# Supplementary material for: Inflation vs. Exhaustion of Antiviral CD8+ T-Cell Populations in Persistent Infections: Two Sides of the Same Coin?
Source: PubMed Central journal article supplement (PMC6414785; doi:10.3389/fimmu.2019.00197), 2019-03-06
Supplement: Table_2.pdf [file Table_2.pdf]

Table S2A

| NAMES         | 1110067D22RIK | 1700025G04RIK | 1700034H14RIK |               |          |               |          |
|---------------|---------------|---------------|---------------|---------------|----------|---------------|----------|
| 2010012005RIK |               | 2010305A19RIK |               | 2310004I24RIK |          | 2310044G17RIK |          |
| 2610524H06RIK |               | 2610528E23RIK |               | 2810408M09RIK |          | 2900062L11RIK |          |
| 3110057012RIK |               | 4632434I11RIK |               | 4930503L19RIK |          | 5730469M10RIK |          |
| 6330403K07RIK |               | 6330442E10RIK |               | ABHD5         | ACPL2    | ACSBG1        | ACSS2    |
| ACTN1         | ADA           | ADAM9         | ADD1          | ADK           | ADSL     | AHNAK         | AI451617 |
| AI747699      | AIM1          | AKR1E1        | AKT1S1        | AMIG02        | ANXA1    | ANXA2         | ANXA4    |
| ANXA5         | AP1S2         | APAF1         | APEX1         | APLP2         | ARHGAP26 | ARL8A         | ART4     |
| AS3MT         | ASAH1         | ASH1L         | ASS1          | ATG5          | ATN1     | ATP1B1        | ATP2A2   |
| ATP2A3        | ATP2B1        | ATP6V1B2      | ATP6V1E1      | ATPAF2        | B3GALNT1 | B3GNT5        | BAZ1A    |
| BBS9          | BC016495      | BC057170      | BCAP31        | BCL2L11       | BEX2     | BOLA2         | BSCL2    |
| BSDC1         | BTBD10        | BTG3          | BTLA          | BZW2          | C1QBP    | CAMK2N1       | CAMP     |
| CAPG          | CAPN2         | CAR5B         | CARHSP1       | CASP1         | CASP4    | CBLB          | CCDC109B |
| CCDC125       | CCDC28B       | CCDC86        | CCDC88C       | CCL2          | CCL3     | CCL4          | CCL5     |
| CCL6          | CCL9          | CCR5          | CCR7          | CCR9          | CCRL2    | CCT3          | CD244    |
| CD3EAP        | CD44          | CD48          | CD74          | CD80          | CD82     | CD9           | CDC37    |
| CDC42EP3      | CEP78         | CERCAM        | CHCHD10       | CHD4          | CHPT1    | CHST12        | CHSY1    |
| CLDN10        | CLDND2        | CLEC2I        | CLEC4D        | CLEC4N        | CLGN     | CLYBL         | CMAH     |
| CNR2          | COBLL1        | COMMD6        | COP54         | COQ10B        | COR02A   | CPEB2         | CREM     |
| CRIP2         | CRMP1         | CRYBG3        | CTNNBIP1      | CTPS          | CTSD     | CTSE          | CX3CR1   |
| CXCL2         | CXCR6         | CYB5          | CYFIP1        | CYP17A1       | CYSLTR2  | D10WSU52E     |          |
| D16ERTD472E   |               | D1ERTD622E    |               | DAPK2         | DAPL1    | DBNDD2        | DEK      |
| DENND5A       | DGAT1         | DGKA          | DHRS7         | DKKL1         | DNAJB13  | DPH5          | DPP4     |
| DPYSL2        | DTD1          | DUS2L         | DUSP1         | DUSP16        | DUSP19   | DUSP6         | E2F2     |
| EBPL          | ECE1          | ECE2          | EFHA1         | EGR2          | EIF2S2   | EIF4E3        | ELOVL1   |
| EMP1          | EMP3          | ENDOD1        | ENPP1         | ENTPD1        | ENTPD5   | EOMES         | ERMN     |
| ERRFI1        | ESM1          | ETAA1         | ETS2          | EVL           | EXOSC2   | EXT1          | F10      |
| F2RL1         | F2RL3         | FAM134B       | FASL          | FCGR2B        | FCHSD2   | FDPS          | FGFR10P  |
| FGL2          | FOXP1         | FUCA2         | FYN           | FZD5          | G0S2     | GAB3          |          |
| GABARAPL1     |               | GABARAPL2     |               | GALK1         | GALNT3   | GARNL4        | GART     |
| GAS5          | GBA           | GBP4          | GCNT1         | GEM           | GGT1     | GIMAP7        | GM885    |
| GMDS          | GNA15         | GNPTAB        | GOLGA7        | GOLIM4        | GOLM1    | GPR141        | GPX1     |
| GPX8          | GRK5          | GRWD1         | GST01         | GSTT2         | GZMK     | H2-AA         | H2-AB1   |
| H2-EB1        | H2-Q10        | HACE1         | HBA-A1        | HBB-B1        | HBS1L    | HDDC2         | HDGFRP3  |
| HERPUD2       | HIST1H1C      | HIST1H2AC     |               | HIST1H2BG     |          | HIST1H4C      | HIST1H4D |
| HIST1H4M      | HIST2H2BE     |               | HIST3H2A      | HIST4H4       | HPCAL1   | HPSE          | HSD17B12 |
| HSPA1A        | HVCN1         | ICA1          | IDE           | IDH1          | IER3     | IFI204        | IFNG     |
| IFNGR1        | IFT57         | IFT80         | IIGP1         | IL10RA        | IL10RB   | IL15          | IL18     |
| IL18R1        | IL18RAP       | IL1R2         | IL2RB         | IL6ST         | ILDRI    | IMPDH2        | INSL6    |
| IRAK2         | ISG20         | ITGB2         | JAZF1         | KCNJ8         | KCNK5    | KDELC1        | KIF5C    |
| KLF7          | KLHDC10       | KLRA10        | KLRB1C        | KLRB1F        | KLRD1    | KLRE1         | KLRG1    |
| KLRK1         | LAIR1         | LAT2          | LATS2         | LCN2          | LCN4     | LEF1          | LGALS1   |
| LGALS3        | LMNA          | LOC547323     |               | LPIN1         | LRPPRC   | LRRC40        | LRRK1    |
| LTB           | LXN           | LY6E          | LY96          | LYPD6B        | LYSMD2   | LYZ2          | MAN2A1   |
| MAN2A2        | MAP2K6        | MAPKAPK3      | MAPRE2        | METTL1        | MIPEP    | MKI67IP       | MLF1     |
| MOSPD1        | MPND          | MRPL23        | MRPL48        | MRPS27        | MRPS28   | MRRF          | MS4A4C   |
| MS4A6C        | MS4A6D        | MSC           | MTHFD1        | MX1           | MXI1     | MYADM         | MYB      |
| MYC           | MYL4          | MYO1F         | MYO1G         | MYO5A         | N4BP2    | N6AMT1        | NAIP2    |
| NAIP5         | NCALD         | NDFIP2        | NECAP2        | NEDD4L        | NFYB     | NGP           | NME4     |
| NOD1          | NQ02          | NR4A1         | NR4A2         | NRN1          | NRP1     | NSG2          | NSMAF    |
| NUP50         | OASL2         | OCIAD2        | OSBPL3        | PAC SIN1      | PARVG    | PCYT1A        | PDE4B    |
| PDE4D         | PDK1          | PDLIM1        | PECAM1        | PELI1         | PHF11    | PHF21A        | PHPT1    |
| PHTF2         | PLEK          | PLEKHB2       | PLEKHF1       | PLSCR1        | PLXDC1   | PMAIP1        | PMS2     |

|               |             |             |             |          |          |           |          |
|---------------|-------------|-------------|-------------|----------|----------|-----------|----------|
| PN01          | POLDIP2     | POLK        | PPP1R9B     | PPP3CA   | PPT1     | PQLC3     | PRDM1    |
| PRDX4         | PRKCZ       | PRKX        | PRPS2       | PRR13    | PRUNE    | PSAP      | PTGR1    |
| PTGS2         | PTPLAD1     | PTPN11      | PTPN6       | PUS7L    | PVR      | QPRT      | RAB18    |
| RABGAP1L      | RAI12       | RAMP1       | RAP2A       | RAPGEF6  | RBM38    | RCN3      | REEP5    |
| REX02         | RFC2        | RGS1        | RGS10       | RGS16    | RHOQ     | ROM1      | RORA     |
| RPL12         | RRAS2       | RREB1       | RRN3        | RSL1     | RTP4     | RUVBL2    | RYK      |
| S100A4        | S100A8      | S100A9      | SAA3        | SAMD3    | SAMSN1   | SAP30BP   | SATB1    |
| SCMH1         | SDCBP2      | SEC24D      | SELL        | SEPHS1   | SEPP1    | SERPINA3F |          |
| SERPINB1B     |             | SERPINB6A   |             | SERPINI1 | SESN1    | SF3B3     | SFMBT1   |
| SGCB          | SHMT2       | SIDT1       | SIT1        | SLAMF6   | SLAMF7   | SLC11A2   | SLC15A2  |
| SLC20A1       | SLC25A24    | SLC27A4     | SLC2A3      | SLC30A4  | SLC6A19  | SLC9A7    | SLC9A9   |
| SLFN1         | SMAD3       | SMARCC1     | SMPD1       | SMPDL3B  | SND1     | SNX10     | SNX18    |
| SOCS3         | SPRED1      | SRM         | SSR4        | ST3GAL4  | ST3GAL6  | ST7L      | ST8SIA4  |
| STARD10       | STARD3NL    | STARD7      | STT3B       | SUHW4    | SUOX     | SURF4     | SWAP70   |
| SYAP1         | SYT11       | SYTL2       | SYTL3       | TAF9B    | TANK     | TBL1X     | TBX21    |
| TCF7          | TCTE3       | TEX2        | TEX9        | TFRC     | TGTP     | THADA     | TIMM10   |
| TLE1          | TLR1        | TLR2        | TLR7        | TM6SF1   | TMEM108  | TMEM111   | TMEM184C |
| TMEM2         | TMEM50B     | TMEM51      | TMEM65      | TNFAIP3  | TNFRSF18 | TNFRSF26  | TNFSF10  |
| TNFSF14       | TNFSF8      | TNFSF9      | TPCN1       | TPPP3    | TRAF1    | TRAPPC2   | TRDMT1   |
| TRIB2         | TRIM17      | TRIM36      | TRIM56      | TRMT1    | TRP53    | TRPC4AP   | TRPM7    |
| TRPS1         | TSEN15      | TSPAN13     | TSPAN3      | TSPAN31  | TSR1     | TUBB3     | TUSC4    |
| TXNDC5        | UAP1        | UAP1L1      | UBA6        | UBASH3B  | UNC84A   | URB2      | USP18    |
| USP28         | UTP15       | UVRAG       | VAMP8       | VAV3     | VIM      | VPREB1    | VPS54    |
| WBP5          | WDR74       | XKRX        | ZBTB2       | ZEB2     | ZFP238   | ZFP281    | ZFP455   |
| ZFP52         | ZFP715      | ZHX2        | ZMYM2       |          |          |           |          |
| 1110067D22RIK | 1           | 0.488957704 | 0.362983089 |          |          |           |          |
| 0.312065077   | 0.346955893 | 0.281260226 | 0.164785528 |          |          |           |          |
| 0.188802012   | 0.068871962 | 0.001905681 | 0.012292253 |          |          |           |          |
| 0.368714792   | 0.135606394 | 0.196748461 | 0.252849273 |          |          |           |          |
| 0.346196641   | 0.112802147 | 0.385510734 | 0.208633929 |          |          |           |          |
| 0.344633654   | 0.071964497 | 0.315039116 | 0.083206089 |          |          |           |          |
| 0.28713807    | 0.08346722  | 0.053910156 | 0.212353723 |          |          |           |          |
| 0.390063076   | 0.065509251 | 0.230573345 | 0.314530303 |          |          |           |          |
| 0.128509163   | 0.393689306 | 0.499797419 | 0.323804815 |          |          |           |          |
| 0.49327416    | 0.352694434 | 0.025949797 | 0.201491128 |          |          |           |          |
| 0.412959209   | 0.336503871 | 0.334233573 | 0.256837543 |          |          |           |          |
| 0.032967514   | 0.469603483 | 0.187173972 | 0.361061177 |          |          |           |          |
| 0.210471796   | 0.021916391 | 0.19778617  | 0.436462727 |          |          |           |          |
| 0.434699706   | 0.309685763 | 0.2062022   | 0.121311176 |          |          |           |          |
| 0.118992607   | 0.188534461 | 0.188918742 | 0.266032055 |          |          |           |          |
| 0.179110128   | 0.125177275 | 0.450197757 | 0.064392507 |          |          |           |          |
| 0.130837307   | 0.253587224 | 0.167366227 | 0.227382586 |          |          |           |          |
| 0.306731805   | 0.326664391 | 0.026538455 | 0.357038076 |          |          |           |          |
| 0.001014614   | 0.336582303 | 0.355810789 | 0.241131696 |          |          |           |          |
| 0.041519583   | 0.011087861 | 0.188891003 | 0.25456243  |          |          |           |          |
| 0.419021779   | 0.475116707 | 0.431809491 | 0.445797838 |          |          |           |          |
| 0.142719708   | 0.297869238 | 0.344453369 | 0.135080285 |          |          |           |          |
| 0.412897505   | 0.125372973 | 0.108470552 | 0.34043023  |          |          |           |          |
| 0.44222681    | 0.48708056  | 0.178414779 | 0.251179662 |          |          |           |          |
| 0.327084072   | 0.454471613 | 0.3216296   | 0.324286475 |          |          |           |          |
| 0.23741214    | 0.072223535 | 0.405955904 | 0.46890506  |          |          |           |          |
| 0.379209626   | 0.27848022  | 0.134717607 | 0.345027722 |          |          |           |          |
| 0.063831668   | 0.318618135 | 0.279683169 | 0.172194624 |          |          |           |          |
| 0.428999514   | 0.015140912 | 0.196457912 | 0.267709695 |          |          |           |          |

|             |             |             |             |
|-------------|-------------|-------------|-------------|
| 0.269646717 | 0.379095395 | 0.484958306 | 0.156284269 |
| 0.373173433 | 0.018759806 | 0.099457533 | 0.04771609  |
| 0.265199435 | 0.147869163 | 0.463076906 | 0.387083932 |
| 0.211920103 | 0.301305943 | 0.237539142 | 0.003447291 |
| 0.028110169 | 0.23918091  | 0.385100637 | 0.381611135 |
| 0.369237892 | 0.398666924 | 0.159515259 | 0.329354289 |
| 0.333557189 | 0.427600451 | 0.038315719 | 0.096715337 |
| 0.330279166 | 0.237328747 | 0.210428244 | 0.345807139 |
| 0.239692835 | 0.117570211 | 0.115102471 | 0.476726691 |
| 0.411574929 | 0.073686541 | 0.347571979 | 0.343459714 |
| 0.220582514 | 0.297114397 | 0.107109103 | 0.212007712 |
| 0.04039093  | 0.462662277 | 0.033708082 | 0.332825498 |
| 0.187045067 | 0.128425796 | 0.026120333 | 0.230549514 |
| 0.205562419 | 0.353031988 | 0.466868652 | 0.114900594 |
| 0.247599679 | 0.3218867   | 0.294781332 | 0.289506414 |
| 0.003946873 | 0.059828265 | 0.273924057 | 0.458501588 |
| 0.222219643 | 0.482614218 | 0.279636824 | 0.299076199 |
| 0.249344534 | 0.387844443 | 0.007986195 | 0.474056356 |
| 0.494197426 | 0.268717089 | 0.282694162 | 0.381322483 |
| 0.285390108 | 0.374286537 | 0.056729764 | 0.345733865 |
| 0.316804743 | 0.089507333 | 0.460178823 | 0.130887693 |
| 0.453178754 | 0.033721615 | 0.263107817 | 0.379521733 |
| 0.324178902 | 0.009364512 | 0.171712889 | 0.308745772 |
| 0.036498885 | 0.077501828 | 0.371348213 | 0.320401386 |
| 0.28038409  | 0.384921338 | 0.434274392 | 0.265615874 |
| 0.332557039 | 0.230518816 | 0.018784849 | 0.299993187 |
| 0.39594846  | 0.300351792 | 0.416875103 | 0.206755134 |
| 0.299382957 | 0.437232889 | 0.37427512  | 0.14194643  |
| 0.035680602 | 0.267073113 | 0.016285684 | 0.260457949 |
| 0.390759001 | 0.075228162 | 0.309688671 | 0.208800367 |
| 0.069115939 | 0.479461869 | 0.177271681 | 0.244832957 |
| 0.130246323 | 0.275297602 | 0.243898897 | 0.139039883 |
| 0.12584815  | 0.148276142 | 0.281162426 | 0.290884264 |
| 0.029465729 | 0.075537171 | 0.033161014 | 0.266182136 |
| 0.076167243 | 0.219337391 | 0.215174954 | 0.326136735 |
| 0.261745717 | 0.073745951 | 0.284378297 | 0.287553008 |
| 0.108820485 | 0.01606097  | 0.474082639 | 0.353971459 |
| 0.280712766 | 0.139307051 | 0.048692426 | 0.231410214 |
| 0.399565145 | 0.219410892 | 0.252452199 | 0.399044869 |
| 0.041075483 | 0.451123998 | 0.162217892 | 0.101463119 |
| 0.277877747 | 0.202463071 | 0.409855154 | 0.043875518 |
| 0.356617241 | 0.430643812 | 0.318478819 | 0.143505945 |
| 0.360539091 | 0.339530905 | 0.025283134 | 0.35450398  |
| 0.336531927 | 0.028474273 | 0.490665133 | 0.122030145 |
| 0.024850305 | 0.361905724 | 0.31379928  | 0.074680964 |
| 0.078663922 | 0.219089152 | 0.04035813  | 0.249408455 |
| 0.471181973 | 0.319928967 | 0.323195076 | 0.239311612 |
| 0.029475313 | 0.004252509 | 0.222303384 | 0.376209355 |
| 0.489892443 | 0.476730561 | 0.254782737 | 0.260317841 |
| 0.2121861   | 0.244734587 | 0.141710989 | 0.459521336 |
| 0.296853099 | 0.508718448 | 0.009015989 | 0.358377943 |
| 0.483055485 | 0.240565736 | 0.063690267 | 0.234792281 |
| 0.339799391 | 0.042143943 | 0.243473873 | 0.46378464  |
| 0.400178784 | 0.264384399 | 0.256322846 | 0.384055182 |

|             |             |             |             |
|-------------|-------------|-------------|-------------|
| 0.012792785 | 0.038377691 | 0.329931436 | 0.190546835 |
| 0.281912908 | 0.192306217 | 0.063653902 | 0.305189616 |
| 0.028955516 | 0.408901357 | 0.407872878 | 0.046050213 |
| 0.220445588 | 0.304721489 | 0.334973268 | 0.035685136 |
| 0.405904329 | 0.491735745 | 0.494945702 | 0.185958345 |
| 0.37347214  | 0.438310513 | 0.301396513 | 0.095161901 |
| 0.020444719 | 0.494141843 | 0.346367155 | 0.014297421 |
| 0.423921044 | 0.192881338 | 0.005039617 | 0.468520442 |
| 0.173602017 | 0.444128667 | 0.003324549 | 0.144876581 |
| 0.062342607 | 0.413674118 | 0.449823259 | 0.326170759 |
| 0.161919903 | 0.354466669 | 0.016815813 | 0.500961498 |
| 0.447672606 | 0.01546396  | 0.148598995 | 0.353578234 |
| 0.323289804 | 0.507925971 | 0.256985723 | 0.384000203 |
| 0.320902604 | 0.46537115  | 0.173144653 | 0.227598023 |
| 0.367650451 | 0.467172286 | 0.347989823 | 0.446094079 |
| 0.395686891 | 0.360149067 | 0.2272493   | 0.011374812 |
| 0.120909847 | 0.184752578 | 0.190601012 | 0.051261391 |
| 0.28034508  | 0.111958042 | 0.46870552  | 0.421562819 |
| 0.432997047 | 0.006635153 | 0.133309974 | 0.366787285 |
| 0.399956686 | 0.439372555 | 0.045016799 | 0.009211745 |
| 0.013507237 | 0.012365018 | 0.311479271 | 0.246485602 |
| 0.454671415 | 0.145316706 | 0.004817473 | 0.043423753 |
| 0.24574366  | 0.319892979 | 0.464379256 | 0.321211962 |
| 0.389560173 | 0.087396742 | 0.166712409 | 0.346155657 |
| 0.057025491 | 0.29892488  | 0.431568162 | 0.439534873 |
| 0.063262576 | 0.249273731 | 0.381539391 | 0.43860143  |
| 0.070826446 | 0.287508405 | 0.368905609 | 0.216009738 |
| 0.031947957 | 0.081767709 | 0.060645797 | 0.380048676 |
| 0.475952445 | 0.046537502 | 0.020488202 | 0.125901963 |
| 0.078827564 | 0.43681998  | 0.122983956 | 0.473191617 |
| 0.378761939 | 0.370701869 | 0.086075421 | 0.457888326 |
| 0.029404139 | 0.456057714 | 0.276837002 | 0.04289528  |
| 0.329186371 | 0.019018454 | 0.460230952 | 0.087753788 |
| 0.270079552 | 0.358439099 | 0.173332457 | 0.023306729 |
| 0.194156739 | 0.052466196 | 0.415631152 | 0.407950582 |
| 0.053508679 | 0.234823183 | 0.295293668 | 0.378868227 |
| 0.234648312 | 0.318275751 | 0.47744524  | 0.289128412 |
| 0.065979863 | 0.192547696 | 0.345730461 | 0.342358237 |
| 0.218609705 | 0.447827596 | 0.202279206 | 0.502079353 |
| 0.352478954 | 0.459048265 | 0.440066525 | 0.275810542 |
| 0.2052446   | 0.339972293 | 0.25993478  | 0.011483441 |
| 0.315924012 | 0.381337233 | 0.356576019 | 0.110217048 |
| 0.191720288 | 0.331309329 | 0.071766413 | 0.237685728 |
| 0.285460046 | 0.233318418 | 0.110460848 | 0.389654348 |
| 0.363309218 | 0.339405283 | 0.059554772 | 0.05325617  |
| 0.513670179 | 0.43384203  | 0.127414464 | 0.320320932 |
| 0.186136673 | 0.269599502 | 0.389039426 | 0.377723434 |
| 0.342952801 | 0.37664717  | 0.363010594 | 0.271919658 |
| 0.389886601 | 0.229509266 | 0.495504162 | 0.101775948 |
| 0.078223378 | 0.368727552 | 0.060396329 | 0.100514623 |
| 0.120976241 | 0.03154098  | 0.248601669 | 0.363643826 |
| 0.308451166 | 0.294226205 | 0.297597127 | 0.085452436 |
| 0.308086972 | 0.387240779 | 0.313783811 | 0.147889326 |
| 0.054564051 | 0.457299742 | 0.009700417 | 0.062529991 |



|               |             |             |             |
|---------------|-------------|-------------|-------------|
| 0.321258061   | 0.360295272 | 0.281715576 | 0.229270542 |
| 0.247373071   | 0.173596768 | 0.246351453 | 0.244358215 |
| 0.194213983   | 0.343941669 | 0.361094082 | 0.037460058 |
| 0.017962147   | 0.452613713 | 0.344337144 | 0.038888834 |
| 0.109364562   | 0.346932353 | 0.348591207 | 0.165197465 |
| 0.030077984   | 0.441270066 | 0.226771729 | 0.357293194 |
| 0.295234705   | 0.077929004 | 0.361948268 | 0.113044343 |
| 0.087600943   | 0.440473477 | 0.353395394 | 0.484450142 |
| 0.36630393    | 0.320295222 | 0.447154077 | 0.375514903 |
| 0.178413655   | 0.366835285 | 0.02436364  | 0.407198712 |
| 0.29151007    |             |             |             |
| 1700025G04RIK | 0.488957704 | 1           | 0.453833524 |
| 0.493032105   | 0.490469994 | 0.464089917 | 0.259871069 |
| 0.233009614   | 0.106012306 | 0.007031388 | 0.029799455 |
| 0.499778158   | 0.251149922 | 0.334635282 | 0.407635985 |
| 0.478861242   | 0.15370001  | 0.402450498 | 0.284164827 |
| 0.478476854   | 0.122623092 | 0.459773202 | 0.112207106 |
| 0.323646563   | 0.119618098 | 0.082566286 | 0.310002995 |
| 0.507240431   | 0.094238633 | 0.420904714 | 0.464175968 |
| 0.109205969   | 0.509212901 | 0.526895921 | 0.503040263 |
| 0.521054646   | 0.470277452 | 0.012663121 | 0.376214216 |
| 0.490216495   | 0.512435961 | 0.479630269 | 0.388937149 |
| 0.052709353   | 0.501063231 | 0.298638898 | 0.451708699 |
| 0.284619101   | 0.036884728 | 0.311493423 | 0.461623015 |
| 0.491543633   | 0.518042203 | 0.283039996 | 0.201189066 |
| 0.259371445   | 0.29838846  | 0.318935422 | 0.406792943 |
| 0.274787934   | 0.214156056 | 0.492364837 | 0.115674039 |
| 0.189406286   | 0.304666086 | 0.166651848 | 0.318016199 |
| 0.395880609   | 0.468292546 | 0.021699732 | 0.466831624 |
| 0.00405253    | 0.452219378 | 0.422529435 | 0.365687661 |
| 0.047369624   | 0.025947053 | 0.195996929 | 0.410590724 |
| 0.518136419   | 0.477478907 | 0.528717285 | 0.526837607 |
| 0.208825023   | 0.32820923  | 0.446091995 | 0.204339288 |
| 0.510094267   | 0.224085684 | 0.128032823 | 0.47970244  |
| 0.529925342   | 0.520406382 | 0.231973024 | 0.293624727 |
| 0.511308707   | 0.508427842 | 0.499460216 | 0.501554157 |
| 0.410726938   | 0.054240164 | 0.493457963 | 0.529741625 |
| 0.474542928   | 0.357078871 | 0.173586218 | 0.489386727 |
| 0.067397988   | 0.429602903 | 0.415550317 | 0.177289631 |
| 0.520264783   | 0.023571383 | 0.237409451 | 0.435776595 |
| 0.242077944   | 0.513945474 | 0.511186162 | 0.227914523 |
| 0.461177417   | 0.022968655 | 0.160925483 | 0.036060903 |
| 0.387046062   | 0.160201341 | 0.504771931 | 0.525801527 |
| 0.290399258   | 0.445013696 | 0.322136094 | 0.001837435 |
| 0.029169345   | 0.201227686 | 0.511029278 | 0.421783596 |
| 0.501084084   | 0.44759767  | 0.281695749 | 0.477019203 |
| 0.512089245   | 0.528022088 | 0.082351034 | 0.117730302 |
| 0.497243222   | 0.201949377 | 0.27752432  | 0.521947502 |
| 0.357226185   | 0.141809298 | 0.151494479 | 0.529537178 |
| 0.470814808   | 0.102023716 | 0.400088153 | 0.473985344 |
| 0.41335997    | 0.403086989 | 0.127109904 | 0.333238996 |
| 0.064486187   | 0.487980553 | 0.029715273 | 0.398062018 |
| 0.33019116    | 0.167334242 | 0.012091014 | 0.325478272 |
| 0.356087829   | 0.516310726 | 0.488622668 | 0.122827008 |

|             |             |             |             |
|-------------|-------------|-------------|-------------|
| 0.382099831 | 0.469096158 | 0.398889349 | 0.514017851 |
| 0.014639639 | 0.052662037 | 0.352662498 | 0.529818468 |
| 0.372447756 | 0.520724709 | 0.348561461 | 0.342635185 |
| 0.321636345 | 0.513080216 | 0.003434735 | 0.50920969  |
| 0.522427325 | 0.376004837 | 0.472033586 | 0.474492796 |
| 0.443767584 | 0.520994639 | 0.050927368 | 0.478807566 |
| 0.438009407 | 0.0912113   | 0.529682758 | 0.185649523 |
| 0.490360542 | 0.04883361  | 0.396094695 | 0.503575716 |
| 0.507065019 | 0.010188635 | 0.295119523 | 0.464906967 |
| 0.027908876 | 0.132083607 | 0.498540391 | 0.480457703 |
| 0.457199368 | 0.507762633 | 0.522612341 | 0.424073466 |
| 0.497273096 | 0.280215024 | 0.013266005 | 0.357086098 |
| 0.505497351 | 0.453648717 | 0.482212033 | 0.293369096 |
| 0.41836834  | 0.511395202 | 0.497531871 | 0.267585879 |
| 0.053837856 | 0.384507813 | 0.026809542 | 0.391574584 |
| 0.470921796 | 0.152972391 | 0.468429795 | 0.158747979 |
| 0.078488409 | 0.527628997 | 0.194380012 | 0.292711957 |
| 0.139462223 | 0.48837042  | 0.298926513 | 0.303785278 |
| 0.262909073 | 0.193547449 | 0.414755873 | 0.45003621  |
| 0.05065862  | 0.111035791 | 0.013591984 | 0.449516585 |
| 0.1776603   | 0.419743498 | 0.422295723 | 0.49508281  |
| 0.395316488 | 0.135035857 | 0.450201075 | 0.322668571 |
| 0.127032155 | 0.016394757 | 0.518668958 | 0.467129935 |
| 0.421557348 | 0.187278891 | 0.044951167 | 0.419562308 |
| 0.529375599 | 0.41241728  | 0.341942681 | 0.516783635 |
| 0.030652104 | 0.52589732  | 0.305698033 | 0.141814739 |
| 0.441672436 | 0.312179461 | 0.515946496 | 0.078466481 |
| 0.467982967 | 0.50185546  | 0.353240043 | 0.217855063 |
| 0.469663968 | 0.491863403 | 0.038366754 | 0.485377996 |
| 0.485012136 | 0.036356149 | 0.518930537 | 0.139306582 |
| 0.022401028 | 0.499870041 | 0.519662633 | 0.085193922 |
| 0.086790243 | 0.412853061 | 0.063079365 | 0.332607282 |
| 0.526426963 | 0.473440792 | 0.519110304 | 0.23757706  |
| 0.050311373 | 0.013118694 | 0.228200514 | 0.452207511 |
| 0.522412896 | 0.516558228 | 0.298404339 | 0.429313286 |
| 0.284636796 | 0.397387255 | 0.190443503 | 0.529180163 |
| 0.20667614  | 0.515997587 | 0.007205882 | 0.509831602 |
| 0.521423074 | 0.370010721 | 0.092611884 | 0.386955948 |
| 0.479865942 | 0.056539317 | 0.238069462 | 0.500459948 |
| 0.512088443 | 0.393581771 | 0.421418902 | 0.490595093 |
| 0.021737781 | 0.05559524  | 0.45073384  | 0.203283409 |
| 0.466422787 | 0.252998502 | 0.055278074 | 0.402245031 |
| 0.053426512 | 0.502017657 | 0.515712132 | 0.072328141 |
| 0.434795112 | 0.380026178 | 0.429972108 | 0.043835771 |
| 0.50845355  | 0.494698768 | 0.528597826 | 0.197414052 |
| 0.515541046 | 0.51659032  | 0.473151704 | 0.086836152 |
| 0.018023595 | 0.517614771 | 0.479131295 | 0.027857065 |
| 0.526509466 | 0.312171572 | 0.016882065 | 0.512100337 |
| 0.221506401 | 0.465572897 | 0.005274608 | 0.088071934 |
| 0.041457334 | 0.513542895 | 0.492999844 | 0.461016053 |
| 0.33179597  | 0.426788022 | 0.005458611 | 0.517537419 |
| 0.506455105 | 0.014991219 | 0.155820723 | 0.521260591 |
| 0.500316977 | 0.524711932 | 0.37061899  | 0.520118314 |
| 0.499111812 | 0.507998209 | 0.299878728 | 0.311590734 |

|               |             |             |             |
|---------------|-------------|-------------|-------------|
| 0.522529996   | 0.490845906 | 0.49999741  | 0.49432551  |
| 0.527462011   | 0.48356311  | 0.335597568 | 0.020288434 |
| 0.159209631   | 0.27658558  | 0.392773728 | 0.105696308 |
| 0.40775897    | 0.164061131 | 0.510097167 | 0.525117305 |
| 0.525990963   | 0.005047048 | 0.192532291 | 0.518895664 |
| 0.50829755    | 0.520478364 | 0.021096261 | 0.00690037  |
| 0.007927597   | 0.022006952 | 0.436821088 | 0.272390296 |
| 0.522271876   | 0.319765381 | 0.005153679 | 0.058326223 |
| 0.334088989   | 0.456764943 | 0.509020385 | 0.442392804 |
| 0.50701374    | 0.092666388 | 0.365457071 | 0.463313651 |
| 0.07847184    | 0.408984944 | 0.530516495 | 0.495249814 |
| 0.043250964   | 0.281198213 | 0.435485666 | 0.528046827 |
| 0.079995656   | 0.362881127 | 0.505809359 | 0.390367484 |
| 0.013198183   | 0.090349891 | 0.076043431 | 0.500407904 |
| 0.510583238   | 0.09544771  | 0.039772232 | 0.194353146 |
| 0.152476366   | 0.524136549 | 0.199175769 | 0.53176023  |
| 0.517723455   | 0.50309816  | 0.08079827  | 0.493454904 |
| 0.049107557   | 0.496563668 | 0.387996158 | 0.076753829 |
| 0.320919702   | 0.013201206 | 0.491197949 | 0.196229724 |
| 0.405678289   | 0.474873611 | 0.234691478 | 0.016993604 |
| 0.202373561   | 0.059125039 | 0.529322854 | 0.518807535 |
| 0.033516873   | 0.287910202 | 0.338615169 | 0.466764917 |
| 0.361755372   | 0.510778813 | 0.515707212 | 0.489724984 |
| 0.110388116   | 0.149398167 | 0.482160912 | 0.478216622 |
| 0.300045154   | 0.527704434 | 0.365422267 | 0.519569002 |
| 0.489621976   | 0.506147251 | 0.518178833 | 0.422743305 |
| 0.267463136   | 0.481368663 | 0.464662284 | 0.026653608 |
| 0.413750031   | 0.527989523 | 0.424568072 | 0.182803021 |
| 0.305368879   | 0.44671688  | 0.056072042 | 0.211974263 |
| 0.378968689   | 0.394593244 | 0.177021791 | 0.499572932 |
| 0.464621006   | 0.483610022 | 0.048834429 | 0.07216551  |
| 0.532606843   | 0.488046684 | 0.182511676 | 0.509897079 |
| 0.192378787   | 0.408139088 | 0.51502586  | 0.510382657 |
| 0.437153949   | 0.526390116 | 0.508016246 | 0.481023103 |
| 0.482515129   | 0.313583115 | 0.530193239 | 0.116788863 |
| 0.099565857   | 0.487760131 | 0.122053882 | 0.101722476 |
| 0.170833817   | 0.029130114 | 0.348304669 | 0.486677603 |
| 0.437396036   | 0.450592084 | 0.392777122 | 0.09381075  |
| 0.367609281   | 0.42839981  | 0.412532253 | 0.2560896   |
| 0.097065275   | 0.508517001 | 0.010110414 | 0.062300532 |
| 0.444679487   | 0.521276549 | 0.448820076 | 0.27413995  |
| 0.342502338   | 0.151308428 | 0.352645296 | 0.377954638 |
| 0.411119905   | 0.422087515 | 0.520049731 | 0.041341529 |
| 0.024683372   | 0.52887343  | 0.448021626 | 0.020362788 |
| 0.09808206    | 0.459942282 | 0.334203915 | 0.297103365 |
| 0.022051783   | 0.508774355 | 0.428987879 | 0.490277759 |
| 0.418756539   | 0.074568377 | 0.427156336 | 0.106893419 |
| 0.068413954   | 0.478276631 | 0.453088664 | 0.512167936 |
| 0.390699008   | 0.488935561 | 0.464801659 | 0.518946227 |
| 0.133347726   | 0.440293199 | 0.034684631 | 0.514451843 |
| 0.481754772   |             |             |             |
| 1700034H14RIK | 0.362983089 | 0.453833524 | 1           |
| 0.315204273   | 0.219644724 | 0.186156763 | 0.09296202  |
| 0.08538874    | 0.074796324 | 0.001423338 | 0.014373516 |

|             |             |             |             |
|-------------|-------------|-------------|-------------|
| 0.295388019 | 0.083255562 | 0.093438968 | 0.156374517 |
| 0.366416234 | 0.085222188 | 0.209358238 | 0.127671477 |
| 0.290047358 | 0.034557691 | 0.298855926 | 0.05911745  |
| 0.223426971 | 0.083951923 | 0.04868205  | 0.182183831 |
| 0.382303234 | 0.058694876 | 0.101308746 | 0.252334791 |
| 0.103623879 | 0.360233407 | 0.45571574  | 0.293976576 |
| 0.446050262 | 0.339223978 | 0.011486278 | 0.104498609 |
| 0.378706635 | 0.371586547 | 0.288403313 | 0.177726443 |
| 0.026080308 | 0.400431593 | 0.112483082 | 0.290527242 |
| 0.109070221 | 0.023585773 | 0.084027412 | 0.369128917 |
| 0.385792969 | 0.227919161 | 0.10255593  | 0.072792164 |
| 0.068601702 | 0.068657572 | 0.135499145 | 0.177991755 |
| 0.103186645 | 0.046932596 | 0.408741384 | 0.050138738 |
| 0.064674656 | 0.119186116 | 0.125149066 | 0.110762723 |
| 0.214376053 | 0.285595749 | 0.016861428 | 0.28584945  |
| 4.05E-05    | 0.281675914 | 0.268977808 | 0.193194645 |
| 0.039559735 | 0.008791064 | 0.139052074 | 0.169009403 |
| 0.407158297 | 0.438698751 | 0.448418865 | 0.460062015 |
| 0.09661775  | 0.197934314 | 0.23104086  | 0.09005581  |
| 0.390694274 | 0.073440332 | 0.080959064 | 0.365756263 |
| 0.45694518  | 0.451250242 | 0.141409883 | 0.192820913 |
| 0.314061491 | 0.408718536 | 0.187423212 | 0.187370532 |
| 0.175684253 | 0.08463734  | 0.36091141  | 0.458371294 |
| 0.324071802 | 0.20669808  | 0.111972923 | 0.301721597 |
| 0.052279259 | 0.169387235 | 0.22335384  | 0.09238556  |
| 0.421720164 | 0.015943913 | 0.155583747 | 0.149503269 |
| 0.176138804 | 0.370238493 | 0.46404963  | 0.096690146 |
| 0.220123508 | 0.016217861 | 0.1083067   | 0.043697693 |
| 0.146549831 | 0.138895619 | 0.398629371 | 0.372915093 |
| 0.088467919 | 0.172778731 | 0.12975214  | 0.005309243 |
| 0.030324762 | 0.177915757 | 0.350447077 | 0.198024118 |
| 0.354487412 | 0.383007202 | 0.118288757 | 0.276591929 |
| 0.30418036  | 0.442409344 | 0.020440325 | 0.063146722 |
| 0.214006847 | 0.170798012 | 0.142488647 | 0.238447543 |
| 0.175333311 | 0.066798063 | 0.073809362 | 0.47692453  |
| 0.34690407  | 0.051355123 | 0.157466852 | 0.343878781 |
| 0.118150643 | 0.221095669 | 0.068304399 | 0.109972235 |
| 0.023307524 | 0.432740889 | 0.038386156 | 0.15917483  |
| 0.159185751 | 0.088928429 | 0.019228112 | 0.102619533 |
| 0.114939882 | 0.334147132 | 0.40175131  | 0.081345235 |
| 0.128147904 | 0.281763507 | 0.124096495 | 0.268088736 |
| 0.00505305  | 0.048923503 | 0.108740293 | 0.43533992  |
| 0.1313843   | 0.48242111  | 0.167080078 | 0.222088175 |
| 0.178327854 | 0.406947076 | 0.009771349 | 0.421270113 |
| 0.467969803 | 0.111636551 | 0.195023217 | 0.294809455 |
| 0.197456077 | 0.376149866 | 0.028657426 | 0.316339061 |
| 0.240186286 | 0.067224358 | 0.469690636 | 0.100544915 |
| 0.409011826 | 0.032270369 | 0.114604121 | 0.412723653 |
| 0.316160501 | 0.007667361 | 0.075249295 | 0.253210501 |
| 0.043407135 | 0.035461153 | 0.345947466 | 0.278056789 |
| 0.211162456 | 0.413651358 | 0.446992126 | 0.193205354 |
| 0.206147268 | 0.121997946 | 0.020270897 | 0.217880155 |
| 0.404249151 | 0.160221059 | 0.36534986  | 0.117849574 |
| 0.16923469  | 0.407956126 | 0.36165838  | 0.080411433 |

|             |             |             |             |
|-------------|-------------|-------------|-------------|
| 0.028729745 | 0.126024622 | 0.011661169 | 0.186975454 |
| 0.379195689 | 0.041172928 | 0.196184661 | 0.136321177 |
| 0.064329091 | 0.465494109 | 0.166679207 | 0.199994416 |
| 0.135682239 | 0.167122108 | 0.140188714 | 0.070068692 |
| 0.077811639 | 0.114980108 | 0.204549272 | 0.186513394 |
| 0.015817908 | 0.05458369  | 0.042667399 | 0.13066544  |
| 0.04188282  | 0.109632766 | 0.100162139 | 0.261610432 |
| 0.116501145 | 0.043350587 | 0.176331146 | 0.237224702 |
| 0.110181501 | 0.017535803 | 0.443627773 | 0.318355665 |
| 0.218932404 | 0.09654765  | 0.043507413 | 0.1103093   |
| 0.380704019 | 0.118238913 | 0.10605668  | 0.360926095 |
| 0.03795836  | 0.457584605 | 0.094686924 | 0.083999193 |
| 0.162504062 | 0.121378272 | 0.418033034 | 0.036495162 |
| 0.208121944 | 0.37611855  | 0.211488637 | 0.12013592  |
| 0.295447885 | 0.267646196 | 0.018730966 | 0.322069236 |
| 0.286669904 | 0.025351404 | 0.467838089 | 0.09798554  |
| 0.0267043   | 0.364043128 | 0.32598148  | 0.06848609  |
| 0.078934297 | 0.122413255 | 0.019984338 | 0.202173081 |
| 0.455351757 | 0.326010795 | 0.305297853 | 0.213218559 |
| 0.023083755 | 0.002795096 | 0.177205226 | 0.262806271 |
| 0.427608752 | 0.46593584  | 0.161521333 | 0.168026409 |
| 0.134161751 | 0.180986483 | 0.053242655 | 0.449618016 |
| 0.2229276   | 0.464791419 | 0.009869707 | 0.387003384 |
| 0.436195733 | 0.094889611 | 0.064131779 | 0.117768283 |
| 0.2866969   | 0.036393205 | 0.135769155 | 0.422541301 |
| 0.384924136 | 0.190159337 | 0.183488445 | 0.316962071 |
| 0.008854066 | 0.021361764 | 0.265501719 | 0.18547234  |
| 0.161113191 | 0.146569179 | 0.078308006 | 0.14508602  |
| 0.023371685 | 0.359185174 | 0.410720593 | 0.055022358 |
| 0.129465479 | 0.148834622 | 0.284204092 | 0.030790351 |
| 0.430688305 | 0.470318649 | 0.446085362 | 0.099454941 |
| 0.352369885 | 0.432578824 | 0.239538646 | 0.085456713 |
| 0.025936929 | 0.462593634 | 0.286387984 | 0.012412202 |
| 0.418069153 | 0.074644414 | 0.00387292  | 0.427348926 |
| 0.108838158 | 0.365567792 | 0.0055843   | 0.129924252 |
| 0.07166423  | 0.440830466 | 0.409157713 | 0.250991774 |
| 0.069809191 | 0.247529509 | 0.015654013 | 0.489107626 |
| 0.405307593 | 0.022624459 | 0.137647356 | 0.336724665 |
| 0.346376456 | 0.461650827 | 0.203363765 | 0.401773424 |
| 0.258700257 | 0.425295457 | 0.090199765 | 0.167153091 |
| 0.353551304 | 0.452146969 | 0.332336377 | 0.406524287 |
| 0.379726255 | 0.342683369 | 0.156075272 | 0.010115863 |
| 0.154629063 | 0.077928306 | 0.116273112 | 0.04816175  |
| 0.174826886 | 0.102845985 | 0.444995901 | 0.426745065 |
| 0.433704755 | 0.008713251 | 0.064546861 | 0.340635798 |
| 0.362900717 | 0.426979421 | 0.046904639 | 0.01403475  |
| 0.017976145 | 0.020815619 | 0.183057193 | 0.193427476 |
| 0.448314159 | 0.064380657 | 0.005393896 | 0.021145417 |
| 0.154298484 | 0.292789135 | 0.426076676 | 0.294125176 |
| 0.409082153 | 0.065953555 | 0.088378477 | 0.32082106  |
| 0.066658079 | 0.226272628 | 0.433403258 | 0.386800511 |
| 0.058921885 | 0.195221803 | 0.189535088 | 0.429946969 |
| 0.082178473 | 0.201135591 | 0.299162727 | 0.124039833 |
| 0.028837513 | 0.083547262 | 0.068316035 | 0.400807882 |

|               |             |             |             |
|---------------|-------------|-------------|-------------|
| 0.429020416   | 0.03371648  | 0.018939249 | 0.046441622 |
| 0.048757346   | 0.429545486 | 0.082286782 | 0.472162245 |
| 0.360643472   | 0.380146147 | 0.079068001 | 0.422988901 |
| 0.028211609   | 0.40406162  | 0.199926235 | 0.027556403 |
| 0.209354718   | 0.01942398  | 0.425629712 | 0.083766894 |
| 0.113783773   | 0.283279467 | 0.186620461 | 0.028101242 |
| 0.201426341   | 0.048052651 | 0.424603877 | 0.438412982 |
| 0.060649163   | 0.134720377 | 0.204987827 | 0.307011265 |
| 0.109438773   | 0.321808561 | 0.424340115 | 0.168452175 |
| 0.038897509   | 0.147100812 | 0.302582468 | 0.265087036 |
| 0.090466087   | 0.461472669 | 0.140680614 | 0.491413765 |
| 0.323725596   | 0.435827316 | 0.420502321 | 0.183959031 |
| 0.142207436   | 0.222456285 | 0.203180003 | 0.008285833 |
| 0.204960182   | 0.378934889 | 0.180749002 | 0.105908096 |
| 0.133631429   | 0.241270012 | 0.045726307 | 0.114741108 |
| 0.202111373   | 0.134323222 | 0.063294509 | 0.406830986 |
| 0.25252422    | 0.281476645 | 0.027394718 | 0.061937381 |
| 0.479378587   | 0.396717424 | 0.080113834 | 0.282274371 |
| 0.138229332   | 0.190671765 | 0.406952757 | 0.402190443 |
| 0.20783954    | 0.34902703  | 0.329655936 | 0.213125642 |
| 0.329246689   | 0.140531585 | 0.45374966  | 0.039896612 |
| 0.092324929   | 0.269441883 | 0.041809271 | 0.090256861 |
| 0.08132476    | 0.039373408 | 0.187775042 | 0.350213652 |
| 0.18789333    | 0.227868516 | 0.122348266 | 0.075568011 |
| 0.205750509   | 0.200021767 | 0.221603877 | 0.076538663 |
| 0.041141493   | 0.413076887 | 0.011656223 | 0.052888402 |
| 0.180310018   | 0.373354561 | 0.188709251 | 0.174223758 |
| 0.20055478    | 0.142845559 | 0.152184884 | 0.103373249 |
| 0.090020815   | 0.19494919  | 0.370494373 | 0.031001135 |
| 0.010766464   | 0.455849031 | 0.17101448  | 0.045852513 |
| 0.084653819   | 0.251906055 | 0.18657859  | 0.115356218 |
| 0.038387848   | 0.424936998 | 0.109761222 | 0.252807319 |
| 0.168595236   | 0.059190186 | 0.288717851 | 0.07154159  |
| 0.067401284   | 0.378329756 | 0.271304306 | 0.451389904 |
| 0.245107994   | 0.330894406 | 0.375782653 | 0.338474893 |
| 0.139984713   | 0.236656864 | 0.020729414 | 0.390383265 |
| 0.176760181   |             |             |             |
| 2010012005RIK | 0.312065077 | 0.493032105 | 0.315204273 |
| 1             | 0.384160828 | 0.337073903 | 0.339610073 |
| 0.262123314   | 0.182659608 | 0.033642713 | 0.065002065 |
| 0.338630072   | 0.260002822 | 0.340387701 | 0.319939142 |
| 0.398851971   | 0.199872084 | 0.31505347  | 0.3541312   |
| 0.396269461   | 0.212674942 | 0.401697443 | 0.219833394 |
| 0.263700481   | 0.164560377 | 0.164084931 | 0.285657115 |
| 0.447989331   | 0.179367868 | 0.313315736 | 0.366952971 |
| 0.151350246   | 0.372353808 | 0.460366701 | 0.372171541 |
| 0.439719245   | 0.28234292  | 0.020743879 | 0.343815908 |
| 0.381166007   | 0.369356555 | 0.396513189 | 0.402704045 |
| 0.139144254   | 0.43175691  | 0.365630284 | 0.347453301 |
| 0.2655557     | 0.091743552 | 0.268213342 | 0.403402876 |
| 0.420328932   | 0.352201923 | 0.316874022 | 0.299089888 |
| 0.221712679   | 0.254642225 | 0.21567117  | 0.2912956   |
| 0.348564089   | 0.217950762 | 0.430217199 | 0.209706211 |
| 0.18951772    | 0.321878719 | 0.189935204 | 0.349222666 |

|             |             |             |             |
|-------------|-------------|-------------|-------------|
| 0.274577085 | 0.330145173 | 0.065010803 | 0.275382524 |
| 0.014664468 | 0.396902152 | 0.346624293 | 0.243635023 |
| 0.108836362 | 0.075520976 | 0.221906162 | 0.400803629 |
| 0.454472849 | 0.397107164 | 0.464182811 | 0.454021068 |
| 0.242108423 | 0.325010493 | 0.299091948 | 0.289437163 |
| 0.39593929  | 0.312486258 | 0.187161145 | 0.395088326 |
| 0.469311545 | 0.469199847 | 0.268505233 | 0.30009109  |
| 0.397368438 | 0.454466768 | 0.366153657 | 0.389274203 |
| 0.306083566 | 0.081604876 | 0.40554726  | 0.476945554 |
| 0.356664027 | 0.247966095 | 0.23388573  | 0.386983492 |
| 0.137615384 | 0.314250608 | 0.409663481 | 0.171258538 |
| 0.470944697 | 0.080896767 | 0.257849456 | 0.39512638  |
| 0.271084153 | 0.37711904  | 0.456371084 | 0.322917183 |
| 0.34726621  | 0.0625112   | 0.150692107 | 0.077659605 |
| 0.33741288  | 0.118065355 | 0.409593953 | 0.459123462 |
| 0.29214202  | 0.351214778 | 0.365726661 | 0.012822875 |
| 0.069816329 | 0.205025371 | 0.356129964 | 0.335705625 |
| 0.366410301 | 0.304805426 | 0.321705087 | 0.311598668 |
| 0.324469953 | 0.454080304 | 0.07178806  | 0.220868796 |
| 0.390435694 | 0.208962518 | 0.339681287 | 0.359724234 |
| 0.347118354 | 0.238491988 | 0.24661469  | 0.498225589 |
| 0.407628588 | 0.201444951 | 0.291042039 | 0.399295793 |
| 0.353485885 | 0.333998013 | 0.220352168 | 0.349856296 |
| 0.153870473 | 0.41079629  | 0.061518437 | 0.328310544 |
| 0.246329352 | 0.170034172 | 0.033174488 | 0.320483924 |
| 0.347153857 | 0.400815231 | 0.385173047 | 0.208207864 |
| 0.377131744 | 0.394225675 | 0.297291064 | 0.358158409 |
| 0.050126791 | 0.112768167 | 0.23715057  | 0.480790721 |
| 0.258731975 | 0.455274854 | 0.367621033 | 0.32397585  |
| 0.338009925 | 0.423151461 | 0.004595882 | 0.441426484 |
| 0.466356059 | 0.248283411 | 0.391609306 | 0.351432775 |
| 0.300917661 | 0.450505449 | 0.033984253 | 0.397015982 |
| 0.268394442 | 0.175064606 | 0.48961928  | 0.252899212 |
| 0.407691968 | 0.116753045 | 0.341771621 | 0.359436007 |
| 0.30931204  | 0.023769797 | 0.284597297 | 0.39541136  |
| 0.055238268 | 0.211060506 | 0.3558339   | 0.409172843 |
| 0.39508559  | 0.383138264 | 0.479251033 | 0.28686888  |
| 0.393626153 | 0.331002729 | 0.039824507 | 0.318260577 |
| 0.354858727 | 0.280886049 | 0.422813498 | 0.35127119  |
| 0.257825844 | 0.454560092 | 0.33328372  | 0.211478729 |
| 0.139369751 | 0.363941223 | 0.06833315  | 0.373194471 |
| 0.326841498 | 0.242331296 | 0.311893768 | 0.17249973  |
| 0.132546383 | 0.497736907 | 0.167726419 | 0.196012251 |
| 0.109183116 | 0.364559483 | 0.353505679 | 0.298960578 |
| 0.244462685 | 0.267996357 | 0.323210673 | 0.369102695 |
| 0.132399827 | 0.193063811 | 0.024387573 | 0.272271286 |
| 0.19295636  | 0.306805495 | 0.296021241 | 0.312736149 |
| 0.331560265 | 0.195581513 | 0.38713625  | 0.260147893 |
| 0.181425077 | 0.052701105 | 0.478142547 | 0.396858474 |
| 0.274661106 | 0.287373607 | 0.097913908 | 0.261273152 |
| 0.462264913 | 0.280346566 | 0.232642931 | 0.450354745 |
| 0.070463951 | 0.455665142 | 0.325680517 | 0.212954778 |
| 0.32269337  | 0.361468205 | 0.468404994 | 0.102457547 |
| 0.332276435 | 0.446902616 | 0.341962212 | 0.278469562 |

|             |             |             |             |
|-------------|-------------|-------------|-------------|
| 0.370151313 | 0.399562446 | 0.109667038 | 0.325595505 |
| 0.314237157 | 0.095317027 | 0.478866792 | 0.17518318  |
| 0.060736913 | 0.353320202 | 0.339024352 | 0.155798342 |
| 0.150218433 | 0.378640703 | 0.143813133 | 0.348061464 |
| 0.495970075 | 0.403874559 | 0.368278256 | 0.212250819 |
| 0.131324156 | 0.035827787 | 0.225618978 | 0.300430357 |
| 0.446068072 | 0.4554911   | 0.331516392 | 0.347947423 |
| 0.352528513 | 0.322081407 | 0.182474651 | 0.478032602 |
| 0.174198182 | 0.459035441 | 0.029696768 | 0.348308905 |
| 0.437044675 | 0.278886031 | 0.153115473 | 0.369929743 |
| 0.363131962 | 0.142375532 | 0.283454512 | 0.453982707 |
| 0.416359702 | 0.358590484 | 0.351113108 | 0.357903907 |
| 0.079929088 | 0.13701372  | 0.358374999 | 0.160193024 |
| 0.36831363  | 0.316327455 | 0.040900647 | 0.329237173 |
| 0.133376329 | 0.43459571  | 0.417537186 | 0.145307377 |
| 0.31062464  | 0.306883228 | 0.365714037 | 0.115604091 |
| 0.388532264 | 0.431245815 | 0.468062802 | 0.270148586 |
| 0.344627416 | 0.444201425 | 0.288064391 | 0.142794172 |
| 0.048451037 | 0.448946821 | 0.336079469 | 0.074957688 |
| 0.461589936 | 0.2349079   | 0.054646771 | 0.478026085 |
| 0.312972283 | 0.374755327 | 0.019266897 | 0.058789861 |
| 0.067699908 | 0.414400359 | 0.433507272 | 0.369974421 |
| 0.249688392 | 0.377799876 | 0.006949766 | 0.469536877 |
| 0.459218622 | 0.041060231 | 0.173128007 | 0.353482842 |
| 0.312903868 | 0.491897243 | 0.271779915 | 0.396996714 |
| 0.321745638 | 0.437308284 | 0.329065556 | 0.344859879 |
| 0.421755938 | 0.417856714 | 0.369860525 | 0.436537571 |
| 0.449382795 | 0.371554162 | 0.38299075  | 0.073714742 |
| 0.169227576 | 0.284151166 | 0.278825066 | 0.159625229 |
| 0.287508091 | 0.225663359 | 0.440783103 | 0.447323854 |
| 0.438873528 | 0.022404548 | 0.270147287 | 0.357773899 |
| 0.44552005  | 0.476447423 | 0.040499669 | 0.012652821 |
| 0.010791348 | 0.046561596 | 0.379330188 | 0.28839289  |
| 0.455325181 | 0.240128829 | 0.02680685  | 0.133759642 |
| 0.359061392 | 0.335056489 | 0.463080162 | 0.407498347 |
| 0.353373441 | 0.16357653  | 0.306645403 | 0.400961369 |
| 0.12883998  | 0.239692933 | 0.458559944 | 0.452191931 |
| 0.080244676 | 0.296472614 | 0.314696732 | 0.490887259 |
| 0.052081544 | 0.352780865 | 0.338564495 | 0.370098641 |
| 0.02555248  | 0.145431254 | 0.136545613 | 0.39050848  |
| 0.422935465 | 0.152732525 | 0.089900471 | 0.145272571 |
| 0.249082937 | 0.431544908 | 0.281720915 | 0.494546354 |
| 0.429181122 | 0.440532277 | 0.10991303  | 0.44931248  |
| 0.102921025 | 0.433171722 | 0.306182192 | 0.096854142 |
| 0.297903188 | 0.042986409 | 0.399417794 | 0.179088223 |
| 0.329625981 | 0.345208678 | 0.218985027 | 0.03948265  |
| 0.145124305 | 0.117205678 | 0.472092038 | 0.415377509 |
| 0.057394098 | 0.340753279 | 0.33975398  | 0.373200164 |
| 0.332165539 | 0.401756188 | 0.453204228 | 0.308628866 |
| 0.214027864 | 0.102636945 | 0.38601261  | 0.311803274 |
| 0.297223239 | 0.468454383 | 0.330959357 | 0.481890461 |
| 0.330060819 | 0.428790596 | 0.425100388 | 0.399961205 |
| 0.223599847 | 0.340946307 | 0.363198581 | 0.084611487 |
| 0.395737664 | 0.442002198 | 0.345881238 | 0.222042145 |



|               |             |             |             |
|---------------|-------------|-------------|-------------|
| 0.331156592   | 0.281593178 | 0.107734    | 0.150395533 |
| 0.230879676   | 0.312152882 | 0.26151137  | 0.432933672 |
| 0.333993317   | 0.313610668 | 0.094665841 | 0.135646959 |
| 0.49959966    | 0.408621253 | 0.254709496 | 0.385972651 |
| 0.249922403   | 0.384051931 | 0.372828759 | 0.360981807 |
| 0.302174755   | 0.403965187 | 0.387457337 | 0.350462781 |
| 0.415091989   | 0.369611107 | 0.473682137 | 0.148790226 |
| 0.128002782   | 0.2982634   | 0.206810251 | 0.157872042 |
| 0.264434649   | 0.07193693  | 0.212451044 | 0.385550776 |
| 0.256105307   | 0.404328462 | 0.274477995 | 0.162347332 |
| 0.333533781   | 0.278188134 | 0.386176604 | 0.323395402 |
| 0.186128686   | 0.454952055 | 0.031834266 | 0.120965483 |
| 0.272004726   | 0.376822309 | 0.320208314 | 0.310680726 |
| 0.248435717   | 0.163173583 | 0.374127231 | 0.299711443 |
| 0.296338167   | 0.278451877 | 0.382358248 | 0.101861167 |
| 0.080900493   | 0.477501188 | 0.319576998 | 0.0409303   |
| 0.11452713    | 0.293887927 | 0.290838621 | 0.325763784 |
| 0.046179254   | 0.420561932 | 0.316339007 | 0.361927763 |
| 0.389320388   | 0.146265763 | 0.319740766 | 0.134322218 |
| 0.130759321   | 0.40964802  | 0.312522272 | 0.448893834 |
| 0.298145707   | 0.409845533 | 0.390510399 | 0.370476777 |
| 0.152969071   | 0.262285326 | 0.108403036 | 0.419560445 |
| 0.296662283   |             |             |             |
| 2010305A19RIK | 0.346955893 | 0.490469994 | 0.219644724 |
| 0.384160828   | 1           | 0.205778576 | 0.160956211 |
| 0.117264981   | 0.079852637 | 0.008463354 | 0.039907106 |
| 0.299002266   | 0.153981837 | 0.166864581 | 0.154332832 |
| 0.418109844   | 0.159671169 | 0.209080354 | 0.201821769 |
| 0.355017592   | 0.077626791 | 0.384127003 | 0.106061051 |
| 0.238123504   | 0.123426177 | 0.099908409 | 0.203352341 |
| 0.44132487    | 0.107965999 | 0.151114143 | 0.307900119 |
| 0.146261985   | 0.3957702   | 0.456701716 | 0.361809811 |
| 0.450467556   | 0.299688086 | 0.026348821 | 0.156989336 |
| 0.377024762   | 0.379967649 | 0.356483809 | 0.244047224 |
| 0.062387061   | 0.408995699 | 0.187186097 | 0.2912349   |
| 0.128155724   | 0.056424094 | 0.108200403 | 0.378167695 |
| 0.404533564   | 0.263174598 | 0.140539716 | 0.135283888 |
| 0.133159994   | 0.123773156 | 0.173366646 | 0.209642111 |
| 0.19005404    | 0.078702572 | 0.431532683 | 0.079873296 |
| 0.112241916   | 0.173001482 | 0.189247342 | 0.177540719 |
| 0.238564193   | 0.296653231 | 0.033279637 | 0.264998276 |
| 0.004408819   | 0.328105673 | 0.286617187 | 0.178999443 |
| 0.078540985   | 0.038313459 | 0.203658426 | 0.244631191 |
| 0.463996685   | 0.414524539 | 0.502049365 | 0.495360008 |
| 0.170559098   | 0.254875157 | 0.245806509 | 0.17673521  |
| 0.397577424   | 0.144079332 | 0.093499009 | 0.434628057 |
| 0.505445449   | 0.47956012  | 0.193393602 | 0.237773118 |
| 0.363840955   | 0.444116791 | 0.208194197 | 0.248453215 |
| 0.178571706   | 0.093218799 | 0.390289805 | 0.505269505 |
| 0.339686761   | 0.217503513 | 0.172745546 | 0.364664516 |
| 0.098577649   | 0.171330923 | 0.303252741 | 0.151864813 |
| 0.473253993   | 0.030138221 | 0.216263334 | 0.222711859 |
| 0.193765629   | 0.377880501 | 0.475972805 | 0.169181358 |
| 0.263386077   | 0.039616799 | 0.104149585 | 0.072407731 |

|             |             |             |             |
|-------------|-------------|-------------|-------------|
| 0.196845404 | 0.128876523 | 0.396296179 | 0.44764928  |
| 0.153641015 | 0.257440542 | 0.194396156 | 0.011937012 |
| 0.060890433 | 0.19518034  | 0.393963431 | 0.231350901 |
| 0.379829525 | 0.329619507 | 0.184521704 | 0.300632253 |
| 0.317336365 | 0.500300879 | 0.018860295 | 0.110043605 |
| 0.228755378 | 0.203680372 | 0.219441395 | 0.283882421 |
| 0.231399103 | 0.108966763 | 0.149062063 | 0.511136791 |
| 0.369678183 | 0.110954427 | 0.178057129 | 0.39734372  |
| 0.196010566 | 0.257279248 | 0.131235146 | 0.209889442 |
| 0.070186017 | 0.422855409 | 0.064590498 | 0.182054868 |
| 0.138707427 | 0.166866977 | 0.024967587 | 0.154251132 |
| 0.159160146 | 0.388259825 | 0.389418715 | 0.136955254 |
| 0.229647466 | 0.343956383 | 0.15925802  | 0.319079483 |
| 0.019241348 | 0.072330587 | 0.125722474 | 0.495160016 |
| 0.164060988 | 0.498352476 | 0.22868995  | 0.246851375 |
| 0.243887443 | 0.43754953  | 0.004012004 | 0.422910268 |
| 0.478806198 | 0.124191869 | 0.265686133 | 0.309459792 |
| 0.206182605 | 0.435084661 | 0.022654939 | 0.395235117 |
| 0.246203399 | 0.111245471 | 0.521446322 | 0.175080306 |
| 0.414582165 | 0.073502839 | 0.187664317 | 0.407206786 |
| 0.345406119 | 0.015039439 | 0.112288316 | 0.316170659 |
| 0.06427962  | 0.074478047 | 0.36300678  | 0.331708953 |
| 0.246253392 | 0.427549313 | 0.509025088 | 0.192794168 |
| 0.25575699  | 0.180226524 | 0.032471675 | 0.250839697 |
| 0.398590271 | 0.206547004 | 0.385997531 | 0.175625305 |
| 0.170398569 | 0.433236271 | 0.352223904 | 0.115893299 |
| 0.067655456 | 0.197095812 | 0.022198814 | 0.227800579 |
| 0.33999044  | 0.115757971 | 0.199510547 | 0.174347358 |
| 0.11212157  | 0.50869121  | 0.167561042 | 0.18226755  |
| 0.119376387 | 0.239878602 | 0.20141269  | 0.147001187 |
| 0.149852632 | 0.172417425 | 0.219276351 | 0.225734064 |
| 0.047396951 | 0.125253958 | 0.037463294 | 0.194503317 |
| 0.110067276 | 0.182733818 | 0.169199863 | 0.306137693 |
| 0.208257858 | 0.109321479 | 0.244251027 | 0.212589056 |
| 0.135680309 | 0.040732079 | 0.477582377 | 0.354612558 |
| 0.239399886 | 0.149704853 | 0.08018928  | 0.159748136 |
| 0.459899314 | 0.131552035 | 0.114153332 | 0.42744466  |
| 0.043542317 | 0.50243909  | 0.188480425 | 0.14870285  |
| 0.238681627 | 0.213234937 | 0.468186797 | 0.040402754 |
| 0.234083744 | 0.425741184 | 0.249501169 | 0.178741196 |
| 0.335929874 | 0.315558551 | 0.04726179  | 0.3211225   |
| 0.311116435 | 0.064227136 | 0.498233468 | 0.16116159  |
| 0.052596845 | 0.382474994 | 0.3552489   | 0.114252793 |
| 0.112937418 | 0.202865655 | 0.046157915 | 0.253157404 |
| 0.495940678 | 0.407868522 | 0.360758973 | 0.198949458 |
| 0.065533208 | 0.021969508 | 0.21678246  | 0.227218516 |
| 0.439561659 | 0.489804183 | 0.237586721 | 0.234833433 |
| 0.210028754 | 0.20712738  | 0.07787972  | 0.495528886 |
| 0.164852835 | 0.469254015 | 0.023030594 | 0.405196702 |
| 0.439370714 | 0.137590819 | 0.10820617  | 0.180358823 |
| 0.326298084 | 0.070099652 | 0.182419836 | 0.443114503 |
| 0.405875295 | 0.219998728 | 0.196289863 | 0.350828234 |
| 0.025549967 | 0.060389859 | 0.254739621 | 0.158214286 |
| 0.222333405 | 0.200531376 | 0.055384039 | 0.180092014 |

|             |             |             |             |
|-------------|-------------|-------------|-------------|
| 0.067149618 | 0.408718568 | 0.46484567  | 0.078810415 |
| 0.170416824 | 0.15859656  | 0.334582381 | 0.06734626  |
| 0.431343561 | 0.463260606 | 0.46119696  | 0.154862185 |
| 0.392131511 | 0.457205826 | 0.251528507 | 0.122437228 |
| 0.045940418 | 0.462014533 | 0.293657852 | 0.033967538 |
| 0.49096965  | 0.09679906  | 0.024533438 | 0.461377859 |
| 0.175158979 | 0.364674473 | 0.002435678 | 0.064136673 |
| 0.078763728 | 0.475487579 | 0.411541268 | 0.300208663 |
| 0.097765753 | 0.279642483 | 0.019192076 | 0.507452197 |
| 0.442774624 | 0.036909686 | 0.169985299 | 0.380263342 |
| 0.35123185  | 0.487609562 | 0.204380704 | 0.427404591 |
| 0.279773345 | 0.442728219 | 0.162001387 | 0.234010307 |
| 0.396630721 | 0.45052305  | 0.353827429 | 0.413549947 |
| 0.462652247 | 0.385956612 | 0.21952823  | 0.031041367 |
| 0.109194065 | 0.124729342 | 0.132286831 | 0.08564199  |
| 0.18358225  | 0.148833173 | 0.449542141 | 0.488918214 |
| 0.47007894  | 0.019645952 | 0.118985538 | 0.372356182 |
| 0.416669006 | 0.47642643  | 0.040655744 | 0.006128004 |
| 0.00835542  | 0.033148095 | 0.236086802 | 0.226123566 |
| 0.469354461 | 0.09618163  | 0.017188132 | 0.048965676 |
| 0.188687891 | 0.307723247 | 0.463928398 | 0.363408557 |
| 0.409773143 | 0.12496678  | 0.139585932 | 0.375773113 |
| 0.095428893 | 0.214379368 | 0.478158298 | 0.422575633 |
| 0.08403838  | 0.228616777 | 0.208100706 | 0.492397724 |
| 0.063311296 | 0.262798345 | 0.327168902 | 0.204518392 |
| 0.037769936 | 0.119847964 | 0.09661283  | 0.444307386 |
| 0.434198767 | 0.092329826 | 0.056077067 | 0.06496964  |
| 0.116378269 | 0.471448537 | 0.155980658 | 0.522651677 |
| 0.410963109 | 0.460596734 | 0.126744016 | 0.428185257 |
| 0.062554073 | 0.427503981 | 0.238671489 | 0.029385497 |
| 0.235001879 | 0.035503237 | 0.435255155 | 0.099645501 |
| 0.173199847 | 0.302088004 | 0.139377248 | 0.047940033 |
| 0.133609765 | 0.091632709 | 0.490330142 | 0.470535152 |
| 0.072458843 | 0.189372903 | 0.24444729  | 0.327142429 |
| 0.151456862 | 0.395973031 | 0.439141832 | 0.17057267  |
| 0.093532652 | 0.137114    | 0.350223132 | 0.272714826 |
| 0.156758381 | 0.513964654 | 0.204667032 | 0.505843244 |
| 0.318242423 | 0.438289782 | 0.44454784  | 0.216926195 |
| 0.22033859  | 0.220622616 | 0.267510987 | 0.024980088 |
| 0.238851998 | 0.464991392 | 0.209657072 | 0.140933746 |
| 0.218418266 | 0.224588591 | 0.073372069 | 0.097867497 |
| 0.193396734 | 0.168146895 | 0.153217921 | 0.464641843 |
| 0.269769359 | 0.287192995 | 0.060121353 | 0.087941652 |
| 0.506936895 | 0.393494452 | 0.095044183 | 0.323871957 |
| 0.192576486 | 0.243489712 | 0.419360617 | 0.428705121 |
| 0.208754665 | 0.418411931 | 0.380295587 | 0.282557196 |
| 0.375473102 | 0.206874284 | 0.468610339 | 0.052549523 |
| 0.086910685 | 0.281720654 | 0.107808259 | 0.13612758  |
| 0.158498531 | 0.056679259 | 0.171563136 | 0.409611999 |
| 0.199422575 | 0.320220322 | 0.171792941 | 0.104496146 |
| 0.267611966 | 0.190852499 | 0.271372156 | 0.1405945   |
| 0.092138438 | 0.439483382 | 0.024003467 | 0.100589938 |
| 0.224214996 | 0.381827992 | 0.228016913 | 0.21660963  |
| 0.202790906 | 0.179962038 | 0.247176077 | 0.138416771 |

|               |             |             |             |
|---------------|-------------|-------------|-------------|
| 0.144847743   | 0.195390004 | 0.377697248 | 0.040615576 |
| 0.036170587   | 0.514744526 | 0.178557026 | 0.050067412 |
| 0.128142964   | 0.244099221 | 0.223462739 | 0.176805573 |
| 0.054176347   | 0.452114953 | 0.150829942 | 0.266051152 |
| 0.209876411   | 0.105122763 | 0.294593573 | 0.07454437  |
| 0.081616826   | 0.394349611 | 0.241088221 | 0.465092795 |
| 0.245774477   | 0.420431702 | 0.368947695 | 0.390563888 |
| 0.110309036   | 0.194331112 | 0.04374879  | 0.434461371 |
| 0.184190451   |             |             |             |
| 2310004I24RIK | 0.281260226 | 0.464089917 | 0.186156763 |
| 0.337073903   | 0.205778576 | 1           | 0.18965277  |
| 0.189215913   | 0.08851094  | 0.012425173 | 0.018757036 |
| 0.201190166   | 0.111272986 | 0.200718969 | 0.234222868 |
| 0.293027443   | 0.063619826 | 0.204676179 | 0.17123974  |
| 0.283735166   | 0.132366489 | 0.24146853  | 0.095245316 |
| 0.11967116    | 0.051332947 | 0.055524406 | 0.128971469 |
| 0.378254052   | 0.062221564 | 0.246299572 | 0.31749156  |
| 0.049872557   | 0.329951439 | 0.458321553 | 0.230222239 |
| 0.432613159   | 0.272177681 | 0.006492438 | 0.243097024 |
| 0.368681904   | 0.299548282 | 0.300170787 | 0.210025608 |
| 0.053855534   | 0.45735565  | 0.19201954  | 0.17974016  |
| 0.192314099   | 0.023830332 | 0.235265871 | 0.435161058 |
| 0.428094999   | 0.223862623 | 0.22185142  | 0.162115762 |
| 0.108360788   | 0.203653289 | 0.099153202 | 0.281981637 |
| 0.17328747    | 0.195490636 | 0.422229198 | 0.118502575 |
| 0.116371512   | 0.212552152 | 0.064064617 | 0.216413363 |
| 0.139029904   | 0.343870333 | 0.025989163 | 0.180510036 |
| 0.00749069    | 0.268783887 | 0.171402701 | 0.134230271 |
| 0.029861704   | 0.019451725 | 0.079153749 | 0.236505317 |
| 0.387302283   | 0.389241152 | 0.372698216 | 0.37788327  |
| 0.087007707   | 0.148359178 | 0.15581176  | 0.117027485 |
| 0.370112501   | 0.164437568 | 0.084958679 | 0.276837016 |
| 0.382792297   | 0.442302992 | 0.104481705 | 0.126807873 |
| 0.369579748   | 0.442988046 | 0.232129792 | 0.219091533 |
| 0.179544346   | 0.0223671   | 0.408669118 | 0.410676432 |
| 0.364363273   | 0.115018134 | 0.082325933 | 0.357970059 |
| 0.044634095   | 0.227205869 | 0.219429706 | 0.068133261 |
| 0.401023092   | 0.033669797 | 0.096291699 | 0.236037235 |
| 0.134656017   | 0.341071667 | 0.42425789  | 0.155746978 |
| 0.182098254   | 0.014716404 | 0.060478959 | 0.021391028 |
| 0.198581049   | 0.043420484 | 0.44061814  | 0.392836255 |
| 0.185122522   | 0.183415344 | 0.209395633 | 0.001980498 |
| 0.015345202   | 0.087187963 | 0.313423202 | 0.203311977 |
| 0.308594777   | 0.300799771 | 0.1514299   | 0.31810814  |
| 0.228585081   | 0.363084387 | 0.080372516 | 0.105756356 |
| 0.236184213   | 0.086638449 | 0.150551282 | 0.21882244  |
| 0.155136022   | 0.128143271 | 0.099202578 | 0.434954583 |
| 0.434325854   | 0.076803501 | 0.216364351 | 0.264665106 |
| 0.220967488   | 0.151751667 | 0.088520265 | 0.170490146 |
| 0.065864998   | 0.402721638 | 0.01299669  | 0.228168626 |
| 0.145468639   | 0.054582298 | 0.012596499 | 0.2317211   |
| 0.216032755   | 0.367844218 | 0.410539491 | 0.080823863 |
| 0.191829794   | 0.213779272 | 0.231297299 | 0.302153384 |
| 0.017899066   | 0.039611743 | 0.210465401 | 0.421730008 |

|             |             |             |             |
|-------------|-------------|-------------|-------------|
| 0.252412005 | 0.389373104 | 0.183877869 | 0.152523558 |
| 0.145883019 | 0.347989723 | 0.002209446 | 0.454099077 |
| 0.439569015 | 0.21493822  | 0.207735676 | 0.190774256 |
| 0.175893551 | 0.382889033 | 0.022351403 | 0.258449005 |
| 0.265373422 | 0.066996903 | 0.403289726 | 0.091455975 |
| 0.400313427 | 0.034302679 | 0.23138954  | 0.300158687 |
| 0.262758411 | 0.008250372 | 0.235171739 | 0.298241354 |
| 0.012167881 | 0.148887972 | 0.30410193  | 0.277310004 |
| 0.231695144 | 0.309421829 | 0.385027859 | 0.167246267 |
| 0.213760224 | 0.186854313 | 0.009823297 | 0.142975317 |
| 0.303118216 | 0.170900203 | 0.440468254 | 0.198408125 |
| 0.208506945 | 0.440410009 | 0.311380117 | 0.162423951 |
| 0.052370194 | 0.240055822 | 0.028300751 | 0.190759995 |
| 0.325569471 | 0.111085117 | 0.199778234 | 0.067689077 |
| 0.036806017 | 0.444118838 | 0.061999608 | 0.090160686 |
| 0.039581391 | 0.223276286 | 0.188466292 | 0.163439858 |
| 0.104998145 | 0.109533896 | 0.173117107 | 0.218849299 |
| 0.06769673  | 0.06318772  | 0.005692311 | 0.153268238 |
| 0.076228847 | 0.169182248 | 0.177470357 | 0.289185683 |
| 0.185911858 | 0.069554841 | 0.193701296 | 0.128708888 |
| 0.0616153   | 0.011787679 | 0.445900494 | 0.253859646 |
| 0.311745125 | 0.138206017 | 0.026986548 | 0.167676194 |
| 0.398645234 | 0.234028471 | 0.215570304 | 0.42345842  |
| 0.024342499 | 0.378386701 | 0.156224908 | 0.071620242 |
| 0.156814138 | 0.167787927 | 0.395299531 | 0.070427572 |
| 0.229250688 | 0.442242614 | 0.167193597 | 0.113559041 |
| 0.386345326 | 0.263117724 | 0.043399462 | 0.32464489  |
| 0.305740935 | 0.02503861  | 0.432433614 | 0.053890945 |
| 0.013997353 | 0.244894606 | 0.287781956 | 0.049537288 |
| 0.047714769 | 0.216756152 | 0.091952701 | 0.152620785 |
| 0.448353474 | 0.266302022 | 0.336383693 | 0.087394908 |
| 0.044931096 | 0.006904059 | 0.084891892 | 0.172748221 |
| 0.455469809 | 0.401424818 | 0.147823381 | 0.166682576 |
| 0.167247669 | 0.171516234 | 0.177282804 | 0.416991355 |
| 0.086876284 | 0.444532939 | 0.006598865 | 0.281137298 |
| 0.437874605 | 0.225009965 | 0.046263305 | 0.247352399 |
| 0.372701962 | 0.054481292 | 0.15154774  | 0.443579463 |
| 0.393607736 | 0.195082791 | 0.202962244 | 0.232791064 |
| 0.03644355  | 0.064881399 | 0.198215184 | 0.065326381 |
| 0.231356083 | 0.146219493 | 0.01217147  | 0.235337348 |
| 0.044807316 | 0.430178515 | 0.331207887 | 0.054637097 |
| 0.237290901 | 0.232448041 | 0.176919656 | 0.037614222 |
| 0.328087379 | 0.400580531 | 0.462978211 | 0.142732454 |
| 0.291671428 | 0.400684942 | 0.162576898 | 0.045339496 |
| 0.00989736  | 0.430920791 | 0.296987942 | 0.027086551 |
| 0.378954994 | 0.218536803 | 0.014466262 | 0.459550142 |
| 0.151112747 | 0.410429392 | 0.016808203 | 0.030327002 |
| 0.017628598 | 0.321979475 | 0.446349889 | 0.295512156 |
| 0.223702798 | 0.216961225 | 0.001509388 | 0.415266807 |
| 0.443613991 | 0.007806634 | 0.057942632 | 0.308226893 |
| 0.255395849 | 0.475204376 | 0.132954197 | 0.330220453 |
| 0.187887482 | 0.427747015 | 0.176321428 | 0.151714569 |
| 0.382147523 | 0.386526366 | 0.337779531 | 0.439210598 |
| 0.373365675 | 0.232487536 | 0.194313972 | 0.025916083 |

|               |             |             |             |
|---------------|-------------|-------------|-------------|
| 0.08536496    | 0.222969489 | 0.202195325 | 0.077450772 |
| 0.251462394   | 0.084671828 | 0.409440563 | 0.360936818 |
| 0.369994485   | 0.004130583 | 0.174877198 | 0.325550736 |
| 0.414619998   | 0.419037345 | 0.013442606 | 0.007466806 |
| 0.004358312   | 0.010041731 | 0.244047315 | 0.121810093 |
| 0.411476476   | 0.201099174 | 0.005878679 | 0.075336853 |
| 0.203604691   | 0.171709499 | 0.441320454 | 0.257993647 |
| 0.292457299   | 0.055280806 | 0.200058617 | 0.282846651 |
| 0.038637613   | 0.2564992   | 0.388283583 | 0.458384238 |
| 0.022983382   | 0.130233401 | 0.202980847 | 0.424746029 |
| 0.018585715   | 0.158048954 | 0.216918454 | 0.198236045 |
| 0.006683983   | 0.044543115 | 0.045388029 | 0.302694521 |
| 0.419987952   | 0.046989186 | 0.021822085 | 0.125282144 |
| 0.11143144    | 0.364668618 | 0.115164646 | 0.419589743 |
| 0.382184598   | 0.342687505 | 0.031109335 | 0.454051873 |
| 0.033357338   | 0.427384833 | 0.139348792 | 0.067734516 |
| 0.143877567   | 0.011089505 | 0.370584498 | 0.092815624 |
| 0.226549849   | 0.286070444 | 0.115753104 | 0.007822149 |
| 0.066561225   | 0.031658247 | 0.387542186 | 0.328095985 |
| 0.013832595   | 0.197544643 | 0.158670827 | 0.232763396 |
| 0.245035318   | 0.317384487 | 0.460337682 | 0.221009237 |
| 0.106679825   | 0.039945043 | 0.311100103 | 0.270873113 |
| 0.196069694   | 0.377337278 | 0.167936439 | 0.432481793 |
| 0.309777253   | 0.4038075   | 0.385387316 | 0.239603827 |
| 0.088027122   | 0.243668772 | 0.303041835 | 0.037326691 |
| 0.216113854   | 0.35597295  | 0.231114345 | 0.082089625 |
| 0.142602276   | 0.154452186 | 0.050925088 | 0.107914547 |
| 0.120118541   | 0.251535929 | 0.109537015 | 0.339506314 |
| 0.246027302   | 0.288181444 | 0.047089907 | 0.045378892 |
| 0.469146921   | 0.41560081  | 0.174751556 | 0.304289886 |
| 0.098649172   | 0.196985591 | 0.304388474 | 0.280656272 |
| 0.191686121   | 0.354068455 | 0.348193446 | 0.303193007 |
| 0.431334976   | 0.196275501 | 0.465406793 | 0.126440905 |
| 0.045995047   | 0.20518331  | 0.07937267  | 0.049435324 |
| 0.103567283   | 0.018521473 | 0.111779013 | 0.263200053 |
| 0.143983704   | 0.210906366 | 0.199342819 | 0.063535938 |
| 0.15206854    | 0.191799522 | 0.19367802  | 0.193467755 |
| 0.069450859   | 0.451991255 | 0.007332015 | 0.034405259 |
| 0.14230119    | 0.32908071  | 0.162347137 | 0.132582262 |
| 0.117371914   | 0.057507311 | 0.173658841 | 0.241060205 |
| 0.202089099   | 0.171177333 | 0.343119529 | 0.047897195 |
| 0.030842429   | 0.390746714 | 0.22755791  | 0.009684402 |
| 0.046778613   | 0.24134992  | 0.157140754 | 0.176126825 |
| 0.009559823   | 0.377621486 | 0.2473339   | 0.200869825 |
| 0.247530683   | 0.050876417 | 0.361720644 | 0.076214581 |
| 0.057264026   | 0.417585518 | 0.171122861 | 0.424638531 |
| 0.152543834   | 0.300986134 | 0.430988204 | 0.332072834 |
| 0.073755085   | 0.169521149 | 0.04314156  | 0.368814847 |
| 0.186419945   |             |             |             |
| 2310044G17RIK | 0.164785528 | 0.259871069 | 0.09296202  |
| 0.339610073   | 0.160956211 | 0.18965277  | 1           |
| 0.194008831   | 0.174803489 | 0.091231567 | 0.070642098 |
| 0.133039994   | 0.125767866 | 0.186154145 | 0.115970758 |
| 0.303771214   | 0.115146784 | 0.102996235 | 0.271965346 |

|             |             |             |             |
|-------------|-------------|-------------|-------------|
| 0.290869459 | 0.273218002 | 0.28482792  | 0.263967751 |
| 0.075522027 | 0.09473573  | 0.17469013  | 0.098643816 |
| 0.332080355 | 0.18017296  | 0.154760959 | 0.292170025 |
| 0.093743543 | 0.221908421 | 0.213824501 | 0.19287291  |
| 0.189845284 | 0.138782391 | 0.023768534 | 0.176666826 |
| 0.223029084 | 0.221993114 | 0.310964414 | 0.296824518 |
| 0.219583522 | 0.205942752 | 0.304447999 | 0.146986413 |
| 0.13662406  | 0.111684177 | 0.141897859 | 0.210120586 |
| 0.189931003 | 0.153703437 | 0.225737338 | 0.283680515 |
| 0.08915333  | 0.13536564  | 0.043845125 | 0.207429487 |
| 0.264049121 | 0.162688289 | 0.198037297 | 0.248963496 |
| 0.12283769  | 0.201908843 | 0.089100283 | 0.223114125 |
| 0.063799771 | 0.221361955 | 0.130202294 | 0.092531415 |
| 0.034091655 | 0.307379001 | 0.154830097 | 0.052703059 |
| 0.12748127  | 0.108544974 | 0.103907275 | 0.318971734 |
| 0.306367049 | 0.185498707 | 0.266754732 | 0.239263674 |
| 0.11957223  | 0.137235967 | 0.085138157 | 0.215602223 |
| 0.227065223 | 0.267660629 | 0.138615373 | 0.285677696 |
| 0.2624122   | 0.222318593 | 0.141280191 | 0.143073905 |
| 0.255552226 | 0.254700394 | 0.120498856 | 0.134897977 |
| 0.082085498 | 0.049326635 | 0.209355789 | 0.249632933 |
| 0.204891799 | 0.053191952 | 0.14107371  | 0.289696651 |
| 0.156581399 | 0.089675263 | 0.327213252 | 0.070084054 |
| 0.316035245 | 0.174234419 | 0.112359344 | 0.255228971 |
| 0.140264793 | 0.218081276 | 0.2075232   | 0.26997556  |
| 0.114641084 | 0.078152813 | 0.048724755 | 0.089763874 |
| 0.124912681 | 0.024918753 | 0.177670409 | 0.301656325 |
| 0.17524632  | 0.110402349 | 0.237724476 | 0.029013943 |
| 0.077255272 | 0.082398716 | 0.1769308   | 0.121318837 |
| 0.238740157 | 0.128056437 | 0.176055601 | 0.183181571 |
| 0.134620534 | 0.260735062 | 0.037064732 | 0.262727693 |
| 0.175801615 | 0.090770257 | 0.267047506 | 0.151187179 |
| 0.146006678 | 0.265810328 | 0.230217208 | 0.277812817 |
| 0.239372738 | 0.234525478 | 0.094247266 | 0.280406117 |
| 0.149792146 | 0.130862827 | 0.229525673 | 0.183558328 |
| 0.248297205 | 0.175961965 | 0.055503094 | 0.139574665 |
| 0.068733448 | 0.067830339 | 0.058791455 | 0.195057019 |
| 0.163571405 | 0.219338694 | 0.159411725 | 0.19883972  |
| 0.180633097 | 0.229748943 | 0.135156309 | 0.2114888   |
| 0.092872348 | 0.136205782 | 0.084013    | 0.258633886 |
| 0.176996516 | 0.232167078 | 0.179683945 | 0.123828403 |
| 0.185136024 | 0.282532906 | 0.002450999 | 0.206717723 |
| 0.215402289 | 0.078978979 | 0.201220631 | 0.154465365 |
| 0.077460994 | 0.30886466  | 0.010673995 | 0.271431585 |
| 0.143340283 | 0.194578164 | 0.289050482 | 0.16285761  |
| 0.193069899 | 0.147123193 | 0.160767065 | 0.16901571  |
| 0.137676715 | 0.034431949 | 0.184550398 | 0.323923219 |
| 0.048450296 | 0.268598279 | 0.224844898 | 0.292014137 |
| 0.231801926 | 0.231139417 | 0.309502064 | 0.06639476  |
| 0.159802813 | 0.223305507 | 0.066504233 | 0.122743532 |
| 0.190544359 | 0.066264523 | 0.234746919 | 0.250325741 |
| 0.109543845 | 0.249514285 | 0.152342079 | 0.089480021 |
| 0.217706712 | 0.213322712 | 0.110390243 | 0.170048195 |
| 0.155197287 | 0.240152068 | 0.094923543 | 0.08274871  |

|             |             |             |             |
|-------------|-------------|-------------|-------------|
| 0.102677289 | 0.264424847 | 0.046463186 | 0.038085969 |
| 0.025186565 | 0.177821981 | 0.230501841 | 0.153312214 |
| 0.09393243  | 0.195923291 | 0.095321109 | 0.125862406 |
| 0.250970676 | 0.178449096 | 0.019099739 | 0.054043279 |
| 0.098813483 | 0.086007088 | 0.081874083 | 0.174024745 |
| 0.133999581 | 0.143339827 | 0.147075112 | 0.072617002 |
| 0.108579708 | 0.084350877 | 0.253051525 | 0.267901074 |
| 0.175962617 | 0.263578935 | 0.111969338 | 0.056822317 |
| 0.290571905 | 0.132867601 | 0.082973437 | 0.275427601 |
| 0.086475135 | 0.260479682 | 0.16677764  | 0.153018606 |
| 0.079718306 | 0.237543218 | 0.328071791 | 0.084652511 |
| 0.160927121 | 0.24641238  | 0.167687884 | 0.164599091 |
| 0.200664156 | 0.262155362 | 0.195703232 | 0.173748423 |
| 0.167425347 | 0.130638116 | 0.23390921  | 0.090462124 |
| 0.081962845 | 0.179087294 | 0.178062622 | 0.14342839  |
| 0.120185348 | 0.187425673 | 0.255247013 | 0.221705017 |
| 0.267488376 | 0.297104384 | 0.217546207 | 0.064719113 |
| 0.198498082 | 0.0486002   | 0.08260797  | 0.091567989 |
| 0.202952476 | 0.213689692 | 0.199146692 | 0.112475334 |
| 0.293293011 | 0.103353125 | 0.127446325 | 0.249761663 |
| 0.05285411  | 0.215819644 | 0.062399082 | 0.176321269 |
| 0.189498569 | 0.132988256 | 0.114354622 | 0.256984749 |
| 0.217307219 | 0.214408278 | 0.187400311 | 0.219924377 |
| 0.25140378  | 0.144228507 | 0.11707711  | 0.18528385  |
| 0.195059983 | 0.24230119  | 0.156847138 | 0.039552048 |
| 0.127117497 | 0.197843161 | 0.007875242 | 0.142639179 |
| 0.178175791 | 0.241913288 | 0.258500247 | 0.149818457 |
| 0.17073869  | 0.129160082 | 0.19849323  | 0.175228879 |
| 0.179760178 | 0.191885614 | 0.220729496 | 0.226308476 |
| 0.178024668 | 0.214401524 | 0.089150854 | 0.113562436 |
| 0.058921188 | 0.197892514 | 0.206573464 | 0.098562749 |
| 0.295230962 | 0.12232848  | 0.089933216 | 0.264530134 |
| 0.253545168 | 0.164360129 | 0.039778569 | 0.012645623 |
| 0.046765775 | 0.239180038 | 0.208435554 | 0.282540658 |
| 0.10569759  | 0.235371885 | 0.004189832 | 0.227434194 |
| 0.233657373 | 0.047831143 | 0.07532012  | 0.174905231 |
| 0.138597142 | 0.254507094 | 0.06400214  | 0.196335333 |
| 0.115513775 | 0.194892993 | 0.208689814 | 0.219566848 |
| 0.261716098 | 0.177519082 | 0.255232568 | 0.240260676 |
| 0.29003977  | 0.205544951 | 0.318763686 | 0.165276951 |
| 0.07499018  | 0.196388314 | 0.082726009 | 0.120288079 |
| 0.174559661 | 0.138503119 | 0.222546511 | 0.276393411 |
| 0.218980874 | 0.045355379 | 0.25883728  | 0.186954033 |
| 0.301930892 | 0.313287848 | 0.041791457 | 0.010993962 |
| 0.00502208  | 0.036902638 | 0.252128869 | 0.123528979 |
| 0.237661477 | 0.089623262 | 0.065735349 | 0.233543862 |
| 0.180621572 | 0.140049941 | 0.229275885 | 0.331456367 |
| 0.183578608 | 0.159356826 | 0.128345966 | 0.313484493 |
| 0.093762994 | 0.125593685 | 0.243645792 | 0.247138423 |
| 0.07671603  | 0.130886992 | 0.098586799 | 0.31356154  |
| 0.009005361 | 0.192817118 | 0.14512584  | 0.171017379 |
| 0.024759359 | 0.104720849 | 0.120604549 | 0.258926775 |
| 0.17817586  | 0.119713512 | 0.093064378 | 0.065667952 |
| 0.247232864 | 0.249199683 | 0.203962329 | 0.278252448 |



|               |             |             |             |
|---------------|-------------|-------------|-------------|
| 0.288967503   | 0.330067415 | 0.065267017 | 0.229862596 |
| 0.125634265   | 0.200059456 | 0.090917315 | 0.063987671 |
| 0.109124841   | 0.074639199 | 0.174896364 | 0.069839509 |
| 0.136658398   | 0.215721241 | 0.082615608 | 0.043530635 |
| 0.030933931   | 0.114693839 | 0.295142796 | 0.22990618  |
| 0.04264938    | 0.232793719 | 0.157596144 | 0.216144416 |
| 0.221961491   | 0.290027663 | 0.215853172 | 0.093911623 |
| 0.285870739   | 0.021244627 | 0.287691066 | 0.161444926 |
| 0.179816179   | 0.269298728 | 0.133378055 | 0.24061907  |
| 0.201223322   | 0.237023975 | 0.2089577   | 0.260035731 |
| 0.067417954   | 0.162103217 | 0.276494357 | 0.154959156 |
| 0.232150538   | 0.281444105 | 0.15515884  | 0.109850354 |
| 0.159740597   | 0.078097607 | 0.138264067 | 0.043355427 |
| 0.046867786   | 0.219192535 | 0.227029086 | 0.315892543 |
| 0.184449955   | 0.17298661  | 0.138694052 | 0.124929009 |
| 0.252552259   | 0.224852465 | 0.227529046 | 0.244199457 |
| 0.151915436   | 0.209027006 | 0.199735468 | 0.190818061 |
| 0.083624578   | 0.2198147   | 0.262683165 | 0.238156898 |
| 0.243360842   | 0.263812364 | 0.226080908 | 0.147955829 |
| 0.07249267    | 0.116395181 | 0.196211261 | 0.115073732 |
| 0.225158577   | 0.084483291 | 0.038103797 | 0.251057576 |
| 0.045308538   | 0.268974178 | 0.095084106 | 0.13845917  |
| 0.144441056   | 0.076361996 | 0.219712657 | 0.256476768 |
| 0.193254891   | 0.221120274 | 0.04718498  | 0.121954357 |
| 0.051582118   | 0.211539088 | 0.0943055   | 0.14889564  |
| 0.056891816   | 0.070388155 | 0.224427897 | 0.150412958 |
| 0.093948443   | 0.063607845 | 0.212067898 | 0.159943843 |
| 0.175861651   | 0.282993859 | 0.109349541 | 0.037679534 |
| 0.069126955   | 0.143511299 | 0.109291184 | 0.18882923  |
| 0.042080334   | 0.190943887 | 0.117851279 | 0.139653396 |
| 0.253536796   | 0.16222525  | 0.175345457 | 0.095811475 |
| 0.151403861   | 0.206685212 | 0.103005263 | 0.201460586 |
| 0.080795152   | 0.322485968 | 0.186019361 | 0.198017187 |
| 0.072624998   | 0.071237055 | 0.209010164 | 0.273651694 |
| 0.058459722   |             |             |             |
| 2610524H06RIK | 0.188802012 | 0.233009614 | 0.08538874  |
| 0.262123314   | 0.117264981 | 0.189215913 | 0.194008831 |
| 1             | 0.041890179 | 0.017554993 | 0.005009484 |
| 0.120254539   | 0.026589022 | 0.095841774 | 0.051017797 |
| 0.237241723   | 0.024643711 | 0.127430978 | 0.198194255 |
| 0.273075358   | 0.124568568 | 0.185220907 | 0.086181526 |
| 0.025306167   | 0.017730282 | 0.039438857 | 0.031224961 |
| 0.307422138   | 0.049916994 | 0.145172134 | 0.324570495 |
| 0.035978457   | 0.239906915 | 0.209787289 | 0.121226499 |
| 0.182400112   | 0.169334802 | 0.024752796 | 0.073220631 |
| 0.273109739   | 0.163686322 | 0.281020688 | 0.202543419 |
| 0.052740296   | 0.230037922 | 0.186768743 | 0.115902506 |
| 0.110191955   | 0.015749264 | 0.163316106 | 0.245658814 |
| 0.173524171   | 0.101191804 | 0.192008851 | 0.122039548 |
| 0.013432199   | 0.128442833 | 0.009124232 | 0.298879803 |
| 0.160502803   | 0.167878032 | 0.177514704 | 0.063298417 |
| 0.043151899   | 0.211271794 | 0.028844172 | 0.225358406 |
| 0.027012534   | 0.279988408 | 0.077679999 | 0.09190698  |
| 0.013257481   | 0.296259126 | 0.130805508 | 0.019187333 |

|             |             |             |             |
|-------------|-------------|-------------|-------------|
| 0.044750843 | 0.016164725 | 0.044490453 | 0.227787052 |
| 0.283856687 | 0.213143683 | 0.201337701 | 0.182001883 |
| 0.031814734 | 0.112102716 | 0.060697287 | 0.071447287 |
| 0.234670373 | 0.128403964 | 0.091263225 | 0.203144307 |
| 0.200042331 | 0.195194024 | 0.035786663 | 0.087607227 |
| 0.191357485 | 0.256201649 | 0.102259472 | 0.085988437 |
| 0.02593095  | 0.014069698 | 0.193334995 | 0.203303639 |
| 0.257778557 | 0.031380841 | 0.05700774  | 0.314108174 |
| 0.057366532 | 0.067316165 | 0.22559674  | 0.039759973 |
| 0.288354782 | 0.041674428 | 0.055395744 | 0.188476849 |
| 0.083080059 | 0.223811596 | 0.178514574 | 0.177506615 |
| 0.101754583 | 0.021469497 | 0.007895571 | 0.031452621 |
| 0.062265021 | 0.006872623 | 0.185452421 | 0.241094078 |
| 0.124354561 | 0.033173471 | 0.176186462 | 0.006814333 |
| 0.015922736 | 0.045487435 | 0.169416459 | 0.164464648 |
| 0.239290826 | 0.146835456 | 0.047730496 | 0.223442717 |
| 0.098137305 | 0.194995017 | 0.025575405 | 0.105444274 |
| 0.15619036  | 0.045466302 | 0.168581707 | 0.119689426 |
| 0.072964512 | 0.154576996 | 0.099781715 | 0.231819142 |
| 0.280830485 | 0.102970313 | 0.13466015  | 0.220494662 |
| 0.038526487 | 0.076927586 | 0.108291529 | 0.087305305 |
| 0.072685603 | 0.160752453 | 0.013315797 | 0.217154166 |
| 0.015718366 | 0.014737146 | 0.050589068 | 0.254912415 |
| 0.072900761 | 0.160441617 | 0.173404073 | 0.111124981 |
| 0.119930073 | 0.147601475 | 0.204654186 | 0.150753774 |
| 0.007396658 | 0.069939    | 0.162796489 | 0.213573103 |
| 0.250388219 | 0.208379896 | 0.099593751 | 0.061618078 |
| 0.111805566 | 0.242317753 | 0.002889186 | 0.212137932 |
| 0.189361897 | 0.149485187 | 0.121090927 | 0.143734639 |
| 0.042749021 | 0.245196627 | 0.022646846 | 0.218821673 |
| 0.220976708 | 0.096887517 | 0.232261298 | 0.065253771 |
| 0.20242683  | 0.034672734 | 0.133364356 | 0.125930461 |
| 0.106280408 | 0.012851219 | 0.210854461 | 0.287623829 |
| 0.011127187 | 0.114369319 | 0.238923142 | 0.232450547 |
| 0.141085733 | 0.201711311 | 0.250427976 | 0.033551032 |
| 0.112059737 | 0.201608422 | 0.027041627 | 0.084694059 |
| 0.186703853 | 0.024290819 | 0.248813293 | 0.116167358 |
| 0.182887356 | 0.231522574 | 0.144786523 | 0.023389372 |
| 0.067399082 | 0.212711954 | 0.062628896 | 0.094953322 |
| 0.166023436 | 0.053082697 | 0.06567535  | 0.052958168 |
| 0.026810178 | 0.217026132 | 0.015755051 | 0.018359444 |
| 0.006461125 | 0.123930786 | 0.219130273 | 0.038760941 |
| 0.015839908 | 0.050571804 | 0.037342643 | 0.058127061 |
| 0.086551514 | 0.050343157 | 0.010220928 | 0.027235121 |
| 0.016441608 | 0.036065062 | 0.041980174 | 0.189945125 |
| 0.065907997 | 0.037350545 | 0.088697927 | 0.02646713  |
| 0.02666335  | 0.025102474 | 0.227958433 | 0.235900368 |
| 0.256443185 | 0.094995802 | 0.039856751 | 0.020185099 |
| 0.226744212 | 0.13679862  | 0.129273864 | 0.235214446 |
| 0.054150187 | 0.216073652 | 0.036603721 | 0.051795278 |
| 0.037464716 | 0.138324635 | 0.277976755 | 0.027840343 |
| 0.202479255 | 0.236254245 | 0.147312851 | 0.048483898 |
| 0.220079458 | 0.23231218  | 0.054819102 | 0.205672369 |
| 0.202157008 | 0.035688441 | 0.203630572 | 0.022549818 |

|             |             |             |             |
|-------------|-------------|-------------|-------------|
| 0.026658521 | 0.142753516 | 0.118464712 | 0.057998235 |
| 0.038010768 | 0.094221246 | 0.123431097 | 0.127533527 |
| 0.223325224 | 0.197286597 | 0.159365345 | 0.029134299 |
| 0.044292144 | 0.005403318 | 0.040077757 | 0.09392414  |
| 0.209076701 | 0.178665831 | 0.153280757 | 0.055333207 |
| 0.201340813 | 0.02951298  | 0.106318285 | 0.199646374 |
| 0.045027512 | 0.21771954  | 0.019687178 | 0.127430856 |
| 0.178722274 | 0.197809862 | 0.024052835 | 0.205080378 |
| 0.241866028 | 0.066027685 | 0.141663731 | 0.209208932 |
| 0.227402419 | 0.064408619 | 0.047042809 | 0.18862736  |
| 0.064750914 | 0.078938492 | 0.110663066 | 0.011154161 |
| 0.056843101 | 0.072481089 | 0.002083111 | 0.097842569 |
| 0.032903098 | 0.21941779  | 0.230470525 | 0.024254807 |
| 0.121504242 | 0.117325102 | 0.141569098 | 0.057294009 |
| 0.133761586 | 0.182083831 | 0.213834345 | 0.148097999 |
| 0.166969787 | 0.167867234 | 0.054213351 | 0.04858621  |
| 0.016009821 | 0.184526032 | 0.254025166 | 0.023938559 |
| 0.245438037 | 0.20699188  | 0.010267831 | 0.255250147 |
| 0.189166124 | 0.195573767 | 0.026517816 | 0.013254082 |
| 0.015407716 | 0.194808049 | 0.19886373  | 0.312899863 |
| 0.076549804 | 0.249931694 | 0.003458885 | 0.201128971 |
| 0.211861508 | 0.008120374 | 0.018191701 | 0.140178208 |
| 0.098544225 | 0.253151935 | 0.030747745 | 0.139499225 |
| 0.07966777  | 0.172386119 | 0.067129242 | 0.119515992 |
| 0.221698677 | 0.150496565 | 0.278678862 | 0.260282387 |
| 0.238758235 | 0.158272381 | 0.202841629 | 0.031925046 |
| 0.015946806 | 0.209278505 | 0.026836248 | 0.014121021 |
| 0.264165591 | 0.026507446 | 0.227211701 | 0.223440159 |
| 0.172233721 | 0.014074191 | 0.142654747 | 0.172862061 |
| 0.304120061 | 0.28972591  | 0.030886345 | 0.006210221 |
| 0.007707564 | 0.002864003 | 0.256347516 | 0.082094088 |
| 0.20393748  | 0.037894725 | 0.016392257 | 0.139057575 |
| 0.085368815 | 0.085653175 | 0.202757026 | 0.266544986 |
| 0.166075674 | 0.056963084 | 0.031753451 | 0.286103467 |
| 0.01384605  | 0.207638216 | 0.187353035 | 0.239066645 |
| 0.030014037 | 0.075695116 | 0.151649439 | 0.261059569 |
| 0.001674927 | 0.129212886 | 0.132455969 | 0.045118091 |
| 0.016714452 | 0.025932993 | 0.021689261 | 0.223132877 |
| 0.165324436 | 0.01684381  | 0.011845039 | 0.064063712 |
| 0.060423041 | 0.222137626 | 0.054265699 | 0.228397575 |
| 0.264502561 | 0.262974714 | 0.014643932 | 0.22146328  |
| 0.016578624 | 0.192058638 | 0.048268823 | 0.042470657 |
| 0.08650103  | 0.028075416 | 0.169373895 | 0.007520345 |
| 0.138068385 | 0.277483431 | 0.020093963 | 0.009291176 |
| 0.010154984 | 0.030659392 | 0.218544617 | 0.174170262 |
| 0.014609457 | 0.123612027 | 0.126309332 | 0.228891511 |
| 0.27288244  | 0.205595296 | 0.215049797 | 0.084079596 |
| 0.078124025 | 0.012419514 | 0.306575638 | 0.216348603 |
| 0.135227192 | 0.212081379 | 0.026613049 | 0.214482035 |
| 0.242461892 | 0.247662136 | 0.180389381 | 0.191053915 |
| 0.015627915 | 0.201630519 | 0.221806628 | 0.045928221 |
| 0.212753921 | 0.206489326 | 0.211220179 | 0.019231291 |
| 0.065076955 | 0.05561052  | 0.070843979 | 0.069181292 |
| 0.030421489 | 0.252884699 | 0.057885909 | 0.269038244 |

|               |             |             |             |
|---------------|-------------|-------------|-------------|
| 0.252296842   | 0.224479951 | 0.100138429 | 0.020791637 |
| 0.233530324   | 0.246065423 | 0.124070939 | 0.202257145 |
| 0.093733792   | 0.11364305  | 0.177767491 | 0.152472767 |
| 0.037984552   | 0.174766645 | 0.275584403 | 0.205913539 |
| 0.24995581    | 0.190068027 | 0.212031031 | 0.19580757  |
| 0.015731031   | 0.126127113 | 0.031764334 | 0.049378853 |
| 0.102653535   | 0.019492875 | 0.012353579 | 0.210410305 |
| 0.024013835   | 0.173821654 | 0.074024153 | 0.04868768  |
| 0.10019291    | 0.115593937 | 0.159429761 | 0.151249276 |
| 0.039377312   | 0.199348432 | 0.011642516 | 0.040948933 |
| 0.032156256   | 0.17113178  | 0.048900637 | 0.072238785 |
| 0.014250632   | 0.025090542 | 0.130791715 | 0.21688194  |
| 0.0567928     | 0.037786131 | 0.17455277  | 0.11145811  |
| 0.064610959   | 0.232966933 | 0.165571065 | 0.016569193 |
| 0.021521994   | 0.185026614 | 0.082438241 | 0.038069059 |
| 0.010165031   | 0.150947892 | 0.086142767 | 0.106132414 |
| 0.247609507   | 0.064558152 | 0.251944019 | 0.056172746 |
| 0.089067383   | 0.239865354 | 0.083958129 | 0.180685211 |
| 0.079237877   | 0.222204789 | 0.225834072 | 0.181196025 |
| 0.06463758    | 0.080060306 | 0.062836158 | 0.270011859 |
| 0.035886168   |             |             |             |
| 2610528E23RIK | 0.068871962 | 0.106012306 | 0.074796324 |
| 0.182659608   | 0.079852637 | 0.08851094  | 0.174803489 |
| 0.041890179   | 1           | 0.014785549 | 0.022307705 |
| 0.064170427   | 0.013572855 | 0.04071807  | 0.066775875 |
| 0.185447549   | 0.050159862 | 0.041466345 | 0.179983028 |
| 0.131113747   | 0.075796087 | 0.167596744 | 0.124076682 |
| 0.041531892   | 0.109059957 | 0.162840105 | 0.125527131 |
| 0.154278646   | 0.186660688 | 0.052759041 | 0.110355611 |
| 0.039393416   | 0.081024557 | 0.083673102 | 0.099301477 |
| 0.068734126   | 0.060888168 | 0.001125178 | 0.072786095 |
| 0.087660018   | 0.15463854  | 0.143067332 | 0.181340269 |
| 0.102428167   | 0.0678419   | 0.212575525 | 0.100355734 |
| 0.011854877   | 0.075218561 | 0.046800118 | 0.070805242 |
| 0.068521606   | 0.084388331 | 0.092176522 | 0.159206526 |
| 0.009849067   | 0.020823969 | 0.016472762 | 0.061299971 |
| 0.160662249   | 0.039779278 | 0.074095168 | 0.075992898 |
| 0.011166298   | 0.066361348 | 0.034761222 | 0.090044149 |
| 0.038452904   | 0.084571298 | 0.020597515 | 0.041171548 |
| 0.002143981   | 0.160738456 | 0.095450131 | 0.066853213 |
| 0.121059295   | 0.019283111 | 0.053071489 | 0.162744706 |
| 0.135710784   | 0.070496888 | 0.134705457 | 0.120988273 |
| 0.023351037   | 0.094357268 | 0.053577303 | 0.098431739 |
| 0.100473897   | 0.153709296 | 0.021479848 | 0.169830614 |
| 0.131694791   | 0.086899218 | 0.065955041 | 0.147419267 |
| 0.12618098    | 0.095417662 | 0.079167365 | 0.079705996 |
| 0.083069837   | 0.038930599 | 0.079305614 | 0.108142534 |
| 0.067730132   | 0.04723264  | 0.14796305  | 0.102682796 |
| 0.103550612   | 0.01965703  | 0.190333821 | 0.004206203 |
| 0.146519804   | 0.138777103 | 0.113621309 | 0.109604506 |
| 0.031285522   | 0.09729866  | 0.087589375 | 0.1920905   |
| 0.058548538   | 0.010542159 | 0.022022071 | 0.04871698  |
| 0.009895993   | 0.012629858 | 0.060257338 | 0.132542729 |
| 0.019551703   | 0.02396995  | 0.123663538 | 0.023808143 |

|             |             |             |             |
|-------------|-------------|-------------|-------------|
| 0.052213326 | 0.013637988 | 0.05871614  | 0.048668282 |
| 0.110803626 | 0.05446353  | 0.154494876 | 0.0589917   |
| 0.071799788 | 0.129685922 | 0.008824206 | 0.118505333 |
| 0.104325744 | 0.020660845 | 0.196252896 | 0.061673532 |
| 0.150401085 | 0.097286755 | 0.105240431 | 0.13484649  |
| 0.082146458 | 0.144712553 | 0.025380341 | 0.16456083  |
| 0.03741653  | 0.100439658 | 0.096737191 | 0.049288517 |
| 0.066964038 | 0.0727282   | 0.053711986 | 0.056657311 |
| 0.046929986 | 0.009692554 | 0.009432875 | 0.073018162 |
| 0.025468285 | 0.095658244 | 0.052310786 | 0.118456243 |
| 0.067048057 | 0.149523404 | 0.040758264 | 0.099075519 |
| 0.026603294 | 0.026903398 | 0.02163015  | 0.104579717 |
| 0.047170119 | 0.104397697 | 0.064293736 | 0.079017295 |
| 0.159207729 | 0.155853835 | 0.001557736 | 0.076970602 |
| 0.090544916 | 0.022895544 | 0.101393146 | 0.079369599 |
| 0.090076625 | 0.156031456 | 0.000852537 | 0.128033277 |
| 0.040193767 | 0.121134899 | 0.142239368 | 0.154329759 |
| 0.068945518 | 0.143567983 | 0.041749576 | 0.098994581 |
| 0.054810089 | 0.005256008 | 0.080138115 | 0.15648896  |
| 0.043489214 | 0.069989994 | 0.100205223 | 0.166115494 |
| 0.188742285 | 0.126473808 | 0.1543362   | 0.088485572 |
| 0.092593785 | 0.088872047 | 0.016885336 | 0.107336085 |
| 0.090021157 | 0.007416124 | 0.087952626 | 0.087907905 |
| 0.03059656  | 0.105581951 | 0.065453122 | 0.011542138 |
| 0.166539322 | 0.086742329 | 0.015130417 | 0.193127385 |
| 0.074134034 | 0.056993299 | 0.093035943 | 0.012681253 |
| 0.078711035 | 0.117952353 | 0.046264294 | 0.033831941 |
| 0.024989172 | 0.062077972 | 0.139789412 | 0.035302446 |
| 0.018806514 | 0.114483273 | 0.089931673 | 0.09119759  |
| 0.073694262 | 0.090624821 | 0.007774509 | 0.012240145 |
| 0.010318351 | 0.02178726  | 0.019137887 | 0.052513382 |
| 0.015898044 | 0.013697056 | 0.096606059 | 0.047353857 |
| 0.109577355 | 0.08174286  | 0.10505188  | 0.153892727 |
| 0.049176294 | 0.142753997 | 0.07081262  | 0.003970514 |
| 0.123674708 | 0.057287001 | 0.021639145 | 0.107060112 |
| 0.021956807 | 0.12409474  | 0.037959897 | 0.151253916 |
| 0.034581535 | 0.140251376 | 0.172094895 | 0.022557719 |
| 0.054570709 | 0.085692919 | 0.12280349  | 0.177556422 |
| 0.059332987 | 0.131841519 | 0.034804841 | 0.064315226 |
| 0.050961977 | 0.084139966 | 0.095907502 | 0.037022394 |
| 0.078123961 | 0.097245945 | 0.099957485 | 0.168848459 |
| 0.134920645 | 0.109204926 | 0.065676656 | 0.195344243 |
| 0.119312962 | 0.175732853 | 0.096868128 | 0.057315089 |
| 0.10959457  | 0.003893667 | 0.060603797 | 0.054592301 |
| 0.068599364 | 0.090898978 | 0.1241941   | 0.079975086 |
| 0.203067274 | 0.090444136 | 0.007120647 | 0.11053942  |
| 0.010215607 | 0.081318491 | 0.04843786  | 0.099854583 |
| 0.070776436 | 0.034781036 | 0.136579032 | 0.128632571 |
| 0.069685709 | 0.172093096 | 0.060190613 | 0.083311561 |
| 0.122370694 | 0.134603917 | 0.113077557 | 0.076889762 |
| 0.065735512 | 0.040145522 | 0.152186503 | 0.035385885 |
| 0.062131851 | 0.147742716 | 0.004092048 | 0.034739951 |
| 0.052536397 | 0.088157094 | 0.11406336  | 0.16634486  |
| 0.072295979 | 0.040710882 | 0.122269121 | 0.130547842 |

|             |             |             |             |
|-------------|-------------|-------------|-------------|
| 0.099128054 | 0.078201955 | 0.082181778 | 0.068478567 |
| 0.065079765 | 0.099657318 | 0.053386666 | 0.094522674 |
| 0.079108892 | 0.078736764 | 0.085747289 | 0.014754462 |
| 0.131366955 | 0.037416962 | 0.01069305  | 0.104251658 |
| 0.178023847 | 0.048339501 | 0.058621921 | 0.00289099  |
| 0.035246894 | 0.123578098 | 0.086070061 | 0.113574285 |
| 0.031763031 | 0.117987012 | 0.000844156 | 0.097009768 |
| 0.087875816 | 0.06194918  | 0.039124465 | 0.069467396 |
| 0.073944402 | 0.096240538 | 0.08541463  | 0.105034599 |
| 0.058414167 | 0.074023545 | 0.021853662 | 0.206403272 |
| 0.120691372 | 0.075851966 | 0.114349452 | 0.096942322 |
| 0.118939749 | 0.113930668 | 0.226215154 | 0.095587153 |
| 0.056989305 | 0.06299778  | 0.045877482 | 0.036425642 |
| 0.060658722 | 0.124915457 | 0.090379306 | 0.130063402 |
| 0.099310781 | 0.053410984 | 0.048336969 | 0.072600408 |
| 0.119017856 | 0.142526069 | 0.013610959 | 0.04083131  |
| 0.002550964 | 0.033509694 | 0.104927072 | 0.126879657 |
| 0.111351891 | 0.009704141 | 0.04540353  | 0.037632649 |
| 0.046114079 | 0.107481123 | 0.087251518 | 0.188314076 |
| 0.090591022 | 0.082456676 | 0.037002423 | 0.163142565 |
| 0.070838817 | 0.036790725 | 0.115084868 | 0.09194281  |
| 0.033474208 | 0.131652793 | 0.035710407 | 0.144727712 |
| 0.008135683 | 0.1276977   | 0.058374332 | 0.044357182 |
| 0.004606353 | 0.109221568 | 0.153468947 | 0.133421696 |
| 0.064445401 | 0.030156661 | 0.032295016 | 0.00295525  |
| 0.098290232 | 0.109439535 | 0.063514305 | 0.128708677 |
| 0.126431721 | 0.163061218 | 0.026221238 | 0.09819777  |
| 0.031426303 | 0.069648355 | 0.081594867 | 0.009345686 |
| 0.044695574 | 0.031945832 | 0.062372809 | 0.031212933 |
| 0.033026607 | 0.081633899 | 0.05448139  | 0.040083581 |
| 0.025595831 | 0.079896239 | 0.150068236 | 0.124918983 |
| 0.025650067 | 0.09595753  | 0.127346658 | 0.105910148 |
| 0.08972146  | 0.149899635 | 0.078484181 | 0.045927399 |
| 0.107019341 | 0.002606238 | 0.123182098 | 0.054368989 |
| 0.030935224 | 0.131576168 | 0.073849324 | 0.106652297 |
| 0.087056439 | 0.101882943 | 0.087495169 | 0.194831982 |
| 0.01127687  | 0.072257773 | 0.116951569 | 0.021932145 |
| 0.141245866 | 0.126829198 | 0.067119822 | 0.064730771 |
| 0.142538141 | 0.053961253 | 0.018978846 | 0.002656233 |
| 0.038451047 | 0.081178274 | 0.040888858 | 0.164306084 |
| 0.064464575 | 0.061190772 | 0.009089132 | 0.16908152  |
| 0.100851892 | 0.0940919   | 0.063416836 | 0.124200106 |
| 0.109285993 | 0.19237568  | 0.097638685 | 0.095362995 |
| 0.031973661 | 0.081876986 | 0.099452875 | 0.082138444 |
| 0.081090035 | 0.196700266 | 0.088818121 | 0.014895006 |
| 0.045590733 | 0.039865579 | 0.066934403 | 0.117023265 |
| 0.140268717 | 0.067879729 | 0.024941082 | 0.124622132 |
| 0.020264656 | 0.135502102 | 0.008111828 | 0.031519656 |
| 0.101233465 | 0.031276768 | 0.141517764 | 0.108940855 |
| 0.058047783 | 0.085214376 | 0.013025359 | 0.071651442 |
| 0.018091733 | 0.122985346 | 0.077285828 | 0.11058616  |
| 0.033478954 | 0.025613747 | 0.140956132 | 0.049820565 |
| 0.029836475 | 0.005989522 | 0.118465017 | 0.036694976 |
| 0.036681518 | 0.130537937 | 0.045646747 | 0.015614583 |

|               |             |             |             |
|---------------|-------------|-------------|-------------|
| 0.011407314   | 0.055699586 | 0.023136802 | 0.083968599 |
| 0.05127157    | 0.080370501 | 0.057464941 | 0.086161269 |
| 0.125000207   | 0.072644749 | 0.049851871 | 0.017255892 |
| 0.040160752   | 0.067266264 | 0.079530671 | 0.078609002 |
| 0.054871885   | 0.175055456 | 0.060726108 | 0.068135861 |
| 0.012158802   | 0.038306171 | 0.106236337 | 0.115946442 |
| 0.037149651   |             |             |             |
| 2810408M09RIK | 0.001905681 | 0.007031388 | 0.001423338 |
| 0.033642713   | 0.008463354 | 0.012425173 | 0.091231567 |
| 0.017554993   | 0.014785549 | 1           | 0.01931244  |
| 0.00401805    | 0.007487396 | 0.051734733 | 0.004528159 |
| 0.017409032   | 0.041702817 | 0.001727934 | 0.067159042 |
| 0.017374791   | 0.105793097 | 0.030134158 | 0.070477784 |
| 0.001368513   | 0.031551227 | 0.082599257 | 0.008138289 |
| 0.019588026   | 0.087304756 | 0.017171728 | 0.019257551 |
| 0.011545247   | 0.005469217 | 0.00340409  | 0.015437645 |
| 0.002610907   | 0.001116352 | 0.001268496 | 0.025817639 |
| 0.004419586   | 0.009037394 | 0.019500583 | 0.065188508 |
| 0.119138175   | 0.003606012 | 0.095537848 | 0.00493837  |
| 0.001075002   | 0.071657187 | 0.015991809 | 0.003534353 |
| 0.004439045   | 0.006804624 | 0.027272503 | 0.099319149 |
| 0.00526931    | 0.012488904 | 0.002766355 | 0.011613581 |
| 0.08301777    | 0.032765391 | 0.00400533  | 0.036256499 |
| 0.001183878   | 0.018190889 | 0.010802474 | 0.042823956 |
| 0.00083463    | 0.006700536 | 0.019340723 | 0.000678414 |
| 0.019831984   | 0.020240447 | 0.00698353  | 0.000945962 |
| 0.085160369   | 0.106874164 | 0.015465762 | 0.057595391 |
| 0.013611344   | 0.001753092 | 0.011298331 | 0.006944867 |
| 0.033342626   | 0.011321518 | 0.001601509 | 0.070108774 |
| 0.00477489    | 0.124954741 | 0.011494448 | 0.019038094 |
| 0.010089463   | 0.004775058 | 0.011506485 | 0.014822052 |
| 0.017013584   | 0.00658305  | 0.007001459 | 0.009694668 |
| 0.004581492   | 0.004410678 | 0.005040832 | 0.007694477 |
| 0.004696175   | 0.001847248 | 0.049263622 | 0.016403633 |
| 0.055239115   | 0.001885706 | 0.053118004 | 0.003440009 |
| 0.014452103   | 0.083410419 | 0.021134346 | 0.037946608 |
| 0.00359112    | 0.006586077 | 0.00383231  | 0.095155577 |
| 0.004136686   | 0.020256518 | 0.000745845 | 0.021176446 |
| 0.00230812    | 0.000807304 | 0.002070932 | 0.020746337 |
| 0.016899069   | 0.003421763 | 0.03314654  | 0.027981942 |
| 0.046354683   | 0.001046344 | 0.004191329 | 0.003756888 |
| 0.00665179    | 0.000314017 | 0.046111718 | 0.003910597 |
| 0.003234484   | 0.010087939 | 0.001527023 | 0.058787708 |
| 0.011965052   | 0.001891635 | 0.063480297 | 0.005880537 |
| 0.025915143   | 0.054628566 | 0.079109941 | 0.008983447 |
| 0.00627909    | 0.127967887 | 0.001845396 | 0.02023356  |
| 0.010789899   | 0.012099899 | 0.064920005 | 0.051075182 |
| 0.109724843   | 0.002119655 | 0.029196419 | 0.006625412 |
| 0.001407343   | 0.008555505 | 0.003535964 | 0.027797036 |
| 0.018697177   | 0.011498244 | 0.000894978 | 0.05572427  |
| 0.044859289   | 0.018794565 | 0.005722027 | 0.019548652 |
| 0.042186223   | 0.015548943 | 0.001962496 | 0.009688815 |
| 0.012945828   | 0.004965515 | 0.019629699 | 0.004537855 |
| 0.027916836   | 0.012074204 | 1.27E-05    | 0.003681491 |

|             |             |             |             |
|-------------|-------------|-------------|-------------|
| 0.003965697 | 0.002554276 | 0.038201483 | 0.004464694 |
| 0.00209331  | 0.021025302 | 8.81E-05    | 0.021062245 |
| 0.002684179 | 0.051587433 | 0.010966968 | 0.075283739 |
| 0.002825614 | 0.101423491 | 0.013387007 | 0.003161122 |
| 0.003713672 | 0.002870759 | 0.042479066 | 0.027423913 |
| 0.01282799  | 0.061663381 | 0.005370145 | 0.025934314 |
| 0.025014716 | 0.006445283 | 0.014809821 | 0.002054934 |
| 0.012705627 | 0.032597861 | 0.008596257 | 0.009258767 |
| 0.003130458 | 0.000304312 | 0.007018114 | 0.027007156 |
| 0.002459201 | 0.007705211 | 0.002115067 | 0.000880928 |
| 0.143388434 | 0.023391019 | 0.05605025  | 0.020339786 |
| 0.001058131 | 0.098263659 | 0.002051485 | 0.002478231 |
| 0.041829354 | 0.008371491 | 0.002832034 | 0.000672817 |
| 0.00101997  | 0.025639773 | 0.036756549 | 0.057665309 |
| 0.029387909 | 0.023203126 | 0.003348282 | 0.006759176 |
| 0.132431654 | 0.103792091 | 0.000723632 | 0.004483925 |
| 0.04234069  | 0.020978278 | 0.018588918 | 0.004240387 |
| 0.010200407 | 0.056914495 | 0.025652756 | 0.000967322 |
| 0.021097443 | 0.079372595 | 0.006899853 | 0.016192304 |
| 0.005499403 | 0.04363769  | 0.04652881  | 0.001769638 |
| 0.016934985 | 0.01407858  | 0.001763695 | 0.01355089  |
| 0.004658798 | 0.00726514  | 0.039416145 | 0.07430052  |
| 0.01081115  | 0.087284367 | 0.016485079 | 0.002317912 |
| 0.00402814  | 0.008114657 | 0.010567853 | 0.040204969 |
| 0.007871939 | 0.016904742 | 0.045198511 | 0.003331725 |
| 0.004897673 | 0.108117957 | 0.005724585 | 0.020849969 |
| 0.051911205 | 0.005711722 | 0.00685496  | 0.062448814 |
| 0.038717652 | 0.046117795 | 0.083220002 | 0.036411906 |
| 0.009112668 | 0.029791452 | 0.01038647  | 0.002090653 |
| 0.158276025 | 0.041168163 | 0.006763642 | 0.001205143 |
| 0.003307922 | 0.004741827 | 0.031784223 | 0.02191493  |
| 0.06920836  | 0.0051194   | 0.001575136 | 0.008446098 |
| 0.000180354 | 0.003238396 | 0.049146603 | 0.003815394 |
| 0.002700706 | 0.010481747 | 0.056297311 | 0.042695145 |
| 0.009715601 | 0.093175747 | 0.01341373  | 0.00549743  |
| 0.007238334 | 0.008779166 | 0.008033087 | 0.005743717 |
| 0.13869429  | 0.047180949 | 0.006291985 | 0.000879384 |
| 0.006945094 | 0.021463642 | 0.000148417 | 0.003230728 |
| 0.093498833 | 0.008967072 | 0.010244929 | 0.037257952 |
| 0.022643183 | 0.003030439 | 0.013401319 | 0.098198721 |
| 0.003677054 | 0.002345264 | 0.004444594 | 0.027942313 |
| 0.003994527 | 0.005943977 | 0.002402405 | 0.025785687 |
| 0.040597258 | 0.003019077 | 0.005572325 | 0.024666804 |
| 0.013221605 | 0.012357084 | 0.084608555 | 0.008005005 |
| 0.067343186 | 0.001521327 | 0.007586391 | 0.000148323 |
| 0.005277287 | 0.007647497 | 0.004201362 | 0.015753315 |
| 0.017432616 | 0.012408917 | 0.000136069 | 0.004370957 |
| 0.007667402 | 0.027346072 | 0.004636459 | 0.005334054 |
| 0.003858584 | 0.005761237 | 0.002948399 | 0.006637938 |
| 0.005388914 | 0.003529818 | 0.015461905 | 0.038465657 |
| 0.01450987  | 0.002320688 | 0.010876524 | 0.005656696 |
| 0.016990399 | 0.00905868  | 0.070064777 | 0.124977168 |
| 0.001113151 | 0.028792073 | 0.008092306 | 0.006345659 |
| 0.006686339 | 0.033319174 | 0.004755478 | 0.010725343 |



|               |             |             |             |
|---------------|-------------|-------------|-------------|
| 0.007299136   | 0.05092222  | 0.042395538 | 0.004598532 |
| 0.015367647   | 0.012774567 | 0.001054881 | 0.000611393 |
| 0.000347029   | 0.014758286 | 0.018459645 | 0.012435547 |
| 0.005969844   | 0.011807733 | 0.090585534 | 0.069136689 |
| 0.012960101   | 0.006672593 | 0.005978669 | 0.03271462  |
| 0.003099795   | 0.041706162 | 0.023873429 | 0.020638039 |
| 0.014266574   | 0.001373175 | 0.009721401 | 0.007471371 |
| 0.009242959   | 0.010218411 | 0.002576555 | 0.014404574 |
| 5.92E-05      | 0.024060845 | 0.004571663 | 0.01873112  |
| 0.000664654   | 0.025165043 | 0.025900009 | 0.009241945 |
| 0.002292007   | 0.078983822 | 0.091365556 | 0.000717096 |
| 0.128592803   | 0.006601991 | 0.072982906 | 0.00951264  |
| 0.015534588   | 0.023563774 | 0.006585204 | 0.005027418 |
| 0.009802678   | 0.004438741 | 0.008112507 | 0.006761908 |
| 0.004500191   | 0.020989737 | 0.002324653 | 0.004313395 |
| 0.013714722   | 0.006405061 | 0.000931374 | 0.015600952 |
| 0.000159669   | 0.059196777 | 0.015045337 | 0.007209085 |
| 0.005021462   | 0.017881396 | 0.014894342 | 0.008086301 |
| 0.035191543   | 0.027661491 | 0.004299055 | 0.004050611 |
| 0.098766032   | 6.45E-05    | 0.016656412 | 0.004421911 |
| 0.018470653   | 0.009856538 | 0.012381624 | 0.005028063 |
| 0.00419787    | 0.004135648 | 0.004733128 | 0.031681764 |
| 0.001995116   | 0.005536926 | 0.036143578 | 0.105831614 |
| 0.022699057   | 0.017867123 | 0.005434774 | 0.01543562  |
| 0.051061035   | 0.001122003 | 0.003887163 | 0.00015326  |
| 0.000643627   | 0.025219158 | 0.049364416 | 0.015837617 |
| 0.004911091   | 0.004204906 | 0.007097438 | 0.032808773 |
| 0.005663874   | 0.004013595 | 0.020617821 | 0.016565701 |
| 0.025367257   | 0.02361761  | 0.004923066 | 0.004838156 |
| 0.000527341   | 0.009856621 | 0.01162401  | 0.026936627 |
| 0.009336219   | 0.045049244 | 0.004562839 | 0.012807717 |
| 0.001787128   | 0.001462092 | 0.092254046 | 0.032864054 |
| 0.100686231   | 0.020935355 | 0.000350382 | 0.01211399  |
| 0.000509577   | 0.042427089 | 0.00095075  | 0.007332193 |
| 0.010166112   | 0.000580052 | 0.020570289 | 0.093505999 |
| 0.112384848   | 0.005694921 | 0.007190513 | 0.044734507 |
| 0.001416389   | 0.006339746 | 0.007296352 | 0.01982807  |
| 0.001132815   | 0.002721504 | 0.045495132 | 0.014404549 |
| 0.025217228   | 0.000247132 | 0.006703687 | 0.007999644 |
| 0.088639031   | 0.011044865 | 0.003809895 | 0.003205939 |
| 0.000548842   | 0.001677504 | 0.002561728 | 0.018429953 |
| 0.014590248   | 0.003909843 | 0.012960096 | 0.004201169 |
| 0.026782394   | 0.037398507 | 0.002829671 | 0.000888323 |
| 0.008396423   | 0.004287005 | 0.001923126 | 0.003475686 |
| 0.001665317   | 0.031864859 | 0.002181666 | 0.005953694 |
| 0.000679831   | 0.000186272 | 0.080983359 | 0.008818065 |
| 0.001666122   |             |             |             |
| 2900062L11RIK | 0.012292253 | 0.029799455 | 0.014373516 |
| 0.065002065   | 0.039907106 | 0.018757036 | 0.070642098 |
| 0.005009484   | 0.022307705 | 0.01931244  | 1           |
| 0.020530463   | 0.022128369 | 0.025860239 | 0.009869412 |
| 0.062037433   | 0.109939235 | 0.004625364 | 0.080951579 |
| 0.038402776   | 0.029698569 | 0.095000041 | 0.051896828 |
| 0.019669647   | 0.164192181 | 0.196716291 | 0.079923147 |

|             |             |             |             |
|-------------|-------------|-------------|-------------|
| 0.04271609  | 0.173648354 | 0.019796046 | 0.024975198 |
| 0.029942102 | 0.018732805 | 0.01911008  | 0.067044466 |
| 0.017563374 | 0.008795035 | 0.00121314  | 0.030164873 |
| 0.013702131 | 0.047624256 | 0.042032019 | 0.090371091 |
| 0.073416942 | 0.013653867 | 0.10660647  | 0.033886833 |
| 0.001191064 | 0.157146372 | 0.006104594 | 0.012890955 |
| 0.019519728 | 0.039027438 | 0.014157317 | 0.079192187 |
| 0.035674792 | 0.006682792 | 0.032347974 | 0.010047267 |
| 0.10238091  | 0.008315631 | 0.021605085 | 0.024017783 |
| 0.005058148 | 0.012328705 | 0.041107483 | 0.025925605 |
| 0.020620519 | 0.01245138  | 0.006088737 | 0.010505211 |
| 0.007166549 | 0.039305789 | 0.035083405 | 0.030257556 |
| 0.141468188 | 0.07594596  | 0.051614866 | 0.07531404  |
| 0.038056915 | 0.012277696 | 0.052706807 | 0.043855522 |
| 0.041399229 | 0.039289304 | 0.024542366 | 0.103451727 |
| 0.020208073 | 0.100353321 | 0.004439594 | 0.07573144  |
| 0.049651492 | 0.026080555 | 0.05214317  | 0.079890424 |
| 0.04649384  | 0.02311804  | 0.017992485 | 0.039042309 |
| 0.033858796 | 0.030405702 | 0.021517313 | 0.037793756 |
| 0.01138186  | 0.032911771 | 0.150928736 | 0.02555636  |
| 0.087184604 | 0.002204487 | 0.092620632 | 0.004636063 |
| 0.040502432 | 0.047691963 | 0.109816866 | 0.056381241 |
| 0.006198922 | 0.020355122 | 0.025812148 | 0.095460783 |
| 0.021862702 | 0.016425845 | 0.016596667 | 0.038680488 |
| 0.003819722 | 0.017279666 | 0.013034992 | 0.051294295 |
| 0.006743099 | 0.01978352  | 0.036918044 | 0.032085128 |
| 0.092812598 | 0.004456989 | 0.019315252 | 0.008749639 |
| 0.024746846 | 0.008620796 | 0.139303033 | 0.011075436 |
| 0.028821507 | 0.052368886 | 0.000625385 | 0.040621939 |
| 0.027279865 | 0.008281271 | 0.117285881 | 0.026507915 |
| 0.108854492 | 0.022365094 | 0.084886097 | 0.040403262 |
| 0.015206242 | 0.116966935 | 0.002943108 | 0.061374952 |
| 0.030901538 | 0.072781389 | 0.058360361 | 0.050466427 |
| 0.059965306 | 0.018546626 | 0.097018815 | 0.006264236 |
| 0.01654497  | 0.037210282 | 0.00160336  | 0.014833712 |
| 0.008742747 | 0.041262071 | 0.010750976 | 0.063841107 |
| 0.054762607 | 0.0789653   | 0.005909896 | 0.04587678  |
| 0.077719438 | 0.011074358 | 0.001966666 | 0.038018344 |
| 0.00922676  | 0.029093776 | 0.022637405 | 0.025797764 |
| 0.098307865 | 0.04187962  | 7.48E-05    | 0.016605313 |
| 0.025185691 | 0.00207083  | 0.081197747 | 0.024144171 |
| 0.037915546 | 0.052957553 | 2.14E-05    | 0.05634466  |
| 0.005530342 | 0.056190616 | 0.048303571 | 0.188391329 |
| 0.015042431 | 0.201781054 | 0.015045653 | 0.033212713 |
| 0.024762134 | 0.005090794 | 0.016811062 | 0.04579474  |
| 0.060273845 | 0.020956673 | 0.019800017 | 0.053397823 |
| 0.075422923 | 0.034183716 | 0.053415908 | 0.037858913 |
| 0.043689463 | 0.022516599 | 0.009799205 | 0.052239195 |
| 0.020271332 | 0.004008768 | 0.018079479 | 0.024759023 |
| 0.003602006 | 0.026559203 | 0.015425811 | 0.005631378 |
| 0.12419734  | 0.025055405 | 0.005819256 | 0.081784902 |
| 0.012385616 | 0.087174948 | 0.025911286 | 0.005817908 |
| 0.120029739 | 0.038441146 | 0.043921069 | 0.020476078 |
| 0.029143716 | 0.046432889 | 0.038260803 | 0.060730991 |

|             |             |             |             |
|-------------|-------------|-------------|-------------|
| 0.064856823 | 0.072422958 | 0.038411989 | 0.036311946 |
| 0.040499997 | 0.149577284 | 0.003150735 | 0.015195745 |
| 0.056193845 | 0.035024901 | 0.026857378 | 0.013686722 |
| 0.011642327 | 0.034782087 | 0.066374418 | 0.013697108 |
| 0.076981628 | 0.116286974 | 0.028924975 | 0.044082513 |
| 0.007439439 | 0.051298842 | 0.070086802 | 0.004195836 |
| 0.050021622 | 0.013264406 | 0.001591876 | 0.036743505 |
| 0.003798694 | 0.040202592 | 0.060331105 | 0.194636936 |
| 0.046295766 | 0.116487075 | 0.049392265 | 0.004898557 |
| 0.010361247 | 0.024395666 | 0.036323014 | 0.14706486  |
| 0.015546712 | 0.037652454 | 0.024650628 | 0.011110487 |
| 0.011273154 | 0.13474873  | 0.029418918 | 0.063509464 |
| 0.097759456 | 0.035418058 | 0.043768598 | 0.150281537 |
| 0.104584127 | 0.089039144 | 0.01627125  | 0.123867249 |
| 0.037168863 | 0.092512831 | 0.040244483 | 0.024266122 |
| 0.141116816 | 0.057571014 | 0.046125045 | 0.011635238 |
| 0.015984571 | 0.029810986 | 0.064454852 | 0.084660655 |
| 0.099248563 | 0.052400171 | 0.000795837 | 0.039218004 |
| 0.001288144 | 0.018500398 | 0.049289477 | 0.038578208 |
| 0.018100563 | 0.007251398 | 0.199400019 | 0.044389066 |
| 0.016622728 | 0.086090007 | 0.012869666 | 0.021503958 |
| 0.029126272 | 0.049078801 | 0.037318892 | 0.022252418 |
| 0.027995847 | 0.025761663 | 0.044373063 | 0.021410445 |
| 0.032202715 | 0.06459211  | 0.007214238 | 0.005376222 |
| 0.080055692 | 0.027202171 | 0.037604155 | 0.099795818 |
| 0.034742668 | 0.00358884  | 0.061632338 | 0.10275458  |
| 0.034699862 | 0.019191328 | 0.020342935 | 0.018154257 |
| 0.021326814 | 0.034152998 | 0.033341294 | 0.067669853 |
| 0.113248393 | 0.020058028 | 0.012938359 | 0.016283409 |
| 0.047284671 | 0.004801213 | 0.064969211 | 0.025844801 |
| 0.069018805 | 0.009120625 | 0.001247431 | 0.000174803 |
| 0.025183024 | 0.042528673 | 0.019731974 | 0.023946696 |
| 0.008796094 | 0.026594746 | 0.000609059 | 0.028040212 |
| 0.026077261 | 0.098305516 | 0.040767422 | 0.028407919 |
| 0.031380611 | 0.022945281 | 0.047592684 | 0.042999886 |
| 0.031978107 | 0.021686807 | 0.016432594 | 0.13038754  |
| 0.037566873 | 0.022642688 | 0.022049954 | 0.018252156 |
| 0.047113332 | 0.046907458 | 0.110193037 | 0.08604388  |
| 0.011817241 | 0.012943014 | 0.019042927 | 0.041921793 |
| 0.007069152 | 0.110767575 | 0.020109896 | 0.046200784 |
| 0.03740406  | 0.068639418 | 0.014326223 | 0.021758362 |
| 0.029566553 | 0.037820024 | 0.002161454 | 0.001176651 |
| 0.000217522 | 0.089387423 | 0.026923632 | 0.057202151 |
| 0.031470506 | 0.004886912 | 0.061623849 | 0.01175273  |
| 0.011013633 | 0.059167273 | 0.026886442 | 0.068722943 |
| 0.024282505 | 0.076383863 | 0.033505511 | 0.046016328 |
| 0.088561969 | 0.003761422 | 0.043553963 | 0.02364365  |
| 0.022112522 | 0.054417362 | 0.005308945 | 0.046561735 |
| 0.017334741 | 0.078994732 | 0.021333294 | 0.039272377 |
| 0.001944536 | 0.100947096 | 0.123542846 | 0.041512104 |
| 0.017459394 | 0.124453171 | 0.1278984   | 0.000582497 |
| 0.116419197 | 0.032424129 | 0.067442557 | 0.043035404 |
| 0.034671763 | 0.062620623 | 0.045889389 | 0.021746727 |
| 0.058262577 | 0.019204597 | 0.065324707 | 0.000879054 |

|               |             |             |             |
|---------------|-------------|-------------|-------------|
| 0.011785643   | 0.021316297 | 0.017081914 | 0.047101801 |
| 0.009563805   | 0.013310242 | 0.011866287 | 0.067046631 |
| 0.007826349   | 0.112366807 | 0.059089374 | 0.046418506 |
| 0.021511665   | 0.023247879 | 0.045790607 | 0.023519225 |
| 0.017978813   | 0.069868877 | 0.018680901 | 0.011444334 |
| 0.06989628    | 0.001641426 | 0.028689618 | 0.008997075 |
| 0.009870686   | 0.04811203  | 0.075659445 | 0.028701668 |
| 0.012971203   | 0.01985275  | 0.026739875 | 0.057514975 |
| 0.023400776   | 0.010420109 | 0.046186928 | 0.015161281 |
| 0.038600102   | 0.059669154 | 0.009411833 | 0.071736644 |
| 0.163002032   | 0.021153198 | 0.005568924 | 4.76E-05    |
| 0.019690136   | 0.017370261 | 0.054870449 | 0.051441138 |
| 0.010364395   | 0.009926552 | 0.003538446 | 0.127828425 |
| 0.026842076   | 0.016627833 | 0.006881204 | 0.038392865 |
| 0.05767079    | 0.101696456 | 0.027701083 | 0.035432997 |
| 0.006485579   | 0.035788356 | 0.025182777 | 0.035238441 |
| 0.02105471    | 0.068847843 | 0.022435638 | 0.000992404 |
| 0.018346345   | 0.01032674  | 0.136608839 | 0.107390647 |
| 0.127648102   | 0.051442295 | 0.012466574 | 0.045967591 |
| 0.009877421   | 0.091790408 | 0.001634565 | 0.013321587 |
| 0.054047112   | 0.003534196 | 0.063817306 | 0.050097534 |
| 0.072040149   | 0.024128487 | 0.012836661 | 0.083694051 |
| 0.013437492   | 0.034545418 | 0.060289035 | 0.052926704 |
| 0.023798229   | 0.019806106 | 0.106393287 | 0.008656235 |
| 0.027400351   | 0.001336771 | 0.031959238 | 0.004140597 |
| 0.030434895   | 0.045482411 | 0.005143132 | 0.008929433 |
| 0.008769227   | 0.007720743 | 0.004951198 | 0.064598296 |
| 0.068735034   | 0.029261561 | 0.023233672 | 0.0297766   |
| 0.029527041   | 0.045353511 | 0.007025565 | 0.002321593 |
| 0.007289368   | 0.013404469 | 0.021909462 | 0.022539582 |
| 0.013950223   | 0.086648826 | 0.010171418 | 0.02323798  |
| 0.001166498   | 0.006523363 | 0.041405443 | 0.029212008 |
| 0.014128702   |             |             |             |
| 3110057012RIK | 0.368714792 | 0.499778158 | 0.295388019 |
| 0.338630072   | 0.299002266 | 0.201190166 | 0.133039994 |
| 0.120254539   | 0.064170427 | 0.00401805  | 0.020530463 |
| 1             | 0.1546251   | 0.171653548 | 0.179287029 |
| 0.368893143   | 0.146623502 | 0.26591263  | 0.184333119 |
| 0.305694544   | 0.054366208 | 0.32478134  | 0.076208252 |
| 0.26396395    | 0.111832969 | 0.063173497 | 0.214496119 |
| 0.412710934   | 0.074578438 | 0.164006731 | 0.276419311 |
| 0.139020868   | 0.394725415 | 0.493357815 | 0.341084073 |
| 0.496892417   | 0.331822386 | 0.025849077 | 0.151774363 |
| 0.394085262   | 0.367973308 | 0.303943289 | 0.230915963 |
| 0.035319072   | 0.447257964 | 0.163463238 | 0.317993884 |
| 0.136984725   | 0.035491862 | 0.121872027 | 0.398768268 |
| 0.438974875   | 0.253021856 | 0.134908809 | 0.101795786 |
| 0.131492384   | 0.121438404 | 0.216904963 | 0.200102735 |
| 0.157034179   | 0.075906609 | 0.455731287 | 0.053127264 |
| 0.084184439   | 0.1682616   | 0.187559029 | 0.168287547 |
| 0.2713633     | 0.296801692 | 0.020815194 | 0.294437091 |
| 0.001861694   | 0.285174911 | 0.317840324 | 0.214109197 |
| 0.053770802   | 0.022119744 | 0.20566625  | 0.207465314 |
| 0.44054073    | 0.459043458 | 0.490241638 | 0.493861659 |

|             |             |             |             |
|-------------|-------------|-------------|-------------|
| 0.178239978 | 0.266671484 | 0.30641098  | 0.141362842 |
| 0.405066145 | 0.114265204 | 0.108412043 | 0.384368586 |
| 0.497317714 | 0.503191527 | 0.188261897 | 0.244543115 |
| 0.343837156 | 0.448401612 | 0.263564579 | 0.280977331 |
| 0.213679389 | 0.085483866 | 0.396529495 | 0.510458808 |
| 0.353634324 | 0.281165932 | 0.155285656 | 0.341217571 |
| 0.06865831  | 0.241876823 | 0.244892782 | 0.184492453 |
| 0.454521762 | 0.01444348  | 0.214883828 | 0.215539317 |
| 0.213995339 | 0.391737434 | 0.508113184 | 0.137392608 |
| 0.330064173 | 0.02949844  | 0.118839835 | 0.053532109 |
| 0.24549462  | 0.18158501  | 0.438868272 | 0.42530866  |
| 0.153254948 | 0.265623189 | 0.179615635 | 0.006363706 |
| 0.04341208  | 0.212313664 | 0.409970078 | 0.284232788 |
| 0.35942047  | 0.381138904 | 0.162018614 | 0.301864326 |
| 0.322053756 | 0.482108149 | 0.028761988 | 0.077422975 |
| 0.275462512 | 0.208413564 | 0.197267869 | 0.290965181 |
| 0.248572625 | 0.088130351 | 0.113405998 | 0.510062974 |
| 0.378098127 | 0.075513161 | 0.226650392 | 0.360567461 |
| 0.185016326 | 0.302820838 | 0.099117713 | 0.204130472 |
| 0.036726737 | 0.466205153 | 0.051501898 | 0.223527893 |
| 0.163101088 | 0.170321926 | 0.019859368 | 0.155396147 |
| 0.183261386 | 0.382069335 | 0.437916905 | 0.108854717 |
| 0.227323853 | 0.29492666  | 0.189831833 | 0.313038799 |
| 0.006935747 | 0.061624766 | 0.161425398 | 0.497597615 |
| 0.153764968 | 0.517806104 | 0.241967496 | 0.26124795  |
| 0.246570573 | 0.416286725 | 0.007168281 | 0.462110729 |
| 0.509886001 | 0.172847398 | 0.271084539 | 0.323011536 |
| 0.238618201 | 0.409660373 | 0.043665668 | 0.352684202 |
| 0.269194382 | 0.083001553 | 0.506309556 | 0.150496922 |
| 0.449903415 | 0.043630407 | 0.187933176 | 0.421276557 |
| 0.370109784 | 0.012159623 | 0.112239824 | 0.26607784  |
| 0.049162286 | 0.048059301 | 0.348977843 | 0.287253451 |
| 0.234091468 | 0.414896569 | 0.481936569 | 0.23056188  |
| 0.296263237 | 0.17790199  | 0.021561981 | 0.293408472 |
| 0.410183184 | 0.22612353  | 0.396975565 | 0.162661051 |
| 0.200103264 | 0.442432244 | 0.386876836 | 0.095052354 |
| 0.03694252  | 0.186773216 | 0.019518641 | 0.237226283 |
| 0.365583633 | 0.078312869 | 0.236888711 | 0.192340392 |
| 0.092289104 | 0.511229999 | 0.202935659 | 0.248100547 |
| 0.156860421 | 0.241092713 | 0.191748552 | 0.14424841  |
| 0.16252633  | 0.140892486 | 0.246500965 | 0.237017946 |
| 0.023770619 | 0.092250387 | 0.035345449 | 0.256638765 |
| 0.109160723 | 0.22427702  | 0.207733659 | 0.300151157 |
| 0.221677609 | 0.099313237 | 0.281059414 | 0.247872109 |
| 0.128202539 | 0.02365629  | 0.485744054 | 0.323682712 |
| 0.245055799 | 0.117706205 | 0.058844671 | 0.218401068 |
| 0.434228931 | 0.156381538 | 0.143688239 | 0.411442627 |
| 0.041439198 | 0.48509188  | 0.172528527 | 0.121952347 |
| 0.290106972 | 0.19896642  | 0.435920783 | 0.036669095 |
| 0.246732183 | 0.429519508 | 0.271838666 | 0.152814977 |
| 0.354508594 | 0.281296826 | 0.027253488 | 0.343514764 |
| 0.334417382 | 0.039603782 | 0.521617104 | 0.155341843 |
| 0.034197287 | 0.382056237 | 0.351179857 | 0.085570806 |
| 0.093193295 | 0.198205832 | 0.026082169 | 0.245946354 |

|             |             |             |             |
|-------------|-------------|-------------|-------------|
| 0.500035277 | 0.354129397 | 0.340396154 | 0.236560115 |
| 0.03596599  | 0.013000889 | 0.233735167 | 0.312719693 |
| 0.48046598  | 0.516819842 | 0.234800691 | 0.275991815 |
| 0.188043253 | 0.218263449 | 0.074474689 | 0.501535818 |
| 0.233133496 | 0.507665602 | 0.012306166 | 0.399886027 |
| 0.481685831 | 0.158886252 | 0.085793584 | 0.171604161 |
| 0.33355001  | 0.04109492  | 0.181002322 | 0.473204341 |
| 0.392245808 | 0.221513524 | 0.221444481 | 0.344008177 |
| 0.011942256 | 0.028755207 | 0.280013352 | 0.202816078 |
| 0.226171462 | 0.170148707 | 0.091624829 | 0.199255555 |
| 0.038598053 | 0.409937734 | 0.451999788 | 0.050633983 |
| 0.166489349 | 0.186443045 | 0.308570415 | 0.038903799 |
| 0.450888209 | 0.50466207  | 0.496622269 | 0.136343706 |
| 0.402211452 | 0.473270844 | 0.27517124  | 0.10428536  |
| 0.03115624  | 0.505825547 | 0.2875485   | 0.019985286 |
| 0.462421648 | 0.117516621 | 0.012193076 | 0.469737559 |
| 0.145894112 | 0.410915484 | 0.003399041 | 0.109552086 |
| 0.074493848 | 0.466675769 | 0.438785786 | 0.264213565 |
| 0.112485657 | 0.272601644 | 0.014121876 | 0.531303178 |
| 0.463301765 | 0.026526531 | 0.169376582 | 0.387048067 |
| 0.379953294 | 0.507396276 | 0.254398427 | 0.438467423 |
| 0.299681202 | 0.474271949 | 0.154364228 | 0.221205205 |
| 0.392473906 | 0.490287599 | 0.346707606 | 0.430003954 |
| 0.436026256 | 0.360562555 | 0.199331982 | 0.012821933 |
| 0.102010613 | 0.114924852 | 0.160195072 | 0.052382811 |
| 0.180853166 | 0.12797305  | 0.483667146 | 0.461774195 |
| 0.486531894 | 0.010589839 | 0.094270954 | 0.380950049 |
| 0.402762233 | 0.454530697 | 0.038789169 | 0.010183821 |
| 0.015099421 | 0.026022257 | 0.222985944 | 0.238692188 |
| 0.475676024 | 0.118153397 | 0.007691522 | 0.030551326 |
| 0.209552154 | 0.304312196 | 0.478704058 | 0.307125307 |
| 0.416552277 | 0.091367843 | 0.154319581 | 0.330553892 |
| 0.074331261 | 0.236619425 | 0.482265641 | 0.429469222 |
| 0.066754558 | 0.227523574 | 0.282224333 | 0.466614918 |
| 0.09296691  | 0.27469281  | 0.342372184 | 0.202624669 |
| 0.031308604 | 0.098485453 | 0.067989094 | 0.414414467 |
| 0.479285276 | 0.073414123 | 0.039099334 | 0.08300356  |
| 0.084139573 | 0.460200338 | 0.136866443 | 0.514381228 |
| 0.394248688 | 0.416431056 | 0.104589682 | 0.447340494 |
| 0.034492714 | 0.462355384 | 0.289306925 | 0.036666824 |
| 0.283613112 | 0.022637694 | 0.478019134 | 0.092936371 |
| 0.195215754 | 0.297877595 | 0.142121048 | 0.032974114 |
| 0.188003127 | 0.070385662 | 0.462069071 | 0.462663003 |
| 0.065383415 | 0.165533771 | 0.269466277 | 0.309994489 |
| 0.164164266 | 0.361854615 | 0.469980355 | 0.232792755 |
| 0.054163991 | 0.198728368 | 0.326174471 | 0.296462782 |
| 0.151580661 | 0.500929948 | 0.192081177 | 0.527987783 |
| 0.325849011 | 0.446347062 | 0.466145616 | 0.218678959 |
| 0.225659415 | 0.248990013 | 0.233817153 | 0.016057974 |
| 0.264385767 | 0.432213751 | 0.247075203 | 0.138637374 |
| 0.204112908 | 0.291847948 | 0.047997542 | 0.168679394 |
| 0.273189963 | 0.158830058 | 0.110575561 | 0.424613681 |
| 0.269209268 | 0.309273544 | 0.0399753   | 0.061938298 |
| 0.525942085 | 0.405047947 | 0.093967032 | 0.300667854 |

|               |             |             |             |
|---------------|-------------|-------------|-------------|
| 0.180624433   | 0.240239481 | 0.428539709 | 0.42994818  |
| 0.242720748   | 0.410889961 | 0.370445358 | 0.260531097 |
| 0.376673085   | 0.184447597 | 0.497117402 | 0.05734339  |
| 0.090645404   | 0.299019033 | 0.075197021 | 0.114163099 |
| 0.125815128   | 0.040371152 | 0.240358202 | 0.373535619 |
| 0.283924413   | 0.270598998 | 0.193513736 | 0.085068118 |
| 0.28684636    | 0.263278613 | 0.27803493  | 0.122399262 |
| 0.068387883   | 0.460572619 | 0.013445491 | 0.074547286 |
| 0.304643763   | 0.381554814 | 0.280860771 | 0.228755435 |
| 0.251583999   | 0.176056327 | 0.233825938 | 0.166014718 |
| 0.173796213   | 0.278414598 | 0.381910155 | 0.031933279 |
| 0.017316167   | 0.500423122 | 0.248099831 | 0.044918084 |
| 0.088869252   | 0.243965579 | 0.270699093 | 0.146427842 |
| 0.042392654   | 0.473287652 | 0.165765187 | 0.303206614 |
| 0.217130867   | 0.077855785 | 0.317041677 | 0.086827078 |
| 0.067199631   | 0.425508985 | 0.304941563 | 0.501150185 |
| 0.311726224   | 0.364615121 | 0.405311377 | 0.394058797 |
| 0.155361188   | 0.277541343 | 0.023994257 | 0.416301946 |
| 0.259557949   |             |             |             |
| 4632434I11RIK | 0.135606394 | 0.251149922 | 0.083255562 |
| 0.260002822   | 0.153981837 | 0.111272986 | 0.125767866 |
| 0.026589022   | 0.013572855 | 0.007487396 | 0.022128369 |
| 0.1546251     | 1           | 0.087034307 | 0.033813847 |
| 0.238960456   | 0.107326883 | 0.041371676 | 0.156193556 |
| 0.189147199   | 0.047591999 | 0.272667212 | 0.053477734 |
| 0.044362815   | 0.102223515 | 0.096193102 | 0.097749451 |
| 0.252315514   | 0.101897342 | 0.097747857 | 0.168161685 |
| 0.035573006   | 0.181981272 | 0.211694272 | 0.260222137 |
| 0.208868569   | 0.109459923 | 0.001648338 | 0.07078995  |
| 0.159556933   | 0.214667178 | 0.200194996 | 0.222633411 |
| 0.047856966   | 0.186388877 | 0.175707876 | 0.148165027 |
| 0.004260752   | 0.067299754 | 0.037612587 | 0.164863809 |
| 0.205828437   | 0.152880869 | 0.048292429 | 0.094049574 |
| 0.033252868   | 0.041028014 | 0.05529898  | 0.103777395 |
| 0.158401686   | 0.034086921 | 0.209375027 | 0.022020558 |
| 0.005949718   | 0.053392068 | 0.057509363 | 0.089604625 |
| 0.055482702   | 0.130216609 | 0.006190556 | 0.1047755   |
| 0.002210421   | 0.181924338 | 0.148417379 | 0.057803416 |
| 0.082594402   | 0.045169325 | 0.078917466 | 0.200018164 |
| 0.248648858   | 0.165095663 | 0.291190828 | 0.265193273 |
| 0.071954667   | 0.102817099 | 0.109181473 | 0.118142941 |
| 0.184135003   | 0.1371715   | 0.008213539 | 0.26872108  |
| 0.28654204    | 0.24083141  | 0.0690298   | 0.13379308  |
| 0.230827952   | 0.213307919 | 0.104529962 | 0.131349442 |
| 0.06393442    | 0.017619854 | 0.19131061  | 0.272310169 |
| 0.147273618   | 0.093819276 | 0.138675658 | 0.200074918 |
| 0.06079943    | 0.023287605 | 0.238823863 | 0.011340885 |
| 0.259903608   | 0.019167031 | 0.137625906 | 0.175403102 |
| 0.019229797   | 0.177636688 | 0.233829191 | 0.142089276 |
| 0.119677807   | 0.00922936  | 0.021476586 | 0.026590362 |
| 0.015154868   | 0.026993066 | 0.174397746 | 0.288933523 |
| 0.035608848   | 0.048397214 | 0.091275429 | 0.008579662 |
| 0.046251925   | 0.011156645 | 0.191189955 | 0.071174188 |
| 0.170094024   | 0.121662048 | 0.128662633 | 0.133498767 |

|             |             |             |             |
|-------------|-------------|-------------|-------------|
| 0.165593959 | 0.282755891 | 0.00142888  | 0.044486281 |
| 0.149297223 | 0.01945956  | 0.184678316 | 0.158628024 |
| 0.184754989 | 0.042637114 | 0.098708317 | 0.271325338 |
| 0.171900202 | 0.105972435 | 0.036426794 | 0.248320869 |
| 0.064882565 | 0.187415925 | 0.076351539 | 0.126916174 |
| 0.046756674 | 0.194796894 | 0.047478657 | 0.061030453 |
| 0.023707497 | 0.043698185 | 0.001334046 | 0.071317713 |
| 0.034260018 | 0.243270331 | 0.15963395  | 0.0755128   |
| 0.155506951 | 0.228126359 | 0.061662162 | 0.237094388 |
| 0.015415274 | 0.012210204 | 0.033531465 | 0.279881779 |
| 0.089423636 | 0.241150166 | 0.069865708 | 0.061388316 |
| 0.17546791  | 0.231901935 | 0.000120189 | 0.198862691 |
| 0.234488299 | 0.039509764 | 0.25610465  | 0.149758101 |
| 0.089898378 | 0.271242933 | 0.000856655 | 0.243348883 |
| 0.09789753  | 0.055160555 | 0.286772397 | 0.173373808 |
| 0.181705025 | 0.088619298 | 0.069560232 | 0.202324108 |
| 0.194155672 | 0.004291602 | 0.063141289 | 0.193684864 |
| 0.024549759 | 0.030257809 | 0.156399467 | 0.206467167 |
| 0.17814989  | 0.200800787 | 0.288198799 | 0.082920658 |
| 0.175754625 | 0.075310922 | 0.005779356 | 0.13480989  |
| 0.169259928 | 0.017171253 | 0.18497381  | 0.062863998 |
| 0.068648242 | 0.219498639 | 0.161554232 | 0.005187057 |
| 0.069013389 | 0.095539448 | 0.006455423 | 0.150799203 |
| 0.130339656 | 0.090268946 | 0.087098693 | 0.015549642 |
| 0.083787617 | 0.273432943 | 0.058188622 | 0.055800266 |
| 0.032647322 | 0.205209977 | 0.103359233 | 0.118260358 |
| 0.085405227 | 0.070656159 | 0.076044184 | 0.075859699 |
| 0.034666183 | 0.125249517 | 0.001653796 | 0.087395962 |
| 0.074818292 | 0.131291253 | 0.124134395 | 0.145539362 |
| 0.059046691 | 0.055546255 | 0.194563519 | 0.030842106 |
| 0.061215133 | 0.048040118 | 0.244961143 | 0.196080267 |
| 0.104769112 | 0.060047736 | 0.049554533 | 0.024257134 |
| 0.284249649 | 0.087922741 | 0.023553638 | 0.24836656  |
| 0.002769859 | 0.252252458 | 0.089637485 | 0.151240865 |
| 0.139073373 | 0.20781257  | 0.259057591 | 0.003632255 |
| 0.096662039 | 0.221103271 | 0.111981999 | 0.116474728 |
| 0.183477905 | 0.187900585 | 0.015075021 | 0.132767313 |
| 0.146781861 | 0.076304324 | 0.256971917 | 0.067388925 |
| 0.045312498 | 0.197221202 | 0.212920611 | 0.096574102 |
| 0.068692397 | 0.17668115  | 0.020783596 | 0.210692496 |
| 0.268358512 | 0.292288285 | 0.21264687  | 0.047686667 |
| 0.077669314 | 0.019336451 | 0.075950656 | 0.092621357 |
| 0.202825119 | 0.2497141   | 0.142451468 | 0.197060458 |
| 0.174535094 | 0.077629239 | 0.003372679 | 0.275448149 |
| 0.006845567 | 0.213167199 | 0.019576446 | 0.207295154 |
| 0.206365324 | 0.067720707 | 0.109489024 | 0.126384078 |
| 0.173347429 | 0.051162256 | 0.04150553  | 0.222070804 |
| 0.195723911 | 0.083612507 | 0.079746079 | 0.164149051 |
| 0.01819586  | 0.018524555 | 0.138303456 | 0.033893001 |
| 0.076555131 | 0.076638419 | 0.007431572 | 0.034288444 |
| 0.046607192 | 0.222915104 | 0.245177148 | 0.038700836 |
| 0.130698316 | 0.029785203 | 0.201031636 | 0.057132825 |
| 0.222252324 | 0.205915255 | 0.22348796  | 0.044483347 |
| 0.191564191 | 0.245189892 | 0.149278897 | 0.057883642 |



|             |             |             |             |
|-------------|-------------|-------------|-------------|
| 0.042617154 | 0.216931472 | 0.123141389 | 0.007317772 |
| 0.27672437  | 0.046550013 | 0.028209397 | 0.231670696 |
| 0.11048423  | 0.15201728  | 0.000483072 | 0.000885039 |
| 0.016612605 | 0.248639232 | 0.19712425  | 0.153342467 |
| 0.041528755 | 0.134269295 | 0.000213426 | 0.244424902 |
| 0.239673687 | 0.034686631 | 0.041732448 | 0.210331756 |
| 0.201259067 | 0.232844789 | 0.100506108 | 0.250405516 |
| 0.185290936 | 0.215889687 | 0.033719198 | 0.188840895 |
| 0.241255565 | 0.212482655 | 0.174162912 | 0.189390568 |
| 0.279481068 | 0.209228844 | 0.203135855 | 0.032567556 |
| 0.008272754 | 0.051297262 | 0.046833666 | 0.010171058 |
| 0.078306731 | 0.075676488 | 0.211022677 | 0.261776222 |
| 0.265350826 | 0.021392626 | 0.031434679 | 0.191548769 |
| 0.229700246 | 0.24724563  | 0.001338678 | 0.000378082 |
| 0.000491164 | 0.025839854 | 0.130386169 | 0.101854357 |
| 0.23255647  | 0.021906431 | 0.021433945 | 0.016541808 |
| 0.031089016 | 0.192082419 | 0.236431881 | 0.236924831 |
| 0.181230461 | 0.063758582 | 0.072432136 | 0.207969063 |
| 0.043297953 | 0.075379156 | 0.277813644 | 0.21487225  |
| 0.016833004 | 0.088628654 | 0.063199279 | 0.272600012 |
| 0.015522118 | 0.187470727 | 0.168507186 | 0.094522945 |
| 0.001118065 | 0.059058588 | 0.052539044 | 0.225258954 |
| 0.201870847 | 0.091584874 | 0.066897308 | 0.00368303  |
| 0.111085287 | 0.229254653 | 0.08861318  | 0.28100664  |
| 0.229119819 | 0.286121713 | 0.028156432 | 0.201806514 |
| 0.015095768 | 0.215772434 | 0.149269594 | 0.004899192 |
| 0.051905551 | 0.011091202 | 0.19681308  | 0.02490189  |
| 0.070440791 | 0.131406905 | 0.012992978 | 0.023899512 |
| 0.016040542 | 0.075033029 | 0.292059001 | 0.253297135 |
| 0.01335891  | 0.049552616 | 0.118823899 | 0.150084047 |
| 0.093613038 | 0.280916729 | 0.208396358 | 0.090000376 |
| 0.058233107 | 0.005261095 | 0.187373232 | 0.122424871 |
| 0.048259271 | 0.282527354 | 0.08463662  | 0.245853145 |
| 0.13578257  | 0.187637826 | 0.226031599 | 0.152071366 |
| 0.034136907 | 0.104961161 | 0.20106641  | 0.011503967 |
| 0.146079033 | 0.293937543 | 0.074054369 | 0.062229749 |
| 0.187333257 | 0.108189149 | 0.003553587 | 0.001837112 |
| 0.083827927 | 0.104548495 | 0.064450102 | 0.253475619 |
| 0.11180611  | 0.131159536 | 0.004200301 | 0.051593744 |
| 0.246752867 | 0.168293645 | 0.014885024 | 0.188001084 |
| 0.084573767 | 0.174144276 | 0.204084512 | 0.218719492 |
| 0.02991271  | 0.247001719 | 0.204692106 | 0.20569317  |
| 0.197126117 | 0.127156946 | 0.225871462 | 0.006654902 |
| 0.011156578 | 0.115367941 | 0.095298604 | 0.084421286 |
| 0.142518024 | 0.022721012 | 0.044032496 | 0.222789643 |
| 0.063102623 | 0.26808005  | 0.019197803 | 0.009332452 |
| 0.138176692 | 0.046920724 | 0.172701191 | 0.101350132 |
| 0.05903996  | 0.224286011 | 0.003292904 | 0.061440608 |
| 0.082404259 | 0.206986584 | 0.167511569 | 0.090220861 |
| 0.042930546 | 0.025898    | 0.188787911 | 0.071346607 |
| 0.116417834 | 0.010903835 | 0.203785827 | 0.003576413 |
| 0.022218984 | 0.281988408 | 0.065356102 | 0.005627854 |
| 0.004408828 | 0.086548478 | 0.032814391 | 0.0560495   |
| 0.02663222  | 0.232726488 | 0.074611536 | 0.13190122  |

|               |             |             |             |
|---------------|-------------|-------------|-------------|
| 0.122574275   | 0.043316338 | 0.116817587 | 0.003829659 |
| 0.008512865   | 0.181397807 | 0.116491026 | 0.226363363 |
| 0.07245368    | 0.297704493 | 0.152384973 | 0.202717118 |
| 0.003076689   | 0.065540582 | 0.025299622 | 0.208690826 |
| 0.074060691   |             |             |             |
| 4930503L19RIK | 0.196748461 | 0.334635282 | 0.093438968 |
| 0.340387701   | 0.166864581 | 0.200718969 | 0.186154145 |
| 0.095841774   | 0.04071807  | 0.051734733 | 0.025860239 |
| 0.171653548   | 0.087034307 | 1           | 0.053813115 |
| 0.280372159   | 0.070902892 | 0.081607854 | 0.201681932 |
| 0.283149258   | 0.114131852 | 0.281120844 | 0.084815085 |
| 0.035868217   | 0.040840014 | 0.062719181 | 0.053100063 |
| 0.356701339   | 0.071224795 | 0.170810207 | 0.310512583 |
| 0.040749177   | 0.270487383 | 0.292896725 | 0.238242519 |
| 0.277773131   | 0.170878902 | 0.019078151 | 0.093400517 |
| 0.268352391   | 0.231480915 | 0.294903491 | 0.265012724 |
| 0.070836778   | 0.298158648 | 0.222383759 | 0.146227591 |
| 0.068103391   | 0.043085188 | 0.106975931 | 0.27847592  |
| 0.282809363   | 0.169932004 | 0.113258682 | 0.127632555 |
| 0.070219007   | 0.109801184 | 0.036468476 | 0.250450707 |
| 0.193251567   | 0.116540168 | 0.280171865 | 0.065198799 |
| 0.044739017   | 0.126254363 | 0.046860552 | 0.185566644 |
| 0.041195604   | 0.254600679 | 0.03640558  | 0.121431036 |
| 0.031038894   | 0.272898866 | 0.152779472 | 0.034221922 |
| 0.058315723   | 0.081872519 | 0.06103817  | 0.281217086 |
| 0.342642117   | 0.248026598 | 0.31777766  | 0.289294277 |
| 0.102886116   | 0.112364843 | 0.093788326 | 0.117882905 |
| 0.262467358   | 0.172269216 | 0.067491849 | 0.282266386 |
| 0.315738651   | 0.305623048 | 0.056469922 | 0.106204836 |
| 0.296300708   | 0.320955144 | 0.133125399 | 0.140589675 |
| 0.048000962   | 0.015290331 | 0.274555536 | 0.321404599 |
| 0.26874858    | 0.058167101 | 0.093859734 | 0.339485645 |
| 0.054770567   | 0.067373028 | 0.292360508 | 0.088129991 |
| 0.352265999   | 0.033576683 | 0.087819431 | 0.247001402 |
| 0.059930646   | 0.266377188 | 0.284540994 | 0.178756162 |
| 0.127611139   | 0.065274575 | 0.019429473 | 0.026842311 |
| 0.08468195    | 0.015980286 | 0.262250983 | 0.364983935 |
| 0.121342392   | 0.065590679 | 0.142856189 | 0.007231735 |
| 0.031551678   | 0.038373459 | 0.251665977 | 0.127799364 |
| 0.249827899   | 0.171765762 | 0.093255267 | 0.230324384 |
| 0.167084499   | 0.306348861 | 0.024327479 | 0.079762105 |
| 0.184028512   | 0.038773448 | 0.198255638 | 0.186501165 |
| 0.127284036   | 0.09579139  | 0.118045107 | 0.332718692 |
| 0.30407358    | 0.116979691 | 0.09169135  | 0.279367679 |
| 0.079385581   | 0.136808439 | 0.094683306 | 0.158468207 |
| 0.090407793   | 0.245901518 | 0.021239086 | 0.138162555 |
| 0.029428541   | 0.0537342   | 0.015198756 | 0.175146662 |
| 0.107149572   | 0.289317609 | 0.236667326 | 0.090633377 |
| 0.198715478   | 0.223134056 | 0.152527281 | 0.277017763 |
| 0.030329356   | 0.047969486 | 0.099802643 | 0.341771128 |
| 0.227207352   | 0.291958272 | 0.097673966 | 0.060295074 |
| 0.149804215   | 0.296835525 | 0.001241414 | 0.2907915   |
| 0.292305959   | 0.102433708 | 0.249235356 | 0.166938463 |
| 0.069015323   | 0.346725342 | 0.008911075 | 0.29281463  |

|             |             |             |             |
|-------------|-------------|-------------|-------------|
| 0.20156289  | 0.068360285 | 0.335770372 | 0.121204383 |
| 0.267727818 | 0.056462837 | 0.132754036 | 0.20506727  |
| 0.202008155 | 0.011006188 | 0.162224679 | 0.294784154 |
| 0.015024609 | 0.090969588 | 0.237239646 | 0.2788212   |
| 0.192426004 | 0.24808675  | 0.345564276 | 0.059426194 |
| 0.171443054 | 0.140147069 | 0.016485888 | 0.111455931 |
| 0.222043132 | 0.041915166 | 0.306340906 | 0.100512802 |
| 0.154991621 | 0.314745732 | 0.20339378  | 0.037226271 |
| 0.071401873 | 0.179700186 | 0.065566059 | 0.127399446 |
| 0.184984626 | 0.132264813 | 0.085306679 | 0.042795643 |
| 0.044834942 | 0.334456905 | 0.026470918 | 0.031409938 |
| 0.013160635 | 0.249767874 | 0.165761756 | 0.133259155 |
| 0.099296228 | 0.063712445 | 0.054829305 | 0.079375138 |
| 0.084166686 | 0.100533607 | 0.004961589 | 0.079526913 |
| 0.127994901 | 0.119830366 | 0.128400123 | 0.226694669 |
| 0.112616215 | 0.153822601 | 0.164242987 | 0.033161349 |
| 0.039572429 | 0.031226091 | 0.322901111 | 0.254929261 |
| 0.237425422 | 0.082246245 | 0.039235277 | 0.064822721 |
| 0.354724622 | 0.161444169 | 0.069114375 | 0.345481323 |
| 0.028183477 | 0.298914491 | 0.118504702 | 0.09582067  |
| 0.102332251 | 0.222914636 | 0.342311665 | 0.02305005  |
| 0.173425485 | 0.330744844 | 0.1313682   | 0.081129639 |
| 0.302729215 | 0.254196178 | 0.063152234 | 0.228525122 |
| 0.246734786 | 0.056658035 | 0.315925762 | 0.051546673 |
| 0.029255156 | 0.208960837 | 0.216244613 | 0.068405084 |
| 0.0448621   | 0.184156859 | 0.081547285 | 0.179526233 |
| 0.33884501  | 0.30005407  | 0.26354177  | 0.032131333 |
| 0.072928343 | 0.058779994 | 0.052123308 | 0.105113961 |
| 0.297561245 | 0.29056479  | 0.163363103 | 0.139131252 |
| 0.210768387 | 0.04914273  | 0.062777476 | 0.323971165 |
| 0.027239576 | 0.294972593 | 0.015704826 | 0.204209249 |
| 0.274181282 | 0.161919055 | 0.051453998 | 0.208902374 |
| 0.301703881 | 0.05534053  | 0.079966758 | 0.310589169 |
| 0.276085332 | 0.074979765 | 0.06722806  | 0.21558469  |
| 0.057660424 | 0.071863425 | 0.135028364 | 0.018996211 |
| 0.084219255 | 0.070712654 | 0.004778409 | 0.070649246 |
| 0.085975108 | 0.320924492 | 0.304247722 | 0.035099467 |
| 0.193608948 | 0.066071894 | 0.194179655 | 0.055022673 |
| 0.226700729 | 0.262009413 | 0.311198813 | 0.091913323 |
| 0.23578473  | 0.28405086  | 0.116281304 | 0.044724763 |
| 0.020625544 | 0.279868892 | 0.225386255 | 0.070754214 |
| 0.338891925 | 0.143461671 | 0.069175742 | 0.338384494 |
| 0.157462374 | 0.251286454 | 0.011033716 | 0.007026639 |
| 0.01423694  | 0.272912354 | 0.279583597 | 0.277377551 |
| 0.097190338 | 0.210362131 | 0.00108064  | 0.297264052 |
| 0.327392744 | 0.014462575 | 0.030357183 | 0.240039476 |
| 0.189786346 | 0.33618384  | 0.057474619 | 0.251129141 |
| 0.162447346 | 0.278896093 | 0.124355065 | 0.161497491 |
| 0.318266244 | 0.247426317 | 0.284347539 | 0.301495857 |
| 0.354709162 | 0.219373024 | 0.234836586 | 0.0406032   |
| 0.016447166 | 0.13482852  | 0.052402596 | 0.038658534 |
| 0.193621911 | 0.053190318 | 0.296083528 | 0.312995168 |
| 0.292228168 | 0.012931877 | 0.113915394 | 0.243513115 |
| 0.358221579 | 0.349477232 | 0.010323069 | 0.002758148 |

|               |             |             |             |
|---------------|-------------|-------------|-------------|
| 0.002744773   | 0.013993658 | 0.227707467 | 0.087027274 |
| 0.293536753   | 0.089525571 | 0.01939563  | 0.086790305 |
| 0.097574925   | 0.151314823 | 0.313769596 | 0.299211827 |
| 0.214867698   | 0.058195593 | 0.092610387 | 0.293651339 |
| 0.027950731   | 0.166357725 | 0.312813057 | 0.322683702 |
| 0.022573544   | 0.076981518 | 0.120429877 | 0.358737879 |
| 0.005041964   | 0.173176774 | 0.194200752 | 0.094637778 |
| 0.007572409   | 0.035499736 | 0.029704776 | 0.26882978  |
| 0.263751003   | 0.096344441 | 0.066914163 | 0.056134251 |
| 0.119846176   | 0.29109347  | 0.126666922 | 0.336473547 |
| 0.335557108   | 0.351635364 | 0.024688549 | 0.293446148 |
| 0.034100513   | 0.294978228 | 0.097190903 | 0.038434763 |
| 0.070055691   | 0.01930244  | 0.253208207 | 0.027240264 |
| 0.141533897   | 0.239636259 | 0.022284447 | 0.012073152 |
| 0.014165312   | 0.046591456 | 0.335305228 | 0.264665099 |
| 0.013234791   | 0.08305298  | 0.129555779 | 0.218408775 |
| 0.216675604   | 0.323377697 | 0.303359645 | 0.128992096 |
| 0.090099087   | 0.015060256 | 0.303925902 | 0.219522961 |
| 0.112048566   | 0.317654019 | 0.06197016  | 0.307496589 |
| 0.225538056   | 0.278819771 | 0.276443482 | 0.198099486 |
| 0.041102017   | 0.186631253 | 0.304737863 | 0.092419132 |
| 0.20402647    | 0.337932248 | 0.144479815 | 0.049275054 |
| 0.13695831    | 0.089767507 | 0.034299641 | 0.038088249 |
| 0.056826415   | 0.235570013 | 0.116979995 | 0.319903104 |
| 0.21165955    | 0.225446231 | 0.053415918 | 0.031462101 |
| 0.332099324   | 0.267715683 | 0.081588916 | 0.266006885 |
| 0.088106503   | 0.159807906 | 0.240354927 | 0.227263536 |
| 0.04131464    | 0.300859534 | 0.311733295 | 0.315563714 |
| 0.324918891   | 0.171447631 | 0.309115318 | 0.077137026 |
| 0.020970159   | 0.154962184 | 0.102521899 | 0.057046042 |
| 0.144442076   | 0.021703006 | 0.025237936 | 0.260922127 |
| 0.04558865    | 0.286103112 | 0.063994844 | 0.051564747 |
| 0.125584707   | 0.085115315 | 0.19336423  | 0.176254193 |
| 0.09924674    | 0.306382543 | 0.017337861 | 0.048735723 |
| 0.064662475   | 0.23742191  | 0.110407919 | 0.083990478 |
| 0.032089161   | 0.029419834 | 0.195821916 | 0.171796658 |
| 0.148388806   | 0.048032436 | 0.246011687 | 0.045485944 |
| 0.06101472    | 0.335785346 | 0.133683083 | 0.010700955 |
| 0.019798935   | 0.156782641 | 0.066565217 | 0.069803117 |
| 0.012494182   | 0.262141218 | 0.114617884 | 0.141261485 |
| 0.220081821   | 0.055021938 | 0.242713398 | 0.033544937 |
| 0.040069204   | 0.294037485 | 0.106979328 | 0.283667488 |
| 0.078137269   | 0.330718186 | 0.261230213 | 0.270117358 |
| 0.035566431   | 0.083553942 | 0.053296258 | 0.305427381 |
| 0.067410868   |             |             |             |
| 5730469M10RIK | 0.252849273 | 0.407635985 | 0.156374517 |
| 0.319939142   | 0.154332832 | 0.234222868 | 0.115970758 |
| 0.051017797   | 0.066775875 | 0.004528159 | 0.009869412 |
| 0.179287029   | 0.033813847 | 0.053813115 | 1           |
| 0.29195986    | 0.018991047 | 0.094467718 | 0.116025732 |
| 0.253101752   | 0.03651327  | 0.228935218 | 0.035689198 |
| 0.04587135    | 0.028145684 | 0.030758504 | 0.088933089 |
| 0.339362886   | 0.038599446 | 0.140236478 | 0.262941527 |
| 0.016015757   | 0.277339074 | 0.406133303 | 0.205424511 |

|             |             |             |             |
|-------------|-------------|-------------|-------------|
| 0.370841326 | 0.255871912 | 0.000709908 | 0.098215072 |
| 0.325367163 | 0.321694891 | 0.269723785 | 0.177559019 |
| 0.022049317 | 0.378373106 | 0.144673892 | 0.170922357 |
| 0.070444771 | 0.010511057 | 0.094207215 | 0.365906572 |
| 0.361417008 | 0.210588787 | 0.091070323 | 0.076943273 |
| 0.031082235 | 0.049841901 | 0.033003389 | 0.212662677 |
| 0.101049364 | 0.059484962 | 0.362941627 | 0.065949302 |
| 0.036779168 | 0.081979726 | 0.018824507 | 0.103139103 |
| 0.065102221 | 0.296209872 | 0.008334065 | 0.165396657 |
| 0.001219552 | 0.252490616 | 0.147710445 | 0.096213474 |
| 0.017419375 | 0.005435617 | 0.030068908 | 0.200547452 |
| 0.346006311 | 0.344384893 | 0.345520888 | 0.353383639 |
| 0.02428801  | 0.091265597 | 0.121344904 | 0.04516722  |
| 0.338010653 | 0.086023587 | 0.032612894 | 0.268149795 |
| 0.356387455 | 0.384376508 | 0.041856122 | 0.103984722 |
| 0.344823894 | 0.375130449 | 0.180193646 | 0.142741824 |
| 0.106811951 | 0.011218044 | 0.35039496  | 0.363700852 |
| 0.301798937 | 0.077516827 | 0.052690849 | 0.290335722 |
| 0.019772833 | 0.066963227 | 0.20934741  | 0.014925858 |
| 0.361086918 | 0.021136574 | 0.063097782 | 0.163552498 |
| 0.043268462 | 0.305928853 | 0.380004861 | 0.098521626 |
| 0.118374778 | 0.004528958 | 0.042208913 | 0.007917936 |
| 0.048563885 | 0.016644847 | 0.372744519 | 0.343201235 |
| 0.040544525 | 0.053235725 | 0.103233949 | 0.001039981 |
| 0.006249808 | 0.028959105 | 0.249277023 | 0.111216153 |
| 0.284759551 | 0.28390968  | 0.086304769 | 0.263139123 |
| 0.220223771 | 0.334677498 | 0.026622084 | 0.036869434 |
| 0.199642636 | 0.028317471 | 0.119007082 | 0.175268824 |
| 0.118133327 | 0.042343529 | 0.038801284 | 0.405953844 |
| 0.360879875 | 0.038014771 | 0.084380095 | 0.257860595 |
| 0.063369558 | 0.124275123 | 0.03318067  | 0.052439579 |
| 0.01977981  | 0.361553714 | 0.006221386 | 0.126038072 |
| 0.093746658 | 0.014039519 | 0.004279669 | 0.109830588 |
| 0.063570482 | 0.324985349 | 0.347483183 | 0.038178452 |
| 0.082582029 | 0.215126721 | 0.124182841 | 0.26886785  |
| 0.009682571 | 0.014809985 | 0.094109114 | 0.36160203  |
| 0.179622569 | 0.354347371 | 0.063322024 | 0.074926256 |
| 0.117851627 | 0.341634887 | 0.00234213  | 0.393352782 |
| 0.395541969 | 0.099632841 | 0.164345981 | 0.174421653 |
| 0.149516752 | 0.356539739 | 0.00674124  | 0.22575464  |
| 0.20476828  | 0.030583519 | 0.373839011 | 0.057328407 |
| 0.333634983 | 0.019644505 | 0.079583274 | 0.302362129 |
| 0.220135816 | 0.002340062 | 0.123270659 | 0.270694585 |
| 0.005863314 | 0.043976754 | 0.278899475 | 0.276028529 |
| 0.243573273 | 0.302167747 | 0.355580631 | 0.138510004 |
| 0.165575515 | 0.077240906 | 0.0048927   | 0.110758821 |
| 0.283136713 | 0.054599976 | 0.383338326 | 0.066707141 |
| 0.157428498 | 0.388553876 | 0.279577277 | 0.062101295 |
| 0.027555995 | 0.130318971 | 0.010148109 | 0.169533966 |
| 0.31739235  | 0.029400192 | 0.183788127 | 0.018416613 |
| 0.016152291 | 0.400948973 | 0.033202768 | 0.05298758  |
| 0.018787737 | 0.157096907 | 0.111497073 | 0.040190495 |
| 0.027057671 | 0.045679325 | 0.102912415 | 0.119596282 |
| 0.020886823 | 0.024613102 | 0.003347819 | 0.049580064 |

|             |             |             |             |
|-------------|-------------|-------------|-------------|
| 0.016056571 | 0.052816109 | 0.057397547 | 0.226719019 |
| 0.039268837 | 0.016437094 | 0.128430038 | 0.058343465 |
| 0.030377337 | 0.006674575 | 0.397233165 | 0.243945505 |
| 0.241436501 | 0.054826411 | 0.011148822 | 0.035936872 |
| 0.344690103 | 0.184977076 | 0.085260044 | 0.35641835  |
| 0.010282844 | 0.349908579 | 0.041990416 | 0.044008736 |
| 0.06759778  | 0.102501825 | 0.375885979 | 0.031485195 |
| 0.172591626 | 0.359244337 | 0.126134835 | 0.070913361 |
| 0.295290931 | 0.245095557 | 0.014797805 | 0.275781606 |
| 0.239508461 | 0.010819424 | 0.379802614 | 0.016682158 |
| 0.007683318 | 0.233321993 | 0.279728169 | 0.034060059 |
| 0.027883628 | 0.134940127 | 0.029801526 | 0.143667272 |
| 0.404233541 | 0.255861295 | 0.296788597 | 0.046394481 |
| 0.017692302 | 0.001117473 | 0.042171499 | 0.145304662 |
| 0.380043974 | 0.35668823  | 0.095772992 | 0.10789376  |
| 0.128592552 | 0.093305098 | 0.03715074  | 0.372600069 |
| 0.030429589 | 0.383962533 | 0.003042781 | 0.276005368 |
| 0.381826168 | 0.106174993 | 0.027983461 | 0.170247828 |
| 0.293118103 | 0.028622855 | 0.048165433 | 0.38286204  |
| 0.374931523 | 0.125745254 | 0.128378905 | 0.199855293 |
| 0.013858079 | 0.01965261  | 0.212645491 | 0.030779026 |
| 0.105334944 | 0.075712754 | 0.005665461 | 0.065437262 |
| 0.015845583 | 0.3550806   | 0.290470223 | 0.037686342 |
| 0.187783726 | 0.084528946 | 0.169659699 | 0.018813289 |
| 0.322225515 | 0.359351375 | 0.398286825 | 0.043209113 |
| 0.23950937  | 0.369914346 | 0.157378252 | 0.023016667 |
| 0.006519877 | 0.383554976 | 0.273634846 | 0.010446334 |
| 0.334402819 | 0.113034352 | 0.003816457 | 0.397644305 |
| 0.092380835 | 0.327928767 | 0.018881424 | 0.013511442 |
| 0.008432201 | 0.302052833 | 0.403617545 | 0.2523024   |
| 0.086263472 | 0.187634664 | 0.000621456 | 0.371927259 |
| 0.375316611 | 0.004630116 | 0.023425624 | 0.264269299 |
| 0.243189588 | 0.409723782 | 0.103802754 | 0.314788002 |
| 0.171131608 | 0.369848353 | 0.046710109 | 0.133497446 |
| 0.3452901   | 0.349238478 | 0.311443481 | 0.39404019  |
| 0.317026152 | 0.218924984 | 0.168758999 | 0.012084769 |
| 0.090739688 | 0.087541831 | 0.094440768 | 0.03891729  |
| 0.205872526 | 0.040787686 | 0.360276165 | 0.325871177 |
| 0.332678709 | 0.002615172 | 0.047242669 | 0.280075373 |
| 0.354625662 | 0.380568079 | 0.006735682 | 0.00904463  |
| 0.002545404 | 0.007190281 | 0.188051368 | 0.084655602 |
| 0.384533359 | 0.047010627 | 0.002547341 | 0.0213081   |
| 0.071824484 | 0.183440542 | 0.37806428  | 0.246474702 |
| 0.278990587 | 0.020973469 | 0.057280635 | 0.263048441 |
| 0.022810886 | 0.208692023 | 0.354681475 | 0.388584862 |
| 0.008838347 | 0.089014394 | 0.108151528 | 0.383254244 |
| 0.009959053 | 0.123368193 | 0.180942338 | 0.061243575 |
| 0.002621088 | 0.022884199 | 0.027469792 | 0.285713602 |
| 0.358475835 | 0.012960886 | 0.00696862  | 0.027108861 |
| 0.037592939 | 0.325937126 | 0.035749415 | 0.381895694 |
| 0.339880231 | 0.3105153   | 0.011116034 | 0.412954803 |
| 0.01544169  | 0.357510843 | 0.102758707 | 0.031102395 |
| 0.05556832  | 0.004330984 | 0.310961102 | 0.060544896 |
| 0.079618666 | 0.241816743 | 0.094081482 | 0.003724603 |

|               |             |             |             |
|---------------|-------------|-------------|-------------|
| 0.038951678   | 0.013170721 | 0.360127747 | 0.314386445 |
| 0.006209824   | 0.072751318 | 0.115694516 | 0.215830409 |
| 0.15298354    | 0.287604651 | 0.394789752 | 0.170450982 |
| 0.035181951   | 0.011821399 | 0.267806916 | 0.220250699 |
| 0.046723449   | 0.347128126 | 0.06676446  | 0.39225834  |
| 0.285569518   | 0.369623377 | 0.334969527 | 0.225086016 |
| 0.025979739   | 0.208906893 | 0.258267607 | 0.012917802 |
| 0.172316515   | 0.31206865  | 0.145494996 | 0.041724463 |
| 0.089324768   | 0.137657814 | 0.016083261 | 0.025577114 |
| 0.091584605   | 0.197763654 | 0.030269418 | 0.318225211 |
| 0.200630609   | 0.239727555 | 0.010065426 | 0.028787495 |
| 0.410039466   | 0.379346589 | 0.074880732 | 0.284680926 |
| 0.052716008   | 0.181138166 | 0.285201424 | 0.258270417 |
| 0.069087364   | 0.294972972 | 0.28668608  | 0.236821324 |
| 0.345201518   | 0.140604143 | 0.410289971 | 0.031927482 |
| 0.035158925   | 0.166513436 | 0.024342063 | 0.030062838 |
| 0.052501145   | 0.010794368 | 0.049140876 | 0.238885156 |
| 0.062267471   | 0.186323424 | 0.044377911 | 0.030837549 |
| 0.109447109   | 0.112607408 | 0.160830186 | 0.083792057 |
| 0.024183788   | 0.392443538 | 0.003898091 | 0.013908854 |
| 0.059703565   | 0.332295322 | 0.131743099 | 0.067226456 |
| 0.046110939   | 0.019879903 | 0.116359618 | 0.12568513  |
| 0.082711721   | 0.050244543 | 0.343671691 | 0.025321085 |
| 0.008670947   | 0.350600373 | 0.143693267 | 0.00491298  |
| 0.017594427   | 0.217697705 | 0.040275441 | 0.072584259 |
| 0.005265368   | 0.334272479 | 0.127518324 | 0.171751139 |
| 0.188754078   | 0.017262621 | 0.282095103 | 0.025343646 |
| 0.023501321   | 0.343946836 | 0.164142493 | 0.369676887 |
| 0.096198975   | 0.279942565 | 0.362335926 | 0.267996804 |
| 0.02625431    | 0.137444809 | 0.020310908 | 0.320538239 |
| 0.099636198   |             |             |             |
| 6330403K07RIK | 0.346196641 | 0.478861242 | 0.366416234 |
| 0.398851971   | 0.418109844 | 0.293027443 | 0.303771214 |
| 0.237241723   | 0.185447549 | 0.017409032 | 0.062037433 |
| 0.368893143   | 0.238960456 | 0.280372159 | 0.29195986  |
| 1             | 0.238759659 | 0.369454637 | 0.365765182 |
| 0.406110211   | 0.159555932 | 0.426106494 | 0.219898017 |
| 0.367482319   | 0.202195963 | 0.17868518  | 0.338274154 |
| 0.455204025   | 0.198835066 | 0.250796281 | 0.342837335 |
| 0.235861664   | 0.390698396 | 0.443494387 | 0.384751147 |
| 0.426278288   | 0.302932484 | 0.035172046 | 0.279506085 |
| 0.388134144   | 0.384259133 | 0.39744551  | 0.394940281 |
| 0.127398003   | 0.399900604 | 0.33956451  | 0.414870303 |
| 0.24133174    | 0.098263455 | 0.212371942 | 0.377159127 |
| 0.385633831   | 0.340140961 | 0.287070233 | 0.261542131 |
| 0.191377082   | 0.207196855 | 0.2345167   | 0.25076329  |
| 0.33544401    | 0.154722926 | 0.408378554 | 0.174690859 |
| 0.195387931   | 0.324212336 | 0.280143478 | 0.323440522 |
| 0.350371472   | 0.314054216 | 0.078411928 | 0.309581399 |
| 0.006710322   | 0.411655668 | 0.424585963 | 0.283298289 |
| 0.138938614   | 0.060144181 | 0.312095099 | 0.368331803 |
| 0.468096676   | 0.407007649 | 0.485433078 | 0.475193139 |
| 0.258912523   | 0.415825034 | 0.364067407 | 0.294449234 |
| 0.404013729   | 0.262452501 | 0.189491958 | 0.429948103 |

|             |             |             |             |
|-------------|-------------|-------------|-------------|
| 0.48780637  | 0.45632697  | 0.33040388  | 0.390384802 |
| 0.363998289 | 0.439410105 | 0.351574756 | 0.398179486 |
| 0.30269106  | 0.152220883 | 0.379487331 | 0.483589443 |
| 0.343438326 | 0.318801927 | 0.286564111 | 0.373266361 |
| 0.17845958  | 0.302297873 | 0.411034597 | 0.210694023 |
| 0.480983865 | 0.07500324  | 0.338413507 | 0.362578715 |
| 0.361064719 | 0.384093631 | 0.452190398 | 0.315394272 |
| 0.409507682 | 0.067159688 | 0.178085626 | 0.126951017 |
| 0.328891108 | 0.183493994 | 0.379766261 | 0.443022    |
| 0.264260742 | 0.385784059 | 0.367106188 | 0.022060359 |
| 0.099197268 | 0.314149096 | 0.366900549 | 0.387109461 |
| 0.386761526 | 0.322330287 | 0.312723972 | 0.300180546 |
| 0.335231775 | 0.479816862 | 0.041600765 | 0.230181751 |
| 0.380850823 | 0.324801345 | 0.377234667 | 0.366359298 |
| 0.381309999 | 0.232775035 | 0.263114556 | 0.503032308 |
| 0.376650923 | 0.206680775 | 0.306598052 | 0.429506356 |
| 0.310375867 | 0.39427055  | 0.244208898 | 0.328940316 |
| 0.134401702 | 0.403655286 | 0.101580951 | 0.335279649 |
| 0.247915553 | 0.219112177 | 0.055762533 | 0.285520189 |
| 0.285176126 | 0.371603186 | 0.368940081 | 0.252718175 |
| 0.362564095 | 0.423966161 | 0.279753585 | 0.317404238 |
| 0.034683173 | 0.146273193 | 0.222525897 | 0.474131611 |
| 0.205851116 | 0.482039231 | 0.399500157 | 0.413803808 |
| 0.400774384 | 0.447595819 | 0.00918417  | 0.413727961 |
| 0.458644394 | 0.220300147 | 0.373595943 | 0.408625009 |
| 0.328413446 | 0.440584738 | 0.03919677  | 0.423762038 |
| 0.255905347 | 0.216316946 | 0.510453432 | 0.286989537 |
| 0.401316422 | 0.13163954  | 0.314209224 | 0.387583535 |
| 0.315795872 | 0.028879723 | 0.215349591 | 0.377434276 |
| 0.101663551 | 0.158699887 | 0.372766172 | 0.40273976  |
| 0.381574693 | 0.425441847 | 0.503891415 | 0.310598754 |
| 0.408207181 | 0.339938644 | 0.063479247 | 0.40386871  |
| 0.393758559 | 0.30054803  | 0.387934169 | 0.337662229 |
| 0.237687839 | 0.431274257 | 0.341484389 | 0.186788961 |
| 0.1363039   | 0.344027516 | 0.04975047  | 0.39617275  |
| 0.339596608 | 0.190834346 | 0.330256186 | 0.272310121 |
| 0.180185641 | 0.492177866 | 0.252523844 | 0.269588089 |
| 0.174607032 | 0.322255505 | 0.376790808 | 0.224539691 |
| 0.211151166 | 0.316942609 | 0.36568433  | 0.380843792 |
| 0.101285961 | 0.205638432 | 0.062905225 | 0.262516071 |
| 0.148426649 | 0.263059509 | 0.242942155 | 0.297967793 |
| 0.313998598 | 0.165552302 | 0.38880488  | 0.352496785 |
| 0.239434553 | 0.072583453 | 0.466355628 | 0.430048891 |
| 0.246338985 | 0.297966481 | 0.139840806 | 0.232259406 |
| 0.447726202 | 0.215496202 | 0.208592691 | 0.419972097 |
| 0.094373735 | 0.485849473 | 0.287999087 | 0.247304413 |
| 0.338828534 | 0.35589774  | 0.479203453 | 0.087611313 |
| 0.34191602  | 0.414963708 | 0.426667165 | 0.306789895 |
| 0.328745036 | 0.399857133 | 0.100297199 | 0.32271079  |
| 0.303765239 | 0.111623791 | 0.476238989 | 0.237582109 |
| 0.091502573 | 0.389392691 | 0.341185217 | 0.202444326 |
| 0.20185691  | 0.327493374 | 0.107740029 | 0.403704675 |
| 0.483840426 | 0.42253824  | 0.3490617   | 0.321070045 |
| 0.121492566 | 0.025972845 | 0.332383874 | 0.356557954 |



|             |             |             |             |
|-------------|-------------|-------------|-------------|
| 0.421430404 | 0.462759673 | 0.396593079 | 0.354975496 |
| 0.375063308 | 0.34397793  | 0.157760338 | 0.4753006   |
| 0.286340756 | 0.454475187 | 0.044488483 | 0.382360055 |
| 0.41760316  | 0.236263981 | 0.182054774 | 0.322575038 |
| 0.325820274 | 0.148885374 | 0.339718124 | 0.429162819 |
| 0.411757417 | 0.386710448 | 0.347493232 | 0.397565235 |
| 0.060436257 | 0.124802101 | 0.4033424   | 0.247274244 |
| 0.358818067 | 0.363876734 | 0.079270217 | 0.330443238 |
| 0.118121215 | 0.399713462 | 0.453563424 | 0.15952851  |
| 0.243655769 | 0.306710976 | 0.431205722 | 0.13153189  |
| 0.40914635  | 0.44147196  | 0.44590538  | 0.299595853 |
| 0.368223059 | 0.436030098 | 0.306251311 | 0.212914163 |
| 0.077896938 | 0.440487142 | 0.330591373 | 0.058116546 |
| 0.479908269 | 0.180726005 | 0.036001152 | 0.457668592 |
| 0.330211625 | 0.350179341 | 0.012249785 | 0.110926495 |
| 0.133112833 | 0.460631749 | 0.404638047 | 0.358386062 |
| 0.171735984 | 0.421101177 | 0.024187423 | 0.48478841  |
| 0.429179327 | 0.064713593 | 0.264733829 | 0.354499067 |
| 0.328322798 | 0.477571222 | 0.322330835 | 0.406458988 |
| 0.331839261 | 0.417970718 | 0.285292383 | 0.39303184  |
| 0.400209677 | 0.42254661  | 0.370542005 | 0.418396231 |
| 0.449110183 | 0.418844428 | 0.384952547 | 0.065764471 |
| 0.223037315 | 0.238002464 | 0.221931913 | 0.148909007 |
| 0.255883897 | 0.257233883 | 0.442956578 | 0.475740586 |
| 0.44631299  | 0.036072623 | 0.229935504 | 0.358456902 |
| 0.425615525 | 0.48220012  | 0.080750927 | 0.017685858 |
| 0.016192909 | 0.055732128 | 0.372441595 | 0.38139274  |
| 0.457349536 | 0.158887926 | 0.032920611 | 0.109623066 |
| 0.356944829 | 0.380401119 | 0.442660772 | 0.42874867  |
| 0.394890915 | 0.214673254 | 0.228932667 | 0.423782522 |
| 0.166345281 | 0.227562258 | 0.459490222 | 0.417341689 |
| 0.142335111 | 0.389871674 | 0.346998191 | 0.489757288 |
| 0.087627614 | 0.419848834 | 0.365294063 | 0.331372892 |
| 0.057325465 | 0.203328728 | 0.180455779 | 0.44013939  |
| 0.408001919 | 0.135709777 | 0.085950457 | 0.118136915 |
| 0.204344898 | 0.45923199  | 0.265632002 | 0.506835514 |
| 0.418626164 | 0.461952728 | 0.183683814 | 0.426086394 |
| 0.11553258  | 0.407256977 | 0.361940843 | 0.064296615 |
| 0.391322556 | 0.068182575 | 0.407168835 | 0.163401281 |
| 0.29271853  | 0.348785984 | 0.273926183 | 0.075616424 |
| 0.22114806  | 0.15424355  | 0.480998957 | 0.452854056 |
| 0.116830925 | 0.365242356 | 0.417957297 | 0.415718611 |
| 0.280483238 | 0.395185774 | 0.425102831 | 0.275714276 |
| 0.184812682 | 0.186971497 | 0.383952831 | 0.302313815 |
| 0.272244217 | 0.496631527 | 0.324700553 | 0.490893948 |
| 0.332975497 | 0.439902846 | 0.427822015 | 0.385442754 |
| 0.29638639  | 0.327769877 | 0.304409869 | 0.052189135 |
| 0.419482853 | 0.446804449 | 0.370443043 | 0.238610637 |
| 0.348348244 | 0.332679218 | 0.151293968 | 0.171704818 |
| 0.284075358 | 0.251872448 | 0.24926242  | 0.470487975 |
| 0.343818683 | 0.302143326 | 0.115123907 | 0.168291503 |
| 0.491748092 | 0.399985551 | 0.218365121 | 0.362639289 |
| 0.330266985 | 0.407432352 | 0.406693494 | 0.40540081  |
| 0.353845489 | 0.392924092 | 0.385775924 | 0.296348054 |

|               |             |             |             |
|---------------|-------------|-------------|-------------|
| 0.37281706    | 0.383320836 | 0.453386993 | 0.122018538 |
| 0.172747618   | 0.323368126 | 0.176765565 | 0.227314358 |
| 0.27699929    | 0.107173654 | 0.259553954 | 0.424750556 |
| 0.293479895   | 0.407800887 | 0.273231768 | 0.198979291 |
| 0.421055958   | 0.320816253 | 0.435736349 | 0.261817357 |
| 0.165876392   | 0.423550304 | 0.040449819 | 0.168444141 |
| 0.312141617   | 0.38266011  | 0.341691261 | 0.377234122 |
| 0.309255754   | 0.27253707  | 0.401348166 | 0.251508997 |
| 0.222254672   | 0.317724833 | 0.379400336 | 0.099765156 |
| 0.074092821   | 0.500742705 | 0.314422918 | 0.08648789  |
| 0.192573583   | 0.30139599  | 0.368309576 | 0.310196892 |
| 0.087495765   | 0.42192768  | 0.256317727 | 0.404084595 |
| 0.374435172   | 0.192100116 | 0.297990023 | 0.167396351 |
| 0.17732186    | 0.386828182 | 0.369197061 | 0.440353623 |
| 0.393232001   | 0.418760305 | 0.364729083 | 0.370847556 |
| 0.214474755   | 0.30821278  | 0.102019312 | 0.436748187 |
| 0.290004234   |             |             |             |
| 6330442E10RIK | 0.112802147 | 0.15370001  | 0.085222188 |
| 0.199872084   | 0.159671169 | 0.063619826 | 0.115146784 |
| 0.024643711   | 0.050159862 | 0.041702817 | 0.109939235 |
| 0.146623502   | 0.107326883 | 0.070902892 | 0.018991047 |
| 0.238759659   | 1           | 0.049260311 | 0.202960977 |
| 0.173602858   | 0.042383587 | 0.291555658 | 0.09133857  |
| 0.074255654   | 0.179994519 | 0.173218205 | 0.112211906 |
| 0.202012689   | 0.182154125 | 0.047727033 | 0.122178536 |
| 0.150348279   | 0.141178656 | 0.119755868 | 0.234480421 |
| 0.120021016   | 0.081844084 | 0.042399743 | 0.034694703 |
| 0.112094753   | 0.1662171   | 0.169934038 | 0.224174576 |
| 0.092091311   | 0.098263907 | 0.174650511 | 0.178139118 |
| 0.017893148   | 0.159320239 | 0.019119419 | 0.087904888 |
| 0.106878891   | 0.106099602 | 0.039238191 | 0.090905195 |
| 0.074438611   | 0.025722181 | 0.067363384 | 0.06006633  |
| 0.175847789   | 0.018595188 | 0.118435584 | 0.038925651 |
| 0.025905796   | 0.055894354 | 0.167235565 | 0.085828981 |
| 0.068878404   | 0.081701926 | 0.052008102 | 0.095359073 |
| 0.015851309   | 0.174253757 | 0.205005219 | 0.048364792 |
| 0.230262002   | 0.161477638 | 0.201071799 | 0.164961816 |
| 0.196065907   | 0.109693919 | 0.231861961 | 0.200738208 |
| 0.181382535   | 0.185308022 | 0.127432492 | 0.179490428 |
| 0.123913365   | 0.125639549 | 0.061204402 | 0.280314427 |
| 0.221348077   | 0.14422829  | 0.125502602 | 0.234557015 |
| 0.131990779   | 0.133061285 | 0.073162565 | 0.115815613 |
| 0.043351935   | 0.113239157 | 0.105491329 | 0.192310545 |
| 0.091098558   | 0.123604732 | 0.271412098 | 0.139910014 |
| 0.170249182   | 0.022898831 | 0.248319255 | 0.121784968 |
| 0.201707745   | 0.042190361 | 0.267299604 | 0.138851834 |
| 0.071381248   | 0.134368078 | 0.145247364 | 0.170161873 |
| 0.146318067   | 0.132898645 | 0.060910359 | 0.126905932 |
| 0.056805385   | 0.073213377 | 0.088397599 | 0.199196607 |
| 0.039998983   | 0.064139019 | 0.093981196 | 0.061368697 |
| 0.171477714   | 0.084070168 | 0.14267521  | 0.087137965 |
| 0.148879208   | 0.081660121 | 0.130067398 | 0.078831064 |
| 0.128954937   | 0.22915501  | 0.00248536  | 0.075081439 |
| 0.112418234   | 0.093853619 | 0.280614515 | 0.131369838 |

|             |             |             |             |
|-------------|-------------|-------------|-------------|
| 0.211800088 | 0.058695491 | 0.180992973 | 0.190193292 |
| 0.093753868 | 0.188784242 | 0.034559105 | 0.257133888 |
| 0.043398954 | 0.24034578  | 0.143374164 | 0.135873198 |
| 0.08393115  | 0.112596586 | 0.185651172 | 0.052748743 |
| 0.025863347 | 0.19333554  | 0.035847869 | 0.056855551 |
| 0.04540137  | 0.139046462 | 0.085008493 | 0.174120741 |
| 0.162191915 | 0.236997618 | 0.043833353 | 0.141700091 |
| 0.06514006  | 0.101715365 | 0.021539572 | 0.187467461 |
| 0.043534222 | 0.184808638 | 0.093625066 | 0.09562694  |
| 0.269149969 | 0.195121319 | 0.002819692 | 0.106095685 |
| 0.141529709 | 0.022246915 | 0.213849513 | 0.166235199 |
| 0.068670569 | 0.19606193  | 0.004099216 | 0.259494023 |
| 0.063684637 | 0.138542646 | 0.224971308 | 0.297472695 |
| 0.11483434  | 0.190336319 | 0.053411369 | 0.155220769 |
| 0.136737315 | 0.037252377 | 0.033670737 | 0.148333286 |
| 0.131334107 | 0.024962336 | 0.131822836 | 0.175431503 |
| 0.135209949 | 0.186975477 | 0.242550711 | 0.063008061 |
| 0.148261937 | 0.092616688 | 0.076206578 | 0.211175293 |
| 0.147180372 | 0.027329576 | 0.100367221 | 0.057863116 |
| 0.041512825 | 0.132009673 | 0.106808312 | 0.01431071  |
| 0.12121032  | 0.079578644 | 0.038789653 | 0.145959492 |
| 0.084564016 | 0.108889985 | 0.060744999 | 0.108581095 |
| 0.222238262 | 0.179526043 | 0.116706629 | 0.079616002 |
| 0.068226484 | 0.138094223 | 0.131840275 | 0.081300197 |
| 0.127151611 | 0.111827792 | 0.066693236 | 0.063872975 |
| 0.048697588 | 0.227952252 | 0.055170952 | 0.064362175 |
| 0.144257646 | 0.0863342   | 0.072255125 | 0.092826175 |
| 0.06034152  | 0.170767288 | 0.176005624 | 0.052829735 |
| 0.133822578 | 0.170523241 | 0.150675601 | 0.207848801 |
| 0.05696702  | 0.081318433 | 0.172300919 | 0.035147699 |
| 0.193120473 | 0.036412971 | 0.013309167 | 0.149010176 |
| 0.058875273 | 0.203176044 | 0.111692513 | 0.276761868 |
| 0.135007348 | 0.246657749 | 0.205173082 | 0.014004235 |
| 0.078148198 | 0.126925664 | 0.177820259 | 0.17115496  |
| 0.095041198 | 0.151313554 | 0.083554293 | 0.090284345 |
| 0.095122134 | 0.197975779 | 0.166901013 | 0.198084258 |
| 0.178519124 | 0.196868198 | 0.144139124 | 0.242756686 |
| 0.176785503 | 0.124474716 | 0.0261628   | 0.305208887 |
| 0.172761343 | 0.291964636 | 0.129981217 | 0.099484151 |
| 0.134433535 | 0.153966279 | 0.179895589 | 0.100742244 |
| 0.111611722 | 0.170444181 | 0.24949096  | 0.186964962 |
| 0.235038208 | 0.058778181 | 0.010727978 | 0.185591702 |
| 0.046171114 | 0.131075679 | 0.085972307 | 0.168745166 |
| 0.112831856 | 0.038569215 | 0.208493366 | 0.08498118  |
| 0.097432534 | 0.093057755 | 0.074860173 | 0.127853127 |
| 0.126170454 | 0.076757619 | 0.05560617  | 0.171211124 |
| 0.040483819 | 0.059662789 | 0.137555    | 0.066674566 |
| 0.05582004  | 0.106682432 | 0.048184005 | 0.026210646 |
| 0.13732019  | 0.123323986 | 0.22429571  | 0.086522715 |
| 0.059225757 | 0.021997615 | 0.265996557 | 0.137316979 |
| 0.16086206  | 0.136693708 | 0.126586606 | 0.071981049 |
| 0.153735768 | 0.154223015 | 0.117683416 | 0.186826919 |
| 0.174506846 | 0.12952741  | 0.08831559  | 0.073496032 |
| 0.221755126 | 0.022015521 | 0.130286046 | 0.140859756 |

|             |             |             |             |
|-------------|-------------|-------------|-------------|
| 0.160687334 | 0.079460784 | 0.002293739 | 0.014654642 |
| 0.112100476 | 0.228507919 | 0.103630885 | 0.117838744 |
| 0.0163967   | 0.156521063 | 0.016983546 | 0.172834327 |
| 0.136677717 | 0.128744255 | 0.134633689 | 0.141024924 |
| 0.148593229 | 0.142689629 | 0.101779224 | 0.175895565 |
| 0.146007506 | 0.121790495 | 0.073624573 | 0.268189263 |
| 0.152235962 | 0.134861024 | 0.128486152 | 0.112858011 |
| 0.212885695 | 0.230663432 | 0.219903866 | 0.064872508 |
| 0.034236661 | 0.034388319 | 0.021264045 | 0.063723419 |
| 0.04712298  | 0.127719638 | 0.143200135 | 0.221652887 |
| 0.187795715 | 0.103564708 | 0.040793239 | 0.124572655 |
| 0.149849664 | 0.184988822 | 0.042378526 | 0.006852247 |
| 0.005673803 | 0.118246771 | 0.108498021 | 0.19101735  |
| 0.156453981 | 0.017055088 | 0.077777312 | 0.03657709  |
| 0.059060123 | 0.201849774 | 0.140554348 | 0.250125773 |
| 0.159118602 | 0.173574454 | 0.039385795 | 0.213051117 |
| 0.136286717 | 0.045350381 | 0.19353148  | 0.117182207 |
| 0.116194721 | 0.155038415 | 0.065761286 | 0.199675072 |
| 0.038039201 | 0.276382362 | 0.158230658 | 0.067095705 |
| 0.049873499 | 0.157478409 | 0.112649365 | 0.219943685 |
| 0.113665271 | 0.194255475 | 0.197352916 | 0.009900735 |
| 0.121761311 | 0.184420637 | 0.144397439 | 0.207739141 |
| 0.162467104 | 0.257677654 | 0.159401416 | 0.113840472 |
| 0.108198034 | 0.11868153  | 0.183853569 | 0.007762311 |
| 0.099359272 | 0.090535483 | 0.132081485 | 0.039820942 |
| 0.047422398 | 0.105001432 | 0.034267108 | 0.123203855 |
| 0.039112248 | 0.205221476 | 0.22264335  | 0.216705691 |
| 0.116783656 | 0.059041985 | 0.193787367 | 0.16295626  |
| 0.062824384 | 0.22185503  | 0.113890556 | 0.053520467 |
| 0.067163798 | 0.064898099 | 0.159349246 | 0.085410903 |
| 0.03992377  | 0.231191353 | 0.066857032 | 0.169263721 |
| 0.096819477 | 0.131374701 | 0.150092808 | 0.122006173 |
| 0.119644618 | 0.07361892  | 0.11410356  | 0.059463745 |
| 0.165248162 | 0.228557608 | 0.071365487 | 0.127432562 |
| 0.234240732 | 0.107518583 | 0.054818204 | 0.01436715  |
| 0.091679266 | 0.056318624 | 0.127040252 | 0.23949622  |
| 0.095203243 | 0.088383288 | 0.053922223 | 0.109626493 |
| 0.156664885 | 0.101774904 | 0.028095436 | 0.136785638 |
| 0.202523891 | 0.178536257 | 0.175276842 | 0.200762166 |
| 0.029214806 | 0.162112036 | 0.148540737 | 0.119660401 |
| 0.105780959 | 0.146335143 | 0.129153348 | 0.010994949 |
| 0.073382169 | 0.100770773 | 0.14759892  | 0.242104572 |
| 0.232310213 | 0.111173764 | 0.040180196 | 0.237248763 |
| 0.053928216 | 0.264988034 | 0.020738339 | 0.092586866 |
| 0.221894684 | 0.046426561 | 0.221888798 | 0.086321511 |
| 0.139605931 | 0.121449417 | 0.062469485 | 0.196364912 |
| 0.080541403 | 0.138709514 | 0.144390095 | 0.155531934 |
| 0.063248932 | 0.120982913 | 0.252726465 | 0.041707509 |
| 0.058308483 | 0.031948552 | 0.132432709 | 0.033412076 |
| 0.070382339 | 0.228324196 | 0.049832742 | 0.085687754 |
| 0.071114858 | 0.063245981 | 0.058503199 | 0.062438529 |
| 0.12934915  | 0.149291808 | 0.036726088 | 0.137175875 |
| 0.105290867 | 0.132893347 | 0.064977265 | 0.032239948 |
| 0.058875368 | 0.103474782 | 0.119221676 | 0.136306359 |

|             |             |             |             |
|-------------|-------------|-------------|-------------|
| 0.111026172 | 0.270858889 | 0.079469375 | 0.140402222 |
| 0.046247621 | 0.064028641 | 0.063347799 | 0.16881312  |
| 0.049133718 |             |             |             |
| ABHD5       | 0.385510734 | 0.402450498 | 0.209358238 |
| 0.31505347  | 0.209080354 | 0.204676179 | 0.102996235 |
| 0.127430978 | 0.041466345 | 0.001727934 | 0.004625364 |
| 0.26591263  | 0.041371676 | 0.081607854 | 0.094467718 |
| 0.369454637 | 0.049260311 | 1           | 0.151953991 |
| 0.349504146 | 0.049317402 | 0.280835504 | 0.061613561 |
| 0.118367038 | 0.035337108 | 0.031162033 | 0.07476437  |
| 0.410889027 | 0.039192867 | 0.117933272 | 0.330305633 |
| 0.094367756 | 0.394259486 | 0.393040609 | 0.232993662 |
| 0.371287761 | 0.349339148 | 0.031478414 | 0.071791831 |
| 0.426935881 | 0.303145441 | 0.340359582 | 0.194058796 |
| 0.026383654 | 0.37721991  | 0.127000685 | 0.262915495 |
| 0.113047777 | 0.012708734 | 0.093669486 | 0.373998361 |
| 0.314200119 | 0.178779701 | 0.121065945 | 0.065271984 |
| 0.026869269 | 0.086519806 | 0.044347829 | 0.259008312 |
| 0.107771648 | 0.065542241 | 0.337605825 | 0.039065279 |
| 0.058186336 | 0.157868555 | 0.091171124 | 0.140606105 |
| 0.101948374 | 0.345669895 | 0.040738139 | 0.251627903 |
| 0.001088262 | 0.34928579  | 0.272125532 | 0.067573749 |
| 0.032855967 | 0.006271095 | 0.101474808 | 0.195716886 |
| 0.424990551 | 0.424608205 | 0.378754084 | 0.373537109 |
| 0.058077009 | 0.192151828 | 0.178332029 | 0.066377999 |
| 0.392018781 | 0.06175738  | 0.077444845 | 0.342902697 |
| 0.381787782 | 0.375289481 | 0.078936909 | 0.166286911 |
| 0.267380288 | 0.40187968  | 0.158999845 | 0.14610882  |
| 0.067221051 | 0.055218587 | 0.31925276  | 0.387023791 |
| 0.368325853 | 0.108295926 | 0.072461542 | 0.362553763 |
| 0.052190165 | 0.139063454 | 0.242304009 | 0.094681084 |
| 0.427415919 | 0.016288515 | 0.104593324 | 0.171286909 |
| 0.194385192 | 0.375217928 | 0.371844088 | 0.1047723   |
| 0.217538222 | 0.016667193 | 0.029962679 | 0.048714335 |
| 0.107510976 | 0.05088869  | 0.343594397 | 0.34326701  |
| 0.113094173 | 0.099777851 | 0.132104181 | 0.00661216  |
| 0.02274104  | 0.161408004 | 0.330176813 | 0.254919506 |
| 0.392243406 | 0.345977195 | 0.05762504  | 0.312708125 |
| 0.228453692 | 0.374733062 | 0.015619106 | 0.079647114 |
| 0.205955003 | 0.151830631 | 0.167631673 | 0.218033085 |
| 0.11388655  | 0.095244645 | 0.072657926 | 0.414580374 |
| 0.373642729 | 0.051229324 | 0.181566105 | 0.342946816 |
| 0.067515134 | 0.171131194 | 0.078289898 | 0.086913865 |
| 0.03197215  | 0.344389784 | 0.026242282 | 0.222691663 |
| 0.051633541 | 0.047186288 | 0.050642172 | 0.152869356 |
| 0.081993825 | 0.265331035 | 0.350179937 | 0.088460986 |
| 0.111136804 | 0.250273708 | 0.194703205 | 0.217529534 |
| 0.002009277 | 0.062924812 | 0.164038246 | 0.376249995 |
| 0.188479384 | 0.427485352 | 0.145503757 | 0.144846237 |
| 0.167192357 | 0.39678685  | 0.01138379  | 0.37105833  |
| 0.380501139 | 0.142268786 | 0.164872143 | 0.298125486 |
| 0.106099729 | 0.347670714 | 0.033453443 | 0.333066559 |
| 0.311092289 | 0.078225514 | 0.417519104 | 0.069569095 |
| 0.379884704 | 0.022725084 | 0.111764592 | 0.307913821 |

|             |             |             |             |
|-------------|-------------|-------------|-------------|
| 0.239383403 | 0.008243762 | 0.099210923 | 0.299947288 |
| 0.031010657 | 0.051122806 | 0.39321364  | 0.290878888 |
| 0.181585362 | 0.394952497 | 0.419695628 | 0.087471822 |
| 0.183799675 | 0.143225634 | 0.025901481 | 0.186272175 |
| 0.391095467 | 0.085569681 | 0.359692288 | 0.110795158 |
| 0.231450017 | 0.369701742 | 0.310675806 | 0.045313338 |
| 0.028966607 | 0.169999313 | 0.014401774 | 0.136650159 |
| 0.346704291 | 0.033280064 | 0.142093825 | 0.151960951 |
| 0.04192569  | 0.393544326 | 0.070429936 | 0.080281653 |
| 0.047530688 | 0.153115771 | 0.176388581 | 0.040394331 |
| 0.031548881 | 0.078332126 | 0.092293202 | 0.102541262 |
| 0.026381838 | 0.04079293  | 0.043913831 | 0.064892419 |
| 0.019806711 | 0.055881731 | 0.054386403 | 0.2850565   |
| 0.098350668 | 0.03080978  | 0.130564312 | 0.125939096 |
| 0.06207693  | 0.016897522 | 0.395376478 | 0.352107507 |
| 0.282554189 | 0.088321573 | 0.044035674 | 0.05641395  |
| 0.342634194 | 0.118771203 | 0.118510671 | 0.335075574 |
| 0.051789845 | 0.414042378 | 0.053639117 | 0.051813234 |
| 0.081156462 | 0.118577299 | 0.41238962  | 0.022651867 |
| 0.279877417 | 0.355070959 | 0.239977838 | 0.062712556 |
| 0.294823545 | 0.293951515 | 0.023209654 | 0.343365482 |
| 0.309836804 | 0.022873699 | 0.393580635 | 0.061868285 |
| 0.024933442 | 0.314300674 | 0.238534179 | 0.053359328 |
| 0.053630211 | 0.09167243  | 0.038232586 | 0.188461509 |
| 0.388944428 | 0.299560247 | 0.25519623  | 0.116199429 |
| 0.020745376 | 0.001810778 | 0.108830385 | 0.2428111   |
| 0.380161814 | 0.376942719 | 0.190279639 | 0.10233667  |
| 0.171486646 | 0.074421762 | 0.085728683 | 0.371691943 |
| 0.208830141 | 0.418202589 | 0.013566545 | 0.298222248 |
| 0.355742697 | 0.140892755 | 0.031232429 | 0.149630157 |
| 0.30229212  | 0.036825664 | 0.176453523 | 0.366414153 |
| 0.364776573 | 0.101921463 | 0.084946019 | 0.35014449  |
| 0.015171687 | 0.035399605 | 0.222038439 | 0.074648339 |
| 0.092632048 | 0.101742688 | 0.023817408 | 0.14313511  |
| 0.01831458  | 0.32687271  | 0.409134727 | 0.027784181 |
| 0.118868458 | 0.154321031 | 0.272151252 | 0.032875642 |
| 0.316770547 | 0.396889448 | 0.388283786 | 0.140783262 |
| 0.332985154 | 0.334987645 | 0.152431844 | 0.072262428 |
| 0.019414046 | 0.379799131 | 0.352104915 | 0.010440601 |
| 0.401224552 | 0.11763414  | 0.002531247 | 0.404884549 |
| 0.127746598 | 0.34737087  | 0.005239901 | 0.101497172 |
| 0.054205702 | 0.395525385 | 0.347629786 | 0.335933586 |
| 0.052773211 | 0.333921969 | 0.020569685 | 0.416826657 |
| 0.351292971 | 0.013068456 | 0.070929963 | 0.274951244 |
| 0.242268637 | 0.431715796 | 0.089203992 | 0.298187195 |
| 0.185786274 | 0.342284842 | 0.06786439  | 0.156424321 |
| 0.319042779 | 0.347515123 | 0.376872049 | 0.404158147 |
| 0.362280659 | 0.319578944 | 0.177371258 | 0.010915646 |
| 0.057192304 | 0.1027833   | 0.049210886 | 0.020159815 |
| 0.251709099 | 0.051819317 | 0.416524398 | 0.398858627 |
| 0.347569566 | 0.009894147 | 0.090562942 | 0.306972568 |
| 0.388719461 | 0.434539757 | 0.067614704 | 0.009875905 |
| 0.017617125 | 0.00536546  | 0.25343791  | 0.148441859 |
| 0.384761998 | 0.042651566 | 0.007518593 | 0.044941565 |

|             |             |             |             |
|-------------|-------------|-------------|-------------|
| 0.126099032 | 0.210194852 | 0.363096431 | 0.330928911 |
| 0.36749471  | 0.06430165  | 0.044264859 | 0.378912873 |
| 0.028472526 | 0.298638653 | 0.351681706 | 0.359615509 |
| 0.062783462 | 0.136896318 | 0.238597589 | 0.403555886 |
| 0.019455099 | 0.205551856 | 0.280496586 | 0.070249684 |
| 0.045498789 | 0.051469797 | 0.037223311 | 0.403581692 |
| 0.34650643  | 0.016782132 | 0.009739701 | 0.054516539 |
| 0.036137056 | 0.409883864 | 0.057471804 | 0.415430643 |
| 0.363784052 | 0.381449152 | 0.049846211 | 0.375709818 |
| 0.015264114 | 0.344829829 | 0.123070948 | 0.023059332 |
| 0.189500118 | 0.027820521 | 0.367025009 | 0.020535716 |
| 0.112147558 | 0.373953084 | 0.072899151 | 0.021401378 |
| 0.077696612 | 0.0364963   | 0.368734225 | 0.365098402 |
| 0.049319456 | 0.142666082 | 0.206029337 | 0.371694474 |
| 0.168708495 | 0.290459179 | 0.37463961  | 0.137470198 |
| 0.043509793 | 0.093733307 | 0.373664522 | 0.318131052 |
| 0.115396348 | 0.402967507 | 0.060127006 | 0.423496362 |
| 0.364096139 | 0.436081604 | 0.355332001 | 0.193878619 |
| 0.068178894 | 0.262641447 | 0.20907973  | 0.009560674 |
| 0.246469707 | 0.336046956 | 0.260951429 | 0.040173062 |
| 0.083351447 | 0.170936983 | 0.08422052  | 0.1533676   |
| 0.114930378 | 0.181077347 | 0.053937002 | 0.420704685 |
| 0.346864554 | 0.321779469 | 0.072920965 | 0.032047445 |
| 0.425432463 | 0.399410137 | 0.084510677 | 0.27490108  |
| 0.119987791 | 0.16209815  | 0.367613646 | 0.342053527 |
| 0.130968462 | 0.300704269 | 0.36803538  | 0.217617457 |
| 0.328403914 | 0.16155818  | 0.389220426 | 0.086982345 |
| 0.036894302 | 0.276700058 | 0.0251603   | 0.066195862 |
| 0.068297562 | 0.029755257 | 0.067163035 | 0.360949584 |
| 0.082809263 | 0.222774576 | 0.125772174 | 0.065659747 |
| 0.197325046 | 0.232206425 | 0.23390728  | 0.071429014 |
| 0.028976923 | 0.346858015 | 0.011214232 | 0.048629884 |
| 0.092466687 | 0.309167477 | 0.117636929 | 0.118812746 |
| 0.0748127   | 0.101666665 | 0.152449022 | 0.14890838  |
| 0.05524487  | 0.133072    | 0.305010088 | 0.04366301  |
| 0.021079894 | 0.417775225 | 0.214295365 | 0.046474042 |
| 0.067157874 | 0.306808814 | 0.205056615 | 0.059694871 |
| 0.026584844 | 0.327809592 | 0.082672023 | 0.219656514 |
| 0.229239872 | 0.070038816 | 0.346203455 | 0.085831292 |
| 0.098829957 | 0.37903683  | 0.217343803 | 0.367574396 |
| 0.203487227 | 0.312443544 | 0.370204489 | 0.316239358 |
| 0.155647201 | 0.224182039 | 0.025186783 | 0.419322516 |
| 0.08178934  |             |             |             |
| ACPL2       | 0.208633929 | 0.284164827 | 0.127671477 |
| 0.3541312   | 0.201821769 | 0.17123974  | 0.271965346 |
| 0.198194255 | 0.179983028 | 0.067159042 | 0.080951579 |
| 0.184333119 | 0.156193556 | 0.201681932 | 0.116025732 |
| 0.365765182 | 0.202960977 | 0.151953991 | 1           |
| 0.324247959 | 0.22707292  | 0.348580843 | 0.30158174  |
| 0.137723015 | 0.158127318 | 0.222460768 | 0.146407315 |
| 0.371012861 | 0.23537559  | 0.12421339  | 0.292638883 |
| 0.198753744 | 0.262304875 | 0.234525172 | 0.245676927 |
| 0.214766219 | 0.169845085 | 0.052739412 | 0.149016533 |
| 0.25248754  | 0.259415888 | 0.333642129 | 0.320036967 |

|             |             |             |             |
|-------------|-------------|-------------|-------------|
| 0.230125762 | 0.215621345 | 0.286138461 | 0.210260303 |
| 0.136523706 | 0.15708192  | 0.122602437 | 0.213956964 |
| 0.200051012 | 0.166005747 | 0.221161253 | 0.26704052  |
| 0.098030619 | 0.126262463 | 0.07191404  | 0.188022904 |
| 0.286190904 | 0.125626893 | 0.214815083 | 0.199706384 |
| 0.125576013 | 0.22823903  | 0.187726517 | 0.240507663 |
| 0.1068653   | 0.223048007 | 0.17847805  | 0.129539485 |
| 0.026563596 | 0.343591378 | 0.22811963  | 0.076131202 |
| 0.206982039 | 0.137472393 | 0.206867191 | 0.301373286 |
| 0.350254    | 0.219075146 | 0.323843709 | 0.289479007 |
| 0.198776022 | 0.221782348 | 0.126834206 | 0.281313631 |
| 0.255464333 | 0.25741313  | 0.189957831 | 0.359127627 |
| 0.316250186 | 0.248837447 | 0.219386313 | 0.211693336 |
| 0.249676653 | 0.27299607  | 0.133256685 | 0.157564656 |
| 0.09936065  | 0.118242819 | 0.215496357 | 0.29407506  |
| 0.217837255 | 0.097479651 | 0.230537279 | 0.301251717 |
| 0.243320117 | 0.116967439 | 0.359683287 | 0.139343297 |
| 0.360067002 | 0.160195135 | 0.200975851 | 0.245251374 |
| 0.2311118   | 0.254588309 | 0.239553212 | 0.302940002 |
| 0.166640392 | 0.135745015 | 0.072870622 | 0.17751145  |
| 0.166817925 | 0.060120832 | 0.186394107 | 0.327027228 |
| 0.191227955 | 0.152104085 | 0.268575067 | 0.059289276 |
| 0.150729706 | 0.167248887 | 0.216397957 | 0.166819614 |
| 0.281622815 | 0.157247201 | 0.201062936 | 0.190401287 |
| 0.169364876 | 0.317734157 | 0.0245551   | 0.297672905 |
| 0.198241008 | 0.179359213 | 0.321623338 | 0.183165012 |
| 0.198783076 | 0.291963786 | 0.305657195 | 0.3187296   |
| 0.23747047  | 0.290412684 | 0.12398473  | 0.352076893 |
| 0.145711123 | 0.193792217 | 0.305942131 | 0.234996735 |
| 0.246203722 | 0.200042387 | 0.12695533  | 0.162913256 |
| 0.078474411 | 0.136712004 | 0.105893235 | 0.192269475 |
| 0.172836097 | 0.227498511 | 0.174321558 | 0.290773325 |
| 0.231064586 | 0.284837217 | 0.133524547 | 0.219006904 |
| 0.072971344 | 0.22148073  | 0.089129317 | 0.295153873 |
| 0.145070439 | 0.287866173 | 0.251342974 | 0.198940876 |
| 0.253043937 | 0.33236866  | 0.006343631 | 0.219989922 |
| 0.244511224 | 0.084721572 | 0.231276175 | 0.216185501 |
| 0.096661076 | 0.334730137 | 0.017690253 | 0.340800616 |
| 0.15832943  | 0.279062221 | 0.344259861 | 0.244346634 |
| 0.219721494 | 0.200299979 | 0.172402266 | 0.212688371 |
| 0.171628046 | 0.052674508 | 0.145065939 | 0.321747338 |
| 0.113619406 | 0.199425081 | 0.263695252 | 0.31353322  |
| 0.231513431 | 0.291395195 | 0.369376271 | 0.089518727 |
| 0.193699779 | 0.273736418 | 0.122825299 | 0.189661446 |
| 0.243151782 | 0.087060328 | 0.234752883 | 0.274640604 |
| 0.11599423  | 0.263599208 | 0.182306639 | 0.072503162 |
| 0.23712109  | 0.204532857 | 0.113854648 | 0.194432899 |
| 0.178201273 | 0.235661276 | 0.10604413  | 0.179276868 |
| 0.191210671 | 0.29808714  | 0.100464598 | 0.075911735 |
| 0.058840699 | 0.183677488 | 0.285039007 | 0.153901774 |
| 0.125354806 | 0.264715948 | 0.132141827 | 0.15147792  |
| 0.210121198 | 0.254799088 | 0.058933905 | 0.079365492 |
| 0.125149175 | 0.110066037 | 0.097880986 | 0.187818654 |
| 0.167958092 | 0.196837196 | 0.17954842  | 0.124837639 |



|             |             |             |             |
|-------------|-------------|-------------|-------------|
| 0.186987114 | 0.144839346 | 0.277967024 | 0.330470423 |
| 0.167394658 | 0.301223379 | 0.202934422 | 0.073468338 |
| 0.314748264 | 0.10587895  | 0.084319876 | 0.281639165 |
| 0.146976919 | 0.314712342 | 0.195865804 | 0.232962244 |
| 0.125019675 | 0.268063346 | 0.367132278 | 0.07418839  |
| 0.17908937  | 0.254223191 | 0.233070753 | 0.22231029  |
| 0.201323586 | 0.28665388  | 0.213236042 | 0.195337835 |
| 0.188630421 | 0.200736506 | 0.271539898 | 0.182745029 |
| 0.15425176  | 0.243035418 | 0.204047437 | 0.22788671  |
| 0.202980254 | 0.176473694 | 0.196716192 | 0.294364217 |
| 0.296771866 | 0.360707072 | 0.224087152 | 0.132735744 |
| 0.222914429 | 0.068168367 | 0.16990619  | 0.134824894 |
| 0.220281402 | 0.256683306 | 0.269893863 | 0.148330958 |
| 0.328088029 | 0.129111374 | 0.112046169 | 0.287941159 |
| 0.118209714 | 0.246150971 | 0.10943277  | 0.22281227  |
| 0.208711787 | 0.117338333 | 0.178505413 | 0.215277715 |
| 0.216567758 | 0.243043324 | 0.263918879 | 0.239588359 |
| 0.265351761 | 0.179158911 | 0.137464    | 0.246966733 |
| 0.164338678 | 0.231027189 | 0.196761854 | 0.084400031 |
| 0.142854378 | 0.256056107 | 0.024982983 | 0.163092695 |
| 0.207377939 | 0.245192431 | 0.326453679 | 0.173448805 |
| 0.133445675 | 0.14601261  | 0.278927368 | 0.229209766 |
| 0.222420144 | 0.230351378 | 0.24133095  | 0.286512099 |
| 0.224347447 | 0.243614657 | 0.117693685 | 0.212438047 |
| 0.120594645 | 0.226858139 | 0.222115874 | 0.11155972  |
| 0.346292599 | 0.094919515 | 0.09687434  | 0.282551855 |
| 0.308484045 | 0.175019588 | 0.030354198 | 0.033238014 |
| 0.11750029  | 0.310124871 | 0.216520788 | 0.287881203 |
| 0.080274624 | 0.286622531 | 0.015897326 | 0.274552181 |
| 0.250152226 | 0.098372269 | 0.153014349 | 0.205365181 |
| 0.177891846 | 0.279521019 | 0.102931595 | 0.236710349 |
| 0.153175888 | 0.214518991 | 0.227202423 | 0.275068569 |
| 0.277515829 | 0.211183817 | 0.279550226 | 0.254139484 |
| 0.330074294 | 0.27734165  | 0.332188734 | 0.158026202 |
| 0.096766366 | 0.174966977 | 0.075700047 | 0.116070967 |
| 0.161860487 | 0.197490534 | 0.260908581 | 0.3331182   |
| 0.264631947 | 0.0867563   | 0.238772978 | 0.21402667  |
| 0.314680659 | 0.34871124  | 0.091924703 | 0.018530187 |
| 0.011446043 | 0.063255972 | 0.253466407 | 0.213381156 |
| 0.271151395 | 0.0728247   | 0.097951402 | 0.210843559 |
| 0.227219063 | 0.195503876 | 0.250099893 | 0.387019566 |
| 0.238124486 | 0.254879212 | 0.116043924 | 0.368261921 |
| 0.147618288 | 0.133123347 | 0.284988609 | 0.250084757 |
| 0.163176549 | 0.211522207 | 0.134091314 | 0.347242648 |
| 0.022104494 | 0.268232555 | 0.197596541 | 0.184610651 |
| 0.064607666 | 0.186354885 | 0.176187124 | 0.327863971 |
| 0.200194399 | 0.164089605 | 0.140205144 | 0.066106491 |
| 0.248640726 | 0.300270794 | 0.263702334 | 0.32645298  |
| 0.311083305 | 0.387320465 | 0.143072524 | 0.240981914 |
| 0.154215911 | 0.217884401 | 0.136124626 | 0.051930561 |
| 0.196021813 | 0.139640471 | 0.21221777  | 0.066082525 |
| 0.151292056 | 0.243335096 | 0.107103915 | 0.101562127 |
| 0.062941453 | 0.202888567 | 0.338199381 | 0.291547268 |
| 0.113006959 | 0.266987456 | 0.2255053   | 0.276268383 |

|             |             |             |             |
|-------------|-------------|-------------|-------------|
| 0.190521888 | 0.322469224 | 0.229492296 | 0.099970268 |
| 0.259290715 | 0.062328967 | 0.320626598 | 0.18585401  |
| 0.19229601  | 0.330242322 | 0.152736853 | 0.283624418 |
| 0.225383238 | 0.269648688 | 0.243876044 | 0.252875592 |
| 0.125204549 | 0.177920274 | 0.242803707 | 0.133186445 |
| 0.275015993 | 0.324081808 | 0.176449095 | 0.159100281 |
| 0.218880795 | 0.113099181 | 0.194194828 | 0.071738636 |
| 0.074062803 | 0.177925025 | 0.266085222 | 0.380396166 |
| 0.214397184 | 0.195790455 | 0.18564202  | 0.173220372 |
| 0.283933625 | 0.238239144 | 0.210577087 | 0.255751905 |
| 0.256659533 | 0.2340951   | 0.256373106 | 0.253867221 |
| 0.115865008 | 0.246453164 | 0.290467582 | 0.22470788  |
| 0.237438236 | 0.276712852 | 0.246110175 | 0.136416145 |
| 0.117695688 | 0.153461755 | 0.217901227 | 0.211434964 |
| 0.297926381 | 0.147144855 | 0.065135735 | 0.323383413 |
| 0.075609555 | 0.313544912 | 0.111890063 | 0.203572767 |
| 0.212567605 | 0.103958764 | 0.280081789 | 0.240752983 |
| 0.224373997 | 0.232233673 | 0.074033255 | 0.219091387 |
| 0.089064238 | 0.239777743 | 0.124339147 | 0.240418923 |
| 0.097923195 | 0.155206259 | 0.270573798 | 0.132597355 |
| 0.093872313 | 0.102303362 | 0.235626323 | 0.17841949  |
| 0.190068485 | 0.341756282 | 0.125382096 | 0.097985185 |
| 0.118183746 | 0.15950153  | 0.182964325 | 0.189395313 |
| 0.101878006 | 0.22390335  | 0.105665442 | 0.182475535 |
| 0.249585117 | 0.258104924 | 0.177809129 | 0.140999392 |
| 0.221602978 | 0.222361741 | 0.146754316 | 0.230457704 |
| 0.143033145 | 0.371618266 | 0.192555465 | 0.228984347 |
| 0.13987399  | 0.100623451 | 0.216658807 | 0.314912306 |
| 0.080833984 |             |             |             |
| ACSBG1      | 0.344633654 | 0.478476854 | 0.290047358 |
| 0.396269461 | 0.355017592 | 0.283735166 | 0.290869459 |
| 0.273075358 | 0.131113747 | 0.017374791 | 0.038402776 |
| 0.305694544 | 0.189147199 | 0.283149258 | 0.253101752 |
| 0.406110211 | 0.173602858 | 0.349504146 | 0.324247959 |
| 1           | 0.180558197 | 0.354959838 | 0.193115158 |
| 0.260917563 | 0.127075367 | 0.131448797 | 0.228672358 |
| 0.459559598 | 0.14706902  | 0.259277461 | 0.360786578 |
| 0.179369228 | 0.401858403 | 0.444820774 | 0.313362866 |
| 0.424105922 | 0.303983169 | 0.040288426 | 0.265644774 |
| 0.405894711 | 0.352195011 | 0.382776593 | 0.345314982 |
| 0.110467583 | 0.420487576 | 0.30445865  | 0.327056364 |
| 0.253862144 | 0.0657365   | 0.239255851 | 0.403695521 |
| 0.389232406 | 0.288355585 | 0.302028405 | 0.245337212 |
| 0.15115709  | 0.253634649 | 0.162494021 | 0.270679531 |
| 0.305966881 | 0.195759222 | 0.40839209  | 0.152114768 |
| 0.18367625  | 0.349624115 | 0.208165084 | 0.337482041 |
| 0.25839718  | 0.344700194 | 0.07990703  | 0.258989795 |
| 0.010240772 | 0.376722498 | 0.342744385 | 0.192116378 |
| 0.102137984 | 0.049488444 | 0.235351417 | 0.344977586 |
| 0.470026827 | 0.411390039 | 0.455482164 | 0.444102483 |
| 0.201575391 | 0.340540951 | 0.279234328 | 0.247415924 |
| 0.407576523 | 0.243667552 | 0.162821711 | 0.397911684 |
| 0.458568522 | 0.450057897 | 0.236160199 | 0.289975998 |
| 0.362641817 | 0.454225538 | 0.300384664 | 0.329788271 |

|             |             |             |             |
|-------------|-------------|-------------|-------------|
| 0.220598424 | 0.095676757 | 0.388386515 | 0.465333294 |
| 0.373047792 | 0.222762103 | 0.206626005 | 0.404606829 |
| 0.142236314 | 0.289085936 | 0.35997674  | 0.19168135  |
| 0.478868233 | 0.06136591  | 0.242207761 | 0.345020752 |
| 0.314622872 | 0.384650831 | 0.437157367 | 0.285072687 |
| 0.338264486 | 0.054072548 | 0.101635104 | 0.096334749 |
| 0.293716235 | 0.111188496 | 0.39163698  | 0.439936119 |
| 0.299888876 | 0.31918836  | 0.349110884 | 0.014926413 |
| 0.067192324 | 0.254458258 | 0.36694401  | 0.366961022 |
| 0.389104432 | 0.316110042 | 0.237937578 | 0.327592135 |
| 0.27352116  | 0.450281521 | 0.044958072 | 0.217243126 |
| 0.329053445 | 0.257598717 | 0.31635681  | 0.318226374 |
| 0.282200265 | 0.238087176 | 0.232763084 | 0.485549473 |
| 0.409220452 | 0.180710397 | 0.32118462  | 0.378398993 |
| 0.276574471 | 0.294912944 | 0.22188509  | 0.306432976 |
| 0.136959242 | 0.393386642 | 0.064286546 | 0.341198202 |
| 0.166963732 | 0.158193177 | 0.055373861 | 0.314848259 |
| 0.263972879 | 0.364917158 | 0.378824008 | 0.217846582 |
| 0.335088805 | 0.346421668 | 0.301710997 | 0.306105991 |
| 0.024820138 | 0.124692457 | 0.253480694 | 0.464825973 |
| 0.230644238 | 0.461357344 | 0.35577028  | 0.31839677  |
| 0.310012994 | 0.431375988 | 0.006414827 | 0.422321284 |
| 0.44667942  | 0.238675903 | 0.315217324 | 0.341509284 |
| 0.2442676   | 0.432297724 | 0.038546979 | 0.37636422  |
| 0.280200907 | 0.185861426 | 0.487532236 | 0.214874505 |
| 0.407247564 | 0.095907622 | 0.331089187 | 0.350004155 |
| 0.296355235 | 0.022720489 | 0.241839942 | 0.355448256 |
| 0.064305489 | 0.182948719 | 0.37706019  | 0.357501782 |
| 0.319098225 | 0.402502072 | 0.484146359 | 0.223874543 |
| 0.340223671 | 0.338342603 | 0.04787191  | 0.302830988 |
| 0.378811049 | 0.25268697  | 0.410197893 | 0.315979002 |
| 0.245651954 | 0.435710174 | 0.330632361 | 0.169452645 |
| 0.116446361 | 0.353831218 | 0.048185725 | 0.305559511 |
| 0.335143208 | 0.182048251 | 0.262328406 | 0.231116752 |
| 0.123998684 | 0.478679415 | 0.158885993 | 0.179194137 |
| 0.101734216 | 0.295885087 | 0.353599574 | 0.207575455 |
| 0.163424885 | 0.241951295 | 0.268482872 | 0.309167599 |
| 0.111829558 | 0.164738874 | 0.040820175 | 0.223936951 |
| 0.125306065 | 0.229208686 | 0.222245393 | 0.316236839 |
| 0.312685057 | 0.146909932 | 0.31286074  | 0.251404126 |
| 0.15975814  | 0.052121083 | 0.464777624 | 0.371877843 |
| 0.288310613 | 0.259031349 | 0.106737021 | 0.204618913 |
| 0.44429836  | 0.213592176 | 0.23354132  | 0.430561004 |
| 0.079816383 | 0.465802065 | 0.246294696 | 0.179518185 |
| 0.266719074 | 0.307010286 | 0.470735098 | 0.071500546 |
| 0.335998608 | 0.432594851 | 0.351391703 | 0.222062234 |
| 0.355556814 | 0.361371472 | 0.090601938 | 0.337887355 |
| 0.323852963 | 0.085750374 | 0.463861579 | 0.169510405 |
| 0.064695488 | 0.334270072 | 0.314037022 | 0.147568623 |
| 0.140102028 | 0.286315093 | 0.127989596 | 0.312899449 |
| 0.473593479 | 0.375334438 | 0.345242712 | 0.21788585  |
| 0.102364944 | 0.022103717 | 0.237149791 | 0.288530721 |
| 0.432406081 | 0.441949079 | 0.33540487  | 0.271068901 |
| 0.327802156 | 0.249326032 | 0.198452955 | 0.457547923 |

|             |             |             |             |
|-------------|-------------|-------------|-------------|
| 0.229894838 | 0.455540326 | 0.033858453 | 0.34673739  |
| 0.41600967  | 0.265590853 | 0.119284263 | 0.319249089 |
| 0.353743607 | 0.123751108 | 0.332491333 | 0.432475677 |
| 0.412846831 | 0.299541592 | 0.264795021 | 0.350303727 |
| 0.062459272 | 0.132497344 | 0.315275838 | 0.152504318 |
| 0.30922378  | 0.286759289 | 0.040197354 | 0.331959886 |
| 0.097720014 | 0.413308852 | 0.439725679 | 0.105597017 |
| 0.235709397 | 0.308076115 | 0.346663021 | 0.107872735 |
| 0.372028336 | 0.428558605 | 0.449825844 | 0.30546431  |
| 0.361714455 | 0.41588048  | 0.236488954 | 0.156141047 |
| 0.049664308 | 0.431949175 | 0.331745249 | 0.052200919 |
| 0.470197201 | 0.210383864 | 0.030800698 | 0.467666593 |
| 0.300748615 | 0.371814714 | 0.010453344 | 0.081490907 |
| 0.084650839 | 0.428857869 | 0.408753945 | 0.352788993 |
| 0.184954079 | 0.385946616 | 0.018020505 | 0.466847042 |
| 0.433234472 | 0.037149029 | 0.170512817 | 0.343375708 |
| 0.29338052  | 0.486088319 | 0.2198813   | 0.372804748 |
| 0.265360513 | 0.413781026 | 0.263840185 | 0.305510261 |
| 0.398207929 | 0.401976408 | 0.384773905 | 0.43417655  |
| 0.446322312 | 0.344842922 | 0.334724612 | 0.056306441 |
| 0.132117443 | 0.275738002 | 0.185406691 | 0.105878099 |
| 0.270176155 | 0.178424674 | 0.441313859 | 0.457861018 |
| 0.421207002 | 0.025041266 | 0.260073634 | 0.357267272 |
| 0.446351965 | 0.485564741 | 0.063746932 | 0.010566651 |
| 0.011803316 | 0.027258572 | 0.367649592 | 0.285133852 |
| 0.444160044 | 0.165743441 | 0.026119365 | 0.131432208 |
| 0.318096471 | 0.287556649 | 0.442828776 | 0.375378843 |
| 0.371825507 | 0.17370035  | 0.203153328 | 0.393341815 |
| 0.099508909 | 0.252551345 | 0.436239737 | 0.433694797 |
| 0.105906264 | 0.292421246 | 0.333420645 | 0.48444214  |
| 0.044790496 | 0.337808749 | 0.311151296 | 0.283073068 |
| 0.046404534 | 0.136754955 | 0.116805326 | 0.420286588 |
| 0.404420535 | 0.1030489   | 0.060312943 | 0.141910517 |
| 0.1820269   | 0.448873105 | 0.222419402 | 0.488896823 |
| 0.425208681 | 0.449795038 | 0.122229436 | 0.430993342 |
| 0.078276694 | 0.412290319 | 0.260063533 | 0.062754999 |
| 0.332642144 | 0.053884257 | 0.400502115 | 0.102927277 |
| 0.309787872 | 0.342763029 | 0.171272967 | 0.04716912  |
| 0.13333206  | 0.110370291 | 0.459169174 | 0.416494024 |
| 0.075738412 | 0.347345853 | 0.334785469 | 0.37047802  |
| 0.298498774 | 0.380748125 | 0.434934628 | 0.243354737 |
| 0.181219342 | 0.131816015 | 0.38569486  | 0.299023364 |
| 0.308504454 | 0.46924912  | 0.245652779 | 0.474879276 |
| 0.34547831  | 0.444135594 | 0.415404531 | 0.339398141 |
| 0.211961104 | 0.308911759 | 0.29541835  | 0.052716302 |
| 0.369051166 | 0.43216789  | 0.362928887 | 0.15404095  |
| 0.267069897 | 0.251809462 | 0.149018467 | 0.179125446 |
| 0.201621037 | 0.267712449 | 0.228085299 | 0.45629297  |
| 0.336491479 | 0.31274565  | 0.139833187 | 0.108190484 |
| 0.489534409 | 0.414111707 | 0.212320687 | 0.332490385 |
| 0.264382757 | 0.324360412 | 0.383996962 | 0.372838416 |
| 0.291040487 | 0.389526096 | 0.403153728 | 0.301435114 |
| 0.400626639 | 0.342322242 | 0.454345029 | 0.161711071 |
| 0.101328378 | 0.288068485 | 0.144201928 | 0.162535044 |

|             |             |             |             |
|-------------|-------------|-------------|-------------|
| 0.233117085 | 0.069656732 | 0.17695198  | 0.383966034 |
| 0.22237847  | 0.351026802 | 0.293335477 | 0.158135911 |
| 0.330771003 | 0.299109428 | 0.363973914 | 0.262276369 |
| 0.135350336 | 0.427067035 | 0.030163865 | 0.128230102 |
| 0.247805015 | 0.361707864 | 0.254111232 | 0.288112761 |
| 0.206082585 | 0.195558477 | 0.335815879 | 0.273423942 |
| 0.210115432 | 0.274369528 | 0.362027324 | 0.094941719 |
| 0.077948917 | 0.481808685 | 0.304925572 | 0.058098729 |
| 0.145167161 | 0.288850444 | 0.347024292 | 0.248130334 |
| 0.053407757 | 0.401943063 | 0.245188108 | 0.327933858 |
| 0.362844325 | 0.16271466  | 0.337277754 | 0.14517461  |
| 0.160438435 | 0.408569912 | 0.284380302 | 0.431179462 |
| 0.311397817 | 0.399493082 | 0.389291678 | 0.373795708 |
| 0.181687102 | 0.257473551 | 0.089102474 | 0.443913887 |
| 0.227510693 |             |             |             |
| ACSS2       | 0.071964497 | 0.122623092 | 0.034557691 |
| 0.212674942 | 0.077626791 | 0.132366489 | 0.273218002 |
| 0.124568568 | 0.075796087 | 0.105793097 | 0.029698569 |
| 0.054366208 | 0.047591999 | 0.114131852 | 0.03651327  |
| 0.159555932 | 0.042383587 | 0.049317402 | 0.22707292  |
| 0.180558197 | 1           | 0.155774089 | 0.151318862 |
| 0.013942883 | 0.03139326  | 0.099186929 | 0.028964549 |
| 0.194978275 | 0.108334125 | 0.130962798 | 0.212690004 |
| 0.032747075 | 0.113146107 | 0.093728679 | 0.087805515 |
| 0.078662418 | 0.058874948 | 0.020951922 | 0.09927264  |
| 0.117830997 | 0.097307818 | 0.197244091 | 0.219458855 |
| 0.145481338 | 0.102448795 | 0.266811002 | 0.059583098 |
| 0.064108733 | 0.053836991 | 0.124076753 | 0.111343751 |
| 0.086737727 | 0.071350891 | 0.168267279 | 0.221233336 |
| 0.030957227 | 0.106962546 | 0.00772227  | 0.175938299 |
| 0.23609664  | 0.169009957 | 0.086930203 | 0.141867516 |
| 0.050171459 | 0.155837757 | 0.026802561 | 0.211028262 |
| 0.01375925  | 0.140107296 | 0.102085755 | 0.032026201 |
| 0.046632973 | 0.199752328 | 0.068919698 | 0.011056073 |
| 0.088164038 | 0.076283441 | 0.039887385 | 0.252041622 |
| 0.165765976 | 0.079569314 | 0.118571869 | 0.098909811 |
| 0.045968904 | 0.074161576 | 0.028000097 | 0.120767093 |
| 0.110948821 | 0.243624496 | 0.074743751 | 0.142288318 |
| 0.114649384 | 0.096282842 | 0.042177816 | 0.068834567 |
| 0.141967918 | 0.131791296 | 0.060066823 | 0.067034183 |
| 0.021445985 | 0.012727807 | 0.102487121 | 0.109369439 |
| 0.116157183 | 0.015658809 | 0.079789659 | 0.193499728 |
| 0.093716514 | 0.029702213 | 0.225565734 | 0.028857018 |
| 0.169872162 | 0.118308739 | 0.055441074 | 0.195241166 |
| 0.051033246 | 0.108682154 | 0.083798451 | 0.252669751 |
| 0.050211681 | 0.047457903 | 0.008492047 | 0.041245111 |
| 0.050193537 | 0.003455956 | 0.079930487 | 0.167079092 |
| 0.10803653  | 0.028526828 | 0.177188381 | 0.018041871 |
| 0.034321466 | 0.02166266  | 0.079667428 | 0.072057145 |
| 0.122757964 | 0.047847196 | 0.086059255 | 0.103850974 |
| 0.049767498 | 0.11445515  | 0.027165899 | 0.153314397 |
| 0.098141552 | 0.025554468 | 0.195229587 | 0.072706676 |
| 0.074424834 | 0.172415379 | 0.159586871 | 0.126616142 |
| 0.141213645 | 0.19497024  | 0.055723091 | 0.147651057 |

|             |             |             |             |
|-------------|-------------|-------------|-------------|
| 0.055223029 | 0.054251383 | 0.149140361 | 0.109373814 |
| 0.181123571 | 0.069384661 | 0.022787108 | 0.106796256 |
| 0.013006248 | 0.020478382 | 0.043085645 | 0.205875711 |
| 0.080474391 | 0.10826197  | 0.067208067 | 0.137686263 |
| 0.134378768 | 0.113450283 | 0.110512593 | 0.116464573 |
| 0.060710333 | 0.07366182  | 0.071042382 | 0.121257813 |
| 0.164558727 | 0.096362861 | 0.078875092 | 0.038365709 |
| 0.102650474 | 0.140362767 | 0.000606533 | 0.09601768  |
| 0.089018142 | 0.065994467 | 0.119829346 | 0.067041314 |
| 0.026273297 | 0.170290128 | 0.004602999 | 0.150683467 |
| 0.086729461 | 0.124964544 | 0.132819172 | 0.108360488 |
| 0.087485554 | 0.094914786 | 0.112166958 | 0.060350054 |
| 0.053522578 | 0.024836986 | 0.21283301  | 0.226724077 |
| 0.015794958 | 0.198405673 | 0.115797137 | 0.178614522 |
| 0.13417566  | 0.10187328  | 0.152275185 | 0.021334267 |
| 0.079211645 | 0.170444868 | 0.034241967 | 0.052676246 |
| 0.079834037 | 0.013619986 | 0.128326278 | 0.121131342 |
| 0.072517384 | 0.125965995 | 0.06186243  | 0.03086541  |
| 0.170298075 | 0.18358244  | 0.105527494 | 0.08924386  |
| 0.063367835 | 0.146294224 | 0.036122162 | 0.028439245 |
| 0.045280147 | 0.119660065 | 0.00958284  | 0.007788673 |
| 0.003396522 | 0.115751174 | 0.192824501 | 0.07986499  |
| 0.035467752 | 0.070978847 | 0.026294776 | 0.049624741 |
| 0.212369026 | 0.109732996 | 0.005765308 | 0.018510751 |
| 0.050172113 | 0.040371074 | 0.044788244 | 0.09578002  |
| 0.059176773 | 0.082096523 | 0.079427811 | 0.012993947 |
| 0.032722303 | 0.060126256 | 0.118897734 | 0.148773846 |
| 0.124449088 | 0.129309159 | 0.061245241 | 0.016730337 |
| 0.154079565 | 0.103502864 | 0.057389413 | 0.15293981  |
| 0.048903771 | 0.114801302 | 0.070966056 | 0.093524354 |
| 0.031083532 | 0.191490214 | 0.175643973 | 0.042942171 |
| 0.098479944 | 0.132201325 | 0.091528487 | 0.076034087 |
| 0.119119731 | 0.157812523 | 0.143702524 | 0.088659353 |
| 0.090629765 | 0.088276006 | 0.100509435 | 0.029019614 |
| 0.050680728 | 0.071905796 | 0.074075274 | 0.094813651 |
| 0.054514558 | 0.136620653 | 0.224697028 | 0.123793197 |
| 0.124815699 | 0.159507726 | 0.110415382 | 0.014420341 |
| 0.137996859 | 0.038122368 | 0.027338183 | 0.033044696 |
| 0.09276642  | 0.085985495 | 0.134814675 | 0.053203858 |
| 0.232692877 | 0.02734342  | 0.08804952  | 0.110694474 |
| 0.012199635 | 0.094419645 | 0.04093926  | 0.065587222 |
| 0.079175691 | 0.130600694 | 0.050731208 | 0.222870354 |
| 0.136213903 | 0.13505413  | 0.099734346 | 0.102080885 |
| 0.125919612 | 0.055868108 | 0.041062979 | 0.089368203 |
| 0.182653091 | 0.181724638 | 0.066034722 | 0.005647591 |
| 0.052641862 | 0.083122061 | 0.000660446 | 0.058561872 |
| 0.110350315 | 0.129836106 | 0.12466232  | 0.060178358 |
| 0.127685044 | 0.060016865 | 0.093687859 | 0.121298257 |
| 0.065136109 | 0.075023962 | 0.100128515 | 0.132830582 |
| 0.078257969 | 0.089178464 | 0.02872013  | 0.055516695 |
| 0.031532544 | 0.080336251 | 0.11985662  | 0.06813344  |
| 0.148675832 | 0.134696935 | 0.07109797  | 0.134933153 |
| 0.22477417  | 0.078255324 | 0.03465797  | 0.002025147 |
| 0.013930616 | 0.101708582 | 0.096409406 | 0.199061909 |

|             |             |             |             |
|-------------|-------------|-------------|-------------|
| 0.078926976 | 0.146539512 | 0.000936221 | 0.092986067 |
| 0.114075565 | 0.018085479 | 0.017655044 | 0.074726278 |
| 0.049246738 | 0.122273195 | 0.01891544  | 0.077507747 |
| 0.043634353 | 0.082495333 | 0.101710347 | 0.130209385 |
| 0.141480416 | 0.066150917 | 0.148476532 | 0.123868144 |
| 0.155069438 | 0.091161537 | 0.243629694 | 0.118416688 |
| 0.0140044   | 0.192753982 | 0.029319481 | 0.047703162 |
| 0.138170056 | 0.044917734 | 0.10112271  | 0.130625845 |
| 0.091133698 | 0.032189113 | 0.178472065 | 0.086088923 |
| 0.182921881 | 0.167363433 | 0.017598874 | 0.00484995  |
| 0.00201833  | 0.011182965 | 0.186082395 | 0.059810605 |
| 0.103642253 | 0.048647998 | 0.050807291 | 0.21602221  |
| 0.073220843 | 0.050990108 | 0.10545085  | 0.207670537 |
| 0.072194463 | 0.084789916 | 0.056177417 | 0.189996489 |
| 0.028274503 | 0.075129154 | 0.107089913 | 0.130714423 |
| 0.031435519 | 0.057888037 | 0.057237714 | 0.162495024 |
| 0.00067044  | 0.106285008 | 0.062135625 | 0.064810728 |
| 0.010944476 | 0.036587304 | 0.040195967 | 0.122420726 |
| 0.072551089 | 0.060273141 | 0.050023143 | 0.038992392 |
| 0.158497213 | 0.113897912 | 0.098541288 | 0.126599345 |
| 0.164632534 | 0.183355606 | 0.019203445 | 0.109595853 |
| 0.054685399 | 0.091281906 | 0.033625127 | 0.046653212 |
| 0.041053571 | 0.043880836 | 0.070246419 | 0.017813583 |
| 0.100385054 | 0.132906753 | 0.015718015 | 0.016267906 |
| 0.003839443 | 0.057734702 | 0.143105469 | 0.094276696 |
| 0.013566103 | 0.116335861 | 0.085620253 | 0.115735074 |
| 0.223413178 | 0.163611681 | 0.101052676 | 0.045554588 |
| 0.182676667 | 0.003107113 | 0.186126989 | 0.091753288 |
| 0.114191    | 0.119263752 | 0.037806007 | 0.102182012 |
| 0.107153867 | 0.111316987 | 0.090042111 | 0.177604596 |
| 0.014408264 | 0.098039933 | 0.208093291 | 0.150430514 |
| 0.152627368 | 0.142558929 | 0.105484749 | 0.03131755  |
| 0.097065117 | 0.023977778 | 0.076487168 | 0.017842618 |
| 0.012609557 | 0.201247172 | 0.121220405 | 0.166080058 |
| 0.113719116 | 0.096740849 | 0.109545597 | 0.044272547 |
| 0.114594408 | 0.112825096 | 0.137191239 | 0.141938337 |
| 0.085717013 | 0.113419435 | 0.083168475 | 0.075243153 |
| 0.01832374  | 0.106151054 | 0.15633852  | 0.169502512 |
| 0.145050909 | 0.206009545 | 0.101204538 | 0.134399844 |
| 0.017936658 | 0.049431068 | 0.104934419 | 0.062417589 |
| 0.174140465 | 0.035085678 | 0.00554569  | 0.126120614 |
| 0.010451601 | 0.167637127 | 0.038651719 | 0.056536341 |
| 0.068940349 | 0.036637622 | 0.124307274 | 0.231540755 |
| 0.112091946 | 0.103303927 | 0.024473746 | 0.064651114 |
| 0.014904059 | 0.092655152 | 0.034376435 | 0.064151204 |
| 0.009111378 | 0.017379958 | 0.150942402 | 0.146422521 |
| 0.068618533 | 0.013785826 | 0.095418608 | 0.106416478 |
| 0.154055039 | 0.132389468 | 0.067815833 | 0.013486589 |
| 0.021132308 | 0.074791744 | 0.037128259 | 0.068366874 |
| 0.014280355 | 0.075241836 | 0.088278201 | 0.058304904 |
| 0.196443657 | 0.085142523 | 0.106293657 | 0.042136214 |
| 0.077489593 | 0.106073034 | 0.035566097 | 0.083039312 |
| 0.031211725 | 0.182855423 | 0.093015698 | 0.095457613 |
| 0.026618857 | 0.024926877 | 0.144250445 | 0.145558411 |

0.019335035

| ACTN1       | 0.315039116 | 0.459773202 | 0.298855926 |
|-------------|-------------|-------------|-------------|
| 0.401697443 | 0.384127003 | 0.24146853  | 0.28482792  |
| 0.185220907 | 0.167596744 | 0.030134158 | 0.095000041 |
| 0.32478134  | 0.272667212 | 0.281120844 | 0.228935218 |
| 0.426106494 | 0.291555658 | 0.280835504 | 0.348580843 |
| 0.354959838 | 0.155774089 | 1           | 0.219413588 |
| 0.327699861 | 0.236368691 | 0.211058855 | 0.321121134 |
| 0.444130387 | 0.225382216 | 0.217133663 | 0.307951904 |
| 0.242532688 | 0.368942238 | 0.41396377  | 0.368278553 |
| 0.403410634 | 0.268051147 | 0.039375976 | 0.249580679 |
| 0.350679326 | 0.376018515 | 0.359735808 | 0.377244751 |
| 0.147995155 | 0.368623612 | 0.32848999  | 0.36449545  |
| 0.186957676 | 0.13787646  | 0.163658935 | 0.340522276 |
| 0.369401189 | 0.303659208 | 0.228419198 | 0.255658966 |
| 0.225989488 | 0.178051621 | 0.250110788 | 0.201910522 |
| 0.332873525 | 0.127327407 | 0.391513518 | 0.163064491 |
| 0.169211836 | 0.262476948 | 0.297429131 | 0.285614574 |
| 0.3133053   | 0.280168743 | 0.073956366 | 0.260707494 |
| 0.0130961   | 0.350260888 | 0.378867031 | 0.246100349 |
| 0.168524668 | 0.106425834 | 0.323962437 | 0.342036977 |
| 0.455399403 | 0.369516897 | 0.490054075 | 0.472081934 |
| 0.307131001 | 0.37877025  | 0.325294237 | 0.327046069 |
| 0.372288998 | 0.271310447 | 0.172894732 | 0.443221737 |
| 0.489491674 | 0.440385605 | 0.328900104 | 0.367920933 |
| 0.3601565   | 0.414242383 | 0.300757465 | 0.366463754 |
| 0.269577779 | 0.154819383 | 0.359040908 | 0.47916694  |
| 0.312197995 | 0.2987247   | 0.312527274 | 0.357454145 |
| 0.195651846 | 0.242150574 | 0.387142711 | 0.228907239 |
| 0.467404707 | 0.076820661 | 0.348452603 | 0.337573952 |
| 0.298571795 | 0.362715216 | 0.435996518 | 0.307817089 |
| 0.364718358 | 0.09569231  | 0.175451893 | 0.137135619 |
| 0.305020021 | 0.183847435 | 0.349970152 | 0.447502658 |
| 0.234565504 | 0.368499645 | 0.319832076 | 0.030116179 |
| 0.131670818 | 0.274603993 | 0.361087573 | 0.315701221 |
| 0.364086481 | 0.287095662 | 0.325949801 | 0.272548089 |
| 0.297288505 | 0.484223103 | 0.032929767 | 0.214706926 |
| 0.329240197 | 0.287908286 | 0.371484443 | 0.33061639  |
| 0.378334998 | 0.205274353 | 0.283510643 | 0.490060852 |
| 0.342251885 | 0.229288491 | 0.234577798 | 0.409974605 |
| 0.300117961 | 0.382996473 | 0.249234236 | 0.349135623 |
| 0.154045959 | 0.379673896 | 0.128868152 | 0.257480725 |
| 0.208323286 | 0.269694816 | 0.047304682 | 0.235911589 |
| 0.266030797 | 0.374260492 | 0.336729458 | 0.253055524 |
| 0.368493707 | 0.396109783 | 0.219365385 | 0.323196272 |
| 0.056295777 | 0.14625932  | 0.162700495 | 0.472222366 |
| 0.166157007 | 0.466090949 | 0.363130776 | 0.36122636  |
| 0.390387282 | 0.43438456  | 0.006668877 | 0.384007239 |
| 0.438886718 | 0.165649711 | 0.370828827 | 0.354752211 |
| 0.283537309 | 0.440111104 | 0.028296136 | 0.40229582  |
| 0.22079498  | 0.213288564 | 0.5063812   | 0.322586522 |
| 0.375041923 | 0.165972423 | 0.275863477 | 0.379941111 |
| 0.320463251 | 0.03265095  | 0.177821509 | 0.326440198 |
| 0.118424006 | 0.139900096 | 0.343138594 | 0.356483852 |



|             |             |             |             |
|-------------|-------------|-------------|-------------|
| 0.341771912 | 0.410850633 | 0.503286414 | 0.270929006 |
| 0.375807562 | 0.296147842 | 0.067980699 | 0.374854615 |
| 0.370649356 | 0.260324745 | 0.359358097 | 0.297757813 |
| 0.183746206 | 0.410149919 | 0.322174608 | 0.164615616 |
| 0.154591872 | 0.294170578 | 0.056427647 | 0.362326653 |
| 0.301551372 | 0.234252938 | 0.271484371 | 0.250418492 |
| 0.216212301 | 0.48258612  | 0.247190692 | 0.245689848 |
| 0.17105771  | 0.312453203 | 0.329973901 | 0.259660454 |
| 0.268246565 | 0.309489807 | 0.320898749 | 0.335151932 |
| 0.108977101 | 0.254844972 | 0.058684787 | 0.263940378 |
| 0.216801925 | 0.281028544 | 0.253886142 | 0.278915609 |
| 0.304667369 | 0.226573567 | 0.38071629  | 0.29589953  |
| 0.249063585 | 0.095430514 | 0.447291457 | 0.374635895 |
| 0.219539419 | 0.275365004 | 0.160674168 | 0.231573863 |
| 0.451844194 | 0.178669665 | 0.1475994   | 0.412979501 |
| 0.087717127 | 0.476311353 | 0.33089459  | 0.285036159 |
| 0.349778002 | 0.370582977 | 0.467343701 | 0.07296342  |
| 0.275425577 | 0.398271208 | 0.371627292 | 0.322169982 |
| 0.313844931 | 0.344617274 | 0.116473936 | 0.295937901 |
| 0.286470895 | 0.147507071 | 0.463809441 | 0.275721723 |
| 0.113148903 | 0.368511153 | 0.344575632 | 0.223140664 |
| 0.218297143 | 0.326572406 | 0.098360909 | 0.394502789 |
| 0.47285152  | 0.427924737 | 0.348602181 | 0.286139724 |
| 0.156312701 | 0.061402975 | 0.324380803 | 0.295846139 |
| 0.395084256 | 0.454163679 | 0.378464537 | 0.364302558 |
| 0.358731587 | 0.310557782 | 0.11770931  | 0.47178333  |
| 0.216312911 | 0.425471712 | 0.055162612 | 0.379514588 |
| 0.393920037 | 0.192479152 | 0.220316452 | 0.282869594 |
| 0.309619207 | 0.155698451 | 0.283946016 | 0.410248683 |
| 0.38520598  | 0.336802036 | 0.303325479 | 0.344468216 |
| 0.067504181 | 0.129390221 | 0.346491373 | 0.225719957 |
| 0.324573099 | 0.336185615 | 0.080397629 | 0.25572059  |
| 0.162496791 | 0.385741051 | 0.451059454 | 0.170217589 |
| 0.217703053 | 0.223681999 | 0.40086439  | 0.149443199 |
| 0.402645221 | 0.417444443 | 0.421973831 | 0.25893058  |
| 0.36175326  | 0.42890915  | 0.282599137 | 0.22026392  |
| 0.09921299  | 0.418120579 | 0.276722682 | 0.084293902 |
| 0.478960845 | 0.138654646 | 0.073636672 | 0.434437198 |
| 0.308885541 | 0.318521624 | 0.009055933 | 0.076942422 |
| 0.135036073 | 0.457919585 | 0.376871652 | 0.297652143 |
| 0.147388981 | 0.354161909 | 0.021626764 | 0.468650541 |
| 0.416253526 | 0.085162253 | 0.269163212 | 0.355128079 |
| 0.332525187 | 0.450997655 | 0.296128264 | 0.409375197 |
| 0.308558487 | 0.401053078 | 0.286842745 | 0.38494003  |
| 0.393221044 | 0.406555053 | 0.345667538 | 0.384711041 |
| 0.455143823 | 0.379487758 | 0.365417795 | 0.080950285 |
| 0.176091602 | 0.193496526 | 0.198082572 | 0.17075055  |
| 0.195799749 | 0.278857628 | 0.418712045 | 0.473917023 |
| 0.447010299 | 0.047627454 | 0.206388108 | 0.346300252 |
| 0.407314128 | 0.464500683 | 0.066713966 | 0.013655974 |
| 0.012665072 | 0.081844455 | 0.314346431 | 0.353162759 |
| 0.440421358 | 0.15097356  | 0.046086295 | 0.103143435 |
| 0.317332589 | 0.353168901 | 0.428868089 | 0.386002711 |
| 0.378777661 | 0.232487197 | 0.231370206 | 0.385706293 |

|             |             |             |             |
|-------------|-------------|-------------|-------------|
| 0.188872388 | 0.187542367 | 0.460748463 | 0.394123386 |
| 0.144711627 | 0.352320532 | 0.277433521 | 0.482386046 |
| 0.087778886 | 0.404215435 | 0.325273044 | 0.331683231 |
| 0.054880792 | 0.222366565 | 0.190875179 | 0.431989828 |
| 0.387562615 | 0.203454142 | 0.140755298 | 0.095419021 |
| 0.241740026 | 0.445539628 | 0.304073364 | 0.500634818 |
| 0.407210046 | 0.469664047 | 0.205892311 | 0.396327319 |
| 0.138139471 | 0.389535948 | 0.354096165 | 0.054639604 |
| 0.337247189 | 0.07661266  | 0.390157071 | 0.168303808 |
| 0.252835406 | 0.28773897  | 0.214736092 | 0.091990522 |
| 0.182462114 | 0.188820568 | 0.484848647 | 0.45260689  |
| 0.122679751 | 0.304519441 | 0.377561117 | 0.349986136 |
| 0.23337981  | 0.410278535 | 0.399233255 | 0.236563243 |
| 0.190631542 | 0.172055706 | 0.351917645 | 0.255147527 |
| 0.236732657 | 0.496935257 | 0.321746449 | 0.47149558  |
| 0.298154479 | 0.404405415 | 0.415490457 | 0.335065247 |
| 0.314800594 | 0.262668838 | 0.277654013 | 0.07209837  |
| 0.367997221 | 0.460890678 | 0.291103948 | 0.263749834 |
| 0.373291283 | 0.292303845 | 0.128459644 | 0.124348696 |
| 0.256039249 | 0.208302376 | 0.287399517 | 0.46436834  |
| 0.276212649 | 0.2685416   | 0.105400931 | 0.182638165 |
| 0.470315445 | 0.360841313 | 0.177399291 | 0.32722722  |
| 0.319505491 | 0.379222809 | 0.396505047 | 0.404556572 |
| 0.27861049  | 0.398442446 | 0.369842875 | 0.285722156 |
| 0.35336075  | 0.344107094 | 0.429256223 | 0.087777506 |
| 0.162198322 | 0.272770449 | 0.231386612 | 0.242925743 |
| 0.303604344 | 0.120052854 | 0.232605012 | 0.404668889 |
| 0.264415007 | 0.397531452 | 0.217959721 | 0.198971772 |
| 0.392933169 | 0.242058956 | 0.402156226 | 0.255565253 |
| 0.208768356 | 0.405033092 | 0.05163402  | 0.195006542 |
| 0.294223237 | 0.366910818 | 0.329946017 | 0.360518884 |
| 0.288282395 | 0.263629378 | 0.402117645 | 0.203363847 |
| 0.222625488 | 0.264506422 | 0.364313591 | 0.086872152 |
| 0.087472967 | 0.499249013 | 0.246284607 | 0.086814349 |
| 0.177427719 | 0.232301335 | 0.306073903 | 0.302393863 |
| 0.102737841 | 0.415287706 | 0.221823884 | 0.35501896  |
| 0.317710613 | 0.200227768 | 0.262519055 | 0.131345587 |
| 0.147835033 | 0.358211587 | 0.313837171 | 0.422620688 |
| 0.331938763 | 0.438914401 | 0.326339785 | 0.365383763 |
| 0.168670645 | 0.2447377   | 0.107659252 | 0.417294409 |
| 0.255619957 |             |             |             |
| ADA         | 0.083206089 | 0.112207106 | 0.05911745  |
| 0.219833394 | 0.106061051 | 0.095245316 | 0.263967751 |
| 0.086181526 | 0.124076682 | 0.070477784 | 0.051896828 |
| 0.076208252 | 0.053477734 | 0.084815085 | 0.035689198 |
| 0.219898017 | 0.09133857  | 0.061613561 | 0.30158174  |
| 0.193115158 | 0.151318862 | 0.219413588 | 1           |
| 0.036850839 | 0.088978175 | 0.18675151  | 0.069593269 |
| 0.203697155 | 0.209557468 | 0.074383132 | 0.172804125 |
| 0.0858626   | 0.112859197 | 0.081792829 | 0.118700265 |
| 0.069704763 | 0.06346654  | 0.027047402 | 0.070531957 |
| 0.108822016 | 0.127460855 | 0.205237898 | 0.263126837 |
| 0.176666869 | 0.074906018 | 0.293146917 | 0.108242911 |
| 0.044970239 | 0.102996781 | 0.066782627 | 0.080339604 |

|             |             |             |             |
|-------------|-------------|-------------|-------------|
| 0.067565385 | 0.077434114 | 0.138788765 | 0.21630551  |
| 0.028375453 | 0.051213492 | 0.013778243 | 0.101449438 |
| 0.268182645 | 0.076669416 | 0.074110985 | 0.138291579 |
| 0.050570212 | 0.135785333 | 0.070077096 | 0.177204002 |
| 0.029190397 | 0.107613224 | 0.142845768 | 0.044281901 |
| 0.022678419 | 0.229655847 | 0.125109922 | 0.024479756 |
| 0.205855391 | 0.09033493  | 0.100765211 | 0.236905573 |
| 0.175227662 | 0.076776874 | 0.145614163 | 0.120028731 |
| 0.069918534 | 0.143137241 | 0.052622483 | 0.174382049 |
| 0.109196744 | 0.228724805 | 0.093613758 | 0.206794329 |
| 0.138297261 | 0.089041503 | 0.085451561 | 0.161486038 |
| 0.121268916 | 0.111931518 | 0.068752398 | 0.087750653 |
| 0.032480736 | 0.054544401 | 0.082528353 | 0.118072656 |
| 0.088866432 | 0.038385647 | 0.18486906  | 0.158092408 |
| 0.196699996 | 0.024887684 | 0.276744543 | 0.037343414 |
| 0.181137331 | 0.159960236 | 0.140650299 | 0.174834495 |
| 0.088407292 | 0.112993688 | 0.083570944 | 0.306039169 |
| 0.080136687 | 0.081945564 | 0.024844834 | 0.109577683 |
| 0.046127602 | 0.012888889 | 0.059782781 | 0.161300496 |
| 0.064337151 | 0.03532094  | 0.193834804 | 0.056292655 |
| 0.092863699 | 0.050040539 | 0.079329821 | 0.086471835 |
| 0.140146932 | 0.051266131 | 0.123268206 | 0.077757034 |
| 0.065496626 | 0.141949518 | 0.009766926 | 0.200317215 |
| 0.112676853 | 0.058873808 | 0.30817437  | 0.081596102 |
| 0.139084063 | 0.186243721 | 0.23250725  | 0.137210836 |
| 0.099615186 | 0.280269838 | 0.046907856 | 0.209674077 |
| 0.043254407 | 0.109195232 | 0.2196238   | 0.111295139 |
| 0.168385576 | 0.065209725 | 0.087297163 | 0.09532073  |
| 0.020529637 | 0.042714414 | 0.082644217 | 0.143365134 |
| 0.060104277 | 0.094392177 | 0.053075727 | 0.242226813 |
| 0.141246814 | 0.168762528 | 0.074448588 | 0.10377932  |
| 0.065646185 | 0.134825128 | 0.039769485 | 0.119989155 |
| 0.07815534  | 0.113386095 | 0.106236682 | 0.082112307 |
| 0.200199067 | 0.172267923 | 0.003173253 | 0.076660421 |
| 0.086323911 | 0.036962603 | 0.136650516 | 0.102778762 |
| 0.043558863 | 0.175634542 | 0.003738792 | 0.19572029  |
| 0.06192501  | 0.229072423 | 0.156881921 | 0.211073014 |
| 0.078033106 | 0.191642027 | 0.080513913 | 0.081559766 |
| 0.059034273 | 0.039741551 | 0.116263126 | 0.213220448 |
| 0.063273984 | 0.12006276  | 0.128865039 | 0.199714921 |
| 0.158065106 | 0.138338598 | 0.183238396 | 0.037528622 |
| 0.1043132   | 0.181573567 | 0.091417391 | 0.118079599 |
| 0.101143501 | 0.015425785 | 0.095686428 | 0.133648705 |
| 0.047307115 | 0.109425935 | 0.06479335  | 0.022785094 |
| 0.242551859 | 0.153122454 | 0.09013367  | 0.145119298 |
| 0.065464474 | 0.121686519 | 0.050397379 | 0.060965797 |
| 0.124163292 | 0.121099469 | 0.036361585 | 0.022686959 |
| 0.015738047 | 0.095020395 | 0.240469312 | 0.058591453 |
| 0.037633937 | 0.127353399 | 0.047775714 | 0.066512116 |
| 0.159416904 | 0.182568903 | 0.031737708 | 0.018264443 |
| 0.043226349 | 0.034023955 | 0.031504459 | 0.075668616 |
| 0.042794097 | 0.082656719 | 0.109133497 | 0.031038221 |
| 0.092553108 | 0.155368493 | 0.110938657 | 0.202295327 |
| 0.072620594 | 0.18285953  | 0.152376186 | 0.011749269 |

|             |             |             |             |
|-------------|-------------|-------------|-------------|
| 0.148099319 | 0.057425796 | 0.032160923 | 0.126576987 |
| 0.098429317 | 0.137564284 | 0.06962304  | 0.19717104  |
| 0.044287991 | 0.242330634 | 0.195777736 | 0.044658093 |
| 0.0875555   | 0.101872296 | 0.167450641 | 0.150091661 |
| 0.077483598 | 0.169930519 | 0.165075003 | 0.077230138 |
| 0.071551963 | 0.177302559 | 0.100916008 | 0.07155606  |
| 0.14744474  | 0.108344193 | 0.085602737 | 0.227874464 |
| 0.148817415 | 0.12668391  | 0.148970746 | 0.233536816 |
| 0.122638787 | 0.219955381 | 0.09972652  | 0.048142052 |
| 0.187522214 | 0.041469801 | 0.080523419 | 0.055307011 |
| 0.073890504 | 0.092966889 | 0.228238267 | 0.081665076 |
| 0.324943061 | 0.045268938 | 0.044259275 | 0.11590446  |
| 0.030201241 | 0.086740807 | 0.106663681 | 0.089969568 |
| 0.067904047 | 0.06821844  | 0.128501333 | 0.174984089 |
| 0.093221228 | 0.218736385 | 0.132267682 | 0.087116341 |
| 0.121659483 | 0.089490363 | 0.058872442 | 0.114611493 |
| 0.157713003 | 0.16877749  | 0.112691084 | 0.021229122 |
| 0.055904865 | 0.149121172 | 0.005799662 | 0.051720059 |
| 0.139289964 | 0.099535166 | 0.15357238  | 0.119452941 |
| 0.075449281 | 0.054399972 | 0.163898067 | 0.21832621  |
| 0.082951919 | 0.078610538 | 0.08506337  | 0.156291424 |
| 0.085740053 | 0.091613385 | 0.042348227 | 0.154013943 |
| 0.113892635 | 0.076201304 | 0.108025556 | 0.073578533 |
| 0.165562197 | 0.062064929 | 0.068314738 | 0.116236772 |
| 0.300079517 | 0.055512759 | 0.038552506 | 0.006869939 |
| 0.059221639 | 0.140078595 | 0.078422225 | 0.173534928 |
| 0.034938513 | 0.18602042  | 0.006383157 | 0.101970925 |
| 0.094946266 | 0.067804717 | 0.056243413 | 0.075488904 |
| 0.064660362 | 0.107378786 | 0.043795561 | 0.09343381  |
| 0.058517085 | 0.072226168 | 0.087954799 | 0.238239509 |
| 0.130287173 | 0.069602007 | 0.141809973 | 0.10361568  |
| 0.15901258  | 0.139901728 | 0.309293273 | 0.143415443 |
| 0.04220014  | 0.117968018 | 0.022283992 | 0.066928747 |
| 0.087493795 | 0.096156173 | 0.099756539 | 0.157273563 |
| 0.102817    | 0.100671434 | 0.120119044 | 0.08153951  |
| 0.154936475 | 0.170224193 | 0.055681002 | 0.014180313 |
| 0.005129617 | 0.038746733 | 0.170017683 | 0.142635368 |
| 0.108573764 | 0.019293259 | 0.104913257 | 0.152367806 |
| 0.082475066 | 0.093209839 | 0.092389419 | 0.267536072 |
| 0.096191251 | 0.175063975 | 0.036977264 | 0.234653863 |
| 0.080503178 | 0.051686127 | 0.117859169 | 0.100187998 |
| 0.092164128 | 0.134170625 | 0.060549863 | 0.167608158 |
| 0.004541269 | 0.189656336 | 0.079769575 | 0.05953178  |
| 0.037537538 | 0.111222017 | 0.11190537  | 0.165655661 |
| 0.063583202 | 0.078450075 | 0.081035005 | 0.016094115 |
| 0.161176423 | 0.12989196  | 0.119927237 | 0.14063538  |
| 0.156717043 | 0.218384879 | 0.06258962  | 0.093154789 |
| 0.098613735 | 0.074210968 | 0.073064169 | 0.028535492 |
| 0.076524466 | 0.10793986  | 0.069770796 | 0.023905211 |
| 0.066901662 | 0.121721785 | 0.040198205 | 0.065119759 |
| 0.014061136 | 0.142549714 | 0.163382963 | 0.128064612 |
| 0.058007473 | 0.140641293 | 0.166597021 | 0.15199984  |
| 0.148247221 | 0.179375253 | 0.080746424 | 0.040459974 |
| 0.172816228 | 0.011576586 | 0.184906904 | 0.077123466 |

|             |             |             |             |
|-------------|-------------|-------------|-------------|
| 0.07671788  | 0.147289552 | 0.052163298 | 0.109435434 |
| 0.103605944 | 0.112119391 | 0.091189377 | 0.19810361  |
| 0.031544618 | 0.088740602 | 0.14797079  | 0.110602426 |
| 0.202306463 | 0.156174649 | 0.105834032 | 0.065553741 |
| 0.159552898 | 0.043603627 | 0.121434641 | 0.015685388 |
| 0.027274047 | 0.116664753 | 0.129677813 | 0.209852748 |
| 0.104309146 | 0.082346727 | 0.111176818 | 0.109494695 |
| 0.108127955 | 0.097581344 | 0.119727945 | 0.13783474  |
| 0.184242782 | 0.172368945 | 0.108156706 | 0.105484221 |
| 0.026272254 | 0.099242447 | 0.141250323 | 0.117673787 |
| 0.099552279 | 0.264364838 | 0.088304254 | 0.066755291 |
| 0.052212242 | 0.055932576 | 0.116602233 | 0.173980886 |
| 0.261998349 | 0.10484818  | 0.012468786 | 0.173974043 |
| 0.017212115 | 0.206078134 | 0.023650624 | 0.10955837  |
| 0.137365837 | 0.042798546 | 0.192742259 | 0.184929417 |
| 0.13195783  | 0.084203267 | 0.054706321 | 0.157636325 |
| 0.022641327 | 0.105494795 | 0.057463411 | 0.13488662  |
| 0.021148637 | 0.052028383 | 0.222745852 | 0.084170331 |
| 0.040328356 | 0.01710871  | 0.102502196 | 0.135383104 |
| 0.152273671 | 0.155288375 | 0.060804879 | 0.056857552 |
| 0.04895171  | 0.069751901 | 0.050266029 | 0.07505322  |
| 0.067001671 | 0.078309088 | 0.056561181 | 0.090883906 |
| 0.186373885 | 0.169653944 | 0.067799672 | 0.069969321 |
| 0.136600564 | 0.081315889 | 0.064783635 | 0.078305932 |
| 0.064080529 | 0.225142627 | 0.066251753 | 0.089317776 |
| 0.051148253 | 0.036790373 | 0.188426905 | 0.150751748 |
| 0.024515686 |             |             |             |
| ADAM9       | 0.28713807  | 0.323646563 | 0.223426971 |
| 0.263700481 | 0.238123504 | 0.11967116  | 0.075522027 |
| 0.025306167 | 0.041531892 | 0.001368513 | 0.019669647 |
| 0.26396395  | 0.044362815 | 0.035868217 | 0.04587135  |
| 0.367482319 | 0.074255654 | 0.118367038 | 0.137723015 |
| 0.260917563 | 0.013942883 | 0.327699861 | 0.036850839 |
| 1           | 0.08621862  | 0.058760537 | 0.154360207 |
| 0.311687832 | 0.069591081 | 0.066784046 | 0.18617769  |
| 0.094478387 | 0.283382622 | 0.29948192  | 0.295779905 |
| 0.296855781 | 0.239122205 | 0.013367828 | 0.043462193 |
| 0.262565567 | 0.319685688 | 0.255489794 | 0.182088078 |
| 0.020803555 | 0.241831795 | 0.116472611 | 0.327223719 |
| 0.031070992 | 0.028211113 | 0.029828491 | 0.226768772 |
| 0.243192258 | 0.194263678 | 0.045193622 | 0.048613159 |
| 0.035342043 | 0.025576261 | 0.073802402 | 0.107122209 |
| 0.10262303  | 0.01573678  | 0.274731759 | 0.025316315 |
| 0.039670053 | 0.065666732 | 0.11285152  | 0.072234647 |
| 0.159623985 | 0.181453122 | 0.014293359 | 0.246683455 |
| 4.73E-05    | 0.255978701 | 0.319354651 | 0.135773089 |
| 0.064393376 | 0.010000536 | 0.142768611 | 0.155592405 |
| 0.333886806 | 0.298341073 | 0.391792411 | 0.391609942 |
| 0.059752529 | 0.2259443   | 0.273577413 | 0.070878084 |
| 0.285886704 | 0.055693607 | 0.033434283 | 0.388198571 |
| 0.390618599 | 0.319574871 | 0.101552663 | 0.279480525 |
| 0.225978107 | 0.283543587 | 0.134937068 | 0.168642048 |
| 0.084662894 | 0.097112241 | 0.24105365  | 0.364744821 |
| 0.20705641  | 0.232188069 | 0.147668653 | 0.221774001 |

|             |             |             |             |
|-------------|-------------|-------------|-------------|
| 0.065725298 | 0.044370681 | 0.231711083 | 0.054093847 |
| 0.339720728 | 0.013278656 | 0.22170873  | 0.13599765  |
| 0.094533087 | 0.270857312 | 0.333572166 | 0.095341788 |
| 0.235348697 | 0.015900948 | 0.068773092 | 0.055437812 |
| 0.054111843 | 0.111985437 | 0.240361734 | 0.292012959 |
| 0.030414934 | 0.088410164 | 0.091455374 | 0.011977845 |
| 0.041357976 | 0.115210287 | 0.275011374 | 0.157908762 |
| 0.300624456 | 0.261240315 | 0.090212152 | 0.182065635 |
| 0.266731914 | 0.396837089 | 0.002776612 | 0.038075825 |
| 0.170349459 | 0.134093711 | 0.196871199 | 0.212933612 |
| 0.193471429 | 0.031727209 | 0.067722617 | 0.372052279 |
| 0.215006612 | 0.056297045 | 0.077049221 | 0.346389042 |
| 0.048149312 | 0.286646142 | 0.057400217 | 0.064953698 |
| 0.016871995 | 0.293448191 | 0.062914357 | 0.098605628 |
| 0.064125469 | 0.082476737 | 0.018821363 | 0.062391502 |
| 0.034440279 | 0.242690921 | 0.248071689 | 0.085697628 |
| 0.10072149  | 0.308505351 | 0.080683163 | 0.196328237 |
| 0.006575097 | 0.037205309 | 0.053182006 | 0.334608263 |
| 0.073281693 | 0.389970192 | 0.085986899 | 0.15970762  |
| 0.248442403 | 0.348370058 | 0.00705056  | 0.262286683 |
| 0.330666736 | 0.050418013 | 0.18579171  | 0.304764306 |
| 0.175568773 | 0.29822929  | 0.008393602 | 0.320892325 |
| 0.149887884 | 0.066983069 | 0.399655141 | 0.134570419 |
| 0.275884548 | 0.048550241 | 0.060451233 | 0.356243381 |
| 0.25434198  | 0.010668502 | 0.037652043 | 0.211255491 |
| 0.065231696 | 0.013397131 | 0.285509299 | 0.24410352  |
| 0.195476683 | 0.373855359 | 0.393341959 | 0.156402466 |
| 0.201300087 | 0.076237725 | 0.027447311 | 0.281869917 |
| 0.340463141 | 0.070429161 | 0.22692724  | 0.050406047 |
| 0.09831913  | 0.277310602 | 0.262697951 | 0.032725447 |
| 0.031732592 | 0.097367359 | 0.004977631 | 0.188736262 |
| 0.265224985 | 0.02326508  | 0.173308592 | 0.100526411 |
| 0.081138853 | 0.35307628  | 0.169955361 | 0.18235596  |
| 0.11862646  | 0.136599811 | 0.121946324 | 0.02769526  |
| 0.038647526 | 0.083167732 | 0.134332572 | 0.117609319 |
| 0.009296843 | 0.058473892 | 0.058125961 | 0.070912371 |
| 0.022157047 | 0.053862687 | 0.049060172 | 0.189637736 |
| 0.046323456 | 0.024677291 | 0.162776828 | 0.132861459 |
| 0.08678466  | 0.036160184 | 0.318979284 | 0.308020062 |
| 0.125650713 | 0.055818106 | 0.056825527 | 0.035520717 |
| 0.301150067 | 0.063734899 | 0.037389101 | 0.258895698 |
| 0.025577695 | 0.398227856 | 0.045993556 | 0.113058949 |
| 0.128183651 | 0.131207062 | 0.346713169 | 0.015345674 |
| 0.165320796 | 0.251882176 | 0.255676253 | 0.112850417 |
| 0.179609093 | 0.230453887 | 0.014968131 | 0.212486937 |
| 0.188949678 | 0.037645953 | 0.345661173 | 0.088295881 |
| 0.050573368 | 0.352500611 | 0.271464683 | 0.108386957 |
| 0.090382194 | 0.100813356 | 0.008675962 | 0.27902491  |
| 0.336270917 | 0.34085443  | 0.233279721 | 0.183099706 |
| 0.023636795 | 0.004820472 | 0.202586377 | 0.246568428 |
| 0.271204894 | 0.357646804 | 0.207590981 | 0.165781492 |
| 0.168887255 | 0.106300368 | 0.015612633 | 0.348019034 |
| 0.117564339 | 0.318428791 | 0.018579472 | 0.359910513 |
| 0.284559526 | 0.055801564 | 0.077341289 | 0.095871475 |

|             |             |             |             |
|-------------|-------------|-------------|-------------|
| 0.178665542 | 0.033371626 | 0.076743393 | 0.277861777 |
| 0.284522819 | 0.130281529 | 0.099190829 | 0.298740334 |
| 0.006104759 | 0.015275633 | 0.276125122 | 0.136864715 |
| 0.092000869 | 0.110471092 | 0.07896692  | 0.049568427 |
| 0.020609303 | 0.241108097 | 0.369828524 | 0.0457515   |
| 0.085380383 | 0.052355455 | 0.351222423 | 0.037991358 |
| 0.358452461 | 0.340990081 | 0.293028542 | 0.053499931 |
| 0.295642916 | 0.321280953 | 0.235041679 | 0.108976302 |
| 0.053127212 | 0.315535009 | 0.201016548 | 0.008710624 |
| 0.362280277 | 0.035733799 | 0.004983978 | 0.293363771 |
| 0.107727738 | 0.216581606 | 0.000789079 | 0.06235975  |
| 0.087665129 | 0.413499511 | 0.259048121 | 0.194885121 |
| 0.021394003 | 0.242297952 | 0.030446434 | 0.378790231 |
| 0.271372992 | 0.036347299 | 0.138578839 | 0.263770025 |
| 0.29203361  | 0.316667772 | 0.193629859 | 0.332553792 |
| 0.232686692 | 0.287452934 | 0.036292965 | 0.236492908 |
| 0.255403053 | 0.33175493  | 0.241623329 | 0.264209964 |
| 0.314647477 | 0.364762509 | 0.177558346 | 0.011104803 |
| 0.094729142 | 0.037823732 | 0.03627428  | 0.035011266 |
| 0.103323295 | 0.073940952 | 0.313413157 | 0.382607429 |
| 0.346608407 | 0.0217975   | 0.024420708 | 0.254083509 |
| 0.258395915 | 0.334792071 | 0.043482848 | 0.007385275 |
| 0.007267195 | 0.027675267 | 0.156578609 | 0.226522474 |
| 0.337328661 | 0.01410834  | 0.010151184 | 0.009903382 |
| 0.057222373 | 0.330275008 | 0.296856165 | 0.297486073 |
| 0.359669639 | 0.075873747 | 0.027457421 | 0.30339304  |
| 0.069418435 | 0.133109472 | 0.344499115 | 0.252015032 |
| 0.073681492 | 0.215128217 | 0.131160217 | 0.342733243 |
| 0.078633903 | 0.274507442 | 0.271161019 | 0.052448272 |
| 0.04154486  | 0.088833873 | 0.06890055  | 0.388830172 |
| 0.28509115  | 0.027428646 | 0.021304113 | 0.010163107 |
| 0.030499331 | 0.363213027 | 0.045072234 | 0.385020367 |
| 0.271099506 | 0.34956749  | 0.107160683 | 0.276435253 |
| 0.036083159 | 0.263008526 | 0.239618793 | 0.005879661 |
| 0.138230291 | 0.027379964 | 0.308820665 | 0.044625204 |
| 0.053873559 | 0.209987795 | 0.10250357  | 0.052948089 |
| 0.124407831 | 0.060123955 | 0.364210251 | 0.404657266 |
| 0.080348132 | 0.071691968 | 0.235677116 | 0.286679538 |
| 0.072546707 | 0.279274922 | 0.270209955 | 0.106877836 |
| 0.023265939 | 0.111726219 | 0.243162966 | 0.175733986 |
| 0.034850156 | 0.406700565 | 0.072304104 | 0.371525878 |
| 0.228632931 | 0.318420536 | 0.315797273 | 0.166127719 |
| 0.122464717 | 0.148412384 | 0.143917401 | 0.004657424 |
| 0.199185695 | 0.33031331  | 0.141727489 | 0.068781848 |
| 0.14788752  | 0.259969958 | 0.042529985 | 0.032179337 |
| 0.21822513  | 0.081354983 | 0.041458799 | 0.379449771 |
| 0.189880947 | 0.186559238 | 0.020562559 | 0.058815511 |
| 0.342094703 | 0.263781648 | 0.025703781 | 0.217179089 |
| 0.153613894 | 0.222381971 | 0.350647617 | 0.382345005 |
| 0.088272789 | 0.271094864 | 0.248513381 | 0.148138044 |
| 0.208287748 | 0.142256978 | 0.30312426  | 0.009545558 |
| 0.067790983 | 0.227823617 | 0.029468555 | 0.138780575 |
| 0.087837879 | 0.049521913 | 0.100661532 | 0.359750025 |
| 0.117117974 | 0.241152614 | 0.040534144 | 0.054397259 |

|             |             |             |             |
|-------------|-------------|-------------|-------------|
| 0.28654728  | 0.138759273 | 0.259081519 | 0.043700502 |
| 0.027646495 | 0.270917853 | 0.014002544 | 0.069843746 |
| 0.132680258 | 0.292763359 | 0.205694341 | 0.141567963 |
| 0.117493503 | 0.136849914 | 0.190278092 | 0.058277477 |
| 0.044023012 | 0.06838125  | 0.276757209 | 0.015282236 |
| 0.00954716  | 0.392142607 | 0.104146014 | 0.059731113 |
| 0.114060223 | 0.181180357 | 0.085249402 | 0.058684147 |
| 0.062595624 | 0.325638    | 0.059382717 | 0.259505236 |
| 0.140992406 | 0.055385563 | 0.167867702 | 0.03646015  |
| 0.046154854 | 0.237407952 | 0.278418323 | 0.31613357  |
| 0.237422672 | 0.322600658 | 0.22146671  | 0.260592278 |
| 0.061667044 | 0.202387718 | 0.016201556 | 0.314548356 |
| 0.099865445 |             |             |             |
| ADD1        | 0.08346722  | 0.119618098 | 0.083951923 |
| 0.164560377 | 0.123426177 | 0.051332947 | 0.09473573  |
| 0.017730282 | 0.109059957 | 0.031551227 | 0.164192181 |
| 0.111832969 | 0.102223515 | 0.040840014 | 0.028145684 |
| 0.202195963 | 0.179994519 | 0.035337108 | 0.158127318 |
| 0.127075367 | 0.03139326  | 0.236368691 | 0.088978175 |
| 0.08621862  | 1           | 0.186742619 | 0.15608458  |
| 0.152915891 | 0.199348606 | 0.033495791 | 0.083524821 |
| 0.120796478 | 0.09727935  | 0.094018291 | 0.186045571 |
| 0.091077876 | 0.063943168 | 0.014207623 | 0.033635286 |
| 0.081754838 | 0.161127996 | 0.127260675 | 0.181069479 |
| 0.094916855 | 0.071115024 | 0.150777221 | 0.155748195 |
| 0.016896439 | 0.189857701 | 0.013802195 | 0.064266509 |
| 0.081620006 | 0.094443246 | 0.030432974 | 0.080784429 |
| 0.073232956 | 0.012753191 | 0.083439334 | 0.037808178 |
| 0.135404763 | 0.011039599 | 0.091387245 | 0.061747867 |
| 0.025800933 | 0.035692858 | 0.130492399 | 0.055611035 |
| 0.069537524 | 0.059668676 | 0.034060633 | 0.073760568 |
| 0.007245718 | 0.134244373 | 0.162514574 | 0.074844354 |
| 0.197913131 | 0.121679596 | 0.142811539 | 0.127350993 |
| 0.14755051  | 0.082031394 | 0.189877773 | 0.168040549 |
| 0.141030287 | 0.143961688 | 0.111975619 | 0.138113054 |
| 0.097520853 | 0.102790582 | 0.061239875 | 0.232450558 |
| 0.182624446 | 0.111845631 | 0.151205302 | 0.226744689 |
| 0.112916904 | 0.098455697 | 0.068884308 | 0.099223007 |
| 0.065033622 | 0.135232121 | 0.081644404 | 0.150202493 |
| 0.062636231 | 0.127794777 | 0.263113791 | 0.09387517  |
| 0.134084315 | 0.019793662 | 0.196847385 | 0.059044041 |
| 0.155350931 | 0.066032612 | 0.245489422 | 0.098043715 |
| 0.061337352 | 0.102406716 | 0.116968645 | 0.139954671 |
| 0.107342273 | 0.093735445 | 0.131850914 | 0.104858109 |
| 0.045195722 | 0.097774184 | 0.066774886 | 0.152206441 |
| 0.023393972 | 0.059661008 | 0.072865098 | 0.058555274 |
| 0.166634584 | 0.07239656  | 0.095453214 | 0.055641643 |
| 0.11355515  | 0.065567862 | 0.154912032 | 0.054821887 |
| 0.113189514 | 0.186305287 | 0.003096764 | 0.068755338 |
| 0.098302241 | 0.077713276 | 0.229399444 | 0.093669614 |
| 0.224108591 | 0.046296744 | 0.123730124 | 0.157145269 |
| 0.0675908   | 0.143155917 | 0.020574616 | 0.210813649 |
| 0.044394536 | 0.216929094 | 0.097571854 | 0.079010374 |
| 0.063659494 | 0.091383189 | 0.167885849 | 0.035327492 |



|             |             |             |             |
|-------------|-------------|-------------|-------------|
| 0.059735518 | 0.144040057 | 0.02382672  | 0.035856662 |
| 0.041452695 | 0.112708572 | 0.063150022 | 0.128329088 |
| 0.098828665 | 0.208375512 | 0.026368655 | 0.114342418 |
| 0.092467149 | 0.085949525 | 0.012547964 | 0.141669224 |
| 0.026760453 | 0.14545213  | 0.067989611 | 0.094467872 |
| 0.243632346 | 0.163480152 | 0.004526033 | 0.081715328 |
| 0.114093591 | 0.013798423 | 0.162163942 | 0.127637625 |
| 0.089477735 | 0.159928591 | 0.002969484 | 0.185801819 |
| 0.039338585 | 0.107478891 | 0.182236872 | 0.2701413   |
| 0.083461024 | 0.189928315 | 0.031710947 | 0.142205075 |
| 0.10300664  | 0.029905204 | 0.0248208   | 0.114948337 |
| 0.143424065 | 0.021766134 | 0.099553172 | 0.147154789 |
| 0.143090681 | 0.155098664 | 0.193030087 | 0.088125164 |
| 0.126918416 | 0.061183518 | 0.070635032 | 0.193206597 |
| 0.115349453 | 0.028102386 | 0.076217657 | 0.055101284 |
| 0.025883453 | 0.104101917 | 0.084548475 | 0.020417575 |
| 0.112559992 | 0.054385724 | 0.029526125 | 0.172778015 |
| 0.071727032 | 0.08158554  | 0.073461552 | 0.068356596 |
| 0.192273308 | 0.144497321 | 0.136715526 | 0.093699559 |
| 0.105401412 | 0.089549736 | 0.099499406 | 0.055906591 |
| 0.107692308 | 0.135457756 | 0.086250911 | 0.070985708 |
| 0.037345373 | 0.1702966   | 0.058250358 | 0.038870613 |
| 0.094946254 | 0.052472567 | 0.040875796 | 0.061207158 |
| 0.035312824 | 0.106353274 | 0.153280366 | 0.073020965 |
| 0.183919    | 0.142380882 | 0.118411401 | 0.165656152 |
| 0.036735725 | 0.087105696 | 0.12901329  | 0.023730031 |
| 0.147230543 | 0.029698457 | 0.009104649 | 0.111570715 |
| 0.050373078 | 0.162679898 | 0.093949509 | 0.265379418 |
| 0.099912138 | 0.182983961 | 0.168927191 | 0.025792664 |
| 0.051364943 | 0.091441269 | 0.147361543 | 0.204706796 |
| 0.063157706 | 0.119092596 | 0.074370186 | 0.064606138 |
| 0.061532677 | 0.151654589 | 0.129785155 | 0.170521716 |
| 0.147740669 | 0.161527405 | 0.12985423  | 0.233930003 |
| 0.190251336 | 0.107614076 | 0.021600923 | 0.283082156 |
| 0.139027263 | 0.241285623 | 0.105012684 | 0.108934967 |
| 0.115810481 | 0.090688478 | 0.153020536 | 0.085454459 |
| 0.081808159 | 0.134574962 | 0.17875153  | 0.169532008 |
| 0.189348356 | 0.082947092 | 0.00709446  | 0.148082417 |
| 0.042337917 | 0.098854387 | 0.070652531 | 0.149404376 |
| 0.087950034 | 0.021948709 | 0.24301323  | 0.067554596 |
| 0.066141185 | 0.100103259 | 0.04812616  | 0.097362532 |
| 0.106100812 | 0.097166417 | 0.077569387 | 0.117721772 |
| 0.035266318 | 0.045247356 | 0.149431553 | 0.099985483 |
| 0.053337767 | 0.118677944 | 0.079571    | 0.021240272 |
| 0.127088186 | 0.091378615 | 0.164203677 | 0.167185227 |
| 0.047621718 | 0.017327786 | 0.212345322 | 0.11871498  |
| 0.144530405 | 0.107169954 | 0.096329033 | 0.048002298 |
| 0.106252964 | 0.129392186 | 0.110900934 | 0.157403277 |
| 0.168561247 | 0.102250688 | 0.066172569 | 0.063407934 |
| 0.168101789 | 0.013978801 | 0.093486482 | 0.106843354 |
| 0.128113442 | 0.055185573 | 0.006487793 | 0.01700753  |
| 0.121112717 | 0.184450839 | 0.084383781 | 0.08296283  |
| 0.01230822  | 0.113520674 | 0.012225465 | 0.135540539 |
| 0.10289816  | 0.166090948 | 0.156894133 | 0.10682491  |

|             |             |             |             |
|-------------|-------------|-------------|-------------|
| 0.130684238 | 0.106919862 | 0.133014723 | 0.154350724 |
| 0.120928854 | 0.0948249   | 0.058413624 | 0.260441944 |
| 0.121789053 | 0.109946879 | 0.098092536 | 0.087270651 |
| 0.15494493  | 0.183335191 | 0.191151687 | 0.073872183 |
| 0.097931335 | 0.022595154 | 0.027617812 | 0.112426605 |
| 0.032308924 | 0.187207884 | 0.10839094  | 0.172076072 |
| 0.150478286 | 0.087948701 | 0.03095825  | 0.093050931 |
| 0.109110823 | 0.143462961 | 0.042423753 | 0.016639087 |
| 0.009475657 | 0.22091835  | 0.076233039 | 0.184324524 |
| 0.129609828 | 0.012394188 | 0.06352915  | 0.025406253 |
| 0.058831241 | 0.196099464 | 0.107264797 | 0.197016647 |
| 0.129009201 | 0.12622746  | 0.037421793 | 0.162286011 |
| 0.216884462 | 0.029784673 | 0.158053819 | 0.0888391   |
| 0.097840486 | 0.158943838 | 0.040795297 | 0.157202885 |
| 0.076557342 | 0.217600227 | 0.109636247 | 0.069312564 |
| 0.036915269 | 0.184653294 | 0.181431671 | 0.173671155 |
| 0.086816068 | 0.164863918 | 0.182060549 | 0.00605489  |
| 0.097025471 | 0.140477471 | 0.124609208 | 0.165744842 |
| 0.123029552 | 0.197663749 | 0.150003664 | 0.092507823 |
| 0.145985617 | 0.087789088 | 0.185008388 | 0.009250294 |
| 0.069156153 | 0.073551481 | 0.095869258 | 0.093725555 |
| 0.026876452 | 0.071929567 | 0.085012522 | 0.126660826 |
| 0.071495333 | 0.170067575 | 0.183313775 | 0.183382285 |
| 0.113716536 | 0.049675143 | 0.167764584 | 0.120188706 |
| 0.04259714  | 0.177753021 | 0.086527725 | 0.045051522 |
| 0.063127177 | 0.052581418 | 0.113061747 | 0.056526012 |
| 0.022366799 | 0.185510313 | 0.093950777 | 0.135065508 |
| 0.073905056 | 0.102550965 | 0.116101827 | 0.120066949 |
| 0.11105645  | 0.055215011 | 0.086147313 | 0.046035389 |
| 0.131837045 | 0.174787329 | 0.049894948 | 0.200520227 |
| 0.224213125 | 0.10392923  | 0.043280296 | 0.008388661 |
| 0.097520453 | 0.039464658 | 0.09796792  | 0.18867088  |
| 0.061598141 | 0.060668917 | 0.027480097 | 0.187924441 |
| 0.120378093 | 0.080525005 | 0.033744798 | 0.111939788 |
| 0.160119363 | 0.188451276 | 0.140222045 | 0.160428763 |
| 0.033393472 | 0.117978712 | 0.103033059 | 0.080162168 |
| 0.074955155 | 0.129649451 | 0.101150013 | 0.006954049 |
| 0.140383806 | 0.066441019 | 0.136877315 | 0.214660199 |
| 0.176667585 | 0.145817795 | 0.05518899  | 0.17804334  |
| 0.048659374 | 0.196451733 | 0.013222876 | 0.111041293 |
| 0.179007171 | 0.032325873 | 0.179968341 | 0.060666775 |
| 0.134169878 | 0.094948738 | 0.067832486 | 0.143851527 |
| 0.05782914  | 0.127073115 | 0.149466769 | 0.147546132 |
| 0.088578811 | 0.107160855 | 0.196459615 | 0.026245619 |
| 0.036622816 | 0.028739436 | 0.119105892 | 0.035964887 |
| 0.045626392 | 0.177037575 | 0.035498962 | 0.084416693 |
| 0.064607496 | 0.046546401 | 0.038092855 | 0.090124588 |
| 0.141820658 | 0.119527636 | 0.031828364 | 0.118873846 |
| 0.079556905 | 0.102121298 | 0.042738671 | 0.03220366  |
| 0.056096833 | 0.072835184 | 0.117011717 | 0.105942733 |
| 0.092315672 | 0.21778848  | 0.057911095 | 0.096562916 |
| 0.041444325 | 0.053312137 | 0.069430244 | 0.124124353 |
| 0.049904244 |             |             |             |

ADK

0.053910156

0.082566286

0.04868205

|             |             |             |             |
|-------------|-------------|-------------|-------------|
| 0.164084931 | 0.099908409 | 0.055524406 | 0.17469013  |
| 0.039438857 | 0.162840105 | 0.082599257 | 0.196716291 |
| 0.063173497 | 0.096193102 | 0.062719181 | 0.030758504 |
| 0.17868518  | 0.173218205 | 0.031162033 | 0.222460768 |
| 0.131448797 | 0.099186929 | 0.211058855 | 0.18675151  |
| 0.058760537 | 0.186742619 | 1           | 0.108899866 |
| 0.137955493 | 0.263886987 | 0.044777475 | 0.095410422 |
| 0.1296961   | 0.073034317 | 0.057295275 | 0.126195284 |
| 0.05117087  | 0.039163832 | 0.02493021  | 0.052173733 |
| 0.061438354 | 0.112463518 | 0.137723248 | 0.21200027  |
| 0.212189452 | 0.046156572 | 0.228711527 | 0.100495395 |
| 0.026370898 | 0.239308752 | 0.024807423 | 0.046716323 |
| 0.049639072 | 0.073877025 | 0.061321426 | 0.160048033 |
| 0.071481173 | 0.023240668 | 0.038205123 | 0.044419677 |
| 0.216572933 | 0.028441674 | 0.056352537 | 0.142542124 |
| 0.04957204  | 0.062858791 | 0.118035354 | 0.095446821 |
| 0.039020626 | 0.054706036 | 0.09987114  | 0.036916943 |
| 0.025577232 | 0.145832683 | 0.113773444 | 0.038461458 |
| 0.253726508 | 0.184070691 | 0.121246316 | 0.175215567 |
| 0.123041282 | 0.049038104 | 0.128662475 | 0.107036418 |
| 0.125412168 | 0.130055771 | 0.059046756 | 0.185092219 |
| 0.070886986 | 0.181016483 | 0.07078708  | 0.189916165 |
| 0.121455461 | 0.068884624 | 0.146600789 | 0.186029415 |
| 0.095622276 | 0.074081743 | 0.050861205 | 0.08276462  |
| 0.043557126 | 0.116953237 | 0.058550626 | 0.097512755 |
| 0.04855845  | 0.055297755 | 0.249406126 | 0.092546143 |
| 0.205083618 | 0.017051843 | 0.225553003 | 0.050556923 |
| 0.127281319 | 0.173531268 | 0.1943027   | 0.129662194 |
| 0.07471703  | 0.074089839 | 0.067345248 | 0.23042806  |
| 0.070179447 | 0.123617433 | 0.07248842  | 0.15350256  |
| 0.044613429 | 0.034285491 | 0.039948863 | 0.124523567 |
| 0.04248063  | 0.055363084 | 0.119169613 | 0.096371668 |
| 0.192640007 | 0.063844117 | 0.060346037 | 0.049442867 |
| 0.094942054 | 0.034235353 | 0.165628061 | 0.043807476 |
| 0.064135422 | 0.127286873 | 0.005114682 | 0.162745838 |
| 0.078783258 | 0.074718419 | 0.281379569 | 0.069464292 |
| 0.174019796 | 0.113888401 | 0.198694814 | 0.108387606 |
| 0.055428609 | 0.247308798 | 0.020488547 | 0.174401303 |
| 0.060818371 | 0.135942634 | 0.174494258 | 0.096420574 |
| 0.181272994 | 0.050215284 | 0.164346129 | 0.040137563 |
| 0.039978368 | 0.105846554 | 0.05612277  | 0.064080631 |
| 0.051572336 | 0.080914567 | 0.035557029 | 0.195084044 |
| 0.118178658 | 0.170800069 | 0.031946785 | 0.087004614 |
| 0.169513928 | 0.136424382 | 0.014011015 | 0.096129871 |
| 0.033966198 | 0.089163807 | 0.082985637 | 0.078054796 |
| 0.217358094 | 0.1297241   | 0.002863683 | 0.050777184 |
| 0.067346139 | 0.013072039 | 0.136174289 | 0.084298755 |
| 0.056110294 | 0.134666973 | 0.001521016 | 0.161536461 |
| 0.02949265  | 0.178127239 | 0.129461341 | 0.279700689 |
| 0.052118252 | 0.265143604 | 0.047144817 | 0.078417548 |
| 0.054783297 | 0.043957674 | 0.051444301 | 0.137359613 |
| 0.144469862 | 0.081089048 | 0.082132223 | 0.14884185  |
| 0.143439316 | 0.110265101 | 0.148176936 | 0.052061645 |
| 0.096831602 | 0.09717792  | 0.114252716 | 0.13068454  |

|             |             |             |             |
|-------------|-------------|-------------|-------------|
| 0.074704728 | 0.021203225 | 0.0585584   | 0.097661848 |
| 0.020289201 | 0.076000713 | 0.048293376 | 0.033313088 |
| 0.226470872 | 0.087040603 | 0.057136146 | 0.154228808 |
| 0.044176013 | 0.163495526 | 0.050413339 | 0.070069845 |
| 0.198030813 | 0.09734403  | 0.063624812 | 0.034248474 |
| 0.04026261  | 0.082742891 | 0.147311583 | 0.074666333 |
| 0.089586148 | 0.185304768 | 0.059781512 | 0.067200563 |
| 0.134853668 | 0.22086044  | 0.053516685 | 0.020545035 |
| 0.095786439 | 0.03747708  | 0.031103183 | 0.048183419 |
| 0.042557417 | 0.12796178  | 0.114911668 | 0.049237148 |
| 0.170680813 | 0.200504771 | 0.081303711 | 0.148580676 |
| 0.033577404 | 0.162947021 | 0.184450554 | 0.016609956 |
| 0.118111444 | 0.031125876 | 0.010786129 | 0.092108054 |
| 0.079233795 | 0.113675498 | 0.117552809 | 0.276177209 |
| 0.0591886   | 0.224250504 | 0.144596518 | 0.042328699 |
| 0.048339768 | 0.069190619 | 0.134621327 | 0.208471319 |
| 0.046923492 | 0.116376342 | 0.179413375 | 0.045863599 |
| 0.042630464 | 0.222390843 | 0.079375092 | 0.14718749  |
| 0.189062189 | 0.099866418 | 0.083865281 | 0.281833374 |
| 0.199417424 | 0.125015072 | 0.091539775 | 0.257273717 |
| 0.095630364 | 0.207093993 | 0.083953764 | 0.063644067 |
| 0.231739424 | 0.118327682 | 0.105872102 | 0.044672981 |
| 0.049937068 | 0.077659158 | 0.195536121 | 0.109768651 |
| 0.259727021 | 0.065785133 | 0.02038685  | 0.096264183 |
| 0.028406107 | 0.060100902 | 0.132742741 | 0.089037663 |
| 0.050201942 | 0.029247382 | 0.225000456 | 0.109918718 |
| 0.054378067 | 0.214417184 | 0.079362225 | 0.061841204 |
| 0.085292492 | 0.091834735 | 0.061734767 | 0.084870956 |
| 0.127979178 | 0.157506658 | 0.1088656   | 0.046673609 |
| 0.055678844 | 0.151243781 | 0.018990417 | 0.030504556 |
| 0.225427268 | 0.06991791  | 0.119762729 | 0.232738776 |
| 0.056173846 | 0.023929665 | 0.162274129 | 0.220480195 |
| 0.078524216 | 0.059753084 | 0.059796592 | 0.098409097 |
| 0.067137486 | 0.078539134 | 0.052401937 | 0.172993827 |
| 0.179489587 | 0.057434599 | 0.058797613 | 0.113335619 |
| 0.131112985 | 0.021244494 | 0.154582616 | 0.078382545 |
| 0.209849894 | 0.033510105 | 0.01808983  | 0.007099282 |
| 0.111355    | 0.121348221 | 0.054769298 | 0.096114039 |
| 0.018238224 | 0.117247761 | 0.012299762 | 0.081135836 |
| 0.068870625 | 0.168884094 | 0.120367716 | 0.065771196 |
| 0.064736692 | 0.072979565 | 0.066337004 | 0.089364042 |
| 0.061483554 | 0.056037258 | 0.092419331 | 0.26081559  |
| 0.09515046  | 0.058463706 | 0.084705231 | 0.063967359 |
| 0.124263495 | 0.130191482 | 0.25362306  | 0.196947453 |
| 0.089132669 | 0.050537216 | 0.024796007 | 0.164348718 |
| 0.036267168 | 0.19474701  | 0.06837658  | 0.129113572 |
| 0.089458544 | 0.129101339 | 0.082430682 | 0.061333424 |
| 0.096479042 | 0.119091563 | 0.056024528 | 0.01431009  |
| 0.004705044 | 0.161116551 | 0.099469896 | 0.152162621 |
| 0.085561469 | 0.016590004 | 0.13645794  | 0.093749781 |
| 0.074457989 | 0.112076594 | 0.070302401 | 0.20296725  |
| 0.079061612 | 0.195131586 | 0.045534339 | 0.1620247   |
| 0.207241995 | 0.022624812 | 0.101546348 | 0.066829939 |
| 0.129472456 | 0.142269039 | 0.031456505 | 0.127357768 |

|             |             |             |             |
|-------------|-------------|-------------|-------------|
| 0.018113147 | 0.191996821 | 0.065818138 | 0.081829624 |
| 0.046373175 | 0.194126776 | 0.225398966 | 0.13272995  |
| 0.048204665 | 0.184034593 | 0.204954655 | 0.008450224 |
| 0.178902889 | 0.100181399 | 0.166302586 | 0.114674686 |
| 0.106075511 | 0.173131557 | 0.1432563   | 0.063811314 |
| 0.229677624 | 0.053062768 | 0.102610742 | 0.015098409 |
| 0.056151494 | 0.132222044 | 0.053045843 | 0.076148507 |
| 0.034123853 | 0.064858482 | 0.07216746  | 0.142849272 |
| 0.028720641 | 0.208680502 | 0.1398175   | 0.117295286 |
| 0.108041417 | 0.094059232 | 0.146520695 | 0.101098802 |
| 0.06770921  | 0.152751298 | 0.055289058 | 0.029552286 |
| 0.172808975 | 0.022192561 | 0.111379995 | 0.041320523 |
| 0.043448902 | 0.126619743 | 0.094691623 | 0.084182327 |
| 0.057974211 | 0.073382537 | 0.072082616 | 0.144083545 |
| 0.075905832 | 0.04628778  | 0.100572907 | 0.107919721 |
| 0.13712277  | 0.136174833 | 0.052966832 | 0.157119588 |
| 0.2160108   | 0.048618492 | 0.106893156 | 0.006716979 |
| 0.036092319 | 0.056451325 | 0.177465716 | 0.160372764 |
| 0.054385043 | 0.04435889  | 0.081673123 | 0.233228793 |
| 0.079158458 | 0.059806645 | 0.073752528 | 0.101839629 |
| 0.174248709 | 0.184152715 | 0.087591449 | 0.096478174 |
| 0.028398455 | 0.082838143 | 0.088177639 | 0.080676868 |
| 0.061972543 | 0.191780351 | 0.063798284 | 0.021330324 |
| 0.113178602 | 0.040396092 | 0.208224145 | 0.221441604 |
| 0.250160433 | 0.18490416  | 0.022078923 | 0.142810685 |
| 0.02011317  | 0.191366376 | 0.015596979 | 0.15393382  |
| 0.143493314 | 0.022534088 | 0.171919593 | 0.115859191 |
| 0.205032106 | 0.061899219 | 0.097924552 | 0.193644976 |
| 0.026078853 | 0.085364752 | 0.07980384  | 0.133003168 |
| 0.047238951 | 0.092632444 | 0.219296124 | 0.035325552 |
| 0.034257813 | 0.01783968  | 0.081036294 | 0.083799408 |
| 0.143569856 | 0.126584369 | 0.028406954 | 0.088512236 |
| 0.085774328 | 0.038083469 | 0.038678542 | 0.127069087 |
| 0.138022208 | 0.06845214  | 0.040407977 | 0.083570612 |
| 0.10767089  | 0.175710677 | 0.033042832 | 0.048090727 |
| 0.10934526  | 0.048801541 | 0.061963097 | 0.060787905 |
| 0.056305505 | 0.197688024 | 0.038246842 | 0.067134986 |
| 0.037957878 | 0.027695453 | 0.179224646 | 0.102584785 |
| 0.024630259 |             |             |             |

|             |             |             |             |
|-------------|-------------|-------------|-------------|
| ADSL        | 0.212353723 | 0.310002995 | 0.182183831 |
| 0.285657115 | 0.203352341 | 0.128971469 | 0.098643816 |
| 0.031224961 | 0.125527131 | 0.008138289 | 0.079923147 |
| 0.214496119 | 0.097749451 | 0.053100063 | 0.088933089 |
| 0.338274154 | 0.112211906 | 0.07476437  | 0.146407315 |
| 0.228672358 | 0.028964549 | 0.321121134 | 0.069593269 |
| 0.154360207 | 0.15608458  | 0.108899866 | 1           |
| 0.2919785   | 0.113604405 | 0.074179719 | 0.170760221 |
| 0.088525666 | 0.226506465 | 0.277984411 | 0.290716969 |
| 0.268616396 | 0.183344468 | 0.005306095 | 0.071251916 |
| 0.214773836 | 0.333994337 | 0.233762251 | 0.206841883 |
| 0.054198017 | 0.220538089 | 0.154329749 | 0.260337135 |
| 0.04214633  | 0.081430696 | 0.031249375 | 0.201822358 |
| 0.24054244  | 0.208638245 | 0.048936852 | 0.073783546 |
| 0.084993818 | 0.02559375  | 0.124769794 | 0.095208254 |

|             |             |             |             |
|-------------|-------------|-------------|-------------|
| 0.123603612 | 0.018419484 | 0.262575057 | 0.075359188 |
| 0.047739298 | 0.052613448 | 0.107345426 | 0.071343478 |
| 0.141273797 | 0.161193822 | 0.015895488 | 0.180477033 |
| 0.00114273  | 0.227166308 | 0.2390219   | 0.16209295  |
| 0.077470114 | 0.034615047 | 0.114357381 | 0.178973263 |
| 0.300869011 | 0.240651747 | 0.374944338 | 0.370338997 |
| 0.098346629 | 0.167125619 | 0.20904837  | 0.10198321  |
| 0.251799802 | 0.086351548 | 0.054293201 | 0.358088778 |
| 0.37504115  | 0.301474389 | 0.155505457 | 0.240395324 |
| 0.258766096 | 0.258716182 | 0.148240181 | 0.171704249 |
| 0.148234902 | 0.09944386  | 0.235151338 | 0.341884568 |
| 0.175963177 | 0.19273517  | 0.166797297 | 0.200154338 |
| 0.072682691 | 0.05503435  | 0.246400953 | 0.048166165 |
| 0.315597525 | 0.042055329 | 0.199714484 | 0.146052961 |
| 0.087112868 | 0.240428691 | 0.314370391 | 0.118556089 |
| 0.173159731 | 0.029411475 | 0.188796099 | 0.054389882 |
| 0.072132394 | 0.124086704 | 0.221761889 | 0.299535241 |
| 0.037505732 | 0.117572239 | 0.093093444 | 0.01703899  |
| 0.065994975 | 0.097425495 | 0.225898061 | 0.102120348 |
| 0.248052617 | 0.205896174 | 0.153901158 | 0.154764949 |
| 0.247016563 | 0.371218621 | 0.007858022 | 0.061358887 |
| 0.176393715 | 0.100495562 | 0.201581449 | 0.187580797 |
| 0.23256398  | 0.045541728 | 0.076690652 | 0.359512716 |
| 0.196587255 | 0.073215615 | 0.049470898 | 0.318294373 |
| 0.091300088 | 0.262558993 | 0.066337189 | 0.075198779 |
| 0.035918762 | 0.271319914 | 0.07338678  | 0.073378444 |
| 0.157472141 | 0.099032803 | 0.012186165 | 0.05775835  |
| 0.067231702 | 0.26528852  | 0.213984914 | 0.077187125 |
| 0.101977507 | 0.304507493 | 0.062407526 | 0.227402168 |
| 0.041028483 | 0.047421956 | 0.036814774 | 0.320625737 |
| 0.070396488 | 0.338131149 | 0.094924349 | 0.143537513 |
| 0.238912936 | 0.32705379  | 0.005081135 | 0.247237266 |
| 0.312980261 | 0.039541188 | 0.210354901 | 0.225660272 |
| 0.203775877 | 0.313015181 | 0.005796097 | 0.278053958 |
| 0.112163973 | 0.069321439 | 0.37571344  | 0.16727597  |
| 0.237681005 | 0.08426723  | 0.054662778 | 0.335497666 |
| 0.232871769 | 0.013255432 | 0.045614564 | 0.210629776 |
| 0.073041409 | 0.027584156 | 0.228522864 | 0.252796573 |
| 0.248340946 | 0.318975058 | 0.366915841 | 0.194637913 |
| 0.201640362 | 0.067298693 | 0.030136031 | 0.233907037 |
| 0.270144095 | 0.085386406 | 0.220412313 | 0.077573128 |
| 0.07512892  | 0.27314107  | 0.229937891 | 0.068163268 |
| 0.059272893 | 0.09041353  | 0.013269626 | 0.240369124 |
| 0.223519672 | 0.056568436 | 0.191124684 | 0.068760635 |
| 0.103884407 | 0.345019513 | 0.154770542 | 0.14651852  |
| 0.134754774 | 0.148047513 | 0.112934165 | 0.059528925 |
| 0.089787156 | 0.138215371 | 0.16187898  | 0.139059352 |
| 0.022403209 | 0.085381699 | 0.038230606 | 0.066163059 |
| 0.055443401 | 0.066499573 | 0.057687166 | 0.159012843 |
| 0.056967819 | 0.052843533 | 0.187104997 | 0.155833516 |
| 0.148188583 | 0.045592466 | 0.304238377 | 0.269033169 |
| 0.108172809 | 0.094504942 | 0.062393051 | 0.053228912 |
| 0.305073247 | 0.077803874 | 0.028186705 | 0.262950463 |
| 0.029125641 | 0.353572676 | 0.095612962 | 0.147956161 |

|             |             |             |             |
|-------------|-------------|-------------|-------------|
| 0.127424025 | 0.154127397 | 0.33763309  | 0.03964038  |
| 0.120498645 | 0.242047323 | 0.193673146 | 0.164660011 |
| 0.171744292 | 0.220143915 | 0.034706076 | 0.17887908  |
| 0.158082853 | 0.057053306 | 0.322713666 | 0.111974776 |
| 0.054344751 | 0.299244142 | 0.288286611 | 0.122829156 |
| 0.118527464 | 0.141921188 | 0.01886647  | 0.283055673 |
| 0.33369938  | 0.341493186 | 0.248357089 | 0.15313496  |
| 0.055910918 | 0.016416492 | 0.142580883 | 0.178730788 |
| 0.246909291 | 0.329431669 | 0.168656742 | 0.197035586 |
| 0.17774666  | 0.171543546 | 0.017639479 | 0.339494195 |
| 0.078192434 | 0.279952446 | 0.023693566 | 0.330216259 |
| 0.266181718 | 0.048762938 | 0.136285198 | 0.113202001 |
| 0.170853121 | 0.065922068 | 0.0639403   | 0.26755108  |
| 0.275515713 | 0.160597835 | 0.149186419 | 0.220415757 |
| 0.016963472 | 0.029532094 | 0.27512232  | 0.156425432 |
| 0.106502954 | 0.147950117 | 0.082757062 | 0.056200111 |
| 0.059170667 | 0.240396679 | 0.310190495 | 0.136513666 |
| 0.108890491 | 0.050568073 | 0.287170565 | 0.058902983 |
| 0.342893184 | 0.296148747 | 0.275120959 | 0.054911864 |
| 0.237967281 | 0.322338722 | 0.227781389 | 0.095928738 |
| 0.061938843 | 0.290626165 | 0.168714798 | 0.028714792 |
| 0.330177554 | 0.034747836 | 0.022718386 | 0.27872379  |
| 0.112876351 | 0.185052544 | 0.006546605 | 0.041284287 |
| 0.081506497 | 0.356122949 | 0.256269115 | 0.171494116 |
| 0.029440743 | 0.186279447 | 0.010984471 | 0.335553319 |
| 0.268286614 | 0.066924035 | 0.149667101 | 0.247954439 |
| 0.283812021 | 0.288990002 | 0.21327695  | 0.336754713 |
| 0.22452498  | 0.274343653 | 0.067677217 | 0.255827333 |
| 0.266940827 | 0.304064993 | 0.218592613 | 0.244565884 |
| 0.298712256 | 0.304674267 | 0.207833672 | 0.03424403  |
| 0.198613398 | 0.037772155 | 0.077563999 | 0.122855184 |
| 0.088267356 | 0.161344044 | 0.276706269 | 0.343108181 |
| 0.331542906 | 0.025578761 | 0.03929606  | 0.22928215  |
| 0.246614453 | 0.311496223 | 0.0318187   | 0.014348467 |
| 0.008716439 | 0.100059143 | 0.139389981 | 0.188411143 |
| 0.32193335  | 0.029040561 | 0.01833516  | 0.017670351 |
| 0.08963463  | 0.31396393  | 0.284486462 | 0.279401193 |
| 0.291674761 | 0.079725834 | 0.063311507 | 0.265312008 |
| 0.155188392 | 0.097145075 | 0.342395289 | 0.246968494 |
| 0.060312157 | 0.184154019 | 0.085160932 | 0.334265231 |
| 0.099845961 | 0.233700372 | 0.212161364 | 0.102047799 |
| 0.021453203 | 0.126838271 | 0.140041392 | 0.323352172 |
| 0.261627306 | 0.075343461 | 0.064200984 | 0.014219691 |
| 0.069226537 | 0.311930433 | 0.091485603 | 0.361928066 |
| 0.263428941 | 0.330434    | 0.103642654 | 0.269201603 |
| 0.089945231 | 0.247746587 | 0.232765359 | 0.01948414  |
| 0.095011148 | 0.029359415 | 0.259440133 | 0.156552685 |
| 0.048736965 | 0.165005601 | 0.205209245 | 0.056895458 |
| 0.146714962 | 0.082703697 | 0.363381497 | 0.366556096 |
| 0.067858901 | 0.08356745  | 0.194529985 | 0.218903737 |
| 0.075404673 | 0.297643482 | 0.255440423 | 0.114944325 |
| 0.052863592 | 0.076970994 | 0.213185849 | 0.141722768 |
| 0.038146978 | 0.373432266 | 0.15413373  | 0.33794129  |
| 0.190205866 | 0.272880607 | 0.291137437 | 0.19745913  |

|             |             |             |             |
|-------------|-------------|-------------|-------------|
| 0.13359526  | 0.131347484 | 0.16903495  | 0.017936331 |
| 0.183159801 | 0.325245465 | 0.103036864 | 0.174791926 |
| 0.192647032 | 0.216271217 | 0.036373113 | 0.021513297 |
| 0.183257467 | 0.088427302 | 0.073916803 | 0.336225646 |
| 0.13929244  | 0.153753249 | 0.01675365  | 0.140172952 |
| 0.31604965  | 0.236016898 | 0.052324851 | 0.228039252 |
| 0.123602083 | 0.262967729 | 0.298975516 | 0.319837727 |
| 0.104543268 | 0.262311043 | 0.219757495 | 0.160990376 |
| 0.203640883 | 0.154894107 | 0.288580563 | 0.011186536 |
| 0.136889263 | 0.160159195 | 0.08177866  | 0.122184582 |
| 0.105270599 | 0.079780331 | 0.132067169 | 0.293851241 |
| 0.100232044 | 0.246829004 | 0.038806195 | 0.088258165 |
| 0.219479424 | 0.084150794 | 0.231539255 | 0.06000805  |
| 0.07673206  | 0.268975827 | 0.028981862 | 0.07280639  |
| 0.101372357 | 0.296894361 | 0.230744723 | 0.13740426  |
| 0.162847305 | 0.114396313 | 0.192968752 | 0.05585577  |
| 0.059266292 | 0.074498146 | 0.285395847 | 0.027649321 |
| 0.017968529 | 0.357108634 | 0.083798359 | 0.047573407 |
| 0.082303869 | 0.135660532 | 0.067558089 | 0.140168759 |
| 0.069479824 | 0.306640362 | 0.074459365 | 0.22195861  |
| 0.136803467 | 0.062608694 | 0.136554476 | 0.041269498 |
| 0.049416628 | 0.209360078 | 0.230837636 | 0.292122698 |
| 0.155727062 | 0.328644703 | 0.193000343 | 0.227731546 |
| 0.054031539 | 0.13831099  | 0.039085658 | 0.27040651  |
| 0.108292028 |             |             |             |
| AHNAK       | 0.390063076 | 0.507240431 | 0.382303234 |
| 0.447989331 | 0.44132487  | 0.378254052 | 0.332080355 |
| 0.307422138 | 0.154278646 | 0.019588026 | 0.04271609  |
| 0.412710934 | 0.252315514 | 0.356701339 | 0.339362886 |
| 0.455204025 | 0.202012689 | 0.410889027 | 0.371012861 |
| 0.459559598 | 0.194978275 | 0.444130387 | 0.203697155 |
| 0.311687832 | 0.152915891 | 0.137955493 | 0.2919785   |
| 1           | 0.156623131 | 0.341028209 | 0.427478939 |
| 0.179102931 | 0.418732675 | 0.483189078 | 0.419484504 |
| 0.464744418 | 0.35542372  | 0.032355918 | 0.338144494 |
| 0.412165883 | 0.417025791 | 0.454021007 | 0.424320741 |
| 0.111562219 | 0.457389663 | 0.35869147  | 0.415078634 |
| 0.302669678 | 0.07154376  | 0.302831162 | 0.428392818 |
| 0.432606628 | 0.390242214 | 0.347692987 | 0.274299731 |
| 0.206420033 | 0.295182055 | 0.230321109 | 0.348491311 |
| 0.346641885 | 0.234265563 | 0.444544226 | 0.169323481 |
| 0.197572166 | 0.380298991 | 0.223658666 | 0.383680534 |
| 0.322317751 | 0.380836547 | 0.0688466   | 0.347239543 |
| 0.010043248 | 0.459371093 | 0.419465034 | 0.262051463 |
| 0.100648698 | 0.054747067 | 0.258208764 | 0.419372548 |
| 0.467603714 | 0.433672626 | 0.470065227 | 0.463336907 |
| 0.251690887 | 0.384234179 | 0.360948205 | 0.278356984 |
| 0.418606006 | 0.284910756 | 0.201709255 | 0.448785129 |
| 0.475914489 | 0.485821236 | 0.281302289 | 0.336447474 |
| 0.387458897 | 0.47323571  | 0.411163483 | 0.430100876 |
| 0.311596631 | 0.09286013  | 0.415682511 | 0.489720341 |
| 0.383375085 | 0.292977739 | 0.235145092 | 0.426017841 |
| 0.136284166 | 0.384067164 | 0.439022837 | 0.218788214 |
| 0.482464153 | 0.060117358 | 0.28081362  | 0.422944386 |



|             |             |             |             |
|-------------|-------------|-------------|-------------|
| 0.336197444 | 0.417613708 | 0.47389257  | 0.317692259 |
| 0.427041836 | 0.056487258 | 0.141554771 | 0.085084534 |
| 0.387850864 | 0.143248783 | 0.432458699 | 0.455708053 |
| 0.342455958 | 0.391629714 | 0.39594357  | 0.011476575 |
| 0.065331773 | 0.264109259 | 0.383050445 | 0.432387233 |
| 0.43861177  | 0.337110633 | 0.295443312 | 0.362548102 |
| 0.377337272 | 0.461098228 | 0.070961162 | 0.216164704 |
| 0.443914981 | 0.266726482 | 0.356685439 | 0.421042187 |
| 0.362680323 | 0.248527968 | 0.244256066 | 0.507628874 |
| 0.428129477 | 0.185960885 | 0.381055125 | 0.457238131 |
| 0.351258416 | 0.37906369  | 0.225359278 | 0.370969347 |
| 0.131341761 | 0.432127232 | 0.062159241 | 0.412813348 |
| 0.241962559 | 0.1879467   | 0.042517801 | 0.365605157 |
| 0.357909986 | 0.393913737 | 0.415196426 | 0.218795969 |
| 0.406589533 | 0.436975767 | 0.36956084  | 0.393003137 |
| 0.026829285 | 0.121921015 | 0.31006605  | 0.49082659  |
| 0.302273896 | 0.47966584  | 0.418367756 | 0.372957258 |
| 0.367914916 | 0.446062526 | 0.006514993 | 0.462933801 |
| 0.484278436 | 0.316339542 | 0.421595319 | 0.431597244 |
| 0.328790776 | 0.443985689 | 0.052589604 | 0.459588467 |
| 0.343212421 | 0.180349203 | 0.498850788 | 0.246731402 |
| 0.435055804 | 0.096546619 | 0.391379893 | 0.36948577  |
| 0.356668249 | 0.02393193  | 0.298890638 | 0.442154001 |
| 0.05828732  | 0.193319331 | 0.430565191 | 0.452325057 |
| 0.412265256 | 0.433123633 | 0.486285497 | 0.308162125 |
| 0.443312205 | 0.377384032 | 0.041170894 | 0.371035752 |
| 0.407006988 | 0.325390443 | 0.435780413 | 0.368559456 |
| 0.329367321 | 0.463938245 | 0.354010541 | 0.200689708 |
| 0.114413476 | 0.406451416 | 0.059775498 | 0.387163011 |
| 0.351731563 | 0.206011157 | 0.350547925 | 0.234225073 |
| 0.131377303 | 0.506332334 | 0.194496095 | 0.235734553 |
| 0.127950445 | 0.398011563 | 0.393261124 | 0.280324867 |
| 0.231282857 | 0.266298686 | 0.350880433 | 0.391455155 |
| 0.109060906 | 0.178440954 | 0.033037204 | 0.316471408 |
| 0.173414613 | 0.328380364 | 0.31894196  | 0.378364287 |
| 0.385129028 | 0.182984519 | 0.418231149 | 0.303903178 |
| 0.182010528 | 0.046587357 | 0.491817804 | 0.462422205 |
| 0.323756063 | 0.281267218 | 0.100181865 | 0.296842708 |
| 0.459828136 | 0.306389696 | 0.294113382 | 0.4507004   |
| 0.079107862 | 0.470653919 | 0.309826286 | 0.202174452 |
| 0.361671615 | 0.368069927 | 0.47048806  | 0.09166205  |
| 0.413387163 | 0.458746088 | 0.405623162 | 0.261822141 |
| 0.384561599 | 0.458161085 | 0.091222285 | 0.370276208 |
| 0.367865951 | 0.08357062  | 0.496596941 | 0.189778075 |
| 0.058047759 | 0.41881702  | 0.380092761 | 0.150454511 |
| 0.147338998 | 0.372914896 | 0.126605194 | 0.374110636 |
| 0.502925763 | 0.44748628  | 0.383187492 | 0.255573503 |
| 0.103848683 | 0.025242223 | 0.267987342 | 0.378688661 |
| 0.471268219 | 0.473449348 | 0.376687559 | 0.370845233 |
| 0.369431714 | 0.329981264 | 0.216495978 | 0.486194244 |
| 0.251638456 | 0.487984078 | 0.027571378 | 0.385683843 |
| 0.45826783  | 0.334772617 | 0.135811324 | 0.387093657 |
| 0.374441647 | 0.121757171 | 0.346118501 | 0.470060967 |
| 0.423716777 | 0.37451226  | 0.359177468 | 0.441681342 |

|             |             |             |             |
|-------------|-------------|-------------|-------------|
| 0.060611852 | 0.119880152 | 0.404556627 | 0.189476304 |
| 0.389792528 | 0.319630956 | 0.052311885 | 0.399067971 |
| 0.103098761 | 0.441305828 | 0.446187001 | 0.114633071 |
| 0.324418845 | 0.375579868 | 0.425232451 | 0.101736506 |
| 0.398597394 | 0.459139537 | 0.488881229 | 0.31061955  |
| 0.400862795 | 0.450311255 | 0.331399873 | 0.155109678 |
| 0.045384316 | 0.471559814 | 0.407158599 | 0.055765391 |
| 0.471594601 | 0.276036748 | 0.034666218 | 0.493026935 |
| 0.323538478 | 0.405760571 | 0.014946359 | 0.091147956 |
| 0.079971671 | 0.431142    | 0.446904268 | 0.434351532 |
| 0.256596732 | 0.454312228 | 0.011606105 | 0.492860717 |
| 0.470070368 | 0.036451922 | 0.192835872 | 0.377494428 |
| 0.356336108 | 0.514469006 | 0.298977168 | 0.400359005 |
| 0.374258427 | 0.453155777 | 0.330616387 | 0.35976336  |
| 0.421078412 | 0.437934986 | 0.433824327 | 0.456467123 |
| 0.453663471 | 0.436918229 | 0.39349141  | 0.052920274 |
| 0.158459567 | 0.313302652 | 0.274479683 | 0.118518527 |
| 0.348802077 | 0.208988029 | 0.466920305 | 0.45799279  |
| 0.44975394  | 0.020211624 | 0.274922707 | 0.385682999 |
| 0.455396289 | 0.487713863 | 0.053287276 | 0.01341256  |
| 0.014103473 | 0.033974811 | 0.436785557 | 0.328363227 |
| 0.467208329 | 0.240859202 | 0.021636615 | 0.128251586 |
| 0.389513076 | 0.381955724 | 0.475933172 | 0.458887687 |
| 0.401756213 | 0.168561902 | 0.292446522 | 0.464707894 |
| 0.112768439 | 0.308550493 | 0.463419716 | 0.463170128 |
| 0.093659117 | 0.331254259 | 0.413856149 | 0.494082045 |
| 0.060547872 | 0.40022682  | 0.414614984 | 0.369308487 |
| 0.035654989 | 0.143839618 | 0.121619439 | 0.448464511 |
| 0.445278024 | 0.127399111 | 0.069881239 | 0.181821139 |
| 0.211574389 | 0.451768679 | 0.266456977 | 0.505425532 |
| 0.433785442 | 0.460258213 | 0.121417494 | 0.463027592 |
| 0.081488934 | 0.452269914 | 0.342788403 | 0.089436073 |
| 0.380346842 | 0.044321625 | 0.429023264 | 0.145740432 |
| 0.387159178 | 0.42625986  | 0.215698333 | 0.040721322 |
| 0.17337316  | 0.113221493 | 0.470259944 | 0.426036317 |
| 0.06897851  | 0.372504014 | 0.393142964 | 0.454723057 |
| 0.371186352 | 0.444096409 | 0.472674584 | 0.35119676  |
| 0.183982708 | 0.149301436 | 0.455244728 | 0.389205675 |
| 0.348033157 | 0.479462828 | 0.318545505 | 0.502336116 |
| 0.403181412 | 0.454626207 | 0.442537654 | 0.422510211 |
| 0.253291836 | 0.412684849 | 0.38967247  | 0.060713457 |
| 0.450708648 | 0.440046908 | 0.43108915  | 0.203065699 |
| 0.32762691  | 0.337952714 | 0.122837261 | 0.223431096 |
| 0.277550432 | 0.346839432 | 0.246292744 | 0.459814938 |
| 0.420994025 | 0.388782122 | 0.113753979 | 0.115760923 |
| 0.519532875 | 0.430622962 | 0.253855464 | 0.431126238 |
| 0.280907142 | 0.400537385 | 0.416030269 | 0.411142122 |
| 0.361461981 | 0.409250572 | 0.433486076 | 0.387406939 |
| 0.424624021 | 0.386685227 | 0.491638477 | 0.18176878  |
| 0.126579624 | 0.378402231 | 0.168687558 | 0.166447242 |
| 0.256543944 | 0.06671383  | 0.246996458 | 0.454757369 |
| 0.310857355 | 0.440322074 | 0.351244367 | 0.161680086 |
| 0.389563625 | 0.371306936 | 0.436463487 | 0.311902435 |
| 0.155772243 | 0.465890048 | 0.027095903 | 0.123607086 |

|             |             |             |             |
|-------------|-------------|-------------|-------------|
| 0.335355452 | 0.399191189 | 0.351729209 | 0.340393125 |
| 0.278026933 | 0.200552861 | 0.396222054 | 0.352591077 |
| 0.305672447 | 0.355707631 | 0.392926601 | 0.099390009 |
| 0.070167207 | 0.489884312 | 0.400831125 | 0.050146207 |
| 0.13186452  | 0.367365679 | 0.388829342 | 0.299158526 |
| 0.048446588 | 0.434037393 | 0.331791724 | 0.422463023 |
| 0.43502778  | 0.153807692 | 0.350062991 | 0.162239314 |
| 0.148361862 | 0.436744372 | 0.376707204 | 0.46950975  |
| 0.377976103 | 0.452737825 | 0.419756087 | 0.39077779  |
| 0.203431973 | 0.337852227 | 0.088469079 | 0.4388481   |
| 0.337052108 |             |             |             |
| AI451617    | 0.065509251 | 0.094238633 | 0.058694876 |
| 0.179367868 | 0.107965999 | 0.062221564 | 0.18017296  |
| 0.049916994 | 0.186660688 | 0.087304756 | 0.173648354 |
| 0.074578438 | 0.101897342 | 0.071224795 | 0.038599446 |
| 0.198835066 | 0.182154125 | 0.039192867 | 0.23537559  |
| 0.14706902  | 0.108334125 | 0.225382216 | 0.209557468 |
| 0.069591081 | 0.199348606 | 0.263886987 | 0.113604405 |
| 0.156623131 | 1           | 0.046043544 | 0.107976091 |
| 0.153727748 | 0.085650686 | 0.067142233 | 0.135019168 |
| 0.059910207 | 0.048483971 | 0.027536537 | 0.0579123   |
| 0.074579316 | 0.127286128 | 0.152332905 | 0.225419216 |
| 0.231292239 | 0.054477777 | 0.234696245 | 0.11588149  |
| 0.035128371 | 0.238617857 | 0.0286179   | 0.054867024 |
| 0.056731504 | 0.077416362 | 0.067752731 | 0.159861751 |
| 0.06647201  | 0.02645585  | 0.041674329 | 0.051537297 |
| 0.217065431 | 0.030352081 | 0.064258646 | 0.159358501 |
| 0.053453128 | 0.070667095 | 0.134566479 | 0.104691835 |
| 0.043971349 | 0.064745672 | 0.115928889 | 0.044505059 |
| 0.024571129 | 0.164474888 | 0.130882736 | 0.041244152 |
| 0.257490979 | 0.181045259 | 0.139306667 | 0.182372813 |
| 0.140811526 | 0.059558722 | 0.144116116 | 0.120420489 |
| 0.13889333  | 0.146158994 | 0.066202069 | 0.19782848  |
| 0.083481911 | 0.178993089 | 0.090372653 | 0.20814645  |
| 0.136444142 | 0.078791532 | 0.162042902 | 0.203151826 |
| 0.103515268 | 0.084732696 | 0.060406259 | 0.089080471 |
| 0.051005057 | 0.138928009 | 0.06575102  | 0.110182075 |
| 0.058376718 | 0.061888612 | 0.258549089 | 0.105446636 |
| 0.226646817 | 0.023559879 | 0.239233701 | 0.059775346 |
| 0.144924994 | 0.189095022 | 0.203196062 | 0.133215983 |
| 0.097590016 | 0.088120132 | 0.077508791 | 0.237445771 |
| 0.08015057  | 0.137545891 | 0.07959184  | 0.175780711 |
| 0.052263735 | 0.041731454 | 0.046725212 | 0.13720683  |
| 0.051083    | 0.062614472 | 0.127234249 | 0.106266738 |
| 0.21412046  | 0.081945225 | 0.069211765 | 0.059883714 |
| 0.110461467 | 0.042405229 | 0.162416484 | 0.051385545 |
| 0.071615887 | 0.141614606 | 0.00574237  | 0.18439797  |
| 0.090087963 | 0.092671534 | 0.295778291 | 0.075928745 |
| 0.182653266 | 0.133974276 | 0.204784917 | 0.123358081 |
| 0.064576663 | 0.247754694 | 0.02540098  | 0.19579959  |
| 0.063359959 | 0.147358292 | 0.195106395 | 0.102945557 |
| 0.187589162 | 0.058432461 | 0.182833546 | 0.049556007 |
| 0.045467071 | 0.109390994 | 0.07171358  | 0.070715597 |
| 0.06139617  | 0.087904881 | 0.042101156 | 0.20791872  |

|             |             |             |             |
|-------------|-------------|-------------|-------------|
| 0.120981848 | 0.184201609 | 0.037603529 | 0.094301773 |
| 0.154973673 | 0.163460473 | 0.017200847 | 0.107942254 |
| 0.038218566 | 0.104159383 | 0.101136829 | 0.094422481 |
| 0.23337749  | 0.149335476 | 0.005852515 | 0.059625048 |
| 0.077747498 | 0.016325839 | 0.141602831 | 0.098395249 |
| 0.059194756 | 0.149746613 | 0.002337293 | 0.178029682 |
| 0.036449778 | 0.204933087 | 0.146155259 | 0.280107502 |
| 0.061185821 | 0.262974346 | 0.049934274 | 0.089831082 |
| 0.061091966 | 0.044363248 | 0.055358095 | 0.149846253 |
| 0.165346643 | 0.086684516 | 0.096681867 | 0.165835602 |
| 0.152125664 | 0.127923639 | 0.166797289 | 0.055214975 |
| 0.107739065 | 0.108487601 | 0.135983745 | 0.147442151 |
| 0.088693225 | 0.024620136 | 0.068286827 | 0.113565956 |
| 0.025292256 | 0.086679199 | 0.057425733 | 0.034296125 |
| 0.237037636 | 0.093202521 | 0.067677269 | 0.165137555 |
| 0.052716701 | 0.16190584  | 0.055381309 | 0.086175541 |
| 0.215287866 | 0.10994737  | 0.075761295 | 0.039710188 |
| 0.048658377 | 0.08518033  | 0.163184141 | 0.074427308 |
| 0.086847417 | 0.20267933  | 0.063634584 | 0.071109213 |
| 0.140441794 | 0.231570657 | 0.070952081 | 0.021498751 |
| 0.090002131 | 0.037103028 | 0.031045337 | 0.05509362  |
| 0.048041028 | 0.134440531 | 0.122543948 | 0.062434553 |
| 0.200900187 | 0.204976004 | 0.093433726 | 0.169537245 |
| 0.04001072  | 0.181588087 | 0.207677709 | 0.018658925 |
| 0.129167807 | 0.034516602 | 0.013051249 | 0.101288655 |
| 0.099876921 | 0.128791943 | 0.121322416 | 0.275760945 |
| 0.060805144 | 0.228266401 | 0.162864917 | 0.041360754 |
| 0.056301481 | 0.077732352 | 0.154017132 | 0.210397418 |
| 0.053756951 | 0.130378603 | 0.184524915 | 0.055303285 |
| 0.050600734 | 0.234626751 | 0.091096766 | 0.163537879 |
| 0.20244426  | 0.114416665 | 0.091757758 | 0.290225533 |
| 0.229911734 | 0.122404249 | 0.102468657 | 0.274439035 |
| 0.10815197  | 0.223262237 | 0.090101189 | 0.080038935 |
| 0.237869364 | 0.102785349 | 0.115847379 | 0.054859974 |
| 0.058532664 | 0.089127147 | 0.211683362 | 0.113450512 |
| 0.27415231  | 0.071975964 | 0.02421574  | 0.108316195 |
| 0.040852616 | 0.070886098 | 0.145023606 | 0.099382544 |
| 0.058384989 | 0.032775968 | 0.236799645 | 0.11457593  |
| 0.062321031 | 0.235994181 | 0.097747647 | 0.071674433 |
| 0.097078025 | 0.096198778 | 0.067292213 | 0.098926404 |
| 0.138322898 | 0.162114517 | 0.123328548 | 0.057300575 |
| 0.057043877 | 0.170729821 | 0.023627098 | 0.03693744  |
| 0.23413651  | 0.077740764 | 0.137012425 | 0.252355948 |
| 0.056770413 | 0.031128811 | 0.178888436 | 0.238519603 |
| 0.089568099 | 0.070481247 | 0.069744494 | 0.117606983 |
| 0.076919793 | 0.088669685 | 0.057690868 | 0.193923966 |
| 0.193958252 | 0.067343284 | 0.070948016 | 0.123833996 |
| 0.146422599 | 0.024477986 | 0.140384877 | 0.090411591 |
| 0.223647605 | 0.039874811 | 0.025119317 | 0.011549255 |
| 0.134903641 | 0.138620537 | 0.063396338 | 0.109055806 |
| 0.019562667 | 0.135654044 | 0.01473175  | 0.093925095 |
| 0.078358089 | 0.182976651 | 0.13494542  | 0.073383272 |
| 0.073896263 | 0.08497761  | 0.072343229 | 0.100265489 |
| 0.069212636 | 0.06415136  | 0.09792484  | 0.273065917 |

|             |             |             |             |
|-------------|-------------|-------------|-------------|
| 0.106853342 | 0.067540192 | 0.100417362 | 0.075644687 |
| 0.137209425 | 0.146505512 | 0.264892072 | 0.199654757 |
| 0.106300443 | 0.054426902 | 0.028134313 | 0.164421538 |
| 0.043054434 | 0.219503758 | 0.081322257 | 0.144772367 |
| 0.101635179 | 0.140446997 | 0.094829811 | 0.070053741 |
| 0.110500685 | 0.135949762 | 0.076404023 | 0.020636131 |
| 0.007505861 | 0.158729038 | 0.10984315  | 0.170647976 |
| 0.097959756 | 0.01887333  | 0.14413307  | 0.106345754 |
| 0.094920972 | 0.123513674 | 0.079504913 | 0.223585908 |
| 0.092330905 | 0.213502582 | 0.04674602  | 0.182824342 |
| 0.214701521 | 0.028436125 | 0.114233745 | 0.075643552 |
| 0.152787846 | 0.156981608 | 0.039287886 | 0.142008652 |
| 0.021279036 | 0.207417649 | 0.076018171 | 0.088470429 |
| 0.060107678 | 0.220316311 | 0.243532239 | 0.151526752 |
| 0.055985789 | 0.17761891  | 0.203377109 | 0.010484578 |
| 0.181553594 | 0.114482968 | 0.181607023 | 0.129739799 |
| 0.120615436 | 0.19152142  | 0.153317192 | 0.073789034 |
| 0.208027711 | 0.061322611 | 0.111596837 | 0.020950557 |
| 0.071332844 | 0.150545463 | 0.062127817 | 0.075109578 |
| 0.038457456 | 0.077674776 | 0.083320908 | 0.156194049 |
| 0.037645094 | 0.227458783 | 0.15423017  | 0.13251224  |
| 0.128957446 | 0.109522588 | 0.167950119 | 0.119837331 |
| 0.075561662 | 0.164786921 | 0.064184177 | 0.034251824 |
| 0.178358214 | 0.028107601 | 0.12793244  | 0.050726582 |
| 0.051018408 | 0.142709252 | 0.096850428 | 0.097692787 |
| 0.069798214 | 0.086445627 | 0.08248351  | 0.155859596 |
| 0.07975529  | 0.055866427 | 0.106217875 | 0.121564556 |
| 0.155176677 | 0.148272406 | 0.063550235 | 0.169696122 |
| 0.214401686 | 0.05625968  | 0.123588757 | 0.010172145 |
| 0.041826427 | 0.062339224 | 0.187337282 | 0.180864514 |
| 0.065241817 | 0.053629034 | 0.091624978 | 0.253257354 |
| 0.091203554 | 0.070509042 | 0.091510138 | 0.113365619 |
| 0.190950045 | 0.190730063 | 0.102646886 | 0.109493656 |
| 0.034639258 | 0.091413634 | 0.100902534 | 0.086636774 |
| 0.069577611 | 0.203469881 | 0.07397279  | 0.02837795  |
| 0.127639293 | 0.047669103 | 0.202407412 | 0.232483078 |
| 0.251397164 | 0.217002504 | 0.027202602 | 0.160008786 |
| 0.022842595 | 0.200667724 | 0.01912148  | 0.190938997 |
| 0.156009428 | 0.028606664 | 0.187486584 | 0.118777866 |
| 0.220480369 | 0.070417046 | 0.110738926 | 0.213806558 |
| 0.029078609 | 0.09683376  | 0.08573769  | 0.149302166 |
| 0.052969591 | 0.108671393 | 0.224467398 | 0.040212565 |
| 0.034183157 | 0.0238492   | 0.092290847 | 0.104848287 |
| 0.149508693 | 0.143154572 | 0.036158349 | 0.112374015 |
| 0.090586099 | 0.045895478 | 0.049994687 | 0.130943534 |
| 0.158165906 | 0.077291899 | 0.040343362 | 0.092758073 |
| 0.120699779 | 0.199065581 | 0.039880278 | 0.059191519 |
| 0.13686975  | 0.05800148  | 0.073121772 | 0.070116116 |
| 0.067445316 | 0.212136121 | 0.045605107 | 0.075802632 |
| 0.053611785 | 0.034181804 | 0.198136645 | 0.117119472 |
| 0.027268936 |             |             |             |
| AI747699    | 0.230573345 | 0.420904714 | 0.101308746 |
| 0.313315736 | 0.151114143 | 0.246299572 | 0.154760959 |
| 0.145172134 | 0.052759041 | 0.017171728 | 0.019796046 |

|             |             |             |             |
|-------------|-------------|-------------|-------------|
| 0.164006731 | 0.097747857 | 0.170810207 | 0.140236478 |
| 0.250796281 | 0.047727033 | 0.117933272 | 0.12421339  |
| 0.259277461 | 0.130962798 | 0.217133663 | 0.074383132 |
| 0.066784046 | 0.033495791 | 0.044777475 | 0.074179719 |
| 0.341028209 | 0.046043544 | 1           | 0.309674904 |
| 0.028925562 | 0.29555117  | 0.406430429 | 0.207698645 |
| 0.384225972 | 0.2166188   | 0.007034122 | 0.197261442 |
| 0.316645305 | 0.247586168 | 0.281225118 | 0.174561475 |
| 0.047498279 | 0.421284324 | 0.148305964 | 0.129329712 |
| 0.123743516 | 0.021667682 | 0.186021275 | 0.404764487 |
| 0.395640129 | 0.203302054 | 0.168293938 | 0.137315769 |
| 0.100862783 | 0.197646122 | 0.063718654 | 0.290793362 |
| 0.142148192 | 0.18551672  | 0.384155824 | 0.09376848  |
| 0.097532723 | 0.160865962 | 0.040433993 | 0.167735579 |
| 0.081439385 | 0.314720174 | 0.02078261  | 0.141035044 |
| 0.009666507 | 0.240124559 | 0.119810457 | 0.072656942 |
| 0.022174756 | 0.023671054 | 0.049534535 | 0.226017938 |
| 0.344641159 | 0.327507142 | 0.324677119 | 0.325138523 |
| 0.065136202 | 0.089646353 | 0.095584939 | 0.092600118 |
| 0.323476205 | 0.144765468 | 0.054253568 | 0.239655251 |
| 0.332841808 | 0.39906707  | 0.0696513   | 0.074432713 |
| 0.352488818 | 0.408368495 | 0.141539664 | 0.144962724 |
| 0.104483562 | 0.010859749 | 0.383296011 | 0.364710538 |
| 0.330544326 | 0.065152462 | 0.053557595 | 0.347550362 |
| 0.032656723 | 0.130744303 | 0.207563653 | 0.049201247 |
| 0.357713123 | 0.028200652 | 0.059882779 | 0.209857504 |
| 0.073925079 | 0.287042049 | 0.371020278 | 0.122025325 |
| 0.113531896 | 0.01258426  | 0.033305278 | 0.013763451 |
| 0.141276555 | 0.022449521 | 0.401076912 | 0.369858432 |
| 0.165301149 | 0.126849115 | 0.155290334 | 0.00137082  |
| 0.011014597 | 0.046352462 | 0.283689897 | 0.125457147 |
| 0.260608012 | 0.239695119 | 0.110185899 | 0.302177595 |
| 0.193711265 | 0.318169953 | 0.058513877 | 0.080253836 |
| 0.173095681 | 0.048785744 | 0.105829074 | 0.194207919 |
| 0.099383941 | 0.099373482 | 0.079613693 | 0.379648062 |
| 0.413223723 | 0.064508087 | 0.139568106 | 0.226260595 |
| 0.183708571 | 0.100146681 | 0.07072725  | 0.143134071 |
| 0.068617472 | 0.350787155 | 0.008153895 | 0.150949013 |
| 0.083068105 | 0.041760371 | 0.007363299 | 0.187644057 |
| 0.158419047 | 0.349380827 | 0.36633705  | 0.057188034 |
| 0.15448614  | 0.186399956 | 0.1720823   | 0.289459198 |
| 0.022509921 | 0.025866628 | 0.155165255 | 0.386285773 |
| 0.282707465 | 0.329450174 | 0.119860602 | 0.087477248 |
| 0.091780455 | 0.292657876 | 0.000157676 | 0.410483027 |
| 0.386293437 | 0.155058442 | 0.184063426 | 0.152832255 |
| 0.104568253 | 0.346367767 | 0.01400483  | 0.231771319 |
| 0.243233803 | 0.046786695 | 0.35149905  | 0.065690096 |
| 0.355014565 | 0.028533887 | 0.194437547 | 0.243566448 |
| 0.23528607  | 0.008194459 | 0.199545995 | 0.289069167 |
| 0.006885025 | 0.148082342 | 0.258887492 | 0.245533846 |
| 0.187230787 | 0.25160494  | 0.336417436 | 0.096262437 |
| 0.148651378 | 0.13569263  | 0.006579908 | 0.082097008 |
| 0.245386992 | 0.116436179 | 0.406272338 | 0.150123996 |
| 0.191291463 | 0.398751351 | 0.262020498 | 0.117796116 |

|             |             |             |             |
|-------------|-------------|-------------|-------------|
| 0.046711114 | 0.190704437 | 0.026909702 | 0.118468269 |
| 0.267971018 | 0.119323263 | 0.119383692 | 0.039957036 |
| 0.025246133 | 0.396664196 | 0.032813768 | 0.047175391 |
| 0.019663087 | 0.219924924 | 0.130264977 | 0.160956728 |
| 0.091873321 | 0.075481032 | 0.103113475 | 0.137320127 |
| 0.073653842 | 0.054229994 | 0.0019891   | 0.11663465  |
| 0.083026248 | 0.142216618 | 0.154926706 | 0.280971855 |
| 0.166317784 | 0.068507397 | 0.132618834 | 0.063852031 |
| 0.034785581 | 0.009334675 | 0.4020614   | 0.213272994 |
| 0.305513547 | 0.102319214 | 0.018916647 | 0.127252116 |
| 0.378116067 | 0.207793601 | 0.157606746 | 0.410337295 |
| 0.013576731 | 0.327080327 | 0.13115575  | 0.051610566 |
| 0.110524946 | 0.128847051 | 0.347177316 | 0.057785891 |
| 0.196740415 | 0.425335269 | 0.098299797 | 0.074876457 |
| 0.384449075 | 0.241775064 | 0.042100088 | 0.277089511 |
| 0.282556089 | 0.021833502 | 0.383948933 | 0.036207919 |
| 0.009911886 | 0.19868543  | 0.251707951 | 0.03333987  |
| 0.028651279 | 0.176369425 | 0.090006465 | 0.109645358 |
| 0.401917136 | 0.238081396 | 0.320254677 | 0.043904036 |
| 0.044180418 | 0.012544024 | 0.048641846 | 0.106581794 |
| 0.41398786  | 0.349062017 | 0.097699974 | 0.113347442 |
| 0.119345849 | 0.108406309 | 0.147259043 | 0.372893513 |
| 0.038441692 | 0.391691898 | 0.005216021 | 0.235302268 |
| 0.391047506 | 0.194086017 | 0.032063696 | 0.199316197 |
| 0.364029115 | 0.043122274 | 0.101213599 | 0.39931761  |
| 0.348841319 | 0.121430853 | 0.122313975 | 0.19846915  |
| 0.037905126 | 0.06568332  | 0.13213939  | 0.031905398 |
| 0.160066943 | 0.094697987 | 0.005445627 | 0.172628734 |
| 0.04226351  | 0.417069295 | 0.287220708 | 0.035827794 |
| 0.246263832 | 0.153412555 | 0.147404457 | 0.030955682 |
| 0.272786667 | 0.339898226 | 0.416904972 | 0.104841846 |
| 0.260320074 | 0.352224739 | 0.132142066 | 0.027259154 |
| 0.006372481 | 0.374729236 | 0.256168482 | 0.022523195 |
| 0.342986348 | 0.183310355 | 0.022035767 | 0.419687849 |
| 0.109105773 | 0.377941206 | 0.0062371   | 0.010728569 |
| 0.008460341 | 0.270420062 | 0.400545485 | 0.283011596 |
| 0.186443639 | 0.172482343 | 0.000173376 | 0.357653266 |
| 0.4114765   | 0.004952427 | 0.033745286 | 0.280401552 |
| 0.213041384 | 0.427375645 | 0.074868524 | 0.284966819 |
| 0.160655346 | 0.38519049  | 0.155119437 | 0.099461085 |
| 0.351036046 | 0.331450649 | 0.29362557  | 0.388309242 |
| 0.349404678 | 0.193077439 | 0.155170107 | 0.027832498 |
| 0.037023174 | 0.194086021 | 0.137928001 | 0.056348774 |
| 0.241198521 | 0.052997933 | 0.350710025 | 0.317694544 |
| 0.324059228 | 0.003097676 | 0.149580456 | 0.295512263 |
| 0.389687046 | 0.371626433 | 0.005923764 | 0.001847473 |
| 0.00149405  | 0.007033911 | 0.214979053 | 0.069103608 |
| 0.356523766 | 0.171308055 | 0.005566686 | 0.07435111  |
| 0.119536169 | 0.138525339 | 0.404850209 | 0.231181702 |
| 0.237807477 | 0.040884696 | 0.175133725 | 0.247847397 |
| 0.025214704 | 0.230048131 | 0.343595105 | 0.435144063 |
| 0.013329519 | 0.074095102 | 0.126040949 | 0.383750812 |
| 0.008989573 | 0.109494821 | 0.186269284 | 0.162874241 |
| 0.003316492 | 0.027007263 | 0.02825019  | 0.256278955 |

|             |             |             |             |
|-------------|-------------|-------------|-------------|
| 0.374150216 | 0.04825118  | 0.02179787  | 0.10888124  |
| 0.108708061 | 0.317915101 | 0.090068091 | 0.368997194 |
| 0.347139284 | 0.308241274 | 0.019737185 | 0.40396504  |
| 0.032208139 | 0.394432311 | 0.083181065 | 0.045035083 |
| 0.08132952  | 0.007420327 | 0.322711223 | 0.064821576 |
| 0.187428863 | 0.253173487 | 0.055620102 | 0.004849541 |
| 0.029623307 | 0.023199299 | 0.346449131 | 0.276187423 |
| 0.006871263 | 0.137958559 | 0.09157062  | 0.191256161 |
| 0.193934291 | 0.294482835 | 0.419160342 | 0.151146276 |
| 0.104226066 | 0.020072085 | 0.28220177  | 0.238797168 |
| 0.176410156 | 0.327068886 | 0.124272607 | 0.372058199 |
| 0.265826057 | 0.346927694 | 0.339983326 | 0.180166039 |
| 0.060460855 | 0.203897163 | 0.320715865 | 0.038236682 |
| 0.149120422 | 0.329303846 | 0.148993235 | 0.05329342  |
| 0.101826162 | 0.098144765 | 0.035186587 | 0.061893544 |
| 0.066252215 | 0.260477491 | 0.100917936 | 0.294297782 |
| 0.219080252 | 0.257963246 | 0.043860514 | 0.02856761  |
| 0.417694088 | 0.365771887 | 0.1166437   | 0.272047966 |
| 0.060421053 | 0.135085434 | 0.250525355 | 0.236108088 |
| 0.11169765  | 0.334204121 | 0.32711651  | 0.319993004 |
| 0.425928498 | 0.13748321  | 0.416103247 | 0.104093176 |
| 0.026357857 | 0.176779631 | 0.079848244 | 0.031012889 |
| 0.082134794 | 0.010902664 | 0.060767554 | 0.228371543 |
| 0.087239823 | 0.204090726 | 0.163713062 | 0.035148429 |
| 0.093891424 | 0.111619937 | 0.139269367 | 0.166622449 |
| 0.059744789 | 0.416981937 | 0.005359779 | 0.02474871  |
| 0.093508116 | 0.283832664 | 0.1026259   | 0.077417128 |
| 0.067430363 | 0.032239426 | 0.124430226 | 0.192034602 |
| 0.176787072 | 0.096432811 | 0.294079038 | 0.031552242 |
| 0.033984818 | 0.34256885  | 0.140490409 | 0.00441615  |
| 0.029622212 | 0.205702809 | 0.096947568 | 0.132595015 |
| 0.005206842 | 0.334736116 | 0.199650351 | 0.139809866 |
| 0.189437043 | 0.035955394 | 0.339879498 | 0.044514412 |
| 0.033897255 | 0.384065794 | 0.110252717 | 0.377215161 |
| 0.083348332 | 0.277634992 | 0.392899653 | 0.308587387 |
| 0.034186611 | 0.1014801   | 0.037155781 | 0.327305502 |
| 0.118105933 |             |             |             |

|             |             |             |             |
|-------------|-------------|-------------|-------------|
| AIM1        | 0.314530303 | 0.464175968 | 0.252334791 |
| 0.366952971 | 0.307900119 | 0.31749156  | 0.292170025 |
| 0.324570495 | 0.110355611 | 0.019257551 | 0.024975198 |
| 0.276419311 | 0.168161685 | 0.310512583 | 0.262941527 |
| 0.342837335 | 0.122178536 | 0.330305633 | 0.292638883 |
| 0.360786578 | 0.212690004 | 0.307951904 | 0.172804125 |
| 0.18617769  | 0.083524821 | 0.095410422 | 0.170760221 |
| 0.427478939 | 0.107976091 | 0.309674904 | 1           |
| 0.114525481 | 0.378178634 | 0.442335694 | 0.277427128 |
| 0.417563954 | 0.286535518 | 0.030897092 | 0.287407637 |
| 0.398888795 | 0.307323858 | 0.360891027 | 0.319239732 |
| 0.094891752 | 0.441795582 | 0.288431379 | 0.270973908 |
| 0.278569732 | 0.044819855 | 0.313703164 | 0.427054641 |
| 0.397400905 | 0.277906127 | 0.342440223 | 0.240442564 |
| 0.138120108 | 0.322060289 | 0.126619307 | 0.328595845 |
| 0.283810906 | 0.278680043 | 0.403122703 | 0.147863674 |
| 0.181570045 | 0.369016429 | 0.135535267 | 0.356123503 |



|             |             |             |             |
|-------------|-------------|-------------|-------------|
| 0.196204354 | 0.362306261 | 0.071109204 | 0.232587967 |
| 0.013122722 | 0.362162115 | 0.278762143 | 0.151924202 |
| 0.067560229 | 0.040503497 | 0.160440178 | 0.342154224 |
| 0.432534089 | 0.39874747  | 0.399437293 | 0.391942845 |
| 0.159356975 | 0.264344165 | 0.224953799 | 0.205039045 |
| 0.391002658 | 0.241038639 | 0.154580064 | 0.326387848 |
| 0.405028036 | 0.434387793 | 0.17702543  | 0.212250259 |
| 0.356420955 | 0.45137237  | 0.293975267 | 0.29903076  |
| 0.194976379 | 0.049475268 | 0.393804704 | 0.426532586 |
| 0.38569343  | 0.165565616 | 0.145893468 | 0.406125682 |
| 0.100079523 | 0.304668993 | 0.329329995 | 0.155176465 |
| 0.443963282 | 0.053766409 | 0.168316038 | 0.348162566 |
| 0.256711907 | 0.362541353 | 0.41355962  | 0.262087015 |
| 0.287358902 | 0.040312208 | 0.071744057 | 0.058572008 |
| 0.286454432 | 0.069833023 | 0.408138633 | 0.415699269 |
| 0.339334109 | 0.26750093  | 0.3419755   | 0.007280259 |
| 0.038390033 | 0.177164606 | 0.340919304 | 0.342685396 |
| 0.350215496 | 0.299988684 | 0.197920125 | 0.339601657 |
| 0.250089629 | 0.39197462  | 0.069102166 | 0.196287487 |
| 0.32458829  | 0.178564471 | 0.260658238 | 0.300459589 |
| 0.227101587 | 0.242771918 | 0.194870967 | 0.447262748 |
| 0.437157152 | 0.151303186 | 0.339120662 | 0.320785915 |
| 0.269893161 | 0.231042966 | 0.188741524 | 0.29027674  |
| 0.129310513 | 0.381705331 | 0.033211039 | 0.366283739 |
| 0.146633245 | 0.106781708 | 0.041031642 | 0.362922126 |
| 0.284767546 | 0.353013234 | 0.387779559 | 0.171500242 |
| 0.316857675 | 0.296056591 | 0.349742525 | 0.296398542 |
| 0.020308819 | 0.09723421  | 0.308823356 | 0.436121071 |
| 0.299095283 | 0.414658858 | 0.31693503  | 0.246990414 |
| 0.240692692 | 0.383057959 | 0.004105893 | 0.433117633 |
| 0.427831752 | 0.296204599 | 0.292838613 | 0.295626668 |
| 0.20836706  | 0.402531356 | 0.043070311 | 0.330083344 |
| 0.296627454 | 0.14499618  | 0.434021841 | 0.159430411 |
| 0.401801041 | 0.066389504 | 0.361840178 | 0.30051579  |
| 0.268237936 | 0.018469588 | 0.309522023 | 0.360910557 |
| 0.0313675   | 0.223120225 | 0.345375053 | 0.340713316 |
| 0.297949924 | 0.344246321 | 0.426871099 | 0.18947548  |
| 0.305031436 | 0.335446065 | 0.030060642 | 0.230334081 |
| 0.333804351 | 0.230136499 | 0.428359623 | 0.31681815  |
| 0.288336672 | 0.431761765 | 0.309224518 | 0.165881514 |
| 0.09643828  | 0.372004479 | 0.056295194 | 0.258969182 |
| 0.320450714 | 0.177704945 | 0.239122945 | 0.16354537  |
| 0.077844427 | 0.447982735 | 0.100732753 | 0.127412531 |
| 0.061146413 | 0.302045949 | 0.330105397 | 0.218940265 |
| 0.144513149 | 0.188440898 | 0.221982641 | 0.274182514 |
| 0.121102595 | 0.126264851 | 0.01806596  | 0.211717014 |
| 0.117676105 | 0.230000515 | 0.235801218 | 0.315630788 |
| 0.320635486 | 0.13538262  | 0.277022913 | 0.184716707 |
| 0.105642677 | 0.031263478 | 0.448149487 | 0.337438442 |
| 0.326082609 | 0.231731322 | 0.068647064 | 0.207674364 |
| 0.418579205 | 0.266148352 | 0.292771531 | 0.427735386 |
| 0.061140327 | 0.410118347 | 0.22176598  | 0.128439515 |
| 0.22583827  | 0.272702114 | 0.42898185  | 0.075849942 |
| 0.345115882 | 0.441009075 | 0.285119686 | 0.167595418 |

|             |             |             |             |
|-------------|-------------|-------------|-------------|
| 0.384532936 | 0.352901634 | 0.082193658 | 0.334485358 |
| 0.329674906 | 0.059276116 | 0.437109691 | 0.109888721 |
| 0.037400546 | 0.27800727  | 0.280947307 | 0.09931605  |
| 0.09105469  | 0.280128907 | 0.15331289  | 0.245808504 |
| 0.449226077 | 0.311830354 | 0.33092442  | 0.145326285 |
| 0.083603255 | 0.017765229 | 0.157695499 | 0.249739299 |
| 0.440092699 | 0.406012854 | 0.271518272 | 0.229780637 |
| 0.285909669 | 0.208716738 | 0.2605807   | 0.42410816  |
| 0.168837496 | 0.444650324 | 0.020512975 | 0.292972326 |
| 0.414108279 | 0.331390905 | 0.078877396 | 0.343709887 |
| 0.377587398 | 0.101387918 | 0.301014101 | 0.431172046 |
| 0.396664801 | 0.257409046 | 0.239029014 | 0.318288441 |
| 0.065302045 | 0.128386851 | 0.267863601 | 0.098052934 |
| 0.286830821 | 0.228956279 | 0.021398179 | 0.36034884  |
| 0.079839484 | 0.422192203 | 0.384070704 | 0.074853945 |
| 0.271843715 | 0.342894735 | 0.281950998 | 0.081083324 |
| 0.326350829 | 0.401849531 | 0.449149907 | 0.288652511 |
| 0.326019774 | 0.388295991 | 0.205094985 | 0.100576531 |
| 0.025666482 | 0.417406548 | 0.332275152 | 0.045530251 |
| 0.421954021 | 0.293342647 | 0.026596254 | 0.463556591 |
| 0.268231818 | 0.394993239 | 0.014362186 | 0.055518609 |
| 0.043689858 | 0.363068528 | 0.415504014 | 0.370082528 |
| 0.247382167 | 0.355314135 | 0.007140164 | 0.428080045 |
| 0.433218013 | 0.018902195 | 0.106221641 | 0.316525385 |
| 0.255121105 | 0.478837396 | 0.170699671 | 0.33071524  |
| 0.239832338 | 0.405998042 | 0.275598873 | 0.241311469 |
| 0.386791336 | 0.374470917 | 0.371227371 | 0.437636037 |
| 0.411506491 | 0.294175802 | 0.301921211 | 0.047332726 |
| 0.090394235 | 0.335972228 | 0.196231033 | 0.079522087 |
| 0.323176596 | 0.127053812 | 0.421617534 | 0.401916273 |
| 0.381142607 | 0.013292004 | 0.286531019 | 0.339159615 |
| 0.444622579 | 0.453352875 | 0.038514868 | 0.00830174  |
| 0.007929778 | 0.014768846 | 0.376592381 | 0.208972409 |
| 0.413160481 | 0.214696745 | 0.016928385 | 0.151078278 |
| 0.300364923 | 0.235552458 | 0.4324781   | 0.341624742 |
| 0.319665979 | 0.123460982 | 0.223937297 | 0.353217945 |
| 0.062321207 | 0.273624156 | 0.397698683 | 0.446431502 |
| 0.061696763 | 0.215916268 | 0.329304799 | 0.450203662 |
| 0.025801263 | 0.268634926 | 0.284769324 | 0.268098631 |
| 0.023768933 | 0.084640362 | 0.074760261 | 0.355737013 |
| 0.398494709 | 0.082164119 | 0.04274857  | 0.193933137 |
| 0.172028026 | 0.402529424 | 0.19440026  | 0.442465519 |
| 0.408741391 | 0.395808557 | 0.067865482 | 0.432388447 |
| 0.057314788 | 0.41528133  | 0.200370623 | 0.078889813 |
| 0.26777017  | 0.03304586  | 0.377454348 | 0.083536876 |
| 0.356433321 | 0.349437469 | 0.128842138 | 0.022190223 |
| 0.089115162 | 0.071493587 | 0.410783237 | 0.35396899  |
| 0.037497555 | 0.326350804 | 0.266560033 | 0.338803101 |
| 0.353383783 | 0.343089177 | 0.44172672  | 0.255779383 |
| 0.176008063 | 0.081811979 | 0.365492048 | 0.311578133 |
| 0.349992711 | 0.410376379 | 0.20987814  | 0.440635413 |
| 0.338715727 | 0.423836109 | 0.3890102   | 0.32768767  |
| 0.146792476 | 0.332176583 | 0.322357508 | 0.05863848  |
| 0.340048725 | 0.386817379 | 0.362671544 | 0.114338023 |

|             |             |             |             |
|-------------|-------------|-------------|-------------|
| 0.212920213 | 0.208261188 | 0.118006561 | 0.191120041 |
| 0.158528679 | 0.327910527 | 0.198926248 | 0.396265709 |
| 0.347610861 | 0.318209097 | 0.130055944 | 0.070820198 |
| 0.471184853 | 0.414947644 | 0.237288193 | 0.325058989 |
| 0.194437462 | 0.275458445 | 0.333215744 | 0.312904323 |
| 0.261103386 | 0.366489805 | 0.392694888 | 0.315917672 |
| 0.425983263 | 0.311695633 | 0.449139233 | 0.22794074  |
| 0.069362888 | 0.273905122 | 0.123991626 | 0.103874933 |
| 0.192796038 | 0.040493468 | 0.138670053 | 0.321930495 |
| 0.189858853 | 0.31585657  | 0.324312937 | 0.116312524 |
| 0.25496225  | 0.289889767 | 0.30760478  | 0.285289824 |
| 0.114681053 | 0.429428106 | 0.018124067 | 0.083586799 |
| 0.209462091 | 0.332812599 | 0.212138908 | 0.222134889 |
| 0.154609552 | 0.120344176 | 0.282280647 | 0.340088203 |
| 0.241844663 | 0.249890747 | 0.338614679 | 0.095218764 |
| 0.073451021 | 0.427777088 | 0.327487854 | 0.029164494 |
| 0.091824688 | 0.299516372 | 0.305406512 | 0.217122229 |
| 0.025198578 | 0.372089758 | 0.280370929 | 0.284957691 |
| 0.369313304 | 0.119479388 | 0.370416457 | 0.137300814 |
| 0.129383918 | 0.422680208 | 0.239640084 | 0.414917108 |
| 0.246708997 | 0.34496099  | 0.414847186 | 0.355165267 |
| 0.146971651 | 0.230710701 | 0.080527363 | 0.411471002 |
| 0.217809202 |             |             |             |
| AKR1E1      | 0.128509163 | 0.109205969 | 0.103623879 |
| 0.151350246 | 0.146261985 | 0.049872557 | 0.093743543 |
| 0.035978457 | 0.039393416 | 0.011545247 | 0.029942102 |
| 0.139020868 | 0.035573006 | 0.040749177 | 0.016015757 |
| 0.235861664 | 0.150348279 | 0.094367756 | 0.198753744 |
| 0.179369228 | 0.032747075 | 0.242532688 | 0.0858626   |
| 0.094478387 | 0.120796478 | 0.1296961   | 0.088525666 |
| 0.179102931 | 0.153727748 | 0.028925562 | 0.114525481 |
| 1           | 0.138128289 | 0.085378709 | 0.158365963 |
| 0.082608035 | 0.092126319 | 0.09547588  | 0.020924934 |
| 0.116106861 | 0.132740597 | 0.162198633 | 0.17731795  |
| 0.066558432 | 0.070386217 | 0.131235027 | 0.202400127 |
| 0.021656576 | 0.078571177 | 0.018852827 | 0.068862352 |
| 0.06385543  | 0.068076839 | 0.046986796 | 0.068770697 |
| 0.016545945 | 0.022194671 | 0.027105609 | 0.056596161 |
| 0.13730689  | 0.015807702 | 0.076691415 | 0.026695467 |
| 0.018643201 | 0.082826164 | 0.219034352 | 0.090263883 |
| 0.074142268 | 0.079019303 | 0.095164779 | 0.102932929 |
| 0.004545761 | 0.190670811 | 0.26036861  | 0.036617996 |
| 0.253852426 | 0.053116891 | 0.268677536 | 0.122531663 |
| 0.175190338 | 0.10194119  | 0.175749047 | 0.151147015 |
| 0.098779206 | 0.274380248 | 0.131082985 | 0.133727622 |
| 0.111689018 | 0.076344823 | 0.064029    | 0.255207068 |
| 0.166030325 | 0.09707932  | 0.095858558 | 0.293174873 |
| 0.07906531  | 0.103362631 | 0.06002066  | 0.085420421 |
| 0.025369522 | 0.19729984  | 0.070301183 | 0.138417554 |
| 0.084277984 | 0.119351755 | 0.253641639 | 0.121499314 |
| 0.231366644 | 0.024854989 | 0.206779624 | 0.130428374 |
| 0.173360928 | 0.037991048 | 0.280485981 | 0.097368661 |
| 0.133509104 | 0.124804737 | 0.099932706 | 0.152055125 |
| 0.166199716 | 0.095986398 | 0.028474614 | 0.222182739 |

|             |             |             |             |
|-------------|-------------|-------------|-------------|
| 0.039786568 | 0.071128556 | 0.059168247 | 0.13420502  |
| 0.035103461 | 0.04458329  | 0.101301197 | 0.088101368 |
| 0.170597857 | 0.173173056 | 0.114942764 | 0.14244198  |
| 0.162393547 | 0.07962023  | 0.07215414  | 0.069700957 |
| 0.094587986 | 0.176459508 | 0.001049348 | 0.100121962 |
| 0.09106712  | 0.174137964 | 0.288159296 | 0.102153143 |
| 0.15346876  | 0.080717659 | 0.178779443 | 0.144157729 |
| 0.07437741  | 0.176503812 | 0.058563557 | 0.246736849 |
| 0.01967598  | 0.209758085 | 0.171714995 | 0.087195502 |
| 0.060320117 | 0.077180808 | 0.234835368 | 0.079723584 |
| 0.011876448 | 0.120354834 | 0.117957619 | 0.062847036 |
| 0.024751551 | 0.078030386 | 0.061621422 | 0.247993034 |
| 0.112769717 | 0.201586527 | 0.052347444 | 0.075980861 |
| 0.016003441 | 0.154437733 | 0.031737305 | 0.127880559 |
| 0.034235826 | 0.157695204 | 0.112435054 | 0.13260653  |
| 0.277486854 | 0.181351578 | 0.020261151 | 0.073075061 |
| 0.097578124 | 0.026174165 | 0.120763177 | 0.193769196 |
| 0.050842815 | 0.142477576 | 0.008351173 | 0.24414619  |
| 0.069587374 | 0.216740676 | 0.180024737 | 0.231428934 |
| 0.090654    | 0.154243711 | 0.046591    | 0.121870586 |
| 0.031136364 | 0.027306246 | 0.130076682 | 0.197102683 |
| 0.018154933 | 0.146583263 | 0.153844779 | 0.097268047 |
| 0.191030109 | 0.204371037 | 0.043426012 | 0.116338449 |
| 0.121793093 | 0.137240379 | 0.254464657 | 0.153812008 |
| 0.018359347 | 0.073953636 | 0.055965586 | 0.044994686 |
| 0.094032481 | 0.086242989 | 0.007767624 | 0.109983405 |
| 0.079760113 | 0.020681057 | 0.120275157 | 0.078751181 |
| 0.04166065  | 0.050728078 | 0.211097748 | 0.22376995  |
| 0.12557291  | 0.138402278 | 0.087992944 | 0.079360695 |
| 0.071665627 | 0.171393831 | 0.024415214 | 0.029663517 |
| 0.103043562 | 0.054216774 | 0.052085157 | 0.034299913 |
| 0.165714362 | 0.187099023 | 0.030894123 | 0.028395914 |
| 0.030002445 | 0.024798293 | 0.077604031 | 0.036300609 |
| 0.061408583 | 0.111934339 | 0.070326136 | 0.147722334 |
| 0.206239818 | 0.109091909 | 0.227026097 | 0.051680067 |
| 0.087036825 | 0.249198736 | 0.012844365 | 0.128319732 |
| 0.02074892  | 0.017985989 | 0.097115609 | 0.114301663 |
| 0.174703254 | 0.042874505 | 0.218075035 | 0.076318232 |
| 0.174386999 | 0.176311886 | 0.007483593 | 0.091883219 |
| 0.08562308  | 0.266224324 | 0.128452714 | 0.061156659 |
| 0.137805307 | 0.062702099 | 0.086156805 | 0.079382539 |
| 0.183138322 | 0.117857237 | 0.171007371 | 0.249731435 |
| 0.187182498 | 0.090542677 | 0.286583096 | 0.219729492 |
| 0.060399879 | 0.024273702 | 0.29595868  | 0.119494398 |
| 0.235056624 | 0.079792748 | 0.161988254 | 0.092482725 |
| 0.03276261  | 0.258781169 | 0.129485365 | 0.077759689 |
| 0.121753061 | 0.313881595 | 0.101115515 | 0.239956256 |
| 0.037423055 | 0.013602991 | 0.126582701 | 0.12690836  |
| 0.101194523 | 0.138580413 | 0.135570293 | 0.074534496 |
| 0.03445909  | 0.147668698 | 0.064668362 | 0.06901341  |
| 0.102936013 | 0.143106398 | 0.086649077 | 0.101941865 |
| 0.066691896 | 0.038391229 | 0.195776751 | 0.032008503 |
| 0.054334068 | 0.141784632 | 0.085191325 | 0.039879961 |
| 0.117343261 | 0.052887805 | 0.031676489 | 0.069391857 |

|             |             |             |             |
|-------------|-------------|-------------|-------------|
| 0.078318589 | 0.210075697 | 0.061436678 | 0.029008678 |
| 0.031266343 | 0.283124347 | 0.158659866 | 0.116111174 |
| 0.108206359 | 0.087363667 | 0.120152768 | 0.133005268 |
| 0.099879289 | 0.075853773 | 0.301594779 | 0.234093908 |
| 0.091289492 | 0.09886046  | 0.037440212 | 0.181268343 |
| 0.019690817 | 0.028687453 | 0.104358607 | 0.189673046 |
| 0.058712886 | 0.003616127 | 0.057506589 | 0.211321245 |
| 0.210063571 | 0.069439582 | 0.122027258 | 0.008687204 |
| 0.214491976 | 0.082304382 | 0.135343911 | 0.087344192 |
| 0.130469051 | 0.138146426 | 0.093981327 | 0.098598962 |
| 0.108639367 | 0.078596625 | 0.115752273 | 0.095423439 |
| 0.078298146 | 0.03357581  | 0.251092728 | 0.102618446 |
| 0.093898137 | 0.126009198 | 0.092807484 | 0.156843247 |
| 0.233298723 | 0.188735857 | 0.044466902 | 0.038464295 |
| 0.036333065 | 0.009223861 | 0.026697129 | 0.050744824 |
| 0.097592702 | 0.11939309  | 0.188807945 | 0.12958808  |
| 0.158736178 | 0.038680756 | 0.093268588 | 0.119480373 |
| 0.160631672 | 0.151962367 | 0.016150279 | 0.016397737 |
| 0.044596449 | 0.112371658 | 0.267057885 | 0.118548077 |
| 0.005562915 | 0.094458163 | 0.038501616 | 0.057976478 |
| 0.166975944 | 0.09313651  | 0.247101668 | 0.157804585 |
| 0.233107968 | 0.012352138 | 0.230525421 | 0.086006709 |
| 0.053074169 | 0.13102963  | 0.079152039 | 0.225102361 |
| 0.21731314  | 0.102090751 | 0.153443642 | 0.029123954 |
| 0.295805818 | 0.145671244 | 0.02934479  | 0.156714607 |
| 0.191731458 | 0.115248373 | 0.227267283 | 0.075168854 |
| 0.058299997 | 0.072461066 | 0.007639439 | 0.058472307 |
| 0.16448042  | 0.076840286 | 0.160236378 | 0.128383274 |
| 0.219281116 | 0.188162084 | 0.082046435 | 0.052218728 |
| 0.076395825 | 0.147759492 | 0.005318448 | 0.181369577 |
| 0.158141057 | 0.102288459 | 0.01040879  | 0.039552614 |
| 0.124390445 | 0.031342097 | 0.186772498 | 0.048796316 |
| 0.213268192 | 0.162825631 | 0.180240729 | 0.224663949 |
| 0.081556461 | 0.266711122 | 0.211499643 | 0.057179817 |
| 0.15184014  | 0.078034162 | 0.035089721 | 0.050331245 |
| 0.125404407 | 0.162502507 | 0.087336459 | 0.041530915 |
| 0.186693382 | 0.032848864 | 0.131993106 | 0.101744643 |
| 0.122123281 | 0.108600764 | 0.104944974 | 0.086358527 |
| 0.074355627 | 0.06808959  | 0.024570449 | 0.18582742  |
| 0.160241365 | 0.107929004 | 0.058171918 | 0.148867143 |
| 0.102806576 | 0.125825382 | 0.03624069  | 0.083909265 |
| 0.043427329 | 0.074148953 | 0.233292628 | 0.119833414 |
| 0.085213794 | 0.10535245  | 0.094770654 | 0.115992567 |
| 0.088382202 | 0.029164288 | 0.106096925 | 0.308603496 |
| 0.14366883  | 0.164586371 | 0.17905715  | 0.032918993 |
| 0.103941696 | 0.128954683 | 0.069344786 | 0.0709767   |
| 0.155476706 | 0.089472595 | 0.018322661 | 0.058575734 |
| 0.105279093 | 0.052553536 | 0.331508803 | 0.194559477 |
| 0.141950117 | 0.033543106 | 0.242318885 | 0.042588517 |
| 0.193100502 | 0.021664945 | 0.126334307 | 0.269974142 |
| 0.077243422 | 0.236329004 | 0.056635209 | 0.067921863 |
| 0.076645604 | 0.065196529 | 0.260949339 | 0.064054484 |
| 0.103285009 | 0.087293572 | 0.185318056 | 0.042575863 |
| 0.198259112 | 0.212954184 | 0.037549974 | 0.019278338 |

|             |             |             |             |
|-------------|-------------|-------------|-------------|
| 0.036204919 | 0.096014371 | 0.050044773 | 0.064206046 |
| 0.187261124 | 0.062924793 | 0.206659058 | 0.124553542 |
| 0.076351108 | 0.112078171 | 0.031904887 | 0.217925665 |
| 0.098225917 | 0.02051507  | 0.134429072 | 0.109540497 |
| 0.210786003 | 0.060381061 | 0.05396571  | 0.13455296  |
| 0.080397465 | 0.130149264 | 0.092643495 | 0.176644334 |
| 0.20689782  | 0.061956196 | 0.103991666 | 0.114819267 |
| 0.084665789 | 0.058046504 | 0.161057663 | 0.028184604 |
| AKT1S1      | 0.393689306 | 0.509212901 | 0.360233407 |
| 0.372353808 | 0.3957702   | 0.329951439 | 0.221908421 |
| 0.239906915 | 0.081024557 | 0.005469217 | 0.018732805 |
| 0.394725415 | 0.181981272 | 0.270487383 | 0.277339074 |
| 0.390698396 | 0.141178656 | 0.394259486 | 0.262304875 |
| 0.401858403 | 0.113146107 | 0.368942238 | 0.112859197 |
| 0.283382622 | 0.09727935  | 0.073034317 | 0.226506465 |
| 0.418732675 | 0.085650686 | 0.29555117  | 0.378178634 |
| 0.138128289 | 1           | 0.506720974 | 0.37290347  |
| 0.497491962 | 0.36281814  | 0.034246615 | 0.257168584 |
| 0.418660131 | 0.370099814 | 0.393888301 | 0.318251727 |
| 0.050711597 | 0.484635772 | 0.244416388 | 0.379418871 |
| 0.250910518 | 0.032271475 | 0.250438457 | 0.45078398  |
| 0.450594791 | 0.353187985 | 0.260842617 | 0.168411514 |
| 0.159269618 | 0.262480594 | 0.206719484 | 0.323406053 |
| 0.239330243 | 0.180479093 | 0.463537398 | 0.087254432 |
| 0.161176963 | 0.310573048 | 0.184518675 | 0.29456058  |
| 0.309932883 | 0.359464442 | 0.037128802 | 0.361160509 |
| 0.003793509 | 0.389490684 | 0.380019704 | 0.236685005 |
| 0.054184259 | 0.022387427 | 0.209310758 | 0.324398803 |
| 0.442503703 | 0.465892856 | 0.449035745 | 0.455181812 |
| 0.18297789  | 0.325034091 | 0.353984265 | 0.181141698 |
| 0.420855706 | 0.177064111 | 0.130754482 | 0.386541196 |
| 0.458229356 | 0.501232816 | 0.204671838 | 0.269880542 |
| 0.356127662 | 0.47527575  | 0.358692487 | 0.372023996 |
| 0.254755179 | 0.068360053 | 0.425266099 | 0.486661575 |
| 0.395952331 | 0.278603095 | 0.158720924 | 0.388138157 |
| 0.081014632 | 0.345660995 | 0.342108431 | 0.204585792 |
| 0.454159908 | 0.022887036 | 0.217994212 | 0.344153064 |
| 0.278458743 | 0.391070773 | 0.490243257 | 0.207364779 |
| 0.40127251  | 0.028790551 | 0.102333237 | 0.054640668 |
| 0.314028651 | 0.136685965 | 0.468725377 | 0.422715119 |
| 0.2889035   | 0.347874057 | 0.297477299 | 0.004610831 |
| 0.035537805 | 0.23834116  | 0.39816245  | 0.412138151 |
| 0.406934238 | 0.374037492 | 0.198469988 | 0.360875453 |
| 0.359727571 | 0.44395739  | 0.048722601 | 0.128400233 |
| 0.378921761 | 0.24016017  | 0.257141723 | 0.393062203 |
| 0.275845956 | 0.157210183 | 0.155014916 | 0.492797446 |
| 0.435686109 | 0.104686596 | 0.377862367 | 0.389919661 |
| 0.278741859 | 0.325737297 | 0.143635241 | 0.284805358 |
| 0.067910908 | 0.459887289 | 0.038035664 | 0.376831563 |
| 0.193128285 | 0.155483737 | 0.028177827 | 0.295269183 |
| 0.262101962 | 0.379743289 | 0.463237346 | 0.142553578 |
| 0.322586906 | 0.367832455 | 0.350179417 | 0.344389982 |
| 0.008101617 | 0.072510389 | 0.311866475 | 0.484183598 |
| 0.280880065 | 0.485390118 | 0.332551803 | 0.312584622 |

|             |             |             |             |
|-------------|-------------|-------------|-------------|
| 0.284463775 | 0.400563058 | 0.005387632 | 0.485074275 |
| 0.501179041 | 0.307981891 | 0.347010231 | 0.407868449 |
| 0.297043918 | 0.403836893 | 0.056805353 | 0.401033383 |
| 0.353576306 | 0.111041301 | 0.478198888 | 0.163380719 |
| 0.458973344 | 0.047395052 | 0.340749109 | 0.371566903 |
| 0.352866727 | 0.012981898 | 0.22895017  | 0.371509831 |
| 0.038143119 | 0.118852004 | 0.406425855 | 0.375203022 |
| 0.32854186  | 0.400003882 | 0.455546802 | 0.272885572 |
| 0.381706792 | 0.285864697 | 0.022548234 | 0.316434996 |
| 0.396877288 | 0.32828328  | 0.438453377 | 0.260687762 |
| 0.335255734 | 0.457425535 | 0.368863073 | 0.166105849 |
| 0.053785732 | 0.335712503 | 0.027837007 | 0.295424415 |
| 0.374853692 | 0.12070034  | 0.322720806 | 0.218425722 |
| 0.083023953 | 0.499065558 | 0.170367856 | 0.22970967  |
| 0.117129375 | 0.346958163 | 0.295457457 | 0.201772574 |
| 0.169720031 | 0.177896437 | 0.297742058 | 0.324165322 |
| 0.051992311 | 0.105908206 | 0.027324933 | 0.315484728 |
| 0.118194699 | 0.283474765 | 0.281764176 | 0.375996384 |
| 0.346457572 | 0.115279665 | 0.338292409 | 0.273200369 |
| 0.119178677 | 0.021958672 | 0.492561497 | 0.397339426 |
| 0.319132484 | 0.176517157 | 0.060126467 | 0.278605449 |
| 0.434711934 | 0.268371606 | 0.284797267 | 0.434209682 |
| 0.048493322 | 0.46201773  | 0.21928397  | 0.12714942  |
| 0.324852664 | 0.262319262 | 0.432489673 | 0.053685334 |
| 0.401768418 | 0.461118563 | 0.34247578  | 0.171651894 |
| 0.392126025 | 0.398200316 | 0.040044098 | 0.363625605 |
| 0.366815642 | 0.041442119 | 0.504534799 | 0.141867245 |
| 0.030972864 | 0.389949648 | 0.350161037 | 0.090357567 |
| 0.089859191 | 0.282939344 | 0.065560628 | 0.286760475 |
| 0.492626575 | 0.373749195 | 0.352763346 | 0.225656542 |
| 0.047549192 | 0.011147423 | 0.229402614 | 0.375073458 |
| 0.501499036 | 0.484193808 | 0.297041399 | 0.305210789 |
| 0.263696084 | 0.268953392 | 0.181890588 | 0.47902983  |
| 0.255769565 | 0.513632298 | 0.012497107 | 0.368427033 |
| 0.488541664 | 0.307965608 | 0.078612503 | 0.30265313  |
| 0.370504144 | 0.058843906 | 0.279482286 | 0.480662774 |
| 0.413502394 | 0.293285931 | 0.283847085 | 0.421546981 |
| 0.023297719 | 0.063029339 | 0.348059185 | 0.172320736 |
| 0.327252595 | 0.222725043 | 0.051432393 | 0.358197553 |
| 0.0467024   | 0.439764186 | 0.422825616 | 0.056467976 |
| 0.278240319 | 0.339188911 | 0.37113377  | 0.050364037 |
| 0.402396001 | 0.487072277 | 0.50809306  | 0.231605186 |
| 0.397491168 | 0.449751112 | 0.321998863 | 0.105606437 |
| 0.024009104 | 0.496361439 | 0.384407209 | 0.023890798 |
| 0.449050023 | 0.245695339 | 0.012429488 | 0.491674818 |
| 0.219314511 | 0.449972757 | 0.004237987 | 0.106819852 |
| 0.058689048 | 0.419005957 | 0.460164859 | 0.386176159 |
| 0.211894657 | 0.398068304 | 0.01397722  | 0.505519244 |
| 0.472189351 | 0.017860052 | 0.152217489 | 0.368837852 |
| 0.343081568 | 0.525076958 | 0.261880872 | 0.392170296 |
| 0.353024078 | 0.475501829 | 0.238752297 | 0.265958848 |
| 0.394740867 | 0.463620244 | 0.39357092  | 0.45914997  |
| 0.428905486 | 0.395497865 | 0.283607945 | 0.01988959  |
| 0.10896954  | 0.246045897 | 0.221701201 | 0.065152121 |

|             |             |             |             |
|-------------|-------------|-------------|-------------|
| 0.325629171 | 0.132329753 | 0.474869983 | 0.439873982 |
| 0.446498551 | 0.008895741 | 0.184868055 | 0.381354738 |
| 0.43369439  | 0.462824336 | 0.040519313 | 0.007329349 |
| 0.010982506 | 0.015166961 | 0.377334904 | 0.260782287 |
| 0.46390628  | 0.194013208 | 0.008095857 | 0.07090649  |
| 0.287275596 | 0.343052175 | 0.484152845 | 0.376889881 |
| 0.390829653 | 0.109178108 | 0.219810215 | 0.397337819 |
| 0.065447288 | 0.323320617 | 0.450240175 | 0.465832914 |
| 0.066871951 | 0.263431991 | 0.409761978 | 0.466694192 |
| 0.059534089 | 0.328900922 | 0.404594385 | 0.277515931 |
| 0.030957093 | 0.091349072 | 0.06924081  | 0.409638626 |
| 0.479203254 | 0.071962605 | 0.032894063 | 0.166376576 |
| 0.119694075 | 0.449038455 | 0.167185601 | 0.491572938 |
| 0.407279583 | 0.399183964 | 0.092457413 | 0.468976893 |
| 0.041209507 | 0.473577412 | 0.296837935 | 0.055083609 |
| 0.343740097 | 0.023390991 | 0.460622126 | 0.099708795 |
| 0.346827159 | 0.401468768 | 0.161846434 | 0.025208443 |
| 0.162698328 | 0.066207313 | 0.44001949  | 0.412762973 |
| 0.051334219 | 0.280785075 | 0.319657272 | 0.414515976 |
| 0.300033355 | 0.377105267 | 0.492164996 | 0.32307326  |
| 0.101402662 | 0.169213395 | 0.401072722 | 0.381529173 |
| 0.295112377 | 0.463012889 | 0.242208692 | 0.508488912 |
| 0.387207218 | 0.462868355 | 0.45009942  | 0.327576857 |
| 0.226613831 | 0.379600748 | 0.326987224 | 0.022445738 |
| 0.364763549 | 0.411832329 | 0.394149786 | 0.130443866 |
| 0.235701118 | 0.334670234 | 0.084501441 | 0.239153313 |
| 0.277242754 | 0.295647467 | 0.16021515  | 0.408106936 |
| 0.40568852  | 0.380444983 | 0.08211706  | 0.062310979 |
| 0.528427503 | 0.439581967 | 0.157381282 | 0.371465349 |
| 0.209371735 | 0.312754071 | 0.39524626  | 0.39284659  |
| 0.347657261 | 0.403957393 | 0.400206663 | 0.34020338  |
| 0.423564179 | 0.280445005 | 0.507640743 | 0.135986879 |
| 0.081187756 | 0.393974201 | 0.092148227 | 0.113483773 |
| 0.161966556 | 0.035172892 | 0.239409423 | 0.408468028 |
| 0.31488963  | 0.359746182 | 0.358128946 | 0.099419479 |
| 0.336139831 | 0.387644517 | 0.358985472 | 0.207541589 |
| 0.08106182  | 0.476688623 | 0.013280331 | 0.077332816 |
| 0.344606358 | 0.36922666  | 0.310753182 | 0.253548919 |
| 0.248678055 | 0.175204955 | 0.3016606   | 0.307001468 |
| 0.257115761 | 0.351025131 | 0.370847353 | 0.050461027 |
| 0.032467696 | 0.471466011 | 0.377600518 | 0.036260563 |
| 0.113552945 | 0.369813885 | 0.374780604 | 0.205308789 |
| 0.030858865 | 0.449025407 | 0.279547874 | 0.386449391 |
| 0.356274768 | 0.096619382 | 0.375109108 | 0.118637607 |
| 0.097774915 | 0.457351734 | 0.357933294 | 0.49216131  |
| 0.3630211   | 0.379172371 | 0.453659809 | 0.396172923 |
| 0.171009342 | 0.353163539 | 0.037157377 | 0.424888159 |
| 0.312416836 |             |             |             |
| AMIG02      | 0.499797419 | 0.526895921 | 0.45571574  |
| 0.460366701 | 0.456701716 | 0.458321553 | 0.213824501 |
| 0.209787289 | 0.083673102 | 0.00340409  | 0.01911008  |
| 0.493357815 | 0.211694272 | 0.292896725 | 0.406133303 |
| 0.443494387 | 0.119755868 | 0.393040609 | 0.234525172 |
| 0.444820774 | 0.093728679 | 0.41396377  | 0.081792829 |



|             |             |             |             |
|-------------|-------------|-------------|-------------|
| 0.29948192  | 0.094018291 | 0.057295275 | 0.277984411 |
| 0.483189078 | 0.067142233 | 0.406430429 | 0.442335694 |
| 0.085378709 | 0.506720974 | 1           | 0.473803555 |
| 0.512419697 | 0.495588955 | 0.009444954 | 0.343407663 |
| 0.500227039 | 0.501214398 | 0.446008842 | 0.337311923 |
| 0.034097809 | 0.4934337   | 0.248181941 | 0.428088965 |
| 0.275424257 | 0.023566884 | 0.301667452 | 0.488800975 |
| 0.50290134  | 0.506465436 | 0.251567366 | 0.158257679 |
| 0.225369932 | 0.276122186 | 0.306712184 | 0.405383759 |
| 0.222381133 | 0.195691338 | 0.515468941 | 0.088183719 |
| 0.16111732  | 0.268323851 | 0.135629339 | 0.275903058 |
| 0.3820008   | 0.475597945 | 0.013890906 | 0.485106128 |
| 0.002081001 | 0.416428677 | 0.391193565 | 0.365705914 |
| 0.031625006 | 0.014924812 | 0.16083037  | 0.362347593 |
| 0.499928133 | 0.506148037 | 0.514696988 | 0.523318116 |
| 0.171020692 | 0.286498213 | 0.436787862 | 0.158887117 |
| 0.517144735 | 0.178710546 | 0.109056055 | 0.441775078 |
| 0.51990826  | 0.525295215 | 0.191952307 | 0.25343198  |
| 0.505263865 | 0.517222376 | 0.493152576 | 0.468431344 |
| 0.401123376 | 0.042065188 | 0.512038423 | 0.530047945 |
| 0.490315983 | 0.344639439 | 0.136934544 | 0.473929691 |
| 0.046781416 | 0.433050818 | 0.364660683 | 0.154077835 |
| 0.503205415 | 0.01445892  | 0.198385115 | 0.390419404 |
| 0.209027078 | 0.514445229 | 0.524767104 | 0.181249653 |
| 0.436692739 | 0.01463926  | 0.146055062 | 0.02475139  |
| 0.354599251 | 0.15084677  | 0.506412915 | 0.508238357 |
| 0.256844193 | 0.404790322 | 0.274636839 | 0.000381384 |
| 0.019056846 | 0.176990299 | 0.517281443 | 0.400891003 |
| 0.486905654 | 0.486969095 | 0.235766101 | 0.491630993 |
| 0.51503932  | 0.513662435 | 0.084801663 | 0.086878015 |
| 0.47734047  | 0.173850078 | 0.227142614 | 0.50408788  |
| 0.313676416 | 0.11090444  | 0.112938975 | 0.527955811 |
| 0.487574389 | 0.072088494 | 0.39689351  | 0.436948057 |
| 0.372907306 | 0.367558058 | 0.094028126 | 0.281717705 |
| 0.042190136 | 0.510475281 | 0.020304806 | 0.38357214  |
| 0.329366339 | 0.137043168 | 0.008171131 | 0.294510683 |
| 0.325736715 | 0.518178592 | 0.495054119 | 0.091907616 |
| 0.329454278 | 0.428758331 | 0.390364211 | 0.503049451 |
| 0.007989287 | 0.037955098 | 0.361319451 | 0.528939895 |
| 0.37457819  | 0.524811691 | 0.304766903 | 0.308870267 |
| 0.275635979 | 0.494100025 | 0.003175642 | 0.505740842 |
| 0.524447785 | 0.390783539 | 0.43073966  | 0.455138693 |
| 0.439489225 | 0.501223814 | 0.055994114 | 0.439392575 |
| 0.45820146  | 0.066167946 | 0.516992249 | 0.145085023 |
| 0.514327455 | 0.031689356 | 0.360768078 | 0.511092939 |
| 0.51708687  | 0.007050852 | 0.273697198 | 0.431317034 |
| 0.0194016   | 0.10413741  | 0.490024281 | 0.445526098 |
| 0.422716757 | 0.494701466 | 0.501046549 | 0.420864833 |
| 0.463512085 | 0.238198317 | 0.00843621  | 0.321946371 |
| 0.50757015  | 0.454677709 | 0.500457677 | 0.24989934  |
| 0.439847318 | 0.521738301 | 0.518941547 | 0.252616822 |
| 0.034816644 | 0.344883047 | 0.019426173 | 0.351402353 |
| 0.501909185 | 0.112980528 | 0.471235601 | 0.135223765 |
| 0.057339053 | 0.530916929 | 0.175436063 | 0.288653    |

|             |             |             |             |
|-------------|-------------|-------------|-------------|
| 0.130086116 | 0.459356567 | 0.252902377 | 0.261546466 |
| 0.226725323 | 0.152078472 | 0.392151099 | 0.419929483 |
| 0.033095358 | 0.079559012 | 0.010347465 | 0.444874715 |
| 0.143335835 | 0.393134342 | 0.402182133 | 0.5006322   |
| 0.357505989 | 0.102811759 | 0.410349923 | 0.307441528 |
| 0.101354138 | 0.009568356 | 0.528315794 | 0.431708961 |
| 0.438353697 | 0.147328285 | 0.030724864 | 0.412604481 |
| 0.515170484 | 0.421365088 | 0.357233535 | 0.513228011 |
| 0.023083876 | 0.517085013 | 0.254824425 | 0.107588005 |
| 0.411104695 | 0.258309663 | 0.495152768 | 0.068340861 |
| 0.459927344 | 0.512211211 | 0.314486742 | 0.176768424 |
| 0.485972908 | 0.461908726 | 0.024184265 | 0.502020421 |
| 0.499189974 | 0.022781623 | 0.53063224  | 0.110571219 |
| 0.01407985  | 0.485285602 | 0.516743685 | 0.061412376 |
| 0.064523371 | 0.367934324 | 0.045086256 | 0.284768524 |
| 0.530139616 | 0.430849556 | 0.514497728 | 0.216708152 |
| 0.031815427 | 0.007095118 | 0.196215524 | 0.457243072 |
| 0.513123938 | 0.528662704 | 0.250792226 | 0.393498902 |
| 0.2335141   | 0.371787546 | 0.174159745 | 0.530796978 |
| 0.200623831 | 0.518626411 | 0.003593143 | 0.507406793 |
| 0.514416478 | 0.360049876 | 0.068704234 | 0.34789371  |
| 0.488762864 | 0.037640479 | 0.201645512 | 0.518858598 |
| 0.515084039 | 0.359347327 | 0.400336166 | 0.472370453 |
| 0.01297602  | 0.036078875 | 0.428375617 | 0.190658505 |
| 0.434533339 | 0.208461382 | 0.052605605 | 0.382348262 |
| 0.034116535 | 0.511338261 | 0.496249095 | 0.052247843 |
| 0.425208718 | 0.373096336 | 0.389893255 | 0.028133493 |
| 0.518528671 | 0.519341477 | 0.515892476 | 0.159843084 |
| 0.515390643 | 0.528589288 | 0.477570963 | 0.064952895 |
| 0.011379409 | 0.517499368 | 0.48032008  | 0.018362084 |
| 0.506757414 | 0.313172213 | 0.009057397 | 0.521455655 |
| 0.177022331 | 0.469312259 | 0.004006515 | 0.096360936 |
| 0.031253916 | 0.498149632 | 0.507695312 | 0.437694103 |
| 0.329530864 | 0.391767937 | 0.004320805 | 0.528718128 |
| 0.520414543 | 0.009375255 | 0.128898653 | 0.5258829   |
| 0.508544894 | 0.521909185 | 0.356199522 | 0.521185936 |
| 0.494300449 | 0.513770083 | 0.253945498 | 0.262905578 |
| 0.515769735 | 0.516723561 | 0.491457913 | 0.510927279 |
| 0.507858388 | 0.454523538 | 0.282809536 | 0.011402941 |
| 0.144702626 | 0.24811594  | 0.395614642 | 0.079755443 |
| 0.413321189 | 0.130895715 | 0.523835969 | 0.50674261  |
| 0.528060299 | 0.002186675 | 0.157287113 | 0.526299369 |
| 0.500082397 | 0.507641142 | 0.016380709 | 0.005856443 |
| 0.008001381 | 0.015291645 | 0.402434422 | 0.235064638 |
| 0.529543185 | 0.313493832 | 0.00186226  | 0.041651587 |
| 0.296165165 | 0.435663709 | 0.524523773 | 0.397692816 |
| 0.508410936 | 0.066534131 | 0.337883854 | 0.426152431 |
| 0.058817375 | 0.439093473 | 0.527993035 | 0.510203594 |
| 0.03137818  | 0.242670945 | 0.430901638 | 0.514405448 |
| 0.078184021 | 0.314917063 | 0.497638727 | 0.344706645 |
| 0.009860032 | 0.068004473 | 0.055297986 | 0.47629506  |
| 0.504100763 | 0.068930338 | 0.025613341 | 0.189040241 |
| 0.113828285 | 0.516699692 | 0.156871939 | 0.525478299 |
| 0.504846271 | 0.469257106 | 0.06133798  | 0.514727052 |

|             |             |             |             |
|-------------|-------------|-------------|-------------|
| 0.032387358 | 0.512445834 | 0.359208101 | 0.071812053 |
| 0.291171696 | 0.008005811 | 0.515075212 | 0.179775625 |
| 0.381374178 | 0.466570033 | 0.220519589 | 0.011018496 |
| 0.203490325 | 0.041167647 | 0.511110957 | 0.507162907 |
| 0.024957281 | 0.243646033 | 0.298050812 | 0.441854941 |
| 0.336825733 | 0.479259219 | 0.509717632 | 0.505281398 |
| 0.078331893 | 0.145153579 | 0.456431515 | 0.487072291 |
| 0.265537861 | 0.514414157 | 0.326582361 | 0.530129515 |
| 0.497108202 | 0.517103002 | 0.528364948 | 0.384390775 |
| 0.233315087 | 0.480698433 | 0.442046108 | 0.016708225 |
| 0.373473269 | 0.505137329 | 0.405710564 | 0.15342284  |
| 0.255176808 | 0.448914428 | 0.040197072 | 0.223822032 |
| 0.385081583 | 0.382108667 | 0.132706338 | 0.470207585 |
| 0.457718687 | 0.494337239 | 0.034707222 | 0.052292842 |
| 0.527474057 | 0.507183492 | 0.156797291 | 0.490433153 |
| 0.155337246 | 0.362801892 | 0.511335811 | 0.501427383 |
| 0.433304962 | 0.522915893 | 0.495447668 | 0.464382282 |
| 0.493420965 | 0.263828074 | 0.518843179 | 0.105176164 |
| 0.082104299 | 0.496932495 | 0.088374482 | 0.076751635 |
| 0.1294759   | 0.019523806 | 0.352862572 | 0.454409437 |
| 0.444400107 | 0.400980822 | 0.387435618 | 0.071322121 |
| 0.325776473 | 0.441885416 | 0.365308749 | 0.212918491 |
| 0.069148567 | 0.515479896 | 0.00636029  | 0.043523492 |
| 0.441306793 | 0.522587859 | 0.430066881 | 0.232997231 |
| 0.328415382 | 0.125897301 | 0.297808521 | 0.36558504  |
| 0.395208426 | 0.422384932 | 0.524180456 | 0.031063889 |
| 0.014628392 | 0.514267695 | 0.453008377 | 0.014793463 |
| 0.077859766 | 0.474306593 | 0.308402006 | 0.250756207 |
| 0.01514236  | 0.524682826 | 0.416796549 | 0.470941116 |
| 0.382499894 | 0.053138964 | 0.454304856 | 0.088873674 |
| 0.05191735  | 0.502347646 | 0.449749751 | 0.521601615 |
| 0.374925719 | 0.44829957  | 0.477136063 | 0.520519574 |
| 0.122084084 | 0.46264303  | 0.021794934 | 0.501581679 |
| 0.493999774 |             |             |             |

|             |             |             |             |
|-------------|-------------|-------------|-------------|
| ANXA1       | 0.323804815 | 0.503040263 | 0.293976576 |
| 0.372171541 | 0.361809811 | 0.230222239 | 0.19287291  |
| 0.121226499 | 0.099301477 | 0.015437645 | 0.067044466 |
| 0.341084073 | 0.260222137 | 0.238242519 | 0.205424511 |
| 0.384751147 | 0.234480421 | 0.232993662 | 0.245676927 |
| 0.313362866 | 0.087805515 | 0.368278553 | 0.118700265 |
| 0.295779905 | 0.186045571 | 0.126195284 | 0.290716969 |
| 0.419484504 | 0.135019168 | 0.207698645 | 0.277427128 |
| 0.158365963 | 0.37290347  | 0.473803555 | 1           |
| 0.476479995 | 0.28271097  | 0.022133815 | 0.212778461 |
| 0.353831079 | 0.380906773 | 0.318521172 | 0.306771263 |
| 0.072935587 | 0.421798593 | 0.238888091 | 0.345513376 |
| 0.141026764 | 0.084811122 | 0.131693082 | 0.374076188 |
| 0.438622567 | 0.317371973 | 0.154115514 | 0.162918411 |
| 0.247892035 | 0.146353784 | 0.305290655 | 0.188916254 |
| 0.235838191 | 0.092373188 | 0.454941321 | 0.091892144 |
| 0.124176669 | 0.180429801 | 0.229361462 | 0.205467701 |
| 0.31575153  | 0.274107724 | 0.026886255 | 0.286449206 |
| 0.007230044 | 0.293778441 | 0.342559952 | 0.26382219  |
| 0.092451526 | 0.069803601 | 0.249973243 | 0.28088445  |

|             |             |             |             |
|-------------|-------------|-------------|-------------|
| 0.442887171 | 0.408450426 | 0.512231677 | 0.508324249 |
| 0.269869243 | 0.297772525 | 0.339231888 | 0.230753765 |
| 0.383387202 | 0.189093749 | 0.116014358 | 0.412769828 |
| 0.517057477 | 0.503286231 | 0.258351776 | 0.294971838 |
| 0.378025058 | 0.440439786 | 0.297894098 | 0.355168116 |
| 0.277839424 | 0.097937127 | 0.401160348 | 0.522721595 |
| 0.324358862 | 0.320459074 | 0.22810721  | 0.341577971 |
| 0.104820339 | 0.22747718  | 0.320092938 | 0.201712533 |
| 0.458113616 | 0.03055399  | 0.283043404 | 0.290544056 |
| 0.201900537 | 0.369708061 | 0.50270495  | 0.201870245 |
| 0.351282235 | 0.055387293 | 0.175265625 | 0.068945452 |
| 0.282046443 | 0.201121818 | 0.416528535 | 0.45771467  |
| 0.178479067 | 0.350424696 | 0.225464933 | 0.01137166  |
| 0.074919683 | 0.199893183 | 0.399141546 | 0.269694859 |
| 0.344667288 | 0.327079079 | 0.265416604 | 0.283118186 |
| 0.329297856 | 0.505118465 | 0.030952306 | 0.110328136 |
| 0.313449537 | 0.209085906 | 0.267882181 | 0.341549985 |
| 0.336911057 | 0.110412457 | 0.175804277 | 0.517963539 |
| 0.360923311 | 0.129573801 | 0.203405574 | 0.374995802 |
| 0.277102824 | 0.370480452 | 0.142928753 | 0.29504588  |
| 0.076184654 | 0.448436    | 0.078166997 | 0.210360027 |
| 0.213765282 | 0.256536642 | 0.016184702 | 0.176036975 |
| 0.233431022 | 0.417662794 | 0.403530952 | 0.144866779 |
| 0.314873544 | 0.365017978 | 0.191969    | 0.349613772 |
| 0.031950994 | 0.073079989 | 0.145414064 | 0.515394948 |
| 0.158490557 | 0.501117157 | 0.279278634 | 0.291598313 |
| 0.314950828 | 0.418736336 | 0.003829763 | 0.441954435 |
| 0.503577174 | 0.158790706 | 0.366017438 | 0.339597292 |
| 0.294437757 | 0.437410327 | 0.027509149 | 0.371615973 |
| 0.228778552 | 0.111247632 | 0.520835479 | 0.238463333 |
| 0.421846189 | 0.092084461 | 0.231598144 | 0.422006392 |
| 0.377904974 | 0.018206622 | 0.137595237 | 0.285090183 |
| 0.067687114 | 0.076281257 | 0.326818969 | 0.315811322 |
| 0.306323833 | 0.403677644 | 0.498361528 | 0.28732005  |
| 0.361623974 | 0.202182321 | 0.028624888 | 0.331812905 |
| 0.380462702 | 0.274991872 | 0.387362809 | 0.207830286 |
| 0.18686999  | 0.442677498 | 0.36319902  | 0.144597289 |
| 0.075251953 | 0.228239962 | 0.031910584 | 0.309862075 |
| 0.329218202 | 0.164343322 | 0.2747983   | 0.177326951 |
| 0.14440741  | 0.525351505 | 0.235361956 | 0.267173975 |
| 0.177363828 | 0.322535835 | 0.225882299 | 0.253541096 |
| 0.296234962 | 0.207345939 | 0.307102496 | 0.303607719 |
| 0.04933159  | 0.168880928 | 0.029561161 | 0.326461475 |
| 0.234256546 | 0.324891255 | 0.295982457 | 0.29298712  |
| 0.283049938 | 0.19048643  | 0.367801576 | 0.262552887 |
| 0.173939355 | 0.045115827 | 0.486702077 | 0.328303808 |
| 0.223894486 | 0.166412421 | 0.085502638 | 0.282302904 |
| 0.46975052  | 0.184085913 | 0.130903078 | 0.436937603 |
| 0.040734389 | 0.490209827 | 0.294482295 | 0.201246833 |
| 0.38647083  | 0.29179105  | 0.449203715 | 0.051369724 |
| 0.253508974 | 0.435718287 | 0.292573011 | 0.240925325 |
| 0.351523831 | 0.310480052 | 0.055116451 | 0.311380561 |
| 0.310210507 | 0.079290768 | 0.520468037 | 0.216966239 |
| 0.056098156 | 0.378271977 | 0.380675355 | 0.132216054 |

|             |             |             |             |
|-------------|-------------|-------------|-------------|
| 0.134102737 | 0.299098361 | 0.042965666 | 0.320639447 |
| 0.513270301 | 0.397442758 | 0.374512425 | 0.245640739 |
| 0.083248541 | 0.051085013 | 0.268008576 | 0.300644298 |
| 0.459311078 | 0.515163849 | 0.283524555 | 0.378717317 |
| 0.252722427 | 0.297610111 | 0.079527215 | 0.518519823 |
| 0.167169036 | 0.480085797 | 0.021574112 | 0.410330033 |
| 0.467043441 | 0.173444091 | 0.154523698 | 0.227019742 |
| 0.329908433 | 0.073619155 | 0.182581925 | 0.466322906 |
| 0.393926379 | 0.28576596  | 0.283722131 | 0.330783048 |
| 0.026353634 | 0.056943925 | 0.31969174  | 0.220018911 |
| 0.301804025 | 0.232574615 | 0.09199444  | 0.210422916 |
| 0.093489757 | 0.424193545 | 0.448614103 | 0.097614742 |
| 0.221906885 | 0.180028478 | 0.362101982 | 0.071163093 |
| 0.455524965 | 0.477028684 | 0.48313214  | 0.153534839 |
| 0.390281519 | 0.486838434 | 0.329513793 | 0.132167314 |
| 0.051572506 | 0.48699026  | 0.261938256 | 0.047886021 |
| 0.479629868 | 0.122753592 | 0.051128696 | 0.465673053 |
| 0.194579695 | 0.375745364 | 0.00330125  | 0.066062392 |
| 0.080854225 | 0.465679066 | 0.430098662 | 0.261395661 |
| 0.14295672  | 0.289166533 | 0.011337946 | 0.519299261 |
| 0.469508624 | 0.047385594 | 0.215497014 | 0.40074312  |
| 0.38781222  | 0.493043382 | 0.310520373 | 0.458931216 |
| 0.35130128  | 0.471670562 | 0.233427319 | 0.300793489 |
| 0.410343174 | 0.47929566  | 0.330171544 | 0.408001784 |
| 0.462318699 | 0.366871438 | 0.274377378 | 0.034200524 |
| 0.131004814 | 0.136945511 | 0.213393209 | 0.118335044 |
| 0.179437347 | 0.203412684 | 0.455148547 | 0.476010461 |
| 0.498171223 | 0.019277332 | 0.124994465 | 0.378576959 |
| 0.405144703 | 0.457108871 | 0.02987731  | 0.007576936 |
| 0.008262128 | 0.062172324 | 0.259498168 | 0.273625218 |
| 0.476152828 | 0.159875385 | 0.017820585 | 0.045555315 |
| 0.241430578 | 0.363198743 | 0.484292919 | 0.327955007 |
| 0.395587618 | 0.134540519 | 0.23763831  | 0.334101342 |
| 0.131622055 | 0.193654002 | 0.503125088 | 0.432050807 |
| 0.07633174  | 0.268499014 | 0.254602241 | 0.48719906  |
| 0.108388589 | 0.338396092 | 0.342736064 | 0.300848416 |
| 0.025743826 | 0.14320191  | 0.114539598 | 0.411873106 |
| 0.464205697 | 0.170580741 | 0.101943395 | 0.086752176 |
| 0.166188322 | 0.456637952 | 0.224795902 | 0.526448081 |
| 0.404116618 | 0.442796758 | 0.145203193 | 0.437631572 |
| 0.082973257 | 0.454698859 | 0.359446585 | 0.041296974 |
| 0.269211717 | 0.031018242 | 0.451881695 | 0.170090369 |
| 0.224191662 | 0.267773353 | 0.175972499 | 0.049417317 |
| 0.182638317 | 0.114809962 | 0.494895474 | 0.472018091 |
| 0.071281277 | 0.199315715 | 0.299217799 | 0.309928322 |
| 0.188449394 | 0.403028084 | 0.456754046 | 0.261288653 |
| 0.102672288 | 0.17108498  | 0.318932593 | 0.261341265 |
| 0.178041612 | 0.515154063 | 0.298546706 | 0.516663432 |
| 0.294183075 | 0.419208872 | 0.463888353 | 0.275027793 |
| 0.308289791 | 0.252223301 | 0.267864759 | 0.038755657 |
| 0.299447699 | 0.471894396 | 0.241055255 | 0.225506787 |
| 0.314911548 | 0.319307719 | 0.055495175 | 0.109401401 |
| 0.295382224 | 0.186110762 | 0.197004854 | 0.432337109 |
| 0.254917918 | 0.276806752 | 0.045623592 | 0.109289406 |

|             |             |             |             |
|-------------|-------------|-------------|-------------|
| 0.518770128 | 0.379518071 | 0.109162011 | 0.317868556 |
| 0.215217329 | 0.323923226 | 0.412876517 | 0.426630782 |
| 0.260189554 | 0.437802088 | 0.364477371 | 0.29142623  |
| 0.381417233 | 0.241399874 | 0.488007416 | 0.049699677 |
| 0.123018785 | 0.290195736 | 0.166901306 | 0.155536368 |
| 0.200513645 | 0.060873381 | 0.271469491 | 0.378668199 |
| 0.312506941 | 0.35864678  | 0.198946325 | 0.112981902 |
| 0.33634902  | 0.228255521 | 0.336928825 | 0.182633671 |
| 0.136873799 | 0.464327844 | 0.024526533 | 0.111753224 |
| 0.341885825 | 0.38756879  | 0.360777237 | 0.274896355 |
| 0.305503662 | 0.196535466 | 0.323512136 | 0.179456903 |
| 0.249444855 | 0.267769318 | 0.38825967  | 0.038375211 |
| 0.036234715 | 0.511763275 | 0.230819554 | 0.04403968  |
| 0.116399989 | 0.224903154 | 0.245064771 | 0.239012555 |
| 0.057989649 | 0.481796514 | 0.216341809 | 0.345022893 |
| 0.254022881 | 0.1054379   | 0.280164952 | 0.082945401 |
| 0.068162995 | 0.397552037 | 0.318640393 | 0.491799511 |
| 0.302880025 | 0.410157894 | 0.370328083 | 0.397901622 |
| 0.112874281 | 0.256393038 | 0.045786238 | 0.407695669 |
| 0.298155712 |             |             |             |
| ANXA2       | 0.49327416  | 0.521054646 | 0.446050262 |
| 0.439719245 | 0.450467556 | 0.432613159 | 0.189845284 |
| 0.182400112 | 0.068734126 | 0.002610907 | 0.017563374 |
| 0.496892417 | 0.208868569 | 0.277773131 | 0.370841326 |
| 0.426278288 | 0.120021016 | 0.371287761 | 0.214766219 |
| 0.424105922 | 0.078662418 | 0.403410634 | 0.069704763 |
| 0.296855781 | 0.091077876 | 0.05117087  | 0.268616396 |
| 0.464744418 | 0.059910207 | 0.384225972 | 0.417563954 |
| 0.082608035 | 0.497491962 | 0.512419697 | 0.476479995 |
| 1           | 0.487774438 | 0.009620442 | 0.315710301 |
| 0.485570724 | 0.488713062 | 0.423481343 | 0.317766713 |
| 0.028301356 | 0.489748438 | 0.225996201 | 0.422453813 |
| 0.246476155 | 0.021433433 | 0.269084494 | 0.479179032 |
| 0.505206518 | 0.498583656 | 0.218195733 | 0.138194685 |
| 0.22940806  | 0.256232243 | 0.325787509 | 0.38159511  |
| 0.203340589 | 0.171165754 | 0.51739593  | 0.072102377 |
| 0.146800792 | 0.239819818 | 0.136216476 | 0.250143721 |
| 0.384421558 | 0.453290237 | 0.010660952 | 0.495018113 |
| 0.001807958 | 0.391287942 | 0.385236717 | 0.362169169 |
| 0.028606818 | 0.014253931 | 0.159735674 | 0.338758343 |
| 0.485399362 | 0.50367289  | 0.510727061 | 0.521814928 |
| 0.171349684 | 0.275727583 | 0.443807939 | 0.148972914 |
| 0.50317576  | 0.160760112 | 0.097011521 | 0.430992797 |
| 0.516331119 | 0.526394276 | 0.18185948  | 0.244401201 |
| 0.491208939 | 0.50728584  | 0.476968869 | 0.459562628 |
| 0.388043087 | 0.040477235 | 0.506068743 | 0.529041081 |
| 0.477983087 | 0.355451997 | 0.131094051 | 0.455377877 |
| 0.041779184 | 0.41412869  | 0.345659758 | 0.160854899 |
| 0.48783863  | 0.010517122 | 0.195180378 | 0.3698942   |
| 0.193462955 | 0.503482181 | 0.527546264 | 0.16204504  |
| 0.435338276 | 0.013585341 | 0.142286481 | 0.022447904 |
| 0.343714432 | 0.161306497 | 0.504705682 | 0.497322798 |
| 0.237113554 | 0.401298167 | 0.246792867 | 0.000909874 |
| 0.018010171 | 0.170634508 | 0.523298411 | 0.385961781 |

|             |             |             |             |
|-------------|-------------|-------------|-------------|
| 0.471017837 | 0.488339497 | 0.221763052 | 0.477711781 |
| 0.518696727 | 0.510248924 | 0.074090699 | 0.072932657 |
| 0.456760461 | 0.168092031 | 0.212115058 | 0.503624337 |
| 0.304195568 | 0.093186968 | 0.103070647 | 0.520139632 |
| 0.472524508 | 0.063521733 | 0.378664781 | 0.423254975 |
| 0.357928183 | 0.368709363 | 0.083441126 | 0.273498772 |
| 0.03519423  | 0.513593602 | 0.019767035 | 0.354481204 |
| 0.310579424 | 0.144906999 | 0.006475553 | 0.265550623 |
| 0.305655589 | 0.514969627 | 0.496261544 | 0.082345264 |
| 0.319518155 | 0.418757447 | 0.365880362 | 0.496012373 |
| 0.006390849 | 0.032837683 | 0.338284908 | 0.527115597 |
| 0.352673369 | 0.523304031 | 0.285661791 | 0.294196725 |
| 0.265224586 | 0.47873265  | 0.002934494 | 0.502619605 |
| 0.525232986 | 0.370102576 | 0.425794179 | 0.45003833  |
| 0.430390039 | 0.486465112 | 0.054335882 | 0.429739986 |
| 0.448970867 | 0.057563688 | 0.509641457 | 0.138669939 |
| 0.513933957 | 0.028127935 | 0.338627602 | 0.513684909 |
| 0.529559314 | 0.006207566 | 0.24293499  | 0.404723661 |
| 0.018607904 | 0.085011803 | 0.473692489 | 0.423940079 |
| 0.399439676 | 0.485073472 | 0.490866954 | 0.413575371 |
| 0.453321923 | 0.214793322 | 0.007040765 | 0.317054128 |
| 0.502020946 | 0.45332974  | 0.488517842 | 0.222985386 |
| 0.426956303 | 0.512221822 | 0.520551851 | 0.237394549 |
| 0.028762817 | 0.316972292 | 0.016087629 | 0.331345357 |
| 0.494209503 | 0.104176028 | 0.454809485 | 0.132587215 |
| 0.055193356 | 0.526695156 | 0.179441235 | 0.298964529 |
| 0.136313332 | 0.456598573 | 0.228342688 | 0.257437199 |
| 0.235704291 | 0.137819454 | 0.377146757 | 0.40057043  |
| 0.026005037 | 0.074983734 | 0.0097372   | 0.473242355 |
| 0.151548042 | 0.405177822 | 0.413707977 | 0.493581874 |
| 0.351684333 | 0.102036658 | 0.402857332 | 0.298357823 |
| 0.095014453 | 0.008402561 | 0.522205373 | 0.4135368   |
| 0.421911454 | 0.127944074 | 0.028001993 | 0.430554245 |
| 0.506692625 | 0.398445015 | 0.32795922  | 0.502985063 |
| 0.019408652 | 0.511042333 | 0.250235984 | 0.10201648  |
| 0.426088383 | 0.245355126 | 0.477645098 | 0.058153727 |
| 0.441410223 | 0.505333082 | 0.298597606 | 0.165569083 |
| 0.480764514 | 0.439287614 | 0.019690009 | 0.493780073 |
| 0.495594905 | 0.020575646 | 0.531065895 | 0.111300717 |
| 0.012692064 | 0.485280037 | 0.515435592 | 0.055988016 |
| 0.059365124 | 0.352701579 | 0.034638011 | 0.273566825 |
| 0.524448709 | 0.41976362  | 0.507340845 | 0.214005358 |
| 0.02744471  | 0.007972092 | 0.195816955 | 0.456781961 |
| 0.511019861 | 0.532667072 | 0.238618712 | 0.397074412 |
| 0.214591052 | 0.356480621 | 0.152253668 | 0.529218198 |
| 0.194646055 | 0.517737236 | 0.002749385 | 0.508398859 |
| 0.514415541 | 0.337115291 | 0.064916872 | 0.318056586 |
| 0.478088988 | 0.030661735 | 0.182147423 | 0.517158956 |
| 0.499153844 | 0.334598661 | 0.378501296 | 0.467326879 |
| 0.009563521 | 0.028674641 | 0.412181577 | 0.193212372 |
| 0.417723603 | 0.189512556 | 0.058248849 | 0.349793192 |
| 0.03041734  | 0.503770384 | 0.490270925 | 0.044134608 |
| 0.407747816 | 0.337507914 | 0.384379948 | 0.023696732 |
| 0.521996731 | 0.522706066 | 0.5149319   | 0.14058178  |

|             |             |             |             |
|-------------|-------------|-------------|-------------|
| 0.518552041 | 0.529258289 | 0.491580307 | 0.060314558 |
| 0.010472069 | 0.520581111 | 0.457892193 | 0.016227298 |
| 0.497459043 | 0.285604426 | 0.008784158 | 0.512205107 |
| 0.157759043 | 0.471261888 | 0.002601968 | 0.096022117 |
| 0.029885045 | 0.494156935 | 0.502410502 | 0.411183863 |
| 0.306640096 | 0.369914115 | 0.00426668  | 0.529564184 |
| 0.517551064 | 0.008639082 | 0.127786545 | 0.529408097 |
| 0.518428858 | 0.516198169 | 0.355735939 | 0.523296473 |
| 0.505512807 | 0.517546674 | 0.236475376 | 0.249423694 |
| 0.502801591 | 0.52366679  | 0.470642132 | 0.498282648 |
| 0.500062641 | 0.450343086 | 0.261159607 | 0.008692471 |
| 0.126422338 | 0.218608188 | 0.379917584 | 0.072069956 |
| 0.386021765 | 0.12265427  | 0.519734137 | 0.499421987 |
| 0.530467663 | 0.001591067 | 0.136147756 | 0.52251171  |
| 0.482908033 | 0.491906199 | 0.014219133 | 0.004882271 |
| 0.007428964 | 0.014733156 | 0.375181835 | 0.224803963 |
| 0.52380123  | 0.303413943 | 0.001121078 | 0.032827164 |
| 0.272612746 | 0.437389597 | 0.52348286  | 0.377791159 |
| 0.505992982 | 0.060959828 | 0.326009097 | 0.405593232 |
| 0.054496082 | 0.426381952 | 0.526295595 | 0.500888536 |
| 0.029000661 | 0.229621255 | 0.41912155  | 0.502130263 |
| 0.084978077 | 0.306407527 | 0.503678102 | 0.329567967 |
| 0.009314338 | 0.063758007 | 0.048943632 | 0.465412678 |
| 0.510208426 | 0.069311783 | 0.02531453  | 0.172665402 |
| 0.103617437 | 0.509718826 | 0.147870644 | 0.519919942 |
| 0.489227069 | 0.455723428 | 0.061097172 | 0.506103257 |
| 0.028168316 | 0.514176041 | 0.364178696 | 0.063004464 |
| 0.281964601 | 0.006742099 | 0.52276118  | 0.172590009 |
| 0.361307066 | 0.446316072 | 0.198684933 | 0.010465361 |
| 0.202782727 | 0.038632168 | 0.502299985 | 0.50455103  |
| 0.024068582 | 0.215504228 | 0.284753273 | 0.425919416 |
| 0.306576753 | 0.46711957  | 0.507230009 | 0.499022011 |
| 0.065502601 | 0.157908383 | 0.435263287 | 0.476500165 |
| 0.243601476 | 0.510130501 | 0.314520577 | 0.527844945 |
| 0.477919365 | 0.505470722 | 0.52847645  | 0.354730095 |
| 0.242288289 | 0.458399855 | 0.420857122 | 0.013875154 |
| 0.351161252 | 0.499366245 | 0.379398735 | 0.147002789 |
| 0.247470571 | 0.456835559 | 0.033175493 | 0.219224979 |
| 0.400263087 | 0.353885235 | 0.123958813 | 0.454925625 |
| 0.439947229 | 0.481351894 | 0.029191422 | 0.045901165 |
| 0.524064599 | 0.493083543 | 0.131246196 | 0.472746242 |
| 0.145747876 | 0.344520444 | 0.508983499 | 0.503022092 |
| 0.415267247 | 0.523390248 | 0.47994972  | 0.451577791 |
| 0.482415074 | 0.238461366 | 0.516759334 | 0.086687137 |
| 0.073512689 | 0.502786444 | 0.08278707  | 0.072410023 |
| 0.119385113 | 0.017276699 | 0.362215478 | 0.444898413 |
| 0.460998633 | 0.390816027 | 0.370846811 | 0.063387736 |
| 0.319553316 | 0.42990548  | 0.350670671 | 0.191532408 |
| 0.062976157 | 0.513125216 | 0.005467782 | 0.040512618 |
| 0.4641662   | 0.510944212 | 0.435908303 | 0.221427434 |
| 0.332155237 | 0.124489102 | 0.285697911 | 0.337909283 |
| 0.393726141 | 0.418309676 | 0.513001244 | 0.024155806 |
| 0.011576532 | 0.508414182 | 0.43187209  | 0.013793696 |
| 0.073407895 | 0.457184288 | 0.298039263 | 0.229869472 |



|             |             |             |             |
|-------------|-------------|-------------|-------------|
| 0.014472131 | 0.530674434 | 0.393629523 | 0.463848921 |
| 0.353572642 | 0.047418474 | 0.44367534  | 0.077903175 |
| 0.043052445 | 0.497330811 | 0.446118176 | 0.525205771 |
| 0.370717402 | 0.435128646 | 0.471544927 | 0.520504593 |
| 0.112922784 | 0.463385342 | 0.016838444 | 0.4872983   |
| 0.496827457 |             |             |             |
| ANXA4       | 0.352694434 | 0.470277452 | 0.339223978 |
| 0.28234292  | 0.299688086 | 0.272177681 | 0.138782391 |
| 0.169334802 | 0.060888168 | 0.001116352 | 0.008795035 |
| 0.331822386 | 0.109459923 | 0.170878902 | 0.255871912 |
| 0.302932484 | 0.081844084 | 0.349339148 | 0.169845085 |
| 0.303983169 | 0.058874948 | 0.268051147 | 0.06346654  |
| 0.239122205 | 0.063943168 | 0.039163832 | 0.183344468 |
| 0.35542372  | 0.048483971 | 0.2166188   | 0.286535518 |
| 0.092126319 | 0.36281814  | 0.495588955 | 0.28271097  |
| 0.487774438 | 1           | 0.015351499 | 0.185718032 |
| 0.395989454 | 0.313005573 | 0.295186639 | 0.218087312 |
| 0.023735425 | 0.470057055 | 0.157556764 | 0.313226615 |
| 0.203216799 | 0.014923969 | 0.190338188 | 0.43458256  |
| 0.434273055 | 0.287866767 | 0.184466151 | 0.100049781 |
| 0.100290934 | 0.166376518 | 0.166723127 | 0.253152044 |
| 0.144224299 | 0.116201192 | 0.444072043 | 0.05561881  |
| 0.10479339  | 0.217125661 | 0.120465598 | 0.195574045 |
| 0.26849541  | 0.318230568 | 0.017719172 | 0.333366098 |
| 0.000579529 | 0.295580025 | 0.300600182 | 0.229065517 |
| 0.028096958 | 0.007040202 | 0.139563405 | 0.221260403 |
| 0.38355976  | 0.466852945 | 0.39598514  | 0.415044709 |
| 0.110577633 | 0.24081455  | 0.302629758 | 0.104775696 |
| 0.393402427 | 0.104197004 | 0.094076257 | 0.294048716 |
| 0.40885654  | 0.472155464 | 0.139922798 | 0.202609043 |
| 0.314293874 | 0.437504661 | 0.306269819 | 0.285443022 |
| 0.229910082 | 0.052092617 | 0.398208246 | 0.439341279 |
| 0.368928482 | 0.240476385 | 0.102820658 | 0.317758713 |
| 0.043890565 | 0.315297748 | 0.237567621 | 0.1316558   |
| 0.394749515 | 0.011228338 | 0.151646253 | 0.231678455 |
| 0.218060418 | 0.360155042 | 0.472461201 | 0.125950141 |
| 0.319615666 | 0.012726164 | 0.08796518  | 0.031075779 |
| 0.230708794 | 0.120372678 | 0.470463118 | 0.358160439 |
| 0.178140883 | 0.252683922 | 0.198350612 | 0.001391893 |
| 0.018102685 | 0.192831625 | 0.357282305 | 0.333152275 |
| 0.335592632 | 0.399478947 | 0.135550896 | 0.318430299 |
| 0.311779283 | 0.390202273 | 0.04549152  | 0.07415086  |
| 0.304878915 | 0.180763135 | 0.16746169  | 0.307221092 |
| 0.202382164 | 0.094951719 | 0.085322563 | 0.450945133 |
| 0.404361103 | 0.053838268 | 0.31913395  | 0.298592256 |
| 0.194390464 | 0.249274956 | 0.078633889 | 0.172547984 |
| 0.028612839 | 0.460167932 | 0.021590356 | 0.302470409 |
| 0.189169188 | 0.091790731 | 0.017377322 | 0.20487472  |
| 0.189516431 | 0.338941021 | 0.473566653 | 0.084779263 |
| 0.203609744 | 0.278705272 | 0.270680784 | 0.271863396 |
| 0.002729306 | 0.0442506   | 0.262370998 | 0.430212151 |
| 0.214911091 | 0.452575972 | 0.234257668 | 0.25391693  |
| 0.20265357  | 0.356414622 | 0.006947824 | 0.474363834 |
| 0.482651415 | 0.261943547 | 0.245576886 | 0.332319291 |

|             |             |             |             |
|-------------|-------------|-------------|-------------|
| 0.269231839 | 0.347580127 | 0.055087409 | 0.295782257 |
| 0.30365801  | 0.065282107 | 0.424012953 | 0.099737289 |
| 0.441972251 | 0.02306562  | 0.227555685 | 0.360161756 |
| 0.304089024 | 0.005947891 | 0.163068071 | 0.27613783  |
| 0.023781893 | 0.065169007 | 0.339329823 | 0.287636027 |
| 0.255171203 | 0.353098961 | 0.394417186 | 0.253612621 |
| 0.293020384 | 0.19132137  | 0.012159723 | 0.249628401 |
| 0.369041321 | 0.272234118 | 0.413908213 | 0.175830625 |
| 0.291467567 | 0.425395013 | 0.36202349  | 0.134961437 |
| 0.025479462 | 0.23170129  | 0.01330902  | 0.229680271 |
| 0.389039282 | 0.058011551 | 0.297419119 | 0.154966637 |
| 0.047989819 | 0.456083697 | 0.142864179 | 0.214969348 |
| 0.107025264 | 0.24531391  | 0.202278654 | 0.119563761 |
| 0.105452441 | 0.114796487 | 0.25556851  | 0.263631098 |
| 0.021800884 | 0.053951174 | 0.022953111 | 0.235395998 |
| 0.06003889  | 0.193097874 | 0.192375868 | 0.303065736 |
| 0.216091145 | 0.056183275 | 0.247681211 | 0.255870972 |
| 0.084989951 | 0.009768517 | 0.455216412 | 0.309072243 |
| 0.277791418 | 0.112650254 | 0.03237258  | 0.208513298 |
| 0.370003103 | 0.221900589 | 0.251174634 | 0.3785042   |
| 0.031469131 | 0.415548683 | 0.134188874 | 0.075769546 |
| 0.235675568 | 0.163960093 | 0.377978174 | 0.041466095 |
| 0.322855494 | 0.41602268  | 0.264697789 | 0.117269664 |
| 0.35260157  | 0.302223832 | 0.017885452 | 0.346212394 |
| 0.323363572 | 0.018411023 | 0.46967194  | 0.088019466 |
| 0.015616595 | 0.324343298 | 0.294967227 | 0.053517696 |
| 0.058141816 | 0.193895938 | 0.032303    | 0.203664981 |
| 0.450369918 | 0.275586564 | 0.305744415 | 0.198369027 |
| 0.020413694 | 0.002148854 | 0.171399411 | 0.345575573 |
| 0.486748258 | 0.454539085 | 0.201251853 | 0.225263953 |
| 0.170937743 | 0.22192575  | 0.124946468 | 0.434373617 |
| 0.25593372  | 0.496040116 | 0.005049987 | 0.331910298 |
| 0.481832253 | 0.221182238 | 0.047519839 | 0.209473664 |
| 0.330175982 | 0.030826524 | 0.195855375 | 0.456332455 |
| 0.384199809 | 0.238784316 | 0.240802554 | 0.336847976 |
| 0.009212701 | 0.027004186 | 0.298771739 | 0.161181424 |
| 0.25542233  | 0.157140379 | 0.050419409 | 0.273123899 |
| 0.020636747 | 0.395490633 | 0.365817683 | 0.036972449 |
| 0.212009605 | 0.28370751  | 0.279245872 | 0.024500624 |
| 0.386948402 | 0.478337984 | 0.487698385 | 0.147009182 |
| 0.341572207 | 0.423979183 | 0.277734438 | 0.067628099 |
| 0.012872802 | 0.487599289 | 0.328824593 | 0.011438894 |
| 0.384610382 | 0.189054211 | 0.003019654 | 0.452025853 |
| 0.138972129 | 0.448216787 | 0.004146052 | 0.136689565 |
| 0.042945897 | 0.373825353 | 0.451532879 | 0.294457348 |
| 0.165290067 | 0.305803696 | 0.01093497  | 0.476297598 |
| 0.435776744 | 0.009810924 | 0.109758914 | 0.333760651 |
| 0.305622991 | 0.492210852 | 0.231126472 | 0.362283076 |
| 0.292121525 | 0.459062053 | 0.14563072  | 0.185516725 |
| 0.349613003 | 0.456194895 | 0.329027175 | 0.439484905 |
| 0.360415307 | 0.31194098  | 0.189151779 | 0.007565261 |
| 0.116040861 | 0.164732547 | 0.196871199 | 0.04249344  |
| 0.271994723 | 0.089961875 | 0.452240106 | 0.381428384 |
| 0.406972385 | 0.003575851 | 0.113289341 | 0.348023196 |

|             |             |             |             |
|-------------|-------------|-------------|-------------|
| 0.375996141 | 0.409433422 | 0.033727029 | 0.008761141 |
| 0.013261159 | 0.009094802 | 0.27381114  | 0.200193494 |
| 0.437482333 | 0.145883032 | 0.002419055 | 0.03332636  |
| 0.220842289 | 0.282691707 | 0.451086065 | 0.275528143 |
| 0.362661708 | 0.060570166 | 0.15646147  | 0.301823863 |
| 0.042614839 | 0.295028    | 0.405873627 | 0.430505993 |
| 0.042154415 | 0.202859973 | 0.344865644 | 0.407872748 |
| 0.059385718 | 0.231653991 | 0.327299898 | 0.187104433 |
| 0.020687646 | 0.060514574 | 0.045295697 | 0.338452887 |
| 0.472209886 | 0.033943627 | 0.013792513 | 0.122821578 |
| 0.061866215 | 0.40214068  | 0.098663457 | 0.441086168 |
| 0.35373004  | 0.329371494 | 0.057682953 | 0.454763234 |
| 0.020207942 | 0.449175761 | 0.235659607 | 0.043153284 |
| 0.272000114 | 0.011774007 | 0.443482141 | 0.084155487 |
| 0.238770449 | 0.329685478 | 0.165221701 | 0.013938625 |
| 0.178317993 | 0.035585459 | 0.381642974 | 0.373072825 |
| 0.036011304 | 0.195388066 | 0.245222081 | 0.333271164 |
| 0.21639493  | 0.285222059 | 0.475053957 | 0.288806838 |
| 0.050302454 | 0.154382024 | 0.310683243 | 0.324203142 |
| 0.183342441 | 0.409527729 | 0.178450127 | 0.479345333 |
| 0.334657386 | 0.441000481 | 0.418663875 | 0.248759942 |
| 0.156531647 | 0.323232795 | 0.241770013 | 0.008981636 |
| 0.274273817 | 0.345727008 | 0.319994344 | 0.092490975 |
| 0.156021227 | 0.300559217 | 0.050562052 | 0.221404915 |
| 0.260070584 | 0.222779917 | 0.082167884 | 0.347667454 |
| 0.331851112 | 0.322351638 | 0.041411622 | 0.040623528 |
| 0.495196495 | 0.427212541 | 0.11855185  | 0.298631088 |
| 0.142968816 | 0.233297291 | 0.359684871 | 0.341993508 |
| 0.313178864 | 0.352050443 | 0.334475418 | 0.252339067 |
| 0.380191722 | 0.191498267 | 0.488418762 | 0.092107298 |
| 0.065794955 | 0.334210354 | 0.045803892 | 0.071878127 |
| 0.091361483 | 0.021426525 | 0.230546783 | 0.313869401 |
| 0.279151373 | 0.248247653 | 0.262367324 | 0.067661149 |
| 0.249584319 | 0.360824576 | 0.263301931 | 0.126840576 |
| 0.041489208 | 0.452008896 | 0.006889342 | 0.042014527 |
| 0.279027372 | 0.344219704 | 0.251529809 | 0.186821264 |
| 0.217481787 | 0.127424345 | 0.199360635 | 0.229409438 |
| 0.18252434  | 0.325385648 | 0.348830344 | 0.031499452 |
| 0.01169409  | 0.413557759 | 0.331197581 | 0.026231734 |
| 0.076081964 | 0.330893339 | 0.288374238 | 0.144315474 |
| 0.019442056 | 0.422730991 | 0.21777395  | 0.318249119 |
| 0.262395494 | 0.054552363 | 0.360590411 | 0.091189381 |
| 0.06729205  | 0.43364976  | 0.321632359 | 0.472849029 |
| 0.317274294 | 0.279251552 | 0.453150605 | 0.349432138 |
| 0.154911046 | 0.349124972 | 0.017578368 | 0.375559283 |
| 0.281294872 |             |             |             |
| ANXA5       | 0.025949797 | 0.012663121 | 0.011486278 |
| 0.020743879 | 0.026348821 | 0.006492438 | 0.023768534 |
| 0.024752796 | 0.001125178 | 0.001268496 | 0.00121314  |
| 0.025849077 | 0.001648338 | 0.019078151 | 0.000709908 |
| 0.035172046 | 0.042399743 | 0.031478414 | 0.052739412 |
| 0.040288426 | 0.020951922 | 0.039375976 | 0.027047402 |
| 0.013367828 | 0.014207623 | 0.02493021  | 0.005306095 |
| 0.032355918 | 0.027536537 | 0.007034122 | 0.030897092 |

|             |             |             |             |
|-------------|-------------|-------------|-------------|
| 0.09547588  | 0.034246615 | 0.009444954 | 0.022133815 |
| 0.009620442 | 0.015351499 | 1           | 0.002565626 |
| 0.023619934 | 0.010743861 | 0.033173853 | 0.0325376   |
| 0.019293378 | 0.01031151  | 0.024886386 | 0.032304839 |
| 0.001267526 | 0.01474895  | 0.00797597  | 0.010830998 |
| 0.006416208 | 0.005302876 | 0.016816944 | 0.016874167 |
| 0.000602094 | 0.026316043 | 0.002133126 | 0.021878237 |
| 0.038121692 | 0.013916546 | 0.008088333 | 0.00146532  |
| 0.000336852 | 0.046806679 | 0.092335189 | 0.039023201 |
| 0.008062424 | 0.015628738 | 0.049562946 | 0.018606478 |
| 0.00110717  | 0.04175373  | 0.062200321 | 0.000417548 |
| 0.076208137 | 0.010736019 | 0.098711685 | 0.024565868 |
| 0.030234046 | 0.016451703 | 0.020809758 | 0.015519429 |
| 0.025382331 | 0.075492219 | 0.019372458 | 0.035200829 |
| 0.01642425  | 0.017471598 | 0.003134926 | 0.038973806 |
| 0.018714752 | 0.010685993 | 0.012993008 | 0.049320887 |
| 0.007072717 | 0.01488171  | 0.005324443 | 0.009394683 |
| 0.000281051 | 0.034686716 | 0.007744921 | 0.01683372  |
| 0.019447485 | 0.014361029 | 0.045094628 | 0.032500409 |
| 0.087938032 | 0.005313051 | 0.038854979 | 0.051995331 |
| 0.027826154 | 0.00798578  | 0.054086888 | 0.024424968 |
| 0.030683627 | 0.01934137  | 0.00967886  | 0.040329726 |
| 0.041695962 | 0.005966353 | 0.000124094 | 0.10514573  |
| 0.002750239 | 0.010338291 | 0.006646966 | 0.018960457 |
| 0.035469384 | 0.005846418 | 0.030900883 | 0.045334715 |
| 0.050809029 | 0.027455764 | 0.024439102 | 0.066583657 |
| 0.029863559 | 0.010750853 | 0.005840672 | 0.01591121  |
| 0.008249767 | 0.021550629 | 1.47E-05    | 0.040542355 |
| 0.011625552 | 0.050795519 | 0.068037851 | 0.01652733  |
| 0.015681883 | 0.04128854  | 0.071902607 | 0.015413789 |
| 0.01332354  | 0.064883213 | 0.02949155  | 0.041234185 |
| 0.002169322 | 0.031670441 | 0.084604525 | 0.039561207 |
| 0.037413822 | 0.007153303 | 0.066478141 | 0.034401769 |
| 0.000642025 | 0.023915349 | 0.039164895 | 0.031984851 |
| 0.002562024 | 0.007067196 | 0.007847473 | 0.098868653 |
| 0.042385176 | 0.025494733 | 0.026781223 | 0.007660685 |
| 0.000686666 | 0.028742895 | 0.019102785 | 0.016567781 |
| 0.015039026 | 0.021387714 | 0.03727805  | 0.021243306 |
| 0.050310952 | 0.023552824 | 0.000300195 | 0.00846847  |
| 0.009596052 | 0.011531858 | 0.020011124 | 0.045265161 |
| 0.00183163  | 0.017142321 | 0.001222249 | 0.057450538 |
| 0.026921083 | 0.086608121 | 0.022383542 | 0.044532076 |
| 0.01331546  | 0.037273778 | 0.024715078 | 0.00973958  |
| 0.011104651 | 0.001952182 | 0.009419449 | 0.025338443 |
| 0.051476868 | 0.009907695 | 0.027759848 | 0.021444736 |
| 0.00758849  | 0.026681642 | 0.028948685 | 0.000896802 |
| 0.014998765 | 0.057124527 | 0.025148272 | 0.04372881  |
| 0.025311424 | 0.000916387 | 0.0097812   | 0.013733702 |
| 0.016462671 | 0.010467354 | 0.009615779 | 2.94E-05    |
| 0.034885082 | 0.027871417 | 0.001198171 | 0.009178333 |
| 0.008644246 | 0.015797944 | 0.00248463  | 0.113810421 |
| 0.057780511 | 0.013240978 | 0.018608431 | 0.009018852 |
| 0.008693793 | 0.015610279 | 0.054560936 | 0.007135716 |
| 0.003921275 | 0.018712832 | 0.002920726 | 0.00377095  |

|             |             |             |             |
|-------------|-------------|-------------|-------------|
| 0.024978598 | 0.05255356  | 0.022099558 | 0.009013772 |
| 0.00564473  | 0.008412122 | 0.008354159 | 0.018591687 |
| 0.029536701 | 0.016508846 | 0.015434448 | 0.006995928 |
| 0.020555071 | 0.078363812 | 0.01270779  | 0.042077686 |
| 0.01588107  | 0.01995613  | 0.102602273 | 0.001266126 |
| 0.017389503 | 0.002361547 | 0.007125227 | 0.012877446 |
| 0.008320153 | 0.022960992 | 0.007230366 | 0.040550169 |
| 0.014412567 | 0.042081879 | 0.022812374 | 3.98E-05    |
| 0.031308357 | 0.012535462 | 0.065247247 | 0.013204345 |
| 0.012180219 | 0.026261293 | 0.01075148  | 0.015551218 |
| 0.021480264 | 0.070100244 | 0.013744347 | 0.051679948 |
| 0.090458168 | 0.028335429 | 0.006468633 | 0.066962337 |
| 0.040672095 | 0.00712668  | 0.015919234 | 0.047395013 |
| 0.012518024 | 0.03541841  | 0.007874482 | 0.024587936 |
| 0.031823454 | 0.005864497 | 0.065154294 | 0.024527283 |
| 0.010239258 | 0.013611163 | 0.10331517  | 0.011498586 |
| 0.059841399 | 0.001506891 | 0.003124288 | 0.013650066 |
| 0.027067869 | 0.013402834 | 0.083537664 | 0.012837645 |
| 0.007667144 | 0.02540745  | 0.019932519 | 0.014620018 |
| 0.013581164 | 0.028587318 | 0.084988038 | 0.010053632 |
| 0.010900771 | 0.004460054 | 0.001472285 | 0.057453624 |
| 0.015268142 | 0.026494337 | 0.011788023 | 0.008352876 |
| 0.003351752 | 0.016508954 | 0.004039205 | 0.010968196 |
| 0.012231686 | 0.010373224 | 0.042127117 | 0.00473925  |
| 0.003495491 | 0.00881433  | 0.05760511  | 0.056199599 |
| 0.009339291 | 0.013076787 | 0.010225977 | 0.078195437 |
| 0.027724344 | 0.008410789 | 0.006025795 | 0.091917914 |
| 0.063142469 | 0.009636116 | 0.020061832 | 0.000879284 |
| 0.028789425 | 0.010315388 | 0.004685959 | 0.014081824 |
| 0.057218197 | 0.009716874 | 1.73E-05    | 0.001743562 |
| 0.048818064 | 0.03098699  | 0.006367054 | 0.033046989 |
| 0.001312721 | 0.063686427 | 0.004903466 | 0.016682119 |
| 0.010284116 | 0.027828618 | 0.020498232 | 0.011819372 |
| 0.008413071 | 0.014878113 | 0.004037239 | 0.009561576 |
| 0.010988236 | 0.007815707 | 0.004628386 | 0.037516154 |
| 0.011861329 | 0.008802065 | 0.022971585 | 0.01243591  |
| 0.026701284 | 0.040860773 | 0.035076768 | 0.015946196 |
| 5.46E-05    | 0.020793232 | 0.000592081 | 0.000259044 |
| 0.015245477 | 0.010113702 | 0.017154214 | 0.02810745  |
| 0.014652808 | 0.073331469 | 0.017901004 | 0.013852122 |
| 0.022315181 | 0.024133365 | 0.016503182 | 0.000121233 |
| 0.000233974 | 0.001577013 | 0.033740402 | 0.049137518 |
| 0.01174598  | 0.000754161 | 0.059008685 | 0.027743154 |
| 0.007001392 | 0.016784294 | 0.010585596 | 0.049898392 |
| 0.023592872 | 0.095937526 | 0.001107387 | 0.048663954 |
| 0.006682315 | 0.016412189 | 0.01379399  | 0.009933739 |
| 0.085365827 | 0.034430545 | 0.052445263 | 0.019943051 |
| 0.001399401 | 0.07090223  | 0.036632366 | 0.00411816  |
| 0.011000063 | 0.032160471 | 0.01542106  | 0.039554275 |
| 0.008005826 | 0.010887483 | 0.012090767 | 0.000559069 |
| 0.015974871 | 0.026203171 | 0.018098832 | 0.019554329 |
| 0.02013764  | 0.037705859 | 0.036568511 | 0.00808249  |
| 0.002975544 | 0.009882821 | 0.016666187 | 6.33E-05    |
| 0.082411625 | 0.067804684 | 0.015470058 | 0.001311494 |

|             |             |             |             |
|-------------|-------------|-------------|-------------|
| 0.02567646  | 0.03429929  | 0.000166306 | 0.059098547 |
| 0.001963123 | 0.064370039 | 0.01853031  | 0.020737922 |
| 0.058513158 | 0.023991866 | 0.055471822 | 0.053700822 |
| 0.021279958 | 0.019981556 | 0.009180809 | 0.002904303 |
| 0.020452543 | 0.023067411 | 0.038264541 | 0.024056572 |
| 0.045640197 | 0.02437303  | 0.001745201 | 0.015218025 |
| 0.019960806 | 0.017640465 | 0.012664855 | 0.012161643 |
| 0.008658626 | 0.013775709 | 0.011523133 | 0.002573236 |
| 0.040223461 | 0.022736764 | 0.037172096 | 0.002981157 |
| 0.01981477  | 0.010732123 | 0.023198942 | 0.007610654 |
| 0.007601168 | 0.011705509 | 0.021900418 | 0.040330817 |
| 0.043202264 | 0.022132533 | 0.072049265 | 0.011167961 |
| 0.014014764 | 0.011542748 | 0.002961917 | 0.012251096 |
| 0.092442803 | 0.013893552 | 0.02447663  | 0.026811179 |
| 0.003547427 | 0.014594517 | 0.029751836 | 0.014668007 |
| 0.011535671 | 0.032079007 | 0.009533691 | 0.017210107 |
| 0.000699996 | 0.029339498 | 0.011493489 | 0.086303673 |
| 0.058245767 | 0.024303276 | 0.001589125 | 0.051804046 |
| 0.004341071 | 0.039082194 | 0.01412117  | 0.006608501 |
| 0.061639654 | 0.026479125 | 0.047330013 | 0.016974716 |
| 0.01043961  | 0.007873201 | 0.001222688 | 0.104041608 |
| 0.015686389 | 0.008860788 | 0.006671859 | 0.032878085 |
| 0.002816401 | 0.053638895 | 0.046071815 | 0.016530485 |
| 0.004075943 | 0.003025726 | 0.00799511  | 0.003028311 |
| 0.053508831 | 0.026754164 | 0.017886586 | 0.03960223  |
| 0.006006403 | 0.016171215 | 0.094351026 | 0.002051961 |
| 0.054517718 | 0.009639185 | 0.00200218  | 0.01859451  |
| 0.02613448  | 0.103822276 | 0.015602454 | 0.001240467 |
| 0.029823951 | 0.014484685 | 0.01512749  | 0.010205118 |
| 0.045143804 | 0.031074166 | 0.009529493 | 0.019438448 |
| 0.006896453 | 0.014209335 | 0.017260622 | 0.029441602 |
| 0.001462804 |             |             |             |

|             |             |             |             |
|-------------|-------------|-------------|-------------|
| AP1S2       | 0.201491128 | 0.376214216 | 0.104498609 |
| 0.343815908 | 0.156989336 | 0.243097024 | 0.176666826 |
| 0.073220631 | 0.072786095 | 0.025817639 | 0.030164873 |
| 0.151774363 | 0.07078995  | 0.093400517 | 0.098215072 |
| 0.279506085 | 0.034694703 | 0.071791831 | 0.149016533 |
| 0.265644774 | 0.09927264  | 0.249580679 | 0.070531957 |
| 0.043462193 | 0.033635286 | 0.052173733 | 0.071251916 |
| 0.338144494 | 0.0579123   | 0.197261442 | 0.287407637 |
| 0.020924934 | 0.257168584 | 0.343407663 | 0.212778461 |
| 0.315710301 | 0.185718032 | 0.002565626 | 1           |
| 0.27340714  | 0.269429362 | 0.290821378 | 0.218990711 |
| 0.058948228 | 0.33441832  | 0.207703498 | 0.139924599 |
| 0.072721027 | 0.026241438 | 0.111897868 | 0.325014142 |
| 0.327945953 | 0.207585312 | 0.109662859 | 0.135739267 |
| 0.072745346 | 0.082483513 | 0.038050352 | 0.233463828 |
| 0.162971985 | 0.099391289 | 0.32613384  | 0.117659129 |
| 0.066704171 | 0.100154993 | 0.026432643 | 0.1385472   |
| 0.050594091 | 0.26913028  | 0.017527532 | 0.124198475 |
| 0.008372382 | 0.254476843 | 0.127653173 | 0.060623489 |
| 0.02715347  | 0.024536685 | 0.032639876 | 0.273982745 |
| 0.334410784 | 0.27014616  | 0.321152205 | 0.315799535 |
| 0.041813641 | 0.086809451 | 0.097077439 | 0.072286487 |

|             |             |             |             |
|-------------|-------------|-------------|-------------|
| 0.293143187 | 0.156055081 | 0.036168404 | 0.264801132 |
| 0.326143648 | 0.345942397 | 0.055172029 | 0.093035066 |
| 0.354411731 | 0.351365228 | 0.145317809 | 0.147850861 |
| 0.080571059 | 0.010330508 | 0.328645202 | 0.335737776 |
| 0.271107095 | 0.058354504 | 0.061080969 | 0.311419963 |
| 0.031522392 | 0.061851019 | 0.252157107 | 0.022124228 |
| 0.345476014 | 0.043201708 | 0.064371478 | 0.229491283 |
| 0.047554532 | 0.264702607 | 0.325068108 | 0.145997083 |
| 0.106248513 | 0.011046146 | 0.03502415  | 0.012859344 |
| 0.070603443 | 0.01412873  | 0.317875545 | 0.358577791 |
| 0.078323899 | 0.082246576 | 0.135195769 | 0.00245743  |
| 0.012143893 | 0.028228719 | 0.236533707 | 0.097432932 |
| 0.254541662 | 0.199551708 | 0.112704354 | 0.244165156 |
| 0.183769487 | 0.314081857 | 0.034098005 | 0.072320854 |
| 0.176581013 | 0.030939615 | 0.148804623 | 0.181722485 |
| 0.115067501 | 0.071784484 | 0.065870876 | 0.362474636 |
| 0.340108836 | 0.069603444 | 0.075274772 | 0.24604107  |
| 0.128470723 | 0.114290097 | 0.054889139 | 0.082433312 |
| 0.066078676 | 0.296627858 | 0.008524849 | 0.113783014 |
| 0.070847197 | 0.025501731 | 0.006156639 | 0.144232173 |
| 0.094835131 | 0.330212518 | 0.284457338 | 0.051837495 |
| 0.120297158 | 0.215433896 | 0.132073748 | 0.284410235 |
| 0.040052068 | 0.020787263 | 0.091012416 | 0.350089993 |
| 0.220112559 | 0.301753488 | 0.074623569 | 0.057476793 |
| 0.118139378 | 0.304633163 | 0.000485738 | 0.338349935 |
| 0.338156986 | 0.091392994 | 0.198214848 | 0.148539219 |
| 0.110145537 | 0.354379607 | 0.004246414 | 0.237954719 |
| 0.181052407 | 0.04125321  | 0.344816021 | 0.078702716 |
| 0.290071303 | 0.036697441 | 0.114484663 | 0.240931095 |
| 0.202471395 | 0.006010929 | 0.173055945 | 0.308155543 |
| 0.007510292 | 0.115157035 | 0.24492997  | 0.280879784 |
| 0.246872332 | 0.254782363 | 0.338573516 | 0.097342703 |
| 0.163452475 | 0.094349245 | 0.007062869 | 0.092938346 |
| 0.228996143 | 0.06205025  | 0.349986126 | 0.100224156 |
| 0.138713533 | 0.35816978  | 0.230670141 | 0.103105235 |
| 0.055897513 | 0.173564014 | 0.023174608 | 0.153224154 |
| 0.234131591 | 0.097006055 | 0.134330884 | 0.021629772 |
| 0.022923651 | 0.368721921 | 0.023542761 | 0.034089247 |
| 0.014310373 | 0.209528211 | 0.128825816 | 0.098967677 |
| 0.05672624  | 0.06858204  | 0.07872232  | 0.116959761 |
| 0.070604646 | 0.046564335 | 0.002079883 | 0.056904263 |
| 0.04947348  | 0.073907062 | 0.083716363 | 0.229714764 |
| 0.075025037 | 0.043419372 | 0.135006311 | 0.046460949 |
| 0.034444018 | 0.012245284 | 0.362900209 | 0.230660022 |
| 0.233291488 | 0.086576783 | 0.017921502 | 0.058867193 |
| 0.362497255 | 0.19254821  | 0.07359726  | 0.374427403 |
| 0.011953261 | 0.316569574 | 0.092947731 | 0.060848007 |
| 0.076530625 | 0.149532766 | 0.356533563 | 0.043115115 |
| 0.16735052  | 0.360283471 | 0.110888076 | 0.080031883 |
| 0.30235163  | 0.252619606 | 0.042782979 | 0.234392826 |
| 0.221673475 | 0.022776756 | 0.338471802 | 0.025843056 |
| 0.011557856 | 0.197000102 | 0.255149772 | 0.044220232 |
| 0.030005274 | 0.194727821 | 0.079860686 | 0.148795891 |
| 0.372509117 | 0.269559908 | 0.310678923 | 0.030627344 |

|             |             |             |             |
|-------------|-------------|-------------|-------------|
| 0.050802982 | 0.009810352 | 0.037061969 | 0.100958971 |
| 0.333909641 | 0.311192246 | 0.10883888  | 0.113958648 |
| 0.166386915 | 0.084359029 | 0.069197818 | 0.344253536 |
| 0.020666056 | 0.328714434 | 0.006542287 | 0.234208759 |
| 0.323756337 | 0.136702788 | 0.035672084 | 0.238459548 |
| 0.298103536 | 0.051330892 | 0.058489007 | 0.33953864  |
| 0.336938813 | 0.104717475 | 0.103169904 | 0.18232743  |
| 0.045798931 | 0.062388394 | 0.163537143 | 0.023184412 |
| 0.119857648 | 0.08209826  | 0.003706254 | 0.082482331 |
| 0.047456681 | 0.361152602 | 0.273305365 | 0.054574613 |
| 0.254660261 | 0.076475215 | 0.163703878 | 0.034530049 |
| 0.262307259 | 0.291370496 | 0.350844604 | 0.066799258 |
| 0.223647493 | 0.324783696 | 0.132124938 | 0.025012781 |
| 0.008437974 | 0.318149887 | 0.23410585  | 0.024630109 |
| 0.331520333 | 0.131621582 | 0.023740777 | 0.372360521 |
| 0.122705532 | 0.283309966 | 0.011060289 | 0.005826643 |
| 0.008136109 | 0.266707071 | 0.345853836 | 0.270070052 |
| 0.111191487 | 0.179662977 | 0.000278856 | 0.318899744 |
| 0.353884227 | 0.006880359 | 0.026515807 | 0.248512309 |
| 0.20183782  | 0.368147077 | 0.073600734 | 0.27668248  |
| 0.152488402 | 0.326946437 | 0.096846659 | 0.143498105 |
| 0.335269932 | 0.288176441 | 0.27892264  | 0.339073983 |
| 0.33005289  | 0.202588096 | 0.217425955 | 0.039079461 |
| 0.0518828   | 0.129395723 | 0.093627259 | 0.085980852 |
| 0.197184312 | 0.057129902 | 0.304842829 | 0.313418097 |
| 0.299493337 | 0.004498734 | 0.099704508 | 0.257210388 |
| 0.358033822 | 0.359690912 | 0.005324737 | 0.003022303 |
| 0.001015982 | 0.011041631 | 0.217736487 | 0.070970391 |
| 0.331625207 | 0.089835334 | 0.007670901 | 0.057813971 |
| 0.083531645 | 0.153259848 | 0.350018464 | 0.261985188 |
| 0.223669613 | 0.034745664 | 0.111229557 | 0.263340509 |
| 0.030571187 | 0.170495452 | 0.326179068 | 0.373059111 |
| 0.011765731 | 0.075567775 | 0.089483876 | 0.373849905 |
| 0.006745188 | 0.13139447  | 0.165269639 | 0.112651504 |
| 0.00255322  | 0.02726025  | 0.036917929 | 0.260448245 |
| 0.307730509 | 0.039601548 | 0.022369713 | 0.039371817 |
| 0.096987035 | 0.298267738 | 0.06888602  | 0.35185334  |
| 0.334530444 | 0.319813418 | 0.016666758 | 0.356338968 |
| 0.038530723 | 0.323215535 | 0.089031603 | 0.035137202 |
| 0.045812033 | 0.007957661 | 0.265762102 | 0.076977634 |
| 0.103973758 | 0.221934511 | 0.060727606 | 0.005772024 |
| 0.022483124 | 0.022229172 | 0.352252293 | 0.276008001 |
| 0.00626596  | 0.09808796  | 0.101673146 | 0.191209573 |
| 0.189598064 | 0.310740216 | 0.348106559 | 0.13947902  |
| 0.100836216 | 0.009520851 | 0.26939989  | 0.193693038 |
| 0.082941248 | 0.319737791 | 0.096782239 | 0.336902646 |
| 0.2348429   | 0.309549907 | 0.303386862 | 0.233623444 |
| 0.037976361 | 0.180432001 | 0.32930339  | 0.04319501  |
| 0.166877725 | 0.326520602 | 0.13178497  | 0.050656479 |
| 0.116560839 | 0.101638322 | 0.030677916 | 0.0214168   |
| 0.062817353 | 0.243201488 | 0.083078355 | 0.304753303 |
| 0.182918567 | 0.208090081 | 0.025137382 | 0.039958022 |
| 0.366223619 | 0.319864246 | 0.095619268 | 0.282875164 |
| 0.055266085 | 0.187016412 | 0.238511289 | 0.225293274 |



|             |             |             |             |
|-------------|-------------|-------------|-------------|
| 0.064703376 | 0.301407835 | 0.290107967 | 0.295368196 |
| 0.355153511 | 0.171632    | 0.358281403 | 0.048390713 |
| 0.02812027  | 0.146182011 | 0.073822474 | 0.03388431  |
| 0.085209669 | 0.01481479  | 0.036495237 | 0.231525871 |
| 0.048857593 | 0.229177461 | 0.062820474 | 0.036376101 |
| 0.105307888 | 0.08147289  | 0.165296931 | 0.142938445 |
| 0.063116971 | 0.358337135 | 0.006993172 | 0.021838764 |
| 0.05441962  | 0.27936349  | 0.116775973 | 0.061914147 |
| 0.04359591  | 0.022519949 | 0.149974955 | 0.148275014 |
| 0.121129176 | 0.046469532 | 0.287510277 | 0.028925494 |
| 0.031625531 | 0.330887405 | 0.112155289 | 0.004306761 |
| 0.026184394 | 0.17724396  | 0.045642536 | 0.124068814 |
| 0.006109936 | 0.297953273 | 0.165514596 | 0.145095164 |
| 0.212138675 | 0.029990054 | 0.254462653 | 0.028101373 |
| 0.028850473 | 0.305769569 | 0.115382041 | 0.320416393 |
| 0.069311722 | 0.305596204 | 0.305435171 | 0.264344496 |
| 0.019560081 | 0.09110026  | 0.044748829 | 0.303590131 |
| 0.079311747 |             |             |             |
| APAF1       | 0.412959209 | 0.490216495 | 0.378706635 |
| 0.381166007 | 0.377024762 | 0.368681904 | 0.223029084 |
| 0.273109739 | 0.087660018 | 0.004419586 | 0.013702131 |
| 0.394085262 | 0.159556933 | 0.268352391 | 0.325367163 |
| 0.388134144 | 0.112094753 | 0.426935881 | 0.25248754  |
| 0.405894711 | 0.117830997 | 0.350679326 | 0.108822016 |
| 0.262565567 | 0.081754838 | 0.061438354 | 0.214773836 |
| 0.412165883 | 0.074579316 | 0.316645305 | 0.398888795 |
| 0.116106861 | 0.418660131 | 0.500227039 | 0.353831079 |
| 0.485570724 | 0.395989454 | 0.023619934 | 0.27340714  |
| 1           | 0.381961697 | 0.399139608 | 0.311505877 |
| 0.046151855 | 0.487069235 | 0.24013393  | 0.368405809 |
| 0.29480581  | 0.024979196 | 0.297363476 | 0.456253255 |
| 0.444401285 | 0.356653216 | 0.289405696 | 0.166277315 |
| 0.136411052 | 0.272105743 | 0.186524057 | 0.360948049 |
| 0.223577391 | 0.207516784 | 0.450688925 | 0.094694733 |
| 0.154534757 | 0.327428922 | 0.14953614  | 0.303947957 |
| 0.288532206 | 0.399847797 | 0.034950875 | 0.369423888 |
| 0.003111707 | 0.398956786 | 0.361670556 | 0.239283833 |
| 0.043485869 | 0.015510673 | 0.175052333 | 0.322842483 |
| 0.416308153 | 0.461617635 | 0.411400706 | 0.421229609 |
| 0.153794284 | 0.302401936 | 0.334793125 | 0.159713794 |
| 0.409331728 | 0.17220864  | 0.14118618  | 0.373370395 |
| 0.42235176  | 0.480965173 | 0.18126548  | 0.247249218 |
| 0.361515639 | 0.463561397 | 0.386385145 | 0.363465482 |
| 0.268145414 | 0.056438715 | 0.416227689 | 0.45317488  |
| 0.395577673 | 0.256164004 | 0.137973727 | 0.405187886 |
| 0.067404266 | 0.400211871 | 0.332157143 | 0.172132935 |
| 0.427853475 | 0.022968366 | 0.188006341 | 0.335761146 |
| 0.281614624 | 0.415681443 | 0.470713746 | 0.198817937 |
| 0.383398782 | 0.0215736   | 0.097957991 | 0.043290472 |
| 0.322752285 | 0.117039417 | 0.472181649 | 0.394732055 |
| 0.285645466 | 0.317756281 | 0.297486518 | 0.002926451 |
| 0.026370153 | 0.220180631 | 0.386694335 | 0.422488263 |
| 0.421911638 | 0.374572895 | 0.187170549 | 0.38836355  |
| 0.362557328 | 0.403869268 | 0.068854261 | 0.125839942 |

|             |             |             |             |
|-------------|-------------|-------------|-------------|
| 0.396730241 | 0.21630261  | 0.237451506 | 0.387326014 |
| 0.258690366 | 0.163553175 | 0.13672101  | 0.467897722 |
| 0.439349731 | 0.092005055 | 0.414370018 | 0.383672119 |
| 0.27366452  | 0.299084748 | 0.128138808 | 0.258255924 |
| 0.058594809 | 0.449799726 | 0.027686457 | 0.41305434  |
| 0.209788257 | 0.116179578 | 0.027130079 | 0.320175275 |
| 0.284668715 | 0.360318048 | 0.463941279 | 0.128830281 |
| 0.297654307 | 0.353550576 | 0.380754532 | 0.355158658 |
| 0.006345879 | 0.06806969  | 0.357236657 | 0.452432131 |
| 0.315722445 | 0.455685054 | 0.323677216 | 0.302614815 |
| 0.262352517 | 0.408967258 | 0.006779455 | 0.484661703 |
| 0.483884876 | 0.361026049 | 0.33051316  | 0.398939992 |
| 0.300650756 | 0.392100261 | 0.066512205 | 0.386102611 |
| 0.387673129 | 0.101362411 | 0.442925275 | 0.140058709 |
| 0.449124404 | 0.037965674 | 0.339325217 | 0.360869874 |
| 0.35153866  | 0.011160725 | 0.263590726 | 0.383497112 |
| 0.028246141 | 0.126526185 | 0.425481377 | 0.385249901 |
| 0.335954911 | 0.40769608  | 0.419704012 | 0.279512241 |
| 0.373160815 | 0.291830015 | 0.018326053 | 0.295865444 |
| 0.409381998 | 0.318637448 | 0.442205784 | 0.270302482 |
| 0.378009235 | 0.449399746 | 0.373839947 | 0.177092471 |
| 0.047588496 | 0.344005101 | 0.028643357 | 0.294577028 |
| 0.376369003 | 0.10405274  | 0.3396389   | 0.190164035 |
| 0.06563074  | 0.473097767 | 0.148280506 | 0.214611305 |
| 0.101623332 | 0.33776712  | 0.296244133 | 0.18634061  |
| 0.145577816 | 0.160409268 | 0.294468926 | 0.32969561  |
| 0.049680365 | 0.085528554 | 0.022500323 | 0.289088984 |
| 0.093810175 | 0.262698104 | 0.267122064 | 0.389490172 |
| 0.315621729 | 0.093334819 | 0.323925996 | 0.270874944 |
| 0.108008842 | 0.016204126 | 0.47490166  | 0.398937515 |
| 0.359244032 | 0.174111211 | 0.047760529 | 0.271564795 |
| 0.403394833 | 0.309098824 | 0.344774914 | 0.414538739 |
| 0.046202723 | 0.42722999  | 0.198351747 | 0.107315035 |
| 0.290608217 | 0.242147799 | 0.40919818  | 0.063792129 |
| 0.419470073 | 0.447285119 | 0.332225829 | 0.15788661  |
| 0.387321686 | 0.403113807 | 0.036765723 | 0.397455432 |
| 0.389347253 | 0.031654458 | 0.479041765 | 0.11287752  |
| 0.023251808 | 0.38534693  | 0.355477568 | 0.07639166  |
| 0.07877952  | 0.275752057 | 0.07175245  | 0.265069368 |
| 0.470650931 | 0.359134062 | 0.361685945 | 0.209814138 |
| 0.039238678 | 0.005698767 | 0.197465118 | 0.383850699 |
| 0.495678065 | 0.4556163   | 0.272736536 | 0.283760428 |
| 0.249984439 | 0.26446193  | 0.213023915 | 0.449595647 |
| 0.26377838  | 0.500894389 | 0.009209211 | 0.366799731 |
| 0.480180635 | 0.332802702 | 0.06563035  | 0.313452191 |
| 0.371871832 | 0.054810168 | 0.279623979 | 0.471249315 |
| 0.404048455 | 0.297281878 | 0.299550988 | 0.416591486 |
| 0.02313589  | 0.056382881 | 0.354910798 | 0.157290689 |
| 0.330688867 | 0.214656715 | 0.042124349 | 0.381079599 |
| 0.038916698 | 0.425868981 | 0.410883952 | 0.053526613 |
| 0.296496708 | 0.387756688 | 0.34648098  | 0.042819867 |
| 0.376302747 | 0.469143451 | 0.498802476 | 0.228033702 |
| 0.395799963 | 0.429063616 | 0.312811829 | 0.089256914 |
| 0.017723802 | 0.483964047 | 0.420709415 | 0.022101473 |

|             |             |             |             |
|-------------|-------------|-------------|-------------|
| 0.411836083 | 0.291050116 | 0.007966557 | 0.479223746 |
| 0.212997044 | 0.453654998 | 0.008735205 | 0.114209054 |
| 0.047816299 | 0.39686646  | 0.461335663 | 0.405348038 |
| 0.246677161 | 0.402212947 | 0.009679406 | 0.477509561 |
| 0.458286469 | 0.013291252 | 0.127261502 | 0.368509099 |
| 0.345281932 | 0.512376215 | 0.252245973 | 0.363663627 |
| 0.345254191 | 0.461931838 | 0.224971981 | 0.246735999 |
| 0.387026993 | 0.443184377 | 0.422320815 | 0.461474013 |
| 0.396727981 | 0.381922386 | 0.274497708 | 0.016933591 |
| 0.120186709 | 0.27179877  | 0.249349206 | 0.061035736 |
| 0.374562691 | 0.120565774 | 0.462454879 | 0.401748939 |
| 0.414522502 | 0.006127362 | 0.197024539 | 0.386860491 |
| 0.419684179 | 0.441169878 | 0.038457058 | 0.009533262 |
| 0.013427649 | 0.011887174 | 0.385458339 | 0.244005611 |
| 0.44532516  | 0.218477827 | 0.005767887 | 0.072989271 |
| 0.308802836 | 0.327692147 | 0.466346045 | 0.371172315 |
| 0.397735783 | 0.089896709 | 0.224647256 | 0.400148943 |
| 0.055070838 | 0.368865233 | 0.419857372 | 0.459158512 |
| 0.054324838 | 0.24775322  | 0.431179351 | 0.439137842 |
| 0.050229414 | 0.299172816 | 0.395859024 | 0.267134181 |
| 0.025223011 | 0.077661192 | 0.060378317 | 0.406474303 |
| 0.467213787 | 0.054876272 | 0.02367596  | 0.182317077 |
| 0.107140715 | 0.415728972 | 0.152373703 | 0.458969332 |
| 0.404582027 | 0.395239128 | 0.069251675 | 0.468723336 |
| 0.031824839 | 0.461227999 | 0.273954281 | 0.073126182 |
| 0.33349146  | 0.018864118 | 0.43849121  | 0.099597698 |
| 0.354662066 | 0.429296963 | 0.175721737 | 0.017377423 |
| 0.162927116 | 0.051993758 | 0.405838524 | 0.386297052 |
| 0.040202565 | 0.285926149 | 0.309077772 | 0.421214544 |
| 0.331327336 | 0.376415199 | 0.487726997 | 0.356046443 |
| 0.093737687 | 0.1442392   | 0.417427803 | 0.412157676 |
| 0.29351947  | 0.424065712 | 0.229202869 | 0.485807504 |
| 0.419986739 | 0.452234602 | 0.426175936 | 0.342273722 |
| 0.184127674 | 0.418097817 | 0.343057552 | 0.022287495 |
| 0.370430677 | 0.38457636  | 0.423098997 | 0.120230404 |
| 0.211423132 | 0.326557319 | 0.079135395 | 0.277057067 |
| 0.267634766 | 0.330445154 | 0.135379172 | 0.406347106 |
| 0.429717248 | 0.410147486 | 0.074283985 | 0.055422104 |
| 0.509521943 | 0.442419305 | 0.191385188 | 0.39148729  |
| 0.189450299 | 0.302254249 | 0.402256319 | 0.386035789 |
| 0.361010997 | 0.373504228 | 0.414017734 | 0.352496239 |
| 0.418588794 | 0.277969186 | 0.498044376 | 0.168348056 |
| 0.07547436  | 0.396011956 | 0.077018775 | 0.09408885  |
| 0.142365199 | 0.029999909 | 0.23374882  | 0.397078099 |
| 0.304123653 | 0.338362055 | 0.365767042 | 0.096520971 |
| 0.306623961 | 0.419098503 | 0.342710295 | 0.21178762  |
| 0.071079737 | 0.467015689 | 0.010359783 | 0.060777709 |
| 0.315567121 | 0.385009259 | 0.295167309 | 0.242060763 |
| 0.232521234 | 0.144766419 | 0.27595074  | 0.343201169 |
| 0.260864195 | 0.361318839 | 0.382725199 | 0.058278765 |
| 0.027630079 | 0.434251309 | 0.423613015 | 0.029836734 |
| 0.092032735 | 0.405024581 | 0.366989339 | 0.198302417 |
| 0.022696027 | 0.421339656 | 0.303355603 | 0.381032802 |
| 0.373687004 | 0.083693311 | 0.386024161 | 0.12751366  |

|             |             |             |             |
|-------------|-------------|-------------|-------------|
| 0.098379796 | 0.455248756 | 0.359069678 | 0.473505873 |
| 0.355288192 | 0.369595719 | 0.463810064 | 0.386466486 |
| 0.184404835 | 0.37431473  | 0.036263339 | 0.418643005 |
| 0.325396603 |             |             |             |
| APEX1       | 0.336503871 | 0.512435961 | 0.371586547 |
| 0.369356555 | 0.379967649 | 0.299548282 | 0.221993114 |
| 0.163686322 | 0.15463854  | 0.009037394 | 0.047624256 |
| 0.367973308 | 0.214667178 | 0.231480915 | 0.321694891 |
| 0.384259133 | 0.1662171   | 0.303145441 | 0.259415888 |
| 0.352195011 | 0.097307818 | 0.376018515 | 0.127460855 |
| 0.319685688 | 0.161127996 | 0.112463518 | 0.333994337 |
| 0.417025791 | 0.127286128 | 0.247586168 | 0.307323858 |
| 0.132740597 | 0.370099814 | 0.501214398 | 0.380906773 |
| 0.488713062 | 0.313005573 | 0.010743861 | 0.269429362 |
| 0.381961697 | 1           | 0.348348676 | 0.325451294 |
| 0.068935291 | 0.44991351  | 0.262821665 | 0.38061086  |
| 0.211197139 | 0.058888072 | 0.188443823 | 0.410210808 |
| 0.451154965 | 0.363620431 | 0.211979424 | 0.184693141 |
| 0.195953704 | 0.163143058 | 0.273519417 | 0.235678445 |
| 0.23961446  | 0.120492198 | 0.466077867 | 0.132049364 |
| 0.141657125 | 0.221916898 | 0.180015391 | 0.236561579 |
| 0.344681484 | 0.30789564  | 0.026983065 | 0.326644792 |
| 0.002913579 | 0.346753904 | 0.361196535 | 0.340689695 |
| 0.071508658 | 0.032154173 | 0.20723475  | 0.311559789 |
| 0.438223613 | 0.436562874 | 0.48639699  | 0.493773672 |
| 0.199859071 | 0.308423354 | 0.35977506  | 0.202911606 |
| 0.407663719 | 0.195919772 | 0.137488639 | 0.387497262 |
| 0.496437132 | 0.506948772 | 0.254041065 | 0.305322637 |
| 0.388150142 | 0.455476235 | 0.375514414 | 0.385617215 |
| 0.36657055  | 0.089547645 | 0.419536371 | 0.505170345 |
| 0.348098127 | 0.322488856 | 0.203486975 | 0.34232098  |
| 0.089525283 | 0.29856868  | 0.341815128 | 0.141993628 |
| 0.456206277 | 0.039499024 | 0.256561571 | 0.311305948 |
| 0.235695388 | 0.383111593 | 0.508165966 | 0.215589461 |
| 0.363216167 | 0.032393384 | 0.208212784 | 0.055119235 |
| 0.289285884 | 0.175550419 | 0.447824138 | 0.439622951 |
| 0.189948352 | 0.350560658 | 0.265467827 | 0.006828597 |
| 0.04959006  | 0.210713259 | 0.372573096 | 0.310241358 |
| 0.360076093 | 0.360328888 | 0.282932377 | 0.302686196 |
| 0.367951112 | 0.477434501 | 0.051547425 | 0.126895579 |
| 0.374242249 | 0.209403552 | 0.268727877 | 0.359864502 |
| 0.344771035 | 0.132680843 | 0.154174429 | 0.522025704 |
| 0.393466444 | 0.115295634 | 0.256354703 | 0.383357038 |
| 0.300255441 | 0.360471606 | 0.1331163   | 0.254252116 |
| 0.066361036 | 0.467676575 | 0.051968482 | 0.274371791 |
| 0.323874489 | 0.161999524 | 0.017424941 | 0.216899691 |
| 0.270482182 | 0.409878371 | 0.432727764 | 0.139026344 |
| 0.288166645 | 0.388419514 | 0.239614053 | 0.346910766 |
| 0.024605307 | 0.070147863 | 0.195754786 | 0.495074916 |
| 0.201093993 | 0.494783964 | 0.303849395 | 0.337785607 |
| 0.316678385 | 0.424911149 | 0.005701416 | 0.471918519 |
| 0.515320563 | 0.212055805 | 0.357019165 | 0.369969173 |
| 0.372423377 | 0.434019073 | 0.03376559  | 0.36913971  |
| 0.255908774 | 0.111635435 | 0.50623513  | 0.205296875 |

|             |             |             |             |
|-------------|-------------|-------------|-------------|
| 0.435492206 | 0.073261629 | 0.253746296 | 0.421710412 |
| 0.345275704 | 0.013177207 | 0.186057664 | 0.334597306 |
| 0.05082591  | 0.099899501 | 0.350998754 | 0.370352992 |
| 0.374394608 | 0.405236739 | 0.479568739 | 0.365929937 |
| 0.388336232 | 0.22880484  | 0.024868395 | 0.341672788 |
| 0.385879048 | 0.316170269 | 0.42110444  | 0.248281403 |
| 0.238789467 | 0.46371351  | 0.373126156 | 0.198168176 |
| 0.071694723 | 0.269191121 | 0.029762476 | 0.371036283 |
| 0.372087065 | 0.129806489 | 0.36706365  | 0.157885274 |
| 0.10805262  | 0.523574337 | 0.223467168 | 0.280545192 |
| 0.168090299 | 0.319785467 | 0.260939806 | 0.209870451 |
| 0.210839325 | 0.218988097 | 0.376974641 | 0.377485982 |
| 0.049415905 | 0.124171141 | 0.028101927 | 0.284937696 |
| 0.13239879  | 0.274904799 | 0.258141065 | 0.301194897 |
| 0.25807677  | 0.117529545 | 0.371158293 | 0.330600457 |
| 0.17569772  | 0.03043692  | 0.498200005 | 0.373133545 |
| 0.247286219 | 0.196291238 | 0.065881377 | 0.25515176  |
| 0.450198231 | 0.244133952 | 0.195056621 | 0.434515015 |
| 0.046254556 | 0.479748568 | 0.248783407 | 0.170137045 |
| 0.336941402 | 0.272405784 | 0.455273758 | 0.078387644 |
| 0.304749009 | 0.441970286 | 0.327225695 | 0.249152664 |
| 0.354867841 | 0.362919135 | 0.047691874 | 0.332436424 |
| 0.310001913 | 0.053142677 | 0.515204602 | 0.160013866 |
| 0.039991568 | 0.384209348 | 0.371176166 | 0.118364092 |
| 0.126490263 | 0.313208082 | 0.055943876 | 0.324462064 |
| 0.516363805 | 0.382696797 | 0.369799922 | 0.266701595 |
| 0.064772822 | 0.013302433 | 0.245120182 | 0.35314861  |
| 0.477668541 | 0.503277923 | 0.277688912 | 0.357655083 |
| 0.26520554  | 0.368439134 | 0.108262816 | 0.505411552 |
| 0.207174709 | 0.496982275 | 0.014891366 | 0.397616225 |
| 0.485936989 | 0.208130052 | 0.130890264 | 0.275477069 |
| 0.339468408 | 0.079299017 | 0.207914869 | 0.479142538 |
| 0.424572083 | 0.36733572  | 0.380521568 | 0.358414494 |
| 0.027208324 | 0.056929633 | 0.394068475 | 0.232735501 |
| 0.352934504 | 0.273084305 | 0.075714675 | 0.271491242 |
| 0.067673691 | 0.430170623 | 0.420097393 | 0.119602299 |
| 0.265299533 | 0.261250326 | 0.367509063 | 0.063271964 |
| 0.451888765 | 0.487405084 | 0.5001201   | 0.173132681 |
| 0.362984222 | 0.487470448 | 0.350963838 | 0.118318651 |
| 0.036664281 | 0.501784838 | 0.319425415 | 0.036042587 |
| 0.456147973 | 0.168324469 | 0.019821521 | 0.482960356 |
| 0.214713724 | 0.400650506 | 0.010279148 | 0.094072413 |
| 0.070795927 | 0.441737694 | 0.465335295 | 0.313738265 |
| 0.188373332 | 0.336280102 | 0.009033493 | 0.515189068 |
| 0.472650769 | 0.033350905 | 0.191799753 | 0.378012784 |
| 0.36652677  | 0.509958424 | 0.351751998 | 0.44255833  |
| 0.361282563 | 0.481334881 | 0.227105852 | 0.311120182 |
| 0.413332379 | 0.482760802 | 0.351432265 | 0.444339151 |
| 0.433057808 | 0.384659421 | 0.298978184 | 0.030833603 |
| 0.236902941 | 0.177161773 | 0.288359806 | 0.134580146 |
| 0.243999554 | 0.206780143 | 0.466784307 | 0.454489251 |
| 0.475811958 | 0.012497048 | 0.149609221 | 0.373536087 |
| 0.414855312 | 0.464417887 | 0.03594794  | 0.013554625 |
| 0.012984233 | 0.046094588 | 0.307746796 | 0.290039045 |

|             |             |             |             |
|-------------|-------------|-------------|-------------|
| 0.488048893 | 0.181478455 | 0.010990167 | 0.052319499 |
| 0.294822124 | 0.38455767  | 0.487699192 | 0.358944447 |
| 0.393456562 | 0.111882334 | 0.249350668 | 0.360543674 |
| 0.125067599 | 0.234158229 | 0.486105819 | 0.453246005 |
| 0.065297831 | 0.300391333 | 0.299268645 | 0.483598438 |
| 0.098832421 | 0.329038072 | 0.357445353 | 0.309038437 |
| 0.021926358 | 0.130901509 | 0.12134534  | 0.396583487 |
| 0.474583173 | 0.099101124 | 0.053786924 | 0.101650218 |
| 0.143066232 | 0.447054734 | 0.193917495 | 0.514978326 |
| 0.408229247 | 0.415316403 | 0.10747578  | 0.473892414 |
| 0.070150952 | 0.461385538 | 0.353561067 | 0.06832887  |
| 0.288331399 | 0.024305188 | 0.444788368 | 0.217638892 |
| 0.249799966 | 0.317321843 | 0.298283648 | 0.033305567 |
| 0.23557952  | 0.083874391 | 0.477341773 | 0.451550027 |
| 0.058001009 | 0.25180842  | 0.325152853 | 0.358752857 |
| 0.238132668 | 0.377050095 | 0.480309375 | 0.322839337 |
| 0.108340436 | 0.144574161 | 0.341629826 | 0.300242383 |
| 0.193696436 | 0.490891106 | 0.329247139 | 0.522600228 |
| 0.327123944 | 0.448195577 | 0.457918883 | 0.346799786 |
| 0.246700718 | 0.320481584 | 0.303203368 | 0.030210486 |
| 0.34491141  | 0.435449789 | 0.30493056  | 0.225159481 |
| 0.293195971 | 0.354426467 | 0.063544894 | 0.139328768 |
| 0.316077709 | 0.239061013 | 0.160963728 | 0.419664476 |
| 0.306459514 | 0.304355286 | 0.042573215 | 0.118054817 |
| 0.52795578  | 0.42238508  | 0.167024442 | 0.362954693 |
| 0.210860929 | 0.36785399  | 0.404382663 | 0.398146218 |
| 0.341245601 | 0.409490295 | 0.360912975 | 0.300464251 |
| 0.39557336  | 0.283518671 | 0.508862738 | 0.074502063 |
| 0.146695756 | 0.319933403 | 0.124991572 | 0.135135672 |
| 0.176498462 | 0.056398672 | 0.303082437 | 0.37667898  |
| 0.32291461  | 0.354606281 | 0.23132376  | 0.12403936  |
| 0.335603635 | 0.293251995 | 0.355296889 | 0.1984887   |
| 0.111140869 | 0.480954764 | 0.020271654 | 0.08418151  |
| 0.318083853 | 0.404975855 | 0.371782977 | 0.287623271 |
| 0.327682998 | 0.174762873 | 0.311367401 | 0.224819412 |
| 0.246580774 | 0.307311616 | 0.408065078 | 0.054364878 |
| 0.028454704 | 0.48845823  | 0.299971055 | 0.038872285 |
| 0.11231745  | 0.295904478 | 0.26185406  | 0.280638174 |
| 0.043398226 | 0.470498182 | 0.270230622 | 0.388959236 |
| 0.312279702 | 0.093126186 | 0.310097879 | 0.101415136 |
| 0.086734577 | 0.417571981 | 0.374320985 | 0.496592981 |
| 0.33977853  | 0.379264798 | 0.410108041 | 0.376363492 |
| 0.144958305 | 0.318264495 | 0.049342396 | 0.408615992 |
| 0.347572669 |             |             |             |

|             |             |             |             |
|-------------|-------------|-------------|-------------|
| APLP2       | 0.334233573 | 0.479630269 | 0.288403313 |
| 0.396513189 | 0.356483809 | 0.300170787 | 0.310964414 |
| 0.281020688 | 0.143067332 | 0.019500583 | 0.042032019 |
| 0.303943289 | 0.200194996 | 0.294903491 | 0.269723785 |
| 0.39744551  | 0.169934038 | 0.340359582 | 0.333642129 |
| 0.382776593 | 0.197244091 | 0.359735808 | 0.205237898 |
| 0.255489794 | 0.127260675 | 0.137723248 | 0.233762251 |
| 0.454021007 | 0.152332905 | 0.281225118 | 0.360891027 |
| 0.162198633 | 0.393888301 | 0.446008842 | 0.318521172 |
| 0.423481343 | 0.295186639 | 0.033173853 | 0.290821378 |

|             |             |             |             |
|-------------|-------------|-------------|-------------|
| 0.399139608 | 0.348348676 | 1           | 0.355957181 |
| 0.118315284 | 0.423234369 | 0.32205684  | 0.324282171 |
| 0.257363916 | 0.068451502 | 0.258507077 | 0.40813883  |
| 0.393620897 | 0.303100218 | 0.321798585 | 0.26568505  |
| 0.16508979  | 0.268642263 | 0.163110255 | 0.284225459 |
| 0.322810397 | 0.214418065 | 0.409821494 | 0.170362614 |
| 0.21130434  | 0.356958645 | 0.192712763 | 0.348099868 |
| 0.256076743 | 0.345056058 | 0.080159853 | 0.255578029 |
| 0.010323304 | 0.384969115 | 0.334132148 | 0.198556871 |
| 0.099728311 | 0.051541694 | 0.220708089 | 0.362514293 |
| 0.462775207 | 0.40432801  | 0.44812451  | 0.438435097 |
| 0.197166547 | 0.328399432 | 0.27645343  | 0.253144252 |
| 0.404974375 | 0.262658478 | 0.160055736 | 0.387174917 |
| 0.451756847 | 0.450357338 | 0.240539485 | 0.283616285 |
| 0.36961329  | 0.454638958 | 0.308542511 | 0.341983659 |
| 0.232149574 | 0.084714758 | 0.394452686 | 0.461297487 |
| 0.370029432 | 0.217877654 | 0.203670918 | 0.403305794 |
| 0.139938078 | 0.285241428 | 0.370101975 | 0.172792775 |
| 0.473348878 | 0.068814867 | 0.235475304 | 0.363443809 |
| 0.300894143 | 0.376537393 | 0.435170636 | 0.29921023  |
| 0.331689707 | 0.05108722  | 0.105798537 | 0.088519721 |
| 0.296006566 | 0.104040802 | 0.395827692 | 0.439843611 |
| 0.306465788 | 0.325215294 | 0.367008818 | 0.013329672 |
| 0.062169926 | 0.22807303  | 0.359054071 | 0.357170445 |
| 0.379646245 | 0.309459143 | 0.251495762 | 0.327708417 |
| 0.278535457 | 0.442993851 | 0.048840453 | 0.226695337 |
| 0.33916834  | 0.239353595 | 0.319118363 | 0.325958866 |
| 0.287039549 | 0.247720369 | 0.237006169 | 0.481718245 |
| 0.414665611 | 0.187015629 | 0.317632863 | 0.366968385 |
| 0.298861016 | 0.29138134  | 0.225240181 | 0.31212792  |
| 0.147006941 | 0.393754141 | 0.057712347 | 0.345285521 |
| 0.180196643 | 0.150543894 | 0.049325414 | 0.328891653 |
| 0.275130833 | 0.369220787 | 0.379915403 | 0.214802663 |
| 0.342939135 | 0.349793479 | 0.312972077 | 0.309626077 |
| 0.029060626 | 0.118455813 | 0.259879708 | 0.462544162 |
| 0.246777003 | 0.451620877 | 0.352040458 | 0.313635327 |
| 0.30714283  | 0.423666576 | 0.00515604  | 0.425405989 |
| 0.446419769 | 0.246608392 | 0.324765009 | 0.336894796 |
| 0.254214934 | 0.431328821 | 0.036018771 | 0.36930691  |
| 0.274783443 | 0.184314055 | 0.480305503 | 0.215901439 |
| 0.404434756 | 0.098921618 | 0.347957178 | 0.343472817 |
| 0.292376385 | 0.023566901 | 0.262841071 | 0.371437541 |
| 0.056756027 | 0.207264666 | 0.368972786 | 0.367384095 |
| 0.335521218 | 0.389857518 | 0.47505631  | 0.233595717 |
| 0.345800157 | 0.342676367 | 0.044722909 | 0.294013138 |
| 0.367524349 | 0.265093503 | 0.414087729 | 0.33514483  |
| 0.251668802 | 0.437711957 | 0.326149589 | 0.18777006  |
| 0.124385642 | 0.371020315 | 0.051454509 | 0.315446464 |
| 0.332805662 | 0.197647769 | 0.273988416 | 0.205944886 |
| 0.118434635 | 0.477122405 | 0.150693655 | 0.173181242 |
| 0.095591746 | 0.309162352 | 0.359496365 | 0.223207675 |
| 0.169690338 | 0.252697557 | 0.277779908 | 0.322889371 |
| 0.123706348 | 0.1671517   | 0.032517009 | 0.227272623 |
| 0.130784    | 0.238344172 | 0.232764443 | 0.31485477  |

|             |             |             |             |
|-------------|-------------|-------------|-------------|
| 0.320352517 | 0.148514701 | 0.318236092 | 0.245122456 |
| 0.154207253 | 0.049923287 | 0.464787643 | 0.374470109 |
| 0.289925676 | 0.273773518 | 0.100187953 | 0.211811624 |
| 0.445138098 | 0.232169772 | 0.244154792 | 0.435737604 |
| 0.072952591 | 0.456901482 | 0.256713198 | 0.1803041   |
| 0.268097233 | 0.315640726 | 0.466108548 | 0.081232222 |
| 0.342389175 | 0.436695678 | 0.343897439 | 0.22799786  |
| 0.360157809 | 0.37290503  | 0.097380212 | 0.331161717 |
| 0.319008656 | 0.085375715 | 0.460600916 | 0.158290315 |
| 0.060380402 | 0.321071249 | 0.314943428 | 0.145123811 |
| 0.134976915 | 0.306172392 | 0.141727601 | 0.312352632 |
| 0.473150635 | 0.367597826 | 0.350534882 | 0.205527376 |
| 0.108910977 | 0.022442088 | 0.223040644 | 0.281757981 |
| 0.433460439 | 0.436605933 | 0.329160453 | 0.275496512 |
| 0.335516344 | 0.263501478 | 0.216434693 | 0.455207091 |
| 0.204630295 | 0.453066694 | 0.032152904 | 0.340272721 |
| 0.417846951 | 0.280727724 | 0.119790584 | 0.343311545 |
| 0.356400417 | 0.131529779 | 0.325035125 | 0.43295125  |
| 0.415263819 | 0.313466473 | 0.279534015 | 0.34652665  |
| 0.068813857 | 0.144726598 | 0.31917326  | 0.145953804 |
| 0.325294563 | 0.295169958 | 0.036088383 | 0.349996697 |
| 0.102519544 | 0.419971793 | 0.426321216 | 0.112383516 |
| 0.256991165 | 0.324255821 | 0.342733323 | 0.110395616 |
| 0.367233899 | 0.422898417 | 0.45085227  | 0.306061564 |
| 0.352455762 | 0.415071435 | 0.240175113 | 0.14689769  |
| 0.045325782 | 0.4298252   | 0.32643551  | 0.051891736 |
| 0.462974213 | 0.227854869 | 0.033051773 | 0.468490776 |
| 0.308465974 | 0.374025352 | 0.011342314 | 0.069324104 |
| 0.074373504 | 0.415788593 | 0.413625409 | 0.365156144 |
| 0.203019769 | 0.384899943 | 0.013855081 | 0.460033352 |
| 0.435862806 | 0.034943183 | 0.164978632 | 0.340004261 |
| 0.288528412 | 0.484870675 | 0.222435248 | 0.369412708 |
| 0.268856344 | 0.415273056 | 0.286661913 | 0.308803201 |
| 0.400262686 | 0.399252814 | 0.37835095  | 0.433346082 |
| 0.441766483 | 0.342958539 | 0.348232506 | 0.062502062 |
| 0.138462143 | 0.295581497 | 0.199646976 | 0.11590176  |
| 0.282821319 | 0.179715681 | 0.433916235 | 0.449418299 |
| 0.415721793 | 0.022990941 | 0.270528587 | 0.354521841 |
| 0.446416087 | 0.479972051 | 0.053867033 | 0.009862426 |
| 0.008818409 | 0.027481283 | 0.381615729 | 0.275659483 |
| 0.440575318 | 0.178205943 | 0.02560788  | 0.138869498 |
| 0.319390748 | 0.287802046 | 0.443484733 | 0.381113615 |
| 0.359598221 | 0.170159025 | 0.223323422 | 0.383862442 |
| 0.102044376 | 0.249548308 | 0.432619085 | 0.440027785 |
| 0.095114551 | 0.28803435  | 0.324904304 | 0.482134155 |
| 0.042991656 | 0.33342082  | 0.310314118 | 0.300420778 |
| 0.036661137 | 0.130649706 | 0.119710807 | 0.407067865 |
| 0.405068842 | 0.106574477 | 0.060972114 | 0.14822643  |
| 0.197415032 | 0.440399697 | 0.22809362  | 0.482367941 |
| 0.424138796 | 0.441774113 | 0.113436624 | 0.434415686 |
| 0.089009949 | 0.413810564 | 0.258060974 | 0.066149469 |
| 0.312152372 | 0.049269575 | 0.393770758 | 0.114176405 |
| 0.324061331 | 0.342222345 | 0.182054737 | 0.04228393  |
| 0.128173508 | 0.1063054   | 0.456062745 | 0.406780131 |



|             |             |             |             |
|-------------|-------------|-------------|-------------|
| 0.064854465 | 0.36178588  | 0.326024973 | 0.367467044 |
| 0.315098424 | 0.378801415 | 0.436904892 | 0.252016843 |
| 0.19984102  | 0.11457441  | 0.378516857 | 0.294673215 |
| 0.319923317 | 0.460223322 | 0.262357484 | 0.469739223 |
| 0.341461642 | 0.439581314 | 0.412813462 | 0.356412717 |
| 0.20778819  | 0.317851837 | 0.312061943 | 0.056437006 |
| 0.37170178  | 0.427801803 | 0.363606068 | 0.158549152 |
| 0.273559226 | 0.251730818 | 0.147013569 | 0.165061416 |
| 0.198838385 | 0.286844441 | 0.237821576 | 0.445487927 |
| 0.338514467 | 0.308570787 | 0.13430329  | 0.111548861 |
| 0.487812164 | 0.414670328 | 0.226501211 | 0.336417727 |
| 0.25293155  | 0.335731552 | 0.371498212 | 0.360923019 |
| 0.30247791  | 0.388116173 | 0.399448902 | 0.306544533 |
| 0.407695793 | 0.356586901 | 0.455520708 | 0.168044892 |
| 0.104418202 | 0.288438531 | 0.155109259 | 0.154667224 |
| 0.239191913 | 0.06665962  | 0.177602293 | 0.370475241 |
| 0.224131263 | 0.358536976 | 0.302890091 | 0.152195254 |
| 0.324134469 | 0.294721506 | 0.364583456 | 0.282160659 |
| 0.141098859 | 0.431261361 | 0.027307854 | 0.122037333 |
| 0.244897991 | 0.36164731  | 0.258008284 | 0.282391084 |
| 0.207296906 | 0.17971099  | 0.341270716 | 0.289165911 |
| 0.225947072 | 0.266303573 | 0.36231969  | 0.097393054 |
| 0.081955195 | 0.472650341 | 0.305346138 | 0.048860467 |
| 0.143635792 | 0.295550762 | 0.32839665  | 0.268743117 |
| 0.046850147 | 0.40064198  | 0.269120863 | 0.330923833 |
| 0.375795577 | 0.157196534 | 0.337435652 | 0.150737227 |
| 0.154939227 | 0.407539099 | 0.282859568 | 0.430058686 |
| 0.298713231 | 0.394669748 | 0.392464681 | 0.371128766 |
| 0.161503251 | 0.253342429 | 0.097613295 | 0.43592621  |
| 0.236474105 |             |             |             |
| ARHGAP26    | 0.256837543 | 0.388937149 | 0.177726443 |
| 0.402704045 | 0.244047224 | 0.210025608 | 0.296824518 |
| 0.202543419 | 0.181340269 | 0.065188508 | 0.090371091 |
| 0.230915963 | 0.222633411 | 0.265012724 | 0.177559019 |
| 0.394940281 | 0.224174576 | 0.194058796 | 0.320036967 |
| 0.345314982 | 0.219458855 | 0.377244751 | 0.263126837 |
| 0.182088078 | 0.181069479 | 0.21200027  | 0.206841883 |
| 0.424320741 | 0.225419216 | 0.174561475 | 0.319239732 |
| 0.17731795  | 0.318251727 | 0.337311923 | 0.306771263 |
| 0.317766713 | 0.218087312 | 0.0325376   | 0.218990711 |
| 0.311505877 | 0.325451294 | 0.355957181 | 1           |
| 0.19946226  | 0.310372308 | 0.312260096 | 0.23369382  |
| 0.167521877 | 0.146379123 | 0.160010594 | 0.294468723 |
| 0.302219313 | 0.217817659 | 0.236681757 | 0.281969254 |
| 0.161855486 | 0.162757939 | 0.132387074 | 0.215121443 |
| 0.314658992 | 0.148660415 | 0.315899099 | 0.209400529 |
| 0.139787511 | 0.244457943 | 0.193646505 | 0.273548831 |
| 0.163629774 | 0.269320353 | 0.107101953 | 0.171911632 |
| 0.025892813 | 0.34534599  | 0.238207316 | 0.132048566 |
| 0.169650884 | 0.136728791 | 0.218567065 | 0.305837195 |
| 0.415453062 | 0.2976373   | 0.413242231 | 0.383558172 |
| 0.242629685 | 0.258452502 | 0.173639104 | 0.302418474 |
| 0.322770029 | 0.291475692 | 0.188562657 | 0.397339255 |
| 0.409599357 | 0.356433159 | 0.247253458 | 0.246969085 |

|             |             |             |             |
|-------------|-------------|-------------|-------------|
| 0.332459072 | 0.361183403 | 0.206104312 | 0.2405798   |
| 0.173116852 | 0.102410999 | 0.303692195 | 0.394812325 |
| 0.279422255 | 0.153794661 | 0.248575923 | 0.349640816 |
| 0.193495621 | 0.177859599 | 0.357736118 | 0.160264762 |
| 0.428224106 | 0.1209233   | 0.234417135 | 0.270302221 |
| 0.233992088 | 0.31963815  | 0.345765336 | 0.312060509 |
| 0.221066352 | 0.112515979 | 0.113580849 | 0.123470259 |
| 0.235198796 | 0.086165018 | 0.281617694 | 0.411716305 |
| 0.221232544 | 0.228288212 | 0.292403639 | 0.03439328  |
| 0.122448366 | 0.174514895 | 0.290009493 | 0.215683343 |
| 0.323839048 | 0.21955145  | 0.26663826  | 0.243198219 |
| 0.23092327  | 0.403657096 | 0.039610028 | 0.251344428 |
| 0.236945169 | 0.181618371 | 0.311223615 | 0.2305879   |
| 0.268820093 | 0.251836018 | 0.2854942   | 0.417740377 |
| 0.311944471 | 0.257471824 | 0.167376804 | 0.381448584 |
| 0.227143973 | 0.234900997 | 0.263483016 | 0.295840601 |
| 0.208021563 | 0.296089046 | 0.103295836 | 0.20481072  |
| 0.134489299 | 0.1675868   | 0.056910535 | 0.225697516 |
| 0.245976486 | 0.322725713 | 0.26219798  | 0.248875601 |
| 0.297842117 | 0.318788937 | 0.170333049 | 0.296978814 |
| 0.077002587 | 0.163163365 | 0.124721562 | 0.398422762 |
| 0.17290729  | 0.377708175 | 0.291674625 | 0.24052965  |
| 0.28174391  | 0.391601622 | 0.005390689 | 0.319121433 |
| 0.351409984 | 0.127865147 | 0.274312243 | 0.24322777  |
| 0.163114774 | 0.411185878 | 0.021254213 | 0.370027982 |
| 0.1977378   | 0.222951592 | 0.4330872   | 0.268005047 |
| 0.306040917 | 0.175913314 | 0.223647645 | 0.292299058 |
| 0.24619617  | 0.038444396 | 0.185479488 | 0.34124334  |
| 0.088368412 | 0.191904227 | 0.304717488 | 0.345736791 |
| 0.262208437 | 0.347552302 | 0.444750905 | 0.15540585  |
| 0.25132075  | 0.283478651 | 0.074161734 | 0.236160424 |
| 0.300864567 | 0.146335087 | 0.321308523 | 0.295217742 |
| 0.144418989 | 0.358040871 | 0.25608747  | 0.117910989 |
| 0.197603194 | 0.251074519 | 0.097116286 | 0.265731531 |
| 0.240921849 | 0.26303625  | 0.163729846 | 0.165339209 |
| 0.178181979 | 0.40507294  | 0.131875557 | 0.119570871 |
| 0.081624587 | 0.234041396 | 0.300281707 | 0.232481426 |
| 0.20080288  | 0.267177226 | 0.199108363 | 0.226687278 |
| 0.174310709 | 0.248839618 | 0.037525734 | 0.149627406 |
| 0.188387153 | 0.193910948 | 0.177574003 | 0.241995924 |
| 0.229591489 | 0.231116977 | 0.267374468 | 0.169081986 |
| 0.196784113 | 0.103664973 | 0.379258233 | 0.346503105 |
| 0.21158609  | 0.286815622 | 0.15351872  | 0.142915066 |
| 0.404313802 | 0.141043891 | 0.118276028 | 0.372739687 |
| 0.09801644  | 0.396213907 | 0.275376474 | 0.244498265 |
| 0.207779936 | 0.320524968 | 0.432930846 | 0.082261247 |
| 0.19847156  | 0.348315222 | 0.259798063 | 0.261788305 |
| 0.281824478 | 0.312713694 | 0.167809408 | 0.255885824 |
| 0.249029399 | 0.161912003 | 0.378120635 | 0.194535253 |
| 0.110873107 | 0.297503813 | 0.281618138 | 0.202847664 |
| 0.189262805 | 0.261634714 | 0.164824472 | 0.287006354 |
| 0.402873401 | 0.398817813 | 0.30306724  | 0.162836867 |
| 0.196451795 | 0.072987176 | 0.195275115 | 0.169053367 |
| 0.322102801 | 0.360157462 | 0.290332373 | 0.236472425 |

|             |             |                      |             |
|-------------|-------------|----------------------|-------------|
| 0.317890584 | 0.199554234 | 0.121364377          | 0.392589271 |
| 0.127663729 | 0.345148444 | 0.065688495          | 0.294316457 |
| 0.312005443 | 0.159891222 | 0.188872451          | 0.250390014 |
| 0.288367283 | 0.196486357 | 0.250722617          | 0.342922926 |
| 0.339708437 | 0.241494463 | 0.214242125          | 0.281264309 |
| 0.124930409 | 0.180161242 | 0.223001852          | 0.114240204 |
| 0.222242015 | 0.279595522 | 0.033294887          | 0.202194768 |
| 0.199573467 | 0.338482642 | 0.38825294           | 0.171625579 |
| 0.17778934  | 0.181672205 | 0.293300855          | 0.177580473 |
| 0.310890561 | 0.325302573 | 0.347757946          | 0.259242039 |
| 0.290142344 | 0.347917231 | 0.168998013          | 0.180504807 |
| 0.090424359 | 0.331158509 | 0.259606557          | 0.115281688 |
| 0.421147697 | 0.128287252 | 0.101635 0.379125127 |             |
| 0.303514162 | 0.2580154   | 0.02468764           | 0.037312709 |
| 0.093317077 | 0.378243214 | 0.314939452          | 0.305097896 |
| 0.133507732 | 0.277166494 | 0.009124371          | 0.374428225 |
| 0.354760211 | 0.077729526 | 0.167294695          | 0.28566984  |
| 0.254038352 | 0.381810044 | 0.1664295            | 0.328680345 |
| 0.211651841 | 0.31903945  | 0.271551379          | 0.292462545 |
| 0.359992118 | 0.310061095 | 0.328636278          | 0.339018633 |
| 0.408370005 | 0.317693837 | 0.316825933          | 0.122567135 |
| 0.122201622 | 0.200303225 | 0.144146639          | 0.15136803  |
| 0.183064748 | 0.228625438 | 0.350759082          | 0.406012117 |
| 0.362915792 | 0.053043285 | 0.244126763          | 0.287456086 |
| 0.385965194 | 0.422392245 | 0.056857963          | 0.015677153 |
| 0.011695194 | 0.070507317 | 0.253265913          | 0.24418854  |
| 0.366698939 | 0.133842469 | 0.062775933          | 0.166022783 |
| 0.278308889 | 0.239737075 | 0.355269587          | 0.389144374 |
| 0.300194421 | 0.212467567 | 0.193777181          | 0.378999123 |
| 0.153729254 | 0.167965711 | 0.385044845          | 0.345531871 |
| 0.116042898 | 0.242777641 | 0.186139942          | 0.432195611 |
| 0.034960828 | 0.279376329 | 0.247022522          | 0.267765663 |
| 0.040300039 | 0.178587635 | 0.166106879          | 0.373566511 |
| 0.301575563 | 0.195326631 | 0.147148852          | 0.087723712 |
| 0.271866655 | 0.37311121  | 0.297581888          | 0.423371326 |
| 0.379783724 | 0.438524751 | 0.132582826          | 0.337355631 |
| 0.138594547 | 0.318852051 | 0.207357965          | 0.07774912  |
| 0.227217163 | 0.084127232 | 0.301887931          | 0.116971803 |
| 0.207138124 | 0.272914692 | 0.142981706          | 0.071936069 |
| 0.090662326 | 0.174339396 | 0.424461835          | 0.369224832 |
| 0.084333894 | 0.275766473 | 0.26884646           | 0.292475745 |
| 0.21755377  | 0.386208399 | 0.331937242          | 0.153382217 |
| 0.239818093 | 0.075758819 | 0.348956658          | 0.230790781 |
| 0.219740989 | 0.416499555 | 0.227921222          | 0.384868277 |
| 0.269238551 | 0.343889558 | 0.33687036           | 0.272000165 |
| 0.173150395 | 0.20888366  | 0.293463176          | 0.131843942 |
| 0.28653155  | 0.405649032 | 0.215820298          | 0.206034366 |
| 0.283531382 | 0.153714389 | 0.133107606          | 0.089207708 |
| 0.126687664 | 0.200094354 | 0.283123875          | 0.424216072 |
| 0.23684158  | 0.242312094 | 0.126095219          | 0.166974688 |
| 0.39055286  | 0.313516989 | 0.218137218          | 0.312148882 |
| 0.252008701 | 0.273056958 | 0.32429576           | 0.319549681 |
| 0.167639231 | 0.336205984 | 0.344994753          | 0.285605061 |
| 0.321691182 | 0.305560963 | 0.353359382          | 0.123058356 |

|             |             |             |             |
|-------------|-------------|-------------|-------------|
| 0.126375291 | 0.194786229 | 0.243460113 | 0.192151575 |
| 0.296143383 | 0.116109875 | 0.116160772 | 0.356261873 |
| 0.136175953 | 0.337601889 | 0.153593992 | 0.190274384 |
| 0.250262435 | 0.149461984 | 0.284931122 | 0.277981106 |
| 0.237033201 | 0.337710817 | 0.056538891 | 0.17653143  |
| 0.153629497 | 0.312841734 | 0.192502709 | 0.274864218 |
| 0.154144712 | 0.15521286  | 0.310465514 | 0.176823682 |
| 0.170741523 | 0.158028711 | 0.312958347 | 0.129433332 |
| 0.135087843 | 0.426967753 | 0.17802052  | 0.065974082 |
| 0.107674508 | 0.190199183 | 0.20974068  | 0.249322891 |
| 0.07753048  | 0.323356045 | 0.171485526 | 0.216348578 |
| 0.262664367 | 0.199725233 | 0.23485565  | 0.128630706 |
| 0.15935574  | 0.307379383 | 0.179800498 | 0.334681052 |
| 0.192450625 | 0.417105374 | 0.273982838 | 0.303755525 |
| 0.13560683  | 0.134617231 | 0.163243972 | 0.373498429 |
| 0.150816625 |             |             |             |

|             |             |             |             |
|-------------|-------------|-------------|-------------|
| ARL8A       | 0.032967514 | 0.052709353 | 0.026080308 |
| 0.139144254 | 0.062387061 | 0.053855534 | 0.219583522 |
| 0.052740296 | 0.102428167 | 0.119138175 | 0.073416942 |
| 0.035319072 | 0.047856966 | 0.070836778 | 0.022049317 |
| 0.127398003 | 0.092091311 | 0.026383654 | 0.230125762 |
| 0.110467583 | 0.145481338 | 0.147995155 | 0.176666869 |
| 0.020803555 | 0.094916855 | 0.212189452 | 0.054198017 |
| 0.111562219 | 0.231292239 | 0.047498279 | 0.094891752 |
| 0.066558432 | 0.050711597 | 0.034097809 | 0.072935587 |
| 0.028301356 | 0.023735425 | 0.019293378 | 0.058948228 |
| 0.046151855 | 0.068935291 | 0.118315284 | 0.19946226  |

|             |             |             |             |
|-------------|-------------|-------------|-------------|
| 1           | 0.030618638 | 0.246655625 | 0.055986368 |
| 0.024812545 | 0.118333106 | 0.040867076 | 0.033167133 |
| 0.029814407 | 0.043361762 | 0.088634164 | 0.201226913 |
| 0.027077457 | 0.033615297 | 0.009653144 | 0.051082286 |
| 0.226593052 | 0.056133403 | 0.032786151 | 0.130280636 |
| 0.030096982 | 0.082178092 | 0.056541559 | 0.127004586 |
| 0.015298719 | 0.048717791 | 0.107066936 | 0.017538575 |
| 0.039319911 | 0.130055247 | 0.068260927 | 0.014430592 |
| 0.22537651  | 0.130790368 | 0.079087838 | 0.17738859  |
| 0.092021996 | 0.02921003  | 0.077306894 | 0.059823652 |
| 0.061762421 | 0.091657062 | 0.025241175 | 0.168474184 |
| 0.048030713 | 0.219881622 | 0.060059573 | 0.1249625   |
| 0.071966418 | 0.039886629 | 0.05955753  | 0.114091022 |
| 0.070848686 | 0.051155734 | 0.03876879  | 0.054733543 |
| 0.022978876 | 0.043256986 | 0.03788569  | 0.057499078 |
| 0.038296981 | 0.02125696  | 0.175943736 | 0.083843472 |
| 0.190052969 | 0.010725476 | 0.199781511 | 0.026087449 |
| 0.093906768 | 0.161014199 | 0.114205732 | 0.124108568 |
| 0.047656269 | 0.052809487 | 0.036567614 | 0.259495092 |
| 0.03992017  | 0.08601141  | 0.019347863 | 0.099607147 |
| 0.025726903 | 0.00762711  | 0.023704174 | 0.091976228 |
| 0.040272631 | 0.022059096 | 0.13282185  | 0.066181333 |
| 0.110677883 | 0.026918822 | 0.035461657 | 0.040735131 |
| 0.068810407 | 0.018139136 | 0.121171472 | 0.033341108 |
| 0.031348654 | 0.074788402 | 0.006290384 | 0.17275886  |
| 0.060989228 | 0.032702398 | 0.248505232 | 0.042859135 |
| 0.107354623 | 0.14271194  | 0.213834975 | 0.067917764 |

|             |             |             |             |
|-------------|-------------|-------------|-------------|
| 0.044124492 | 0.280550359 | 0.020116757 | 0.12434515  |
| 0.033412397 | 0.071336862 | 0.190086328 | 0.094276988 |
| 0.169552622 | 0.026285056 | 0.097529776 | 0.044925108 |
| 0.011931429 | 0.036478533 | 0.056849864 | 0.090678811 |
| 0.04244314  | 0.052304157 | 0.019674933 | 0.206252224 |
| 0.11091892  | 0.109864092 | 0.035245721 | 0.062894852 |
| 0.108769078 | 0.099854849 | 0.015858252 | 0.06002513  |
| 0.041826597 | 0.051138297 | 0.072209287 | 0.048607748 |
| 0.149895911 | 0.091819628 | 0.00239788  | 0.031751223 |
| 0.037667237 | 0.015068845 | 0.099199287 | 0.049610319 |
| 0.024338551 | 0.101776714 | 0.000977734 | 0.117479359 |
| 0.024050038 | 0.196828609 | 0.081239501 | 0.207817105 |
| 0.031590718 | 0.231642434 | 0.050968839 | 0.038580614 |
| 0.02707154  | 0.030019902 | 0.084412227 | 0.129046987 |
| 0.06543595  | 0.100889678 | 0.060167822 | 0.127094629 |
| 0.109740038 | 0.068714851 | 0.099619499 | 0.022039084 |
| 0.064403916 | 0.121854289 | 0.076279403 | 0.074268454 |
| 0.044155367 | 0.006937365 | 0.044638763 | 0.093542032 |
| 0.018163369 | 0.05222164  | 0.027067084 | 0.018043983 |
| 0.272580203 | 0.098626985 | 0.0803426   | 0.105222    |
| 0.025111144 | 0.129061128 | 0.025562981 | 0.034069154 |
| 0.128853184 | 0.059704747 | 0.025808678 | 0.012026804 |
| 0.011052611 | 0.065732864 | 0.163527429 | 0.060463684 |
| 0.037355365 | 0.105825611 | 0.028764793 | 0.044310827 |
| 0.163088516 | 0.198224004 | 0.023017462 | 0.010606106 |
| 0.050165252 | 0.026416281 | 0.023890287 | 0.03443055  |
| 0.025971404 | 0.085931067 | 0.077145655 | 0.016910513 |
| 0.089391191 | 0.187641617 | 0.052431849 | 0.113919424 |
| 0.03229375  | 0.145508789 | 0.15079149  | 0.007012978 |
| 0.082872653 | 0.0340673   | 0.013019538 | 0.067517704 |
| 0.064408521 | 0.06818937  | 0.066613791 | 0.203911429 |
| 0.030523304 | 0.209117359 | 0.10715367  | 0.028210629 |
| 0.0393937   | 0.048536818 | 0.099194974 | 0.144656373 |
| 0.035975661 | 0.095697516 | 0.15595519  | 0.032873084 |
| 0.03061433  | 0.208056237 | 0.045943314 | 0.062040695 |
| 0.16267805  | 0.055069153 | 0.04629523  | 0.229217413 |
| 0.151613796 | 0.106815273 | 0.131072617 | 0.178166064 |
| 0.060759577 | 0.144484856 | 0.055564549 | 0.029550049 |
| 0.23100013  | 0.072502493 | 0.056223605 | 0.022950812 |
| 0.030402691 | 0.042112767 | 0.162605674 | 0.061822539 |
| 0.254346999 | 0.031333023 | 0.023963468 | 0.057397877 |
| 0.011752877 | 0.035592997 | 0.120413553 | 0.044066461 |
| 0.027949397 | 0.036105666 | 0.147874119 | 0.12529649  |
| 0.045499843 | 0.225941552 | 0.081713048 | 0.039028126 |
| 0.059632397 | 0.05835036  | 0.040723299 | 0.055151184 |
| 0.166917996 | 0.157782101 | 0.063996332 | 0.013080062 |
| 0.038893538 | 0.11752516  | 0.003458963 | 0.024750101 |
| 0.167462821 | 0.048881151 | 0.078500845 | 0.121177556 |
| 0.053298802 | 0.025067099 | 0.099933342 | 0.235624729 |
| 0.038669223 | 0.032014028 | 0.036652364 | 0.10952838  |
| 0.038377407 | 0.044113368 | 0.021829814 | 0.135034685 |
| 0.134901643 | 0.031725527 | 0.049932056 | 0.107304151 |
| 0.088126592 | 0.032775022 | 0.111513146 | 0.054752485 |
| 0.238673974 | 0.020724473 | 0.032432477 | 0.002305784 |

|             |             |             |             |
|-------------|-------------|-------------|-------------|
| 0.046051264 | 0.070336971 | 0.034495259 | 0.093087415 |
| 0.026642465 | 0.101213991 | 0.003507865 | 0.045097984 |
| 0.044829646 | 0.082534578 | 0.039709723 | 0.036327516 |
| 0.030968359 | 0.047854907 | 0.026933234 | 0.047239667 |
| 0.030365915 | 0.031491943 | 0.061374606 | 0.188335408 |
| 0.069829367 | 0.029150426 | 0.070909034 | 0.046275205 |
| 0.08807993  | 0.077697686 | 0.242055042 | 0.1670863   |
| 0.03058384  | 0.079994715 | 0.017283281 | 0.08283822  |
| 0.040109724 | 0.104170937 | 0.043172695 | 0.082670801 |
| 0.050166408 | 0.123298733 | 0.091920097 | 0.037063512 |
| 0.080600273 | 0.088007524 | 0.035069373 | 0.008465596 |
| 0.002881641 | 0.049346018 | 0.099095237 | 0.098758612 |
| 0.051286316 | 0.015439576 | 0.141396326 | 0.130085897 |
| 0.054063543 | 0.053803706 | 0.04281343  | 0.169091019 |
| 0.043066656 | 0.160924712 | 0.032501761 | 0.134678062 |
| 0.075720995 | 0.018726273 | 0.060343683 | 0.046993495 |
| 0.06976697  | 0.092592801 | 0.025346719 | 0.089710058 |
| 0.0027189   | 0.131807068 | 0.037277964 | 0.045099217 |
| 0.028564565 | 0.112245215 | 0.117437989 | 0.085998504 |
| 0.025938584 | 0.093672849 | 0.108425615 | 0.007546136 |
| 0.176345326 | 0.062112836 | 0.110826333 | 0.070998352 |
| 0.084283975 | 0.128983697 | 0.051358649 | 0.041776868 |
| 0.096565388 | 0.031888231 | 0.049254575 | 0.026488985 |
| 0.042193289 | 0.094383396 | 0.028224092 | 0.023902055 |
| 0.039823728 | 0.055704135 | 0.023225382 | 0.070359264 |
| 0.006626194 | 0.150885784 | 0.091226916 | 0.065229338 |
| 0.045136319 | 0.094032828 | 0.107951851 | 0.076893118 |
| 0.094194801 | 0.112517471 | 0.034685303 | 0.020394932 |
| 0.177746778 | 0.005004357 | 0.098944604 | 0.032555989 |
| 0.051140174 | 0.076051611 | 0.043473266 | 0.049249524 |
| 0.044194948 | 0.048333616 | 0.041330952 | 0.13374087  |
| 0.021160148 | 0.039666765 | 0.099334904 | 0.147237818 |
| 0.123464468 | 0.090664389 | 0.050873625 | 0.058405185 |
| 0.148020693 | 0.020248799 | 0.084280519 | 0.00494102  |
| 0.012877877 | 0.071917361 | 0.125630293 | 0.11525726  |
| 0.045809622 | 0.033929781 | 0.081973638 | 0.120523996 |
| 0.04873818  | 0.041817559 | 0.081755376 | 0.081429524 |
| 0.141590817 | 0.124383747 | 0.051321659 | 0.050619177 |
| 0.011808141 | 0.052263808 | 0.069909166 | 0.074464589 |
| 0.048327078 | 0.193624731 | 0.03883619  | 0.03700199  |
| 0.037885487 | 0.022465938 | 0.123966677 | 0.159165407 |
| 0.246343714 | 0.104657753 | 0.006344166 | 0.095521832 |
| 0.007627481 | 0.148664174 | 0.009529924 | 0.101144341 |
| 0.086393039 | 0.01549093  | 0.125725654 | 0.162856468 |
| 0.149178995 | 0.038538152 | 0.063800064 | 0.153799473 |
| 0.010729672 | 0.051189795 | 0.037192238 | 0.101929408 |
| 0.011169215 | 0.032776015 | 0.174311571 | 0.04569356  |
| 0.031991072 | 0.00655256  | 0.050584601 | 0.09573588  |
| 0.152357556 | 0.080477209 | 0.026180402 | 0.04454561  |
| 0.032423044 | 0.028217088 | 0.025099784 | 0.061242831 |
| 0.072032222 | 0.035588059 | 0.037566656 | 0.046965365 |
| 0.117974984 | 0.149406436 | 0.026594147 | 0.033068263 |
| 0.08833035  | 0.033804477 | 0.029797703 | 0.0333119   |
| 0.030169751 | 0.145686354 | 0.02550536  | 0.042125427 |

|             |             |             |             |
|-------------|-------------|-------------|-------------|
| 0.024116235 | 0.013505375 | 0.173553402 | 0.073765577 |
| 0.011486743 |             |             |             |
| ART4        | 0.469603483 | 0.501063231 | 0.400431593 |
| 0.43175691  | 0.408995699 | 0.45735565  | 0.205942752 |
| 0.230037922 | 0.0678419   | 0.003606012 | 0.013653867 |
| 0.447257964 | 0.186388877 | 0.298158648 | 0.378373106 |
| 0.399900604 | 0.098263907 | 0.37721991  | 0.215621345 |
| 0.420487576 | 0.102448795 | 0.368623612 | 0.074906018 |
| 0.241831795 | 0.071115024 | 0.046156572 | 0.220538089 |
| 0.457389663 | 0.054477777 | 0.421284324 | 0.441795582 |
| 0.070386217 | 0.484635772 | 0.4934337   | 0.421798593 |
| 0.489748438 | 0.470057055 | 0.01031151  | 0.33441832  |
| 0.487069235 | 0.44991351  | 0.423234369 | 0.310372308 |
| 0.030618638 | 1           | 0.230283216 | 0.371229981 |
| 0.282734587 | 0.018232922 | 0.332860878 | 0.486882075 |
| 0.487508542 | 0.462586968 | 0.260645606 | 0.149877455 |
| 0.19717239  | 0.312871266 | 0.250379881 | 0.43212265  |
| 0.206300635 | 0.232817423 | 0.493307032 | 0.080217376 |
| 0.15103061  | 0.276231875 | 0.11082462  | 0.280175115 |
| 0.31422573  | 0.478317559 | 0.014141608 | 0.439863926 |
| 0.003115323 | 0.392762377 | 0.341584945 | 0.293761801 |
| 0.025384433 | 0.013451947 | 0.133141888 | 0.34550843  |
| 0.470829499 | 0.485383016 | 0.467878659 | 0.475446516 |
| 0.147351356 | 0.248701031 | 0.372112886 | 0.140595934 |
| 0.491544043 | 0.169840777 | 0.103234961 | 0.39296715  |
| 0.473561992 | 0.497467369 | 0.155846811 | 0.208933288 |
| 0.479989597 | 0.501155941 | 0.456535247 | 0.419464796 |
| 0.339119601 | 0.030383001 | 0.496072039 | 0.491508877 |
| 0.490094781 | 0.279660591 | 0.111189401 | 0.469384271 |
| 0.039110121 | 0.430079014 | 0.334460431 | 0.144652173 |
| 0.473302376 | 0.012529813 | 0.160252076 | 0.375953726 |
| 0.190217394 | 0.489137087 | 0.49107445  | 0.167511955 |
| 0.389027762 | 0.012917533 | 0.107656755 | 0.019845047 |
| 0.33863001  | 0.113099157 | 0.496503942 | 0.479811177 |
| 0.273764934 | 0.352906112 | 0.262440477 | 0.001305419 |
| 0.014481544 | 0.150890886 | 0.490863155 | 0.384526441 |
| 0.456361607 | 0.45958329  | 0.199478353 | 0.489960693 |
| 0.460874204 | 0.465754093 | 0.095697727 | 0.081938176 |
| 0.444442506 | 0.146555765 | 0.200180086 | 0.466942342 |
| 0.263361016 | 0.112095573 | 0.10247029  | 0.489878391 |
| 0.489434571 | 0.064743893 | 0.408082431 | 0.393443868 |
| 0.346877766 | 0.309515274 | 0.086262063 | 0.268094981 |
| 0.041345114 | 0.481609214 | 0.014715941 | 0.38889249  |
| 0.269155713 | 0.11141858  | 0.008002474 | 0.313054311 |
| 0.321485631 | 0.489163367 | 0.482631455 | 0.081576353 |
| 0.312103731 | 0.377285271 | 0.411405685 | 0.475081986 |
| 0.006315224 | 0.034211526 | 0.393592689 | 0.496772673 |
| 0.41107938  | 0.483998398 | 0.281143401 | 0.261114957 |
| 0.234009873 | 0.45438724  | 0.002704254 | 0.492184151 |
| 0.493210782 | 0.422315802 | 0.392672061 | 0.407646706 |
| 0.370607383 | 0.469339857 | 0.058237313 | 0.401741981 |
| 0.469758039 | 0.058474747 | 0.47422614  | 0.120253769 |
| 0.496764477 | 0.025237847 | 0.368478313 | 0.455620023 |
| 0.476051404 | 0.006477886 | 0.298929491 | 0.414794237 |

|             |             |             |             |
|-------------|-------------|-------------|-------------|
| 0.013702296 | 0.114460735 | 0.463120193 | 0.414184044 |
| 0.380148196 | 0.448679898 | 0.459938303 | 0.35094604  |
| 0.414620804 | 0.23549558  | 0.006613952 | 0.27007812  |
| 0.466861864 | 0.403836837 | 0.494916678 | 0.239915372 |
| 0.459930524 | 0.501561987 | 0.486160823 | 0.234362935 |
| 0.030590247 | 0.34580751  | 0.020330807 | 0.301041309 |
| 0.473015174 | 0.108581304 | 0.412540458 | 0.119259082 |
| 0.04489971  | 0.495932615 | 0.132521881 | 0.228178836 |
| 0.094485943 | 0.441810655 | 0.239482345 | 0.254657657 |
| 0.199651445 | 0.126014827 | 0.32613698  | 0.369149799 |
| 0.035205161 | 0.068074733 | 0.007215802 | 0.412737787 |
| 0.133145283 | 0.371946332 | 0.393010921 | 0.492499661 |
| 0.353968344 | 0.096395364 | 0.363593439 | 0.248657663 |
| 0.079075502 | 0.007348351 | 0.501429785 | 0.394597308 |
| 0.460918115 | 0.133449982 | 0.025029541 | 0.396027675 |
| 0.485348655 | 0.43527854  | 0.38787446  | 0.495356888 |
| 0.020772524 | 0.473310515 | 0.231761252 | 0.087344867 |
| 0.35911148  | 0.234742376 | 0.460959577 | 0.064529603 |
| 0.452121407 | 0.50142213  | 0.276107207 | 0.144301164 |
| 0.491089545 | 0.433604167 | 0.022875256 | 0.491477765 |
| 0.495750677 | 0.018812445 | 0.497742913 | 0.088943842 |
| 0.010757459 | 0.432017565 | 0.467279218 | 0.049156163 |
| 0.050800355 | 0.340942324 | 0.051069725 | 0.241927729 |
| 0.498222169 | 0.384815849 | 0.484912262 | 0.170399989 |
| 0.027933477 | 0.006714006 | 0.157418542 | 0.406380693 |
| 0.499850778 | 0.489843112 | 0.222536699 | 0.339302014 |
| 0.211190657 | 0.308532351 | 0.205229469 | 0.493475368 |
| 0.17442245  | 0.495998901 | 0.002603268 | 0.450580016 |
| 0.492306286 | 0.391995677 | 0.052736188 | 0.344153745 |
| 0.493452144 | 0.032625435 | 0.194723307 | 0.499874374 |
| 0.487631075 | 0.30738133  | 0.346182091 | 0.43686722  |
| 0.013549823 | 0.036333471 | 0.369900096 | 0.143053358 |
| 0.393793637 | 0.177203701 | 0.035847659 | 0.382420067 |
| 0.030113476 | 0.49849054  | 0.457586185 | 0.039603777 |
| 0.425383677 | 0.377506173 | 0.339176992 | 0.023969962 |
| 0.465652807 | 0.486536021 | 0.497006932 | 0.157489705 |
| 0.481253536 | 0.490306373 | 0.413836796 | 0.052114549 |
| 0.008090426 | 0.489860587 | 0.470500092 | 0.017410939 |
| 0.469891721 | 0.356201746 | 0.008465326 | 0.503105458 |
| 0.163621795 | 0.468902391 | 0.00434454  | 0.079955921 |
| 0.022673977 | 0.448329676 | 0.490139079 | 0.432286876 |
| 0.35699163  | 0.366999967 | 0.002999938 | 0.490779368 |
| 0.50170267  | 0.006274471 | 0.098175443 | 0.488654271 |
| 0.454657998 | 0.502532266 | 0.287079799 | 0.470804674 |
| 0.44014167  | 0.489517104 | 0.244162173 | 0.223236372 |
| 0.490151243 | 0.479371621 | 0.474162798 | 0.497645123 |
| 0.477461644 | 0.402902777 | 0.25666032  | 0.009946221 |
| 0.104420602 | 0.27198674  | 0.366591081 | 0.063459291 |
| 0.435080538 | 0.104045277 | 0.498262805 | 0.464705223 |
| 0.485313139 | 0.00115994  | 0.167211513 | 0.497200677 |
| 0.487852621 | 0.479564215 | 0.013481103 | 0.004841955 |
| 0.007050329 | 0.010012889 | 0.394257352 | 0.195208916 |
| 0.493111984 | 0.337196999 | 0.001191158 | 0.047171344 |
| 0.277845793 | 0.370107619 | 0.500600107 | 0.364481008 |



|             |             |             |             |
|-------------|-------------|-------------|-------------|
| 0.460935569 | 0.056193663 | 0.324930936 | 0.396491022 |
| 0.042648777 | 0.453087849 | 0.486424567 | 0.499070632 |
| 0.024856651 | 0.200465127 | 0.42262319  | 0.482454012 |
| 0.053507918 | 0.272236954 | 0.456824961 | 0.314110012 |
| 0.008112516 | 0.052177817 | 0.040904067 | 0.431699066 |
| 0.481168092 | 0.059048098 | 0.020876711 | 0.212840138 |
| 0.1057164   | 0.478316322 | 0.141163439 | 0.485732032 |
| 0.482806103 | 0.432716696 | 0.046018681 | 0.495539573 |
| 0.024752826 | 0.495660137 | 0.296668803 | 0.076655831 |
| 0.261742227 | 0.006519704 | 0.486776424 | 0.140410816 |
| 0.397794542 | 0.459001402 | 0.168477014 | 0.007518379 |
| 0.153020573 | 0.032792191 | 0.468762924 | 0.454366088 |
| 0.01812116  | 0.230384145 | 0.258926223 | 0.410187611 |
| 0.354921397 | 0.442600402 | 0.495187104 | 0.482834848 |
| 0.075052742 | 0.116597296 | 0.441114965 | 0.484258986 |
| 0.283071089 | 0.468500094 | 0.276521954 | 0.49435186  |
| 0.481305301 | 0.49172349  | 0.494334253 | 0.355527661 |
| 0.187867331 | 0.472869991 | 0.437630706 | 0.017793894 |
| 0.346079617 | 0.466080753 | 0.397488152 | 0.12072097  |
| 0.215963087 | 0.38252578  | 0.03761437  | 0.241682442 |
| 0.318759944 | 0.404601914 | 0.121455179 | 0.43125544  |
| 0.452886325 | 0.489192642 | 0.037908776 | 0.038799668 |
| 0.500915289 | 0.491773668 | 0.158376876 | 0.463924269 |
| 0.132756716 | 0.313647889 | 0.466491018 | 0.44894335  |
| 0.383753828 | 0.492948685 | 0.480573955 | 0.46301945  |
| 0.493354968 | 0.241820536 | 0.496790439 | 0.129472906 |
| 0.059696566 | 0.467144642 | 0.078014936 | 0.060713511 |
| 0.114468891 | 0.014472396 | 0.285510825 | 0.411681406 |
| 0.383409146 | 0.36449165  | 0.400951855 | 0.060622735 |
| 0.277700152 | 0.423420554 | 0.323645004 | 0.214610162 |
| 0.06105105  | 0.496363256 | 0.004954145 | 0.035460916 |
| 0.387321313 | 0.47942641  | 0.363988777 | 0.198045967 |
| 0.26225535  | 0.099262364 | 0.263774056 | 0.393268595 |
| 0.396498481 | 0.384435174 | 0.485300211 | 0.030745305 |
| 0.01512512  | 0.473505156 | 0.452455658 | 0.01090102  |
| 0.061172193 | 0.462912025 | 0.293666608 | 0.215709795 |
| 0.010387274 | 0.48578488  | 0.414303175 | 0.416373797 |
| 0.373251886 | 0.04646126  | 0.46846378  | 0.08411959  |
| 0.047564565 | 0.497441071 | 0.387727083 | 0.492834539 |
| 0.324184063 | 0.407829488 | 0.476253839 | 0.495643738 |
| 0.113082254 | 0.417797833 | 0.019996352 | 0.475385293 |
| 0.442113145 |             |             |             |

|             |             |             |             |
|-------------|-------------|-------------|-------------|
| AS3MT       | 0.187173972 | 0.298638898 | 0.112483082 |
| 0.365630284 | 0.187186097 | 0.19201954  | 0.304447999 |
| 0.186768743 | 0.212575525 | 0.095537848 | 0.10660647  |
| 0.163463238 | 0.175707876 | 0.222383759 | 0.144673892 |
| 0.33956451  | 0.174650511 | 0.127000685 | 0.286138461 |
| 0.30445865  | 0.266811002 | 0.32848999  | 0.293146917 |
| 0.116472611 | 0.150777221 | 0.228711527 | 0.154329749 |
| 0.35869147  | 0.234696245 | 0.148305964 | 0.288431379 |
| 0.131235027 | 0.244416388 | 0.248181941 | 0.238888091 |
| 0.225996201 | 0.157556764 | 0.024886386 | 0.207703498 |
| 0.24013393  | 0.262821665 | 0.32205684  | 0.312260096 |
| 0.246655625 | 0.230283216 | 1           | 0.178544989 |

|             |             |             |             |
|-------------|-------------|-------------|-------------|
| 0.144574573 | 0.155502544 | 0.143545258 | 0.226450391 |
| 0.223025511 | 0.181077656 | 0.231121749 | 0.315184002 |
| 0.133299475 | 0.138115547 | 0.078271794 | 0.192514023 |
| 0.302583671 | 0.15324663  | 0.233385208 | 0.266912093 |
| 0.137933576 | 0.211647448 | 0.132877132 | 0.244312314 |
| 0.100776675 | 0.22432926  | 0.125409539 | 0.115265668 |
| 0.034900476 | 0.314804327 | 0.183840584 | 0.086733973 |
| 0.167140199 | 0.147197806 | 0.152571789 | 0.319745165 |
| 0.338204163 | 0.212972472 | 0.319388902 | 0.290054546 |
| 0.17804551  | 0.18187916  | 0.110084727 | 0.279263101 |
| 0.251169023 | 0.308331862 | 0.158111437 | 0.331707818 |
| 0.314692085 | 0.263088076 | 0.197750971 | 0.178298409 |
| 0.285011076 | 0.281884405 | 0.138839964 | 0.167975147 |
| 0.125737558 | 0.076406413 | 0.236499552 | 0.297587662 |
| 0.217089343 | 0.087622805 | 0.20439961  | 0.297681199 |
| 0.192619486 | 0.114860612 | 0.348182926 | 0.099185357 |
| 0.349777743 | 0.180282625 | 0.169962764 | 0.257889673 |
| 0.173215643 | 0.246529286 | 0.250660135 | 0.310433457 |
| 0.136950984 | 0.105401725 | 0.082775033 | 0.112772613 |
| 0.162012752 | 0.045889095 | 0.204588809 | 0.339773964 |
| 0.183466409 | 0.158708032 | 0.26929357  | 0.037036053 |
| 0.110981299 | 0.11395268  | 0.208766103 | 0.13993572  |
| 0.261938393 | 0.151579399 | 0.244343092 | 0.191428989 |
| 0.168589563 | 0.312107817 | 0.038948971 | 0.280963106 |
| 0.193150861 | 0.123153222 | 0.282586498 | 0.178192918 |
| 0.199079038 | 0.268811215 | 0.27703632  | 0.324282634 |
| 0.250591848 | 0.274137664 | 0.110576222 | 0.318926699 |
| 0.194240158 | 0.167808275 | 0.261406278 | 0.235877535 |
| 0.260844669 | 0.211572671 | 0.084974847 | 0.147850612 |
| 0.104115667 | 0.110240187 | 0.057258504 | 0.197868906 |
| 0.20009691  | 0.256777891 | 0.185147124 | 0.235043071 |
| 0.232954196 | 0.270429982 | 0.124552845 | 0.244553156 |
| 0.116601496 | 0.154321685 | 0.085969216 | 0.303798075 |
| 0.160573302 | 0.277002265 | 0.22581908  | 0.172376277 |
| 0.215556096 | 0.320009857 | 0.00347346  | 0.236300866 |
| 0.25725059  | 0.084963916 | 0.235837331 | 0.181298277 |
| 0.110553072 | 0.346553062 | 0.011394303 | 0.306918981 |
| 0.147665699 | 0.223681934 | 0.338684604 | 0.230116907 |
| 0.222706273 | 0.192245866 | 0.18268832  | 0.212689191 |
| 0.173104369 | 0.038613289 | 0.182745914 | 0.325686435 |
| 0.073134381 | 0.253032491 | 0.243973987 | 0.314306027 |
| 0.254673817 | 0.270090348 | 0.356744479 | 0.104753114 |
| 0.186531289 | 0.24591846  | 0.076439421 | 0.153628338 |
| 0.223218497 | 0.094770754 | 0.255116071 | 0.277974327 |
| 0.109337333 | 0.281597443 | 0.182388958 | 0.114034789 |
| 0.24485446  | 0.215631093 | 0.110799978 | 0.208792412 |
| 0.17792745  | 0.286062947 | 0.112935903 | 0.108767257 |
| 0.150109364 | 0.31084951  | 0.079871527 | 0.065769295 |
| 0.046234142 | 0.200066873 | 0.261553668 | 0.201877006 |
| 0.150003062 | 0.251237732 | 0.141771061 | 0.175055475 |
| 0.241587834 | 0.236207432 | 0.0271271   | 0.084945346 |
| 0.150421673 | 0.127530564 | 0.117341362 | 0.187454158 |
| 0.165155518 | 0.196040074 | 0.185919531 | 0.111180734 |
| 0.16078518  | 0.108859492 | 0.290678925 | 0.29465376  |

|             |             |             |             |
|-------------|-------------|-------------|-------------|
| 0.173001646 | 0.299133229 | 0.1429836   | 0.086009778 |
| 0.330289655 | 0.131424362 | 0.086343263 | 0.305502129 |
| 0.095735209 | 0.305415888 | 0.232409758 | 0.216715634 |
| 0.127149006 | 0.272218456 | 0.363948505 | 0.093447676 |
| 0.162592605 | 0.273637092 | 0.185486561 | 0.234177763 |
| 0.217982637 | 0.276777644 | 0.210638565 | 0.192608798 |
| 0.184542684 | 0.167658338 | 0.278476939 | 0.139720719 |
| 0.108239253 | 0.22048836  | 0.218754622 | 0.191340547 |
| 0.168202095 | 0.222512037 | 0.229658919 | 0.258246227 |
| 0.311903081 | 0.343274724 | 0.249698314 | 0.101952813 |
| 0.23513343  | 0.072494062 | 0.127343467 | 0.112127584 |
| 0.234210805 | 0.260434012 | 0.2231594   | 0.157072715 |
| 0.2959816   | 0.152957053 | 0.11874305  | 0.297673978 |
| 0.072928436 | 0.250737822 | 0.073226455 | 0.218980665 |
| 0.224676161 | 0.121907139 | 0.171918564 | 0.241203194 |
| 0.231160394 | 0.239024596 | 0.207592694 | 0.255505613 |
| 0.278320627 | 0.195739974 | 0.165708745 | 0.21143951  |
| 0.185666026 | 0.240810027 | 0.186317836 | 0.068104905 |
| 0.172414039 | 0.253252616 | 0.015954846 | 0.159201874 |
| 0.225578277 | 0.26947551  | 0.299129477 | 0.198482402 |
| 0.175069636 | 0.141832145 | 0.236694933 | 0.203431164 |
| 0.225762706 | 0.230907266 | 0.256293593 | 0.240532719 |
| 0.209961642 | 0.259835009 | 0.118950828 | 0.152498814 |
| 0.084521467 | 0.237057763 | 0.213393986 | 0.128528745 |
| 0.336469322 | 0.105098    | 0.120276969 | 0.296127907 |
| 0.291652011 | 0.184974128 | 0.03860276  | 0.018894591 |
| 0.069448487 | 0.286324712 | 0.238903769 | 0.27762803  |
| 0.118913942 | 0.242783688 | 0.005791886 | 0.272732586 |
| 0.269637374 | 0.072368627 | 0.118201704 | 0.21087656  |
| 0.17919434  | 0.288920704 | 0.105382042 | 0.244159016 |
| 0.149546995 | 0.232484745 | 0.251596369 | 0.249453035 |
| 0.294016399 | 0.219126478 | 0.271048625 | 0.263917945 |
| 0.329255962 | 0.246466278 | 0.325357561 | 0.17643423  |
| 0.110709284 | 0.194434361 | 0.113947053 | 0.172854769 |
| 0.162298441 | 0.20337125  | 0.257908978 | 0.320789221 |
| 0.267341063 | 0.057170976 | 0.258315254 | 0.215793964 |
| 0.321207517 | 0.345592711 | 0.048134432 | 0.014790037 |
| 0.006619362 | 0.066107941 | 0.243901028 | 0.175845235 |
| 0.279228746 | 0.109894872 | 0.076539146 | 0.210792991 |
| 0.226084475 | 0.18113103  | 0.267470652 | 0.354561448 |
| 0.22015223  | 0.199532764 | 0.167797586 | 0.333263468 |
| 0.142825152 | 0.126406597 | 0.29289948  | 0.27315895  |
| 0.098636199 | 0.183150735 | 0.113780295 | 0.353751779 |
| 0.018252398 | 0.222925058 | 0.175837876 | 0.222473827 |
| 0.030624911 | 0.153158636 | 0.168325631 | 0.296542491 |
| 0.213989842 | 0.17840528  | 0.141547342 | 0.067220102 |
| 0.297106747 | 0.28747913  | 0.268660456 | 0.326599067 |
| 0.316366497 | 0.369747361 | 0.100282021 | 0.260485171 |
| 0.164335635 | 0.233204475 | 0.129419721 | 0.068426308 |
| 0.146593911 | 0.087199499 | 0.210764298 | 0.110117298 |
| 0.156298288 | 0.221050884 | 0.121216345 | 0.063347274 |
| 0.052823795 | 0.157850536 | 0.343801694 | 0.279459044 |
| 0.062818055 | 0.260206367 | 0.191169004 | 0.235698079 |
| 0.197386197 | 0.32986291  | 0.247246836 | 0.110257304 |

|             |             |             |             |
|-------------|-------------|-------------|-------------|
| 0.30213742  | 0.036039308 | 0.29856598  | 0.1729933   |
| 0.187420039 | 0.320362389 | 0.191300136 | 0.285229025 |
| 0.213777246 | 0.264844126 | 0.248835049 | 0.265222966 |
| 0.109468644 | 0.169166931 | 0.281804879 | 0.166630455 |
| 0.243041097 | 0.327692254 | 0.152743943 | 0.170907377 |
| 0.231074043 | 0.102813067 | 0.143292675 | 0.050186454 |
| 0.068572841 | 0.201428452 | 0.278184922 | 0.352639235 |
| 0.188320095 | 0.184572034 | 0.130638052 | 0.174535331 |
| 0.293278367 | 0.245234174 | 0.233332752 | 0.268854524 |
| 0.200377147 | 0.2374125   | 0.239245691 | 0.233902472 |
| 0.114437051 | 0.258195584 | 0.280258994 | 0.251486177 |
| 0.260766321 | 0.280421626 | 0.263018544 | 0.122485816 |
| 0.106023801 | 0.13628825  | 0.257469815 | 0.160749924 |
| 0.281546955 | 0.114059635 | 0.065217285 | 0.286605013 |
| 0.073893444 | 0.302717456 | 0.106407302 | 0.178326401 |
| 0.171495499 | 0.089612949 | 0.246214909 | 0.284180115 |
| 0.247611431 | 0.255866417 | 0.060969565 | 0.160382447 |
| 0.082625143 | 0.246583829 | 0.125219188 | 0.207476546 |
| 0.095725393 | 0.10484111  | 0.248874067 | 0.138202062 |
| 0.126238476 | 0.091610076 | 0.247090802 | 0.154072099 |
| 0.174706716 | 0.331123832 | 0.114524565 | 0.051540689 |
| 0.091225267 | 0.150042704 | 0.135877882 | 0.246643802 |
| 0.064177209 | 0.234328042 | 0.143842937 | 0.167332612 |
| 0.245655132 | 0.192315288 | 0.180243532 | 0.107798086 |
| 0.160471575 | 0.228638445 | 0.128517253 | 0.241351305 |
| 0.115330481 | 0.36431263  | 0.203823289 | 0.228829627 |
| 0.090470352 | 0.086123959 | 0.217158798 | 0.300350747 |
| 0.09043562  |             |             |             |
| ASAH1       | 0.361061177 | 0.451708699 | 0.290527242 |
| 0.347453301 | 0.2912349   | 0.17974016  | 0.146986413 |
| 0.115902506 | 0.100355734 | 0.00493837  | 0.033886833 |
| 0.317993884 | 0.148165027 | 0.146227591 | 0.170922357 |
| 0.414870303 | 0.178139118 | 0.262915495 | 0.210260303 |
| 0.327056364 | 0.059583098 | 0.36449545  | 0.108242911 |
| 0.327223719 | 0.155748195 | 0.100495395 | 0.260337135 |
| 0.415078634 | 0.11588149  | 0.129329712 | 0.270973908 |
| 0.202400127 | 0.379418871 | 0.428088965 | 0.345513376 |
| 0.422453813 | 0.313226615 | 0.032304839 | 0.139924599 |
| 0.368405809 | 0.38061086  | 0.324282171 | 0.23369382  |
| 0.055986368 | 0.371229981 | 0.178544989 | 1           |
| 0.130819703 | 0.05745258  | 0.101527997 | 0.34178404  |
| 0.363136952 | 0.238624042 | 0.139096571 | 0.120261618 |
| 0.117609293 | 0.098714912 | 0.201750732 | 0.176722729 |
| 0.177014327 | 0.062652098 | 0.3914455   | 0.073744635 |
| 0.105186141 | 0.172823174 | 0.245689575 | 0.166804262 |
| 0.298983674 | 0.272702604 | 0.037956274 | 0.284770562 |
| 0.001333757 | 0.315779691 | 0.3337161   | 0.232775653 |
| 0.090887229 | 0.027818524 | 0.26203111  | 0.202445718 |
| 0.437909234 | 0.410812385 | 0.484815056 | 0.481565412 |
| 0.184556372 | 0.314696776 | 0.306674976 | 0.169080802 |
| 0.386143619 | 0.123470663 | 0.118027383 | 0.428658165 |
| 0.487101998 | 0.443616508 | 0.242251125 | 0.307004332 |
| 0.318140687 | 0.403754852 | 0.231603037 | 0.267503594 |
| 0.210920814 | 0.154359288 | 0.347482337 | 0.477922367 |

|             |             |             |             |
|-------------|-------------|-------------|-------------|
| 0.3129552   | 0.298009404 | 0.206588797 | 0.323106616 |
| 0.113757906 | 0.19537776  | 0.274840876 | 0.173776537 |
| 0.44984389  | 0.029664191 | 0.272971918 | 0.201542699 |
| 0.266399218 | 0.370771784 | 0.451520533 | 0.164276377 |
| 0.318835268 | 0.04227815  | 0.149353843 | 0.099665763 |
| 0.208895324 | 0.220584986 | 0.360254968 | 0.402397433 |
| 0.138229541 | 0.269253622 | 0.198754208 | 0.01658702  |
| 0.075552037 | 0.278289371 | 0.369654882 | 0.272641273 |
| 0.372451525 | 0.343971047 | 0.185379613 | 0.269931183 |
| 0.31273989  | 0.481474666 | 0.017816607 | 0.11204777  |
| 0.246244144 | 0.284405638 | 0.236294863 | 0.265852802 |
| 0.271092061 | 0.110200172 | 0.146660476 | 0.4868262   |
| 0.329865203 | 0.106400268 | 0.19760596  | 0.398016689 |
| 0.171331491 | 0.314503752 | 0.135477517 | 0.191111119 |
| 0.05336239  | 0.404415322 | 0.091654174 | 0.205413401 |
| 0.17446822  | 0.189743404 | 0.03888583  | 0.142703948 |
| 0.155190223 | 0.340385623 | 0.362085778 | 0.155724744 |
| 0.214567256 | 0.332328315 | 0.160190417 | 0.281577763 |
| 0.012915874 | 0.09449222  | 0.127958209 | 0.455422482 |
| 0.128907716 | 0.495425511 | 0.258377693 | 0.319476109 |
| 0.288558119 | 0.432043983 | 0.012094736 | 0.390650796 |
| 0.452877177 | 0.128348538 | 0.240320381 | 0.330933557 |
| 0.242765466 | 0.40039779  | 0.032960033 | 0.378931505 |
| 0.231707976 | 0.129507569 | 0.501618936 | 0.191041066 |
| 0.392007825 | 0.074873845 | 0.169321855 | 0.414940849 |
| 0.329927112 | 0.018056459 | 0.096173817 | 0.279871847 |
| 0.0970151   | 0.056421752 | 0.357851895 | 0.307356529 |
| 0.232380731 | 0.436067541 | 0.48907718  | 0.233246071 |
| 0.278226957 | 0.189464714 | 0.046715244 | 0.330875675 |
| 0.412151515 | 0.215693028 | 0.344755685 | 0.177315904 |
| 0.15909685  | 0.39658661  | 0.348807105 | 0.098881345 |
| 0.061811106 | 0.182700232 | 0.021317265 | 0.261532712 |
| 0.342453231 | 0.084204558 | 0.231963777 | 0.242848343 |
| 0.138938792 | 0.473371976 | 0.264088537 | 0.276380477 |
| 0.208363783 | 0.195052528 | 0.21774187  | 0.116419747 |
| 0.136970319 | 0.20045675  | 0.268739151 | 0.246102202 |
| 0.033772287 | 0.121498844 | 0.077811794 | 0.192810934 |
| 0.085900055 | 0.168050767 | 0.148926688 | 0.270363644 |
| 0.189846787 | 0.092700243 | 0.263072606 | 0.310035081 |
| 0.186822647 | 0.047697887 | 0.441723574 | 0.360708282 |
| 0.206652154 | 0.156823619 | 0.100378014 | 0.154813975 |
| 0.409921724 | 0.115810607 | 0.115137964 | 0.372311218 |
| 0.065918183 | 0.485425553 | 0.163403156 | 0.165434071 |
| 0.255830475 | 0.208812479 | 0.443877837 | 0.04126995  |
| 0.218769534 | 0.373606527 | 0.315573009 | 0.198265962 |
| 0.289459166 | 0.296928491 | 0.042017787 | 0.306557991 |
| 0.286380508 | 0.066005144 | 0.469967249 | 0.199426886 |
| 0.067060531 | 0.397320063 | 0.337148491 | 0.137893188 |
| 0.148086591 | 0.182242701 | 0.034987698 | 0.284854037 |
| 0.459468158 | 0.389610072 | 0.316505373 | 0.312356609 |
| 0.055482993 | 0.012964262 | 0.302763035 | 0.29465948  |
| 0.402488566 | 0.470491329 | 0.273325251 | 0.255987112 |
| 0.220675065 | 0.239123815 | 0.069367342 | 0.463469271 |
| 0.286525533 | 0.446856776 | 0.028700966 | 0.405843498 |

|             |             |             |             |
|-------------|-------------|-------------|-------------|
| 0.407960857 | 0.124519757 | 0.126627477 | 0.164028105 |
| 0.282354694 | 0.071586459 | 0.213526733 | 0.406566002 |
| 0.378807931 | 0.251744356 | 0.227342488 | 0.355126364 |
| 0.019749221 | 0.046635476 | 0.293792655 | 0.267183473 |
| 0.21788215  | 0.227554293 | 0.125378183 | 0.189817202 |
| 0.055289215 | 0.357276221 | 0.45617435  | 0.090452241 |
| 0.131673252 | 0.179233539 | 0.349809322 | 0.06934048  |
| 0.432763864 | 0.454005309 | 0.426160007 | 0.166124174 |
| 0.378185833 | 0.428574467 | 0.25459736  | 0.167680152 |
| 0.063278332 | 0.439497009 | 0.280325232 | 0.025936661 |
| 0.459619024 | 0.088191924 | 0.014145507 | 0.422371865 |
| 0.182066209 | 0.332797035 | 0.004180862 | 0.141572976 |
| 0.138009862 | 0.481764149 | 0.377460754 | 0.270056249 |
| 0.081855438 | 0.282442284 | 0.033402573 | 0.492773805 |
| 0.399055672 | 0.054065515 | 0.246898977 | 0.350812816 |
| 0.356126613 | 0.451340418 | 0.273266806 | 0.41560177  |
| 0.282089061 | 0.406327029 | 0.148844114 | 0.264832313 |
| 0.362290133 | 0.436513004 | 0.337162914 | 0.384394392 |
| 0.419159754 | 0.395197576 | 0.220895131 | 0.025295914 |
| 0.170304083 | 0.107409238 | 0.130145849 | 0.077203404 |
| 0.164170643 | 0.174473266 | 0.43607073  | 0.468498274 |
| 0.451539465 | 0.025766552 | 0.100277462 | 0.34678403  |
| 0.375651911 | 0.446095931 | 0.076520962 | 0.015664551 |
| 0.018090498 | 0.043331995 | 0.213922414 | 0.3024352   |
| 0.445006034 | 0.078930353 | 0.01748089  | 0.039899843 |
| 0.21479028  | 0.330115653 | 0.419392814 | 0.34907902  |
| 0.420569017 | 0.142008822 | 0.122291485 | 0.365868402 |
| 0.122981145 | 0.204164391 | 0.452032765 | 0.374058374 |
| 0.123365216 | 0.299886178 | 0.247085445 | 0.454029645 |
| 0.124718562 | 0.305465297 | 0.331956554 | 0.19022173  |
| 0.059572119 | 0.157387174 | 0.12311746  | 0.44613595  |
| 0.404719876 | 0.079012018 | 0.051077498 | 0.05932858  |
| 0.094823373 | 0.455953509 | 0.150517855 | 0.495319115 |
| 0.378140173 | 0.434137478 | 0.170528502 | 0.395645565 |
| 0.064086228 | 0.38879985  | 0.300786507 | 0.030378158 |
| 0.313305156 | 0.047660192 | 0.418962394 | 0.10605122  |
| 0.162796465 | 0.291097101 | 0.206812072 | 0.07096664  |
| 0.244684701 | 0.110084578 | 0.459309093 | 0.47079905  |
| 0.122485836 | 0.201020258 | 0.311309863 | 0.338824396 |
| 0.142224889 | 0.361507045 | 0.399161883 | 0.178883034 |
| 0.074725948 | 0.232660482 | 0.329266116 | 0.263409273 |
| 0.140053402 | 0.498975589 | 0.204438251 | 0.490011131 |
| 0.314357586 | 0.425047534 | 0.423926901 | 0.222714326 |
| 0.259433981 | 0.217765538 | 0.217197831 | 0.018108358 |
| 0.269529921 | 0.423414508 | 0.235775805 | 0.169561782 |
| 0.227162174 | 0.282129124 | 0.087581572 | 0.134731963 |
| 0.26569517  | 0.135266295 | 0.13008873  | 0.454351105 |
| 0.262044868 | 0.277295503 | 0.058517719 | 0.109893441 |
| 0.473473048 | 0.370885566 | 0.102106272 | 0.293544188 |
| 0.242093686 | 0.26360561  | 0.425468157 | 0.436953976 |
| 0.257798629 | 0.37186285  | 0.350853598 | 0.229886284 |
| 0.322321376 | 0.216176068 | 0.43293654  | 0.052298134 |
| 0.138034875 | 0.283395647 | 0.088096082 | 0.178159501 |
| 0.158384343 | 0.080778662 | 0.241344159 | 0.406540036 |

|             |             |             |             |
|-------------|-------------|-------------|-------------|
| 0.25059837  | 0.28695797  | 0.165405548 | 0.129861884 |
| 0.32709296  | 0.239393934 | 0.29761078  | 0.121139562 |
| 0.084763427 | 0.395201813 | 0.026379605 | 0.121023228 |
| 0.263284465 | 0.372580011 | 0.264039834 | 0.27660147  |
| 0.275606488 | 0.260302755 | 0.255423177 | 0.131505946 |
| 0.123661595 | 0.247336633 | 0.363788701 | 0.047152498 |
| 0.028513178 | 0.493646342 | 0.204987723 | 0.090390174 |
| 0.161992733 | 0.238978831 | 0.27809423  | 0.170140182 |
| 0.085932555 | 0.42676818  | 0.135928835 | 0.297854566 |
| 0.21194273  | 0.123156836 | 0.265735496 | 0.108072168 |
| 0.111809899 | 0.360483641 | 0.302420118 | 0.437404166 |
| 0.336538523 | 0.388460473 | 0.338079169 | 0.35779796  |
| 0.18347167  | 0.251603096 | 0.042346565 | 0.411252696 |
| 0.212772112 |             |             |             |
| ASH1L       | 0.210471796 | 0.284619101 | 0.109070221 |
| 0.2655557   | 0.128155724 | 0.192314099 | 0.13662406  |
| 0.110191955 | 0.011854877 | 0.001075002 | 0.001191064 |
| 0.136984725 | 0.004260752 | 0.068103391 | 0.070444771 |
| 0.24133174  | 0.017893148 | 0.113047777 | 0.136523706 |
| 0.253862144 | 0.064108733 | 0.186957676 | 0.044970239 |
| 0.031070992 | 0.016896439 | 0.026370898 | 0.04214633  |
| 0.302669678 | 0.035128371 | 0.123743516 | 0.278569732 |
| 0.021656576 | 0.250910518 | 0.275424257 | 0.141026764 |
| 0.246476155 | 0.203216799 | 0.001267526 | 0.072721027 |
| 0.29480581  | 0.211197139 | 0.257363916 | 0.167521877 |
| 0.024812545 | 0.282734587 | 0.144574573 | 0.130819703 |
| 1           | 0.007299282 | 0.122795001 | 0.285829244 |
| 0.233298462 | 0.126501934 | 0.1283787   | 0.083883007 |
| 0.003159251 | 0.08291709  | 0.01281828  | 0.250457068 |
| 0.109367059 | 0.100161934 | 0.240546862 | 0.021537331 |
| 0.005473978 | 0.131307217 | 0.022425441 | 0.160043056 |
| 0.037414912 | 0.27959197  | 0.009988638 | 0.122030165 |
| 0.001010554 | 0.255378512 | 0.133280018 | 0.035639495 |
| 0.024575743 | 0.00334213  | 0.034577486 | 0.195033142 |
| 0.296070948 | 0.264448739 | 0.242463192 | 0.233820262 |
| 0.014792986 | 0.099526106 | 0.080429947 | 0.051921826 |
| 0.262770094 | 0.08940752  | 0.010261599 | 0.212635631 |
| 0.246395088 | 0.255869632 | 0.021249519 | 0.085745579 |
| 0.230429237 | 0.286121208 | 0.136930693 | 0.099624412 |
| 0.044301664 | 0.008974701 | 0.240479105 | 0.252683111 |
| 0.284265184 | 0.044932482 | 0.046947204 | 0.291129518 |
| 0.030313799 | 0.06158217  | 0.198571472 | 0.004418092 |
| 0.298734818 | 0.016491445 | 0.051940553 | 0.160203388 |
| 0.035234248 | 0.254942818 | 0.241345136 | 0.118432819 |
| 0.100333015 | 0.001766495 | 0.002156472 | 0.014449313 |
| 0.011444756 | 0.007571021 | 0.249920999 | 0.26240393  |
| 0.055047527 | 0.027107893 | 0.1220067   | 0.002155772 |
| 0.00869045  | 0.015862346 | 0.197280593 | 0.140330964 |
| 0.257167744 | 0.199274975 | 0.050685343 | 0.235369367 |
| 0.132430992 | 0.234800923 | 0.003372535 | 0.060282551 |
| 0.157803239 | 0.022989017 | 0.129494147 | 0.13106177  |
| 0.0765774   | 0.085026626 | 0.056402082 | 0.283636924 |
| 0.301152976 | 0.056260607 | 0.113984841 | 0.21902666  |
| 0.035970662 | 0.086621517 | 0.056217582 | 0.061022499 |

|             |             |             |             |
|-------------|-------------|-------------|-------------|
| 0.030016762 | 0.221279513 | 0.008232743 | 0.168862026 |
| 0.015391745 | 0.005255634 | 0.004369196 | 0.165052052 |
| 0.034749462 | 0.206364512 | 0.235983658 | 0.062890227 |
| 0.090526526 | 0.160461336 | 0.159671748 | 0.178009887 |
| 0.001465774 | 0.012400107 | 0.121824121 | 0.255921039 |
| 0.208260042 | 0.25614138  | 0.085025316 | 0.063619162 |
| 0.105349396 | 0.273238047 | 0.000887923 | 0.270950678 |
| 0.254779798 | 0.119903488 | 0.123076319 | 0.150133746 |
| 0.066684408 | 0.274464428 | 0.002144579 | 0.208629519 |
| 0.217434402 | 0.052510312 | 0.272758987 | 0.050484527 |
| 0.24748852  | 0.0203957   | 0.09936195  | 0.181215697 |
| 0.140116504 | 0.000672439 | 0.15535667  | 0.25515925  |
| 0.007258494 | 0.058586878 | 0.251961747 | 0.244796939 |
| 0.163862889 | 0.23840665  | 0.277747064 | 0.055915401 |
| 0.12022081  | 0.123201811 | 0.004902469 | 0.08862841  |
| 0.224189916 | 0.014632377 | 0.297133433 | 0.077034634 |
| 0.164327782 | 0.280708149 | 0.188389598 | 0.007177678 |
| 0.036088037 | 0.159779084 | 0.004352524 | 0.107184095 |
| 0.218241331 | 0.028153197 | 0.093938611 | 0.018057163 |
| 0.017676689 | 0.272938336 | 0.020427209 | 0.028638609 |
| 0.009794003 | 0.125276388 | 0.149316317 | 0.032133199 |
| 0.010142325 | 0.034841391 | 0.048758055 | 0.07408191  |
| 0.034874893 | 0.028920638 | 0.002459007 | 0.033358667 |
| 0.005625914 | 0.036492455 | 0.042370472 | 0.198175093 |
| 0.037819161 | 0.008600984 | 0.093123694 | 0.0342283   |
| 0.025512973 | 0.011323534 | 0.281095606 | 0.222161883 |
| 0.255435394 | 0.059369157 | 0.020064202 | 0.010347287 |
| 0.255703739 | 0.145711491 | 0.10711679  | 0.262698856 |
| 0.006184824 | 0.258397395 | 0.026851546 | 0.038402862 |
| 0.043913818 | 0.103105684 | 0.299748732 | 0.003191567 |
| 0.182621322 | 0.269946502 | 0.131853063 | 0.048069546 |
| 0.236927859 | 0.220516594 | 0.007317766 | 0.239761451 |
| 0.213734963 | 0.016517698 | 0.258028149 | 0.015498356 |
| 0.012984799 | 0.174079382 | 0.16304641  | 0.037908773 |
| 0.029258873 | 0.094584451 | 0.048535636 | 0.120059392 |
| 0.278273166 | 0.203252527 | 0.197075294 | 0.034643102 |
| 0.022841989 | 0.000357137 | 0.038449539 | 0.114430677 |
| 0.268324198 | 0.235910753 | 0.114288573 | 0.066158454 |
| 0.144570441 | 0.040937136 | 0.015609593 | 0.250678488 |
| 0.017713071 | 0.272623415 | 0.007232369 | 0.171995792 |
| 0.246009133 | 0.138968568 | 0.020169434 | 0.16948519  |
| 0.255283043 | 0.037464048 | 0.085511976 | 0.267987129 |
| 0.272553963 | 0.073007413 | 0.067190266 | 0.189360206 |
| 0.018891074 | 0.018958207 | 0.138389039 | 0.015805439 |
| 0.069200457 | 0.062039287 | 0.001286513 | 0.072496237 |
| 0.012009734 | 0.253911509 | 0.245407082 | 0.016490771 |
| 0.132631291 | 0.098489944 | 0.143928517 | 0.028528813 |
| 0.191201778 | 0.244842461 | 0.273663977 | 0.082743808 |
| 0.187703525 | 0.230216758 | 0.084747697 | 0.030841161 |
| 0.0093418   | 0.251870921 | 0.26794314  | 0.004035183 |
| 0.263123358 | 0.145870948 | 0.001405675 | 0.300103471 |
| 0.127918132 | 0.243975197 | 0.005437424 | 0.002912232 |
| 0.008274653 | 0.226056189 | 0.26446237  | 0.270164415 |
| 0.077220079 | 0.215037798 | 0.000488438 | 0.257246357 |



|             |             |             |             |
|-------------|-------------|-------------|-------------|
| 0.259632577 | 0.004598231 | 0.012498825 | 0.17620873  |
| 0.141696204 | 0.306227868 | 0.046334113 | 0.188231725 |
| 0.104899807 | 0.238312097 | 0.017064879 | 0.110512866 |
| 0.250408114 | 0.214211523 | 0.290361835 | 0.308640009 |
| 0.25520421  | 0.176518352 | 0.161741937 | 0.012394176 |
| 0.008264076 | 0.133526704 | 0.045059557 | 0.003082937 |
| 0.233589602 | 0.028397917 | 0.273217627 | 0.252816217 |
| 0.221328372 | 0.00563628  | 0.06856192  | 0.203790337 |
| 0.312641269 | 0.314628087 | 0.004019764 | 0.000594466 |
| 0.002087528 | 0.00129227  | 0.212225031 | 0.076814918 |
| 0.259333708 | 0.022793787 | 0.006065242 | 0.034950112 |
| 0.054184271 | 0.112466271 | 0.258594861 | 0.23632067  |
| 0.209112226 | 0.030551273 | 0.032804505 | 0.258348922 |
| 0.007202116 | 0.211643233 | 0.236970706 | 0.280248311 |
| 0.012746467 | 0.074938467 | 0.131358115 | 0.295056222 |
| 0.002548949 | 0.114923423 | 0.147083669 | 0.034946541 |
| 0.003136508 | 0.020516711 | 0.017486361 | 0.237896988 |
| 0.229425501 | 0.006970308 | 0.004296025 | 0.005954849 |
| 0.037796049 | 0.254302453 | 0.034322684 | 0.275273971 |
| 0.288382834 | 0.264603233 | 0.006861982 | 0.282321853 |
| 0.001856912 | 0.246867548 | 0.062952509 | 0.006955131 |
| 0.073908703 | 0.00789588  | 0.219839889 | 0.005931525 |
| 0.100038637 | 0.250489425 | 0.011407342 | 0.004977353 |
| 0.011043522 | 0.016570062 | 0.256520049 | 0.215578523 |
| 0.006647766 | 0.089649032 | 0.116501208 | 0.221145861 |
| 0.200181279 | 0.217277204 | 0.275303881 | 0.11738117  |
| 0.043553957 | 0.0034979   | 0.268920543 | 0.210451604 |
| 0.080230045 | 0.252151864 | 0.032399359 | 0.273492635 |
| 0.26032549  | 0.290695234 | 0.226062903 | 0.186491304 |
| 0.007501751 | 0.186054476 | 0.215112233 | 0.005391014 |
| 0.183281685 | 0.23322349  | 0.179091966 | 0.013804302 |
| 0.062813246 | 0.082529616 | 0.007273551 | 0.008824822 |
| 0.048333063 | 0.214619281 | 0.023678757 | 0.274433062 |
| 0.220507176 | 0.222293957 | 0.008275636 | 0.016568051 |
| 0.290134119 | 0.29028404  | 0.038884885 | 0.22548121  |
| 0.067886831 | 0.121838672 | 0.219188232 | 0.1847535   |
| 0.044401826 | 0.209599618 | 0.259089741 | 0.202666064 |
| 0.272927125 | 0.147840277 | 0.27749438  | 0.044864832 |
| 0.00214211  | 0.141240397 | 0.017145665 | 0.034161809 |
| 0.062783237 | 0.0094067   | 0.020821378 | 0.210589532 |
| 0.033653355 | 0.161624225 | 0.041073065 | 0.014260158 |
| 0.096782181 | 0.11641558  | 0.148311952 | 0.103143474 |
| 0.015590316 | 0.260539741 | 0.002002925 | 0.021671094 |
| 0.039740792 | 0.213320249 | 0.069990999 | 0.064744614 |
| 0.017475286 | 0.016106289 | 0.108544051 | 0.15263603  |
| 0.059693477 | 0.01397243  | 0.226526669 | 0.023874723 |
| 0.015804651 | 0.26591212  | 0.157709848 | 0.005043446 |
| 0.003140943 | 0.20239635  | 0.062551258 | 0.03016918  |
| 0.00693565  | 0.20748708  | 0.088647243 | 0.128404323 |
| 0.218926543 | 0.033414469 | 0.265012003 | 0.004127446 |
| 0.022601121 | 0.27766241  | 0.10924706  | 0.242616029 |
| 0.087351412 | 0.223920547 | 0.275362409 | 0.206662931 |
| 0.008419301 | 0.10160304  | 0.022392415 | 0.276863407 |
| 0.04966694  |             |             |             |

| ASS1        | 0.021916391 | 0.036884728 | 0.023585773 |
|-------------|-------------|-------------|-------------|
| 0.091743552 | 0.056424094 | 0.023830332 | 0.111684177 |
| 0.015749264 | 0.075218561 | 0.071657187 | 0.157146372 |
| 0.035491862 | 0.067299754 | 0.043085188 | 0.010511057 |
| 0.098263455 | 0.159320239 | 0.012708734 | 0.15708192  |
| 0.0657365   | 0.053836991 | 0.13787646  | 0.102996781 |
| 0.028211113 | 0.189857701 | 0.239308752 | 0.081430696 |
| 0.07154376  | 0.238617857 | 0.021667682 | 0.044819855 |
| 0.078571177 | 0.032271475 | 0.023566884 | 0.084811122 |
| 0.021433433 | 0.014923969 | 0.01474895  | 0.026241438 |
| 0.024979196 | 0.058888072 | 0.068451502 | 0.146379123 |
| 0.118333106 | 0.018232922 | 0.155502544 | 0.05745258  |
| 0.007299282 | 1           | 0.010686198 | 0.017504247 |
| 0.02154033  | 0.037203292 | 0.030218528 | 0.107953743 |
| 0.045903335 | 0.011352894 | 0.023814647 | 0.018404779 |
| 0.152986517 | 0.01440897  | 0.023965689 | 0.059014033 |
| 0.015893521 | 0.031262349 | 0.082675504 | 0.054616754 |
| 0.020961615 | 0.021523365 | 0.050986469 | 0.016444421 |
| 0.021961683 | 0.075621472 | 0.068836695 | 0.021355466 |
| 0.262992918 | 0.170575492 | 0.107282304 | 0.103618156 |
| 0.061080334 | 0.019127304 | 0.070525158 | 0.054137442 |
| 0.094683501 | 0.083265193 | 0.032196848 | 0.159957485 |
| 0.029896204 | 0.135008549 | 0.03964259  | 0.114484532 |
| 0.064933038 | 0.030648278 | 0.082553871 | 0.133926248 |
| 0.047727563 | 0.031774979 | 0.026057428 | 0.047300512 |
| 0.025186869 | 0.06685778  | 0.024097346 | 0.048599036 |
| 0.019003935 | 0.038631104 | 0.236278838 | 0.043934756 |
| 0.176498254 | 0.00526384  | 0.145934381 | 0.033950983 |
| 0.064472625 | 0.088573518 | 0.170177164 | 0.075731322 |
| 0.027322503 | 0.033854927 | 0.030327363 | 0.164079173 |
| 0.041338837 | 0.099866781 | 0.04548839  | 0.103393926 |
| 0.02166811  | 0.021085209 | 0.015157193 | 0.068564589 |
| 0.015999061 | 0.020218883 | 0.067352332 | 0.074095191 |
| 0.165363549 | 0.025263458 | 0.028345153 | 0.023225784 |
| 0.042228844 | 0.012748575 | 0.130494181 | 0.017018644 |
| 0.033860458 | 0.068374259 | 0.00237284  | 0.086173741 |
| 0.04599421  | 0.030020244 | 0.207510135 | 0.036511914 |
| 0.144954221 | 0.060750496 | 0.165364641 | 0.05295467  |
| 0.021769626 | 0.213577155 | 0.007699021 | 0.106484293 |
| 0.023447462 | 0.105840554 | 0.133877675 | 0.081645849 |
| 0.095148871 | 0.021065947 | 0.174665168 | 0.017371388 |
| 0.015550925 | 0.081953105 | 0.026683659 | 0.032452537 |
| 0.023371828 | 0.041275832 | 0.013028349 | 0.154645866 |
| 0.089907439 | 0.107649131 | 0.012878112 | 0.051604451 |
| 0.121274245 | 0.080966671 | 0.00470035  | 0.048622354 |
| 0.014071727 | 0.042404979 | 0.049737591 | 0.046925699 |
| 0.166712389 | 0.06524152  | 0.001301741 | 0.020802    |
| 0.029698863 | 0.005132663 | 0.103500698 | 0.045821118 |
| 0.028543349 | 0.072612125 | 0.000944925 | 0.098160433 |
| 0.01123768  | 0.138036132 | 0.067018726 | 0.26817221  |
| 0.021351697 | 0.26902371  | 0.02372008  | 0.038261231 |
| 0.029654923 | 0.034924482 | 0.025196274 | 0.069045488 |
| 0.10596191  | 0.031107158 | 0.034969856 | 0.080429025 |
| 0.07986573  | 0.053726365 | 0.079545428 | 0.028340155 |

|             |             |             |             |
|-------------|-------------|-------------|-------------|
| 0.060583367 | 0.060115405 | 0.070845106 | 0.093141198 |
| 0.033120965 | 0.005797845 | 0.023657578 | 0.04911065  |
| 0.007747259 | 0.033656403 | 0.020903908 | 0.007690959 |
| 0.192267528 | 0.042623971 | 0.040266687 | 0.10042614  |
| 0.016288074 | 0.101440093 | 0.022035694 | 0.032579405 |
| 0.20349019  | 0.046822953 | 0.055645002 | 0.023342049 |
| 0.02990367  | 0.053880082 | 0.088604099 | 0.059221722 |
| 0.072563672 | 0.104812737 | 0.035718734 | 0.033397264 |
| 0.069520996 | 0.228982057 | 0.027989127 | 0.015296387 |
| 0.088292015 | 0.035845242 | 0.027243654 | 0.019961784 |
| 0.018639584 | 0.10687686  | 0.09116783  | 0.018496485 |
| 0.124429956 | 0.221539236 | 0.036443338 | 0.082205035 |
| 0.01272752  | 0.089891548 | 0.164680895 | 0.007598196 |
| 0.062217877 | 0.014784204 | 0.003695786 | 0.044177156 |
| 0.043663785 | 0.055017857 | 0.067982484 | 0.275704513 |
| 0.049869638 | 0.183081687 | 0.073091355 | 0.020241747 |
| 0.019588179 | 0.030454778 | 0.080009638 | 0.174392015 |
| 0.021201696 | 0.059873546 | 0.112316127 | 0.01833205  |
| 0.018991235 | 0.238677182 | 0.037632075 | 0.10749703  |
| 0.201336605 | 0.055790491 | 0.044228036 | 0.258608991 |
| 0.185181827 | 0.086420954 | 0.035960858 | 0.195156182 |
| 0.045990063 | 0.134613511 | 0.040224562 | 0.042708751 |
| 0.19607534  | 0.147002984 | 0.083888795 | 0.0221591   |
| 0.020293354 | 0.037399103 | 0.140440389 | 0.09629584  |
| 0.180604591 | 0.038644407 | 0.005099066 | 0.048601123 |
| 0.009326533 | 0.025001982 | 0.119854576 | 0.044607006 |
| 0.020809398 | 0.013380241 | 0.245617276 | 0.056512383 |
| 0.024605596 | 0.150238989 | 0.041712499 | 0.027453305 |
| 0.035723292 | 0.052899737 | 0.035370613 | 0.043461918 |
| 0.066296702 | 0.069156198 | 0.058865359 | 0.026937489 |
| 0.027603176 | 0.095493121 | 0.014370398 | 0.010565793 |
| 0.148850217 | 0.031385878 | 0.063767812 | 0.123025178 |
| 0.02797979  | 0.008607928 | 0.105069566 | 0.189277806 |
| 0.039080062 | 0.025466149 | 0.025480611 | 0.051497802 |
| 0.032427675 | 0.038066002 | 0.030637027 | 0.15283662  |
| 0.204091839 | 0.024801587 | 0.02326168  | 0.075465875 |
| 0.068713248 | 0.00919797  | 0.154269417 | 0.034217996 |
| 0.140366054 | 0.012263969 | 0.01077617  | 0.001922016 |
| 0.065326767 | 0.064837773 | 0.022329244 | 0.04311663  |
| 0.00884118  | 0.059489769 | 0.00440266  | 0.037504566 |
| 0.032140135 | 0.162069417 | 0.070190611 | 0.03330779  |
| 0.036454117 | 0.031172882 | 0.046907866 | 0.048494452 |
| 0.039746884 | 0.023961689 | 0.046124482 | 0.194468415 |
| 0.049297071 | 0.025796443 | 0.038926883 | 0.026176128 |
| 0.067761844 | 0.074792303 | 0.16936485  | 0.117378906 |
| 0.034092293 | 0.024097054 | 0.012292111 | 0.076074539 |
| 0.013847429 | 0.131812528 | 0.030764478 | 0.066043311 |
| 0.047429798 | 0.147680013 | 0.030836035 | 0.028677202 |
| 0.045523209 | 0.056738214 | 0.025743874 | 0.009386926 |
| 0.003232991 | 0.15801445  | 0.047150068 | 0.110573269 |
| 0.039287482 | 0.006887762 | 0.127384935 | 0.041141501 |
| 0.029957595 | 0.073734373 | 0.031684532 | 0.121510951 |
| 0.037047851 | 0.155163548 | 0.027012859 | 0.087135923 |
| 0.137705432 | 0.007569412 | 0.05401418  | 0.028409038 |

|             |             |             |             |
|-------------|-------------|-------------|-------------|
| 0.069418914 | 0.092336846 | 0.014246464 | 0.063427578 |
| 0.012509792 | 0.139506875 | 0.036088448 | 0.039173896 |
| 0.023553092 | 0.158875878 | 0.155800078 | 0.068525707 |
| 0.019946697 | 0.160742271 | 0.190239521 | 0.003222664 |
| 0.141750553 | 0.047032941 | 0.108732762 | 0.057490509 |
| 0.052178467 | 0.099385742 | 0.08671847  | 0.026145963 |
| 0.144992265 | 0.023450703 | 0.081331884 | 0.006275352 |
| 0.034614128 | 0.081292011 | 0.023161344 | 0.03874953  |
| 0.017928598 | 0.027647724 | 0.025104711 | 0.115113761 |
| 0.011906607 | 0.20604014  | 0.074913201 | 0.062812661 |
| 0.065291829 | 0.04310838  | 0.097346508 | 0.050087526 |
| 0.034558738 | 0.09274106  | 0.02292586  | 0.014604182 |
| 0.094471099 | 0.009569871 | 0.056071564 | 0.017928281 |
| 0.02072096  | 0.067001553 | 0.053882854 | 0.038515014 |
| 0.023727587 | 0.029770283 | 0.033466755 | 0.078021833 |
| 0.041921419 | 0.020704388 | 0.053565109 | 0.078355351 |
| 0.082040902 | 0.076961438 | 0.022689979 | 0.108140551 |
| 0.186728944 | 0.025567494 | 0.041089453 | 0.00196493  |
| 0.022136339 | 0.025705051 | 0.094621683 | 0.08544399  |
| 0.023253117 | 0.019395103 | 0.035957754 | 0.155063887 |
| 0.034927377 | 0.022945717 | 0.027380966 | 0.051790841 |
| 0.133653233 | 0.115688072 | 0.043865722 | 0.051407528 |
| 0.008276881 | 0.042681896 | 0.042981199 | 0.044361756 |
| 0.026734605 | 0.113882488 | 0.027004586 | 0.007105615 |
| 0.078200668 | 0.017405353 | 0.142939516 | 0.202192968 |
| 0.219196087 | 0.111974044 | 0.012011715 | 0.080365933 |
| 0.011879384 | 0.1330914   | 0.003976871 | 0.07649891  |
| 0.095111687 | 0.008272154 | 0.109173921 | 0.079087026 |
| 0.135264052 | 0.026891229 | 0.062057067 | 0.17717785  |
| 0.016840796 | 0.041809066 | 0.058848471 | 0.103680347 |
| 0.023193054 | 0.043376873 | 0.162796037 | 0.016984502 |
| 0.026199886 | 0.005598105 | 0.039371435 | 0.039976693 |
| 0.081266751 | 0.066118258 | 0.012553802 | 0.052185422 |
| 0.031792023 | 0.013171106 | 0.016176061 | 0.053040053 |
| 0.123000346 | 0.032015458 | 0.019153034 | 0.044482922 |
| 0.053119437 | 0.119815883 | 0.011706016 | 0.020637243 |
| 0.045266559 | 0.020123335 | 0.033617126 | 0.026929896 |
| 0.029998907 | 0.122918018 | 0.013876405 | 0.031826856 |
| 0.016061358 | 0.011305793 | 0.094675506 | 0.047537401 |
| 0.015130586 |             |             |             |
| ATG5        | 0.19778617  | 0.311493423 | 0.084027412 |
| 0.268213342 | 0.108200403 | 0.235265871 | 0.141897859 |
| 0.163316106 | 0.046800118 | 0.015991809 | 0.006104594 |
| 0.121872027 | 0.037612587 | 0.106975931 | 0.094207215 |
| 0.212371942 | 0.019119419 | 0.093669486 | 0.122602437 |
| 0.239255851 | 0.124076753 | 0.163658935 | 0.066782627 |
| 0.029828491 | 0.013802195 | 0.024807423 | 0.031249375 |
| 0.302831162 | 0.0286179   | 0.186021275 | 0.313703164 |
| 0.018852827 | 0.250438457 | 0.301667452 | 0.131693082 |
| 0.269084494 | 0.190338188 | 0.00797597  | 0.111897868 |
| 0.297363476 | 0.188443823 | 0.258507077 | 0.160010594 |
| 0.040867076 | 0.332860878 | 0.143545258 | 0.101527997 |
| 0.122795001 | 0.010686198 | 1           | 0.340001284 |
| 0.275098412 | 0.13357731  | 0.159736066 | 0.098731021 |

|             |             |             |             |
|-------------|-------------|-------------|-------------|
| 0.029050793 | 0.141132548 | 0.017893636 | 0.324819026 |
| 0.113531179 | 0.173132849 | 0.266055383 | 0.077214    |
| 0.060509976 | 0.139114008 | 0.019425004 | 0.158183462 |
| 0.030921004 | 0.315568836 | 0.034009088 | 0.100913952 |
| 0.010171445 | 0.243865866 | 0.098247208 | 0.02711225  |
| 0.015167476 | 0.011398399 | 0.024875108 | 0.206974198 |
| 0.291613899 | 0.265396726 | 0.229252397 | 0.223232402 |
| 0.02856595  | 0.067461106 | 0.061153441 | 0.050130487 |
| 0.274193971 | 0.100171837 | 0.058263734 | 0.183685025 |
| 0.233840668 | 0.277266463 | 0.034810058 | 0.05626286  |
| 0.262132462 | 0.323889786 | 0.115816712 | 0.094639838 |
| 0.045257315 | 0.00644998  | 0.281131475 | 0.254585103 |
| 0.304617331 | 0.030683844 | 0.030582106 | 0.324148603 |
| 0.025122597 | 0.092238583 | 0.183805252 | 0.026007476 |
| 0.300298295 | 0.031266741 | 0.033294455 | 0.179353898 |
| 0.064519485 | 0.2471233   | 0.252505519 | 0.109876293 |
| 0.08465077  | 0.00936275  | 0.012258404 | 0.012103581 |
| 0.079538058 | 0.007722209 | 0.29387088  | 0.281211884 |
| 0.133412593 | 0.052937313 | 0.127926583 | 0.001627166 |
| 0.006627503 | 0.030904624 | 0.201269128 | 0.116828624 |
| 0.232805433 | 0.189210709 | 0.049633813 | 0.266222564 |
| 0.123333513 | 0.221653269 | 0.052839961 | 0.078619969 |
| 0.153708627 | 0.032408639 | 0.102053773 | 0.135314108 |
| 0.060736923 | 0.111445903 | 0.054587749 | 0.282236666 |
| 0.367267175 | 0.048043181 | 0.111969903 | 0.18826362  |
| 0.077147791 | 0.065725864 | 0.057573178 | 0.073450337 |
| 0.056729138 | 0.241424882 | 0.004439757 | 0.170495918 |
| 0.036434321 | 0.013311913 | 0.016245906 | 0.199612224 |
| 0.101549172 | 0.233910549 | 0.266815653 | 0.04716835  |
| 0.092526142 | 0.135693205 | 0.195630741 | 0.2033433   |
| 0.010956582 | 0.029831396 | 0.159661235 | 0.271352899 |
| 0.305081778 | 0.242800086 | 0.083142536 | 0.049136394 |
| 0.073424546 | 0.246434693 | 0.001283209 | 0.312037223 |
| 0.269260706 | 0.155133593 | 0.125664866 | 0.122888717 |
| 0.056008282 | 0.276019676 | 0.014525869 | 0.186469513 |
| 0.241003188 | 0.043209447 | 0.260171945 | 0.037919604 |
| 0.269495499 | 0.017012948 | 0.12383345  | 0.161520508 |
| 0.143622664 | 0.006951338 | 0.211999582 | 0.276830925 |
| 0.00403621  | 0.139694873 | 0.236270091 | 0.221260891 |
| 0.153359896 | 0.202475674 | 0.260220484 | 0.046329665 |
| 0.110886009 | 0.116892364 | 0.008136391 | 0.060638884 |
| 0.198069734 | 0.047130388 | 0.340603336 | 0.116581737 |
| 0.201270586 | 0.310102481 | 0.192123152 | 0.056839018 |
| 0.037605815 | 0.179610855 | 0.040411375 | 0.086572909 |
| 0.215919165 | 0.0611995   | 0.084387026 | 0.02903729  |
| 0.012879691 | 0.282313374 | 0.012785075 | 0.017618653 |
| 0.006935429 | 0.149166997 | 0.131331692 | 0.064503325 |
| 0.026887448 | 0.045890757 | 0.044982999 | 0.067222763 |
| 0.073351054 | 0.028410837 | 0.002389836 | 0.037518401 |
| 0.023890997 | 0.049677796 | 0.05676185  | 0.224370695 |
| 0.08668895  | 0.032354406 | 0.083983342 | 0.033481741 |
| 0.020194082 | 0.007093177 | 0.300720157 | 0.196936214 |
| 0.31022794  | 0.07999869  | 0.014808556 | 0.046761905 |
| 0.275509356 | 0.197118932 | 0.131566711 | 0.307884869 |

|             |             |             |             |
|-------------|-------------|-------------|-------------|
| 0.022276467 | 0.240812097 | 0.052468881 | 0.027531419 |
| 0.041115966 | 0.098195922 | 0.290264239 | 0.036539459 |
| 0.192050513 | 0.322603775 | 0.094025743 | 0.036645921 |
| 0.307207156 | 0.220496794 | 0.037743063 | 0.243478858 |
| 0.237771353 | 0.014242947 | 0.268918126 | 0.015629563 |
| 0.00743581  | 0.142450968 | 0.163105272 | 0.023449539 |
| 0.018543685 | 0.107235327 | 0.110029881 | 0.088916852 |
| 0.291686967 | 0.180065353 | 0.221198998 | 0.022061264 |
| 0.029952542 | 0.00320922  | 0.022803046 | 0.086272802 |
| 0.305859863 | 0.236068942 | 0.087097299 | 0.058780288 |
| 0.125691909 | 0.044825664 | 0.151677671 | 0.257781883 |
| 0.032507171 | 0.293710009 | 0.005629266 | 0.153867416 |
| 0.272928177 | 0.202106084 | 0.01475842  | 0.204172604 |
| 0.31053233  | 0.03948547  | 0.092580492 | 0.294009797 |
| 0.284890523 | 0.06251153  | 0.061522393 | 0.164426966 |
| 0.046890593 | 0.061461417 | 0.107808849 | 0.012990717 |
| 0.072599693 | 0.05816034  | 0.00172248  | 0.124807154 |
| 0.026091879 | 0.310711471 | 0.224988906 | 0.023498062 |
| 0.187579309 | 0.134692707 | 0.111971585 | 0.025616702 |
| 0.178302641 | 0.242142631 | 0.30647839  | 0.101424031 |
| 0.185848482 | 0.236412553 | 0.073948278 | 0.01936409  |
| 0.004254193 | 0.263800938 | 0.260156834 | 0.016840929 |
| 0.26066418  | 0.229021058 | 0.008964776 | 0.332600506 |
| 0.105694275 | 0.29291029  | 0.022984716 | 0.009591143 |
| 0.006155052 | 0.19914756  | 0.300259615 | 0.292395686 |
| 0.116734384 | 0.18287837  | 0.000392943 | 0.253339844 |
| 0.298510453 | 0.003004469 | 0.014977602 | 0.183274701 |
| 0.132425766 | 0.331733275 | 0.034468632 | 0.184526011 |
| 0.098218189 | 0.262162698 | 0.088186448 | 0.082519611 |
| 0.27527245  | 0.217915328 | 0.282774423 | 0.331203204 |
| 0.261764949 | 0.14408584  | 0.150772431 | 0.023094618 |
| 0.022999715 | 0.17701149  | 0.062395559 | 0.025217539 |
| 0.285414271 | 0.027380078 | 0.276520125 | 0.238156534 |
| 0.218663269 | 0.002990997 | 0.137875881 | 0.216007216 |
| 0.343990695 | 0.31249406  | 0.009653847 | 0.005307295 |
| 0.002186384 | 0.002273031 | 0.222969002 | 0.047899905 |
| 0.26019435  | 0.091708005 | 0.005494645 | 0.100221652 |
| 0.093756064 | 0.088470303 | 0.28499975  | 0.213033828 |
| 0.177952415 | 0.027746911 | 0.073322871 | 0.23559684  |
| 0.011299898 | 0.239799224 | 0.236816794 | 0.336410622 |
| 0.011680336 | 0.04799451  | 0.117608683 | 0.298382765 |
| 0.002434088 | 0.088466452 | 0.134522281 | 0.073058141 |
| 0.004136695 | 0.014839194 | 0.016463551 | 0.207315246 |
| 0.254148274 | 0.01642651  | 0.008498281 | 0.085126923 |
| 0.060855616 | 0.243166151 | 0.050760966 | 0.268700543 |
| 0.296355822 | 0.249603907 | 0.008663924 | 0.313656036 |
| 0.014802047 | 0.281550321 | 0.045995547 | 0.045307547 |
| 0.055206282 | 0.00897679  | 0.224384882 | 0.021398973 |
| 0.13048074  | 0.258154182 | 0.031046691 | 0.00296752  |
| 0.013518821 | 0.013867111 | 0.252342165 | 0.193816646 |
| 0.004951971 | 0.111413303 | 0.079654391 | 0.185004704 |
| 0.246560668 | 0.221925352 | 0.312289024 | 0.116642346 |
| 0.078177736 | 0.008667069 | 0.27501408  | 0.226809941 |
| 0.138446384 | 0.235246973 | 0.04642814  | 0.272214757 |

|             |             |             |             |
|-------------|-------------|-------------|-------------|
| 0.256812579 | 0.28998633  | 0.239429182 | 0.177448027 |
| 0.01909819  | 0.209032231 | 0.271612832 | 0.038362936 |
| 0.15472959  | 0.23290345  | 0.166158336 | 0.022596478 |
| 0.053304189 | 0.06304067  | 0.041022186 | 0.061758956 |
| 0.035124136 | 0.286405938 | 0.056275783 | 0.24850507  |
| 0.22474743  | 0.241710326 | 0.050266324 | 0.017209406 |
| 0.308284084 | 0.314286068 | 0.136368187 | 0.226644278 |
| 0.042511504 | 0.104291577 | 0.189162576 | 0.162951534 |
| 0.060355856 | 0.226115011 | 0.286949891 | 0.255959218 |
| 0.344061616 | 0.134221571 | 0.303998464 | 0.172524785 |
| 0.014065147 | 0.134487592 | 0.035194381 | 0.019153624 |
| 0.054632992 | 0.008968021 | 0.021336395 | 0.183170613 |
| 0.031051381 | 0.153421709 | 0.102806662 | 0.030950325 |
| 0.070323556 | 0.102349156 | 0.120312214 | 0.122713732 |
| 0.036804122 | 0.298170154 | 0.00442271  | 0.01634453  |
| 0.034895245 | 0.212210561 | 0.058995017 | 0.046916716 |
| 0.023801155 | 0.017020208 | 0.094868349 | 0.217106421 |
| 0.085413173 | 0.051636107 | 0.222718706 | 0.055440892 |
| 0.036743057 | 0.25438237  | 0.150721851 | 0.004513408 |
| 0.017519142 | 0.200129191 | 0.070586817 | 0.062583291 |
| 0.003190675 | 0.215806584 | 0.126342687 | 0.103452368 |
| 0.212168032 | 0.031166213 | 0.321591485 | 0.045885849 |
| 0.04559909  | 0.314554864 | 0.082624676 | 0.25908181  |
| 0.057942292 | 0.213072425 | 0.325579503 | 0.223367791 |
| 0.037260097 | 0.082306469 | 0.041561946 | 0.276718842 |
| 0.051981052 |             |             |             |
| ATN1        | 0.436462727 | 0.461623015 | 0.369128917 |
| 0.403402876 | 0.378167695 | 0.435161058 | 0.210120586 |
| 0.245658814 | 0.070805242 | 0.003534353 | 0.012890955 |
| 0.398768268 | 0.164863809 | 0.27847592  | 0.365906572 |
| 0.377159127 | 0.087904888 | 0.373998361 | 0.213956964 |
| 0.403695521 | 0.111343751 | 0.340522276 | 0.080339604 |
| 0.226768772 | 0.064266509 | 0.046716323 | 0.201822358 |
| 0.428392818 | 0.054867024 | 0.404764487 | 0.427054641 |
| 0.068862352 | 0.45078398  | 0.488800975 | 0.374076188 |
| 0.479179032 | 0.43458256  | 0.010830998 | 0.325014142 |
| 0.456253255 | 0.410210808 | 0.40813883  | 0.294468723 |
| 0.033167133 | 0.486882075 | 0.226450391 | 0.34178404  |
| 0.285829244 | 0.017504247 | 0.340001284 | 1           |
| 0.454989798 | 0.42130874  | 0.276774206 | 0.154877278 |
| 0.168987446 | 0.317000042 | 0.206047889 | 0.42071825  |
| 0.205772242 | 0.243867373 | 0.448342313 | 0.08677841  |
| 0.163641999 | 0.292865391 | 0.103448493 | 0.2839358   |
| 0.287120598 | 0.456003378 | 0.01798816  | 0.392801354 |
| 0.00284043  | 0.382306214 | 0.317165717 | 0.264183634 |
| 0.025728106 | 0.011787099 | 0.124485901 | 0.333528538 |
| 0.438428755 | 0.442225916 | 0.421587492 | 0.427383603 |
| 0.128700672 | 0.239583963 | 0.334368916 | 0.134745513 |
| 0.457920124 | 0.167938002 | 0.100177945 | 0.363752055 |
| 0.426162189 | 0.464007945 | 0.148498459 | 0.198078495 |
| 0.43805959  | 0.46192656  | 0.415784934 | 0.384005785 |
| 0.303200518 | 0.029877361 | 0.451933411 | 0.441230696 |
| 0.456046306 | 0.244368055 | 0.104336231 | 0.443918091 |
| 0.041402865 | 0.398230847 | 0.317535177 | 0.127810599 |

|             |             |             |             |
|-------------|-------------|-------------|-------------|
| 0.439312413 | 0.015364567 | 0.148252965 | 0.360284919 |
| 0.194949906 | 0.448278427 | 0.449733245 | 0.17019371  |
| 0.356640825 | 0.011907091 | 0.094237335 | 0.021338856 |
| 0.31338652  | 0.095432848 | 0.490135932 | 0.437017991 |
| 0.275816179 | 0.326309535 | 0.269812542 | 0.00064936  |
| 0.014001154 | 0.147596668 | 0.439849923 | 0.373034039 |
| 0.431476386 | 0.415644825 | 0.185710163 | 0.460634076 |
| 0.409660077 | 0.420935115 | 0.088729288 | 0.091462515 |
| 0.411621133 | 0.146977418 | 0.19540488  | 0.424079253 |
| 0.239270026 | 0.123786752 | 0.103867702 | 0.444782307 |
| 0.458002587 | 0.067285748 | 0.40213656  | 0.365577188 |
| 0.326057722 | 0.276146244 | 0.091092391 | 0.248183805 |
| 0.046254028 | 0.444116625 | 0.014023146 | 0.389473089 |
| 0.245365949 | 0.095992072 | 0.010371379 | 0.322532294 |
| 0.296335726 | 0.436740135 | 0.476327973 | 0.085524541 |
| 0.29098692  | 0.347291746 | 0.409315363 | 0.423359943 |
| 0.006515375 | 0.0364806   | 0.395915969 | 0.446093465 |
| 0.398932184 | 0.437011201 | 0.270580942 | 0.251669034 |
| 0.219515744 | 0.421551021 | 0.002636774 | 0.482121448 |
| 0.464871695 | 0.409650847 | 0.350327815 | 0.377248721 |
| 0.338876637 | 0.430217831 | 0.054727389 | 0.372472215 |
| 0.439518291 | 0.063565097 | 0.431633359 | 0.112555404 |
| 0.448760386 | 0.02582496  | 0.365489209 | 0.405866228 |
| 0.415409107 | 0.007136686 | 0.30461172  | 0.402449466 |
| 0.013662653 | 0.130411105 | 0.43994991  | 0.390574705 |
| 0.35721522  | 0.413866243 | 0.421818559 | 0.316717071 |
| 0.379247777 | 0.242025763 | 0.007658145 | 0.247996976 |
| 0.429174116 | 0.375997267 | 0.455179152 | 0.246143293 |
| 0.433847087 | 0.456981708 | 0.436571208 | 0.230763297 |
| 0.033864266 | 0.351554205 | 0.02037126  | 0.282672318 |
| 0.437024805 | 0.10501023  | 0.385410583 | 0.117771598 |
| 0.042443739 | 0.447023018 | 0.11749905  | 0.1990198   |
| 0.081550214 | 0.395929893 | 0.24501386  | 0.223464122 |
| 0.163270121 | 0.127717189 | 0.30318915  | 0.347981472 |
| 0.041224686 | 0.065166739 | 0.007730434 | 0.346059458 |
| 0.106385078 | 0.314297121 | 0.334381013 | 0.45774827  |
| 0.331257601 | 0.083158567 | 0.324974521 | 0.233844684 |
| 0.074813597 | 0.007846    | 0.455483591 | 0.373593654 |
| 0.436815311 | 0.140929158 | 0.025836801 | 0.335595568 |
| 0.441337502 | 0.405631393 | 0.395880857 | 0.453305015 |
| 0.021975376 | 0.43296887  | 0.207351752 | 0.082438178 |
| 0.307625783 | 0.220978121 | 0.429339907 | 0.067897313 |
| 0.440223392 | 0.457129566 | 0.268609229 | 0.136238243 |
| 0.445409786 | 0.412719036 | 0.025579337 | 0.451364378 |
| 0.450747144 | 0.019083293 | 0.445196119 | 0.080309569 |
| 0.011276552 | 0.388605589 | 0.416692746 | 0.049575803 |
| 0.049986579 | 0.31358268  | 0.061538195 | 0.226641552 |
| 0.449473205 | 0.353945484 | 0.44016592  | 0.158652956 |
| 0.029092982 | 0.00481486  | 0.146281936 | 0.368993503 |
| 0.493223353 | 0.435078481 | 0.21589478  | 0.293906802 |
| 0.209906207 | 0.28548608  | 0.229445131 | 0.441808149 |
| 0.17195987  | 0.474128987 | 0.003368654 | 0.405270892 |
| 0.482498195 | 0.387549153 | 0.049098016 | 0.342101397 |
| 0.452860583 | 0.036799213 | 0.206227084 | 0.456175466 |



|             |             |             |             |
|-------------|-------------|-------------|-------------|
| 0.454601219 | 0.295735026 | 0.319879969 | 0.404630529 |
| 0.016280376 | 0.04394851  | 0.3452099   | 0.128357324 |
| 0.371204072 | 0.17860226  | 0.029198317 | 0.392131082 |
| 0.029603517 | 0.454083526 | 0.419197697 | 0.040972594 |
| 0.394224491 | 0.39022949  | 0.313501324 | 0.026516819 |
| 0.412849264 | 0.436914064 | 0.486905084 | 0.170483867 |
| 0.434908385 | 0.435759158 | 0.358556513 | 0.052672385 |
| 0.00820083  | 0.467500328 | 0.450497321 | 0.016222602 |
| 0.432154347 | 0.356578265 | 0.007089677 | 0.459905229 |
| 0.169381356 | 0.464807703 | 0.004694054 | 0.075582704 |
| 0.022747712 | 0.407740415 | 0.461971618 | 0.423147913 |
| 0.335582765 | 0.359507788 | 0.003557345 | 0.440650116 |
| 0.450002187 | 0.006192554 | 0.092053705 | 0.434742432 |
| 0.395299272 | 0.480704626 | 0.254106652 | 0.416438144 |
| 0.381270631 | 0.460619555 | 0.23284811  | 0.212210129 |
| 0.446680131 | 0.425884097 | 0.445924251 | 0.459048607 |
| 0.435352575 | 0.368877019 | 0.25099143  | 0.011867853 |
| 0.10607325  | 0.28944268  | 0.325047615 | 0.06225669  |
| 0.427674977 | 0.097529334 | 0.450377563 | 0.426024831 |
| 0.430300372 | 0.00167544  | 0.179284948 | 0.451248161 |
| 0.454615239 | 0.446019494 | 0.015358422 | 0.004755843 |
| 0.006363276 | 0.008531642 | 0.391533092 | 0.18641882  |
| 0.446534701 | 0.298408306 | 0.001831817 | 0.055688979 |
| 0.265692288 | 0.328837537 | 0.450953678 | 0.347650566 |
| 0.419797384 | 0.058472269 | 0.288673747 | 0.379710013 |
| 0.040829162 | 0.430874571 | 0.434004348 | 0.456918496 |
| 0.026580862 | 0.195332084 | 0.400898001 | 0.443401005 |
| 0.044330933 | 0.255373213 | 0.408524099 | 0.290515814 |
| 0.008999243 | 0.050698647 | 0.042110974 | 0.402401702 |
| 0.469162467 | 0.050089391 | 0.017841383 | 0.210260418 |
| 0.102092667 | 0.439529664 | 0.130624519 | 0.440275039 |
| 0.446494203 | 0.40108745  | 0.044312086 | 0.454924756 |
| 0.026212073 | 0.457376477 | 0.260202753 | 0.072087125 |
| 0.250889965 | 0.007611426 | 0.432678494 | 0.123416344 |
| 0.384879271 | 0.4408152   | 0.166638749 | 0.007769918 |
| 0.138405757 | 0.031857276 | 0.426760289 | 0.410498    |
| 0.01820108  | 0.245713834 | 0.246660863 | 0.390164723 |
| 0.353178311 | 0.403691172 | 0.483188892 | 0.428217491 |
| 0.083119167 | 0.102638992 | 0.420517252 | 0.448349167 |
| 0.290651348 | 0.424333792 | 0.253754604 | 0.445718464 |
| 0.455103858 | 0.456491198 | 0.443745377 | 0.345418316 |
| 0.16796166  | 0.446815831 | 0.409683438 | 0.017306535 |
| 0.332277949 | 0.422060502 | 0.396425403 | 0.107258843 |
| 0.197574146 | 0.339974256 | 0.047133272 | 0.228738735 |
| 0.275251715 | 0.394317455 | 0.119431863 | 0.40381537  |
| 0.435026495 | 0.454633606 | 0.046665304 | 0.039421273 |
| 0.476216081 | 0.458739752 | 0.167400734 | 0.429209634 |
| 0.131240494 | 0.296113649 | 0.421895659 | 0.404371655 |
| 0.373920394 | 0.441186432 | 0.4494277   | 0.424513634 |
| 0.45427338  | 0.245373545 | 0.485024543 | 0.145927174 |
| 0.057740823 | 0.425609416 | 0.072708307 | 0.059877473 |
| 0.112535399 | 0.015191502 | 0.248020578 | 0.383515285 |
| 0.333769311 | 0.335863825 | 0.400257919 | 0.061548716 |
| 0.261047965 | 0.407543309 | 0.306754765 | 0.212850626 |

|             |             |             |             |
|-------------|-------------|-------------|-------------|
| 0.05768294  | 0.465764735 | 0.005095122 | 0.035869756 |
| 0.334681521 | 0.437741614 | 0.316131345 | 0.18731375  |
| 0.231350958 | 0.096267616 | 0.249474402 | 0.387057738 |
| 0.344595595 | 0.349184802 | 0.44090084  | 0.035006821 |
| 0.018003547 | 0.430830719 | 0.426908586 | 0.011477545 |
| 0.066718802 | 0.445932367 | 0.288159221 | 0.209280982 |
| 0.010331131 | 0.430571216 | 0.393523365 | 0.382742013 |
| 0.368756591 | 0.0497721   | 0.438820063 | 0.090555096 |
| 0.05516611  | 0.452845174 | 0.352376907 | 0.45815672  |
| 0.302964808 | 0.376617572 | 0.466934733 | 0.448460644 |
| 0.110557444 | 0.383544393 | 0.023551145 | 0.444813017 |
| 0.385893158 |             |             |             |
| ATP1B1      | 0.434699706 | 0.491543633 | 0.385792969 |
| 0.420328932 | 0.404533564 | 0.428094999 | 0.189931003 |
| 0.173524171 | 0.068521606 | 0.004439045 | 0.019519728 |
| 0.438974875 | 0.205828437 | 0.282809363 | 0.361417008 |
| 0.385633831 | 0.106878891 | 0.314200119 | 0.200051012 |
| 0.389232406 | 0.086737727 | 0.369401189 | 0.067565385 |
| 0.243192258 | 0.081620006 | 0.049639072 | 0.24054244  |
| 0.432606628 | 0.056731504 | 0.395640129 | 0.397400905 |
| 0.06385543  | 0.450594791 | 0.50290134  | 0.438622567 |
| 0.505206518 | 0.434273055 | 0.006416208 | 0.327945953 |
| 0.444401285 | 0.451154965 | 0.393620897 | 0.302219313 |
| 0.029814407 | 0.487508542 | 0.223025511 | 0.363136952 |
| 0.233298462 | 0.02154033  | 0.275098412 | 0.454989798 |
| 1           | 0.475409688 | 0.212652786 | 0.142197162 |
| 0.238796846 | 0.259879109 | 0.297685288 | 0.373247865 |
| 0.197562916 | 0.186696773 | 0.49058862  | 0.077969327 |
| 0.140832489 | 0.220706458 | 0.108242804 | 0.240850077 |
| 0.325601199 | 0.429389145 | 0.009286843 | 0.427950428 |
| 0.00327555  | 0.357740696 | 0.326615399 | 0.32318856  |
| 0.025194691 | 0.017076406 | 0.129598975 | 0.331750142 |
| 0.448382173 | 0.457503831 | 0.470333034 | 0.479596496 |
| 0.157009482 | 0.231021781 | 0.378482273 | 0.142455769 |
| 0.462490318 | 0.167961112 | 0.087808997 | 0.388907584 |
| 0.476229898 | 0.494544732 | 0.158864062 | 0.206664616 |
| 0.481364818 | 0.479047531 | 0.448526608 | 0.428326336 |
| 0.370981131 | 0.029295531 | 0.485139055 | 0.491174537 |
| 0.44721428  | 0.298378676 | 0.115768468 | 0.431066461 |
| 0.03595422  | 0.384118618 | 0.325006892 | 0.132628577 |
| 0.452473219 | 0.011590908 | 0.165486903 | 0.360961544 |
| 0.157104047 | 0.464304242 | 0.491711859 | 0.15616753  |
| 0.373433746 | 0.012872358 | 0.128344539 | 0.016986762 |
| 0.323410488 | 0.125534374 | 0.504850665 | 0.474712345 |
| 0.225232971 | 0.362015169 | 0.231839005 | 0.00123222  |
| 0.015083608 | 0.130664277 | 0.478197129 | 0.330091501 |
| 0.425439904 | 0.435996023 | 0.218690407 | 0.447090422 |
| 0.473347252 | 0.467958841 | 0.087746672 | 0.068904946 |
| 0.42734079  | 0.12808371  | 0.192214684 | 0.464594965 |
| 0.278161792 | 0.088338631 | 0.096074225 | 0.484486268 |
| 0.452793557 | 0.06104521  | 0.335824733 | 0.381747459 |
| 0.361635178 | 0.322330383 | 0.075332842 | 0.263740235 |
| 0.037303536 | 0.478506741 | 0.01526235  | 0.31813276  |
| 0.297542875 | 0.123157931 | 0.004196609 | 0.259269472 |

|             |             |             |             |
|-------------|-------------|-------------|-------------|
| 0.310322254 | 0.50004144  | 0.48718658  | 0.071401336 |
| 0.304925605 | 0.38111406  | 0.343995087 | 0.486841105 |
| 0.009401268 | 0.027337297 | 0.314859314 | 0.495295519 |
| 0.3578807   | 0.474429654 | 0.254786021 | 0.249086176 |
| 0.23326658  | 0.438668865 | 0.001912126 | 0.492785646 |
| 0.492216367 | 0.351081918 | 0.407996383 | 0.387104615 |
| 0.391980339 | 0.462731867 | 0.04307506  | 0.388252961 |
| 0.412143678 | 0.04977641  | 0.469326592 | 0.12682153  |
| 0.477601161 | 0.027058999 | 0.327514816 | 0.465458362 |
| 0.488771394 | 0.005509314 | 0.257081809 | 0.385345573 |
| 0.013583869 | 0.094310741 | 0.426625508 | 0.398791001 |
| 0.383472049 | 0.434130634 | 0.451192476 | 0.380011253 |
| 0.41548245  | 0.196562866 | 0.005219762 | 0.268211869 |
| 0.446035287 | 0.407359924 | 0.470382324 | 0.213766117 |
| 0.397207993 | 0.488670663 | 0.476468074 | 0.243664988 |
| 0.029437113 | 0.303915133 | 0.017585661 | 0.307291881 |
| 0.448809939 | 0.114693652 | 0.41567586  | 0.098147652 |
| 0.04673982  | 0.494567075 | 0.142724734 | 0.24367335  |
| 0.105794341 | 0.450270504 | 0.207127624 | 0.280183736 |
| 0.242908652 | 0.124053284 | 0.339873389 | 0.375589612 |
| 0.029852054 | 0.071093165 | 0.005490403 | 0.442805899 |
| 0.165839217 | 0.406019059 | 0.420818725 | 0.460198467 |
| 0.330575823 | 0.105331056 | 0.376744501 | 0.246654298 |
| 0.081158854 | 0.007287881 | 0.491010841 | 0.371184778 |
| 0.407155306 | 0.121235283 | 0.022833897 | 0.422422707 |
| 0.482823354 | 0.413199717 | 0.311028315 | 0.486390874 |
| 0.015316126 | 0.465140291 | 0.254568818 | 0.09297541  |
| 0.39046124  | 0.23481902  | 0.445089587 | 0.06266436  |
| 0.39830627  | 0.485925159 | 0.252487128 | 0.155229815 |
| 0.468629152 | 0.406595769 | 0.021101713 | 0.457806463 |
| 0.462310833 | 0.019191267 | 0.494705129 | 0.092578691 |
| 0.010313677 | 0.430712479 | 0.48545919  | 0.048548817 |
| 0.05066634  | 0.358462989 | 0.03896674  | 0.243385541 |
| 0.495392368 | 0.385838609 | 0.489933807 | 0.168347808 |
| 0.029108289 | 0.010161324 | 0.156117329 | 0.387034809 |
| 0.507762541 | 0.491873115 | 0.206597399 | 0.371530326 |
| 0.197712005 | 0.331283268 | 0.154834922 | 0.49596943  |
| 0.14026329  | 0.483081224 | 0.002148388 | 0.458641143 |
| 0.509535022 | 0.331941967 | 0.059578862 | 0.31862626  |
| 0.465176817 | 0.030030317 | 0.154029069 | 0.491244555 |
| 0.46955145  | 0.309948348 | 0.360253492 | 0.408901528 |
| 0.011470279 | 0.030145148 | 0.367497378 | 0.152513904 |
| 0.401786518 | 0.171856211 | 0.040892177 | 0.322747407 |
| 0.033225519 | 0.487809972 | 0.441754755 | 0.04353666  |
| 0.425293171 | 0.309172808 | 0.334311352 | 0.022251325 |
| 0.477116411 | 0.477876233 | 0.504858999 | 0.123840278 |
| 0.467182655 | 0.498335181 | 0.443766938 | 0.048085589 |
| 0.008264584 | 0.494612204 | 0.421502743 | 0.018904755 |
| 0.458734363 | 0.29342157  | 0.012234885 | 0.485241006 |
| 0.145798245 | 0.464013825 | 0.003369245 | 0.064335808 |
| 0.020699588 | 0.441873942 | 0.480024145 | 0.384920005 |
| 0.33720148  | 0.32544591  | 0.001891244 | 0.485097481 |
| 0.495977835 | 0.006969011 | 0.102116095 | 0.493248802 |
| 0.474599792 | 0.484584637 | 0.312777998 | 0.485696062 |

|             |             |             |             |
|-------------|-------------|-------------|-------------|
| 0.461258859 | 0.492436529 | 0.240247151 | 0.225061995 |
| 0.482691041 | 0.483066039 | 0.437258329 | 0.470166553 |
| 0.469124799 | 0.397247681 | 0.247506605 | 0.009962629 |
| 0.11190959  | 0.221410675 | 0.396515156 | 0.077263735 |
| 0.371464941 | 0.112973313 | 0.479753583 | 0.456191107 |
| 0.491321562 | 0.001078125 | 0.137865577 | 0.484898678 |
| 0.459223811 | 0.458085428 | 0.009045631 | 0.004028476 |
| 0.005222974 | 0.014244211 | 0.350855154 | 0.187986458 |
| 0.487946165 | 0.340392856 | 0.001160078 | 0.034170904 |
| 0.256415189 | 0.387497242 | 0.496533897 | 0.344916102 |
| 0.448951769 | 0.051903073 | 0.354828846 | 0.367866068 |
| 0.048708058 | 0.391505529 | 0.492187949 | 0.482709551 |
| 0.020900792 | 0.193437461 | 0.361640066 | 0.472200482 |
| 0.065031795 | 0.266501865 | 0.446156731 | 0.326811425 |
| 0.005442839 | 0.053627184 | 0.043493041 | 0.414172776 |
| 0.500498586 | 0.073063078 | 0.026762453 | 0.172414404 |
| 0.1116573   | 0.463017391 | 0.145999757 | 0.481219058 |
| 0.463229984 | 0.420927222 | 0.047149755 | 0.481452123 |
| 0.02834382  | 0.487787064 | 0.31923201  | 0.06755378  |
| 0.228673742 | 0.005140522 | 0.477943603 | 0.178969016 |
| 0.348727284 | 0.405954971 | 0.176927744 | 0.007468961 |
| 0.15912952  | 0.033225469 | 0.469514794 | 0.456214    |
| 0.01626415  | 0.197135335 | 0.243484854 | 0.373377949 |
| 0.305761292 | 0.4438826   | 0.496690106 | 0.483888409 |
| 0.069524066 | 0.11068085  | 0.402766369 | 0.437588033 |
| 0.232322689 | 0.466274285 | 0.306318936 | 0.486814796 |
| 0.436656675 | 0.463662655 | 0.49073483  | 0.339658376 |
| 0.204138553 | 0.427318018 | 0.425003376 | 0.018229274 |
| 0.318479453 | 0.468178852 | 0.33660746  | 0.138793941 |
| 0.233206063 | 0.393549019 | 0.026846734 | 0.180449545 |
| 0.339522953 | 0.361000482 | 0.12180302  | 0.412538014 |
| 0.395426107 | 0.443737729 | 0.024617897 | 0.042111434 |
| 0.490403209 | 0.461065184 | 0.133210957 | 0.452962355 |
| 0.121554102 | 0.32026538  | 0.456214391 | 0.44712321  |
| 0.362996643 | 0.495688137 | 0.447558241 | 0.451497889 |
| 0.470883489 | 0.222820135 | 0.503795115 | 0.084538946 |
| 0.06334614  | 0.440998267 | 0.089166322 | 0.059132768 |
| 0.112393262 | 0.0141104   | 0.311474551 | 0.395483862 |
| 0.401565464 | 0.365478217 | 0.335926052 | 0.055861466 |
| 0.271261431 | 0.364322289 | 0.312821876 | 0.200860174 |
| 0.065654981 | 0.491623451 | 0.00479499  | 0.033617073 |
| 0.400700928 | 0.475224832 | 0.397298986 | 0.192443871 |
| 0.287669034 | 0.093945443 | 0.263363961 | 0.335948658 |
| 0.419307082 | 0.361319663 | 0.482239858 | 0.022936137 |
| 0.012229496 | 0.466523079 | 0.392945768 | 0.008835643 |
| 0.056810621 | 0.412357749 | 0.242625098 | 0.230641848 |
| 0.010347588 | 0.49350056  | 0.407887596 | 0.412514097 |
| 0.334573457 | 0.039904684 | 0.41931579  | 0.066929587 |
| 0.034646915 | 0.468635242 | 0.383109925 | 0.490201088 |
| 0.302810901 | 0.40613145  | 0.453394804 | 0.48436762  |
| 0.087196575 | 0.393293407 | 0.017701358 | 0.447678867 |
| 0.466237137 |             |             |             |
| ATP2A2      | 0.309685763 | 0.518042203 | 0.227919161 |
| 0.352201923 | 0.263174598 | 0.223862623 | 0.153703437 |

|             |             |             |             |
|-------------|-------------|-------------|-------------|
| 0.101191804 | 0.084388331 | 0.006804624 | 0.039027438 |
| 0.253021856 | 0.152880869 | 0.169932004 | 0.210588787 |
| 0.340140961 | 0.106099602 | 0.178779701 | 0.166005747 |
| 0.288355585 | 0.071350891 | 0.303659208 | 0.077434114 |
| 0.194263678 | 0.094443246 | 0.073877025 | 0.208638245 |
| 0.390242214 | 0.077416362 | 0.203302054 | 0.277906127 |
| 0.068076839 | 0.353187985 | 0.506465436 | 0.317371973 |
| 0.498583656 | 0.287866767 | 0.005302876 | 0.207585312 |
| 0.356653216 | 0.363620431 | 0.303100218 | 0.217817659 |
| 0.043361762 | 0.462586968 | 0.181077656 | 0.238624042 |
| 0.126501934 | 0.037203292 | 0.13357731  | 0.42130874  |
| 0.475409688 | 1           | 0.139838771 | 0.130797771 |
| 0.177516965 | 0.131502557 | 0.192362669 | 0.208152356 |
| 0.169877823 | 0.094590879 | 0.483176369 | 0.084985057 |
| 0.125913696 | 0.145160308 | 0.102961589 | 0.160077469 |
| 0.232697598 | 0.297803499 | 0.013919564 | 0.233126071 |
| 0.003028589 | 0.262036673 | 0.221549747 | 0.227365709 |
| 0.039133468 | 0.025023554 | 0.119303537 | 0.226395017 |
| 0.414423715 | 0.419922253 | 0.465852647 | 0.479805745 |
| 0.126122034 | 0.182224225 | 0.240123472 | 0.137802455 |
| 0.389247873 | 0.142958285 | 0.064855359 | 0.347928236 |
| 0.477477113 | 0.516702255 | 0.153496664 | 0.179860526 |
| 0.399790602 | 0.460611623 | 0.246524226 | 0.277338366 |
| 0.24425578  | 0.040996654 | 0.442460648 | 0.500341355 |
| 0.340212172 | 0.203230613 | 0.120224868 | 0.334468966 |
| 0.050642773 | 0.186998405 | 0.238503702 | 0.086594723 |
| 0.43149006  | 0.022739657 | 0.153801946 | 0.234981482 |
| 0.123657033 | 0.356480358 | 0.511431336 | 0.141728483 |
| 0.232835399 | 0.017866905 | 0.118228791 | 0.026698845 |
| 0.190984343 | 0.097747255 | 0.470572809 | 0.435536215 |
| 0.129831747 | 0.254324787 | 0.177565621 | 0.002694328 |
| 0.024890898 | 0.108165458 | 0.371351689 | 0.192754613 |
| 0.327632274 | 0.341205575 | 0.197545087 | 0.303039704 |
| 0.309207973 | 0.4605861   | 0.036770503 | 0.076890281 |
| 0.247384459 | 0.11209607  | 0.169884209 | 0.265185184 |
| 0.219298335 | 0.078750227 | 0.100394965 | 0.506053204 |
| 0.401543159 | 0.073413653 | 0.168092894 | 0.312446506 |
| 0.245787997 | 0.229875592 | 0.080977834 | 0.183920685 |
| 0.048698583 | 0.476511461 | 0.024940381 | 0.171095217 |
| 0.210054258 | 0.106976853 | 0.006393954 | 0.151841904 |
| 0.178524274 | 0.428352106 | 0.450019338 | 0.078419318 |
| 0.209211911 | 0.277079678 | 0.171741544 | 0.341474596 |
| 0.021260635 | 0.032856377 | 0.138934194 | 0.496762639 |
| 0.177842721 | 0.470193811 | 0.182023361 | 0.199623882 |
| 0.193905345 | 0.389951902 | 0.001535241 | 0.481158258 |
| 0.519776172 | 0.146626946 | 0.256865873 | 0.235610573 |
| 0.26155374  | 0.419085007 | 0.016689731 | 0.305238526 |
| 0.233303531 | 0.061102693 | 0.484309823 | 0.129803305 |
| 0.43590425  | 0.046003141 | 0.194608465 | 0.402300559 |
| 0.349449836 | 0.00713469  | 0.139517309 | 0.28182361  |
| 0.023695272 | 0.078654872 | 0.315369332 | 0.288932475 |
| 0.260354053 | 0.367342882 | 0.4513614   | 0.254522233 |
| 0.262540455 | 0.141407817 | 0.010633799 | 0.201846047 |
| 0.356241904 | 0.242838782 | 0.427736141 | 0.162066025 |

|             |             |             |             |
|-------------|-------------|-------------|-------------|
| 0.167564398 | 0.465496768 | 0.360769215 | 0.176542166 |
| 0.046214083 | 0.195662731 | 0.015760004 | 0.236572859 |
| 0.35891932  | 0.109071876 | 0.256622653 | 0.081227184 |
| 0.059780472 | 0.521545768 | 0.124097981 | 0.167265033 |
| 0.090884327 | 0.250702489 | 0.160926954 | 0.177520623 |
| 0.167414573 | 0.138633882 | 0.251911986 | 0.264593618 |
| 0.036878078 | 0.082444327 | 0.009354411 | 0.223329592 |
| 0.114518171 | 0.218595553 | 0.210885785 | 0.297336266 |
| 0.191670919 | 0.084408559 | 0.247693762 | 0.189627033 |
| 0.089244381 | 0.015865199 | 0.496331359 | 0.277257177 |
| 0.251052148 | 0.123030022 | 0.033531482 | 0.204669122 |
| 0.454509868 | 0.188360185 | 0.135673696 | 0.451858414 |
| 0.01780722  | 0.459536175 | 0.193936562 | 0.104845612 |
| 0.243774416 | 0.186726056 | 0.429224364 | 0.054510907 |
| 0.212832724 | 0.461181017 | 0.191514099 | 0.159088073 |
| 0.374021611 | 0.272558828 | 0.031481897 | 0.31896317  |
| 0.306319298 | 0.031848633 | 0.513051588 | 0.091299613 |
| 0.019958555 | 0.32215553  | 0.374555015 | 0.06590666  |
| 0.065052106 | 0.243883484 | 0.038711801 | 0.201853784 |
| 0.514405096 | 0.332116075 | 0.390620385 | 0.141869162 |
| 0.044664642 | 0.013142749 | 0.139278836 | 0.21657129  |
| 0.491914683 | 0.497921658 | 0.169484488 | 0.2468493   |
| 0.169777284 | 0.2537792   | 0.085711125 | 0.503377992 |
| 0.094703276 | 0.494506107 | 0.007096008 | 0.384005754 |
| 0.501519467 | 0.157304346 | 0.077177421 | 0.206414679 |
| 0.347890002 | 0.046700243 | 0.118882524 | 0.486688219 |
| 0.419442019 | 0.244678882 | 0.246082795 | 0.269950709 |
| 0.01745806  | 0.042494729 | 0.249127263 | 0.129543905 |
| 0.2703417   | 0.169344805 | 0.035347221 | 0.189838303 |
| 0.047905411 | 0.454147398 | 0.390416099 | 0.069842732 |
| 0.220209895 | 0.168999666 | 0.23733049  | 0.037092918 |
| 0.43784482  | 0.479344238 | 0.508917773 | 0.103086687 |
| 0.354010198 | 0.48982315  | 0.250149698 | 0.060385057 |
| 0.017072437 | 0.502988079 | 0.270356457 | 0.023751564 |
| 0.4401923   | 0.126880697 | 0.018618725 | 0.482408026 |
| 0.132957182 | 0.419409686 | 0.003078163 | 0.038495378 |
| 0.030009347 | 0.407426349 | 0.478009312 | 0.261189779 |
| 0.155235518 | 0.211935624 | 0.004134169 | 0.503637493 |
| 0.486558036 | 0.015523303 | 0.108306805 | 0.385258744 |
| 0.353848172 | 0.509399895 | 0.223048401 | 0.432942923 |
| 0.265098552 | 0.498628479 | 0.175643075 | 0.1970154   |
| 0.409659534 | 0.486425536 | 0.32294728  | 0.43555627  |
| 0.42614383  | 0.301521815 | 0.199670549 | 0.021025233 |
| 0.129363395 | 0.13087213  | 0.213209197 | 0.103999917 |
| 0.183595671 | 0.120967349 | 0.44751514  | 0.43433837  |
| 0.465027231 | 0.005587488 | 0.101603353 | 0.373659561 |
| 0.40461924  | 0.443949746 | 0.012182528 | 0.004173279 |
| 0.003211232 | 0.025064238 | 0.216920999 | 0.162433225 |
| 0.479486814 | 0.15014155  | 0.005914238 | 0.032621972 |
| 0.175447575 | 0.259561116 | 0.501437024 | 0.278465158 |
| 0.364702393 | 0.0665907   | 0.207372629 | 0.293901669 |
| 0.072312758 | 0.213501306 | 0.477001102 | 0.471676291 |
| 0.030208704 | 0.174082229 | 0.186378521 | 0.474201829 |
| 0.055430463 | 0.207270609 | 0.274251441 | 0.224770829 |

|             |             |             |             |
|-------------|-------------|-------------|-------------|
| 0.007592672 | 0.069638133 | 0.070224771 | 0.360959035 |
| 0.491872073 | 0.075264569 | 0.037023897 | 0.07838441  |
| 0.109304121 | 0.429835117 | 0.128748077 | 0.49906851  |
| 0.395676801 | 0.39009405  | 0.061616996 | 0.479721609 |
| 0.055837794 | 0.475640746 | 0.225958077 | 0.034067302 |
| 0.157725366 | 0.010753085 | 0.443592156 | 0.15809486  |
| 0.18198721  | 0.25917136  | 0.173185992 | 0.015948159 |
| 0.121109898 | 0.045874862 | 0.465261543 | 0.424350039 |
| 0.024360187 | 0.162620026 | 0.187109094 | 0.245492292 |
| 0.167111031 | 0.365268543 | 0.493067113 | 0.233552487 |
| 0.081498532 | 0.077310426 | 0.295557126 | 0.253436635 |
| 0.137773101 | 0.468269187 | 0.246873801 | 0.50824942  |
| 0.299771837 | 0.430818748 | 0.457520908 | 0.232855667 |
| 0.170654534 | 0.216696398 | 0.282015888 | 0.019719413 |
| 0.214472485 | 0.430559795 | 0.193031197 | 0.133363339 |
| 0.201770622 | 0.235909316 | 0.035695636 | 0.073363485 |
| 0.203696087 | 0.181355076 | 0.118482542 | 0.384363641 |
| 0.223927716 | 0.274854521 | 0.025691165 | 0.066989765 |
| 0.52895493  | 0.414892818 | 0.096257373 | 0.314554692 |
| 0.116879644 | 0.25058274  | 0.370430974 | 0.372091562 |
| 0.235482172 | 0.422061605 | 0.34809339  | 0.293641302 |
| 0.418059869 | 0.185607056 | 0.517198539 | 0.042682811 |
| 0.077660869 | 0.244228207 | 0.098265191 | 0.073024857 |
| 0.114717245 | 0.025530144 | 0.198109386 | 0.317115734 |
| 0.225846712 | 0.25537994  | 0.168858067 | 0.063793354 |
| 0.210798681 | 0.184618468 | 0.231027233 | 0.145547929 |
| 0.072379722 | 0.499633104 | 0.009531302 | 0.046800715 |
| 0.223575637 | 0.389210109 | 0.253080549 | 0.161568335 |
| 0.211888823 | 0.096518455 | 0.212805201 | 0.16390233  |
| 0.206972297 | 0.199355139 | 0.39533585  | 0.024840087 |
| 0.019025966 | 0.466553051 | 0.189772904 | 0.014389065 |
| 0.075220498 | 0.22950577  | 0.152664231 | 0.214286788 |
| 0.019204663 | 0.479909436 | 0.224167058 | 0.262403    |
| 0.210318035 | 0.051012995 | 0.313637671 | 0.057713981 |
| 0.040670708 | 0.417948876 | 0.23348979  | 0.503412404 |
| 0.199380924 | 0.357185951 | 0.42180949  | 0.384400527 |
| 0.060185412 | 0.204800096 | 0.029002941 | 0.390567042 |
| 0.246372129 |             |             |             |

|             |             |             |             |
|-------------|-------------|-------------|-------------|
| ATP2A3      | 0.2062022   | 0.283039996 | 0.10255593  |
| 0.316874022 | 0.140539716 | 0.22185142  | 0.225737338 |
| 0.192008851 | 0.092176522 | 0.027272503 | 0.014157317 |
| 0.134908809 | 0.048292429 | 0.113258682 | 0.091070323 |
| 0.287070233 | 0.039238191 | 0.121065945 | 0.221161253 |
| 0.302028405 | 0.168267279 | 0.228419198 | 0.138788765 |
| 0.045193622 | 0.030432974 | 0.061321426 | 0.048936852 |
| 0.347692987 | 0.067752731 | 0.168293938 | 0.342440223 |
| 0.046986796 | 0.260842617 | 0.251567366 | 0.154115514 |
| 0.218195733 | 0.184466151 | 0.016816944 | 0.109662859 |
| 0.289405696 | 0.211979424 | 0.321798585 | 0.236681757 |
| 0.088634164 | 0.260645606 | 0.231121749 | 0.139096571 |
| 0.1283787   | 0.030218528 | 0.159736066 | 0.276774206 |
| 0.212652786 | 0.139838771 | 1           | 0.156314801 |
| 0.031212083 | 0.123327619 | 0.018544033 | 0.290782481 |
| 0.196969187 | 0.154861398 | 0.218393617 | 0.122255641 |

|             |             |             |             |
|-------------|-------------|-------------|-------------|
| 0.081632167 | 0.196467013 | 0.040940904 | 0.21670339  |
| 0.039127819 | 0.298522079 | 0.088232586 | 0.102435176 |
| 0.013038239 | 0.327934781 | 0.145095512 | 0.031699844 |
| 0.049456015 | 0.025274999 | 0.050103274 | 0.273663227 |
| 0.321792563 | 0.236552559 | 0.24934173  | 0.230889166 |
| 0.046621202 | 0.121131047 | 0.076981809 | 0.092538654 |
| 0.272847257 | 0.159079061 | 0.098030923 | 0.248501605 |
| 0.248624509 | 0.239751088 | 0.067270793 | 0.107897857 |
| 0.247962505 | 0.296811788 | 0.120995501 | 0.114105708 |
| 0.046019015 | 0.021310017 | 0.238207131 | 0.249787206 |
| 0.270108767 | 0.041264533 | 0.069938974 | 0.333304253 |
| 0.070314643 | 0.084973381 | 0.269347864 | 0.037855353 |
| 0.333525068 | 0.078922105 | 0.068808237 | 0.225403667 |
| 0.110322351 | 0.249771703 | 0.221701511 | 0.205662648 |
| 0.112637644 | 0.026262663 | 0.019106662 | 0.042309551 |
| 0.086784979 | 0.011777164 | 0.220302405 | 0.290096743 |
| 0.143613017 | 0.062394071 | 0.204737052 | 0.009199824 |
| 0.022850732 | 0.059043554 | 0.190253604 | 0.152000273 |
| 0.267879349 | 0.166481801 | 0.074828914 | 0.240227174 |
| 0.126053909 | 0.243472422 | 0.039969057 | 0.158888422 |
| 0.179726563 | 0.061479009 | 0.196552681 | 0.144999493 |
| 0.097962884 | 0.189573318 | 0.110784858 | 0.284338689 |
| 0.312375742 | 0.115069084 | 0.120653621 | 0.254962161 |
| 0.078677421 | 0.096326971 | 0.123556625 | 0.094803202 |
| 0.112555009 | 0.200480997 | 0.016796353 | 0.200251746 |
| 0.039623048 | 0.02340891  | 0.049159943 | 0.239194119 |
| 0.105463419 | 0.207847707 | 0.20270158  | 0.111838894 |
| 0.1283049   | 0.18544231  | 0.195806389 | 0.191177971 |
| 0.021149947 | 0.080546938 | 0.145946095 | 0.259107851 |
| 0.247392484 | 0.246014911 | 0.121813283 | 0.079741779 |
| 0.133965698 | 0.286704499 | 0.002230729 | 0.250700028 |
| 0.234521308 | 0.131700439 | 0.15070504  | 0.1577506   |
| 0.066710616 | 0.297432717 | 0.014539472 | 0.246337231 |
| 0.20977184  | 0.107490421 | 0.282859377 | 0.083104813 |
| 0.233099274 | 0.047697357 | 0.141179477 | 0.163424208 |
| 0.13300815  | 0.017566438 | 0.216852628 | 0.335748605 |
| 0.01629452  | 0.183025029 | 0.264529939 | 0.273749499 |
| 0.195346287 | 0.237270185 | 0.298520316 | 0.053875189 |
| 0.136268294 | 0.186698477 | 0.032779724 | 0.099654742 |
| 0.214012661 | 0.045322074 | 0.284945338 | 0.169124143 |
| 0.16927491  | 0.279210447 | 0.171868306 | 0.052307869 |
| 0.090510947 | 0.229810301 | 0.063681651 | 0.131790369 |
| 0.198545702 | 0.093195386 | 0.095159452 | 0.058489541 |
| 0.035645372 | 0.268956336 | 0.021844518 | 0.024097483 |
| 0.011535568 | 0.148084754 | 0.225817268 | 0.064700597 |
| 0.030330483 | 0.097446166 | 0.057068629 | 0.085511275 |
| 0.128714707 | 0.063230065 | 0.011301669 | 0.03260715  |
| 0.027458746 | 0.043642697 | 0.048848451 | 0.207509216 |
| 0.089565753 | 0.04959972  | 0.11031907  | 0.048380254 |
| 0.045699012 | 0.027357058 | 0.274544073 | 0.267724098 |
| 0.252703981 | 0.15400318  | 0.047158273 | 0.034351365 |
| 0.278954836 | 0.156860583 | 0.118767996 | 0.285626671 |
| 0.064377203 | 0.261801176 | 0.065430781 | 0.066270951 |
| 0.048323883 | 0.161427392 | 0.332058577 | 0.057198481 |



|             |             |             |             |
|-------------|-------------|-------------|-------------|
| 0.208685268 | 0.278889031 | 0.161913503 | 0.070155941 |
| 0.241823111 | 0.272356929 | 0.087185938 | 0.220234891 |
| 0.20800865  | 0.043305916 | 0.246620793 | 0.033927208 |
| 0.029021462 | 0.168257616 | 0.160622528 | 0.069795367 |
| 0.04867543  | 0.130437077 | 0.165946893 | 0.15830205  |
| 0.275289327 | 0.243217499 | 0.20925871  | 0.038193606 |
| 0.0696746   | 0.007555344 | 0.045461632 | 0.102474187 |
| 0.243070832 | 0.219188441 | 0.163511862 | 0.073941741 |
| 0.232189437 | 0.055971582 | 0.141093729 | 0.247627116 |
| 0.052115777 | 0.25475242  | 0.02433906  | 0.166195466 |
| 0.21774796  | 0.185469947 | 0.035556663 | 0.249839009 |
| 0.261250135 | 0.098846824 | 0.153752869 | 0.247166496 |
| 0.280559993 | 0.093536905 | 0.070549749 | 0.198126098 |
| 0.093338533 | 0.127901401 | 0.145325212 | 0.021120087 |
| 0.07994197  | 0.108380311 | 0.003518454 | 0.142334053 |
| 0.055480125 | 0.266890992 | 0.259407049 | 0.056801406 |
| 0.160714302 | 0.1411136   | 0.166671748 | 0.073305093 |
| 0.174588931 | 0.216850083 | 0.253887988 | 0.171963015 |
| 0.189802318 | 0.2139613   | 0.07437666  | 0.054079879 |
| 0.018032298 | 0.22232199  | 0.266865001 | 0.030678864 |
| 0.290340839 | 0.191921483 | 0.018155741 | 0.300465133 |
| 0.206356318 | 0.21824164  | 0.035551788 | 0.014976458 |
| 0.02141491  | 0.232331381 | 0.243622756 | 0.336236074 |
| 0.086548369 | 0.260510622 | 0.003211553 | 0.242047242 |
| 0.253995517 | 0.013082152 | 0.032517783 | 0.172845173 |
| 0.127554421 | 0.293937824 | 0.046142385 | 0.182014363 |
| 0.100009682 | 0.213611397 | 0.116568029 | 0.153463609 |
| 0.267988845 | 0.189516548 | 0.2991145   | 0.294384452 |
| 0.279703027 | 0.186576806 | 0.250376202 | 0.059728772 |
| 0.04123743  | 0.203940699 | 0.048705987 | 0.038763135 |
| 0.262221969 | 0.052278722 | 0.2566478   | 0.269606508 |
| 0.212738439 | 0.015039079 | 0.182324782 | 0.204280626 |
| 0.339857727 | 0.335176038 | 0.035209096 | 0.010445342 |
| 0.004720358 | 0.006976719 | 0.280143017 | 0.094434824 |
| 0.25014094  | 0.059710551 | 0.021448903 | 0.158240543 |
| 0.121777203 | 0.112960391 | 0.246638436 | 0.305712271 |
| 0.194222221 | 0.073315363 | 0.063925967 | 0.318451641 |
| 0.030935749 | 0.200333077 | 0.23380232  | 0.28593945  |
| 0.039262989 | 0.094581193 | 0.134754879 | 0.315858815 |
| 0.003788627 | 0.149790673 | 0.1466744   | 0.084035735 |
| 0.014924084 | 0.039845951 | 0.046190317 | 0.258733381 |
| 0.202095657 | 0.029899848 | 0.020072768 | 0.073181428 |
| 0.098086404 | 0.262919819 | 0.084286063 | 0.277279151 |
| 0.305793453 | 0.307555863 | 0.024404367 | 0.268712078 |
| 0.041965004 | 0.227600517 | 0.06376453  | 0.044441175 |
| 0.083373068 | 0.035760273 | 0.196797877 | 0.023716545 |
| 0.132287969 | 0.279767088 | 0.051048841 | 0.013978301 |
| 0.019751894 | 0.04059173  | 0.275068351 | 0.2165791   |
| 0.019010794 | 0.174895574 | 0.138056285 | 0.239870748 |
| 0.268562191 | 0.255205434 | 0.254061194 | 0.09984444  |
| 0.141508451 | 0.014418141 | 0.323050522 | 0.213027984 |
| 0.151104311 | 0.258391203 | 0.059893033 | 0.258944847 |
| 0.262767918 | 0.285661718 | 0.222107354 | 0.240670893 |
| 0.028724984 | 0.212799108 | 0.267913255 | 0.060161764 |

|             |             |             |             |
|-------------|-------------|-------------|-------------|
| 0.228339889 | 0.253869912 | 0.20623458  | 0.039759182 |
| 0.090419333 | 0.07226626  | 0.103149414 | 0.058954587 |
| 0.04023033  | 0.268034498 | 0.093797484 | 0.312920471 |
| 0.246015445 | 0.229958075 | 0.10373017  | 0.046024492 |
| 0.279292535 | 0.284601352 | 0.176979179 | 0.241216539 |
| 0.098044705 | 0.160433818 | 0.204829246 | 0.184630586 |
| 0.07052014  | 0.211820928 | 0.300957967 | 0.235136697 |
| 0.287835818 | 0.231989934 | 0.255957053 | 0.18278616  |
| 0.0334508   | 0.135870087 | 0.063034231 | 0.056229568 |
| 0.118788547 | 0.03109916  | 0.022512016 | 0.239704669 |
| 0.031210931 | 0.208395244 | 0.097201927 | 0.067950346 |
| 0.118872437 | 0.113302705 | 0.187793287 | 0.168164613 |
| 0.06793855  | 0.245117332 | 0.015904474 | 0.049138786 |
| 0.037877695 | 0.218826969 | 0.068750007 | 0.08145783  |
| 0.030485437 | 0.037947816 | 0.160253289 | 0.207815319 |
| 0.069290613 | 0.053979805 | 0.22009174  | 0.119429199 |
| 0.083911236 | 0.277225811 | 0.153817992 | 0.018841408 |
| 0.041287662 | 0.199585012 | 0.09697018  | 0.088995531 |
| 0.01391565  | 0.19282145  | 0.117140856 | 0.132492761 |
| 0.270210146 | 0.083920236 | 0.257391703 | 0.081801218 |
| 0.114348639 | 0.260512464 | 0.103097101 | 0.221250253 |
| 0.08485044  | 0.273325977 | 0.2525686   | 0.210564012 |
| 0.068136819 | 0.088493077 | 0.100270467 | 0.304890113 |
| 0.049627061 |             |             |             |
| ATP2B1      | 0.121311176 | 0.201189066 | 0.072792164 |
| 0.299089888 | 0.135283888 | 0.162115762 | 0.283680515 |
| 0.122039548 | 0.159206526 | 0.099319149 | 0.079192187 |
| 0.101795786 | 0.094049574 | 0.127632555 | 0.076943273 |
| 0.261542131 | 0.090905195 | 0.065271984 | 0.26704052  |
| 0.245337212 | 0.221233336 | 0.255658966 | 0.21630551  |
| 0.048613159 | 0.080784429 | 0.160048033 | 0.073783546 |
| 0.274299731 | 0.159861751 | 0.137315769 | 0.240442564 |
| 0.068770697 | 0.168411514 | 0.158257679 | 0.162918411 |
| 0.138194685 | 0.100049781 | 0.016874167 | 0.135739267 |
| 0.166277315 | 0.184693141 | 0.26568505  | 0.281969254 |
| 0.201226913 | 0.149877455 | 0.315184002 | 0.120261618 |
| 0.083883007 | 0.107953743 | 0.098731021 | 0.154877278 |
| 0.142197162 | 0.130797771 | 0.156314801 | 1           |
| 0.072850213 | 0.085212465 | 0.02884632  | 0.162471924 |
| 0.275736479 | 0.112399797 | 0.148945833 | 0.215475476 |
| 0.088199762 | 0.140057897 | 0.063735377 | 0.193081223 |
| 0.039925248 | 0.169713893 | 0.104647388 | 0.067141512 |
| 0.033679218 | 0.263236069 | 0.127041334 | 0.035744744 |
| 0.115562728 | 0.104917593 | 0.073637613 | 0.305347322 |
| 0.247562899 | 0.13297928  | 0.215578478 | 0.190273412 |
| 0.087143781 | 0.121318446 | 0.067580249 | 0.169388247 |
| 0.174818528 | 0.256481899 | 0.091219826 | 0.246515665 |
| 0.210446912 | 0.168145422 | 0.105992709 | 0.134049386 |
| 0.2172633   | 0.195816986 | 0.097748346 | 0.119007466 |
| 0.058130129 | 0.039020558 | 0.160707459 | 0.194946566 |
| 0.151282391 | 0.043794839 | 0.133895021 | 0.232263105 |
| 0.13268455  | 0.049513745 | 0.305884891 | 0.042716084 |
| 0.255850422 | 0.169408967 | 0.108389094 | 0.237186658 |
| 0.090867406 | 0.168441382 | 0.156065051 | 0.281887537 |

|             |             |             |             |
|-------------|-------------|-------------|-------------|
| 0.091253504 | 0.064286766 | 0.035972738 | 0.073819955 |
| 0.08092156  | 0.015772404 | 0.128302096 | 0.249984175 |
| 0.112632749 | 0.076061817 | 0.201684467 | 0.028741752 |
| 0.069277934 | 0.051548323 | 0.131965127 | 0.093000934 |
| 0.190163309 | 0.089768122 | 0.146105986 | 0.135558014 |
| 0.105077683 | 0.211017786 | 0.028449466 | 0.21309347  |
| 0.144387902 | 0.059539348 | 0.265912082 | 0.122739358 |
| 0.13998389  | 0.196359813 | 0.182878484 | 0.220030203 |
| 0.181615519 | 0.207696436 | 0.059408402 | 0.237631071 |
| 0.114023669 | 0.114132357 | 0.177859825 | 0.128776991 |
| 0.221247519 | 0.129848442 | 0.048473017 | 0.108535291 |
| 0.049703191 | 0.050477706 | 0.044763693 | 0.171281052 |
| 0.110834146 | 0.179127791 | 0.112561002 | 0.155128211 |
| 0.155350747 | 0.202799603 | 0.105447213 | 0.17817287  |
| 0.107036835 | 0.101415904 | 0.061140213 | 0.202812026 |
| 0.140914454 | 0.176751811 | 0.120521186 | 0.080189868 |
| 0.174429018 | 0.230976373 | 0.0013844   | 0.152350483 |
| 0.161945549 | 0.056632575 | 0.181245527 | 0.12071982  |
| 0.068438284 | 0.259286989 | 0.00455653  | 0.229451337 |
| 0.100767413 | 0.154117271 | 0.232332218 | 0.168070394 |
| 0.141565815 | 0.137944394 | 0.114285952 | 0.132021462 |
| 0.104504806 | 0.029997695 | 0.1740405   | 0.286861374 |
| 0.041812876 | 0.220358078 | 0.175541186 | 0.256103929 |
| 0.219431259 | 0.184447323 | 0.253410873 | 0.058841876 |
| 0.136392521 | 0.16061394  | 0.054043458 | 0.106900391 |
| 0.145270668 | 0.038877604 | 0.179184141 | 0.176366546 |
| 0.07635041  | 0.195477625 | 0.113438188 | 0.071033425 |
| 0.19958321  | 0.192736592 | 0.088987387 | 0.163232611 |
| 0.114073545 | 0.206052059 | 0.080852715 | 0.053248352 |
| 0.085482137 | 0.207931436 | 0.031397691 | 0.024473615 |
| 0.01689635  | 0.154063585 | 0.213987904 | 0.118518722 |
| 0.07371079  | 0.155452305 | 0.065549789 | 0.09512107  |
| 0.223791747 | 0.150287076 | 0.014836759 | 0.031910469 |
| 0.080401669 | 0.055772588 | 0.055681123 | 0.130650965 |
| 0.085036379 | 0.110566375 | 0.131679586 | 0.047087103 |
| 0.087139968 | 0.078421087 | 0.195436404 | 0.226897905 |
| 0.129482472 | 0.207061849 | 0.093691072 | 0.035618388 |
| 0.239246857 | 0.112032625 | 0.048950642 | 0.223032247 |
| 0.066661455 | 0.206721138 | 0.129639573 | 0.146916939 |
| 0.060531092 | 0.238197013 | 0.272663103 | 0.069328507 |
| 0.124119672 | 0.190926951 | 0.146319306 | 0.136047042 |
| 0.150657848 | 0.223387616 | 0.181878236 | 0.129017944 |
| 0.121809147 | 0.117300159 | 0.17760913  | 0.068683198 |
| 0.073041431 | 0.141513581 | 0.146683337 | 0.14145558  |
| 0.099909506 | 0.187749751 | 0.212828863 | 0.212301379 |
| 0.210584065 | 0.262894174 | 0.18121437  | 0.041766564 |
| 0.187119399 | 0.04908908  | 0.058093183 | 0.067868057 |
| 0.147847118 | 0.162065759 | 0.185613485 | 0.102163082 |
| 0.291698819 | 0.07563474  | 0.086333725 | 0.195667309 |
| 0.029477527 | 0.158955629 | 0.057612565 | 0.140251528 |
| 0.138833474 | 0.106822036 | 0.100834197 | 0.249112175 |
| 0.166480142 | 0.189060604 | 0.124448605 | 0.164743175 |
| 0.201988218 | 0.106373784 | 0.082358048 | 0.143280844 |
| 0.18418193  | 0.214710534 | 0.136012511 | 0.026086393 |

|             |             |             |             |
|-------------|-------------|-------------|-------------|
| 0.090866154 | 0.1502078   | 0.005155338 | 0.088904137 |
| 0.163967519 | 0.190834367 | 0.204873438 | 0.143987723 |
| 0.158980984 | 0.076975587 | 0.170469357 | 0.155575322 |
| 0.139637331 | 0.140435009 | 0.164145865 | 0.159614372 |
| 0.134372712 | 0.166635395 | 0.070902919 | 0.089363911 |
| 0.05415803  | 0.145402887 | 0.158565958 | 0.083519075 |
| 0.239872885 | 0.097960628 | 0.09543072  | 0.205048019 |
| 0.250362419 | 0.115565794 | 0.038068383 | 0.006433662 |
| 0.037021956 | 0.190106581 | 0.15758031  | 0.234471457 |
| 0.072360517 | 0.196425505 | 0.002886855 | 0.171891838 |
| 0.179062537 | 0.044880934 | 0.055698871 | 0.135366141 |
| 0.107067901 | 0.192276746 | 0.054367501 | 0.155867525 |
| 0.090789459 | 0.145752425 | 0.155298796 | 0.21676239  |
| 0.213511216 | 0.131829577 | 0.201662765 | 0.182081371 |
| 0.235713851 | 0.169686414 | 0.318271865 | 0.165487053 |
| 0.060644627 | 0.152953638 | 0.058749374 | 0.121292428 |
| 0.135390949 | 0.117838039 | 0.166168241 | 0.224129655 |
| 0.170065154 | 0.043442277 | 0.19094976  | 0.143203325 |
| 0.241989405 | 0.253107153 | 0.030674314 | 0.011124363 |
| 0.002740888 | 0.038851587 | 0.217830098 | 0.110203084 |
| 0.184573864 | 0.062308363 | 0.064485531 | 0.188635571 |
| 0.122279062 | 0.117513162 | 0.175326533 | 0.293960333 |
| 0.140124279 | 0.129829584 | 0.098188139 | 0.266548486 |
| 0.083827813 | 0.087139332 | 0.193131969 | 0.191350432 |
| 0.061111395 | 0.110140657 | 0.071559433 | 0.256253333 |
| 0.005962105 | 0.175893923 | 0.110614377 | 0.127221776 |
| 0.018087014 | 0.087577558 | 0.109612881 | 0.20997314  |
| 0.130173559 | 0.107072922 | 0.089309301 | 0.037493282 |
| 0.215252801 | 0.195921579 | 0.157564594 | 0.220783475 |
| 0.23531072  | 0.279253159 | 0.053522252 | 0.176073728 |
| 0.123123285 | 0.148026714 | 0.079914755 | 0.04112286  |
| 0.065691872 | 0.065441453 | 0.127253297 | 0.064201669 |
| 0.092092272 | 0.165376243 | 0.062288324 | 0.039569799 |
| 0.019531409 | 0.09854343  | 0.245513818 | 0.184421835 |
| 0.034440024 | 0.169886203 | 0.139571643 | 0.17251168  |
| 0.194948951 | 0.25246549  | 0.160340974 | 0.073157811 |
| 0.251823497 | 0.011928651 | 0.234354037 | 0.117389947 |
| 0.117321716 | 0.215647867 | 0.103035504 | 0.183559911 |
| 0.151860777 | 0.179471382 | 0.161063215 | 0.244581439 |
| 0.046365378 | 0.124659234 | 0.248580596 | 0.143666183 |
| 0.201182002 | 0.23426048  | 0.12346373  | 0.088873575 |
| 0.165043902 | 0.06097927  | 0.114214881 | 0.020922568 |
| 0.036520446 | 0.189243879 | 0.188013516 | 0.262986531 |
| 0.138582    | 0.126367145 | 0.103408356 | 0.117467585 |
| 0.192094617 | 0.170518977 | 0.169537846 | 0.20730736  |
| 0.123390303 | 0.203043679 | 0.15350561  | 0.149424371 |
| 0.050855459 | 0.173826084 | 0.207873454 | 0.201443304 |
| 0.189680298 | 0.262301684 | 0.169799199 | 0.091989668 |
| 0.059889418 | 0.08499514  | 0.177884543 | 0.101942636 |
| 0.207297588 | 0.074821724 | 0.022734902 | 0.207140817 |
| 0.026164849 | 0.244609366 | 0.052787207 | 0.106672576 |
| 0.128136302 | 0.054864127 | 0.198534244 | 0.213539624 |
| 0.174332636 | 0.168544418 | 0.041746415 | 0.100539862 |
| 0.033098111 | 0.168898674 | 0.08156989  | 0.104751036 |

|                      |             |             |             |
|----------------------|-------------|-------------|-------------|
| 0.037992303          | 0.049384192 | 0.219074787 | 0.123518689 |
| 0.078027404          | 0.035359399 | 0.16910204  | 0.117341098 |
| 0.157482842          | 0.226413278 | 0.07993214  | 0.029054214 |
| 0.05503446           | 0.106786454 | 0.062766322 | 0.160027024 |
| 0.03700006           | 0.145737546 | 0.112166096 | 0.114159866 |
| 0.22546329           | 0.128711392 | 0.125704224 | 0.063968126 |
| 0.112624174          | 0.149925969 | 0.080403021 | 0.149915547 |
| 0.063230984          | 0.284661408 | 0.133458447 | 0.152245509 |
| 0.042491147          | 0.051605003 | 0.187096212 | 0.217562192 |
| 0.041653234          |             |             |             |
| ATP6V1B2 0.118992607 | 0.259371445 | 0.068601702 |             |
| 0.221712679          | 0.133159994 | 0.108360788 | 0.08915333  |
| 0.013432199          | 0.009849067 | 0.00526931  | 0.035674792 |
| 0.131492384          | 0.033252868 | 0.070219007 | 0.031082235 |
| 0.191377082          | 0.074438611 | 0.026869269 | 0.098030619 |
| 0.15115709           | 0.030957227 | 0.225989488 | 0.028375453 |
| 0.035342043          | 0.073232956 | 0.071481173 | 0.084993818 |
| 0.206420033          | 0.06647201  | 0.100862783 | 0.138120108 |
| 0.016545945          | 0.159269618 | 0.225369932 | 0.247892035 |
| 0.22940806           | 0.100290934 | 0.000602094 | 0.072745346 |
| 0.136411052          | 0.195953704 | 0.16508979  | 0.161855486 |
| 0.027077457          | 0.19717239  | 0.133299475 | 0.117609293 |
| 0.003159251          | 0.045903335 | 0.029050793 | 0.168987446 |
| 0.238796846          | 0.177516965 | 0.031212083 | 0.072850213 |
| 1                    | 0.03402861  | 0.066604871 | 0.088576519 |
| 0.119722499          | 0.027753998 | 0.23604074  | 0.015005408 |
| 0.008965865          | 0.032086283 | 0.032894986 | 0.05939036  |
| 0.056809255          | 0.113856758 | 0.001932796 | 0.097946173 |
| 0.00213518           | 0.132910918 | 0.106400261 | 0.066499637 |
| 0.040760952          | 0.033886588 | 0.045998722 | 0.170656423 |
| 0.212749193          | 0.159913841 | 0.273368327 | 0.264096731 |
| 0.047313518          | 0.065155256 | 0.103991478 | 0.083173844 |
| 0.167140973          | 0.108228691 | 0.003294597 | 0.221270966 |
| 0.273503893          | 0.259231205 | 0.044145701 | 0.090201335 |
| 0.245517249          | 0.211858754 | 0.088749637 | 0.133317708 |
| 0.071066252          | 0.008421468 | 0.213308967 | 0.274530425 |
| 0.135549918          | 0.087426605 | 0.08787986  | 0.168777318 |
| 0.030158638          | 0.017212657 | 0.183825473 | 0.007404224 |
| 0.223106101          | 0.01018994  | 0.092316068 | 0.15809261  |
| 0.009420494          | 0.156898599 | 0.252722638 | 0.090794784 |
| 0.092037368          | 0.005304407 | 0.011363595 | 0.010222932 |
| 0.010075352          | 0.023038575 | 0.200248764 | 0.271340071 |
| 0.02160163           | 0.052381534 | 0.063588418 | 0.002837494 |
| 0.022064213          | 0.005921026 | 0.18914385  | 0.048118666 |
| 0.144593038          | 0.121702639 | 0.124267811 | 0.124004015 |
| 0.169721987          | 0.269040586 | 0.001727792 | 0.023074217 |
| 0.115147718          | 0.010453414 | 0.119972694 | 0.156016273 |
| 0.140720799          | 0.019677218 | 0.058892815 | 0.261350699 |
| 0.168936997          | 0.060326216 | 0.026687589 | 0.187453946 |
| 0.069486015          | 0.149217272 | 0.037958776 | 0.099427973 |
| 0.030459299          | 0.218902875 | 0.022093251 | 0.03849495  |
| 0.027095055          | 0.034081949 | 0.00017213  | 0.048316442 |
| 0.023111128          | 0.270868616 | 0.181423583 | 0.035397337 |
| 0.124037692          | 0.191886248 | 0.049504993 | 0.245030543 |

|             |             |                      |             |
|-------------|-------------|----------------------|-------------|
| 0.021284676 | 0.004138084 | 0.026160372          | 0.281686971 |
| 0.084487242 | 0.2276685   | 0.042263632          | 0.042051872 |
| 0.116615385 | 0.197490717 | 1.64E-05 0.212327072 |             |
| 0.252894745 | 0.029344793 | 0.23427187           | 0.113750263 |
| 0.102498953 | 0.246898795 | 0.000426715          | 0.192705133 |
| 0.083585796 | 0.024539978 | 0.265458589          | 0.120504307 |
| 0.185149933 | 0.058581715 | 0.061320972          | 0.208695714 |
| 0.209493084 | 0.001441474 | 0.053588289          | 0.160897845 |
| 0.011801883 | 0.024433345 | 0.130629817          | 0.169936904 |
| 0.167274179 | 0.17328395  | 0.252229475          | 0.096885151 |
| 0.146305712 | 0.040302205 | 0.001783805          | 0.093993211 |
| 0.153602092 | 0.020718075 | 0.189418037          | 0.037825494 |
| 0.057022478 | 0.222522575 | 0.159728652          | 0.009611246 |
| 0.04174541  | 0.075305821 | 0.003170738          | 0.119982246 |
| 0.131105198 | 0.083841178 | 0.094869626          | 0.006979806 |
| 0.044550009 | 0.278322723 | 0.044337485          | 0.051512949 |
| 0.027819458 | 0.213384875 | 0.059712035          | 0.132185014 |
| 0.103404234 | 0.050299491 | 0.076896508          | 0.080103847 |
| 0.021986456 | 0.083277376 | 0.000477987          | 0.105113224 |
| 0.085695186 | 0.147595187 | 0.140749469          | 0.138487425 |
| 0.046403561 | 0.04084808  | 0.154299762          | 0.026049947 |
| 0.032678047 | 0.021680635 | 0.244717684          | 0.146672774 |
| 0.097273457 | 0.036973998 | 0.020594676          | 0.029601301 |
| 0.280662614 | 0.092649585 | 0.017745791          | 0.257316164 |
| 0.00093271  | 0.236015343 | 0.088374744          | 0.100531855 |
| 0.14535214  | 0.153221167 | 0.225174177          | 0.003109723 |
| 0.079225254 | 0.23262697  | 0.070167566          | 0.093366362 |
| 0.191032374 | 0.150751483 | 0.008697914          | 0.12412611  |
| 0.138459002 | 0.040568023 | 0.262959012          | 0.039240799 |
| 0.019439054 | 0.173286342 | 0.23642842           | 0.052469912 |
| 0.034957337 | 0.184490486 | 0.011184975          | 0.147955129 |
| 0.27187096  | 0.241824414 | 0.240459066          | 0.031853552 |
| 0.052903629 | 0.019112602 | 0.049189687          | 0.073700142 |
| 0.220372022 | 0.25912275  | 0.086427375          | 0.184408486 |
| 0.112706373 | 0.082564001 | 0.002594408          | 0.28039342  |
| 0.003388657 | 0.217219522 | 0.006828815          | 0.210149455 |
| 0.232673499 | 0.054404226 | 0.074636791          | 0.115102719 |
| 0.168422079 | 0.026853978 | 0.019998846          | 0.235453238 |
| 0.194675667 | 0.07702128  | 0.072442562          | 0.129009304 |
| 0.009087396 | 0.011852135 | 0.116381057          | 0.028275269 |
| 0.087001197 | 0.052266918 | 0.005935631          | 0.025751347 |
| 0.033814872 | 0.242622622 | 0.207190333          | 0.029785091 |
| 0.159791599 | 0.020499794 | 0.153354599          | 0.028915867 |
| 0.234886531 | 0.213770859 | 0.238313658          | 0.021896167 |
| 0.18003036  | 0.264662687 | 0.167057577          | 0.026670087 |
| 0.019006338 | 0.232730066 | 0.102618362          | 0.005590637 |
| 0.248117363 | 0.03840773  | 0.027041669          | 0.230331606 |
| 0.063658973 | 0.167832784 | 0.000194853          | 0.000585258 |
| 0.006739344 | 0.217691817 | 0.216733036          | 0.122388578 |
| 0.049746719 | 0.09151512  | 7.63E-05 0.245164089 |             |
| 0.255521012 | 0.01624075  | 0.02601125           | 0.22539236  |
| 0.213579058 | 0.233294388 | 0.096075876          | 0.259800538 |
| 0.186963828 | 0.244869288 | 0.035475127          | 0.134722397 |
| 0.233274426 | 0.237049905 | 0.142164515          | 0.182113713 |

|             |             |             |             |
|-------------|-------------|-------------|-------------|
| 0.256215302 | 0.173397762 | 0.147382728 | 0.02052877  |
| 0.007785781 | 0.037293035 | 0.058807244 | 0.015102133 |
| 0.065000678 | 0.054888943 | 0.199334446 | 0.238568151 |
| 0.266297963 | 0.007883535 | 0.019113057 | 0.190463259 |
| 0.20341921  | 0.220733681 | 0.000299554 | 0.000171585 |
| 5.88E-05    | 0.01923126  | 0.103462955 | 0.061708579 |
| 0.235194847 | 0.027044052 | 0.009023183 | 0.007175801 |
| 0.020096202 | 0.175914056 | 0.254864581 | 0.173124967 |
| 0.166215408 | 0.033730296 | 0.094559835 | 0.154455531 |
| 0.029071498 | 0.065289128 | 0.278012292 | 0.228048958 |
| 0.006263014 | 0.05912835  | 0.043703339 | 0.258122044 |
| 0.016742534 | 0.130411095 | 0.148340054 | 0.07238055  |
| 0.000249444 | 0.03371439  | 0.036745456 | 0.185337802 |
| 0.231412342 | 0.084678608 | 0.05326269  | 0.003914631 |
| 0.096367841 | 0.214605668 | 0.062555815 | 0.267550498 |
| 0.208714575 | 0.237802219 | 0.017865774 | 0.21359768  |
| 0.019542723 | 0.234646393 | 0.130901685 | 0.001486838 |
| 0.028688875 | 0.003408758 | 0.205624431 | 0.036870106 |
| 0.055002255 | 0.101867258 | 0.012229712 | 0.011312705 |
| 0.013341304 | 0.038058108 | 0.279508144 | 0.234535548 |
| 0.005062965 | 0.033646839 | 0.073362376 | 0.10832096  |
| 0.069341701 | 0.254084608 | 0.224570669 | 0.095907768 |
| 0.044660744 | 0.003775185 | 0.143292364 | 0.102581838 |
| 0.031587448 | 0.261821827 | 0.096031056 | 0.242739887 |
| 0.113519993 | 0.17655391  | 0.234431969 | 0.122279197 |
| 0.030811113 | 0.085265141 | 0.199626309 | 0.006352083 |
| 0.094714172 | 0.281764932 | 0.05002058  | 0.04374681  |
| 0.164329296 | 0.108625222 | 0.001790059 | 0.001070756 |
| 0.08527605  | 0.095308912 | 0.048624491 | 0.205498413 |
| 0.085806716 | 0.111178091 | 0.001567425 | 0.036842585 |
| 0.252994855 | 0.163682266 | 0.007938953 | 0.17391582  |
| 0.044348148 | 0.156624133 | 0.178357064 | 0.199259754 |
| 0.029570482 | 0.261025206 | 0.173406576 | 0.206965839 |
| 0.207515929 | 0.090198837 | 0.242402036 | 0.002472631 |
| 0.007882619 | 0.106111133 | 0.090629763 | 0.044310215 |
| 0.090897136 | 0.009642777 | 0.045830145 | 0.175964389 |
| 0.064411981 | 0.222485135 | 0.014214062 | 0.004670426 |
| 0.100524924 | 0.036324489 | 0.131218786 | 0.080024062 |
| 0.040913912 | 0.24959976  | 0.001747046 | 0.02989756  |
| 0.081955791 | 0.199791759 | 0.166836767 | 0.052970349 |
| 0.042334667 | 0.015945734 | 0.14697837  | 0.056368407 |
| 0.142450799 | 0.009933955 | 0.200941688 | 0.001253195 |
| 0.010683453 | 0.25645803  | 0.047423237 | 0.00169401  |
| 0.004594213 | 0.077673438 | 0.018715661 | 0.069042466 |
| 0.012181696 | 0.259625758 | 0.091587448 | 0.117212066 |
| 0.091842427 | 0.018512274 | 0.112392956 | 0.002270224 |
| 0.002985476 | 0.177453915 | 0.096862239 | 0.244926176 |
| 0.051901396 | 0.253325886 | 0.161799283 | 0.208580958 |
| 0.001194776 | 0.058845464 | 0.012083284 | 0.183083027 |
| 0.078137735 |             |             |             |
| ATP6V1E1    | 0.188534461 | 0.29838846  | 0.068657572 |
| 0.254642225 | 0.123773156 | 0.203653289 | 0.13536564  |
| 0.128442833 | 0.020823969 | 0.012488904 | 0.006682792 |
| 0.121438404 | 0.041028014 | 0.109801184 | 0.049841901 |

|             |             |             |             |
|-------------|-------------|-------------|-------------|
| 0.207196855 | 0.025722181 | 0.086519806 | 0.126262463 |
| 0.253634649 | 0.106962546 | 0.178051621 | 0.051213492 |
| 0.025576261 | 0.012753191 | 0.023240668 | 0.02559375  |
| 0.295182055 | 0.026455585 | 0.197646122 | 0.322060289 |
| 0.022194671 | 0.262480594 | 0.276122186 | 0.146353784 |
| 0.256232243 | 0.166376518 | 0.026316043 | 0.082483513 |
| 0.272105743 | 0.163143058 | 0.268642263 | 0.162757939 |
| 0.033615297 | 0.312871266 | 0.138115547 | 0.098714912 |
| 0.08291709  | 0.011352894 | 0.141132548 | 0.317000042 |
| 0.259879109 | 0.131502557 | 0.123327619 | 0.085212465 |
| 0.03402861  | 1           | 0.017777288 | 0.330926859 |
| 0.127816309 | 0.163723182 | 0.256502082 | 0.042669782 |
| 0.056834122 | 0.151484675 | 0.025116163 | 0.172539867 |
| 0.028422933 | 0.285356736 | 0.03158994  | 0.100269487 |
| 0.015385508 | 0.236753639 | 0.104213511 | 0.020448669 |
| 0.019085058 | 0.01792596  | 0.029471283 | 0.218295519 |
| 0.288945333 | 0.243447682 | 0.22774387  | 0.21750285  |
| 0.036433637 | 0.075733523 | 0.064781969 | 0.053956913 |
| 0.251383328 | 0.099155516 | 0.037052728 | 0.190704435 |
| 0.229836766 | 0.268631885 | 0.030193228 | 0.057997642 |
| 0.241547196 | 0.313692657 | 0.094412794 | 0.095164434 |
| 0.027450629 | 0.006573517 | 0.270766879 | 0.25402659  |
| 0.295775895 | 0.032122131 | 0.034827474 | 0.340650431 |
| 0.026847874 | 0.064007427 | 0.193059034 | 0.044697206 |
| 0.29071885  | 0.017335381 | 0.039440371 | 0.208825169 |
| 0.053302425 | 0.226429548 | 0.238681483 | 0.111548765 |
| 0.092848025 | 0.013233445 | 0.007974112 | 0.014279941 |
| 0.06899752  | 0.007616155 | 0.272751246 | 0.28170913  |
| 0.158052199 | 0.05442659  | 0.126843913 | 0.002163848 |
| 0.008850439 | 0.030781325 | 0.223210704 | 0.126687632 |
| 0.22746831  | 0.164641504 | 0.042578244 | 0.267777194 |
| 0.118794268 | 0.224814763 | 0.023374748 | 0.064639924 |
| 0.131920094 | 0.033278096 | 0.113281222 | 0.149885705 |
| 0.058525722 | 0.087733013 | 0.062520839 | 0.26399364  |
| 0.345165205 | 0.056251294 | 0.119347272 | 0.187843724 |
| 0.070600483 | 0.071166992 | 0.060667618 | 0.091680784 |
| 0.062293757 | 0.220512671 | 0.006004687 | 0.157005778 |
| 0.018423121 | 0.022445475 | 0.016322066 | 0.210038376 |
| 0.075100058 | 0.229037659 | 0.251473058 | 0.052210085 |
| 0.126323993 | 0.141054672 | 0.210671179 | 0.194795155 |
| 0.007975325 | 0.026194728 | 0.167050137 | 0.275381269 |
| 0.323295204 | 0.234926604 | 0.073600233 | 0.039140762 |
| 0.077904023 | 0.228003355 | 0.000346871 | 0.283306297 |
| 0.251800054 | 0.142052069 | 0.141137559 | 0.127623347 |
| 0.047213334 | 0.260567024 | 0.010134656 | 0.209819917 |
| 0.245485078 | 0.040009568 | 0.255334509 | 0.045912212 |
| 0.259504476 | 0.018283421 | 0.159927897 | 0.149286792 |
| 0.151969888 | 0.007705135 | 0.187401916 | 0.272849645 |
| 0.005138919 | 0.109806467 | 0.227240276 | 0.208303216 |
| 0.131731569 | 0.191814475 | 0.258605705 | 0.037033884 |
| 0.111768331 | 0.12301084  | 0.007755603 | 0.061750724 |
| 0.188339601 | 0.043232312 | 0.311055801 | 0.087975378 |
| 0.193553969 | 0.284818122 | 0.176211742 | 0.045692277 |
| 0.032593026 | 0.201325184 | 0.025984235 | 0.072728642 |



|             |             |             |             |
|-------------|-------------|-------------|-------------|
| 0.184227692 | 0.070463372 | 0.068023343 | 0.036272644 |
| 0.015200718 | 0.271508709 | 0.011665925 | 0.017203086 |
| 0.006167152 | 0.182751822 | 0.132139915 | 0.071890004 |
| 0.033679357 | 0.038500029 | 0.034288797 | 0.057932574 |
| 0.065798421 | 0.03596027  | 0.002654494 | 0.050983315 |
| 0.039993327 | 0.062111668 | 0.077811523 | 0.250531645 |
| 0.11896704  | 0.049528276 | 0.08618555  | 0.023885421 |
| 0.015937501 | 0.009289006 | 0.285361156 | 0.190549384 |
| 0.30803489  | 0.059970381 | 0.017487135 | 0.050534698 |
| 0.283455917 | 0.161036819 | 0.113188954 | 0.309558354 |
| 0.015204287 | 0.240814452 | 0.058974615 | 0.03321463  |
| 0.053255382 | 0.115661454 | 0.272194534 | 0.019427847 |
| 0.20772228  | 0.324193517 | 0.093478004 | 0.032977644 |
| 0.31282485  | 0.217368934 | 0.032458953 | 0.227329094 |
| 0.245179799 | 0.018209257 | 0.261315751 | 0.020377887 |
| 0.009345341 | 0.143356681 | 0.153778398 | 0.026729359 |
| 0.016337297 | 0.11194964  | 0.084218055 | 0.092930428 |
| 0.27641659  | 0.189467948 | 0.222425423 | 0.018103361 |
| 0.030326673 | 0.010994565 | 0.026835399 | 0.079241348 |
| 0.292963569 | 0.230858936 | 0.103077476 | 0.064121146 |
| 0.133370844 | 0.031709196 | 0.139198466 | 0.252348645 |
| 0.026060902 | 0.277574947 | 0.006757356 | 0.151564526 |
| 0.255127418 | 0.235239302 | 0.014212252 | 0.200619031 |
| 0.308039793 | 0.029796532 | 0.087289443 | 0.276880324 |
| 0.256742472 | 0.04932021  | 0.040829402 | 0.180195451 |
| 0.034817223 | 0.064310994 | 0.090408159 | 0.010443795 |
| 0.067368595 | 0.04543054  | 0.001630401 | 0.104203101 |
| 0.027739253 | 0.307874963 | 0.236116885 | 0.014194314 |
| 0.183117991 | 0.090197932 | 0.123995226 | 0.024993851 |
| 0.165390942 | 0.229014212 | 0.287990277 | 0.09918064  |
| 0.204679597 | 0.221490179 | 0.074835325 | 0.020036756 |
| 0.005254865 | 0.245031475 | 0.236880294 | 0.017128459 |
| 0.270752572 | 0.209816125 | 0.01439101  | 0.314999253 |
| 0.107512625 | 0.283793092 | 0.004019321 | 0.006720876 |
| 0.006317127 | 0.200243099 | 0.266128826 | 0.298415258 |
| 0.097001464 | 0.187593262 | 0.00157142  | 0.245898158 |
| 0.287384371 | 0.003257347 | 0.014727813 | 0.191820099 |
| 0.1263224   | 0.316128643 | 0.030056417 | 0.17557563  |
| 0.100770654 | 0.251296289 | 0.084340301 | 0.084591569 |
| 0.254182606 | 0.206620185 | 0.256551241 | 0.29559032  |
| 0.278708157 | 0.152680233 | 0.150298408 | 0.0192299   |
| 0.009671447 | 0.183573255 | 0.037006656 | 0.017991558 |
| 0.257173794 | 0.021527781 | 0.257066647 | 0.245416993 |
| 0.215401285 | 0.003817946 | 0.125727716 | 0.217493453 |
| 0.334432917 | 0.300328096 | 0.007915869 | 0.000862    |
| 0.001039616 | 0.002052104 | 0.241195882 | 0.047347367 |
| 0.241488748 | 0.075495682 | 0.00700169  | 0.0909841   |
| 0.065504603 | 0.087894117 | 0.278431583 | 0.216998037 |
| 0.172406079 | 0.032835318 | 0.057933209 | 0.236246573 |
| 0.009484806 | 0.222885135 | 0.22992909  | 0.319769415 |
| 0.01331979  | 0.046099847 | 0.121519167 | 0.292119048 |
| 0.002029735 | 0.102652078 | 0.147757328 | 0.064266004 |
| 0.006042297 | 0.013919838 | 0.012804244 | 0.210860285 |
| 0.243762645 | 0.024991245 | 0.013102474 | 0.084316116 |

|             |             |             |             |
|-------------|-------------|-------------|-------------|
| 0.057880359 | 0.247476401 | 0.050928681 | 0.264049516 |
| 0.283821957 | 0.258209775 | 0.011522872 | 0.277865148 |
| 0.01502142  | 0.272942341 | 0.047721446 | 0.024662199 |
| 0.051335743 | 0.009893343 | 0.225859468 | 0.012628708 |
| 0.157461691 | 0.254292149 | 0.014931774 | 0.004171455 |
| 0.008499045 | 0.016295706 | 0.248561312 | 0.189752121 |
| 0.005816706 | 0.090865322 | 0.078007248 | 0.184601822 |
| 0.232477023 | 0.222548616 | 0.292402443 | 0.098162756 |
| 0.069953698 | 0.011155155 | 0.274337385 | 0.220488366 |
| 0.160457186 | 0.236279056 | 0.038143812 | 0.256246847 |
| 0.227759193 | 0.267509678 | 0.233237362 | 0.149388685 |
| 0.024329565 | 0.178578843 | 0.268972418 | 0.029754495 |
| 0.145906401 | 0.247779078 | 0.161033317 | 0.016985446 |
| 0.060157735 | 0.061003551 | 0.042945849 | 0.048524166 |
| 0.033967195 | 0.272592081 | 0.071586553 | 0.248197959 |
| 0.231947324 | 0.229129385 | 0.078993986 | 0.012288238 |
| 0.295353828 | 0.277819904 | 0.069390951 | 0.209454794 |
| 0.048595174 | 0.098890397 | 0.183505076 | 0.167807156 |
| 0.044699251 | 0.242886413 | 0.294294609 | 0.276564541 |
| 0.341255875 | 0.127692344 | 0.282962176 | 0.122672566 |
| 0.00864335  | 0.148592072 | 0.038329343 | 0.023563662 |
| 0.06632975  | 0.00757907  | 0.016294535 | 0.197198946 |
| 0.030735043 | 0.179780928 | 0.117921227 | 0.024923794 |
| 0.0800851   | 0.095564292 | 0.127625908 | 0.120989267 |
| 0.034457407 | 0.280810795 | 0.004802703 | 0.020602241 |
| 0.043651093 | 0.186551787 | 0.058703921 | 0.040712415 |
| 0.019078116 | 0.019373279 | 0.112205311 | 0.212972675 |
| 0.096938383 | 0.042198397 | 0.1928073   | 0.03060222  |
| 0.043053329 | 0.257470172 | 0.128420158 | 0.00490875  |
| 0.020636228 | 0.187303466 | 0.072764818 | 0.047260434 |
| 0.003913342 | 0.213457732 | 0.115030884 | 0.101974171 |
| 0.204672239 | 0.033913068 | 0.313090178 | 0.030560038 |
| 0.034489915 | 0.301791409 | 0.073618095 | 0.248435425 |
| 0.057752322 | 0.222911481 | 0.298114001 | 0.242679863 |
| 0.026444075 | 0.073812468 | 0.027762366 | 0.278254601 |
| 0.043921111 |             |             |             |

|             |             |             |             |
|-------------|-------------|-------------|-------------|
| ATPAF2      | 0.188918742 | 0.318935422 | 0.135499145 |
| 0.21567117  | 0.173366646 | 0.099153202 | 0.043845125 |
| 0.009124232 | 0.016472762 | 0.002766355 | 0.032347974 |
| 0.216904963 | 0.05529898  | 0.036468476 | 0.033003389 |
| 0.2345167   | 0.067363384 | 0.044347829 | 0.07191404  |
| 0.162494021 | 0.00772227  | 0.250110788 | 0.013778243 |
| 0.073802402 | 0.083439334 | 0.038205123 | 0.124769794 |
| 0.230321109 | 0.041674329 | 0.063718654 | 0.126619307 |
| 0.027105609 | 0.206719484 | 0.306712184 | 0.305290655 |
| 0.325787509 | 0.166723127 | 0.002133126 | 0.038050352 |
| 0.186524057 | 0.273519417 | 0.163110255 | 0.132387074 |
| 0.009653144 | 0.250379881 | 0.078271794 | 0.201750732 |
| 0.01281828  | 0.023814647 | 0.017893636 | 0.206047889 |
| 0.297685288 | 0.192362669 | 0.018544033 | 0.02884632  |
| 0.066604871 | 0.017777288 | 1           | 0.077312804 |
| 0.06355986  | 0.00986142  | 0.310413081 | 0.011007334 |
| 0.013242631 | 0.024341772 | 0.051573142 | 0.038583271 |
| 0.109253878 | 0.131111991 | 0.001384267 | 0.195783793 |

|             |             |             |             |
|-------------|-------------|-------------|-------------|
| 0.001074942 | 0.141120818 | 0.179007684 | 0.128934171 |
| 0.030556633 | 0.018368858 | 0.068770479 | 0.116472454 |
| 0.253057244 | 0.248816502 | 0.362796507 | 0.369696937 |
| 0.057462265 | 0.098332473 | 0.201550958 | 0.052819373 |
| 0.218290339 | 0.044687949 | 0.0137845   | 0.277197944 |
| 0.368154355 | 0.342923879 | 0.047056553 | 0.138758173 |
| 0.241844171 | 0.253450077 | 0.123250977 | 0.145207774 |
| 0.096069631 | 0.024915795 | 0.249434321 | 0.360319073 |
| 0.168291164 | 0.205535573 | 0.095047037 | 0.168833401 |
| 0.021461393 | 0.025798988 | 0.161799965 | 0.031666892 |
| 0.263815454 | 0.003750483 | 0.133644103 | 0.107652711 |
| 0.020766894 | 0.217081941 | 0.359109751 | 0.05103457  |
| 0.1479352   | 0.010559032 | 0.076571608 | 0.011262606 |
| 0.034887482 | 0.091141666 | 0.268116751 | 0.284587807 |
| 0.014261275 | 0.058588294 | 0.041503726 | 0.002534936 |
| 0.021359914 | 0.028901504 | 0.259071813 | 0.070757184 |
| 0.192332787 | 0.217172884 | 0.089335791 | 0.145758744 |
| 0.264188547 | 0.357430182 | 0.003197824 | 0.011545896 |
| 0.135235559 | 0.029625904 | 0.104920556 | 0.187442138 |
| 0.165248624 | 0.009784572 | 0.033753048 | 0.342653138 |
| 0.186755097 | 0.0286206   | 0.035725432 | 0.237640534 |
| 0.042555953 | 0.235080684 | 0.021604037 | 0.060802918 |
| 0.007170019 | 0.314611996 | 0.031211492 | 0.043512336 |
| 0.052839824 | 0.070693806 | 0.000840975 | 0.032062874 |
| 0.029145677 | 0.294582977 | 0.261919764 | 0.028022274 |
| 0.086148876 | 0.238050795 | 0.045229998 | 0.242297147 |
| 0.01247306  | 0.008069559 | 0.027382588 | 0.344494993 |
| 0.0618432   | 0.339231882 | 0.044882052 | 0.069389856 |
| 0.14807244  | 0.258295768 | 0.000980169 | 0.27691335  |
| 0.350380618 | 0.033017248 | 0.210702551 | 0.186246515 |
| 0.15143391  | 0.271558344 | 0.002764889 | 0.226802635 |
| 0.109563655 | 0.018228934 | 0.347020779 | 0.100932021 |
| 0.260748606 | 0.030549134 | 0.039683943 | 0.34469051  |
| 0.297080537 | 0.002606184 | 0.025601556 | 0.13995941  |
| 0.020634729 | 0.004920109 | 0.177389048 | 0.178468212 |
| 0.158655086 | 0.263670558 | 0.319101762 | 0.150009951 |
| 0.170909362 | 0.031409125 | 0.004080734 | 0.166791911 |
| 0.242355445 | 0.047480129 | 0.220627517 | 0.02434405  |
| 0.071432638 | 0.270601481 | 0.246738859 | 0.024402754 |
| 0.015084143 | 0.052933661 | 0.003603817 | 0.135924573 |
| 0.206518955 | 0.024079972 | 0.131324008 | 0.021908738 |
| 0.047775104 | 0.35515517  | 0.124371931 | 0.156093669 |
| 0.10603632  | 0.168576445 | 0.049653699 | 0.054719966 |
| 0.085931771 | 0.03482549  | 0.097478054 | 0.086590828 |
| 0.003636075 | 0.045095923 | 0.006587451 | 0.116726547 |
| 0.063401153 | 0.104341711 | 0.095038582 | 0.16050658  |
| 0.032945068 | 0.036071714 | 0.168269502 | 0.059904358 |
| 0.0480609   | 0.014733988 | 0.310274957 | 0.182896038 |
| 0.102896299 | 0.022050915 | 0.01881507  | 0.050423669 |
| 0.298991766 | 0.071260438 | 0.019192802 | 0.262356716 |
| 0.004017899 | 0.325674321 | 0.054697028 | 0.082692108 |
| 0.170187974 | 0.104716661 | 0.266192285 | 0.006799096 |
| 0.093713908 | 0.257380637 | 0.105166723 | 0.085151503 |
| 0.198378071 | 0.155743131 | 0.005902253 | 0.174497499 |

|             |             |             |             |
|-------------|-------------|-------------|-------------|
| 0.172407188 | 0.021663789 | 0.356532263 | 0.05264328  |
| 0.017463812 | 0.28293164  | 0.2979011   | 0.046922441 |
| 0.041360293 | 0.115887565 | 0.002207213 | 0.175814358 |
| 0.340778823 | 0.271282027 | 0.249285489 | 0.086116241 |
| 0.017467356 | 0.018894391 | 0.098206638 | 0.156783282 |
| 0.292147979 | 0.373720664 | 0.096148703 | 0.217220953 |
| 0.086018183 | 0.090218772 | 0.004595849 | 0.361889292 |
| 0.022805833 | 0.304817258 | 0.004251413 | 0.323478977 |
| 0.320356999 | 0.039139066 | 0.068568694 | 0.065718314 |
| 0.178178433 | 0.012163321 | 0.020867812 | 0.303742888 |
| 0.233959755 | 0.080234947 | 0.087392582 | 0.191866369 |
| 0.002012951 | 0.004135775 | 0.178431459 | 0.087774959 |
| 0.077435343 | 0.049190491 | 0.065373336 | 0.022782849 |
| 0.017736505 | 0.254852166 | 0.280852436 | 0.022526858 |
| 0.102498432 | 0.021352125 | 0.221645248 | 0.014248973 |
| 0.368322122 | 0.331236134 | 0.312276903 | 0.015231846 |
| 0.25284953  | 0.359398784 | 0.284645022 | 0.034252224 |
| 0.02218572  | 0.339482067 | 0.129504994 | 0.010737431 |
| 0.297554729 | 0.02524522  | 0.015846711 | 0.277069533 |
| 0.04431768  | 0.224763531 | 0.000237946 | 0.014357444 |
| 0.018638101 | 0.323283044 | 0.276437446 | 0.117655256 |
| 0.026462771 | 0.112996279 | 0.002078912 | 0.357855573 |
| 0.302403056 | 0.018911639 | 0.053866741 | 0.286366211 |
| 0.341386649 | 0.300159655 | 0.182670104 | 0.365341002 |
| 0.276423789 | 0.330172122 | 0.027108578 | 0.143470024 |
| 0.252006023 | 0.360623718 | 0.173235218 | 0.232829661 |
| 0.287380848 | 0.258485792 | 0.108478417 | 0.004650795 |
| 0.034383799 | 0.018587435 | 0.056911857 | 0.034779829 |
| 0.065581894 | 0.057069728 | 0.284482085 | 0.308138192 |
| 0.368083129 | 0.006181662 | 0.009359258 | 0.239346115 |
| 0.216821126 | 0.262695703 | 0.003470747 | 0.001381083 |
| 0.001660455 | 0.042817676 | 0.088401975 | 0.100867996 |
| 0.31995386  | 0.021108174 | 0.003821528 | 0.002343307 |
| 0.028009077 | 0.295939045 | 0.320577616 | 0.182345711 |
| 0.273179417 | 0.025820086 | 0.045625611 | 0.176976747 |
| 0.040643657 | 0.089962275 | 0.362004666 | 0.254777692 |
| 0.011318857 | 0.089946898 | 0.067246889 | 0.299060109 |
| 0.085423153 | 0.160696199 | 0.225054565 | 0.046238495 |
| 0.003807116 | 0.043047751 | 0.031115831 | 0.257220676 |
| 0.325750694 | 0.048866422 | 0.034115668 | 0.006741026 |
| 0.032209005 | 0.286345378 | 0.037308467 | 0.351805175 |
| 0.230289418 | 0.268035651 | 0.035242575 | 0.271250704 |
| 0.017978765 | 0.298778148 | 0.230191409 | 0.005179259 |
| 0.052946713 | 0.004037053 | 0.310280846 | 0.070348006 |
| 0.039281608 | 0.126197916 | 0.040960896 | 0.015407508 |
| 0.062518486 | 0.032086882 | 0.332086182 | 0.345312317 |
| 0.015890856 | 0.024597066 | 0.111328844 | 0.155238061 |
| 0.046827063 | 0.260922469 | 0.289042434 | 0.125685461 |
| 0.011449496 | 0.049549075 | 0.157881531 | 0.134014187 |
| 0.018192545 | 0.355186597 | 0.076121307 | 0.347237958 |
| 0.152671725 | 0.244367893 | 0.312743161 | 0.107235099 |
| 0.080170151 | 0.102644466 | 0.143623863 | 0.00552376  |
| 0.109667902 | 0.316848158 | 0.062770907 | 0.068752712 |
| 0.139347421 | 0.220585768 | 0.003958266 | 0.009299056 |

|             |             |             |             |
|-------------|-------------|-------------|-------------|
| 0.215320544 | 0.065364296 | 0.026246551 | 0.255879626 |
| 0.109156343 | 0.142260272 | 0.00243237  | 0.029757855 |
| 0.332988925 | 0.213164587 | 0.008899469 | 0.189017091 |
| 0.056812474 | 0.157099491 | 0.285535188 | 0.312902836 |
| 0.042529667 | 0.297372279 | 0.191178217 | 0.163463584 |
| 0.21083851  | 0.066826647 | 0.319696036 | 0.001951793 |
| 0.028433788 | 0.167847248 | 0.033245877 | 0.054570831 |
| 0.053345006 | 0.013682521 | 0.107645098 | 0.234333207 |
| 0.12000284  | 0.204686576 | 0.018185395 | 0.017300406 |
| 0.150073215 | 0.063753096 | 0.151104631 | 0.033229792 |
| 0.024892909 | 0.305483985 | 0.006234929 | 0.026105371 |
| 0.137325572 | 0.262170198 | 0.25340069  | 0.073036205 |
| 0.082355387 | 0.038125608 | 0.127912636 | 0.040941916 |
| 0.0843646   | 0.038850421 | 0.262079969 | 0.003370119 |
| 0.002859944 | 0.335715179 | 0.065294413 | 0.00868873  |
| 0.01919838  | 0.10794263  | 0.029635553 | 0.038926291 |
| 0.02247733  | 0.360572491 | 0.058693116 | 0.180062838 |
| 0.080374241 | 0.01534025  | 0.137420533 | 0.0070413   |
| 0.005551775 | 0.228532667 | 0.190940702 | 0.342541086 |
| 0.11262126  | 0.263689105 | 0.210245577 | 0.248879397 |
| 0.012112103 | 0.124564235 | 0.0046983   | 0.226558329 |
| 0.116856737 |             |             |             |

B3GALNT1 0.266032055

0.406792943

0.177991755

|             |             |             |             |
|-------------|-------------|-------------|-------------|
| 0.2912956   | 0.209642111 | 0.281981637 | 0.207429487 |
| 0.298879803 | 0.061299971 | 0.011613581 | 0.010047267 |
| 0.200102735 | 0.103777395 | 0.250450707 | 0.212662677 |
| 0.25076329  | 0.06006633  | 0.259008312 | 0.188022904 |
| 0.270679531 | 0.175938299 | 0.201910522 | 0.101449438 |
| 0.107122209 | 0.037808178 | 0.044419677 | 0.095208254 |
| 0.348491311 | 0.051537297 | 0.290793362 | 0.328595845 |
| 0.056596161 | 0.323406053 | 0.405383759 | 0.188916254 |
| 0.38159511  | 0.253152044 | 0.021878237 | 0.233463828 |
| 0.360948049 | 0.235678445 | 0.284225459 | 0.215121443 |
| 0.051082286 | 0.43212265  | 0.192514023 | 0.176722729 |
| 0.250457068 | 0.018404779 | 0.324819026 | 0.42071825  |
| 0.373247865 | 0.208152356 | 0.290782481 | 0.162471924 |
| 0.088576519 | 0.330926859 | 0.077312804 | 1           |
| 0.184737126 | 0.305650295 | 0.366469396 | 0.095461879 |
| 0.131810754 | 0.303860844 | 0.068448923 | 0.284303246 |
| 0.121087913 | 0.347862824 | 0.043365084 | 0.175761816 |
| 0.011768127 | 0.268057954 | 0.178905852 | 0.096036631 |
| 0.029206353 | 0.018975208 | 0.08351222  | 0.251899854 |
| 0.35358385  | 0.361917969 | 0.309092218 | 0.309028735 |
| 0.088937978 | 0.15959757  | 0.146712358 | 0.116496957 |
| 0.339708364 | 0.16365552  | 0.105316237 | 0.231413284 |
| 0.31682627  | 0.382641918 | 0.093745129 | 0.117746777 |
| 0.307255021 | 0.408266754 | 0.224985355 | 0.206482525 |
| 0.131684148 | 0.019890469 | 0.363762734 | 0.350049352 |
| 0.369832931 | 0.098935037 | 0.07267902  | 0.364162726 |
| 0.048028289 | 0.262346084 | 0.222491941 | 0.100884427 |
| 0.362532331 | 0.028205587 | 0.087073982 | 0.263594991 |
| 0.165083066 | 0.309225954 | 0.357288258 | 0.166941502 |
| 0.194368086 | 0.018426061 | 0.037076462 | 0.025533308 |
| 0.219301159 | 0.03591999  | 0.399148304 | 0.343349921 |

|             |             |             |             |
|-------------|-------------|-------------|-------------|
| 0.298777495 | 0.174173922 | 0.244706889 | 0.002021728 |
| 0.014734141 | 0.102452369 | 0.291176864 | 0.262120381 |
| 0.284974366 | 0.269730728 | 0.115687672 | 0.324648962 |
| 0.182958959 | 0.301903997 | 0.079908292 | 0.122807135 |
| 0.244122491 | 0.102200046 | 0.154409682 | 0.224788961 |
| 0.132824166 | 0.175711887 | 0.112345159 | 0.367598546 |
| 0.429034436 | 0.083288733 | 0.302978585 | 0.228741375 |
| 0.199549645 | 0.13868187  | 0.110442545 | 0.200929421 |
| 0.079830703 | 0.341977845 | 0.011987349 | 0.313962389 |
| 0.097892951 | 0.054284    | 0.023806406 | 0.326381774 |
| 0.228405313 | 0.303459109 | 0.376427118 | 0.09555336  |
| 0.221390365 | 0.193304027 | 0.330110167 | 0.249178585 |
| 0.009351094 | 0.052817724 | 0.317925083 | 0.365747278 |
| 0.31594422  | 0.3374534   | 0.211969437 | 0.148232742 |
| 0.13853274  | 0.299597488 | 0.002501848 | 0.409677454 |
| 0.373969016 | 0.306634794 | 0.202650506 | 0.204865625 |
| 0.140156989 | 0.326540363 | 0.042009677 | 0.234356461 |
| 0.296801273 | 0.07867046  | 0.342057961 | 0.081691442 |
| 0.367530173 | 0.028776311 | 0.310192204 | 0.233984994 |
| 0.219753059 | 0.010784948 | 0.30398929  | 0.281635811 |
| 0.011161874 | 0.192655845 | 0.287658808 | 0.248792338 |
| 0.208210996 | 0.264562728 | 0.331198495 | 0.125991381 |
| 0.209080732 | 0.249501145 | 0.012669562 | 0.135556478 |
| 0.269072535 | 0.16853895  | 0.409886723 | 0.229081857 |
| 0.282577364 | 0.386986564 | 0.267576676 | 0.133044072 |
| 0.049993167 | 0.302838121 | 0.041465075 | 0.161935618 |
| 0.286381237 | 0.113993632 | 0.173027823 | 0.096483727 |
| 0.03383455  | 0.375828631 | 0.050711885 | 0.074651338 |
| 0.030071793 | 0.237164636 | 0.227244507 | 0.163058151 |
| 0.089616121 | 0.099927939 | 0.140324262 | 0.187202708 |
| 0.085849308 | 0.063397214 | 0.006895404 | 0.15935582  |
| 0.074138098 | 0.172961825 | 0.191253767 | 0.289861842 |
| 0.255279565 | 0.081588733 | 0.18219514  | 0.110010072 |
| 0.050381937 | 0.011871967 | 0.391048212 | 0.236009989 |
| 0.345719902 | 0.142372627 | 0.030476993 | 0.169303955 |
| 0.346598406 | 0.260638788 | 0.309735206 | 0.378145349 |
| 0.033220459 | 0.323988246 | 0.142163932 | 0.062317255 |
| 0.146709375 | 0.171846859 | 0.342985125 | 0.057906028 |
| 0.290295552 | 0.408143851 | 0.179288843 | 0.088493082 |
| 0.38059683  | 0.264178872 | 0.046833634 | 0.308990991 |
| 0.309826468 | 0.025688864 | 0.372832748 | 0.052753224 |
| 0.014331506 | 0.203451786 | 0.222232972 | 0.045547409 |
| 0.041529643 | 0.199093356 | 0.127043191 | 0.142105398 |
| 0.381342363 | 0.220420997 | 0.280917851 | 0.078234595 |
| 0.041962786 | 0.008027027 | 0.082227819 | 0.177972221 |
| 0.416252154 | 0.33859707  | 0.164598164 | 0.145345283 |
| 0.178364844 | 0.131571257 | 0.283746631 | 0.351078554 |
| 0.109727434 | 0.400522038 | 0.00788386  | 0.222773109 |
| 0.381792409 | 0.334193591 | 0.034851197 | 0.277190067 |
| 0.367803951 | 0.052523653 | 0.212030376 | 0.392541398 |
| 0.34298495  | 0.164938175 | 0.162057785 | 0.233098957 |
| 0.042777651 | 0.082111258 | 0.17734656  | 0.051082323 |
| 0.206834529 | 0.131800454 | 0.009492235 | 0.305411051 |
| 0.040124827 | 0.388852173 | 0.2990884   | 0.034577729 |

|             |             |             |             |
|-------------|-------------|-------------|-------------|
| 0.243656318 | 0.303666108 | 0.177381504 | 0.038775847 |
| 0.258361932 | 0.348116914 | 0.411884721 | 0.203866431 |
| 0.267953082 | 0.32688332  | 0.142914435 | 0.046822574 |
| 0.008855273 | 0.371958838 | 0.294985911 | 0.025511396 |
| 0.33483105  | 0.326051683 | 0.012748013 | 0.416268778 |
| 0.170622952 | 0.397683893 | 0.012128057 | 0.036169855 |
| 0.017402982 | 0.273801472 | 0.387962761 | 0.305777874 |
| 0.256250376 | 0.256482202 | 0.002946223 | 0.357318017 |
| 0.391687413 | 0.006086769 | 0.050114496 | 0.262711502 |
| 0.19917133  | 0.431661065 | 0.102955795 | 0.260786846 |
| 0.170724718 | 0.367210204 | 0.196605111 | 0.138380805 |
| 0.330580674 | 0.32109957  | 0.321086833 | 0.404720279 |
| 0.334116129 | 0.197744567 | 0.19525386  | 0.023270645 |
| 0.047359393 | 0.319496536 | 0.1595753   | 0.042139197 |
| 0.317005396 | 0.063770329 | 0.368341104 | 0.312807736 |
| 0.308389578 | 0.004378691 | 0.237293826 | 0.291678893 |
| 0.394978485 | 0.376900958 | 0.01905644  | 0.004768378 |
| 0.005195075 | 0.004996431 | 0.299290281 | 0.116843426 |
| 0.346852847 | 0.216812294 | 0.006605748 | 0.123385498 |
| 0.211928762 | 0.150449912 | 0.384850647 | 0.234964921 |
| 0.251290036 | 0.061301226 | 0.177988519 | 0.263632971 |
| 0.026042955 | 0.28473761  | 0.321758595 | 0.417399824 |
| 0.027551047 | 0.121137379 | 0.268962885 | 0.369549284 |
| 0.012371839 | 0.161090279 | 0.209593778 | 0.185125778 |
| 0.011260933 | 0.037337678 | 0.032198294 | 0.267523884 |
| 0.365037612 | 0.04142294  | 0.018355217 | 0.203934325 |
| 0.105461191 | 0.324257256 | 0.114240017 | 0.357510284 |
| 0.347458672 | 0.301943634 | 0.028729726 | 0.396770944 |
| 0.02480462  | 0.384353749 | 0.11902443  | 0.072648767 |
| 0.174381152 | 0.014144598 | 0.330706738 | 0.049862262 |
| 0.320247111 | 0.296924682 | 0.073892647 | 0.007288472 |
| 0.049825978 | 0.030965124 | 0.322146932 | 0.26817685  |
| 0.014574754 | 0.228672355 | 0.162418102 | 0.24662116  |
| 0.322908333 | 0.265583113 | 0.413717271 | 0.215558712 |
| 0.112574952 | 0.04598166  | 0.306096446 | 0.280300625 |
| 0.310813935 | 0.318484993 | 0.130405785 | 0.371274403 |
| 0.302318698 | 0.369687128 | 0.330179196 | 0.23603465  |
| 0.079491133 | 0.283226864 | 0.276313901 | 0.039601926 |
| 0.237335362 | 0.303075584 | 0.294111595 | 0.058782894 |
| 0.121072681 | 0.139801026 | 0.070839233 | 0.184935688 |
| 0.102382528 | 0.315802395 | 0.119596902 | 0.301634517 |
| 0.292481885 | 0.295178242 | 0.095009229 | 0.030793299 |
| 0.412803798 | 0.383261046 | 0.192208083 | 0.259251859 |
| 0.106525438 | 0.172898647 | 0.261980024 | 0.236271716 |
| 0.188013723 | 0.308501463 | 0.340848954 | 0.287271298 |
| 0.411919255 | 0.205504922 | 0.407152179 | 0.24671441  |
| 0.032632698 | 0.216608132 | 0.067555753 | 0.047649229 |
| 0.10768278  | 0.015902    | 0.087877021 | 0.236259772 |
| 0.131277138 | 0.212244234 | 0.300026743 | 0.061443298 |
| 0.152153971 | 0.238373647 | 0.196914389 | 0.220228601 |
| 0.062113755 | 0.39400679  | 0.007253823 | 0.037525062 |
| 0.143806071 | 0.270815803 | 0.136620669 | 0.126960124 |
| 0.091282028 | 0.059634746 | 0.173082198 | 0.333679748 |
| 0.210580117 | 0.184561708 | 0.281552046 | 0.065083675 |

|             |             |             |             |
|-------------|-------------|-------------|-------------|
| 0.045281237 | 0.337453185 | 0.284563735 | 0.011530241 |
| 0.047175181 | 0.259191116 | 0.221744228 | 0.1348889   |
| 0.008515866 | 0.313286236 | 0.248888352 | 0.194991722 |
| 0.289168469 | 0.06201453  | 0.386016261 | 0.092064368 |
| 0.076182498 | 0.405332598 | 0.16183936  | 0.366531873 |
| 0.160392865 | 0.253998562 | 0.416203479 | 0.305786012 |
| 0.097046173 | 0.175525937 | 0.044472872 | 0.342535697 |
| 0.163667146 |             |             |             |
| B3GNT5      | 0.179110128 | 0.274787934 | 0.103186645 |
| 0.348564089 | 0.19005404  | 0.17328747  | 0.264049121 |
| 0.160502803 | 0.160662249 | 0.08301777  | 0.10238091  |
| 0.157034179 | 0.158401686 | 0.193251567 | 0.101049364 |
| 0.33544401  | 0.175847789 | 0.107771648 | 0.286190904 |
| 0.305966881 | 0.23609664  | 0.332873525 | 0.268182645 |
| 0.10262303  | 0.135404763 | 0.216572933 | 0.123603612 |
| 0.346641885 | 0.217065431 | 0.142148192 | 0.283810906 |
| 0.13730689  | 0.239330243 | 0.222381133 | 0.235838191 |
| 0.203340589 | 0.144224299 | 0.038121692 | 0.162971985 |
| 0.223577391 | 0.23961446  | 0.322810397 | 0.314658992 |
| 0.226593052 | 0.206300635 | 0.302583671 | 0.177014327 |
| 0.109367059 | 0.152986517 | 0.113531179 | 0.205772242 |
| 0.197562916 | 0.169877823 | 0.196969187 | 0.275736479 |
| 0.119722499 | 0.127816309 | 0.06355986  | 0.184737126 |
| 1           | 0.128294491 | 0.210075587 | 0.204365357 |
| 0.131441382 | 0.193608537 | 0.138864726 | 0.21544666  |
| 0.086338802 | 0.207282396 | 0.137082287 | 0.108937435 |
| 0.034002164 | 0.315386314 | 0.18878841  | 0.064353576 |
| 0.171733583 | 0.149739791 | 0.154351988 | 0.320666448 |
| 0.325982397 | 0.194261863 | 0.303055468 | 0.271726127 |
| 0.169273173 | 0.167064864 | 0.109753981 | 0.261655613 |
| 0.235309441 | 0.266918568 | 0.129014393 | 0.331529244 |
| 0.296303352 | 0.240068376 | 0.183877982 | 0.179106277 |
| 0.258425545 | 0.262215065 | 0.120138957 | 0.154820387 |
| 0.089374689 | 0.075951604 | 0.215217734 | 0.27904957  |
| 0.201418745 | 0.073963007 | 0.189263194 | 0.290766299 |
| 0.202209162 | 0.084809755 | 0.353596195 | 0.103043463 |
| 0.335109729 | 0.153100469 | 0.158475227 | 0.265127422 |
| 0.157897599 | 0.227223335 | 0.226850501 | 0.280499465 |
| 0.140956399 | 0.108949609 | 0.060491103 | 0.128387015 |
| 0.138034596 | 0.040712104 | 0.180639938 | 0.321960048 |
| 0.175583894 | 0.142629314 | 0.243529608 | 0.043507346 |
| 0.118201841 | 0.107916192 | 0.201632227 | 0.130103872 |
| 0.253408188 | 0.135608044 | 0.201768793 | 0.181456102 |
| 0.156497678 | 0.299117831 | 0.023829752 | 0.264069387 |
| 0.179249591 | 0.122649948 | 0.304522842 | 0.176062554 |
| 0.175194014 | 0.246132084 | 0.274936895 | 0.299612853 |
| 0.230620851 | 0.268571072 | 0.094598776 | 0.315351037 |
| 0.161404294 | 0.169952955 | 0.263515381 | 0.222056569 |
| 0.263667116 | 0.18934065  | 0.092448899 | 0.129536261 |
| 0.070945117 | 0.117599515 | 0.065820636 | 0.172669363 |
| 0.15244328  | 0.233599166 | 0.165370476 | 0.233850392 |
| 0.215257815 | 0.267643849 | 0.126393884 | 0.223044472 |
| 0.101225952 | 0.1543665   | 0.074354094 | 0.285078592 |
| 0.152778629 | 0.259804433 | 0.200982019 | 0.147890488 |



|             |             |             |             |
|-------------|-------------|-------------|-------------|
| 0.223958354 | 0.302014025 | 0.002114485 | 0.210128607 |
| 0.232351357 | 0.067669905 | 0.234411471 | 0.182177672 |
| 0.0881346   | 0.323469264 | 0.009326293 | 0.314049834 |
| 0.140214878 | 0.222689765 | 0.321290183 | 0.216288869 |
| 0.203939586 | 0.190387303 | 0.168149374 | 0.194242055 |
| 0.162793088 | 0.044402631 | 0.144973541 | 0.321963577 |
| 0.079043975 | 0.221054609 | 0.235622466 | 0.299675138 |
| 0.236228694 | 0.257002668 | 0.342987328 | 0.078240288 |
| 0.182141895 | 0.224236292 | 0.084356874 | 0.155032996 |
| 0.211951368 | 0.079743013 | 0.228001961 | 0.240273525 |
| 0.102219457 | 0.254639293 | 0.165629852 | 0.085734266 |
| 0.233751384 | 0.205285056 | 0.095412387 | 0.182862423 |
| 0.160143021 | 0.269902044 | 0.101336907 | 0.116857526 |
| 0.15300747  | 0.286514064 | 0.070661246 | 0.054388379 |
| 0.040053825 | 0.198227368 | 0.235542496 | 0.174933147 |
| 0.133582646 | 0.234358255 | 0.113690211 | 0.139483465 |
| 0.229098846 | 0.238928387 | 0.030632064 | 0.073491569 |
| 0.144350533 | 0.109716277 | 0.099875886 | 0.182764836 |
| 0.161015611 | 0.191097784 | 0.17114289  | 0.090002662 |
| 0.140028303 | 0.119497902 | 0.266666184 | 0.292829747 |
| 0.160251701 | 0.26775395  | 0.15606777  | 0.071614077 |
| 0.314085624 | 0.11208755  | 0.069136185 | 0.285643029 |
| 0.09328799  | 0.29210856  | 0.204307028 | 0.205165404 |
| 0.111758021 | 0.27028256  | 0.344634042 | 0.070047915 |
| 0.165283727 | 0.253509333 | 0.191951761 | 0.199993489 |
| 0.200219044 | 0.273696875 | 0.207510818 | 0.175383274 |
| 0.173578764 | 0.178774986 | 0.256337081 | 0.141717024 |
| 0.119469976 | 0.211845847 | 0.20044357  | 0.187300958 |
| 0.156046011 | 0.195803897 | 0.200634606 | 0.267071374 |
| 0.285511232 | 0.34252323  | 0.232487879 | 0.088548641 |
| 0.231464615 | 0.085248283 | 0.121981707 | 0.106116739 |
| 0.210666735 | 0.240003141 | 0.237688491 | 0.141707812 |
| 0.316634965 | 0.120455795 | 0.107478877 | 0.27557077  |
| 0.065090508 | 0.229136298 | 0.085330909 | 0.206752655 |
| 0.20031593  | 0.120582319 | 0.157087203 | 0.238796844 |
| 0.211982218 | 0.220317523 | 0.199653782 | 0.228925723 |
| 0.256098632 | 0.156917797 | 0.121630888 | 0.213372858 |
| 0.168405977 | 0.246777864 | 0.173313755 | 0.057858912 |
| 0.139996989 | 0.21945644  | 0.014895129 | 0.141302248 |
| 0.211306828 | 0.24888751  | 0.293936128 | 0.1631587   |
| 0.159136896 | 0.117088329 | 0.245241761 | 0.204592546 |
| 0.205916117 | 0.21036481  | 0.230615093 | 0.234817098 |
| 0.205852294 | 0.234210946 | 0.110979125 | 0.155706918 |
| 0.090291645 | 0.212231327 | 0.199683487 | 0.103323183 |
| 0.327974163 | 0.095598346 | 0.124044212 | 0.272005691 |
| 0.266910495 | 0.166507527 | 0.019552566 | 0.015815671 |
| 0.073468514 | 0.277257222 | 0.21032039  | 0.276874333 |
| 0.085058148 | 0.249453939 | 0.008844507 | 0.253215133 |
| 0.244473978 | 0.074290878 | 0.114225698 | 0.198833802 |
| 0.163522983 | 0.264825109 | 0.082887753 | 0.224187355 |
| 0.140927902 | 0.208655885 | 0.230648394 | 0.257194059 |
| 0.270158834 | 0.198238406 | 0.252975154 | 0.237439114 |
| 0.319160111 | 0.245931562 | 0.334254308 | 0.170708624 |
| 0.076915335 | 0.169410795 | 0.076062465 | 0.135872527 |

|             |             |             |             |
|-------------|-------------|-------------|-------------|
| 0.15182413  | 0.171962928 | 0.235649263 | 0.311873108 |
| 0.248228498 | 0.066334902 | 0.226463055 | 0.203674703 |
| 0.303082648 | 0.327524354 | 0.050343805 | 0.00906768  |
| 0.004064143 | 0.057581173 | 0.250836741 | 0.156014868 |
| 0.255049572 | 0.078453747 | 0.085675131 | 0.200285652 |
| 0.178568863 | 0.174250998 | 0.244087105 | 0.35954927  |
| 0.208668224 | 0.212362878 | 0.129965836 | 0.33419783  |
| 0.129146287 | 0.117089531 | 0.271173252 | 0.248861624 |
| 0.110882255 | 0.161387751 | 0.103097963 | 0.334268192 |
| 0.015426914 | 0.23973643  | 0.173950981 | 0.187548496 |
| 0.035821387 | 0.143873266 | 0.152976831 | 0.293308204 |
| 0.192059877 | 0.175651643 | 0.141583258 | 0.058813045 |
| 0.270983258 | 0.27803289  | 0.241052986 | 0.307115656 |
| 0.297361782 | 0.364519856 | 0.110555684 | 0.231737056 |
| 0.173229278 | 0.21081544  | 0.119805304 | 0.040885165 |
| 0.132826029 | 0.09965345  | 0.195326757 | 0.077158636 |
| 0.138790166 | 0.215493337 | 0.086848178 | 0.074236347 |
| 0.040854909 | 0.165832823 | 0.326434134 | 0.266023717 |
| 0.070271158 | 0.236039228 | 0.182849292 | 0.234669218 |
| 0.190812374 | 0.317401131 | 0.221270842 | 0.093634811 |
| 0.283919336 | 0.037108885 | 0.293146667 | 0.162735278 |
| 0.180280441 | 0.306247071 | 0.155981201 | 0.262219986 |
| 0.199488227 | 0.245989215 | 0.231180732 | 0.250916254 |
| 0.107507552 | 0.156837848 | 0.264788183 | 0.136927681 |
| 0.241186512 | 0.317473264 | 0.151810711 | 0.13803251  |
| 0.204350592 | 0.097653484 | 0.158500236 | 0.04096914  |
| 0.061801385 | 0.187697563 | 0.27702461  | 0.347386297 |
| 0.187019968 | 0.173461606 | 0.155742279 | 0.153699694 |
| 0.269251561 | 0.22284036  | 0.176181545 | 0.24798634  |
| 0.192045715 | 0.232666642 | 0.225045533 | 0.227106892 |
| 0.09446868  | 0.244921134 | 0.273357544 | 0.238752977 |
| 0.240211384 | 0.26667424  | 0.236101573 | 0.106102891 |
| 0.092281202 | 0.135178951 | 0.242027678 | 0.161800931 |
| 0.271856361 | 0.108820702 | 0.050592495 | 0.290498981 |
| 0.060482632 | 0.312010343 | 0.098798968 | 0.152365072 |
| 0.1837594   | 0.079944473 | 0.254931168 | 0.241891892 |
| 0.224803508 | 0.229212552 | 0.058656961 | 0.174332159 |
| 0.072277262 | 0.225152597 | 0.117811553 | 0.180646634 |
| 0.078867764 | 0.108752894 | 0.266624477 | 0.130869899 |
| 0.099651934 | 0.075196042 | 0.2217013   | 0.125895933 |
| 0.188565214 | 0.317559309 | 0.102773984 | 0.056284984 |
| 0.10091779  | 0.142745116 | 0.12786022  | 0.204606085 |
| 0.069629367 | 0.215749839 | 0.11245713  | 0.162342273 |
| 0.242095578 | 0.201988767 | 0.166289374 | 0.099823151 |
| 0.154289197 | 0.208072971 | 0.120938861 | 0.219096759 |
| 0.099499193 | 0.361215026 | 0.182452687 | 0.220913242 |
| 0.075855145 | 0.080749226 | 0.196033726 | 0.291099534 |
| 0.068022548 |             |             |             |
| BAZ1A       | 0.125177275 | 0.214156056 | 0.046932596 |
| 0.217950762 | 0.078702572 | 0.195490636 | 0.162688289 |
| 0.167878032 | 0.039779278 | 0.032765391 | 0.008315631 |
| 0.075906609 | 0.034086921 | 0.116540168 | 0.059484962 |
| 0.154722926 | 0.018595188 | 0.065542241 | 0.125626893 |
| 0.195759222 | 0.169009957 | 0.127327407 | 0.076669416 |

|             |             |             |             |
|-------------|-------------|-------------|-------------|
| 0.01573678  | 0.011039599 | 0.028441674 | 0.018419484 |
| 0.234265563 | 0.030352081 | 0.18551672  | 0.278680043 |
| 0.015807702 | 0.180479093 | 0.195691338 | 0.092373188 |
| 0.171165754 | 0.116201192 | 0.013916546 | 0.099391289 |
| 0.207516784 | 0.120492198 | 0.214418065 | 0.148660415 |
| 0.056133403 | 0.232817423 | 0.15324663  | 0.062652098 |
| 0.100161934 | 0.01440897  | 0.173132849 | 0.243867373 |
| 0.186696773 | 0.094590879 | 0.154861398 | 0.112399797 |
| 0.027753998 | 0.163723182 | 0.00986142  | 0.305650295 |
| 0.128294491 | 1           | 0.177187922 | 0.081817967 |
| 0.055272729 | 0.145953836 | 0.015120154 | 0.175252222 |
| 0.016087936 | 0.246276165 | 0.045938199 | 0.05674586  |
| 0.026289746 | 0.199349885 | 0.065083164 | 0.012763819 |
| 0.019179943 | 0.02201776  | 0.019174324 | 0.204398245 |
| 0.2150547   | 0.16680312  | 0.153392955 | 0.14285182  |
| 0.027315461 | 0.051052542 | 0.034931188 | 0.054130793 |
| 0.186103286 | 0.124667474 | 0.052989348 | 0.132467954 |
| 0.154672876 | 0.18242133  | 0.025961841 | 0.039900209 |
| 0.198875176 | 0.234082689 | 0.077078949 | 0.0684103   |
| 0.024539291 | 0.004536694 | 0.199814783 | 0.16987659  |
| 0.227775811 | 0.01643953  | 0.027858475 | 0.274132419 |
| 0.028540942 | 0.061694354 | 0.164951905 | 0.025481742 |
| 0.221154752 | 0.041165641 | 0.025489224 | 0.178410944 |
| 0.046510128 | 0.17002507  | 0.158659979 | 0.12467807  |
| 0.056196794 | 0.014859207 | 0.006081713 | 0.013158262 |
| 0.063288118 | 0.003508565 | 0.194968281 | 0.215309333 |
| 0.148147139 | 0.036126156 | 0.129121864 | 0.002594091 |
| 0.00807086  | 0.020329949 | 0.13889698  | 0.088826606 |
| 0.164918356 | 0.107836334 | 0.042446671 | 0.201423285 |
| 0.074143338 | 0.148261308 | 0.050390869 | 0.089237208 |
| 0.111957453 | 0.021541481 | 0.098221377 | 0.097640633 |
| 0.044769249 | 0.125596172 | 0.063332312 | 0.188490284 |
| 0.280852198 | 0.06452447  | 0.091931185 | 0.137347966 |
| 0.065720636 | 0.043046029 | 0.066297531 | 0.077044451 |
| 0.08655154  | 0.14817788  | 0.004614319 | 0.142347601 |
| 0.0179818   | 0.011519336 | 0.019251237 | 0.218832817 |
| 0.091975166 | 0.168342301 | 0.170249072 | 0.050957315 |
| 0.09758909  | 0.097972314 | 0.182745782 | 0.154533692 |
| 0.018092833 | 0.03269165  | 0.144427158 | 0.189127723 |
| 0.308759829 | 0.153571455 | 0.068198475 | 0.030409119 |
| 0.057637357 | 0.170474153 | 0.000421417 | 0.208817488 |
| 0.170827746 | 0.131530719 | 0.104481172 | 0.079263229 |
| 0.031650187 | 0.207141728 | 0.009311312 | 0.145375329 |
| 0.184247983 | 0.046530824 | 0.176520664 | 0.038230638 |
| 0.18009962  | 0.021546147 | 0.132935353 | 0.093418139 |
| 0.091496338 | 0.009266906 | 0.238457995 | 0.241173443 |
| 0.003748008 | 0.180206228 | 0.165193048 | 0.17530369  |
| 0.11831984  | 0.130952265 | 0.183493837 | 0.02528898  |
| 0.078412872 | 0.123307744 | 0.009546668 | 0.039409873 |
| 0.124218241 | 0.027217545 | 0.249562571 | 0.108797587 |
| 0.157259118 | 0.219211608 | 0.117023108 | 0.045269512 |
| 0.050919147 | 0.18300135  | 0.054998707 | 0.062475091 |
| 0.12960674  | 0.086228401 | 0.049194121 | 0.022637575 |
| 0.012776785 | 0.190078584 | 0.006456502 | 0.008503681 |

|             |             |             |             |
|-------------|-------------|-------------|-------------|
| 0.002947086 | 0.134609033 | 0.128705235 | 0.073735115 |
| 0.02640446  | 0.040003945 | 0.02502497  | 0.047159787 |
| 0.115421396 | 0.035066836 | 0.001665901 | 0.02657019  |
| 0.03193059  | 0.042044478 | 0.054149898 | 0.172847174 |
| 0.085972126 | 0.045648175 | 0.06397716  | 0.016592014 |
| 0.014891248 | 0.010003488 | 0.204226155 | 0.146268899 |
| 0.262037783 | 0.079760466 | 0.017139963 | 0.034537227 |
| 0.208220896 | 0.171829815 | 0.11198926  | 0.237593784 |
| 0.023370105 | 0.159711287 | 0.053442194 | 0.028708287 |
| 0.029565971 | 0.102971059 | 0.212187147 | 0.034234268 |
| 0.15209494  | 0.243313294 | 0.068853262 | 0.03077782  |
| 0.243653715 | 0.174799482 | 0.056260527 | 0.169782888 |
| 0.177062125 | 0.020309498 | 0.17584937  | 0.013231122 |
| 0.009310951 | 0.089316036 | 0.105061612 | 0.025363786 |
| 0.016395219 | 0.104023931 | 0.156807865 | 0.070086769 |
| 0.199278572 | 0.137181539 | 0.16412859  | 0.011351671 |
| 0.044509074 | 0.00885582  | 0.015064914 | 0.048431445 |
| 0.205923682 | 0.148953095 | 0.077937339 | 0.042281427 |
| 0.125571785 | 0.026546806 | 0.165027394 | 0.172635003 |
| 0.016967253 | 0.190605864 | 0.008327375 | 0.093079961 |
| 0.174314864 | 0.212619401 | 0.013881134 | 0.208383096 |
| 0.250972955 | 0.047962198 | 0.08382871  | 0.199801982 |
| 0.198188409 | 0.043105996 | 0.036932106 | 0.114553543 |
| 0.07666323  | 0.0929708   | 0.066294644 | 0.005912336 |
| 0.053366064 | 0.046446846 | 1.83E-05    | 0.101621081 |
| 0.039191545 | 0.234484382 | 0.157469939 | 0.022473023 |
| 0.174249097 | 0.098787455 | 0.078646164 | 0.033578915 |
| 0.104744026 | 0.14806067  | 0.20444703  | 0.104714436 |
| 0.125791818 | 0.15131018  | 0.041685953 | 0.017392062 |
| 0.004925216 | 0.164698211 | 0.191250401 | 0.026349211 |
| 0.188824437 | 0.238326918 | 0.019687852 | 0.237134552 |
| 0.114102952 | 0.201274208 | 0.020736587 | 0.003964451 |
| 0.004586077 | 0.12893449  | 0.199798208 | 0.253105995 |
| 0.116687955 | 0.145300647 | 3.38E-05    | 0.160200085 |
| 0.210661887 | 0.003316723 | 0.009609547 | 0.123121798 |
| 0.077439709 | 0.228181055 | 0.018482904 | 0.114846306 |
| 0.06033175  | 0.170417985 | 0.095803556 | 0.068419637 |
| 0.203049936 | 0.130951823 | 0.210197253 | 0.230935125 |
| 0.198852875 | 0.096387605 | 0.145502082 | 0.036842241 |
| 0.010303986 | 0.205480736 | 0.042723447 | 0.024056711 |
| 0.247140673 | 0.021716491 | 0.181675996 | 0.166033356 |
| 0.140971932 | 0.004464293 | 0.165389885 | 0.148061491 |
| 0.270470031 | 0.228751795 | 0.00803929  | 0.002582093 |
| 0.001260273 | 0.002232586 | 0.204312896 | 0.034061559 |
| 0.169395177 | 0.092085032 | 0.009839806 | 0.145758092 |
| 0.07521435  | 0.053154616 | 0.195291904 | 0.174804728 |
| 0.108822371 | 0.030484558 | 0.06874838  | 0.186504049 |
| 0.009520501 | 0.17492238  | 0.157351254 | 0.24704804  |
| 0.011085997 | 0.033915547 | 0.086288275 | 0.218510466 |
| 0.00029879  | 0.069499213 | 0.088687773 | 0.061942313 |
| 0.003908386 | 0.012447737 | 0.014409015 | 0.141998477 |
| 0.161111111 | 0.023214867 | 0.013482173 | 0.092199961 |
| 0.079396004 | 0.165732817 | 0.05641133  | 0.181418493 |
| 0.226096158 | 0.191493945 | 0.007120433 | 0.21187704  |

|             |             |             |             |
|-------------|-------------|-------------|-------------|
| 0.01897582  | 0.191069098 | 0.027943793 | 0.043384527 |
| 0.036529846 | 0.011673224 | 0.141596117 | 0.014572845 |
| 0.133901875 | 0.199083248 | 0.014918323 | 0.003216261 |
| 0.005169327 | 0.015642606 | 0.177985312 | 0.122573979 |
| 0.003991474 | 0.099417767 | 0.058177328 | 0.132458327 |
| 0.257140176 | 0.172509183 | 0.212399479 | 0.0793002   |
| 0.10344038  | 0.004179006 | 0.223802125 | 0.166824394 |
| 0.15193705  | 0.157069489 | 0.034437036 | 0.174084718 |
| 0.17959982  | 0.193854034 | 0.156860949 | 0.148788324 |
| 0.012355639 | 0.155818694 | 0.251382417 | 0.06482217  |
| 0.126778519 | 0.172361153 | 0.132300261 | 0.016637335 |
| 0.047627345 | 0.033673067 | 0.043897211 | 0.04240436  |
| 0.017447811 | 0.286490378 | 0.068500831 | 0.18151219  |
| 0.17555838  | 0.177193242 | 0.073222209 | 0.015455445 |
| 0.20686049  | 0.21468863  | 0.127763794 | 0.173959681 |
| 0.03821171  | 0.080696382 | 0.118811547 | 0.102034201 |
| 0.033606029 | 0.163534168 | 0.225996908 | 0.232878249 |
| 0.273848903 | 0.128894503 | 0.20110226  | 0.192538341 |
| 0.009068365 | 0.087630877 | 0.047507629 | 0.018328421 |
| 0.065366099 | 0.008800915 | 0.009461977 | 0.132048415 |
| 0.016108015 | 0.132226536 | 0.088258174 | 0.028103834 |
| 0.050314929 | 0.065373836 | 0.094607635 | 0.152127083 |
| 0.047433463 | 0.204457189 | 0.006018937 | 0.018511305 |
| 0.021028256 | 0.136806015 | 0.035619163 | 0.033344873 |
| 0.011936461 | 0.011463341 | 0.087812456 | 0.218911795 |
| 0.085871483 | 0.029681261 | 0.145366773 | 0.061868247 |
| 0.064050748 | 0.175003979 | 0.110495691 | 0.003836201 |
| 0.01414128  | 0.138778657 | 0.052056398 | 0.054598361 |
| 0.00294775  | 0.135827169 | 0.115849692 | 0.066896899 |
| 0.193279153 | 0.035276773 | 0.24740919  | 0.035931201 |
| 0.044117576 | 0.223072911 | 0.045741931 | 0.165299131 |
| 0.034321811 | 0.167803103 | 0.225273056 | 0.161132189 |
| 0.025842821 | 0.044732657 | 0.055776634 | 0.20409375  |
| 0.030497881 |             |             |             |

|             |             |             |             |
|-------------|-------------|-------------|-------------|
| BBS9        | 0.450197757 | 0.492364837 | 0.408741384 |
| 0.430217199 | 0.431532683 | 0.422229198 | 0.198037297 |
| 0.177514704 | 0.074095168 | 0.00400533  | 0.021605085 |
| 0.455731287 | 0.209375027 | 0.280171865 | 0.362941627 |
| 0.408378554 | 0.118435584 | 0.337605825 | 0.214815083 |
| 0.40839209  | 0.086930203 | 0.391513518 | 0.074110985 |
| 0.274731759 | 0.091387245 | 0.056352537 | 0.262575057 |
| 0.444544226 | 0.064258646 | 0.384155824 | 0.403122703 |
| 0.076691415 | 0.463537398 | 0.515468941 | 0.454941321 |
| 0.51739593  | 0.444072043 | 0.008088333 | 0.32613384  |
| 0.450688925 | 0.466077867 | 0.409821494 | 0.315899099 |
| 0.032786151 | 0.493307032 | 0.233385208 | 0.3914455   |
| 0.240546862 | 0.023965689 | 0.266055383 | 0.448342313 |
| 0.49058862  | 0.483176369 | 0.218393617 | 0.148945833 |
| 0.23604074  | 0.256502082 | 0.310413081 | 0.366469396 |
| 0.210075587 | 0.177187922 | 1           | 0.081392837 |
| 0.149672456 | 0.233595364 | 0.126626221 | 0.25014387  |
| 0.358979511 | 0.429269697 | 0.010991439 | 0.446205821 |
| 0.002811335 | 0.375734246 | 0.356413343 | 0.344795544 |
| 0.02983414  | 0.017231602 | 0.149446617 | 0.342177741 |

|             |             |             |             |
|-------------|-------------|-------------|-------------|
| 0.461114557 | 0.461306959 | 0.484195065 | 0.492308115 |
| 0.167115751 | 0.259978576 | 0.408408832 | 0.154520281 |
| 0.470479266 | 0.172233678 | 0.092590074 | 0.412566825 |
| 0.48909017  | 0.505647844 | 0.176332879 | 0.232731409 |
| 0.47855397  | 0.479325486 | 0.455707653 | 0.445107961 |
| 0.380497684 | 0.037360177 | 0.480340359 | 0.498913737 |
| 0.446882909 | 0.325020939 | 0.129931887 | 0.436021262 |
| 0.042850194 | 0.384367566 | 0.342378452 | 0.144881851 |
| 0.46388817  | 0.012993128 | 0.187146916 | 0.370953088 |
| 0.178266636 | 0.472469388 | 0.497947511 | 0.167599563 |
| 0.400257448 | 0.014396028 | 0.138232418 | 0.021670371 |
| 0.327290068 | 0.141504217 | 0.509693004 | 0.479168418 |
| 0.232108722 | 0.388708126 | 0.246473451 | 0.000333401 |
| 0.018334743 | 0.154466142 | 0.486323884 | 0.35345261  |
| 0.443753128 | 0.441051528 | 0.23103725  | 0.44791741  |
| 0.48640016  | 0.48369508  | 0.076401728 | 0.077135167 |
| 0.435370155 | 0.152314667 | 0.211391527 | 0.476728309 |
| 0.296432058 | 0.095073536 | 0.106453833 | 0.492618194 |
| 0.446459931 | 0.067938156 | 0.348421207 | 0.403222086 |
| 0.366814735 | 0.347150834 | 0.085014316 | 0.273048946 |
| 0.040890664 | 0.483270246 | 0.01910484  | 0.329672962 |
| 0.305148007 | 0.137286278 | 0.005889823 | 0.262911473 |
| 0.305455759 | 0.496310959 | 0.495450131 | 0.08229807  |
| 0.316935208 | 0.404823927 | 0.346055516 | 0.481328695 |
| 0.009643532 | 0.031641637 | 0.313598879 | 0.499447635 |
| 0.344041267 | 0.48668087  | 0.275773288 | 0.278123402 |
| 0.256656038 | 0.455078719 | 0.002212534 | 0.50050718  |
| 0.508225154 | 0.341934782 | 0.416420762 | 0.413949386 |
| 0.412713628 | 0.469778712 | 0.042682104 | 0.410028372 |
| 0.411501068 | 0.058277389 | 0.483064106 | 0.140267981 |
| 0.477291888 | 0.031299455 | 0.334394217 | 0.479669927 |
| 0.493337162 | 0.006110063 | 0.248905511 | 0.396392049 |
| 0.017805908 | 0.095087167 | 0.443920092 | 0.413563318 |
| 0.397054062 | 0.455584877 | 0.467145141 | 0.396915169 |
| 0.433257684 | 0.209108412 | 0.006954024 | 0.295335228 |
| 0.463887728 | 0.428651972 | 0.463594963 | 0.222990002 |
| 0.391631057 | 0.486827669 | 0.480356048 | 0.251264778 |
| 0.033176732 | 0.315704608 | 0.017158266 | 0.326750789 |
| 0.455105768 | 0.116671291 | 0.433032853 | 0.116903914 |
| 0.054730423 | 0.499265277 | 0.163184455 | 0.268388066 |
| 0.121641992 | 0.448920492 | 0.224055075 | 0.269677314 |
| 0.239338238 | 0.139395885 | 0.362200826 | 0.395828679 |
| 0.031192742 | 0.078592601 | 0.008125323 | 0.444790949 |
| 0.158577754 | 0.396081128 | 0.405607732 | 0.464419418 |
| 0.340230683 | 0.105945683 | 0.390443433 | 0.277476355 |
| 0.09304137  | 0.00912355  | 0.493124642 | 0.39275266  |
| 0.398263714 | 0.132567435 | 0.027921319 | 0.409410185 |
| 0.488130879 | 0.391001292 | 0.307133516 | 0.484361162 |
| 0.018588384 | 0.482010652 | 0.259450947 | 0.103969733 |
| 0.405401075 | 0.247360956 | 0.458149815 | 0.06166081  |
| 0.412928076 | 0.481121337 | 0.280392177 | 0.170144293 |
| 0.455209963 | 0.422520549 | 0.022553426 | 0.45989407  |
| 0.460455246 | 0.022309872 | 0.497790811 | 0.106458829 |
| 0.013055021 | 0.45234147  | 0.491779386 | 0.057148165 |

|             |             |             |             |
|-------------|-------------|-------------|-------------|
| 0.059359107 | 0.36124486  | 0.040044544 | 0.2664009   |
| 0.49816747  | 0.406169619 | 0.491134285 | 0.1937846   |
| 0.032022586 | 0.009783379 | 0.180446846 | 0.410967164 |
| 0.516706672 | 0.497523655 | 0.229485312 | 0.384361269 |
| 0.21488434  | 0.351117016 | 0.152391227 | 0.500933665 |
| 0.163680555 | 0.499065268 | 0.003168716 | 0.477005885 |
| 0.519648885 | 0.325645264 | 0.067219205 | 0.323312391 |
| 0.455823636 | 0.034288868 | 0.172172835 | 0.48634842  |
| 0.475760811 | 0.330350817 | 0.373090587 | 0.432269748 |
| 0.012074281 | 0.03381862  | 0.391824351 | 0.17356783  |
| 0.415800276 | 0.191484588 | 0.047855039 | 0.333114752 |
| 0.035548194 | 0.481358854 | 0.46014556  | 0.049649815 |
| 0.410680987 | 0.31741116  | 0.362858709 | 0.026182039 |
| 0.487900134 | 0.482544084 | 0.515973045 | 0.137747152 |
| 0.480586363 | 0.500104483 | 0.459546996 | 0.058051565 |
| 0.010643917 | 0.509040569 | 0.430620637 | 0.019419444 |
| 0.47313563  | 0.27791186  | 0.011686884 | 0.485079477 |
| 0.160113277 | 0.468315385 | 0.002886325 | 0.076073381 |
| 0.026803135 | 0.462623432 | 0.483657105 | 0.395937907 |
| 0.312972816 | 0.349634431 | 0.003449527 | 0.49329716  |
| 0.489778572 | 0.008745502 | 0.119306569 | 0.498355313 |
| 0.482703071 | 0.50008252  | 0.334834581 | 0.493774834 |
| 0.470613055 | 0.503970042 | 0.24114759  | 0.246726818 |
| 0.481986141 | 0.485638313 | 0.445852197 | 0.468713706 |
| 0.478887639 | 0.423436326 | 0.263417339 | 0.011180854 |
| 0.127118126 | 0.221771676 | 0.382167007 | 0.084594564 |
| 0.367051021 | 0.125672242 | 0.483254286 | 0.473962722 |
| 0.498582025 | 0.002000798 | 0.143137296 | 0.489454391 |
| 0.461859201 | 0.468715247 | 0.012390234 | 0.00422289  |
| 0.006047865 | 0.015897139 | 0.365593931 | 0.212071709 |
| 0.49426642  | 0.311320762 | 0.001905403 | 0.036131006 |
| 0.266704099 | 0.411594162 | 0.494609207 | 0.365569008 |
| 0.468447185 | 0.061506199 | 0.335935451 | 0.38837612  |
| 0.056514335 | 0.389182734 | 0.498869445 | 0.47635817  |
| 0.02710173  | 0.219776607 | 0.378418852 | 0.481338155 |
| 0.074036411 | 0.292636732 | 0.463632946 | 0.332509109 |
| 0.008007825 | 0.063437897 | 0.051521461 | 0.437919087 |
| 0.511392501 | 0.074781016 | 0.028212449 | 0.162541603 |
| 0.114351255 | 0.478993881 | 0.152614029 | 0.492258544 |
| 0.468929956 | 0.437669195 | 0.058298394 | 0.477504862 |
| 0.032259774 | 0.488812023 | 0.342634451 | 0.063786475 |
| 0.255497634 | 0.006850676 | 0.481356595 | 0.183115425 |
| 0.349331898 | 0.416964449 | 0.196066553 | 0.010138362 |
| 0.17960477  | 0.038964533 | 0.481567512 | 0.474377969 |
| 0.021541519 | 0.215616913 | 0.268737572 | 0.397403258 |
| 0.303705583 | 0.45362331  | 0.505893344 | 0.474719304 |
| 0.074787456 | 0.129807905 | 0.414730697 | 0.439334841 |
| 0.239478093 | 0.481937849 | 0.320610434 | 0.493607388 |
| 0.445111453 | 0.472417123 | 0.494756134 | 0.352881991 |
| 0.228213122 | 0.428784663 | 0.419167906 | 0.017124344 |
| 0.337456807 | 0.479998767 | 0.354628207 | 0.148512063 |
| 0.249556359 | 0.418158835 | 0.033344664 | 0.186226991 |
| 0.361392681 | 0.351359751 | 0.131566507 | 0.433056115 |
| 0.407682056 | 0.444976119 | 0.029188395 | 0.049119563 |

|             |             |             |             |
|-------------|-------------|-------------|-------------|
| 0.508048094 | 0.462460441 | 0.134066762 | 0.458949144 |
| 0.140005683 | 0.34229758  | 0.473553788 | 0.467876739 |
| 0.387512236 | 0.498656501 | 0.454550175 | 0.443509964 |
| 0.461505803 | 0.240316218 | 0.516568976 | 0.083106077 |
| 0.07066034  | 0.457307755 | 0.092236203 | 0.07059674  |
| 0.123043142 | 0.017598841 | 0.32916     | 0.419967649 |
| 0.416328165 | 0.382913272 | 0.346423175 | 0.06415852  |
| 0.301169918 | 0.383824951 | 0.337511745 | 0.201412321 |
| 0.069002194 | 0.497955512 | 0.006195285 | 0.040485391 |
| 0.420114122 | 0.483634524 | 0.414761883 | 0.212188744 |
| 0.310871806 | 0.113977715 | 0.283634534 | 0.327033544 |
| 0.395252845 | 0.376280214 | 0.486629625 | 0.025022714 |
| 0.013658171 | 0.480887263 | 0.397236141 | 0.012111208 |
| 0.071799295 | 0.423576012 | 0.267907398 | 0.242293888 |
| 0.013718554 | 0.497117218 | 0.396087784 | 0.437526178 |
| 0.347881574 | 0.047507543 | 0.412226561 | 0.071311685 |
| 0.041671169 | 0.463340793 | 0.408229084 | 0.50202017  |
| 0.334238409 | 0.423052056 | 0.458891862 | 0.489138026 |
| 0.098488012 | 0.413536772 | 0.01951352  | 0.461025393 |
| 0.465701298 |             |             |             |
| BC016495    | 0.064392507 | 0.115674039 | 0.050138738 |
| 0.209706211 | 0.079873296 | 0.118502575 | 0.248963496 |
| 0.063298417 | 0.075992898 | 0.036256499 | 0.024017783 |
| 0.053127264 | 0.022020558 | 0.065198799 | 0.065949302 |
| 0.174690859 | 0.038925651 | 0.039065279 | 0.199706384 |
| 0.152114768 | 0.141867516 | 0.163064491 | 0.138291579 |
| 0.025316315 | 0.061747867 | 0.142542124 | 0.075359188 |
| 0.169323481 | 0.159358501 | 0.09376848  | 0.147863674 |
| 0.026695467 | 0.087254432 | 0.088183719 | 0.091892144 |
| 0.072102377 | 0.05561881  | 0.00146532  | 0.117659129 |
| 0.094694733 | 0.132049364 | 0.170362614 | 0.209400529 |
| 0.130280636 | 0.080217376 | 0.266912093 | 0.073744635 |
| 0.021537331 | 0.059014033 | 0.077214    | 0.08677841  |
| 0.077969327 | 0.084985057 | 0.122255641 | 0.215475476 |
| 0.015005408 | 0.042669782 | 0.011007334 | 0.095461879 |
| 0.204365357 | 0.081817967 | 0.081392837 | 1           |
| 0.021249259 | 0.092698625 | 0.02396295  | 0.135928016 |
| 0.024681841 | 0.103996307 | 0.024383708 | 0.034196096 |
| 0.007482269 | 0.174490709 | 0.074522713 | 0.037408051 |
| 0.097435236 | 0.023693385 | 0.037745897 | 0.224143972 |
| 0.148152722 | 0.070341627 | 0.127442464 | 0.111718386 |
| 0.019573459 | 0.077515457 | 0.037412581 | 0.109214164 |
| 0.102268467 | 0.228836389 | 0.026727243 | 0.155817842 |
| 0.124661199 | 0.092135426 | 0.04579208  | 0.101696981 |
| 0.149953971 | 0.110766737 | 0.077241423 | 0.076333714 |
| 0.055448546 | 0.017789598 | 0.093016123 | 0.108037429 |
| 0.082065533 | 0.026995771 | 0.107541474 | 0.133812771 |
| 0.089153408 | 0.019934872 | 0.213552544 | 0.005134284 |
| 0.153590816 | 0.133271284 | 0.077131578 | 0.153606305 |
| 0.027034192 | 0.09788874  | 0.086441949 | 0.235401972 |
| 0.047683309 | 0.012361937 | 0.019120004 | 0.034853235 |
| 0.014947959 | 0.005243129 | 0.069138634 | 0.150877966 |
| 0.032658149 | 0.023344827 | 0.144383924 | 0.016576933 |
| 0.035554423 | 0.009889396 | 0.063002308 | 0.050035271 |



|             |             |             |             |
|-------------|-------------|-------------|-------------|
| 0.114622809 | 0.04879521  | 0.140291254 | 0.074247907 |
| 0.061545065 | 0.122846563 | 0.01000148  | 0.133973366 |
| 0.101397954 | 0.014790861 | 0.194608083 | 0.064753077 |
| 0.111741809 | 0.121626957 | 0.120884094 | 0.133686518 |
| 0.10441676  | 0.167427459 | 0.031287208 | 0.153923078 |
| 0.056787397 | 0.071228796 | 0.110904739 | 0.065883755 |
| 0.105556345 | 0.070579264 | 0.029544344 | 0.066132349 |
| 0.025440779 | 0.007163096 | 0.01026058  | 0.116988829 |
| 0.035628571 | 0.110910835 | 0.057649421 | 0.117214753 |
| 0.088411283 | 0.137722842 | 0.05655327  | 0.114273322 |
| 0.044280546 | 0.025564802 | 0.032141724 | 0.112115154 |
| 0.084079787 | 0.097475207 | 0.062297935 | 0.057157766 |
| 0.127671725 | 0.151307829 | 0.001028764 | 0.084642238 |
| 0.090752908 | 0.032594759 | 0.108931254 | 0.067377262 |
| 0.060302927 | 0.170035719 | 0.001001805 | 0.130230546 |
| 0.049686486 | 0.114309716 | 0.138684448 | 0.127245155 |
| 0.073202059 | 0.124725725 | 0.062436857 | 0.081368995 |
| 0.051514227 | 0.006490877 | 0.14903833  | 0.19530675  |
| 0.022697929 | 0.12896382  | 0.105342533 | 0.186483849 |
| 0.189485806 | 0.11314431  | 0.153531867 | 0.055819901 |
| 0.089465849 | 0.111512791 | 0.015298126 | 0.071811473 |
| 0.080446814 | 0.007498398 | 0.109234812 | 0.112653598 |
| 0.039838867 | 0.117157865 | 0.063156495 | 0.024671873 |
| 0.188935539 | 0.129637958 | 0.025408019 | 0.155333003 |
| 0.068414778 | 0.095318554 | 0.069048516 | 0.009074915 |
| 0.053890447 | 0.122170905 | 0.021509016 | 0.016647572 |
| 0.009747655 | 0.085831254 | 0.15954063  | 0.057735053 |
| 0.018510611 | 0.093231688 | 0.055717098 | 0.079609348 |
| 0.129083075 | 0.093319244 | 0.003794698 | 0.013162428 |
| 0.013323886 | 0.026628489 | 0.027153719 | 0.067763537 |
| 0.022176723 | 0.018338238 | 0.087369997 | 0.025524918 |
| 0.062133038 | 0.065735898 | 0.114828508 | 0.144787622 |
| 0.072106273 | 0.144972319 | 0.055182495 | 0.004976878 |
| 0.141523344 | 0.087530249 | 0.031961478 | 0.132946058 |
| 0.015696604 | 0.120605947 | 0.05008387  | 0.120011619 |
| 0.02985924  | 0.162642946 | 0.179115479 | 0.031074139 |
| 0.066191506 | 0.105468641 | 0.099480543 | 0.131680786 |
| 0.079353359 | 0.142057182 | 0.050168202 | 0.070826541 |
| 0.059727246 | 0.079633305 | 0.097309891 | 0.024884905 |
| 0.055890352 | 0.08138273  | 0.093073015 | 0.126533523 |
| 0.088525936 | 0.148013988 | 0.120283303 | 0.157398757 |
| 0.125465964 | 0.169631263 | 0.112249882 | 0.029473874 |
| 0.1314293   | 0.007055791 | 0.036655579 | 0.038984826 |
| 0.077808596 | 0.087567071 | 0.115584581 | 0.065289079 |
| 0.219025634 | 0.061791179 | 0.016913912 | 0.112256663 |
| 0.005494239 | 0.084636492 | 0.038801771 | 0.084389362 |
| 0.074984668 | 0.057844818 | 0.08966747  | 0.191136272 |
| 0.093812919 | 0.174324682 | 0.064176652 | 0.092056695 |
| 0.131770884 | 0.103558743 | 0.088108184 | 0.074351898 |
| 0.098424252 | 0.062041961 | 0.111007089 | 0.014909332 |
| 0.071479917 | 0.13145757  | 0.00099953  | 0.039803156 |
| 0.064634484 | 0.108057052 | 0.112370476 | 0.108475416 |
| 0.118925666 | 0.046417892 | 0.102159206 | 0.13132504  |
| 0.082651858 | 0.074847793 | 0.090129674 | 0.081625891 |

|             |             |             |             |
|-------------|-------------|-------------|-------------|
| 0.065643843 | 0.098524014 | 0.041108756 | 0.064412448 |
| 0.046770906 | 0.07920807  | 0.099518177 | 0.028306751 |
| 0.138286051 | 0.06504262  | 0.020947276 | 0.118180385 |
| 0.201839213 | 0.057612658 | 0.028134831 | 0.001279514 |
| 0.016449905 | 0.109319484 | 0.094901169 | 0.144836894 |
| 0.063818083 | 0.120931793 | 0.000318582 | 0.093209632 |
| 0.100274779 | 0.031878156 | 0.022216831 | 0.07094811  |
| 0.060355384 | 0.107086847 | 0.046293075 | 0.09330261  |
| 0.048715687 | 0.07941828  | 0.030577139 | 0.174279651 |
| 0.133509559 | 0.070924548 | 0.127249973 | 0.110069842 |
| 0.133868219 | 0.09919134  | 0.25302937  | 0.120949845 |
| 0.038017823 | 0.113720107 | 0.052038481 | 0.047001155 |
| 0.08349746  | 0.08291549  | 0.091320954 | 0.129407633 |
| 0.094241309 | 0.037097652 | 0.087614401 | 0.07618572  |
| 0.145152364 | 0.154700187 | 0.008497016 | 0.00801437  |
| 0.001740442 | 0.015036491 | 0.13737575  | 0.085497826 |
| 0.111097428 | 0.019447804 | 0.046226098 | 0.06440804  |
| 0.044090083 | 0.075634289 | 0.097078078 | 0.19429483  |
| 0.079006943 | 0.074891452 | 0.054540639 | 0.170474937 |
| 0.041431727 | 0.046376796 | 0.11260289  | 0.11159432  |
| 0.022029023 | 0.09272931  | 0.036262428 | 0.156207034 |
| 0.002671463 | 0.108739008 | 0.053154652 | 0.058702599 |
| 0.004149459 | 0.065576995 | 0.093559832 | 0.125220027 |
| 0.067831298 | 0.03083383  | 0.027716468 | 0.006245841 |
| 0.138749156 | 0.107767559 | 0.070733792 | 0.129212224 |
| 0.143500538 | 0.171148756 | 0.015570429 | 0.107435313 |
| 0.035095794 | 0.077538714 | 0.052909625 | 0.034153581 |
| 0.035056564 | 0.023456147 | 0.062450106 | 0.027081031 |
| 0.050184489 | 0.094818788 | 0.031848912 | 0.021893767 |
| 0.009622737 | 0.059103754 | 0.151654139 | 0.10958812  |
| 0.011630882 | 0.10533968  | 0.099468403 | 0.102448063 |
| 0.138558321 | 0.159975407 | 0.088991673 | 0.047674928 |
| 0.160103856 | 0.001479779 | 0.143111466 | 0.06176898  |
| 0.050407691 | 0.125041782 | 0.067106607 | 0.10378291  |
| 0.090185464 | 0.104185764 | 0.086651222 | 0.214404975 |
| 0.008435159 | 0.076425158 | 0.175122571 | 0.049263362 |
| 0.141530866 | 0.136044219 | 0.075593261 | 0.039369136 |
| 0.124324877 | 0.036293481 | 0.024139757 | 0.003292731 |
| 0.021963042 | 0.134961869 | 0.057765432 | 0.161851843 |
| 0.07400875  | 0.066914426 | 0.017687283 | 0.098695738 |
| 0.107077651 | 0.103427582 | 0.068532077 | 0.143050375 |
| 0.087416914 | 0.166800797 | 0.088816742 | 0.081451688 |
| 0.025311276 | 0.094139011 | 0.114743285 | 0.122641521 |
| 0.107911575 | 0.213476811 | 0.096333905 | 0.023607247 |
| 0.023171046 | 0.039194527 | 0.081008034 | 0.079329305 |
| 0.150565556 | 0.045105261 | 0.013564304 | 0.119314666 |
| 0.014266793 | 0.150383638 | 0.011991282 | 0.035139132 |
| 0.078740268 | 0.028489505 | 0.127252848 | 0.177002229 |
| 0.064288476 | 0.0962543   | 0.014285594 | 0.057451059 |
| 0.014668306 | 0.111259223 | 0.055367872 | 0.081423735 |
| 0.016732129 | 0.015131648 | 0.142639039 | 0.075742136 |
| 0.048641173 | 0.005655005 | 0.112022496 | 0.043862399 |
| 0.055500749 | 0.130353004 | 0.048238918 | 0.00780329  |
| 0.011579786 | 0.061687437 | 0.022134871 | 0.081194646 |

|             |             |             |             |
|-------------|-------------|-------------|-------------|
| 0.024460256 | 0.078648546 | 0.084832449 | 0.070848476 |
| 0.161714234 | 0.067882698 | 0.065493825 | 0.018783689 |
| 0.031742629 | 0.079797077 | 0.053096782 | 0.079652804 |
| 0.037398503 | 0.18317499  | 0.071909469 | 0.075616071 |
| 0.01009475  | 0.028559552 | 0.113890619 | 0.124386531 |
| 0.026821842 |             |             |             |
| BC057170    | 0.130837307 | 0.189406286 | 0.064674656 |
| 0.18951772  | 0.112241916 | 0.116371512 | 0.12283769  |
| 0.043151899 | 0.011166298 | 0.001183878 | 0.005058148 |
| 0.084184439 | 0.005949718 | 0.044739017 | 0.036779168 |
| 0.195387931 | 0.025905796 | 0.058186336 | 0.125576013 |
| 0.18367625  | 0.050171459 | 0.169211836 | 0.050570212 |
| 0.039670053 | 0.025800933 | 0.04957204  | 0.047739298 |
| 0.197572166 | 0.053453128 | 0.097532723 | 0.181570045 |
| 0.018643201 | 0.161176963 | 0.16111732  | 0.124176669 |
| 0.146800792 | 0.10479339  | 0.000336852 | 0.066704171 |
| 0.154534757 | 0.141657125 | 0.21130434  | 0.139787511 |
| 0.030096982 | 0.15103061  | 0.137933576 | 0.105186141 |
| 0.005473978 | 0.015893521 | 0.060509976 | 0.163641999 |
| 0.140832489 | 0.125913696 | 0.081632167 | 0.088199762 |
| 0.008965865 | 0.056834122 | 0.013242631 | 0.131810754 |
| 0.131441382 | 0.055272729 | 0.149672456 | 0.021249259 |
| 1           | 0.089679204 | 0.023747014 | 0.099768019 |
| 0.042214486 | 0.146443315 | 0.008973502 | 0.0711379   |
| 0.000233046 | 0.186580549 | 0.096840338 | 0.039353548 |
| 0.032821074 | 0.006184231 | 0.035045222 | 0.171892501 |
| 0.199564516 | 0.141565178 | 0.177242517 | 0.173771819 |
| 0.012497713 | 0.078520681 | 0.074688149 | 0.056874896 |
| 0.16243146  | 0.091171843 | 0.002646425 | 0.180725602 |
| 0.176419167 | 0.16768255  | 0.034294218 | 0.086071622 |
| 0.164715902 | 0.18330366  | 0.068815933 | 0.114268154 |
| 0.035499747 | 0.00902516  | 0.16493648  | 0.179213483 |
| 0.141969023 | 0.042015795 | 0.055687426 | 0.182890056 |
| 0.041267963 | 0.018352267 | 0.172278041 | 0.00211681  |
| 0.197520897 | 0.019912579 | 0.060759647 | 0.154599753 |
| 0.025016841 | 0.138030994 | 0.154925473 | 0.116199643 |
| 0.072889153 | 0.000972259 | 0.001923484 | 0.018125976 |
| 0.006837812 | 0.007018112 | 0.142478162 | 0.183705727 |
| 0.032420643 | 0.038182283 | 0.117171986 | 0.003368941 |
| 0.011208777 | 0.008652513 | 0.130574983 | 0.079145255 |
| 0.173136295 | 0.105096446 | 0.063583831 | 0.134772279 |
| 0.100159644 | 0.181947629 | 0.000287524 | 0.056872823 |
| 0.093375723 | 0.021125436 | 0.127749333 | 0.114886544 |
| 0.076309007 | 0.05486665  | 0.067191666 | 0.18810307  |
| 0.174338562 | 0.066270961 | 0.058725882 | 0.161049162 |
| 0.048732432 | 0.077317138 | 0.05979286  | 0.055570104 |
| 0.040582297 | 0.139205758 | 0.011234222 | 0.084559774 |
| 0.013147898 | 0.007684452 | 0.002526287 | 0.100778189 |
| 0.014810182 | 0.149203853 | 0.134125132 | 0.059449169 |
| 0.085851278 | 0.139337462 | 0.100427223 | 0.123067023 |
| 0.004073146 | 0.007473378 | 0.061514892 | 0.177933773 |
| 0.11210634  | 0.166329303 | 0.048124658 | 0.055747925 |
| 0.094320153 | 0.183315623 | 3.41E-05    | 0.150664607 |
| 0.163487401 | 0.047207696 | 0.105697709 | 0.104196018 |

|             |             |             |             |
|-------------|-------------|-------------|-------------|
| 0.067934364 | 0.183588054 | 0.000167281 | 0.162113084 |
| 0.100554809 | 0.051395179 | 0.194670787 | 0.066748761 |
| 0.143595222 | 0.039526996 | 0.089612671 | 0.129940584 |
| 0.098735087 | 0.000440843 | 0.086635313 | 0.200960188 |
| 0.009786179 | 0.061693119 | 0.17132641  | 0.169580376 |
| 0.139527093 | 0.159296627 | 0.19761887  | 0.056669722 |
| 0.097493163 | 0.078160892 | 0.003994455 | 0.070185801 |
| 0.146804002 | 0.053632538 | 0.164238054 | 0.07113378  |
| 0.07392672  | 0.168799442 | 0.113480936 | 0.018412836 |
| 0.050574851 | 0.143409792 | 0.000899182 | 0.092613502 |
| 0.130207043 | 0.043388603 | 0.082478701 | 0.011099144 |
| 0.023428072 | 0.185355388 | 0.021747628 | 0.024987702 |
| 0.010475553 | 0.105855931 | 0.11303977  | 0.034965387 |
| 0.013415156 | 0.065756352 | 0.052933323 | 0.075995024 |
| 0.037788391 | 0.04556317  | 0.001557941 | 0.028667136 |
| 0.008960496 | 0.031991286 | 0.034078779 | 0.133076312 |
| 0.033623377 | 0.008472409 | 0.069245726 | 0.027965286 |
| 0.020995321 | 0.018400287 | 0.181605796 | 0.161214956 |
| 0.12193823  | 0.065367411 | 0.022679334 | 0.008085812 |
| 0.191520415 | 0.073414663 | 0.046275717 | 0.190114678 |
| 0.001311757 | 0.188648437 | 0.030907532 | 0.055551456 |
| 0.04325374  | 0.10484127  | 0.205560219 | 0.001148921 |
| 0.129090657 | 0.174055485 | 0.099755558 | 0.058840282 |
| 0.134826217 | 0.160645622 | 0.009911617 | 0.11827189  |
| 0.11214547  | 0.027059153 | 0.166226978 | 0.015835159 |
| 0.01861016  | 0.119554324 | 0.13761747  | 0.050164442 |
| 0.028988673 | 0.101217718 | 0.035842659 | 0.115603352 |
| 0.182711049 | 0.173672163 | 0.164528179 | 0.029205916 |
| 0.036738551 | 0.00124951  | 0.039728212 | 0.061588266 |
| 0.153239046 | 0.155132986 | 0.100365155 | 0.059648916 |
| 0.142176033 | 0.04964475  | 0.016043036 | 0.173570799 |
| 0.008000663 | 0.162159167 | 0.01091864  | 0.138836604 |
| 0.148021394 | 0.081424227 | 0.030199268 | 0.151084442 |
| 0.137472736 | 0.046239047 | 0.056898366 | 0.153608363 |
| 0.192671801 | 0.07404735  | 0.050601711 | 0.122483787 |
| 0.016497718 | 0.029142329 | 0.104540411 | 0.017029797 |
| 0.078980487 | 0.070879472 | 0.001330273 | 0.056735986 |
| 0.016529285 | 0.174305557 | 0.169124212 | 0.023190047 |
| 0.10646946  | 0.065224917 | 0.127596184 | 0.0391514   |
| 0.137191689 | 0.148366125 | 0.161900729 | 0.061352897 |
| 0.129117193 | 0.1538296   | 0.0722351   | 0.033778181 |
| 0.013046086 | 0.147723429 | 0.142150482 | 0.000828592 |
| 0.19642826  | 0.06957241  | 0.003418438 | 0.18317471  |
| 0.110667163 | 0.134504622 | 0.000180557 | 0.000457385 |
| 0.009180721 | 0.162331325 | 0.155365722 | 0.185262653 |
| 0.038104422 | 0.145338807 | 0.000777341 | 0.168216939 |
| 0.161047723 | 0.008483799 | 0.022918974 | 0.124601444 |
| 0.100432436 | 0.18320726  | 0.044422993 | 0.137116663 |
| 0.076367091 | 0.150199419 | 0.023434624 | 0.116664646 |
| 0.161547074 | 0.141576628 | 0.152422755 | 0.164155699 |
| 0.18402604  | 0.135021369 | 0.159587716 | 0.023479599 |
| 0.007866465 | 0.093324704 | 0.025516548 | 0.006725787 |
| 0.115099375 | 0.029238569 | 0.148327668 | 0.19359307  |
| 0.148564181 | 0.008730126 | 0.039959052 | 0.132039857 |

|             |             |             |             |
|-------------|-------------|-------------|-------------|
| 0.188023473 | 0.202525813 | 0.001826769 | 8.75E-05    |
| 0.000424036 | 0.002496805 | 0.171829116 | 0.063811469 |
| 0.168776797 | 0.010768893 | 0.009623513 | 0.02052316  |
| 0.023857548 | 0.093908824 | 0.165757859 | 0.184041291 |
| 0.136302247 | 0.044918589 | 0.03250646  | 0.188355315 |
| 0.014743917 | 0.098031158 | 0.16251757  | 0.17876881  |
| 0.013804005 | 0.077165834 | 0.060024581 | 0.207534665 |
| 0.003981593 | 0.109604043 | 0.098183448 | 0.036974805 |
| 0.000453278 | 0.024471406 | 0.03359194  | 0.178744781 |
| 0.142816148 | 0.013307257 | 0.00825649  | 0.001282173 |
| 0.052642424 | 0.182360785 | 0.031472244 | 0.188286726 |
| 0.184720018 | 0.198842389 | 0.014153305 | 0.16875223  |
| 0.01215656  | 0.14430752  | 0.059225701 | 0.000486751 |
| 0.039089435 | 0.007515985 | 0.132894115 | 0.009611565 |
| 0.068848621 | 0.140580078 | 0.013141685 | 0.01077925  |
| 0.008642177 | 0.023754792 | 0.198763879 | 0.161514751 |
| 0.00668846  | 0.089208458 | 0.082770437 | 0.136763055 |
| 0.106170433 | 0.165208666 | 0.156398764 | 0.057054095 |
| 0.063306394 | 0.002421615 | 0.167507254 | 0.101739556 |
| 0.058843867 | 0.183750491 | 0.050268715 | 0.173769052 |
| 0.139166179 | 0.17895672  | 0.153263676 | 0.1436557   |
| 0.015527921 | 0.098554911 | 0.155820398 | 0.003088521 |
| 0.114792063 | 0.182957489 | 0.099697449 | 0.013771826 |
| 0.080585782 | 0.070589425 | 0.011709253 | 0.001403552 |
| 0.039002855 | 0.121021841 | 0.038606936 | 0.200643183 |
| 0.123115601 | 0.111220005 | 0.007520486 | 0.028103355 |
| 0.184778313 | 0.169450687 | 0.018451161 | 0.143889973 |
| 0.056793162 | 0.129602819 | 0.132963556 | 0.134951439 |
| 0.056888847 | 0.156057812 | 0.163489819 | 0.138198447 |
| 0.17009746  | 0.145526158 | 0.167433279 | 0.013006408 |
| 0.002665651 | 0.096631314 | 0.031254223 | 0.042888165 |
| 0.079267816 | 0.011677712 | 0.018793067 | 0.164340056 |
| 0.029635347 | 0.150195003 | 0.027568361 | 0.006249947 |
| 0.096688667 | 0.064009005 | 0.131411946 | 0.084669159 |
| 0.017032393 | 0.161224894 | 0.000366973 | 0.029993655 |
| 0.034186863 | 0.145891055 | 0.061079989 | 0.050675573 |
| 0.019788095 | 0.020150739 | 0.123544528 | 0.079437445 |
| 0.043411593 | 0.007335603 | 0.142473763 | 0.002919816 |
| 0.017633632 | 0.18907262  | 0.059483567 | 0.003558796 |
| 0.012647637 | 0.127616679 | 0.033979273 | 0.044613205 |
| 0.00941725  | 0.152008431 | 0.079335314 | 0.103325085 |
| 0.148250448 | 0.033304048 | 0.132159188 | 0.002727217 |
| 0.01375899  | 0.143781595 | 0.072945312 | 0.15106274  |
| 0.057685091 | 0.190031656 | 0.147277296 | 0.152442913 |
| 0.001608955 | 0.059252955 | 0.025307118 | 0.183337644 |
| 0.034827262 |             |             |             |
| BCAP31      | 0.253587224 | 0.304666086 | 0.119186116 |
| 0.321878719 | 0.173001482 | 0.212552152 | 0.201908843 |
| 0.211271794 | 0.066361348 | 0.018190889 | 0.012328705 |
| 0.1682616   | 0.053392068 | 0.126254363 | 0.081979726 |
| 0.324212336 | 0.055894354 | 0.157868555 | 0.22823903  |
| 0.349624115 | 0.155837757 | 0.262476948 | 0.135785333 |
| 0.065666732 | 0.035692858 | 0.062858791 | 0.052613448 |
| 0.380298991 | 0.070667095 | 0.160865962 | 0.369016429 |

|             |             |             |             |
|-------------|-------------|-------------|-------------|
| 0.082826164 | 0.310573048 | 0.268323851 | 0.180429801 |
| 0.239819818 | 0.217125661 | 0.046806679 | 0.100154993 |
| 0.327428922 | 0.221916898 | 0.356958645 | 0.244457943 |
| 0.082178092 | 0.276231875 | 0.211647448 | 0.172823174 |
| 0.131307217 | 0.031262349 | 0.139114008 | 0.292865391 |
| 0.220706458 | 0.145160308 | 0.196467013 | 0.140057897 |
| 0.032086283 | 0.151484675 | 0.024341772 | 0.303860844 |
| 0.193608537 | 0.145953836 | 0.233595364 | 0.092698625 |
| 0.089679204 | 1           | 0.072458897 | 0.228788779 |
| 0.055079246 | 0.312486702 | 0.109370281 | 0.134935799 |
| 0.012832449 | 0.362478677 | 0.191527002 | 0.033444598 |
| 0.059430453 | 0.027010227 | 0.083052573 | 0.272395839 |
| 0.364985769 | 0.272129927 | 0.281691274 | 0.26006312  |
| 0.063070059 | 0.162435449 | 0.100455522 | 0.106667716 |
| 0.299634692 | 0.135556619 | 0.100668875 | 0.289852669 |
| 0.279091546 | 0.261071008 | 0.080074112 | 0.134261134 |
| 0.240036349 | 0.323672009 | 0.121902131 | 0.124247656 |
| 0.044169477 | 0.036819858 | 0.247451753 | 0.279603746 |
| 0.299198114 | 0.054728803 | 0.081974819 | 0.367100552 |
| 0.091875315 | 0.103726695 | 0.285591328 | 0.074609567 |
| 0.366644589 | 0.057798602 | 0.089069356 | 0.232535816 |
| 0.16404287  | 0.279455348 | 0.243404964 | 0.19648571  |
| 0.150212784 | 0.033754594 | 0.018648294 | 0.067648253 |
| 0.109300061 | 0.019887187 | 0.231934262 | 0.306939814 |
| 0.186759095 | 0.083312301 | 0.204204406 | 0.014462886 |
| 0.034659336 | 0.102699563 | 0.232695395 | 0.207380461 |
| 0.31572875  | 0.1927264   | 0.070724792 | 0.266206829 |
| 0.144774192 | 0.278376334 | 0.023962585 | 0.16836207  |
| 0.181897424 | 0.106585312 | 0.219035819 | 0.172920682 |
| 0.103388132 | 0.200344099 | 0.134427969 | 0.308894399 |
| 0.324700471 | 0.116776965 | 0.158068169 | 0.294875294 |
| 0.081808183 | 0.120373926 | 0.150901423 | 0.121093167 |
| 0.115429749 | 0.216760977 | 0.028840841 | 0.227066919 |
| 0.032474105 | 0.040192692 | 0.080452964 | 0.248718794 |
| 0.102965523 | 0.212744141 | 0.222213165 | 0.139167811 |
| 0.148855646 | 0.214060307 | 0.221464457 | 0.189756426 |
| 0.012595109 | 0.104339202 | 0.173331442 | 0.286990605 |
| 0.245186493 | 0.286791092 | 0.151942219 | 0.103946878 |
| 0.157462243 | 0.317623639 | 0.003872986 | 0.261655167 |
| 0.253902919 | 0.14280103  | 0.162376496 | 0.204774354 |
| 0.067236281 | 0.308615923 | 0.021173551 | 0.299000327 |
| 0.248338822 | 0.133261408 | 0.318268738 | 0.092570791 |
| 0.260549504 | 0.051910905 | 0.157121729 | 0.186107284 |
| 0.153895344 | 0.021137301 | 0.183400199 | 0.346954754 |
| 0.029138184 | 0.155206111 | 0.311499103 | 0.28845467  |
| 0.182980177 | 0.279888085 | 0.338711814 | 0.052847051 |
| 0.155597292 | 0.207889423 | 0.04421039  | 0.128614    |
| 0.257563609 | 0.057983154 | 0.292367585 | 0.17446613  |
| 0.193997838 | 0.289194957 | 0.196513735 | 0.04936928  |
| 0.086294869 | 0.246781116 | 0.050062553 | 0.128404356 |
| 0.217958362 | 0.091792224 | 0.095756431 | 0.113165595 |
| 0.050956415 | 0.291567105 | 0.033984762 | 0.032695377 |
| 0.018474469 | 0.160605512 | 0.246205791 | 0.064477122 |
| 0.034485927 | 0.106636355 | 0.063299087 | 0.085319917 |

|             |             |             |             |
|-------------|-------------|-------------|-------------|
| 0.114670321 | 0.077672789 | 0.024092584 | 0.043163728 |
| 0.032436575 | 0.051965681 | 0.053067632 | 0.243170986 |
| 0.123850451 | 0.060392731 | 0.118211912 | 0.064578922 |
| 0.056424653 | 0.037465177 | 0.296635932 | 0.309850613 |
| 0.269793164 | 0.153856144 | 0.069221926 | 0.043275531 |
| 0.29837513  | 0.130776085 | 0.123198183 | 0.298082476 |
| 0.071573349 | 0.304243804 | 0.073497044 | 0.073160718 |
| 0.060342823 | 0.171392136 | 0.357703381 | 0.040524274 |
| 0.254968879 | 0.295246574 | 0.202314812 | 0.07174678  |
| 0.254233253 | 0.291629896 | 0.082895839 | 0.25047762  |
| 0.240091952 | 0.054870706 | 0.273632354 | 0.054860231 |
| 0.042729891 | 0.206746761 | 0.170158748 | 0.080029722 |
| 0.062228032 | 0.119286917 | 0.144323428 | 0.181995502 |
| 0.293315497 | 0.273929187 | 0.215654564 | 0.058398306 |
| 0.068325457 | 0.010369563 | 0.069988867 | 0.131735984 |
| 0.263624524 | 0.247962189 | 0.206532586 | 0.082127329 |
| 0.247185463 | 0.056528665 | 0.156993883 | 0.271083927 |
| 0.095318185 | 0.283606658 | 0.034067512 | 0.1929353   |
| 0.233207774 | 0.198515998 | 0.040662932 | 0.230340721 |
| 0.272675214 | 0.093751514 | 0.213539474 | 0.262933905 |
| 0.293190138 | 0.090471642 | 0.06666799  | 0.259034994 |
| 0.07574067  | 0.128122796 | 0.158020948 | 0.031291022 |
| 0.086359648 | 0.119766322 | 0.006826937 | 0.163282327 |
| 0.055267837 | 0.275896988 | 0.31461997  | 0.047084088 |
| 0.141130403 | 0.154338701 | 0.212557534 | 0.081299459 |
| 0.194520205 | 0.246747666 | 0.272778829 | 0.221454011 |
| 0.235022184 | 0.229040271 | 0.087092355 | 0.079524697 |
| 0.027512868 | 0.243425335 | 0.29818907  | 0.030046759 |
| 0.333667236 | 0.173836374 | 0.017108642 | 0.319724416 |
| 0.213076273 | 0.238862317 | 0.014003114 | 0.027635588 |
| 0.038944342 | 0.278527006 | 0.248658343 | 0.368038834 |
| 0.071237891 | 0.316392149 | 0.010472828 | 0.277021778 |
| 0.267743208 | 0.018273064 | 0.048893203 | 0.196727662 |
| 0.144324477 | 0.321199361 | 0.050449321 | 0.199793111 |
| 0.11774399  | 0.229549919 | 0.114839196 | 0.167289258 |
| 0.273546625 | 0.211388676 | 0.325977583 | 0.312204487 |
| 0.314046865 | 0.234015669 | 0.249489072 | 0.05046794  |
| 0.03559803  | 0.198435451 | 0.040469731 | 0.031808933 |
| 0.267490507 | 0.056872515 | 0.289105546 | 0.312585477 |
| 0.238616934 | 0.022142891 | 0.199228944 | 0.230000676 |
| 0.360069518 | 0.369250856 | 0.055969298 | 0.007478532 |
| 0.00583058  | 0.00695997  | 0.307450709 | 0.118677753 |
| 0.273719005 | 0.053512824 | 0.02682206  | 0.159511241 |
| 0.134182825 | 0.133997491 | 0.265953109 | 0.341754527 |
| 0.235180543 | 0.101840701 | 0.055122799 | 0.365165343 |
| 0.033058162 | 0.230732323 | 0.255469319 | 0.294606129 |
| 0.067437223 | 0.113333865 | 0.179840847 | 0.340650082 |
| 0.00582197  | 0.188957938 | 0.187529506 | 0.087245872 |
| 0.034687151 | 0.053490984 | 0.04919806  | 0.312909802 |
| 0.221196245 | 0.034141099 | 0.023593373 | 0.084218308 |
| 0.090193699 | 0.307376269 | 0.092203036 | 0.311333694 |
| 0.323106232 | 0.347425057 | 0.043209055 | 0.277217793 |
| 0.039104436 | 0.243671781 | 0.078363961 | 0.035447311 |
| 0.13181595  | 0.052812594 | 0.231296195 | 0.017423555 |

|             |             |             |             |
|-------------|-------------|-------------|-------------|
| 0.146264435 | 0.331232571 | 0.045215687 | 0.025126003 |
| 0.026451854 | 0.05604148  | 0.29956059  | 0.252492957 |
| 0.037030493 | 0.197777719 | 0.171603541 | 0.298308167 |
| 0.254436402 | 0.26998436  | 0.26900143  | 0.098917763 |
| 0.130522316 | 0.03412204  | 0.366200064 | 0.250425659 |
| 0.19199455  | 0.297612165 | 0.059330474 | 0.288917769 |
| 0.286241149 | 0.31830502  | 0.247878157 | 0.225458351 |
| 0.046592039 | 0.226047263 | 0.251965716 | 0.047394808 |
| 0.25114156  | 0.284199808 | 0.248222428 | 0.039113764 |
| 0.095777818 | 0.0896209   | 0.148551861 | 0.092100295 |
| 0.051609066 | 0.247749967 | 0.111990392 | 0.360066183 |
| 0.301455142 | 0.256881924 | 0.171571633 | 0.045407679 |
| 0.306708478 | 0.303225981 | 0.148840731 | 0.250945516 |
| 0.127495061 | 0.162177525 | 0.244851311 | 0.225405021 |
| 0.085901551 | 0.237887394 | 0.336950774 | 0.23838688  |
| 0.295390105 | 0.230948648 | 0.273297123 | 0.187951109 |
| 0.033133091 | 0.178922    | 0.060320631 | 0.074156228 |
| 0.125183146 | 0.039626937 | 0.029227041 | 0.295204215 |
| 0.041020778 | 0.236246907 | 0.132862653 | 0.082189108 |
| 0.156148328 | 0.1493362   | 0.222094293 | 0.145663244 |
| 0.066514736 | 0.25434357  | 0.019031443 | 0.072628191 |
| 0.052806062 | 0.226911339 | 0.077022009 | 0.103679599 |
| 0.038282183 | 0.067898468 | 0.181687543 | 0.205458031 |
| 0.063517208 | 0.077932589 | 0.224791776 | 0.101762152 |
| 0.091375126 | 0.320387415 | 0.172778126 | 0.035640832 |
| 0.06379224  | 0.233294497 | 0.158582066 | 0.081247467 |
| 0.024730299 | 0.214790796 | 0.100814056 | 0.15421194  |
| 0.27956834  | 0.115505304 | 0.284286739 | 0.100612074 |
| 0.14256318  | 0.284726308 | 0.122891412 | 0.242370353 |
| 0.117802646 | 0.300005912 | 0.268312104 | 0.244418463 |
| 0.098563117 | 0.115474679 | 0.085059259 | 0.351759983 |
| 0.050179532 |             |             |             |
| BCL2L11     | 0.167366227 | 0.166651848 | 0.125149066 |
| 0.189935204 | 0.189247342 | 0.064064617 | 0.089100283 |
| 0.028844172 | 0.034761222 | 0.010802474 | 0.041107483 |
| 0.187559029 | 0.057509363 | 0.046860552 | 0.018824507 |
| 0.280143478 | 0.167235565 | 0.091171124 | 0.187726517 |
| 0.208165084 | 0.026802561 | 0.297429131 | 0.070077096 |
| 0.11285152  | 0.130492399 | 0.118035354 | 0.107345426 |
| 0.223658666 | 0.134566479 | 0.040433993 | 0.135535267 |
| 0.219034352 | 0.184518675 | 0.135629339 | 0.229361462 |
| 0.136216476 | 0.120465598 | 0.092335189 | 0.026432643 |
| 0.14953614  | 0.180015391 | 0.192712763 | 0.193646505 |
| 0.056541559 | 0.11082462  | 0.132877132 | 0.245689575 |
| 0.022425441 | 0.082675504 | 0.019425004 | 0.103448493 |
| 0.108242804 | 0.102961589 | 0.040940904 | 0.063735377 |
| 0.032894986 | 0.025116163 | 0.051573142 | 0.068448923 |
| 0.138864726 | 0.015120154 | 0.126626221 | 0.02396295  |
| 0.023747014 | 0.072458897 | 1           | 0.085033185 |
| 0.100232933 | 0.099371822 | 0.062970326 | 0.143738858 |
| 0.004040945 | 0.208671979 | 0.296106674 | 0.054168017 |
| 0.20615845  | 0.058969003 | 0.26731496  | 0.140798457 |
| 0.226675508 | 0.146795443 | 0.250405502 | 0.224062154 |
| 0.127821036 | 0.271970478 | 0.180929388 | 0.132905822 |



|             |             |             |             |
|-------------|-------------|-------------|-------------|
| 0.153858193 | 0.077014497 | 0.056445441 | 0.315941141 |
| 0.239735008 | 0.156704083 | 0.114938763 | 0.301474597 |
| 0.118789409 | 0.150540297 | 0.076934592 | 0.115348865 |
| 0.036223117 | 0.17780362  | 0.111555875 | 0.209501649 |
| 0.114201665 | 0.164558443 | 0.246764302 | 0.155306273 |
| 0.183635063 | 0.029140654 | 0.23122953  | 0.154812034 |
| 0.226441479 | 0.027342971 | 0.300168315 | 0.120248369 |
| 0.118891087 | 0.16294378  | 0.160662409 | 0.139222107 |
| 0.205298826 | 0.086541826 | 0.042171664 | 0.173839787 |
| 0.053107522 | 0.100527008 | 0.098741337 | 0.190964978 |
| 0.039640762 | 0.068522749 | 0.096870979 | 0.06452547  |
| 0.151614139 | 0.164119486 | 0.172578288 | 0.147466554 |
| 0.198316425 | 0.11575717  | 0.084363619 | 0.097686459 |
| 0.144556533 | 0.252880409 | 0.001333461 | 0.073779591 |
| 0.114391978 | 0.180508522 | 0.278687535 | 0.147106385 |
| 0.182917016 | 0.058782196 | 0.157083561 | 0.208085528 |
| 0.106650319 | 0.147048625 | 0.059542922 | 0.291960186 |
| 0.031402781 | 0.265814329 | 0.140430777 | 0.10176983  |
| 0.05328148  | 0.127551611 | 0.202071636 | 0.078685118 |
| 0.019257535 | 0.177127259 | 0.072491762 | 0.060413763 |
| 0.031086728 | 0.126473785 | 0.102328214 | 0.197060536 |
| 0.133097215 | 0.250688347 | 0.058306124 | 0.117040799 |
| 0.017989229 | 0.116797657 | 0.033931302 | 0.195403264 |
| 0.044104957 | 0.226142789 | 0.109436504 | 0.135262318 |
| 0.291741059 | 0.227746966 | 0.010501996 | 0.116834779 |
| 0.156526712 | 0.030402253 | 0.168326952 | 0.238805523 |
| 0.07493379  | 0.192546628 | 0.0092403   | 0.296421129 |
| 0.090077554 | 0.161295689 | 0.25087597  | 0.236410546 |
| 0.137959007 | 0.132804912 | 0.054999886 | 0.183099676 |
| 0.145781104 | 0.031022437 | 0.028133829 | 0.15427923  |
| 0.172652601 | 0.016468976 | 0.179942948 | 0.181326142 |
| 0.121720976 | 0.241614968 | 0.270759501 | 0.064371467 |
| 0.152678156 | 0.106038593 | 0.100770274 | 0.27938053  |
| 0.203059639 | 0.032389454 | 0.108662824 | 0.05265512  |
| 0.056757767 | 0.140094121 | 0.130761222 | 0.011819412 |
| 0.084772462 | 0.08476033  | 0.018190186 | 0.137195583 |
| 0.113427014 | 0.049588658 | 0.071194813 | 0.209375154 |
| 0.209250418 | 0.190570587 | 0.160900621 | 0.118113029 |
| 0.097659992 | 0.108465381 | 0.151279756 | 0.035691381 |
| 0.052722775 | 0.101014372 | 0.071503292 | 0.065790866 |
| 0.028087167 | 0.159724247 | 0.140363337 | 0.05606072  |
| 0.049817948 | 0.051715596 | 0.043617039 | 0.112456712 |
| 0.053965525 | 0.079772973 | 0.147720707 | 0.082020932 |
| 0.132086639 | 0.156523761 | 0.16507599  | 0.255142517 |
| 0.068383169 | 0.072982029 | 0.195767467 | 0.026061003 |
| 0.188284634 | 0.03004802  | 0.019469744 | 0.145675973 |
| 0.080597693 | 0.243588007 | 0.060777903 | 0.214948726 |
| 0.11954709  | 0.188899386 | 0.225456438 | 0.008067225 |
| 0.111848701 | 0.131994242 | 0.262385331 | 0.131233657 |
| 0.09558663  | 0.168420791 | 0.051454297 | 0.11567173  |
| 0.113296325 | 0.151801121 | 0.183460209 | 0.197294207 |
| 0.191307886 | 0.247148305 | 0.142143958 | 0.240089685 |
| 0.182025069 | 0.081684219 | 0.017906496 | 0.315602293 |
| 0.180253806 | 0.293411219 | 0.124101166 | 0.165754045 |

|             |             |             |             |
|-------------|-------------|-------------|-------------|
| 0.07849577  | 0.047013062 | 0.268258712 | 0.159315899 |
| 0.125463202 | 0.19084053  | 0.30515467  | 0.146024138 |
| 0.227687266 | 0.052671073 | 0.012893266 | 0.19400103  |
| 0.118648107 | 0.15604191  | 0.094323253 | 0.201241792 |
| 0.124626729 | 0.042000974 | 0.145498162 | 0.073634892 |
| 0.100239736 | 0.07476393  | 0.117169309 | 0.136252626 |
| 0.142745325 | 0.0771644   | 0.049124469 | 0.241762768 |
| 0.023255075 | 0.043807133 | 0.168960119 | 0.099395034 |
| 0.053907583 | 0.110672069 | 0.072716367 | 0.034567507 |
| 0.066772195 | 0.123130353 | 0.274330033 | 0.056238093 |
| 0.044814104 | 0.031264066 | 0.334624516 | 0.118050888 |
| 0.181062881 | 0.167349872 | 0.138985637 | 0.094307681 |
| 0.193841154 | 0.159445615 | 0.126769688 | 0.246325904 |
| 0.183648546 | 0.146919673 | 0.117992481 | 0.032152285 |
| 0.247689606 | 0.022226676 | 0.034715539 | 0.153970675 |
| 0.161491813 | 0.09476698  | 0.001366994 | 0.049379744 |
| 0.184419084 | 0.281696902 | 0.111000561 | 0.140725106 |
| 0.011566904 | 0.221323319 | 0.071146277 | 0.204415999 |
| 0.138408192 | 0.109744717 | 0.164804077 | 0.149943288 |
| 0.158067575 | 0.162714301 | 0.109934868 | 0.181017614 |
| 0.150111238 | 0.130921871 | 0.043168772 | 0.263176054 |
| 0.147891139 | 0.15442693  | 0.154062537 | 0.131319769 |
| 0.219345487 | 0.292847331 | 0.194193721 | 0.036274524 |
| 0.038665008 | 0.034257906 | 0.014453776 | 0.031256356 |
| 0.058961902 | 0.096037285 | 0.171375399 | 0.256727683 |
| 0.199696651 | 0.110339456 | 0.034642478 | 0.142025316 |
| 0.160789875 | 0.210909794 | 0.100129949 | 0.009522788 |
| 0.010778001 | 0.053359382 | 0.12541235  | 0.257692794 |
| 0.174913844 | 0.009019788 | 0.064126384 | 0.028699656 |
| 0.057960581 | 0.228468994 | 0.148567293 | 0.274818427 |
| 0.214655872 | 0.195960621 | 0.018935878 | 0.256577411 |
| 0.095957923 | 0.067439921 | 0.198542479 | 0.122172376 |
| 0.190560292 | 0.212661402 | 0.111007983 | 0.21178071  |
| 0.048987926 | 0.32563528  | 0.202415464 | 0.044251565 |
| 0.124709923 | 0.165344397 | 0.099378937 | 0.283640266 |
| 0.126935828 | 0.079632345 | 0.085145315 | 0.009042116 |
| 0.060557015 | 0.226880919 | 0.085412945 | 0.230405591 |
| 0.171540307 | 0.275960928 | 0.207315453 | 0.124909916 |
| 0.059353431 | 0.126165819 | 0.196575041 | 0.004829513 |
| 0.172659665 | 0.117062428 | 0.161428119 | 0.018147992 |
| 0.047622452 | 0.144833557 | 0.036669165 | 0.155725344 |
| 0.062645695 | 0.186143654 | 0.229754223 | 0.253318765 |
| 0.196288872 | 0.071728749 | 0.259669521 | 0.234199785 |
| 0.059964306 | 0.205259082 | 0.12441381  | 0.052098299 |
| 0.042649607 | 0.14837299  | 0.188664902 | 0.111771698 |
| 0.042574312 | 0.262109193 | 0.04619435  | 0.196834212 |
| 0.128612665 | 0.167154834 | 0.168437436 | 0.116549607 |
| 0.135430411 | 0.089838028 | 0.093544681 | 0.021334086 |
| 0.190574951 | 0.228506618 | 0.110633136 | 0.075280982 |
| 0.175566033 | 0.148138207 | 0.094694565 | 0.035423661 |
| 0.124506692 | 0.052150673 | 0.084093531 | 0.285276448 |
| 0.138552467 | 0.112604408 | 0.07898115  | 0.083646299 |
| 0.176295287 | 0.124299755 | 0.024081956 | 0.137525077 |
| 0.267905332 | 0.16960267  | 0.222432138 | 0.251978529 |

|             |             |             |             |
|-------------|-------------|-------------|-------------|
| 0.042110491 | 0.162463486 | 0.170071768 | 0.100206803 |
| 0.107528017 | 0.147540424 | 0.141685153 | 0.013526947 |
| 0.062037029 | 0.147640528 | 0.064190438 | 0.288997952 |
| 0.181460437 | 0.116096419 | 0.050931912 | 0.297907081 |
| 0.068383564 | 0.241391411 | 0.030027996 | 0.100915723 |
| 0.301707608 | 0.086774192 | 0.258928731 | 0.056242705 |
| 0.070881491 | 0.125023864 | 0.052489499 | 0.216449729 |
| 0.101476971 | 0.150069001 | 0.134161023 | 0.175864387 |
| 0.06783085  | 0.210279422 | 0.234533766 | 0.042878024 |
| 0.032143371 | 0.047042241 | 0.140154197 | 0.032983031 |
| 0.050079627 | 0.258896314 | 0.069554184 | 0.160338902 |
| 0.141568973 | 0.094647646 | 0.108504603 | 0.041531473 |
| 0.174367073 | 0.162214063 | 0.029689451 | 0.173366041 |
| 0.114960576 | 0.161101614 | 0.083587309 | 0.042888542 |
| 0.093172006 | 0.12046554  | 0.167981807 | 0.151544075 |
| 0.194476793 | 0.263544773 | 0.0953167   | 0.157802685 |
| 0.090105878 | 0.108124713 | 0.043553994 | 0.207418795 |
| 0.046272802 |             |             |             |
| BEX2        | 0.227382586 | 0.318016199 | 0.110762723 |
| 0.349222666 | 0.177540719 | 0.216413363 | 0.223114125 |
| 0.225358406 | 0.090044149 | 0.042823956 | 0.025925605 |
| 0.168287547 | 0.089604625 | 0.185566644 | 0.103139103 |
| 0.323440522 | 0.085828981 | 0.140606105 | 0.240507663 |
| 0.337482041 | 0.211028262 | 0.285614574 | 0.177204002 |
| 0.072234647 | 0.055611035 | 0.095446821 | 0.071343478 |
| 0.383680534 | 0.104691835 | 0.167735579 | 0.356123503 |
| 0.090263883 | 0.29456058  | 0.275903058 | 0.205467701 |
| 0.250143721 | 0.195574045 | 0.039023201 | 0.1385472   |
| 0.303947957 | 0.236561579 | 0.348099868 | 0.273548831 |
| 0.127004586 | 0.280175115 | 0.244312314 | 0.166804262 |
| 0.160043056 | 0.054616754 | 0.158183462 | 0.2839358   |
| 0.240850077 | 0.160077469 | 0.21670339  | 0.193081223 |
| 0.05939036  | 0.172539867 | 0.038583271 | 0.284303246 |
| 0.21544666  | 0.175252222 | 0.25014387  | 0.135928016 |
| 0.099768019 | 0.228788779 | 0.085033185 | 1           |
| 0.063950792 | 0.292043019 | 0.109844343 | 0.12780542  |
| 0.027850032 | 0.34223814  | 0.180907973 | 0.043636772 |
| 0.081996617 | 0.06262644  | 0.098355942 | 0.300483751 |
| 0.365670267 | 0.258606295 | 0.302389571 | 0.276443233 |
| 0.102537327 | 0.150130189 | 0.099031632 | 0.159694406 |
| 0.286030609 | 0.184598852 | 0.125060963 | 0.300977223 |
| 0.299623212 | 0.27703326  | 0.100697033 | 0.133191288 |
| 0.27059792  | 0.322394103 | 0.134688009 | 0.137709824 |
| 0.064190813 | 0.039616841 | 0.258598375 | 0.298294707 |
| 0.287405745 | 0.057069582 | 0.101821561 | 0.362695506 |
| 0.111232013 | 0.120943712 | 0.312144599 | 0.096320802 |
| 0.370039842 | 0.081092704 | 0.095742978 | 0.253367107 |
| 0.158412012 | 0.278716941 | 0.257986936 | 0.215885355 |
| 0.140460555 | 0.058630761 | 0.028069829 | 0.071423262 |
| 0.131002211 | 0.024503403 | 0.23912059  | 0.336745469 |
| 0.214305394 | 0.106088058 | 0.212249569 | 0.017511553 |
| 0.049950838 | 0.09963059  | 0.236297135 | 0.173784418 |
| 0.297702766 | 0.180795349 | 0.11111902  | 0.249944167 |
| 0.154354676 | 0.295716219 | 0.032613493 | 0.198159902 |

|             |             |             |             |
|-------------|-------------|-------------|-------------|
| 0.189432283 | 0.101831043 | 0.233962397 | 0.179531253 |
| 0.121331636 | 0.22985859  | 0.17787519  | 0.324503691 |
| 0.315528648 | 0.161407581 | 0.141582034 | 0.302327073 |
| 0.117634091 | 0.131033763 | 0.183364392 | 0.174421509 |
| 0.164867379 | 0.224452286 | 0.037761184 | 0.191669674 |
| 0.045113301 | 0.058574719 | 0.064804195 | 0.229525276 |
| 0.150659476 | 0.244318553 | 0.222035758 | 0.162421649 |
| 0.174685087 | 0.230500169 | 0.192970198 | 0.224892975 |
| 0.031126147 | 0.115654438 | 0.136227279 | 0.309160303 |
| 0.23912986  | 0.290232303 | 0.182262425 | 0.116103537 |
| 0.168712277 | 0.323187143 | 0.004273399 | 0.269499048 |
| 0.268060146 | 0.122089151 | 0.197907134 | 0.190741472 |
| 0.071803286 | 0.337234442 | 0.018250656 | 0.306486868 |
| 0.222814989 | 0.151685239 | 0.333218961 | 0.114155286 |
| 0.259391628 | 0.080042799 | 0.180138522 | 0.197205818 |
| 0.168459189 | 0.023158393 | 0.189866962 | 0.3443249   |
| 0.034319398 | 0.196454782 | 0.286346565 | 0.306646522 |
| 0.205697693 | 0.275767217 | 0.352350005 | 0.058782514 |
| 0.167771127 | 0.229355616 | 0.047613453 | 0.127826982 |
| 0.245856869 | 0.070109121 | 0.300827672 | 0.208375298 |
| 0.170799076 | 0.302747459 | 0.197421076 | 0.069906743 |
| 0.124084654 | 0.233228091 | 0.077839312 | 0.142228341 |
| 0.203488799 | 0.158244216 | 0.095908698 | 0.105780652 |
| 0.070410292 | 0.312175178 | 0.041081466 | 0.039075377 |
| 0.022235027 | 0.19324578  | 0.232294528 | 0.118875139 |
| 0.069112147 | 0.132714907 | 0.078743795 | 0.109027137 |
| 0.162473279 | 0.121017442 | 0.019851566 | 0.062816892 |
| 0.073893985 | 0.085134383 | 0.085483968 | 0.234330067 |
| 0.154787354 | 0.118478209 | 0.139907757 | 0.071383435 |
| 0.075214715 | 0.050888998 | 0.30926421  | 0.300417779 |
| 0.255711338 | 0.185685329 | 0.083040747 | 0.064622902 |
| 0.326807109 | 0.146601366 | 0.115155365 | 0.320500415 |
| 0.076314793 | 0.308767648 | 0.128683657 | 0.100512067 |
| 0.078946799 | 0.205314225 | 0.366772691 | 0.046799136 |
| 0.219691422 | 0.308198432 | 0.182873297 | 0.106256767 |
| 0.266835796 | 0.288972839 | 0.114744905 | 0.242050691 |
| 0.237209465 | 0.081478377 | 0.289162123 | 0.074590491 |
| 0.053703218 | 0.212528565 | 0.192485197 | 0.095326679 |
| 0.081700157 | 0.153835066 | 0.187196336 | 0.197658652 |
| 0.315311104 | 0.299829077 | 0.240187476 | 0.06321469  |
| 0.111053072 | 0.028745453 | 0.079380349 | 0.120592038 |
| 0.27219928  | 0.263853329 | 0.201733755 | 0.104053466 |
| 0.258272081 | 0.075787247 | 0.157856581 | 0.293891343 |
| 0.078845677 | 0.2844385   | 0.039818337 | 0.201521047 |
| 0.24563818  | 0.181896139 | 0.065182331 | 0.242270755 |
| 0.28333172  | 0.125580161 | 0.2088977   | 0.280495655 |
| 0.294744849 | 0.112153685 | 0.091728787 | 0.241889287 |
| 0.112767459 | 0.16512032  | 0.15868506  | 0.03586926  |
| 0.11365363  | 0.145368304 | 0.007511097 | 0.161499898 |
| 0.104197452 | 0.29307721  | 0.315212506 | 0.070419873 |
| 0.166923488 | 0.152074144 | 0.21398483  | 0.10798675  |
| 0.209286085 | 0.251090162 | 0.284954829 | 0.230683039 |
| 0.232143397 | 0.252125776 | 0.098729807 | 0.090213076 |
| 0.036133412 | 0.255224462 | 0.274315102 | 0.069731348 |

|             |             |             |             |
|-------------|-------------|-------------|-------------|
| 0.342558508 | 0.162595545 | 0.044817936 | 0.329372686 |
| 0.215728255 | 0.236252112 | 0.024195153 | 0.021938164 |
| 0.039301091 | 0.281666547 | 0.260818065 | 0.342111344 |
| 0.104880354 | 0.28329292  | 0.006609266 | 0.285035154 |
| 0.289069412 | 0.025761433 | 0.058126306 | 0.212094914 |
| 0.161406194 | 0.327146313 | 0.055545523 | 0.221434443 |
| 0.133133305 | 0.246613034 | 0.164604638 | 0.183831937 |
| 0.296734415 | 0.223479622 | 0.318339157 | 0.310605652 |
| 0.335773728 | 0.235765946 | 0.271659113 | 0.078037653 |
| 0.041923069 | 0.205978545 | 0.06546997  | 0.058191515 |
| 0.238951806 | 0.087001954 | 0.291096816 | 0.321036321 |
| 0.259903931 | 0.027137385 | 0.242881533 | 0.234256504 |
| 0.366893202 | 0.372289823 | 0.04429718  | 0.007393163 |
| 0.006191823 | 0.014012495 | 0.288748583 | 0.114473358 |
| 0.285360522 | 0.090449311 | 0.037816362 | 0.195678816 |
| 0.178418693 | 0.145526338 | 0.283826659 | 0.344883555 |
| 0.230257625 | 0.121318494 | 0.09439394  | 0.3524721   |
| 0.047651583 | 0.197195676 | 0.280860931 | 0.305643425 |
| 0.066507756 | 0.114205175 | 0.151170815 | 0.358842093 |
| 0.007322343 | 0.193129468 | 0.187627558 | 0.128944095 |
| 0.029325054 | 0.069646339 | 0.064818667 | 0.303838761 |
| 0.233401931 | 0.072834683 | 0.052145559 | 0.091912115 |
| 0.152871132 | 0.305441157 | 0.153427627 | 0.327150377 |
| 0.33931026  | 0.363548889 | 0.049976568 | 0.28554721  |
| 0.056235494 | 0.258944584 | 0.088944882 | 0.057387465 |
| 0.134474797 | 0.055970659 | 0.235286116 | 0.032283766 |
| 0.166898208 | 0.293898219 | 0.05142063  | 0.028641094 |
| 0.028341926 | 0.076602944 | 0.323925985 | 0.262926658 |
| 0.036742134 | 0.210422496 | 0.16551876  | 0.272441882 |
| 0.252776911 | 0.30147576  | 0.279953746 | 0.113212533 |
| 0.179218404 | 0.03150487  | 0.349858357 | 0.233489395 |
| 0.212801183 | 0.312110149 | 0.088890272 | 0.297994316 |
| 0.264082735 | 0.305036358 | 0.258166626 | 0.237053127 |
| 0.060095443 | 0.210299261 | 0.284356087 | 0.095991868 |
| 0.247651158 | 0.312554216 | 0.207323239 | 0.064631953 |
| 0.121159329 | 0.09135839  | 0.128652911 | 0.081840166 |
| 0.053752387 | 0.254285094 | 0.169084036 | 0.357690985 |
| 0.261744788 | 0.240663389 | 0.158483699 | 0.063516647 |
| 0.317168203 | 0.2901383   | 0.182594011 | 0.270062851 |
| 0.137315127 | 0.177990841 | 0.247360707 | 0.22799117  |
| 0.089565353 | 0.26229393  | 0.328046894 | 0.271104084 |
| 0.306596163 | 0.231886891 | 0.286622147 | 0.189975431 |
| 0.039932673 | 0.164776766 | 0.111535113 | 0.086285459 |
| 0.163556117 | 0.05073122  | 0.037462961 | 0.289566663 |
| 0.050925615 | 0.267533485 | 0.131877198 | 0.113213067 |
| 0.151049994 | 0.117677562 | 0.224954    | 0.205519908 |
| 0.118669332 | 0.273592722 | 0.029427235 | 0.090546364 |
| 0.061132093 | 0.23624107  | 0.091608974 | 0.129213789 |
| 0.048740967 | 0.070052107 | 0.202126969 | 0.193410245 |
| 0.090741335 | 0.085228256 | 0.239950474 | 0.126682341 |
| 0.122244496 | 0.332853008 | 0.157058426 | 0.034128613 |
| 0.059688412 | 0.201107265 | 0.152237847 | 0.118163297 |
| 0.028881026 | 0.231981749 | 0.111320386 | 0.155434456 |
| 0.275930175 | 0.131442659 | 0.261312203 | 0.0906677   |

|             |             |             |             |
|-------------|-------------|-------------|-------------|
| 0.136925097 | 0.283870626 | 0.118850709 | 0.255576307 |
| 0.102598057 | 0.327877225 | 0.260254335 | 0.252792832 |
| 0.094229176 | 0.099973272 | 0.117238305 | 0.338704035 |
| 0.058843785 |             |             |             |
| BOLA2       | 0.306731805 | 0.395880609 | 0.214376053 |
| 0.274577085 | 0.238564193 | 0.139029904 | 0.063799771 |
| 0.027012534 | 0.038452904 | 0.00083463  | 0.020620519 |
| 0.2713633   | 0.055482702 | 0.041195604 | 0.065102221 |
| 0.350371472 | 0.068878404 | 0.101948374 | 0.1068653   |
| 0.25839718  | 0.01375925  | 0.3133053   | 0.029190397 |
| 0.159623985 | 0.069537524 | 0.039020626 | 0.141273797 |
| 0.322317751 | 0.043971349 | 0.081439385 | 0.196204354 |
| 0.074142268 | 0.309932883 | 0.3820008   | 0.31575153  |
| 0.384421558 | 0.26849541  | 0.008062424 | 0.050594091 |
| 0.288532206 | 0.344681484 | 0.256076743 | 0.163629774 |
| 0.015298719 | 0.31422573  | 0.100776675 | 0.298983674 |
| 0.037414912 | 0.020961615 | 0.030921004 | 0.287120598 |
| 0.325601199 | 0.232697598 | 0.039127819 | 0.039925248 |
| 0.056809255 | 0.028422933 | 0.109253878 | 0.121087913 |
| 0.086338802 | 0.016087936 | 0.358979511 | 0.024681841 |
| 0.042214486 | 0.055079246 | 0.100232933 | 0.063950792 |
| 1           | 0.20532744  | 0.007424143 | 0.270597714 |
| 0.000161065 | 0.23740645  | 0.2789099   | 0.149977134 |
| 0.033786991 | 0.007795347 | 0.102264815 | 0.154750614 |
| 0.352883782 | 0.354756953 | 0.431313675 | 0.446834943 |
| 0.063490312 | 0.176423599 | 0.276140317 | 0.056885947 |
| 0.3247834   | 0.047887959 | 0.027929442 | 0.374156219 |
| 0.436908214 | 0.402569472 | 0.098453777 | 0.213660697 |
| 0.275708041 | 0.340466486 | 0.144998617 | 0.175688947 |
| 0.101087953 | 0.071048792 | 0.310852754 | 0.427240502 |
| 0.244718    | 0.223289258 | 0.101604544 | 0.241233707 |
| 0.037722091 | 0.059337319 | 0.213057694 | 0.055191912 |
| 0.362432384 | 0.00858286  | 0.165151983 | 0.141502165 |
| 0.080313365 | 0.296360823 | 0.418872343 | 0.073204816 |
| 0.220389508 | 0.010833303 | 0.086947157 | 0.035050945 |
| 0.065878579 | 0.124105017 | 0.325824225 | 0.33040479  |
| 0.037043034 | 0.122715961 | 0.077299725 | 0.005289702 |
| 0.026719053 | 0.11056342  | 0.322384366 | 0.139644953 |
| 0.307691535 | 0.314434356 | 0.084390898 | 0.219287037 |
| 0.30619401  | 0.437037569 | 0.004638392 | 0.030732218 |
| 0.173657723 | 0.112879075 | 0.151400968 | 0.234764337 |
| 0.169789657 | 0.025961868 | 0.045319829 | 0.426761089 |
| 0.263876016 | 0.035273229 | 0.074067438 | 0.324638517 |
| 0.072284308 | 0.260147721 | 0.038641779 | 0.060752786 |
| 0.013972366 | 0.381274786 | 0.037175543 | 0.090070706 |
| 0.095299577 | 0.087437185 | 0.008547875 | 0.058241157 |
| 0.044724737 | 0.306902213 | 0.334769121 | 0.05092715  |
| 0.09517826  | 0.300122732 | 0.083931405 | 0.235896737 |
| 0.00613551  | 0.024346923 | 0.05748532  | 0.397392777 |
| 0.089035082 | 0.439004131 | 0.080330235 | 0.129185465 |
| 0.196799736 | 0.358959364 | 0.003807393 | 0.339779257 |
| 0.415992652 | 0.055406305 | 0.195852953 | 0.286632893 |
| 0.2007113   | 0.327493955 | 0.008791376 | 0.308452088 |
| 0.171413852 | 0.038131391 | 0.438968296 | 0.098494867 |

|             |             |             |             |
|-------------|-------------|-------------|-------------|
| 0.338806962 | 0.027617049 | 0.063089371 | 0.411248124 |
| 0.311622044 | 0.005626788 | 0.039423899 | 0.215036945 |
| 0.04389267  | 0.014390784 | 0.291870084 | 0.243340781 |
| 0.203920646 | 0.381346515 | 0.414228692 | 0.178820039 |
| 0.205197706 | 0.05907339  | 0.01412202  | 0.232292973 |
| 0.361475312 | 0.107937757 | 0.283711518 | 0.051698364 |
| 0.112200092 | 0.337013817 | 0.312086562 | 0.054264469 |
| 0.018495609 | 0.093509152 | 0.003410959 | 0.174681457 |
| 0.316792605 | 0.026290948 | 0.199536048 | 0.083942102 |
| 0.053333856 | 0.421975465 | 0.138079153 | 0.170648892 |
| 0.1238327   | 0.160817118 | 0.094593264 | 0.039262819 |
| 0.055143967 | 0.077637242 | 0.138217535 | 0.123871759 |
| 0.007487839 | 0.040178123 | 0.033931572 | 0.089517954 |
| 0.030916803 | 0.065665327 | 0.062131633 | 0.22654787  |
| 0.062675496 | 0.026547347 | 0.161831229 | 0.149967054 |
| 0.072661102 | 0.016112368 | 0.384641608 | 0.283686991 |
| 0.151865149 | 0.049490175 | 0.033005768 | 0.060038509 |
| 0.34932446  | 0.081004846 | 0.040083374 | 0.314254016 |
| 0.015403498 | 0.438403275 | 0.060274639 | 0.07775117  |
| 0.139634981 | 0.111813878 | 0.365739325 | 0.016129722 |
| 0.170952576 | 0.316254191 | 0.198918371 | 0.089178012 |
| 0.230348058 | 0.234777642 | 0.010283811 | 0.246534144 |
| 0.224387003 | 0.020554951 | 0.419527606 | 0.079685281 |
| 0.023547254 | 0.360187504 | 0.323961762 | 0.063318471 |
| 0.054458934 | 0.110275168 | 0.007155714 | 0.227034666 |
| 0.40234512  | 0.331855558 | 0.288886729 | 0.144692701 |
| 0.016543264 | 0.004341357 | 0.148578835 | 0.238875358 |
| 0.353167393 | 0.431637216 | 0.15727175  | 0.170706624 |
| 0.131631447 | 0.123456142 | 0.018017423 | 0.413795443 |
| 0.101863928 | 0.392612207 | 0.0085491   | 0.40742175  |
| 0.375643306 | 0.062121252 | 0.052203106 | 0.099268768 |
| 0.217924525 | 0.021246139 | 0.060549397 | 0.351783227 |
| 0.33050506  | 0.125021374 | 0.103225576 | 0.293175189 |
| 0.003783991 | 0.012158972 | 0.263957574 | 0.146561501 |
| 0.103489612 | 0.089380711 | 0.079001767 | 0.061468796 |
| 0.016572045 | 0.306215608 | 0.380490159 | 0.039415316 |
| 0.111154684 | 0.0535548   | 0.312048454 | 0.021071144 |
| 0.423736994 | 0.416914725 | 0.373509038 | 0.044397969 |
| 0.334311318 | 0.397081491 | 0.27814013  | 0.061655232 |
| 0.024518059 | 0.400191922 | 0.215554126 | 0.007175303 |
| 0.391368755 | 0.040319246 | 0.004200999 | 0.354017737 |
| 0.077295278 | 0.288719315 | 0.000431601 | 0.062551707 |
| 0.058711941 | 0.430094366 | 0.336983196 | 0.199524194 |
| 0.028006665 | 0.212369688 | 0.025572123 | 0.44681271  |
| 0.342614477 | 0.021416386 | 0.116807006 | 0.32566359  |
| 0.343572093 | 0.385039414 | 0.194477668 | 0.392893921 |
| 0.265031997 | 0.376321002 | 0.045649396 | 0.189943945 |
| 0.297086641 | 0.420383876 | 0.25601851  | 0.316828998 |
| 0.348025629 | 0.354149485 | 0.151635922 | 0.007345011 |
| 0.101481161 | 0.035779299 | 0.05438171  | 0.042829575 |
| 0.11338293  | 0.071508908 | 0.365637846 | 0.409721076 |
| 0.407240611 | 0.008542728 | 0.025847147 | 0.306572245 |
| 0.290808816 | 0.365672183 | 0.025338883 | 0.00463793  |
| 0.005812075 | 0.021953229 | 0.154639475 | 0.164466712 |

|             |             |             |             |
|-------------|-------------|-------------|-------------|
| 0.400729983 | 0.024613204 | 0.00466031  | 0.007596012 |
| 0.062270058 | 0.333824385 | 0.374893054 | 0.27118111  |
| 0.386643583 | 0.050015241 | 0.043752703 | 0.281695244 |
| 0.059086864 | 0.153689505 | 0.402975706 | 0.319053398 |
| 0.046481295 | 0.160309727 | 0.123560465 | 0.38381024  |
| 0.092404353 | 0.227237991 | 0.285370874 | 0.07058788  |
| 0.021253602 | 0.063918424 | 0.056039979 | 0.384798918 |
| 0.376940433 | 0.028365242 | 0.017560072 | 0.016655673 |
| 0.029047402 | 0.401475484 | 0.04559125  | 0.436468807 |
| 0.299226939 | 0.352870099 | 0.085964243 | 0.346724169 |
| 0.030588384 | 0.342037214 | 0.224435944 | 0.006785516 |
| 0.104164318 | 0.014009064 | 0.380838742 | 0.069264125 |
| 0.056738837 | 0.215504208 | 0.117947812 | 0.032944817 |
| 0.135308466 | 0.038021463 | 0.402989944 | 0.433824287 |
| 0.052005861 | 0.064772153 | 0.181038533 | 0.26389127  |
| 0.072937145 | 0.298930969 | 0.350222144 | 0.131655526 |
| 0.022478909 | 0.118762653 | 0.242443198 | 0.195209783 |
| 0.038680152 | 0.443606039 | 0.100267677 | 0.435605567 |
| 0.246785893 | 0.363291968 | 0.381545922 | 0.159577568 |
| 0.139987934 | 0.157976037 | 0.168161653 | 0.003397583 |
| 0.171419202 | 0.367576942 | 0.129325982 | 0.072365964 |
| 0.13080755  | 0.275803771 | 0.028493128 | 0.032747908 |
| 0.228025403 | 0.092938113 | 0.04297182  | 0.374507322 |
| 0.192618931 | 0.209414524 | 0.014333966 | 0.048182515 |
| 0.415885949 | 0.314491852 | 0.024991624 | 0.238610469 |
| 0.102129857 | 0.212057361 | 0.373119111 | 0.407108688 |
| 0.116487305 | 0.329288412 | 0.271268599 | 0.177527775 |
| 0.26322429  | 0.116571722 | 0.385679224 | 0.009126632 |
| 0.064015042 | 0.249061128 | 0.030666072 | 0.083098908 |
| 0.061379496 | 0.029035592 | 0.132699342 | 0.343713798 |
| 0.131593254 | 0.235230651 | 0.055816888 | 0.04261941  |
| 0.236719862 | 0.134049763 | 0.226679442 | 0.039122917 |
| 0.025422394 | 0.352963874 | 0.009725296 | 0.042183249 |
| 0.146071446 | 0.337109376 | 0.224392969 | 0.10077792  |
| 0.147958121 | 0.122262945 | 0.162645172 | 0.063322529 |
| 0.057713286 | 0.095778418 | 0.32300371  | 0.009802367 |
| 0.005966556 | 0.425880087 | 0.10622676  | 0.034010148 |
| 0.102422245 | 0.198021907 | 0.087369209 | 0.079482357 |
| 0.038672042 | 0.408081732 | 0.074003742 | 0.258315858 |
| 0.133210655 | 0.037633511 | 0.206670091 | 0.029196995 |
| 0.030973625 | 0.294331078 | 0.272207325 | 0.401476548 |
| 0.201472013 | 0.324128064 | 0.288192074 | 0.309740683 |
| 0.049943733 | 0.209842845 | 0.010126721 | 0.337739866 |
| 0.117867666 |             |             |             |

|             |             |             |             |
|-------------|-------------|-------------|-------------|
| BSCL2       | 0.326664391 | 0.468292546 | 0.285595749 |
| 0.330145173 | 0.296653231 | 0.343870333 | 0.221361955 |
| 0.279988408 | 0.084571298 | 0.006700536 | 0.01245138  |
| 0.296801692 | 0.130216609 | 0.254600679 | 0.296209872 |
| 0.314054216 | 0.081701926 | 0.345669895 | 0.223048007 |
| 0.344700194 | 0.140107296 | 0.280168743 | 0.107613224 |
| 0.181453122 | 0.059668676 | 0.054706036 | 0.161193822 |
| 0.380836547 | 0.064745672 | 0.314720174 | 0.362306261 |
| 0.079019303 | 0.359464442 | 0.475597945 | 0.274107724 |
| 0.453290237 | 0.318230568 | 0.015628738 | 0.26913028  |



|             |             |             |             |
|-------------|-------------|-------------|-------------|
| 0.399847797 | 0.30789564  | 0.345056058 | 0.269320353 |
| 0.048717791 | 0.478317559 | 0.22432926  | 0.272702604 |
| 0.27959197  | 0.021523365 | 0.315568836 | 0.456003378 |
| 0.429389145 | 0.297803499 | 0.298522079 | 0.169713893 |
| 0.113856758 | 0.285356736 | 0.131111991 | 0.347862824 |
| 0.207282396 | 0.246276165 | 0.429269697 | 0.103996307 |
| 0.146443315 | 0.312486702 | 0.099371822 | 0.292043019 |
| 0.20532744  | 1           | 0.035689466 | 0.271998945 |
| 0.0050595   | 0.341346475 | 0.266129992 | 0.176982312 |
| 0.035073264 | 0.015255466 | 0.120506954 | 0.296369898 |
| 0.39425449  | 0.427979666 | 0.373396602 | 0.380777877 |
| 0.115241567 | 0.226779098 | 0.238976928 | 0.138515777 |
| 0.389641266 | 0.172176687 | 0.1251244   | 0.294344821 |
| 0.38423186  | 0.451576345 | 0.137530782 | 0.180915841 |
| 0.343200975 | 0.452530091 | 0.321531162 | 0.293532768 |
| 0.216656575 | 0.034897736 | 0.410161578 | 0.416927121 |
| 0.391760835 | 0.172509429 | 0.103792387 | 0.366985563 |
| 0.055768805 | 0.33919186  | 0.284227479 | 0.119262021 |
| 0.407493231 | 0.027624597 | 0.133666435 | 0.306489287 |
| 0.218328278 | 0.355669758 | 0.434710515 | 0.186477303 |
| 0.284653387 | 0.018387867 | 0.070960504 | 0.031699398 |
| 0.267600877 | 0.068582441 | 0.45830567  | 0.381075991 |
| 0.273928935 | 0.245889396 | 0.276526938 | 0.002138168 |
| 0.018697466 | 0.153295165 | 0.335154112 | 0.336391919 |
| 0.345696868 | 0.337824362 | 0.160987641 | 0.34253368  |
| 0.28099775  | 0.365432236 | 0.081641399 | 0.125544452 |
| 0.333690182 | 0.147775153 | 0.197082533 | 0.309682703 |
| 0.199738816 | 0.167238625 | 0.121722838 | 0.437088775 |
| 0.448467114 | 0.086547628 | 0.357382701 | 0.30529018  |
| 0.247482592 | 0.216135896 | 0.115639298 | 0.222771992 |
| 0.065305831 | 0.417295625 | 0.017694749 | 0.366634571 |
| 0.172305167 | 0.076813013 | 0.022431366 | 0.321901757 |
| 0.266156511 | 0.348569484 | 0.440493195 | 0.109134088 |
| 0.255586243 | 0.279150727 | 0.354589503 | 0.303549848 |
| 0.008410055 | 0.057458993 | 0.338503445 | 0.423678784 |
| 0.320062411 | 0.410391704 | 0.268324606 | 0.228881714 |
| 0.200382973 | 0.351976617 | 0.003738022 | 0.469514175 |
| 0.450600009 | 0.336973568 | 0.270760992 | 0.299779727 |
| 0.234191612 | 0.368549814 | 0.049129792 | 0.308075992 |
| 0.334396774 | 0.08863101  | 0.40713934  | 0.110321252 |
| 0.425031548 | 0.033476254 | 0.319118187 | 0.305388323 |
| 0.27416173  | 0.00988931  | 0.289697436 | 0.344095193 |
| 0.017603641 | 0.157851546 | 0.350914644 | 0.328624084 |
| 0.28990524  | 0.323323413 | 0.387339378 | 0.215897731 |
| 0.295506226 | 0.26609279  | 0.014481507 | 0.212053037 |
| 0.327925341 | 0.250879424 | 0.445173433 | 0.255899275 |
| 0.336448948 | 0.438862334 | 0.325924304 | 0.170238632 |
| 0.049650193 | 0.328036136 | 0.032686508 | 0.240866413 |
| 0.351272231 | 0.107043515 | 0.274149835 | 0.127929452 |
| 0.047247069 | 0.443928285 | 0.093147775 | 0.138798506 |
| 0.060299166 | 0.292040423 | 0.264096025 | 0.17521229  |
| 0.117139465 | 0.133974418 | 0.227795726 | 0.274985101 |
| 0.063191758 | 0.071846827 | 0.012020425 | 0.221633299 |
| 0.079449018 | 0.217664579 | 0.228961623 | 0.333091354 |

|             |             |             |             |
|-------------|-------------|-------------|-------------|
| 0.272242636 | 0.080809371 | 0.257959131 | 0.192989598 |
| 0.078875219 | 0.013166174 | 0.452143039 | 0.322811516 |
| 0.333242332 | 0.166220035 | 0.036611953 | 0.217043881 |
| 0.388365662 | 0.302488397 | 0.339143458 | 0.411253651 |
| 0.039403417 | 0.389077263 | 0.17123571  | 0.084194367 |
| 0.215540514 | 0.20739193  | 0.391376628 | 0.07047453  |
| 0.358729838 | 0.443678529 | 0.254940977 | 0.12883194  |
| 0.392125904 | 0.343782041 | 0.040494563 | 0.344985048 |
| 0.331570534 | 0.027138094 | 0.443824496 | 0.076932505 |
| 0.017562558 | 0.291519858 | 0.285265326 | 0.060377209 |
| 0.059328362 | 0.249354232 | 0.093783367 | 0.204961659 |
| 0.44634645  | 0.287695824 | 0.319205712 | 0.13799437  |
| 0.040036944 | 0.005280261 | 0.131503589 | 0.28064927  |
| 0.475424486 | 0.413492358 | 0.214457785 | 0.217047247 |
| 0.216651921 | 0.211680808 | 0.232828551 | 0.417759351 |
| 0.174115802 | 0.469526381 | 0.007857012 | 0.286093756 |
| 0.45281212  | 0.328428928 | 0.050493737 | 0.306623994 |
| 0.376547713 | 0.05558048  | 0.238452412 | 0.451652675 |
| 0.393608275 | 0.248014875 | 0.250484809 | 0.322820014 |
| 0.030944155 | 0.066656021 | 0.276418569 | 0.098615696 |
| 0.28264605  | 0.181756021 | 0.021291284 | 0.352474652 |
| 0.03872489  | 0.423584448 | 0.347936657 | 0.049153308 |
| 0.285925562 | 0.360117033 | 0.259637781 | 0.040825784 |
| 0.333492028 | 0.426621696 | 0.476046337 | 0.209041006 |
| 0.313719221 | 0.398106502 | 0.231219285 | 0.064906902 |
| 0.012262218 | 0.448869996 | 0.364148451 | 0.023400671 |
| 0.383107911 | 0.311175422 | 0.008945391 | 0.466349558 |
| 0.193945154 | 0.44173227  | 0.011195997 | 0.06919938  |
| 0.028952733 | 0.336271408 | 0.44904709  | 0.36445539  |
| 0.264765629 | 0.331450576 | 0.004958295 | 0.43390636  |
| 0.443081358 | 0.008973723 | 0.083422166 | 0.311991282 |
| 0.263297875 | 0.49077147  | 0.181152004 | 0.327318468 |
| 0.259475993 | 0.435411839 | 0.213252959 | 0.1963735   |
| 0.369891685 | 0.401167439 | 0.361232775 | 0.452359485 |
| 0.373175972 | 0.290089794 | 0.241951285 | 0.020186104 |
| 0.094669461 | 0.292749926 | 0.226295956 | 0.057914011 |
| 0.35686696  | 0.094727353 | 0.430754947 | 0.368085988 |
| 0.375567791 | 0.004790991 | 0.212406232 | 0.336107254 |
| 0.41784633  | 0.422894733 | 0.026616016 | 0.007667306 |
| 0.009193124 | 0.008562766 | 0.349030429 | 0.177999536 |
| 0.416236235 | 0.224826627 | 0.005626639 | 0.088306448 |
| 0.265748583 | 0.241356056 | 0.444904716 | 0.308525044 |
| 0.313777259 | 0.072613562 | 0.212749815 | 0.333202306 |
| 0.042295123 | 0.324009576 | 0.386861468 | 0.458041533 |
| 0.037102933 | 0.185651622 | 0.345594721 | 0.420357698 |
| 0.027819535 | 0.226268625 | 0.300670542 | 0.232248945 |
| 0.014784138 | 0.05637197  | 0.048413886 | 0.320046885 |
| 0.436039273 | 0.046015532 | 0.019554238 | 0.182826666 |
| 0.107112647 | 0.381177445 | 0.132999497 | 0.424047192 |
| 0.380320966 | 0.339863016 | 0.044623193 | 0.456944555 |
| 0.030013135 | 0.440399763 | 0.194207545 | 0.079059002 |
| 0.243869088 | 0.015150409 | 0.397089449 | 0.084471456 |
| 0.331982606 | 0.367028655 | 0.141182379 | 0.010903707 |
| 0.10401187  | 0.039339955 | 0.378605369 | 0.334100374 |

|             |             |             |             |
|-------------|-------------|-------------|-------------|
| 0.0238079   | 0.265146243 | 0.234584319 | 0.33595232  |
| 0.332210126 | 0.314274989 | 0.472378473 | 0.301593182 |
| 0.104397055 | 0.080830874 | 0.358527953 | 0.347424985 |
| 0.285424145 | 0.383670535 | 0.192783398 | 0.447198587 |
| 0.356320372 | 0.429304302 | 0.392974897 | 0.306772693 |
| 0.124446978 | 0.363483288 | 0.321442956 | 0.028132572 |
| 0.310547478 | 0.348070109 | 0.362004828 | 0.093544441 |
| 0.169027417 | 0.232970263 | 0.071851725 | 0.220141958 |
| 0.181748626 | 0.333767397 | 0.122585752 | 0.34675611  |
| 0.363989635 | 0.348552609 | 0.072461503 | 0.045688781 |
| 0.481096088 | 0.433416197 | 0.201426385 | 0.337077111 |
| 0.144333414 | 0.249418727 | 0.322074196 | 0.296071004 |
| 0.286933894 | 0.351079783 | 0.361426276 | 0.321354412 |
| 0.428553908 | 0.250494623 | 0.475090399 | 0.190797616 |
| 0.055660186 | 0.305068666 | 0.073033224 | 0.068006376 |
| 0.123853236 | 0.022403594 | 0.159988326 | 0.311423679 |
| 0.214855111 | 0.277716812 | 0.326240827 | 0.078358838 |
| 0.225110161 | 0.330339172 | 0.270847034 | 0.217933011 |
| 0.066263793 | 0.45261139  | 0.008986008 | 0.046167329 |
| 0.221502626 | 0.329860097 | 0.219246974 | 0.183747999 |
| 0.16323464  | 0.093741013 | 0.225873248 | 0.339747879 |
| 0.242472381 | 0.270283616 | 0.339056449 | 0.061990869 |
| 0.032211289 | 0.39742473  | 0.362107162 | 0.017790138 |
| 0.067079544 | 0.343993575 | 0.279155253 | 0.17947824  |
| 0.013873609 | 0.384017907 | 0.294724014 | 0.29464998  |
| 0.341418465 | 0.069628037 | 0.393641598 | 0.11064513  |
| 0.086690026 | 0.444420557 | 0.263218381 | 0.439466134 |
| 0.251916518 | 0.304291507 | 0.458892826 | 0.343407105 |
| 0.137598313 | 0.276793244 | 0.040801431 | 0.38226196  |
| 0.257034072 |             |             |             |

|             |             |             |             |
|-------------|-------------|-------------|-------------|
| BSDC1       | 0.026538455 | 0.021699732 | 0.016861428 |
| 0.065010803 | 0.033279637 | 0.025989163 | 0.130202294 |
| 0.077679999 | 0.020597515 | 0.019340723 | 0.006088737 |
| 0.020815194 | 0.006190556 | 0.03640558  | 0.008334065 |
| 0.078411928 | 0.052008102 | 0.040738139 | 0.17847805  |
| 0.07990703  | 0.102085755 | 0.073956366 | 0.142845768 |
| 0.014293359 | 0.034060633 | 0.09987114  | 0.015895488 |
| 0.0688466   | 0.115928889 | 0.02078261  | 0.071109204 |
| 0.095164779 | 0.037128802 | 0.013890906 | 0.026886255 |
| 0.010660952 | 0.017719172 | 0.049562946 | 0.017527532 |
| 0.034950875 | 0.026983065 | 0.080159853 | 0.107101953 |
| 0.107066936 | 0.014141608 | 0.125409539 | 0.037956274 |
| 0.009988638 | 0.050986469 | 0.034009088 | 0.01798816  |
| 0.009286843 | 0.013919564 | 0.088232586 | 0.104647388 |
| 0.001932796 | 0.03158994  | 0.001384267 | 0.043365084 |
| 0.137082287 | 0.045938199 | 0.010991439 | 0.024383708 |
| 0.008973502 | 0.109370281 | 0.062970326 | 0.109844343 |
| 0.007424143 | 0.035689466 | 1           | 0.01059292  |
| 0.009492988 | 0.106851517 | 0.057385586 | 0.002952979 |
| 0.197153048 | 0.025505197 | 0.082987025 | 0.087518486 |
| 0.054200376 | 0.017554442 | 0.031964612 | 0.02317957  |
| 0.021346287 | 0.093141026 | 0.013563962 | 0.091003885 |
| 0.029613354 | 0.095404423 | 0.030408691 | 0.068312801 |
| 0.028850624 | 0.01449136  | 0.034094598 | 0.082238147 |

|             |             |             |             |
|-------------|-------------|-------------|-------------|
| 0.022190764 | 0.025941749 | 0.015031483 | 0.021851078 |
| 0.003962733 | 0.044576398 | 0.014570425 | 0.023055917 |
| 0.026248008 | 0.009265859 | 0.098630143 | 0.057086247 |
| 0.215795333 | 0.008524877 | 0.110931268 | 0.013947465 |
| 0.054471645 | 0.088831414 | 0.072954933 | 0.06378664  |
| 0.054680973 | 0.030683777 | 0.012891916 | 0.175113787 |
| 0.032776707 | 0.036556343 | 0.001366521 | 0.183057489 |
| 0.008188162 | 0.003822334 | 0.008868681 | 0.038266039 |
| 0.042104665 | 0.008149738 | 0.116792727 | 0.110376471 |
| 0.095095221 | 0.020971735 | 0.018297038 | 0.056293877 |
| 0.048768666 | 0.010482992 | 0.03067373  | 0.022819565 |
| 0.010882584 | 0.031597887 | 0.00128917  | 0.175396521 |
| 0.034156287 | 0.039200418 | 0.176659208 | 0.020735604 |
| 0.041962874 | 0.176676204 | 0.181577978 | 0.028477215 |
| 0.025842592 | 0.218490163 | 0.029862626 | 0.076142523 |
| 0.008270182 | 0.034179487 | 0.21535122  | 0.053396416 |
| 0.127676946 | 0.009533548 | 0.097224221 | 0.064230999 |
| 0.001303528 | 0.011045861 | 0.126215996 | 0.090286001 |
| 0.010895662 | 0.014242304 | 0.008252855 | 0.245424358 |
| 0.063224267 | 0.049889309 | 0.041545378 | 0.018124818 |
| 0.008255845 | 0.081976663 | 0.025072752 | 0.023522898 |
| 0.0296294   | 0.02519681  | 0.067679489 | 0.039287924 |
| 0.093911557 | 0.049786967 | 0.003675843 | 0.013091098 |
| 0.013688404 | 0.018999103 | 0.035034145 | 0.039439999 |
| 0.006479178 | 0.043041139 | 0.002136628 | 0.076409764 |
| 0.023701016 | 0.253818814 | 0.037017685 | 0.105307281 |
| 0.015705024 | 0.129470313 | 0.041198919 | 0.013371637 |
| 0.009146541 | 0.02369377  | 0.050804984 | 0.081010544 |
| 0.074944128 | 0.067323071 | 0.045416292 | 0.06428372  |
| 0.038692042 | 0.03963746  | 0.049971665 | 0.004816048 |
| 0.028864687 | 0.14650188  | 0.077734196 | 0.051842277 |
| 0.028256551 | 0.001334153 | 0.019964281 | 0.073566892 |
| 0.018825278 | 0.021625702 | 0.011993413 | 0.001501291 |
| 0.178866815 | 0.077813273 | 0.033381774 | 0.040840228 |
| 0.013874338 | 0.049563581 | 0.009250999 | 0.048953688 |
| 0.099161793 | 0.022412823 | 0.014545865 | 0.00555886  |
| 0.005407614 | 0.021759286 | 0.16895897  | 0.013817912 |
| 0.004697205 | 0.07172465  | 0.01053922  | 0.015903717 |
| 0.125439078 | 0.119401665 | 0.033540221 | 0.002955757 |
| 0.005315615 | 0.006438396 | 0.005799408 | 0.021202221 |
| 0.019601572 | 0.017404122 | 0.029406285 | 0.010702314 |
| 0.05140214  | 0.199306164 | 0.021527655 | 0.085236864 |
| 0.024304272 | 0.113156719 | 0.201471414 | 0.000820327 |
| 0.032640523 | 0.012532569 | 0.017048188 | 0.0266756   |
| 0.07900934  | 0.033108851 | 0.015608809 | 0.10356969  |
| 0.009618312 | 0.109933067 | 0.055833718 | 0.005897367 |
| 0.039972736 | 0.020790924 | 0.103278913 | 0.051992283 |
| 0.016646825 | 0.063421968 | 0.061673792 | 0.020371692 |
| 0.019547741 | 0.174528852 | 0.018030209 | 0.046412476 |
| 0.198609809 | 0.028189445 | 0.01318376  | 0.181034686 |
| 0.107401556 | 0.028526791 | 0.101799595 | 0.101864268 |
| 0.022853824 | 0.069622992 | 0.017739683 | 0.024553567 |
| 0.127665725 | 0.011217871 | 0.053463795 | 0.01749531  |
| 0.012502126 | 0.015760572 | 0.160688317 | 0.016583601 |

|             |             |             |             |
|-------------|-------------|-------------|-------------|
| 0.190065574 | 0.008156691 | 0.013898277 | 0.021014788 |
| 0.015665978 | 0.016717753 | 0.215923345 | 0.016888377 |
| 0.009791064 | 0.036239286 | 0.057309895 | 0.066593765 |
| 0.022716949 | 0.169584202 | 0.145391408 | 0.014819973 |
| 0.027846822 | 0.025087263 | 0.01097502  | 0.045817309 |
| 0.106036008 | 0.088062235 | 0.031040622 | 0.007555684 |
| 0.012212311 | 0.07078584  | 0.001393944 | 0.029171032 |
| 0.049139954 | 0.019258968 | 0.048025232 | 0.038764815 |
| 0.013674164 | 0.030634242 | 0.06693537  | 0.21083894  |
| 0.01283805  | 0.013906405 | 0.01447405  | 0.171568248 |
| 0.022090662 | 0.013633064 | 0.005436607 | 0.168588417 |
| 0.135882125 | 0.011800005 | 0.039075304 | 0.013831501 |
| 0.045540763 | 0.030726    | 0.014140086 | 0.025002015 |
| 0.20879885  | 0.010174297 | 0.009961076 | 0.003893899 |
| 0.066683938 | 0.037611921 | 0.012456354 | 0.076811338 |
| 0.00761933  | 0.106874789 | 0.011242492 | 0.019662    |
| 0.016520331 | 0.069034159 | 0.025519592 | 0.013310243 |
| 0.009265909 | 0.022238849 | 0.007657991 | 0.014719791 |
| 0.009801766 | 0.010216267 | 0.015742277 | 0.102038708 |
| 0.028578992 | 0.009956265 | 0.047562631 | 0.023776331 |
| 0.041160698 | 0.045785622 | 0.139466752 | 0.101375107 |
| 0.004223636 | 0.071367286 | 0.002116131 | 0.005665416 |
| 0.037822345 | 0.035167295 | 0.022066887 | 0.041974742 |
| 0.018277119 | 0.190658256 | 0.068699266 | 0.017645423 |
| 0.045103192 | 0.048344077 | 0.065803155 | 0.006809174 |
| 0.00192273  | 0.005245843 | 0.081423747 | 0.082784462 |
| 0.020537031 | 0.002047401 | 0.175819032 | 0.107152489 |
| 0.025501908 | 0.020621373 | 0.015507948 | 0.117295261 |
| 0.023943241 | 0.185907854 | 0.006154523 | 0.103626586 |
| 0.021900359 | 0.019204343 | 0.0214798   | 0.01962602  |
| 0.122015389 | 0.071591248 | 0.03559405  | 0.041061663 |
| 0.000671119 | 0.097672081 | 0.022976421 | 0.013306379 |
| 0.040314593 | 0.075332033 | 0.061474933 | 0.056159974 |
| 0.008913277 | 0.019818665 | 0.026085348 | 0.004636213 |
| 0.068791377 | 0.034684624 | 0.049942184 | 0.030536336 |
| 0.042881949 | 0.071132026 | 0.038727095 | 0.016895485 |
| 0.020657533 | 0.011984637 | 0.017793861 | 0.003838176 |
| 0.06135086  | 0.1566812   | 0.012682277 | 0.000682798 |
| 0.034468108 | 0.053937515 | 0.003653246 | 0.095501254 |
| 0.002703009 | 0.134507547 | 0.036944053 | 0.028704713 |
| 0.067390348 | 0.094420737 | 0.093694771 | 0.071225388 |
| 0.074440097 | 0.046250556 | 0.013675122 | 0.00633743  |
| 0.105989943 | 0.004471314 | 0.077517661 | 0.027127649 |
| 0.060041744 | 0.034537689 | 0.009514777 | 0.021335188 |
| 0.034760409 | 0.028765549 | 0.017108914 | 0.067649378 |
| 0.005537188 | 0.032361144 | 0.037814055 | 0.027070331 |
| 0.100100002 | 0.036619029 | 0.064209811 | 0.01058518  |
| 0.050889205 | 0.00874192  | 0.092574523 | 0.006779935 |
| 0.004803458 | 0.042016666 | 0.049723578 | 0.073411999 |
| 0.050679336 | 0.027755867 | 0.10686237  | 0.054027652 |
| 0.020815795 | 0.023339434 | 0.032855688 | 0.034619265 |
| 0.157486022 | 0.051275214 | 0.026687606 | 0.02573626  |
| 0.008367308 | 0.018707283 | 0.048162656 | 0.02885756  |
| 0.021900614 | 0.139458899 | 0.01469951  | 0.050227367 |

|             |             |             |             |
|-------------|-------------|-------------|-------------|
| 0.010557107 | 0.017031323 | 0.039546591 | 0.155799678 |
| 0.168038706 | 0.074583459 | 0.001779683 | 0.065851962 |
| 0.002875268 | 0.071430883 | 0.009763458 | 0.032207139 |
| 0.069644551 | 0.021679017 | 0.087989695 | 0.084105011 |
| 0.040546805 | 0.013114267 | 0.022195504 | 0.181816441 |
| 0.005084439 | 0.021177722 | 0.009030301 | 0.073209879 |
| 0.003668062 | 0.039898869 | 0.100927715 | 0.042224811 |
| 0.006567795 | 0.002592508 | 0.019482528 | 0.060162152 |
| 0.148584229 | 0.038829441 | 0.027255864 | 0.054861785 |
| 0.021631605 | 0.024724385 | 0.047960741 | 0.015426536 |
| 0.086150658 | 0.011622104 | 0.012189477 | 0.025546307 |
| 0.085841944 | 0.214699766 | 0.020239937 | 0.034652862 |
| 0.100850099 | 0.018040634 | 0.016910874 | 0.012220803 |
| 0.031087699 | 0.068749656 | 0.01359464  | 0.020478955 |
| 0.025106896 | 0.01078435  | 0.123261341 | 0.048507482 |
| 0.003159514 |             |             |             |
| BTBD10      | 0.357038076 | 0.466831624 | 0.28584945  |
| 0.275382524 | 0.264998276 | 0.180510036 | 0.092531415 |
| 0.09190698  | 0.041171548 | 0.000678414 | 0.010505211 |
| 0.294437091 | 0.1047755   | 0.121431036 | 0.165396657 |
| 0.309581399 | 0.095359073 | 0.251627903 | 0.129539485 |
| 0.258989795 | 0.032026201 | 0.260707494 | 0.044281901 |
| 0.246683455 | 0.073760568 | 0.036916943 | 0.180477033 |
| 0.347239543 | 0.044505059 | 0.141035044 | 0.232587967 |
| 0.102932929 | 0.361160509 | 0.485106128 | 0.286449206 |
| 0.495018113 | 0.333366098 | 0.018606478 | 0.124198475 |
| 0.369423888 | 0.326644792 | 0.255578029 | 0.171911632 |
| 0.017538575 | 0.439863926 | 0.115265668 | 0.284770562 |
| 0.122030165 | 0.016444421 | 0.100913952 | 0.392801354 |
| 0.427950428 | 0.233126071 | 0.102435176 | 0.067141512 |
| 0.097946173 | 0.100269487 | 0.195783793 | 0.175761816 |
| 0.108937435 | 0.05674586  | 0.446205821 | 0.034196096 |
| 0.07111379  | 0.134935799 | 0.143738858 | 0.12780542  |
| 0.270597714 | 0.271998945 | 0.01059292  | 1           |
| 0.00018696  | 0.233855859 | 0.277705966 | 0.217932471 |
| 0.029718742 | 0.007708048 | 0.156123348 | 0.162014399 |
| 0.383572778 | 0.459234795 | 0.43194004  | 0.45268745  |
| 0.116519426 | 0.221455813 | 0.297026913 | 0.092778206 |
| 0.377486037 | 0.074351169 | 0.067097723 | 0.319985382 |
| 0.44329672  | 0.482809301 | 0.135342698 | 0.198924452 |
| 0.302479806 | 0.417972279 | 0.236008109 | 0.24179622  |
| 0.193153666 | 0.067439371 | 0.381139941 | 0.466483925 |
| 0.335026946 | 0.265936127 | 0.106572078 | 0.292695132 |
| 0.041864322 | 0.220222987 | 0.189430839 | 0.141640816 |
| 0.391423558 | 0.006601547 | 0.16530168  | 0.171903657 |
| 0.174990276 | 0.354552135 | 0.491940525 | 0.092088728 |
| 0.291683785 | 0.012770683 | 0.098342227 | 0.034513672 |
| 0.189277712 | 0.170521405 | 0.449593372 | 0.360990136 |
| 0.115727147 | 0.234763688 | 0.134546418 | 0.002518577 |
| 0.023668876 | 0.189000593 | 0.384636443 | 0.257844534 |
| 0.326811667 | 0.401131387 | 0.118321289 | 0.287281738 |
| 0.301870699 | 0.428439003 | 0.021243871 | 0.049114673 |
| 0.229815266 | 0.183538547 | 0.143075599 | 0.263122885 |
| 0.189859225 | 0.056304807 | 0.071314741 | 0.462575614 |

|             |             |             |             |
|-------------|-------------|-------------|-------------|
| 0.356326974 | 0.043201283 | 0.217074222 | 0.294809442 |
| 0.155835676 | 0.252323932 | 0.061851423 | 0.144613123 |
| 0.018976739 | 0.467151531 | 0.031393426 | 0.193870031 |
| 0.149407759 | 0.122894391 | 0.013428016 | 0.12288923  |
| 0.134880838 | 0.345674906 | 0.460765423 | 0.071537386 |
| 0.169023735 | 0.246125405 | 0.170298069 | 0.264485733 |
| 0.002498516 | 0.036364607 | 0.155780106 | 0.44900982  |
| 0.135037835 | 0.482388053 | 0.184514194 | 0.225986581 |
| 0.191259913 | 0.363145983 | 0.007425236 | 0.452100694 |
| 0.493952122 | 0.160988592 | 0.213115353 | 0.292745954 |
| 0.23475356  | 0.347429686 | 0.039286021 | 0.289388494 |
| 0.257681699 | 0.05289313  | 0.44910835  | 0.099819617 |
| 0.437797054 | 0.02309177  | 0.155453248 | 0.404958903 |
| 0.345715507 | 0.005807375 | 0.088290093 | 0.21857411  |
| 0.034092031 | 0.031270035 | 0.32072822  | 0.237366225 |
| 0.19664973  | 0.376260362 | 0.416585877 | 0.225239873 |
| 0.250151817 | 0.130851817 | 0.012393333 | 0.246230063 |
| 0.388487659 | 0.232588543 | 0.3760555   | 0.117171042 |
| 0.192108302 | 0.40950049  | 0.378237788 | 0.097945331 |
| 0.019000978 | 0.153839314 | 0.007336752 | 0.192011876 |
| 0.375989536 | 0.045414097 | 0.236051658 | 0.15890472  |
| 0.057593579 | 0.469896871 | 0.180060001 | 0.247056124 |
| 0.148629561 | 0.2002444   | 0.143323093 | 0.097777403 |
| 0.109433099 | 0.098602421 | 0.222030164 | 0.21275661  |
| 0.011418559 | 0.053154905 | 0.031069526 | 0.230913103 |
| 0.063414853 | 0.173782105 | 0.16565068  | 0.282163041 |
| 0.173958232 | 0.05287374  | 0.219450615 | 0.241583494 |
| 0.089300683 | 0.011494201 | 0.453515483 | 0.267226891 |
| 0.230913802 | 0.078619502 | 0.034918076 | 0.191973263 |
| 0.376843578 | 0.138438626 | 0.140314178 | 0.366599457 |
| 0.024220417 | 0.443716409 | 0.122500586 | 0.077933412 |
| 0.241855776 | 0.138366216 | 0.375570524 | 0.02476408  |
| 0.231497527 | 0.397661357 | 0.227898842 | 0.109018048 |
| 0.326016404 | 0.233607523 | 0.012106872 | 0.329425934 |
| 0.309639899 | 0.019407106 | 0.488647497 | 0.10813344  |
| 0.018844459 | 0.343650339 | 0.320790729 | 0.054187069 |
| 0.060971001 | 0.153627007 | 0.014464969 | 0.189286989 |
| 0.456730342 | 0.285012544 | 0.308337661 | 0.215414333 |
| 0.017051317 | 0.003831077 | 0.194358899 | 0.305499801 |
| 0.475034858 | 0.488745578 | 0.178590725 | 0.219859785 |
| 0.13490115  | 0.192496351 | 0.064916347 | 0.456812166 |
| 0.232986515 | 0.494791042 | 0.005595469 | 0.377588304 |
| 0.482122446 | 0.135675832 | 0.052750662 | 0.136597608 |
| 0.301022308 | 0.022336147 | 0.14199305  | 0.45014381  |
| 0.365420152 | 0.189085857 | 0.191145994 | 0.306117123 |
| 0.004634605 | 0.015457605 | 0.252843233 | 0.193551002 |
| 0.205046933 | 0.130220255 | 0.086992842 | 0.173580201 |
| 0.018366186 | 0.377418171 | 0.395058368 | 0.031313589 |
| 0.145959013 | 0.16851815  | 0.261288155 | 0.020540929 |
| 0.429543942 | 0.499197173 | 0.480219285 | 0.098930164 |
| 0.373017121 | 0.44531018  | 0.268360113 | 0.071848526 |
| 0.017565525 | 0.498279642 | 0.266526832 | 0.009514204 |
| 0.402817343 | 0.09964577  | 0.003522708 | 0.434274178 |
| 0.102036124 | 0.422171578 | 0.001392071 | 0.134007673 |

|             |             |             |             |
|-------------|-------------|-------------|-------------|
| 0.056136264 | 0.416174994 | 0.430373039 | 0.225255417 |
| 0.096077937 | 0.233240597 | 0.016768431 | 0.504402982 |
| 0.429730753 | 0.014053914 | 0.134020713 | 0.359459524 |
| 0.353998771 | 0.480787416 | 0.232047882 | 0.400385015 |
| 0.272329284 | 0.467625753 | 0.103547044 | 0.168340022 |
| 0.340597707 | 0.487297893 | 0.304715947 | 0.407824915 |
| 0.373865637 | 0.314020928 | 0.14655166  | 0.005202497 |
| 0.096734638 | 0.090855601 | 0.144417721 | 0.038384021 |
| 0.165220105 | 0.088957077 | 0.453918516 | 0.407960403 |
| 0.442909606 | 0.004775617 | 0.066868447 | 0.355224061 |
| 0.350855801 | 0.401526636 | 0.031706246 | 0.0063849   |
| 0.01289411  | 0.013096285 | 0.188999702 | 0.192514236 |
| 0.445718436 | 0.096120405 | 0.00265849  | 0.016215235 |
| 0.160255932 | 0.272529921 | 0.453975136 | 0.242779291 |
| 0.39632867  | 0.059400058 | 0.116155507 | 0.271878511 |
| 0.047736956 | 0.238454858 | 0.432624571 | 0.402787159 |
| 0.048449174 | 0.189149778 | 0.259639063 | 0.409781657 |
| 0.096205583 | 0.217932936 | 0.307269517 | 0.153124773 |
| 0.026951687 | 0.067035268 | 0.045489206 | 0.364559656 |
| 0.482690364 | 0.037886452 | 0.017111179 | 0.066901701 |
| 0.04813315  | 0.42043633  | 0.084532365 | 0.464089445 |
| 0.341271367 | 0.344965052 | 0.07875497  | 0.431418827 |
| 0.018778531 | 0.445637178 | 0.248262065 | 0.025157014 |
| 0.24208977  | 0.012421338 | 0.471136347 | 0.078934085 |
| 0.158616498 | 0.266694591 | 0.133266274 | 0.021330367 |
| 0.193264703 | 0.040134575 | 0.402228918 | 0.41724577  |
| 0.048739547 | 0.130753677 | 0.21800578  | 0.269600891 |
| 0.129558664 | 0.295660966 | 0.458206135 | 0.219006847 |
| 0.031990973 | 0.204540304 | 0.27308141  | 0.270671405 |
| 0.117060192 | 0.445819468 | 0.156828171 | 0.497490435 |
| 0.301931229 | 0.425346113 | 0.437820438 | 0.17757189  |
| 0.193205544 | 0.221712825 | 0.191469967 | 0.005684728 |
| 0.210684756 | 0.370720061 | 0.222979141 | 0.093900844 |
| 0.149099433 | 0.291348017 | 0.035887475 | 0.156838691 |
| 0.275788071 | 0.134485794 | 0.070723241 | 0.361117779 |
| 0.242197207 | 0.281527861 | 0.027335021 | 0.039237989 |
| 0.497513356 | 0.392673714 | 0.064558353 | 0.258664833 |
| 0.133939287 | 0.196672229 | 0.394228572 | 0.392569409 |
| 0.246458268 | 0.371014175 | 0.319684151 | 0.217115332 |
| 0.346616014 | 0.139220216 | 0.482056497 | 0.040013915 |
| 0.061616872 | 0.290154541 | 0.041352932 | 0.079032258 |
| 0.078503159 | 0.024147779 | 0.243866934 | 0.318557895 |
| 0.280832486 | 0.213596997 | 0.183205036 | 0.059346587 |
| 0.2419643   | 0.269053488 | 0.226600864 | 0.082413797 |
| 0.035804137 | 0.441938408 | 0.007292378 | 0.045934249 |
| 0.288916563 | 0.347013687 | 0.247667771 | 0.171629105 |
| 0.228719862 | 0.150814633 | 0.175781197 | 0.136835186 |
| 0.139002166 | 0.267709815 | 0.349251796 | 0.017791543 |
| 0.007204562 | 0.442243343 | 0.224272951 | 0.033711189 |
| 0.083896872 | 0.243521051 | 0.238243728 | 0.113696486 |
| 0.028584425 | 0.455687407 | 0.145600622 | 0.277808801 |
| 0.178965332 | 0.049565407 | 0.312578495 | 0.060723483 |
| 0.047547715 | 0.407850356 | 0.290546823 | 0.488000668 |
| 0.295055628 | 0.294133093 | 0.410961749 | 0.362510808 |



|             |                      |             |                      |
|-------------|----------------------|-------------|----------------------|
| 0.126168525 | 0.29566085           | 0.010988678 | 0.371534886          |
| 0.238951926 |                      |             |                      |
| BTG3        | 0.001014614          | 0.00405253  | 4.05E-05 0.014664468 |
| 0.004408819 | 0.00749069           | 0.034091655 | 0.013257481          |
| 0.002143981 | 0.019831984          | 0.007166549 | 0.001861694          |
| 0.002210421 | 0.031038894          | 0.001219552 | 0.006710322          |
| 0.015851309 | 0.001088262          | 0.026563596 | 0.010240772          |
| 0.046632973 | 0.0130961            | 0.022678419 | 4.73E-05             |
| 0.007245718 | 0.025577232          | 0.00114273  | 0.010043248          |
| 0.024571129 | 0.009666507          | 0.013122722 | 0.004545761          |
| 0.003793509 | 0.002081001          | 0.007230044 | 0.001807958          |
| 0.000579529 | 0.00110717           | 0.008372382 | 0.003111707          |
| 0.002913579 | 0.010323304          | 0.025892813 | 0.039319911          |
| 0.003115323 | 0.034900476          | 0.001333757 | 0.001010554          |
| 0.021961683 | 0.010171445          | 0.00284043  | 0.00327555           |
| 0.003028589 | 0.013038239          | 0.033679218 | 0.00213518           |
| 0.015385508 | 0.001074942          | 0.011768127 | 0.034002164          |
| 0.026289746 | 0.002811335          | 0.007482269 | 0.000233046          |
| 0.012832449 | 0.004040945          | 0.027850032 | 0.000161065          |
| 0.0050595   | 0.009492988          | 0.00018696  | 1                    |
| 0.009465628 | 0.002507947          | 0.000901918 | 0.028810633          |
| 0.051900625 | 0.005641548          | 0.027072786 | 0.007571318          |
| 0.001211244 | 0.005214711          | 0.003103975 | 0.01316787           |
| 0.004364133 | 0.000197178          | 0.034311713 | 0.002340725          |
| 0.046312923 | 0.001818036          | 0.007673057 | 0.004680823          |
| 0.002856486 | 0.002113999          | 0.003709224 | 0.007747192          |
| 0.004377337 | 0.00312157           | 0.00427682  | 0.000774772          |
| 0.000963891 | 0.003170104          | 0.004168082 | 0.004457539          |
| 0.000401819 | 0.015916991          | 0.011612272 | 0.020453958          |
| 0.001723672 | 0.023170533          | 0.002715147 | 0.007258442          |
| 0.017370894 | 0.006004641          | 0.020182248 | 0.001486869          |
| 0.004326051 | 0.002089058          | 0.034733659 | 0.001703064          |
| 0.004821636 | 0.000204866          | 0.007564445 | 0.001111186          |
| 0.000856764 | 0.00181637           | 0.010843153 | 0.012426242          |
| 0.001510306 | 0.013765385          | 0.012513418 | 0.016035225          |
| 0.000383121 | 0.003435893          | 0.003003258 | 0.004008855          |
| 0.000114251 | 0.013372008          | 0.003158064 | 0.001222951          |
| 0.00464307  | 0.000249034          | 0.023219865 | 0.004331139          |
| 0.000648065 | 0.02490612           | 0.003728587 | 0.006881357          |
| 0.02358633  | 0.038016837          | 0.004299227 | 0.004752142          |
| 0.050842413 | 0.002568115          | 0.008197287 | 0.004536597          |
| 0.003710374 | 0.0272705            | 0.031066275 | 0.053217461          |
| 0.001036194 | 0.008042056          | 0.00449794  | 0.000256471          |
| 0.003504997 | 0.00200425           | 0.020290963 | 0.007281828          |
| 0.006235902 | 0.000960713          | 0.022360022 | 0.027811733          |
| 0.007394933 | 0.006343908          | 0.009729698 | 0.01232057           |
| 0.00501402  | 0.003053578          | 0.005628604 | 0.013450367          |
| 0.002505416 | 0.008198675          | 0.001150868 | 0.009388226          |
| 0.005450033 | 6.47E-05 0.002468047 | 0.002126021 |                      |
| 0.002855557 | 0.017696051          | 0.001770699 | 2.45E-05             |
| 0.010189016 | 1.06E-05 0.011324888 | 0.003248366 |                      |
| 0.019640361 | 0.005207079          | 0.025792819 | 0.002167426          |
| 0.033723388 | 0.011189088          | 0.000986672 | 0.002056927          |
| 0.000225563 | 0.023240478          | 0.012996959 | 0.003572187          |

|             |             |             |             |             |
|-------------|-------------|-------------|-------------|-------------|
| 0.025215292 | 0.003110094 | 0.012307352 | 0.007568902 |             |
| 0.002963817 | 0.007138595 | 0.000154895 | 0.004823473 |             |
| 0.01713818  | 0.00232604  | 0.002385009 | 0.001608405 |             |
| 9.58E-05    | 0.00516756  | 0.009350027 | 0.002755009 |             |
| 0.004656007 | 0.00108204  | 0.000454007 | 0.047262672 |             |
| 0.014778717 | 0.003323918 | 0.004621421 | 0.000281033 |             |
| 0.049523133 | 5.44E-05    | 0.001272043 | 0.012366534 |             |
| 0.004421783 | 0.000597564 | 0.001720309 | 0.001941835 |             |
| 0.016949412 | 0.016043528 | 0.030681981 | 0.015462562 |             |
| 0.00552036  | 0.000178705 | 0.002151121 | 0.055530198 |             |
| 0.044185228 | 7.06E-05    | 0.003190725 | 0.024507902 |             |
| 0.012121493 | 0.012360946 | 0.003642743 | 0.007279428 |             |
| 0.026894417 | 0.009000667 | 0.000459007 | 0.004144737 |             |
| 0.028677535 | 0.003817818 | 0.006847902 | 0.006590496 |             |
| 0.012734052 | 0.015920345 | 0.001592034 | 0.009093446 |             |
| 0.007262559 | 0.002051561 | 0.008002619 | 0.000935817 |             |
| 0.003566169 | 0.023364339 | 0.023752481 | 0.005134102 |             |
| 0.038322153 | 0.007647591 | 0.000151089 | 0.00327634  |             |
| 0.005745909 | 0.003614767 | 0.012527423 | 0.006806975 |             |
| 0.007167786 | 0.016235721 | 0.003321322 | 0.004724345 |             |
| 0.042912624 | 0.00323224  | 0.006889668 | 0.017867316 |             |
| 0.002711459 | 0.002922926 | 0.018323107 | 0.010263126 |             |
| 0.019024115 | 0.035569391 | 0.011579435 | 0.004895062 |             |
| 0.012366668 | 0.005544809 | 0.000589003 | 0.0617053   |             |
| 0.027639757 | 0.00168561  | 6.55E-05    | 0.002717155 |             |
| 0.002602507 | 0.013768686 | 0.008405552 | 0.026605407 |             |
| 0.000691846 | 0.00209977  | 0.004463663 | 0.000372584 |             |
| 0.002062654 | 0.018178541 | 0.00132628  | 0.001765911 |             |
| 0.010488258 | 0.01572348  | 0.018707858 | 0.008228432 |             |
| 0.026731414 | 0.007503028 | 0.003888456 | 0.00350226  |             |
| 0.001766757 | 0.001502512 | 0.003563397 | 0.045332911 |             |
| 0.024987357 | 0.001327405 | 0.001904591 | 0.003271371 |             |
| 0.005662732 | 0.002034839 | 0.001853519 | 0.049562753 |             |
| 0.005704004 | 0.005774911 | 0.007255393 | 0.010759074 |             |
| 0.001623627 | 0.005264884 | 0.034412921 | 0.001220511 |             |
| 0.001304919 | 0.003036278 | 0.015307185 | 0.002638667 |             |
| 0.003078556 | 0.000549396 | 0.007441684 | 0.011906737 |             |
| 0.001827717 | 0.004033463 | 0.018565607 | 0.006900578 |             |
| 0.010965246 | 0.056094548 | 0.005060463 | 0.02753679  |             |
| 0.001862403 | 0.000421977 | 0.000639995 | 0.000935262 |             |
| 0.003308917 | 0.002531996 | 0.010021134 | 0.011108241 |             |
| 0.006659741 | 4.22E-05    | 0.002349553 | 0.005059819 |             |
| 0.006089548 | 0.000757274 | 0.003230874 | 0.001466932 |             |
| 0.003900891 | 0.000434058 | 0.002692289 | 0.002395725 |             |
| 0.002380505 | 0.006382185 | 0.012388814 | 0.007376967 |             |
| 0.001110052 | 0.006601652 | 0.003859952 | 0.009917485 |             |
| 0.004034352 | 0.024853861 | 0.035563954 | 0.000589279 |             |
| 0.019539032 | 0.003156248 | 0.002534121 | 0.006403208 |             |
| 0.008772454 | 0.003117628 | 0.005411892 | 0.003704982 |             |
| 0.017515439 | 0.026217823 | 0.002725513 | 0.009386517 |             |
| 0.007114045 | 0.000194335 | 4.35E-06    | 1.72E-05    | 0.003204243 |
| 0.011234266 | 0.00309455  | 0.00309635  | 0.012770865 |             |
| 0.042223891 | 0.030961267 | 0.006152292 | 0.001817342 |             |
| 0.00392267  | 0.013783233 | 0.001424446 | 0.017072857 |             |

|             |                     |                      |             |
|-------------|---------------------|----------------------|-------------|
| 0.009309947 | 0.009982657         | 0.00247243           | 0.001784587 |
| 0.004835112 | 0.004743362         | 0.003347268          | 0.00237713  |
| 0.002181321 | 0.007690032         | 0.004053945          | 0.008879768 |
| 0.002741335 | 0.006020256         | 0.000176366          | 0.006455311 |
| 0.00478036  | 0.004157305         | 0.001651826          | 0.038072714 |
| 0.041526005 | 0.000331927         | 0.051402758          | 0.003608988 |
| 0.03431422  | 0.0048783           | 0.009083956          | 0.011639862 |
| 0.001824944 | 0.003004932         | 0.002371256          | 0.003139201 |
| 0.002190831 | 0.000591328         | 0.002025535          | 0.009664391 |
| 0.001694877 | 0.000730648         | 0.010476827          | 0.00478246  |
| 0.000515974 | 0.0040124           | 0.004201845          | 0.017853866 |
| 0.006956546 | 0.002913879         | 0.001239979          | 0.007702013 |
| 0.005088036 | 0.004319085         | 0.021923476          | 0.012557651 |
| 0.003116466 | 0.003188456         | 0.035778248          | 0.000182237 |
| 0.010030028 | 0.003886474         | 0.014845231          | 0.00472287  |
| 0.003222756 | 0.00263043          | 0.002458767          | 0.002386069 |
| 0.002632659 | 0.010159431         | 0.000641973          | 0.003257111 |
| 0.01805658  | 0.031049655         | 0.009724848          | 0.009589601 |
| 0.003823967 | 0.003556834         | 0.018908154          | 0.000384109 |
| 0.002184884 | 0.000127023         | 0.001199174          | 0.017076203 |
| 0.025412387 | 0.007294094         | 0.004159059          | 0.003129309 |
| 0.006587735 | 0.006099988         | 0.003512929          | 0.002449667 |
| 0.006190946 | 0.009533442         | 0.009326783          | 0.006951736 |
| 0.002442734 | 0.002025654         | 6.26E-05 0.006552748 |             |
| 0.007183996 | 0.017969736         | 0.006974775          | 0.016481625 |
| 0.002931226 | 0.009035234         | 8.43E-05 0.001132088 |             |
| 0.040614637 | 0.009242768         | 0.040305617          | 0.005537692 |
| 0.001145284 | 0.005852324         | 0.00027049           | 0.020503162 |
| 0.001251596 | 0.004074342         | 0.003605361          | 0.000315384 |
| 0.008739356 | 0.042558998         | 0.034656241          | 0.003631866 |
| 0.002111295 | 0.017257691         | 0.000594784          | 0.002105123 |
| 0.001942283 | 0.006002046         | 0.000167048          | 0.000714519 |
| 0.020731799 | 0.011415144         | 0.015829083          | 0.000135228 |
| 0.0027361   | 0.002208834         | 0.044966362          | 0.005750755 |
| 0.002880338 | 0.000959005         | 0.000215832          | 0.00137461  |
| 0.001957815 | 0.004874223         | 0.003406578          | 0.002049332 |
| 0.005814799 | 0.001721135         | 0.014638005          | 0.017345638 |
| 0.003612927 | 7.15E-05 0.00291101 | 0.00358985           |             |
| 0.000204121 | 0.002045888         | 0.000296383          | 0.013978188 |
| 0.002088068 | 0.004436961         | 0.000188771          | 0.000378704 |
| 0.023835882 | 0.005429278         | 0.000309159          |             |
| BTLA        | 0.336582303         | 0.452219378          | 0.281675914 |
| 0.396902152 | 0.328105673         | 0.268783887          | 0.307379001 |
| 0.296259126 | 0.160738456         | 0.020240447          | 0.039305789 |
| 0.285174911 | 0.181924338         | 0.272898866          | 0.252490616 |
| 0.411655668 | 0.174253757         | 0.34928579           | 0.343591378 |
| 0.376722498 | 0.199752328         | 0.350260888          | 0.229655847 |
| 0.255978701 | 0.134244373         | 0.145832683          | 0.227166308 |
| 0.459371093 | 0.164474888         | 0.240124559          | 0.362162115 |
| 0.190670811 | 0.389490684         | 0.416428677          | 0.293778441 |
| 0.391287942 | 0.295580025         | 0.04175373           | 0.254476843 |
| 0.398956786 | 0.346753904         | 0.384969115          | 0.34534599  |
| 0.130055247 | 0.392762377         | 0.314804327          | 0.315779691 |
| 0.255378512 | 0.075621472         | 0.243865866          | 0.382306214 |

|             |             |             |             |
|-------------|-------------|-------------|-------------|
| 0.357740696 | 0.262036673 | 0.327934781 | 0.263236069 |
| 0.132910918 | 0.236753639 | 0.141120818 | 0.268057954 |
| 0.315386314 | 0.199349885 | 0.375734246 | 0.174490709 |
| 0.186580549 | 0.362478677 | 0.208671979 | 0.34223814  |
| 0.23740645  | 0.341346475 | 0.106851517 | 0.233855859 |
| 0.009465628 | 1           | 0.332513896 | 0.179065265 |
| 0.118201096 | 0.052024314 | 0.237639324 | 0.335229433 |
| 0.462015022 | 0.391328421 | 0.438104503 | 0.422580641 |
| 0.19780372  | 0.340453657 | 0.256661978 | 0.253727054 |
| 0.398167058 | 0.253325869 | 0.193773071 | 0.396824968 |
| 0.439349395 | 0.418466103 | 0.251561685 | 0.294445378 |
| 0.346890396 | 0.433413428 | 0.284517767 | 0.308590276 |
| 0.20887     | 0.105881711 | 0.362934683 | 0.440212587 |
| 0.358149575 | 0.206531519 | 0.216552368 | 0.397888271 |
| 0.163757572 | 0.280129666 | 0.354436453 | 0.179594963 |
| 0.473639016 | 0.083006145 | 0.243768604 | 0.327850808 |
| 0.339130017 | 0.375839113 | 0.406784604 | 0.306888526 |
| 0.321965116 | 0.061224981 | 0.103987711 | 0.113543312 |
| 0.292162296 | 0.106200689 | 0.359751266 | 0.425272353 |
| 0.293963771 | 0.289079883 | 0.3684652   | 0.019712945 |
| 0.076213558 | 0.256464994 | 0.34209258  | 0.357973493 |
| 0.384770745 | 0.299501238 | 0.235789272 | 0.313693072 |
| 0.254651833 | 0.431700152 | 0.04831207  | 0.253230206 |
| 0.322716374 | 0.264929789 | 0.326651967 | 0.290301863 |
| 0.281329602 | 0.279111437 | 0.251460368 | 0.466627872 |
| 0.393482827 | 0.20345583  | 0.308407322 | 0.38359011  |
| 0.252125557 | 0.281497582 | 0.249535547 | 0.292549294 |
| 0.152339064 | 0.365196847 | 0.072233319 | 0.346300061 |
| 0.165975278 | 0.14740202  | 0.072563502 | 0.319907049 |
| 0.264261657 | 0.339647832 | 0.346936333 | 0.245238153 |
| 0.318930321 | 0.328003043 | 0.291805729 | 0.29183378  |
| 0.026821086 | 0.154375713 | 0.243569765 | 0.438522163 |
| 0.214527587 | 0.441285892 | 0.362374265 | 0.325007636 |
| 0.312767387 | 0.428449654 | 0.007963511 | 0.395703429 |
| 0.416984616 | 0.231804845 | 0.293619598 | 0.325213698 |
| 0.227150831 | 0.423678385 | 0.042401988 | 0.373811654 |
| 0.270818995 | 0.217446921 | 0.471301201 | 0.221875354 |
| 0.383093787 | 0.109332627 | 0.314677463 | 0.330693121 |
| 0.273861744 | 0.030291375 | 0.243879634 | 0.359480528 |
| 0.071934817 | 0.202531883 | 0.373642943 | 0.345797455 |
| 0.308790095 | 0.395551429 | 0.473571992 | 0.2086587   |
| 0.320682462 | 0.361655763 | 0.062821367 | 0.299958932 |
| 0.368540288 | 0.223331089 | 0.389023974 | 0.344356472 |
| 0.230184161 | 0.415565246 | 0.312417097 | 0.148249758 |
| 0.137869714 | 0.34746003  | 0.063163093 | 0.306496218 |
| 0.321713471 | 0.180905702 | 0.246674766 | 0.238783667 |
| 0.134725937 | 0.452793662 | 0.156911362 | 0.167933182 |
| 0.099198352 | 0.264483598 | 0.375819569 | 0.188729987 |
| 0.146390488 | 0.266063688 | 0.261281172 | 0.294583897 |
| 0.130708197 | 0.174180285 | 0.047963239 | 0.189084075 |
| 0.110274363 | 0.201276039 | 0.192262398 | 0.297714628 |
| 0.287619697 | 0.143434593 | 0.299145625 | 0.248735837 |
| 0.175178655 | 0.06316279  | 0.439956653 | 0.368485814 |
| 0.277145262 | 0.295110047 | 0.123734929 | 0.176099809 |

|             |             |             |             |
|-------------|-------------|-------------|-------------|
| 0.424019789 | 0.20061928  | 0.23086746  | 0.408578759 |
| 0.102935943 | 0.447203055 | 0.227354725 | 0.189569908 |
| 0.237617738 | 0.307417935 | 0.466853316 | 0.08723177  |
| 0.317864255 | 0.406526229 | 0.358931856 | 0.22965495  |
| 0.333238864 | 0.350009666 | 0.113642066 | 0.323736915 |
| 0.307387979 | 0.099122249 | 0.43579905  | 0.170317471 |
| 0.077139601 | 0.324457166 | 0.296418346 | 0.165812345 |
| 0.157323596 | 0.268266115 | 0.152004492 | 0.314315499 |
| 0.449482512 | 0.374200667 | 0.323977949 | 0.221796538 |
| 0.116379808 | 0.020370009 | 0.237204285 | 0.274295876 |
| 0.400185926 | 0.413332818 | 0.342471827 | 0.251130409 |
| 0.343127546 | 0.240919555 | 0.206601996 | 0.432146012 |
| 0.242265736 | 0.428502023 | 0.044323181 | 0.32875832  |
| 0.383398874 | 0.254043847 | 0.128439833 | 0.314470696 |
| 0.336869945 | 0.151967767 | 0.358481804 | 0.404299727 |
| 0.399768257 | 0.302526115 | 0.260597617 | 0.329021351 |
| 0.080028992 | 0.152406679 | 0.307780992 | 0.152092097 |
| 0.284633628 | 0.305576479 | 0.040706978 | 0.339296302 |
| 0.106321572 | 0.388568178 | 0.42909251  | 0.122962269 |
| 0.212722297 | 0.321336775 | 0.333100262 | 0.129410534 |
| 0.350375807 | 0.400963642 | 0.419757245 | 0.333979051 |
| 0.342105303 | 0.388575099 | 0.208081507 | 0.175246999 |
| 0.058755226 | 0.401415775 | 0.329037835 | 0.053967666 |
| 0.455853719 | 0.208539105 | 0.030976147 | 0.445361993 |
| 0.326531346 | 0.34272865  | 0.018684847 | 0.084268244 |
| 0.097031216 | 0.417360081 | 0.382859037 | 0.355422271 |
| 0.170504228 | 0.383808561 | 0.017872068 | 0.44058614  |
| 0.405952774 | 0.045530894 | 0.17867812  | 0.318856577 |
| 0.274897844 | 0.459759991 | 0.209414725 | 0.351798039 |
| 0.239093901 | 0.380203718 | 0.269462742 | 0.310531419 |
| 0.386464394 | 0.371484381 | 0.383350114 | 0.416962361 |
| 0.42923011  | 0.336076924 | 0.343256024 | 0.069966255 |
| 0.147410871 | 0.28185621  | 0.169619336 | 0.102781295 |
| 0.261770363 | 0.186187385 | 0.421989206 | 0.442918151 |
| 0.397270148 | 0.032226444 | 0.272505681 | 0.338087204 |
| 0.436337773 | 0.475297673 | 0.078939374 | 0.016172849 |
| 0.01397949  | 0.030987924 | 0.358200988 | 0.295708496 |
| 0.421718708 | 0.146734912 | 0.033488854 | 0.156417132 |
| 0.329276998 | 0.268012435 | 0.411968967 | 0.383224736 |
| 0.358116704 | 0.192287647 | 0.188626226 | 0.403459328 |
| 0.11175512  | 0.245459468 | 0.413758882 | 0.409514317 |
| 0.122246579 | 0.302464511 | 0.322564728 | 0.469306376 |
| 0.042529894 | 0.33286442  | 0.285619681 | 0.270932288 |
| 0.05202938  | 0.149751087 | 0.134079565 | 0.415915569 |
| 0.370309715 | 0.100796255 | 0.062931466 | 0.139584508 |
| 0.189951101 | 0.432307282 | 0.22975112  | 0.4675683   |
| 0.416239316 | 0.446446699 | 0.126391408 | 0.408344087 |
| 0.092005811 | 0.381771585 | 0.244964865 | 0.068316343 |
| 0.336838713 | 0.069222018 | 0.371218479 | 0.096832242 |
| 0.295270223 | 0.343740603 | 0.186789969 | 0.054756965 |
| 0.135906494 | 0.124385823 | 0.443559847 | 0.401760795 |
| 0.086294238 | 0.370756332 | 0.342160647 | 0.359908843 |
| 0.300307078 | 0.373790454 | 0.404963184 | 0.221218795 |
| 0.200592704 | 0.124793635 | 0.390544761 | 0.292468501 |

|             |             |             |             |
|-------------|-------------|-------------|-------------|
| 0.304481882 | 0.451745853 | 0.232974206 | 0.451197872 |
| 0.344771548 | 0.429913278 | 0.391652452 | 0.341060882 |
| 0.193838503 | 0.30098199  | 0.288185562 | 0.061250299 |
| 0.375003978 | 0.413219962 | 0.360988772 | 0.16141107  |
| 0.26044223  | 0.230152835 | 0.175037126 | 0.183081847 |
| 0.183439921 | 0.256985269 | 0.22668343  | 0.45650323  |
| 0.322495074 | 0.308340619 | 0.155874552 | 0.124818785 |
| 0.461704991 | 0.399474686 | 0.249497547 | 0.325634787 |
| 0.281086715 | 0.318150274 | 0.370743061 | 0.358327234 |
| 0.282996174 | 0.362116246 | 0.397231994 | 0.286768683 |
| 0.378832233 | 0.359339306 | 0.424068553 | 0.189979222 |
| 0.121182055 | 0.261356315 | 0.147572554 | 0.177406231 |
| 0.24973581  | 0.085149052 | 0.162267832 | 0.381690082 |
| 0.200228484 | 0.332531205 | 0.2752577   | 0.174732538 |
| 0.323871978 | 0.288238798 | 0.358580485 | 0.270694762 |
| 0.145321888 | 0.396679837 | 0.034047094 | 0.143626466 |
| 0.218952562 | 0.352235537 | 0.231558083 | 0.302673092 |
| 0.196804117 | 0.198383186 | 0.331207992 | 0.270325513 |
| 0.184973463 | 0.257502022 | 0.35086467  | 0.128534828 |
| 0.094700229 | 0.464896011 | 0.297797474 | 0.069423642 |
| 0.148031996 | 0.270938843 | 0.346264236 | 0.245727698 |
| 0.061126233 | 0.371416518 | 0.229017715 | 0.310114372 |
| 0.359757    | 0.18781444  | 0.321424623 | 0.179163948 |
| 0.19750977  | 0.385584741 | 0.271899746 | 0.400158656 |
| 0.304241231 | 0.396632057 | 0.365394538 | 0.350994054 |
| 0.205587081 | 0.240343483 | 0.117918372 | 0.435281895 |
| 0.209996862 |             |             |             |
| BZW2        | 0.355810789 | 0.422529435 | 0.268977808 |
| 0.346624293 | 0.286617187 | 0.171402701 | 0.154830097 |
| 0.130805508 | 0.095450131 | 0.00698353  | 0.035083405 |
| 0.317840324 | 0.148417379 | 0.152779472 | 0.147710445 |
| 0.424585963 | 0.205005219 | 0.272125532 | 0.22811963  |
| 0.342744385 | 0.068919698 | 0.378867031 | 0.125109922 |
| 0.319354651 | 0.162514574 | 0.113773444 | 0.2390219   |
| 0.419465034 | 0.130882736 | 0.119810457 | 0.278762143 |
| 0.26036861  | 0.380019704 | 0.391193565 | 0.342559952 |
| 0.385236717 | 0.300600182 | 0.062200321 | 0.127653173 |
| 0.361670556 | 0.361196535 | 0.334132148 | 0.238207316 |
| 0.068260927 | 0.341584945 | 0.183840584 | 0.3337161   |
| 0.133280018 | 0.068836695 | 0.098247208 | 0.317165717 |
| 0.326615399 | 0.221549747 | 0.145095512 | 0.127041334 |
| 0.106400261 | 0.104213511 | 0.179007684 | 0.178905852 |
| 0.18878841  | 0.065083164 | 0.356413343 | 0.074522713 |
| 0.096840338 | 0.191527002 | 0.296106674 | 0.180907973 |
| 0.2789099   | 0.266129992 | 0.057385586 | 0.277705966 |
| 0.002507947 | 0.332513896 | 1           | 0.19206888  |
| 0.119036041 | 0.03775183  | 0.30838943  | 0.21146557  |
| 0.438338424 | 0.387853177 | 0.470505223 | 0.457236498 |
| 0.208465057 | 0.344077385 | 0.288381311 | 0.190007742 |
| 0.370896149 | 0.129857753 | 0.138628566 | 0.440264437 |
| 0.469148552 | 0.408979468 | 0.250785383 | 0.32164715  |
| 0.295479352 | 0.384115083 | 0.210200777 | 0.247036205 |
| 0.173775623 | 0.190210803 | 0.318159658 | 0.454220405 |
| 0.304291474 | 0.278818716 | 0.228798951 | 0.327369503 |

|             |              |             |             |
|-------------|--------------|-------------|-------------|
| 0.147291783 | 0.191920342  | 0.291647798 | 0.226912681 |
| 0.44711735  | 0.034952518  | 0.2936494   | 0.199615907 |
| 0.3029684   | 0.361835344  | 0.414596967 | 0.179949004 |
| 0.321288766 | 0.0617111714 | 0.130091563 | 0.140770495 |
| 0.213212955 | 0.215264945  | 0.322505403 | 0.39166132  |
| 0.154932301 | 0.258557695  | 0.208377429 | 0.027300239 |
| 0.104016034 | 0.335023208  | 0.361108816 | 0.289564625 |
| 0.375716214 | 0.317801735  | 0.17665686  | 0.262196697 |
| 0.293771778 | 0.467854796  | 0.015775191 | 0.133458435 |
| 0.232752196 | 0.331862114  | 0.258260332 | 0.262194555 |
| 0.264885108 | 0.132056408  | 0.175613278 | 0.462911348 |
| 0.311558587 | 0.130225956  | 0.204249762 | 0.413798558 |
| 0.157333772 | 0.310637071  | 0.16817743  | 0.207062946 |
| 0.06811218  | 0.364492639  | 0.123797312 | 0.211983965 |
| 0.135365537 | 0.219082458  | 0.062333928 | 0.151198432 |
| 0.15275473  | 0.313722877  | 0.326132842 | 0.1939228   |
| 0.226430882 | 0.339868769  | 0.160256898 | 0.264385694 |
| 0.01396187  | 0.130865279  | 0.128408986 | 0.433884585 |
| 0.127842285 | 0.476841339  | 0.280792953 | 0.325936949 |
| 0.303660597 | 0.427549307  | 0.015523322 | 0.355711774 |
| 0.414829079 | 0.124708244  | 0.239126406 | 0.345035086 |
| 0.206506204 | 0.389707466  | 0.038572589 | 0.400474436 |
| 0.232143395 | 0.164266312  | 0.488342111 | 0.210412141 |
| 0.366893448 | 0.091198179  | 0.172639979 | 0.38538696  |
| 0.310164523 | 0.023696902  | 0.094682558 | 0.285271982 |
| 0.130299701 | 0.061073666  | 0.358836205 | 0.311217649 |
| 0.219237759 | 0.432907857  | 0.486180792 | 0.19434533  |
| 0.267031816 | 0.214388221  | 0.069827369 | 0.338966629 |
| 0.403681028 | 0.190260295  | 0.320618037 | 0.185839052 |
| 0.158738697 | 0.369795713  | 0.324907684 | 0.081661448 |
| 0.075912945 | 0.187180046  | 0.027305929 | 0.247382878 |
| 0.314761186 | 0.09370972   | 0.19892217  | 0.31537299  |
| 0.17166317  | 0.445011997  | 0.263163836 | 0.254912875 |
| 0.199095473 | 0.193422989  | 0.239525199 | 0.114193561 |
| 0.13221802  | 0.211987462  | 0.239064304 | 0.22101354  |
| 0.04297646  | 0.146065395  | 0.111506747 | 0.17918107  |
| 0.089924801 | 0.158552491  | 0.139427362 | 0.265725824 |
| 0.199642619 | 0.110991792  | 0.255468177 | 0.293451623 |
| 0.206652459 | 0.06913809   | 0.414164583 | 0.377022686 |
| 0.201986594 | 0.170638689  | 0.138860615 | 0.14115173  |
| 0.395336896 | 0.10114379   | 0.110939184 | 0.353037757 |
| 0.092563366 | 0.473551144  | 0.16543139  | 0.185349939 |
| 0.245052623 | 0.221715074  | 0.438416636 | 0.03774792  |
| 0.225776801 | 0.351063006  | 0.334905851 | 0.200804583 |
| 0.27269753  | 0.302147699  | 0.054208152 | 0.295975285 |
| 0.280285348 | 0.089748877  | 0.440782634 | 0.239026684 |
| 0.095666555 | 0.396752941  | 0.310018401 | 0.166687873 |
| 0.175953179 | 0.171280229  | 0.042775882 | 0.295370447 |
| 0.431112935 | 0.400318995  | 0.294172223 | 0.320254711 |
| 0.069075186 | 0.019679228  | 0.332662792 | 0.282244573 |
| 0.369204879 | 0.440539121  | 0.305988796 | 0.241549634 |
| 0.239424496 | 0.206389955  | 0.072683505 | 0.436875759 |
| 0.323200539 | 0.416129014  | 0.045392644 | 0.384981279 |
| 0.368268442 | 0.12440177   | 0.139527198 | 0.159674326 |

|             |             |             |             |
|-------------|-------------|-------------|-------------|
| 0.270458022 | 0.086457874 | 0.253231384 | 0.375765098 |
| 0.355624739 | 0.231993473 | 0.196714586 | 0.372969202 |
| 0.026308687 | 0.059554273 | 0.273338976 | 0.255134026 |
| 0.198363672 | 0.235547922 | 0.121658722 | 0.189212134 |
| 0.06782292  | 0.332304489 | 0.463398387 | 0.092297808 |
| 0.121433097 | 0.174024708 | 0.372530027 | 0.090775512 |
| 0.398844095 | 0.421951018 | 0.391833487 | 0.200046447 |
| 0.374481517 | 0.393573793 | 0.234521168 | 0.210375702 |
| 0.088043244 | 0.402164951 | 0.279529826 | 0.033958314 |
| 0.457466848 | 0.084727738 | 0.019139192 | 0.398098166 |
| 0.204875502 | 0.303805931 | 0.004507787 | 0.154774213 |
| 0.176717346 | 0.47939511  | 0.340321672 | 0.279298588 |
| 0.07305657  | 0.308468345 | 0.05301498  | 0.465930534 |
| 0.37021165  | 0.070799451 | 0.262686603 | 0.332814954 |
| 0.329004284 | 0.424709105 | 0.241577351 | 0.386745212 |
| 0.269379126 | 0.368298256 | 0.150468483 | 0.273865398 |
| 0.344826511 | 0.397321262 | 0.33698557  | 0.362501791 |
| 0.415687469 | 0.406922596 | 0.22776333  | 0.032333154 |
| 0.144004036 | 0.112575323 | 0.106248465 | 0.069656932 |
| 0.163654146 | 0.180590799 | 0.41635616  | 0.463604114 |
| 0.427321339 | 0.040894194 | 0.114789822 | 0.331984444 |
| 0.368705697 | 0.43990916  | 0.108904915 | 0.017099179 |
| 0.025344999 | 0.045191254 | 0.218824595 | 0.323863429 |
| 0.417801555 | 0.070580361 | 0.028008921 | 0.052760315 |
| 0.221990661 | 0.32310281  | 0.388888643 | 0.371058593 |
| 0.411440973 | 0.181179617 | 0.108228529 | 0.385891106 |
| 0.128300544 | 0.199295634 | 0.427673222 | 0.346511843 |
| 0.169869123 | 0.312219128 | 0.256713715 | 0.440955972 |
| 0.109542705 | 0.323174847 | 0.335347793 | 0.18275241  |
| 0.096154218 | 0.183878616 | 0.133534007 | 0.455259191 |
| 0.365545307 | 0.089525091 | 0.063096361 | 0.063641347 |
| 0.10304584  | 0.447853108 | 0.166219656 | 0.477722698 |
| 0.369467024 | 0.443294047 | 0.206851911 | 0.36186352  |
| 0.067317472 | 0.357247866 | 0.285974681 | 0.030287493 |
| 0.352139546 | 0.074221379 | 0.394012769 | 0.081344399 |
| 0.164489668 | 0.300778918 | 0.170526412 | 0.098733539 |
| 0.218913022 | 0.141623796 | 0.444236167 | 0.457463209 |
| 0.165002865 | 0.212744792 | 0.330784792 | 0.359404054 |
| 0.143079572 | 0.35797453  | 0.36607637  | 0.156133567 |
| 0.085037259 | 0.262987438 | 0.342668406 | 0.264400651 |
| 0.154277067 | 0.487737659 | 0.182913748 | 0.461402023 |
| 0.3084454   | 0.406714662 | 0.397565141 | 0.213081991 |
| 0.266466917 | 0.215680405 | 0.211012095 | 0.023818197 |
| 0.277726414 | 0.416272931 | 0.242330159 | 0.164465916 |
| 0.228721446 | 0.255274672 | 0.116680188 | 0.154103085 |
| 0.23764122  | 0.134611522 | 0.147751872 | 0.464508081 |
| 0.275051948 | 0.274741427 | 0.089799192 | 0.116999369 |
| 0.443749327 | 0.347392923 | 0.105804394 | 0.28662     |
| 0.28542008  | 0.25203807  | 0.418819667 | 0.430932799 |
| 0.233119316 | 0.355308221 | 0.353082258 | 0.224470602 |
| 0.302781192 | 0.224898744 | 0.397060862 | 0.063092893 |
| 0.135247088 | 0.28276599  | 0.09625641  | 0.215901849 |
| 0.181900628 | 0.101877512 | 0.209653397 | 0.424461554 |
| 0.225755937 | 0.301571801 | 0.169642885 | 0.156841119 |



|             |             |             |             |
|-------------|-------------|-------------|-------------|
| 0.341445686 | 0.234611283 | 0.305353659 | 0.126531752 |
| 0.097729868 | 0.359880193 | 0.038865165 | 0.161092119 |
| 0.251061234 | 0.348399544 | 0.23793299  | 0.295463715 |
| 0.24480173  | 0.305701165 | 0.26727293  | 0.130049425 |
| 0.111488674 | 0.242590892 | 0.338485881 | 0.060832058 |
| 0.042105837 | 0.486097023 | 0.201130268 | 0.128379419 |
| 0.184600541 | 0.233774316 | 0.319734297 | 0.157613602 |
| 0.115728092 | 0.392105105 | 0.119102403 | 0.282107129 |
| 0.212300236 | 0.164584482 | 0.254410598 | 0.118041949 |
| 0.145541224 | 0.340625199 | 0.2819433   | 0.401605843 |
| 0.34221055  | 0.395296243 | 0.309765714 | 0.345529409 |
| 0.226080592 | 0.233391595 | 0.052752828 | 0.412337664 |
| 0.180705538 |             |             |             |
| C1QBP       | 0.241131696 | 0.365687661 | 0.193194645 |
| 0.243635023 | 0.178999443 | 0.134230271 | 0.052703059 |
| 0.019187333 | 0.066853213 | 0.000945962 | 0.030257556 |
| 0.214109197 | 0.057803416 | 0.034221922 | 0.096213474 |
| 0.283298289 | 0.048364792 | 0.067573749 | 0.076131202 |
| 0.192116378 | 0.011056073 | 0.246100349 | 0.024479756 |
| 0.135773089 | 0.074844354 | 0.038461458 | 0.16209295  |
| 0.262051463 | 0.041244152 | 0.072656942 | 0.151924202 |
| 0.036617996 | 0.236685005 | 0.365705914 | 0.26382219  |
| 0.362169169 | 0.229065517 | 0.000417548 | 0.060623489 |
| 0.239283833 | 0.340689695 | 0.198556871 | 0.132048566 |
| 0.014430592 | 0.293761801 | 0.086733973 | 0.232775653 |
| 0.035639495 | 0.021355466 | 0.02711225  | 0.264183634 |
| 0.32318856  | 0.227365709 | 0.031699844 | 0.035744744 |
| 0.066499637 | 0.020448669 | 0.128934171 | 0.096036631 |
| 0.064353576 | 0.012763819 | 0.344795544 | 0.037408051 |
| 0.039353548 | 0.033444598 | 0.054168017 | 0.043636772 |
| 0.149977134 | 0.176982312 | 0.002952979 | 0.217932471 |
| 0.000901918 | 0.179065265 | 0.19206888  | 1           |
| 0.020452305 | 0.006543136 | 0.059116744 | 0.127363864 |
| 0.287359849 | 0.309772013 | 0.377783723 | 0.404529845 |
| 0.047615684 | 0.109159899 | 0.217956263 | 0.044898308 |
| 0.283050451 | 0.042073165 | 0.023382223 | 0.296270781 |
| 0.388816125 | 0.377202999 | 0.088969098 | 0.157434413 |
| 0.279020461 | 0.300313836 | 0.150996519 | 0.157059549 |
| 0.159879962 | 0.044408165 | 0.297908864 | 0.37919167  |
| 0.205390017 | 0.191392135 | 0.076089133 | 0.189067892 |
| 0.021996536 | 0.055440325 | 0.167706574 | 0.026579427 |
| 0.301429763 | 0.011127632 | 0.115721942 | 0.110729707 |
| 0.050874157 | 0.254740941 | 0.3984243   | 0.055761524 |
| 0.150173894 | 0.006039579 | 0.150960603 | 0.015311923 |
| 0.053137434 | 0.112574196 | 0.320225018 | 0.291148615 |
| 0.024311188 | 0.10515931  | 0.056329151 | 0.002423231 |
| 0.016255556 | 0.06134094  | 0.255079746 | 0.085336091 |
| 0.243491472 | 0.287197199 | 0.099133018 | 0.182602107 |
| 0.283261593 | 0.376381268 | 0.007395909 | 0.02256009  |
| 0.157542122 | 0.062410152 | 0.105494374 | 0.186897271 |
| 0.159391725 | 0.017921917 | 0.028681445 | 0.391700316 |
| 0.237069982 | 0.022983055 | 0.047709162 | 0.254756942 |
| 0.079315405 | 0.206392675 | 0.023333095 | 0.044131561 |
| 0.00951353  | 0.370350545 | 0.021208527 | 0.061881177 |

|             |             |             |             |
|-------------|-------------|-------------|-------------|
| 0.177635505 | 0.053138662 | 0.002520265 | 0.040188442 |
| 0.047748831 | 0.304281493 | 0.316915583 | 0.028000085 |
| 0.064784905 | 0.249278504 | 0.058832752 | 0.232911879 |
| 0.011927877 | 0.013068821 | 0.039838966 | 0.352138626 |
| 0.074140839 | 0.376984495 | 0.058776813 | 0.108738402 |
| 0.146600846 | 0.311411911 | 0.003055938 | 0.328558317 |
| 0.398265025 | 0.043458803 | 0.166231417 | 0.205129867 |
| 0.232587069 | 0.298258684 | 0.005538518 | 0.221234169 |
| 0.130952244 | 0.023167687 | 0.380864441 | 0.074920173 |
| 0.300098895 | 0.023725798 | 0.043013943 | 0.396180171 |
| 0.273628792 | 0.00326089  | 0.03505753  | 0.176020446 |
| 0.023873187 | 0.012579017 | 0.231317188 | 0.211494901 |
| 0.215668008 | 0.317450821 | 0.346485868 | 0.224227012 |
| 0.17455333  | 0.03636211  | 0.006936363 | 0.172604778 |
| 0.295098286 | 0.107106808 | 0.271263222 | 0.04518553  |
| 0.08831209  | 0.319417242 | 0.287190167 | 0.079709331 |
| 0.016270552 | 0.066958038 | 0.003233209 | 0.185311699 |
| 0.299682846 | 0.022643235 | 0.224847873 | 0.035744242 |
| 0.035834103 | 0.391585162 | 0.124152386 | 0.154407439 |
| 0.123078879 | 0.134154527 | 0.063167607 | 0.039094445 |
| 0.058529726 | 0.071061025 | 0.158729442 | 0.131301792 |
| 0.005546115 | 0.028541726 | 0.014807738 | 0.07109277  |
| 0.0285863   | 0.058415207 | 0.053429967 | 0.179881675 |
| 0.043070431 | 0.019914151 | 0.142280245 | 0.149765455 |
| 0.068649717 | 0.009075673 | 0.35660217  | 0.216280163 |
| 0.127566794 | 0.044645622 | 0.016697405 | 0.056343801 |
| 0.30887667  | 0.088267066 | 0.03226021  | 0.286215116 |
| 0.008155651 | 0.370799521 | 0.057585327 | 0.060420518 |
| 0.111290792 | 0.082924398 | 0.318878738 | 0.025121766 |
| 0.120695085 | 0.285307583 | 0.133612167 | 0.090753345 |
| 0.206327953 | 0.189625592 | 0.007721582 | 0.211360535 |
| 0.181489015 | 0.012901968 | 0.382014293 | 0.050007811 |
| 0.012519751 | 0.293296019 | 0.324593786 | 0.042683576 |
| 0.044116312 | 0.109112258 | 0.005735542 | 0.176646131 |
| 0.377740475 | 0.269609416 | 0.276937856 | 0.121001277 |
| 0.014078695 | 0.002515259 | 0.091163954 | 0.188724697 |
| 0.330150156 | 0.392589328 | 0.093731216 | 0.159118066 |
| 0.093571735 | 0.165429383 | 0.013135682 | 0.380394424 |
| 0.062317879 | 0.355068028 | 0.003861913 | 0.368559445 |
| 0.365303734 | 0.044856353 | 0.054049326 | 0.085994713 |
| 0.192876941 | 0.019558871 | 0.034171862 | 0.334275301 |
| 0.312962495 | 0.137096429 | 0.14213618  | 0.202782234 |
| 0.003155791 | 0.007879904 | 0.256572723 | 0.143453576 |
| 0.103576153 | 0.087938488 | 0.075520128 | 0.049279226 |
| 0.015396612 | 0.284114744 | 0.291528072 | 0.058458726 |
| 0.115136911 | 0.047567152 | 0.222037224 | 0.015022403 |
| 0.409499022 | 0.379087869 | 0.353412704 | 0.025460475 |
| 0.257218119 | 0.389761404 | 0.268554806 | 0.036092306 |
| 0.015063886 | 0.381801877 | 0.178791175 | 0.007437407 |
| 0.318258967 | 0.033888982 | 0.004006976 | 0.322753948 |
| 0.052988127 | 0.26504849  | 0.001735146 | 0.044471502 |
| 0.032785148 | 0.349505571 | 0.340886419 | 0.151412805 |
| 0.030965309 | 0.142772978 | 0.005553783 | 0.39548778  |
| 0.32293601  | 0.016801368 | 0.088680225 | 0.285660856 |

|             |             |             |             |
|-------------|-------------|-------------|-------------|
| 0.33152057  | 0.347706737 | 0.212897001 | 0.379204432 |
| 0.237997747 | 0.364635603 | 0.040368497 | 0.154491592 |
| 0.277781916 | 0.400415535 | 0.215209124 | 0.293757193 |
| 0.286585964 | 0.269216021 | 0.123575147 | 0.007250452 |
| 0.181231868 | 0.025897652 | 0.091206542 | 0.072867789 |
| 0.093421456 | 0.081062411 | 0.322342236 | 0.33587622  |
| 0.369239799 | 0.004186135 | 0.019367308 | 0.26327091  |
| 0.248313398 | 0.310507369 | 0.011877821 | 0.006178886 |
| 0.004157044 | 0.034411249 | 0.11275431  | 0.117343825 |
| 0.375079659 | 0.029288505 | 0.002472618 | 0.004734525 |
| 0.058261498 | 0.298034858 | 0.349581419 | 0.204181049 |
| 0.320136378 | 0.027170188 | 0.05494862  | 0.209655473 |
| 0.069636879 | 0.125048293 | 0.372458991 | 0.301043567 |
| 0.020440651 | 0.122936494 | 0.078989967 | 0.336820585 |
| 0.109933421 | 0.152353674 | 0.211808572 | 0.074401858 |
| 0.006523532 | 0.051088929 | 0.060312389 | 0.296913012 |
| 0.360869809 | 0.026313354 | 0.016235888 | 0.012556605 |
| 0.02756172  | 0.326805474 | 0.039720128 | 0.383567036 |
| 0.260223562 | 0.280955949 | 0.047146255 | 0.34164593  |
| 0.032875173 | 0.320271604 | 0.198634654 | 0.012606985 |
| 0.064822111 | 0.00572781  | 0.329204599 | 0.151808022 |
| 0.040342766 | 0.160089455 | 0.200948651 | 0.016008734 |
| 0.158431513 | 0.024094678 | 0.359674491 | 0.375757394 |
| 0.02512527  | 0.051724721 | 0.127115951 | 0.187393598 |
| 0.057834077 | 0.261097014 | 0.334154376 | 0.13864711  |
| 0.019460263 | 0.067694149 | 0.183316638 | 0.153110156 |
| 0.025334279 | 0.377397403 | 0.129744964 | 0.395337439 |
| 0.206971477 | 0.317119037 | 0.342716519 | 0.154744779 |
| 0.101927366 | 0.13321936  | 0.155928018 | 0.003550638 |
| 0.128524724 | 0.311564359 | 0.088806128 | 0.098355133 |
| 0.115517483 | 0.245238376 | 0.012726573 | 0.020014982 |
| 0.212532988 | 0.081927598 | 0.031220834 | 0.29417183  |
| 0.134463058 | 0.16801871  | 0.00441713  | 0.058130218 |
| 0.378799656 | 0.291310597 | 0.029181628 | 0.21912748  |
| 0.058416944 | 0.203053093 | 0.313104423 | 0.328992824 |
| 0.11748281  | 0.288209995 | 0.212558951 | 0.155800246 |
| 0.239880828 | 0.092753618 | 0.370253306 | 0.005826737 |
| 0.080598263 | 0.181155391 | 0.030533056 | 0.048447235 |
| 0.041348455 | 0.023118796 | 0.157729445 | 0.24975593  |
| 0.11670462  | 0.179962886 | 0.038698031 | 0.034217192 |
| 0.157813318 | 0.093757224 | 0.164286527 | 0.032272497 |
| 0.024988414 | 0.345123613 | 0.006761347 | 0.021909444 |
| 0.107467629 | 0.328859453 | 0.225924739 | 0.07858276  |
| 0.161578882 | 0.068018709 | 0.116673857 | 0.049275526 |
| 0.057255579 | 0.078802879 | 0.321414558 | 0.008547657 |
| 0.003011539 | 0.355775376 | 0.083908217 | 0.015660019 |
| 0.052924515 | 0.161257499 | 0.048615277 | 0.10224269  |
| 0.021961752 | 0.38205356  | 0.077237334 | 0.213070571 |
| 0.1048366   | 0.019296562 | 0.175136492 | 0.021202324 |
| 0.018169142 | 0.2613729   | 0.238268051 | 0.375770167 |
| 0.138559618 | 0.266970148 | 0.26912693  | 0.253804647 |
| 0.029904347 | 0.170599005 | 0.00935366  | 0.267816524 |
| 0.12768738  |             |             |             |

CAMK2N1 0.041519583

0.047369624

0.039559735

|             |             |             |             |
|-------------|-------------|-------------|-------------|
| 0.108836362 | 0.078540985 | 0.029861704 | 0.12748127  |
| 0.044750843 | 0.121059295 | 0.085160369 | 0.141468188 |
| 0.053770802 | 0.082594402 | 0.058315723 | 0.017419375 |
| 0.138938614 | 0.230262002 | 0.032855967 | 0.206982039 |
| 0.102137984 | 0.088164038 | 0.168524668 | 0.205855391 |
| 0.064393376 | 0.197913131 | 0.253726508 | 0.077470114 |
| 0.100648698 | 0.257490979 | 0.022174756 | 0.067560229 |
| 0.253852426 | 0.054184259 | 0.031625006 | 0.092451526 |
| 0.028606818 | 0.028096958 | 0.076208137 | 0.02715347  |
| 0.043485869 | 0.071508658 | 0.099728311 | 0.169650884 |
| 0.22537651  | 0.025384433 | 0.167140199 | 0.090887229 |
| 0.024575743 | 0.262992918 | 0.015167476 | 0.025728106 |
| 0.025194691 | 0.039133468 | 0.049456015 | 0.115562728 |
| 0.040760952 | 0.019085058 | 0.030556633 | 0.029206353 |
| 0.171733583 | 0.019179943 | 0.02983414  | 0.097435236 |
| 0.032821074 | 0.059430453 | 0.20615845  | 0.081996617 |
| 0.033786991 | 0.035073264 | 0.197153048 | 0.029718742 |
| 0.028810633 | 0.118201096 | 0.119036041 | 0.020452305 |
| 1           | 0.219272811 | 0.199957508 | 0.117929751 |
| 0.088163041 | 0.032075819 | 0.087688332 | 0.068355415 |
| 0.170748681 | 0.15264373  | 0.049336943 | 0.199975467 |
| 0.045613486 | 0.126096282 | 0.107751534 | 0.151840201 |
| 0.08072366  | 0.038658777 | 0.155612351 | 0.193455588 |
| 0.049018711 | 0.044022925 | 0.033291769 | 0.054522651 |
| 0.024015336 | 0.214595989 | 0.030167127 | 0.061539033 |
| 0.031691071 | 0.050111177 | 0.265236423 | 0.06470988  |
| 0.311935952 | 0.017022035 | 0.178187153 | 0.103253228 |
| 0.089759904 | 0.160998765 | 0.212760087 | 0.086381175 |
| 0.118080987 | 0.052430899 | 0.038415062 | 0.196829152 |
| 0.069337414 | 0.228435647 | 0.052490463 | 0.311895112 |
| 0.045721324 | 0.049667547 | 0.020231296 | 0.079139067 |
| 0.046938854 | 0.044101006 | 0.096474479 | 0.205885218 |
| 0.333273633 | 0.119503764 | 0.041983306 | 0.053834093 |
| 0.071392319 | 0.022327888 | 0.107342119 | 0.027228196 |
| 0.040994312 | 0.086406821 | 0.002420907 | 0.189185171 |
| 0.05669386  | 0.132584178 | 0.274663638 | 0.048034367 |
| 0.139854659 | 0.138817341 | 0.236913083 | 0.067732418 |
| 0.03150126  | 0.25943884  | 0.019343653 | 0.147374246 |
| 0.033070389 | 0.125631213 | 0.242007765 | 0.099596985 |
| 0.193726005 | 0.027183815 | 0.303250054 | 0.037271074 |
| 0.018592394 | 0.153086921 | 0.15468766  | 0.050974842 |
| 0.042990675 | 0.041900987 | 0.018916409 | 0.259906118 |
| 0.103024279 | 0.131360718 | 0.024438856 | 0.049013186 |
| 0.113932672 | 0.264724708 | 0.010882429 | 0.059393413 |
| 0.019574603 | 0.061673732 | 0.102254801 | 0.087714603 |
| 0.215394247 | 0.093311271 | 0.010466924 | 0.027378763 |
| 0.037855255 | 0.009791935 | 0.098266991 | 0.078791624 |
| 0.028322061 | 0.086482089 | 0.003636986 | 0.14025771  |
| 0.021864116 | 0.268129791 | 0.087870126 | 0.274027053 |
| 0.03165241  | 0.28960268  | 0.033661909 | 0.049355562 |
| 0.034688111 | 0.07258208  | 0.029381573 | 0.091987032 |
| 0.272585892 | 0.057833006 | 0.061269929 | 0.105174808 |
| 0.082321323 | 0.084048936 | 0.106678154 | 0.025851773 |
| 0.072038918 | 0.102392966 | 0.250634408 | 0.139025322 |

|             |             |             |             |
|-------------|-------------|-------------|-------------|
| 0.056275946 | 0.013356224 | 0.032017997 | 0.09047488  |
| 0.014724028 | 0.042798529 | 0.03009404  | 0.011976499 |
| 0.238473382 | 0.062766305 | 0.077306415 | 0.105247591 |
| 0.026198977 | 0.138007175 | 0.02554354  | 0.157370803 |
| 0.298394806 | 0.057631416 | 0.083405603 | 0.032809057 |
| 0.053042792 | 0.051710303 | 0.144945236 | 0.053047246 |
| 0.072065216 | 0.184190325 | 0.038197635 | 0.036943879 |
| 0.130608734 | 0.272666404 | 0.153100395 | 0.01470263  |
| 0.084886894 | 0.026855751 | 0.019715765 | 0.030704136 |
| 0.042680068 | 0.159851758 | 0.089572097 | 0.051454194 |
| 0.2201529   | 0.317804666 | 0.047351966 | 0.127496938 |
| 0.020856957 | 0.158915827 | 0.336792422 | 0.011339199 |
| 0.072067064 | 0.014492691 | 0.007395152 | 0.05163808  |
| 0.178674018 | 0.077618957 | 0.09616101  | 0.276485189 |
| 0.046693764 | 0.195595421 | 0.09829092  | 0.023799849 |
| 0.037073073 | 0.038432802 | 0.146778586 | 0.166688369 |
| 0.026511069 | 0.083985933 | 0.208562494 | 0.03061621  |
| 0.029239641 | 0.327743144 | 0.048158775 | 0.236748003 |
| 0.328879599 | 0.081226066 | 0.046756958 | 0.330772452 |
| 0.27620668  | 0.069933871 | 0.084034423 | 0.240614726 |
| 0.056113963 | 0.161451393 | 0.043697663 | 0.088440937 |
| 0.249552235 | 0.146828517 | 0.139974449 | 0.041865995 |
| 0.027590828 | 0.048093611 | 0.226312268 | 0.081722386 |
| 0.240749467 | 0.038516237 | 0.017258503 | 0.058477295 |
| 0.059476416 | 0.035939222 | 0.260596051 | 0.057725752 |
| 0.026656225 | 0.020294533 | 0.242946283 | 0.064655979 |
| 0.032299749 | 0.235653403 | 0.120046839 | 0.034954154 |
| 0.048461671 | 0.055688867 | 0.034562546 | 0.077625224 |
| 0.136463294 | 0.165915217 | 0.078538838 | 0.057123884 |
| 0.029561375 | 0.141284914 | 0.033926552 | 0.025796729 |
| 0.241496203 | 0.037136019 | 0.095826359 | 0.193579648 |
| 0.023436607 | 0.020681942 | 0.154885764 | 0.291158717 |
| 0.047821981 | 0.036959596 | 0.033356611 | 0.136989531 |
| 0.049315774 | 0.044080205 | 0.032707841 | 0.284454314 |
| 0.30533337  | 0.032842052 | 0.041475293 | 0.130308506 |
| 0.092080358 | 0.013247924 | 0.156264707 | 0.045843681 |
| 0.204123457 | 0.018328961 | 0.016254921 | 0.017324098 |
| 0.231277189 | 0.093525526 | 0.027898302 | 0.069370332 |
| 0.008102939 | 0.112201218 | 0.038103483 | 0.051988587 |
| 0.03841612  | 0.267848927 | 0.160217967 | 0.040105438 |
| 0.0414008   | 0.04338383  | 0.04546542  | 0.054196514 |
| 0.04348777  | 0.029666006 | 0.076035818 | 0.228442432 |
| 0.056945048 | 0.033390059 | 0.060827278 | 0.037928016 |
| 0.085157885 | 0.111776004 | 0.199048511 | 0.19477274  |
| 0.062601692 | 0.034963197 | 0.010779737 | 0.095678614 |
| 0.023939153 | 0.192595389 | 0.045160957 | 0.091621426 |
| 0.057342198 | 0.251957997 | 0.079590862 | 0.038212177 |
| 0.062335306 | 0.080253091 | 0.149128092 | 0.022887152 |
| 0.01244404  | 0.155745346 | 0.073510536 | 0.172392989 |
| 0.051298917 | 0.009162248 | 0.234618361 | 0.111470745 |
| 0.078695775 | 0.086786798 | 0.039089972 | 0.170962513 |
| 0.059053625 | 0.297409593 | 0.024310735 | 0.136119863 |
| 0.203789773 | 0.015602748 | 0.063306917 | 0.035524265 |
| 0.276622919 | 0.142487065 | 0.033150319 | 0.081398055 |

|             |             |             |             |
|-------------|-------------|-------------|-------------|
| 0.020621044 | 0.197984947 | 0.055544608 | 0.056972591 |
| 0.135508767 | 0.263192369 | 0.230160904 | 0.106847266 |
| 0.025904834 | 0.187859373 | 0.243295264 | 0.008125171 |
| 0.152194236 | 0.070078833 | 0.180372555 | 0.07482766  |
| 0.069613024 | 0.131602495 | 0.227968468 | 0.034079028 |
| 0.181168946 | 0.029311385 | 0.088326731 | 0.012479378 |
| 0.089169592 | 0.286627351 | 0.033688287 | 0.031960565 |
| 0.026152889 | 0.051498999 | 0.044086349 | 0.269677089 |
| 0.031723078 | 0.326791725 | 0.089873671 | 0.082947129 |
| 0.244556961 | 0.090373918 | 0.16190663  | 0.094094838 |
| 0.04788959  | 0.102586313 | 0.029917884 | 0.016771905 |
| 0.146936865 | 0.049711922 | 0.088092826 | 0.031386959 |
| 0.044835902 | 0.088531969 | 0.055856354 | 0.052795541 |
| 0.040912225 | 0.047397434 | 0.043578254 | 0.092317884 |
| 0.083714804 | 0.033429913 | 0.054502095 | 0.117628891 |
| 0.125626278 | 0.090726935 | 0.047955019 | 0.138704919 |
| 0.167801048 | 0.036990174 | 0.176452897 | 0.012925583 |
| 0.029313144 | 0.032368875 | 0.180844309 | 0.125515632 |
| 0.046162937 | 0.03230425  | 0.157645508 | 0.226448933 |
| 0.046949279 | 0.034780808 | 0.063873515 | 0.06392287  |
| 0.230220303 | 0.123279706 | 0.066422775 | 0.07357813  |
| 0.021172481 | 0.049980308 | 0.062899111 | 0.047029917 |
| 0.033490649 | 0.15312069  | 0.03502416  | 0.028203108 |
| 0.114732862 | 0.032130014 | 0.179583958 | 0.296064276 |
| 0.252288136 | 0.283312374 | 0.017933089 | 0.12276042  |
| 0.0149816   | 0.151575276 | 0.014338342 | 0.213010002 |
| 0.149245094 | 0.021041076 | 0.156244928 | 0.082539341 |
| 0.213915106 | 0.032169231 | 0.158577758 | 0.330410218 |
| 0.022486161 | 0.050574991 | 0.053710309 | 0.153902232 |
| 0.038911329 | 0.163452554 | 0.192630215 | 0.024501073 |
| 0.018064296 | 0.019260381 | 0.047240687 | 0.118706185 |
| 0.2010336   | 0.089344207 | 0.02432103  | 0.224116638 |
| 0.112855835 | 0.026101912 | 0.063228802 | 0.0750695   |
| 0.26455155  | 0.038922668 | 0.016874254 | 0.064050193 |
| 0.080184217 | 0.29894624  | 0.020240209 | 0.063516338 |
| 0.19110945  | 0.029504617 | 0.051089827 | 0.034517514 |
| 0.063274839 | 0.144749451 | 0.020872561 | 0.043290487 |
| 0.082140468 | 0.023197731 | 0.199322871 | 0.073540366 |
| 0.013809518 |             |             |             |

| CAMP        | 0.011087861 | 0.025947053 | 0.008791064 |
|-------------|-------------|-------------|-------------|
| 0.075520976 | 0.038313459 | 0.019451725 | 0.108544974 |
| 0.016164725 | 0.019283111 | 0.106874164 | 0.07594596  |
| 0.022119744 | 0.045169325 | 0.081872519 | 0.005435617 |
| 0.060144181 | 0.161477638 | 0.006271095 | 0.137472393 |
| 0.049488444 | 0.076283441 | 0.106425834 | 0.09033493  |
| 0.010000536 | 0.121679596 | 0.184070691 | 0.034615047 |
| 0.054747067 | 0.181045259 | 0.023671054 | 0.040503497 |
| 0.053116891 | 0.022387427 | 0.014924812 | 0.069803601 |
| 0.014253931 | 0.007040202 | 0.010736019 | 0.024536685 |
| 0.015510673 | 0.032154173 | 0.051541694 | 0.136728791 |
| 0.130790368 | 0.013451947 | 0.147197806 | 0.027818524 |
| 0.00334213  | 0.170575492 | 0.011398399 | 0.011787099 |
| 0.017076406 | 0.025023554 | 0.025274999 | 0.104917593 |
| 0.033886588 | 0.01792596  | 0.018368858 | 0.018975208 |

|             |             |             |             |
|-------------|-------------|-------------|-------------|
| 0.149739791 | 0.02201776  | 0.017231602 | 0.023693385 |
| 0.006184231 | 0.027010227 | 0.058969003 | 0.06262644  |
| 0.007795347 | 0.015255466 | 0.025505197 | 0.007708048 |
| 0.051900625 | 0.052024314 | 0.03775183  | 0.006543136 |
| 0.219272811 | 1           | 0.076936413 | 0.10324813  |
| 0.044483703 | 0.010506107 | 0.048281381 | 0.033450121 |
| 0.096404103 | 0.049079548 | 0.014281942 | 0.177023943 |
| 0.017186141 | 0.156402254 | 0.019976807 | 0.075359298 |
| 0.043608517 | 0.021262967 | 0.04023408  | 0.068359871 |
| 0.038729433 | 0.022536059 | 0.017766661 | 0.034588127 |
| 0.01168664  | 0.026282414 | 0.017338154 | 0.034414408 |
| 0.014517285 | 0.016694117 | 0.172993465 | 0.040380475 |
| 0.135021871 | 0.004368366 | 0.128848213 | 0.034770437 |
| 0.046120532 | 0.053691976 | 0.103894152 | 0.079969835 |
| 0.011206831 | 0.02307459  | 0.019332637 | 0.149927485 |
| 0.023610665 | 0.09143803  | 0.008895263 | 0.068804374 |
| 0.010304646 | 0.008717212 | 0.010232962 | 0.060452439 |
| 0.021486204 | 0.013055195 | 0.053485919 | 0.059406082 |
| 0.144280167 | 0.006670316 | 0.022454413 | 0.015184464 |
| 0.025785699 | 0.005720723 | 0.099007338 | 0.012105041 |
| 0.01875086  | 0.045389512 | 0.001644434 | 0.072732718 |
| 0.031307065 | 0.01037511  | 0.167009991 | 0.028260525 |
| 0.092980679 | 0.056765247 | 0.173127744 | 0.034333898 |
| 0.016223095 | 0.220584353 | 0.00561356  | 0.072487716 |
| 0.021982867 | 0.064983356 | 0.126366121 | 0.126415669 |
| 0.125519955 | 0.012281161 | 0.124430968 | 0.012473368 |
| 0.003125524 | 0.045494995 | 0.010391997 | 0.034094005 |
| 0.019716961 | 0.035573346 | 0.007925392 | 0.124637848 |
| 0.122791229 | 0.071514759 | 0.01178872  | 0.050967535 |
| 0.085368772 | 0.0346929   | 0.003698236 | 0.038441194 |
| 0.017282063 | 0.025504586 | 0.04369837  | 0.021001531 |
| 0.109352384 | 0.041457489 | 0.000317571 | 0.014094122 |
| 0.018885014 | 0.004299011 | 0.115297416 | 0.024461363 |
| 0.010408528 | 0.058147157 | 0.000312901 | 0.0797063   |
| 0.008841814 | 0.103554825 | 0.044645193 | 0.228249312 |
| 0.013946497 | 0.226173566 | 0.026890832 | 0.019534401 |
| 0.022265984 | 0.012956145 | 0.029867216 | 0.054099509 |
| 0.06176344  | 0.035332781 | 0.020407923 | 0.062540206 |
| 0.051591977 | 0.029791626 | 0.055456702 | 0.010350592 |
| 0.043065897 | 0.055261296 | 0.024989892 | 0.048607118 |
| 0.01758417  | 0.001640579 | 0.018254556 | 0.038402203 |
| 0.006288782 | 0.024004522 | 0.011801914 | 0.003158405 |
| 0.177361519 | 0.039162213 | 0.043790289 | 0.053707369 |
| 0.007214209 | 0.164047662 | 0.00815945  | 0.01301312  |
| 0.155194782 | 0.032674187 | 0.022625792 | 0.008019488 |
| 0.010414895 | 0.075108339 | 0.069835546 | 0.116731631 |
| 0.095033793 | 0.060325194 | 0.013497062 | 0.018035827 |
| 0.094326966 | 0.262217519 | 0.006224133 | 0.022647484 |
| 0.114810737 | 0.067590958 | 0.056385294 | 0.01590183  |
| 0.027316746 | 0.128637729 | 0.079243971 | 0.006107649 |
| 0.067775342 | 0.188532334 | 0.025027098 | 0.053289101 |
| 0.011944486 | 0.061846818 | 0.129442519 | 0.007246089 |
| 0.053391902 | 0.01553383  | 0.002400375 | 0.038401471 |
| 0.016855126 | 0.033526539 | 0.100686371 | 0.224741643 |

|             |             |             |             |
|-------------|-------------|-------------|-------------|
| 0.05181607  | 0.204106633 | 0.049672274 | 0.005521393 |
| 0.013029537 | 0.025476074 | 0.042648664 | 0.115242457 |
| 0.022083951 | 0.042734979 | 0.062688898 | 0.012600377 |
| 0.017408773 | 0.247569336 | 0.025982772 | 0.090691609 |
| 0.151561951 | 0.033129453 | 0.029152025 | 0.176269713 |
| 0.115482747 | 0.093811271 | 0.042331218 | 0.129323914 |
| 0.032974368 | 0.103137529 | 0.032561277 | 0.015180696 |
| 0.230702076 | 0.205556563 | 0.043424278 | 0.009228324 |
| 0.014707627 | 0.024773975 | 0.106990915 | 0.086435916 |
| 0.149081808 | 0.016085944 | 0.003048993 | 0.035140167 |
| 0.001700709 | 0.015687526 | 0.094594881 | 0.023303057 |
| 0.013757298 | 0.01563739  | 0.17790863  | 0.053381883 |
| 0.024397772 | 0.114459038 | 0.029878209 | 0.020986478 |
| 0.021725005 | 0.023310313 | 0.01691007  | 0.028443454 |
| 0.072192014 | 0.049826721 | 0.025448743 | 0.008349468 |
| 0.019193029 | 0.05159368  | 0.002631863 | 0.006565982 |
| 0.159598538 | 0.026413557 | 0.045165119 | 0.060093551 |
| 0.030754763 | 0.00496805  | 0.065587699 | 0.16124035  |
| 0.021279363 | 0.014778062 | 0.018089286 | 0.044837668 |
| 0.02241506  | 0.025703481 | 0.017251143 | 0.094241874 |
| 0.138763618 | 0.0157619   | 0.015066057 | 0.092376128 |
| 0.049902968 | 0.01102938  | 0.189865821 | 0.025180566 |
| 0.116608063 | 0.008655906 | 0.007036717 | 0.000162962 |
| 0.027735605 | 0.038518187 | 0.01466719  | 0.033778953 |
| 0.014171174 | 0.038797973 | 0.000714483 | 0.023127638 |
| 0.026518316 | 0.099962411 | 0.028239113 | 0.025578223 |
| 0.022774579 | 0.021812083 | 0.017840106 | 0.031064691 |
| 0.029513766 | 0.016781954 | 0.032333142 | 0.126890795 |
| 0.039795917 | 0.015232316 | 0.027976656 | 0.017450667 |
| 0.058969066 | 0.045832823 | 0.13824014  | 0.110646998 |
| 0.004263034 | 0.025891178 | 0.009731439 | 0.035058576 |
| 0.010907019 | 0.087003291 | 0.020296258 | 0.044750972 |
| 0.033777795 | 0.111457618 | 0.036464968 | 0.019876735 |
| 0.038096841 | 0.040079269 | 0.00609986  | 0.001484832 |
| 0.000601877 | 0.051820777 | 0.038650578 | 0.055509156 |
| 0.024508277 | 0.011378136 | 0.137262167 | 0.03850962  |
| 0.022005562 | 0.039063045 | 0.023687039 | 0.090293328 |
| 0.019179803 | 0.121240633 | 0.037445723 | 0.061343282 |
| 0.050812465 | 0.004733715 | 0.039368666 | 0.021699787 |
| 0.036186201 | 0.042732924 | 0.009717038 | 0.047239816 |
| 0.003286241 | 0.096982027 | 0.025888262 | 0.036335382 |
| 0.007488449 | 0.09085336  | 0.073935182 | 0.040594114 |
| 0.013409915 | 0.204844583 | 0.217350368 | 0.003102245 |
| 0.193128624 | 0.029870149 | 0.151645971 | 0.03901272  |
| 0.042884547 | 0.078024075 | 0.036625567 | 0.016804562 |
| 0.049903187 | 0.018199088 | 0.046938475 | 0.006367051 |
| 0.02050812  | 0.047862437 | 0.015148775 | 0.010932886 |
| 0.024098259 | 0.018955467 | 0.00306694  | 0.066739715 |
| 0.00207945  | 0.171680825 | 0.053740594 | 0.036406825 |
| 0.026588462 | 0.02879688  | 0.057202807 | 0.030823145 |
| 0.038384805 | 0.079616528 | 0.0163949   | 0.012221702 |
| 0.097745626 | 0.002133016 | 0.044212355 | 0.014291272 |
| 0.026470132 | 0.044340731 | 0.033695717 | 0.02368303  |
| 0.013778295 | 0.017010102 | 0.022254795 | 0.052230778 |



|             |             |             |             |
|-------------|-------------|-------------|-------------|
| 0.01388932  | 0.014072458 | 0.057895499 | 0.104468837 |
| 0.059411805 | 0.064886152 | 0.014007426 | 0.050078377 |
| 0.15864377  | 0.010715242 | 0.014709164 | 0.000742757 |
| 0.008587357 | 0.028869537 | 0.098615944 | 0.056410731 |
| 0.016324578 | 0.014106904 | 0.021867144 | 0.077590411 |
| 0.023748567 | 0.013328703 | 0.012338442 | 0.041695339 |
| 0.089020456 | 0.068641855 | 0.025804514 | 0.029174329 |
| 0.002929302 | 0.038761981 | 0.034418805 | 0.057030749 |
| 0.024018015 | 0.082119806 | 0.018409484 | 0.005405946 |
| 0.013672581 | 0.010411557 | 0.190343803 | 0.126720616 |
| 0.222887419 | 0.057325962 | 0.004115659 | 0.052754746 |
| 0.005456132 | 0.130186112 | 0.002637041 | 0.033503541 |
| 0.053584831 | 0.003674165 | 0.07484213  | 0.107213762 |
| 0.143008494 | 0.0200831   | 0.033168919 | 0.14486594  |
| 0.011523529 | 0.023033051 | 0.036158229 | 0.065418396 |
| 0.008483088 | 0.018498833 | 0.142094831 | 0.01900745  |
| 0.052520964 | 0.001718807 | 0.023544372 | 0.017529318 |
| 0.090353653 | 0.046180988 | 0.009254104 | 0.014799243 |
| 0.007705539 | 0.006951235 | 0.011164124 | 0.032406115 |
| 0.068623047 | 0.021162993 | 0.016979059 | 0.023551288 |
| 0.045190259 | 0.096678126 | 0.008759236 | 0.005263609 |
| 0.01417477  | 0.01528401  | 0.013119195 | 0.01776546  |
| 0.012388796 | 0.099207671 | 0.009034187 | 0.026400708 |
| 0.004559905 | 0.004098006 | 0.071336848 | 0.032157499 |
| 0.007824974 |             |             |             |
| CAPG        | 0.188891003 | 0.195996929 | 0.139052074 |
| 0.221906162 | 0.203658426 | 0.079153749 | 0.103907275 |
| 0.044490453 | 0.053071489 | 0.015465762 | 0.051614866 |
| 0.20566625  | 0.078917466 | 0.06103817  | 0.030068908 |
| 0.312095099 | 0.201071799 | 0.101474808 | 0.206867191 |
| 0.235351417 | 0.039887385 | 0.323962437 | 0.100765211 |
| 0.142768611 | 0.142811539 | 0.121246316 | 0.114357381 |
| 0.258208764 | 0.139306667 | 0.049534535 | 0.160440178 |
| 0.268677536 | 0.209310758 | 0.16083037  | 0.249973243 |
| 0.159735674 | 0.139563405 | 0.098711685 | 0.032639876 |
| 0.175052333 | 0.20723475  | 0.220708089 | 0.218567065 |
| 0.079087838 | 0.133141888 | 0.152571789 | 0.26203111  |
| 0.034577486 | 0.107282304 | 0.024875108 | 0.124485901 |
| 0.129598975 | 0.119303537 | 0.050103274 | 0.073637613 |
| 0.045998722 | 0.029471283 | 0.068770479 | 0.08351222  |
| 0.154351988 | 0.019174324 | 0.149446617 | 0.037745897 |
| 0.035045222 | 0.083052573 | 0.26731496  | 0.098355942 |
| 0.102264815 | 0.120506954 | 0.082987025 | 0.156123348 |
| 0.005641548 | 0.237639324 | 0.30838943  | 0.059116744 |
| 0.199957508 | 0.076936413 | 1           | 0.163398148 |
| 0.259835332 | 0.17069878  | 0.28265389  | 0.253742425 |
| 0.165156112 | 0.277062896 | 0.187993645 | 0.141994158 |
| 0.17993333  | 0.08879977  | 0.081651605 | 0.345285562 |
| 0.27177507  | 0.183080341 | 0.154733089 | 0.306850832 |
| 0.142701992 | 0.177782358 | 0.091051517 | 0.130075886 |
| 0.043605117 | 0.213335514 | 0.133290142 | 0.239729403 |
| 0.135567021 | 0.166085432 | 0.248268367 | 0.181882455 |
| 0.184036265 | 0.045319622 | 0.259055004 | 0.184808454 |
| 0.261361229 | 0.039487598 | 0.294853979 | 0.13833691  |

|             |             |             |             |
|-------------|-------------|-------------|-------------|
| 0.162537516 | 0.190101381 | 0.187018143 | 0.15499272  |
| 0.21592562  | 0.11247272  | 0.058027878 | 0.210992423 |
| 0.076818843 | 0.122916937 | 0.118576213 | 0.222300677 |
| 0.058416397 | 0.094350322 | 0.110661278 | 0.077031711 |
| 0.184353676 | 0.210208817 | 0.193571558 | 0.158931669 |
| 0.224589315 | 0.134051107 | 0.094098731 | 0.115591189 |
| 0.162315849 | 0.283620097 | 0.002465858 | 0.10130067  |
| 0.134042377 | 0.220648856 | 0.295170012 | 0.163378098 |
| 0.197058391 | 0.081194557 | 0.162479724 | 0.241237489 |
| 0.129159636 | 0.153408093 | 0.067752779 | 0.322619092 |
| 0.047083373 | 0.275191066 | 0.151345159 | 0.109477937 |
| 0.074394833 | 0.149952053 | 0.206477668 | 0.091889292 |
| 0.030285972 | 0.207399987 | 0.089686104 | 0.072006637 |
| 0.048726661 | 0.149406264 | 0.121162003 | 0.199441132 |
| 0.144743434 | 0.27407396  | 0.069039875 | 0.138897483 |
| 0.024555943 | 0.154022444 | 0.040809019 | 0.225399738 |
| 0.054871345 | 0.256394619 | 0.130167405 | 0.142825447 |
| 0.30319416  | 0.260948564 | 0.012639776 | 0.14025998  |
| 0.183159258 | 0.036981642 | 0.187748192 | 0.255110912 |
| 0.08403693  | 0.224986085 | 0.012029307 | 0.322361625 |
| 0.10537227  | 0.163557007 | 0.28519034  | 0.240595298 |
| 0.161547951 | 0.132426842 | 0.063098389 | 0.206068319 |
| 0.163388057 | 0.038034787 | 0.03584959  | 0.18076147  |
| 0.20305027  | 0.026615594 | 0.205056329 | 0.209512932 |
| 0.142515327 | 0.270435247 | 0.306204319 | 0.072689378 |
| 0.170455089 | 0.117975942 | 0.12283569  | 0.287445134 |
| 0.227723394 | 0.046256353 | 0.131975198 | 0.076527388 |
| 0.068169284 | 0.167045789 | 0.150874171 | 0.018387665 |
| 0.08957226  | 0.09858926  | 0.027168662 | 0.154499747 |
| 0.132812785 | 0.071739679 | 0.082273867 | 0.252546974 |
| 0.213389119 | 0.221527538 | 0.154108684 | 0.117873921 |
| 0.113930485 | 0.124005132 | 0.168632647 | 0.049724285 |
| 0.073284697 | 0.139517886 | 0.079470702 | 0.075401854 |
| 0.041345755 | 0.161034213 | 0.158155844 | 0.05980155  |
| 0.06778912  | 0.057430574 | 0.049280969 | 0.129695857 |
| 0.075756726 | 0.107162895 | 0.162925769 | 0.112225439 |
| 0.170781752 | 0.147720798 | 0.193738108 | 0.284804332 |
| 0.083175874 | 0.100458082 | 0.205676684 | 0.037620599 |
| 0.218478955 | 0.038470574 | 0.023982974 | 0.172673698 |
| 0.105848064 | 0.27411465  | 0.086594675 | 0.21682439  |
| 0.124066031 | 0.205173087 | 0.261017318 | 0.013010542 |
| 0.12692149  | 0.157022194 | 0.275080848 | 0.140209165 |
| 0.115117481 | 0.193858465 | 0.071730079 | 0.136222353 |
| 0.13242829  | 0.151948004 | 0.212420994 | 0.241571127 |
| 0.178586342 | 0.269342083 | 0.163448968 | 0.23685605  |
| 0.182025955 | 0.09510448  | 0.027892308 | 0.331989874 |
| 0.211167128 | 0.32308199  | 0.145882711 | 0.168138465 |
| 0.093829735 | 0.056265727 | 0.255979344 | 0.172316181 |
| 0.148930575 | 0.218458267 | 0.313258418 | 0.15751424  |
| 0.247735768 | 0.062543032 | 0.020230275 | 0.224090653 |
| 0.152411902 | 0.182549201 | 0.104648434 | 0.222853883 |
| 0.147314909 | 0.050255654 | 0.145312087 | 0.088804891 |
| 0.120723847 | 0.090976465 | 0.136604035 | 0.161782514 |
| 0.169163617 | 0.087858888 | 0.057920149 | 0.261353828 |

|             |             |             |             |
|-------------|-------------|-------------|-------------|
| 0.033767749 | 0.061568274 | 0.18822109  | 0.126871359 |
| 0.061744628 | 0.124504246 | 0.085136874 | 0.049554803 |
| 0.091566719 | 0.147134839 | 0.304040816 | 0.079338218 |
| 0.055306211 | 0.040782735 | 0.349442695 | 0.12372043  |
| 0.205498723 | 0.192722276 | 0.164848172 | 0.117776223 |
| 0.214607586 | 0.185798138 | 0.137667565 | 0.235477917 |
| 0.168807278 | 0.172056038 | 0.13949435  | 0.045163728 |
| 0.279952102 | 0.028573111 | 0.045489038 | 0.182793912 |
| 0.176317552 | 0.113196503 | 0.00248861  | 0.063172908 |
| 0.219386834 | 0.31091698  | 0.133724426 | 0.164967037 |
| 0.015106327 | 0.243614059 | 0.072894586 | 0.233552667 |
| 0.164453512 | 0.132995942 | 0.202707807 | 0.170755431 |
| 0.177831195 | 0.191602534 | 0.117498265 | 0.206672405 |
| 0.165411011 | 0.153979666 | 0.065893374 | 0.27897365  |
| 0.175527495 | 0.177976802 | 0.18151621  | 0.157213564 |
| 0.250211188 | 0.313888901 | 0.217632394 | 0.050046321 |
| 0.055621989 | 0.041733827 | 0.020306721 | 0.045095858 |
| 0.072459564 | 0.130703554 | 0.199636065 | 0.288033749 |
| 0.227752716 | 0.101782899 | 0.053004143 | 0.163319224 |
| 0.190375319 | 0.244749481 | 0.122112353 | 0.013737323 |
| 0.014685358 | 0.067470076 | 0.145001284 | 0.263128571 |
| 0.203860547 | 0.014998751 | 0.073329781 | 0.042288021 |
| 0.087561046 | 0.2446481   | 0.174522816 | 0.306095376 |
| 0.237912807 | 0.206267745 | 0.030072882 | 0.28816983  |
| 0.125053322 | 0.080459051 | 0.228495838 | 0.146915155 |
| 0.226565806 | 0.218714524 | 0.122147232 | 0.245628855 |
| 0.058456838 | 0.335153488 | 0.219387723 | 0.065624208 |
| 0.135512916 | 0.187545949 | 0.128180697 | 0.312383658 |
| 0.148955698 | 0.104893283 | 0.108766866 | 0.014502679 |
| 0.077391844 | 0.255988959 | 0.120895354 | 0.263359626 |
| 0.201525841 | 0.310314422 | 0.242121837 | 0.150015078 |
| 0.078736122 | 0.149204989 | 0.203580567 | 0.008309502 |
| 0.175168484 | 0.142850285 | 0.184104213 | 0.027078207 |
| 0.055959237 | 0.167708533 | 0.054352763 | 0.180669092 |
| 0.083401194 | 0.198192572 | 0.262780263 | 0.281739074 |
| 0.229053949 | 0.089809863 | 0.273223889 | 0.258203694 |
| 0.073640551 | 0.235216366 | 0.14853569  | 0.062896113 |
| 0.062278993 | 0.173078931 | 0.217666671 | 0.130924684 |
| 0.056068182 | 0.294382629 | 0.065740542 | 0.227112091 |
| 0.151044451 | 0.195116835 | 0.194221781 | 0.137672907 |
| 0.163773246 | 0.108140417 | 0.113388968 | 0.031375122 |
| 0.213655213 | 0.25873074  | 0.125215552 | 0.103881173 |
| 0.18631202  | 0.157238166 | 0.118669107 | 0.048671075 |
| 0.129221532 | 0.06528881  | 0.115258836 | 0.319471779 |
| 0.158075696 | 0.132289889 | 0.100782592 | 0.112544368 |
| 0.206131623 | 0.148510576 | 0.039373365 | 0.162090716 |
| 0.2678122   | 0.188723031 | 0.248077582 | 0.274930319 |
| 0.061073048 | 0.186697307 | 0.197203028 | 0.119728363 |
| 0.129862656 | 0.166367991 | 0.167941097 | 0.021674009 |
| 0.085622852 | 0.161143125 | 0.089910178 | 0.27661103  |
| 0.190062887 | 0.145271398 | 0.062949741 | 0.322848642 |
| 0.07222033  | 0.264404628 | 0.043013575 | 0.135450858 |
| 0.305510384 | 0.096350803 | 0.277890339 | 0.066901687 |
| 0.098771677 | 0.149273599 | 0.066637166 | 0.219511175 |

|             |             |             |             |
|-------------|-------------|-------------|-------------|
| 0.103827757 | 0.175439031 | 0.145050841 | 0.184222076 |
| 0.091836176 | 0.252309199 | 0.249744648 | 0.052799344 |
| 0.038643705 | 0.068023708 | 0.16483298  | 0.047685982 |
| 0.067293811 | 0.292200317 | 0.08258447  | 0.187390165 |
| 0.158605896 | 0.110083615 | 0.142184823 | 0.062449519 |
| 0.188695852 | 0.186123682 | 0.036753645 | 0.189022023 |
| 0.135005018 | 0.193696129 | 0.100709483 | 0.063020209 |
| 0.125347402 | 0.143280988 | 0.181896501 | 0.176477685 |
| 0.2002102   | 0.295482549 | 0.115018396 | 0.18001019  |
| 0.123737236 | 0.118488402 | 0.06176859  | 0.237349812 |
| 0.053891366 |             |             |             |
| CAPN2       | 0.25456243  | 0.410590724 | 0.169009403 |
| 0.400803629 | 0.244631191 | 0.236505317 | 0.318971734 |
| 0.227787052 | 0.162744706 | 0.057595391 | 0.07531404  |
| 0.207465314 | 0.200018164 | 0.281217086 | 0.200547452 |
| 0.368331803 | 0.164961816 | 0.195716886 | 0.301373286 |
| 0.344977586 | 0.252041622 | 0.342036977 | 0.236905573 |
| 0.155592405 | 0.127350993 | 0.175215567 | 0.178973263 |
| 0.419372548 | 0.182372813 | 0.226017938 | 0.342154224 |
| 0.122531663 | 0.324398803 | 0.362347593 | 0.28088445  |
| 0.338758343 | 0.221260403 | 0.024565868 | 0.273982745 |
| 0.322842483 | 0.311559789 | 0.362514293 | 0.305837195 |
| 0.17738859  | 0.34550843  | 0.319745165 | 0.202445718 |
| 0.195033142 | 0.103618156 | 0.206974198 | 0.333528538 |
| 0.331750142 | 0.226395017 | 0.273663227 | 0.305347322 |
| 0.170656423 | 0.218295519 | 0.116472454 | 0.251899854 |
| 0.320666448 | 0.204398245 | 0.342177741 | 0.224143972 |
| 0.171892501 | 0.272395839 | 0.140798457 | 0.300483751 |
| 0.154750614 | 0.296369898 | 0.087518486 | 0.162014399 |
| 0.027072786 | 0.335229433 | 0.21146557  | 0.127363864 |
| 0.117929751 | 0.10324813  | 0.163398148 | 1           |
| 0.412764451 | 0.309899393 | 0.396395991 | 0.375596965 |
| 0.185996549 | 0.225318916 | 0.163574804 | 0.269027047 |
| 0.334270675 | 0.307185133 | 0.143580829 | 0.361319239 |
| 0.39645164  | 0.37589349  | 0.19870961  | 0.204134398 |
| 0.357163316 | 0.38765175  | 0.21266596  | 0.246493769 |
| 0.173723223 | 0.061957142 | 0.3378335   | 0.395851228 |
| 0.305497228 | 0.131214661 | 0.188378421 | 0.370794465 |
| 0.148214211 | 0.182829275 | 0.33427644  | 0.125943387 |
| 0.424155106 | 0.109535027 | 0.182217597 | 0.304235396 |
| 0.198610568 | 0.318592643 | 0.357655602 | 0.304911327 |
| 0.204527072 | 0.072208318 | 0.085657356 | 0.081692945 |
| 0.222065605 | 0.060197824 | 0.317083239 | 0.416133948 |
| 0.251577968 | 0.234811027 | 0.311374617 | 0.018409092 |
| 0.073574927 | 0.138220662 | 0.293884444 | 0.215341108 |
| 0.322419244 | 0.2258564   | 0.256097409 | 0.271107945 |
| 0.221631906 | 0.389370242 | 0.050582322 | 0.242047094 |
| 0.238182875 | 0.146057106 | 0.280237422 | 0.227596329 |
| 0.231107768 | 0.247782245 | 0.251230603 | 0.418656806 |
| 0.352960009 | 0.224572041 | 0.187915685 | 0.341964021 |
| 0.269991318 | 0.201334944 | 0.230324475 | 0.28762678  |
| 0.211134776 | 0.313536276 | 0.057867069 | 0.221616566 |
| 0.134127226 | 0.123686029 | 0.040650062 | 0.26579266  |
| 0.24955092  | 0.342362973 | 0.292445272 | 0.204712164 |

|             |             |             |             |
|-------------|-------------|-------------|-------------|
| 0.297025828 | 0.287962798 | 0.20617289  | 0.303481249 |
| 0.074262765 | 0.115092562 | 0.156972685 | 0.405340452 |
| 0.216417989 | 0.369536826 | 0.271890772 | 0.210678172 |
| 0.23937805  | 0.377362802 | 0.002730076 | 0.348477857 |
| 0.36724705  | 0.152665852 | 0.258993316 | 0.216427535 |
| 0.167652875 | 0.410420116 | 0.017248345 | 0.340245856 |
| 0.214985339 | 0.182062038 | 0.422036901 | 0.214629124 |
| 0.324385315 | 0.135024667 | 0.271148905 | 0.281805024 |
| 0.242821048 | 0.026656145 | 0.241797364 | 0.356802902 |
| 0.05083992  | 0.25119882  | 0.306440394 | 0.338564175 |
| 0.267399821 | 0.328927304 | 0.42720295  | 0.15624066  |
| 0.245527416 | 0.280924707 | 0.046562848 | 0.196091104 |
| 0.291917936 | 0.164727686 | 0.357959084 | 0.299422296 |
| 0.15871157  | 0.381715085 | 0.258996821 | 0.167101508 |
| 0.176958742 | 0.294823212 | 0.077849419 | 0.250617739 |
| 0.254357272 | 0.273207943 | 0.175765749 | 0.125409278 |
| 0.118914546 | 0.41466899  | 0.095151951 | 0.098210809 |
| 0.056651879 | 0.243132758 | 0.293855643 | 0.250382553 |
| 0.178891327 | 0.233796535 | 0.192244455 | 0.242160027 |
| 0.191080809 | 0.199119882 | 0.019544145 | 0.15393879  |
| 0.168407408 | 0.197409413 | 0.191817941 | 0.264836118 |
| 0.248373674 | 0.188868066 | 0.247385539 | 0.148519617 |
| 0.137301922 | 0.066516383 | 0.397356262 | 0.317604608 |
| 0.247669727 | 0.273477204 | 0.10383081  | 0.153720258 |
| 0.415494178 | 0.178005768 | 0.151006327 | 0.40200276  |
| 0.067986059 | 0.38967719  | 0.270874413 | 0.188082847 |
| 0.193095049 | 0.29909857  | 0.428137534 | 0.086234535 |
| 0.212684503 | 0.383141801 | 0.231572144 | 0.223270525 |
| 0.315655748 | 0.31167223  | 0.146419551 | 0.269304413 |
| 0.26283745  | 0.115482462 | 0.385930183 | 0.134418829 |
| 0.069523495 | 0.269273456 | 0.281237823 | 0.149733615 |
| 0.131823973 | 0.28641139  | 0.194231335 | 0.247845239 |
| 0.414614335 | 0.362680098 | 0.326183102 | 0.123598228 |
| 0.170399688 | 0.053059811 | 0.14772983  | 0.158182599 |
| 0.351844679 | 0.361408442 | 0.254151087 | 0.213630197 |
| 0.299245884 | 0.199581795 | 0.169264572 | 0.395892391 |
| 0.09846017  | 0.363321219 | 0.041616206 | 0.283475732 |
| 0.337284962 | 0.202766115 | 0.13492737  | 0.300645951 |
| 0.31902702  | 0.170116819 | 0.236944051 | 0.365071254 |
| 0.361645118 | 0.240230199 | 0.215641528 | 0.261808809 |
| 0.123127003 | 0.19612234  | 0.213251478 | 0.085376662 |
| 0.251973635 | 0.256640401 | 0.018691837 | 0.235413251 |
| 0.166437359 | 0.374167275 | 0.367223013 | 0.142385762 |
| 0.215136464 | 0.208610392 | 0.250314929 | 0.142368027 |
| 0.303124173 | 0.333269097 | 0.372710494 | 0.255734623 |
| 0.286614926 | 0.355880357 | 0.158018154 | 0.12617843  |
| 0.051746549 | 0.346386148 | 0.274341741 | 0.093811091 |
| 0.414091814 | 0.170132132 | 0.083189384 | 0.404386446 |
| 0.289236189 | 0.29216032  | 0.019255974 | 0.027646306 |
| 0.053578719 | 0.352069701 | 0.345934642 | 0.325717883 |
| 0.183339037 | 0.260620531 | 0.005748214 | 0.375873541 |
| 0.378305547 | 0.041700998 | 0.118372575 | 0.290385763 |
| 0.240151789 | 0.405415455 | 0.146487898 | 0.319362473 |
| 0.193254222 | 0.343067671 | 0.28485391  | 0.257764841 |

|             |             |             |             |
|-------------|-------------|-------------|-------------|
| 0.369773487 | 0.318981981 | 0.333357087 | 0.364168693 |
| 0.407109381 | 0.285127605 | 0.312658595 | 0.111810558 |
| 0.105856858 | 0.255879486 | 0.168105381 | 0.156335269 |
| 0.211239956 | 0.181240823 | 0.355262448 | 0.395517618 |
| 0.355679882 | 0.030662053 | 0.279630225 | 0.297134689 |
| 0.406534359 | 0.428081873 | 0.036114638 | 0.008000898 |
| 0.005331493 | 0.040206704 | 0.280319887 | 0.195922984 |
| 0.374213998 | 0.171586622 | 0.042355783 | 0.177626215 |
| 0.262781195 | 0.206886106 | 0.37851311  | 0.359737229 |
| 0.287421798 | 0.16720522  | 0.22400973  | 0.358660876 |
| 0.108242731 | 0.188799762 | 0.380640298 | 0.383314591 |
| 0.076165683 | 0.2061518   | 0.188035082 | 0.438756005 |
| 0.0237206   | 0.245473653 | 0.228832826 | 0.277289537 |
| 0.023680165 | 0.122798979 | 0.126057148 | 0.350469376 |
| 0.324399743 | 0.153697059 | 0.10114381  | 0.108698873 |
| 0.268408779 | 0.371319308 | 0.254920476 | 0.420003168 |
| 0.38960822  | 0.417531506 | 0.089874144 | 0.366309094 |
| 0.11993915  | 0.343699239 | 0.176662815 | 0.071331793 |
| 0.192216146 | 0.053765986 | 0.309896028 | 0.120265555 |
| 0.242163137 | 0.279868501 | 0.130460995 | 0.04067743  |
| 0.069310637 | 0.116831615 | 0.41828504  | 0.347613936 |
| 0.047223501 | 0.296010719 | 0.229199166 | 0.271549159 |
| 0.257249527 | 0.374305807 | 0.362657341 | 0.169061473 |
| 0.26319319  | 0.053475005 | 0.346355784 | 0.236677197 |
| 0.258545916 | 0.400502975 | 0.233143161 | 0.388636862 |
| 0.278601711 | 0.357994413 | 0.344240453 | 0.288949706 |
| 0.144931832 | 0.212449791 | 0.327329609 | 0.116379086 |
| 0.274108466 | 0.399493115 | 0.23075277  | 0.156893691 |
| 0.25292946  | 0.146702974 | 0.126223889 | 0.083272896 |
| 0.113343154 | 0.238168382 | 0.27393272  | 0.40250478  |
| 0.241816654 | 0.250823099 | 0.124191906 | 0.126699442 |
| 0.408447801 | 0.340458635 | 0.22594861  | 0.317978398 |
| 0.200274892 | 0.268633012 | 0.306370563 | 0.297569191 |
| 0.178845896 | 0.347209531 | 0.353667791 | 0.313532267 |
| 0.364539095 | 0.309974933 | 0.378728936 | 0.142105087 |
| 0.087508496 | 0.192490599 | 0.222543338 | 0.136176138 |
| 0.255978492 | 0.072427381 | 0.104010527 | 0.327558169 |
| 0.129415482 | 0.311991371 | 0.188407969 | 0.148728854 |
| 0.220127348 | 0.156831459 | 0.267496723 | 0.307013383 |
| 0.199635448 | 0.368270511 | 0.037803753 | 0.123939746 |
| 0.144770878 | 0.312874794 | 0.178945944 | 0.220150196 |
| 0.133137331 | 0.11532667  | 0.28966845  | 0.214739357 |
| 0.19982355  | 0.153299514 | 0.316392256 | 0.109429446 |
| 0.124962745 | 0.413986991 | 0.187857579 | 0.035699939 |
| 0.099090498 | 0.20628049  | 0.194577051 | 0.271556756 |
| 0.042440844 | 0.332282591 | 0.221126323 | 0.212936893 |
| 0.290082946 | 0.154423116 | 0.270317784 | 0.107213727 |
| 0.131111858 | 0.33371418  | 0.167160083 | 0.350696058 |
| 0.170149758 | 0.393325492 | 0.311060252 | 0.31525119  |
| 0.097995355 | 0.134599045 | 0.14222314  | 0.377301251 |
| 0.152159363 |             |             |             |
| CAR5B       | 0.419021779 | 0.518136419 | 0.407158297 |
| 0.454472849 | 0.463996685 | 0.387302283 | 0.306367049 |
| 0.283856687 | 0.135710784 | 0.013611344 | 0.038056915 |

|             |             |             |             |
|-------------|-------------|-------------|-------------|
| 0.44054073  | 0.248648858 | 0.342642117 | 0.346006311 |
| 0.468096676 | 0.196065907 | 0.424990551 | 0.350254    |
| 0.470026827 | 0.165765976 | 0.455399403 | 0.175227662 |
| 0.333886806 | 0.14755051  | 0.123041282 | 0.300869011 |
| 0.467603714 | 0.140811526 | 0.344641159 | 0.432534089 |
| 0.175190338 | 0.442503703 | 0.499928133 | 0.442887171 |
| 0.485399362 | 0.38355976  | 0.030234046 | 0.334410784 |
| 0.416308153 | 0.438223613 | 0.462775207 | 0.415453062 |
| 0.092021996 | 0.470829499 | 0.338204163 | 0.437909234 |
| 0.296070948 | 0.061080334 | 0.291613899 | 0.438428755 |
| 0.448382173 | 0.414423715 | 0.321792563 | 0.247562899 |
| 0.212749193 | 0.288945333 | 0.253057244 | 0.35358385  |
| 0.325982397 | 0.2150547   | 0.461114557 | 0.148152722 |
| 0.199564516 | 0.364985769 | 0.226675508 | 0.365670267 |
| 0.352883782 | 0.39425449  | 0.054200376 | 0.383572778 |
| 0.007571318 | 0.462015022 | 0.438338424 | 0.287359849 |
| 0.088163041 | 0.044483703 | 0.259835332 | 0.412764451 |
| 1           | 0.44928137  | 0.475820542 | 0.474478603 |
| 0.24447697  | 0.390518723 | 0.394012346 | 0.260314499 |
| 0.42313829  | 0.26051915  | 0.177386281 | 0.464934849 |
| 0.483130338 | 0.50231588  | 0.276016559 | 0.342011281 |
| 0.404874237 | 0.480152883 | 0.427905576 | 0.449947376 |
| 0.328076447 | 0.091641995 | 0.425939489 | 0.500702216 |
| 0.386977866 | 0.320958227 | 0.227598724 | 0.437511458 |
| 0.12132577  | 0.395804235 | 0.435039001 | 0.222370011 |
| 0.478212173 | 0.046130549 | 0.283960224 | 0.421144505 |
| 0.33247501  | 0.439323314 | 0.492107448 | 0.291721728 |
| 0.450321185 | 0.046176294 | 0.144880977 | 0.076430356 |
| 0.387975166 | 0.158561446 | 0.451721399 | 0.452774438 |
| 0.328153052 | 0.416460285 | 0.375702298 | 0.00901521  |
| 0.058220218 | 0.269752309 | 0.413448288 | 0.448007966 |
| 0.460299061 | 0.354504274 | 0.288598291 | 0.383265773 |
| 0.409287583 | 0.468007138 | 0.06379323  | 0.187810655 |
| 0.451663237 | 0.27532196  | 0.344073432 | 0.448000309 |
| 0.365631288 | 0.215749595 | 0.222167466 | 0.51468934  |
| 0.431138891 | 0.162140621 | 0.395870991 | 0.469239603 |
| 0.359553669 | 0.397150803 | 0.201001251 | 0.362403453 |
| 0.109280535 | 0.452078085 | 0.057499175 | 0.412575788 |
| 0.252674245 | 0.193142431 | 0.03578524  | 0.350068889 |
| 0.34343622  | 0.400763376 | 0.437400443 | 0.198971191 |
| 0.402620533 | 0.452969557 | 0.375031096 | 0.410181691 |
| 0.021087465 | 0.104685275 | 0.318623846 | 0.499673113 |
| 0.305641534 | 0.492168113 | 0.407070012 | 0.381006399 |
| 0.368249863 | 0.464792029 | 0.006725974 | 0.477134267 |
| 0.501934067 | 0.323881101 | 0.431079025 | 0.456592171 |
| 0.354624199 | 0.451987179 | 0.053523498 | 0.473543957 |
| 0.363049767 | 0.159803714 | 0.503686934 | 0.236223997 |
| 0.448449606 | 0.08372698  | 0.390374674 | 0.399835332 |
| 0.38780427  | 0.019608785 | 0.28274583  | 0.444596083 |
| 0.055361128 | 0.166053699 | 0.452653235 | 0.460202466 |
| 0.418122735 | 0.458133877 | 0.48620705  | 0.3333379   |
| 0.462126874 | 0.355400214 | 0.034188966 | 0.384358866 |
| 0.43641761  | 0.359411096 | 0.441648452 | 0.345429474 |
| 0.345539986 | 0.469683957 | 0.384349807 | 0.212792345 |

|             |             |             |             |
|-------------|-------------|-------------|-------------|
| 0.094720837 | 0.400294231 | 0.045166811 | 0.389267804 |
| 0.365158796 | 0.185109836 | 0.37589565  | 0.236177109 |
| 0.12272418  | 0.516655514 | 0.208283062 | 0.261758469 |
| 0.140803706 | 0.412105114 | 0.373961854 | 0.272564143 |
| 0.232060007 | 0.251889484 | 0.368866462 | 0.405925978 |
| 0.086689016 | 0.162405731 | 0.032518916 | 0.344897208 |
| 0.167460827 | 0.340120026 | 0.33138839  | 0.40259167  |
| 0.388382717 | 0.166373074 | 0.425458106 | 0.323574268 |
| 0.174110686 | 0.03885671  | 0.502238753 | 0.47216676  |
| 0.338187497 | 0.253553678 | 0.088717897 | 0.319440168 |
| 0.460473291 | 0.311988928 | 0.29911222  | 0.452822291 |
| 0.064376821 | 0.479168002 | 0.30592705  | 0.190966848 |
| 0.384958844 | 0.354895078 | 0.465511412 | 0.08063585  |
| 0.432078942 | 0.465165133 | 0.410091919 | 0.253205256 |
| 0.389041802 | 0.465708968 | 0.072413445 | 0.394523764 |
| 0.39081479  | 0.070982761 | 0.510748287 | 0.187293409 |
| 0.050175114 | 0.44704955  | 0.408342544 | 0.13777218  |
| 0.13698409  | 0.372507844 | 0.101892389 | 0.374407721 |
| 0.511221815 | 0.459251534 | 0.406272994 | 0.269754285 |
| 0.086174977 | 0.020663279 | 0.278086891 | 0.407763745 |
| 0.488810409 | 0.489894481 | 0.371213065 | 0.385618208 |
| 0.352206384 | 0.343173455 | 0.207684377 | 0.49645055  |
| 0.26529026  | 0.504470241 | 0.021833649 | 0.417686376 |
| 0.478559418 | 0.333839647 | 0.12681491  | 0.3771445   |
| 0.378795723 | 0.101444751 | 0.331127211 | 0.482758013 |
| 0.427973186 | 0.378861183 | 0.367045457 | 0.466189025 |
| 0.04488527  | 0.098168661 | 0.422568698 | 0.206089284 |
| 0.408173489 | 0.308213257 | 0.058452843 | 0.395997052 |
| 0.087194217 | 0.447348301 | 0.469640177 | 0.101546701 |
| 0.332814343 | 0.374695911 | 0.44236326  | 0.085097953 |
| 0.414089399 | 0.478547014 | 0.504618879 | 0.286831772 |
| 0.431031531 | 0.464333992 | 0.365678791 | 0.145661223 |
| 0.040013105 | 0.49096514  | 0.424599809 | 0.045934443 |
| 0.473014213 | 0.269823718 | 0.027275593 | 0.499513524 |
| 0.299393325 | 0.423339145 | 0.010412359 | 0.099497514 |
| 0.077786174 | 0.457074057 | 0.460693797 | 0.439762331 |
| 0.25479443  | 0.460112321 | 0.012582103 | 0.508800795 |
| 0.480037799 | 0.031982887 | 0.197664295 | 0.40735555  |
| 0.388025605 | 0.52616229  | 0.320683801 | 0.411693687 |
| 0.404636983 | 0.471986962 | 0.311265505 | 0.355902899 |
| 0.428895746 | 0.459288339 | 0.448459668 | 0.463005624 |
| 0.457476775 | 0.460979768 | 0.379246123 | 0.040958654 |
| 0.160509236 | 0.295730345 | 0.285076001 | 0.113436388 |
| 0.354855163 | 0.201262275 | 0.47717341  | 0.462892939 |
| 0.461139241 | 0.016185501 | 0.248786442 | 0.413057164 |
| 0.450513056 | 0.486406386 | 0.048747948 | 0.011563999 |
| 0.012588837 | 0.030350401 | 0.437796199 | 0.330858922 |
| 0.478322478 | 0.240787853 | 0.016464464 | 0.103004777 |
| 0.378308447 | 0.407684263 | 0.489408777 | 0.460859779 |
| 0.432977509 | 0.15465207  | 0.291377754 | 0.471431049 |
| 0.105156261 | 0.328746584 | 0.471832332 | 0.470362037 |
| 0.087670845 | 0.334599337 | 0.431067186 | 0.493968446 |
| 0.069777548 | 0.406559013 | 0.443750796 | 0.368566388 |
| 0.03442473  | 0.136996417 | 0.112389698 | 0.470831308 |



|             |             |             |             |
|-------------|-------------|-------------|-------------|
| 0.467094561 | 0.11646118  | 0.060694171 | 0.177391204 |
| 0.188368223 | 0.4587464   | 0.246888849 | 0.513044096 |
| 0.447362469 | 0.474047088 | 0.121917003 | 0.474046309 |
| 0.070926327 | 0.467187911 | 0.364417928 | 0.078533487 |
| 0.388207443 | 0.036522837 | 0.448151348 | 0.14977634  |
| 0.386025362 | 0.441294163 | 0.219287806 | 0.037557621 |
| 0.189631411 | 0.102000485 | 0.472248606 | 0.44606141  |
| 0.066649171 | 0.35472176  | 0.39592182  | 0.470519629 |
| 0.357434283 | 0.456983194 | 0.487275868 | 0.37308057  |
| 0.157825136 | 0.16769559  | 0.46359304  | 0.40911914  |
| 0.33490583  | 0.486103038 | 0.324735258 | 0.515880921 |
| 0.421419909 | 0.462470236 | 0.455419914 | 0.417988149 |
| 0.273130553 | 0.424269226 | 0.393920262 | 0.046085981 |
| 0.446427196 | 0.455993966 | 0.438913648 | 0.195680267 |
| 0.325941032 | 0.372452118 | 0.110143976 | 0.228634202 |
| 0.309804176 | 0.343683045 | 0.230332868 | 0.475579144 |
| 0.436611649 | 0.406923045 | 0.099688291 | 0.105450398 |
| 0.533001207 | 0.438296347 | 0.225717543 | 0.445866222 |
| 0.271824    | 0.404807289 | 0.444611623 | 0.441147365 |
| 0.386684928 | 0.419144305 | 0.448546665 | 0.39780049  |
| 0.427382234 | 0.369809448 | 0.507501919 | 0.157924971 |
| 0.120768691 | 0.411554967 | 0.151100087 | 0.158630602 |
| 0.235616435 | 0.059274758 | 0.276311308 | 0.473889797 |
| 0.345937178 | 0.44685907  | 0.36340106  | 0.14972613  |
| 0.403175953 | 0.39722948  | 0.443130535 | 0.286760918 |
| 0.136166156 | 0.479383084 | 0.022153653 | 0.112372171 |
| 0.370787252 | 0.422515668 | 0.376876537 | 0.335914927 |
| 0.298780216 | 0.20754239  | 0.392901781 | 0.346790927 |
| 0.312309628 | 0.382555349 | 0.416211691 | 0.078617576 |
| 0.054176452 | 0.494803673 | 0.411961263 | 0.047348839 |
| 0.136254999 | 0.391440448 | 0.398429836 | 0.293507245 |
| 0.045455429 | 0.452197463 | 0.337752801 | 0.446144439 |
| 0.430317904 | 0.137041133 | 0.35583661  | 0.151045386 |
| 0.130245346 | 0.446316038 | 0.403782126 | 0.487772428 |
| 0.402227521 | 0.463638068 | 0.433670309 | 0.418579256 |
| 0.19390512  | 0.371948947 | 0.069320508 | 0.457781076 |
| 0.361513939 |             |             |             |
| CARHSP1     | 0.475116707 | 0.477478907 | 0.438698751 |
| 0.397107164 | 0.414524539 | 0.389241152 | 0.185498707 |
| 0.213143683 | 0.070496888 | 0.001753092 | 0.012277696 |
| 0.459043458 | 0.165095663 | 0.248026598 | 0.344384893 |
| 0.407007649 | 0.109693919 | 0.424608205 | 0.219075146 |
| 0.411390039 | 0.079569314 | 0.369516897 | 0.076776874 |
| 0.298341073 | 0.082031394 | 0.049038104 | 0.240651747 |
| 0.433672626 | 0.059558722 | 0.327507142 | 0.39874747  |
| 0.10194119  | 0.465892856 | 0.506148037 | 0.408450426 |
| 0.50367289  | 0.466852945 | 0.016451703 | 0.27014616  |
| 0.461617635 | 0.436562874 | 0.40432801  | 0.2976373   |
| 0.02921003  | 0.485383016 | 0.212972472 | 0.410812385 |
| 0.264448739 | 0.019127304 | 0.265396726 | 0.442225916 |
| 0.457503831 | 0.419922253 | 0.236552559 | 0.13297928  |
| 0.159913841 | 0.243447682 | 0.248816502 | 0.361917969 |
| 0.194261863 | 0.16680312  | 0.461306959 | 0.070341627 |
| 0.141565178 | 0.272129927 | 0.146795443 | 0.258606295 |

|             |             |             |             |
|-------------|-------------|-------------|-------------|
| 0.354756953 | 0.427979666 | 0.017554442 | 0.459234795 |
| 0.001211244 | 0.391328421 | 0.387853177 | 0.309772013 |
| 0.032075819 | 0.010506107 | 0.17069878  | 0.309899393 |
| 0.44928137  | 1           | 0.448950537 | 0.454241053 |
| 0.152816074 | 0.296258562 | 0.40910162  | 0.140290621 |
| 0.462647984 | 0.145118071 | 0.112409914 | 0.401012325 |
| 0.451921481 | 0.485911712 | 0.177597548 | 0.250618569 |
| 0.412336739 | 0.448565266 | 0.429330282 | 0.403766622 |
| 0.321869286 | 0.052375061 | 0.428512623 | 0.457136351 |
| 0.440318142 | 0.321659309 | 0.129207551 | 0.422513639 |
| 0.049503079 | 0.417204209 | 0.324325541 | 0.170482203 |
| 0.448742471 | 0.012265195 | 0.192211838 | 0.331857773 |
| 0.244435403 | 0.4657328   | 0.482058075 | 0.163226337 |
| 0.424800973 | 0.014783522 | 0.117269813 | 0.03141305  |
| 0.322440183 | 0.151709044 | 0.49111956  | 0.431683458 |
| 0.243469994 | 0.354206385 | 0.256171571 | 0.000538467 |
| 0.020256164 | 0.212332341 | 0.460442132 | 0.421439278 |
| 0.454455899 | 0.445903688 | 0.188200146 | 0.436541765 |
| 0.446732077 | 0.449137697 | 0.064735071 | 0.086509259 |
| 0.42218814  | 0.205497526 | 0.214386224 | 0.44330751  |
| 0.273799693 | 0.112794364 | 0.107770591 | 0.457389911 |
| 0.421663641 | 0.06683621  | 0.411867357 | 0.402684378 |
| 0.291571457 | 0.337263996 | 0.094811542 | 0.24606253  |
| 0.036495054 | 0.470691267 | 0.023236017 | 0.387779757 |
| 0.257659884 | 0.127339804 | 0.014642867 | 0.275135858 |
| 0.272730313 | 0.421378514 | 0.489624302 | 0.097930683 |
| 0.289556863 | 0.382214289 | 0.37029528  | 0.408179265 |
| 0.003981072 | 0.045902468 | 0.353482049 | 0.451370246 |
| 0.319267685 | 0.469297118 | 0.298789674 | 0.31025157  |
| 0.261202681 | 0.445659546 | 0.005577376 | 0.488251844 |
| 0.492820753 | 0.367156407 | 0.359722233 | 0.441335971 |
| 0.371344545 | 0.429818755 | 0.067488447 | 0.405366856 |
| 0.42941377  | 0.072306008 | 0.454436908 | 0.130365012 |
| 0.451049038 | 0.028019007 | 0.321501212 | 0.446510285 |
| 0.441343587 | 0.007274799 | 0.230661779 | 0.381699826 |
| 0.023908493 | 0.087143741 | 0.459615962 | 0.39526391  |
| 0.354904949 | 0.45703535  | 0.445786907 | 0.350597121 |
| 0.408161609 | 0.23981663  | 0.011301963 | 0.316754353 |
| 0.47288576  | 0.391319191 | 0.426165716 | 0.229113968 |
| 0.411278021 | 0.443887471 | 0.457415156 | 0.195589708 |
| 0.030549156 | 0.314436924 | 0.017011018 | 0.3056373   |
| 0.450752221 | 0.085696453 | 0.406396763 | 0.173136644 |
| 0.057581255 | 0.46135823  | 0.175465369 | 0.277828292 |
| 0.130327351 | 0.37409658  | 0.25102426  | 0.191185988 |
| 0.16730263  | 0.141046203 | 0.33995771  | 0.359847622 |
| 0.027774704 | 0.070912591 | 0.018493961 | 0.368729909 |
| 0.100479816 | 0.306500762 | 0.310861923 | 0.441898572 |
| 0.316855322 | 0.083133816 | 0.35115882  | 0.307531877 |
| 0.099851529 | 0.010316931 | 0.461053653 | 0.407998048 |
| 0.389115795 | 0.137657695 | 0.035020166 | 0.331372432 |
| 0.435210241 | 0.335658467 | 0.340175332 | 0.428948972 |
| 0.030396992 | 0.460388183 | 0.200843384 | 0.097113875 |
| 0.348648231 | 0.225771542 | 0.438623031 | 0.054832696 |
| 0.438429634 | 0.431856831 | 0.32412559  | 0.152428239 |

|             |             |             |             |
|-------------|-------------|-------------|-------------|
| 0.408035834 | 0.415213234 | 0.021500131 | 0.455144302 |
| 0.446616325 | 0.021888445 | 0.477008684 | 0.1109871   |
| 0.016184106 | 0.446155343 | 0.43049977  | 0.061757339 |
| 0.066048091 | 0.28841729  | 0.040259104 | 0.264741975 |
| 0.456279041 | 0.381856046 | 0.423216531 | 0.231437637 |
| 0.026206121 | 0.004194544 | 0.207182206 | 0.451371156 |
| 0.503657604 | 0.460438702 | 0.252556321 | 0.327607795 |
| 0.219008783 | 0.305443371 | 0.16786658  | 0.452169444 |
| 0.267706963 | 0.501297766 | 0.004638458 | 0.445268004 |
| 0.49976279  | 0.320206894 | 0.06004513  | 0.293858862 |
| 0.416830257 | 0.035152246 | 0.227628418 | 0.46949881  |
| 0.446174902 | 0.312872774 | 0.331254204 | 0.455125184 |
| 0.010982898 | 0.03269883  | 0.392049294 | 0.192819976 |
| 0.362479302 | 0.194447919 | 0.058149577 | 0.361942188 |
| 0.027363354 | 0.425121267 | 0.455305552 | 0.043215568 |
| 0.327251936 | 0.365060956 | 0.370573857 | 0.027601081 |
| 0.446964185 | 0.479885974 | 0.50141004  | 0.172843874 |
| 0.465402134 | 0.444397686 | 0.405715947 | 0.07382385  |
| 0.013114227 | 0.498262358 | 0.446826759 | 0.01492128  |
| 0.448489698 | 0.273168466 | 0.005167959 | 0.456730918 |
| 0.171673318 | 0.465490157 | 0.003807529 | 0.134966022 |
| 0.041685332 | 0.453480953 | 0.464623477 | 0.402103903 |
| 0.253374998 | 0.390637591 | 0.008722545 | 0.475600207 |
| 0.451270043 | 0.010142509 | 0.132279699 | 0.44788624  |
| 0.43544992  | 0.497470601 | 0.31114001  | 0.441853429 |
| 0.425868084 | 0.477745771 | 0.20823073  | 0.240945319 |
| 0.435975543 | 0.465435833 | 0.447961165 | 0.446474116 |
| 0.441050607 | 0.423286989 | 0.251536449 | 0.008992214 |
| 0.128346917 | 0.224280647 | 0.295961294 | 0.057578183 |
| 0.378003522 | 0.114522685 | 0.465273473 | 0.451590862 |
| 0.453730473 | 0.00304807  | 0.146611309 | 0.456904052 |
| 0.436589149 | 0.451086838 | 0.027692124 | 0.007454575 |
| 0.01206988  | 0.011562317 | 0.370611474 | 0.240875849 |
| 0.457725807 | 0.233202936 | 0.002156816 | 0.040482687 |
| 0.281087484 | 0.388933869 | 0.465019542 | 0.367792261 |
| 0.468319306 | 0.070258221 | 0.245194214 | 0.400980197 |
| 0.051620812 | 0.412781404 | 0.450038352 | 0.44326017  |
| 0.041995968 | 0.244223824 | 0.446732117 | 0.446067868 |
| 0.074311126 | 0.302099335 | 0.460637861 | 0.274978154 |
| 0.018281513 | 0.06909587  | 0.051346072 | 0.443296325 |
| 0.491052071 | 0.051354098 | 0.019589859 | 0.169444537 |
| 0.088246408 | 0.46442809  | 0.134641483 | 0.458192179 |
| 0.440577597 | 0.419661219 | 0.066882381 | 0.461033042 |
| 0.025361862 | 0.467980342 | 0.322379847 | 0.060242146 |
| 0.325053325 | 0.010982711 | 0.453301372 | 0.123006748 |
| 0.341520416 | 0.444649027 | 0.194675235 | 0.013825395 |
| 0.207525609 | 0.041738163 | 0.440086977 | 0.450925911 |
| 0.034635708 | 0.239559286 | 0.302316847 | 0.434491616 |
| 0.299860076 | 0.409105021 | 0.489708105 | 0.423955754 |
| 0.065174588 | 0.178921123 | 0.423063401 | 0.453008777 |
| 0.250580111 | 0.454392124 | 0.256175428 | 0.478437443 |
| 0.459516114 | 0.465336137 | 0.45570545  | 0.335451557 |
| 0.21491901  | 0.442186474 | 0.359209531 | 0.012322888 |
| 0.356680014 | 0.433686215 | 0.40926327  | 0.125133182 |

|             |             |             |             |
|-------------|-------------|-------------|-------------|
| 0.21587639  | 0.411347489 | 0.050767126 | 0.271986337 |
| 0.354336047 | 0.323011956 | 0.113474647 | 0.43160859  |
| 0.445181288 | 0.453484381 | 0.044399086 | 0.046641845 |
| 0.500742185 | 0.447027276 | 0.145412077 | 0.423172263 |
| 0.166909958 | 0.314647643 | 0.466489972 | 0.455022782 |
| 0.407788436 | 0.440879065 | 0.44406952  | 0.380697604 |
| 0.413528703 | 0.244518453 | 0.500502534 | 0.112676903 |
| 0.074558272 | 0.46874972  | 0.066496845 | 0.082009858 |
| 0.118212136 | 0.02190692  | 0.313213342 | 0.425305571 |
| 0.396998287 | 0.35030332  | 0.369476022 | 0.075227166 |
| 0.320436882 | 0.459824347 | 0.344845408 | 0.177507947 |
| 0.055984607 | 0.469762645 | 0.006890337 | 0.047493652 |
| 0.401601994 | 0.44973153  | 0.361574587 | 0.230660282 |
| 0.291962293 | 0.144582219 | 0.268925364 | 0.324874469 |
| 0.29498618  | 0.416403419 | 0.447867916 | 0.033816949 |
| 0.013881332 | 0.45578983  | 0.43985287  | 0.023226956 |
| 0.085911027 | 0.448456865 | 0.350481936 | 0.197675339 |
| 0.019030775 | 0.444243794 | 0.327244176 | 0.43240581  |
| 0.35142361  | 0.060238918 | 0.406793151 | 0.100382534 |
| 0.06623436  | 0.441587207 | 0.424963065 | 0.486121853 |
| 0.392866099 | 0.391872891 | 0.462614589 | 0.453005298 |
| 0.160593216 | 0.456952356 | 0.019955777 | 0.456153068 |
| 0.411016694 |             |             |             |
| CASP1       | 0.431809491 | 0.528717285 | 0.448418865 |
| 0.464182811 | 0.502049365 | 0.372698216 | 0.266754732 |
| 0.201337701 | 0.134705457 | 0.011298331 | 0.052706807 |
| 0.490241638 | 0.291190828 | 0.31777766  | 0.345520888 |
| 0.485433078 | 0.231861961 | 0.378754084 | 0.323843709 |
| 0.455482164 | 0.118571869 | 0.490054075 | 0.145614163 |
| 0.391792411 | 0.189877773 | 0.128662475 | 0.374944338 |
| 0.470065227 | 0.144116116 | 0.324677119 | 0.399437293 |
| 0.175749047 | 0.449035745 | 0.514696988 | 0.512231677 |
| 0.510727061 | 0.39598514  | 0.020809758 | 0.321152205 |
| 0.411400706 | 0.48639699  | 0.44812451  | 0.413242231 |
| 0.077306894 | 0.467878659 | 0.319388902 | 0.484815056 |
| 0.242463192 | 0.070525158 | 0.229252397 | 0.421587492 |
| 0.470333034 | 0.465852647 | 0.24934173  | 0.215578478 |
| 0.273368327 | 0.22774387  | 0.362796507 | 0.309092218 |
| 0.303055468 | 0.153392955 | 0.484195065 | 0.127442464 |
| 0.177242517 | 0.281691274 | 0.250405502 | 0.302389571 |
| 0.431313675 | 0.373396602 | 0.031964612 | 0.43194004  |
| 0.005214711 | 0.438104503 | 0.470505223 | 0.377783723 |
| 0.087688332 | 0.048281381 | 0.28265389  | 0.396395991 |
| 0.475820542 | 0.448950537 | 1           | 0.506931013 |
| 0.282663962 | 0.395558107 | 0.469446037 | 0.262547146 |
| 0.434675129 | 0.240307189 | 0.157852257 | 0.500764861 |
| 0.510943354 | 0.527586838 | 0.308747873 | 0.375564134 |
| 0.434862712 | 0.471104673 | 0.457239792 | 0.496502444 |
| 0.404059201 | 0.104589326 | 0.43216888  | 0.526711899 |
| 0.378454295 | 0.41487512  | 0.253192827 | 0.420710307 |
| 0.110367468 | 0.37353559  | 0.43620256  | 0.225695954 |
| 0.476816255 | 0.035389541 | 0.328514963 | 0.409395589 |
| 0.288859791 | 0.454312882 | 0.525521993 | 0.261613761 |
| 0.48727062  | 0.045380495 | 0.21256861  | 0.069412851 |

|             |             |             |             |
|-------------|-------------|-------------|-------------|
| 0.387623039 | 0.229146278 | 0.463885782 | 0.474755804 |
| 0.261311387 | 0.464771117 | 0.325338752 | 0.008094066 |
| 0.063375839 | 0.266730257 | 0.448874617 | 0.410968649 |
| 0.461667812 | 0.365246391 | 0.327976243 | 0.376897469 |
| 0.477792772 | 0.501960972 | 0.055210596 | 0.144414463 |
| 0.468500508 | 0.270270529 | 0.338084128 | 0.487555328 |
| 0.424786326 | 0.156121908 | 0.200574208 | 0.531077188 |
| 0.403675222 | 0.142792429 | 0.337854801 | 0.492801199 |
| 0.381856592 | 0.471661877 | 0.169095962 | 0.360539001 |
| 0.082929872 | 0.481553087 | 0.066879576 | 0.34729209  |
| 0.322540881 | 0.246343813 | 0.020494997 | 0.277666626 |
| 0.335164627 | 0.439337884 | 0.450826215 | 0.172523256 |
| 0.401553919 | 0.497635172 | 0.317123143 | 0.453347097 |
| 0.024517103 | 0.084387559 | 0.257958569 | 0.51985747  |
| 0.266165132 | 0.51189413  | 0.385358673 | 0.403722747 |
| 0.398037202 | 0.486403292 | 0.005706663 | 0.485436373 |
| 0.531050293 | 0.277310437 | 0.480421136 | 0.486698449 |
| 0.431879235 | 0.477563329 | 0.046064823 | 0.492523524 |
| 0.343355068 | 0.132736929 | 0.519592734 | 0.260855852 |
| 0.454231739 | 0.085904685 | 0.343613134 | 0.466611636 |
| 0.454421251 | 0.016854876 | 0.226662723 | 0.423474773 |
| 0.062405728 | 0.114426929 | 0.44940762  | 0.463439041 |
| 0.444862143 | 0.489363728 | 0.499661675 | 0.417679436 |
| 0.503930248 | 0.290796757 | 0.028532793 | 0.432969578 |
| 0.464996265 | 0.408330313 | 0.428349905 | 0.299034107 |
| 0.317675077 | 0.471936776 | 0.423446928 | 0.221814435 |
| 0.080197044 | 0.345287136 | 0.035130574 | 0.428079427 |
| 0.383528431 | 0.176357146 | 0.426449008 | 0.220075809 |
| 0.13872781  | 0.538815947 | 0.27688799  | 0.348979043 |
| 0.204809172 | 0.443272957 | 0.321774657 | 0.297488077 |
| 0.305164184 | 0.254120121 | 0.434940133 | 0.442188279 |
| 0.058227195 | 0.166865728 | 0.032018785 | 0.422276569 |
| 0.212619167 | 0.401822124 | 0.379249601 | 0.40676154  |
| 0.376361368 | 0.179049759 | 0.48232403  | 0.374022874 |
| 0.197747625 | 0.037406774 | 0.511924048 | 0.47482584  |
| 0.312525922 | 0.221823499 | 0.083619265 | 0.372165957 |
| 0.473016095 | 0.304718123 | 0.242160101 | 0.451692863 |
| 0.050456092 | 0.493138568 | 0.339684711 | 0.212189993 |
| 0.475830432 | 0.358794668 | 0.479150147 | 0.076166163 |
| 0.402194333 | 0.462448053 | 0.407007573 | 0.286109438 |
| 0.37825616  | 0.462314166 | 0.056425413 | 0.39966541  |
| 0.397325213 | 0.068990431 | 0.536824742 | 0.220010404 |
| 0.049359921 | 0.502354457 | 0.472732136 | 0.140156369 |
| 0.145007281 | 0.400654345 | 0.061526572 | 0.406046136 |
| 0.529572823 | 0.496477512 | 0.44502922  | 0.318272904 |
| 0.078755998 | 0.026815882 | 0.31945378  | 0.450014311 |
| 0.499631906 | 0.525166371 | 0.363061901 | 0.473219708 |
| 0.330272104 | 0.414529285 | 0.137471141 | 0.524309993 |
| 0.251772947 | 0.515678728 | 0.017960726 | 0.483107286 |
| 0.504203002 | 0.281403832 | 0.15304982  | 0.341477074 |
| 0.380049539 | 0.084154    | 0.263821265 | 0.496903924 |
| 0.433735371 | 0.411881106 | 0.418260622 | 0.481244193 |
| 0.029196881 | 0.067311723 | 0.466260107 | 0.275153539 |
| 0.436482664 | 0.307751751 | 0.095990282 | 0.341387676 |

|             |             |             |             |
|-------------|-------------|-------------|-------------|
| 0.084952884 | 0.448446708 | 0.497581314 | 0.110550103 |
| 0.340548381 | 0.31208065  | 0.482519942 | 0.073069253 |
| 0.463377949 | 0.504620763 | 0.51893555  | 0.217570051 |
| 0.467944642 | 0.499957889 | 0.459268858 | 0.145071836 |
| 0.043607016 | 0.518960423 | 0.403186306 | 0.044015992 |
| 0.492678426 | 0.215872084 | 0.031162294 | 0.496226858 |
| 0.259033271 | 0.422216388 | 0.006014404 | 0.10583481  |
| 0.084417584 | 0.503105983 | 0.471916969 | 0.402868474 |
| 0.235461998 | 0.429429094 | 0.012092968 | 0.534964696 |
| 0.493201978 | 0.038303243 | 0.239641133 | 0.459499408 |
| 0.466512663 | 0.527380873 | 0.415777566 | 0.478259253 |
| 0.486011637 | 0.500646924 | 0.301067155 | 0.380863956 |
| 0.454841096 | 0.500220189 | 0.439738641 | 0.44933968  |
| 0.485929034 | 0.504432906 | 0.367547946 | 0.032916936 |
| 0.195033193 | 0.221905044 | 0.329110639 | 0.133549211 |
| 0.30904972  | 0.232195802 | 0.481925583 | 0.498041613 |
| 0.496336525 | 0.014866115 | 0.183225464 | 0.445563171 |
| 0.434215981 | 0.472449926 | 0.038708011 | 0.010754958 |
| 0.012411852 | 0.048477219 | 0.395567025 | 0.353089233 |
| 0.496236432 | 0.239365246 | 0.013497762 | 0.061722917 |
| 0.351273017 | 0.491159331 | 0.508028316 | 0.458137042 |
| 0.475327132 | 0.144167058 | 0.321896789 | 0.46093739  |
| 0.133256989 | 0.304877496 | 0.50242185  | 0.4668698   |
| 0.081226165 | 0.354540189 | 0.400046402 | 0.494575368 |
| 0.119580614 | 0.43234901  | 0.488831698 | 0.395447732 |
| 0.028076842 | 0.152617585 | 0.124837535 | 0.494849958 |
| 0.496721693 | 0.143934531 | 0.075454991 | 0.141967524 |
| 0.182710726 | 0.479975014 | 0.252646106 | 0.530752407 |
| 0.458039227 | 0.493829074 | 0.142894992 | 0.478263959 |
| 0.078277058 | 0.484648436 | 0.454968383 | 0.068315902 |
| 0.375304873 | 0.029177981 | 0.471972544 | 0.214889364 |
| 0.340881437 | 0.412527557 | 0.265412079 | 0.041777925 |
| 0.252959033 | 0.107707201 | 0.494964079 | 0.501399951 |
| 0.071481178 | 0.29585629  | 0.404056611 | 0.462125891 |
| 0.300306276 | 0.490520233 | 0.496681253 | 0.409112217 |
| 0.126189129 | 0.206294675 | 0.443474064 | 0.399168402 |
| 0.264549859 | 0.507651293 | 0.389254782 | 0.536930743 |
| 0.414342561 | 0.453319881 | 0.477327793 | 0.40927413  |
| 0.345989674 | 0.4074521   | 0.391206338 | 0.036808572 |
| 0.43104005  | 0.497824293 | 0.386151261 | 0.252682487 |
| 0.372691401 | 0.45309761  | 0.073737727 | 0.187027796 |
| 0.403820932 | 0.303700014 | 0.218410214 | 0.490447383 |
| 0.405012248 | 0.400905957 | 0.058471291 | 0.118141541 |
| 0.546301108 | 0.423126049 | 0.174761533 | 0.459913427 |
| 0.264701907 | 0.441059363 | 0.487236511 | 0.49778267  |
| 0.406566837 | 0.461984244 | 0.446092084 | 0.402961257 |
| 0.4124866   | 0.337868171 | 0.523864474 | 0.090372578 |
| 0.147798341 | 0.437411478 | 0.163337021 | 0.167401701 |
| 0.226879829 | 0.060332684 | 0.371554636 | 0.496463773 |
| 0.432800137 | 0.473548615 | 0.318400524 | 0.138136388 |
| 0.437195204 | 0.376440563 | 0.456112081 | 0.248901664 |
| 0.137706758 | 0.496560598 | 0.022209681 | 0.110103223 |
| 0.453263476 | 0.464798151 | 0.475886635 | 0.35094429  |
| 0.395995488 | 0.228379841 | 0.407513688 | 0.293523077 |

|             |             |             |             |
|-------------|-------------|-------------|-------------|
| 0.342345808 | 0.404548515 | 0.456603497 | 0.054091426 |
| 0.03616518  | 0.507202128 | 0.381728564 | 0.045900687 |
| 0.138280835 | 0.375420329 | 0.356449214 | 0.316386048 |
| 0.05221902  | 0.49172147  | 0.337689317 | 0.495002353 |
| 0.387857923 | 0.11692256  | 0.32314967  | 0.120718483 |
| 0.09468358  | 0.43636844  | 0.46446069  | 0.517475489 |
| 0.432342346 | 0.492881432 | 0.422437271 | 0.449399787 |
| 0.169029166 | 0.40383982  | 0.05157646  | 0.464032683 |
| 0.438141694 |             |             |             |
| CASP4       | 0.445797838 | 0.526837607 | 0.460062015 |
| 0.454021068 | 0.495360008 | 0.37788327  | 0.239263674 |
| 0.182001883 | 0.120988273 | 0.006944867 | 0.043855522 |
| 0.493861659 | 0.265193273 | 0.289294277 | 0.353383639 |
| 0.475193139 | 0.200738208 | 0.373537109 | 0.289479007 |
| 0.444102483 | 0.098909811 | 0.472081934 | 0.120028731 |
| 0.391609942 | 0.168040549 | 0.107036418 | 0.370338997 |
| 0.463336907 | 0.120420489 | 0.325138523 | 0.391942845 |
| 0.151147015 | 0.455181812 | 0.523318116 | 0.508324249 |
| 0.521814928 | 0.415044709 | 0.015519429 | 0.315799535 |
| 0.421229609 | 0.493773672 | 0.438435097 | 0.383558172 |
| 0.059823652 | 0.475446516 | 0.290054546 | 0.481565412 |
| 0.233820262 | 0.054137442 | 0.223232402 | 0.427383603 |
| 0.479596496 | 0.479805745 | 0.230889166 | 0.190273412 |
| 0.264096731 | 0.21750285  | 0.369696937 | 0.309028735 |
| 0.271726127 | 0.14285182  | 0.492308115 | 0.111718386 |
| 0.173771819 | 0.26006312  | 0.224062154 | 0.276443233 |
| 0.446834943 | 0.380777877 | 0.02317957  | 0.45268745  |
| 0.003103975 | 0.422580641 | 0.457236498 | 0.404529845 |
| 0.068355415 | 0.033450121 | 0.253742425 | 0.375596965 |
| 0.474478603 | 0.454241053 | 0.506931013 | 1           |
| 0.246637445 | 0.370643159 | 0.481958382 | 0.227659451 |
| 0.44752896  | 0.211798679 | 0.132508693 | 0.489092761 |
| 0.504203975 | 0.531873873 | 0.281652231 | 0.353403544 |
| 0.444124186 | 0.467158258 | 0.461237604 | 0.495196389 |
| 0.418234493 | 0.091546953 | 0.436886814 | 0.51945404  |
| 0.390151529 | 0.422617179 | 0.222581525 | 0.417352331 |
| 0.089134806 | 0.369933631 | 0.410519343 | 0.199143957 |
| 0.475599453 | 0.026974751 | 0.302684935 | 0.392066646 |
| 0.264209824 | 0.461329594 | 0.531331287 | 0.229460472 |
| 0.479353683 | 0.031748994 | 0.211386093 | 0.055038482 |
| 0.36697339  | 0.229044535 | 0.479898268 | 0.474622799 |
| 0.238040507 | 0.462416091 | 0.3001436   | 0.005164817 |
| 0.048238349 | 0.247136264 | 0.462154232 | 0.399183228 |
| 0.464116238 | 0.392099951 | 0.307484677 | 0.389525487 |
| 0.494594716 | 0.508138965 | 0.053978269 | 0.121032598 |
| 0.460099528 | 0.251536441 | 0.304136468 | 0.493123917 |
| 0.401697867 | 0.130927898 | 0.168434228 | 0.52165635  |
| 0.402534149 | 0.115538683 | 0.336017918 | 0.476881338 |
| 0.379049925 | 0.45726575  | 0.139757861 | 0.32527787  |
| 0.064394365 | 0.494152751 | 0.052994654 | 0.336021708 |
| 0.339194901 | 0.221863762 | 0.01525663  | 0.25996129  |
| 0.313734588 | 0.453715846 | 0.469026805 | 0.144008657 |
| 0.370232426 | 0.484975533 | 0.31391836  | 0.45720764  |
| 0.018641993 | 0.065377825 | 0.260745713 | 0.510895109 |

|             |             |             |             |
|-------------|-------------|-------------|-------------|
| 0.268105721 | 0.505274368 | 0.354103706 | 0.388118412 |
| 0.369388434 | 0.485975602 | 0.005040995 | 0.493710456 |
| 0.537360403 | 0.28035422  | 0.46286057  | 0.482517415 |
| 0.455668589 | 0.476426082 | 0.043488835 | 0.47609702  |
| 0.352872683 | 0.108829847 | 0.504081888 | 0.228361957 |
| 0.458357677 | 0.067800548 | 0.330646211 | 0.487702585 |
| 0.472723247 | 0.012971403 | 0.216085645 | 0.412970971 |
| 0.050952237 | 0.099880429 | 0.454090399 | 0.45192861  |
| 0.4394196   | 0.493648284 | 0.498293222 | 0.44178626  |
| 0.493527519 | 0.260397674 | 0.021067659 | 0.415125651 |
| 0.477245569 | 0.432019638 | 0.428539568 | 0.271252609 |
| 0.325373132 | 0.469340462 | 0.445446818 | 0.237225007 |
| 0.062623109 | 0.329435159 | 0.02518034  | 0.414365272 |
| 0.409627244 | 0.14834245  | 0.450442858 | 0.196530806 |
| 0.115091455 | 0.533347654 | 0.270551481 | 0.360899132 |
| 0.205821713 | 0.436760863 | 0.291130843 | 0.273562919 |
| 0.281662891 | 0.227700372 | 0.442155    | 0.447946677 |
| 0.044371799 | 0.136504823 | 0.026961742 | 0.429384788 |
| 0.184642896 | 0.389954226 | 0.37181456  | 0.418248293 |
| 0.355254637 | 0.14486561  | 0.461600534 | 0.379960607 |
| 0.173967565 | 0.02704567  | 0.509316059 | 0.460102306 |
| 0.321370767 | 0.194240227 | 0.065491006 | 0.378821333 |
| 0.477201765 | 0.311289682 | 0.247275726 | 0.443652788 |
| 0.039053646 | 0.497414338 | 0.311921454 | 0.182256822 |
| 0.468459521 | 0.322946135 | 0.477765439 | 0.071686307 |
| 0.404148226 | 0.459966313 | 0.38521273  | 0.260997659 |
| 0.376120988 | 0.453141654 | 0.041930662 | 0.413633922 |
| 0.407052859 | 0.051563821 | 0.535072864 | 0.191737353 |
| 0.03716897  | 0.505568236 | 0.489177769 | 0.116690637 |
| 0.122168182 | 0.385408823 | 0.049102986 | 0.377878    |
| 0.523597259 | 0.48027322  | 0.458907959 | 0.309974858 |
| 0.06019429  | 0.017692729 | 0.299234411 | 0.459467553 |
| 0.508735891 | 0.524898613 | 0.329936505 | 0.459458114 |
| 0.296823058 | 0.422553851 | 0.132775189 | 0.517626815 |
| 0.2437691   | 0.520815463 | 0.012320925 | 0.500316441 |
| 0.517039018 | 0.276245008 | 0.130207146 | 0.327733262 |
| 0.388814279 | 0.066631077 | 0.236472889 | 0.499181418 |
| 0.448244254 | 0.407187969 | 0.422301156 | 0.477077193 |
| 0.020657146 | 0.052972888 | 0.46799246  | 0.277630355 |
| 0.442015901 | 0.284269888 | 0.095992732 | 0.336080868 |
| 0.064819467 | 0.446599131 | 0.495381057 | 0.096034286 |
| 0.346695456 | 0.310055123 | 0.466279701 | 0.056174862 |
| 0.484636898 | 0.511379495 | 0.524599799 | 0.189718157 |
| 0.478634972 | 0.500974613 | 0.480891231 | 0.122466001 |
| 0.033128056 | 0.527507865 | 0.408365237 | 0.032385656 |
| 0.492805439 | 0.213374174 | 0.020892227 | 0.491995817 |
| 0.227558478 | 0.4354674   | 0.004421811 | 0.109839325 |
| 0.071953627 | 0.506189398 | 0.480892825 | 0.395802314 |
| 0.236178858 | 0.412066904 | 0.011083008 | 0.533624309 |
| 0.492030136 | 0.02905627  | 0.222245993 | 0.474819336 |
| 0.485151874 | 0.526579706 | 0.425167348 | 0.493579412 |
| 0.495400034 | 0.510770761 | 0.273328797 | 0.352976497 |
| 0.460173382 | 0.510669055 | 0.439073552 | 0.447721561 |
| 0.484800159 | 0.499028514 | 0.338073048 | 0.02387891  |



|             |             |             |             |
|-------------|-------------|-------------|-------------|
| 0.201108246 | 0.208208213 | 0.340784174 | 0.126872591 |
| 0.312338255 | 0.20834128  | 0.477830141 | 0.500789863 |
| 0.490385111 | 0.010096333 | 0.160610633 | 0.459853648 |
| 0.436190078 | 0.469711182 | 0.031930993 | 0.0091473   |
| 0.010748888 | 0.039574789 | 0.382940488 | 0.328349327 |
| 0.493205769 | 0.23705606  | 0.008690701 | 0.047796745 |
| 0.324615947 | 0.493398573 | 0.509563156 | 0.436163477 |
| 0.488383448 | 0.119647417 | 0.313081145 | 0.444944442 |
| 0.117071777 | 0.319299724 | 0.493146037 | 0.46731599  |
| 0.067015297 | 0.335383131 | 0.393836383 | 0.480345782 |
| 0.125961542 | 0.404782946 | 0.492508768 | 0.374671287 |
| 0.022520538 | 0.13060709  | 0.10898978  | 0.491783724 |
| 0.510466179 | 0.117166698 | 0.05684692  | 0.134913733 |
| 0.153996222 | 0.488293525 | 0.215989406 | 0.518754263 |
| 0.459306167 | 0.483025092 | 0.12643342  | 0.483045877 |
| 0.065763048 | 0.490069874 | 0.448844199 | 0.061693549 |
| 0.351726191 | 0.02113986  | 0.47715791  | 0.22146541  |
| 0.327798255 | 0.41123446  | 0.276790659 | 0.033164975 |
| 0.264334172 | 0.085811266 | 0.498496313 | 0.509072951 |
| 0.059863998 | 0.274645703 | 0.378078919 | 0.45228834  |
| 0.285551794 | 0.482554452 | 0.503442837 | 0.423967613 |
| 0.105446318 | 0.204961126 | 0.432897051 | 0.404172488 |
| 0.243843861 | 0.505758123 | 0.383996634 | 0.534941164 |
| 0.422824538 | 0.450559252 | 0.476663265 | 0.395251035 |
| 0.335792724 | 0.408772492 | 0.387191997 | 0.025450745 |
| 0.406549602 | 0.497545454 | 0.377629551 | 0.230459121 |
| 0.345070962 | 0.473228254 | 0.062109457 | 0.181163292 |
| 0.423992053 | 0.29994218  | 0.187236309 | 0.482650787 |
| 0.402914162 | 0.407551397 | 0.046168605 | 0.102132314 |
| 0.545865694 | 0.424955783 | 0.156018065 | 0.45932276  |
| 0.233718168 | 0.427795959 | 0.495545043 | 0.50608865  |
| 0.426479549 | 0.472522929 | 0.444863327 | 0.400895409 |
| 0.409617077 | 0.31156205  | 0.529914496 | 0.078233672 |
| 0.134024741 | 0.451981568 | 0.136156614 | 0.143241573 |
| 0.192482199 | 0.04780865  | 0.39318208  | 0.486458007 |
| 0.453906942 | 0.450666491 | 0.319039341 | 0.116776894 |
| 0.418451484 | 0.386786042 | 0.433546117 | 0.222442594 |
| 0.111171705 | 0.502112396 | 0.016276342 | 0.088506856 |
| 0.463144311 | 0.478043582 | 0.480595859 | 0.32004295  |
| 0.406021662 | 0.211579564 | 0.376704108 | 0.285688386 |
| 0.33836021  | 0.40804253  | 0.470628927 | 0.041978548 |
| 0.025459093 | 0.500110157 | 0.379140836 | 0.037099904 |
| 0.133183483 | 0.390705316 | 0.336248471 | 0.304138926 |
| 0.04220785  | 0.496697253 | 0.34469065  | 0.498715783 |
| 0.371796127 | 0.094534306 | 0.332071697 | 0.10761705  |
| 0.078408051 | 0.437011584 | 0.474293743 | 0.524550021 |
| 0.429441963 | 0.478704756 | 0.433009084 | 0.461425437 |
| 0.150713629 | 0.425779112 | 0.038519639 | 0.466317838 |
| 0.457217107 |             |             |             |
| CBLB        | 0.142719708 | 0.208825023 | 0.09661775  |
| 0.242108423 | 0.170559098 | 0.087007707 | 0.11957223  |
| 0.031814734 | 0.023351037 | 0.033342626 | 0.041399229 |
| 0.178239978 | 0.071954667 | 0.102886116 | 0.02428801  |
| 0.258912523 | 0.181382535 | 0.058077009 | 0.198776022 |

|             |             |             |             |
|-------------|-------------|-------------|-------------|
| 0.201575391 | 0.045968904 | 0.307131001 | 0.069918534 |
| 0.059752529 | 0.141030287 | 0.125412168 | 0.098346629 |
| 0.251690887 | 0.13889333  | 0.065136202 | 0.159356975 |
| 0.098779206 | 0.18297789  | 0.171020692 | 0.269869243 |
| 0.171349684 | 0.110577633 | 0.025382331 | 0.041813641 |
| 0.153794284 | 0.199859071 | 0.197166547 | 0.242629685 |
| 0.061762421 | 0.147351356 | 0.17804551  | 0.184556372 |
| 0.014792986 | 0.094683501 | 0.02856595  | 0.128700672 |
| 0.157009482 | 0.126122034 | 0.046621202 | 0.087143781 |
| 0.047313518 | 0.036433637 | 0.057462265 | 0.088937978 |
| 0.169273173 | 0.027315461 | 0.167115751 | 0.019573459 |
| 0.012497713 | 0.063070059 | 0.127821036 | 0.102537327 |
| 0.063490312 | 0.115241567 | 0.021346287 | 0.116519426 |
| 0.01316787  | 0.19780372  | 0.208465057 | 0.047615684 |
| 0.170748681 | 0.096404103 | 0.165156112 | 0.185996549 |
| 0.24447697  | 0.152816074 | 0.282663962 | 0.246637445 |
| 1           | 0.168761639 | 0.130063534 | 0.168222994 |
| 0.164650234 | 0.129604151 | 0.044757391 | 0.299961331 |
| 0.273152455 | 0.198289148 | 0.07540564  | 0.199366178 |
| 0.176094517 | 0.181439576 | 0.096216488 | 0.127325104 |
| 0.048758737 | 0.051892025 | 0.146810908 | 0.248024072 |
| 0.132625262 | 0.119142772 | 0.222919745 | 0.186888986 |
| 0.122131415 | 0.027733586 | 0.264487117 | 0.102013884 |
| 0.253929176 | 0.02097954  | 0.218378611 | 0.160851031 |
| 0.036700544 | 0.178066288 | 0.197757661 | 0.1625196   |
| 0.156853433 | 0.08885807  | 0.029767814 | 0.077731533 |
| 0.038369125 | 0.046110263 | 0.131733387 | 0.258986752 |
| 0.040240272 | 0.045905127 | 0.096376836 | 0.030050038 |
| 0.115790707 | 0.040801072 | 0.187114194 | 0.101535169 |
| 0.178826607 | 0.113152546 | 0.118718691 | 0.112527345 |
| 0.156189419 | 0.274448565 | 0.002925365 | 0.061853868 |
| 0.144212031 | 0.041901167 | 0.255765016 | 0.155562173 |
| 0.2069478   | 0.058228142 | 0.15539164  | 0.244791231 |
| 0.136328857 | 0.159840708 | 0.045488339 | 0.285218229 |
| 0.039608272 | 0.239251536 | 0.122594902 | 0.165388069 |
| 0.059420072 | 0.158014885 | 0.128597539 | 0.070287321 |
| 0.015872479 | 0.098038356 | 0.013741741 | 0.071194631 |
| 0.035920099 | 0.188472212 | 0.125461361 | 0.140715821 |
| 0.188991438 | 0.248570419 | 0.060809207 | 0.193515067 |
| 0.028513452 | 0.048115277 | 0.032251986 | 0.247574036 |
| 0.067525337 | 0.235314492 | 0.104602609 | 0.086893772 |
| 0.24744473  | 0.234774105 | 0.001698481 | 0.156304925 |
| 0.19451479  | 0.035364742 | 0.259732952 | 0.18393662  |
| 0.07267247  | 0.24858381  | 0.004582569 | 0.289644637 |
| 0.095088753 | 0.106351597 | 0.276408858 | 0.252688069 |
| 0.159796798 | 0.136287208 | 0.066042546 | 0.188748241 |
| 0.179097624 | 0.013552187 | 0.046707556 | 0.176092478 |
| 0.074606426 | 0.022202249 | 0.160365168 | 0.205559765 |
| 0.150093151 | 0.217807235 | 0.291057731 | 0.066584722 |
| 0.172088274 | 0.100020725 | 0.029882297 | 0.198751451 |
| 0.180094708 | 0.017094161 | 0.146163616 | 0.060553174 |
| 0.063983808 | 0.181916074 | 0.14310357  | 0.008208913 |
| 0.092191165 | 0.090049965 | 0.037796656 | 0.14595766  |
| 0.113492357 | 0.096168322 | 0.06939996  | 0.051996655 |

|             |             |             |             |
|-------------|-------------|-------------|-------------|
| 0.167376374 | 0.236130094 | 0.093954006 | 0.074148559 |
| 0.053564967 | 0.182649404 | 0.133753174 | 0.110337753 |
| 0.094636345 | 0.080870288 | 0.067019268 | 0.06602365  |
| 0.038096153 | 0.198530738 | 0.019110501 | 0.087277859 |
| 0.105980387 | 0.125982552 | 0.11030704  | 0.125808814 |
| 0.062915778 | 0.138265244 | 0.20683352  | 0.042347697 |
| 0.104719606 | 0.115699397 | 0.203991925 | 0.230282863 |
| 0.087833988 | 0.069497944 | 0.125096372 | 0.028449275 |
| 0.248552933 | 0.057672145 | 0.020125536 | 0.200645501 |
| 0.031523371 | 0.245390902 | 0.094412523 | 0.225233336 |
| 0.155603564 | 0.254846953 | 0.249650208 | 0.007087514 |
| 0.09804868  | 0.178206562 | 0.168606636 | 0.142383339 |
| 0.144428072 | 0.182620837 | 0.036705693 | 0.126789    |
| 0.13913512  | 0.150641408 | 0.225088367 | 0.138927351 |
| 0.119854977 | 0.225657316 | 0.178962976 | 0.176840758 |
| 0.132529118 | 0.141944463 | 0.019274224 | 0.281211121 |
| 0.230051138 | 0.318627637 | 0.167497509 | 0.08232183  |
| 0.108802065 | 0.089816627 | 0.143740118 | 0.117193011 |
| 0.163203321 | 0.225138223 | 0.228963471 | 0.21022672  |
| 0.221294235 | 0.057728132 | 0.00739602  | 0.242863957 |
| 0.024523471 | 0.182684961 | 0.054421691 | 0.196938463 |
| 0.16272638  | 0.057067721 | 0.160772235 | 0.100186818 |
| 0.143519281 | 0.069912052 | 0.071335281 | 0.183498454 |
| 0.16315286  | 0.075108103 | 0.061436925 | 0.199880946 |
| 0.023087182 | 0.026134872 | 0.145151036 | 0.051557725 |
| 0.060372368 | 0.087964141 | 0.021188451 | 0.03186468  |
| 0.072383176 | 0.173164954 | 0.268579586 | 0.04445714  |
| 0.08197473  | 0.028331806 | 0.263545682 | 0.099279896 |
| 0.201624999 | 0.185061106 | 0.181393485 | 0.069214197 |
| 0.193689231 | 0.205902385 | 0.138340252 | 0.134513404 |
| 0.115330707 | 0.182231407 | 0.119194323 | 0.049735486 |
| 0.270030563 | 0.035416243 | 0.076228679 | 0.194893446 |
| 0.147962056 | 0.119935484 | 0.002811141 | 0.008569133 |
| 0.052781953 | 0.266556219 | 0.149858082 | 0.147672862 |
| 0.026933879 | 0.171946652 | 0.005020326 | 0.225677435 |
| 0.194513956 | 0.077755148 | 0.066001227 | 0.187311903 |
| 0.18829868  | 0.198325726 | 0.100707252 | 0.222878928 |
| 0.183269785 | 0.171603069 | 0.049483175 | 0.239142193 |
| 0.205889528 | 0.181642688 | 0.171671884 | 0.160315895 |
| 0.268402436 | 0.248526658 | 0.217096205 | 0.037780756 |
| 0.014712603 | 0.042747599 | 0.029649992 | 0.025829552 |
| 0.068861967 | 0.101050301 | 0.197114805 | 0.262810343 |
| 0.244703086 | 0.064986873 | 0.034107747 | 0.168651549 |
| 0.203651204 | 0.235348231 | 0.016921915 | 0.003813669 |
| 0.005130937 | 0.044855567 | 0.128075541 | 0.165325831 |
| 0.205084958 | 0.016766051 | 0.052126798 | 0.021080249 |
| 0.042575691 | 0.214208465 | 0.194525989 | 0.271491554 |
| 0.191812537 | 0.125302886 | 0.051456198 | 0.238164082 |
| 0.053345752 | 0.068316562 | 0.250998204 | 0.166222365 |
| 0.054161226 | 0.129222261 | 0.085751561 | 0.251520632 |
| 0.021077755 | 0.261769197 | 0.192799428 | 0.061453103 |
| 0.019390728 | 0.113723465 | 0.071936803 | 0.248338043 |
| 0.161912791 | 0.124316244 | 0.111102501 | 0.011270273 |
| 0.121132079 | 0.22732996  | 0.13407218  | 0.262320061 |

|             |             |             |             |
|-------------|-------------|-------------|-------------|
| 0.212773514 | 0.301033019 | 0.060426967 | 0.160214362 |
| 0.036506584 | 0.173413486 | 0.181859511 | 0.008807235 |
| 0.099856793 | 0.037485578 | 0.180190467 | 0.020187696 |
| 0.067316394 | 0.13727878  | 0.015471041 | 0.068444434 |
| 0.021534087 | 0.155168372 | 0.270673339 | 0.254353998 |
| 0.048973619 | 0.055853665 | 0.184688941 | 0.186832135 |
| 0.086278821 | 0.26877527  | 0.165698614 | 0.077814014 |
| 0.054909175 | 0.030333881 | 0.197940956 | 0.123076563 |
| 0.051152598 | 0.279800406 | 0.062670969 | 0.222427405 |
| 0.1310353   | 0.173162526 | 0.198988762 | 0.135663413 |
| 0.052747382 | 0.101844151 | 0.153122191 | 0.048115509 |
| 0.182606347 | 0.279968551 | 0.086830022 | 0.068287228 |
| 0.216139515 | 0.117134295 | 0.020524495 | 0.012477778 |
| 0.096581055 | 0.080946291 | 0.07403217  | 0.274579651 |
| 0.12436402  | 0.12704648  | 0.023562455 | 0.0689098   |
| 0.212628584 | 0.140772477 | 0.018502153 | 0.172568629 |
| 0.167428898 | 0.17279095  | 0.214783166 | 0.233555102 |
| 0.028468336 | 0.215007415 | 0.196170233 | 0.168603637 |
| 0.152798317 | 0.140069636 | 0.182514332 | 0.009629674 |
| 0.032981057 | 0.12469419  | 0.110380611 | 0.1754529   |
| 0.206887007 | 0.05078267  | 0.042406124 | 0.260090268 |
| 0.061443923 | 0.292686904 | 0.017584561 | 0.04570208  |
| 0.199782108 | 0.058223461 | 0.221880285 | 0.100943207 |
| 0.083195685 | 0.173903628 | 0.029453439 | 0.143627331 |
| 0.092958706 | 0.177959398 | 0.161368994 | 0.141979412 |
| 0.046861896 | 0.060270461 | 0.239370973 | 0.062099182 |
| 0.091855581 | 0.023223289 | 0.174573688 | 0.020164103 |
| 0.036654277 | 0.279369814 | 0.073328393 | 0.031653514 |
| 0.022824989 | 0.082777841 | 0.061100654 | 0.04197283  |
| 0.081995322 | 0.197005599 | 0.047485949 | 0.148128365 |
| 0.124437883 | 0.098621472 | 0.098375345 | 0.015416527 |
| 0.026320985 | 0.152912524 | 0.132142062 | 0.189337119 |
| 0.111044652 | 0.305137631 | 0.119667551 | 0.185904222 |
| 0.028598956 | 0.076356023 | 0.034002442 | 0.209858924 |
| 0.063103395 |             |             |             |
| CCDC109B    | 0.297869238 | 0.32820923  | 0.197934314 |
| 0.325010493 | 0.254875157 | 0.148359178 | 0.137235967 |
| 0.112102716 | 0.094357268 | 0.011321518 | 0.039289304 |
| 0.266671484 | 0.102817099 | 0.112364843 | 0.091265597 |
| 0.415825034 | 0.185308022 | 0.192151828 | 0.221782348 |
| 0.340540951 | 0.074161576 | 0.37877025  | 0.143137241 |
| 0.2259443   | 0.143961688 | 0.130055771 | 0.167125619 |
| 0.384234179 | 0.146158994 | 0.089646353 | 0.264344165 |
| 0.274380248 | 0.325034091 | 0.286498213 | 0.297772525 |
| 0.275727583 | 0.24081455  | 0.075492219 | 0.086809451 |
| 0.302401936 | 0.308423354 | 0.328399432 | 0.258452502 |
| 0.091657062 | 0.248701031 | 0.18187916  | 0.314696776 |
| 0.099526106 | 0.083265193 | 0.067461106 | 0.239583963 |
| 0.231021781 | 0.182224225 | 0.121131047 | 0.121318446 |
| 0.065155256 | 0.075733523 | 0.098332473 | 0.15959757  |
| 0.167064864 | 0.051052542 | 0.259978576 | 0.077515457 |
| 0.078520681 | 0.162435449 | 0.271970478 | 0.150130189 |
| 0.176423599 | 0.226779098 | 0.093141026 | 0.221455813 |
| 0.004364133 | 0.340453657 | 0.344077385 | 0.109159899 |

|             |             |             |             |
|-------------|-------------|-------------|-------------|
| 0.15264373  | 0.049079548 | 0.277062896 | 0.225318916 |
| 0.390518723 | 0.296258562 | 0.395558107 | 0.370643159 |
| 0.168761639 | 1           | 0.221463376 | 0.179748359 |
| 0.304316489 | 0.116183628 | 0.124900708 | 0.425591305 |
| 0.388801087 | 0.304832306 | 0.204342397 | 0.291157821 |
| 0.238888717 | 0.305920681 | 0.145124297 | 0.172680663 |
| 0.099650273 | 0.206775227 | 0.239767495 | 0.361052801 |
| 0.246500435 | 0.168576485 | 0.212010477 | 0.293949116 |
| 0.185089315 | 0.117518711 | 0.314570945 | 0.186260769 |
| 0.393716861 | 0.053245549 | 0.243512599 | 0.191391424 |
| 0.273591547 | 0.30427189  | 0.306763976 | 0.169582545 |
| 0.250255541 | 0.082288142 | 0.084237813 | 0.188677388 |
| 0.140638793 | 0.137662441 | 0.225412371 | 0.331733891 |
| 0.123228014 | 0.17193192  | 0.175399436 | 0.050279261 |
| 0.136097474 | 0.303090481 | 0.286702013 | 0.2165481   |
| 0.344341935 | 0.23506019  | 0.138039114 | 0.212172544 |
| 0.231613109 | 0.395201184 | 0.00867269  | 0.157568977 |
| 0.197661812 | 0.296628671 | 0.286066169 | 0.223004633 |
| 0.197725434 | 0.143679883 | 0.187779273 | 0.376314046 |
| 0.245468583 | 0.152684549 | 0.138276371 | 0.403987032 |
| 0.103450558 | 0.272486586 | 0.189023442 | 0.159914915 |
| 0.091297871 | 0.259616087 | 0.152434174 | 0.153801852 |
| 0.07501824  | 0.175901071 | 0.100840229 | 0.117910949 |
| 0.103854247 | 0.241177743 | 0.227278019 | 0.218143504 |
| 0.169345516 | 0.331553008 | 0.124082531 | 0.210575916 |
| 0.020042895 | 0.166514325 | 0.082979133 | 0.3440909   |
| 0.110487883 | 0.384617203 | 0.226714644 | 0.249468039 |
| 0.290393    | 0.385460844 | 0.016608549 | 0.257306104 |
| 0.306778167 | 0.073432892 | 0.21841359  | 0.319759431 |
| 0.123732434 | 0.338909272 | 0.022713793 | 0.39224119  |
| 0.189108715 | 0.199256081 | 0.414284251 | 0.193673683 |
| 0.276723213 | 0.116159665 | 0.122921897 | 0.302890165 |
| 0.231032534 | 0.029750246 | 0.069173537 | 0.280863225 |
| 0.163664196 | 0.06407555  | 0.324797741 | 0.303785467 |
| 0.210146122 | 0.386974488 | 0.431030164 | 0.109449356 |
| 0.219155626 | 0.188388203 | 0.107082505 | 0.286124536 |
| 0.341577468 | 0.108739886 | 0.248211876 | 0.155986487 |
| 0.128797047 | 0.289073204 | 0.245824827 | 0.055501908 |
| 0.102470366 | 0.153625759 | 0.031024327 | 0.19329485  |
| 0.241243662 | 0.091561785 | 0.13611819  | 0.296545031 |
| 0.185727272 | 0.351121169 | 0.187935788 | 0.152523829 |
| 0.13276567  | 0.166461396 | 0.210176166 | 0.077047235 |
| 0.084512384 | 0.198704495 | 0.149832193 | 0.146579186 |
| 0.059603747 | 0.156351124 | 0.144747467 | 0.093481225 |
| 0.063492798 | 0.088382978 | 0.076142056 | 0.217674618 |
| 0.135448318 | 0.098224654 | 0.182911035 | 0.206636602 |
| 0.197615618 | 0.105342032 | 0.32378897  | 0.37614352  |
| 0.164668408 | 0.170311765 | 0.18095062  | 0.072427986 |
| 0.330227581 | 0.07759171  | 0.068968829 | 0.28509446  |
| 0.120888632 | 0.402469465 | 0.123959582 | 0.180489675 |
| 0.145186191 | 0.198546036 | 0.394487175 | 0.031107774 |
| 0.208217563 | 0.272070447 | 0.30775565  | 0.174806413 |
| 0.20486514  | 0.287195663 | 0.075974231 | 0.238554598 |
| 0.220647686 | 0.122064474 | 0.336940277 | 0.222023311 |

|             |             |             |             |
|-------------|-------------|-------------|-------------|
| 0.136698857 | 0.346383731 | 0.243170939 | 0.190415364 |
| 0.193059443 | 0.122977209 | 0.055956993 | 0.324895937 |
| 0.339840502 | 0.389442999 | 0.235738573 | 0.241853108 |
| 0.091621495 | 0.024510257 | 0.272390187 | 0.230347727 |
| 0.267032655 | 0.335628645 | 0.296388144 | 0.161714089 |
| 0.261527648 | 0.129364547 | 0.060468987 | 0.343375894 |
| 0.255275693 | 0.312045847 | 0.078513689 | 0.313932729 |
| 0.260961826 | 0.090428019 | 0.140048973 | 0.143783437 |
| 0.21401212  | 0.114747603 | 0.237041755 | 0.279205611 |
| 0.294169755 | 0.162717566 | 0.123598176 | 0.343570021 |
| 0.042385911 | 0.085477908 | 0.255848542 | 0.17265762  |
| 0.128204819 | 0.210577826 | 0.077336781 | 0.131205256 |
| 0.085876078 | 0.255343298 | 0.412522743 | 0.104208922 |
| 0.099507289 | 0.120214317 | 0.378061277 | 0.126824028 |
| 0.305849998 | 0.315402351 | 0.288326477 | 0.202798972 |
| 0.305740749 | 0.297073536 | 0.178838188 | 0.235741813 |
| 0.122665088 | 0.29231239  | 0.248972359 | 0.044519328 |
| 0.400206368 | 0.06068499  | 0.025996577 | 0.314372894 |
| 0.199701387 | 0.214848568 | 0.005781952 | 0.116547807 |
| 0.201906289 | 0.417902333 | 0.24797947  | 0.271698964 |
| 0.042500797 | 0.328779253 | 0.069746379 | 0.362536889 |
| 0.277996177 | 0.093613992 | 0.222522527 | 0.256411757 |
| 0.247403155 | 0.328930158 | 0.143606389 | 0.300371357 |
| 0.209186352 | 0.265421305 | 0.114080925 | 0.277416698 |
| 0.280834514 | 0.288312357 | 0.299692292 | 0.285870041 |
| 0.359059026 | 0.382126771 | 0.253974171 | 0.051641356 |
| 0.114902332 | 0.091256147 | 0.056217913 | 0.067915973 |
| 0.145322808 | 0.164958869 | 0.326175624 | 0.406787784 |
| 0.333734644 | 0.070700088 | 0.113150242 | 0.259790374 |
| 0.31535701  | 0.384482452 | 0.145913425 | 0.017692125 |
| 0.02451008  | 0.04657003  | 0.226320602 | 0.266678942 |
| 0.330637762 | 0.039407905 | 0.051923408 | 0.070397063 |
| 0.174344087 | 0.28419293  | 0.293194395 | 0.387902722 |
| 0.344819051 | 0.212580278 | 0.063211382 | 0.392118716 |
| 0.126825066 | 0.160157847 | 0.339855405 | 0.265085343 |
| 0.214098257 | 0.258196779 | 0.17777596  | 0.37748297  |
| 0.0619328   | 0.326922729 | 0.282355202 | 0.12297483  |
| 0.130838895 | 0.195340973 | 0.146886341 | 0.422813445 |
| 0.258231829 | 0.083282477 | 0.071749704 | 0.039410037 |
| 0.10007057  | 0.380867405 | 0.150105368 | 0.39465226  |
| 0.319189348 | 0.416138962 | 0.214034064 | 0.273655563 |
| 0.07673307  | 0.258171276 | 0.201607475 | 0.022647619 |
| 0.277355596 | 0.119084532 | 0.29285369  | 0.050239932 |
| 0.109806492 | 0.275870057 | 0.12221922  | 0.133880358 |
| 0.137537046 | 0.167909899 | 0.380125868 | 0.386814697 |
| 0.197065474 | 0.191311304 | 0.288377618 | 0.354319291 |
| 0.126456588 | 0.320912311 | 0.268287191 | 0.107996458 |
| 0.098620012 | 0.191268321 | 0.327015423 | 0.219263639 |
| 0.122725244 | 0.413634806 | 0.122278041 | 0.360962084 |
| 0.262322285 | 0.332909108 | 0.305655105 | 0.20766105  |
| 0.190128138 | 0.185795695 | 0.186802257 | 0.031635058 |
| 0.27354524  | 0.359318747 | 0.198797115 | 0.127520304 |
| 0.177889367 | 0.197819279 | 0.16196676  | 0.104132182 |
| 0.146214241 | 0.124456302 | 0.145245395 | 0.439179132 |

|             |             |             |             |
|-------------|-------------|-------------|-------------|
| 0.253042088 | 0.224198383 | 0.126884522 | 0.129441544 |
| 0.34261404  | 0.275656704 | 0.095039414 | 0.25431749  |
| 0.275899446 | 0.233029308 | 0.353312943 | 0.363754111 |
| 0.147507742 | 0.281921204 | 0.30758589  | 0.190198036 |
| 0.235541785 | 0.209167704 | 0.29442306  | 0.059170459 |
| 0.109925325 | 0.232187583 | 0.094761323 | 0.230484798 |
| 0.182407454 | 0.134862635 | 0.111643127 | 0.406763631 |
| 0.117856233 | 0.303141066 | 0.109240751 | 0.177214576 |
| 0.303752764 | 0.155780207 | 0.315163525 | 0.10765794  |
| 0.104563453 | 0.264119099 | 0.059427172 | 0.197342452 |
| 0.138092322 | 0.280181703 | 0.167247167 | 0.246597281 |
| 0.146674376 | 0.282577022 | 0.249744631 | 0.095976534 |
| 0.060650677 | 0.144331057 | 0.268690006 | 0.077041353 |
| 0.068157928 | 0.416058783 | 0.141577204 | 0.166512317 |
| 0.192602179 | 0.201923782 | 0.247325827 | 0.121422659 |
| 0.147627974 | 0.291464729 | 0.069747681 | 0.24834282  |
| 0.210113186 | 0.205637514 | 0.198343472 | 0.109031934 |
| 0.183206441 | 0.257634213 | 0.236854648 | 0.293427598 |
| 0.233603844 | 0.377851566 | 0.225505882 | 0.275156265 |
| 0.203747538 | 0.177659559 | 0.076322266 | 0.365265392 |
| 0.090723816 |             |             |             |
| CCDC125     | 0.344453369 | 0.446091995 | 0.23104086  |
| 0.299091948 | 0.245806509 | 0.15581176  | 0.085138157 |
| 0.060697287 | 0.053577303 | 0.001601509 | 0.024542366 |
| 0.30641098  | 0.109181473 | 0.093788326 | 0.121344904 |
| 0.364067407 | 0.127432492 | 0.178332029 | 0.126834206 |
| 0.279234328 | 0.028000097 | 0.325294237 | 0.052622483 |
| 0.273577413 | 0.111975619 | 0.059046756 | 0.20904837  |
| 0.360948205 | 0.066202069 | 0.095584939 | 0.224953799 |
| 0.131082985 | 0.353984265 | 0.436787862 | 0.339231888 |
| 0.443807939 | 0.302629758 | 0.019372458 | 0.097077439 |
| 0.334793125 | 0.35977506  | 0.27645343  | 0.173639104 |
| 0.025241175 | 0.372112886 | 0.110084727 | 0.306674976 |
| 0.080429947 | 0.032196848 | 0.061153441 | 0.334368916 |
| 0.378482273 | 0.240123472 | 0.076981809 | 0.067580249 |
| 0.103991478 | 0.064781969 | 0.201550958 | 0.146712358 |
| 0.109753981 | 0.034931188 | 0.408408832 | 0.037412581 |
| 0.074688149 | 0.100455522 | 0.180929388 | 0.099031632 |
| 0.276140317 | 0.238976928 | 0.013563962 | 0.297026913 |
| 0.000197178 | 0.256661978 | 0.288381311 | 0.217956263 |
| 0.049336943 | 0.014281942 | 0.187993645 | 0.163574804 |
| 0.394012346 | 0.40910162  | 0.469446037 | 0.481958382 |
| 0.130063534 | 0.221463376 | 1           | 0.106463601 |
| 0.362627805 | 0.072735714 | 0.059431537 | 0.388706632 |
| 0.475773916 | 0.456038016 | 0.169188195 | 0.223663816 |
| 0.302665398 | 0.388100935 | 0.174547027 | 0.210873464 |
| 0.174861511 | 0.107672704 | 0.350680158 | 0.476326641 |
| 0.289986282 | 0.273779511 | 0.137394202 | 0.28064914  |
| 0.062515263 | 0.135459348 | 0.224090953 | 0.125770351 |
| 0.404721292 | 0.011459137 | 0.203576496 | 0.15263346  |
| 0.157920306 | 0.339814563 | 0.46942266  | 0.094459383 |
| 0.250457898 | 0.020584577 | 0.125838386 | 0.056105846 |
| 0.145112107 | 0.215425891 | 0.37904719  | 0.372624781 |
| 0.083797724 | 0.224647529 | 0.120011315 | 0.007305392 |

|             |             |             |             |
|-------------|-------------|-------------|-------------|
| 0.043330767 | 0.195350875 | 0.372453833 | 0.190190349 |
| 0.335430638 | 0.355615738 | 0.13209884  | 0.254012843 |
| 0.325521475 | 0.470874893 | 0.010702203 | 0.05432853  |
| 0.193499568 | 0.201923526 | 0.151458843 | 0.259180581 |
| 0.200409435 | 0.051650174 | 0.083352456 | 0.470401496 |
| 0.308862066 | 0.0555545   | 0.135631742 | 0.346755427 |
| 0.134159143 | 0.261783848 | 0.072325051 | 0.130358396 |
| 0.024801673 | 0.428665927 | 0.058572306 | 0.130381657 |
| 0.146577536 | 0.16100126  | 0.01507218  | 0.085426904 |
| 0.099302208 | 0.341754418 | 0.387801255 | 0.084985548 |
| 0.149471507 | 0.304286433 | 0.108863871 | 0.267988709 |
| 0.006905749 | 0.044327739 | 0.087498548 | 0.449334912 |
| 0.109025031 | 0.488654253 | 0.164865833 | 0.23245869  |
| 0.203736385 | 0.388949215 | 0.006521272 | 0.395117269 |
| 0.46760426  | 0.088561622 | 0.216278039 | 0.307785606 |
| 0.216858552 | 0.36311756  | 0.022371706 | 0.335749347 |
| 0.211181279 | 0.066529469 | 0.478883156 | 0.127020351 |
| 0.393697255 | 0.0411939   | 0.116853899 | 0.431965433 |
| 0.351210311 | 0.009447338 | 0.057835077 | 0.23261155  |
| 0.064381817 | 0.027308291 | 0.321681765 | 0.260768756 |
| 0.200253353 | 0.40747854  | 0.452012452 | 0.209000312 |
| 0.217540271 | 0.107631622 | 0.022243625 | 0.250615478 |
| 0.397086724 | 0.199888045 | 0.329353129 | 0.103083994 |
| 0.140465703 | 0.382951415 | 0.352889339 | 0.083890626 |
| 0.029082813 | 0.119551295 | 0.007896404 | 0.188284531 |
| 0.345526128 | 0.050626351 | 0.1971624   | 0.163552882 |
| 0.08957764  | 0.468820763 | 0.231909012 | 0.261527901 |
| 0.200914616 | 0.18431476  | 0.127735991 | 0.085375273 |
| 0.113846734 | 0.12709904  | 0.221375943 | 0.191622923 |
| 0.013583475 | 0.073065307 | 0.049459742 | 0.180330644 |
| 0.067560819 | 0.140458804 | 0.124498606 | 0.260562335 |
| 0.139929343 | 0.058289016 | 0.198647708 | 0.251806999 |
| 0.119946545 | 0.023857113 | 0.433641118 | 0.304682617 |
| 0.185371923 | 0.086424614 | 0.055122119 | 0.136159254 |
| 0.38988804  | 0.096374233 | 0.077958908 | 0.355922245 |
| 0.028966594 | 0.471839458 | 0.11941784  | 0.107078219 |
| 0.22400891  | 0.136803498 | 0.397454634 | 0.024543916 |
| 0.193242838 | 0.365340961 | 0.217122588 | 0.135195935 |
| 0.279542988 | 0.254570789 | 0.017651565 | 0.288609823 |
| 0.272244427 | 0.034323636 | 0.474673855 | 0.144141981 |
| 0.036147585 | 0.386421536 | 0.344362884 | 0.081214214 |
| 0.087951943 | 0.135531062 | 0.013423357 | 0.220340709 |
| 0.450485799 | 0.348446039 | 0.314249809 | 0.247891169 |
| 0.027343762 | 0.008363044 | 0.234507908 | 0.257106529 |
| 0.41333496  | 0.483790543 | 0.180682347 | 0.209502322 |
| 0.135972112 | 0.199089504 | 0.039126385 | 0.461846645 |
| 0.198489378 | 0.451069112 | 0.012681341 | 0.420388399 |
| 0.430455592 | 0.08495022  | 0.082726494 | 0.108419583 |
| 0.262311185 | 0.033019881 | 0.1224475   | 0.408122509 |
| 0.358983097 | 0.187031602 | 0.171992574 | 0.326504225 |
| 0.006594519 | 0.020312632 | 0.254825819 | 0.240319219 |
| 0.173811969 | 0.147197022 | 0.130218824 | 0.127233795 |
| 0.028238315 | 0.351028832 | 0.423497464 | 0.051578389 |
| 0.123164352 | 0.114358776 | 0.319095845 | 0.033222183 |



|             |             |             |             |
|-------------|-------------|-------------|-------------|
| 0.45293725  | 0.470514685 | 0.431915409 | 0.08861474  |
| 0.377137885 | 0.439921965 | 0.285021873 | 0.102161223 |
| 0.036032004 | 0.456919134 | 0.244370787 | 0.012585139 |
| 0.429951237 | 0.056388085 | 0.007413145 | 0.405422454 |
| 0.102947873 | 0.34497993  | 0.000810453 | 0.11244952  |
| 0.090906379 | 0.462477643 | 0.382714046 | 0.223323546 |
| 0.058263825 | 0.228778574 | 0.030173247 | 0.498998769 |
| 0.396970139 | 0.031208113 | 0.192415822 | 0.3623218   |
| 0.376171683 | 0.442404712 | 0.241295235 | 0.425189649 |
| 0.292764003 | 0.42792505  | 0.095717911 | 0.183744027 |
| 0.336899818 | 0.467374723 | 0.292042177 | 0.364001397 |
| 0.39151288  | 0.371365583 | 0.151501799 | 0.010377192 |
| 0.125715539 | 0.062339654 | 0.106025784 | 0.05473715  |
| 0.135376367 | 0.116315561 | 0.422330321 | 0.444121681 |
| 0.455152298 | 0.012011037 | 0.052409465 | 0.345143488 |
| 0.335694185 | 0.405740584 | 0.039614708 | 0.007199304 |
| 0.010078211 | 0.029759789 | 0.168418343 | 0.210858533 |
| 0.440669866 | 0.058283961 | 0.006988431 | 0.015213581 |
| 0.129629026 | 0.333417347 | 0.426108379 | 0.287912853 |
| 0.416602776 | 0.084244688 | 0.09279807  | 0.304412392 |
| 0.083971455 | 0.186562201 | 0.44758819  | 0.365821471 |
| 0.074257202 | 0.212540547 | 0.175870837 | 0.423772686 |
| 0.142096495 | 0.228803325 | 0.324788532 | 0.138464685 |
| 0.034636228 | 0.100851346 | 0.077117092 | 0.409526601 |
| 0.43239767  | 0.053590901 | 0.030767449 | 0.038706086 |
| 0.055125574 | 0.439136556 | 0.091268398 | 0.48036125  |
| 0.340668216 | 0.385349627 | 0.131521273 | 0.391320904 |
| 0.039671822 | 0.399700582 | 0.254342391 | 0.015033501 |
| 0.212739015 | 0.022079222 | 0.43789369  | 0.094908329 |
| 0.109944434 | 0.248348196 | 0.158322246 | 0.046291055 |
| 0.218298833 | 0.064429026 | 0.436393077 | 0.462369055 |
| 0.080685755 | 0.119385269 | 0.211552862 | 0.289515355 |
| 0.087980572 | 0.327348647 | 0.404896815 | 0.152471783 |
| 0.037980882 | 0.217502764 | 0.27513263  | 0.236094291 |
| 0.086080781 | 0.482527123 | 0.166633947 | 0.487661516 |
| 0.281926359 | 0.405565566 | 0.428201985 | 0.160902519 |
| 0.23760232  | 0.185228827 | 0.189838541 | 0.006825629 |
| 0.185255189 | 0.403443149 | 0.158127422 | 0.121585809 |
| 0.166095274 | 0.275488261 | 0.043945506 | 0.085547047 |
| 0.253413778 | 0.109087667 | 0.080807283 | 0.403177324 |
| 0.224809744 | 0.251060003 | 0.02685949  | 0.066329293 |
| 0.471409204 | 0.353947665 | 0.049367187 | 0.262360424 |
| 0.152415303 | 0.197262854 | 0.410911279 | 0.436227219 |
| 0.209566997 | 0.372022483 | 0.312862522 | 0.20812457  |
| 0.308267285 | 0.133579436 | 0.439656127 | 0.022184268 |
| 0.091987497 | 0.283883516 | 0.054794494 | 0.114738631 |
| 0.093262965 | 0.043069367 | 0.233904941 | 0.368224117 |
| 0.23558875  | 0.251775123 | 0.123259963 | 0.071221813 |
| 0.248565894 | 0.181116435 | 0.231558594 | 0.070005858 |
| 0.046192505 | 0.403157469 | 0.013581472 | 0.07121853  |
| 0.244959431 | 0.361101487 | 0.232252364 | 0.180714156 |
| 0.25212889  | 0.201071031 | 0.178405184 | 0.085700553 |
| 0.098771865 | 0.198828246 | 0.352223232 | 0.018361211 |
| 0.010810527 | 0.469256937 | 0.141969941 | 0.053174863 |

|             |             |             |             |
|-------------|-------------|-------------|-------------|
| 0.135190558 | 0.220417944 | 0.188310965 | 0.123448311 |
| 0.056139249 | 0.451794187 | 0.104396554 | 0.265216739 |
| 0.145611694 | 0.0658546   | 0.25000284  | 0.055863871 |
| 0.052878742 | 0.350937417 | 0.276531397 | 0.456431476 |
| 0.262979233 | 0.345737215 | 0.339200108 | 0.355418815 |
| 0.102477572 | 0.224606338 | 0.016498187 | 0.375036847 |
| 0.185605281 |             |             |             |
| CCDC28B     | 0.135080285 | 0.204339288 | 0.09005581  |
| 0.289437163 | 0.17673521  | 0.117027485 | 0.215602223 |
| 0.071447287 | 0.098431739 | 0.070108774 | 0.103451727 |
| 0.141362842 | 0.118142941 | 0.117882905 | 0.04516722  |
| 0.294449234 | 0.179490428 | 0.066377999 | 0.281313631 |
| 0.247415924 | 0.120767093 | 0.327046069 | 0.174382049 |
| 0.070878084 | 0.138113054 | 0.185092219 | 0.10198321  |
| 0.278356984 | 0.19782848  | 0.092600118 | 0.205039045 |
| 0.133727622 | 0.181141698 | 0.158887117 | 0.230753765 |
| 0.148972914 | 0.104775696 | 0.035200829 | 0.072286487 |
| 0.159713794 | 0.202911606 | 0.253144252 | 0.302418474 |
| 0.168474184 | 0.140595934 | 0.279263101 | 0.169080802 |
| 0.051921826 | 0.159957485 | 0.050130487 | 0.134745513 |
| 0.142455769 | 0.137802455 | 0.092538654 | 0.169388247 |
| 0.083173844 | 0.053956913 | 0.052819373 | 0.116496957 |
| 0.261655613 | 0.054130793 | 0.154520281 | 0.109214164 |
| 0.056874896 | 0.106667716 | 0.132905822 | 0.159694406 |
| 0.056885947 | 0.138515777 | 0.091003885 | 0.092778206 |
| 0.034311713 | 0.253727054 | 0.190007742 | 0.044898308 |
| 0.199975467 | 0.177023943 | 0.141994158 | 0.269027047 |
| 0.260314499 | 0.140290621 | 0.262547146 | 0.227659451 |
| 0.168222994 | 0.179748359 | 0.106463601 | 1           |
| 0.168732822 | 0.210849438 | 0.093568552 | 0.311241926 |
| 0.25326541  | 0.180716371 | 0.132718725 | 0.209107177 |
| 0.19556151  | 0.188040515 | 0.101346781 | 0.138282098 |
| 0.051267338 | 0.086696169 | 0.151961882 | 0.226855879 |
| 0.138768827 | 0.08263054  | 0.23281585  | 0.214439575 |
| 0.169826925 | 0.043636611 | 0.333551908 | 0.103166714 |
| 0.267122028 | 0.097945454 | 0.203833535 | 0.21784684  |
| 0.100222217 | 0.177843211 | 0.174319489 | 0.262209001 |
| 0.133190973 | 0.135210506 | 0.052779986 | 0.123708389 |
| 0.079888249 | 0.040038261 | 0.123108466 | 0.262654623 |
| 0.083510079 | 0.081722278 | 0.161074722 | 0.055478845 |
| 0.143926099 | 0.085306371 | 0.161980757 | 0.107569074 |
| 0.199957426 | 0.098706888 | 0.156798192 | 0.121031289 |
| 0.135113077 | 0.257892253 | 0.008974392 | 0.158302139 |
| 0.148912686 | 0.091176027 | 0.331539385 | 0.149292458 |
| 0.200756579 | 0.135252661 | 0.21935536  | 0.23898839  |
| 0.150862463 | 0.239582308 | 0.054186679 | 0.294610817 |
| 0.083430536 | 0.194189793 | 0.184411088 | 0.159565601 |
| 0.170844558 | 0.137916376 | 0.119874518 | 0.089265434 |
| 0.037605857 | 0.124225819 | 0.049951241 | 0.119032125 |
| 0.090256995 | 0.183113636 | 0.112937919 | 0.199207261 |
| 0.199613173 | 0.261026086 | 0.080189744 | 0.184061591 |
| 0.092776063 | 0.129981144 | 0.041812523 | 0.228526651 |
| 0.091766658 | 0.21089728  | 0.125597005 | 0.099455664 |
| 0.262304133 | 0.251864807 | 0.003188961 | 0.146236944 |

|             |             |             |             |
|-------------|-------------|-------------|-------------|
| 0.175254784 | 0.040611097 | 0.234186838 | 0.164751264 |
| 0.076009187 | 0.267003757 | 0.004653051 | 0.293812578 |
| 0.093860885 | 0.166936779 | 0.268983361 | 0.270132642 |
| 0.14834497  | 0.186958552 | 0.09233158  | 0.165354765 |
| 0.138055747 | 0.034366681 | 0.090480337 | 0.241619936 |
| 0.098274986 | 0.092131478 | 0.179374297 | 0.255252199 |
| 0.199252794 | 0.219716706 | 0.293481475 | 0.066873395 |
| 0.16534061  | 0.148012672 | 0.081301201 | 0.17683275  |
| 0.171261299 | 0.039590156 | 0.157169247 | 0.125129115 |
| 0.065308306 | 0.186809231 | 0.126016162 | 0.039193369 |
| 0.173610907 | 0.14877231  | 0.067811643 | 0.178012453 |
| 0.112714259 | 0.189927665 | 0.078095533 | 0.096015153 |
| 0.164644467 | 0.22566869  | 0.065522974 | 0.048358157 |
| 0.038621632 | 0.17543074  | 0.203670284 | 0.119518717 |
| 0.122857973 | 0.157057578 | 0.070379163 | 0.088850027 |
| 0.128393913 | 0.21737986  | 0.038259563 | 0.053241762 |
| 0.143192627 | 0.081680722 | 0.075323621 | 0.129761237 |
| 0.087792204 | 0.191918071 | 0.178412367 | 0.059492997 |
| 0.133947635 | 0.139284575 | 0.199631679 | 0.25655415  |
| 0.101711813 | 0.156826039 | 0.153064919 | 0.041995192 |
| 0.253313905 | 0.072453152 | 0.029273174 | 0.213565669 |
| 0.077266649 | 0.240836067 | 0.159221992 | 0.243261508 |
| 0.105172888 | 0.296087187 | 0.279638879 | 0.034794423 |
| 0.114416106 | 0.181510077 | 0.190857768 | 0.181486522 |
| 0.139189775 | 0.214402323 | 0.144298841 | 0.127616662 |
| 0.126988477 | 0.179004989 | 0.20049224  | 0.15194683  |
| 0.136871376 | 0.198577045 | 0.167779117 | 0.222320729 |
| 0.152223226 | 0.179451149 | 0.095638135 | 0.304620572 |
| 0.223164966 | 0.330676404 | 0.1794275   | 0.070829055 |
| 0.187047045 | 0.123044887 | 0.121749147 | 0.095787594 |
| 0.149269739 | 0.193521291 | 0.260263247 | 0.162406287 |
| 0.314492829 | 0.068701664 | 0.037639042 | 0.223192927 |
| 0.045330999 | 0.16658935  | 0.08689579  | 0.178168998 |
| 0.144579209 | 0.073830689 | 0.165586648 | 0.170133217 |
| 0.150289961 | 0.155765629 | 0.11279641  | 0.170166897 |
| 0.18550454  | 0.102977495 | 0.074932563 | 0.185202041 |
| 0.103291506 | 0.144741647 | 0.157146614 | 0.047740033 |
| 0.082735481 | 0.142291851 | 0.017501511 | 0.056717157 |
| 0.202381424 | 0.177254482 | 0.254540632 | 0.130365461 |
| 0.108859352 | 0.046284004 | 0.252773332 | 0.16599137  |
| 0.1722711   | 0.161435507 | 0.167065496 | 0.129635706 |
| 0.167535589 | 0.18649098  | 0.103437317 | 0.151174141 |
| 0.117115846 | 0.159252318 | 0.14069619  | 0.142719843 |
| 0.271446856 | 0.053807102 | 0.142912456 | 0.197631963 |
| 0.243171451 | 0.110981594 | 0.012649325 | 0.012366834 |
| 0.082405757 | 0.244280404 | 0.147203026 | 0.196819217 |
| 0.040393378 | 0.209156299 | 0.009899912 | 0.200896223 |
| 0.182190495 | 0.097659006 | 0.103964343 | 0.160856202 |
| 0.144657587 | 0.19323626  | 0.080780198 | 0.190496929 |
| 0.132287514 | 0.154593866 | 0.130588486 | 0.289232684 |
| 0.209424865 | 0.153864877 | 0.190830818 | 0.167329334 |
| 0.267446355 | 0.233911381 | 0.314049952 | 0.1208764   |
| 0.050215301 | 0.086898636 | 0.038152539 | 0.109098141 |
| 0.092976664 | 0.150980489 | 0.180125493 | 0.263190056 |

|             |             |             |             |
|-------------|-------------|-------------|-------------|
| 0.208135753 | 0.078738413 | 0.114655929 | 0.154197081 |
| 0.223783348 | 0.255430034 | 0.044566527 | 0.007228063 |
| 0.005691492 | 0.080000327 | 0.183654087 | 0.172644671 |
| 0.198699652 | 0.039219072 | 0.089894519 | 0.10368988  |
| 0.11226173  | 0.178136853 | 0.183233375 | 0.322886771 |
| 0.175711266 | 0.176820925 | 0.070368841 | 0.284777297 |
| 0.125901557 | 0.072655219 | 0.225994502 | 0.173339712 |
| 0.107398672 | 0.153503241 | 0.080878473 | 0.26801582  |
| 0.015582659 | 0.261766652 | 0.154657486 | 0.10713252  |
| 0.041741914 | 0.142549188 | 0.131967504 | 0.25295627  |
| 0.140523849 | 0.189122826 | 0.177843123 | 0.023269925 |
| 0.189173612 | 0.222773788 | 0.203368682 | 0.251595727 |
| 0.232269117 | 0.320693273 | 0.114243826 | 0.163758582 |
| 0.12831398  | 0.153312133 | 0.140584622 | 0.026738784 |
| 0.093295694 | 0.099079028 | 0.150708735 | 0.05245424  |
| 0.078680453 | 0.155067702 | 0.050704393 | 0.089791002 |
| 0.029810044 | 0.169901352 | 0.274518741 | 0.232857956 |
| 0.082403612 | 0.115618791 | 0.198258144 | 0.19952185  |
| 0.131932258 | 0.278336379 | 0.156919671 | 0.074580645 |
| 0.158196332 | 0.034459648 | 0.230331981 | 0.117650407 |
| 0.081589139 | 0.262777495 | 0.097449315 | 0.205273265 |
| 0.141877755 | 0.17987999  | 0.178675537 | 0.202190625 |
| 0.087485483 | 0.111051003 | 0.195660592 | 0.116307214 |
| 0.221004757 | 0.274650311 | 0.110117253 | 0.128655701 |
| 0.233914978 | 0.091753835 | 0.092620715 | 0.021311151 |
| 0.063828669 | 0.122004596 | 0.196620022 | 0.297158273 |
| 0.135494989 | 0.123334919 | 0.095460471 | 0.132626018 |
| 0.202578249 | 0.152164348 | 0.084932074 | 0.2005485   |
| 0.193308829 | 0.22204379  | 0.194154093 | 0.201330369 |
| 0.045678449 | 0.198520369 | 0.204920746 | 0.184142423 |
| 0.164908293 | 0.232747469 | 0.172030607 | 0.040481956 |
| 0.067403748 | 0.10704049  | 0.200629017 | 0.190102319 |
| 0.266579002 | 0.115024197 | 0.032870396 | 0.262750194 |
| 0.041420217 | 0.307693749 | 0.040146454 | 0.140753036 |
| 0.198577553 | 0.057653081 | 0.25102189  | 0.16367323  |
| 0.193406954 | 0.165708673 | 0.075219181 | 0.169053317 |
| 0.058044814 | 0.17556292  | 0.122312292 | 0.152303066 |
| 0.054954941 | 0.096218949 | 0.286290401 | 0.08314822  |
| 0.078787842 | 0.040474987 | 0.17367077  | 0.084028796 |
| 0.131997514 | 0.268328231 | 0.075211121 | 0.06728345  |
| 0.070134551 | 0.096122963 | 0.075650394 | 0.115518933 |
| 0.08918384  | 0.170498914 | 0.071033169 | 0.149380865 |
| 0.186214442 | 0.16721828  | 0.104897782 | 0.051737594 |
| 0.101416217 | 0.145598518 | 0.11156244  | 0.165175562 |
| 0.098115352 | 0.33069841  | 0.118761123 | 0.17178763  |
| 0.058739495 | 0.065597003 | 0.131632147 | 0.226105873 |
| 0.049575303 |             |             |             |
| CCDC86      | 0.412897505 | 0.510094267 | 0.390694274 |
| 0.39593929  | 0.397577424 | 0.370112501 | 0.227065223 |
| 0.234670373 | 0.100473897 | 0.00477489  | 0.020208073 |
| 0.405066145 | 0.184135003 | 0.262467358 | 0.338010653 |
| 0.404013729 | 0.123913365 | 0.392018781 | 0.255464333 |
| 0.407576523 | 0.110948821 | 0.372288998 | 0.109196744 |
| 0.285886704 | 0.097520853 | 0.070886986 | 0.251799802 |

|             |             |             |             |
|-------------|-------------|-------------|-------------|
| 0.418606006 | 0.083481911 | 0.323476205 | 0.391002658 |
| 0.111689018 | 0.420855706 | 0.517144735 | 0.383387202 |
| 0.50317576  | 0.393402427 | 0.01642425  | 0.293143187 |
| 0.409331728 | 0.407663719 | 0.404974375 | 0.322770029 |
| 0.048030713 | 0.491544043 | 0.251169023 | 0.386143619 |
| 0.262770094 | 0.029896204 | 0.274193971 | 0.457920124 |
| 0.462490318 | 0.389247873 | 0.272847257 | 0.174818528 |
| 0.167140973 | 0.251383328 | 0.218290339 | 0.339708364 |
| 0.235309441 | 0.186103286 | 0.470479266 | 0.102268467 |
| 0.16243146  | 0.299634692 | 0.153858193 | 0.286030609 |
| 0.3247834   | 0.389641266 | 0.029613354 | 0.377486037 |
| 0.002340725 | 0.398167058 | 0.370896149 | 0.283050451 |
| 0.045613486 | 0.017186141 | 0.17993333  | 0.334270675 |
| 0.42313829  | 0.462647984 | 0.434675129 | 0.44752896  |
| 0.164650234 | 0.304316489 | 0.362627805 | 0.168732822 |
| 1           | 0.181566369 | 0.128185668 | 0.394421359 |
| 0.446452853 | 0.503743449 | 0.2062079   | 0.263490218 |
| 0.384576802 | 0.472357326 | 0.396120341 | 0.390895475 |
| 0.309006877 | 0.058112536 | 0.432749488 | 0.476231587 |
| 0.385750906 | 0.285829273 | 0.149608478 | 0.401572927 |
| 0.068923077 | 0.36516516  | 0.344969914 | 0.155073471 |
| 0.437208161 | 0.024700344 | 0.205261668 | 0.349490991 |
| 0.255421073 | 0.416631743 | 0.495175757 | 0.204440203 |
| 0.394641609 | 0.020801165 | 0.124877013 | 0.041859148 |
| 0.321032378 | 0.131819789 | 0.484311593 | 0.411323852 |
| 0.264880297 | 0.353025278 | 0.2993504   | 0.002777806 |
| 0.027716218 | 0.208530587 | 0.396191513 | 0.392449047 |
| 0.42280241  | 0.378195892 | 0.216699837 | 0.387465828 |
| 0.390802276 | 0.428194438 | 0.065569795 | 0.12219867  |
| 0.408742623 | 0.208758642 | 0.24602742  | 0.406054067 |
| 0.287838326 | 0.149184538 | 0.137856065 | 0.48915153  |
| 0.438012451 | 0.094475285 | 0.369015505 | 0.396960259 |
| 0.304706579 | 0.326011722 | 0.126382659 | 0.263949082 |
| 0.059537166 | 0.473043194 | 0.02944024  | 0.378847613 |
| 0.255861908 | 0.131426916 | 0.020024207 | 0.296007749 |
| 0.281018544 | 0.384410197 | 0.474757165 | 0.125038027 |
| 0.304633304 | 0.37853237  | 0.352968603 | 0.37844729  |
| 0.0092181   | 0.060507463 | 0.320861791 | 0.473774758 |
| 0.299138059 | 0.471868419 | 0.318860931 | 0.313707759 |
| 0.277590933 | 0.420954828 | 0.004634833 | 0.497625629 |
| 0.507866267 | 0.326913695 | 0.356154635 | 0.407938713 |
| 0.346500176 | 0.408471184 | 0.053359005 | 0.396476512 |
| 0.365944825 | 0.097694244 | 0.46358834  | 0.154613319 |
| 0.455902905 | 0.043055875 | 0.334567846 | 0.388002264 |
| 0.376387399 | 0.011561238 | 0.249363829 | 0.390658584 |
| 0.029614606 | 0.123038863 | 0.424181668 | 0.394308863 |
| 0.364660795 | 0.419386492 | 0.43546696  | 0.324402923 |
| 0.398493895 | 0.271685269 | 0.017116964 | 0.311518519 |
| 0.416992148 | 0.352390876 | 0.445278764 | 0.2682513   |
| 0.352018925 | 0.46257657  | 0.387409801 | 0.194825813 |
| 0.050828506 | 0.337146515 | 0.025813365 | 0.324248432 |
| 0.385420747 | 0.113064663 | 0.377380413 | 0.171313666 |
| 0.071277009 | 0.497030325 | 0.167353764 | 0.239791065 |
| 0.11775149  | 0.356733012 | 0.286354457 | 0.204028526 |

|             |             |             |             |
|-------------|-------------|-------------|-------------|
| 0.16912376  | 0.178517235 | 0.339645748 | 0.361600121 |
| 0.048268015 | 0.092490514 | 0.019542823 | 0.312973464 |
| 0.107670868 | 0.286722498 | 0.286155495 | 0.393763293 |
| 0.320902411 | 0.09782126  | 0.351276055 | 0.290269033 |
| 0.117217861 | 0.016813227 | 0.493043536 | 0.404169313 |
| 0.341007532 | 0.179611692 | 0.047618767 | 0.289538607 |
| 0.423510598 | 0.310986996 | 0.311953426 | 0.430855576 |
| 0.039959629 | 0.446275167 | 0.216946574 | 0.119608542 |
| 0.32349269  | 0.25427935  | 0.420894219 | 0.069535786 |
| 0.408540402 | 0.459368897 | 0.332061562 | 0.178504254 |
| 0.388632649 | 0.415548476 | 0.037174071 | 0.390245834 |
| 0.383493826 | 0.033364084 | 0.500736521 | 0.121011536 |
| 0.023781955 | 0.401937598 | 0.387358516 | 0.081605856 |
| 0.083093655 | 0.303274965 | 0.064377783 | 0.283665517 |
| 0.492304008 | 0.381617999 | 0.38720245  | 0.222150603 |
| 0.042956093 | 0.006699124 | 0.208725703 | 0.388456518 |
| 0.506688746 | 0.478879124 | 0.273812479 | 0.317083912 |
| 0.25609412  | 0.314071165 | 0.18144982  | 0.473836233 |
| 0.232298653 | 0.514255572 | 0.008953007 | 0.396989059 |
| 0.500276392 | 0.31421401  | 0.076606624 | 0.321687726 |
| 0.369710102 | 0.056892745 | 0.252764857 | 0.484473755 |
| 0.417922481 | 0.331495642 | 0.334884171 | 0.416727109 |
| 0.021855677 | 0.056264333 | 0.379868566 | 0.178108707 |
| 0.359510922 | 0.230205449 | 0.049017321 | 0.375016222 |
| 0.04142761  | 0.442361214 | 0.420796703 | 0.064624315 |
| 0.315206148 | 0.363447989 | 0.363560962 | 0.044223586 |
| 0.404476461 | 0.485535943 | 0.514315983 | 0.20895907  |
| 0.40918453  | 0.455208079 | 0.349321508 | 0.090278447 |
| 0.018734623 | 0.502779747 | 0.408931386 | 0.020549526 |
| 0.427770765 | 0.26531122  | 0.009463211 | 0.490872791 |
| 0.210534615 | 0.454786592 | 0.006042993 | 0.101904692 |
| 0.047726824 | 0.41595606  | 0.478263396 | 0.398621825 |
| 0.242057545 | 0.391381814 | 0.008335577 | 0.497634648 |
| 0.474782009 | 0.014896396 | 0.141980111 | 0.39251193  |
| 0.373457122 | 0.523289458 | 0.292733384 | 0.392125026 |
| 0.373553249 | 0.48382522  | 0.239797353 | 0.265878334 |
| 0.40345807  | 0.468767052 | 0.417745455 | 0.463553318 |
| 0.412241345 | 0.398861422 | 0.288000498 | 0.019023471 |
| 0.148629209 | 0.252052181 | 0.274432106 | 0.076462432 |
| 0.350779694 | 0.1366779   | 0.468329155 | 0.420335095 |
| 0.438327159 | 0.006163266 | 0.179254325 | 0.404324241 |
| 0.422134371 | 0.449185831 | 0.031736929 | 0.008734792 |
| 0.010235837 | 0.016376306 | 0.381900312 | 0.252661141 |
| 0.465109336 | 0.216549973 | 0.005648104 | 0.063696595 |
| 0.293318935 | 0.360292929 | 0.485938068 | 0.379987521 |
| 0.411694008 | 0.092043104 | 0.248981128 | 0.401660049 |
| 0.068222628 | 0.346547564 | 0.444354612 | 0.472753121 |
| 0.05131745  | 0.261127925 | 0.397385418 | 0.455072292 |
| 0.063102388 | 0.314304467 | 0.406403312 | 0.297395911 |
| 0.019258656 | 0.084554533 | 0.071572972 | 0.419543292 |
| 0.487339676 | 0.064110806 | 0.027558624 | 0.170049611 |
| 0.117360138 | 0.429995165 | 0.158220878 | 0.479872793 |
| 0.41223713  | 0.409120768 | 0.07672696  | 0.482995062 |
| 0.042353791 | 0.477267687 | 0.30429122  | 0.06394738  |

|             |             |             |             |
|-------------|-------------|-------------|-------------|
| 0.312885882 | 0.016944334 | 0.451510403 | 0.132347154 |
| 0.341418837 | 0.413411959 | 0.212105121 | 0.018753923 |
| 0.183986013 | 0.055618297 | 0.42899112  | 0.410596245 |
| 0.039410846 | 0.282238036 | 0.30999927  | 0.413636124 |
| 0.313102894 | 0.398256996 | 0.501102177 | 0.363724193 |
| 0.10009012  | 0.142205215 | 0.41102231  | 0.396970746 |
| 0.2746175   | 0.445177955 | 0.271739192 | 0.504667638 |
| 0.415300658 | 0.457703881 | 0.446878708 | 0.357005553 |
| 0.211816628 | 0.408303228 | 0.355580098 | 0.020524302 |
| 0.366994484 | 0.407223919 | 0.397302598 | 0.142349925 |
| 0.237694204 | 0.35561109  | 0.072029633 | 0.215183461 |
| 0.296077713 | 0.319873516 | 0.144282808 | 0.417810789 |
| 0.408932781 | 0.401221677 | 0.06089215  | 0.066377723 |
| 0.526756894 | 0.446726719 | 0.176708774 | 0.401565214 |
| 0.187773813 | 0.333773632 | 0.414544662 | 0.408285224 |
| 0.381345855 | 0.393953435 | 0.417171427 | 0.361020953 |
| 0.424298812 | 0.284853913 | 0.51602481  | 0.131996868 |
| 0.096205042 | 0.398954963 | 0.08854748  | 0.099169928 |
| 0.149262123 | 0.030862202 | 0.268642496 | 0.408768516 |
| 0.335456148 | 0.358250774 | 0.349428906 | 0.091437701 |
| 0.322340787 | 0.395021193 | 0.354796251 | 0.210483132 |
| 0.077399772 | 0.487178333 | 0.010384716 | 0.061991657 |
| 0.341752261 | 0.410802944 | 0.335171595 | 0.247240133 |
| 0.272238144 | 0.149860946 | 0.292192093 | 0.322796141 |
| 0.27636859  | 0.360442439 | 0.4041907   | 0.048389223 |
| 0.025921895 | 0.451309826 | 0.393847986 | 0.026477722 |
| 0.100261129 | 0.395146138 | 0.330809287 | 0.233232081 |
| 0.024021968 | 0.449228107 | 0.321822154 | 0.401690981 |
| 0.365724772 | 0.079554617 | 0.37049955  | 0.11854241  |
| 0.086707442 | 0.454065119 | 0.381386497 | 0.495785826 |
| 0.356352941 | 0.3909598   | 0.463894933 | 0.400067276 |
| 0.153061147 | 0.376360484 | 0.035926834 | 0.423900334 |
| 0.35879561  |             |             |             |

CCDC88C 0.125372973

0.224085684

0.073440332

|             |             |             |             |
|-------------|-------------|-------------|-------------|
| 0.312486258 | 0.144079332 | 0.164437568 | 0.267660629 |
| 0.128403964 | 0.153709296 | 0.124954741 | 0.100353321 |
| 0.114265204 | 0.1371715   | 0.172269216 | 0.086023587 |
| 0.262452501 | 0.125639549 | 0.06175738  | 0.25741313  |
| 0.243667552 | 0.243624496 | 0.271310447 | 0.228724805 |
| 0.055693607 | 0.102790582 | 0.181016483 | 0.086351548 |
| 0.284910756 | 0.178993089 | 0.144765468 | 0.241038639 |
| 0.076344823 | 0.177064111 | 0.178710546 | 0.189093749 |
| 0.160760112 | 0.104197004 | 0.017471598 | 0.156055081 |
| 0.17220864  | 0.195919772 | 0.262658478 | 0.291475692 |
| 0.219881622 | 0.169840777 | 0.308331862 | 0.123470663 |
| 0.08940752  | 0.135008549 | 0.100171837 | 0.167938002 |
| 0.167961112 | 0.142958285 | 0.159079061 | 0.256481899 |
| 0.108228691 | 0.099155516 | 0.044687949 | 0.16365552  |
| 0.266918568 | 0.124667474 | 0.172233678 | 0.228836389 |
| 0.091171843 | 0.135556619 | 0.077014497 | 0.184598852 |
| 0.047887959 | 0.172176687 | 0.095404423 | 0.074351169 |
| 0.046312923 | 0.253325869 | 0.129857753 | 0.042073165 |
| 0.126096282 | 0.156402254 | 0.08879977  | 0.307185133 |
| 0.26051915  | 0.145118071 | 0.240307189 | 0.211798679 |

|             |             |             |             |
|-------------|-------------|-------------|-------------|
| 0.129604151 | 0.116183628 | 0.072735714 | 0.210849438 |
| 0.181566369 | 1           | 0.109259049 | 0.258066611 |
| 0.235189758 | 0.193087948 | 0.12303129  | 0.130505018 |
| 0.239401735 | 0.213279652 | 0.105728553 | 0.126491077 |
| 0.071143733 | 0.040784749 | 0.179671122 | 0.220620018 |
| 0.160555884 | 0.048889698 | 0.139102728 | 0.242300553 |
| 0.138626467 | 0.061921109 | 0.312316453 | 0.065253173 |
| 0.26987993  | 0.162100054 | 0.112613062 | 0.243427259 |
| 0.092283811 | 0.180217107 | 0.179991289 | 0.266348098 |
| 0.096517281 | 0.090417491 | 0.047268863 | 0.073341825 |
| 0.104919812 | 0.021269574 | 0.147998833 | 0.278260342 |
| 0.129481522 | 0.091392834 | 0.178523778 | 0.028942867 |
| 0.083218632 | 0.054573683 | 0.151077093 | 0.089604353 |
| 0.191130898 | 0.09811992  | 0.176927047 | 0.143131054 |
| 0.120592295 | 0.233435367 | 0.035670889 | 0.209865622 |
| 0.153981458 | 0.061168375 | 0.259261832 | 0.135844319 |
| 0.151094732 | 0.200260067 | 0.209332346 | 0.242204816 |
| 0.192975618 | 0.219468785 | 0.05723207  | 0.249024332 |
| 0.140516979 | 0.127436349 | 0.1922379   | 0.174512683 |
| 0.238773251 | 0.14896511  | 0.057541937 | 0.099727688 |
| 0.058170295 | 0.073730195 | 0.035923417 | 0.160119206 |
| 0.14702459  | 0.208207473 | 0.129065021 | 0.162299005 |
| 0.174586421 | 0.215748812 | 0.099934947 | 0.208823616 |
| 0.129895333 | 0.106770315 | 0.057167093 | 0.231926045 |
| 0.145550795 | 0.195662046 | 0.136912117 | 0.089662671 |
| 0.178275769 | 0.240396898 | 0.001337869 | 0.173086873 |
| 0.185246183 | 0.05729452  | 0.212338937 | 0.126264646 |
| 0.06967464  | 0.281275035 | 0.006024008 | 0.24371714  |
| 0.106549221 | 0.155529902 | 0.253836766 | 0.177645572 |
| 0.158651794 | 0.156756138 | 0.120100408 | 0.147587408 |
| 0.125810636 | 0.031793278 | 0.166526336 | 0.280189769 |
| 0.045258512 | 0.224380794 | 0.175764389 | 0.261492893 |
| 0.219973445 | 0.192331454 | 0.272730211 | 0.06097492  |
| 0.148614342 | 0.162920687 | 0.052230202 | 0.110249215 |
| 0.152512103 | 0.048700785 | 0.196534738 | 0.194636915 |
| 0.080874805 | 0.215322788 | 0.127207072 | 0.077965067 |
| 0.210904194 | 0.179709884 | 0.108791511 | 0.162118224 |
| 0.119778682 | 0.266202409 | 0.07977153  | 0.056224109 |
| 0.104393334 | 0.233835461 | 0.039038501 | 0.029414757 |
| 0.021347214 | 0.184026169 | 0.194856374 | 0.177451712 |
| 0.124914693 | 0.165648212 | 0.075377892 | 0.100716903 |
| 0.235469842 | 0.1901681   | 0.012667    | 0.049697948 |
| 0.145635815 | 0.090906836 | 0.08441584  | 0.141784518 |
| 0.110720171 | 0.177300176 | 0.150996541 | 0.051068493 |
| 0.099638279 | 0.086150311 | 0.217539643 | 0.226184582 |
| 0.136649215 | 0.214224013 | 0.100848876 | 0.054619471 |
| 0.266827189 | 0.122994614 | 0.04935916  | 0.248225668 |
| 0.061096176 | 0.222772578 | 0.184806528 | 0.156048385 |
| 0.075838068 | 0.255082492 | 0.28409557  | 0.076231684 |
| 0.120688813 | 0.213975696 | 0.136334926 | 0.159109617 |
| 0.174476928 | 0.222124221 | 0.195434823 | 0.138596582 |
| 0.137337655 | 0.138796851 | 0.203763832 | 0.090215784 |
| 0.078855545 | 0.15620622  | 0.166181229 | 0.13283346  |
| 0.111102593 | 0.207845967 | 0.21448545  | 0.216596016 |



|             |             |             |             |
|-------------|-------------|-------------|-------------|
| 0.236821083 | 0.281519567 | 0.2012894   | 0.047401562 |
| 0.215262928 | 0.090428827 | 0.066022744 | 0.071738194 |
| 0.17038622  | 0.187141804 | 0.180692228 | 0.124537291 |
| 0.277481214 | 0.087971174 | 0.082682118 | 0.223869084 |
| 0.029671917 | 0.178175926 | 0.057014645 | 0.154413335 |
| 0.161375225 | 0.10628366  | 0.125120141 | 0.236967771 |
| 0.186985148 | 0.192266755 | 0.124178882 | 0.190332548 |
| 0.20981398  | 0.113635196 | 0.096738884 | 0.15097826  |
| 0.189318925 | 0.211450911 | 0.134358939 | 0.030726394 |
| 0.105955057 | 0.159813755 | 0.006802207 | 0.091238218 |
| 0.209807891 | 0.213903887 | 0.221655628 | 0.148618227 |
| 0.173700908 | 0.078317139 | 0.178054566 | 0.162982387 |
| 0.15859418  | 0.159267109 | 0.188050138 | 0.158910342 |
| 0.150110043 | 0.192739753 | 0.083952545 | 0.094490677 |
| 0.05985453  | 0.168225019 | 0.157818506 | 0.125352052 |
| 0.259170465 | 0.096580177 | 0.144590347 | 0.224761031 |
| 0.226842277 | 0.132132717 | 0.033909483 | 0.006180666 |
| 0.03726571  | 0.205925704 | 0.177444326 | 0.226025315 |
| 0.092483409 | 0.184991448 | 0.001886303 | 0.193545095 |
| 0.207289386 | 0.052160495 | 0.065166268 | 0.157410001 |
| 0.127274837 | 0.21340399  | 0.05830139  | 0.180125127 |
| 0.110037225 | 0.16973269  | 0.194700055 | 0.216310586 |
| 0.236402338 | 0.152785854 | 0.207689903 | 0.196386323 |
| 0.262550582 | 0.180130482 | 0.308447679 | 0.171035011 |
| 0.05730083  | 0.142473887 | 0.078439671 | 0.139218088 |
| 0.130954003 | 0.138353595 | 0.185165403 | 0.240474096 |
| 0.197174916 | 0.044161495 | 0.206826814 | 0.159535065 |
| 0.257050791 | 0.265732942 | 0.024572364 | 0.008375958 |
| 0.003729519 | 0.052780208 | 0.205864037 | 0.106077715 |
| 0.204808361 | 0.090995087 | 0.068657082 | 0.190893    |
| 0.142481379 | 0.130618668 | 0.201317977 | 0.293376461 |
| 0.150796374 | 0.139000486 | 0.138078916 | 0.263595194 |
| 0.097503909 | 0.089161181 | 0.22136109  | 0.21237011  |
| 0.058651949 | 0.10125697  | 0.071869203 | 0.276189976 |
| 0.007996672 | 0.179910917 | 0.124857072 | 0.163687434 |
| 0.016455271 | 0.09866236  | 0.113273763 | 0.216791679 |
| 0.152379769 | 0.167181864 | 0.13502076  | 0.046145267 |
| 0.268637683 | 0.208612905 | 0.212665991 | 0.244290601 |
| 0.251006124 | 0.296373837 | 0.060030543 | 0.19381444  |
| 0.135014216 | 0.173025358 | 0.09079696  | 0.058830034 |
| 0.074033392 | 0.061898106 | 0.146856992 | 0.081015251 |
| 0.100880706 | 0.164667865 | 0.061135463 | 0.041268579 |
| 0.022007808 | 0.116346601 | 0.268071552 | 0.202504444 |
| 0.034364592 | 0.16454167  | 0.136248342 | 0.170787809 |
| 0.189467548 | 0.276861335 | 0.183057396 | 0.085255022 |
| 0.264729561 | 0.014274084 | 0.238007143 | 0.126447109 |
| 0.130129315 | 0.237611852 | 0.129059484 | 0.204567967 |
| 0.15350125  | 0.188233413 | 0.181062785 | 0.234834755 |
| 0.061762135 | 0.127454585 | 0.266464797 | 0.185571616 |
| 0.198863043 | 0.261979662 | 0.113251365 | 0.116779079 |
| 0.179105374 | 0.066645179 | 0.091524077 | 0.024102987 |
| 0.041709628 | 0.190619721 | 0.228523304 | 0.269780866 |
| 0.13811454  | 0.134889624 | 0.096328511 | 0.122544934 |
| 0.215223592 | 0.17850761  | 0.176052058 | 0.220753195 |

|             |             |             |             |
|-------------|-------------|-------------|-------------|
| 0.120067281 | 0.200766497 | 0.168680783 | 0.164769354 |
| 0.054504679 | 0.202303804 | 0.219142462 | 0.229095998 |
| 0.21027818  | 0.236685847 | 0.193016437 | 0.091802563 |
| 0.063887772 | 0.092103451 | 0.236203038 | 0.101582562 |
| 0.213449304 | 0.078049474 | 0.030188638 | 0.215738699 |
| 0.035258814 | 0.267447559 | 0.059870006 | 0.116909887 |
| 0.127884879 | 0.052063079 | 0.197683901 | 0.232881146 |
| 0.220557967 | 0.193682026 | 0.047730639 | 0.112744425 |
| 0.041222837 | 0.182362967 | 0.095571936 | 0.122633281 |
| 0.047812572 | 0.052731918 | 0.22659325  | 0.122745558 |
| 0.102354589 | 0.043677956 | 0.184852242 | 0.115579054 |
| 0.164445153 | 0.248509364 | 0.081918216 | 0.02812623  |
| 0.04888788  | 0.103948418 | 0.069348922 | 0.178800626 |
| 0.039614465 | 0.169194736 | 0.115055463 | 0.119322411 |
| 0.213561803 | 0.133394175 | 0.133327063 | 0.06327632  |
| 0.099439462 | 0.168820847 | 0.084530437 | 0.173404213 |
| 0.062442303 | 0.304643773 | 0.147221075 | 0.171545314 |
| 0.044825164 | 0.053362661 | 0.189308632 | 0.225654493 |
| 0.049136883 |             |             |             |
| CCL2        | 0.108470552 | 0.128032823 | 0.080959064 |
| 0.187161145 | 0.093499009 | 0.084958679 | 0.138615373 |
| 0.091263225 | 0.021479848 | 0.011494448 | 0.004439594 |
| 0.108412043 | 0.008213539 | 0.067491849 | 0.032612894 |
| 0.189491958 | 0.061204402 | 0.077444845 | 0.189957831 |
| 0.162821711 | 0.074743751 | 0.172894732 | 0.093613758 |
| 0.033434283 | 0.061239875 | 0.07078708  | 0.054293201 |
| 0.201709255 | 0.090372653 | 0.054253568 | 0.154580064 |
| 0.064029    | 0.130754482 | 0.109056055 | 0.116014358 |
| 0.097011521 | 0.094076257 | 0.003134926 | 0.036168404 |
| 0.14118618  | 0.137488639 | 0.160055736 | 0.188562657 |
| 0.060059573 | 0.103234961 | 0.158111437 | 0.118027383 |
| 0.010261599 | 0.03964259  | 0.058263734 | 0.100177945 |
| 0.087808997 | 0.064855359 | 0.098030923 | 0.091219826 |
| 0.003294597 | 0.037052728 | 0.0137845   | 0.105316237 |
| 0.129014393 | 0.052989348 | 0.092590074 | 0.026727243 |
| 0.002646425 | 0.100668875 | 0.056445441 | 0.125060963 |
| 0.027929442 | 0.1251244   | 0.030408691 | 0.067097723 |
| 0.001818036 | 0.193773071 | 0.138628566 | 0.023382223 |
| 0.107751534 | 0.019976807 | 0.081651605 | 0.143580829 |
| 0.177386281 | 0.112409914 | 0.157852257 | 0.132508693 |
| 0.044757391 | 0.124900708 | 0.059431537 | 0.093568552 |
| 0.128185668 | 0.109259049 | 1           | 0.181865573 |
| 0.153197026 | 0.109858784 | 0.046676145 | 0.129862946 |
| 0.113064257 | 0.127032611 | 0.086314624 | 0.065998084 |
| 0.029451353 | 0.034749218 | 0.091041616 | 0.134707281 |
| 0.114541175 | 0.047158971 | 0.121572794 | 0.15645919  |
| 0.093027989 | 0.041452281 | 0.191949724 | 0.009060845 |
| 0.189892186 | 0.042309102 | 0.107372413 | 0.107546913 |
| 0.048174539 | 0.141914748 | 0.108488669 | 0.162821103 |
| 0.095959033 | 0.015515664 | 0.00487589  | 0.062006603 |
| 0.016277717 | 0.015516522 | 0.082025402 | 0.161139144 |
| 0.045616077 | 0.018283819 | 0.109095287 | 0.021874713 |
| 0.056887677 | 0.026310316 | 0.098545927 | 0.101916212 |
| 0.140029001 | 0.081857276 | 0.063652085 | 0.094610237 |

|             |             |             |             |
|-------------|-------------|-------------|-------------|
| 0.079861283 | 0.148068416 | 0.003911627 | 0.091501687 |
| 0.13910619  | 0.031495129 | 0.187934833 | 0.076989903 |
| 0.118660374 | 0.123833921 | 0.112365327 | 0.155832407 |
| 0.11505357  | 0.128815456 | 0.056061216 | 0.205453566 |
| 0.020254353 | 0.114385838 | 0.118862527 | 0.077735704 |
| 0.052280933 | 0.088908204 | 0.060905804 | 0.111681132 |
| 0.01167721  | 0.016019281 | 0.01316426  | 0.111931803 |
| 0.055737243 | 0.098051743 | 0.076554665 | 0.140212531 |
| 0.096328273 | 0.143988634 | 0.071399609 | 0.109298406 |
| 0.004100349 | 0.055702599 | 0.048558293 | 0.135814009 |
| 0.075791763 | 0.142717161 | 0.101077757 | 0.075237984 |
| 0.160860748 | 0.176318713 | 0.001252435 | 0.10541463  |
| 0.110520369 | 0.059372755 | 0.119408438 | 0.12529867  |
| 0.039090626 | 0.173110723 | 0.007018798 | 0.178038869 |
| 0.093630468 | 0.123681584 | 0.167869101 | 0.122604986 |
| 0.105080598 | 0.072872468 | 0.050867711 | 0.098345091 |
| 0.077806183 | 0.005622005 | 0.081563059 | 0.157753816 |
| 0.03889413  | 0.043690525 | 0.133774096 | 0.165918857 |
| 0.111907458 | 0.151854768 | 0.186884364 | 0.034598554 |
| 0.100587521 | 0.143399998 | 0.024703799 | 0.126222753 |
| 0.121813604 | 0.00588928  | 0.113482249 | 0.088936239 |
| 0.076000037 | 0.12654434  | 0.088162561 | 0.001632227 |
| 0.087270668 | 0.093924891 | 0.074342971 | 0.11291618  |
| 0.086110676 | 0.042990403 | 0.046368478 | 0.035172397 |
| 0.082119983 | 0.137094927 | 0.041376044 | 0.031390137 |
| 0.020462048 | 0.078663461 | 0.169146809 | 0.035519448 |
| 0.019269632 | 0.060633065 | 0.039909214 | 0.042587456 |
| 0.054774554 | 0.088411831 | 0.009529423 | 0.022065612 |
| 0.014392377 | 0.035176993 | 0.032571014 | 0.083768856 |
| 0.031038601 | 0.031640185 | 0.117838164 | 0.03049876  |
| 0.084115346 | 0.070918194 | 0.129340809 | 0.188495594 |
| 0.090526324 | 0.094272362 | 0.090340669 | 0.005871872 |
| 0.142961468 | 0.061566387 | 0.042058203 | 0.123886452 |
| 0.025596717 | 0.146279787 | 0.033187091 | 0.110153623 |
| 0.044773659 | 0.149196792 | 0.189596261 | 0.006940856 |
| 0.08735999  | 0.113207402 | 0.151214967 | 0.083659959 |
| 0.097534659 | 0.149791729 | 0.024361063 | 0.103552286 |
| 0.101381257 | 0.080654752 | 0.127896805 | 0.057896882 |
| 0.076788565 | 0.129797287 | 0.086400078 | 0.120230723 |
| 0.099339984 | 0.075443752 | 0.053492366 | 0.176028989 |
| 0.140130905 | 0.185586785 | 0.088573494 | 0.056087183 |
| 0.066904279 | 0.004014363 | 0.073564597 | 0.090511601 |
| 0.100759924 | 0.119000753 | 0.168046141 | 0.082597427 |
| 0.190592801 | 0.032482016 | 0.00599312  | 0.134377643 |
| 0.025126957 | 0.116338994 | 0.048269809 | 0.098495738 |
| 0.092456108 | 0.06639127  | 0.07408868  | 0.097242029 |
| 0.112950906 | 0.08811673  | 0.10320797  | 0.11466485  |
| 0.119538131 | 0.06270715  | 0.051011303 | 0.136355884 |
| 0.04927715  | 0.026924061 | 0.108929216 | 0.024765401 |
| 0.033927394 | 0.082432632 | 0.007004822 | 0.04129224  |
| 0.035473881 | 0.105269126 | 0.169518915 | 0.038093501 |
| 0.052094099 | 0.050813406 | 0.149739415 | 0.090750437 |
| 0.102408829 | 0.108542035 | 0.111871042 | 0.101243085 |
| 0.105189342 | 0.110878186 | 0.051143733 | 0.100937022 |

|             |             |             |             |
|-------------|-------------|-------------|-------------|
| 0.065672256 | 0.106466852 | 0.123026083 | 0.009927003 |
| 0.165319737 | 0.06708511  | 0.008790242 | 0.13388322  |
| 0.1692707   | 0.079624168 | 0.00842667  | 0.004545782 |
| 0.038538138 | 0.158668548 | 0.098823423 | 0.148002607 |
| 0.027851092 | 0.169336885 | 0.000858713 | 0.128982912 |
| 0.116421032 | 0.042431972 | 0.031596281 | 0.089675132 |
| 0.086183968 | 0.132072319 | 0.048337277 | 0.111476377 |
| 0.077490616 | 0.092056435 | 0.020673172 | 0.157483722 |
| 0.14067797  | 0.09252543  | 0.164543261 | 0.130367048 |
| 0.160046751 | 0.142178315 | 0.179952692 | 0.037823334 |
| 0.008305168 | 0.075167231 | 0.021841998 | 0.003084485 |
| 0.096766196 | 0.059708242 | 0.138326484 | 0.155887958 |
| 0.128173991 | 0.047864083 | 0.059965221 | 0.099006434 |
| 0.163594003 | 0.174536471 | 0.013876023 | 0.005030733 |
| 0.044823741 | 0.012406796 | 0.122916122 | 0.13004013  |
| 0.127869792 | 0.011500837 | 0.038706362 | 0.056826735 |
| 0.050376149 | 0.103285107 | 0.110953443 | 0.217452011 |
| 0.119590764 | 0.08394545  | 0.024261005 | 0.205361039 |
| 0.02842717  | 0.077669935 | 0.137419376 | 0.112543349 |
| 0.044435184 | 0.099626204 | 0.09455936  | 0.165179124 |
| 0.004899693 | 0.151319771 | 0.103920032 | 0.035334569 |
| 0.005902581 | 0.073012205 | 0.048807361 | 0.166765831 |
| 0.08582775  | 0.028808646 | 0.028244656 | 0.003690244 |
| 0.066999843 | 0.139076134 | 0.07458184  | 0.156312163 |
| 0.157312346 | 0.199598956 | 0.023902622 | 0.111863224 |
| 0.005857001 | 0.100650861 | 0.077249969 | 0.038363392 |
| 0.099259718 | 0.039955864 | 0.097760582 | 0.005509491 |
| 0.059945136 | 0.140212786 | 0.010986201 | 0.034361473 |
| 0.015544382 | 0.086019032 | 0.156943273 | 0.141813157 |
| 0.034180909 | 0.072669242 | 0.159372541 | 0.165147086 |
| 0.129520854 | 0.162361644 | 0.106573459 | 0.055727248 |
| 0.057455061 | 0.005932037 | 0.185618769 | 0.113827126 |
| 0.057146895 | 0.159677458 | 0.030165966 | 0.136129714 |
| 0.130748174 | 0.132978553 | 0.108940117 | 0.139751901 |
| 0.010979096 | 0.113731105 | 0.113988539 | 0.026474352 |
| 0.19748847  | 0.147981531 | 0.109600213 | 0.040422767 |
| 0.094149148 | 0.053406092 | 0.010858572 | 0.012075934 |
| 0.038936944 | 0.097545811 | 0.035723161 | 0.199074008 |
| 0.126313328 | 0.120059495 | 0.013545449 | 0.048440957 |
| 0.130726772 | 0.115708786 | 0.048494531 | 0.129803671 |
| 0.138137676 | 0.111622633 | 0.139083162 | 0.125518768 |
| 0.021291804 | 0.105188247 | 0.154187834 | 0.105343662 |
| 0.107589785 | 0.144880909 | 0.112131257 | 0.049797786 |
| 0.008539054 | 0.072445827 | 0.040936387 | 0.109341426 |
| 0.13392484  | 0.043391195 | 0.016969434 | 0.168011605 |
| 0.023718494 | 0.154240541 | 0.017029097 | 0.018890987 |
| 0.113681045 | 0.060172176 | 0.147771417 | 0.100057194 |
| 0.045424059 | 0.10300088  | 0.011056361 | 0.085662207 |
| 0.031250254 | 0.121821598 | 0.064265458 | 0.120683017 |
| 0.020004332 | 0.030580854 | 0.134543633 | 0.086404818 |
| 0.036724909 | 0.009879963 | 0.120054644 | 0.030112426 |
| 0.042788288 | 0.166773226 | 0.102530327 | 0.024385099 |
| 0.002965324 | 0.077065523 | 0.062036904 | 0.025178235 |
| 0.045097911 | 0.094053904 | 0.035719247 | 0.091897649 |

|             |             |             |             |
|-------------|-------------|-------------|-------------|
| 0.137340374 | 0.091710115 | 0.091118009 | 0.007656972 |
| 0.045860405 | 0.115538633 | 0.089520405 | 0.1041873   |
| 0.083408948 | 0.185506159 | 0.091273701 | 0.097773623 |
| 0.034219422 | 0.05585278  | 0.058740379 | 0.156361867 |
| 0.036174242 |             |             |             |
| CCL3        | 0.34043023  | 0.47970244  | 0.365756263 |
| 0.395088326 | 0.434628057 | 0.276837016 | 0.285677696 |
| 0.203144307 | 0.169830614 | 0.019038094 | 0.07573144  |
| 0.384368586 | 0.26872108  | 0.282266386 | 0.268149795 |
| 0.429948103 | 0.280314427 | 0.342902697 | 0.359127627 |
| 0.397911684 | 0.142288318 | 0.443221737 | 0.206794329 |
| 0.388198571 | 0.232450558 | 0.189916165 | 0.358088778 |
| 0.448785129 | 0.20814645  | 0.239655251 | 0.326387848 |
| 0.255207068 | 0.386541196 | 0.441775078 | 0.412769828 |
| 0.430992797 | 0.294048716 | 0.038973806 | 0.264801132 |
| 0.373370395 | 0.387497262 | 0.387174917 | 0.397339255 |
| 0.1249625   | 0.39296715  | 0.331707818 | 0.428658165 |
| 0.212635631 | 0.114484532 | 0.183685025 | 0.363752055 |
| 0.388907584 | 0.347928236 | 0.248501605 | 0.246515665 |
| 0.221270966 | 0.190704435 | 0.277197944 | 0.231413284 |
| 0.331529244 | 0.132467954 | 0.412566825 | 0.155817842 |
| 0.180725602 | 0.289852669 | 0.315941141 | 0.300977223 |
| 0.374156219 | 0.294344821 | 0.068312801 | 0.319985382 |
| 0.007673057 | 0.396824968 | 0.440264437 | 0.296270781 |
| 0.151840201 | 0.075359298 | 0.345285562 | 0.361319239 |
| 0.464934849 | 0.401012325 | 0.500764861 | 0.489092761 |
| 0.299961331 | 0.425591305 | 0.388706632 | 0.311241926 |
| 0.394421359 | 0.258066611 | 0.181865573 | 1           |
| 0.50233882  | 0.462883861 | 0.351308978 | 0.409211589 |
| 0.36320183  | 0.433023634 | 0.348372749 | 0.410329374 |
| 0.309477257 | 0.167711124 | 0.376145693 | 0.495842943 |
| 0.330273428 | 0.354503722 | 0.31345371  | 0.361828176 |
| 0.184551769 | 0.287649714 | 0.4134068   | 0.239770052 |
| 0.477661631 | 0.066284582 | 0.372494881 | 0.359561809 |
| 0.341353298 | 0.378859311 | 0.461068504 | 0.305324491 |
| 0.42727439  | 0.078246128 | 0.195888421 | 0.134146974 |
| 0.335633658 | 0.219018193 | 0.376190313 | 0.448506374 |
| 0.248795294 | 0.408599713 | 0.341301461 | 0.024864813 |
| 0.116765462 | 0.321028492 | 0.376813795 | 0.374001076 |
| 0.378219164 | 0.318203463 | 0.327489747 | 0.288609899 |
| 0.351199101 | 0.49542462  | 0.035985015 | 0.208180136 |
| 0.37800075  | 0.332948826 | 0.383597619 | 0.379218062 |
| 0.407696556 | 0.205336762 | 0.268047719 | 0.507728866 |
| 0.360452522 | 0.208292432 | 0.282221429 | 0.437785843 |
| 0.315275225 | 0.430489448 | 0.240165629 | 0.348721176 |
| 0.129684624 | 0.407848372 | 0.121227153 | 0.304407919 |
| 0.247236056 | 0.271214019 | 0.048341646 | 0.256983326 |
| 0.279961589 | 0.380043557 | 0.366336301 | 0.250581649 |
| 0.378417763 | 0.441412591 | 0.256009088 | 0.326397335 |
| 0.039459511 | 0.143520094 | 0.197576826 | 0.485172856 |
| 0.189506927 | 0.490550304 | 0.394911829 | 0.416923776 |
| 0.421130849 | 0.445070633 | 0.008559679 | 0.409506594 |
| 0.464635304 | 0.199960374 | 0.398043416 | 0.419413585 |
| 0.33675872  | 0.44162524  | 0.037616303 | 0.435755218 |

|             |             |             |             |
|-------------|-------------|-------------|-------------|
| 0.244524308 | 0.209194821 | 0.519711221 | 0.314872038 |
| 0.399640321 | 0.14334327  | 0.30019265  | 0.401029615 |
| 0.333750665 | 0.03002515  | 0.190001409 | 0.362932703 |
| 0.117141737 | 0.133327035 | 0.362450802 | 0.397491221 |
| 0.378160741 | 0.427513818 | 0.511278017 | 0.321006294 |
| 0.423757501 | 0.31648396  | 0.064528644 | 0.427959712 |
| 0.393994151 | 0.308752027 | 0.376544649 | 0.31423228  |
| 0.223314238 | 0.426839247 | 0.344366265 | 0.176760885 |
| 0.133443974 | 0.320405044 | 0.047977582 | 0.399726804 |
| 0.330249867 | 0.201597657 | 0.326667164 | 0.284350269 |
| 0.206345184 | 0.499627808 | 0.287339354 | 0.299927843 |
| 0.204438163 | 0.337565849 | 0.354216818 | 0.245593885 |
| 0.254495066 | 0.318492334 | 0.374558461 | 0.377467806 |
| 0.090942528 | 0.228462459 | 0.066846943 | 0.295251547 |
| 0.186306608 | 0.294206375 | 0.267058631 | 0.294853773 |
| 0.325309285 | 0.194884285 | 0.414413584 | 0.357784224 |
| 0.257018752 | 0.081095925 | 0.466851695 | 0.427257055 |
| 0.230637107 | 0.278349071 | 0.150792672 | 0.254351722 |
| 0.454677122 | 0.204017833 | 0.180568123 | 0.419554413 |
| 0.088504709 | 0.493565696 | 0.316824298 | 0.273243884 |
| 0.383344393 | 0.371103142 | 0.474648768 | 0.077114251 |
| 0.326453005 | 0.41216466  | 0.424721559 | 0.323971263 |
| 0.324935118 | 0.391876551 | 0.097449352 | 0.314127774 |
| 0.300979545 | 0.124618353 | 0.485677159 | 0.27752217  |
| 0.101765214 | 0.406310432 | 0.353377938 | 0.214836427 |
| 0.215470718 | 0.337791332 | 0.088187365 | 0.423669328 |
| 0.488855765 | 0.43846302  | 0.353164481 | 0.341115496 |
| 0.127758807 | 0.039032605 | 0.364958665 | 0.363659758 |
| 0.420615287 | 0.47659541  | 0.405874249 | 0.393973938 |
| 0.370699366 | 0.35298538  | 0.129297171 | 0.487080393 |
| 0.277579268 | 0.454055265 | 0.047089803 | 0.396994603 |
| 0.42081163  | 0.218237215 | 0.206586946 | 0.302509719 |
| 0.318405337 | 0.140903872 | 0.314164569 | 0.430805448 |
| 0.401717008 | 0.380706539 | 0.344123621 | 0.404217025 |
| 0.053645806 | 0.111808996 | 0.404971291 | 0.273874752 |
| 0.359543235 | 0.356259697 | 0.099605155 | 0.299054664 |
| 0.129657594 | 0.397846732 | 0.462345505 | 0.159751296 |
| 0.239271356 | 0.267824679 | 0.45289087  | 0.132012609 |
| 0.424315532 | 0.447284888 | 0.446460884 | 0.272742925 |
| 0.378449915 | 0.446961173 | 0.332731395 | 0.225003339 |
| 0.08985664  | 0.445886928 | 0.312640291 | 0.064138822 |
| 0.487018769 | 0.158626877 | 0.047352514 | 0.452609559 |
| 0.314416537 | 0.34421562  | 0.008330237 | 0.107827726 |
| 0.145808163 | 0.473849801 | 0.400016584 | 0.33857098  |
| 0.160018517 | 0.406483853 | 0.026450533 | 0.494312462 |
| 0.43233865  | 0.076564944 | 0.295592328 | 0.367893959 |
| 0.347677587 | 0.474386205 | 0.347809202 | 0.423755818 |
| 0.358411307 | 0.423942452 | 0.286931507 | 0.407629849 |
| 0.400228638 | 0.433788017 | 0.357464256 | 0.406493504 |
| 0.457496158 | 0.435737023 | 0.380384002 | 0.064233106 |
| 0.209221145 | 0.207265156 | 0.221908928 | 0.154098981 |
| 0.231750179 | 0.276568431 | 0.442769683 | 0.484110941 |
| 0.462934764 | 0.040252171 | 0.204764835 | 0.362626486 |
| 0.415707684 | 0.476360478 | 0.075682966 | 0.015870384 |

|             |             |             |             |
|-------------|-------------|-------------|-------------|
| 0.01574534  | 0.070745421 | 0.352234551 | 0.395123335 |
| 0.460851251 | 0.157412572 | 0.035621172 | 0.092969837 |
| 0.342695618 | 0.408413324 | 0.447585434 | 0.427365092 |
| 0.401602313 | 0.224564145 | 0.237829611 | 0.416535763 |
| 0.184226933 | 0.211664991 | 0.473500408 | 0.410940468 |
| 0.149433849 | 0.395689981 | 0.335134354 | 0.490651211 |
| 0.108677495 | 0.442316189 | 0.38217527  | 0.345104045 |
| 0.059458254 | 0.222275152 | 0.187685346 | 0.444306215 |
| 0.413930475 | 0.16833634  | 0.109618999 | 0.108967614 |
| 0.212940483 | 0.463282909 | 0.284551743 | 0.515979337 |
| 0.413375453 | 0.467457478 | 0.212555746 | 0.41898322  |
| 0.123206837 | 0.410973518 | 0.400401771 | 0.056362212 |
| 0.393165015 | 0.06987327  | 0.416223072 | 0.175427603 |
| 0.279702545 | 0.33247143  | 0.258289544 | 0.088042162 |
| 0.233659842 | 0.173980618 | 0.490579752 | 0.468019374 |
| 0.130289147 | 0.329814826 | 0.423840106 | 0.408964851 |
| 0.255747256 | 0.403868284 | 0.422886759 | 0.276982747 |
| 0.171820009 | 0.214759377 | 0.37291366  | 0.294044758 |
| 0.253007649 | 0.510262973 | 0.342091234 | 0.496298608 |
| 0.317662508 | 0.429832919 | 0.435533704 | 0.369047917 |
| 0.345165266 | 0.311889204 | 0.298340793 | 0.053217763 |
| 0.410382652 | 0.460868335 | 0.343834379 | 0.265653311 |
| 0.378581956 | 0.353684431 | 0.131945117 | 0.157810227 |
| 0.312199845 | 0.231984147 | 0.262980796 | 0.470653316 |
| 0.328557191 | 0.293231731 | 0.102477583 | 0.175437986 |
| 0.493742888 | 0.385049508 | 0.186282188 | 0.359645328 |
| 0.339003346 | 0.414026454 | 0.415074868 | 0.42192877  |
| 0.340115147 | 0.405363983 | 0.379189341 | 0.296546465 |
| 0.364661609 | 0.364079004 | 0.453716003 | 0.095802887 |
| 0.181243321 | 0.329407898 | 0.196985977 | 0.246112954 |
| 0.288209303 | 0.113567066 | 0.284918592 | 0.434348    |
| 0.319910705 | 0.426197719 | 0.257327979 | 0.197943463 |
| 0.442857972 | 0.303737692 | 0.444604336 | 0.249507191 |
| 0.179339667 | 0.424755832 | 0.044356341 | 0.184187814 |
| 0.347416675 | 0.383567493 | 0.375025775 | 0.389556125 |
| 0.339341432 | 0.297212674 | 0.418762311 | 0.230186893 |
| 0.233801033 | 0.323047515 | 0.379715869 | 0.084678085 |
| 0.070478323 | 0.511225788 | 0.296310012 | 0.092498971 |
| 0.197052082 | 0.283787569 | 0.360613969 | 0.310572409 |
| 0.101340729 | 0.435947737 | 0.246077731 | 0.414542188 |
| 0.351398588 | 0.193368115 | 0.281764714 | 0.149071793 |
| 0.156650173 | 0.380112215 | 0.380736248 | 0.448007443 |
| 0.402154707 | 0.428778026 | 0.352720757 | 0.377798062 |
| 0.201678742 | 0.308040516 | 0.093059592 | 0.430849781 |
| 0.303526153 |             |             |             |

|             |             |             |             |
|-------------|-------------|-------------|-------------|
| CCL4        | 0.44222681  | 0.529925342 | 0.45694518  |
| 0.469311545 | 0.505445449 | 0.382792297 | 0.2624122   |
| 0.200042331 | 0.131694791 | 0.010089463 | 0.049651492 |
| 0.497317714 | 0.28654204  | 0.315738651 | 0.356387455 |
| 0.48780637  | 0.221348077 | 0.381787782 | 0.316250186 |
| 0.458568522 | 0.114649384 | 0.489491674 | 0.138297261 |
| 0.390618599 | 0.182624446 | 0.121455461 | 0.37504115  |
| 0.475914489 | 0.136444142 | 0.332841808 | 0.405028036 |
| 0.166030325 | 0.458229356 | 0.51990826  | 0.517057477 |

|             |             |             |             |
|-------------|-------------|-------------|-------------|
| 0.516331119 | 0.40885654  | 0.018714752 | 0.326143648 |
| 0.42235176  | 0.496437132 | 0.451756847 | 0.409599357 |
| 0.071966418 | 0.473561992 | 0.314692085 | 0.487101998 |
| 0.246395088 | 0.064933038 | 0.233840668 | 0.426162189 |
| 0.476229898 | 0.477477113 | 0.248624509 | 0.210446912 |
| 0.273503893 | 0.229836766 | 0.368154355 | 0.31682627  |
| 0.296303352 | 0.154672876 | 0.48909017  | 0.124661199 |
| 0.176419167 | 0.279091546 | 0.239735008 | 0.299623212 |
| 0.436908214 | 0.38423186  | 0.028850624 | 0.44329672  |
| 0.004680823 | 0.439349395 | 0.469148552 | 0.388816125 |
| 0.08072366  | 0.043608517 | 0.27177507  | 0.39645164  |
| 0.483130338 | 0.451921481 | 0.510943354 | 0.504203975 |
| 0.273152455 | 0.388801087 | 0.475773916 | 0.25326541  |
| 0.446452853 | 0.235189758 | 0.153197026 | 0.50233882  |
| 1           | 0.530709882 | 0.300464052 | 0.368760298 |
| 0.447110763 | 0.47177625  | 0.467872091 | 0.501629716 |
| 0.415042047 | 0.098507134 | 0.435844185 | 0.524854303 |
| 0.390442125 | 0.418083734 | 0.243361077 | 0.427964101 |
| 0.102545741 | 0.381552774 | 0.433725376 | 0.21822484  |
| 0.484522484 | 0.032816473 | 0.319582892 | 0.410792393 |
| 0.281380549 | 0.464813072 | 0.528815813 | 0.254294892 |
| 0.488484968 | 0.041054625 | 0.21354774  | 0.063466743 |
| 0.386395106 | 0.22711418  | 0.471947389 | 0.483643363 |
| 0.259092585 | 0.46635     | 0.321045407 | 0.006845795 |
| 0.057604646 | 0.260178783 | 0.460115655 | 0.411850884 |
| 0.468911483 | 0.380072043 | 0.324924356 | 0.389114424 |
| 0.490220632 | 0.510980385 | 0.057404212 | 0.137567585 |
| 0.475041574 | 0.262216379 | 0.329345123 | 0.494995042 |
| 0.421228967 | 0.150063032 | 0.190764327 | 0.529092384 |
| 0.406131988 | 0.134488486 | 0.342824677 | 0.493808624 |
| 0.386291294 | 0.469889268 | 0.160105335 | 0.35423167  |
| 0.07743973  | 0.487122394 | 0.061066171 | 0.350257623 |
| 0.333782174 | 0.23700781  | 0.018434388 | 0.277897278 |
| 0.336930604 | 0.452862596 | 0.458892261 | 0.163298439 |
| 0.396875386 | 0.499168459 | 0.322416942 | 0.464197997 |
| 0.02275861  | 0.078228503 | 0.264684902 | 0.518125864 |
| 0.274319083 | 0.509661014 | 0.3799629   | 0.400945112 |
| 0.390982294 | 0.493714415 | 0.005447573 | 0.491162791 |
| 0.534732323 | 0.285407545 | 0.482174795 | 0.490010312 |
| 0.443801418 | 0.486021034 | 0.046528085 | 0.492917101 |
| 0.353839854 | 0.124742459 | 0.514522119 | 0.250979147 |
| 0.457102328 | 0.07952682  | 0.345100834 | 0.47961632  |
| 0.467189386 | 0.015300803 | 0.229915055 | 0.427405052 |
| 0.057305092 | 0.112168783 | 0.457475345 | 0.467399117 |
| 0.450360853 | 0.497143584 | 0.506651915 | 0.42960237  |
| 0.507567537 | 0.284835988 | 0.025672651 | 0.428774156 |
| 0.475001136 | 0.420236587 | 0.431694476 | 0.294869191 |
| 0.327923806 | 0.473427444 | 0.437339183 | 0.229075999 |
| 0.074658478 | 0.345921404 | 0.032904718 | 0.428752115 |
| 0.398459012 | 0.169795181 | 0.439494069 | 0.211098607 |
| 0.129925676 | 0.538403591 | 0.273012694 | 0.352491472 |
| 0.203116001 | 0.44948667  | 0.315626785 | 0.296335671 |
| 0.302164678 | 0.245727263 | 0.440900843 | 0.448566853 |
| 0.054506729 | 0.15718308  | 0.029428147 | 0.430737075 |



|             |             |             |             |
|-------------|-------------|-------------|-------------|
| 0.20699176  | 0.40584775  | 0.38513292  | 0.418030363 |
| 0.375399415 | 0.170673877 | 0.482959192 | 0.376491457 |
| 0.189980453 | 0.033377969 | 0.512916133 | 0.475739607 |
| 0.323426011 | 0.214976608 | 0.076751945 | 0.379269708 |
| 0.482980524 | 0.316228902 | 0.25028008  | 0.450944575 |
| 0.046902381 | 0.498268395 | 0.335114706 | 0.202614466 |
| 0.477882454 | 0.351190568 | 0.486697603 | 0.076203595 |
| 0.409117906 | 0.464173102 | 0.402036428 | 0.279647924 |
| 0.380549507 | 0.466774463 | 0.051806099 | 0.412070661 |
| 0.408950812 | 0.062740617 | 0.537663195 | 0.209836978 |
| 0.044507397 | 0.509093739 | 0.485239085 | 0.131771248 |
| 0.136968982 | 0.403244858 | 0.058714988 | 0.399408222 |
| 0.529432427 | 0.497235414 | 0.457540998 | 0.314335045 |
| 0.072830997 | 0.023870784 | 0.311058672 | 0.457750644 |
| 0.505312757 | 0.525741235 | 0.353920925 | 0.474657784 |
| 0.322329275 | 0.421032464 | 0.13778876  | 0.523267409 |
| 0.248709859 | 0.518981882 | 0.015671872 | 0.494305398 |
| 0.51067616  | 0.286581354 | 0.145491279 | 0.34377378  |
| 0.391947932 | 0.078653517 | 0.25662847  | 0.500430576 |
| 0.446315444 | 0.415161134 | 0.426279105 | 0.485487531 |
| 0.026751245 | 0.062899377 | 0.471567237 | 0.273886403 |
| 0.443487006 | 0.301718546 | 0.094095948 | 0.3449392   |
| 0.078799221 | 0.45027403  | 0.503547478 | 0.106047202 |
| 0.351087794 | 0.317230105 | 0.480262518 | 0.067308413 |
| 0.477017816 | 0.507642539 | 0.523354207 | 0.210268309 |
| 0.477790936 | 0.50175552  | 0.471437095 | 0.136317675 |
| 0.039332636 | 0.52370156  | 0.412932565 | 0.041100088 |
| 0.50018051  | 0.221890662 | 0.028022681 | 0.49719546  |
| 0.251185094 | 0.429070964 | 0.005736333 | 0.106669468 |
| 0.078500875 | 0.510296994 | 0.47764619  | 0.407899224 |
| 0.243969188 | 0.428779753 | 0.011209669 | 0.534961238 |
| 0.495519227 | 0.034538458 | 0.231218082 | 0.472203927 |
| 0.479290016 | 0.529335745 | 0.421370835 | 0.490783538 |
| 0.495508884 | 0.505920892 | 0.297353785 | 0.37419173  |
| 0.465789219 | 0.50423359  | 0.448366648 | 0.451497694 |
| 0.493874437 | 0.507215373 | 0.362334708 | 0.029987207 |
| 0.197279638 | 0.222447401 | 0.342397676 | 0.131282361 |
| 0.317663236 | 0.225393033 | 0.482182672 | 0.505777177 |
| 0.49470547  | 0.012900224 | 0.179626216 | 0.458020181 |
| 0.443779585 | 0.47630331  | 0.035989049 | 0.010229263 |
| 0.01212751  | 0.045376726 | 0.397998476 | 0.345732779 |
| 0.496573661 | 0.246762886 | 0.011657123 | 0.058219138 |
| 0.348722082 | 0.496277262 | 0.510735832 | 0.456856719 |
| 0.485690074 | 0.13505481  | 0.327397983 | 0.461869418 |
| 0.127243703 | 0.316327182 | 0.500382122 | 0.469885246 |
| 0.075042467 | 0.348534697 | 0.404274683 | 0.49044337  |
| 0.119851853 | 0.425517274 | 0.495781898 | 0.395669304 |
| 0.025659697 | 0.144655548 | 0.118716848 | 0.49961492  |
| 0.502921498 | 0.136278219 | 0.06937468  | 0.144150692 |
| 0.175883018 | 0.489563598 | 0.243981569 | 0.527355054 |
| 0.467152947 | 0.497427117 | 0.134668046 | 0.482351169 |
| 0.073417264 | 0.489135917 | 0.455402719 | 0.069221896 |
| 0.369630011 | 0.025926527 | 0.474246549 | 0.220101763 |
| 0.344003467 | 0.419382487 | 0.27005685  | 0.03769603  |

|             |             |             |             |
|-------------|-------------|-------------|-------------|
| 0.255944596 | 0.099689066 | 0.503844602 | 0.51027191  |
| 0.066011367 | 0.291487737 | 0.398032343 | 0.464550733 |
| 0.303137681 | 0.496008136 | 0.501911904 | 0.423530929 |
| 0.12074328  | 0.203099573 | 0.447653527 | 0.408971279 |
| 0.26267072  | 0.509209718 | 0.392480936 | 0.537071075 |
| 0.425027135 | 0.453475893 | 0.477513482 | 0.411905493 |
| 0.340626224 | 0.416261421 | 0.399001964 | 0.033998753 |
| 0.429258754 | 0.505561879 | 0.389099778 | 0.248029026 |
| 0.36643554  | 0.462457395 | 0.068991555 | 0.188854778 |
| 0.412119635 | 0.310684999 | 0.209597272 | 0.494482495 |
| 0.411278429 | 0.411392286 | 0.05429184  | 0.11240462  |
| 0.547851654 | 0.425655214 | 0.172877817 | 0.468475857 |
| 0.254638704 | 0.441286949 | 0.496799225 | 0.506091926 |
| 0.415186669 | 0.473667019 | 0.453879115 | 0.411589925 |
| 0.414537382 | 0.332892046 | 0.528303453 | 0.089116646 |
| 0.14359655  | 0.447111611 | 0.15601472  | 0.158174087 |
| 0.216886313 | 0.055456291 | 0.380137801 | 0.49850376  |
| 0.44218245  | 0.472072695 | 0.323905994 | 0.131700827 |
| 0.43192756  | 0.384307186 | 0.452445238 | 0.245484267 |
| 0.130344553 | 0.501235647 | 0.020312597 | 0.101902696 |
| 0.459713058 | 0.477322342 | 0.482728303 | 0.342739376 |
| 0.399898727 | 0.219825504 | 0.40063688  | 0.298488481 |
| 0.350301082 | 0.411069625 | 0.46969897  | 0.051209313 |
| 0.032693571 | 0.505095978 | 0.389725533 | 0.042012218 |
| 0.133259975 | 0.386541399 | 0.352371898 | 0.315772091 |
| 0.04771456  | 0.493783648 | 0.347403175 | 0.501212279 |
| 0.389581355 | 0.108906435 | 0.329028253 | 0.116412177 |
| 0.089345219 | 0.439562929 | 0.471972809 | 0.521384135 |
| 0.433138467 | 0.49519158  | 0.428780691 | 0.460628421 |
| 0.164755768 | 0.414830374 | 0.047548828 | 0.472164325 |
| 0.451749344 |             |             |             |

|             |             |             |             |
|-------------|-------------|-------------|-------------|
| CCL5        | 0.48708056  | 0.520406382 | 0.451250242 |
| 0.469199847 | 0.47956012  | 0.442302992 | 0.222318593 |
| 0.195194024 | 0.086899218 | 0.004775058 | 0.026080555 |
| 0.503191527 | 0.24083141  | 0.305623048 | 0.384376508 |
| 0.45632697  | 0.14422829  | 0.375289481 | 0.248837447 |
| 0.450057897 | 0.096282842 | 0.440385605 | 0.089041503 |
| 0.319574871 | 0.111845631 | 0.068884624 | 0.301474389 |
| 0.485821236 | 0.078791532 | 0.39906707  | 0.434387793 |
| 0.09707932  | 0.501232816 | 0.525295215 | 0.503286231 |
| 0.526394276 | 0.472155464 | 0.010685993 | 0.345942397 |
| 0.480965173 | 0.506948772 | 0.450357338 | 0.356433159 |
| 0.039886629 | 0.497467369 | 0.263088076 | 0.443616508 |
| 0.255869632 | 0.030648278 | 0.277266463 | 0.464007945 |
| 0.494544732 | 0.516702255 | 0.239751088 | 0.168145422 |
| 0.259231205 | 0.268631885 | 0.342923879 | 0.382641918 |
| 0.240068376 | 0.18242133  | 0.505647844 | 0.092135426 |
| 0.16768255  | 0.261071008 | 0.156704083 | 0.27703326  |
| 0.402569472 | 0.451576345 | 0.01449136  | 0.482809301 |
| 0.002856486 | 0.418466103 | 0.408979468 | 0.377202999 |
| 0.038658777 | 0.021262967 | 0.183080341 | 0.37589349  |
| 0.50231588  | 0.485911712 | 0.527586838 | 0.531873873 |
| 0.198289148 | 0.304832306 | 0.456038016 | 0.180716371 |
| 0.503743449 | 0.193087948 | 0.109858784 | 0.462883861 |

|             |             |             |             |
|-------------|-------------|-------------|-------------|
| 0.530709882 | 1           | 0.212992429 | 0.275461132 |
| 0.505185722 | 0.505826067 | 0.490390369 | 0.49025973  |
| 0.410860209 | 0.048875448 | 0.499535513 | 0.535153186 |
| 0.468779091 | 0.370144525 | 0.157661024 | 0.468395378 |
| 0.054586216 | 0.410300817 | 0.384535027 | 0.171119837 |
| 0.504854817 | 0.016119097 | 0.224779603 | 0.405157843 |
| 0.212417063 | 0.506871706 | 0.519082028 | 0.194027536 |
| 0.453354553 | 0.018538694 | 0.161339469 | 0.029109633 |
| 0.366297117 | 0.169642956 | 0.509727544 | 0.516190306 |
| 0.256546209 | 0.43538455  | 0.279606243 | 0.00071663  |
| 0.024539938 | 0.185425683 | 0.520077073 | 0.396082056 |
| 0.484206982 | 0.46293289  | 0.26099669  | 0.470587862 |
| 0.524569742 | 0.527395502 | 0.074194237 | 0.091818054 |
| 0.477607948 | 0.186012917 | 0.247525148 | 0.519373817 |
| 0.341587745 | 0.111329774 | 0.127569726 | 0.528727188 |
| 0.464849966 | 0.082472826 | 0.375161129 | 0.453316695 |
| 0.394600519 | 0.398866067 | 0.103719087 | 0.308309676 |
| 0.048495639 | 0.49668186  | 0.025974082 | 0.36249372  |
| 0.329503245 | 0.166578093 | 0.008211953 | 0.284955401 |
| 0.330657223 | 0.522298468 | 0.496642636 | 0.101361566 |
| 0.355897441 | 0.453606152 | 0.369216671 | 0.512046952 |
| 0.011159165 | 0.040907447 | 0.328339582 | 0.533669166 |
| 0.351994048 | 0.525331722 | 0.316173832 | 0.322215249 |
| 0.300312708 | 0.498151    | 0.002913139 | 0.506972574 |
| 0.522232332 | 0.35753001  | 0.460511333 | 0.46581543  |
| 0.448448118 | 0.507636873 | 0.04906966  | 0.459458864 |
| 0.432443415 | 0.072660952 | 0.52522052  | 0.168195589 |
| 0.500209083 | 0.039525281 | 0.362181577 | 0.516577573 |
| 0.527010445 | 0.008155041 | 0.259339815 | 0.432502179 |
| 0.024217633 | 0.102907818 | 0.482878683 | 0.453941912 |
| 0.434216585 | 0.499694111 | 0.511783674 | 0.430918351 |
| 0.483141666 | 0.240198164 | 0.009857367 | 0.344619265 |
| 0.50415868  | 0.462549332 | 0.481091716 | 0.253479006 |
| 0.409449671 | 0.511738074 | 0.509654242 | 0.25657471  |
| 0.040659134 | 0.344802521 | 0.020627681 | 0.368720831 |
| 0.478384221 | 0.131394982 | 0.466455748 | 0.144762067 |
| 0.069764263 | 0.531710208 | 0.196319376 | 0.307059906 |
| 0.146112609 | 0.481184847 | 0.258329376 | 0.290281228 |
| 0.265822575 | 0.167871369 | 0.405346084 | 0.432569317 |
| 0.036097661 | 0.095966387 | 0.011592135 | 0.476806451 |
| 0.17680382  | 0.427140401 | 0.430277585 | 0.491783975 |
| 0.376550896 | 0.123529006 | 0.437907268 | 0.316394796 |
| 0.114596996 | 0.012548457 | 0.522040059 | 0.440905531 |
| 0.410655311 | 0.155347247 | 0.036690201 | 0.434991056 |
| 0.523662493 | 0.399509446 | 0.318251867 | 0.511935042 |
| 0.023733695 | 0.523519922 | 0.28885785  | 0.126666796 |
| 0.452144701 | 0.28376704  | 0.498669396 | 0.067594931 |
| 0.447214666 | 0.503127717 | 0.326396027 | 0.198549787 |
| 0.471733686 | 0.465388218 | 0.027920119 | 0.483719477 |
| 0.485533443 | 0.02899534  | 0.528588771 | 0.131563971 |
| 0.017801763 | 0.500062376 | 0.527196647 | 0.071971208 |
| 0.074720069 | 0.391934103 | 0.044877754 | 0.310466111 |
| 0.529249193 | 0.455202104 | 0.519194515 | 0.231566734 |
| 0.039177204 | 0.011954832 | 0.218860227 | 0.455586919 |

|             |             |             |             |
|-------------|-------------|-------------|-------------|
| 0.523089412 | 0.529817698 | 0.270481387 | 0.430265982 |
| 0.249910165 | 0.389530961 | 0.159815125 | 0.535124224 |
| 0.194962998 | 0.512801251 | 0.004890159 | 0.51829285  |
| 0.526574498 | 0.34291832  | 0.08297493  | 0.349039979 |
| 0.474938425 | 0.042479326 | 0.202616361 | 0.507773943 |
| 0.505109331 | 0.36937251  | 0.408019251 | 0.480244278 |
| 0.01445687  | 0.03993795  | 0.437149646 | 0.206313401 |
| 0.449039013 | 0.223596441 | 0.060535209 | 0.365065755 |
| 0.042803405 | 0.503238799 | 0.50685656  | 0.059694028 |
| 0.422867048 | 0.344520964 | 0.41551452  | 0.03327698  |
| 0.523271897 | 0.509703065 | 0.526166422 | 0.162049541 |
| 0.520540048 | 0.52877984  | 0.497445299 | 0.074375058 |
| 0.014751658 | 0.520679906 | 0.459989938 | 0.022258856 |
| 0.516466276 | 0.285138392 | 0.013903133 | 0.511400577 |
| 0.187064859 | 0.468585242 | 0.003262688 | 0.088637285 |
| 0.036401613 | 0.510198384 | 0.489555649 | 0.42941389  |
| 0.312853379 | 0.39405878  | 0.004867853 | 0.52700157  |
| 0.513239461 | 0.012399892 | 0.148512797 | 0.531594951 |
| 0.51970011  | 0.514535659 | 0.377263245 | 0.531090488 |
| 0.514192732 | 0.51208315  | 0.269374654 | 0.287160885 |
| 0.514666636 | 0.510993943 | 0.480445893 | 0.491752876 |
| 0.51890414  | 0.474643889 | 0.300243136 | 0.014042485 |
| 0.146025629 | 0.237014163 | 0.392333464 | 0.093796751 |
| 0.383405992 | 0.149190661 | 0.513768218 | 0.518017741 |
| 0.53555753  | 0.0034117   | 0.157677788 | 0.522195796 |
| 0.49334703  | 0.506213055 | 0.016681597 | 0.005415957 |
| 0.007335797 | 0.020402941 | 0.400609278 | 0.252555076 |
| 0.525893101 | 0.310735772 | 0.003184951 | 0.041942038 |
| 0.299108535 | 0.460530399 | 0.518558887 | 0.411864881 |
| 0.509859292 | 0.077345347 | 0.35330224  | 0.433727064 |
| 0.070473542 | 0.404195294 | 0.535624773 | 0.496471704 |
| 0.036138165 | 0.259676668 | 0.417220459 | 0.51839765  |
| 0.088749412 | 0.341518387 | 0.510209938 | 0.368953509 |
| 0.011038991 | 0.079678703 | 0.064408671 | 0.486511944 |
| 0.518399436 | 0.088541957 | 0.035110141 | 0.172917865 |
| 0.130518684 | 0.5198255   | 0.177297781 | 0.530997718 |
| 0.503746312 | 0.483880734 | 0.074797448 | 0.49791204  |
| 0.040121138 | 0.500677079 | 0.391342554 | 0.067775892 |
| 0.299431517 | 0.009631422 | 0.508194261 | 0.197262306 |
| 0.376665659 | 0.451957648 | 0.221603351 | 0.014344181 |
| 0.208404625 | 0.050385046 | 0.522826495 | 0.51966835  |
| 0.029467064 | 0.245654974 | 0.313834113 | 0.444000946 |
| 0.324478507 | 0.495943911 | 0.512829279 | 0.494804996 |
| 0.086168116 | 0.156621914 | 0.454463497 | 0.468978854 |
| 0.263888579 | 0.525764696 | 0.35424956  | 0.526444446 |
| 0.476785874 | 0.50293734  | 0.526674083 | 0.388624491 |
| 0.269304421 | 0.460804942 | 0.443112478 | 0.019697082 |
| 0.381006609 | 0.521792246 | 0.391467009 | 0.174181672 |
| 0.287343575 | 0.462000892 | 0.041672618 | 0.203148575 |
| 0.401416185 | 0.365480103 | 0.153616346 | 0.479939178 |
| 0.442930558 | 0.474728785 | 0.035751353 | 0.060914992 |
| 0.524585613 | 0.485351022 | 0.148932606 | 0.492760425 |
| 0.169988651 | 0.384707405 | 0.516332758 | 0.514481074 |
| 0.425944935 | 0.531228767 | 0.491439805 | 0.467594045 |

|             |             |             |             |
|-------------|-------------|-------------|-------------|
| 0.479400102 | 0.274256042 | 0.527105144 | 0.091322288 |
| 0.08866616  | 0.495241572 | 0.106875321 | 0.089313172 |
| 0.147029507 | 0.023571446 | 0.366705985 | 0.470490535 |
| 0.459515722 | 0.429315394 | 0.373362733 | 0.077884849 |
| 0.350945258 | 0.418116676 | 0.385836351 | 0.221210752 |
| 0.081949214 | 0.505714635 | 0.007961721 | 0.052262829 |
| 0.466734069 | 0.51982137  | 0.459815048 | 0.251314512 |
| 0.352256543 | 0.141745136 | 0.325869181 | 0.345911909 |
| 0.409881864 | 0.415334953 | 0.519510243 | 0.030308152 |
| 0.017039495 | 0.524043543 | 0.427387587 | 0.017031198 |
| 0.088036325 | 0.449462155 | 0.309598241 | 0.269537926 |
| 0.019033597 | 0.525937155 | 0.410542485 | 0.48444924  |
| 0.38094737  | 0.060112201 | 0.42481255  | 0.087162409 |
| 0.052187645 | 0.483072966 | 0.455547452 | 0.514747946 |
| 0.382795377 | 0.469410261 | 0.460648799 | 0.522359698 |
| 0.117790375 | 0.448733387 | 0.024399999 | 0.499745382 |
| 0.498329689 |             |             |             |
| CCL6        | 0.178414779 | 0.231973024 | 0.141409883 |
| 0.268505233 | 0.193393602 | 0.104481705 | 0.141280191 |
| 0.035786663 | 0.065955041 | 0.011506485 | 0.05214317  |
| 0.188261897 | 0.0690298   | 0.056469922 | 0.041856122 |
| 0.33040388  | 0.125502602 | 0.078936909 | 0.219386313 |
| 0.236160199 | 0.042177816 | 0.328900104 | 0.085451561 |
| 0.101552663 | 0.151205302 | 0.146600789 | 0.155505457 |
| 0.281302289 | 0.162042902 | 0.0696513   | 0.17702543  |
| 0.095858558 | 0.204671838 | 0.191952307 | 0.258351776 |
| 0.18185948  | 0.139922798 | 0.012993008 | 0.055172029 |
| 0.18126548  | 0.254041065 | 0.240539485 | 0.247253458 |
| 0.05955753  | 0.155846811 | 0.197750971 | 0.242251125 |
| 0.021249519 | 0.082553871 | 0.034810058 | 0.148498459 |
| 0.158864062 | 0.153496664 | 0.067270793 | 0.105992709 |
| 0.044145701 | 0.030193228 | 0.047056553 | 0.093745129 |
| 0.183877982 | 0.025961841 | 0.176332879 | 0.04579208  |
| 0.034294218 | 0.080074112 | 0.114938763 | 0.100697033 |
| 0.098453777 | 0.137530782 | 0.034094598 | 0.135342698 |
| 0.002113999 | 0.251561685 | 0.250785383 | 0.088969098 |
| 0.155612351 | 0.04023408  | 0.154733089 | 0.19870961  |
| 0.276016559 | 0.177597548 | 0.308747873 | 0.281652231 |
| 0.07540564  | 0.204342397 | 0.169188195 | 0.132718725 |
| 0.2062079   | 0.12303129  | 0.046676145 | 0.351308978 |
| 0.300464052 | 0.212992429 | 1           | 0.271252773 |
| 0.195387547 | 0.204910362 | 0.108871377 | 0.147170342 |
| 0.074972235 | 0.070465862 | 0.164768119 | 0.265082404 |
| 0.142898361 | 0.149298403 | 0.226866441 | 0.195096211 |
| 0.13487701  | 0.027474195 | 0.279553469 | 0.042314966 |
| 0.288409834 | 0.039339011 | 0.24569349  | 0.1629125   |
| 0.062906961 | 0.196334343 | 0.216714112 | 0.184348132 |
| 0.180681895 | 0.040224191 | 0.063263202 | 0.087576668 |
| 0.045928716 | 0.051422339 | 0.142660204 | 0.261303247 |
| 0.031409399 | 0.056353987 | 0.132068151 | 0.027757991 |
| 0.086508633 | 0.063870008 | 0.183762135 | 0.116260887 |
| 0.220800892 | 0.139239822 | 0.14172621  | 0.12947613  |
| 0.182979901 | 0.306556923 | 0.003548528 | 0.08133388  |
| 0.168498273 | 0.073628838 | 0.279267703 | 0.162838326 |

|             |             |             |             |
|-------------|-------------|-------------|-------------|
| 0.240434925 | 0.070140952 | 0.138753208 | 0.280148162 |
| 0.155899957 | 0.147639441 | 0.051640478 | 0.326422684 |
| 0.04595569  | 0.259754431 | 0.12471603  | 0.099288519 |
| 0.051760498 | 0.180348288 | 0.109523223 | 0.087027157 |
| 0.049057035 | 0.077650991 | 0.022965856 | 0.079701261 |
| 0.035667476 | 0.190472198 | 0.138763514 | 0.152995478 |
| 0.134668531 | 0.288851987 | 0.068873498 | 0.18035533  |
| 0.027294529 | 0.061711168 | 0.038912136 | 0.253296208 |
| 0.066624929 | 0.266750588 | 0.100728549 | 0.133499037 |
| 0.280615669 | 0.282086804 | 0.002807077 | 0.171230221 |
| 0.216001339 | 0.038600892 | 0.210556033 | 0.224232793 |
| 0.127331875 | 0.266702726 | 0.005717016 | 0.295973936 |
| 0.098756159 | 0.128077196 | 0.312404596 | 0.235784856 |
| 0.173774434 | 0.138701052 | 0.067089622 | 0.228853396 |
| 0.172904095 | 0.027054275 | 0.053310127 | 0.218878837 |
| 0.079955055 | 0.031773624 | 0.203735843 | 0.236450331 |
| 0.204778715 | 0.267767934 | 0.325367002 | 0.114632576 |
| 0.194625879 | 0.109761846 | 0.046176201 | 0.243894282 |
| 0.219782648 | 0.032388644 | 0.160529176 | 0.084114588 |
| 0.06774633  | 0.201867404 | 0.16391123  | 0.017540234 |
| 0.105182908 | 0.110615959 | 0.019928386 | 0.212196555 |
| 0.153324876 | 0.058454992 | 0.123564288 | 0.06440646  |
| 0.147107993 | 0.258907545 | 0.125261175 | 0.103614424 |
| 0.074022171 | 0.136658568 | 0.166545426 | 0.050421535 |
| 0.048639058 | 0.134878026 | 0.12428809  | 0.100117455 |
| 0.036756367 | 0.143733056 | 0.034584554 | 0.054142415 |
| 0.039143129 | 0.062441612 | 0.053471936 | 0.135084615 |
| 0.043763565 | 0.051262985 | 0.189145046 | 0.073381205 |
| 0.123071482 | 0.103267384 | 0.228004709 | 0.280950374 |
| 0.091092729 | 0.106644254 | 0.116924454 | 0.021983359 |
| 0.255140554 | 0.060617514 | 0.027777846 | 0.210508472 |
| 0.036926619 | 0.289169891 | 0.056906827 | 0.216914635 |
| 0.117397756 | 0.212344393 | 0.296888357 | 0.022097276 |
| 0.122029367 | 0.185463887 | 0.227073942 | 0.174336847 |
| 0.134675119 | 0.222882538 | 0.049234136 | 0.137494596 |
| 0.133314731 | 0.115677556 | 0.240066938 | 0.102567008 |
| 0.11435038  | 0.252552735 | 0.203413393 | 0.202199259 |
| 0.149899575 | 0.134454548 | 0.023570918 | 0.325896265 |
| 0.25008537  | 0.341713122 | 0.182355615 | 0.127123347 |
| 0.088639224 | 0.023116957 | 0.173743977 | 0.148966134 |
| 0.170775916 | 0.239575027 | 0.243354684 | 0.178473151 |
| 0.255662996 | 0.106245298 | 0.01304571  | 0.257596545 |
| 0.045926293 | 0.203796135 | 0.056946007 | 0.242974083 |
| 0.175592749 | 0.056786525 | 0.16109797  | 0.125454435 |
| 0.13842644  | 0.09582467  | 0.088749667 | 0.189022986 |
| 0.208251509 | 0.137853144 | 0.097378106 | 0.219649887 |
| 0.024647746 | 0.038678912 | 0.220070042 | 0.084882883 |
| 0.080366437 | 0.142728677 | 0.033554943 | 0.04896566  |
| 0.05343112  | 0.18241284  | 0.288970446 | 0.075508064 |
| 0.084483962 | 0.045081085 | 0.303873034 | 0.109950159 |
| 0.236336423 | 0.207283633 | 0.193483728 | 0.082079073 |
| 0.203823359 | 0.222858428 | 0.152497809 | 0.156169931 |
| 0.109892595 | 0.197374268 | 0.146955517 | 0.020711981 |
| 0.298918749 | 0.038066003 | 0.026643131 | 0.214110552 |

|             |             |             |             |
|-------------|-------------|-------------|-------------|
| 0.177334465 | 0.126428054 | 0.003549032 | 0.016631683 |
| 0.069484747 | 0.309282239 | 0.170437825 | 0.179745121 |
| 0.02301668  | 0.214577748 | 0.010615023 | 0.251522581 |
| 0.197028559 | 0.08019291  | 0.1008857   | 0.190178109 |
| 0.19776734  | 0.217433222 | 0.151803276 | 0.244714252 |
| 0.175526017 | 0.181286562 | 0.056035492 | 0.293934685 |
| 0.219576235 | 0.201470091 | 0.197091146 | 0.184232188 |
| 0.268161373 | 0.283966495 | 0.259838528 | 0.047122158 |
| 0.064134165 | 0.053405158 | 0.034026207 | 0.043410812 |
| 0.083109995 | 0.114855157 | 0.213682007 | 0.297451349 |
| 0.252791796 | 0.063678933 | 0.034436239 | 0.184280268 |
| 0.218738538 | 0.270711981 | 0.033287615 | 0.012021894 |
| 0.004801142 | 0.059219413 | 0.158284134 | 0.22208183  |
| 0.237457151 | 0.011474726 | 0.042124848 | 0.02697081  |
| 0.05063237  | 0.255756047 | 0.204518377 | 0.315663804 |
| 0.232473053 | 0.135764613 | 0.039278823 | 0.285395708 |
| 0.097464317 | 0.080135399 | 0.263272491 | 0.183347014 |
| 0.067446113 | 0.199717789 | 0.092030941 | 0.279391885 |
| 0.031308257 | 0.289065339 | 0.192254808 | 0.064713648 |
| 0.024712888 | 0.136497439 | 0.124233831 | 0.304306955 |
| 0.17116554  | 0.062537388 | 0.05868891  | 0.010803036 |
| 0.087794687 | 0.263875181 | 0.081401373 | 0.290725839 |
| 0.227810803 | 0.323989809 | 0.087461027 | 0.186847509 |
| 0.09475267  | 0.175542888 | 0.200294647 | 0.007384167 |
| 0.110245493 | 0.044780263 | 0.18825867  | 0.042404256 |
| 0.058912394 | 0.162674839 | 0.06586624  | 0.078821978 |
| 0.051074954 | 0.134629783 | 0.301875393 | 0.29895133  |
| 0.064758083 | 0.089611379 | 0.225426037 | 0.224424963 |
| 0.090739467 | 0.27348379  | 0.177543584 | 0.076673604 |
| 0.068911067 | 0.041882815 | 0.221992054 | 0.127443844 |
| 0.047041892 | 0.311484597 | 0.089139646 | 0.251332006 |
| 0.163728136 | 0.213347206 | 0.217643751 | 0.191328794 |
| 0.078385114 | 0.12167672  | 0.153801533 | 0.02016869  |
| 0.2109884   | 0.28269979  | 0.113472586 | 0.089237495 |
| 0.212604965 | 0.153038001 | 0.045399735 | 0.01339573  |
| 0.12267645  | 0.08597738  | 0.066072636 | 0.326305972 |
| 0.143025582 | 0.138057412 | 0.031354304 | 0.112673419 |
| 0.23402055  | 0.176359543 | 0.035134123 | 0.189529901 |
| 0.187974909 | 0.242508513 | 0.242135606 | 0.268706359 |
| 0.052323558 | 0.207557347 | 0.212099358 | 0.14389846  |
| 0.158554481 | 0.196159621 | 0.199751547 | 0.013271895 |
| 0.124271618 | 0.137825519 | 0.073130884 | 0.200057904 |
| 0.185394462 | 0.066074156 | 0.061797212 | 0.299694803 |
| 0.073461993 | 0.271130039 | 0.022844259 | 0.060040674 |
| 0.249249378 | 0.077919665 | 0.26154047  | 0.086248193 |
| 0.063231333 | 0.185009832 | 0.025919025 | 0.132706259 |
| 0.088762397 | 0.227279445 | 0.173667383 | 0.164384082 |
| 0.073214581 | 0.081433703 | 0.2430375   | 0.064136867 |
| 0.049868916 | 0.034831774 | 0.210156842 | 0.028958176 |
| 0.033707839 | 0.305677611 | 0.079997234 | 0.048764746 |
| 0.059043006 | 0.110754931 | 0.063720299 | 0.067953322 |
| 0.089458328 | 0.212499449 | 0.059108876 | 0.18804343  |
| 0.148821201 | 0.101777208 | 0.107748406 | 0.04393944  |
| 0.051970919 | 0.159563778 | 0.185084781 | 0.202987231 |

|             |             |             |             |
|-------------|-------------|-------------|-------------|
| 0.150644661 | 0.326019445 | 0.135422885 | 0.18738892  |
| 0.037757232 | 0.104921142 | 0.046548995 | 0.244316571 |
| 0.076116082 |             |             |             |
| CCL9        | 0.251179662 | 0.293624727 | 0.192820913 |
| 0.30009109  | 0.237773118 | 0.126807873 | 0.143073905 |
| 0.087607227 | 0.147419267 | 0.014822052 | 0.079890424 |
| 0.244543115 | 0.13379308  | 0.106204836 | 0.103984722 |
| 0.390384802 | 0.234557015 | 0.166286911 | 0.211693336 |
| 0.289975998 | 0.068834567 | 0.367920933 | 0.161486038 |
| 0.279480525 | 0.226744689 | 0.186029415 | 0.240395324 |
| 0.336447474 | 0.203151826 | 0.074432713 | 0.212250259 |
| 0.293174873 | 0.269880542 | 0.25343198  | 0.294971838 |
| 0.244401201 | 0.202609043 | 0.049320887 | 0.093035066 |
| 0.247249218 | 0.305322637 | 0.283616285 | 0.246969085 |
| 0.114091022 | 0.208933288 | 0.178298409 | 0.307004332 |
| 0.085745579 | 0.133926248 | 0.05626286  | 0.198078495 |
| 0.206664616 | 0.179860526 | 0.107897857 | 0.134049386 |
| 0.090201335 | 0.057997642 | 0.138758173 | 0.117746777 |
| 0.179106277 | 0.039900209 | 0.232731409 | 0.101696981 |
| 0.086071622 | 0.134261134 | 0.301474597 | 0.133191288 |
| 0.213660697 | 0.180915841 | 0.082238147 | 0.198924452 |
| 0.003709224 | 0.294445378 | 0.32164715  | 0.157434413 |
| 0.193455588 | 0.068359871 | 0.306850832 | 0.204134398 |
| 0.342011281 | 0.250618569 | 0.375564134 | 0.353403544 |
| 0.199366178 | 0.291157821 | 0.223663816 | 0.209107177 |
| 0.263490218 | 0.130505018 | 0.129862946 | 0.409211589 |
| 0.368760298 | 0.275461132 | 0.271252773 | 1           |
| 0.224349058 | 0.262566129 | 0.1374345   | 0.173091029 |
| 0.138828743 | 0.26588534  | 0.211869337 | 0.333129135 |
| 0.195797821 | 0.214605284 | 0.275694558 | 0.239033212 |
| 0.212331763 | 0.106026735 | 0.295956225 | 0.159484907 |
| 0.349039082 | 0.074525122 | 0.30385844  | 0.169017369 |
| 0.259021957 | 0.262631033 | 0.282399464 | 0.184098176 |
| 0.22762836  | 0.092881667 | 0.152427268 | 0.207040521 |
| 0.14211985  | 0.197183268 | 0.194776375 | 0.302574157 |
| 0.097771767 | 0.190898426 | 0.172115271 | 0.063395059 |
| 0.179073633 | 0.293341776 | 0.246218655 | 0.177495455 |
| 0.295994903 | 0.204136403 | 0.19119529  | 0.169567505 |
| 0.228188447 | 0.374699229 | 0.008551574 | 0.160814891 |
| 0.185023575 | 0.303400045 | 0.280551719 | 0.202906237 |
| 0.24392909  | 0.132595769 | 0.201123802 | 0.348220404 |
| 0.20084219  | 0.17266606  | 0.108376407 | 0.380007936 |
| 0.117657938 | 0.289791762 | 0.194167992 | 0.16090012  |
| 0.095341318 | 0.237130904 | 0.20104755  | 0.123236488 |
| 0.12068484  | 0.21325389  | 0.082921833 | 0.098397601 |
| 0.107606957 | 0.227063981 | 0.194285159 | 0.229280025 |
| 0.169996887 | 0.329451905 | 0.088946214 | 0.200874517 |
| 0.040168346 | 0.171829087 | 0.060591673 | 0.312988439 |
| 0.080879796 | 0.349235787 | 0.221379983 | 0.286103579 |
| 0.30206602  | 0.353313552 | 0.017944317 | 0.224300643 |
| 0.280780337 | 0.057928998 | 0.215173993 | 0.289250369 |
| 0.154731827 | 0.31351869  | 0.017485721 | 0.353260177 |
| 0.140216535 | 0.211273487 | 0.384993105 | 0.249411768 |
| 0.236868607 | 0.164469725 | 0.107901789 | 0.299313918 |



|             |             |             |             |
|-------------|-------------|-------------|-------------|
| 0.217523195 | 0.036076138 | 0.060612974 | 0.243932618 |
| 0.212519481 | 0.059255455 | 0.274770918 | 0.278710368 |
| 0.216231012 | 0.354932218 | 0.397045851 | 0.149740628 |
| 0.213331054 | 0.169767131 | 0.120651661 | 0.29390733  |
| 0.303450401 | 0.119876526 | 0.210369809 | 0.161107727 |
| 0.09383074  | 0.256825842 | 0.221147032 | 0.065612464 |
| 0.127607576 | 0.12913029  | 0.03314302  | 0.220723458 |
| 0.213410416 | 0.104297917 | 0.14455156  | 0.266928472 |
| 0.241384546 | 0.323726119 | 0.260391391 | 0.203296026 |
| 0.1999532   | 0.150451254 | 0.202869683 | 0.086309289 |
| 0.113530068 | 0.254281938 | 0.197495929 | 0.172717518 |
| 0.05941141  | 0.192178693 | 0.162143746 | 0.098157992 |
| 0.079883607 | 0.096278641 | 0.078885308 | 0.17679692  |
| 0.122742941 | 0.110679441 | 0.191686952 | 0.253989612 |
| 0.272854156 | 0.134400035 | 0.289680823 | 0.339471778 |
| 0.12336335  | 0.19277909  | 0.206023104 | 0.075588829 |
| 0.301392099 | 0.067280931 | 0.053910801 | 0.253249889 |
| 0.115869536 | 0.369374739 | 0.14735656  | 0.242309425 |
| 0.168250758 | 0.200948766 | 0.3592718   | 0.043968489 |
| 0.161978558 | 0.234169405 | 0.284653012 | 0.243903871 |
| 0.169518918 | 0.253627638 | 0.089108574 | 0.195469982 |
| 0.177658179 | 0.152831187 | 0.306446535 | 0.267744214 |
| 0.169045212 | 0.329659657 | 0.243644603 | 0.243172028 |
| 0.255874407 | 0.132523673 | 0.050412381 | 0.341456799 |
| 0.311941487 | 0.379431413 | 0.219989185 | 0.301476326 |
| 0.117485779 | 0.033327659 | 0.320608945 | 0.21224922  |
| 0.229786035 | 0.310373701 | 0.271605966 | 0.185457673 |
| 0.248438224 | 0.180100435 | 0.045328887 | 0.319482447 |
| 0.241025493 | 0.27198088  | 0.091594531 | 0.308813488 |
| 0.233490993 | 0.064729869 | 0.215237739 | 0.125045192 |
| 0.17602874  | 0.143225394 | 0.206244376 | 0.246936113 |
| 0.264069217 | 0.206084457 | 0.161178177 | 0.292683143 |
| 0.04560462  | 0.084183818 | 0.265286138 | 0.244831708 |
| 0.144138163 | 0.257736307 | 0.125991388 | 0.116637575 |
| 0.114786711 | 0.224178295 | 0.366919368 | 0.173832481 |
| 0.090393407 | 0.105105077 | 0.365166412 | 0.152744022 |
| 0.301334812 | 0.283154317 | 0.253791252 | 0.176291851 |
| 0.266590784 | 0.281464209 | 0.188805479 | 0.274465566 |
| 0.166630753 | 0.263465463 | 0.200260272 | 0.055168229 |
| 0.361484913 | 0.042984282 | 0.038252769 | 0.273423492 |
| 0.206418261 | 0.176761061 | 0.007688102 | 0.109550169 |
| 0.248960912 | 0.39053314  | 0.221781242 | 0.218227986 |
| 0.039630244 | 0.273978242 | 0.062748245 | 0.329873923 |
| 0.247624431 | 0.145060281 | 0.302724876 | 0.236201852 |
| 0.248054857 | 0.285050896 | 0.199423046 | 0.296263668 |
| 0.20952965  | 0.23989412  | 0.123052743 | 0.297462319 |
| 0.256776018 | 0.268639006 | 0.251951003 | 0.243492081 |
| 0.321710377 | 0.360052743 | 0.248496017 | 0.06995523  |
| 0.195411457 | 0.075240739 | 0.070164964 | 0.113318482 |
| 0.108380587 | 0.240048079 | 0.284193987 | 0.371789123 |
| 0.314263713 | 0.08901869  | 0.097979427 | 0.230275148 |
| 0.267298987 | 0.338044315 | 0.142203478 | 0.025685078 |
| 0.022418385 | 0.103488513 | 0.183908784 | 0.312288484 |
| 0.303950064 | 0.037889757 | 0.063076744 | 0.059454325 |

|             |             |             |             |
|-------------|-------------|-------------|-------------|
| 0.179677385 | 0.30264883  | 0.262590985 | 0.353778991 |
| 0.315845594 | 0.236590685 | 0.074651745 | 0.343712664 |
| 0.211344228 | 0.11770091  | 0.321284692 | 0.230458777 |
| 0.232246112 | 0.306208453 | 0.140551315 | 0.342122368 |
| 0.111964644 | 0.318829526 | 0.250867154 | 0.145075414 |
| 0.118429875 | 0.26616903  | 0.225233963 | 0.384031445 |
| 0.23099104  | 0.11900208  | 0.110114522 | 0.030535669 |
| 0.121276435 | 0.339575936 | 0.17860033  | 0.363184345 |
| 0.280289361 | 0.380173131 | 0.269633985 | 0.243266137 |
| 0.127916198 | 0.226920894 | 0.231552137 | 0.022712026 |
| 0.263106182 | 0.128133693 | 0.257338758 | 0.09604162  |
| 0.093220677 | 0.216642211 | 0.195271252 | 0.174282295 |
| 0.19989296  | 0.212119662 | 0.359420589 | 0.372016313 |
| 0.234554974 | 0.186040939 | 0.283563197 | 0.300077628 |
| 0.097893399 | 0.304288604 | 0.233764728 | 0.099946303 |
| 0.108271998 | 0.202948492 | 0.271888284 | 0.172297578 |
| 0.098687879 | 0.38671433  | 0.168853843 | 0.328261722 |
| 0.217526101 | 0.286926517 | 0.278250485 | 0.200230625 |
| 0.240311144 | 0.15303032  | 0.165190014 | 0.037131268 |
| 0.244957321 | 0.334238549 | 0.15320081  | 0.205900969 |
| 0.228875039 | 0.20569579  | 0.147081125 | 0.072055832 |
| 0.163817523 | 0.097952241 | 0.160329468 | 0.397372682 |
| 0.19396308  | 0.1801529   | 0.094892819 | 0.207147495 |
| 0.30467259  | 0.234836411 | 0.097450088 | 0.23108482  |
| 0.297933566 | 0.24953869  | 0.32291044  | 0.343051131 |
| 0.161441351 | 0.255455722 | 0.257148841 | 0.163489011 |
| 0.198355739 | 0.205072183 | 0.2620967   | 0.039574878 |
| 0.185429275 | 0.194417208 | 0.128594127 | 0.281947355 |
| 0.209783979 | 0.187909654 | 0.154135848 | 0.36881313  |
| 0.139475562 | 0.28797489  | 0.087986854 | 0.209195688 |
| 0.298097417 | 0.12699964  | 0.299963963 | 0.108259815 |
| 0.136404305 | 0.236653157 | 0.072791049 | 0.226879753 |
| 0.15071122  | 0.268725531 | 0.18841117  | 0.289520544 |
| 0.205601147 | 0.318436891 | 0.246521496 | 0.071505697 |
| 0.063188009 | 0.142261366 | 0.255931146 | 0.078110904 |
| 0.066512237 | 0.380672114 | 0.109439171 | 0.189635319 |
| 0.218722293 | 0.160826216 | 0.208244785 | 0.164242129 |
| 0.196488639 | 0.273384958 | 0.072757584 | 0.24102595  |
| 0.175089762 | 0.21442162  | 0.151167637 | 0.11111667  |
| 0.175714187 | 0.21292778  | 0.238810063 | 0.265582711 |
| 0.245065104 | 0.360199707 | 0.185813472 | 0.239679775 |
| 0.179858543 | 0.158748565 | 0.09295159  | 0.313147774 |
| 0.108524859 |             |             |             |

| CCR5        | 0.327084072 | 0.511308707 | 0.314061491 |
|-------------|-------------|-------------|-------------|
| 0.397368438 | 0.363840955 | 0.369579748 | 0.255552226 |
| 0.191357485 | 0.12618098  | 0.017013584 | 0.04649384  |
| 0.343837156 | 0.230827952 | 0.296300708 | 0.344823894 |
| 0.363998289 | 0.131990779 | 0.267380288 | 0.249676653 |
| 0.362641817 | 0.141967918 | 0.3601565   | 0.121268916 |
| 0.225978107 | 0.112916904 | 0.095622276 | 0.258766096 |
| 0.387458897 | 0.103515268 | 0.352488818 | 0.356420955 |
| 0.07906531  | 0.356127662 | 0.505263865 | 0.378025058 |
| 0.491208939 | 0.314293874 | 0.007072717 | 0.354411731 |
| 0.361515639 | 0.388150142 | 0.36961329  | 0.332459072 |

|             |             |             |             |
|-------------|-------------|-------------|-------------|
| 0.070848686 | 0.479989597 | 0.285011076 | 0.318140687 |
| 0.230429237 | 0.047727563 | 0.262132462 | 0.43805959  |
| 0.481364818 | 0.399790602 | 0.247962505 | 0.2172633   |
| 0.245517249 | 0.241547196 | 0.241844171 | 0.307255021 |
| 0.258425545 | 0.198875176 | 0.47855397  | 0.149953971 |
| 0.164715902 | 0.240036349 | 0.118789409 | 0.27059792  |
| 0.275708041 | 0.343200975 | 0.022190764 | 0.302479806 |
| 0.007747192 | 0.346890396 | 0.295479352 | 0.279020461 |
| 0.049018711 | 0.038729433 | 0.142701992 | 0.357163316 |
| 0.404874237 | 0.412336739 | 0.434862712 | 0.444124186 |
| 0.176094517 | 0.238888717 | 0.302665398 | 0.19556151  |
| 0.384576802 | 0.239401735 | 0.113064257 | 0.36320183  |
| 0.447110763 | 0.505185722 | 0.195387547 | 0.224349058 |
| 1           | 0.462288074 | 0.384283068 | 0.389293674 |
| 0.345626374 | 0.039942166 | 0.443082641 | 0.475429458 |
| 0.355568231 | 0.244396107 | 0.151992811 | 0.367488324 |
| 0.064502601 | 0.309885945 | 0.345791861 | 0.118137879 |
| 0.422826762 | 0.038157223 | 0.185538713 | 0.367176693 |
| 0.170738646 | 0.369899864 | 0.49208241  | 0.220254265 |
| 0.31643008  | 0.025599588 | 0.144062947 | 0.030057764 |
| 0.300681342 | 0.103246782 | 0.478668    | 0.433340752 |
| 0.231319131 | 0.337743629 | 0.27673433  | 0.002695613 |
| 0.028862317 | 0.132037191 | 0.353808401 | 0.283475743 |
| 0.360218365 | 0.32677549  | 0.277612428 | 0.338361676 |
| 0.367369154 | 0.425276972 | 0.08650364  | 0.120361735 |
| 0.384824272 | 0.13309238  | 0.237736895 | 0.378644029 |
| 0.296896861 | 0.136044462 | 0.14387     | 0.487810023 |
| 0.424582591 | 0.109038627 | 0.267371331 | 0.358576979 |
| 0.371345079 | 0.298627286 | 0.118801556 | 0.283222595 |
| 0.081628815 | 0.461585762 | 0.025791326 | 0.284155434 |
| 0.292174379 | 0.125981196 | 0.00904966  | 0.268446007 |
| 0.318129139 | 0.425311864 | 0.4494301   | 0.109108069 |
| 0.316235232 | 0.363862909 | 0.288617375 | 0.407297255 |
| 0.034345518 | 0.04713708  | 0.241842697 | 0.482194242 |
| 0.290844909 | 0.442263377 | 0.274163976 | 0.255926935 |
| 0.256793124 | 0.38261114  | 0.001966269 | 0.49131415  |
| 0.504238175 | 0.264213231 | 0.382248649 | 0.326304169 |
| 0.339836042 | 0.415135461 | 0.029002335 | 0.357597119 |
| 0.295361547 | 0.084680368 | 0.456727004 | 0.16995218  |
| 0.431549038 | 0.058760827 | 0.315272177 | 0.36276267  |
| 0.356565578 | 0.010228119 | 0.271970641 | 0.372475118 |
| 0.022798286 | 0.154167358 | 0.354051996 | 0.383065412 |
| 0.387616104 | 0.364541244 | 0.427006788 | 0.329608717 |
| 0.380071131 | 0.228603408 | 0.012771225 | 0.258879601 |
| 0.34834739  | 0.323404071 | 0.448650545 | 0.263013843 |
| 0.285510426 | 0.470136759 | 0.34743657  | 0.247736204 |
| 0.070356089 | 0.315237714 | 0.034634218 | 0.332145054 |
| 0.345118051 | 0.178956346 | 0.35215218  | 0.099084454 |
| 0.070354739 | 0.505078362 | 0.135543908 | 0.193882562 |
| 0.093650084 | 0.391111504 | 0.247177381 | 0.299700083 |
| 0.243070493 | 0.178583925 | 0.326493125 | 0.367721601 |
| 0.071672376 | 0.112218931 | 0.007991925 | 0.319235002 |
| 0.178621703 | 0.340014206 | 0.341296986 | 0.350722976 |
| 0.302368274 | 0.135567633 | 0.362510981 | 0.229693038 |

|             |             |             |             |
|-------------|-------------|-------------|-------------|
| 0.112062782 | 0.018749356 | 0.491733297 | 0.349436106 |
| 0.304401422 | 0.184439553 | 0.040963808 | 0.312283173 |
| 0.446374092 | 0.342334785 | 0.245024435 | 0.456278032 |
| 0.0267451   | 0.427031521 | 0.288209299 | 0.134583129 |
| 0.329210035 | 0.277482339 | 0.416984171 | 0.088533136 |
| 0.32737038  | 0.470468286 | 0.258184432 | 0.208083973 |
| 0.399344113 | 0.377886832 | 0.051807699 | 0.3398416   |
| 0.338875977 | 0.041294012 | 0.496482169 | 0.109502815 |
| 0.022445047 | 0.354048928 | 0.390249651 | 0.081409946 |
| 0.080162599 | 0.377948765 | 0.082270963 | 0.269592426 |
| 0.504151567 | 0.370180708 | 0.398570192 | 0.16256477  |
| 0.06785226  | 0.019631499 | 0.15973602  | 0.297704862 |
| 0.497279951 | 0.471937348 | 0.231167335 | 0.342853674 |
| 0.248206996 | 0.333996264 | 0.155147437 | 0.483533852 |
| 0.117309851 | 0.487722288 | 0.008439976 | 0.363967913 |
| 0.49650819  | 0.283275293 | 0.094690278 | 0.343266165 |
| 0.372920243 | 0.069807753 | 0.177363361 | 0.489875364 |
| 0.412935598 | 0.332861932 | 0.359899107 | 0.337920928 |
| 0.036325789 | 0.069983866 | 0.341329409 | 0.138320366 |
| 0.383709527 | 0.226905174 | 0.032337045 | 0.300837366 |
| 0.072014419 | 0.462772733 | 0.36979224  | 0.091167196 |
| 0.374609604 | 0.280284167 | 0.31430006  | 0.051380165 |
| 0.400228009 | 0.457128537 | 0.510716011 | 0.161462637 |
| 0.355287598 | 0.47086726  | 0.336118513 | 0.071012961 |
| 0.017957299 | 0.49190831  | 0.344785126 | 0.039969777 |
| 0.418630258 | 0.249725267 | 0.030945466 | 0.488431892 |
| 0.201207665 | 0.430928956 | 0.009108507 | 0.043857847 |
| 0.029309274 | 0.370631727 | 0.484583024 | 0.350264481 |
| 0.302407591 | 0.311890866 | 0.002032535 | 0.476659038 |
| 0.491243101 | 0.015886869 | 0.116616739 | 0.374819805 |
| 0.356099835 | 0.510173231 | 0.279178326 | 0.402998333 |
| 0.357117341 | 0.49015383  | 0.280629387 | 0.26312449  |
| 0.413788592 | 0.458343423 | 0.370127412 | 0.447618158 |
| 0.414427043 | 0.347919796 | 0.298095374 | 0.034188131 |
| 0.151268034 | 0.241873098 | 0.355771285 | 0.134177685 |
| 0.302421384 | 0.158634174 | 0.442260405 | 0.404901074 |
| 0.440641151 | 0.006073138 | 0.187378974 | 0.370168887 |
| 0.419031879 | 0.436774603 | 0.013967455 | 0.006088486 |
| 0.005133526 | 0.028061612 | 0.340644568 | 0.206077577 |
| 0.461720571 | 0.295272705 | 0.007773469 | 0.067622533 |
| 0.28019538  | 0.334496552 | 0.495956392 | 0.346900246 |
| 0.350917323 | 0.082781921 | 0.354106126 | 0.351202177 |
| 0.08151028  | 0.273238548 | 0.456204286 | 0.484102791 |
| 0.03253932  | 0.217245863 | 0.285997713 | 0.461311965 |
| 0.0521459   | 0.275907179 | 0.346197539 | 0.352887469 |
| 0.007848858 | 0.081130718 | 0.07987684  | 0.360900891 |
| 0.481468142 | 0.106873033 | 0.049802738 | 0.147706555 |
| 0.178491232 | 0.402818356 | 0.195285718 | 0.47555193  |
| 0.398251689 | 0.383879812 | 0.061266919 | 0.48380426  |
| 0.063403291 | 0.479800962 | 0.287676058 | 0.078939946 |
| 0.215226643 | 0.012843892 | 0.423982261 | 0.212860605 |
| 0.313053817 | 0.336515766 | 0.208132111 | 0.014518591 |
| 0.136321511 | 0.056322403 | 0.440992858 | 0.38567637  |
| 0.023231808 | 0.244466028 | 0.253544011 | 0.330716501 |

|             |             |             |             |
|-------------|-------------|-------------|-------------|
| 0.30330769  | 0.403076253 | 0.500534411 | 0.369938417 |
| 0.135382223 | 0.078309939 | 0.361066291 | 0.331117677 |
| 0.239473408 | 0.435170025 | 0.333906671 | 0.487765699 |
| 0.34702331  | 0.420915097 | 0.438216961 | 0.361586431 |
| 0.192756674 | 0.350063592 | 0.390374699 | 0.044951175 |
| 0.323093853 | 0.409151246 | 0.301461893 | 0.177678929 |
| 0.271395141 | 0.302950693 | 0.047521708 | 0.123844351 |
| 0.252175477 | 0.327636297 | 0.17630675  | 0.372242317 |
| 0.321818984 | 0.338110648 | 0.040116135 | 0.080362465 |
| 0.518423332 | 0.41996745  | 0.183493228 | 0.399769275 |
| 0.151068523 | 0.343666667 | 0.362642122 | 0.357837174 |
| 0.308000106 | 0.409250297 | 0.37339555  | 0.386399277 |
| 0.439774755 | 0.276038209 | 0.515443977 | 0.09760028  |
| 0.092661411 | 0.319514259 | 0.146537714 | 0.08506282  |
| 0.164278123 | 0.029454503 | 0.240649778 | 0.353766406 |
| 0.2912818   | 0.361946014 | 0.270636864 | 0.087428586 |
| 0.267318618 | 0.27125139  | 0.318120987 | 0.257658602 |
| 0.114624356 | 0.503506892 | 0.01218518  | 0.055756167 |
| 0.292588936 | 0.387086868 | 0.340554076 | 0.21885606  |
| 0.251859721 | 0.101913916 | 0.294303078 | 0.29799765  |
| 0.357035247 | 0.278902338 | 0.388560091 | 0.04607509  |
| 0.032949759 | 0.439951887 | 0.314184834 | 0.014043451 |
| 0.072541683 | 0.314742744 | 0.215917262 | 0.298836624 |
| 0.018148551 | 0.451856957 | 0.37073684  | 0.35544364  |
| 0.339060703 | 0.066718383 | 0.336686719 | 0.081296045 |
| 0.057954593 | 0.433958208 | 0.312955878 | 0.489542986 |
| 0.25658837  | 0.385827619 | 0.438330935 | 0.370505056 |
| 0.087805255 | 0.280479553 | 0.04877856  | 0.378197462 |
| 0.356422819 |             |             |             |
| CCR7        | 0.454471613 | 0.508427842 | 0.408718536 |
| 0.454466768 | 0.444116791 | 0.442988046 | 0.254700394 |
| 0.256201649 | 0.095417662 | 0.00658305  | 0.02311804  |
| 0.448401612 | 0.213307919 | 0.320955144 | 0.375130449 |
| 0.439410105 | 0.133061285 | 0.40187968  | 0.27299607  |
| 0.454225538 | 0.131791296 | 0.414242383 | 0.111931518 |
| 0.283543587 | 0.098455697 | 0.074081743 | 0.258716182 |
| 0.47323571  | 0.084732696 | 0.408368495 | 0.45137237  |
| 0.103362631 | 0.47527575  | 0.517222376 | 0.440439786 |
| 0.50728584  | 0.437504661 | 0.01488171  | 0.351365228 |
| 0.463561397 | 0.455476235 | 0.454638958 | 0.361183403 |
| 0.051155734 | 0.501155941 | 0.281884405 | 0.403754852 |
| 0.286121208 | 0.031774979 | 0.323889786 | 0.46192656  |
| 0.479047531 | 0.460611623 | 0.296811788 | 0.195816986 |
| 0.211858754 | 0.313692657 | 0.253450077 | 0.408266754 |
| 0.262215065 | 0.234082689 | 0.479325486 | 0.110766737 |
| 0.18330366  | 0.323672009 | 0.150540297 | 0.322394103 |
| 0.340466486 | 0.452530091 | 0.025941749 | 0.417972279 |
| 0.004377337 | 0.433413428 | 0.384115083 | 0.300313836 |
| 0.044022925 | 0.022536059 | 0.177782358 | 0.38765175  |
| 0.480152883 | 0.448565266 | 0.471104673 | 0.467158258 |
| 0.181439576 | 0.305920681 | 0.388100935 | 0.188040515 |
| 0.472357326 | 0.213279652 | 0.127032611 | 0.433023634 |
| 0.47177625  | 0.505826067 | 0.204910362 | 0.262566129 |
| 0.462288074 | 1           | 0.448646868 | 0.444552054 |

|             |             |             |             |
|-------------|-------------|-------------|-------------|
| 0.343609581 | 0.048578135 | 0.450003688 | 0.473629124 |
| 0.449771759 | 0.298542715 | 0.153218462 | 0.467170304 |
| 0.065434089 | 0.416088814 | 0.38502904  | 0.16805531  |
| 0.480851505 | 0.023937668 | 0.207719511 | 0.410849943 |
| 0.242295737 | 0.475118736 | 0.493607045 | 0.220455233 |
| 0.421003643 | 0.021386389 | 0.123300968 | 0.035641187 |
| 0.369293891 | 0.127693709 | 0.497717336 | 0.47827912  |
| 0.299858644 | 0.390819295 | 0.318435187 | 0.001894931 |
| 0.026085667 | 0.192536692 | 0.464438888 | 0.414961556 |
| 0.46880087  | 0.40658566  | 0.243463725 | 0.45309477  |
| 0.4500479   | 0.47059684  | 0.083565969 | 0.122183949 |
| 0.457608463 | 0.192555284 | 0.259124905 | 0.4723396   |
| 0.309438991 | 0.152784081 | 0.147229122 | 0.477282532 |
| 0.44580396  | 0.099340664 | 0.40865446  | 0.432845544 |
| 0.371997113 | 0.349294228 | 0.127497573 | 0.311366459 |
| 0.066461302 | 0.472597432 | 0.026071261 | 0.404126052 |
| 0.273169331 | 0.141307376 | 0.015067602 | 0.3415151   |
| 0.334375508 | 0.459738539 | 0.481558166 | 0.122177737 |
| 0.356500212 | 0.419453102 | 0.4059945   | 0.458898722 |
| 0.01180525  | 0.055064405 | 0.370693487 | 0.476373982 |
| 0.374694438 | 0.468501859 | 0.331229476 | 0.313489931 |
| 0.289056222 | 0.468563233 | 0.003365043 | 0.503200465 |
| 0.505977765 | 0.383756603 | 0.418410851 | 0.434011175 |
| 0.378654719 | 0.474064149 | 0.05365409  | 0.440340702 |
| 0.425315111 | 0.092471265 | 0.476854123 | 0.16408971  |
| 0.454507221 | 0.044156283 | 0.392990123 | 0.439736809 |
| 0.445326891 | 0.010913021 | 0.304943013 | 0.443855347 |
| 0.024921626 | 0.143937659 | 0.469235588 | 0.444325698 |
| 0.410475959 | 0.461568007 | 0.474258565 | 0.35666297  |
| 0.444598881 | 0.28761282  | 0.013541353 | 0.316838647 |
| 0.46120487  | 0.396955846 | 0.451719711 | 0.291594699 |
| 0.413039864 | 0.467871425 | 0.447702895 | 0.238914849 |
| 0.0528508   | 0.385220345 | 0.027484798 | 0.346087144 |
| 0.431248303 | 0.143113239 | 0.412389033 | 0.157583976 |
| 0.069474075 | 0.492380429 | 0.160225162 | 0.241567128 |
| 0.110664367 | 0.441759114 | 0.297757569 | 0.269764782 |
| 0.21601217  | 0.177191636 | 0.358055092 | 0.399689036 |
| 0.055491379 | 0.101168094 | 0.013134381 | 0.386903904 |
| 0.1471165   | 0.364369331 | 0.372006798 | 0.464448297 |
| 0.376181305 | 0.120133755 | 0.396439558 | 0.281258229 |
| 0.110741586 | 0.015529394 | 0.489004496 | 0.435302044 |
| 0.412812673 | 0.184880051 | 0.043257342 | 0.366223948 |
| 0.479289747 | 0.390213796 | 0.360380456 | 0.47357679  |
| 0.031997103 | 0.474658608 | 0.268572619 | 0.12473023  |
| 0.376233385 | 0.287513359 | 0.474730168 | 0.079304715 |
| 0.457024042 | 0.469437864 | 0.33195826  | 0.189579953 |
| 0.437849345 | 0.459568458 | 0.040222458 | 0.455057409 |
| 0.454978319 | 0.034126715 | 0.496732106 | 0.121802676 |
| 0.02117713  | 0.445147867 | 0.454051413 | 0.078274655 |
| 0.078258159 | 0.369897251 | 0.072540638 | 0.297661633 |
| 0.489615227 | 0.425407788 | 0.46571969  | 0.207286005 |
| 0.047623032 | 0.010618354 | 0.202036078 | 0.408435974 |
| 0.515616662 | 0.47258539  | 0.282125984 | 0.36475419  |
| 0.271004482 | 0.337263989 | 0.217089875 | 0.47243148  |

|             |             |             |             |
|-------------|-------------|-------------|-------------|
| 0.203956157 | 0.508747503 | 0.00745081  | 0.447420391 |
| 0.506984035 | 0.378909701 | 0.078146887 | 0.375023813 |
| 0.451943623 | 0.056100724 | 0.249857543 | 0.491306585 |
| 0.470316625 | 0.352151054 | 0.364358856 | 0.455842959 |
| 0.023975287 | 0.060279902 | 0.401022733 | 0.167560234 |
| 0.419834895 | 0.234280831 | 0.042030151 | 0.406528639 |
| 0.049090075 | 0.459990846 | 0.471413354 | 0.062616124 |
| 0.401851352 | 0.386477684 | 0.386874528 | 0.043357668 |
| 0.443695471 | 0.47572996  | 0.519208772 | 0.208995736 |
| 0.468530187 | 0.45729826  | 0.399674963 | 0.081523933 |
| 0.016194607 | 0.502354904 | 0.459792247 | 0.025792075 |
| 0.480544455 | 0.32694383  | 0.014332203 | 0.489091399 |
| 0.218689801 | 0.466329634 | 0.005579531 | 0.081817071 |
| 0.037832122 | 0.460970897 | 0.484637943 | 0.449639372 |
| 0.320204737 | 0.412780485 | 0.005563871 | 0.485311286 |
| 0.484401697 | 0.012836932 | 0.134207546 | 0.464239522 |
| 0.431487082 | 0.52112548  | 0.306956872 | 0.454589312 |
| 0.430788969 | 0.492042157 | 0.281542257 | 0.280062283 |
| 0.47624455  | 0.465046396 | 0.472321139 | 0.459468073 |
| 0.481101646 | 0.434618641 | 0.314122976 | 0.020216978 |
| 0.132108212 | 0.296448039 | 0.340342762 | 0.087275645 |
| 0.410879062 | 0.140000433 | 0.466238972 | 0.475338814 |
| 0.465451151 | 0.00495256  | 0.206370633 | 0.47164733  |
| 0.476151819 | 0.481825896 | 0.022564074 | 0.006820392 |
| 0.007875313 | 0.016283056 | 0.427375411 | 0.247594326 |
| 0.470459584 | 0.298296353 | 0.005315494 | 0.067763541 |
| 0.317122156 | 0.392947147 | 0.492798778 | 0.413445296 |
| 0.456996438 | 0.089609334 | 0.324191505 | 0.437700728 |
| 0.065160189 | 0.401074338 | 0.471089727 | 0.481642888 |
| 0.042612026 | 0.254690101 | 0.427884582 | 0.481967194 |
| 0.058899886 | 0.329374214 | 0.456287036 | 0.349036369 |
| 0.014144752 | 0.080292561 | 0.066456106 | 0.458089618 |
| 0.494667838 | 0.079702943 | 0.032915144 | 0.204320291 |
| 0.14112048  | 0.477344107 | 0.181163952 | 0.478771851 |
| 0.47834156  | 0.461244623 | 0.071386314 | 0.484608295 |
| 0.043170127 | 0.486369185 | 0.327119499 | 0.073597841 |
| 0.308012429 | 0.014000168 | 0.447409892 | 0.151184845 |
| 0.400290384 | 0.461631082 | 0.198315252 | 0.015299188 |
| 0.16714853  | 0.053772365 | 0.474969385 | 0.461028699 |
| 0.031124404 | 0.290133914 | 0.313078782 | 0.441106851 |
| 0.366886872 | 0.461757194 | 0.509333677 | 0.440955776 |
| 0.111377546 | 0.132338825 | 0.462236722 | 0.456282151 |
| 0.312894105 | 0.472689085 | 0.312213334 | 0.492397289 |
| 0.463716502 | 0.468426095 | 0.464963576 | 0.395108308 |
| 0.226414469 | 0.461899919 | 0.434862036 | 0.026379743 |
| 0.392998416 | 0.474379267 | 0.424283852 | 0.149902686 |
| 0.26557327  | 0.382407001 | 0.063108144 | 0.226476242 |
| 0.316456371 | 0.391279149 | 0.165054959 | 0.460762212 |
| 0.455117196 | 0.459749448 | 0.059842649 | 0.0623384   |
| 0.523668047 | 0.455147422 | 0.189292328 | 0.4700358   |
| 0.182542612 | 0.363741375 | 0.463443007 | 0.454474262 |
| 0.398596593 | 0.472381719 | 0.479240308 | 0.447579476 |
| 0.450829612 | 0.301693241 | 0.519430698 | 0.141159624 |
| 0.084450362 | 0.448612785 | 0.108208025 | 0.092882316 |

|             |             |             |             |
|-------------|-------------|-------------|-------------|
| 0.160284514 | 0.026629584 | 0.285260904 | 0.447137511 |
| 0.372603523 | 0.408256017 | 0.396226599 | 0.088336641 |
| 0.33249695  | 0.416187336 | 0.379614947 | 0.251262485 |
| 0.087183499 | 0.497542682 | 0.009377044 | 0.058962512 |
| 0.384202133 | 0.467312232 | 0.375907575 | 0.249664006 |
| 0.285068755 | 0.137000745 | 0.322918015 | 0.385168583 |
| 0.367627374 | 0.388052039 | 0.466513271 | 0.045190863 |
| 0.02751554  | 0.477994864 | 0.436890942 | 0.019754268 |
| 0.091101328 | 0.441531916 | 0.334467716 | 0.263356797 |
| 0.019471144 | 0.448815236 | 0.403286794 | 0.439132359 |
| 0.407480737 | 0.075417859 | 0.412415709 | 0.112887153 |
| 0.074294415 | 0.457332546 | 0.398989716 | 0.496422805 |
| 0.357219402 | 0.443290093 | 0.469894747 | 0.472475129 |
| 0.136473374 | 0.402258614 | 0.036234364 | 0.481241299 |
| 0.417849707 |             |             |             |
| CCR9        | 0.3216296   | 0.499460216 | 0.187423212 |
| 0.366153657 | 0.208194197 | 0.232129792 | 0.120498856 |
| 0.102259472 | 0.079167365 | 0.007001459 | 0.017992485 |
| 0.263564579 | 0.104529962 | 0.133125399 | 0.180193646 |
| 0.351574756 | 0.073162565 | 0.158999845 | 0.133256685 |
| 0.300384664 | 0.060066823 | 0.300757465 | 0.068752398 |
| 0.134937068 | 0.068884308 | 0.050861205 | 0.148240181 |
| 0.411163483 | 0.060406259 | 0.141539664 | 0.293975267 |
| 0.06002066  | 0.358692487 | 0.493152576 | 0.297894098 |
| 0.476968869 | 0.306269819 | 0.005324443 | 0.145317809 |
| 0.386385145 | 0.375514414 | 0.308542511 | 0.206104312 |
| 0.03876879  | 0.456535247 | 0.138839964 | 0.231603037 |
| 0.136930693 | 0.026057428 | 0.115816712 | 0.415784934 |
| 0.448526608 | 0.246524226 | 0.120995501 | 0.097748346 |
| 0.088749637 | 0.094412794 | 0.123250977 | 0.224985355 |
| 0.120138957 | 0.077078949 | 0.455707653 | 0.077241423 |
| 0.068815933 | 0.121902131 | 0.076934592 | 0.134688009 |
| 0.144998617 | 0.321531162 | 0.015031483 | 0.236008109 |
| 0.00312157  | 0.284517767 | 0.210200777 | 0.150996519 |
| 0.033291769 | 0.017766661 | 0.091051517 | 0.21266596  |
| 0.427905576 | 0.429330282 | 0.457239792 | 0.461237604 |
| 0.096216488 | 0.145124297 | 0.174547027 | 0.101346781 |
| 0.396120341 | 0.105728553 | 0.086314624 | 0.348372749 |
| 0.467872091 | 0.490390369 | 0.108871377 | 0.1374345   |
| 0.384283068 | 0.448646868 | 1           | 0.188255114 |
| 0.180820489 | 0.036350418 | 0.413654104 | 0.480168794 |
| 0.359938884 | 0.139690909 | 0.093668358 | 0.348438303 |
| 0.041013364 | 0.178070814 | 0.248730893 | 0.071500174 |
| 0.443753782 | 0.02163482  | 0.11193421  | 0.185647639 |
| 0.122738981 | 0.383626375 | 0.487246986 | 0.112163713 |
| 0.174193592 | 0.018443057 | 0.097321986 | 0.024039635 |
| 0.148270134 | 0.071357554 | 0.448103662 | 0.429809392 |
| 0.107414204 | 0.158572326 | 0.136325363 | 0.003110939 |
| 0.022240787 | 0.097421937 | 0.355679995 | 0.160652098 |
| 0.343780932 | 0.350490385 | 0.134960896 | 0.305139629 |
| 0.29067327  | 0.443615069 | 0.035247586 | 0.067931967 |
| 0.230364902 | 0.093067807 | 0.140988664 | 0.241457408 |
| 0.161698734 | 0.076873339 | 0.077402692 | 0.502353774 |
| 0.402948144 | 0.058928022 | 0.142120636 | 0.332468344 |



|             |             |             |             |
|-------------|-------------|-------------|-------------|
| 0.148470668 | 0.184616407 | 0.067228646 | 0.130328986 |
| 0.035955535 | 0.447812013 | 0.021498717 | 0.153287201 |
| 0.150908582 | 0.065656367 | 0.010048224 | 0.124019682 |
| 0.164294208 | 0.39961338  | 0.426667336 | 0.069355319 |
| 0.147176223 | 0.275140611 | 0.13448759  | 0.33182673  |
| 0.012101668 | 0.037969491 | 0.111162549 | 0.476040684 |
| 0.184063599 | 0.469512724 | 0.157692675 | 0.156662951 |
| 0.1534458   | 0.413679723 | 0.005449955 | 0.471337165 |
| 0.497356049 | 0.12454795  | 0.226588315 | 0.242859878 |
| 0.167916548 | 0.428941679 | 0.019656067 | 0.310564669 |
| 0.254545373 | 0.055920964 | 0.480107139 | 0.094442143 |
| 0.427582533 | 0.033342174 | 0.132951641 | 0.390344201 |
| 0.319505724 | 0.005627533 | 0.113162459 | 0.287964957 |
| 0.02037269  | 0.058758965 | 0.333490059 | 0.31205293  |
| 0.240282521 | 0.383823765 | 0.457057398 | 0.16693237  |
| 0.210758867 | 0.125449342 | 0.011725905 | 0.157045994 |
| 0.365560458 | 0.147381142 | 0.434533242 | 0.13329702  |
| 0.186150556 | 0.46121409  | 0.360070095 | 0.10316872  |
| 0.036605816 | 0.143050551 | 0.021436878 | 0.180535657 |
| 0.358586158 | 0.068559574 | 0.175845575 | 0.071802336 |
| 0.046997155 | 0.504408923 | 0.091380477 | 0.119880642 |
| 0.06626656  | 0.213778665 | 0.138109186 | 0.111489999 |
| 0.100285038 | 0.098059547 | 0.165878764 | 0.182270419 |
| 0.02944875  | 0.058829559 | 0.011687019 | 0.136424178 |
| 0.065727115 | 0.137626674 | 0.133541919 | 0.286416482 |
| 0.12906108  | 0.063310583 | 0.181543078 | 0.148651193 |
| 0.081700181 | 0.013815067 | 0.487817671 | 0.301339511 |
| 0.267977491 | 0.098703872 | 0.029985463 | 0.128327307 |
| 0.435498598 | 0.172641078 | 0.113037579 | 0.428814377 |
| 0.026020227 | 0.44959193  | 0.126995806 | 0.077531097 |
| 0.153824188 | 0.137308864 | 0.443655888 | 0.03973999  |
| 0.202505435 | 0.438884851 | 0.157414713 | 0.116443385 |
| 0.365294941 | 0.282906226 | 0.024933908 | 0.339409053 |
| 0.314237354 | 0.02508807  | 0.495405605 | 0.069369141 |
| 0.017576001 | 0.327427815 | 0.347477357 | 0.053824413 |
| 0.059275427 | 0.159564847 | 0.037240102 | 0.182360885 |
| 0.502842802 | 0.332873804 | 0.356317034 | 0.114976153 |
| 0.032723009 | 0.006679153 | 0.103988275 | 0.200188711 |
| 0.475883744 | 0.478170192 | 0.133513214 | 0.169360759 |
| 0.140766441 | 0.163293323 | 0.065915191 | 0.484205561 |
| 0.098706992 | 0.484636932 | 0.006758209 | 0.35945189  |
| 0.475661719 | 0.116718086 | 0.058183831 | 0.155410111 |
| 0.354042597 | 0.041397529 | 0.108115446 | 0.478549585 |
| 0.415922489 | 0.171446424 | 0.192810221 | 0.281724786 |
| 0.017614913 | 0.030783092 | 0.232446178 | 0.094093546 |
| 0.1727746   | 0.129915468 | 0.027418497 | 0.138957065 |
| 0.037455354 | 0.424898846 | 0.397995288 | 0.055513704 |
| 0.186774368 | 0.145505948 | 0.240694445 | 0.031159491 |
| 0.418805877 | 0.46824906  | 0.495041149 | 0.092632032 |
| 0.338484106 | 0.468475608 | 0.222919984 | 0.052942833 |
| 0.01569389  | 0.48907902  | 0.30126625  | 0.028303279 |
| 0.431448975 | 0.103536746 | 0.010691476 | 0.480010633 |
| 0.112462087 | 0.404721013 | 0.014530914 | 0.045136854 |
| 0.029124515 | 0.408382135 | 0.464472429 | 0.276446207 |

|             |             |             |             |
|-------------|-------------|-------------|-------------|
| 0.117787048 | 0.225365761 | 0.003017459 | 0.489222855 |
| 0.468817187 | 0.013946996 | 0.077047454 | 0.354284626 |
| 0.340434382 | 0.504636782 | 0.155057004 | 0.413326238 |
| 0.253248815 | 0.469025343 | 0.116025911 | 0.156223563 |
| 0.409552959 | 0.456805139 | 0.359209285 | 0.451390881 |
| 0.417995509 | 0.30496909  | 0.1759472   | 0.015773843 |
| 0.103810775 | 0.10305789  | 0.160344907 | 0.063543604 |
| 0.205135489 | 0.097829775 | 0.460742851 | 0.427152325 |
| 0.450957881 | 0.005452185 | 0.090970682 | 0.355686438 |
| 0.419948889 | 0.455463415 | 0.017324596 | 0.007923064 |
| 0.009927346 | 0.018635525 | 0.202177817 | 0.133749322 |
| 0.470289147 | 0.11373412  | 0.005542911 | 0.033503966 |
| 0.175607279 | 0.252484714 | 0.475504166 | 0.297267676 |
| 0.366457922 | 0.050241105 | 0.132383297 | 0.317646566 |
| 0.051168423 | 0.235514247 | 0.464214919 | 0.452363421 |
| 0.0280707   | 0.1371636   | 0.158523748 | 0.469667588 |
| 0.036407855 | 0.171961365 | 0.273322766 | 0.152799992 |
| 0.01054426  | 0.057179222 | 0.050796724 | 0.368976714 |
| 0.461210962 | 0.046798652 | 0.025584153 | 0.059643909 |
| 0.074653867 | 0.420441586 | 0.104110242 | 0.490996107 |
| 0.40946312  | 0.3977329   | 0.04046435  | 0.472090177 |
| 0.026148268 | 0.455072876 | 0.160371864 | 0.076063102 |
| 0.142974928 | 0.01144031  | 0.425323405 | 0.100073827 |
| 0.138772618 | 0.285528791 | 0.130602253 | 0.012487321 |
| 0.098003649 | 0.037226387 | 0.452864965 | 0.416171264 |
| 0.023147398 | 0.128366665 | 0.159555632 | 0.27634685  |
| 0.147397195 | 0.361489736 | 0.478760077 | 0.200226756 |
| 0.056031031 | 0.057657852 | 0.321084305 | 0.279004726 |
| 0.106420867 | 0.46043844  | 0.149177575 | 0.502571309 |
| 0.326057467 | 0.438469814 | 0.435057673 | 0.210712042 |
| 0.099299512 | 0.235742511 | 0.275733925 | 0.024882509 |
| 0.204291216 | 0.412574981 | 0.161815685 | 0.105636723 |
| 0.136137793 | 0.190445731 | 0.030210308 | 0.084773188 |
| 0.141000702 | 0.189985155 | 0.080540813 | 0.398114191 |
| 0.245310422 | 0.294922396 | 0.023001189 | 0.050964349 |
| 0.514271598 | 0.421463655 | 0.107881701 | 0.326492741 |
| 0.100257661 | 0.190691456 | 0.385626564 | 0.361027439 |
| 0.160221835 | 0.393318415 | 0.355188733 | 0.285535217 |
| 0.402286455 | 0.144130835 | 0.501899633 | 0.05313141  |
| 0.056180649 | 0.238564092 | 0.060713495 | 0.05876136  |
| 0.087006527 | 0.026793425 | 0.134100678 | 0.32183438  |
| 0.146324396 | 0.249842486 | 0.120247549 | 0.07381228  |
| 0.153246875 | 0.149324956 | 0.203126339 | 0.114791085 |
| 0.05945534  | 0.475288986 | 0.010880962 | 0.037459392 |
| 0.142754708 | 0.384584859 | 0.18076716  | 0.141706273 |
| 0.134889039 | 0.070851323 | 0.149497598 | 0.129379624 |
| 0.135893379 | 0.151422187 | 0.396789558 | 0.039491276 |
| 0.016022222 | 0.463498305 | 0.169777528 | 0.0173959   |
| 0.042499078 | 0.240765092 | 0.132594636 | 0.128826756 |
| 0.017210175 | 0.442427818 | 0.141663025 | 0.222311864 |
| 0.195960692 | 0.045335474 | 0.324697312 | 0.052461308 |
| 0.046240037 | 0.424940426 | 0.211354407 | 0.477897769 |
| 0.15800338  | 0.3544383   | 0.416686177 | 0.360074964 |
| 0.084751611 | 0.175857876 | 0.028186346 | 0.394911603 |

0.16728475

| CCRL2       | 0.324286475 | 0.501554157 | 0.187370532 |
|-------------|-------------|-------------|-------------|
| 0.389274203 | 0.248453215 | 0.219091533 | 0.134897977 |
| 0.085988437 | 0.079705996 | 0.009694668 | 0.039042309 |
| 0.280977331 | 0.131349442 | 0.140589675 | 0.142741824 |
| 0.398179486 | 0.115815613 | 0.14610882  | 0.157564656 |
| 0.329788271 | 0.067034183 | 0.366463754 | 0.087750653 |
| 0.168642048 | 0.099223007 | 0.08276462  | 0.171704249 |
| 0.430100876 | 0.089080471 | 0.144962724 | 0.29903076  |
| 0.085420421 | 0.372023996 | 0.468431344 | 0.355168116 |
| 0.459562628 | 0.285443022 | 0.009394683 | 0.147850861 |
| 0.363465482 | 0.385617215 | 0.341983659 | 0.2405798   |
| 0.054733543 | 0.419464796 | 0.167975147 | 0.267503594 |
| 0.099624412 | 0.047300512 | 0.094639838 | 0.384005785 |
| 0.428326336 | 0.277338366 | 0.114105708 | 0.119007466 |
| 0.133317708 | 0.095164434 | 0.145207774 | 0.206482525 |
| 0.154820387 | 0.0684103   | 0.445107961 | 0.076333714 |
| 0.114268154 | 0.124247656 | 0.115348865 | 0.137709824 |
| 0.175688947 | 0.293532768 | 0.021851078 | 0.24179622  |
| 0.00427682  | 0.308590276 | 0.247036205 | 0.157059549 |
| 0.054522651 | 0.034588127 | 0.130075886 | 0.246493769 |
| 0.449947376 | 0.403766622 | 0.496502444 | 0.495196389 |
| 0.127325104 | 0.172680663 | 0.210873464 | 0.138282098 |
| 0.390895475 | 0.126491077 | 0.065998084 | 0.410329374 |
| 0.501629716 | 0.49025973  | 0.147170342 | 0.173091029 |
| 0.389293674 | 0.444552054 | 0.188255114 | 1           |
| 0.171799371 | 0.052966105 | 0.407222612 | 0.507208131 |
| 0.332669421 | 0.164521989 | 0.129375848 | 0.354209178 |
| 0.066898043 | 0.135149753 | 0.295479224 | 0.088774446 |
| 0.463087043 | 0.027888688 | 0.153233122 | 0.221304552 |
| 0.131893617 | 0.373235283 | 0.485236059 | 0.135816813 |
| 0.20371912  | 0.02838954  | 0.092348698 | 0.040670277 |
| 0.150760298 | 0.091977171 | 0.412846253 | 0.454479539 |
| 0.11084871  | 0.205987146 | 0.156406479 | 0.006613612 |
| 0.038843844 | 0.110455416 | 0.376790428 | 0.160104211 |
| 0.359735111 | 0.322359535 | 0.166591699 | 0.28908006  |
| 0.311604361 | 0.49074884  | 0.019839691 | 0.085699698 |
| 0.227355524 | 0.120276376 | 0.186290845 | 0.279347659 |
| 0.189016877 | 0.082484087 | 0.111969482 | 0.513942086 |
| 0.376292787 | 0.085797864 | 0.128374174 | 0.372849889 |
| 0.175663591 | 0.230612455 | 0.093380927 | 0.162688341 |
| 0.057251012 | 0.435445536 | 0.038164279 | 0.135874956 |
| 0.135840075 | 0.109465368 | 0.012236853 | 0.118797433 |
| 0.137829377 | 0.411062331 | 0.395457608 | 0.09342231  |
| 0.179649054 | 0.325329767 | 0.132088991 | 0.341689527 |
| 0.022735349 | 0.044996972 | 0.093405651 | 0.498912417 |
| 0.167107287 | 0.485420767 | 0.168485894 | 0.175770854 |
| 0.194777625 | 0.430909383 | 0.002472854 | 0.437793693 |
| 0.491446107 | 0.097051757 | 0.26920771  | 0.27110309  |
| 0.177022631 | 0.444660273 | 0.012237905 | 0.364515862 |
| 0.230222789 | 0.076191414 | 0.513545572 | 0.135444605 |
| 0.41380204  | 0.058938859 | 0.148878398 | 0.408553317 |
| 0.343516042 | 0.009535196 | 0.098556416 | 0.312066812 |
| 0.035735625 | 0.067037268 | 0.342752329 | 0.330644975 |

|             |             |             |             |
|-------------|-------------|-------------|-------------|
| 0.260873187 | 0.406328287 | 0.494969038 | 0.172602161 |
| 0.23856586  | 0.131656958 | 0.017998619 | 0.190383352 |
| 0.38028962  | 0.167979434 | 0.400596848 | 0.141166578 |
| 0.161128559 | 0.447599379 | 0.352616685 | 0.119784891 |
| 0.056162675 | 0.154112139 | 0.019633445 | 0.191469515 |
| 0.337218828 | 0.102719958 | 0.183072468 | 0.092250959 |
| 0.074837774 | 0.517163492 | 0.11846873  | 0.136547649 |
| 0.0856444   | 0.246005831 | 0.150452161 | 0.136466495 |
| 0.136917815 | 0.138391737 | 0.184964687 | 0.199745309 |
| 0.040885233 | 0.096288908 | 0.016257687 | 0.156537236 |
| 0.100905679 | 0.158139412 | 0.14701578  | 0.291627579 |
| 0.153475414 | 0.088752042 | 0.197283293 | 0.160857613 |
| 0.098739428 | 0.026584208 | 0.484799885 | 0.333813272 |
| 0.236649901 | 0.11938162  | 0.048848062 | 0.141772488 |
| 0.467183573 | 0.148247141 | 0.086709853 | 0.442244347 |
| 0.026432461 | 0.48429109  | 0.164533805 | 0.114823079 |
| 0.190473772 | 0.171929222 | 0.463644559 | 0.035677095 |
| 0.211308291 | 0.436018612 | 0.185193304 | 0.149672223 |
| 0.346966474 | 0.305465351 | 0.039606962 | 0.315391443 |
| 0.301672765 | 0.046233781 | 0.501230993 | 0.103236948 |
| 0.032020544 | 0.3593959   | 0.376152055 | 0.081104908 |
| 0.079613697 | 0.181268756 | 0.039920114 | 0.233445611 |
| 0.508066348 | 0.393733125 | 0.382006729 | 0.134795093 |
| 0.055997259 | 0.018351357 | 0.141281083 | 0.202217722 |
| 0.449794112 | 0.490954283 | 0.169161812 | 0.195760226 |
| 0.180386578 | 0.183369691 | 0.066345472 | 0.502838399 |
| 0.095649868 | 0.470333039 | 0.013546999 | 0.396449723 |
| 0.454437071 | 0.110322079 | 0.086534079 | 0.172610561 |
| 0.332821819 | 0.05708924  | 0.119555896 | 0.457275026 |
| 0.416354668 | 0.184680568 | 0.181283196 | 0.30934537  |
| 0.02294446  | 0.049109097 | 0.249723183 | 0.116014504 |
| 0.194388193 | 0.156073904 | 0.037941242 | 0.1387994   |
| 0.059617233 | 0.427059619 | 0.435791695 | 0.072937052 |
| 0.191482678 | 0.127322066 | 0.298714118 | 0.049615016 |
| 0.437823442 | 0.460987214 | 0.474583343 | 0.107173422 |
| 0.366809812 | 0.472801806 | 0.250724803 | 0.077189528 |
| 0.027915896 | 0.470540562 | 0.281341287 | 0.029419393 |
| 0.473287604 | 0.085110057 | 0.024350446 | 0.470397165 |
| 0.133490984 | 0.371523907 | 0.00433939  | 0.036758482 |
| 0.04372005  | 0.449190378 | 0.433511116 | 0.286039595 |
| 0.095205036 | 0.247231974 | 0.006340521 | 0.501386348 |
| 0.460198975 | 0.024903904 | 0.115946595 | 0.377496023 |
| 0.359342591 | 0.491392026 | 0.170487162 | 0.437063867 |
| 0.279450642 | 0.458761668 | 0.146319489 | 0.202451517 |
| 0.412351929 | 0.458940167 | 0.343797407 | 0.417633184 |
| 0.453386394 | 0.3540354   | 0.216605888 | 0.027294572 |
| 0.098787222 | 0.099832094 | 0.131873948 | 0.095337658 |
| 0.180890112 | 0.123612354 | 0.444429261 | 0.472714126 |
| 0.471786858 | 0.011238092 | 0.091535225 | 0.365393196 |
| 0.416599976 | 0.46785972  | 0.019379819 | 0.005350029 |
| 0.003492918 | 0.02971719  | 0.222672967 | 0.157995919 |
| 0.472495995 | 0.095608117 | 0.011582709 | 0.037338346 |
| 0.15848419  | 0.294679729 | 0.473643823 | 0.341094326 |
| 0.384654802 | 0.082581908 | 0.140129414 | 0.350917279 |

|             |             |             |             |
|-------------|-------------|-------------|-------------|
| 0.076485072 | 0.202778034 | 0.485156661 | 0.438789878 |
| 0.044437307 | 0.165670012 | 0.14571391  | 0.494234637 |
| 0.048784569 | 0.225362998 | 0.30251672  | 0.173583532 |
| 0.01334798  | 0.082346475 | 0.076924768 | 0.411256241 |
| 0.448127707 | 0.080676339 | 0.048550843 | 0.049924142 |
| 0.105854521 | 0.453207302 | 0.130214758 | 0.515878972 |
| 0.417316376 | 0.444648464 | 0.074983516 | 0.446319261 |
| 0.057914621 | 0.438645573 | 0.189024071 | 0.027328634 |
| 0.151323902 | 0.01933632  | 0.426646142 | 0.107932742 |
| 0.138559202 | 0.279031326 | 0.127410815 | 0.026027181 |
| 0.100372476 | 0.062195428 | 0.494323596 | 0.456309805 |
| 0.036717979 | 0.147967737 | 0.176725002 | 0.29321616  |
| 0.139562757 | 0.400472234 | 0.451085479 | 0.181052847 |
| 0.080608098 | 0.075810741 | 0.330993932 | 0.25958059  |
| 0.115001537 | 0.501018217 | 0.181411319 | 0.50625786  |
| 0.306777697 | 0.429906093 | 0.450080877 | 0.222033605 |
| 0.152040118 | 0.219132094 | 0.284668263 | 0.025130578 |
| 0.2176725   | 0.461355607 | 0.159677252 | 0.121499812 |
| 0.18083978  | 0.215652043 | 0.046705006 | 0.060683453 |
| 0.154129213 | 0.176496669 | 0.124023649 | 0.439473233 |
| 0.242506286 | 0.275752889 | 0.032905043 | 0.074395557 |
| 0.512627966 | 0.395553007 | 0.084750833 | 0.33098432  |
| 0.127449226 | 0.232751    | 0.397728333 | 0.401715445 |
| 0.171051239 | 0.421866752 | 0.365501408 | 0.295091755 |
| 0.389710255 | 0.166669603 | 0.482880519 | 0.038271019 |
| 0.069580029 | 0.256832601 | 0.097838255 | 0.088707729 |
| 0.123868157 | 0.038768737 | 0.141605261 | 0.37224096  |
| 0.159329891 | 0.30847562  | 0.118954487 | 0.076763337 |
| 0.202080508 | 0.137870216 | 0.250545527 | 0.125136445 |
| 0.082044713 | 0.4594521   | 0.014171928 | 0.06387959  |
| 0.16557026  | 0.388666763 | 0.209690019 | 0.162008578 |
| 0.162643751 | 0.106477437 | 0.202901349 | 0.117376587 |
| 0.136588507 | 0.147217624 | 0.390954304 | 0.029877444 |
| 0.026814554 | 0.500519566 | 0.143207884 | 0.024212444 |
| 0.079803088 | 0.23121994  | 0.139896757 | 0.164460893 |
| 0.030147014 | 0.461991974 | 0.14145391  | 0.251547188 |
| 0.204699564 | 0.066900713 | 0.28992575  | 0.059479128 |
| 0.051652559 | 0.392565488 | 0.2236086   | 0.472702411 |
| 0.169116487 | 0.411535579 | 0.375947513 | 0.387095554 |
| 0.064723815 | 0.174921176 | 0.037955606 | 0.413759845 |
| 0.161300123 |             |             |             |
| CCT3        | 0.23741214  | 0.410726938 | 0.175684253 |
| 0.306083566 | 0.178571706 | 0.179544346 | 0.082085498 |
| 0.02593095  | 0.083069837 | 0.004581492 | 0.033858796 |
| 0.213679389 | 0.06393442  | 0.048000962 | 0.106811951 |
| 0.30269106  | 0.043351935 | 0.067221051 | 0.09936065  |
| 0.220598424 | 0.021445985 | 0.269577779 | 0.032480736 |
| 0.084662894 | 0.065033622 | 0.043557126 | 0.148234902 |
| 0.311596631 | 0.051005057 | 0.104483562 | 0.194976379 |
| 0.025369522 | 0.254755179 | 0.401123376 | 0.277839424 |
| 0.388043087 | 0.229910082 | 0.000281051 | 0.080571059 |
| 0.268145414 | 0.36657055  | 0.232149574 | 0.173116852 |
| 0.022978876 | 0.339119601 | 0.125737558 | 0.210920814 |
| 0.044301664 | 0.025186869 | 0.045257315 | 0.303200518 |

|             |             |             |             |
|-------------|-------------|-------------|-------------|
| 0.370981131 | 0.24425578  | 0.046019015 | 0.058130129 |
| 0.071066252 | 0.027450629 | 0.096069631 | 0.131684148 |
| 0.089374689 | 0.024539291 | 0.380497684 | 0.055448546 |
| 0.035499747 | 0.044169477 | 0.036223117 | 0.064190813 |
| 0.101087953 | 0.216656575 | 0.003962733 | 0.193153666 |
| 0.000774772 | 0.20887     | 0.173775623 | 0.159879962 |
| 0.024015336 | 0.01168664  | 0.043605117 | 0.173723223 |
| 0.328076447 | 0.321869286 | 0.404059201 | 0.418234493 |
| 0.048758737 | 0.099650273 | 0.174861511 | 0.051267338 |
| 0.309006877 | 0.071143733 | 0.029451353 | 0.309477257 |
| 0.415042047 | 0.410860209 | 0.074972235 | 0.138828743 |
| 0.345626374 | 0.343609581 | 0.180820489 | 0.171799371 |
| 1           | 0.024118949 | 0.337608562 | 0.408350056 |
| 0.241019664 | 0.142302434 | 0.08012544  | 0.235610379 |
| 0.02122561  | 0.060940918 | 0.207901184 | 0.022287489 |
| 0.346620994 | 0.018023896 | 0.101138308 | 0.145482695 |
| 0.042362674 | 0.289446112 | 0.422408122 | 0.07953739  |
| 0.13950447  | 0.007948932 | 0.115021912 | 0.010952287 |
| 0.058673673 | 0.055014669 | 0.354445101 | 0.352415013 |
| 0.03067776  | 0.089096775 | 0.074320386 | 0.002134916 |
| 0.014996548 | 0.03853453  | 0.268067835 | 0.087027731 |
| 0.258900231 | 0.278382694 | 0.120792836 | 0.209303571 |
| 0.279194258 | 0.393885618 | 0.01764818  | 0.028650731 |
| 0.190375842 | 0.037735424 | 0.123235437 | 0.19806445  |
| 0.170511641 | 0.024730226 | 0.035739389 | 0.43158115  |
| 0.286187529 | 0.033863701 | 0.053379455 | 0.277103088 |
| 0.086446512 | 0.190502191 | 0.02624308  | 0.054352678 |
| 0.016139552 | 0.387774381 | 0.014937868 | 0.075661543 |
| 0.166074081 | 0.038717894 | 0.001971377 | 0.059562925 |
| 0.066133005 | 0.359249971 | 0.333448966 | 0.032365738 |
| 0.083990688 | 0.261972199 | 0.074630753 | 0.295255172 |
| 0.020839404 | 0.013447474 | 0.04917842  | 0.39459639  |
| 0.108357276 | 0.388393505 | 0.060988514 | 0.083743386 |
| 0.148150292 | 0.344061218 | 0.001626853 | 0.373294181 |
| 0.426537838 | 0.056948756 | 0.204453817 | 0.192224579 |
| 0.209783585 | 0.360092099 | 0.004592578 | 0.241406563 |
| 0.150988673 | 0.024032791 | 0.410816182 | 0.086008876 |
| 0.325686354 | 0.029102271 | 0.057084596 | 0.382902077 |
| 0.280030267 | 0.002808451 | 0.062911824 | 0.221355466 |
| 0.014253135 | 0.023406484 | 0.24515174  | 0.257878516 |
| 0.258307923 | 0.322358834 | 0.380844123 | 0.205473353 |
| 0.19266097  | 0.048848101 | 0.005455502 | 0.152121466 |
| 0.291624783 | 0.081090079 | 0.328588067 | 0.054648873 |
| 0.107277029 | 0.373327139 | 0.297978609 | 0.078490572 |
| 0.023858579 | 0.087939757 | 0.007265667 | 0.204471842 |
| 0.297995952 | 0.035829817 | 0.213206352 | 0.022734061 |
| 0.030148063 | 0.433436424 | 0.071655602 | 0.103601216 |
| 0.060254231 | 0.17254346  | 0.079554214 | 0.056767316 |
| 0.06754253  | 0.06541374  | 0.140741429 | 0.140228186 |
| 0.012097625 | 0.033363867 | 0.005850332 | 0.074804475 |
| 0.039195869 | 0.073953641 | 0.072752205 | 0.200703517 |
| 0.046540558 | 0.028267666 | 0.166589252 | 0.100374723 |
| 0.059789317 | 0.009847842 | 0.400156661 | 0.237381499 |
| 0.163040928 | 0.05090631  | 0.014711122 | 0.059231202 |

|             |             |             |             |
|-------------|-------------|-------------|-------------|
| 0.363090846 | 0.134124436 | 0.040858765 | 0.345508678 |
| 0.008685964 | 0.382246004 | 0.06965427  | 0.069027011 |
| 0.112466268 | 0.11075268  | 0.366245438 | 0.028610148 |
| 0.131156768 | 0.337996176 | 0.125999742 | 0.102938441 |
| 0.259247148 | 0.222349427 | 0.013058799 | 0.239721541 |
| 0.212166246 | 0.014795567 | 0.414127647 | 0.0385681   |
| 0.011322716 | 0.284676115 | 0.346075527 | 0.04582164  |
| 0.040149585 | 0.149145678 | 0.012691399 | 0.183813883 |
| 0.427369227 | 0.298956823 | 0.318831367 | 0.072084936 |
| 0.021497054 | 0.00458386  | 0.066436167 | 0.165547702 |
| 0.368649923 | 0.411343234 | 0.09824662  | 0.173467534 |
| 0.116958726 | 0.140686161 | 0.017219321 | 0.418293655 |
| 0.035063559 | 0.382103622 | 0.003690441 | 0.349194147 |
| 0.395099578 | 0.063303985 | 0.054193455 | 0.124337502 |
| 0.246176898 | 0.025314417 | 0.032659067 | 0.382804001 |
| 0.350527559 | 0.141424172 | 0.156366785 | 0.202965107 |
| 0.007922185 | 0.012704178 | 0.250514435 | 0.077575538 |
| 0.114137003 | 0.080860947 | 0.027996707 | 0.049386567 |
| 0.02396782  | 0.33950806  | 0.308668899 | 0.065586796 |
| 0.165391987 | 0.049257871 | 0.210873402 | 0.01781609  |
| 0.406382891 | 0.38674536  | 0.396791235 | 0.02826848  |
| 0.260969619 | 0.423918165 | 0.244526119 | 0.028919483 |
| 0.012704693 | 0.407914992 | 0.206847667 | 0.013402004 |
| 0.350404547 | 0.05437174  | 0.008842745 | 0.37607223  |
| 0.069965374 | 0.293298946 | 0.008249524 | 0.019134116 |
| 0.017221808 | 0.349918121 | 0.387398556 | 0.186039181 |
| 0.05558496  | 0.154154034 | 0.001023967 | 0.409814146 |
| 0.378522528 | 0.013458894 | 0.053730984 | 0.304697972 |
| 0.331910367 | 0.391836971 | 0.181586968 | 0.397807709 |
| 0.240753935 | 0.396370031 | 0.053668709 | 0.164619338 |
| 0.339701145 | 0.405441916 | 0.258648206 | 0.341975973 |
| 0.331232602 | 0.262210007 | 0.159063005 | 0.012090714 |
| 0.140045058 | 0.041647806 | 0.112173446 | 0.084873646 |
| 0.122816156 | 0.081719774 | 0.355794364 | 0.356266025 |
| 0.395473787 | 0.003877849 | 0.02940552  | 0.285751086 |
| 0.307114106 | 0.35692145  | 0.006490004 | 0.008732598 |
| 0.002925755 | 0.03202961  | 0.138369899 | 0.104601895 |
| 0.406503935 | 0.048255845 | 0.003243794 | 0.009480641 |
| 0.070593876 | 0.273407309 | 0.392198129 | 0.236607751 |
| 0.307525256 | 0.024024182 | 0.078137049 | 0.237843272 |
| 0.058123065 | 0.1412707   | 0.410711226 | 0.356613814 |
| 0.012332557 | 0.107910921 | 0.083465725 | 0.386546362 |
| 0.045169464 | 0.150907853 | 0.211444841 | 0.086414398 |
| 0.002909293 | 0.042195069 | 0.052631784 | 0.301082745 |
| 0.383649267 | 0.034033853 | 0.021509692 | 0.017032246 |
| 0.0428265   | 0.340349296 | 0.051014708 | 0.41627128  |
| 0.31523002  | 0.320671969 | 0.026829813 | 0.388911015 |
| 0.031505576 | 0.3623768   | 0.176627081 | 0.022146614 |
| 0.053016154 | 0.004914334 | 0.337615826 | 0.150935301 |
| 0.055958548 | 0.183872918 | 0.154995796 | 0.009284847 |
| 0.088602011 | 0.022818662 | 0.400808811 | 0.377822054 |
| 0.012812262 | 0.054124687 | 0.125419421 | 0.195830186 |
| 0.089949431 | 0.31421044  | 0.379671965 | 0.170500392 |
| 0.029995275 | 0.028000208 | 0.221040949 | 0.179276017 |

|             |             |             |             |
|-------------|-------------|-------------|-------------|
| 0.031183694 | 0.396738069 | 0.122534138 | 0.42010648  |
| 0.230690228 | 0.339321603 | 0.366774833 | 0.196347887 |
| 0.06411725  | 0.16245235  | 0.220523625 | 0.010454789 |
| 0.151486758 | 0.352169625 | 0.099270388 | 0.09714447  |
| 0.133113876 | 0.200951214 | 0.010761637 | 0.018257018 |
| 0.160608681 | 0.12461033  | 0.039547747 | 0.319856962 |
| 0.150622141 | 0.194919105 | 0.004745851 | 0.056909582 |
| 0.416881018 | 0.325226967 | 0.046156663 | 0.269891375 |
| 0.056484383 | 0.218774443 | 0.317189605 | 0.315464386 |
| 0.086706838 | 0.326078599 | 0.252221793 | 0.21371877  |
| 0.297903366 | 0.116037869 | 0.412287103 | 0.009793299 |
| 0.068311809 | 0.172905438 | 0.042892976 | 0.043058366 |
| 0.055603318 | 0.01985049  | 0.103117077 | 0.255608752 |
| 0.095965824 | 0.212567264 | 0.036304908 | 0.03520743  |
| 0.138384181 | 0.087589633 | 0.173514043 | 0.057637992 |
| 0.037882477 | 0.395497402 | 0.007152643 | 0.018765856 |
| 0.091387308 | 0.35580646  | 0.218544201 | 0.079518388 |
| 0.109474619 | 0.036714511 | 0.133978545 | 0.073610599 |
| 0.088428363 | 0.065345798 | 0.35837346  | 0.012648175 |
| 0.005629297 | 0.383750561 | 0.102169865 | 0.007924626 |
| 0.026333354 | 0.16680344  | 0.039215721 | 0.108082601 |
| 0.013000299 | 0.395566936 | 0.106760646 | 0.201771735 |
| 0.137817373 | 0.017880801 | 0.206896936 | 0.019663345 |
| 0.016412021 | 0.303093204 | 0.207742161 | 0.401013114 |
| 0.110455341 | 0.308600424 | 0.303849179 | 0.278353564 |
| 0.024005867 | 0.144790295 | 0.015258321 | 0.296330236 |
| 0.133929579 |             |             |             |

|             |             |             |             |
|-------------|-------------|-------------|-------------|
| CD244       | 0.072223535 | 0.054240164 | 0.08463734  |
| 0.081604876 | 0.093218799 | 0.0223671   | 0.049326635 |
| 0.014069698 | 0.038930599 | 0.004410678 | 0.030405702 |
| 0.085483866 | 0.017619854 | 0.015290331 | 0.011218044 |
| 0.152220883 | 0.113239157 | 0.055218587 | 0.118242819 |
| 0.095676757 | 0.012727807 | 0.154819383 | 0.054544401 |
| 0.097112241 | 0.135232121 | 0.116953237 | 0.09944386  |
| 0.09286013  | 0.138928009 | 0.010859749 | 0.049475268 |
| 0.19729984  | 0.068360053 | 0.042065188 | 0.097937127 |
| 0.040477235 | 0.052092617 | 0.034686716 | 0.010330508 |
| 0.056438715 | 0.089547645 | 0.084714758 | 0.102410999 |
| 0.043256986 | 0.030383001 | 0.076406413 | 0.154359288 |
| 0.008974701 | 0.06685778  | 0.00644998  | 0.029877361 |
| 0.029295531 | 0.040996654 | 0.021310017 | 0.039020558 |
| 0.008421468 | 0.006573517 | 0.024915795 | 0.019890469 |
| 0.075951604 | 0.004536694 | 0.037360177 | 0.017789598 |
| 0.00902516  | 0.036819858 | 0.17780362  | 0.039616841 |
| 0.071048792 | 0.034897736 | 0.044576398 | 0.067439371 |
| 0.000963891 | 0.105881711 | 0.190210803 | 0.044408165 |
| 0.214595989 | 0.026282414 | 0.213335514 | 0.061957142 |
| 0.091641995 | 0.052375061 | 0.104589326 | 0.091546953 |
| 0.051892025 | 0.206775227 | 0.107672704 | 0.086696169 |
| 0.058112536 | 0.040784749 | 0.034749218 | 0.167711124 |
| 0.098507134 | 0.048875448 | 0.070465862 | 0.26588534  |
| 0.039942166 | 0.048578135 | 0.036350418 | 0.052966105 |
| 0.024118949 | 1           | 0.033320616 | 0.075465301 |
| 0.036167161 | 0.120464437 | 0.22595813  | 0.052344167 |



|             |             |             |             |
|-------------|-------------|-------------|-------------|
| 0.179878368 | 0.011771308 | 0.120353025 | 0.053193701 |
| 0.091908756 | 0.028659826 | 0.253295765 | 0.045833906 |
| 0.0765499   | 0.06515073  | 0.053647114 | 0.090425419 |
| 0.109274858 | 0.050678841 | 0.035159128 | 0.19203073  |
| 0.01695224  | 0.07956277  | 0.026825086 | 0.067030503 |
| 0.010279052 | 0.023894591 | 0.053907867 | 0.082072225 |
| 0.15802242  | 0.124231338 | 0.05645907  | 0.077165741 |
| 0.091795248 | 0.045924498 | 0.061611146 | 0.03009766  |
| 0.062484531 | 0.105953898 | 0.000354209 | 0.062256463 |
| 0.052768567 | 0.120177449 | 0.196895243 | 0.055102846 |
| 0.128437489 | 0.041587957 | 0.10718227  | 0.080737597 |
| 0.031192778 | 0.111916371 | 0.025221242 | 0.157229741 |
| 0.010635901 | 0.169327065 | 0.103108293 | 0.040474017 |
| 0.029147447 | 0.040654406 | 0.244207903 | 0.035698873 |
| 0.011852577 | 0.07251021  | 0.070566987 | 0.024258618 |
| 0.010022816 | 0.038909874 | 0.02879206  | 0.171451687 |
| 0.053739629 | 0.139203445 | 0.019409534 | 0.037513969 |
| 0.014056819 | 0.093026501 | 0.010816448 | 0.065042423 |
| 0.010886249 | 0.090721284 | 0.066931139 | 0.119694436 |
| 0.221902758 | 0.108484145 | 0.02245039  | 0.033896578 |
| 0.051492623 | 0.009057439 | 0.066049302 | 0.128010979 |
| 0.0480072   | 0.07649356  | 0.003333023 | 0.140578405 |
| 0.027472855 | 0.156750237 | 0.104491026 | 0.184477118 |
| 0.043756245 | 0.136080423 | 0.018270816 | 0.083684205 |
| 0.048652718 | 0.017285452 | 0.009763844 | 0.064907519 |
| 0.231115793 | 0.007237204 | 0.080583961 | 0.088241038 |
| 0.065944249 | 0.122682775 | 0.118276036 | 0.043901875 |
| 0.07219429  | 0.060898672 | 0.103350599 | 0.218521879 |
| 0.093479994 | 0.010299228 | 0.032615295 | 0.030557551 |
| 0.016654941 | 0.046142345 | 0.046820223 | 0.004613891 |
| 0.079710945 | 0.035703698 | 0.007873363 | 0.101741624 |
| 0.046116428 | 0.019178704 | 0.041658967 | 0.121929555 |
| 0.200987271 | 0.067078088 | 0.172168259 | 0.104853954 |
| 0.118193785 | 0.031121516 | 0.098440922 | 0.009976713 |
| 0.014648078 | 0.087090354 | 0.051343713 | 0.039475718 |
| 0.015153658 | 0.111064048 | 0.203330612 | 0.014982592 |
| 0.010672282 | 0.012936366 | 0.009453244 | 0.033852433 |
| 0.013114253 | 0.02350419  | 0.072601567 | 0.079224848 |
| 0.163965005 | 0.180388855 | 0.054792278 | 0.139186347 |
| 0.018804745 | 0.060117224 | 0.201792858 | 0.004366901 |
| 0.064408892 | 0.008155541 | 0.006827046 | 0.044842959 |
| 0.074639313 | 0.103437289 | 0.02144347  | 0.185840806 |
| 0.048131677 | 0.100244013 | 0.099717168 | 0.006108704 |
| 0.042739402 | 0.037842267 | 0.200254327 | 0.123943128 |
| 0.023543724 | 0.0738241   | 0.031180569 | 0.040569531 |
| 0.033204666 | 0.136557262 | 0.061715147 | 0.135743059 |
| 0.228071195 | 0.127142745 | 0.055538239 | 0.261499339 |
| 0.226259186 | 0.033321051 | 0.00867117  | 0.233701166 |
| 0.062642815 | 0.148812815 | 0.040811591 | 0.185733852 |
| 0.06196819  | 0.014251179 | 0.243705867 | 0.096715796 |
| 0.035285378 | 0.067354169 | 0.208274869 | 0.071935741 |
| 0.151018075 | 0.035991508 | 0.00369719  | 0.068422281 |
| 0.094338156 | 0.050018515 | 0.116110743 | 0.093009694 |
| 0.036550532 | 0.011101629 | 0.156086907 | 0.029563867 |

|             |             |             |             |
|-------------|-------------|-------------|-------------|
| 0.027673663 | 0.081981036 | 0.082124905 | 0.041243522 |
| 0.054589804 | 0.059487778 | 0.03332067  | 0.111640496 |
| 0.013910901 | 0.022588333 | 0.11858244  | 0.117056321 |
| 0.025420508 | 0.10287019  | 0.073399366 | 0.015076641 |
| 0.039012792 | 0.034831657 | 0.118662171 | 0.068289908 |
| 0.012147414 | 0.015291802 | 0.20170517  | 0.121585793 |
| 0.075878948 | 0.059505292 | 0.041347262 | 0.063559996 |
| 0.070460103 | 0.055380346 | 0.056791563 | 0.273958451 |
| 0.252983514 | 0.047224362 | 0.048145069 | 0.021155779 |
| 0.098716271 | 0.005964481 | 0.013242463 | 0.049264862 |
| 0.117713561 | 0.024751816 | 0.002668901 | 0.058536079 |
| 0.209955658 | 0.133427024 | 0.033665628 | 0.056002296 |
| 0.00296064  | 0.124706935 | 0.082559382 | 0.075418076 |
| 0.040529242 | 0.158452082 | 0.122059375 | 0.04965754  |
| 0.064304525 | 0.051976831 | 0.08545466  | 0.071062927 |
| 0.060886956 | 0.038825479 | 0.012219568 | 0.202142115 |
| 0.051068737 | 0.053028063 | 0.062871246 | 0.044099003 |
| 0.079693049 | 0.15683832  | 0.117733401 | 0.031533171 |
| 0.058626364 | 0.013106597 | 0.006069855 | 0.026108772 |
| 0.019746644 | 0.104035534 | 0.060901985 | 0.108842479 |
| 0.07299575  | 0.151852729 | 0.014400565 | 0.047087812 |
| 0.054275822 | 0.08432377  | 0.137440166 | 0.01964709  |
| 0.01705525  | 0.060902454 | 0.05319222  | 0.244611874 |
| 0.065888045 | 0.001443739 | 0.072766657 | 0.013023961 |
| 0.02952239  | 0.136686447 | 0.045446016 | 0.146843317 |
| 0.101965217 | 0.174023692 | 0.005802342 | 0.132231216 |
| 0.087896624 | 0.021322735 | 0.073202373 | 0.035630723 |
| 0.171404641 | 0.204546851 | 0.050106498 | 0.08179164  |
| 0.04841621  | 0.210274982 | 0.082211989 | 0.01531386  |
| 0.121960257 | 0.20951447  | 0.142578097 | 0.141851229 |
| 0.03695439  | 0.031100052 | 0.045865036 | 0.00174001  |
| 0.031493905 | 0.092357704 | 0.045560379 | 0.08968642  |
| 0.063287177 | 0.123588835 | 0.153929571 | 0.040590207 |
| 0.040547149 | 0.035089048 | 0.132656647 | 0.002240088 |
| 0.125829011 | 0.108085589 | 0.05261286  | 0.01212478  |
| 0.013835823 | 0.05835567  | 0.0394847   | 0.20844214  |
| 0.061514493 | 0.176677278 | 0.093197276 | 0.116639347 |
| 0.206708893 | 0.04898465  | 0.207147478 | 0.125017765 |
| 0.021840733 | 0.083508725 | 0.036183976 | 0.018259579 |
| 0.027666669 | 0.098647828 | 0.079943431 | 0.037720314 |
| 0.014818347 | 0.110952909 | 0.027808258 | 0.072743052 |
| 0.052325737 | 0.065123807 | 0.057236361 | 0.065782288 |
| 0.061398802 | 0.035047028 | 0.029118613 | 0.009988358 |
| 0.113210438 | 0.086790961 | 0.055228347 | 0.0530354   |
| 0.114507756 | 0.088399981 | 0.073536103 | 0.012911766 |
| 0.084582864 | 0.015973799 | 0.032448152 | 0.138527925 |
| 0.055406705 | 0.038207277 | 0.042147515 | 0.119555364 |
| 0.058584398 | 0.043686326 | 0.013785498 | 0.056358622 |
| 0.244114688 | 0.111541747 | 0.10138569  | 0.116124391 |
| 0.026467243 | 0.050730648 | 0.059608514 | 0.027586968 |
| 0.029327369 | 0.098853285 | 0.043820402 | 0.004569642 |
| 0.063317299 | 0.055877656 | 0.031297568 | 0.307826234 |
| 0.123087538 | 0.131910629 | 0.03885047  | 0.148704996 |
| 0.034054762 | 0.109192048 | 0.007115378 | 0.09997766  |

|             |             |             |             |
|-------------|-------------|-------------|-------------|
| 0.209698267 | 0.043556944 | 0.160321497 | 0.024495639 |
| 0.037413706 | 0.036337469 | 0.053806706 | 0.207355986 |
| 0.04251752  | 0.062670197 | 0.070759282 | 0.154096981 |
| 0.044307277 | 0.156522736 | 0.136468653 | 0.012814932 |
| 0.007091967 | 0.019425539 | 0.056531685 | 0.029242573 |
| 0.026245838 | 0.10583449  | 0.029371625 | 0.193291594 |
| 0.102097374 | 0.03890269  | 0.06323444  | 0.022434692 |
| 0.26502622  | 0.054069324 | 0.009516854 | 0.097380523 |
| 0.054217338 | 0.151490591 | 0.023395863 | 0.028714278 |
| 0.088083241 | 0.03476632  | 0.10927858  | 0.047605021 |
| 0.144891556 | 0.121335281 | 0.026791489 | 0.049608916 |
| 0.074606119 | 0.061271525 | 0.033015909 | 0.084469732 |
| 0.0195011   |             |             |             |
| CD3EAP      | 0.405955904 | 0.493457963 | 0.36091141  |
| 0.40554726  | 0.390289805 | 0.408669118 | 0.209355789 |
| 0.193334995 | 0.079305614 | 0.005040832 | 0.021517313 |
| 0.396529495 | 0.19131061  | 0.274555536 | 0.35039496  |
| 0.379487331 | 0.105491329 | 0.31925276  | 0.215496357 |
| 0.388386515 | 0.102487121 | 0.359040908 | 0.082528353 |
| 0.24105365  | 0.081644404 | 0.058550626 | 0.235151338 |
| 0.415682511 | 0.06575102  | 0.383296011 | 0.393804704 |
| 0.070301183 | 0.425266099 | 0.512038423 | 0.401160348 |
| 0.506068743 | 0.398208246 | 0.007744921 | 0.328645202 |
| 0.416227689 | 0.419536371 | 0.394452686 | 0.303692195 |
| 0.03788569  | 0.496072039 | 0.236499552 | 0.347482337 |
| 0.240479105 | 0.024097346 | 0.281131475 | 0.451933411 |
| 0.485139055 | 0.442460648 | 0.238207131 | 0.160707459 |
| 0.213308967 | 0.270766879 | 0.249434321 | 0.363762734 |
| 0.215217734 | 0.199814783 | 0.480340359 | 0.093016123 |
| 0.16493648  | 0.247451753 | 0.111555875 | 0.258598375 |
| 0.310852754 | 0.410161578 | 0.014570425 | 0.381139941 |
| 0.003170104 | 0.362934683 | 0.318159658 | 0.297908864 |
| 0.030167127 | 0.017338154 | 0.133290142 | 0.3378335   |
| 0.425939489 | 0.428512623 | 0.43216888  | 0.436886814 |
| 0.146810908 | 0.239767495 | 0.350680158 | 0.151961882 |
| 0.432749488 | 0.179671122 | 0.091041616 | 0.376145693 |
| 0.435844185 | 0.499535513 | 0.164768119 | 0.211869337 |
| 0.443082641 | 0.450003688 | 0.413654104 | 0.407222612 |
| 0.337608562 | 0.033320616 | 1           | 0.448783109 |
| 0.414423363 | 0.269509525 | 0.119991061 | 0.415074301 |
| 0.044559892 | 0.353046678 | 0.327651311 | 0.124122033 |
| 0.428973625 | 0.017234491 | 0.167197885 | 0.363994998 |
| 0.173431986 | 0.428749563 | 0.48718049  | 0.174545343 |
| 0.354357232 | 0.014187135 | 0.119727264 | 0.02195519  |
| 0.301890386 | 0.110456549 | 0.50600765  | 0.43979705  |
| 0.237640852 | 0.351089039 | 0.256410922 | 0.0001716   |
| 0.017176724 | 0.139629902 | 0.43060246  | 0.330730134 |
| 0.411433113 | 0.386766311 | 0.21987263  | 0.41968928  |
| 0.423320201 | 0.432052075 | 0.076838639 | 0.087843422 |
| 0.404039082 | 0.139715726 | 0.205374675 | 0.430728601 |
| 0.267764421 | 0.108121063 | 0.109723806 | 0.452333746 |
| 0.423909612 | 0.072933471 | 0.335243864 | 0.369633373 |
| 0.354246431 | 0.301360854 | 0.090659385 | 0.258874729 |
| 0.048994021 | 0.472659508 | 0.017158932 | 0.326620953 |

|             |             |             |             |
|-------------|-------------|-------------|-------------|
| 0.274485265 | 0.114388154 | 0.00718859  | 0.277020888 |
| 0.293124651 | 0.447263884 | 0.487401625 | 0.084957049 |
| 0.301581968 | 0.367097387 | 0.347031886 | 0.436698563 |
| 0.01164635  | 0.033589896 | 0.314756549 | 0.4529194   |
| 0.345860503 | 0.431556837 | 0.262766546 | 0.256819638 |
| 0.235885289 | 0.417496398 | 0.001886448 | 0.499956174 |
| 0.50035811  | 0.33345759  | 0.376938493 | 0.36904989  |
| 0.367920349 | 0.433073157 | 0.03809077  | 0.375969624 |
| 0.381816543 | 0.062606487 | 0.435457396 | 0.131369888 |
| 0.441053851 | 0.032860929 | 0.337746107 | 0.417215481 |
| 0.426740354 | 0.006628566 | 0.26672868  | 0.387040116 |
| 0.016201186 | 0.117511307 | 0.412781126 | 0.389910294 |
| 0.375533688 | 0.40988541  | 0.424423434 | 0.35022259  |
| 0.391470257 | 0.215785963 | 0.007702372 | 0.26068819  |
| 0.414890942 | 0.387841343 | 0.44093601  | 0.232654035 |
| 0.368355677 | 0.449520451 | 0.423014443 | 0.251095497 |
| 0.038705607 | 0.324531616 | 0.019047604 | 0.305041298 |
| 0.4099146   | 0.12286048  | 0.394942706 | 0.106314641 |
| 0.050542547 | 0.475495483 | 0.134716596 | 0.218254321 |
| 0.095998156 | 0.412668488 | 0.229081607 | 0.254536124 |
| 0.204795211 | 0.141103092 | 0.328372816 | 0.369900087 |
| 0.040526257 | 0.077088948 | 0.007177962 | 0.373222304 |
| 0.137109504 | 0.34642331  | 0.358830135 | 0.430127845 |
| 0.321313896 | 0.097527066 | 0.349610429 | 0.243968353 |
| 0.085142915 | 0.009692336 | 0.47297022  | 0.366129915 |
| 0.381112426 | 0.142464175 | 0.027937014 | 0.352820258 |
| 0.446760868 | 0.378698631 | 0.311720776 | 0.44835384  |
| 0.019366366 | 0.433382808 | 0.242097562 | 0.098153857 |
| 0.344635806 | 0.237644136 | 0.424906716 | 0.068189114 |
| 0.393951417 | 0.457856522 | 0.262327854 | 0.161314377 |
| 0.419323048 | 0.401388424 | 0.027188234 | 0.417552987 |
| 0.417575933 | 0.023240627 | 0.481470507 | 0.092380658 |
| 0.013278956 | 0.396900198 | 0.436931535 | 0.056636473 |
| 0.056818098 | 0.345347506 | 0.053071788 | 0.245400647 |
| 0.47322227  | 0.371624144 | 0.450405427 | 0.16709223  |
| 0.035674945 | 0.008553608 | 0.157596164 | 0.355920966 |
| 0.512661442 | 0.458828762 | 0.217600502 | 0.332989918 |
| 0.214301835 | 0.321124832 | 0.176521717 | 0.453634881 |
| 0.14401378  | 0.494751697 | 0.003933451 | 0.419399403 |
| 0.510533966 | 0.330172422 | 0.062639457 | 0.331404979 |
| 0.424289522 | 0.040171492 | 0.176592133 | 0.483771185 |
| 0.441027176 | 0.314994854 | 0.344368005 | 0.389041451 |
| 0.016421887 | 0.044141643 | 0.355170626 | 0.144159077 |
| 0.39250083  | 0.190881434 | 0.034544585 | 0.342534727 |
| 0.038012093 | 0.445739332 | 0.414859684 | 0.052282561 |
| 0.396148579 | 0.325637128 | 0.325882842 | 0.029721746 |
| 0.424440462 | 0.464249488 | 0.512601871 | 0.148063392 |
| 0.426977642 | 0.448950279 | 0.387127236 | 0.056002786 |
| 0.010266128 | 0.497424569 | 0.406809982 | 0.020342149 |
| 0.431560737 | 0.291285968 | 0.011802465 | 0.470398892 |
| 0.166539206 | 0.467343577 | 0.003791666 | 0.062862342 |
| 0.024198505 | 0.41173654  | 0.485120303 | 0.388065728 |
| 0.315095001 | 0.334465905 | 0.003128145 | 0.465532871 |
| 0.475709773 | 0.008344491 | 0.105360472 | 0.440384359 |

|             |             |             |             |
|-------------|-------------|-------------|-------------|
| 0.41307355  | 0.502654671 | 0.286059571 | 0.432410679 |
| 0.40223972  | 0.494920542 | 0.24413076  | 0.232149797 |
| 0.442800294 | 0.463209979 | 0.416223348 | 0.43871802  |
| 0.437269285 | 0.37738439  | 0.260684623 | 0.014559985 |
| 0.122138779 | 0.244219219 | 0.347559949 | 0.086071968 |
| 0.363612144 | 0.116466027 | 0.432848867 | 0.429245924 |
| 0.438231504 | 0.002437601 | 0.158649094 | 0.440509067 |
| 0.432609538 | 0.433351241 | 0.012397727 | 0.004131961 |
| 0.004886112 | 0.013737127 | 0.363986566 | 0.193593156 |
| 0.443034408 | 0.295433906 | 0.002734709 | 0.045695008 |
| 0.256651504 | 0.355744773 | 0.484807333 | 0.346194452 |
| 0.414108008 | 0.062669314 | 0.318005049 | 0.367924298 |
| 0.053828504 | 0.364374643 | 0.443075823 | 0.47297235  |
| 0.02642763  | 0.205016541 | 0.348207177 | 0.442393267 |
| 0.055666168 | 0.267486869 | 0.405733625 | 0.3135962   |
| 0.007357046 | 0.059072214 | 0.052252925 | 0.398598444 |
| 0.499033499 | 0.06774786  | 0.025811898 | 0.170037696 |
| 0.118867717 | 0.433351451 | 0.147123707 | 0.441973988 |
| 0.435462433 | 0.404207276 | 0.052011771 | 0.476772293 |
| 0.036280395 | 0.483344138 | 0.291554978 | 0.065757197 |
| 0.23203223  | 0.007624976 | 0.434846704 | 0.164321652 |
| 0.346323989 | 0.395317261 | 0.186860975 | 0.009557884 |
| 0.147644704 | 0.037303965 | 0.436918996 | 0.419993512 |
| 0.019197434 | 0.228323811 | 0.247552745 | 0.367683297 |
| 0.311844075 | 0.41660944  | 0.505056244 | 0.423872294 |
| 0.088254317 | 0.101254967 | 0.394332374 | 0.403974778 |
| 0.249829962 | 0.430979172 | 0.298512678 | 0.472411666 |
| 0.415569506 | 0.432236671 | 0.440346252 | 0.345157325 |
| 0.195382878 | 0.405498677 | 0.405069586 | 0.019608468 |
| 0.321848675 | 0.434514518 | 0.344377999 | 0.132976178 |
| 0.229867644 | 0.356026087 | 0.039804748 | 0.168504836 |
| 0.29596924  | 0.355955804 | 0.133015418 | 0.399941648 |
| 0.385712412 | 0.412174229 | 0.035657008 | 0.049503107 |
| 0.507087134 | 0.426950635 | 0.146603139 | 0.426555935 |
| 0.133443812 | 0.322180231 | 0.418520753 | 0.410982872 |
| 0.365459302 | 0.446934076 | 0.425122769 | 0.418687257 |
| 0.431198422 | 0.24511644  | 0.513686872 | 0.098019066 |
| 0.066425762 | 0.404102242 | 0.092738374 | 0.066660677 |
| 0.123318089 | 0.017739474 | 0.273168136 | 0.382838234 |
| 0.350974196 | 0.354543545 | 0.341854265 | 0.064303106 |
| 0.272617187 | 0.351599087 | 0.314400679 | 0.211938461 |
| 0.069183726 | 0.497179569 | 0.006354928 | 0.039902338 |
| 0.350190361 | 0.438004462 | 0.353385405 | 0.195354558 |
| 0.263350325 | 0.101727336 | 0.268481774 | 0.332421535 |
| 0.364322362 | 0.330263707 | 0.440232484 | 0.029804339 |
| 0.017727004 | 0.43287952  | 0.371126721 | 0.01122108  |
| 0.072089558 | 0.397989599 | 0.250554361 | 0.241385149 |
| 0.012424189 | 0.444258221 | 0.390619742 | 0.393470633 |
| 0.345436764 | 0.049880565 | 0.385387516 | 0.077635358 |
| 0.046850172 | 0.441423111 | 0.355916539 | 0.491626226 |
| 0.29418265  | 0.390912948 | 0.464941019 | 0.440938517 |
| 0.091690981 | 0.359022422 | 0.024717816 | 0.427059913 |
| 0.403623362 |             |             |             |
| CD44        | 0.46890506  | 0.529741625 | 0.458371294 |

|             |             |             |             |
|-------------|-------------|-------------|-------------|
| 0.476945554 | 0.505269505 | 0.410676432 | 0.249632933 |
| 0.203303639 | 0.108142534 | 0.007694477 | 0.037793756 |
| 0.510458808 | 0.272310169 | 0.321404599 | 0.363700852 |
| 0.483589443 | 0.192310545 | 0.387023791 | 0.29407506  |
| 0.465333294 | 0.109369439 | 0.47916694  | 0.118072656 |
| 0.364744821 | 0.150202493 | 0.097512755 | 0.341884568 |
| 0.489720341 | 0.110182075 | 0.364710538 | 0.426532586 |
| 0.138417554 | 0.486661575 | 0.530047945 | 0.522721595 |
| 0.529041081 | 0.439341279 | 0.01683372  | 0.335737776 |
| 0.45317488  | 0.505170345 | 0.461297487 | 0.394812325 |
| 0.057499078 | 0.491508877 | 0.297587662 | 0.477922367 |
| 0.252683111 | 0.048599036 | 0.254585103 | 0.441230696 |
| 0.491174537 | 0.500341355 | 0.249787206 | 0.194946566 |
| 0.274530425 | 0.25402659  | 0.360319073 | 0.350049352 |
| 0.27904957  | 0.16987659  | 0.498913737 | 0.108037429 |
| 0.179213483 | 0.279603746 | 0.209501649 | 0.298294707 |
| 0.427240502 | 0.416927121 | 0.023055917 | 0.466483925 |
| 0.004168082 | 0.440212587 | 0.454220405 | 0.37919167  |
| 0.061539033 | 0.034414408 | 0.239729403 | 0.395851228 |
| 0.500702216 | 0.457136351 | 0.526711899 | 0.51945404  |
| 0.248024072 | 0.361052801 | 0.476326641 | 0.226855879 |
| 0.476231587 | 0.220620018 | 0.134707281 | 0.495842943 |
| 0.524854303 | 0.535153186 | 0.265082404 | 0.333129135 |
| 0.475429458 | 0.473629124 | 0.480168794 | 0.507208131 |
| 0.408350056 | 0.075465301 | 0.448783109 | 1           |
| 0.428598352 | 0.403163307 | 0.207680905 | 0.454485838 |
| 0.082059992 | 0.39833181  | 0.422004261 | 0.209307628 |
| 0.502343228 | 0.024400336 | 0.282938688 | 0.418909305 |
| 0.257611115 | 0.48963507  | 0.530294017 | 0.23267097  |
| 0.486146848 | 0.031458065 | 0.18452587  | 0.048209517 |
| 0.386753828 | 0.204813292 | 0.493928852 | 0.50603283  |
| 0.267811213 | 0.46355612  | 0.311449562 | 0.003885562 |
| 0.041983658 | 0.232197645 | 0.495251087 | 0.417711906 |
| 0.484508082 | 0.416204883 | 0.297727411 | 0.428134732 |
| 0.510080976 | 0.526993131 | 0.062705167 | 0.119594723 |
| 0.482858648 | 0.235464577 | 0.300312255 | 0.517649321 |
| 0.391253989 | 0.136634656 | 0.167874622 | 0.514687849 |
| 0.416725889 | 0.113610547 | 0.365805031 | 0.486485398 |
| 0.394589722 | 0.448104786 | 0.139139669 | 0.347178115 |
| 0.06651704  | 0.496359186 | 0.044540457 | 0.364129089 |
| 0.322518389 | 0.214265291 | 0.014020525 | 0.288034599 |
| 0.33782328  | 0.486320199 | 0.481005591 | 0.13874071  |
| 0.39290813  | 0.487912827 | 0.351344576 | 0.490271154 |
| 0.016632948 | 0.061976358 | 0.296229131 | 0.510675414 |
| 0.310422862 | 0.50861496  | 0.361872117 | 0.37187492  |
| 0.358094803 | 0.503506068 | 0.004195868 | 0.505079701 |
| 0.537996833 | 0.319167987 | 0.484217598 | 0.490776432 |
| 0.444491059 | 0.502754574 | 0.048726529 | 0.491837585 |
| 0.393040423 | 0.103123025 | 0.52139127  | 0.217738328 |
| 0.464793466 | 0.060992663 | 0.364421823 | 0.49943599  |
| 0.500384596 | 0.012176146 | 0.244865993 | 0.437838715 |
| 0.041547183 | 0.110551717 | 0.476516106 | 0.469194918 |
| 0.446680896 | 0.50623459  | 0.518305989 | 0.427434731 |
| 0.505806493 | 0.27384213  | 0.018112548 | 0.399631666 |

|             |             |             |             |
|-------------|-------------|-------------|-------------|
| 0.495806695 | 0.443398379 | 0.440085622 | 0.282347472 |
| 0.36640096  | 0.47375239  | 0.471382554 | 0.238939534 |
| 0.059383275 | 0.35423735  | 0.027833496 | 0.404291418 |
| 0.433046125 | 0.157889934 | 0.449805937 | 0.189849869 |
| 0.103535526 | 0.530141785 | 0.241286547 | 0.335337957 |
| 0.178256902 | 0.474144472 | 0.298278978 | 0.302095306 |
| 0.294475062 | 0.214040374 | 0.426412754 | 0.444467274 |
| 0.047552812 | 0.133096688 | 0.02088105  | 0.462848194 |
| 0.202564115 | 0.426916121 | 0.415018228 | 0.456513645 |
| 0.391341429 | 0.156796691 | 0.471840082 | 0.351353347 |
| 0.154933875 | 0.023312757 | 0.510920079 | 0.471144    |
| 0.363519578 | 0.19101566  | 0.058963337 | 0.413317147 |
| 0.508592061 | 0.350990374 | 0.279762617 | 0.480124787 |
| 0.036678837 | 0.517202576 | 0.323310799 | 0.170459955 |
| 0.479917533 | 0.330719243 | 0.499492698 | 0.071007077 |
| 0.434941725 | 0.471325856 | 0.377708927 | 0.244263123 |
| 0.420605751 | 0.475726718 | 0.041549013 | 0.447099706 |
| 0.448588644 | 0.047688709 | 0.534645601 | 0.178836039 |
| 0.031810046 | 0.51503527  | 0.508421755 | 0.105020313 |
| 0.108134993 | 0.404561157 | 0.053693312 | 0.367044444 |
| 0.52232913  | 0.489602462 | 0.489390263 | 0.28038078  |
| 0.058138273 | 0.019687972 | 0.27667778  | 0.463795184 |
| 0.521359435 | 0.520318515 | 0.327100704 | 0.463579639 |
| 0.297687209 | 0.406266466 | 0.15227251  | 0.513841649 |
| 0.230201981 | 0.525656715 | 0.010447761 | 0.510992997 |
| 0.524923656 | 0.317490915 | 0.116375959 | 0.352320266 |
| 0.431788759 | 0.062008478 | 0.241210587 | 0.50739123  |
| 0.475157831 | 0.396075815 | 0.415593256 | 0.495998866 |
| 0.021292333 | 0.054486902 | 0.459946255 | 0.245245959 |
| 0.450706671 | 0.26893117  | 0.079420708 | 0.362324361 |
| 0.063147658 | 0.458562664 | 0.516656604 | 0.081895106 |
| 0.383279645 | 0.334096861 | 0.463781919 | 0.051841013 |
| 0.501044999 | 0.50949335  | 0.533243631 | 0.196085449 |
| 0.506686806 | 0.497028619 | 0.487161924 | 0.109587202 |
| 0.027120014 | 0.530493421 | 0.438301195 | 0.032591437 |
| 0.517214048 | 0.251040967 | 0.022309907 | 0.498083469 |
| 0.228092455 | 0.452907552 | 0.004389364 | 0.099502491 |
| 0.058996068 | 0.520006837 | 0.488592564 | 0.426014867 |
| 0.272604325 | 0.424876891 | 0.008586481 | 0.528202306 |
| 0.500919309 | 0.023262741 | 0.197147865 | 0.504790819 |
| 0.501988696 | 0.532914826 | 0.402625923 | 0.513286098 |
| 0.512292035 | 0.516416969 | 0.295267997 | 0.34138702  |
| 0.492800496 | 0.507156019 | 0.468746663 | 0.454259446 |
| 0.514850975 | 0.504340267 | 0.341996214 | 0.022356056 |
| 0.165676506 | 0.233703578 | 0.35782236  | 0.112058767 |
| 0.349354435 | 0.190251159 | 0.482041296 | 0.521003954 |
| 0.516097848 | 0.008135977 | 0.173826869 | 0.492213782 |
| 0.47209021  | 0.49691157  | 0.026934697 | 0.007660154 |
| 0.009491971 | 0.03201507  | 0.40919133  | 0.309283118 |
| 0.497039344 | 0.274359837 | 0.007607433 | 0.052591731 |
| 0.332879551 | 0.48789727  | 0.515006077 | 0.447680502 |
| 0.50379377  | 0.111773731 | 0.341983202 | 0.460358449 |
| 0.099286998 | 0.355463596 | 0.517722095 | 0.478407924 |
| 0.057968532 | 0.31345109  | 0.421292716 | 0.507761715 |

|             |             |             |             |
|-------------|-------------|-------------|-------------|
| 0.105596722 | 0.399508024 | 0.514929918 | 0.38922934  |
| 0.01907159  | 0.114508919 | 0.092233441 | 0.504376427 |
| 0.517412794 | 0.118267821 | 0.054447259 | 0.161137757 |
| 0.159475964 | 0.511886985 | 0.219758797 | 0.517920911 |
| 0.490990209 | 0.502710371 | 0.109543644 | 0.488300073 |
| 0.058321386 | 0.501339413 | 0.434432655 | 0.066430533 |
| 0.34917466  | 0.018217721 | 0.479036112 | 0.202783687 |
| 0.368691265 | 0.441906404 | 0.240169049 | 0.026477985 |
| 0.231800396 | 0.077813906 | 0.520262966 | 0.522441947 |
| 0.049158888 | 0.277879642 | 0.36861052  | 0.466544252 |
| 0.31824859  | 0.505341411 | 0.514304456 | 0.455729867 |
| 0.107513808 | 0.189219799 | 0.460643224 | 0.441907385 |
| 0.273528748 | 0.525415544 | 0.377023826 | 0.530090524 |
| 0.453021913 | 0.47311219  | 0.494984909 | 0.405802012 |
| 0.318107245 | 0.441681956 | 0.423379344 | 0.027782067 |
| 0.417274242 | 0.522605981 | 0.398966356 | 0.213224316 |
| 0.337551661 | 0.468503299 | 0.058527746 | 0.200829285 |
| 0.411336532 | 0.337908714 | 0.191287556 | 0.498625015 |
| 0.434971103 | 0.445688499 | 0.048663208 | 0.086682987 |
| 0.548161499 | 0.441505732 | 0.162445844 | 0.484926296 |
| 0.221840928 | 0.421622304 | 0.513121171 | 0.519478731 |
| 0.424777178 | 0.506168955 | 0.479632914 | 0.442772855 |
| 0.431775097 | 0.313510457 | 0.535985159 | 0.092802402 |
| 0.116112488 | 0.478265408 | 0.136958798 | 0.128526221 |
| 0.190767818 | 0.039501396 | 0.374835382 | 0.498709001 |
| 0.456810411 | 0.465724694 | 0.354976538 | 0.107627206 |
| 0.407328275 | 0.406447978 | 0.434562646 | 0.240653985 |
| 0.109912857 | 0.510887007 | 0.014017508 | 0.08082217  |
| 0.475171685 | 0.499558881 | 0.47766523  | 0.307080601 |
| 0.381684728 | 0.190146816 | 0.378283641 | 0.324977865 |
| 0.381675883 | 0.421959873 | 0.49479238  | 0.0418308   |
| 0.026472592 | 0.522645763 | 0.412064005 | 0.03013203  |
| 0.116542802 | 0.417833189 | 0.347695467 | 0.296589588 |
| 0.03374934  | 0.493210137 | 0.376397432 | 0.503673807 |
| 0.393756359 | 0.088881069 | 0.371705198 | 0.106596432 |
| 0.073555251 | 0.450705243 | 0.470372749 | 0.527568246 |
| 0.420532    | 0.494456666 | 0.448594151 | 0.49653255  |
| 0.146247299 | 0.433713595 | 0.036957234 | 0.493261536 |
| 0.47313033  |             |             |             |
| CD48        | 0.379209626 | 0.474542928 | 0.324071802 |
| 0.356664027 | 0.339686761 | 0.364363273 | 0.204891799 |
| 0.257778557 | 0.067730132 | 0.004696175 | 0.01138186  |
| 0.353634324 | 0.147273618 | 0.26874858  | 0.301798937 |
| 0.343438326 | 0.091098558 | 0.368325853 | 0.217837255 |
| 0.373047792 | 0.116157183 | 0.312197995 | 0.088866432 |
| 0.20705641  | 0.062636231 | 0.04855845  | 0.175963177 |
| 0.383375085 | 0.058376718 | 0.330544326 | 0.38569343  |
| 0.084277984 | 0.395952331 | 0.490315983 | 0.324358862 |
| 0.477983087 | 0.368928482 | 0.019447485 | 0.271107095 |
| 0.395577673 | 0.348098127 | 0.370029432 | 0.279422255 |
| 0.038296981 | 0.490094781 | 0.217089343 | 0.3129552   |
| 0.284265184 | 0.019003935 | 0.304617331 | 0.456046306 |
| 0.44721428  | 0.340212172 | 0.270108767 | 0.151282391 |
| 0.135549918 | 0.295775895 | 0.168291164 | 0.369832931 |



|             |             |             |             |
|-------------|-------------|-------------|-------------|
| 0.201418745 | 0.227775811 | 0.446882909 | 0.082065533 |
| 0.141969023 | 0.299198114 | 0.114201665 | 0.287405745 |
| 0.244718    | 0.391760835 | 0.026248008 | 0.335026946 |
| 0.004457539 | 0.358149575 | 0.304291474 | 0.205390017 |
| 0.031691071 | 0.014517285 | 0.135567021 | 0.305497228 |
| 0.386977866 | 0.440318142 | 0.378454295 | 0.390151529 |
| 0.132625262 | 0.246500435 | 0.289986282 | 0.138768827 |
| 0.385750906 | 0.160555884 | 0.114541175 | 0.330273428 |
| 0.390442125 | 0.468779091 | 0.142898361 | 0.195797821 |
| 0.355568231 | 0.449771759 | 0.359938884 | 0.332669421 |
| 0.241019664 | 0.036167161 | 0.414423363 | 0.428598352 |
| 1           | 0.213609681 | 0.10800569  | 0.39407478  |
| 0.050201874 | 0.373468373 | 0.299358479 | 0.149650131 |
| 0.396225668 | 0.01743458  | 0.148003358 | 0.32480252  |
| 0.219340636 | 0.390935694 | 0.453579228 | 0.173653578 |
| 0.331009068 | 0.017731446 | 0.077743494 | 0.029223629 |
| 0.288039542 | 0.089170321 | 0.477757202 | 0.376019048 |
| 0.283345073 | 0.286865055 | 0.265620811 | 0.00119218  |
| 0.018244059 | 0.168386129 | 0.372816943 | 0.371881335 |
| 0.386222884 | 0.353493638 | 0.164563525 | 0.385965955 |
| 0.335065114 | 0.3711439   | 0.07418854  | 0.104068426 |
| 0.363079494 | 0.162508073 | 0.199818212 | 0.362687964 |
| 0.218500189 | 0.140917208 | 0.114960338 | 0.438591741 |
| 0.43845907  | 0.076444568 | 0.38855533  | 0.338209827 |
| 0.266954914 | 0.252839567 | 0.10546914  | 0.24369567  |
| 0.053721771 | 0.437459963 | 0.018111842 | 0.3793483   |
| 0.183470061 | 0.096283075 | 0.018007988 | 0.310841497 |
| 0.273153874 | 0.354222845 | 0.465508687 | 0.100884494 |
| 0.279844253 | 0.312615625 | 0.376576543 | 0.347828329 |
| 0.00594036  | 0.04955545  | 0.357136871 | 0.433438463 |
| 0.33984764  | 0.421812657 | 0.281483002 | 0.243441163 |
| 0.216056037 | 0.373159626 | 0.004247104 | 0.481337158 |
| 0.468119369 | 0.360903018 | 0.309189736 | 0.346799684 |
| 0.267486728 | 0.370746777 | 0.056217727 | 0.347101997 |
| 0.384471666 | 0.077309066 | 0.408442913 | 0.114206198 |
| 0.437067529 | 0.029024842 | 0.338140207 | 0.332521984 |
| 0.337514633 | 0.007980291 | 0.27298429  | 0.3600996   |
| 0.01786247  | 0.127191447 | 0.3907093   | 0.353974975 |
| 0.307488565 | 0.366435554 | 0.383181374 | 0.247133736 |
| 0.33593746  | 0.256606174 | 0.011774114 | 0.239846304 |
| 0.373311144 | 0.300100416 | 0.441249716 | 0.238323751 |
| 0.377014123 | 0.437067465 | 0.355126731 | 0.179259692 |
| 0.038620034 | 0.328672347 | 0.025618939 | 0.252757554 |
| 0.354470046 | 0.102531424 | 0.306791732 | 0.144126904 |
| 0.048192373 | 0.451369566 | 0.111539966 | 0.173233031 |
| 0.074978017 | 0.337701997 | 0.255466982 | 0.193798118 |
| 0.14069322  | 0.127470412 | 0.251837387 | 0.296233888 |
| 0.047060128 | 0.071113394 | 0.012550191 | 0.287722284 |
| 0.096534531 | 0.265014719 | 0.278544994 | 0.385656538 |
| 0.311357396 | 0.08937188  | 0.291232576 | 0.215220732 |
| 0.07944693  | 0.010988471 | 0.457707074 | 0.350557547 |
| 0.371118174 | 0.144079023 | 0.034001023 | 0.274575241 |
| 0.386956634 | 0.324039637 | 0.34187128  | 0.407283542 |
| 0.033856556 | 0.392747959 | 0.188942288 | 0.085241201 |

|             |             |             |             |
|-------------|-------------|-------------|-------------|
| 0.267104566 | 0.215943882 | 0.376140382 | 0.05432463  |
| 0.39467448  | 0.445481899 | 0.271194451 | 0.129507772 |
| 0.396082491 | 0.372141554 | 0.02969547  | 0.385328202 |
| 0.385559247 | 0.023939828 | 0.458929221 | 0.087330677 |
| 0.015513832 | 0.343841132 | 0.336322754 | 0.056466734 |
| 0.056870319 | 0.266838564 | 0.068886699 | 0.220111391 |
| 0.450997558 | 0.321473562 | 0.356048284 | 0.156481784 |
| 0.032998849 | 0.006298553 | 0.150592619 | 0.331432007 |
| 0.494577346 | 0.432716533 | 0.225989276 | 0.255531432 |
| 0.213772755 | 0.231302595 | 0.217606063 | 0.42778182  |
| 0.193041029 | 0.484742497 | 0.005792061 | 0.336037811 |
| 0.47563602  | 0.345168496 | 0.050203202 | 0.305606009 |
| 0.377652095 | 0.042497779 | 0.231329915 | 0.464383197 |
| 0.384061886 | 0.25518782  | 0.266617704 | 0.373882615 |
| 0.020429053 | 0.051225008 | 0.304104552 | 0.117290935 |
| 0.309358692 | 0.174120287 | 0.028333119 | 0.354515353 |
| 0.033717292 | 0.424907515 | 0.375380425 | 0.040296575 |
| 0.311176539 | 0.356559736 | 0.295639605 | 0.032578718 |
| 0.348727259 | 0.447708059 | 0.491262448 | 0.194835627 |
| 0.372610441 | 0.411476567 | 0.28857207  | 0.063463892 |
| 0.01122424  | 0.470327383 | 0.398992897 | 0.020754218 |
| 0.38074354  | 0.31026769  | 0.00828688  | 0.466387932 |
| 0.180621244 | 0.461338654 | 0.006746904 | 0.082840627 |
| 0.029559468 | 0.35792011  | 0.457018997 | 0.384963739 |
| 0.274732654 | 0.3523942   | 0.005816197 | 0.449898738 |
| 0.45236608  | 0.008054133 | 0.092333175 | 0.355963469 |
| 0.32221701  | 0.497895079 | 0.212072762 | 0.340172382 |
| 0.318955072 | 0.456674272 | 0.215737751 | 0.205116298 |
| 0.373330144 | 0.425581451 | 0.39728651  | 0.447957363 |
| 0.377348273 | 0.33578061  | 0.241502331 | 0.013645612 |
| 0.087342512 | 0.272241223 | 0.248475268 | 0.053496713 |
| 0.373584682 | 0.096020659 | 0.438902079 | 0.371206296 |
| 0.390234372 | 0.003560485 | 0.188580875 | 0.372927735 |
| 0.404615002 | 0.412009373 | 0.024002829 | 0.005794415 |
| 0.009132935 | 0.008199426 | 0.363450491 | 0.189876733 |
| 0.42119821  | 0.246369275 | 0.003808777 | 0.068297026 |
| 0.271647656 | 0.28549556  | 0.457352864 | 0.329014427 |
| 0.361557988 | 0.068643117 | 0.2297101   | 0.357311233 |
| 0.03985791  | 0.365878903 | 0.396008159 | 0.456936947 |
| 0.035913392 | 0.194369589 | 0.389665851 | 0.413618834 |
| 0.037075455 | 0.250761003 | 0.362319567 | 0.249901743 |
| 0.015727428 | 0.055670964 | 0.043076042 | 0.362838865 |
| 0.4625386   | 0.049986267 | 0.019981637 | 0.193795004 |
| 0.099859572 | 0.384523467 | 0.13460646  | 0.428627906 |
| 0.387371224 | 0.361741963 | 0.048852429 | 0.458420327 |
| 0.02488273  | 0.459183425 | 0.231839692 | 0.071786312 |
| 0.269826532 | 0.012105851 | 0.421982013 | 0.08993742  |
| 0.357758503 | 0.401223975 | 0.134966881 | 0.010546263 |
| 0.12026172  | 0.037979583 | 0.376819668 | 0.350939154 |
| 0.024662234 | 0.247037231 | 0.25109175  | 0.371456696 |
| 0.32849741  | 0.351664205 | 0.484921254 | 0.349718025 |
| 0.085444488 | 0.107456961 | 0.386778912 | 0.396810953 |
| 0.29050861  | 0.388914213 | 0.207555774 | 0.458340278 |
| 0.395891732 | 0.426288432 | 0.406061201 | 0.310246862 |

|             |             |             |             |
|-------------|-------------|-------------|-------------|
| 0.152590312 | 0.393758469 | 0.345305361 | 0.021809847 |
| 0.323731314 | 0.362991571 | 0.380002926 | 0.097711458 |
| 0.182868811 | 0.286470158 | 0.059677671 | 0.246999532 |
| 0.229382726 | 0.342281401 | 0.12358389  | 0.366152983 |
| 0.401398748 | 0.395590858 | 0.063577746 | 0.040047987 |
| 0.491262085 | 0.426253702 | 0.168029503 | 0.371020079 |
| 0.146963321 | 0.264204562 | 0.367383312 | 0.34909633  |
| 0.315568592 | 0.36506538  | 0.394846773 | 0.359156928 |
| 0.423529027 | 0.241278431 | 0.48864233  | 0.161908161 |
| 0.053143081 | 0.368925674 | 0.070204414 | 0.068324795 |
| 0.11971811  | 0.019294445 | 0.19934251  | 0.352390445 |
| 0.271534379 | 0.309050023 | 0.360794777 | 0.074837367 |
| 0.252851003 | 0.373381177 | 0.294537659 | 0.205856663 |
| 0.061975095 | 0.464416701 | 0.007775136 | 0.04451284  |
| 0.285877006 | 0.360427172 | 0.264287003 | 0.19231154  |
| 0.192332161 | 0.1059715   | 0.240382731 | 0.347523628 |
| 0.279816553 | 0.320952746 | 0.362233655 | 0.046519484 |
| 0.024136112 | 0.400091413 | 0.396757982 | 0.01763765  |
| 0.068847935 | 0.383391212 | 0.310527056 | 0.178093628 |
| 0.013867095 | 0.405034084 | 0.309395606 | 0.337423148 |
| 0.348616777 | 0.062823232 | 0.390273662 | 0.096474773 |
| 0.072164128 | 0.45174503  | 0.307795441 | 0.460719819 |
| 0.290800528 | 0.337336632 | 0.466713526 | 0.375755117 |
| 0.13834833  | 0.328942238 | 0.028144471 | 0.390981312 |
| 0.302059932 |             |             |             |
| CD74        | 0.27848022  | 0.357078871 | 0.20669808  |
| 0.247966095 | 0.217503513 | 0.115018134 | 0.053191952 |
| 0.031380841 | 0.04723264  | 0.001847248 | 0.032911771 |
| 0.281165932 | 0.093819276 | 0.058167101 | 0.077516827 |
| 0.318801927 | 0.123604732 | 0.108295926 | 0.097479651 |
| 0.222762103 | 0.015658809 | 0.2987247   | 0.038385647 |
| 0.232188069 | 0.127794777 | 0.055297755 | 0.19273517  |
| 0.292977739 | 0.061888612 | 0.065152462 | 0.165565616 |
| 0.119351755 | 0.278603095 | 0.344639439 | 0.320459074 |
| 0.355451997 | 0.240476385 | 0.014361029 | 0.058354504 |
| 0.256164004 | 0.322488856 | 0.217877654 | 0.153794661 |
| 0.02125696  | 0.279660591 | 0.087622805 | 0.298009404 |
| 0.044932482 | 0.038631104 | 0.030683844 | 0.244368055 |
| 0.298378676 | 0.203230613 | 0.041264533 | 0.043794839 |
| 0.087426605 | 0.032122131 | 0.205535573 | 0.098935037 |
| 0.073963007 | 0.01643953  | 0.325020939 | 0.026995771 |
| 0.042015795 | 0.054728803 | 0.164558443 | 0.057069582 |
| 0.223289258 | 0.172509429 | 0.009265859 | 0.265936127 |
| 0.000401819 | 0.206531519 | 0.278818716 | 0.191392135 |
| 0.050111177 | 0.016694117 | 0.166085432 | 0.131214661 |
| 0.320958227 | 0.321659309 | 0.41487512  | 0.422617179 |
| 0.119142772 | 0.168576485 | 0.273779511 | 0.08263054  |
| 0.285829273 | 0.048889698 | 0.047158971 | 0.354503722 |
| 0.418083734 | 0.370144525 | 0.149298403 | 0.214605284 |
| 0.244396107 | 0.298542715 | 0.139690909 | 0.164521989 |
| 0.142302434 | 0.120464437 | 0.269509525 | 0.403163307 |
| 0.213609681 | 1           | 0.128750003 | 0.211061893 |
| 0.054323315 | 0.083728949 | 0.194804184 | 0.099522525 |
| 0.331221955 | 0.010020426 | 0.185789391 | 0.119646452 |

|             |             |             |             |
|-------------|-------------|-------------|-------------|
| 0.112003524 | 0.275655628 | 0.390778247 | 0.064521642 |
| 0.219106625 | 0.021948685 | 0.152698428 | 0.052959626 |
| 0.098201321 | 0.273080934 | 0.288041768 | 0.30773136  |
| 0.046129318 | 0.161531387 | 0.072947154 | 0.009721346 |
| 0.051589277 | 0.158371865 | 0.304334975 | 0.126166165 |
| 0.270720977 | 0.288284404 | 0.108219537 | 0.184828507 |
| 0.295073777 | 0.414328187 | 0.006093237 | 0.036172278 |
| 0.165692185 | 0.15982843  | 0.141767133 | 0.219341926 |
| 0.180327911 | 0.031353034 | 0.061676933 | 0.395115785 |
| 0.223740655 | 0.043340963 | 0.074009641 | 0.313572175 |
| 0.087121891 | 0.284017119 | 0.052636546 | 0.088792577 |
| 0.016751777 | 0.34854241  | 0.07243598  | 0.076265856 |
| 0.12314086  | 0.160254463 | 0.011609323 | 0.045625268 |
| 0.065634231 | 0.282733672 | 0.295570113 | 0.065536861 |
| 0.099462839 | 0.28488809  | 0.067664506 | 0.227162349 |
| 0.009239525 | 0.03863705  | 0.044338047 | 0.373452242 |
| 0.071212711 | 0.417473643 | 0.112866178 | 0.179319966 |
| 0.199273804 | 0.331614398 | 0.008147103 | 0.305633163 |
| 0.384236862 | 0.047009462 | 0.199271448 | 0.27901303  |
| 0.173522414 | 0.303340577 | 0.014755611 | 0.293630208 |
| 0.151208539 | 0.051834719 | 0.411736908 | 0.11372987  |
| 0.307829919 | 0.041754001 | 0.064487281 | 0.396265648 |
| 0.309136439 | 0.009007646 | 0.029977574 | 0.179609617 |
| 0.076471162 | 0.013442093 | 0.254859696 | 0.218309683 |
| 0.176042678 | 0.354758043 | 0.388739578 | 0.167588322 |
| 0.200073553 | 0.06601185  | 0.022440849 | 0.248041655 |
| 0.335469882 | 0.132173515 | 0.247195206 | 0.064679291 |
| 0.098143483 | 0.301652012 | 0.293881051 | 0.050782716 |
| 0.024027258 | 0.072304957 | 0.00669041  | 0.161215124 |
| 0.272721239 | 0.035679556 | 0.164341093 | 0.12700853  |
| 0.094071702 | 0.390007994 | 0.260942895 | 0.266484521 |
| 0.258173694 | 0.152193928 | 0.081820362 | 0.059845538 |
| 0.10382997  | 0.10262025  | 0.174647906 | 0.132998894 |
| 0.008119492 | 0.06467941  | 0.056248332 | 0.129789247 |
| 0.060938571 | 0.101272276 | 0.084236829 | 0.195392819 |
| 0.086142534 | 0.050405005 | 0.169836077 | 0.215286472 |
| 0.124234627 | 0.026856539 | 0.34900863  | 0.263851137 |
| 0.12710301  | 0.059913335 | 0.053134177 | 0.093592223 |
| 0.320339541 | 0.069778423 | 0.03813902  | 0.279002977 |
| 0.024735949 | 0.401853379 | 0.09090193  | 0.101708997 |
| 0.179604883 | 0.109895002 | 0.329630922 | 0.017123845 |
| 0.141486261 | 0.279217452 | 0.187147751 | 0.119336453 |
| 0.207974934 | 0.206253312 | 0.014128332 | 0.221372338 |
| 0.207158411 | 0.034816678 | 0.394608941 | 0.143841608 |
| 0.03937936  | 0.360079672 | 0.306436734 | 0.076961515 |
| 0.089264153 | 0.099383843 | 0.006851665 | 0.227760186 |
| 0.37161025  | 0.319747411 | 0.25482511  | 0.239273759 |
| 0.024306565 | 0.011329307 | 0.216676138 | 0.241816221 |
| 0.319887994 | 0.413067997 | 0.151240408 | 0.191094467 |
| 0.118562317 | 0.157552673 | 0.017462993 | 0.390909436 |
| 0.156307609 | 0.358141465 | 0.013644046 | 0.382739052 |
| 0.342731895 | 0.050076091 | 0.092132711 | 0.077504336 |
| 0.194775005 | 0.027299432 | 0.076853396 | 0.324997346 |
| 0.282586552 | 0.136606442 | 0.130530339 | 0.277956    |

|             |             |             |             |
|-------------|-------------|-------------|-------------|
| 0.004630894 | 0.012127997 | 0.244241166 | 0.2681894   |
| 0.113827327 | 0.111749761 | 0.211185219 | 0.069516243 |
| 0.026641754 | 0.269826819 | 0.363235394 | 0.051965953 |
| 0.092130913 | 0.061459259 | 0.308747961 | 0.029324285 |
| 0.40989018  | 0.389641212 | 0.341416639 | 0.05391909  |
| 0.314999955 | 0.374027646 | 0.285963058 | 0.095529578 |
| 0.044953795 | 0.373479876 | 0.182730936 | 0.012365008 |
| 0.360346549 | 0.03172012  | 0.009166275 | 0.316727029 |
| 0.069615584 | 0.254944234 | 0.000763436 | 0.103845204 |
| 0.102495021 | 0.414621735 | 0.298535449 | 0.164496447 |
| 0.031447006 | 0.186847667 | 0.026505708 | 0.419867801 |
| 0.316062578 | 0.044514962 | 0.195385304 | 0.306361232 |
| 0.356032353 | 0.346916967 | 0.222617243 | 0.384868033 |
| 0.284874492 | 0.344582917 | 0.061895222 | 0.182475916 |
| 0.274532816 | 0.395507577 | 0.228709898 | 0.278963475 |
| 0.324397202 | 0.344229869 | 0.134095553 | 0.009367494 |
| 0.120407035 | 0.031119861 | 0.074070094 | 0.049329642 |
| 0.091172236 | 0.114107393 | 0.343132923 | 0.378913302 |
| 0.398398159 | 0.0147576   | 0.029098613 | 0.279311986 |
| 0.258811392 | 0.326850145 | 0.036467643 | 0.008919258 |
| 0.010741995 | 0.052890608 | 0.124731259 | 0.177876234 |
| 0.365990402 | 0.034192766 | 0.007880963 | 0.00830242  |
| 0.089185627 | 0.347209366 | 0.340956075 | 0.248014561 |
| 0.363239246 | 0.070386243 | 0.062525522 | 0.253094737 |
| 0.095637448 | 0.129180689 | 0.387861241 | 0.278259999 |
| 0.068810163 | 0.173370927 | 0.115045527 | 0.347230422 |
| 0.220459956 | 0.226075089 | 0.287054959 | 0.098345879 |
| 0.031569737 | 0.104458688 | 0.078335429 | 0.355931604 |
| 0.347001615 | 0.056247432 | 0.038806506 | 0.02022642  |
| 0.041228483 | 0.365028489 | 0.073723854 | 0.407032166 |
| 0.271767357 | 0.329666786 | 0.132892947 | 0.304949602 |
| 0.037967083 | 0.315444609 | 0.256406169 | 0.010455131 |
| 0.155510384 | 0.021803504 | 0.359443283 | 0.095541539 |
| 0.060876468 | 0.186885888 | 0.138352699 | 0.054676324 |
| 0.237905287 | 0.066463721 | 0.374724957 | 0.417483351 |
| 0.089381668 | 0.071965022 | 0.181475361 | 0.243072017 |
| 0.059901449 | 0.282799539 | 0.314068482 | 0.126231233 |
| 0.024255421 | 0.223807977 | 0.21612265  | 0.17982674  |
| 0.046035241 | 0.422023622 | 0.129702432 | 0.406617334 |
| 0.215703974 | 0.31856772  | 0.355410365 | 0.133849775 |
| 0.21871594  | 0.141683815 | 0.144860285 | 0.00623233  |
| 0.159635525 | 0.345637263 | 0.108333234 | 0.12923685  |
| 0.137826093 | 0.28350959  | 0.029201072 | 0.04960942  |
| 0.260896683 | 0.074892834 | 0.058650951 | 0.343359362 |
| 0.167911464 | 0.190473627 | 0.015983286 | 0.069577497 |
| 0.379015737 | 0.267946082 | 0.030548663 | 0.214164254 |
| 0.123350029 | 0.18629538  | 0.361918873 | 0.395515172 |
| 0.138495447 | 0.307618164 | 0.243317726 | 0.159789266 |
| 0.227994184 | 0.095842294 | 0.349391657 | 0.010044346 |
| 0.098937992 | 0.232432658 | 0.04734188  | 0.109207819 |
| 0.072679423 | 0.049153511 | 0.225908254 | 0.322847509 |
| 0.191267389 | 0.22572894  | 0.065349393 | 0.063187628 |
| 0.230633146 | 0.117440456 | 0.212749981 | 0.042556476 |
| 0.042205086 | 0.317875993 | 0.015514646 | 0.066572054 |

|             |             |             |             |
|-------------|-------------|-------------|-------------|
| 0.19083111  | 0.307331523 | 0.243013841 | 0.150349981 |
| 0.231660275 | 0.18439314  | 0.153437063 | 0.052390479 |
| 0.063063023 | 0.140560756 | 0.296915278 | 0.013623502 |
| 0.007627077 | 0.402151638 | 0.097754266 | 0.05895952  |
| 0.103762138 | 0.161570025 | 0.121681072 | 0.09018618  |
| 0.070558508 | 0.383357407 | 0.059786207 | 0.241083445 |
| 0.110599185 | 0.053605668 | 0.174539167 | 0.039207794 |
| 0.03910954  | 0.265293185 | 0.274226673 | 0.372997156 |
| 0.201200527 | 0.304165043 | 0.247929549 | 0.285264966 |
| 0.079750912 | 0.197171942 | 0.01332147  | 0.298850383 |
| 0.135619552 |             |             |             |
| CD80        | 0.134717607 | 0.173586218 | 0.111972923 |
| 0.23388573  | 0.172745546 | 0.082325933 | 0.14107371  |
| 0.05700774  | 0.14796305  | 0.049263622 | 0.150928736 |
| 0.155285656 | 0.138675658 | 0.093859734 | 0.052690849 |
| 0.286564111 | 0.271412098 | 0.072461542 | 0.230537279 |
| 0.206626005 | 0.079789659 | 0.312527274 | 0.18486906  |
| 0.147668653 | 0.263113791 | 0.249406126 | 0.166797297 |
| 0.235145092 | 0.258549089 | 0.053557595 | 0.145893468 |
| 0.253641639 | 0.158720924 | 0.136934544 | 0.22810721  |
| 0.131094051 | 0.102820658 | 0.045094628 | 0.061080969 |
| 0.137973727 | 0.203486975 | 0.203670918 | 0.248575923 |
| 0.175943736 | 0.111189401 | 0.20439961  | 0.206588797 |
| 0.046947204 | 0.236278838 | 0.030582106 | 0.104336231 |
| 0.115768468 | 0.120224868 | 0.069938974 | 0.133895021 |
| 0.08787986  | 0.034827474 | 0.095047037 | 0.07267902  |
| 0.189263194 | 0.027858475 | 0.129931887 | 0.107541474 |
| 0.055687426 | 0.081974819 | 0.246764302 | 0.101821561 |
| 0.101604544 | 0.103792387 | 0.098630143 | 0.106572078 |
| 0.015916991 | 0.216552368 | 0.228798951 | 0.076089133 |
| 0.265236423 | 0.172993465 | 0.248268367 | 0.188378421 |
| 0.227598724 | 0.129207551 | 0.253192827 | 0.222581525 |
| 0.222919745 | 0.212010477 | 0.137394202 | 0.23281585  |
| 0.149608478 | 0.139102728 | 0.121572794 | 0.31345371  |
| 0.243361077 | 0.157661024 | 0.226866441 | 0.275694558 |
| 0.151992811 | 0.153218462 | 0.093668358 | 0.129375848 |
| 0.08012544  | 0.22595813  | 0.119991061 | 0.207680905 |
| 0.10800569  | 0.128750003 | 1           | 0.158799754 |
| 0.246749931 | 0.051736189 | 0.276695171 | 0.132895205 |
| 0.232857706 | 0.110334649 | 0.270655029 | 0.147894918 |
| 0.160188164 | 0.159727207 | 0.160170779 | 0.197358633 |
| 0.153036489 | 0.165171368 | 0.118788996 | 0.220324545 |
| 0.095054388 | 0.117551451 | 0.099908662 | 0.214852929 |
| 0.066953427 | 0.111522506 | 0.121228412 | 0.10403494  |
| 0.263569696 | 0.169018284 | 0.145228625 | 0.104291098 |
| 0.183507488 | 0.098769652 | 0.180933984 | 0.09264761  |
| 0.141948868 | 0.249552684 | 0.005667447 | 0.161909301 |
| 0.134449018 | 0.179129233 | 0.311426145 | 0.135443743 |
| 0.230758109 | 0.123966118 | 0.224992126 | 0.218550779 |
| 0.111896216 | 0.219504579 | 0.046064642 | 0.293785042 |
| 0.080001565 | 0.243382416 | 0.207829756 | 0.147142042 |
| 0.139763155 | 0.12612858  | 0.255260244 | 0.070243613 |
| 0.065045451 | 0.207916099 | 0.076380834 | 0.070653439 |
| 0.083571732 | 0.148766683 | 0.095657308 | 0.230639074 |

|             |             |             |             |
|-------------|-------------|-------------|-------------|
| 0.144696857 | 0.266018064 | 0.053641664 | 0.14735719  |
| 0.096268814 | 0.19245367  | 0.027891151 | 0.198899445 |
| 0.050662881 | 0.207407498 | 0.154584831 | 0.167793903 |
| 0.298550019 | 0.237290951 | 0.011232007 | 0.120867835 |
| 0.158047366 | 0.027968185 | 0.198499007 | 0.18620423  |
| 0.089216697 | 0.224481996 | 0.007365584 | 0.273599517 |
| 0.073417613 | 0.218279403 | 0.253147414 | 0.288865675 |
| 0.128131218 | 0.247497012 | 0.064191039 | 0.178208957 |
| 0.132672736 | 0.047178565 | 0.045220323 | 0.181500843 |
| 0.23228719  | 0.056213928 | 0.16390323  | 0.216002516 |
| 0.174189883 | 0.22511099  | 0.273910129 | 0.082539556 |
| 0.164574421 | 0.124867574 | 0.145192183 | 0.237714258 |
| 0.17460343  | 0.05285996  | 0.12005552  | 0.125267655 |
| 0.049286143 | 0.153042463 | 0.12184739  | 0.036060125 |
| 0.183775816 | 0.097244647 | 0.057075194 | 0.190239928 |
| 0.106701015 | 0.148714968 | 0.08368242  | 0.173805899 |
| 0.290089678 | 0.200189636 | 0.166676202 | 0.100229948 |
| 0.120776859 | 0.124150601 | 0.166121399 | 0.093484088 |
| 0.134537397 | 0.22735233  | 0.107900036 | 0.097071735 |
| 0.088447577 | 0.262757634 | 0.122299956 | 0.054958925 |
| 0.125439358 | 0.072590396 | 0.055962657 | 0.101447002 |
| 0.081918852 | 0.176244361 | 0.174362041 | 0.125469782 |
| 0.271223775 | 0.209142431 | 0.171704192 | 0.249495909 |
| 0.068362747 | 0.175411632 | 0.249877814 | 0.044149044 |
| 0.20710466  | 0.044654284 | 0.021228514 | 0.164062018 |
| 0.117148316 | 0.231326421 | 0.156359383 | 0.283846446 |
| 0.110836062 | 0.238433768 | 0.2464309   | 0.034752538 |
| 0.093605627 | 0.139198408 | 0.220064012 | 0.241442722 |
| 0.100258933 | 0.179646675 | 0.142524525 | 0.108187022 |
| 0.102074048 | 0.242297656 | 0.181457337 | 0.272743764 |
| 0.229492972 | 0.218094824 | 0.159676868 | 0.277221041 |
| 0.28168663  | 0.127920728 | 0.060328092 | 0.340862968 |
| 0.193871851 | 0.315675308 | 0.143315023 | 0.171418573 |
| 0.19653703  | 0.108032588 | 0.216574833 | 0.120504108 |
| 0.123448296 | 0.183378825 | 0.264876907 | 0.171081794 |
| 0.270627911 | 0.106295776 | 0.02507948  | 0.201220425 |
| 0.106640405 | 0.147621813 | 0.137454244 | 0.189202493 |
| 0.124951741 | 0.04262025  | 0.279455327 | 0.10595945  |
| 0.107764515 | 0.185682353 | 0.136776301 | 0.142044696 |
| 0.156899318 | 0.125308874 | 0.095871569 | 0.186594146 |
| 0.079345666 | 0.109732937 | 0.183200375 | 0.13434237  |
| 0.082736837 | 0.200926122 | 0.076296295 | 0.055999702 |
| 0.209227975 | 0.135233777 | 0.244628648 | 0.214227461 |
| 0.066059565 | 0.047551239 | 0.285278226 | 0.210370919 |
| 0.179671299 | 0.153353117 | 0.141325664 | 0.135556501 |
| 0.158638036 | 0.170439138 | 0.119867296 | 0.263765386 |
| 0.229987507 | 0.144273556 | 0.11573735  | 0.116487554 |
| 0.244248384 | 0.027993953 | 0.11956586  | 0.161629634 |
| 0.197220389 | 0.088382836 | 0.011824532 | 0.0371084   |
| 0.215536279 | 0.254496085 | 0.121621042 | 0.145603109 |
| 0.02344686  | 0.193632858 | 0.031872875 | 0.191360976 |
| 0.148416495 | 0.215972164 | 0.232857694 | 0.145406206 |
| 0.155290232 | 0.162774714 | 0.11922868  | 0.189873157 |
| 0.142581783 | 0.132947276 | 0.113341341 | 0.309175445 |

|             |             |             |             |
|-------------|-------------|-------------|-------------|
| 0.172159275 | 0.147424854 | 0.160117507 | 0.137526058 |
| 0.225104648 | 0.253428545 | 0.259090242 | 0.124385058 |
| 0.119946275 | 0.048079798 | 0.04107143  | 0.137477115 |
| 0.062264039 | 0.259565426 | 0.163550669 | 0.246436981 |
| 0.198499525 | 0.139144283 | 0.085919597 | 0.135723617 |
| 0.173211932 | 0.219232542 | 0.104440113 | 0.023468162 |
| 0.01533576  | 0.182699022 | 0.132695441 | 0.2334893   |
| 0.181854733 | 0.026437281 | 0.1193001   | 0.072652437 |
| 0.133167871 | 0.219088484 | 0.153774918 | 0.290598479 |
| 0.185063354 | 0.252351031 | 0.060281899 | 0.255353693 |
| 0.245957093 | 0.05694594  | 0.208875302 | 0.133825769 |
| 0.212649142 | 0.200929167 | 0.076804075 | 0.227997998 |
| 0.063551255 | 0.288835338 | 0.158601522 | 0.115506757 |
| 0.095164366 | 0.28392784  | 0.247000304 | 0.255344812 |
| 0.123202937 | 0.211533546 | 0.228252093 | 0.016939869 |
| 0.16724184  | 0.20815798  | 0.219576117 | 0.232081399 |
| 0.18800693  | 0.285875588 | 0.24264388  | 0.136153345 |
| 0.173219759 | 0.127079642 | 0.188727794 | 0.01960391  |
| 0.149352499 | 0.1618868   | 0.140318271 | 0.082342884 |
| 0.053583145 | 0.129411745 | 0.104378861 | 0.202527564 |
| 0.092237602 | 0.278908699 | 0.248469017 | 0.242343992 |
| 0.210581569 | 0.122437683 | 0.235899031 | 0.197661313 |
| 0.078051469 | 0.238108516 | 0.128551209 | 0.062747355 |
| 0.129487687 | 0.098189553 | 0.188884493 | 0.098546667 |
| 0.06503989  | 0.254673464 | 0.12636357  | 0.191734526 |
| 0.122170821 | 0.159971781 | 0.163270775 | 0.164878009 |
| 0.164406948 | 0.092527031 | 0.12749822  | 0.086793026 |
| 0.201470429 | 0.240072499 | 0.094424486 | 0.224787336 |
| 0.234148561 | 0.120995376 | 0.120430639 | 0.028994806 |
| 0.098740935 | 0.069762846 | 0.19221724  | 0.279401978 |
| 0.113768291 | 0.102121799 | 0.091408854 | 0.245713803 |
| 0.17640763  | 0.127184812 | 0.079664163 | 0.16429427  |
| 0.243652502 | 0.219190662 | 0.199588144 | 0.215796732 |
| 0.067617734 | 0.16643331  | 0.165717362 | 0.122051031 |
| 0.118313582 | 0.190147746 | 0.146558468 | 0.026900182 |
| 0.161204364 | 0.106248553 | 0.199440328 | 0.278147164 |
| 0.238800478 | 0.234153564 | 0.072711489 | 0.262088573 |
| 0.06379111  | 0.263889705 | 0.038067034 | 0.218241658 |
| 0.239364061 | 0.059566839 | 0.253442821 | 0.104140605 |
| 0.212654476 | 0.135174239 | 0.109846647 | 0.266844784 |
| 0.073840563 | 0.165719803 | 0.146386829 | 0.228988342 |
| 0.113928905 | 0.210300475 | 0.259031925 | 0.049599008 |
| 0.046246597 | 0.063709918 | 0.158718164 | 0.086403668 |
| 0.109219442 | 0.251831801 | 0.064294631 | 0.172730409 |
| 0.130991731 | 0.082564378 | 0.107408206 | 0.134378188 |
| 0.220021752 | 0.158857398 | 0.044434251 | 0.159438045 |
| 0.135715243 | 0.230098798 | 0.077354617 | 0.075721568 |
| 0.145856551 | 0.116729527 | 0.14432719  | 0.147881679 |
| 0.133704021 | 0.294050823 | 0.093741353 | 0.145947966 |
| 0.106442473 | 0.079701162 | 0.137251026 | 0.19702183  |
| 0.053094478 |             |             |             |
| CD82        | 0.345027722 | 0.489386727 | 0.301721597 |
| 0.386983492 | 0.364664516 | 0.357970059 | 0.289696651 |
| 0.314108174 | 0.102682796 | 0.016403633 | 0.02555636  |



|             |             |             |             |
|-------------|-------------|-------------|-------------|
| 0.341217571 | 0.200074918 | 0.339485645 | 0.290335722 |
| 0.373266361 | 0.139910014 | 0.362553763 | 0.301251717 |
| 0.404606829 | 0.193499728 | 0.357454145 | 0.158092408 |
| 0.221774001 | 0.09387517  | 0.092546143 | 0.200154338 |
| 0.426017841 | 0.105446636 | 0.347550362 | 0.406125682 |
| 0.121499314 | 0.388138157 | 0.473929691 | 0.341577971 |
| 0.455377877 | 0.317758713 | 0.032500409 | 0.311419963 |
| 0.405187886 | 0.34232098  | 0.403305794 | 0.349640816 |
| 0.083843472 | 0.469384271 | 0.297681199 | 0.323106616 |
| 0.291129518 | 0.043934756 | 0.324148603 | 0.443918091 |
| 0.431066461 | 0.334468966 | 0.333304253 | 0.232263105 |
| 0.168777318 | 0.340650431 | 0.168833401 | 0.364162726 |
| 0.290766299 | 0.274132419 | 0.436021262 | 0.133812771 |
| 0.182890056 | 0.367100552 | 0.155306273 | 0.362695506 |
| 0.241233707 | 0.366985563 | 0.057086247 | 0.292695132 |
| 0.011612272 | 0.397888271 | 0.327369503 | 0.189067892 |
| 0.06470988  | 0.040380475 | 0.181882455 | 0.370794465 |
| 0.437511458 | 0.422513639 | 0.420710307 | 0.417352331 |
| 0.186888986 | 0.293949116 | 0.28064914  | 0.214439575 |
| 0.401572927 | 0.242300553 | 0.15645919  | 0.361828176 |
| 0.427964101 | 0.468395378 | 0.195096211 | 0.239033212 |
| 0.367488324 | 0.467170304 | 0.348438303 | 0.354209178 |
| 0.235610379 | 0.052344167 | 0.415074301 | 0.454485838 |
| 0.39407478  | 0.211061893 | 0.158799754 | 1           |
| 0.09445332  | 0.345788298 | 0.364049182 | 0.18459664  |
| 0.449520868 | 0.042341206 | 0.193016459 | 0.384926342 |
| 0.26529719  | 0.372952855 | 0.44821702  | 0.259811571 |
| 0.344469989 | 0.039462274 | 0.087187466 | 0.054924804 |
| 0.330506212 | 0.091109906 | 0.441173613 | 0.42861317  |
| 0.35860415  | 0.31861544  | 0.346003978 | 0.006010081 |
| 0.038552378 | 0.193397758 | 0.365985837 | 0.383141148 |
| 0.383253391 | 0.322430117 | 0.218374603 | 0.35250041  |
| 0.312797529 | 0.412961487 | 0.071398945 | 0.176214367 |
| 0.375986156 | 0.196671484 | 0.275400887 | 0.364413258 |
| 0.263728999 | 0.220142379 | 0.192428309 | 0.468652922 |
| 0.445492214 | 0.142675876 | 0.373124618 | 0.37116912  |
| 0.308892384 | 0.280982246 | 0.179971704 | 0.324975346 |
| 0.114333818 | 0.415365103 | 0.034608901 | 0.393076476 |
| 0.174769458 | 0.133224086 | 0.033324258 | 0.369449737 |
| 0.316730632 | 0.376023034 | 0.421781315 | 0.165130434 |
| 0.355981458 | 0.346999831 | 0.380165628 | 0.346713222 |
| 0.017958491 | 0.087628837 | 0.334047893 | 0.463380604 |
| 0.332387557 | 0.440258585 | 0.343514329 | 0.275612835 |
| 0.270398521 | 0.387656079 | 0.004013149 | 0.462717722 |
| 0.461762655 | 0.332511188 | 0.350394736 | 0.352768005 |
| 0.253583052 | 0.410205004 | 0.049571016 | 0.383948806 |
| 0.341968175 | 0.133710778 | 0.45231245  | 0.173097593 |
| 0.428484169 | 0.06278117  | 0.390777104 | 0.325128008 |
| 0.308708138 | 0.017614009 | 0.313716419 | 0.39818613  |
| 0.031970255 | 0.198399415 | 0.381914501 | 0.385190726 |
| 0.33766581  | 0.360670247 | 0.43858929  | 0.232342317 |
| 0.36157647  | 0.336784897 | 0.025843231 | 0.270027292 |
| 0.348259529 | 0.282187257 | 0.442964832 | 0.31789116  |
| 0.335459589 | 0.450953076 | 0.333264858 | 0.1826021   |

|             |             |             |             |
|-------------|-------------|-------------|-------------|
| 0.084362158 | 0.389378516 | 0.051754924 | 0.291723102 |
| 0.336615675 | 0.179873079 | 0.284555411 | 0.179381342 |
| 0.082714048 | 0.474700829 | 0.124074819 | 0.163626566 |
| 0.078020427 | 0.363362423 | 0.33356145  | 0.254466707 |
| 0.181623844 | 0.190520485 | 0.261188548 | 0.313997086 |
| 0.101530145 | 0.129994064 | 0.017956946 | 0.279941886 |
| 0.146262145 | 0.291295141 | 0.298157328 | 0.362699819 |
| 0.373114449 | 0.151836427 | 0.330462213 | 0.21542585  |
| 0.113791356 | 0.028170914 | 0.472962644 | 0.382356983 |
| 0.335435245 | 0.220471255 | 0.065722928 | 0.269213027 |
| 0.434830277 | 0.306043293 | 0.314649032 | 0.442629655 |
| 0.055216168 | 0.428243506 | 0.254310976 | 0.136882398 |
| 0.288013429 | 0.297026516 | 0.431279638 | 0.073219679 |
| 0.391373583 | 0.461423709 | 0.313922594 | 0.180789471 |
| 0.403442481 | 0.400099429 | 0.070065034 | 0.345691557 |
| 0.350811288 | 0.055833055 | 0.469234447 | 0.127102982 |
| 0.034712361 | 0.339253901 | 0.320130578 | 0.098272859 |
| 0.092431978 | 0.318887783 | 0.127088116 | 0.276160057 |
| 0.474333449 | 0.361567664 | 0.34627536  | 0.170321014 |
| 0.076342086 | 0.02009351  | 0.183402096 | 0.30478483  |
| 0.473629224 | 0.439944808 | 0.293880498 | 0.284766571 |
| 0.295606559 | 0.246267909 | 0.251082262 | 0.452290977 |
| 0.18815525  | 0.475577718 | 0.016996452 | 0.317823563 |
| 0.450658349 | 0.362989962 | 0.08405311  | 0.362600525 |
| 0.388697827 | 0.087662424 | 0.299338846 | 0.460698379 |
| 0.40535613  | 0.285267596 | 0.277464919 | 0.3777901   |
| 0.051900443 | 0.107593036 | 0.31223     | 0.120291788 |
| 0.329302389 | 0.235756928 | 0.028773248 | 0.381189997 |
| 0.075396162 | 0.442021389 | 0.396848772 | 0.070578171 |
| 0.315526784 | 0.360693577 | 0.331225055 | 0.071344484 |
| 0.354899218 | 0.434824883 | 0.481398914 | 0.276521396 |
| 0.353273241 | 0.419013395 | 0.265936264 | 0.10124772  |
| 0.024653485 | 0.453316582 | 0.378388671 | 0.042459589 |
| 0.434261628 | 0.311698063 | 0.026561465 | 0.483446977 |
| 0.263300166 | 0.424483322 | 0.0102483   | 0.06437366  |
| 0.045180209 | 0.379908049 | 0.441949137 | 0.407643054 |
| 0.272351965 | 0.389510808 | 0.007233942 | 0.458917069 |
| 0.460981962 | 0.01838245  | 0.122403588 | 0.341072814 |
| 0.294485775 | 0.5042703   | 0.212295455 | 0.357773138 |
| 0.30568155  | 0.441910973 | 0.29244189  | 0.265357367 |
| 0.399095721 | 0.410873624 | 0.390861255 | 0.45171932  |
| 0.425397288 | 0.351599429 | 0.318825728 | 0.038519992 |
| 0.094951617 | 0.332244408 | 0.234568365 | 0.081725381 |
| 0.355854974 | 0.137738109 | 0.445138707 | 0.416070839 |
| 0.411123574 | 0.011244187 | 0.270177987 | 0.358596499 |
| 0.448884999 | 0.458845691 | 0.034704896 | 0.007223054 |
| 0.00868815  | 0.016293064 | 0.406771804 | 0.231975737 |
| 0.435655829 | 0.249575512 | 0.013835504 | 0.129338442 |
| 0.317874501 | 0.290938591 | 0.46250119  | 0.380850989 |
| 0.337744917 | 0.120373932 | 0.261080502 | 0.395008557 |
| 0.065566185 | 0.312046152 | 0.424269665 | 0.465877591 |
| 0.060063833 | 0.236572035 | 0.377478478 | 0.461662985 |
| 0.034983589 | 0.306198055 | 0.352464361 | 0.307821978 |
| 0.023693267 | 0.088228439 | 0.07311179  | 0.373920968 |

|             |             |             |             |
|-------------|-------------|-------------|-------------|
| 0.436776767 | 0.092938622 | 0.04574832  | 0.201365756 |
| 0.172900204 | 0.417884183 | 0.206220599 | 0.464688714 |
| 0.414437541 | 0.398127752 | 0.075303456 | 0.453963855 |
| 0.053206236 | 0.449005653 | 0.249001349 | 0.082496307 |
| 0.300251976 | 0.028189463 | 0.411470264 | 0.099861814 |
| 0.395673978 | 0.395764127 | 0.140559347 | 0.021843218 |
| 0.110047215 | 0.072350624 | 0.426359835 | 0.374160704 |
| 0.038908197 | 0.321055251 | 0.296003256 | 0.386472785 |
| 0.370807049 | 0.376582533 | 0.471465847 | 0.312381759 |
| 0.158286434 | 0.10413855  | 0.408546905 | 0.36713549  |
| 0.36491276  | 0.430867711 | 0.243634543 | 0.469349288 |
| 0.368932406 | 0.436743266 | 0.416585409 | 0.355160615 |
| 0.18265558  | 0.378969624 | 0.367515846 | 0.051884745 |
| 0.372756416 | 0.402813146 | 0.394218567 | 0.131316666 |
| 0.242144935 | 0.263338009 | 0.100927516 | 0.218964426 |
| 0.206402132 | 0.356126094 | 0.205874181 | 0.396689628 |
| 0.394272463 | 0.365715719 | 0.112990441 | 0.069190253 |
| 0.499610995 | 0.426291949 | 0.221467239 | 0.377360979 |
| 0.203358596 | 0.309739839 | 0.351713329 | 0.339345917 |
| 0.299603478 | 0.390356001 | 0.397186176 | 0.370541161 |
| 0.439388283 | 0.317644664 | 0.480321275 | 0.208654555 |
| 0.073550622 | 0.337759499 | 0.12842174  | 0.107876468 |
| 0.195850432 | 0.038091505 | 0.178858875 | 0.376972976 |
| 0.246353005 | 0.365204029 | 0.366229313 | 0.112089682 |
| 0.294216846 | 0.334875872 | 0.345358488 | 0.287172625 |
| 0.115152196 | 0.459550795 | 0.01657705  | 0.082482835 |
| 0.273187326 | 0.347402159 | 0.268459451 | 0.244328073 |
| 0.194476768 | 0.134898952 | 0.31252928  | 0.366307326 |
| 0.294245474 | 0.294979191 | 0.35407938  | 0.079452725 |
| 0.061191816 | 0.446033094 | 0.371989591 | 0.028478506 |
| 0.094489978 | 0.345311707 | 0.337859457 | 0.230847631 |
| 0.025503089 | 0.406437754 | 0.316917057 | 0.340191502 |
| 0.395177342 | 0.111854653 | 0.378244703 | 0.1291897   |
| 0.113013404 | 0.44521657  | 0.292671818 | 0.451095818 |
| 0.291235403 | 0.376123481 | 0.436741256 | 0.376026646 |
| 0.152887613 | 0.281920569 | 0.06593509  | 0.415014801 |
| 0.275790966 |             |             |             |

|             |             |             |             |
|-------------|-------------|-------------|-------------|
| CD9         | 0.063831668 | 0.067397988 | 0.052279259 |
| 0.137615384 | 0.098577649 | 0.044634095 | 0.156581399 |
| 0.057366532 | 0.103550612 | 0.055239115 | 0.087184604 |
| 0.06865831  | 0.06079943  | 0.054770567 | 0.019772833 |
| 0.17845958  | 0.170249182 | 0.052190165 | 0.243320117 |
| 0.142236314 | 0.093716514 | 0.195651846 | 0.196699996 |
| 0.065725298 | 0.134084315 | 0.205083618 | 0.072682691 |
| 0.136284166 | 0.226646817 | 0.032656723 | 0.100079523 |
| 0.231366644 | 0.081014632 | 0.046781416 | 0.104820339 |
| 0.041779184 | 0.043890565 | 0.087938032 | 0.031522392 |
| 0.067404266 | 0.089525283 | 0.139938078 | 0.193495621 |
| 0.190052969 | 0.039110121 | 0.192619486 | 0.113757906 |
| 0.030313799 | 0.176498254 | 0.025122597 | 0.041402865 |
| 0.03595422  | 0.050642773 | 0.070314643 | 0.13268455  |
| 0.030158638 | 0.026847874 | 0.021461393 | 0.048028289 |
| 0.202209162 | 0.028540942 | 0.042850194 | 0.089153408 |
| 0.041267963 | 0.091875315 | 0.183635063 | 0.111232013 |

|             |             |             |             |
|-------------|-------------|-------------|-------------|
| 0.037722091 | 0.055768805 | 0.215795333 | 0.041864322 |
| 0.020453958 | 0.163757572 | 0.147291783 | 0.021996536 |
| 0.311935952 | 0.135021871 | 0.184036265 | 0.148214211 |
| 0.12132577  | 0.049503079 | 0.110367468 | 0.089134806 |
| 0.122131415 | 0.185089315 | 0.062515263 | 0.169826925 |
| 0.068923077 | 0.138626467 | 0.093027989 | 0.184551769 |
| 0.102545741 | 0.054586216 | 0.13487701  | 0.212331763 |
| 0.064502601 | 0.065434089 | 0.041013364 | 0.066898043 |
| 0.02122561  | 0.179878368 | 0.044559892 | 0.082059992 |
| 0.050201874 | 0.054323315 | 0.246749931 | 0.09445332  |
| 1           | 0.019516729 | 0.210891672 | 0.088440799 |
| 0.122224491 | 0.141095233 | 0.212017924 | 0.111681024 |
| 0.132552863 | 0.073891121 | 0.053327516 | 0.228075833 |
| 0.08904829  | 0.160230778 | 0.03324329  | 0.289672132 |
| 0.046154024 | 0.038553161 | 0.031126331 | 0.101611873 |
| 0.057458939 | 0.047232838 | 0.133528663 | 0.161432378 |
| 0.243255065 | 0.123107428 | 0.059390798 | 0.080467446 |
| 0.103632408 | 0.034483324 | 0.097730898 | 0.04382395  |
| 0.051655264 | 0.110375453 | 0.002592085 | 0.199455572 |
| 0.070681302 | 0.146660805 | 0.306950008 | 0.064169285 |
| 0.136015731 | 0.153145154 | 0.239008846 | 0.090694819 |
| 0.050217731 | 0.275016721 | 0.033375031 | 0.178759369 |
| 0.033994425 | 0.131246455 | 0.235776879 | 0.094778063 |
| 0.18504415  | 0.039566694 | 0.224774964 | 0.060271546 |
| 0.016215938 | 0.115736783 | 0.179121576 | 0.077198259 |
| 0.039123891 | 0.054117318 | 0.029824492 | 0.288634677 |
| 0.115955694 | 0.151600935 | 0.042179737 | 0.058876874 |
| 0.071015012 | 0.240745615 | 0.02136466  | 0.079142446 |
| 0.0323192   | 0.084525964 | 0.105351401 | 0.090566662 |
| 0.228026609 | 0.123217664 | 0.008852782 | 0.040903429 |
| 0.053299638 | 0.017103302 | 0.105006183 | 0.104105711 |
| 0.034293402 | 0.110144475 | 0.003963925 | 0.174656557 |
| 0.0365268   | 0.268991877 | 0.11469199  | 0.25584795  |
| 0.047561304 | 0.239428875 | 0.051326235 | 0.063706787 |
| 0.044593763 | 0.066941478 | 0.043754584 | 0.129767762 |
| 0.216106878 | 0.06993515  | 0.091680576 | 0.133436975 |
| 0.099219686 | 0.112454149 | 0.13753343  | 0.029313479 |
| 0.085289087 | 0.137264017 | 0.225639701 | 0.153343061 |
| 0.080634536 | 0.016073912 | 0.048110146 | 0.09714264  |
| 0.024815231 | 0.061024553 | 0.04323566  | 0.014203497 |
| 0.216540484 | 0.09331124  | 0.06200893  | 0.114200526 |
| 0.040961145 | 0.115741448 | 0.034656654 | 0.170085686 |
| 0.227143576 | 0.077681863 | 0.069838501 | 0.035329607 |
| 0.040995835 | 0.06126513  | 0.189173583 | 0.041469421 |
| 0.045174969 | 0.170550115 | 0.04175672  | 0.047063334 |
| 0.13127164  | 0.220505878 | 0.147493063 | 0.016175022 |
| 0.051266881 | 0.024422457 | 0.020156839 | 0.047505213 |
| 0.046607556 | 0.108061036 | 0.091832066 | 0.051924699 |
| 0.167317208 | 0.270543817 | 0.066919562 | 0.16629063  |
| 0.03463447  | 0.16051844  | 0.290322196 | 0.011128435 |
| 0.094213004 | 0.020343218 | 0.014038117 | 0.071459659 |
| 0.176364979 | 0.105149759 | 0.073770382 | 0.250702166 |
| 0.047694138 | 0.206476759 | 0.130869665 | 0.02336299  |
| 0.0610088   | 0.056140144 | 0.185530377 | 0.150647394 |

|             |             |             |             |
|-------------|-------------|-------------|-------------|
| 0.039008029 | 0.115818484 | 0.186437169 | 0.046835844 |
| 0.043621618 | 0.256148049 | 0.065922618 | 0.18176013  |
| 0.28229328  | 0.100583612 | 0.058432304 | 0.324849026 |
| 0.220805778 | 0.075632385 | 0.094000803 | 0.254442035 |
| 0.075591277 | 0.187180319 | 0.058854372 | 0.082070137 |
| 0.201845134 | 0.078957154 | 0.151368281 | 0.055728826 |
| 0.041326271 | 0.064745614 | 0.266705347 | 0.076678054 |
| 0.282554614 | 0.036062198 | 0.027993076 | 0.076769865 |
| 0.070013822 | 0.053473709 | 0.223713516 | 0.074834061 |
| 0.038940652 | 0.03382186  | 0.174319354 | 0.091217393 |
| 0.047059523 | 0.210453344 | 0.143520419 | 0.049325127 |
| 0.071120204 | 0.065810466 | 0.036237131 | 0.106862357 |
| 0.127401501 | 0.176307603 | 0.095873395 | 0.049500791 |
| 0.037222029 | 0.134979209 | 0.024298222 | 0.036921625 |
| 0.174098716 | 0.053728475 | 0.126586626 | 0.147343435 |
| 0.031942806 | 0.02991161  | 0.183642486 | 0.253025185 |
| 0.061794434 | 0.053083518 | 0.04850121  | 0.16061562  |
| 0.069336088 | 0.058070159 | 0.038340911 | 0.269112857 |
| 0.242418721 | 0.046737467 | 0.064879643 | 0.07889966  |
| 0.122462928 | 0.022103637 | 0.091926516 | 0.066691745 |
| 0.24789178  | 0.029473942 | 0.012889634 | 0.020170179 |
| 0.201621954 | 0.120717156 | 0.041051976 | 0.106109605 |
| 0.010597422 | 0.158164517 | 0.048509954 | 0.072078685 |
| 0.053383906 | 0.183407082 | 0.136336655 | 0.053479321 |
| 0.050166951 | 0.063671416 | 0.046439173 | 0.067265594 |
| 0.050079511 | 0.042353253 | 0.073300328 | 0.2419971   |
| 0.075352405 | 0.046606565 | 0.087219117 | 0.056957374 |
| 0.110301094 | 0.139095627 | 0.233024813 | 0.163683836 |
| 0.05260394  | 0.055763928 | 0.009877597 | 0.070135289 |
| 0.040967017 | 0.141881141 | 0.064305224 | 0.12164175  |
| 0.07343217  | 0.207445627 | 0.090287603 | 0.054500613 |
| 0.089127187 | 0.111805839 | 0.158358384 | 0.017563567 |
| 0.008276053 | 0.081558676 | 0.109689582 | 0.189261188 |
| 0.070375597 | 0.008568686 | 0.18683633  | 0.123572443 |
| 0.076173205 | 0.096280217 | 0.054962426 | 0.214970478 |
| 0.080989059 | 0.275576722 | 0.021177795 | 0.181832799 |
| 0.143875666 | 0.027879212 | 0.080534753 | 0.052552892 |
| 0.268159375 | 0.16368753  | 0.050821955 | 0.109176492 |
| 0.014182657 | 0.225025844 | 0.073146903 | 0.051922598 |
| 0.138374861 | 0.204737477 | 0.181855021 | 0.142651663 |
| 0.037839169 | 0.116695963 | 0.145036173 | 0.010195028 |
| 0.12669183  | 0.098436175 | 0.138720113 | 0.099225495 |
| 0.095283174 | 0.1661809   | 0.198593184 | 0.050266311 |
| 0.148137303 | 0.042193148 | 0.088011103 | 0.010013789 |
| 0.101087425 | 0.265237717 | 0.048700573 | 0.021309161 |
| 0.03852489  | 0.080323643 | 0.041195286 | 0.220431261 |
| 0.02848526  | 0.256041328 | 0.114839055 | 0.105566511 |
| 0.21721674  | 0.111200393 | 0.187682731 | 0.130907796 |
| 0.069960082 | 0.124050904 | 0.044155089 | 0.021436024 |
| 0.14792542  | 0.051269957 | 0.123886701 | 0.047867188 |
| 0.0572808   | 0.114225998 | 0.047532814 | 0.07338862  |
| 0.063166828 | 0.071482597 | 0.061089283 | 0.117874026 |
| 0.074355208 | 0.050122939 | 0.072454794 | 0.082178402 |
| 0.157203168 | 0.113725167 | 0.076472863 | 0.090323789 |

|             |             |             |             |
|-------------|-------------|-------------|-------------|
| 0.159889634 | 0.046403832 | 0.22272893  | 0.017653568 |
| 0.033433096 | 0.048869183 | 0.161491818 | 0.165556821 |
| 0.072889497 | 0.049306824 | 0.192382814 | 0.172761768 |
| 0.067025482 | 0.054468428 | 0.068918856 | 0.083377257 |
| 0.257756803 | 0.140427714 | 0.087413113 | 0.095399743 |
| 0.027282931 | 0.065909381 | 0.090805025 | 0.0615286   |
| 0.050063576 | 0.194731936 | 0.050646042 | 0.039678391 |
| 0.088299263 | 0.048600953 | 0.132771248 | 0.299649077 |
| 0.26220655  | 0.220734423 | 0.016259185 | 0.158927014 |
| 0.018008551 | 0.172748347 | 0.021341676 | 0.173634287 |
| 0.177755451 | 0.035558245 | 0.18855493  | 0.097742127 |
| 0.157539396 | 0.04596156  | 0.112610012 | 0.284288617 |
| 0.027403576 | 0.067546188 | 0.054529305 | 0.152308136 |
| 0.034328696 | 0.161790136 | 0.214159325 | 0.038580655 |
| 0.018940895 | 0.022343244 | 0.06267005  | 0.115062734 |
| 0.193201551 | 0.117012173 | 0.036409552 | 0.200702595 |
| 0.137564642 | 0.044387662 | 0.077171175 | 0.06975464  |
| 0.206400718 | 0.05303583  | 0.024322935 | 0.081477391 |
| 0.1133256   | 0.286436306 | 0.034675475 | 0.072797208 |
| 0.209025506 | 0.044790443 | 0.064037252 | 0.048935595 |
| 0.082861399 | 0.173210532 | 0.033955491 | 0.061521254 |
| 0.083405429 | 0.034427581 | 0.180792821 | 0.105779227 |
| 0.016234649 |             |             |             |
| CDC37       | 0.318618135 | 0.429602903 | 0.169387235 |
| 0.314250608 | 0.171330923 | 0.227205869 | 0.089675263 |
| 0.067316165 | 0.01965703  | 0.001885706 | 0.002204487 |
| 0.241876823 | 0.023287605 | 0.067373028 | 0.066963227 |
| 0.302297873 | 0.022898831 | 0.139063454 | 0.116967439 |
| 0.289085936 | 0.029702213 | 0.242150574 | 0.024887684 |
| 0.044370681 | 0.019793662 | 0.017051843 | 0.05503435  |
| 0.384067164 | 0.023559879 | 0.130744303 | 0.304668993 |
| 0.024854989 | 0.345660995 | 0.433050818 | 0.22747718  |
| 0.41412869  | 0.315297748 | 0.005313051 | 0.061851019 |
| 0.400211871 | 0.29856868  | 0.285241428 | 0.177859599 |
| 0.010725476 | 0.430079014 | 0.114860612 | 0.19537776  |
| 0.06158217  | 0.00526384  | 0.092238583 | 0.398230847 |
| 0.384118618 | 0.186998405 | 0.084973381 | 0.049513745 |
| 0.017212657 | 0.064007427 | 0.025798988 | 0.262346084 |
| 0.084809755 | 0.061694354 | 0.384367566 | 0.019934872 |
| 0.018352267 | 0.103726695 | 0.029140654 | 0.120943712 |
| 0.059337319 | 0.33919186  | 0.008524877 | 0.220222987 |
| 0.001723672 | 0.280129666 | 0.191920342 | 0.055440325 |
| 0.017022035 | 0.004368366 | 0.045319622 | 0.182829275 |
| 0.395804235 | 0.417204209 | 0.37353559  | 0.369933631 |
| 0.027733586 | 0.117518711 | 0.135459348 | 0.043636611 |
| 0.36516516  | 0.061921109 | 0.041452281 | 0.287649714 |
| 0.381552774 | 0.410300817 | 0.027474195 | 0.106026735 |
| 0.309885945 | 0.416088814 | 0.178070814 | 0.135149753 |
| 0.060940918 | 0.011771308 | 0.353046678 | 0.39833181  |
| 0.373468373 | 0.083728949 | 0.051736189 | 0.345788298 |
| 0.019516729 | 1           | 0.210364709 | 0.035910087 |
| 0.404988892 | 0.005924728 | 0.067695381 | 0.157110477 |
| 0.053222793 | 0.37309349  | 0.407124233 | 0.082038447 |
| 0.162230329 | 0.006851569 | 0.015544465 | 0.010310325 |

|             |             |             |             |
|-------------|-------------|-------------|-------------|
| 0.058584659 | 0.01780768  | 0.400310908 | 0.365801039 |
| 0.046876984 | 0.040589646 | 0.094496154 | 0.001034441 |
| 0.007024469 | 0.041435517 | 0.322488279 | 0.17941262  |
| 0.331620616 | 0.333319623 | 0.050313516 | 0.303374879 |
| 0.230997822 | 0.35817276  | 0.020310862 | 0.030317488 |
| 0.211112626 | 0.035023905 | 0.120066633 | 0.205788891 |
| 0.102956571 | 0.044582569 | 0.041055016 | 0.425922989 |
| 0.393754203 | 0.032966861 | 0.137529403 | 0.293382864 |
| 0.03803133  | 0.140540669 | 0.035525592 | 0.067364242 |
| 0.011476104 | 0.380034634 | 0.008409941 | 0.172649764 |
| 0.030149722 | 0.016499984 | 0.007285606 | 0.131290497 |
| 0.058769476 | 0.315256431 | 0.386824916 | 0.044159576 |
| 0.101351481 | 0.217623164 | 0.165233705 | 0.267734985 |
| 0.001364962 | 0.019880444 | 0.137107314 | 0.399719652 |
| 0.207631884 | 0.410403399 | 0.080335998 | 0.075063859 |
| 0.124513245 | 0.365639954 | 0.005481391 | 0.42366745  |
| 0.416478631 | 0.144823207 | 0.176058117 | 0.225478897 |
| 0.097795514 | 0.367302208 | 0.018731415 | 0.279245559 |
| 0.297321095 | 0.032213938 | 0.40418893  | 0.052412575 |
| 0.395436523 | 0.012122549 | 0.090175436 | 0.305792226 |
| 0.257781292 | 0.002499073 | 0.109416946 | 0.265134298 |
| 0.006709458 | 0.022881641 | 0.322961187 | 0.276884935 |
| 0.178873441 | 0.341367882 | 0.393881993 | 0.087144826 |
| 0.171849194 | 0.101241639 | 0.004846555 | 0.132329224 |
| 0.338847055 | 0.036744136 | 0.406614026 | 0.058949445 |
| 0.228472914 | 0.408218109 | 0.317973907 | 0.023295033 |
| 0.015414528 | 0.132769298 | 0.009905504 | 0.122508261 |
| 0.326276786 | 0.018798435 | 0.1283926   | 0.034813095 |
| 0.017993223 | 0.419335402 | 0.035137753 | 0.055533532 |
| 0.019068717 | 0.174095662 | 0.124319555 | 0.036887895 |
| 0.022351257 | 0.0288185   | 0.067786643 | 0.085319843 |
| 0.011401323 | 0.02413161  | 0.005789759 | 0.065287074 |
| 0.015004229 | 0.062834419 | 0.068959131 | 0.270555047 |
| 0.043025764 | 0.019304692 | 0.133791467 | 0.044898738 |
| 0.026179501 | 0.006492231 | 0.417452462 | 0.283869232 |
| 0.303055698 | 0.039404625 | 0.014264873 | 0.037896324 |
| 0.359226308 | 0.164611188 | 0.10185264  | 0.367416404 |
| 0.013869713 | 0.380588734 | 0.03280242  | 0.037743226 |
| 0.080078982 | 0.106349691 | 0.392531814 | 0.013118086 |
| 0.216148185 | 0.391518815 | 0.152278342 | 0.04724848  |
| 0.350096609 | 0.252642109 | 0.008916596 | 0.35351562  |
| 0.326251246 | 0.010547888 | 0.421192106 | 0.020037474 |
| 0.008664022 | 0.283630203 | 0.261635983 | 0.029638755 |
| 0.025995677 | 0.104768137 | 0.016527184 | 0.142925989 |
| 0.422583798 | 0.268321737 | 0.279569944 | 0.051701529 |
| 0.010881275 | 0.001450218 | 0.055661153 | 0.19338398  |
| 0.430695505 | 0.398806835 | 0.123039204 | 0.109553302 |
| 0.124915518 | 0.051046265 | 0.034990731 | 0.398638531 |
| 0.050865046 | 0.435318621 | 0.003151169 | 0.278733576 |
| 0.407778357 | 0.134757399 | 0.019414589 | 0.138094804 |
| 0.348859527 | 0.016338773 | 0.071411707 | 0.426305958 |
| 0.358030531 | 0.079645648 | 0.07701748  | 0.277746196 |
| 0.006499206 | 0.01022923  | 0.184741971 | 0.028168862 |
| 0.081445355 | 0.052607466 | 0.00663594  | 0.069104959 |

|             |             |             |             |
|-------------|-------------|-------------|-------------|
| 0.00995402  | 0.367700685 | 0.362462525 | 0.010632047 |
| 0.149965741 | 0.085968614 | 0.201709853 | 0.013836177 |
| 0.325583974 | 0.40931586  | 0.437484829 | 0.055724963 |
| 0.304693366 | 0.378137969 | 0.155073338 | 0.02803017  |
| 0.006973169 | 0.422843069 | 0.319038626 | 0.011750638 |
| 0.374555692 | 0.130005362 | 0.002226258 | 0.429243057 |
| 0.088286241 | 0.387309182 | 0.013966364 | 0.022897957 |
| 0.010167409 | 0.348556081 | 0.404165743 | 0.282580096 |
| 0.074363304 | 0.237725142 | 0.001903425 | 0.420006823 |
| 0.409844837 | 0.003963011 | 0.019402418 | 0.295437704 |
| 0.262202585 | 0.457632576 | 0.078077147 | 0.319531718 |
| 0.199590288 | 0.391781292 | 0.034734617 | 0.118584865 |
| 0.358549882 | 0.374556554 | 0.365208769 | 0.433651334 |
| 0.360989802 | 0.260933108 | 0.145260987 | 0.003731108 |
| 0.020379877 | 0.08774398  | 0.05793458  | 0.009926332 |
| 0.244415787 | 0.026102171 | 0.436000917 | 0.359961616 |
| 0.368806917 | 0.002718058 | 0.040355067 | 0.315891248 |
| 0.395360138 | 0.419709584 | 0.009951756 | 0.005945766 |
| 0.011211032 | 0.002681166 | 0.200451775 | 0.09461175  |
| 0.402851377 | 0.040637198 | 0.002268716 | 0.016892732 |
| 0.074644457 | 0.186959567 | 0.407066367 | 0.269336974 |
| 0.326785112 | 0.022869442 | 0.041423618 | 0.304477864 |
| 0.00936796  | 0.277270645 | 0.3774658   | 0.40126283  |
| 0.010934321 | 0.081898221 | 0.1869722   | 0.405264708 |
| 0.006749108 | 0.144896186 | 0.248477634 | 0.038929075 |
| 0.006491051 | 0.020523296 | 0.013054717 | 0.328105517 |
| 0.392310967 | 0.009964573 | 0.005470009 | 0.03678417  |
| 0.025754082 | 0.369726531 | 0.03308476  | 0.41531176  |
| 0.371926568 | 0.348781213 | 0.010733975 | 0.418794852 |
| 0.004517965 | 0.39848832  | 0.106774094 | 0.027031898 |
| 0.09559731  | 0.005032929 | 0.380413584 | 0.014284928 |
| 0.100863559 | 0.319043372 | 0.026082515 | 0.004058628 |
| 0.024592644 | 0.014538825 | 0.367059473 | 0.339715444 |
| 0.008627046 | 0.063111772 | 0.143104021 | 0.28272424  |
| 0.169466522 | 0.298687054 | 0.429272571 | 0.188857897 |
| 0.018836061 | 0.023247273 | 0.333030178 | 0.314768112 |
| 0.060593432 | 0.383770072 | 0.038057162 | 0.432005622 |
| 0.330503059 | 0.408259899 | 0.369713112 | 0.177296629 |
| 0.023474487 | 0.257930449 | 0.238961975 | 0.010293392 |
| 0.203801838 | 0.337105589 | 0.192239943 | 0.021487792 |
| 0.0749263   | 0.14360767  | 0.013764485 | 0.063446912 |
| 0.099065485 | 0.20107715  | 0.021627442 | 0.357200652 |
| 0.285849635 | 0.317725923 | 0.015064709 | 0.011870523 |
| 0.450743286 | 0.397056224 | 0.049219741 | 0.296996699 |
| 0.068467915 | 0.136891803 | 0.3421416   | 0.301864362 |
| 0.054231151 | 0.327134108 | 0.346879175 | 0.255860792 |
| 0.373056294 | 0.117836059 | 0.436010272 | 0.039432496 |
| 0.013634153 | 0.228325945 | 0.013514519 | 0.032848525 |
| 0.050187141 | 0.007377127 | 0.042617263 | 0.28832441  |
| 0.070514285 | 0.201824434 | 0.048659089 | 0.031413119 |
| 0.128981001 | 0.162516294 | 0.18018706  | 0.073343843 |
| 0.015564886 | 0.404324266 | 0.003382238 | 0.017303763 |
| 0.08063979  | 0.313697319 | 0.119758195 | 0.076520231 |
| 0.031375795 | 0.022839448 | 0.120421435 | 0.155714471 |



|                      |             |             |             |
|----------------------|-------------|-------------|-------------|
| 0.084527537          | 0.064870202 | 0.332701663 | 0.023859124 |
| 0.006422765          | 0.398280025 | 0.21226315  | 0.007892862 |
| 0.011502206          | 0.250213418 | 0.076188567 | 0.029289366 |
| 0.006520209          | 0.351418347 | 0.097781845 | 0.183758098 |
| 0.193957949          | 0.021996717 | 0.355474163 | 0.025564284 |
| 0.022923069          | 0.414258863 | 0.175303255 | 0.403813817 |
| 0.131860038          | 0.289516399 | 0.405763075 | 0.318585048 |
| 0.054170776          | 0.176273737 | 0.009536467 | 0.378951614 |
| 0.094938035          |             |             |             |
| CDC42EP3 0.279683169 | 0.415550317 | 0.22335384  |             |
| 0.409663481          | 0.303252741 | 0.219429706 | 0.327213252 |
| 0.22559674           | 0.190333821 | 0.053118004 | 0.092620632 |
| 0.244892782          | 0.238823863 | 0.292360508 | 0.20934741  |
| 0.411034597          | 0.248319255 | 0.242304009 | 0.359683287 |
| 0.35997674           | 0.225565734 | 0.387142711 | 0.276744543 |
| 0.231711083          | 0.196847385 | 0.225553003 | 0.246400953 |
| 0.439022837          | 0.239233701 | 0.207563653 | 0.329329995 |
| 0.206779624          | 0.342108431 | 0.364660683 | 0.320092938 |
| 0.345659758          | 0.237567621 | 0.038854979 | 0.252157107 |
| 0.332157143          | 0.341815128 | 0.370101975 | 0.357736118 |
| 0.199781511          | 0.334460431 | 0.348182926 | 0.274840876 |
| 0.198571472          | 0.145934381 | 0.183805252 | 0.317535177 |
| 0.325006892          | 0.238503702 | 0.269347864 | 0.305884891 |
| 0.183825473          | 0.193059034 | 0.161799965 | 0.222491941 |
| 0.353596195          | 0.164951905 | 0.342378452 | 0.213552544 |
| 0.172278041          | 0.285591328 | 0.23122953  | 0.312144599 |
| 0.213057694          | 0.284227479 | 0.110931268 | 0.189430839 |
| 0.023170533          | 0.354436453 | 0.291647798 | 0.167706574 |
| 0.178187153          | 0.128848213 | 0.259055004 | 0.33427644  |
| 0.435039001          | 0.324325541 | 0.43620256  | 0.410519343 |
| 0.264487117          | 0.314570945 | 0.224090953 | 0.333551908 |
| 0.344969914          | 0.312316453 | 0.191949724 | 0.4134068   |
| 0.433725376          | 0.384535027 | 0.279553469 | 0.295956225 |
| 0.345791861          | 0.38502904  | 0.248730893 | 0.295479224 |
| 0.207901184          | 0.120353025 | 0.327651311 | 0.422004261 |
| 0.299358479          | 0.194804184 | 0.276695171 | 0.364049182 |
| 0.210891672          | 0.210364709 | 1           | 0.186315649 |
| 0.447421154          | 0.117827618 | 0.275786027 | 0.320500355 |
| 0.277998907          | 0.33819378  | 0.373480961 | 0.343053253 |
| 0.274640362          | 0.111551587 | 0.1270739   | 0.137616679 |
| 0.264883183          | 0.10773803  | 0.307158307 | 0.426495145 |
| 0.253750076          | 0.284240993 | 0.339096302 | 0.034723654 |
| 0.127091981          | 0.218147833 | 0.314144929 | 0.267587432 |
| 0.345492456          | 0.242304528 | 0.3000395   | 0.261329238 |
| 0.247787519          | 0.42877273  | 0.039190202 | 0.27361864  |
| 0.280412012          | 0.227326444 | 0.356244872 | 0.255809255 |
| 0.309814066          | 0.269262191 | 0.312285769 | 0.442636986 |
| 0.332141559          | 0.272457389 | 0.209737086 | 0.391739214 |
| 0.268957497          | 0.28343996  | 0.286641499 | 0.333308827 |
| 0.215782595          | 0.32203277  | 0.111292557 | 0.246646112 |
| 0.159513473          | 0.194884678 | 0.062275037 | 0.259851445 |
| 0.267804672          | 0.339784516 | 0.288963087 | 0.274424626 |
| 0.343555167          | 0.329293392 | 0.209067388 | 0.304096322 |
| 0.073577496          | 0.169502117 | 0.153965118 | 0.422825078 |

|             |             |             |             |
|-------------|-------------|-------------|-------------|
| 0.178394138 | 0.405736031 | 0.341838266 | 0.294283106 |
| 0.330081861 | 0.410641569 | 0.005649992 | 0.343313873 |
| 0.379597948 | 0.153264739 | 0.307924904 | 0.270160428 |
| 0.206136429 | 0.424878501 | 0.023084766 | 0.383890081 |
| 0.212214675 | 0.243828732 | 0.457996837 | 0.29620549  |
| 0.332121701 | 0.182812786 | 0.27024485  | 0.316228356 |
| 0.26546598  | 0.037991999 | 0.208446261 | 0.349439144 |
| 0.099201893 | 0.206648957 | 0.326259754 | 0.353324714 |
| 0.30061332  | 0.371069629 | 0.46631967  | 0.194331949 |
| 0.300806934 | 0.31979984  | 0.078097149 | 0.285727102 |
| 0.326233075 | 0.191314382 | 0.341711715 | 0.326309802 |
| 0.157921629 | 0.38020778  | 0.276110105 | 0.150031949 |
| 0.202892141 | 0.299718612 | 0.087008187 | 0.311218695 |
| 0.26442876  | 0.276467423 | 0.206697207 | 0.204038135 |
| 0.1940232   | 0.431303419 | 0.16180025  | 0.152915884 |
| 0.101829792 | 0.263176935 | 0.344351532 | 0.252636225 |
| 0.219150503 | 0.301888046 | 0.243321736 | 0.27965885  |
| 0.174427399 | 0.264280439 | 0.045566408 | 0.186334804 |
| 0.195777994 | 0.224383224 | 0.206885961 | 0.260885652 |
| 0.273195439 | 0.234763756 | 0.310765439 | 0.215756187 |
| 0.216657197 | 0.106386405 | 0.40465595  | 0.358003494 |
| 0.224164793 | 0.315433948 | 0.165781989 | 0.171949103 |
| 0.424006503 | 0.165977413 | 0.144037881 | 0.392169345 |
| 0.106505469 | 0.424472097 | 0.306317338 | 0.265971544 |
| 0.251922037 | 0.358701147 | 0.451257428 | 0.085757391 |
| 0.235567818 | 0.37130039  | 0.31524867  | 0.294000779 |
| 0.29722894  | 0.323978339 | 0.164438825 | 0.274385583 |
| 0.265293573 | 0.166287981 | 0.405123164 | 0.220979975 |
| 0.117423885 | 0.317053681 | 0.299262913 | 0.221204857 |
| 0.205664702 | 0.301216616 | 0.166294815 | 0.335378734 |
| 0.427525151 | 0.408509978 | 0.322335259 | 0.20202533  |
| 0.198489586 | 0.068061189 | 0.238741201 | 0.214028269 |
| 0.348733068 | 0.387872919 | 0.341070564 | 0.277547367 |
| 0.36131835  | 0.242414958 | 0.143515706 | 0.417443122 |
| 0.162849174 | 0.373503177 | 0.067415561 | 0.31879748  |
| 0.33901821  | 0.190876638 | 0.201036829 | 0.292750022 |
| 0.302294296 | 0.202827997 | 0.293120833 | 0.36671645  |
| 0.36293692  | 0.288848504 | 0.254319716 | 0.300268649 |
| 0.11833256  | 0.193229175 | 0.273121065 | 0.143347178 |
| 0.272676248 | 0.322993781 | 0.04130741  | 0.246866253 |
| 0.199298174 | 0.359705455 | 0.410496973 | 0.181873146 |
| 0.19819322  | 0.220969502 | 0.313799302 | 0.184891402 |
| 0.335772193 | 0.354856491 | 0.373865538 | 0.295554913 |
| 0.313543475 | 0.372056343 | 0.191968806 | 0.203904016 |
| 0.095067919 | 0.358598787 | 0.275318489 | 0.112092772 |
| 0.443238006 | 0.149428124 | 0.093603668 | 0.403546512 |
| 0.339845585 | 0.282398066 | 0.019061781 | 0.050910634 |
| 0.107967077 | 0.402567468 | 0.338215225 | 0.317707832 |
| 0.153237671 | 0.314670573 | 0.013691584 | 0.404218661 |
| 0.376491436 | 0.079055312 | 0.198779258 | 0.305941074 |
| 0.271975892 | 0.409196856 | 0.204477337 | 0.349140271 |
| 0.222942023 | 0.346174727 | 0.30101385  | 0.339770145 |
| 0.373084447 | 0.338570429 | 0.342220577 | 0.360465975 |
| 0.427414732 | 0.336590597 | 0.361609359 | 0.119481939 |

|             |             |             |             |
|-------------|-------------|-------------|-------------|
| 0.14362927  | 0.229205004 | 0.168015646 | 0.170077997 |
| 0.190700266 | 0.251410473 | 0.374109514 | 0.431823301 |
| 0.386179793 | 0.05413491  | 0.265205915 | 0.307344027 |
| 0.402490471 | 0.443880936 | 0.06624158  | 0.013947822 |
| 0.011248001 | 0.069273576 | 0.299365332 | 0.289324618 |
| 0.391744756 | 0.149267825 | 0.061839928 | 0.167303301 |
| 0.313776855 | 0.254602053 | 0.381150054 | 0.395494474 |
| 0.325473891 | 0.237644228 | 0.215460724 | 0.391101629 |
| 0.166885629 | 0.181559156 | 0.407192087 | 0.368107598 |
| 0.134193638 | 0.293009841 | 0.230530319 | 0.45502534  |
| 0.044568531 | 0.333258769 | 0.264754088 | 0.300397603 |
| 0.048577879 | 0.196980396 | 0.182394658 | 0.396117024 |
| 0.329246383 | 0.19854877  | 0.143827913 | 0.097924945 |
| 0.282945957 | 0.400956254 | 0.315597652 | 0.449365774 |
| 0.396769338 | 0.453430487 | 0.157657736 | 0.361279155 |
| 0.148252379 | 0.342980696 | 0.251765123 | 0.071846135 |
| 0.277331748 | 0.089667817 | 0.329416805 | 0.133955398 |
| 0.246198965 | 0.287002063 | 0.173309178 | 0.080004308 |
| 0.114677126 | 0.184787025 | 0.445959257 | 0.393014283 |
| 0.098148688 | 0.32644865  | 0.319631654 | 0.308203202 |
| 0.249856805 | 0.395206047 | 0.357149922 | 0.187452131 |
| 0.255243118 | 0.101001681 | 0.359279601 | 0.242956516 |
| 0.255947134 | 0.442010689 | 0.268971467 | 0.413606422 |
| 0.287126022 | 0.371353861 | 0.361925916 | 0.318548996 |
| 0.214238888 | 0.227379476 | 0.296459088 | 0.115470407 |
| 0.336827394 | 0.424909659 | 0.264143593 | 0.22318397  |
| 0.323371405 | 0.197991106 | 0.155990953 | 0.108729934 |
| 0.162453328 | 0.211143198 | 0.30912876  | 0.443760971 |
| 0.250752426 | 0.256008692 | 0.140938219 | 0.17933809  |
| 0.419404646 | 0.336996614 | 0.226594217 | 0.321928209 |
| 0.292007953 | 0.325947871 | 0.346643452 | 0.343741721 |
| 0.217663438 | 0.356771135 | 0.360518067 | 0.291539931 |
| 0.340554952 | 0.353384322 | 0.380377664 | 0.128565958 |
| 0.13282857  | 0.214521093 | 0.252916868 | 0.217243103 |
| 0.321389671 | 0.121835203 | 0.146320524 | 0.374893849 |
| 0.172796069 | 0.341563508 | 0.194469689 | 0.207904736 |
| 0.307711621 | 0.192165324 | 0.341955376 | 0.300737148 |
| 0.238231789 | 0.362255203 | 0.05937319  | 0.1937902   |
| 0.19496103  | 0.331043949 | 0.234338279 | 0.314636531 |
| 0.192683077 | 0.194821446 | 0.36217038  | 0.205892495 |
| 0.196209975 | 0.19582221  | 0.330402573 | 0.129454078 |
| 0.135590326 | 0.451409158 | 0.214880437 | 0.075193817 |
| 0.141792633 | 0.208353881 | 0.260006718 | 0.286641572 |
| 0.085984547 | 0.350805545 | 0.205309709 | 0.272226827 |
| 0.31240752  | 0.220254911 | 0.253174326 | 0.139626598 |
| 0.177397999 | 0.329132062 | 0.226042961 | 0.362618476 |
| 0.244313773 | 0.427014134 | 0.297480772 | 0.326497179 |
| 0.156676992 | 0.174134561 | 0.16060124  | 0.395861403 |
| 0.184850855 |             |             |             |
| CEP78       | 0.172194624 | 0.177289631 | 0.09238556  |
| 0.171258538 | 0.151864813 | 0.068133261 | 0.070084054 |
| 0.039759973 | 0.004206203 | 0.003440009 | 0.004636063 |
| 0.184492453 | 0.011340885 | 0.088129991 | 0.014925858 |
| 0.210694023 | 0.121784968 | 0.094681084 | 0.139343297 |

|             |             |             |             |
|-------------|-------------|-------------|-------------|
| 0.19168135  | 0.028857018 | 0.228907239 | 0.037343414 |
| 0.054093847 | 0.059044041 | 0.050556923 | 0.048166165 |
| 0.218788214 | 0.059775346 | 0.049201247 | 0.155176465 |
| 0.130428374 | 0.204585792 | 0.154077835 | 0.201712533 |
| 0.160854899 | 0.1316558   | 0.051995331 | 0.022124228 |
| 0.172132935 | 0.141993628 | 0.172792775 | 0.160264762 |
| 0.026087449 | 0.144652173 | 0.099185357 | 0.173776537 |
| 0.004418092 | 0.033950983 | 0.026007476 | 0.127810599 |
| 0.132628577 | 0.086594723 | 0.037855353 | 0.042716084 |
| 0.007404224 | 0.044697206 | 0.031666892 | 0.100884427 |
| 0.103043463 | 0.025481742 | 0.144881851 | 0.005134284 |
| 0.00211681  | 0.074609567 | 0.154812034 | 0.096320802 |
| 0.055191912 | 0.119262021 | 0.013947465 | 0.141640816 |
| 0.002715147 | 0.179594963 | 0.226912681 | 0.026579427 |
| 0.103253228 | 0.034770437 | 0.184808454 | 0.125943387 |
| 0.222370011 | 0.170482203 | 0.225695954 | 0.199143957 |
| 0.102013884 | 0.186260769 | 0.125770351 | 0.103166714 |
| 0.155073471 | 0.065253173 | 0.009060845 | 0.239770052 |
| 0.21822484  | 0.171119837 | 0.042314966 | 0.159484907 |
| 0.118137879 | 0.16805531  | 0.071500174 | 0.088774446 |
| 0.022287489 | 0.053193701 | 0.124122033 | 0.209307628 |
| 0.149650131 | 0.099522525 | 0.132895205 | 0.18459664  |
| 0.088440799 | 0.035910087 | 0.186315649 | 1           |
| 0.220762994 | 0.00712549  | 0.162091434 | 0.118561584 |
| 0.051592653 | 0.174397029 | 0.169868039 | 0.097029689 |
| 0.17656461  | 0.019350833 | 0.002513302 | 0.081152728 |
| 0.013646284 | 0.043360601 | 0.12432067  | 0.198045089 |
| 0.05063669  | 0.034790791 | 0.071502095 | 0.020772444 |
| 0.077576622 | 0.048785757 | 0.203785706 | 0.169534664 |
| 0.18332217  | 0.128062066 | 0.046629773 | 0.121796593 |
| 0.12530597  | 0.222697875 | 0.000383132 | 0.040821225 |
| 0.107625558 | 0.068370619 | 0.182047496 | 0.139737012 |
| 0.111739307 | 0.0467404   | 0.110056185 | 0.198614821 |
| 0.131847142 | 0.093809747 | 0.08410799  | 0.237859356 |
| 0.021453303 | 0.18176863  | 0.095586555 | 0.14265479  |
| 0.033777033 | 0.139088255 | 0.098209319 | 0.09722525  |
| 0.005566115 | 0.064347279 | 0.010327568 | 0.07301736  |
| 0.020249271 | 0.133503704 | 0.128936638 | 0.118523558 |
| 0.161518929 | 0.181417811 | 0.081740764 | 0.127321683 |
| 0.002575411 | 0.030203268 | 0.054785341 | 0.207119457 |
| 0.071421676 | 0.22183467  | 0.100279057 | 0.077224708 |
| 0.181356636 | 0.198005667 | 0.001038625 | 0.14111344  |
| 0.166343341 | 0.051124545 | 0.171841585 | 0.205895262 |
| 0.044016256 | 0.184184555 | 0.006066902 | 0.270510889 |
| 0.139735934 | 0.085519346 | 0.228833653 | 0.139462637 |
| 0.162628632 | 0.058596402 | 0.065740069 | 0.152544787 |
| 0.156029012 | 0.002185523 | 0.035629636 | 0.138606313 |
| 0.066594677 | 0.012490467 | 0.170541487 | 0.155194739 |
| 0.085164937 | 0.203781805 | 0.243658864 | 0.036968953 |
| 0.127176373 | 0.101810954 | 0.015505003 | 0.176751354 |
| 0.189942911 | 0.010516891 | 0.131486074 | 0.040351343 |
| 0.093796582 | 0.150923619 | 0.135691723 | 0.001365769 |
| 0.040701001 | 0.080950136 | 0.006170492 | 0.078791914 |
| 0.112034476 | 0.050884634 | 0.04731846  | 0.110811624 |

|             |             |             |             |
|-------------|-------------|-------------|-------------|
| 0.110465278 | 0.190823439 | 0.075335349 | 0.0640204   |
| 0.041738778 | 0.138393554 | 0.118180422 | 0.061711306 |
| 0.04448889  | 0.043440147 | 0.038913597 | 0.040539096 |
| 0.020436635 | 0.116059942 | 0.018470733 | 0.08278858  |
| 0.046441174 | 0.087335274 | 0.081420209 | 0.136313372 |
| 0.068954008 | 0.076310789 | 0.130805521 | 0.037187399 |
| 0.059246344 | 0.069642535 | 0.173640567 | 0.208649401 |
| 0.105354352 | 0.039104434 | 0.10368891  | 0.016074156 |
| 0.192117665 | 0.040051461 | 0.028053567 | 0.159533579 |
| 0.008305451 | 0.217460061 | 0.051069486 | 0.116737138 |
| 0.115894968 | 0.164679084 | 0.201094023 | 0.00063992  |
| 0.123802238 | 0.156761726 | 0.177120484 | 0.063059526 |
| 0.137782149 | 0.150673547 | 0.010111139 | 0.141910918 |
| 0.163773742 | 0.085648055 | 0.195987328 | 0.120815832 |
| 0.085541196 | 0.211317332 | 0.123251749 | 0.107295819 |
| 0.080495207 | 0.074068454 | 0.01146076  | 0.19157418  |
| 0.184091758 | 0.233008307 | 0.121537712 | 0.081678799 |
| 0.046611098 | 0.013949581 | 0.153015291 | 0.140266994 |
| 0.15729133  | 0.196898272 | 0.223752632 | 0.121614832 |
| 0.15439436  | 0.027566723 | 0.003690626 | 0.19578965  |
| 0.045296672 | 0.17696197  | 0.038218956 | 0.160867186 |
| 0.145528062 | 0.066752044 | 0.067076697 | 0.066829826 |
| 0.136791465 | 0.03264581  | 0.101228052 | 0.162137962 |
| 0.133803806 | 0.041921074 | 0.029970128 | 0.24506218  |
| 0.010329868 | 0.013238472 | 0.105521051 | 0.041894491 |
| 0.038562379 | 0.051788064 | 0.01513076  | 0.033030401 |
| 0.031619424 | 0.142331903 | 0.266161695 | 0.013539345 |
| 0.050779059 | 0.031332539 | 0.241976475 | 0.054559167 |
| 0.158900379 | 0.179560246 | 0.163594396 | 0.078299326 |
| 0.20776455  | 0.160019715 | 0.101548244 | 0.120500781 |
| 0.075425025 | 0.165336325 | 0.131037701 | 0.007528289 |
| 0.234002499 | 0.038110987 | 0.015245746 | 0.171155637 |
| 0.106718817 | 0.131182419 | 0.000331884 | 0.006454792 |
| 0.0595264   | 0.242606932 | 0.125086394 | 0.145917968 |
| 0.019016128 | 0.195820268 | 0.006030892 | 0.207369781 |
| 0.163313798 | 0.039510956 | 0.050057261 | 0.160190869 |
| 0.146050399 | 0.184406381 | 0.058131056 | 0.164763249 |
| 0.14457649  | 0.148257043 | 0.020629845 | 0.148679833 |
| 0.155083754 | 0.159855699 | 0.166697375 | 0.150435625 |
| 0.227990963 | 0.232150779 | 0.132861752 | 0.01350497  |
| 0.003125868 | 0.039352887 | 0.0134802   | 0.00186591  |
| 0.078735766 | 0.043738744 | 0.193559621 | 0.229548502 |
| 0.200815162 | 0.042746283 | 0.028331659 | 0.15379769  |
| 0.180848388 | 0.207098218 | 0.011006767 | 0.00074072  |
| 0.001828815 | 0.008039927 | 0.121198354 | 0.142520111 |
| 0.172017095 | 0.011210433 | 0.028929199 | 0.015711343 |
| 0.033849923 | 0.156947148 | 0.166510808 | 0.221872892 |
| 0.192901333 | 0.102604639 | 0.023422678 | 0.220047566 |
| 0.019857399 | 0.099410987 | 0.195459503 | 0.141090831 |
| 0.069676866 | 0.104613858 | 0.153826525 | 0.203866534 |
| 0.013566453 | 0.227455384 | 0.215405224 | 0.031175042 |
| 0.01354168  | 0.069184633 | 0.030986192 | 0.236569736 |
| 0.148834358 | 0.056395231 | 0.047260003 | 0.004114403 |
| 0.055737573 | 0.214879953 | 0.082440823 | 0.220069807 |

|             |             |             |             |
|-------------|-------------|-------------|-------------|
| 0.179323752 | 0.248922089 | 0.056262055 | 0.135732047 |
| 0.004185314 | 0.156080091 | 0.124824093 | 0.001176572 |
| 0.162767429 | 0.035503945 | 0.186844421 | 0.003164759 |
| 0.07414702  | 0.166826178 | 0.004691265 | 0.057097339 |
| 0.016765341 | 0.0992231   | 0.204515776 | 0.211335302 |
| 0.061376816 | 0.045295481 | 0.175208606 | 0.2170499   |
| 0.076945573 | 0.188829645 | 0.149905377 | 0.061008186 |
| 0.025962705 | 0.03874134  | 0.197364164 | 0.155746005 |
| 0.061946128 | 0.23654876  | 0.026581544 | 0.197667856 |
| 0.139520054 | 0.171088186 | 0.17325762  | 0.084439551 |
| 0.033675496 | 0.104256949 | 0.104866643 | 0.009409185 |
| 0.160687447 | 0.219486375 | 0.114658847 | 0.024493118 |
| 0.110397187 | 0.103938033 | 0.009046393 | 0.014097608 |
| 0.082573094 | 0.06817332  | 0.046339904 | 0.243267084 |
| 0.171818808 | 0.148441694 | 0.016898485 | 0.02560917  |
| 0.190302998 | 0.133560693 | 0.00893209  | 0.131889666 |
| 0.164686367 | 0.09992898  | 0.208020584 | 0.217760222 |
| 0.025945529 | 0.180387296 | 0.191491622 | 0.132937232 |
| 0.134869398 | 0.093525769 | 0.159737717 | 0.01218439  |
| 0.003426434 | 0.164355936 | 0.044282826 | 0.13768937  |
| 0.126643065 | 0.030044425 | 0.029782418 | 0.252069373 |
| 0.054838784 | 0.216461046 | 0.027432084 | 0.014299116 |
| 0.191938119 | 0.097954847 | 0.186129894 | 0.063084824 |
| 0.0373677   | 0.143856752 | 0.00511631  | 0.119439388 |
| 0.101972076 | 0.132851861 | 0.096595593 | 0.106350581 |
| 0.029005297 | 0.081971771 | 0.168025691 | 0.063938013 |
| 0.058457614 | 0.018401344 | 0.130231227 | 0.003755341 |
| 0.023437946 | 0.243290292 | 0.098060193 | 0.035921485 |
| 0.007007578 | 0.100872064 | 0.137818592 | 0.017134316 |
| 0.06893488  | 0.164584135 | 0.028807621 | 0.128938138 |
| 0.106571258 | 0.092585271 | 0.121573546 | 0.003936422 |
| 0.022681783 | 0.159593156 | 0.119876938 | 0.167906502 |
| 0.146580882 | 0.221487093 | 0.124465439 | 0.180156582 |
| 0.014247405 | 0.098110994 | 0.015129782 | 0.206042662 |
| 0.040421231 |             |             |             |
| CERCAM      | 0.428999514 | 0.520264783 | 0.421720164 |
| 0.470944697 | 0.473253993 | 0.401023092 | 0.316035245 |
| 0.288354782 | 0.146519804 | 0.014452103 | 0.040502432 |
| 0.454521762 | 0.259903608 | 0.352265999 | 0.361086918 |
| 0.480983865 | 0.201707745 | 0.427415919 | 0.360067002 |
| 0.478868233 | 0.169872162 | 0.467404707 | 0.181137331 |
| 0.339720728 | 0.155350931 | 0.127281319 | 0.315597525 |
| 0.482464153 | 0.144924994 | 0.357713123 | 0.443963282 |
| 0.173360928 | 0.454159908 | 0.503205415 | 0.458113616 |
| 0.48783863  | 0.394749515 | 0.027826154 | 0.345476014 |
| 0.427853475 | 0.456206277 | 0.473348878 | 0.428224106 |
| 0.093906768 | 0.473302376 | 0.349777743 | 0.44984389  |
| 0.298734818 | 0.064472625 | 0.300298295 | 0.439312413 |
| 0.452473219 | 0.43149006  | 0.333525068 | 0.255850422 |
| 0.223106101 | 0.29071885  | 0.263815454 | 0.362532331 |
| 0.335109729 | 0.221154752 | 0.46388817  | 0.153590816 |
| 0.197520897 | 0.366644589 | 0.226441479 | 0.370039842 |
| 0.362432384 | 0.407493231 | 0.054471645 | 0.391423558 |
| 0.007258442 | 0.473639016 | 0.44711735  | 0.301429763 |

|             |             |             |             |
|-------------|-------------|-------------|-------------|
| 0.089759904 | 0.046120532 | 0.261361229 | 0.424155106 |
| 0.478212173 | 0.448742471 | 0.476816255 | 0.475599453 |
| 0.253929176 | 0.393716861 | 0.404721292 | 0.267122028 |
| 0.437208161 | 0.26987993  | 0.189892186 | 0.477661631 |
| 0.484522484 | 0.504854817 | 0.288409834 | 0.349039082 |
| 0.422826762 | 0.480851505 | 0.443753782 | 0.463087043 |
| 0.346620994 | 0.091908756 | 0.428973625 | 0.502343228 |
| 0.396225668 | 0.331221955 | 0.232857706 | 0.449520868 |
| 0.122224491 | 0.404988892 | 0.447421154 | 0.220762994 |
| 1           | 0.048876194 | 0.290246708 | 0.433409106 |
| 0.328986508 | 0.453351553 | 0.495180646 | 0.300467965 |
| 0.461677758 | 0.048453894 | 0.157290978 | 0.075893303 |
| 0.400322755 | 0.163206793 | 0.454525395 | 0.463681961 |
| 0.330266802 | 0.42074888  | 0.386268521 | 0.008842871 |
| 0.058501836 | 0.269180977 | 0.424765083 | 0.44902891  |
| 0.469076245 | 0.354479955 | 0.30162807  | 0.395412128 |
| 0.424621982 | 0.468271889 | 0.071490955 | 0.19107242  |
| 0.47370372  | 0.270111973 | 0.350798596 | 0.45961022  |
| 0.382022639 | 0.221002038 | 0.22511003  | 0.516930041 |
| 0.432353954 | 0.165870358 | 0.39492497  | 0.482789136 |
| 0.368439521 | 0.41017849  | 0.204112758 | 0.37022882  |
| 0.110344087 | 0.455858344 | 0.057927518 | 0.420409626 |
| 0.274663459 | 0.197040544 | 0.033852488 | 0.356305192 |
| 0.360410889 | 0.409888226 | 0.438868814 | 0.200199196 |
| 0.410904909 | 0.465164348 | 0.380718518 | 0.429309112 |
| 0.022561815 | 0.10674249  | 0.32226397  | 0.50152141  |
| 0.314885659 | 0.491981298 | 0.417924377 | 0.390846755 |
| 0.377654109 | 0.47884607  | 0.006093199 | 0.481395236 |
| 0.505261317 | 0.33194368  | 0.448274252 | 0.466704817 |
| 0.371740854 | 0.469122065 | 0.055828856 | 0.48430796  |
| 0.371513031 | 0.161213631 | 0.504084036 | 0.243057985 |
| 0.449913944 | 0.085975905 | 0.395964422 | 0.413752409 |
| 0.403830406 | 0.020641806 | 0.292372483 | 0.457618711 |
| 0.054840434 | 0.171411793 | 0.461514184 | 0.472156659 |
| 0.435389053 | 0.46999003  | 0.485232716 | 0.350181235 |
| 0.475470094 | 0.360685771 | 0.03465887  | 0.394181785 |
| 0.447530124 | 0.365859592 | 0.443051818 | 0.35657435  |
| 0.354629188 | 0.472999725 | 0.39656312  | 0.212379761 |
| 0.097572804 | 0.405510517 | 0.04968831  | 0.406176918 |
| 0.372759491 | 0.190462016 | 0.392261657 | 0.23255136  |
| 0.125683619 | 0.518996678 | 0.214191635 | 0.269907938 |
| 0.145317821 | 0.425859976 | 0.380655557 | 0.28561063  |
| 0.245979308 | 0.260714864 | 0.3870969   | 0.418504433 |
| 0.088779652 | 0.165934311 | 0.031084678 | 0.357106921 |
| 0.176324841 | 0.356954828 | 0.346110503 | 0.412879275 |
| 0.39628565  | 0.173655657 | 0.445301606 | 0.331426514 |
| 0.180150967 | 0.039171003 | 0.503584633 | 0.484188292 |
| 0.347116312 | 0.263824711 | 0.089343265 | 0.328717583 |
| 0.46236644  | 0.328615187 | 0.306009755 | 0.454946407 |
| 0.06839942  | 0.477363626 | 0.313617328 | 0.1965294   |
| 0.399003416 | 0.364828108 | 0.478125284 | 0.090116274 |
| 0.438094919 | 0.467683761 | 0.416563378 | 0.26302922  |
| 0.391236283 | 0.481820972 | 0.075455149 | 0.40509883  |
| 0.403100167 | 0.072263442 | 0.513416576 | 0.190728787 |

|             |             |             |             |
|-------------|-------------|-------------|-------------|
| 0.050490401 | 0.459534386 | 0.424483264 | 0.140294802 |
| 0.139535314 | 0.388391219 | 0.103502575 | 0.384445636 |
| 0.514391094 | 0.473290466 | 0.422041498 | 0.275118614 |
| 0.088719691 | 0.021602611 | 0.281190756 | 0.419557629 |
| 0.490870611 | 0.491865934 | 0.37586498  | 0.40314429  |
| 0.359851981 | 0.362815467 | 0.20362412  | 0.499285494 |
| 0.262979772 | 0.505974173 | 0.021923582 | 0.431656138 |
| 0.48190248  | 0.342586282 | 0.132175878 | 0.38935825  |
| 0.392536377 | 0.104561818 | 0.330199854 | 0.485938902 |
| 0.430710335 | 0.397386736 | 0.387192931 | 0.474580802 |
| 0.046552431 | 0.099310219 | 0.436943457 | 0.212843237 |
| 0.41640535  | 0.316535403 | 0.061159792 | 0.410284684 |
| 0.088969071 | 0.450710304 | 0.48172727  | 0.107381415 |
| 0.347765064 | 0.384349495 | 0.451289731 | 0.086925651 |
| 0.416742782 | 0.479783146 | 0.507351284 | 0.287117938 |
| 0.443242872 | 0.467737057 | 0.379185096 | 0.146777877 |
| 0.040285004 | 0.493775229 | 0.433902119 | 0.046889216 |
| 0.47839236  | 0.280264567 | 0.028652859 | 0.501349154 |
| 0.30451041  | 0.424277502 | 0.011193325 | 0.100947141 |
| 0.077313147 | 0.47076688  | 0.464488303 | 0.450171309 |
| 0.266832941 | 0.466525771 | 0.011489514 | 0.509700934 |
| 0.483747354 | 0.032943526 | 0.201206586 | 0.422511047 |
| 0.404116177 | 0.526981287 | 0.337069205 | 0.427800846 |
| 0.420505737 | 0.47476234  | 0.329462545 | 0.36592315  |
| 0.44699374  | 0.461919648 | 0.461584221 | 0.463678614 |
| 0.472531746 | 0.470802325 | 0.390441509 | 0.042510668 |
| 0.170321538 | 0.300102277 | 0.302449282 | 0.115596996 |
| 0.364790791 | 0.207689798 | 0.477958628 | 0.476301842 |
| 0.463863467 | 0.016236777 | 0.249128723 | 0.428008989 |
| 0.450896491 | 0.485221645 | 0.047836688 | 0.01266824  |
| 0.013650379 | 0.033458791 | 0.446266927 | 0.337371701 |
| 0.47988203  | 0.251278407 | 0.016498194 | 0.10420667  |
| 0.385528328 | 0.422885202 | 0.491928472 | 0.473108009 |
| 0.444797414 | 0.155184542 | 0.309914944 | 0.482337479 |
| 0.112081559 | 0.335609071 | 0.474927804 | 0.473669294 |
| 0.085883768 | 0.340512701 | 0.437005066 | 0.494918298 |
| 0.073021896 | 0.41412057  | 0.45600021  | 0.382749725 |
| 0.031565842 | 0.139471356 | 0.116738774 | 0.481696224 |
| 0.46948136  | 0.122282357 | 0.063426618 | 0.185976947 |
| 0.196337408 | 0.463194655 | 0.255450323 | 0.513509593 |
| 0.46254265  | 0.487870852 | 0.121469181 | 0.477031527 |
| 0.076443222 | 0.470905279 | 0.376593736 | 0.083252926 |
| 0.390009972 | 0.036220699 | 0.44822806  | 0.161710162 |
| 0.394704592 | 0.450199809 | 0.235781235 | 0.037279181 |
| 0.198860785 | 0.104319696 | 0.473193629 | 0.460281717 |
| 0.065975512 | 0.359582463 | 0.402653039 | 0.478139193 |
| 0.369364158 | 0.47443034  | 0.49039242  | 0.38943111  |
| 0.162475264 | 0.166944167 | 0.475464834 | 0.42031192  |
| 0.337041803 | 0.485839837 | 0.342190495 | 0.517284183 |
| 0.435795401 | 0.462178445 | 0.45718486  | 0.433716038 |
| 0.275923563 | 0.440559394 | 0.409848603 | 0.047964948 |
| 0.459886093 | 0.470963965 | 0.443256764 | 0.210545243 |
| 0.336558269 | 0.383654259 | 0.106046325 | 0.229790515 |
| 0.320590586 | 0.35607609  | 0.230575521 | 0.488550492 |



|             |             |             |             |
|-------------|-------------|-------------|-------------|
| 0.444909258 | 0.421895968 | 0.094649107 | 0.110256011 |
| 0.534583205 | 0.438655283 | 0.234944657 | 0.459932245 |
| 0.274091189 | 0.419996624 | 0.457223765 | 0.454987408 |
| 0.396339331 | 0.433042303 | 0.46358131  | 0.412196861 |
| 0.429781556 | 0.37890488  | 0.510129836 | 0.160525974 |
| 0.133036224 | 0.419283696 | 0.158359396 | 0.160461977 |
| 0.24138439  | 0.059455783 | 0.287910215 | 0.484277782 |
| 0.358117215 | 0.458917918 | 0.367483134 | 0.14863291  |
| 0.409651078 | 0.401439538 | 0.451977306 | 0.295992379 |
| 0.141459019 | 0.483448018 | 0.023094493 | 0.112970098 |
| 0.38092593  | 0.441862447 | 0.393351378 | 0.343154493 |
| 0.315768663 | 0.206277447 | 0.401602845 | 0.359198632 |
| 0.328463804 | 0.392191233 | 0.434616395 | 0.082833501 |
| 0.054946407 | 0.493595533 | 0.42428646  | 0.046047154 |
| 0.132260887 | 0.398202379 | 0.396441173 | 0.306486244 |
| 0.045403218 | 0.454362772 | 0.353829415 | 0.460854027 |
| 0.438917097 | 0.137103174 | 0.354039649 | 0.155618562 |
| 0.130866358 | 0.447416111 | 0.419077228 | 0.491114115 |
| 0.408537946 | 0.478508716 | 0.435035719 | 0.431291725 |
| 0.199312906 | 0.379591029 | 0.072110933 | 0.470474284 |
| 0.384315047 |             |             |             |
| CHCHD10     | 0.015140912 | 0.023571383 | 0.015943913 |
| 0.080896767 | 0.030138221 | 0.033669797 | 0.174234419 |
| 0.041674428 | 0.138777103 | 0.083410419 | 0.047691963 |
| 0.01444348  | 0.019167031 | 0.033576683 | 0.021136574 |
| 0.07500324  | 0.042190361 | 0.016288515 | 0.160195135 |
| 0.06136591  | 0.118308739 | 0.076820661 | 0.159960236 |
| 0.013278656 | 0.066032612 | 0.173531268 | 0.042055329 |
| 0.060117358 | 0.189095022 | 0.028200652 | 0.053766409 |
| 0.037991048 | 0.022887036 | 0.01445892  | 0.03055399  |
| 0.010517122 | 0.011228338 | 0.00798578  | 0.043201708 |
| 0.022968366 | 0.039499024 | 0.068814867 | 0.1209233   |
| 0.161014199 | 0.012529813 | 0.180282625 | 0.029664191 |
| 0.016491445 | 0.088573518 | 0.031266741 | 0.015364567 |
| 0.011590908 | 0.022739657 | 0.078922105 | 0.169408967 |
| 0.01018994  | 0.017335381 | 0.003750483 | 0.028205587 |
| 0.153100469 | 0.041165641 | 0.012993128 | 0.133271284 |
| 0.019912579 | 0.057798602 | 0.027342971 | 0.081092704 |
| 0.00858286  | 0.027624597 | 0.088831414 | 0.006601547 |
| 0.017370894 | 0.083006145 | 0.034952518 | 0.011127632 |
| 0.160998765 | 0.053691976 | 0.039487598 | 0.109535027 |
| 0.046130549 | 0.012265195 | 0.035389541 | 0.026974751 |
| 0.02097954  | 0.053245549 | 0.011459137 | 0.097945454 |
| 0.024700344 | 0.162100054 | 0.042309102 | 0.066284582 |
| 0.032816473 | 0.016119097 | 0.039339011 | 0.074525122 |
| 0.038157223 | 0.023937668 | 0.02163482  | 0.027888688 |
| 0.018023896 | 0.028659826 | 0.017234491 | 0.024400336 |
| 0.01743458  | 0.010020426 | 0.110334649 | 0.042341206 |
| 0.141095233 | 0.005924728 | 0.117827618 | 0.00712549  |
| 0.048876194 | 1           | 0.065794351 | 0.070176297 |
| 0.02793837  | 0.02513011  | 0.014765304 | 0.196946772 |
| 0.018443168 | 0.037602643 | 0.014020283 | 0.074033423 |
| 0.011781475 | 0.003238639 | 0.009216756 | 0.044170087 |
| 0.018667369 | 0.008811319 | 0.100120373 | 0.057358739 |

|             |             |             |             |
|-------------|-------------|-------------|-------------|
| 0.068357581 | 0.014111013 | 0.012583721 | 0.021089667 |
| 0.036193932 | 0.007497263 | 0.088406747 | 0.015915446 |
| 0.013927385 | 0.034212658 | 0.007106642 | 0.155009635 |
| 0.037509608 | 0.016841408 | 0.159241648 | 0.017913532 |
| 0.067170588 | 0.126971739 | 0.134284064 | 0.032662857 |
| 0.022085222 | 0.202240294 | 0.010291049 | 0.067644356 |
| 0.019340968 | 0.034907308 | 0.133068757 | 0.041108612 |
| 0.128558883 | 0.010613709 | 0.060265607 | 0.029033329 |
| 0.011888759 | 0.011471141 | 0.047594981 | 0.061398657 |
| 0.021868687 | 0.023234281 | 0.007185365 | 0.149124325 |
| 0.049915112 | 0.059169529 | 0.019826487 | 0.029397622 |
| 0.088970174 | 0.072712301 | 0.008763009 | 0.025104053 |
| 0.022884514 | 0.021985281 | 0.042940909 | 0.035341103 |
| 0.090936579 | 0.049486381 | 0.001849365 | 0.013529432 |
| 0.015645922 | 0.008341423 | 0.044251619 | 0.023982722 |
| 0.017473882 | 0.053231355 | 0.000815038 | 0.056365603 |
| 0.010249075 | 0.161706633 | 0.038646463 | 0.124232462 |
| 0.012771602 | 0.181342854 | 0.027778658 | 0.017435604 |
| 0.009518705 | 0.019926935 | 0.066201939 | 0.081765016 |
| 0.046646074 | 0.100190703 | 0.031904978 | 0.074617217 |
| 0.077149796 | 0.034890212 | 0.048979315 | 0.016320308 |
| 0.0324523   | 0.083798267 | 0.065769758 | 0.041604581 |
| 0.02050474  | 0.002828141 | 0.02128383  | 0.078889373 |
| 0.008314286 | 0.025159856 | 0.011047649 | 0.010465676 |
| 0.254734864 | 0.063811169 | 0.057730422 | 0.080475277 |
| 0.012746479 | 0.074554509 | 0.018572848 | 0.01570046  |
| 0.077765621 | 0.026727753 | 0.015204945 | 0.006221818 |
| 0.006659681 | 0.02600878  | 0.119000087 | 0.026423197 |
| 0.011083403 | 0.089997921 | 0.022970779 | 0.030775398 |
| 0.152046869 | 0.110382459 | 0.018030206 | 0.002566508 |
| 0.012542622 | 0.008203813 | 0.007193078 | 0.014447834 |
| 0.010167875 | 0.027208291 | 0.038934125 | 0.012506777 |
| 0.069915347 | 0.142308975 | 0.023572156 | 0.065912292 |
| 0.015544917 | 0.140788915 | 0.103378302 | 0.001593821 |
| 0.038542643 | 0.022058536 | 0.009238239 | 0.031859057 |
| 0.057670954 | 0.031956486 | 0.027106646 | 0.129729686 |
| 0.01050425  | 0.114628764 | 0.059504447 | 0.038483348 |
| 0.020624678 | 0.021392676 | 0.064311841 | 0.110784852 |
| 0.014582689 | 0.056375158 | 0.127850026 | 0.014444026 |
| 0.011917626 | 0.136569088 | 0.018846306 | 0.029393614 |
| 0.121144862 | 0.024683206 | 0.021655359 | 0.174546516 |
| 0.117744645 | 0.062308745 | 0.122268204 | 0.109062805 |
| 0.02776068  | 0.075340381 | 0.026387978 | 0.019735814 |
| 0.17413225  | 0.019267186 | 0.030854191 | 0.010983613 |
| 0.011645777 | 0.016631368 | 0.094053559 | 0.027378249 |
| 0.173458397 | 0.025041793 | 0.014961967 | 0.024743523 |
| 0.006447584 | 0.014551778 | 0.109484992 | 0.020470509 |
| 0.010829966 | 0.019943181 | 0.105792423 | 0.088995079 |
| 0.02047631  | 0.240229282 | 0.057914196 | 0.016009685 |
| 0.032625028 | 0.052293128 | 0.033493839 | 0.02453573  |
| 0.154510053 | 0.116617241 | 0.044087183 | 0.009016372 |
| 0.023231274 | 0.102273217 | 0.001516699 | 0.018391737 |
| 0.091576701 | 0.022195445 | 0.035325818 | 0.130825258 |
| 0.031359021 | 0.020246914 | 0.050485191 | 0.207142705 |

|             |             |             |             |
|-------------|-------------|-------------|-------------|
| 0.016980798 | 0.012644009 | 0.014867938 | 0.078985426 |
| 0.014819759 | 0.018905663 | 0.008696729 | 0.096333766 |
| 0.102313606 | 0.012443133 | 0.02755392  | 0.049441283 |
| 0.041869395 | 0.022367008 | 0.047238664 | 0.025258437 |
| 0.18255037  | 0.00754419  | 0.069694616 | 0.001476796 |
| 0.031348595 | 0.0327415   | 0.015760323 | 0.055588248 |
| 0.017259326 | 0.061084649 | 0.002440407 | 0.018672812 |
| 0.018748567 | 0.069242284 | 0.022055162 | 0.01415467  |
| 0.012168052 | 0.020810297 | 0.017714142 | 0.020617499 |
| 0.011330667 | 0.012176328 | 0.032240879 | 0.125983275 |
| 0.035283219 | 0.01121831  | 0.038598434 | 0.022628128 |
| 0.039773591 | 0.036885802 | 0.168302827 | 0.185380658 |
| 0.041013547 | 0.059276654 | 0.012429875 | 0.053718855 |
| 0.02521788  | 0.078038859 | 0.018451677 | 0.038899821 |
| 0.020460689 | 0.111086671 | 0.061996455 | 0.015951409 |
| 0.040981837 | 0.045405271 | 0.036621692 | 0.023005573 |
| 0.002728543 | 0.036768845 | 0.061122293 | 0.067216784 |
| 0.02380674  | 0.006156493 | 0.120540374 | 0.09636421  |
| 0.031177166 | 0.02683649  | 0.017726969 | 0.100656526 |
| 0.019687036 | 0.107754904 | 0.019196609 | 0.078858533 |
| 0.057350441 | 0.008768067 | 0.026300458 | 0.022082481 |
| 0.045000096 | 0.068397212 | 0.012198459 | 0.044866311 |
| 0.001462101 | 0.070791052 | 0.014102624 | 0.026307741 |
| 0.017009537 | 0.087050139 | 0.121256135 | 0.043910584 |
| 0.009399548 | 0.033554376 | 0.04322714  | 0.00386509  |
| 0.116834624 | 0.028675326 | 0.059879463 | 0.032432331 |
| 0.042786615 | 0.065929961 | 0.026262298 | 0.020108939 |
| 0.075653881 | 0.012281837 | 0.023996392 | 0.016708855 |
| 0.023164159 | 0.070163653 | 0.010016915 | 0.017491081 |
| 0.019685243 | 0.029601001 | 0.028804528 | 0.052854359 |
| 0.004862151 | 0.095560846 | 0.044725111 | 0.030521162 |
| 0.027640341 | 0.078021277 | 0.066951576 | 0.041153392 |
| 0.06419067  | 0.057222438 | 0.014449937 | 0.009470409 |
| 0.156879054 | 0.001540104 | 0.054664601 | 0.014250669 |
| 0.02884931  | 0.034738696 | 0.030939715 | 0.021497284 |
| 0.0246691   | 0.024013467 | 0.017180139 | 0.103451934 |
| 0.007927276 | 0.02311253  | 0.056980857 | 0.092362722 |
| 0.079600157 | 0.040727015 | 0.031830426 | 0.037341191 |
| 0.084555498 | 0.009197045 | 0.065797886 | 0.002339709 |
| 0.005662795 | 0.045998608 | 0.056288911 | 0.062256685 |
| 0.023549018 | 0.016308481 | 0.046637373 | 0.128548296 |
| 0.020948515 | 0.021641848 | 0.081553544 | 0.044097119 |
| 0.092233434 | 0.087245894 | 0.022819002 | 0.022153494 |
| 0.008340404 | 0.020471785 | 0.034808424 | 0.034493525 |
| 0.022581167 | 0.151219748 | 0.016347907 | 0.026726289 |
| 0.043919738 | 0.00831844  | 0.073821049 | 0.108852397 |
| 0.155702068 | 0.079094226 | 0.003517234 | 0.047824125 |
| 0.003003812 | 0.072151246 | 0.004109873 | 0.066371311 |
| 0.047504702 | 0.007937712 | 0.072676632 | 0.113478834 |
| 0.077935834 | 0.016419893 | 0.045373038 | 0.097391835 |
| 0.003333852 | 0.028187814 | 0.01762636  | 0.067147922 |
| 0.007210757 | 0.016486422 | 0.097335416 | 0.028329278 |
| 0.012801527 | 0.002535666 | 0.027070363 | 0.110558357 |
| 0.103339133 | 0.036618814 | 0.014430262 | 0.030524619 |

|             |             |             |             |
|-------------|-------------|-------------|-------------|
| 0.020516983 | 0.015025198 | 0.013212308 | 0.046789765 |
| 0.054066907 | 0.013830201 | 0.025669534 | 0.025221816 |
| 0.077206262 | 0.10728729  | 0.011843498 | 0.028680293 |
| 0.082036462 | 0.013999151 | 0.016395894 | 0.013039898 |
| 0.016135634 | 0.076704808 | 0.010989441 | 0.016443697 |
| 0.016519614 | 0.006275104 | 0.173646224 | 0.037344773 |
| 0.005992201 |             |             |             |
| CHD4        | 0.196457912 | 0.237409451 | 0.155583747 |
| 0.257849456 | 0.216263334 | 0.096291699 | 0.112359344 |
| 0.055395744 | 0.113621309 | 0.021134346 | 0.109816866 |
| 0.214883828 | 0.137625906 | 0.087819431 | 0.063097782 |
| 0.338413507 | 0.267299604 | 0.104593324 | 0.200975851 |
| 0.242207761 | 0.055441074 | 0.348452603 | 0.140650299 |
| 0.22170873  | 0.245489422 | 0.1943027   | 0.199714484 |
| 0.28081362  | 0.203196062 | 0.059882779 | 0.168316038 |
| 0.280485981 | 0.217994212 | 0.198385115 | 0.283043404 |
| 0.195180378 | 0.151646253 | 0.054086888 | 0.064371478 |
| 0.188006341 | 0.256561571 | 0.235475304 | 0.234417135 |
| 0.114205732 | 0.160252076 | 0.169962764 | 0.272971918 |
| 0.051940553 | 0.170177164 | 0.033294455 | 0.148252965 |
| 0.165486903 | 0.153801946 | 0.068808237 | 0.108389094 |
| 0.092316068 | 0.039440371 | 0.133644103 | 0.087073982 |
| 0.158475227 | 0.025489224 | 0.187146916 | 0.077131578 |
| 0.060759647 | 0.089069356 | 0.300168315 | 0.095742978 |
| 0.165151983 | 0.133666435 | 0.072954933 | 0.16530168  |
| 0.006004641 | 0.243768604 | 0.2936494   | 0.115721942 |
| 0.212760087 | 0.103894152 | 0.294853979 | 0.182217597 |
| 0.283960224 | 0.192211838 | 0.328514963 | 0.302684935 |
| 0.218378611 | 0.243512599 | 0.203576496 | 0.203833535 |
| 0.205261668 | 0.112613062 | 0.107372413 | 0.372494881 |
| 0.319582892 | 0.224779603 | 0.24569349  | 0.30385844  |
| 0.185538713 | 0.207719511 | 0.11193421  | 0.153233122 |
| 0.101138308 | 0.253295765 | 0.167197885 | 0.282938688 |
| 0.148003358 | 0.185789391 | 0.270655029 | 0.193016459 |
| 0.212017924 | 0.067695381 | 0.275786027 | 0.162091434 |
| 0.290246708 | 0.065794351 | 1           | 0.151605921 |
| 0.187924784 | 0.209982836 | 0.231096191 | 0.156773215 |
| 0.206916635 | 0.117292647 | 0.140883478 | 0.209032995 |
| 0.113222571 | 0.187852317 | 0.149236297 | 0.260803831 |
| 0.0710405   | 0.152483821 | 0.12443768  | 0.076738086 |
| 0.215332963 | 0.229650257 | 0.208664324 | 0.134646958 |
| 0.237616508 | 0.154177593 | 0.169923791 | 0.12851047  |
| 0.198062695 | 0.32793955  | 0.005226497 | 0.130038803 |
| 0.15586809  | 0.24594241  | 0.283737153 | 0.179382901 |
| 0.233441959 | 0.100204332 | 0.192070589 | 0.288868882 |
| 0.151068208 | 0.169645903 | 0.066628498 | 0.340885612 |
| 0.091551879 | 0.293312992 | 0.177922579 | 0.146525379 |
| 0.093745145 | 0.188385435 | 0.237098241 | 0.083141479 |
| 0.083186607 | 0.254309505 | 0.067642564 | 0.068240083 |
| 0.082910278 | 0.19278041  | 0.148232795 | 0.206688809 |
| 0.146763809 | 0.306215423 | 0.065390163 | 0.176232002 |
| 0.054291303 | 0.15967809  | 0.036980583 | 0.266211147 |
| 0.059837861 | 0.29063247  | 0.171968643 | 0.215479508 |
| 0.305606972 | 0.293672559 | 0.011902098 | 0.173844932 |

|             |             |             |             |
|-------------|-------------|-------------|-------------|
| 0.227301759 | 0.036291608 | 0.213643759 | 0.252476747 |
| 0.120439686 | 0.266649439 | 0.011507897 | 0.323215697 |
| 0.10436892  | 0.188048423 | 0.328712952 | 0.251616583 |
| 0.18698911  | 0.183855807 | 0.076253608 | 0.253622624 |
| 0.192773256 | 0.04337273  | 0.040342935 | 0.200187625 |
| 0.228676381 | 0.041333076 | 0.216400264 | 0.236778609 |
| 0.185673704 | 0.29603926  | 0.342460548 | 0.108727033 |
| 0.193542943 | 0.125545107 | 0.120246921 | 0.284423952 |
| 0.245962204 | 0.084995591 | 0.160705563 | 0.118609338 |
| 0.068099004 | 0.204507442 | 0.177731049 | 0.043094044 |
| 0.126048519 | 0.099982908 | 0.033817907 | 0.195754538 |
| 0.159425538 | 0.108948666 | 0.113488374 | 0.23167385  |
| 0.2702274   | 0.269452717 | 0.236605283 | 0.167021634 |
| 0.18568295  | 0.141372535 | 0.154725139 | 0.084370063 |
| 0.129980089 | 0.219383507 | 0.145619909 | 0.12272368  |
| 0.053892541 | 0.213756557 | 0.144351323 | 0.084244775 |
| 0.104916058 | 0.087860262 | 0.069036707 | 0.141269359 |
| 0.100744047 | 0.135989801 | 0.18754474  | 0.182834477 |
| 0.258211572 | 0.158389738 | 0.234143605 | 0.291494392 |
| 0.090116799 | 0.152944967 | 0.21900854  | 0.06288468  |
| 0.258967741 | 0.051087617 | 0.029777438 | 0.209097618 |
| 0.100731827 | 0.311448236 | 0.144654717 | 0.251888024 |
| 0.15209967  | 0.207605537 | 0.298717408 | 0.031944557 |
| 0.124955104 | 0.188120974 | 0.25390525  | 0.223555465 |
| 0.135015203 | 0.211144377 | 0.092150747 | 0.14965187  |
| 0.141357457 | 0.181700277 | 0.254337109 | 0.293576971 |
| 0.190413202 | 0.292022848 | 0.210880478 | 0.242459433 |
| 0.250479108 | 0.121961218 | 0.03750529  | 0.344567138 |
| 0.258102221 | 0.355009651 | 0.184763471 | 0.24272722  |
| 0.131638223 | 0.068511844 | 0.286558762 | 0.17641384  |
| 0.180302568 | 0.261113322 | 0.270259418 | 0.189205231 |
| 0.240984388 | 0.136318126 | 0.026443491 | 0.270999162 |
| 0.164843682 | 0.215119691 | 0.103707829 | 0.266795641 |
| 0.185036396 | 0.049537238 | 0.23657883  | 0.102605398 |
| 0.139350706 | 0.131054853 | 0.150908172 | 0.198080584 |
| 0.206283779 | 0.148814247 | 0.115161939 | 0.251509194 |
| 0.043349772 | 0.075325833 | 0.224572843 | 0.205860787 |
| 0.104169902 | 0.204568456 | 0.128882701 | 0.073585482 |
| 0.134653379 | 0.180840635 | 0.317993252 | 0.160620476 |
| 0.074387825 | 0.061271316 | 0.34678208  | 0.154727548 |
| 0.256053826 | 0.227986495 | 0.201498708 | 0.131976808 |
| 0.227825975 | 0.235159193 | 0.174128195 | 0.26275293  |
| 0.192665499 | 0.211358517 | 0.149057877 | 0.065061278 |
| 0.310864038 | 0.030256953 | 0.065397495 | 0.217355088 |
| 0.165337712 | 0.133977892 | 0.004320659 | 0.06905919  |
| 0.240161683 | 0.339861318 | 0.171661193 | 0.170894607 |
| 0.025715423 | 0.227176414 | 0.05423705  | 0.273013164 |
| 0.201924389 | 0.17608909  | 0.289796501 | 0.202879543 |
| 0.219879071 | 0.226070104 | 0.159890293 | 0.25796781  |
| 0.194932435 | 0.19367692  | 0.10438212  | 0.299419857 |
| 0.213224645 | 0.220487865 | 0.197593125 | 0.186118319 |
| 0.280220016 | 0.325564052 | 0.23481875  | 0.074066314 |
| 0.131707869 | 0.048147589 | 0.049014246 | 0.10724691  |
| 0.076646825 | 0.229178186 | 0.227769443 | 0.319898555 |

|             |             |             |             |
|-------------|-------------|-------------|-------------|
| 0.271544639 | 0.105144963 | 0.071308575 | 0.189491695 |
| 0.214925173 | 0.275771325 | 0.110393307 | 0.019049733 |
| 0.016775633 | 0.142113702 | 0.148009552 | 0.256282663 |
| 0.2475947   | 0.027774779 | 0.077352682 | 0.047668165 |
| 0.131439289 | 0.285123466 | 0.214222733 | 0.314994269 |
| 0.262558494 | 0.234551838 | 0.061393244 | 0.292431205 |
| 0.225001678 | 0.082500006 | 0.276499441 | 0.181181557 |
| 0.222287988 | 0.242317879 | 0.104352487 | 0.286350159 |
| 0.111267002 | 0.318230922 | 0.222802691 | 0.121306526 |
| 0.107911393 | 0.263133754 | 0.214487745 | 0.328899002 |
| 0.184975273 | 0.161374936 | 0.159555412 | 0.019533199 |
| 0.123226512 | 0.282853761 | 0.178820665 | 0.307188587 |
| 0.230169264 | 0.335721331 | 0.286912128 | 0.188186454 |
| 0.141550877 | 0.182647391 | 0.232242273 | 0.015444115 |
| 0.199703986 | 0.13353502  | 0.210907346 | 0.084631863 |
| 0.064726768 | 0.166556225 | 0.129989328 | 0.197297049 |
| 0.149774915 | 0.239784737 | 0.311015841 | 0.32414483  |
| 0.234502962 | 0.128475635 | 0.256863852 | 0.248285136 |
| 0.076374642 | 0.273364532 | 0.183236354 | 0.08058878  |
| 0.093944986 | 0.180087729 | 0.222540973 | 0.133314214 |
| 0.070183479 | 0.335182424 | 0.141230667 | 0.268691251 |
| 0.164336312 | 0.222333899 | 0.230587309 | 0.166574732 |
| 0.238505194 | 0.116404859 | 0.138417373 | 0.043042403 |
| 0.213427345 | 0.297350792 | 0.11611636  | 0.209579954 |
| 0.214143241 | 0.182473901 | 0.115163202 | 0.044333993 |
| 0.153063629 | 0.07444361  | 0.158856203 | 0.340392961 |
| 0.149880652 | 0.139249653 | 0.081279537 | 0.1997668   |
| 0.246051209 | 0.176137941 | 0.063989517 | 0.191802893 |
| 0.258999882 | 0.230120027 | 0.2731236   | 0.301686253 |
| 0.105199662 | 0.220581843 | 0.210294676 | 0.139816448 |
| 0.156091041 | 0.174410348 | 0.207903738 | 0.022988531 |
| 0.161627127 | 0.161229527 | 0.148038594 | 0.277101317 |
| 0.203315373 | 0.190615924 | 0.12128244  | 0.327807881 |
| 0.109153168 | 0.280383176 | 0.057622965 | 0.181231689 |
| 0.289293502 | 0.088500101 | 0.278533963 | 0.086441291 |
| 0.149884145 | 0.189120411 | 0.08084278  | 0.241315016 |
| 0.124313918 | 0.219636141 | 0.18523738  | 0.243607    |
| 0.171447607 | 0.286679617 | 0.251762269 | 0.054151956 |
| 0.051270094 | 0.09824506  | 0.208199855 | 0.060018146 |
| 0.070144398 | 0.327588549 | 0.081322357 | 0.180010268 |
| 0.18799275  | 0.116739513 | 0.151404585 | 0.130931297 |
| 0.214350431 | 0.230027882 | 0.049767958 | 0.210087395 |
| 0.140943447 | 0.205129118 | 0.10990242  | 0.078973377 |
| 0.132416615 | 0.16496879  | 0.204361444 | 0.216253127 |
| 0.187128835 | 0.329956165 | 0.137628238 | 0.201576672 |
| 0.127879341 | 0.124187161 | 0.085872569 | 0.255252515 |
| 0.080027339 |             |             |             |

|             |             |             |             |
|-------------|-------------|-------------|-------------|
| CHPT1       | 0.267709695 | 0.435776595 | 0.149503269 |
| 0.39512638  | 0.222711859 | 0.236037235 | 0.255228971 |
| 0.188476849 | 0.109604506 | 0.037946608 | 0.056381241 |
| 0.215539317 | 0.175403102 | 0.247001402 | 0.163552498 |
| 0.362578715 | 0.138851834 | 0.171286909 | 0.245251374 |
| 0.345020752 | 0.195241166 | 0.337573952 | 0.174834495 |
| 0.13599765  | 0.098043715 | 0.129662194 | 0.146052961 |

|             |             |             |             |
|-------------|-------------|-------------|-------------|
| 0.422944386 | 0.133215983 | 0.209857504 | 0.348162566 |
| 0.097368661 | 0.344153064 | 0.390419404 | 0.290544056 |
| 0.3698942   | 0.231678455 | 0.024424968 | 0.229491283 |
| 0.335761146 | 0.311305948 | 0.363443809 | 0.270302221 |
| 0.124108568 | 0.375953726 | 0.257889673 | 0.201542699 |
| 0.160203388 | 0.075731322 | 0.179353898 | 0.360284919 |
| 0.360961544 | 0.234981482 | 0.225403667 | 0.237186658 |
| 0.15809261  | 0.208825169 | 0.107652711 | 0.263594991 |
| 0.265127422 | 0.178410944 | 0.370953088 | 0.153606305 |
| 0.154599753 | 0.232535816 | 0.120248369 | 0.253367107 |
| 0.141502165 | 0.306489287 | 0.06378664  | 0.171903657 |
| 0.020182248 | 0.327850808 | 0.199615907 | 0.110729707 |
| 0.086381175 | 0.079969835 | 0.13833691  | 0.304235396 |
| 0.421144505 | 0.331857773 | 0.409395589 | 0.392066646 |
| 0.160851031 | 0.191391424 | 0.15263346  | 0.21784684  |
| 0.349490991 | 0.243427259 | 0.107546913 | 0.359561809 |
| 0.410792393 | 0.405157843 | 0.1629125   | 0.169017369 |
| 0.367176693 | 0.410849943 | 0.185647639 | 0.221304552 |
| 0.145482695 | 0.045833906 | 0.363994998 | 0.418909305 |
| 0.32480252  | 0.119646452 | 0.147894918 | 0.384926342 |
| 0.111681024 | 0.157110477 | 0.320500355 | 0.118561584 |
| 0.433409106 | 0.070176297 | 0.151605921 | 1           |
| 0.158604952 | 0.326577481 | 0.383687407 | 0.241627013 |
| 0.187520896 | 0.055650476 | 0.066475491 | 0.060906781 |
| 0.193787002 | 0.053662316 | 0.348276256 | 0.429453863 |
| 0.231042578 | 0.21365871  | 0.260304865 | 0.011939303 |
| 0.053553813 | 0.114737147 | 0.319324112 | 0.19314385  |
| 0.326898269 | 0.242252788 | 0.203645548 | 0.291968936 |
| 0.232530777 | 0.404129781 | 0.039120838 | 0.18076054  |
| 0.214030292 | 0.123639062 | 0.228518146 | 0.239634444 |
| 0.193197911 | 0.189660846 | 0.200442435 | 0.433997546 |
| 0.376709282 | 0.171624606 | 0.171564503 | 0.336617121 |
| 0.236420195 | 0.178141433 | 0.18193293  | 0.256703141 |
| 0.162676122 | 0.34004951  | 0.042709681 | 0.196432066 |
| 0.110417563 | 0.11402494  | 0.028153832 | 0.230383145 |
| 0.205689049 | 0.361129607 | 0.323963803 | 0.157592176 |
| 0.265847101 | 0.283401947 | 0.192840938 | 0.313374217 |
| 0.051002437 | 0.082974104 | 0.148249541 | 0.429955958 |
| 0.230859544 | 0.388459679 | 0.22924965  | 0.176569109 |
| 0.198901088 | 0.37747462  | 0.001396518 | 0.376609586 |
| 0.394140797 | 0.1422627   | 0.256975877 | 0.221561906 |
| 0.148964878 | 0.414236853 | 0.016052031 | 0.34340682  |
| 0.232419661 | 0.135948287 | 0.435146649 | 0.171678058 |
| 0.350527217 | 0.098226148 | 0.252361141 | 0.293205889 |
| 0.26460654  | 0.020788167 | 0.204407162 | 0.353518693 |
| 0.036945842 | 0.198780745 | 0.313067588 | 0.328183381 |
| 0.248337933 | 0.332495059 | 0.434733885 | 0.136687567 |
| 0.21858708  | 0.231660621 | 0.0327001   | 0.167712056 |
| 0.303078951 | 0.159152841 | 0.377994889 | 0.242030155 |
| 0.170223618 | 0.400504869 | 0.274416399 | 0.140011428 |
| 0.126886071 | 0.259787475 | 0.056962083 | 0.205098625 |
| 0.269140307 | 0.225463581 | 0.156517603 | 0.108628926 |
| 0.091785062 | 0.436026152 | 0.080924852 | 0.088378861 |
| 0.048554673 | 0.256213621 | 0.240011877 | 0.224737375 |

|             |             |             |             |
|-------------|-------------|-------------|-------------|
| 0.162866288 | 0.184239643 | 0.165587254 | 0.205985726 |
| 0.142233226 | 0.159257058 | 0.013756014 | 0.155939101 |
| 0.156721093 | 0.191174914 | 0.188175374 | 0.287703973 |
| 0.243184648 | 0.164695639 | 0.217556904 | 0.124577941 |
| 0.101293372 | 0.046963517 | 0.419948985 | 0.310909153 |
| 0.26514016  | 0.209471379 | 0.077564727 | 0.150106048 |
| 0.433826907 | 0.169964189 | 0.138673001 | 0.42380495  |
| 0.048475349 | 0.404575212 | 0.231726136 | 0.146777937 |
| 0.182609854 | 0.250801893 | 0.429513373 | 0.064171585 |
| 0.222392084 | 0.411707153 | 0.195179575 | 0.172767303 |
| 0.343881696 | 0.313231439 | 0.105278234 | 0.281660342 |
| 0.284259043 | 0.086211311 | 0.412052525 | 0.112049763 |
| 0.049860874 | 0.275543387 | 0.292347773 | 0.111110334 |
| 0.095217155 | 0.248651875 | 0.141310199 | 0.21107228  |
| 0.434826398 | 0.358870984 | 0.343154358 | 0.102781458 |
| 0.125634754 | 0.046960223 | 0.125720967 | 0.145017853 |
| 0.383785646 | 0.386043795 | 0.213894999 | 0.190867806 |
| 0.243409836 | 0.170362946 | 0.149559998 | 0.41770453  |
| 0.082331873 | 0.391493081 | 0.028886596 | 0.296098571 |
| 0.367871262 | 0.193704692 | 0.100455673 | 0.259323806 |
| 0.339457444 | 0.118925027 | 0.195259825 | 0.390886754 |
| 0.373266709 | 0.198870212 | 0.177840717 | 0.27135936  |
| 0.083207846 | 0.15117958  | 0.192339119 | 0.072499518 |
| 0.219787793 | 0.199978533 | 0.016374486 | 0.214151941 |
| 0.121918516 | 0.401528072 | 0.379005222 | 0.095835779 |
| 0.221573582 | 0.183120666 | 0.248744729 | 0.102332405 |
| 0.318968861 | 0.358608454 | 0.401594339 | 0.208412943 |
| 0.308768379 | 0.376354449 | 0.167907018 | 0.095711775 |
| 0.035950677 | 0.373495804 | 0.279004638 | 0.064539877 |
| 0.42812706  | 0.156856085 | 0.065647063 | 0.427078435 |
| 0.22768503  | 0.324551218 | 0.009217745 | 0.023410133 |
| 0.039279639 | 0.362367236 | 0.369460625 | 0.329934148 |
| 0.16200858  | 0.255187947 | 0.005090771 | 0.399954791 |
| 0.404814865 | 0.028439638 | 0.097430371 | 0.3123723   |
| 0.253908673 | 0.431690845 | 0.127814423 | 0.334395249 |
| 0.203929243 | 0.372540108 | 0.251488449 | 0.21071159  |
| 0.380852557 | 0.345089556 | 0.335893911 | 0.380720818 |
| 0.423729826 | 0.288033823 | 0.256845014 | 0.07711575  |
| 0.073531086 | 0.220469061 | 0.14265782  | 0.110843828 |
| 0.217131879 | 0.135182545 | 0.373944694 | 0.408541117 |
| 0.376024427 | 0.020721904 | 0.220337824 | 0.31822289  |
| 0.420549294 | 0.43702012  | 0.024972813 | 0.00424228  |
| 0.003363392 | 0.027488485 | 0.27125585  | 0.15927493  |
| 0.390936484 | 0.152322783 | 0.02890597  | 0.133313976 |
| 0.206589507 | 0.208921827 | 0.406307652 | 0.34916136  |
| 0.299113675 | 0.131207823 | 0.197327487 | 0.35222701  |
| 0.079439996 | 0.202606571 | 0.398489044 | 0.409728399 |
| 0.057273225 | 0.167395485 | 0.172657293 | 0.451429072 |
| 0.021153204 | 0.212113431 | 0.243338708 | 0.238824522 |
| 0.017418739 | 0.090519651 | 0.089495615 | 0.3554147   |
| 0.355628652 | 0.128552771 | 0.078336101 | 0.103888014 |
| 0.213067446 | 0.388840034 | 0.204280813 | 0.436895523 |
| 0.398975152 | 0.41974558  | 0.073367929 | 0.386780567 |
| 0.09428471  | 0.375060369 | 0.156004302 | 0.049097549 |



|             |             |             |             |
|-------------|-------------|-------------|-------------|
| 0.164625208 | 0.037397847 | 0.337844084 | 0.094239359 |
| 0.228094506 | 0.28632839  | 0.098430233 | 0.029713222 |
| 0.057868258 | 0.088585235 | 0.428875312 | 0.358046918 |
| 0.035138731 | 0.241467658 | 0.189460012 | 0.270371708 |
| 0.223491179 | 0.376855286 | 0.391362205 | 0.154530024 |
| 0.202801769 | 0.05030126  | 0.347182132 | 0.248773798 |
| 0.238300297 | 0.41466573  | 0.198968252 | 0.410099917 |
| 0.288311904 | 0.375133106 | 0.36719688  | 0.241055995 |
| 0.133187375 | 0.215547597 | 0.331534385 | 0.078167291 |
| 0.231806433 | 0.413703888 | 0.20345459  | 0.1216829   |
| 0.21025966  | 0.137544427 | 0.096312106 | 0.075327985 |
| 0.105213899 | 0.239956161 | 0.227688096 | 0.403721231 |
| 0.250804592 | 0.265784498 | 0.101979181 | 0.088021819 |
| 0.434732752 | 0.357261889 | 0.162326605 | 0.315904304 |
| 0.159556797 | 0.226209915 | 0.316141498 | 0.311441026 |
| 0.161046694 | 0.370973995 | 0.369058024 | 0.327693393 |
| 0.390960473 | 0.2512351   | 0.405900755 | 0.115627133 |
| 0.065380625 | 0.209269502 | 0.178174343 | 0.105026832 |
| 0.204240704 | 0.048277531 | 0.094391903 | 0.33193982  |
| 0.123767677 | 0.310892256 | 0.18720801  | 0.104612559 |
| 0.192319209 | 0.145103422 | 0.234946586 | 0.24909894  |
| 0.148859547 | 0.396374428 | 0.025769556 | 0.095784356 |
| 0.142345585 | 0.322753461 | 0.162102063 | 0.175365931 |
| 0.118970784 | 0.097423646 | 0.246956959 | 0.195735401 |
| 0.188540438 | 0.139629179 | 0.325289006 | 0.073972213 |
| 0.093969454 | 0.428032874 | 0.168306837 | 0.025109593 |
| 0.084434381 | 0.215658595 | 0.174442955 | 0.217821249 |
| 0.030255317 | 0.35883435  | 0.199334882 | 0.198880986 |
| 0.248832542 | 0.117211979 | 0.293120858 | 0.082945278 |
| 0.094195864 | 0.360464466 | 0.156018694 | 0.380172739 |
| 0.15117978  | 0.391826252 | 0.339169561 | 0.340950083 |
| 0.075004613 | 0.124694659 | 0.096631036 | 0.388789758 |
| 0.141569706 |             |             |             |

|             |             |             |             |
|-------------|-------------|-------------|-------------|
| CHST12      | 0.269646717 | 0.242077944 | 0.176138804 |
| 0.271084153 | 0.193765629 | 0.134656017 | 0.140264793 |
| 0.083080059 | 0.031285522 | 0.00359112  | 0.006198922 |
| 0.213995339 | 0.019229797 | 0.059930646 | 0.043268462 |
| 0.361064719 | 0.071381248 | 0.194385192 | 0.2311118   |
| 0.314622872 | 0.051033246 | 0.298571795 | 0.088407292 |
| 0.094533087 | 0.061337352 | 0.07471703  | 0.087112868 |
| 0.336197444 | 0.097590016 | 0.073925079 | 0.256711907 |
| 0.133509104 | 0.278458743 | 0.209027078 | 0.201900537 |
| 0.193462955 | 0.218060418 | 0.030683627 | 0.047554532 |
| 0.281614624 | 0.235695388 | 0.300894143 | 0.233992088 |
| 0.047656269 | 0.190217394 | 0.173215643 | 0.266399218 |
| 0.035234248 | 0.027322503 | 0.064519485 | 0.194949906 |
| 0.157104047 | 0.123657033 | 0.110322351 | 0.090867406 |
| 0.009420494 | 0.053302425 | 0.020766894 | 0.165083066 |
| 0.157897599 | 0.046510128 | 0.178266636 | 0.027034192 |
| 0.025016841 | 0.16404287  | 0.118891087 | 0.158412012 |
| 0.080313365 | 0.218328278 | 0.054680973 | 0.174990276 |
| 0.001486869 | 0.339130017 | 0.3029684   | 0.050874157 |
| 0.118080987 | 0.011206831 | 0.162537516 | 0.198610568 |
| 0.33247501  | 0.244435403 | 0.288859791 | 0.264209824 |

|             |             |             |             |
|-------------|-------------|-------------|-------------|
| 0.036700544 | 0.273591547 | 0.157920306 | 0.100222217 |
| 0.255421073 | 0.092283811 | 0.048174539 | 0.341353298 |
| 0.281380549 | 0.212417063 | 0.062906961 | 0.259021957 |
| 0.170738646 | 0.242295737 | 0.122738981 | 0.131893617 |
| 0.042362674 | 0.0765499   | 0.173431986 | 0.257611115 |
| 0.219340636 | 0.112003524 | 0.160188164 | 0.26529719  |
| 0.132552863 | 0.053222793 | 0.277998907 | 0.051592653 |
| 0.328986508 | 0.02793837  | 0.187924784 | 0.158604952 |
| 1           | 0.265395455 | 0.211838541 | 0.173434033 |
| 0.209166504 | 0.024496064 | 0.015315184 | 0.110638853 |
| 0.037811065 | 0.035022155 | 0.161576581 | 0.249087884 |
| 0.052597844 | 0.044107577 | 0.164397599 | 0.02968782  |
| 0.06150367  | 0.094053401 | 0.21433434  | 0.243569957 |
| 0.31595778  | 0.192059912 | 0.070956632 | 0.180734786 |
| 0.155958619 | 0.286121543 | 0.002909842 | 0.112096607 |
| 0.167821875 | 0.096441635 | 0.274510339 | 0.167076617 |
| 0.148540658 | 0.112251335 | 0.138420239 | 0.282021946 |
| 0.208291266 | 0.127414778 | 0.143466623 | 0.346767538 |
| 0.031117085 | 0.198211091 | 0.139036356 | 0.087465234 |
| 0.045534637 | 0.179103291 | 0.082916672 | 0.19170932  |
| 0.013912302 | 0.032397179 | 0.07374708  | 0.142728995 |
| 0.029002132 | 0.159569256 | 0.164314663 | 0.193154317 |
| 0.127737378 | 0.255147472 | 0.140645746 | 0.144984679 |
| 0.003973542 | 0.069095571 | 0.103340046 | 0.245165936 |
| 0.108121357 | 0.294327328 | 0.136912156 | 0.151377577 |
| 0.250384645 | 0.329730118 | 0.014929396 | 0.189551093 |
| 0.214438085 | 0.085429019 | 0.152306424 | 0.274319335 |
| 0.080503389 | 0.26642022  | 0.008763011 | 0.329218095 |
| 0.185445477 | 0.169395261 | 0.314500648 | 0.145713974 |
| 0.214023307 | 0.073674837 | 0.090974365 | 0.211671939 |
| 0.147737513 | 0.011016249 | 0.07813524  | 0.258751803 |
| 0.074359518 | 0.037925322 | 0.306620515 | 0.269364823 |
| 0.166006278 | 0.326956706 | 0.34227865  | 0.067250564 |
| 0.167025669 | 0.182226002 | 0.04480382  | 0.24591434  |
| 0.289250366 | 0.021618325 | 0.199617417 | 0.092243227 |
| 0.133904385 | 0.220467748 | 0.187969456 | 0.012966698 |
| 0.077426158 | 0.161834695 | 0.013317085 | 0.158023528 |
| 0.197350562 | 0.033259531 | 0.100205848 | 0.09971957  |
| 0.098673056 | 0.251674465 | 0.090767759 | 0.08096363  |
| 0.048073471 | 0.113969819 | 0.244696876 | 0.02620633  |
| 0.014041571 | 0.090507555 | 0.074054243 | 0.089219004 |
| 0.035814902 | 0.087988583 | 0.061433012 | 0.039039168 |
| 0.009925373 | 0.036323042 | 0.034915252 | 0.175865164 |
| 0.044527546 | 0.021574513 | 0.130369047 | 0.083945951 |
| 0.093508967 | 0.07971905  | 0.24148081  | 0.35522886  |
| 0.156751641 | 0.104306605 | 0.119142731 | 0.013123437 |
| 0.240290742 | 0.063528055 | 0.066543276 | 0.21117125  |
| 0.055910951 | 0.307327395 | 0.033507817 | 0.124890316 |
| 0.073633487 | 0.171591067 | 0.330609711 | 0.009955192 |
| 0.206020481 | 0.202610674 | 0.317760942 | 0.102278104 |
| 0.157178127 | 0.252219534 | 0.028845453 | 0.211907882 |
| 0.183993787 | 0.078046749 | 0.2391689   | 0.076784494 |
| 0.100386862 | 0.268105637 | 0.161284461 | 0.161513509 |
| 0.126700486 | 0.085677947 | 0.035843123 | 0.276325205 |

|             |             |             |             |
|-------------|-------------|-------------|-------------|
| 0.246671692 | 0.304274761 | 0.16289467  | 0.138141033 |
| 0.052009962 | 0.004112471 | 0.17430063  | 0.201465726 |
| 0.195153019 | 0.233567097 | 0.295639396 | 0.102045222 |
| 0.266468303 | 0.052071628 | 0.028755208 | 0.241397137 |
| 0.10277159  | 0.235864333 | 0.0576965   | 0.217034058 |
| 0.179822396 | 0.093386851 | 0.071903111 | 0.135495573 |
| 0.175097447 | 0.082982455 | 0.189572471 | 0.202618096 |
| 0.238232744 | 0.098475001 | 0.067454808 | 0.302590657 |
| 0.022652569 | 0.034714914 | 0.215145652 | 0.064906343 |
| 0.069713722 | 0.129787805 | 0.015723669 | 0.076318637 |
| 0.024976516 | 0.185067312 | 0.338378687 | 0.037277294 |
| 0.070169669 | 0.093026781 | 0.311968697 | 0.094547863 |
| 0.206864738 | 0.230407859 | 0.209926813 | 0.157456967 |
| 0.230586771 | 0.2010864   | 0.105786439 | 0.173375883 |
| 0.084343028 | 0.20641203  | 0.246604965 | 0.012915813 |
| 0.311281513 | 0.071069718 | 0.005150989 | 0.24465283  |
| 0.219839025 | 0.164914075 | 0.005978443 | 0.045073492 |
| 0.0878965   | 0.324757746 | 0.179953823 | 0.271035314 |
| 0.026793759 | 0.348508731 | 0.022780583 | 0.264412663 |
| 0.198700037 | 0.043858188 | 0.067547004 | 0.170230478 |
| 0.161667037 | 0.253579683 | 0.087388843 | 0.200311985 |
| 0.135766043 | 0.180111498 | 0.028677022 | 0.238295454 |
| 0.213406331 | 0.194401428 | 0.278526794 | 0.236922911 |
| 0.273144931 | 0.307392982 | 0.238939136 | 0.025588184 |
| 0.030998264 | 0.094102533 | 0.020928633 | 0.014788123 |
| 0.158875891 | 0.067071076 | 0.259875957 | 0.316894994 |
| 0.230767    | 0.056160013 | 0.058559495 | 0.188299065 |
| 0.267532304 | 0.321148621 | 0.078710491 | 0.011504981 |
| 0.011155565 | 0.008645901 | 0.225821284 | 0.239698837 |
| 0.244356039 | 0.009069203 | 0.036741528 | 0.034908795 |
| 0.060822791 | 0.196379656 | 0.205389112 | 0.35593384  |
| 0.271083951 | 0.135803151 | 0.020239616 | 0.376826982 |
| 0.030396835 | 0.166680564 | 0.237671944 | 0.198876569 |
| 0.098109743 | 0.215770387 | 0.196396303 | 0.293994859 |
| 0.01264383  | 0.2787347   | 0.219533386 | 0.035256502 |
| 0.060364318 | 0.101502439 | 0.068930546 | 0.357506167 |
| 0.176575336 | 0.016985246 | 0.015907035 | 0.012450788 |
| 0.048833132 | 0.29904209  | 0.057875163 | 0.293304836 |
| 0.265365237 | 0.343136857 | 0.055632547 | 0.207886293 |
| 0.017957578 | 0.179723725 | 0.139262742 | 0.010048047 |
| 0.206438754 | 0.05689752  | 0.210971915 | 0.007318104 |
| 0.08725688  | 0.282720887 | 0.032021788 | 0.06542246  |
| 0.036799949 | 0.094033685 | 0.281669438 | 0.285758883 |
| 0.07445024  | 0.137566456 | 0.293950109 | 0.354373221 |
| 0.1403516   | 0.242871201 | 0.195115415 | 0.0803316   |
| 0.054848914 | 0.048179883 | 0.316996153 | 0.208437346 |
| 0.07821794  | 0.308838021 | 0.038578844 | 0.269589028 |
| 0.245180589 | 0.280524038 | 0.21959918  | 0.192202623 |
| 0.035078692 | 0.184579244 | 0.147952958 | 0.011765737 |
| 0.277889334 | 0.259944342 | 0.231390867 | 0.026815814 |
| 0.12208212  | 0.138287154 | 0.083101563 | 0.049265445 |
| 0.096065731 | 0.122647363 | 0.041429953 | 0.378220977 |
| 0.262103143 | 0.203594971 | 0.065465005 | 0.057255704 |
| 0.25473407  | 0.233212409 | 0.042175026 | 0.210243633 |

|             |             |             |             |
|-------------|-------------|-------------|-------------|
| 0.240318649 | 0.182645281 | 0.280867096 | 0.267973502 |
| 0.065286411 | 0.193862617 | 0.265161407 | 0.145773191 |
| 0.182483017 | 0.22125511  | 0.212860272 | 0.03494328  |
| 0.026245258 | 0.19222367  | 0.029459784 | 0.180402773 |
| 0.146306344 | 0.059259968 | 0.037839955 | 0.343078504 |
| 0.055410302 | 0.23518509  | 0.036152984 | 0.063407137 |
| 0.258544825 | 0.174506263 | 0.279392701 | 0.088059039 |
| 0.028476971 | 0.183830858 | 0.017248631 | 0.124637396 |
| 0.071778485 | 0.206506626 | 0.101300496 | 0.176550512 |
| 0.039462693 | 0.093822899 | 0.209985901 | 0.103918286 |
| 0.034510864 | 0.037269523 | 0.198389188 | 0.039846792 |
| 0.032072001 | 0.320512687 | 0.153867283 | 0.067751476 |
| 0.054268196 | 0.201576723 | 0.145640412 | 0.033557863 |
| 0.079924159 | 0.192704659 | 0.051541028 | 0.194508427 |
| 0.221694367 | 0.136388348 | 0.183313823 | 0.067726168 |
| 0.091099287 | 0.206044235 | 0.187516882 | 0.201934783 |
| 0.218444822 | 0.296212733 | 0.180763994 | 0.202942828 |
| 0.092982035 | 0.15938557  | 0.040738609 | 0.314504635 |
| 0.050681192 |             |             |             |

|             |             |             |             |
|-------------|-------------|-------------|-------------|
| CHSY1       | 0.379095395 | 0.513945474 | 0.370238493 |
| 0.37711904  | 0.377880501 | 0.341071667 | 0.218081276 |
| 0.223811596 | 0.09729866  | 0.006586077 | 0.020355122 |
| 0.391737434 | 0.177636688 | 0.266377188 | 0.305928853 |
| 0.384093631 | 0.134368078 | 0.375217928 | 0.254588309 |
| 0.384650831 | 0.108682154 | 0.362715216 | 0.112993688 |
| 0.270857312 | 0.102406716 | 0.074089839 | 0.240428691 |
| 0.417613708 | 0.088120132 | 0.287042049 | 0.362541353 |
| 0.124804737 | 0.391070773 | 0.514445229 | 0.369708061 |
| 0.503482181 | 0.360155042 | 0.01934137  | 0.264702607 |
| 0.415681443 | 0.383111593 | 0.376537393 | 0.31963815  |
| 0.052809487 | 0.489137087 | 0.246529286 | 0.370771784 |
| 0.254942818 | 0.033854927 | 0.2471233   | 0.448278427 |
| 0.464304242 | 0.356480358 | 0.249771703 | 0.168441382 |
| 0.156898599 | 0.226429548 | 0.217081941 | 0.309225954 |
| 0.227223335 | 0.17002507  | 0.472469388 | 0.09788874  |
| 0.138030994 | 0.279455348 | 0.16294378  | 0.278716941 |
| 0.296360823 | 0.355669758 | 0.030683777 | 0.354552135 |
| 0.004326051 | 0.375839113 | 0.361835344 | 0.254740941 |
| 0.052430899 | 0.02307459  | 0.190101381 | 0.318592643 |
| 0.439323314 | 0.4657328   | 0.454312882 | 0.461329594 |
| 0.178066288 | 0.30427189  | 0.339814563 | 0.177843211 |
| 0.416631743 | 0.180217107 | 0.141914748 | 0.378859311 |
| 0.464813072 | 0.506871706 | 0.196334343 | 0.262631033 |
| 0.369899864 | 0.475118736 | 0.383626375 | 0.373235283 |
| 0.289446112 | 0.06515073  | 0.428749563 | 0.48963507  |
| 0.390935694 | 0.275655628 | 0.159727207 | 0.372952855 |
| 0.073891121 | 0.37309349  | 0.33819378  | 0.174397029 |
| 0.453351553 | 0.02513011  | 0.209982836 | 0.326577481 |
| 0.265395455 | 1           | 0.500522508 | 0.201537622 |
| 0.378978156 | 0.028598021 | 0.11719841  | 0.046959857 |
| 0.318613832 | 0.13445261  | 0.476619928 | 0.428181508 |
| 0.247812253 | 0.325593447 | 0.278132228 | 0.004309737 |
| 0.03415805  | 0.216887393 | 0.387893343 | 0.381168568 |
| 0.396731993 | 0.377420312 | 0.213130009 | 0.343417434 |

|             |             |             |             |
|-------------|-------------|-------------|-------------|
| 0.364088485 | 0.444600331 | 0.064641399 | 0.122333843 |
| 0.387078193 | 0.208312009 | 0.248546165 | 0.382163305 |
| 0.285135043 | 0.147939547 | 0.145080532 | 0.502950117 |
| 0.432265992 | 0.099853561 | 0.353246142 | 0.385294487 |
| 0.278545633 | 0.322239369 | 0.128555193 | 0.267414884 |
| 0.060321225 | 0.468370624 | 0.035536439 | 0.353072061 |
| 0.22220554  | 0.135734265 | 0.02321663  | 0.276000902 |
| 0.288706456 | 0.392488872 | 0.463787683 | 0.131821195 |
| 0.303555434 | 0.366073571 | 0.320250376 | 0.357735522 |
| 0.010032395 | 0.069324957 | 0.284719939 | 0.487135506 |
| 0.26819765  | 0.486270302 | 0.321310036 | 0.305725278 |
| 0.280530734 | 0.407158888 | 0.006546565 | 0.494385223 |
| 0.510305611 | 0.29749913  | 0.348697346 | 0.386932731 |
| 0.307699877 | 0.41610433  | 0.050220406 | 0.385306948 |
| 0.335888113 | 0.103232812 | 0.481426426 | 0.162439593 |
| 0.461410308 | 0.047387343 | 0.303451145 | 0.383272851 |
| 0.350166399 | 0.011018342 | 0.229142097 | 0.360614315 |
| 0.034606745 | 0.109129093 | 0.393446654 | 0.380578468 |
| 0.342045171 | 0.399138719 | 0.457514962 | 0.29326284  |
| 0.378137041 | 0.266591575 | 0.019613451 | 0.312005139 |
| 0.390032484 | 0.302049169 | 0.448327993 | 0.253473749 |
| 0.322314239 | 0.470681577 | 0.376165261 | 0.173993598 |
| 0.053324803 | 0.309125325 | 0.029852899 | 0.310981131 |
| 0.378088639 | 0.116279858 | 0.330562395 | 0.180341647 |
| 0.079589057 | 0.508113304 | 0.168009034 | 0.230922675 |
| 0.118056413 | 0.340949788 | 0.279761633 | 0.205394777 |
| 0.177731764 | 0.170337249 | 0.303999073 | 0.337496844 |
| 0.047837313 | 0.100846814 | 0.023489721 | 0.300788277 |
| 0.118171976 | 0.281502684 | 0.278207216 | 0.353589475 |
| 0.298010186 | 0.111742407 | 0.344808333 | 0.279197145 |
| 0.126367542 | 0.020636363 | 0.498107854 | 0.390517482 |
| 0.309547394 | 0.174329163 | 0.054266318 | 0.279623235 |
| 0.436796696 | 0.281800631 | 0.270498878 | 0.437175919 |
| 0.048527536 | 0.459002747 | 0.225086449 | 0.127077075 |
| 0.316545109 | 0.258615148 | 0.439102563 | 0.061973196 |
| 0.368010267 | 0.462132424 | 0.327006153 | 0.182688371 |
| 0.392361032 | 0.383891968 | 0.039866952 | 0.366739803 |
| 0.357369261 | 0.039265189 | 0.510332899 | 0.132112055 |
| 0.028549301 | 0.388678365 | 0.359270459 | 0.088228722 |
| 0.092504777 | 0.290465722 | 0.062151807 | 0.284930495 |
| 0.504709974 | 0.370128687 | 0.354429958 | 0.221816623 |
| 0.047432702 | 0.009914145 | 0.212753557 | 0.371497097 |
| 0.506647314 | 0.490972142 | 0.27715267  | 0.315357321 |
| 0.254027714 | 0.279503051 | 0.16244458  | 0.487495563 |
| 0.239938746 | 0.515311612 | 0.010847932 | 0.366124355 |
| 0.496786015 | 0.278694792 | 0.083007308 | 0.292938097 |
| 0.374517444 | 0.05938092  | 0.248769302 | 0.493277071 |
| 0.418850733 | 0.302869757 | 0.313405778 | 0.398032846 |
| 0.023992696 | 0.053846029 | 0.359327371 | 0.173372108 |
| 0.332306895 | 0.22349555  | 0.051013589 | 0.321779432 |
| 0.050223846 | 0.442055945 | 0.415115671 | 0.065713059 |
| 0.284023561 | 0.320658409 | 0.355550838 | 0.048169908 |
| 0.413923799 | 0.491197313 | 0.516837419 | 0.20356999  |
| 0.37890904  | 0.465659369 | 0.324935171 | 0.09829531  |

|             |             |             |             |
|-------------|-------------|-------------|-------------|
| 0.023140434 | 0.507068582 | 0.377380148 | 0.030054826 |
| 0.442795806 | 0.236599713 | 0.013143329 | 0.497292377 |
| 0.210776791 | 0.447924515 | 0.010348321 | 0.10315587  |
| 0.054192334 | 0.415920161 | 0.474587143 | 0.36552376  |
| 0.22696538  | 0.375245016 | 0.008635237 | 0.507961738 |
| 0.482596233 | 0.018299743 | 0.143001239 | 0.367506226 |
| 0.35244142  | 0.52888525  | 0.274767843 | 0.404569671 |
| 0.35685358  | 0.485229285 | 0.227325468 | 0.265559803 |
| 0.406645118 | 0.471817244 | 0.393747265 | 0.468632488 |
| 0.426138527 | 0.385325391 | 0.280432745 | 0.019636425 |
| 0.129999307 | 0.226346699 | 0.259781391 | 0.077960625 |
| 0.317561866 | 0.143665936 | 0.483272415 | 0.435264198 |
| 0.454317916 | 0.008026219 | 0.177782748 | 0.37575094  |
| 0.43305132  | 0.464634312 | 0.03662665  | 0.010926546 |
| 0.014149245 | 0.018908889 | 0.349431381 | 0.25636146  |
| 0.474862736 | 0.218587137 | 0.007577615 | 0.062622611 |
| 0.313187182 | 0.346321713 | 0.49163727  | 0.366939507 |
| 0.38473788  | 0.096709294 | 0.238280097 | 0.385706605 |
| 0.069311585 | 0.310152832 | 0.460926856 | 0.470523589 |
| 0.056913295 | 0.257519488 | 0.384115055 | 0.471524701 |
| 0.060212134 | 0.310786006 | 0.38883837  | 0.27779274  |
| 0.023776372 | 0.09215919  | 0.071651387 | 0.395803056 |
| 0.486120892 | 0.07331809  | 0.034912652 | 0.145389304 |
| 0.1215565   | 0.440273156 | 0.174185622 | 0.495971792 |
| 0.412370076 | 0.396932806 | 0.080041904 | 0.483097889 |
| 0.03831336  | 0.478504966 | 0.301987033 | 0.073434922 |
| 0.321087684 | 0.020774396 | 0.458761938 | 0.121297906 |
| 0.314891873 | 0.384458771 | 0.185273948 | 0.02155379  |
| 0.17296639  | 0.062972669 | 0.446052453 | 0.415945912 |
| 0.045434459 | 0.262115144 | 0.316321618 | 0.398610497 |
| 0.294024592 | 0.381395714 | 0.501141799 | 0.350867287 |
| 0.094055363 | 0.145690262 | 0.39061636  | 0.372698659 |
| 0.250427302 | 0.463899597 | 0.251167679 | 0.515958469 |
| 0.378909463 | 0.461532001 | 0.453464753 | 0.335593965 |
| 0.20286737  | 0.380730539 | 0.329210136 | 0.027954388 |
| 0.362774916 | 0.412148347 | 0.371103459 | 0.146590978 |
| 0.239719141 | 0.331327638 | 0.068260929 | 0.229562432 |
| 0.281605519 | 0.293483562 | 0.146403624 | 0.403071211 |
| 0.380970111 | 0.369159477 | 0.059567616 | 0.067715493 |
| 0.534133974 | 0.443004088 | 0.177458564 | 0.384803261 |
| 0.197933496 | 0.317038855 | 0.394363485 | 0.383440328 |
| 0.333077277 | 0.403486231 | 0.385633212 | 0.339105071 |
| 0.424717798 | 0.273226016 | 0.51811145  | 0.123679174 |
| 0.084517123 | 0.368668999 | 0.09472552  | 0.106363851 |
| 0.155953295 | 0.036723741 | 0.247467344 | 0.390642535 |
| 0.308302996 | 0.349820562 | 0.298948302 | 0.107025521 |
| 0.315284533 | 0.364271876 | 0.34795316  | 0.20975735  |
| 0.086947636 | 0.487703772 | 0.013672514 | 0.069398273 |
| 0.319981799 | 0.376946743 | 0.319933089 | 0.259860761 |
| 0.255346226 | 0.152005807 | 0.291731346 | 0.294414127 |
| 0.267513184 | 0.345115459 | 0.385534765 | 0.054667022 |
| 0.027599987 | 0.471427624 | 0.378760676 | 0.032475372 |
| 0.089812299 | 0.353927825 | 0.328683854 | 0.213107685 |
| 0.028415395 | 0.453561711 | 0.2864625   | 0.38143925  |

|             |             |             |             |
|-------------|-------------|-------------|-------------|
| 0.348328888 | 0.087081019 | 0.367962642 | 0.115451769 |
| 0.090401397 | 0.457430036 | 0.357100373 | 0.498152845 |
| 0.346268513 | 0.375783198 | 0.45409384  | 0.386406925 |
| 0.177004107 | 0.348552428 | 0.038542267 | 0.418322352 |
| 0.333010745 |             |             |             |
| CLDN10      | 0.484958306 | 0.511186162 | 0.46404963  |
| 0.456371084 | 0.475972805 | 0.42425789  | 0.2075232   |
| 0.178514574 | 0.087589375 | 0.00383231  | 0.025812148 |
| 0.508113184 | 0.233829191 | 0.284540994 | 0.380004861 |
| 0.452190398 | 0.145247364 | 0.371844088 | 0.239553212 |
| 0.437157367 | 0.083798451 | 0.435996518 | 0.083570944 |
| 0.333572166 | 0.116968645 | 0.067345248 | 0.314370391 |
| 0.47389257  | 0.077508791 | 0.371020278 | 0.41355962  |
| 0.099932706 | 0.490243257 | 0.524767104 | 0.50270495  |
| 0.527546264 | 0.472461201 | 0.00967886  | 0.325068108 |
| 0.470713746 | 0.508165966 | 0.435170636 | 0.345765336 |
| 0.036567614 | 0.49107445  | 0.250660135 | 0.451520533 |
| 0.241345136 | 0.030327363 | 0.252505519 | 0.449733245 |
| 0.491711859 | 0.511431336 | 0.221701511 | 0.156065051 |
| 0.252722638 | 0.238681483 | 0.359109751 | 0.357288258 |
| 0.226850501 | 0.158659979 | 0.497947511 | 0.086441949 |
| 0.154925473 | 0.243404964 | 0.160662409 | 0.257986936 |
| 0.418872343 | 0.434710515 | 0.012891916 | 0.491940525 |
| 0.002089058 | 0.406784604 | 0.414596967 | 0.3984243   |
| 0.038415062 | 0.019332637 | 0.187018143 | 0.357655602 |
| 0.492107448 | 0.482058075 | 0.525521993 | 0.531331287 |
| 0.197757661 | 0.306763976 | 0.46942266  | 0.174319489 |
| 0.495175757 | 0.179991289 | 0.108488669 | 0.461068504 |
| 0.528815813 | 0.519082028 | 0.216714112 | 0.282399464 |
| 0.49208241  | 0.493607045 | 0.487246986 | 0.485236059 |
| 0.422408122 | 0.053647114 | 0.48718049  | 0.530294017 |
| 0.453579228 | 0.390778247 | 0.160170779 | 0.44821702  |
| 0.053327516 | 0.407124233 | 0.373480961 | 0.169868039 |
| 0.495180646 | 0.014765304 | 0.231096191 | 0.383687407 |
| 0.211838541 | 0.500522508 | 1           | 0.183891312 |
| 0.457694588 | 0.017887847 | 0.175759511 | 0.029505363 |
| 0.358139678 | 0.188233747 | 0.506455699 | 0.503788352 |
| 0.233265354 | 0.431449551 | 0.264338399 | 0.000761857 |
| 0.025116239 | 0.192526835 | 0.512662868 | 0.389493111 |
| 0.476894007 | 0.46556543  | 0.258831464 | 0.453832473 |
| 0.530474873 | 0.525170944 | 0.070344156 | 0.085325885 |
| 0.471453381 | 0.189561615 | 0.242334816 | 0.512085365 |
| 0.346869822 | 0.102457236 | 0.121099861 | 0.524035157 |
| 0.447200315 | 0.077580168 | 0.361040895 | 0.450776774 |
| 0.376741587 | 0.408944575 | 0.09790251  | 0.293234994 |
| 0.042384178 | 0.497064332 | 0.027611313 | 0.34661127  |
| 0.344149885 | 0.169905715 | 0.007852498 | 0.262315993 |
| 0.316239742 | 0.512042195 | 0.495964411 | 0.098218623 |
| 0.339731086 | 0.453381094 | 0.345848351 | 0.500796736 |
| 0.010029384 | 0.04058747  | 0.308182312 | 0.525458573 |
| 0.3236025   | 0.524408507 | 0.308706744 | 0.329492875 |
| 0.302794566 | 0.493547573 | 0.003434452 | 0.503929029 |
| 0.524913498 | 0.337553574 | 0.451802656 | 0.468715446 |
| 0.461145825 | 0.497467337 | 0.049868268 | 0.452679321 |

|             |             |             |             |
|-------------|-------------|-------------|-------------|
| 0.416674254 | 0.070209289 | 0.521263658 | 0.16788794  |
| 0.49251242  | 0.03849628  | 0.335763859 | 0.523775851 |
| 0.526860608 | 0.007652228 | 0.235310877 | 0.414676419 |
| 0.026122767 | 0.088369989 | 0.474308164 | 0.443569016 |
| 0.427684488 | 0.500252519 | 0.506530051 | 0.447152799 |
| 0.481045466 | 0.22735174  | 0.009950592 | 0.355317899 |
| 0.504523205 | 0.458654491 | 0.466603768 | 0.240223328 |
| 0.392564169 | 0.501023933 | 0.508474377 | 0.245423394 |
| 0.037608816 | 0.321902815 | 0.018577668 | 0.371267944 |
| 0.477121792 | 0.119205576 | 0.473280101 | 0.146778263 |
| 0.071438605 | 0.525496183 | 0.21336617  | 0.331199189 |
| 0.163601954 | 0.461898375 | 0.247814955 | 0.271422544 |
| 0.262636418 | 0.16650249  | 0.41713823  | 0.431008765 |
| 0.030447057 | 0.092650785 | 0.01326808  | 0.471736154 |
| 0.167944999 | 0.414093721 | 0.411435042 | 0.474728183 |
| 0.353216781 | 0.116560041 | 0.43677446  | 0.333880593 |
| 0.119667971 | 0.012429754 | 0.512992282 | 0.436344641 |
| 0.389077107 | 0.148872703 | 0.03667274  | 0.423691114 |
| 0.511188022 | 0.377870485 | 0.298448731 | 0.496259675 |
| 0.023650505 | 0.520440848 | 0.277984606 | 0.127046202 |
| 0.455178407 | 0.27402093  | 0.490445424 | 0.06534321  |
| 0.430990863 | 0.487776178 | 0.327941568 | 0.200497605 |
| 0.45304262  | 0.452368006 | 0.02531723  | 0.47490631  |
| 0.4722164   | 0.027969217 | 0.523810374 | 0.135173226 |
| 0.018062696 | 0.505907414 | 0.52664648  | 0.072365697 |
| 0.076845966 | 0.377026587 | 0.037634087 | 0.312379321 |
| 0.521924567 | 0.451072607 | 0.507076888 | 0.24810884  |
| 0.036066042 | 0.010540879 | 0.228808408 | 0.468200946 |
| 0.519843307 | 0.528363561 | 0.267084497 | 0.434848318 |
| 0.241669264 | 0.396883026 | 0.139672978 | 0.530030664 |
| 0.207117064 | 0.512849197 | 0.004737069 | 0.523258907 |
| 0.527194783 | 0.314421825 | 0.085206637 | 0.326414281 |
| 0.455593891 | 0.040015913 | 0.194646874 | 0.499289577 |
| 0.495151555 | 0.372599532 | 0.411586597 | 0.476859381 |
| 0.012157796 | 0.034155044 | 0.445021414 | 0.227226026 |
| 0.440619637 | 0.222108712 | 0.071887287 | 0.345888077 |
| 0.039918948 | 0.487792319 | 0.502243983 | 0.060487377 |
| 0.399191292 | 0.327397334 | 0.418174593 | 0.031592237 |
| 0.528564411 | 0.508709186 | 0.52425877  | 0.151760645 |
| 0.515690753 | 0.526208728 | 0.508717022 | 0.076170233 |
| 0.015516007 | 0.52411705  | 0.447421483 | 0.020895482 |
| 0.508457322 | 0.258816973 | 0.01216343  | 0.499327804 |
| 0.178495362 | 0.463020571 | 0.003215552 | 0.099769378 |
| 0.039902291 | 0.51153748  | 0.487276822 | 0.409853299 |
| 0.288977629 | 0.385619102 | 0.005510585 | 0.525096093 |
| 0.502586127 | 0.013369542 | 0.156662352 | 0.527517251 |
| 0.527077413 | 0.511049513 | 0.397450827 | 0.533233201 |
| 0.521048623 | 0.512294047 | 0.253278921 | 0.287294708 |
| 0.50358971  | 0.511584235 | 0.469066409 | 0.481037065 |
| 0.507455785 | 0.476843177 | 0.290179694 | 0.012435981 |
| 0.159617906 | 0.212946553 | 0.389286347 | 0.092198792 |
| 0.361952772 | 0.152168895 | 0.508888087 | 0.512467129 |
| 0.534082452 | 0.003455795 | 0.142405353 | 0.51468189  |
| 0.476453769 | 0.496259086 | 0.017826711 | 0.006315635 |



|             |             |             |             |
|-------------|-------------|-------------|-------------|
| 0.008396512 | 0.022381565 | 0.380350062 | 0.259802937 |
| 0.522503175 | 0.288496856 | 0.002879642 | 0.035450274 |
| 0.293899214 | 0.473001637 | 0.509826527 | 0.403381872 |
| 0.513253306 | 0.075687402 | 0.337415289 | 0.424604164 |
| 0.074016143 | 0.389771748 | 0.532209074 | 0.482029099 |
| 0.037215935 | 0.265461652 | 0.410617297 | 0.508559746 |
| 0.103127143 | 0.341819165 | 0.50977608  | 0.356031932 |
| 0.011547349 | 0.083026888 | 0.066577492 | 0.484108745 |
| 0.519897479 | 0.08558092  | 0.034309524 | 0.160483049 |
| 0.120941703 | 0.514615713 | 0.171517708 | 0.526255874 |
| 0.490193217 | 0.475395458 | 0.078260452 | 0.489112095 |
| 0.039028424 | 0.49421316  | 0.405603064 | 0.063942458 |
| 0.302565723 | 0.009565735 | 0.505477377 | 0.204649099 |
| 0.349179418 | 0.438618422 | 0.236993986 | 0.015339601 |
| 0.23236596  | 0.050761428 | 0.516628563 | 0.521942139 |
| 0.032210188 | 0.233232367 | 0.317407674 | 0.439261998 |
| 0.300838275 | 0.486636922 | 0.50950747  | 0.490881498 |
| 0.077070933 | 0.172302609 | 0.440746296 | 0.45734444  |
| 0.239186857 | 0.523488993 | 0.353909603 | 0.523093902 |
| 0.466446117 | 0.495765995 | 0.522059547 | 0.377837106 |
| 0.277413157 | 0.449664821 | 0.420193887 | 0.017212743 |
| 0.374137836 | 0.513364571 | 0.379113207 | 0.180465741 |
| 0.286388848 | 0.477912693 | 0.038760901 | 0.199418005 |
| 0.424940671 | 0.339164068 | 0.142902803 | 0.473879013 |
| 0.429730156 | 0.462338688 | 0.031400308 | 0.062770749 |
| 0.523875017 | 0.475183992 | 0.140847433 | 0.482317508 |
| 0.170952266 | 0.383539339 | 0.517663525 | 0.518058473 |
| 0.428349151 | 0.5211581   | 0.476308075 | 0.444503836 |
| 0.460506444 | 0.263962289 | 0.526015598 | 0.0797395   |
| 0.096318109 | 0.491600009 | 0.100893876 | 0.091551405 |
| 0.141317471 | 0.024463592 | 0.392394443 | 0.466800819 |
| 0.475686875 | 0.419379194 | 0.348684657 | 0.078143141 |
| 0.355195955 | 0.416311107 | 0.383472803 | 0.203498106 |
| 0.077992362 | 0.502380225 | 0.007985441 | 0.052126812 |
| 0.476501892 | 0.517526204 | 0.471461296 | 0.254970521 |
| 0.372706444 | 0.148445144 | 0.319360318 | 0.320945823 |
| 0.387776597 | 0.427268605 | 0.516225346 | 0.028450708 |
| 0.0144106   | 0.519292554 | 0.418546963 | 0.018695285 |
| 0.088462811 | 0.439008038 | 0.305106714 | 0.264657986 |
| 0.020836434 | 0.523653096 | 0.388919318 | 0.488051474 |
| 0.362728297 | 0.058453095 | 0.407902765 | 0.086505475 |
| 0.050962805 | 0.470376604 | 0.4695627   | 0.516848602 |
| 0.394679971 | 0.461373773 | 0.454522169 | 0.511521371 |
| 0.122718193 | 0.460823336 | 0.02215688  | 0.490129749 |
| 0.507073305 |             |             |             |

|             |             |             |             |
|-------------|-------------|-------------|-------------|
| CLDND2      | 0.156284269 | 0.227914523 | 0.096690146 |
| 0.322917183 | 0.169181358 | 0.155746978 | 0.26997556  |
| 0.177506615 | 0.1920905   | 0.095155577 | 0.095460783 |
| 0.137392608 | 0.142089276 | 0.178756162 | 0.098521626 |
| 0.315394272 | 0.170161873 | 0.1047723   | 0.302940002 |
| 0.285072687 | 0.252669751 | 0.307817089 | 0.306039169 |
| 0.095341788 | 0.139954671 | 0.23042806  | 0.118556089 |
| 0.317692259 | 0.237445771 | 0.122025325 | 0.262087015 |
| 0.152055125 | 0.207364779 | 0.181249653 | 0.201870245 |

|             |             |             |             |
|-------------|-------------|-------------|-------------|
| 0.16204504  | 0.125950141 | 0.040329726 | 0.145997083 |
| 0.198817937 | 0.215589461 | 0.29921023  | 0.312060509 |
| 0.259495092 | 0.167511955 | 0.310433457 | 0.164276377 |
| 0.118432819 | 0.164079173 | 0.109876293 | 0.17019371  |
| 0.15616753  | 0.141728483 | 0.205662648 | 0.281887537 |
| 0.090794784 | 0.111548765 | 0.05103457  | 0.166941502 |
| 0.280499465 | 0.12467807  | 0.167599563 | 0.235401972 |
| 0.116199643 | 0.19648571  | 0.139222107 | 0.215885355 |
| 0.073204816 | 0.186477303 | 0.175113787 | 0.092088728 |
| 0.034733659 | 0.306888526 | 0.179949004 | 0.055761524 |
| 0.196829152 | 0.149927485 | 0.15499272  | 0.304911327 |
| 0.291721728 | 0.163226337 | 0.261613761 | 0.229460472 |
| 0.1625196   | 0.169582545 | 0.094459383 | 0.262209001 |
| 0.204440203 | 0.266348098 | 0.162821103 | 0.305324491 |
| 0.254294892 | 0.194027536 | 0.184348132 | 0.184098176 |
| 0.220254265 | 0.220455233 | 0.112163713 | 0.135816813 |
| 0.07953739  | 0.090425419 | 0.174545343 | 0.23267097  |
| 0.173653578 | 0.064521642 | 0.197358633 | 0.259811571 |
| 0.228075833 | 0.082038447 | 0.343053253 | 0.097029689 |
| 0.300467965 | 0.196946772 | 0.156773215 | 0.241627013 |
| 0.173434033 | 0.201537622 | 0.183891312 | 1           |
| 0.127686901 | 0.123470837 | 0.062301688 | 0.153607191 |
| 0.128573023 | 0.037641665 | 0.142672426 | 0.279237758 |
| 0.166225891 | 0.117312804 | 0.242534713 | 0.057878525 |
| 0.137224206 | 0.115919873 | 0.164610953 | 0.125983585 |
| 0.230108225 | 0.113407958 | 0.191832426 | 0.154382637 |
| 0.130748022 | 0.256490865 | 0.024384964 | 0.299776399 |
| 0.170072329 | 0.12743283  | 0.317368372 | 0.147390359 |
| 0.172292969 | 0.284908248 | 0.287506023 | 0.257358653 |
| 0.195248655 | 0.291674615 | 0.086785041 | 0.298965661 |
| 0.134539393 | 0.157600874 | 0.288563798 | 0.201183184 |
| 0.278886609 | 0.151224744 | 0.107575322 | 0.130154494 |
| 0.065669146 | 0.103916918 | 0.092088883 | 0.173387503 |
| 0.151916588 | 0.190674028 | 0.130108219 | 0.263458596 |
| 0.193835237 | 0.247110456 | 0.115895237 | 0.188852083 |
| 0.103114916 | 0.197344546 | 0.06789561  | 0.236744433 |
| 0.133608184 | 0.22109041  | 0.202631446 | 0.148971092 |
| 0.228825648 | 0.27632478  | 0.004124901 | 0.170919085 |
| 0.188883457 | 0.062982304 | 0.206922045 | 0.166651074 |
| 0.077121432 | 0.28891301  | 0.010956459 | 0.288105156 |
| 0.121578008 | 0.259923156 | 0.27948746  | 0.21761625  |
| 0.167192031 | 0.20836762  | 0.146322054 | 0.163308056 |
| 0.129616651 | 0.050356038 | 0.143874262 | 0.301160474 |
| 0.094497865 | 0.229524202 | 0.213324361 | 0.284228603 |
| 0.222412981 | 0.231819853 | 0.305332344 | 0.066908301 |
| 0.165038203 | 0.237223069 | 0.113303388 | 0.153402005 |
| 0.185419423 | 0.062815557 | 0.192235155 | 0.253704242 |
| 0.089942089 | 0.214693911 | 0.137271419 | 0.07080046  |
| 0.264074939 | 0.196656832 | 0.119728207 | 0.182682493 |
| 0.135698477 | 0.252309206 | 0.089614393 | 0.124400125 |
| 0.166322151 | 0.239659099 | 0.068575319 | 0.047963715 |
| 0.03836923  | 0.164324683 | 0.248735084 | 0.145661034 |
| 0.107699219 | 0.243561257 | 0.102070618 | 0.123799141 |
| 0.252620166 | 0.242289373 | 0.042114834 | 0.05367066  |

|             |             |             |             |
|-------------|-------------|-------------|-------------|
| 0.11463346  | 0.084712796 | 0.075757467 | 0.151686925 |
| 0.134100322 | 0.179609783 | 0.158652104 | 0.087208786 |
| 0.159413307 | 0.142682365 | 0.222947548 | 0.280716481 |
| 0.13882941  | 0.293497242 | 0.182357918 | 0.052525195 |
| 0.266788326 | 0.099199721 | 0.064399534 | 0.238933443 |
| 0.127149844 | 0.251922507 | 0.179853662 | 0.212058954 |
| 0.089182966 | 0.266819374 | 0.313239608 | 0.078301028 |
| 0.147321907 | 0.207830481 | 0.198061681 | 0.203655348 |
| 0.162938304 | 0.253678305 | 0.235373525 | 0.151361402 |
| 0.145666269 | 0.19863352  | 0.211151803 | 0.143881117 |
| 0.143224559 | 0.187860367 | 0.16629194  | 0.210347818 |
| 0.181204095 | 0.176050473 | 0.23360782  | 0.269408757 |
| 0.240032119 | 0.316324452 | 0.191248594 | 0.090298465 |
| 0.247570672 | 0.074111157 | 0.120513656 | 0.097270198 |
| 0.168928199 | 0.196699508 | 0.245059545 | 0.125355153 |
| 0.331879164 | 0.107057283 | 0.103100562 | 0.229671457 |
| 0.071313735 | 0.187906538 | 0.108297849 | 0.174264121 |
| 0.159239329 | 0.108048227 | 0.167557203 | 0.226596966 |
| 0.179413704 | 0.262773761 | 0.216181251 | 0.187658222 |
| 0.221545117 | 0.150821889 | 0.114458052 | 0.191711493 |
| 0.204869476 | 0.265496415 | 0.165663336 | 0.055871481 |
| 0.118982408 | 0.230929328 | 0.014496315 | 0.131254575 |
| 0.224575015 | 0.202944218 | 0.260320779 | 0.188160255 |
| 0.132357972 | 0.11496138  | 0.229728204 | 0.238440356 |
| 0.170759685 | 0.172400579 | 0.187313809 | 0.2549453   |
| 0.171222693 | 0.192214326 | 0.089674687 | 0.178339952 |
| 0.110452985 | 0.171948882 | 0.183359248 | 0.120474005 |
| 0.286166553 | 0.090599765 | 0.115650007 | 0.228870261 |
| 0.28645199  | 0.131791793 | 0.036833256 | 0.01805133  |
| 0.089498775 | 0.244224156 | 0.171782465 | 0.257750339 |
| 0.074374103 | 0.246085736 | 0.010129359 | 0.210390555 |
| 0.199830033 | 0.091186872 | 0.115712827 | 0.161094582 |
| 0.134349671 | 0.220669335 | 0.073582084 | 0.186616255 |
| 0.116847089 | 0.165710566 | 0.210038955 | 0.26295394  |
| 0.234096706 | 0.158576191 | 0.233369507 | 0.204099357 |
| 0.27597692  | 0.222340841 | 0.339789708 | 0.197298573 |
| 0.087760919 | 0.165879057 | 0.065558915 | 0.130379337 |
| 0.140730836 | 0.182110266 | 0.200534226 | 0.271729236 |
| 0.206597205 | 0.085272745 | 0.242297825 | 0.16888674  |
| 0.267522525 | 0.291368281 | 0.072220256 | 0.015377176 |
| 0.008034236 | 0.063343557 | 0.236390012 | 0.162200572 |
| 0.215492209 | 0.065311269 | 0.105969767 | 0.235209878 |
| 0.189153679 | 0.15516493  | 0.198178405 | 0.348864047 |
| 0.181450685 | 0.230582701 | 0.107889492 | 0.321077402 |
| 0.139329447 | 0.10212296  | 0.228228293 | 0.205105968 |
| 0.133523205 | 0.165485861 | 0.097627597 | 0.29163343  |
| 0.013815035 | 0.233827463 | 0.148275004 | 0.168007076 |
| 0.048623747 | 0.162398886 | 0.172252294 | 0.26619601  |
| 0.151002771 | 0.159860836 | 0.140377835 | 0.053938317 |
| 0.264194282 | 0.239075993 | 0.243404913 | 0.262887172 |
| 0.26376535  | 0.332562394 | 0.113162486 | 0.193012435 |
| 0.167587382 | 0.168730557 | 0.109339434 | 0.053586273 |
| 0.135500172 | 0.128683364 | 0.157311626 | 0.06754278  |
| 0.12201673  | 0.198801295 | 0.091669186 | 0.087705048 |

|             |             |             |             |
|-------------|-------------|-------------|-------------|
| 0.040520328 | 0.183628191 | 0.283241634 | 0.230626113 |
| 0.085659789 | 0.241147054 | 0.191333785 | 0.223858759 |
| 0.189589497 | 0.282824092 | 0.17960425  | 0.080289305 |
| 0.294657059 | 0.034269379 | 0.275257714 | 0.143811276 |
| 0.168329757 | 0.264850051 | 0.137160911 | 0.220156335 |
| 0.180783616 | 0.212834022 | 0.189593303 | 0.24933146  |
| 0.09068315  | 0.145055891 | 0.233780215 | 0.161175764 |
| 0.246457593 | 0.272374962 | 0.149241433 | 0.142398266 |
| 0.190589002 | 0.083354209 | 0.181166736 | 0.043205709 |
| 0.052592804 | 0.173750459 | 0.26351398  | 0.320131135 |
| 0.171881982 | 0.153144839 | 0.175292128 | 0.174234497 |
| 0.223054421 | 0.19099849  | 0.209813071 | 0.22373045  |
| 0.207814531 | 0.223121911 | 0.197752573 | 0.195102351 |
| 0.083483919 | 0.199914048 | 0.241621454 | 0.203338847 |
| 0.198546425 | 0.278157214 | 0.192551998 | 0.1273072   |
| 0.102490957 | 0.112420514 | 0.228728424 | 0.17863717  |
| 0.279941803 | 0.138516431 | 0.04263012  | 0.265672939 |
| 0.047961414 | 0.285611863 | 0.084105291 | 0.186228098 |
| 0.176947525 | 0.073482157 | 0.247141693 | 0.240828373 |
| 0.234447233 | 0.184980037 | 0.07553774  | 0.1941995   |
| 0.056405741 | 0.195675806 | 0.101567152 | 0.190304702 |
| 0.068165673 | 0.11079895  | 0.258153625 | 0.12336907  |
| 0.078261318 | 0.065942661 | 0.19247565  | 0.18152664  |
| 0.214238385 | 0.275731287 | 0.099071258 | 0.075501188 |
| 0.097090742 | 0.126265956 | 0.126201613 | 0.188708426 |
| 0.084936926 | 0.172390912 | 0.093157431 | 0.146641693 |
| 0.23848952  | 0.233490438 | 0.139883155 | 0.113560722 |
| 0.199000613 | 0.172965614 | 0.110876032 | 0.176123014 |
| 0.095052307 | 0.329898769 | 0.148751492 | 0.180493696 |
| 0.096556071 | 0.071075229 | 0.244269002 | 0.258192533 |
| 0.055242511 |             |             |             |
| CLEC2I      | 0.373173433 | 0.461177417 | 0.220123508 |
| 0.34726621  | 0.263386077 | 0.182098254 | 0.114641084 |
| 0.101754583 | 0.058548538 | 0.004136686 | 0.021862702 |
| 0.330064173 | 0.119677807 | 0.127611139 | 0.118374778 |
| 0.409507682 | 0.146318067 | 0.217538222 | 0.166640392 |
| 0.338264486 | 0.050211681 | 0.364718358 | 0.080136687 |
| 0.235348697 | 0.107342273 | 0.070179447 | 0.173159731 |
| 0.427041836 | 0.08015057  | 0.113531896 | 0.287358902 |
| 0.166199716 | 0.40127251  | 0.436692739 | 0.351282235 |
| 0.435338276 | 0.319615666 | 0.041695962 | 0.106248513 |
| 0.383398782 | 0.363216167 | 0.331689707 | 0.221066352 |
| 0.03992017  | 0.389027762 | 0.136950984 | 0.318835268 |
| 0.100333015 | 0.041338837 | 0.08465077  | 0.356640825 |
| 0.373433746 | 0.232835399 | 0.112637644 | 0.091253504 |
| 0.092037368 | 0.092848025 | 0.1479352   | 0.194368086 |
| 0.140956399 | 0.056196794 | 0.400257448 | 0.047683309 |
| 0.072889153 | 0.150212784 | 0.205298826 | 0.140460555 |
| 0.220389508 | 0.284653387 | 0.032776707 | 0.291683785 |
| 0.001703064 | 0.321965116 | 0.321288766 | 0.150173894 |
| 0.069337414 | 0.023610665 | 0.21592562  | 0.204527072 |
| 0.450321185 | 0.424800973 | 0.48727062  | 0.479353683 |
| 0.156853433 | 0.250255541 | 0.250457898 | 0.133190973 |
| 0.394641609 | 0.096517281 | 0.095959033 | 0.42727439  |

|             |             |             |             |
|-------------|-------------|-------------|-------------|
| 0.488484968 | 0.453354553 | 0.180681895 | 0.22762836  |
| 0.31643008  | 0.421003643 | 0.174193592 | 0.20371912  |
| 0.13950447  | 0.109274858 | 0.354357232 | 0.486146848 |
| 0.331009068 | 0.219106625 | 0.153036489 | 0.344469989 |
| 0.08904829  | 0.162230329 | 0.274640362 | 0.17656461  |
| 0.461677758 | 0.018443168 | 0.206916635 | 0.187520896 |
| 0.209166504 | 0.378978156 | 0.457694588 | 0.127686901 |
| 1           | 0.036515926 | 0.090059109 | 0.080380802 |
| 0.186384866 | 0.153885629 | 0.371408079 | 0.41357793  |
| 0.129206165 | 0.211091089 | 0.158127957 | 0.012914118 |
| 0.058980483 | 0.225380236 | 0.39558448  | 0.234540253 |
| 0.377034034 | 0.346878285 | 0.129956885 | 0.288132763 |
| 0.310977181 | 0.484304841 | 0.015757635 | 0.085229907 |
| 0.225587844 | 0.22502415  | 0.191941823 | 0.277199337 |
| 0.200408565 | 0.08983219  | 0.119581641 | 0.488638763 |
| 0.345990746 | 0.083693599 | 0.173682077 | 0.400008367 |
| 0.132460698 | 0.267829042 | 0.111519148 | 0.168522995 |
| 0.043423004 | 0.41034553  | 0.071239408 | 0.175006705 |
| 0.108423292 | 0.16926093  | 0.032815199 | 0.125024585 |
| 0.125437193 | 0.343854318 | 0.375672366 | 0.124503625 |
| 0.184483104 | 0.32713339  | 0.140225609 | 0.285802042 |
| 0.007467448 | 0.077643698 | 0.117199811 | 0.469807725 |
| 0.143233055 | 0.50391521  | 0.210294005 | 0.233961583 |
| 0.219991794 | 0.426481341 | 0.007362471 | 0.402382807 |
| 0.457648127 | 0.115738661 | 0.244210773 | 0.341643912 |
| 0.168652218 | 0.401189233 | 0.034649062 | 0.394876243 |
| 0.257006686 | 0.100693021 | 0.505136535 | 0.145488468 |
| 0.409281312 | 0.053455382 | 0.147438858 | 0.401060885 |
| 0.343999541 | 0.017333469 | 0.080254354 | 0.285532683 |
| 0.071629332 | 0.04479016  | 0.363984766 | 0.301823379 |
| 0.210647998 | 0.431775651 | 0.494664946 | 0.157816022 |
| 0.238714719 | 0.161460029 | 0.035596401 | 0.252898828 |
| 0.414670736 | 0.161390395 | 0.353353589 | 0.140002021 |
| 0.178414827 | 0.403380223 | 0.354960408 | 0.064014022 |
| 0.044734815 | 0.152113417 | 0.018110182 | 0.18595436  |
| 0.339457565 | 0.069878489 | 0.165115249 | 0.219449593 |
| 0.108396277 | 0.478299679 | 0.183769693 | 0.19394394  |
| 0.137351657 | 0.208784824 | 0.175246589 | 0.099909406 |
| 0.11409004  | 0.142791517 | 0.188778574 | 0.174552653 |
| 0.027572693 | 0.098205506 | 0.055757264 | 0.170560705 |
| 0.079078819 | 0.148335501 | 0.133167779 | 0.291962827 |
| 0.177231516 | 0.085003974 | 0.209914613 | 0.208206087 |
| 0.129271751 | 0.037044102 | 0.449458667 | 0.363213659 |
| 0.224658852 | 0.116433095 | 0.081570829 | 0.136123113 |
| 0.420032394 | 0.111055003 | 0.100632285 | 0.38438811  |
| 0.052274176 | 0.489593433 | 0.131542777 | 0.123254062 |
| 0.213080746 | 0.169193456 | 0.443970258 | 0.029866732 |
| 0.235822867 | 0.391624369 | 0.245587156 | 0.136583214 |
| 0.312614022 | 0.302220625 | 0.033910939 | 0.319991244 |
| 0.312399256 | 0.052843704 | 0.481965119 | 0.165063614 |
| 0.052355832 | 0.397540192 | 0.327269377 | 0.101067103 |
| 0.104843873 | 0.142143264 | 0.027728354 | 0.250632464 |
| 0.46416189  | 0.388778869 | 0.31646004  | 0.220214676 |
| 0.042159852 | 0.014255322 | 0.233314814 | 0.264977381 |

|             |             |             |             |
|-------------|-------------|-------------|-------------|
| 0.419273775 | 0.479011771 | 0.223471905 | 0.200188045 |
| 0.177623976 | 0.162855123 | 0.059950786 | 0.470143399 |
| 0.225871344 | 0.461915608 | 0.023102574 | 0.397445231 |
| 0.417011582 | 0.114367834 | 0.087628205 | 0.13418305  |
| 0.301658332 | 0.04947737  | 0.182702895 | 0.418066008 |
| 0.37413291  | 0.175824638 | 0.153349453 | 0.378007419 |
| 0.015066051 | 0.036693315 | 0.254142418 | 0.177551088 |
| 0.162972104 | 0.160378531 | 0.082681165 | 0.159806612 |
| 0.041074984 | 0.371064471 | 0.47395795  | 0.052572473 |
| 0.134044439 | 0.142054818 | 0.351203092 | 0.05187256  |
| 0.422394831 | 0.461548223 | 0.438948329 | 0.141272931 |
| 0.403504649 | 0.427975798 | 0.245838848 | 0.128291282 |
| 0.046763899 | 0.447640704 | 0.287653464 | 0.018863386 |
| 0.474425193 | 0.078152884 | 0.012594861 | 0.434048043 |
| 0.141550391 | 0.352540429 | 0.001860427 | 0.100782025 |
| 0.100280164 | 0.486582596 | 0.380600142 | 0.283401085 |
| 0.066701073 | 0.29166016  | 0.027587176 | 0.502118228 |
| 0.413026324 | 0.037461869 | 0.177384232 | 0.364699424 |
| 0.351197566 | 0.46593691  | 0.188962255 | 0.411634133 |
| 0.28631915  | 0.414074619 | 0.123098608 | 0.203340448 |
| 0.368606469 | 0.439266568 | 0.346380855 | 0.393863802 |
| 0.436380637 | 0.398236957 | 0.19277896  | 0.017801519 |
| 0.088662867 | 0.092868925 | 0.092700601 | 0.044448665 |
| 0.175645862 | 0.117129868 | 0.45124274  | 0.475015876 |
| 0.45866986  | 0.020133386 | 0.084762616 | 0.362930631 |
| 0.391122569 | 0.455012636 | 0.056677665 | 0.010033695 |
| 0.014565483 | 0.026523605 | 0.216081017 | 0.225320547 |
| 0.446627834 | 0.066684871 | 0.014010857 | 0.034789416 |
| 0.161889176 | 0.315511503 | 0.431803599 | 0.353327208 |
| 0.421988158 | 0.114600545 | 0.097401782 | 0.372865885 |
| 0.079866552 | 0.221441059 | 0.455659294 | 0.386334107 |
| 0.097316174 | 0.214874941 | 0.218381247 | 0.45921748  |
| 0.075448422 | 0.268008531 | 0.35315388  | 0.151364455 |
| 0.050280694 | 0.11177983  | 0.078180738 | 0.451440778 |
| 0.41528451  | 0.065755418 | 0.04052848  | 0.06023904  |
| 0.074843804 | 0.466420443 | 0.11854557  | 0.502178838 |
| 0.384329535 | 0.44308987  | 0.133618635 | 0.398498683 |
| 0.043466396 | 0.405449238 | 0.223656416 | 0.021649235 |
| 0.261114095 | 0.039027303 | 0.438550015 | 0.061139444 |
| 0.144326897 | 0.311714277 | 0.115818624 | 0.054018067 |
| 0.15426979  | 0.087433387 | 0.45876072  | 0.468592918 |
| 0.093785101 | 0.154075156 | 0.239474339 | 0.348807946 |
| 0.124802997 | 0.366633768 | 0.412385296 | 0.155356056 |
| 0.057306785 | 0.195974393 | 0.34745936  | 0.286849414 |
| 0.129120156 | 0.503773575 | 0.144928459 | 0.495456252 |
| 0.322269381 | 0.431004417 | 0.434502128 | 0.189229076 |
| 0.20881933  | 0.227964007 | 0.223923839 | 0.014542881 |
| 0.237579111 | 0.433166534 | 0.197773722 | 0.113738957 |
| 0.171313235 | 0.23975371  | 0.068883301 | 0.130673881 |
| 0.194969949 | 0.142901524 | 0.106521162 | 0.459834708 |
| 0.286479372 | 0.298691305 | 0.058017136 | 0.068318795 |
| 0.484841586 | 0.376510316 | 0.075487407 | 0.293729757 |
| 0.190600563 | 0.205922536 | 0.429565527 | 0.44426817  |
| 0.185148812 | 0.386924486 | 0.375468357 | 0.244348576 |

|             |             |             |             |
|-------------|-------------|-------------|-------------|
| 0.339581055 | 0.163652274 | 0.441109792 | 0.049675709 |
| 0.092792227 | 0.304166158 | 0.068850321 | 0.1349907   |
| 0.125715261 | 0.053196884 | 0.168547188 | 0.418743111 |
| 0.197511443 | 0.295321124 | 0.151199083 | 0.089347449 |
| 0.257419714 | 0.19943211  | 0.270723559 | 0.097581954 |
| 0.064668738 | 0.403688383 | 0.019537217 | 0.098169676 |
| 0.223957578 | 0.365728083 | 0.202197329 | 0.206601212 |
| 0.195960312 | 0.201652848 | 0.203339095 | 0.117046266 |
| 0.105105442 | 0.205543165 | 0.356187934 | 0.034010441 |
| 0.025063777 | 0.503949658 | 0.173473714 | 0.067138411 |
| 0.115516766 | 0.244338279 | 0.248456987 | 0.118507608 |
| 0.062691978 | 0.431258224 | 0.107886074 | 0.267299725 |
| 0.18850662  | 0.100317932 | 0.287670129 | 0.085704023 |
| 0.084647016 | 0.382476925 | 0.266907102 | 0.448245132 |
| 0.262961421 | 0.391504505 | 0.353333804 | 0.377671013 |
| 0.150360811 | 0.222077054 | 0.029642473 | 0.428050141 |
| 0.164987363 |             |             |             |
| CLEC4D      | 0.018759806 | 0.022968655 | 0.016217861 |
| 0.0625112   | 0.039616799 | 0.014716404 | 0.078152813 |
| 0.021469497 | 0.010542159 | 0.020256518 | 0.016425845 |
| 0.02949844  | 0.00922936  | 0.065274575 | 0.004528958 |
| 0.067159688 | 0.132898645 | 0.016667193 | 0.135745015 |
| 0.054072548 | 0.047457903 | 0.09569231  | 0.081945564 |
| 0.015900948 | 0.093735445 | 0.123617433 | 0.029411475 |
| 0.056487258 | 0.137545891 | 0.01258426  | 0.040312208 |
| 0.095986398 | 0.028790551 | 0.01463926  | 0.055387293 |
| 0.013585341 | 0.012726164 | 0.005966353 | 0.011046146 |
| 0.0215736   | 0.032393384 | 0.05108722  | 0.112515979 |
| 0.08601141  | 0.012917533 | 0.105401725 | 0.04227815  |
| 0.001766495 | 0.099866781 | 0.00936275  | 0.011907091 |
| 0.012872358 | 0.017866905 | 0.026262663 | 0.064286766 |
| 0.005304407 | 0.013233445 | 0.010559032 | 0.018426061 |
| 0.108949609 | 0.014859207 | 0.014396028 | 0.012361937 |
| 0.000972259 | 0.033754594 | 0.086541826 | 0.058630761 |
| 0.010833303 | 0.018387867 | 0.036556343 | 0.012770683 |
| 0.004821636 | 0.061224981 | 0.061711714 | 0.006039579 |
| 0.228435647 | 0.09143803  | 0.11247272  | 0.072208318 |
| 0.046176294 | 0.014783522 | 0.045380495 | 0.031748994 |
| 0.08885807  | 0.082288142 | 0.020584577 | 0.135210506 |
| 0.020801165 | 0.090417491 | 0.015515664 | 0.078246128 |
| 0.041054625 | 0.018538694 | 0.040224191 | 0.092881667 |
| 0.025599588 | 0.021386389 | 0.018443057 | 0.02838954  |
| 0.007948932 | 0.050678841 | 0.014187135 | 0.031458065 |
| 0.017731446 | 0.021948685 | 0.165171368 | 0.039462274 |
| 0.160230778 | 0.006851569 | 0.111551587 | 0.019350833 |
| 0.048453894 | 0.037602643 | 0.117292647 | 0.055650476 |
| 0.024496064 | 0.028598021 | 0.017887847 | 0.123470837 |
| 0.036515926 | 1           | 0.001995788 | 0.124107671 |
| 0.004681239 | 0.012776585 | 0.009302056 | 0.047902727 |
| 0.022216052 | 0.009847019 | 0.051826015 | 0.082094232 |
| 0.155833819 | 0.018866007 | 0.023141319 | 0.030068194 |
| 0.033102976 | 0.009552728 | 0.054127731 | 0.013781023 |
| 0.018294063 | 0.04296131  | 0.000162606 | 0.072508812 |
| 0.033713435 | 0.023982581 | 0.167078245 | 0.02413996  |

|             |             |             |             |
|-------------|-------------|-------------|-------------|
| 0.078727478 | 0.066319169 | 0.15516125  | 0.032967042 |
| 0.015803875 | 0.18574018  | 0.010844162 | 0.082216133 |
| 0.008807125 | 0.069399711 | 0.139920111 | 0.096897086 |
| 0.082783406 | 0.011870193 | 0.158409877 | 0.022371621 |
| 0.002124162 | 0.035536679 | 0.015710177 | 0.031893212 |
| 0.014547636 | 0.022468905 | 0.008344317 | 0.160092319 |
| 0.095679844 | 0.067462609 | 0.014534571 | 0.032485426 |
| 0.015516629 | 0.055195844 | 0.005857156 | 0.032263823 |
| 0.01366489  | 0.029741916 | 0.063459919 | 0.034644422 |
| 0.120547812 | 0.046822393 | 0.000393694 | 0.013314338 |
| 0.017530731 | 0.005741327 | 0.07828774  | 0.038568713 |
| 0.009109052 | 0.049142159 | 0.000411239 | 0.0851119   |
| 0.013209612 | 0.141072227 | 0.044233869 | 0.185549243 |
| 0.015406469 | 0.163585532 | 0.021229501 | 0.020500569 |
| 0.018464252 | 0.003332883 | 0.019188925 | 0.047212015 |
| 0.096463901 | 0.020372939 | 0.028001905 | 0.057364809 |
| 0.037753224 | 0.039309136 | 0.056004912 | 0.008392536 |
| 0.039252005 | 0.066188222 | 0.040222511 | 0.071535677 |
| 0.025545064 | 0.001408888 | 0.016630446 | 0.035135189 |
| 0.009303923 | 0.021125052 | 0.013013105 | 0.000476099 |
| 0.12918049  | 0.033743838 | 0.022877542 | 0.046363902 |
| 0.010215727 | 0.080839001 | 0.008265693 | 0.034983444 |
| 0.161075826 | 0.028409187 | 0.03294531  | 0.012845013 |
| 0.015678047 | 0.042905155 | 0.086081263 | 0.05210988  |
| 0.040722015 | 0.05755803  | 0.012571522 | 0.01404721  |
| 0.05890054  | 0.198388887 | 0.014989074 | 0.014272362 |
| 0.048108103 | 0.036010146 | 0.028178912 | 0.015732432 |
| 0.022611476 | 0.092571231 | 0.064670743 | 0.011810881 |
| 0.077950094 | 0.202955098 | 0.022758474 | 0.067661212 |
| 0.012722046 | 0.059998961 | 0.183144686 | 0.002736562 |
| 0.0412192   | 0.009520671 | 0.003502238 | 0.028219041 |
| 0.023368833 | 0.035846624 | 0.047250757 | 0.183621813 |
| 0.034987331 | 0.152229983 | 0.049697084 | 0.000607914 |
| 0.017810924 | 0.020507271 | 0.07312062  | 0.086244401 |
| 0.01728713  | 0.045272608 | 0.033598641 | 0.015911472 |
| 0.019642725 | 0.21565066  | 0.024198343 | 0.104017043 |
| 0.196541965 | 0.040769222 | 0.02143409  | 0.191525661 |
| 0.130207123 | 0.047655102 | 0.028192885 | 0.134251056 |
| 0.028484232 | 0.093326075 | 0.021749441 | 0.031040026 |
| 0.142471449 | 0.033731023 | 0.072583814 | 0.019457863 |
| 0.013741449 | 0.023580487 | 0.140264897 | 0.058553817 |
| 0.14462832  | 0.011023688 | 0.001288258 | 0.030246189 |
| 0.008620349 | 0.016867041 | 0.128326195 | 0.023815204 |
| 0.012328419 | 0.013887242 | 0.132422769 | 0.035325954 |
| 0.020539688 | 0.09917812  | 0.053910572 | 0.018550962 |
| 0.021110431 | 0.020908291 | 0.012767366 | 0.041935202 |
| 0.051828931 | 0.035384691 | 0.030891992 | 0.014045345 |
| 0.011363802 | 0.050242596 | 0.005303708 | 0.008296915 |
| 0.095311903 | 0.019571673 | 0.052440194 | 0.040966127 |
| 0.013500628 | 0.007677804 | 0.081528134 | 0.158134845 |
| 0.020971071 | 0.016913476 | 0.016516357 | 0.063962536 |
| 0.025215927 | 0.021186476 | 0.014358276 | 0.148713976 |
| 0.173253985 | 0.015511165 | 0.020756305 | 0.024069914 |
| 0.047976357 | 0.009865708 | 0.049491048 | 0.023545205 |



|             |             |             |             |
|-------------|-------------|-------------|-------------|
| 0.120181255 | 0.009009693 | 0.001259698 | 0.000799397 |
| 0.060405908 | 0.045920539 | 0.012616947 | 0.03692656  |
| 0.007962675 | 0.059698915 | 0.001138865 | 0.024542468 |
| 0.021062752 | 0.104500492 | 0.035419228 | 0.021074542 |
| 0.020648161 | 0.021391329 | 0.017832629 | 0.026378421 |
| 0.025053522 | 0.013917139 | 0.022897149 | 0.120205115 |
| 0.03216488  | 0.014771697 | 0.03394816  | 0.01836705  |
| 0.051423764 | 0.05531924  | 0.112716516 | 0.06811288  |
| 0.002788357 | 0.019586957 | 0.004511615 | 0.004597163 |
| 0.0127886   | 0.066791042 | 0.02321226  | 0.04618593  |
| 0.030645237 | 0.150478188 | 0.028298245 | 0.018702313 |
| 0.035857941 | 0.041069365 | 0.013508605 | 0.00135284  |
| 0.001461831 | 0.026476894 | 0.039463323 | 0.085139198 |
| 0.023987164 | 0.005687096 | 0.131484018 | 0.035006043 |
| 0.024757543 | 0.041378125 | 0.019524562 | 0.097131294 |
| 0.026078741 | 0.145703288 | 0.015868575 | 0.073724537 |
| 0.040392838 | 0.007880879 | 0.034066907 | 0.017703207 |
| 0.075972751 | 0.062140469 | 0.020963531 | 0.04287159  |
| 0.003873506 | 0.114040121 | 0.032090617 | 0.018481702 |
| 0.005330876 | 0.106327675 | 0.064464876 | 0.051215251 |
| 0.011999019 | 0.099654925 | 0.116641617 | 0.000817767 |
| 0.103258407 | 0.034024697 | 0.125618004 | 0.03733127  |
| 0.040526291 | 0.075366795 | 0.049014109 | 0.015425025 |
| 0.012681054 | 0.015521744 | 0.045816665 | 0.001584489 |
| 0.04823153  | 0.081472459 | 0.016295772 | 0.003114784 |
| 0.023273329 | 0.026869282 | 0.002820136 | 0.100042263 |
| 0.004642772 | 0.186273935 | 0.046064326 | 0.038241817 |
| 0.060951397 | 0.032487645 | 0.088319587 | 0.049531968 |
| 0.034210863 | 0.061416609 | 0.014723146 | 0.010568626 |
| 0.058560153 | 0.005004337 | 0.050378321 | 0.019529896 |
| 0.025332148 | 0.044573255 | 0.017417864 | 0.024733119 |
| 0.02029972  | 0.02171262  | 0.020583076 | 0.044134517 |
| 0.012276411 | 0.018672396 | 0.034824384 | 0.033977115 |
| 0.07607301  | 0.052369914 | 0.023402545 | 0.033943035 |
| 0.103648422 | 0.01452697  | 0.011804617 | 0.001163245 |
| 0.011688672 | 0.021106097 | 0.059472054 | 0.064659569 |
| 0.025429561 | 0.01912274  | 0.01595024  | 0.062917501 |
| 0.02270271  | 0.015223398 | 0.011089573 | 0.034465493 |
| 0.138872402 | 0.056145212 | 0.032370153 | 0.034624289 |
| 0.004387882 | 0.028961852 | 0.036161265 | 0.036547705 |
| 0.018518347 | 0.077534463 | 0.016674383 | 0.008495407 |
| 0.004173094 | 0.015374566 | 0.090599984 | 0.172101457 |
| 0.188595657 | 0.071005642 | 0.004682254 | 0.063464681 |
| 0.005948172 | 0.102641848 | 0.003265709 | 0.02140244  |
| 0.073527647 | 0.009724707 | 0.084286992 | 0.071024331 |
| 0.086346386 | 0.015955464 | 0.037165778 | 0.188318534 |
| 0.012422983 | 0.022834619 | 0.027463868 | 0.083049104 |
| 0.008531046 | 0.038665595 | 0.120947655 | 0.017073175 |
| 0.025558341 | 0.002597206 | 0.021870041 | 0.009018395 |
| 0.074096341 | 0.046201398 | 0.016758949 | 0.039116562 |
| 0.003335138 | 0.011065739 | 0.026598221 | 0.016062848 |
| 0.111095939 | 0.018002455 | 0.007958591 | 0.028978568 |
| 0.045453305 | 0.133902082 | 0.010635158 | 0.002381018 |
| 0.033555542 | 0.016113738 | 0.021298429 | 0.01636779  |

|             |             |             |             |
|-------------|-------------|-------------|-------------|
| 0.028602285 | 0.084171835 | 0.00978624  | 0.02380473  |
| 0.007556688 | 0.009073167 | 0.058099678 | 0.036645051 |
| 0.006403806 |             |             |             |
| CLEC4N      | 0.099457533 | 0.160925483 | 0.1083067   |
| 0.150692107 | 0.104149585 | 0.060478959 | 0.048724755 |
| 0.007895571 | 0.022022071 | 0.000745845 | 0.016596667 |
| 0.118839835 | 0.021476586 | 0.019429473 | 0.042208913 |
| 0.178085626 | 0.060910359 | 0.029962679 | 0.072870622 |
| 0.101635104 | 0.008492047 | 0.175451893 | 0.024844834 |
| 0.068773092 | 0.131850914 | 0.07248842  | 0.188796099 |
| 0.141554771 | 0.07959184  | 0.033305278 | 0.071744057 |
| 0.028474614 | 0.102333237 | 0.146055062 | 0.175265625 |
| 0.142286481 | 0.08796518  | 0.000124094 | 0.03502415  |
| 0.097957991 | 0.208212784 | 0.105798537 | 0.113580849 |
| 0.019347863 | 0.107656755 | 0.082775033 | 0.149353843 |
| 0.002156472 | 0.04548839  | 0.012258404 | 0.094237335 |
| 0.128344539 | 0.118228791 | 0.019106662 | 0.035972738 |
| 0.011363595 | 0.007974112 | 0.076571608 | 0.037076462 |
| 0.060491103 | 0.006081713 | 0.138232418 | 0.019120004 |
| 0.001923484 | 0.018648294 | 0.042171664 | 0.028069829 |
| 0.086947157 | 0.070960504 | 0.001366521 | 0.098342227 |
| 0.000204866 | 0.103987711 | 0.130091563 | 0.150960603 |
| 0.052490463 | 0.008895263 | 0.058027878 | 0.085657356 |
| 0.144880977 | 0.117269813 | 0.21256861  | 0.211386093 |
| 0.029767814 | 0.084237813 | 0.125838386 | 0.052779986 |
| 0.124877013 | 0.047268863 | 0.00487589  | 0.195888421 |
| 0.21354774  | 0.161339469 | 0.063263202 | 0.152427268 |
| 0.144062947 | 0.123300968 | 0.097321986 | 0.092348698 |
| 0.115021912 | 0.035159128 | 0.119727264 | 0.18452587  |
| 0.077743494 | 0.152698428 | 0.118788996 | 0.087187466 |
| 0.03324329  | 0.015544465 | 0.1270739   | 0.002513302 |
| 0.157290978 | 0.014020283 | 0.140883478 | 0.066475491 |
| 0.015315184 | 0.11719841  | 0.175759511 | 0.062301688 |
| 0.090059109 | 0.001995788 | 1           | 0.018482604 |
| 0.006509154 | 0.067754967 | 0.113247098 | 0.15657762  |
| 0.007266055 | 0.031791653 | 0.040066718 | 0.006851356 |
| 0.031730167 | 0.013393062 | 0.108868344 | 0.040561664 |
| 0.11427277  | 0.108385647 | 0.11850536  | 0.069798672 |
| 0.148231766 | 0.206156968 | 0.000667655 | 0.019312944 |
| 0.104504536 | 0.018803444 | 0.107178378 | 0.093080801 |
| 0.183537896 | 0.013550986 | 0.034396051 | 0.196463321 |
| 0.089032322 | 0.039365154 | 0.017287136 | 0.174636627 |
| 0.032448913 | 0.181632696 | 0.027025592 | 0.033128442 |
| 0.008761166 | 0.149017494 | 0.047247982 | 0.028694725 |
| 0.056356222 | 0.022358481 | 0.000666482 | 0.021515228 |
| 0.017974227 | 0.151259092 | 0.107598703 | 0.037035712 |
| 0.048076723 | 0.178461057 | 0.02208533  | 0.133870456 |
| 0.008177279 | 0.006723512 | 0.012807607 | 0.170258676 |
| 0.02763591  | 0.181061972 | 0.036764668 | 0.073819823 |
| 0.150601102 | 0.174021352 | 0.000649443 | 0.128052255 |
| 0.173105728 | 0.016188759 | 0.125443335 | 0.117831303 |
| 0.15633219  | 0.168979558 | 0.000412255 | 0.135602474 |
| 0.046456256 | 0.029614341 | 0.204211024 | 0.117804112 |
| 0.115648393 | 0.057192268 | 0.019820053 | 0.210934839 |

|             |             |             |             |
|-------------|-------------|-------------|-------------|
| 0.134978955 | 0.001542503 | 0.018741096 | 0.095909457 |
| 0.03284774  | 0.006162549 | 0.103953238 | 0.13023259  |
| 0.156138749 | 0.16558691  | 0.193508611 | 0.162790917 |
| 0.120427342 | 0.0280126   | 0.004063917 | 0.151677357 |
| 0.133031588 | 0.014753715 | 0.107471416 | 0.028126537 |
| 0.031155347 | 0.139594351 | 0.124827404 | 0.004630411 |
| 0.030989796 | 0.035117752 | 0.001200012 | 0.183602214 |
| 0.115432629 | 0.018430235 | 0.13002292  | 0.010187871 |
| 0.069628719 | 0.188265667 | 0.126176889 | 0.128919487 |
| 0.103186287 | 0.075168378 | 0.050847165 | 0.026494767 |
| 0.03370088  | 0.059379842 | 0.114436433 | 0.083542766 |
| 0.005378731 | 0.047988108 | 0.004478903 | 0.039373969 |
| 0.014720677 | 0.041103749 | 0.034066511 | 0.072003626 |
| 0.014231679 | 0.010343419 | 0.130436271 | 0.064652953 |
| 0.088697464 | 0.029163071 | 0.160351857 | 0.132744315 |
| 0.044430683 | 0.03796179  | 0.029442434 | 0.008644961 |
| 0.158723608 | 0.040724997 | 0.010825268 | 0.131378397 |
| 0.001545484 | 0.186005804 | 0.033279443 | 0.111738335 |
| 0.084233926 | 0.08444563  | 0.174672141 | 0.0049062   |
| 0.047337595 | 0.116774448 | 0.098408662 | 0.125708645 |
| 0.081045955 | 0.108801662 | 0.004344692 | 0.080977227 |
| 0.07099441  | 0.032818889 | 0.175618017 | 0.049240348 |
| 0.032894059 | 0.170730702 | 0.177087319 | 0.082235972 |
| 0.078649382 | 0.087037944 | 0.003995918 | 0.178847066 |
| 0.181458011 | 0.193303241 | 0.13267276  | 0.096927927 |
| 0.026273538 | 0.002292175 | 0.090114681 | 0.102859387 |
| 0.124621109 | 0.183925238 | 0.080941007 | 0.152292402 |
| 0.089607317 | 0.118220139 | 0.000771692 | 0.189335223 |
| 0.01110977  | 0.14234743  | 0.010683308 | 0.201021926 |
| 0.1437      | 0.01840505  | 0.118331732 | 0.050171364 |
| 0.078956449 | 0.030988618 | 0.019057669 | 0.141263882 |
| 0.139523115 | 0.110095632 | 0.125842446 | 0.102893578 |
| 0.003634491 | 0.00378439  | 0.179678941 | 0.096491412 |
| 0.057877304 | 0.08546308  | 0.031558981 | 0.016842406 |
| 0.015999871 | 0.118373054 | 0.15420338  | 0.059554405 |
| 0.055040945 | 0.017384786 | 0.157803287 | 0.029789054 |
| 0.212128577 | 0.159460441 | 0.14339351  | 0.015083034 |
| 0.118374314 | 0.187387408 | 0.16182619  | 0.053163749 |
| 0.044751181 | 0.159363051 | 0.074478191 | 0.00263598  |
| 0.166750192 | 0.013420842 | 0.00407325  | 0.137597564 |
| 0.052864029 | 0.087522717 | 0.000572976 | 0.002894563 |
| 0.02884298  | 0.195965273 | 0.137378601 | 0.071186431 |
| 0.014288895 | 0.079887743 | 0.000441097 | 0.179827694 |
| 0.140631482 | 0.044264892 | 0.058199963 | 0.135527837 |
| 0.187281969 | 0.143208167 | 0.195431047 | 0.212194601 |
| 0.15065261  | 0.148396526 | 0.009304904 | 0.164517033 |
| 0.141829031 | 0.173366082 | 0.102725735 | 0.119916493 |
| 0.150425806 | 0.165170466 | 0.113295306 | 0.01267417  |
| 0.035699132 | 0.013595037 | 0.05008623  | 0.010505864 |
| 0.034488262 | 0.089530243 | 0.141138207 | 0.175808171 |
| 0.1915653   | 0.015621508 | 0.008411839 | 0.117434636 |
| 0.116156405 | 0.15157378  | 0.002331573 | 0.00117989  |
| 0.002377377 | 0.0493613   | 0.056602592 | 0.116204906 |
| 0.1749644   | 0.00590448  | 0.008190484 | 0.002486057 |

|             |             |             |             |
|-------------|-------------|-------------|-------------|
| 0.01973335  | 0.218817919 | 0.148013277 | 0.138554726 |
| 0.154566626 | 0.033678054 | 0.027242367 | 0.123906196 |
| 0.078930632 | 0.03983999  | 0.196717661 | 0.122188824 |
| 0.015222718 | 0.114214601 | 0.034933815 | 0.169961243 |
| 0.074541777 | 0.128307881 | 0.108149465 | 0.040307372 |
| 0.001103741 | 0.072096784 | 0.08028877  | 0.164224423 |
| 0.140093486 | 0.030661487 | 0.026500787 | 0.0006416   |
| 0.031361429 | 0.154118216 | 0.03461565  | 0.194698746 |
| 0.127088146 | 0.168197679 | 0.029830481 | 0.139564694 |
| 0.011430132 | 0.129030949 | 0.18040584  | 0.011004194 |
| 0.04041897  | 0.006861139 | 0.133512436 | 0.051157363 |
| 0.019275277 | 0.06992047  | 0.049281621 | 0.027769794 |
| 0.06251749  | 0.047889374 | 0.197833831 | 0.20955305  |
| 0.019806345 | 0.028066775 | 0.107277904 | 0.100437397 |
| 0.030799003 | 0.16252247  | 0.131139665 | 0.065378627 |
| 0.017168195 | 0.009759555 | 0.09550253  | 0.063529408 |
| 0.010199781 | 0.204569451 | 0.087296323 | 0.18125204  |
| 0.088559302 | 0.131897163 | 0.153998346 | 0.111448928 |
| 0.032429103 | 0.061130406 | 0.082922938 | 0.002188208 |
| 0.093300465 | 0.171948968 | 0.041252843 | 0.088525208 |
| 0.133591511 | 0.147910652 | 0.001757821 | 0.000853107 |
| 0.14762308  | 0.037520503 | 0.016187283 | 0.167188069 |
| 0.056517116 | 0.070511803 | 0.000709669 | 0.076244799 |
| 0.162426295 | 0.113439556 | 0.009650578 | 0.116524977 |
| 0.064659693 | 0.168531188 | 0.165220736 | 0.178913243 |
| 0.039283598 | 0.136578403 | 0.100617029 | 0.076696359 |
| 0.094843074 | 0.076357972 | 0.15253089  | 0.001221296 |
| 0.013597045 | 0.073078489 | 0.034073717 | 0.078395311 |
| 0.057536256 | 0.030194029 | 0.107685297 | 0.14529329  |
| 0.081520483 | 0.131516068 | 0.006876331 | 0.009069245 |
| 0.120002835 | 0.034071074 | 0.116167094 | 0.027074106 |
| 0.022898676 | 0.142619196 | 0.002538759 | 0.034112725 |
| 0.065144288 | 0.176597346 | 0.189531709 | 0.08169475  |
| 0.077236031 | 0.031660121 | 0.099498513 | 0.022177392 |
| 0.034105897 | 0.009919067 | 0.167020978 | 0.001793275 |
| 0.003297092 | 0.187949623 | 0.038054553 | 0.008850238 |
| 0.003861182 | 0.057250729 | 0.018072151 | 0.047441561 |
| 0.039766326 | 0.172777638 | 0.036045031 | 0.122817346 |
| 0.05855265  | 0.02161087  | 0.057059795 | 0.002286066 |
| 0.00655488  | 0.100500377 | 0.154189555 | 0.158095242 |
| 0.083683354 | 0.177413214 | 0.090394455 | 0.107931412 |
| 0.003305338 | 0.072013219 | 0.010699058 | 0.124898285 |
| 0.077101917 |             |             |             |

| CLGN        | 0.04771609  | 0.036060903 | 0.043697693 |
|-------------|-------------|-------------|-------------|
| 0.077659605 | 0.072407731 | 0.021391028 | 0.089763874 |
| 0.031452621 | 0.04871698  | 0.021176446 | 0.038680488 |
| 0.053532109 | 0.026590362 | 0.026842311 | 0.007917936 |
| 0.126951017 | 0.126905932 | 0.048714335 | 0.17751145  |
| 0.096334749 | 0.041245111 | 0.137135619 | 0.109577683 |
| 0.055437812 | 0.104858109 | 0.15350256  | 0.054389882 |
| 0.085084534 | 0.175780711 | 0.013763451 | 0.058572008 |
| 0.222182739 | 0.054640668 | 0.02475139  | 0.068945452 |
| 0.022447904 | 0.031075779 | 0.10514573  | 0.012859344 |
| 0.043290472 | 0.055119235 | 0.088519721 | 0.123470259 |

|             |             |             |             |
|-------------|-------------|-------------|-------------|
| 0.099607147 | 0.019845047 | 0.112772613 | 0.099665763 |
| 0.014449313 | 0.103393926 | 0.012103581 | 0.021338856 |
| 0.016986762 | 0.026698845 | 0.042309551 | 0.073819955 |
| 0.010222932 | 0.014279941 | 0.011262606 | 0.025533308 |
| 0.128387015 | 0.013158262 | 0.021670371 | 0.034853235 |
| 0.018125976 | 0.067648253 | 0.173839787 | 0.071423262 |
| 0.035050945 | 0.031699398 | 0.183057489 | 0.034513672 |
| 0.007564445 | 0.113543312 | 0.140770495 | 0.015311923 |
| 0.311895112 | 0.068804374 | 0.210992423 | 0.081692945 |
| 0.076430356 | 0.03141305  | 0.069412851 | 0.055038482 |
| 0.077731533 | 0.188677388 | 0.056105846 | 0.123708389 |
| 0.041859148 | 0.073341825 | 0.062006603 | 0.134146974 |
| 0.063466743 | 0.029109633 | 0.087576668 | 0.207040521 |
| 0.030057764 | 0.035641187 | 0.024039635 | 0.040670277 |
| 0.010952287 | 0.19203073  | 0.02195519  | 0.048209517 |
| 0.029223629 | 0.052959626 | 0.220324545 | 0.054924804 |
| 0.289672132 | 0.010310325 | 0.137616679 | 0.081152728 |
| 0.075893303 | 0.074033423 | 0.209032995 | 0.060906781 |
| 0.110638853 | 0.046959857 | 0.029505363 | 0.153607191 |
| 0.080380802 | 0.124107671 | 0.018482604 | 1           |
| 0.023445527 | 0.038017237 | 0.015227032 | 0.055168251 |
| 0.028886877 | 0.024854992 | 0.089372067 | 0.157232433 |
| 0.20231178  | 0.126616864 | 0.038253669 | 0.074555498 |
| 0.072307532 | 0.02322591  | 0.054448137 | 0.024856538 |
| 0.032753442 | 0.070335447 | 0.000564084 | 0.127996693 |
| 0.043215469 | 0.147003765 | 0.24603217  | 0.04091933  |
| 0.097664912 | 0.098934151 | 0.195653288 | 0.052800377 |
| 0.025709961 | 0.217549382 | 0.027051871 | 0.131599784 |
| 0.011412059 | 0.111850677 | 0.205951778 | 0.062277329 |
| 0.095249276 | 0.021257047 | 0.252347523 | 0.045178473 |
| 0.006153048 | 0.089703909 | 0.203105814 | 0.046594941 |
| 0.01531246  | 0.025576171 | 0.01571036  | 0.280677316 |
| 0.075653314 | 0.106879694 | 0.026448771 | 0.028013505 |
| 0.026111211 | 0.207445723 | 0.01404928  | 0.04422355  |
| 0.014992583 | 0.055643956 | 0.082200708 | 0.085971347 |
| 0.197012857 | 0.080957335 | 0.019128327 | 0.0207091   |
| 0.028984446 | 0.010333163 | 0.060806235 | 0.090428815 |
| 0.021382359 | 0.061436342 | 0.004362889 | 0.129788794 |
| 0.023910434 | 0.267176435 | 0.071939395 | 0.207165042 |
| 0.027392358 | 0.197218357 | 0.029438438 | 0.041376871 |
| 0.026840258 | 0.053023378 | 0.019551546 | 0.074630486 |
| 0.220326779 | 0.025756618 | 0.063805846 | 0.081316427 |
| 0.053657738 | 0.081720173 | 0.089125732 | 0.017800894 |
| 0.055886235 | 0.107126132 | 0.235373681 | 0.15028751  |
| 0.058920272 | 0.007725646 | 0.023893335 | 0.050554782 |
| 0.015477337 | 0.031605515 | 0.026202314 | 0.004328278 |
| 0.159456652 | 0.055750351 | 0.032256982 | 0.074863793 |
| 0.025350539 | 0.045891748 | 0.020946034 | 0.179546387 |
| 0.225368284 | 0.042929618 | 0.082298329 | 0.038310942 |
| 0.043035351 | 0.03039521  | 0.147657872 | 0.014735347 |
| 0.017574637 | 0.104365045 | 0.028241204 | 0.027385867 |
| 0.059967957 | 0.177834413 | 0.216484657 | 0.00983794  |
| 0.01937825  | 0.011981344 | 0.009097573 | 0.027648471 |
| 0.022853387 | 0.055154363 | 0.059328009 | 0.040644608 |

|             |             |             |             |
|-------------|-------------|-------------|-------------|
| 0.13006819  | 0.292850124 | 0.036297286 | 0.124831781 |
| 0.018315141 | 0.095852026 | 0.307608989 | 0.004052697 |
| 0.050668882 | 0.0079832   | 0.008284347 | 0.035560617 |
| 0.170475408 | 0.068737833 | 0.029882046 | 0.208300756 |
| 0.03337058  | 0.138066632 | 0.08000093  | 0.008559576 |
| 0.04207996  | 0.02812605  | 0.179248516 | 0.106593133 |
| 0.018729077 | 0.073186104 | 0.104209005 | 0.028583087 |
| 0.025902047 | 0.240645798 | 0.037445293 | 0.148256471 |
| 0.328514813 | 0.077562513 | 0.031676437 | 0.317889868 |
| 0.222454294 | 0.03522362  | 0.041066888 | 0.209323458 |
| 0.040925703 | 0.127484614 | 0.028849615 | 0.100214252 |
| 0.127393039 | 0.041372665 | 0.180436509 | 0.051624776 |
| 0.021420929 | 0.03827613  | 0.248256452 | 0.049046343 |
| 0.212203359 | 0.020398062 | 0.012318247 | 0.043165123 |
| 0.083286204 | 0.030497965 | 0.234107466 | 0.050240648 |
| 0.019988048 | 0.018111287 | 0.143506861 | 0.045156462 |
| 0.023518711 | 0.148159127 | 0.130129186 | 0.025558932 |
| 0.038937042 | 0.041915737 | 0.019793338 | 0.088065396 |
| 0.063203537 | 0.093973577 | 0.070955553 | 0.047048665 |
| 0.019431691 | 0.102118724 | 0.029787058 | 0.020045334 |
| 0.088203734 | 0.025831595 | 0.090614896 | 0.077382976 |
| 0.011953675 | 0.018755084 | 0.159534922 | 0.225664853 |
| 0.038044409 | 0.032363176 | 0.025278383 | 0.126460893 |
| 0.047899258 | 0.031082653 | 0.0250743   | 0.315579384 |
| 0.289668    | 0.025739699 | 0.041283981 | 0.039542482 |
| 0.077239335 | 0.010549905 | 0.039081033 | 0.035517435 |
| 0.190676234 | 0.015325028 | 0.005717994 | 0.032983974 |
| 0.225061432 | 0.087871727 | 0.020040143 | 0.06543384  |
| 0.003735607 | 0.129661429 | 0.08657728  | 0.044379124 |
| 0.026779483 | 0.160963248 | 0.116557191 | 0.030463287 |
| 0.031219161 | 0.034954157 | 0.035870699 | 0.039216269 |
| 0.032719968 | 0.021597583 | 0.030051659 | 0.18923962  |
| 0.039135002 | 0.026699423 | 0.054134535 | 0.030996911 |
| 0.065352163 | 0.11166002  | 0.1521998   | 0.085855929 |
| 0.032148056 | 0.029998017 | 0.003294022 | 0.026734812 |
| 0.022812884 | 0.084077392 | 0.038992837 | 0.080028055 |
| 0.043641309 | 0.256817464 | 0.041623604 | 0.031447237 |
| 0.04916194  | 0.067435417 | 0.209540436 | 0.017726285 |
| 0.010368096 | 0.048019926 | 0.068823789 | 0.192846224 |
| 0.040294602 | 0.002105409 | 0.167611393 | 0.065294617 |
| 0.040549229 | 0.07431376  | 0.028447182 | 0.153259641 |
| 0.059689314 | 0.26896971  | 0.006145114 | 0.131390378 |
| 0.092993976 | 0.017687872 | 0.046046639 | 0.025657461 |
| 0.278574733 | 0.159676589 | 0.045563564 | 0.062822841 |
| 0.01394589  | 0.200144998 | 0.056431211 | 0.019574296 |
| 0.182202618 | 0.18664476  | 0.129359723 | 0.106831131 |
| 0.019804146 | 0.056103848 | 0.080860944 | 0.00442481  |
| 0.061483074 | 0.065015455 | 0.070686839 | 0.059993553 |
| 0.053794446 | 0.109034279 | 0.186489205 | 0.0255905   |
| 0.080006821 | 0.021438904 | 0.072956696 | 0.003750155 |
| 0.11477869  | 0.253511693 | 0.029848232 | 0.00662348  |
| 0.022124813 | 0.055468884 | 0.022778649 | 0.227407623 |
| 0.02547776  | 0.243440192 | 0.067383393 | 0.071643547 |
| 0.248001768 | 0.075123113 | 0.178409391 | 0.107584674 |

|             |             |             |             |
|-------------|-------------|-------------|-------------|
| 0.037457748 | 0.071203236 | 0.022352639 | 0.010674135 |
| 0.069104682 | 0.068408381 | 0.081953676 | 0.031331526 |
| 0.032963984 | 0.074326827 | 0.020031036 | 0.043877056 |
| 0.040796645 | 0.044280463 | 0.035067007 | 0.067342775 |
| 0.055713004 | 0.03105046  | 0.032474424 | 0.034256691 |
| 0.118460326 | 0.066986669 | 0.059432541 | 0.046641741 |
| 0.107505847 | 0.039023029 | 0.192943702 | 0.016821714 |
| 0.030473472 | 0.022656116 | 0.080630103 | 0.115949237 |
| 0.053501179 | 0.031248107 | 0.160540318 | 0.107834503 |
| 0.037296906 | 0.030332682 | 0.03045997  | 0.04585594  |
| 0.272485715 | 0.091046031 | 0.062657699 | 0.070724854 |
| 0.015919127 | 0.035466814 | 0.055369625 | 0.028542128 |
| 0.023865087 | 0.133541436 | 0.026347142 | 0.021568307 |
| 0.060787204 | 0.03763843  | 0.05704582  | 0.332534254 |
| 0.202190319 | 0.185168894 | 0.012131628 | 0.122703901 |
| 0.014360313 | 0.112896134 | 0.011411468 | 0.128863834 |
| 0.171584716 | 0.031821074 | 0.150608815 | 0.050258753 |
| 0.07757125  | 0.022363558 | 0.091359835 | 0.302013881 |
| 0.023312806 | 0.038868668 | 0.035920559 | 0.138189851 |
| 0.021716901 | 0.167145614 | 0.15730307  | 0.020363148 |
| 0.007165576 | 0.01500182  | 0.034615991 | 0.077979153 |
| 0.121087003 | 0.075307956 | 0.025855847 | 0.247093434 |
| 0.133012674 | 0.029767294 | 0.069002669 | 0.026643427 |
| 0.240600162 | 0.029552779 | 0.009585885 | 0.061914496 |
| 0.069794709 | 0.255857647 | 0.019216038 | 0.055856438 |
| 0.185805476 | 0.024398682 | 0.054874094 | 0.026697318 |
| 0.090198142 | 0.10940017  | 0.017544339 | 0.035855657 |
| 0.084935108 | 0.030355858 | 0.10193922  | 0.068702551 |
| 0.009064378 |             |             |             |
| CLYBL       | 0.265199435 | 0.387046062 | 0.146549831 |
| 0.33741288  | 0.196845404 | 0.198581049 | 0.124912681 |
| 0.062265021 | 0.009895993 | 0.00230812  | 0.003819722 |
| 0.24549462  | 0.015154868 | 0.08468195  | 0.048563885 |
| 0.328891108 | 0.056805385 | 0.107510976 | 0.166817925 |
| 0.293716235 | 0.050193537 | 0.305020021 | 0.046127602 |
| 0.054111843 | 0.045195722 | 0.044613429 | 0.072132394 |
| 0.387850864 | 0.052263735 | 0.141276555 | 0.286454432 |
| 0.039786568 | 0.314028651 | 0.354599251 | 0.282046443 |
| 0.343714432 | 0.230708794 | 0.002750239 | 0.070603443 |
| 0.322752285 | 0.289285884 | 0.296006566 | 0.235198796 |
| 0.025726903 | 0.33863001  | 0.162012752 | 0.208895324 |
| 0.011444756 | 0.02166811  | 0.079538058 | 0.31338652  |
| 0.323410488 | 0.190984343 | 0.086784979 | 0.08092156  |
| 0.010075352 | 0.06899752  | 0.034887482 | 0.219301159 |
| 0.138034596 | 0.063288118 | 0.327290068 | 0.014947959 |
| 0.006837812 | 0.109300061 | 0.053107522 | 0.131002211 |
| 0.065878579 | 0.267600877 | 0.008188162 | 0.189277712 |
| 0.001111186 | 0.292162296 | 0.213212955 | 0.053137434 |
| 0.045721324 | 0.010304646 | 0.076818843 | 0.222065605 |
| 0.387975166 | 0.322440183 | 0.387623039 | 0.36697339  |
| 0.038369125 | 0.140638793 | 0.145112107 | 0.079888249 |
| 0.321032378 | 0.104919812 | 0.016277717 | 0.335633658 |
| 0.386395106 | 0.366297117 | 0.045928716 | 0.14211985  |
| 0.300681342 | 0.369293891 | 0.148270134 | 0.150760298 |

|             |             |             |             |
|-------------|-------------|-------------|-------------|
| 0.058673673 | 0.01695224  | 0.301890386 | 0.386753828 |
| 0.288039542 | 0.098201321 | 0.095054388 | 0.330506212 |
| 0.046154024 | 0.058584659 | 0.264883183 | 0.013646284 |
| 0.400322755 | 0.011781475 | 0.113222571 | 0.193787002 |
| 0.037811065 | 0.318613832 | 0.358139678 | 0.128573023 |
| 0.186384866 | 0.004681239 | 0.006509154 | 0.023445527 |
| 1           | 0.021370097 | 0.307431327 | 0.384014167 |
| 0.050551984 | 0.046537928 | 0.119709858 | 0.004781649 |
| 0.021956559 | 0.019403566 | 0.306573466 | 0.157018101 |
| 0.297798702 | 0.238601492 | 0.080474025 | 0.247900385 |
| 0.229666743 | 0.375931945 | 0.009360616 | 0.049232235 |
| 0.212637373 | 0.03047261  | 0.178270247 | 0.229312902 |
| 0.149073233 | 0.060562332 | 0.081351785 | 0.401582936 |
| 0.321820667 | 0.072346546 | 0.101247943 | 0.3280452   |
| 0.052697639 | 0.189930702 | 0.067223858 | 0.107745196 |
| 0.02824413  | 0.317753484 | 0.024882877 | 0.141679318 |
| 0.01889819  | 0.022121514 | 0.003124772 | 0.139869518 |
| 0.045496548 | 0.310283691 | 0.291042555 | 0.076655354 |
| 0.146601588 | 0.260675324 | 0.137988786 | 0.283915977 |
| 0.002146603 | 0.014098587 | 0.102601932 | 0.394793662 |
| 0.17380751  | 0.377936148 | 0.091787985 | 0.081482035 |
| 0.173286744 | 0.345390461 | 0.000397882 | 0.342376522 |
| 0.36078419  | 0.117923011 | 0.239822256 | 0.236234703 |
| 0.096808589 | 0.369676118 | 0.007601614 | 0.325200975 |
| 0.22445813  | 0.056765173 | 0.403938319 | 0.106779757 |
| 0.331989122 | 0.03751769  | 0.102505112 | 0.282903367 |
| 0.266216869 | 0.020359208 | 0.105478833 | 0.283724372 |
| 0.015773387 | 0.032724196 | 0.285032176 | 0.27785701  |
| 0.192509016 | 0.31875075  | 0.406416693 | 0.085250163 |
| 0.198277744 | 0.124304416 | 0.004280409 | 0.161931237 |
| 0.295141703 | 0.018097742 | 0.320976972 | 0.077979101 |
| 0.168747098 | 0.360727574 | 0.280028765 | 0.005883032 |
| 0.039510122 | 0.145374752 | 0.005922366 | 0.145446232 |
| 0.248833081 | 0.044218144 | 0.113861199 | 0.027089523 |
| 0.046913317 | 0.39489951  | 0.048970993 | 0.059640476 |
| 0.025371485 | 0.214009613 | 0.145799673 | 0.066831037 |
| 0.037372061 | 0.049517935 | 0.076591023 | 0.088681178 |
| 0.026115257 | 0.063463246 | 0.002581827 | 0.082483735 |
| 0.025109341 | 0.09588423  | 0.09826783  | 0.245959136 |
| 0.061819996 | 0.022194233 | 0.182237405 | 0.040872255 |
| 0.044576709 | 0.023331068 | 0.376350296 | 0.298364289 |
| 0.224020698 | 0.061764736 | 0.035524155 | 0.029405636 |
| 0.37275764  | 0.136033513 | 0.076337916 | 0.355863435 |
| 0.005261618 | 0.372136713 | 0.054117458 | 0.082816677 |
| 0.119100569 | 0.173958937 | 0.385507399 | 0.017351056 |
| 0.195713351 | 0.354248809 | 0.169214177 | 0.07619312  |
| 0.305967282 | 0.265179762 | 0.014325519 | 0.273227676 |
| 0.270921244 | 0.035833044 | 0.387207352 | 0.044292054 |
| 0.026266696 | 0.284095952 | 0.263017145 | 0.063522646 |
| 0.048580125 | 0.141964292 | 0.023355353 | 0.201144175 |
| 0.393072758 | 0.327762023 | 0.274977511 | 0.058434913 |
| 0.035269881 | 0.003514646 | 0.081182192 | 0.167682682 |
| 0.348282597 | 0.36948331  | 0.172079304 | 0.157804396 |
| 0.179385023 | 0.06247331  | 0.010438959 | 0.385371765 |



|             |             |             |             |
|-------------|-------------|-------------|-------------|
| 0.019797565 | 0.368031282 | 0.012034141 | 0.278444382 |
| 0.333715249 | 0.136724912 | 0.046884525 | 0.154931759 |
| 0.303526349 | 0.034058009 | 0.083514722 | 0.357315106 |
| 0.311998672 | 0.088418641 | 0.077378368 | 0.279064083 |
| 0.013199391 | 0.013456459 | 0.183944706 | 0.032880626 |
| 0.08762419  | 0.073008294 | 0.005280674 | 0.069952419 |
| 0.0189194   | 0.339222297 | 0.371919281 | 0.018571943 |
| 0.153978551 | 0.068283511 | 0.248959906 | 0.035107121 |
| 0.30484757  | 0.340832772 | 0.36691565  | 0.070550825 |
| 0.304343357 | 0.347066013 | 0.164337409 | 0.05148447  |
| 0.021530499 | 0.351241538 | 0.245040396 | 0.004279128 |
| 0.394387573 | 0.106589704 | 0.005266051 | 0.377573022 |
| 0.123657969 | 0.290875664 | 0.001618644 | 0.003282065 |
| 0.01615385  | 0.357217062 | 0.32633246  | 0.267987285 |
| 0.056522202 | 0.235444172 | 0.000559056 | 0.381453135 |
| 0.367136921 | 0.013655649 | 0.031261381 | 0.290468146 |
| 0.25808564  | 0.392605585 | 0.090655991 | 0.320573115 |
| 0.218985813 | 0.334741702 | 0.025503513 | 0.170677733 |
| 0.348024275 | 0.324753432 | 0.311063183 | 0.347368068 |
| 0.381207534 | 0.288754218 | 0.201562531 | 0.013769376 |
| 0.00634966  | 0.096400642 | 0.049212348 | 0.005275341 |
| 0.191005072 | 0.04427363  | 0.371681767 | 0.37043902  |
| 0.362685249 | 0.011096539 | 0.046574386 | 0.298524667 |
| 0.369289987 | 0.393226982 | 0.003100316 | 0.001393621 |
| 0.002272417 | 0.006195981 | 0.203223959 | 0.120541864 |
| 0.357798645 | 0.025786087 | 0.010139697 | 0.020055687 |
| 0.044663602 | 0.213956613 | 0.36455237  | 0.313872166 |
| 0.295232442 | 0.050663457 | 0.055856992 | 0.319979471 |
| 0.017153562 | 0.192934519 | 0.372618945 | 0.349347281 |
| 0.018651287 | 0.100544095 | 0.152367171 | 0.395378515 |
| 0.007959223 | 0.202948422 | 0.259755196 | 0.063299647 |
| 0.002649379 | 0.040460063 | 0.027495143 | 0.336823858 |
| 0.325651652 | 0.027518435 | 0.017493823 | 0.009209618 |
| 0.05957811  | 0.353934727 | 0.055882829 | 0.405878957 |
| 0.347943513 | 0.384200905 | 0.01965465  | 0.343202512 |
| 0.00510848  | 0.342262831 | 0.138647907 | 0.008990927 |
| 0.096843109 | 0.011179527 | 0.331101413 | 0.009116996 |
| 0.103198522 | 0.275827093 | 0.011114327 | 0.013256575 |
| 0.018176237 | 0.041799777 | 0.383397102 | 0.351049849 |
| 0.013789883 | 0.073548744 | 0.161849098 | 0.266366563 |
| 0.166005842 | 0.345413424 | 0.351120773 | 0.146328324 |
| 0.039760464 | 0.008432058 | 0.328015178 | 0.252897449 |
| 0.074552577 | 0.391878427 | 0.054942692 | 0.389506325 |
| 0.266394303 | 0.336716915 | 0.349764106 | 0.188938923 |
| 0.02290608  | 0.215300298 | 0.25323036  | 0.006406708 |
| 0.219071234 | 0.368698743 | 0.171206111 | 0.029317869 |
| 0.12796839  | 0.138837466 | 0.006412104 | 0.013906667 |
| 0.100068366 | 0.178570165 | 0.035950629 | 0.373391853 |
| 0.244656359 | 0.262439925 | 0.007456224 | 0.025708308 |
| 0.397288877 | 0.316950776 | 0.026455543 | 0.282262393 |
| 0.097357134 | 0.170859317 | 0.319724254 | 0.315570317 |
| 0.046564924 | 0.328077799 | 0.344436059 | 0.265133362 |
| 0.327888049 | 0.147781211 | 0.364697738 | 0.022148982 |
| 0.008200312 | 0.211765366 | 0.03906426  | 0.064863435 |

|             |             |             |             |
|-------------|-------------|-------------|-------------|
| 0.101230049 | 0.01391594  | 0.042044945 | 0.322715653 |
| 0.07630691  | 0.271408674 | 0.039016382 | 0.008277541 |
| 0.169455783 | 0.120429473 | 0.21739851  | 0.099179926 |
| 0.027126045 | 0.346310525 | 0.001978713 | 0.042119938 |
| 0.097055707 | 0.293561062 | 0.147471441 | 0.100902178 |
| 0.042647372 | 0.029256686 | 0.181936345 | 0.149834929 |
| 0.100253922 | 0.019923043 | 0.298836795 | 0.00675277  |
| 0.015559414 | 0.405419495 | 0.151351855 | 0.006559774 |
| 0.005539735 | 0.187003751 | 0.072675535 | 0.038935096 |
| 0.016222407 | 0.328858745 | 0.102657963 | 0.187039809 |
| 0.188521055 | 0.043333099 | 0.262309255 | 0.009611707 |
| 0.014279025 | 0.33364631  | 0.167375705 | 0.354438976 |
| 0.126295037 | 0.347787729 | 0.300595339 | 0.307765292 |
| 0.011671166 | 0.13810557  | 0.018768286 | 0.359832275 |
| 0.102083846 |             |             |             |
| CMAH        | 0.147869163 | 0.160201341 | 0.138895619 |
| 0.118065355 | 0.128876523 | 0.043420484 | 0.024918753 |
| 0.006872623 | 0.012629858 | 0.000807304 | 0.017279666 |
| 0.18158501  | 0.026993066 | 0.015980286 | 0.016644847 |
| 0.183493994 | 0.073213377 | 0.05088869  | 0.060120832 |
| 0.111188496 | 0.003455956 | 0.183847435 | 0.012888889 |
| 0.111985437 | 0.097774184 | 0.034285491 | 0.124086704 |
| 0.143248783 | 0.041731454 | 0.022449521 | 0.069833023 |
| 0.071128556 | 0.136685965 | 0.15084677  | 0.201121818 |
| 0.161306497 | 0.120372678 | 0.010338291 | 0.01412873  |
| 0.117039417 | 0.175550419 | 0.104040802 | 0.086165018 |
| 0.00762711  | 0.113099157 | 0.045889095 | 0.220584986 |
| 0.007571021 | 0.021085209 | 0.007722209 | 0.095432848 |
| 0.125534374 | 0.097747255 | 0.011777164 | 0.015772404 |
| 0.023038575 | 0.007616155 | 0.091141666 | 0.03591999  |
| 0.040712104 | 0.003508565 | 0.141504217 | 0.005243129 |
| 0.007018112 | 0.019887187 | 0.100527008 | 0.024503403 |
| 0.124105017 | 0.068582441 | 0.003822334 | 0.170521405 |
| 0.000856764 | 0.106200689 | 0.215264945 | 0.112574196 |
| 0.049667547 | 0.008717212 | 0.122916937 | 0.060197824 |
| 0.158561446 | 0.151709044 | 0.229146278 | 0.229044535 |
| 0.046110263 | 0.137662441 | 0.215425891 | 0.040038261 |
| 0.131819789 | 0.021269574 | 0.015516522 | 0.219018193 |
| 0.22711418  | 0.169642956 | 0.051422339 | 0.197183268 |
| 0.103246782 | 0.127693709 | 0.071357554 | 0.091977171 |
| 0.055014669 | 0.07956277  | 0.110456549 | 0.204813292 |
| 0.089170321 | 0.273080934 | 0.117551451 | 0.091109906 |
| 0.038553161 | 0.01780768  | 0.10773803  | 0.043360601 |
| 0.163206793 | 0.003238639 | 0.187852317 | 0.053662316 |
| 0.035022155 | 0.13445261  | 0.188233747 | 0.037641665 |
| 0.153885629 | 0.012776585 | 0.067754967 | 0.038017237 |
| 0.021370097 | 1           | 0.116586307 | 0.145043797 |
| 0.008034774 | 0.038549768 | 0.031155221 | 0.009730729 |
| 0.041905119 | 0.065386825 | 0.154665313 | 0.075490627 |
| 0.138996867 | 0.145585768 | 0.050355016 | 0.07495827  |
| 0.169019756 | 0.229012929 | 0.000743121 | 0.012610909 |
| 0.08546564  | 0.063518682 | 0.101188722 | 0.117119798 |
| 0.142182264 | 0.009820523 | 0.033240295 | 0.194887413 |
| 0.086104192 | 0.02738076  | 0.029203547 | 0.192530927 |

|             |             |             |             |
|-------------|-------------|-------------|-------------|
| 0.016821187 | 0.244023331 | 0.02671485  | 0.035285474 |
| 0.0048553   | 0.161059014 | 0.07991769  | 0.035688206 |
| 0.027390822 | 0.076863292 | 0.00708904  | 0.018265775 |
| 0.012117221 | 0.125896977 | 0.124463918 | 0.043735937 |
| 0.051412908 | 0.178106418 | 0.027075625 | 0.104908101 |
| 0.004121922 | 0.018180193 | 0.016638173 | 0.180761012 |
| 0.023423053 | 0.224993823 | 0.04363768  | 0.093282865 |
| 0.163515625 | 0.176365383 | 0.007540715 | 0.127694702 |
| 0.180571311 | 0.017968308 | 0.114125865 | 0.186478285 |
| 0.106341639 | 0.145865972 | 0.004519522 | 0.174739496 |
| 0.064602025 | 0.032197769 | 0.218164151 | 0.098155056 |
| 0.138148697 | 0.032646715 | 0.021109913 | 0.234051601 |
| 0.170227221 | 0.004113211 | 0.009747908 | 0.079216115 |
| 0.067967278 | 0.001992185 | 0.12664972  | 0.10942672  |
| 0.087091971 | 0.203121588 | 0.208828831 | 0.106470656 |
| 0.118786183 | 0.029058212 | 0.015055483 | 0.226829154 |
| 0.187501926 | 0.027284633 | 0.097480574 | 0.017159087 |
| 0.039355785 | 0.129409857 | 0.146735534 | 0.007187907 |
| 0.013392116 | 0.03039472  | 0.002494811 | 0.10263102  |
| 0.126202267 | 0.009146551 | 0.08684153  | 0.05565236  |
| 0.077585203 | 0.186523306 | 0.250468038 | 0.25381737  |
| 0.235759529 | 0.071041971 | 0.047628669 | 0.016361847 |
| 0.031637533 | 0.039380714 | 0.083071489 | 0.053282952 |
| 0.001901902 | 0.040789528 | 0.048904921 | 0.059169448 |
| 0.018741574 | 0.040606167 | 0.032742663 | 0.084180171 |
| 0.018455659 | 0.017675742 | 0.109285089 | 0.09143892  |
| 0.076247996 | 0.030356592 | 0.15763052  | 0.15435741  |
| 0.046682406 | 0.019632679 | 0.043479307 | 0.019285873 |
| 0.149408571 | 0.023812171 | 0.010452712 | 0.118137526 |
| 0.01258582  | 0.213850869 | 0.022666988 | 0.087371531 |
| 0.114447981 | 0.069666813 | 0.162812233 | 0.003037156 |
| 0.06423954  | 0.11476089  | 0.141577368 | 0.072086066 |
| 0.08196489  | 0.101067431 | 0.004625447 | 0.0988277   |
| 0.091859517 | 0.028930703 | 0.192029049 | 0.080470537 |
| 0.043661151 | 0.236985025 | 0.16155622  | 0.07428374  |
| 0.071892943 | 0.047249895 | 0.000990278 | 0.179526709 |
| 0.173682238 | 0.193709738 | 0.112424629 | 0.184141916 |
| 0.012682387 | 0.00744159  | 0.191364567 | 0.173820972 |
| 0.136164164 | 0.212999671 | 0.116264673 | 0.140687317 |
| 0.075743986 | 0.059863604 | 0.002289105 | 0.193809148 |
| 0.064621089 | 0.163528745 | 0.013400316 | 0.22782743  |
| 0.151366858 | 0.018194509 | 0.075464845 | 0.030329678 |
| 0.077077888 | 0.013490321 | 0.031104269 | 0.143342523 |
| 0.123176612 | 0.059647075 | 0.051299292 | 0.166337316 |
| 0.001239362 | 0.002848224 | 0.158954413 | 0.19149252  |
| 0.039424854 | 0.04878611  | 0.19601716  | 0.016091571 |
| 0.009853787 | 0.11011042  | 0.205321225 | 0.018250032 |
| 0.032580144 | 0.015640981 | 0.228045147 | 0.019459116 |
| 0.232733455 | 0.195154311 | 0.149265541 | 0.019363846 |
| 0.169973981 | 0.182160012 | 0.197173414 | 0.082187326 |
| 0.057796242 | 0.175279691 | 0.080213609 | 0.005038781 |
| 0.185383692 | 0.00991368  | 0.004628481 | 0.136226714 |
| 0.042307841 | 0.102745398 | 0.000187358 | 0.057800943 |
| 0.070819677 | 0.249969558 | 0.123773011 | 0.071050834 |

|                      |             |                      |             |
|----------------------|-------------|----------------------|-------------|
| 0.007247164          | 0.107501737 | 0.021877173          | 0.215457521 |
| 0.137745493          | 0.045451147 | 0.096663558          | 0.155141114 |
| 0.21933297           | 0.152844682 | 0.190494 0.212900245 |             |
| 0.188754538          | 0.153790962 | 0.011737148          | 0.13760314  |
| 0.124361335          | 0.199583203 | 0.10520694           | 0.11759388  |
| 0.160097496          | 0.228299218 | 0.076321049          | 0.003675627 |
| 0.039337391          | 0.009091844 | 0.018521123          | 0.012798075 |
| 0.033478508          | 0.055838598 | 0.165553688          | 0.20310516  |
| 0.212855603          | 0.019868178 | 0.005063987          | 0.13324592  |
| 0.111485708          | 0.155127056 | 0.0231359            | 0.006098448 |
| 0.006842 0.040848239 | 0.055415977 | 0.159178083          |             |
| 0.176119155          | 0.004618861 | 0.007432724          | 0.001618991 |
| 0.020606986          | 0.267013408 | 0.151023689          | 0.140809603 |
| 0.212426071          | 0.045168425 | 0.013689166          | 0.137943856 |
| 0.045350978          | 0.051453016 | 0.199802164          | 0.111702332 |
| 0.039395363          | 0.13258452  | 0.064617498          | 0.165469439 |
| 0.174734232          | 0.17604081  | 0.176250706          | 0.021162863 |
| 0.023002104          | 0.075850498 | 0.044979688          | 0.208459366 |
| 0.156850264          | 0.022839826 | 0.021306776          | 0.003300103 |
| 0.014432973          | 0.190133468 | 0.024448578          | 0.207529828 |
| 0.124292163          | 0.178174945 | 0.072398546          | 0.127875584 |
| 0.013407678          | 0.137145958 | 0.240957658          | 0.001891766 |
| 0.087165305          | 0.014230385 | 0.179671793          | 0.026260666 |
| 0.020041135          | 0.087139476 | 0.037586957          | 0.052239922 |
| 0.119282911          | 0.052122057 | 0.192190761          | 0.245732999 |
| 0.064258134          | 0.022183377 | 0.146398962          | 0.142672855 |
| 0.022734109          | 0.144823555 | 0.131814703          | 0.057513548 |
| 0.00646006           | 0.138984699 | 0.104507322          | 0.082912658 |
| 0.011260612          | 0.233613491 | 0.039047714          | 0.202065746 |
| 0.098863636          | 0.147473133 | 0.174290669          | 0.06340662  |
| 0.088714184          | 0.063630052 | 0.056439689          | 0.002195685 |
| 0.093688289          | 0.178310665 | 0.054247891          | 0.05051411  |
| 0.099706334          | 0.227483386 | 0.011057565          | 0.012393336 |
| 0.258130527          | 0.025866789 | 0.015071756          | 0.189193706 |
| 0.080680008          | 0.086566731 | 0.005943804          | 0.036883532 |
| 0.174125565          | 0.111758289 | 0.005549046          | 0.098521868 |
| 0.097134698          | 0.111882186 | 0.210274714          | 0.244906303 |
| 0.039158618          | 0.146763513 | 0.111819028          | 0.064563937 |
| 0.088081086          | 0.052964934 | 0.153194752          | 0.001411464 |
| 0.04219552           | 0.128527859 | 0.015332792          | 0.108665259 |
| 0.046991836          | 0.029555091 | 0.130600275          | 0.195270892 |
| 0.116358132          | 0.131269061 | 0.010977981          | 0.026539993 |
| 0.188884145          | 0.064447944 | 0.141783262          | 0.014918228 |
| 0.014010457          | 0.134240443 | 0.009497088          | 0.052809257 |
| 0.125021678          | 0.15246942  | 0.185320457          | 0.093946278 |
| 0.091977458          | 0.090824287 | 0.100980301          | 0.019262781 |
| 0.024164542          | 0.038179976 | 0.143905131          | 0.004655326 |
| 0.002623016          | 0.215055184 | 0.046530086          | 0.046335631 |
| 0.040896182          | 0.071380916 | 0.045030095          | 0.018123188 |
| 0.078511958          | 0.192003014 | 0.020571131          | 0.151857244 |
| 0.049631956          | 0.031412378 | 0.066589125          | 0.011739407 |
| 0.015190683          | 0.111000416 | 0.205024688          | 0.174836137 |
| 0.168812846          | 0.167160483 | 0.0971699            | 0.136574329 |
| 0.031873693          | 0.126511831 | 0.004380927          | 0.145401657 |

|             |             |             |             |
|-------------|-------------|-------------|-------------|
| 0.066745896 |             |             |             |
| CNR2        | 0.463076906 | 0.504771931 | 0.398629371 |
| 0.409593953 | 0.396296179 | 0.44061814  | 0.177670409 |
| 0.185452421 | 0.060257338 | 0.002070932 | 0.013034992 |
| 0.438868272 | 0.174397746 | 0.262250983 | 0.372744519 |
| 0.379766261 | 0.088397599 | 0.343594397 | 0.186394107 |
| 0.39163698  | 0.079930487 | 0.349970152 | 0.059782781 |
| 0.240361734 | 0.066774886 | 0.039948863 | 0.221761889 |
| 0.432458699 | 0.046725212 | 0.401076912 | 0.408138633 |
| 0.059168247 | 0.468725377 | 0.506412915 | 0.416528535 |
| 0.504705682 | 0.470463118 | 0.006646966 | 0.317875545 |
| 0.472181649 | 0.447824138 | 0.395827692 | 0.281617694 |
| 0.023704174 | 0.496503942 | 0.204588809 | 0.360254968 |
| 0.249920999 | 0.015157193 | 0.29387088  | 0.490135932 |
| 0.504850665 | 0.470572809 | 0.220302405 | 0.128302096 |
| 0.200248764 | 0.272751246 | 0.268116751 | 0.399148304 |
| 0.180639938 | 0.194968281 | 0.509693004 | 0.069138634 |
| 0.142478162 | 0.231934262 | 0.098741337 | 0.23912059  |
| 0.325824225 | 0.45830567  | 0.008868681 | 0.449593372 |
| 0.00181637  | 0.359751266 | 0.322505403 | 0.320225018 |
| 0.020231296 | 0.010232962 | 0.118576213 | 0.317083239 |
| 0.451721399 | 0.49111956  | 0.463885782 | 0.479898268 |
| 0.131733387 | 0.225412371 | 0.37904719  | 0.123108466 |
| 0.484311593 | 0.147998833 | 0.082025402 | 0.376190313 |
| 0.471947389 | 0.509727544 | 0.142660204 | 0.194776375 |
| 0.478668    | 0.497717336 | 0.448103662 | 0.412846253 |
| 0.354445101 | 0.026825086 | 0.50600765  | 0.493928852 |
| 0.477757202 | 0.288041768 | 0.099908662 | 0.441173613 |
| 0.031126331 | 0.400310908 | 0.307158307 | 0.12432067  |
| 0.454525395 | 0.009216756 | 0.149236297 | 0.348276256 |
| 0.161576581 | 0.476619928 | 0.506455699 | 0.142672426 |
| 0.371408079 | 0.009302056 | 0.113247098 | 0.015227032 |
| 0.307431327 | 0.116586307 | 1           | 0.466915327 |
| 0.228460828 | 0.34788515  | 0.227628791 | 0.002818343 |
| 0.011549496 | 0.133266789 | 0.490181831 | 0.348134958 |
| 0.438744627 | 0.476151949 | 0.191242428 | 0.479365111 |
| 0.473135335 | 0.46291181  | 0.086135787 | 0.064393844 |
| 0.421809961 | 0.129740477 | 0.176745854 | 0.460825171 |
| 0.251504331 | 0.086048755 | 0.084588527 | 0.4886161   |
| 0.482177183 | 0.051834984 | 0.371562206 | 0.370711818 |
| 0.341070201 | 0.300847582 | 0.068380091 | 0.238232916 |
| 0.031231995 | 0.502742296 | 0.012174113 | 0.343349138 |
| 0.287624407 | 0.10398462  | 0.004656072 | 0.268513328 |
| 0.291050124 | 0.496939599 | 0.488078056 | 0.065465486 |
| 0.282027404 | 0.363886472 | 0.372715691 | 0.471388131 |
| 0.00545785  | 0.024876044 | 0.359115452 | 0.496665255 |
| 0.382693512 | 0.484345191 | 0.24617142  | 0.245577343 |
| 0.215686056 | 0.439475035 | 0.002108681 | 0.50359176  |
| 0.507758297 | 0.388932852 | 0.376392904 | 0.39089506  |
| 0.391430444 | 0.455418279 | 0.049251304 | 0.377169429 |
| 0.450559984 | 0.045748838 | 0.46782313  | 0.107879599 |
| 0.503385902 | 0.02084275  | 0.331761793 | 0.470759622 |
| 0.489039162 | 0.00464805  | 0.263238764 | 0.385698629 |
| 0.011503998 | 0.092100238 | 0.445829512 | 0.391017147 |

|             |             |             |             |
|-------------|-------------|-------------|-------------|
| 0.369241201 | 0.439251687 | 0.44651451  | 0.374461519 |
| 0.399735693 | 0.195110641 | 0.004423135 | 0.255736326 |
| 0.462506582 | 0.422909432 | 0.494413994 | 0.206881324 |
| 0.437051977 | 0.502244556 | 0.497040345 | 0.248048339 |
| 0.023821634 | 0.309522975 | 0.013983678 | 0.289283591 |
| 0.486422516 | 0.093538902 | 0.42845302  | 0.099506286 |
| 0.038535183 | 0.49962411  | 0.132456018 | 0.23931175  |
| 0.098561606 | 0.4282584   | 0.203782113 | 0.238486628 |
| 0.195797729 | 0.112114551 | 0.330606666 | 0.367816418 |
| 0.025419944 | 0.057424456 | 0.005595336 | 0.421852463 |
| 0.124405017 | 0.364403945 | 0.385315777 | 0.483547911 |
| 0.319895782 | 0.081323307 | 0.347143889 | 0.249415562 |
| 0.070797424 | 0.005311357 | 0.504319442 | 0.367491804 |
| 0.44220438  | 0.112655276 | 0.019430813 | 0.399051029 |
| 0.477639275 | 0.423614117 | 0.357509759 | 0.490521961 |
| 0.014528205 | 0.469784372 | 0.217866666 | 0.077557522 |
| 0.358074068 | 0.209726819 | 0.444520925 | 0.058591551 |
| 0.425724817 | 0.501029646 | 0.250457746 | 0.135199987 |
| 0.486502493 | 0.406791042 | 0.016616703 | 0.484793347 |
| 0.484025428 | 0.014518799 | 0.504530108 | 0.079474824 |
| 0.008171156 | 0.426830041 | 0.479245402 | 0.041392623 |
| 0.043445184 | 0.328026701 | 0.036964471 | 0.224060116 |
| 0.500521936 | 0.366592409 | 0.489817776 | 0.164804902 |
| 0.021977157 | 0.005011471 | 0.146760137 | 0.401970827 |
| 0.50297413  | 0.500074446 | 0.19566569  | 0.335274245 |
| 0.184089364 | 0.31607451  | 0.173398092 | 0.497337079 |
| 0.15637017  | 0.504526488 | 0.001092298 | 0.460825415 |
| 0.504548735 | 0.352205811 | 0.047682331 | 0.314348401 |
| 0.481354631 | 0.02534881  | 0.159109008 | 0.507828544 |
| 0.4861882   | 0.300151699 | 0.346934826 | 0.415749517 |
| 0.009008944 | 0.0269371   | 0.364120559 | 0.146862695 |
| 0.392885332 | 0.161046887 | 0.037467028 | 0.345908418 |
| 0.024295794 | 0.50013397  | 0.441253159 | 0.035786827 |
| 0.420679304 | 0.341993272 | 0.321890464 | 0.018297866 |
| 0.481479859 | 0.50021089  | 0.507561603 | 0.125084871 |
| 0.477252895 | 0.503545512 | 0.436452105 | 0.043301009 |
| 0.006332765 | 0.505909474 | 0.449093275 | 0.013677969 |
| 0.45659821  | 0.318846434 | 0.006407763 | 0.500826304 |
| 0.137379627 | 0.483220486 | 0.002795957 | 0.078003937 |
| 0.019027996 | 0.44060281  | 0.504369036 | 0.398809731 |
| 0.340434431 | 0.332109044 | 0.002448872 | 0.497497648 |
| 0.506703616 | 0.004987808 | 0.092434848 | 0.495834248 |
| 0.470386757 | 0.504283092 | 0.298032692 | 0.481078364 |
| 0.447066023 | 0.508412002 | 0.217460849 | 0.206323655 |
| 0.481169279 | 0.500765456 | 0.450105989 | 0.494655177 |
| 0.46337877  | 0.390009515 | 0.23040331  | 0.007199781 |
| 0.109644505 | 0.231939636 | 0.380178361 | 0.06382732  |
| 0.40477568  | 0.096500553 | 0.496672641 | 0.455024336 |
| 0.490154417 | 6.36E-05    | 0.135570287 | 0.497272354 |
| 0.468080881 | 0.463979007 | 0.009822237 | 0.003786414 |
| 0.005611914 | 0.009526596 | 0.359230274 | 0.178460492 |
| 0.49813365  | 0.324005891 | 0.000300252 | 0.032526674 |
| 0.24560733  | 0.372147488 | 0.509674279 | 0.334879938 |
| 0.460929936 | 0.045935233 | 0.317845634 | 0.366212754 |

|             |             |             |             |
|-------------|-------------|-------------|-------------|
| 0.039828029 | 0.441193719 | 0.488721538 | 0.501597975 |
| 0.019672689 | 0.1861684   | 0.386576399 | 0.472314897 |
| 0.060282288 | 0.250526099 | 0.447482474 | 0.297125187 |
| 0.005778543 | 0.045973809 | 0.036887757 | 0.415481111 |
| 0.502884251 | 0.052460045 | 0.017502625 | 0.182696967 |
| 0.09100885  | 0.471290243 | 0.122888958 | 0.482713745 |
| 0.465873301 | 0.411083001 | 0.041566613 | 0.504019578 |
| 0.022089561 | 0.5070185   | 0.296494064 | 0.065747005 |
| 0.231737974 | 0.004247069 | 0.498933041 | 0.154835845 |
| 0.356402588 | 0.428781645 | 0.176239615 | 0.006064986 |
| 0.161501386 | 0.026837551 | 0.462380003 | 0.45328296  |
| 0.014934242 | 0.199301638 | 0.234996452 | 0.381700278 |
| 0.31235592  | 0.426542133 | 0.50600964  | 0.488355599 |
| 0.060902106 | 0.11450603  | 0.408175744 | 0.462399295 |
| 0.23831996  | 0.463397319 | 0.278987748 | 0.499362136 |
| 0.46422716  | 0.488354398 | 0.501176742 | 0.331825228 |
| 0.186658871 | 0.44665119  | 0.41769346  | 0.012484129 |
| 0.312316599 | 0.456907599 | 0.359267586 | 0.116142418 |
| 0.204178838 | 0.397216312 | 0.028190001 | 0.207644923 |
| 0.33777211  | 0.373199133 | 0.10427117  | 0.410020705 |
| 0.420568258 | 0.469184333 | 0.026090338 | 0.034874223 |
| 0.505978882 | 0.491753605 | 0.130645761 | 0.449048433 |
| 0.113921849 | 0.302007406 | 0.4619015   | 0.447473454 |
| 0.387834847 | 0.494041185 | 0.456365538 | 0.444803376 |
| 0.488812365 | 0.213953946 | 0.508530251 | 0.094721492 |
| 0.055249204 | 0.464224915 | 0.068812848 | 0.052165856 |
| 0.096989854 | 0.011651584 | 0.307497187 | 0.391057321 |
| 0.401938454 | 0.341957563 | 0.368643803 | 0.050439769 |
| 0.260834791 | 0.405956191 | 0.299720932 | 0.1848775   |
| 0.050892496 | 0.508747572 | 0.003673219 | 0.028615575 |
| 0.394861643 | 0.481124796 | 0.372849869 | 0.178055146 |
| 0.27343659  | 0.090386839 | 0.241631531 | 0.351280429 |
| 0.388745701 | 0.372974253 | 0.487828489 | 0.021626132 |
| 0.009941418 | 0.464725851 | 0.418501967 | 0.008353007 |
| 0.05718017  | 0.453760252 | 0.255768698 | 0.20846671  |
| 0.008617547 | 0.503109809 | 0.407734409 | 0.410842821 |
| 0.337663046 | 0.036152189 | 0.46089928  | 0.068099238 |
| 0.035514802 | 0.496415071 | 0.388321437 | 0.508026304 |
| 0.310930298 | 0.388540761 | 0.485523332 | 0.493265873 |
| 0.09192784  | 0.42533784  | 0.014381917 | 0.457724498 |
| 0.459551068 |             |             |             |
| COBLL1      | 0.387083932 | 0.525801527 | 0.372915093 |
| 0.459123462 | 0.44764928  | 0.392836255 | 0.301656325 |
| 0.241094078 | 0.132542729 | 0.020746337 | 0.051294295 |
| 0.42530866  | 0.288933523 | 0.364983935 | 0.343201235 |
| 0.443022    | 0.199196607 | 0.34326701  | 0.327027228 |
| 0.439936119 | 0.167079092 | 0.447502658 | 0.161300496 |
| 0.292012959 | 0.152206441 | 0.124523567 | 0.299535241 |
| 0.455708053 | 0.13720683  | 0.369858432 | 0.415699269 |
| 0.13420502  | 0.422715119 | 0.508238357 | 0.45771467  |
| 0.497322798 | 0.358160439 | 0.018960457 | 0.358577791 |
| 0.394732055 | 0.439622951 | 0.439843611 | 0.411716305 |
| 0.091976228 | 0.479811177 | 0.339773964 | 0.402397433 |
| 0.26240393  | 0.068564589 | 0.281211884 | 0.437017991 |

|             |             |             |             |
|-------------|-------------|-------------|-------------|
| 0.474712345 | 0.435536215 | 0.290096743 | 0.249984175 |
| 0.271340071 | 0.28170913  | 0.284587807 | 0.343349921 |
| 0.321960048 | 0.215309333 | 0.479168418 | 0.150877966 |
| 0.183705727 | 0.306939814 | 0.190964978 | 0.336745469 |
| 0.33040479  | 0.381075991 | 0.038266039 | 0.360990136 |
| 0.010843153 | 0.425272353 | 0.39166132  | 0.291148615 |
| 0.079139067 | 0.060452439 | 0.222300677 | 0.416133948 |
| 0.452774438 | 0.431683458 | 0.474755804 | 0.474622799 |
| 0.258986752 | 0.331733891 | 0.372624781 | 0.262654623 |
| 0.411323852 | 0.278260342 | 0.161139144 | 0.448506374 |
| 0.483643363 | 0.516190306 | 0.261303247 | 0.302574157 |
| 0.433340752 | 0.47827912  | 0.429809392 | 0.454479539 |
| 0.352415013 | 0.067030503 | 0.43979705  | 0.50603283  |
| 0.376019048 | 0.30773136  | 0.214852929 | 0.42861317  |
| 0.101611873 | 0.365801039 | 0.426495145 | 0.198045089 |
| 0.463681961 | 0.044170087 | 0.260803831 | 0.429453863 |
| 0.249087884 | 0.428181508 | 0.503788352 | 0.279237758 |
| 0.41357793  | 0.047902727 | 0.15657762  | 0.055168251 |
| 0.384014167 | 0.145043797 | 0.466915327 | 1           |
| 0.302730069 | 0.40841631  | 0.342387465 | 0.006487022 |
| 0.051768638 | 0.201085568 | 0.413927941 | 0.375324717 |
| 0.427902166 | 0.337495345 | 0.312473196 | 0.376184609 |
| 0.418266669 | 0.464873133 | 0.076578748 | 0.160231868 |
| 0.45060486  | 0.204788573 | 0.318108037 | 0.448773719 |
| 0.369956817 | 0.183386842 | 0.206417795 | 0.51486763  |
| 0.428502503 | 0.153969586 | 0.332668333 | 0.44758707  |
| 0.393152253 | 0.387166515 | 0.175526539 | 0.376150775 |
| 0.10822882  | 0.462834549 | 0.047787282 | 0.353878453 |
| 0.276304146 | 0.195828564 | 0.018889374 | 0.321509967 |
| 0.367255431 | 0.428354316 | 0.443678128 | 0.16502171  |
| 0.409439171 | 0.444270985 | 0.340731429 | 0.448591444 |
| 0.032214999 | 0.080306262 | 0.27967623  | 0.510830285 |
| 0.311207757 | 0.479701044 | 0.367163584 | 0.331172974 |
| 0.342454035 | 0.449556362 | 0.003459624 | 0.489540973 |
| 0.513378138 | 0.301376849 | 0.46204404  | 0.416757501 |
| 0.360309828 | 0.462264199 | 0.042684162 | 0.453164011 |
| 0.342454512 | 0.128462067 | 0.496682488 | 0.234530024 |
| 0.446989874 | 0.08338459  | 0.376064101 | 0.402901317 |
| 0.408119685 | 0.017541242 | 0.286232362 | 0.43177826  |
| 0.041594141 | 0.164124845 | 0.418493071 | 0.449073826 |
| 0.427308384 | 0.434499296 | 0.473260149 | 0.344457703 |
| 0.459373078 | 0.307297408 | 0.024164272 | 0.347097629 |
| 0.411821539 | 0.355805338 | 0.447463431 | 0.322538178 |
| 0.326748656 | 0.478355235 | 0.384552768 | 0.222972826 |
| 0.092211516 | 0.372874326 | 0.049968117 | 0.384851861 |
| 0.349614021 | 0.217254229 | 0.37155681  | 0.170200634 |
| 0.112532455 | 0.526046866 | 0.18667653  | 0.243209775 |
| 0.126838759 | 0.451277598 | 0.324948874 | 0.34340315  |
| 0.300758211 | 0.231154497 | 0.364614606 | 0.402171415 |
| 0.087496349 | 0.165764306 | 0.017367552 | 0.384725961 |
| 0.236055947 | 0.406091772 | 0.397075916 | 0.398734479 |
| 0.39257097  | 0.202058033 | 0.445435576 | 0.279491817 |
| 0.156989478 | 0.033531522 | 0.507420301 | 0.436560785 |
| 0.332920835 | 0.231583154 | 0.071650696 | 0.362586029 |



|             |             |             |             |
|-------------|-------------|-------------|-------------|
| 0.472809506 | 0.342925353 | 0.268276505 | 0.468345121 |
| 0.047019945 | 0.464839979 | 0.349209973 | 0.188711662 |
| 0.413603656 | 0.360262682 | 0.455317831 | 0.087013179 |
| 0.391809745 | 0.478934921 | 0.347886468 | 0.254813116 |
| 0.405505627 | 0.449145912 | 0.07200069  | 0.383513065 |
| 0.389770724 | 0.068143533 | 0.519367038 | 0.173458516 |
| 0.040718134 | 0.431816429 | 0.430218284 | 0.121104598 |
| 0.118835763 | 0.416499585 | 0.094752137 | 0.353385373 |
| 0.5225128   | 0.455163157 | 0.431464502 | 0.223570754 |
| 0.092093896 | 0.035016948 | 0.235567963 | 0.369297856 |
| 0.500371729 | 0.49698627  | 0.325929054 | 0.418318976 |
| 0.325193367 | 0.356855423 | 0.176476862 | 0.508232243 |
| 0.180026713 | 0.503521784 | 0.01655535  | 0.417611759 |
| 0.494682449 | 0.325547504 | 0.129793217 | 0.379356211 |
| 0.392690403 | 0.092162125 | 0.256023672 | 0.497419491 |
| 0.421585964 | 0.369843906 | 0.379795719 | 0.428781111 |
| 0.045413106 | 0.08999873  | 0.398944135 | 0.180625633 |
| 0.415189553 | 0.279709518 | 0.050280416 | 0.354985902 |
| 0.098192272 | 0.466087519 | 0.452464681 | 0.101795453 |
| 0.376218417 | 0.323759408 | 0.410610793 | 0.075955932 |
| 0.418801396 | 0.475806599 | 0.516867512 | 0.229118367 |
| 0.42373578  | 0.481503138 | 0.382642179 | 0.115034232 |
| 0.032717548 | 0.500701372 | 0.394683467 | 0.053870807 |
| 0.462478345 | 0.267721399 | 0.044381208 | 0.503174316 |
| 0.265860872 | 0.428649575 | 0.009081128 | 0.064440848 |
| 0.05353246  | 0.443039308 | 0.475394717 | 0.411886305 |
| 0.290353825 | 0.400956074 | 0.005589666 | 0.505722766 |
| 0.499948568 | 0.028097236 | 0.171060582 | 0.424183135 |
| 0.405240351 | 0.526881868 | 0.32263906  | 0.429021345 |
| 0.422423506 | 0.490808813 | 0.338338563 | 0.337950398 |
| 0.446277244 | 0.468824917 | 0.429721406 | 0.457030426 |
| 0.465141244 | 0.43588631  | 0.36726649  | 0.04280439  |
| 0.144296371 | 0.274936082 | 0.333783457 | 0.128505399 |
| 0.334944187 | 0.199865323 | 0.469330494 | 0.455569566 |
| 0.470636165 | 0.012422121 | 0.22754164  | 0.419053395 |
| 0.445182243 | 0.471125145 | 0.026934043 | 0.008294974 |
| 0.008677387 | 0.03737842  | 0.406658175 | 0.284399661 |
| 0.479350738 | 0.293728028 | 0.014498812 | 0.090703653 |
| 0.348254373 | 0.405106327 | 0.505419022 | 0.434413691 |
| 0.414261565 | 0.129870848 | 0.361405467 | 0.436183289 |
| 0.105237194 | 0.305207223 | 0.48349945  | 0.484191932 |
| 0.059751954 | 0.286842093 | 0.371241307 | 0.492089105 |
| 0.066500415 | 0.37389005  | 0.430426751 | 0.404431903 |
| 0.018014802 | 0.119836556 | 0.10228316  | 0.442119511 |
| 0.482621134 | 0.150784473 | 0.077191667 | 0.173556162 |
| 0.21618081  | 0.441369408 | 0.262315913 | 0.510598388 |
| 0.449125099 | 0.46505325  | 0.100174712 | 0.481450457 |
| 0.07677243  | 0.485680197 | 0.362549433 | 0.083759904 |
| 0.312313577 | 0.025351646 | 0.447429594 | 0.187848742 |
| 0.376999541 | 0.403163795 | 0.204791083 | 0.027921917 |
| 0.164365214 | 0.092929545 | 0.474227993 | 0.441829004 |
| 0.045029497 | 0.302282253 | 0.34386585  | 0.419038965 |
| 0.347707637 | 0.47159691  | 0.500751764 | 0.395843202 |
| 0.158563945 | 0.12733535  | 0.437010858 | 0.38982543  |

|             |             |             |             |
|-------------|-------------|-------------|-------------|
| 0.306503141 | 0.478245811 | 0.358603139 | 0.513453055 |
| 0.398096658 | 0.442781812 | 0.459705571 | 0.409279681 |
| 0.263006658 | 0.404549637 | 0.422355792 | 0.057675718 |
| 0.410334105 | 0.468120255 | 0.37501592  | 0.215717352 |
| 0.339714259 | 0.358913927 | 0.072561569 | 0.176211052 |
| 0.302199925 | 0.350929425 | 0.235712772 | 0.452747496 |
| 0.39349178  | 0.392872729 | 0.067991378 | 0.100125747 |
| 0.536825914 | 0.42621094  | 0.206838496 | 0.450631943 |
| 0.2246711   | 0.401230359 | 0.431041823 | 0.430901203 |
| 0.34686349  | 0.439709733 | 0.439603883 | 0.428214864 |
| 0.441393592 | 0.339072063 | 0.519361738 | 0.127132214 |
| 0.115188367 | 0.387321615 | 0.18271662  | 0.132796023 |
| 0.229118912 | 0.047417766 | 0.274932889 | 0.445026986 |
| 0.345895487 | 0.451224437 | 0.328343057 | 0.123444585 |
| 0.360424118 | 0.334265906 | 0.409872672 | 0.299389493 |
| 0.152087348 | 0.500896062 | 0.019855281 | 0.094366035 |
| 0.369813344 | 0.429721389 | 0.398683533 | 0.30029307  |
| 0.299517214 | 0.160059413 | 0.382167412 | 0.339162432 |
| 0.381598771 | 0.346190477 | 0.427079608 | 0.064210966 |
| 0.0503252   | 0.484868656 | 0.376008673 | 0.028918237 |
| 0.101495845 | 0.356222759 | 0.313879556 | 0.313118959 |
| 0.033865327 | 0.466082759 | 0.370744622 | 0.427267386 |
| 0.401560736 | 0.108623564 | 0.343390686 | 0.115421887 |
| 0.089355636 | 0.446579027 | 0.37792457  | 0.500592272 |
| 0.340840283 | 0.465101302 | 0.433636959 | 0.425226642 |
| 0.138289137 | 0.332932627 | 0.064630148 | 0.440033734 |
| 0.390121161 |             |             |             |

|             |             |             |             |
|-------------|-------------|-------------|-------------|
| COMMD6      | 0.211920103 | 0.290399258 | 0.088467919 |
| 0.29214202  | 0.153641015 | 0.185122522 | 0.17524632  |
| 0.124354561 | 0.019551703 | 0.016899069 | 0.006743099 |
| 0.153254948 | 0.035608848 | 0.121342392 | 0.040544525 |
| 0.264260742 | 0.039998983 | 0.113094173 | 0.191227955 |
| 0.299888876 | 0.10803653  | 0.234565504 | 0.064337151 |
| 0.030414934 | 0.023393972 | 0.04248063  | 0.037505732 |
| 0.342455958 | 0.051083    | 0.165301149 | 0.339334109 |
| 0.035103461 | 0.2889035   | 0.256844193 | 0.178479067 |
| 0.237113554 | 0.178140883 | 0.035469384 | 0.078323899 |
| 0.285645466 | 0.189948352 | 0.306465788 | 0.221232544 |
| 0.040272631 | 0.273764934 | 0.183466409 | 0.138229541 |
| 0.055047527 | 0.015999061 | 0.133412593 | 0.275816179 |
| 0.225232971 | 0.129831747 | 0.143613017 | 0.112632749 |
| 0.02160163  | 0.158052199 | 0.014261275 | 0.298777495 |
| 0.175583894 | 0.148147139 | 0.232108722 | 0.032658149 |
| 0.032420643 | 0.186759095 | 0.039640762 | 0.214305394 |
| 0.037043034 | 0.273928935 | 0.042104665 | 0.115727147 |
| 0.012426242 | 0.293963771 | 0.154932301 | 0.024311188 |
| 0.046938854 | 0.021486204 | 0.058416397 | 0.251577968 |
| 0.328153052 | 0.243469994 | 0.261311387 | 0.238040507 |
| 0.040240272 | 0.123228014 | 0.083797724 | 0.083510079 |
| 0.264880297 | 0.129481522 | 0.045616077 | 0.248795294 |
| 0.259092585 | 0.256546209 | 0.031409399 | 0.097771767 |
| 0.231319131 | 0.299858644 | 0.107414204 | 0.11084871  |
| 0.03067776  | 0.010279052 | 0.237640852 | 0.267811213 |
| 0.283345073 | 0.046129318 | 0.066953427 | 0.35860415  |

|             |             |             |             |
|-------------|-------------|-------------|-------------|
| 0.057458939 | 0.046876984 | 0.253750076 | 0.05063669  |
| 0.330266802 | 0.018667369 | 0.0710405   | 0.231042578 |
| 0.052597844 | 0.247812253 | 0.233265354 | 0.166225891 |
| 0.129206165 | 0.022216052 | 0.007266055 | 0.028886877 |
| 0.050551984 | 0.008034774 | 0.228460828 | 0.302730069 |
| 1           | 0.038889943 | 0.165310272 | 0.005437877 |
| 0.018827611 | 0.033903913 | 0.231919325 | 0.166191453 |
| 0.257651208 | 0.166379013 | 0.057310043 | 0.253360195 |
| 0.131321446 | 0.25684424  | 0.011310262 | 0.08237604  |
| 0.160741003 | 0.03570973  | 0.180058133 | 0.160758019 |
| 0.088801841 | 0.113168306 | 0.107131669 | 0.282148484 |
| 0.307700229 | 0.102789427 | 0.127725752 | 0.252704404 |
| 0.04486559  | 0.106220397 | 0.107298995 | 0.129978305 |
| 0.06655173  | 0.20616847  | 0.016935173 | 0.193640991 |
| 0.012262339 | 0.025187765 | 0.025157092 | 0.228500448 |
| 0.051001329 | 0.216466741 | 0.215938346 | 0.102587714 |
| 0.167963387 | 0.184681815 | 0.205461934 | 0.19737487  |
| 0.007301266 | 0.03697318  | 0.152494704 | 0.283975967 |
| 0.263085921 | 0.260994128 | 0.105818079 | 0.060050196 |
| 0.12578469  | 0.269787965 | 0.000861986 | 0.255481134 |
| 0.243182335 | 0.133973293 | 0.175048658 | 0.173102793 |
| 0.052992273 | 0.285867297 | 0.010019457 | 0.273142238 |
| 0.240374395 | 0.080869384 | 0.289070816 | 0.083176567 |
| 0.246127464 | 0.038649077 | 0.165087952 | 0.164217654 |
| 0.15684229  | 0.010555262 | 0.174538315 | 0.302356397 |
| 0.011463032 | 0.080579158 | 0.255145585 | 0.247360451 |
| 0.152284118 | 0.231282695 | 0.304195713 | 0.041548641 |
| 0.144793515 | 0.177552104 | 0.014924497 | 0.099977947 |
| 0.215571794 | 0.025722684 | 0.278898256 | 0.093987271 |
| 0.187684553 | 0.270827179 | 0.179623149 | 0.018631918 |
| 0.060050679 | 0.217083952 | 0.040518571 | 0.099467501 |
| 0.180589249 | 0.064560326 | 0.073545077 | 0.044019983 |
| 0.033454373 | 0.276883238 | 0.021509748 | 0.025673021 |
| 0.009255915 | 0.188099648 | 0.193623214 | 0.065714188 |
| 0.025761527 | 0.047652466 | 0.044175733 | 0.065164985 |
| 0.066571513 | 0.068660325 | 0.005913365 | 0.055676863 |
| 0.032936522 | 0.070559856 | 0.08101736  | 0.240856089 |
| 0.100611248 | 0.05299869  | 0.11805994  | 0.0252665   |
| 0.026702109 | 0.0266666   | 0.283060585 | 0.252396264 |
| 0.265163631 | 0.074484756 | 0.041598094 | 0.027385285 |
| 0.295300315 | 0.132500562 | 0.100186073 | 0.293916489 |
| 0.0263463   | 0.270129573 | 0.044587108 | 0.064249185 |
| 0.068798868 | 0.169699449 | 0.308791755 | 0.01179571  |
| 0.22236823  | 0.29426403  | 0.146067029 | 0.052757042 |
| 0.273641416 | 0.260988618 | 0.034262014 | 0.223329104 |
| 0.244815514 | 0.041760197 | 0.265063423 | 0.029778682 |
| 0.027426167 | 0.178591238 | 0.158884149 | 0.058584121 |
| 0.036397676 | 0.120823238 | 0.065819395 | 0.147519973 |
| 0.278919885 | 0.247357923 | 0.20900242  | 0.031811777 |
| 0.049489959 | 0.013651082 | 0.050645825 | 0.105217889 |
| 0.262105038 | 0.2385214   | 0.169711741 | 0.08567781  |
| 0.203137796 | 0.036409298 | 0.062877657 | 0.261473221 |
| 0.028380578 | 0.269432954 | 0.017772901 | 0.169599719 |
| 0.229747964 | 0.222236632 | 0.029510018 | 0.208539312 |

|             |             |             |             |
|-------------|-------------|-------------|-------------|
| 0.278380138 | 0.04938717  | 0.123669572 | 0.258441571 |
| 0.25447059  | 0.062715471 | 0.048957378 | 0.229081146 |
| 0.03731819  | 0.053744599 | 0.118229381 | 0.01360845  |
| 0.067546878 | 0.065123837 | 0.002552502 | 0.088964411 |
| 0.028468339 | 0.276740217 | 0.285781066 | 0.014945705 |
| 0.149212691 | 0.090038826 | 0.178637272 | 0.051312808 |
| 0.178402197 | 0.229574561 | 0.267539773 | 0.135042817 |
| 0.225068751 | 0.219901054 | 0.084391125 | 0.047562767 |
| 0.017223106 | 0.234805908 | 0.250396006 | 0.016999875 |
| 0.308392174 | 0.178587912 | 0.016059284 | 0.306460264 |
| 0.166984954 | 0.237963825 | 0.003933887 | 0.007806458 |
| 0.011255191 | 0.245171084 | 0.236158297 | 0.323325602 |
| 0.073320782 | 0.250276865 | 0.002585425 | 0.257908327 |
| 0.268461307 | 0.008198678 | 0.016924358 | 0.195928127 |
| 0.139364159 | 0.305502048 | 0.041248226 | 0.190663487 |
| 0.117957491 | 0.227743248 | 0.061471234 | 0.130773325 |
| 0.261489277 | 0.201453937 | 0.287304595 | 0.283539645 |
| 0.307887452 | 0.199716393 | 0.207895434 | 0.024431122 |
| 0.008548535 | 0.182976457 | 0.029347547 | 0.012246965 |
| 0.233973233 | 0.029360467 | 0.267811616 | 0.282795824 |
| 0.233240262 | 0.013529178 | 0.093347697 | 0.221344893 |
| 0.346624441 | 0.327923693 | 0.014154652 | 0.001451434 |
| 0.002209639 | 0.003124234 | 0.27002512  | 0.083685212 |
| 0.248551659 | 0.034495068 | 0.016084813 | 0.087957721 |
| 0.053039255 | 0.116468789 | 0.261450758 | 0.291187127 |
| 0.199469242 | 0.06118856  | 0.042115589 | 0.301684281 |
| 0.011378901 | 0.20602832  | 0.247317173 | 0.286218778 |
| 0.020949507 | 0.076108453 | 0.155153825 | 0.311478675 |
| 0.002142784 | 0.161670079 | 0.180274407 | 0.050227648 |
| 0.010755183 | 0.027216854 | 0.020051124 | 0.263898418 |
| 0.219597883 | 0.025592973 | 0.016573614 | 0.045740878 |
| 0.072999226 | 0.275843709 | 0.056249148 | 0.288300541 |
| 0.301905424 | 0.314090716 | 0.015298488 | 0.254626237 |
| 0.014847849 | 0.250282541 | 0.06932344  | 0.017960507 |
| 0.087832931 | 0.016751101 | 0.22411     | 0.007728538 |
| 0.178579009 | 0.282315638 | 0.011890394 | 0.010560085 |
| 0.008226319 | 0.037038387 | 0.276512079 | 0.223719778 |
| 0.011077983 | 0.105636532 | 0.12760504  | 0.242557808 |
| 0.245891503 | 0.257054279 | 0.263315629 | 0.092989568 |
| 0.074719492 | 0.012876682 | 0.319837754 | 0.236027575 |
| 0.170846256 | 0.271941221 | 0.035069873 | 0.266411741 |
| 0.243611317 | 0.27501617  | 0.235657287 | 0.179037536 |
| 0.021364532 | 0.193796191 | 0.256773629 | 0.032254707 |
| 0.202707935 | 0.277025411 | 0.193504198 | 0.016837678 |
| 0.088544925 | 0.075389832 | 0.044597943 | 0.039470109 |
| 0.043931295 | 0.241651167 | 0.06528362  | 0.307206432 |
| 0.260062732 | 0.240174618 | 0.078532999 | 0.018499265 |
| 0.289493474 | 0.264534714 | 0.053337348 | 0.221540195 |
| 0.092963096 | 0.128254466 | 0.215987184 | 0.201436334 |
| 0.036653535 | 0.244409483 | 0.321097415 | 0.263210708 |
| 0.295890703 | 0.173411602 | 0.26339299  | 0.098409632 |
| 0.010778582 | 0.164608753 | 0.037628866 | 0.053536335 |
| 0.116340524 | 0.012254425 | 0.017394858 | 0.254885169 |
| 0.035941101 | 0.234192873 | 0.066613844 | 0.027352018 |

|             |             |             |             |
|-------------|-------------|-------------|-------------|
| 0.122093753 | 0.112708134 | 0.179550643 | 0.14571915  |
| 0.036454293 | 0.252778659 | 0.00822613  | 0.04611812  |
| 0.055057112 | 0.201551622 | 0.074715444 | 0.072176314 |
| 0.016980566 | 0.022539389 | 0.160577298 | 0.205575177 |
| 0.087063992 | 0.031040734 | 0.200546099 | 0.035495034 |
| 0.047952253 | 0.294150409 | 0.150941483 | 0.009942961 |
| 0.018095559 | 0.185313983 | 0.084688372 | 0.032376591 |
| 0.011262117 | 0.210232187 | 0.092645863 | 0.124545073 |
| 0.238449331 | 0.058249632 | 0.269865398 | 0.028327239 |
| 0.042122075 | 0.281867801 | 0.097965532 | 0.237737615 |
| 0.086130705 | 0.275768075 | 0.254577844 | 0.244155568 |
| 0.031976128 | 0.08724485  | 0.030634624 | 0.304655003 |
| 0.046742213 |             |             |             |

|             |             |             |             |
|-------------|-------------|-------------|-------------|
| COPS4       | 0.301305943 | 0.445013696 | 0.172778731 |
| 0.351214778 | 0.257440542 | 0.183415344 | 0.110402349 |
| 0.033173471 | 0.02396995  | 0.003421763 | 0.01978352  |
| 0.265623189 | 0.048397214 | 0.065590679 | 0.053235725 |
| 0.385784059 | 0.064139019 | 0.099777851 | 0.152104085 |
| 0.31918836  | 0.028526828 | 0.368499645 | 0.03532094  |
| 0.088410164 | 0.059661008 | 0.055363084 | 0.117572239 |
| 0.391629714 | 0.062614472 | 0.126849115 | 0.26750093  |
| 0.04458329  | 0.347874057 | 0.404790322 | 0.350424696 |
| 0.401298167 | 0.252683922 | 0.005846418 | 0.082246576 |
| 0.317756281 | 0.350560658 | 0.325215294 | 0.228288212 |
| 0.022059096 | 0.352906112 | 0.158708032 | 0.269253622 |
| 0.027107893 | 0.020218883 | 0.052937313 | 0.326309535 |
| 0.362015169 | 0.254324787 | 0.062394071 | 0.076061817 |
| 0.052381534 | 0.05442659  | 0.058588294 | 0.174173922 |
| 0.142629314 | 0.036126156 | 0.388708126 | 0.023344827 |
| 0.038182283 | 0.083312301 | 0.068522749 | 0.106088058 |
| 0.122715961 | 0.245889396 | 0.008149738 | 0.234763688 |
| 0.001510306 | 0.289079883 | 0.258557695 | 0.10515931  |
| 0.044101006 | 0.013055195 | 0.094350322 | 0.234811027 |
| 0.416460285 | 0.354206385 | 0.464771117 | 0.462416091 |
| 0.045905127 | 0.17193192  | 0.224647529 | 0.081722278 |
| 0.353025278 | 0.091392834 | 0.018283819 | 0.408599713 |

|             |             |             |             |
|-------------|-------------|-------------|-------------|
| 0.46635     | 0.43538455  | 0.056353987 | 0.190898426 |
| 0.337743629 | 0.390819295 | 0.158572326 | 0.205987146 |
| 0.089096775 | 0.023894591 | 0.351089039 | 0.46355612  |
| 0.286865055 | 0.161531387 | 0.111522506 | 0.31861544  |
| 0.047232838 | 0.040589646 | 0.284240993 | 0.034790791 |
| 0.42074888  | 0.008811319 | 0.152483821 | 0.21365871  |
| 0.044107577 | 0.325593447 | 0.431449551 | 0.117312804 |
| 0.211091089 | 0.009847019 | 0.031791653 | 0.024854992 |
| 0.046537928 | 0.038549768 | 0.34788515  | 0.40841631  |
| 0.038889943 | 1           | 0.11640407  | 0.003925922 |
| 0.02216257  | 0.044647438 | 0.353057394 | 0.149464455 |
| 0.336908038 | 0.283162304 | 0.109436748 | 0.25715292  |
| 0.291543644 | 0.46726075  | 0.00407866  | 0.04008689  |
| 0.196774757 | 0.051043509 | 0.19489078  | 0.269087891 |
| 0.177302974 | 0.036246698 | 0.074053051 | 0.461930046 |
| 0.318705855 | 0.062853867 | 0.086702889 | 0.358832201 |
| 0.072529337 | 0.242433811 | 0.057234555 | 0.099123557 |
| 0.02553521  | 0.382448959 | 0.028399382 | 0.112714115 |

|             |             |             |             |
|-------------|-------------|-------------|-------------|
| 0.040501153 | 0.05303896  | 0.005517906 | 0.095551827 |
| 0.036488655 | 0.363657033 | 0.341647359 | 0.067921351 |
| 0.146601213 | 0.327851584 | 0.117638886 | 0.295459066 |
| 0.009650072 | 0.015821723 | 0.075280366 | 0.452486331 |
| 0.138435431 | 0.44796641  | 0.088353026 | 0.10395942  |
| 0.203120314 | 0.393929541 | 0.00081102  | 0.369942145 |
| 0.433537663 | 0.071359708 | 0.257059702 | 0.274342346 |
| 0.164820502 | 0.39419022  | 0.003756852 | 0.361599773 |
| 0.199391949 | 0.049032499 | 0.477275447 | 0.124392112 |
| 0.359324149 | 0.04325839  | 0.103788777 | 0.383106585 |
| 0.318710277 | 0.004193632 | 0.072298542 | 0.289877668 |
| 0.022676957 | 0.025020888 | 0.317799644 | 0.303268523 |
| 0.241253676 | 0.383005612 | 0.463829441 | 0.143333622 |
| 0.237218672 | 0.087201024 | 0.007836695 | 0.201405887 |
| 0.354036949 | 0.059710952 | 0.335243753 | 0.059827021 |
| 0.134554863 | 0.383042497 | 0.316837341 | 0.043716842 |
| 0.036008539 | 0.143961759 | 0.005133452 | 0.181666753 |
| 0.296799468 | 0.042699341 | 0.175009117 | 0.039693863 |
| 0.050621327 | 0.464625451 | 0.083860072 | 0.105412037 |
| 0.050490674 | 0.231143292 | 0.128909753 | 0.061240533 |
| 0.045585626 | 0.065460075 | 0.119659485 | 0.135763062 |
| 0.016540358 | 0.064395408 | 0.009339565 | 0.10538944  |
| 0.035585032 | 0.095580479 | 0.095127028 | 0.271824371 |
| 0.061374302 | 0.029861858 | 0.189035492 | 0.070334384 |
| 0.048933847 | 0.021953589 | 0.431189552 | 0.318208793 |
| 0.196074445 | 0.054525574 | 0.033737728 | 0.046846901 |
| 0.425331256 | 0.112385354 | 0.04957251  | 0.390014051 |
| 0.009000092 | 0.461633267 | 0.060311654 | 0.097158773 |
| 0.155939695 | 0.169488587 | 0.420559958 | 0.009117303 |
| 0.202415267 | 0.379003991 | 0.191220202 | 0.100740205 |
| 0.291556393 | 0.288551492 | 0.013275097 | 0.270772759 |
| 0.262454946 | 0.031827741 | 0.448731912 | 0.051395696 |
| 0.026234061 | 0.345318489 | 0.344282127 | 0.072285355 |
| 0.052312094 | 0.162632073 | 0.012417494 | 0.243795431 |
| 0.448252364 | 0.386778711 | 0.344805413 | 0.087364947 |
| 0.032116239 | 0.008584479 | 0.116553103 | 0.193291629 |
| 0.386177816 | 0.44567959  | 0.182279389 | 0.188753064 |
| 0.183324961 | 0.104043082 | 0.019687188 | 0.452336214 |
| 0.033790816 | 0.415144851 | 0.009583899 | 0.386379518 |
| 0.393231617 | 0.099060872 | 0.058026185 | 0.160394427 |
| 0.27715091  | 0.029824386 | 0.065619733 | 0.389647932 |
| 0.369231052 | 0.119505737 | 0.102910429 | 0.306792606 |
| 0.00709651  | 0.018368003 | 0.240429947 | 0.060251806 |
| 0.128880466 | 0.090151565 | 0.017029252 | 0.061705567 |
| 0.020396174 | 0.371101838 | 0.416524327 | 0.026127265 |
| 0.165291062 | 0.058343094 | 0.314715588 | 0.031909122 |
| 0.404278996 | 0.411887874 | 0.409667731 | 0.056746365 |
| 0.354114579 | 0.418627066 | 0.251458206 | 0.057822382 |
| 0.023496814 | 0.410582987 | 0.247924123 | 0.008062861 |
| 0.450015077 | 0.065580964 | 0.009625034 | 0.410801107 |
| 0.113184719 | 0.313930503 | 0.000517535 | 0.013395056 |
| 0.02128801  | 0.434465051 | 0.366255085 | 0.263525614 |
| 0.046528679 | 0.241944078 | 0.007481386 | 0.457441276 |
| 0.395304142 | 0.01390992  | 0.048051523 | 0.352911358 |

|             |             |             |             |
|-------------|-------------|-------------|-------------|
| 0.330059796 | 0.430597692 | 0.146536604 | 0.402411944 |
| 0.266087256 | 0.401339909 | 0.044126648 | 0.209297848 |
| 0.357220125 | 0.41260885  | 0.301795294 | 0.355898084 |
| 0.419092647 | 0.359869624 | 0.213083245 | 0.012141501 |
| 0.033651327 | 0.066996255 | 0.054185292 | 0.037598491 |
| 0.148093204 | 0.05956648  | 0.389559126 | 0.452246975 |
| 0.431083559 | 0.009915202 | 0.030201095 | 0.336996387 |
| 0.366536597 | 0.425051083 | 0.008667196 | 0.001439408 |
| 0.001179374 | 0.011415585 | 0.213524931 | 0.142986655 |
| 0.42278425  | 0.024171224 | 0.007432698 | 0.012487647 |
| 0.04449471  | 0.297108446 | 0.416617437 | 0.331063676 |
| 0.365080215 | 0.056129498 | 0.052380031 | 0.333395032 |
| 0.02895165  | 0.171684972 | 0.439092447 | 0.375659857 |
| 0.021614313 | 0.140018286 | 0.130240837 | 0.445948511 |
| 0.021721869 | 0.246551519 | 0.293421048 | 0.065577432 |
| 0.008129263 | 0.049675167 | 0.041403311 | 0.404926299 |
| 0.392370165 | 0.029832001 | 0.018613384 | 0.015152492 |
| 0.053467084 | 0.430738289 | 0.047937674 | 0.476173534 |
| 0.366214713 | 0.420876914 | 0.03981314  | 0.379169661 |
| 0.024312949 | 0.379095733 | 0.197101889 | 0.005783242 |
| 0.09483326  | 0.008756008 | 0.387243355 | 0.036466622 |
| 0.092163536 | 0.253582634 | 0.040666951 | 0.019549807 |
| 0.036130355 | 0.040752809 | 0.458793316 | 0.43707113  |
| 0.018631515 | 0.078571668 | 0.176795445 | 0.282330875 |
| 0.117374968 | 0.369598369 | 0.385595901 | 0.144131857 |
| 0.039162073 | 0.035109455 | 0.301144739 | 0.226121392 |
| 0.059650289 | 0.473195401 | 0.084361495 | 0.45391567  |
| 0.266235022 | 0.381731114 | 0.409544268 | 0.200920963 |
| 0.071314073 | 0.183840322 | 0.24806972  | 0.006904185 |
| 0.19967888  | 0.436445191 | 0.150103082 | 0.039197852 |
| 0.165209801 | 0.219895691 | 0.022787605 | 0.016505986 |
| 0.15968028  | 0.144904041 | 0.050848917 | 0.419657074 |
| 0.222208116 | 0.23699571  | 0.015207929 | 0.036787199 |
| 0.453275065 | 0.342001503 | 0.021556526 | 0.291562486 |
| 0.104152143 | 0.232927083 | 0.371391597 | 0.393878633 |
| 0.072399549 | 0.389748055 | 0.332637232 | 0.257924778 |
| 0.330134699 | 0.159247492 | 0.418636312 | 0.01051826  |
| 0.026936981 | 0.250645773 | 0.038556121 | 0.079574166 |
| 0.097504087 | 0.015251461 | 0.072899089 | 0.371750455 |
| 0.107627491 | 0.309537154 | 0.039473969 | 0.025638136 |
| 0.224659481 | 0.123961538 | 0.255467483 | 0.07751933  |
| 0.028413502 | 0.394754208 | 0.005682642 | 0.044845487 |
| 0.133642018 | 0.347326955 | 0.212652312 | 0.10292767  |
| 0.06591734  | 0.050022457 | 0.21078312  | 0.09825217  |
| 0.092302463 | 0.047643793 | 0.339394428 | 0.007551967 |
| 0.010214737 | 0.47007354  | 0.119366056 | 0.011631734 |
| 0.050789776 | 0.208503168 | 0.066163819 | 0.060658811 |
| 0.022399674 | 0.422858493 | 0.104614799 | 0.24081006  |
| 0.186434671 | 0.037301536 | 0.243758644 | 0.017819138 |
| 0.018117992 | 0.334287764 | 0.217982082 | 0.418479124 |
| 0.1573218   | 0.395418029 | 0.315085506 | 0.357991336 |
| 0.019559744 | 0.166304659 | 0.011578734 | 0.382727477 |
| 0.108741246 |             |             |             |
| COQ10B      | 0.237539142 | 0.322136094 | 0.12975214  |

|             |             |             |             |
|-------------|-------------|-------------|-------------|
| 0.365726661 | 0.194396156 | 0.209395633 | 0.237724476 |
| 0.176186462 | 0.123663538 | 0.03314654  | 0.036918044 |
| 0.179615635 | 0.091275429 | 0.142856189 | 0.103233949 |
| 0.367106188 | 0.093981196 | 0.132104181 | 0.268575067 |
| 0.349110884 | 0.177188381 | 0.319832076 | 0.193834804 |
| 0.091455374 | 0.072865098 | 0.119169613 | 0.093093444 |
| 0.39594357  | 0.127234249 | 0.155290334 | 0.3419755   |
| 0.101301197 | 0.297477299 | 0.274636839 | 0.225464933 |
| 0.246792867 | 0.198350612 | 0.030900883 | 0.135195769 |
| 0.297486518 | 0.265467827 | 0.367008818 | 0.292403639 |
| 0.13282185  | 0.262440477 | 0.26929357  | 0.198754208 |
| 0.1220067   | 0.067352332 | 0.127926583 | 0.269812542 |
| 0.231839005 | 0.177565621 | 0.204737052 | 0.201684467 |
| 0.063588418 | 0.126843913 | 0.041503726 | 0.244706889 |
| 0.243529608 | 0.129121864 | 0.246473451 | 0.144383924 |
| 0.117171986 | 0.204204406 | 0.096870979 | 0.212249569 |
| 0.077299725 | 0.276526938 | 0.116792727 | 0.134546418 |
| 0.013765385 | 0.3684652   | 0.208377429 | 0.056329151 |
| 0.096474479 | 0.053485919 | 0.110661278 | 0.311374617 |
| 0.375702298 | 0.256171571 | 0.325338752 | 0.3001436   |
| 0.096376836 | 0.175399436 | 0.120011315 | 0.161074722 |
| 0.2993504   | 0.178523778 | 0.109095287 | 0.341301461 |
| 0.321045407 | 0.279606243 | 0.132068151 | 0.172115271 |
| 0.27673433  | 0.318435187 | 0.136325363 | 0.156406479 |
| 0.074320386 | 0.053907867 | 0.256410922 | 0.311449562 |
| 0.265620811 | 0.072947154 | 0.121228412 | 0.346003978 |
| 0.133528663 | 0.094496154 | 0.339096302 | 0.071502095 |
| 0.386268521 | 0.100120373 | 0.12443768  | 0.260304865 |
| 0.164397599 | 0.278132228 | 0.264338399 | 0.242534713 |
| 0.158127957 | 0.051826015 | 0.040066718 | 0.089372067 |
| 0.119709858 | 0.031155221 | 0.227628791 | 0.342387465 |
| 0.165310272 | 0.11640407  | 1           | 0.022865605 |
| 0.058740722 | 0.104911101 | 0.233624704 | 0.171371719 |
| 0.311066522 | 0.183835461 | 0.128329847 | 0.237099478 |
| 0.168991034 | 0.321572969 | 0.025333466 | 0.215550003 |
| 0.200771474 | 0.116878287 | 0.27197974  | 0.190582643 |
| 0.150184668 | 0.21804118  | 0.183584936 | 0.340567846 |
| 0.298923709 | 0.170606589 | 0.11681541  | 0.332604275 |
| 0.119401538 | 0.157548156 | 0.191924044 | 0.150537697 |
| 0.1618946   | 0.230454957 | 0.048479844 | 0.184031135 |
| 0.060489071 | 0.064666534 | 0.069121477 | 0.206835572 |
| 0.122683559 | 0.245965727 | 0.213602485 | 0.175202104 |
| 0.167175143 | 0.260953547 | 0.175801316 | 0.225045171 |
| 0.036331885 | 0.118404735 | 0.116534231 | 0.314755328 |
| 0.196507123 | 0.305216964 | 0.178953235 | 0.134088157 |
| 0.202854495 | 0.345786221 | 0.003013467 | 0.262051343 |
| 0.274196099 | 0.101933006 | 0.207016352 | 0.211574646 |
| 0.094115523 | 0.348186599 | 0.012688358 | 0.326282752 |
| 0.19692676  | 0.170412014 | 0.355783533 | 0.140635948 |
| 0.255166758 | 0.098340916 | 0.160579358 | 0.218501631 |
| 0.176413437 | 0.029645771 | 0.16533457  | 0.362938534 |
| 0.046312663 | 0.185155349 | 0.29807264  | 0.320174958 |
| 0.237611516 | 0.299345154 | 0.375325568 | 0.077552001 |
| 0.184102101 | 0.21076846  | 0.05893361  | 0.156381916 |



|             |             |             |             |
|-------------|-------------|-------------|-------------|
| 0.262576946 | 0.074115783 | 0.28247644  | 0.208352558 |
| 0.146550588 | 0.302001289 | 0.203002511 | 0.071442882 |
| 0.140697967 | 0.23347373  | 0.061641661 | 0.176688474 |
| 0.21453614  | 0.144344997 | 0.119302329 | 0.108630324 |
| 0.08512273  | 0.322349977 | 0.053848755 | 0.047894656 |
| 0.030593966 | 0.183446966 | 0.251202898 | 0.09847928  |
| 0.06346916  | 0.17253884  | 0.099575481 | 0.123890914 |
| 0.150259897 | 0.127500468 | 0.027189285 | 0.05601564  |
| 0.057974502 | 0.072724627 | 0.068832003 | 0.224012752 |
| 0.132304251 | 0.09058531  | 0.153922251 | 0.088042263 |
| 0.093277726 | 0.062090632 | 0.312491042 | 0.331382619 |
| 0.217000028 | 0.213186167 | 0.098025825 | 0.056549874 |
| 0.3345891   | 0.130414195 | 0.092190085 | 0.317520992 |
| 0.085147028 | 0.331460108 | 0.115998161 | 0.117288817 |
| 0.080592593 | 0.219404964 | 0.388630691 | 0.058090569 |
| 0.218572507 | 0.297876174 | 0.216813228 | 0.127245781 |
| 0.240058325 | 0.313673731 | 0.124313196 | 0.227727759 |
| 0.216522428 | 0.091119681 | 0.294884421 | 0.083441079 |
| 0.067172316 | 0.231867265 | 0.211106634 | 0.117527468 |
| 0.099528975 | 0.162052164 | 0.160574673 | 0.239698613 |
| 0.322409509 | 0.333868538 | 0.249229766 | 0.079225027 |
| 0.119857084 | 0.021519424 | 0.095792116 | 0.133213927 |
| 0.260009191 | 0.273086577 | 0.230383999 | 0.116839242 |
| 0.296276059 | 0.097724687 | 0.133400431 | 0.304147708 |
| 0.08189419  | 0.28463296  | 0.050279767 | 0.228115725 |
| 0.242748176 | 0.156208369 | 0.081225209 | 0.252939867 |
| 0.25451277  | 0.146431391 | 0.204649612 | 0.271135243 |
| 0.309217594 | 0.135775316 | 0.104935846 | 0.251350232 |
| 0.105188059 | 0.173285672 | 0.193645526 | 0.049399024 |
| 0.11847836  | 0.174918496 | 0.011322186 | 0.165223837 |
| 0.098282524 | 0.287981207 | 0.330247799 | 0.098539311 |
| 0.16042544  | 0.147592022 | 0.248603639 | 0.125057601 |
| 0.230350988 | 0.25658071  | 0.278669019 | 0.224295693 |
| 0.239770893 | 0.260537523 | 0.112750637 | 0.110995993 |
| 0.047371107 | 0.255089823 | 0.265196431 | 0.044923262 |
| 0.361041238 | 0.132129447 | 0.037561482 | 0.326113579 |
| 0.242841879 | 0.218395782 | 0.02102958  | 0.02337742  |
| 0.054095367 | 0.309261853 | 0.2572564   | 0.342574497 |
| 0.076200709 | 0.30249983  | 0.009563267 | 0.296553517 |
| 0.281537636 | 0.03606996  | 0.080209976 | 0.218251982 |
| 0.175355389 | 0.321968865 | 0.075294028 | 0.240014185 |
| 0.1438439   | 0.244950479 | 0.165879639 | 0.226806873 |
| 0.30086111  | 0.232787747 | 0.312255159 | 0.300175602 |
| 0.340683433 | 0.263470459 | 0.311739849 | 0.090347872 |
| 0.06836726  | 0.172240561 | 0.060846825 | 0.072826589 |
| 0.215291095 | 0.104805311 | 0.28852366  | 0.345004739 |
| 0.271814    | 0.035508399 | 0.193317709 | 0.239809204 |
| 0.35821518  | 0.3817788   | 0.054040086 | 0.010510299 |
| 0.004468    | 0.021069536 | 0.296354738 | 0.144311602 |
| 0.295124287 | 0.060860768 | 0.042777173 | 0.161041609 |
| 0.159727618 | 0.173894708 | 0.281108354 | 0.379215695 |
| 0.248132598 | 0.142724659 | 0.086176368 | 0.37837566  |
| 0.070842475 | 0.175511468 | 0.293606699 | 0.298100804 |
| 0.084196867 | 0.142202222 | 0.142028137 | 0.372368642 |

|             |             |             |             |
|-------------|-------------|-------------|-------------|
| 0.011401864 | 0.227791147 | 0.19645275  | 0.130736294 |
| 0.031183588 | 0.088446831 | 0.095831613 | 0.334030024 |
| 0.231130984 | 0.068825351 | 0.051054036 | 0.066494209 |
| 0.150747403 | 0.324983287 | 0.14019186  | 0.342760672 |
| 0.340386144 | 0.386008157 | 0.068997031 | 0.28438988  |
| 0.091076398 | 0.250795713 | 0.10901377  | 0.034809149 |
| 0.132923432 | 0.068500856 | 0.235491465 | 0.044030413 |
| 0.136303289 | 0.285164845 | 0.081541082 | 0.041994945 |
| 0.040089226 | 0.091671218 | 0.348100741 | 0.291082298 |
| 0.050017636 | 0.232583358 | 0.192066238 | 0.286669413 |
| 0.226928051 | 0.319687461 | 0.269785582 | 0.106809751 |
| 0.19243368  | 0.035315769 | 0.348558571 | 0.214646894 |
| 0.17460318  | 0.335512484 | 0.105330151 | 0.309385381 |
| 0.26734041  | 0.312994903 | 0.269430745 | 0.266140008 |
| 0.072388463 | 0.207435645 | 0.274313616 | 0.068061888 |
| 0.264734702 | 0.326885888 | 0.208078462 | 0.079162937 |
| 0.145981595 | 0.109820661 | 0.16020705  | 0.058244651 |
| 0.066327017 | 0.224674061 | 0.164318427 | 0.388965205 |
| 0.251170738 | 0.229862152 | 0.141057496 | 0.092521441 |
| 0.319421645 | 0.290312302 | 0.16858585  | 0.271180739 |
| 0.151737538 | 0.221052651 | 0.260215262 | 0.253005105 |
| 0.105307799 | 0.261176729 | 0.327461366 | 0.247513112 |
| 0.287478098 | 0.273451364 | 0.283410929 | 0.132295544 |
| 0.066643076 | 0.169240007 | 0.115129551 | 0.10742319  |
| 0.173213585 | 0.065899575 | 0.044774674 | 0.317562777 |
| 0.055422381 | 0.285578995 | 0.113899284 | 0.111223323 |
| 0.185389104 | 0.120412716 | 0.259172207 | 0.180188274 |
| 0.116980797 | 0.268670469 | 0.029971211 | 0.106384491 |
| 0.062480189 | 0.259826077 | 0.108709455 | 0.141852463 |
| 0.063939164 | 0.088870192 | 0.231351359 | 0.169515425 |
| 0.075660123 | 0.08061121  | 0.255404299 | 0.113567782 |
| 0.116586307 | 0.350898934 | 0.142619618 | 0.042914608 |
| 0.090129486 | 0.201608779 | 0.139319979 | 0.14408279  |
| 0.040463743 | 0.242983541 | 0.115178471 | 0.179684362 |
| 0.278896897 | 0.145935707 | 0.231987882 | 0.10792778  |
| 0.15308257  | 0.263671741 | 0.142304589 | 0.258899534 |
| 0.120070341 | 0.357096118 | 0.2439744   | 0.253399888 |
| 0.086692121 | 0.109183226 | 0.13025329  | 0.348665175 |
| 0.063596238 |             |             |             |

|             |             |             |             |
|-------------|-------------|-------------|-------------|
| COR02A      | 0.003447291 | 0.001837435 | 0.005309243 |
| 0.012822875 | 0.011937012 | 0.001980498 | 0.029013943 |
| 0.006814333 | 0.023808143 | 0.027981942 | 0.032085128 |
| 0.006363706 | 0.008579662 | 0.007231735 | 0.001039981 |
| 0.022060359 | 0.061368697 | 0.00661216  | 0.059289276 |
| 0.014926413 | 0.018041871 | 0.030116179 | 0.056292655 |
| 0.011977845 | 0.058555274 | 0.096371668 | 0.01703899  |
| 0.011476575 | 0.106266738 | 0.00137082  | 0.007280259 |
| 0.088101368 | 0.004610831 | 0.000381384 | 0.01137166  |
| 0.000909874 | 0.001391893 | 0.045334715 | 0.00245743  |
| 0.002926451 | 0.006828597 | 0.013329672 | 0.03439328  |
| 0.066181333 | 0.001305419 | 0.037036053 | 0.01658702  |
| 0.002155772 | 0.074095191 | 0.001627166 | 0.00064936  |
| 0.00123222  | 0.002694328 | 0.009199824 | 0.028741752 |
| 0.002837494 | 0.002163848 | 0.002534936 | 0.002021728 |

|             |             |             |             |
|-------------|-------------|-------------|-------------|
| 0.043507346 | 0.002594091 | 0.000333401 | 0.016576933 |
| 0.003368941 | 0.014462886 | 0.06452547  | 0.017511553 |
| 0.005289702 | 0.002138168 | 0.110376471 | 0.002518577 |
| 0.012513418 | 0.019712945 | 0.027300239 | 0.002423231 |
| 0.205885218 | 0.059406082 | 0.077031711 | 0.018409092 |
| 0.00901521  | 0.000538467 | 0.008094066 | 0.005164817 |
| 0.030050038 | 0.050279261 | 0.007305392 | 0.055478845 |
| 0.002777806 | 0.028942867 | 0.021874713 | 0.024864813 |
| 0.006845795 | 0.00071663  | 0.027757991 | 0.063395059 |
| 0.002695613 | 0.001894931 | 0.003110939 | 0.006613612 |
| 0.002134916 | 0.082072225 | 0.0001716   | 0.003885562 |
| 0.00119218  | 0.009721346 | 0.10403494  | 0.006010081 |
| 0.161432378 | 0.001034441 | 0.034723654 | 0.020772444 |
| 0.008842871 | 0.057358739 | 0.076738086 | 0.011939303 |
| 0.02968782  | 0.004309737 | 0.000761857 | 0.057878525 |
| 0.012914118 | 0.082094232 | 0.006851356 | 0.157232433 |
| 0.004781649 | 0.009730729 | 0.002818343 | 0.006487022 |
| 0.005437877 | 0.003925922 | 0.022865605 | 1           |
| 0.14257949  | 0.030024554 | 0.002615295 | 0.01115365  |
| 0.008236065 | 0.000385219 | 0.021680654 | 0.000868706 |
| 0.00291681  | 0.008060832 | 7.44E-07    | 0.060475041 |
| 0.006043433 | 0.036841705 | 0.087388202 | 0.004728829 |
| 0.030102085 | 0.038969106 | 0.092153287 | 0.004614485 |
| 0.000540479 | 0.11855436  | 0.002906505 | 0.024923031 |
| 0.002101151 | 0.026746665 | 0.094815793 | 0.019387378 |
| 0.051766787 | 0.000804027 | 0.164329401 | 0.005946325 |
| 0.000998962 | 0.030910209 | 0.118368412 | 0.008971146 |
| 0.003583333 | 0.001723101 | 0.003177232 | 0.130958884 |
| 0.020753665 | 0.021822719 | 0.002612041 | 0.003099334 |
| 0.029629961 | 0.100457688 | 0.000745115 | 0.00351643  |
| 0.000762347 | 0.004456041 | 0.022314673 | 0.02054136  |
| 0.063087206 | 0.010517573 | 0.0067379   | 0.000957577 |
| 0.000583014 | 0.000446128 | 0.013060403 | 0.012823989 |
| 0.002620061 | 0.007941635 | 0.000327433 | 0.02424798  |
| 0.000766287 | 0.134464892 | 0.007912477 | 0.097578908 |
| 0.000443189 | 0.141753762 | 0.004716924 | 0.003435948 |
| 0.001669858 | 0.032178842 | 0.003443626 | 0.011621607 |
| 0.125639603 | 0.008291665 | 0.006628292 | 0.014399478 |
| 0.010172628 | 0.010056233 | 0.011722144 | 0.002494124 |
| 0.009410963 | 0.030363539 | 0.137531077 | 0.038410239 |
| 0.005281558 | 0.000491273 | 0.000428135 | 0.014147453 |
| 0.000344531 | 0.001711053 | 0.001006505 | 0.000625242 |
| 0.109264089 | 0.010413287 | 0.018387384 | 0.01953738  |
| 0.000353918 | 0.021078633 | 0.001933828 | 0.048036055 |
| 0.127689323 | 0.00312424  | 0.026107509 | 0.007240712 |
| 0.013952796 | 0.004607613 | 0.041847616 | 0.004880703 |
| 0.00660192  | 0.040802934 | 0.004863136 | 0.004901227 |
| 0.034737984 | 0.09887713  | 0.090448032 | 0.001043792 |
| 0.008867625 | 0.002304845 | 0.001431061 | 0.00151205  |
| 0.003893768 | 0.025444745 | 0.013966589 | 0.008435666 |
| 0.067463043 | 0.246434364 | 0.002014506 | 0.022480262 |
| 0.000268081 | 0.037686244 | 0.183541327 | 0.000330481 |
| 0.005376998 | 0.000158949 | 0.000354587 | 0.002738777 |
| 0.083704004 | 0.006926057 | 0.010610178 | 0.108408918 |

|             |             |             |             |
|-------------|-------------|-------------|-------------|
| 0.006691193 | 0.048901111 | 0.010303479 | 0.002774142 |
| 0.003979408 | 0.001087975 | 0.043753569 | 0.04824499  |
| 2.42E-05    | 0.010509751 | 0.067759077 | 0.001458211 |
| 0.001150852 | 0.17691259  | 0.002015101 | 0.061493326 |
| 0.237176923 | 0.010442125 | 0.002918897 | 0.177167754 |
| 0.126701759 | 0.008457655 | 0.019533565 | 0.066765209 |
| 0.002967241 | 0.026251749 | 0.002310445 | 0.02777291  |
| 0.093489533 | 0.042880723 | 0.056288033 | 0.005765632 |
| 0.001106233 | 0.002210956 | 0.078151186 | 0.012396166 |
| 0.071569061 | 0.004046078 | 0.002155469 | 0.003372089 |
| 0.015921743 | 0.000463272 | 0.21703491  | 0.004810919 |
| 0.001329843 | 0.001800126 | 0.089538199 | 0.008376921 |
| 0.001154988 | 0.097143222 | 0.038260726 | 0.000379188 |
| 0.002856607 | 0.008861181 | 0.004072849 | 0.011532507 |
| 0.050148915 | 0.049828198 | 0.012262305 | 0.012611484 |
| 0.003050035 | 0.036494365 | 0.009461836 | 0.00249472  |
| 0.064053208 | 0.000944053 | 0.011621237 | 0.047616288 |
| 0.000983539 | 0.002282324 | 0.034354005 | 0.155469722 |
| 0.002749623 | 0.000820189 | 0.000107861 | 0.041723863 |
| 0.003953553 | 0.001697997 | 0.002413428 | 0.152747005 |
| 0.220309574 | 0.000110571 | 0.003457495 | 0.034563459 |
| 0.009192496 | 0.00083743  | 0.041236914 | 0.001925319 |
| 0.071002915 | 0.002901691 | 0.004929778 | 0.005316209 |
| 0.099304061 | 0.010839443 | 0.000681804 | 0.00833501  |
| 0.000198282 | 0.023627304 | 0.02561047  | 0.002725264 |
| 0.000855704 | 0.133507189 | 0.039586489 | 0.001957962 |
| 0.002565121 | 0.001390896 | 0.007107949 | 0.003446624 |
| 0.003649514 | 0.000542584 | 0.007143108 | 0.06357385  |
| 0.003681996 | 0.000252624 | 0.005686456 | 0.001249481 |
| 0.007931091 | 0.018518305 | 0.046345732 | 0.070795252 |
| 0.012122001 | 0.005834988 | 0.000360204 | 0.01686109  |
| 0.001662141 | 0.045272934 | 0.00224359  | 0.009619609 |
| 0.003606351 | 0.257683995 | 0.012780592 | 0.001794632 |
| 0.004678385 | 0.007160646 | 0.08545856  | 0.009760578 |
| 0.00352752  | 0.043458313 | 0.010642822 | 0.061033144 |
| 0.002737255 | 0.000235191 | 0.203581305 | 0.031005838 |
| 0.010276058 | 0.012707723 | 0.000889324 | 0.032659695 |
| 0.005515537 | 0.133581774 | 0.00128873  | 0.023627952 |
| 0.051202699 | 0.000188275 | 0.00418501  | 0.000580802 |
| 0.1227011   | 0.04845374  | 0.005140091 | 0.006786574 |
| 0.003678204 | 0.05518353  | 0.006354055 | 0.004420155 |
| 0.082904506 | 0.101417134 | 0.077446836 | 0.014821871 |
| 0.001359926 | 0.033019093 | 0.061285887 | 0.000347559 |
| 0.030793635 | 0.00614792  | 0.030497281 | 0.005750096 |
| 0.005885149 | 0.017771427 | 0.074346894 | 0.000383953 |
| 0.044152183 | 0.000510886 | 0.017671866 | 0.001457586 |
| 0.027168995 | 0.172886397 | 0.00062186  | 0.002588459 |
| 0.003080515 | 0.005588538 | 0.00578638  | 0.150910241 |
| 0.005229998 | 0.148521962 | 0.008160698 | 0.008323906 |
| 0.110275597 | 0.019992742 | 0.049757999 | 0.016454602 |
| 0.006328596 | 0.011499124 | 0.000569226 | 0.000577293 |
| 0.033494516 | 0.012969366 | 0.011578881 | 0.002092107 |
| 0.006747408 | 0.008414862 | 0.005272668 | 0.002790421 |
| 0.003040443 | 0.002766369 | 0.001953991 | 0.013796092 |

|             |             |             |             |
|-------------|-------------|-------------|-------------|
| 0.01327665  | 0.002794552 | 0.004266421 | 0.030716058 |
| 0.026584669 | 0.008693458 | 0.008135424 | 0.020882339 |
| 0.040494704 | 0.004236548 | 0.075845002 | 0.001817483 |
| 0.003894699 | 0.002589842 | 0.033327794 | 0.017597248 |
| 0.005360645 | 0.001922831 | 0.069996036 | 0.069403566 |
| 0.001759081 | 0.00106282  | 0.009494643 | 0.006016208 |
| 0.103835499 | 0.022161206 | 0.006599817 | 0.007906123 |
| 0.001624636 | 0.002831696 | 0.005657851 | 0.003240655 |
| 0.000695201 | 0.038768132 | 0.000128063 | 0.00473421  |
| 0.024265882 | 0.002744661 | 0.029428803 | 0.160170282 |
| 0.093637984 | 0.121664303 | 0.001572799 | 0.020115997 |
| 0.001287841 | 0.026302603 | 0.000905145 | 0.061723054 |
| 0.041892878 | 0.002622427 | 0.035781757 | 0.01669555  |
| 0.044607436 | 0.000157583 | 0.069799025 | 0.167161241 |
| 0.002584649 | 0.003207922 | 0.006434187 | 0.050111225 |
| 0.003939638 | 0.047630014 | 0.048606941 | 0.002300623 |
| 0.001002183 | 0.001409975 | 0.002739388 | 0.038015685 |
| 0.084700813 | 0.008588112 | 0.002369945 | 0.116765843 |
| 0.035335917 | 0.001748248 | 0.013376054 | 0.007446041 |
| 0.150911779 | 0.001141291 | 0.00094496  | 0.008694178 |
| 0.013054305 | 0.135097769 | 0.000603209 | 0.015880983 |
| 0.074108668 | 4.70E-05    | 0.006822928 | 0.00019729  |
| 0.015195139 | 0.020703916 | 0.001988315 | 0.0024682   |
| 0.022436536 | 0.002250523 | 0.068604736 | 0.00725934  |
| 0.000688577 |             |             |             |
| CPEB2       | 0.028110169 | 0.029169345 | 0.030324762 |
| 0.069816329 | 0.060890433 | 0.015345202 | 0.077255272 |
| 0.015922736 | 0.052213326 | 0.046354683 | 0.092812598 |
| 0.04341208  | 0.046251925 | 0.031551678 | 0.006249808 |
| 0.099197268 | 0.171477714 | 0.02274104  | 0.150729706 |
| 0.067192324 | 0.034321466 | 0.131670818 | 0.092863699 |
| 0.041357976 | 0.166634584 | 0.192640007 | 0.065994975 |
| 0.065331773 | 0.21412046  | 0.011014597 | 0.038390033 |
| 0.170597857 | 0.035537805 | 0.019056846 | 0.074919683 |
| 0.018010171 | 0.018102685 | 0.050809029 | 0.012143893 |
| 0.026370153 | 0.04959006  | 0.062169926 | 0.122448366 |
| 0.110677883 | 0.014481544 | 0.110981299 | 0.075552037 |
| 0.00869045  | 0.165363549 | 0.006627503 | 0.014001154 |
| 0.015083608 | 0.024890898 | 0.022850732 | 0.069277934 |
| 0.022064213 | 0.008850439 | 0.021359914 | 0.014734141 |
| 0.118201841 | 0.00807086  | 0.018334743 | 0.035554423 |
| 0.011208777 | 0.034659336 | 0.151614139 | 0.049950838 |
| 0.026719053 | 0.018697466 | 0.095095221 | 0.023668876 |
| 0.016035225 | 0.076213558 | 0.104016034 | 0.016255556 |
| 0.333273633 | 0.144280167 | 0.184353676 | 0.073574927 |
| 0.058220218 | 0.020256164 | 0.063375839 | 0.048238349 |
| 0.115790707 | 0.136097474 | 0.043330767 | 0.143926099 |
| 0.027716218 | 0.083218632 | 0.056887677 | 0.116765462 |
| 0.057604646 | 0.024539938 | 0.086508633 | 0.179073633 |
| 0.028862317 | 0.026085667 | 0.022240787 | 0.038843844 |
| 0.014996548 | 0.15802242  | 0.017176724 | 0.041983658 |
| 0.018244059 | 0.051589277 | 0.263569696 | 0.038552378 |
| 0.243255065 | 0.007024469 | 0.127091981 | 0.077576622 |
| 0.058501836 | 0.068357581 | 0.215332963 | 0.053553813 |

|             |             |             |             |
|-------------|-------------|-------------|-------------|
| 0.06150367  | 0.03415805  | 0.025116239 | 0.137224206 |
| 0.058980483 | 0.155833819 | 0.031730167 | 0.20231178  |
| 0.021956559 | 0.041905119 | 0.011549496 | 0.051768638 |
| 0.018827611 | 0.02216257  | 0.058740722 | 0.14257949  |
| 1           | 0.075282307 | 0.02958514  | 0.04001275  |
| 0.047108603 | 0.014513394 | 0.080481608 | 0.015268085 |
| 0.030478598 | 0.062448387 | 0.000651348 | 0.089425615 |
| 0.037466747 | 0.083776597 | 0.223444618 | 0.034170502 |
| 0.122225541 | 0.062610797 | 0.177491095 | 0.044668112 |
| 0.016804067 | 0.211493418 | 0.01200642  | 0.11235919  |
| 0.012811394 | 0.118747541 | 0.161822212 | 0.07129044  |
| 0.087286785 | 0.017069171 | 0.281416298 | 0.021713653 |
| 0.007910478 | 0.117789368 | 0.085351359 | 0.027087158 |
| 0.017768257 | 0.026464631 | 0.011137954 | 0.217345909 |
| 0.079128756 | 0.103496615 | 0.01297612  | 0.032095043 |
| 0.06384837  | 0.151534196 | 0.005418004 | 0.039651196 |
| 0.009285608 | 0.043280429 | 0.063891037 | 0.063599373 |
| 0.192574209 | 0.063410931 | 0.008645281 | 0.015947554 |
| 0.024131483 | 0.004996018 | 0.076896797 | 0.063865345 |
| 0.01998728  | 0.05623499  | 0.002089938 | 0.107959544 |
| 0.012935961 | 0.19578751  | 0.061082564 | 0.260158984 |
| 0.019573084 | 0.246948657 | 0.01954045  | 0.036250328 |
| 0.025732829 | 0.040484991 | 0.013204307 | 0.053860383 |
| 0.204854058 | 0.016716836 | 0.039369702 | 0.069647642 |
| 0.052753797 | 0.060828617 | 0.075251426 | 0.018966731 |
| 0.055032341 | 0.068700429 | 0.157809354 | 0.131140914 |
| 0.039673934 | 0.005727078 | 0.017712343 | 0.037849622 |
| 0.008216949 | 0.025368343 | 0.020062905 | 0.0038346   |
| 0.1624877   | 0.035134421 | 0.038063448 | 0.078745125 |
| 0.01579952  | 0.064144374 | 0.016070368 | 0.103150104 |
| 0.260565307 | 0.037551154 | 0.08551873  | 0.035894304 |
| 0.048737319 | 0.035868194 | 0.098803448 | 0.028999108 |
| 0.045118956 | 0.09332593  | 0.026632408 | 0.024248835 |
| 0.050771288 | 0.222365324 | 0.120761708 | 0.012899591 |
| 0.054825364 | 0.02153188  | 0.015714945 | 0.018586577 |
| 0.020159076 | 0.101068015 | 0.074475128 | 0.029159881 |
| 0.153994291 | 0.303033816 | 0.029461789 | 0.092094484 |
| 0.01083261  | 0.075009669 | 0.268148728 | 0.005711443 |
| 0.046713843 | 0.006946988 | 0.003340385 | 0.030772961 |
| 0.101863809 | 0.054120715 | 0.0502898   | 0.269218835 |
| 0.044307949 | 0.155475639 | 0.063826695 | 0.007118272 |
| 0.022611593 | 0.022422444 | 0.121215157 | 0.141438488 |
| 0.01522194  | 0.053336229 | 0.098919274 | 0.018748132 |
| 0.018445443 | 0.273239322 | 0.031918382 | 0.17065296  |
| 0.311655547 | 0.065201473 | 0.032224491 | 0.319644749 |
| 0.241238498 | 0.046400511 | 0.027287416 | 0.210740536 |
| 0.035878537 | 0.124279842 | 0.026623898 | 0.078465307 |
| 0.158380295 | 0.11341111  | 0.149123265 | 0.03450496  |
| 0.01653324  | 0.033257231 | 0.194428945 | 0.074106189 |
| 0.180137895 | 0.022675451 | 0.004768682 | 0.039307642 |
| 0.037973337 | 0.022462118 | 0.189577198 | 0.042670909 |
| 0.016329387 | 0.010435999 | 0.221191437 | 0.034063274 |
| 0.01838534  | 0.136630757 | 0.069606044 | 0.021466803 |
| 0.028220033 | 0.037388879 | 0.021995864 | 0.06004542  |

|             |             |             |             |
|-------------|-------------|-------------|-------------|
| 0.056850843 | 0.066840935 | 0.059087027 | 0.042596043 |
| 0.018167774 | 0.088155515 | 0.034416911 | 0.009463539 |
| 0.135640444 | 0.021454793 | 0.070740499 | 0.101325331 |
| 0.012107352 | 0.008225322 | 0.133483835 | 0.209875982 |
| 0.034491775 | 0.024553713 | 0.020317596 | 0.071713517 |
| 0.035723129 | 0.02923377  | 0.02752166  | 0.257894854 |
| 0.312597162 | 0.021059183 | 0.024113025 | 0.075559367 |
| 0.063517795 | 0.005742202 | 0.102904049 | 0.027403755 |
| 0.146726147 | 0.010435303 | 0.005142533 | 0.01206969  |
| 0.168328007 | 0.07083845  | 0.016016048 | 0.039532992 |
| 0.003661422 | 0.078956405 | 0.031093927 | 0.035475372 |
| 0.023552791 | 0.200794964 | 0.108122733 | 0.027802468 |
| 0.032026256 | 0.026477138 | 0.041224769 | 0.03909376  |
| 0.035966697 | 0.018483723 | 0.031256473 | 0.191451725 |
| 0.035429768 | 0.022414195 | 0.037570447 | 0.021965471 |
| 0.05801217  | 0.091038161 | 0.13954307  | 0.092510549 |
| 0.032144718 | 0.016602972 | 0.005037919 | 0.047808203 |
| 0.011705768 | 0.123271269 | 0.029471718 | 0.064549408 |
| 0.040948504 | 0.235032989 | 0.028899308 | 0.024883197 |
| 0.037100485 | 0.051121779 | 0.095087021 | 0.013709711 |
| 0.009148364 | 0.117279628 | 0.042761573 | 0.16178182  |
| 0.033285518 | 0.003435425 | 0.167146425 | 0.042375993 |
| 0.036330428 | 0.075567207 | 0.024387659 | 0.122724533 |
| 0.043415284 | 0.218283746 | 0.01040401  | 0.093763385 |
| 0.125565841 | 0.00852909  | 0.043947352 | 0.020049248 |
| 0.181444042 | 0.124958585 | 0.024006313 | 0.052322443 |
| 0.02002069  | 0.175518227 | 0.044514258 | 0.025517579 |
| 0.100942166 | 0.207035229 | 0.14318165  | 0.078613513 |
| 0.016235714 | 0.123742965 | 0.17237622  | 0.002829827 |
| 0.086311441 | 0.047893045 | 0.098554181 | 0.051170033 |
| 0.043295916 | 0.09328038  | 0.161525863 | 0.019638839 |
| 0.091423424 | 0.018059906 | 0.086638534 | 0.004448242 |
| 0.072568882 | 0.176756754 | 0.022933202 | 0.016692053 |
| 0.015398236 | 0.031471372 | 0.01929974  | 0.203226231 |
| 0.021460773 | 0.2671088   | 0.061489029 | 0.06205602  |
| 0.181951741 | 0.042854045 | 0.141340676 | 0.068695277 |
| 0.024726188 | 0.071354945 | 0.017675809 | 0.010590188 |
| 0.061535924 | 0.041737975 | 0.056065766 | 0.019632176 |
| 0.020171223 | 0.06384643  | 0.027838446 | 0.035021942 |
| 0.024210029 | 0.028991093 | 0.028794475 | 0.055739533 |
| 0.057120962 | 0.019360746 | 0.030350961 | 0.06064212  |
| 0.089825086 | 0.063967717 | 0.030005715 | 0.085053016 |
| 0.147001672 | 0.031766002 | 0.086666061 | 0.006681389 |
| 0.028764083 | 0.015498714 | 0.092036851 | 0.088560636 |
| 0.029050578 | 0.019547285 | 0.075237596 | 0.133577452 |
| 0.02953273  | 0.019661996 | 0.021408824 | 0.040362913 |
| 0.214624777 | 0.089672331 | 0.049357818 | 0.057236932 |
| 0.008694074 | 0.033666106 | 0.03929203  | 0.028153847 |
| 0.018434922 | 0.100498153 | 0.021293954 | 0.008529527 |
| 0.066795287 | 0.023740157 | 0.095084434 | 0.304127598 |
| 0.211851662 | 0.186121273 | 0.012608327 | 0.093961443 |
| 0.012923668 | 0.116754947 | 0.00533774  | 0.126881775 |
| 0.133707964 | 0.014458604 | 0.124035028 | 0.049942696 |
| 0.12026165  | 0.019155147 | 0.105662664 | 0.271542571 |

|             |             |             |             |
|-------------|-------------|-------------|-------------|
| 0.021511993 | 0.032432002 | 0.047950991 | 0.133651779 |
| 0.022937053 | 0.111894649 | 0.154803968 | 0.012272551 |
| 0.012226948 | 0.00960688  | 0.029993913 | 0.0507728   |
| 0.095598073 | 0.063241022 | 0.015067528 | 0.16549401  |
| 0.066918761 | 0.015075761 | 0.035964401 | 0.031137966 |
| 0.230597774 | 0.026341617 | 0.008211843 | 0.048215299 |
| 0.047169989 | 0.189962347 | 0.010838512 | 0.026988412 |
| 0.095198982 | 0.017429228 | 0.041766995 | 0.022254118 |
| 0.056722024 | 0.104778406 | 0.011443651 | 0.028707715 |
| 0.046909022 | 0.017728597 | 0.089211678 | 0.047498274 |
| 0.009928618 |             |             |             |
| CREM        | 0.23918091  | 0.201227686 | 0.177915757 |
| 0.205025371 | 0.19518034  | 0.087187963 | 0.082398716 |
| 0.045487435 | 0.013637988 | 0.001046344 | 0.004456989 |
| 0.212313664 | 0.011156645 | 0.038373459 | 0.028959105 |
| 0.314149096 | 0.084070168 | 0.161408004 | 0.167248887 |
| 0.254458258 | 0.02166266  | 0.274603993 | 0.050040539 |
| 0.115210287 | 0.07239656  | 0.063844117 | 0.097425495 |
| 0.264109259 | 0.081945225 | 0.046352462 | 0.177164606 |
| 0.173173056 | 0.23834116  | 0.176990299 | 0.199893183 |
| 0.170634508 | 0.192831625 | 0.027455764 | 0.028228719 |
| 0.220180631 | 0.210713259 | 0.22807303  | 0.174514895 |
| 0.026918822 | 0.150890886 | 0.11395268  | 0.278289371 |
| 0.015862346 | 0.025263458 | 0.030904624 | 0.147596668 |
| 0.130664277 | 0.108165458 | 0.059043554 | 0.051548323 |
| 0.005921026 | 0.030781325 | 0.028901504 | 0.102452369 |
| 0.107916192 | 0.020329949 | 0.154466142 | 0.009889396 |
| 0.008652513 | 0.102699563 | 0.164119486 | 0.09963059  |
| 0.11056342  | 0.153295165 | 0.020971735 | 0.189000593 |
| 0.000383121 | 0.256464994 | 0.335023208 | 0.06134094  |
| 0.119503764 | 0.006670316 | 0.210208817 | 0.138220662 |
| 0.269752309 | 0.212332341 | 0.266730257 | 0.247136264 |
| 0.040801072 | 0.303090481 | 0.195350875 | 0.085306371 |
| 0.208530587 | 0.054573683 | 0.026310316 | 0.321028492 |
| 0.260178783 | 0.185425683 | 0.063870008 | 0.293341776 |
| 0.132037191 | 0.192536692 | 0.097421937 | 0.110455416 |
| 0.03853453  | 0.124231338 | 0.139629902 | 0.232197645 |
| 0.168386129 | 0.158371865 | 0.169018284 | 0.193397758 |
| 0.123107428 | 0.041435517 | 0.218147833 | 0.048785757 |
| 0.269180977 | 0.014111013 | 0.229650257 | 0.114737147 |
| 0.094053401 | 0.216887393 | 0.192526835 | 0.115919873 |
| 0.225380236 | 0.018866007 | 0.013393062 | 0.126616864 |
| 0.019403566 | 0.065386825 | 0.133266789 | 0.201085568 |
| 0.033903913 | 0.044647438 | 0.104911101 | 0.030024554 |
| 0.075282307 | 1           | 0.197472991 | 0.214423555 |
| 0.26331137  | 0.177903475 | 0.059416167 | 0.141306801 |
| 0.157640783 | 0.268257805 | 0.000912869 | 0.067400129 |
| 0.134286008 | 0.113388342 | 0.238486222 | 0.14773366  |
| 0.145837781 | 0.062912918 | 0.104453464 | 0.24452461  |
| 0.150126209 | 0.091963714 | 0.104792371 | 0.312619284 |
| 0.022895317 | 0.229995479 | 0.104938734 | 0.070623435 |
| 0.025682681 | 0.161120923 | 0.118870527 | 0.130409506 |
| 0.012173668 | 0.035460517 | 0.036554654 | 0.081221847 |
| 0.01640791  | 0.133395867 | 0.142164767 | 0.162182115 |



|             |             |             |             |
|-------------|-------------|-------------|-------------|
| 0.102019768 | 0.24640905  | 0.08965192  | 0.115144627 |
| 0.001803514 | 0.04347229  | 0.06565621  | 0.213306774 |
| 0.064176995 | 0.273141417 | 0.122609551 | 0.163797417 |
| 0.25905768  | 0.277592195 | 0.010304228 | 0.154740591 |
| 0.190322628 | 0.052819606 | 0.132102021 | 0.282240303 |
| 0.086602811 | 0.212143359 | 0.006268471 | 0.300985892 |
| 0.141187967 | 0.137196733 | 0.281849388 | 0.144867125 |
| 0.180939048 | 0.065188058 | 0.060485025 | 0.212379946 |
| 0.148250927 | 0.005119273 | 0.038569069 | 0.181196645 |
| 0.118299044 | 0.015162542 | 0.247074225 | 0.207038175 |
| 0.129815009 | 0.30230967  | 0.300714259 | 0.071519879 |
| 0.152013555 | 0.121330229 | 0.03287177  | 0.286978822 |
| 0.26669127  | 0.015634354 | 0.149071547 | 0.054102169 |
| 0.0938347   | 0.174974702 | 0.164715129 | 0.00571238  |
| 0.050143964 | 0.102719176 | 0.004433468 | 0.139517747 |
| 0.171158553 | 0.020395671 | 0.094495095 | 0.112890123 |
| 0.120174912 | 0.218593781 | 0.143710197 | 0.124344431 |
| 0.087159288 | 0.091755595 | 0.175396845 | 0.018514036 |
| 0.013775839 | 0.077227963 | 0.077104864 | 0.074049043 |
| 0.015629969 | 0.078741456 | 0.070033731 | 0.042339089 |
| 0.007033547 | 0.032566679 | 0.029407624 | 0.143540538 |
| 0.036607076 | 0.012790319 | 0.123462989 | 0.105419159 |
| 0.106794539 | 0.0824445   | 0.200343447 | 0.299512529 |
| 0.106634638 | 0.068273393 | 0.130375847 | 0.00825582  |
| 0.198701313 | 0.039239288 | 0.039412063 | 0.164323087 |
| 0.038273413 | 0.284149216 | 0.027330574 | 0.126016741 |
| 0.083981844 | 0.133563467 | 0.268035155 | 0.003548591 |
| 0.158276216 | 0.159965009 | 0.312991954 | 0.096507366 |
| 0.117384654 | 0.199679256 | 0.010770454 | 0.168795432 |
| 0.149378793 | 0.072066135 | 0.213984108 | 0.106067983 |
| 0.115921623 | 0.277102847 | 0.14589422  | 0.166772852 |
| 0.138682817 | 0.063960608 | 0.013195998 | 0.276109007 |
| 0.208981984 | 0.276723892 | 0.133631229 | 0.193033231 |
| 0.034969938 | 0.002940668 | 0.244513918 | 0.223156784 |
| 0.162819496 | 0.218374696 | 0.283667822 | 0.105300807 |
| 0.204293225 | 0.051109097 | 0.007885573 | 0.2144524   |
| 0.090698441 | 0.202085994 | 0.054074831 | 0.223482407 |
| 0.157119019 | 0.056668535 | 0.07880258  | 0.082452996 |
| 0.127124162 | 0.05360492  | 0.146109638 | 0.169283555 |
| 0.186012234 | 0.087446817 | 0.054909932 | 0.292224241 |
| 0.009259056 | 0.014870318 | 0.205878344 | 0.103758708 |
| 0.056051083 | 0.109181989 | 0.025731206 | 0.050410895 |
| 0.01750354  | 0.144754517 | 0.309561808 | 0.031107348 |
| 0.047603267 | 0.054528203 | 0.32834197  | 0.075132937 |
| 0.204650026 | 0.214137309 | 0.175206585 | 0.108741954 |
| 0.22136603  | 0.18063056  | 0.121889894 | 0.20172849  |
| 0.110046111 | 0.18463036  | 0.185039398 | 0.00825506  |
| 0.271983324 | 0.035889019 | 0.002499893 | 0.194029207 |
| 0.154471061 | 0.132874942 | 0.001467536 | 0.072536003 |
| 0.127064397 | 0.318183097 | 0.145488987 | 0.19040345  |
| 0.01514965  | 0.291318847 | 0.049034594 | 0.24474491  |
| 0.162625882 | 0.05618742  | 0.085836616 | 0.162544343 |
| 0.163805775 | 0.207833264 | 0.107875394 | 0.191130091 |
| 0.141695254 | 0.157797612 | 0.012213137 | 0.225790012 |

|             |             |             |             |
|-------------|-------------|-------------|-------------|
| 0.167106749 | 0.184902137 | 0.213650881 | 0.184061084 |
| 0.231930324 | 0.313199892 | 0.174941443 | 0.014708349 |
| 0.022900321 | 0.046781507 | 0.015883651 | 0.007536922 |
| 0.098114821 | 0.067029698 | 0.222808683 | 0.285483378 |
| 0.216066853 | 0.062266238 | 0.031109614 | 0.168452749 |
| 0.199449621 | 0.260873168 | 0.069513685 | 0.006638104 |
| 0.022751475 | 0.008257149 | 0.159026756 | 0.268651849 |
| 0.214889966 | 0.005195466 | 0.029670916 | 0.014684035 |
| 0.043614312 | 0.225128275 | 0.175892364 | 0.293352186 |
| 0.27068247  | 0.135027334 | 0.013692303 | 0.304455132 |
| 0.033891157 | 0.119030489 | 0.214471146 | 0.153841773 |
| 0.119339463 | 0.230237926 | 0.17188574  | 0.242933844 |
| 0.028655763 | 0.290316677 | 0.219172318 | 0.027025989 |
| 0.058865416 | 0.125316346 | 0.072304304 | 0.332713545 |
| 0.156649585 | 0.015740956 | 0.015682816 | 0.006295313 |
| 0.029677509 | 0.272194814 | 0.044839562 | 0.262221777 |
| 0.20353986  | 0.29114743  | 0.083394946 | 0.165480774 |
| 0.00968407  | 0.153419658 | 0.165879993 | 0.003369766 |
| 0.222183641 | 0.055121514 | 0.1977919   | 0.004883028 |
| 0.056022831 | 0.214197046 | 0.020936513 | 0.096599121 |
| 0.055709419 | 0.102841917 | 0.243504428 | 0.276367217 |
| 0.114327045 | 0.088920653 | 0.290821234 | 0.311377798 |
| 0.079987875 | 0.200318944 | 0.161600621 | 0.064785205 |
| 0.029407698 | 0.068082139 | 0.239053103 | 0.162675013 |
| 0.047997526 | 0.287309457 | 0.03569994  | 0.23900474  |
| 0.192843279 | 0.233533076 | 0.194638703 | 0.135216699 |
| 0.037741102 | 0.131851539 | 0.099838116 | 0.003687315 |
| 0.224428123 | 0.229302617 | 0.172231865 | 0.027747939 |
| 0.115908816 | 0.167042022 | 0.039539268 | 0.027837209 |
| 0.131537048 | 0.071309403 | 0.029851577 | 0.328415834 |
| 0.206164313 | 0.160911965 | 0.030260077 | 0.055888401 |
| 0.216723171 | 0.180438793 | 0.0150874   | 0.161201953 |
| 0.259030202 | 0.164110839 | 0.269667679 | 0.27744265  |
| 0.057667031 | 0.169929636 | 0.208170557 | 0.103936747 |
| 0.134662923 | 0.154774186 | 0.179101259 | 0.012093242 |
| 0.021393598 | 0.182887577 | 0.021317675 | 0.21747316  |
| 0.113925403 | 0.058640842 | 0.054097752 | 0.322301294 |
| 0.067839357 | 0.204376615 | 0.027542311 | 0.044022587 |
| 0.290293632 | 0.149710481 | 0.260023717 | 0.046828533 |
| 0.021056726 | 0.152731937 | 0.021251997 | 0.139619977 |
| 0.091174445 | 0.181376066 | 0.114719979 | 0.164506199 |
| 0.051252265 | 0.14542294  | 0.184516934 | 0.060157517 |
| 0.024959215 | 0.029552735 | 0.169631892 | 0.017202264 |
| 0.017576226 | 0.287233689 | 0.117145569 | 0.073038726 |
| 0.048909664 | 0.1548345   | 0.145511739 | 0.026488337 |
| 0.126910458 | 0.180195985 | 0.033039596 | 0.197398806 |
| 0.147333884 | 0.123793262 | 0.131914485 | 0.020966917 |
| 0.058299975 | 0.164257859 | 0.211681184 | 0.182106155 |
| 0.257729151 | 0.252775419 | 0.140608884 | 0.17573043  |
| 0.075503837 | 0.165735988 | 0.020066918 | 0.262388141 |
| 0.048275026 |             |             |             |
| CRIP2       | 0.385100637 | 0.511029278 | 0.350447077 |
| 0.356129964 | 0.393963431 | 0.313423202 | 0.1769308   |
| 0.169416459 | 0.05871614  | 0.004191329 | 0.019315252 |

|             |             |             |             |
|-------------|-------------|-------------|-------------|
| 0.409970078 | 0.191189955 | 0.251665977 | 0.249277023 |
| 0.366900549 | 0.14267521  | 0.330176813 | 0.216397957 |
| 0.36694401  | 0.079667428 | 0.361087573 | 0.079329821 |
| 0.275011374 | 0.095453214 | 0.060346037 | 0.225898061 |
| 0.383050445 | 0.069211765 | 0.283689897 | 0.340919304 |
| 0.114942764 | 0.39816245  | 0.517281443 | 0.399141546 |
| 0.523298411 | 0.357282305 | 0.024439102 | 0.236533707 |
| 0.386694335 | 0.372573096 | 0.359054071 | 0.290009493 |
| 0.035461657 | 0.490863155 | 0.208766103 | 0.369654882 |
| 0.197280593 | 0.028345153 | 0.201269128 | 0.439849923 |
| 0.478197129 | 0.371351689 | 0.190253604 | 0.131965127 |
| 0.18914385  | 0.223210704 | 0.259071813 | 0.291176864 |
| 0.201632227 | 0.13889698  | 0.486323884 | 0.063002308 |
| 0.130574983 | 0.232695395 | 0.172578288 | 0.236297135 |
| 0.322384366 | 0.335154112 | 0.018297038 | 0.384636443 |
| 0.003435893 | 0.34209258  | 0.361108816 | 0.255079746 |
| 0.041983306 | 0.022454413 | 0.193571558 | 0.293884444 |
| 0.413448288 | 0.460442132 | 0.448874617 | 0.462154232 |
| 0.187114194 | 0.286702013 | 0.372453833 | 0.161980757 |
| 0.396191513 | 0.151077093 | 0.098545927 | 0.376813795 |
| 0.460115655 | 0.520077073 | 0.183762135 | 0.246218655 |
| 0.353808401 | 0.464438888 | 0.355679995 | 0.376790428 |
| 0.268067835 | 0.05645907  | 0.43060246  | 0.495251087 |
| 0.372816943 | 0.304334975 | 0.145228625 | 0.365985837 |
| 0.059390798 | 0.322488279 | 0.314144929 | 0.203785706 |
| 0.424765083 | 0.012583721 | 0.208664324 | 0.319324112 |
| 0.21433434  | 0.387893343 | 0.512662868 | 0.164610953 |
| 0.39558448  | 0.023141319 | 0.108868344 | 0.038253669 |
| 0.306573466 | 0.154665313 | 0.490181831 | 0.413927941 |
| 0.231919325 | 0.353057394 | 0.233624704 | 0.002615295 |
| 0.02958514  | 0.197472991 | 1           | 0.361144925 |
| 0.385020082 | 0.375384394 | 0.192824504 | 0.350236752 |
| 0.38968213  | 0.443586246 | 0.043519794 | 0.08494934  |
| 0.360712134 | 0.199679767 | 0.221051408 | 0.411429324 |
| 0.272149735 | 0.102638564 | 0.124641362 | 0.488018561 |
| 0.413163413 | 0.07894984  | 0.327557722 | 0.371500427 |
| 0.283511227 | 0.336431641 | 0.104676913 | 0.273862108 |
| 0.046212084 | 0.48237771  | 0.032747272 | 0.305482911 |
| 0.196322095 | 0.173628564 | 0.013821121 | 0.235172674 |
| 0.247614953 | 0.395942997 | 0.484744618 | 0.105010126 |
| 0.3091625   | 0.363967762 | 0.300324418 | 0.366596032 |
| 0.007113236 | 0.047423364 | 0.26473858  | 0.493224782 |
| 0.258000705 | 0.484360611 | 0.281924163 | 0.276953696 |
| 0.263298561 | 0.384880169 | 0.003674182 | 0.494589891 |
| 0.519383777 | 0.276061682 | 0.362204612 | 0.395390084 |
| 0.309794995 | 0.388246923 | 0.047008064 | 0.387820288 |
| 0.340279051 | 0.076130791 | 0.469005989 | 0.151680777 |
| 0.465666846 | 0.037803371 | 0.29867201  | 0.385239414 |
| 0.397161605 | 0.009294069 | 0.18688792  | 0.334508876 |
| 0.03089093  | 0.078573179 | 0.381971971 | 0.35156177  |
| 0.313427439 | 0.393764843 | 0.43752262  | 0.291376921 |
| 0.379478426 | 0.219524795 | 0.013200658 | 0.303759646 |
| 0.395733828 | 0.338590753 | 0.42865971  | 0.205495891 |
| 0.31694383  | 0.454599099 | 0.378071605 | 0.165187197 |

|             |             |             |             |
|-------------|-------------|-------------|-------------|
| 0.036708483 | 0.280776698 | 0.01842566  | 0.276849922 |
| 0.365298226 | 0.110332092 | 0.321354667 | 0.178610851 |
| 0.074129741 | 0.505471923 | 0.175970745 | 0.250893621 |
| 0.127967627 | 0.369901316 | 0.229445408 | 0.220791555 |
| 0.209835368 | 0.144128323 | 0.292964214 | 0.314455602 |
| 0.03194178  | 0.094150657 | 0.01842168  | 0.385542941 |
| 0.151645443 | 0.333265906 | 0.330841037 | 0.377147191 |
| 0.332977529 | 0.118880174 | 0.345005021 | 0.255452253 |
| 0.103709239 | 0.015733223 | 0.492660169 | 0.36472309  |
| 0.304314238 | 0.130650025 | 0.044484762 | 0.337842694 |
| 0.431082134 | 0.263345007 | 0.237430127 | 0.430431753 |
| 0.028517087 | 0.452451893 | 0.232885765 | 0.115711991 |
| 0.37251651  | 0.242906531 | 0.403289983 | 0.043578151 |
| 0.364391603 | 0.462060418 | 0.295308996 | 0.158897456 |
| 0.39507993  | 0.365286915 | 0.026535382 | 0.36508087  |
| 0.373667321 | 0.032545058 | 0.518581134 | 0.138614365 |
| 0.022655113 | 0.402121608 | 0.378700706 | 0.07194792  |
| 0.073370059 | 0.285926451 | 0.037573224 | 0.266805873 |
| 0.497071176 | 0.367186523 | 0.371715703 | 0.210789773 |
| 0.036486454 | 0.015070451 | 0.216760844 | 0.373375127 |
| 0.519024536 | 0.50469238  | 0.257361696 | 0.336108887 |
| 0.218797046 | 0.269785512 | 0.133954764 | 0.490528112 |
| 0.207418678 | 0.52050598  | 0.007302036 | 0.390785777 |
| 0.51400199  | 0.270268192 | 0.072977633 | 0.261009992 |
| 0.362374001 | 0.03813201  | 0.204764833 | 0.494327481 |
| 0.394145243 | 0.268390424 | 0.276890431 | 0.409678742 |
| 0.012875504 | 0.037958435 | 0.333431554 | 0.175965386 |
| 0.326929215 | 0.184916106 | 0.059512817 | 0.291517645 |
| 0.039793122 | 0.442356274 | 0.411644435 | 0.043815938 |
| 0.284679127 | 0.267076551 | 0.360518042 | 0.033961088 |
| 0.42042863  | 0.50202242  | 0.522283398 | 0.161029613 |
| 0.41490828  | 0.470453124 | 0.368183574 | 0.082453349 |
| 0.018550754 | 0.518288584 | 0.352267958 | 0.020675921 |
| 0.432867902 | 0.20770467  | 0.013971973 | 0.483766187 |
| 0.167461505 | 0.463844497 | 0.002041499 | 0.089072852 |
| 0.045864285 | 0.40887882  | 0.469478433 | 0.340553747 |
| 0.204516934 | 0.34251052  | 0.009502972 | 0.515043319 |
| 0.485124713 | 0.014390199 | 0.144125742 | 0.396271929 |
| 0.383647278 | 0.523075811 | 0.279036479 | 0.410101261 |
| 0.394753238 | 0.503285119 | 0.213687717 | 0.242849731 |
| 0.386445699 | 0.492596175 | 0.368868914 | 0.443099791 |
| 0.419823999 | 0.394668797 | 0.245426536 | 0.012194023 |
| 0.09113941  | 0.188131039 | 0.239630552 | 0.063258038 |
| 0.287240579 | 0.121738915 | 0.472045461 | 0.426378758 |
| 0.462599596 | 0.005504758 | 0.135289503 | 0.389793844 |
| 0.405364438 | 0.43444439  | 0.023588405 | 0.004903033 |
| 0.008111752 | 0.016209601 | 0.324544146 | 0.230687565 |
| 0.46518122  | 0.209414163 | 0.004853419 | 0.04023088  |
| 0.245012215 | 0.362267197 | 0.499891777 | 0.341494867 |
| 0.398214466 | 0.084497336 | 0.236341106 | 0.359149978 |
| 0.058977619 | 0.305688332 | 0.460711984 | 0.463587511 |
| 0.047835457 | 0.229253463 | 0.369988005 | 0.450900231 |
| 0.072320862 | 0.307293324 | 0.422693115 | 0.274485396 |
| 0.020325747 | 0.077886627 | 0.055283984 | 0.395460451 |

|             |             |             |             |
|-------------|-------------|-------------|-------------|
| 0.510912714 | 0.08047191  | 0.034891568 | 0.137757423 |
| 0.106306813 | 0.434207806 | 0.154201805 | 0.488603939 |
| 0.384999849 | 0.387096057 | 0.08513364  | 0.468661259 |
| 0.032887168 | 0.493618231 | 0.318583746 | 0.045941014 |
| 0.29686769  | 0.01416976  | 0.482268735 | 0.113286936 |
| 0.307989235 | 0.364942405 | 0.14187348  | 0.019796029 |
| 0.161687958 | 0.055202749 | 0.433141923 | 0.411863237 |
| 0.040013811 | 0.209503995 | 0.282596582 | 0.377438294 |
| 0.250839164 | 0.37978246  | 0.504098948 | 0.345643906 |
| 0.071262999 | 0.177316024 | 0.367415579 | 0.36946474  |
| 0.235068676 | 0.45873424  | 0.249534019 | 0.513135179 |
| 0.362396866 | 0.440359572 | 0.461313719 | 0.28955937  |
| 0.248142611 | 0.35141675  | 0.318793995 | 0.017238134 |
| 0.319888469 | 0.409732179 | 0.331561228 | 0.131045738 |
| 0.235013963 | 0.359162694 | 0.048203588 | 0.205264657 |
| 0.313206324 | 0.264963104 | 0.140684642 | 0.386358544 |
| 0.36779319  | 0.366635929 | 0.047573742 | 0.049961968 |
| 0.533693734 | 0.418643628 | 0.111582762 | 0.366775803 |
| 0.171720105 | 0.295817848 | 0.404657403 | 0.408800823 |
| 0.321465821 | 0.4171661   | 0.38463674  | 0.345410519 |
| 0.417051738 | 0.226767797 | 0.520533686 | 0.082482734 |
| 0.06754653  | 0.406269682 | 0.08908838  | 0.094253919 |
| 0.13619491  | 0.025540399 | 0.269927387 | 0.394065577 |
| 0.357678803 | 0.353667522 | 0.315728338 | 0.074823422 |
| 0.317324015 | 0.350958738 | 0.330624988 | 0.173957341 |
| 0.071111502 | 0.492853418 | 0.009223198 | 0.061047349 |
| 0.392997352 | 0.37448874  | 0.344954104 | 0.224899685 |
| 0.270407534 | 0.154823379 | 0.281807162 | 0.265669882 |
| 0.289511745 | 0.342679159 | 0.37107207  | 0.027842615 |
| 0.019085723 | 0.462864459 | 0.340052096 | 0.025202968 |
| 0.091382161 | 0.343868459 | 0.316087521 | 0.190181235 |
| 0.024652592 | 0.476081776 | 0.27600994  | 0.385304814 |
| 0.303952037 | 0.068834884 | 0.355372249 | 0.083255629 |
| 0.057255725 | 0.453817094 | 0.35830726  | 0.515391064 |
| 0.34130731  | 0.371956718 | 0.451032875 | 0.400271942 |
| 0.127486667 | 0.355505258 | 0.021841557 | 0.395981731 |
| 0.347631344 |             |             |             |

|             |             |             |             |
|-------------|-------------|-------------|-------------|
| CRMP1       | 0.381611135 | 0.421783596 | 0.198024118 |
| 0.335705625 | 0.231350901 | 0.203311977 | 0.121318837 |
| 0.164464648 | 0.048668282 | 0.003756888 | 0.008749639 |
| 0.284232788 | 0.071174188 | 0.127799364 | 0.111216153 |
| 0.387109461 | 0.087137965 | 0.254919506 | 0.166819614 |
| 0.366961022 | 0.072057145 | 0.315701221 | 0.086471835 |
| 0.157908762 | 0.055641643 | 0.049442867 | 0.102120348 |
| 0.432387233 | 0.059883714 | 0.125457147 | 0.342685396 |
| 0.14244198  | 0.412138151 | 0.400891003 | 0.269694859 |
| 0.385961781 | 0.333152275 | 0.066583657 | 0.097432932 |
| 0.422488263 | 0.310241358 | 0.357170445 | 0.215683343 |
| 0.040735131 | 0.384526441 | 0.13993572  | 0.272641273 |
| 0.140330964 | 0.023225784 | 0.116828624 | 0.373034039 |
| 0.330091501 | 0.192754613 | 0.152000273 | 0.093000934 |
| 0.048118666 | 0.126687632 | 0.070757184 | 0.262120381 |
| 0.130103872 | 0.088826606 | 0.35345261  | 0.050035271 |
| 0.079145255 | 0.207380461 | 0.147466554 | 0.173784418 |

|             |             |             |             |
|-------------|-------------|-------------|-------------|
| 0.139644953 | 0.336391919 | 0.056293877 | 0.257844534 |
| 0.003003258 | 0.357973493 | 0.289564625 | 0.085336091 |
| 0.053834093 | 0.015184464 | 0.158931669 | 0.215341108 |
| 0.448007966 | 0.421439278 | 0.410968649 | 0.399183228 |
| 0.101535169 | 0.2165481   | 0.190190349 | 0.107569074 |
| 0.392449047 | 0.089604353 | 0.101916212 | 0.374001076 |
| 0.411850884 | 0.396082056 | 0.116260887 | 0.177495455 |
| 0.283475743 | 0.414961556 | 0.160652098 | 0.160104211 |
| 0.087027731 | 0.077165741 | 0.330730134 | 0.417711906 |
| 0.371881335 | 0.126166165 | 0.104291098 | 0.383141148 |
| 0.080467446 | 0.17941262  | 0.267587432 | 0.169534664 |
| 0.44902891  | 0.021089667 | 0.134646958 | 0.19314385  |
| 0.243569957 | 0.381168568 | 0.389493111 | 0.125983585 |
| 0.234540253 | 0.030068194 | 0.040561664 | 0.074555498 |
| 0.157018101 | 0.075490627 | 0.348134958 | 0.375324717 |
| 0.166191453 | 0.149464455 | 0.171371719 | 0.01115365  |
| 0.04001275  | 0.214423555 | 0.361144925 | 1           |
| 0.39828898  | 0.332614667 | 0.085456718 | 0.316246167 |
| 0.243500133 | 0.407221889 | 0.017479345 | 0.107517512 |
| 0.213230044 | 0.209329172 | 0.187978368 | 0.243257237 |
| 0.129484325 | 0.128394792 | 0.114148288 | 0.434536017 |
| 0.375155708 | 0.080728207 | 0.225411651 | 0.368554539 |
| 0.100775978 | 0.194518626 | 0.11855942  | 0.143669932 |
| 0.052263995 | 0.352639361 | 0.044778532 | 0.219486772 |
| 0.061290083 | 0.088929062 | 0.061897143 | 0.166149608 |
| 0.116213206 | 0.289122666 | 0.352676808 | 0.128937918 |
| 0.158804896 | 0.275141833 | 0.19636494  | 0.24056237  |
| 0.003914322 | 0.090094848 | 0.16262101  | 0.409448083 |
| 0.193294254 | 0.447995443 | 0.203832884 | 0.189369478 |
| 0.186410649 | 0.409260154 | 0.011691124 | 0.377193444 |
| 0.396512232 | 0.145002791 | 0.195594825 | 0.313748734 |
| 0.107338932 | 0.371497384 | 0.045541038 | 0.370697293 |
| 0.31289422  | 0.110466877 | 0.445967252 | 0.097999952 |
| 0.38920439  | 0.03805125  | 0.163018348 | 0.320473365 |
| 0.267321552 | 0.013061391 | 0.104993817 | 0.311606838 |
| 0.049171144 | 0.068295782 | 0.392042222 | 0.305535167 |
| 0.188273602 | 0.404013511 | 0.449627414 | 0.095944387 |
| 0.202681759 | 0.197595436 | 0.037548715 | 0.199308323 |
| 0.396805925 | 0.118804524 | 0.363323821 | 0.150646299 |
| 0.227183321 | 0.380603242 | 0.31740487  | 0.058089407 |
| 0.04417969  | 0.176792445 | 0.021187147 | 0.141205633 |
| 0.329619998 | 0.059497877 | 0.135754045 | 0.226928321 |
| 0.069544021 | 0.417964091 | 0.099954007 | 0.108695544 |
| 0.0658607   | 0.182512066 | 0.196487546 | 0.070500619 |
| 0.057889757 | 0.111490155 | 0.122101499 | 0.13509766  |
| 0.040578642 | 0.07191646  | 0.055698208 | 0.106733709 |
| 0.041705667 | 0.094336955 | 0.090956319 | 0.301944181 |
| 0.158434045 | 0.061072351 | 0.149898079 | 0.152946012 |
| 0.087384884 | 0.029171423 | 0.412248624 | 0.365356951 |
| 0.28346889  | 0.118136501 | 0.07024183  | 0.091719645 |
| 0.375260666 | 0.119960107 | 0.138660596 | 0.360021435 |
| 0.065124734 | 0.437730571 | 0.091828718 | 0.08115413  |
| 0.125765382 | 0.14197312  | 0.428642439 | 0.025426388 |
| 0.281692017 | 0.375086572 | 0.244551512 | 0.091916046 |

|             |             |             |             |
|-------------|-------------|-------------|-------------|
| 0.314484965 | 0.307097068 | 0.036419651 | 0.343583712 |
| 0.326579002 | 0.040984557 | 0.418293102 | 0.103609271 |
| 0.041284143 | 0.337475665 | 0.258550302 | 0.077752768 |
| 0.078284076 | 0.106796011 | 0.051981959 | 0.209647335 |
| 0.411118576 | 0.334712282 | 0.276307337 | 0.151142938 |
| 0.035748259 | 0.006477038 | 0.159668847 | 0.240087032 |
| 0.393158991 | 0.402614298 | 0.21179814  | 0.122193044 |
| 0.188230084 | 0.099747471 | 0.11145192  | 0.40029239  |
| 0.245138671 | 0.42889521  | 0.022359271 | 0.317263281 |
| 0.368318559 | 0.148493667 | 0.050243745 | 0.156939396 |
| 0.317560227 | 0.052064277 | 0.234675196 | 0.383668455 |
| 0.365629094 | 0.132226798 | 0.108854169 | 0.373245112 |
| 0.022376596 | 0.052774778 | 0.219478097 | 0.098226386 |
| 0.129666784 | 0.135977975 | 0.033475504 | 0.182830132 |
| 0.033382592 | 0.347025109 | 0.441721825 | 0.036700351 |
| 0.128201523 | 0.181747492 | 0.300567613 | 0.050353989 |
| 0.333050464 | 0.409284959 | 0.402675166 | 0.191230371 |
| 0.362567611 | 0.355509442 | 0.168798729 | 0.106023391 |
| 0.032042301 | 0.393167045 | 0.342152808 | 0.018952546 |
| 0.434440321 | 0.114726753 | 0.007141078 | 0.418396877 |
| 0.152318027 | 0.352142136 | 0.005411454 | 0.104202859 |
| 0.075914787 | 0.422001788 | 0.352078074 | 0.341425403 |
| 0.071571313 | 0.339443237 | 0.029972712 | 0.438613963 |
| 0.373703576 | 0.0217139   | 0.104805482 | 0.303370081 |
| 0.262854179 | 0.446433046 | 0.105521325 | 0.321656395 |
| 0.21058819  | 0.359328575 | 0.106018267 | 0.173088256 |
| 0.339315909 | 0.363538538 | 0.379276578 | 0.404075747 |
| 0.399356123 | 0.34687952  | 0.193730124 | 0.017438648 |
| 0.058067153 | 0.133950605 | 0.06547187  | 0.028394511 |
| 0.240783806 | 0.076113172 | 0.428816979 | 0.428083034 |
| 0.37726048  | 0.016753446 | 0.124695097 | 0.328252896 |
| 0.406088938 | 0.452105921 | 0.075221313 | 0.009464074 |
| 0.016551373 | 0.009019534 | 0.26256103  | 0.1753406   |
| 0.398499644 | 0.062127464 | 0.013511435 | 0.063568862 |
| 0.171064948 | 0.229230056 | 0.38473334  | 0.353997971 |
| 0.379718446 | 0.100836095 | 0.068007576 | 0.394631217 |
| 0.041750597 | 0.282802395 | 0.380442705 | 0.371954355 |
| 0.092216829 | 0.170107631 | 0.240086878 | 0.428803812 |
| 0.027436992 | 0.232876493 | 0.309112226 | 0.107954833 |
| 0.066331439 | 0.075949496 | 0.051935746 | 0.424501243 |
| 0.361535819 | 0.034606338 | 0.02090776  | 0.080078415 |
| 0.060660296 | 0.43265349  | 0.094435174 | 0.443275579 |
| 0.383301105 | 0.416002053 | 0.081360677 | 0.378331095 |
| 0.024784958 | 0.364186479 | 0.139179928 | 0.027907849 |
| 0.256878784 | 0.042511127 | 0.388188057 | 0.02788043  |
| 0.160919011 | 0.373422329 | 0.075896269 | 0.035701393 |
| 0.088088739 | 0.060936838 | 0.39859856  | 0.390242557 |
| 0.072378832 | 0.181948395 | 0.213856037 | 0.378147332 |
| 0.17180222  | 0.321222957 | 0.385654444 | 0.142590104 |
| 0.064161198 | 0.1360703   | 0.387819449 | 0.324261036 |
| 0.167358566 | 0.434770503 | 0.088199641 | 0.440649534 |
| 0.355261864 | 0.433887372 | 0.377053445 | 0.195299729 |
| 0.112631886 | 0.258046369 | 0.226389982 | 0.016953583 |
| 0.255315949 | 0.374719598 | 0.252906591 | 0.060241128 |

|             |             |             |             |
|-------------|-------------|-------------|-------------|
| 0.111424171 | 0.178844775 | 0.106340215 | 0.19337196  |
| 0.120642531 | 0.184314064 | 0.092036596 | 0.443696697 |
| 0.349454976 | 0.32720643  | 0.10779167  | 0.044445222 |
| 0.444153026 | 0.38971337  | 0.101757676 | 0.288080832 |
| 0.170381961 | 0.172891421 | 0.385472231 | 0.36843373  |
| 0.160436114 | 0.335217713 | 0.388527567 | 0.242868568 |
| 0.344099887 | 0.166892376 | 0.402001238 | 0.107922397 |
| 0.048268879 | 0.291937787 | 0.045508417 | 0.100114115 |
| 0.106141195 | 0.042117125 | 0.091745245 | 0.390545112 |
| 0.119797806 | 0.259426387 | 0.174480572 | 0.092325001 |
| 0.217216583 | 0.216366133 | 0.255304135 | 0.10553502  |
| 0.048903799 | 0.362382732 | 0.016535861 | 0.079804886 |
| 0.140162564 | 0.316476435 | 0.133018091 | 0.165556411 |
| 0.102846907 | 0.149727732 | 0.17733872  | 0.152835067 |
| 0.078692906 | 0.178859879 | 0.314063745 | 0.05535242  |
| 0.03504273  | 0.450131098 | 0.208099106 | 0.064308956 |
| 0.094889386 | 0.290292275 | 0.283125814 | 0.085245899 |
| 0.04161797  | 0.351967969 | 0.09431794  | 0.23071627  |
| 0.232478818 | 0.105231166 | 0.341271444 | 0.102732052 |
| 0.120344594 | 0.388577726 | 0.217436086 | 0.386291716 |
| 0.217110435 | 0.34718091  | 0.366198525 | 0.34713755  |
| 0.184107534 | 0.212293845 | 0.035919504 | 0.435520464 |
| 0.103506008 |             |             |             |

CRYBG3 0.369237892

0.501084084

0.354487412

|             |             |             |             |
|-------------|-------------|-------------|-------------|
| 0.366410301 | 0.379829525 | 0.308594777 | 0.238740157 |
| 0.239290826 | 0.110803626 | 0.00665179  | 0.024746846 |
| 0.35942047  | 0.170094024 | 0.249827899 | 0.284759551 |
| 0.386761526 | 0.148879208 | 0.392243406 | 0.281622815 |
| 0.389104432 | 0.122757964 | 0.364086481 | 0.140146932 |
| 0.300624456 | 0.11355515  | 0.094942054 | 0.248052617 |
| 0.43861177  | 0.110461467 | 0.260608012 | 0.350215496 |
| 0.162393547 | 0.406934238 | 0.486905654 | 0.344667288 |
| 0.471017837 | 0.335592632 | 0.029863559 | 0.254541662 |
| 0.421911638 | 0.360076093 | 0.379646245 | 0.323839048 |
| 0.068810407 | 0.456361607 | 0.261938393 | 0.372451525 |
| 0.257167744 | 0.042228844 | 0.232805433 | 0.431476386 |
| 0.425439904 | 0.327632274 | 0.267879349 | 0.190163309 |
| 0.144593038 | 0.22746831  | 0.192332787 | 0.284974366 |
| 0.253408188 | 0.164918356 | 0.443753128 | 0.114622809 |
| 0.173136295 | 0.31572875  | 0.198316425 | 0.297702766 |
| 0.307691535 | 0.345696868 | 0.048768666 | 0.326811667 |
| 0.004008855 | 0.384770745 | 0.375716214 | 0.243491472 |
| 0.071392319 | 0.025785699 | 0.224589315 | 0.322419244 |
| 0.460299061 | 0.454455899 | 0.461667812 | 0.464116238 |
| 0.178826607 | 0.344341935 | 0.335430638 | 0.199957426 |
| 0.42280241  | 0.191130898 | 0.140029001 | 0.378219164 |
| 0.468911483 | 0.484206982 | 0.220800892 | 0.295994903 |
| 0.360218365 | 0.46880087  | 0.343780932 | 0.359735111 |
| 0.258900231 | 0.091795248 | 0.411433113 | 0.484508082 |
| 0.386222884 | 0.270720977 | 0.183507488 | 0.383253391 |
| 0.103632408 | 0.331620616 | 0.345492456 | 0.18332217  |
| 0.469076245 | 0.036193932 | 0.237616508 | 0.326898269 |
| 0.31595778  | 0.396731993 | 0.476894007 | 0.230108225 |
| 0.377034034 | 0.033102976 | 0.11427277  | 0.072307532 |



|             |             |             |             |
|-------------|-------------|-------------|-------------|
| 0.297798702 | 0.138996867 | 0.438744627 | 0.427902166 |
| 0.257651208 | 0.336908038 | 0.311066522 | 0.008236065 |
| 0.047108603 | 0.26331137  | 0.385020082 | 0.39828898  |
| 1           | 0.365410781 | 0.218542702 | 0.334633806 |
| 0.327293539 | 0.456397225 | 0.044605492 | 0.160463335 |
| 0.355850195 | 0.266790985 | 0.281543504 | 0.358996971 |
| 0.285521514 | 0.179761874 | 0.176958228 | 0.500936068 |
| 0.421622438 | 0.126019788 | 0.355770673 | 0.381593403 |
| 0.273053264 | 0.320471366 | 0.164510209 | 0.268837747 |
| 0.081462393 | 0.440286708 | 0.050015075 | 0.356409244 |
| 0.199219917 | 0.14790916  | 0.039696361 | 0.285880168 |
| 0.254546173 | 0.374102915 | 0.431206704 | 0.170852764 |
| 0.306580264 | 0.364624197 | 0.315724025 | 0.307630973 |
| 0.01237503  | 0.091611961 | 0.275166842 | 0.477498165 |
| 0.239250245 | 0.488156417 | 0.338353694 | 0.338865262 |
| 0.304594455 | 0.428330438 | 0.00844348  | 0.460792725 |
| 0.486827316 | 0.266125982 | 0.322062266 | 0.385553083 |
| 0.294289676 | 0.420803979 | 0.04500849  | 0.383904452 |
| 0.301250331 | 0.140459464 | 0.492866641 | 0.183034628 |
| 0.441905552 | 0.063928746 | 0.313238714 | 0.382316402 |
| 0.319035583 | 0.014701661 | 0.218954151 | 0.358161671 |
| 0.05293617  | 0.129252395 | 0.383926862 | 0.371824335 |
| 0.331868608 | 0.411425456 | 0.477265855 | 0.274333053 |
| 0.363728029 | 0.297380986 | 0.032025278 | 0.327453063 |
| 0.402288836 | 0.299167757 | 0.428675756 | 0.276457378 |
| 0.283706431 | 0.453955522 | 0.364484384 | 0.183744002 |
| 0.072829354 | 0.330383888 | 0.028493859 | 0.314402547 |
| 0.375338668 | 0.126056517 | 0.315631707 | 0.227344762 |
| 0.099974585 | 0.498168629 | 0.183212329 | 0.228784087 |
| 0.126041445 | 0.306210217 | 0.316837648 | 0.18071736  |
| 0.152993085 | 0.208867373 | 0.303613758 | 0.337164322 |
| 0.063193366 | 0.119977093 | 0.039970333 | 0.256396118 |
| 0.101206824 | 0.236303171 | 0.230171548 | 0.324739883 |
| 0.292765605 | 0.10721351  | 0.322030545 | 0.300315746 |
| 0.146960622 | 0.031860138 | 0.486420241 | 0.393126435 |
| 0.290649815 | 0.20868034  | 0.076950104 | 0.234238615 |
| 0.436923431 | 0.234154904 | 0.256438071 | 0.429418302 |
| 0.060000382 | 0.476613341 | 0.219501281 | 0.147836582 |
| 0.290729413 | 0.269529432 | 0.458932221 | 0.062337745 |
| 0.367337678 | 0.444693979 | 0.363355384 | 0.201200675 |
| 0.365769194 | 0.376615095 | 0.052606396 | 0.358629898 |
| 0.335567822 | 0.053846446 | 0.492987535 | 0.152271902 |
| 0.043641682 | 0.368569987 | 0.329819056 | 0.116000506 |
| 0.117293931 | 0.274038196 | 0.079741752 | 0.306046732 |
| 0.491482687 | 0.364835841 | 0.349273617 | 0.250546252 |
| 0.061252308 | 0.009932029 | 0.247667037 | 0.353912736 |
| 0.47342709  | 0.475330539 | 0.314065661 | 0.288556446 |
| 0.286968962 | 0.275325059 | 0.186114473 | 0.476146418 |
| 0.278222864 | 0.49529388  | 0.019145365 | 0.36860656  |
| 0.462805378 | 0.262832588 | 0.09713043  | 0.296591291 |
| 0.356567928 | 0.082267361 | 0.30157624  | 0.463756066 |
| 0.42481461  | 0.314057769 | 0.293749881 | 0.391146161 |
| 0.032073514 | 0.079606405 | 0.35737625  | 0.188332412 |
| 0.330727793 | 0.263489437 | 0.053481527 | 0.33765165  |

|             |             |             |             |
|-------------|-------------|-------------|-------------|
| 0.060537573 | 0.424320135 | 0.437261581 | 0.082463876 |
| 0.246910896 | 0.330253756 | 0.36872936  | 0.069070569 |
| 0.405738077 | 0.474421619 | 0.486970806 | 0.25262224  |
| 0.375831864 | 0.445276124 | 0.290448793 | 0.132279728 |
| 0.035097825 | 0.477577877 | 0.3580704   | 0.032472904 |
| 0.461829652 | 0.211213641 | 0.013792567 | 0.484026052 |
| 0.249867953 | 0.415131485 | 0.008780172 | 0.11547093  |
| 0.078978984 | 0.436692569 | 0.445454428 | 0.363513326 |
| 0.18808013  | 0.398104392 | 0.018644884 | 0.50036552  |
| 0.455353114 | 0.026656476 | 0.174013226 | 0.359359517 |
| 0.320762846 | 0.513423489 | 0.262525673 | 0.39420519  |
| 0.314768153 | 0.454603436 | 0.225301608 | 0.291224251 |
| 0.397932753 | 0.4490491   | 0.379146352 | 0.456295765 |
| 0.434233997 | 0.382471931 | 0.301920067 | 0.029120769 |
| 0.151337785 | 0.240620008 | 0.211454782 | 0.090865477 |
| 0.294401885 | 0.15996281  | 0.46965021  | 0.456323082 |
| 0.442432668 | 0.014244486 | 0.201535926 | 0.372239372 |
| 0.43601164  | 0.480282033 | 0.056646761 | 0.010922784 |
| 0.013262938 | 0.020728362 | 0.363016664 | 0.290330722 |
| 0.46774293  | 0.168568307 | 0.012921912 | 0.07990729  |
| 0.313517669 | 0.330852868 | 0.469360142 | 0.375730134 |
| 0.395609018 | 0.13291259  | 0.199471716 | 0.391901621 |
| 0.084570087 | 0.278739938 | 0.451008343 | 0.450922053 |
| 0.087939665 | 0.299213895 | 0.374537814 | 0.480429432 |
| 0.062024894 | 0.336019954 | 0.360795344 | 0.266734783 |
| 0.041029632 | 0.117190404 | 0.096658625 | 0.414644852 |
| 0.452654337 | 0.07345629  | 0.038138115 | 0.134748457 |
| 0.129983882 | 0.458008745 | 0.180143908 | 0.499872875 |
| 0.417825211 | 0.424538998 | 0.11039596  | 0.462278515 |
| 0.052971875 | 0.445581831 | 0.293773187 | 0.058767158 |
| 0.352271297 | 0.034733842 | 0.441025704 | 0.110411015 |
| 0.301441806 | 0.371440231 | 0.200685832 | 0.035819625 |
| 0.177657531 | 0.081316625 | 0.456252657 | 0.429664297 |
| 0.068119383 | 0.313078437 | 0.3432517   | 0.403538732 |
| 0.282124808 | 0.360070132 | 0.470184252 | 0.292137802 |
| 0.120467374 | 0.164517603 | 0.379216239 | 0.334463235 |
| 0.26795986  | 0.476603552 | 0.247236033 | 0.506856479 |
| 0.355569717 | 0.467469077 | 0.442534312 | 0.337127734 |
| 0.223123868 | 0.346768927 | 0.297760441 | 0.027884377 |
| 0.370016679 | 0.421749514 | 0.385657845 | 0.145649202 |
| 0.249154593 | 0.315349944 | 0.113091527 | 0.21107151  |
| 0.261148384 | 0.268515334 | 0.170883497 | 0.438241745 |
| 0.370441667 | 0.330927829 | 0.093660964 | 0.087294708 |
| 0.519341714 | 0.438967873 | 0.183259514 | 0.354558975 |
| 0.240346842 | 0.327787482 | 0.401910952 | 0.388045439 |
| 0.350480334 | 0.39604489  | 0.390936197 | 0.299394009 |
| 0.407105635 | 0.308466238 | 0.491431652 | 0.130380438 |
| 0.095925127 | 0.345844748 | 0.101631826 | 0.139027569 |
| 0.181541816 | 0.053326826 | 0.230968416 | 0.391711438 |
| 0.282018193 | 0.347065094 | 0.307227612 | 0.134867774 |
| 0.346053778 | 0.361754389 | 0.368639775 | 0.213868895 |
| 0.094438716 | 0.457548589 | 0.018942675 | 0.095896925 |
| 0.296666185 | 0.375772019 | 0.292211265 | 0.282561962 |
| 0.247179068 | 0.199150529 | 0.312886691 | 0.272338102 |

|             |             |             |             |
|-------------|-------------|-------------|-------------|
| 0.216422077 | 0.326685401 | 0.379031323 | 0.067428674 |
| 0.040544174 | 0.484750002 | 0.344681088 | 0.051414431 |
| 0.142117443 | 0.341080399 | 0.364796763 | 0.227998754 |
| 0.043607814 | 0.436596909 | 0.257703417 | 0.374649282 |
| 0.356217592 | 0.121647691 | 0.356190458 | 0.13650779  |
| 0.128505535 | 0.434076663 | 0.343900196 | 0.471726692 |
| 0.364477923 | 0.368410568 | 0.427913729 | 0.385299276 |
| 0.190671394 | 0.330886667 | 0.053483942 | 0.439736696 |
| 0.278728208 |             |             |             |
| CTNNBIP1    | 0.398666924 | 0.44759767  | 0.383007202 |
| 0.304805426 | 0.329619507 | 0.300799771 | 0.128056437 |
| 0.146835456 | 0.05446353  | 0.000314017 | 0.008620796 |
| 0.381138904 | 0.121662048 | 0.171765762 | 0.28390968  |
| 0.322330287 | 0.081660121 | 0.345977195 | 0.157247201 |
| 0.316110042 | 0.047847196 | 0.287095662 | 0.051266131 |
| 0.261240315 | 0.065567862 | 0.034235353 | 0.205896174 |
| 0.337110633 | 0.042405229 | 0.239695119 | 0.299988684 |
| 0.07962023  | 0.374037492 | 0.486969095 | 0.327079079 |
| 0.488339497 | 0.399478947 | 0.010750853 | 0.199551708 |
| 0.374572895 | 0.360328888 | 0.309459143 | 0.21955145  |
| 0.018139136 | 0.45958329  | 0.151579399 | 0.343971047 |
| 0.199274975 | 0.012748575 | 0.189210709 | 0.415644825 |
| 0.435996023 | 0.341205575 | 0.166481801 | 0.089768122 |
| 0.121702639 | 0.164641504 | 0.217172884 | 0.269730728 |
| 0.135608044 | 0.107836334 | 0.441051528 | 0.04879521  |
| 0.105096446 | 0.1927264   | 0.11575717  | 0.180795349 |
| 0.314434356 | 0.337824362 | 0.010482992 | 0.401131387 |
| 0.000114251 | 0.299501238 | 0.317801735 | 0.287197199 |
| 0.022327888 | 0.005720723 | 0.134051107 | 0.2258564   |
| 0.354504274 | 0.445903688 | 0.365246391 | 0.392099951 |
| 0.113152546 | 0.23506019  | 0.355615738 | 0.098706888 |
| 0.378195892 | 0.09811992  | 0.081857276 | 0.318203463 |
| 0.380072043 | 0.46293289  | 0.139239822 | 0.204136403 |
| 0.32677549  | 0.40658566  | 0.350490385 | 0.322359535 |
| 0.278382694 | 0.045924498 | 0.386766311 | 0.416204883 |
| 0.353493638 | 0.288284404 | 0.098769652 | 0.322430117 |
| 0.034483324 | 0.333319623 | 0.242304528 | 0.128062066 |
| 0.354479955 | 0.007497263 | 0.154177593 | 0.242252788 |
| 0.192059912 | 0.377420312 | 0.46556543  | 0.113407958 |
| 0.346878285 | 0.009552728 | 0.108385647 | 0.02322591  |
| 0.238601492 | 0.145585768 | 0.476151949 | 0.337495345 |
| 0.166379013 | 0.283162304 | 0.183835461 | 0.000385219 |
| 0.014513394 | 0.177903475 | 0.375384394 | 0.332614667 |
| 0.365410781 | 1           | 0.143496005 | 0.349538608 |
| 0.377062372 | 0.365387843 | 0.04658274  | 0.057664768 |
| 0.332809868 | 0.168152063 | 0.15800236  | 0.353681868 |
| 0.217770705 | 0.074505006 | 0.073133409 | 0.419610517 |
| 0.374777883 | 0.043916902 | 0.321935167 | 0.317443315 |
| 0.219433959 | 0.277089711 | 0.063983219 | 0.173287883 |
| 0.02124958  | 0.46150056  | 0.018114338 | 0.296252695 |
| 0.231234575 | 0.098588117 | 0.01026944  | 0.191659879 |
| 0.198409457 | 0.33932434  | 0.481804686 | 0.06892428  |
| 0.208074179 | 0.303419373 | 0.276975384 | 0.321005403 |
| 0.002179562 | 0.032188297 | 0.27009972  | 0.406508866 |

|             |             |             |             |
|-------------|-------------|-------------|-------------|
| 0.234221743 | 0.423810144 | 0.224227809 | 0.25732467  |
| 0.204507917 | 0.35865536  | 0.005721947 | 0.466469296 |
| 0.474984638 | 0.28140035  | 0.274539367 | 0.362828321 |
| 0.32632209  | 0.337881878 | 0.055881051 | 0.314436771 |
| 0.343615074 | 0.050478373 | 0.387292727 | 0.096498313 |
| 0.426082796 | 0.018892147 | 0.229607741 | 0.383224159 |
| 0.36761997  | 0.004497158 | 0.159569695 | 0.28762579  |
| 0.019613735 | 0.053596704 | 0.37107101  | 0.305759031 |
| 0.279561565 | 0.376306253 | 0.355959465 | 0.311844065 |
| 0.324027496 | 0.169097576 | 0.008140934 | 0.262745013 |
| 0.395655144 | 0.334280544 | 0.390948325 | 0.162797655 |
| 0.326027607 | 0.401208668 | 0.386921689 | 0.159274426 |
| 0.019159815 | 0.226434361 | 0.010035393 | 0.245045885 |
| 0.388887158 | 0.054394954 | 0.353010545 | 0.13653088  |
| 0.0431481   | 0.432953245 | 0.160520777 | 0.261693012 |
| 0.127450393 | 0.281698736 | 0.18223651  | 0.132830404 |
| 0.124747613 | 0.106239738 | 0.290534032 | 0.293479125 |
| 0.015159394 | 0.048252656 | 0.01746656  | 0.297265526 |
| 0.068740308 | 0.231115428 | 0.232264994 | 0.35126268  |
| 0.227518648 | 0.054836024 | 0.273511028 | 0.279177204 |
| 0.080341788 | 0.006793316 | 0.432592982 | 0.320742242 |
| 0.303067197 | 0.097186724 | 0.024934777 | 0.259258503 |
| 0.342951928 | 0.257316622 | 0.261930287 | 0.352189264 |
| 0.022245231 | 0.380886394 | 0.14449667  | 0.071696173 |
| 0.279729506 | 0.161908296 | 0.347431808 | 0.039448666 |
| 0.343664356 | 0.394194912 | 0.259041756 | 0.117742075 |
| 0.335743146 | 0.321347797 | 0.012441435 | 0.371928978 |
| 0.357296777 | 0.014148683 | 0.452474993 | 0.085957676 |
| 0.011464268 | 0.370577146 | 0.356592537 | 0.045442932 |
| 0.050629469 | 0.214206279 | 0.022872674 | 0.206694678 |
| 0.426453264 | 0.298107571 | 0.339214482 | 0.208534464 |
| 0.015987441 | 0.001737036 | 0.173540138 | 0.393333219 |
| 0.481422613 | 0.441519963 | 0.190071964 | 0.261780548 |
| 0.158737382 | 0.257630314 | 0.112027905 | 0.413733293 |
| 0.242272311 | 0.480635638 | 0.002686614 | 0.376518487 |
| 0.485075141 | 0.229313842 | 0.04560744  | 0.212198231 |
| 0.325327278 | 0.023038534 | 0.166042794 | 0.443728139 |
| 0.363259655 | 0.25509131  | 0.275643967 | 0.366106463 |
| 0.005665147 | 0.01882678  | 0.329412797 | 0.184326397 |
| 0.287286779 | 0.149250944 | 0.062240813 | 0.273054704 |
| 0.016958264 | 0.376808375 | 0.3645683   | 0.032907555 |
| 0.24768442  | 0.283749353 | 0.297331967 | 0.017921057 |
| 0.381448373 | 0.468651357 | 0.477420787 | 0.12012623  |
| 0.380226527 | 0.414443342 | 0.351631913 | 0.056838276 |
| 0.009830457 | 0.483687771 | 0.357495192 | 0.009320929 |
| 0.355895702 | 0.195502243 | 0.002310121 | 0.423605029 |
| 0.121278329 | 0.448323692 | 0.002652857 | 0.14583061  |
| 0.036144611 | 0.372282366 | 0.444732457 | 0.304864538 |
| 0.185736951 | 0.302723326 | 0.008452425 | 0.455819564 |
| 0.420497034 | 0.007799332 | 0.111591386 | 0.367387819 |
| 0.371254657 | 0.467042669 | 0.277200857 | 0.36854849  |
| 0.355764278 | 0.460010098 | 0.145535762 | 0.186091748 |
| 0.345242782 | 0.457510264 | 0.353781439 | 0.409327416 |
| 0.345678776 | 0.343832307 | 0.184122101 | 0.004952186 |

|             |             |             |             |
|-------------|-------------|-------------|-------------|
| 0.123057812 | 0.151974459 | 0.242349627 | 0.044193842 |
| 0.289023922 | 0.089390609 | 0.424202212 | 0.363191976 |
| 0.389706921 | 0.00170309  | 0.095735224 | 0.37243245  |
| 0.339992432 | 0.362603892 | 0.023803015 | 0.006750646 |
| 0.011597219 | 0.009318122 | 0.276424303 | 0.196135388 |
| 0.41364746  | 0.168869561 | 0.000559451 | 0.022957982 |
| 0.21220223  | 0.328862413 | 0.437670119 | 0.280838759 |
| 0.394303093 | 0.049682198 | 0.180932685 | 0.309748755 |
| 0.04148618  | 0.337474225 | 0.384598578 | 0.410324991 |
| 0.032697987 | 0.200312909 | 0.356602218 | 0.368775569 |
| 0.079750055 | 0.2352373   | 0.376802725 | 0.203620745 |
| 0.014719853 | 0.054213753 | 0.040347289 | 0.357775795 |
| 0.478379618 | 0.034527949 | 0.012676877 | 0.119883608 |
| 0.057628372 | 0.378033209 | 0.094388209 | 0.408470614 |
| 0.345811228 | 0.326708183 | 0.053873275 | 0.437627041 |
| 0.017700894 | 0.443797768 | 0.272769931 | 0.044862716 |
| 0.261514012 | 0.007413633 | 0.435325704 | 0.107352404 |
| 0.246763332 | 0.348895041 | 0.18195775  | 0.010981701 |
| 0.209612346 | 0.029885927 | 0.352408582 | 0.37262678  |
| 0.029520349 | 0.175105923 | 0.241129461 | 0.346373871 |
| 0.213195196 | 0.317453561 | 0.465272147 | 0.348029852 |
| 0.040719052 | 0.170275291 | 0.324255199 | 0.361856828 |
| 0.170968338 | 0.375659089 | 0.204068934 | 0.456418551 |
| 0.372686405 | 0.405694422 | 0.40202359  | 0.256521355 |
| 0.177573603 | 0.350135792 | 0.268117375 | 0.006550838 |
| 0.272758391 | 0.34256798  | 0.317621888 | 0.100485471 |
| 0.164064889 | 0.365835928 | 0.035093132 | 0.216851188 |
| 0.326377028 | 0.235711758 | 0.075943639 | 0.341259015 |
| 0.34914547  | 0.362820789 | 0.027341133 | 0.036229234 |
| 0.473036228 | 0.398115525 | 0.102367763 | 0.331422194 |
| 0.127616397 | 0.248326865 | 0.386956521 | 0.378407593 |
| 0.353244653 | 0.353245245 | 0.345092558 | 0.286034861 |
| 0.356968493 | 0.17948963  | 0.477683907 | 0.072634228 |
| 0.063601954 | 0.390301976 | 0.043975322 | 0.06327773  |
| 0.08187843  | 0.016783639 | 0.293956116 | 0.337366205 |
| 0.351667032 | 0.264686152 | 0.278625476 | 0.056662204 |
| 0.258041705 | 0.389123794 | 0.267978986 | 0.119496142 |
| 0.037022798 | 0.444338896 | 0.004878477 | 0.034049739 |
| 0.34178191  | 0.371610011 | 0.305077667 | 0.181198429 |
| 0.260432976 | 0.121835206 | 0.200212657 | 0.233940534 |
| 0.21852359  | 0.356320492 | 0.369033253 | 0.022400158 |
| 0.007215162 | 0.375617992 | 0.350393735 | 0.019863835 |
| 0.070983061 | 0.370370714 | 0.273829746 | 0.150512603 |
| 0.015902918 | 0.419203322 | 0.24801263  | 0.358081293 |
| 0.261693866 | 0.041978917 | 0.334964221 | 0.075533632 |
| 0.048688427 | 0.413052987 | 0.370860033 | 0.468250858 |
| 0.338261131 | 0.302960491 | 0.442495282 | 0.364536105 |
| 0.133401332 | 0.408077158 | 0.011947999 | 0.362214792 |
| 0.350244128 |             |             |             |
| CTPS        | 0.159515259 | 0.281695749 | 0.118288757 |
| 0.321705087 | 0.184521704 | 0.1514299   | 0.176055601 |
| 0.047730496 | 0.154494876 | 0.046111718 | 0.139303033 |
| 0.162018614 | 0.128662633 | 0.093255267 | 0.086304769 |
| 0.312723972 | 0.130067398 | 0.05762504  | 0.201062936 |

|             |             |             |             |
|-------------|-------------|-------------|-------------|
| 0.237937578 | 0.086059255 | 0.325949801 | 0.123268206 |
| 0.090212152 | 0.154912032 | 0.165628061 | 0.153901158 |
| 0.295443312 | 0.162416484 | 0.110185899 | 0.197920125 |
| 0.07215414  | 0.198469988 | 0.235766101 | 0.265416604 |
| 0.221763052 | 0.135550896 | 0.005840672 | 0.112704354 |
| 0.187170549 | 0.282932377 | 0.251495762 | 0.26663826  |
| 0.121171472 | 0.199478353 | 0.244343092 | 0.185379613 |
| 0.050685343 | 0.130494181 | 0.049633813 | 0.185710163 |
| 0.218690407 | 0.197545087 | 0.074828914 | 0.146105986 |
| 0.124267811 | 0.042578244 | 0.089335791 | 0.115687672 |
| 0.201768793 | 0.042446671 | 0.23103725  | 0.140291254 |
| 0.063583831 | 0.070724792 | 0.084363619 | 0.11111902  |
| 0.084390898 | 0.160987641 | 0.03067373  | 0.118321289 |
| 0.013372008 | 0.235789272 | 0.17665686  | 0.099133018 |
| 0.107342119 | 0.099007338 | 0.094098731 | 0.256097409 |
| 0.288598291 | 0.188200146 | 0.327976243 | 0.307484677 |
| 0.118718691 | 0.138039114 | 0.13209884  | 0.156798192 |
| 0.216699837 | 0.176927047 | 0.063652085 | 0.327489747 |
| 0.324924356 | 0.26099669  | 0.14172621  | 0.19119529  |
| 0.277612428 | 0.243463725 | 0.134960896 | 0.166591699 |
| 0.120792836 | 0.061611146 | 0.21987263  | 0.297727411 |
| 0.164563525 | 0.108219537 | 0.180933984 | 0.218374603 |
| 0.097730898 | 0.050313516 | 0.3000395   | 0.046629773 |
| 0.30162807  | 0.088406747 | 0.169923791 | 0.203645548 |
| 0.070956632 | 0.213130009 | 0.258831464 | 0.191832426 |
| 0.129956885 | 0.054127731 | 0.11850536  | 0.054448137 |
| 0.080474025 | 0.050355016 | 0.191242428 | 0.312473196 |
| 0.057310043 | 0.109436748 | 0.128329847 | 0.021680654 |
| 0.080481608 | 0.059416167 | 0.192824504 | 0.085456718 |
| 0.218542702 | 0.143496005 | 1           | 0.14574071  |
| 0.192380164 | 0.321558259 | 0.017354404 | 0.10553211  |
| 0.170690867 | 0.063681535 | 0.24645379  | 0.171787129 |
| 0.221452607 | 0.081467478 | 0.125612557 | 0.317970545 |
| 0.194713975 | 0.135469486 | 0.045350315 | 0.294725674 |
| 0.128037622 | 0.204837879 | 0.103578638 | 0.114495673 |
| 0.101259319 | 0.216612592 | 0.068124742 | 0.073403268 |
| 0.117108373 | 0.090932874 | 0.013122468 | 0.088316897 |
| 0.096168154 | 0.265587573 | 0.173163156 | 0.102841383 |
| 0.143830244 | 0.286342145 | 0.069848133 | 0.246036301 |
| 0.112112964 | 0.058546183 | 0.03796433  | 0.295567285 |
| 0.09591886  | 0.270797633 | 0.102633467 | 0.105917118 |
| 0.22626072  | 0.294126783 | 0.001648355 | 0.2173887   |
| 0.260493237 | 0.040834219 | 0.242165037 | 0.168218439 |
| 0.144909374 | 0.321077379 | 0.003384167 | 0.270971317 |
| 0.100957027 | 0.093082416 | 0.331909672 | 0.209112118 |
| 0.201071772 | 0.134917997 | 0.076500043 | 0.247252819 |
| 0.188994065 | 0.017394558 | 0.08845247  | 0.249274915 |
| 0.058135011 | 0.080630598 | 0.198006949 | 0.274070859 |
| 0.268299483 | 0.25867806  | 0.337040277 | 0.136313674 |
| 0.189516524 | 0.09116459  | 0.033052603 | 0.169624988 |
| 0.20663193  | 0.065311574 | 0.2159466   | 0.110925465 |
| 0.07082124  | 0.258046609 | 0.180498229 | 0.089866958 |
| 0.122238309 | 0.1256026   | 0.036660007 | 0.2294724   |
| 0.167152269 | 0.147459938 | 0.140840647 | 0.046773922 |

|             |             |             |             |
|-------------|-------------|-------------|-------------|
| 0.111401483 | 0.309334679 | 0.079359128 | 0.068639601 |
| 0.055486533 | 0.186090435 | 0.141509689 | 0.121034856 |
| 0.132726193 | 0.154709958 | 0.119525874 | 0.132972698 |
| 0.079780179 | 0.140735412 | 0.016413769 | 0.061262438 |
| 0.116771642 | 0.08435503  | 0.077892616 | 0.150878356 |
| 0.07257195  | 0.108690897 | 0.191744862 | 0.088619926 |
| 0.133623814 | 0.06617287  | 0.274570219 | 0.249740378 |
| 0.11484085  | 0.136461879 | 0.074780484 | 0.057609164 |
| 0.311292644 | 0.102927966 | 0.029776967 | 0.275269695 |
| 0.032407582 | 0.299039722 | 0.156398465 | 0.18581693  |
| 0.115842367 | 0.224039756 | 0.326697958 | 0.053974541 |
| 0.112779369 | 0.240331885 | 0.157506028 | 0.192046467 |
| 0.178492548 | 0.225596178 | 0.088227046 | 0.15790987  |
| 0.146917188 | 0.096810316 | 0.276123924 | 0.103758553 |
| 0.065813263 | 0.229908096 | 0.250900776 | 0.14672328  |
| 0.122587801 | 0.208062195 | 0.063400197 | 0.277057114 |
| 0.305401072 | 0.341267385 | 0.250645374 | 0.080044445 |
| 0.128834264 | 0.059010543 | 0.094001434 | 0.111692698 |
| 0.2156797   | 0.269788836 | 0.174683821 | 0.189845067 |
| 0.233966348 | 0.141495702 | 0.029886986 | 0.3016919   |
| 0.034409358 | 0.233054724 | 0.034529813 | 0.24964699  |
| 0.222632612 | 0.065122109 | 0.159120619 | 0.174995287 |
| 0.18239591  | 0.116081833 | 0.068578458 | 0.240945322 |
| 0.254197853 | 0.145900389 | 0.132151953 | 0.18027227  |
| 0.062817386 | 0.081461138 | 0.211436331 | 0.06962999  |
| 0.116687821 | 0.156042066 | 0.022626798 | 0.058529516 |
| 0.136730161 | 0.242690091 | 0.270884543 | 0.176381583 |
| 0.157851279 | 0.049755941 | 0.2382821   | 0.101002251 |
| 0.25988222  | 0.229592275 | 0.241681831 | 0.075467778 |
| 0.195437636 | 0.277228723 | 0.161641639 | 0.08860239  |
| 0.065324807 | 0.237108153 | 0.157481084 | 0.074480206 |
| 0.309697396 | 0.051444511 | 0.088148753 | 0.262997381 |
| 0.16300799  | 0.159441257 | 0.013697658 | 0.010805508 |
| 0.048957841 | 0.286276291 | 0.228186454 | 0.190164444 |
| 0.053282047 | 0.175388016 | 0.002993179 | 0.271686943 |
| 0.253781353 | 0.067448688 | 0.099759313 | 0.216261201 |
| 0.214206402 | 0.259607763 | 0.135928395 | 0.27734053  |
| 0.176312252 | 0.235120593 | 0.116877864 | 0.267425991 |
| 0.270232356 | 0.235332575 | 0.212381794 | 0.224575774 |
| 0.299149818 | 0.24809578  | 0.276829726 | 0.089081936 |
| 0.128243509 | 0.068309161 | 0.088473363 | 0.195822325 |
| 0.097832362 | 0.179972852 | 0.234454703 | 0.305988638 |
| 0.280486765 | 0.033475991 | 0.082424518 | 0.201113187 |
| 0.257404949 | 0.298966639 | 0.01883587  | 0.010564061 |
| 0.004256781 | 0.106384529 | 0.165085382 | 0.147276621 |
| 0.277241792 | 0.055178025 | 0.037603047 | 0.053633118 |
| 0.10526924  | 0.229867977 | 0.258912512 | 0.295327028 |
| 0.217958286 | 0.100281281 | 0.107646671 | 0.264965597 |
| 0.152392376 | 0.084637841 | 0.303650195 | 0.241819299 |
| 0.048873758 | 0.145018109 | 0.069316854 | 0.325087621 |
| 0.031043847 | 0.216379893 | 0.167826152 | 0.14055871  |
| 0.012933305 | 0.12341339  | 0.148561651 | 0.272621276 |
| 0.215418461 | 0.14502067  | 0.122216722 | 0.019743224 |
| 0.160361468 | 0.266173286 | 0.150426637 | 0.320453719 |

|             |             |             |             |
|-------------|-------------|-------------|-------------|
| 0.268631969 | 0.330842682 | 0.07970166  | 0.24238904  |
| 0.135648153 | 0.220889904 | 0.16939457  | 0.028618929 |
| 0.068808716 | 0.036387397 | 0.205581826 | 0.164865943 |
| 0.064365784 | 0.154856387 | 0.130423594 | 0.048403715 |
| 0.057802831 | 0.102931296 | 0.342931586 | 0.295946875 |
| 0.041993249 | 0.104281102 | 0.164209044 | 0.186776483 |
| 0.114185448 | 0.317306416 | 0.228905333 | 0.108401489 |
| 0.128460661 | 0.026465928 | 0.220970722 | 0.128263805 |
| 0.058269627 | 0.321041834 | 0.168166027 | 0.280178557 |
| 0.165152307 | 0.230398757 | 0.246869208 | 0.231204105 |
| 0.095725831 | 0.124418093 | 0.231583201 | 0.070742095 |
| 0.188984833 | 0.321165399 | 0.096528531 | 0.176548711 |
| 0.23228519  | 0.130631521 | 0.045347776 | 0.015098332 |
| 0.096968194 | 0.129215355 | 0.142786221 | 0.311411575 |
| 0.127391117 | 0.138097461 | 0.029315851 | 0.159905456 |
| 0.277127002 | 0.208598801 | 0.085436737 | 0.242385159 |
| 0.119168182 | 0.267855583 | 0.235215733 | 0.244193519 |
| 0.070535552 | 0.252783725 | 0.219363643 | 0.206879612 |
| 0.215243322 | 0.200325565 | 0.252548767 | 0.02128222  |
| 0.102938028 | 0.120782639 | 0.174112857 | 0.117944103 |
| 0.167729114 | 0.08273733  | 0.066639851 | 0.258756582 |
| 0.060356627 | 0.284283205 | 0.038092297 | 0.101159171 |
| 0.174048641 | 0.058754944 | 0.225250391 | 0.126970495 |
| 0.153234191 | 0.247191432 | 0.040213368 | 0.087711856 |
| 0.068401419 | 0.251898759 | 0.179406419 | 0.126353183 |
| 0.097784082 | 0.068433    | 0.233461832 | 0.076061331 |
| 0.091969799 | 0.050737717 | 0.249356788 | 0.045667008 |
| 0.055693226 | 0.317775729 | 0.075800468 | 0.028979905 |
| 0.057395499 | 0.112851322 | 0.052372072 | 0.186318541 |
| 0.053335543 | 0.251793832 | 0.104676457 | 0.173286966 |
| 0.169921389 | 0.080953198 | 0.128845598 | 0.038467497 |
| 0.053248378 | 0.190650361 | 0.145815725 | 0.24262731  |
| 0.094288576 | 0.346847033 | 0.170021836 | 0.208187322 |
| 0.034600854 | 0.083978005 | 0.087949198 | 0.250761325 |
| 0.083551773 |             |             |             |
| CTSD        | 0.329354289 | 0.477019203 | 0.276591929 |
| 0.311598668 | 0.300632253 | 0.31810814  | 0.183181571 |
| 0.223442717 | 0.0589917   | 0.003910597 | 0.011075436 |
| 0.301864326 | 0.133498767 | 0.230324384 | 0.263139123 |
| 0.300180546 | 0.078831064 | 0.312708125 | 0.190401287 |
| 0.327592135 | 0.103850974 | 0.272548089 | 0.077757034 |
| 0.182065635 | 0.054821887 | 0.043807476 | 0.154764949 |
| 0.362548102 | 0.051385545 | 0.302177595 | 0.339601657 |
| 0.069700957 | 0.360875453 | 0.491630993 | 0.283118186 |
| 0.477711781 | 0.318430299 | 0.01591121  | 0.244165156 |
| 0.38836355  | 0.302686196 | 0.327708417 | 0.243198219 |
| 0.033341108 | 0.489960693 | 0.191428989 | 0.269931183 |
| 0.235369367 | 0.017018644 | 0.266222564 | 0.460634076 |
| 0.447090422 | 0.303039704 | 0.240227174 | 0.135558014 |
| 0.124004015 | 0.267777194 | 0.145758744 | 0.324648962 |
| 0.181456102 | 0.201423285 | 0.44791741  | 0.074247907 |
| 0.134772279 | 0.266206829 | 0.097686459 | 0.249944167 |
| 0.219287037 | 0.34253368  | 0.022819565 | 0.287281738 |
| 0.003158064 | 0.313693072 | 0.262196697 | 0.182602107 |



|             |             |             |             |
|-------------|-------------|-------------|-------------|
| 0.027228196 | 0.012105041 | 0.115591189 | 0.271107945 |
| 0.383265773 | 0.436541765 | 0.376897469 | 0.389525487 |
| 0.112527345 | 0.212172544 | 0.254012843 | 0.121031289 |
| 0.387465828 | 0.143131054 | 0.094610237 | 0.288609899 |
| 0.389114424 | 0.470587862 | 0.12947613  | 0.169567505 |
| 0.338361676 | 0.45309477  | 0.305139629 | 0.28908006  |
| 0.209303571 | 0.03009766  | 0.41968928  | 0.428134732 |
| 0.385965955 | 0.184828507 | 0.09264761  | 0.35250041  |
| 0.04382395  | 0.303374879 | 0.261329238 | 0.121796593 |
| 0.395412128 | 0.015915446 | 0.12851047  | 0.291968936 |
| 0.180734786 | 0.343417434 | 0.453832473 | 0.154382637 |
| 0.288132763 | 0.013781023 | 0.069798672 | 0.024856538 |
| 0.247900385 | 0.07495827  | 0.479365111 | 0.376184609 |
| 0.253360195 | 0.25715292  | 0.237099478 | 0.000868706 |
| 0.015268085 | 0.141306801 | 0.350236752 | 0.316246167 |
| 0.334633806 | 0.349538608 | 0.14574071  | 1           |
| 0.294433665 | 0.371433662 | 0.060789496 | 0.09118769  |
| 0.316462975 | 0.139036603 | 0.17411378  | 0.317023811 |
| 0.190408169 | 0.1229687   | 0.10038315  | 0.437906137 |
| 0.442708716 | 0.06743849  | 0.328507153 | 0.293177869 |
| 0.242857431 | 0.219124385 | 0.093759637 | 0.213301718 |
| 0.049283436 | 0.439865337 | 0.015148393 | 0.327923753 |
| 0.16662087  | 0.085336567 | 0.014362769 | 0.276033173 |
| 0.229710702 | 0.356568851 | 0.467897724 | 0.087202525 |
| 0.245466488 | 0.274077432 | 0.329898568 | 0.303784131 |
| 0.00571018  | 0.041153167 | 0.315888459 | 0.434019432 |
| 0.301435395 | 0.418915818 | 0.238856883 | 0.211747567 |
| 0.186596455 | 0.3377568   | 0.002575049 | 0.482551682 |
| 0.469049431 | 0.313321529 | 0.269676592 | 0.302264419 |
| 0.240636749 | 0.355496824 | 0.048474301 | 0.3015016   |
| 0.332455664 | 0.066838185 | 0.407488685 | 0.099594233 |
| 0.43487262  | 0.025843689 | 0.304055103 | 0.315848346 |
| 0.295489322 | 0.007793198 | 0.241847651 | 0.320303943 |
| 0.015088192 | 0.118430055 | 0.340455486 | 0.305809581 |
| 0.271101115 | 0.315975788 | 0.380907772 | 0.219430665 |
| 0.29550166  | 0.222785492 | 0.010040905 | 0.204846371 |
| 0.327349673 | 0.277174786 | 0.440359106 | 0.213386639 |
| 0.327464497 | 0.436026411 | 0.33535372  | 0.159097865 |
| 0.034891727 | 0.296476319 | 0.021268111 | 0.22151805  |
| 0.356200864 | 0.093207668 | 0.275736457 | 0.120439656 |
| 0.041524419 | 0.451936256 | 0.095784455 | 0.148733409 |
| 0.06399061  | 0.297571361 | 0.222911368 | 0.170988634 |
| 0.122006587 | 0.115399832 | 0.227027147 | 0.25916939  |
| 0.043316914 | 0.062491735 | 0.009638089 | 0.252359063 |
| 0.083813133 | 0.232441628 | 0.244573374 | 0.344224724 |
| 0.283263438 | 0.075691866 | 0.254037792 | 0.183403669 |
| 0.067035196 | 0.009408888 | 0.459553494 | 0.302279848 |
| 0.323489332 | 0.129608481 | 0.02896939  | 0.234136583 |
| 0.389290789 | 0.284646984 | 0.306526184 | 0.41149759  |
| 0.025745099 | 0.393498898 | 0.163764752 | 0.074558821 |
| 0.2335521   | 0.18809338  | 0.374567707 | 0.0519535   |
| 0.351330231 | 0.449206197 | 0.232681062 | 0.11283945  |
| 0.396788554 | 0.32963661  | 0.026633855 | 0.337040972 |
| 0.334223211 | 0.020787259 | 0.458999025 | 0.074946143 |

|             |             |             |             |
|-------------|-------------|-------------|-------------|
| 0.013185706 | 0.29520868  | 0.29466189  | 0.048997177 |
| 0.047938333 | 0.238444371 | 0.061859001 | 0.190741592 |
| 0.450557243 | 0.280531636 | 0.323591951 | 0.1330898   |
| 0.029432181 | 0.005414234 | 0.129427676 | 0.28243646  |
| 0.494253895 | 0.430999042 | 0.195111437 | 0.221671022 |
| 0.187432251 | 0.21013477  | 0.187247991 | 0.427698628 |
| 0.155101577 | 0.484960333 | 0.004996865 | 0.297755762 |
| 0.477079916 | 0.311060864 | 0.04385123  | 0.275388271 |
| 0.36938083  | 0.037919101 | 0.199761088 | 0.461633884 |
| 0.386760525 | 0.229373197 | 0.232533254 | 0.323844438 |
| 0.017913676 | 0.047888166 | 0.263628406 | 0.100530649 |
| 0.274450525 | 0.15476586  | 0.023546174 | 0.325353379 |
| 0.028538191 | 0.43005674  | 0.346068739 | 0.035784308 |
| 0.279674313 | 0.31493013  | 0.256622734 | 0.029047618 |
| 0.347539892 | 0.445293117 | 0.491059442 | 0.170505995 |
| 0.327714918 | 0.410726511 | 0.253361505 | 0.053854361 |
| 0.009412694 | 0.468695434 | 0.346252735 | 0.01561702  |
| 0.382545562 | 0.274697452 | 0.00712859  | 0.466542583 |
| 0.157591933 | 0.461537465 | 0.003750268 | 0.064673557 |
| 0.024280153 | 0.338797831 | 0.458646783 | 0.341018316 |
| 0.237845587 | 0.30511359  | 0.004934872 | 0.448687265 |
| 0.452325709 | 0.006817846 | 0.080807784 | 0.329213086 |
| 0.278603188 | 0.497466503 | 0.18612884  | 0.338927832 |
| 0.276019316 | 0.457235824 | 0.194390452 | 0.179107225 |
| 0.362968224 | 0.425277381 | 0.342926559 | 0.445830597 |
| 0.372130357 | 0.290389774 | 0.213071875 | 0.013044134 |
| 0.078696428 | 0.246410397 | 0.214889166 | 0.046597997 |
| 0.326270209 | 0.082126784 | 0.432871407 | 0.367984335 |
| 0.388294007 | 0.002997373 | 0.165550511 | 0.348477123 |
| 0.404390599 | 0.410500969 | 0.018899602 | 0.004063238 |
| 0.006498465 | 0.00724497  | 0.324972585 | 0.162304986 |
| 0.421132043 | 0.205320092 | 0.003232511 | 0.060923923 |
| 0.218352294 | 0.248328714 | 0.458968426 | 0.287154136 |
| 0.319001046 | 0.060690386 | 0.203226695 | 0.310417144 |
| 0.036115623 | 0.318641379 | 0.394621953 | 0.462001226 |
| 0.030177197 | 0.168219712 | 0.330362133 | 0.413090879 |
| 0.032340047 | 0.218634201 | 0.312408245 | 0.22693634  |
| 0.01228249  | 0.0480925   | 0.038722925 | 0.317066501 |
| 0.46269832  | 0.043578124 | 0.01679551  | 0.179733839 |
| 0.089014563 | 0.385172514 | 0.113578223 | 0.428098425 |
| 0.366521329 | 0.328004607 | 0.043307492 | 0.459042978 |
| 0.024741882 | 0.46030973  | 0.199004708 | 0.057102476 |
| 0.224732675 | 0.009936515 | 0.419494032 | 0.081516015 |
| 0.31710306  | 0.349184567 | 0.122058043 | 0.009130925 |
| 0.103548089 | 0.032746572 | 0.376737224 | 0.338962201 |
| 0.020294462 | 0.219810782 | 0.211669126 | 0.318650445 |
| 0.287336956 | 0.306916655 | 0.485960873 | 0.295331706 |
| 0.080405364 | 0.089413569 | 0.336204382 | 0.340961101 |
| 0.263006046 | 0.387584038 | 0.189973626 | 0.455978226 |
| 0.345312529 | 0.426165587 | 0.405895436 | 0.273624883 |
| 0.13858524  | 0.340182892 | 0.306570195 | 0.017020878 |
| 0.27765536  | 0.350023666 | 0.329747173 | 0.085006838 |
| 0.160288021 | 0.248459155 | 0.053072481 | 0.194147615 |
| 0.197164644 | 0.30142813  | 0.110819599 | 0.333383184 |

|             |             |             |             |
|-------------|-------------|-------------|-------------|
| 0.349127408 | 0.344080466 | 0.057928384 | 0.035569877 |
| 0.491080553 | 0.428432521 | 0.140995178 | 0.320095893 |
| 0.124881546 | 0.234422074 | 0.323803361 | 0.305416393 |
| 0.281609406 | 0.363856953 | 0.352986198 | 0.315712117 |
| 0.427269669 | 0.212984418 | 0.489009334 | 0.139076929 |
| 0.050076325 | 0.321213781 | 0.062883788 | 0.059013321 |
| 0.104879457 | 0.016071991 | 0.174688254 | 0.307741134 |
| 0.238741826 | 0.271226079 | 0.334399451 | 0.059171282 |
| 0.220363116 | 0.319956032 | 0.254796137 | 0.179099453 |
| 0.052534585 | 0.466733153 | 0.00636538  | 0.038341731 |
| 0.252617913 | 0.330636356 | 0.231446152 | 0.160893494 |
| 0.169750277 | 0.091363782 | 0.210639444 | 0.306323379 |
| 0.243834818 | 0.272177113 | 0.337027452 | 0.037584605 |
| 0.02194765  | 0.398225109 | 0.334633608 | 0.013906178 |
| 0.063921593 | 0.336046214 | 0.262489018 | 0.162952834 |
| 0.011622585 | 0.406725474 | 0.278985341 | 0.293293116 |
| 0.30296381  | 0.053783275 | 0.389250976 | 0.08326105  |
| 0.060812244 | 0.450784281 | 0.267223443 | 0.461585804 |
| 0.247550095 | 0.295793177 | 0.468679214 | 0.355725885 |
| 0.106808051 | 0.28202231  | 0.024877837 | 0.372451664 |
| 0.264859049 |             |             |             |

| CTSE        | 0.333557189 | 0.512089245 | 0.30418036  |
|-------------|-------------|-------------|-------------|
| 0.324469953 | 0.317336365 | 0.228585081 | 0.134620534 |
| 0.098137305 | 0.071799788 | 0.003234484 | 0.028821507 |
| 0.322053756 | 0.165593959 | 0.167084499 | 0.220223771 |
| 0.335231775 | 0.128954937 | 0.228453692 | 0.169364876 |
| 0.27352116  | 0.049767498 | 0.297288505 | 0.065496626 |
| 0.266731914 | 0.113189514 | 0.064135422 | 0.247016563 |
| 0.377337272 | 0.071615887 | 0.193711265 | 0.250089629 |
| 0.094587986 | 0.359727571 | 0.51503932  | 0.329297856 |
| 0.518696727 | 0.311779283 | 0.008249767 | 0.183769487 |
| 0.362557328 | 0.367951112 | 0.278535457 | 0.23092327  |
| 0.031348654 | 0.460874204 | 0.168589563 | 0.31273989  |
| 0.132430992 | 0.033860458 | 0.123333513 | 0.409660077 |
| 0.473347252 | 0.309207973 | 0.126053909 | 0.105077683 |
| 0.169721987 | 0.118794268 | 0.264188547 | 0.182958959 |
| 0.156497678 | 0.074143338 | 0.48640016  | 0.061545065 |
| 0.100159644 | 0.144774192 | 0.144556533 | 0.154354676 |
| 0.30619401  | 0.28099775  | 0.010882584 | 0.301870699 |
| 0.001222951 | 0.254651833 | 0.293771778 | 0.283261593 |
| 0.040994312 | 0.01875086  | 0.162315849 | 0.221631906 |
| 0.409287583 | 0.446732077 | 0.477792772 | 0.494594716 |
| 0.156189419 | 0.231613109 | 0.325521475 | 0.135113077 |
| 0.390802276 | 0.120592295 | 0.079861283 | 0.351199101 |
| 0.490220632 | 0.524569742 | 0.182979901 | 0.228188447 |
| 0.367369154 | 0.4500479   | 0.29067327  | 0.311604361 |
| 0.279194258 | 0.062484531 | 0.423320201 | 0.510080976 |
| 0.335065114 | 0.295073777 | 0.141948868 | 0.312797529 |
| 0.051655264 | 0.230997822 | 0.247787519 | 0.12530597  |
| 0.424621982 | 0.013927385 | 0.198062695 | 0.232530777 |
| 0.155958619 | 0.364088485 | 0.530474873 | 0.130748022 |
| 0.310977181 | 0.018294063 | 0.148231766 | 0.032753442 |
| 0.229666743 | 0.169019756 | 0.473135335 | 0.418266669 |
| 0.131321446 | 0.291543644 | 0.168991034 | 0.00291681  |

|             |             |             |             |
|-------------|-------------|-------------|-------------|
| 0.030478598 | 0.157640783 | 0.38968213  | 0.243500133 |
| 0.327293539 | 0.377062372 | 0.192380164 | 0.294433665 |
| 1           | 0.471781996 | 0.032187273 | 0.063492853 |
| 0.289972778 | 0.158901867 | 0.182455471 | 0.312211728 |
| 0.261384092 | 0.068847934 | 0.095750383 | 0.510452314 |
| 0.379301715 | 0.064225575 | 0.199450782 | 0.318528397 |
| 0.229991761 | 0.304067395 | 0.077776047 | 0.194529596 |
| 0.032276423 | 0.495944871 | 0.034842734 | 0.195393896 |
| 0.238016859 | 0.148161265 | 0.007412023 | 0.145237653 |
| 0.186245668 | 0.410984058 | 0.465941576 | 0.082699523 |
| 0.22169932  | 0.310779141 | 0.18122862  | 0.324628749 |
| 0.010468364 | 0.037743366 | 0.152305503 | 0.498614332 |
| 0.155512537 | 0.49852827  | 0.209189868 | 0.252618607 |
| 0.234128779 | 0.389400452 | 0.003313645 | 0.483593856 |
| 0.533274117 | 0.166682569 | 0.291708474 | 0.311648345 |
| 0.307871339 | 0.400692998 | 0.03071077  | 0.307377821 |
| 0.238250637 | 0.061201938 | 0.491197351 | 0.143005103 |
| 0.448223937 | 0.040128741 | 0.189050431 | 0.431445135 |
| 0.373041562 | 0.007928387 | 0.119814329 | 0.249060046 |
| 0.034021849 | 0.049338781 | 0.317323991 | 0.276371405 |
| 0.273278007 | 0.385030806 | 0.45442802  | 0.30203227  |
| 0.31599465  | 0.146523786 | 0.012446991 | 0.271812743 |
| 0.380048491 | 0.283953454 | 0.409168171 | 0.157367262 |
| 0.19994725  | 0.453134116 | 0.384418227 | 0.1416994   |
| 0.033690449 | 0.188814404 | 0.013702573 | 0.26267817  |
| 0.374068602 | 0.083067824 | 0.296429563 | 0.1221663   |
| 0.073436048 | 0.522699552 | 0.192727068 | 0.258602926 |
| 0.153862642 | 0.270416301 | 0.166686857 | 0.164733813 |
| 0.185847848 | 0.13839061  | 0.29582721  | 0.279856575 |
| 0.02103856  | 0.081581027 | 0.017906802 | 0.28466541  |
| 0.116123276 | 0.249940082 | 0.234767229 | 0.290472332 |
| 0.212331119 | 0.086309575 | 0.297039674 | 0.254993451 |
| 0.112554417 | 0.015898921 | 0.495323349 | 0.284235311 |
| 0.234069006 | 0.111811995 | 0.038840249 | 0.238892483 |
| 0.435430726 | 0.189857115 | 0.146657138 | 0.422906611 |
| 0.021266556 | 0.47152007  | 0.189775833 | 0.114634318 |
| 0.310375977 | 0.193582209 | 0.416008778 | 0.045804957 |
| 0.246696803 | 0.441069386 | 0.238917346 | 0.165586836 |
| 0.357621298 | 0.275487813 | 0.022308534 | 0.325232068 |
| 0.313169    | 0.03000508  | 0.528790188 | 0.125510576 |
| 0.022483281 | 0.351761245 | 0.372753892 | 0.071220082 |
| 0.076403717 | 0.2373722   | 0.022435423 | 0.238951862 |
| 0.511298047 | 0.326899793 | 0.362913236 | 0.212625064 |
| 0.032929312 | 0.010284363 | 0.199225606 | 0.305335054 |
| 0.498930978 | 0.523194152 | 0.200387661 | 0.3042875   |
| 0.174048372 | 0.279313155 | 0.067182803 | 0.509739773 |
| 0.160584346 | 0.511356828 | 0.006766158 | 0.404788601 |
| 0.513900423 | 0.158544222 | 0.08451478  | 0.18827919  |
| 0.329412088 | 0.036310068 | 0.134258355 | 0.488829495 |
| 0.401520298 | 0.261983435 | 0.269486536 | 0.302121482 |
| 0.009539175 | 0.024837007 | 0.302799757 | 0.200333031 |
| 0.275462274 | 0.173078641 | 0.077136171 | 0.194733287 |
| 0.036448898 | 0.428578766 | 0.407025332 | 0.058415614 |
| 0.211352305 | 0.179071384 | 0.298325425 | 0.031182984 |

|             |             |             |             |
|-------------|-------------|-------------|-------------|
| 0.46668918  | 0.509654352 | 0.514658836 | 0.102406298 |
| 0.375407436 | 0.499664097 | 0.328439771 | 0.075392204 |
| 0.021132666 | 0.526028776 | 0.264521184 | 0.017962759 |
| 0.439667202 | 0.120721662 | 0.011783769 | 0.472552101 |
| 0.128878868 | 0.425003325 | 0.001783805 | 0.075043875 |
| 0.0477621   | 0.433485307 | 0.471321241 | 0.236563972 |
| 0.138202494 | 0.248322681 | 0.007341306 | 0.529154437 |
| 0.479656586 | 0.019429111 | 0.151802157 | 0.395521485 |
| 0.386797028 | 0.510515483 | 0.295116104 | 0.451988747 |
| 0.330631969 | 0.50634706  | 0.159877212 | 0.221047451 |
| 0.393609266 | 0.514613875 | 0.318062326 | 0.430508725 |
| 0.41825245  | 0.321542587 | 0.200164178 | 0.012400285 |
| 0.138124714 | 0.112397399 | 0.223210784 | 0.074479649 |
| 0.184636098 | 0.13233082  | 0.467387509 | 0.43852112  |
| 0.486573296 | 0.005861523 | 0.085086824 | 0.379696945 |
| 0.384431717 | 0.43385287  | 0.019187267 | 0.006116486 |
| 0.007342464 | 0.028840001 | 0.224402331 | 0.211816604 |
| 0.487202983 | 0.141110632 | 0.004568221 | 0.022145996 |
| 0.190809471 | 0.33125336  | 0.50086422  | 0.266739066 |
| 0.395248815 | 0.070308375 | 0.196155301 | 0.284983943 |
| 0.078141734 | 0.217004728 | 0.486959957 | 0.449522406 |
| 0.041203482 | 0.213037808 | 0.243492123 | 0.458689689 |
| 0.100896172 | 0.255028159 | 0.318031143 | 0.233365533 |
| 0.013594078 | 0.085608607 | 0.068862005 | 0.374240403 |
| 0.508571751 | 0.073531262 | 0.03550969  | 0.077793419 |
| 0.087752106 | 0.438593747 | 0.129524591 | 0.507268648 |
| 0.377787797 | 0.381493626 | 0.084569427 | 0.47063231  |
| 0.040544173 | 0.48208994  | 0.303464214 | 0.032900231 |
| 0.219489361 | 0.011853632 | 0.475073651 | 0.153556406 |
| 0.18830673  | 0.257098334 | 0.188363077 | 0.021718587 |
| 0.195645176 | 0.053196531 | 0.457703396 | 0.448006246 |
| 0.040104974 | 0.153417737 | 0.236579364 | 0.279299935 |
| 0.162037703 | 0.349207785 | 0.493249566 | 0.274428266 |
| 0.054921108 | 0.149072402 | 0.284438705 | 0.261392071 |
| 0.134351325 | 0.482581681 | 0.252278871 | 0.526604687 |
| 0.300677558 | 0.435201616 | 0.468312973 | 0.238950049 |
| 0.2296096   | 0.251436954 | 0.238932449 | 0.0127621   |
| 0.246728499 | 0.423091901 | 0.224863865 | 0.154890381 |
| 0.218686675 | 0.320276768 | 0.031515752 | 0.111477747 |
| 0.299577964 | 0.173102729 | 0.10620798  | 0.38394033  |
| 0.245711555 | 0.2793277   | 0.022348658 | 0.064282146 |
| 0.533735536 | 0.409002504 | 0.085829437 | 0.2956384   |
| 0.143030346 | 0.269512237 | 0.399687942 | 0.404255226 |
| 0.270124248 | 0.418068305 | 0.339141318 | 0.26065605  |
| 0.387822144 | 0.180406116 | 0.520552442 | 0.038551448 |
| 0.095970922 | 0.290291819 | 0.081006067 | 0.090558699 |
| 0.112803392 | 0.029772405 | 0.28093003  | 0.328517183 |
| 0.311718993 | 0.278728724 | 0.18788962  | 0.067837235 |
| 0.267850066 | 0.243672754 | 0.269141793 | 0.123419201 |
| 0.063505721 | 0.492348335 | 0.009777896 | 0.053474615 |
| 0.316195618 | 0.39098866  | 0.325437992 | 0.201653179 |
| 0.288060935 | 0.138249186 | 0.231285966 | 0.164268952 |
| 0.209253919 | 0.269612622 | 0.393461667 | 0.021945775 |
| 0.011946061 | 0.476440587 | 0.233062068 | 0.024206582 |

|             |             |             |             |
|-------------|-------------|-------------|-------------|
| 0.08213559  | 0.242194178 | 0.203891682 | 0.187550457 |
| 0.028328011 | 0.496554449 | 0.209377665 | 0.322571576 |
| 0.21598585  | 0.05380064  | 0.306071451 | 0.062032937 |
| 0.04276554  | 0.421999907 | 0.317031114 | 0.521529475 |
| 0.28196696  | 0.342733958 | 0.419916357 | 0.385254655 |
| 0.092277978 | 0.285284886 | 0.019988581 | 0.386384288 |
| 0.312544437 |             |             |             |
| CX3CR1      | 0.427600451 | 0.528022088 | 0.442409344 |
| 0.454080304 | 0.500300879 | 0.363084387 | 0.260735062 |
| 0.194995017 | 0.129685922 | 0.010087939 | 0.052368886 |
| 0.482108149 | 0.282755891 | 0.306348861 | 0.334677498 |
| 0.479816862 | 0.22915501  | 0.374733062 | 0.317734157 |
| 0.450281521 | 0.11445515  | 0.484223103 | 0.141949518 |
| 0.396837089 | 0.186305287 | 0.127286873 | 0.371218621 |
| 0.461098228 | 0.141614606 | 0.318169953 | 0.39197462  |
| 0.176459508 | 0.44395739  | 0.513662435 | 0.505118465 |
| 0.510248924 | 0.390202273 | 0.021550629 | 0.314081857 |
| 0.403869268 | 0.477434501 | 0.442993851 | 0.403657096 |
| 0.074788402 | 0.465754093 | 0.312107817 | 0.481474666 |
| 0.234800923 | 0.068374259 | 0.221653269 | 0.420935115 |
| 0.467958841 | 0.4605861   | 0.243472422 | 0.211017786 |
| 0.269040586 | 0.224814763 | 0.357430182 | 0.301903997 |
| 0.299117831 | 0.148261308 | 0.48369508  | 0.122846563 |
| 0.181947629 | 0.278376334 | 0.252880409 | 0.295716219 |
| 0.437037569 | 0.365432236 | 0.031597887 | 0.428439003 |
| 0.00464307  | 0.431700152 | 0.467854796 | 0.376381268 |
| 0.086406821 | 0.045389512 | 0.283620097 | 0.389370242 |
| 0.468007138 | 0.449137697 | 0.501960972 | 0.508138965 |
| 0.274448565 | 0.395201184 | 0.470874893 | 0.257892253 |
| 0.428194438 | 0.233435367 | 0.148068416 | 0.49542462  |
| 0.510980385 | 0.527395502 | 0.306556923 | 0.374699229 |
| 0.425276972 | 0.47059684  | 0.443615069 | 0.49074884  |
| 0.393885618 | 0.105953898 | 0.432052075 | 0.526993131 |
| 0.3711439   | 0.414328187 | 0.249552684 | 0.412961487 |
| 0.110375453 | 0.35817276  | 0.42877273  | 0.222697875 |
| 0.468271889 | 0.034212658 | 0.32793955  | 0.404129781 |
| 0.286121543 | 0.444600331 | 0.525170944 | 0.256490865 |
| 0.484304841 | 0.04296131  | 0.206156968 | 0.070335447 |
| 0.375931945 | 0.229012929 | 0.46291181  | 0.464873133 |
| 0.25684424  | 0.46726075  | 0.321572969 | 0.008060832 |
| 0.062448387 | 0.268257805 | 0.443586246 | 0.407221889 |
| 0.456397225 | 0.365387843 | 0.321558259 | 0.371433662 |
| 0.471781996 | 1           | 0.050276946 | 0.142411204 |
| 0.455638869 | 0.275334051 | 0.334213542 | 0.482605338 |
| 0.416178072 | 0.15188412  | 0.198127909 | 0.530076977 |
| 0.402245597 | 0.140132099 | 0.333472627 | 0.484867086 |
| 0.378243183 | 0.466650117 | 0.167305316 | 0.353010818 |
| 0.081872816 | 0.48161003  | 0.06680466  | 0.340268976 |
| 0.31514299  | 0.247435965 | 0.020501614 | 0.271680035 |
| 0.318578582 | 0.4303928   | 0.451486087 | 0.170934239 |
| 0.394812346 | 0.491962266 | 0.312335355 | 0.441054964 |
| 0.02359717  | 0.081705533 | 0.253834291 | 0.519141475 |
| 0.25962617  | 0.512681361 | 0.378103593 | 0.402777531 |
| 0.393619468 | 0.47795644  | 0.005326913 | 0.48323162  |

|             |             |             |             |
|-------------|-------------|-------------|-------------|
| 0.530600332 | 0.269163611 | 0.469527419 | 0.483315092 |
| 0.430272973 | 0.466983486 | 0.044009595 | 0.486712139 |
| 0.33693357  | 0.131602607 | 0.519899365 | 0.257002347 |
| 0.453969033 | 0.084764634 | 0.341029246 | 0.460693279 |
| 0.447946248 | 0.016792855 | 0.219083429 | 0.416937423 |
| 0.063400065 | 0.112603762 | 0.444537414 | 0.454111218 |
| 0.43659384  | 0.483317088 | 0.492101647 | 0.413726722 |
| 0.49549282  | 0.284620559 | 0.028472329 | 0.429095172 |
| 0.459986445 | 0.412891455 | 0.425560832 | 0.292078114 |
| 0.310158269 | 0.469635002 | 0.416455982 | 0.223524225 |
| 0.078666348 | 0.342384229 | 0.031918159 | 0.419924086 |
| 0.379044764 | 0.172001109 | 0.423663133 | 0.222900246 |
| 0.137569128 | 0.538053161 | 0.277517273 | 0.348915824 |
| 0.205697389 | 0.4343703   | 0.316506355 | 0.286648483 |
| 0.294279619 | 0.253453704 | 0.432338445 | 0.438541649 |
| 0.056686113 | 0.164014651 | 0.032963402 | 0.417009545 |
| 0.20337579  | 0.390132158 | 0.368209534 | 0.402416934 |
| 0.373286761 | 0.170380345 | 0.470347245 | 0.374768138 |
| 0.193525585 | 0.03704827  | 0.511066122 | 0.46768173  |
| 0.305461471 | 0.218312493 | 0.083363426 | 0.363304021 |
| 0.467955057 | 0.293599395 | 0.237252084 | 0.450370779 |
| 0.048621257 | 0.495632258 | 0.331068606 | 0.208876362 |
| 0.470043672 | 0.351106483 | 0.470548055 | 0.073492538 |
| 0.39993406  | 0.4613154   | 0.404728203 | 0.281397503 |
| 0.375251248 | 0.455496113 | 0.054591235 | 0.391460036 |
| 0.38922533  | 0.067793199 | 0.536128669 | 0.218981494 |
| 0.049281144 | 0.495994857 | 0.465170454 | 0.139100031 |
| 0.142586691 | 0.39173194  | 0.05953383  | 0.401236231 |
| 0.527844006 | 0.48922007  | 0.438280866 | 0.318982912 |
| 0.076819804 | 0.025306431 | 0.321811608 | 0.44475769  |
| 0.49830338  | 0.525205923 | 0.360736422 | 0.46260051  |
| 0.325639906 | 0.411978404 | 0.136275796 | 0.523397051 |
| 0.251694558 | 0.515519964 | 0.017967809 | 0.479282945 |
| 0.503459509 | 0.276003657 | 0.149773362 | 0.335719778 |
| 0.370665865 | 0.082381653 | 0.262190057 | 0.494100352 |
| 0.427237017 | 0.407702824 | 0.407878595 | 0.477099688 |
| 0.027816911 | 0.067409521 | 0.460369731 | 0.276257185 |
| 0.433355174 | 0.305769511 | 0.09620063  | 0.338968952 |
| 0.081621766 | 0.447236572 | 0.491042153 | 0.108233488 |
| 0.332594156 | 0.307163176 | 0.479988855 | 0.072112383 |
| 0.459899537 | 0.505297581 | 0.517126    | 0.215730723 |
| 0.46356118  | 0.498658827 | 0.455247139 | 0.145177233 |
| 0.043383592 | 0.517888731 | 0.395959608 | 0.040578347 |
| 0.486047352 | 0.208665792 | 0.029150705 | 0.494599608 |
| 0.2550927   | 0.42174232  | 0.004706533 | 0.105871761 |
| 0.085485468 | 0.497308636 | 0.469834468 | 0.39722514  |
| 0.225464422 | 0.425276475 | 0.013656156 | 0.535849615 |
| 0.49039136  | 0.037621195 | 0.242537534 | 0.452996547 |
| 0.458298301 | 0.526277691 | 0.411463848 | 0.470023516 |
| 0.477026044 | 0.500153402 | 0.293476333 | 0.376773149 |
| 0.443992737 | 0.501138441 | 0.429891076 | 0.446880897 |
| 0.477825567 | 0.500251277 | 0.361351874 | 0.032218143 |
| 0.193850632 | 0.217864397 | 0.31579638  | 0.132777599 |
| 0.30185337  | 0.227244817 | 0.479796614 | 0.492374691 |

|             |             |             |             |
|-------------|-------------|-------------|-------------|
| 0.495464706 | 0.014833468 | 0.178424604 | 0.439110483 |
| 0.425104941 | 0.471724411 | 0.038910891 | 0.009800443 |
| 0.011398962 | 0.046333719 | 0.391852768 | 0.350547575 |
| 0.495687819 | 0.227033076 | 0.013246601 | 0.059801186 |
| 0.337247169 | 0.486038553 | 0.507163963 | 0.45134398  |
| 0.470678661 | 0.145133855 | 0.309367302 | 0.454458293 |
| 0.132089778 | 0.299542499 | 0.500997649 | 0.46532389  |
| 0.083034707 | 0.354596671 | 0.393603754 | 0.4939515   |
| 0.120556158 | 0.42994005  | 0.48321201  | 0.386533735 |
| 0.029046379 | 0.151429722 | 0.12469943  | 0.490383533 |
| 0.496677984 | 0.138411271 | 0.071991628 | 0.136626091 |
| 0.17710943  | 0.47498958  | 0.243320989 | 0.530851261 |
| 0.448535583 | 0.485932722 | 0.147504052 | 0.476403919 |
| 0.079510634 | 0.482960141 | 0.449641017 | 0.061065759 |
| 0.372130234 | 0.029204943 | 0.473005348 | 0.210223297 |
| 0.334254465 | 0.405703842 | 0.264200492 | 0.043030194 |
| 0.252492524 | 0.10637999  | 0.488464746 | 0.49525044  |
| 0.072919934 | 0.294955673 | 0.39871676  | 0.456559222 |
| 0.29120868  | 0.480428109 | 0.49481964  | 0.395992388 |
| 0.124990601 | 0.210736744 | 0.434933401 | 0.390003033 |
| 0.261808808 | 0.508728265 | 0.385756775 | 0.536763972 |
| 0.407116196 | 0.454141616 | 0.477598218 | 0.400807838 |
| 0.35214827  | 0.396746406 | 0.381515722 | 0.033061178 |
| 0.421868749 | 0.490186624 | 0.381328811 | 0.244011581 |
| 0.367137422 | 0.451567491 | 0.075959742 | 0.180953995 |
| 0.401460292 | 0.295082445 | 0.216460343 | 0.484083822 |
| 0.399232808 | 0.392295214 | 0.059400842 | 0.116778872 |
| 0.545748764 | 0.422792275 | 0.165406004 | 0.449237223 |
| 0.263253586 | 0.436768498 | 0.479999371 | 0.493359391 |
| 0.408870708 | 0.454601066 | 0.438231508 | 0.392905576 |
| 0.410501868 | 0.333830361 | 0.522447518 | 0.086062987 |
| 0.14495401  | 0.43541629  | 0.158717751 | 0.167740657 |
| 0.222964793 | 0.059481251 | 0.368136513 | 0.49230262  |
| 0.429642808 | 0.466596409 | 0.319146985 | 0.134116622 |
| 0.43807866  | 0.374158688 | 0.451885709 | 0.240596468 |
| 0.131725402 | 0.494771225 | 0.021636309 | 0.110299232 |
| 0.45215552  | 0.456712934 | 0.468539495 | 0.344004404 |
| 0.395685927 | 0.234327059 | 0.403683248 | 0.284769812 |
| 0.329654858 | 0.397306641 | 0.447175117 | 0.050752928 |
| 0.035476232 | 0.50776529  | 0.369972179 | 0.046361019 |
| 0.148053913 | 0.372380163 | 0.355439147 | 0.313624379 |
| 0.052857338 | 0.492997108 | 0.330882101 | 0.491600064 |
| 0.380804568 | 0.116641283 | 0.322177293 | 0.117843866 |
| 0.093730301 | 0.434235923 | 0.459918389 | 0.517314475 |
| 0.431725848 | 0.485102719 | 0.4214786   | 0.443696934 |
| 0.162611371 | 0.401309405 | 0.049723612 | 0.457694922 |
| 0.427779515 |             |             |             |
| CXCL2       | 0.038315719 | 0.082351034 | 0.020440325 |
| 0.07178806  | 0.018860295 | 0.080372516 | 0.037064732 |
| 0.025575405 | 0.008824206 | 0.001527023 | 0.000625385 |
| 0.028761988 | 0.00142888  | 0.024327479 | 0.026622084 |
| 0.041600765 | 0.00248536  | 0.015619106 | 0.0245551   |
| 0.044958072 | 0.027165899 | 0.032929767 | 0.009766926 |
| 0.002776612 | 0.003096764 | 0.005114682 | 0.007858022 |



|             |             |                      |             |
|-------------|-------------|----------------------|-------------|
| 0.070961162 | 0.00574237  | 0.058513877          | 0.069102166 |
| 0.001049348 | 0.048722601 | 0.084801663          | 0.030952306 |
| 0.074090699 | 0.04549152  | 1.47E-05 0.034098005 |             |
| 0.068854261 | 0.051547425 | 0.048840453          | 0.039610028 |
| 0.006290384 | 0.095697727 | 0.038948971          | 0.017816607 |
| 0.003372535 | 0.00237284  | 0.052839961          | 0.088729288 |
| 0.087746672 | 0.036770503 | 0.039969057          | 0.028449466 |
| 0.001727792 | 0.023374748 | 0.003197824          | 0.079908292 |
| 0.023829752 | 0.050390869 | 0.076401728          | 0.01000148  |
| 0.000287524 | 0.023962585 | 0.001333461          | 0.032613493 |
| 0.004638392 | 0.081641399 | 0.00128917           | 0.021243871 |
| 0.000249034 | 0.04831207  | 0.015775191          | 0.007395909 |
| 0.002420907 | 0.001644434 | 0.002465858          | 0.050582322 |
| 0.06379323  | 0.064735071 | 0.055210596          | 0.053978269 |
| 0.002925365 | 0.00867269  | 0.010702203          | 0.008974392 |
| 0.065569795 | 0.035670889 | 0.003911627          | 0.035985015 |
| 0.057404212 | 0.074194237 | 0.003548528          | 0.008551574 |
| 0.08650364  | 0.083565969 | 0.035247586          | 0.019839691 |
| 0.01764818  | 0.000354209 | 0.076838639          | 0.062705167 |
| 0.07418854  | 0.006093237 | 0.005667447          | 0.071398945 |
| 0.002592085 | 0.020310862 | 0.039190202          | 0.000383132 |
| 0.071490955 | 0.007106642 | 0.005226497          | 0.039120838 |
| 0.002909842 | 0.064641399 | 0.070344156          | 0.024384964 |
| 0.015757635 | 0.000162606 | 0.000667655          | 0.000564084 |
| 0.009360616 | 0.000743121 | 0.086135787          | 0.076578748 |
| 0.011310262 | 0.00407866  | 0.025333466          | 7.44E-07    |
| 0.000651348 | 0.000912869 | 0.043519794          | 0.017479345 |
| 0.044605492 | 0.04658274  | 0.017354404          | 0.060789496 |
| 0.032187273 | 0.050276946 | 1                    | 0.010282286 |
| 0.046803032 | 0.000939496 | 0.017068053          | 0.029685911 |
| 0.016220421 | 0.018344297 | 0.00784301           | 0.073876628 |
| 0.096477502 | 0.009215026 | 0.01884608           | 0.038748929 |
| 0.013556504 | 0.013978491 | 0.006371928          | 0.014123062 |
| 0.006174528 | 0.070291715 | 0.000426526          | 0.033843976 |
| 0.00825155  | 0.000683879 | 0.000153985          | 0.046428058 |
| 0.024528515 | 0.074625764 | 0.07227707           | 0.005814323 |
| 0.018125533 | 0.028469472 | 0.037852801          | 0.073595537 |
| 0.001557792 | 0.001802865 | 0.034279391          | 0.069904018 |
| 0.082058918 | 0.055828815 | 0.013057418          | 0.006432856 |
| 0.013365886 | 0.054970555 | 3.29E-05 0.093800352 |             |
| 0.073987716 | 0.04382198  | 0.03621836           | 0.021225549 |
| 0.01564438  | 0.076669207 | 0.000222035          | 0.034888557 |
| 0.053689333 | 0.004878255 | 0.06084264           | 0.007761753 |
| 0.070389342 | 0.003247927 | 0.023071845          | 0.040416461 |
| 0.039123535 | 0.000340723 | 0.074746376          | 0.062652287 |
| 0.00014344  | 0.022048096 | 0.043235778          | 0.051847181 |
| 0.044882334 | 0.04182448  | 0.058749243          | 0.015505027 |
| 0.024861992 | 0.023905706 | 0.000181945          | 0.011080688 |
| 0.040047864 | 0.00199109  | 0.097507433          | 0.018962541 |
| 0.048148293 | 0.092220227 | 0.050075021          | 0.001984945 |
| 0.008105043 | 0.032035616 | 0.001399313          | 0.024385547 |
| 0.053416715 | 0.011710119 | 0.022659707          | 0.000816365 |
| 0.001848727 | 0.075195256 | 0.001908449          | 0.003544045 |
| 0.000918149 | 0.042065913 | 0.023097293          | 0.022734501 |

|                      |             |                      |             |
|----------------------|-------------|----------------------|-------------|
| 0.006339181          | 0.004725877 | 0.011305248          | 0.016923297 |
| 0.011664292          | 0.004455744 | 4.13E-05 0.009112216 |             |
| 0.00406377           | 0.01781629  | 0.021758985          | 0.045962772 |
| 0.007996831          | 0.002929182 | 0.026396769          | 0.003383528 |
| 0.003757264          | 0.000909194 | 0.077504247          | 0.039084593 |
| 0.077061569          | 0.013673682 | 0.001331066          | 0.005494246 |
| 0.070685386          | 0.087902537 | 0.033548384          | 0.084211297 |
| 0.00071909           | 0.05141104  | 0.010034501          | 0.00552934  |
| 0.010489921          | 0.023177055 | 0.070430765          | 0.009402667 |
| 0.032119466          | 0.089155152 | 0.013831977          | 0.009628783 |
| 0.090076295          | 0.047195943 | 0.004727911          | 0.064614964 |
| 0.059366713          | 0.00210881  | 0.071303526          | 0.001551308 |
| 0.000760108          | 0.030687571 | 0.04636648           | 0.003654489 |
| 0.003246158          | 0.039216574 | 0.015049262          | 0.01663674  |
| 0.080930436          | 0.038496737 | 0.060883706          | 0.002761707 |
| 0.006425148          | 0.000209283 | 0.002744752          | 0.018415761 |
| 0.085356866          | 0.061489294 | 0.012328865          | 0.018686024 |
| 0.022462585          | 0.010810061 | 0.004417329          | 0.068587124 |
| 0.001085948          | 0.075868683 | 0.000466501          | 0.034628915 |
| 0.078681358          | 0.048317659 | 0.003518092          | 0.052579583 |
| 0.089825592          | 0.006847275 | 0.009500569          | 0.086971915 |
| 0.069868351          | 0.017091747 | 0.020885677          | 0.028791092 |
| 0.007467725          | 0.0033211   | 0.025246332          | 0.001663646 |
| 0.018209937          | 0.009153797 | 7.82E-05 0.018436594 |             |
| 0.003725665          | 0.089164507 | 0.045243175          | 0.005403408 |
| 0.075891102          | 0.021566178 | 0.018116934          | 0.003605466 |
| 0.046914012          | 0.060709278 | 0.086889418          | 0.010072225 |
| 0.03878753           | 0.069275973 | 0.018611661          | 0.001909473 |
| 0.00049255           | 0.074146077 | 0.056500369          | 0.001088162 |
| 0.057220258          | 0.069830207 | 0.001359985          | 0.08931978  |
| 0.018839478          | 0.077808998 | 0.0039445            | 8.99E-05    |
| 0.000268262          | 0.041467825 | 0.09288711           | 0.058609758 |
| 0.057333956          | 0.029318363 | 0.000431428          | 0.061737069 |
| 0.08956209           | 0.0004483   | 0.000931515          | 0.048893439 |
| 0.037355005          | 0.086125449 | 0.00967343           | 0.051863999 |
| 0.027646719          | 0.075008568 | 0.006823053          | 0.015691208 |
| 0.084689223          | 0.058773294 | 0.070586195          | 0.092416974 |
| 0.061233816          | 0.026803254 | 0.033145244          | 0.003937446 |
| 0.001946474          | 0.041234573 | 0.042232289          | 0.001156524 |
| 0.07464761           | 0.004929891 | 0.074848301          | 0.04900837  |
| 0.058156838          | 0.000279558 | 0.017831178          | 0.055434386 |
| 0.08714085           | 0.074921587 | 0.000138562          | 0.002529798 |
| 0.000847479          | 0.000787721 | 0.039241303          | 0.007950793 |
| 0.069595859          | 0.02871931  | 0.000715571          | 0.008486421 |
| 0.012241579          | 0.020586758 | 0.080210248          | 0.042133169 |
| 0.03733941           | 0.002247497 | 0.032481564          | 0.044747451 |
| 0.001376424          | 0.053172417 | 0.06451566           | 0.096027345 |
| 0.000342002          | 0.00666725  | 0.022369797          | 0.073950651 |
| 6.66E-05 0.013736082 | 0.027540571 | 0.013028961          | 9.82E-06    |
| 0.002022188          | 0.002616901 | 0.037809158          | 0.071071635 |
| 0.003004802          | 0.001622012 | 0.002584475          | 0.016880915 |
| 0.050767679          | 0.00870942  | 0.065603734          | 0.073876698 |
| 0.05404252           | 0.000272883 | 0.092866839          | 0.000587477 |
| 0.082272089          | 0.010295175 | 0.001896296          | 0.006768209 |

|                      |                      |                      |             |
|----------------------|----------------------|----------------------|-------------|
| 0.000511379          | 0.055915811          | 0.005111289          | 0.025291417 |
| 0.053717196          | 0.003117651          | 9.55E-06 0.00146502  |             |
| 0.001907572          | 0.061712227          | 0.043778887          | 0.000174402 |
| 0.013874078          | 0.01335638           | 0.03179397           | 0.073000449 |
| 0.062063735          | 0.092097535          | 0.048910746          | 0.0127024   |
| 3.02E-05 0.061373744 | 0.055488228          | 0.0166703            |             |
| 0.053099247          | 0.010580378          | 0.068704486          | 0.059609904 |
| 0.066109703          | 0.063371508          | 0.048371063          | 0.000737197 |
| 0.059899961          | 0.089039234          | 0.005759219          | 0.034429538 |
| 0.055558125          | 0.030692978          | 0.004500279          | 0.013615876 |
| 0.012485381          | 0.00036338           | 0.001488 0.008275537 |             |
| 0.088848333          | 0.003874428          | 0.049897825          | 0.043700939 |
| 0.061189531          | 0.000532319          | 0.003615429          | 0.080282045 |
| 0.080585964          | 0.026290079          | 0.068247917          | 0.005518727 |
| 0.024445778          | 0.0419199            | 0.034489611          | 0.00617218  |
| 0.057284988          | 0.068218924          | 0.077834179          | 0.09842654  |
| 0.026134939          | 0.08596774           | 0.0175169            | 0.001488687 |
| 0.023706226          | 0.008325095          | 0.00230721           | 0.010210093 |
| 0.000596165          | 0.004342378          | 0.032605818          | 0.007150597 |
| 0.031966483          | 0.006712178          | 0.000979922          | 0.010028841 |
| 0.017149188          | 0.021441051          | 0.03997066           | 0.006490483 |
| 0.090131196          | 6.50E-05 0.001316791 | 0.006988595          |             |
| 0.058600646          | 0.016694942          | 0.008734174          | 0.003909533 |
| 0.00060822           | 0.017472219          | 0.067527509          | 0.043747804 |
| 0.003399492          | 0.066911392          | 0.00258253           | 0.003014412 |
| 0.057273396          | 0.042085147          | 6.62E-05 3.54E-05    | 0.037170269 |
| 0.005476441          | 0.012183453          | 0.000166701          | 0.05595297  |
| 0.051998189          | 0.020551075          | 0.043139046          | 0.002382011 |
| 0.079904482          | 0.000541864          | 0.002033351          | 0.084110213 |
| 0.017854104          | 0.071677231          | 0.008840003          | 0.048195663 |
| 0.089120828          | 0.050166837          | 0.001331661          | 0.017017318 |
| 0.006600192          | 0.06139543           | 0.022254805          |             |
| CXCR6                | 0.096715337          | 0.117730302          | 0.063146722 |
| 0.220868796          | 0.110043605          | 0.105756356          | 0.262727693 |
| 0.105444274          | 0.118505333          | 0.058787708          | 0.040621939 |
| 0.077422975          | 0.044486281          | 0.079762105          | 0.036869434 |
| 0.230181751          | 0.075081439          | 0.079647114          | 0.297672905 |
| 0.217243126          | 0.153314397          | 0.214706926          | 0.200317215 |
| 0.038075825          | 0.068755338          | 0.162745838          | 0.061358887 |
| 0.216164704          | 0.18439797           | 0.080253836          | 0.196287487 |
| 0.100121962          | 0.128400233          | 0.086878015          | 0.110328136 |
| 0.072932657          | 0.07415086           | 0.040542355          | 0.072320854 |
| 0.125839942          | 0.126895579          | 0.226695337          | 0.251344428 |
| 0.17275886           | 0.081938176          | 0.280963106          | 0.11204777  |
| 0.060282551          | 0.086173741          | 0.078619969          | 0.091462515 |
| 0.068904946          | 0.076890281          | 0.158888422          | 0.21309347  |
| 0.023074217          | 0.064639924          | 0.011545896          | 0.122807135 |
| 0.264069387          | 0.089237208          | 0.077135167          | 0.133973366 |
| 0.056872823          | 0.16836207           | 0.073779591          | 0.198159902 |
| 0.030732218          | 0.125544452          | 0.175396521          | 0.049114673 |
| 0.023219865          | 0.253230206          | 0.133458435          | 0.02256009  |
| 0.189185171          | 0.072732718          | 0.10130067           | 0.242047094 |
| 0.187810655          | 0.086509259          | 0.144414463          | 0.121032598 |
| 0.061853868          | 0.157568977          | 0.05432853           | 0.158302139 |

|             |             |             |             |
|-------------|-------------|-------------|-------------|
| 0.12219867  | 0.209865622 | 0.091501687 | 0.208180136 |
| 0.137567585 | 0.091818054 | 0.08133388  | 0.160814891 |
| 0.120361735 | 0.122183949 | 0.067931967 | 0.085699698 |
| 0.028650731 | 0.062256463 | 0.087843422 | 0.119594723 |
| 0.104068426 | 0.036172278 | 0.161909301 | 0.176214367 |
| 0.199455572 | 0.030317488 | 0.27361864  | 0.040821225 |
| 0.19107242  | 0.155009635 | 0.130038803 | 0.18076054  |
| 0.112096607 | 0.122333843 | 0.085325885 | 0.299776399 |
| 0.085229907 | 0.072508812 | 0.019312944 | 0.127996693 |
| 0.049232235 | 0.012610909 | 0.064393844 | 0.160231868 |
| 0.08237604  | 0.04008689  | 0.215550003 | 0.060475041 |
| 0.089425615 | 0.067400129 | 0.08494934  | 0.107517512 |
| 0.160463335 | 0.057664768 | 0.10553211  | 0.09118769  |
| 0.063492853 | 0.142411204 | 0.010282286 | 1           |
| 0.109453627 | 0.077705379 | 0.304891759 | 0.08481701  |
| 0.119197718 | 0.199416777 | 0.227144308 | 0.140148515 |
| 0.113397404 | 0.266874478 | 0.063559999 | 0.210241126 |
| 0.045963406 | 0.099608987 | 0.224499925 | 0.103225476 |
| 0.18265468  | 0.06783109  | 0.079804917 | 0.118009461 |
| 0.018327555 | 0.039131442 | 0.12023999  | 0.168825479 |
| 0.059397143 | 0.091915149 | 0.058519119 | 0.251912446 |
| 0.134543482 | 0.164386747 | 0.095308772 | 0.096254745 |
| 0.052841696 | 0.150857579 | 0.056228355 | 0.120949385 |
| 0.093547341 | 0.118633199 | 0.114666463 | 0.084717587 |
| 0.191232382 | 0.180514659 | 0.00443598  | 0.081375578 |
| 0.088787032 | 0.046299287 | 0.121693763 | 0.110534812 |
| 0.042534918 | 0.175638676 | 0.004187533 | 0.201992387 |
| 0.075807353 | 0.241228531 | 0.159995655 | 0.182305837 |
| 0.084971801 | 0.16689647  | 0.096221882 | 0.081933198 |
| 0.057508395 | 0.03923178  | 0.128437703 | 0.23301815  |
| 0.068117636 | 0.139683135 | 0.148487104 | 0.206261123 |
| 0.154844361 | 0.148198708 | 0.18765224  | 0.034976936 |
| 0.100553597 | 0.202661156 | 0.103166752 | 0.116971749 |
| 0.112184983 | 0.017501049 | 0.104388617 | 0.131601093 |
| 0.056935712 | 0.115288695 | 0.068640796 | 0.02792562  |
| 0.226218938 | 0.178410019 | 0.07516852  | 0.135928222 |
| 0.074305821 | 0.113949775 | 0.052913278 | 0.082111402 |
| 0.110385712 | 0.123163871 | 0.033337225 | 0.021771782 |
| 0.014145861 | 0.090095403 | 0.262906178 | 0.046663433 |
| 0.027721195 | 0.128999073 | 0.04580592  | 0.070162884 |
| 0.172110861 | 0.157238424 | 0.04501163  | 0.016355282 |
| 0.031021372 | 0.027449564 | 0.026466072 | 0.087032424 |
| 0.048428956 | 0.068210943 | 0.096062025 | 0.036433695 |
| 0.084948304 | 0.145286245 | 0.115918758 | 0.215514822 |
| 0.087622033 | 0.180443388 | 0.153402215 | 0.012001404 |
| 0.148725552 | 0.057702562 | 0.042665881 | 0.130603902 |
| 0.119264223 | 0.145270093 | 0.062993643 | 0.167441948 |
| 0.038534981 | 0.221107033 | 0.204551622 | 0.041574032 |
| 0.108965859 | 0.10875686  | 0.185217747 | 0.129653149 |
| 0.082279333 | 0.184051389 | 0.163495051 | 0.088772019 |
| 0.078911585 | 0.158524146 | 0.102831231 | 0.069375045 |
| 0.143255714 | 0.109879127 | 0.082428062 | 0.214914954 |
| 0.138201335 | 0.112609631 | 0.16960159  | 0.220618497 |
| 0.124346378 | 0.213043725 | 0.101404928 | 0.049751718 |

|             |             |             |             |
|-------------|-------------|-------------|-------------|
| 0.165672033 | 0.030057948 | 0.082153043 | 0.060169537 |
| 0.079072332 | 0.094031508 | 0.239093547 | 0.067004916 |
| 0.327465101 | 0.041605734 | 0.067571482 | 0.115356423 |
| 0.043089545 | 0.093416671 | 0.108775991 | 0.091582723 |
| 0.070799744 | 0.08375461  | 0.102739297 | 0.189489103 |
| 0.100204894 | 0.205526619 | 0.162150624 | 0.090104543 |
| 0.132501495 | 0.087174198 | 0.054354842 | 0.127782556 |
| 0.160073841 | 0.200295164 | 0.115124283 | 0.02113221  |
| 0.059058826 | 0.148192761 | 0.005489632 | 0.065115515 |
| 0.123868339 | 0.104630695 | 0.161476611 | 0.111033261 |
| 0.075842571 | 0.066927583 | 0.166105453 | 0.209466188 |
| 0.081892726 | 0.083225773 | 0.089263662 | 0.186767159 |
| 0.092504654 | 0.090535631 | 0.039493085 | 0.158807399 |
| 0.106012632 | 0.078852457 | 0.128375873 | 0.06411275  |
| 0.172129447 | 0.072802945 | 0.052890852 | 0.124446334 |
| 0.312647942 | 0.062137681 | 0.036378579 | 0.011134117 |
| 0.068892757 | 0.144419314 | 0.082676575 | 0.203703324 |
| 0.035406489 | 0.21677873  | 0.012512808 | 0.106149563 |
| 0.096734091 | 0.060945281 | 0.055435759 | 0.07649015  |
| 0.060651484 | 0.115625097 | 0.038564584 | 0.089446882 |
| 0.053805212 | 0.074587644 | 0.084706738 | 0.224601059 |
| 0.130460441 | 0.07118     | 0.156932131 | 0.114397966 |
| 0.160921695 | 0.145654126 | 0.304510425 | 0.139266011 |
| 0.042811806 | 0.141603249 | 0.019427013 | 0.061582739 |
| 0.107982246 | 0.085747061 | 0.106366637 | 0.164352999 |
| 0.100928688 | 0.099364515 | 0.146074495 | 0.087027944 |
| 0.167221451 | 0.183696346 | 0.082656153 | 0.013842719 |
| 0.005202161 | 0.02687767  | 0.198342324 | 0.144042664 |
| 0.112347886 | 0.019363364 | 0.099885027 | 0.178250782 |
| 0.090942528 | 0.087334197 | 0.095521274 | 0.277761925 |
| 0.103722539 | 0.180202534 | 0.030590326 | 0.254289952 |
| 0.069262567 | 0.065522962 | 0.115304677 | 0.106870073 |
| 0.114448416 | 0.139295239 | 0.074534085 | 0.173850264 |
| 0.003933664 | 0.189490826 | 0.082898882 | 0.056602485 |
| 0.053033948 | 0.101610198 | 0.102358258 | 0.178123283 |
| 0.066306352 | 0.0592227   | 0.061991427 | 0.021106903 |
| 0.136728875 | 0.14103311  | 0.107520633 | 0.144154197 |
| 0.164613891 | 0.222738488 | 0.06776892  | 0.099543381 |
| 0.087872803 | 0.076856771 | 0.064300878 | 0.02555557  |
| 0.088682667 | 0.128481845 | 0.074293656 | 0.018958811 |
| 0.075118675 | 0.145915398 | 0.040641437 | 0.06886755  |
| 0.014705906 | 0.128252269 | 0.163410292 | 0.128819828 |
| 0.069775258 | 0.166660042 | 0.172562279 | 0.173208221 |
| 0.165184663 | 0.17398317  | 0.08582039  | 0.039801688 |
| 0.177532747 | 0.015429885 | 0.204503466 | 0.088264245 |
| 0.092278958 | 0.149514597 | 0.044244476 | 0.113981366 |
| 0.119179521 | 0.125763722 | 0.095088296 | 0.201363361 |
| 0.030758177 | 0.098503666 | 0.149865018 | 0.096528015 |
| 0.210250695 | 0.154997797 | 0.133715644 | 0.052703433 |
| 0.136998318 | 0.044246962 | 0.183731254 | 0.022060731 |
| 0.02596476  | 0.131020168 | 0.13097063  | 0.222554314 |
| 0.12710389  | 0.092861546 | 0.163703322 | 0.102025627 |
| 0.11400255  | 0.110711818 | 0.128172824 | 0.142397674 |
| 0.193867601 | 0.167101262 | 0.112989446 | 0.108477969 |

|             |             |             |             |
|-------------|-------------|-------------|-------------|
| 0.03305296  | 0.099634757 | 0.155081102 | 0.118451291 |
| 0.107867695 | 0.279604258 | 0.092715501 | 0.089964774 |
| 0.045498286 | 0.064167227 | 0.099447901 | 0.170358215 |
| 0.240203228 | 0.104252416 | 0.011376371 | 0.183831425 |
| 0.016493797 | 0.19695932  | 0.034119385 | 0.120888967 |
| 0.143374704 | 0.05581894  | 0.199528146 | 0.177322084 |
| 0.118594177 | 0.087002036 | 0.054292663 | 0.155024765 |
| 0.022018993 | 0.106233333 | 0.049831722 | 0.127665256 |
| 0.020118051 | 0.064411176 | 0.21302015  | 0.098092007 |
| 0.034246472 | 0.021338781 | 0.103268389 | 0.147327828 |
| 0.16937714  | 0.159477278 | 0.070179342 | 0.069416743 |
| 0.071171934 | 0.087904328 | 0.065275399 | 0.076830582 |
| 0.065955214 | 0.078828929 | 0.059215845 | 0.094097478 |
| 0.208937966 | 0.180777274 | 0.082555844 | 0.075908684 |
| 0.176938121 | 0.089103966 | 0.066274214 | 0.080774461 |
| 0.072695199 | 0.219832603 | 0.07540246  | 0.094895103 |
| 0.065490452 | 0.042949741 | 0.185453531 | 0.168344406 |
| 0.021662323 |             |             |             |
| CYB5        | 0.330279166 | 0.497243222 | 0.214006847 |
| 0.390435694 | 0.228755378 | 0.236184213 | 0.175801615 |
| 0.15619036  | 0.104325744 | 0.011965052 | 0.027279865 |
| 0.275462512 | 0.149297223 | 0.184028512 | 0.199642636 |
| 0.380850823 | 0.112418234 | 0.205955003 | 0.198241008 |
| 0.329053445 | 0.098141552 | 0.329240197 | 0.112676853 |
| 0.170349459 | 0.098302241 | 0.078783258 | 0.176393715 |
| 0.443914981 | 0.090087963 | 0.173095681 | 0.32458829  |
| 0.09106712  | 0.378921761 | 0.47734047  | 0.313449537 |
| 0.456760461 | 0.304878915 | 0.011625552 | 0.176581013 |
| 0.396730241 | 0.374242249 | 0.33916834  | 0.236945169 |
| 0.060989228 | 0.444442506 | 0.193150861 | 0.246244144 |
| 0.157803239 | 0.04599421  | 0.153708627 | 0.411621133 |
| 0.42734079  | 0.247384459 | 0.179726563 | 0.144387902 |
| 0.115147718 | 0.131920094 | 0.135235559 | 0.244122491 |
| 0.179249591 | 0.111957453 | 0.435370155 | 0.101397954 |
| 0.093375723 | 0.181897424 | 0.114391978 | 0.189432283 |
| 0.173657723 | 0.333690182 | 0.034156287 | 0.229815266 |
| 0.004331139 | 0.322716374 | 0.232752196 | 0.157542122 |
| 0.05669386  | 0.031307065 | 0.134042377 | 0.238182875 |
| 0.451663237 | 0.42218814  | 0.468500508 | 0.460099528 |
| 0.144212031 | 0.197661812 | 0.193499568 | 0.148912686 |
| 0.408742623 | 0.153981458 | 0.13910619  | 0.37800075  |
| 0.475041574 | 0.477607948 | 0.168498273 | 0.185023575 |
| 0.384824272 | 0.457608463 | 0.230364902 | 0.227355524 |
| 0.190375842 | 0.052768567 | 0.404039082 | 0.482858648 |
| 0.363079494 | 0.165692185 | 0.134449018 | 0.375986156 |
| 0.070681302 | 0.211112626 | 0.280412012 | 0.107625558 |
| 0.47370372  | 0.037509608 | 0.15586809  | 0.214030292 |
| 0.167821875 | 0.387078193 | 0.471453381 | 0.170072329 |
| 0.225587844 | 0.033713435 | 0.104504536 | 0.043215469 |
| 0.212637373 | 0.08546564  | 0.421809961 | 0.45060486  |
| 0.160741003 | 0.196774757 | 0.200771474 | 0.006043433 |
| 0.037466747 | 0.134286008 | 0.360712134 | 0.213230044 |
| 0.355850195 | 0.332809868 | 0.170690867 | 0.316462975 |
| 0.289972778 | 0.455638869 | 0.046803032 | 0.109453627 |

| 1           | 0.131095491 | 0.188341853 | 0.251773016 |
|-------------|-------------|-------------|-------------|
| 0.214277734 | 0.130685697 | 0.124324322 | 0.506572524 |
| 0.410251886 | 0.098723309 | 0.18044915  | 0.365500166 |
| 0.180480721 | 0.212841985 | 0.115995335 | 0.18945685  |
| 0.063704609 | 0.430736479 | 0.035688496 | 0.209430191 |
| 0.167148252 | 0.100051028 | 0.018816071 | 0.179279741 |
| 0.206276341 | 0.391989327 | 0.402363021 | 0.113203643 |
| 0.206101318 | 0.294403047 | 0.178055134 | 0.337377069 |
| 0.016846637 | 0.07047567  | 0.14796365  | 0.482310793 |
| 0.197316505 | 0.47305638  | 0.218985439 | 0.207670126 |
| 0.203523012 | 0.424946917 | 0.004120461 | 0.458050597 |
| 0.481329164 | 0.161826861 | 0.248740996 | 0.265675753 |
| 0.189394728 | 0.442635566 | 0.036139921 | 0.344386883 |
| 0.26505887  | 0.093884046 | 0.49357066  | 0.138780421 |
| 0.421281313 | 0.054823543 | 0.18420729  | 0.372549156 |
| 0.31978584  | 0.014466234 | 0.152734251 | 0.320336007 |
| 0.032228926 | 0.094835175 | 0.34575884  | 0.32532992  |
| 0.245900348 | 0.39029535  | 0.478305633 | 0.182203387 |
| 0.242428201 | 0.191761221 | 0.023840154 | 0.205902955 |
| 0.3692946   | 0.168669594 | 0.423828561 | 0.20289607  |
| 0.197314082 | 0.457142595 | 0.348441836 | 0.097961525 |
| 0.06254539  | 0.196193909 | 0.045816679 | 0.22473282  |
| 0.346711278 | 0.105813867 | 0.196999835 | 0.112436746 |
| 0.075339765 | 0.501594626 | 0.114961871 | 0.136710267 |
| 0.078138638 | 0.226455262 | 0.202679158 | 0.151153536 |
| 0.13518782  | 0.14993304  | 0.206432339 | 0.208782317 |
| 0.055091516 | 0.096623557 | 0.017170332 | 0.164915014 |
| 0.096589178 | 0.179193715 | 0.169349274 | 0.296392969 |
| 0.187014873 | 0.103075047 | 0.239789433 | 0.169748652 |
| 0.112431116 | 0.025653633 | 0.483081809 | 0.332541673 |
| 0.273981016 | 0.15630384  | 0.053128858 | 0.152422871 |
| 0.449659323 | 0.174646854 | 0.148862846 | 0.43763521  |
| 0.046285056 | 0.458574599 | 0.163865228 | 0.116397736 |
| 0.195675838 | 0.196502035 | 0.463898394 | 0.064158134 |
| 0.222881481 | 0.442105149 | 0.213440673 | 0.153493543 |
| 0.370394962 | 0.313387876 | 0.051392569 | 0.333911287 |
| 0.3249472   | 0.045895328 | 0.492385178 | 0.104593564 |
| 0.031741835 | 0.334996639 | 0.338571454 | 0.084074249 |
| 0.086184615 | 0.203217374 | 0.063462052 | 0.208249887 |
| 0.499813936 | 0.362829134 | 0.352320328 | 0.146149875 |
| 0.056282759 | 0.013576441 | 0.144087048 | 0.207557088 |
| 0.458791011 | 0.469835121 | 0.193636989 | 0.213492487 |
| 0.193932205 | 0.195852643 | 0.092299846 | 0.484035267 |
| 0.130949688 | 0.476902635 | 0.01461598  | 0.355839627 |
| 0.452833227 | 0.162707215 | 0.084831359 | 0.196839234 |
| 0.360120363 | 0.069252496 | 0.167573479 | 0.46494406  |
| 0.41339114  | 0.218337602 | 0.214900488 | 0.305733142 |
| 0.033371266 | 0.055353413 | 0.235067456 | 0.113826363 |
| 0.201579694 | 0.17678534  | 0.03434542  | 0.201036933 |
| 0.05702947  | 0.428225307 | 0.422599145 | 0.073377177 |
| 0.188761625 | 0.193645281 | 0.266130147 | 0.055343894 |
| 0.404415582 | 0.452581947 | 0.480909691 | 0.148284881 |
| 0.353227978 | 0.452745039 | 0.212291916 | 0.083494826 |
| 0.02637966  | 0.468783481 | 0.308917521 | 0.033106382 |

|             |             |             |             |
|-------------|-------------|-------------|-------------|
| 0.458111968 | 0.140639389 | 0.019623197 | 0.480119329 |
| 0.167864185 | 0.388101434 | 0.014512919 | 0.050821049 |
| 0.044382022 | 0.425819291 | 0.443872253 | 0.306666764 |
| 0.136237964 | 0.255624328 | 0.004724124 | 0.485945253 |
| 0.464511978 | 0.024120586 | 0.110389243 | 0.358920357 |
| 0.328935482 | 0.500638727 | 0.180779563 | 0.407995809 |
| 0.256246496 | 0.445221078 | 0.181129722 | 0.199135965 |
| 0.423024343 | 0.435202055 | 0.375545546 | 0.447150831 |
| 0.44074626  | 0.321863599 | 0.210268675 | 0.030227968 |
| 0.110490958 | 0.149588069 | 0.166555337 | 0.064432856 |
| 0.220517769 | 0.124978093 | 0.46090807  | 0.443096006 |
| 0.451115921 | 0.011089242 | 0.132555951 | 0.367267151 |
| 0.440165652 | 0.474051102 | 0.027524384 | 0.012279947 |
| 0.013579123 | 0.02783512  | 0.229683516 | 0.183205376 |
| 0.464934466 | 0.127058073 | 0.011419331 | 0.063185517 |
| 0.213864932 | 0.259014539 | 0.467009478 | 0.337935655 |
| 0.369639306 | 0.084977182 | 0.168874453 | 0.353468242 |
| 0.074727866 | 0.238847117 | 0.465657875 | 0.451502064 |
| 0.046877174 | 0.180469866 | 0.210044902 | 0.483584717 |
| 0.039783053 | 0.211748697 | 0.288571801 | 0.207941289 |
| 0.016076355 | 0.084672086 | 0.073988892 | 0.393575935 |
| 0.436182043 | 0.074607403 | 0.04241487  | 0.096835824 |
| 0.11560928  | 0.435493627 | 0.150968264 | 0.498736265 |
| 0.422571109 | 0.430338776 | 0.062835028 | 0.457711099 |
| 0.049566748 | 0.445527016 | 0.195416288 | 0.063068938 |
| 0.196037196 | 0.022577902 | 0.416689306 | 0.098852368 |
| 0.189498047 | 0.310096465 | 0.144399863 | 0.022002837 |
| 0.11125494  | 0.064262182 | 0.465203699 | 0.424840266 |
| 0.037350015 | 0.182708152 | 0.212326144 | 0.299285429 |
| 0.190615945 | 0.385860422 | 0.464340088 | 0.196113623 |
| 0.092985329 | 0.07672458  | 0.355719665 | 0.2938551   |
| 0.161164756 | 0.473291031 | 0.186006695 | 0.496593399 |
| 0.340570355 | 0.44114937  | 0.434135891 | 0.231569592 |
| 0.133159994 | 0.255011034 | 0.292397448 | 0.037126712 |
| 0.243108677 | 0.429845116 | 0.214846203 | 0.139432109 |
| 0.182342346 | 0.185201026 | 0.051751891 | 0.115029684 |
| 0.158165995 | 0.204392027 | 0.120632001 | 0.430137851 |
| 0.271794912 | 0.315900137 | 0.045398267 | 0.072434275 |
| 0.508804359 | 0.418492717 | 0.149665471 | 0.330994326 |
| 0.147672669 | 0.221110238 | 0.387362996 | 0.374317694 |
| 0.188968613 | 0.397156943 | 0.389402905 | 0.299039294 |
| 0.407611164 | 0.201508111 | 0.484394197 | 0.092910958 |
| 0.100055211 | 0.245724276 | 0.094788671 | 0.091202182 |
| 0.137564532 | 0.039800759 | 0.148004499 | 0.35352153  |
| 0.172870118 | 0.279748856 | 0.165346027 | 0.088927357 |
| 0.203916671 | 0.186451135 | 0.229936334 | 0.162939114 |
| 0.088925282 | 0.460084889 | 0.01640439  | 0.064738046 |
| 0.179038555 | 0.391225885 | 0.203022383 | 0.192143528 |
| 0.166605414 | 0.101199099 | 0.207201421 | 0.17997643  |
| 0.165404908 | 0.192684168 | 0.394642465 | 0.064966795 |
| 0.034350979 | 0.479498068 | 0.2153169   | 0.027377317 |
| 0.059329013 | 0.242346913 | 0.18848329  | 0.167419978 |
| 0.027636965 | 0.428483881 | 0.174711189 | 0.230502283 |
| 0.220172635 | 0.077765505 | 0.326500009 | 0.090937153 |



|             |             |             |             |
|-------------|-------------|-------------|-------------|
| 0.077063413 | 0.42396164  | 0.216362791 | 0.464364727 |
| 0.201005912 | 0.386304792 | 0.405377969 | 0.36981936  |
| 0.118724735 | 0.179423896 | 0.052610323 | 0.419384554 |
| 0.199684822 |             |             |             |
| CYFIP1      | 0.237328747 | 0.201949377 | 0.170798012 |
| 0.208962518 | 0.203680372 | 0.086638449 | 0.090770257 |
| 0.045466302 | 0.020660845 | 0.001891635 | 0.008281271 |
| 0.208413564 | 0.01945956  | 0.038773448 | 0.028317471 |
| 0.324801345 | 0.093853619 | 0.151830631 | 0.179359213 |
| 0.257598717 | 0.025554468 | 0.287908286 | 0.058873808 |
| 0.134093711 | 0.077713276 | 0.074718419 | 0.100495562 |
| 0.266726482 | 0.092671534 | 0.048785744 | 0.178564471 |
| 0.174137964 | 0.24016017  | 0.173850078 | 0.209085906 |
| 0.168092031 | 0.180763135 | 0.050795519 | 0.030939615 |
| 0.21630261  | 0.209403552 | 0.239353595 | 0.181618371 |
| 0.032702398 | 0.146555765 | 0.123153222 | 0.284405638 |
| 0.022989017 | 0.030020244 | 0.032408639 | 0.146977418 |
| 0.12808371  | 0.11209607  | 0.061479009 | 0.059539348 |
| 0.010453414 | 0.033278096 | 0.029625904 | 0.102200046 |
| 0.122649948 | 0.021541481 | 0.152314667 | 0.014790861 |
| 0.021125436 | 0.106585312 | 0.180508522 | 0.101831043 |
| 0.112879075 | 0.147775153 | 0.039200418 | 0.183538547 |
| 0.000648065 | 0.264929789 | 0.331862114 | 0.062410152 |
| 0.132584178 | 0.01037511  | 0.220648856 | 0.146057106 |
| 0.27532196  | 0.205497526 | 0.270270529 | 0.251536441 |
| 0.041901167 | 0.296628671 | 0.201923526 | 0.091176027 |
| 0.208758642 | 0.061168375 | 0.031495129 | 0.332948826 |
| 0.262216379 | 0.186012917 | 0.073628838 | 0.303400045 |
| 0.13309238  | 0.192555284 | 0.093067807 | 0.120276376 |
| 0.037735424 | 0.120177449 | 0.139715726 | 0.235464577 |
| 0.162508073 | 0.15982843  | 0.179129233 | 0.196671484 |
| 0.146660805 | 0.035023905 | 0.227326444 | 0.068370619 |
| 0.270111973 | 0.016841408 | 0.24594241  | 0.123639062 |
| 0.096441635 | 0.208312009 | 0.189561615 | 0.12743283  |
| 0.22502415  | 0.023982581 | 0.018803444 | 0.147003765 |
| 0.03047261  | 0.063518682 | 0.129740477 | 0.204788573 |
| 0.03570973  | 0.051043509 | 0.116878287 | 0.036841705 |
| 0.083776597 | 0.113388342 | 0.199679767 | 0.209329172 |
| 0.266790985 | 0.168152063 | 0.063681535 | 0.139036603 |
| 0.158901867 | 0.275334051 | 0.000939496 | 0.077705379 |
| 0.131095491 | 1           | 0.252138232 | 0.158311246 |
| 0.152308677 | 0.067871659 | 0.120030391 | 0.244248011 |
| 0.149829789 | 0.10530052  | 0.100464236 | 0.315047893 |
| 0.026676257 | 0.236529691 | 0.119848704 | 0.07529317  |
| 0.03257313  | 0.158213628 | 0.127743159 | 0.127654397 |
| 0.012932916 | 0.058690825 | 0.062022278 | 0.084430541 |
| 0.017226459 | 0.134470786 | 0.138446593 | 0.179276625 |
| 0.109347886 | 0.251711846 | 0.092452317 | 0.115533388 |
| 0.0033292   | 0.059620968 | 0.06327598  | 0.216012446 |
| 0.063749635 | 0.271579104 | 0.116005213 | 0.163754638 |
| 0.267740467 | 0.276600813 | 0.014935923 | 0.150427697 |
| 0.188573863 | 0.051209569 | 0.138247235 | 0.28627447  |
| 0.088257299 | 0.213446042 | 0.008690382 | 0.309081749 |
| 0.1358461   | 0.15241139  | 0.284599478 | 0.157171136 |

|             |             |             |             |
|-------------|-------------|-------------|-------------|
| 0.177643763 | 0.077645892 | 0.067557603 | 0.21155119  |
| 0.14961745  | 0.012108422 | 0.039484902 | 0.191625607 |
| 0.124879706 | 0.018764586 | 0.252829626 | 0.20988768  |
| 0.134287273 | 0.299626919 | 0.304548148 | 0.072286059 |
| 0.156305005 | 0.126393456 | 0.057181391 | 0.280600104 |
| 0.266798212 | 0.02492081  | 0.144873985 | 0.060830067 |
| 0.088397516 | 0.173113693 | 0.165287462 | 0.010154545 |
| 0.05960496  | 0.112040738 | 0.006412877 | 0.141516577 |
| 0.168119526 | 0.024343981 | 0.095226939 | 0.137141276 |
| 0.130202598 | 0.219391015 | 0.14444433  | 0.121638389 |
| 0.085643237 | 0.096329727 | 0.178437693 | 0.020086434 |
| 0.014769764 | 0.089851892 | 0.080029052 | 0.078501613 |
| 0.019856928 | 0.09066817  | 0.108202011 | 0.043772298 |
| 0.009848092 | 0.033712862 | 0.030494982 | 0.146087426 |
| 0.041216141 | 0.019324576 | 0.123808489 | 0.099704819 |
| 0.105358079 | 0.095905038 | 0.201755832 | 0.301513962 |
| 0.103182567 | 0.074560554 | 0.144477607 | 0.01229774  |
| 0.203590919 | 0.037983235 | 0.039230585 | 0.167393218 |
| 0.049025058 | 0.288870981 | 0.029720837 | 0.137591158 |
| 0.088699261 | 0.144891423 | 0.26924359  | 0.00548264  |
| 0.166261962 | 0.159729914 | 0.316364364 | 0.100828366 |
| 0.11555959  | 0.203939851 | 0.01960621  | 0.160687153 |
| 0.143984204 | 0.084140285 | 0.212551865 | 0.110039298 |
| 0.130343628 | 0.273540236 | 0.151298847 | 0.180477976 |
| 0.140229017 | 0.068186729 | 0.016159379 | 0.28520624  |
| 0.208315909 | 0.286987734 | 0.137824167 | 0.187517091 |
| 0.042996166 | 0.005295334 | 0.250747447 | 0.208308906 |
| 0.159072816 | 0.217275594 | 0.295776833 | 0.108515183 |
| 0.219092764 | 0.05539802  | 0.015077025 | 0.215259917 |
| 0.114116459 | 0.200055413 | 0.068385985 | 0.228157303 |
| 0.154369359 | 0.059705135 | 0.083727841 | 0.089377374 |
| 0.124731487 | 0.061990953 | 0.15490627  | 0.164250693 |
| 0.189723622 | 0.090309905 | 0.055581883 | 0.292693509 |
| 0.011662501 | 0.022822691 | 0.206585098 | 0.102331795 |
| 0.061298249 | 0.117894692 | 0.03266428  | 0.054512013 |
| 0.019617209 | 0.146326309 | 0.313497997 | 0.032898833 |
| 0.049091971 | 0.058482994 | 0.342617649 | 0.084801069 |
| 0.204653271 | 0.209598028 | 0.172054609 | 0.116337952 |
| 0.224641968 | 0.179558207 | 0.125907682 | 0.212964759 |
| 0.120157981 | 0.180075638 | 0.178846631 | 0.008639534 |
| 0.279794985 | 0.035561499 | 0.004669759 | 0.192879508 |
| 0.166904892 | 0.129608677 | 0.001079872 | 0.056499686 |
| 0.133507067 | 0.319530588 | 0.142601425 | 0.194785364 |
| 0.013908174 | 0.291906571 | 0.067523209 | 0.244120167 |
| 0.160511765 | 0.062017022 | 0.107666485 | 0.162186476 |
| 0.163326989 | 0.206608477 | 0.108175464 | 0.191359044 |
| 0.142473748 | 0.156521133 | 0.020126898 | 0.239452372 |
| 0.167539734 | 0.182978686 | 0.206314996 | 0.178821105 |
| 0.236518509 | 0.319173662 | 0.188920653 | 0.019025896 |
| 0.032681192 | 0.05199835  | 0.014750768 | 0.012648512 |
| 0.097499825 | 0.069862992 | 0.215362757 | 0.29288602  |
| 0.215487326 | 0.073601837 | 0.032512331 | 0.169453385 |
| 0.200494852 | 0.260662689 | 0.091043482 | 0.006500413 |
| 0.009038687 | 0.01154598  | 0.167317949 | 0.268631575 |

|             |             |             |             |
|-------------|-------------|-------------|-------------|
| 0.211049138 | 0.004819939 | 0.036997057 | 0.018106685 |
| 0.040437683 | 0.225585111 | 0.174939677 | 0.301569192 |
| 0.26879986  | 0.157211612 | 0.014298858 | 0.308770378 |
| 0.037796857 | 0.115485241 | 0.214338173 | 0.153491376 |
| 0.143826504 | 0.240180039 | 0.161129917 | 0.245371293 |
| 0.0291903   | 0.307856651 | 0.222249447 | 0.030733405 |
| 0.112571715 | 0.125404112 | 0.080263566 | 0.339845567 |
| 0.154749128 | 0.018134082 | 0.01782037  | 0.006928659 |
| 0.035105014 | 0.275079318 | 0.046016384 | 0.263686344 |
| 0.205671527 | 0.298619004 | 0.101827512 | 0.162828357 |
| 0.020632008 | 0.150915222 | 0.172056131 | 0.00340308  |
| 0.211776043 | 0.067199395 | 0.195610614 | 0.007470389 |
| 0.058444245 | 0.209751167 | 0.031616054 | 0.115705744 |
| 0.05248697  | 0.113845027 | 0.250974465 | 0.283265418 |
| 0.124404015 | 0.099927073 | 0.283763726 | 0.306421417 |
| 0.080065721 | 0.205642349 | 0.156942075 | 0.06029291  |
| 0.03622284  | 0.087027855 | 0.237785585 | 0.153321105 |
| 0.053818613 | 0.291642308 | 0.039279556 | 0.238934156 |
| 0.188940817 | 0.230369808 | 0.196841105 | 0.140045328 |
| 0.061522967 | 0.125685192 | 0.102652889 | 0.005636209 |
| 0.219587363 | 0.236148884 | 0.173982025 | 0.0288051   |
| 0.126218983 | 0.169190112 | 0.083200083 | 0.037098546 |
| 0.129468476 | 0.07081539  | 0.037327426 | 0.33477782  |
| 0.201189457 | 0.154315283 | 0.054318911 | 0.061077742 |
| 0.215846436 | 0.178831174 | 0.019525318 | 0.159614096 |
| 0.25434278  | 0.171871501 | 0.265511603 | 0.281673308 |
| 0.063628445 | 0.173418192 | 0.209269736 | 0.105276395 |
| 0.13455772  | 0.167462758 | 0.176067869 | 0.014925441 |
| 0.031026295 | 0.189452232 | 0.02518427  | 0.233126903 |
| 0.129462106 | 0.067717284 | 0.051906306 | 0.336217417 |
| 0.069589381 | 0.216856908 | 0.031851986 | 0.056354347 |
| 0.310799476 | 0.147167592 | 0.270768605 | 0.051137386 |
| 0.022458627 | 0.150452235 | 0.019395329 | 0.156637023 |
| 0.095045893 | 0.180353534 | 0.117185225 | 0.169033948 |
| 0.055469314 | 0.15541801  | 0.201905286 | 0.060085776 |
| 0.024794068 | 0.034749892 | 0.168173137 | 0.022922971 |
| 0.022974393 | 0.291496469 | 0.104106315 | 0.102036741 |
| 0.118060893 | 0.15611976  | 0.14627617  | 0.029139268 |
| 0.132860438 | 0.183188017 | 0.035295468 | 0.201931016 |
| 0.151569355 | 0.140342459 | 0.128118936 | 0.033874078 |
| 0.074094969 | 0.15912219  | 0.206094583 | 0.180728823 |
| 0.250818476 | 0.263752532 | 0.136908605 | 0.182130047 |
| 0.073262779 | 0.159189359 | 0.025223618 | 0.261999567 |
| 0.04755915  |             |             |             |

|             |             |             |             |
|-------------|-------------|-------------|-------------|
| CYP17A1     | 0.210428244 | 0.27752432  | 0.142488647 |
| 0.339681287 | 0.219441395 | 0.150551282 | 0.267047506 |
| 0.168581707 | 0.196252896 | 0.063480297 | 0.117285881 |
| 0.197267869 | 0.184678316 | 0.198255638 | 0.119007082 |
| 0.377234667 | 0.280614515 | 0.167631673 | 0.321623338 |
| 0.31635681  | 0.195229587 | 0.371484443 | 0.30817437  |
| 0.196871199 | 0.229399444 | 0.281379569 | 0.201581449 |
| 0.356685439 | 0.295778291 | 0.105829074 | 0.260658238 |
| 0.288159296 | 0.257141723 | 0.227142614 | 0.267882181 |
| 0.212115058 | 0.16746169  | 0.068037851 | 0.148804623 |

|             |             |             |             |
|-------------|-------------|-------------|-------------|
| 0.237451506 | 0.268727877 | 0.319118363 | 0.311223615 |
| 0.248505232 | 0.200180086 | 0.282586498 | 0.236294863 |
| 0.129494147 | 0.207510135 | 0.102053773 | 0.19540488  |
| 0.192214684 | 0.169884209 | 0.196552681 | 0.265912082 |
| 0.119972694 | 0.113281222 | 0.104920556 | 0.154409682 |
| 0.304522842 | 0.098221377 | 0.211391527 | 0.194608083 |
| 0.127749333 | 0.219035819 | 0.278687535 | 0.233962397 |
| 0.151400968 | 0.197082533 | 0.176659208 | 0.143075599 |
| 0.02490612  | 0.326651967 | 0.258260332 | 0.105494374 |
| 0.274663638 | 0.167009991 | 0.295170012 | 0.280237422 |
| 0.344073432 | 0.214386224 | 0.338084128 | 0.304136468 |
| 0.255765016 | 0.286066169 | 0.151458843 | 0.331539385 |
| 0.24602742  | 0.259261832 | 0.187934833 | 0.383597619 |
| 0.329345123 | 0.247525148 | 0.279267703 | 0.280551719 |
| 0.237736895 | 0.259124905 | 0.140988664 | 0.186290845 |
| 0.123235437 | 0.196895243 | 0.205374675 | 0.300312255 |
| 0.199818212 | 0.141767133 | 0.311426145 | 0.275400887 |
| 0.306950008 | 0.120066633 | 0.356244872 | 0.182047496 |
| 0.350798596 | 0.159241648 | 0.283737153 | 0.228518146 |
| 0.274510339 | 0.248546165 | 0.242334816 | 0.317368372 |
| 0.191941823 | 0.167078245 | 0.107178378 | 0.24603217  |
| 0.178270247 | 0.101188722 | 0.176745854 | 0.318108037 |
| 0.180058133 | 0.19489078  | 0.27197974  | 0.087388202 |
| 0.223444618 | 0.238486222 | 0.221051408 | 0.187978368 |
| 0.281543504 | 0.15800236  | 0.24645379  | 0.17411378  |
| 0.182455471 | 0.334213542 | 0.017068053 | 0.304891759 |
| 0.188341853 | 0.252138232 | 1           | 0.190226008 |
| 0.251602272 | 0.271148517 | 0.346179794 | 0.320099247 |
| 0.212229385 | 0.323252648 | 0.127687024 | 0.365942649 |
| 0.163477474 | 0.229166267 | 0.336117884 | 0.259078419 |
| 0.249815035 | 0.199153179 | 0.203221897 | 0.15917208  |
| 0.094945725 | 0.20713883  | 0.120871136 | 0.17507552  |
| 0.169855432 | 0.224428531 | 0.168106901 | 0.33991982  |
| 0.25618758  | 0.309607241 | 0.119534074 | 0.211793744 |
| 0.090638308 | 0.253338348 | 0.081663211 | 0.295729307 |
| 0.114872019 | 0.297243048 | 0.283928804 | 0.254273144 |
| 0.298835132 | 0.335381018 | 0.009767054 | 0.207770386 |
| 0.244485957 | 0.076271736 | 0.237135808 | 0.23481509  |
| 0.123762754 | 0.326754599 | 0.01574439  | 0.354716269 |
| 0.142093576 | 0.322198697 | 0.353364541 | 0.317437938 |
| 0.213453055 | 0.258982107 | 0.171623844 | 0.231316782 |
| 0.181090156 | 0.057871053 | 0.122517057 | 0.295940147 |
| 0.188966211 | 0.165071105 | 0.259968807 | 0.307034727 |
| 0.23079072  | 0.306467527 | 0.377825945 | 0.116094318 |
| 0.203065752 | 0.272992791 | 0.157898745 | 0.242459883 |
| 0.252557085 | 0.107225042 | 0.215684528 | 0.265218649 |
| 0.099476036 | 0.25143924  | 0.18479698  | 0.084112525 |
| 0.260367382 | 0.203778896 | 0.092766782 | 0.234169895 |
| 0.175702812 | 0.246418261 | 0.11848418  | 0.247146753 |
| 0.275556624 | 0.299064378 | 0.160209608 | 0.115324389 |
| 0.100497154 | 0.17929082  | 0.298626933 | 0.161994068 |
| 0.156406369 | 0.317754834 | 0.16694461  | 0.18161582  |
| 0.188183623 | 0.314221086 | 0.10446255  | 0.098139948 |
| 0.148247286 | 0.125131477 | 0.107618555 | 0.179055256 |

|             |             |             |             |
|-------------|-------------|-------------|-------------|
| 0.179264655 | 0.221756651 | 0.213706015 | 0.175301449 |
| 0.265842848 | 0.199238126 | 0.272396354 | 0.334714488 |
| 0.14256596  | 0.312464243 | 0.273327775 | 0.085715601 |
| 0.309966224 | 0.086031522 | 0.073684854 | 0.267604993 |
| 0.16464468  | 0.327604058 | 0.232244929 | 0.308120596 |
| 0.163123524 | 0.303456927 | 0.361561487 | 0.066125518 |
| 0.167963396 | 0.239231858 | 0.271773774 | 0.288028716 |
| 0.181586921 | 0.27468895  | 0.212872201 | 0.18602591  |
| 0.176473933 | 0.256926482 | 0.272968881 | 0.271188421 |
| 0.219128552 | 0.266941038 | 0.213584757 | 0.304369859 |
| 0.283411442 | 0.193268957 | 0.160594309 | 0.330731145 |
| 0.293890424 | 0.380131979 | 0.221391173 | 0.198390443 |
| 0.253138673 | 0.088693548 | 0.252459982 | 0.148985872 |
| 0.211146283 | 0.264679332 | 0.321944139 | 0.188807999 |
| 0.328487082 | 0.162546652 | 0.093194497 | 0.291649916 |
| 0.160986352 | 0.241110764 | 0.143694336 | 0.244071968 |
| 0.204531566 | 0.102956578 | 0.252238668 | 0.188984335 |
| 0.194472681 | 0.264357717 | 0.282654676 | 0.231264418 |
| 0.256299372 | 0.211171295 | 0.161553617 | 0.259058942 |
| 0.146586293 | 0.226879813 | 0.2146656   | 0.133899454 |
| 0.167088534 | 0.306945857 | 0.047354057 | 0.157374672 |
| 0.243588928 | 0.230384892 | 0.337785086 | 0.22336968  |
| 0.117689964 | 0.137099449 | 0.315059049 | 0.269712294 |
| 0.237914397 | 0.234409098 | 0.233259131 | 0.292975384 |
| 0.232521568 | 0.247808373 | 0.135953349 | 0.295123068 |
| 0.186458206 | 0.226084592 | 0.20583654  | 0.131153124 |
| 0.350482758 | 0.074356969 | 0.114600861 | 0.269433535 |
| 0.329957671 | 0.163201134 | 0.020479825 | 0.051121469 |
| 0.191799006 | 0.331326517 | 0.206005451 | 0.260004032 |
| 0.07015962  | 0.283230394 | 0.033201148 | 0.281591902 |
| 0.240068833 | 0.153543963 | 0.231921798 | 0.210993463 |
| 0.192878026 | 0.269629323 | 0.141992558 | 0.249604471 |
| 0.167776761 | 0.212827097 | 0.222622776 | 0.306217823 |
| 0.264394267 | 0.21812907  | 0.262093134 | 0.237860869 |
| 0.328441024 | 0.306673082 | 0.3230302   | 0.168833907 |
| 0.135356199 | 0.151814143 | 0.081181954 | 0.15858683  |
| 0.132794494 | 0.270534178 | 0.256265421 | 0.345026522 |
| 0.274056869 | 0.124200394 | 0.218481533 | 0.211973502 |
| 0.291550624 | 0.33980995  | 0.126056736 | 0.020534167 |
| 0.014958789 | 0.102233247 | 0.23064359  | 0.284518657 |
| 0.272691405 | 0.067110779 | 0.123920088 | 0.178633911 |
| 0.244037943 | 0.227136468 | 0.2455307   | 0.385993214 |
| 0.253872477 | 0.325563583 | 0.116844001 | 0.363321928 |
| 0.213548694 | 0.117013142 | 0.291491863 | 0.233055159 |
| 0.236249423 | 0.280027399 | 0.1459638   | 0.342562613 |
| 0.041095523 | 0.301174914 | 0.210824472 | 0.20325068  |
| 0.102719966 | 0.271488677 | 0.245351947 | 0.344365969 |
| 0.198917379 | 0.208036441 | 0.189288341 | 0.05397555  |
| 0.261047443 | 0.307289641 | 0.299479335 | 0.333124534 |
| 0.296554303 | 0.390750998 | 0.231222394 | 0.229361125 |
| 0.190042694 | 0.210074243 | 0.187855015 | 0.044064316 |
| 0.246325506 | 0.182758616 | 0.216178545 | 0.090205848 |
| 0.145546942 | 0.225512995 | 0.139796599 | 0.166469648 |
| 0.096771864 | 0.277736758 | 0.345027991 | 0.312515799 |

|             |             |             |             |
|-------------|-------------|-------------|-------------|
| 0.18672493  | 0.277082026 | 0.282560251 | 0.281139098 |
| 0.153451924 | 0.321928325 | 0.218866817 | 0.09577636  |
| 0.255591213 | 0.106677613 | 0.300481862 | 0.171551587 |
| 0.180487254 | 0.345258534 | 0.187800834 | 0.286871003 |
| 0.210121563 | 0.262642837 | 0.246256113 | 0.23720149  |
| 0.189675044 | 0.159312246 | 0.215930032 | 0.123868425 |
| 0.268027503 | 0.331620548 | 0.175483351 | 0.214220899 |
| 0.278609605 | 0.133816716 | 0.222774221 | 0.071946632 |
| 0.10303717  | 0.143547672 | 0.302955984 | 0.386768989 |
| 0.199167863 | 0.178814739 | 0.193635687 | 0.237681812 |
| 0.279772099 | 0.223726748 | 0.182072386 | 0.247253438 |
| 0.331391068 | 0.24978207  | 0.270709724 | 0.276487137 |
| 0.138537299 | 0.248067268 | 0.272486344 | 0.203984536 |
| 0.215161656 | 0.297433161 | 0.239597123 | 0.09817115  |
| 0.152826528 | 0.160369032 | 0.25101281  | 0.298974249 |
| 0.342817972 | 0.210682095 | 0.092530522 | 0.341381624 |
| 0.09996632  | 0.323561323 | 0.112203643 | 0.262964371 |
| 0.262289036 | 0.1160257   | 0.29859111  | 0.227449821 |
| 0.260033043 | 0.223519491 | 0.104195294 | 0.296261823 |
| 0.118381198 | 0.239467547 | 0.147508    | 0.304113144 |
| 0.138939152 | 0.242404172 | 0.305218783 | 0.113420458 |
| 0.095627877 | 0.122286109 | 0.233144579 | 0.158054022 |
| 0.189064605 | 0.351747176 | 0.121684027 | 0.155819204 |
| 0.179248954 | 0.151123677 | 0.214451812 | 0.219978682 |
| 0.171302193 | 0.231727    | 0.103884293 | 0.198806631 |
| 0.225875098 | 0.314919494 | 0.156721127 | 0.139100815 |
| 0.243443732 | 0.206797533 | 0.165288882 | 0.23048949  |
| 0.188585224 | 0.379385682 | 0.176305272 | 0.227988817 |
| 0.166068112 | 0.109236274 | 0.211490752 | 0.308688304 |
| 0.094383632 |             |             |             |
| CYSLTR2     | 0.345807139 | 0.521947502 | 0.238447543 |
| 0.359724234 | 0.283882421 | 0.21882244  | 0.151187179 |
| 0.119689426 | 0.061673532 | 0.005880537 | 0.026507915 |
| 0.290965181 | 0.158628024 | 0.186501165 | 0.175268824 |
| 0.366359298 | 0.131369838 | 0.218033085 | 0.183165012 |
| 0.318226374 | 0.072706676 | 0.33061639  | 0.081596102 |
| 0.212933612 | 0.093669614 | 0.069464292 | 0.187580797 |
| 0.421042187 | 0.075928745 | 0.194207919 | 0.300459589 |
| 0.102153143 | 0.393062203 | 0.50408788  | 0.341549985 |
| 0.503624337 | 0.307221092 | 0.01652733  | 0.181722485 |
| 0.387326014 | 0.359864502 | 0.325958866 | 0.2305879   |
| 0.042859135 | 0.466942342 | 0.178192918 | 0.265852802 |
| 0.13106177  | 0.036511914 | 0.135314108 | 0.424079253 |
| 0.464594965 | 0.265185184 | 0.144999493 | 0.122739358 |
| 0.156016273 | 0.149885705 | 0.187442138 | 0.224788961 |
| 0.176062554 | 0.097640633 | 0.476728309 | 0.064753077 |
| 0.114886544 | 0.172920682 | 0.147106385 | 0.179531253 |
| 0.234764337 | 0.309682703 | 0.020735604 | 0.263122885 |
| 0.003728587 | 0.290301863 | 0.262194555 | 0.186897271 |
| 0.048034367 | 0.028260525 | 0.163378098 | 0.227596329 |
| 0.448000309 | 0.44330751  | 0.487555328 | 0.493123917 |
| 0.155562173 | 0.223004633 | 0.259180581 | 0.149292458 |
| 0.406054067 | 0.135844319 | 0.076989903 | 0.379218062 |
| 0.494995042 | 0.519373817 | 0.162838326 | 0.202906237 |

|             |             |             |             |
|-------------|-------------|-------------|-------------|
| 0.378644029 | 0.4723396   | 0.241457408 | 0.279347659 |
| 0.19806445  | 0.055102846 | 0.430728601 | 0.517649321 |
| 0.362687964 | 0.219341926 | 0.135443743 | 0.364413258 |
| 0.064169285 | 0.205788891 | 0.255809255 | 0.139737012 |
| 0.45961022  | 0.017913532 | 0.179382901 | 0.239634444 |
| 0.167076617 | 0.382163305 | 0.512085365 | 0.147390359 |
| 0.277199337 | 0.02413996  | 0.093080801 | 0.04091933  |
| 0.229312902 | 0.117119798 | 0.460825171 | 0.448773719 |
| 0.160758019 | 0.269087891 | 0.190582643 | 0.004728829 |
| 0.034170502 | 0.14773366  | 0.411429324 | 0.243257237 |
| 0.358996971 | 0.353681868 | 0.171787129 | 0.317023811 |
| 0.312211728 | 0.482605338 | 0.029685911 | 0.08481701  |
| 0.251773016 | 0.158311246 | 0.190226008 | 1           |
| 0.221646172 | 0.091159626 | 0.119705024 | 0.514565056 |
| 0.407474002 | 0.082196976 | 0.20713415  | 0.346294112 |
| 0.224495343 | 0.25528491  | 0.099579408 | 0.214332651 |
| 0.051312786 | 0.470172635 | 0.036425492 | 0.201573634 |
| 0.14579358  | 0.146188194 | 0.013338173 | 0.169509419 |
| 0.181709205 | 0.414429476 | 0.448988687 | 0.099589266 |
| 0.238487024 | 0.293445817 | 0.195465216 | 0.335295253 |
| 0.012128932 | 0.046266693 | 0.160817019 | 0.513979001 |
| 0.18409872  | 0.500287667 | 0.214188962 | 0.214710708 |
| 0.216426222 | 0.410867651 | 0.002726778 | 0.47678575  |
| 0.517775236 | 0.166204475 | 0.268890322 | 0.272880381 |
| 0.224074649 | 0.427054407 | 0.024877535 | 0.350488606 |
| 0.266314301 | 0.076209618 | 0.50667602  | 0.142215331 |
| 0.454439964 | 0.046853082 | 0.215131356 | 0.405009909 |
| 0.367980518 | 0.011133413 | 0.133342136 | 0.29354584  |
| 0.033896164 | 0.07088705  | 0.346090646 | 0.300012079 |
| 0.23799728  | 0.395536055 | 0.481757072 | 0.213285816 |
| 0.275500911 | 0.172424602 | 0.015222219 | 0.23364733  |
| 0.388666757 | 0.228050701 | 0.423075567 | 0.168805578 |
| 0.187218178 | 0.464365458 | 0.378296007 | 0.132393812 |
| 0.044737343 | 0.208768042 | 0.017037478 | 0.221400482 |
| 0.358052944 | 0.106264737 | 0.225105698 | 0.133853976 |
| 0.075901249 | 0.525997967 | 0.141176941 | 0.178954877 |
| 0.100542854 | 0.259292664 | 0.184624341 | 0.173119142 |
| 0.168704545 | 0.13838948  | 0.224230131 | 0.241992924 |
| 0.0359274   | 0.095920178 | 0.01731712  | 0.247634029 |
| 0.125517696 | 0.231661784 | 0.222701809 | 0.320378078 |
| 0.230903311 | 0.102381357 | 0.258070942 | 0.190994006 |
| 0.097443999 | 0.02105377  | 0.502136164 | 0.311954487 |
| 0.265421004 | 0.122431765 | 0.047638793 | 0.231957921 |
| 0.463842313 | 0.169314071 | 0.144175133 | 0.451973715 |
| 0.025659231 | 0.484261461 | 0.197777616 | 0.113813483 |
| 0.26931935  | 0.204751475 | 0.445377221 | 0.041073315 |
| 0.239435215 | 0.465581917 | 0.227112199 | 0.147925732 |
| 0.38502086  | 0.290209728 | 0.033680814 | 0.342051387 |
| 0.335553567 | 0.039690429 | 0.525708479 | 0.122483536 |
| 0.027738908 | 0.354733445 | 0.364621005 | 0.075797747 |
| 0.074922507 | 0.2235479   | 0.037821003 | 0.220218509 |
| 0.516187443 | 0.35732128  | 0.378404949 | 0.164698697 |
| 0.045034841 | 0.017334012 | 0.177266183 | 0.244314035 |
| 0.497106729 | 0.513094599 | 0.20936762  | 0.253355405 |

|             |             |             |             |
|-------------|-------------|-------------|-------------|
| 0.187323429 | 0.211210337 | 0.10340021  | 0.511728058 |
| 0.139252341 | 0.510182428 | 0.010649461 | 0.392380007 |
| 0.495306936 | 0.174811401 | 0.076780291 | 0.198377324 |
| 0.360200282 | 0.045303556 | 0.159719818 | 0.488177788 |
| 0.413591207 | 0.213858084 | 0.209149767 | 0.321327744 |
| 0.016691483 | 0.043732835 | 0.246312044 | 0.138399672 |
| 0.250469736 | 0.1660864   | 0.045936679 | 0.205842668 |
| 0.04820033  | 0.450224338 | 0.439254722 | 0.051879999 |
| 0.195425613 | 0.180554901 | 0.276182888 | 0.040887691 |
| 0.437313626 | 0.49372831  | 0.511559772 | 0.132457332 |
| 0.396292125 | 0.482624142 | 0.247439713 | 0.080680323 |
| 0.023079715 | 0.505542117 | 0.288647843 | 0.023073257 |
| 0.472017334 | 0.130177804 | 0.018657842 | 0.490320185 |
| 0.147758197 | 0.42793164  | 0.002326458 | 0.052934722 |
| 0.045587642 | 0.444353607 | 0.46112407  | 0.284313392 |
| 0.13383773  | 0.247213123 | 0.008316026 | 0.524269095 |
| 0.487703262 | 0.019090634 | 0.130995558 | 0.396758684 |
| 0.361162476 | 0.522684585 | 0.208354147 | 0.433787367 |
| 0.282887323 | 0.493280627 | 0.173951757 | 0.206630382 |
| 0.411657589 | 0.487702902 | 0.344820241 | 0.4414711   |
| 0.453669173 | 0.341749701 | 0.205629419 | 0.0180875   |
| 0.083924233 | 0.139094989 | 0.165368902 | 0.07286943  |
| 0.195612754 | 0.115858383 | 0.472855866 | 0.465100792 |
| 0.481072762 | 0.008347382 | 0.111021033 | 0.389806835 |
| 0.424415037 | 0.466131771 | 0.020409579 | 0.004713191 |
| 0.004956553 | 0.020642444 | 0.232978702 | 0.188946111 |
| 0.480328911 | 0.13801802  | 0.00807214  | 0.038031101 |
| 0.189969622 | 0.271363096 | 0.501764061 | 0.309108373 |
| 0.39253345  | 0.086180168 | 0.177122178 | 0.329748568 |
| 0.064555813 | 0.235269428 | 0.485468883 | 0.465040924 |
| 0.047714343 | 0.190759091 | 0.233636074 | 0.487068451 |
| 0.056101141 | 0.243632479 | 0.320050924 | 0.216235804 |
| 0.016864511 | 0.078443661 | 0.063140963 | 0.400470996 |
| 0.49176098  | 0.080713182 | 0.041203119 | 0.087576527 |
| 0.104228572 | 0.460011803 | 0.138682155 | 0.518473191 |
| 0.411854642 | 0.424190907 | 0.084784169 | 0.468381405 |
| 0.043653886 | 0.478793727 | 0.24113481  | 0.031830352 |
| 0.212780072 | 0.017573662 | 0.471115826 | 0.09766365  |
| 0.205415727 | 0.295543586 | 0.120563678 | 0.024173906 |
| 0.11770708  | 0.059370748 | 0.476958036 | 0.448280836 |
| 0.039691432 | 0.174627836 | 0.22085176  | 0.288616188 |
| 0.175291656 | 0.379244236 | 0.489608033 | 0.22273652  |
| 0.07501146  | 0.119852257 | 0.33125926  | 0.286772778 |
| 0.16707292  | 0.496217189 | 0.20373047  | 0.524661739 |
| 0.319201592 | 0.446200836 | 0.473717683 | 0.221695155 |
| 0.202557354 | 0.230333999 | 0.274070653 | 0.019554368 |
| 0.238850499 | 0.451245875 | 0.226614983 | 0.118371521 |
| 0.203802312 | 0.2449548   | 0.049176705 | 0.111751654 |
| 0.212708898 | 0.178237845 | 0.1323528   | 0.420644033 |
| 0.262821006 | 0.302515924 | 0.04264358  | 0.05757989  |
| 0.539507704 | 0.417235297 | 0.093260078 | 0.318602531 |
| 0.148400406 | 0.237885986 | 0.403573054 | 0.407081245 |
| 0.229730405 | 0.435588399 | 0.381258387 | 0.298701895 |
| 0.418369789 | 0.191331661 | 0.513825591 | 0.0561721   |



|             |             |             |             |
|-------------|-------------|-------------|-------------|
| 0.065282922 | 0.285306691 | 0.092658882 | 0.092077573 |
| 0.129585826 | 0.030446706 | 0.190079788 | 0.362325184 |
| 0.241864779 | 0.280441813 | 0.200499338 | 0.072045429 |
| 0.248114148 | 0.218980604 | 0.258035782 | 0.144646538 |
| 0.074325366 | 0.487592488 | 0.010348435 | 0.064079482 |
| 0.259646481 | 0.380984798 | 0.24896157  | 0.187214613 |
| 0.205054022 | 0.132279196 | 0.233821012 | 0.176765657 |
| 0.196675902 | 0.224137153 | 0.385992528 | 0.026907229 |
| 0.023359796 | 0.49985142  | 0.212260523 | 0.024749311 |
| 0.089298892 | 0.246127925 | 0.215235548 | 0.171485608 |
| 0.027700797 | 0.482792086 | 0.19735053  | 0.27423539  |
| 0.222078238 | 0.069727735 | 0.333010916 | 0.074004375 |
| 0.053140484 | 0.434798711 | 0.245789605 | 0.507975053 |
| 0.239279307 | 0.378649881 | 0.422968632 | 0.411691957 |
| 0.0882726   | 0.225255448 | 0.028226688 | 0.42349463  |
| 0.232596447 |             |             |             |
| D10WSU52E   | 0.239692835 | 0.357226185 | 0.175333311 |
| 0.347118354 | 0.231399103 | 0.155136022 | 0.146006678 |
| 0.072964512 | 0.150401085 | 0.025915143 | 0.108854492 |
| 0.248572625 | 0.184754989 | 0.127284036 | 0.118133327 |
| 0.381309999 | 0.211800088 | 0.11388655  | 0.198783076 |
| 0.282200265 | 0.074424834 | 0.378334998 | 0.139084063 |
| 0.193471429 | 0.224108591 | 0.174019796 | 0.23256398  |
| 0.362680323 | 0.182653266 | 0.099383941 | 0.227101587 |
| 0.15346876  | 0.275845956 | 0.313676416 | 0.336911057 |
| 0.304195568 | 0.202382164 | 0.015681883 | 0.115067501 |
| 0.258690366 | 0.344771035 | 0.287039549 | 0.268820093 |
| 0.107354623 | 0.263361016 | 0.199079038 | 0.271092061 |
| 0.0765774   | 0.144954221 | 0.060736923 | 0.239270026 |
| 0.278161792 | 0.219298335 | 0.097962884 | 0.13998389  |
| 0.140720799 | 0.058525722 | 0.165248624 | 0.132824166 |
| 0.175194014 | 0.044769249 | 0.296432058 | 0.111741809 |
| 0.076309007 | 0.103388132 | 0.182917016 | 0.121331636 |
| 0.169789657 | 0.199738816 | 0.041962874 | 0.189859225 |
| 0.006881357 | 0.281329602 | 0.264885108 | 0.159391725 |
| 0.139854659 | 0.092980679 | 0.197058391 | 0.231107768 |
| 0.365631288 | 0.273799693 | 0.424786326 | 0.401697867 |
| 0.2069478   | 0.197725434 | 0.200409435 | 0.200756579 |
| 0.287838326 | 0.151094732 | 0.118660374 | 0.407696556 |
| 0.421228967 | 0.341587745 | 0.240434925 | 0.24392909  |
| 0.296896861 | 0.309438991 | 0.161698734 | 0.189016877 |
| 0.170511641 | 0.128437489 | 0.267764421 | 0.391253989 |
| 0.218500189 | 0.180327911 | 0.230758109 | 0.263728999 |
| 0.136015731 | 0.102956571 | 0.309814066 | 0.111739307 |
| 0.382022639 | 0.067170588 | 0.233441959 | 0.193197911 |
| 0.148540658 | 0.285135043 | 0.346869822 | 0.172292969 |
| 0.200408565 | 0.078727478 | 0.183537896 | 0.097664912 |
| 0.149073233 | 0.142182264 | 0.251504331 | 0.369956817 |
| 0.088801841 | 0.177302974 | 0.150184668 | 0.030102085 |
| 0.122225541 | 0.145837781 | 0.272149735 | 0.129484325 |
| 0.285521514 | 0.217770705 | 0.221452607 | 0.190408169 |
| 0.261384092 | 0.416178072 | 0.016220421 | 0.119197718 |
| 0.214277734 | 0.152308677 | 0.251602272 | 0.221646172 |
| 1           | 0.10431828  | 0.164249152 | 0.406184367 |

|             |             |             |             |
|-------------|-------------|-------------|-------------|
| 0.24160186  | 0.147621768 | 0.082075978 | 0.377584096 |
| 0.142619046 | 0.282233315 | 0.144113349 | 0.170793797 |
| 0.087534492 | 0.295243111 | 0.120992133 | 0.100277835 |
| 0.157966336 | 0.17939281  | 0.025330034 | 0.091304058 |
| 0.136022478 | 0.304827412 | 0.239575045 | 0.152474132 |
| 0.174294589 | 0.338324659 | 0.086655607 | 0.277070746 |
| 0.061971095 | 0.102280799 | 0.052341234 | 0.379336593 |
| 0.100100449 | 0.380467703 | 0.180138406 | 0.206821036 |
| 0.269604708 | 0.370354565 | 0.005777586 | 0.286122374 |
| 0.346239588 | 0.058004596 | 0.27051655  | 0.256535869 |
| 0.160977088 | 0.37304935  | 0.013947222 | 0.346793797 |
| 0.146338053 | 0.133168005 | 0.428036186 | 0.229742983 |
| 0.276782826 | 0.144719787 | 0.10466541  | 0.334304268 |
| 0.265117029 | 0.027828758 | 0.070123017 | 0.262265188 |
| 0.105909282 | 0.061957987 | 0.263732032 | 0.299442913 |
| 0.253972979 | 0.348555376 | 0.428443595 | 0.162715155 |
| 0.235103564 | 0.135941818 | 0.056685093 | 0.24414266  |
| 0.297839193 | 0.116609243 | 0.262553652 | 0.154068075 |
| 0.101076241 | 0.317262131 | 0.253429776 | 0.072882527 |
| 0.112639115 | 0.120881466 | 0.043184754 | 0.23162358  |
| 0.230897502 | 0.133078257 | 0.158570866 | 0.124521686 |
| 0.179205283 | 0.391431968 | 0.185665392 | 0.158724761 |
| 0.14102645  | 0.198631483 | 0.160774926 | 0.135112394 |
| 0.178472528 | 0.212424706 | 0.196698866 | 0.17204984  |
| 0.059765713 | 0.179579565 | 0.046377663 | 0.118585533 |
| 0.138905154 | 0.138399258 | 0.115225848 | 0.196282215 |
| 0.12512402  | 0.14743931  | 0.227022493 | 0.176668849 |
| 0.212572429 | 0.086241925 | 0.349447902 | 0.319786068 |
| 0.143299733 | 0.165557194 | 0.120082263 | 0.100738956 |
| 0.367170593 | 0.100592051 | 0.050081753 | 0.319062397 |
| 0.059628211 | 0.393039886 | 0.185469517 | 0.220216304 |
| 0.185840248 | 0.214312289 | 0.392404027 | 0.053772062 |
| 0.150955964 | 0.293973525 | 0.214999325 | 0.238543031 |
| 0.223208876 | 0.26608079  | 0.083374352 | 0.214268317 |
| 0.20501595  | 0.1204521   | 0.370176815 | 0.197835224 |
| 0.097890258 | 0.328840627 | 0.303110078 | 0.174171929 |
| 0.182062585 | 0.172210403 | 0.047613101 | 0.316515389 |
| 0.382324305 | 0.40227839  | 0.278898143 | 0.189843473 |
| 0.117276374 | 0.053795706 | 0.203393101 | 0.185636218 |
| 0.288529184 | 0.368798196 | 0.215298406 | 0.224432885 |
| 0.22912561  | 0.198455707 | 0.036991566 | 0.388323329 |
| 0.110211374 | 0.320794652 | 0.04731682  | 0.333262892 |
| 0.297956428 | 0.072900305 | 0.207351767 | 0.144739881 |
| 0.22236987  | 0.116353709 | 0.127124743 | 0.313634095 |
| 0.302383641 | 0.201546306 | 0.184230092 | 0.266574221 |
| 0.044085477 | 0.067511859 | 0.257728997 | 0.169007123 |
| 0.152854316 | 0.210498689 | 0.080548474 | 0.101392743 |
| 0.125907194 | 0.289248762 | 0.372598905 | 0.166442019 |
| 0.132968996 | 0.088485666 | 0.323583512 | 0.112081176 |
| 0.351518133 | 0.325694425 | 0.318722938 | 0.1168039   |
| 0.281565665 | 0.354139204 | 0.220532847 | 0.157644645 |
| 0.099021298 | 0.324705574 | 0.202486597 | 0.065328889 |
| 0.394261187 | 0.052737643 | 0.065165547 | 0.329886791 |
| 0.165978567 | 0.218865751 | 0.010478472 | 0.043082211 |

|             |             |             |             |
|-------------|-------------|-------------|-------------|
| 0.111051104 | 0.397478941 | 0.286315251 | 0.219735974 |
| 0.057949011 | 0.229099968 | 0.011229344 | 0.375847195 |
| 0.320765718 | 0.102226716 | 0.203956472 | 0.286774383 |
| 0.299614318 | 0.339648181 | 0.196993375 | 0.361738888 |
| 0.251106216 | 0.306237903 | 0.150128786 | 0.280010737 |
| 0.323272139 | 0.324854834 | 0.269648934 | 0.287601119 |
| 0.370096894 | 0.339228626 | 0.25569336  | 0.066893116 |
| 0.161980225 | 0.072115771 | 0.107232834 | 0.132712605 |
| 0.116771087 | 0.228292692 | 0.325706939 | 0.39334832  |
| 0.37698943  | 0.046338133 | 0.088670913 | 0.270230419 |
| 0.311063465 | 0.370790835 | 0.04481634  | 0.017960314 |
| 0.012463653 | 0.128820265 | 0.179718954 | 0.220213731 |
| 0.3573277   | 0.061689287 | 0.040357637 | 0.049565555 |
| 0.165332888 | 0.312411484 | 0.329839391 | 0.345227534 |
| 0.314840465 | 0.149568314 | 0.121133594 | 0.325429762 |
| 0.197377956 | 0.121140571 | 0.390515811 | 0.29307038  |
| 0.098551074 | 0.214273094 | 0.111360059 | 0.392752349 |
| 0.086165536 | 0.276734045 | 0.253856878 | 0.183784333 |
| 0.033091614 | 0.188286246 | 0.177115164 | 0.367261929 |
| 0.291657843 | 0.165220518 | 0.137077951 | 0.035693097 |
| 0.151276553 | 0.356525765 | 0.196530972 | 0.413792152 |
| 0.323298744 | 0.403581867 | 0.150286013 | 0.302425713 |
| 0.132497666 | 0.292901674 | 0.230350642 | 0.033074061 |
| 0.164984775 | 0.057698523 | 0.296736508 | 0.14917318  |
| 0.095747424 | 0.209327488 | 0.175093826 | 0.084215613 |
| 0.140301996 | 0.155951465 | 0.414723168 | 0.398328487 |
| 0.098160099 | 0.140955137 | 0.219693473 | 0.261233302 |
| 0.110920709 | 0.361872498 | 0.296825865 | 0.133385527 |
| 0.10718468  | 0.098088362 | 0.276153212 | 0.184072448 |
| 0.087982059 | 0.423261578 | 0.204267905 | 0.378230406 |
| 0.225160406 | 0.308253941 | 0.329833559 | 0.219698756 |
| 0.190642234 | 0.166086961 | 0.219271143 | 0.053401267 |
| 0.22985723  | 0.388418928 | 0.128869603 | 0.247667618 |
| 0.239447476 | 0.197740472 | 0.062934425 | 0.044886466 |
| 0.157679346 | 0.121656335 | 0.158750086 | 0.395673633 |
| 0.180547561 | 0.197231875 | 0.043004127 | 0.177910701 |
| 0.363538793 | 0.267263607 | 0.097052301 | 0.270241466 |
| 0.191128082 | 0.262785423 | 0.33357178  | 0.350135037 |
| 0.130629425 | 0.315508917 | 0.282692756 | 0.217474398 |
| 0.254323797 | 0.183445764 | 0.327537919 | 0.031315312 |
| 0.181011985 | 0.186425538 | 0.166790548 | 0.179205951 |
| 0.189886034 | 0.115879049 | 0.148498066 | 0.347998304 |
| 0.137595437 | 0.314965327 | 0.074724092 | 0.141252245 |
| 0.238015231 | 0.095891336 | 0.272358015 | 0.124284744 |
| 0.156943235 | 0.308816802 | 0.047984955 | 0.140118341 |
| 0.142980917 | 0.317976392 | 0.226159748 | 0.227901971 |
| 0.192649535 | 0.160022266 | 0.242401879 | 0.083473802 |
| 0.099569952 | 0.121844518 | 0.31085043  | 0.058972197 |
| 0.051698493 | 0.416066166 | 0.109858274 | 0.070261857 |
| 0.096207346 | 0.152677513 | 0.12740227  | 0.187892779 |
| 0.098148885 | 0.33454776  | 0.094126263 | 0.232102339 |
| 0.174419688 | 0.124940051 | 0.171922144 | 0.074919667 |
| 0.086323744 | 0.257539167 | 0.222204542 | 0.328511702 |
| 0.16704998  | 0.396412988 | 0.227093997 | 0.27708116  |

|             |             |             |             |
|-------------|-------------|-------------|-------------|
| 0.093804607 | 0.138264276 | 0.081065415 | 0.324542251 |
| 0.134282107 |             |             |             |
| D16ERTD472E | 0.117570211 | 0.141809298 | 0.066798063 |
| 0.238491988 | 0.108966763 | 0.128143271 | 0.265810328 |
| 0.154576996 | 0.097286755 | 0.054628566 | 0.022365094 |
| 0.088130351 | 0.042637114 | 0.09579139  | 0.042343529 |
| 0.232775035 | 0.058695491 | 0.095244645 | 0.291963786 |
| 0.238087176 | 0.172415379 | 0.205274353 | 0.186243721 |
| 0.031727209 | 0.046296744 | 0.113888401 | 0.045541728 |
| 0.248527968 | 0.133974276 | 0.099373482 | 0.242771918 |
| 0.080717659 | 0.157210183 | 0.11090444  | 0.110412457 |
| 0.093186968 | 0.094951719 | 0.04128854  | 0.071784484 |
| 0.163553175 | 0.132680843 | 0.247720369 | 0.251836018 |
| 0.14271194  | 0.112095573 | 0.268811215 | 0.110200172 |
| 0.085026626 | 0.060750496 | 0.111445903 | 0.123786752 |
| 0.088338631 | 0.078750227 | 0.189573318 | 0.196359813 |
| 0.019677218 | 0.087733013 | 0.009784572 | 0.175711887 |
| 0.246132084 | 0.125596172 | 0.095073536 | 0.121626957 |
| 0.05486665  | 0.200344099 | 0.058782196 | 0.22985859  |
| 0.025961868 | 0.167238625 | 0.176676204 | 0.056304807 |
| 0.02358633  | 0.279111437 | 0.132056408 | 0.017921917 |
| 0.138817341 | 0.056765247 | 0.081194557 | 0.247782245 |
| 0.215749595 | 0.112794364 | 0.156121908 | 0.130927898 |
| 0.058228142 | 0.143679883 | 0.051650174 | 0.135252661 |
| 0.149184538 | 0.200260067 | 0.123833921 | 0.205336762 |
| 0.150063032 | 0.111329774 | 0.070140952 | 0.132595769 |
| 0.136044462 | 0.152784081 | 0.076873339 | 0.082484087 |
| 0.024730226 | 0.041587957 | 0.108121063 | 0.136634656 |
| 0.140917208 | 0.031353034 | 0.123966118 | 0.220142379 |
| 0.153145154 | 0.044582569 | 0.269262191 | 0.0467404   |
| 0.221002038 | 0.126971739 | 0.100204332 | 0.189660846 |
| 0.112251335 | 0.147939547 | 0.102457236 | 0.284908248 |
| 0.08983219  | 0.066319169 | 0.013550986 | 0.098934151 |
| 0.060562332 | 0.009820523 | 0.086048755 | 0.183386842 |
| 0.113168306 | 0.036246698 | 0.21804118  | 0.038969106 |
| 0.062610797 | 0.062912918 | 0.102638564 | 0.128394792 |
| 0.179761874 | 0.074505006 | 0.081467478 | 0.1229687   |
| 0.068847934 | 0.15188412  | 0.018344297 | 0.199416777 |
| 0.130685697 | 0.067871659 | 0.271148517 | 0.091159626 |
| 0.10431828  | 1           | 0.197723508 | 0.160289964 |
| 0.152675002 | 0.227730186 | 0.08392987  | 0.218870172 |
| 0.042546162 | 0.089974452 | 0.206744088 | 0.107786618 |
| 0.164206038 | 0.084642659 | 0.051455323 | 0.158734256 |
| 0.016593082 | 0.030589591 | 0.116222933 | 0.215436268 |
| 0.073937826 | 0.10471702  | 0.07867658  | 0.220935573 |
| 0.139727946 | 0.156312383 | 0.130146532 | 0.110430007 |
| 0.03216254  | 0.153594858 | 0.085735348 | 0.141223845 |
| 0.137407098 | 0.137682507 | 0.118678601 | 0.077344038 |
| 0.166800715 | 0.196880372 | 0.004542185 | 0.107813265 |
| 0.107657713 | 0.076513391 | 0.124316933 | 0.119804662 |
| 0.037471551 | 0.195797342 | 0.011767689 | 0.210751967 |
| 0.111907434 | 0.207122976 | 0.176205359 | 0.141569738 |
| 0.108765318 | 0.114689413 | 0.11102176  | 0.086770073 |
| 0.066423555 | 0.034960575 | 0.16721167  | 0.256954396 |

|             |             |             |             |
|-------------|-------------|-------------|-------------|
| 0.04391571  | 0.153657839 | 0.170934497 | 0.217316521 |
| 0.147804728 | 0.158437137 | 0.203882488 | 0.029999331 |
| 0.104771664 | 0.231033296 | 0.088809535 | 0.104670741 |
| 0.127543106 | 0.018301267 | 0.135984379 | 0.148199164 |
| 0.089396829 | 0.140506881 | 0.083063153 | 0.022301157 |
| 0.178342601 | 0.197339715 | 0.105266693 | 0.120637022 |
| 0.091355675 | 0.104716816 | 0.05138529  | 0.078669513 |
| 0.078166202 | 0.142125044 | 0.02433654  | 0.018311077 |
| 0.009911744 | 0.099889293 | 0.275301028 | 0.047256789 |
| 0.02495742  | 0.107892114 | 0.040206882 | 0.060095864 |
| 0.171182882 | 0.12529994  | 0.032044166 | 0.018398996 |
| 0.029272421 | 0.030913594 | 0.0314591   | 0.11060795  |
| 0.0600806   | 0.07074003  | 0.096829942 | 0.030933861 |
| 0.063689767 | 0.09941458  | 0.139393776 | 0.227405162 |
| 0.129416616 | 0.166003314 | 0.116604321 | 0.01399376  |
| 0.167494892 | 0.080531672 | 0.067398976 | 0.155035503 |
| 0.123009213 | 0.15868691  | 0.056586743 | 0.125627906 |
| 0.036642864 | 0.207675394 | 0.225657881 | 0.042510104 |
| 0.134849955 | 0.136577569 | 0.176869358 | 0.096823264 |
| 0.114361156 | 0.2038694   | 0.148390898 | 0.114882099 |
| 0.109341942 | 0.117289492 | 0.123618469 | 0.053647504 |
| 0.09900867  | 0.115445129 | 0.086443104 | 0.156919223 |
| 0.099280333 | 0.10830122  | 0.188579038 | 0.19055227  |
| 0.145290363 | 0.209563187 | 0.110744739 | 0.039718118 |
| 0.127020995 | 0.022488773 | 0.064389927 | 0.067621232 |
| 0.104256734 | 0.110053885 | 0.221378504 | 0.062038491 |
| 0.305673031 | 0.034111086 | 0.084387713 | 0.132743755 |
| 0.04553236  | 0.118547809 | 0.078351601 | 0.094401045 |
| 0.090450732 | 0.122151821 | 0.069109071 | 0.202594781 |
| 0.13571667  | 0.166499458 | 0.172251735 | 0.114771859 |
| 0.15167397  | 0.078191    | 0.049160056 | 0.14510653  |
| 0.153533706 | 0.175410819 | 0.108530511 | 0.01615858  |
| 0.053498522 | 0.122060247 | 0.003854448 | 0.078446822 |
| 0.097055762 | 0.129384299 | 0.180351395 | 0.075302531 |
| 0.085760158 | 0.085731416 | 0.156453159 | 0.162148108 |
| 0.089323537 | 0.101814881 | 0.114172568 | 0.19588491  |
| 0.108962859 | 0.104387227 | 0.039336497 | 0.120450547 |
| 0.067328351 | 0.098823324 | 0.162491553 | 0.054985502 |
| 0.191280341 | 0.117833855 | 0.039662283 | 0.153608289 |
| 0.296043748 | 0.087153471 | 0.046358961 | 0.011950917 |
| 0.047817334 | 0.154917203 | 0.104953433 | 0.242618992 |
| 0.047766578 | 0.236088839 | 0.008171752 | 0.124903018 |
| 0.121572317 | 0.03920365  | 0.040286115 | 0.089153068 |
| 0.06653465  | 0.145072167 | 0.032517035 | 0.097793248 |
| 0.058634864 | 0.091666832 | 0.093941254 | 0.189731803 |
| 0.155422821 | 0.084435896 | 0.194536682 | 0.147713008 |
| 0.182505912 | 0.145128336 | 0.286050806 | 0.108615678 |
| 0.028777458 | 0.177073776 | 0.020155843 | 0.035733474 |
| 0.153786113 | 0.061897371 | 0.13406797  | 0.176418495 |
| 0.115502703 | 0.066002583 | 0.170289324 | 0.106419675 |
| 0.206755224 | 0.212195491 | 0.075712006 | 0.015073974 |
| 0.008760146 | 0.014488902 | 0.223897159 | 0.123447832 |
| 0.130757764 | 0.025937667 | 0.069665362 | 0.209489457 |
| 0.101134894 | 0.081983672 | 0.116583938 | 0.286178487 |

|             |             |             |             |
|-------------|-------------|-------------|-------------|
| 0.115547338 | 0.140045448 | 0.033459223 | 0.272910213 |
| 0.044856636 | 0.09791779  | 0.130426307 | 0.135338645 |
| 0.086911644 | 0.113990477 | 0.099829756 | 0.195187145 |
| 0.002652752 | 0.172365529 | 0.094820261 | 0.057401986 |
| 0.040909681 | 0.070248945 | 0.067705507 | 0.189075116 |
| 0.083538107 | 0.046969025 | 0.044434429 | 0.040171258 |
| 0.120118837 | 0.158653127 | 0.102941371 | 0.162221362 |
| 0.192959515 | 0.238228111 | 0.044248857 | 0.123996905 |
| 0.059593316 | 0.100039167 | 0.055410549 | 0.036996124 |
| 0.091928552 | 0.099146207 | 0.092416795 | 0.012077361 |
| 0.100243604 | 0.186676549 | 0.030406254 | 0.043197185 |
| 0.012047011 | 0.094323059 | 0.174631484 | 0.13605836  |
| 0.048257813 | 0.158465577 | 0.16166069  | 0.192817312 |
| 0.217400181 | 0.18448645  | 0.111529628 | 0.049673261 |
| 0.160032026 | 0.013659826 | 0.244546336 | 0.123579996 |
| 0.117154606 | 0.162453749 | 0.037113689 | 0.134173808 |
| 0.152939802 | 0.152778288 | 0.111741768 | 0.205049713 |
| 0.023768771 | 0.131779062 | 0.173854742 | 0.099004444 |
| 0.226894865 | 0.166589627 | 0.162597616 | 0.040814932 |
| 0.10953017  | 0.043158578 | 0.150522714 | 0.038664709 |
| 0.024423308 | 0.172727159 | 0.114443835 | 0.237904    |
| 0.166272087 | 0.130036309 | 0.167129979 | 0.067449843 |
| 0.138543459 | 0.139866875 | 0.154774849 | 0.158354568 |
| 0.165816596 | 0.145303311 | 0.126757462 | 0.11605085  |
| 0.032866964 | 0.115323318 | 0.19280641  | 0.144581686 |
| 0.140532164 | 0.26276646  | 0.115857702 | 0.160624487 |
| 0.037796306 | 0.076871656 | 0.080905817 | 0.12495855  |
| 0.207938098 | 0.071580655 | 0.010353401 | 0.19220974  |
| 0.017148796 | 0.194340899 | 0.047699973 | 0.101607869 |
| 0.126359388 | 0.070348985 | 0.189566033 | 0.189653779 |
| 0.098599397 | 0.108748186 | 0.040485042 | 0.116853794 |
| 0.023495854 | 0.120971576 | 0.046032093 | 0.11285855  |
| 0.0167825   | 0.048607865 | 0.190398775 | 0.143160067 |
| 0.041472536 | 0.027052315 | 0.119149706 | 0.181801488 |
| 0.157995242 | 0.176491675 | 0.101626341 | 0.052525885 |
| 0.045248274 | 0.10868485  | 0.07807525  | 0.062649433 |
| 0.040669227 | 0.090675089 | 0.064968869 | 0.093924742 |
| 0.230896853 | 0.149851418 | 0.119913306 | 0.085865191 |
| 0.173235723 | 0.122749054 | 0.068571402 | 0.099530847 |
| 0.072501893 | 0.223218926 | 0.105374364 | 0.113825543 |
| 0.079119745 | 0.049547203 | 0.166517337 | 0.195671364 |
| 0.024560527 |             |             |             |
| D1ERTD622E  | 0.115102471 | 0.151494479 | 0.073809362 |
| 0.24661469  | 0.149062063 | 0.099202578 | 0.230217208 |
| 0.099781715 | 0.105240431 | 0.079109941 | 0.084886097 |
| 0.113405998 | 0.098708317 | 0.118045107 | 0.038801284 |
| 0.263114556 | 0.180992973 | 0.072657926 | 0.305657195 |
| 0.232763084 | 0.159586871 | 0.283510643 | 0.23250725  |
| 0.067722617 | 0.123730124 | 0.198694814 | 0.076690652 |
| 0.244256066 | 0.204784917 | 0.079613693 | 0.194870967 |
| 0.178779443 | 0.155014916 | 0.112938975 | 0.175804277 |
| 0.103070647 | 0.085322563 | 0.071902607 | 0.065870876 |
| 0.13672101  | 0.154174429 | 0.237006169 | 0.2854942   |
| 0.213834975 | 0.10247029  | 0.27703632  | 0.146660476 |

|             |             |             |             |
|-------------|-------------|-------------|-------------|
| 0.056402082 | 0.165364641 | 0.054587749 | 0.103867702 |
| 0.096074225 | 0.100394965 | 0.110784858 | 0.182878484 |
| 0.058892815 | 0.062520839 | 0.033753048 | 0.112345159 |
| 0.274936895 | 0.063332312 | 0.106453833 | 0.120884094 |
| 0.067191666 | 0.134427969 | 0.157083561 | 0.17787519  |
| 0.045319829 | 0.121722838 | 0.181577978 | 0.071314741 |
| 0.038016837 | 0.251460368 | 0.175613278 | 0.028681445 |
| 0.236913083 | 0.173127744 | 0.162479724 | 0.251230603 |
| 0.222167466 | 0.107770591 | 0.200574208 | 0.168434228 |
| 0.15539164  | 0.187779273 | 0.083352456 | 0.21935536  |
| 0.137856065 | 0.209332346 | 0.112365327 | 0.268047719 |
| 0.190764327 | 0.127569726 | 0.138753208 | 0.201123802 |
| 0.14387     | 0.147229122 | 0.077402692 | 0.111969482 |
| 0.035739389 | 0.10718227  | 0.109723806 | 0.167874622 |
| 0.114960338 | 0.061676933 | 0.224992126 | 0.192428309 |
| 0.239008846 | 0.041055016 | 0.312285769 | 0.110056185 |
| 0.22511003  | 0.134284064 | 0.192070589 | 0.200442435 |
| 0.138420239 | 0.145080532 | 0.121099861 | 0.287506023 |
| 0.119581641 | 0.15516125  | 0.034396051 | 0.195653288 |
| 0.081351785 | 0.033240295 | 0.084588527 | 0.206417795 |
| 0.107131669 | 0.074053051 | 0.183584936 | 0.092153287 |
| 0.177491095 | 0.104453464 | 0.124641362 | 0.114148288 |
| 0.176958228 | 0.073133409 | 0.125612557 | 0.10038315  |
| 0.095750383 | 0.198127909 | 0.00784301  | 0.227144308 |
| 0.124324322 | 0.120030391 | 0.346179794 | 0.119705024 |
| 0.164249152 | 0.197723508 | 1           | 0.18064315  |
| 0.122037467 | 0.284391042 | 0.058864182 | 0.260640546 |
| 0.070076877 | 0.158212829 | 0.255179905 | 0.156113335 |
| 0.232906451 | 0.094460623 | 0.148040568 | 0.099896502 |
| 0.024623471 | 0.119116232 | 0.115284472 | 0.137378953 |
| 0.082905617 | 0.127125872 | 0.078337883 | 0.258258405 |
| 0.18751511  | 0.21740044  | 0.085110254 | 0.132235395 |
| 0.080467304 | 0.198246584 | 0.046466057 | 0.169483595 |
| 0.085365515 | 0.161408659 | 0.141763829 | 0.09997991  |
| 0.245662007 | 0.21035253  | 0.003952361 | 0.103905499 |
| 0.122510375 | 0.040761385 | 0.184726002 | 0.145833994 |
| 0.051740737 | 0.212481067 | 0.005879516 | 0.26440728  |
| 0.083348091 | 0.240201508 | 0.210325703 | 0.258183093 |
| 0.110708218 | 0.203397816 | 0.095649428 | 0.116789439 |
| 0.095112609 | 0.057197775 | 0.093986211 | 0.227868882 |
| 0.127146038 | 0.122595789 | 0.160436481 | 0.223411606 |
| 0.161336689 | 0.181976394 | 0.239684867 | 0.043738402 |
| 0.135333765 | 0.180888228 | 0.135616611 | 0.160052217 |
| 0.140231722 | 0.031429952 | 0.119180329 | 0.149745973 |
| 0.059444726 | 0.139662419 | 0.092636963 | 0.030697254 |
| 0.218483656 | 0.158567707 | 0.088539432 | 0.147296927 |
| 0.085471222 | 0.195965005 | 0.05704047  | 0.139145708 |
| 0.18798562  | 0.165217499 | 0.057557551 | 0.035797844 |
| 0.032231688 | 0.135305819 | 0.236931073 | 0.098006755 |
| 0.087754238 | 0.179040991 | 0.05362045  | 0.071598301 |
| 0.181983567 | 0.240981421 | 0.063122983 | 0.036007066 |
| 0.107922614 | 0.056522472 | 0.052235572 | 0.106390976 |
| 0.09182466  | 0.176898997 | 0.140369326 | 0.05458107  |
| 0.13815215  | 0.180571072 | 0.148480374 | 0.241314953 |

|             |             |             |             |
|-------------|-------------|-------------|-------------|
| 0.08836245  | 0.196430852 | 0.219314871 | 0.030438936 |
| 0.195227069 | 0.055472778 | 0.03138617  | 0.163154885 |
| 0.128876778 | 0.189641042 | 0.134587295 | 0.235304006 |
| 0.076602465 | 0.284385286 | 0.233868353 | 0.035416788 |
| 0.111521242 | 0.136559969 | 0.199579218 | 0.157024579 |
| 0.105063515 | 0.194967636 | 0.205184345 | 0.102944872 |
| 0.101922129 | 0.228559512 | 0.144545461 | 0.162306735 |
| 0.184322618 | 0.156988703 | 0.117063387 | 0.252320829 |
| 0.174305879 | 0.141029309 | 0.143332696 | 0.282131748 |
| 0.163668146 | 0.280741528 | 0.130748821 | 0.070417443 |
| 0.225965735 | 0.109442694 | 0.122360183 | 0.079153088 |
| 0.105897338 | 0.137550087 | 0.284897199 | 0.116943316 |
| 0.339544072 | 0.052953249 | 0.056256093 | 0.161934006 |
| 0.059331244 | 0.122794114 | 0.14534858  | 0.130140595 |
| 0.098402829 | 0.076920786 | 0.153739987 | 0.165555963 |
| 0.118565449 | 0.207455525 | 0.165753095 | 0.120729962 |
| 0.146382047 | 0.085686331 | 0.054980586 | 0.166120332 |
| 0.154960466 | 0.215238936 | 0.128901919 | 0.04174419  |
| 0.065132901 | 0.153871235 | 0.015441736 | 0.06693489  |
| 0.21405597  | 0.131512953 | 0.214409291 | 0.130807877 |
| 0.081296479 | 0.05529873  | 0.228053979 | 0.228127893 |
| 0.119597144 | 0.1156117   | 0.119018807 | 0.193268071 |
| 0.132560325 | 0.128580143 | 0.06781119  | 0.192388737 |
| 0.145295227 | 0.110374    | 0.126461218 | 0.118013431 |
| 0.222476748 | 0.055955262 | 0.131957467 | 0.151333224 |
| 0.285669225 | 0.080234234 | 0.015372211 | 0.01417901  |
| 0.114988737 | 0.196590398 | 0.103113281 | 0.193000834 |
| 0.03150622  | 0.218074053 | 0.018330364 | 0.147917464 |
| 0.130493892 | 0.115063908 | 0.110088782 | 0.114761093 |
| 0.097836872 | 0.145746814 | 0.056063521 | 0.132852527 |
| 0.092141417 | 0.105208234 | 0.134881582 | 0.2696378   |
| 0.160882552 | 0.104723857 | 0.166545535 | 0.130057244 |
| 0.214735763 | 0.198434355 | 0.312780666 | 0.161463169 |
| 0.042088699 | 0.103449159 | 0.024968029 | 0.087498651 |
| 0.090872466 | 0.140548857 | 0.137466948 | 0.213828411 |
| 0.149399507 | 0.120948533 | 0.151017943 | 0.116391969 |
| 0.187645731 | 0.212433267 | 0.082033448 | 0.010166696 |
| 0.005420947 | 0.06200053  | 0.186466535 | 0.172489116 |
| 0.146409973 | 0.030152669 | 0.138356727 | 0.16906097  |
| 0.11679527  | 0.13326763  | 0.130419694 | 0.309063892 |
| 0.137944668 | 0.242971956 | 0.053801252 | 0.273782203 |
| 0.119706612 | 0.065210942 | 0.163881768 | 0.129133583 |
| 0.171164748 | 0.152594093 | 0.0818565   | 0.213247574 |
| 0.010786616 | 0.253643795 | 0.125397222 | 0.094325679 |
| 0.074556644 | 0.158553268 | 0.142364733 | 0.219766688 |
| 0.09535429  | 0.164566741 | 0.163779827 | 0.026073164 |
| 0.197529905 | 0.180136909 | 0.201633745 | 0.192229922 |
| 0.191296224 | 0.276459079 | 0.14002677  | 0.119439464 |
| 0.140806852 | 0.107049542 | 0.106552726 | 0.023624849 |
| 0.106509027 | 0.173515455 | 0.108653012 | 0.030434048 |
| 0.079507816 | 0.148245582 | 0.042191035 | 0.126407497 |
| 0.024729448 | 0.211272052 | 0.213464197 | 0.179230987 |
| 0.120675465 | 0.150039292 | 0.199523637 | 0.191560152 |
| 0.137858984 | 0.224477241 | 0.111411765 | 0.051398748 |



|             |             |             |             |
|-------------|-------------|-------------|-------------|
| 0.201019258 | 0.039087791 | 0.217347927 | 0.102144666 |
| 0.105770115 | 0.204487128 | 0.075409674 | 0.152171565 |
| 0.122966547 | 0.144562473 | 0.131107352 | 0.184983098 |
| 0.080046203 | 0.099941539 | 0.161107274 | 0.128173625 |
| 0.218958144 | 0.214544675 | 0.118923997 | 0.100810594 |
| 0.197045121 | 0.067004326 | 0.175601055 | 0.028194334 |
| 0.044282639 | 0.113464884 | 0.224484842 | 0.262348227 |
| 0.13223024  | 0.105256477 | 0.186930311 | 0.139288423 |
| 0.149727331 | 0.120633921 | 0.107716395 | 0.162380451 |
| 0.223796147 | 0.188048624 | 0.152155619 | 0.156968957 |
| 0.042659762 | 0.1456638   | 0.178923617 | 0.14684199  |
| 0.126912728 | 0.249667335 | 0.122037427 | 0.070164426 |
| 0.066575946 | 0.0890617   | 0.192854674 | 0.218413984 |
| 0.290469245 | 0.149140468 | 0.022880088 | 0.234878773 |
| 0.028815478 | 0.268931096 | 0.045015784 | 0.157792754 |
| 0.190598007 | 0.056895794 | 0.239341279 | 0.167659288 |
| 0.200571704 | 0.11539307  | 0.083545726 | 0.22924089  |
| 0.04303481  | 0.130749813 | 0.082830024 | 0.152422527 |
| 0.042256907 | 0.118943621 | 0.274512731 | 0.085293032 |
| 0.053961235 | 0.036927738 | 0.127104647 | 0.121647972 |
| 0.209705905 | 0.213312867 | 0.070038285 | 0.105534157 |
| 0.096536934 | 0.086442603 | 0.096129837 | 0.102325697 |
| 0.116417966 | 0.117569084 | 0.05642399  | 0.121303794 |
| 0.188166227 | 0.248192343 | 0.087886502 | 0.08087857  |
| 0.170143201 | 0.110753903 | 0.087540645 | 0.114805365 |
| 0.091565742 | 0.280633244 | 0.08870287  | 0.132807878 |
| 0.078496353 | 0.053919672 | 0.188614616 | 0.194650804 |
| 0.03251526  |             |             |             |
| DAPK2       | 0.476726691 | 0.529537178 | 0.47692453  |
| 0.498225589 | 0.511136791 | 0.434954583 | 0.277812817 |
| 0.231819142 | 0.13484649  | 0.008983447 | 0.040403262 |
| 0.510062974 | 0.271325338 | 0.332718692 | 0.405953844 |
| 0.503032308 | 0.190193292 | 0.414580374 | 0.3187296   |
| 0.485549473 | 0.126616142 | 0.490060852 | 0.137210836 |
| 0.372052279 | 0.157145269 | 0.108387606 | 0.359512716 |
| 0.507628874 | 0.123358081 | 0.379648062 | 0.447262748 |
| 0.144157729 | 0.492797446 | 0.527955811 | 0.517963539 |
| 0.520139632 | 0.450945133 | 0.015413789 | 0.362474636 |
| 0.467897722 | 0.522025704 | 0.481718245 | 0.417740377 |
| 0.067917764 | 0.489878391 | 0.324282634 | 0.4868262   |
| 0.283636924 | 0.05295467  | 0.282236666 | 0.444782307 |
| 0.484486268 | 0.506053204 | 0.284338689 | 0.220030203 |
| 0.261350699 | 0.26399364  | 0.342653138 | 0.367598546 |
| 0.299612853 | 0.188490284 | 0.492618194 | 0.133686518 |
| 0.18810307  | 0.308894399 | 0.208085528 | 0.324503691 |
| 0.426761089 | 0.437088775 | 0.028477215 | 0.462575614 |
| 0.004299227 | 0.466627872 | 0.462911348 | 0.391700316 |
| 0.067732418 | 0.034333898 | 0.241237489 | 0.418656806 |
| 0.51468934  | 0.457389911 | 0.531077188 | 0.52165635  |
| 0.244791231 | 0.376314046 | 0.470401496 | 0.23898839  |
| 0.48915153  | 0.242204816 | 0.155832407 | 0.507728866 |
| 0.529092384 | 0.528727188 | 0.280148162 | 0.348220404 |
| 0.487810023 | 0.477282532 | 0.502353774 | 0.513942086 |
| 0.43158115  | 0.080737597 | 0.452333746 | 0.514687849 |

|             |             |             |             |
|-------------|-------------|-------------|-------------|
| 0.438591741 | 0.395115785 | 0.218550779 | 0.468652922 |
| 0.090694819 | 0.425922989 | 0.442636986 | 0.198614821 |
| 0.516930041 | 0.032662857 | 0.288868882 | 0.433997546 |
| 0.282021946 | 0.502950117 | 0.524035157 | 0.257358653 |
| 0.488638763 | 0.032967042 | 0.196463321 | 0.052800377 |
| 0.401582936 | 0.194887413 | 0.4886161   | 0.51486763  |
| 0.282148484 | 0.461930046 | 0.340567846 | 0.004614485 |
| 0.044668112 | 0.24452461  | 0.488018561 | 0.434536017 |
| 0.500936068 | 0.419610517 | 0.317970545 | 0.437906137 |
| 0.510452314 | 0.530076977 | 0.073876628 | 0.140148515 |
| 0.506572524 | 0.244248011 | 0.320099247 | 0.514565056 |
| 0.406184367 | 0.160289964 | 0.18064315  | 1           |
| 0.427692447 | 0.126398279 | 0.384208535 | 0.503096504 |
| 0.406061354 | 0.448958098 | 0.153525077 | 0.350497011 |
| 0.075680485 | 0.490335736 | 0.046287261 | 0.392606107 |
| 0.35366604  | 0.198908199 | 0.017327029 | 0.315100694 |
| 0.362789034 | 0.488454259 | 0.473409302 | 0.153909488 |
| 0.397745734 | 0.501020815 | 0.368536001 | 0.496354916 |
| 0.019535304 | 0.072225001 | 0.314308458 | 0.509946455 |
| 0.324124104 | 0.511479366 | 0.384487723 | 0.395077421 |
| 0.373657423 | 0.521080846 | 0.005038007 | 0.504051628 |
| 0.532913792 | 0.337280771 | 0.486133849 | 0.497947896 |
| 0.458999159 | 0.517567231 | 0.051836827 | 0.500375256 |
| 0.400355085 | 0.117717765 | 0.528939339 | 0.227444857 |
| 0.461367313 | 0.067844296 | 0.376864711 | 0.501000192 |
| 0.488113251 | 0.013649664 | 0.272579991 | 0.462723009 |
| 0.044052716 | 0.130360074 | 0.493317609 | 0.493523625 |
| 0.474056008 | 0.51940357  | 0.529011994 | 0.442328468 |
| 0.517684329 | 0.300958044 | 0.021323807 | 0.40994371  |
| 0.503083498 | 0.43964221  | 0.446429632 | 0.314847398 |
| 0.378230497 | 0.481640051 | 0.473369813 | 0.252851546 |
| 0.070146624 | 0.3789457   | 0.033064134 | 0.433602074 |
| 0.443131834 | 0.165187473 | 0.470500477 | 0.193430682 |
| 0.107891971 | 0.529260914 | 0.240281274 | 0.330254426 |
| 0.17465073  | 0.470225472 | 0.328299729 | 0.299206521 |
| 0.279090524 | 0.234503111 | 0.447583656 | 0.46808763  |
| 0.057320336 | 0.13875252  | 0.022982116 | 0.430564539 |
| 0.185297699 | 0.407505477 | 0.396316902 | 0.458964572 |
| 0.386179242 | 0.153006473 | 0.481238116 | 0.369981209 |
| 0.169462149 | 0.026058922 | 0.511873091 | 0.492332559 |
| 0.375507928 | 0.219369481 | 0.064284659 | 0.390877561 |
| 0.51411327  | 0.36968688  | 0.305318867 | 0.486804712 |
| 0.043755232 | 0.523490498 | 0.324526537 | 0.179924698 |
| 0.459551968 | 0.344571717 | 0.518151428 | 0.086016509 |
| 0.449672005 | 0.470563531 | 0.399592299 | 0.263468676 |
| 0.422451659 | 0.496373087 | 0.04950685  | 0.457303785 |
| 0.450964709 | 0.051708641 | 0.529424462 | 0.178033697 |
| 0.035089562 | 0.518002029 | 0.510006033 | 0.115565122 |
| 0.119734399 | 0.41812141  | 0.067352486 | 0.383483815 |
| 0.523080463 | 0.501217299 | 0.4929719   | 0.290480542 |
| 0.065364984 | 0.016509396 | 0.279180207 | 0.471404658 |
| 0.515522238 | 0.512482835 | 0.342277564 | 0.460292532 |
| 0.32152039  | 0.427126053 | 0.168359214 | 0.512230194 |
| 0.2456211   | 0.522275849 | 0.012227744 | 0.511302661 |

|             |             |             |             |
|-------------|-------------|-------------|-------------|
| 0.517468473 | 0.331437193 | 0.124575937 | 0.378996987 |
| 0.439712492 | 0.075155602 | 0.265504761 | 0.504755564 |
| 0.490258021 | 0.429466813 | 0.447049656 | 0.501309783 |
| 0.027422796 | 0.064099211 | 0.484290064 | 0.247501508 |
| 0.467546239 | 0.298043288 | 0.074341503 | 0.388264154 |
| 0.069335983 | 0.46239051  | 0.522382307 | 0.098614335 |
| 0.395027138 | 0.367103356 | 0.4703963   | 0.060415053 |
| 0.500580175 | 0.503189017 | 0.529653838 | 0.218981265 |
| 0.501681287 | 0.494684171 | 0.476000446 | 0.118609026 |
| 0.029788807 | 0.524457623 | 0.460838062 | 0.036621852 |
| 0.525069283 | 0.271014557 | 0.02166328  | 0.501458496 |
| 0.254073663 | 0.446532692 | 0.007228191 | 0.104540121 |
| 0.063245735 | 0.525243237 | 0.490076977 | 0.449027669 |
| 0.290213585 | 0.448904499 | 0.008489277 | 0.523209583 |
| 0.498076496 | 0.025648925 | 0.200568508 | 0.500014966 |
| 0.495629909 | 0.533534393 | 0.409917866 | 0.513217508 |
| 0.50242882  | 0.508248221 | 0.307655177 | 0.360892099 |
| 0.504701666 | 0.497361111 | 0.490887957 | 0.462703107 |
| 0.520263555 | 0.509924207 | 0.368102528 | 0.027746832 |
| 0.200113183 | 0.259719884 | 0.379784947 | 0.124846684 |
| 0.372433536 | 0.20647297  | 0.488209638 | 0.527368668 |
| 0.514559163 | 0.009416364 | 0.198807226 | 0.493889308 |
| 0.486557777 | 0.512379549 | 0.032047499 | 0.010217742 |
| 0.011576057 | 0.034533071 | 0.432458076 | 0.327802918 |
| 0.504582992 | 0.282407338 | 0.008957944 | 0.064120584 |
| 0.36590504  | 0.489563287 | 0.510842589 | 0.469766238 |
| 0.50875388  | 0.120099219 | 0.351119524 | 0.482717675 |
| 0.108973821 | 0.367413814 | 0.519983489 | 0.480830725 |
| 0.062928793 | 0.334440125 | 0.435289108 | 0.518841522 |
| 0.099551292 | 0.409280892 | 0.508300382 | 0.404622196 |
| 0.020723031 | 0.124779359 | 0.10528501  | 0.516208359 |
| 0.506690697 | 0.115021921 | 0.054198423 | 0.17004351  |
| 0.171228032 | 0.517375262 | 0.231633116 | 0.523819314 |
| 0.504789437 | 0.515756515 | 0.109778723 | 0.493048275 |
| 0.06451263  | 0.494285187 | 0.432131013 | 0.079628579 |
| 0.364330929 | 0.021202124 | 0.468283441 | 0.217544536 |
| 0.380130104 | 0.461589198 | 0.277997543 | 0.027896682 |
| 0.242918906 | 0.082775746 | 0.528488489 | 0.526920434 |
| 0.052152901 | 0.310567656 | 0.389840107 | 0.485274371 |
| 0.345882503 | 0.516874086 | 0.512441213 | 0.466250221 |
| 0.124069938 | 0.17763151  | 0.481816424 | 0.452557218 |
| 0.288802067 | 0.5298297   | 0.392351079 | 0.528584652 |
| 0.471358485 | 0.484745428 | 0.494528386 | 0.440789321 |
| 0.30393853  | 0.464311682 | 0.440002774 | 0.032776038 |
| 0.445191748 | 0.526208722 | 0.426750242 | 0.226972546 |
| 0.347269488 | 0.463343627 | 0.068729868 | 0.211164421 |
| 0.40221536  | 0.360271912 | 0.198791904 | 0.514723472 |
| 0.451269961 | 0.456670282 | 0.055183873 | 0.100223911 |
| 0.54647812  | 0.455363742 | 0.197671318 | 0.504687196 |
| 0.23762842  | 0.444730693 | 0.518679456 | 0.518663391 |
| 0.442181345 | 0.503241201 | 0.491819785 | 0.450155706 |
| 0.438525209 | 0.344489938 | 0.533818175 | 0.111147744 |
| 0.13318566  | 0.471861622 | 0.142969774 | 0.13693448  |
| 0.20413568  | 0.045750987 | 0.371516457 | 0.508266649 |

|             |             |             |             |
|-------------|-------------|-------------|-------------|
| 0.441997431 | 0.473590325 | 0.361508657 | 0.123117262 |
| 0.414727584 | 0.42117327  | 0.451419459 | 0.263082626 |
| 0.11932889  | 0.508027253 | 0.016302608 | 0.085963016 |
| 0.450771759 | 0.512322259 | 0.47436746  | 0.327912837 |
| 0.382692879 | 0.192024926 | 0.391067785 | 0.346390109 |
| 0.377098508 | 0.42984854  | 0.507309563 | 0.054061419 |
| 0.031087022 | 0.528462874 | 0.436384232 | 0.033379783 |
| 0.119759562 | 0.433908118 | 0.358994561 | 0.322398718 |
| 0.036022703 | 0.482966722 | 0.394171409 | 0.511964035 |
| 0.423427937 | 0.098575479 | 0.379993669 | 0.122151154 |
| 0.088953282 | 0.450959355 | 0.479723396 | 0.519453854 |
| 0.430151369 | 0.507389453 | 0.449788114 | 0.492641269 |
| 0.165047749 | 0.440589477 | 0.046626955 | 0.506641318 |
| 0.476621473 |             |             |             |
| DAPL1       | 0.411574929 | 0.470814808 | 0.34690407  |
| 0.407628588 | 0.369678183 | 0.434325854 | 0.239372738 |
| 0.280830485 | 0.082146458 | 0.00627909  | 0.015206242 |
| 0.378098127 | 0.171900202 | 0.30407358  | 0.360879875 |
| 0.376650923 | 0.093753868 | 0.373642729 | 0.23747047  |
| 0.409220452 | 0.141213645 | 0.342251885 | 0.099615186 |
| 0.215006612 | 0.0675908   | 0.055428609 | 0.196587255 |
| 0.428129477 | 0.064576663 | 0.413223723 | 0.437157152 |
| 0.07437741  | 0.435686109 | 0.487574389 | 0.360923311 |
| 0.472524508 | 0.404361103 | 0.01332354  | 0.340108836 |
| 0.439349731 | 0.393466444 | 0.414665611 | 0.311944471 |
| 0.044124492 | 0.489434571 | 0.250591848 | 0.329865203 |
| 0.301152976 | 0.021769626 | 0.367267175 | 0.458002587 |
| 0.452793557 | 0.401543159 | 0.312375742 | 0.181615519 |
| 0.168936997 | 0.345165205 | 0.186755097 | 0.429034436 |
| 0.230620851 | 0.280852198 | 0.446459931 | 0.10441676  |
| 0.174338562 | 0.324700471 | 0.106650319 | 0.315528648 |
| 0.263876016 | 0.448467114 | 0.025842592 | 0.356326974 |
| 0.004752142 | 0.393482827 | 0.311558587 | 0.237069982 |
| 0.03150126  | 0.016223095 | 0.129159636 | 0.352960009 |
| 0.431138891 | 0.421663641 | 0.403675222 | 0.402534149 |
| 0.136328857 | 0.245468583 | 0.308862066 | 0.150862463 |
| 0.438012451 | 0.192975618 | 0.11505357  | 0.360452522 |
| 0.406131988 | 0.464849966 | 0.155899957 | 0.20084219  |
| 0.424582591 | 0.44580396  | 0.402948144 | 0.376292787 |
| 0.286187529 | 0.031192778 | 0.423909612 | 0.416725889 |
| 0.43845907  | 0.223740655 | 0.111896216 | 0.445492214 |
| 0.050217731 | 0.393754203 | 0.332141559 | 0.131847142 |
| 0.432353954 | 0.022085222 | 0.151068208 | 0.376709282 |
| 0.208291266 | 0.432265992 | 0.447200315 | 0.195248655 |
| 0.345990746 | 0.015803875 | 0.089032322 | 0.025709961 |
| 0.321820667 | 0.086104192 | 0.482177183 | 0.428502503 |
| 0.307700229 | 0.318705855 | 0.298923709 | 0.000540479 |
| 0.016804067 | 0.150126209 | 0.413163413 | 0.375155708 |
| 0.421622438 | 0.374777883 | 0.194713975 | 0.442708716 |
| 0.379301715 | 0.402245597 | 0.096477502 | 0.113397404 |
| 0.410251886 | 0.149829789 | 0.212229385 | 0.407474002 |
| 0.24160186  | 0.152675002 | 0.122037467 | 0.427692447 |
| 1           | 0.082998405 | 0.403509434 | 0.365795557 |
| 0.329485284 | 0.268368632 | 0.109814748 | 0.26683824  |

|             |             |             |             |
|-------------|-------------|-------------|-------------|
| 0.062043219 | 0.436121086 | 0.015920377 | 0.40492983  |
| 0.229081833 | 0.09651576  | 0.014005194 | 0.354925849 |
| 0.313603813 | 0.414012075 | 0.463631831 | 0.100695678 |
| 0.30779282  | 0.343645574 | 0.421432088 | 0.410870478 |
| 0.009363985 | 0.045686623 | 0.400269981 | 0.424724332 |
| 0.408009284 | 0.410917738 | 0.288951495 | 0.251953195 |
| 0.226066698 | 0.41257352  | 0.00270052  | 0.482619513 |
| 0.463267422 | 0.409721186 | 0.351028183 | 0.364477154 |
| 0.31234629  | 0.423470097 | 0.053598493 | 0.373373672 |
| 0.423183262 | 0.077233175 | 0.41488949  | 0.122273441 |
| 0.426691825 | 0.032064259 | 0.387517557 | 0.373274838 |
| 0.382812997 | 0.009084901 | 0.335740744 | 0.414011145 |
| 0.01518823  | 0.162883359 | 0.428458595 | 0.395153135 |
| 0.358768922 | 0.397955766 | 0.411409062 | 0.290241881 |
| 0.37345059  | 0.27197958  | 0.010206942 | 0.244880783 |
| 0.405582455 | 0.345662953 | 0.44194422  | 0.274168171 |
| 0.421632071 | 0.435722372 | 0.402085434 | 0.224160483 |
| 0.044776979 | 0.375933568 | 0.028493598 | 0.285601121 |
| 0.400938719 | 0.12489417  | 0.358716043 | 0.123377975 |
| 0.047291217 | 0.44422222  | 0.110573196 | 0.17821304  |
| 0.073722931 | 0.393406346 | 0.271444095 | 0.237863557 |
| 0.164992277 | 0.141379436 | 0.29011743  | 0.341619933 |
| 0.057946053 | 0.076103898 | 0.008303811 | 0.321113647 |
| 0.113541141 | 0.309201507 | 0.328711794 | 0.439137495 |
| 0.345110115 | 0.09574669  | 0.324961106 | 0.221077104 |
| 0.079947074 | 0.010508046 | 0.452248726 | 0.377149508 |
| 0.427585118 | 0.163867864 | 0.031364291 | 0.317505928 |
| 0.428855036 | 0.403229833 | 0.398683419 | 0.43851964  |
| 0.028197408 | 0.41273023  | 0.21813971  | 0.090969803 |
| 0.294055613 | 0.239241247 | 0.423198837 | 0.075417813 |
| 0.435725072 | 0.447444308 | 0.275217072 | 0.144522899 |
| 0.426432449 | 0.417226123 | 0.035563698 | 0.42869409  |
| 0.431109016 | 0.024531774 | 0.449090996 | 0.084021706 |
| 0.01419885  | 0.369309947 | 0.390736189 | 0.057253141 |
| 0.05615475  | 0.322685779 | 0.084029481 | 0.233706209 |
| 0.445264193 | 0.354302951 | 0.420782711 | 0.152195109 |
| 0.038436825 | 0.006752151 | 0.145476054 | 0.343998712 |
| 0.491429646 | 0.420025399 | 0.229763487 | 0.28628138  |
| 0.231425002 | 0.274737076 | 0.257663412 | 0.419522425 |
| 0.167081777 | 0.474839547 | 0.005268995 | 0.376699239 |
| 0.475311155 | 0.405546357 | 0.054116032 | 0.365876448 |
| 0.439880506 | 0.047997382 | 0.229751381 | 0.460235924 |
| 0.435455695 | 0.295856083 | 0.31280713  | 0.393635599 |
| 0.024928137 | 0.060036269 | 0.334310764 | 0.117876097 |
| 0.364464088 | 0.191813703 | 0.025583521 | 0.407926065 |
| 0.03817432  | 0.433158334 | 0.407475531 | 0.047819755 |
| 0.39259745  | 0.402752692 | 0.310318751 | 0.034711489 |
| 0.379837692 | 0.432506436 | 0.48829782  | 0.198936566 |
| 0.410561451 | 0.407664892 | 0.324534116 | 0.059293727 |
| 0.009998847 | 0.462617521 | 0.442080641 | 0.021128667 |
| 0.420961907 | 0.377247877 | 0.010324098 | 0.461312364 |
| 0.193818845 | 0.459365547 | 0.007186892 | 0.06721462  |
| 0.024502567 | 0.390379865 | 0.462454784 | 0.433135135 |
| 0.346297228 | 0.369368196 | 0.003513805 | 0.433934348 |

|             |             |             |             |
|-------------|-------------|-------------|-------------|
| 0.452674823 | 0.007546734 | 0.092322905 | 0.406756333 |
| 0.36287141  | 0.489502417 | 0.235850087 | 0.388757804 |
| 0.355041225 | 0.455996013 | 0.25754632  | 0.221441754 |
| 0.434256148 | 0.417614785 | 0.441159137 | 0.441071784 |
| 0.425756964 | 0.357970064 | 0.27136938  | 0.017474332 |
| 0.102641129 | 0.324734739 | 0.31156311  | 0.067602699 |
| 0.431762891 | 0.104037668 | 0.424408788 | 0.412086008 |
| 0.403939079 | 0.00297695  | 0.212552012 | 0.426114216 |
| 0.448750871 | 0.436412794 | 0.017911987 | 0.005617718 |
| 0.006417371 | 0.009418858 | 0.407835204 | 0.190738616 |
| 0.420117201 | 0.305584291 | 0.00365676  | 0.076742437 |
| 0.28411342  | 0.310895533 | 0.455390162 | 0.358347779 |
| 0.393586833 | 0.068483261 | 0.295641398 | 0.387119561 |
| 0.044247785 | 0.409897682 | 0.411122209 | 0.463219822 |
| 0.030411565 | 0.199526347 | 0.396743168 | 0.431465566 |
| 0.037630355 | 0.261111169 | 0.388007221 | 0.30010682  |
| 0.010076288 | 0.05538895  | 0.047362934 | 0.392806724 |
| 0.459974137 | 0.056991241 | 0.021782109 | 0.226110151 |
| 0.121200655 | 0.420855718 | 0.146831677 | 0.420113124 |
| 0.439550181 | 0.400184968 | 0.046208551 | 0.460313352 |
| 0.03193503  | 0.45786302  | 0.247759463 | 0.079530987 |
| 0.255289317 | 0.01037229  | 0.405993924 | 0.117873138 |
| 0.404854682 | 0.438504834 | 0.159790172 | 0.00903279  |
| 0.123304789 | 0.037442438 | 0.41312056  | 0.389407747 |
| 0.019697313 | 0.272490849 | 0.2533639   | 0.388859619 |
| 0.381686586 | 0.401008512 | 0.484815276 | 0.403921093 |
| 0.105134206 | 0.091984804 | 0.426327765 | 0.435102714 |
| 0.323410146 | 0.406142594 | 0.251840107 | 0.444393196 |
| 0.44132578  | 0.433290149 | 0.414893927 | 0.358316219 |
| 0.160621419 | 0.442942165 | 0.416374705 | 0.025349596 |
| 0.345856745 | 0.410603938 | 0.404487075 | 0.110548071 |
| 0.204830766 | 0.30884415  | 0.05857326  | 0.227549128 |
| 0.244618183 | 0.410983834 | 0.137836056 | 0.400750802 |
| 0.432596332 | 0.440844197 | 0.060367856 | 0.044923838 |
| 0.482717613 | 0.43421664  | 0.19582611  | 0.424075804 |
| 0.142484755 | 0.299796969 | 0.399374305 | 0.381348183 |
| 0.353140621 | 0.41946099  | 0.445037985 | 0.42485304  |
| 0.437658109 | 0.268621747 | 0.486267667 | 0.179377446 |
| 0.060810196 | 0.397178427 | 0.085167996 | 0.066002358 |
| 0.129686395 | 0.018250227 | 0.219354724 | 0.378672278 |
| 0.299390289 | 0.342521656 | 0.401839552 | 0.07052205  |
| 0.260663626 | 0.388369061 | 0.313535501 | 0.243822592 |
| 0.069895405 | 0.468523343 | 0.006647369 | 0.042261829 |
| 0.305672491 | 0.415799664 | 0.296471094 | 0.196170848 |
| 0.213382502 | 0.097193018 | 0.262171378 | 0.408552433 |
| 0.344247927 | 0.33185707  | 0.418312418 | 0.0465587   |
| 0.026622354 | 0.41501686  | 0.424054049 | 0.012926988 |
| 0.069092145 | 0.425966562 | 0.29523734  | 0.220219073 |
| 0.011598805 | 0.399446849 | 0.394555349 | 0.367185935 |
| 0.388156485 | 0.060186223 | 0.418047825 | 0.103254917 |
| 0.067586892 | 0.443541635 | 0.329313623 | 0.454992859 |
| 0.289878977 | 0.377900537 | 0.467203343 | 0.425985939 |
| 0.117871491 | 0.348453871 | 0.03329549  | 0.435100802 |
| 0.355750012 |             |             |             |

| DBNDD2      | 0.073686541 | 0.102023716 | 0.051355123 |
|-------------|-------------|-------------|-------------|
| 0.201444951 | 0.110954427 | 0.076803501 | 0.234525478 |
| 0.102970313 | 0.144712553 | 0.127967887 | 0.116966935 |
| 0.075513161 | 0.105972435 | 0.116979691 | 0.038014771 |
| 0.206680775 | 0.188784242 | 0.051229324 | 0.290412684 |
| 0.180710397 | 0.19497024  | 0.229288491 | 0.280269838 |
| 0.056297045 | 0.143155917 | 0.247308798 | 0.073215615 |
| 0.185960885 | 0.247754694 | 0.064508087 | 0.151303186 |
| 0.176503812 | 0.104686596 | 0.072088494 | 0.129573801 |
| 0.063521733 | 0.053838268 | 0.064883213 | 0.069603444 |
| 0.092005055 | 0.115295634 | 0.187015629 | 0.257471824 |
| 0.280550359 | 0.064743893 | 0.274137664 | 0.106400268 |
| 0.056260607 | 0.213577155 | 0.048043181 | 0.067285748 |
| 0.06104521  | 0.073413653 | 0.115069084 | 0.207696436 |
| 0.060326216 | 0.056251294 | 0.0286206   | 0.083288733 |
| 0.268571072 | 0.06452447  | 0.067938156 | 0.167427459 |
| 0.066270961 | 0.116776965 | 0.147048625 | 0.161407581 |
| 0.035273229 | 0.086547628 | 0.218490163 | 0.043201283 |
| 0.050842413 | 0.20345583  | 0.130225956 | 0.022983055 |
| 0.25943884  | 0.220584353 | 0.153408093 | 0.224572041 |
| 0.162140621 | 0.06683621  | 0.142792429 | 0.115538683 |
| 0.159840708 | 0.152684549 | 0.0555545   | 0.239582308 |
| 0.094475285 | 0.219468785 | 0.128815456 | 0.208292432 |
| 0.134488486 | 0.082472826 | 0.147639441 | 0.17266606  |
| 0.109038627 | 0.099340664 | 0.058928022 | 0.085797864 |
| 0.033863701 | 0.111916371 | 0.072933471 | 0.113610547 |
| 0.076444568 | 0.043340963 | 0.219504579 | 0.142675876 |
| 0.275016721 | 0.032966861 | 0.272457389 | 0.093809747 |
| 0.165870358 | 0.202240294 | 0.169645903 | 0.171624606 |
| 0.127414778 | 0.099853561 | 0.077580168 | 0.291674615 |
| 0.083693599 | 0.18574018  | 0.039365154 | 0.217549382 |
| 0.072346546 | 0.02738076  | 0.051834984 | 0.153969586 |
| 0.102789427 | 0.062853867 | 0.170606589 | 0.11855436  |
| 0.211493418 | 0.091963714 | 0.07894984  | 0.080728207 |
| 0.126019788 | 0.043916902 | 0.135469486 | 0.06743849  |
| 0.064225575 | 0.140132099 | 0.009215026 | 0.266874478 |
| 0.098723309 | 0.10530052  | 0.323252648 | 0.082196976 |
| 0.147621768 | 0.227730186 | 0.284391042 | 0.126398279 |
| 0.082998405 | 1           | 0.039664505 | 0.205050312 |
| 0.068262893 | 0.123794865 | 0.286476606 | 0.151877434 |
| 0.292354138 | 0.058755758 | 0.168689875 | 0.076858419 |
| 0.025541196 | 0.111634271 | 0.128627307 | 0.120192134 |
| 0.085001343 | 0.089859073 | 0.046608608 | 0.268622558 |
| 0.159876463 | 0.173328275 | 0.06222317  | 0.099466526 |
| 0.125249752 | 0.231111902 | 0.031469114 | 0.115731329 |
| 0.064107827 | 0.1068411   | 0.137261478 | 0.091861745 |
| 0.216501672 | 0.156378303 | 0.004165019 | 0.066419441 |
| 0.078913304 | 0.028064038 | 0.150077641 | 0.102069096 |
| 0.039501684 | 0.162299522 | 0.004809485 | 0.202234739 |
| 0.052956016 | 0.273756177 | 0.149810377 | 0.254382574 |
| 0.069401471 | 0.256623663 | 0.07745774  | 0.07761802  |
| 0.060555196 | 0.066738756 | 0.089223195 | 0.187803161 |
| 0.143156305 | 0.152813037 | 0.112434333 | 0.182388826 |
| 0.14078765  | 0.128631847 | 0.175856441 | 0.033880431 |

|             |             |             |             |
|-------------|-------------|-------------|-------------|
| 0.105496648 | 0.164773093 | 0.169038172 | 0.1271311   |
| 0.092702541 | 0.023840012 | 0.081048898 | 0.162562628 |
| 0.038316182 | 0.095930131 | 0.058317172 | 0.029463805 |
| 0.285143153 | 0.135519374 | 0.120844071 | 0.133741332 |
| 0.05440472  | 0.227568377 | 0.042582907 | 0.121556373 |
| 0.209966961 | 0.113192088 | 0.051631062 | 0.024879725 |
| 0.028145615 | 0.103181244 | 0.217818648 | 0.100806112 |
| 0.088173452 | 0.201535671 | 0.048298082 | 0.059004718 |
| 0.241287595 | 0.273981114 | 0.065162943 | 0.024111444 |
| 0.112143738 | 0.046907654 | 0.039171167 | 0.07040788  |
| 0.079799529 | 0.193184062 | 0.117405852 | 0.046770811 |
| 0.157245432 | 0.225053657 | 0.100366839 | 0.188345973 |
| 0.05999475  | 0.228157666 | 0.250860515 | 0.022571882 |
| 0.142523245 | 0.044617487 | 0.022674223 | 0.116649986 |
| 0.151018007 | 0.131516132 | 0.138332894 | 0.239841455 |
| 0.056220543 | 0.26441066  | 0.177048268 | 0.044988341 |
| 0.077404678 | 0.092248745 | 0.162437629 | 0.167064592 |
| 0.069671785 | 0.154552393 | 0.266145073 | 0.066756465 |
| 0.065781696 | 0.276910523 | 0.094941109 | 0.164643719 |
| 0.220273576 | 0.109061634 | 0.082346824 | 0.263994533 |
| 0.202689697 | 0.128116606 | 0.18863638  | 0.250359093 |
| 0.113001602 | 0.22603089  | 0.093757534 | 0.06193206  |
| 0.289187764 | 0.136458522 | 0.101233711 | 0.051933456 |
| 0.066012309 | 0.089146881 | 0.246672575 | 0.095373818 |
| 0.321238688 | 0.051741137 | 0.052407261 | 0.110570051 |
| 0.045569733 | 0.077643514 | 0.183678702 | 0.088284631 |
| 0.06122448  | 0.058844298 | 0.18486608  | 0.151322719 |
| 0.081838724 | 0.271401472 | 0.160766071 | 0.078688175 |
| 0.104044213 | 0.078812362 | 0.052654449 | 0.114112966 |
| 0.220550786 | 0.269906962 | 0.101235273 | 0.036008702 |
| 0.055025059 | 0.167367694 | 0.012887946 | 0.059432909 |
| 0.268673606 | 0.090140708 | 0.151133027 | 0.178718859 |
| 0.066796673 | 0.048928565 | 0.175244632 | 0.287163175 |
| 0.079177458 | 0.072188611 | 0.076234568 | 0.201016081 |
| 0.085628596 | 0.085935816 | 0.045001578 | 0.2080407   |
| 0.176881317 | 0.069337356 | 0.089932914 | 0.148947901 |
| 0.160666861 | 0.045305311 | 0.17504365  | 0.103125775 |
| 0.281319699 | 0.047992226 | 0.028410841 | 0.010411078 |
| 0.120763061 | 0.137764226 | 0.067453358 | 0.150069815 |
| 0.02893075  | 0.170722495 | 0.015343648 | 0.096081698 |
| 0.087014998 | 0.145315166 | 0.107543276 | 0.075932916 |
| 0.064337698 | 0.096010632 | 0.04412629  | 0.091104223 |
| 0.062357512 | 0.066393071 | 0.142479816 | 0.247923575 |
| 0.118193405 | 0.065194514 | 0.12251128  | 0.087905256 |
| 0.1562444   | 0.144026205 | 0.295659445 | 0.234645014 |
| 0.050917784 | 0.094799482 | 0.024224166 | 0.109660417 |
| 0.066755766 | 0.16506528  | 0.089897136 | 0.15249912  |
| 0.100679242 | 0.155528005 | 0.169077647 | 0.077476839 |
| 0.137532786 | 0.15466334  | 0.090975837 | 0.01387478  |
| 0.006708486 | 0.084702268 | 0.151648475 | 0.149481005 |
| 0.099336401 | 0.028460505 | 0.184041922 | 0.214340652 |
| 0.117666561 | 0.098442911 | 0.085709307 | 0.256491707 |
| 0.091549761 | 0.267207789 | 0.055122317 | 0.216760099 |
| 0.146213407 | 0.040807015 | 0.113854659 | 0.08768741  |



|             |             |             |             |
|-------------|-------------|-------------|-------------|
| 0.18164251  | 0.13302353  | 0.054941044 | 0.155621196 |
| 0.009149428 | 0.210780567 | 0.082265639 | 0.097886857 |
| 0.074505527 | 0.181601345 | 0.178052382 | 0.159488812 |
| 0.058265124 | 0.189194508 | 0.200830367 | 0.023725479 |
| 0.234992873 | 0.123679161 | 0.222171775 | 0.134042732 |
| 0.141377262 | 0.213084668 | 0.140430009 | 0.07966119  |
| 0.181240239 | 0.068123565 | 0.082754281 | 0.029527634 |
| 0.090266708 | 0.204474461 | 0.066397482 | 0.036886574 |
| 0.062546319 | 0.104893518 | 0.045782065 | 0.144978164 |
| 0.02095245  | 0.243822322 | 0.156871604 | 0.125271395 |
| 0.125792937 | 0.154372979 | 0.166561997 | 0.140527053 |
| 0.120909042 | 0.175957868 | 0.071575518 | 0.035545718 |
| 0.253690678 | 0.026645881 | 0.165694721 | 0.067550431 |
| 0.100742847 | 0.143957854 | 0.078262127 | 0.100428152 |
| 0.085675275 | 0.096951808 | 0.085677758 | 0.166984095 |
| 0.068076372 | 0.071896171 | 0.133139794 | 0.180722801 |
| 0.184306648 | 0.157501123 | 0.089099405 | 0.117750783 |
| 0.18433016  | 0.044019033 | 0.190352266 | 0.019736722 |
| 0.028818726 | 0.094177557 | 0.24916759  | 0.198523869 |
| 0.091631996 | 0.0707762   | 0.199252849 | 0.179782676 |
| 0.098534355 | 0.080917602 | 0.129579394 | 0.124486173 |
| 0.203915433 | 0.166341574 | 0.10317989  | 0.106109441 |
| 0.033880164 | 0.099499374 | 0.128999856 | 0.112521563 |
| 0.087406576 | 0.236448951 | 0.078997368 | 0.076742373 |
| 0.083087032 | 0.054437357 | 0.228861738 | 0.213077997 |
| 0.291199364 | 0.18532536  | 0.017701432 | 0.17397986  |
| 0.018745222 | 0.22211252  | 0.034743033 | 0.184879282 |
| 0.150087254 | 0.035856176 | 0.196832532 | 0.168071163 |
| 0.248642278 | 0.075812771 | 0.111938281 | 0.25510818  |
| 0.026970645 | 0.093842067 | 0.062997694 | 0.148104959 |
| 0.035632982 | 0.107213782 | 0.242443077 | 0.068400945 |
| 0.043296304 | 0.027199896 | 0.090773417 | 0.160595562 |
| 0.267859147 | 0.150548467 | 0.049647702 | 0.11431248  |
| 0.090414821 | 0.057022095 | 0.077552172 | 0.116356034 |
| 0.133458777 | 0.075368399 | 0.047100182 | 0.087839281 |
| 0.159967144 | 0.274808112 | 0.055794595 | 0.081337516 |
| 0.194013705 | 0.071136156 | 0.061180613 | 0.072615357 |
| 0.063795433 | 0.225298817 | 0.055306929 | 0.087399104 |
| 0.073113388 | 0.032983967 | 0.256307164 | 0.138110934 |
| 0.022447492 |             |             |             |

|             |             |             |             |
|-------------|-------------|-------------|-------------|
| DEK         | 0.347571979 | 0.400088153 | 0.157466852 |
| 0.291042039 | 0.178057129 | 0.216364351 | 0.094247266 |
| 0.13466015  | 0.025380341 | 0.001845396 | 0.002943108 |
| 0.226650392 | 0.036426794 | 0.09169135  | 0.084380095 |
| 0.306598052 | 0.034559105 | 0.181566105 | 0.12398473  |
| 0.32118462  | 0.055723091 | 0.234577798 | 0.046907856 |
| 0.077049221 | 0.020574616 | 0.020488547 | 0.049470898 |
| 0.381055125 | 0.02540098  | 0.139568106 | 0.339120662 |
| 0.058563557 | 0.377862367 | 0.39689351  | 0.203405574 |
| 0.378664781 | 0.31913395  | 0.02949155  | 0.075274772 |
| 0.414370018 | 0.256354703 | 0.317632863 | 0.167376804 |
| 0.020116757 | 0.408082431 | 0.110576222 | 0.19760596  |
| 0.113984841 | 0.007699021 | 0.111969903 | 0.40213656  |
| 0.335824733 | 0.168092894 | 0.120653621 | 0.059408402 |

|             |             |             |             |
|-------------|-------------|-------------|-------------|
| 0.026687589 | 0.119347272 | 0.035725432 | 0.302978585 |
| 0.094598776 | 0.091931185 | 0.348421207 | 0.031287208 |
| 0.058725882 | 0.158068169 | 0.059542922 | 0.141582034 |
| 0.074067438 | 0.357382701 | 0.029862626 | 0.217074222 |
| 0.002568115 | 0.308407322 | 0.204249762 | 0.047709162 |
| 0.019343653 | 0.00561356  | 0.067752779 | 0.187915685 |
| 0.395870991 | 0.411867357 | 0.337854801 | 0.336017918 |
| 0.045488339 | 0.138276371 | 0.135631742 | 0.054186679 |
| 0.369015505 | 0.05723207  | 0.056061216 | 0.282221429 |
| 0.342824677 | 0.375161129 | 0.051640478 | 0.108376407 |
| 0.267371331 | 0.40865446  | 0.142120636 | 0.128374174 |
| 0.053379455 | 0.025221242 | 0.335243864 | 0.365805031 |
| 0.38855533  | 0.074009641 | 0.046064642 | 0.373124618 |
| 0.033375031 | 0.137529403 | 0.209737086 | 0.08410799  |
| 0.39492497  | 0.010291049 | 0.066628498 | 0.171564503 |
| 0.143466623 | 0.353246142 | 0.361040895 | 0.086785041 |
| 0.173682077 | 0.010844162 | 0.017287136 | 0.027051871 |
| 0.101247943 | 0.029203547 | 0.371562206 | 0.332668333 |
| 0.127725752 | 0.086702889 | 0.11681541  | 0.002906505 |
| 0.01200642  | 0.104792371 | 0.327557722 | 0.225411651 |
| 0.355770673 | 0.321935167 | 0.045350315 | 0.328507153 |
| 0.199450782 | 0.333472627 | 0.01884608  | 0.063559999 |
| 0.18044915  | 0.100464236 | 0.127687024 | 0.20713415  |
| 0.082075978 | 0.08392987  | 0.058864182 | 0.384208535 |
| 0.403509434 | 0.039664505 | 1           | 0.282402861 |
| 0.06896937  | 0.124916759 | 0.061293341 | 0.086453251 |
| 0.030086735 | 0.3395455   | 0.012635881 | 0.211518832 |
| 0.036802843 | 0.034057927 | 0.031118188 | 0.165343766 |
| 0.082588729 | 0.268702173 | 0.371420022 | 0.063454914 |
| 0.107223851 | 0.203364495 | 0.216581598 | 0.216566477 |
| 0.001464545 | 0.040411123 | 0.187878983 | 0.366812022 |
| 0.2413806   | 0.387879173 | 0.120131887 | 0.099571126 |
| 0.118208622 | 0.34778163  | 0.005356774 | 0.3859685   |
| 0.372543421 | 0.161054039 | 0.150685616 | 0.239686366 |
| 0.081443501 | 0.32646654  | 0.030378189 | 0.289789343 |
| 0.335432139 | 0.053705825 | 0.376147177 | 0.047786866 |
| 0.385080238 | 0.014223507 | 0.128103724 | 0.265956745 |
| 0.228611247 | 0.005661345 | 0.117453308 | 0.286312418 |
| 0.013983116 | 0.058405827 | 0.35854259  | 0.261388713 |
| 0.155177091 | 0.335209879 | 0.373977603 | 0.066167872 |
| 0.155613391 | 0.131571467 | 0.012384791 | 0.127095975 |
| 0.344027744 | 0.078363189 | 0.382994787 | 0.099002122 |
| 0.253897161 | 0.372195625 | 0.294358546 | 0.050366709 |
| 0.021020749 | 0.173634089 | 0.012165455 | 0.101538896 |
| 0.321902873 | 0.034759279 | 0.115133    | 0.107324187 |
| 0.024285438 | 0.377433089 | 0.039555244 | 0.051555342 |
| 0.024815975 | 0.162654227 | 0.147588275 | 0.045856107 |
| 0.029978735 | 0.053490899 | 0.068114687 | 0.087003343 |
| 0.027026004 | 0.030697426 | 0.017123874 | 0.068172945 |
| 0.021436738 | 0.060082924 | 0.063097254 | 0.3001027   |
| 0.106899614 | 0.029887184 | 0.107955492 | 0.080476594 |
| 0.034465727 | 0.009045459 | 0.388737066 | 0.293714459 |
| 0.330025838 | 0.067881984 | 0.025684232 | 0.064580039 |
| 0.335000543 | 0.137212035 | 0.133950523 | 0.34662525  |

|             |             |             |             |
|-------------|-------------|-------------|-------------|
| 0.028861864 | 0.371121438 | 0.052293006 | 0.03362689  |
| 0.070354261 | 0.101447042 | 0.373566437 | 0.017923597 |
| 0.275112842 | 0.37794812  | 0.174159694 | 0.043181091 |
| 0.335465094 | 0.26507574  | 0.018198287 | 0.347808575 |
| 0.327513551 | 0.014679532 | 0.380755852 | 0.039151797 |
| 0.012921925 | 0.261467715 | 0.219431888 | 0.031054313 |
| 0.030119636 | 0.088191353 | 0.041333943 | 0.13505824  |
| 0.37669653  | 0.251521441 | 0.257175949 | 0.067138529 |
| 0.015878757 | 0.002069024 | 0.068115129 | 0.187819959 |
| 0.402279821 | 0.357070476 | 0.144077698 | 0.083920034 |
| 0.13688773  | 0.056285719 | 0.118360755 | 0.354293914 |
| 0.134898109 | 0.415519309 | 0.00704837  | 0.255781186 |
| 0.365837138 | 0.171112434 | 0.018452054 | 0.152877899 |
| 0.336159855 | 0.024830321 | 0.147988019 | 0.377291531 |
| 0.349749199 | 0.077344511 | 0.067493133 | 0.305768596 |
| 0.013301905 | 0.033337872 | 0.166501237 | 0.0408916   |
| 0.087894312 | 0.072377212 | 0.010599814 | 0.141709327 |
| 0.01479681  | 0.347695923 | 0.364865562 | 0.015637723 |
| 0.136346213 | 0.148884993 | 0.209476714 | 0.021441826 |
| 0.279828602 | 0.379437012 | 0.39878691  | 0.123083578 |
| 0.313654228 | 0.321316375 | 0.129119895 | 0.04158638  |
| 0.00887257  | 0.375816621 | 0.341720076 | 0.009409274 |
| 0.368788199 | 0.149367431 | 0.002658665 | 0.408805364 |
| 0.102178827 | 0.385673375 | 0.00383493  | 0.054122081 |
| 0.02474614  | 0.335946521 | 0.358714701 | 0.332201348 |
| 0.070762182 | 0.284211929 | 0.009549971 | 0.390345941 |
| 0.364200188 | 0.005482472 | 0.039622852 | 0.266418891 |
| 0.214585068 | 0.435646905 | 0.060346031 | 0.268538496 |
| 0.16341009  | 0.35119418  | 0.067959832 | 0.112256496 |
| 0.312200785 | 0.333304437 | 0.357342574 | 0.408227939 |
| 0.34708158  | 0.261132697 | 0.146927584 | 0.007682444 |
| 0.028269194 | 0.11986872  | 0.048839248 | 0.015378582 |
| 0.277914837 | 0.033135103 | 0.401500765 | 0.35806932  |
| 0.322589437 | 0.00451785  | 0.097547681 | 0.299479484 |
| 0.391450354 | 0.409007477 | 0.031500425 | 0.004377749 |
| 0.007384969 | 0.00231965  | 0.247653344 | 0.094952125 |
| 0.361959501 | 0.058948172 | 0.004358463 | 0.04614836  |
| 0.109781506 | 0.160025221 | 0.369601462 | 0.27961627  |
| 0.31672261  | 0.043311956 | 0.048121347 | 0.328542263 |
| 0.014760763 | 0.320774538 | 0.327704204 | 0.379891117 |
| 0.033927977 | 0.088264891 | 0.21934985  | 0.382404068 |
| 0.009542308 | 0.153827558 | 0.250482251 | 0.064894796 |
| 0.023799003 | 0.027882716 | 0.019700659 | 0.341519331 |
| 0.35703475  | 0.014218268 | 0.007043148 | 0.071208049 |
| 0.033466021 | 0.374516713 | 0.048398216 | 0.383610102 |
| 0.354667517 | 0.340703485 | 0.027247452 | 0.380384547 |
| 0.009734688 | 0.360836741 | 0.088444752 | 0.023317986 |
| 0.142794095 | 0.015101352 | 0.361422654 | 0.015217446 |
| 0.128875563 | 0.3618647   | 0.040997982 | 0.00936607  |
| 0.040049436 | 0.021426352 | 0.336407712 | 0.312645804 |
| 0.022496006 | 0.123125293 | 0.146533878 | 0.315468147 |
| 0.183704063 | 0.266670013 | 0.391729784 | 0.138963559 |
| 0.03983474  | 0.058677247 | 0.353056657 | 0.322323156 |
| 0.131955058 | 0.358835012 | 0.049284333 | 0.398211472 |

|             |             |             |             |
|-------------|-------------|-------------|-------------|
| 0.343711541 | 0.413341857 | 0.34247035  | 0.167212236 |
| 0.049131839 | 0.253570939 | 0.224360974 | 0.009853809 |
| 0.203865111 | 0.314041983 | 0.238843026 | 0.025738904 |
| 0.06392202  | 0.131763733 | 0.061447184 | 0.14806987  |
| 0.082981652 | 0.211868716 | 0.049817015 | 0.363863751 |
| 0.337463521 | 0.322592853 | 0.068843091 | 0.01708879  |
| 0.420356743 | 0.396164794 | 0.075644089 | 0.263410953 |
| 0.081104347 | 0.126304593 | 0.320882324 | 0.290585518 |
| 0.107681477 | 0.301826335 | 0.361452686 | 0.241735854 |
| 0.364180287 | 0.132633515 | 0.394991035 | 0.099216868 |
| 0.018228943 | 0.259214119 | 0.021786049 | 0.038288864 |
| 0.052347416 | 0.014110206 | 0.04807726  | 0.304905875 |
| 0.069101013 | 0.197072955 | 0.140397156 | 0.0433057   |
| 0.142831559 | 0.204702912 | 0.186310283 | 0.075556589 |
| 0.02304584  | 0.360643469 | 0.005519389 | 0.029725795 |
| 0.078986326 | 0.276328546 | 0.09307857  | 0.081839222 |
| 0.050555064 | 0.060394613 | 0.124100616 | 0.172411018 |
| 0.065950678 | 0.115125186 | 0.281007446 | 0.031132029 |
| 0.018822574 | 0.379231168 | 0.20532707  | 0.020732982 |
| 0.042082526 | 0.297863724 | 0.175410587 | 0.049670387 |
| 0.011273584 | 0.316400738 | 0.091877235 | 0.178276936 |
| 0.217788114 | 0.047382773 | 0.390170065 | 0.064432693 |
| 0.064103784 | 0.401254156 | 0.160518823 | 0.36484683  |
| 0.145212391 | 0.274192495 | 0.401266043 | 0.319268176 |
| 0.100033086 | 0.182615136 | 0.017748852 | 0.394119184 |
| 0.071019009 |             |             |             |

|             |             |             |             |
|-------------|-------------|-------------|-------------|
| DENND5A     | 0.343459714 | 0.473985344 | 0.343878781 |
| 0.399295793 | 0.39734372  | 0.264665106 | 0.280406117 |
| 0.220494662 | 0.16456083  | 0.02023356  | 0.061374952 |
| 0.360567461 | 0.248320869 | 0.279367679 | 0.257860595 |
| 0.429506356 | 0.257133888 | 0.342946816 | 0.352076893 |
| 0.378398993 | 0.147651057 | 0.409974605 | 0.209674077 |
| 0.346389042 | 0.210813649 | 0.174401303 | 0.318294373 |
| 0.457238131 | 0.19579959  | 0.226260595 | 0.320785915 |
| 0.246736849 | 0.389919661 | 0.436948057 | 0.374995802 |
| 0.423254975 | 0.298592256 | 0.041234185 | 0.24604107  |
| 0.383672119 | 0.383357038 | 0.366968385 | 0.381448584 |
| 0.12434515  | 0.393443868 | 0.318926699 | 0.398016689 |
| 0.21902666  | 0.106484293 | 0.18826362  | 0.365577188 |
| 0.381747459 | 0.312446506 | 0.254962161 | 0.237631071 |
| 0.187453946 | 0.187843724 | 0.237640534 | 0.228741375 |
| 0.315351037 | 0.137347966 | 0.403222086 | 0.153923078 |
| 0.161049162 | 0.294875294 | 0.291960186 | 0.302327073 |
| 0.324638517 | 0.30529018  | 0.076142523 | 0.294809442 |
| 0.008197287 | 0.38359011  | 0.413798558 | 0.254756942 |
| 0.147374246 | 0.072487716 | 0.322619092 | 0.341964021 |
| 0.469239603 | 0.402684378 | 0.492801199 | 0.476881338 |
| 0.285218229 | 0.403987032 | 0.346755427 | 0.294610817 |
| 0.396960259 | 0.249024332 | 0.205453566 | 0.437785843 |
| 0.493808624 | 0.453316695 | 0.326422684 | 0.380007936 |
| 0.358576979 | 0.432845544 | 0.332468344 | 0.372849889 |
| 0.277103088 | 0.157229741 | 0.369633373 | 0.486485398 |
| 0.338209827 | 0.313572175 | 0.293785042 | 0.37116912  |
| 0.178759369 | 0.293382864 | 0.391739214 | 0.237859356 |

|             |             |             |             |
|-------------|-------------|-------------|-------------|
| 0.482789136 | 0.067644356 | 0.340885612 | 0.336617121 |
| 0.346767538 | 0.385294487 | 0.450776774 | 0.298965661 |
| 0.400008367 | 0.082216133 | 0.174636627 | 0.131599784 |
| 0.3280452   | 0.192530927 | 0.370711818 | 0.44758707  |
| 0.252704404 | 0.358832201 | 0.332604275 | 0.024923031 |
| 0.11235919  | 0.312619284 | 0.371500427 | 0.368554539 |
| 0.381593403 | 0.317443315 | 0.294725674 | 0.293177869 |
| 0.318528397 | 0.484867086 | 0.038748929 | 0.210241126 |
| 0.365500166 | 0.315047893 | 0.365942649 | 0.346294112 |
| 0.377584096 | 0.218870172 | 0.260640546 | 0.503096504 |
| 0.365795557 | 0.205050312 | 0.282402861 | 1           |
| 0.279130774 | 0.393570729 | 0.240482935 | 0.332665589 |
| 0.127626767 | 0.398379337 | 0.114296382 | 0.311185713 |
| 0.220025392 | 0.238488635 | 0.055238554 | 0.260754868 |
| 0.282153888 | 0.37058291  | 0.36020086  | 0.250370593 |
| 0.358273635 | 0.406516952 | 0.253782058 | 0.318837177 |
| 0.033622133 | 0.155897143 | 0.199951274 | 0.477872481 |
| 0.1860732   | 0.485896649 | 0.389170149 | 0.392907431 |
| 0.395356244 | 0.44805308  | 0.010268969 | 0.407583269 |
| 0.455262267 | 0.204391279 | 0.368321943 | 0.394454514 |
| 0.294518839 | 0.442811073 | 0.043973823 | 0.409245296 |
| 0.24759907  | 0.211213762 | 0.51428943  | 0.292510308 |
| 0.397530924 | 0.133602011 | 0.285460863 | 0.387765822 |
| 0.322659439 | 0.03020188  | 0.191888713 | 0.3458664   |
| 0.109122798 | 0.133874143 | 0.364632727 | 0.377317285 |
| 0.349480503 | 0.42643384  | 0.509640366 | 0.280485293 |
| 0.394718486 | 0.324344774 | 0.067516972 | 0.400054339 |
| 0.392709575 | 0.269887335 | 0.379458573 | 0.315691676 |
| 0.222410053 | 0.425285855 | 0.340416711 | 0.148142549 |
| 0.130430859 | 0.308934555 | 0.05775278  | 0.371467769 |
| 0.327698109 | 0.188898943 | 0.292900413 | 0.280508646 |
| 0.193695113 | 0.491442171 | 0.256057265 | 0.264790323 |
| 0.178105578 | 0.31037158  | 0.354667013 | 0.226849134 |
| 0.226379258 | 0.297265086 | 0.334414306 | 0.338414396 |
| 0.093746075 | 0.21598615  | 0.065924952 | 0.262535577 |
| 0.167960025 | 0.268664979 | 0.244762506 | 0.290480473 |
| 0.307430306 | 0.191730167 | 0.387793549 | 0.325173341 |
| 0.245811905 | 0.079040806 | 0.462478482 | 0.408557349 |
| 0.240186194 | 0.274684536 | 0.148426317 | 0.22779118  |
| 0.448960015 | 0.197570955 | 0.184057479 | 0.415686637 |
| 0.099040308 | 0.485593859 | 0.287884168 | 0.254417438 |
| 0.341075532 | 0.352822615 | 0.477544415 | 0.076148694 |
| 0.312624909 | 0.409262982 | 0.408139603 | 0.296581777 |
| 0.327823857 | 0.372553765 | 0.099521047 | 0.319711153 |
| 0.307045756 | 0.120769749 | 0.478336537 | 0.257377935 |
| 0.098832312 | 0.376932291 | 0.340353579 | 0.204620193 |
| 0.207599995 | 0.309216208 | 0.095084546 | 0.395896513 |
| 0.482955938 | 0.414970722 | 0.342481353 | 0.315445004 |
| 0.122392252 | 0.035549872 | 0.334895937 | 0.343746202 |
| 0.416697809 | 0.466267283 | 0.389736039 | 0.357472322 |
| 0.358235574 | 0.309354544 | 0.130191093 | 0.478420442 |
| 0.281497728 | 0.450441272 | 0.047608153 | 0.381880597 |
| 0.412357405 | 0.216317458 | 0.189958339 | 0.288228861 |
| 0.324243505 | 0.141008652 | 0.321252819 | 0.427873303 |

|             |             |             |             |
|-------------|-------------|-------------|-------------|
| 0.398869488 | 0.34889946  | 0.316589777 | 0.382246918 |
| 0.057812831 | 0.110173422 | 0.374878915 | 0.242798897 |
| 0.320442984 | 0.334436827 | 0.087180592 | 0.292226916 |
| 0.124700371 | 0.393164071 | 0.462912653 | 0.146362312 |
| 0.220170565 | 0.26991299  | 0.419254333 | 0.130587304 |
| 0.410440886 | 0.439937082 | 0.442206469 | 0.280049031 |
| 0.373247464 | 0.436105133 | 0.293122965 | 0.217504471 |
| 0.085986935 | 0.438796256 | 0.303120505 | 0.066450467 |
| 0.48379606  | 0.163239448 | 0.043711078 | 0.452210627 |
| 0.311328038 | 0.342800046 | 0.01236173  | 0.10860977  |
| 0.139643644 | 0.468721746 | 0.395523518 | 0.327486105 |
| 0.156027084 | 0.395216795 | 0.02276802  | 0.486086566 |
| 0.428573838 | 0.072964021 | 0.265337905 | 0.358056467 |
| 0.33648847  | 0.472898709 | 0.308168652 | 0.411808226 |
| 0.326141298 | 0.413292989 | 0.275551032 | 0.37968337  |
| 0.401374632 | 0.420525186 | 0.36958533  | 0.411283079 |
| 0.455407855 | 0.402588053 | 0.362693075 | 0.062829054 |
| 0.186029903 | 0.209138212 | 0.204287173 | 0.126731083 |
| 0.230369489 | 0.254907725 | 0.445358434 | 0.477834787 |
| 0.454129426 | 0.039952156 | 0.210934981 | 0.35840547  |
| 0.423152899 | 0.479704561 | 0.081233569 | 0.018671709 |
| 0.020138145 | 0.062910754 | 0.338626958 | 0.375566415 |
| 0.454912538 | 0.151699834 | 0.035957388 | 0.102571424 |
| 0.346791584 | 0.369080272 | 0.439775927 | 0.408044278 |
| 0.396606167 | 0.214186226 | 0.219741318 | 0.399562592 |
| 0.165283057 | 0.215156271 | 0.465473087 | 0.408676769 |
| 0.145221093 | 0.36912894  | 0.334748881 | 0.488100589 |
| 0.089883756 | 0.413022487 | 0.355385629 | 0.319562687 |
| 0.061040146 | 0.20909365  | 0.170515771 | 0.443496117 |
| 0.403581032 | 0.153553389 | 0.101662655 | 0.114411886 |
| 0.202074822 | 0.458225371 | 0.277602006 | 0.509602883 |
| 0.417528876 | 0.469223152 | 0.186909464 | 0.416196808 |
| 0.106545486 | 0.405926411 | 0.360283896 | 0.066871881 |
| 0.389358847 | 0.071757529 | 0.408794835 | 0.144941125 |
| 0.275454202 | 0.324663644 | 0.229553604 | 0.080648128 |
| 0.210720108 | 0.166911469 | 0.48283249  | 0.458545358 |
| 0.124475229 | 0.32015614  | 0.409317038 | 0.394366187 |
| 0.258528934 | 0.401929624 | 0.419447745 | 0.260694664 |
| 0.16515206  | 0.195630508 | 0.369310764 | 0.287280588 |
| 0.252918471 | 0.502713848 | 0.299289311 | 0.490206668 |
| 0.327159696 | 0.431269636 | 0.426993345 | 0.352269076 |
| 0.295108319 | 0.306933426 | 0.28150166  | 0.059158852 |
| 0.402888146 | 0.453028065 | 0.340709542 | 0.245358646 |
| 0.342980109 | 0.31560796  | 0.130645777 | 0.175043763 |
| 0.276383056 | 0.227855758 | 0.244950032 | 0.473573518 |
| 0.321863436 | 0.296013854 | 0.108784898 | 0.160357597 |
| 0.48826982  | 0.38741511  | 0.200954617 | 0.338917267 |
| 0.329535691 | 0.377493891 | 0.413413225 | 0.412905217 |
| 0.308370352 | 0.396496189 | 0.386805687 | 0.28110054  |
| 0.365393006 | 0.35013994  | 0.447891451 | 0.114315957 |
| 0.171489645 | 0.305480211 | 0.180508265 | 0.23237658  |
| 0.277560558 | 0.111396996 | 0.250157579 | 0.409726529 |
| 0.284840795 | 0.396101294 | 0.247606016 | 0.199407342 |
| 0.407724341 | 0.295620333 | 0.417348197 | 0.247240572 |

|             |             |             |             |
|-------------|-------------|-------------|-------------|
| 0.173571186 | 0.417905319 | 0.044577457 | 0.177018717 |
| 0.310700547 | 0.379661306 | 0.334257726 | 0.377666751 |
| 0.295132937 | 0.26971225  | 0.389145027 | 0.232342671 |
| 0.217219754 | 0.309357879 | 0.376717242 | 0.099613709 |
| 0.073594611 | 0.506792689 | 0.300500672 | 0.093309863 |
| 0.164818567 | 0.270168846 | 0.360494604 | 0.273884603 |
| 0.09498504  | 0.421017319 | 0.226245764 | 0.380177987 |
| 0.342540897 | 0.193199636 | 0.289565772 | 0.158297995 |
| 0.167548366 | 0.384630829 | 0.35248422  | 0.438515507 |
| 0.379118534 | 0.426404079 | 0.354223936 | 0.371789209 |
| 0.2248594   | 0.287664179 | 0.09785822  | 0.434111469 |
| 0.277259373 |             |             |             |
| DGAT1       | 0.220582514 | 0.41335997  | 0.118150643 |
| 0.353485885 | 0.196010566 | 0.220967488 | 0.149792146 |
| 0.038526487 | 0.03741653  | 0.010789899 | 0.030901538 |
| 0.185016326 | 0.064882565 | 0.079385581 | 0.063369558 |
| 0.310375867 | 0.043398954 | 0.067515134 | 0.145711123 |
| 0.276574471 | 0.055223029 | 0.300117961 | 0.043254407 |
| 0.048149312 | 0.044394536 | 0.060818371 | 0.091300088 |
| 0.351258416 | 0.063359959 | 0.183708571 | 0.269893161 |
| 0.01967598  | 0.278741859 | 0.372907306 | 0.277102824 |
| 0.357928183 | 0.194390464 | 0.002169322 | 0.128470723 |
| 0.27366452  | 0.300255441 | 0.298861016 | 0.227143973 |
| 0.033412397 | 0.346877766 | 0.194240158 | 0.171331491 |
| 0.035970662 | 0.023447462 | 0.077147791 | 0.326057722 |
| 0.361635178 | 0.245787997 | 0.078677421 | 0.114023669 |
| 0.069486015 | 0.070600483 | 0.042555953 | 0.199549645 |
| 0.161404294 | 0.065720636 | 0.366814735 | 0.056787397 |
| 0.048732432 | 0.081808183 | 0.031402781 | 0.117634091 |
| 0.072284308 | 0.247482592 | 0.008270182 | 0.155835676 |
| 0.004536597 | 0.252125557 | 0.157333772 | 0.079315405 |
| 0.033070389 | 0.021982867 | 0.047083373 | 0.269991318 |
| 0.359553669 | 0.291571457 | 0.381856592 | 0.379049925 |
| 0.039608272 | 0.103450558 | 0.134159143 | 0.083430536 |
| 0.304706579 | 0.140516979 | 0.020254353 | 0.315275225 |
| 0.386291294 | 0.394600519 | 0.04595569  | 0.117657938 |
| 0.371345079 | 0.371997113 | 0.148470668 | 0.175663591 |
| 0.086446512 | 0.010635901 | 0.354246431 | 0.394589722 |
| 0.266954914 | 0.087121891 | 0.080001565 | 0.308892384 |
| 0.033994425 | 0.03803133  | 0.268957497 | 0.021453303 |
| 0.368439521 | 0.019340968 | 0.091551879 | 0.236420195 |
| 0.031117085 | 0.278545633 | 0.376741587 | 0.134539393 |
| 0.132460698 | 0.008807125 | 0.032448913 | 0.011412059 |
| 0.052697639 | 0.016821187 | 0.341070201 | 0.393152253 |
| 0.04486559  | 0.072529337 | 0.119401538 | 0.002101151 |
| 0.012811394 | 0.022895317 | 0.283511227 | 0.100775978 |
| 0.273053264 | 0.219433959 | 0.128037622 | 0.242857431 |
| 0.229991761 | 0.378243183 | 0.013556504 | 0.045963406 |
| 0.180480721 | 0.026676257 | 0.163477474 | 0.224495343 |
| 0.142619046 | 0.042546162 | 0.070076877 | 0.406061354 |
| 0.329485284 | 0.068262893 | 0.06896937  | 0.279130774 |
| 1           | 0.156665598 | 0.05094125  | 0.095678581 |
| 0.0375369   | 0.336843481 | 0.012531615 | 0.095021277 |
| 0.04935527  | 0.031734679 | 0.002875051 | 0.115585165 |

|             |             |             |             |
|-------------|-------------|-------------|-------------|
| 0.057747843 | 0.373551747 | 0.311618956 | 0.052064839 |
| 0.139235324 | 0.261538794 | 0.114433829 | 0.312691513 |
| 0.026635097 | 0.012649806 | 0.073757311 | 0.404540637 |
| 0.183392371 | 0.351161613 | 0.06805161  | 0.067330934 |
| 0.145805597 | 0.329526367 | 0.000109669 | 0.35717052  |
| 0.385165242 | 0.075583747 | 0.239602884 | 0.178453259 |
| 0.13630399  | 0.379968458 | 0.002580371 | 0.279354057 |
| 0.175307276 | 0.0388437   | 0.397674293 | 0.101518576 |
| 0.319052592 | 0.043758583 | 0.109717952 | 0.296734976 |
| 0.258792447 | 0.00469991  | 0.12327002  | 0.298510688 |
| 0.008603156 | 0.051969653 | 0.257350501 | 0.288673187 |
| 0.254868625 | 0.290470366 | 0.385568617 | 0.121049092 |
| 0.190387948 | 0.081807471 | 0.004810811 | 0.119317307 |
| 0.261358484 | 0.053743435 | 0.347594799 | 0.069560591 |
| 0.126282984 | 0.378264946 | 0.263461183 | 0.082861926 |
| 0.049192025 | 0.158862081 | 0.010094651 | 0.167018559 |
| 0.249703869 | 0.068535863 | 0.15018014  | 0.018376742 |
| 0.031371498 | 0.419150852 | 0.037237221 | 0.051367722 |
| 0.019738382 | 0.245053341 | 0.116023013 | 0.091083278 |
| 0.057010108 | 0.05541735  | 0.09341123  | 0.130009869 |
| 0.032835942 | 0.058838988 | 0.002032591 | 0.081948035 |
| 0.050860519 | 0.096359546 | 0.104326214 | 0.247851379 |
| 0.056778696 | 0.037453781 | 0.162507951 | 0.039705407 |
| 0.032921196 | 0.015405711 | 0.397682333 | 0.246896406 |
| 0.210742858 | 0.061949252 | 0.019478325 | 0.053507376 |
| 0.406264311 | 0.1632969   | 0.056273374 | 0.402211345 |
| 0.006164041 | 0.370402524 | 0.080572582 | 0.079046005 |
| 0.112103675 | 0.167578759 | 0.379271093 | 0.025372688 |
| 0.167872495 | 0.383545717 | 0.122937688 | 0.095771893 |
| 0.309800422 | 0.256640265 | 0.023768528 | 0.241117216 |
| 0.233162539 | 0.027508412 | 0.390139075 | 0.027423361 |
| 0.015154267 | 0.245938183 | 0.308519437 | 0.052874856 |
| 0.036136705 | 0.211536424 | 0.031157806 | 0.180725305 |
| 0.415695944 | 0.318982698 | 0.350917952 | 0.04077333  |
| 0.043925345 | 0.013150632 | 0.054349423 | 0.120519575 |
| 0.363259494 | 0.370884723 | 0.125007952 | 0.154315613 |
| 0.167939359 | 0.095902667 | 0.034991446 | 0.40056769  |
| 0.015303179 | 0.362536295 | 0.00608431  | 0.295180057 |
| 0.362989875 | 0.116684313 | 0.048814783 | 0.209400607 |
| 0.297717756 | 0.037765545 | 0.047111346 | 0.370995312 |
| 0.350755633 | 0.112406339 | 0.10613335  | 0.213160615 |
| 0.018560256 | 0.032700592 | 0.184529698 | 0.026671139 |
| 0.139720755 | 0.084286307 | 0.005032779 | 0.05971595  |
| 0.03470014  | 0.384345733 | 0.318786858 | 0.036522281 |
| 0.244139505 | 0.05624397  | 0.208034703 | 0.032555445 |
| 0.32071855  | 0.337349816 | 0.383006413 | 0.047706995 |
| 0.270228812 | 0.378347838 | 0.182260565 | 0.030720767 |
| 0.012323318 | 0.361069752 | 0.221406665 | 0.016870193 |
| 0.379003039 | 0.094685963 | 0.02070232  | 0.391409775 |
| 0.111878432 | 0.299303914 | 0.002249779 | 0.004407232 |
| 0.007937113 | 0.320501964 | 0.365247434 | 0.253396227 |
| 0.085015024 | 0.181779454 | 0.00082024  | 0.373332301 |
| 0.387272842 | 0.007943966 | 0.02808116  | 0.299982961 |
| 0.256479368 | 0.396283961 | 0.098092945 | 0.335896234 |



|             |             |             |             |
|-------------|-------------|-------------|-------------|
| 0.200145967 | 0.373361518 | 0.063107679 | 0.170599469 |
| 0.354266045 | 0.344554863 | 0.272189924 | 0.341884717 |
| 0.375443441 | 0.252069888 | 0.218736013 | 0.021257726 |
| 0.034842805 | 0.097176105 | 0.07826726  | 0.07342649  |
| 0.163668964 | 0.052120879 | 0.33284582  | 0.365310382 |
| 0.358459987 | 0.005589544 | 0.049728336 | 0.291308135 |
| 0.359237764 | 0.380360154 | 0.003149624 | 0.000881443 |
| 0.000610469 | 0.01256343  | 0.20618444  | 0.086054159 |
| 0.371712597 | 0.051364526 | 0.006878571 | 0.02372748  |
| 0.050035593 | 0.203340149 | 0.393376884 | 0.27792895  |
| 0.2666631   | 0.038094391 | 0.084523583 | 0.274752354 |
| 0.028911164 | 0.156587262 | 0.381571799 | 0.387815575 |
| 0.009991565 | 0.089706669 | 0.090196525 | 0.410095266 |
| 0.008866831 | 0.163936395 | 0.20585552  | 0.084711362 |
| 0.002352671 | 0.031229769 | 0.035005778 | 0.30030034  |
| 0.353412389 | 0.040211359 | 0.023397615 | 0.02043686  |
| 0.08292213  | 0.34158959  | 0.051495916 | 0.405228069 |
| 0.347245886 | 0.358899608 | 0.019710723 | 0.372933765 |
| 0.03323715  | 0.35763473  | 0.126215559 | 0.01472588  |
| 0.051664159 | 0.00564607  | 0.314627564 | 0.063456271 |
| 0.094307585 | 0.215499927 | 0.0424145   | 0.007285434 |
| 0.019849827 | 0.026558853 | 0.40499329  | 0.335966897 |
| 0.00652301  | 0.076965632 | 0.115149325 | 0.203704444 |
| 0.149386701 | 0.348638273 | 0.373048234 | 0.147204533 |
| 0.063851189 | 0.01146166  | 0.268992602 | 0.193127764 |
| 0.061352041 | 0.379814332 | 0.095132915 | 0.384244016 |
| 0.23041481  | 0.326823444 | 0.351318873 | 0.218943807 |
| 0.045230117 | 0.168732836 | 0.316330139 | 0.019429561 |
| 0.167957374 | 0.384531561 | 0.121729876 | 0.044146495 |
| 0.150170229 | 0.137042328 | 0.017190611 | 0.012508315 |
| 0.090967624 | 0.199471857 | 0.063491664 | 0.33704723  |
| 0.180041917 | 0.207538368 | 0.013738523 | 0.033762132 |
| 0.407709962 | 0.321617948 | 0.040243509 | 0.294252064 |
| 0.063800103 | 0.213488445 | 0.281453516 | 0.282453656 |
| 0.054481959 | 0.35528746  | 0.299821059 | 0.301269768 |
| 0.359657674 | 0.160934606 | 0.39219857  | 0.01647593  |
| 0.021070536 | 0.175946717 | 0.058005855 | 0.044704488 |
| 0.092877426 | 0.011846273 | 0.044286323 | 0.273556131 |
| 0.069601289 | 0.272184033 | 0.042308387 | 0.024519152 |
| 0.137445925 | 0.08236316  | 0.191126601 | 0.118017681 |
| 0.042949862 | 0.390235595 | 0.005322492 | 0.026511251 |
| 0.07999277  | 0.306785774 | 0.158465646 | 0.070896114 |
| 0.042532389 | 0.022813484 | 0.179658806 | 0.120135861 |
| 0.128942568 | 0.035068891 | 0.313355159 | 0.012161333 |
| 0.016814415 | 0.385322527 | 0.101085252 | 0.003902894 |
| 0.026532326 | 0.175324772 | 0.037858924 | 0.088606297 |
| 0.00815312  | 0.360610114 | 0.157090558 | 0.178170191 |
| 0.190757585 | 0.025972448 | 0.241527976 | 0.015798686 |
| 0.014800361 | 0.316603222 | 0.140860227 | 0.369242199 |
| 0.085848024 | 0.350072354 | 0.307957972 | 0.307211278 |
| 0.011753857 | 0.106906683 | 0.021710212 | 0.32655619  |
| 0.095344602 |             |             |             |
| DGKA        | 0.297114397 | 0.403086989 | 0.221095669 |
| 0.333998013 | 0.257279248 | 0.151751667 | 0.130862827 |

|             |             |             |             |
|-------------|-------------|-------------|-------------|
| 0.076927586 | 0.100439658 | 0.012099899 | 0.072781389 |
| 0.302820838 | 0.187415925 | 0.136808439 | 0.124275123 |
| 0.39427055  | 0.24034578  | 0.171131194 | 0.193792217 |
| 0.294912944 | 0.054251383 | 0.382996473 | 0.109195232 |
| 0.286646142 | 0.216929094 | 0.135942634 | 0.262558993 |
| 0.37906369  | 0.147358292 | 0.100146681 | 0.231042966 |
| 0.209758085 | 0.325737297 | 0.367558058 | 0.370480452 |
| 0.368709363 | 0.249274956 | 0.031670441 | 0.114290097 |
| 0.299084748 | 0.360471606 | 0.29138134  | 0.234900997 |
| 0.071336862 | 0.309515274 | 0.167808275 | 0.314503752 |
| 0.086621517 | 0.105840554 | 0.065725864 | 0.276146244 |
| 0.322330383 | 0.229875592 | 0.096326971 | 0.114132357 |
| 0.149217272 | 0.071166992 | 0.235080684 | 0.13868187  |
| 0.169952955 | 0.043046029 | 0.347150834 | 0.071228796 |
| 0.077317138 | 0.120373926 | 0.265814329 | 0.131033763 |
| 0.260147721 | 0.216135896 | 0.034179487 | 0.252323932 |
| 0.003710374 | 0.281497582 | 0.310637071 | 0.206392675 |
| 0.125631213 | 0.064983356 | 0.275191066 | 0.201334944 |
| 0.397150803 | 0.337263996 | 0.471661877 | 0.45726575  |
| 0.239251536 | 0.272486586 | 0.261783848 | 0.194189793 |
| 0.326011722 | 0.127436349 | 0.114385838 | 0.430489448 |
| 0.469889268 | 0.398866067 | 0.259754431 | 0.289791762 |
| 0.298627286 | 0.349294228 | 0.184616407 | 0.230612455 |
| 0.190502191 | 0.169327065 | 0.301360854 | 0.448104786 |
| 0.252839567 | 0.284017119 | 0.243382416 | 0.280982246 |
| 0.131246455 | 0.140540669 | 0.28343996  | 0.18176863  |
| 0.41017849  | 0.034907308 | 0.293312992 | 0.178141433 |
| 0.198211091 | 0.322239369 | 0.408944575 | 0.157600874 |
| 0.267829042 | 0.069399711 | 0.181632696 | 0.111850677 |
| 0.189930702 | 0.244023331 | 0.300847582 | 0.387166515 |
| 0.106220397 | 0.242433811 | 0.157548156 | 0.026746665 |
| 0.118747541 | 0.229995479 | 0.336431641 | 0.194518626 |
| 0.320471366 | 0.277089711 | 0.204837879 | 0.219124385 |
| 0.304067395 | 0.466650117 | 0.013978491 | 0.099608987 |
| 0.212841985 | 0.236529691 | 0.229166267 | 0.25528491  |
| 0.282233315 | 0.089974452 | 0.158212829 | 0.448958098 |
| 0.268368632 | 0.123794865 | 0.124916759 | 0.393570729 |
| 0.156665598 | 1           | 0.137531536 | 0.196484735 |
| 0.061911227 | 0.35383626  | 0.135071231 | 0.134290642 |
| 0.156998528 | 0.257004807 | 0.029135387 | 0.102330503 |
| 0.14090419  | 0.326987574 | 0.297848248 | 0.155344298 |
| 0.207053052 | 0.346700765 | 0.105050727 | 0.282055452 |
| 0.030493528 | 0.099807567 | 0.076368382 | 0.428851732 |
| 0.101770027 | 0.450150309 | 0.219419551 | 0.269609547 |
| 0.283096699 | 0.394958296 | 0.008501241 | 0.332340077 |
| 0.404968107 | 0.081936743 | 0.266518986 | 0.308648095 |
| 0.205942419 | 0.381039401 | 0.023121584 | 0.37560244  |
| 0.179459471 | 0.127671641 | 0.473904849 | 0.232328472 |
| 0.33375246  | 0.111191764 | 0.129608879 | 0.391528213 |
| 0.322682448 | 0.025366195 | 0.069030852 | 0.251465457 |
| 0.125967921 | 0.043331198 | 0.299556976 | 0.290158054 |
| 0.224896278 | 0.395756728 | 0.465435506 | 0.203950417 |
| 0.247566233 | 0.150488254 | 0.05426611  | 0.305321257 |
| 0.357819957 | 0.16977453  | 0.289309381 | 0.148698269 |

|             |             |             |             |
|-------------|-------------|-------------|-------------|
| 0.120579838 | 0.349257048 | 0.305738734 | 0.075212246 |
| 0.077172561 | 0.136869854 | 0.028342257 | 0.240621633 |
| 0.275495919 | 0.107125885 | 0.179951268 | 0.208495346 |
| 0.189577861 | 0.438174566 | 0.278648661 | 0.260237373 |
| 0.227333706 | 0.204522105 | 0.175751627 | 0.136717501 |
| 0.195562475 | 0.202597552 | 0.237496267 | 0.202599499 |
| 0.036143332 | 0.165384016 | 0.073109013 | 0.186967042 |
| 0.142434646 | 0.180034248 | 0.151578045 | 0.231041674 |
| 0.168895886 | 0.141832269 | 0.261406655 | 0.250718723 |
| 0.217269454 | 0.07396678  | 0.393920792 | 0.335307725 |
| 0.160643248 | 0.143690249 | 0.12485831  | 0.147357463 |
| 0.391671608 | 0.093889382 | 0.067522323 | 0.341166529 |
| 0.060809989 | 0.448755101 | 0.191962901 | 0.212168533 |
| 0.266645225 | 0.216631583 | 0.408187686 | 0.038534628 |
| 0.175397055 | 0.32936517  | 0.258531553 | 0.224710423 |
| 0.252050705 | 0.269912458 | 0.054934272 | 0.25247639  |
| 0.244593661 | 0.101542843 | 0.430878124 | 0.252294866 |
| 0.094372793 | 0.38601247  | 0.330051143 | 0.16606806  |
| 0.177805841 | 0.178039618 | 0.028688001 | 0.296988546 |
| 0.423174242 | 0.406605026 | 0.296843443 | 0.282640984 |
| 0.081893759 | 0.043259298 | 0.299410371 | 0.235749364 |
| 0.344377206 | 0.436982166 | 0.25060397  | 0.272985533 |
| 0.204117611 | 0.220266733 | 0.040460608 | 0.437605735 |
| 0.19562012  | 0.38389565  | 0.040689021 | 0.388602226 |
| 0.355469784 | 0.086968275 | 0.183594702 | 0.129191406 |
| 0.244139566 | 0.081030347 | 0.159010212 | 0.360544659 |
| 0.325279015 | 0.217341057 | 0.196803504 | 0.322992965 |
| 0.023428182 | 0.046022424 | 0.263859947 | 0.260766216 |
| 0.183304918 | 0.210278375 | 0.150951919 | 0.127869341 |
| 0.088551891 | 0.318390488 | 0.428130358 | 0.113490937 |
| 0.123398065 | 0.109768025 | 0.360138755 | 0.086794233 |
| 0.410257349 | 0.397868145 | 0.371965444 | 0.127710284 |
| 0.347222112 | 0.401411675 | 0.264699202 | 0.181171559 |
| 0.095656965 | 0.388022206 | 0.223138587 | 0.04372681  |
| 0.434567329 | 0.056893261 | 0.040992876 | 0.368456319 |
| 0.16247962  | 0.269793519 | 0.003267312 | 0.08892291  |
| 0.149447494 | 0.458888352 | 0.323823215 | 0.225408512 |
| 0.062020779 | 0.24558863  | 0.0266971   | 0.44681606  |
| 0.361368062 | 0.090622689 | 0.268436266 | 0.335455424 |
| 0.353953946 | 0.391305487 | 0.262124738 | 0.40803437  |
| 0.295417929 | 0.361750173 | 0.145366188 | 0.262177529 |
| 0.337771846 | 0.394321864 | 0.288199526 | 0.322059068 |
| 0.402292244 | 0.388790464 | 0.210037155 | 0.037117888 |
| 0.14540817  | 0.074171173 | 0.114374487 | 0.095274433 |
| 0.122644303 | 0.210810955 | 0.381982613 | 0.440439974 |
| 0.434281706 | 0.040449662 | 0.080201185 | 0.314134286 |
| 0.330425321 | 0.399797025 | 0.059907494 | 0.014615206 |
| 0.015742106 | 0.095483156 | 0.17745717  | 0.280389884 |
| 0.403113154 | 0.068346682 | 0.029426297 | 0.03420349  |
| 0.178923711 | 0.350656493 | 0.378746018 | 0.339688036 |
| 0.379281435 | 0.15823026  | 0.123230352 | 0.335399427 |
| 0.170630297 | 0.148105484 | 0.435346725 | 0.324121315 |
| 0.126446294 | 0.266237611 | 0.172088627 | 0.42019143  |
| 0.149250835 | 0.28784667  | 0.315472442 | 0.192914608 |

|             |             |             |             |
|-------------|-------------|-------------|-------------|
| 0.053488622 | 0.192083136 | 0.14876783  | 0.413873236 |
| 0.354608837 | 0.14438792  | 0.108981025 | 0.04370108  |
| 0.119029068 | 0.412171641 | 0.182197892 | 0.463973398 |
| 0.340941151 | 0.421799026 | 0.203773933 | 0.338311602 |
| 0.092255305 | 0.344401123 | 0.302409397 | 0.025023641 |
| 0.249313223 | 0.057440468 | 0.371605801 | 0.126563763 |
| 0.121762968 | 0.236479364 | 0.169193406 | 0.09712373  |
| 0.213344975 | 0.153388761 | 0.442997534 | 0.453992239 |
| 0.136772707 | 0.148817443 | 0.270984234 | 0.296223405 |
| 0.103889302 | 0.364802545 | 0.344411498 | 0.143438769 |
| 0.076055122 | 0.213867504 | 0.290510723 | 0.217208223 |
| 0.104649685 | 0.477366491 | 0.210305477 | 0.440199426 |
| 0.253538378 | 0.355243165 | 0.386068693 | 0.188079389 |
| 0.287713866 | 0.178975407 | 0.20473677  | 0.030285065 |
| 0.223055619 | 0.418937887 | 0.160516775 | 0.225827283 |
| 0.255010884 | 0.247920753 | 0.066164704 | 0.080471693 |
| 0.239810912 | 0.112187434 | 0.149168807 | 0.424056887 |
| 0.211067427 | 0.228917569 | 0.046993741 | 0.139242544 |
| 0.419859722 | 0.301871342 | 0.077756694 | 0.273042365 |
| 0.231753123 | 0.241147145 | 0.39282863  | 0.419225438 |
| 0.182046055 | 0.356705738 | 0.310563949 | 0.218843698 |
| 0.278116392 | 0.181960015 | 0.378783142 | 0.030004712 |
| 0.160857449 | 0.244732568 | 0.131419944 | 0.20239633  |
| 0.179211019 | 0.103179595 | 0.226014863 | 0.389858273 |
| 0.222844518 | 0.310142517 | 0.112182579 | 0.133263215 |
| 0.295307925 | 0.153518006 | 0.275810711 | 0.110876057 |
| 0.121583562 | 0.350573776 | 0.039906322 | 0.149448452 |
| 0.241533594 | 0.34172678  | 0.261139297 | 0.266403226 |
| 0.268747359 | 0.249934887 | 0.250221986 | 0.092766003 |
| 0.118416109 | 0.191352772 | 0.332884592 | 0.042117148 |
| 0.035326049 | 0.467311207 | 0.140789355 | 0.094408019 |
| 0.139036005 | 0.180609338 | 0.203487993 | 0.168663211 |
| 0.114669563 | 0.396816401 | 0.106794225 | 0.261513452 |
| 0.1622825   | 0.1297657   | 0.204012937 | 0.079987581 |
| 0.08733044  | 0.302556493 | 0.263271823 | 0.391664781 |
| 0.265519987 | 0.396711843 | 0.269657483 | 0.326315987 |
| 0.134139139 | 0.182784763 | 0.049108793 | 0.362760516 |
| 0.184899879 |             |             |             |

|             |             |             |             |
|-------------|-------------|-------------|-------------|
| DHR57       | 0.107109103 | 0.127109904 | 0.068304399 |
| 0.220352168 | 0.131235146 | 0.088520265 | 0.229525673 |
| 0.108291529 | 0.096737191 | 0.064920005 | 0.058360361 |
| 0.099117713 | 0.076351539 | 0.094683306 | 0.03318067  |
| 0.244208898 | 0.143374164 | 0.078289898 | 0.305942131 |
| 0.22188509  | 0.149140361 | 0.249234236 | 0.2196238   |
| 0.057400217 | 0.097571854 | 0.174494258 | 0.066337189 |
| 0.225359278 | 0.195106395 | 0.07072725  | 0.188741524 |
| 0.171714995 | 0.143635241 | 0.094028126 | 0.142928753 |
| 0.083441126 | 0.078633889 | 0.084604525 | 0.054889139 |
| 0.128138808 | 0.1331163   | 0.225240181 | 0.263483016 |
| 0.190086328 | 0.086262063 | 0.261406278 | 0.135477517 |
| 0.056217582 | 0.133877675 | 0.057573178 | 0.091092391 |
| 0.075332842 | 0.080977834 | 0.123556625 | 0.177859825 |
| 0.037958776 | 0.060667618 | 0.021604037 | 0.110442545 |
| 0.263515381 | 0.066297531 | 0.085014316 | 0.110904739 |

|             |             |             |             |
|-------------|-------------|-------------|-------------|
| 0.05979286  | 0.150901423 | 0.140430777 | 0.183364392 |
| 0.038641779 | 0.115639298 | 0.21535122  | 0.061851423 |
| 0.0272705   | 0.249535547 | 0.16817743  | 0.023333095 |
| 0.242007765 | 0.126366121 | 0.151345159 | 0.230324475 |
| 0.201001251 | 0.094811542 | 0.169095962 | 0.139757861 |
| 0.122594902 | 0.189023442 | 0.072325051 | 0.184411088 |
| 0.126382659 | 0.1922379   | 0.118862527 | 0.240165629 |
| 0.160105335 | 0.103719087 | 0.12471603  | 0.194167992 |
| 0.118801556 | 0.127497573 | 0.067228646 | 0.093380927 |
| 0.02624308  | 0.103108293 | 0.090659385 | 0.139139669 |
| 0.10546914  | 0.052636546 | 0.207829756 | 0.179971704 |
| 0.235776879 | 0.035525592 | 0.286641499 | 0.095586555 |
| 0.204112758 | 0.133068757 | 0.177922579 | 0.18193293  |
| 0.139036356 | 0.128555193 | 0.09790251  | 0.288563798 |
| 0.111519148 | 0.139920111 | 0.027025592 | 0.205951778 |
| 0.067223858 | 0.02671485  | 0.068380091 | 0.175526539 |
| 0.107298995 | 0.057234555 | 0.191924044 | 0.094815793 |
| 0.161822212 | 0.104938734 | 0.104676913 | 0.11855942  |
| 0.164510209 | 0.063983219 | 0.103578638 | 0.093759637 |
| 0.077776047 | 0.167305316 | 0.006371928 | 0.224499925 |
| 0.115995335 | 0.119848704 | 0.336117884 | 0.099579408 |
| 0.144113349 | 0.206744088 | 0.255179905 | 0.153525077 |
| 0.109814748 | 0.286476606 | 0.061293341 | 0.240482935 |
| 0.05094125  | 0.137531536 | 1           | 0.132866977 |
| 0.214720618 | 0.076545259 | 0.137212454 | 0.111175027 |
| 0.01920742  | 0.093075071 | 0.14986332  | 0.145999906 |
| 0.067025483 | 0.099900417 | 0.064374454 | 0.280356581 |
| 0.165474728 | 0.190117171 | 0.088349782 | 0.10541459  |
| 0.05649956  | 0.218222356 | 0.050379221 | 0.139938286 |
| 0.081507071 | 0.138812668 | 0.131320377 | 0.093917731 |
| 0.230326925 | 0.189550156 | 0.00530179  | 0.086561443 |
| 0.099946488 | 0.042443301 | 0.150882303 | 0.137785864 |
| 0.043119563 | 0.183056384 | 0.008043829 | 0.239915813 |
| 0.080317553 | 0.254174998 | 0.181042957 | 0.232549549 |
| 0.093322658 | 0.191925549 | 0.093429676 | 0.095378378 |
| 0.074853839 | 0.059938166 | 0.094331778 | 0.217400352 |
| 0.12333128  | 0.118427865 | 0.151130719 | 0.202809519 |
| 0.142051635 | 0.16280476  | 0.210211523 | 0.035216243 |
| 0.119652974 | 0.198303914 | 0.162424324 | 0.15050392  |
| 0.125471336 | 0.024502888 | 0.102130167 | 0.143463186 |
| 0.058234009 | 0.117320392 | 0.0772622   | 0.021189287 |
| 0.212523751 | 0.159026178 | 0.092195597 | 0.133843518 |
| 0.075585589 | 0.149883976 | 0.050056128 | 0.144271976 |
| 0.165145147 | 0.136730345 | 0.050166568 | 0.031370339 |
| 0.02624027  | 0.107180595 | 0.254164617 | 0.06549544  |
| 0.053100853 | 0.164471035 | 0.048132983 | 0.061048977 |
| 0.174407047 | 0.208745958 | 0.075288193 | 0.026522192 |
| 0.065506389 | 0.041298366 | 0.038091767 | 0.095478047 |
| 0.079103541 | 0.132794723 | 0.120128206 | 0.04716096  |
| 0.122099782 | 0.19127665  | 0.125266208 | 0.230269    |
| 0.082782736 | 0.187183825 | 0.218058775 | 0.019277786 |
| 0.163734012 | 0.048258911 | 0.03424892  | 0.136640097 |
| 0.151946261 | 0.164383951 | 0.091629009 | 0.214822848 |
| 0.059116416 | 0.254949321 | 0.209783242 | 0.03195811  |

|             |             |             |             |
|-------------|-------------|-------------|-------------|
| 0.11077613  | 0.114420686 | 0.204308852 | 0.137199868 |
| 0.088288103 | 0.187001806 | 0.190475987 | 0.090521221 |
| 0.090037177 | 0.208780436 | 0.119315213 | 0.137855815 |
| 0.194677057 | 0.135570609 | 0.092426911 | 0.255946837 |
| 0.16361634  | 0.114184025 | 0.145428745 | 0.261074051 |
| 0.135608279 | 0.246933732 | 0.105408318 | 0.064431986 |
| 0.192696214 | 0.073919287 | 0.119401425 | 0.07407111  |
| 0.086957155 | 0.111984336 | 0.285430044 | 0.091607375 |
| 0.337926626 | 0.041156811 | 0.054618619 | 0.132754449 |
| 0.062822908 | 0.103932521 | 0.155426077 | 0.1083312   |
| 0.079185419 | 0.079214441 | 0.130638837 | 0.158879322 |
| 0.101977542 | 0.200307628 | 0.173834142 | 0.098649203 |
| 0.128347926 | 0.080182801 | 0.04761234  | 0.155442057 |
| 0.151510025 | 0.208161606 | 0.117438758 | 0.035242138 |
| 0.053612017 | 0.138165683 | 0.013198707 | 0.066260442 |
| 0.165015736 | 0.109153116 | 0.191270389 | 0.111067318 |
| 0.06566043  | 0.055719788 | 0.208751926 | 0.221862714 |
| 0.09686188  | 0.096302746 | 0.09792677  | 0.202757346 |
| 0.114907667 | 0.102439376 | 0.052516712 | 0.203555999 |
| 0.149544043 | 0.089825581 | 0.122300887 | 0.081083712 |
| 0.195322494 | 0.05829771  | 0.088542066 | 0.129617637 |
| 0.298419356 | 0.067004776 | 0.016472171 | 0.016450736 |
| 0.118056441 | 0.172994272 | 0.084612981 | 0.191548592 |
| 0.026356299 | 0.2232551   | 0.0235788   | 0.123936008 |
| 0.106248843 | 0.10660746  | 0.095992881 | 0.093206097 |
| 0.076998799 | 0.124032381 | 0.047350121 | 0.106860104 |
| 0.073255149 | 0.083367083 | 0.113029316 | 0.24994716  |
| 0.136951678 | 0.083684768 | 0.156638854 | 0.114165566 |
| 0.184095563 | 0.176619925 | 0.299023169 | 0.15150033  |
| 0.037331121 | 0.110643942 | 0.016847572 | 0.057102512 |
| 0.091274099 | 0.112431338 | 0.118331582 | 0.186308414 |
| 0.122096607 | 0.132592028 | 0.144205665 | 0.099951857 |
| 0.169680295 | 0.190496714 | 0.108594551 | 0.012018351 |
| 0.007274128 | 0.044369785 | 0.186829734 | 0.172102882 |
| 0.122800984 | 0.019729029 | 0.135821441 | 0.181465475 |
| 0.102006609 | 0.112370875 | 0.105819753 | 0.295367235 |
| 0.121321236 | 0.231907877 | 0.036370858 | 0.26397681  |
| 0.099274705 | 0.063591348 | 0.13437666  | 0.108862131 |
| 0.182060048 | 0.151785632 | 0.084830861 | 0.184079663 |
| 0.008358993 | 0.239965631 | 0.109137702 | 0.074054532 |
| 0.086783613 | 0.141596876 | 0.126812812 | 0.202197708 |
| 0.075695224 | 0.112091218 | 0.116637742 | 0.026768483 |
| 0.154507749 | 0.159149376 | 0.157951464 | 0.163157525 |
| 0.16873088  | 0.247505793 | 0.125832588 | 0.100013978 |
| 0.121282661 | 0.087160826 | 0.088559801 | 0.021225775 |
| 0.109481373 | 0.186797435 | 0.089555679 | 0.018971801 |
| 0.079482894 | 0.146835859 | 0.036792973 | 0.126205019 |
| 0.021677019 | 0.192904761 | 0.180450753 | 0.152573506 |
| 0.125287616 | 0.145585402 | 0.197641893 | 0.187977415 |
| 0.140609835 | 0.190927249 | 0.091891252 | 0.040537432 |
| 0.183725342 | 0.036079417 | 0.20905924  | 0.096075042 |
| 0.10431483  | 0.174791556 | 0.055132033 | 0.127968208 |
| 0.118349873 | 0.129980617 | 0.108320221 | 0.17637849  |
| 0.061398636 | 0.096460879 | 0.139474375 | 0.104095566 |

|             |             |             |             |
|-------------|-------------|-------------|-------------|
| 0.217006458 | 0.179415853 | 0.126402538 | 0.076560127 |
| 0.164050385 | 0.056826832 | 0.197683989 | 0.030235133 |
| 0.036568633 | 0.107739133 | 0.184032507 | 0.24200182  |
| 0.132766628 | 0.099871908 | 0.214671719 | 0.121039537 |
| 0.125216007 | 0.107754762 | 0.106930778 | 0.139465097 |
| 0.233691115 | 0.167609345 | 0.132723994 | 0.135470008 |
| 0.036916964 | 0.117672379 | 0.16626019  | 0.122841615 |
| 0.10792674  | 0.251657127 | 0.100232979 | 0.087637914 |
| 0.067032553 | 0.079486912 | 0.140453209 | 0.225164194 |
| 0.278159789 | 0.143323276 | 0.017229579 | 0.216112247 |
| 0.023561751 | 0.234023559 | 0.043558443 | 0.146082544 |
| 0.180432993 | 0.05820622  | 0.224729757 | 0.156855043 |
| 0.158375311 | 0.093275234 | 0.081345299 | 0.218425759 |
| 0.035756669 | 0.1137556   | 0.065793287 | 0.147474968 |
| 0.031796864 | 0.112912429 | 0.247351945 | 0.087135909 |
| 0.039073852 | 0.03169574  | 0.108044117 | 0.141248234 |
| 0.210395437 | 0.183798161 | 0.071001149 | 0.118499284 |
| 0.093256209 | 0.083091113 | 0.096020138 | 0.080063229 |
| 0.114826725 | 0.09340542  | 0.047194792 | 0.107158906 |
| 0.185905438 | 0.24786168  | 0.080606916 | 0.088112036 |
| 0.198510031 | 0.096143481 | 0.080342266 | 0.093117083 |
| 0.090306737 | 0.245953589 | 0.076575006 | 0.111542703 |
| 0.086205732 | 0.049488749 | 0.18573188  | 0.177649183 |
| 0.025745742 |             |             |             |

|             |             |             |             |
|-------------|-------------|-------------|-------------|
| DKKL1       | 0.212007712 | 0.333238996 | 0.109972235 |
| 0.349856296 | 0.209889442 | 0.170490146 | 0.183558328 |
| 0.087305305 | 0.049288517 | 0.051075182 | 0.050466427 |
| 0.204130472 | 0.126916174 | 0.158468207 | 0.052439579 |
| 0.328940316 | 0.135873198 | 0.086913865 | 0.234996735 |
| 0.306432976 | 0.109373814 | 0.349135623 | 0.111295139 |
| 0.064953698 | 0.079010374 | 0.096420574 | 0.075198779 |
| 0.370969347 | 0.102945557 | 0.143134071 | 0.29027674  |
| 0.087195502 | 0.284805358 | 0.281717705 | 0.29504588  |
| 0.273498772 | 0.172547984 | 0.039561207 | 0.082433312 |
| 0.258255924 | 0.254252116 | 0.31212792  | 0.295840601 |
| 0.094276988 | 0.268094981 | 0.235877535 | 0.191111119 |
| 0.061022499 | 0.081645849 | 0.073450337 | 0.248183805 |
| 0.263740235 | 0.183920685 | 0.094803202 | 0.128776991 |
| 0.099427973 | 0.091680784 | 0.060802918 | 0.200929421 |
| 0.222056569 | 0.077044451 | 0.273048946 | 0.065883755 |
| 0.055570104 | 0.121093167 | 0.10176983  | 0.174421509 |
| 0.060752786 | 0.222771992 | 0.053396416 | 0.144613123 |
| 0.031066275 | 0.292549294 | 0.207062946 | 0.044131561 |
| 0.099596985 | 0.126415669 | 0.109477937 | 0.28762678  |
| 0.362403453 | 0.24606253  | 0.360539001 | 0.32527787  |
| 0.165388069 | 0.159914915 | 0.130358396 | 0.159565601 |
| 0.263949082 | 0.174512683 | 0.077735704 | 0.348721176 |
| 0.35423167  | 0.308309676 | 0.099288519 | 0.16090012  |
| 0.283222595 | 0.311366459 | 0.130328986 | 0.162688341 |
| 0.054352678 | 0.040474017 | 0.258874729 | 0.347178115 |
| 0.24369567  | 0.088792577 | 0.147142042 | 0.324975346 |
| 0.094778063 | 0.067364242 | 0.333308827 | 0.14265479  |
| 0.37022882  | 0.041108612 | 0.146525379 | 0.256703141 |
| 0.087465234 | 0.267414884 | 0.293234994 | 0.201183184 |

|             |             |             |             |
|-------------|-------------|-------------|-------------|
| 0.168522995 | 0.096897086 | 0.033128442 | 0.062277329 |
| 0.107745196 | 0.035285474 | 0.238232916 | 0.376150775 |
| 0.129978305 | 0.099123557 | 0.150537697 | 0.019387378 |
| 0.07129044  | 0.070623435 | 0.273862108 | 0.143669932 |
| 0.268837747 | 0.173287883 | 0.114495673 | 0.213301718 |
| 0.194529596 | 0.353010818 | 0.014123062 | 0.103225476 |
| 0.18945685  | 0.07529317  | 0.259078419 | 0.214332651 |
| 0.170793797 | 0.107786618 | 0.156113335 | 0.350497011 |
| 0.26683824  | 0.151877434 | 0.086453251 | 0.332665589 |
| 0.095678581 | 0.196484735 | 0.132866977 | 1           |
| 0.119140092 | 0.246063816 | 0.056550351 | 0.126356727 |
| 0.036366041 | 0.116193368 | 0.02627163  | 0.150187355 |
| 0.10685725  | 0.287570136 | 0.22206083  | 0.127234686 |
| 0.228728218 | 0.279103108 | 0.131980994 | 0.273725506 |
| 0.043084056 | 0.077475985 | 0.080833936 | 0.359455554 |
| 0.169165594 | 0.321161171 | 0.127625386 | 0.085066885 |
| 0.211020094 | 0.320971867 | 0.001318032 | 0.268754086 |
| 0.295965166 | 0.079617563 | 0.288248457 | 0.210852788 |
| 0.083466916 | 0.355791089 | 0.010181875 | 0.352731869 |
| 0.180797517 | 0.098420153 | 0.372255512 | 0.181977797 |
| 0.262817581 | 0.090344206 | 0.12899273  | 0.235110947 |
| 0.228711354 | 0.021128846 | 0.115147483 | 0.295176305 |
| 0.042481447 | 0.081092308 | 0.250380922 | 0.291885861 |
| 0.203876464 | 0.283733532 | 0.386721165 | 0.07138615  |
| 0.202519401 | 0.145519184 | 0.035711423 | 0.161989853 |
| 0.247724109 | 0.056637308 | 0.270635341 | 0.116366361 |
| 0.130379101 | 0.300588504 | 0.211169707 | 0.038559747 |
| 0.091426495 | 0.174721279 | 0.062162688 | 0.15237167  |
| 0.184512173 | 0.169225526 | 0.094414312 | 0.085636892 |
| 0.092952978 | 0.347634984 | 0.04975658  | 0.049445681 |
| 0.029473908 | 0.260194655 | 0.182017308 | 0.156233006 |
| 0.145395105 | 0.103152787 | 0.069675354 | 0.089080627 |
| 0.091707772 | 0.150664714 | 0.015674614 | 0.096439235 |
| 0.182333601 | 0.132858796 | 0.133345935 | 0.224661526 |
| 0.144362618 | 0.212701204 | 0.199079615 | 0.053201842 |
| 0.074007136 | 0.059944155 | 0.322405717 | 0.293147527 |
| 0.192225982 | 0.10861033  | 0.081592442 | 0.080435756 |
| 0.368983222 | 0.119431306 | 0.052313464 | 0.335050997 |
| 0.04318833  | 0.337395998 | 0.160438584 | 0.149156262 |
| 0.13885241  | 0.269218666 | 0.361138337 | 0.023476001 |
| 0.17718498  | 0.31214271  | 0.174040574 | 0.112553299 |
| 0.266685501 | 0.269451613 | 0.087606481 | 0.215909214 |
| 0.234575414 | 0.098101813 | 0.328998395 | 0.109293747 |
| 0.059656919 | 0.255665179 | 0.236794703 | 0.114108346 |
| 0.077534124 | 0.192119543 | 0.071852966 | 0.2484393   |
| 0.344627892 | 0.363947803 | 0.265890005 | 0.056164117 |
| 0.110544918 | 0.104997902 | 0.093270162 | 0.128483859 |
| 0.279905875 | 0.312636446 | 0.224290972 | 0.180125583 |
| 0.255598477 | 0.0655142   | 0.052966095 | 0.343185398 |
| 0.045608107 | 0.292982159 | 0.03613793  | 0.24361729  |
| 0.265172587 | 0.133014937 | 0.086155796 | 0.190880678 |
| 0.265231348 | 0.079070449 | 0.107049585 | 0.296809276 |
| 0.271632736 | 0.088543027 | 0.071226813 | 0.256800075 |
| 0.060844181 | 0.092265167 | 0.162470498 | 0.038180965 |



|             |             |             |             |
|-------------|-------------|-------------|-------------|
| 0.09187261  | 0.097620885 | 0.013275615 | 0.077949405 |
| 0.123313393 | 0.30195696  | 0.350110751 | 0.054841234 |
| 0.162537763 | 0.062836172 | 0.264855087 | 0.084996185 |
| 0.255223298 | 0.273119405 | 0.298401346 | 0.117230508 |
| 0.268391143 | 0.294863266 | 0.1458451   | 0.081181703 |
| 0.046214156 | 0.279678471 | 0.211418066 | 0.079643643 |
| 0.377175447 | 0.095972912 | 0.106785615 | 0.325032275 |
| 0.182087198 | 0.225529058 | 0.005169563 | 0.011845459 |
| 0.038708993 | 0.325091526 | 0.258196859 | 0.267710699 |
| 0.063294838 | 0.238311674 | 0.004845989 | 0.320178171 |
| 0.314272616 | 0.037588671 | 0.067463037 | 0.261726475 |
| 0.218001294 | 0.327368179 | 0.079536729 | 0.280239348 |
| 0.19533679  | 0.274404838 | 0.146949906 | 0.220200528 |
| 0.312607191 | 0.261104728 | 0.275039265 | 0.279065279 |
| 0.381804566 | 0.278954014 | 0.269527845 | 0.0585545   |
| 0.024924862 | 0.107327161 | 0.050031846 | 0.054696983 |
| 0.154524223 | 0.08873845  | 0.298093878 | 0.35582903  |
| 0.320464727 | 0.029373556 | 0.112534824 | 0.255096584 |
| 0.34149294  | 0.360069735 | 0.021381726 | 0.003407154 |
| 0.003231537 | 0.032114159 | 0.228419221 | 0.129962203 |
| 0.304565496 | 0.070604229 | 0.038405897 | 0.085831213 |
| 0.108348719 | 0.201519174 | 0.311187099 | 0.345429855 |
| 0.248922302 | 0.107707882 | 0.095032695 | 0.327768217 |
| 0.058052102 | 0.142050409 | 0.337030956 | 0.29768806  |
| 0.0547538   | 0.112276714 | 0.126365165 | 0.374250717 |
| 0.012067407 | 0.244144918 | 0.232800475 | 0.120615611 |
| 0.020759598 | 0.073595055 | 0.057865286 | 0.318789075 |
| 0.259691754 | 0.156736429 | 0.117027759 | 0.050217516 |
| 0.153870768 | 0.323394849 | 0.171892318 | 0.365702905 |
| 0.33170448  | 0.396322782 | 0.065587415 | 0.274612388 |
| 0.064175157 | 0.283143862 | 0.140345182 | 0.024525876 |
| 0.09458169  | 0.04340665  | 0.267018988 | 0.036366093 |
| 0.127463915 | 0.23515454  | 0.031843357 | 0.036968568 |
| 0.025508856 | 0.095342217 | 0.368550408 | 0.312393198 |
| 0.038972907 | 0.101706972 | 0.172472711 | 0.248431373 |
| 0.175040973 | 0.352800846 | 0.284036547 | 0.118043644 |
| 0.11061355  | 0.036959712 | 0.309211643 | 0.206786582 |
| 0.120971056 | 0.362525289 | 0.08735813  | 0.323003807 |
| 0.217487167 | 0.280131982 | 0.291364986 | 0.200559225 |
| 0.084472938 | 0.171549609 | 0.272862868 | 0.088458423 |
| 0.226836783 | 0.376595001 | 0.146065666 | 0.081630331 |
| 0.187347284 | 0.117669668 | 0.056041749 | 0.039551518 |
| 0.079690937 | 0.181138286 | 0.170024852 | 0.364808491 |
| 0.211266018 | 0.21277038  | 0.077076266 | 0.058012017 |
| 0.334161688 | 0.250921012 | 0.071270053 | 0.264144607 |
| 0.133338086 | 0.196606237 | 0.273370179 | 0.277853884 |
| 0.054774327 | 0.317155836 | 0.314164372 | 0.288598634 |
| 0.289147074 | 0.191722451 | 0.29860148  | 0.057626109 |
| 0.039273008 | 0.177773336 | 0.150629222 | 0.104497539 |
| 0.19162495  | 0.046019408 | 0.039988126 | 0.319581614 |
| 0.060237367 | 0.343477148 | 0.072801701 | 0.0746823   |
| 0.185182137 | 0.090412611 | 0.246528138 | 0.158738172 |
| 0.136315397 | 0.290435386 | 0.030361649 | 0.096536039 |
| 0.089940164 | 0.249715378 | 0.143999361 | 0.11521658  |

|             |             |             |             |
|-------------|-------------|-------------|-------------|
| 0.055284184 | 0.067892325 | 0.2557447   | 0.135581498 |
| 0.131744074 | 0.06307517  | 0.250593437 | 0.047132786 |
| 0.084252508 | 0.375755328 | 0.119928805 | 0.02928574  |
| 0.04349078  | 0.151901045 | 0.095587463 | 0.09149257  |
| 0.036713277 | 0.280879985 | 0.097444818 | 0.174089214 |
| 0.21134192  | 0.098955369 | 0.205924621 | 0.043654534 |
| 0.058662821 | 0.270269145 | 0.135197841 | 0.288285488 |
| 0.107854089 | 0.382402814 | 0.230280999 | 0.2850388   |
| 0.048846575 | 0.097716686 | 0.067677742 | 0.323172757 |
| 0.073727758 |             |             |             |
| DNAJB13     | 0.04039093  | 0.064486187 | 0.023307524 |
| 0.153870473 | 0.070186017 | 0.065864998 | 0.248297205 |
| 0.072685603 | 0.066964038 | 0.109724843 | 0.059965306 |
| 0.036726737 | 0.046756674 | 0.090407793 | 0.01977981  |
| 0.134401702 | 0.08393115  | 0.03197215  | 0.246203722 |
| 0.136959242 | 0.181123571 | 0.154045959 | 0.168385576 |
| 0.016871995 | 0.063659494 | 0.181272994 | 0.035918762 |
| 0.131341761 | 0.187589162 | 0.068617472 | 0.129310513 |
| 0.060320117 | 0.067910908 | 0.042190136 | 0.076184654 |
| 0.03519423  | 0.028612839 | 0.037413822 | 0.066078676 |
| 0.058594809 | 0.066361036 | 0.147006941 | 0.208021563 |
| 0.169552622 | 0.041345114 | 0.260844669 | 0.05336239  |
| 0.030016762 | 0.095148871 | 0.056729138 | 0.046254028 |
| 0.037303536 | 0.048698583 | 0.112555009 | 0.221247519 |
| 0.030459299 | 0.062293757 | 0.007170019 | 0.079830703 |
| 0.263667116 | 0.08655154  | 0.040890664 | 0.105556345 |
| 0.040582297 | 0.115429749 | 0.05328148  | 0.164867379 |
| 0.013972366 | 0.065305831 | 0.127676946 | 0.018976739 |
| 0.053217461 | 0.152339064 | 0.06811218  | 0.00951353  |
| 0.193726005 | 0.125519955 | 0.074394833 | 0.211134776 |
| 0.109280535 | 0.036495054 | 0.082929872 | 0.064394365 |
| 0.059420072 | 0.091297871 | 0.024801673 | 0.170844558 |
| 0.059537166 | 0.238773251 | 0.052280933 | 0.129684624 |
| 0.07743973  | 0.048495639 | 0.051760498 | 0.095341318 |
| 0.081628815 | 0.066461302 | 0.035955535 | 0.057251012 |
| 0.016139552 | 0.029147447 | 0.048994021 | 0.06651704  |
| 0.053721771 | 0.016751777 | 0.139763155 | 0.114333818 |
| 0.18504415  | 0.011476104 | 0.215782595 | 0.033777033 |
| 0.110344087 | 0.128558883 | 0.093745145 | 0.162676122 |
| 0.045534637 | 0.060321225 | 0.042384178 | 0.278886609 |
| 0.043423004 | 0.082783406 | 0.008761166 | 0.095249276 |
| 0.02824413  | 0.0048553   | 0.031231995 | 0.10822882  |
| 0.06655173  | 0.02553521  | 0.1618946   | 0.051766787 |
| 0.087286785 | 0.025682681 | 0.046212084 | 0.052263995 |
| 0.081462393 | 0.02124958  | 0.101259319 | 0.049283436 |
| 0.032276423 | 0.081872816 | 0.006174528 | 0.18265468  |
| 0.063704609 | 0.03257313  | 0.249815035 | 0.051312786 |
| 0.087534492 | 0.164206038 | 0.232906451 | 0.075680485 |
| 0.062043219 | 0.292354138 | 0.030086735 | 0.127626767 |
| 0.0375369   | 0.061911227 | 0.214720618 | 0.119140092 |
| 1           | 0.031543544 | 0.072588292 | 0.061278696 |
| 0.007767117 | 0.036068899 | 0.062383882 | 0.128667997 |
| 0.040948901 | 0.060713318 | 0.026541082 | 0.20977364  |
| 0.13893114  | 0.108044565 | 0.057691116 | 0.069771491 |

|             |             |             |             |
|-------------|-------------|-------------|-------------|
| 0.087401474 | 0.095920555 | 0.02909019  | 0.071623373 |
| 0.069323317 | 0.057673016 | 0.079615711 | 0.042652963 |
| 0.132684725 | 0.097484201 | 0.000742724 | 0.040301662 |
| 0.044272439 | 0.023187627 | 0.10752624  | 0.053600995 |
| 0.020466562 | 0.112112195 | 0.001311188 | 0.134155978 |
| 0.037035519 | 0.194785817 | 0.089770029 | 0.181916619 |
| 0.040212334 | 0.197938097 | 0.082238753 | 0.037977622 |
| 0.031246709 | 0.031774154 | 0.112728372 | 0.1607079   |
| 0.047765557 | 0.134161337 | 0.072525611 | 0.135563369 |
| 0.106993526 | 0.072214385 | 0.109599506 | 0.016614755 |
| 0.066571207 | 0.148208967 | 0.068908739 | 0.062360148 |
| 0.05000031  | 0.008604278 | 0.057407646 | 0.101621158 |
| 0.027901808 | 0.062697599 | 0.030360221 | 0.017749331 |
| 0.263660438 | 0.137024559 | 0.077909399 | 0.086352449 |
| 0.029756675 | 0.154466965 | 0.024200145 | 0.039074646 |
| 0.104457066 | 0.068685897 | 0.016558684 | 0.00841107  |
| 0.006214064 | 0.084961703 | 0.184626091 | 0.072886675 |
| 0.037343224 | 0.097151275 | 0.024397331 | 0.041605829 |
| 0.203758905 | 0.19873027  | 0.016954638 | 0.014154959 |
| 0.057253988 | 0.033278264 | 0.032343909 | 0.05084526  |
| 0.043185181 | 0.096208065 | 0.074201892 | 0.012393653 |
| 0.057531373 | 0.161444854 | 0.062775937 | 0.122178432 |
| 0.050573878 | 0.144562096 | 0.140806278 | 0.008721496 |
| 0.099684682 | 0.042470454 | 0.020857959 | 0.085594861 |
| 0.060644129 | 0.077320588 | 0.067724685 | 0.170217021 |
| 0.032041557 | 0.222409041 | 0.118828481 | 0.022287552 |
| 0.059001738 | 0.064962691 | 0.097667864 | 0.110377006 |
| 0.051212064 | 0.115845667 | 0.166508822 | 0.041466923 |
| 0.043321805 | 0.195824593 | 0.054053378 | 0.052620987 |
| 0.138916749 | 0.055043054 | 0.047930222 | 0.189106465 |
| 0.107612331 | 0.116308163 | 0.157914496 | 0.157967471 |
| 0.069789304 | 0.149272204 | 0.066873311 | 0.020487848 |
| 0.230081285 | 0.084438879 | 0.047527257 | 0.022156179 |
| 0.039695476 | 0.047926463 | 0.17242771  | 0.054931287 |
| 0.26847113  | 0.025743406 | 0.038259223 | 0.065211789 |
| 0.010510059 | 0.044449102 | 0.112608341 | 0.045549447 |
| 0.034698757 | 0.063634834 | 0.104055146 | 0.161633284 |
| 0.061758757 | 0.198966485 | 0.100186416 | 0.047601828 |
| 0.070676584 | 0.051453029 | 0.031187645 | 0.066182391 |
| 0.175027702 | 0.207213223 | 0.054838272 | 0.008069048 |
| 0.04147668  | 0.100735403 | 0.001775202 | 0.036126483 |
| 0.149466456 | 0.064774715 | 0.090236728 | 0.079031644 |
| 0.06869459  | 0.032071143 | 0.099857912 | 0.223004376 |
| 0.039532812 | 0.037608072 | 0.045605025 | 0.139707629 |
| 0.048604852 | 0.048615348 | 0.020795516 | 0.115869589 |
| 0.098662078 | 0.037514254 | 0.064165308 | 0.080421034 |
| 0.104216082 | 0.051809904 | 0.116723657 | 0.068621292 |
| 0.253136752 | 0.029593556 | 0.017260772 | 0.001711655 |
| 0.033046122 | 0.075029551 | 0.041934104 | 0.126900403 |
| 0.033942952 | 0.120324733 | 0.004535564 | 0.052233181 |
| 0.055447336 | 0.053483711 | 0.029155971 | 0.044414262 |
| 0.030482697 | 0.060197097 | 0.018652466 | 0.048642291 |
| 0.030405711 | 0.03845501  | 0.079636054 | 0.166622094 |
| 0.080909847 | 0.033379716 | 0.085141522 | 0.057475859 |

|             |             |             |             |
|-------------|-------------|-------------|-------------|
| 0.106134361 | 0.07983326  | 0.252136068 | 0.163819624 |
| 0.014060672 | 0.116998874 | 0.01505468  | 0.05558396  |
| 0.059034011 | 0.070492064 | 0.050919355 | 0.094428263 |
| 0.055333427 | 0.103957097 | 0.115755628 | 0.047411148 |
| 0.102727086 | 0.104732536 | 0.03035035  | 0.003354511 |
| 0.000956981 | 0.024930122 | 0.136298607 | 0.080902686 |
| 0.058089718 | 0.018120659 | 0.131585472 | 0.168459529 |
| 0.049493999 | 0.046970531 | 0.053076181 | 0.186195748 |
| 0.047053866 | 0.166354597 | 0.036329371 | 0.152898479 |
| 0.048794004 | 0.028553755 | 0.066282214 | 0.061457899 |
| 0.064454522 | 0.076280514 | 0.033842345 | 0.104646966 |
| 0.001319021 | 0.13276063  | 0.043431357 | 0.048179992 |
| 0.024096562 | 0.079639447 | 0.080339471 | 0.095347469 |
| 0.032253069 | 0.090105114 | 0.091024948 | 0.014466733 |
| 0.190515149 | 0.075090113 | 0.106261492 | 0.080254832 |
| 0.100700071 | 0.144749902 | 0.04409154  | 0.050449884 |
| 0.095288866 | 0.041154381 | 0.038380628 | 0.016029814 |
| 0.043273858 | 0.08820977  | 0.035055081 | 0.014602227 |
| 0.063059074 | 0.074287195 | 0.012745012 | 0.056084085 |
| 0.003521776 | 0.131676901 | 0.100539201 | 0.067542902 |
| 0.035434828 | 0.110410966 | 0.096541281 | 0.087326108 |
| 0.126877128 | 0.123298041 | 0.044310459 | 0.021423837 |
| 0.212262821 | 0.004682319 | 0.121698309 | 0.043734788 |
| 0.085142754 | 0.083352187 | 0.039072726 | 0.056054478 |
| 0.055474128 | 0.059407808 | 0.049094191 | 0.137588089 |
| 0.019741617 | 0.048366708 | 0.125311786 | 0.128798425 |
| 0.128787714 | 0.104659107 | 0.066430601 | 0.037536779 |
| 0.132032607 | 0.018561825 | 0.10416079  | 0.006204341 |
| 0.010299099 | 0.09967861  | 0.146894761 | 0.128861239 |
| 0.064206    | 0.045683568 | 0.131155328 | 0.079699773 |
| 0.059205865 | 0.052936528 | 0.073409687 | 0.089582468 |
| 0.132466308 | 0.116401437 | 0.053974181 | 0.054370015 |
| 0.012497627 | 0.065099819 | 0.092460306 | 0.098744697 |
| 0.067041508 | 0.206685064 | 0.047418039 | 0.05579839  |
| 0.023776736 | 0.029586618 | 0.126125789 | 0.133629602 |
| 0.254169344 | 0.067788886 | 0.004553498 | 0.107048618 |
| 0.00722594  | 0.166038124 | 0.017858562 | 0.072612216 |
| 0.084913015 | 0.020234609 | 0.130927517 | 0.189609395 |
| 0.131994238 | 0.048018912 | 0.04970902  | 0.147856381 |
| 0.012139691 | 0.055160498 | 0.03107911  | 0.082047226 |
| 0.008105343 | 0.030234479 | 0.18436749  | 0.069040593 |
| 0.040518554 | 0.00748595  | 0.054005728 | 0.082405411 |
| 0.195358391 | 0.090515475 | 0.03242665  | 0.033485911 |
| 0.037774639 | 0.038494492 | 0.03243397  | 0.059424694 |
| 0.050678468 | 0.041394132 | 0.047944911 | 0.047586355 |
| 0.142511387 | 0.152383868 | 0.041092057 | 0.031243284 |
| 0.085874707 | 0.045595382 | 0.026649657 | 0.0403128   |
| 0.028766093 | 0.15810735  | 0.035808775 | 0.056305029 |
| 0.020398601 | 0.014308899 | 0.154785622 | 0.091648195 |
| 0.01060441  |             |             |             |
| DPH5        | 0.462662277 | 0.487980553 | 0.432740889 |
| 0.41079629  | 0.422855409 | 0.402721638 | 0.175961965 |
| 0.160752453 | 0.0727282   | 0.002119655 | 0.018546626 |
| 0.466205153 | 0.194796894 | 0.245901518 | 0.361553714 |

|             |             |             |             |
|-------------|-------------|-------------|-------------|
| 0.403655286 | 0.112596586 | 0.344389784 | 0.200042387 |
| 0.393386642 | 0.069384661 | 0.379673896 | 0.065209725 |
| 0.293448191 | 0.091383189 | 0.050215284 | 0.271319914 |
| 0.432127232 | 0.058432461 | 0.350787155 | 0.381705331 |
| 0.077180808 | 0.459887289 | 0.510475281 | 0.448436    |
| 0.513593602 | 0.460167932 | 0.007153303 | 0.296627858 |
| 0.449799726 | 0.467676575 | 0.393754141 | 0.296089046 |
| 0.026285056 | 0.481609214 | 0.211572671 | 0.404415322 |
| 0.221279513 | 0.021065947 | 0.241424882 | 0.444116625 |
| 0.478506741 | 0.476511461 | 0.200480997 | 0.129848442 |
| 0.218902875 | 0.220512671 | 0.314611996 | 0.341977845 |
| 0.18934065  | 0.14817788  | 0.483270246 | 0.070579264 |
| 0.139205758 | 0.216760977 | 0.127551611 | 0.224452286 |
| 0.381274786 | 0.417295625 | 0.009533548 | 0.467151531 |
| 0.001036194 | 0.365196847 | 0.364492639 | 0.370350545 |
| 0.027183815 | 0.012281161 | 0.149952053 | 0.313536276 |
| 0.452078085 | 0.470691267 | 0.481553087 | 0.494152751 |
| 0.158014885 | 0.259616087 | 0.428665927 | 0.137916376 |
| 0.473043194 | 0.14896511  | 0.088908204 | 0.407848372 |
| 0.487122394 | 0.49668186  | 0.180348288 | 0.237130904 |
| 0.461585762 | 0.472597432 | 0.447812013 | 0.435445536 |
| 0.387774381 | 0.040654406 | 0.472659508 | 0.496359186 |
| 0.437459963 | 0.34854241  | 0.12612858  | 0.415365103 |
| 0.039566694 | 0.380034634 | 0.32203277  | 0.139088255 |
| 0.455858344 | 0.010613709 | 0.188385435 | 0.34004951  |
| 0.179103291 | 0.468370624 | 0.497064332 | 0.151224744 |
| 0.41034553  | 0.011870193 | 0.149017494 | 0.021257047 |
| 0.317753484 | 0.161059014 | 0.502742296 | 0.462834549 |
| 0.20616847  | 0.382448959 | 0.230454957 | 0.000804027 |
| 0.017069171 | 0.161120923 | 0.48237771  | 0.352639361 |
| 0.440286708 | 0.46150056  | 0.216612592 | 0.439865337 |
| 0.495944871 | 0.48161003  | 0.070291715 | 0.06783109  |
| 0.430736479 | 0.158213628 | 0.199153179 | 0.470172635 |
| 0.295243111 | 0.084642659 | 0.094460623 | 0.490335736 |
| 0.436121086 | 0.058755758 | 0.3395455   | 0.398379337 |
| 0.336843481 | 0.35383626  | 0.076545259 | 0.246063816 |
| 0.031543544 | 1           | 0.019169616 | 0.322100926 |
| 0.325037407 | 0.135549344 | 0.005548923 | 0.237573706 |
| 0.277200335 | 0.482243786 | 0.495301813 | 0.07633197  |
| 0.289015322 | 0.397857284 | 0.328643822 | 0.463080725 |
| 0.006538007 | 0.030439854 | 0.303530289 | 0.491784881 |
| 0.313235027 | 0.492283601 | 0.263322071 | 0.285615123 |
| 0.252869495 | 0.450617696 | 0.002808083 | 0.492809425 |
| 0.504103164 | 0.330794468 | 0.396490233 | 0.423999747 |
| 0.4315168   | 0.454905773 | 0.04939645  | 0.399144816 |
| 0.404922344 | 0.053819732 | 0.47992498  | 0.132364525 |
| 0.477546126 | 0.02729452  | 0.30556948  | 0.492049316 |
| 0.496747093 | 0.005905353 | 0.218655333 | 0.376892847 |
| 0.018394035 | 0.076814713 | 0.441819913 | 0.396231362 |
| 0.383652003 | 0.458347795 | 0.460668579 | 0.417325148 |
| 0.42974797  | 0.194983484 | 0.006742527 | 0.305209759 |
| 0.473283146 | 0.434785719 | 0.452145363 | 0.208252458 |
| 0.384307051 | 0.478452062 | 0.489733352 | 0.228170296 |
| 0.027344255 | 0.288899883 | 0.014102668 | 0.32381635  |

|             |             |             |             |
|-------------|-------------|-------------|-------------|
| 0.470503745 | 0.093724696 | 0.451397505 | 0.120560626 |
| 0.05285981  | 0.494839475 | 0.180108889 | 0.297957505 |
| 0.139662656 | 0.41640147  | 0.211261598 | 0.23163667  |
| 0.218637223 | 0.136227049 | 0.381566164 | 0.389578337 |
| 0.023165579 | 0.069497286 | 0.00965885  | 0.431048567 |
| 0.13395459  | 0.368151514 | 0.370701804 | 0.45242266  |
| 0.312720836 | 0.089498196 | 0.380796736 | 0.298596434 |
| 0.09386493  | 0.007976962 | 0.488344083 | 0.388734529 |
| 0.379885693 | 0.122715427 | 0.026276956 | 0.391939259 |
| 0.471893321 | 0.366733248 | 0.297704153 | 0.467235918 |
| 0.017847647 | 0.481860931 | 0.229771843 | 0.098158185 |
| 0.400020886 | 0.227100113 | 0.44882386  | 0.05911732  |
| 0.406216572 | 0.467522111 | 0.283040319 | 0.162793851 |
| 0.438358877 | 0.411082167 | 0.018513058 | 0.455686272 |
| 0.451891071 | 0.019109695 | 0.497757883 | 0.104597821 |
| 0.012134953 | 0.458902268 | 0.491742774 | 0.054201983 |
| 0.057858355 | 0.330544054 | 0.03041468  | 0.261675831 |
| 0.491813977 | 0.395540224 | 0.47606298  | 0.212822962 |
| 0.025541979 | 0.006177018 | 0.189275092 | 0.435221959 |
| 0.50724398  | 0.500731296 | 0.222050493 | 0.377511955 |
| 0.200929554 | 0.359659582 | 0.132754237 | 0.496833719 |
| 0.185514629 | 0.495280709 | 0.002624991 | 0.486955992 |
| 0.515584109 | 0.29917255  | 0.06427996  | 0.294763599 |
| 0.435116465 | 0.029530908 | 0.165915715 | 0.481221938 |
| 0.470794989 | 0.333857435 | 0.372297197 | 0.433061065 |
| 0.008528501 | 0.025865435 | 0.402238323 | 0.198813951 |
| 0.400424047 | 0.184812789 | 0.060996901 | 0.326767481 |
| 0.027762381 | 0.468240102 | 0.45666729  | 0.046498821 |
| 0.377578081 | 0.31286854  | 0.363399269 | 0.022431315 |
| 0.498929239 | 0.491330163 | 0.506746324 | 0.127197845 |
| 0.482346732 | 0.499527253 | 0.472608582 | 0.057898952 |
| 0.010266231 | 0.506543527 | 0.423889641 | 0.014005463 |
| 0.465574315 | 0.252699493 | 0.007390595 | 0.476513502 |
| 0.146545623 | 0.461291788 | 0.002480175 | 0.094701191 |
| 0.02974405  | 0.466948205 | 0.475466852 | 0.378070117 |
| 0.276545593 | 0.343218977 | 0.00421491  | 0.498144646 |
| 0.4815022   | 0.008821762 | 0.126830787 | 0.497585806 |
| 0.493184493 | 0.488311967 | 0.35761226  | 0.49769703  |
| 0.478921669 | 0.495718208 | 0.219683456 | 0.239431729 |
| 0.470778576 | 0.495189855 | 0.436494021 | 0.464159509 |
| 0.46346175  | 0.424847245 | 0.246028237 | 0.008416654 |
| 0.143216949 | 0.1952043   | 0.366496742 | 0.07298633  |
| 0.350774773 | 0.120855433 | 0.484857518 | 0.468344795 |
| 0.498761466 | 0.001592048 | 0.120412671 | 0.490113405 |
| 0.445207103 | 0.459766131 | 0.013559988 | 0.00548172  |
| 0.006930384 | 0.015831575 | 0.345064706 | 0.217571627 |
| 0.494775933 | 0.268947755 | 0.000984107 | 0.028249651 |
| 0.252836409 | 0.423087001 | 0.488752913 | 0.353606918 |
| 0.479300636 | 0.05727171  | 0.305812111 | 0.378075102 |
| 0.056749496 | 0.388015789 | 0.495144721 | 0.466116766 |
| 0.02748444  | 0.223924856 | 0.380795452 | 0.469820163 |
| 0.090553126 | 0.289463532 | 0.467604784 | 0.310802059 |
| 0.008053967 | 0.063106218 | 0.051268516 | 0.438514299 |
| 0.507870075 | 0.063393347 | 0.023306408 | 0.157561269 |

|             |             |             |             |
|-------------|-------------|-------------|-------------|
| 0.095591112 | 0.478796775 | 0.136011266 | 0.48853968  |
| 0.453552646 | 0.425405541 | 0.059787541 | 0.47539715  |
| 0.029798094 | 0.478260681 | 0.352496513 | 0.054206424 |
| 0.260415901 | 0.006279585 | 0.487569374 | 0.179921228 |
| 0.320419863 | 0.41051599  | 0.21645094  | 0.010437716 |
| 0.212697231 | 0.036795174 | 0.473203538 | 0.479249949 |
| 0.023680658 | 0.202660524 | 0.269618933 | 0.395767219 |
| 0.275870997 | 0.437653017 | 0.494977478 | 0.467195817 |
| 0.061194515 | 0.151635426 | 0.401361767 | 0.435335138 |
| 0.213900515 | 0.48043846  | 0.310045906 | 0.496188603 |
| 0.445097709 | 0.474071617 | 0.497013726 | 0.337285323 |
| 0.233787663 | 0.426388049 | 0.387582008 | 0.011713322 |
| 0.327056228 | 0.466494559 | 0.349416003 | 0.146485698 |
| 0.237157764 | 0.443391173 | 0.030941053 | 0.188026571 |
| 0.392825073 | 0.319590748 | 0.112457733 | 0.427044663 |
| 0.402490936 | 0.442666401 | 0.024764604 | 0.048181819 |
| 0.498343772 | 0.462329782 | 0.12323603  | 0.441987033 |
| 0.137213121 | 0.33434353  | 0.477766221 | 0.47634284  |
| 0.40683407  | 0.486420277 | 0.443164701 | 0.410822037 |
| 0.444020157 | 0.225447293 | 0.507470203 | 0.073724931 |
| 0.082759194 | 0.465394098 | 0.077231822 | 0.06995073  |
| 0.111086412 | 0.016999389 | 0.364976898 | 0.41671828  |
| 0.446641315 | 0.363085883 | 0.331318546 | 0.059551498 |
| 0.304577757 | 0.401034092 | 0.331801754 | 0.173358325 |
| 0.058439945 | 0.484798298 | 0.005055859 | 0.038035444 |
| 0.437779652 | 0.488039853 | 0.421930781 | 0.211010562 |
| 0.335875165 | 0.120544943 | 0.267940696 | 0.303940899 |
| 0.355179465 | 0.402785018 | 0.487585041 | 0.021948948 |
| 0.010015151 | 0.476410562 | 0.395505653 | 0.013276529 |
| 0.072782083 | 0.425937343 | 0.268783618 | 0.229871637 |
| 0.0145117   | 0.500380503 | 0.370323124 | 0.442387697 |
| 0.324482804 | 0.043752789 | 0.403979306 | 0.075700928 |
| 0.04042076  | 0.457386331 | 0.432942679 | 0.49757741  |
| 0.354388665 | 0.408232139 | 0.452196275 | 0.482381388 |
| 0.103669256 | 0.444822532 | 0.015976889 | 0.454557622 |
| 0.481725643 |             |             |             |

|             |             |             |             |
|-------------|-------------|-------------|-------------|
| DPP4        | 0.033708082 | 0.029715273 | 0.038386156 |
| 0.061518437 | 0.064590498 | 0.01299669  | 0.055503094 |
| 0.013315797 | 0.053711986 | 0.029196419 | 0.097018815 |
| 0.051501898 | 0.047478657 | 0.021239086 | 0.006221386 |
| 0.101580951 | 0.185651172 | 0.026242282 | 0.12695533  |
| 0.064286546 | 0.022787108 | 0.128868152 | 0.087297163 |
| 0.062914357 | 0.167885849 | 0.164346129 | 0.07338678  |
| 0.062159241 | 0.182833546 | 0.008153895 | 0.033211039 |
| 0.234835368 | 0.038035664 | 0.020304806 | 0.078166997 |
| 0.019767035 | 0.021590356 | 0.066478141 | 0.008524849 |
| 0.027686457 | 0.051968482 | 0.057712347 | 0.103295836 |
| 0.097529776 | 0.014715941 | 0.084974847 | 0.091654174 |
| 0.008232743 | 0.174665168 | 0.004439757 | 0.014023146 |
| 0.01526235  | 0.024940381 | 0.016796353 | 0.048473017 |
| 0.022093251 | 0.006004687 | 0.031211492 | 0.011987349 |
| 0.092448899 | 0.004614319 | 0.01910484  | 0.029544344 |
| 0.011234222 | 0.028840841 | 0.202071636 | 0.037761184 |
| 0.037175543 | 0.017694749 | 0.097224221 | 0.031393426 |

|             |             |             |             |
|-------------|-------------|-------------|-------------|
| 0.008042056 | 0.072233319 | 0.123797312 | 0.021208527 |
| 0.303250054 | 0.124430968 | 0.206477668 | 0.057867069 |
| 0.057499175 | 0.023236017 | 0.066879576 | 0.052994654 |
| 0.128597539 | 0.152434174 | 0.058572306 | 0.119874518 |
| 0.02944024  | 0.057541937 | 0.060905804 | 0.121227153 |
| 0.061066171 | 0.025974082 | 0.109523223 | 0.20104755  |
| 0.025791326 | 0.026071261 | 0.021498717 | 0.038164279 |
| 0.014937868 | 0.244207903 | 0.017158932 | 0.044540457 |
| 0.018111842 | 0.07243598  | 0.255260244 | 0.034608901 |
| 0.224774964 | 0.008409941 | 0.111292557 | 0.098209319 |
| 0.057927518 | 0.060265607 | 0.237098241 | 0.042709681 |
| 0.082916672 | 0.035536439 | 0.027611313 | 0.107575322 |
| 0.071239408 | 0.158409877 | 0.047247982 | 0.252347523 |
| 0.024882877 | 0.07991769  | 0.012174113 | 0.047787282 |
| 0.016935173 | 0.028399382 | 0.048479844 | 0.164329401 |
| 0.281416298 | 0.118870527 | 0.032747272 | 0.044778532 |
| 0.050015075 | 0.018114338 | 0.068124742 | 0.015148393 |
| 0.034842734 | 0.06680466  | 0.000426526 | 0.079804917 |
| 0.035688496 | 0.127743159 | 0.203221897 | 0.036425492 |
| 0.120992133 | 0.051455323 | 0.148040568 | 0.046287261 |
| 0.015920377 | 0.168689875 | 0.012635881 | 0.114296382 |
| 0.012531615 | 0.135071231 | 0.137212454 | 0.056550351 |
| 0.072588292 | 0.019169616 | 1           | 0.020500934 |
| 0.010185264 | 0.15869086  | 0.103766923 | 0.020173286 |
| 0.016365985 | 0.024953066 | 0.012401175 | 0.197030921 |
| 0.065071755 | 0.104963777 | 0.011410848 | 0.028469634 |
| 0.053453498 | 0.17337496  | 0.005063065 | 0.04029805  |
| 0.006929862 | 0.048958586 | 0.059688416 | 0.072831763 |
| 0.196434378 | 0.065018303 | 0.014922811 | 0.016500079 |
| 0.026206887 | 0.004525086 | 0.06816985  | 0.076092616 |
| 0.023687682 | 0.052314258 | 0.002976468 | 0.109089067 |
| 0.013371112 | 0.176660888 | 0.064013363 | 0.238702161 |
| 0.021395622 | 0.210125769 | 0.015403734 | 0.043031891 |
| 0.029390544 | 0.048808598 | 0.008261925 | 0.046440991 |
| 0.283720359 | 0.011761086 | 0.042148815 | 0.062835694 |
| 0.047027126 | 0.067792671 | 0.076937227 | 0.02238168  |
| 0.054301099 | 0.057947729 | 0.189179116 | 0.154698641 |
| 0.046531968 | 0.008100068 | 0.01677899  | 0.032582068 |
| 0.008114953 | 0.025028046 | 0.022933679 | 0.003757744 |
| 0.122689627 | 0.028117295 | 0.029334507 | 0.076295932 |
| 0.018515154 | 0.051689655 | 0.018497935 | 0.15294031  |
| 0.261641956 | 0.038626224 | 0.117952574 | 0.055449332 |
| 0.082382877 | 0.029710701 | 0.086634786 | 0.020546189 |
| 0.044949085 | 0.105321142 | 0.029983204 | 0.023786817 |
| 0.037620117 | 0.186537735 | 0.200605604 | 0.013563586 |
| 0.047877908 | 0.017519212 | 0.012157344 | 0.018792837 |
| 0.020807521 | 0.090251531 | 0.07035387  | 0.047494809 |
| 0.181347336 | 0.274606719 | 0.030035707 | 0.094169362 |
| 0.009630591 | 0.06721989  | 0.258411685 | 0.0064307   |
| 0.044085222 | 0.005213861 | 0.002941951 | 0.028370182 |
| 0.120950922 | 0.05902622  | 0.047292858 | 0.247047678 |
| 0.047299834 | 0.12832263  | 0.062442463 | 0.007413943 |
| 0.023111574 | 0.02153606  | 0.134843265 | 0.129320778 |
| 0.013910446 | 0.050418761 | 0.088863459 | 0.019634951 |



|             |             |             |             |
|-------------|-------------|-------------|-------------|
| 0.018491773 | 0.234042012 | 0.034168862 | 0.222680595 |
| 0.301046268 | 0.075958273 | 0.033640411 | 0.30452939  |
| 0.238315322 | 0.035904858 | 0.019157109 | 0.210674363 |
| 0.036250239 | 0.1212735   | 0.02532528  | 0.107164691 |
| 0.119895263 | 0.099274411 | 0.18582768  | 0.045753668 |
| 0.017338556 | 0.036927014 | 0.194550857 | 0.073237281 |
| 0.156265661 | 0.023730983 | 0.004124179 | 0.040836135 |
| 0.067579524 | 0.024587083 | 0.181894495 | 0.050501924 |
| 0.01762774  | 0.007977601 | 0.208196505 | 0.025039975 |
| 0.016495604 | 0.108716085 | 0.06734011  | 0.021859166 |
| 0.028220587 | 0.037246019 | 0.021191014 | 0.068395164 |
| 0.042772622 | 0.056390464 | 0.065975576 | 0.075370648 |
| 0.016619576 | 0.084045974 | 0.076076551 | 0.009598287 |
| 0.120298043 | 0.020261418 | 0.076010325 | 0.108375704 |
| 0.009034951 | 0.007556644 | 0.149138306 | 0.174599813 |
| 0.040087415 | 0.028438054 | 0.02113997  | 0.064410204 |
| 0.040949527 | 0.030785167 | 0.033606559 | 0.272296385 |
| 0.31503189  | 0.023197626 | 0.023917209 | 0.060648652 |
| 0.064455734 | 0.00396657  | 0.081003617 | 0.027064025 |
| 0.122389628 | 0.011121573 | 0.003556167 | 0.026701579 |
| 0.257414038 | 0.080206819 | 0.016298986 | 0.035573888 |
| 0.00228494  | 0.080965053 | 0.06222799  | 0.039800962 |
| 0.023182504 | 0.24844273  | 0.163468085 | 0.029561678 |
| 0.037400964 | 0.027179941 | 0.052117884 | 0.042638862 |
| 0.040928974 | 0.019667195 | 0.027734    | 0.185454886 |
| 0.03295394  | 0.025974638 | 0.036064813 | 0.021912288 |
| 0.05600562  | 0.103121289 | 0.117371472 | 0.079416965 |
| 0.044493605 | 0.011175509 | 0.004093875 | 0.046636918 |
| 0.010152927 | 0.131990742 | 0.031691502 | 0.068185034 |
| 0.044110722 | 0.220618127 | 0.023826076 | 0.026222825 |
| 0.033993088 | 0.05028729  | 0.138896635 | 0.020084402 |
| 0.013877365 | 0.147725094 | 0.037277669 | 0.180810053 |
| 0.035132264 | 0.002464622 | 0.143993357 | 0.032850701 |
| 0.037716333 | 0.089206741 | 0.024835459 | 0.115995265 |
| 0.051651574 | 0.209034499 | 0.008321691 | 0.091893453 |
| 0.161420377 | 0.008922779 | 0.045445971 | 0.019249262 |
| 0.247221517 | 0.140617222 | 0.027096405 | 0.051097871 |
| 0.045202054 | 0.183687371 | 0.052017063 | 0.024695908 |
| 0.143795296 | 0.217907696 | 0.161739787 | 0.086268603 |
| 0.017904372 | 0.120039578 | 0.171800661 | 0.002357634 |
| 0.060324677 | 0.052207286 | 0.094237989 | 0.053475294 |
| 0.040322834 | 0.090631231 | 0.237396657 | 0.019900264 |
| 0.101353605 | 0.018583479 | 0.10144045  | 0.00328986  |
| 0.084707451 | 0.20845345  | 0.026460617 | 0.018724449 |
| 0.011855392 | 0.031904087 | 0.028337477 | 0.268904987 |
| 0.042344117 | 0.252974481 | 0.061274111 | 0.069441157 |
| 0.274865453 | 0.037408294 | 0.152128629 | 0.074705323 |
| 0.017793406 | 0.065850202 | 0.018073644 | 0.010105228 |
| 0.047945744 | 0.08798402  | 0.053082961 | 0.02018064  |
| 0.015421549 | 0.068594677 | 0.028676601 | 0.038359088 |
| 0.025339747 | 0.03133683  | 0.031327538 | 0.04756804  |
| 0.089173095 | 0.01903036  | 0.023332506 | 0.041758694 |
| 0.085542807 | 0.062371913 | 0.030376053 | 0.100671027 |
| 0.133159657 | 0.043901937 | 0.102831733 | 0.009572179 |

|             |             |             |             |
|-------------|-------------|-------------|-------------|
| 0.043079513 | 0.01127868  | 0.0842771   | 0.090639542 |
| 0.030240144 | 0.020108631 | 0.080730909 | 0.151450575 |
| 0.031015012 | 0.020263192 | 0.018421229 | 0.036790209 |
| 0.22219832  | 0.086174681 | 0.056348503 | 0.067923783 |
| 0.013187473 | 0.033074072 | 0.037964385 | 0.022301903 |
| 0.016775859 | 0.085968837 | 0.022162639 | 0.006633299 |
| 0.089281203 | 0.029183387 | 0.086892278 | 0.317873965 |
| 0.175568876 | 0.225261461 | 0.019964498 | 0.101039679 |
| 0.018388239 | 0.10604794  | 0.006463469 | 0.141752788 |
| 0.155026888 | 0.018028426 | 0.125254893 | 0.032649792 |
| 0.109517008 | 0.019184839 | 0.113780097 | 0.263064426 |
| 0.028362844 | 0.03421866  | 0.053388701 | 0.134225373 |
| 0.037887233 | 0.179528979 | 0.141594248 | 0.009249422 |
| 0.008429623 | 0.014902514 | 0.03078881  | 0.047838108 |
| 0.08274451  | 0.066450946 | 0.015089213 | 0.243276477 |
| 0.107319997 | 0.016535364 | 0.047970022 | 0.0314426   |
| 0.28061719  | 0.029239213 | 0.006373877 | 0.055808648 |
| 0.03936656  | 0.194555724 | 0.010725864 | 0.035506649 |
| 0.11340525  | 0.017639901 | 0.054376041 | 0.024354834 |
| 0.075706899 | 0.098520336 | 0.011823909 | 0.029697815 |
| 0.069082024 | 0.024434429 | 0.078979744 | 0.048931418 |
| 0.011292286 |             |             |             |

DPYSL2 0.332825498

0.398062018

0.15917483

|             |             |             |             |
|-------------|-------------|-------------|-------------|
| 0.328310544 | 0.182054868 | 0.228168626 | 0.139574665 |
| 0.217154166 | 0.056657311 | 0.006625412 | 0.006264236 |
| 0.223527893 | 0.061030453 | 0.138162555 | 0.126038072 |
| 0.335279649 | 0.052748743 | 0.222691663 | 0.162913256 |
| 0.341198202 | 0.106796256 | 0.257480725 | 0.09532073  |
| 0.098605628 | 0.035327492 | 0.040137563 | 0.073378444 |
| 0.412813348 | 0.049556007 | 0.150949013 | 0.366283739 |
| 0.079723584 | 0.376831563 | 0.38357214  | 0.210360027 |
| 0.354481204 | 0.302470409 | 0.034401769 | 0.113783014 |
| 0.41305434  | 0.274371791 | 0.345285521 | 0.20481072  |
| 0.044925108 | 0.38889249  | 0.147850612 | 0.205413401 |
| 0.168862026 | 0.017371388 | 0.170495918 | 0.389473089 |
| 0.31813276  | 0.171095217 | 0.200251746 | 0.108535291 |
| 0.03849495  | 0.157005778 | 0.043512336 | 0.313962389 |
| 0.129536261 | 0.142347601 | 0.329672962 | 0.066132349 |
| 0.084559774 | 0.227066919 | 0.078685118 | 0.191669674 |
| 0.090070706 | 0.366634571 | 0.064230999 | 0.193870031 |
| 0.00449794  | 0.346300061 | 0.211983965 | 0.061881177 |
| 0.037271074 | 0.012473368 | 0.091889292 | 0.221616566 |
| 0.412575788 | 0.387779757 | 0.34729209  | 0.336021708 |
| 0.070287321 | 0.153801852 | 0.130381657 | 0.089265434 |
| 0.378847613 | 0.099727688 | 0.111681132 | 0.304407919 |
| 0.350257623 | 0.36249372  | 0.087027157 | 0.123236488 |
| 0.284155434 | 0.404126052 | 0.153287201 | 0.135874956 |
| 0.075661543 | 0.035698873 | 0.326620953 | 0.364129089 |
| 0.3793483   | 0.076265856 | 0.070243613 | 0.393076476 |
| 0.060271546 | 0.172649764 | 0.246646112 | 0.09722525  |
| 0.420409626 | 0.029033329 | 0.083141479 | 0.196432066 |
| 0.19170932  | 0.353072061 | 0.34661127  | 0.130154494 |
| 0.175006705 | 0.022371621 | 0.028694725 | 0.045178473 |
| 0.141679318 | 0.035688206 | 0.343349138 | 0.353878453 |

|             |             |             |             |
|-------------|-------------|-------------|-------------|
| 0.193640991 | 0.112714115 | 0.184031135 | 0.005946325 |
| 0.021713653 | 0.130409506 | 0.305482911 | 0.219486772 |
| 0.356409244 | 0.296252695 | 0.073403268 | 0.327923753 |
| 0.195393896 | 0.340268976 | 0.033843976 | 0.118009461 |
| 0.209430191 | 0.127654397 | 0.15917208  | 0.201573634 |
| 0.100277835 | 0.158734256 | 0.099896502 | 0.392606107 |
| 0.40492983  | 0.076858419 | 0.211518832 | 0.311185713 |
| 0.095021277 | 0.134290642 | 0.111175027 | 0.126356727 |
| 0.061278696 | 0.322100926 | 0.020500934 | 1           |
| 0.057715204 | 0.04536099  | 0.052658183 | 0.200275241 |
| 0.12920698  | 0.271020051 | 0.336690059 | 0.10770397  |
| 0.139186966 | 0.220265247 | 0.221170024 | 0.230780479 |
| 0.004481036 | 0.077612936 | 0.183966574 | 0.367031896 |
| 0.249269452 | 0.382131478 | 0.180439601 | 0.138951418 |
| 0.138763154 | 0.367689684 | 0.006374384 | 0.374692878 |
| 0.360807397 | 0.170345907 | 0.168287453 | 0.243478578 |
| 0.085639119 | 0.351341772 | 0.04342988  | 0.306610413 |
| 0.318373773 | 0.09594138  | 0.387313482 | 0.070479224 |
| 0.362391596 | 0.029351982 | 0.173131999 | 0.258295801 |
| 0.217113926 | 0.012574942 | 0.150594803 | 0.323835652 |
| 0.021403554 | 0.109960532 | 0.359379087 | 0.289168962 |
| 0.181631849 | 0.337545621 | 0.390950678 | 0.075023837 |
| 0.171564864 | 0.205438064 | 0.027086723 | 0.137502738 |
| 0.333359214 | 0.097183724 | 0.379117    | 0.170461911 |
| 0.247338701 | 0.372714621 | 0.279328559 | 0.058248846 |
| 0.04659425  | 0.194348667 | 0.040055493 | 0.124001793 |
| 0.308592821 | 0.061527165 | 0.121379195 | 0.132259931 |
| 0.040480486 | 0.378332185 | 0.052482396 | 0.062528575 |
| 0.031639832 | 0.168461561 | 0.193987562 | 0.068917149 |
| 0.042677983 | 0.094610987 | 0.097344502 | 0.117581564 |
| 0.059943597 | 0.054810131 | 0.023090948 | 0.077772509 |
| 0.031926153 | 0.079216356 | 0.080904196 | 0.290910183 |
| 0.149173021 | 0.051823519 | 0.125741877 | 0.103657458 |
| 0.057889277 | 0.018605993 | 0.388624003 | 0.320529026 |
| 0.321503411 | 0.125146002 | 0.045757715 | 0.07401352  |
| 0.348740276 | 0.153680605 | 0.174351344 | 0.354159547 |
| 0.060217347 | 0.372134379 | 0.075286104 | 0.057327269 |
| 0.086388777 | 0.127125788 | 0.399228355 | 0.035653434 |
| 0.272844303 | 0.372404519 | 0.191756961 | 0.070809749 |
| 0.329123426 | 0.300475755 | 0.042548078 | 0.326709751 |
| 0.315301892 | 0.02972975  | 0.373640262 | 0.056454192 |
| 0.024181604 | 0.258897535 | 0.221388959 | 0.054315581 |
| 0.051784462 | 0.1039419   | 0.087412224 | 0.159894828 |
| 0.379871846 | 0.278758805 | 0.259578126 | 0.088255394 |
| 0.034945421 | 0.004025502 | 0.089873156 | 0.182073736 |
| 0.377920074 | 0.344955112 | 0.165650448 | 0.092373945 |
| 0.175560925 | 0.083265894 | 0.150490995 | 0.354838867 |
| 0.154212049 | 0.398691173 | 0.015635088 | 0.251902293 |
| 0.344941419 | 0.185489345 | 0.033447385 | 0.184889801 |
| 0.334592148 | 0.05539882  | 0.213044547 | 0.36541921  |
| 0.357720808 | 0.117235852 | 0.101683722 | 0.301404662 |
| 0.035731318 | 0.066055875 | 0.181192686 | 0.052826442 |
| 0.113539992 | 0.116221503 | 0.013315677 | 0.204177045 |
| 0.029901803 | 0.347601275 | 0.369633591 | 0.0329731   |

|             |             |             |             |
|-------------|-------------|-------------|-------------|
| 0.146246447 | 0.214516104 | 0.221244313 | 0.045188349 |
| 0.274649978 | 0.357945205 | 0.384156893 | 0.194164246 |
| 0.300898    | 0.315526844 | 0.124244667 | 0.06654846  |
| 0.016279314 | 0.357083329 | 0.346742736 | 0.017451334 |
| 0.381881471 | 0.171192596 | 0.006229893 | 0.409955144 |
| 0.14942131  | 0.35027593  | 0.013349927 | 0.05826041  |
| 0.036075332 | 0.341477953 | 0.349609883 | 0.35941106  |
| 0.096743345 | 0.304797252 | 0.009622075 | 0.378576042 |
| 0.359133128 | 0.011051198 | 0.057177272 | 0.259909172 |
| 0.209380561 | 0.426102367 | 0.073320242 | 0.270589107 |
| 0.162197583 | 0.330545331 | 0.116760987 | 0.136758889 |
| 0.331743879 | 0.312782623 | 0.377082126 | 0.406061112 |
| 0.359485712 | 0.264954832 | 0.187707393 | 0.020941101 |
| 0.046796379 | 0.17942395  | 0.067857318 | 0.024309513 |
| 0.288842451 | 0.055851955 | 0.392510388 | 0.365606015 |
| 0.321732316 | 0.009850884 | 0.155876311 | 0.298209631 |
| 0.413665225 | 0.424701442 | 0.0494402   | 0.008931485 |
| 0.011167332 | 0.0050845   | 0.274315799 | 0.120118587 |
| 0.359587638 | 0.075217887 | 0.010284149 | 0.101073357 |
| 0.164335955 | 0.166162981 | 0.357744431 | 0.319710257 |
| 0.307219782 | 0.071858658 | 0.072078803 | 0.359563043 |
| 0.027593132 | 0.301218234 | 0.332935587 | 0.378688816 |
| 0.051293808 | 0.121097116 | 0.212739213 | 0.396809856 |
| 0.011873055 | 0.172664209 | 0.242181311 | 0.102179438 |
| 0.029928718 | 0.04597505  | 0.036898455 | 0.352925586 |
| 0.329651693 | 0.025015155 | 0.013834381 | 0.105449471 |
| 0.063659154 | 0.374985194 | 0.082821658 | 0.38834252  |
| 0.373391005 | 0.36717032  | 0.037844703 | 0.374204099 |
| 0.021800671 | 0.347299856 | 0.093253905 | 0.043599731 |
| 0.182492519 | 0.028422823 | 0.333163748 | 0.023798741 |
| 0.180905265 | 0.367187729 | 0.065095691 | 0.015344868 |
| 0.05258558  | 0.038968316 | 0.351728244 | 0.316348787 |
| 0.032168867 | 0.188890174 | 0.163604861 | 0.324965723 |
| 0.220535586 | 0.291336473 | 0.376320114 | 0.136516835 |
| 0.079023887 | 0.059594021 | 0.378055833 | 0.318095981 |
| 0.194273686 | 0.365360257 | 0.07369945  | 0.391074185 |
| 0.356023631 | 0.409318104 | 0.333983101 | 0.203820985 |
| 0.061709463 | 0.270874336 | 0.250621045 | 0.025131449 |
| 0.23691726  | 0.325344084 | 0.248032344 | 0.04544324  |
| 0.083818724 | 0.12657497  | 0.0961442   | 0.168157708 |
| 0.07780127  | 0.235831895 | 0.083073701 | 0.388237503 |
| 0.336312163 | 0.329206241 | 0.104709631 | 0.03360909  |
| 0.410068186 | 0.392676773 | 0.145147771 | 0.275613309 |
| 0.120063177 | 0.148357902 | 0.316925548 | 0.287748146 |
| 0.136698672 | 0.297307741 | 0.380689542 | 0.254750825 |
| 0.362497345 | 0.168433908 | 0.3815648   | 0.187014163 |
| 0.036917041 | 0.236275829 | 0.040577678 | 0.061011249 |
| 0.092032975 | 0.026709291 | 0.059320904 | 0.317388483 |
| 0.081576226 | 0.220678212 | 0.177174384 | 0.070928597 |
| 0.15168382  | 0.189303788 | 0.20628009  | 0.127580676 |
| 0.046275806 | 0.351244726 | 0.011285834 | 0.050089568 |
| 0.09181068  | 0.29370429  | 0.098600112 | 0.123024088 |
| 0.066269131 | 0.077428821 | 0.14450402  | 0.196310722 |
| 0.080669946 | 0.138286306 | 0.293651231 | 0.078664727 |

|             |             |             |             |
|-------------|-------------|-------------|-------------|
| 0.043059691 | 0.385813638 | 0.214553336 | 0.030372133 |
| 0.055044435 | 0.283203204 | 0.214404591 | 0.080053299 |
| 0.017948341 | 0.302518843 | 0.106767243 | 0.181983286 |
| 0.247970403 | 0.080120446 | 0.36594472  | 0.10473607  |
| 0.112743155 | 0.388618097 | 0.165584759 | 0.348680207 |
| 0.148037381 | 0.30363057  | 0.378572939 | 0.308800157 |
| 0.137739993 | 0.164526826 | 0.046084211 | 0.399103519 |
| 0.087376327 |             |             |             |
| DTD1        | 0.187045067 | 0.33019116  | 0.159185751 |
| 0.246329352 | 0.138707427 | 0.145468639 | 0.068733448 |
| 0.015718366 | 0.046929986 | 0.001407343 | 0.01654497  |
| 0.163101088 | 0.023707497 | 0.029428541 | 0.093746658 |
| 0.247915553 | 0.025863347 | 0.051633541 | 0.078474411 |
| 0.166963732 | 0.013006248 | 0.208323286 | 0.020529637 |
| 0.064125469 | 0.059735518 | 0.039978368 | 0.157472141 |
| 0.241962559 | 0.045467071 | 0.083068105 | 0.146633245 |
| 0.011876448 | 0.193128285 | 0.329366339 | 0.213765282 |
| 0.310579424 | 0.189169188 | 0.000642025 | 0.070847197 |
| 0.209788257 | 0.323874489 | 0.180196643 | 0.134489299 |
| 0.011931429 | 0.269155713 | 0.104115667 | 0.17446822  |
| 0.015391745 | 0.015550925 | 0.036434321 | 0.245365949 |
| 0.297542875 | 0.210054258 | 0.039623048 | 0.049703191 |
| 0.027095055 | 0.018423121 | 0.052839824 | 0.097892951 |
| 0.070945117 | 0.0179818   | 0.305148007 | 0.025440779 |
| 0.013147898 | 0.032474105 | 0.019257535 | 0.045113301 |
| 0.095299577 | 0.172305167 | 0.001303528 | 0.149407759 |
| 0.000256471 | 0.165975278 | 0.135365537 | 0.177635505 |
| 0.018592394 | 0.003125524 | 0.030285972 | 0.134127226 |
| 0.252674245 | 0.257659884 | 0.322540881 | 0.339194901 |
| 0.015872479 | 0.07501824  | 0.146577536 | 0.037605857 |
| 0.255861908 | 0.058170295 | 0.01167721  | 0.247236056 |
| 0.333782174 | 0.329503245 | 0.049057035 | 0.12068484  |
| 0.292174379 | 0.273169331 | 0.150908582 | 0.135840075 |
| 0.166074081 | 0.011852577 | 0.274485265 | 0.322518389 |
| 0.183470061 | 0.12314086  | 0.065045451 | 0.174769458 |
| 0.016215938 | 0.030149722 | 0.159513473 | 0.005566115 |
| 0.274663459 | 0.011888759 | 0.083186607 | 0.110417563 |
| 0.013912302 | 0.22220554  | 0.344149885 | 0.065669146 |
| 0.108423292 | 0.002124162 | 0.056356222 | 0.006153048 |
| 0.01889819  | 0.027390822 | 0.287624407 | 0.276304146 |
| 0.012262339 | 0.040501153 | 0.060489071 | 0.000998962 |
| 0.007910478 | 0.012173668 | 0.196322095 | 0.061290083 |
| 0.199219917 | 0.231234575 | 0.117108373 | 0.16662087  |
| 0.238016859 | 0.31514299  | 0.00825155  | 0.018327555 |
| 0.167148252 | 0.012932916 | 0.094945725 | 0.14579358  |
| 0.157966336 | 0.016593082 | 0.024623471 | 0.35366604  |
| 0.229081833 | 0.025541196 | 0.036802843 | 0.220025392 |
| 0.04935527  | 0.156998528 | 0.01920742  | 0.036366041 |
| 0.007767117 | 0.325037407 | 0.010185264 | 0.057715204 |
| 1           | 0.011582152 | 0.000483698 | 0.043793866 |
| 0.021654923 | 0.2909256   | 0.270751072 | 0.023809945 |
| 0.056724518 | 0.2140502   | 0.054027299 | 0.238536154 |
| 0.00959267  | 0.004626755 | 0.036837544 | 0.307718991 |
| 0.080898287 | 0.308144869 | 0.041546438 | 0.078607442 |

|             |             |             |             |
|-------------|-------------|-------------|-------------|
| 0.121227073 | 0.276023599 | 0.000659215 | 0.306101609 |
| 0.349415338 | 0.04336691  | 0.155707061 | 0.152183326 |
| 0.225800373 | 0.287171739 | 0.002435389 | 0.176429878 |
| 0.111694538 | 0.018692144 | 0.328678943 | 0.069509241 |
| 0.254595432 | 0.024687819 | 0.040222986 | 0.32160377  |
| 0.218928314 | 0.001647143 | 0.051014763 | 0.178127259 |
| 0.008004369 | 0.014257578 | 0.190886107 | 0.203119462 |
| 0.241645653 | 0.256969203 | 0.298909578 | 0.222163304 |
| 0.159049554 | 0.035496023 | 0.002130846 | 0.12545309  |
| 0.229517203 | 0.031096052 | 0.263012471 | 0.040166681 |
| 0.081460204 | 0.301137022 | 0.237637003 | 0.029931643 |
| 0.020584704 | 0.065705659 | 0.00310005  | 0.202782179 |
| 0.259507256 | 0.018193398 | 0.224503297 | 0.006379813 |
| 0.022635496 | 0.34965081  | 0.065204754 | 0.094007899 |
| 0.046700182 | 0.12294909  | 0.061708466 | 0.034750151 |
| 0.026015342 | 0.051436122 | 0.162104427 | 0.12821067  |
| 0.006715742 | 0.024170183 | 0.001940365 | 0.052348567 |
| 0.011025524 | 0.053164647 | 0.050931772 | 0.15101028  |
| 0.020829859 | 0.007885549 | 0.139556704 | 0.070229598 |
| 0.04385974  | 0.007373025 | 0.322215375 | 0.185792897 |
| 0.123338843 | 0.041669114 | 0.00989646  | 0.016734869 |
| 0.284242625 | 0.11776467  | 0.034883441 | 0.271953309 |
| 0.003111588 | 0.305479391 | 0.030089168 | 0.057728167 |
| 0.083587245 | 0.080993487 | 0.29628916  | 0.018242943 |
| 0.100072587 | 0.263922117 | 0.101375748 | 0.09733475  |
| 0.197156044 | 0.181695696 | 0.004915668 | 0.18076939  |
| 0.158284029 | 0.010644208 | 0.331033364 | 0.018818416 |
| 0.008585646 | 0.22153625  | 0.291034678 | 0.038321298 |
| 0.033800094 | 0.125742654 | 0.006193395 | 0.152553493 |
| 0.344941104 | 0.23593078  | 0.256478845 | 0.066339078 |
| 0.01478103  | 0.001024184 | 0.052561879 | 0.136451601 |
| 0.291225628 | 0.327147186 | 0.070866162 | 0.142453347 |
| 0.09160229  | 0.159429318 | 0.00493413  | 0.334884706 |
| 0.011976875 | 0.305573623 | 0.00253912  | 0.293529133 |
| 0.322186234 | 0.046762022 | 0.049893743 | 0.102116298 |
| 0.186099682 | 0.021246196 | 0.021416746 | 0.303397101 |
| 0.294636659 | 0.159655011 | 0.166282753 | 0.149259954 |
| 0.003579426 | 0.00400128  | 0.236872921 | 0.060516491 |
| 0.096677862 | 0.07728702  | 0.011288337 | 0.035531021 |
| 0.007992371 | 0.270120635 | 0.231611848 | 0.044205461 |
| 0.138186482 | 0.040680752 | 0.162210558 | 0.014582192 |
| 0.344007185 | 0.310438977 | 0.317354887 | 0.017443984 |
| 0.196535358 | 0.348469625 | 0.207255358 | 0.022701021 |
| 0.010037037 | 0.330747319 | 0.163593887 | 0.003561412 |
| 0.273490762 | 0.043100287 | 0.002554648 | 0.29840293  |
| 0.054561792 | 0.230224059 | 0.004819859 | 0.007116727 |
| 0.008491096 | 0.278257355 | 0.323469613 | 0.142720708 |
| 0.045610342 | 0.116144878 | 0.000247777 | 0.327327231 |
| 0.299571314 | 0.009462351 | 0.028418986 | 0.241373214 |
| 0.271909344 | 0.30961027  | 0.18982185  | 0.332440204 |
| 0.190417645 | 0.317800075 | 0.019054052 | 0.141866329 |
| 0.276534495 | 0.331095074 | 0.203902034 | 0.276527967 |
| 0.251355613 | 0.200057767 | 0.131358537 | 0.008024941 |
| 0.088988296 | 0.031566269 | 0.104740054 | 0.031713004 |

|             |             |             |             |
|-------------|-------------|-------------|-------------|
| 0.096460804 | 0.058229359 | 0.279298189 | 0.276656204 |
| 0.315312259 | 0.00306234  | 0.012670658 | 0.229569378 |
| 0.237671578 | 0.281706645 | 0.002428392 | 0.006700029 |
| 0.001267742 | 0.014742275 | 0.106079118 | 0.090803247 |
| 0.335383894 | 0.015845652 | 0.001937449 | 0.003224306 |
| 0.025474621 | 0.236869575 | 0.312703963 | 0.185737469 |
| 0.247689309 | 0.016682115 | 0.055814359 | 0.182555279 |
| 0.031483302 | 0.110016327 | 0.331079982 | 0.288793217 |
| 0.005317259 | 0.097933508 | 0.060278121 | 0.305951694 |
| 0.027377066 | 0.116277754 | 0.155378864 | 0.051085864 |
| 0.000765169 | 0.033148654 | 0.046060333 | 0.237693717 |
| 0.306462517 | 0.013028347 | 0.007637193 | 0.005993875 |
| 0.030553393 | 0.267606255 | 0.025499248 | 0.33165736  |
| 0.243419635 | 0.245462032 | 0.010549172 | 0.32298628  |
| 0.017414589 | 0.289006137 | 0.147767473 | 0.007669361 |
| 0.037749993 | 0.001852302 | 0.26106788  | 0.081979162 |
| 0.039300904 | 0.138665276 | 0.095152289 | 0.005872433 |
| 0.054022264 | 0.016481589 | 0.322301938 | 0.307953221 |
| 0.005473659 | 0.04135299  | 0.097936213 | 0.146496983 |
| 0.068796959 | 0.247875834 | 0.306276726 | 0.138245807 |
| 0.020287058 | 0.008564114 | 0.166095297 | 0.1334427   |
| 0.018934428 | 0.313957814 | 0.108396475 | 0.33721263  |
| 0.188870478 | 0.276066877 | 0.29103041  | 0.180779363 |
| 0.021901504 | 0.130652008 | 0.175123828 | 0.003004151 |
| 0.119381923 | 0.270843739 | 0.075600922 | 0.050043235 |
| 0.11101381  | 0.170931562 | 0.003381518 | 0.005386609 |
| 0.140013759 | 0.096259551 | 0.013421374 | 0.251921122 |
| 0.111981451 | 0.152216781 | 0.001170156 | 0.047478207 |
| 0.331623258 | 0.270771005 | 0.019263851 | 0.212002709 |
| 0.042101595 | 0.205925931 | 0.247094142 | 0.252001462 |
| 0.062653508 | 0.248469696 | 0.193710003 | 0.158098934 |
| 0.232795217 | 0.098216893 | 0.333551395 | 0.003203621 |
| 0.05333277  | 0.127406302 | 0.023405141 | 0.034990812 |
| 0.041818008 | 0.009458716 | 0.087383759 | 0.195472492 |
| 0.080737665 | 0.15732046  | 0.014276    | 0.010926402 |
| 0.109189264 | 0.068496455 | 0.135065154 | 0.04286994  |
| 0.013508952 | 0.321962927 | 0.002425789 | 0.012878686 |
| 0.070041992 | 0.320339578 | 0.194767345 | 0.0641108   |
| 0.078294723 | 0.016009797 | 0.100739761 | 0.055953644 |
| 0.065714739 | 0.022274097 | 0.311324316 | 0.005264492 |
| 0.002069933 | 0.297584779 | 0.079391507 | 0.002541639 |
| 0.009576639 | 0.133379948 | 0.020974303 | 0.070185223 |
| 0.008953823 | 0.318848679 | 0.093606655 | 0.167481717 |
| 0.10444318  | 0.010411556 | 0.158778051 | 0.008099981 |
| 0.006177523 | 0.237126431 | 0.188748945 | 0.323941354 |
| 0.089218026 | 0.243075473 | 0.246954767 | 0.208713072 |
| 0.00771338  | 0.121032906 | 0.008299711 | 0.229198199 |
| 0.128894729 |             |             |             |
| DUS2L       | 0.128425796 | 0.167334242 | 0.088928429 |
| 0.170034172 | 0.166866977 | 0.054582298 | 0.067830339 |
| 0.014737146 | 0.009692554 | 0.008555505 | 0.037210282 |
| 0.170321926 | 0.043698185 | 0.0537342   | 0.014039519 |
| 0.219112177 | 0.19333554  | 0.047186288 | 0.136712004 |
| 0.158193177 | 0.020478382 | 0.269694816 | 0.042714414 |

|             |             |             |             |
|-------------|-------------|-------------|-------------|
| 0.082476737 | 0.144040057 | 0.105846554 | 0.099032803 |
| 0.1879467   | 0.109390994 | 0.041760371 | 0.106781708 |
| 0.120354834 | 0.155483737 | 0.137043168 | 0.256536642 |
| 0.144906999 | 0.091790731 | 0.023915349 | 0.025501731 |
| 0.116179578 | 0.161999524 | 0.150543894 | 0.1675868   |
| 0.036478533 | 0.11141858  | 0.110240187 | 0.189743404 |
| 0.005255634 | 0.081953105 | 0.013311913 | 0.095992072 |
| 0.123157931 | 0.106976853 | 0.02340891  | 0.050477706 |
| 0.034081949 | 0.022445475 | 0.070693806 | 0.054284    |
| 0.117599515 | 0.011519336 | 0.137286278 | 0.007163096 |
| 0.007684452 | 0.040192692 | 0.177127259 | 0.058574719 |
| 0.087437185 | 0.076813013 | 0.011045861 | 0.122894391 |
| 0.003504997 | 0.14740202  | 0.219082458 | 0.053138662 |
| 0.153086921 | 0.045494995 | 0.207399987 | 0.123686029 |
| 0.193142431 | 0.127339804 | 0.246343813 | 0.221863762 |
| 0.098038356 | 0.175901071 | 0.16100126  | 0.124225819 |
| 0.131426916 | 0.073730195 | 0.016019281 | 0.271214019 |
| 0.23700781  | 0.166578093 | 0.077650991 | 0.21325389  |
| 0.125981196 | 0.141307376 | 0.065656367 | 0.109465368 |
| 0.038717894 | 0.07251021  | 0.114388154 | 0.214265291 |
| 0.096283075 | 0.160254463 | 0.207916099 | 0.133224086 |
| 0.115736783 | 0.016499984 | 0.194884678 | 0.064347279 |
| 0.197040544 | 0.011471141 | 0.254309505 | 0.11402494  |
| 0.032397179 | 0.135734265 | 0.169905715 | 0.103916918 |
| 0.16926093  | 0.035536679 | 0.022358481 | 0.089703909 |
| 0.022121514 | 0.076863292 | 0.10398462  | 0.195828564 |
| 0.025187765 | 0.05303896  | 0.064666534 | 0.030910209 |
| 0.117789368 | 0.035460517 | 0.173628564 | 0.088929062 |
| 0.14790916  | 0.098588117 | 0.090932874 | 0.085336567 |
| 0.148161265 | 0.247435965 | 0.000683879 | 0.039131442 |
| 0.100051028 | 0.058690825 | 0.20713883  | 0.146188194 |
| 0.17939281  | 0.030589591 | 0.119116232 | 0.198908199 |
| 0.09651576  | 0.111634271 | 0.034057927 | 0.238488635 |
| 0.031734679 | 0.257004807 | 0.093075071 | 0.116193368 |
| 0.036068899 | 0.135549344 | 0.15869086  | 0.04536099  |
| 0.011582152 | 1           | 0.009122879 | 0.04017684  |
| 0.016392059 | 0.147399802 | 0.105100475 | 0.116050449 |
| 0.139068287 | 0.22349922  | 0.040440057 | 0.1396269   |
| 0.015011381 | 0.025537652 | 0.021416853 | 0.206583147 |
| 0.039279183 | 0.209179696 | 0.076646816 | 0.084570186 |
| 0.229325979 | 0.185329683 | 0.000923389 | 0.119954182 |
| 0.163480133 | 0.021662128 | 0.204927192 | 0.18647401  |
| 0.072365525 | 0.182318066 | 0.002562707 | 0.255221028 |
| 0.071067726 | 0.08532674  | 0.234692531 | 0.226385869 |
| 0.132164939 | 0.116856725 | 0.04754686  | 0.178780748 |
| 0.173494586 | 0.012231845 | 0.0213625   | 0.12376134  |
| 0.101756871 | 0.009890333 | 0.131953824 | 0.146169136 |
| 0.108138424 | 0.191438668 | 0.242784393 | 0.064729804 |
| 0.146665131 | 0.064244285 | 0.0202173   | 0.211679705 |
| 0.16269406  | 0.014052592 | 0.102393713 | 0.03611298  |
| 0.043934549 | 0.136496279 | 0.124819744 | 0.00465449  |
| 0.060898785 | 0.06096775  | 0.008529721 | 0.11385577  |
| 0.095074181 | 0.058048112 | 0.061870106 | 0.061251651 |
| 0.183898004 | 0.194082769 | 0.138940662 | 0.107079952 |



|             |              |             |             |
|-------------|--------------|-------------|-------------|
| 0.09055347  | 0.139735042  | 0.090178661 | 0.068053236 |
| 0.07663563  | 0.071563012  | 0.065043695 | 0.05528799  |
| 0.018457101 | 0.162013183  | 0.021968095 | 0.093673011 |
| 0.062690861 | 0.099344046  | 0.08366493  | 0.105195021 |
| 0.053974612 | 0.058019556  | 0.165805399 | 0.047651536 |
| 0.096340662 | 0.110036357  | 0.162958233 | 0.187764028 |
| 0.057161845 | 0.045666716  | 0.12584866  | 0.019996887 |
| 0.196009201 | 0.031145444  | 0.011971186 | 0.151067541 |
| 0.014712901 | 0.220034041  | 0.068069272 | 0.202992947 |
| 0.170642633 | 0.184487013  | 0.190797667 | 0.002870814 |
| 0.081626371 | 0.13644707   | 0.160067061 | 0.116287438 |
| 0.103831576 | 0.13819141   | 0.016767326 | 0.095967615 |
| 0.10729877  | 0.12878882   | 0.19072402  | 0.168247155 |
| 0.124540966 | 0.216547593  | 0.155306856 | 0.16625084  |
| 0.121827277 | 0.097217349  | 0.007499169 | 0.255260588 |
| 0.1827709   | 0.270679046  | 0.133727701 | 0.106474431 |
| 0.074009156 | 0.054795755  | 0.196798856 | 0.117190975 |
| 0.130515941 | 0.199934317  | 0.213519602 | 0.190980955 |
| 0.163600574 | 0.05419147   | 0.002992706 | 0.203363231 |
| 0.021267196 | 0.152318778  | 0.052424967 | 0.195584385 |
| 0.134596929 | 0.036573657  | 0.148913855 | 0.061146737 |
| 0.098651191 | 0.045013154  | 0.057699545 | 0.142004285 |
| 0.125000991 | 0.060385982  | 0.044396604 | 0.191326993 |
| 0.010322919 | 0.013898022  | 0.127901538 | 0.077389908 |
| 0.050278101 | 0.072519658  | 0.031452262 | 0.022986999 |
| 0.043476636 | 0.131692679  | 0.23881521  | 0.032387206 |
| 0.052901975 | 0.017345306  | 0.273459493 | 0.075624402 |
| 0.187076489 | 0.163184015  | 0.144158618 | 0.048488229 |
| 0.187875011 | 0.172026823  | 0.151814976 | 0.146429876 |
| 0.127527749 | 0.152666388  | 0.08426794  | 0.014245305 |
| 0.230048105 | 0.0171117084 | 0.035373954 | 0.14831659  |
| 0.099943627 | 0.095479717  | 0.000160144 | 0.008068026 |
| 0.073878253 | 0.249478906  | 0.113674591 | 0.103805178 |
| 0.012271189 | 0.140255947  | 0.011425027 | 0.200098758 |
| 0.149882998 | 0.084526676  | 0.097179591 | 0.168697437 |
| 0.178187778 | 0.156510445  | 0.111433614 | 0.198428824 |
| 0.178566115 | 0.143562553  | 0.021428466 | 0.209055812 |
| 0.149352775 | 0.164881128  | 0.12009654  | 0.116719679 |
| 0.216886497 | 0.246912847  | 0.153594555 | 0.024581648 |
| 0.009536387 | 0.022552064  | 0.018014344 | 0.014916084 |
| 0.041723938 | 0.084527084  | 0.158243711 | 0.232215563 |
| 0.214032195 | 0.065563737  | 0.016832422 | 0.144577614 |
| 0.144750323 | 0.181159828  | 0.013001801 | 0.001474757 |
| 0.001728935 | 0.036489374  | 0.091474327 | 0.166640344 |
| 0.168234603 | 0.00794691   | 0.04222009  | 0.009319189 |
| 0.023400614 | 0.223079244  | 0.15805868  | 0.212647689 |
| 0.180958431 | 0.129971947  | 0.030736758 | 0.186917933 |
| 0.057306505 | 0.049295206  | 0.210000903 | 0.123810638 |
| 0.070385632 | 0.133049963  | 0.071059692 | 0.196675922 |
| 0.044699963 | 0.264368166  | 0.192086074 | 0.045712292 |
| 0.020476228 | 0.11642034   | 0.070996452 | 0.226889236 |
| 0.139002303 | 0.096995262  | 0.087049986 | 0.004243879 |
| 0.072632291 | 0.201959003  | 0.07997356  | 0.221961765 |
| 0.153975212 | 0.243030113  | 0.105645762 | 0.120762627 |

|             |             |             |             |
|-------------|-------------|-------------|-------------|
| 0.029707761 | 0.139425971 | 0.201835764 | 0.001408407 |
| 0.099974034 | 0.037178292 | 0.164907963 | 0.013348198 |
| 0.043200403 | 0.103061406 | 0.010281292 | 0.101988355 |
| 0.029513597 | 0.153639077 | 0.223992248 | 0.236910756 |
| 0.071662488 | 0.039558559 | 0.166210441 | 0.158839737 |
| 0.04495109  | 0.207673089 | 0.128672483 | 0.053268009 |
| 0.032987074 | 0.044532642 | 0.144145163 | 0.091128671 |
| 0.033909301 | 0.248311478 | 0.054749187 | 0.188819538 |
| 0.096866325 | 0.138900588 | 0.173641319 | 0.088837732 |
| 0.074015951 | 0.068567277 | 0.097251898 | 0.011433356 |
| 0.131495389 | 0.235302485 | 0.065393282 | 0.055999616 |
| 0.189523366 | 0.136504453 | 0.015633266 | 0.006502646 |
| 0.124508734 | 0.043975337 | 0.056407714 | 0.229523801 |
| 0.097075474 | 0.0939973   | 0.015151799 | 0.061097888 |
| 0.173810612 | 0.106044647 | 0.005677689 | 0.122428458 |
| 0.161952358 | 0.145040978 | 0.19286897  | 0.234681216 |
| 0.028108797 | 0.181359289 | 0.150551406 | 0.112470835 |
| 0.109265417 | 0.097454001 | 0.145299422 | 0.002815185 |
| 0.023219152 | 0.128386244 | 0.077845298 | 0.195876019 |
| 0.154718119 | 0.048090115 | 0.053874613 | 0.243072348 |
| 0.076599494 | 0.241345019 | 0.015559514 | 0.022704253 |
| 0.229097555 | 0.052259687 | 0.197044516 | 0.050247795 |
| 0.049659357 | 0.135508151 | 0.015910669 | 0.149455006 |
| 0.122685748 | 0.143039383 | 0.164601923 | 0.120684756 |
| 0.060077446 | 0.097811077 | 0.205522876 | 0.034811528 |
| 0.056494537 | 0.015743561 | 0.134637092 | 0.005898626 |
| 0.022965049 | 0.241386251 | 0.046844684 | 0.031347084 |
| 0.036885842 | 0.066117955 | 0.061238213 | 0.032200339 |
| 0.110551472 | 0.179396616 | 0.030903998 | 0.141765093 |
| 0.079329581 | 0.090699488 | 0.070651415 | 0.008734587 |
| 0.0146247   | 0.115444348 | 0.13434749  | 0.162456359 |
| 0.12550293  | 0.247006303 | 0.090047427 | 0.162258462 |
| 0.014931105 | 0.078083152 | 0.018769366 | 0.171105283 |
| 0.054623786 |             |             |             |

|             |             |             |             |
|-------------|-------------|-------------|-------------|
| DUSP1       | 0.026120333 | 0.012091014 | 0.019228112 |
| 0.033174488 | 0.024967587 | 0.012596499 | 0.058791455 |
| 0.050589068 | 0.009432875 | 0.003535964 | 0.00160336  |
| 0.019859368 | 0.001334046 | 0.015198756 | 0.004279669 |
| 0.055762533 | 0.035847869 | 0.050642172 | 0.105893235 |
| 0.055373861 | 0.043085645 | 0.047304682 | 0.082644217 |
| 0.018821363 | 0.02382672  | 0.05612277  | 0.012186165 |
| 0.042517801 | 0.07171358  | 0.007363299 | 0.041031642 |
| 0.117957619 | 0.028177827 | 0.008171131 | 0.016184702 |
| 0.006475553 | 0.017377322 | 0.039164895 | 0.006156639 |
| 0.027130079 | 0.017424941 | 0.049325414 | 0.056910535 |
| 0.056849864 | 0.008002474 | 0.057258504 | 0.03888583  |
| 0.004369196 | 0.026683659 | 0.016245906 | 0.010371379 |
| 0.004196609 | 0.006393954 | 0.049159943 | 0.044763693 |
| 0.00017213  | 0.016322066 | 0.000840975 | 0.023806406 |
| 0.065820636 | 0.019251237 | 0.005889823 | 0.01026058  |
| 0.002526287 | 0.080452964 | 0.072491762 | 0.064804195 |
| 0.008547875 | 0.022431366 | 0.126215996 | 0.013428016 |
| 0.00200425  | 0.072563502 | 0.062333928 | 0.002520265 |
| 0.15468766  | 0.010391997 | 0.089686104 | 0.040650062 |

|             |             |             |             |
|-------------|-------------|-------------|-------------|
| 0.03578524  | 0.014642867 | 0.020494997 | 0.01525663  |
| 0.013741741 | 0.100840229 | 0.01507218  | 0.049951241 |
| 0.020024207 | 0.035923417 | 0.01316426  | 0.048341646 |
| 0.018434388 | 0.008211953 | 0.022965856 | 0.082921833 |
| 0.00904966  | 0.015067602 | 0.010048224 | 0.012236853 |
| 0.001971377 | 0.070566987 | 0.00718859  | 0.014020525 |
| 0.018007988 | 0.011609323 | 0.076380834 | 0.033324258 |
| 0.179121576 | 0.007285606 | 0.062275037 | 0.010327568 |
| 0.033852488 | 0.047594981 | 0.067642564 | 0.028153832 |
| 0.07374708  | 0.02321663  | 0.007852498 | 0.092088883 |
| 0.032815199 | 0.015710177 | 0.000666482 | 0.203105814 |
| 0.003124772 | 0.00708904  | 0.004656072 | 0.018889374 |
| 0.025157092 | 0.005517906 | 0.069121477 | 0.118368412 |
| 0.085351359 | 0.036554654 | 0.013821121 | 0.061897143 |
| 0.039696361 | 0.01026944  | 0.013122468 | 0.014362769 |
| 0.007412023 | 0.020501614 | 0.000153985 | 0.12023999  |
| 0.018816071 | 0.062022278 | 0.120871136 | 0.013338173 |
| 0.025330034 | 0.116222933 | 0.115284472 | 0.017327029 |
| 0.014005194 | 0.128627307 | 0.031118188 | 0.055238554 |
| 0.002875051 | 0.029135387 | 0.14986332  | 0.02627163  |
| 0.062383882 | 0.005548923 | 0.103766923 | 0.052658183 |
| 0.000483698 | 0.009122879 | 1           | 0.051434409 |
| 0.004813273 | 0.006002808 | 0.005094129 | 0.202481046 |
| 0.032329384 | 0.034067185 | 0.027794933 | 0.007137931 |
| 0.001637688 | 0.075090789 | 0.019389949 | 0.013153923 |
| 0.013437964 | 0.019421099 | 0.053001365 | 0.041186496 |
| 0.075472724 | 0.035443646 | 0.011783537 | 0.007133235 |
| 0.008064677 | 0.01289545  | 0.015755386 | 0.040099154 |
| 0.004176701 | 0.022701206 | 0.001401524 | 0.055207034 |
| 0.019186855 | 0.217534103 | 0.0240516   | 0.066965208 |
| 0.010798842 | 0.079760723 | 0.021632046 | 0.010461625 |
| 0.005631903 | 0.00946953  | 0.020543688 | 0.043146637 |
| 0.098317642 | 0.025933244 | 0.038028062 | 0.038730088 |
| 0.018442304 | 0.034450591 | 0.0332073   | 0.003020247 |
| 0.017862621 | 0.10257117  | 0.078790857 | 0.056517596 |
| 0.026026202 | 0.000855716 | 0.010805919 | 0.03715053  |
| 0.014249315 | 0.011672407 | 0.009323318 | 0.000403119 |
| 0.097553926 | 0.044166884 | 0.008674796 | 0.024787795 |
| 0.011004205 | 0.015998358 | 0.006000774 | 0.070196015 |
| 0.084263241 | 0.012776117 | 0.021952531 | 0.009127275 |
| 0.009957372 | 0.008568218 | 0.122152054 | 0.003288943 |
| 0.001229036 | 0.046735743 | 0.006568817 | 0.009564692 |
| 0.054735109 | 0.067879941 | 0.070630561 | 0.001503228 |
| 0.001233687 | 0.001905524 | 0.001591135 | 0.013650126 |
| 0.010124921 | 0.007241938 | 0.015779053 | 0.016967457 |
| 0.050217675 | 0.166651599 | 0.012520618 | 0.066190184 |
| 0.014404973 | 0.065191181 | 0.186583259 | 0.000287416 |
| 0.016143156 | 0.004007569 | 0.011346148 | 0.012344739 |
| 0.052589657 | 0.023868706 | 0.005962948 | 0.067577925 |
| 0.00577945  | 0.055820365 | 0.034446572 | 0.00112876  |
| 0.03130727  | 0.010409396 | 0.107631637 | 0.031196202 |
| 0.007862104 | 0.037909496 | 0.027108095 | 0.016099178 |
| 0.013306473 | 0.11910769  | 0.011004461 | 0.043864735 |
| 0.186004636 | 0.025702846 | 0.006689964 | 0.150017891 |

|             |             |             |             |
|-------------|-------------|-------------|-------------|
| 0.100942402 | 0.009278761 | 0.050686402 | 0.076659726 |
| 0.012625164 | 0.043002157 | 0.007878067 | 0.042129766 |
| 0.06192419  | 0.002405422 | 0.069085154 | 0.023644401 |
| 0.007288516 | 0.010378622 | 0.135890356 | 0.008706891 |
| 0.120675863 | 0.003949561 | 0.005303985 | 0.011958839 |
| 0.040024802 | 0.011172172 | 0.19907885  | 0.012660846 |
| 0.00536024  | 0.01853044  | 0.03870346  | 0.028011365 |
| 0.011608199 | 0.105763304 | 0.139503512 | 0.008262898 |
| 0.016228104 | 0.014193197 | 0.00569019  | 0.044105959 |
| 0.051481347 | 0.048771294 | 0.026152408 | 0.013242786 |
| 0.006142021 | 0.050007212 | 0.003343536 | 0.018029018 |
| 0.023413829 | 0.008678988 | 0.037423737 | 0.023286001 |
| 0.003888005 | 0.021995961 | 0.059819486 | 0.146212634 |
| 0.00879894  | 0.010426937 | 0.008265761 | 0.143813077 |
| 0.017387578 | 0.007521255 | 0.00385323  | 0.180758861 |
| 0.138999501 | 0.00747011  | 0.029775991 | 0.004750873 |
| 0.028696953 | 0.013665548 | 0.003516533 | 0.014205155 |
| 0.138716946 | 0.006202474 | 0.003836328 | 0.012578179 |
| 0.107414007 | 0.030423679 | 0.006386337 | 0.048205049 |
| 0.002244782 | 0.093468339 | 0.026611933 | 0.013893343 |
| 0.008234326 | 0.065677525 | 0.029181046 | 0.007651063 |
| 0.006278806 | 0.013649474 | 0.006535384 | 0.008691624 |
| 0.00658716  | 0.005508817 | 0.005304845 | 0.070456722 |
| 0.013687767 | 0.0064718   | 0.032517668 | 0.014814349 |
| 0.023371221 | 0.041027494 | 0.07519988  | 0.048049115 |
| 0.003758426 | 0.036428864 | 0.000470885 | 0.001594945 |
| 0.022634673 | 0.025049192 | 0.01596673  | 0.02899117  |
| 0.011381386 | 0.183797833 | 0.038687646 | 0.010620356 |
| 0.025030937 | 0.03060886  | 0.091010305 | 0.005742499 |
| 0.004903009 | 0.003286968 | 0.049576534 | 0.089726048 |
| 0.012916132 | 0.000484089 | 0.137360176 | 0.061584919 |
| 0.018430985 | 0.017191514 | 0.00832837  | 0.077755446 |
| 0.021996205 | 0.155550538 | 0.001114432 | 0.075385876 |
| 0.015637626 | 0.016165672 | 0.012315958 | 0.009526266 |
| 0.161130465 | 0.076608333 | 0.03894437  | 0.02336724  |
| 0.001454604 | 0.080600949 | 0.020733443 | 0.004586292 |
| 0.062031243 | 0.072080066 | 0.048997647 | 0.046101622 |
| 0.005089232 | 0.007390316 | 0.012649631 | 0.001357271 |
| 0.023431291 | 0.025044682 | 0.024153177 | 0.019509653 |
| 0.024036692 | 0.044624156 | 0.043764748 | 0.009307115 |
| 0.005506231 | 0.006276359 | 0.01589147  | 0.001476833 |
| 0.081680342 | 0.163326877 | 0.009571107 | 6.13E-05    |
| 0.018374895 | 0.042900355 | 0.003028456 | 0.111692828 |
| 0.005886977 | 0.106839414 | 0.020866802 | 0.021221205 |
| 0.10453693  | 0.069232007 | 0.096638266 | 0.068332652 |
| 0.036397118 | 0.023367408 | 0.00751747  | 0.003282516 |
| 0.04554103  | 0.00859606  | 0.052503623 | 0.021279858 |
| 0.035591976 | 0.023649964 | 0.003416684 | 0.014540076 |
| 0.025497565 | 0.020931543 | 0.01054408  | 0.034622873 |
| 0.005068925 | 0.021489605 | 0.014073693 | 0.006266961 |
| 0.072210498 | 0.020256677 | 0.057115641 | 0.005822907 |
| 0.026765082 | 0.009764501 | 0.070223307 | 0.006471648 |
| 0.00623448  | 0.018078782 | 0.023980072 | 0.052488762 |
| 0.042501186 | 0.019373696 | 0.06716146  | 0.039170156 |

|             |             |             |             |
|-------------|-------------|-------------|-------------|
| 0.012722102 | 0.015131526 | 0.0179689   | 0.019253464 |
| 0.15780713  | 0.029210958 | 0.023654842 | 0.021636752 |
| 0.007596003 | 0.00976016  | 0.029389164 | 0.011537694 |
| 0.010141177 | 0.08558477  | 0.008384963 | 0.034524397 |
| 0.004945221 | 0.017354906 | 0.013561145 | 0.154129458 |
| 0.096224883 | 0.080808088 | 0.001991598 | 0.05257274  |
| 0.002668811 | 0.039166151 | 0.007257465 | 0.022696882 |
| 0.068277498 | 0.027839459 | 0.066825017 | 0.032847026 |
| 0.018682253 | 0.006380441 | 0.012756721 | 0.161394793 |
| 0.005001022 | 0.011951737 | 0.005750388 | 0.066252653 |
| 0.0031998   | 0.059760827 | 0.060658225 | 0.020749991 |
| 0.001409021 | 0.002688406 | 0.010720287 | 0.028704027 |
| 0.088296065 | 0.026417358 | 0.022726347 | 0.101302118 |
| 0.018871779 | 0.021654968 | 0.059697528 | 0.005753116 |
| 0.113650603 | 0.006764638 | 0.003719378 | 0.020948947 |
| 0.052582119 | 0.19284111  | 0.013622336 | 0.018681598 |
| 0.127562622 | 0.011311804 | 0.018531494 | 0.007247615 |
| 0.046265842 | 0.038392911 | 0.00815341  | 0.012293024 |
| 0.026663326 | 0.015148363 | 0.068424271 | 0.033998167 |
| 0.001498117 |             |             |             |
| DUSP16      | 0.230549514 | 0.325478272 | 0.102619533 |
| 0.320483924 | 0.154251132 | 0.2317211   | 0.195057019 |
| 0.254912415 | 0.073018162 | 0.027797036 | 0.014833712 |
| 0.155396147 | 0.071317713 | 0.175146662 | 0.109830588 |
| 0.285520189 | 0.056855551 | 0.152869356 | 0.192269475 |
| 0.314848259 | 0.205875711 | 0.235911589 | 0.143365134 |
| 0.062391502 | 0.035856662 | 0.064080631 | 0.05775835  |
| 0.365605157 | 0.070715597 | 0.187644057 | 0.362922126 |
| 0.062847036 | 0.295269183 | 0.294510683 | 0.176036975 |
| 0.265550623 | 0.20487472  | 0.031984851 | 0.144232173 |
| 0.320175275 | 0.216899691 | 0.328891653 | 0.225697516 |
| 0.090678811 | 0.313054311 | 0.197868906 | 0.142703948 |
| 0.165052052 | 0.032452537 | 0.199612224 | 0.322532294 |
| 0.259269472 | 0.151841904 | 0.239194119 | 0.171281052 |
| 0.048316442 | 0.210038376 | 0.032062874 | 0.326381774 |
| 0.172669363 | 0.218832817 | 0.262911473 | 0.116988829 |
| 0.100778189 | 0.248718794 | 0.060413763 | 0.229525276 |
| 0.058241157 | 0.321901757 | 0.090286001 | 0.12288923  |
| 0.020290963 | 0.319907049 | 0.151198432 | 0.040188442 |
| 0.050974842 | 0.034094005 | 0.072006637 | 0.26579266  |
| 0.350068889 | 0.275135858 | 0.277666626 | 0.25996129  |
| 0.071194631 | 0.117910949 | 0.085426904 | 0.119032125 |
| 0.296007749 | 0.160119206 | 0.111931803 | 0.256983326 |
| 0.277897278 | 0.284955401 | 0.079701261 | 0.098397601 |
| 0.268446007 | 0.3415151   | 0.124019682 | 0.118797433 |
| 0.059562925 | 0.024258618 | 0.277020888 | 0.288034599 |
| 0.310841497 | 0.045625268 | 0.070653439 | 0.369449737 |
| 0.077198259 | 0.131290497 | 0.259851445 | 0.07301736  |
| 0.356305192 | 0.061398657 | 0.068240083 | 0.230383145 |
| 0.142728995 | 0.276000902 | 0.262315993 | 0.173387503 |
| 0.125024585 | 0.031893212 | 0.021515228 | 0.046594941 |
| 0.139869518 | 0.018265775 | 0.268513328 | 0.321509967 |
| 0.228500448 | 0.095551827 | 0.206835572 | 0.008971146 |
| 0.027087158 | 0.081221847 | 0.235172674 | 0.166149608 |

|             |             |             |             |
|-------------|-------------|-------------|-------------|
| 0.285880168 | 0.191659879 | 0.088316897 | 0.276033173 |
| 0.145237653 | 0.271680035 | 0.046428058 | 0.168825479 |
| 0.179279741 | 0.084430541 | 0.17507552  | 0.169509419 |
| 0.091304058 | 0.215436268 | 0.137378953 | 0.315100694 |
| 0.354925849 | 0.120192134 | 0.165343766 | 0.260754868 |
| 0.115585165 | 0.102330503 | 0.145999906 | 0.150187355 |
| 0.128667997 | 0.237573706 | 0.020173286 | 0.200275241 |
| 0.043793866 | 0.04017684  | 0.051434409 | 1           |
| 0.149674663 | 0.242003926 | 0.249045944 | 0.125982387 |
| 0.15513572  | 0.192103885 | 0.214670986 | 0.215806338 |
| 0.018301531 | 0.087053348 | 0.168111866 | 0.302871895 |
| 0.285510604 | 0.280648212 | 0.161466337 | 0.101213716 |
| 0.12490923  | 0.297809067 | 0.002280478 | 0.295153025 |
| 0.274819432 | 0.150738715 | 0.166103406 | 0.172089944 |
| 0.064253989 | 0.316374151 | 0.023501605 | 0.266003028 |
| 0.251243854 | 0.116685489 | 0.311417069 | 0.08016138  |
| 0.27762951  | 0.04992529  | 0.196804076 | 0.184177509 |
| 0.163959586 | 0.020498185 | 0.206693057 | 0.333220203 |
| 0.018517289 | 0.205994441 | 0.28305362  | 0.27337157  |
| 0.179605189 | 0.253382387 | 0.323460055 | 0.053756951 |
| 0.14509221  | 0.225282305 | 0.030073687 | 0.098896205 |
| 0.236177234 | 0.071110818 | 0.325769634 | 0.20413706  |
| 0.201145931 | 0.315350871 | 0.202576721 | 0.069340161 |
| 0.089738614 | 0.229673977 | 0.065431976 | 0.114898364 |
| 0.218134556 | 0.123423077 | 0.091305512 | 0.086677718 |
| 0.043875317 | 0.30718721  | 0.03055491  | 0.03342818  |
| 0.016329247 | 0.178300891 | 0.202225657 | 0.103467924 |
| 0.052094814 | 0.10416868  | 0.073000351 | 0.103238284 |
| 0.140193163 | 0.081050141 | 0.011400459 | 0.061610815 |
| 0.051523729 | 0.079817015 | 0.084747792 | 0.249371163 |
| 0.156811959 | 0.079285042 | 0.114852173 | 0.061471104 |
| 0.051174627 | 0.028937893 | 0.315078405 | 0.267391645 |
| 0.296701684 | 0.162808582 | 0.053373155 | 0.066719325 |
| 0.313716275 | 0.165466517 | 0.161660536 | 0.32639394  |
| 0.056463101 | 0.291262751 | 0.101005118 | 0.067852251 |
| 0.069592101 | 0.155972859 | 0.345827729 | 0.055843602 |
| 0.232095847 | 0.328587987 | 0.150628932 | 0.078146262 |
| 0.296421007 | 0.27171288  | 0.09027477  | 0.255567044 |
| 0.252639517 | 0.049804493 | 0.28981811  | 0.04922534  |
| 0.031120064 | 0.187915785 | 0.179872813 | 0.063624561 |
| 0.053464729 | 0.130371542 | 0.181723769 | 0.147028924 |
| 0.312678378 | 0.250845256 | 0.235974901 | 0.050370617 |
| 0.075168973 | 0.013947922 | 0.060317494 | 0.111487538 |
| 0.295828339 | 0.259345961 | 0.15601034  | 0.081876619 |
| 0.202593257 | 0.069413463 | 0.204039091 | 0.285743436 |
| 0.073188136 | 0.300543744 | 0.023844206 | 0.185883872 |
| 0.262680756 | 0.213176254 | 0.040478302 | 0.232860992 |
| 0.309112363 | 0.092854167 | 0.201795542 | 0.293176935 |
| 0.299448702 | 0.103965885 | 0.085828321 | 0.224919867 |
| 0.090850477 | 0.136075824 | 0.137230794 | 0.028068433 |
| 0.111017256 | 0.121721489 | 0.005151755 | 0.192016144 |
| 0.065317023 | 0.311112928 | 0.29082759  | 0.048265425 |
| 0.17503361  | 0.182219759 | 0.174272487 | 0.074313105 |
| 0.198268951 | 0.255761577 | 0.302296762 | 0.216905218 |

|             |             |             |             |
|-------------|-------------|-------------|-------------|
| 0.227456452 | 0.248806412 | 0.087983114 | 0.061682291 |
| 0.019101562 | 0.265192967 | 0.284318393 | 0.039341146 |
| 0.322382428 | 0.202945696 | 0.02452331  | 0.342239115 |
| 0.180186024 | 0.271190791 | 0.019762706 | 0.019321037 |
| 0.024088027 | 0.255930431 | 0.281789557 | 0.347157829 |
| 0.124009035 | 0.258747541 | 0.004131842 | 0.281690932 |
| 0.301036413 | 0.013185771 | 0.041614936 | 0.207046503 |
| 0.149788914 | 0.342087791 | 0.048238182 | 0.207932919 |
| 0.119506539 | 0.258474373 | 0.150619549 | 0.136191791 |
| 0.293710561 | 0.226269474 | 0.317066272 | 0.331364548 |
| 0.316856054 | 0.203083814 | 0.219763567 | 0.054317765 |
| 0.034112366 | 0.243635965 | 0.067592384 | 0.04058247  |
| 0.279423524 | 0.059464707 | 0.296998241 | 0.296833976 |
| 0.247752756 | 0.014572119 | 0.24442838  | 0.237875336 |
| 0.373258332 | 0.361916586 | 0.031654896 | 0.006186661 |
| 0.005114049 | 0.007069764 | 0.281435201 | 0.090238108 |
| 0.282561409 | 0.10003747  | 0.021758732 | 0.186328775 |
| 0.155540547 | 0.120889618 | 0.293438108 | 0.298976969 |
| 0.217136177 | 0.086569163 | 0.093422328 | 0.319216916 |
| 0.03106917  | 0.234046101 | 0.266779959 | 0.33028631  |
| 0.04442782  | 0.093462813 | 0.152790487 | 0.344069055 |
| 0.005346654 | 0.149341418 | 0.174535717 | 0.118856639 |
| 0.019285427 | 0.044968493 | 0.043303376 | 0.275574435 |
| 0.248074584 | 0.044641229 | 0.02760581  | 0.116822918 |
| 0.118428327 | 0.292538429 | 0.111463307 | 0.312199374 |
| 0.329835821 | 0.325791881 | 0.032056462 | 0.30472012  |
| 0.039232393 | 0.276143794 | 0.068257584 | 0.057948493 |
| 0.12115346  | 0.036237233 | 0.241606089 | 0.026446361 |
| 0.186306077 | 0.305811847 | 0.046597943 | 0.015277188 |
| 0.02424346  | 0.047738279 | 0.299480585 | 0.24004138  |
| 0.021995916 | 0.20530212  | 0.129648154 | 0.250506725 |
| 0.265546066 | 0.272366718 | 0.302354438 | 0.113296    |
| 0.152270109 | 0.025482579 | 0.341961028 | 0.248095212 |
| 0.234377012 | 0.28810706  | 0.077650071 | 0.296527354 |
| 0.276858012 | 0.314042952 | 0.25923761  | 0.213267997 |
| 0.047456876 | 0.223293877 | 0.284266898 | 0.069283025 |
| 0.216585183 | 0.285754953 | 0.211348408 | 0.046056297 |
| 0.089896841 | 0.079748204 | 0.110246644 | 0.099643088 |
| 0.045741974 | 0.279500276 | 0.128055578 | 0.324950207 |
| 0.273648981 | 0.258943947 | 0.145498186 | 0.041987023 |
| 0.324853721 | 0.314438512 | 0.187473837 | 0.256922056 |
| 0.106206769 | 0.144563688 | 0.230833861 | 0.209176886 |
| 0.093385139 | 0.25452555  | 0.333738032 | 0.272105694 |
| 0.336734606 | 0.193761321 | 0.301147991 | 0.236076103 |
| 0.030712268 | 0.165008267 | 0.078519928 | 0.05796175  |
| 0.123164091 | 0.030067987 | 0.034309701 | 0.257285227 |
| 0.050446088 | 0.22089967  | 0.163535701 | 0.07436114  |
| 0.11916103  | 0.123434156 | 0.183507906 | 0.19269591  |
| 0.080332133 | 0.289600601 | 0.01568     | 0.058336044 |
| 0.058981953 | 0.230922617 | 0.075554564 | 0.102662223 |
| 0.04319653  | 0.051136938 | 0.155546437 | 0.221400777 |
| 0.094004613 | 0.085610136 | 0.235249643 | 0.106321747 |
| 0.094758935 | 0.310815581 | 0.164176046 | 0.020148339 |
| 0.04725565  | 0.217055437 | 0.150091483 | 0.10178196  |

|             |             |             |             |
|-------------|-------------|-------------|-------------|
| 0.015183075 | 0.230391641 | 0.123716112 | 0.137511288 |
| 0.259279975 | 0.096415072 | 0.307209223 | 0.092403156 |
| 0.11375207  | 0.311558106 | 0.105897308 | 0.26467495  |
| 0.088231545 | 0.28420509  | 0.299479982 | 0.252412205 |
| 0.084104851 | 0.099015966 | 0.089852366 | 0.334238601 |
| 0.063010412 |             |             |             |
| DUSP19      | 0.205562419 | 0.356087829 | 0.114939882 |
| 0.347153857 | 0.159160146 | 0.216032755 | 0.163571405 |
| 0.072900761 | 0.025468285 | 0.018697177 | 0.008742747 |
| 0.183261386 | 0.034260018 | 0.107149572 | 0.063570482 |
| 0.285176126 | 0.04540137  | 0.081993825 | 0.172836097 |
| 0.263972879 | 0.080474391 | 0.266030797 | 0.060104277 |
| 0.034440279 | 0.041452695 | 0.051572336 | 0.067231702 |
| 0.357909986 | 0.06139617  | 0.158419047 | 0.284767546 |
| 0.024751551 | 0.262101962 | 0.325736715 | 0.233431022 |
| 0.305655589 | 0.189516431 | 0.002562024 | 0.094835131 |
| 0.284668715 | 0.270482182 | 0.275130833 | 0.245976486 |
| 0.04244314  | 0.321485631 | 0.20009691  | 0.155190223 |
| 0.034749462 | 0.023371828 | 0.101549172 | 0.296335726 |
| 0.310322254 | 0.178524274 | 0.105463419 | 0.110834146 |
| 0.023111128 | 0.075100058 | 0.029145677 | 0.228405313 |
| 0.15244328  | 0.091975166 | 0.305455759 | 0.035628571 |
| 0.014810182 | 0.102965523 | 0.031086728 | 0.150659476 |
| 0.044724737 | 0.266156511 | 0.010895662 | 0.134880838 |
| 0.007281828 | 0.264261657 | 0.15275473  | 0.047748831 |
| 0.042990675 | 0.019716961 | 0.048726661 | 0.24955092  |
| 0.34343622  | 0.272730313 | 0.335164627 | 0.313734588 |
| 0.035920099 | 0.103854247 | 0.099302208 | 0.090256995 |
| 0.281018544 | 0.14702459  | 0.055737243 | 0.279961589 |
| 0.336930604 | 0.330657223 | 0.035667476 | 0.107606957 |
| 0.318129139 | 0.334375508 | 0.164294208 | 0.137829377 |
| 0.066133005 | 0.010022816 | 0.293124651 | 0.33782328  |
| 0.273153874 | 0.065634231 | 0.083571732 | 0.316730632 |
| 0.039123891 | 0.058769476 | 0.267804672 | 0.020249271 |
| 0.360410889 | 0.021868687 | 0.082910278 | 0.205689049 |
| 0.029002132 | 0.288706456 | 0.316239742 | 0.151916588 |
| 0.125437193 | 0.014547636 | 0.017974227 | 0.01531246  |
| 0.045496548 | 0.012117221 | 0.291050124 | 0.367255431 |
| 0.051001329 | 0.036488655 | 0.122683559 | 0.003583333 |
| 0.017768257 | 0.01640791  | 0.247614953 | 0.116213206 |
| 0.254546173 | 0.198409457 | 0.096168154 | 0.229710702 |
| 0.186245668 | 0.318578582 | 0.024528515 | 0.059397143 |
| 0.206276341 | 0.017226459 | 0.169855432 | 0.181709205 |
| 0.136022478 | 0.073937826 | 0.082905617 | 0.362789034 |
| 0.313603813 | 0.085001343 | 0.082588729 | 0.282153888 |
| 0.057747843 | 0.14090419  | 0.067025483 | 0.10685725  |
| 0.040948901 | 0.277200335 | 0.016365985 | 0.12920698  |
| 0.021654923 | 0.016392059 | 0.004813273 | 0.149674663 |
| 1           | 0.307712026 | 0.260715406 | 0.069988639 |
| 0.143689554 | 0.224929528 | 0.127982702 | 0.291368389 |
| 0.011021273 | 0.018460156 | 0.08806964  | 0.35293122  |
| 0.200312522 | 0.313582559 | 0.088051968 | 0.065081058 |
| 0.147399451 | 0.31738644  | 0.001126536 | 0.322958552 |
| 0.324510259 | 0.105908517 | 0.227205867 | 0.169382324 |



|             |             |             |             |
|-------------|-------------|-------------|-------------|
| 0.086534192 | 0.366187565 | 0.005440395 | 0.268634457 |
| 0.195835775 | 0.054008119 | 0.353059608 | 0.099889325 |
| 0.289791597 | 0.0419364   | 0.098066689 | 0.237254446 |
| 0.21421632  | 0.006120451 | 0.151522892 | 0.280531403 |
| 0.009565395 | 0.055450998 | 0.2426721   | 0.285149025 |
| 0.212567009 | 0.267133005 | 0.355845091 | 0.078208813 |
| 0.170767841 | 0.119639377 | 0.005697427 | 0.117822896 |
| 0.236219367 | 0.018750362 | 0.329067552 | 0.085324145 |
| 0.152044642 | 0.346584621 | 0.231443397 | 0.018218409 |
| 0.055558214 | 0.149417914 | 0.031665122 | 0.15026415  |
| 0.214599592 | 0.064673437 | 0.104492046 | 0.014398938 |
| 0.036800373 | 0.36035054  | 0.030383144 | 0.038435139 |
| 0.014857584 | 0.213845957 | 0.145861901 | 0.088523224 |
| 0.039466852 | 0.046840702 | 0.064523882 | 0.088899918 |
| 0.044665213 | 0.064452068 | 0.002050338 | 0.065934263 |
| 0.032314739 | 0.093279068 | 0.100161526 | 0.216102124 |
| 0.051732686 | 0.03757167  | 0.168316604 | 0.031745194 |
| 0.04098109  | 0.020724777 | 0.348005598 | 0.254155806 |
| 0.229224732 | 0.070496646 | 0.027623346 | 0.026497933 |
| 0.354206392 | 0.177078961 | 0.071862627 | 0.348410643 |
| 0.013089578 | 0.312772934 | 0.064148831 | 0.078785852 |
| 0.09053833  | 0.179093948 | 0.360875733 | 0.026472593 |
| 0.157420839 | 0.338588524 | 0.130647958 | 0.08264406  |
| 0.300777618 | 0.247711717 | 0.021347108 | 0.246209645 |
| 0.240230115 | 0.035737609 | 0.340682871 | 0.030810294 |
| 0.020442121 | 0.224057133 | 0.238432356 | 0.057599108 |
| 0.044612265 | 0.171061657 | 0.044415121 | 0.174507717 |
| 0.367794424 | 0.291618485 | 0.271262301 | 0.037591318 |
| 0.048850248 | 0.010058425 | 0.048928991 | 0.121418664 |
| 0.321212863 | 0.316220063 | 0.136741701 | 0.139929002 |
| 0.179806146 | 0.060208491 | 0.022374311 | 0.346875414 |
| 0.013228916 | 0.320791412 | 0.009573153 | 0.225298057 |
| 0.305061072 | 0.132505312 | 0.04783582  | 0.186169363 |
| 0.306531215 | 0.047379554 | 0.065774311 | 0.339579823 |
| 0.299027983 | 0.087918376 | 0.091775834 | 0.207449815 |
| 0.027178435 | 0.021015266 | 0.16096333  | 0.020044412 |
| 0.086859586 | 0.074634342 | 0.002780232 | 0.060399735 |
| 0.031042279 | 0.328364208 | 0.30161153  | 0.026846817 |
| 0.190741381 | 0.067425193 | 0.186606786 | 0.040753568 |
| 0.258752445 | 0.290900726 | 0.339140086 | 0.065820418 |
| 0.233756398 | 0.318050261 | 0.130753436 | 0.037673783 |
| 0.016310014 | 0.313967875 | 0.232283602 | 0.030011166 |
| 0.336247181 | 0.130087726 | 0.01553894  | 0.357620638 |
| 0.134678233 | 0.266551914 | 0.013700494 | 0.004420007 |
| 0.00884287  | 0.285668957 | 0.317090422 | 0.256108231 |
| 0.095772039 | 0.196292159 | 0.000149855 | 0.321462044 |
| 0.348568167 | 0.010582928 | 0.018915185 | 0.245979812 |
| 0.21543361  | 0.358605913 | 0.073030919 | 0.279406843 |
| 0.173642131 | 0.307782783 | 0.039606865 | 0.158173296 |
| 0.337910717 | 0.277967647 | 0.296954637 | 0.33169576  |
| 0.34568693  | 0.222138933 | 0.215005913 | 0.02222468  |
| 0.013841142 | 0.112792025 | 0.071445239 | 0.019243758 |
| 0.193050646 | 0.048309136 | 0.324107483 | 0.315836897 |
| 0.314328559 | 0.00852732  | 0.06436669  | 0.251959119 |

|             |             |             |             |
|-------------|-------------|-------------|-------------|
| 0.36011586  | 0.359947175 | 0.004291451 | 0.003298688 |
| 0.01228862  | 0.007671985 | 0.196920035 | 0.091101998 |
| 0.322760287 | 0.042909549 | 0.011089145 | 0.031143359 |
| 0.054712274 | 0.167708326 | 0.335684255 | 0.283662752 |
| 0.233200043 | 0.040124529 | 0.074648964 | 0.283382229 |
| 0.016704186 | 0.170548113 | 0.336007613 | 0.340809282 |
| 0.010863837 | 0.080681851 | 0.114132522 | 0.370387836 |
| 0.004496074 | 0.154319415 | 0.191906527 | 0.064493273 |
| 0.002940182 | 0.032784031 | 0.027018283 | 0.270530225 |
| 0.290572307 | 0.032252355 | 0.02152876  | 0.018614234 |
| 0.085067075 | 0.294456601 | 0.071460775 | 0.356307437 |
| 0.341102229 | 0.343189434 | 0.010366483 | 0.329718006 |
| 0.011108911 | 0.315945147 | 0.105902677 | 0.100821863 |
| 0.067179824 | 0.007940227 | 0.270722008 | 0.018468674 |
| 0.106294231 | 0.235301378 | 0.01732043  | 0.007360866 |
| 0.012079107 | 0.033859493 | 0.347984941 | 0.285247738 |
| 0.006776666 | 0.073775466 | 0.132107883 | 0.216483101 |
| 0.198355735 | 0.32534405  | 0.331854691 | 0.153820321 |
| 0.058295144 | 0.006131033 | 0.295593116 | 0.219815454 |
| 0.071529876 | 0.331850496 | 0.058807405 | 0.338912909 |
| 0.242172267 | 0.299607514 | 0.296425083 | 0.212387981 |
| 0.016021173 | 0.198350968 | 0.29308488  | 0.039669208 |
| 0.208381032 | 0.331483333 | 0.140693235 | 0.033569196 |
| 0.123073595 | 0.10219983  | 0.010253613 | 0.020056869 |
| 0.068491029 | 0.223082945 | 0.04026969  | 0.320183559 |
| 0.199816959 | 0.231185636 | 0.012660357 | 0.02772167  |
| 0.356954401 | 0.294148781 | 0.046928098 | 0.284657457 |
| 0.076891045 | 0.166970382 | 0.264472789 | 0.240152214 |
| 0.038007051 | 0.296153121 | 0.302476768 | 0.289380894 |
| 0.328584886 | 0.157832319 | 0.340410212 | 0.029466648 |
| 0.012719498 | 0.15172217  | 0.051755648 | 0.047870516 |
| 0.105316071 | 0.013145799 | 0.030972152 | 0.25226906  |
| 0.051383351 | 0.249302303 | 0.030498699 | 0.022968145 |
| 0.118279744 | 0.085961929 | 0.179454146 | 0.144608492 |
| 0.04043507  | 0.333906026 | 0.007518971 | 0.032214263 |
| 0.061638173 | 0.26961687  | 0.124337381 | 0.08699993  |
| 0.028860063 | 0.015604968 | 0.16326553  | 0.155642261 |
| 0.12831411  | 0.021752127 | 0.284189092 | 0.028254377 |
| 0.020828018 | 0.345545292 | 0.141982776 | 0.004284717 |
| 0.006802718 | 0.161089432 | 0.048001718 | 0.04612646  |
| 0.009777598 | 0.283737177 | 0.11843501  | 0.152577085 |
| 0.205784095 | 0.036720942 | 0.244716052 | 0.015010781 |
| 0.016238054 | 0.310565263 | 0.127343342 | 0.312139177 |
| 0.083406144 | 0.319287818 | 0.281817334 | 0.260281729 |
| 0.026216295 | 0.095446568 | 0.02888683  | 0.307198733 |
| 0.084530524 |             |             |             |

|             |             |             |             |
|-------------|-------------|-------------|-------------|
| DUSP6       | 0.353031988 | 0.516310726 | 0.334147132 |
| 0.400815231 | 0.388259825 | 0.367844218 | 0.219338694 |
| 0.160441617 | 0.095658244 | 0.011498244 | 0.041262071 |
| 0.382069335 | 0.243270331 | 0.289317609 | 0.324985349 |
| 0.371603186 | 0.139046462 | 0.265331035 | 0.227498511 |
| 0.364917158 | 0.10826197  | 0.374260492 | 0.094392177 |
| 0.242690921 | 0.112708572 | 0.080914567 | 0.26528852  |
| 0.393913737 | 0.087904881 | 0.349380827 | 0.353013234 |

|             |             |             |             |
|-------------|-------------|-------------|-------------|
| 0.078030386 | 0.379743289 | 0.518178592 | 0.417662794 |
| 0.514969627 | 0.338941021 | 0.007067196 | 0.330212518 |
| 0.360318048 | 0.409878371 | 0.369220787 | 0.322725713 |
| 0.052304157 | 0.489163367 | 0.256777891 | 0.340385623 |
| 0.206364512 | 0.041275832 | 0.233910549 | 0.436740135 |
| 0.50004144  | 0.428352106 | 0.207847707 | 0.179127791 |
| 0.270868616 | 0.229037659 | 0.294582977 | 0.303459109 |
| 0.233599166 | 0.168342301 | 0.496310959 | 0.110910835 |
| 0.149203853 | 0.212744141 | 0.126473785 | 0.244318553 |
| 0.306902213 | 0.348569484 | 0.014242304 | 0.345674906 |
| 0.006235902 | 0.339647832 | 0.313722877 | 0.304281493 |
| 0.041900987 | 0.035573346 | 0.149406264 | 0.342362973 |
| 0.400763376 | 0.421378514 | 0.439337884 | 0.453715846 |
| 0.188472212 | 0.241177743 | 0.341754418 | 0.183113636 |
| 0.384410197 | 0.208207473 | 0.098051743 | 0.380043557 |
| 0.452862596 | 0.522298468 | 0.190472198 | 0.227063981 |
| 0.425311864 | 0.459738539 | 0.39961338  | 0.411062331 |
| 0.359249971 | 0.038909874 | 0.447263884 | 0.486320199 |
| 0.354222845 | 0.282733672 | 0.148766683 | 0.376023034 |
| 0.054117318 | 0.315256431 | 0.339784516 | 0.133503704 |
| 0.409888226 | 0.023234281 | 0.19278041  | 0.361129607 |
| 0.159569256 | 0.392488872 | 0.512042195 | 0.190674028 |
| 0.343854318 | 0.022468905 | 0.151259092 | 0.025576171 |
| 0.310283691 | 0.125896977 | 0.496939599 | 0.428354316 |
| 0.216466741 | 0.363657033 | 0.245965727 | 0.001723101 |
| 0.026464631 | 0.133395867 | 0.395942997 | 0.289122666 |
| 0.374102915 | 0.33932434  | 0.265587573 | 0.356568851 |
| 0.410984058 | 0.4303928   | 0.074625764 | 0.091915149 |
| 0.391989327 | 0.134470786 | 0.224428531 | 0.414429476 |
| 0.304827412 | 0.10471702  | 0.127125872 | 0.488454259 |
| 0.414012075 | 0.089859073 | 0.268702173 | 0.37058291  |
| 0.373551747 | 0.326987574 | 0.099900417 | 0.287570136 |
| 0.060713318 | 0.482243786 | 0.024953066 | 0.271020051 |
| 0.2909256   | 0.147399802 | 0.006002808 | 0.242003926 |
| 0.307712026 | 1           | 0.471565008 | 0.093509154 |
| 0.321538659 | 0.381305113 | 0.282000933 | 0.436958642 |
| 0.024892256 | 0.037529515 | 0.237375241 | 0.491665011 |
| 0.287046334 | 0.452079675 | 0.263617347 | 0.254921828 |
| 0.258305325 | 0.398275403 | 0.001775505 | 0.501823245 |
| 0.521515917 | 0.264933609 | 0.407691646 | 0.350999831 |
| 0.36324248  | 0.422212571 | 0.029989202 | 0.374592989 |
| 0.313710942 | 0.068411851 | 0.456510233 | 0.16548287  |
| 0.443133475 | 0.048679966 | 0.305803033 | 0.399404432 |
| 0.409674938 | 0.00834599  | 0.237968469 | 0.364035405 |
| 0.021563471 | 0.112393687 | 0.367649528 | 0.383599113 |
| 0.382989029 | 0.387668454 | 0.421046332 | 0.354333994 |
| 0.401751323 | 0.204158205 | 0.009384262 | 0.273824073 |
| 0.376870768 | 0.356364115 | 0.442976808 | 0.230395901 |
| 0.298605532 | 0.468193406 | 0.383169669 | 0.240488772 |
| 0.051597451 | 0.294320274 | 0.02566681  | 0.326306642 |
| 0.349435911 | 0.159758765 | 0.368453667 | 0.100880677 |
| 0.068132687 | 0.512092872 | 0.152765646 | 0.226553827 |
| 0.110407133 | 0.421608843 | 0.221457448 | 0.309689161 |
| 0.278159646 | 0.158835712 | 0.336242637 | 0.370107251 |

|             |             |             |             |
|-------------|-------------|-------------|-------------|
| 0.048263286 | 0.104397615 | 0.007353597 | 0.387199032 |
| 0.206351335 | 0.389819067 | 0.389969996 | 0.377565437 |
| 0.317397327 | 0.139979635 | 0.383071509 | 0.239035748 |
| 0.106178927 | 0.01503463  | 0.496174539 | 0.354085292 |
| 0.313940217 | 0.151348167 | 0.035381893 | 0.368383383 |
| 0.443403187 | 0.341610954 | 0.233621352 | 0.451531771 |
| 0.01993814  | 0.429223269 | 0.297609849 | 0.128484577 |
| 0.381808642 | 0.270172977 | 0.405508197 | 0.071049678 |
| 0.335143269 | 0.471946613 | 0.255411145 | 0.196858155 |
| 0.402178628 | 0.37965018  | 0.036883692 | 0.364360985 |
| 0.368257332 | 0.034840654 | 0.511549764 | 0.11679032  |
| 0.018783335 | 0.388762695 | 0.429166204 | 0.07171952  |
| 0.072374618 | 0.377655052 | 0.053601818 | 0.270647762 |
| 0.508468142 | 0.385461192 | 0.428525835 | 0.172774005 |
| 0.053094768 | 0.022122322 | 0.170796366 | 0.327364219 |
| 0.514528384 | 0.491758247 | 0.226499024 | 0.379719429 |
| 0.227873633 | 0.340129707 | 0.131409388 | 0.494030187 |
| 0.120309433 | 0.501271473 | 0.005925488 | 0.403738062 |
| 0.518449681 | 0.276297087 | 0.089565709 | 0.316823465 |
| 0.378629555 | 0.050214063 | 0.158167094 | 0.501481241 |
| 0.402404199 | 0.320983673 | 0.35771524  | 0.363095736 |
| 0.022065783 | 0.04829356  | 0.351228805 | 0.154459155 |
| 0.391693806 | 0.205140917 | 0.041553855 | 0.283164378 |
| 0.05986062  | 0.463370937 | 0.397111865 | 0.071778478 |
| 0.379862571 | 0.258776258 | 0.333384423 | 0.038801216 |
| 0.417056225 | 0.476407505 | 0.524831544 | 0.136290761 |
| 0.395136302 | 0.485866009 | 0.390766232 | 0.064777864 |
| 0.015629099 | 0.512746178 | 0.350515115 | 0.033028853 |
| 0.414695643 | 0.232581926 | 0.028322997 | 0.486837391 |
| 0.173447026 | 0.447216512 | 0.004611813 | 0.047536287 |
| 0.028029377 | 0.398148838 | 0.4917054   | 0.34417767  |
| 0.289203026 | 0.307355841 | 0.002222991 | 0.49167746  |
| 0.500432019 | 0.013924848 | 0.122088623 | 0.419048785 |
| 0.406745597 | 0.515202943 | 0.306813031 | 0.42416152  |
| 0.409075047 | 0.511871922 | 0.263170911 | 0.257315276 |
| 0.422355712 | 0.483894063 | 0.378265549 | 0.441742636 |
| 0.423449628 | 0.374766583 | 0.277516325 | 0.022354706 |
| 0.132130495 | 0.208824348 | 0.362456849 | 0.118296967 |
| 0.295555025 | 0.150049561 | 0.448661214 | 0.412181406 |
| 0.456018138 | 0.004422776 | 0.153370402 | 0.404754085 |
| 0.403739283 | 0.423675104 | 0.011115742 | 0.004433792 |
| 0.004807818 | 0.027190805 | 0.32851119  | 0.205394385 |
| 0.466568164 | 0.300801237 | 0.005310577 | 0.045937827 |
| 0.261270186 | 0.369829901 | 0.508581372 | 0.344714513 |
| 0.384215199 | 0.073152575 | 0.35696002  | 0.351349986 |
| 0.074756764 | 0.28704227  | 0.465604964 | 0.482692762 |
| 0.028889659 | 0.21260664  | 0.297725709 | 0.452598741 |
| 0.065921865 | 0.284047356 | 0.387067006 | 0.352909137 |
| 0.007128862 | 0.075903991 | 0.067777401 | 0.380711476 |
| 0.507978569 | 0.111141025 | 0.04937211  | 0.140631664 |
| 0.155727034 | 0.403351677 | 0.184947169 | 0.479020875 |
| 0.408394389 | 0.398888803 | 0.063454497 | 0.484813074 |
| 0.051211364 | 0.497220915 | 0.321607393 | 0.068006389 |
| 0.219543296 | 0.00951846  | 0.44721115  | 0.212330234 |

|             |             |             |             |
|-------------|-------------|-------------|-------------|
| 0.309791339 | 0.342907013 | 0.190862384 | 0.013257612 |
| 0.149326766 | 0.051642525 | 0.437615446 | 0.40957913  |
| 0.022385233 | 0.211089552 | 0.252953785 | 0.339458304 |
| 0.279023146 | 0.421716183 | 0.511908779 | 0.399434527 |
| 0.102276647 | 0.097033668 | 0.364058191 | 0.351128094 |
| 0.221478217 | 0.439197753 | 0.33710621  | 0.498094263 |
| 0.358250476 | 0.416537044 | 0.450991751 | 0.341589957 |
| 0.222234795 | 0.355683632 | 0.391104644 | 0.032928723 |
| 0.314737419 | 0.430703106 | 0.294198015 | 0.176172402 |
| 0.27509435  | 0.344949424 | 0.035053647 | 0.127568438 |
| 0.297457197 | 0.31289213  | 0.163162269 | 0.385043043 |
| 0.329801799 | 0.356198164 | 0.030417269 | 0.067217069 |
| 0.527560681 | 0.412832323 | 0.143154589 | 0.411641339 |
| 0.143126772 | 0.340518654 | 0.396431162 | 0.396058673 |
| 0.316880721 | 0.428994543 | 0.388647265 | 0.402495983 |
| 0.434103206 | 0.247293987 | 0.527963039 | 0.073682818 |
| 0.082976675 | 0.357983483 | 0.133851684 | 0.080110232 |
| 0.148537211 | 0.024263484 | 0.279873789 | 0.372710931 |
| 0.34329158  | 0.375034449 | 0.27511801  | 0.074560588 |
| 0.279786098 | 0.284605456 | 0.321097389 | 0.225351306 |
| 0.100538741 | 0.514914183 | 0.009592331 | 0.050156505 |
| 0.349770904 | 0.41245684  | 0.383787947 | 0.21461881  |
| 0.281272553 | 0.106364443 | 0.292922386 | 0.284428391 |
| 0.385264993 | 0.303218506 | 0.414442938 | 0.030745685 |
| 0.022383372 | 0.441356455 | 0.318418092 | 0.012575427 |
| 0.069391857 | 0.326789697 | 0.21897686  | 0.274252475 |
| 0.016995    | 0.47450093  | 0.365752071 | 0.379535711 |
| 0.320597888 | 0.055905141 | 0.332104269 | 0.068965561 |
| 0.043135645 | 0.438863584 | 0.340749511 | 0.510699744 |
| 0.275097652 | 0.399382824 | 0.443434542 | 0.407079282 |
| 0.081306706 | 0.311303507 | 0.031886745 | 0.391436306 |
| 0.398432931 |             |             |             |
| E2F2        | 0.466868652 | 0.488622668 | 0.40175131  |
| 0.385173047 | 0.389418715 | 0.410539491 | 0.159411725 |
| 0.173404073 | 0.052310786 | 0.000894978 | 0.010750976 |
| 0.437916905 | 0.15963395  | 0.236667326 | 0.347483183 |
| 0.368940081 | 0.085008493 | 0.350179937 | 0.174321558 |
| 0.378824008 | 0.067208067 | 0.336729458 | 0.053075727 |
| 0.248071689 | 0.063150022 | 0.035557029 | 0.213984914 |
| 0.415196426 | 0.042101156 | 0.36633705  | 0.387779559 |
| 0.061621422 | 0.463237346 | 0.495054119 | 0.403530952 |
| 0.496261544 | 0.473566653 | 0.007847473 | 0.284457338 |
| 0.463941279 | 0.432727764 | 0.379915403 | 0.26219798  |
| 0.019674933 | 0.482631455 | 0.185147124 | 0.362085778 |
| 0.235983658 | 0.013028349 | 0.266815653 | 0.476327973 |
| 0.48718658  | 0.450019338 | 0.20270158  | 0.112561002 |
| 0.181423583 | 0.251473058 | 0.261919764 | 0.376427118 |
| 0.165370476 | 0.170249072 | 0.495450131 | 0.057649421 |
| 0.134125132 | 0.22213165  | 0.102328214 | 0.222035758 |
| 0.334769121 | 0.440493195 | 0.008252855 | 0.460765423 |
| 0.000960713 | 0.346936333 | 0.326132842 | 0.316915583 |
| 0.018916409 | 0.007925392 | 0.121162003 | 0.292445272 |
| 0.437400443 | 0.489624302 | 0.450826215 | 0.469026805 |
| 0.125461361 | 0.227278019 | 0.387801255 | 0.112937919 |

|             |             |             |             |
|-------------|-------------|-------------|-------------|
| 0.474757165 | 0.129065021 | 0.076554665 | 0.366336301 |
| 0.458892261 | 0.496642636 | 0.138763514 | 0.194285159 |
| 0.4494301   | 0.481558166 | 0.426667336 | 0.395457608 |
| 0.333448966 | 0.02879206  | 0.487401625 | 0.481005591 |
| 0.465508687 | 0.295570113 | 0.095657308 | 0.421781315 |
| 0.029824492 | 0.386824916 | 0.288963087 | 0.128936638 |
| 0.438868814 | 0.007185365 | 0.148232795 | 0.323963803 |
| 0.164314663 | 0.463787683 | 0.495964411 | 0.130108219 |
| 0.375672366 | 0.008344317 | 0.107598703 | 0.01571036  |
| 0.291042555 | 0.124463918 | 0.488078056 | 0.443678128 |
| 0.215938346 | 0.341647359 | 0.213602485 | 0.003177232 |
| 0.011137954 | 0.142164767 | 0.484744618 | 0.352676808 |
| 0.431206704 | 0.481804686 | 0.173163156 | 0.467897724 |
| 0.465941576 | 0.451486087 | 0.07227707  | 0.058519119 |
| 0.402363021 | 0.138446593 | 0.168106901 | 0.448988687 |
| 0.239575045 | 0.07867658  | 0.078337883 | 0.473409302 |
| 0.463631831 | 0.046608608 | 0.371420022 | 0.36020086  |
| 0.311618956 | 0.297848248 | 0.064374454 | 0.22206083  |
| 0.026541082 | 0.495301813 | 0.012401175 | 0.336690059 |
| 0.270751072 | 0.105100475 | 0.005094129 | 0.249045944 |
| 0.260715406 | 0.471565008 | 1           | 0.062974663 |
| 0.264659935 | 0.35198667  | 0.359655022 | 0.441178418 |
| 0.0034976   | 0.024164966 | 0.352068561 | 0.480190497 |
| 0.354522029 | 0.478519419 | 0.238154571 | 0.246217718 |
| 0.209920805 | 0.42601093  | 0.00243037  | 0.489559597 |
| 0.496454317 | 0.374830187 | 0.353832598 | 0.39484858  |
| 0.383951365 | 0.432060943 | 0.053177008 | 0.36749668  |
| 0.445571418 | 0.043732036 | 0.454850467 | 0.101403911 |
| 0.494415078 | 0.018457404 | 0.313018358 | 0.465435206 |
| 0.481152159 | 0.004354502 | 0.23325914  | 0.364342388 |
| 0.012170338 | 0.07797066  | 0.43949759  | 0.370500024 |
| 0.345181571 | 0.433412641 | 0.432892189 | 0.364476296 |
| 0.386622345 | 0.185510211 | 0.004451731 | 0.25684496  |
| 0.462055199 | 0.423569404 | 0.473479749 | 0.190780293 |
| 0.428254595 | 0.481865006 | 0.491237489 | 0.226941113 |
| 0.020244885 | 0.290772674 | 0.011379844 | 0.273469467 |
| 0.485025344 | 0.07932718  | 0.420432818 | 0.10837898  |
| 0.037504314 | 0.483347785 | 0.138074787 | 0.250218566 |
| 0.104769166 | 0.399900994 | 0.194365224 | 0.207958573 |
| 0.176636922 | 0.106269126 | 0.323567046 | 0.350018494 |
| 0.020503092 | 0.052564923 | 0.006937522 | 0.413483263 |
| 0.108475382 | 0.338455116 | 0.355861017 | 0.472607241 |
| 0.307508455 | 0.072126242 | 0.329585126 | 0.255718665 |
| 0.0684415   | 0.004851196 | 0.488471361 | 0.358179617 |
| 0.42389962  | 0.103072009 | 0.019147472 | 0.379110076 |
| 0.455570054 | 0.385762817 | 0.345128176 | 0.4658868   |
| 0.014397284 | 0.461304002 | 0.195897453 | 0.072640075 |
| 0.349407954 | 0.193956632 | 0.426829019 | 0.05001976  |
| 0.421570247 | 0.480269386 | 0.25106446  | 0.125125089 |
| 0.463874842 | 0.391240076 | 0.01373091  | 0.474452593 |
| 0.473140157 | 0.013078881 | 0.492363446 | 0.079595337 |
| 0.007934809 | 0.423675567 | 0.4618645   | 0.039459537 |
| 0.041723602 | 0.296767196 | 0.030271814 | 0.216546978 |
| 0.482140338 | 0.352196708 | 0.465809155 | 0.172777345 |

|             |             |             |             |
|-------------|-------------|-------------|-------------|
| 0.018361524 | 0.003737583 | 0.152358279 | 0.412180719 |
| 0.491220587 | 0.490762909 | 0.192433684 | 0.319153228 |
| 0.173364377 | 0.302439462 | 0.158481503 | 0.481470931 |
| 0.174686828 | 0.49635392  | 0.000831853 | 0.456306182 |
| 0.494155253 | 0.33092114  | 0.044095797 | 0.287243129 |
| 0.456756342 | 0.022004103 | 0.158801875 | 0.491214008 |
| 0.469121672 | 0.286057444 | 0.324659837 | 0.416755107 |
| 0.006767034 | 0.022986751 | 0.356812887 | 0.154819867 |
| 0.370822137 | 0.152383068 | 0.04246622  | 0.335402512 |
| 0.019979321 | 0.477436138 | 0.433931289 | 0.031084481 |
| 0.381813576 | 0.331588026 | 0.319806824 | 0.016331242 |
| 0.47431996  | 0.496254601 | 0.493746532 | 0.121193224 |
| 0.47486958  | 0.487812332 | 0.433616643 | 0.043665241 |
| 0.006233938 | 0.496845093 | 0.438098934 | 0.010741325 |
| 0.443352285 | 0.291496199 | 0.004440281 | 0.482833495 |
| 0.128335799 | 0.475522977 | 0.001874936 | 0.092639922 |
| 0.020798945 | 0.435628034 | 0.487559862 | 0.382413158 |
| 0.299038995 | 0.327883097 | 0.003576681 | 0.490361616 |
| 0.486693081 | 0.004786441 | 0.094779359 | 0.484692523 |
| 0.462456946 | 0.490335568 | 0.295365245 | 0.468005593 |
| 0.43924843  | 0.495557144 | 0.196162463 | 0.19719043  |
| 0.456882002 | 0.494959799 | 0.434433397 | 0.478720657 |
| 0.445200889 | 0.386689685 | 0.214114255 | 0.005502192 |
| 0.105339558 | 0.210748166 | 0.342575834 | 0.054125913 |
| 0.385432466 | 0.089643121 | 0.486682434 | 0.444130699 |
| 0.477908254 | 0.000292805 | 0.120962209 | 0.487061237 |
| 0.446765576 | 0.4479257   | 0.011213047 | 0.00366167  |
| 0.006163688 | 0.008347971 | 0.343647651 | 0.178793748 |
| 0.484716596 | 0.281141228 | 0.000875062 | 0.027876302 |
| 0.229086205 | 0.368366579 | 0.493313456 | 0.321919292 |
| 0.461100431 | 0.044753294 | 0.278331176 | 0.354804806 |
| 0.037210029 | 0.437797881 | 0.472635309 | 0.480536014 |
| 0.021052795 | 0.185644208 | 0.391810374 | 0.453362867 |
| 0.065397831 | 0.247273503 | 0.447328974 | 0.272254537 |
| 0.007012905 | 0.044899912 | 0.034535344 | 0.410627257 |
| 0.494291344 | 0.045576383 | 0.014862992 | 0.173323303 |
| 0.07753447  | 0.464134882 | 0.110409317 | 0.469289762 |
| 0.444707244 | 0.395587326 | 0.043483182 | 0.486812283 |
| 0.019322501 | 0.492886891 | 0.293235536 | 0.055254824 |
| 0.239094446 | 0.004193916 | 0.496068126 | 0.13745012  |
| 0.336162523 | 0.420463221 | 0.170073001 | 0.006451489 |
| 0.171376181 | 0.025700973 | 0.44473834  | 0.445761539 |
| 0.016635906 | 0.189613748 | 0.232884247 | 0.379245054 |
| 0.286321714 | 0.403848561 | 0.491095023 | 0.463447676 |
| 0.052072681 | 0.133032748 | 0.393009009 | 0.453922853 |
| 0.225249608 | 0.452761369 | 0.258590859 | 0.489212117 |
| 0.455568724 | 0.480024027 | 0.490231587 | 0.30930653  |
| 0.190290418 | 0.43115401  | 0.383122878 | 0.008962218 |
| 0.300146267 | 0.43892943  | 0.355243188 | 0.106686317 |
| 0.190829514 | 0.404654954 | 0.028425513 | 0.216587741 |
| 0.347584556 | 0.340788541 | 0.094510314 | 0.399332444 |
| 0.416308509 | 0.459688511 | 0.026052018 | 0.031875189 |
| 0.492693373 | 0.479328859 | 0.114766644 | 0.424213441 |
| 0.113418765 | 0.286557038 | 0.457115242 | 0.445833596 |

|             |             |             |             |
|-------------|-------------|-------------|-------------|
| 0.390470187 | 0.476279102 | 0.440968423 | 0.412282585 |
| 0.464442859 | 0.200382619 | 0.494332995 | 0.086776354 |
| 0.05376549  | 0.471333739 | 0.058604831 | 0.052076667 |
| 0.089330614 | 0.011164063 | 0.313520766 | 0.385736363 |
| 0.40931864  | 0.324942742 | 0.366289385 | 0.047587433 |
| 0.26227786  | 0.419480256 | 0.292154939 | 0.161785652 |
| 0.043552383 | 0.49047512  | 0.003341024 | 0.028149335 |
| 0.405138832 | 0.466530402 | 0.363205075 | 0.173071317 |
| 0.27437427  | 0.096960161 | 0.229567267 | 0.326053976 |
| 0.348089066 | 0.381794523 | 0.470186783 | 0.019012039 |
| 0.008266865 | 0.452781241 | 0.410018925 | 0.009497053 |
| 0.060732678 | 0.451977595 | 0.265885203 | 0.188809765 |
| 0.009174447 | 0.493275768 | 0.370841013 | 0.406365996 |
| 0.318136754 | 0.035211261 | 0.449743717 | 0.066437467 |
| 0.035418205 | 0.483359429 | 0.393270486 | 0.498101938 |
| 0.323370861 | 0.370515551 | 0.475268459 | 0.481937949 |
| 0.095905877 | 0.440917279 | 0.011762521 | 0.446277546 |
| 0.444342328 |             |             |             |

| EBPL        | 0.114900594 | 0.122827008 | 0.081345235 |
|-------------|-------------|-------------|-------------|
| 0.208207864 | 0.136955254 | 0.080823863 | 0.19883972  |
| 0.111124981 | 0.118456243 | 0.05572427  | 0.063841107 |
| 0.108854717 | 0.0755128   | 0.090633377 | 0.038178452 |
| 0.252718175 | 0.174120741 | 0.088460986 | 0.290773325 |
| 0.217846582 | 0.137686263 | 0.253055524 | 0.242226813 |
| 0.085697628 | 0.128329088 | 0.195084044 | 0.077187125 |
| 0.218795969 | 0.20791872  | 0.057188034 | 0.171500242 |
| 0.247993034 | 0.142553578 | 0.091907616 | 0.144866779 |
| 0.082345264 | 0.084779263 | 0.098868653 | 0.051837495 |
| 0.128830281 | 0.139026344 | 0.214802663 | 0.248875601 |
| 0.206252224 | 0.081576353 | 0.235043071 | 0.155724744 |
| 0.062890227 | 0.154645866 | 0.04716835  | 0.085524541 |
| 0.071401336 | 0.078419318 | 0.111838894 | 0.155128211 |
| 0.035397337 | 0.052210085 | 0.028022274 | 0.09555336  |
| 0.233850392 | 0.050957315 | 0.08229807  | 0.117214753 |
| 0.059449169 | 0.139167811 | 0.197060536 | 0.162421649 |
| 0.05092715  | 0.109134088 | 0.245424358 | 0.071537386 |
| 0.022360022 | 0.245238153 | 0.1939228   | 0.028000085 |
| 0.259906118 | 0.124637848 | 0.199441132 | 0.204712164 |
| 0.198971191 | 0.097930683 | 0.172523256 | 0.144008657 |
| 0.140715821 | 0.218143504 | 0.084985548 | 0.199207261 |
| 0.125038027 | 0.162299005 | 0.140212531 | 0.250581649 |
| 0.163298439 | 0.101361566 | 0.152995478 | 0.229280025 |
| 0.109108069 | 0.122177737 | 0.069355319 | 0.09342231  |
| 0.032365738 | 0.171451687 | 0.084957049 | 0.13874071  |
| 0.100884494 | 0.065536861 | 0.230639074 | 0.165130434 |
| 0.288634677 | 0.044159576 | 0.274424626 | 0.118523558 |
| 0.200199196 | 0.149124325 | 0.206688809 | 0.157592176 |
| 0.193154317 | 0.131821195 | 0.098218623 | 0.263458596 |
| 0.124503625 | 0.160092319 | 0.037035712 | 0.280677316 |
| 0.076655354 | 0.043735937 | 0.065465486 | 0.16502171  |
| 0.102587714 | 0.067921351 | 0.175202104 | 0.130958884 |
| 0.217345909 | 0.162182115 | 0.105010126 | 0.128937918 |
| 0.170852764 | 0.06892428  | 0.102841383 | 0.087202525 |
| 0.082699523 | 0.170934239 | 0.005814323 | 0.251912446 |



|             |             |                  |             |
|-------------|-------------|------------------|-------------|
| 0.113203643 | 0.179276625 | 0.33991982       | 0.099589266 |
| 0.152474132 | 0.220935573 | 0.258258405      | 0.153909488 |
| 0.100695678 | 0.268622558 | 0.063454914      | 0.250370593 |
| 0.052064839 | 0.155344298 | 0.280356581      | 0.127234686 |
| 0.20977364  | 0.07633197  | 0.197030921      | 0.10770397  |
| 0.023809945 | 0.116050449 | 0.202481046      | 0.125982387 |
| 0.069988639 | 0.093509154 | 0.062974663      | 1           |
| 0.147567769 | 0.199531594 | 0.0791281        | 0.096985137 |
| 0.055647183 | 0.275101968 | 0.046226383      | 0.135917784 |
| 0.06612573  | 0.144814412 | 0.156377241      | 0.124652434 |
| 0.253327532 | 0.195319909 | 0.01252 0.082854 | 0.099227845 |
| 0.038654654 | 0.140541646 | 0.153537227      | 0.047280023 |
| 0.176450347 | 0.00982802  | 0.243736596      | 0.077420033 |
| 0.298297522 | 0.18366642  | 0.239970387      | 0.092710396 |
| 0.207517778 | 0.078589248 | 0.103567672      | 0.075376586 |
| 0.065353929 | 0.075269306 | 0.199662446      | 0.189383139 |
| 0.10607397  | 0.156375259 | 0.19943783       | 0.137587838 |
| 0.176779518 | 0.213333731 | 0.039429341      | 0.121015232 |
| 0.186724124 | 0.215627169 | 0.180408864      | 0.135944765 |
| 0.028763446 | 0.095877614 | 0.151396419      | 0.055011282 |
| 0.112825738 | 0.080517715 | 0.023111128      | 0.219696521 |
| 0.140792267 | 0.086418122 | 0.14080982       | 0.078829461 |
| 0.138466825 | 0.053145667 | 0.207658802      | 0.217815674 |
| 0.134765541 | 0.076243678 | 0.0420935        | 0.044653032 |
| 0.093294662 | 0.247120444 | 0.05875964       | 0.053228387 |
| 0.194955471 | 0.054374678 | 0.063257798      | 0.161555543 |
| 0.223878933 | 0.138207215 | 0.024687055      | 0.058666652 |
| 0.035398639 | 0.030740866 | 0.089431117      | 0.076483124 |
| 0.127903312 | 0.118760182 | 0.073370576      | 0.175926608 |
| 0.220986031 | 0.122030756 | 0.239975712      | 0.074377203 |
| 0.209280486 | 0.283594587 | 0.020349593      | 0.154012932 |
| 0.040169843 | 0.031158539 | 0.125510526      | 0.200973274 |
| 0.169822568 | 0.094828551 | 0.224591684      | 0.059438507 |
| 0.236255306 | 0.208479218 | 0.034167968      | 0.10795531  |
| 0.105731791 | 0.232805637 | 0.146674541      | 0.078797309 |
| 0.178096578 | 0.199546614 | 0.092007664      | 0.086075779 |
| 0.242251687 | 0.118513422 | 0.185610016      | 0.240966943 |
| 0.150425406 | 0.092800407 | 0.283497646      | 0.220192174 |
| 0.098771924 | 0.136509488 | 0.282863603      | 0.132604336 |
| 0.249169314 | 0.098375258 | 0.10251429       | 0.203604135 |
| 0.064821088 | 0.150887401 | 0.088960922      | 0.083809093 |
| 0.113909224 | 0.302966963 | 0.092948679      | 0.328261604 |
| 0.049848768 | 0.053714839 | 0.131233307      | 0.107346688 |
| 0.103256026 | 0.197653445 | 0.115997529      | 0.07725078  |
| 0.064171514 | 0.158588548 | 0.134020535      | 0.092572187 |
| 0.229869497 | 0.211042103 | 0.095408927      | 0.12534328  |
| 0.083208703 | 0.050865618 | 0.166764772      | 0.148381574 |
| 0.20401318  | 0.132684808 | 0.058578465      | 0.052342975 |
| 0.171079563 | 0.024038009 | 0.070088001      | 0.177642418 |
| 0.099612447 | 0.198091428 | 0.142622734      | 0.05377443  |
| 0.06179456  | 0.230864096 | 0.257086556      | 0.102291616 |
| 0.099305632 | 0.094903267 | 0.229641377      | 0.117275452 |
| 0.102282121 | 0.056961985 | 0.261149613      | 0.19694122  |
| 0.090041313 | 0.121588751 | 0.090312339      | 0.193538248 |

|             |             |             |             |
|-------------|-------------|-------------|-------------|
| 0.046217466 | 0.079961497 | 0.123990539 | 0.288551177 |
| 0.063861378 | 0.019907182 | 0.032635428 | 0.190793736 |
| 0.184732687 | 0.081267205 | 0.177661851 | 0.020542995 |
| 0.232247537 | 0.043662818 | 0.127095462 | 0.100510359 |
| 0.150931655 | 0.140156862 | 0.091607492 | 0.081532265 |
| 0.120803574 | 0.056044703 | 0.109296183 | 0.076734963 |
| 0.081353729 | 0.104978323 | 0.265161379 | 0.129205103 |
| 0.085585644 | 0.154504939 | 0.111261745 | 0.176859355 |
| 0.19405722  | 0.282650619 | 0.157513049 | 0.059597897 |
| 0.090866657 | 0.018343261 | 0.068590445 | 0.082656168 |
| 0.149325144 | 0.120192902 | 0.189572616 | 0.123370076 |
| 0.168146195 | 0.145052541 | 0.097321547 | 0.158083577 |
| 0.187712512 | 0.173998453 | 0.020529174 | 0.013695852 |
| 0.060595608 | 0.170887516 | 0.207374712 | 0.124002961 |
| 0.01816281  | 0.162339425 | 0.173197119 | 0.123119108 |
| 0.126904752 | 0.102090317 | 0.293973773 | 0.132833225 |
| 0.287410264 | 0.033826931 | 0.266556051 | 0.131093319 |
| 0.062278131 | 0.133883273 | 0.10075614  | 0.264419718 |
| 0.180642705 | 0.090972988 | 0.179245387 | 0.01437991  |
| 0.258783171 | 0.115847833 | 0.07547872  | 0.144769667 |
| 0.201531558 | 0.170961098 | 0.214233926 | 0.074518943 |
| 0.114000434 | 0.128623329 | 0.023869721 | 0.149891708 |
| 0.162054229 | 0.170937679 | 0.164409742 | 0.161194372 |
| 0.245198725 | 0.182086635 | 0.096983424 | 0.12662834  |
| 0.082886413 | 0.103044738 | 0.022316956 | 0.143824133 |
| 0.250818355 | 0.091405634 | 0.022763948 | 0.065828272 |
| 0.145745816 | 0.053160102 | 0.184236481 | 0.037948391 |
| 0.244767867 | 0.178705094 | 0.16213239  | 0.200991994 |
| 0.165325234 | 0.22832304  | 0.202330362 | 0.119009924 |
| 0.183009321 | 0.0880809   | 0.040289917 | 0.178643563 |
| 0.062627215 | 0.203093832 | 0.094722774 | 0.100583256 |
| 0.179739807 | 0.061707731 | 0.130411933 | 0.117857979 |
| 0.131360925 | 0.108023185 | 0.167560466 | 0.081669794 |
| 0.09379731  | 0.118630278 | 0.098894961 | 0.221051555 |
| 0.174483646 | 0.128970574 | 0.096685414 | 0.164558171 |
| 0.06694242  | 0.252556097 | 0.042165768 | 0.045532556 |
| 0.089576034 | 0.18792435  | 0.247598166 | 0.132476547 |
| 0.096451976 | 0.23719967  | 0.161700913 | 0.123442437 |
| 0.105716305 | 0.115541775 | 0.135959414 | 0.266495961 |
| 0.170805941 | 0.143480995 | 0.146163384 | 0.047421407 |
| 0.112182751 | 0.156962847 | 0.105376923 | 0.096871401 |
| 0.241825916 | 0.097693378 | 0.083692104 | 0.088772239 |
| 0.084592543 | 0.140037114 | 0.26326388  | 0.263799563 |
| 0.206507024 | 0.024831845 | 0.227069871 | 0.026592482 |
| 0.223605681 | 0.045230135 | 0.2018646   | 0.205895024 |
| 0.065684207 | 0.236702946 | 0.129302081 | 0.169516088 |
| 0.088434688 | 0.10614293  | 0.280343104 | 0.039044005 |
| 0.11348491  | 0.070791502 | 0.174202248 | 0.044660172 |
| 0.172657258 | 0.244055594 | 0.072610952 | 0.030735527 |
| 0.042327841 | 0.107700467 | 0.162361669 | 0.209338568 |
| 0.186947202 | 0.071844    | 0.192318263 | 0.133201688 |
| 0.08502917  | 0.126711161 | 0.086605296 | 0.177357312 |
| 0.093479651 | 0.039492189 | 0.11725264  | 0.173807677 |
| 0.31096217  | 0.075567539 | 0.107226826 | 0.26075824  |

|             |             |             |             |
|-------------|-------------|-------------|-------------|
| 0.091737364 | 0.094421846 | 0.092095975 | 0.113100026 |
| 0.240271888 | 0.072829865 | 0.107476652 | 0.131340643 |
| 0.05944487  | 0.203416154 | 0.177455021 | 0.026474458 |
| ECE1        | 0.247599679 | 0.382099831 | 0.128147904 |
| 0.377131744 | 0.229647466 | 0.191829794 | 0.180633097 |
| 0.119930073 | 0.067048057 | 0.044859289 | 0.054762607 |
| 0.227323853 | 0.155506951 | 0.198715478 | 0.082582029 |
| 0.362564095 | 0.162191915 | 0.111136804 | 0.231064586 |
| 0.335088805 | 0.134378768 | 0.368493707 | 0.141246814 |
| 0.10072149  | 0.098828665 | 0.118178658 | 0.101977507 |
| 0.406589533 | 0.120981848 | 0.15448614  | 0.316857675 |
| 0.112769717 | 0.322586906 | 0.329454278 | 0.314873544 |
| 0.319518155 | 0.203609744 | 0.042385176 | 0.120297158 |
| 0.297654307 | 0.288166645 | 0.342939135 | 0.297842117 |
| 0.11091892  | 0.312103731 | 0.232954196 | 0.214567256 |
| 0.090526526 | 0.089907439 | 0.092526142 | 0.29098692  |
| 0.304925605 | 0.209211911 | 0.1283049   | 0.155350747 |
| 0.124037692 | 0.126323993 | 0.086148876 | 0.221390365 |
| 0.215257815 | 0.09758909  | 0.316935208 | 0.088411283 |
| 0.085851278 | 0.148855646 | 0.133097215 | 0.174685087 |
| 0.09517826  | 0.255586243 | 0.063224267 | 0.169023735 |
| 0.027811733 | 0.318930321 | 0.226430882 | 0.064784905 |
| 0.103024279 | 0.122791229 | 0.144743434 | 0.297025828 |
| 0.402620533 | 0.289556863 | 0.401553919 | 0.370232426 |
| 0.188991438 | 0.169345516 | 0.149471507 | 0.199613173 |
| 0.304633304 | 0.174586421 | 0.096328273 | 0.378417763 |
| 0.396875386 | 0.355897441 | 0.134668531 | 0.169996887 |
| 0.316235232 | 0.356500212 | 0.147176223 | 0.179649054 |
| 0.083990688 | 0.053739629 | 0.301581968 | 0.39290813  |
| 0.279844253 | 0.099462839 | 0.144696857 | 0.355981458 |
| 0.115955694 | 0.101351481 | 0.343555167 | 0.161518929 |
| 0.410904909 | 0.049915112 | 0.146763809 | 0.265847101 |
| 0.127737378 | 0.303555434 | 0.339731086 | 0.193835237 |
| 0.184483104 | 0.095679844 | 0.048076723 | 0.075653314 |
| 0.146601588 | 0.051412908 | 0.282027404 | 0.409439171 |
| 0.167963387 | 0.146601213 | 0.167175143 | 0.020753665 |
| 0.079128756 | 0.102019768 | 0.3091625   | 0.158804896 |
| 0.306580264 | 0.208074179 | 0.143830244 | 0.245466488 |
| 0.22169932  | 0.394812346 | 0.018125533 | 0.134543482 |
| 0.206101318 | 0.109347886 | 0.25618758  | 0.238487024 |
| 0.174294589 | 0.139727946 | 0.18751511  | 0.397745734 |
| 0.30779282  | 0.159876463 | 0.107223851 | 0.358273635 |
| 0.139235324 | 0.207053052 | 0.165474728 | 0.228728218 |
| 0.13893114  | 0.289015322 | 0.065071755 | 0.139186966 |
| 0.056724518 | 0.139068287 | 0.032329384 | 0.15513572  |
| 0.143689554 | 0.321538659 | 0.264659935 | 0.147567769 |
| 1           | 0.300369876 | 0.146075536 | 0.294789218 |
| 0.044932449 | 0.092725306 | 0.091351277 | 0.402612731 |
| 0.184972664 | 0.36754605  | 0.175944541 | 0.128119528 |
| 0.215981654 | 0.360809846 | 0.001937693 | 0.313243195 |
| 0.344005806 | 0.089069117 | 0.289427656 | 0.235016654 |
| 0.098044976 | 0.390971797 | 0.013532001 | 0.375015894 |
| 0.206464816 | 0.125162606 | 0.417536795 | 0.167880683 |
| 0.306159676 | 0.103082801 | 0.15704764  | 0.273165889 |

|             |             |             |             |
|-------------|-------------|-------------|-------------|
| 0.257068787 | 0.023415222 | 0.119170801 | 0.321005831 |
| 0.051473653 | 0.107135825 | 0.288034248 | 0.317528053 |
| 0.223785052 | 0.322955819 | 0.428188672 | 0.083670352 |
| 0.217123741 | 0.170749039 | 0.041455732 | 0.173398537 |
| 0.286955958 | 0.091930565 | 0.312473442 | 0.161204206 |
| 0.148164311 | 0.344408516 | 0.246425566 | 0.063438166 |
| 0.109050527 | 0.186274501 | 0.061894545 | 0.164323852 |
| 0.221549291 | 0.197499608 | 0.11215838  | 0.115484433 |
| 0.111678481 | 0.395225417 | 0.072599196 | 0.066850873 |
| 0.043800673 | 0.265974548 | 0.186277692 | 0.186747262 |
| 0.166424809 | 0.140879597 | 0.101645209 | 0.120427309 |
| 0.10666839  | 0.175549795 | 0.020250329 | 0.120661159 |
| 0.191399356 | 0.157962605 | 0.147343877 | 0.25553218  |
| 0.188663627 | 0.220616706 | 0.201412197 | 0.084400149 |
| 0.096788045 | 0.064635647 | 0.369765453 | 0.320090204 |
| 0.218518073 | 0.146638755 | 0.096169273 | 0.110682692 |
| 0.406540686 | 0.131789075 | 0.069752818 | 0.374784057 |
| 0.051268213 | 0.383435667 | 0.20083579  | 0.147028356 |
| 0.148971549 | 0.254621913 | 0.402670498 | 0.032458182 |
| 0.200691123 | 0.354646597 | 0.188525197 | 0.13805981  |
| 0.298349934 | 0.295016124 | 0.098547926 | 0.249310187 |
| 0.262765901 | 0.1096889   | 0.375619634 | 0.134101342 |
| 0.068016169 | 0.286588793 | 0.269049122 | 0.112774992 |
| 0.098272399 | 0.194082058 | 0.089045235 | 0.254251286 |
| 0.391352575 | 0.385635303 | 0.300932097 | 0.084839043 |
| 0.124933221 | 0.092942539 | 0.117524069 | 0.148172846 |
| 0.326001648 | 0.357922407 | 0.225295787 | 0.181134205 |
| 0.253899671 | 0.100163754 | 0.078232271 | 0.387675378 |
| 0.070067481 | 0.341127903 | 0.040077729 | 0.280597206 |
| 0.310774519 | 0.140346512 | 0.104808387 | 0.20187798  |
| 0.296293329 | 0.098082388 | 0.149235569 | 0.341013998 |
| 0.315395716 | 0.119301496 | 0.102870725 | 0.284595596 |
| 0.067643641 | 0.112960246 | 0.18464527  | 0.058640235 |
| 0.128408897 | 0.139998958 | 0.018829494 | 0.119248243 |
| 0.13710299  | 0.342509642 | 0.38713547  | 0.071091145 |
| 0.176516504 | 0.098988517 | 0.284707365 | 0.101096482 |
| 0.294961352 | 0.319862107 | 0.345500477 | 0.157229685 |
| 0.302653948 | 0.337771671 | 0.165639769 | 0.102946697 |
| 0.052289579 | 0.326008439 | 0.242725593 | 0.086022113 |
| 0.417042104 | 0.103388686 | 0.098874504 | 0.371295474 |
| 0.179220784 | 0.266520081 | 0.006140089 | 0.019180804 |
| 0.050194805 | 0.364639071 | 0.302349649 | 0.295887044 |
| 0.082982981 | 0.260545165 | 0.0069506   | 0.368520027 |
| 0.356492064 | 0.042434957 | 0.094171619 | 0.293604274 |
| 0.247407151 | 0.376927972 | 0.089256243 | 0.316450354 |
| 0.213894441 | 0.319630433 | 0.18720787  | 0.22544523  |
| 0.346206529 | 0.305715216 | 0.307518811 | 0.322450534 |
| 0.416405647 | 0.307837502 | 0.273062654 | 0.065923239 |
| 0.039486372 | 0.122877386 | 0.074922099 | 0.073524086 |
| 0.175074457 | 0.115995562 | 0.341157858 | 0.398269767 |
| 0.360050578 | 0.031889023 | 0.147300021 | 0.288888719 |
| 0.379108735 | 0.403554328 | 0.027798016 | 0.004196364 |
| 0.00389753  | 0.035152941 | 0.248503778 | 0.136344189 |
| 0.349736638 | 0.093302346 | 0.040856337 | 0.100418542 |

|             |             |             |             |
|-------------|-------------|-------------|-------------|
| 0.151342966 | 0.2226779   | 0.35632111  | 0.366069639 |
| 0.287002189 | 0.134621969 | 0.125290681 | 0.356379484 |
| 0.074435685 | 0.166955978 | 0.377345308 | 0.341909997 |
| 0.069192874 | 0.127099425 | 0.140045136 | 0.418601229 |
| 0.018500359 | 0.251147222 | 0.257677847 | 0.162803346 |
| 0.02604545  | 0.093779943 | 0.076144352 | 0.356470356 |
| 0.304642884 | 0.165142523 | 0.118523977 | 0.065319194 |
| 0.181647853 | 0.367117789 | 0.204315586 | 0.411961819 |
| 0.36858874  | 0.428242295 | 0.085135552 | 0.320477601 |
| 0.078288287 | 0.324970888 | 0.150133114 | 0.032675867 |
| 0.137079654 | 0.050187059 | 0.309193371 | 0.051906947 |
| 0.148318876 | 0.264572892 | 0.051767171 | 0.043734081 |
| 0.040822843 | 0.110747674 | 0.409627124 | 0.35231623  |
| 0.0488266   | 0.148452328 | 0.18264813  | 0.276377899 |
| 0.181883581 | 0.376864137 | 0.329486881 | 0.133674045 |
| 0.13846428  | 0.054071613 | 0.337283038 | 0.232299813 |
| 0.161502385 | 0.405999648 | 0.125870702 | 0.372363713 |
| 0.251268444 | 0.326723685 | 0.333702316 | 0.217448314 |
| 0.11905856  | 0.193248851 | 0.290906157 | 0.088095739 |
| 0.240437854 | 0.410233108 | 0.163253283 | 0.105115542 |
| 0.182337371 | 0.137482712 | 0.074590079 | 0.05841311  |
| 0.092217375 | 0.195871287 | 0.206349637 | 0.402345202 |
| 0.236864798 | 0.240653342 | 0.094099133 | 0.074491002 |
| 0.384859817 | 0.2942817   | 0.097650599 | 0.291757819 |
| 0.146839368 | 0.211820089 | 0.310872204 | 0.313614441 |
| 0.0910378   | 0.351418862 | 0.346017476 | 0.304965829 |
| 0.327711797 | 0.199686259 | 0.34686414  | 0.073755327 |
| 0.051657948 | 0.204778541 | 0.172045318 | 0.111200028 |
| 0.190012439 | 0.056298483 | 0.063477902 | 0.349671698 |
| 0.085030225 | 0.349970622 | 0.110301385 | 0.097919744 |
| 0.198401392 | 0.106299408 | 0.260935927 | 0.173631759 |
| 0.152629042 | 0.335036687 | 0.033495994 | 0.115634787 |
| 0.107887036 | 0.285781913 | 0.155498661 | 0.149651607 |
| 0.084174487 | 0.09595206  | 0.25537454  | 0.14328697  |
| 0.128375806 | 0.095750106 | 0.286847171 | 0.059258299 |
| 0.093333863 | 0.419152888 | 0.133687247 | 0.036456755 |
| 0.06477585  | 0.180566964 | 0.139043514 | 0.129014945 |
| 0.043893584 | 0.324162302 | 0.10800625  | 0.197917503 |
| 0.228071118 | 0.123040274 | 0.239597188 | 0.062791784 |
| 0.078184025 | 0.310753354 | 0.155731783 | 0.334082239 |
| 0.1224665   | 0.406396647 | 0.271988339 | 0.320440884 |
| 0.068863701 | 0.116162675 | 0.080884862 | 0.3635793   |
| 0.086667972 |             |             |             |

|             |             |             |             |
|-------------|-------------|-------------|-------------|
| ECE2        | 0.3218867   | 0.469096158 | 0.281763507 |
| 0.394225675 | 0.343956383 | 0.213779272 | 0.229748943 |
| 0.147601475 | 0.149523404 | 0.018794565 | 0.0789653   |
| 0.29492666  | 0.228126359 | 0.223134056 | 0.215126721 |
| 0.423966161 | 0.236997618 | 0.250273708 | 0.284837217 |
| 0.346421668 | 0.113450283 | 0.396109783 | 0.168762528 |
| 0.308505351 | 0.208375512 | 0.170800069 | 0.304507493 |
| 0.436975767 | 0.184201609 | 0.186399956 | 0.296056591 |
| 0.201586527 | 0.367832455 | 0.428758331 | 0.365017978 |
| 0.418757447 | 0.278705272 | 0.025494733 | 0.215433896 |
| 0.353550576 | 0.388419514 | 0.349793479 | 0.318788937 |

|             |             |             |             |
|-------------|-------------|-------------|-------------|
| 0.109864092 | 0.377285271 | 0.270429982 | 0.332328315 |
| 0.160461336 | 0.107649131 | 0.135693205 | 0.347291746 |
| 0.38111406  | 0.277079678 | 0.18544231  | 0.202799603 |
| 0.191886248 | 0.141054672 | 0.238050795 | 0.193304027 |
| 0.267643849 | 0.097972314 | 0.404823927 | 0.137722842 |
| 0.139337462 | 0.214060307 | 0.250688347 | 0.230500169 |
| 0.300122732 | 0.279150727 | 0.049889309 | 0.246125405 |
| 0.007394933 | 0.328003043 | 0.339868769 | 0.249278504 |
| 0.131360718 | 0.071514759 | 0.27407396  | 0.287962798 |
| 0.452969557 | 0.382214289 | 0.497635172 | 0.484975533 |
| 0.248570419 | 0.331553008 | 0.304286433 | 0.261026086 |
| 0.37853237  | 0.215748812 | 0.143988634 | 0.441412591 |
| 0.499168459 | 0.453606152 | 0.288851987 | 0.329451905 |
| 0.363862909 | 0.419453102 | 0.275140611 | 0.325329767 |
| 0.261972199 | 0.139203445 | 0.367097387 | 0.487912827 |
| 0.312615625 | 0.28488809  | 0.266018064 | 0.346999831 |
| 0.151600935 | 0.217623164 | 0.329293392 | 0.181417811 |
| 0.465164348 | 0.059169529 | 0.306215423 | 0.283401947 |
| 0.255147472 | 0.366073571 | 0.453381094 | 0.247110456 |
| 0.32713339  | 0.067462609 | 0.178461057 | 0.106879694 |
| 0.260675324 | 0.178106418 | 0.363886472 | 0.444270985 |
| 0.184681815 | 0.327851584 | 0.260953547 | 0.021822719 |
| 0.103496615 | 0.24640905  | 0.363967762 | 0.275141833 |
| 0.364624197 | 0.303419373 | 0.286342145 | 0.274077432 |
| 0.310779141 | 0.491962266 | 0.028469472 | 0.164386747 |
| 0.294403047 | 0.251711846 | 0.309607241 | 0.293445817 |
| 0.338324659 | 0.156312383 | 0.21740044  | 0.501020815 |
| 0.343645574 | 0.173328275 | 0.203364495 | 0.406516952 |
| 0.261538794 | 0.346700765 | 0.190117171 | 0.279103108 |
| 0.108044565 | 0.397857284 | 0.104963777 | 0.220265247 |
| 0.2140502   | 0.22349922  | 0.034067185 | 0.192103885 |
| 0.224929528 | 0.381305113 | 0.35198667  | 0.199531594 |
| 0.300369876 | 1           | 0.184860513 | 0.323770051 |
| 0.042960736 | 0.113637265 | 0.140378219 | 0.477864283 |
| 0.149864467 | 0.478208713 | 0.304325703 | 0.329966277 |
| 0.341149005 | 0.437495305 | 0.00638846  | 0.3963039   |
| 0.45534426  | 0.144323335 | 0.32068766  | 0.32096346  |
| 0.27645654  | 0.438708471 | 0.025716884 | 0.392104696 |
| 0.219223431 | 0.166629936 | 0.513279905 | 0.268509318 |
| 0.384070432 | 0.129698341 | 0.225468456 | 0.400201017 |
| 0.328864808 | 0.023655874 | 0.145877705 | 0.315496259 |
| 0.100303954 | 0.103954041 | 0.344661223 | 0.340636642 |
| 0.307317836 | 0.419263736 | 0.504932657 | 0.266805019 |
| 0.337553337 | 0.238562943 | 0.051958129 | 0.33927108  |
| 0.379105933 | 0.244316674 | 0.365213945 | 0.245938572 |
| 0.163270446 | 0.417263127 | 0.334608472 | 0.150630189 |
| 0.116171588 | 0.244894694 | 0.039388288 | 0.329973296 |
| 0.317285533 | 0.17414296  | 0.261329902 | 0.208342972 |
| 0.176839061 | 0.493651652 | 0.236015685 | 0.2415466   |
| 0.170073906 | 0.268318927 | 0.272148847 | 0.206930907 |
| 0.222222071 | 0.262083665 | 0.306266232 | 0.306228374 |
| 0.074876228 | 0.195851846 | 0.051627698 | 0.233906525 |
| 0.164155172 | 0.238276647 | 0.214648273 | 0.278537765 |
| 0.248399606 | 0.165299712 | 0.336446282 | 0.28551911  |

|             |             |             |             |
|-------------|-------------|-------------|-------------|
| 0.221247313 | 0.07137876  | 0.45742147  | 0.35899022  |
| 0.216567265 | 0.225271411 | 0.124213617 | 0.199404599 |
| 0.450757192 | 0.158296441 | 0.130196005 | 0.412994882 |
| 0.066479876 | 0.485765805 | 0.270774517 | 0.236742423 |
| 0.309882114 | 0.302580773 | 0.46783034  | 0.065670176 |
| 0.242104158 | 0.400899261 | 0.326906524 | 0.2824391   |
| 0.31286285  | 0.313719265 | 0.082469464 | 0.300193515 |
| 0.2862893   | 0.108780137 | 0.476366538 | 0.230962678 |
| 0.087270674 | 0.377041374 | 0.355628161 | 0.183358764 |
| 0.18581796  | 0.280788493 | 0.06953797  | 0.345001984 |
| 0.482640942 | 0.421709777 | 0.351940635 | 0.271488526 |
| 0.113959104 | 0.038188516 | 0.290155317 | 0.276608643 |
| 0.406735394 | 0.468804227 | 0.317293364 | 0.326133916 |
| 0.295725468 | 0.29602647  | 0.090160847 | 0.482037791 |
| 0.199959266 | 0.438193708 | 0.039332574 | 0.39558428  |
| 0.410065302 | 0.159765127 | 0.187904144 | 0.236647998 |
| 0.307182547 | 0.120729796 | 0.231156951 | 0.420701332 |
| 0.392915781 | 0.31244125  | 0.285524825 | 0.331355808 |
| 0.045632964 | 0.089601815 | 0.32263116  | 0.222359626 |
| 0.292189811 | 0.294587525 | 0.081339642 | 0.217242412 |
| 0.119497439 | 0.388375433 | 0.450348995 | 0.150032755 |
| 0.190996328 | 0.193456354 | 0.35587349  | 0.113086906 |
| 0.422548594 | 0.434177073 | 0.434325257 | 0.202588836 |
| 0.365204551 | 0.444842573 | 0.267977248 | 0.182507294 |
| 0.079916833 | 0.435433142 | 0.277619661 | 0.061636394 |
| 0.478934771 | 0.115577556 | 0.047627747 | 0.440034939 |
| 0.249203375 | 0.327566093 | 0.006632933 | 0.076584689 |
| 0.117727465 | 0.466057026 | 0.390783388 | 0.287198463 |
| 0.126337627 | 0.306744107 | 0.018820147 | 0.482941106 |
| 0.4235487   | 0.070003253 | 0.241892364 | 0.363218131 |
| 0.347654876 | 0.459864409 | 0.287845091 | 0.424769521 |
| 0.283606968 | 0.41582262  | 0.226894753 | 0.33512318  |
| 0.394607801 | 0.42578047  | 0.344892753 | 0.39284958  |
| 0.451250188 | 0.382138496 | 0.306608909 | 0.058690154 |
| 0.186903662 | 0.154951653 | 0.187705855 | 0.150341802 |
| 0.170276049 | 0.245813075 | 0.428322913 | 0.476325208 |
| 0.458369353 | 0.035139587 | 0.160674788 | 0.352260807 |
| 0.40249302  | 0.465104763 | 0.056953343 | 0.013022966 |
| 0.012690964 | 0.073032893 | 0.26713304  | 0.315915392 |
| 0.45504466  | 0.127425054 | 0.031560815 | 0.071259408 |
| 0.269314566 | 0.328454066 | 0.439737779 | 0.373043477 |
| 0.391426462 | 0.181986134 | 0.198291455 | 0.375825587 |
| 0.16846484  | 0.189502387 | 0.470841362 | 0.400000414 |
| 0.117160295 | 0.317127791 | 0.244040524 | 0.48339538  |
| 0.092537187 | 0.350360422 | 0.310081699 | 0.287269502 |
| 0.044806038 | 0.19354178  | 0.167756864 | 0.434494404 |
| 0.403238533 | 0.154226932 | 0.104349215 | 0.078028724 |
| 0.183942945 | 0.450397217 | 0.240708863 | 0.509517715 |
| 0.403110553 | 0.461843104 | 0.17561776  | 0.408752857 |
| 0.11055999  | 0.399732024 | 0.326924713 | 0.047394389 |
| 0.294837185 | 0.056023102 | 0.402363446 | 0.168828882 |
| 0.20826013  | 0.283821381 | 0.222399085 | 0.074716192 |
| 0.18984849  | 0.148921092 | 0.488551547 | 0.464606189 |
| 0.104814467 | 0.251803858 | 0.332358416 | 0.317226541 |

|             |             |             |             |
|-------------|-------------|-------------|-------------|
| 0.193017973 | 0.404793296 | 0.411368636 | 0.217546532 |
| 0.143008755 | 0.160810527 | 0.342584861 | 0.254287738 |
| 0.186477048 | 0.504272873 | 0.295384861 | 0.484967649 |
| 0.300332518 | 0.413357929 | 0.424954383 | 0.294431041 |
| 0.283924671 | 0.23321901  | 0.268570839 | 0.048737924 |
| 0.317711426 | 0.459542662 | 0.253418276 | 0.238452868 |
| 0.321291445 | 0.277542504 | 0.096819628 | 0.107428345 |
| 0.248990985 | 0.176487675 | 0.220065484 | 0.461132865 |
| 0.248608456 | 0.267708577 | 0.073364276 | 0.160310407 |
| 0.481461413 | 0.370311033 | 0.146747694 | 0.326784921 |
| 0.269269194 | 0.339551382 | 0.406513155 | 0.414568658 |
| 0.259045064 | 0.401568431 | 0.363588987 | 0.276315008 |
| 0.352899009 | 0.288039939 | 0.443262921 | 0.065499129 |
| 0.15573728  | 0.254263601 | 0.177313678 | 0.20400138  |
| 0.238320361 | 0.100457364 | 0.232235896 | 0.401425616 |
| 0.250263844 | 0.340628878 | 0.185722173 | 0.166417157 |
| 0.347552195 | 0.219534699 | 0.349342739 | 0.200417752 |
| 0.159628052 | 0.416789891 | 0.041457332 | 0.151870229 |
| 0.27039984  | 0.379424792 | 0.308773032 | 0.314392756 |
| 0.27817238  | 0.231964631 | 0.338240972 | 0.16967255  |
| 0.189047929 | 0.243765201 | 0.375544909 | 0.066156188 |
| 0.057004701 | 0.503396682 | 0.219098868 | 0.073561445 |
| 0.153350388 | 0.221895466 | 0.260736082 | 0.26747673  |
| 0.087179962 | 0.430306972 | 0.19437972  | 0.323375521 |
| 0.269885033 | 0.15360215  | 0.263689198 | 0.108721504 |
| 0.118373968 | 0.364241514 | 0.296111512 | 0.437591242 |
| 0.305342778 | 0.430876788 | 0.335779336 | 0.365630242 |
| 0.147957144 | 0.231962194 | 0.07873013  | 0.416315569 |
| 0.241941627 |             |             |             |

|             |             |             |             |
|-------------|-------------|-------------|-------------|
| EFHA1       | 0.294781332 | 0.398889349 | 0.124096495 |
| 0.297291064 | 0.15925802  | 0.231297299 | 0.135156309 |
| 0.204654186 | 0.040758264 | 0.005722027 | 0.005909896 |
| 0.189831833 | 0.061662162 | 0.152527281 | 0.124182841 |
| 0.279753585 | 0.043833353 | 0.194703205 | 0.133524547 |
| 0.301710997 | 0.110512593 | 0.219365385 | 0.074448588 |
| 0.080683163 | 0.026368655 | 0.031946785 | 0.062407526 |
| 0.36956084  | 0.037603529 | 0.1720823   | 0.349742525 |
| 0.052347444 | 0.350179417 | 0.390364211 | 0.191969    |
| 0.365880362 | 0.270680784 | 0.026781223 | 0.132073748 |
| 0.380754532 | 0.239614053 | 0.312972077 | 0.170333049 |
| 0.035245721 | 0.411405685 | 0.124552845 | 0.160190417 |
| 0.159671748 | 0.012878112 | 0.195630741 | 0.409315363 |
| 0.343995087 | 0.171741544 | 0.195806389 | 0.105447213 |
| 0.049504993 | 0.210671179 | 0.045229998 | 0.330110167 |
| 0.126393884 | 0.182745782 | 0.346055516 | 0.05655327  |
| 0.100427223 | 0.221464457 | 0.058306124 | 0.192970198 |
| 0.083931405 | 0.354589503 | 0.041545378 | 0.170298069 |
| 0.006343908 | 0.291805729 | 0.160256898 | 0.058832752 |
| 0.024438856 | 0.01178872  | 0.069039875 | 0.20617289  |
| 0.375031096 | 0.37029528  | 0.317123143 | 0.31391836  |
| 0.060809207 | 0.124082531 | 0.108863871 | 0.080189744 |
| 0.352968603 | 0.099934947 | 0.071399609 | 0.256009088 |
| 0.322416942 | 0.369216671 | 0.068873498 | 0.088946214 |
| 0.288617375 | 0.4059945   | 0.13448759  | 0.132088991 |



|             |             |             |             |
|-------------|-------------|-------------|-------------|
| 0.074630753 | 0.019409534 | 0.347031886 | 0.351344576 |
| 0.376576543 | 0.067664506 | 0.053641664 | 0.380165628 |
| 0.042179737 | 0.165233705 | 0.209067388 | 0.081740764 |
| 0.380718518 | 0.019826487 | 0.065390163 | 0.192840938 |
| 0.140645746 | 0.320250376 | 0.345848351 | 0.115895237 |
| 0.140225609 | 0.014534571 | 0.02208533  | 0.026448771 |
| 0.137988786 | 0.027075625 | 0.372715691 | 0.340731429 |
| 0.205461934 | 0.117638886 | 0.175801316 | 0.002612041 |
| 0.01297612  | 0.08965192  | 0.300324418 | 0.19636494  |
| 0.315724025 | 0.276975384 | 0.069848133 | 0.329898568 |
| 0.18122862  | 0.312335355 | 0.037852801 | 0.095308772 |
| 0.178055134 | 0.092452317 | 0.119534074 | 0.195465216 |
| 0.086655607 | 0.130146532 | 0.085110254 | 0.368536001 |
| 0.421432088 | 0.06222317  | 0.216581598 | 0.253782058 |
| 0.114433829 | 0.105050727 | 0.088349782 | 0.131980994 |
| 0.057691116 | 0.328643822 | 0.011410848 | 0.221170024 |
| 0.054027299 | 0.040440057 | 0.027794933 | 0.214670986 |
| 0.127982702 | 0.282000933 | 0.359655022 | 0.0791281   |
| 0.146075536 | 0.184860513 | 1           | 0.231657021 |
| 0.004460256 | 0.046542004 | 0.212023941 | 0.361351788 |
| 0.286858387 | 0.350254249 | 0.153080273 | 0.110574516 |
| 0.101135685 | 0.319186588 | 0.00263982  | 0.388377929 |
| 0.362022064 | 0.189404084 | 0.156006559 | 0.195563333 |
| 0.085750383 | 0.326903018 | 0.031113233 | 0.262676475 |
| 0.311979772 | 0.067295697 | 0.353708461 | 0.057994859 |
| 0.363681079 | 0.021872473 | 0.208801922 | 0.236794509 |
| 0.21612885  | 0.008784711 | 0.177048557 | 0.299150663 |
| 0.011421555 | 0.123137509 | 0.31810613  | 0.252835663 |
| 0.160394254 | 0.287902339 | 0.348684525 | 0.075403597 |
| 0.147451066 | 0.18267637  | 0.013272689 | 0.098850417 |
| 0.294374563 | 0.108581852 | 0.391852521 | 0.155236083 |
| 0.241334779 | 0.373586456 | 0.267299421 | 0.076984302 |
| 0.03641724  | 0.203682882 | 0.025902796 | 0.103904023 |
| 0.292157847 | 0.06902979  | 0.108284598 | 0.092665905 |
| 0.027430583 | 0.369292093 | 0.038462105 | 0.052148759 |
| 0.022664255 | 0.178347465 | 0.16810169  | 0.086833949 |
| 0.049021049 | 0.076781433 | 0.09085981  | 0.118679526 |
| 0.057288165 | 0.046257269 | 0.00933215  | 0.093689981 |
| 0.039808496 | 0.096257104 | 0.103825585 | 0.297154828 |
| 0.170277246 | 0.051308721 | 0.112384956 | 0.081479685 |
| 0.037878732 | 0.010982528 | 0.383278887 | 0.260327891 |
| 0.342757234 | 0.102788638 | 0.028267387 | 0.096115658 |
| 0.343044538 | 0.167923953 | 0.19351415  | 0.365808687 |
| 0.030823237 | 0.340105443 | 0.083320475 | 0.045036508 |
| 0.09145473  | 0.114065635 | 0.357827178 | 0.032148636 |
| 0.255179917 | 0.392546158 | 0.137721832 | 0.059110896 |
| 0.358936638 | 0.264812645 | 0.033579031 | 0.314957186 |
| 0.313605214 | 0.020928516 | 0.366512054 | 0.041174156 |
| 0.013834004 | 0.220603547 | 0.216772682 | 0.037254057 |
| 0.033359076 | 0.113296252 | 0.083052234 | 0.118655293 |
| 0.371890485 | 0.238017214 | 0.270305122 | 0.062134968 |
| 0.029163042 | 0.004756998 | 0.066914281 | 0.142072703 |
| 0.397225691 | 0.335030716 | 0.126353943 | 0.087665153 |
| 0.135087704 | 0.080745195 | 0.202493957 | 0.345130513 |

|             |             |             |             |
|-------------|-------------|-------------|-------------|
| 0.101497107 | 0.396144548 | 0.008362136 | 0.230855878 |
| 0.361438581 | 0.208569877 | 0.024587572 | 0.181679096 |
| 0.351553502 | 0.039830872 | 0.174153628 | 0.37413169  |
| 0.345507744 | 0.107276014 | 0.095803103 | 0.255121973 |
| 0.027785635 | 0.063308996 | 0.143275633 | 0.039011619 |
| 0.12705171  | 0.095140906 | 0.008026284 | 0.213793516 |
| 0.025960727 | 0.370864951 | 0.325413059 | 0.023560852 |
| 0.16929792  | 0.21023221  | 0.174885059 | 0.031464778 |
| 0.257471182 | 0.347912201 | 0.39454079  | 0.164550272 |
| 0.284049165 | 0.312962071 | 0.11653139  | 0.042408274 |
| 0.008584806 | 0.358482289 | 0.315623587 | 0.014612426 |
| 0.351741454 | 0.191194059 | 0.006859581 | 0.408578613 |
| 0.126210982 | 0.380910299 | 0.007049492 | 0.034214996 |
| 0.018400626 | 0.295641924 | 0.364483738 | 0.333877742 |
| 0.131356227 | 0.244131076 | 0.004983105 | 0.36131414  |
| 0.371858878 | 0.005668478 | 0.040866067 | 0.259868594 |
| 0.196372518 | 0.425530111 | 0.065665185 | 0.255885721 |
| 0.149922316 | 0.346868227 | 0.12690954  | 0.102397066 |
| 0.322579348 | 0.312790345 | 0.336774936 | 0.398625675 |
| 0.341173493 | 0.220781996 | 0.152839407 | 0.016120832 |
| 0.032130359 | 0.205970787 | 0.07862462  | 0.024403768 |
| 0.28886764  | 0.043232474 | 0.370904421 | 0.331848164 |
| 0.305895261 | 0.004815986 | 0.155332786 | 0.294109229 |
| 0.399052651 | 0.392198565 | 0.022189031 | 0.003920227 |
| 0.003739985 | 0.003142743 | 0.253842964 | 0.089919111 |
| 0.34397286  | 0.104774129 | 0.006087291 | 0.08629137  |
| 0.142630983 | 0.137684151 | 0.368463439 | 0.262910219 |
| 0.270732306 | 0.053405434 | 0.090343496 | 0.299629441 |
| 0.018879273 | 0.29631994  | 0.317192114 | 0.39813438  |
| 0.029287658 | 0.093557123 | 0.192514222 | 0.37578584  |
| 0.008981564 | 0.131686443 | 0.215146153 | 0.107766682 |
| 0.014122988 | 0.029964081 | 0.0254278   | 0.299399918 |
| 0.3470976   | 0.024912627 | 0.01185962  | 0.132817914 |
| 0.064222027 | 0.345631984 | 0.073935603 | 0.363093728 |
| 0.354079766 | 0.324124102 | 0.026072847 | 0.380495816 |
| 0.018994864 | 0.364027657 | 0.078624525 | 0.035339296 |
| 0.140151531 | 0.015199331 | 0.330940807 | 0.024843094 |
| 0.206918146 | 0.328669728 | 0.049430549 | 0.008036595 |
| 0.036354596 | 0.025819206 | 0.327881382 | 0.281248306 |
| 0.016090638 | 0.172672042 | 0.121713963 | 0.262005132 |
| 0.210765324 | 0.268680481 | 0.392235741 | 0.136211649 |
| 0.077093821 | 0.042407456 | 0.334004562 | 0.295264516 |
| 0.216407961 | 0.331852852 | 0.076378912 | 0.372563794 |
| 0.321526998 | 0.383901053 | 0.329171834 | 0.17301282  |
| 0.057259996 | 0.243377192 | 0.261453638 | 0.021199547 |
| 0.184110467 | 0.308444585 | 0.20963037  | 0.036044307 |
| 0.078627794 | 0.107749003 | 0.072371659 | 0.13659238  |
| 0.066911407 | 0.250722256 | 0.083567353 | 0.332518119 |
| 0.30076883  | 0.308439037 | 0.08886847  | 0.023121178 |
| 0.407265364 | 0.383977308 | 0.121197206 | 0.258746334 |
| 0.087455336 | 0.12316207  | 0.277021714 | 0.253551118 |
| 0.133594336 | 0.302430232 | 0.358089396 | 0.272080816 |
| 0.392352252 | 0.146171543 | 0.390013589 | 0.168523204 |
| 0.023850391 | 0.21914412  | 0.040738684 | 0.040868177 |

|             |             |             |             |
|-------------|-------------|-------------|-------------|
| 0.07822794  | 0.01427837  | 0.055862665 | 0.267681957 |
| 0.083913671 | 0.195661049 | 0.205353195 | 0.048710882 |
| 0.114739448 | 0.173259376 | 0.165397002 | 0.135037856 |
| 0.039460578 | 0.369522804 | 0.005808859 | 0.033731538 |
| 0.094623177 | 0.270772974 | 0.086216414 | 0.09339063  |
| 0.05982165  | 0.054740579 | 0.119989265 | 0.205809054 |
| 0.107892319 | 0.129914534 | 0.27685262  | 0.047743    |
| 0.034962022 | 0.352069581 | 0.185563818 | 0.013645168 |
| 0.046033153 | 0.26528414  | 0.181233849 | 0.08280175  |
| 0.00895275  | 0.305180471 | 0.137921225 | 0.154909618 |
| 0.218832771 | 0.055316363 | 0.385479469 | 0.078547367 |
| 0.070855354 | 0.394778123 | 0.130054469 | 0.353816349 |
| 0.121894343 | 0.268487493 | 0.401494253 | 0.31268789  |
| 0.081607037 | 0.136976018 | 0.03249331  | 0.366847591 |
| 0.093177644 |             |             |             |
| EGR2        | 0.289506414 | 0.514017851 | 0.268088736 |
| 0.358158409 | 0.319079483 | 0.302153384 | 0.2114888   |
| 0.150753774 | 0.099075519 | 0.019548652 | 0.04587678  |
| 0.313038799 | 0.237094388 | 0.277017763 | 0.26886785  |
| 0.317404238 | 0.141700091 | 0.217529534 | 0.219006904 |
| 0.306105991 | 0.116464573 | 0.323196272 | 0.10377932  |
| 0.196328237 | 0.114342418 | 0.087004614 | 0.227402168 |
| 0.393003137 | 0.094301773 | 0.289459198 | 0.296398542 |
| 0.075980861 | 0.344389982 | 0.503049451 | 0.349613772 |
| 0.496012373 | 0.271863396 | 0.007660685 | 0.284410235 |
| 0.355158658 | 0.346910766 | 0.309626077 | 0.296978814 |
| 0.062894852 | 0.475081986 | 0.244553156 | 0.281577763 |
| 0.178009887 | 0.051604451 | 0.2033433   | 0.423359943 |
| 0.486841105 | 0.341474596 | 0.191177971 | 0.17817287  |
| 0.245030543 | 0.194795155 | 0.242297147 | 0.249178585 |
| 0.223044472 | 0.154533692 | 0.481328695 | 0.114273322 |
| 0.123067023 | 0.189756426 | 0.117040799 | 0.224892975 |
| 0.235896737 | 0.303549848 | 0.018124818 | 0.264485733 |
| 0.009729698 | 0.29183378  | 0.264385694 | 0.232911879 |
| 0.049013186 | 0.050967535 | 0.138897483 | 0.303481249 |
| 0.410181691 | 0.408179265 | 0.453347097 | 0.45720764  |
| 0.193515067 | 0.210575916 | 0.267988709 | 0.184061591 |
| 0.37844729  | 0.208823616 | 0.109298406 | 0.326397335 |
| 0.464197997 | 0.512046952 | 0.18035533  | 0.200874517 |
| 0.407297255 | 0.458898722 | 0.33182673  | 0.341689527 |
| 0.295255172 | 0.037513969 | 0.436698563 | 0.490271154 |
| 0.347828329 | 0.227162349 | 0.14735719  | 0.346713222 |
| 0.058876874 | 0.267734985 | 0.304096322 | 0.127321683 |
| 0.429309112 | 0.029397622 | 0.176232002 | 0.313374217 |
| 0.144984679 | 0.357735522 | 0.500796736 | 0.188852083 |
| 0.285802042 | 0.032485426 | 0.133870456 | 0.028013505 |
| 0.283915977 | 0.104908101 | 0.471388131 | 0.448591444 |
| 0.19737487  | 0.295459066 | 0.225045171 | 0.003099334 |
| 0.032095043 | 0.115144627 | 0.366596032 | 0.24056237  |
| 0.307630973 | 0.321005403 | 0.246036301 | 0.303784131 |
| 0.324628749 | 0.441054964 | 0.073595537 | 0.096254745 |
| 0.337377069 | 0.115533388 | 0.211793744 | 0.335295253 |
| 0.277070746 | 0.110430007 | 0.132235395 | 0.496354916 |
| 0.410870478 | 0.099466526 | 0.216566477 | 0.318837177 |

|             |             |             |             |
|-------------|-------------|-------------|-------------|
| 0.312691513 | 0.282055452 | 0.10541459  | 0.273725506 |
| 0.069771491 | 0.463080725 | 0.028469634 | 0.230780479 |
| 0.238536154 | 0.1396269   | 0.007137931 | 0.215806338 |
| 0.291368389 | 0.436958642 | 0.441178418 | 0.096985137 |
| 0.294789218 | 0.323770051 | 0.231657021 | 1           |
| 0.031489512 | 0.044490069 | 0.188273815 | 0.498694429 |
| 0.23419412  | 0.453362265 | 0.242281216 | 0.218419616 |
| 0.234773786 | 0.376371402 | 0.001911854 | 0.48861504  |
| 0.509689758 | 0.215875339 | 0.35983391  | 0.288242812 |
| 0.281453766 | 0.425438126 | 0.027529848 | 0.319985973 |
| 0.246529023 | 0.072950072 | 0.469451675 | 0.165357449 |
| 0.432578311 | 0.056342362 | 0.25972285  | 0.371776164 |
| 0.344855153 | 0.010601578 | 0.213117279 | 0.309430428 |
| 0.022884591 | 0.112240386 | 0.297223826 | 0.327798681 |
| 0.325861088 | 0.342806168 | 0.440216883 | 0.276916313 |
| 0.341151534 | 0.193918301 | 0.011779148 | 0.237993653 |
| 0.331008225 | 0.265187343 | 0.439594348 | 0.219000671 |
| 0.237133213 | 0.469940775 | 0.352451066 | 0.179402913 |
| 0.060471078 | 0.252527185 | 0.037169498 | 0.286207383 |
| 0.331599763 | 0.16981776  | 0.284189737 | 0.091012833 |
| 0.073036675 | 0.514960117 | 0.130171377 | 0.178664352 |
| 0.091212759 | 0.357728479 | 0.206660372 | 0.300663077 |
| 0.27368423  | 0.152441209 | 0.275004185 | 0.302020502 |
| 0.058069264 | 0.114606879 | 0.007298953 | 0.313610192 |
| 0.222095668 | 0.347661585 | 0.341378733 | 0.295299789 |
| 0.277801389 | 0.163064758 | 0.342180324 | 0.191460376 |
| 0.10669241  | 0.01947343  | 0.49465326  | 0.303437252 |
| 0.267683855 | 0.150962601 | 0.040179734 | 0.306303705 |
| 0.458812738 | 0.283660575 | 0.185573477 | 0.460070064 |
| 0.024147677 | 0.433627921 | 0.282025914 | 0.132185311 |
| 0.324822754 | 0.259726964 | 0.420006161 | 0.070261442 |
| 0.267425324 | 0.470822273 | 0.222813538 | 0.187396157 |
| 0.404053657 | 0.320431335 | 0.047718013 | 0.320965195 |
| 0.320858716 | 0.04338001  | 0.509330959 | 0.115300859 |
| 0.022751643 | 0.316788424 | 0.357975746 | 0.075827282 |
| 0.076055169 | 0.335129074 | 0.060820232 | 0.245735473 |
| 0.513418572 | 0.332492066 | 0.38232633  | 0.145795901 |
| 0.064741642 | 0.033283934 | 0.150002798 | 0.261151758 |
| 0.497679366 | 0.487485682 | 0.208387624 | 0.334131638 |
| 0.216066954 | 0.279471829 | 0.111917437 | 0.499141084 |
| 0.100146204 | 0.488956697 | 0.008268976 | 0.34814694  |
| 0.497962196 | 0.231367189 | 0.095133061 | 0.276714339 |
| 0.374369725 | 0.057992354 | 0.14628263  | 0.496314129 |
| 0.401982089 | 0.272183853 | 0.301775941 | 0.29719558  |
| 0.030418288 | 0.053560018 | 0.290075614 | 0.126429334 |
| 0.316731266 | 0.1876205   | 0.035611836 | 0.235300172 |
| 0.073811274 | 0.463192035 | 0.379734894 | 0.075190198 |
| 0.312591596 | 0.214590485 | 0.283825302 | 0.045813277 |
| 0.412302172 | 0.461971668 | 0.513908755 | 0.131243008 |
| 0.341904424 | 0.482966845 | 0.304248687 | 0.066124729 |
| 0.018970315 | 0.498051258 | 0.281418053 | 0.043555673 |
| 0.429976881 | 0.197375479 | 0.042281293 | 0.488070331 |
| 0.16930474  | 0.423640013 | 0.007709045 | 0.036152287 |
| 0.028225751 | 0.384688583 | 0.478334351 | 0.286757925 |

|             |             |             |             |
|-------------|-------------|-------------|-------------|
| 0.247288129 | 0.262350921 | 0.001525054 | 0.486851855 |
| 0.500808629 | 0.017758735 | 0.11097065  | 0.378733655 |
| 0.343843063 | 0.510466818 | 0.250930691 | 0.421635592 |
| 0.333329253 | 0.49479704  | 0.25621443  | 0.235012826 |
| 0.423127496 | 0.466525394 | 0.328722505 | 0.439980445 |
| 0.430136371 | 0.310066495 | 0.257160647 | 0.029043297 |
| 0.109161885 | 0.185545406 | 0.302667303 | 0.108192625 |
| 0.240242116 | 0.146915289 | 0.44982929  | 0.414814483 |
| 0.461759517 | 0.006370104 | 0.149697741 | 0.368498051 |
| 0.41946361  | 0.438047493 | 0.011469021 | 0.005703758 |
| 0.005424722 | 0.03301547  | 0.277192078 | 0.185150801 |
| 0.465782244 | 0.267773763 | 0.008173435 | 0.053759004 |
| 0.245572529 | 0.304486059 | 0.502251084 | 0.302128016 |
| 0.336408611 | 0.075526818 | 0.326346844 | 0.301073795 |
| 0.076575205 | 0.219972353 | 0.475138099 | 0.478841305 |
| 0.029513463 | 0.18622978  | 0.245800408 | 0.467389998 |
| 0.05190229  | 0.252392892 | 0.313997952 | 0.319913853 |
| 0.0070404   | 0.077265596 | 0.068317843 | 0.336302819 |
| 0.485685183 | 0.129256514 | 0.064393361 | 0.124764031 |
| 0.168437421 | 0.40737727  | 0.195658154 | 0.487726136 |
| 0.402313614 | 0.384534408 | 0.059365507 | 0.476327168 |
| 0.055068765 | 0.487069725 | 0.272938336 | 0.072667302 |
| 0.19224992  | 0.012087311 | 0.433974582 | 0.181368494 |
| 0.266645278 | 0.280394545 | 0.155464076 | 0.014727688 |
| 0.118250022 | 0.058879693 | 0.453719768 | 0.400066096 |
| 0.022783048 | 0.188965565 | 0.226335637 | 0.28357134  |
| 0.248438048 | 0.371639704 | 0.499185953 | 0.322796499 |
| 0.107530286 | 0.076391923 | 0.308567543 | 0.284065465 |
| 0.197981788 | 0.450779125 | 0.288871132 | 0.495609736 |
| 0.294448764 | 0.412539496 | 0.447983019 | 0.298448959 |
| 0.18557767  | 0.295147578 | 0.331867771 | 0.048987273 |
| 0.281082114 | 0.427275506 | 0.244955091 | 0.174809811 |
| 0.255220313 | 0.267317142 | 0.034032548 | 0.108788432 |
| 0.231007732 | 0.265017465 | 0.164131391 | 0.367653513 |
| 0.269042552 | 0.28758761  | 0.031170483 | 0.06988144  |
| 0.5226272   | 0.405165014 | 0.145652298 | 0.343091847 |
| 0.136533174 | 0.293743033 | 0.35595413  | 0.347174905 |
| 0.241949616 | 0.425187246 | 0.355580567 | 0.337951063 |
| 0.435083066 | 0.226577746 | 0.516170711 | 0.07511227  |
| 0.083832217 | 0.277103336 | 0.147828492 | 0.080382462 |
| 0.154478855 | 0.028053925 | 0.217125201 | 0.31158829  |
| 0.266763701 | 0.330054171 | 0.216689825 | 0.077213351 |
| 0.239498685 | 0.221342329 | 0.280755459 | 0.222008112 |
| 0.117012463 | 0.505191985 | 0.012070741 | 0.054742544 |
| 0.276896695 | 0.374789166 | 0.317595615 | 0.202111453 |
| 0.229372493 | 0.092215295 | 0.266928227 | 0.245581923 |
| 0.337732801 | 0.245964248 | 0.387031748 | 0.037918427 |
| 0.029443168 | 0.454933642 | 0.266016086 | 0.013503746 |
| 0.055378963 | 0.250780533 | 0.187015777 | 0.243647134 |
| 0.018598851 | 0.463635815 | 0.30085158  | 0.308093343 |
| 0.277864684 | 0.060110366 | 0.323085729 | 0.068765161 |
| 0.045137512 | 0.432937574 | 0.273616557 | 0.497483174 |
| 0.224101998 | 0.35185506  | 0.424163393 | 0.380073601 |
| 0.079168696 | 0.236605944 | 0.041020424 | 0.378213552 |

|             |             |             |             |
|-------------|-------------|-------------|-------------|
| 0.321807752 |             |             |             |
| EIF2S2      | 0.003946873 | 0.014639639 | 0.00505305  |
| 0.050126791 | 0.019241348 | 0.017899066 | 0.092872348 |
| 0.007396658 | 0.026603294 | 0.042186223 | 0.077719438 |
| 0.006935747 | 0.015415274 | 0.030329356 | 0.009682571 |
| 0.034683173 | 0.06514006  | 0.002009277 | 0.072971344 |
| 0.024820138 | 0.060710333 | 0.056295777 | 0.065646185 |
| 0.006575097 | 0.092467149 | 0.169513928 | 0.041028483 |
| 0.026829285 | 0.154973673 | 0.022509921 | 0.020308819 |
| 0.016003441 | 0.008101617 | 0.007989287 | 0.031950994 |
| 0.006390849 | 0.002729306 | 0.000686666 | 0.040052068 |
| 0.006345879 | 0.024605307 | 0.029060626 | 0.077002587 |
| 0.108769078 | 0.006315224 | 0.116601496 | 0.012915874 |
| 0.001465774 | 0.121274245 | 0.010956582 | 0.006515375 |
| 0.009401268 | 0.021260635 | 0.021149947 | 0.107036835 |
| 0.021284676 | 0.007975325 | 0.01247306  | 0.009351094 |
| 0.101225952 | 0.018092833 | 0.009643532 | 0.044280546 |
| 0.004073146 | 0.012595109 | 0.017989229 | 0.031126147 |
| 0.00613551  | 0.008410055 | 0.008255845 | 0.002498516 |
| 0.01232057  | 0.026821086 | 0.01396187  | 0.011927877 |
| 0.113932672 | 0.085368772 | 0.024555943 | 0.074262765 |
| 0.021087465 | 0.003981072 | 0.024517103 | 0.018641993 |
| 0.028513452 | 0.020042895 | 0.006905749 | 0.092776063 |
| 0.0092181   | 0.129895333 | 0.004100349 | 0.039459511 |
| 0.02275861  | 0.011159165 | 0.027294529 | 0.040168346 |
| 0.034345518 | 0.01180525  | 0.012101668 | 0.022735349 |
| 0.020839404 | 0.014056819 | 0.01164635  | 0.016632948 |
| 0.00594036  | 0.009239525 | 0.096268814 | 0.017958491 |
| 0.071015012 | 0.001364962 | 0.073577496 | 0.002575411 |
| 0.022561815 | 0.088970174 | 0.054291303 | 0.051002437 |
| 0.003973542 | 0.010032395 | 0.010029384 | 0.103114916 |
| 0.007467448 | 0.015516629 | 0.008177279 | 0.026111211 |
| 0.002146603 | 0.004121922 | 0.00545785  | 0.032214999 |
| 0.007301266 | 0.009650072 | 0.036331885 | 0.029629961 |
| 0.06384837  | 0.001803514 | 0.007113236 | 0.003914322 |
| 0.01237503  | 0.002179562 | 0.112112964 | 0.00571018  |
| 0.010468364 | 0.02359717  | 0.001557792 | 0.052841696 |
| 0.016846637 | 0.0033292   | 0.090638308 | 0.012128932 |
| 0.061971095 | 0.03216254  | 0.080467304 | 0.019535304 |
| 0.009363985 | 0.125249752 | 0.001464545 | 0.033622133 |
| 0.026635097 | 0.030493528 | 0.05649956  | 0.043084056 |
| 0.087401474 | 0.006538007 | 0.053453498 | 0.004481036 |
| 0.00959267  | 0.015011381 | 0.001637688 | 0.018301531 |
| 0.011021273 | 0.024892256 | 0.0034976   | 0.055647183 |
| 0.044932449 | 0.042960736 | 0.004460256 | 0.031489512 |
| 1           | 0.009815784 | 0.00116629  | 0.018284788 |
| 0.010733176 | 0.010935404 | 0.017249605 | 0.012725885 |
| 0.057629    | 0.02297067  | 6.60E-05    | 0.007506863 |
| 0.001322995 | 0.053256536 | 0.008532118 | 0.015921585 |
| 0.034902851 | 0.000124139 | 0.030877408 | 0.002250556 |
| 0.052669444 | 0.02307411  | 0.130367779 | 0.005771525 |
| 0.17816304  | 0.013449269 | 0.012157694 | 0.008602957 |
| 0.003161761 | 0.033361586 | 0.037534037 | 0.031865973 |
| 0.049081105 | 0.009554014 | 0.040422637 | 0.058583226 |

|             |                      |                      |             |
|-------------|----------------------|----------------------|-------------|
| 0.015044488 | 0.027581689          | 0.01653055           | 0.02306395  |
| 0.022266972 | 0.008354316          | 0.022506738          | 0.007316317 |
| 0.001546914 | 0.011494407          | 0.026873914          | 0.001640109 |
| 0.014923776 | 0.005407496          | 0.006117647          | 0.158275324 |
| 0.025085891 | 0.010857075          | 0.054067085          | 0.004271774 |
| 0.10435864  | 0.011278113          | 0.002271575          | 0.072581227 |
| 0.018566509 | 0.013892819          | 0.005027719          | 0.007492495 |
| 0.034113928 | 0.03544792           | 0.061679388          | 0.043688964 |
| 0.051772292 | 0.016752432          | 0.023890564          | 0.081202469 |
| 0.124738134 | 0.001434808          | 0.006067252          | 0.04492725  |
| 0.022590609 | 0.018827572          | 0.006641151          | 0.008023952 |
| 0.034130229 | 0.039110633          | 0.005639345          | 0.047848112 |
| 0.099432813 | 0.014237183          | 0.024904079          | 0.005214317 |
| 0.054194112 | 0.052020833          | 0.002273541          | 0.030057777 |
| 0.01779731  | 0.001265825          | 0.02371488           | 0.003308487 |
| 0.017422844 | 0.054020113          | 0.135354366          | 0.020045759 |
| 0.098745766 | 0.029649866          | 0.006662492          | 0.005104652 |
| 0.013967772 | 0.019031707          | 0.10658954           | 0.009436691 |
| 0.024715737 | 0.030962609          | 0.005020408          | 0.004976696 |
| 0.1192493   | 0.012192607          | 0.032250485          | 0.0730159   |
| 0.013745159 | 0.02109827           | 0.111337365          | 0.073702091 |
| 0.08249097  | 0.046761182          | 0.074482162          | 0.019028145 |
| 0.054431527 | 0.024921096          | 0.008665648          | 0.165944999 |
| 0.049091703 | 0.017628051          | 0.003247454          | 0.006656053 |
| 0.011321284 | 0.040850419          | 0.044450276          | 0.085435732 |
| 0.027966225 | 0.001121126          | 0.018248305          | 0.00031987  |
| 0.007013118 | 0.046869515          | 0.014290365          | 0.007088087 |
| 0.006901083 | 0.132625682          | 0.053212703          | 0.01131806  |
| 0.110567548 | 0.009912192          | 0.010251937          | 0.016642744 |
| 0.030028239 | 0.026756265          | 0.008610408          | 0.068723394 |
| 0.042579216 | 0.021792659          | 0.006238517          | 0.021795965 |
| 0.049335058 | 0.001236885          | 0.003838219          | 0.097649875 |
| 0.016385083 | 0.0168421            | 0.095217825          | 0.040082638 |
| 0.003035356 | 0.028182164          | 0.111065179          | 0.012704964 |
| 0.006406636 | 0.00898171           | 0.018519722          | 0.0074476   |
| 0.015382176 | 0.01098688           | 0.042439187          | 0.075630769 |
| 0.007481241 | 0.007654598          | 0.028303891          | 0.023803476 |
| 0.007471058 | 0.072889166          | 0.014000368          | 0.070735263 |
| 0.003315942 | 0.006851112          | 7.58E-05 0.011764284 |             |
| 0.017142105 | 0.009994708          | 0.018257731          | 0.018064785 |
| 0.015777007 | 1.19E-05 0.010434302 | 0.013569823          |             |
| 0.060403429 | 0.016324447          | 0.011579853          | 0.011070057 |
| 0.01075535  | 0.01791341           | 0.018027496          | 0.011602225 |
| 0.009138776 | 0.015990981          | 0.085588742          | 0.023512956 |
| 0.007646695 | 0.013672519          | 0.009735154          | 0.02655945  |
| 0.020217153 | 0.097903723          | 0.126157477          | 0.007155719 |
| 0.020221003 | 0.019937387          | 0.043289519          | 0.006053956 |
| 0.08003751  | 0.008201026          | 0.022112895          | 0.015520869 |
| 0.059742815 | 0.024686787          | 0.009033452          | 0.019865173 |
| 0.021431227 | 0.001304257          | 0.000852674          | 0.000137981 |
| 0.048462374 | 0.022001132          | 0.029310177          | 0.014257227 |
| 0.008157597 | 0.074179151          | 0.025249861          | 0.011161027 |
| 0.023078799 | 0.012708612          | 0.045898842          | 0.008407724 |
| 0.057030658 | 0.036902431          | 0.028946786          | 0.05231103  |

|             |             |             |             |
|-------------|-------------|-------------|-------------|
| 0.001412717 | 0.020457994 | 0.013941769 | 0.013026066 |
| 0.029774191 | 0.002022203 | 0.026860096 | 0.00326808  |
| 0.041831895 | 0.007238755 | 0.031456758 | 0.001044408 |
| 0.06114808  | 0.085733267 | 0.018717923 | 0.006374214 |
| 0.09937718  | 0.105946839 | 0.00050759  | 0.136846714 |
| 0.013817113 | 0.065568341 | 0.020141907 | 0.022639019 |
| 0.037133563 | 0.018991069 | 0.01132238  | 0.038263497 |
| 0.008338118 | 0.026432852 | 0.002798043 | 0.005182387 |
| 0.018500479 | 0.005365241 | 0.033882731 | 0.008896986 |
| 0.007161106 | 0.006528125 | 0.035842134 | 0.002169624 |
| 0.076867872 | 0.031919197 | 0.018922044 | 0.00943755  |
| 0.022402394 | 0.025655142 | 0.011541882 | 0.024380979 |
| 0.044975412 | 0.008708368 | 0.00686202  | 0.101534363 |
| 0.000133184 | 0.018724605 | 0.004053136 | 0.010293445 |
| 0.021522711 | 0.050683632 | 0.011710396 | 0.006397217 |
| 0.00873446  | 0.010808564 | 0.052434375 | 0.007496909 |
| 0.006102568 | 0.04815029  | 0.03293861  | 0.027217889 |
| 0.032840332 | 0.005618359 | 0.04512388  | 0.109616828 |
| 0.00595643  | 0.004949334 | 6.93E-05    | 0.004729794 |
| 0.023964114 | 0.056022414 | 0.027606866 | 0.005021581 |
| 0.004525065 | 0.003878772 | 0.095031482 | 0.011965015 |
| 0.00828913  | 0.014049045 | 0.027275079 | 0.036780017 |
| 0.066045225 | 0.010848043 | 0.012417493 | 0.002533779 |
| 0.018080876 | 0.014240284 | 0.031228269 | 0.014237059 |
| 0.06407565  | 0.010192934 | 0.002270538 | 0.00831293  |
| 0.002848925 | 0.130754629 | 0.064199071 | 0.113388788 |
| 0.040593192 | 0.003364106 | 0.021620791 | 0.002406186 |
| 0.061814242 | 0.000888205 | 0.012696651 | 0.023999558 |
| 0.000960986 | 0.037011808 | 0.075777127 | 0.08350641  |
| 0.012286104 | 0.015109875 | 0.058854924 | 0.003160248 |
| 0.016404263 | 0.025402044 | 0.032895423 | 0.007823344 |
| 0.007206565 | 0.074107596 | 0.009542566 | 0.027138951 |
| 0.000387275 | 0.016372589 | 0.007877581 | 0.047305659 |
| 0.021358687 | 0.002791714 | 0.004888472 | 0.003951148 |
| 0.003356876 | 0.002146666 | 0.052094535 | 0.035874058 |
| 0.011184742 | 0.025658753 | 0.012748548 | 0.029156083 |
| 0.038422819 | 0.003399019 | 0.00136815  | 0.007483427 |
| 0.006117538 | 0.007056208 | 0.008572771 | 0.004328815 |
| 0.054553403 | 0.004383988 | 0.01018312  | 0.000609128 |
| 0.001444201 | 0.067825444 | 0.014770185 | 0.005515181 |
| EIF4E3      | 0.059828265 | 0.052662037 | 0.048923503 |
| 0.112768167 | 0.072330587 | 0.039611743 | 0.136205782 |
| 0.069939    | 0.026903398 | 0.015548943 | 0.011074358 |
| 0.061624766 | 0.012210204 | 0.047969486 | 0.014809985 |
| 0.146273193 | 0.101715365 | 0.062924812 | 0.22148073  |
| 0.124692457 | 0.07366182  | 0.14625932  | 0.134825128 |
| 0.037205309 | 0.085949525 | 0.136424382 | 0.047421956 |
| 0.121921015 | 0.163460473 | 0.025866628 | 0.09723421  |
| 0.154437733 | 0.072510389 | 0.037955098 | 0.073079989 |
| 0.032837683 | 0.0442506   | 0.028742895 | 0.020787263 |
| 0.06806969  | 0.070147863 | 0.118455813 | 0.163163365 |
| 0.099854849 | 0.034211526 | 0.154321685 | 0.09449222  |
| 0.012400107 | 0.080966671 | 0.029831396 | 0.0364806   |
| 0.027337297 | 0.032856377 | 0.080546938 | 0.101415904 |



|             |             |             |             |
|-------------|-------------|-------------|-------------|
| 0.004138084 | 0.026194728 | 0.008069559 | 0.052817724 |
| 0.1543665   | 0.03269165  | 0.031641637 | 0.025564802 |
| 0.007473378 | 0.104339202 | 0.116797657 | 0.115654438 |
| 0.024346923 | 0.057458993 | 0.081976663 | 0.036364607 |
| 0.00501402  | 0.154375713 | 0.130865279 | 0.013068821 |
| 0.264724708 | 0.0346929   | 0.154022444 | 0.115092562 |
| 0.104685275 | 0.045902468 | 0.084387559 | 0.065377825 |
| 0.048115277 | 0.166514325 | 0.044327739 | 0.129981144 |
| 0.060507463 | 0.106770315 | 0.055702599 | 0.143520094 |
| 0.078228503 | 0.040907447 | 0.061711168 | 0.171829087 |
| 0.04713708  | 0.055064405 | 0.037969491 | 0.044996972 |
| 0.013447474 | 0.093026501 | 0.033589896 | 0.061976358 |
| 0.04955545  | 0.03863705  | 0.19245367  | 0.087628837 |
| 0.240745615 | 0.019880444 | 0.169502117 | 0.030203268 |
| 0.10674249  | 0.072712301 | 0.15967809  | 0.082974104 |
| 0.069095571 | 0.069324957 | 0.04058747  | 0.197344546 |
| 0.077643698 | 0.055195844 | 0.006723512 | 0.207445723 |
| 0.014098587 | 0.018180193 | 0.024876044 | 0.080306262 |
| 0.03697318  | 0.015821723 | 0.118404735 | 0.100457688 |
| 0.151534196 | 0.04347229  | 0.047423364 | 0.090094848 |
| 0.091611961 | 0.032188297 | 0.058546183 | 0.041153167 |
| 0.037743366 | 0.081705533 | 0.001802865 | 0.150857579 |
| 0.07047567  | 0.059620968 | 0.253338348 | 0.046266693 |
| 0.102280799 | 0.153594858 | 0.198246584 | 0.072225001 |
| 0.045686623 | 0.231111902 | 0.040411123 | 0.155897143 |
| 0.012649806 | 0.099807567 | 0.218222356 | 0.077475985 |
| 0.095920555 | 0.030439854 | 0.17337496  | 0.077612936 |
| 0.004626755 | 0.025537652 | 0.075090789 | 0.087053348 |
| 0.018460156 | 0.037529515 | 0.024164966 | 0.275101968 |
| 0.092725306 | 0.113637265 | 0.046542004 | 0.044490069 |
| 0.009815784 | 1           | 0.028061185 | 0.060296617 |
| 0.033413395 | 0.069732573 | 0.098346149 | 0.081306441 |
| 0.18698866  | 0.105892119 | 0.007950312 | 0.034446029 |
| 0.040829791 | 0.025225464 | 0.076369624 | 0.092963432 |
| 0.02100077  | 0.08961621  | 0.006764715 | 0.144878248 |
| 0.042006992 | 0.263264592 | 0.090469011 | 0.186875304 |
| 0.040336151 | 0.168518168 | 0.04173573  | 0.046512072 |
| 0.03194644  | 0.019585542 | 0.046576611 | 0.109273616 |
| 0.13203462  | 0.04339712  | 0.082750143 | 0.112471159 |
| 0.070540753 | 0.09498036  | 0.111524569 | 0.017960803 |
| 0.067300729 | 0.156296939 | 0.080360948 | 0.132726415 |
| 0.06962009  | 0.003189002 | 0.04195817  | 0.082451597 |
| 0.03145665  | 0.049591933 | 0.035520611 | 0.001858054 |
| 0.170189966 | 0.081164736 | 0.034972028 | 0.086761515 |
| 0.03503946  | 0.053218301 | 0.023746427 | 0.07092314  |
| 0.17415377  | 0.058979507 | 0.053424345 | 0.02660223  |
| 0.025409024 | 0.042512302 | 0.196653411 | 0.022942303 |
| 0.013684168 | 0.09750748  | 0.028264048 | 0.029276618 |
| 0.080913266 | 0.165396097 | 0.050443237 | 0.010357372 |
| 0.012108865 | 0.017080845 | 0.014113846 | 0.039982289 |
| 0.024199842 | 0.030607727 | 0.073327056 | 0.030744506 |
| 0.114625533 | 0.231142205 | 0.052779158 | 0.151139593 |
| 0.037385726 | 0.122288066 | 0.2483429   | 0.002378851 |
| 0.070113723 | 0.01988991  | 0.019397216 | 0.054508137 |

|             |             |             |             |
|-------------|-------------|-------------|-------------|
| 0.082493456 | 0.081216206 | 0.029419423 | 0.184157374 |
| 0.030376644 | 0.161623099 | 0.110180393 | 0.007338972 |
| 0.0573535   | 0.044441634 | 0.174971173 | 0.103089918 |
| 0.034597844 | 0.099663593 | 0.053540061 | 0.045466307 |
| 0.042894878 | 0.20911411  | 0.05177513  | 0.09941599  |
| 0.249134904 | 0.083247945 | 0.039062803 | 0.264190186 |
| 0.189348325 | 0.048964265 | 0.06031885  | 0.201154283 |
| 0.058686862 | 0.143440735 | 0.039288323 | 0.072794912 |
| 0.129726989 | 0.014899739 | 0.123300651 | 0.055789289 |
| 0.033994318 | 0.049403454 | 0.237149877 | 0.0527189   |
| 0.242082221 | 0.020266459 | 0.008523648 | 0.058196529 |
| 0.031805465 | 0.044436857 | 0.18940307  | 0.052571918 |
| 0.030104525 | 0.036735242 | 0.122277194 | 0.071523836 |
| 0.043512779 | 0.165453797 | 0.149586714 | 0.040821313 |
| 0.055656682 | 0.04866169  | 0.025697133 | 0.097716509 |
| 0.065645286 | 0.054415037 | 0.076827719 | 0.030524917 |
| 0.02237583  | 0.103773417 | 0.007486513 | 0.031270038 |
| 0.061277383 | 0.040834995 | 0.107687554 | 0.059250538 |
| 0.020922425 | 0.03315993  | 0.145614663 | 0.215903733 |
| 0.044628188 | 0.043098926 | 0.039407984 | 0.154469868 |
| 0.055995827 | 0.042621573 | 0.023917609 | 0.245205232 |
| 0.206478603 | 0.03740681  | 0.066444161 | 0.02328125  |
| 0.097130606 | 0.029491181 | 0.017014262 | 0.054806112 |
| 0.229434185 | 0.025593151 | 0.012333011 | 0.011586257 |
| 0.114741768 | 0.097838541 | 0.032740845 | 0.100135199 |
| 0.010134594 | 0.156797441 | 0.013256004 | 0.056936991 |
| 0.042728355 | 0.120709331 | 0.055759573 | 0.039274206 |
| 0.036637014 | 0.053007399 | 0.031804968 | 0.048651643 |
| 0.037415258 | 0.031088321 | 0.018709475 | 0.184781544 |
| 0.062455178 | 0.034340636 | 0.087296955 | 0.052075324 |
| 0.087395083 | 0.110614978 | 0.186455126 | 0.082589096 |
| 0.011359273 | 0.05845281  | 0.006252476 | 0.009157248 |
| 0.047046109 | 0.077036464 | 0.058385523 | 0.093626987 |
| 0.056114462 | 0.194326743 | 0.057706314 | 0.04378632  |
| 0.079476187 | 0.095781587 | 0.072479431 | 0.021092025 |
| 0.014582208 | 0.017987285 | 0.09801927  | 0.170998377 |
| 0.055818061 | 0.00350442  | 0.142730022 | 0.064155454 |
| 0.042186593 | 0.070368607 | 0.041700615 | 0.18711396  |
| 0.067479824 | 0.215923142 | 0.011147145 | 0.165916253 |
| 0.045602777 | 0.03238331  | 0.061178473 | 0.042097183 |
| 0.145821124 | 0.134354032 | 0.063656564 | 0.086490214 |
| 0.005383007 | 0.181120027 | 0.061557265 | 0.022834276 |
| 0.044191478 | 0.14814694  | 0.101349154 | 0.119028665 |
| 0.028424749 | 0.038512653 | 0.049735411 | 0.007374848 |
| 0.078216167 | 0.078516839 | 0.081655762 | 0.077522432 |
| 0.081064295 | 0.136840395 | 0.067292725 | 0.040948935 |
| 0.023852538 | 0.033629855 | 0.062743951 | 0.007797107 |
| 0.111717584 | 0.142480773 | 0.039165093 | 0.002651373 |
| 0.038150686 | 0.086057462 | 0.008520609 | 0.136353807 |
| 0.013039418 | 0.199102018 | 0.085124545 | 0.080273619 |
| 0.108885158 | 0.089995269 | 0.179425049 | 0.12879601  |
| 0.078517845 | 0.094940781 | 0.036205962 | 0.019510723 |
| 0.085424384 | 0.014398866 | 0.123076683 | 0.054160935 |
| 0.051165845 | 0.088533319 | 0.02101945  | 0.058669892 |

|             |             |             |             |
|-------------|-------------|-------------|-------------|
| 0.064120588 | 0.062641454 | 0.046420804 | 0.098676291 |
| 0.01457589  | 0.056625198 | 0.056480001 | 0.027154609 |
| 0.159716371 | 0.08337707  | 0.085104101 | 0.031121183 |
| 0.103681997 | 0.033357186 | 0.060689626 | 0.011411355 |
| 0.024411894 | 0.048538861 | 0.054693101 | 0.140332104 |
| 0.080615795 | 0.054300779 | 0.061162259 | 0.090487545 |
| 0.053515652 | 0.047830633 | 0.033734771 | 0.069375085 |
| 0.242987031 | 0.09667102  | 0.075084519 | 0.073983072 |
| 0.015324158 | 0.047722287 | 0.083868249 | 0.049259552 |
| 0.041521493 | 0.16393187  | 0.040127594 | 0.032099708 |
| 0.029358753 | 0.040987587 | 0.054647446 | 0.250545411 |
| 0.21031822  | 0.106334749 | 0.010267483 | 0.131739362 |
| 0.012826241 | 0.128654613 | 0.011228076 | 0.052884324 |
| 0.138866086 | 0.039533392 | 0.154992099 | 0.085928506 |
| 0.05718403  | 0.035043783 | 0.033137364 | 0.235750745 |
| 0.01935509  | 0.053992579 | 0.035690286 | 0.139739539 |
| 0.0145016   | 0.074077275 | 0.158359232 | 0.046733898 |
| 0.014069134 | 0.007960516 | 0.050754474 | 0.062600655 |
| 0.093313316 | 0.093191247 | 0.050521891 | 0.080443454 |
| 0.02254808  | 0.041770926 | 0.070858753 | 0.023688326 |
| 0.151441659 | 0.036928968 | 0.016297784 | 0.063361627 |
| 0.10473912  | 0.226440016 | 0.035488598 | 0.033890402 |
| 0.097397759 | 0.041859398 | 0.055569827 | 0.037349129 |
| 0.079000645 | 0.132304498 | 0.030624767 | 0.047039687 |
| 0.051691786 | 0.03283346  | 0.099930462 | 0.092789747 |
| 0.012524359 |             |             |             |
| ELOVL1      | 0.273924057 | 0.352662498 | 0.108740293 |
| 0.23715057  | 0.125722474 | 0.210465401 | 0.084013    |
| 0.162796489 | 0.02163015  | 0.001962496 | 0.001966666 |
| 0.161425398 | 0.033531465 | 0.099802643 | 0.094109114 |
| 0.222525897 | 0.021539572 | 0.164038246 | 0.089129317 |
| 0.253480694 | 0.071042382 | 0.162700495 | 0.039769485 |
| 0.053182006 | 0.012547964 | 0.014011015 | 0.036814774 |
| 0.31006605  | 0.017200847 | 0.155165255 | 0.308823356 |
| 0.031737305 | 0.311866475 | 0.361319451 | 0.145414064 |
| 0.338284908 | 0.262370998 | 0.019102785 | 0.091012416 |
| 0.357236657 | 0.195754786 | 0.259879708 | 0.124721562 |
| 0.015858252 | 0.393592689 | 0.085969216 | 0.127958209 |
| 0.121824121 | 0.00470035  | 0.159661235 | 0.395915969 |
| 0.314859314 | 0.138934194 | 0.145946095 | 0.061140213 |
| 0.026160372 | 0.167050137 | 0.027382588 | 0.317925083 |
| 0.074354094 | 0.144427158 | 0.313598879 | 0.032141724 |
| 0.061514892 | 0.173331442 | 0.033931302 | 0.136227279 |
| 0.05748532  | 0.338503445 | 0.025072752 | 0.155780106 |
| 0.003053578 | 0.243569765 | 0.128408986 | 0.039838966 |
| 0.010882429 | 0.003698236 | 0.040809019 | 0.156972685 |
| 0.318623846 | 0.353482049 | 0.257958569 | 0.260745713 |
| 0.032251986 | 0.082979133 | 0.087498548 | 0.041812523 |
| 0.320861791 | 0.057167093 | 0.048558293 | 0.197576826 |
| 0.264684902 | 0.328339582 | 0.038912136 | 0.060591673 |
| 0.241842697 | 0.370693487 | 0.111162549 | 0.093405651 |
| 0.04917842  | 0.010816448 | 0.314756549 | 0.296229131 |
| 0.357136871 | 0.044338047 | 0.027891151 | 0.334047893 |
| 0.02136466  | 0.137107314 | 0.153965118 | 0.054785341 |

|             |             |             |             |
|-------------|-------------|-------------|-------------|
| 0.32226397  | 0.008763009 | 0.036980583 | 0.148249541 |
| 0.103340046 | 0.284719939 | 0.308182312 | 0.06789561  |
| 0.117199811 | 0.005857156 | 0.012807607 | 0.01404928  |
| 0.102601932 | 0.016638173 | 0.359115452 | 0.27967623  |
| 0.152494704 | 0.075280366 | 0.116534231 | 0.000745115 |
| 0.005418004 | 0.06565621  | 0.26473858  | 0.16262101  |
| 0.275166842 | 0.27009972  | 0.03796433  | 0.315888459 |
| 0.152305503 | 0.253834291 | 0.034279391 | 0.056228355 |
| 0.14796365  | 0.06327598  | 0.081663211 | 0.160817019 |
| 0.052341234 | 0.085735348 | 0.046466057 | 0.314308458 |
| 0.400269981 | 0.031469114 | 0.187878983 | 0.199951274 |
| 0.073757311 | 0.076368382 | 0.050379221 | 0.080833936 |
| 0.02909019  | 0.303530289 | 0.005063065 | 0.183966574 |
| 0.036837544 | 0.021416853 | 0.019389949 | 0.168111866 |
| 0.08806964  | 0.237375241 | 0.352068561 | 0.046226383 |
| 0.091351277 | 0.140378219 | 0.212023941 | 0.188273815 |
| 0.00116629  | 0.028061185 | 1           | 0.306657197 |
| 0.27841073  | 0.303856065 | 0.10065432  | 0.073459514 |
| 0.070121051 | 0.264787047 | 0.002294016 | 0.364977182 |
| 0.323326262 | 0.172315615 | 0.113783548 | 0.165373113 |
| 0.060834677 | 0.266568008 | 0.032377315 | 0.206911057 |
| 0.311378231 | 0.038566521 | 0.292991422 | 0.029469799 |
| 0.338974555 | 0.008826511 | 0.151248874 | 0.200013068 |
| 0.183192279 | 0.005247694 | 0.137540078 | 0.249130529 |
| 0.005388256 | 0.081346216 | 0.284039874 | 0.201362431 |
| 0.121648564 | 0.243101091 | 0.285401085 | 0.051444075 |
| 0.115468749 | 0.130178851 | 0.006372988 | 0.073506042 |
| 0.258399071 | 0.076760418 | 0.364486537 | 0.103800162 |
| 0.249367543 | 0.333324106 | 0.244450309 | 0.05182681  |
| 0.016696279 | 0.157771245 | 0.014023617 | 0.070422812 |
| 0.279741483 | 0.034403214 | 0.092625357 | 0.065515958 |
| 0.013118469 | 0.316309602 | 0.023161621 | 0.035266328 |
| 0.013873368 | 0.139441238 | 0.114347542 | 0.049544956 |
| 0.025552163 | 0.041266059 | 0.060252517 | 0.078611029 |
| 0.031455993 | 0.021359468 | 0.005852107 | 0.064252337 |
| 0.018916412 | 0.061244987 | 0.068872357 | 0.274302879 |
| 0.116989058 | 0.024529468 | 0.077515476 | 0.055981564 |
| 0.020317403 | 0.004346425 | 0.338952629 | 0.212023736 |
| 0.338697266 | 0.061646109 | 0.014133798 | 0.066888124 |
| 0.282321024 | 0.153170905 | 0.1838958   | 0.31506784  |
| 0.017722909 | 0.286920174 | 0.045469241 | 0.021878192 |
| 0.05720156  | 0.071231017 | 0.298327868 | 0.023976787 |
| 0.238943129 | 0.353836665 | 0.108411098 | 0.030875547 |
| 0.333294481 | 0.217872913 | 0.016866064 | 0.298103565 |
| 0.29306142  | 0.008594352 | 0.321022619 | 0.022067191 |
| 0.006007593 | 0.180233353 | 0.175230322 | 0.018364517 |
| 0.017022174 | 0.073161582 | 0.05270427  | 0.081898348 |
| 0.319581001 | 0.178096339 | 0.224678264 | 0.041096884 |
| 0.012073002 | 0.001235991 | 0.041152488 | 0.127068599 |
| 0.373150968 | 0.290347064 | 0.089220895 | 0.056693269 |
| 0.095037593 | 0.051056422 | 0.159278232 | 0.292006128 |
| 0.085683157 | 0.366223949 | 0.003497769 | 0.19103257  |
| 0.334588777 | 0.192574534 | 0.011083087 | 0.145594914 |
| 0.323302728 | 0.019100169 | 0.129134522 | 0.338338344 |

|             |             |             |             |
|-------------|-------------|-------------|-------------|
| 0.304559225 | 0.069956056 | 0.062722038 | 0.220453729 |
| 0.013713421 | 0.0333721   | 0.114589124 | 0.024861765 |
| 0.085635998 | 0.057120399 | 0.00505368  | 0.169910435 |
| 0.010257304 | 0.329820355 | 0.271473076 | 0.0106364   |
| 0.143414288 | 0.17156232  | 0.132774849 | 0.014742073 |
| 0.217023217 | 0.315679212 | 0.362131373 | 0.114746343 |
| 0.248208107 | 0.268956169 | 0.093259638 | 0.02328552  |
| 0.003514738 | 0.327156648 | 0.295766159 | 0.006252744 |
| 0.292253807 | 0.185257238 | 0.001906374 | 0.366025787 |
| 0.077495981 | 0.375928734 | 0.003945063 | 0.031590093 |
| 0.010360762 | 0.244122571 | 0.337784998 | 0.295551229 |
| 0.10190851  | 0.207583909 | 0.003515379 | 0.316518616 |
| 0.3307311   | 0.002088795 | 0.022532149 | 0.22214493  |
| 0.16205077  | 0.386573743 | 0.042367186 | 0.211523745 |
| 0.120295389 | 0.313924458 | 0.074791126 | 0.069017482 |
| 0.273176861 | 0.279235164 | 0.300748926 | 0.371790364 |
| 0.280790778 | 0.176093505 | 0.108095897 | 0.006429335 |
| 0.020671455 | 0.161815572 | 0.055323085 | 0.011338886 |
| 0.285576856 | 0.021864507 | 0.336805084 | 0.272724653 |
| 0.256627584 | 0.001761472 | 0.111330105 | 0.260198774 |
| 0.3493565   | 0.33711992  | 0.015777043 | 0.003025879 |
| 0.003677505 | 0.001042607 | 0.215681785 | 0.056914818 |
| 0.301347086 | 0.077408547 | 0.002149015 | 0.056304001 |
| 0.09408027  | 0.104999148 | 0.327984717 | 0.205414447 |
| 0.23432739  | 0.028499888 | 0.05694493  | 0.246021061 |
| 0.008679838 | 0.310853255 | 0.263622442 | 0.363195248 |
| 0.016747032 | 0.058465273 | 0.168017952 | 0.313735821 |
| 0.005411064 | 0.095318912 | 0.18171831  | 0.066628037 |
| 0.009457172 | 0.015377592 | 0.011962533 | 0.248163929 |
| 0.320592758 | 0.010135397 | 0.004066052 | 0.119877013 |
| 0.031364187 | 0.29498836  | 0.037930197 | 0.30619203  |
| 0.297977092 | 0.258194836 | 0.013566331 | 0.349809646 |
| 0.007480458 | 0.332551408 | 0.052736748 | 0.02755954  |
| 0.102984769 | 0.007631015 | 0.301622771 | 0.01386683  |
| 0.155276796 | 0.308758194 | 0.032903569 | 0.003457187 |
| 0.026227149 | 0.01195792  | 0.264696942 | 0.230617002 |
| 0.009017847 | 0.117964564 | 0.0871276   | 0.22612714  |
| 0.186784881 | 0.210701753 | 0.365219457 | 0.119297991 |
| 0.041759635 | 0.032136142 | 0.291582278 | 0.282342815 |
| 0.161665908 | 0.272755787 | 0.044776018 | 0.326691947 |
| 0.297793181 | 0.350481771 | 0.287755886 | 0.135767279 |
| 0.033796615 | 0.227207394 | 0.216893933 | 0.009632603 |
| 0.147745704 | 0.246446835 | 0.194369998 | 0.0182722   |
| 0.042834726 | 0.08765054  | 0.048245501 | 0.131719564 |
| 0.052046328 | 0.22773269  | 0.043023426 | 0.271821748 |
| 0.284986087 | 0.290713295 | 0.065827317 | 0.010584506 |
| 0.363196006 | 0.362928292 | 0.086649135 | 0.216933463 |
| 0.053876707 | 0.088298796 | 0.236778804 | 0.210608728 |
| 0.099147686 | 0.254094443 | 0.316214297 | 0.22878624  |
| 0.35915596  | 0.098611063 | 0.355466681 | 0.143718485 |
| 0.013616021 | 0.199305489 | 0.017902946 | 0.021593417 |
| 0.040799097 | 0.006429228 | 0.038890364 | 0.216682582 |
| 0.060426879 | 0.143063163 | 0.16996858  | 0.026338662 |
| 0.085489164 | 0.15690709  | 0.124053197 | 0.083912126 |

|             |             |             |             |
|-------------|-------------|-------------|-------------|
| 0.017882004 | 0.333944371 | 0.002482585 | 0.016564202 |
| 0.06694329  | 0.231075252 | 0.063918761 | 0.056835848 |
| 0.038325127 | 0.033511219 | 0.08222464  | 0.189443541 |
| 0.072844123 | 0.104010983 | 0.236059958 | 0.027898678 |
| 0.017976077 | 0.292593486 | 0.175651824 | 0.007836169 |
| 0.026680717 | 0.257675261 | 0.140975287 | 0.047482877 |
| 0.004120262 | 0.263760226 | 0.102001467 | 0.123524509 |
| 0.181074373 | 0.031081045 | 0.389828304 | 0.059353984 |
| 0.047006028 | 0.375199219 | 0.108859325 | 0.318193355 |
| 0.089697414 | 0.205071305 | 0.396659295 | 0.26981111  |
| 0.065458869 | 0.131124892 | 0.014999195 | 0.321846089 |
| 0.067981219 |             |             |             |
| EMP1        | 0.458501588 | 0.529818468 | 0.43533992  |
| 0.480790721 | 0.495160016 | 0.421730008 | 0.258633886 |
| 0.213573103 | 0.104579717 | 0.009688815 | 0.038018344 |
| 0.497597615 | 0.279881779 | 0.341771128 | 0.36160203  |
| 0.474131611 | 0.187467461 | 0.376249995 | 0.295153873 |
| 0.464825973 | 0.121257813 | 0.472222366 | 0.119989155 |
| 0.334608263 | 0.141669224 | 0.096129871 | 0.320625737 |
| 0.49082659  | 0.107942254 | 0.386285773 | 0.436121071 |
| 0.127880559 | 0.484183598 | 0.528939895 | 0.515394948 |
| 0.527115597 | 0.430212151 | 0.016567781 | 0.350089993 |
| 0.452432131 | 0.495074916 | 0.462544162 | 0.398422762 |
| 0.06002513  | 0.496772673 | 0.303798075 | 0.455422482 |
| 0.255921039 | 0.048622354 | 0.271352899 | 0.446093465 |
| 0.495295519 | 0.496762639 | 0.259107851 | 0.202812026 |
| 0.281686971 | 0.275381269 | 0.344494993 | 0.365747278 |
| 0.285078592 | 0.189127723 | 0.499447635 | 0.112115154 |
| 0.177933773 | 0.286990605 | 0.195403264 | 0.309160303 |
| 0.397392777 | 0.423678784 | 0.023522898 | 0.44900982  |
| 0.005628604 | 0.438522163 | 0.433884585 | 0.352138626 |
| 0.059393413 | 0.038441194 | 0.225399738 | 0.405340452 |
| 0.499673113 | 0.451370246 | 0.51985747  | 0.510895109 |
| 0.247574036 | 0.3440909   | 0.449334912 | 0.228526651 |
| 0.473774758 | 0.231926045 | 0.135814009 | 0.485172856 |
| 0.518125864 | 0.533669166 | 0.253296208 | 0.312988439 |
| 0.482194242 | 0.476373982 | 0.476040684 | 0.498912417 |
| 0.39459639  | 0.065042423 | 0.4529194   | 0.510675414 |
| 0.433438463 | 0.373452242 | 0.198899445 | 0.463380604 |
| 0.079142446 | 0.399719652 | 0.422825078 | 0.207119457 |
| 0.50152141  | 0.025104053 | 0.266211147 | 0.429955958 |
| 0.245165936 | 0.487135506 | 0.525458573 | 0.236744433 |
| 0.469807725 | 0.032263823 | 0.170258676 | 0.04422355  |
| 0.394793662 | 0.180761012 | 0.496665255 | 0.510830285 |
| 0.283975967 | 0.452486331 | 0.314755328 | 0.00351643  |
| 0.039651196 | 0.213306774 | 0.493224782 | 0.409448083 |
| 0.477498165 | 0.406508866 | 0.295567285 | 0.434019432 |
| 0.498614332 | 0.519141475 | 0.069904018 | 0.120949385 |
| 0.482310793 | 0.216012446 | 0.295729307 | 0.513979001 |
| 0.379336593 | 0.141223845 | 0.169483595 | 0.509946455 |
| 0.424724332 | 0.115731329 | 0.366812022 | 0.477872481 |
| 0.404540637 | 0.428851732 | 0.139938286 | 0.359455554 |
| 0.071623373 | 0.491784881 | 0.04029805  | 0.367031896 |
| 0.307718991 | 0.206583147 | 0.013153923 | 0.302871895 |

|             |             |             |             |
|-------------|-------------|-------------|-------------|
| 0.35293122  | 0.491665011 | 0.480190497 | 0.135917784 |
| 0.402612731 | 0.477864283 | 0.361351788 | 0.498694429 |
| 0.018284788 | 0.060296617 | 0.306657197 | 1           |
| 0.33039242  | 0.500224996 | 0.357682896 | 0.3493186   |
| 0.344377193 | 0.496485263 | 0.003488408 | 0.507633217 |
| 0.53386243  | 0.332061786 | 0.488652656 | 0.474199097 |
| 0.423303901 | 0.504613244 | 0.048408853 | 0.486315414 |
| 0.398673527 | 0.10048089  | 0.515471581 | 0.212908433 |
| 0.463681505 | 0.0601737   | 0.377949291 | 0.484838784 |
| 0.495413129 | 0.012535672 | 0.263883616 | 0.443859367 |
| 0.036328954 | 0.121379614 | 0.470435879 | 0.468703767 |
| 0.443725412 | 0.493384081 | 0.513038386 | 0.405913748 |
| 0.499854295 | 0.278717439 | 0.016593011 | 0.377118281 |
| 0.482742413 | 0.429114467 | 0.446086849 | 0.288304064 |
| 0.375701291 | 0.476006574 | 0.46593407  | 0.2384972   |
| 0.061024856 | 0.364444757 | 0.031094997 | 0.393100411 |
| 0.42504454  | 0.171216944 | 0.433204362 | 0.176363493 |
| 0.097944793 | 0.527445071 | 0.215813593 | 0.303899161 |
| 0.155433475 | 0.488709457 | 0.298397014 | 0.325786534 |
| 0.304813748 | 0.206071659 | 0.405681786 | 0.433175179 |
| 0.05317217  | 0.134406469 | 0.016683872 | 0.466736387 |
| 0.220737106 | 0.444520857 | 0.437350135 | 0.462154558 |
| 0.406331617 | 0.168691021 | 0.469263878 | 0.31980647  |
| 0.144411234 | 0.022352383 | 0.510590301 | 0.462845654 |
| 0.37573758  | 0.191219098 | 0.055894408 | 0.424980927 |
| 0.512423732 | 0.368473617 | 0.290147073 | 0.487896496 |
| 0.034534664 | 0.50892234  | 0.334044823 | 0.165822186 |
| 0.473198529 | 0.335401463 | 0.497260086 | 0.073612406 |
| 0.435736456 | 0.47805159  | 0.360352247 | 0.236174672 |
| 0.433401816 | 0.475558004 | 0.044390577 | 0.447770269 |
| 0.454386371 | 0.047623068 | 0.531279283 | 0.169653471 |
| 0.029662251 | 0.498968429 | 0.501959655 | 0.099880457 |
| 0.101384852 | 0.415833245 | 0.059917775 | 0.354537516 |
| 0.521203294 | 0.483139578 | 0.492700301 | 0.251895779 |
| 0.060957152 | 0.023390145 | 0.254142318 | 0.441226988 |
| 0.523814521 | 0.513682604 | 0.318425553 | 0.456925027 |
| 0.29656241  | 0.389776701 | 0.162623999 | 0.510680085 |
| 0.206359045 | 0.523076979 | 0.009932858 | 0.496026784 |
| 0.523863828 | 0.336809248 | 0.111418893 | 0.365105617 |
| 0.444239758 | 0.062233906 | 0.2378917   | 0.509340432 |
| 0.474039778 | 0.382535637 | 0.404850208 | 0.485949516 |
| 0.02388661  | 0.058128387 | 0.44052796  | 0.216073714 |
| 0.447937994 | 0.259773385 | 0.066076723 | 0.366410868 |
| 0.066589225 | 0.466492612 | 0.509567156 | 0.078200435 |
| 0.401834608 | 0.335434035 | 0.446846901 | 0.051658081 |
| 0.488949979 | 0.501279843 | 0.534527127 | 0.197500163 |
| 0.501059173 | 0.493049472 | 0.470224927 | 0.10135321  |
| 0.024607158 | 0.526533637 | 0.438846873 | 0.034978019 |
| 0.514621558 | 0.270452072 | 0.026432629 | 0.500730379 |
| 0.22835628  | 0.456738109 | 0.004556091 | 0.083809509 |
| 0.05064574  | 0.507463128 | 0.490302377 | 0.432113041 |
| 0.294236644 | 0.417735562 | 0.006484569 | 0.520255844 |
| 0.50528997  | 0.020961261 | 0.178538291 | 0.502704276 |
| 0.490393203 | 0.533648859 | 0.376607154 | 0.505835856 |

|             |             |             |             |
|-------------|-------------|-------------|-------------|
| 0.502044191 | 0.515649864 | 0.308167987 | 0.330605567 |
| 0.497535039 | 0.498925665 | 0.470315906 | 0.456147701 |
| 0.517024807 | 0.489050568 | 0.34298522  | 0.023836728 |
| 0.147153887 | 0.249910225 | 0.363834759 | 0.110236718 |
| 0.360416861 | 0.18222335  | 0.48004305  | 0.514296662 |
| 0.51116915  | 0.007526715 | 0.185729629 | 0.491452536 |
| 0.47916709  | 0.496437786 | 0.023204711 | 0.006872496 |
| 0.008470609 | 0.030066176 | 0.414741054 | 0.290090131 |
| 0.493352313 | 0.299997942 | 0.007689943 | 0.058345332 |
| 0.331316507 | 0.466782858 | 0.516324241 | 0.444083691 |
| 0.489047048 | 0.107762933 | 0.361630364 | 0.45616748  |
| 0.092182617 | 0.359929477 | 0.514543219 | 0.484662516 |
| 0.051863194 | 0.292878924 | 0.416600899 | 0.507590351 |
| 0.089275042 | 0.386308133 | 0.504866356 | 0.39944916  |
| 0.016371081 | 0.106355301 | 0.085348952 | 0.492898879 |
| 0.515442208 | 0.124616354 | 0.056752557 | 0.174065092 |
| 0.169568491 | 0.504784953 | 0.224944229 | 0.513751654 |
| 0.494026421 | 0.500101093 | 0.098930236 | 0.489187885 |
| 0.057139181 | 0.504245529 | 0.411951706 | 0.071764601 |
| 0.332170847 | 0.016961451 | 0.473540403 | 0.196215844 |
| 0.38580107  | 0.443589614 | 0.217722427 | 0.023099465 |
| 0.202813945 | 0.074796325 | 0.516784938 | 0.510292394 |
| 0.042167208 | 0.276382352 | 0.352272493 | 0.456566053 |
| 0.334866118 | 0.507295656 | 0.517288154 | 0.457910067 |
| 0.114005684 | 0.166224962 | 0.463823661 | 0.445822125 |
| 0.288798932 | 0.517547113 | 0.371404462 | 0.523481273 |
| 0.450848077 | 0.469061471 | 0.491893217 | 0.406594181 |
| 0.299926076 | 0.445133222 | 0.439990387 | 0.032575549 |
| 0.413181765 | 0.52197264  | 0.396955042 | 0.205043909 |
| 0.332605993 | 0.44139215  | 0.056253269 | 0.199576227 |
| 0.382529137 | 0.356583365 | 0.198173455 | 0.491677907 |
| 0.435816627 | 0.448861164 | 0.050519869 | 0.08115706  |
| 0.546310218 | 0.442121254 | 0.168689113 | 0.488215009 |
| 0.211000453 | 0.411578213 | 0.501745884 | 0.505099118 |
| 0.402979415 | 0.509116248 | 0.484634215 | 0.46034265  |
| 0.44291199  | 0.312239203 | 0.536014889 | 0.102020007 |
| 0.106925792 | 0.468785509 | 0.144190201 | 0.11952268  |
| 0.19205901  | 0.036021055 | 0.346916803 | 0.488461373 |
| 0.435686252 | 0.466462013 | 0.362556905 | 0.102302268 |
| 0.387214186 | 0.393689808 | 0.423356317 | 0.255616054 |
| 0.114744309 | 0.514056962 | 0.013348575 | 0.076854098 |
| 0.458823564 | 0.493689266 | 0.461626697 | 0.293953757 |
| 0.354338031 | 0.17044779  | 0.374581434 | 0.34339264  |
| 0.406551482 | 0.406785411 | 0.490608225 | 0.042243459 |
| 0.029020671 | 0.517368544 | 0.413940931 | 0.025507648 |
| 0.103827514 | 0.413724743 | 0.336536807 | 0.295429073 |
| 0.029195767 | 0.487362423 | 0.391327451 | 0.485271386 |
| 0.398992712 | 0.085882323 | 0.379562148 | 0.104319182 |
| 0.069866336 | 0.455351956 | 0.445400626 | 0.524330256 |
| 0.393103618 | 0.492539668 | 0.45237257  | 0.497160151 |
| 0.136633463 | 0.412633575 | 0.038425416 | 0.491417988 |
| 0.465438424 |             |             |             |
| EMP3        | 0.222219643 | 0.372447756 | 0.1313843   |
| 0.258731975 | 0.164060988 | 0.252412005 | 0.176996516 |



|             |             |             |             |
|-------------|-------------|-------------|-------------|
| 0.250388219 | 0.047170119 | 0.012945828 | 0.00922676  |
| 0.153764968 | 0.089423636 | 0.227207352 | 0.179622569 |
| 0.205851116 | 0.043534222 | 0.188479384 | 0.145070439 |
| 0.230644238 | 0.164558727 | 0.166157007 | 0.07815534  |
| 0.073281693 | 0.026760453 | 0.033966198 | 0.070396488 |
| 0.302273896 | 0.038218566 | 0.282707465 | 0.299095283 |
| 0.034235826 | 0.280880065 | 0.37457819  | 0.158490557 |
| 0.352673369 | 0.214911091 | 0.015039026 | 0.220112559 |
| 0.315722445 | 0.201093993 | 0.246777003 | 0.17290729  |
| 0.041826597 | 0.41107938  | 0.160573302 | 0.128907716 |
| 0.208260042 | 0.014071727 | 0.305081778 | 0.398932184 |
| 0.3578807   | 0.177842721 | 0.247392484 | 0.140914454 |
| 0.084487242 | 0.323295204 | 0.0618432   | 0.31594422  |
| 0.152778629 | 0.308759829 | 0.344041267 | 0.084079787 |
| 0.11210634  | 0.245186493 | 0.044104957 | 0.23912986  |
| 0.089035082 | 0.320062411 | 0.0296294   | 0.135037835 |
| 0.013450367 | 0.214527587 | 0.127842285 | 0.074140839 |
| 0.019574603 | 0.017282063 | 0.054871345 | 0.216417989 |
| 0.305641534 | 0.319267685 | 0.266165132 | 0.268105721 |
| 0.067525337 | 0.110487883 | 0.109025031 | 0.091766658 |
| 0.299138059 | 0.145550795 | 0.075791763 | 0.189506927 |
| 0.274319083 | 0.351994048 | 0.066624929 | 0.080879796 |
| 0.290844909 | 0.374694438 | 0.184063599 | 0.167107287 |
| 0.108357276 | 0.010886249 | 0.345860503 | 0.310422862 |
| 0.33984764  | 0.071212711 | 0.050662881 | 0.332387557 |
| 0.0323192   | 0.207631884 | 0.178394138 | 0.071421676 |
| 0.314885659 | 0.022884514 | 0.059837861 | 0.230859544 |
| 0.108121357 | 0.26819765  | 0.3236025   | 0.133608184 |
| 0.143233055 | 0.01366489  | 0.02763591  | 0.014992583 |
| 0.17380751  | 0.023423053 | 0.382693512 | 0.311207757 |
| 0.263085921 | 0.138435431 | 0.196507123 | 0.000762347 |
| 0.009285608 | 0.064176995 | 0.258000705 | 0.193294254 |
| 0.239250245 | 0.234221743 | 0.09591886  | 0.301435395 |
| 0.155512537 | 0.25962617  | 0.082058918 | 0.093547341 |
| 0.197316505 | 0.063749635 | 0.114872019 | 0.18409872  |
| 0.100100449 | 0.137407098 | 0.085365515 | 0.324124104 |
| 0.408009284 | 0.064107827 | 0.2413806   | 0.1860732   |
| 0.183392371 | 0.101770027 | 0.081507071 | 0.169165594 |
| 0.069323317 | 0.313235027 | 0.006929862 | 0.249269452 |
| 0.080898287 | 0.039279183 | 0.013437964 | 0.285510604 |
| 0.200312522 | 0.287046334 | 0.354522029 | 0.06612573  |
| 0.184972664 | 0.149864467 | 0.286858387 | 0.23419412  |
| 0.010733176 | 0.033413395 | 0.27841073  | 0.33039242  |
| 1           | 0.289527774 | 0.158907987 | 0.103240796 |
| 0.09941167  | 0.253042132 | 0.001074463 | 0.385405434 |
| 0.340556298 | 0.269960087 | 0.169470069 | 0.151925992 |
| 0.111705821 | 0.290973015 | 0.028791011 | 0.193786623 |
| 0.270032414 | 0.05356832  | 0.295073187 | 0.060177533 |
| 0.334884551 | 0.021324472 | 0.276549678 | 0.199639667 |
| 0.195930131 | 0.007657661 | 0.292609384 | 0.250737719 |
| 0.006107329 | 0.18607364  | 0.242965445 | 0.206358666 |
| 0.172730101 | 0.217979163 | 0.282504181 | 0.100334678 |
| 0.165050714 | 0.192756896 | 0.007277703 | 0.094280518 |
| 0.223499213 | 0.139523547 | 0.389205414 | 0.184302497 |

|             |             |             |             |
|-------------|-------------|-------------|-------------|
| 0.245807994 | 0.357774727 | 0.235442078 | 0.127026403 |
| 0.039903319 | 0.260283808 | 0.035799223 | 0.124895325 |
| 0.251989401 | 0.108277911 | 0.139356149 | 0.058931361 |
| 0.022274394 | 0.338425685 | 0.033135486 | 0.052026498 |
| 0.019362601 | 0.214123054 | 0.172111072 | 0.1620117   |
| 0.081183008 | 0.072462582 | 0.107494871 | 0.151227457 |
| 0.079201698 | 0.048514132 | 0.002831776 | 0.1389412   |
| 0.072555202 | 0.158775426 | 0.182347137 | 0.267820338 |
| 0.224194895 | 0.071239731 | 0.14538545  | 0.075411271 |
| 0.033194101 | 0.007604547 | 0.356212489 | 0.184301094 |
| 0.335536051 | 0.109523415 | 0.019231803 | 0.15304163  |
| 0.316520129 | 0.252724151 | 0.274244047 | 0.356251882 |
| 0.02064836  | 0.277391103 | 0.12523187  | 0.045140876 |
| 0.118248349 | 0.138128503 | 0.296850265 | 0.050885077 |
| 0.237640369 | 0.387894393 | 0.124934119 | 0.066659773 |
| 0.37209697  | 0.214932927 | 0.037856837 | 0.275821414 |
| 0.283357166 | 0.018263637 | 0.335256317 | 0.035455033 |
| 0.008713249 | 0.165496051 | 0.198211842 | 0.03055678  |
| 0.026930605 | 0.180114069 | 0.116870141 | 0.103511237 |
| 0.345702969 | 0.184028212 | 0.263835085 | 0.049992471 |
| 0.034925699 | 0.008153898 | 0.05329412  | 0.130265102 |
| 0.39132355  | 0.300524071 | 0.117523738 | 0.116523361 |
| 0.135905369 | 0.105476101 | 0.2603919   | 0.3148242   |
| 0.064689415 | 0.363066441 | 0.004693516 | 0.188984952 |
| 0.356689205 | 0.312557566 | 0.024921135 | 0.248975294 |
| 0.353881258 | 0.039506786 | 0.150457548 | 0.364936966 |
| 0.309438428 | 0.128137713 | 0.131713472 | 0.181044355 |
| 0.038441184 | 0.07069529  | 0.133098087 | 0.033178546 |
| 0.17489349  | 0.096793908 | 0.005351883 | 0.252599845 |
| 0.034021764 | 0.372328737 | 0.250381943 | 0.026222848 |
| 0.2404045   | 0.247227598 | 0.130139603 | 0.028002127 |
| 0.224109133 | 0.308574164 | 0.382878316 | 0.152284352 |
| 0.231310005 | 0.2962848   | 0.11528927  | 0.028956112 |
| 0.005107209 | 0.338778194 | 0.258257302 | 0.022482499 |
| 0.28995404  | 0.317431057 | 0.013426821 | 0.383658748 |
| 0.129598326 | 0.38050779  | 0.009464915 | 0.020736315 |
| 0.009106611 | 0.2266686   | 0.365813662 | 0.271834864 |
| 0.266655799 | 0.192689483 | 0.000919563 | 0.313522104 |
| 0.367369112 | 0.003441107 | 0.032043188 | 0.236204457 |
| 0.172531395 | 0.394655348 | 0.076986792 | 0.229274726 |
| 0.137275789 | 0.343170498 | 0.175364375 | 0.102043047 |
| 0.301805207 | 0.288542843 | 0.279931622 | 0.370073481 |
| 0.297229891 | 0.157720394 | 0.155177063 | 0.019993551 |
| 0.032685836 | 0.293621554 | 0.150281903 | 0.037699127 |
| 0.281528312 | 0.046501076 | 0.325120243 | 0.267737152 |
| 0.271896665 | 0.002397157 | 0.207267324 | 0.261475064 |
| 0.361022822 | 0.330058376 | 0.009798591 | 0.002657126 |
| 0.002890052 | 0.003543242 | 0.249729365 | 0.078339654 |
| 0.308274049 | 0.230107803 | 0.004472496 | 0.107694071 |
| 0.161573043 | 0.114111051 | 0.357338385 | 0.191948224 |
| 0.208265396 | 0.041686612 | 0.176725917 | 0.217619659 |
| 0.018082371 | 0.2608682   | 0.285745293 | 0.397588157 |
| 0.01548673  | 0.082658689 | 0.203844943 | 0.328492547 |
| 0.00808332  | 0.116601708 | 0.164201813 | 0.161662898 |

|             |             |             |             |
|-------------|-------------|-------------|-------------|
| 0.005408598 | 0.024084643 | 0.021846182 | 0.218920954 |
| 0.340051831 | 0.036371044 | 0.015135212 | 0.189770386 |
| 0.095900162 | 0.278446454 | 0.092185338 | 0.312798777 |
| 0.311811435 | 0.256951647 | 0.01770232  | 0.368580771 |
| 0.020139845 | 0.361722683 | 0.087777587 | 0.066650445 |
| 0.116830941 | 0.0080983   | 0.294976429 | 0.045792061 |
| 0.288429183 | 0.25519242  | 0.053449805 | 0.003883775 |
| 0.032634164 | 0.020564793 | 0.282425681 | 0.225219581 |
| 0.007421915 | 0.176885524 | 0.112748068 | 0.185441365 |
| 0.290288325 | 0.234583104 | 0.389265928 | 0.186975011 |
| 0.099726394 | 0.027188167 | 0.263288428 | 0.247259433 |
| 0.274994823 | 0.272291601 | 0.11074904  | 0.327516209 |
| 0.263288697 | 0.325088581 | 0.295312642 | 0.193611543 |
| 0.0575698   | 0.233718969 | 0.271652803 | 0.038314712 |
| 0.180591704 | 0.267911838 | 0.227351411 | 0.044564605 |
| 0.094828647 | 0.10537526  | 0.047027943 | 0.13450918  |
| 0.075766516 | 0.298717863 | 0.100517628 | 0.251080683 |
| 0.234772295 | 0.262534544 | 0.071018249 | 0.021533891 |
| 0.374199935 | 0.348525645 | 0.158148047 | 0.231729297 |
| 0.070863494 | 0.135705152 | 0.218775668 | 0.195976843 |
| 0.143218929 | 0.282894836 | 0.303485041 | 0.282232008 |
| 0.400368774 | 0.160340649 | 0.377300024 | 0.2139402   |
| 0.021786861 | 0.172100426 | 0.060868994 | 0.03044781  |
| 0.082481446 | 0.009539324 | 0.065711612 | 0.192211852 |
| 0.101497069 | 0.171574175 | 0.259344322 | 0.041005597 |
| 0.107602185 | 0.179012234 | 0.146408793 | 0.20022582  |
| 0.052069431 | 0.373174135 | 0.004953912 | 0.024361531 |
| 0.111362473 | 0.23820323  | 0.108115516 | 0.087678681 |
| 0.067378069 | 0.036542491 | 0.133668544 | 0.304698574 |
| 0.211290447 | 0.136571002 | 0.250103136 | 0.04665722  |
| 0.037734395 | 0.289991408 | 0.227978657 | 0.005521132 |
| 0.031207392 | 0.212584688 | 0.154516083 | 0.115743849 |
| 0.004484145 | 0.283325022 | 0.239007151 | 0.149410068 |
| 0.239611777 | 0.040994452 | 0.367227533 | 0.061836387 |
| 0.048541106 | 0.377947429 | 0.119601936 | 0.335242499 |
| 0.110231394 | 0.217830681 | 0.395454747 | 0.276176583 |
| 0.059740956 | 0.130804266 | 0.034765982 | 0.296033382 |
| 0.136339943 |             |             |             |

|             |             |             |             |
|-------------|-------------|-------------|-------------|
| ENDOD1      | 0.482614218 | 0.520724709 | 0.48242111  |
| 0.455274854 | 0.498352476 | 0.389373104 | 0.232167078 |
| 0.208379896 | 0.104397697 | 0.004965515 | 0.029093776 |
| 0.517806104 | 0.241150166 | 0.291958272 | 0.354347371 |
| 0.482039231 | 0.184808638 | 0.427485352 | 0.287866173 |
| 0.461357344 | 0.096362861 | 0.466090949 | 0.113386095 |
| 0.389970192 | 0.14545213  | 0.089163807 | 0.338131149 |
| 0.47966584  | 0.104159383 | 0.329450174 | 0.414658858 |
| 0.157695204 | 0.485390118 | 0.524811691 | 0.501117157 |
| 0.523304031 | 0.452575972 | 0.021387714 | 0.301753488 |
| 0.455685054 | 0.494783964 | 0.451620877 | 0.377708175 |
| 0.051138297 | 0.483998398 | 0.277002265 | 0.495425511 |
| 0.25614138  | 0.042404979 | 0.242800086 | 0.437011201 |
| 0.474429654 | 0.470193811 | 0.246014911 | 0.176751811 |
| 0.2276685   | 0.234926604 | 0.339231882 | 0.3374534   |
| 0.259804433 | 0.153571455 | 0.48668087  | 0.097475207 |

|             |             |             |             |
|-------------|-------------|-------------|-------------|
| 0.166329303 | 0.286791092 | 0.226142789 | 0.290232303 |
| 0.439004131 | 0.410391704 | 0.02519681  | 0.482388053 |
| 0.002505416 | 0.441285892 | 0.476841339 | 0.376984495 |
| 0.061673732 | 0.025504586 | 0.256394619 | 0.369536826 |
| 0.492168113 | 0.469297118 | 0.51189413  | 0.505274368 |
| 0.235314492 | 0.384617203 | 0.488654253 | 0.21089728  |
| 0.471868419 | 0.195662046 | 0.142717161 | 0.490550304 |
| 0.509661014 | 0.525331722 | 0.266750588 | 0.349235787 |
| 0.442263377 | 0.468501859 | 0.469512724 | 0.485420767 |
| 0.388393505 | 0.090721284 | 0.431556837 | 0.50861496  |
| 0.421812657 | 0.417473643 | 0.207407498 | 0.440258585 |
| 0.084525964 | 0.410403399 | 0.405736031 | 0.22183467  |
| 0.491981298 | 0.021985281 | 0.29063247  | 0.388459679 |
| 0.294327328 | 0.486270302 | 0.524408507 | 0.22109041  |
| 0.50391521  | 0.029741916 | 0.181061972 | 0.055643956 |
| 0.377936148 | 0.224993823 | 0.484345191 | 0.479701044 |
| 0.260994128 | 0.44796641  | 0.305216964 | 0.004456041 |
| 0.043280429 | 0.273141417 | 0.484360611 | 0.447995443 |
| 0.488156417 | 0.423810144 | 0.270797633 | 0.418915818 |
| 0.49852827  | 0.512681361 | 0.055828815 | 0.118633199 |
| 0.47305638  | 0.271579104 | 0.297243048 | 0.500287667 |
| 0.380467703 | 0.137682507 | 0.161408659 | 0.511479366 |
| 0.410917738 | 0.1068411   | 0.387879173 | 0.485896649 |
| 0.351161613 | 0.450150309 | 0.138812668 | 0.321161171 |
| 0.057673016 | 0.492283601 | 0.048958586 | 0.382131478 |
| 0.308144869 | 0.209179696 | 0.019421099 | 0.280648212 |
| 0.313582559 | 0.452079675 | 0.478519419 | 0.144814412 |
| 0.36754605  | 0.478208713 | 0.350254249 | 0.453362265 |
| 0.010935404 | 0.069732573 | 0.303856065 | 0.500224996 |
| 0.289527774 | 1           | 0.369336496 | 0.394968098 |
| 0.361938224 | 0.498971817 | 0.006628602 | 0.497191176 |
| 0.531387545 | 0.321081095 | 0.45027447  | 0.509538875 |
| 0.434237587 | 0.480522902 | 0.058748163 | 0.486907528 |
| 0.395868064 | 0.108928879 | 0.508823126 | 0.208983342 |
| 0.464881801 | 0.055979789 | 0.344433021 | 0.492426948 |
| 0.480541362 | 0.012227055 | 0.225013324 | 0.42208889  |
| 0.048306269 | 0.097063071 | 0.482477404 | 0.455939039 |
| 0.423369993 | 0.510696555 | 0.507776894 | 0.415839458 |
| 0.494166897 | 0.279447185 | 0.021301202 | 0.419976445 |
| 0.503435045 | 0.430446534 | 0.431279234 | 0.274687197 |
| 0.36904321  | 0.464321786 | 0.465698413 | 0.212372295 |
| 0.053626479 | 0.341612343 | 0.024959511 | 0.394742334 |
| 0.434606754 | 0.129555762 | 0.444122099 | 0.225617265 |
| 0.105633666 | 0.521231997 | 0.262412996 | 0.35892074  |
| 0.197500561 | 0.430960801 | 0.30425241  | 0.250122614 |
| 0.248229624 | 0.211759003 | 0.422222552 | 0.428243399 |
| 0.040176293 | 0.122628192 | 0.030732022 | 0.428734087 |
| 0.159522333 | 0.37620868  | 0.362818189 | 0.442967941 |
| 0.368525987 | 0.133518628 | 0.450235016 | 0.381655804 |
| 0.162585038 | 0.023568111 | 0.504043559 | 0.477005937 |
| 0.352413202 | 0.186916739 | 0.063573495 | 0.37370474  |
| 0.480807907 | 0.320042825 | 0.284354263 | 0.451004447 |
| 0.04387974  | 0.509351262 | 0.282248961 | 0.163977608 |
| 0.453395568 | 0.309916094 | 0.48786147  | 0.064642626 |

|             |             |             |             |
|-------------|-------------|-------------|-------------|
| 0.440610007 | 0.45678424  | 0.403350531 | 0.232776702 |
| 0.395597022 | 0.46658797  | 0.036898341 | 0.444201847 |
| 0.439171947 | 0.044907113 | 0.528943246 | 0.184257351 |
| 0.03406104  | 0.518125426 | 0.48274436  | 0.107380272 |
| 0.113628854 | 0.3598543   | 0.048055468 | 0.367086527 |
| 0.512216683 | 0.475570252 | 0.456450099 | 0.315910923 |
| 0.049709437 | 0.012763952 | 0.301646578 | 0.493780862 |
| 0.513472455 | 0.517057408 | 0.33753843  | 0.43601437  |
| 0.292856465 | 0.388068947 | 0.147194987 | 0.504627197 |
| 0.294197828 | 0.526019912 | 0.011239753 | 0.502791578 |
| 0.516006755 | 0.30234469  | 0.110891278 | 0.326396968 |
| 0.409129688 | 0.059123474 | 0.264407131 | 0.49726025  |
| 0.46064887  | 0.387856586 | 0.398798431 | 0.50851966  |
| 0.018017051 | 0.048225438 | 0.466746276 | 0.271885691 |
| 0.422542702 | 0.268855313 | 0.095109182 | 0.363687338 |
| 0.052794605 | 0.439686374 | 0.514610315 | 0.076618607 |
| 0.339609705 | 0.345506334 | 0.471685487 | 0.050187506 |
| 0.489276654 | 0.51367394  | 0.524828799 | 0.206738274 |
| 0.501226115 | 0.486570716 | 0.47272675  | 0.121571594 |
| 0.029532653 | 0.526829577 | 0.441777513 | 0.027058709 |
| 0.503974893 | 0.237239873 | 0.014338609 | 0.490732007 |
| 0.226966038 | 0.448761699 | 0.004542891 | 0.137016854 |
| 0.073669278 | 0.519629553 | 0.478053462 | 0.419909263 |
| 0.239395328 | 0.441252799 | 0.013180855 | 0.530229818 |
| 0.486118047 | 0.024653525 | 0.212028102 | 0.483448066 |
| 0.48774253  | 0.528578775 | 0.404146176 | 0.494130438 |
| 0.496988428 | 0.504529677 | 0.263966362 | 0.337286329 |
| 0.468157435 | 0.504302086 | 0.465953848 | 0.453690183 |
| 0.493716208 | 0.508675382 | 0.327854907 | 0.01859437  |
| 0.175015478 | 0.221786753 | 0.321171111 | 0.094535154 |
| 0.344531252 | 0.184206225 | 0.483665098 | 0.510807306 |
| 0.498543531 | 0.008881434 | 0.165676677 | 0.477117909 |
| 0.454933281 | 0.486003118 | 0.038519416 | 0.010092054 |
| 0.013799057 | 0.028587206 | 0.401286871 | 0.331508772 |
| 0.485636309 | 0.234401274 | 0.007161584 | 0.049547875 |
| 0.334711014 | 0.486059431 | 0.502517153 | 0.444107518 |
| 0.509186208 | 0.115228044 | 0.290546599 | 0.462260262 |
| 0.096790502 | 0.361539142 | 0.496942539 | 0.464339165 |
| 0.069917129 | 0.332666632 | 0.450716445 | 0.488800978 |
| 0.116434881 | 0.405592371 | 0.516759927 | 0.352639856 |
| 0.027524946 | 0.120475631 | 0.09238954  | 0.508640629 |
| 0.509143384 | 0.096576126 | 0.044493962 | 0.154829597 |
| 0.134833967 | 0.505722682 | 0.201093002 | 0.508245567 |
| 0.473105693 | 0.490446328 | 0.119059452 | 0.480783376 |
| 0.050316171 | 0.489613668 | 0.433955591 | 0.063571814 |
| 0.39044595  | 0.021134267 | 0.481317999 | 0.175663541 |
| 0.352486973 | 0.449356148 | 0.248496768 | 0.030553828 |
| 0.264644564 | 0.078808487 | 0.500025398 | 0.515890963 |
| 0.061944903 | 0.281474574 | 0.390305556 | 0.484446406 |
| 0.303827346 | 0.479756417 | 0.504574806 | 0.433443784 |
| 0.094155021 | 0.229796367 | 0.458036321 | 0.444399159 |
| 0.265217053 | 0.514345173 | 0.34262492  | 0.53086428  |
| 0.456267673 | 0.469904606 | 0.479116607 | 0.391191257 |
| 0.318036551 | 0.442288853 | 0.386723908 | 0.02169268  |

|             |             |             |             |
|-------------|-------------|-------------|-------------|
| 0.422487008 | 0.498704965 | 0.418634377 | 0.200055906 |
| 0.315548366 | 0.478387723 | 0.066487062 | 0.236037009 |
| 0.425174471 | 0.314210971 | 0.171665677 | 0.496380181 |
| 0.446378649 | 0.444728631 | 0.053683774 | 0.08490826  |
| 0.542875938 | 0.433784465 | 0.160884965 | 0.46469502  |
| 0.238736413 | 0.406309145 | 0.514659299 | 0.518973972 |
| 0.437252006 | 0.478774859 | 0.4689383   | 0.40573969  |
| 0.408981399 | 0.307756765 | 0.527352779 | 0.097844958 |
| 0.121519985 | 0.486357711 | 0.113097307 | 0.137719503 |
| 0.18083216  | 0.043347683 | 0.383788654 | 0.501528872 |
| 0.459278966 | 0.44336298  | 0.354934336 | 0.114029261 |
| 0.422290369 | 0.441805726 | 0.436516631 | 0.216091104 |
| 0.095939097 | 0.495557456 | 0.014415179 | 0.084756583 |
| 0.475738764 | 0.485657125 | 0.459950398 | 0.31988961  |
| 0.38474876  | 0.216420694 | 0.364529871 | 0.31101392  |
| 0.32750364  | 0.446573731 | 0.477902142 | 0.044082729 |
| 0.02343447  | 0.511443959 | 0.426822877 | 0.040483782 |
| 0.127210393 | 0.426684928 | 0.387749517 | 0.267544586 |
| 0.039863416 | 0.48477284  | 0.337371534 | 0.504957919 |
| 0.386240843 | 0.094865344 | 0.365081281 | 0.119484861 |
| 0.086779605 | 0.448262555 | 0.489783397 | 0.520698872 |
| 0.460804114 | 0.475246258 | 0.446297854 | 0.478108219 |
| 0.18337566  | 0.463320051 | 0.034011385 | 0.488151563 |
| 0.454275892 |             |             |             |

|             |             |             |             |
|-------------|-------------|-------------|-------------|
| ENPP1       | 0.279636824 | 0.348561461 | 0.167080078 |
| 0.367621033 | 0.22868995  | 0.183877869 | 0.179683945 |
| 0.099593751 | 0.064293736 | 0.019629699 | 0.022637405 |
| 0.241967496 | 0.069865708 | 0.097673966 | 0.063322024 |
| 0.399500157 | 0.093625066 | 0.145503757 | 0.251342974 |
| 0.35577028  | 0.078875092 | 0.363130776 | 0.106236682 |
| 0.085986899 | 0.067989611 | 0.082985637 | 0.094924349 |
| 0.418367756 | 0.101136829 | 0.119860602 | 0.31693503  |
| 0.112435054 | 0.332551803 | 0.304766903 | 0.279278634 |
| 0.285661791 | 0.234257668 | 0.03727805  | 0.074623569 |
| 0.323677216 | 0.303849395 | 0.352040458 | 0.291674625 |
| 0.072209287 | 0.281143401 | 0.22581908  | 0.258377693 |
| 0.085025316 | 0.049737591 | 0.083142536 | 0.270580942 |
| 0.254786021 | 0.182023361 | 0.121813283 | 0.120521186 |
| 0.042263632 | 0.073600233 | 0.044882052 | 0.211969437 |
| 0.200982019 | 0.068198475 | 0.275773288 | 0.062297935 |
| 0.048124658 | 0.151942219 | 0.109436504 | 0.182262425 |
| 0.080330235 | 0.268324606 | 0.067679489 | 0.184514194 |
| 0.008198675 | 0.362374265 | 0.280792953 | 0.058776813 |
| 0.102254801 | 0.04369837  | 0.130167405 | 0.271890772 |
| 0.407070012 | 0.298789674 | 0.385358673 | 0.354103706 |
| 0.104602609 | 0.226714644 | 0.164865833 | 0.125597005 |
| 0.318860931 | 0.136912117 | 0.101077757 | 0.394911829 |
| 0.3799629   | 0.316173832 | 0.100728549 | 0.221379983 |
| 0.274163976 | 0.331229476 | 0.157692675 | 0.168485894 |
| 0.060988514 | 0.066931139 | 0.262766546 | 0.361872117 |
| 0.281483002 | 0.112866178 | 0.154584831 | 0.343514329 |
| 0.105351401 | 0.080335998 | 0.341838266 | 0.100279057 |
| 0.417924377 | 0.042940909 | 0.171968643 | 0.22924965  |
| 0.136912156 | 0.321310036 | 0.308706744 | 0.202631446 |

|             |             |             |             |
|-------------|-------------|-------------|-------------|
| 0.210294005 | 0.063459919 | 0.036764668 | 0.082200708 |
| 0.091787985 | 0.04363768  | 0.24617142  | 0.367163584 |
| 0.105818079 | 0.088353026 | 0.178953235 | 0.022314673 |
| 0.063891037 | 0.122609551 | 0.281924163 | 0.203832884 |
| 0.338353694 | 0.224227809 | 0.102633467 | 0.238856883 |
| 0.209189868 | 0.378103593 | 0.013057418 | 0.114666463 |
| 0.218985439 | 0.116005213 | 0.283928804 | 0.214188962 |
| 0.180138406 | 0.118678601 | 0.141763829 | 0.384487723 |
| 0.288951495 | 0.137261478 | 0.120131887 | 0.389170149 |
| 0.06805161  | 0.219419551 | 0.131320377 | 0.127625386 |
| 0.079615711 | 0.263322071 | 0.059688416 | 0.180439601 |
| 0.041546438 | 0.076646816 | 0.053001365 | 0.161466337 |
| 0.088051968 | 0.263617347 | 0.238154571 | 0.156377241 |
| 0.175944541 | 0.304325703 | 0.153080273 | 0.242281216 |
| 0.017249605 | 0.098346149 | 0.10065432  | 0.357682896 |
| 0.158907987 | 0.369336496 | 1           | 0.126303255 |
| 0.250708546 | 0.387841456 | 0.005348291 | 0.284885616 |
| 0.313817494 | 0.094865525 | 0.236912699 | 0.273607185 |
| 0.102952079 | 0.372414669 | 0.014137066 | 0.380975516 |
| 0.214248335 | 0.12820622  | 0.409619559 | 0.164620831 |
| 0.289421224 | 0.077090603 | 0.119805727 | 0.271446417 |
| 0.221340183 | 0.018582822 | 0.112596285 | 0.324205715 |
| 0.056026214 | 0.067563733 | 0.32076516  | 0.329085392 |
| 0.225936137 | 0.35881684  | 0.429168233 | 0.086652138 |
| 0.212834822 | 0.17493872  | 0.05316211  | 0.220700702 |
| 0.316089666 | 0.054697704 | 0.288423026 | 0.114965588 |
| 0.152982717 | 0.320130598 | 0.240324047 | 0.034346338 |
| 0.083033339 | 0.185533594 | 0.047116673 | 0.185243065 |
| 0.236379254 | 0.079194062 | 0.122603437 | 0.125505949 |
| 0.087343469 | 0.362393204 | 0.071145242 | 0.071779248 |
| 0.040444727 | 0.192980096 | 0.231788265 | 0.066168591 |
| 0.058057657 | 0.107557401 | 0.087978325 | 0.107595312 |
| 0.062864478 | 0.106251379 | 0.040979126 | 0.066777047 |
| 0.05266756  | 0.074616052 | 0.073392892 | 0.232644357 |
| 0.096523875 | 0.087279246 | 0.188229642 | 0.08416876  |
| 0.092274599 | 0.061696424 | 0.34236522  | 0.369230341 |
| 0.206824235 | 0.115956946 | 0.089134428 | 0.046958946 |
| 0.357699089 | 0.111430136 | 0.06863302  | 0.320917753 |
| 0.093518202 | 0.383116731 | 0.085484149 | 0.135721199 |
| 0.110698765 | 0.22411432  | 0.413457173 | 0.02386432  |
| 0.215719915 | 0.307178647 | 0.261108174 | 0.116620033 |
| 0.246887415 | 0.314473765 | 0.062382356 | 0.25662418  |
| 0.246431582 | 0.076102738 | 0.34353406  | 0.098776929 |
| 0.070999558 | 0.30354609  | 0.238400052 | 0.134517253 |
| 0.098867826 | 0.146696988 | 0.063050419 | 0.286611416 |
| 0.358862255 | 0.380614211 | 0.253862711 | 0.094371449 |
| 0.069324774 | 0.022028694 | 0.13186406  | 0.189067565 |
| 0.289159249 | 0.329630339 | 0.270223362 | 0.153541526 |
| 0.280888958 | 0.070757863 | 0.052205779 | 0.350495224 |
| 0.099546542 | 0.323120023 | 0.040174568 | 0.276325599 |
| 0.274152664 | 0.12669953  | 0.078747445 | 0.189966588 |
| 0.259651751 | 0.079011439 | 0.142412336 | 0.304364372 |
| 0.312386163 | 0.113331276 | 0.089122124 | 0.314396771 |
| 0.046559026 | 0.07366401  | 0.223731383 | 0.056437895 |

|             |             |             |             |
|-------------|-------------|-------------|-------------|
| 0.092889142 | 0.119691028 | 0.019867524 | 0.090673085 |
| 0.065237842 | 0.290556634 | 0.396588322 | 0.058810179 |
| 0.131140574 | 0.085992741 | 0.316811924 | 0.083942399 |
| 0.283514077 | 0.308552689 | 0.31025616  | 0.139125557 |
| 0.289804139 | 0.301901271 | 0.150340611 | 0.117715145 |
| 0.057601354 | 0.299422674 | 0.27303814  | 0.040812468 |
| 0.40180738  | 0.097789    | 0.026992712 | 0.347517736 |
| 0.21484187  | 0.236346704 | 0.011729415 | 0.039500594 |
| 0.066433621 | 0.381506482 | 0.272608725 | 0.314080466 |
| 0.050745076 | 0.32493201  | 0.014297407 | 0.353401769 |
| 0.307465114 | 0.038393674 | 0.079911707 | 0.255568175 |
| 0.228333426 | 0.352716569 | 0.10034469  | 0.290094405 |
| 0.191795475 | 0.277290344 | 0.093985337 | 0.250442964 |
| 0.316884096 | 0.279359881 | 0.334312687 | 0.317654359 |
| 0.378875642 | 0.332289622 | 0.282903531 | 0.041248146 |
| 0.045965941 | 0.111055463 | 0.041060125 | 0.040150768 |
| 0.186717625 | 0.087238732 | 0.338837067 | 0.39506379  |
| 0.330832001 | 0.036246714 | 0.099991663 | 0.267507184 |
| 0.365577021 | 0.407749356 | 0.059935034 | 0.009430071 |
| 0.014629198 | 0.021811762 | 0.260430767 | 0.191838163 |
| 0.334390777 | 0.039085568 | 0.031081464 | 0.077481617 |
| 0.122610722 | 0.233149272 | 0.311433848 | 0.399981681 |
| 0.308590433 | 0.10905841  | 0.051968735 | 0.40043191  |
| 0.056388093 | 0.180041064 | 0.345325751 | 0.301085319 |
| 0.08404549  | 0.170376408 | 0.176672913 | 0.399701677 |
| 0.015770174 | 0.281316671 | 0.258541553 | 0.084738699 |
| 0.044388746 | 0.084429732 | 0.066350721 | 0.38971672  |
| 0.265873632 | 0.059558069 | 0.04865223  | 0.037120162 |
| 0.084341038 | 0.370737251 | 0.108899501 | 0.39464366  |
| 0.358315521 | 0.426192046 | 0.07256359  | 0.298900481 |
| 0.042459727 | 0.281763877 | 0.156536624 | 0.027092935 |
| 0.151769105 | 0.058501371 | 0.286765728 | 0.028097652 |
| 0.117851033 | 0.296449063 | 0.05316969  | 0.045914369 |
| 0.045969265 | 0.084701256 | 0.385853865 | 0.353888266 |
| 0.065183725 | 0.125672913 | 0.246416487 | 0.337459383 |
| 0.184690656 | 0.345551328 | 0.29435975  | 0.12270958  |
| 0.083725116 | 0.056493228 | 0.359329761 | 0.242950419 |
| 0.100966171 | 0.397538149 | 0.069622852 | 0.360769459 |
| 0.283812156 | 0.341462536 | 0.308237592 | 0.236737016 |
| 0.071497119 | 0.213479357 | 0.241375675 | 0.042785807 |
| 0.287904623 | 0.36784864  | 0.208112772 | 0.070681204 |
| 0.161788039 | 0.150830832 | 0.087035829 | 0.065180381 |
| 0.101844199 | 0.179073723 | 0.102951088 | 0.432865485 |
| 0.267671464 | 0.251860403 | 0.083571059 | 0.063630989 |
| 0.356821369 | 0.297946636 | 0.085649287 | 0.281048885 |
| 0.185571487 | 0.221833617 | 0.328498974 | 0.320910872 |
| 0.072496819 | 0.29393535  | 0.341805865 | 0.239553194 |
| 0.280216411 | 0.23158868  | 0.313880284 | 0.06830701  |
| 0.049774606 | 0.209766523 | 0.071588907 | 0.135926338 |
| 0.166232412 | 0.059389959 | 0.045083262 | 0.374210309 |
| 0.066661908 | 0.313687521 | 0.071287568 | 0.096693607 |
| 0.236328473 | 0.14181819  | 0.291382498 | 0.127850377 |
| 0.082707082 | 0.290150733 | 0.035841572 | 0.09752284  |
| 0.089134867 | 0.285855548 | 0.144634326 | 0.151905598 |



|             |             |             |             |
|-------------|-------------|-------------|-------------|
| 0.060815294 | 0.097193557 | 0.244995141 | 0.138328023 |
| 0.076193717 | 0.075693118 | 0.281252425 | 0.07321789  |
| 0.060778432 | 0.4088123   | 0.163690845 | 0.05635668  |
| 0.061130044 | 0.204295105 | 0.128377417 | 0.076739784 |
| 0.050354632 | 0.285424229 | 0.086713486 | 0.216760711 |
| 0.251483433 | 0.111210544 | 0.231891707 | 0.061125702 |
| 0.105785161 | 0.289234537 | 0.191307921 | 0.300510137 |
| 0.172310346 | 0.387412942 | 0.253178587 | 0.283186393 |
| 0.109331902 | 0.143836111 | 0.062922899 | 0.37455567  |
| 0.07707466  |             |             |             |
| ENTPD1      | 0.299076199 | 0.342635185 | 0.222088175 |
| 0.32397585  | 0.246851375 | 0.152523558 | 0.123828403 |
| 0.061618078 | 0.079017295 | 0.004537855 | 0.025797764 |
| 0.26124795  | 0.061388316 | 0.060295074 | 0.074926256 |
| 0.413803808 | 0.09562694  | 0.144846237 | 0.198940876 |
| 0.31839677  | 0.038365709 | 0.36122636  | 0.082112307 |
| 0.15970762  | 0.094467872 | 0.078054796 | 0.143537513 |
| 0.372957258 | 0.094422481 | 0.087477248 | 0.246990414 |
| 0.13260653  | 0.312584622 | 0.308870267 | 0.291598313 |
| 0.294196725 | 0.25391693  | 0.021243306 | 0.057476793 |
| 0.302614815 | 0.337785607 | 0.313635327 | 0.24052965  |
| 0.048607748 | 0.261114957 | 0.172376277 | 0.319476109 |
| 0.063619162 | 0.046925699 | 0.049136394 | 0.251669034 |
| 0.249086176 | 0.199623882 | 0.079741779 | 0.080189868 |
| 0.042051872 | 0.039140762 | 0.069389856 | 0.148232742 |
| 0.147890488 | 0.030409119 | 0.278123402 | 0.057157766 |
| 0.055747925 | 0.103946878 | 0.135262318 | 0.116103537 |
| 0.129185465 | 0.228881714 | 0.039287924 | 0.225986581 |
| 0.001150868 | 0.325007636 | 0.325936949 | 0.108738402 |
| 0.087714603 | 0.021001531 | 0.142825447 | 0.210678172 |
| 0.381006399 | 0.31025157  | 0.403722747 | 0.388118412 |
| 0.086893772 | 0.249468039 | 0.23245869  | 0.099455664 |
| 0.313707759 | 0.089662671 | 0.075237984 | 0.416923776 |
| 0.400945112 | 0.322215249 | 0.133499037 | 0.286103579 |
| 0.255926935 | 0.313489931 | 0.156662951 | 0.175770854 |
| 0.083743386 | 0.119694436 | 0.256819638 | 0.37187492  |
| 0.243441163 | 0.179319966 | 0.167793903 | 0.275612835 |
| 0.090566662 | 0.075063859 | 0.294283106 | 0.077224708 |
| 0.390846755 | 0.035341103 | 0.215479508 | 0.176569109 |
| 0.151377577 | 0.305725278 | 0.329492875 | 0.148971092 |
| 0.233961583 | 0.034644422 | 0.073819823 | 0.085971347 |
| 0.081482035 | 0.093282865 | 0.245577343 | 0.331172974 |
| 0.060050196 | 0.10395942  | 0.134088157 | 0.02054136  |
| 0.063599373 | 0.163797417 | 0.276953696 | 0.189369478 |
| 0.338865262 | 0.25732467  | 0.105917118 | 0.211747567 |
| 0.252618607 | 0.402777531 | 0.006432856 | 0.084717587 |
| 0.207670126 | 0.163754638 | 0.254273144 | 0.214710708 |
| 0.206821036 | 0.077344038 | 0.09997991  | 0.395077421 |
| 0.251953195 | 0.091861745 | 0.099571126 | 0.392907431 |
| 0.067330934 | 0.269609547 | 0.093917731 | 0.085066885 |
| 0.042652963 | 0.285615123 | 0.072831763 | 0.138951418 |
| 0.078607442 | 0.084570186 | 0.041186496 | 0.101213716 |
| 0.065081058 | 0.254921828 | 0.246217718 | 0.124652434 |
| 0.128119528 | 0.329966277 | 0.110574516 | 0.218419616 |

|             |             |             |             |
|-------------|-------------|-------------|-------------|
| 0.012725885 | 0.081306441 | 0.073459514 | 0.3493186   |
| 0.103240796 | 0.394968098 | 0.126303255 | 1           |
| 0.277912121 | 0.392149375 | 0.010482579 | 0.277097104 |
| 0.330798677 | 0.068299636 | 0.20702438  | 0.309445358 |
| 0.156987609 | 0.345010807 | 0.013758252 | 0.359692235 |
| 0.178023162 | 0.102490248 | 0.422488776 | 0.158248585 |
| 0.286766359 | 0.066424496 | 0.081254169 | 0.331820951 |
| 0.23768829  | 0.013625924 | 0.065199634 | 0.271771675 |
| 0.083526072 | 0.03715935  | 0.321608326 | 0.300823403 |
| 0.230792501 | 0.394970515 | 0.429037598 | 0.137281598 |
| 0.216785657 | 0.119965063 | 0.05273692  | 0.279502834 |
| 0.349281201 | 0.079011355 | 0.260633564 | 0.098607808 |
| 0.122428097 | 0.304994895 | 0.257708065 | 0.04286297  |
| 0.056499342 | 0.137901381 | 0.017027806 | 0.215333312 |
| 0.269965046 | 0.047322605 | 0.168179253 | 0.137903417 |
| 0.09550025  | 0.367814999 | 0.128785553 | 0.132349076 |
| 0.096373314 | 0.154042939 | 0.181965401 | 0.043460495 |
| 0.050183263 | 0.128579495 | 0.127678975 | 0.123785909 |
| 0.029317531 | 0.07840054  | 0.074993354 | 0.063203326 |
| 0.031620581 | 0.056636813 | 0.052761751 | 0.208934115 |
| 0.069933455 | 0.045534035 | 0.180872832 | 0.154413574 |
| 0.124672625 | 0.050242199 | 0.337860061 | 0.360677503 |
| 0.160196717 | 0.108050952 | 0.082637274 | 0.042151719 |
| 0.331568548 | 0.085309906 | 0.053442819 | 0.2903031   |
| 0.058964842 | 0.409921274 | 0.070523735 | 0.134066309 |
| 0.114538106 | 0.172725269 | 0.400659889 | 0.030727196 |
| 0.194300907 | 0.277755858 | 0.290705233 | 0.133639763 |
| 0.204547161 | 0.279170608 | 0.038406032 | 0.239047353 |
| 0.213624365 | 0.056062858 | 0.35188149  | 0.111280682 |
| 0.065025251 | 0.350372066 | 0.26522616  | 0.13614257  |
| 0.111538251 | 0.124289571 | 0.029508955 | 0.312229007 |
| 0.357195982 | 0.377952776 | 0.247280797 | 0.165488505 |
| 0.045877394 | 0.008062349 | 0.183465591 | 0.240231752 |
| 0.281059062 | 0.351642456 | 0.250509485 | 0.16260586  |
| 0.232863902 | 0.105614913 | 0.0323718   | 0.358258369 |
| 0.155425416 | 0.326375232 | 0.033020654 | 0.33605726  |
| 0.283481534 | 0.078897546 | 0.088250993 | 0.137988057 |
| 0.21268276  | 0.067258517 | 0.122170938 | 0.294932908 |
| 0.3144578   | 0.147361752 | 0.108175624 | 0.317960595 |
| 0.021253482 | 0.040803244 | 0.285599427 | 0.128940701 |
| 0.098535475 | 0.142513292 | 0.054526492 | 0.081405339 |
| 0.044280258 | 0.264186338 | 0.395746134 | 0.078578205 |
| 0.10377181  | 0.079015338 | 0.356970008 | 0.064807617 |
| 0.336176666 | 0.335761576 | 0.304822828 | 0.100773024 |
| 0.29517989  | 0.321683185 | 0.195835995 | 0.127220057 |
| 0.0619722   | 0.314886503 | 0.247509626 | 0.023196694 |
| 0.392890241 | 0.057667253 | 0.010647405 | 0.323557352 |
| 0.165200762 | 0.225424296 | 0.004965989 | 0.076027715 |
| 0.107879327 | 0.419582255 | 0.272844009 | 0.254576768 |
| 0.032023968 | 0.300421374 | 0.030269679 | 0.378238744 |
| 0.290275589 | 0.050573392 | 0.142154012 | 0.262619825 |
| 0.267254478 | 0.339973497 | 0.160226646 | 0.322294692 |
| 0.214628924 | 0.285166013 | 0.067907673 | 0.273581658 |
| 0.291067157 | 0.31339398  | 0.296821249 | 0.299445307 |

|             |             |             |             |
|-------------|-------------|-------------|-------------|
| 0.349604272 | 0.368508762 | 0.239939127 | 0.028123092 |
| 0.121014273 | 0.064830063 | 0.046588281 | 0.049784172 |
| 0.142059978 | 0.108626286 | 0.33466562  | 0.40318211  |
| 0.346146376 | 0.030579607 | 0.05905878  | 0.264709465 |
| 0.310057448 | 0.384501297 | 0.076266919 | 0.012883363 |
| 0.013845113 | 0.033524918 | 0.208488128 | 0.244023888 |
| 0.352452346 | 0.024385422 | 0.021279174 | 0.032454869 |
| 0.106663974 | 0.302714015 | 0.308250539 | 0.364961186 |
| 0.358265675 | 0.103222926 | 0.043340111 | 0.370291511 |
| 0.088852929 | 0.158022846 | 0.354473209 | 0.27882639  |
| 0.10253908  | 0.227038432 | 0.157596142 | 0.383647632 |
| 0.050819202 | 0.294564801 | 0.267503264 | 0.07902339  |
| 0.05601579  | 0.116518044 | 0.100141946 | 0.414572335 |
| 0.277267941 | 0.042545653 | 0.034888136 | 0.021689401 |
| 0.055442535 | 0.380775135 | 0.084207744 | 0.403900873 |
| 0.318832351 | 0.400405278 | 0.110408635 | 0.297593227 |
| 0.051355187 | 0.271780621 | 0.209009834 | 0.015544456 |
| 0.158202988 | 0.05084241  | 0.300737154 | 0.049436161 |
| 0.074493751 | 0.258246482 | 0.127214535 | 0.063812897 |
| 0.118111491 | 0.081584784 | 0.388842363 | 0.400287485 |
| 0.099340353 | 0.114106514 | 0.27137653  | 0.331693887 |
| 0.115714887 | 0.317161547 | 0.285753126 | 0.119502487 |
| 0.054498379 | 0.103735433 | 0.3057705   | 0.207943048 |
| 0.061727228 | 0.418871926 | 0.094173721 | 0.378911737 |
| 0.269504003 | 0.347851176 | 0.315955034 | 0.219719708 |
| 0.111704108 | 0.185782042 | 0.18489921  | 0.014985362 |
| 0.260391822 | 0.354038677 | 0.182083435 | 0.095112698 |
| 0.163370068 | 0.217030926 | 0.074128544 | 0.055162563 |
| 0.164988827 | 0.119772636 | 0.072087071 | 0.429013995 |
| 0.232580976 | 0.220746937 | 0.046789558 | 0.089777961 |
| 0.357661277 | 0.293396564 | 0.063586956 | 0.257988101 |
| 0.188529253 | 0.249280978 | 0.358397387 | 0.368090179 |
| 0.109895056 | 0.281761192 | 0.293362508 | 0.181781654 |
| 0.240311337 | 0.199590158 | 0.314602669 | 0.029402242 |
| 0.090926461 | 0.221399596 | 0.052897804 | 0.153950803 |
| 0.124601642 | 0.076639145 | 0.087919857 | 0.386355642 |
| 0.093006456 | 0.27737649  | 0.061962707 | 0.102166617 |
| 0.283965505 | 0.151642186 | 0.296117417 | 0.074488531 |
| 0.054555313 | 0.283706817 | 0.029906701 | 0.09266133  |
| 0.108662771 | 0.309770236 | 0.181188885 | 0.165885986 |
| 0.113664862 | 0.153671826 | 0.225569965 | 0.087178592 |
| 0.052726698 | 0.091135331 | 0.297362022 | 0.04799099  |
| 0.02797161  | 0.413925892 | 0.136771595 | 0.084376405 |
| 0.107543091 | 0.205240335 | 0.129080513 | 0.089374406 |
| 0.075431073 | 0.310266257 | 0.072863128 | 0.262674615 |
| 0.196862051 | 0.097317397 | 0.197084848 | 0.064543863 |
| 0.098108968 | 0.263231377 | 0.261527136 | 0.31293765  |
| 0.231072212 | 0.36735788  | 0.240471017 | 0.270406965 |
| 0.113405384 | 0.190479916 | 0.044294973 | 0.357150121 |
| 0.093334242 |             |             |             |
| ENTPD5      | 0.249344534 | 0.321636345 | 0.178327854 |
| 0.338009925 | 0.243887443 | 0.145883019 | 0.185136024 |
| 0.111805566 | 0.159207729 | 0.027916836 | 0.098307865 |
| 0.246570573 | 0.17546791  | 0.149804215 | 0.117851627 |

|             |             |             |             |
|-------------|-------------|-------------|-------------|
| 0.400774384 | 0.269149969 | 0.167192357 | 0.253043937 |
| 0.310012994 | 0.102650474 | 0.390387282 | 0.200199067 |
| 0.248442403 | 0.243632346 | 0.217358094 | 0.238912936 |
| 0.367914916 | 0.23337749  | 0.091780455 | 0.240692692 |
| 0.277486854 | 0.284463775 | 0.275635979 | 0.314950828 |
| 0.265224586 | 0.20265357  | 0.050310952 | 0.118139378 |
| 0.262352517 | 0.316678385 | 0.30714283  | 0.28174391  |
| 0.149895911 | 0.234009873 | 0.215556096 | 0.288558119 |
| 0.105349396 | 0.166712389 | 0.073424546 | 0.219515744 |
| 0.23326658  | 0.193905345 | 0.133965698 | 0.174429018 |
| 0.116615385 | 0.077904023 | 0.14807244  | 0.13853274  |
| 0.223958354 | 0.057637357 | 0.256656038 | 0.127671725 |
| 0.094320153 | 0.157462243 | 0.291741059 | 0.168712277 |
| 0.196799736 | 0.200382973 | 0.093911557 | 0.191259913 |
| 0.009388226 | 0.312767387 | 0.303660597 | 0.146600846 |
| 0.215394247 | 0.109352384 | 0.30319416  | 0.23937805  |
| 0.368249863 | 0.261202681 | 0.398037202 | 0.369388434 |
| 0.24744473  | 0.290393    | 0.203736385 | 0.262304133 |
| 0.277590933 | 0.178275769 | 0.160860748 | 0.421130849 |
| 0.390982294 | 0.300312708 | 0.280615669 | 0.30206602  |
| 0.256793124 | 0.289056222 | 0.1534458   | 0.194777625 |
| 0.148150292 | 0.221902758 | 0.235885289 | 0.358094803 |
| 0.216056037 | 0.199273804 | 0.298550019 | 0.270398521 |
| 0.228026609 | 0.124513245 | 0.330081861 | 0.181356636 |
| 0.377654109 | 0.090936579 | 0.305606972 | 0.198901088 |
| 0.250384645 | 0.280530734 | 0.302794566 | 0.228825648 |
| 0.219991794 | 0.120547812 | 0.150601102 | 0.197012857 |
| 0.173286744 | 0.163515625 | 0.215686056 | 0.342454035 |
| 0.12578469  | 0.203120314 | 0.202854495 | 0.063087206 |
| 0.192574209 | 0.25905768  | 0.263298561 | 0.186410649 |
| 0.304594455 | 0.204507917 | 0.22626072  | 0.186596455 |
| 0.234128779 | 0.393619468 | 0.013365886 | 0.191232382 |
| 0.203523012 | 0.267740467 | 0.298835132 | 0.216426222 |
| 0.269604708 | 0.166800715 | 0.245662007 | 0.373657423 |
| 0.226066698 | 0.216501672 | 0.118208622 | 0.395356244 |
| 0.145805597 | 0.283096699 | 0.230326925 | 0.211020094 |
| 0.132684725 | 0.252869495 | 0.196434378 | 0.138763154 |
| 0.121227073 | 0.229325979 | 0.075472724 | 0.12490923  |
| 0.147399451 | 0.258305325 | 0.209920805 | 0.253327532 |
| 0.215981654 | 0.341149005 | 0.101135685 | 0.234773786 |
| 0.057629    | 0.18698866  | 0.070121051 | 0.344377193 |
| 0.09941167  | 0.361938224 | 0.250708546 | 0.277912121 |
| 1           | 0.370181468 | 0.01277232  | 0.248545483 |
| 0.302345688 | 0.070370171 | 0.249027329 | 0.28001868  |
| 0.154861121 | 0.350224339 | 0.018947578 | 0.373585909 |
| 0.152779819 | 0.230035955 | 0.407955338 | 0.28596406  |
| 0.255524588 | 0.19317507  | 0.134127117 | 0.300635083 |
| 0.232948909 | 0.040831918 | 0.083071637 | 0.27223107  |
| 0.188369012 | 0.083851096 | 0.281311707 | 0.305545062 |
| 0.234379634 | 0.356885133 | 0.421824473 | 0.149699882 |
| 0.225829139 | 0.202706407 | 0.117288135 | 0.280610305 |
| 0.303140213 | 0.124541976 | 0.237664087 | 0.198407731 |
| 0.10379878  | 0.285544613 | 0.230930818 | 0.073731516 |
| 0.160406769 | 0.156243868 | 0.053792313 | 0.240573494 |

|             |             |             |             |
|-------------|-------------|-------------|-------------|
| 0.215999609 | 0.155994917 | 0.139860182 | 0.246185213 |
| 0.256831238 | 0.352007534 | 0.22460656  | 0.175622559 |
| 0.160549759 | 0.181368563 | 0.232868765 | 0.129668036 |
| 0.157175727 | 0.270311104 | 0.196879392 | 0.185387585 |
| 0.088823514 | 0.239836562 | 0.115978349 | 0.117486875 |
| 0.125751813 | 0.129450024 | 0.108256366 | 0.19400055  |
| 0.154056098 | 0.1699315   | 0.226750568 | 0.221548954 |
| 0.276123267 | 0.146829677 | 0.316243222 | 0.348743287 |
| 0.142452473 | 0.225124058 | 0.214898229 | 0.096101279 |
| 0.338215522 | 0.084121491 | 0.063578703 | 0.288646911 |
| 0.120814633 | 0.38290063  | 0.199260967 | 0.275435737 |
| 0.191808406 | 0.251375272 | 0.386618846 | 0.053293285 |
| 0.168991337 | 0.26549197  | 0.275047693 | 0.272191173 |
| 0.198789189 | 0.273751587 | 0.119818244 | 0.210794933 |
| 0.197904285 | 0.183855845 | 0.331439397 | 0.280570277 |
| 0.173689517 | 0.329837577 | 0.260442302 | 0.256877771 |
| 0.262479486 | 0.17145317  | 0.074149759 | 0.345259738 |
| 0.342498056 | 0.405126207 | 0.246085714 | 0.258393156 |
| 0.157381706 | 0.058776104 | 0.293949872 | 0.196739052 |
| 0.254202551 | 0.330282734 | 0.291763865 | 0.215921038 |
| 0.271239519 | 0.1859024   | 0.056617663 | 0.347629199 |
| 0.197472117 | 0.29162893  | 0.095992427 | 0.309234527 |
| 0.255164992 | 0.08241072  | 0.240376208 | 0.148244685 |
| 0.205910407 | 0.170375534 | 0.21969777  | 0.275477433 |
| 0.28284769  | 0.217182213 | 0.176299063 | 0.294707416 |
| 0.06737905  | 0.112779035 | 0.254356901 | 0.199719534 |
| 0.164304764 | 0.272991842 | 0.090971274 | 0.132446325 |
| 0.161334759 | 0.255382279 | 0.38290714  | 0.187146878 |
| 0.111393642 | 0.116899288 | 0.357524131 | 0.178108816 |
| 0.308612559 | 0.296374556 | 0.279793442 | 0.20013986  |
| 0.278137162 | 0.305406391 | 0.188059733 | 0.2660064   |
| 0.164701087 | 0.283830613 | 0.212940841 | 0.088724934 |
| 0.387456931 | 0.056520414 | 0.067741612 | 0.302508244 |
| 0.242361228 | 0.195354381 | 0.011957276 | 0.077392327 |
| 0.205440086 | 0.395816497 | 0.245484151 | 0.239891903 |
| 0.056448344 | 0.277296839 | 0.038408307 | 0.346719723 |
| 0.279724264 | 0.145706203 | 0.273113584 | 0.256315624 |
| 0.256975357 | 0.312095048 | 0.19210443  | 0.313331631 |
| 0.219603908 | 0.263087353 | 0.165757055 | 0.304572816 |
| 0.290490405 | 0.282407723 | 0.273965122 | 0.267578669 |
| 0.356904066 | 0.358148722 | 0.277460533 | 0.091742907 |
| 0.163051763 | 0.098114999 | 0.088032483 | 0.131256659 |
| 0.122940733 | 0.262683095 | 0.305002687 | 0.389810624 |
| 0.337075433 | 0.09040385  | 0.131284188 | 0.24938337  |
| 0.301438591 | 0.365784721 | 0.111414306 | 0.02160989  |
| 0.021261507 | 0.115424905 | 0.202534769 | 0.304591729 |
| 0.32450338  | 0.056528929 | 0.075150866 | 0.08457204  |
| 0.213942877 | 0.293925267 | 0.290983802 | 0.377054036 |
| 0.314604739 | 0.25130733  | 0.104411241 | 0.36116044  |
| 0.217029684 | 0.125686583 | 0.348620977 | 0.260192582 |
| 0.206907745 | 0.293787242 | 0.150734343 | 0.374527024 |
| 0.082435987 | 0.317427121 | 0.256926096 | 0.184238186 |
| 0.09679924  | 0.264702352 | 0.223473996 | 0.387362163 |
| 0.250746512 | 0.170308255 | 0.152470146 | 0.041868025 |

|             |             |             |             |
|-------------|-------------|-------------|-------------|
| 0.173328747 | 0.353144144 | 0.238236295 | 0.388210357 |
| 0.312654998 | 0.411034128 | 0.241503164 | 0.267162246 |
| 0.141806728 | 0.253649602 | 0.236231169 | 0.035482197 |
| 0.258256152 | 0.128477445 | 0.272417845 | 0.105609405 |
| 0.11804419  | 0.229553861 | 0.169172414 | 0.15451973  |
| 0.154961779 | 0.232524397 | 0.388045295 | 0.37998867  |
| 0.194718659 | 0.205472002 | 0.28947564  | 0.300384005 |
| 0.119822844 | 0.340884566 | 0.259984311 | 0.114113327 |
| 0.144546488 | 0.158154649 | 0.296682299 | 0.187278424 |
| 0.125157583 | 0.405697899 | 0.192863461 | 0.34770871  |
| 0.229465615 | 0.30056856  | 0.297803537 | 0.219930875 |
| 0.230675461 | 0.166460916 | 0.200507453 | 0.065085151 |
| 0.2603128   | 0.367279186 | 0.161419464 | 0.237426798 |
| 0.26670618  | 0.187876759 | 0.139338201 | 0.075497187 |
| 0.152788209 | 0.120576914 | 0.209036727 | 0.414322553 |
| 0.203875437 | 0.196715441 | 0.105631226 | 0.212350164 |
| 0.330641165 | 0.251617181 | 0.123993823 | 0.258442944 |
| 0.302887776 | 0.257803024 | 0.329819685 | 0.343864108 |
| 0.155853805 | 0.285143756 | 0.283853763 | 0.199016403 |
| 0.229768469 | 0.235541173 | 0.287463605 | 0.053414186 |
| 0.173726952 | 0.194754292 | 0.18121663  | 0.27847635  |
| 0.257538058 | 0.183977486 | 0.141632765 | 0.37594597  |
| 0.139976063 | 0.321514622 | 0.101421304 | 0.224473897 |
| 0.283439785 | 0.12715654  | 0.305780259 | 0.151692535 |
| 0.185718478 | 0.26492505  | 0.080814637 | 0.238844231 |
| 0.156212937 | 0.283847417 | 0.19085825  | 0.304087963 |
| 0.192450359 | 0.271883579 | 0.273940692 | 0.091123072 |
| 0.090129415 | 0.145315321 | 0.275916275 | 0.100583214 |
| 0.092755994 | 0.403686485 | 0.122711137 | 0.155281291 |
| 0.174406951 | 0.163240948 | 0.210602256 | 0.189843074 |
| 0.172428063 | 0.29150308  | 0.092634033 | 0.238011088 |
| 0.195424205 | 0.230533381 | 0.168084667 | 0.110515183 |
| 0.173124341 | 0.237477112 | 0.220464654 | 0.287241857 |
| 0.229294936 | 0.393755802 | 0.204946968 | 0.261810166 |
| 0.171486457 | 0.145220928 | 0.120270983 | 0.332816024 |
| 0.121291624 |             |             |             |

|             |             |             |             |
|-------------|-------------|-------------|-------------|
| EOMES       | 0.387844443 | 0.513080216 | 0.406947076 |
| 0.423151461 | 0.43754953  | 0.347989723 | 0.282532906 |
| 0.242317753 | 0.155853835 | 0.012074204 | 0.04187962  |
| 0.416286725 | 0.231901935 | 0.296835525 | 0.341634887 |
| 0.447595819 | 0.195121319 | 0.39678685  | 0.33236866  |
| 0.431375988 | 0.140362767 | 0.43438456  | 0.172267923 |
| 0.348370058 | 0.163480152 | 0.1297241   | 0.32705379  |
| 0.446062526 | 0.149335476 | 0.292657876 | 0.383057959 |
| 0.181351578 | 0.400563058 | 0.494100025 | 0.418736336 |
| 0.47873265  | 0.356414622 | 0.023552824 | 0.304633163 |
| 0.408967258 | 0.424911149 | 0.423666576 | 0.391601622 |
| 0.091819628 | 0.45438724  | 0.320009857 | 0.432043983 |
| 0.273238047 | 0.06524152  | 0.246434693 | 0.421551021 |
| 0.438668865 | 0.389951902 | 0.286704499 | 0.230976373 |
| 0.197490717 | 0.228003355 | 0.258295768 | 0.299597488 |
| 0.302014025 | 0.170474153 | 0.455078719 | 0.151307829 |
| 0.183315623 | 0.317623639 | 0.227746966 | 0.323187143 |
| 0.358959364 | 0.351976617 | 0.049786967 | 0.363145983 |

|             |             |             |             |
|-------------|-------------|-------------|-------------|
| 0.005450033 | 0.428449654 | 0.427549307 | 0.311411911 |
| 0.093311271 | 0.041457489 | 0.260948564 | 0.377362802 |
| 0.464792029 | 0.445659546 | 0.486403292 | 0.485975602 |
| 0.234774105 | 0.385460844 | 0.388949215 | 0.251864807 |
| 0.420954828 | 0.240396898 | 0.176318713 | 0.445070633 |
| 0.493714415 | 0.498151    | 0.282086804 | 0.353313552 |
| 0.38261114  | 0.468563233 | 0.413679723 | 0.430909383 |
| 0.344061218 | 0.108484145 | 0.417496398 | 0.503506068 |
| 0.373159626 | 0.331614398 | 0.237290951 | 0.387656079 |
| 0.123217664 | 0.365639954 | 0.410641569 | 0.198005667 |
| 0.47884607  | 0.049486381 | 0.293672559 | 0.37747462  |
| 0.329730118 | 0.407158888 | 0.493547573 | 0.27632478  |
| 0.426481341 | 0.046822393 | 0.174021352 | 0.080957335 |
| 0.345390461 | 0.176365383 | 0.439475035 | 0.449556362 |
| 0.269787965 | 0.393929541 | 0.345786221 | 0.010517573 |
| 0.063410931 | 0.277592195 | 0.384880169 | 0.409260154 |
| 0.428330438 | 0.35865536  | 0.294126783 | 0.3377568   |
| 0.389400452 | 0.47795644  | 0.054970555 | 0.180514659 |
| 0.424946917 | 0.276600813 | 0.335381018 | 0.410867651 |
| 0.370354565 | 0.196880372 | 0.21035253  | 0.521080846 |
| 0.41257352  | 0.156378303 | 0.34778163  | 0.44805308  |
| 0.329526367 | 0.394958296 | 0.189550156 | 0.320971867 |
| 0.097484201 | 0.450617696 | 0.065018303 | 0.367689684 |
| 0.276023599 | 0.185329683 | 0.035443646 | 0.297809067 |
| 0.31738644  | 0.398275403 | 0.42601093  | 0.195319909 |
| 0.360809846 | 0.437495305 | 0.319186588 | 0.376371402 |
| 0.02297067  | 0.105892119 | 0.264787047 | 0.496485263 |
| 0.253042132 | 0.498971817 | 0.387841456 | 0.392149375 |
| 0.370181468 | 1           | 0.008619239 | 0.466981769 |
| 0.502203119 | 0.272480607 | 0.400283243 | 0.433562586 |
| 0.362581631 | 0.443360267 | 0.045259022 | 0.44152451  |
| 0.315425559 | 0.159901509 | 0.512467998 | 0.239094222 |
| 0.440647573 | 0.088583742 | 0.331248763 | 0.402502122 |
| 0.357992911 | 0.017550595 | 0.240014648 | 0.403976986 |
| 0.064541864 | 0.141072291 | 0.418992025 | 0.434281862 |
| 0.407222817 | 0.437964865 | 0.494732635 | 0.346942922 |
| 0.437186581 | 0.320063673 | 0.037481633 | 0.390531619 |
| 0.411244422 | 0.340536121 | 0.430299766 | 0.318779944 |
| 0.296987352 | 0.465146691 | 0.36955057  | 0.208433279 |
| 0.094680666 | 0.352081813 | 0.041029769 | 0.396800818 |
| 0.369474744 | 0.164084613 | 0.374061292 | 0.227347119 |
| 0.130555435 | 0.518675226 | 0.230732971 | 0.280523923 |
| 0.162579435 | 0.365692268 | 0.350531625 | 0.237931671 |
| 0.216631101 | 0.258627795 | 0.377695341 | 0.404066621 |
| 0.074838214 | 0.157443646 | 0.040221466 | 0.30897286  |
| 0.145821431 | 0.300545742 | 0.286395502 | 0.354425654 |
| 0.326989109 | 0.147766944 | 0.407350717 | 0.351804761 |
| 0.194822243 | 0.04205327  | 0.498838331 | 0.448407887 |
| 0.290027044 | 0.249095458 | 0.092454718 | 0.279313848 |
| 0.457124251 | 0.273992697 | 0.252399027 | 0.442339539 |
| 0.069310883 | 0.48718426  | 0.284196048 | 0.197266444 |
| 0.362304485 | 0.332807139 | 0.472839911 | 0.079612841 |
| 0.381822799 | 0.450003904 | 0.405737132 | 0.268211643 |
| 0.367282499 | 0.430384182 | 0.067469705 | 0.35755335  |

|             |             |             |             |
|-------------|-------------|-------------|-------------|
| 0.344832662 | 0.071985452 | 0.509854168 | 0.191235398 |
| 0.055001594 | 0.429928374 | 0.38727541  | 0.147173358 |
| 0.151655677 | 0.346102304 | 0.087505663 | 0.37552797  |
| 0.512456263 | 0.438032867 | 0.373129359 | 0.295052936 |
| 0.084035881 | 0.017079835 | 0.289191511 | 0.398343768 |
| 0.476097806 | 0.493569751 | 0.357329446 | 0.375320924 |
| 0.337301992 | 0.354854628 | 0.165135687 | 0.499247817 |
| 0.27425787  | 0.497939471 | 0.023251009 | 0.400572997 |
| 0.472154647 | 0.272228345 | 0.139661642 | 0.337385024 |
| 0.356729265 | 0.104918645 | 0.304177113 | 0.475973425 |
| 0.430093116 | 0.386436858 | 0.379763251 | 0.431237512 |
| 0.041259396 | 0.08817897  | 0.426333704 | 0.233306462 |
| 0.387679974 | 0.318046928 | 0.071116944 | 0.34881378  |
| 0.086669543 | 0.433468632 | 0.443395159 | 0.11991003  |
| 0.292881024 | 0.339054005 | 0.429510558 | 0.08723469  |
| 0.429674947 | 0.481059025 | 0.496096265 | 0.259637541 |
| 0.392845354 | 0.46967504  | 0.355334997 | 0.155801415 |
| 0.046560867 | 0.48961984  | 0.386344541 | 0.048026223 |
| 0.473431813 | 0.220668038 | 0.024104776 | 0.491460499 |
| 0.286572365 | 0.405411625 | 0.013657019 | 0.114071853 |
| 0.091320573 | 0.450474623 | 0.455071115 | 0.392749225 |
| 0.219482245 | 0.42952192  | 0.014463458 | 0.512376126 |
| 0.470523898 | 0.03867835  | 0.214145488 | 0.373118311 |
| 0.371346272 | 0.517437008 | 0.339387776 | 0.423301651 |
| 0.383646482 | 0.467197367 | 0.278284106 | 0.35906551  |
| 0.41739129  | 0.463675437 | 0.411059358 | 0.455647513 |
| 0.449518679 | 0.441974243 | 0.362582401 | 0.040640994 |
| 0.203991606 | 0.246029113 | 0.277956185 | 0.127782212 |
| 0.306820431 | 0.219268409 | 0.47509148  | 0.468419073 |
| 0.466942817 | 0.018300617 | 0.215548152 | 0.377392645 |
| 0.439716866 | 0.486261762 | 0.055994545 | 0.014963093 |
| 0.015537873 | 0.038445939 | 0.391634547 | 0.34313677  |
| 0.483262953 | 0.205896812 | 0.017121234 | 0.086033203 |
| 0.370329619 | 0.406032759 | 0.48239752  | 0.434346718 |
| 0.410662115 | 0.154017952 | 0.26270133  | 0.441215375 |
| 0.123178283 | 0.2863862   | 0.478069441 | 0.457043624 |
| 0.09418516  | 0.350661386 | 0.38783049  | 0.495965474 |
| 0.084811863 | 0.394775382 | 0.411018458 | 0.339275563 |
| 0.036888605 | 0.152015754 | 0.129991898 | 0.44489119  |
| 0.461001074 | 0.110593357 | 0.061175929 | 0.138618988 |
| 0.174248952 | 0.461717735 | 0.238062395 | 0.518274304 |
| 0.427671247 | 0.44215971  | 0.129991253 | 0.469898957 |
| 0.075032381 | 0.455709448 | 0.370942102 | 0.080512423 |
| 0.37738345  | 0.038751366 | 0.443663257 | 0.170282787 |
| 0.326567229 | 0.395521027 | 0.263958669 | 0.043393274 |
| 0.221635815 | 0.106554206 | 0.480185718 | 0.449176307 |
| 0.076778417 | 0.33432263  | 0.397397326 | 0.442234115 |
| 0.309077287 | 0.425375816 | 0.476638615 | 0.347817627 |
| 0.144567864 | 0.172885032 | 0.420629704 | 0.363687753 |
| 0.274678113 | 0.495864637 | 0.325992821 | 0.520156379 |
| 0.385813895 | 0.462697483 | 0.454438782 | 0.400444349 |
| 0.269593652 | 0.384520297 | 0.349939247 | 0.042341453 |
| 0.425446145 | 0.443305031 | 0.397125924 | 0.215591624 |
| 0.323335619 | 0.371758442 | 0.104665937 | 0.200351721 |



|             |             |             |             |
|-------------|-------------|-------------|-------------|
| 0.317375948 | 0.295900332 | 0.209400396 | 0.447149981 |
| 0.3882724   | 0.362802099 | 0.081915876 | 0.122726151 |
| 0.529037606 | 0.432689127 | 0.215487026 | 0.414017748 |
| 0.275526382 | 0.403029673 | 0.421020761 | 0.418270041 |
| 0.382344407 | 0.411642192 | 0.40134207  | 0.349110102 |
| 0.408152294 | 0.355269309 | 0.50207197  | 0.124897096 |
| 0.137044408 | 0.374253827 | 0.143953475 | 0.169164161 |
| 0.226723209 | 0.070244221 | 0.290138197 | 0.445362544 |
| 0.335357658 | 0.416271268 | 0.303166122 | 0.164039133 |
| 0.397637969 | 0.36584081  | 0.426855647 | 0.2561894   |
| 0.133873293 | 0.471401636 | 0.026071449 | 0.115462994 |
| 0.346456992 | 0.399177508 | 0.374467801 | 0.344527517 |
| 0.314659787 | 0.218631183 | 0.375207378 | 0.290652316 |
| 0.271492946 | 0.360986756 | 0.398736816 | 0.080229358 |
| 0.047333893 | 0.50041793  | 0.373316562 | 0.055979555 |
| 0.142392339 | 0.355747966 | 0.364420552 | 0.292259562 |
| 0.054333472 | 0.454518569 | 0.299772731 | 0.434454658 |
| 0.394609979 | 0.136662267 | 0.334681313 | 0.146215418 |
| 0.133414274 | 0.430486571 | 0.403444    | 0.484589642 |
| 0.400770851 | 0.435806733 | 0.417166293 | 0.387984771 |
| 0.203125679 | 0.357598095 | 0.069395987 | 0.435556977 |
| 0.347707501 |             |             |             |

|             |             |             |             |
|-------------|-------------|-------------|-------------|
| ERMN        | 0.007986195 | 0.003434735 | 0.009771349 |
| 0.004595882 | 0.004012004 | 0.002209446 | 0.002450999 |
| 0.002889186 | 0.001557736 | 1.27E-05    | 7.48E-05    |
| 0.000120189 | 0.001241414 | 0.00234213  | 0.007168281 |
| 0.002819692 | 0.01138379  | 0.006343631 | 0.00918417  |
| 0.000606533 | 0.006668877 | 0.003173253 | 0.006414827 |
| 0.004526033 | 0.002863683 | 0.005081135 | 0.00705056  |
| 0.005852515 | 0.000157676 | 0.004105893 | 0.006514993 |
| 0.005387632 | 0.003175642 | 0.003829763 | 0.020261151 |
| 0.006947824 | 0.000300195 | 0.000485738 | 0.002934494 |
| 0.005701416 | 0.00515604  | 0.000485738 | 0.006779455 |
| 0.002704254 | 0.00347346  | 0.005390689 | 0.00239788  |
| 0.001301741 | 0.001283209 | 0.012094736 | 0.000887923 |
| 0.001535241 | 0.002230729 | 0.002636774 | 0.001912126 |
| 0.000346871 | 0.000980169 | 0.0013844   | 1.64E-05    |
| 0.000421417 | 0.000980169 | 0.002501848 | 0.002114485 |
| 0.003872986 | 0.002212534 | 0.001028764 | 3.41E-05    |
| 0.003738022 | 0.010501996 | 0.004273399 | 0.003807393 |
| 0.007963511 | 0.003675843 | 0.007425236 | 6.47E-05    |
| 0.000317571 | 0.015523322 | 0.003055938 | 0.010466924 |
| 0.005577376 | 0.012639776 | 0.002730076 | 0.006725974 |
| 0.016608549 | 0.005706663 | 0.005040995 | 0.001698481 |
| 0.001337869 | 0.006521272 | 0.003188961 | 0.004634833 |
| 0.002913139 | 0.001252435 | 0.008559679 | 0.005447573 |
| 0.003365043 | 0.002807077 | 0.017944317 | 0.001966269 |
| 0.02245039  | 0.005449955 | 0.002472854 | 0.001626853 |
| 0.008147103 | 0.001886448 | 0.004195868 | 0.004247104 |
| 0.005481391 | 0.011232007 | 0.004013149 | 0.008852782 |
| 0.001849365 | 0.005649992 | 0.001038625 | 0.006093199 |
| 0.006546565 | 0.011902098 | 0.001396518 | 0.014929396 |
| 0.000393694 | 0.003434452 | 0.004124901 | 0.007362471 |
| 0.007540715 | 0.000649443 | 0.019128327 | 0.000397882 |
|             | 0.002108681 | 0.003459624 | 0.000861986 |

|                      |                     |                      |             |
|----------------------|---------------------|----------------------|-------------|
| 0.00081102           | 0.003013467         | 0.0067379            | 0.008645281 |
| 0.010304228          | 0.003674182         | 0.011691124          | 0.00844348  |
| 0.005721947          | 0.001648355         | 0.002575049          | 0.003313645 |
| 0.005326913          | 3.29E-05 0.00443598 | 0.004120461          |             |
| 0.014935923          | 0.009767054         | 0.002726778          | 0.005777586 |
| 0.004542185          | 0.003952361         | 0.005038007          | 0.00270052  |
| 0.004165019          | 0.005356774         | 0.010268969          | 0.000109669 |
| 0.008501241          | 0.00530179          | 0.001318032          | 0.000742724 |
| 0.002808083          | 0.014922811         | 0.006374384          | 0.000659215 |
| 0.000923389          | 0.011783537         | 0.002280478          | 0.001126536 |
| 0.001775505          | 0.00243037          | 0.01252 0.001937693  |             |
| 0.00638846           | 0.00263982          | 0.001911854          | 6.60E-05    |
| 0.007950312          | 0.002294016         | 0.003488408          | 0.001074463 |
| 0.006628602          | 0.005348291         | 0.010482579          | 0.01277232  |
| 0.008619239          | 1 0.002675728       | 0.003382204          |             |
| 0.00227458           | 0.002272957         | 0.010492539          | 0.002502959 |
| 0.004782523          | 0.000595145         | 0.007679379          | 0.004283311 |
| 0.013171667          | 0.006153803         | 0.005718256          | 0.003337837 |
| 0.003807817          | 0.000889039         | 0.005628549          | 0.002353427 |
| 1.33E-05 0.001111984 | 0.003582344         | 0.021702202          |             |
| 0.000197032          | 0.007651423         | 0.007077301          | 0.003244399 |
| 0.009620119          | 0.007125794         | 0.002657699          | 0.004089549 |
| 0.006081449          | 0.010309814         | 0.016884259          | 0.008608597 |
| 0.000279289          | 0.002977532         | 0.0021475            | 0.002962366 |
| 0.003092581          | 0.004194632         | 5.23E-05 0.002711396 |             |
| 0.002031506          | 0.000100572         | 0.005750756          | 0.00427061  |
| 0.000131053          | 0.00271179          | 0.011866968          | 0.007811304 |
| 0.003859653          | 0.01355866          | 0.009708118          | 0.010089738 |
| 0.000949133          | 0.009026947         | 0.000108982          | 0.000121    |
| 0.003734153          | 0.002816065         | 0.001873765          | 0.000450057 |
| 0.002643181          | 0.034868557         | 0.000435224          | 5.55E-05    |
| 0.000220169          | 0.000132167         | 0.002324946          | 0.000400933 |
| 0.000358851          | 0.003005644         | 0.009528613          | 0.011947089 |
| 0.008834918          | 0.003594008         | 0.010932529          | 0.002669216 |
| 0.002764992          | 0.012656097         | 0.000146514          | 0.002918983 |
| 0.000993945          | 0.001346173         | 0.002283361          | 0.002378238 |
| 0.006155033          | 0.000746423         | 0.006207776          | 0.001384206 |
| 0.003592557          | 0.006546067         | 4.75E-06 0.003858629 |             |
| 0.002169998          | 0.019654293         | 0.005025414          | 0.001837566 |
| 0.004263319          | 0.00045032          | 0.00520148           | 0.003324619 |
| 0.004299293          | 0.003847254         | 0.005209708          | 0.013948947 |
| 0.009337282          | 0.002804653         | 0.013584641          | 0.017212387 |
| 0.00076773           | 0.000988543         | 0.011911486          | 0.003722077 |
| 0.006872668          | 0.001680294         | 0.022898732          | 0.001240681 |
| 7.55E-05 0.017767765 | 0.012478551         | 0.002802822          |             |
| 0.004176531          | 0.01241522          | 0.002479078          | 0.007922493 |
| 0.001299421          | 0.000238978         | 0.003768845          | 0.02434291  |
| 0.00387392           | 0.00849881          | 0.005177735          | 0.002610474 |
| 0.000973355          | 0.005474009         | 0.001355811          | 0.002365858 |
| 0.00538713           | 0.010146938         | 0.003205976          | 0.003612902 |
| 0.002990549          | 0.002480635         | 0.00917923           | 0.000629548 |
| 0.000514919          | 0.009161173         | 0.012462734          | 0.00111724  |
| 0.005544736          | 0.004924475         | 0.001175192          | 0.001670733 |
| 0.001834625          | 0.008069382         | 0.003232567          | 0.000254136 |

|             |             |             |             |
|-------------|-------------|-------------|-------------|
| 0.002695685 | 0.011470658 | 0.005536636 | 0.004574128 |
| 0.00466894  | 0.003111332 | 0.006606559 | 0.004407515 |
| 0.003205746 | 0.002753321 | 0.023695449 | 0.017142861 |
| 0.003565969 | 0.006209702 | 0.00087952  | 0.005319575 |
| 0.000975807 | 6.27E-05    | 0.003418095 | 0.008094743 |
| 0.002311858 | 0.00142833  | 0.01005693  | 0.032122991 |
| 0.008537568 | 0.002594142 | 0.00435189  | 0.00056187  |
| 0.012021427 | 0.001821589 | 0.005042137 | 0.002660955 |
| 0.010359823 | 0.007329795 | 0.002642716 | 0.003968413 |
| 0.003943684 | 0.005374312 | 0.00383112  | 0.003694427 |
| 0.002413064 | 9.74E-05    | 0.009511411 | 0.003367334 |
| 0.003442792 | 0.006790566 | 0.004391735 | 0.003991919 |
| 0.009923771 | 0.005317555 | 0.000756811 | 0.003080438 |
| 0.001141283 | 0.000618655 | 0.000174966 | 0.002842672 |
| 0.005679327 | 0.005665766 | 0.00593726  | 0.004177424 |
| 0.010816281 | 0.001402343 | 0.00301153  | 0.004053091 |
| 0.006109028 | 0.021132829 | 0.001282791 | 0.001175832 |
| 0.000933622 | 0.003416822 | 0.021817401 | 0.00438454  |
| 0.000211237 | 0.003303725 | 0.000894561 | 0.009315684 |
| 0.007407316 | 0.002642029 | 0.008539348 | 0.00821185  |
| 0.007568332 | 8.73E-05    | 0.0096638   | 0.002183434 |
| 0.003926938 | 0.004021537 | 0.002222067 | 0.023358812 |
| 0.017291341 | 0.008666197 | 0.00466779  | 0.004392168 |
| 0.010715963 | 0.005628076 | 0.000412938 | 0.004699547 |
| 0.011735055 | 0.006721025 | 0.009690407 | 0.002544646 |
| 0.000260834 | 0.000688683 | 0.000129746 | 0.000383926 |
| 0.005780474 | 0.002773347 | 0.005270508 | 0.004667305 |
| 0.007011232 | 0.00510884  | 0.003117946 | 8.14E-05    |
| 0.002337347 | 0.007264666 | 0.000473871 | 0.01953306  |
| 0.009754644 | 0.00393923  | 0.000164815 | 0.001150427 |
| 0.007044157 | 0.00180684  | 0.013796917 | 0.008336853 |
| 0.006639787 | 0.004640333 | 0.00683622  | 0.024284533 |
| 0.00360789  | 0.021496072 | 0.013354747 | 0.002320849 |
| 0.003805645 | 0.002720693 | 0.002651654 | 0.000502037 |
| 0.005115149 | 0.006971795 | 0.005519457 | 0.001036113 |
| 0.006341    | 0.000525628 | 0.00503405  | 0.005553897 |
| 0.005381566 | 0.003520728 | 0.004028222 | 0.001100359 |
| 0.004560976 | 0.001355564 | 0.000400444 | 0.009564796 |
| 0.00387151  | 0.007728201 | 0.001724259 | 0.00313662  |
| 0.007071497 | 0.003460657 | 0.001133849 | 0.007056007 |
| 0.001566485 | 0.00069991  | 0.00881196  | 0.006689285 |
| 0.004370539 | 0.001558726 | 0.005162598 | 0.003969424 |
| 0.003847748 | 0.002585191 | 0.00449206  | 0.020212223 |
| 0.004230499 | 0.00834478  | 0.006869984 | 0.002394305 |
| 0.002509537 | 0.004101188 | 0.00146585  | 0.001893807 |
| 0.005843996 | 0.003171835 | 0.001383608 | 0.000835275 |
| 0.004794086 | 0.000119488 | 0.0187128   | 0.004006808 |
| 0.014917221 | 0.004398144 | 0.008919217 | 0.00288216  |
| 0.004021766 | 0.000583243 | 0.016138695 | 0.011959848 |
| 0.008808445 | 0.009718812 | 0.001689224 | 0.001238045 |
| 0.002245302 | 0.000414059 | 0.010974543 | 0.002288181 |
| 0.003771088 | 0.003177064 | 0.014137628 | 0.002073356 |
| 0.014260802 | 0.004539213 | 0.001645356 | 0.000192712 |
| 0.002261933 | 0.004007957 | 0.002387288 | 0.000627445 |

|             |             |             |             |
|-------------|-------------|-------------|-------------|
| 0.006353882 | 0.006533432 | 0.039073625 | 0.001077169 |
| 0.0047023   | 0.010273251 | 0.000572544 | 0.024653836 |
| 0.002848898 | 0.000168083 | 0.005745871 | 0.004826884 |
| 0.011095797 | 0.003045778 | 0.001066705 | 0.015190087 |
| 0.003282602 | 0.010293808 | 0.002984155 | 0.019048558 |
| 0.005226843 | 0.002657968 | 0.002854972 | 0.005207971 |
| 0.009076859 | 0.002231506 | 0.006010975 | 0.001028845 |
| ERRFI1      | 0.474056356 | 0.50920969  | 0.421270113 |
| 0.441426484 | 0.422910268 | 0.454099077 | 0.206717723 |
| 0.212137932 | 0.076970602 | 0.003681491 | 0.016605313 |
| 0.462110729 | 0.198862691 | 0.2907915   | 0.393352782 |
| 0.413727961 | 0.106095685 | 0.37105833  | 0.219989922 |
| 0.422321284 | 0.09601768  | 0.384007239 | 0.076660421 |
| 0.262286683 | 0.081715328 | 0.050777184 | 0.247237266 |
| 0.462933801 | 0.059625048 | 0.410483027 | 0.433117633 |
| 0.073075061 | 0.485074275 | 0.505740842 | 0.441954435 |
| 0.502619605 | 0.474363834 | 0.00846847  | 0.338349935 |
| 0.484661703 | 0.471918519 | 0.425405989 | 0.319121433 |
| 0.031751223 | 0.492184151 | 0.236300866 | 0.390650796 |
| 0.270950678 | 0.020802    | 0.312037223 | 0.482121448 |
| 0.492785646 | 0.481158258 | 0.250700028 | 0.152350483 |
| 0.212327072 | 0.283306297 | 0.27691335  | 0.409677454 |
| 0.210128607 | 0.208817488 | 0.50050718  | 0.084642238 |
| 0.150664607 | 0.261655167 | 0.116834779 | 0.269499048 |
| 0.339779257 | 0.469514175 | 0.013091098 | 0.452100694 |
| 0.002468047 | 0.395703429 | 0.355711774 | 0.328558317 |
| 0.027378763 | 0.014094122 | 0.14025998  | 0.348477857 |
| 0.477134267 | 0.488251844 | 0.485436373 | 0.493710456 |
| 0.156304925 | 0.257306104 | 0.395117269 | 0.146236944 |
| 0.497625629 | 0.173086873 | 0.10541463  | 0.409506594 |
| 0.491162791 | 0.506972574 | 0.171230221 | 0.224300643 |
| 0.49131415  | 0.503200465 | 0.471337165 | 0.437793693 |
| 0.373294181 | 0.033896578 | 0.499956174 | 0.505079701 |
| 0.481337158 | 0.305633163 | 0.120867835 | 0.462717722 |
| 0.040903429 | 0.42366745  | 0.343313873 | 0.14111344  |
| 0.481395236 | 0.013529432 | 0.173844932 | 0.376609586 |
| 0.189551093 | 0.494385223 | 0.503929029 | 0.170919085 |
| 0.402382807 | 0.013314338 | 0.128052255 | 0.0207091   |
| 0.342376522 | 0.127694702 | 0.50359176  | 0.489540973 |
| 0.255481134 | 0.369942145 | 0.262051343 | 0.000957577 |
| 0.015947554 | 0.154740591 | 0.494589891 | 0.377193444 |
| 0.460792725 | 0.466469296 | 0.2173887   | 0.482551682 |
| 0.483593856 | 0.48323162  | 0.093800352 | 0.081375578 |
| 0.458050597 | 0.150427697 | 0.207770386 | 0.47678575  |
| 0.286122374 | 0.107813265 | 0.103905499 | 0.504051628 |
| 0.482619513 | 0.066419441 | 0.3859685   | 0.407583269 |
| 0.35717052  | 0.332340077 | 0.086561443 | 0.268754086 |
| 0.040301662 | 0.492809425 | 0.016500079 | 0.374692878 |
| 0.306101609 | 0.119954182 | 0.007133235 | 0.295153025 |
| 0.322958552 | 0.501823245 | 0.489559597 | 0.082854    |
| 0.313243195 | 0.3963039   | 0.388377929 | 0.48861504  |
| 0.007506863 | 0.034446029 | 0.364977182 | 0.507633217 |
| 0.385405434 | 0.497191176 | 0.284885616 | 0.277097104 |
| 0.248545483 | 0.466981769 | 0.002675728 | 1           |

|             |             |             |             |
|-------------|-------------|-------------|-------------|
| 0.504874924 | 0.39744318  | 0.408348846 | 0.420555729 |
| 0.403193828 | 0.480822717 | 0.055886753 | 0.410834439 |
| 0.45267864  | 0.059409147 | 0.489190037 | 0.129895113 |
| 0.499195277 | 0.02773927  | 0.35386421  | 0.478207275 |
| 0.491716804 | 0.006635287 | 0.282712358 | 0.416225178 |
| 0.015346577 | 0.107053735 | 0.465745066 | 0.423160464 |
| 0.399329198 | 0.462849522 | 0.473310757 | 0.385633569 |
| 0.433432677 | 0.22885251  | 0.007019012 | 0.288366779 |
| 0.477453229 | 0.420907036 | 0.493061085 | 0.240933653 |
| 0.44039288  | 0.507691348 | 0.496779571 | 0.239335728 |
| 0.032013216 | 0.335625038 | 0.020229018 | 0.323940544 |
| 0.48152412  | 0.109581925 | 0.439270734 | 0.118456772 |
| 0.049239259 | 0.508883173 | 0.14930684  | 0.252600072 |
| 0.108921236 | 0.445749271 | 0.238572637 | 0.258967846 |
| 0.214792437 | 0.13597732  | 0.357300423 | 0.390143413 |
| 0.03329709  | 0.071855917 | 0.007767048 | 0.423014346 |
| 0.139061716 | 0.382057974 | 0.39636057  | 0.4868076   |
| 0.346096831 | 0.098619286 | 0.384582476 | 0.27075522  |
| 0.088185162 | 0.008004033 | 0.509952484 | 0.404364165 |
| 0.440787237 | 0.137905958 | 0.026348578 | 0.400367651 |
| 0.49531308  | 0.429452593 | 0.363848781 | 0.499939551 |
| 0.020971902 | 0.487323629 | 0.240707256 | 0.095371223 |
| 0.380063367 | 0.242240371 | 0.471766755 | 0.068432098 |
| 0.443164639 | 0.501900483 | 0.285380678 | 0.158709353 |
| 0.483808852 | 0.440529917 | 0.023227328 | 0.488192186 |
| 0.489132837 | 0.020007904 | 0.509359901 | 0.095994125 |
| 0.011677422 | 0.450044239 | 0.489159278 | 0.053262972 |
| 0.05567962  | 0.353823174 | 0.046563513 | 0.257628879 |
| 0.51010229  | 0.401305554 | 0.49594799  | 0.186708291 |
| 0.029372643 | 0.006864281 | 0.169396566 | 0.422292865 |
| 0.507700466 | 0.50406858  | 0.228197033 | 0.364583794 |
| 0.216671872 | 0.34016702  | 0.179511802 | 0.507693469 |
| 0.176661573 | 0.501637284 | 0.002847212 | 0.472542234 |
| 0.505801044 | 0.366869786 | 0.059839642 | 0.341418768 |
| 0.485445395 | 0.034306101 | 0.188271739 | 0.505373653 |
| 0.495974509 | 0.33134504  | 0.374459622 | 0.442213602 |
| 0.013094936 | 0.034538084 | 0.393742871 | 0.162169653 |
| 0.408733063 | 0.188505441 | 0.042632745 | 0.373356544 |
| 0.031565614 | 0.50115493  | 0.467308767 | 0.045959417 |
| 0.425490133 | 0.366194979 | 0.354900886 | 0.0251022   |
| 0.488028335 | 0.496865576 | 0.504515345 | 0.150970565 |
| 0.488649498 | 0.506428329 | 0.441556847 | 0.055523253 |
| 0.009156584 | 0.499501439 | 0.465657582 | 0.017571178 |
| 0.480733407 | 0.328987908 | 0.008915341 | 0.507134074 |
| 0.165078377 | 0.468325931 | 0.004371431 | 0.082956483 |
| 0.02503618  | 0.465020232 | 0.496263661 | 0.425174261 |
| 0.343290944 | 0.367442348 | 0.003018415 | 0.50347517  |
| 0.507644718 | 0.007494772 | 0.109204617 | 0.502048684 |
| 0.478257728 | 0.506414663 | 0.319773664 | 0.492925079 |
| 0.463069985 | 0.497869112 | 0.247873491 | 0.237995166 |
| 0.500032741 | 0.493681533 | 0.47516953  | 0.498832831 |
| 0.485793214 | 0.418801933 | 0.265123795 | 0.010603101 |
| 0.12487456  | 0.252591133 | 0.388171887 | 0.071248536 |
| 0.415697849 | 0.115918528 | 0.504814785 | 0.477504178 |

|             |             |             |             |
|-------------|-------------|-------------|-------------|
| 0.502074403 | 0.001498368 | 0.156687538 | 0.50567694  |
| 0.487489771 | 0.486373552 | 0.01356937  | 0.005462102 |
| 0.007264537 | 0.012912218 | 0.388060594 | 0.208430409 |
| 0.506604408 | 0.326604237 | 0.001381808 | 0.042610518 |
| 0.281256001 | 0.397472549 | 0.508310149 | 0.37326507  |
| 0.475619341 | 0.058243166 | 0.337015197 | 0.401905691 |
| 0.050237451 | 0.435872434 | 0.503161525 | 0.500802413 |
| 0.02588819  | 0.214462216 | 0.412502165 | 0.492406311 |
| 0.064212053 | 0.28518975  | 0.467123379 | 0.329078227 |
| 0.007779482 | 0.058021224 | 0.047003907 | 0.444163629 |
| 0.49439619  | 0.063957712 | 0.023117614 | 0.197109782 |
| 0.109471821 | 0.488828714 | 0.147139843 | 0.499494263 |
| 0.487458663 | 0.443313399 | 0.050536277 | 0.50161033  |
| 0.028414302 | 0.500275376 | 0.322775342 | 0.074527934 |
| 0.264428218 | 0.006680106 | 0.493921333 | 0.164546672 |
| 0.379860479 | 0.451567672 | 0.195302816 | 0.008537188 |
| 0.175352748 | 0.035647225 | 0.484570292 | 0.474053671 |
| 0.019851895 | 0.229185932 | 0.270057919 | 0.414033261 |
| 0.339848855 | 0.456662394 | 0.498522214 | 0.492789619 |
| 0.07523817  | 0.122750539 | 0.439580717 | 0.47619303  |
| 0.263896245 | 0.484478403 | 0.302017218 | 0.506513448 |
| 0.480939519 | 0.496808924 | 0.506041068 | 0.3665463   |
| 0.203555617 | 0.470589082 | 0.437317987 | 0.017415004 |
| 0.352181564 | 0.479432188 | 0.38873719  | 0.13805358  |
| 0.232567483 | 0.408027333 | 0.035720977 | 0.221593806 |
| 0.346333201 | 0.3881459   | 0.123259992 | 0.442072038 |
| 0.442698597 | 0.483652758 | 0.032763729 | 0.044975187 |
| 0.508765464 | 0.493596835 | 0.156806936 | 0.472153896 |
| 0.137860985 | 0.334186079 | 0.480474408 | 0.466936769 |
| 0.399165472 | 0.502298699 | 0.4801117   | 0.459484254 |
| 0.488711645 | 0.247021707 | 0.503768778 | 0.112665478 |
| 0.07182807  | 0.469480764 | 0.083155013 | 0.065633927 |
| 0.118972027 | 0.016172768 | 0.316110919 | 0.422806836 |
| 0.407997975 | 0.375977941 | 0.379485168 | 0.062998593 |
| 0.291941959 | 0.418565095 | 0.335737161 | 0.211149656 |
| 0.064765301 | 0.503001873 | 0.005389085 | 0.037391771 |
| 0.405506954 | 0.498140111 | 0.394766459 | 0.210122569 |
| 0.29304032  | 0.105750072 | 0.274292807 | 0.372820831 |
| 0.397450077 | 0.394744324 | 0.501982663 | 0.030138034 |
| 0.014175298 | 0.486477316 | 0.44390641  | 0.011631806 |
| 0.064343448 | 0.457151357 | 0.285512053 | 0.233048171 |
| 0.011850977 | 0.500760356 | 0.415614441 | 0.435151711 |
| 0.369185561 | 0.046975782 | 0.452827987 | 0.084113453 |
| 0.046822114 | 0.493783035 | 0.411929387 | 0.502963207 |
| 0.337675442 | 0.422004819 | 0.471380124 | 0.500059487 |
| 0.112302218 | 0.430008888 | 0.020592536 | 0.47941327  |
| 0.470692354 |             |             |             |
| ESM1        | 0.494197426 | 0.522427325 | 0.467969803 |
| 0.466356059 | 0.478806198 | 0.439569015 | 0.215402289 |
| 0.189361897 | 0.090544916 | 0.003965697 | 0.025185691 |
| 0.509886001 | 0.234488299 | 0.292305959 | 0.395541969 |
| 0.458644394 | 0.141529709 | 0.380501139 | 0.244511224 |
| 0.44667942  | 0.089018142 | 0.438886718 | 0.086323911 |
| 0.330666736 | 0.114093591 | 0.067346139 | 0.312980261 |

|             |             |             |             |
|-------------|-------------|-------------|-------------|
| 0.484278436 | 0.077747498 | 0.386293437 | 0.427831752 |
| 0.097578124 | 0.501179041 | 0.524447785 | 0.503577174 |
| 0.525232986 | 0.482651415 | 0.009596052 | 0.338156986 |
| 0.483884876 | 0.515320563 | 0.446419769 | 0.351409984 |
| 0.037667237 | 0.493210782 | 0.25725059  | 0.452877177 |
| 0.254779798 | 0.029698863 | 0.269260706 | 0.464871695 |
| 0.492216367 | 0.519776172 | 0.234521308 | 0.161945549 |
| 0.252894745 | 0.251800054 | 0.350380618 | 0.373969016 |
| 0.232351357 | 0.170827746 | 0.508225154 | 0.090752908 |
| 0.163487401 | 0.253902919 | 0.156526712 | 0.268060146 |
| 0.415992652 | 0.450600009 | 0.013688404 | 0.493952122 |
| 0.002126021 | 0.416984616 | 0.414829079 | 0.398265025 |
| 0.037855255 | 0.018885014 | 0.183159258 | 0.36724705  |
| 0.501934067 | 0.492820753 | 0.531050293 | 0.537360403 |
| 0.19451479  | 0.306778167 | 0.46760426  | 0.175254784 |
| 0.507866267 | 0.185246183 | 0.110520369 | 0.464635304 |
| 0.534732323 | 0.522232332 | 0.216001339 | 0.280780337 |
| 0.504238175 | 0.505977765 | 0.497356049 | 0.491446107 |
| 0.426537838 | 0.051492623 | 0.50035811  | 0.537996833 |
| 0.468119369 | 0.384236862 | 0.158047366 | 0.461762655 |
| 0.053299638 | 0.416478631 | 0.379597948 | 0.166343341 |
| 0.505261317 | 0.015645922 | 0.227301759 | 0.394140797 |
| 0.214438085 | 0.510305611 | 0.524913498 | 0.188883457 |
| 0.457648127 | 0.017530731 | 0.173105728 | 0.028984446 |
| 0.36078419  | 0.180571311 | 0.507758297 | 0.513378138 |
| 0.243182335 | 0.433537663 | 0.274196099 | 0.000583014 |
| 0.024131483 | 0.190322628 | 0.519383777 | 0.396512232 |
| 0.486827316 | 0.474984638 | 0.260493237 | 0.469049431 |
| 0.533274117 | 0.530600332 | 0.073987716 | 0.088787032 |
| 0.481329164 | 0.188573863 | 0.244485957 | 0.517775236 |
| 0.346239588 | 0.107657713 | 0.122510375 | 0.532913792 |
| 0.463267422 | 0.078913304 | 0.372543421 | 0.455262267 |
| 0.385165242 | 0.404968107 | 0.099946488 | 0.295965166 |
| 0.044272439 | 0.504103164 | 0.026206887 | 0.360807397 |
| 0.349415338 | 0.163480133 | 0.008064677 | 0.274819432 |
| 0.324510259 | 0.521515917 | 0.496454317 | 0.099227845 |
| 0.344005806 | 0.45534426  | 0.362022064 | 0.509689758 |
| 0.010197893 | 0.040829791 | 0.323326262 | 0.53386243  |
| 0.340556298 | 0.531387545 | 0.313817494 | 0.330798677 |
| 0.302345688 | 0.502203119 | 0.003382204 | 0.504874924 |
| 1           | 0.353110386 | 0.454924753 | 0.471490291 |
| 0.465127491 | 0.50724657  | 0.051059739 | 0.456869929 |
| 0.430416751 | 0.071315088 | 0.528460361 | 0.16629321  |
| 0.503060025 | 0.03825906  | 0.348965189 | 0.527810429 |
| 0.530410282 | 0.007643222 | 0.249597939 | 0.427259085 |
| 0.024869188 | 0.095720532 | 0.485331177 | 0.452923452 |
| 0.436740311 | 0.506211544 | 0.513396126 | 0.449643153 |
| 0.485206563 | 0.23470034  | 0.009925268 | 0.352524211 |
| 0.51202625  | 0.468011788 | 0.481236938 | 0.249170717 |
| 0.406869325 | 0.513172919 | 0.516580464 | 0.254960803 |
| 0.038651678 | 0.33452639  | 0.019446226 | 0.375375471 |
| 0.488998752 | 0.12164999  | 0.482190874 | 0.144991115 |
| 0.069368653 | 0.534558382 | 0.206799526 | 0.324260433 |
| 0.15688846  | 0.469080852 | 0.254925988 | 0.275060057 |

|             |             |             |             |
|-------------|-------------|-------------|-------------|
| 0.258027306 | 0.168601205 | 0.420247759 | 0.438229468 |
| 0.032608126 | 0.091955931 | 0.012635141 | 0.469060137 |
| 0.164547333 | 0.414620224 | 0.414631254 | 0.487282955 |
| 0.360030107 | 0.115548412 | 0.438010915 | 0.333206025 |
| 0.117834424 | 0.012116776 | 0.524102133 | 0.442831834 |
| 0.405531609 | 0.153266211 | 0.036054604 | 0.425522032 |
| 0.520776449 | 0.395300345 | 0.315351447 | 0.508443583 |
| 0.024044569 | 0.527443355 | 0.27861926  | 0.125494036 |
| 0.45010472  | 0.276568276 | 0.500102813 | 0.067678501 |
| 0.444002123 | 0.500433866 | 0.33057219  | 0.200213209 |
| 0.466578524 | 0.463730385 | 0.026073731 | 0.48624416  |
| 0.483520061 | 0.027575774 | 0.532263484 | 0.130761468 |
| 0.01754201  | 0.507606172 | 0.533199732 | 0.071677635 |
| 0.075689451 | 0.383961287 | 0.041148419 | 0.312163008 |
| 0.53166472  | 0.454738898 | 0.517899568 | 0.243829924 |
| 0.036530842 | 0.00981712  | 0.223932642 | 0.469945779 |
| 0.519671272 | 0.53502932  | 0.268128714 | 0.431808841 |
| 0.245937113 | 0.400913222 | 0.151053917 | 0.537898386 |
| 0.205883291 | 0.511316533 | 0.004665575 | 0.527199357 |
| 0.525866906 | 0.330092384 | 0.083428924 | 0.340080657 |
| 0.469482953 | 0.041309746 | 0.199696082 | 0.510284814 |
| 0.508408552 | 0.378946379 | 0.41926818  | 0.481480276 |
| 0.013057299 | 0.036465439 | 0.449360564 | 0.221399096 |
| 0.448906091 | 0.225089781 | 0.067045315 | 0.361985282 |
| 0.039990001 | 0.500844394 | 0.507948946 | 0.061098281 |
| 0.413489838 | 0.34535342  | 0.418119802 | 0.032001902 |
| 0.533417665 | 0.517133691 | 0.523345622 | 0.157356851 |
| 0.521677694 | 0.534007703 | 0.507692901 | 0.075039966 |
| 0.014837287 | 0.521024106 | 0.461814132 | 0.020952213 |
| 0.51607413  | 0.275787443 | 0.011772235 | 0.511776924 |
| 0.183191223 | 0.465112627 | 0.003620895 | 0.098929359 |
| 0.038296635 | 0.515685486 | 0.493936457 | 0.424048873 |
| 0.304328289 | 0.393702554 | 0.005232399 | 0.53266779  |
| 0.513640841 | 0.012727224 | 0.152799067 | 0.533988306 |
| 0.529205562 | 0.512078732 | 0.394287951 | 0.53793214  |
| 0.520992849 | 0.509927789 | 0.260851852 | 0.288144941 |
| 0.514888765 | 0.518814836 | 0.481467152 | 0.494576501 |
| 0.515563672 | 0.478480062 | 0.296041583 | 0.01295775  |
| 0.161495548 | 0.226051498 | 0.398576153 | 0.092846532 |
| 0.379233522 | 0.151083104 | 0.518352109 | 0.519280098 |
| 0.539852069 | 0.003288329 | 0.149304026 | 0.524548578 |
| 0.489880425 | 0.506936733 | 0.017642443 | 0.006234653 |
| 0.008141987 | 0.021113412 | 0.393694512 | 0.258396993 |
| 0.531414578 | 0.298416627 | 0.00281768  | 0.038278306 |
| 0.300808106 | 0.471021015 | 0.519966221 | 0.409926991 |
| 0.518724894 | 0.075416224 | 0.345246365 | 0.432641584 |
| 0.07250789  | 0.404843496 | 0.539029088 | 0.495794568 |
| 0.036458847 | 0.265760867 | 0.418591316 | 0.518508176 |
| 0.097960096 | 0.341510154 | 0.512484903 | 0.36171901  |
| 0.011130753 | 0.081040497 | 0.066216665 | 0.489912611 |
| 0.517387036 | 0.083330202 | 0.032941943 | 0.169506624 |
| 0.123269799 | 0.522855346 | 0.172334694 | 0.533852798 |
| 0.50224961  | 0.482331742 | 0.075193379 | 0.502046163 |
| 0.039371566 | 0.502278384 | 0.400529131 | 0.067433209 |



|             |             |             |             |
|-------------|-------------|-------------|-------------|
| 0.302946003 | 0.009435635 | 0.512815809 | 0.20490596  |
| 0.363465414 | 0.451022599 | 0.240302544 | 0.014554204 |
| 0.227987883 | 0.0495213   | 0.524189268 | 0.526052046 |
| 0.030709696 | 0.24225914  | 0.318180994 | 0.446304532 |
| 0.315255133 | 0.493538615 | 0.509625798 | 0.500747328 |
| 0.080748554 | 0.164689181 | 0.451414476 | 0.469106029 |
| 0.250329636 | 0.52928643  | 0.35649546  | 0.531805299 |
| 0.480799663 | 0.507874062 | 0.530525456 | 0.388605471 |
| 0.270407335 | 0.46331176  | 0.433916313 | 0.017759981 |
| 0.380960082 | 0.519837965 | 0.390880592 | 0.178562099 |
| 0.285358648 | 0.477614811 | 0.040412349 | 0.20364076  |
| 0.419360582 | 0.355866047 | 0.144789699 | 0.481124256 |
| 0.441537239 | 0.475748942 | 0.032896054 | 0.062502984 |
| 0.523188235 | 0.489374938 | 0.148461702 | 0.492250612 |
| 0.170326781 | 0.387695668 | 0.522808146 | 0.520849753 |
| 0.439291312 | 0.529081215 | 0.488033792 | 0.456870707 |
| 0.47511156  | 0.271339987 | 0.524992689 | 0.086949066 |
| 0.095599439 | 0.497726378 | 0.10100026  | 0.089851614 |
| 0.142426529 | 0.023994554 | 0.388102957 | 0.471151858 |
| 0.473444767 | 0.423093566 | 0.363434816 | 0.078831462 |
| 0.354090596 | 0.426082266 | 0.386586384 | 0.211646414 |
| 0.078278059 | 0.506115664 | 0.007802285 | 0.051227221 |
| 0.471829339 | 0.527466104 | 0.468843229 | 0.254537651 |
| 0.36722154  | 0.145149119 | 0.321082761 | 0.336754953 |
| 0.396319598 | 0.429428498 | 0.526799473 | 0.030277265 |
| 0.01517462  | 0.525855609 | 0.43110361  | 0.017950091 |
| 0.08866865  | 0.453385104 | 0.308935669 | 0.269746763 |
| 0.019745519 | 0.530803073 | 0.403971511 | 0.49224244  |
| 0.375354507 | 0.05866899  | 0.423025063 | 0.088882809 |
| 0.052603032 | 0.483287264 | 0.47146837  | 0.518267703 |
| 0.394451653 | 0.466979411 | 0.458200844 | 0.520889722 |
| 0.1228676   | 0.464628939 | 0.023288743 | 0.500030497 |
| 0.51004722  |             |             |             |

|             |             |             |             |
|-------------|-------------|-------------|-------------|
| ETAA1       | 0.268717089 | 0.376004837 | 0.111636551 |
| 0.248283411 | 0.124191869 | 0.21493822  | 0.078978979 |
| 0.149485187 | 0.022895544 | 0.002554276 | 0.00207083  |
| 0.172847398 | 0.039509764 | 0.102433708 | 0.099632841 |
| 0.220300147 | 0.022246915 | 0.142268786 | 0.084721572 |
| 0.238675903 | 0.065994467 | 0.165649711 | 0.036962603 |
| 0.050418013 | 0.013798423 | 0.013072039 | 0.039541188 |
| 0.316339542 | 0.016325839 | 0.155058442 | 0.296204599 |
| 0.026174165 | 0.307981891 | 0.390783539 | 0.158790706 |
| 0.370102576 | 0.261943547 | 0.011531858 | 0.091392994 |
| 0.361026049 | 0.212055805 | 0.246608392 | 0.127865147 |
| 0.015068845 | 0.422315802 | 0.084963916 | 0.128348538 |
| 0.119903488 | 0.005132663 | 0.155133593 | 0.409650847 |
| 0.351081918 | 0.146626946 | 0.131700439 | 0.056632575 |
| 0.029344793 | 0.142052069 | 0.033017248 | 0.306634794 |
| 0.067669905 | 0.131530719 | 0.341934782 | 0.032594759 |
| 0.047207696 | 0.14280103  | 0.030402253 | 0.122089151 |
| 0.055406305 | 0.336973568 | 0.018999103 | 0.160988592 |
| 0.002855557 | 0.231804845 | 0.124708244 | 0.043458803 |
| 0.009791935 | 0.004299011 | 0.036981642 | 0.152665852 |
| 0.323881101 | 0.367156407 | 0.277310437 | 0.28035422  |

|             |             |             |             |
|-------------|-------------|-------------|-------------|
| 0.035364742 | 0.073432892 | 0.088561622 | 0.040611097 |
| 0.326913695 | 0.05729452  | 0.059372755 | 0.199960374 |
| 0.285407545 | 0.35753001  | 0.038600892 | 0.057928998 |
| 0.264213231 | 0.383756603 | 0.12454795  | 0.097051757 |
| 0.056948756 | 0.009057439 | 0.33345759  | 0.319167987 |
| 0.360903018 | 0.047009462 | 0.027968185 | 0.332511188 |
| 0.017103302 | 0.144823207 | 0.153264739 | 0.051124545 |
| 0.33194368  | 0.008341423 | 0.036291608 | 0.1422627   |
| 0.085429019 | 0.29749913  | 0.337553574 | 0.062982304 |
| 0.115738661 | 0.005741327 | 0.016188759 | 0.010333163 |
| 0.117923011 | 0.017968308 | 0.388932852 | 0.301376849 |
| 0.133973293 | 0.071359708 | 0.101933006 | 0.000446128 |
| 0.004996018 | 0.052819606 | 0.276061682 | 0.145002791 |
| 0.266125982 | 0.28140035  | 0.040834219 | 0.313321529 |
| 0.166682569 | 0.269163611 | 0.04382198  | 0.046299287 |
| 0.161826861 | 0.051209569 | 0.076271736 | 0.166204475 |
| 0.058004596 | 0.076513391 | 0.040761385 | 0.337280771 |
| 0.409721186 | 0.028064038 | 0.161054039 | 0.204391279 |
| 0.075583747 | 0.081936743 | 0.042443301 | 0.079617563 |
| 0.023187627 | 0.330794468 | 0.004525086 | 0.170345907 |
| 0.04336691  | 0.021662128 | 0.01289545  | 0.150738715 |
| 0.105908517 | 0.264933609 | 0.374830187 | 0.038654654 |
| 0.089069117 | 0.144323335 | 0.189404084 | 0.215875339 |
| 0.001322995 | 0.025225464 | 0.172315615 | 0.332061786 |
| 0.269960087 | 0.321081095 | 0.094865525 | 0.068299636 |
| 0.070370171 | 0.272480607 | 0.00227458  | 0.39744318  |
| 0.353110386 | 1           | 0.126649564 | 0.163888958 |
| 0.064817603 | 0.286866251 | 0.040484823 | 0.205681597 |
| 0.309186848 | 0.03112556  | 0.309188513 | 0.02959645  |
| 0.359297717 | 0.008090468 | 0.130054767 | 0.217662774 |
| 0.204620217 | 0.006859891 | 0.132107297 | 0.240599148 |
| 0.004303242 | 0.068450379 | 0.274312406 | 0.204926988 |
| 0.127817266 | 0.246288812 | 0.297366902 | 0.05632165  |
| 0.12163473  | 0.116980426 | 0.005080809 | 0.073949907 |
| 0.259895343 | 0.07413319  | 0.385398445 | 0.100357574 |
| 0.250704625 | 0.359084975 | 0.265096784 | 0.046821551 |
| 0.014515703 | 0.1377673   | 0.019521431 | 0.074777092 |
| 0.286510432 | 0.033236191 | 0.094938326 | 0.052105886 |
| 0.012663873 | 0.342360338 | 0.023802936 | 0.037307986 |
| 0.014675237 | 0.150472497 | 0.100602715 | 0.056817507 |
| 0.031935065 | 0.036649177 | 0.061782277 | 0.078024987 |
| 0.026839605 | 0.020457822 | 0.004025584 | 0.071485998 |
| 0.02369588  | 0.071737159 | 0.080071744 | 0.271774264 |
| 0.109418462 | 0.027551418 | 0.087655096 | 0.052335628 |
| 0.021041023 | 0.003607553 | 0.363704409 | 0.207599583 |
| 0.336846685 | 0.055199086 | 0.011530076 | 0.077678321 |
| 0.301095062 | 0.171960126 | 0.170794479 | 0.333993699 |
| 0.01592091  | 0.295493264 | 0.050003951 | 0.021927622 |
| 0.063118635 | 0.07266255  | 0.30735637  | 0.028696081 |
| 0.216791873 | 0.373812485 | 0.099058705 | 0.031913226 |
| 0.359481561 | 0.214641366 | 0.01613319  | 0.30612656  |
| 0.305182812 | 0.007788952 | 0.34961361  | 0.02179731  |
| 0.004858668 | 0.189507309 | 0.194812358 | 0.016276635 |
| 0.016176243 | 0.079695561 | 0.046639285 | 0.082274266 |

|             |             |             |             |
|-------------|-------------|-------------|-------------|
| 0.347786843 | 0.184786113 | 0.23949624  | 0.038985912 |
| 0.011241732 | 0.001510078 | 0.037863999 | 0.129968972 |
| 0.403230019 | 0.317625568 | 0.080973765 | 0.06646415  |
| 0.087672666 | 0.054433848 | 0.129524059 | 0.319445991 |
| 0.069949179 | 0.39040279  | 0.002585464 | 0.202382314 |
| 0.367206606 | 0.181177234 | 0.011783123 | 0.136701874 |
| 0.345665366 | 0.016820772 | 0.104480179 | 0.371639864 |
| 0.312342406 | 0.06971336  | 0.07020799  | 0.215490932 |
| 0.013329459 | 0.02391645  | 0.117792866 | 0.025010862 |
| 0.084384405 | 0.052247943 | 0.005562751 | 0.14877963  |
| 0.010554204 | 0.350887948 | 0.277348819 | 0.010521321 |
| 0.152841125 | 0.156753899 | 0.131150995 | 0.012165098 |
| 0.23915578  | 0.338697365 | 0.39396763  | 0.090817743 |
| 0.254950975 | 0.299697969 | 0.105345748 | 0.019468777 |
| 0.003000055 | 0.359548153 | 0.286065967 | 0.007486448 |
| 0.300403877 | 0.183395554 | 0.002340393 | 0.387273625 |
| 0.068095516 | 0.397244448 | 0.007731761 | 0.025708855 |
| 0.008388249 | 0.252971457 | 0.368460367 | 0.275267819 |
| 0.107749149 | 0.188014532 | 0.001766688 | 0.338389966 |
| 0.3635585   | 0.002042225 | 0.021785828 | 0.238989323 |
| 0.185170453 | 0.409955431 | 0.046893069 | 0.236506037 |
| 0.137421498 | 0.345348512 | 0.073720567 | 0.068662629 |
| 0.298340063 | 0.306090031 | 0.305672989 | 0.390870376 |
| 0.295269761 | 0.177884507 | 0.104727187 | 0.005667516 |
| 0.020555293 | 0.140953262 | 0.067684504 | 0.011389527 |
| 0.275771842 | 0.023123746 | 0.3607382   | 0.279425232 |
| 0.28374793  | 0.00127053  | 0.09722403  | 0.273603491 |
| 0.362241945 | 0.343911718 | 0.010734565 | 0.003695546 |
| 0.005513201 | 0.001559524 | 0.193371878 | 0.053728789 |
| 0.321684161 | 0.089957161 | 0.001717825 | 0.050041212 |
| 0.096512626 | 0.113835399 | 0.355885066 | 0.200643074 |
| 0.240424921 | 0.022470194 | 0.067702163 | 0.236484128 |
| 0.009026056 | 0.30405663  | 0.29077577  | 0.385563695 |
| 0.012311106 | 0.053050623 | 0.158781469 | 0.327863186 |
| 0.006095374 | 0.091874591 | 0.190006266 | 0.073299373 |
| 0.006763984 | 0.014339757 | 0.010789826 | 0.245147674 |
| 0.351151192 | 0.012007131 | 0.004835619 | 0.10448867  |
| 0.032211769 | 0.297686891 | 0.041040837 | 0.325590483 |
| 0.311687302 | 0.264246363 | 0.011405697 | 0.375064358 |
| 0.006274509 | 0.365751723 | 0.058669943 | 0.042755055 |
| 0.092531927 | 0.005664439 | 0.323300357 | 0.017394592 |
| 0.145602891 | 0.294559064 | 0.033165957 | 0.002591455 |
| 0.027037138 | 0.011087267 | 0.281581186 | 0.245041978 |
| 0.007073562 | 0.095708225 | 0.083549644 | 0.215122172 |
| 0.183424737 | 0.226791463 | 0.395304338 | 0.137586565 |
| 0.03421457  | 0.027852723 | 0.286509624 | 0.2878371   |
| 0.137079224 | 0.288167904 | 0.048458384 | 0.351390251 |
| 0.299112076 | 0.354720082 | 0.309272948 | 0.136699572 |
| 0.033355292 | 0.232181586 | 0.228128983 | 0.012852212 |
| 0.146746386 | 0.261212971 | 0.175757897 | 0.022684476 |
| 0.04498594  | 0.092461038 | 0.028770625 | 0.13820951  |
| 0.057429894 | 0.225978447 | 0.038241093 | 0.270933787 |
| 0.267406698 | 0.299592129 | 0.041045171 | 0.010045011 |
| 0.387822695 | 0.371089853 | 0.092382621 | 0.228628746 |

|             |             |             |             |
|-------------|-------------|-------------|-------------|
| 0.046614432 | 0.088932122 | 0.250433538 | 0.220391419 |
| 0.089824959 | 0.27326293  | 0.319479734 | 0.243715811 |
| 0.377108532 | 0.088948619 | 0.385529974 | 0.138533101 |
| 0.014561022 | 0.197198671 | 0.019171137 | 0.018797726 |
| 0.03831249  | 0.005844808 | 0.043114449 | 0.213882174 |
| 0.065934078 | 0.14668518  | 0.150101875 | 0.023936738 |
| 0.080607356 | 0.142031759 | 0.118682281 | 0.083029399 |
| 0.019382563 | 0.365531577 | 0.002183121 | 0.013610798 |
| 0.070547314 | 0.248936921 | 0.073721764 | 0.057095194 |
| 0.041931058 | 0.027187061 | 0.079782651 | 0.186253938 |
| 0.085587012 | 0.097873007 | 0.258993966 | 0.031014741 |
| 0.014661388 | 0.306939082 | 0.179078292 | 0.006014288 |
| 0.017759296 | 0.239442002 | 0.119902001 | 0.046367067 |
| 0.003321568 | 0.288918666 | 0.104226335 | 0.125850192 |
| 0.170145928 | 0.024729633 | 0.388569047 | 0.051571368 |
| 0.03553047  | 0.399818668 | 0.114017426 | 0.348732792 |
| 0.083536075 | 0.212802619 | 0.413990201 | 0.279975012 |
| 0.06242508  | 0.128726804 | 0.014642327 | 0.318424827 |
| 0.07994362  |             |             |             |

|             |             |             |             |
|-------------|-------------|-------------|-------------|
| ETS2        | 0.282694162 | 0.472033586 | 0.195023217 |
| 0.391609306 | 0.265686133 | 0.207735676 | 0.201220631 |
| 0.121090927 | 0.101393146 | 0.038201483 | 0.081197747 |
| 0.271084539 | 0.25610465  | 0.249235356 | 0.164345981 |
| 0.373595943 | 0.213849513 | 0.164872143 | 0.231276175 |
| 0.315217324 | 0.119829346 | 0.370828827 | 0.136650516 |
| 0.18579171  | 0.162163942 | 0.136174289 | 0.210354901 |
| 0.421595319 | 0.141602831 | 0.184063426 | 0.292838613 |
| 0.120763177 | 0.347010231 | 0.43073966  | 0.366017438 |
| 0.425794179 | 0.245576886 | 0.020011124 | 0.198214848 |
| 0.33051316  | 0.357019165 | 0.324765009 | 0.274312243 |
| 0.099199287 | 0.392672061 | 0.235837331 | 0.240320381 |
| 0.123076319 | 0.103500698 | 0.125664866 | 0.350327815 |
| 0.407996383 | 0.256865873 | 0.15070504  | 0.181245527 |
| 0.23427187  | 0.141137559 | 0.210702551 | 0.202650506 |
| 0.234411471 | 0.104481172 | 0.416420762 | 0.108931254 |
| 0.105697709 | 0.162376496 | 0.168326952 | 0.197907134 |
| 0.195852953 | 0.270760992 | 0.035034145 | 0.213115353 |
| 0.017696051 | 0.293619598 | 0.239126406 | 0.166231417 |
| 0.098266991 | 0.115297416 | 0.187748192 | 0.258993316 |
| 0.431079025 | 0.359722233 | 0.480421136 | 0.46286057  |
| 0.259732952 | 0.21841359  | 0.216278039 | 0.234186838 |
| 0.356154635 | 0.212338937 | 0.119408438 | 0.398043416 |
| 0.482174795 | 0.460511333 | 0.210556033 | 0.215173993 |
| 0.382248649 | 0.418410851 | 0.226588315 | 0.26920771  |
| 0.204453817 | 0.066049302 | 0.376938493 | 0.484217598 |
| 0.309189736 | 0.199271448 | 0.198499007 | 0.350394736 |
| 0.105006183 | 0.176058117 | 0.307924904 | 0.171841585 |
| 0.448274252 | 0.044251619 | 0.213643759 | 0.256975877 |
| 0.152306424 | 0.348697346 | 0.451802656 | 0.206922045 |
| 0.244210773 | 0.07828774  | 0.125443335 | 0.060806235 |
| 0.239822256 | 0.114125865 | 0.376392904 | 0.46204404  |
| 0.175048658 | 0.257059702 | 0.207016352 | 0.013060403 |
| 0.076896797 | 0.132102021 | 0.362204612 | 0.195594825 |
| 0.322062266 | 0.274539367 | 0.242165037 | 0.269676592 |

|             |             |             |             |
|-------------|-------------|-------------|-------------|
| 0.291708474 | 0.469527419 | 0.03621836  | 0.121693763 |
| 0.248740996 | 0.138247235 | 0.237135808 | 0.268890322 |
| 0.27051655  | 0.124316933 | 0.184726002 | 0.486133849 |
| 0.351028183 | 0.150077641 | 0.150685616 | 0.368321943 |
| 0.239602884 | 0.266518986 | 0.150882303 | 0.288248457 |
| 0.10752624  | 0.396490233 | 0.06816985  | 0.168287453 |
| 0.155707061 | 0.204927192 | 0.015755386 | 0.166103406 |
| 0.227205867 | 0.407691646 | 0.353832598 | 0.140541646 |
| 0.289427656 | 0.32068766  | 0.156006559 | 0.35983391  |
| 0.053256536 | 0.076369624 | 0.113783548 | 0.488652656 |
| 0.169470069 | 0.45027447  | 0.236912699 | 0.20702438  |
| 0.249027329 | 0.400283243 | 0.002272957 | 0.408348846 |
| 0.454924753 | 0.126649564 | 1           | 0.252979103 |
| 0.197917966 | 0.440391069 | 0.020018546 | 0.367183923 |
| 0.215219811 | 0.11139378  | 0.489704866 | 0.220856516 |
| 0.381856082 | 0.105622201 | 0.203885148 | 0.365959886 |
| 0.339026272 | 0.020702489 | 0.141142558 | 0.303454582 |
| 0.052708649 | 0.0995618   | 0.303215262 | 0.319906269 |
| 0.248630962 | 0.366931726 | 0.47796788  | 0.193056037 |
| 0.277350836 | 0.188898036 | 0.029252584 | 0.233486444 |
| 0.335292846 | 0.183845682 | 0.37440518  | 0.2006738   |
| 0.152479228 | 0.423364472 | 0.320778446 | 0.114338586 |
| 0.097520635 | 0.201134693 | 0.054692337 | 0.246488649 |
| 0.285112983 | 0.210983155 | 0.188254212 | 0.122612736 |
| 0.131062001 | 0.492182584 | 0.144610199 | 0.155120383 |
| 0.099369031 | 0.277607634 | 0.203028603 | 0.279712533 |
| 0.297393162 | 0.183994735 | 0.216859342 | 0.228561945 |
| 0.079142959 | 0.185795676 | 0.017439625 | 0.243143886 |
| 0.282264082 | 0.290715882 | 0.266787261 | 0.277209706 |
| 0.249731702 | 0.245354532 | 0.301152993 | 0.164479954 |
| 0.144721308 | 0.051700196 | 0.456122189 | 0.316417897 |
| 0.224675238 | 0.167304957 | 0.083648849 | 0.225751469 |
| 0.465531575 | 0.15989567  | 0.10431458  | 0.434243147 |
| 0.042145592 | 0.448852727 | 0.292930843 | 0.190945337 |
| 0.291521675 | 0.278438281 | 0.441115927 | 0.053368565 |
| 0.190803486 | 0.421771098 | 0.215319807 | 0.21343148  |
| 0.349206195 | 0.29586702  | 0.080892084 | 0.28870983  |
| 0.29534651  | 0.095331563 | 0.477830665 | 0.177526915 |
| 0.056920855 | 0.337529516 | 0.352838846 | 0.124431176 |
| 0.119886235 | 0.273716735 | 0.065701462 | 0.256376773 |
| 0.485919713 | 0.399754627 | 0.364017081 | 0.152010405 |
| 0.114054353 | 0.089457404 | 0.180203539 | 0.195055302 |
| 0.419972156 | 0.463835001 | 0.231527587 | 0.299330015 |
| 0.231423451 | 0.218873092 | 0.076903177 | 0.485152574 |
| 0.098334725 | 0.433149008 | 0.025521517 | 0.35882216  |
| 0.419626925 | 0.152760702 | 0.14809624  | 0.210240645 |
| 0.332375383 | 0.089304141 | 0.154189677 | 0.435910675 |
| 0.372758102 | 0.22056162  | 0.219202581 | 0.293640506 |
| 0.047511711 | 0.079209436 | 0.22727204  | 0.126605655 |
| 0.234229187 | 0.196162073 | 0.045553766 | 0.169798092 |
| 0.129734605 | 0.413652621 | 0.420464731 | 0.10030339  |
| 0.198499592 | 0.143489064 | 0.28820324  | 0.084818967 |
| 0.39994574  | 0.417930098 | 0.445475245 | 0.146272646 |
| 0.351099971 | 0.447501176 | 0.234750954 | 0.109510948 |

|             |             |             |             |
|-------------|-------------|-------------|-------------|
| 0.04946028  | 0.435621991 | 0.251758448 | 0.073963866 |
| 0.460870575 | 0.114041176 | 0.096267542 | 0.444804489 |
| 0.188718089 | 0.338910376 | 0.00643502  | 0.031856339 |
| 0.055029037 | 0.422894659 | 0.398728347 | 0.27042871  |
| 0.139058405 | 0.228363774 | 0.004712253 | 0.465453226 |
| 0.448492707 | 0.04625918  | 0.147689389 | 0.369655102 |
| 0.342240899 | 0.459902279 | 0.205719626 | 0.419277523 |
| 0.28268894  | 0.427279874 | 0.245271586 | 0.247519951 |
| 0.409944444 | 0.418302024 | 0.326041813 | 0.386373752 |
| 0.456533731 | 0.334938926 | 0.249580619 | 0.053212793 |
| 0.089421054 | 0.137030925 | 0.177787652 | 0.117559999 |
| 0.167499413 | 0.181353681 | 0.418534487 | 0.446797691 |
| 0.458945689 | 0.02192742  | 0.140137277 | 0.351373095 |
| 0.408284971 | 0.444151219 | 0.021494613 | 0.00638291  |
| 0.006196605 | 0.064227237 | 0.215196983 | 0.201139505 |
| 0.438781633 | 0.16322539  | 0.025608896 | 0.067854865 |
| 0.21488509  | 0.279980969 | 0.451937798 | 0.340076087 |
| 0.345324097 | 0.12646316  | 0.23584347  | 0.335681586 |
| 0.115886902 | 0.178601826 | 0.47316076  | 0.416420455 |
| 0.059308192 | 0.194800089 | 0.183427714 | 0.474455144 |
| 0.053916844 | 0.260847125 | 0.294793305 | 0.276522939 |
| 0.017383251 | 0.121493252 | 0.102297388 | 0.381335312 |
| 0.412499819 | 0.211152678 | 0.135819748 | 0.084093575 |
| 0.207242808 | 0.419671727 | 0.245343814 | 0.492881446 |
| 0.403450059 | 0.442358636 | 0.10354594  | 0.408504444 |
| 0.092096174 | 0.42179119  | 0.250450539 | 0.048759042 |
| 0.191002064 | 0.032456175 | 0.397186415 | 0.139830276 |
| 0.198753365 | 0.25917047  | 0.119024093 | 0.039987079 |
| 0.100624742 | 0.11477381  | 0.477136665 | 0.427763471 |
| 0.049092872 | 0.175881443 | 0.225710657 | 0.269106282 |
| 0.177619919 | 0.413573701 | 0.423671868 | 0.197072643 |
| 0.130514411 | 0.087715305 | 0.324205946 | 0.249190222 |
| 0.170735773 | 0.478367606 | 0.244957695 | 0.468881753 |
| 0.276689924 | 0.383294259 | 0.42327019  | 0.233765347 |
| 0.207439498 | 0.207047795 | 0.299906923 | 0.075791849 |
| 0.244616566 | 0.462413807 | 0.183986625 | 0.200624765 |
| 0.274699083 | 0.201045553 | 0.051882462 | 0.077242313 |
| 0.178249736 | 0.179729951 | 0.215550061 | 0.418107297 |
| 0.225891304 | 0.264275027 | 0.050491804 | 0.103447686 |
| 0.478982249 | 0.35240564  | 0.118318395 | 0.321993015 |
| 0.174804476 | 0.257568481 | 0.370433274 | 0.377263951 |
| 0.171534131 | 0.419712472 | 0.361910299 | 0.318165366 |
| 0.379156116 | 0.21673006  | 0.448912001 | 0.058368124 |
| 0.100451917 | 0.232255691 | 0.206890541 | 0.128879133 |
| 0.208588174 | 0.057436276 | 0.163578554 | 0.357516383 |
| 0.197220779 | 0.333713598 | 0.1518861   | 0.106156273 |
| 0.239989579 | 0.151815581 | 0.262498812 | 0.203915105 |
| 0.173312124 | 0.435367724 | 0.028475952 | 0.106509914 |
| 0.223836742 | 0.361641181 | 0.256928584 | 0.220859077 |
| 0.196854792 | 0.126019307 | 0.27711856  | 0.161504081 |
| 0.23532765  | 0.181888598 | 0.365466576 | 0.048512297 |
| 0.057536444 | 0.481514408 | 0.176514492 | 0.031308528 |
| 0.074558231 | 0.192539193 | 0.17575375  | 0.216572296 |
| 0.045280869 | 0.430849123 | 0.186290323 | 0.24139244  |

|             |             |             |             |
|-------------|-------------|-------------|-------------|
| 0.217312299 | 0.103271817 | 0.265385536 | 0.070458268 |
| 0.063511816 | 0.373509223 | 0.209246076 | 0.442684953 |
| 0.194761661 | 0.419607126 | 0.339680788 | 0.372346062 |
| 0.083070325 | 0.160382544 | 0.065530366 | 0.389043461 |
| 0.211551916 |             |             |             |
| EVL         | 0.381322483 | 0.474492796 | 0.294809455 |
| 0.351432775 | 0.309459792 | 0.190774256 | 0.154465365 |
| 0.143734639 | 0.079369599 | 0.004464694 | 0.024144171 |
| 0.323011536 | 0.149758101 | 0.166938463 | 0.174421653 |
| 0.408625009 | 0.166235199 | 0.298125486 | 0.216185501 |
| 0.341509284 | 0.067041314 | 0.354752211 | 0.102778762 |
| 0.304764306 | 0.127637625 | 0.084298755 | 0.225660272 |
| 0.431597244 | 0.098395249 | 0.152832255 | 0.295626668 |
| 0.193769196 | 0.407868449 | 0.455138693 | 0.339597292 |
| 0.45003833  | 0.332319291 | 0.045265161 | 0.148539219 |
| 0.398939992 | 0.369969173 | 0.336894796 | 0.24322777  |
| 0.049610319 | 0.407646706 | 0.181298277 | 0.330933557 |
| 0.150133746 | 0.045821118 | 0.122888717 | 0.377248721 |
| 0.387104615 | 0.235610573 | 0.1577506   | 0.12071982  |
| 0.113750263 | 0.127623347 | 0.186246515 | 0.204865625 |
| 0.182177672 | 0.079263229 | 0.413949386 | 0.067377262 |
| 0.104196018 | 0.204774354 | 0.238805523 | 0.190741472 |
| 0.286632893 | 0.299779727 | 0.039439999 | 0.292745954 |
| 0.001770699 | 0.325213698 | 0.345035086 | 0.205129867 |
| 0.078791624 | 0.024461363 | 0.255110912 | 0.216427535 |
| 0.456592171 | 0.441335971 | 0.486698449 | 0.482517415 |
| 0.18393662  | 0.319759431 | 0.307785606 | 0.164751264 |
| 0.407938713 | 0.126264646 | 0.12529867  | 0.419413585 |
| 0.490010312 | 0.46581543  | 0.224232793 | 0.289250369 |
| 0.326304169 | 0.434011175 | 0.242859878 | 0.27110309  |
| 0.192224579 | 0.128010979 | 0.36904989  | 0.490776432 |
| 0.346799684 | 0.27901303  | 0.18620423  | 0.352768005 |
| 0.104105711 | 0.225478897 | 0.270160428 | 0.205895262 |
| 0.466704817 | 0.023982722 | 0.252476747 | 0.221561906 |
| 0.274319335 | 0.386932731 | 0.468715446 | 0.166651074 |
| 0.341643912 | 0.038568713 | 0.117831303 | 0.090428815 |
| 0.236234703 | 0.186478285 | 0.39089506  | 0.416757501 |
| 0.173102793 | 0.274342346 | 0.211574646 | 0.012823989 |
| 0.063865345 | 0.282240303 | 0.395390084 | 0.313748734 |
| 0.385553083 | 0.362828321 | 0.168218439 | 0.302264419 |
| 0.311648345 | 0.483315092 | 0.021225549 | 0.110534812 |
| 0.265675753 | 0.28627447  | 0.23481509  | 0.272880381 |
| 0.256535869 | 0.119804662 | 0.145833994 | 0.497947896 |
| 0.364477154 | 0.102069096 | 0.239686366 | 0.394454514 |
| 0.178453259 | 0.308648095 | 0.137785864 | 0.210852788 |
| 0.053600995 | 0.423999747 | 0.076092616 | 0.243478578 |
| 0.152183326 | 0.18647401  | 0.040099154 | 0.172089944 |
| 0.169382324 | 0.350999831 | 0.39484858  | 0.153537227 |
| 0.235016654 | 0.32096346  | 0.195563333 | 0.288242812 |
| 0.008532118 | 0.092963432 | 0.165373113 | 0.474199097 |
| 0.151925992 | 0.509538875 | 0.273607185 | 0.309445358 |
| 0.28001868  | 0.433562586 | 0.010492539 | 0.420555729 |
| 0.471490291 | 0.163888958 | 0.252979103 | 1           |
| 0.230354562 | 0.407036439 | 0.047443448 | 0.384841662 |

|             |             |             |             |
|-------------|-------------|-------------|-------------|
| 0.267648236 | 0.124315848 | 0.508442862 | 0.175730276 |
| 0.42063459  | 0.061778338 | 0.198828609 | 0.406372022 |
| 0.339797743 | 0.017925664 | 0.114322219 | 0.291584238 |
| 0.07943667  | 0.062739213 | 0.374559687 | 0.30758144  |
| 0.2330054   | 0.435934979 | 0.495425496 | 0.215281722 |
| 0.292957818 | 0.213688453 | 0.041446128 | 0.321425719 |
| 0.421253489 | 0.226257851 | 0.372658987 | 0.190334835 |
| 0.187090414 | 0.416841685 | 0.363759643 | 0.093977244 |
| 0.054822547 | 0.208688397 | 0.022944335 | 0.248846807 |
| 0.357641557 | 0.085841276 | 0.230380149 | 0.265167082 |
| 0.122073607 | 0.48785599  | 0.226285228 | 0.248893416 |
| 0.168714933 | 0.216427243 | 0.232897139 | 0.125159994 |
| 0.134174492 | 0.181752993 | 0.252513471 | 0.23786854  |
| 0.035411584 | 0.114007941 | 0.066227335 | 0.214231095 |
| 0.088263773 | 0.185123408 | 0.169160975 | 0.299945738 |
| 0.226562521 | 0.097191005 | 0.270498675 | 0.279251886 |
| 0.15948314  | 0.039539792 | 0.463798848 | 0.360680963 |
| 0.239125204 | 0.152665169 | 0.09136733  | 0.172407527 |
| 0.423998141 | 0.134124979 | 0.147369221 | 0.393528358 |
| 0.062713918 | 0.494333852 | 0.164671111 | 0.14758884  |
| 0.263536517 | 0.213690426 | 0.451137737 | 0.039583335 |
| 0.25712005  | 0.402947304 | 0.320767518 | 0.17378686  |
| 0.322776785 | 0.305867449 | 0.039569304 | 0.33146534  |
| 0.319300336 | 0.057904354 | 0.490433774 | 0.187648096 |
| 0.05664697  | 0.392672052 | 0.331291761 | 0.120254459 |
| 0.126432949 | 0.188509099 | 0.038721178 | 0.275238987 |
| 0.474567075 | 0.38038726  | 0.323295707 | 0.281271763 |
| 0.04907644  | 0.012403528 | 0.283969939 | 0.311125932 |
| 0.435937159 | 0.484831713 | 0.281254219 | 0.253385561 |
| 0.223748182 | 0.21905895  | 0.085926347 | 0.475984541 |
| 0.297559274 | 0.476646515 | 0.024341425 | 0.398808396 |
| 0.433683771 | 0.158157371 | 0.103858579 | 0.180235136 |
| 0.312439141 | 0.062835479 | 0.239050428 | 0.432128775 |
| 0.390648242 | 0.239357511 | 0.212967743 | 0.372945272 |
| 0.018980011 | 0.046485963 | 0.287968865 | 0.224404557 |
| 0.22241368  | 0.211665791 | 0.095582838 | 0.220670192 |
| 0.047984928 | 0.382144943 | 0.470292849 | 0.067495673 |
| 0.145886727 | 0.205552678 | 0.337238494 | 0.061407579 |
| 0.42766762  | 0.474082061 | 0.454761557 | 0.184891926 |
| 0.40062958  | 0.437435708 | 0.244662251 | 0.151325373 |
| 0.050480961 | 0.462367708 | 0.303088126 | 0.022899067 |
| 0.474770224 | 0.112446343 | 0.012294479 | 0.44851236  |
| 0.185304179 | 0.370141428 | 0.00292887  | 0.136029394 |
| 0.115674782 | 0.483119822 | 0.399919098 | 0.292115232 |
| 0.095625074 | 0.305507221 | 0.031524903 | 0.510079254 |
| 0.424032255 | 0.040500276 | 0.21427844  | 0.365851537 |
| 0.350174992 | 0.48194331  | 0.246823392 | 0.413365587 |
| 0.279401026 | 0.427875462 | 0.158063534 | 0.252591846 |
| 0.376205156 | 0.449320472 | 0.358228297 | 0.413051321 |
| 0.43641159  | 0.389508192 | 0.223706885 | 0.021363983 |
| 0.126521048 | 0.13062306  | 0.131288449 | 0.057481429 |
| 0.187336603 | 0.147933374 | 0.461798487 | 0.475368848 |
| 0.460390816 | 0.020646091 | 0.115768632 | 0.368895317 |
| 0.402483652 | 0.464554999 | 0.070769521 | 0.011927208 |



|             |             |             |             |
|-------------|-------------|-------------|-------------|
| 0.01857674  | 0.028862479 | 0.242296332 | 0.287280776 |
| 0.458177311 | 0.091080606 | 0.014516114 | 0.046314235 |
| 0.219798108 | 0.30690603  | 0.443468834 | 0.349247737 |
| 0.426706146 | 0.133928798 | 0.128907274 | 0.372681336 |
| 0.094849395 | 0.236501565 | 0.459322035 | 0.402038993 |
| 0.11341337  | 0.279167232 | 0.293304926 | 0.466361731 |
| 0.092606849 | 0.309103766 | 0.344556183 | 0.200068967 |
| 0.062281701 | 0.13364972  | 0.096306691 | 0.450590731 |
| 0.429112411 | 0.072210819 | 0.042470239 | 0.081294671 |
| 0.092463136 | 0.470525498 | 0.147041113 | 0.507612246 |
| 0.393479784 | 0.440156954 | 0.149650172 | 0.417309478 |
| 0.0498046   | 0.418352919 | 0.284166391 | 0.032852189 |
| 0.335908447 | 0.042594442 | 0.445229739 | 0.082823611 |
| 0.196534781 | 0.320013176 | 0.162881456 | 0.057385261 |
| 0.204017114 | 0.097302904 | 0.461445555 | 0.467638222 |
| 0.105620583 | 0.209250867 | 0.309844237 | 0.349789119 |
| 0.167941892 | 0.363531006 | 0.429598284 | 0.194823102 |
| 0.074099096 | 0.230283832 | 0.350982296 | 0.293986061 |
| 0.17377237  | 0.50381322  | 0.191402852 | 0.506096164 |
| 0.336757038 | 0.44742094  | 0.439903336 | 0.230027179 |
| 0.249115771 | 0.237074034 | 0.229873888 | 0.017613016 |
| 0.286239568 | 0.431085036 | 0.272346491 | 0.14275728  |
| 0.214425314 | 0.279286507 | 0.087724548 | 0.176466008 |
| 0.253660944 | 0.151500945 | 0.131742808 | 0.459663236 |
| 0.292160947 | 0.307346355 | 0.071123945 | 0.084302708 |
| 0.49803925  | 0.396750862 | 0.106793788 | 0.299983296 |
| 0.235888842 | 0.255272479 | 0.432496859 | 0.438505998 |
| 0.258652589 | 0.389730275 | 0.379384102 | 0.248192955 |
| 0.352759856 | 0.218726855 | 0.458118398 | 0.071592398 |
| 0.114240094 | 0.303642257 | 0.080952325 | 0.159225368 |
| 0.154012598 | 0.063627858 | 0.222132987 | 0.411614192 |
| 0.256259071 | 0.285613174 | 0.209885199 | 0.115606782 |
| 0.32647287  | 0.27498983  | 0.304565179 | 0.130336398 |
| 0.077058189 | 0.419017258 | 0.022101594 | 0.110698581 |
| 0.282809748 | 0.375361224 | 0.257310984 | 0.263811156 |
| 0.247174724 | 0.241544055 | 0.257799716 | 0.16196125  |
| 0.139053692 | 0.270874073 | 0.36764478  | 0.04726697  |
| 0.029241837 | 0.504453818 | 0.240985969 | 0.078522265 |
| 0.144415873 | 0.258653113 | 0.323348203 | 0.157227158 |
| 0.068659317 | 0.438028361 | 0.149538535 | 0.305248203 |
| 0.233015573 | 0.118894207 | 0.304262799 | 0.108918495 |
| 0.10975449  | 0.398554782 | 0.304878727 | 0.459822779 |
| 0.34480052  | 0.386043794 | 0.374660384 | 0.380499966 |
| 0.194103191 | 0.271129126 | 0.03778443  | 0.433177395 |
| 0.219088036 |             |             |             |

|             |             |             |             |
|-------------|-------------|-------------|-------------|
| EXOSC2      | 0.285390108 | 0.443767584 | 0.197456077 |
| 0.300917661 | 0.206182605 | 0.175893551 | 0.077460994 |
| 0.042749021 | 0.090076625 | 0.00209331  | 0.037915546 |
| 0.238618201 | 0.089898378 | 0.069015323 | 0.149516752 |
| 0.328413446 | 0.068670569 | 0.106099729 | 0.096661076 |
| 0.2442676   | 0.026273297 | 0.283537309 | 0.043558863 |
| 0.175568773 | 0.089477735 | 0.056110294 | 0.203775877 |
| 0.328790776 | 0.059194756 | 0.104568253 | 0.20836706  |
| 0.050842815 | 0.297043918 | 0.439489225 | 0.294437757 |

|             |             |             |             |
|-------------|-------------|-------------|-------------|
| 0.430390039 | 0.269231839 | 0.00183163  | 0.110145537 |
| 0.300650756 | 0.372423377 | 0.254214934 | 0.163114774 |
| 0.024338551 | 0.370607383 | 0.110553072 | 0.242765466 |
| 0.066684408 | 0.028543349 | 0.056008282 | 0.338876637 |
| 0.391980339 | 0.26155374  | 0.066710616 | 0.068438284 |
| 0.102498953 | 0.047213334 | 0.15143391  | 0.140156989 |
| 0.0881346   | 0.031650187 | 0.412713628 | 0.060302927 |
| 0.067934364 | 0.067236281 | 0.07493379  | 0.071803286 |
| 0.2007113   | 0.234191612 | 0.006479178 | 0.23475356  |
| 2.45E-05    | 0.227150831 | 0.206506204 | 0.232587069 |
| 0.028322061 | 0.010408528 | 0.08403693  | 0.167652875 |
| 0.354624199 | 0.371344545 | 0.431879235 | 0.455668589 |
| 0.07267247  | 0.123732434 | 0.216858552 | 0.076009187 |
| 0.346500176 | 0.06967464  | 0.039090626 | 0.33675872  |
| 0.443801418 | 0.448448118 | 0.127331875 | 0.154731827 |
| 0.339836042 | 0.378654719 | 0.167916548 | 0.177022631 |
| 0.209783585 | 0.0480072   | 0.367920349 | 0.444491059 |
| 0.267486728 | 0.173522414 | 0.089216697 | 0.253583052 |
| 0.034293402 | 0.097795514 | 0.206136429 | 0.044016256 |
| 0.371740854 | 0.017473882 | 0.120439686 | 0.148964878 |
| 0.080503389 | 0.307699877 | 0.461145825 | 0.077121432 |
| 0.168652218 | 0.009109052 | 0.15633219  | 0.021382359 |
| 0.096808589 | 0.106341639 | 0.391430444 | 0.360309828 |
| 0.052992273 | 0.164820502 | 0.094115523 | 0.002620061 |
| 0.01998728  | 0.086602811 | 0.309794995 | 0.107338932 |
| 0.294289676 | 0.32632209  | 0.144909374 | 0.240636749 |
| 0.307871339 | 0.430272973 | 0.01564438  | 0.042534918 |
| 0.189394728 | 0.088257299 | 0.123762754 | 0.224074649 |
| 0.160977088 | 0.037471551 | 0.051740737 | 0.458999159 |
| 0.31234629  | 0.039501684 | 0.081443501 | 0.294518839 |
| 0.13630399  | 0.205942419 | 0.043119563 | 0.083466916 |
| 0.020466562 | 0.4315168   | 0.023687682 | 0.085639119 |
| 0.225800373 | 0.072365525 | 0.004176701 | 0.064253989 |
| 0.086534192 | 0.36324248  | 0.383951365 | 0.047280023 |
| 0.098044976 | 0.27645654  | 0.085750383 | 0.281453766 |
| 0.015921585 | 0.02100077  | 0.060834677 | 0.423303901 |
| 0.111705821 | 0.434237587 | 0.102952079 | 0.156987609 |
| 0.154861121 | 0.362581631 | 0.002502959 | 0.403193828 |
| 0.465127491 | 0.064817603 | 0.197917966 | 0.230354562 |
| 1           | 0.360822363 | 0.009840341 | 0.266753323 |
| 0.175548534 | 0.038643958 | 0.443507639 | 0.088102804 |
| 0.366681188 | 0.033866299 | 0.084766203 | 0.417902912 |
| 0.312693905 | 0.005142356 | 0.056754195 | 0.230927739 |
| 0.025792956 | 0.030733118 | 0.28142208  | 0.255530799 |
| 0.242264929 | 0.357995832 | 0.408131547 | 0.226223576 |
| 0.198922352 | 0.068856456 | 0.009323405 | 0.169689945 |
| 0.338245906 | 0.164222669 | 0.343264507 | 0.08589869  |
| 0.120883471 | 0.391952524 | 0.330380349 | 0.119877017 |
| 0.027814516 | 0.095012366 | 0.006492902 | 0.190645579 |
| 0.346684229 | 0.044953728 | 0.231226687 | 0.055219362 |
| 0.047165011 | 0.461924083 | 0.131728489 | 0.164291329 |
| 0.113259333 | 0.172773984 | 0.087522614 | 0.073658276 |
| 0.088296516 | 0.108118212 | 0.221795601 | 0.190220376 |
| 0.013659016 | 0.046157936 | 0.014135504 | 0.115576597 |

|             |             |             |             |
|-------------|-------------|-------------|-------------|
| 0.047543519 | 0.101889579 | 0.092345925 | 0.234104722 |
| 0.085143683 | 0.035436509 | 0.159602737 | 0.18626482  |
| 0.084970882 | 0.012068612 | 0.429460595 | 0.256577896 |
| 0.177561547 | 0.077962672 | 0.024195549 | 0.097504457 |
| 0.379359541 | 0.119227611 | 0.062971865 | 0.361859786 |
| 0.012622504 | 0.42942675  | 0.097107562 | 0.075597807 |
| 0.145758886 | 0.102802567 | 0.383690724 | 0.0411953   |
| 0.160067221 | 0.364218964 | 0.147006191 | 0.126736113 |
| 0.273361719 | 0.238181215 | 0.015117179 | 0.263064677 |
| 0.235228588 | 0.019452757 | 0.450829772 | 0.06684647  |
| 0.016347668 | 0.318846233 | 0.359207618 | 0.052222684 |
| 0.05704874  | 0.13323624  | 0.014439686 | 0.186855693 |
| 0.449118113 | 0.310301094 | 0.333682887 | 0.142594493 |
| 0.023969377 | 0.004023663 | 0.116106253 | 0.196973666 |
| 0.405575666 | 0.451033299 | 0.110163448 | 0.164268411 |
| 0.115499708 | 0.228071911 | 0.031072189 | 0.445454551 |
| 0.082245174 | 0.427929912 | 0.005400507 | 0.3965988   |
| 0.434383752 | 0.069291084 | 0.067737983 | 0.119208868 |
| 0.255972483 | 0.031735085 | 0.064382423 | 0.405782123 |
| 0.376502392 | 0.199419553 | 0.19872727  | 0.242087238 |
| 0.007051613 | 0.017972649 | 0.261944726 | 0.150180869 |
| 0.168193577 | 0.132186527 | 0.055138509 | 0.098156336 |
| 0.02460608  | 0.361196041 | 0.34639309  | 0.074965073 |
| 0.152865504 | 0.090523379 | 0.241518925 | 0.024087329 |
| 0.440546541 | 0.437444193 | 0.428752531 | 0.051284461 |
| 0.308684244 | 0.445665703 | 0.267256782 | 0.049358959 |
| 0.016972804 | 0.446135934 | 0.22764537  | 0.011264423 |
| 0.385272348 | 0.053551817 | 0.006665555 | 0.400811618 |
| 0.074505457 | 0.333973563 | 0.002492375 | 0.046732041 |
| 0.035064329 | 0.393434196 | 0.411171305 | 0.204930797 |
| 0.062827221 | 0.177938683 | 0.006472285 | 0.458521008 |
| 0.397614715 | 0.017352532 | 0.105266053 | 0.338118534 |
| 0.34987132  | 0.427728638 | 0.207943138 | 0.417084136 |
| 0.254623366 | 0.43129965  | 0.079626546 | 0.164753861 |
| 0.342634556 | 0.452494761 | 0.271381762 | 0.365502553 |
| 0.353656964 | 0.297867232 | 0.151345939 | 0.012547973 |
| 0.206447363 | 0.052838415 | 0.136120545 | 0.092975198 |
| 0.132514341 | 0.105111206 | 0.387282259 | 0.394468448 |
| 0.42226841  | 0.0050664   | 0.042314184 | 0.322486769 |
| 0.321403204 | 0.382743297 | 0.013971653 | 0.006541345 |
| 0.004410299 | 0.03220256  | 0.15362875  | 0.128737678 |
| 0.437234222 | 0.057686784 | 0.003606708 | 0.01207734  |
| 0.098446462 | 0.295473076 | 0.423518331 | 0.249423246 |
| 0.358395798 | 0.043343218 | 0.098331564 | 0.258713769 |
| 0.082131694 | 0.166022085 | 0.429893156 | 0.380844461 |
| 0.02693665  | 0.145102945 | 0.100944154 | 0.409347499 |
| 0.084753723 | 0.168631351 | 0.245313872 | 0.127600547 |
| 0.00793179  | 0.06433594  | 0.076605321 | 0.34386555  |
| 0.426033264 | 0.039304331 | 0.021582881 | 0.029884737 |
| 0.051249694 | 0.388809638 | 0.066624104 | 0.449998399 |
| 0.325600936 | 0.340290286 | 0.057850548 | 0.413925437 |
| 0.04902474  | 0.392691023 | 0.183472343 | 0.018723122 |
| 0.102048825 | 0.008146563 | 0.38824209  | 0.175754722 |
| 0.076902438 | 0.209757253 | 0.239488164 | 0.01763904  |

|             |             |             |             |
|-------------|-------------|-------------|-------------|
| 0.161015056 | 0.033446164 | 0.420991226 | 0.416475845 |
| 0.027588155 | 0.094866665 | 0.135457303 | 0.224341335 |
| 0.085930537 | 0.314967818 | 0.410496437 | 0.162259696 |
| 0.039946873 | 0.073930696 | 0.238454591 | 0.198602187 |
| 0.056022902 | 0.433953839 | 0.18861304  | 0.460416107 |
| 0.259475519 | 0.383637204 | 0.404993466 | 0.185568264 |
| 0.133458973 | 0.172047107 | 0.209227142 | 0.006950166 |
| 0.156723363 | 0.372468775 | 0.11643939  | 0.122006129 |
| 0.133517618 | 0.235632523 | 0.02282552  | 0.036400299 |
| 0.184060133 | 0.119442372 | 0.057150939 | 0.351053214 |
| 0.178229073 | 0.218785377 | 0.010444197 | 0.073034657 |
| 0.456014697 | 0.359797894 | 0.053500603 | 0.267655861 |
| 0.080645582 | 0.219083992 | 0.352308063 | 0.365152994 |
| 0.177527504 | 0.350033261 | 0.277603376 | 0.209365421 |
| 0.315900652 | 0.114943992 | 0.444543301 | 0.01504751  |
| 0.104681255 | 0.215673184 | 0.051122271 | 0.06013158  |
| 0.063152112 | 0.026442626 | 0.185346225 | 0.293445604 |
| 0.161013157 | 0.217777468 | 0.07895031  | 0.047953602 |
| 0.166978961 | 0.112903677 | 0.189622803 | 0.062060722 |
| 0.040093149 | 0.419575965 | 0.00830619  | 0.032228795 |
| 0.142356836 | 0.376662528 | 0.21805143  | 0.114308344 |
| 0.200322419 | 0.086908019 | 0.138128095 | 0.074843525 |
| 0.087456119 | 0.125458111 | 0.370727028 | 0.014990694 |
| 0.007134002 | 0.418362055 | 0.108460899 | 0.016813286 |
| 0.07291151  | 0.201202916 | 0.085561251 | 0.160261562 |
| 0.022574599 | 0.43706293  | 0.11041302  | 0.232575745 |
| 0.138780667 | 0.031666066 | 0.235072179 | 0.035844438 |
| 0.029278545 | 0.332431586 | 0.238229735 | 0.44293213  |
| 0.147559987 | 0.318134665 | 0.341624683 | 0.314753156 |
| 0.044056351 | 0.181603021 | 0.016594115 | 0.334009551 |
| 0.16161006  |             |             |             |
| EXT1        | 0.374286537 | 0.520994639 | 0.376149866 |
| 0.450505449 | 0.435084661 | 0.382889033 | 0.30886466  |
| 0.245196627 | 0.156031456 | 0.021025302 | 0.052957553 |
| 0.409660373 | 0.271242933 | 0.346725342 | 0.356539739 |
| 0.440584738 | 0.19606193  | 0.347670714 | 0.334730137 |
| 0.432297724 | 0.170290128 | 0.440111104 | 0.175634542 |
| 0.29822929  | 0.159928591 | 0.134666973 | 0.313015181 |
| 0.443985689 | 0.149746613 | 0.346367767 | 0.402531356 |
| 0.142477576 | 0.403836893 | 0.501223814 | 0.437410327 |
| 0.486465112 | 0.347580127 | 0.017142321 | 0.354379607 |
| 0.392100261 | 0.434019073 | 0.431328821 | 0.411185878 |
| 0.101776714 | 0.469339857 | 0.346553062 | 0.40039779  |
| 0.274464428 | 0.072612125 | 0.276019676 | 0.430217831 |
| 0.462731867 | 0.419085007 | 0.297432717 | 0.259286989 |
| 0.246898795 | 0.260567024 | 0.271558344 | 0.326540363 |
| 0.323469264 | 0.207141728 | 0.469778712 | 0.170035719 |
| 0.183588054 | 0.308615923 | 0.192546628 | 0.337234442 |
| 0.327493955 | 0.368549814 | 0.043041139 | 0.347429686 |
| 0.010189016 | 0.423678385 | 0.389707466 | 0.298258684 |
| 0.086482089 | 0.058147157 | 0.224986085 | 0.410420116 |
| 0.451987179 | 0.429818755 | 0.477563329 | 0.476426082 |
| 0.24858381  | 0.338909272 | 0.36311756  | 0.267003757 |
| 0.408471184 | 0.281275035 | 0.173110723 | 0.44162524  |

|             |             |             |             |
|-------------|-------------|-------------|-------------|
| 0.486021034 | 0.507636873 | 0.266702726 | 0.31351869  |
| 0.415135461 | 0.474064149 | 0.428941679 | 0.444660273 |
| 0.360092099 | 0.07649356  | 0.433073157 | 0.502754574 |
| 0.370746777 | 0.303340577 | 0.224481996 | 0.410205004 |
| 0.110144475 | 0.367302208 | 0.424878501 | 0.184184555 |
| 0.469122065 | 0.053231355 | 0.266649439 | 0.414236853 |
| 0.26642022  | 0.41610433  | 0.497467337 | 0.28891301  |
| 0.401189233 | 0.049142159 | 0.168979558 | 0.061436342 |
| 0.369676118 | 0.145865972 | 0.455418279 | 0.462264199 |
| 0.285867297 | 0.39419022  | 0.348186599 | 0.007941635 |
| 0.05623499  | 0.212143359 | 0.388246923 | 0.371497384 |
| 0.420803979 | 0.337881878 | 0.321077379 | 0.355496824 |
| 0.400692998 | 0.466983486 | 0.076669207 | 0.175638676 |
| 0.442635566 | 0.213446042 | 0.326754599 | 0.427054407 |
| 0.37304935  | 0.195797342 | 0.212481067 | 0.517567231 |
| 0.423470097 | 0.162299522 | 0.32646654  | 0.442811073 |
| 0.379968458 | 0.381039401 | 0.183056384 | 0.355791089 |
| 0.112112195 | 0.454905773 | 0.052314258 | 0.351341772 |
| 0.287171739 | 0.182318066 | 0.022701206 | 0.316374151 |
| 0.366187565 | 0.422212571 | 0.432060943 | 0.176450347 |
| 0.390971797 | 0.438708471 | 0.326903018 | 0.425438126 |
| 0.034902851 | 0.08961621  | 0.266568008 | 0.504613244 |
| 0.290973015 | 0.480522902 | 0.372414669 | 0.345010807 |
| 0.350224339 | 0.443360267 | 0.004782523 | 0.480822717 |
| 0.50724657  | 0.286866251 | 0.440391069 | 0.407036439 |
| 0.360822363 | 1           | 0.04024274  | 0.441203962 |
| 0.323266548 | 0.141300252 | 0.500896577 | 0.239994152 |
| 0.440695538 | 0.090804168 | 0.357025505 | 0.390319578 |
| 0.381174495 | 0.017694194 | 0.281817484 | 0.423702365 |
| 0.047088411 | 0.168662282 | 0.410182706 | 0.447509084 |
| 0.429994697 | 0.428117631 | 0.480087201 | 0.347525576 |
| 0.446578934 | 0.312773296 | 0.02828753  | 0.351996232 |
| 0.400978991 | 0.340022887 | 0.444570162 | 0.330203501 |
| 0.30804681  | 0.476942675 | 0.366741534 | 0.229201115 |
| 0.101672879 | 0.366738222 | 0.051358865 | 0.397249042 |
| 0.352594068 | 0.209773663 | 0.371458968 | 0.173185461 |
| 0.118683624 | 0.523824803 | 0.192160904 | 0.244064426 |
| 0.13109178  | 0.419490115 | 0.335725153 | 0.313563624 |
| 0.27285404  | 0.244784762 | 0.368353034 | 0.408983725 |
| 0.091995417 | 0.167042612 | 0.021361322 | 0.344047262 |
| 0.203503423 | 0.363479302 | 0.352803131 | 0.373873934 |
| 0.356833094 | 0.185080634 | 0.432624474 | 0.295796976 |
| 0.172611287 | 0.03764812  | 0.504050806 | 0.435161126 |
| 0.314366538 | 0.248162847 | 0.078082591 | 0.326834463 |
| 0.469884205 | 0.326499258 | 0.259972904 | 0.462704907 |
| 0.055022922 | 0.468652078 | 0.335889686 | 0.195954145 |
| 0.385138747 | 0.356475041 | 0.462255508 | 0.093497014 |
| 0.376486968 | 0.469667293 | 0.358450219 | 0.269880374 |
| 0.392411102 | 0.439587421 | 0.077029104 | 0.36892517  |
| 0.365324511 | 0.072387725 | 0.513150105 | 0.174109872 |
| 0.045809756 | 0.421472348 | 0.413044666 | 0.132498458 |
| 0.132518816 | 0.40328629  | 0.10271367  | 0.360342741 |
| 0.520828188 | 0.446871703 | 0.410252985 | 0.235964009 |
| 0.097302416 | 0.028853307 | 0.2409657   | 0.364922493 |

|             |             |             |             |
|-------------|-------------|-------------|-------------|
| 0.488931977 | 0.491804666 | 0.330495339 | 0.402220688 |
| 0.333960756 | 0.361636045 | 0.175340459 | 0.504729417 |
| 0.192589348 | 0.496658509 | 0.019188611 | 0.403504303 |
| 0.484141181 | 0.303065415 | 0.138857188 | 0.373861398 |
| 0.376198781 | 0.104970123 | 0.265395306 | 0.490327431 |
| 0.426706482 | 0.382778926 | 0.392668314 | 0.414715139 |
| 0.050734859 | 0.096303426 | 0.406756139 | 0.188827929 |
| 0.41125896  | 0.300194821 | 0.051509209 | 0.34796837  |
| 0.10371016  | 0.456666069 | 0.436986342 | 0.119631648 |
| 0.354132247 | 0.326679262 | 0.406283524 | 0.084632155 |
| 0.419898636 | 0.471762128 | 0.507994072 | 0.23786724  |
| 0.399832023 | 0.478206444 | 0.364593381 | 0.125939519 |
| 0.037589134 | 0.493586689 | 0.386915534 | 0.060142692 |
| 0.463994648 | 0.253760366 | 0.040509814 | 0.49974582  |
| 0.279928886 | 0.415765463 | 0.014440206 | 0.071496092 |
| 0.061268522 | 0.430005378 | 0.470212121 | 0.401940763 |
| 0.277536119 | 0.402230141 | 0.006474359 | 0.502780305 |
| 0.490891721 | 0.032430413 | 0.178399025 | 0.398262763 |
| 0.386393535 | 0.521859575 | 0.324805942 | 0.423136003 |
| 0.400028725 | 0.481002991 | 0.32338316  | 0.348312622 |
| 0.43106881  | 0.462449742 | 0.420358633 | 0.45766007  |
| 0.452568148 | 0.427577852 | 0.373946663 | 0.047616711 |
| 0.172736648 | 0.270733576 | 0.330857476 | 0.143850118 |
| 0.324200097 | 0.215383397 | 0.468252409 | 0.452083032 |
| 0.466943119 | 0.014639124 | 0.234247556 | 0.395387133 |
| 0.445677969 | 0.477321428 | 0.032939819 | 0.011055907 |
| 0.010936565 | 0.041234235 | 0.398767411 | 0.298093375 |
| 0.480353689 | 0.273764341 | 0.01656663  | 0.095432863 |
| 0.367643131 | 0.397801859 | 0.496970625 | 0.4324188   |
| 0.402363066 | 0.137370923 | 0.338984926 | 0.433601314 |
| 0.116352785 | 0.290366884 | 0.481776424 | 0.476757724 |
| 0.067020802 | 0.30380152  | 0.361138912 | 0.495992521 |
| 0.067928786 | 0.372670334 | 0.409067699 | 0.388845888 |
| 0.021121877 | 0.131484376 | 0.116824419 | 0.433217297 |
| 0.471086503 | 0.141125931 | 0.075707119 | 0.158165813 |
| 0.214955461 | 0.443220455 | 0.264155116 | 0.511916492 |
| 0.434294842 | 0.453445673 | 0.104333693 | 0.479644063 |
| 0.080757873 | 0.473058415 | 0.358469935 | 0.095685405 |
| 0.318655318 | 0.029733041 | 0.438677941 | 0.196647826 |
| 0.353963833 | 0.392115626 | 0.233090825 | 0.031515424 |
| 0.175537453 | 0.098241225 | 0.478189938 | 0.429516149 |
| 0.050995357 | 0.316901127 | 0.356021419 | 0.416374107 |
| 0.340652679 | 0.456013011 | 0.491761664 | 0.382608594 |
| 0.165680601 | 0.125358586 | 0.427178125 | 0.371776999 |
| 0.290415222 | 0.481442856 | 0.35707317  | 0.512815202 |
| 0.387573271 | 0.446367743 | 0.454702522 | 0.416328102 |
| 0.252372275 | 0.393959954 | 0.403264078 | 0.061110163 |
| 0.415576527 | 0.447754384 | 0.374163154 | 0.226301717 |
| 0.339757294 | 0.35124741  | 0.081336992 | 0.173861008 |
| 0.295658932 | 0.338034518 | 0.231686035 | 0.444883364 |
| 0.380507511 | 0.374328728 | 0.07009504  | 0.114745364 |
| 0.532193807 | 0.427789847 | 0.22735436  | 0.441366015 |
| 0.237448989 | 0.407373468 | 0.418690331 | 0.414856526 |
| 0.350919969 | 0.424026624 | 0.419657521 | 0.401882028 |

|             |             |             |             |
|-------------|-------------|-------------|-------------|
| 0.432504281 | 0.352283009 | 0.512636649 | 0.128732167 |
| 0.123712199 | 0.366229963 | 0.180081277 | 0.142743399 |
| 0.234237637 | 0.056560293 | 0.27232498  | 0.434816501 |
| 0.328871892 | 0.43734493  | 0.306644154 | 0.143227862 |
| 0.361405347 | 0.328652383 | 0.411178324 | 0.299424719 |
| 0.156677219 | 0.49180721  | 0.023475831 | 0.100496372 |
| 0.342438473 | 0.416085607 | 0.386085575 | 0.314812988 |
| 0.298231095 | 0.167103236 | 0.380484313 | 0.323311506 |
| 0.346927977 | 0.337156719 | 0.414094747 | 0.076997604 |
| 0.053017492 | 0.487591592 | 0.369302299 | 0.034530611 |
| 0.108383524 | 0.347140631 | 0.311955792 | 0.321590687 |
| 0.038852247 | 0.45848126  | 0.354881069 | 0.422417858 |
| 0.403030447 | 0.118312498 | 0.337425478 | 0.123693039 |
| 0.103724721 | 0.438282755 | 0.375708709 | 0.491456414 |
| 0.344076749 | 0.453863078 | 0.425246512 | 0.399076082 |
| 0.154249479 | 0.326948139 | 0.074150683 | 0.425890313 |
| 0.372964218 |             |             |             |

| F10         | 0.056729764 | 0.050927368 | 0.028657426 |
|-------------|-------------|-------------|-------------|
| 0.033984253 | 0.022654939 | 0.022351403 | 0.010673995 |
| 0.022646846 | 0.000852537 | 8.81E-05    | 2.14E-05    |
| 0.000856655 | 0.008911075 | 0.00674124  | 0.03919677  |
| 0.004099216 | 0.033453443 | 0.017690253 | 0.038546979 |
| 0.004602999 | 0.028296136 | 0.003738792 | 0.008393602 |
| 0.002969484 | 0.001521016 | 0.005796097 | 0.052589604 |
| 0.002337293 | 0.01400483  | 0.043070311 | 0.008351173 |
| 0.056805353 | 0.055994114 | 0.027509149 | 0.054335882 |
| 0.055087409 | 0.001222249 | 0.004246414 | 0.066512205 |
| 0.03376559  | 0.036018771 | 0.021254213 | 0.000977734 |
| 0.058237313 | 0.011394303 | 0.032960033 | 0.002144579 |
| 0.000944925 | 0.014525869 | 0.054727389 | 0.04307506  |
| 0.016689731 | 0.014539472 | 0.00455653  | 0.000426715 |
| 0.010134656 | 0.002764889 | 0.042009677 | 0.009326293 |
| 0.009311312 | 0.042682104 | 0.001001805 | 0.000167281 |
| 0.021173551 | 0.0092403   | 0.018250656 | 0.008791376 |
| 0.049129792 | 0.002136628 | 0.039286021 | 1.06E-05    |
| 0.042401988 | 0.038572589 | 0.005538518 | 0.003636986 |
| 0.000312901 | 0.012029307 | 0.017248345 | 0.053523498 |
| 0.067488447 | 0.046064823 | 0.043488835 | 0.004582569 |
| 0.022713793 | 0.022371706 | 0.004653051 | 0.053359005 |
| 0.006024008 | 0.007018798 | 0.037616303 | 0.046528085 |
| 0.04906966  | 0.005717016 | 0.017485721 | 0.029002335 |
| 0.05365409  | 0.019656067 | 0.012237905 | 0.004592578 |
| 0.003333023 | 0.03809077  | 0.048726529 | 0.056217727 |
| 0.014755611 | 0.007365584 | 0.049571016 | 0.003963925 |
| 0.018731415 | 0.023084766 | 0.006066902 | 0.055828856 |
| 0.000815038 | 0.011507897 | 0.016052031 | 0.008763011 |
| 0.050220406 | 0.049868268 | 0.010956459 | 0.034649062 |
| 0.000411239 | 0.000412255 | 0.004362889 | 0.007601614 |
| 0.004519522 | 0.049251304 | 0.042684162 | 0.010019457 |
| 0.003756852 | 0.012688358 | 0.000327433 | 0.002089938 |
| 0.006268471 | 0.047008064 | 0.045541038 | 0.04500849  |
| 0.055881051 | 0.003384167 | 0.048474301 | 0.03071077  |
| 0.044009595 | 0.000222035 | 0.004187533 | 0.036139921 |
| 0.008690382 | 0.01574439  | 0.024877535 | 0.013947222 |

|             |             |             |             |
|-------------|-------------|-------------|-------------|
| 0.011767689 | 0.005879516 | 0.051836827 | 0.053598493 |
| 0.004809485 | 0.030378189 | 0.043973823 | 0.002580371 |
| 0.023121584 | 0.008043829 | 0.010181875 | 0.001311188 |
| 0.04939645  | 0.002976468 | 0.04342988  | 0.002435389 |
| 0.002562707 | 0.001401524 | 0.023501605 | 0.005440395 |
| 0.029989202 | 0.053177008 | 0.00982802  | 0.013532001 |
| 0.025716884 | 0.031113233 | 0.027529848 | 0.000124139 |
| 0.006764715 | 0.032377315 | 0.048408853 | 0.028791011 |
| 0.058748163 | 0.014137066 | 0.013758252 | 0.018947578 |
| 0.045259022 | 0.000595145 | 0.055886753 | 0.051059739 |
| 0.040484823 | 0.020018546 | 0.047443448 | 0.009840341 |
| 0.04024274  | 1           | 0.041028461 | 0.064941219 |
| 0.00712685  | 0.050617172 | 0.006515947 | 0.054025514 |
| 0.00128825  | 0.012005552 | 0.035914056 | 0.034793042 |
| 0.000376549 | 0.013619876 | 0.031653017 | 0.002405793 |
| 0.002805589 | 0.047291018 | 0.029000115 | 0.015142766 |
| 0.045585046 | 0.050070735 | 0.008067503 | 0.02390821  |
| 0.023439558 | 0.002060236 | 0.024421051 | 0.050736849 |
| 0.002331964 | 0.04728877  | 0.011955394 | 0.055214883 |
| 0.045882288 | 0.043670616 | 5.62E-06    | 0.001749907 |
| 0.016416328 | 0.001652511 | 0.012988741 | 0.046660618 |
| 0.001411248 | 0.013558306 | 0.014142194 | 0.003957652 |
| 0.04813421  | 0.007911293 | 0.011039247 | 0.004566755 |
| 0.017099612 | 0.021643678 | 0.003035276 | 0.001715938 |
| 0.004123802 | 0.008759272 | 0.005833384 | 0.001818049 |
| 0.003391737 | 0.001927325 | 0.009091627 | 0.000989283 |
| 0.007749568 | 0.007900334 | 0.039324505 | 0.008676057 |
| 0.002147642 | 0.019388952 | 0.006574667 | 0.004866231 |
| 0.001722881 | 0.050527031 | 0.041886721 | 0.048473285 |
| 0.005833363 | 0.004760876 | 0.002221502 | 0.039127587 |
| 0.019499006 | 0.026615159 | 0.039373094 | 0.00111566  |
| 0.048595707 | 0.002118302 | 0.004988257 | 0.01079783  |
| 0.01257279  | 0.046844811 | 0.000227337 | 0.039493022 |
| 0.045300047 | 0.029231332 | 0.004020637 | 0.04755974  |
| 0.034710107 | 0.001094028 | 0.048646657 | 0.056753912 |
| 0.002128176 | 0.054545791 | 0.005219741 | 0.002771466 |
| 0.041731724 | 0.025616134 | 0.004727804 | 0.004413823 |
| 0.007944512 | 0.00288384  | 0.019213081 | 0.047955237 |
| 0.032459579 | 0.024597683 | 0.012345097 | 0.001023948 |
| 7.48E-05    | 0.013549912 | 0.04266746  | 0.055864178 |
| 0.050823936 | 0.023265698 | 0.012944491 | 0.016525912 |
| 0.005058808 | 0.001589647 | 0.047179564 | 0.013275089 |
| 0.060640451 | 0.001649451 | 0.034161476 | 0.051077132 |
| 0.026828646 | 0.002470098 | 0.01314155  | 0.045729139 |
| 0.002452643 | 0.020536484 | 0.05195977  | 0.038708937 |
| 0.008940076 | 0.006546154 | 0.054091639 | 0.001091849 |
| 0.000618808 | 0.022543453 | 0.006270072 | 0.005592411 |
| 0.00583406  | 0.001833869 | 0.013429531 | 0.000435725 |
| 0.040669322 | 0.055408558 | 0.000640035 | 0.011219893 |
| 0.017517045 | 0.032285504 | 0.002373363 | 0.039310552 |
| 0.056512247 | 0.055124442 | 0.012997833 | 0.04906482  |
| 0.041709277 | 0.018832459 | 0.007233606 | 0.002184051 |
| 0.055219687 | 0.04786065  | 7.90E-05    | 0.049729421 |
| 0.02555913  | 7.30E-05    | 0.051470627 | 0.012667908 |



|             |             |             |             |
|-------------|-------------|-------------|-------------|
| 0.055317582 | 8.16E-05    | 0.001216098 | 0.003977091 |
| 0.051206994 | 0.046466053 | 0.040060509 | 0.005930411 |
| 0.042441862 | 0.000197246 | 0.056668494 | 0.048715221 |
| 0.001767628 | 0.003951458 | 0.037969178 | 0.033168016 |
| 0.058793617 | 0.010717937 | 0.037653718 | 0.028818631 |
| 0.044121232 | 0.002407972 | 0.014184055 | 0.042848601 |
| 0.046398819 | 0.053906794 | 0.0570728   | 0.045005235 |
| 0.037567791 | 0.015994901 | 0.000542242 | 0.000731712 |
| 0.01376338  | 0.003787261 | 0.000587371 | 0.040949766 |
| 0.00235072  | 0.063737462 | 0.044636908 | 0.047085309 |
| 0.001442614 | 0.005260725 | 0.045876858 | 0.051797018 |
| 0.052770566 | 0.001799242 | 0.000190477 | 0.001255617 |
| 0.000281643 | 0.027209083 | 0.018654983 | 0.04815582  |
| 0.001815219 | 0.000604896 | 0.003799773 | 0.006575572 |
| 0.025757584 | 0.047086977 | 0.037777444 | 0.049821793 |
| 0.004662564 | 0.003417723 | 0.044049822 | 0.000991506 |
| 0.05927906  | 0.044832769 | 0.046567625 | 0.00461038  |
| 0.012412187 | 0.057577447 | 0.045663228 | 0.00173322  |
| 0.024762107 | 0.044859973 | 0.004977432 | 0.000639058 |
| 0.003729807 | 0.00159245  | 0.049042621 | 0.047732099 |
| 0.000912427 | 0.000527871 | 0.009220868 | 0.002205076 |
| 0.050046316 | 0.00404983  | 0.051229244 | 0.043680701 |
| 0.044786186 | 0.002039547 | 0.047914879 | 0.000177068 |
| 0.052210501 | 0.014797241 | 0.0003808   | 0.03048084  |
| 0.001983079 | 0.055134571 | 0.000267364 | 0.017354522 |
| 0.05781113  | 0.001275126 | 0.001685291 | 0.005043111 |
| 0.003656235 | 0.04035205  | 0.044898    | 0.004042504 |
| 0.007654541 | 0.025334196 | 0.050213678 | 0.02644825  |
| 0.032916276 | 0.053387253 | 0.019760678 | 0.001762729 |
| 0.004469514 | 0.052377209 | 0.062488371 | 0.013247255 |
| 0.049292706 | 0.003125068 | 0.055500172 | 0.056264503 |
| 0.056239203 | 0.04587666  | 0.018655763 | 0.002520127 |
| 0.045190106 | 0.022834589 | 0.000626812 | 0.0341108   |
| 0.037763144 | 0.039333745 | 0.002296448 | 0.006911497 |
| 0.021338647 | 0.00079898  | 0.011369514 | 0.01681866  |
| 0.023153716 | 0.001629464 | 0.049527533 | 0.060605694 |
| 0.064825424 | 0.001830685 | 0.001297534 | 0.055658534 |
| 0.052149691 | 0.00483502  | 0.029375358 | 0.014538471 |
| 0.012759922 | 0.050346396 | 0.046226847 | 0.006846466 |
| 0.037122786 | 0.054955532 | 0.026464401 | 0.043489022 |
| 0.012991263 | 0.052040798 | 0.015445401 | 0.002349101 |
| 0.042314546 | 0.001042944 | 0.007177998 | 0.006879646 |
| 0.001260183 | 0.007170162 | 0.045891686 | 0.01293197  |
| 0.023555797 | 0.010993589 | 0.001001337 | 0.022675647 |
| 0.040566305 | 0.024889892 | 0.007430161 | 0.001073703 |
| 0.045392638 | 0.000104867 | 0.004717374 | 0.018143329 |
| 0.040937381 | 0.014444991 | 0.012881104 | 0.004833915 |
| 0.006064093 | 0.013841725 | 0.030008235 | 0.007226235 |
| 0.006607894 | 0.039843836 | 0.001937359 | 0.001287916 |
| 0.051568188 | 0.051574318 | 0.003415459 | 0.000356733 |
| 0.037939417 | 0.031937981 | 0.001844788 | 0.002661952 |
| 0.040816143 | 0.007637531 | 0.024640249 | 0.022556459 |
| 0.005878942 | 0.057444311 | 0.00048316  | 0.004074805 |
| 0.063738514 | 0.032946771 | 0.051615116 | 0.031579528 |

|             |             |             |             |
|-------------|-------------|-------------|-------------|
| 0.033536944 | 0.058243623 | 0.042169667 | 0.004155882 |
| 0.035346757 | 0.001818816 | 0.052688874 | 0.013630619 |
| F2RL1       | 0.345733865 | 0.478807566 | 0.316339061 |
| 0.397015982 | 0.395235117 | 0.258449005 | 0.271431585 |
| 0.218821673 | 0.128033277 | 0.021062245 | 0.05634466  |
| 0.352684202 | 0.243348883 | 0.29281463  | 0.22575464  |
| 0.423762038 | 0.259494023 | 0.333066559 | 0.340800616 |
| 0.37636422  | 0.150683467 | 0.40229582  | 0.19572029  |
| 0.320892325 | 0.185801819 | 0.161536461 | 0.278053958 |
| 0.459588467 | 0.178029682 | 0.231771319 | 0.330083344 |
| 0.24414619  | 0.401033383 | 0.439392575 | 0.371615973 |
| 0.429739986 | 0.295782257 | 0.057450538 | 0.237954719 |
| 0.386102611 | 0.36913971  | 0.36930691  | 0.370027982 |
| 0.117479359 | 0.401741981 | 0.306918981 | 0.378931505 |
| 0.208629519 | 0.098160433 | 0.186469513 | 0.372472215 |
| 0.388252961 | 0.305238526 | 0.246337231 | 0.229451337 |
| 0.192705133 | 0.209819917 | 0.226802635 | 0.234356461 |
| 0.314049834 | 0.145375329 | 0.410028372 | 0.130230546 |
| 0.162113084 | 0.299000327 | 0.296421129 | 0.306486868 |
| 0.308452088 | 0.308075992 | 0.076409764 | 0.289388494 |
| 0.011324888 | 0.373811654 | 0.400474436 | 0.221234169 |
| 0.14025771  | 0.0797063   | 0.322361625 | 0.340245856 |
| 0.473543957 | 0.405366856 | 0.492523524 | 0.47609702  |
| 0.289644637 | 0.39224119  | 0.335749347 | 0.293812578 |
| 0.396476512 | 0.24371714  | 0.178038869 | 0.435755218 |
| 0.492917101 | 0.459458864 | 0.295973936 | 0.353260177 |
| 0.357597119 | 0.440340702 | 0.310564669 | 0.364515862 |
| 0.241406563 | 0.140578405 | 0.375969624 | 0.491837585 |
| 0.347101997 | 0.293630208 | 0.273599517 | 0.383948806 |
| 0.174656557 | 0.279245559 | 0.383890081 | 0.270510889 |
| 0.48430796  | 0.056365603 | 0.323215697 | 0.34340682  |
| 0.329218095 | 0.385306948 | 0.452679321 | 0.288105156 |
| 0.394876243 | 0.0851119   | 0.135602474 | 0.129788794 |
| 0.325200975 | 0.174739496 | 0.377169429 | 0.453164011 |
| 0.273142238 | 0.361599773 | 0.326282752 | 0.02424798  |
| 0.107959544 | 0.300985892 | 0.387820288 | 0.370697293 |
| 0.383904452 | 0.314436771 | 0.270971317 | 0.3015016   |
| 0.307377821 | 0.486712139 | 0.034888557 | 0.201992387 |
| 0.344386883 | 0.309081749 | 0.354716269 | 0.350488606 |
| 0.346793797 | 0.210751967 | 0.26440728  | 0.500375256 |
| 0.373373672 | 0.202234739 | 0.289789343 | 0.409245296 |
| 0.279354057 | 0.37560244  | 0.239915813 | 0.352731869 |
| 0.134155978 | 0.399144816 | 0.109089067 | 0.306610413 |
| 0.176429878 | 0.255221028 | 0.055207034 | 0.266003028 |
| 0.268634457 | 0.374592989 | 0.36749668  | 0.243736596 |
| 0.375015894 | 0.392104696 | 0.262676475 | 0.319985973 |
| 0.030877408 | 0.144878248 | 0.206911057 | 0.486315414 |
| 0.193786623 | 0.486907528 | 0.380975516 | 0.359692235 |
| 0.373585909 | 0.44152451  | 0.007679379 | 0.410834439 |
| 0.456869929 | 0.205681597 | 0.367183923 | 0.384841662 |
| 0.266753323 | 0.441203962 | 0.041028461 | 1           |
| 0.258477171 | 0.202030051 | 0.514103921 | 0.279942568 |
| 0.405607034 | 0.125681214 | 0.304040156 | 0.380155978 |
| 0.330507602 | 0.02977509  | 0.191079938 | 0.340972742 |

|             |             |             |             |
|-------------|-------------|-------------|-------------|
| 0.10201903  | 0.134686619 | 0.366546832 | 0.364350949 |
| 0.326460036 | 0.421541527 | 0.510158427 | 0.249435646 |
| 0.380312691 | 0.321689935 | 0.062280537 | 0.374976361 |
| 0.392541304 | 0.265315835 | 0.383348237 | 0.297598947 |
| 0.224663968 | 0.427426785 | 0.340553086 | 0.144271408 |
| 0.123308468 | 0.315191491 | 0.052874126 | 0.334383003 |
| 0.322574645 | 0.20200227  | 0.267430954 | 0.29222131  |
| 0.185355093 | 0.493571999 | 0.229476327 | 0.239899188 |
| 0.155302128 | 0.322207918 | 0.343432825 | 0.241823036 |
| 0.234816776 | 0.271631446 | 0.298886206 | 0.317683227 |
| 0.095948342 | 0.218800587 | 0.060210442 | 0.279869338 |
| 0.19074278  | 0.283585537 | 0.262279089 | 0.304439449 |
| 0.337066764 | 0.2108794   | 0.371700706 | 0.28859311  |
| 0.212374088 | 0.07660805  | 0.46546679  | 0.394926279 |
| 0.250442247 | 0.252751952 | 0.14580554  | 0.243338661 |
| 0.457302694 | 0.19165185  | 0.182313062 | 0.424929217 |
| 0.091425414 | 0.487680082 | 0.29718437  | 0.239398421 |
| 0.347231565 | 0.351988691 | 0.473667951 | 0.062257051 |
| 0.31758555  | 0.421130427 | 0.388044018 | 0.267391771 |
| 0.341243518 | 0.364381946 | 0.096864421 | 0.324718382 |
| 0.318959007 | 0.120685218 | 0.482711831 | 0.256267503 |
| 0.095368594 | 0.374480631 | 0.337207055 | 0.189584302 |
| 0.184821681 | 0.304626162 | 0.093709518 | 0.373755482 |
| 0.484314052 | 0.414029363 | 0.348323747 | 0.281043896 |
| 0.121665395 | 0.046385995 | 0.320216465 | 0.325782207 |
| 0.425545245 | 0.469965958 | 0.385516102 | 0.344766382 |
| 0.347207615 | 0.275454087 | 0.141181077 | 0.481370778 |
| 0.260865725 | 0.455890981 | 0.046838313 | 0.378605728 |
| 0.41692473  | 0.228544185 | 0.169412538 | 0.28646935  |
| 0.334973748 | 0.126930117 | 0.320739473 | 0.432805955 |
| 0.39646001  | 0.310949027 | 0.277624863 | 0.382548588 |
| 0.055643647 | 0.115380317 | 0.342815047 | 0.210827408 |
| 0.312307685 | 0.303108843 | 0.074493176 | 0.290649602 |
| 0.124617334 | 0.403104394 | 0.470104001 | 0.118679153 |
| 0.220965732 | 0.258264779 | 0.409438569 | 0.123956294 |
| 0.404172497 | 0.442468707 | 0.447651415 | 0.282605096 |
| 0.386229384 | 0.435124689 | 0.283114333 | 0.205117737 |
| 0.079457195 | 0.440946558 | 0.302450004 | 0.066087059 |
| 0.490655822 | 0.16596222  | 0.05093678  | 0.457700882 |
| 0.300087699 | 0.354050486 | 0.007726834 | 0.094749839 |
| 0.126608354 | 0.467610891 | 0.395460612 | 0.327635638 |
| 0.155769807 | 0.388570333 | 0.02520305  | 0.489335245 |
| 0.435413044 | 0.063518996 | 0.243650812 | 0.365745605 |
| 0.332589993 | 0.479462741 | 0.273549525 | 0.407441841 |
| 0.318447427 | 0.419494569 | 0.278640342 | 0.356101427 |
| 0.400974927 | 0.422366904 | 0.368165328 | 0.411781844 |
| 0.46616264  | 0.394248129 | 0.3484647   | 0.058525572 |
| 0.134430989 | 0.215081409 | 0.184627417 | 0.114275156 |
| 0.229935985 | 0.224817247 | 0.447378583 | 0.483080037 |
| 0.456014198 | 0.038452107 | 0.214223043 | 0.364865378 |
| 0.429973982 | 0.481760139 | 0.072682576 | 0.012470477 |
| 0.014739031 | 0.049939191 | 0.341166562 | 0.344795739 |
| 0.45259474  | 0.15655797  | 0.036219454 | 0.10498682  |
| 0.322837781 | 0.34883465  | 0.447183391 | 0.39733548  |

|             |             |             |             |
|-------------|-------------|-------------|-------------|
| 0.394889392 | 0.214543552 | 0.215819258 | 0.396077128 |
| 0.139314894 | 0.220941221 | 0.465700939 | 0.415385856 |
| 0.141989657 | 0.33781296  | 0.336306326 | 0.491445031 |
| 0.075207648 | 0.404063918 | 0.357171253 | 0.308905261 |
| 0.06288379  | 0.186407028 | 0.144654724 | 0.443617159 |
| 0.410710205 | 0.161355191 | 0.103655097 | 0.119603478 |
| 0.203939152 | 0.464313484 | 0.273177799 | 0.511546416 |
| 0.421357872 | 0.473115012 | 0.185743419 | 0.415532084 |
| 0.097255166 | 0.414287688 | 0.338455943 | 0.054776238 |
| 0.37973865  | 0.071002527 | 0.418717425 | 0.118908773 |
| 0.289496369 | 0.323032651 | 0.175255398 | 0.077773048 |
| 0.171503712 | 0.161129366 | 0.483359706 | 0.454965478 |
| 0.1171515   | 0.310358818 | 0.384509344 | 0.385961013 |
| 0.258365888 | 0.403726953 | 0.425053766 | 0.250598641 |
| 0.164063015 | 0.196542891 | 0.374269154 | 0.288294743 |
| 0.273392697 | 0.504184466 | 0.276668291 | 0.49095426  |
| 0.325754626 | 0.431742179 | 0.432424231 | 0.329234035 |
| 0.297492326 | 0.297139692 | 0.281140499 | 0.058545299 |
| 0.385218846 | 0.461467704 | 0.33649408  | 0.208724479 |
| 0.329733618 | 0.299636812 | 0.132900235 | 0.177772929 |
| 0.257391186 | 0.229410566 | 0.259042465 | 0.473406397 |
| 0.324060774 | 0.300851109 | 0.123477969 | 0.133815716 |
| 0.493673984 | 0.386884095 | 0.175857243 | 0.329672381 |
| 0.315781842 | 0.353380713 | 0.411671493 | 0.414406722 |
| 0.289847146 | 0.408627198 | 0.396358321 | 0.293743801 |
| 0.376912445 | 0.334275108 | 0.451415593 | 0.114602091 |
| 0.130364312 | 0.31115657  | 0.18316623  | 0.219008184 |
| 0.27453982  | 0.095620322 | 0.223577268 | 0.414411664 |
| 0.274726285 | 0.396826831 | 0.264476693 | 0.178456065 |
| 0.397298319 | 0.291210311 | 0.406148003 | 0.247507368 |
| 0.168689926 | 0.422846701 | 0.041088828 | 0.176555432 |
| 0.314991515 | 0.369796755 | 0.314978975 | 0.346705644 |
| 0.267515242 | 0.264478586 | 0.386582291 | 0.23631081  |
| 0.225804242 | 0.298368274 | 0.367961757 | 0.08475215  |
| 0.078800365 | 0.510934104 | 0.290583202 | 0.085484108 |
| 0.167177213 | 0.267046998 | 0.369778319 | 0.252838104 |
| 0.087252334 | 0.426101939 | 0.22393274  | 0.366296452 |
| 0.336876899 | 0.191981278 | 0.300524124 | 0.14209334  |
| 0.153451518 | 0.39319919  | 0.326783659 | 0.443745911 |
| 0.360754768 | 0.428200498 | 0.360609196 | 0.38671901  |
| 0.201801122 | 0.275248157 | 0.087731827 | 0.440826431 |
| 0.258906271 |             |             |             |

|             |             |             |             |
|-------------|-------------|-------------|-------------|
| F2RL3       | 0.316804743 | 0.438009407 | 0.240186286 |
| 0.268394442 | 0.246203399 | 0.265373422 | 0.143340283 |
| 0.220976708 | 0.040193767 | 0.002684179 | 0.005530342 |
| 0.269194382 | 0.09789753  | 0.20156289  | 0.20476828  |
| 0.255905347 | 0.063684637 | 0.311092289 | 0.15832943  |
| 0.280200907 | 0.086729461 | 0.22079498  | 0.06192501  |
| 0.149887884 | 0.039338585 | 0.02949265  | 0.112163973 |
| 0.343212421 | 0.036449778 | 0.243233803 | 0.296627454 |
| 0.069587374 | 0.353576306 | 0.45820146  | 0.228778552 |
| 0.448970867 | 0.30365801  | 0.026921083 | 0.181052407 |
| 0.387673129 | 0.255908774 | 0.274783443 | 0.1977378   |
| 0.024050038 | 0.469758039 | 0.147665699 | 0.231707976 |

|             |             |             |             |
|-------------|-------------|-------------|-------------|
| 0.217434402 | 0.01123768  | 0.241003188 | 0.439518291 |
| 0.412143678 | 0.233303531 | 0.20977184  | 0.100767413 |
| 0.083585796 | 0.245485078 | 0.109563655 | 0.296801273 |
| 0.140214878 | 0.184247983 | 0.411501068 | 0.049686486 |
| 0.100554809 | 0.248338822 | 0.090077554 | 0.222814989 |
| 0.171413852 | 0.334396774 | 0.023701016 | 0.257681699 |
| 0.003248366 | 0.270818995 | 0.232143395 | 0.130952244 |
| 0.021864116 | 0.008841814 | 0.10537227  | 0.214985339 |
| 0.363049767 | 0.42941377  | 0.343355068 | 0.352872683 |
| 0.095088753 | 0.189108715 | 0.211181279 | 0.093860885 |
| 0.365944825 | 0.106549221 | 0.093630468 | 0.244524308 |
| 0.353839854 | 0.432443415 | 0.098756159 | 0.140216535 |
| 0.295361547 | 0.425315111 | 0.254545373 | 0.230222789 |
| 0.150988673 | 0.027472855 | 0.381816543 | 0.393040423 |
| 0.384471666 | 0.151208539 | 0.073417613 | 0.341968175 |
| 0.0365268   | 0.297321095 | 0.212214675 | 0.139735934 |
| 0.371513031 | 0.010249075 | 0.10436892  | 0.232419661 |
| 0.185445477 | 0.335888113 | 0.416674254 | 0.121578008 |
| 0.257006686 | 0.013209612 | 0.046456256 | 0.023910434 |
| 0.22445813  | 0.064602025 | 0.450559984 | 0.342454512 |
| 0.240374395 | 0.199391949 | 0.19692676  | 0.000766287 |
| 0.012935961 | 0.141187967 | 0.340279051 | 0.31289422  |
| 0.301250331 | 0.343615074 | 0.100957027 | 0.332455664 |
| 0.238250637 | 0.33693357  | 0.053689333 | 0.075807353 |
| 0.26505887  | 0.1358461   | 0.142093576 | 0.266314301 |
| 0.146338053 | 0.111907434 | 0.083348091 | 0.400355085 |
| 0.423183262 | 0.052956016 | 0.335432139 | 0.24759907  |
| 0.175307276 | 0.179459471 | 0.080317553 | 0.180797517 |
| 0.037035519 | 0.404922344 | 0.013371112 | 0.318373773 |
| 0.111694538 | 0.071067726 | 0.019186855 | 0.251243854 |
| 0.195835775 | 0.313710942 | 0.445571418 | 0.077420033 |
| 0.206464816 | 0.219223431 | 0.311979772 | 0.246529023 |
| 0.002250556 | 0.042006992 | 0.311378231 | 0.398673527 |
| 0.270032414 | 0.395868064 | 0.214248335 | 0.178023162 |
| 0.152779819 | 0.315425559 | 0.004283311 | 0.45267864  |
| 0.430416751 | 0.309186848 | 0.215219811 | 0.267648236 |
| 0.175548534 | 0.323266548 | 0.064941219 | 0.258477171 |
| 1           | 0.058935563 | 0.373817744 | 0.076252462 |
| 0.419352381 | 0.017824415 | 0.262292598 | 0.285185999 |
| 0.26695243  | 0.007070253 | 0.206215484 | 0.264205468 |
| 0.013300284 | 0.092292316 | 0.306207485 | 0.252397634 |
| 0.205074426 | 0.299296876 | 0.352667733 | 0.159090319 |
| 0.239091932 | 0.207907375 | 0.00968116  | 0.176136963 |
| 0.317943375 | 0.211038885 | 0.414691552 | 0.176789711 |
| 0.317535795 | 0.403017955 | 0.318914518 | 0.110857432 |
| 0.024379074 | 0.25064446  | 0.020653554 | 0.167698691 |
| 0.335818895 | 0.066497051 | 0.208539457 | 0.135987271 |
| 0.033892297 | 0.410724504 | 0.078829108 | 0.123158795 |
| 0.052287588 | 0.240776818 | 0.196628811 | 0.128535289 |
| 0.090232621 | 0.085545412 | 0.166986036 | 0.196612824 |
| 0.033175616 | 0.048216392 | 0.012118606 | 0.212561255 |
| 0.06357594  | 0.187089785 | 0.19986372  | 0.302371113 |
| 0.248507136 | 0.063871762 | 0.202130567 | 0.151929138 |
| 0.053806946 | 0.007617466 | 0.423126101 | 0.262175149 |

|             |             |             |             |
|-------------|-------------|-------------|-------------|
| 0.324913764 | 0.100895168 | 0.026122154 | 0.199087035 |
| 0.350945318 | 0.234262276 | 0.28943769  | 0.37283681  |
| 0.028659394 | 0.362487903 | 0.123005693 | 0.056125249 |
| 0.187953361 | 0.151085939 | 0.34509376  | 0.036718116 |
| 0.316974324 | 0.416860884 | 0.207960541 | 0.081291407 |
| 0.38172066  | 0.274267247 | 0.020607125 | 0.337692742 |
| 0.337646022 | 0.016321069 | 0.424811879 | 0.064694308 |
| 0.011307704 | 0.252077054 | 0.246083249 | 0.038641797 |
| 0.039035743 | 0.174828344 | 0.051580456 | 0.153548372 |
| 0.410586706 | 0.227131362 | 0.283439245 | 0.11624939  |
| 0.020405257 | 0.004188143 | 0.113794182 | 0.256937556 |
| 0.4690428   | 0.398775145 | 0.17258698  | 0.172194742 |
| 0.15357119  | 0.147058451 | 0.184342618 | 0.389245521 |
| 0.179105554 | 0.460345108 | 0.004402056 | 0.266054419 |
| 0.44210468  | 0.285075403 | 0.031128769 | 0.217529333 |
| 0.357764026 | 0.027581506 | 0.198667217 | 0.432126923 |
| 0.351712252 | 0.168944892 | 0.171836817 | 0.293276921 |
| 0.013867591 | 0.035689147 | 0.212181355 | 0.082378237 |
| 0.206706376 | 0.117988133 | 0.021717603 | 0.282274304 |
| 0.020348929 | 0.392139604 | 0.333096915 | 0.02240844  |
| 0.21403523  | 0.287516248 | 0.217537794 | 0.022014921 |
| 0.312491981 | 0.421005977 | 0.459673709 | 0.161922541 |
| 0.315395838 | 0.369769896 | 0.199329649 | 0.048214467 |
| 0.007883298 | 0.437924099 | 0.308816258 | 0.012481422 |
| 0.353633033 | 0.25553071  | 0.004653794 | 0.435841664 |
| 0.132006393 | 0.450981935 | 0.004168293 | 0.07613769  |
| 0.024041545 | 0.31721591  | 0.420406986 | 0.296598028 |
| 0.195421169 | 0.276529562 | 0.006385114 | 0.419156654 |
| 0.418227796 | 0.005307227 | 0.066157451 | 0.299334633 |
| 0.247084057 | 0.469290678 | 0.140484442 | 0.30214792  |
| 0.22782888  | 0.420017344 | 0.152216846 | 0.140074535 |
| 0.331090435 | 0.390984767 | 0.321940845 | 0.42449644  |
| 0.34444459  | 0.246749864 | 0.167699994 | 0.007896366 |
| 0.051086498 | 0.217028701 | 0.156181599 | 0.02766354  |
| 0.299738209 | 0.059817011 | 0.418426515 | 0.340194041 |
| 0.356185278 | 0.002527644 | 0.145798314 | 0.32322459  |
| 0.383315252 | 0.384508462 | 0.023170453 | 0.004732508 |
| 0.008951782 | 0.004324993 | 0.277152258 | 0.139734677 |
| 0.385128455 | 0.172986653 | 0.002520218 | 0.056716546 |
| 0.197296066 | 0.198783    | 0.421427103 | 0.241735514 |
| 0.303095556 | 0.051016852 | 0.148424981 | 0.268774449 |
| 0.024222237 | 0.303614412 | 0.357854609 | 0.424899122 |
| 0.030574767 | 0.139015258 | 0.335139854 | 0.378080478 |
| 0.024576306 | 0.184094987 | 0.278519107 | 0.167061536 |
| 0.017322981 | 0.037915854 | 0.026383443 | 0.295096021 |
| 0.431147066 | 0.031336843 | 0.012167932 | 0.166681054 |
| 0.06358922  | 0.360746261 | 0.091055894 | 0.39299156  |
| 0.343971549 | 0.304426986 | 0.036055284 | 0.423058758 |
| 0.014277869 | 0.43032741  | 0.159652828 | 0.052243846 |
| 0.227384337 | 0.010182979 | 0.402930044 | 0.048179739 |
| 0.28831819  | 0.320793505 | 0.083429781 | 0.007882075 |
| 0.085108112 | 0.027029433 | 0.338406086 | 0.310107759 |
| 0.020950194 | 0.184536973 | 0.188892697 | 0.290169745 |
| 0.255872576 | 0.26085966  | 0.454019072 | 0.248663238 |

|             |             |             |             |
|-------------|-------------|-------------|-------------|
| 0.056264477 | 0.097401682 | 0.298125818 | 0.319577897 |
| 0.243795367 | 0.356543771 | 0.128978868 | 0.425314121 |
| 0.31921378  | 0.405901106 | 0.375722691 | 0.215336752 |
| 0.10854234  | 0.307417114 | 0.244990829 | 0.014147825 |
| 0.243772205 | 0.31622     | 0.310118934 | 0.059684877 |
| 0.119110114 | 0.204675992 | 0.050263449 | 0.262130139 |
| 0.163255658 | 0.258687075 | 0.085016459 | 0.313198971 |
| 0.32879413  | 0.315290556 | 0.06205499  | 0.023823815 |
| 0.457411326 | 0.404840344 | 0.1240786   | 0.264533989 |
| 0.11261956  | 0.17596333  | 0.309589683 | 0.285304756 |
| 0.229118826 | 0.331547087 | 0.340638081 | 0.261357528 |
| 0.39927561  | 0.171029339 | 0.452756945 | 0.154983953 |
| 0.034717555 | 0.292410706 | 0.04277793  | 0.049613104 |
| 0.083341481 | 0.013263108 | 0.135662691 | 0.263965495 |
| 0.197237112 | 0.219471009 | 0.306097596 | 0.051735658 |
| 0.187234044 | 0.313541916 | 0.213975841 | 0.145280941 |
| 0.039032931 | 0.425995885 | 0.005106431 | 0.033357899 |
| 0.216740162 | 0.294960736 | 0.177258513 | 0.139449768 |
| 0.129656903 | 0.083166384 | 0.168908021 | 0.280678318 |
| 0.193665772 | 0.251818965 | 0.303093291 | 0.036119401 |
| 0.018560572 | 0.370394452 | 0.324832849 | 0.016205752 |
| 0.050329205 | 0.30110672  | 0.277800729 | 0.108560607 |
| 0.010326156 | 0.368466817 | 0.213278722 | 0.24290688  |
| 0.260262832 | 0.049503817 | 0.39561132  | 0.082978804 |
| 0.060710481 | 0.439940975 | 0.225335255 | 0.4273166   |
| 0.228719208 | 0.249146616 | 0.452850258 | 0.336000792 |
| 0.128620625 | 0.25725742  | 0.018550421 | 0.356083428 |
| 0.210110407 |             |             |             |
| FAM134B     | 0.089507333 | 0.0912113   | 0.067224358 |
| 0.175064606 | 0.111245471 | 0.066996903 | 0.194578164 |
| 0.096887517 | 0.121134899 | 0.051587433 | 0.056190616 |
| 0.083001553 | 0.055160555 | 0.068360285 | 0.030583519 |
| 0.216316946 | 0.138542646 | 0.078225514 | 0.279062221 |
| 0.185861426 | 0.124964544 | 0.213288564 | 0.229072423 |
| 0.066983069 | 0.107478891 | 0.178127239 | 0.069321439 |
| 0.180349203 | 0.204933087 | 0.046786695 | 0.14499618  |
| 0.216740676 | 0.111041301 | 0.066167946 | 0.111247632 |
| 0.057563688 | 0.065282107 | 0.086608121 | 0.04125321  |
| 0.101362411 | 0.111635435 | 0.184314055 | 0.222951592 |
| 0.196828609 | 0.058474747 | 0.223681934 | 0.129507569 |
| 0.052510312 | 0.138036132 | 0.043209447 | 0.063565097 |
| 0.04977641  | 0.061102693 | 0.107490421 | 0.154117271 |
| 0.024539978 | 0.040009568 | 0.018228934 | 0.07867046  |
| 0.222689765 | 0.046530824 | 0.058277389 | 0.114309716 |
| 0.051395179 | 0.133261408 | 0.161295689 | 0.151685239 |
| 0.038131391 | 0.08863101  | 0.253818814 | 0.05289313  |
| 0.019640361 | 0.217446921 | 0.164266312 | 0.023167687 |
| 0.268129791 | 0.103554825 | 0.163557007 | 0.182062038 |
| 0.159803714 | 0.072306008 | 0.132736929 | 0.108829847 |
| 0.106351597 | 0.199256081 | 0.066529469 | 0.166936779 |
| 0.097694244 | 0.155529902 | 0.123681584 | 0.209194821 |
| 0.124742459 | 0.072660952 | 0.128077196 | 0.211273487 |
| 0.084680368 | 0.092471265 | 0.055920964 | 0.076191414 |
| 0.024032791 | 0.156750237 | 0.062606487 | 0.103123025 |

|             |             |             |             |
|-------------|-------------|-------------|-------------|
| 0.077309066 | 0.051834719 | 0.218279403 | 0.133710778 |
| 0.268991877 | 0.032213938 | 0.243828732 | 0.085519346 |
| 0.161213631 | 0.161706633 | 0.188048423 | 0.135948287 |
| 0.169395261 | 0.103232812 | 0.070209289 | 0.259923156 |
| 0.100693021 | 0.141072227 | 0.029614341 | 0.267176435 |
| 0.056765173 | 0.032197769 | 0.045748838 | 0.128462067 |
| 0.080869384 | 0.049032499 | 0.170412014 | 0.134464892 |
| 0.19578751  | 0.137196733 | 0.076130791 | 0.110466877 |
| 0.140459464 | 0.050478373 | 0.093082416 | 0.066838185 |
| 0.061201938 | 0.131602607 | 0.004878255 | 0.241228531 |
| 0.093884046 | 0.15241139  | 0.322198697 | 0.076209618 |
| 0.133168005 | 0.207122976 | 0.240201508 | 0.117717765 |
| 0.077233175 | 0.273756177 | 0.053705825 | 0.211213762 |
| 0.0388437   | 0.127671641 | 0.254174998 | 0.098420153 |
| 0.194785817 | 0.053819732 | 0.176660888 | 0.09594138  |
| 0.018692144 | 0.08532674  | 0.217534103 | 0.116685489 |
| 0.054008119 | 0.068411851 | 0.043732036 | 0.298297522 |
| 0.125162606 | 0.166629936 | 0.067295697 | 0.072950072 |
| 0.052669444 | 0.263264592 | 0.038566521 | 0.10048089  |
| 0.05356832  | 0.108928879 | 0.12820622  | 0.102490248 |
| 0.230035955 | 0.159901509 | 0.013171667 | 0.059409147 |
| 0.071315088 | 0.03112556  | 0.11139378  | 0.124315848 |
| 0.038643958 | 0.141300252 | 0.00712685  | 0.202030051 |
| 0.058935563 | 1           | 0.142896273 | 0.224407075 |
| 0.067459258 | 0.200626288 | 0.067993557 | 0.077337435 |
| 0.052774101 | 0.061227085 | 0.06989568  | 0.174178434 |
| 0.175191052 | 0.09987123  | 0.128178481 | 0.170686106 |
| 0.120187461 | 0.142639625 | 0.17012681  | 0.032182516 |
| 0.097446438 | 0.180395473 | 0.220123695 | 0.157309833 |
| 0.106297145 | 0.019615893 | 0.072182659 | 0.13194858  |
| 0.042243472 | 0.085193111 | 0.058508121 | 0.018509747 |
| 0.214005117 | 0.128442126 | 0.079896955 | 0.12735356  |
| 0.059921787 | 0.113901431 | 0.043808478 | 0.175282357 |
| 0.188996369 | 0.100475221 | 0.059744154 | 0.033941126 |
| 0.034489381 | 0.07041774  | 0.240143766 | 0.041591576 |
| 0.035951722 | 0.17433837  | 0.044948313 | 0.055521715 |
| 0.155082205 | 0.190336291 | 0.138907692 | 0.016358748 |
| 0.039248983 | 0.024151978 | 0.021183606 | 0.067262116 |
| 0.054170935 | 0.095973643 | 0.096597513 | 0.059218694 |
| 0.154629164 | 0.222762117 | 0.090802077 | 0.207164306 |
| 0.057622808 | 0.194360224 | 0.26321214  | 0.012126023 |
| 0.118429509 | 0.032024008 | 0.026742037 | 0.095480039 |
| 0.205662385 | 0.131703618 | 0.070447518 | 0.21430368  |
| 0.043822881 | 0.212616449 | 0.170970842 | 0.033899556 |
| 0.088690951 | 0.078311565 | 0.214500847 | 0.140093211 |
| 0.056910038 | 0.151366072 | 0.193027323 | 0.069998412 |
| 0.063273337 | 0.220992396 | 0.086093435 | 0.150000707 |
| 0.234981967 | 0.117839137 | 0.069401813 | 0.290346648 |
| 0.19990575  | 0.083182603 | 0.134387181 | 0.256112102 |
| 0.09928449  | 0.208030379 | 0.074667939 | 0.083525883 |
| 0.187092609 | 0.049512892 | 0.136766336 | 0.070640656 |
| 0.059197522 | 0.082215791 | 0.28184589  | 0.072591233 |
| 0.314917357 | 0.038620346 | 0.047155142 | 0.097110197 |
| 0.089885311 | 0.074819962 | 0.199940488 | 0.088021012 |



|             |             |             |             |
|-------------|-------------|-------------|-------------|
| 0.054012443 | 0.053262541 | 0.138947028 | 0.1224769   |
| 0.069639469 | 0.227360307 | 0.186621003 | 0.068705864 |
| 0.099242675 | 0.07693952  | 0.043396864 | 0.133251705 |
| 0.150923584 | 0.199118672 | 0.114259823 | 0.046286409 |
| 0.043909188 | 0.152110228 | 0.018397202 | 0.057142667 |
| 0.157489178 | 0.073808371 | 0.156351755 | 0.140233726 |
| 0.042571305 | 0.051229116 | 0.195228671 | 0.247613921 |
| 0.075164891 | 0.071597616 | 0.067947607 | 0.207377342 |
| 0.086928533 | 0.074149987 | 0.04074127  | 0.245846815 |
| 0.19100883  | 0.063793646 | 0.099750791 | 0.078818623 |
| 0.152206593 | 0.039983573 | 0.065632764 | 0.093444876 |
| 0.289554467 | 0.044764369 | 0.02535432  | 0.028489657 |
| 0.177751815 | 0.144988999 | 0.05894363  | 0.153149404 |
| 0.016913576 | 0.207176347 | 0.042755534 | 0.09341804  |
| 0.072715121 | 0.141679683 | 0.116786518 | 0.065862485 |
| 0.058517759 | 0.089414567 | 0.045886553 | 0.080359587 |
| 0.05526475  | 0.057137226 | 0.084269716 | 0.245771898 |
| 0.099890434 | 0.060404021 | 0.126020386 | 0.084667944 |
| 0.137396135 | 0.157572644 | 0.26561822  | 0.159010589 |
| 0.057567341 | 0.086361973 | 0.012918671 | 0.061583639 |
| 0.069698742 | 0.128724442 | 0.089368705 | 0.149500126 |
| 0.090275958 | 0.169547319 | 0.128337748 | 0.071742209 |
| 0.125413228 | 0.150237059 | 0.186481215 | 0.02281382  |
| 0.012444611 | 0.053106905 | 0.151309588 | 0.19411556  |
| 0.093139257 | 0.012263759 | 0.163597318 | 0.166451876 |
| 0.102175695 | 0.100685617 | 0.073670502 | 0.258837126 |
| 0.102482496 | 0.261017613 | 0.024141674 | 0.232112442 |
| 0.117732941 | 0.048042529 | 0.099662386 | 0.074998209 |
| 0.250767349 | 0.171788932 | 0.074499711 | 0.141476159 |
| 0.010553101 | 0.22850444  | 0.087111553 | 0.056630265 |
| 0.138708346 | 0.180515803 | 0.162393731 | 0.17518592  |
| 0.051629676 | 0.087493485 | 0.104721843 | 0.01778952  |
| 0.126725045 | 0.125929093 | 0.139185659 | 0.125422291 |
| 0.12872839  | 0.201817444 | 0.157378377 | 0.072202778 |
| 0.118366269 | 0.058246046 | 0.083301693 | 0.018658854 |
| 0.118204314 | 0.252051594 | 0.064600156 | 0.018135205 |
| 0.054631473 | 0.120215136 | 0.048771555 | 0.174163606 |
| 0.030157899 | 0.217937741 | 0.140105759 | 0.12534313  |
| 0.187234994 | 0.148970149 | 0.209223097 | 0.171897269 |
| 0.107413359 | 0.147347311 | 0.063129919 | 0.029834396 |
| 0.166661905 | 0.046603617 | 0.171101361 | 0.072797651 |
| 0.080638251 | 0.138850607 | 0.047773826 | 0.096955716 |
| 0.095242003 | 0.102183646 | 0.079017902 | 0.153588358 |
| 0.059351809 | 0.076785611 | 0.097072296 | 0.089532638 |
| 0.199554179 | 0.135114561 | 0.11400169  | 0.078768432 |
| 0.145552058 | 0.051306213 | 0.256230492 | 0.031505828 |
| 0.034366134 | 0.076873229 | 0.156085902 | 0.206219109 |
| 0.108749765 | 0.074657189 | 0.226860217 | 0.154082728 |
| 0.090996004 | 0.081604544 | 0.109468561 | 0.110269378 |
| 0.260251258 | 0.153165542 | 0.110557836 | 0.111877274 |
| 0.036868902 | 0.08181871  | 0.124941145 | 0.081473369 |
| 0.072721104 | 0.236195635 | 0.070488662 | 0.075924904 |
| 0.080459396 | 0.062976964 | 0.115834993 | 0.263116917 |
| 0.255356426 | 0.200177141 | 0.016988978 | 0.187438875 |

|             |             |             |             |
|-------------|-------------|-------------|-------------|
| 0.019150957 | 0.186803472 | 0.032849539 | 0.187716138 |
| 0.180980781 | 0.053874398 | 0.209326557 | 0.12215471  |
| 0.145321246 | 0.063445669 | 0.102845155 | 0.253767776 |
| 0.027578664 | 0.088177243 | 0.05388086  | 0.158450997 |
| 0.032526548 | 0.14652402  | 0.218909638 | 0.06215123  |
| 0.022263206 | 0.029775257 | 0.083037365 | 0.169083034 |
| 0.203040249 | 0.144998335 | 0.058832633 | 0.187140595 |
| 0.121500589 | 0.068901263 | 0.100056566 | 0.073150437 |
| 0.165799405 | 0.066441567 | 0.033058721 | 0.096049436 |
| 0.157674495 | 0.290298343 | 0.056936606 | 0.100829747 |
| 0.26408342  | 0.066834706 | 0.076014802 | 0.065209812 |
| 0.096294157 | 0.1995184   | 0.052834017 | 0.0790944   |
| 0.116927493 | 0.046271142 | 0.207906063 | 0.142525991 |
| 0.01934523  |             |             |             |

| FASL        | 0.460178823 | 0.529682758 | 0.469690636 |
|-------------|-------------|-------------|-------------|
| 0.48961928  | 0.521446322 | 0.403289726 | 0.289050482 |
| 0.232261298 | 0.142239368 | 0.010966968 | 0.048303571 |
| 0.506309556 | 0.286772397 | 0.335770372 | 0.373839011 |
| 0.510453432 | 0.224971308 | 0.417519104 | 0.344259861 |
| 0.487532236 | 0.132819172 | 0.5063812   | 0.156881921 |
| 0.399655141 | 0.182236872 | 0.129461341 | 0.37571344  |
| 0.498850788 | 0.146155259 | 0.35149905  | 0.434021841 |
| 0.180024737 | 0.478198888 | 0.516992249 | 0.520835479 |
| 0.509641457 | 0.424012953 | 0.022383542 | 0.344816021 |
| 0.442925275 | 0.50623513  | 0.480305503 | 0.4330872   |
| 0.081239501 | 0.47422614  | 0.338684604 | 0.501618936 |
| 0.272758987 | 0.067018726 | 0.260171945 | 0.431633359 |
| 0.469326592 | 0.484309823 | 0.282859377 | 0.232332218 |
| 0.265458589 | 0.255334509 | 0.347020779 | 0.342057961 |
| 0.321290183 | 0.176520664 | 0.483064106 | 0.138684448 |
| 0.194670787 | 0.318268738 | 0.25087597  | 0.333218961 |
| 0.438968296 | 0.40713934  | 0.037017685 | 0.44910835  |
| 0.005207079 | 0.471301201 | 0.488342111 | 0.380864441 |
| 0.087870126 | 0.044645193 | 0.28519034  | 0.422036901 |
| 0.503686934 | 0.454436908 | 0.519592734 | 0.504081888 |
| 0.276408858 | 0.414284251 | 0.478883156 | 0.268983361 |
| 0.46358834  | 0.253836766 | 0.167869101 | 0.519711221 |
| 0.514522119 | 0.52522052  | 0.312404596 | 0.384993105 |
| 0.456727004 | 0.476854123 | 0.480107139 | 0.513545572 |
| 0.410816182 | 0.104491026 | 0.435457396 | 0.52139127  |
| 0.408442913 | 0.411736908 | 0.253147414 | 0.45231245  |
| 0.11469199  | 0.40418893  | 0.457996837 | 0.228833653 |
| 0.504084036 | 0.038646463 | 0.328712952 | 0.435146649 |
| 0.314500648 | 0.481426426 | 0.521263658 | 0.27948746  |
| 0.505136535 | 0.044233869 | 0.204211024 | 0.071939395 |
| 0.403938319 | 0.218164151 | 0.46782313  | 0.496682488 |
| 0.289070816 | 0.477275447 | 0.355783533 | 0.007912477 |
| 0.061082564 | 0.281849388 | 0.469005989 | 0.445967252 |
| 0.492866641 | 0.387292727 | 0.331909672 | 0.407488685 |
| 0.491197351 | 0.519899365 | 0.06084264  | 0.159995655 |
| 0.49357066  | 0.284599478 | 0.353364541 | 0.50667602  |
| 0.428036186 | 0.176205359 | 0.210325703 | 0.528939339 |
| 0.41488949  | 0.149810377 | 0.376147177 | 0.51428943  |
| 0.397674293 | 0.473904849 | 0.181042957 | 0.372255512 |

|             |             |             |             |
|-------------|-------------|-------------|-------------|
| 0.089770029 | 0.47992498  | 0.064013363 | 0.387313482 |
| 0.328678943 | 0.234692531 | 0.0240516   | 0.311417069 |
| 0.353059608 | 0.456510233 | 0.454850467 | 0.18366642  |
| 0.417536795 | 0.513279905 | 0.353708461 | 0.469451675 |
| 0.02307411  | 0.090469011 | 0.292991422 | 0.515471581 |
| 0.295073187 | 0.508823126 | 0.409619559 | 0.422488776 |
| 0.407955338 | 0.512467998 | 0.006153803 | 0.489190037 |
| 0.528460361 | 0.309188513 | 0.489704866 | 0.508442862 |
| 0.443507639 | 0.500896577 | 0.050617172 | 0.514103921 |
| 0.373817744 | 0.142896273 | 1           | 0.260697492 |
| 0.457078034 | 0.085503006 | 0.375158472 | 0.48091305  |
| 0.465650607 | 0.017170852 | 0.254702894 | 0.455754016 |
| 0.061158688 | 0.132192943 | 0.481896535 | 0.490668506 |
| 0.466290398 | 0.513566907 | 0.522202237 | 0.425327401 |
| 0.520979303 | 0.320071191 | 0.030011963 | 0.441704707 |
| 0.490080353 | 0.42631643  | 0.436134012 | 0.325823334 |
| 0.348539731 | 0.474827572 | 0.443525892 | 0.237437526 |
| 0.084680144 | 0.380122985 | 0.036927877 | 0.442755214 |
| 0.409115595 | 0.18098121  | 0.447362622 | 0.232354039 |
| 0.135712598 | 0.535520308 | 0.269954232 | 0.344834896 |
| 0.195594809 | 0.458234761 | 0.351157138 | 0.299041555 |
| 0.289783052 | 0.264685931 | 0.446923204 | 0.462632757 |
| 0.065295085 | 0.166647477 | 0.033118537 | 0.421694141 |
| 0.198774505 | 0.40039207  | 0.382062945 | 0.434662123 |
| 0.395652281 | 0.174039657 | 0.48981737  | 0.386497433 |
| 0.197483284 | 0.037035465 | 0.512803149 | 0.502202277 |
| 0.342801272 | 0.239964592 | 0.085255839 | 0.374848209 |
| 0.494430305 | 0.328935817 | 0.276595295 | 0.458046093 |
| 0.054938081 | 0.510762697 | 0.340491361 | 0.210764636 |
| 0.471279317 | 0.370113858 | 0.506108717 | 0.082126604 |
| 0.43835069  | 0.46619231  | 0.430612468 | 0.288696203 |
| 0.386495643 | 0.492691831 | 0.059901328 | 0.427588458 |
| 0.423071643 | 0.068496795 | 0.532944971 | 0.214775748 |
| 0.049212644 | 0.518308841 | 0.486756261 | 0.142389306 |
| 0.14612903  | 0.41371655  | 0.072333417 | 0.41588191  |
| 0.527297962 | 0.513115177 | 0.465331771 | 0.322686671 |
| 0.080122144 | 0.022687333 | 0.321723846 | 0.46942159  |
| 0.502349413 | 0.518538303 | 0.38044818  | 0.469760079 |
| 0.350063506 | 0.423106063 | 0.162315607 | 0.518640036 |
| 0.271552188 | 0.517826848 | 0.018436874 | 0.498247203 |
| 0.503690614 | 0.312516521 | 0.148203867 | 0.371612485 |
| 0.406097199 | 0.090182828 | 0.293161872 | 0.49724194  |
| 0.461577823 | 0.431570377 | 0.433008677 | 0.506641028 |
| 0.032489373 | 0.075966535 | 0.485714639 | 0.271069287 |
| 0.457746263 | 0.324262928 | 0.087843273 | 0.380386388 |
| 0.084535918 | 0.451166693 | 0.520506835 | 0.112213643 |
| 0.361585237 | 0.35244737  | 0.497125463 | 0.076624052 |
| 0.477217564 | 0.502830544 | 0.52015515  | 0.243794696 |
| 0.488707077 | 0.493669042 | 0.462374787 | 0.148906691 |
| 0.042269123 | 0.516921841 | 0.438763021 | 0.043828954 |
| 0.516122969 | 0.244573651 | 0.027839434 | 0.500388627 |
| 0.279994569 | 0.428704092 | 0.007038655 | 0.113218054 |
| 0.084737398 | 0.522470433 | 0.475116187 | 0.439366239 |
| 0.25676876  | 0.463487678 | 0.012927907 | 0.531333236 |

|             |             |             |             |
|-------------|-------------|-------------|-------------|
| 0.492698269 | 0.036090749 | 0.236794674 | 0.476131198 |
| 0.475010616 | 0.531184511 | 0.414529386 | 0.491262786 |
| 0.49168377  | 0.498255457 | 0.316175056 | 0.391743307 |
| 0.477989587 | 0.494415111 | 0.472024012 | 0.45719318  |
| 0.508103955 | 0.522010493 | 0.388126114 | 0.034656772 |
| 0.202585965 | 0.252997271 | 0.340286135 | 0.133483165 |
| 0.344085936 | 0.231271196 | 0.483478233 | 0.520394229 |
| 0.492892315 | 0.014727534 | 0.20646586  | 0.468033916 |
| 0.463428671 | 0.495565579 | 0.042718638 | 0.011366442 |
| 0.013060805 | 0.042648657 | 0.431774314 | 0.364266636 |
| 0.494999722 | 0.252253518 | 0.013587674 | 0.071790774 |
| 0.375789658 | 0.496762803 | 0.506867141 | 0.484073233 |
| 0.496942254 | 0.149680925 | 0.329492408 | 0.491123897 |
| 0.129150631 | 0.335806542 | 0.497867616 | 0.47207456  |
| 0.084549109 | 0.36866879  | 0.433934299 | 0.500847596 |
| 0.110089242 | 0.445139599 | 0.50591689  | 0.406199313 |
| 0.030039045 | 0.1521917   | 0.125933059 | 0.519654989 |
| 0.494686464 | 0.134336796 | 0.068790833 | 0.159644075 |
| 0.187133313 | 0.504499045 | 0.256106751 | 0.52716314  |
| 0.485294366 | 0.517313101 | 0.140415708 | 0.482781397 |
| 0.078048483 | 0.484322348 | 0.451958355 | 0.074254988 |
| 0.397984804 | 0.030635433 | 0.469279933 | 0.20877865  |
| 0.371705553 | 0.448348886 | 0.276013981 | 0.040670749 |
| 0.252730245 | 0.106282924 | 0.515174924 | 0.51852588  |
| 0.071572853 | 0.328312731 | 0.422291638 | 0.493193116 |
| 0.332670338 | 0.509688602 | 0.499704918 | 0.428190204 |
| 0.137821059 | 0.205256558 | 0.476206469 | 0.429313694 |
| 0.294514479 | 0.519673513 | 0.393948191 | 0.534808748 |
| 0.447447497 | 0.460207114 | 0.474174525 | 0.437493683 |
| 0.339221756 | 0.440601555 | 0.416379273 | 0.037633012 |
| 0.459020005 | 0.516538855 | 0.425647341 | 0.244978336 |
| 0.373888169 | 0.461300709 | 0.085063027 | 0.208655784 |
| 0.402740215 | 0.334521969 | 0.225392285 | 0.516772009 |
| 0.440882409 | 0.431195001 | 0.06861809  | 0.118381945 |
| 0.546858499 | 0.432432534 | 0.196375209 | 0.485799157 |
| 0.27655824  | 0.457188183 | 0.507767117 | 0.514196769 |
| 0.435013873 | 0.480219502 | 0.475789866 | 0.425912267 |
| 0.419222732 | 0.364189255 | 0.524917516 | 0.109589148 |
| 0.147441677 | 0.46034857  | 0.161165029 | 0.169321188 |
| 0.234191396 | 0.060563403 | 0.369054315 | 0.519452824 |
| 0.436020708 | 0.48913115  | 0.352234568 | 0.145479798 |
| 0.45049431  | 0.410866928 | 0.47660017  | 0.268270582 |
| 0.137472379 | 0.49693522  | 0.022192367 | 0.111623726 |
| 0.455441873 | 0.48679383  | 0.474262625 | 0.361493656 |
| 0.391960899 | 0.232544436 | 0.420992405 | 0.325606659 |
| 0.35125019  | 0.426057595 | 0.478432264 | 0.061371333 |
| 0.03967201  | 0.517892612 | 0.416292615 | 0.047112148 |
| 0.145626248 | 0.409938947 | 0.386560128 | 0.328436639 |
| 0.050777526 | 0.484651536 | 0.361754504 | 0.514384994 |
| 0.422636256 | 0.123989839 | 0.345312122 | 0.134257126 |
| 0.107252542 | 0.442833928 | 0.4795955   | 0.514370383 |
| 0.451684785 | 0.512371787 | 0.431986214 | 0.471132715 |
| 0.184229259 | 0.426308505 | 0.056168799 | 0.493609528 |
| 0.446401643 |             |             |             |

| FCGR2B      | 0.130887693 | 0.185649523 | 0.100544915 |
|-------------|-------------|-------------|-------------|
| 0.252899212 | 0.175080306 | 0.091455975 | 0.16285761  |
| 0.065253771 | 0.154329759 | 0.075283739 | 0.188391329 |
| 0.150496922 | 0.173373808 | 0.121204383 | 0.057328407 |
| 0.286989537 | 0.297472695 | 0.069569095 | 0.244346634 |
| 0.214874505 | 0.108360488 | 0.322586522 | 0.211073014 |
| 0.134570419 | 0.2701413   | 0.279700689 | 0.16727597  |
| 0.246731402 | 0.280107502 | 0.065690096 | 0.159430411 |
| 0.231428934 | 0.163380719 | 0.145085023 | 0.238463333 |
| 0.138669939 | 0.099737289 | 0.044532076 | 0.078702716 |
| 0.140058709 | 0.205296875 | 0.215901439 | 0.268005047 |
| 0.207817105 | 0.120253769 | 0.230116907 | 0.191041066 |
| 0.050484527 | 0.26817221  | 0.037919604 | 0.112555404 |
| 0.12682153  | 0.129803305 | 0.083104813 | 0.168070394 |
| 0.120504307 | 0.045912212 | 0.100932021 | 0.081691442 |
| 0.216288869 | 0.038230638 | 0.140267981 | 0.127245155 |
| 0.066748761 | 0.092570791 | 0.236410546 | 0.114155286 |
| 0.098494867 | 0.110321252 | 0.105307281 | 0.099819617 |
| 0.025792819 | 0.221875354 | 0.210412141 | 0.074920173 |
| 0.274027053 | 0.228249312 | 0.240595298 | 0.214629124 |
| 0.236223997 | 0.130365012 | 0.260855852 | 0.228361957 |
| 0.252688069 | 0.193673683 | 0.127020351 | 0.270132642 |
| 0.154613319 | 0.177645572 | 0.122604986 | 0.314872038 |
| 0.250979147 | 0.168195589 | 0.235784856 | 0.249411768 |
| 0.16995218  | 0.16408971  | 0.094442143 | 0.135444605 |
| 0.086008876 | 0.184477118 | 0.131369888 | 0.217738328 |
| 0.114206198 | 0.11372987  | 0.288865675 | 0.173097593 |
| 0.25584795  | 0.052412575 | 0.29620549  | 0.139462637 |
| 0.243057985 | 0.124232462 | 0.251616583 | 0.171678058 |
| 0.145713974 | 0.162439593 | 0.16788794  | 0.21761625  |
| 0.145488468 | 0.185549243 | 0.117804112 | 0.207165042 |
| 0.106779757 | 0.098155056 | 0.107879599 | 0.234530024 |
| 0.083176567 | 0.124392112 | 0.140635948 | 0.097578908 |
| 0.260158984 | 0.144867125 | 0.151680777 | 0.097999952 |
| 0.183034628 | 0.096498313 | 0.209112118 | 0.099594233 |
| 0.143005103 | 0.257002347 | 0.007761753 | 0.182305837 |
| 0.138780421 | 0.157171136 | 0.317437938 | 0.142215331 |
| 0.229742983 | 0.141569738 | 0.258183093 | 0.227444857 |
| 0.122273441 | 0.254382574 | 0.047786866 | 0.292510308 |
| 0.101518576 | 0.232328472 | 0.232549549 | 0.181977797 |
| 0.181916619 | 0.132364525 | 0.238702161 | 0.070479224 |
| 0.069509241 | 0.226385869 | 0.066965208 | 0.08016138  |
| 0.099889325 | 0.16548287  | 0.101403911 | 0.239970387 |
| 0.167880683 | 0.268509318 | 0.057994859 | 0.165357449 |
| 0.130367779 | 0.186875304 | 0.029469799 | 0.212908433 |
| 0.060177533 | 0.208983342 | 0.164620831 | 0.158248585 |
| 0.28596406  | 0.239094222 | 0.005718256 | 0.129895113 |
| 0.16629321  | 0.02959645  | 0.220856516 | 0.175730276 |
| 0.088102804 | 0.239994152 | 0.006515947 | 0.279942568 |
| 0.076252462 | 0.224407075 | 0.260697492 | 1           |
| 0.134382696 | 0.273681109 | 0.079514961 | 0.176362962 |
| 0.139524374 | 0.054188117 | 0.055527671 | 0.198577715 |
| 0.202701461 | 0.078355037 | 0.163385711 | 0.225697508 |
| 0.186036408 | 0.219581335 | 0.281399946 | 0.080619964 |

|             |             |             |             |
|-------------|-------------|-------------|-------------|
| 0.168889053 | 0.138508091 | 0.133574022 | 0.213500225 |
| 0.169770953 | 0.057672891 | 0.130465741 | 0.143912896 |
| 0.051660395 | 0.164629022 | 0.12367033  | 0.04448465  |
| 0.215404317 | 0.109479686 | 0.072545201 | 0.189544757 |
| 0.106785817 | 0.206390444 | 0.08323914  | 0.156326115 |
| 0.293221922 | 0.212035066 | 0.14501998  | 0.087614074 |
| 0.099304099 | 0.146201736 | 0.169985525 | 0.133294345 |
| 0.177580472 | 0.242827513 | 0.111546826 | 0.106598069 |
| 0.120859802 | 0.304809716 | 0.085569022 | 0.066131479 |
| 0.182335649 | 0.095285925 | 0.07517111  | 0.109614082 |
| 0.102609692 | 0.23109037  | 0.183742915 | 0.110639377 |
| 0.253693826 | 0.213496187 | 0.182528451 | 0.246716953 |
| 0.075018844 | 0.196812023 | 0.248389547 | 0.055482959 |
| 0.226776992 | 0.052623929 | 0.023835601 | 0.182484088 |
| 0.109692692 | 0.235353937 | 0.197935734 | 0.304641499 |
| 0.125854538 | 0.26430896  | 0.255844881 | 0.041537888 |
| 0.096564147 | 0.15404346  | 0.200280395 | 0.257245405 |
| 0.112974567 | 0.190062327 | 0.175297178 | 0.111012834 |
| 0.108679725 | 0.267504583 | 0.190812726 | 0.274487534 |
| 0.224474954 | 0.210346732 | 0.168019845 | 0.279296958 |
| 0.268497831 | 0.151723162 | 0.079670895 | 0.331830834 |
| 0.206393208 | 0.326146568 | 0.159022381 | 0.144533173 |
| 0.24131488  | 0.1618358   | 0.197807224 | 0.10744787  |
| 0.132474967 | 0.190177769 | 0.25841345  | 0.180249277 |
| 0.283086123 | 0.115990356 | 0.03074612  | 0.212787841 |
| 0.081497715 | 0.154386908 | 0.137312375 | 0.188723258 |
| 0.133224793 | 0.050055807 | 0.291744777 | 0.125185332 |
| 0.119891444 | 0.204497864 | 0.138994905 | 0.152223786 |
| 0.165534196 | 0.132774532 | 0.103362955 | 0.182167747 |
| 0.102715739 | 0.142014989 | 0.17269661  | 0.111464131 |
| 0.095409583 | 0.208690563 | 0.056557417 | 0.063605701 |
| 0.253798373 | 0.151058976 | 0.246698804 | 0.222591524 |
| 0.081681271 | 0.051218126 | 0.273815853 | 0.229766763 |
| 0.181333469 | 0.156398468 | 0.151096091 | 0.14767285  |
| 0.162656455 | 0.179932965 | 0.119909232 | 0.247695888 |
| 0.2151258   | 0.150810399 | 0.117946214 | 0.135184221 |
| 0.255340978 | 0.033137641 | 0.176767598 | 0.173810484 |
| 0.205567115 | 0.095011434 | 0.010997719 | 0.024848267 |
| 0.175720372 | 0.251639258 | 0.130838723 | 0.156441164 |
| 0.031415088 | 0.189176459 | 0.021942097 | 0.196191682 |
| 0.161853446 | 0.202414516 | 0.21442268  | 0.154851072 |
| 0.156801097 | 0.172662434 | 0.110176256 | 0.196671332 |
| 0.144960352 | 0.142610749 | 0.148565068 | 0.30567616  |
| 0.186725297 | 0.152434544 | 0.165071615 | 0.144903699 |
| 0.241745934 | 0.246105255 | 0.278684631 | 0.152905926 |
| 0.105611827 | 0.060817232 | 0.04935883  | 0.162646891 |
| 0.067310784 | 0.264903629 | 0.167999036 | 0.253432642 |
| 0.20677445  | 0.13445249  | 0.106246097 | 0.143623879 |
| 0.187853136 | 0.22902894  | 0.079824999 | 0.017342973 |
| 0.01079807  | 0.187768425 | 0.144236026 | 0.20549056  |
| 0.188893487 | 0.03679628  | 0.128283802 | 0.093446016 |
| 0.137995866 | 0.210039603 | 0.165965759 | 0.298363484 |
| 0.179411406 | 0.263413594 | 0.082236287 | 0.25846958  |
| 0.251784526 | 0.058416854 | 0.219786475 | 0.147451536 |

|             |             |             |             |
|-------------|-------------|-------------|-------------|
| 0.188244448 | 0.189917682 | 0.072966591 | 0.242024283 |
| 0.049841379 | 0.2810156   | 0.157991944 | 0.142652662 |
| 0.07324851  | 0.268578759 | 0.244523583 | 0.251758877 |
| 0.131014839 | 0.273169782 | 0.276236005 | 0.021342158 |
| 0.221539637 | 0.212903932 | 0.258813471 | 0.241150112 |
| 0.200923229 | 0.297767502 | 0.228830852 | 0.145229239 |
| 0.212189789 | 0.137878007 | 0.177659674 | 0.022228883 |
| 0.137817744 | 0.153412986 | 0.144824971 | 0.096923975 |
| 0.065919973 | 0.131544778 | 0.09840708  | 0.183632873 |
| 0.073249839 | 0.288708027 | 0.261733211 | 0.24208114  |
| 0.173398443 | 0.135531914 | 0.214117666 | 0.189877527 |
| 0.089957962 | 0.257418982 | 0.13859003  | 0.066157999 |
| 0.169648415 | 0.077302867 | 0.196519414 | 0.101268568 |
| 0.080876014 | 0.260216062 | 0.148295853 | 0.197377894 |
| 0.12389875  | 0.163503225 | 0.171425811 | 0.175517527 |
| 0.168555365 | 0.095196258 | 0.150616222 | 0.116288535 |
| 0.200463846 | 0.257232883 | 0.092643818 | 0.237274701 |
| 0.248275645 | 0.110975522 | 0.119999098 | 0.025682673 |
| 0.086932573 | 0.082277783 | 0.240740262 | 0.282503711 |
| 0.114774482 | 0.105948988 | 0.100278113 | 0.246699795 |
| 0.186135145 | 0.133072163 | 0.088561863 | 0.175075032 |
| 0.236085489 | 0.225683549 | 0.195851001 | 0.212779735 |
| 0.067461735 | 0.181408315 | 0.177138864 | 0.143321141 |
| 0.133018857 | 0.200214061 | 0.156258867 | 0.031726512 |
| 0.155191796 | 0.105179664 | 0.261229993 | 0.267420142 |
| 0.274673618 | 0.212656052 | 0.067595975 | 0.260319151 |
| 0.063775745 | 0.285461818 | 0.043475799 | 0.201934619 |
| 0.223297361 | 0.054700506 | 0.25046465  | 0.134484525 |
| 0.25899897  | 0.14748309  | 0.109598064 | 0.270483623 |
| 0.076845516 | 0.171575532 | 0.14704081  | 0.222666583 |
| 0.111735038 | 0.184545729 | 0.273365278 | 0.057125546 |
| 0.061140766 | 0.062126849 | 0.164963164 | 0.087084235 |
| 0.138581302 | 0.259156021 | 0.063387382 | 0.134648116 |
| 0.122719004 | 0.082614001 | 0.102973921 | 0.161409669 |
| 0.190443522 | 0.167311164 | 0.053811508 | 0.154332386 |
| 0.145648615 | 0.234206075 | 0.082920231 | 0.073433596 |
| 0.135159324 | 0.124826368 | 0.130795256 | 0.156359515 |
| 0.114289212 | 0.311538    | 0.100373788 | 0.156121475 |
| 0.087020927 | 0.0714241   | 0.156805643 | 0.203394887 |
| 0.057916736 |             |             |             |
| FCHSD2      | 0.453178754 | 0.490360542 | 0.409011826 |
| 0.407691968 | 0.414582165 | 0.400313427 | 0.193069899 |
| 0.20242683  | 0.068945518 | 0.002825614 | 0.015042431 |
| 0.449903415 | 0.181705025 | 0.267727818 | 0.333634983 |
| 0.401316422 | 0.11483434  | 0.379884704 | 0.219721494 |
| 0.407247564 | 0.087485554 | 0.375041923 | 0.078033106 |
| 0.275884548 | 0.083461024 | 0.052118252 | 0.237681005 |
| 0.435055804 | 0.061185821 | 0.355014565 | 0.401801041 |
| 0.090654    | 0.458973344 | 0.514327455 | 0.421846189 |
| 0.513933957 | 0.441972251 | 0.01331546  | 0.290071303 |
| 0.449124404 | 0.435492206 | 0.404434756 | 0.306040917 |
| 0.031590718 | 0.496764477 | 0.222706273 | 0.392007825 |
| 0.24748852  | 0.021351697 | 0.269495499 | 0.448760386 |
| 0.477601161 | 0.43590425  | 0.233099274 | 0.141565815 |

|             |             |             |             |
|-------------|-------------|-------------|-------------|
| 0.185149933 | 0.259504476 | 0.260748606 | 0.367530173 |
| 0.203939586 | 0.18009962  | 0.477291888 | 0.073202059 |
| 0.143595222 | 0.260549504 | 0.137959007 | 0.259391628 |
| 0.338806962 | 0.425031548 | 0.015705024 | 0.437797054 |
| 0.002167426 | 0.383093787 | 0.366893448 | 0.300098895 |
| 0.03165241  | 0.013946497 | 0.161547951 | 0.324385315 |
| 0.448449606 | 0.451049038 | 0.454231739 | 0.458357677 |
| 0.159796798 | 0.276723213 | 0.393697255 | 0.14834497  |
| 0.455902905 | 0.158651794 | 0.105080598 | 0.399640321 |
| 0.457102328 | 0.500209083 | 0.173774434 | 0.236868607 |
| 0.431549038 | 0.454507221 | 0.427582533 | 0.41380204  |
| 0.325686354 | 0.043756245 | 0.441053851 | 0.464793466 |
| 0.437067529 | 0.307829919 | 0.128131218 | 0.428484169 |
| 0.047561304 | 0.395436523 | 0.332121701 | 0.162628632 |
| 0.449913944 | 0.012771602 | 0.18698911  | 0.350527217 |
| 0.214023307 | 0.461410308 | 0.49251242  | 0.167192031 |
| 0.409281312 | 0.015406469 | 0.115648393 | 0.027392358 |
| 0.331989122 | 0.138148697 | 0.503385902 | 0.446989874 |
| 0.246127464 | 0.359324149 | 0.255166758 | 0.000443189 |
| 0.019573084 | 0.180939048 | 0.465666846 | 0.38920439  |
| 0.441905552 | 0.426082796 | 0.201071772 | 0.43487262  |
| 0.448223937 | 0.453969033 | 0.070389342 | 0.084971801 |
| 0.421281313 | 0.177643763 | 0.213453055 | 0.454439964 |
| 0.276782826 | 0.108765318 | 0.110708218 | 0.461367313 |
| 0.426691825 | 0.069401471 | 0.385080238 | 0.397530924 |
| 0.319052592 | 0.33375246  | 0.093322658 | 0.262817581 |
| 0.040212334 | 0.477546126 | 0.021395622 | 0.362391596 |
| 0.254595432 | 0.132164939 | 0.010798842 | 0.27762951  |
| 0.289791597 | 0.443133475 | 0.494415078 | 0.092710396 |
| 0.306159676 | 0.384070432 | 0.363681079 | 0.432578311 |
| 0.005771525 | 0.040336151 | 0.338974555 | 0.463681505 |
| 0.334884551 | 0.464881801 | 0.289421224 | 0.286766359 |
| 0.255524588 | 0.440647573 | 0.003337837 | 0.499195277 |
| 0.503060025 | 0.359297717 | 0.381856082 | 0.42063459  |
| 0.366681188 | 0.440695538 | 0.054025514 | 0.405607034 |
| 0.419352381 | 0.067459258 | 0.457078034 | 0.134382696 |
| 1           | 0.029731093 | 0.332745241 | 0.443080646 |
| 0.4541067   | 0.007637699 | 0.242987073 | 0.387114209 |
| 0.020594604 | 0.094518897 | 0.445131828 | 0.39746293  |
| 0.363123439 | 0.44527531  | 0.447585508 | 0.347471171 |
| 0.408893343 | 0.231488912 | 0.009350121 | 0.300028417 |
| 0.456682401 | 0.386009181 | 0.433408495 | 0.228543572 |
| 0.401999    | 0.453875462 | 0.454370328 | 0.207432536 |
| 0.032521894 | 0.319012541 | 0.018078171 | 0.304885636 |
| 0.435793769 | 0.101332788 | 0.395614444 | 0.148009772 |
| 0.056774973 | 0.474618875 | 0.16081556  | 0.25645737  |
| 0.117189632 | 0.406352409 | 0.24128594  | 0.2260967   |
| 0.195746162 | 0.138592969 | 0.331256046 | 0.363425208 |
| 0.031108191 | 0.075883713 | 0.012451004 | 0.397937    |
| 0.126330834 | 0.344880782 | 0.352643541 | 0.447365931 |
| 0.334351155 | 0.095756004 | 0.362752627 | 0.276295951 |
| 0.094155019 | 0.010154143 | 0.472007294 | 0.397464596 |
| 0.391449472 | 0.137196596 | 0.032569765 | 0.364980495 |
| 0.451913923 | 0.354565686 | 0.325830827 | 0.447032633 |



|             |             |             |             |
|-------------|-------------|-------------|-------------|
| 0.025647065 | 0.458639679 | 0.225694696 | 0.099575865 |
| 0.368002038 | 0.23766619  | 0.440152558 | 0.05980363  |
| 0.424612377 | 0.449045307 | 0.300474976 | 0.156068625 |
| 0.425349854 | 0.414529734 | 0.023526295 | 0.449764702 |
| 0.448567233 | 0.022994528 | 0.488309881 | 0.109257336 |
| 0.015121066 | 0.437759065 | 0.442374775 | 0.059728524 |
| 0.06224518  | 0.316061557 | 0.042639867 | 0.261584749 |
| 0.470695042 | 0.387354432 | 0.443386088 | 0.203709414 |
| 0.029693951 | 0.007031133 | 0.190901203 | 0.418518433 |
| 0.51602257  | 0.469817821 | 0.243767634 | 0.344555639 |
| 0.218546373 | 0.30853172  | 0.170147677 | 0.462531356 |
| 0.210261639 | 0.506456177 | 0.004294293 | 0.443356408 |
| 0.511386654 | 0.330837715 | 0.061766198 | 0.307528452 |
| 0.432032047 | 0.035337655 | 0.206115588 | 0.483616598 |
| 0.447675663 | 0.307745099 | 0.33357504  | 0.440211554 |
| 0.012323279 | 0.035220438 | 0.377055542 | 0.171477626 |
| 0.374638999 | 0.190044458 | 0.049403492 | 0.352074757 |
| 0.031633856 | 0.442543681 | 0.451629562 | 0.043950732 |
| 0.358685109 | 0.341551465 | 0.361862868 | 0.027807806 |
| 0.447524664 | 0.480902122 | 0.513993948 | 0.161167872 |
| 0.46519662  | 0.454404342 | 0.40983135  | 0.066737816 |
| 0.012010311 | 0.506018318 | 0.431374391 | 0.017008631 |
| 0.452600866 | 0.281982459 | 0.008130357 | 0.46866011  |
| 0.168605929 | 0.473730606 | 0.003225441 | 0.097442535 |
| 0.03379337  | 0.447253551 | 0.476394927 | 0.399502465 |
| 0.277418522 | 0.370482967 | 0.005625895 | 0.479918222 |
| 0.470099129 | 0.009421585 | 0.123401019 | 0.457968177 |
| 0.440425331 | 0.506689754 | 0.303283862 | 0.449932037 |
| 0.432850553 | 0.493441812 | 0.226196237 | 0.240010935 |
| 0.448319095 | 0.472666727 | 0.440337177 | 0.445875709 |
| 0.453228417 | 0.415479235 | 0.256732147 | 0.010218901 |
| 0.112951053 | 0.230542896 | 0.314736449 | 0.065295638 |
| 0.374171739 | 0.115213838 | 0.462884204 | 0.453578423 |
| 0.461465175 | 0.002783142 | 0.150143311 | 0.460379425 |
| 0.443844681 | 0.451397303 | 0.019512648 | 0.005783377 |
| 0.008625231 | 0.012684355 | 0.368994197 | 0.222610044 |
| 0.460032579 | 0.267272369 | 0.00241054  | 0.041460309 |
| 0.271450661 | 0.384751946 | 0.481708643 | 0.365077022 |
| 0.453976561 | 0.067869496 | 0.279332039 | 0.393500466 |
| 0.052134017 | 0.396795885 | 0.459880909 | 0.460380734 |
| 0.035030219 | 0.226787776 | 0.41472378  | 0.454194258 |
| 0.066329918 | 0.295314904 | 0.456647825 | 0.29482474  |
| 0.012874843 | 0.065044003 | 0.049621205 | 0.432512648 |
| 0.503531998 | 0.062014036 | 0.02368241  | 0.167272283 |
| 0.101313592 | 0.461151215 | 0.143918284 | 0.462617671 |
| 0.447683908 | 0.423688583 | 0.062707412 | 0.470644001 |
| 0.028217831 | 0.483641041 | 0.319827373 | 0.062123903 |
| 0.291202702 | 0.009519422 | 0.454578264 | 0.133985629 |
| 0.3513954   | 0.430079181 | 0.179010968 | 0.012105469 |
| 0.177711657 | 0.041316956 | 0.449164148 | 0.44894622  |
| 0.027951094 | 0.230440569 | 0.283279228 | 0.413172869 |
| 0.307266233 | 0.424287019 | 0.502826784 | 0.433700918 |
| 0.071268921 | 0.150338334 | 0.419342391 | 0.443361277 |
| 0.254116883 | 0.456446462 | 0.272901713 | 0.483851064 |

|             |             |             |             |
|-------------|-------------|-------------|-------------|
| 0.445059129 | 0.457363771 | 0.461973713 | 0.337611723 |
| 0.215763055 | 0.433087715 | 0.383897037 | 0.015100424 |
| 0.347692563 | 0.447148878 | 0.383262522 | 0.12990774  |
| 0.227179932 | 0.394544156 | 0.043616173 | 0.23778138  |
| 0.338006507 | 0.338698596 | 0.123327447 | 0.426570304 |
| 0.427649617 | 0.445715218 | 0.039862437 | 0.045943793 |
| 0.511234981 | 0.442527801 | 0.141340972 | 0.432400723 |
| 0.15477031  | 0.318788738 | 0.458095084 | 0.4497443   |
| 0.382330148 | 0.457317298 | 0.447220627 | 0.407801309 |
| 0.43011827  | 0.242747722 | 0.512491862 | 0.104782129 |
| 0.067965499 | 0.456757196 | 0.078551789 | 0.076522141 |
| 0.12268952  | 0.019692356 | 0.297284164 | 0.418192266 |
| 0.389430299 | 0.363462757 | 0.363335723 | 0.068355617 |
| 0.307544533 | 0.415995464 | 0.337909352 | 0.192121058 |
| 0.062486723 | 0.487716581 | 0.006560061 | 0.045310395 |
| 0.399041983 | 0.450213505 | 0.368642064 | 0.219699189 |
| 0.287394803 | 0.127587559 | 0.275998372 | 0.332747714 |
| 0.33677869  | 0.381988858 | 0.450612624 | 0.030321898 |
| 0.015158393 | 0.458571045 | 0.415685532 | 0.01728617  |
| 0.077233973 | 0.427570449 | 0.314155529 | 0.209184388 |
| 0.016171241 | 0.453218293 | 0.354512027 | 0.424257933 |
| 0.350055923 | 0.056174911 | 0.405055436 | 0.090129814 |
| 0.05513941  | 0.448804101 | 0.400184247 | 0.497709094 |
| 0.35512549  | 0.40150316  | 0.466651218 | 0.462064544 |
| 0.131100815 | 0.41928867  | 0.020607789 | 0.453182358 |
| 0.421591596 |             |             |             |

| FDPS        | 0.033721615 | 0.04883361  | 0.032270369 |
|-------------|-------------|-------------|-------------|
| 0.116753045 | 0.073502839 | 0.034302679 | 0.147123193 |
| 0.034672734 | 0.143567983 | 0.101423491 | 0.201781054 |
| 0.043630407 | 0.088619298 | 0.056462837 | 0.019644505 |
| 0.13163954  | 0.190336319 | 0.022725084 | 0.200299979 |
| 0.095907622 | 0.094914786 | 0.165972423 | 0.191642027 |
| 0.048550241 | 0.189928315 | 0.265143604 | 0.08426723  |
| 0.096546619 | 0.262974346 | 0.028533887 | 0.066389504 |
| 0.154243711 | 0.047395052 | 0.031689356 | 0.092084461 |
| 0.028127935 | 0.02306562  | 0.037273778 | 0.036697441 |
| 0.037965674 | 0.073261629 | 0.098921618 | 0.175913314 |
| 0.231642434 | 0.025237847 | 0.192245866 | 0.074873845 |
| 0.0203957   | 0.26902371  | 0.017012948 | 0.02582496  |
| 0.027058999 | 0.046003141 | 0.047697357 | 0.137944394 |
| 0.058581715 | 0.018283421 | 0.030549134 | 0.028776311 |
| 0.190387303 | 0.021546147 | 0.031299455 | 0.124725725 |
| 0.039526996 | 0.051910905 | 0.132804912 | 0.080042799 |
| 0.027617049 | 0.033476254 | 0.129470313 | 0.02309177  |
| 0.033723388 | 0.109332627 | 0.091198179 | 0.023725798 |
| 0.28960268  | 0.226173566 | 0.132426842 | 0.135024667 |
| 0.08372698  | 0.028019007 | 0.085904685 | 0.067800548 |
| 0.136287208 | 0.116159665 | 0.0411939   | 0.186958552 |
| 0.043055875 | 0.156756138 | 0.072872468 | 0.14334327  |
| 0.07952682  | 0.039525281 | 0.138701052 | 0.164469725 |
| 0.058760827 | 0.044156283 | 0.033342174 | 0.058938859 |
| 0.029102271 | 0.136080423 | 0.032860929 | 0.060992663 |
| 0.029024842 | 0.041754001 | 0.247497012 | 0.06278117  |
| 0.239428875 | 0.012122549 | 0.182812786 | 0.058596402 |

|             |             |             |             |
|-------------|-------------|-------------|-------------|
| 0.085975905 | 0.181342854 | 0.183855807 | 0.098226148 |
| 0.073674837 | 0.047387343 | 0.03849628  | 0.20836762  |
| 0.053455382 | 0.163585532 | 0.057192268 | 0.197218357 |
| 0.03751769  | 0.032646715 | 0.02084275  | 0.08338459  |
| 0.038649077 | 0.04325839  | 0.098340916 | 0.141753762 |
| 0.246948657 | 0.065188058 | 0.037803371 | 0.03805125  |
| 0.063928746 | 0.018892147 | 0.134917997 | 0.025843689 |
| 0.040128741 | 0.084764634 | 0.003247927 | 0.16689647  |
| 0.054823543 | 0.077645892 | 0.258982107 | 0.046853082 |
| 0.144719787 | 0.114689413 | 0.203397816 | 0.067844296 |
| 0.032064259 | 0.256623663 | 0.014223507 | 0.133602011 |
| 0.043758583 | 0.111191764 | 0.191925549 | 0.090344206 |
| 0.197938097 | 0.02729452  | 0.210125769 | 0.029351982 |
| 0.024687819 | 0.116856725 | 0.079760723 | 0.04992529  |
| 0.0419364   | 0.048679966 | 0.018457404 | 0.207517778 |
| 0.103082801 | 0.129698341 | 0.021872473 | 0.056342362 |
| 0.17816304  | 0.168518168 | 0.008826511 | 0.0601737   |
| 0.021324472 | 0.055979789 | 0.077090603 | 0.066424496 |
| 0.19317507  | 0.088583742 | 0.003807817 | 0.02773927  |
| 0.03825906  | 0.008090468 | 0.105622201 | 0.061778338 |
| 0.033866299 | 0.090804168 | 0.00128825  | 0.125681214 |
| 0.017824415 | 0.200626288 | 0.085503006 | 0.273681109 |
| 0.029731093 | 1           | 0.035545232 | 0.047983702 |
| 0.033506746 | 0.052614867 | 0.036508704 | 0.097814223 |
| 0.182744591 | 0.07026898  | 0.054203992 | 0.108179405 |
| 0.099696837 | 0.074742505 | 0.102279365 | 0.031765381 |
| 0.071206495 | 0.087386748 | 0.154938727 | 0.110919037 |
| 0.048049662 | 0.013424568 | 0.033531982 | 0.08525893  |
| 0.01215143  | 0.044803033 | 0.027999056 | 0.020099719 |
| 0.241972727 | 0.065935306 | 0.065024316 | 0.1166617   |
| 0.024440479 | 0.161129487 | 0.02935536  | 0.081376052 |
| 0.229596124 | 0.059372692 | 0.059897632 | 0.025762786 |
| 0.037618473 | 0.059143946 | 0.129165461 | 0.06506062  |
| 0.083198322 | 0.176293767 | 0.040554877 | 0.045148882 |
| 0.141925822 | 0.245398466 | 0.073383172 | 0.014249006 |
| 0.097615281 | 0.028867476 | 0.022992922 | 0.029357457 |
| 0.037000384 | 0.14409097  | 0.090535657 | 0.038931922 |
| 0.178006433 | 0.247023559 | 0.048333543 | 0.112770241 |
| 0.019951568 | 0.152404111 | 0.231686787 | 0.011729782 |
| 0.077168216 | 0.018350845 | 0.00654512  | 0.056968313 |
| 0.100645036 | 0.073805167 | 0.107478598 | 0.277012743 |
| 0.046186906 | 0.202778102 | 0.097954486 | 0.030575795 |
| 0.03219659  | 0.040677686 | 0.114315681 | 0.184448651 |
| 0.027396515 | 0.082598989 | 0.201160074 | 0.027405465 |
| 0.026093744 | 0.272119991 | 0.047383296 | 0.167833322 |
| 0.236212266 | 0.070000025 | 0.051996049 | 0.298691765 |
| 0.220463485 | 0.092782067 | 0.090238165 | 0.225339724 |
| 0.058216947 | 0.159701834 | 0.051173603 | 0.058186038 |
| 0.257152748 | 0.156770664 | 0.101713668 | 0.030404393 |
| 0.027418673 | 0.046602169 | 0.183948958 | 0.086751424 |
| 0.233958378 | 0.045999098 | 0.016185058 | 0.059545073 |
| 0.027151749 | 0.034205127 | 0.182850725 | 0.056225195 |
| 0.027151409 | 0.020096751 | 0.234217888 | 0.079714106 |
| 0.03297358  | 0.228991569 | 0.079301183 | 0.035402394 |

|             |             |             |             |
|-------------|-------------|-------------|-------------|
| 0.051310444 | 0.06501125  | 0.04088053  | 0.061318802 |
| 0.142848322 | 0.169230493 | 0.076206169 | 0.04077457  |
| 0.036798353 | 0.134642313 | 0.01973029  | 0.022201749 |
| 0.25220157  | 0.040956571 | 0.084204923 | 0.224247744 |
| 0.034110897 | 0.01706661  | 0.131509438 | 0.254162542 |
| 0.047420519 | 0.03427199  | 0.033607805 | 0.100281397 |
| 0.043171472 | 0.046301895 | 0.033128306 | 0.194164358 |
| 0.223475298 | 0.032128948 | 0.037384136 | 0.129803267 |
| 0.089171024 | 0.013953221 | 0.186678841 | 0.046718723 |
| 0.194612125 | 0.017678926 | 0.017674099 | 0.00649536  |
| 0.137270884 | 0.083304607 | 0.029834874 | 0.066984376 |
| 0.011253619 | 0.091714831 | 0.016504163 | 0.048994106 |
| 0.040233462 | 0.211087115 | 0.121901932 | 0.040256821 |
| 0.040315097 | 0.042767352 | 0.046860863 | 0.055662356 |
| 0.041178762 | 0.030933701 | 0.081208437 | 0.226698545 |
| 0.060598464 | 0.032885378 | 0.05613963  | 0.037305595 |
| 0.084833156 | 0.096701761 | 0.213232123 | 0.219640253 |
| 0.06958064  | 0.038433262 | 0.015128328 | 0.14204699  |
| 0.022789199 | 0.190826113 | 0.04123112  | 0.087513826 |
| 0.056152972 | 0.179207809 | 0.076394135 | 0.037141534 |
| 0.062579506 | 0.078356578 | 0.073415148 | 0.014917244 |
| 0.005086717 | 0.172518299 | 0.072885537 | 0.138020506 |
| 0.051497254 | 0.01166254  | 0.18758052  | 0.101189888 |
| 0.06598955  | 0.081217328 | 0.040709193 | 0.160542861 |
| 0.050945243 | 0.224198271 | 0.033329276 | 0.122991843 |
| 0.206450094 | 0.012932449 | 0.064291766 | 0.038328026 |
| 0.164518109 | 0.122974159 | 0.022652641 | 0.083332828 |
| 0.01613441  | 0.16947272  | 0.045572041 | 0.065888168 |
| 0.065235824 | 0.212011719 | 0.228858912 | 0.094298788 |
| 0.026116416 | 0.200630316 | 0.242650851 | 0.006464957 |
| 0.174586068 | 0.06504344  | 0.17009948  | 0.073536308 |
| 0.070278207 | 0.12690518  | 0.163319993 | 0.035830173 |
| 0.227166364 | 0.029722497 | 0.081947512 | 0.012071184 |
| 0.052199361 | 0.180810643 | 0.030702609 | 0.053510399 |
| 0.025527599 | 0.043487858 | 0.050409708 | 0.184912282 |
| 0.022418459 | 0.250211414 | 0.093316306 | 0.078239038 |
| 0.138899704 | 0.081222388 | 0.128511435 | 0.075083997 |
| 0.050026981 | 0.108889303 | 0.030598738 | 0.017563289 |
| 0.168147346 | 0.022628377 | 0.079911866 | 0.026104937 |
| 0.038431597 | 0.084494007 | 0.071496723 | 0.050693214 |
| 0.036146189 | 0.044137045 | 0.043050406 | 0.104583245 |
| 0.069953403 | 0.029860686 | 0.067199874 | 0.12480973  |
| 0.11033068  | 0.093473036 | 0.038350579 | 0.145112068 |
| 0.188478386 | 0.031979067 | 0.123073752 | 0.00554068  |
| 0.024450066 | 0.037352228 | 0.183735199 | 0.115703864 |
| 0.037015517 | 0.027632699 | 0.102265503 | 0.23505477  |
| 0.046639254 | 0.034311059 | 0.063312331 | 0.068058943 |
| 0.176210912 | 0.13950593  | 0.057758259 | 0.064788957 |
| 0.018647404 | 0.052267236 | 0.058932117 | 0.0539808   |
| 0.036321005 | 0.159530033 | 0.035870747 | 0.020089149 |
| 0.106445978 | 0.025739957 | 0.209182005 | 0.238147972 |
| 0.249428723 | 0.220667176 | 0.015147118 | 0.106976262 |
| 0.01291827  | 0.154244392 | 0.011067335 | 0.168937952 |
| 0.122161171 | 0.014709702 | 0.141535605 | 0.098129754 |

|             |             |             |             |
|-------------|-------------|-------------|-------------|
| 0.219943966 | 0.034613462 | 0.122516255 | 0.235865941 |
| 0.018322122 | 0.052205144 | 0.056737706 | 0.123426474 |
| 0.035614331 | 0.099874869 | 0.191997716 | 0.024475154 |
| 0.023736182 | 0.012847307 | 0.049243244 | 0.090679275 |
| 0.175573976 | 0.084900053 | 0.018893611 | 0.11981202  |
| 0.086710993 | 0.022915942 | 0.035820243 | 0.100000674 |
| 0.176320744 | 0.039828488 | 0.024455543 | 0.058244439 |
| 0.080770393 | 0.20887247  | 0.018632573 | 0.045423708 |
| 0.12343421  | 0.027917674 | 0.042047972 | 0.034347891 |
| 0.043639385 | 0.148307936 | 0.020443327 | 0.042075121 |
| 0.039394097 | 0.017234934 | 0.195768762 | 0.0680179   |
| 0.014678098 |             |             |             |
| FGFR10P     | 0.263107817 | 0.396094695 | 0.114604121 |
| 0.341771621 | 0.187664317 | 0.23138954  | 0.160767065 |
| 0.133364356 | 0.041749576 | 0.013387007 | 0.015045653 |
| 0.187933176 | 0.069560232 | 0.132754036 | 0.079583274 |
| 0.314209224 | 0.053411369 | 0.111764592 | 0.172402266 |
| 0.331089187 | 0.112166958 | 0.275863477 | 0.080513913 |
| 0.060451233 | 0.031710947 | 0.047144817 | 0.054662778 |
| 0.391379893 | 0.049934274 | 0.194437547 | 0.361840178 |
| 0.046591    | 0.340749109 | 0.360768078 | 0.231598144 |
| 0.338627602 | 0.227555685 | 0.024715078 | 0.114484663 |
| 0.339325217 | 0.253746296 | 0.347957178 | 0.223647645 |
| 0.050968839 | 0.368478313 | 0.18268832  | 0.169321855 |
| 0.09936195  | 0.02372008  | 0.12383345  | 0.365489209 |
| 0.327514816 | 0.194608465 | 0.141179477 | 0.114285952 |
| 0.061320972 | 0.159927897 | 0.039683943 | 0.310192204 |
| 0.168149374 | 0.132935353 | 0.334394217 | 0.062436857 |
| 0.089612671 | 0.157121729 | 0.054999886 | 0.180138522 |
| 0.063089371 | 0.319118187 | 0.041198919 | 0.155453248 |
| 0.011189088 | 0.314677463 | 0.172639979 | 0.043013943 |
| 0.033661909 | 0.026890832 | 0.063098389 | 0.271148905 |
| 0.390374674 | 0.321501212 | 0.343613134 | 0.330646211 |
| 0.066042546 | 0.122921897 | 0.116853899 | 0.09233158  |
| 0.334567846 | 0.120100408 | 0.050867711 | 0.30019265  |
| 0.345100834 | 0.362181577 | 0.067089622 | 0.107901789 |
| 0.315272177 | 0.392990123 | 0.132951641 | 0.148878398 |
| 0.057084596 | 0.018270816 | 0.337746107 | 0.364421823 |
| 0.338140207 | 0.064487281 | 0.064191039 | 0.390777104 |
| 0.051326235 | 0.090175436 | 0.27024485  | 0.065740069 |
| 0.395964422 | 0.027778658 | 0.076253608 | 0.252361141 |
| 0.090974365 | 0.303451145 | 0.335763859 | 0.146322054 |
| 0.147438858 | 0.021229501 | 0.019820053 | 0.029438438 |
| 0.102505112 | 0.021109913 | 0.331761793 | 0.376064101 |
| 0.165087952 | 0.103788777 | 0.160579358 | 0.004716924 |
| 0.01954045  | 0.060485025 | 0.29867201  | 0.163018348 |
| 0.313238714 | 0.229607741 | 0.076500043 | 0.304055103 |
| 0.189050431 | 0.341029246 | 0.023071845 | 0.096221882 |
| 0.18420729  | 0.067557603 | 0.171623844 | 0.215131356 |
| 0.10466541  | 0.11102176  | 0.095649428 | 0.376864711 |
| 0.387517557 | 0.07745774  | 0.128103724 | 0.285460863 |
| 0.109717952 | 0.129608879 | 0.093429676 | 0.12899273  |
| 0.082238753 | 0.30556948  | 0.015403734 | 0.173131999 |
| 0.040222986 | 0.04754686  | 0.021632046 | 0.196804076 |

|             |             |             |             |
|-------------|-------------|-------------|-------------|
| 0.098066689 | 0.305803033 | 0.313018358 | 0.078589248 |
| 0.15704764  | 0.225468456 | 0.208801922 | 0.25972285  |
| 0.013449269 | 0.04173573  | 0.151248874 | 0.377949291 |
| 0.276549678 | 0.344433021 | 0.119805727 | 0.081254169 |
| 0.134127117 | 0.331248763 | 0.000889039 | 0.35386421  |
| 0.348965189 | 0.130054767 | 0.203885148 | 0.198828609 |
| 0.084766203 | 0.357025505 | 0.012005552 | 0.304040156 |
| 0.262292598 | 0.067993557 | 0.375158472 | 0.079514961 |
| 0.332745241 | 0.035545232 | 1           | 0.240365202 |
| 0.22471766  | 0.010841014 | 0.164498469 | 0.339169866 |
| 0.014090457 | 0.120217674 | 0.304991165 | 0.286110515 |
| 0.196730374 | 0.291493517 | 0.376980522 | 0.068732992 |
| 0.171958197 | 0.139383272 | 0.01508017  | 0.112883477 |
| 0.279933529 | 0.078243075 | 0.364580801 | 0.126964935 |
| 0.195036248 | 0.365857553 | 0.248253993 | 0.067826583 |
| 0.053111328 | 0.218796605 | 0.026818484 | 0.121968843 |
| 0.254187926 | 0.09775684  | 0.111429782 | 0.065208697 |
| 0.034213761 | 0.379405803 | 0.031509259 | 0.036759973 |
| 0.018034319 | 0.223848108 | 0.167907632 | 0.097463888 |
| 0.059077768 | 0.080009101 | 0.070830252 | 0.094450001 |
| 0.075023239 | 0.064311639 | 0.007261327 | 0.074122478 |
| 0.058735975 | 0.086757673 | 0.090297165 | 0.292319393 |
| 0.149007018 | 0.068900554 | 0.134575952 | 0.055585321 |
| 0.037329493 | 0.018024903 | 0.379058941 | 0.280270521 |
| 0.3009955   | 0.099203378 | 0.034397718 | 0.076894837 |
| 0.379737047 | 0.163729791 | 0.101574302 | 0.386899109 |
| 0.025898049 | 0.355132136 | 0.095140758 | 0.059089164 |
| 0.087359    | 0.161107151 | 0.379947203 | 0.027694704 |
| 0.245068873 | 0.39052225  | 0.149951202 | 0.063727694 |
| 0.342697813 | 0.291890604 | 0.047294644 | 0.279941072 |
| 0.287612454 | 0.033572348 | 0.363477002 | 0.044569969 |
| 0.019814115 | 0.231036565 | 0.237351785 | 0.048049338 |
| 0.036327883 | 0.149735533 | 0.084324303 | 0.159927173 |
| 0.379384508 | 0.292444076 | 0.298022358 | 0.044565283 |
| 0.049527539 | 0.015126817 | 0.055808289 | 0.128287764 |
| 0.363497638 | 0.334258937 | 0.156049753 | 0.108011004 |
| 0.189260192 | 0.068409732 | 0.137769935 | 0.358225267 |
| 0.050209888 | 0.366273049 | 0.012832323 | 0.244920634 |
| 0.335389994 | 0.205054769 | 0.03266046  | 0.228393733 |
| 0.337083026 | 0.050340757 | 0.125099133 | 0.35579463  |
| 0.342716419 | 0.086339162 | 0.073322522 | 0.256740259 |
| 0.039121489 | 0.084041445 | 0.154228281 | 0.029069504 |
| 0.104960343 | 0.087417632 | 0.006005264 | 0.141402314 |
| 0.043845329 | 0.376177721 | 0.341127342 | 0.031372145 |
| 0.200506132 | 0.120351561 | 0.206470995 | 0.043336639 |
| 0.262111842 | 0.323283217 | 0.370413399 | 0.133496147 |
| 0.286634566 | 0.317812804 | 0.128952257 | 0.04254616  |
| 0.012716412 | 0.334431516 | 0.286309777 | 0.021682047 |
| 0.381926547 | 0.167492572 | 0.020539724 | 0.398956114 |
| 0.141790848 | 0.327786566 | 0.004394268 | 0.014034476 |
| 0.016916942 | 0.311102357 | 0.339268042 | 0.345647008 |
| 0.090926136 | 0.253701346 | 0.003985193 | 0.354407796 |
| 0.366899405 | 0.008816988 | 0.038617391 | 0.273217815 |
| 0.203309875 | 0.405300454 | 0.060256559 | 0.271453428 |

|             |             |             |             |
|-------------|-------------|-------------|-------------|
| 0.16334256  | 0.333509257 | 0.125007043 | 0.143862039 |
| 0.337420906 | 0.300240382 | 0.323909327 | 0.365885132 |
| 0.3754895   | 0.244925439 | 0.213210295 | 0.030100001 |
| 0.02518243  | 0.161492227 | 0.059140272 | 0.036115963 |
| 0.253793765 | 0.04817864  | 0.345734064 | 0.358392037 |
| 0.31759379  | 0.008187918 | 0.134230694 | 0.295165503 |
| 0.404707039 | 0.403290415 | 0.015144093 | 0.001896782 |
| 0.001576223 | 0.005918163 | 0.283016906 | 0.086346036 |
| 0.341822544 | 0.079456079 | 0.011712212 | 0.086626993 |
| 0.104222695 | 0.15834673  | 0.36552263  | 0.309297346 |
| 0.265201882 | 0.061784285 | 0.084545597 | 0.32648351  |
| 0.024109668 | 0.233640766 | 0.334935692 | 0.387302587 |
| 0.02877519  | 0.084137324 | 0.148846421 | 0.400395987 |
| 0.007169859 | 0.16966953  | 0.219114398 | 0.104840684 |
| 0.010740209 | 0.033352894 | 0.031630975 | 0.317385054 |
| 0.32349997  | 0.043035678 | 0.024107098 | 0.084728997 |
| 0.087644067 | 0.355055862 | 0.082992529 | 0.379518661 |
| 0.367789262 | 0.367585839 | 0.030203523 | 0.35712856  |
| 0.033280704 | 0.346252166 | 0.091339852 | 0.022504948 |
| 0.090301499 | 0.018543723 | 0.310883647 | 0.027601737 |
| 0.152716905 | 0.303416668 | 0.036057918 | 0.011535281 |
| 0.022929821 | 0.034413762 | 0.363547916 | 0.299697136 |
| 0.015606943 | 0.1401087   | 0.128487111 | 0.25927362  |
| 0.222966042 | 0.315879883 | 0.365301034 | 0.130284959 |
| 0.09927289  | 0.026362314 | 0.341207842 | 0.258950495 |
| 0.172581709 | 0.354729059 | 0.075706363 | 0.363736583 |
| 0.288556075 | 0.356764497 | 0.328993366 | 0.205081949 |
| 0.055772388 | 0.217803383 | 0.304722093 | 0.031090141 |
| 0.201969259 | 0.352970124 | 0.19297211  | 0.038706533 |
| 0.10254293  | 0.110882203 | 0.06817042  | 0.056521113 |
| 0.066056059 | 0.258293623 | 0.108288379 | 0.360822926 |
| 0.27381191  | 0.273694073 | 0.083780552 | 0.029931835 |
| 0.395899078 | 0.348220108 | 0.087220922 | 0.277971347 |
| 0.07946791  | 0.163121341 | 0.275105379 | 0.265945088 |
| 0.08493811  | 0.3269042   | 0.363447719 | 0.307121497 |
| 0.38491983  | 0.17796686  | 0.369822711 | 0.100733102 |
| 0.022941632 | 0.205798919 | 0.064511919 | 0.045006474 |
| 0.096262773 | 0.017420574 | 0.038902911 | 0.295642164 |
| 0.057218395 | 0.257982135 | 0.135781616 | 0.045568607 |
| 0.139683021 | 0.126608491 | 0.201930116 | 0.128919289 |
| 0.056323312 | 0.35890678  | 0.008607984 | 0.041666203 |
| 0.072486662 | 0.274938659 | 0.105109771 | 0.076902637 |
| 0.047105394 | 0.046742008 | 0.171905699 | 0.196292615 |
| 0.104471047 | 0.077340679 | 0.278575477 | 0.03808199  |
| 0.050687506 | 0.373759733 | 0.150072846 | 0.011784616 |
| 0.04640289  | 0.230048644 | 0.111803599 | 0.090296537 |
| 0.011191215 | 0.309059984 | 0.1315327   | 0.166579825 |
| 0.242750593 | 0.058446963 | 0.326430952 | 0.04968552  |
| 0.055428112 | 0.355085074 | 0.128192311 | 0.339952847 |
| 0.09895065  | 0.326505695 | 0.345048144 | 0.321300971 |
| 0.04257457  | 0.11590129  | 0.041868631 | 0.370917761 |

0.070372038

FGL2 0.379521733 0.503575716 0.412723653

0.359436007 0.407206786 0.300158687 0.16901571

|             |             |             |             |
|-------------|-------------|-------------|-------------|
| 0.125930461 | 0.098994581 | 0.003161122 | 0.033212713 |
| 0.421276557 | 0.202324108 | 0.20506727  | 0.302362129 |
| 0.387583535 | 0.155220769 | 0.307913821 | 0.212688371 |
| 0.350004155 | 0.060350054 | 0.379941111 | 0.081559766 |
| 0.356243381 | 0.142205075 | 0.078417548 | 0.335497666 |
| 0.36948577  | 0.089831082 | 0.243566448 | 0.30051579  |
| 0.121870586 | 0.371566903 | 0.511092939 | 0.422006392 |
| 0.513684909 | 0.360161756 | 0.00973958  | 0.240931095 |
| 0.360869874 | 0.421710412 | 0.343472817 | 0.292299058 |
| 0.038580614 | 0.455620023 | 0.212689191 | 0.414940849 |
| 0.181215697 | 0.038261231 | 0.161520508 | 0.405866228 |
| 0.465458362 | 0.402300559 | 0.163424208 | 0.132021462 |
| 0.208695714 | 0.149286792 | 0.34469051  | 0.233984994 |
| 0.194242055 | 0.093418139 | 0.479669927 | 0.081368995 |
| 0.129940584 | 0.186107284 | 0.183099676 | 0.197205818 |
| 0.411248124 | 0.305388323 | 0.013371637 | 0.404958903 |
| 0.000986672 | 0.330693121 | 0.38538696  | 0.396180171 |
| 0.049355562 | 0.019534401 | 0.206068319 | 0.281805024 |
| 0.399835332 | 0.446510285 | 0.466611636 | 0.487702585 |
| 0.188748241 | 0.302890165 | 0.431965433 | 0.165354765 |
| 0.388002264 | 0.147587408 | 0.098345091 | 0.401029615 |
| 0.47961632  | 0.516577573 | 0.228853396 | 0.299313918 |
| 0.36276267  | 0.439736809 | 0.390344201 | 0.408553317 |
| 0.382902077 | 0.083684205 | 0.417215481 | 0.49943599  |
| 0.332521984 | 0.396265648 | 0.178208957 | 0.325128008 |
| 0.063706787 | 0.305792226 | 0.316228356 | 0.152544787 |
| 0.413752409 | 0.017435604 | 0.253622624 | 0.293205889 |
| 0.211671939 | 0.383272851 | 0.523775851 | 0.163308056 |
| 0.401060885 | 0.020500569 | 0.210934839 | 0.041376871 |
| 0.282903367 | 0.234051601 | 0.470759622 | 0.402901317 |
| 0.164217654 | 0.383106585 | 0.218501631 | 0.003435948 |
| 0.036250328 | 0.212379946 | 0.385239414 | 0.320473365 |
| 0.382316402 | 0.383224159 | 0.247252819 | 0.315848346 |
| 0.431445135 | 0.460693279 | 0.040416461 | 0.081933198 |
| 0.372549156 | 0.21155119  | 0.231316782 | 0.405009909 |
| 0.334304268 | 0.086770073 | 0.116789439 | 0.501000192 |
| 0.373274838 | 0.07761802  | 0.265956745 | 0.387765822 |
| 0.296734976 | 0.391528213 | 0.095378378 | 0.235110947 |
| 0.037977622 | 0.492049316 | 0.043031891 | 0.258295801 |
| 0.32160377  | 0.178780748 | 0.010461625 | 0.184177509 |
| 0.237254446 | 0.399404432 | 0.465435206 | 0.103567672 |
| 0.273165889 | 0.400201017 | 0.236794509 | 0.371776164 |
| 0.012157694 | 0.046512072 | 0.200013068 | 0.484838784 |
| 0.199639667 | 0.492426948 | 0.271446417 | 0.331820951 |
| 0.300635083 | 0.402502122 | 0.005628549 | 0.478207275 |
| 0.527810429 | 0.217662774 | 0.365959886 | 0.406372022 |
| 0.417902912 | 0.390319578 | 0.035914056 | 0.380155978 |
| 0.285185999 | 0.077337435 | 0.48091305  | 0.176362962 |
| 0.443080646 | 0.047983702 | 0.240365202 | 1           |
| 0.404490605 | 0.008268062 | 0.152571499 | 0.318742302 |
| 0.04355112  | 0.06132087  | 0.374219812 | 0.361367453 |
| 0.359564345 | 0.418317974 | 0.443420654 | 0.412930261 |
| 0.405766158 | 0.186718954 | 0.015313304 | 0.357567616 |
| 0.408185324 | 0.377185037 | 0.4045014   | 0.196841139 |



|             |             |             |             |
|-------------|-------------|-------------|-------------|
| 0.260309751 | 0.445865341 | 0.38581374  | 0.20251668  |
| 0.040641694 | 0.241725488 | 0.014753378 | 0.347617408 |
| 0.378559036 | 0.09628399  | 0.404315125 | 0.157272043 |
| 0.089810943 | 0.512613825 | 0.261759987 | 0.357156388 |
| 0.215021309 | 0.339351277 | 0.215068106 | 0.195765017 |
| 0.219465862 | 0.176794107 | 0.393924311 | 0.380742531 |
| 0.024379862 | 0.095784092 | 0.026100502 | 0.356280553 |
| 0.130272705 | 0.303195838 | 0.286118865 | 0.338167597 |
| 0.259331353 | 0.097038928 | 0.373563458 | 0.359285776 |
| 0.147528105 | 0.018689038 | 0.487752168 | 0.371362636 |
| 0.25397232  | 0.140301188 | 0.047692839 | 0.306825456 |
| 0.420980828 | 0.244286687 | 0.191827158 | 0.40976132  |
| 0.028188067 | 0.463950463 | 0.234357958 | 0.140735998 |
| 0.390721566 | 0.239124706 | 0.40754486  | 0.054204491 |
| 0.321095132 | 0.429539634 | 0.315866367 | 0.212457729 |
| 0.345898041 | 0.358152632 | 0.024885347 | 0.345461105 |
| 0.331378884 | 0.034475753 | 0.518252996 | 0.154746469 |
| 0.027202271 | 0.433893853 | 0.419390835 | 0.089357324 |
| 0.098400043 | 0.297039147 | 0.027948688 | 0.306932178 |
| 0.501124471 | 0.38811367  | 0.378377054 | 0.291426543 |
| 0.038098235 | 0.009340178 | 0.260648443 | 0.409722942 |
| 0.493138129 | 0.514771452 | 0.254965686 | 0.384512083 |
| 0.22097033  | 0.37355118  | 0.090240378 | 0.497824403 |
| 0.22430747  | 0.506609467 | 0.00798183  | 0.436612485 |
| 0.509597283 | 0.200382671 | 0.104739484 | 0.241682585 |
| 0.319228496 | 0.045153323 | 0.174272567 | 0.480956185 |
| 0.399381278 | 0.345662867 | 0.368777893 | 0.392707477 |
| 0.01095537  | 0.03042099  | 0.408511103 | 0.279925153 |
| 0.36510946  | 0.227360036 | 0.109977193 | 0.254409886 |
| 0.042194505 | 0.41715953  | 0.407414682 | 0.078034514 |
| 0.269883674 | 0.241536029 | 0.386628908 | 0.037573362 |
| 0.463867626 | 0.507722649 | 0.507940486 | 0.132358876 |
| 0.399583157 | 0.491316711 | 0.433545259 | 0.097146538 |
| 0.025986131 | 0.521299865 | 0.332732468 | 0.02146171  |
| 0.425859311 | 0.153933853 | 0.011183748 | 0.464754881 |
| 0.164498913 | 0.422314071 | 0.003417071 | 0.118544635 |
| 0.064628967 | 0.427630006 | 0.468318985 | 0.305225591 |
| 0.177659692 | 0.325647482 | 0.010750963 | 0.521916044 |
| 0.467891911 | 0.023509284 | 0.196246774 | 0.400054264 |
| 0.427614843 | 0.503145117 | 0.398600926 | 0.443466059 |
| 0.42867167  | 0.50116405  | 0.192879237 | 0.283831846 |
| 0.381788075 | 0.511761806 | 0.355051774 | 0.426507101 |
| 0.402514799 | 0.418959399 | 0.255214866 | 0.01404981  |
| 0.206095005 | 0.143186702 | 0.294509531 | 0.105674067 |
| 0.242171356 | 0.172825191 | 0.461144201 | 0.429475278 |
| 0.475480672 | 0.006930134 | 0.107561584 | 0.383218817 |
| 0.374677504 | 0.425038406 | 0.027605932 | 0.008760651 |
| 0.010769763 | 0.034457951 | 0.29032952  | 0.277576992 |
| 0.479531721 | 0.178328132 | 0.005013564 | 0.026935525 |
| 0.254774682 | 0.434516731 | 0.489744328 | 0.342358011 |
| 0.4219635   | 0.08670836  | 0.239341606 | 0.352368791 |
| 0.099336217 | 0.26285555  | 0.474990357 | 0.439938393 |
| 0.053349377 | 0.285422195 | 0.318483916 | 0.447746464 |
| 0.145767382 | 0.325759424 | 0.412737855 | 0.28815339  |

|             |                     |              |             |
|-------------|---------------------|--------------|-------------|
| 0.018692977 | 0.107925806         | 0.090297914  | 0.407715824 |
| 0.505042465 | 0.082050192         | 0.038984781  | 0.095354602 |
| 0.103181647 | 0.431428359         | 0.156395209  | 0.496356823 |
| 0.369929263 | 0.387385784         | 0.106307869  | 0.467019304 |
| 0.047088383 | 0.472254118         | 0.398786995  | 0.048186363 |
| 0.289376915 | 0.014658225         | 0.469241982  | 0.20959226  |
| 0.239444132 | 0.328291224         | 0.273018341  | 0.027164775 |
| 0.280211334 | 0.063522206         | 0.446407767  | 0.440170723 |
| 0.052568363 | 0.203924424         | 0.311583135  | 0.36875289  |
| 0.206744805 | 0.387123031         | 0.48617065   | 0.360361437 |
| 0.066943807 | 0.201621433         | 0.33963344   | 0.328195542 |
| 0.167953793 | 0.472315704         | 0.321045694  | 0.521138789 |
| 0.347871245 | 0.433125494         | 0.461738796  | 0.311936114 |
| 0.291079921 | 0.329148343         | 0.297114469  | 0.014266885 |
| 0.319072252 | 0.408308582         | 0.298002222  | 0.196397825 |
| 0.274863229 | 0.435087889         | 0.042994918  | 0.146361308 |
| 0.407148759 | 0.223264225         | 0.128956666  | 0.392126257 |
| 0.320408197 | 0.330362087         | 0.027971122  | 0.08404432  |
| 0.52568649  | 0.407646656         | 0.113564477  | 0.372475193 |
| 0.184049465 | 0.351484167         | 0.423164349  | 0.432885655 |
| 0.375984584 | 0.404044533         | 0.352717383  | 0.309656837 |
| 0.377073621 | 0.234609814         | 0.515011807  | 0.04945758  |
| 0.118990758 | 0.382381847         | 0.093162456  | 0.114607024 |
| 0.136839556 | 0.038479913         | 0.387887551  | 0.396778922 |
| 0.415208272 | 0.351937395         | 0.242185598  | 0.092394773 |
| 0.348129849 | 0.32941144          | 0.347818872  | 0.153334546 |
| 0.076503745 | 0.483961108         | 0.011936937  | 0.064974879 |
| 0.405370437 | 0.405461 0.42534102 | 0.261565989  |             |
| 0.379213936 | 0.184417372         | 0.290041825  | 0.208949901 |
| 0.258544153 | 0.356096587         | 0.399050791  | 0.028323092 |
| 0.013351652 | 0.465251978         | 0.306873886  | 0.032626909 |
| 0.112974043 | 0.326456154         | 0.266059304  | 0.242840046 |
| 0.036623329 | 0.489591954         | 0.268577601  | 0.425317606 |
| 0.283137488 | 0.067084802         | 0.303159783  | 0.081234965 |
| 0.057802191 | 0.414179819         | 0.425884652  | 0.514380624 |
| 0.378963587 | 0.382433714         | 0.417502229  | 0.379562836 |
| 0.126972186 | 0.387210339         | 0.023746878  | 0.379124209 |
| 0.402723125 |                     |              |             |
| FOXP1       | 0.324178902         | 0.507065019  | 0.316160501 |
| 0.30931204  | 0.345406119         | 0.262758411  | 0.137676715 |
| 0.106280408 | 0.054810089         | 0.003713672  | 0.024762134 |
| 0.370109784 | 0.194155672         | 0.202008155  | 0.220135816 |
| 0.315795872 | 0.136737315         | 0.239383403  | 0.171628046 |
| 0.296355235 | 0.053522578         | 0.320463251  | 0.059034273 |
| 0.25434198  | 0.10300664          | 0.054783297  | 0.232871769 |
| 0.356668249 | 0.061091966         | 0.23528607   | 0.268237936 |
| 0.087496419 | 0.352866727         | 0.51708687   | 0.377904974 |
| 0.529559314 | 0.304089024         | 0.0111104651 | 0.202471395 |
| 0.35153866  | 0.345275704         | 0.292376385  | 0.24619617  |
| 0.02707154  | 0.476051404         | 0.173104369  | 0.329927112 |
| 0.140116504 | 0.029654923         | 0.143622664  | 0.415409107 |
| 0.488771394 | 0.349449836         | 0.13300815   | 0.104504806 |
| 0.209493084 | 0.151969888         | 0.297080537  | 0.219753059 |
| 0.162793088 | 0.091496338         | 0.493337162  | 0.051514227 |

|             |             |             |             |
|-------------|-------------|-------------|-------------|
| 0.098735087 | 0.153895344 | 0.145781104 | 0.168459189 |
| 0.311622044 | 0.27416173  | 0.009146541 | 0.345715507 |
| 0.002056927 | 0.273861744 | 0.310164523 | 0.273628792 |
| 0.034688111 | 0.022265984 | 0.163388057 | 0.242821048 |
| 0.38780427  | 0.441343587 | 0.454421251 | 0.472723247 |
| 0.179097624 | 0.231032534 | 0.351210311 | 0.138055747 |
| 0.376387399 | 0.125810636 | 0.077806183 | 0.333750665 |
| 0.467189386 | 0.527010445 | 0.172904095 | 0.217523195 |
| 0.356565578 | 0.445326891 | 0.319505724 | 0.343516042 |
| 0.280030267 | 0.048652718 | 0.426740354 | 0.500384596 |
| 0.337514633 | 0.309136439 | 0.132672736 | 0.308708138 |
| 0.044593763 | 0.257781292 | 0.26546598  | 0.156029012 |
| 0.403830406 | 0.009518705 | 0.192773256 | 0.26460654  |
| 0.147737513 | 0.350166399 | 0.526860608 | 0.129616651 |
| 0.343999541 | 0.018464252 | 0.134978955 | 0.026840258 |
| 0.266216869 | 0.170227221 | 0.489039162 | 0.408119685 |
| 0.15684229  | 0.318710277 | 0.176413437 | 0.001669858 |
| 0.025732829 | 0.148250927 | 0.397161605 | 0.267321552 |
| 0.319035583 | 0.36761997  | 0.188994065 | 0.295489322 |
| 0.373041562 | 0.447946248 | 0.039123535 | 0.057508395 |
| 0.31978584  | 0.14961745  | 0.181090156 | 0.367980518 |
| 0.265117029 | 0.066423555 | 0.095112609 | 0.488113251 |
| 0.382812997 | 0.060555196 | 0.228611247 | 0.322659439 |
| 0.258792447 | 0.322682448 | 0.074853839 | 0.228711354 |
| 0.031246709 | 0.496747093 | 0.029390544 | 0.217113926 |
| 0.218928314 | 0.173494586 | 0.005631903 | 0.163959586 |
| 0.21421632  | 0.409674938 | 0.481152159 | 0.075376586 |
| 0.257068787 | 0.328864808 | 0.21612885  | 0.344855153 |
| 0.008602957 | 0.03194644  | 0.183192279 | 0.495413129 |
| 0.195930131 | 0.480541362 | 0.221340183 | 0.23768829  |
| 0.232948909 | 0.357992911 | 0.002353427 | 0.491716804 |
| 0.530410282 | 0.204620217 | 0.339026272 | 0.339797743 |
| 0.312693905 | 0.381174495 | 0.034793042 | 0.330507602 |
| 0.26695243  | 0.052774101 | 0.465650607 | 0.139524374 |
| 0.4541067   | 0.033506746 | 0.22471766  | 0.404490605 |
| 1           | 0.007891666 | 0.137201478 | 0.273141597 |
| 0.026039598 | 0.051226371 | 0.313216298 | 0.298347488 |
| 0.28526414  | 0.351289687 | 0.426444072 | 0.303666543 |
| 0.343893653 | 0.154390968 | 0.008858616 | 0.274567384 |
| 0.357318243 | 0.3097699   | 0.408886766 | 0.158658516 |
| 0.244611339 | 0.447872002 | 0.378550802 | 0.145046662 |
| 0.028139979 | 0.207716764 | 0.014388625 | 0.258351021 |
| 0.356464897 | 0.093539358 | 0.305641487 | 0.124165881 |
| 0.067624434 | 0.510246936 | 0.181856653 | 0.260494372 |
| 0.14269518  | 0.333859488 | 0.167872569 | 0.212276709 |
| 0.236280129 | 0.124056158 | 0.290030558 | 0.287269972 |
| 0.020230717 | 0.081597346 | 0.012352316 | 0.3780312   |
| 0.167050375 | 0.332543592 | 0.320102904 | 0.31569477  |
| 0.267546229 | 0.110752407 | 0.328978938 | 0.234588425 |
| 0.097217326 | 0.012440105 | 0.487322392 | 0.30430005  |
| 0.24106688  | 0.101580588 | 0.033494678 | 0.32917665  |
| 0.427145791 | 0.229138181 | 0.169149686 | 0.421645801 |
| 0.018102236 | 0.444934237 | 0.219638887 | 0.10746455  |
| 0.372799313 | 0.208769753 | 0.386066936 | 0.042480698 |

|             |             |             |             |
|-------------|-------------|-------------|-------------|
| 0.281706337 | 0.449421482 | 0.237495169 | 0.151878841 |
| 0.378033775 | 0.306147238 | 0.019780171 | 0.321509154 |
| 0.322029868 | 0.026739148 | 0.524986052 | 0.127485365 |
| 0.01775904  | 0.365988968 | 0.364723427 | 0.060292998 |
| 0.063606402 | 0.265699171 | 0.021447142 | 0.238000816 |
| 0.50025111  | 0.328859428 | 0.357927682 | 0.194327303 |
| 0.030120362 | 0.017156113 | 0.192914792 | 0.330842732 |
| 0.513424778 | 0.51743336  | 0.204446203 | 0.341956613 |
| 0.174088252 | 0.275466286 | 0.079638856 | 0.499992698 |
| 0.149310724 | 0.513105802 | 0.004901327 | 0.378987179 |
| 0.523747657 | 0.198840921 | 0.07452045  | 0.208278449 |
| 0.339315255 | 0.028497272 | 0.134251582 | 0.494392728 |
| 0.380495458 | 0.24981776  | 0.270183102 | 0.341426212 |
| 0.008114287 | 0.02312233  | 0.304978257 | 0.18382295  |
| 0.294885314 | 0.156228691 | 0.072784837 | 0.219782974 |
| 0.034223513 | 0.436100354 | 0.387385393 | 0.042811001 |
| 0.255011058 | 0.193306104 | 0.316499059 | 0.025193459 |
| 0.444777004 | 0.505096238 | 0.521227571 | 0.102522823 |
| 0.374792812 | 0.48950126  | 0.37317819  | 0.064915983 |
| 0.015945484 | 0.527311141 | 0.280640178 | 0.017210388 |
| 0.41919667  | 0.149567251 | 0.015431647 | 0.468888442 |
| 0.124197306 | 0.447269909 | 0.001331949 | 0.069976644 |
| 0.037189259 | 0.404575136 | 0.471650274 | 0.264849286 |
| 0.170024159 | 0.263465502 | 0.005507489 | 0.517779969 |
| 0.486810782 | 0.014302657 | 0.137456168 | 0.395155707 |
| 0.377223985 | 0.508713075 | 0.295435136 | 0.434858291 |
| 0.388067243 | 0.515021902 | 0.183876902 | 0.215791183 |
| 0.383681588 | 0.512548212 | 0.304564885 | 0.42171992  |
| 0.407939306 | 0.349290367 | 0.20439857  | 0.009400441 |
| 0.096184905 | 0.127014741 | 0.243847511 | 0.064091184 |
| 0.217083728 | 0.118114378 | 0.460196595 | 0.415149518 |
| 0.477503682 | 0.004011685 | 0.088501739 | 0.377765654 |
| 0.377214277 | 0.41109036  | 0.013456421 | 0.004148034 |
| 0.006226928 | 0.023628529 | 0.248669388 | 0.198544602 |
| 0.466745307 | 0.185307381 | 0.003292841 | 0.022085233 |
| 0.194860216 | 0.353796635 | 0.503036754 | 0.284011082 |
| 0.369237591 | 0.063897985 | 0.234931022 | 0.292441361 |
| 0.063589725 | 0.237275513 | 0.473358421 | 0.452872897 |
| 0.033280381 | 0.196012232 | 0.278566708 | 0.439145004 |
| 0.094267353 | 0.264773014 | 0.375120493 | 0.256804111 |
| 0.010784173 | 0.07013781  | 0.052279669 | 0.342055511 |
| 0.522080438 | 0.086976022 | 0.038333931 | 0.102240743 |
| 0.093414635 | 0.419545092 | 0.13604687  | 0.486650177 |
| 0.365233939 | 0.356562158 | 0.0757451   | 0.463775411 |
| 0.033204015 | 0.496934657 | 0.319873656 | 0.03630613  |
| 0.225556388 | 0.008955233 | 0.482690071 | 0.142048929 |
| 0.230818024 | 0.285358373 | 0.147560762 | 0.016585738 |
| 0.171028602 | 0.047894418 | 0.433708689 | 0.417934019 |
| 0.031497495 | 0.150079685 | 0.233691048 | 0.302623861 |
| 0.186665648 | 0.343388942 | 0.500517423 | 0.321130285 |
| 0.05226238  | 0.157272959 | 0.295855351 | 0.300082468 |
| 0.158909231 | 0.458255993 | 0.254268927 | 0.5134803   |
| 0.299291003 | 0.417273846 | 0.466247775 | 0.245758797 |
| 0.244613494 | 0.288214716 | 0.275070532 | 0.013662393 |

|             |             |             |             |
|-------------|-------------|-------------|-------------|
| 0.259454139 | 0.408345653 | 0.24411765  | 0.14644461  |
| 0.224895789 | 0.348149218 | 0.025974285 | 0.132692757 |
| 0.322369565 | 0.20669131  | 0.112668774 | 0.351952746 |
| 0.28319263  | 0.303274353 | 0.022157621 | 0.048489383 |
| 0.528960396 | 0.396060271 | 0.081265107 | 0.320420925 |
| 0.133745541 | 0.270960265 | 0.377661965 | 0.382635243 |
| 0.279004015 | 0.419412365 | 0.333529681 | 0.298801346 |
| 0.397992959 | 0.178318824 | 0.521438643 | 0.043442634 |
| 0.074870279 | 0.346254964 | 0.086077852 | 0.079010743 |
| 0.111848506 | 0.021073152 | 0.292199482 | 0.336923232 |
| 0.360210462 | 0.311240577 | 0.230869018 | 0.056501078 |
| 0.274933413 | 0.269825306 | 0.28035987  | 0.135844763 |
| 0.064622328 | 0.498183764 | 0.007256405 | 0.047549965 |
| 0.379648394 | 0.366802613 | 0.356638658 | 0.192924273 |
| 0.291210126 | 0.128388075 | 0.242474364 | 0.199749237 |
| 0.276002582 | 0.297073221 | 0.373167791 | 0.018029157 |
| 0.011402396 | 0.454886474 | 0.265009136 | 0.017463675 |
| 0.070983511 | 0.273837878 | 0.222411159 | 0.18071345  |
| 0.021298181 | 0.495304863 | 0.245182649 | 0.348344051 |
| 0.233440676 | 0.047737258 | 0.315875189 | 0.058483806 |
| 0.033944481 | 0.431297075 | 0.334353929 | 0.526507139 |
| 0.289821534 | 0.330062276 | 0.429797623 | 0.390308428 |
| 0.087268933 | 0.31082034  | 0.015491658 | 0.368128508 |
| 0.356477764 |             |             |             |

| FUCA2       | 0.009364512 | 0.010188635 | 0.007667361 |
|-------------|-------------|-------------|-------------|
| 0.023769797 | 0.015039439 | 0.008250372 | 0.034431949 |
| 0.012851219 | 0.005256008 | 0.002870759 | 0.005090794 |
| 0.012159623 | 0.004291602 | 0.011006188 | 0.002340062 |
| 0.028879723 | 0.037252377 | 0.008243762 | 0.052674508 |
| 0.022720489 | 0.024836986 | 0.03265095  | 0.039741551 |
| 0.010668502 | 0.029905204 | 0.043957674 | 0.013255432 |
| 0.02393193  | 0.044363248 | 0.008194459 | 0.018469588 |
| 0.031136364 | 0.012981898 | 0.007050852 | 0.018206622 |
| 0.006207566 | 0.005947891 | 0.001952182 | 0.006010929 |
| 0.011160725 | 0.013177207 | 0.023566901 | 0.038444396 |
| 0.030019902 | 0.006477886 | 0.038613289 | 0.018056459 |
| 0.000672439 | 0.034924482 | 0.006951338 | 0.007136686 |
| 0.005509314 | 0.00713469  | 0.017566438 | 0.029997695 |
| 0.001441474 | 0.007705135 | 0.002606184 | 0.010784948 |
| 0.044402631 | 0.009266906 | 0.006110063 | 0.006490877 |
| 0.000440843 | 0.021137301 | 0.031022437 | 0.023158393 |
| 0.005626788 | 0.00988931  | 0.02369377  | 0.005807375 |
| 0.000225563 | 0.030291375 | 0.023696902 | 0.00326089  |
| 0.07258208  | 0.012956145 | 0.038034787 | 0.026656145 |
| 0.019608785 | 0.007274799 | 0.016854876 | 0.012971403 |
| 0.013552187 | 0.029750246 | 0.009447338 | 0.034366681 |
| 0.011561238 | 0.031793278 | 0.005622005 | 0.03002515  |
| 0.015300803 | 0.008155041 | 0.027054275 | 0.036076138 |
| 0.010228119 | 0.010913021 | 0.005627533 | 0.009535196 |
| 0.002808451 | 0.017285452 | 0.006628566 | 0.012176146 |
| 0.007980291 | 0.009007646 | 0.047178565 | 0.017614009 |
| 0.066941478 | 0.002499073 | 0.037991999 | 0.002185523 |
| 0.020641806 | 0.019926935 | 0.04337273  | 0.020788167 |
| 0.011016249 | 0.011018342 | 0.007652228 | 0.050356038 |

|             |             |             |             |
|-------------|-------------|-------------|-------------|
| 0.017333469 | 0.003332883 | 0.001542503 | 0.053023378 |
| 0.020359208 | 0.004113211 | 0.00464805  | 0.017541242 |
| 0.010555262 | 0.004193632 | 0.029645771 | 0.032178842 |
| 0.040484991 | 0.005119273 | 0.009294069 | 0.013061391 |
| 0.014701661 | 0.004497158 | 0.017394558 | 0.007793198 |
| 0.007928387 | 0.016792855 | 0.000340723 | 0.03923178  |
| 0.014466234 | 0.012108422 | 0.057871053 | 0.011133413 |
| 0.027828758 | 0.034960575 | 0.057197775 | 0.013649664 |
| 0.009084901 | 0.066738756 | 0.005661345 | 0.03020188  |
| 0.00469991  | 0.025366195 | 0.059938166 | 0.021128846 |
| 0.031774154 | 0.005905353 | 0.048808598 | 0.012574942 |
| 0.001647143 | 0.012231845 | 0.00946953  | 0.020498185 |
| 0.006120451 | 0.00834599  | 0.004354502 | 0.065353929 |
| 0.023415222 | 0.023655874 | 0.008784711 | 0.010601578 |
| 0.003161761 | 0.019585542 | 0.005247694 | 0.012535672 |
| 0.007657661 | 0.012227055 | 0.018582822 | 0.013625924 |
| 0.040831918 | 0.017550595 | 1.33E-05    | 0.006635287 |
| 0.007643222 | 0.006859891 | 0.020702489 | 0.017925664 |
| 0.005142356 | 0.017694194 | 0.000376549 | 0.02977509  |
| 0.007070253 | 0.061227085 | 0.017170852 | 0.054188117 |
| 0.007637699 | 0.052614867 | 0.010841014 | 0.008268062 |
| 0.007891666 | 1           | 0.011051281 | 0.024579528 |
| 0.02753354  | 0.013461909 | 0.01370758  | 0.019930471 |
| 0.015119158 | 0.01517764  | 0.021349951 | 0.00428381  |
| 0.014391392 | 0.034490282 | 0.015995986 | 0.025773537 |
| 0.010755033 | 0.000764664 | 0.007203321 | 0.020798556 |
| 0.005422181 | 0.009950446 | 0.007314747 | 0.000208183 |
| 0.050262334 | 0.018613036 | 0.003183358 | 0.019272889 |
| 0.005891988 | 0.018816448 | 0.004815554 | 0.014132458 |
| 0.057501062 | 0.011502161 | 0.012641306 | 0.005420821 |
| 0.006046548 | 0.011196361 | 0.038257329 | 0.007955975 |
| 0.005634854 | 0.028509674 | 0.007915168 | 0.006181234 |
| 0.027471664 | 0.052403792 | 0.00524898  | 0.003167867 |
| 0.005346065 | 0.005825913 | 0.004975724 | 0.008295163 |
| 0.009540898 | 0.008964253 | 0.020018025 | 0.004023771 |
| 0.026232619 | 0.068401248 | 0.010291814 | 0.027606025 |
| 0.006486568 | 0.032780854 | 0.068198876 | 0.001634698 |
| 0.01513663  | 0.00440212  | 0.004379939 | 0.011661885 |
| 0.00485267  | 0.015088721 | 0.008549404 | 0.053237925 |
| 0.009976497 | 0.044404896 | 0.020499011 | 0.009074794 |
| 0.011206393 | 0.009386036 | 0.031063922 | 0.025029982 |
| 0.007592238 | 0.020962493 | 0.021097886 | 0.007075517 |
| 0.007458637 | 0.067517119 | 0.010053356 | 0.031490702 |
| 0.068590218 | 0.014121625 | 0.008283872 | 0.066735419 |
| 0.041931598 | 0.013580521 | 0.017725336 | 0.044978192 |
| 0.011359593 | 0.031309824 | 0.008376498 | 0.012124994 |
| 0.045351676 | 0.00502233  | 0.027142912 | 0.008032241 |
| 0.006290085 | 0.009432822 | 0.052687899 | 0.01558632  |
| 0.056390117 | 0.007491337 | 0.001573156 | 0.011578229 |
| 0.003269894 | 0.008371997 | 0.062954731 | 0.010560149 |
| 0.005685549 | 0.011141556 | 0.036501803 | 0.017686349 |
| 0.009163849 | 0.041334063 | 0.030615403 | 0.007300809 |
| 0.010234039 | 0.011176267 | 0.005943768 | 0.017572405 |
| 0.022981321 | 0.018177179 | 0.013694335 | 0.006184812 |

|             |             |             |             |
|-------------|-------------|-------------|-------------|
| 0.004913126 | 0.024856765 | 0.002162857 | 0.008698481 |
| 0.016898349 | 0.008981025 | 0.020156025 | 0.015010046 |
| 0.005834454 | 0.006346633 | 0.031047682 | 0.058391805 |
| 0.008497153 | 0.007238939 | 0.007365552 | 0.033498302 |
| 0.011688523 | 0.008293706 | 0.005735715 | 0.056454558 |
| 0.053720432 | 0.006692236 | 0.009498542 | 0.000847643 |
| 0.020203375 | 0.006784658 | 0.00713187  | 0.010448224 |
| 0.051357676 | 0.004675167 | 0.000146338 | 0.000107402 |
| 0.024044026 | 0.018294109 | 0.006186332 | 0.019535024 |
| 0.001824448 | 0.026506709 | 0.000258722 | 0.010424284 |
| 0.008565163 | 0.037648171 | 0.022026332 | 0.008078844 |
| 0.007410276 | 0.009839141 | 0.008733543 | 0.010166287 |
| 0.008573533 | 0.006081776 | 0.0057507   | 0.043118105 |
| 0.013108598 | 0.006397602 | 0.013881074 | 0.008970875 |
| 0.018272219 | 0.021316443 | 0.045680829 | 0.028246016 |
| 0.001390457 | 0.015366557 | 0.00137685  | 0.001206659 |
| 0.009183747 | 0.017306734 | 0.010162541 | 0.018171705 |
| 0.011204499 | 0.059218107 | 0.014091355 | 0.009387927 |
| 0.015836074 | 0.017153457 | 0.004807007 | 0.000132283 |
| 0.000178294 | 0.009888285 | 0.019879065 | 0.031859886 |
| 0.009700245 | 0.000845049 | 0.046151729 | 0.021616118 |
| 0.005667174 | 0.015035518 | 0.008363454 | 0.038783031 |
| 0.01086801  | 0.060761    | 0.003709287 | 0.030944154 |
| 0.022623258 | 0.005353225 | 0.012110313 | 0.008682718 |
| 0.034049452 | 0.025738557 | 0.009221818 | 0.016445335 |
| 0.002049649 | 0.042241677 | 0.012706554 | 0.010281337 |
| 0.001711888 | 0.032594161 | 0.027683636 | 0.021707034 |
| 0.005397677 | 0.016730377 | 0.018783135 | 0.000208788 |
| 0.02793777  | 0.014207026 | 0.019016581 | 0.014869719 |
| 0.014839447 | 0.027642657 | 0.023791154 | 0.007546094 |
| 0.010160354 | 0.006856159 | 0.015263919 | 0.000316062 |
| 0.017152403 | 0.041387368 | 0.007365776 | 0.001345325 |
| 0.009182416 | 0.014546073 | 0.002506904 | 0.040380891 |
| 0.002481964 | 0.065383067 | 0.017515623 | 0.016213434 |
| 0.025121883 | 0.020424762 | 0.030028565 | 0.020196624 |
| 0.017450531 | 0.022406471 | 0.006793696 | 0.003086649 |
| 0.028513432 | 0.001638059 | 0.023308891 | 0.008530668 |
| 0.01492346  | 0.017135219 | 0.008070962 | 0.010900709 |
| 0.010574986 | 0.01022714  | 0.009755763 | 0.02083522  |
| 0.007328247 | 0.009674586 | 0.013840483 | 0.004878942 |
| 0.02979871  | 0.0177333   | 0.015004705 | 0.011244785 |
| 0.029846423 | 0.006066743 | 0.007643249 | 0.000990253 |
| 0.005042823 | 0.010403789 | 0.017527915 | 0.026586133 |
| 0.013368776 | 0.009504292 | 0.010374596 | 0.024540382 |
| 0.009936121 | 0.008512387 | 0.006978331 | 0.01286937  |
| 0.047382057 | 0.022600902 | 0.012642547 | 0.015383371 |
| 0.003018704 | 0.009812874 | 0.018123014 | 0.011327548 |
| 0.008875362 | 0.036471715 | 0.007336468 | 0.007415851 |
| 0.003905911 | 0.007856653 | 0.022727175 | 0.061501482 |
| 0.060590183 | 0.024453187 | 0.002110161 | 0.027101059 |
| 0.003560825 | 0.031465223 | 0.003969028 | 0.004347375 |
| 0.031778103 | 0.005459238 | 0.030363264 | 0.022576812 |
| 0.017615221 | 0.006907543 | 0.001082882 | 0.062893199 |
| 0.00552436  | 0.01091556  | 0.009561982 | 0.027923948 |

|             |             |             |             |
|-------------|-------------|-------------|-------------|
| 0.006868615 | 0.015411821 | 0.040469339 | 0.011647674 |
| 0.00366207  | 0.000703339 | 0.009501707 | 0.003448377 |
| 0.037500372 | 0.018044556 | 0.006381328 | 0.013431021 |
| 0.002470179 | 0.006427646 | 0.011334769 | 0.006993511 |
| 0.033949755 | 0.007595302 | 0.005189966 | 0.011842484 |
| 0.0198816   | 0.057689798 | 0.006423316 | 0.001204011 |
| 0.01479622  | 0.007733272 | 0.009898993 | 0.007493232 |
| 0.011751495 | 0.02991396  | 0.005525139 | 0.009533538 |
| 0.001977673 | 0.004700336 | 0.02822861  | 0.017120082 |
| 0.004805036 |             |             |             |

| FYN         | 0.171712889 | 0.295119523 | 0.075249295 |
|-------------|-------------|-------------|-------------|
| 0.284597297 | 0.112288316 | 0.235171739 | 0.184550398 |
| 0.210854461 | 0.080138115 | 0.042479066 | 0.016811062 |
| 0.112239824 | 0.063141289 | 0.162224679 | 0.123270659 |
| 0.215349591 | 0.033670737 | 0.099210923 | 0.145065939 |
| 0.241839942 | 0.21283301  | 0.177821509 | 0.116263126 |
| 0.037652043 | 0.0248208   | 0.051444301 | 0.045614564 |
| 0.298890638 | 0.055358095 | 0.199545995 | 0.309522023 |
| 0.027306246 | 0.22895017  | 0.273697198 | 0.137595237 |
| 0.24293499  | 0.163068071 | 0.009419449 | 0.173055945 |
| 0.263590726 | 0.186057664 | 0.262841071 | 0.185479488 |
| 0.084412227 | 0.298929491 | 0.182745914 | 0.096173817 |
| 0.15535667  | 0.025196274 | 0.211999582 | 0.30461172  |
| 0.257081809 | 0.139517309 | 0.216852628 | 0.1740405   |
| 0.053588289 | 0.187401916 | 0.025601556 | 0.30398929  |
| 0.144973541 | 0.238457995 | 0.248905511 | 0.14903833  |
| 0.086635313 | 0.183400199 | 0.028133829 | 0.189866962 |
| 0.039423899 | 0.289697436 | 0.050804984 | 0.088290093 |
| 0.023240478 | 0.243879634 | 0.094682558 | 0.03505753  |
| 0.029381573 | 0.029867216 | 0.03584959  | 0.241797364 |
| 0.28274583  | 0.230661779 | 0.226662723 | 0.216085645 |
| 0.046707556 | 0.069173537 | 0.057835077 | 0.090480337 |
| 0.249363829 | 0.166526336 | 0.081563059 | 0.190001409 |
| 0.229915055 | 0.259339815 | 0.053310127 | 0.060612974 |
| 0.271970641 | 0.304943013 | 0.113162459 | 0.098556416 |
| 0.062911824 | 0.009763844 | 0.26672868  | 0.244865993 |
| 0.27298429  | 0.029977574 | 0.045220323 | 0.313716419 |
| 0.043754584 | 0.109416946 | 0.208446261 | 0.035629636 |
| 0.292372483 | 0.066201939 | 0.040342935 | 0.204407162 |
| 0.07813524  | 0.229142097 | 0.235310877 | 0.143874262 |
| 0.080254354 | 0.019188925 | 0.018741096 | 0.019551546 |
| 0.105478833 | 0.009747908 | 0.263238764 | 0.286232362 |
| 0.174538315 | 0.072298542 | 0.16533457  | 0.003443626 |
| 0.013204307 | 0.038569069 | 0.18688792  | 0.104993817 |
| 0.218954151 | 0.159569695 | 0.08845247  | 0.241847651 |
| 0.119814329 | 0.219083429 | 0.074746376 | 0.128437703 |
| 0.152734251 | 0.039484902 | 0.122517057 | 0.133342136 |
| 0.070123017 | 0.16721167  | 0.093986211 | 0.272579991 |
| 0.335740744 | 0.089223195 | 0.117453308 | 0.191888713 |
| 0.12327002  | 0.069030852 | 0.094331778 | 0.115147483 |
| 0.112728372 | 0.218655333 | 0.008261925 | 0.150594803 |
| 0.051014763 | 0.0213625   | 0.020543688 | 0.206693057 |
| 0.151522892 | 0.237968469 | 0.23325914  | 0.075269306 |
| 0.119170801 | 0.145877705 | 0.177048557 | 0.213117279 |



|             |             |             |             |
|-------------|-------------|-------------|-------------|
| 0.033361586 | 0.046576611 | 0.137540078 | 0.263883616 |
| 0.292609384 | 0.225013324 | 0.112596285 | 0.065199634 |
| 0.083071637 | 0.240014648 | 0.001111984 | 0.282712358 |
| 0.249597939 | 0.132107297 | 0.141142558 | 0.114322219 |
| 0.056754195 | 0.281817484 | 0.013619876 | 0.191079938 |
| 0.206215484 | 0.06989568  | 0.254702894 | 0.055527671 |
| 0.242987073 | 0.036508704 | 0.164498469 | 0.152571499 |
| 0.137201478 | 0.011051281 | 1           | 0.287653681 |
| 0.007149942 | 0.234446899 | 0.217148569 | 0.232460697 |
| 0.171451024 | 0.192337088 | 0.258187668 | 0.049312019 |
| 0.114361435 | 0.160446581 | 0.013749349 | 0.061394505 |
| 0.178895748 | 0.058372371 | 0.318007199 | 0.17207749  |
| 0.171550059 | 0.295701011 | 0.172100056 | 0.088677279 |
| 0.078059276 | 0.19178102  | 0.063816978 | 0.097439787 |
| 0.18838684  | 0.127519908 | 0.081570653 | 0.035268631 |
| 0.023294473 | 0.273114209 | 0.016988804 | 0.021296607 |
| 0.008941694 | 0.164441395 | 0.144833998 | 0.117711446 |
| 0.049652868 | 0.074635553 | 0.060553528 | 0.093200638 |
| 0.144300104 | 0.055508199 | 0.002945204 | 0.049623765 |
| 0.049195377 | 0.073930928 | 0.08254978  | 0.20914485  |
| 0.115806176 | 0.062072444 | 0.093116989 | 0.040753608 |
| 0.032186029 | 0.014880087 | 0.283824214 | 0.19459493  |
| 0.279916721 | 0.131540037 | 0.025794643 | 0.061173327 |
| 0.279816257 | 0.199695153 | 0.145961359 | 0.307580238 |
| 0.030989128 | 0.231960803 | 0.094896656 | 0.046306631 |
| 0.052046171 | 0.123075613 | 0.289625428 | 0.064159612 |
| 0.174676027 | 0.309260681 | 0.093066417 | 0.063891057 |
| 0.287852044 | 0.220127708 | 0.076625399 | 0.218749821 |
| 0.214950081 | 0.029983314 | 0.25329121  | 0.025240683 |
| 0.014439306 | 0.137371317 | 0.163186242 | 0.038255311 |
| 0.03166551  | 0.13785212  | 0.192370766 | 0.10141243  |
| 0.282766151 | 0.193332435 | 0.225818986 | 0.027573855 |
| 0.066463596 | 0.010260223 | 0.03089409  | 0.075657926 |
| 0.276771799 | 0.221840424 | 0.0954032   | 0.066424378 |
| 0.1491746   | 0.064313427 | 0.182900035 | 0.250593479 |
| 0.032552298 | 0.264254086 | 0.010966109 | 0.148410192 |
| 0.248100166 | 0.191484153 | 0.028749616 | 0.231566062 |
| 0.295282905 | 0.076432505 | 0.119820672 | 0.274776883 |
| 0.271447966 | 0.090120461 | 0.085942192 | 0.153186066 |
| 0.09675176  | 0.116695888 | 0.106592758 | 0.016301829 |
| 0.104792035 | 0.091180524 | 0.001892996 | 0.151073654 |
| 0.060298053 | 0.300859487 | 0.216412954 | 0.047401524 |
| 0.210812894 | 0.151970632 | 0.11437436  | 0.050943303 |
| 0.168664925 | 0.218170277 | 0.281495144 | 0.140093406 |
| 0.172893807 | 0.227928492 | 0.072087508 | 0.030251979 |
| 0.008487429 | 0.240312421 | 0.236928074 | 0.040409675 |
| 0.258025694 | 0.213633041 | 0.027044572 | 0.312952359 |
| 0.133973174 | 0.255496644 | 0.031994594 | 0.008402996 |
| 0.008791566 | 0.191464869 | 0.27755595  | 0.285109922 |
| 0.170613174 | 0.176865591 | 7.22E-06    | 0.235199619 |
| 0.284900463 | 0.006238185 | 0.021783713 | 0.177938741 |
| 0.12618872  | 0.306616156 | 0.037533391 | 0.18032347  |
| 0.095877675 | 0.243471391 | 0.142259255 | 0.097989203 |
| 0.273239741 | 0.199849573 | 0.266700214 | 0.304191717 |

|             |             |             |             |
|-------------|-------------|-------------|-------------|
| 0.263881946 | 0.142143877 | 0.18068159  | 0.055185942 |
| 0.032534845 | 0.228441232 | 0.095815141 | 0.05312373  |
| 0.25819794  | 0.047331621 | 0.252302769 | 0.233616661 |
| 0.210443951 | 0.006282259 | 0.218107123 | 0.203014817 |
| 0.33187361  | 0.303891734 | 0.011781253 | 0.005990334 |
| 0.002732727 | 0.005591473 | 0.2265151   | 0.053960606 |
| 0.248370844 | 0.139665635 | 0.012492052 | 0.160921687 |
| 0.130100862 | 0.089492523 | 0.271516528 | 0.22394185  |
| 0.164285061 | 0.047198687 | 0.125329153 | 0.236633812 |
| 0.021679704 | 0.199583622 | 0.232224223 | 0.319551197 |
| 0.017370919 | 0.058555527 | 0.101358156 | 0.297181935 |
| 0.003055028 | 0.095282089 | 0.124828907 | 0.117237702 |
| 0.005485131 | 0.02576097  | 0.030317525 | 0.200310683 |
| 0.230403559 | 0.037602666 | 0.021066641 | 0.106506915 |
| 0.124314501 | 0.230572651 | 0.092244468 | 0.26125656  |
| 0.290373012 | 0.25579532  | 0.014026484 | 0.291775744 |
| 0.032949063 | 0.259762531 | 0.047917503 | 0.070885624 |
| 0.066000715 | 0.015425451 | 0.202283678 | 0.040459649 |
| 0.158634641 | 0.235052191 | 0.042024362 | 0.00555564  |
| 0.015543441 | 0.025811195 | 0.254716837 | 0.188036198 |
| 0.007261078 | 0.155577709 | 0.081409214 | 0.172813598 |
| 0.253299849 | 0.235133972 | 0.287879028 | 0.113627019 |
| 0.151100748 | 0.009307489 | 0.26826104  | 0.200386401 |
| 0.181770874 | 0.229872335 | 0.077804387 | 0.253031097 |
| 0.228963348 | 0.263887323 | 0.223986216 | 0.195960722 |
| 0.027867202 | 0.189208922 | 0.296759453 | 0.085425499 |
| 0.159687541 | 0.239301549 | 0.15118962  | 0.03951477  |
| 0.071926207 | 0.057998206 | 0.057223007 | 0.059734829 |
| 0.032423196 | 0.293534958 | 0.101617551 | 0.246349793 |
| 0.202169414 | 0.214260713 | 0.074025585 | 0.032600441 |
| 0.288223399 | 0.284296647 | 0.195548266 | 0.233565695 |
| 0.059070299 | 0.120006231 | 0.176998616 | 0.15515729  |
| 0.070010752 | 0.224610592 | 0.27359193  | 0.269915384 |
| 0.329978989 | 0.15497564  | 0.281521536 | 0.202414649 |
| 0.022177684 | 0.118044627 | 0.078867672 | 0.030109948 |
| 0.089325912 | 0.016202911 | 0.026233181 | 0.181193649 |
| 0.03716854  | 0.172116226 | 0.120132193 | 0.050081839 |
| 0.072648353 | 0.083267526 | 0.127668962 | 0.200059264 |
| 0.075494466 | 0.281767066 | 0.009733596 | 0.028959685 |
| 0.039975179 | 0.204247858 | 0.061632174 | 0.066549869 |
| 0.031377097 | 0.022780684 | 0.113085832 | 0.207781448 |
| 0.111361091 | 0.059558997 | 0.215014542 | 0.085295811 |
| 0.07150569  | 0.248293952 | 0.131697675 | 0.006478634 |
| 0.024252846 | 0.17401711  | 0.081559335 | 0.110726134 |
| 0.005665987 | 0.203658497 | 0.144884027 | 0.101582826 |
| 0.220119387 | 0.051254172 | 0.280185357 | 0.055684187 |
| 0.063788487 | 0.283106049 | 0.075725982 | 0.238734824 |
| 0.052202838 | 0.229099788 | 0.285502956 | 0.211292599 |
| 0.043324829 | 0.069359756 | 0.081514144 | 0.265269176 |
| 0.05787211  |             |             |             |
| FZD5        | 0.308745772 | 0.464906967 | 0.253210501 |
| 0.39541136  | 0.316170659 | 0.298241354 | 0.323923219 |
| 0.287623829 | 0.15648896  | 0.027423913 | 0.04579474  |
| 0.26607784  | 0.193684864 | 0.294784154 | 0.270694585 |

|             |             |             |             |
|-------------|-------------|-------------|-------------|
| 0.377434276 | 0.148333286 | 0.299947288 | 0.321747338 |
| 0.355448256 | 0.226724077 | 0.326440198 | 0.213220448 |
| 0.211255491 | 0.114948337 | 0.137359613 | 0.210629776 |
| 0.442154001 | 0.149846253 | 0.289069167 | 0.360910557 |
| 0.130076682 | 0.371509831 | 0.431317034 | 0.285090183 |
| 0.404723661 | 0.27613783  | 0.025338443 | 0.308155543 |
| 0.383497112 | 0.334597306 | 0.371437541 | 0.34124334  |
| 0.129046987 | 0.414794237 | 0.325686435 | 0.279871847 |
| 0.25515925  | 0.069045488 | 0.276830925 | 0.402449466 |
| 0.385345573 | 0.28182361  | 0.335748605 | 0.286861374 |
| 0.160897845 | 0.272849645 | 0.13995941  | 0.281635811 |
| 0.321963577 | 0.241173443 | 0.396392049 | 0.19530675  |
| 0.200960188 | 0.346954754 | 0.15427923  | 0.3443249   |
| 0.215036945 | 0.344095193 | 0.081010544 | 0.21857411  |
| 0.012996959 | 0.359480528 | 0.285271982 | 0.176020446 |
| 0.091987032 | 0.054099509 | 0.18076147  | 0.356802902 |
| 0.444596083 | 0.381699826 | 0.423474773 | 0.412970971 |
| 0.176092478 | 0.280863225 | 0.23261155  | 0.241619936 |
| 0.390658584 | 0.280189769 | 0.157753816 | 0.362932703 |
| 0.427405052 | 0.432502179 | 0.218878837 | 0.243932618 |
| 0.372475118 | 0.443855347 | 0.287964957 | 0.312066812 |
| 0.221355466 | 0.064907519 | 0.387040116 | 0.437838715 |
| 0.3600996   | 0.179609617 | 0.181500843 | 0.39818613  |
| 0.129767762 | 0.265134298 | 0.349439144 | 0.138606313 |
| 0.457618711 | 0.081765016 | 0.200187625 | 0.353518693 |
| 0.258751803 | 0.360614315 | 0.414676419 | 0.301160474 |
| 0.285532683 | 0.047212015 | 0.095909457 | 0.074630486 |
| 0.283724372 | 0.079216115 | 0.385698629 | 0.43177826  |
| 0.302356397 | 0.289877668 | 0.362938534 | 0.011621607 |
| 0.053860383 | 0.181196645 | 0.334508876 | 0.311606838 |
| 0.358161671 | 0.28762579  | 0.249274915 | 0.320303943 |
| 0.249060046 | 0.416937423 | 0.062652287 | 0.23301815  |
| 0.320336007 | 0.191625607 | 0.295940147 | 0.29354584  |
| 0.262265188 | 0.256954396 | 0.227868882 | 0.462723009 |
| 0.414011145 | 0.187803161 | 0.286312418 | 0.3458664   |
| 0.298510688 | 0.251465457 | 0.217400352 | 0.295176305 |
| 0.1607079   | 0.376892847 | 0.046440991 | 0.323835652 |
| 0.178127259 | 0.12376134  | 0.043146637 | 0.333220203 |
| 0.280531403 | 0.364035405 | 0.364342388 | 0.199662446 |
| 0.321005831 | 0.315496259 | 0.299150663 | 0.309430428 |
| 0.037534037 | 0.109273616 | 0.249130529 | 0.443859367 |
| 0.250737719 | 0.42208889  | 0.324205715 | 0.271771675 |
| 0.27223107  | 0.403976986 | 0.003582344 | 0.416225178 |
| 0.427259085 | 0.240599148 | 0.303454582 | 0.291584238 |
| 0.230927739 | 0.423702365 | 0.031653017 | 0.340972742 |
| 0.264205468 | 0.174178434 | 0.455754016 | 0.198577715 |
| 0.387114209 | 0.097814223 | 0.339169866 | 0.318742302 |
| 0.273141597 | 0.024579528 | 0.287653681 | 1           |
| 0.044076796 | 0.2428876   | 0.348593437 | 0.345593807 |
| 0.324158779 | 0.362702725 | 0.451474263 | 0.212776291 |
| 0.314963531 | 0.330865403 | 0.039638257 | 0.250088742 |
| 0.339216994 | 0.232448936 | 0.411425014 | 0.338553592 |
| 0.236592146 | 0.430875144 | 0.308119495 | 0.186333433 |
| 0.133950617 | 0.363260405 | 0.06114551  | 0.296913395 |

|             |             |             |             |
|-------------|-------------|-------------|-------------|
| 0.31644616  | 0.210964773 | 0.252334087 | 0.161529979 |
| 0.102450424 | 0.459123865 | 0.119705938 | 0.139675711 |
| 0.07382675  | 0.293447981 | 0.342294888 | 0.230181462 |
| 0.161889959 | 0.239222603 | 0.254442344 | 0.303763753 |
| 0.146625969 | 0.158814615 | 0.022167018 | 0.200072072 |
| 0.128283401 | 0.2247854   | 0.222467442 | 0.302848586 |
| 0.300466124 | 0.143874278 | 0.294747561 | 0.206416947 |
| 0.136754921 | 0.045829236 | 0.449913564 | 0.339806371 |
| 0.291395034 | 0.278320395 | 0.08821385  | 0.196512186 |
| 0.434380762 | 0.240565826 | 0.243291357 | 0.431585118 |
| 0.068782402 | 0.429064183 | 0.248310278 | 0.166148454 |
| 0.235436756 | 0.301844279 | 0.452377992 | 0.095615548 |
| 0.313785561 | 0.430747618 | 0.29996502  | 0.215516076 |
| 0.359329385 | 0.350013689 | 0.110108466 | 0.318197936 |
| 0.306833836 | 0.081341325 | 0.439259306 | 0.131216955 |
| 0.052788051 | 0.292596733 | 0.301519714 | 0.132234712 |
| 0.120193591 | 0.305201242 | 0.169317689 | 0.279945744 |
| 0.458290808 | 0.349575449 | 0.344335316 | 0.165177296 |
| 0.117297382 | 0.022608702 | 0.17946886  | 0.240460752 |
| 0.419333332 | 0.411584389 | 0.291960857 | 0.249585093 |
| 0.319512054 | 0.24872283  | 0.226974783 | 0.43564065  |
| 0.158605976 | 0.433245277 | 0.029735751 | 0.314691565 |
| 0.402316412 | 0.282163106 | 0.110943843 | 0.351100433 |
| 0.356841109 | 0.138582651 | 0.297174966 | 0.420241828 |
| 0.406069371 | 0.297370467 | 0.26971389  | 0.303033238 |
| 0.085425732 | 0.158840928 | 0.28769368  | 0.116002665 |
| 0.308645599 | 0.278416181 | 0.025697297 | 0.338958319 |
| 0.107038174 | 0.416883401 | 0.397126068 | 0.117041006 |
| 0.264301092 | 0.313233683 | 0.29709217  | 0.110571226 |
| 0.343496922 | 0.396801325 | 0.436716028 | 0.292589581 |
| 0.326355664 | 0.398358708 | 0.210197415 | 0.124886296 |
| 0.03832054  | 0.410020257 | 0.316675125 | 0.053154733 |
| 0.441201199 | 0.240653512 | 0.038269052 | 0.458444755 |
| 0.300702524 | 0.362194294 | 0.016270416 | 0.049963474 |
| 0.056338588 | 0.384449597 | 0.406679657 | 0.347789337 |
| 0.219509955 | 0.347303864 | 0.007874876 | 0.432617685 |
| 0.426507183 | 0.030004094 | 0.134247832 | 0.322361137 |
| 0.268081288 | 0.469137964 | 0.194908153 | 0.349899438 |
| 0.238051901 | 0.39975626  | 0.292000478 | 0.281788259 |
| 0.396592536 | 0.375765509 | 0.369350339 | 0.42501369  |
| 0.425106409 | 0.299859825 | 0.338118968 | 0.07315386  |
| 0.131608571 | 0.312459497 | 0.205232297 | 0.121720197 |
| 0.278362063 | 0.16857358  | 0.41401686  | 0.423344623 |
| 0.393082479 | 0.020486847 | 0.286618954 | 0.339448693 |
| 0.442049635 | 0.464804485 | 0.042790671 | 0.009958681 |
| 0.007152608 | 0.02648692  | 0.363570928 | 0.236660907 |
| 0.422162668 | 0.191977011 | 0.025407285 | 0.159192826 |
| 0.303891434 | 0.250925572 | 0.429720839 | 0.352536414 |
| 0.330128757 | 0.153394231 | 0.236575582 | 0.36735149  |
| 0.094393655 | 0.242349274 | 0.413457677 | 0.436738091 |
| 0.076685249 | 0.249775133 | 0.286002408 | 0.467424996 |
| 0.032258726 | 0.292182867 | 0.270818629 | 0.300316874 |
| 0.025894197 | 0.113926115 | 0.112481618 | 0.378005539 |
| 0.387017687 | 0.10468566  | 0.059658848 | 0.151097936 |

|             |             |             |             |
|-------------|-------------|-------------|-------------|
| 0.212846907 | 0.413842333 | 0.221506746 | 0.459151537 |
| 0.415659291 | 0.423028562 | 0.08963715  | 0.426686527 |
| 0.092143683 | 0.401573564 | 0.22133999  | 0.072262529 |
| 0.261195816 | 0.044033082 | 0.368268027 | 0.118445251 |
| 0.314561381 | 0.321782102 | 0.172037552 | 0.033197271 |
| 0.104596567 | 0.095345607 | 0.438310353 | 0.378872788 |
| 0.048488893 | 0.352856001 | 0.284259379 | 0.326272425 |
| 0.323809211 | 0.37116643  | 0.426386152 | 0.23825005  |
| 0.22224337  | 0.080721244 | 0.368624182 | 0.279804165 |
| 0.317066389 | 0.432454846 | 0.253762797 | 0.445919536 |
| 0.32985793  | 0.420010449 | 0.393437755 | 0.349771662 |
| 0.169789403 | 0.300364536 | 0.317950904 | 0.069555986 |
| 0.344319372 | 0.409915838 | 0.334497847 | 0.15048422  |
| 0.25466583  | 0.21331924  | 0.138237389 | 0.142836349 |
| 0.165282431 | 0.294873195 | 0.234128804 | 0.422436283 |
| 0.308590049 | 0.298402192 | 0.126840441 | 0.108607459 |
| 0.468687043 | 0.405432781 | 0.250022429 | 0.327504257 |
| 0.219351807 | 0.314172088 | 0.34362296  | 0.330653576 |
| 0.266932819 | 0.372462464 | 0.389651009 | 0.312526689 |
| 0.409242039 | 0.346974554 | 0.441197959 | 0.185676535 |
| 0.099784684 | 0.25069447  | 0.162914791 | 0.132104464 |
| 0.231019045 | 0.059064716 | 0.149696705 | 0.343279635 |
| 0.190286068 | 0.330761024 | 0.280929284 | 0.137130964 |
| 0.27672994  | 0.256780951 | 0.327250498 | 0.300211396 |
| 0.14754135  | 0.422599366 | 0.025049793 | 0.106489264 |
| 0.205464013 | 0.349900182 | 0.229492974 | 0.250754125 |
| 0.179062905 | 0.139244037 | 0.314102206 | 0.294537518 |
| 0.227661532 | 0.22999067  | 0.352346735 | 0.104436075 |
| 0.090302617 | 0.446361557 | 0.283127442 | 0.036084797 |
| 0.116361097 | 0.269269001 | 0.276776863 | 0.275243519 |
| 0.036281843 | 0.378861503 | 0.279125794 | 0.291528612 |
| 0.36305233  | 0.142930125 | 0.332786789 | 0.140451654 |
| 0.144452178 | 0.396818933 | 0.244526108 | 0.410799009 |
| 0.247655853 | 0.381189291 | 0.384811749 | 0.352429925 |
| 0.135085679 | 0.21683816  | 0.11015771  | 0.417207391 |
| 0.219087845 |             |             |             |

|             |             |             |             |
|-------------|-------------|-------------|-------------|
| G0S2        | 0.036498885 | 0.027908876 | 0.043407135 |
| 0.055238268 | 0.06427962  | 0.012167881 | 0.048450296 |
| 0.011127187 | 0.043489214 | 0.01282799  | 0.060273845 |
| 0.049162286 | 0.024549759 | 0.015024609 | 0.005863314 |
| 0.101663551 | 0.131334107 | 0.031010657 | 0.113619406 |
| 0.064305489 | 0.015794958 | 0.118424006 | 0.063273984 |
| 0.065231696 | 0.143424065 | 0.144469862 | 0.073041409 |
| 0.05828732  | 0.165346643 | 0.006885025 | 0.0313675   |
| 0.197102683 | 0.038143119 | 0.0194016   | 0.067687114 |
| 0.018607904 | 0.023781893 | 0.051476868 | 0.007510292 |
| 0.028246141 | 0.05082591  | 0.056756027 | 0.088368412 |
| 0.06543595  | 0.013702296 | 0.073134381 | 0.0970151   |
| 0.007258494 | 0.10596191  | 0.00403621  | 0.013662653 |
| 0.013583869 | 0.023695272 | 0.01629452  | 0.041812876 |
| 0.011801883 | 0.005138919 | 0.020634729 | 0.011161874 |
| 0.079043975 | 0.003748008 | 0.017805908 | 0.022697929 |
| 0.009786179 | 0.029138184 | 0.172652601 | 0.034319398 |
| 0.04389267  | 0.017603641 | 0.074944128 | 0.034092031 |

|             |             |             |             |
|-------------|-------------|-------------|-------------|
| 0.003572187 | 0.071934817 | 0.130299701 | 0.023873187 |
| 0.272585892 | 0.06176344  | 0.20305027  | 0.05083992  |
| 0.055361128 | 0.023908493 | 0.062405728 | 0.050952237 |
| 0.074606426 | 0.163664196 | 0.064381817 | 0.098274986 |
| 0.029614606 | 0.045258512 | 0.03889413  | 0.117141737 |
| 0.057305092 | 0.024217633 | 0.079955055 | 0.212519481 |
| 0.022798286 | 0.024921626 | 0.02037269  | 0.035735625 |
| 0.014253135 | 0.231115793 | 0.016201186 | 0.041547183 |
| 0.01786247  | 0.076471162 | 0.23228719  | 0.031970255 |
| 0.216106878 | 0.006709458 | 0.099201893 | 0.066594677 |
| 0.054840434 | 0.046646074 | 0.228676381 | 0.036945842 |
| 0.074359518 | 0.034606745 | 0.026122767 | 0.094497865 |
| 0.071629332 | 0.096463901 | 0.03284774  | 0.220326779 |
| 0.015773387 | 0.067967278 | 0.011503998 | 0.041594141 |
| 0.011463032 | 0.022676957 | 0.046312663 | 0.125639603 |
| 0.204854058 | 0.118299044 | 0.03089093  | 0.049171144 |
| 0.05293617  | 0.019613735 | 0.058135011 | 0.015088192 |
| 0.034021849 | 0.063400065 | 0.00014344  | 0.068117636 |
| 0.032228926 | 0.124879706 | 0.188966211 | 0.033896164 |
| 0.105909282 | 0.04391571  | 0.127146038 | 0.044052716 |
| 0.01518823  | 0.143156305 | 0.013983116 | 0.109122798 |
| 0.008603156 | 0.125967921 | 0.12333128  | 0.042481447 |
| 0.047765557 | 0.018394035 | 0.283720359 | 0.021403554 |
| 0.008004369 | 0.101756871 | 0.098317642 | 0.018517289 |
| 0.009565395 | 0.021563471 | 0.012170338 | 0.189383139 |
| 0.051473653 | 0.100303954 | 0.011421555 | 0.022884591 |
| 0.031865973 | 0.13203462  | 0.005388256 | 0.036328954 |
| 0.006107329 | 0.048306269 | 0.056026214 | 0.083526072 |
| 0.188369012 | 0.064541864 | 0.021702202 | 0.015346577 |
| 0.024869188 | 0.004303242 | 0.052708649 | 0.07943667  |
| 0.025792956 | 0.047088411 | 0.002405793 | 0.10201903  |
| 0.013300284 | 0.175191052 | 0.061158688 | 0.202701461 |
| 0.020594604 | 0.182744591 | 0.014090457 | 0.04355112  |
| 0.026039598 | 0.02753354  | 0.007149942 | 0.044076796 |
| 1           | 0.008234381 | 0.0448996   | 0.059924436 |
| 0.044740959 | 0.070760818 | 0.073157396 | 0.023627421 |
| 0.050011768 | 0.054011298 | 0.164547262 | 0.159253374 |
| 0.04962708  | 0.007422363 | 0.015828778 | 0.026786063 |
| 0.007855754 | 0.023284528 | 0.022373928 | 0.003485848 |
| 0.108278437 | 0.027158806 | 0.014751455 | 0.073754776 |
| 0.020248916 | 0.028411479 | 0.020888827 | 0.136709385 |
| 0.229985257 | 0.036015182 | 0.127841287 | 0.062724888 |
| 0.083201803 | 0.022775941 | 0.084904599 | 0.011199757 |
| 0.021094814 | 0.086339798 | 0.031680612 | 0.024899056 |
| 0.024216429 | 0.147511408 | 0.229878658 | 0.010109084 |
| 0.019565796 | 0.010759101 | 0.007450894 | 0.018236286 |
| 0.012965518 | 0.04333844  | 0.0565655   | 0.04865738  |
| 0.153521183 | 0.249861327 | 0.028313678 | 0.093678188 |
| 0.009244559 | 0.058855122 | 0.245513664 | 0.003551838 |
| 0.039070545 | 0.004282051 | 0.003170381 | 0.025310397 |
| 0.097278205 | 0.059096288 | 0.02683024  | 0.211782463 |
| 0.037408609 | 0.102673624 | 0.060240551 | 0.004927129 |
| 0.024607877 | 0.019531018 | 0.147076186 | 0.119314935 |
| 0.011874245 | 0.048293504 | 0.05601489  | 0.019604579 |

|             |             |             |             |
|-------------|-------------|-------------|-------------|
| 0.017065834 | 0.194268339 | 0.031783872 | 0.154015881 |
| 0.288954608 | 0.076206236 | 0.031061323 | 0.292928087 |
| 0.233882978 | 0.028241817 | 0.013308125 | 0.199676803 |
| 0.03344407  | 0.110341897 | 0.023035207 | 0.128246523 |
| 0.092694628 | 0.040708485 | 0.201205959 | 0.050853394 |
| 0.016184309 | 0.034751139 | 0.188238592 | 0.05726582  |
| 0.144281707 | 0.023326877 | 0.003316219 | 0.037376255 |
| 0.07385868  | 0.023721606 | 0.165018982 | 0.051396379 |
| 0.016564055 | 0.007013829 | 0.178920639 | 0.022719699 |
| 0.014478391 | 0.101943691 | 0.071153268 | 0.020004137 |
| 0.028428335 | 0.039539489 | 0.020371368 | 0.069585119 |
| 0.02769888  | 0.040336625 | 0.07111592  | 0.076718109 |
| 0.016610737 | 0.087132764 | 0.064358816 | 0.009222456 |
| 0.073247715 | 0.0181312   | 0.073438054 | 0.086739295 |
| 0.007459388 | 0.008377425 | 0.148427483 | 0.160760772 |
| 0.039204514 | 0.028270769 | 0.019622682 | 0.062265446 |
| 0.039604093 | 0.028443705 | 0.03210909  | 0.282048656 |
| 0.307999389 | 0.022051382 | 0.025349565 | 0.038182832 |
| 0.060927455 | 0.003421239 | 0.036132768 | 0.025332972 |
| 0.11636896  | 0.010588555 | 0.002762964 | 0.03672176  |
| 0.239085129 | 0.079663963 | 0.015364836 | 0.035276206 |
| 0.001786853 | 0.08566909  | 0.093793453 | 0.038776845 |
| 0.02056568  | 0.191541792 | 0.13447798  | 0.027126661 |
| 0.034352684 | 0.025888654 | 0.052615244 | 0.039079658 |
| 0.035879779 | 0.018288021 | 0.016237729 | 0.176413497 |
| 0.029109077 | 0.025138453 | 0.035457158 | 0.021363485 |
| 0.050142615 | 0.103532635 | 0.105861843 | 0.054913706 |
| 0.048236694 | 0.01030787  | 0.003424852 | 0.034501087 |
| 0.010098652 | 0.105194335 | 0.030392581 | 0.066219478 |
| 0.040150343 | 0.213091697 | 0.016965896 | 0.024829444 |
| 0.031204772 | 0.048873254 | 0.157393548 | 0.017141311 |
| 0.011294587 | 0.09060628  | 0.037090943 | 0.193614911 |
| 0.03421104  | 0.00121775  | 0.118197454 | 0.02212841  |
| 0.028842228 | 0.08747439  | 0.022907246 | 0.110133773 |
| 0.054897625 | 0.201730344 | 0.004810224 | 0.090878035 |
| 0.114947588 | 0.009388193 | 0.041164757 | 0.017738513 |
| 0.224454647 | 0.158082397 | 0.028632134 | 0.048057294 |
| 0.039731123 | 0.176980152 | 0.049223586 | 0.015297736 |
| 0.153567164 | 0.213740689 | 0.147230721 | 0.088598529 |
| 0.016813519 | 0.05935728  | 0.091726603 | 0.00149184  |
| 0.042186528 | 0.052461322 | 0.056662549 | 0.050811084 |
| 0.037290851 | 0.083970619 | 0.19874093  | 0.019127183 |
| 0.068502467 | 0.016741826 | 0.095348138 | 0.001888517 |
| 0.092266355 | 0.167318015 | 0.025521323 | 0.012499927 |
| 0.010046492 | 0.032679266 | 0.028474381 | 0.241318452 |
| 0.042262132 | 0.21954697  | 0.056843502 | 0.068114033 |
| 0.253023948 | 0.039954398 | 0.158079197 | 0.078683465 |
| 0.015546949 | 0.056816321 | 0.016862215 | 0.009037869 |
| 0.035871904 | 0.087868185 | 0.050791043 | 0.019404384 |
| 0.013187106 | 0.065649975 | 0.022238554 | 0.037129973 |
| 0.026334981 | 0.03251292  | 0.029430147 | 0.046105808 |
| 0.068272315 | 0.018341457 | 0.019410367 | 0.021098342 |
| 0.082184436 | 0.055866123 | 0.0332091   | 0.063761599 |
| 0.11181307  | 0.048431062 | 0.100050649 | 0.00813856  |

|             |             |             |             |
|-------------|-------------|-------------|-------------|
| 0.046408224 | 0.00990727  | 0.053568241 | 0.089482774 |
| 0.031291607 | 0.019310719 | 0.065128123 | 0.126341146 |
| 0.029533809 | 0.020657078 | 0.013746553 | 0.03421545  |
| 0.228004252 | 0.084006611 | 0.056384351 | 0.06755455  |
| 0.013937658 | 0.02937487  | 0.035173146 | 0.017933144 |
| 0.015055748 | 0.084573573 | 0.020895685 | 0.004876775 |
| 0.068694685 | 0.030252921 | 0.047444019 | 0.320650097 |
| 0.1462898   | 0.185395428 | 0.020849764 | 0.100176594 |
| 0.018421386 | 0.09026689  | 0.005444582 | 0.126515284 |
| 0.161880306 | 0.021518125 | 0.124352274 | 0.025375372 |
| 0.063640584 | 0.017522667 | 0.089361768 | 0.249564269 |
| 0.026692977 | 0.033137875 | 0.047188022 | 0.13050974  |
| 0.030161362 | 0.171028133 | 0.126033405 | 0.008004631 |
| 0.005267956 | 0.0134074   | 0.029427207 | 0.03848251  |
| 0.053411926 | 0.06308668  | 0.015155187 | 0.239742228 |
| 0.120421183 | 0.018877779 | 0.046108686 | 0.023568368 |
| 0.285014122 | 0.027462142 | 0.005627898 | 0.058608975 |
| 0.038372962 | 0.173688159 | 0.010588321 | 0.028844653 |
| 0.107328625 | 0.016514333 | 0.059547908 | 0.022819625 |
| 0.089252438 | 0.088252749 | 0.011557534 | 0.027610424 |
| 0.061206511 | 0.029026433 | 0.056216772 | 0.048785649 |
| 0.009738827 |             |             |             |
| GAB3        | 0.077501828 | 0.132083607 | 0.035461153 |
| 0.211060506 | 0.074478047 | 0.148887972 | 0.268598279 |
| 0.114369319 | 0.069989994 | 0.061663381 | 0.020956673 |
| 0.048059301 | 0.030257809 | 0.090969588 | 0.043976754 |
| 0.158699887 | 0.024962336 | 0.051122806 | 0.199425081 |
| 0.182948719 | 0.198405673 | 0.139900096 | 0.12006276  |
| 0.013397131 | 0.021766134 | 0.081089048 | 0.027584156 |
| 0.193319331 | 0.086684516 | 0.148082342 | 0.223120225 |
| 0.018154933 | 0.118852004 | 0.10413741  | 0.076281257 |
| 0.085011803 | 0.065169007 | 0.009907695 | 0.115157035 |
| 0.126526185 | 0.099899501 | 0.207264666 | 0.191904227 |
| 0.100889678 | 0.114460735 | 0.253032491 | 0.056421752 |
| 0.058586878 | 0.031107158 | 0.139694873 | 0.130411105 |
| 0.094310741 | 0.078654872 | 0.183025029 | 0.220358078 |
| 0.024433345 | 0.109806467 | 0.004920109 | 0.192655845 |
| 0.221054609 | 0.180206228 | 0.095087167 | 0.12896382  |
| 0.061693119 | 0.155206111 | 0.016468976 | 0.196454782 |
| 0.014390784 | 0.157851546 | 0.067323071 | 0.031270035 |
| 0.025215292 | 0.202531883 | 0.061073666 | 0.012579017 |
| 0.057833006 | 0.035332781 | 0.026615594 | 0.25119882  |
| 0.166053699 | 0.087143741 | 0.114426929 | 0.099880429 |
| 0.022202249 | 0.06407555  | 0.027308291 | 0.092131478 |
| 0.123038863 | 0.224380794 | 0.043690525 | 0.133327035 |
| 0.112168783 | 0.102907818 | 0.031773624 | 0.059255455 |
| 0.154167358 | 0.143937659 | 0.058758965 | 0.067037268 |
| 0.023406484 | 0.007237204 | 0.117511307 | 0.110551717 |
| 0.127191447 | 0.013442093 | 0.056213928 | 0.198399415 |
| 0.06993515  | 0.022881641 | 0.206648957 | 0.012490467 |
| 0.171411793 | 0.100190703 | 0.041333076 | 0.198780745 |
| 0.037925322 | 0.109129093 | 0.088369989 | 0.229524202 |
| 0.04479016  | 0.020372939 | 0.006162549 | 0.025756618 |
| 0.032724196 | 0.001992185 | 0.092100238 | 0.164124845 |



|             |             |             |             |
|-------------|-------------|-------------|-------------|
| 0.080579158 | 0.025020888 | 0.185155349 | 0.008291665 |
| 0.016716836 | 0.015162542 | 0.078573179 | 0.068295782 |
| 0.129252395 | 0.053596704 | 0.080630598 | 0.118430055 |
| 0.049338781 | 0.112603762 | 0.022048096 | 0.139683135 |
| 0.094835175 | 0.018764586 | 0.165071105 | 0.07088705  |
| 0.061957987 | 0.153657839 | 0.122595789 | 0.130360074 |
| 0.162883359 | 0.152813037 | 0.058405827 | 0.133874143 |
| 0.051969653 | 0.043331198 | 0.118427865 | 0.081092308 |
| 0.134161337 | 0.076814713 | 0.011761086 | 0.109960532 |
| 0.014257578 | 0.009890333 | 0.025933244 | 0.205994441 |
| 0.055450998 | 0.112393687 | 0.07797066  | 0.10607397  |
| 0.107135825 | 0.103954041 | 0.123137509 | 0.112240386 |
| 0.049081105 | 0.04339712  | 0.081346216 | 0.121379614 |
| 0.18607364  | 0.097063071 | 0.067563733 | 0.03715935  |
| 0.083851096 | 0.141072291 | 0.000197032 | 0.107053735 |
| 0.095720532 | 0.068450379 | 0.0995618   | 0.062739213 |
| 0.030733118 | 0.168662282 | 0.002805589 | 0.134686619 |
| 0.092292316 | 0.09987123  | 0.132192943 | 0.078355037 |
| 0.094518897 | 0.07026898  | 0.120217674 | 0.06132087  |
| 0.051226371 | 0.013461909 | 0.234446899 | 0.2428876   |
| 0.008234381 | 1           | 0.12484066  | 0.176047498 |
| 0.144754368 | 0.102177104 | 0.147769648 | 0.024169702 |
| 0.072467344 | 0.148868848 | 0.020496114 | 0.043258539 |
| 0.083254161 | 0.014666989 | 0.14395212  | 0.117926622 |
| 0.077356233 | 0.136261917 | 0.063983255 | 0.038146405 |
| 0.145656414 | 0.197773141 | 0.058828937 | 0.087667748 |
| 0.075211209 | 0.104988728 | 0.044284278 | 0.017417358 |
| 0.027429774 | 0.124053047 | 0.007177043 | 0.006765335 |
| 0.002473979 | 0.104459856 | 0.178866528 | 0.064138881 |
| 0.019027025 | 0.063419521 | 0.029390494 | 0.056861989 |
| 0.16878723  | 0.073754175 | 0.00312829  | 0.014533586 |
| 0.023790343 | 0.029452169 | 0.03434254  | 0.104154553 |
| 0.044027561 | 0.038407645 | 0.064844006 | 0.012021853 |
| 0.022909744 | 0.036764959 | 0.1268404   | 0.142282679 |
| 0.140093797 | 0.125924286 | 0.039340245 | 0.011631509 |
| 0.155979765 | 0.117609673 | 0.068775393 | 0.162940909 |
| 0.031094697 | 0.117750777 | 0.04554519  | 0.066291466 |
| 0.023505136 | 0.15169192  | 0.179211048 | 0.040094805 |
| 0.110221845 | 0.144095117 | 0.084632153 | 0.06497768  |
| 0.125543556 | 0.165168877 | 0.097165433 | 0.093301087 |
| 0.091699462 | 0.055449115 | 0.103056377 | 0.01425141  |
| 0.031167908 | 0.065727919 | 0.076246855 | 0.07002285  |
| 0.038052552 | 0.133370216 | 0.190207787 | 0.103204177 |
| 0.129510264 | 0.144064368 | 0.120835407 | 0.012204972 |
| 0.105937617 | 0.013519876 | 0.020537678 | 0.031384947 |
| 0.101655555 | 0.08672189  | 0.109862616 | 0.040636832 |
| 0.206964583 | 0.031333331 | 0.089805669 | 0.111520097 |
| 0.009073571 | 0.102242661 | 0.026173546 | 0.06729248  |
| 0.087434606 | 0.138590894 | 0.034773879 | 0.25024862  |
| 0.142013599 | 0.118743779 | 0.088368289 | 0.107577443 |
| 0.144528875 | 0.06290651  | 0.044801891 | 0.083614289 |
| 0.134098992 | 0.151705004 | 0.068106966 | 0.004682423 |
| 0.059359995 | 0.08119708  | 0.000119111 | 0.070101673 |
| 0.064971968 | 0.143483208 | 0.117407606 | 0.04976281  |

|             |             |             |             |
|-------------|-------------|-------------|-------------|
| 0.148324544 | 0.072588332 | 0.08193915  | 0.094651137 |
| 0.066602539 | 0.079673368 | 0.108053398 | 0.118412145 |
| 0.077321473 | 0.09209194  | 0.027366435 | 0.03950362  |
| 0.018069612 | 0.085514933 | 0.132276808 | 0.033243527 |
| 0.147261131 | 0.151468211 | 0.035375175 | 0.145841415 |
| 0.201789946 | 0.08998632  | 0.026724079 | 0.001585426 |
| 0.007604196 | 0.097798105 | 0.109363303 | 0.21616518  |
| 0.089249404 | 0.144565214 | 0.000622457 | 0.095822682 |
| 0.119272735 | 0.009536399 | 0.011522377 | 0.075106521 |
| 0.046364923 | 0.13162879  | 0.018065237 | 0.076130955 |
| 0.037709894 | 0.089554956 | 0.083742583 | 0.113261543 |
| 0.144307132 | 0.070283644 | 0.152172711 | 0.136078708 |
| 0.14950704  | 0.083332301 | 0.229141671 | 0.090984002 |
| 0.015062498 | 0.208368326 | 0.033090568 | 0.04091619  |
| 0.158488978 | 0.033572436 | 0.10268607  | 0.13070062  |
| 0.088375143 | 0.019155683 | 0.139077729 | 0.090390399 |
| 0.190222894 | 0.17319075  | 0.011904433 | 0.002815817 |
| 0.000528003 | 0.005485519 | 0.202560845 | 0.049791964 |
| 0.109264823 | 0.038723404 | 0.031494412 | 0.156298453 |
| 0.053905105 | 0.045909211 | 0.112337106 | 0.195407652 |
| 0.073411236 | 0.063823997 | 0.054162398 | 0.184945821 |
| 0.019287231 | 0.086951814 | 0.105256116 | 0.146932888 |
| 0.018656965 | 0.054238184 | 0.053583454 | 0.16742602  |
| 0.000384565 | 0.088499215 | 0.056061035 | 0.052406592 |
| 0.005365114 | 0.02585362  | 0.03483152  | 0.12112643  |
| 0.079164901 | 0.029422545 | 0.021377824 | 0.033244175 |
| 0.132870889 | 0.118867696 | 0.058593195 | 0.127156544 |
| 0.168807743 | 0.173027128 | 0.011081703 | 0.123739711 |
| 0.046449794 | 0.097633743 | 0.026818801 | 0.026315646 |
| 0.033108734 | 0.024310223 | 0.072423845 | 0.018350109 |
| 0.098266586 | 0.137535704 | 0.017644598 | 0.009104558 |
| 0.003256262 | 0.035511428 | 0.143404111 | 0.091872056 |
| 0.006925502 | 0.127977013 | 0.071868602 | 0.111672458 |
| 0.227612631 | 0.154184776 | 0.111319334 | 0.045505225 |
| 0.176021722 | 0.001651308 | 0.18174817  | 0.090972188 |
| 0.108258357 | 0.11651184  | 0.039737855 | 0.106190352 |
| 0.119108357 | 0.124419737 | 0.093745969 | 0.190005895 |
| 0.009578397 | 0.102031371 | 0.220512056 | 0.085030069 |
| 0.138548858 | 0.136960618 | 0.109470139 | 0.020766743 |
| 0.078330062 | 0.023774928 | 0.065166072 | 0.012433161 |
| 0.011425226 | 0.222620332 | 0.082380858 | 0.163636763 |
| 0.117079349 | 0.100486994 | 0.073958694 | 0.035941551 |
| 0.122038034 | 0.130918695 | 0.115122678 | 0.142265926 |
| 0.06598963  | 0.115713408 | 0.079665862 | 0.07245421  |
| 0.022228971 | 0.105293177 | 0.158779706 | 0.167837383 |
| 0.161373974 | 0.209193737 | 0.110406033 | 0.102541087 |
| 0.014276204 | 0.050638452 | 0.069606858 | 0.044336625 |
| 0.133801717 | 0.020410629 | 0.005303355 | 0.118676562 |
| 0.009700005 | 0.144855736 | 0.03744571  | 0.036762943 |
| 0.060906868 | 0.040855287 | 0.113633271 | 0.215321231 |
| 0.066790484 | 0.113611193 | 0.01335221  | 0.042329166 |
| 0.012640529 | 0.100162879 | 0.030059627 | 0.049672066 |
| 0.007470209 | 0.011816304 | 0.12837285  | 0.151946602 |
| 0.060756775 | 0.011277927 | 0.101745498 | 0.078074576 |

|             |             |             |             |
|-------------|-------------|-------------|-------------|
| 0.102304155 | 0.128717967 | 0.066324231 | 0.00697044  |
| 0.021510862 | 0.090257286 | 0.031087792 | 0.066574    |
| 0.008144964 | 0.078823336 | 0.107866263 | 0.058742715 |
| 0.203894396 | 0.061831142 | 0.122627877 | 0.033013016 |
| 0.058985756 | 0.11398066  | 0.035126309 | 0.088477844 |
| 0.029081551 | 0.170562272 | 0.109630382 | 0.098372402 |
| 0.016438893 | 0.02625613  | 0.108824864 | 0.150994501 |
| 0.019165665 |             |             |             |
| GABARAPL1   | 0.371348213 | 0.498540391 | 0.345947466 |
| 0.3558339   | 0.36300678  | 0.30410193  | 0.224844898 |
| 0.238923142 | 0.100205223 | 0.005370145 | 0.019800017 |
| 0.348977843 | 0.156399467 | 0.237239646 | 0.278899475 |
| 0.372766172 | 0.131822836 | 0.39321364  | 0.263695252 |
| 0.37706019  | 0.115797137 | 0.343138594 | 0.128865039 |
| 0.285509299 | 0.099553172 | 0.082132223 | 0.228522864 |
| 0.430565191 | 0.096681867 | 0.258887492 | 0.345375053 |
| 0.146583263 | 0.406425855 | 0.490024281 | 0.326818969 |
| 0.473692489 | 0.339329823 | 0.027759848 | 0.24492997  |
| 0.425481377 | 0.350998754 | 0.368972786 | 0.304717488 |
| 0.060167822 | 0.463120193 | 0.243973987 | 0.357851895 |
| 0.251961747 | 0.034969856 | 0.236270091 | 0.43994991  |
| 0.426625508 | 0.315369332 | 0.264529939 | 0.175541186 |
| 0.130629817 | 0.227240276 | 0.177389048 | 0.287658808 |
| 0.235622466 | 0.165193048 | 0.443920092 | 0.105342533 |
| 0.17132641  | 0.311499103 | 0.179942948 | 0.286346565 |
| 0.291870084 | 0.350914644 | 0.045416292 | 0.32072822  |
| 0.003110094 | 0.373642943 | 0.358836205 | 0.231317188 |
| 0.061269929 | 0.020407923 | 0.205056329 | 0.306440394 |
| 0.452653235 | 0.459615962 | 0.44940762  | 0.454090399 |
| 0.160365168 | 0.324797741 | 0.321681765 | 0.179374297 |
| 0.424181668 | 0.175764389 | 0.133774096 | 0.362450802 |
| 0.457475345 | 0.482878683 | 0.203735843 | 0.274770918 |
| 0.354051996 | 0.469235588 | 0.333490059 | 0.342752329 |
| 0.24515174  | 0.080583961 | 0.412781126 | 0.476516106 |
| 0.3907093   | 0.254859696 | 0.16390323  | 0.381914501 |
| 0.091680576 | 0.322961187 | 0.326259754 | 0.170541487 |
| 0.461514184 | 0.031904978 | 0.216400264 | 0.313067588 |
| 0.306620515 | 0.393446654 | 0.474308164 | 0.213324361 |
| 0.363984766 | 0.028001905 | 0.103953238 | 0.063805846 |
| 0.285032176 | 0.12664972  | 0.445829512 | 0.418493071 |
| 0.255145585 | 0.317799644 | 0.29807264  | 0.006628292 |
| 0.039369702 | 0.247074225 | 0.381971971 | 0.392042222 |
| 0.383926862 | 0.37107101  | 0.198006949 | 0.340455486 |
| 0.317323991 | 0.444537414 | 0.043235778 | 0.148487104 |
| 0.34575884  | 0.252829626 | 0.259968807 | 0.346090646 |
| 0.263732032 | 0.170934497 | 0.160436481 | 0.493317609 |
| 0.428458595 | 0.112434333 | 0.35854259  | 0.364632727 |
| 0.257350501 | 0.299556976 | 0.151130719 | 0.250380922 |
| 0.072525611 | 0.441819913 | 0.042148815 | 0.359379087 |
| 0.190886107 | 0.131953824 | 0.038028062 | 0.28305362  |
| 0.2426721   | 0.367649528 | 0.43949759  | 0.156375259 |
| 0.288034248 | 0.344661223 | 0.31810613  | 0.297223826 |
| 0.009554014 | 0.082750143 | 0.284039874 | 0.470435879 |
| 0.242965445 | 0.482477404 | 0.32076516  | 0.321608326 |

|             |             |             |             |
|-------------|-------------|-------------|-------------|
| 0.281311707 | 0.418992025 | 0.007651423 | 0.465745066 |
| 0.485331177 | 0.274312406 | 0.303215262 | 0.374559687 |
| 0.28142208  | 0.410182706 | 0.047291018 | 0.366546832 |
| 0.306207485 | 0.128178481 | 0.481896535 | 0.163385711 |
| 0.445131828 | 0.054203992 | 0.304991165 | 0.374219812 |
| 0.313216298 | 0.01370758  | 0.217148569 | 0.348593437 |
| 0.0448996   | 0.12484066  | 1           | 0.356376656 |
| 0.3155898   | 0.402943725 | 0.465004246 | 0.260635974 |
| 0.347144632 | 0.285967361 | 0.028143116 | 0.306936802 |
| 0.398126727 | 0.295029645 | 0.432069482 | 0.265859196 |
| 0.291953209 | 0.452181089 | 0.364373259 | 0.173387151 |
| 0.063700992 | 0.323465081 | 0.026828292 | 0.294624339 |
| 0.380415335 | 0.112578948 | 0.307200443 | 0.21503364  |
| 0.086979511 | 0.491412607 | 0.167924275 | 0.215712239 |
| 0.115202242 | 0.293101939 | 0.302764281 | 0.166651758 |
| 0.137358343 | 0.191147948 | 0.287231475 | 0.319988423 |
| 0.057285125 | 0.105128175 | 0.035292842 | 0.246575496 |
| 0.089345402 | 0.22340367  | 0.220191772 | 0.324047473 |
| 0.285120221 | 0.094716759 | 0.302570043 | 0.285422842 |
| 0.131005172 | 0.026471511 | 0.484806578 | 0.378519188 |
| 0.297657464 | 0.195045213 | 0.067226742 | 0.222090614 |
| 0.428188844 | 0.233705738 | 0.268419924 | 0.425099084 |
| 0.054812072 | 0.467653729 | 0.197562473 | 0.130570804 |
| 0.271964758 | 0.248409845 | 0.449190353 | 0.060129406 |
| 0.368067738 | 0.444904595 | 0.346308643 | 0.180311992 |
| 0.369136622 | 0.366472934 | 0.046276909 | 0.359730821 |
| 0.338106845 | 0.045556642 | 0.48892902  | 0.135916823 |
| 0.036817389 | 0.353398005 | 0.320513248 | 0.102079961 |
| 0.103000865 | 0.256739301 | 0.07541444  | 0.283019874 |
| 0.48543187  | 0.344937097 | 0.342711483 | 0.234259767 |
| 0.052356236 | 0.007552146 | 0.228067797 | 0.346276078 |
| 0.477859188 | 0.469594735 | 0.293844532 | 0.268372534 |
| 0.267515123 | 0.259628156 | 0.18546042  | 0.468493574 |
| 0.27423666  | 0.498300834 | 0.016076917 | 0.359189988 |
| 0.465312787 | 0.266105854 | 0.083763627 | 0.286896249 |
| 0.358576613 | 0.073120909 | 0.292290535 | 0.462977216 |
| 0.423396117 | 0.296691521 | 0.279839492 | 0.38125989  |
| 0.028597967 | 0.07213408  | 0.341646773 | 0.173909768 |
| 0.312589512 | 0.244367165 | 0.048647371 | 0.338023406 |
| 0.050620361 | 0.423487223 | 0.427641505 | 0.071521444 |
| 0.241344817 | 0.337660828 | 0.348882811 | 0.060365752 |
| 0.398183353 | 0.473896328 | 0.488802271 | 0.242501884 |
| 0.371610368 | 0.439084539 | 0.278507609 | 0.118336355 |
| 0.029100035 | 0.477987962 | 0.357238193 | 0.02600506  |
| 0.451777256 | 0.21803629  | 0.010582453 | 0.483867407 |
| 0.233247143 | 0.424954534 | 0.006664749 | 0.113438785 |
| 0.070055715 | 0.425885858 | 0.447877174 | 0.359320979 |
| 0.185256804 | 0.3870117   | 0.016297521 | 0.495702628 |
| 0.453293321 | 0.021872404 | 0.1590694   | 0.352440282 |
| 0.313123772 | 0.514073533 | 0.24698537  | 0.385155084 |
| 0.301197766 | 0.454471631 | 0.211980792 | 0.26826001  |
| 0.391269516 | 0.446694735 | 0.376939549 | 0.458619072 |
| 0.424828576 | 0.365034991 | 0.28240439  | 0.024929693 |
| 0.140219608 | 0.239596256 | 0.202034151 | 0.077666621 |

|             |             |             |             |
|-------------|-------------|-------------|-------------|
| 0.2989944   | 0.141666204 | 0.468119549 | 0.446099494 |
| 0.434127968 | 0.011585871 | 0.192755971 | 0.368706153 |
| 0.433880203 | 0.472851022 | 0.053034027 | 0.010014837 |
| 0.012302652 | 0.016753623 | 0.355852042 | 0.269838004 |
| 0.462582671 | 0.162803871 | 0.010502729 | 0.076135432 |
| 0.291971396 | 0.31286857  | 0.467053619 | 0.358925015 |
| 0.388969893 | 0.118711624 | 0.188192758 | 0.37855026  |
| 0.074210915 | 0.287515712 | 0.441782352 | 0.452896345 |
| 0.078937897 | 0.279678825 | 0.373994884 | 0.470977168 |
| 0.056180423 | 0.314038545 | 0.350874894 | 0.250882821 |
| 0.037557132 | 0.102923993 | 0.084314104 | 0.404935718 |
| 0.454707394 | 0.062588223 | 0.030928602 | 0.131904627 |
| 0.116203259 | 0.450993749 | 0.161397996 | 0.490521246 |
| 0.411548938 | 0.411016452 | 0.097739451 | 0.46363856  |
| 0.045965006 | 0.447194338 | 0.273580891 | 0.057686375 |
| 0.338929035 | 0.029916223 | 0.440319269 | 0.100016116 |
| 0.300775186 | 0.369821059 | 0.191421602 | 0.03018875  |
| 0.16991412  | 0.070598485 | 0.444092863 | 0.418420005 |
| 0.059957686 | 0.301588604 | 0.323480526 | 0.393571758 |
| 0.279209971 | 0.34736072  | 0.473032777 | 0.283809001 |
| 0.109892336 | 0.155160453 | 0.370911759 | 0.33458436  |
| 0.265394291 | 0.464936065 | 0.229651702 | 0.502825051 |
| 0.358921361 | 0.468980634 | 0.437943966 | 0.323477856 |
| 0.205627479 | 0.345617114 | 0.289694003 | 0.023525694 |
| 0.354910648 | 0.409109981 | 0.383395019 | 0.130028198 |
| 0.225705758 | 0.302929335 | 0.106613123 | 0.219916544 |
| 0.249268647 | 0.267129136 | 0.154352695 | 0.426978508 |
| 0.369769404 | 0.331470355 | 0.088835236 | 0.075811672 |
| 0.51720445  | 0.444153984 | 0.176006638 | 0.341936524 |
| 0.22118574  | 0.306704179 | 0.394515585 | 0.378729223 |
| 0.345021801 | 0.388646614 | 0.388843102 | 0.291972968 |
| 0.409123869 | 0.291126321 | 0.492129624 | 0.135086787 |
| 0.086664904 | 0.343059856 | 0.088404605 | 0.123813453 |
| 0.164035828 | 0.04637686  | 0.21811375  | 0.376732364 |
| 0.271025377 | 0.326908216 | 0.312544397 | 0.117706931 |
| 0.324943994 | 0.36628295  | 0.346352539 | 0.200956723 |
| 0.081818713 | 0.457700894 | 0.015726217 | 0.083935882 |
| 0.285396286 | 0.371114579 | 0.275144416 | 0.262003029 |
| 0.232595065 | 0.181745388 | 0.289802983 | 0.272782759 |
| 0.207522254 | 0.31346099  | 0.372936616 | 0.061791736 |
| 0.035922482 | 0.473971131 | 0.345013354 | 0.04549891  |
| 0.130851242 | 0.344423659 | 0.357220433 | 0.206992034 |
| 0.036819315 | 0.431972235 | 0.251437139 | 0.359095012 |
| 0.346840697 | 0.109394207 | 0.366519721 | 0.13464525  |
| 0.121073667 | 0.440140633 | 0.332879324 | 0.471030985 |
| 0.351524954 | 0.353819499 | 0.437916602 | 0.381089102 |
| 0.184627317 | 0.328138728 | 0.047636623 | 0.434163733 |
| 0.271644692 |             |             |             |
| GABARAPL2   | 0.320401386 | 0.480457703 | 0.278056789 |
| 0.409172843 | 0.331708953 | 0.277310004 | 0.292014137 |
| 0.232450547 | 0.166115494 | 0.025934314 | 0.053397823 |
| 0.287253451 | 0.206467167 | 0.2788212   | 0.276028529 |
| 0.40273976  | 0.175431503 | 0.290878888 | 0.31353322  |
| 0.357501782 | 0.178614522 | 0.356483852 | 0.199714921 |

|             |             |             |             |
|-------------|-------------|-------------|-------------|
| 0.24410352  | 0.147154789 | 0.14884185  | 0.252796573 |
| 0.452325057 | 0.165835602 | 0.245533846 | 0.340713316 |
| 0.153844779 | 0.375203022 | 0.445526098 | 0.315811322 |
| 0.423940079 | 0.287636027 | 0.021444736 | 0.280879784 |
| 0.385249901 | 0.370352992 | 0.367384095 | 0.345736791 |
| 0.127094629 | 0.414184044 | 0.314306027 | 0.307356529 |
| 0.244796939 | 0.080429025 | 0.221260891 | 0.390574705 |
| 0.398791001 | 0.288932475 | 0.273749499 | 0.256103929 |
| 0.169936904 | 0.208303216 | 0.178468212 | 0.248792338 |
| 0.299675138 | 0.17530369  | 0.413563318 | 0.186483849 |
| 0.169580376 | 0.28845467  | 0.181326142 | 0.306646522 |
| 0.243340781 | 0.328624084 | 0.06428372  | 0.237366225 |
| 0.012307352 | 0.345797455 | 0.311217649 | 0.211494901 |
| 0.105174808 | 0.062540206 | 0.209512932 | 0.338564175 |
| 0.460202466 | 0.39526391  | 0.463439041 | 0.45192861  |
| 0.205559765 | 0.303785467 | 0.260768756 | 0.255252199 |
| 0.394308863 | 0.261492893 | 0.165918857 | 0.397491221 |
| 0.467399117 | 0.453941912 | 0.236450331 | 0.278710368 |
| 0.383065412 | 0.444325698 | 0.31205293  | 0.330644975 |
| 0.257878516 | 0.088241038 | 0.389910294 | 0.469194918 |
| 0.353974975 | 0.218309683 | 0.216002516 | 0.385190726 |
| 0.133436975 | 0.276884935 | 0.353324714 | 0.155194739 |
| 0.472156659 | 0.074617217 | 0.236778609 | 0.328183381 |
| 0.269364823 | 0.380578468 | 0.443569016 | 0.284228603 |
| 0.301823379 | 0.057364809 | 0.13023259  | 0.081316427 |
| 0.27785701  | 0.10942672  | 0.391017147 | 0.449073826 |
| 0.247360451 | 0.303268523 | 0.320174958 | 0.014399478 |
| 0.069647642 | 0.207038175 | 0.35156177  | 0.305535167 |
| 0.371824335 | 0.305759031 | 0.274070859 | 0.305809581 |
| 0.276371405 | 0.454111218 | 0.051847181 | 0.206261123 |
| 0.32532992  | 0.20988768  | 0.307034727 | 0.300012079 |
| 0.299442913 | 0.217316521 | 0.223411606 | 0.493523625 |
| 0.395153135 | 0.182388826 | 0.261388713 | 0.377317285 |
| 0.288673187 | 0.290158054 | 0.202809519 | 0.291885861 |
| 0.135563369 | 0.396231362 | 0.062835694 | 0.289168962 |
| 0.203119462 | 0.146169136 | 0.038730088 | 0.27337157  |
| 0.285149025 | 0.383599113 | 0.370500024 | 0.19943783  |
| 0.317528053 | 0.340636642 | 0.252835663 | 0.327798681 |
| 0.040422637 | 0.112471159 | 0.201362431 | 0.468703767 |
| 0.206358666 | 0.455939039 | 0.329085392 | 0.300823403 |
| 0.305545062 | 0.434281862 | 0.007077301 | 0.423160464 |
| 0.452923452 | 0.204926988 | 0.319906269 | 0.30758144  |
| 0.255530799 | 0.447509084 | 0.029000115 | 0.364350949 |
| 0.252397634 | 0.170686106 | 0.490668506 | 0.225697508 |
| 0.39746293  | 0.108179405 | 0.286110515 | 0.361367453 |
| 0.298347488 | 0.019930471 | 0.232460697 | 0.345593807 |
| 0.059924436 | 0.176047498 | 0.356376656 | 1           |
| 0.334878384 | 0.397343908 | 0.48477227  | 0.243800256 |
| 0.333878963 | 0.297098571 | 0.042435523 | 0.289055174 |
| 0.365308004 | 0.23887609  | 0.411128564 | 0.305139473 |
| 0.212804753 | 0.442068276 | 0.329643397 | 0.188211438 |
| 0.126819501 | 0.313575709 | 0.05497803  | 0.325782771 |
| 0.326899238 | 0.196567966 | 0.265489681 | 0.17240616  |
| 0.125172053 | 0.487679662 | 0.156965499 | 0.176800021 |

|             |             |             |             |
|-------------|-------------|-------------|-------------|
| 0.102860818 | 0.291270553 | 0.321056064 | 0.227218175 |
| 0.186647302 | 0.243851592 | 0.277482134 | 0.320696844 |
| 0.113301546 | 0.170744738 | 0.031290055 | 0.214503477 |
| 0.142138059 | 0.234140078 | 0.224378294 | 0.294866865 |
| 0.268564217 | 0.156912729 | 0.320879785 | 0.246274216 |
| 0.173833681 | 0.052926817 | 0.467692352 | 0.349017623 |
| 0.269037862 | 0.257522053 | 0.097575063 | 0.203871268 |
| 0.451357505 | 0.218991361 | 0.195066352 | 0.434919751 |
| 0.070814988 | 0.460224087 | 0.269233677 | 0.192553435 |
| 0.263476367 | 0.309475885 | 0.474019708 | 0.080539295 |
| 0.285288445 | 0.428912857 | 0.3174881   | 0.24996114  |
| 0.350028803 | 0.338149982 | 0.095031978 | 0.326791892 |
| 0.307256677 | 0.089081759 | 0.466811712 | 0.161277027 |
| 0.062210903 | 0.332979993 | 0.332966266 | 0.150443827 |
| 0.148171451 | 0.306177718 | 0.126638659 | 0.311978854 |
| 0.484662041 | 0.383555498 | 0.35688822  | 0.20526586  |
| 0.115373583 | 0.026418096 | 0.214455492 | 0.26474626  |
| 0.428977807 | 0.446383191 | 0.303448448 | 0.286558215 |
| 0.31573255  | 0.271107743 | 0.160724641 | 0.467280341 |
| 0.180470078 | 0.447879107 | 0.03088043  | 0.350808647 |
| 0.419612686 | 0.224387902 | 0.139788021 | 0.308073866 |
| 0.3491293   | 0.134038866 | 0.268819317 | 0.438601884 |
| 0.414686987 | 0.31229463  | 0.299455609 | 0.31092105  |
| 0.069990394 | 0.123800716 | 0.316428616 | 0.151392708 |
| 0.314735114 | 0.291645077 | 0.039080099 | 0.278954781 |
| 0.119111651 | 0.414798989 | 0.425574774 | 0.13579726  |
| 0.241576979 | 0.269159041 | 0.323985104 | 0.110195447 |
| 0.384866514 | 0.425134604 | 0.451693955 | 0.252762965 |
| 0.342927437 | 0.432182029 | 0.238601363 | 0.143486143 |
| 0.050858765 | 0.435972241 | 0.314003847 | 0.072057135 |
| 0.462517137 | 0.187034996 | 0.041515711 | 0.466426167 |
| 0.286526851 | 0.359038523 | 0.021454505 | 0.063720969 |
| 0.074659464 | 0.422679156 | 0.417340039 | 0.326639611 |
| 0.195069125 | 0.339636836 | 0.009652968 | 0.464337188 |
| 0.440407428 | 0.041886389 | 0.164484045 | 0.343523899 |
| 0.30758438  | 0.48118327  | 0.234049286 | 0.389237992 |
| 0.264416749 | 0.420466098 | 0.262572317 | 0.309715715 |
| 0.41051497  | 0.407151792 | 0.375935899 | 0.430429394 |
| 0.44445367  | 0.334835496 | 0.334286523 | 0.065405242 |
| 0.163881636 | 0.239984251 | 0.222397841 | 0.145101942 |
| 0.239676382 | 0.207716389 | 0.436317436 | 0.452245218 |
| 0.430141724 | 0.023939938 | 0.239940622 | 0.349427195 |
| 0.439456857 | 0.479734296 | 0.048351254 | 0.013217984 |
| 0.011291022 | 0.040727929 | 0.326730561 | 0.271873611 |
| 0.45033847  | 0.183077506 | 0.026923204 | 0.118459659 |
| 0.331145559 | 0.287330284 | 0.447018024 | 0.364907708 |
| 0.36240635  | 0.157111261 | 0.231177103 | 0.37838248  |
| 0.117470962 | 0.227021051 | 0.449551088 | 0.433891132 |
| 0.086714375 | 0.280833311 | 0.277928793 | 0.488374174 |
| 0.047983867 | 0.315404417 | 0.285409922 | 0.298575187 |
| 0.032117556 | 0.142602153 | 0.131617497 | 0.405320941 |
| 0.406484052 | 0.121828227 | 0.075907101 | 0.115074986 |
| 0.20396394  | 0.435150108 | 0.243648622 | 0.491931552 |
| 0.427540207 | 0.447937463 | 0.108335424 | 0.437029928 |

|             |             |             |             |
|-------------|-------------|-------------|-------------|
| 0.08681791  | 0.413348348 | 0.26623976  | 0.084098899 |
| 0.282302611 | 0.046161109 | 0.391117166 | 0.145270842 |
| 0.271282308 | 0.313104904 | 0.200588557 | 0.042375712 |
| 0.136400767 | 0.110556314 | 0.470153073 | 0.419959244 |
| 0.063519338 | 0.311620071 | 0.315723578 | 0.332055603 |
| 0.276070395 | 0.394316683 | 0.435828072 | 0.252383514 |
| 0.183861684 | 0.101208323 | 0.366758354 | 0.279112071 |
| 0.251590833 | 0.470553177 | 0.272669528 | 0.476486484 |
| 0.328460205 | 0.430447439 | 0.415398482 | 0.343785636 |
| 0.196919782 | 0.285486379 | 0.306115924 | 0.071256435 |
| 0.349331881 | 0.43800544  | 0.308917213 | 0.190075707 |
| 0.285198662 | 0.244308896 | 0.112574562 | 0.137562321 |
| 0.200091149 | 0.253251455 | 0.227491431 | 0.446097326 |
| 0.287746872 | 0.293426761 | 0.094728825 | 0.128883213 |
| 0.488923778 | 0.404569446 | 0.227328843 | 0.344112595 |
| 0.240906531 | 0.33328398  | 0.380451524 | 0.365449482 |
| 0.269942966 | 0.392581562 | 0.383417739 | 0.306629059 |
| 0.396384248 | 0.330746794 | 0.45891333  | 0.12963087  |
| 0.111917782 | 0.253030877 | 0.168022041 | 0.154638528 |
| 0.234731747 | 0.076365686 | 0.183746947 | 0.367633562 |
| 0.214517911 | 0.342134383 | 0.230720248 | 0.171452275 |
| 0.302641195 | 0.248961916 | 0.343916969 | 0.270444859 |
| 0.160212526 | 0.435391113 | 0.032867098 | 0.118226264 |
| 0.22659683  | 0.371594296 | 0.266522266 | 0.288702999 |
| 0.211806808 | 0.163935715 | 0.327170361 | 0.242911831 |
| 0.223510759 | 0.245204021 | 0.377145794 | 0.100118999 |
| 0.072513671 | 0.47965872  | 0.275104092 | 0.048636461 |
| 0.117629481 | 0.254099637 | 0.272627563 | 0.275797645 |
| 0.050337091 | 0.408478035 | 0.248666034 | 0.313734331 |
| 0.339696475 | 0.144544816 | 0.312728522 | 0.125717958 |
| 0.135923569 | 0.396933208 | 0.272676125 | 0.433553056 |
| 0.275412909 | 0.407437777 | 0.376879478 | 0.362962741 |
| 0.154805701 | 0.231213964 | 0.099794153 | 0.424745195 |
| 0.236224362 |             |             |             |

|             |             |             |             |
|-------------|-------------|-------------|-------------|
| GALK1       | 0.28038409  | 0.457199368 | 0.211162456 |
| 0.39508559  | 0.246253392 | 0.231695144 | 0.231801926 |
| 0.141085733 | 0.188742285 | 0.025014716 | 0.075422923 |
| 0.234091468 | 0.17814989  | 0.192426004 | 0.243573273 |
| 0.381574693 | 0.135209949 | 0.181585362 | 0.231513431 |
| 0.319098225 | 0.13417566  | 0.341771912 | 0.158065106 |
| 0.195476683 | 0.143090681 | 0.143439316 | 0.248340946 |
| 0.412265256 | 0.152125664 | 0.187230787 | 0.297949924 |
| 0.097268047 | 0.32854186  | 0.422716757 | 0.306323833 |
| 0.399439676 | 0.255171203 | 0.00758849  | 0.246872332 |
| 0.335954911 | 0.374394608 | 0.335521218 | 0.262208437 |
| 0.109740038 | 0.380148196 | 0.254673817 | 0.232380731 |
| 0.163862889 | 0.07986573  | 0.153359896 | 0.35721522  |
| 0.383472049 | 0.260354053 | 0.195346287 | 0.219431259 |
| 0.167274179 | 0.131731569 | 0.158655086 | 0.208210996 |
| 0.236228694 | 0.11831984  | 0.397054062 | 0.189485806 |
| 0.139527093 | 0.182980177 | 0.121720976 | 0.205697693 |
| 0.203920646 | 0.28990524  | 0.038692042 | 0.19664973  |
| 0.007568902 | 0.308790095 | 0.219237759 | 0.215668008 |
| 0.082321323 | 0.051591977 | 0.142515327 | 0.267399821 |



|             |             |             |             |
|-------------|-------------|-------------|-------------|
| 0.418122735 | 0.354904949 | 0.444862143 | 0.4394196   |
| 0.150093151 | 0.210146122 | 0.200253353 | 0.199252794 |
| 0.364660795 | 0.219973445 | 0.111907458 | 0.378160741 |
| 0.450360853 | 0.434216585 | 0.204778715 | 0.216231012 |
| 0.387616104 | 0.410475959 | 0.240282521 | 0.260873187 |
| 0.258307923 | 0.065944249 | 0.375533688 | 0.446680896 |
| 0.307488565 | 0.176042678 | 0.174189883 | 0.33766581  |
| 0.099219686 | 0.178873441 | 0.30061332  | 0.085164937 |
| 0.435389053 | 0.077149796 | 0.185673704 | 0.248337933 |
| 0.166006278 | 0.342045171 | 0.427684488 | 0.222412981 |
| 0.210647998 | 0.037753224 | 0.156138749 | 0.053657738 |
| 0.192509016 | 0.087091971 | 0.369241201 | 0.427308384 |
| 0.152284118 | 0.241253676 | 0.237611516 | 0.010172628 |
| 0.052753797 | 0.129815009 | 0.313427439 | 0.188273602 |
| 0.331868608 | 0.279561565 | 0.268299483 | 0.271101115 |
| 0.273278007 | 0.43659384  | 0.044882334 | 0.154844361 |
| 0.245900348 | 0.134287273 | 0.23079072  | 0.23799728  |
| 0.253972979 | 0.147804728 | 0.161336689 | 0.474056008 |
| 0.358768922 | 0.14078765  | 0.155177091 | 0.349480503 |
| 0.254868625 | 0.224896278 | 0.142051635 | 0.203876464 |
| 0.106993526 | 0.383652003 | 0.047027126 | 0.181631849 |
| 0.241645653 | 0.108138424 | 0.018442304 | 0.179605189 |
| 0.212567009 | 0.382989029 | 0.345181571 | 0.137587838 |
| 0.223785052 | 0.307317836 | 0.160394254 | 0.325861088 |
| 0.058583226 | 0.070540753 | 0.121648564 | 0.443725412 |
| 0.172730101 | 0.423369993 | 0.225936137 | 0.230792501 |
| 0.234379634 | 0.407222817 | 0.003244399 | 0.399329198 |
| 0.436740311 | 0.127817266 | 0.248630962 | 0.2330054   |
| 0.242264929 | 0.429994697 | 0.015142766 | 0.326460036 |
| 0.205074426 | 0.120187461 | 0.466290398 | 0.186036408 |
| 0.363123439 | 0.099696837 | 0.196730374 | 0.359564345 |
| 0.28526414  | 0.015119158 | 0.171451024 | 0.324158779 |
| 0.044740959 | 0.144754368 | 0.3155898   | 0.334878384 |
| 1           | 0.368172054 | 0.454252538 | 0.237860402 |
| 0.255250206 | 0.192490953 | 0.028849036 | 0.21529772  |
| 0.330528351 | 0.194895919 | 0.382270387 | 0.229319111 |
| 0.147980974 | 0.420879143 | 0.307628898 | 0.187415467 |
| 0.112294883 | 0.220971035 | 0.039789904 | 0.287131088 |
| 0.30988476  | 0.165565559 | 0.236860498 | 0.096407653 |
| 0.098341912 | 0.470206119 | 0.129572235 | 0.145558965 |
| 0.089133276 | 0.223714006 | 0.222121686 | 0.187122266 |
| 0.161712562 | 0.213827785 | 0.260944342 | 0.281457797 |
| 0.091538796 | 0.133573658 | 0.01832198  | 0.158338307 |
| 0.115368983 | 0.179209164 | 0.168379926 | 0.260953819 |
| 0.180421672 | 0.111137169 | 0.253566315 | 0.204713494 |
| 0.14891226  | 0.041025249 | 0.44403759  | 0.3153993   |
| 0.227259226 | 0.211939119 | 0.06777828  | 0.150932892 |
| 0.43295714  | 0.170990225 | 0.125334482 | 0.41545055  |
| 0.04380818  | 0.434124922 | 0.21962813  | 0.163008531 |
| 0.204008859 | 0.234487978 | 0.448490882 | 0.086592284 |
| 0.19396992  | 0.401220171 | 0.222877541 | 0.233153115 |
| 0.316457848 | 0.302276584 | 0.078306451 | 0.2859548   |
| 0.264554295 | 0.069042924 | 0.442660734 | 0.117147808 |
| 0.046241621 | 0.308962787 | 0.340639433 | 0.122519938 |

|             |             |             |             |
|-------------|-------------|-------------|-------------|
| 0.120984238 | 0.262838325 | 0.096387243 | 0.244355241 |
| 0.466910912 | 0.369500118 | 0.356546968 | 0.158245823 |
| 0.101855068 | 0.020832314 | 0.155047288 | 0.187375487 |
| 0.398140427 | 0.42519503  | 0.208993199 | 0.235222147 |
| 0.236329971 | 0.276257928 | 0.098978241 | 0.450030064 |
| 0.104113282 | 0.415181901 | 0.022007217 | 0.348284178 |
| 0.401521271 | 0.146332289 | 0.133295413 | 0.241670715 |
| 0.312944193 | 0.116754715 | 0.16356772  | 0.412711076 |
| 0.400816064 | 0.288634179 | 0.284598857 | 0.264133843 |
| 0.058488574 | 0.097311593 | 0.259195194 | 0.130501584 |
| 0.266483392 | 0.250883437 | 0.032174342 | 0.195025344 |
| 0.101669624 | 0.396038223 | 0.381318987 | 0.157386191 |
| 0.206320709 | 0.183094648 | 0.260530446 | 0.089332819 |
| 0.38394495  | 0.398293091 | 0.425056642 | 0.15929073  |
| 0.307546612 | 0.425584194 | 0.210177671 | 0.102668897 |
| 0.040433708 | 0.414022295 | 0.273619012 | 0.053884944 |
| 0.430050928 | 0.123685637 | 0.038907764 | 0.435989115 |
| 0.210170484 | 0.324494009 | 0.018016595 | 0.038448205 |
| 0.051613265 | 0.394234431 | 0.404150645 | 0.286626316 |
| 0.153226797 | 0.236260392 | 0.004975535 | 0.436708286 |
| 0.417562282 | 0.037210789 | 0.133640544 | 0.328161416 |
| 0.304501685 | 0.44547161  | 0.216778593 | 0.388537157 |
| 0.232302525 | 0.404884395 | 0.208782363 | 0.251309302 |
| 0.394434583 | 0.394590972 | 0.334685683 | 0.396095757 |
| 0.412208451 | 0.308374229 | 0.26409322  | 0.064803333 |
| 0.210499013 | 0.164192832 | 0.2134958   | 0.180041578 |
| 0.186030583 | 0.195568904 | 0.397088303 | 0.423234189 |
| 0.412631615 | 0.017926908 | 0.163571258 | 0.326296723 |
| 0.399977081 | 0.443099126 | 0.027472876 | 0.012580803 |
| 0.006483829 | 0.052464392 | 0.229563382 | 0.203459289 |
| 0.433193586 | 0.140923424 | 0.020172948 | 0.079565653 |
| 0.23193333  | 0.259031513 | 0.42619005  | 0.335992177 |
| 0.334975043 | 0.113298289 | 0.208644179 | 0.338312008 |
| 0.128518794 | 0.186432238 | 0.435712287 | 0.412006709 |
| 0.055524776 | 0.221347585 | 0.169483629 | 0.463348638 |
| 0.047566252 | 0.229904491 | 0.24631377  | 0.256209769 |
| 0.015566404 | 0.119877129 | 0.136579815 | 0.370595363 |
| 0.387062656 | 0.106482086 | 0.067054501 | 0.071753371 |
| 0.17852109  | 0.402068159 | 0.186415575 | 0.466937237 |
| 0.395518586 | 0.414941522 | 0.082843719 | 0.419503815 |
| 0.102800948 | 0.389090746 | 0.215692479 | 0.061793044 |
| 0.175032917 | 0.029442483 | 0.358551147 | 0.206365818 |
| 0.17849064  | 0.26238585  | 0.243529483 | 0.032442965 |
| 0.12643866  | 0.084907225 | 0.456812121 | 0.403629208 |
| 0.041944884 | 0.231016765 | 0.223617217 | 0.267338429 |
| 0.190399746 | 0.382230508 | 0.410590629 | 0.192717678 |
| 0.161490777 | 0.062180119 | 0.318868346 | 0.233098144 |
| 0.158572842 | 0.44567485  | 0.275591141 | 0.450085259 |
| 0.29170598  | 0.395311914 | 0.394300365 | 0.279231677 |
| 0.156754441 | 0.211946304 | 0.299849394 | 0.055780721 |
| 0.247292486 | 0.417826186 | 0.199733407 | 0.194370567 |
| 0.24491559  | 0.192759685 | 0.073249512 | 0.068155522 |
| 0.161737677 | 0.195880871 | 0.175510956 | 0.410283293 |
| 0.221718796 | 0.25204698  | 0.048936627 | 0.138918049 |

|             |             |             |             |
|-------------|-------------|-------------|-------------|
| 0.459688178 | 0.375670272 | 0.176290032 | 0.327948093 |
| 0.166440865 | 0.287880321 | 0.349230855 | 0.342838439 |
| 0.216427941 | 0.371416172 | 0.340571293 | 0.286307096 |
| 0.367945768 | 0.257449594 | 0.436874822 | 0.069789966 |
| 0.126696009 | 0.206644971 | 0.156212509 | 0.117201731 |
| 0.179856914 | 0.063209286 | 0.163204126 | 0.331357255 |
| 0.167897247 | 0.288532238 | 0.146555633 | 0.123996651 |
| 0.221339111 | 0.158909993 | 0.252649694 | 0.207463462 |
| 0.137782246 | 0.420392071 | 0.026518802 | 0.083582843 |
| 0.165290261 | 0.371707276 | 0.22710285  | 0.213830822 |
| 0.195558445 | 0.11354285  | 0.248771445 | 0.161865938 |
| 0.176189049 | 0.16721643  | 0.374215195 | 0.068798498 |
| 0.051405004 | 0.447112434 | 0.177915122 | 0.029391164 |
| 0.09359733  | 0.214040993 | 0.157454064 | 0.284368018 |
| 0.038337534 | 0.398086308 | 0.209608135 | 0.239342172 |
| 0.242014988 | 0.096405476 | 0.26698873  | 0.083394836 |
| 0.088042208 | 0.355537789 | 0.21083889  | 0.413866879 |
| 0.190194901 | 0.392018073 | 0.343395075 | 0.331251642 |
| 0.086226417 | 0.163414338 | 0.085246501 | 0.382147034 |
| 0.197876619 |             |             |             |

GALNT3 0.384921338 0.507762633 0.413651358

|             |             |             |             |
|-------------|-------------|-------------|-------------|
| 0.383138264 | 0.427549313 | 0.309421829 | 0.231139417 |
| 0.201711311 | 0.126473808 | 0.006445283 | 0.034183716 |
| 0.414896569 | 0.200800787 | 0.24808675  | 0.302167747 |
| 0.425441847 | 0.186975477 | 0.394952497 | 0.291395195 |
| 0.402502072 | 0.10187328  | 0.410850633 | 0.138338598 |
| 0.373855359 | 0.155098664 | 0.110265101 | 0.318975058 |
| 0.433123633 | 0.127923639 | 0.25160494  | 0.344246321 |
| 0.191030109 | 0.400003882 | 0.494701466 | 0.403677644 |
| 0.485073472 | 0.353098961 | 0.026681642 | 0.254782363 |
| 0.40769608  | 0.405236739 | 0.389857518 | 0.347552302 |
| 0.068714851 | 0.448679898 | 0.270090348 | 0.436067541 |
| 0.23840665  | 0.053726365 | 0.202475674 | 0.413866243 |
| 0.434130634 | 0.367342882 | 0.237270185 | 0.184447323 |
| 0.17328395  | 0.191814475 | 0.263670558 | 0.264562728 |
| 0.257002668 | 0.130952265 | 0.455584877 | 0.11314431  |
| 0.159296627 | 0.279888085 | 0.241614968 | 0.275767217 |
| 0.381346515 | 0.323323413 | 0.03963746  | 0.376260362 |
| 0.002963817 | 0.395551429 | 0.432907857 | 0.317450821 |
| 0.084048936 | 0.029791626 | 0.270435247 | 0.328927304 |
| 0.458133877 | 0.45703535  | 0.489363728 | 0.493648284 |
| 0.217807235 | 0.386974488 | 0.40747854  | 0.219716706 |
| 0.419386492 | 0.192331454 | 0.151854768 | 0.427513818 |
| 0.497143584 | 0.499694111 | 0.267767934 | 0.354932218 |
| 0.364541244 | 0.461568007 | 0.383823765 | 0.406328287 |
| 0.322358834 | 0.122682775 | 0.40988541  | 0.50623459  |
| 0.366435554 | 0.354758043 | 0.22511099  | 0.360670247 |
| 0.112454149 | 0.341367882 | 0.371069629 | 0.203781805 |
| 0.46999003  | 0.034890212 | 0.29603926  | 0.332495059 |
| 0.326956706 | 0.399138719 | 0.500252519 | 0.231819853 |
| 0.431775651 | 0.039309136 | 0.16558691  | 0.081720173 |
| 0.31875075  | 0.203121588 | 0.439251687 | 0.434499296 |
| 0.231282695 | 0.383005612 | 0.299345154 | 0.010056233 |
| 0.060828617 | 0.30230967  | 0.393764843 | 0.404013511 |

|             |             |             |             |
|-------------|-------------|-------------|-------------|
| 0.411425456 | 0.376306253 | 0.25867806  | 0.315975788 |
| 0.385030806 | 0.483317088 | 0.04182448  | 0.148198708 |
| 0.39029535  | 0.299626919 | 0.306467527 | 0.395536055 |
| 0.348555376 | 0.158437137 | 0.181976394 | 0.51940357  |
| 0.397955766 | 0.128631847 | 0.335209879 | 0.42643384  |
| 0.290470366 | 0.395756728 | 0.16280476  | 0.283733532 |
| 0.072214385 | 0.458347795 | 0.067792671 | 0.337545621 |
| 0.256969203 | 0.191438668 | 0.034450591 | 0.253382387 |
| 0.267133005 | 0.387668454 | 0.433412641 | 0.176779518 |
| 0.322955819 | 0.419263736 | 0.287902339 | 0.342806168 |
| 0.015044488 | 0.09498036  | 0.243101091 | 0.493384081 |
| 0.217979163 | 0.510696555 | 0.35881684  | 0.394970515 |
| 0.356885133 | 0.437964865 | 0.009620119 | 0.462849522 |
| 0.506211544 | 0.246288812 | 0.366931726 | 0.435934979 |
| 0.357995832 | 0.428117631 | 0.045585046 | 0.421541527 |
| 0.299296876 | 0.142639625 | 0.513566907 | 0.219581335 |
| 0.44527531  | 0.074742505 | 0.291493517 | 0.418317974 |
| 0.351289687 | 0.01517764  | 0.192337088 | 0.362702725 |
| 0.070760818 | 0.102177104 | 0.402943725 | 0.397343908 |
| 0.368172054 | 1           | 0.493240706 | 0.341757463 |
| 0.413442248 | 0.280206917 | 0.035603594 | 0.397050248 |
| 0.414282464 | 0.336562236 | 0.416662221 | 0.269194722 |
| 0.277276702 | 0.455781602 | 0.378684062 | 0.185964584 |
| 0.073015025 | 0.309199085 | 0.027931135 | 0.366599487 |
| 0.379925248 | 0.127008079 | 0.363254562 | 0.248863088 |
| 0.126932172 | 0.516367614 | 0.255198583 | 0.310293505 |
| 0.188116652 | 0.331026268 | 0.311397428 | 0.196385646 |
| 0.193330797 | 0.233183394 | 0.367485193 | 0.379262205 |
| 0.050907807 | 0.136515335 | 0.051020755 | 0.30319834  |
| 0.122430708 | 0.272505823 | 0.256997616 | 0.334857776 |
| 0.297623391 | 0.121244511 | 0.378785025 | 0.373150396 |
| 0.188932853 | 0.037746081 | 0.494432034 | 0.425831459 |
| 0.263694204 | 0.210502284 | 0.088292365 | 0.262022782 |
| 0.444920721 | 0.234296627 | 0.227738966 | 0.426309239 |
| 0.064109493 | 0.495106741 | 0.246880787 | 0.180177726 |
| 0.355822402 | 0.293086517 | 0.462919859 | 0.064249495 |
| 0.363952737 | 0.438404306 | 0.401540551 | 0.244120229 |
| 0.352857711 | 0.396104396 | 0.04965008  | 0.35070082  |
| 0.327277944 | 0.061454008 | 0.513071326 | 0.195193741 |
| 0.052643845 | 0.427913971 | 0.369740833 | 0.136831495 |
| 0.1444353   | 0.300371276 | 0.0596769   | 0.358481941 |
| 0.506919983 | 0.412645811 | 0.355726208 | 0.323141011 |
| 0.064279462 | 0.012447647 | 0.31004905  | 0.412673838 |
| 0.475746741 | 0.502879044 | 0.342454803 | 0.35710153  |
| 0.299964445 | 0.336311342 | 0.136532308 | 0.498612334 |
| 0.315033438 | 0.502966172 | 0.020719991 | 0.399914702 |
| 0.475357748 | 0.236302371 | 0.127413059 | 0.28592081  |
| 0.341238407 | 0.082779026 | 0.285491142 | 0.471444611 |
| 0.422759315 | 0.359689    | 0.34713408  | 0.42713273  |
| 0.026777835 | 0.064680648 | 0.416168374 | 0.261953564 |
| 0.358356603 | 0.291436702 | 0.089915588 | 0.314040389 |
| 0.066313247 | 0.419766657 | 0.449897089 | 0.101087963 |
| 0.253247839 | 0.305456872 | 0.426379283 | 0.072044482 |
| 0.443210614 | 0.494641466 | 0.494074223 | 0.22905002  |

|             |             |             |             |
|-------------|-------------|-------------|-------------|
| 0.38681537  | 0.471362609 | 0.358835743 | 0.15589958  |
| 0.046296065 | 0.496447579 | 0.362180106 | 0.035140467 |
| 0.471283171 | 0.183080094 | 0.016089703 | 0.482335411 |
| 0.248707979 | 0.406364676 | 0.007299617 | 0.142673286 |
| 0.103332064 | 0.463386629 | 0.449019511 | 0.356844839 |
| 0.178422242 | 0.409395958 | 0.021230285 | 0.52327591  |
| 0.461607299 | 0.037560553 | 0.228454831 | 0.376704949 |
| 0.366446909 | 0.514071685 | 0.344639377 | 0.428789578 |
| 0.377300422 | 0.469672824 | 0.229497292 | 0.336898265 |
| 0.402193589 | 0.477006024 | 0.382168543 | 0.447808216 |
| 0.441628037 | 0.437525848 | 0.318800393 | 0.028320363 |
| 0.198916382 | 0.201555855 | 0.24423463  | 0.108188634 |
| 0.275006803 | 0.201086997 | 0.478453357 | 0.471744841 |
| 0.472079554 | 0.017080061 | 0.172932097 | 0.37802852  |
| 0.422266017 | 0.477858844 | 0.062747107 | 0.013899422 |
| 0.017583894 | 0.034534695 | 0.352996253 | 0.345406768 |
| 0.485009977 | 0.169508537 | 0.013739736 | 0.061353505 |
| 0.326936892 | 0.407367514 | 0.479849835 | 0.402957788 |
| 0.416682116 | 0.144275407 | 0.219518861 | 0.413494257 |
| 0.11522882  | 0.272540835 | 0.477634026 | 0.4439496   |
| 0.101001149 | 0.350589533 | 0.382122638 | 0.486473942 |
| 0.102282594 | 0.385146109 | 0.409027031 | 0.296131658 |
| 0.045180962 | 0.149788238 | 0.120165779 | 0.433300563 |
| 0.467713606 | 0.092198268 | 0.050167007 | 0.114265639 |
| 0.136172461 | 0.468093031 | 0.201400826 | 0.519637415 |
| 0.413543584 | 0.431734994 | 0.142609722 | 0.463380133 |
| 0.061598676 | 0.453331177 | 0.375276165 | 0.058917397 |
| 0.387617102 | 0.037029139 | 0.45761678  | 0.15210702  |
| 0.285372153 | 0.372637612 | 0.257290114 | 0.047280086 |
| 0.251615545 | 0.099652288 | 0.474993358 | 0.460863595 |
| 0.088928952 | 0.296350678 | 0.390304236 | 0.429748713 |
| 0.260467379 | 0.392409925 | 0.472660542 | 0.324105554 |
| 0.109282705 | 0.215750908 | 0.388815075 | 0.343982812 |
| 0.236003234 | 0.50164473  | 0.297881972 | 0.526586686 |
| 0.365163539 | 0.465335322 | 0.458585268 | 0.355012672 |
| 0.284757864 | 0.355051986 | 0.304562624 | 0.026460865 |
| 0.393559817 | 0.437745961 | 0.37604278  | 0.19583853  |
| 0.297150364 | 0.386457716 | 0.096640999 | 0.206076019 |
| 0.340351663 | 0.250960077 | 0.176321515 | 0.444808382 |
| 0.369708804 | 0.341386283 | 0.071690984 | 0.110214613 |
| 0.529043    | 0.428737262 | 0.169478495 | 0.38035904  |
| 0.270111481 | 0.374676647 | 0.424073225 | 0.417442531 |
| 0.37980787  | 0.407756522 | 0.378798615 | 0.309456829 |
| 0.390822527 | 0.312808494 | 0.500365692 | 0.096253914 |
| 0.129390765 | 0.377269523 | 0.115322216 | 0.168843014 |
| 0.195976337 | 0.067097386 | 0.305492799 | 0.433246287 |
| 0.346767855 | 0.384481577 | 0.284076968 | 0.148015459 |
| 0.401967134 | 0.372093049 | 0.407666989 | 0.203746146 |
| 0.105974112 | 0.464880909 | 0.023765693 | 0.110843995 |
| 0.360398439 | 0.393129738 | 0.368473165 | 0.331369353 |
| 0.329828399 | 0.243492613 | 0.346996509 | 0.248328054 |
| 0.232995265 | 0.363720698 | 0.394055444 | 0.061167612 |
| 0.033796733 | 0.503003276 | 0.349311191 | 0.064364659 |
| 0.155124243 | 0.343947455 | 0.370457669 | 0.253234745 |

|             |             |             |             |
|-------------|-------------|-------------|-------------|
| 0.05979328  | 0.462835909 | 0.259647906 | 0.430127529 |
| 0.350762731 | 0.126292493 | 0.328267465 | 0.130757418 |
| 0.122788085 | 0.425503926 | 0.412300619 | 0.490515522 |
| 0.423856578 | 0.40523391  | 0.413799682 | 0.388499895 |
| 0.2102416   | 0.37525439  | 0.050139205 | 0.433619013 |
| 0.336958054 |             |             |             |
| GARNL4      | 0.434274392 | 0.522612341 | 0.446992126 |
| 0.479251033 | 0.509025088 | 0.385027859 | 0.309502064 |
| 0.250427976 | 0.1543362   | 0.014809821 | 0.053415908 |
| 0.481936569 | 0.288198799 | 0.345564276 | 0.355580631 |
| 0.503891415 | 0.242550711 | 0.419695628 | 0.369376271 |
| 0.484146359 | 0.152275185 | 0.503286414 | 0.183238396 |
| 0.393341959 | 0.193030087 | 0.148176936 | 0.366915841 |
| 0.486285497 | 0.166797289 | 0.336417436 | 0.426871099 |
| 0.204371037 | 0.455546802 | 0.501046549 | 0.498361528 |
| 0.490866954 | 0.394417186 | 0.028948685 | 0.338573516 |
| 0.419704012 | 0.479568739 | 0.47505631  | 0.444750905 |
| 0.099619499 | 0.459938303 | 0.356744479 | 0.48907718  |
| 0.277747064 | 0.079545428 | 0.260220484 | 0.421818559 |
| 0.451192476 | 0.4513614   | 0.298520316 | 0.253410873 |
| 0.252229475 | 0.258605705 | 0.319101762 | 0.331198495 |
| 0.342987328 | 0.183493837 | 0.467145141 | 0.153531867 |
| 0.19761887  | 0.338711814 | 0.270759501 | 0.352350005 |
| 0.414228692 | 0.387339378 | 0.049971665 | 0.416585877 |
| 0.007138595 | 0.473571992 | 0.486180792 | 0.346485868 |
| 0.106678154 | 0.055456702 | 0.306204319 | 0.42720295  |
| 0.48620705  | 0.445786907 | 0.499661675 | 0.498293222 |
| 0.291057731 | 0.431030164 | 0.452012452 | 0.293481475 |
| 0.43546696  | 0.272730211 | 0.186884364 | 0.511278017 |
| 0.506651915 | 0.511783674 | 0.325367002 | 0.397045851 |
| 0.427006788 | 0.474258565 | 0.457057398 | 0.494969038 |
| 0.380844123 | 0.118276036 | 0.424423434 | 0.518305989 |
| 0.383181374 | 0.388739578 | 0.273910129 | 0.43858929  |
| 0.13753343  | 0.393881993 | 0.46631967  | 0.243658864 |
| 0.485232716 | 0.048979315 | 0.342460548 | 0.434733885 |
| 0.34227865  | 0.457514962 | 0.506530051 | 0.305332344 |
| 0.494664946 | 0.056004912 | 0.193508611 | 0.089125732 |
| 0.406416693 | 0.208828831 | 0.44651451  | 0.473260149 |
| 0.304195713 | 0.463829441 | 0.375325568 | 0.011722144 |
| 0.075251426 | 0.300714259 | 0.43752262  | 0.449627414 |
| 0.477265855 | 0.355959465 | 0.337040277 | 0.380907772 |
| 0.45442802  | 0.492101647 | 0.058749243 | 0.18765224  |
| 0.478305633 | 0.304548148 | 0.377825945 | 0.481757072 |
| 0.428443595 | 0.203882488 | 0.239684867 | 0.529011994 |
| 0.411409062 | 0.175856441 | 0.373977603 | 0.509640366 |
| 0.385568617 | 0.465435506 | 0.210211523 | 0.386721165 |
| 0.109599506 | 0.460668579 | 0.076937227 | 0.390950678 |
| 0.298909578 | 0.242784393 | 0.0332073   | 0.323460055 |
| 0.355845091 | 0.421046332 | 0.432892189 | 0.213333731 |
| 0.428188672 | 0.504932657 | 0.348684525 | 0.440216883 |
| 0.027581689 | 0.111524569 | 0.285401085 | 0.513038386 |
| 0.282504181 | 0.507776894 | 0.429168233 | 0.429037598 |
| 0.421824473 | 0.494732635 | 0.007125794 | 0.473310757 |
| 0.513396126 | 0.297366902 | 0.47796788  | 0.495425496 |

|             |             |             |             |
|-------------|-------------|-------------|-------------|
| 0.408131547 | 0.480087201 | 0.050070735 | 0.510158427 |
| 0.352667733 | 0.17012681  | 0.522202237 | 0.281399946 |
| 0.447585508 | 0.102279365 | 0.376980522 | 0.443420654 |
| 0.426444072 | 0.021349951 | 0.258187668 | 0.451474263 |
| 0.073157396 | 0.147769648 | 0.465004246 | 0.48477227  |
| 0.454252538 | 0.493240706 | 1           | 0.389400955 |
| 0.50634928  | 0.346419544 | 0.03933693  | 0.444178101 |
| 0.463557651 | 0.391390397 | 0.429949859 | 0.345682594 |
| 0.329405314 | 0.470024846 | 0.407325859 | 0.223610264 |
| 0.103396741 | 0.388459468 | 0.045262307 | 0.439933155 |
| 0.373715321 | 0.199383934 | 0.413196439 | 0.256049559 |
| 0.154830482 | 0.530792207 | 0.266665473 | 0.322884943 |
| 0.188148238 | 0.438987714 | 0.377072219 | 0.297874993 |
| 0.283494364 | 0.285431464 | 0.42438335  | 0.446822196 |
| 0.081059151 | 0.189966216 | 0.040446928 | 0.388407674 |
| 0.201768362 | 0.379533579 | 0.359907885 | 0.407814125 |
| 0.396060589 | 0.190956627 | 0.480769836 | 0.377037864 |
| 0.21524372  | 0.048386487 | 0.506990965 | 0.500957895 |
| 0.322549019 | 0.265841183 | 0.104579634 | 0.347254968 |
| 0.470718049 | 0.306399565 | 0.2671935   | 0.453000037 |
| 0.068910232 | 0.49559534  | 0.346830439 | 0.23139163  |
| 0.44928674  | 0.388808161 | 0.488609518 | 0.084917513 |
| 0.426021166 | 0.460337157 | 0.444731858 | 0.302768927 |
| 0.37685335  | 0.483760491 | 0.07559866  | 0.400710727 |
| 0.395831313 | 0.085350144 | 0.524165242 | 0.23298437  |
| 0.062581256 | 0.495244321 | 0.449978662 | 0.16454575  |
| 0.166952933 | 0.40619395  | 0.088129111 | 0.428439351 |
| 0.522988953 | 0.506638788 | 0.432449062 | 0.325054657 |
| 0.097780188 | 0.027939302 | 0.333535246 | 0.446567994 |
| 0.485739941 | 0.508951451 | 0.404501686 | 0.453105494 |
| 0.375174902 | 0.400276047 | 0.170803472 | 0.514100405 |
| 0.282840384 | 0.505891454 | 0.025721584 | 0.463658581 |
| 0.483212314 | 0.306932255 | 0.163351589 | 0.373843098 |
| 0.380241637 | 0.109746522 | 0.323012398 | 0.485479802 |
| 0.432450993 | 0.423226618 | 0.413554952 | 0.493884342 |
| 0.043047144 | 0.093927536 | 0.470500979 | 0.261930738 |
| 0.439830791 | 0.343523371 | 0.084089949 | 0.378510139 |
| 0.102006634 | 0.444251435 | 0.502454768 | 0.125562795 |
| 0.33861457  | 0.350599723 | 0.495692778 | 0.095312441 |
| 0.440499351 | 0.489635642 | 0.50580193  | 0.274601091 |
| 0.459248602 | 0.482694621 | 0.421846977 | 0.171896152 |
| 0.053161641 | 0.500134676 | 0.421846028 | 0.05370598  |
| 0.494830794 | 0.238773179 | 0.034782184 | 0.496840772 |
| 0.309386008 | 0.41121098  | 0.00909981  | 0.111634214 |
| 0.098652518 | 0.499303925 | 0.459445466 | 0.434159549 |
| 0.243302829 | 0.471189399 | 0.015182908 | 0.524261277 |
| 0.483117124 | 0.044618031 | 0.248026501 | 0.439432793 |
| 0.435424989 | 0.524242458 | 0.388616235 | 0.454113888 |
| 0.456810547 | 0.480234787 | 0.325083302 | 0.406383091 |
| 0.450577337 | 0.476751766 | 0.456055939 | 0.453531722 |
| 0.486286974 | 0.509046509 | 0.405407941 | 0.044728131 |
| 0.197935817 | 0.264118111 | 0.311312497 | 0.139757747 |
| 0.332170276 | 0.246227762 | 0.480170533 | 0.497991015 |
| 0.483252456 | 0.020600205 | 0.229620752 | 0.434455994 |

|             |             |             |             |
|-------------|-------------|-------------|-------------|
| 0.442880506 | 0.487484718 | 0.053065357 | 0.013116508 |
| 0.014758353 | 0.047224745 | 0.433301956 | 0.380272793 |
| 0.490104803 | 0.239161949 | 0.019519734 | 0.089253025 |
| 0.392035589 | 0.473004039 | 0.495886249 | 0.489260348 |
| 0.467926783 | 0.174914461 | 0.314034036 | 0.492250689 |
| 0.140167924 | 0.313798081 | 0.49268132  | 0.4638076   |
| 0.102276723 | 0.382472161 | 0.428679778 | 0.502624326 |
| 0.099984244 | 0.456530345 | 0.481449741 | 0.402584382 |
| 0.038462727 | 0.170988166 | 0.140742552 | 0.505416092 |
| 0.473967525 | 0.147056274 | 0.080749871 | 0.1566129   |
| 0.206432548 | 0.478132591 | 0.278417675 | 0.529676464 |
| 0.46454401  | 0.506878276 | 0.155547181 | 0.471909695 |
| 0.088065089 | 0.469153795 | 0.43649959  | 0.07779699  |
| 0.414903786 | 0.04156249  | 0.457311655 | 0.19244971  |
| 0.369880642 | 0.437264212 | 0.264534864 | 0.050248703 |
| 0.238047131 | 0.125652303 | 0.49092714  | 0.490656163 |
| 0.084853768 | 0.351077766 | 0.437988322 | 0.490172252 |
| 0.336964476 | 0.493372521 | 0.484921546 | 0.39455071  |
| 0.158781752 | 0.203244701 | 0.470653858 | 0.408466145 |
| 0.308595213 | 0.507960618 | 0.380074192 | 0.528854007 |
| 0.425399188 | 0.459670755 | 0.466966133 | 0.437648607 |
| 0.33487794  | 0.423676835 | 0.400917599 | 0.047801412 |
| 0.469138539 | 0.493152919 | 0.427999635 | 0.24982288  |
| 0.382389921 | 0.427510696 | 0.104452356 | 0.212386274 |
| 0.369576966 | 0.326274505 | 0.249044609 | 0.506330487 |
| 0.430819793 | 0.407939585 | 0.08682391  | 0.13266796  |
| 0.538736357 | 0.42795937  | 0.214019009 | 0.467583358 |
| 0.3045109   | 0.454555398 | 0.481065203 | 0.486295018 |
| 0.411989083 | 0.447559859 | 0.45794691  | 0.406459104 |
| 0.414754356 | 0.384707608 | 0.510653472 | 0.123617013 |
| 0.152016477 | 0.432510915 | 0.177816767 | 0.191443759 |
| 0.261475685 | 0.074386176 | 0.334471271 | 0.511088262 |
| 0.398034103 | 0.488690735 | 0.343426285 | 0.167557602 |
| 0.456579741 | 0.395776278 | 0.483865677 | 0.28544772  |
| 0.15709937  | 0.482206947 | 0.028404582 | 0.133201875 |
| 0.423592055 | 0.453841806 | 0.444493338 | 0.381726659 |
| 0.368042081 | 0.248265715 | 0.435895291 | 0.321618447 |
| 0.329627156 | 0.405718889 | 0.445056919 | 0.075874454 |
| 0.052791927 | 0.511714772 | 0.404572952 | 0.058220548 |
| 0.156326573 | 0.387868708 | 0.401911396 | 0.329269564 |
| 0.061254768 | 0.470995815 | 0.341145749 | 0.494087659 |
| 0.428739972 | 0.149527354 | 0.33154467  | 0.148289723 |
| 0.129764347 | 0.435249092 | 0.454250375 | 0.498499762 |
| 0.445511373 | 0.503808903 | 0.417604905 | 0.43983462  |
| 0.20338494  | 0.397474009 | 0.071533241 | 0.474679357 |
| 0.406276489 |             |             |             |

|             |             |             |             |
|-------------|-------------|-------------|-------------|
| GART        | 0.265615874 | 0.424073466 | 0.193205354 |
| 0.28686888  | 0.192794168 | 0.167246267 | 0.06639476  |
| 0.033551032 | 0.088485572 | 0.002054934 | 0.037858913 |
| 0.23056188  | 0.082920658 | 0.059426194 | 0.138510004 |
| 0.310598754 | 0.063008061 | 0.087471822 | 0.089518727 |
| 0.223874543 | 0.021334267 | 0.270929006 | 0.037528622 |
| 0.156402466 | 0.088125164 | 0.052061645 | 0.194637913 |
| 0.308162125 | 0.055214975 | 0.096262437 | 0.18947548  |



|             |             |             |             |
|-------------|-------------|-------------|-------------|
| 0.043426012 | 0.272885572 | 0.420864833 | 0.28732005  |
| 0.413575371 | 0.253612621 | 0.000896802 | 0.097342703 |
| 0.279512241 | 0.365929937 | 0.233595717 | 0.15540585  |
| 0.022039084 | 0.35094604  | 0.104753114 | 0.233246071 |
| 0.055915401 | 0.028340155 | 0.046329665 | 0.316717071 |
| 0.380011253 | 0.254522233 | 0.053875189 | 0.058841876 |
| 0.096885151 | 0.037033884 | 0.150009951 | 0.125991381 |
| 0.078240288 | 0.02528898  | 0.396915169 | 0.055819901 |
| 0.056669722 | 0.052847051 | 0.064371467 | 0.058782514 |
| 0.178820039 | 0.215897731 | 0.004816048 | 0.225239873 |
| 0.000154895 | 0.2086587   | 0.19434533  | 0.224227012 |
| 0.025851773 | 0.010350592 | 0.072689378 | 0.15624066  |
| 0.3333379   | 0.350597121 | 0.417679436 | 0.44178626  |
| 0.066584722 | 0.109449356 | 0.209000312 | 0.066873395 |
| 0.324402923 | 0.06097492  | 0.034598554 | 0.321006294 |
| 0.42960237  | 0.430918351 | 0.114632576 | 0.149740628 |
| 0.329608717 | 0.35666297  | 0.16693237  | 0.172602161 |
| 0.205473353 | 0.043901875 | 0.35022259  | 0.427434731 |
| 0.247133736 | 0.167588322 | 0.082539556 | 0.232342317 |
| 0.029313479 | 0.087144826 | 0.194331949 | 0.036968953 |
| 0.350181235 | 0.016320308 | 0.108727033 | 0.136687567 |
| 0.067250564 | 0.29326284  | 0.447152799 | 0.066908301 |
| 0.157816022 | 0.008392536 | 0.162790917 | 0.017800894 |
| 0.085250163 | 0.106470656 | 0.374461519 | 0.344457703 |
| 0.041548641 | 0.143333622 | 0.077552001 | 0.002494124 |
| 0.018966731 | 0.071519879 | 0.291376921 | 0.095944387 |
| 0.274333053 | 0.311844065 | 0.136313674 | 0.219430665 |
| 0.30203227  | 0.413726722 | 0.015505027 | 0.034976936 |
| 0.182203387 | 0.072286059 | 0.116094318 | 0.213285816 |
| 0.162715155 | 0.029999331 | 0.043738402 | 0.442328468 |
| 0.290241881 | 0.033880431 | 0.066167872 | 0.280485293 |
| 0.121049092 | 0.203950417 | 0.035216243 | 0.07138615  |
| 0.016614755 | 0.417325148 | 0.02238168  | 0.075023837 |
| 0.222163304 | 0.064729804 | 0.003020247 | 0.053756951 |
| 0.078208813 | 0.354333994 | 0.364476296 | 0.039429341 |
| 0.083670352 | 0.266805019 | 0.075403597 | 0.276916313 |
| 0.01653055  | 0.017960803 | 0.051444075 | 0.405913748 |
| 0.100334678 | 0.415839458 | 0.086652138 | 0.137281598 |
| 0.149699882 | 0.346942922 | 0.002657699 | 0.385633569 |
| 0.449643153 | 0.05632165  | 0.193056037 | 0.215281722 |
| 0.226223576 | 0.347525576 | 0.008067503 | 0.249435646 |
| 0.159090319 | 0.032182516 | 0.425327401 | 0.080619964 |
| 0.347471171 | 0.031765381 | 0.068732992 | 0.412930261 |
| 0.303666543 | 0.00428381  | 0.049312019 | 0.212776291 |
| 0.023627421 | 0.024169702 | 0.260635974 | 0.243800256 |
| 0.237860402 | 0.341757463 | 0.389400955 | 1           |
| 0.192420866 | 0.05603571  | 0.007901381 | 0.1659905   |
| 0.320496321 | 0.141475889 | 0.325955481 | 0.072515031 |
| 0.109792047 | 0.375584122 | 0.319430931 | 0.110404045 |
| 0.024599191 | 0.083984295 | 0.005821622 | 0.190848399 |
| 0.329344592 | 0.039271996 | 0.228422962 | 0.043705166 |
| 0.043389536 | 0.445436453 | 0.126649701 | 0.157201412 |
| 0.113557622 | 0.164816455 | 0.074260918 | 0.066952993 |
| 0.086053046 | 0.095509864 | 0.203825104 | 0.172610021 |

|             |             |             |             |
|-------------|-------------|-------------|-------------|
| 0.01087715  | 0.041360916 | 0.01230858  | 0.103231073 |
| 0.04576712  | 0.092667302 | 0.082913699 | 0.214051028 |
| 0.069459405 | 0.032225769 | 0.157306145 | 0.170611396 |
| 0.081083171 | 0.011140558 | 0.410472087 | 0.241220231 |
| 0.161968587 | 0.066642411 | 0.020836947 | 0.088928952 |
| 0.361720508 | 0.115044266 | 0.050810506 | 0.343994772 |
| 0.010559756 | 0.408230712 | 0.089343853 | 0.070140306 |
| 0.132529516 | 0.098152973 | 0.365127456 | 0.037638573 |
| 0.142384949 | 0.343865859 | 0.136266433 | 0.11917802  |
| 0.257698203 | 0.220203138 | 0.013244366 | 0.24838188  |
| 0.219229395 | 0.017694701 | 0.433913642 | 0.060128485 |
| 0.014734074 | 0.309152982 | 0.355915388 | 0.047213101 |
| 0.053354735 | 0.130367643 | 0.011282857 | 0.18170606  |
| 0.433546499 | 0.297940972 | 0.321461091 | 0.130991701 |
| 0.021743387 | 0.004018451 | 0.102797672 | 0.189319663 |
| 0.386832887 | 0.436837462 | 0.100962376 | 0.167268987 |
| 0.107168766 | 0.211876828 | 0.024459697 | 0.431094163 |
| 0.06948557  | 0.406924126 | 0.004701634 | 0.385515983 |
| 0.418669307 | 0.060570658 | 0.066340439 | 0.109247388 |
| 0.240650924 | 0.028181807 | 0.050711735 | 0.391205764 |
| 0.357990008 | 0.18081175  | 0.188471322 | 0.223365137 |
| 0.005930201 | 0.013861165 | 0.258590441 | 0.145526118 |
| 0.15052778  | 0.117141845 | 0.05883499  | 0.078679319 |
| 0.0235561   | 0.342876052 | 0.326383451 | 0.073742138 |
| 0.146538291 | 0.073996046 | 0.229062105 | 0.021073824 |
| 0.434206475 | 0.420296489 | 0.41142377  | 0.039925462 |
| 0.288930558 | 0.436627102 | 0.267631435 | 0.043024965 |
| 0.016207266 | 0.431480953 | 0.209923144 | 0.011292418 |
| 0.363553251 | 0.047675534 | 0.0067768   | 0.380201754 |
| 0.062426985 | 0.314515201 | 0.003321459 | 0.040869744 |
| 0.031802513 | 0.376090156 | 0.396892917 | 0.184556726 |
| 0.055998567 | 0.160764125 | 0.004310438 | 0.440000748 |
| 0.382891835 | 0.01774851  | 0.09637456  | 0.324649001 |
| 0.350211343 | 0.405991754 | 0.199156472 | 0.411854759 |
| 0.254284473 | 0.416749237 | 0.068776366 | 0.160071495 |
| 0.330488975 | 0.44013072  | 0.25417952  | 0.346731928 |
| 0.334514321 | 0.283902842 | 0.142820332 | 0.011286301 |
| 0.20416317  | 0.041970648 | 0.13352084  | 0.093357126 |
| 0.119692728 | 0.101647035 | 0.370389949 | 0.37361782  |
| 0.410737928 | 0.004677163 | 0.034190082 | 0.304651929 |
| 0.300353871 | 0.361046287 | 0.011435193 | 0.007479318 |
| 0.004100742 | 0.036373897 | 0.137006079 | 0.114480723 |
| 0.422199456 | 0.053263662 | 0.003295275 | 0.009106986 |
| 0.088912677 | 0.2945246   | 0.406299897 | 0.232619347 |
| 0.341779259 | 0.036249455 | 0.092240973 | 0.239639704 |
| 0.079966307 | 0.150448773 | 0.418368521 | 0.361206612 |
| 0.022154547 | 0.128354318 | 0.090757023 | 0.38976134  |
| 0.090637555 | 0.158847395 | 0.232173487 | 0.113662487 |
| 0.006000802 | 0.060136822 | 0.072375259 | 0.322865254 |
| 0.410975311 | 0.038379954 | 0.02223414  | 0.024125414 |
| 0.045912971 | 0.365522789 | 0.061058357 | 0.431431063 |
| 0.308521351 | 0.321852807 | 0.050226248 | 0.397905234 |
| 0.044089273 | 0.375728283 | 0.187466985 | 0.018345747 |
| 0.085457516 | 0.006876018 | 0.370455317 | 0.180995236 |

|             |             |             |             |
|-------------|-------------|-------------|-------------|
| 0.06282102  | 0.190781804 | 0.2317269   | 0.015834123 |
| 0.158011305 | 0.030527048 | 0.405552998 | 0.403176429 |
| 0.024318624 | 0.07764905  | 0.129190333 | 0.206789211 |
| 0.077421967 | 0.303587238 | 0.392466054 | 0.162628907 |
| 0.033039714 | 0.065834112 | 0.219954269 | 0.184256715 |
| 0.04362292  | 0.416466432 | 0.174552054 | 0.442778333 |
| 0.239951847 | 0.3603329   | 0.389096787 | 0.177374313 |
| 0.118926416 | 0.16124469  | 0.19778605  | 0.006684348 |
| 0.146363641 | 0.356362929 | 0.103759266 | 0.121582342 |
| 0.122909635 | 0.23359562  | 0.017033067 | 0.029713089 |
| 0.189267659 | 0.109471617 | 0.048892977 | 0.329633219 |
| 0.160245791 | 0.202093351 | 0.007119169 | 0.070789413 |
| 0.435997848 | 0.338619741 | 0.048030243 | 0.258349684 |
| 0.068841808 | 0.213951112 | 0.338392636 | 0.349301236 |
| 0.154427237 | 0.335306854 | 0.256167625 | 0.197903932 |
| 0.296999661 | 0.10645304  | 0.427468373 | 0.011257412 |
| 0.100388904 | 0.199289633 | 0.047566058 | 0.053221002 |
| 0.055057209 | 0.025278689 | 0.180885037 | 0.273919738 |
| 0.148913433 | 0.206583143 | 0.061318154 | 0.043870709 |
| 0.156885001 | 0.101958108 | 0.178935233 | 0.053347983 |
| 0.03796203  | 0.403900636 | 0.007681276 | 0.027759547 |
| 0.126395268 | 0.364612961 | 0.22285625  | 0.103475271 |
| 0.188655753 | 0.073547966 | 0.130687835 | 0.067284487 |
| 0.079678206 | 0.111297645 | 0.361705514 | 0.012911837 |
| 0.005515103 | 0.399372889 | 0.100626698 | 0.014734893 |
| 0.057064589 | 0.183561525 | 0.068413015 | 0.146557076 |
| 0.02114007  | 0.423814717 | 0.098031548 | 0.222632286 |
| 0.126736062 | 0.026112862 | 0.215583544 | 0.030908924 |
| 0.023647107 | 0.312354271 | 0.233161389 | 0.426254279 |
| 0.132597251 | 0.303604341 | 0.320861527 | 0.296499542 |
| 0.037517686 | 0.173432915 | 0.014735286 | 0.310960521 |
| 0.15105059  |             |             |             |

| GAS5        | 0.332557039 | 0.497273096 | 0.206147268 |
|-------------|-------------|-------------|-------------|
| 0.393626153 | 0.25575699  | 0.213760224 | 0.159802813 |
| 0.112059737 | 0.092593785 | 0.012705627 | 0.043689463 |
| 0.296263237 | 0.175754625 | 0.171443054 | 0.165575515 |
| 0.408207181 | 0.148261937 | 0.183799675 | 0.193699779 |
| 0.340223671 | 0.079211645 | 0.375807562 | 0.1043132   |
| 0.201300087 | 0.126918416 | 0.096831602 | 0.201640362 |
| 0.443312205 | 0.107739065 | 0.148651378 | 0.305031436 |
| 0.116338449 | 0.381706792 | 0.463512085 | 0.361623974 |
| 0.453321923 | 0.293020384 | 0.014998765 | 0.163452475 |
| 0.373160815 | 0.388336232 | 0.345800157 | 0.25132075  |
| 0.064403916 | 0.414620804 | 0.186531289 | 0.278226957 |
| 0.12022081  | 0.060583367 | 0.110886009 | 0.379247777 |
| 0.41548245  | 0.262540455 | 0.136268294 | 0.136392521 |
| 0.146305712 | 0.111768331 | 0.170909362 | 0.209080732 |
| 0.182141895 | 0.078412872 | 0.433257684 | 0.089465849 |
| 0.097493163 | 0.155597292 | 0.152678156 | 0.167771127 |
| 0.205197706 | 0.295506226 | 0.028864687 | 0.250151817 |
| 0.004823473 | 0.320682462 | 0.267031816 | 0.17455333  |
| 0.072038918 | 0.043065897 | 0.170455089 | 0.245527416 |
| 0.462126874 | 0.408161609 | 0.503930248 | 0.493527519 |
| 0.172088274 | 0.219155626 | 0.217540271 | 0.16534061  |

|             |             |             |             |
|-------------|-------------|-------------|-------------|
| 0.398493895 | 0.148614342 | 0.100587521 | 0.423757501 |
| 0.507567537 | 0.483141666 | 0.194625879 | 0.213331054 |
| 0.380071131 | 0.444598881 | 0.210758867 | 0.23856586  |
| 0.19266097  | 0.07219429  | 0.391470257 | 0.505806493 |
| 0.33593746  | 0.200073553 | 0.164574421 | 0.36157647  |
| 0.085289087 | 0.171849194 | 0.300806934 | 0.127176373 |
| 0.475470094 | 0.0324523   | 0.193542943 | 0.21858708  |
| 0.167025669 | 0.378137041 | 0.481045466 | 0.165038203 |
| 0.238714719 | 0.039252005 | 0.120427342 | 0.055886235 |
| 0.198277744 | 0.118786183 | 0.399735693 | 0.459373078 |
| 0.144793515 | 0.237218672 | 0.184102101 | 0.009410963 |
| 0.055032341 | 0.152013555 | 0.379478426 | 0.202681759 |
| 0.363728029 | 0.324027496 | 0.189516524 | 0.29550166  |
| 0.31599465  | 0.49549282  | 0.024861992 | 0.100553597 |
| 0.242428201 | 0.156305005 | 0.203065752 | 0.275500911 |
| 0.235103564 | 0.104771664 | 0.135333765 | 0.517684329 |
| 0.37345059  | 0.105496648 | 0.155613391 | 0.394718486 |
| 0.190387948 | 0.247566233 | 0.119652974 | 0.202519401 |
| 0.066571207 | 0.42974797  | 0.054301099 | 0.171564864 |
| 0.159049554 | 0.146665131 | 0.017862621 | 0.14509221  |
| 0.170767841 | 0.401751323 | 0.386622345 | 0.121015232 |
| 0.217123741 | 0.337553337 | 0.147451066 | 0.341151534 |
| 0.02306395  | 0.067300729 | 0.115468749 | 0.499854295 |
| 0.165050714 | 0.494166897 | 0.212834822 | 0.216785657 |
| 0.225829139 | 0.437186581 | 0.004089549 | 0.433432677 |
| 0.485206563 | 0.12163473  | 0.277350836 | 0.292957818 |
| 0.198922352 | 0.446578934 | 0.02390821  | 0.380312691 |
| 0.239091932 | 0.097446438 | 0.520979303 | 0.168889053 |
| 0.408893343 | 0.071206495 | 0.171958197 | 0.405766158 |
| 0.343893653 | 0.014391392 | 0.114361435 | 0.314963531 |
| 0.050011768 | 0.072467344 | 0.347144632 | 0.333878963 |
| 0.255250206 | 0.413442248 | 0.50634928  | 0.192420866 |
| 1           | 0.169564582 | 0.026821213 | 0.231104899 |
| 0.383772777 | 0.184539051 | 0.394041497 | 0.176184908 |
| 0.169994931 | 0.440425383 | 0.354513014 | 0.101147693 |
| 0.066384712 | 0.178956425 | 0.029023862 | 0.229209816 |
| 0.333759503 | 0.116439848 | 0.194148784 | 0.129773961 |
| 0.100266261 | 0.514885792 | 0.151998173 | 0.167632523 |
| 0.109253014 | 0.243884175 | 0.188034487 | 0.157953352 |
| 0.163118145 | 0.166547184 | 0.220400656 | 0.214577303 |
| 0.047646479 | 0.120456004 | 0.024423352 | 0.184389407 |
| 0.122728569 | 0.190556325 | 0.174477262 | 0.295048373 |
| 0.19311724  | 0.118640073 | 0.249236334 | 0.187585588 |
| 0.132085161 | 0.035809987 | 0.483871308 | 0.348353472 |
| 0.237817748 | 0.143620635 | 0.067475483 | 0.1622895   |
| 0.464639471 | 0.145486276 | 0.106656321 | 0.434613    |
| 0.037415846 | 0.490107494 | 0.188362987 | 0.145130357 |
| 0.230522164 | 0.209331369 | 0.469753393 | 0.04186469  |
| 0.218420137 | 0.428218467 | 0.220533323 | 0.175668393 |
| 0.345394071 | 0.315374477 | 0.048957787 | 0.316576691 |
| 0.310061784 | 0.059691348 | 0.503245453 | 0.140577294 |
| 0.043857391 | 0.370941251 | 0.364751011 | 0.103794215 |
| 0.105270317 | 0.205305938 | 0.046003067 | 0.247823926 |
| 0.504533041 | 0.406204307 | 0.363279686 | 0.173388245 |

|             |             |             |             |
|-------------|-------------|-------------|-------------|
| 0.065839121 | 0.023402429 | 0.182767904 | 0.216542493 |
| 0.443308671 | 0.491099995 | 0.210386164 | 0.238922807 |
| 0.198483741 | 0.208808482 | 0.068160556 | 0.501999001 |
| 0.130545166 | 0.470217182 | 0.018926272 | 0.39553556  |
| 0.445654837 | 0.131255838 | 0.110022669 | 0.176310489 |
| 0.331574251 | 0.068795466 | 0.155780452 | 0.452521064 |
| 0.406300375 | 0.215977294 | 0.205903198 | 0.329210911 |
| 0.027077789 | 0.05272641  | 0.254180647 | 0.145030672 |
| 0.210282469 | 0.184383954 | 0.052454578 | 0.166208984 |
| 0.068641495 | 0.41663812  | 0.452031341 | 0.08216998  |
| 0.179878449 | 0.149605151 | 0.314391099 | 0.06201046  |
| 0.434558395 | 0.459006596 | 0.470043707 | 0.136639278 |
| 0.377109698 | 0.46656924  | 0.250326829 | 0.102948118 |
| 0.03925579  | 0.46746079  | 0.288777698 | 0.033838834 |
| 0.485802012 | 0.097709205 | 0.028548352 | 0.467393093 |
| 0.162585274 | 0.362575136 | 0.004911393 | 0.04920005  |
| 0.061655262 | 0.464713113 | 0.423530263 | 0.291607963 |
| 0.104299008 | 0.261480012 | 0.008066257 | 0.503948803 |
| 0.455784537 | 0.035306303 | 0.146244458 | 0.382053319 |
| 0.359867383 | 0.490320459 | 0.204789474 | 0.43918491  |
| 0.289374807 | 0.446065991 | 0.170422754 | 0.219465611 |
| 0.415735536 | 0.450667189 | 0.357636225 | 0.420232056 |
| 0.460244478 | 0.367646532 | 0.221530302 | 0.032708468 |
| 0.114296032 | 0.11734002  | 0.147074907 | 0.082394731 |
| 0.182464837 | 0.151016861 | 0.453850698 | 0.476193183 |
| 0.477140268 | 0.016188654 | 0.11159028  | 0.37438444  |
| 0.422766564 | 0.476023162 | 0.029229867 | 0.008603342 |
| 0.007433462 | 0.039416749 | 0.22538683  | 0.204150447 |
| 0.473811926 | 0.1057372   | 0.015090533 | 0.0481158   |
| 0.192474208 | 0.304900245 | 0.467521349 | 0.357562087 |
| 0.39364199  | 0.104279767 | 0.157718003 | 0.364204447 |
| 0.094074805 | 0.208229887 | 0.488174615 | 0.430377696 |
| 0.060871341 | 0.20149508  | 0.188348952 | 0.492263313 |
| 0.061503547 | 0.243212536 | 0.314985494 | 0.218161216 |
| 0.021185089 | 0.109686189 | 0.09208609  | 0.427232571 |
| 0.436401729 | 0.099849217 | 0.061439195 | 0.073116715 |
| 0.122151673 | 0.458427722 | 0.160768944 | 0.522442766 |
| 0.415630157 | 0.456911487 | 0.095859647 | 0.437221789 |
| 0.063465291 | 0.435612158 | 0.230106525 | 0.035879511 |
| 0.201200282 | 0.026932212 | 0.427491753 | 0.1127454   |
| 0.167358541 | 0.294005805 | 0.140424633 | 0.035782604 |
| 0.126983794 | 0.08457378  | 0.493644407 | 0.465511698 |
| 0.053140677 | 0.168934348 | 0.22357623  | 0.309976868 |
| 0.150465112 | 0.406357272 | 0.446219454 | 0.177506419 |
| 0.09070865  | 0.104031946 | 0.346758232 | 0.274418821 |
| 0.143888209 | 0.509233603 | 0.203246169 | 0.506010427 |
| 0.314177237 | 0.42990521  | 0.447545177 | 0.223405268 |
| 0.188429012 | 0.228626491 | 0.279982245 | 0.032469348 |
| 0.231914254 | 0.464460221 | 0.189935381 | 0.154089238 |
| 0.214627777 | 0.215868482 | 0.054861568 | 0.083441262 |
| 0.181998649 | 0.173352698 | 0.146220453 | 0.453469202 |
| 0.257259681 | 0.288803908 | 0.044813299 | 0.089025883 |
| 0.508868304 | 0.39363359  | 0.105450525 | 0.330348938 |
| 0.165960586 | 0.232860984 | 0.410120834 | 0.413976243 |

|             |             |             |             |
|-------------|-------------|-------------|-------------|
| 0.185771711 | 0.420653901 | 0.380034317 | 0.292509415 |
| 0.381057385 | 0.194564381 | 0.476155541 | 0.054001721 |
| 0.110818304 | 0.261565444 | 0.111619025 | 0.116696743 |
| 0.152326169 | 0.051272292 | 0.172701773 | 0.389534178 |
| 0.192812359 | 0.317889748 | 0.145826077 | 0.096572385 |
| 0.233219622 | 0.168271772 | 0.260350389 | 0.144335241 |
| 0.101684187 | 0.449463784 | 0.019580651 | 0.084159231 |
| 0.207319109 | 0.393394762 | 0.228905787 | 0.206833804 |
| 0.191094786 | 0.136270161 | 0.228522865 | 0.139167221 |
| 0.154746504 | 0.193613115 | 0.390647475 | 0.040458372 |
| 0.033158272 | 0.510354095 | 0.176215966 | 0.036379433 |
| 0.083190677 | 0.229361882 | 0.184572552 | 0.180662933 |
| 0.042989998 | 0.452455364 | 0.151444165 | 0.250022153 |
| 0.204846594 | 0.086303039 | 0.2897922   | 0.07657811  |
| 0.068650471 | 0.397255438 | 0.235841221 | 0.467940624 |
| 0.212382475 | 0.420730343 | 0.37071576  | 0.384489993 |
| 0.094634816 | 0.181167913 | 0.045554008 | 0.422639778 |
| 0.190150974 |             |             |             |
| GBA         | 0.230518816 | 0.280215024 | 0.121997946 |
| 0.331002729 | 0.180226524 | 0.186854313 | 0.223305507 |
| 0.201608422 | 0.088872047 | 0.032597861 | 0.022516599 |
| 0.17790199  | 0.075310922 | 0.140147069 | 0.077240906 |
| 0.339938644 | 0.092616688 | 0.143225634 | 0.273736418 |
| 0.338342603 | 0.170444868 | 0.296147842 | 0.181573567 |
| 0.076237725 | 0.061183518 | 0.09717792  | 0.067298693 |
| 0.377384032 | 0.108487601 | 0.13569263  | 0.335446065 |
| 0.121793093 | 0.285864697 | 0.238198317 | 0.202182321 |
| 0.214793322 | 0.19132137  | 0.057124527 | 0.094349245 |
| 0.291830015 | 0.22880484  | 0.342676367 | 0.283478651 |
| 0.121854289 | 0.23549558  | 0.24591846  | 0.189464714 |
| 0.123201811 | 0.060115405 | 0.116892364 | 0.242025763 |
| 0.196562866 | 0.141407817 | 0.186698477 | 0.16061394  |
| 0.040302205 | 0.12301084  | 0.031409125 | 0.249501145 |
| 0.224236292 | 0.123307744 | 0.209108412 | 0.111512791 |
| 0.078160892 | 0.207889423 | 0.106038593 | 0.229355616 |
| 0.05907339  | 0.26609279  | 0.14650188  | 0.130851817 |
| 0.01713818  | 0.361655763 | 0.214388221 | 0.03636211  |
| 0.102392966 | 0.055261296 | 0.117975942 | 0.280924707 |
| 0.355400214 | 0.23981663  | 0.290796757 | 0.260397674 |
| 0.100020725 | 0.188388203 | 0.107631622 | 0.148012672 |
| 0.271685269 | 0.162920687 | 0.143399998 | 0.31648396  |
| 0.284835988 | 0.240198164 | 0.109761846 | 0.169767131 |
| 0.228603408 | 0.28761282  | 0.125449342 | 0.131656958 |
| 0.048848101 | 0.060898672 | 0.215785963 | 0.27384213  |
| 0.256606174 | 0.06601185  | 0.124867574 | 0.336784897 |
| 0.137264017 | 0.101241639 | 0.31979984  | 0.101810954 |
| 0.360685771 | 0.083798267 | 0.125545107 | 0.231660621 |
| 0.182226002 | 0.266591575 | 0.22735174  | 0.237223069 |
| 0.161460029 | 0.066188222 | 0.0280126   | 0.107126132 |
| 0.124304416 | 0.029058212 | 0.195110641 | 0.307297408 |
| 0.177552104 | 0.087201024 | 0.21076846  | 0.030363539 |
| 0.068700429 | 0.121330229 | 0.219524795 | 0.197595436 |
| 0.297380986 | 0.169097576 | 0.09116459  | 0.222785492 |
| 0.146523786 | 0.284620559 | 0.023905706 | 0.202661156 |

|             |             |             |             |
|-------------|-------------|-------------|-------------|
| 0.191761221 | 0.126393456 | 0.272992791 | 0.172424602 |
| 0.135941818 | 0.231033296 | 0.180888228 | 0.300958044 |
| 0.27197958  | 0.164773093 | 0.131571467 | 0.324344774 |
| 0.081807471 | 0.150488254 | 0.198303914 | 0.145519184 |
| 0.148208967 | 0.194983484 | 0.057947729 | 0.205438064 |
| 0.035496023 | 0.064244285 | 0.10257117  | 0.225282305 |
| 0.119639377 | 0.204158205 | 0.185510211 | 0.186724124 |
| 0.170749039 | 0.238562943 | 0.18267637  | 0.193918301 |
| 0.022266972 | 0.156296939 | 0.130178851 | 0.278717439 |
| 0.192756896 | 0.279447185 | 0.17493872  | 0.119965063 |
| 0.202706407 | 0.320063673 | 0.006081449 | 0.22885251  |
| 0.23470034  | 0.116980426 | 0.188898036 | 0.213688453 |
| 0.068856456 | 0.312773296 | 0.023439558 | 0.321689935 |
| 0.207907375 | 0.180395473 | 0.320071191 | 0.138508091 |
| 0.231488912 | 0.087386748 | 0.139383272 | 0.186718954 |
| 0.154390968 | 0.034490282 | 0.160446581 | 0.330865403 |
| 0.054011298 | 0.148868848 | 0.285967361 | 0.297098571 |
| 0.192490953 | 0.280206917 | 0.346419544 | 0.05603571  |
| 0.169564582 | 1           | 0.07558442  | 0.159150594 |
| 0.246576392 | 0.052328325 | 0.252218272 | 0.192324787 |
| 0.15890764  | 0.264455411 | 0.18313304  | 0.040514215 |
| 0.124366366 | 0.223332105 | 0.079404336 | 0.150464985 |
| 0.188007276 | 0.120354283 | 0.09095317  | 0.141410244 |
| 0.089464141 | 0.279817279 | 0.048310444 | 0.039847953 |
| 0.02681341  | 0.164751136 | 0.268575819 | 0.079569883 |
| 0.05157264  | 0.138300449 | 0.069401715 | 0.086432188 |
| 0.139323356 | 0.123056629 | 0.038956831 | 0.046353873 |
| 0.052485383 | 0.060892738 | 0.058039767 | 0.20967572  |
| 0.124184225 | 0.099257991 | 0.143817643 | 0.071802981 |
| 0.089888814 | 0.070382727 | 0.27412328  | 0.32577092  |
| 0.216554632 | 0.184932464 | 0.113958008 | 0.045940627 |
| 0.292601264 | 0.114326472 | 0.092319667 | 0.27559619  |
| 0.108881096 | 0.297792749 | 0.096796541 | 0.114994368 |
| 0.072787875 | 0.217164695 | 0.355037088 | 0.045044169 |
| 0.217491772 | 0.261791326 | 0.227192794 | 0.100536524 |
| 0.221548285 | 0.288165237 | 0.122369617 | 0.221263786 |
| 0.21458113  | 0.097239304 | 0.26036332  | 0.090151079 |
| 0.078125722 | 0.220730317 | 0.172248465 | 0.124714443 |
| 0.100484052 | 0.132271655 | 0.156783161 | 0.231766208 |
| 0.280767982 | 0.308127443 | 0.202979045 | 0.074874934 |
| 0.106988753 | 0.024220992 | 0.094558999 | 0.13568425  |
| 0.229938413 | 0.240089248 | 0.250298706 | 0.10438575  |
| 0.294472443 | 0.06264371  | 0.12348307  | 0.265601246 |
| 0.102596076 | 0.254423915 | 0.061544    | 0.194709588 |
| 0.207060468 | 0.163240826 | 0.070907849 | 0.216530191 |
| 0.240659136 | 0.133641303 | 0.226126051 | 0.240120339 |
| 0.264398272 | 0.09849265  | 0.073525588 | 0.259152977 |
| 0.104482019 | 0.151007923 | 0.169630682 | 0.041663017 |
| 0.084145129 | 0.143652637 | 0.011449575 | 0.142189019 |
| 0.092933231 | 0.246105298 | 0.320198932 | 0.070747696 |
| 0.124879065 | 0.132396072 | 0.243611401 | 0.123710791 |
| 0.19444025  | 0.227990945 | 0.244582889 | 0.238388158 |
| 0.226155569 | 0.220969592 | 0.092747811 | 0.12058446  |
| 0.055037748 | 0.222838511 | 0.260625264 | 0.052365341 |

|             |             |             |             |
|-------------|-------------|-------------|-------------|
| 0.331806398 | 0.138607842 | 0.034818759 | 0.289628256 |
| 0.251567789 | 0.196307064 | 0.024910169 | 0.029914025 |
| 0.065140056 | 0.287995612 | 0.218204516 | 0.331025003 |
| 0.060704581 | 0.31563522  | 0.012805792 | 0.264469376 |
| 0.246984109 | 0.039991172 | 0.072947604 | 0.190601987 |
| 0.151043508 | 0.289258321 | 0.060504844 | 0.204272586 |
| 0.129234385 | 0.207210183 | 0.133013623 | 0.212457643 |
| 0.267137511 | 0.197655506 | 0.306341666 | 0.275384821 |
| 0.314026344 | 0.252413484 | 0.288261326 | 0.076250423 |
| 0.042606924 | 0.170880839 | 0.04093969  | 0.042390689 |
| 0.217388228 | 0.086096903 | 0.270871246 | 0.312655597 |
| 0.240249634 | 0.044012883 | 0.200115839 | 0.214762346 |
| 0.334510103 | 0.352998767 | 0.074652569 | 0.013062454 |
| 0.011614469 | 0.016992635 | 0.281755396 | 0.151799157 |
| 0.258777159 | 0.050811104 | 0.050386546 | 0.182252547 |
| 0.157490358 | 0.15416847  | 0.243383179 | 0.368679656 |
| 0.230856672 | 0.146276018 | 0.060873829 | 0.373718497 |
| 0.055805587 | 0.181349298 | 0.257017146 | 0.257805109 |
| 0.102668816 | 0.137150063 | 0.167891808 | 0.331946364 |
| 0.008664374 | 0.229213164 | 0.193409985 | 0.100866972 |
| 0.051730413 | 0.086659166 | 0.075423548 | 0.317386709 |
| 0.197157106 | 0.062818671 | 0.050692806 | 0.073423969 |
| 0.123836517 | 0.295274977 | 0.136271698 | 0.306786648 |
| 0.311852724 | 0.364099042 | 0.069076426 | 0.244995526 |
| 0.058397699 | 0.219170781 | 0.099396228 | 0.04603936  |
| 0.149398603 | 0.088395914 | 0.213648272 | 0.021915616 |
| 0.132616119 | 0.296556751 | 0.050322859 | 0.048118373 |
| 0.032487812 | 0.098397921 | 0.304033072 | 0.260929036 |
| 0.063697086 | 0.196459503 | 0.205884217 | 0.297917706 |
| 0.234598634 | 0.286808703 | 0.236201695 | 0.095884856 |
| 0.152623348 | 0.043341124 | 0.35422169  | 0.225563149 |
| 0.17571649  | 0.303166071 | 0.069048622 | 0.274943033 |
| 0.256775445 | 0.285086707 | 0.23517302  | 0.232830214 |
| 0.060707974 | 0.208264847 | 0.237763084 | 0.076768508 |
| 0.275827784 | 0.291330333 | 0.224644181 | 0.063186909 |
| 0.128385427 | 0.095275722 | 0.159149026 | 0.088183411 |
| 0.05841999  | 0.212533794 | 0.144796866 | 0.368238081 |
| 0.268559868 | 0.232001125 | 0.183052439 | 0.071284257 |
| 0.282311715 | 0.25985253  | 0.165351824 | 0.246943145 |
| 0.168155065 | 0.182876478 | 0.247341087 | 0.232646279 |
| 0.078327564 | 0.229805613 | 0.316343016 | 0.225165642 |
| 0.254874843 | 0.252119534 | 0.245505443 | 0.177981728 |
| 0.051213053 | 0.165388167 | 0.092709403 | 0.114338376 |
| 0.174603696 | 0.07066886  | 0.033546524 | 0.309403562 |
| 0.044354743 | 0.268241817 | 0.10802134  | 0.11934187  |
| 0.183563497 | 0.128700033 | 0.251136021 | 0.161916851 |
| 0.106460582 | 0.227829509 | 0.034757762 | 0.117974763 |
| 0.057639382 | 0.221317294 | 0.090788803 | 0.138398086 |
| 0.046675814 | 0.091279656 | 0.220307659 | 0.178578467 |
| 0.065910172 | 0.07732586  | 0.219309027 | 0.142613949 |
| 0.126902637 | 0.322627506 | 0.159846307 | 0.060825046 |
| 0.069961017 | 0.191465415 | 0.162228962 | 0.091431321 |
| 0.047754473 | 0.204330715 | 0.088142301 | 0.162143348 |
| 0.268998194 | 0.164776843 | 0.225939877 | 0.115257324 |



|             |             |             |             |
|-------------|-------------|-------------|-------------|
| 0.175830125 | 0.247604497 | 0.131674417 | 0.223275803 |
| 0.127164236 | 0.325787734 | 0.219180132 | 0.2286228   |
| 0.124498881 | 0.107361131 | 0.125089067 | 0.330921314 |
| 0.052521481 |             |             |             |
| GBP4        | 0.018784849 | 0.013266005 | 0.020270897 |
| 0.039824507 | 0.032471675 | 0.009823297 | 0.066504233 |
| 0.027041627 | 0.016885336 | 0.008596257 | 0.009799205 |
| 0.021561981 | 0.005779356 | 0.016485888 | 0.0048927   |
| 0.063479247 | 0.076206578 | 0.025901481 | 0.122825299 |
| 0.04787191  | 0.034241967 | 0.067980699 | 0.091417391 |
| 0.027447311 | 0.070635032 | 0.114252716 | 0.030136031 |
| 0.041170894 | 0.135983745 | 0.006579908 | 0.030060642 |
| 0.137240379 | 0.022548234 | 0.00843621  | 0.028624888 |
| 0.007040765 | 0.012159723 | 0.025148272 | 0.007062869 |
| 0.018326053 | 0.024868395 | 0.044722909 | 0.074161734 |
| 0.076279403 | 0.006613952 | 0.076439421 | 0.046715244 |
| 0.004902469 | 0.070845106 | 0.008136391 | 0.007658145 |
| 0.005219762 | 0.010633799 | 0.032779724 | 0.054043458 |
| 0.001783805 | 0.007755603 | 0.004080734 | 0.012669562 |
| 0.084356874 | 0.009546668 | 0.006954024 | 0.015298126 |
| 0.003994455 | 0.04421039  | 0.100770274 | 0.047613453 |
| 0.01412202  | 0.014481507 | 0.077734196 | 0.012393333 |
| 0.00232604  | 0.062821367 | 0.069827369 | 0.006936363 |
| 0.250634408 | 0.024989892 | 0.12283569  | 0.046562848 |
| 0.034188966 | 0.011301963 | 0.028532793 | 0.021067659 |
| 0.029882297 | 0.107082505 | 0.022243625 | 0.081301201 |
| 0.017116964 | 0.052230202 | 0.024703799 | 0.064528644 |
| 0.025672651 | 0.009857367 | 0.046176201 | 0.120651661 |
| 0.012771225 | 0.013541353 | 0.011725905 | 0.017998619 |
| 0.005455502 | 0.103350599 | 0.007702372 | 0.018112548 |
| 0.011774114 | 0.022440849 | 0.145192183 | 0.025843231 |
| 0.225639701 | 0.004846555 | 0.078097149 | 0.015505003 |
| 0.03465887  | 0.065769758 | 0.120246921 | 0.0327001   |
| 0.04480382  | 0.019613451 | 0.009950592 | 0.113303388 |
| 0.035596401 | 0.040222511 | 0.004063917 | 0.235373681 |
| 0.004280409 | 0.015055483 | 0.004423135 | 0.024164272 |
| 0.014924497 | 0.007836695 | 0.05893361  | 0.137531077 |
| 0.157809354 | 0.03287177  | 0.013200658 | 0.037548715 |
| 0.032025278 | 0.008140934 | 0.033052603 | 0.010040905 |
| 0.012446991 | 0.028472329 | 0.000181945 | 0.103166752 |
| 0.023840154 | 0.057181391 | 0.157898745 | 0.015222219 |
| 0.056685093 | 0.088809535 | 0.135616611 | 0.021323807 |
| 0.010206942 | 0.169038172 | 0.012384791 | 0.067516972 |
| 0.004810811 | 0.05426611  | 0.162424324 | 0.035711423 |
| 0.068908739 | 0.006742527 | 0.189179116 | 0.027086723 |
| 0.002130846 | 0.0202173   | 0.078790857 | 0.030073687 |
| 0.005697427 | 0.009384262 | 0.004451731 | 0.215627169 |
| 0.041455732 | 0.051958129 | 0.013272689 | 0.011779148 |
| 0.008354316 | 0.080360948 | 0.006372988 | 0.016593011 |
| 0.007277703 | 0.021301202 | 0.05316211  | 0.05273692  |
| 0.117288135 | 0.037481633 | 0.010309814 | 0.007019012 |
| 0.009925268 | 0.005080809 | 0.029252584 | 0.041446128 |
| 0.009323405 | 0.02828753  | 0.002060236 | 0.062280537 |
| 0.00968116  | 0.220123695 | 0.030011963 | 0.133574022 |

|             |             |             |             |
|-------------|-------------|-------------|-------------|
| 0.009350121 | 0.154938727 | 0.01508017  | 0.015313304 |
| 0.008858616 | 0.015995986 | 0.013749349 | 0.039638257 |
| 0.164547262 | 0.020496114 | 0.028143116 | 0.042435523 |
| 0.028849036 | 0.035603594 | 0.03933693  | 0.007901381 |
| 0.026821213 | 0.07558442  | 1           | 0.079258738 |
| 0.023677227 | 0.001400311 | 0.009143487 | 0.039297762 |
| 0.006509843 | 0.012125131 | 0.008963807 | 0.000667028 |
| 0.138234871 | 0.031729721 | 0.019094985 | 0.043814002 |
| 0.009420153 | 0.028122628 | 0.009157309 | 0.06257741  |
| 0.155718611 | 0.016229373 | 0.044116862 | 0.016889069 |
| 0.022384609 | 0.012584623 | 0.103347117 | 0.007795775 |
| 0.005871245 | 0.075537823 | 0.014399994 | 0.01275546  |
| 0.051220511 | 0.123858259 | 0.076120229 | 0.003058117 |
| 0.005066497 | 0.004990733 | 0.003553554 | 0.010301688 |
| 0.010159935 | 0.015993049 | 0.031418977 | 0.02119644  |
| 0.094349689 | 0.254274962 | 0.01359289  | 0.064190483 |
| 0.0077876   | 0.075631006 | 0.249876221 | 0.000526049 |
| 0.020946093 | 0.004204042 | 0.00449514  | 0.014091068 |
| 0.074885158 | 0.027587716 | 0.013127706 | 0.141786278 |
| 0.013086409 | 0.084068533 | 0.037324088 | 0.00257902  |
| 0.018689982 | 0.010224546 | 0.105191414 | 0.069777813 |
| 0.006729633 | 0.037721469 | 0.033029286 | 0.010823805 |
| 0.00985141  | 0.191632749 | 0.013442704 | 0.081367333 |
| 0.277197748 | 0.032611683 | 0.012007787 | 0.238773622 |
| 0.166653843 | 0.018833272 | 0.032935206 | 0.122615242 |
| 0.015748612 | 0.063529551 | 0.010888125 | 0.057805044 |
| 0.101558698 | 0.010303173 | 0.09974306  | 0.02279711  |
| 0.006825826 | 0.01341598  | 0.15026245  | 0.023310327 |
| 0.140895917 | 0.010546898 | 0.002488852 | 0.016288373 |
| 0.026038974 | 0.010474086 | 0.238667774 | 0.018986723 |
| 0.006232292 | 0.009623722 | 0.102485023 | 0.026822878 |
| 0.009454897 | 0.139469862 | 0.090451881 | 0.008963219 |
| 0.016036522 | 0.02494734  | 0.010974963 | 0.038451497 |
| 0.047849301 | 0.040807588 | 0.035442463 | 0.024790659 |
| 0.008487201 | 0.068181206 | 0.007707467 | 0.011210562 |
| 0.04300863  | 0.009424587 | 0.038899363 | 0.052700649 |
| 0.005172825 | 0.01168315  | 0.077915966 | 0.196653986 |
| 0.013894903 | 0.011106117 | 0.008520405 | 0.094461995 |
| 0.017403104 | 0.01111301  | 0.008816669 | 0.234502642 |
| 0.243307312 | 0.008563586 | 0.019155877 | 0.012048708 |
| 0.032927697 | 0.00677356  | 0.010537415 | 0.013564492 |
| 0.139578946 | 0.004459633 | 0.006113951 | 0.010036983 |
| 0.138064766 | 0.036953655 | 0.006879554 | 0.033597385 |
| 0.002008269 | 0.071371828 | 0.025306454 | 0.016058636 |
| 0.009535472 | 0.141092008 | 0.052444999 | 0.010645231 |
| 0.011216894 | 0.012780179 | 0.017008128 | 0.014722658 |
| 0.012244657 | 0.0067711   | 0.008422923 | 0.114945384 |
| 0.016925095 | 0.008597773 | 0.025990535 | 0.012219125 |
| 0.027914413 | 0.049150301 | 0.096925802 | 0.077051152 |
| 0.00896957  | 0.0199862   | 0.001586868 | 0.005962475 |
| 0.011560733 | 0.058842903 | 0.014742187 | 0.033370794 |
| 0.016305504 | 0.259792501 | 0.025088352 | 0.011648688 |
| 0.022131816 | 0.029708163 | 0.093914302 | 0.008319702 |
| 0.005162241 | 0.016825483 | 0.037569097 | 0.120013476 |

|             |             |             |             |
|-------------|-------------|-------------|-------------|
| 0.015369643 | 0.000534116 | 0.164345017 | 0.038422302 |
| 0.017809327 | 0.0327724   | 0.009827953 | 0.084897016 |
| 0.023972451 | 0.192238392 | 0.003213515 | 0.069109307 |
| 0.041990575 | 0.006961436 | 0.017927502 | 0.00948408  |
| 0.175427958 | 0.097740013 | 0.022018455 | 0.026918734 |
| 0.00552626  | 0.11028463  | 0.021885966 | 0.009821654 |
| 0.060040861 | 0.134580152 | 0.09999239  | 0.048381097 |
| 0.005863991 | 0.024266784 | 0.037922889 | 0.001254043 |
| 0.042941938 | 0.026022513 | 0.044502577 | 0.023937216 |
| 0.024277385 | 0.052161955 | 0.071099339 | 0.009334054 |
| 0.020854496 | 0.007060773 | 0.034232298 | 0.001795339 |
| 0.06773033  | 0.163044258 | 0.009684145 | 0.001604711 |
| 0.012184636 | 0.025674354 | 0.005906273 | 0.182529805 |
| 0.009841759 | 0.183060018 | 0.02855719  | 0.029177884 |
| 0.136444721 | 0.049196135 | 0.105964216 | 0.053227851 |
| 0.024624961 | 0.033070169 | 0.007528612 | 0.004263988 |
| 0.054435734 | 0.010668241 | 0.041131963 | 0.013060173 |
| 0.020862958 | 0.030418352 | 0.01088744  | 0.016280198 |
| 0.018807359 | 0.0177652   | 0.012219906 | 0.041177446 |
| 0.010765076 | 0.014908557 | 0.01606884  | 0.011913964 |
| 0.071542514 | 0.027984107 | 0.031544357 | 0.020880555 |
| 0.060690458 | 0.015078239 | 0.054045759 | 0.003539686 |
| 0.011710807 | 0.012605278 | 0.035174706 | 0.055539635 |
| 0.024833167 | 0.013693383 | 0.04324891  | 0.086191879 |
| 0.013450703 | 0.01183288  | 0.014028221 | 0.020874121 |
| 0.182488125 | 0.049648581 | 0.025626618 | 0.027895768 |
| 0.007129525 | 0.012850353 | 0.02484087  | 0.012564295 |
| 0.009071463 | 0.088193436 | 0.009011309 | 0.011518709 |
| 0.01973928  | 0.013377428 | 0.03297984  | 0.235325097 |
| 0.141985056 | 0.12269052  | 0.005008045 | 0.057383401 |
| 0.00499183  | 0.057324148 | 0.003809505 | 0.038166235 |
| 0.087621321 | 0.014022354 | 0.081034257 | 0.035589776 |
| 0.036236771 | 0.007588516 | 0.036401944 | 0.228189577 |
| 0.007992364 | 0.016696608 | 0.015532054 | 0.089344836 |
| 0.00847222  | 0.074138944 | 0.088151459 | 0.011854891 |
| 0.003050212 | 0.002354417 | 0.014672711 | 0.044132103 |
| 0.077930005 | 0.030989092 | 0.013643672 | 0.113941503 |
| 0.02527596  | 0.012201082 | 0.03936242  | 0.012888957 |
| 0.194297256 | 0.009726754 | 0.004435296 | 0.027846682 |
| 0.040775785 | 0.197993521 | 0.007041287 | 0.014479108 |
| 0.091177047 | 0.008907818 | 0.025049118 | 0.008822255 |
| 0.044799495 | 0.053880393 | 0.005824044 | 0.012835905 |
| 0.025123285 | 0.011921634 | 0.080424945 | 0.029473199 |
| 0.00361575  |             |             |             |

|             |             |             |             |
|-------------|-------------|-------------|-------------|
| GCNT1       | 0.299993187 | 0.357086098 | 0.217880155 |
| 0.318260577 | 0.250839697 | 0.142975317 | 0.122743532 |
| 0.084694059 | 0.107336085 | 0.009258767 | 0.052239195 |
| 0.293408472 | 0.13480989  | 0.111455931 | 0.110758821 |
| 0.40386871  | 0.211175293 | 0.186272175 | 0.189661446 |
| 0.302830988 | 0.052676246 | 0.374854615 | 0.118079599 |
| 0.281869917 | 0.193206597 | 0.13068454  | 0.233907037 |
| 0.371035752 | 0.147442151 | 0.082097008 | 0.230334081 |
| 0.254464657 | 0.316434996 | 0.321946371 | 0.331812905 |
| 0.317054128 | 0.249628401 | 0.04372881  | 0.092938346 |

|             |             |             |             |
|-------------|-------------|-------------|-------------|
| 0.295865444 | 0.341672788 | 0.294013138 | 0.236160424 |
| 0.074268454 | 0.27007812  | 0.153628338 | 0.330875675 |
| 0.08862841  | 0.093141198 | 0.060638884 | 0.247996976 |
| 0.268211869 | 0.201846047 | 0.099654742 | 0.106900391 |
| 0.093993211 | 0.061750724 | 0.166791911 | 0.135556478 |
| 0.155032996 | 0.039409873 | 0.295335228 | 0.071811473 |
| 0.070185801 | 0.128614    | 0.27938053  | 0.127826982 |
| 0.232292973 | 0.212053037 | 0.051842277 | 0.246230063 |
| 0.002385009 | 0.299958932 | 0.338966629 | 0.172604778 |
| 0.139025322 | 0.048607118 | 0.287445134 | 0.196091104 |
| 0.384358866 | 0.316754353 | 0.432969578 | 0.415125651 |
| 0.198751451 | 0.286124536 | 0.250615478 | 0.17683275  |
| 0.311518519 | 0.110249215 | 0.126222753 | 0.427959712 |
| 0.428774156 | 0.344619265 | 0.243894282 | 0.29390733  |
| 0.258879601 | 0.316838647 | 0.157045994 | 0.190383352 |
| 0.152121466 | 0.218521879 | 0.26068819  | 0.399631666 |
| 0.239846304 | 0.248041655 | 0.237714258 | 0.270027292 |
| 0.153343061 | 0.132329224 | 0.285727102 | 0.176751354 |
| 0.394181785 | 0.041604581 | 0.284423952 | 0.167712056 |
| 0.24591434  | 0.312005139 | 0.355317899 | 0.153402005 |
| 0.252898828 | 0.071535677 | 0.151677357 | 0.15028751  |
| 0.161931237 | 0.226829154 | 0.255736326 | 0.347097629 |
| 0.099977947 | 0.201405887 | 0.156381916 | 0.038410239 |
| 0.131140914 | 0.286978822 | 0.303759646 | 0.199308323 |
| 0.327453063 | 0.262745013 | 0.169624988 | 0.204846371 |
| 0.271812743 | 0.429095172 | 0.011080688 | 0.116971749 |
| 0.205902955 | 0.280600104 | 0.242459883 | 0.23364733  |
| 0.24414266  | 0.104670741 | 0.160052217 | 0.40994371  |
| 0.244880783 | 0.1271311   | 0.127095975 | 0.400054339 |
| 0.119317307 | 0.305321257 | 0.15050392  | 0.161989853 |
| 0.062360148 | 0.305209759 | 0.154698641 | 0.137502738 |
| 0.12545309  | 0.211679705 | 0.056517596 | 0.098896205 |
| 0.117822896 | 0.273824073 | 0.25684496  | 0.180408864 |
| 0.173398537 | 0.33927108  | 0.098850417 | 0.237993653 |
| 0.022506738 | 0.132726415 | 0.073506042 | 0.377118281 |
| 0.094280518 | 0.419976445 | 0.220700702 | 0.279502834 |
| 0.280610305 | 0.390531619 | 0.016884259 | 0.288366779 |
| 0.352524211 | 0.073949907 | 0.233486444 | 0.321425719 |
| 0.169689945 | 0.351996232 | 0.024421051 | 0.374976361 |
| 0.176136963 | 0.157309833 | 0.441704707 | 0.213500225 |
| 0.300028417 | 0.110919037 | 0.112883477 | 0.357567616 |
| 0.274567384 | 0.025773537 | 0.061394505 | 0.250088742 |
| 0.159253374 | 0.043258539 | 0.306936802 | 0.289055174 |
| 0.21529772  | 0.397050248 | 0.444178101 | 0.1659905   |
| 0.231104899 | 0.159150594 | 0.079258738 | 1           |
| 0.355072712 | 0.135111554 | 0.258760387 | 0.14475321  |
| 0.118784487 | 0.311536522 | 0.277863144 | 0.060745184 |
| 0.081894677 | 0.127118983 | 0.027006981 | 0.216561521 |
| 0.261514933 | 0.083439586 | 0.155910157 | 0.256607441 |
| 0.194743582 | 0.388383554 | 0.271355812 | 0.236937849 |
| 0.217673704 | 0.171221713 | 0.185961156 | 0.091246972 |
| 0.12403237  | 0.20424561  | 0.205759862 | 0.176180166 |
| 0.037264739 | 0.151344208 | 0.12537686  | 0.129264703 |
| 0.084112889 | 0.119919687 | 0.100054044 | 0.211902144 |

|             |             |             |             |
|-------------|-------------|-------------|-------------|
| 0.136131498 | 0.104905003 | 0.211230471 | 0.26081254  |
| 0.231835686 | 0.087963967 | 0.351115613 | 0.354772299 |
| 0.151243334 | 0.151459504 | 0.151839557 | 0.100636529 |
| 0.347305623 | 0.080620565 | 0.064047364 | 0.298532107 |
| 0.091308217 | 0.423292937 | 0.143850072 | 0.198887732 |
| 0.199236058 | 0.188683326 | 0.395267019 | 0.035157574 |
| 0.180693561 | 0.28697891  | 0.274167164 | 0.20639853  |
| 0.21576191  | 0.269089237 | 0.057484968 | 0.241367277 |
| 0.223991121 | 0.105876375 | 0.379225408 | 0.245227464 |
| 0.116542815 | 0.376766988 | 0.286346136 | 0.183585079 |
| 0.200695148 | 0.135524196 | 0.032867377 | 0.316969988 |
| 0.37486866  | 0.39371989  | 0.255829338 | 0.305475292 |
| 0.077556246 | 0.025660154 | 0.312545799 | 0.249879233 |
| 0.297426326 | 0.384937427 | 0.256014539 | 0.208763483 |
| 0.213619588 | 0.181120339 | 0.042561774 | 0.385131325 |
| 0.259377181 | 0.343475611 | 0.055946787 | 0.357989127 |
| 0.302652898 | 0.074532737 | 0.16979229  | 0.119029456 |
| 0.216726874 | 0.092858612 | 0.189234381 | 0.312771798 |
| 0.303398868 | 0.197731538 | 0.167433782 | 0.331014471 |
| 0.02635064  | 0.05163488  | 0.275015814 | 0.260899154 |
| 0.150374178 | 0.216118759 | 0.14829286  | 0.123041837 |
| 0.079413798 | 0.273685256 | 0.41691256  | 0.117032464 |
| 0.101879782 | 0.112016131 | 0.375310476 | 0.100278881 |
| 0.365468109 | 0.357617595 | 0.323033324 | 0.150684706 |
| 0.32172541  | 0.346305733 | 0.227598832 | 0.219486862 |
| 0.116383075 | 0.337721551 | 0.228586522 | 0.040438183 |
| 0.407991088 | 0.049601928 | 0.026007136 | 0.33144734  |
| 0.172373226 | 0.234137016 | 0.006040451 | 0.128917365 |
| 0.201692096 | 0.444269397 | 0.280109678 | 0.2316556   |
| 0.047005838 | 0.278394142 | 0.047515391 | 0.404118928 |
| 0.310012653 | 0.102347598 | 0.272411062 | 0.289771718 |
| 0.308029697 | 0.351424781 | 0.22189478  | 0.356795922 |
| 0.257209622 | 0.30672366  | 0.117562871 | 0.264937503 |
| 0.301752286 | 0.341809553 | 0.287150657 | 0.297341899 |
| 0.367355436 | 0.390951008 | 0.220329184 | 0.038693179 |
| 0.160224955 | 0.071533466 | 0.082750706 | 0.080514012 |
| 0.124676741 | 0.199409051 | 0.352696805 | 0.418107798 |
| 0.382803366 | 0.054882445 | 0.0829748   | 0.280770675 |
| 0.309015068 | 0.382998951 | 0.108766728 | 0.023187328 |
| 0.026638273 | 0.077429756 | 0.184979996 | 0.297412385 |
| 0.364532622 | 0.047722545 | 0.036576474 | 0.040521272 |
| 0.180414346 | 0.334341526 | 0.326368197 | 0.354039973 |
| 0.369464582 | 0.179340027 | 0.083887338 | 0.354394756 |
| 0.161650309 | 0.147853377 | 0.384364667 | 0.282743281 |
| 0.174742837 | 0.283089763 | 0.170038559 | 0.388980429 |
| 0.131391736 | 0.308127989 | 0.300150736 | 0.147710557 |
| 0.089469408 | 0.211084648 | 0.160581201 | 0.418621866 |
| 0.301015859 | 0.101488039 | 0.084084333 | 0.038075206 |
| 0.096702126 | 0.391971971 | 0.158072128 | 0.424829881 |
| 0.319720653 | 0.409560826 | 0.220272267 | 0.300308205 |
| 0.081399577 | 0.292466597 | 0.256768674 | 0.024753545 |
| 0.276938855 | 0.084425596 | 0.329523485 | 0.088866372 |
| 0.104977305 | 0.2466399   | 0.172172727 | 0.122758705 |
| 0.220036581 | 0.162301113 | 0.405446813 | 0.426430362 |

|             |             |             |             |
|-------------|-------------|-------------|-------------|
| 0.186840376 | 0.160985835 | 0.281984915 | 0.323474178 |
| 0.100653489 | 0.333847702 | 0.298007701 | 0.125360774 |
| 0.074342076 | 0.233777379 | 0.296715241 | 0.212933406 |
| 0.098622797 | 0.444720014 | 0.162408958 | 0.399858204 |
| 0.254530703 | 0.340438022 | 0.342494126 | 0.192314587 |
| 0.242880519 | 0.180044222 | 0.180936386 | 0.026686189 |
| 0.244722467 | 0.377917481 | 0.162642512 | 0.186965852 |
| 0.213808931 | 0.239686939 | 0.098709717 | 0.094972907 |
| 0.202611384 | 0.106818805 | 0.130254392 | 0.426762339 |
| 0.222602172 | 0.221469862 | 0.067588173 | 0.146121839 |
| 0.374441738 | 0.283003713 | 0.085270409 | 0.25684828  |
| 0.262423803 | 0.234798136 | 0.379186756 | 0.39827196  |
| 0.17233913  | 0.307206521 | 0.296740456 | 0.188818324 |
| 0.242542265 | 0.181560484 | 0.32994491  | 0.0373336   |
| 0.159366012 | 0.236577784 | 0.100915825 | 0.228026971 |
| 0.171213083 | 0.130229823 | 0.18853305  | 0.395197077 |
| 0.178379866 | 0.293512078 | 0.10094752  | 0.16436426  |
| 0.291515507 | 0.15382134  | 0.293709639 | 0.097549691 |
| 0.106225336 | 0.298150711 | 0.048936443 | 0.171540316 |
| 0.191076946 | 0.313027373 | 0.213185791 | 0.273951588 |
| 0.226375863 | 0.288880225 | 0.226761696 | 0.081290742 |
| 0.078784841 | 0.177935328 | 0.301957567 | 0.057100982 |
| 0.040276743 | 0.437552921 | 0.132652879 | 0.145590957 |
| 0.164061391 | 0.18602754  | 0.225149768 | 0.14142157  |
| 0.146544147 | 0.340394036 | 0.081417439 | 0.261218158 |
| 0.172968071 | 0.160458403 | 0.191011544 | 0.099843955 |
| 0.131826454 | 0.270953014 | 0.270630196 | 0.337881762 |
| 0.271698969 | 0.37742399  | 0.239812918 | 0.290405441 |
| 0.190270396 | 0.191850179 | 0.05678917  | 0.354909054 |
| 0.139138262 |             |             |             |

|             |             |             |             |
|-------------|-------------|-------------|-------------|
| GEM         | 0.39594846  | 0.505497351 | 0.404249151 |
| 0.354858727 | 0.398590271 | 0.303118216 | 0.190544359 |
| 0.186703853 | 0.090021157 | 0.003130458 | 0.020271332 |
| 0.410183184 | 0.169259928 | 0.222043132 | 0.283136713 |
| 0.393758559 | 0.147180372 | 0.391095467 | 0.243151782 |
| 0.378811049 | 0.079834037 | 0.370649356 | 0.101143501 |
| 0.340463141 | 0.115349453 | 0.074704728 | 0.270144095 |
| 0.407006988 | 0.088693225 | 0.245386992 | 0.333804351 |
| 0.153812008 | 0.396877288 | 0.50757015  | 0.380462702 |
| 0.502020946 | 0.369041321 | 0.025311424 | 0.228996143 |
| 0.409381998 | 0.385879048 | 0.367524349 | 0.300864567 |
| 0.044155367 | 0.466861864 | 0.223218497 | 0.412151515 |
| 0.224189916 | 0.033120965 | 0.198069734 | 0.429174116 |
| 0.446035287 | 0.356241904 | 0.214012661 | 0.145270668 |
| 0.153602092 | 0.188339601 | 0.242355445 | 0.269072535 |
| 0.211951368 | 0.124218241 | 0.463887728 | 0.080446814 |
| 0.146804002 | 0.257563609 | 0.203059639 | 0.245856869 |
| 0.361475312 | 0.327925341 | 0.028256551 | 0.388487659 |
| 0.001608405 | 0.368540288 | 0.403681028 | 0.295098286 |
| 0.056275946 | 0.01758417  | 0.227723394 | 0.291917936 |
| 0.43641761  | 0.47288576  | 0.464996265 | 0.477245569 |
| 0.180094708 | 0.341577468 | 0.397086724 | 0.171261299 |
| 0.416992148 | 0.152512103 | 0.121813604 | 0.393994151 |
| 0.475001136 | 0.50415868  | 0.219782648 | 0.303450401 |

|             |             |             |             |
|-------------|-------------|-------------|-------------|
| 0.34834739  | 0.46120487  | 0.365560458 | 0.38028962  |
| 0.291624783 | 0.093479994 | 0.414890942 | 0.495806695 |
| 0.373311144 | 0.335469882 | 0.17460343  | 0.348259529 |
| 0.080634536 | 0.338847055 | 0.326233075 | 0.189942911 |
| 0.447530124 | 0.02050474  | 0.245962204 | 0.303078951 |
| 0.289250366 | 0.390032484 | 0.504523205 | 0.185419423 |
| 0.414670736 | 0.025545064 | 0.133031588 | 0.058920272 |
| 0.295141703 | 0.187501926 | 0.462506582 | 0.411821539 |
| 0.215571794 | 0.354036949 | 0.262576946 | 0.005281558 |
| 0.039673934 | 0.26669127  | 0.395733828 | 0.396805925 |
| 0.402288836 | 0.395655144 | 0.20663193  | 0.327349673 |
| 0.380048491 | 0.459986445 | 0.040047864 | 0.112184983 |
| 0.3692946   | 0.266798212 | 0.252557085 | 0.388666757 |
| 0.297839193 | 0.127543106 | 0.140231722 | 0.503083498 |
| 0.405582455 | 0.092702541 | 0.344027744 | 0.392709575 |
| 0.261358484 | 0.357819957 | 0.125471336 | 0.247724109 |
| 0.05000031  | 0.473283146 | 0.046531968 | 0.333359214 |
| 0.229517203 | 0.16269406  | 0.026026202 | 0.236177234 |
| 0.236219367 | 0.376870768 | 0.462055199 | 0.135944765 |
| 0.286955958 | 0.379105933 | 0.294374563 | 0.331008225 |
| 0.007316317 | 0.06962009  | 0.258399071 | 0.482742413 |
| 0.223499213 | 0.503435045 | 0.316089666 | 0.349281201 |
| 0.303140213 | 0.411244422 | 0.008608597 | 0.477453229 |
| 0.51202625  | 0.259895343 | 0.335292846 | 0.421253489 |
| 0.338245906 | 0.400978991 | 0.050736849 | 0.392541304 |
| 0.317943375 | 0.106297145 | 0.490080353 | 0.169770953 |
| 0.456682401 | 0.048049662 | 0.279933529 | 0.408185324 |
| 0.357318243 | 0.010755033 | 0.178895748 | 0.339216994 |
| 0.04962708  | 0.083254161 | 0.398126727 | 0.365308004 |
| 0.330528351 | 0.414282464 | 0.463557651 | 0.320496321 |
| 0.383772777 | 0.246576392 | 0.023677227 | 0.355072712 |
| 1           | 0.33707482  | 0.420143168 | 0.230628935 |
| 0.294748175 | 0.451552567 | 0.383574865 | 0.169723995 |
| 0.047364761 | 0.285235064 | 0.019283567 | 0.31557818  |
| 0.390981067 | 0.095989004 | 0.351894017 | 0.225112854 |
| 0.092043902 | 0.505320962 | 0.22384654  | 0.295274569 |
| 0.167617483 | 0.315271584 | 0.268947622 | 0.170650087 |
| 0.165243686 | 0.183920261 | 0.335665326 | 0.344220616 |
| 0.034908979 | 0.099582503 | 0.039871226 | 0.304631729 |
| 0.100978683 | 0.258598496 | 0.248281405 | 0.343236603 |
| 0.283218888 | 0.094751302 | 0.339686986 | 0.340176327 |
| 0.142196192 | 0.02283215  | 0.490106721 | 0.396039757 |
| 0.276634249 | 0.164254574 | 0.061950504 | 0.26500952  |
| 0.424759529 | 0.235070553 | 0.239167813 | 0.415724946 |
| 0.047330345 | 0.476600741 | 0.206284597 | 0.134432781 |
| 0.333859496 | 0.244948862 | 0.433654164 | 0.050857227 |
| 0.367291008 | 0.439329548 | 0.360054163 | 0.188893457 |
| 0.360418987 | 0.374364691 | 0.032292151 | 0.354842122 |
| 0.339288576 | 0.039538337 | 0.511336866 | 0.155062155 |
| 0.033970304 | 0.413334517 | 0.362369891 | 0.097808109 |
| 0.103752184 | 0.264308913 | 0.043955539 | 0.303779238 |
| 0.495776284 | 0.375101181 | 0.344524094 | 0.286738715 |
| 0.040984899 | 0.007190262 | 0.268711326 | 0.411966557 |
| 0.493210999 | 0.500928712 | 0.294586866 | 0.320945665 |

|             |             |             |             |
|-------------|-------------|-------------|-------------|
| 0.24917073  | 0.299238    | 0.137622643 | 0.487017352 |
| 0.306691184 | 0.514714421 | 0.012243256 | 0.390543932 |
| 0.492415258 | 0.239312184 | 0.089532929 | 0.259774686 |
| 0.341589092 | 0.054686868 | 0.253941242 | 0.476967069 |
| 0.413320979 | 0.315556322 | 0.308598595 | 0.418026407 |
| 0.01617746  | 0.045399907 | 0.383632098 | 0.23709361  |
| 0.331040211 | 0.233947667 | 0.082242645 | 0.309713314 |
| 0.042024485 | 0.419883124 | 0.428917613 | 0.065748841 |
| 0.245603035 | 0.304347346 | 0.389559714 | 0.046838875 |
| 0.435456683 | 0.504966776 | 0.50439526  | 0.196197133 |
| 0.390860692 | 0.465293335 | 0.35360662  | 0.118178861 |
| 0.029215271 | 0.507708606 | 0.36278366  | 0.021535106 |
| 0.447745455 | 0.187398727 | 0.008715617 | 0.479549342 |
| 0.201414211 | 0.434095631 | 0.004972014 | 0.14824902  |
| 0.078541273 | 0.440889812 | 0.458615126 | 0.344800912 |
| 0.174539034 | 0.383243317 | 0.018958433 | 0.521835551 |
| 0.4627984   | 0.02317728  | 0.188523792 | 0.37326898  |
| 0.36559917  | 0.517541036 | 0.315384672 | 0.414929607 |
| 0.371359537 | 0.480196644 | 0.201107128 | 0.280143116 |
| 0.387448306 | 0.486407877 | 0.374122005 | 0.449806928 |
| 0.419255015 | 0.412539082 | 0.268633678 | 0.016083498 |
| 0.156338182 | 0.187074124 | 0.227841433 | 0.07492634  |
| 0.281645595 | 0.150662971 | 0.479336022 | 0.447933009 |
| 0.461249878 | 0.009632485 | 0.143622287 | 0.378046723 |
| 0.408981894 | 0.457481248 | 0.048921379 | 0.010615559 |
| 0.014382928 | 0.020543833 | 0.333313899 | 0.294418091 |
| 0.476297172 | 0.163001759 | 0.007253534 | 0.045780148 |
| 0.285806016 | 0.380894605 | 0.481304152 | 0.364558199 |
| 0.408529889 | 0.108096066 | 0.200077286 | 0.383952925 |
| 0.080010929 | 0.293997204 | 0.461753113 | 0.446774212 |
| 0.076437167 | 0.298336923 | 0.387872521 | 0.464022898 |
| 0.094553934 | 0.338813762 | 0.407797646 | 0.258375885 |
| 0.035541065 | 0.108664285 | 0.083384771 | 0.414319629 |
| 0.485813851 | 0.066131857 | 0.031701164 | 0.120595348 |
| 0.101746403 | 0.455611555 | 0.157142062 | 0.501093899 |
| 0.396069666 | 0.397676907 | 0.111060919 | 0.467731502 |
| 0.04124127  | 0.465117172 | 0.340497532 | 0.04767747  |
| 0.358018266 | 0.024071305 | 0.470349238 | 0.121456761 |
| 0.279235051 | 0.371977817 | 0.214338751 | 0.032027689 |
| 0.232541825 | 0.0696653   | 0.447960329 | 0.439063146 |
| 0.067186779 | 0.257078318 | 0.342318079 | 0.411152216 |
| 0.245314526 | 0.366760008 | 0.484127083 | 0.325238034 |
| 0.079725079 | 0.214694497 | 0.372663307 | 0.354189167 |
| 0.22222528  | 0.478849935 | 0.254714598 | 0.522789834 |
| 0.370350918 | 0.464727624 | 0.458285126 | 0.315814804 |
| 0.252941282 | 0.356000516 | 0.289248984 | 0.016012768 |
| 0.354531491 | 0.41172579  | 0.366957269 | 0.150279601 |
| 0.244725642 | 0.382731908 | 0.076519021 | 0.22032127  |
| 0.336011622 | 0.244552774 | 0.137527514 | 0.412888137 |
| 0.37314731  | 0.352431869 | 0.058536802 | 0.074541591 |
| 0.529801138 | 0.433369641 | 0.140244512 | 0.361498595 |
| 0.220418306 | 0.325695291 | 0.410119789 | 0.408965101 |
| 0.376245362 | 0.398576105 | 0.368683457 | 0.300531102 |
| 0.393372668 | 0.264860608 | 0.507924116 | 0.091052399 |



|             |             |             |             |
|-------------|-------------|-------------|-------------|
| 0.100134993 | 0.391639003 | 0.082737944 | 0.127869389 |
| 0.150871812 | 0.043429633 | 0.298070841 | 0.409012267 |
| 0.352215616 | 0.34540789  | 0.294259644 | 0.109746902 |
| 0.360936402 | 0.390009259 | 0.365399544 | 0.171017766 |
| 0.07385171  | 0.470830279 | 0.013823498 | 0.080159015 |
| 0.363481218 | 0.380363567 | 0.342474277 | 0.276842754 |
| 0.303708468 | 0.208761078 | 0.296632593 | 0.247132125 |
| 0.224072331 | 0.37157682  | 0.382910447 | 0.043883078 |
| 0.021748832 | 0.480327486 | 0.353154914 | 0.047779166 |
| 0.131769856 | 0.356483624 | 0.359634787 | 0.208302002 |
| 0.041234888 | 0.464544265 | 0.251644671 | 0.410660954 |
| 0.322392606 | 0.093745113 | 0.345050819 | 0.115494448 |
| 0.095450981 | 0.437241562 | 0.40060523  | 0.499812992 |
| 0.407256739 | 0.371434031 | 0.436881429 | 0.388308262 |
| 0.186600512 | 0.390469583 | 0.031678567 | 0.418618598 |
| 0.333856935 |             |             |             |
| GGT1        | 0.300351792 | 0.453648717 | 0.160221059 |
| 0.280886049 | 0.206547004 | 0.170900203 | 0.066264523 |
| 0.024290819 | 0.007416124 | 0.000304312 | 0.004008768 |
| 0.22612353  | 0.017171253 | 0.041915166 | 0.054599976 |
| 0.30054803  | 0.027329576 | 0.085569681 | 0.087060328 |
| 0.25268697  | 0.013619986 | 0.260324745 | 0.015425785 |
| 0.070429161 | 0.028102386 | 0.021203225 | 0.085386406 |
| 0.325390443 | 0.024620136 | 0.116436179 | 0.230136499 |
| 0.018359347 | 0.32828328  | 0.454677709 | 0.274991872 |
| 0.45332974  | 0.272234118 | 0.000916387 | 0.06205025  |
| 0.318637448 | 0.316170269 | 0.265093503 | 0.146335087 |
| 0.006937365 | 0.403836837 | 0.094770754 | 0.215693028 |
| 0.014632377 | 0.005797845 | 0.047130388 | 0.375997267 |
| 0.407359924 | 0.242838782 | 0.045322074 | 0.038877604 |
| 0.020718075 | 0.043232312 | 0.047480129 | 0.16853895  |
| 0.079743013 | 0.027217545 | 0.428651972 | 0.007498398 |
| 0.053632538 | 0.057983154 | 0.032389454 | 0.070109121 |
| 0.107937757 | 0.250879424 | 0.001334153 | 0.232588543 |
| 9.58E-05    | 0.223331089 | 0.190260295 | 0.107106808 |
| 0.013356224 | 0.001640579 | 0.046256353 | 0.164727686 |
| 0.359411096 | 0.391319191 | 0.408330313 | 0.432019638 |
| 0.017094161 | 0.108739886 | 0.199888045 | 0.039590156 |
| 0.352390876 | 0.048700785 | 0.00588928  | 0.308752027 |
| 0.420236587 | 0.462549332 | 0.032388644 | 0.119876526 |
| 0.323404071 | 0.396955846 | 0.147381142 | 0.167979434 |
| 0.081090079 | 0.010299228 | 0.387841343 | 0.443398379 |
| 0.300100416 | 0.132173515 | 0.05285996  | 0.282187257 |
| 0.016073912 | 0.036744136 | 0.191314382 | 0.010516891 |
| 0.365859592 | 0.002828141 | 0.084995591 | 0.159152841 |
| 0.021618325 | 0.302049169 | 0.458654491 | 0.062815557 |
| 0.161390395 | 0.001408888 | 0.014753715 | 0.007725646 |
| 0.018097742 | 0.027284633 | 0.422909432 | 0.355805338 |
| 0.025722684 | 0.059710952 | 0.074115783 | 0.000491273 |
| 0.005727078 | 0.015634354 | 0.338590753 | 0.118804524 |
| 0.299167757 | 0.334280544 | 0.065311574 | 0.277174786 |
| 0.283953454 | 0.412891455 | 0.00199109  | 0.017501049 |
| 0.168669594 | 0.02492081  | 0.107225042 | 0.228050701 |
| 0.116609243 | 0.018301267 | 0.031429952 | 0.43964221  |

|             |             |             |             |
|-------------|-------------|-------------|-------------|
| 0.345662953 | 0.023840012 | 0.078363189 | 0.269887335 |
| 0.053743435 | 0.16977453  | 0.024502888 | 0.056637308 |
| 0.008604278 | 0.434785719 | 0.008100068 | 0.097183724 |
| 0.031096052 | 0.014052592 | 0.000855716 | 0.071110818 |
| 0.018750362 | 0.356364115 | 0.423569404 | 0.028763446 |
| 0.091930565 | 0.244316674 | 0.108581852 | 0.265187343 |
| 0.001546914 | 0.003189002 | 0.076760418 | 0.429114467 |
| 0.139523547 | 0.430446534 | 0.054697704 | 0.079011355 |
| 0.124541976 | 0.340536121 | 0.000279289 | 0.420907036 |
| 0.468011788 | 0.07413319  | 0.183845682 | 0.226257851 |
| 0.164222669 | 0.340022887 | 0.002331964 | 0.265315835 |
| 0.211038885 | 0.019615893 | 0.42631643  | 0.057672891 |
| 0.386009181 | 0.013424568 | 0.078243075 | 0.377185037 |
| 0.3097699   | 0.000764664 | 0.058372371 | 0.232448936 |
| 0.007422363 | 0.014666989 | 0.295029645 | 0.23887609  |
| 0.194895919 | 0.336562236 | 0.391390397 | 0.141475889 |
| 0.184539051 | 0.052328325 | 0.001400311 | 0.135111554 |
| 0.33707482  | 1           | 0.363693397 | 0.039928719 |
| 0.145523521 | 0.388854632 | 0.328268027 | 0.027803485 |
| 0.011846864 | 0.11018548  | 0.001043892 | 0.13231589  |
| 0.344841286 | 0.018983903 | 0.181986824 | 0.01415923  |
| 0.018270746 | 0.454586023 | 0.056159637 | 0.089869351 |
| 0.035998831 | 0.184097892 | 0.07973872  | 0.037282868 |
| 0.022394639 | 0.036258848 | 0.101914653 | 0.108917319 |
| 0.005801661 | 0.023805966 | 0.002047047 | 0.090334279 |
| 0.010345713 | 0.070323763 | 0.07427118  | 0.274746486 |
| 0.042899914 | 0.006968231 | 0.133799666 | 0.058463698 |
| 0.022960338 | 0.004842545 | 0.439216698 | 0.239248904 |
| 0.213481816 | 0.029512161 | 0.010093644 | 0.020983329 |
| 0.382377216 | 0.120391579 | 0.056291858 | 0.375592079 |
| 0.001737536 | 0.422921927 | 0.033344805 | 0.042143884 |
| 0.111076737 | 0.093252316 | 0.361969534 | 0.004025072 |
| 0.189715181 | 0.388756421 | 0.12968231  | 0.05550934  |
| 0.306589538 | 0.235563922 | 0.002139151 | 0.274185506 |
| 0.264857346 | 0.008311898 | 0.453794834 | 0.022091852 |
| 0.006652441 | 0.294139246 | 0.328693492 | 0.02768984  |
| 0.020710857 | 0.119582937 | 0.005632929 | 0.148810021 |
| 0.440067898 | 0.28240908  | 0.333545583 | 0.061379411 |
| 0.009199958 | 0.000822551 | 0.067932591 | 0.177825592 |
| 0.437015727 | 0.447326609 | 0.103120814 | 0.134068107 |
| 0.102989443 | 0.089079006 | 0.009005375 | 0.437086529 |
| 0.014708204 | 0.448292276 | 0.001810535 | 0.36597033  |
| 0.453656698 | 0.088656267 | 0.023674859 | 0.121410035 |
| 0.279821765 | 0.01109276  | 0.038305387 | 0.416417027 |
| 0.374015265 | 0.097820522 | 0.089215421 | 0.253580734 |
| 0.001741778 | 0.004716026 | 0.200063252 | 0.045584681 |
| 0.105003903 | 0.055515825 | 0.006538687 | 0.054463951 |
| 0.004987534 | 0.381327176 | 0.349061585 | 0.011253459 |
| 0.155690098 | 0.05813617  | 0.223173764 | 0.00999762  |
| 0.405414742 | 0.445939023 | 0.447205912 | 0.030225892 |
| 0.328038575 | 0.427992161 | 0.241998031 | 0.023032894 |
| 0.005953044 | 0.453826816 | 0.24339155  | 0.001507195 |
| 0.386123931 | 0.06639078  | 0.000991684 | 0.414791161 |
| 0.06056171  | 0.38177791  | 0.000114705 | 0.007281543 |

|             |             |              |             |
|-------------|-------------|--------------|-------------|
| 0.008240535 | 0.374178652 | 0.416563704  | 0.225526906 |
| 0.046052689 | 0.181737802 | 0.002495343  | 0.459639485 |
| 0.408256784 | 0.00367309  | 0.027214829  | 0.341887728 |
| 0.319092146 | 0.448161575 | 0.123586933  | 0.382419977 |
| 0.233725877 | 0.445546473 | 0.016497622  | 0.127602507 |
| 0.330234909 | 0.450653561 | 0.273426916  | 0.375110645 |
| 0.361156963 | 0.278874584 | 0.130360944  | 0.003243455 |
| 0.017048597 | 0.050209606 | 0.055129932  | 0.010841918 |
| 0.150254165 | 0.029105839 | 0.389192159  | 0.391488805 |
| 0.408868251 | 0.001698407 | 0.017184118  | 0.332993965 |
| 0.337201329 | 0.379843796 | 0.002023394  | 0.000306618 |
| 0.000349232 | 0.002176337 | 0.172989436  | 0.087580476 |
| 0.423497605 | 0.016037419 | 0.001128928  | 0.003761884 |
| 0.024290121 | 0.242732442 | 0.4356387    | 0.234501158 |
| 0.347911967 | 0.021294536 | 0.0411110921 | 0.2528356   |
| 0.01135185  | 0.199787734 | 0.411791824  | 0.400982029 |
| 0.007971096 | 0.091895502 | 0.112307298  | 0.401803252 |
| 0.018132595 | 0.153158668 | 0.251823028  | 0.044933137 |
| 0.001865245 | 0.020802799 | 0.018318629  | 0.336418142 |
| 0.448316473 | 0.009303832 | 0.003951992  | 0.007582286 |
| 0.023327307 | 0.395525462 | 0.022916766  | 0.439005849 |
| 0.329243109 | 0.329571114 | 0.014130308  | 0.41468868  |
| 0.00638417  | 0.416395958 | 0.144297267  | 0.0028938   |
| 0.06244604  | 0.001725749 | 0.408765013  | 0.018143057 |
| 0.075749856 | 0.228115162 | 0.022601009  | 0.005580788 |
| 0.028870999 | 0.012767911 | 0.400525543  | 0.387094902 |
| 0.006101851 | 0.050524479 | 0.113284034  | 0.22604556  |
| 0.093232581 | 0.291245863 | 0.429878557  | 0.148401227 |
| 0.017044813 | 0.013986176 | 0.244640047  | 0.218621963 |
| 0.040865461 | 0.41815487  | 0.06775888   | 0.4551637   |
| 0.26953097  | 0.394504764 | 0.404019274  | 0.155681377 |
| 0.027870285 | 0.172109994 | 0.2128435    | 0.001010626 |
| 0.142084173 | 0.367893516 | 0.125010553  | 0.019128615 |
| 0.093875247 | 0.209534262 | 0.005368743  | 0.008763347 |
| 0.148477194 | 0.13186486  | 0.019279942  | 0.338088147 |
| 0.200696776 | 0.237274346 | 0.003282003  | 0.015228034 |
| 0.466485634 | 0.372036549 | 0.008332934  | 0.249189559 |
| 0.052049409 | 0.168557729 | 0.338584745  | 0.348489631 |
| 0.076995397 | 0.36674179  | 0.293605976  | 0.225753696 |
| 0.344183853 | 0.09990952  | 0.457009438  | 0.004706703 |
| 0.008808508 | 0.242658563 | 0.015466432  | 0.033366679 |
| 0.043052361 | 0.004938427 | 0.070515729  | 0.289787827 |
| 0.102317557 | 0.211578306 | 0.03598325   | 0.006843816 |
| 0.14985005  | 0.124097843 | 0.171181723  | 0.045858151 |
| 0.007932635 | 0.431922564 | 0.000978367  | 0.014970673 |
| 0.116162338 | 0.343490327 | 0.174731379  | 0.059182047 |
| 0.053876736 | 0.02656543  | 0.125965709  | 0.085009785 |
| 0.078226498 | 0.024319761 | 0.338058318  | 0.00211796  |
| 0.002320133 | 0.410679366 | 0.112509996  | 0.002541252 |
| 0.020023444 | 0.225521541 | 0.047055431  | 0.038562508 |
| 0.00691518  | 0.440439807 | 0.097412808  | 0.210312986 |
| 0.143933375 | 0.013544629 | 0.27666976   | 0.006279457 |
| 0.0048762   | 0.365615233 | 0.199300604  | 0.453034329 |
| 0.12672145  | 0.297642524 | 0.379969196  | 0.344186084 |

|             |             |             |             |
|-------------|-------------|-------------|-------------|
| 0.006807393 | 0.171697326 | 0.0037056   | 0.339066846 |
| 0.108657327 |             |             |             |
| GIMAP7      | 0.416875103 | 0.482212033 | 0.36534986  |
| 0.422813498 | 0.385997531 | 0.440468254 | 0.234746919 |
| 0.248813293 | 0.087952626 | 0.007018114 | 0.018079479 |
| 0.396975565 | 0.18497381  | 0.306340906 | 0.383338326 |
| 0.387934169 | 0.100367221 | 0.359692288 | 0.234752883 |
| 0.410197893 | 0.128326278 | 0.359358097 | 0.095686428 |
| 0.22692724  | 0.076217657 | 0.0585584   | 0.220412313 |
| 0.435780413 | 0.068286827 | 0.406272338 | 0.428359623 |
| 0.073953636 | 0.438453377 | 0.500457677 | 0.387362809 |
| 0.488517842 | 0.413908213 | 0.0097812   | 0.349986126 |
| 0.442205784 | 0.42110444  | 0.414087729 | 0.321308523 |
| 0.044638763 | 0.494916678 | 0.255116071 | 0.344755685 |
| 0.297133433 | 0.023657578 | 0.340603336 | 0.455179152 |
| 0.470382324 | 0.427736141 | 0.284945338 | 0.179184141 |
| 0.189418037 | 0.311055801 | 0.220627517 | 0.409886723 |
| 0.228001961 | 0.249562571 | 0.463594963 | 0.109234812 |
| 0.164238054 | 0.292367585 | 0.108662824 | 0.300827672 |
| 0.283711518 | 0.445173433 | 0.019964281 | 0.3760555   |
| 0.00516756  | 0.389023974 | 0.320618037 | 0.271263222 |
| 0.032017997 | 0.018254556 | 0.131975198 | 0.357959084 |
| 0.441648452 | 0.426165716 | 0.428349905 | 0.428539568 |
| 0.146163616 | 0.248211876 | 0.329353129 | 0.157169247 |
| 0.445278764 | 0.196534738 | 0.113482249 | 0.376544649 |
| 0.431694476 | 0.481091716 | 0.160529176 | 0.210369809 |
| 0.448650545 | 0.451719711 | 0.434533242 | 0.400596848 |
| 0.328588067 | 0.032615295 | 0.44093601  | 0.440085622 |
| 0.441249716 | 0.247195206 | 0.12005552  | 0.442964832 |
| 0.048110146 | 0.406614026 | 0.341711715 | 0.131486074 |
| 0.443051818 | 0.02128383  | 0.160705563 | 0.377994889 |
| 0.199617417 | 0.448327993 | 0.466603768 | 0.192235155 |
| 0.353353589 | 0.016630446 | 0.107471416 | 0.023893335 |
| 0.320976972 | 0.097480574 | 0.494413994 | 0.447463431 |
| 0.278898256 | 0.335243753 | 0.28247644  | 0.000428135 |
| 0.017712343 | 0.149071547 | 0.42865971  | 0.363323821 |
| 0.428675756 | 0.390948325 | 0.2159466   | 0.440359106 |
| 0.409168171 | 0.425560832 | 0.097507433 | 0.104388617 |
| 0.423828561 | 0.144873985 | 0.215684528 | 0.423075567 |
| 0.262553652 | 0.135984379 | 0.119180329 | 0.446429632 |
| 0.44194422  | 0.081048898 | 0.382994787 | 0.379458573 |
| 0.347594799 | 0.289309381 | 0.102130167 | 0.270635341 |
| 0.057407646 | 0.452145363 | 0.01677899  | 0.379117    |
| 0.263012471 | 0.102393713 | 0.010805919 | 0.325769634 |
| 0.329067552 | 0.442976808 | 0.473479749 | 0.095877614 |
| 0.312473442 | 0.365213945 | 0.391852521 | 0.439594348 |
| 0.011494407 | 0.04195817  | 0.364486537 | 0.446086849 |
| 0.389205414 | 0.431279234 | 0.288423026 | 0.260633564 |
| 0.237664087 | 0.430299766 | 0.002977532 | 0.493061085 |
| 0.481236938 | 0.385398445 | 0.37440518  | 0.372658987 |
| 0.343264507 | 0.444570162 | 0.04728877  | 0.383348237 |
| 0.414691552 | 0.072182659 | 0.436134012 | 0.130465741 |
| 0.433408495 | 0.033531982 | 0.364580801 | 0.4045014   |
| 0.408886766 | 0.007203321 | 0.318007199 | 0.411425014 |

|             |             |             |             |
|-------------|-------------|-------------|-------------|
| 0.015828778 | 0.14395212  | 0.432069482 | 0.411128564 |
| 0.382270387 | 0.416662221 | 0.429949859 | 0.325955481 |
| 0.394041497 | 0.252218272 | 0.009143487 | 0.258760387 |
| 0.420143168 | 0.363693397 | 1           | 0.262283929 |
| 0.409335681 | 0.453591687 | 0.423208833 | 0.2463682   |
| 0.043882382 | 0.357112395 | 0.02659573  | 0.307714964 |
| 0.41438902  | 0.128735227 | 0.383139174 | 0.114564821 |
| 0.049713585 | 0.46073815  | 0.122702535 | 0.199212222 |
| 0.084413765 | 0.412869942 | 0.259531887 | 0.256513708 |
| 0.189345949 | 0.142203812 | 0.312198479 | 0.366553651 |
| 0.051599787 | 0.07878911  | 0.007932209 | 0.347824053 |
| 0.128684207 | 0.334295711 | 0.35184947  | 0.440728683 |
| 0.332200076 | 0.102133308 | 0.348761702 | 0.239441373 |
| 0.086956171 | 0.01044329  | 0.46405373  | 0.383584663 |
| 0.419743525 | 0.158030599 | 0.030315252 | 0.339770259 |
| 0.448903558 | 0.412433837 | 0.365260288 | 0.45474568  |
| 0.025583282 | 0.432011407 | 0.239697407 | 0.097461584 |
| 0.320548637 | 0.247132424 | 0.438547939 | 0.072518558 |
| 0.419770919 | 0.452362026 | 0.275667477 | 0.159457478 |
| 0.435154429 | 0.419166173 | 0.032528295 | 0.440507807 |
| 0.437537317 | 0.024712559 | 0.46491662  | 0.089180857 |
| 0.014057358 | 0.392943412 | 0.422949816 | 0.05874169  |
| 0.059482678 | 0.345838676 | 0.072870476 | 0.246778019 |
| 0.461441837 | 0.372815605 | 0.44474586  | 0.162262381 |
| 0.039030159 | 0.0078817   | 0.151663855 | 0.359545561 |
| 0.50292502  | 0.438488957 | 0.228672637 | 0.317802521 |
| 0.230355456 | 0.300776243 | 0.217132601 | 0.442798037 |
| 0.1610346   | 0.484118855 | 0.004630618 | 0.403080222 |
| 0.492234142 | 0.372208701 | 0.060511298 | 0.359310398 |
| 0.447947445 | 0.046658696 | 0.207145005 | 0.475488933 |
| 0.450699008 | 0.313041994 | 0.345971795 | 0.399069221 |
| 0.022810744 | 0.052341064 | 0.356439855 | 0.130691404 |
| 0.387548338 | 0.197202235 | 0.029147626 | 0.371523977 |
| 0.041771045 | 0.447809104 | 0.421027748 | 0.053428569 |
| 0.40772365  | 0.373368254 | 0.323183042 | 0.033502081 |
| 0.410716039 | 0.447536089 | 0.502038328 | 0.177099555 |
| 0.422864609 | 0.435158056 | 0.359648034 | 0.058795    |
| 0.010451282 | 0.481020877 | 0.442316299 | 0.025624247 |
| 0.435452341 | 0.346669631 | 0.012067626 | 0.468550642 |
| 0.18782955  | 0.462543146 | 0.007935608 | 0.067782529 |
| 0.024599988 | 0.409545607 | 0.476446416 | 0.421109064 |
| 0.356545292 | 0.36199519  | 0.002918228 | 0.448447714 |
| 0.466148076 | 0.008157736 | 0.097398743 | 0.430260489 |
| 0.396904355 | 0.497930826 | 0.264752319 | 0.420336269 |
| 0.385991826 | 0.474897701 | 0.254761867 | 0.233496307 |
| 0.45371042  | 0.437821378 | 0.448271222 | 0.44969665  |
| 0.442610127 | 0.375338496 | 0.27558249  | 0.016889604 |
| 0.118555358 | 0.291194167 | 0.356906039 | 0.081216365 |
| 0.412233037 | 0.116879981 | 0.442387909 | 0.429702657 |
| 0.431442331 | 0.002779076 | 0.197484367 | 0.440335015 |
| 0.455711602 | 0.449068748 | 0.015878927 | 0.005750173 |
| 0.006895122 | 0.011928435 | 0.393654504 | 0.197964638 |
| 0.444378848 | 0.329062211 | 0.003400127 | 0.063818642 |
| 0.297340588 | 0.339304819 | 0.47037422  | 0.363193812 |

|             |             |             |             |
|-------------|-------------|-------------|-------------|
| 0.412708416 | 0.065702352 | 0.321943089 | 0.389304951 |
| 0.049306606 | 0.399591993 | 0.438958191 | 0.468745981 |
| 0.028444544 | 0.206979707 | 0.385134781 | 0.449656613 |
| 0.044900164 | 0.268515385 | 0.402858759 | 0.316167782 |
| 0.008997997 | 0.059311095 | 0.05051799  | 0.404261025 |
| 0.477689014 | 0.064445715 | 0.025110579 | 0.198803859 |
| 0.126091588 | 0.434926892 | 0.157245841 | 0.442384488 |
| 0.453532893 | 0.413740739 | 0.04747338  | 0.47171952  |
| 0.032094716 | 0.470674671 | 0.274780265 | 0.088547555 |
| 0.25230676  | 0.009166421 | 0.417892407 | 0.147101328 |
| 0.384598698 | 0.429697389 | 0.178265176 | 0.00906053  |
| 0.137956976 | 0.03826969  | 0.436185257 | 0.413386596 |
| 0.019438494 | 0.255277267 | 0.260997816 | 0.390760911 |
| 0.363101658 | 0.421642033 | 0.497049474 | 0.437847037 |
| 0.098981505 | 0.094100605 | 0.424222071 | 0.43534663  |
| 0.288497021 | 0.428189305 | 0.278793419 | 0.458917917 |
| 0.441546626 | 0.444261935 | 0.435550218 | 0.367991667 |
| 0.172246223 | 0.440716296 | 0.426170637 | 0.027605711 |
| 0.34853832  | 0.432785796 | 0.385716045 | 0.127469723 |
| 0.223119456 | 0.33510784  | 0.04795041  | 0.210582071 |
| 0.272501657 | 0.40061229  | 0.139122355 | 0.411101437 |
| 0.41937478  | 0.438596807 | 0.046429192 | 0.048923651 |
| 0.495343763 | 0.44332087  | 0.189116963 | 0.445175244 |
| 0.142452171 | 0.318727225 | 0.421299147 | 0.401352174 |
| 0.35829897  | 0.442775061 | 0.444890198 | 0.437032782 |
| 0.446055372 | 0.265369502 | 0.50181343  | 0.144208646 |
| 0.063695333 | 0.403419619 | 0.09215265  | 0.067353554 |
| 0.13073193  | 0.019153263 | 0.247722709 | 0.387731136 |
| 0.322916082 | 0.357258233 | 0.365395384 | 0.075508266 |
| 0.268052401 | 0.378042405 | 0.321735512 | 0.24194118  |
| 0.075405732 | 0.484195558 | 0.007268937 | 0.041608373 |
| 0.324596049 | 0.437756    | 0.331356874 | 0.205999048 |
| 0.236003858 | 0.09765992  | 0.270994866 | 0.381690124 |
| 0.370231454 | 0.342433834 | 0.443273284 | 0.042658379 |
| 0.022581759 | 0.434607351 | 0.421096459 | 0.012513777 |
| 0.065614096 | 0.421766934 | 0.277612379 | 0.23600604  |
| 0.012113447 | 0.422607602 | 0.401521618 | 0.386269521 |
| 0.383551625 | 0.056224675 | 0.413675438 | 0.090817303 |
| 0.059459664 | 0.445537995 | 0.349217376 | 0.471552298 |
| 0.297076133 | 0.395025092 | 0.467116553 | 0.439710397 |
| 0.114423813 | 0.36099732  | 0.03104319  | 0.44149924  |
| 0.387583246 |             |             |             |
| GM885       | 0.206755134 | 0.293369096 | 0.117849574 |
| 0.35127119  | 0.175625305 | 0.198408125 | 0.250325741 |
| 0.116167358 | 0.087907905 | 0.027007156 | 0.024759023 |
| 0.162661051 | 0.062863998 | 0.100512802 | 0.066707141 |
| 0.337662229 | 0.057863116 | 0.110795158 | 0.274640604 |
| 0.315979002 | 0.121131342 | 0.297757813 | 0.133648705 |
| 0.050406047 | 0.055101284 | 0.097661848 | 0.077573128 |
| 0.368559456 | 0.113565956 | 0.150123996 | 0.31681815  |
| 0.055965586 | 0.260687762 | 0.24989934  | 0.207830286 |
| 0.222985386 | 0.175830625 | 0.013733702 | 0.100224156 |
| 0.270302482 | 0.248281403 | 0.33514483  | 0.295217742 |
| 0.093542032 | 0.239915372 | 0.277974327 | 0.177315904 |

|             |             |             |             |
|-------------|-------------|-------------|-------------|
| 0.077034634 | 0.04911065  | 0.116581737 | 0.246143293 |
| 0.213766117 | 0.162066025 | 0.169124143 | 0.176366546 |
| 0.037825494 | 0.087975378 | 0.02434405  | 0.229081857 |
| 0.240273525 | 0.108797587 | 0.222990002 | 0.112653598 |
| 0.07113378  | 0.17446613  | 0.05265512  | 0.208375298 |
| 0.051698364 | 0.255899275 | 0.073566892 | 0.117171042 |
| 0.009350027 | 0.344356472 | 0.185839052 | 0.04518553  |
| 0.09047488  | 0.038402203 | 0.076527388 | 0.299422296 |
| 0.345429474 | 0.229113968 | 0.299034107 | 0.271252609 |
| 0.060553174 | 0.155986487 | 0.103083994 | 0.125129115 |
| 0.2682513   | 0.194636915 | 0.088936239 | 0.31423228  |
| 0.294869191 | 0.253479006 | 0.084114588 | 0.161107727 |
| 0.263013843 | 0.291594699 | 0.13329702  | 0.141166578 |
| 0.054648873 | 0.030557551 | 0.232654035 | 0.282347472 |
| 0.238323751 | 0.064679291 | 0.125267655 | 0.31789116  |
| 0.09714264  | 0.058949445 | 0.326309802 | 0.040351343 |
| 0.35657435  | 0.078889373 | 0.118609338 | 0.242030155 |
| 0.092243227 | 0.253473749 | 0.240223328 | 0.253704242 |
| 0.140002021 | 0.035135189 | 0.028126537 | 0.050554782 |
| 0.077979101 | 0.017159087 | 0.206881324 | 0.322538178 |
| 0.093987271 | 0.059827021 | 0.208352558 | 0.014147453 |
| 0.037849622 | 0.054102169 | 0.205495891 | 0.150646299 |
| 0.276457378 | 0.162797655 | 0.110925465 | 0.213386639 |
| 0.157367262 | 0.292078114 | 0.018962541 | 0.131601093 |
| 0.20289607  | 0.060830067 | 0.265218649 | 0.168805578 |
| 0.154068075 | 0.148199164 | 0.149745973 | 0.314847398 |
| 0.274168171 | 0.162562628 | 0.099002122 | 0.315691676 |
| 0.069560591 | 0.148698269 | 0.143463186 | 0.116366361 |
| 0.101621158 | 0.208252458 | 0.032582068 | 0.170461911 |
| 0.040166681 | 0.03611298  | 0.03715053  | 0.20413706  |
| 0.085324145 | 0.230395901 | 0.190780293 | 0.151396419 |
| 0.161204206 | 0.245938572 | 0.155236083 | 0.219000671 |
| 0.026873914 | 0.082451597 | 0.103800162 | 0.288304064 |
| 0.184302497 | 0.274687197 | 0.114965588 | 0.098607808 |
| 0.198407731 | 0.318779944 | 0.0021475   | 0.240933653 |
| 0.249170717 | 0.100357574 | 0.2006738   | 0.190334835 |
| 0.08589869  | 0.330203501 | 0.011955394 | 0.297598947 |
| 0.176789711 | 0.13194858  | 0.325823334 | 0.143912896 |
| 0.228543572 | 0.08525893  | 0.126964935 | 0.196841139 |
| 0.158658516 | 0.020798556 | 0.17207749  | 0.338553592 |
| 0.026786063 | 0.117926622 | 0.265859196 | 0.305139473 |
| 0.229319111 | 0.269194722 | 0.345682594 | 0.072515031 |
| 0.176184908 | 0.192324787 | 0.039297762 | 0.14475321  |
| 0.230628935 | 0.039928719 | 0.262283929 | 1           |
| 0.137648032 | 0.278826197 | 0.183579732 | 0.038030838 |
| 0.120457544 | 0.215038833 | 0.055821458 | 0.176865825 |
| 0.191366735 | 0.094418397 | 0.107865934 | 0.055653899 |
| 0.061742718 | 0.29584989  | 0.038298722 | 0.038457111 |
| 0.017322874 | 0.171755927 | 0.246014505 | 0.064997184 |
| 0.040865685 | 0.106435428 | 0.077391644 | 0.09819307  |
| 0.103108692 | 0.102562281 | 0.013466068 | 0.043216717 |
| 0.038371073 | 0.059168096 | 0.060755862 | 0.197998944 |
| 0.071978721 | 0.061705999 | 0.154475121 | 0.046892998 |
| 0.060386405 | 0.052698597 | 0.286709943 | 0.304884752 |

|              |             |             |             |
|--------------|-------------|-------------|-------------|
| 0.201286567  | 0.142336384 | 0.066373126 | 0.030913808 |
| 0.308690812  | 0.135587518 | 0.084372887 | 0.294171745 |
| 0.051703651  | 0.2973849   | 0.072438305 | 0.121743597 |
| 0.072922958  | 0.222514976 | 0.362334057 | 0.048622389 |
| 0.191031977  | 0.271363355 | 0.196971591 | 0.113938027 |
| 0.223878071  | 0.285177592 | 0.09063369  | 0.205110243 |
| 0.197382526  | 0.072917918 | 0.269461177 | 0.049014847 |
| 0.053331735  | 0.210843317 | 0.194618244 | 0.118985918 |
| 0.079092121  | 0.164085632 | 0.113160834 | 0.232892802 |
| 0.298125071  | 0.314361829 | 0.225519002 | 0.054093296 |
| 0.087375807  | 0.014646988 | 0.075064307 | 0.119259864 |
| 0.236000163  | 0.247332645 | 0.214147853 | 0.115354591 |
| 0.291478462  | 0.067274595 | 0.07201858  | 0.280320683 |
| 0.042620101  | 0.255987029 | 0.033312284 | 0.203171367 |
| 0.220622785  | 0.14462448  | 0.069555598 | 0.238462487 |
| 0.240393482  | 0.113126281 | 0.130118433 | 0.250751524 |
| 0.280738284  | 0.119013172 | 0.087372586 | 0.222429348 |
| 0.079531299  | 0.100964746 | 0.180047195 | 0.027508105 |
| 0.09211621   | 0.129550555 | 0.006185532 | 0.091030754 |
| 0.069941343  | 0.263064227 | 0.298638743 | 0.067938429 |
| 0.153510215  | 0.098636576 | 0.22502773  | 0.100256012 |
| 0.208571888  | 0.229375404 | 0.254859742 | 0.136736162 |
| 0.210202668  | 0.241172669 | 0.101527509 | 0.083624412 |
| 0.038352946  | 0.232628343 | 0.241633282 | 0.034807869 |
| 0.329822489  | 0.134052734 | 0.027143013 | 0.297024195 |
| 0.244131399  | 0.195950407 | 0.022157861 | 0.010851633 |
| 0.029995266  | 0.278994383 | 0.237965887 | 0.309499247 |
| 0.068016968  | 0.271377021 | 0.003365774 | 0.266924635 |
| 0.261618867  | 0.025225744 | 0.047886672 | 0.197134473 |
| 0.161065478  | 0.293147495 | 0.070917143 | 0.221871974 |
| 0.133633565  | 0.221592841 | 0.102501933 | 0.224247772 |
| 0.286702711  | 0.208308843 | 0.292450823 | 0.278607867 |
| 0.315062923  | 0.235224024 | 0.309312775 | 0.066603035 |
| 0.045548511  | 0.163872262 | 0.044775597 | 0.043263855 |
| 0.202798738  | 0.067300413 | 0.264446167 | 0.308679488 |
| 0.249401195  | 0.02791402  | 0.124832208 | 0.216432568 |
| 0.33248914   | 0.350198925 | 0.028493592 | 0.008967358 |
| 0.004166063  | 0.016588173 | 0.26632527  | 0.138820624 |
| 0.271641985  | 0.038550588 | 0.029969947 | 0.109271932 |
| 0.100392879  | 0.160462819 | 0.257523644 | 0.357163353 |
| 0.221343652  | 0.095066099 | 0.057126228 | 0.349457913 |
| 0.048177441  | 0.159495876 | 0.272091281 | 0.274828516 |
| 0.045899054  | 0.131825422 | 0.127215925 | 0.342240701 |
| 0.006449601  | 0.210430941 | 0.173689578 | 0.085941742 |
| 0.016491745  | 0.060921437 | 0.061509547 | 0.299980324 |
| 0.2073339512 | 0.047384193 | 0.036048976 | 0.040825603 |
| 0.110793733  | 0.286093145 | 0.096314088 | 0.313707245 |
| 0.315002355  | 0.35896005  | 0.036979289 | 0.262445135 |
| 0.0575617    | 0.229494212 | 0.102469083 | 0.032492285 |
| 0.093564308  | 0.040711808 | 0.208875713 | 0.028985708 |
| 0.116962675  | 0.258494193 | 0.051299134 | 0.023599508 |
| 0.022986104  | 0.06540902  | 0.320679737 | 0.265469756 |
| 0.026976777  | 0.142792135 | 0.181644913 | 0.256563086 |
| 0.227231093  | 0.30289171  | 0.247667589 | 0.104338077 |



|             |             |             |             |
|-------------|-------------|-------------|-------------|
| 0.120520526 | 0.016712249 | 0.326294856 | 0.197286738 |
| 0.104668608 | 0.305182431 | 0.065573511 | 0.280470616 |
| 0.243591872 | 0.280181092 | 0.240628661 | 0.264694843 |
| 0.039813217 | 0.196448772 | 0.265377391 | 0.057163784 |
| 0.26001415  | 0.300189033 | 0.187619707 | 0.056485333 |
| 0.144745593 | 0.095123083 | 0.075139514 | 0.035466371 |
| 0.058726452 | 0.21765605  | 0.098656173 | 0.355356104 |
| 0.225167553 | 0.212180078 | 0.073696083 | 0.060932657 |
| 0.290121349 | 0.264234896 | 0.12642004  | 0.257915141 |
| 0.137849511 | 0.209596529 | 0.236650024 | 0.225480872 |
| 0.054580927 | 0.23864692  | 0.299306363 | 0.235733367 |
| 0.265499549 | 0.262049122 | 0.259010891 | 0.092932345 |
| 0.0499561   | 0.143955144 | 0.077733058 | 0.098102499 |
| 0.176218913 | 0.045263879 | 0.026964181 | 0.287662262 |
| 0.043171994 | 0.269946804 | 0.060485635 | 0.071492095 |
| 0.164806455 | 0.102294091 | 0.238069969 | 0.178286536 |
| 0.078825706 | 0.247076732 | 0.02026642  | 0.074251436 |
| 0.053314922 | 0.242942972 | 0.102720564 | 0.12076778  |
| 0.036077854 | 0.044663403 | 0.22080817  | 0.165193016 |
| 0.076346466 | 0.043452018 | 0.241107933 | 0.094950424 |
| 0.075429537 | 0.319995246 | 0.137094406 | 0.024861849 |
| 0.039520458 | 0.174943915 | 0.074533906 | 0.085181439 |
| 0.02430059  | 0.217715854 | 0.109323314 | 0.161549284 |
| 0.260717015 | 0.088904618 | 0.209279411 | 0.074070487 |
| 0.09186066  | 0.243483928 | 0.129574377 | 0.2340118   |
| 0.104626785 | 0.33754322  | 0.221928077 | 0.224253208 |
| 0.053088503 | 0.094811497 | 0.101712859 | 0.313359941 |
| 0.062181277 |             |             |             |
| GMDS        | 0.299382957 | 0.41836834  | 0.16923469  |
| 0.257825844 | 0.170398569 | 0.208506945 | 0.109543845 |
| 0.182887356 | 0.03059656  | 0.002459201 | 0.003602006 |
| 0.200103264 | 0.068648242 | 0.154991621 | 0.157428498 |
| 0.237687839 | 0.041512825 | 0.231450017 | 0.11599423  |
| 0.245651954 | 0.072517384 | 0.183746206 | 0.047307115 |
| 0.09831913  | 0.025883453 | 0.020289201 | 0.07512892  |
| 0.329367321 | 0.025292256 | 0.191291463 | 0.288336672 |
| 0.044994686 | 0.335255734 | 0.439847318 | 0.18686999  |
| 0.426956303 | 0.291467567 | 0.016462671 | 0.138713533 |
| 0.378009235 | 0.238789467 | 0.251668802 | 0.144418989 |
| 0.018163369 | 0.459930524 | 0.109337333 | 0.15909685  |
| 0.164327782 | 0.007747259 | 0.201270586 | 0.433847087 |
| 0.397207993 | 0.167564398 | 0.16927491  | 0.07635041  |
| 0.057022478 | 0.193553969 | 0.071432638 | 0.282577364 |
| 0.102219457 | 0.157259118 | 0.391631057 | 0.039838867 |
| 0.07392672  | 0.193997838 | 0.056757767 | 0.170799076 |
| 0.112200092 | 0.336448948 | 0.018825278 | 0.192108302 |
| 0.002755009 | 0.230184161 | 0.158738697 | 0.08831209  |
| 0.014724028 | 0.006288782 | 0.068169284 | 0.15871157  |
| 0.345539986 | 0.411278021 | 0.317675077 | 0.325373132 |
| 0.063983808 | 0.128797047 | 0.140465703 | 0.065308306 |
| 0.352018925 | 0.080874805 | 0.076000037 | 0.223314238 |
| 0.327923806 | 0.409449671 | 0.06774633  | 0.09383074  |
| 0.285510426 | 0.413039864 | 0.186150556 | 0.161128559 |
| 0.107277029 | 0.016654941 | 0.368355677 | 0.36640096  |

|             |             |             |             |
|-------------|-------------|-------------|-------------|
| 0.377014123 | 0.098143483 | 0.049286143 | 0.335459589 |
| 0.024815231 | 0.228472914 | 0.157921629 | 0.093796582 |
| 0.354629188 | 0.008314286 | 0.068099004 | 0.170223618 |
| 0.133904385 | 0.322314239 | 0.392564169 | 0.089942089 |
| 0.178414827 | 0.009303923 | 0.031155347 | 0.015477337 |
| 0.168747098 | 0.039355785 | 0.437051977 | 0.326748656 |
| 0.187684553 | 0.134554863 | 0.146550588 | 0.000344531 |
| 0.008216949 | 0.0938347   | 0.31694383  | 0.227183321 |
| 0.283706431 | 0.326027607 | 0.07082124  | 0.327464497 |
| 0.19994725  | 0.310158269 | 0.048148293 | 0.056935712 |
| 0.197314082 | 0.088397516 | 0.099476036 | 0.187218178 |
| 0.101076241 | 0.089396829 | 0.059444726 | 0.378230497 |
| 0.421632071 | 0.038316182 | 0.253897161 | 0.222410053 |
| 0.126282984 | 0.120579838 | 0.058234009 | 0.130379101 |
| 0.027901808 | 0.384307051 | 0.008114953 | 0.247338701 |
| 0.081460204 | 0.043934549 | 0.014249315 | 0.201145931 |
| 0.152044642 | 0.298605532 | 0.428254595 | 0.055011282 |
| 0.148164311 | 0.163270446 | 0.241334779 | 0.237133213 |
| 0.001640109 | 0.03145665  | 0.249367543 | 0.375701291 |
| 0.245807994 | 0.36904321  | 0.152982717 | 0.122428097 |
| 0.10379878  | 0.296987352 | 0.002962366 | 0.44039288  |
| 0.406869325 | 0.250704625 | 0.152479228 | 0.187090414 |
| 0.120883471 | 0.30804681  | 0.055214883 | 0.224663968 |
| 0.317535795 | 0.042243472 | 0.348539731 | 0.051660395 |
| 0.401999    | 0.01215143  | 0.195036248 | 0.260309751 |
| 0.244611339 | 0.005422181 | 0.171550059 | 0.236592146 |
| 0.007855754 | 0.077356233 | 0.291953209 | 0.212804753 |
| 0.147980974 | 0.277276702 | 0.329405314 | 0.109792047 |
| 0.169994931 | 0.15890764  | 0.006509843 | 0.118784487 |
| 0.294748175 | 0.145523521 | 0.409335681 | 0.137648032 |
| 1           | 0.389441847 | 0.301396691 | 0.078901869 |
| 0.018077158 | 0.190400867 | 0.019440374 | 0.118635015 |
| 0.320913252 | 0.049251898 | 0.147945133 | 0.089076949 |
| 0.021898074 | 0.387552172 | 0.049523839 | 0.07918765  |
| 0.032149914 | 0.174137364 | 0.146652913 | 0.094852785 |
| 0.062173291 | 0.059415259 | 0.115639227 | 0.138046746 |
| 0.027441057 | 0.033177111 | 0.006911049 | 0.145869629 |
| 0.04446024  | 0.133656213 | 0.145154782 | 0.291328735 |
| 0.180672209 | 0.045896372 | 0.142750953 | 0.101151232 |
| 0.035937426 | 0.005031319 | 0.404636691 | 0.21928552  |
| 0.330980819 | 0.076272011 | 0.017273831 | 0.138718007 |
| 0.332442109 | 0.186873803 | 0.238620704 | 0.360304065 |
| 0.020378751 | 0.335786431 | 0.085987011 | 0.037931282 |
| 0.126069042 | 0.108036925 | 0.328535271 | 0.031284446 |
| 0.235562599 | 0.40463569  | 0.144453669 | 0.055742552 |
| 0.379095592 | 0.222278534 | 0.016630732 | 0.327434755 |
| 0.33033586  | 0.011186381 | 0.400811426 | 0.041297109 |
| 0.007271065 | 0.221281642 | 0.227172698 | 0.025959088 |
| 0.026116846 | 0.127342902 | 0.044742014 | 0.105156816 |
| 0.390009242 | 0.204938248 | 0.26756418  | 0.075453636 |
| 0.014832685 | 0.002778646 | 0.07293121  | 0.179502269 |
| 0.45256913  | 0.371454589 | 0.119699729 | 0.11829944  |
| 0.11045751  | 0.101643253 | 0.146957442 | 0.365613994 |
| 0.123310525 | 0.43998844  | 0.002952026 | 0.240584433 |

|             |             |             |             |
|-------------|-------------|-------------|-------------|
| 0.421587096 | 0.226844873 | 0.020726982 | 0.165754591 |
| 0.356253165 | 0.020659544 | 0.14704228  | 0.4155401   |
| 0.338091701 | 0.120308143 | 0.123339411 | 0.239185653 |
| 0.012037134 | 0.026959566 | 0.148522613 | 0.051968164 |
| 0.146314695 | 0.083183347 | 0.012952867 | 0.214894316 |
| 0.014772199 | 0.38034654  | 0.309321515 | 0.015785391 |
| 0.163487747 | 0.22587271  | 0.150099511 | 0.015858873 |
| 0.286740005 | 0.394455207 | 0.442396122 | 0.121682025 |
| 0.291684997 | 0.347511092 | 0.134955287 | 0.031675727 |
| 0.004862627 | 0.415438021 | 0.29247898  | 0.00931798  |
| 0.331505515 | 0.216514712 | 0.003397715 | 0.421494903 |
| 0.096816049 | 0.440411554 | 0.004348075 | 0.049447202 |
| 0.014820482 | 0.290896292 | 0.407560187 | 0.268401276 |
| 0.159138861 | 0.20011773  | 0.003343206 | 0.391340496 |
| 0.403314863 | 0.003322222 | 0.041933552 | 0.277966913 |
| 0.225613679 | 0.451365815 | 0.094387045 | 0.27966483  |
| 0.166070341 | 0.397883251 | 0.114835951 | 0.096231659 |
| 0.319887327 | 0.363716368 | 0.315270421 | 0.415706933 |
| 0.325092804 | 0.203273733 | 0.121390641 | 0.006173353 |
| 0.035568276 | 0.177210867 | 0.11762725  | 0.018846183 |
| 0.25321677  | 0.040358834 | 0.400518123 | 0.315007339 |
| 0.331151621 | 0.001553275 | 0.117431456 | 0.304864342 |
| 0.374664457 | 0.367278145 | 0.015724062 | 0.004326125 |
| 0.006636935 | 0.002840961 | 0.206431029 | 0.094630899 |
| 0.365059281 | 0.138130533 | 0.0017523   | 0.048682383 |
| 0.145809859 | 0.138786489 | 0.401820857 | 0.207536171 |
| 0.277878073 | 0.034330404 | 0.113282227 | 0.243987498 |
| 0.016077145 | 0.307810374 | 0.334810816 | 0.415489687 |
| 0.019248331 | 0.093726622 | 0.249374185 | 0.358045612 |
| 0.014575091 | 0.125207868 | 0.22088952  | 0.121764026 |
| 0.010097484 | 0.025034241 | 0.017535872 | 0.272448801 |
| 0.408322275 | 0.021486582 | 0.008217796 | 0.136576788 |
| 0.047297794 | 0.335302825 | 0.065779853 | 0.367844493 |
| 0.33034934  | 0.284901581 | 0.021879142 | 0.410426872 |
| 0.00978396  | 0.413109809 | 0.105931375 | 0.045753486 |
| 0.158486497 | 0.006787719 | 0.376578632 | 0.033596532 |
| 0.223215129 | 0.295465383 | 0.059133282 | 0.004560954 |
| 0.056095348 | 0.018022062 | 0.315776636 | 0.284157918 |
| 0.01256482  | 0.136565703 | 0.131364396 | 0.228080577 |
| 0.205334624 | 0.245775953 | 0.439575938 | 0.183702043 |
| 0.042955162 | 0.0598633   | 0.286948949 | 0.300151761 |
| 0.189271552 | 0.329307892 | 0.090186865 | 0.399929699 |
| 0.311310285 | 0.388820294 | 0.352119621 | 0.160126071 |
| 0.068792443 | 0.236481041 | 0.226953893 | 0.012323437 |
| 0.178503865 | 0.294018239 | 0.232554591 | 0.040807142 |
| 0.081286091 | 0.136537615 | 0.035929403 | 0.209229552 |
| 0.10770352  | 0.205898228 | 0.059923371 | 0.292766915 |
| 0.270209901 | 0.311299342 | 0.046707139 | 0.016184934 |
| 0.435301357 | 0.396019308 | 0.105508643 | 0.239708286 |
| 0.076838462 | 0.122887067 | 0.286040195 | 0.258722299 |
| 0.159892909 | 0.311380455 | 0.331020473 | 0.250331025 |
| 0.394375176 | 0.124709412 | 0.434085523 | 0.141951033 |
| 0.024718468 | 0.227044697 | 0.03055324  | 0.032305428 |
| 0.059201034 | 0.008867124 | 0.089870863 | 0.236061372 |

|             |             |             |             |
|-------------|-------------|-------------|-------------|
| 0.132674505 | 0.159832755 | 0.226717327 | 0.035236095 |
| 0.125089283 | 0.229549672 | 0.148481384 | 0.113595348 |
| 0.02831146  | 0.409979178 | 0.003274077 | 0.021853303 |
| 0.144913394 | 0.279555709 | 0.12023464  | 0.097091259 |
| 0.085643088 | 0.051289034 | 0.11738753  | 0.226695246 |
| 0.146027842 | 0.17983389  | 0.287266781 | 0.029539808 |
| 0.014601349 | 0.345081065 | 0.251642904 | 0.009848574 |
| 0.030654954 | 0.25102273  | 0.197139302 | 0.077042362 |
| 0.006070423 | 0.341843132 | 0.163514265 | 0.167043495 |
| 0.19533964  | 0.034190822 | 0.397514617 | 0.068025035 |
| 0.044996709 | 0.432131384 | 0.155151086 | 0.403089228 |
| 0.155074821 | 0.232000211 | 0.446754037 | 0.315091754 |
| 0.094962789 | 0.181118436 | 0.015006913 | 0.339051943 |
| 0.151925693 |             |             |             |
| GNA15       | 0.437232889 | 0.511395202 | 0.407956126 |
| 0.454560092 | 0.433236271 | 0.440410009 | 0.249514285 |
| 0.231522574 | 0.105581951 | 0.007705211 | 0.026559203 |
| 0.442432244 | 0.219498639 | 0.314745732 | 0.388553876 |
| 0.431274257 | 0.132009673 | 0.369701742 | 0.263599208 |
| 0.435710174 | 0.125965995 | 0.410149919 | 0.109425935 |
| 0.277310602 | 0.104101917 | 0.076000713 | 0.27314107  |
| 0.463938245 | 0.086679199 | 0.398751351 | 0.431761765 |
| 0.094032481 | 0.457425535 | 0.521738301 | 0.442677498 |
| 0.512221822 | 0.425395013 | 0.010467354 | 0.35816978  |
| 0.449399746 | 0.46371351  | 0.437711957 | 0.358040871 |
| 0.05222164  | 0.501561987 | 0.281597443 | 0.39658661  |
| 0.280708149 | 0.033656403 | 0.310102481 | 0.456981708 |
| 0.488670663 | 0.465496768 | 0.279210447 | 0.195477625 |
| 0.222522575 | 0.284818122 | 0.270601481 | 0.386986564 |
| 0.254639293 | 0.219211608 | 0.486827669 | 0.117157865 |
| 0.168799442 | 0.289194957 | 0.140094121 | 0.302747459 |
| 0.337013817 | 0.438862334 | 0.021625702 | 0.40950049  |
| 0.004656007 | 0.415565246 | 0.369795713 | 0.319417242 |
| 0.042798529 | 0.024004522 | 0.167045789 | 0.381715085 |
| 0.469683957 | 0.443887471 | 0.471936776 | 0.469340462 |
| 0.181916074 | 0.289073204 | 0.382951415 | 0.186809231 |
| 0.46257657  | 0.215322788 | 0.12654434  | 0.426839247 |
| 0.473427444 | 0.511738074 | 0.201867404 | 0.256825842 |
| 0.470136759 | 0.467871425 | 0.46121409  | 0.447599379 |
| 0.373327139 | 0.046142345 | 0.449520451 | 0.47375239  |
| 0.437067465 | 0.301652012 | 0.153042463 | 0.450953076 |
| 0.061024553 | 0.408218109 | 0.38020778  | 0.150923619 |
| 0.472999725 | 0.025159856 | 0.204507442 | 0.400504869 |
| 0.220467748 | 0.470681577 | 0.501023933 | 0.214693911 |
| 0.403380223 | 0.021125052 | 0.139594351 | 0.031605515 |
| 0.360727574 | 0.129409857 | 0.502244556 | 0.478355235 |
| 0.270827179 | 0.383042497 | 0.302001289 | 0.001711053 |
| 0.025368343 | 0.174974702 | 0.454599099 | 0.380603242 |
| 0.453955522 | 0.401208668 | 0.258046609 | 0.436026411 |
| 0.453134116 | 0.469635002 | 0.092220227 | 0.115288695 |
| 0.457142595 | 0.173113693 | 0.25143924  | 0.464365458 |
| 0.317262131 | 0.140506881 | 0.139662419 | 0.481640051 |
| 0.435722372 | 0.095930131 | 0.372195625 | 0.425285855 |
| 0.378264946 | 0.349257048 | 0.117320392 | 0.300588504 |

|             |             |             |             |
|-------------|-------------|-------------|-------------|
| 0.062697599 | 0.478452062 | 0.025028046 | 0.372714621 |
| 0.301137022 | 0.136496279 | 0.011672407 | 0.315350871 |
| 0.346584621 | 0.468193406 | 0.481865006 | 0.112825738 |
| 0.344408516 | 0.417263127 | 0.373586456 | 0.469940775 |
| 0.014923776 | 0.049591933 | 0.333324106 | 0.476006574 |
| 0.357774727 | 0.464321786 | 0.320130598 | 0.304994895 |
| 0.285544613 | 0.465146691 | 0.003092581 | 0.507691348 |
| 0.513172919 | 0.359084975 | 0.423364472 | 0.416841685 |
| 0.391952524 | 0.476942675 | 0.045882288 | 0.427426785 |
| 0.403017955 | 0.085193111 | 0.474827572 | 0.164629022 |
| 0.453875462 | 0.044803033 | 0.365857553 | 0.445865341 |
| 0.447872002 | 0.009950446 | 0.295701011 | 0.430875144 |
| 0.023284528 | 0.136261917 | 0.452181089 | 0.442068276 |
| 0.420879143 | 0.455781602 | 0.470024846 | 0.375584122 |
| 0.440425383 | 0.264455411 | 0.012125131 | 0.311536522 |
| 0.451552567 | 0.388854632 | 0.453591687 | 0.278826197 |
| 0.389441847 | 1           | 0.446541423 | 0.249586373 |
| 0.052644032 | 0.360293329 | 0.028258586 | 0.356375172 |
| 0.426078853 | 0.143753475 | 0.419046767 | 0.136036995 |
| 0.068220777 | 0.498824666 | 0.161227764 | 0.245522696 |
| 0.113595425 | 0.441752227 | 0.278735912 | 0.280479149 |
| 0.231003704 | 0.173271505 | 0.365072111 | 0.410022441 |
| 0.052649734 | 0.099169715 | 0.011313663 | 0.387165341 |
| 0.155532888 | 0.372296472 | 0.378439807 | 0.446708627 |
| 0.351343596 | 0.121174734 | 0.403206319 | 0.283299714 |
| 0.113902723 | 0.014848476 | 0.492377791 | 0.422837587 |
| 0.396180927 | 0.179415624 | 0.039993788 | 0.372689324 |
| 0.479206285 | 0.396647279 | 0.33191379  | 0.471913954 |
| 0.030710702 | 0.469106753 | 0.276825399 | 0.125471943 |
| 0.379554952 | 0.284417619 | 0.470907538 | 0.08373266  |
| 0.425130802 | 0.469925494 | 0.315993897 | 0.197778557 |
| 0.432470917 | 0.447964873 | 0.038902802 | 0.446906433 |
| 0.441756898 | 0.033051867 | 0.501357871 | 0.11828922  |
| 0.019906772 | 0.44191313  | 0.463860866 | 0.076461148 |
| 0.078104603 | 0.380244302 | 0.068076748 | 0.295512811 |
| 0.497087803 | 0.42314202  | 0.47024616  | 0.203140486 |
| 0.048383704 | 0.0112246   | 0.19267597  | 0.399693142 |
| 0.518051848 | 0.478523971 | 0.266205394 | 0.377597574 |
| 0.261298176 | 0.353680777 | 0.192771718 | 0.476829374 |
| 0.182427982 | 0.508722342 | 0.006702558 | 0.448666132 |
| 0.51372339  | 0.351119989 | 0.082059292 | 0.366441867 |
| 0.446472343 | 0.055492624 | 0.220626045 | 0.497801721 |
| 0.467775332 | 0.358323189 | 0.388957684 | 0.435134428 |
| 0.024057445 | 0.055270675 | 0.405134436 | 0.169330579 |
| 0.423170548 | 0.232492143 | 0.042754325 | 0.374871465 |
| 0.051256156 | 0.458532374 | 0.460184918 | 0.06960127  |
| 0.409175401 | 0.361113344 | 0.376429511 | 0.041621893 |
| 0.450607886 | 0.478480765 | 0.523792303 | 0.185097418 |
| 0.455700447 | 0.466613918 | 0.409653787 | 0.076315845 |
| 0.015728742 | 0.50906622  | 0.442766479 | 0.028760162 |
| 0.472024368 | 0.308422897 | 0.016063078 | 0.490725013 |
| 0.208421803 | 0.463230296 | 0.007369392 | 0.076088986 |
| 0.034807525 | 0.454929489 | 0.492392184 | 0.427298406 |
| 0.327819801 | 0.388116524 | 0.004036352 | 0.48738399  |

|             |             |             |             |
|-------------|-------------|-------------|-------------|
| 0.490448563 | 0.012989872 | 0.130769933 | 0.462565561 |
| 0.441312879 | 0.52128662  | 0.320933352 | 0.462393659 |
| 0.436463013 | 0.500581122 | 0.276888471 | 0.279373858 |
| 0.478537505 | 0.472719259 | 0.461747275 | 0.458648792 |
| 0.475936224 | 0.426341703 | 0.309888145 | 0.020494162 |
| 0.146108909 | 0.272789737 | 0.373473957 | 0.100603083 |
| 0.39065097  | 0.148205555 | 0.462364641 | 0.469292421 |
| 0.468953299 | 0.004586021 | 0.192534966 | 0.464467495 |
| 0.468312356 | 0.474324828 | 0.019215269 | 0.007084011 |
| 0.008163377 | 0.01953679  | 0.402926732 | 0.240443242 |
| 0.471026783 | 0.315162287 | 0.005034945 | 0.061099378 |
| 0.318413728 | 0.398272672 | 0.498161103 | 0.40192345  |
| 0.449940377 | 0.082283341 | 0.343972311 | 0.422131003 |
| 0.069706588 | 0.379349191 | 0.475738411 | 0.483539079 |
| 0.037525759 | 0.248855923 | 0.395331432 | 0.479905627 |
| 0.062291501 | 0.317616334 | 0.445292275 | 0.354458107 |
| 0.011427349 | 0.079409378 | 0.068545307 | 0.445269577 |
| 0.501052008 | 0.084340677 | 0.035426905 | 0.180090591 |
| 0.145072484 | 0.467809928 | 0.184253766 | 0.4773846   |
| 0.47523389  | 0.454064115 | 0.066534534 | 0.490142761 |
| 0.043925963 | 0.491157655 | 0.334448668 | 0.083290835 |
| 0.285216684 | 0.012419133 | 0.447064311 | 0.179001338 |
| 0.37554931  | 0.436407753 | 0.215723693 | 0.01404336  |
| 0.173096668 | 0.052045762 | 0.476232376 | 0.460061777 |
| 0.028090307 | 0.271581414 | 0.303350669 | 0.421124943 |
| 0.351886812 | 0.464046055 | 0.513585285 | 0.454968929 |
| 0.107974067 | 0.119069606 | 0.444028544 | 0.437710723 |
| 0.280515139 | 0.470326177 | 0.327714113 | 0.496478231 |
| 0.450167319 | 0.459654968 | 0.464179071 | 0.395937441 |
| 0.218731817 | 0.447700882 | 0.435586195 | 0.029205265 |
| 0.382253314 | 0.473202336 | 0.39335539  | 0.16530433  |
| 0.271374134 | 0.384467715 | 0.052302729 | 0.20306996  |
| 0.322657274 | 0.381709617 | 0.159369954 | 0.450272744 |
| 0.425150711 | 0.443297893 | 0.045631815 | 0.066203988 |
| 0.526252703 | 0.447912949 | 0.189367375 | 0.47170792  |
| 0.171599374 | 0.368443735 | 0.4598018   | 0.449035063 |
| 0.38794227  | 0.471017054 | 0.463579216 | 0.445799961 |
| 0.445979654 | 0.292622845 | 0.525381767 | 0.12237621  |
| 0.086305741 | 0.429483099 | 0.113459438 | 0.0884965   |
| 0.15610011  | 0.026520241 | 0.294254199 | 0.432527739 |
| 0.371980246 | 0.40312209  | 0.357094171 | 0.087807288 |
| 0.319551148 | 0.386451016 | 0.368417383 | 0.249502393 |
| 0.091764936 | 0.505566723 | 0.009718336 | 0.054650037 |
| 0.374115158 | 0.470391684 | 0.390066442 | 0.247040981 |
| 0.295793729 | 0.125733831 | 0.316074536 | 0.363800595 |
| 0.381766974 | 0.369082571 | 0.472821561 | 0.044663273 |
| 0.024884723 | 0.473385714 | 0.418292617 | 0.017409361 |
| 0.081755617 | 0.420467037 | 0.297414046 | 0.273203992 |
| 0.018370737 | 0.455303351 | 0.407680977 | 0.436418676 |
| 0.393876648 | 0.068459198 | 0.396638638 | 0.09951464  |
| 0.065745076 | 0.453842004 | 0.397898086 | 0.50257236  |
| 0.341271079 | 0.440561653 | 0.466044293 | 0.463554454 |
| 0.12709732  | 0.389478672 | 0.035947405 | 0.467130741 |
| 0.433789393 |             |             |             |

| GNPTAB      | 0.37427512  | 0.497531871 | 0.36165838  |
|-------------|-------------|-------------|-------------|
| 0.33328372  | 0.352223904 | 0.311380117 | 0.152342079 |
| 0.144786523 | 0.065453122 | 0.002115067 | 0.015425811 |
| 0.386876836 | 0.161554232 | 0.20339378  | 0.279577277 |
| 0.341484389 | 0.106808312 | 0.310675806 | 0.182306639 |
| 0.330632361 | 0.06186243  | 0.322174608 | 0.06479335  |
| 0.262697951 | 0.084548475 | 0.048293376 | 0.229937891 |
| 0.354010541 | 0.057425733 | 0.262020498 | 0.309224518 |
| 0.086242989 | 0.368863073 | 0.518941547 | 0.36319902  |
| 0.520551851 | 0.36202349  | 0.009615779 | 0.230670141 |
| 0.373839947 | 0.373126156 | 0.326149589 | 0.25608747  |
| 0.027067084 | 0.486160823 | 0.182388958 | 0.348807105 |
| 0.188389598 | 0.020903908 | 0.192123152 | 0.436571208 |
| 0.476468074 | 0.360769215 | 0.171868306 | 0.113438188 |
| 0.159728652 | 0.176211742 | 0.246738859 | 0.267576676 |
| 0.165629852 | 0.117023108 | 0.480356048 | 0.063156495 |
| 0.113480936 | 0.196513735 | 0.130761222 | 0.197421076 |
| 0.312086562 | 0.325924304 | 0.011993413 | 0.378237788 |
| 0.00108204  | 0.312417097 | 0.324907684 | 0.287190167 |
| 0.03009404  | 0.011801914 | 0.150874171 | 0.258996821 |
| 0.384349807 | 0.457415156 | 0.423446928 | 0.445446818 |
| 0.14310357  | 0.245824827 | 0.352889339 | 0.126016162 |
| 0.387409801 | 0.127207072 | 0.088162561 | 0.344366265 |
| 0.437339183 | 0.509654242 | 0.16391123  | 0.221147032 |
| 0.34743657  | 0.447702895 | 0.360070095 | 0.352616685 |
| 0.297978609 | 0.046820223 | 0.423014443 | 0.471382554 |
| 0.355126731 | 0.293881051 | 0.12184739  | 0.333264858 |
| 0.04323566  | 0.317973907 | 0.276110105 | 0.135691723 |
| 0.39656312  | 0.011047649 | 0.177731049 | 0.274416399 |
| 0.187969456 | 0.376165261 | 0.508474377 | 0.137271419 |
| 0.354960408 | 0.013013105 | 0.124827404 | 0.026202314 |
| 0.280028765 | 0.146735534 | 0.497040345 | 0.384552768 |
| 0.179623149 | 0.316837341 | 0.203002511 | 0.001006505 |
| 0.020062905 | 0.164715129 | 0.378071605 | 0.31740487  |
| 0.364484384 | 0.386921689 | 0.180498229 | 0.33535372  |
| 0.384418227 | 0.416455982 | 0.050075021 | 0.068640796 |
| 0.348441836 | 0.165287462 | 0.18479698  | 0.378296007 |
| 0.253429776 | 0.083063153 | 0.092636963 | 0.473369813 |
| 0.402085434 | 0.058317172 | 0.294358546 | 0.340416711 |
| 0.263461183 | 0.305738734 | 0.0772622   | 0.211169707 |
| 0.030360221 | 0.489733352 | 0.022933679 | 0.279328559 |
| 0.237637003 | 0.124819744 | 0.009323318 | 0.202576721 |
| 0.231443397 | 0.383169669 | 0.491237489 | 0.080517715 |
| 0.246425566 | 0.334608472 | 0.267299421 | 0.352451066 |
| 0.005407496 | 0.035520611 | 0.244450309 | 0.46593407  |
| 0.235442078 | 0.465698413 | 0.240324047 | 0.257708065 |
| 0.230930818 | 0.36955057  | 0.004194632 | 0.496779571 |
| 0.516580464 | 0.265096784 | 0.320778446 | 0.363759643 |
| 0.330380349 | 0.366741534 | 0.043670616 | 0.340553086 |
| 0.318914518 | 0.058508121 | 0.443525892 | 0.12367033  |
| 0.454370328 | 0.027999056 | 0.248253993 | 0.38581374  |
| 0.378550802 | 0.007314747 | 0.172100056 | 0.308119495 |
| 0.022373928 | 0.063983255 | 0.364373259 | 0.329643397 |
| 0.307628898 | 0.378684062 | 0.407325859 | 0.319430931 |

|             |             |             |             |
|-------------|-------------|-------------|-------------|
| 0.354513014 | 0.18313304  | 0.008963807 | 0.277863144 |
| 0.383574865 | 0.328268027 | 0.423208833 | 0.183579732 |
| 0.301396691 | 0.446541423 | 1           | 0.169849469 |
| 0.027589369 | 0.242680997 | 0.013469509 | 0.273404689 |
| 0.378375082 | 0.078755728 | 0.345588254 | 0.130724185 |
| 0.055715568 | 0.489511522 | 0.166750651 | 0.254563536 |
| 0.127726299 | 0.323020506 | 0.196329529 | 0.176757143 |
| 0.1689723   | 0.125829861 | 0.303628814 | 0.315884788 |
| 0.021803399 | 0.067161639 | 0.014073215 | 0.327134991 |
| 0.10404673  | 0.278874145 | 0.277170712 | 0.349869154 |
| 0.257173691 | 0.077970816 | 0.314410658 | 0.262966339 |
| 0.094592559 | 0.009980922 | 0.48107622  | 0.335907347 |
| 0.288814383 | 0.113909894 | 0.030625369 | 0.303064712 |
| 0.400496113 | 0.265189628 | 0.234932604 | 0.406898187 |
| 0.021443511 | 0.428529377 | 0.190826481 | 0.093799045 |
| 0.322555998 | 0.200286309 | 0.381707864 | 0.048356991 |
| 0.3328368   | 0.440834373 | 0.264399594 | 0.14486686  |
| 0.373531568 | 0.337302394 | 0.019129567 | 0.357759136 |
| 0.349095719 | 0.021057064 | 0.502456711 | 0.104824163 |
| 0.015001587 | 0.379841838 | 0.375830489 | 0.057019733 |
| 0.061852432 | 0.257926792 | 0.028902307 | 0.236251806 |
| 0.482390254 | 0.332021809 | 0.35832634  | 0.2027875   |
| 0.025266854 | 0.005472659 | 0.184094409 | 0.367419752 |
| 0.512976501 | 0.489745051 | 0.211091216 | 0.307121735 |
| 0.184691633 | 0.281176657 | 0.116006934 | 0.471079377 |
| 0.1941614   | 0.513509819 | 0.004194065 | 0.383242897 |
| 0.516694519 | 0.235272499 | 0.061693228 | 0.235876954 |
| 0.341440389 | 0.030721623 | 0.167047246 | 0.485552818 |
| 0.389654256 | 0.27156625  | 0.297421781 | 0.368360116 |
| 0.008928175 | 0.025158737 | 0.337581659 | 0.179193559 |
| 0.317221922 | 0.170308069 | 0.059086971 | 0.267902927 |
| 0.027275841 | 0.424978415 | 0.377815272 | 0.043646055 |
| 0.273284957 | 0.261559939 | 0.319901154 | 0.02438982  |
| 0.418934881 | 0.496712733 | 0.517096477 | 0.126629131 |
| 0.383661663 | 0.465259463 | 0.363984461 | 0.0642655   |
| 0.01293215  | 0.51799015  | 0.341648021 | 0.013981828 |
| 0.398669257 | 0.192559362 | 0.006469871 | 0.469022482 |
| 0.139492391 | 0.460251003 | 0.003020467 | 0.094110586 |
| 0.036879136 | 0.382684947 | 0.478016211 | 0.310381898 |
| 0.197014969 | 0.305137941 | 0.00563706  | 0.499288588 |
| 0.471037387 | 0.010856064 | 0.125786558 | 0.377706228 |
| 0.380923397 | 0.509432411 | 0.290488254 | 0.401456525 |
| 0.37742255  | 0.500325197 | 0.175142571 | 0.215470812 |
| 0.371605443 | 0.492258569 | 0.353824206 | 0.439652137 |
| 0.381633525 | 0.362212008 | 0.215837867 | 0.008616886 |
| 0.121674717 | 0.163020196 | 0.262543615 | 0.06264519  |
| 0.276084074 | 0.112281811 | 0.459983235 | 0.394721546 |
| 0.443143811 | 0.003058064 | 0.110395739 | 0.37495389  |
| 0.379662233 | 0.410150503 | 0.018925925 | 0.006268115 |
| 0.008554724 | 0.014965318 | 0.286829923 | 0.208109012 |
| 0.457499192 | 0.195334314 | 0.002306918 | 0.028439516 |
| 0.228813183 | 0.347660416 | 0.48608366  | 0.305582726 |
| 0.386044633 | 0.060863032 | 0.221573165 | 0.325392687 |
| 0.054011679 | 0.301501354 | 0.441775481 | 0.453132668 |



|             |             |             |             |
|-------------|-------------|-------------|-------------|
| 0.034240053 | 0.210975243 | 0.331399463 | 0.424341704 |
| 0.07753583  | 0.262615668 | 0.384566561 | 0.250121061 |
| 0.012722625 | 0.065507603 | 0.050631356 | 0.36757354  |
| 0.510506625 | 0.055020492 | 0.022347247 | 0.116276229 |
| 0.08203525  | 0.406428718 | 0.122431856 | 0.464977976 |
| 0.360973726 | 0.352783816 | 0.063845835 | 0.473005828 |
| 0.026057891 | 0.482863405 | 0.300386098 | 0.050315792 |
| 0.254537944 | 0.008945555 | 0.46615355  | 0.131021693 |
| 0.259804847 | 0.340624952 | 0.178218075 | 0.013354027 |
| 0.186711442 | 0.039854651 | 0.408382822 | 0.393085236 |
| 0.029949407 | 0.185686673 | 0.254000999 | 0.345597173 |
| 0.225361058 | 0.352304146 | 0.500525512 | 0.351704867 |
| 0.054925799 | 0.148457759 | 0.336052051 | 0.348957757 |
| 0.183960911 | 0.430919392 | 0.240264653 | 0.501950802 |
| 0.354093421 | 0.430232815 | 0.447871288 | 0.279050775 |
| 0.206794571 | 0.342745128 | 0.296711528 | 0.011640923 |
| 0.289087044 | 0.3747596   | 0.306242829 | 0.126203973 |
| 0.204599767 | 0.357997099 | 0.036183827 | 0.178751772 |
| 0.318983252 | 0.246136916 | 0.102884468 | 0.357130181 |
| 0.335236597 | 0.348427632 | 0.028665246 | 0.04698074  |
| 0.519853411 | 0.419983902 | 0.112650429 | 0.353233896 |
| 0.139770258 | 0.2786811   | 0.389405581 | 0.386260645 |
| 0.329509156 | 0.387700229 | 0.354911889 | 0.314171963 |
| 0.398261131 | 0.201343896 | 0.517941741 | 0.069705186 |
| 0.072009789 | 0.376344713 | 0.066338591 | 0.074138067 |
| 0.105276806 | 0.02100964  | 0.289572401 | 0.354926223 |
| 0.353942624 | 0.305563943 | 0.269095508 | 0.063854496 |
| 0.276615528 | 0.339491164 | 0.292501019 | 0.14611321  |
| 0.05486916  | 0.488147183 | 0.005964813 | 0.042129914 |
| 0.3518236   | 0.37574848  | 0.335834553 | 0.202497172 |
| 0.273620116 | 0.124088206 | 0.236440604 | 0.241142292 |
| 0.257353232 | 0.328437642 | 0.374041095 | 0.023838891 |
| 0.010871013 | 0.432091857 | 0.32679488  | 0.018617735 |
| 0.072790555 | 0.338854663 | 0.257795405 | 0.182577726 |
| 0.018095357 | 0.465426919 | 0.271166077 | 0.364163803 |
| 0.275617946 | 0.049155024 | 0.343439001 | 0.077926332 |
| 0.046882709 | 0.439870128 | 0.359081837 | 0.508437046 |
| 0.319231795 | 0.337346589 | 0.453600821 | 0.372341628 |
| 0.113871418 | 0.363914397 | 0.017069393 | 0.367889818 |
| 0.362786029 |             |             |             |

|             |             |             |             |
|-------------|-------------|-------------|-------------|
| GOLGA7      | 0.14194643  | 0.267585879 | 0.080411433 |
| 0.211478729 | 0.115893299 | 0.162423951 | 0.089480021 |
| 0.023389372 | 0.011542138 | 0.000880928 | 0.005631378 |
| 0.095052354 | 0.005187057 | 0.037226271 | 0.062101295 |
| 0.186788961 | 0.01431071  | 0.045313338 | 0.072503162 |
| 0.169452645 | 0.03086541  | 0.164615616 | 0.022785094 |
| 0.032725447 | 0.020417575 | 0.033313088 | 0.068163268 |
| 0.200689708 | 0.034296125 | 0.117796116 | 0.165881514 |
| 0.007767624 | 0.166105849 | 0.252616822 | 0.144597289 |
| 0.237394549 | 0.134961437 | 2.94E-05    | 0.103105235 |
| 0.177092471 | 0.198168176 | 0.18777006  | 0.117910989 |
| 0.018043983 | 0.234362935 | 0.114034789 | 0.098881345 |
| 0.007177678 | 0.007690959 | 0.056839018 | 0.230763297 |
| 0.243664988 | 0.176542166 | 0.052307869 | 0.071033425 |

|             |             |             |             |
|-------------|-------------|-------------|-------------|
| 0.009611246 | 0.045692277 | 0.024402754 | 0.133044072 |
| 0.085734266 | 0.045269512 | 0.251264778 | 0.024671873 |
| 0.018412836 | 0.04936928  | 0.011819412 | 0.069906743 |
| 0.054264469 | 0.170238632 | 0.001501291 | 0.097945331 |
| 0.000454007 | 0.148249758 | 0.081661448 | 0.079709331 |
| 0.011976499 | 0.003158405 | 0.018387665 | 0.167101508 |
| 0.212792345 | 0.195589708 | 0.221814435 | 0.237225007 |
| 0.008208913 | 0.055501908 | 0.083890626 | 0.039193369 |
| 0.194825813 | 0.077965067 | 0.001632227 | 0.176760885 |
| 0.229075999 | 0.25657471  | 0.017540234 | 0.065612464 |
| 0.247736204 | 0.238914849 | 0.10316872  | 0.119784891 |
| 0.078490572 | 0.004613891 | 0.251095497 | 0.238939534 |
| 0.179259692 | 0.050782716 | 0.036060125 | 0.1826021   |
| 0.014203497 | 0.023295033 | 0.150031949 | 0.001365769 |
| 0.212379761 | 0.010465676 | 0.043094044 | 0.140011428 |
| 0.012966698 | 0.173993598 | 0.245423394 | 0.07080046  |
| 0.064014022 | 0.000476099 | 0.004630411 | 0.004328278 |
| 0.005883032 | 0.007187907 | 0.248048339 | 0.222972826 |
| 0.018631918 | 0.043716842 | 0.071442882 | 0.000625242 |
| 0.0038346   | 0.00571238  | 0.165187197 | 0.058089407 |
| 0.183744002 | 0.159274426 | 0.089866958 | 0.159097865 |
| 0.1416994   | 0.223524225 | 0.001984945 | 0.02792562  |
| 0.097961525 | 0.010154545 | 0.084112525 | 0.132393812 |
| 0.072882527 | 0.022301157 | 0.030697254 | 0.252851546 |
| 0.224160483 | 0.029463805 | 0.050366709 | 0.148142549 |
| 0.082861926 | 0.075212246 | 0.021189287 | 0.038559747 |
| 0.017749331 | 0.228170296 | 0.003757744 | 0.058248846 |
| 0.029931643 | 0.00465449  | 0.000403119 | 0.069340161 |
| 0.018218409 | 0.240488772 | 0.226941113 | 0.023111128 |
| 0.063438166 | 0.150630189 | 0.076984302 | 0.179402913 |
| 0.006117647 | 0.001858054 | 0.05182681  | 0.2384972   |
| 0.127026403 | 0.212372295 | 0.034346338 | 0.04286297  |
| 0.073731516 | 0.208433279 | 5.23E-05    | 0.239335728 |
| 0.254960803 | 0.046821551 | 0.114338586 | 0.093977244 |
| 0.119877017 | 0.229201115 | 5.62E-06    | 0.144271408 |
| 0.110857432 | 0.018509747 | 0.237437526 | 0.04448465  |
| 0.207432536 | 0.020099719 | 0.067826583 | 0.20251668  |
| 0.145046662 | 0.000208183 | 0.088677279 | 0.186333433 |
| 0.003485848 | 0.038146405 | 0.173387151 | 0.188211438 |
| 0.187415467 | 0.185964584 | 0.223610264 | 0.110404045 |
| 0.101147693 | 0.040514215 | 0.000667028 | 0.060745184 |
| 0.169723995 | 0.027803485 | 0.2463682   | 0.038030838 |
| 0.078901869 | 0.249586373 | 0.169849469 | 1           |
| 0.025178385 | 0.10762738  | 0.000673643 | 0.112565146 |
| 0.190067162 | 0.032749921 | 0.133205414 | 0.00432132  |
| 0.010832337 | 0.264638983 | 0.019933351 | 0.032888279 |
| 0.011588986 | 0.132114805 | 0.064338069 | 0.041771263 |
| 0.016263003 | 0.031655622 | 0.068665427 | 0.126224481 |
| 0.017181936 | 0.020956363 | 0.000408867 | 0.039729427 |
| 0.008538713 | 0.039615768 | 0.045800912 | 0.15689934  |
| 0.022645988 | 0.004665124 | 0.074746484 | 0.035409606 |
| 0.016400027 | 0.005036369 | 0.256777764 | 0.139695623 |
| 0.149184128 | 0.03556369  | 0.006569781 | 0.013052568 |
| 0.241750832 | 0.114351091 | 0.042198156 | 0.253797978 |

|             |             |             |                   |
|-------------|-------------|-------------|-------------------|
| 0.000530628 | 0.231759273 | 0.041237159 | 0.033884524       |
| 0.050786428 | 0.076126526 | 0.235370799 | 0.003411771       |
| 0.107360967 | 0.245912146 | 0.069867886 | 0.06212643        |
| 0.188160606 | 0.148911166 | 0.003391571 | 0.164079426       |
| 0.135783333 | 0.008684849 | 0.23845366  | 0.009021911       |
| 0.005127648 | 0.141064803 | 0.207462946 | 0.024369681       |
| 0.017370806 | 0.130473178 | 0.019277231 | 0.094028698       |
| 0.262710849 | 0.172275308 | 0.245493261 | 0.024862701       |
| 0.019041423 | 0.000529515 | 0.025619245 | 0.071285839       |
| 0.243693823 | 0.22818834  | 0.058436649 | 0.073564383       |
| 0.088458206 | 0.076563145 | 0.010019429 | 0.24335329        |
| 0.004769908 | 0.234536857 | 0.001902533 | 0.194595815       |
| 0.248297699 | 0.066328868 | 0.022599643 | 0.143593703       |
| 0.185253334 | 0.021178641 | 0.024887156 | 0.240834469       |
| 0.256474964 | 0.086242641 | 0.088879449 | 0.113690006       |
| 0.007435668 | 0.011866105 | 0.131967431 | 0.017650844       |
| 0.134398529 | 0.059888448 | 0.00102571  | 0.037379448       |
| 0.012238895 | 0.248146904 | 0.174683517 | 0.026179831       |
| 0.175170263 | 0.043608515 | 0.10885758  | 0.014479743       |
| 0.210120227 | 0.222776852 | 0.251459321 | 0.025460425       |
| 0.150641899 | 0.246254284 | 0.116363426 | 0.013235857       |
| 0.004318864 | 0.23843908  | 0.156609549 | 0.002389941       |
| 0.215682585 | 0.063738021 | 0.002181639 | 0.253219205       |
| 0.062868534 | 0.211940025 | 0.000538675 | 0.000942927       |
| 0.003016965 | 0.182889293 | 0.260487159 | 0.161411062       |
| 0.069138583 | 0.107095076 | 0.000536922 | 0.232482295       |
| 0.241672699 | 0.002533295 | 0.011284732 | 0.176771597       |
| 0.153462429 | 0.257312272 | 0.066739521 | 0.204141974       |
| 0.104125132 | 0.255341092 | 0.013316224 | 0.096443699       |
| 0.210620828 | 0.231015718 | 0.16915363  | 0.232456121       |
| 0.209735636 | 0.142162467 | 0.125152038 | 0.009912586       |
| 0.015171575 | 0.066698045 | 0.068943789 | 0.04108921        |
| 0.117162083 | 0.032997398 | 0.203158762 | 0.219924003       |
| 0.208255618 | 0.001702367 | 0.028827894 | 0.172094277       |
| 0.216827734 | 0.236137254 | 0.00048132  | 1.82E-05 4.82E-05 |
| 0.002787    | 0.132892392 | 0.045379602 | 0.243850536       |
| 0.02296908  | 0.002234696 | 0.007753517 | 0.022983185       |
| 0.117302595 | 0.254398564 | 0.150672417 | 0.168535229       |
| 0.016200594 | 0.049032758 | 0.158484339 | 0.011142121       |
| 0.113556497 | 0.2263489   | 0.259010104 | 0.003800255       |
| 0.059656195 | 0.048920119 | 0.255491454 | 0.005062485       |
| 0.077842006 | 0.105138332 | 0.040636515 | 0.00025827        |
| 0.014759768 | 0.023231981 | 0.176249168 | 0.241780764       |
| 0.009425791 | 0.00495053  | 0.001968772 | 0.039178817       |
| 0.210012768 | 0.021578738 | 0.245002294 | 0.215794296       |
| 0.198774324 | 0.006302951 | 0.26442239  | 0.003815387       |
| 0.22588956  | 0.067671185 | 0.002340643 | 0.025395873       |
| 0.001522379 | 0.195653722 | 0.031626275 | 0.051406669       |
| 0.131056256 | 0.022167575 | 0.002684312 | 0.012255785       |
| 0.008267354 | 0.246567514 | 0.199877315 | 0.001945336       |
| 0.057849859 | 0.06196912  | 0.11911146  | 0.090825388       |
| 0.192158146 | 0.250796179 | 0.100808594 | 0.037581406       |
| 0.00163344  | 0.151679899 | 0.111674098 | 0.031740656       |
| 0.222707033 | 0.069237529 | 0.243807807 | 0.150863707       |

|             |             |             |             |
|-------------|-------------|-------------|-------------|
| 0.223596654 | 0.217137813 | 0.151210453 | 0.011664458 |
| 0.100994051 | 0.197671429 | 0.002232787 | 0.09064508  |
| 0.220483664 | 0.077380742 | 0.016404839 | 0.081471847 |
| 0.092957668 | 0.003357582 | 0.001483036 | 0.057853766 |
| 0.138682066 | 0.023492031 | 0.195018103 | 0.106001635 |
| 0.119754244 | 0.001793259 | 0.02228209  | 0.263507688 |
| 0.230832705 | 0.015580329 | 0.193809014 | 0.030264598 |
| 0.147029928 | 0.167781792 | 0.159824157 | 0.053343839 |
| 0.212533659 | 0.164534521 | 0.176393575 | 0.236037199 |
| 0.105814746 | 0.265355657 | 0.005258031 | 0.002005267 |
| 0.104562834 | 0.024982491 | 0.019263413 | 0.039002183 |
| 0.004894623 | 0.031257615 | 0.147887166 | 0.039552155 |
| 0.13791087  | 0.019838998 | 0.005065083 | 0.073316676 |
| 0.056916826 | 0.105915018 | 0.069047068 | 0.012852614 |
| 0.262739921 | 0.000628183 | 0.009353916 | 0.038112355 |
| 0.196723022 | 0.090572224 | 0.035398975 | 0.026322388 |
| 0.010340149 | 0.092659094 | 0.068425599 | 0.068959201 |
| 0.007823247 | 0.206394475 | 0.001530653 | 0.004757931 |
| 0.223358187 | 0.060678384 | 0.000871655 | 0.008225798 |
| 0.140040846 | 0.01915169  | 0.063052841 | 0.003112991 |
| 0.23414946  | 0.119079807 | 0.114158414 | 0.131536338 |
| 0.011008492 | 0.171642783 | 0.001702522 | 0.004604674 |
| 0.201021738 | 0.086883711 | 0.237392669 | 0.050424377 |
| 0.192227519 | 0.222192108 | 0.183467982 | 0.001258149 |
| 0.074333326 | 0.009218095 | 0.198295718 | 0.056382362 |
| GOLIM4      | 0.035680602 | 0.053837856 | 0.028729745 |
| 0.139369751 | 0.067655456 | 0.052370194 | 0.217706712 |
| 0.067399082 | 0.166539322 | 0.143388434 | 0.12419734  |
| 0.03694252  | 0.069013389 | 0.071401873 | 0.027555995 |
| 0.1363039   | 0.12121032  | 0.028966607 | 0.23712109  |
| 0.116446361 | 0.170298075 | 0.154591872 | 0.242551859 |
| 0.031732592 | 0.112559992 | 0.226470872 | 0.059272893 |
| 0.114413476 | 0.237037636 | 0.046711114 | 0.09643828  |
| 0.109983405 | 0.053785732 | 0.034816644 | 0.075251953 |
| 0.028762817 | 0.025479462 | 0.034885082 | 0.055897513 |
| 0.047588496 | 0.071694723 | 0.124385642 | 0.197603194 |
| 0.272580203 | 0.030590247 | 0.24485446  | 0.061811106 |
| 0.036088037 | 0.192267528 | 0.037605815 | 0.033864266 |
| 0.029437113 | 0.046214083 | 0.090510947 | 0.19958321  |
| 0.04174541  | 0.032593026 | 0.015084143 | 0.049993167 |
| 0.233751384 | 0.050919147 | 0.033176732 | 0.188935539 |
| 0.050574851 | 0.086294869 | 0.084772462 | 0.124084654 |
| 0.018495609 | 0.049650193 | 0.178866815 | 0.019000978 |
| 0.047262672 | 0.137869714 | 0.075912945 | 0.016270552 |
| 0.238473382 | 0.177361519 | 0.08957226  | 0.176958742 |
| 0.094720837 | 0.030549156 | 0.080197044 | 0.062623109 |
| 0.092191165 | 0.102470366 | 0.029082813 | 0.173610907 |
| 0.050828506 | 0.210904194 | 0.087270668 | 0.133443974 |
| 0.074658478 | 0.040659134 | 0.105182908 | 0.127607576 |
| 0.070356089 | 0.0528508   | 0.036605816 | 0.056162675 |
| 0.023858579 | 0.079710945 | 0.038705607 | 0.059383275 |
| 0.038620034 | 0.024027258 | 0.183775816 | 0.084362158 |
| 0.216540484 | 0.015414528 | 0.202892141 | 0.040701001 |
| 0.097572804 | 0.254734864 | 0.126048519 | 0.126886071 |

|             |             |             |             |
|-------------|-------------|-------------|-------------|
| 0.077426158 | 0.053324803 | 0.037608816 | 0.264074939 |
| 0.044734815 | 0.12918049  | 0.030989796 | 0.159456652 |
| 0.039510122 | 0.013392116 | 0.023821634 | 0.092211516 |
| 0.060050679 | 0.036008539 | 0.140697967 | 0.109264089 |
| 0.1624877   | 0.050143964 | 0.036708483 | 0.04417969  |
| 0.072829354 | 0.019159815 | 0.122238309 | 0.034891727 |
| 0.033690449 | 0.078666348 | 0.008105043 | 0.226218938 |
| 0.06254539  | 0.05960496  | 0.260367382 | 0.044737343 |
| 0.112639115 | 0.178342601 | 0.218483656 | 0.070146624 |
| 0.044776979 | 0.285143153 | 0.021020749 | 0.130430859 |
| 0.049192025 | 0.077172561 | 0.212523751 | 0.091426495 |
| 0.263660438 | 0.027344255 | 0.122689627 | 0.04659425  |
| 0.020584704 | 0.060898785 | 0.097553926 | 0.089738614 |
| 0.055558214 | 0.051597451 | 0.020244885 | 0.219696521 |
| 0.109050527 | 0.116171588 | 0.03641724  | 0.060471078 |
| 0.158275324 | 0.170189966 | 0.016696279 | 0.061024856 |
| 0.039903319 | 0.053626479 | 0.083033339 | 0.056499342 |
| 0.160406769 | 0.094680666 | 0.002711396 | 0.032013216 |
| 0.038651678 | 0.014515703 | 0.097520635 | 0.054822547 |
| 0.027814516 | 0.101672879 | 0.001749907 | 0.123308468 |
| 0.024379074 | 0.214005117 | 0.084680144 | 0.215404317 |
| 0.032521894 | 0.241972727 | 0.053111328 | 0.040641694 |
| 0.028139979 | 0.050262334 | 0.078059276 | 0.133950617 |
| 0.108278437 | 0.145656414 | 0.063700992 | 0.126819501 |
| 0.112294883 | 0.073015025 | 0.103396741 | 0.024599191 |
| 0.066384712 | 0.124366366 | 0.138234871 | 0.081894677 |
| 0.047364761 | 0.011846864 | 0.043882382 | 0.120457544 |
| 0.018077158 | 0.052644032 | 0.027589369 | 0.025178385 |
| 1           | 0.102109463 | 0.101674811 | 0.110210847 |
| 0.027070962 | 0.18225516  | 0.028742889 | 0.063711701 |
| 0.151209045 | 0.061045641 | 0.029862505 | 0.013757461 |
| 0.015986193 | 0.062839612 | 0.171008949 | 0.066627868 |
| 0.053407889 | 0.162320063 | 0.033585155 | 0.046567951 |
| 0.237827916 | 0.203721292 | 0.044836522 | 0.010351421 |
| 0.067104417 | 0.024259658 | 0.02132221  | 0.035778459 |
| 0.040718224 | 0.117643595 | 0.077949767 | 0.027834273 |
| 0.12200003  | 0.201185981 | 0.053142871 | 0.120579251 |
| 0.031655807 | 0.192789175 | 0.186969432 | 0.009527374 |
| 0.083921423 | 0.031284979 | 0.013535667 | 0.067779266 |
| 0.111212534 | 0.072461077 | 0.093322949 | 0.212155718 |
| 0.031215459 | 0.206614974 | 0.110756795 | 0.04764575  |
| 0.04301254  | 0.049035852 | 0.110321273 | 0.150885781 |
| 0.034844071 | 0.101136716 | 0.252492051 | 0.033039656 |
| 0.030752215 | 0.224395535 | 0.047147088 | 0.101111414 |
| 0.180428864 | 0.058580087 | 0.047508215 | 0.24715725  |
| 0.162786314 | 0.104169476 | 0.187718477 | 0.189448257 |
| 0.061603112 | 0.150131189 | 0.056332548 | 0.035646208 |
| 0.265550519 | 0.09849819  | 0.065576394 | 0.025288885 |
| 0.030536212 | 0.043425178 | 0.176120582 | 0.061905437 |
| 0.264487556 | 0.03753699  | 0.035387763 | 0.058641525 |
| 0.021281228 | 0.036663332 | 0.162119086 | 0.047771878 |
| 0.028378409 | 0.036032873 | 0.153821932 | 0.126489226 |
| 0.043931354 | 0.268701766 | 0.100579425 | 0.038805756 |
| 0.061847342 | 0.065987587 | 0.040855411 | 0.059533516 |

|             |             |             |             |
|-------------|-------------|-------------|-------------|
| 0.241137337 | 0.253307425 | 0.06939609  | 0.020720579 |
| 0.039984377 | 0.133597928 | 0.006302128 | 0.034637919 |
| 0.236008367 | 0.049358988 | 0.082362354 | 0.198335134 |
| 0.050815933 | 0.028778815 | 0.109002073 | 0.260093509 |
| 0.0406878   | 0.033341477 | 0.036822825 | 0.137213967 |
| 0.040947614 | 0.044804707 | 0.023173772 | 0.152192502 |
| 0.148358357 | 0.03230918  | 0.051355904 | 0.126869656 |
| 0.092408284 | 0.030675983 | 0.152127651 | 0.055278528 |
| 0.245754334 | 0.020913246 | 0.041671071 | 0.00428145  |
| 0.0841376   | 0.075275546 | 0.034610833 | 0.097322858 |
| 0.022505645 | 0.109505433 | 0.008767645 | 0.047178663 |
| 0.044547111 | 0.124461484 | 0.070682945 | 0.037945247 |
| 0.03175951  | 0.04862648  | 0.030009335 | 0.048712117 |
| 0.031048195 | 0.031778761 | 0.097603053 | 0.200509451 |
| 0.069799346 | 0.030306923 | 0.071770554 | 0.046635292 |
| 0.089754315 | 0.083390994 | 0.248046972 | 0.269264814 |
| 0.054491006 | 0.078180766 | 0.017675811 | 0.116913672 |
| 0.040401103 | 0.138951866 | 0.043957263 | 0.087012458 |
| 0.05137169  | 0.139976384 | 0.132502208 | 0.039077444 |
| 0.080649208 | 0.090959599 | 0.067566319 | 0.014791917 |
| 0.003908228 | 0.081729651 | 0.104928606 | 0.109974153 |
| 0.053152169 | 0.018117379 | 0.176899834 | 0.189307183 |
| 0.077084842 | 0.05858737  | 0.043505014 | 0.177631231 |
| 0.046731899 | 0.197435764 | 0.039431108 | 0.141918478 |
| 0.131021882 | 0.019138453 | 0.061475016 | 0.047495569 |
| 0.127768639 | 0.103575856 | 0.027010211 | 0.092278888 |
| 0.00501726  | 0.143511582 | 0.039381295 | 0.068964029 |
| 0.049054036 | 0.144700647 | 0.172038919 | 0.092827831 |
| 0.026309732 | 0.135329023 | 0.154402041 | 0.0118559   |
| 0.195482093 | 0.066524634 | 0.155574913 | 0.073567329 |
| 0.084343959 | 0.133207107 | 0.095427075 | 0.042316194 |
| 0.181158482 | 0.032079221 | 0.052134706 | 0.024155273 |
| 0.046565945 | 0.165173861 | 0.029335588 | 0.037234815 |
| 0.038530539 | 0.05822842  | 0.042426794 | 0.113435793 |
| 0.012087005 | 0.182185291 | 0.094077498 | 0.069289214 |
| 0.085247393 | 0.114085515 | 0.115280462 | 0.081836883 |
| 0.090236944 | 0.113566807 | 0.034943781 | 0.019272548 |
| 0.240077192 | 0.010106468 | 0.101633518 | 0.032658763 |
| 0.060590333 | 0.079685268 | 0.060253635 | 0.050881297 |
| 0.04663554  | 0.051111493 | 0.042820006 | 0.136877421 |
| 0.037490813 | 0.040469299 | 0.095763104 | 0.173397914 |
| 0.12788083  | 0.092715114 | 0.054409694 | 0.092824108 |
| 0.151633568 | 0.022473778 | 0.152451441 | 0.007452855 |
| 0.014336447 | 0.068073095 | 0.187964099 | 0.122356409 |
| 0.048796396 | 0.035040874 | 0.140142209 | 0.18052854  |
| 0.049959088 | 0.043430292 | 0.115829191 | 0.080379522 |
| 0.156065002 | 0.134309259 | 0.053458258 | 0.05499931  |
| 0.018636    | 0.052622224 | 0.072611192 | 0.070357378 |
| 0.048131786 | 0.203454255 | 0.039204583 | 0.051371794 |
| 0.073509604 | 0.024337386 | 0.187678155 | 0.178726918 |
| 0.251179828 | 0.16628162  | 0.008520535 | 0.103077658 |
| 0.008412186 | 0.150753827 | 0.016103413 | 0.150153548 |
| 0.097921143 | 0.017231134 | 0.135782918 | 0.150361508 |
| 0.207211354 | 0.038681373 | 0.102545159 | 0.184705188 |

|             |             |             |             |
|-------------|-------------|-------------|-------------|
| 0.011817275 | 0.054299078 | 0.038712193 | 0.104947745 |
| 0.020349197 | 0.062785901 | 0.182847064 | 0.044502212 |
| 0.027668603 | 0.011256343 | 0.052232082 | 0.145430348 |
| 0.239530129 | 0.083521964 | 0.026105526 | 0.080389542 |
| 0.065173843 | 0.030378958 | 0.036911631 | 0.102512495 |
| 0.102374966 | 0.036823431 | 0.037668312 | 0.051938598 |
| 0.117965838 | 0.202563663 | 0.02688174  | 0.056193896 |
| 0.154002704 | 0.033854256 | 0.033303946 | 0.034254375 |
| 0.034731156 | 0.150240799 | 0.026011845 | 0.043620721 |
| 0.039900917 | 0.015170352 | 0.267840791 | 0.078320961 |
| 0.012129644 |             |             |             |
| GOLM1       | 0.267073113 | 0.384507813 | 0.126024622 |
| 0.363941223 | 0.197095812 | 0.240055822 | 0.213322712 |
| 0.212711954 | 0.086742329 | 0.023391019 | 0.025055405 |
| 0.186773216 | 0.095539448 | 0.179700186 | 0.130318971 |
| 0.344027516 | 0.079578644 | 0.169999313 | 0.204532857 |
| 0.353831218 | 0.18358244  | 0.294170578 | 0.153122454 |
| 0.097367359 | 0.054385724 | 0.087040603 | 0.09041353  |
| 0.406451416 | 0.093202521 | 0.190704437 | 0.372004479 |
| 0.079760113 | 0.335712503 | 0.344883047 | 0.228239962 |
| 0.316972292 | 0.23170129  | 0.027871417 | 0.173564014 |
| 0.344005101 | 0.269191121 | 0.371020315 | 0.251074519 |
| 0.098626985 | 0.34580751  | 0.215631093 | 0.182700232 |
| 0.159779084 | 0.042623971 | 0.179610855 | 0.351554205 |
| 0.303915133 | 0.195662731 | 0.229810301 | 0.192736592 |
| 0.075305821 | 0.201325184 | 0.052933661 | 0.302838121 |
| 0.205285056 | 0.18300135  | 0.315704608 | 0.129637958 |
| 0.143409792 | 0.246781116 | 0.08476033  | 0.233228091 |
| 0.093509152 | 0.328036136 | 0.077813273 | 0.153839314 |
| 0.014778717 | 0.34746003  | 0.187180046 | 0.066958038 |
| 0.062766305 | 0.039162213 | 0.09858926  | 0.294823212 |
| 0.400294231 | 0.314436924 | 0.345287136 | 0.329435159 |
| 0.090049965 | 0.153625759 | 0.119551295 | 0.14877231  |
| 0.337146515 | 0.179709884 | 0.093924891 | 0.320405044 |
| 0.345921404 | 0.344802521 | 0.110615959 | 0.12913029  |
| 0.315237714 | 0.385220345 | 0.143050551 | 0.154112139 |
| 0.087939757 | 0.035703698 | 0.324531616 | 0.35423735  |
| 0.328672347 | 0.072304957 | 0.097244647 | 0.389378516 |
| 0.09331124  | 0.132769298 | 0.299718612 | 0.080950136 |
| 0.405510517 | 0.063811169 | 0.099982908 | 0.259787475 |
| 0.161834695 | 0.309125325 | 0.321902815 | 0.196656832 |
| 0.152113417 | 0.033743838 | 0.035117752 | 0.055750351 |
| 0.145374752 | 0.03039472  | 0.309522975 | 0.372874326 |
| 0.217083952 | 0.143961759 | 0.23347373  | 0.010413287 |
| 0.035134421 | 0.102719176 | 0.280776698 | 0.176792445 |
| 0.330383888 | 0.226434361 | 0.1256026   | 0.296476319 |
| 0.188814404 | 0.342384229 | 0.032035616 | 0.178410019 |
| 0.196193909 | 0.112040738 | 0.203778896 | 0.208768042 |
| 0.120881466 | 0.197339715 | 0.158567707 | 0.3789457   |
| 0.375933568 | 0.135519374 | 0.173634089 | 0.308934555 |
| 0.158862081 | 0.136869854 | 0.159026178 | 0.174721279 |
| 0.137024559 | 0.288899883 | 0.028117295 | 0.194348667 |
| 0.065705659 | 0.06096775  | 0.044166884 | 0.229673977 |
| 0.149417914 | 0.294320274 | 0.290772674 | 0.140792267 |

|             |             |             |             |
|-------------|-------------|-------------|-------------|
| 0.186274501 | 0.244894694 | 0.203682882 | 0.252527185 |
| 0.025085891 | 0.081164736 | 0.157771245 | 0.364444757 |
| 0.260283808 | 0.341612343 | 0.185533594 | 0.137901381 |
| 0.156243868 | 0.352081813 | 0.002031506 | 0.335625038 |
| 0.33452639  | 0.1377673   | 0.201134693 | 0.208688397 |
| 0.095012366 | 0.366738222 | 0.016416328 | 0.315191491 |
| 0.25064446  | 0.128442126 | 0.380122985 | 0.109479686 |
| 0.319012541 | 0.065935306 | 0.218796605 | 0.241725488 |
| 0.207716764 | 0.018613036 | 0.19178102  | 0.363260405 |
| 0.027158806 | 0.197773141 | 0.323465081 | 0.313575709 |
| 0.220971035 | 0.309199085 | 0.388459468 | 0.083984295 |
| 0.178956425 | 0.223332105 | 0.031729721 | 0.127118983 |
| 0.285235064 | 0.11018548  | 0.357112395 | 0.215038833 |
| 0.190400867 | 0.360293329 | 0.242680997 | 0.10762738  |
| 0.102109463 | 1           | 0.04585539  | 0.145095052 |
| 0.257974271 | 0.145407803 | 0.121468934 | 0.101001704 |
| 0.059544304 | 0.372674052 | 0.049843298 | 0.054119986 |
| 0.028293657 | 0.208500226 | 0.220643221 | 0.124544267 |
| 0.072740054 | 0.140622689 | 0.108869187 | 0.147332957 |
| 0.130875493 | 0.102424491 | 0.014895718 | 0.08664415  |
| 0.066173142 | 0.102465659 | 0.105011561 | 0.27993108  |
| 0.179901082 | 0.087123304 | 0.1394681   | 0.092944137 |
| 0.069453894 | 0.035213189 | 0.372201571 | 0.3067394   |
| 0.288385705 | 0.184204129 | 0.063183256 | 0.086261347 |
| 0.373726478 | 0.161108387 | 0.150233766 | 0.376207501 |
| 0.050346922 | 0.360754195 | 0.133618969 | 0.093075819 |
| 0.10177144  | 0.176584215 | 0.401341936 | 0.055015981 |
| 0.249326065 | 0.371671502 | 0.176778973 | 0.111348122 |
| 0.314417323 | 0.307174387 | 0.087734112 | 0.277585334 |
| 0.269669599 | 0.059687723 | 0.349851919 | 0.069174522 |
| 0.038656451 | 0.237024545 | 0.233609641 | 0.083122951 |
| 0.069941759 | 0.158092615 | 0.153869542 | 0.185691107 |
| 0.373651214 | 0.309980693 | 0.290710949 | 0.07508252  |
| 0.087622884 | 0.017180932 | 0.088802555 | 0.135163966 |
| 0.340169495 | 0.321239372 | 0.178977514 | 0.108282595 |
| 0.225068371 | 0.106653809 | 0.186073679 | 0.349464431 |
| 0.085625538 | 0.351245664 | 0.026242415 | 0.246367363 |
| 0.313880168 | 0.190303176 | 0.058478718 | 0.24631355  |
| 0.322218711 | 0.103521769 | 0.207802803 | 0.338909611 |
| 0.352366485 | 0.143594121 | 0.118566863 | 0.262175416 |
| 0.078147457 | 0.145798915 | 0.175493029 | 0.046337089 |
| 0.155678731 | 0.160500439 | 0.008953395 | 0.206300398 |
| 0.076306562 | 0.355995486 | 0.345535735 | 0.066844148 |
| 0.194597987 | 0.188927864 | 0.222498056 | 0.085236545 |
| 0.258232006 | 0.311352526 | 0.351609541 | 0.219349609 |
| 0.274184893 | 0.308749726 | 0.124426192 | 0.078566322 |
| 0.025546592 | 0.318545539 | 0.302006066 | 0.039360973 |
| 0.385086385 | 0.16441785  | 0.028579905 | 0.390094711 |
| 0.201678169 | 0.301740991 | 0.01038294  | 0.02376388  |
| 0.033208141 | 0.318518828 | 0.32668105  | 0.363169785 |
| 0.12378478  | 0.282612242 | 0.006727802 | 0.34502387  |
| 0.347662778 | 0.018101006 | 0.065395197 | 0.256583076 |
| 0.195794046 | 0.392953598 | 0.075752922 | 0.266366248 |
| 0.154611742 | 0.313416602 | 0.173132617 | 0.172086611 |



|             |             |             |             |
|-------------|-------------|-------------|-------------|
| 0.333994092 | 0.285038197 | 0.338865722 | 0.364628266 |
| 0.372622829 | 0.256547045 | 0.249707132 | 0.060647024 |
| 0.055091627 | 0.229170711 | 0.086403328 | 0.067365962 |
| 0.259150759 | 0.085432126 | 0.338948411 | 0.364951415 |
| 0.307333845 | 0.017192686 | 0.225237538 | 0.28045916  |
| 0.404463471 | 0.413660892 | 0.032811868 | 0.004530245 |
| 0.003343932 | 0.011421567 | 0.300762634 | 0.121053538 |
| 0.341684659 | 0.100968169 | 0.023583604 | 0.148046438 |
| 0.168639726 | 0.164898133 | 0.348714012 | 0.340947188 |
| 0.269705936 | 0.107755394 | 0.11369997  | 0.358264326 |
| 0.047870827 | 0.231812912 | 0.32855588  | 0.372902861 |
| 0.054879706 | 0.131066714 | 0.154203526 | 0.405762103 |
| 0.010610855 | 0.186288368 | 0.211441663 | 0.152897894 |
| 0.021421586 | 0.063172239 | 0.063941595 | 0.334920819 |
| 0.300497553 | 0.059208043 | 0.035880747 | 0.095364786 |
| 0.13841129  | 0.354736623 | 0.130041213 | 0.379585797 |
| 0.371231734 | 0.38268979  | 0.050894342 | 0.350754781 |
| 0.059057973 | 0.320981033 | 0.095883582 | 0.043075913 |
| 0.142949673 | 0.038065699 | 0.291358536 | 0.045780768 |
| 0.193816265 | 0.31551289  | 0.072608288 | 0.022370583 |
| 0.038896227 | 0.060582986 | 0.368512984 | 0.305055347 |
| 0.029846393 | 0.237490941 | 0.152700453 | 0.281840394 |
| 0.236060466 | 0.322315753 | 0.346860982 | 0.12786651  |
| 0.171338231 | 0.037155527 | 0.359837244 | 0.253695158 |
| 0.229630473 | 0.357246975 | 0.117990802 | 0.358185744 |
| 0.29799604  | 0.362362087 | 0.314503322 | 0.23963858  |
| 0.079238254 | 0.224946046 | 0.305439588 | 0.055321739 |
| 0.231905831 | 0.350344193 | 0.212635723 | 0.065999204 |
| 0.128339821 | 0.111951863 | 0.124696688 | 0.083165113 |
| 0.066294447 | 0.261824487 | 0.160223652 | 0.383012492 |
| 0.279954467 | 0.266992826 | 0.132477378 | 0.060598158 |
| 0.384117184 | 0.351636951 | 0.163525355 | 0.291356354 |
| 0.131648793 | 0.187671986 | 0.281021184 | 0.266280671 |
| 0.131671198 | 0.309680552 | 0.360054782 | 0.292797306 |
| 0.365189671 | 0.215707222 | 0.35475879  | 0.15583105  |
| 0.042251891 | 0.197657758 | 0.100589518 | 0.07860739  |
| 0.14823028  | 0.038781119 | 0.054979003 | 0.310456801 |
| 0.075119744 | 0.267062146 | 0.177347439 | 0.08788556  |
| 0.154795227 | 0.134058808 | 0.222258898 | 0.198391837 |
| 0.092871429 | 0.340315085 | 0.01850646  | 0.073256915 |
| 0.086209718 | 0.280509881 | 0.105715396 | 0.1305291   |
| 0.06953851  | 0.076308826 | 0.190147354 | 0.191584193 |
| 0.110239808 | 0.104763768 | 0.281417432 | 0.081607758 |
| 0.087582469 | 0.376691178 | 0.156831042 | 0.024562484 |
| 0.078624993 | 0.240135642 | 0.16585932  | 0.145146691 |
| 0.022113583 | 0.292823877 | 0.146608582 | 0.176561691 |
| 0.271207358 | 0.107449818 | 0.311410796 | 0.091132885 |
| 0.112712998 | 0.338599032 | 0.136699091 | 0.320753234 |
| 0.118352864 | 0.343347755 | 0.326805158 | 0.300201397 |
| 0.078667595 | 0.120557797 | 0.088236997 | 0.379230341 |
| 0.085537225 |             |             |             |
| GPR141      | 0.016285684 | 0.026809542 | 0.011661169 |
| 0.06833315  | 0.022198814 | 0.028300751 | 0.110390243 |
| 0.062628896 | 0.015130417 | 0.05605025  | 0.005819256 |

|             |             |             |             |
|-------------|-------------|-------------|-------------|
| 0.019518641 | 0.006455423 | 0.065566059 | 0.010148109 |
| 0.04975047  | 0.038789653 | 0.014401774 | 0.113854648 |
| 0.048185725 | 0.105527494 | 0.056427647 | 0.09013367  |
| 0.004977631 | 0.029526125 | 0.057136146 | 0.013269626 |
| 0.059775498 | 0.067677269 | 0.026909702 | 0.056295194 |
| 0.020681057 | 0.027837007 | 0.019426173 | 0.031910584 |
| 0.016087629 | 0.01330902  | 0.001198171 | 0.023174608 |
| 0.028643357 | 0.029762476 | 0.051454509 | 0.097116286 |
| 0.0803426   | 0.020330807 | 0.110799978 | 0.021317265 |
| 0.004352524 | 0.040266687 | 0.040411375 | 0.02037126  |
| 0.017585661 | 0.015760004 | 0.063681651 | 0.088987387 |
| 0.003170738 | 0.025984235 | 0.003603817 | 0.041465075 |
| 0.095412387 | 0.054998707 | 0.017158266 | 0.025408019 |
| 0.000899182 | 0.050062553 | 0.018190186 | 0.077839312 |
| 0.003410959 | 0.032686508 | 0.033381774 | 0.007336752 |
| 0.003323918 | 0.063163093 | 0.027305929 | 0.003233209 |
| 0.077306415 | 0.043790289 | 0.027168662 | 0.077849419 |
| 0.045166811 | 0.017011018 | 0.035130574 | 0.02518034  |
| 0.037796656 | 0.031024327 | 0.007896404 | 0.067811643 |
| 0.025813365 | 0.108791511 | 0.074342971 | 0.047977582 |
| 0.032904718 | 0.020627681 | 0.019928386 | 0.03314302  |
| 0.034634218 | 0.027484798 | 0.021436878 | 0.019633445 |
| 0.007265667 | 0.007873363 | 0.019047604 | 0.027833496 |
| 0.025618939 | 0.00669041  | 0.057075194 | 0.051754924 |
| 0.06200893  | 0.009905504 | 0.087008187 | 0.006170492 |
| 0.04968831  | 0.057730422 | 0.033817907 | 0.056962083 |
| 0.013317085 | 0.029852899 | 0.018577668 | 0.119728207 |
| 0.018110182 | 0.022877542 | 0.001200012 | 0.032256982 |
| 0.005922366 | 0.002494811 | 0.013983678 | 0.049968117 |
| 0.040518571 | 0.005133452 | 0.061641661 | 0.018387384 |
| 0.038063448 | 0.004433468 | 0.01842566  | 0.021187147 |
| 0.028493859 | 0.010035393 | 0.036660007 | 0.021268111 |
| 0.013702573 | 0.031918159 | 0.001399313 | 0.07516852  |
| 0.045816679 | 0.006412877 | 0.092766782 | 0.017037478 |
| 0.043184754 | 0.105266693 | 0.088539432 | 0.033064134 |
| 0.028493598 | 0.120844071 | 0.012165455 | 0.05775278  |
| 0.010094651 | 0.028342257 | 0.092195597 | 0.062162688 |
| 0.077909399 | 0.014102668 | 0.029334507 | 0.040055493 |
| 0.00310005  | 0.008529721 | 0.008674796 | 0.065431976 |
| 0.031665122 | 0.02566681  | 0.011379844 | 0.086418122 |
| 0.061894545 | 0.039388288 | 0.025902796 | 0.037169498 |
| 0.010857075 | 0.034972028 | 0.014023617 | 0.031094997 |
| 0.035799223 | 0.024959511 | 0.047116673 | 0.017027806 |
| 0.053792313 | 0.041029769 | 0.000100572 | 0.020229018 |
| 0.019446226 | 0.019521431 | 0.054692337 | 0.022944335 |
| 0.006492902 | 0.051358865 | 0.001652511 | 0.052874126 |
| 0.020653554 | 0.079896955 | 0.036927877 | 0.072545201 |
| 0.018078171 | 0.065024316 | 0.026818484 | 0.014753378 |
| 0.014388625 | 0.003183358 | 0.063816978 | 0.06114551  |
| 0.014751455 | 0.058828937 | 0.026828292 | 0.05497803  |
| 0.039789904 | 0.027931135 | 0.045262307 | 0.005821622 |
| 0.029023862 | 0.079404336 | 0.019094985 | 0.027006981 |
| 0.019283567 | 0.001043892 | 0.02659573  | 0.055821458 |
| 0.019440374 | 0.028258586 | 0.013469509 | 0.000673643 |

|             |             |             |             |
|-------------|-------------|-------------|-------------|
| 0.101674811 | 0.04585539  | 1           | 0.03576906  |
| 0.01220779  | 0.062412613 | 0.007749209 | 0.009194859 |
| 0.042691315 | 0.028907197 | 0.007111065 | 0.003524389 |
| 0.00291673  | 0.036684218 | 0.082617726 | 0.043153004 |
| 0.01938057  | 0.032247344 | 0.008691634 | 0.011255044 |
| 0.097679265 | 0.081731633 | 0.002289855 | 0.007852982 |
| 0.02391388  | 0.02461812  | 0.022427264 | 0.018427529 |
| 0.021309894 | 0.051905502 | 0.047215462 | 0.004054071 |
| 0.031309643 | 0.057728961 | 0.026927793 | 0.051178613 |
| 0.02600659  | 0.064748218 | 0.0566293   | 0.002175606 |
| 0.041082919 | 0.028372137 | 0.013622498 | 0.0347728   |
| 0.019272045 | 0.028072397 | 0.026228493 | 0.067550307 |
| 0.015459911 | 0.099498159 | 0.049477262 | 0.001714315 |
| 0.020808551 | 0.027334169 | 0.037233494 | 0.040594362 |
| 0.027156075 | 0.048417484 | 0.033530002 | 0.019113354 |
| 0.023857288 | 0.077143163 | 0.024574776 | 0.02606286  |
| 0.049153425 | 0.022967225 | 0.018487845 | 0.065825468 |
| 0.043261274 | 0.046065906 | 0.080939198 | 0.062009253 |
| 0.030843963 | 0.059833953 | 0.023066207 | 0.008032443 |
| 0.094039999 | 0.011846705 | 0.015788143 | 0.012008476 |
| 0.018299921 | 0.021076667 | 0.065386901 | 0.030857833 |
| 0.104435928 | 0.008802105 | 0.003838153 | 0.028728648 |
| 0.002788001 | 0.020026207 | 0.042478013 | 0.015751909 |
| 0.015666594 | 0.03430126  | 0.043107036 | 0.058728352 |
| 0.03264515  | 0.08475869  | 0.044227746 | 0.023163223 |
| 0.026244399 | 0.018586824 | 0.014494039 | 0.026752845 |
| 0.108988999 | 0.035718497 | 0.021161104 | 0.003137332 |
| 0.010036567 | 0.033013575 | 0.00133242  | 0.014150975 |
| 0.049288812 | 0.026921507 | 0.037619344 | 0.026255906 |
| 0.026391681 | 0.018203923 | 0.035888409 | 0.083537783 |
| 0.016714094 | 0.01638242  | 0.021270539 | 0.062719211 |
| 0.018897479 | 0.021483549 | 0.008278222 | 0.041290556 |
| 0.03595965  | 0.017663095 | 0.028236247 | 0.007470549 |
| 0.040697637 | 0.041773727 | 0.027920431 | 0.030471543 |
| 0.10521274  | 0.013619203 | 0.003939886 | 0.000161116 |
| 0.010490401 | 0.030467889 | 0.019028672 | 0.050040857 |
| 0.020179794 | 0.046850229 | 1.55E-05    | 0.022096781 |
| 0.026539018 | 0.023640708 | 0.00864859  | 0.018292797 |
| 0.015136182 | 0.02645856  | 0.008661139 | 0.022081032 |
| 0.016249347 | 0.016222389 | 0.02160747  | 0.060432202 |
| 0.04018942  | 0.013991642 | 0.043840894 | 0.027250873 |
| 0.045449088 | 0.028488202 | 0.097263403 | 0.064256314 |
| 0.001720642 | 0.053065832 | 0.008726923 | 0.002489875 |
| 0.032823092 | 0.028179116 | 0.025712381 | 0.034752944 |
| 0.026257551 | 0.038653198 | 0.054000763 | 0.019993835 |
| 0.04893031  | 0.042925279 | 0.005217011 | 0.000917425 |
| 0.007006154 | 0.007575291 | 0.047770811 | 0.033213973 |
| 0.024343432 | 0.010155172 | 0.049740311 | 0.095281412 |
| 0.02228718  | 0.020001048 | 0.022554365 | 0.077207036 |
| 0.018164056 | 0.049250966 | 0.021517244 | 0.061716159 |
| 0.013504762 | 0.015401344 | 0.030764607 | 0.026546848 |
| 0.01780085  | 0.024512724 | 0.019896781 | 0.042128009 |
| 0.000561372 | 0.049113342 | 0.019864689 | 0.02111261  |
| 0.000847062 | 0.029206768 | 0.023354139 | 0.03489814  |

|             |             |             |             |
|-------------|-------------|-------------|-------------|
| 0.013833833 | 0.040494559 | 0.041019996 | 0.001167206 |
| 0.09124586  | 0.027512139 | 0.071808652 | 0.033148441 |
| 0.045745639 | 0.059455793 | 0.008135468 | 0.022138057 |
| 0.005969559 | 0.020240064 | 0.017348003 | 0.008501112 |
| 0.022938025 | 0.027202416 | 0.015054678 | 0.002688174 |
| 0.036425247 | 0.033434795 | 0.002338788 | 0.015981506 |
| 0.001792425 | 0.058617135 | 0.039674612 | 0.026851622 |
| 0.010367045 | 0.035069382 | 0.042770785 | 0.036497142 |
| 0.080213128 | 0.054505194 | 0.020550633 | 0.012931906 |
| 0.072055998 | 0.000431293 | 0.056225716 | 0.025834924 |
| 0.044046004 | 0.033666553 | 0.01321929  | 0.024401609 |
| 0.028450781 | 0.024349136 | 0.020207437 | 0.058110404 |
| 0.00279968  | 0.030517898 | 0.05513507  | 0.066818426 |
| 0.071199399 | 0.041395609 | 0.028647045 | 0.019197556 |
| 0.048446324 | 0.006561245 | 0.006103871 | 0.003074406 |
| 0.00438331  | 0.050604763 | 0.037092063 | 0.050778857 |
| 0.029275353 | 0.028127895 | 0.011050552 | 0.026848488 |
| 0.025097334 | 0.022489962 | 0.036333561 | 0.037469297 |
| 0.050404222 | 0.03774377  | 0.024044234 | 0.021515648 |
| 0.003192133 | 0.026133042 | 0.043486672 | 0.046975739 |
| 0.029460698 | 0.073243828 | 0.020972633 | 0.053926531 |
| 0.002759207 | 0.010611475 | 0.053490001 | 0.045792787 |
| 0.108613636 | 0.022946866 | 0.002034183 | 0.039955427 |
| 0.003046829 | 0.066009857 | 0.005075702 | 0.008214292 |
| 0.026496021 | 0.00838741  | 0.045885378 | 0.100943688 |
| 0.064074532 | 0.021419445 | 0.005180052 | 0.052331532 |
| 0.005287362 | 0.025936698 | 0.015138402 | 0.043282992 |
| 0.003490053 | 0.006285814 | 0.064319281 | 0.045212331 |
| 0.027588937 | 0.001495079 | 0.025802242 | 0.021061    |
| 0.071937604 | 0.036796899 | 0.028000531 | 0.008202107 |
| 0.000555879 | 0.013200251 | 0.014218995 | 0.014852664 |
| 0.017470804 | 0.016398059 | 0.016961198 | 0.017101228 |
| 0.05973052  | 0.054640763 | 0.019730377 | 0.001723368 |
| 0.023747265 | 0.024074959 | 0.013252382 | 0.018109567 |
| 0.011043629 | 0.063452367 | 0.016820563 | 0.021731852 |
| 0.00984882  | 0.00556051  | 0.076002718 | 0.034901732 |
| 0.007428527 |             |             |             |

|             |             |             |             |
|-------------|-------------|-------------|-------------|
| GPX1        | 0.260457949 | 0.391574584 | 0.186975454 |
| 0.373194471 | 0.227800579 | 0.190759995 | 0.170048195 |
| 0.094953322 | 0.193127385 | 0.020339786 | 0.081784902 |
| 0.237226283 | 0.150799203 | 0.127399446 | 0.169533966 |
| 0.39617275  | 0.145959492 | 0.136650159 | 0.194432899 |
| 0.305559511 | 0.08924386  | 0.362326653 | 0.145119298 |
| 0.188736262 | 0.172778015 | 0.154228808 | 0.240369124 |
| 0.387163011 | 0.165137555 | 0.118468269 | 0.258969182 |
| 0.120275157 | 0.295424415 | 0.351402353 | 0.309862075 |
| 0.331345357 | 0.229680271 | 0.009178333 | 0.153224154 |
| 0.294577028 | 0.371036283 | 0.315446464 | 0.265731531 |
| 0.105222    | 0.301041309 | 0.208792412 | 0.261532712 |
| 0.107184095 | 0.10042614  | 0.086572909 | 0.282672318 |
| 0.307291881 | 0.236572859 | 0.131790369 | 0.163232611 |
| 0.119982246 | 0.072728642 | 0.135924573 | 0.161935618 |
| 0.182862423 | 0.062475091 | 0.326750789 | 0.155333003 |
| 0.092613502 | 0.128404356 | 0.137195583 | 0.142228341 |

|             |             |             |             |
|-------------|-------------|-------------|-------------|
| 0.174681457 | 0.240866413 | 0.040840228 | 0.192011876 |
| 0.004621421 | 0.306496218 | 0.247382878 | 0.185311699 |
| 0.105247591 | 0.053707369 | 0.154499747 | 0.250617739 |
| 0.389267804 | 0.3056373   | 0.428079427 | 0.414365272 |
| 0.14595766  | 0.19329485  | 0.188284531 | 0.178012453 |
| 0.324248432 | 0.162118224 | 0.11291618  | 0.399726804 |
| 0.428752115 | 0.368720831 | 0.212196555 | 0.220723458 |
| 0.332145054 | 0.346087144 | 0.180535657 | 0.191469515 |
| 0.204471842 | 0.101741624 | 0.305041298 | 0.404291418 |
| 0.252757554 | 0.161215124 | 0.190239928 | 0.291723102 |
| 0.114200526 | 0.122508261 | 0.311218695 | 0.078791914 |
| 0.406176918 | 0.080475277 | 0.195754538 | 0.205098625 |
| 0.158023528 | 0.310981131 | 0.371267944 | 0.182682493 |
| 0.18595436  | 0.046363902 | 0.183602214 | 0.074863793 |
| 0.145446232 | 0.10263102  | 0.289283591 | 0.384851861 |
| 0.099467501 | 0.181666753 | 0.176688474 | 0.01953738  |
| 0.078745125 | 0.139517747 | 0.276849922 | 0.141205633 |
| 0.314402547 | 0.245045885 | 0.2294724   | 0.22151805  |
| 0.26267817  | 0.419924086 | 0.024385547 | 0.135928222 |
| 0.22473282  | 0.141516577 | 0.234169895 | 0.221400482 |
| 0.23162358  | 0.120637022 | 0.147296927 | 0.433602074 |
| 0.285601121 | 0.133741332 | 0.101538896 | 0.371467769 |
| 0.167018559 | 0.240621633 | 0.133843518 | 0.15237167  |
| 0.086352449 | 0.32381635  | 0.076295932 | 0.124001793 |
| 0.202782179 | 0.11385577  | 0.024787795 | 0.114898364 |
| 0.15026415  | 0.326306642 | 0.273469467 | 0.14080982  |
| 0.164323852 | 0.329973296 | 0.103904023 | 0.286207383 |
| 0.054067085 | 0.086761515 | 0.070422812 | 0.393100411 |
| 0.124895325 | 0.394742334 | 0.185243065 | 0.215333312 |
| 0.240573494 | 0.396800818 | 0.005750756 | 0.323940544 |
| 0.375375471 | 0.074777092 | 0.246488649 | 0.248846807 |
| 0.190645579 | 0.397249042 | 0.012988741 | 0.334383003 |
| 0.167698691 | 0.12735356  | 0.442755214 | 0.189544757 |
| 0.304885636 | 0.1166617   | 0.121968843 | 0.347617408 |
| 0.258351021 | 0.019272889 | 0.097439787 | 0.296913395 |
| 0.073754776 | 0.087667748 | 0.294624339 | 0.325782771 |
| 0.287131088 | 0.366599487 | 0.439933155 | 0.190848399 |
| 0.229209816 | 0.150464985 | 0.043814002 | 0.216561521 |
| 0.31557818  | 0.13231589  | 0.307714964 | 0.176865825 |
| 0.118635015 | 0.356375172 | 0.273404689 | 0.112565146 |
| 0.110210847 | 0.145095052 | 0.03576906  | 1           |
| 0.270764251 | 0.120280232 | 0.189967955 | 0.104425177 |
| 0.127331497 | 0.417545669 | 0.150085894 | 0.14228668  |
| 0.109084738 | 0.193665189 | 0.179691903 | 0.120766064 |
| 0.128316172 | 0.211081671 | 0.220953389 | 0.210834382 |
| 0.066947406 | 0.135402395 | 0.036054926 | 0.105482364 |
| 0.087682842 | 0.119253924 | 0.104666334 | 0.217411473 |
| 0.120723272 | 0.096105165 | 0.204451975 | 0.194428238 |
| 0.184116296 | 0.059999948 | 0.383491243 | 0.329055421 |
| 0.17369928  | 0.186896062 | 0.089473816 | 0.095045435 |
| 0.384843602 | 0.12359155  | 0.071744542 | 0.349355169 |
| 0.054253631 | 0.411419412 | 0.166122077 | 0.177095565 |
| 0.158292478 | 0.190807096 | 0.425129123 | 0.073785583 |
| 0.171278278 | 0.326955338 | 0.212396482 | 0.229730655 |

|             |             |             |             |
|-------------|-------------|-------------|-------------|
| 0.247247081 | 0.288648792 | 0.075078008 | 0.24347373  |
| 0.220458225 | 0.084551864 | 0.389484994 | 0.13783011  |
| 0.068991425 | 0.319336228 | 0.315375516 | 0.147086031 |
| 0.154218092 | 0.180555249 | 0.065456427 | 0.286013852 |
| 0.411172827 | 0.387891235 | 0.305191554 | 0.175691663 |
| 0.099090528 | 0.021567754 | 0.169426832 | 0.18528638  |
| 0.321565075 | 0.381406075 | 0.193892923 | 0.191947949 |
| 0.22481919  | 0.229773407 | 0.055094592 | 0.404062355 |
| 0.111597858 | 0.352367397 | 0.033880484 | 0.34153082  |
| 0.329397898 | 0.086301344 | 0.161736119 | 0.17364822  |
| 0.250245162 | 0.120904219 | 0.139382592 | 0.343777211 |
| 0.350627166 | 0.240624992 | 0.226614646 | 0.2645975   |
| 0.048627525 | 0.076218472 | 0.278084446 | 0.148569042 |
| 0.18393283  | 0.235257769 | 0.049450101 | 0.129458879 |
| 0.100003288 | 0.321713482 | 0.372331118 | 0.178303238 |
| 0.157433599 | 0.120930459 | 0.297478495 | 0.100282404 |
| 0.36260219  | 0.349475988 | 0.351989468 | 0.130573394 |
| 0.283196032 | 0.375845765 | 0.209894233 | 0.130034083 |
| 0.067312864 | 0.35225803  | 0.240383012 | 0.052589455 |
| 0.405233837 | 0.068851371 | 0.035846746 | 0.368327161 |
| 0.179107116 | 0.251050512 | 0.019979266 | 0.045207551 |
| 0.084342576 | 0.396148115 | 0.329651052 | 0.254593048 |
| 0.078591737 | 0.244555686 | 0.008980046 | 0.394058279 |
| 0.347512536 | 0.065732892 | 0.161799146 | 0.291634433 |
| 0.292042763 | 0.376412355 | 0.196888939 | 0.366085307 |
| 0.230369833 | 0.335211334 | 0.146470446 | 0.261520381 |
| 0.347670208 | 0.344817216 | 0.303350724 | 0.332646404 |
| 0.377651457 | 0.327812305 | 0.262139669 | 0.065075533 |
| 0.231066867 | 0.09838265  | 0.136579387 | 0.156282459 |
| 0.147803418 | 0.210061576 | 0.35079543  | 0.404827979 |
| 0.380155896 | 0.031150874 | 0.111779635 | 0.286073548 |
| 0.34557788  | 0.404746037 | 0.04321466  | 0.020880766 |
| 0.012059341 | 0.08293049  | 0.205973911 | 0.208477054 |
| 0.3878443   | 0.073355118 | 0.028432191 | 0.059141913 |
| 0.184855866 | 0.289873196 | 0.358015956 | 0.350962026 |
| 0.326201927 | 0.124956368 | 0.127563659 | 0.342391826 |
| 0.165810789 | 0.148368508 | 0.399969706 | 0.333876343 |
| 0.078545068 | 0.219307989 | 0.121196284 | 0.42118463  |
| 0.061207122 | 0.244823647 | 0.241110828 | 0.187302383 |
| 0.026438077 | 0.154833455 | 0.169151504 | 0.375593041 |
| 0.318375611 | 0.103905899 | 0.079429298 | 0.041644537 |
| 0.138867095 | 0.374541726 | 0.164977111 | 0.432069343 |
| 0.35203209  | 0.408285659 | 0.108980095 | 0.348732434 |
| 0.11191555  | 0.318049958 | 0.195931534 | 0.050126667 |
| 0.160952005 | 0.044023825 | 0.310747393 | 0.174815538 |
| 0.109638873 | 0.237063988 | 0.246010411 | 0.055962628 |
| 0.141152756 | 0.109682665 | 0.430083954 | 0.400173817 |
| 0.070439849 | 0.17792092  | 0.207597194 | 0.273830836 |
| 0.13337131  | 0.365377988 | 0.333886078 | 0.147173313 |
| 0.122630617 | 0.072969491 | 0.29914408  | 0.202217799 |
| 0.101513339 | 0.428920167 | 0.219790038 | 0.404007581 |
| 0.259517739 | 0.348961021 | 0.348151405 | 0.254973373 |
| 0.150953125 | 0.188924535 | 0.247761913 | 0.046436271 |
| 0.237045799 | 0.390560341 | 0.149703919 | 0.210495899 |

|             |             |             |             |
|-------------|-------------|-------------|-------------|
| 0.217081362 | 0.191189027 | 0.071951653 | 0.050451131 |
| 0.141488587 | 0.151774172 | 0.142182463 | 0.409707725 |
| 0.200756696 | 0.217676818 | 0.043902468 | 0.170379253 |
| 0.395740588 | 0.316062061 | 0.135040362 | 0.298545829 |
| 0.174282842 | 0.275143153 | 0.341179001 | 0.343262685 |
| 0.163098916 | 0.323570235 | 0.303446011 | 0.233777631 |
| 0.290538503 | 0.205374752 | 0.36442581  | 0.04440118  |
| 0.162313709 | 0.190144302 | 0.134504614 | 0.144749985 |
| 0.166278008 | 0.095722345 | 0.144892113 | 0.34242422  |
| 0.131082173 | 0.295286278 | 0.090027776 | 0.139239622 |
| 0.215213611 | 0.111465265 | 0.263035094 | 0.139868236 |
| 0.130455592 | 0.343877299 | 0.037849536 | 0.103681711 |
| 0.126836493 | 0.346391836 | 0.205565957 | 0.212496052 |
| 0.181803317 | 0.13324579  | 0.220616096 | 0.099620825 |
| 0.101626561 | 0.126733181 | 0.34127012  | 0.06887738  |
| 0.04650885  | 0.424868895 | 0.12500985  | 0.052467541 |
| 0.097394731 | 0.184780955 | 0.130030192 | 0.22245297  |
| 0.067046106 | 0.349286207 | 0.120918701 | 0.235146939 |
| 0.203258994 | 0.108172473 | 0.206482914 | 0.081661341 |
| 0.096560038 | 0.289228229 | 0.221645693 | 0.352283166 |
| 0.168039164 | 0.393219294 | 0.26810164  | 0.286700523 |
| 0.096120456 | 0.147615244 | 0.084869709 | 0.351460585 |
| 0.140899874 |             |             |             |
| GPX8        | 0.390759001 | 0.470921796 | 0.379195689 |
| 0.326841498 | 0.33999044  | 0.325569471 | 0.155197287 |
| 0.166023436 | 0.074134034 | 0.001058131 | 0.012385616 |
| 0.365583633 | 0.130339656 | 0.184984626 | 0.31739235  |
| 0.339596608 | 0.084564016 | 0.346704291 | 0.178201273 |
| 0.335143208 | 0.063367835 | 0.301551372 | 0.065464474 |
| 0.265224985 | 0.071727032 | 0.044176013 | 0.223519672 |
| 0.351731563 | 0.052716701 | 0.267971018 | 0.320450714 |
| 0.078751181 | 0.374853692 | 0.501909185 | 0.329218202 |
| 0.494209503 | 0.389039282 | 0.008644246 | 0.234131591 |
| 0.376369003 | 0.372087065 | 0.332805662 | 0.240921849 |
| 0.025111144 | 0.473015174 | 0.17792745  | 0.342453231 |
| 0.218241331 | 0.016288074 | 0.215919165 | 0.437024805 |
| 0.448809939 | 0.35891932  | 0.198545702 | 0.114073545 |
| 0.131105198 | 0.184227692 | 0.206518955 | 0.286381237 |
| 0.160143021 | 0.12960674  | 0.455105768 | 0.068414778 |
| 0.130207043 | 0.217958362 | 0.113427014 | 0.203488799 |
| 0.316792605 | 0.351272231 | 0.013874338 | 0.375989536 |
| 0.000281033 | 0.321713471 | 0.314761186 | 0.299682846 |
| 0.026198977 | 0.007214209 | 0.132812785 | 0.254357272 |
| 0.365158796 | 0.450752221 | 0.383528431 | 0.409627244 |
| 0.113492357 | 0.241243662 | 0.345526128 | 0.112714259 |
| 0.385420747 | 0.119778682 | 0.086110676 | 0.330249867 |
| 0.398459012 | 0.478384221 | 0.153324876 | 0.213410416 |
| 0.345118051 | 0.431248303 | 0.358586158 | 0.337218828 |
| 0.297995952 | 0.046116428 | 0.4099146   | 0.433046125 |
| 0.354470046 | 0.272721239 | 0.106701015 | 0.336615675 |
| 0.040961145 | 0.326276786 | 0.26442876  | 0.112034476 |
| 0.372759491 | 0.012746479 | 0.159425538 | 0.269140307 |
| 0.197350562 | 0.378088639 | 0.477121792 | 0.135698477 |
| 0.339457565 | 0.010215727 | 0.115432629 | 0.025350539 |

|             |             |             |             |
|-------------|-------------|-------------|-------------|
| 0.248833081 | 0.126202267 | 0.486422516 | 0.349614021 |
| 0.180589249 | 0.296799468 | 0.21453614  | 0.000353918 |
| 0.01579952  | 0.171158553 | 0.365298226 | 0.329619998 |
| 0.375338668 | 0.388887158 | 0.167152269 | 0.356200864 |
| 0.374068602 | 0.379044764 | 0.053416715 | 0.074305821 |
| 0.346711278 | 0.168119526 | 0.175702812 | 0.358052944 |
| 0.230897502 | 0.091355675 | 0.085471222 | 0.443131834 |
| 0.400938719 | 0.05440472  | 0.321902873 | 0.327698109 |
| 0.249703869 | 0.275495919 | 0.075585589 | 0.184512173 |
| 0.029756675 | 0.470503745 | 0.018515154 | 0.308592821 |
| 0.259507256 | 0.095074181 | 0.011004205 | 0.218134556 |
| 0.214599592 | 0.349435911 | 0.485025344 | 0.078829461 |
| 0.221549291 | 0.317285533 | 0.292157847 | 0.331599763 |
| 0.004271774 | 0.03503946  | 0.279741483 | 0.42504454  |
| 0.251989401 | 0.434606754 | 0.236379254 | 0.269965046 |
| 0.215999609 | 0.369474744 | 0.00427061  | 0.48152412  |
| 0.488998752 | 0.286510432 | 0.285112983 | 0.357641557 |
| 0.346684229 | 0.352594068 | 0.046660618 | 0.322574645 |
| 0.335818895 | 0.059921787 | 0.409115595 | 0.106785817 |
| 0.435793769 | 0.024440479 | 0.254187926 | 0.378559036 |
| 0.356464897 | 0.005891988 | 0.18838684  | 0.31644616  |
| 0.020248916 | 0.075211209 | 0.380415335 | 0.326899238 |
| 0.30988476  | 0.379925248 | 0.373715321 | 0.329344592 |
| 0.333759503 | 0.188007276 | 0.009420153 | 0.261514933 |
| 0.390981067 | 0.344841286 | 0.41438902  | 0.191366735 |
| 0.320913252 | 0.426078853 | 0.378375082 | 0.190067162 |
| 0.027070962 | 0.257974271 | 0.01220779  | 0.270764251 |
| 1           | 0.067348697 | 0.375872777 | 0.127953638 |
| 0.046400246 | 0.455098877 | 0.151816959 | 0.241867614 |
| 0.115531461 | 0.292754632 | 0.20447024  | 0.145779705 |
| 0.127613919 | 0.126692485 | 0.31415907  | 0.323992158 |
| 0.022969858 | 0.05543708  | 0.0156786   | 0.279246215 |
| 0.07090935  | 0.230698713 | 0.232566362 | 0.355723349 |
| 0.236360434 | 0.05801881  | 0.282974822 | 0.283300457 |
| 0.086941587 | 0.008395366 | 0.454724723 | 0.333520949 |
| 0.309481162 | 0.121316858 | 0.027680373 | 0.251925266 |
| 0.36586594  | 0.276809574 | 0.282276983 | 0.380120913 |
| 0.023610072 | 0.400929891 | 0.158096151 | 0.080455026 |
| 0.273208069 | 0.178631998 | 0.363496599 | 0.055422541 |
| 0.355961501 | 0.418047943 | 0.26901621  | 0.135594837 |
| 0.350895672 | 0.342284771 | 0.017836561 | 0.368224969 |
| 0.349553407 | 0.017244182 | 0.466367569 | 0.085441744 |
| 0.013210866 | 0.364241378 | 0.363124587 | 0.05274074  |
| 0.056563873 | 0.239408136 | 0.033930115 | 0.220141541 |
| 0.449536712 | 0.311813086 | 0.353333238 | 0.202685863 |
| 0.021810643 | 0.002026842 | 0.170117337 | 0.372862852 |
| 0.4913845   | 0.450818374 | 0.200713555 | 0.264586775 |
| 0.180034137 | 0.287838688 | 0.136620297 | 0.432026034 |
| 0.219110008 | 0.492176323 | 0.003793671 | 0.376991684 |
| 0.494560804 | 0.248453034 | 0.05215566  | 0.246558848 |
| 0.331841495 | 0.032082067 | 0.179926559 | 0.457832555 |
| 0.38392291  | 0.290131702 | 0.303638914 | 0.360919263 |
| 0.009276196 | 0.028447637 | 0.345336571 | 0.175012064 |
| 0.317598848 | 0.176298859 | 0.049286763 | 0.305576042 |



|             |             |             |             |
|-------------|-------------|-------------|-------------|
| 0.021925067 | 0.402360172 | 0.365115201 | 0.045644455 |
| 0.272784229 | 0.312143631 | 0.301462158 | 0.023767968 |
| 0.388323566 | 0.473413907 | 0.491500623 | 0.136914954 |
| 0.37258229  | 0.430540234 | 0.341557763 | 0.060991888 |
| 0.010982358 | 0.491141922 | 0.368202921 | 0.01129726  |
| 0.366525567 | 0.215434594 | 0.00333867  | 0.447577167 |
| 0.142331005 | 0.452645118 | 0.003361785 | 0.117649403 |
| 0.035420636 | 0.371844763 | 0.465254841 | 0.328085738 |
| 0.205132249 | 0.316892584 | 0.00753945  | 0.467223017 |
| 0.438800124 | 0.008793205 | 0.114579372 | 0.364698886 |
| 0.359204254 | 0.486801994 | 0.27992979  | 0.367359506 |
| 0.342832863 | 0.471937002 | 0.165642131 | 0.204553246 |
| 0.357044333 | 0.463017803 | 0.364299998 | 0.431434452 |
| 0.354229306 | 0.345271181 | 0.210322537 | 0.008448069 |
| 0.154014919 | 0.182455139 | 0.261453614 | 0.059943614 |
| 0.307491917 | 0.101516305 | 0.434450619 | 0.3702457   |
| 0.40061435  | 0.00250176  | 0.116921268 | 0.373412196 |
| 0.360872533 | 0.389771738 | 0.023198904 | 0.006788491 |
| 0.009343305 | 0.011031237 | 0.303673431 | 0.203096941 |
| 0.433549823 | 0.179080387 | 0.001644905 | 0.031598025 |
| 0.225588629 | 0.327138437 | 0.456083196 | 0.299862898 |
| 0.388672094 | 0.057227867 | 0.200018039 | 0.326724163 |
| 0.050163151 | 0.333388751 | 0.401336224 | 0.437266997 |
| 0.034420044 | 0.214788464 | 0.343169777 | 0.396798726 |
| 0.068767935 | 0.243713029 | 0.36250264  | 0.226895466 |
| 0.013377311 | 0.059942938 | 0.051459058 | 0.364634349 |
| 0.483866034 | 0.038234509 | 0.014474608 | 0.125467595 |
| 0.071238723 | 0.383605922 | 0.104618797 | 0.429573152 |
| 0.358248846 | 0.339776473 | 0.056322713 | 0.461769414 |
| 0.025754388 | 0.454784347 | 0.268020265 | 0.048400188 |
| 0.253026984 | 0.008757703 | 0.43552236  | 0.12686808  |
| 0.260962655 | 0.357110379 | 0.218608743 | 0.011878581 |
| 0.199446107 | 0.033121342 | 0.373637765 | 0.374049012 |
| 0.028702159 | 0.208364537 | 0.247564683 | 0.350818942 |
| 0.238411421 | 0.332807574 | 0.481392207 | 0.347860479 |
| 0.057119717 | 0.138176433 | 0.338802483 | 0.354896571 |
| 0.190569752 | 0.393674337 | 0.232165946 | 0.471965624 |
| 0.379787245 | 0.426289593 | 0.415863556 | 0.289838313 |
| 0.176478762 | 0.358401675 | 0.293030167 | 0.008828538 |
| 0.289235615 | 0.351690247 | 0.332965493 | 0.111172718 |
| 0.17982963  | 0.351636275 | 0.044608998 | 0.190547067 |
| 0.302474324 | 0.261163492 | 0.089266927 | 0.353909402 |
| 0.352673528 | 0.360804639 | 0.032708484 | 0.046719648 |
| 0.492097857 | 0.422773566 | 0.125122458 | 0.348887163 |
| 0.134952565 | 0.276096257 | 0.381158991 | 0.373376889 |
| 0.374928017 | 0.355601938 | 0.3554813   | 0.3013394   |
| 0.382873752 | 0.209454231 | 0.494689492 | 0.083563516 |
| 0.074719424 | 0.374289617 | 0.053833633 | 0.068393399 |
| 0.09467362  | 0.019650381 | 0.278890062 | 0.344398854 |
| 0.330468383 | 0.27959164  | 0.29306031  | 0.063097312 |
| 0.264217982 | 0.37741599  | 0.282662621 | 0.141805126 |
| 0.044552629 | 0.463979061 | 0.005809101 | 0.037634981 |
| 0.315788877 | 0.381786238 | 0.304176472 | 0.189492087 |
| 0.262839073 | 0.120531368 | 0.218177341 | 0.254422139 |

|             |             |             |             |
|-------------|-------------|-------------|-------------|
| 0.22764555  | 0.332765389 | 0.378012765 | 0.02829025  |
| 0.010779787 | 0.394708802 | 0.345887562 | 0.01887943  |
| 0.083136642 | 0.377526364 | 0.26490489  | 0.184535778 |
| 0.016261018 | 0.430050418 | 0.280659169 | 0.364655786 |
| 0.288817099 | 0.048163273 | 0.3480247   | 0.083625348 |
| 0.056445986 | 0.424794759 | 0.363223679 | 0.478423729 |
| 0.3259677   | 0.319740969 | 0.456358586 | 0.363519125 |
| 0.123117088 | 0.386924197 | 0.017913872 | 0.372350124 |
| 0.349154789 |             |             |             |
| GRK5        | 0.075228162 | 0.152972391 | 0.041172928 |
| 0.242331296 | 0.115757971 | 0.111085117 | 0.240152068 |
| 0.053082697 | 0.056993299 | 0.098263659 | 0.087174948 |
| 0.078312869 | 0.090268946 | 0.132264813 | 0.029400192 |
| 0.190834346 | 0.108889985 | 0.033280064 | 0.235661276 |
| 0.182048251 | 0.146294224 | 0.234252938 | 0.121686519 |
| 0.02326508  | 0.08158554  | 0.163495526 | 0.056568436 |
| 0.206011157 | 0.16190584  | 0.119323263 | 0.177704945 |
| 0.04166065  | 0.12070034  | 0.112980528 | 0.164343322 |
| 0.104176028 | 0.058011551 | 0.015797944 | 0.097006055 |
| 0.10405274  | 0.129806489 | 0.197647769 | 0.26303625  |
| 0.129061128 | 0.108581304 | 0.286062947 | 0.084204558 |
| 0.028153197 | 0.101440093 | 0.0611995   | 0.10501023  |
| 0.114693652 | 0.109071876 | 0.093195386 | 0.206052059 |
| 0.083841178 | 0.070463372 | 0.024079972 | 0.113993632 |
| 0.269902044 | 0.086228401 | 0.116671291 | 0.095318554 |
| 0.043388603 | 0.091792224 | 0.049588658 | 0.158244216 |
| 0.026290948 | 0.107043515 | 0.049563581 | 0.045414097 |
| 0.049523133 | 0.180905702 | 0.09370972  | 0.022643235 |
| 0.138007175 | 0.164047662 | 0.071739679 | 0.273207943 |
| 0.185109836 | 0.085696453 | 0.176357146 | 0.14834245  |
| 0.096168322 | 0.091561785 | 0.050626351 | 0.189927665 |
| 0.113064663 | 0.266202409 | 0.042990403 | 0.201597657 |
| 0.169795181 | 0.131394982 | 0.058454992 | 0.104297917 |
| 0.178956346 | 0.143113239 | 0.068559574 | 0.102719958 |
| 0.035829817 | 0.019178704 | 0.12286048  | 0.157889934 |
| 0.102531424 | 0.035679556 | 0.148714968 | 0.179873079 |
| 0.115741448 | 0.018798435 | 0.276467423 | 0.050884634 |
| 0.190462016 | 0.074554509 | 0.108948666 | 0.225463581 |
| 0.033259531 | 0.116279858 | 0.119205576 | 0.252309206 |
| 0.069878489 | 0.080839001 | 0.018430235 | 0.045891748 |
| 0.044218144 | 0.009146551 | 0.093538902 | 0.217254229 |
| 0.064560326 | 0.042699341 | 0.144344997 | 0.021078633 |
| 0.064144374 | 0.020395671 | 0.110332092 | 0.059497877 |
| 0.126056517 | 0.054394954 | 0.147459938 | 0.093207668 |
| 0.083067824 | 0.172001109 | 0.011710119 | 0.113949775 |
| 0.105813867 | 0.024343981 | 0.246418261 | 0.106264737 |
| 0.133078257 | 0.104716816 | 0.195965005 | 0.165187473 |
| 0.12489417  | 0.227568377 | 0.034759279 | 0.188898943 |
| 0.068535863 | 0.107125885 | 0.149883976 | 0.169225526 |
| 0.154466965 | 0.093724696 | 0.051689655 | 0.061527165 |
| 0.018193398 | 0.058048112 | 0.015998358 | 0.123423077 |
| 0.064673437 | 0.159758765 | 0.07932718  | 0.138466825 |
| 0.197499608 | 0.17414296  | 0.06902979  | 0.16981776  |
| 0.10435864  | 0.053218301 | 0.034403214 | 0.171216944 |

|             |             |             |             |
|-------------|-------------|-------------|-------------|
| 0.108277911 | 0.129555762 | 0.079194062 | 0.047322605 |
| 0.155994917 | 0.164084613 | 0.000131053 | 0.109581925 |
| 0.12164999  | 0.033236191 | 0.210983155 | 0.085841276 |
| 0.044953728 | 0.209773663 | 0.001411248 | 0.20200227  |
| 0.066497051 | 0.113901431 | 0.18098121  | 0.206390444 |
| 0.101332788 | 0.161129487 | 0.09775684  | 0.09628399  |
| 0.093539358 | 0.018816448 | 0.127519908 | 0.210964773 |
| 0.028411479 | 0.104988728 | 0.112578948 | 0.196567966 |
| 0.165565559 | 0.127008079 | 0.199383934 | 0.039271996 |
| 0.116439848 | 0.120354283 | 0.028122628 | 0.083439586 |
| 0.095989004 | 0.018983903 | 0.128735227 | 0.094418397 |
| 0.049251898 | 0.143753475 | 0.078755728 | 0.032749921 |
| 0.18225516  | 0.145407803 | 0.062412613 | 0.120280232 |
| 0.067348697 | 1           | 0.047874596 | 0.026102251 |
| 0.092732546 | 0.163665233 | 0.023807724 | 0.017680532 |
| 0.010095868 | 0.185606894 | 0.154948895 | 0.15394261  |
| 0.108593033 | 0.086010425 | 0.041799202 | 0.065086001 |
| 0.13595293  | 0.202886738 | 0.00549632  | 0.047454456 |
| 0.153084083 | 0.098210677 | 0.096726977 | 0.101254191 |
| 0.064332133 | 0.162902669 | 0.13570507  | 0.016535923 |
| 0.052470259 | 0.094800246 | 0.146953558 | 0.162220382 |
| 0.089743357 | 0.113339653 | 0.083048277 | 0.030358457 |
| 0.208834781 | 0.087979816 | 0.024658547 | 0.187177832 |
| 0.026176071 | 0.154575111 | 0.127352127 | 0.181587719 |
| 0.080538467 | 0.278823805 | 0.199763032 | 0.026861962 |
| 0.080660607 | 0.15276185  | 0.096730578 | 0.133468941 |
| 0.127318422 | 0.16190437  | 0.118234743 | 0.08552515  |
| 0.095211369 | 0.147556464 | 0.139616807 | 0.059070048 |
| 0.079052952 | 0.110031333 | 0.121306875 | 0.140984538 |
| 0.083140749 | 0.207916878 | 0.100520814 | 0.19129522  |
| 0.165304854 | 0.236527396 | 0.154668338 | 0.023590752 |
| 0.190642625 | 0.143364878 | 0.050419527 | 0.041874836 |
| 0.111153226 | 0.128191432 | 0.164922297 | 0.123752851 |
| 0.253774545 | 0.046488685 | 0.030996816 | 0.160553838 |
| 0.008213018 | 0.113139941 | 0.047109245 | 0.105712818 |
| 0.104269871 | 0.081647262 | 0.116018847 | 0.195157999 |
| 0.133701692 | 0.125162177 | 0.064856869 | 0.127968587 |
| 0.13682311  | 0.069554249 | 0.053603543 | 0.106973207 |
| 0.104804053 | 0.127282339 | 0.085356614 | 0.012108089 |
| 0.071930151 | 0.093664697 | 0.002946585 | 0.037267158 |
| 0.159354568 | 0.154936453 | 0.162145915 | 0.070439783 |
| 0.146887428 | 0.031591503 | 0.143188525 | 0.137682689 |
| 0.105301662 | 0.100597903 | 0.123599619 | 0.088687146 |
| 0.107101302 | 0.132992417 | 0.061573221 | 0.074255113 |
| 0.059481163 | 0.10782822  | 0.096760076 | 0.101014257 |
| 0.193099634 | 0.066634918 | 0.169217032 | 0.151690025 |
| 0.200561257 | 0.08317298  | 0.009623804 | 0.001337154 |
| 0.018007127 | 0.144369252 | 0.112786126 | 0.160461906 |
| 0.065317857 | 0.129662298 | 0.000976455 | 0.128663848 |
| 0.146200508 | 0.03737673  | 0.031504526 | 0.116503428 |
| 0.089360844 | 0.140696249 | 0.040026006 | 0.128024875 |
| 0.084851585 | 0.114020697 | 0.115238274 | 0.192516357 |
| 0.170690817 | 0.099459591 | 0.135347706 | 0.122346703 |
| 0.20766952  | 0.133976138 | 0.273676472 | 0.105751472 |

|             |             |             |             |
|-------------|-------------|-------------|-------------|
| 0.015517412 | 0.106697968 | 0.039517284 | 0.080607269 |
| 0.080146177 | 0.078728495 | 0.118140316 | 0.176319858 |
| 0.141414341 | 0.04539551  | 0.094751008 | 0.109553299 |
| 0.18243543  | 0.183978681 | 0.009011329 | 0.001716622 |
| 0.000635143 | 0.038562771 | 0.157094961 | 0.080861503 |
| 0.135997292 | 0.04657695  | 0.064644122 | 0.096394457 |
| 0.056810009 | 0.097036357 | 0.139998984 | 0.231886455 |
| 0.096661286 | 0.11228208  | 0.086168586 | 0.194079332 |
| 0.054092442 | 0.050288378 | 0.160778176 | 0.14524656  |
| 0.030604748 | 0.074958557 | 0.045039951 | 0.200922317 |
| 0.00322425  | 0.159655909 | 0.09192637  | 0.082094728 |
| 0.007925716 | 0.065685585 | 0.06398448  | 0.152166241 |
| 0.099873189 | 0.161896479 | 0.135338612 | 0.020000948 |
| 0.22698293  | 0.144539047 | 0.140128687 | 0.172609929 |
| 0.181280917 | 0.232478942 | 0.036542216 | 0.122858017 |
| 0.094703213 | 0.117597844 | 0.075176924 | 0.019241868 |
| 0.041061511 | 0.036076995 | 0.096791917 | 0.038488518 |
| 0.082897442 | 0.105156281 | 0.016847974 | 0.02989971  |
| 0.006087929 | 0.103293788 | 0.200671896 | 0.141631922 |
| 0.017827819 | 0.084951927 | 0.102281275 | 0.114567142 |
| 0.143602945 | 0.226355516 | 0.119511471 | 0.056773653 |
| 0.16527713  | 0.005708122 | 0.169769628 | 0.081033832 |
| 0.078744743 | 0.171534052 | 0.072457435 | 0.13406035  |
| 0.091538336 | 0.116832053 | 0.123075762 | 0.171196984 |
| 0.034609292 | 0.078032029 | 0.221595837 | 0.124978301 |
| 0.147354942 | 0.211829909 | 0.069872598 | 0.061097573 |
| 0.193737846 | 0.043366489 | 0.042477013 | 0.006435344 |
| 0.02738092  | 0.142677788 | 0.157486512 | 0.195248191 |
| 0.089314134 | 0.084873536 | 0.056982257 | 0.066140732 |
| 0.143944422 | 0.107833737 | 0.060778393 | 0.160682817 |
| 0.104062066 | 0.162231297 | 0.11177468  | 0.115068918 |
| 0.018398126 | 0.159705906 | 0.156566665 | 0.199647731 |
| 0.150158027 | 0.192082357 | 0.126387712 | 0.031915693 |
| 0.024580702 | 0.061599255 | 0.179163726 | 0.099788452 |
| 0.242046662 | 0.04105837  | 0.012500761 | 0.162560125 |
| 0.021047435 | 0.256560218 | 0.022859656 | 0.055613888 |
| 0.103889293 | 0.028405563 | 0.16146408  | 0.212888182 |
| 0.151933997 | 0.131865528 | 0.032536143 | 0.100545828 |
| 0.032581961 | 0.118772496 | 0.077080616 | 0.084708591 |
| 0.018211879 | 0.024483963 | 0.227936282 | 0.088862837 |
| 0.11468162  | 0.014141423 | 0.120371004 | 0.042513172 |
| 0.111744646 | 0.180457237 | 0.047861266 | 0.013746404 |
| 0.024244127 | 0.060831545 | 0.02958193  | 0.084299822 |
| 0.028933644 | 0.117901105 | 0.090549102 | 0.083204342 |
| 0.159120305 | 0.088698164 | 0.082095018 | 0.021644455 |
| 0.03745219  | 0.109119465 | 0.051040744 | 0.114871152 |
| 0.039054891 | 0.255187461 | 0.089288928 | 0.128096797 |
| 0.013267485 | 0.029215765 | 0.094882496 | 0.154946638 |
| 0.032493875 |             |             |             |
| GRWD1       | 0.309688671 | 0.468429795 | 0.196184661 |
| 0.311893768 | 0.199510547 | 0.199778234 | 0.094923543 |
| 0.06567535  | 0.093035943 | 0.002051485 | 0.025911286 |
| 0.236888711 | 0.087098693 | 0.085306679 | 0.183788127 |
| 0.330256186 | 0.060744999 | 0.142093825 | 0.10604413  |

|             |             |             |             |
|-------------|-------------|-------------|-------------|
| 0.262328406 | 0.036122162 | 0.271484371 | 0.050397379 |
| 0.173308592 | 0.073461552 | 0.050413339 | 0.191124684 |
| 0.350547925 | 0.055381309 | 0.119383692 | 0.239122945 |
| 0.050728078 | 0.322720806 | 0.471235601 | 0.2747983   |
| 0.454809485 | 0.297419119 | 0.00248463  | 0.134330884 |
| 0.3396389   | 0.36706365  | 0.273988416 | 0.163729846 |
| 0.025562981 | 0.412540458 | 0.112935903 | 0.231963777 |
| 0.093938611 | 0.022035694 | 0.084387026 | 0.385410583 |
| 0.41567586  | 0.256622653 | 0.095159452 | 0.080852715 |
| 0.094869626 | 0.068023343 | 0.131324008 | 0.173027823 |
| 0.101336907 | 0.049194121 | 0.433032853 | 0.069048516 |
| 0.082478701 | 0.095756431 | 0.071194813 | 0.095908698 |
| 0.199536048 | 0.274149835 | 0.009250999 | 0.236051658 |
| 5.44E-05    | 0.246674766 | 0.19892217  | 0.224847873 |
| 0.02554354  | 0.00815945  | 0.082273867 | 0.175765749 |
| 0.37589565  | 0.406396763 | 0.426449008 | 0.450442858 |
| 0.06939996  | 0.13611819  | 0.1971624   | 0.078095533 |
| 0.377380413 | 0.07977153  | 0.046368478 | 0.326667164 |
| 0.439494069 | 0.466455748 | 0.123564288 | 0.14455156  |
| 0.35215218  | 0.412389033 | 0.175845575 | 0.183072468 |
| 0.213206352 | 0.041658967 | 0.394942706 | 0.449805937 |
| 0.306791732 | 0.164341093 | 0.08368242  | 0.284555411 |
| 0.034656654 | 0.1283926   | 0.206697207 | 0.04731846  |
| 0.392261657 | 0.018572848 | 0.113488374 | 0.156517603 |
| 0.100205848 | 0.330562395 | 0.473280101 | 0.089614393 |
| 0.165115249 | 0.008265693 | 0.13002292  | 0.020946034 |
| 0.113861199 | 0.08684153  | 0.42845302  | 0.37155681  |
| 0.073545077 | 0.175009117 | 0.119302329 | 0.001933828 |
| 0.016070368 | 0.094495095 | 0.321354667 | 0.135754045 |
| 0.315631707 | 0.353010545 | 0.140840647 | 0.275736457 |
| 0.296429563 | 0.423663133 | 0.022659707 | 0.052913278 |
| 0.196999835 | 0.095226939 | 0.11848418  | 0.225105698 |
| 0.158570866 | 0.05138529  | 0.05704047  | 0.470500477 |
| 0.358716043 | 0.042582907 | 0.115133    | 0.292900413 |
| 0.15018014  | 0.179951268 | 0.050056128 | 0.094414312 |
| 0.024200145 | 0.451397505 | 0.018497935 | 0.121379195 |
| 0.224503297 | 0.061870106 | 0.006000774 | 0.091305512 |
| 0.104492046 | 0.368453667 | 0.420432818 | 0.053145667 |
| 0.11215838  | 0.261329902 | 0.108284598 | 0.284189737 |
| 0.011278113 | 0.023746427 | 0.092625357 | 0.433204362 |
| 0.139356149 | 0.444122099 | 0.122603437 | 0.168179253 |
| 0.139860182 | 0.374061292 | 0.00271179  | 0.439270734 |
| 0.482190874 | 0.094938326 | 0.188254212 | 0.230380149 |
| 0.231226687 | 0.371458968 | 0.013558306 | 0.267430954 |
| 0.208539457 | 0.043808478 | 0.447362622 | 0.08323914  |
| 0.395614444 | 0.02935536  | 0.111429782 | 0.404315125 |
| 0.305641487 | 0.004815554 | 0.081570653 | 0.252334087 |
| 0.020888827 | 0.044284278 | 0.307200443 | 0.265489681 |
| 0.236860498 | 0.363254562 | 0.413196439 | 0.228422962 |
| 0.194148784 | 0.09095317  | 0.009157309 | 0.155910157 |
| 0.351894017 | 0.181986824 | 0.383139174 | 0.107865934 |
| 0.147945133 | 0.419046767 | 0.345588254 | 0.133205414 |
| 0.028742889 | 0.121468934 | 0.007749209 | 0.189967955 |
| 0.375872777 | 0.047874596 | 1           | 0.061610944 |

|             |             |             |             |
|-------------|-------------|-------------|-------------|
| 0.040531895 | 0.473155333 | 0.113934828 | 0.151805811 |
| 0.091553686 | 0.173980108 | 0.110393143 | 0.079287957 |
| 0.079610439 | 0.110524615 | 0.227185196 | 0.207652718 |
| 0.017929752 | 0.043888275 | 0.012976086 | 0.122138128 |
| 0.042924477 | 0.108775187 | 0.102462273 | 0.258870969 |
| 0.102781278 | 0.034982081 | 0.158544174 | 0.190633653 |
| 0.077829602 | 0.010107111 | 0.45299841  | 0.265566701 |
| 0.215000888 | 0.089885827 | 0.023162836 | 0.108256627 |
| 0.388938516 | 0.137472401 | 0.096468867 | 0.383753377 |
| 0.015019034 | 0.434488992 | 0.098544449 | 0.069134197 |
| 0.145233039 | 0.106655211 | 0.399412697 | 0.045467068 |
| 0.184379475 | 0.394306287 | 0.148972249 | 0.1200028   |
| 0.305098337 | 0.253530222 | 0.016622413 | 0.293398458 |
| 0.261612506 | 0.017269787 | 0.463960581 | 0.059352173 |
| 0.014052195 | 0.308389409 | 0.348348657 | 0.049085886 |
| 0.052618349 | 0.141429185 | 0.02170547  | 0.168788432 |
| 0.463382845 | 0.298768641 | 0.340369706 | 0.137870048 |
| 0.022973531 | 0.002468212 | 0.111047415 | 0.196633827 |
| 0.43977526  | 0.455376806 | 0.113383753 | 0.155406375 |
| 0.1160142   | 0.226668355 | 0.05028301  | 0.450494454 |
| 0.097891401 | 0.458595407 | 0.004883374 | 0.380988553 |
| 0.459895926 | 0.09044686  | 0.056235576 | 0.132837138 |
| 0.287088532 | 0.033766199 | 0.085573479 | 0.431370253 |
| 0.40287078  | 0.212422343 | 0.210735932 | 0.250937854 |
| 0.008854933 | 0.023177978 | 0.250129484 | 0.133677248 |
| 0.187952094 | 0.139704322 | 0.039289001 | 0.134532352 |
| 0.022414511 | 0.388429385 | 0.353599699 | 0.067668295 |
| 0.164373317 | 0.130325115 | 0.227213119 | 0.02424891  |
| 0.428229099 | 0.454745042 | 0.458780204 | 0.069795433 |
| 0.317112476 | 0.448576518 | 0.240325396 | 0.048231783 |
| 0.013267594 | 0.466525059 | 0.262306835 | 0.010308358 |
| 0.394464435 | 0.074121871 | 0.004757147 | 0.432824345 |
| 0.0891798   | 0.375320573 | 0.003952953 | 0.053377896 |
| 0.031069066 | 0.38909748  | 0.443348351 | 0.235376496 |
| 0.085026808 | 0.194188521 | 0.005871153 | 0.469491297 |
| 0.420832929 | 0.01255539  | 0.092543163 | 0.340045354 |
| 0.332148157 | 0.461132211 | 0.198050117 | 0.404433964 |
| 0.23830127  | 0.449880418 | 0.09330541  | 0.148451461 |
| 0.359576731 | 0.458819336 | 0.301374167 | 0.405409336 |
| 0.36282142  | 0.287997606 | 0.150769463 | 0.012343231 |
| 0.202370333 | 0.077921281 | 0.150997352 | 0.081295413 |
| 0.165534559 | 0.096004716 | 0.412928505 | 0.398314807 |
| 0.419680195 | 0.004045571 | 0.058885198 | 0.338248637 |
| 0.353543039 | 0.407098125 | 0.015797862 | 0.007310506 |
| 0.004703504 | 0.020265853 | 0.174330688 | 0.133103568 |
| 0.451020445 | 0.073166441 | 0.003068923 | 0.018093539 |
| 0.120168696 | 0.26365029  | 0.443288036 | 0.255855262 |
| 0.361753318 | 0.044175542 | 0.109525482 | 0.273604249 |
| 0.066287974 | 0.203875564 | 0.429063994 | 0.415452795 |
| 0.026422421 | 0.150575105 | 0.129400397 | 0.424243837 |
| 0.061689557 | 0.157226004 | 0.245244866 | 0.137903974 |
| 0.008091315 | 0.05734122  | 0.068209563 | 0.348723479 |
| 0.447531073 | 0.032116814 | 0.015783381 | 0.045047355 |
| 0.053695162 | 0.401427965 | 0.06881829  | 0.457078076 |

|             |             |             |             |
|-------------|-------------|-------------|-------------|
| 0.34797751  | 0.345879928 | 0.048611727 | 0.447376055 |
| 0.041100058 | 0.417977225 | 0.165713593 | 0.024860644 |
| 0.119505367 | 0.008020668 | 0.403969652 | 0.14913237  |
| 0.103826243 | 0.241960637 | 0.236846961 | 0.013781504 |
| 0.149528352 | 0.029604472 | 0.421098913 | 0.406711906 |
| 0.024067152 | 0.121291418 | 0.141564711 | 0.239837347 |
| 0.104675641 | 0.314604762 | 0.443799302 | 0.169292635 |
| 0.047170488 | 0.068694928 | 0.263659968 | 0.227136243 |
| 0.078443258 | 0.432030183 | 0.182580116 | 0.475568152 |
| 0.292842749 | 0.416592083 | 0.417212072 | 0.192514897 |
| 0.119315655 | 0.197454075 | 0.226762927 | 0.007649518 |
| 0.164400387 | 0.371142392 | 0.140085406 | 0.104905812 |
| 0.12985305  | 0.215267321 | 0.030379967 | 0.052953873 |
| 0.166581691 | 0.143905243 | 0.061340835 | 0.360435837 |
| 0.206623741 | 0.248828102 | 0.01571505  | 0.064333657 |
| 0.480669906 | 0.4013614   | 0.073551734 | 0.280593051 |
| 0.086241829 | 0.202377728 | 0.355100503 | 0.355655072 |
| 0.206826345 | 0.356305739 | 0.304461427 | 0.226012276 |
| 0.351441816 | 0.131008036 | 0.472603627 | 0.027547729 |
| 0.097318326 | 0.226860929 | 0.046951813 | 0.056359767 |
| 0.066670058 | 0.022970211 | 0.177340764 | 0.294342992 |
| 0.166787956 | 0.211192495 | 0.108244367 | 0.050445616 |
| 0.154185656 | 0.145183841 | 0.185327015 | 0.077852326 |
| 0.038801716 | 0.444899793 | 0.006887184 | 0.030553065 |
| 0.147886534 | 0.383049021 | 0.188171749 | 0.120357839 |
| 0.184530083 | 0.082886078 | 0.131581702 | 0.096721677 |
| 0.101446456 | 0.14926816  | 0.379881413 | 0.019424802 |
| 0.008793685 | 0.423446154 | 0.132282246 | 0.01548287  |
| 0.07181253  | 0.232724072 | 0.108339519 | 0.16377087  |
| 0.017836726 | 0.438421044 | 0.136436018 | 0.224427032 |
| 0.156818122 | 0.034327129 | 0.280294983 | 0.047124653 |
| 0.037310861 | 0.370692407 | 0.226351514 | 0.459554953 |
| 0.163605195 | 0.313613277 | 0.389405247 | 0.329214694 |
| 0.054991495 | 0.188675825 | 0.018724679 | 0.357864939 |
| 0.174746628 |             |             |             |
| GST01       | 0.208800367 | 0.158747979 | 0.136321177 |
| 0.17249973  | 0.174347358 | 0.067689077 | 0.08274871  |
| 0.052958168 | 0.012681253 | 0.002478231 | 0.005817908 |
| 0.192340392 | 0.015549642 | 0.042795643 | 0.018416613 |
| 0.272310121 | 0.108581095 | 0.151960951 | 0.179276868 |
| 0.231116752 | 0.028439245 | 0.250418492 | 0.060965797 |
| 0.100526411 | 0.068356596 | 0.070069845 | 0.068760635 |
| 0.234225073 | 0.086175541 | 0.039957036 | 0.16354537  |
| 0.211097748 | 0.218425722 | 0.135223765 | 0.177326951 |
| 0.132587215 | 0.154966637 | 0.113810421 | 0.021629772 |
| 0.190164035 | 0.157885274 | 0.205944886 | 0.165339209 |
| 0.034069154 | 0.119259082 | 0.108767257 | 0.242848343 |
| 0.018057163 | 0.032579405 | 0.02903729  | 0.117771598 |
| 0.098147652 | 0.081227184 | 0.058489541 | 0.053248352 |
| 0.006979806 | 0.036272644 | 0.021908738 | 0.096483727 |
| 0.116857526 | 0.022637575 | 0.116903914 | 0.009074915 |
| 0.011099144 | 0.113165595 | 0.209375154 | 0.105780652 |
| 0.083942102 | 0.127929452 | 0.048953688 | 0.15890472  |
| 0.001272043 | 0.238783667 | 0.31537299  | 0.035744242 |

|             |             |             |             |
|-------------|-------------|-------------|-------------|
| 0.157370803 | 0.01301312  | 0.252546974 | 0.125409278 |
| 0.236177109 | 0.173136644 | 0.220075809 | 0.196530806 |
| 0.051996655 | 0.296545031 | 0.163552882 | 0.096015153 |
| 0.171313666 | 0.056224109 | 0.035172397 | 0.284350269 |
| 0.211098607 | 0.144762067 | 0.06440646  | 0.266928472 |
| 0.099084454 | 0.157583976 | 0.071802336 | 0.092250959 |
| 0.022734061 | 0.121929555 | 0.106314641 | 0.189849869 |
| 0.144126904 | 0.12700853  | 0.173805899 | 0.179381342 |
| 0.170085686 | 0.034813095 | 0.204038135 | 0.110811624 |
| 0.23255136  | 0.01570046  | 0.23167385  | 0.108628926 |
| 0.09971957  | 0.180341647 | 0.146778263 | 0.124400125 |
| 0.219449593 | 0.034983444 | 0.010187871 | 0.179546387 |
| 0.027089523 | 0.05565236  | 0.099506286 | 0.170200634 |
| 0.044019983 | 0.039693863 | 0.108630324 | 0.048036055 |
| 0.103150104 | 0.112890123 | 0.178610851 | 0.226928321 |
| 0.227344762 | 0.13653088  | 0.046773922 | 0.120439656 |
| 0.1221663   | 0.222900246 | 0.000816365 | 0.082111402 |
| 0.112436746 | 0.137141276 | 0.247146753 | 0.133853976 |
| 0.124521686 | 0.078669513 | 0.139145708 | 0.193430682 |
| 0.123377975 | 0.121556373 | 0.107324187 | 0.280508646 |
| 0.018376742 | 0.208495346 | 0.144271976 | 0.085636892 |
| 0.039074646 | 0.120560626 | 0.15294031  | 0.132259931 |
| 0.006379813 | 0.061251651 | 0.070196015 | 0.086677718 |
| 0.014398938 | 0.100880677 | 0.10837898  | 0.207658802 |
| 0.115484433 | 0.208342972 | 0.092665905 | 0.091012833 |
| 0.002271575 | 0.07092314  | 0.065515958 | 0.176363493 |
| 0.058931361 | 0.225617265 | 0.125505949 | 0.137903417 |
| 0.246185213 | 0.227347119 | 0.011866968 | 0.118456772 |
| 0.144991115 | 0.052105886 | 0.122612736 | 0.265167082 |
| 0.055219362 | 0.173185461 | 0.014142194 | 0.29222131  |
| 0.135987271 | 0.175282357 | 0.232354039 | 0.156326115 |
| 0.148009772 | 0.081376052 | 0.065208697 | 0.157272043 |
| 0.124165881 | 0.014132458 | 0.035268631 | 0.161529979 |
| 0.136709385 | 0.017417358 | 0.21503364  | 0.17240616  |
| 0.096407653 | 0.248863088 | 0.256049559 | 0.043705166 |
| 0.129773961 | 0.141410244 | 0.06257741  | 0.256607441 |
| 0.225112854 | 0.01415923  | 0.114564821 | 0.055653899 |
| 0.089076949 | 0.136036995 | 0.130724185 | 0.00432132  |
| 0.063711701 | 0.101001704 | 0.009194859 | 0.104425177 |
| 0.127953638 | 0.026102251 | 0.061610944 | 1           |
| 0.148929589 | 0.171643878 | 0.120090814 | 0.092287547 |
| 0.066793896 | 0.084467934 | 0.181347516 | 0.019545735 |
| 0.014391737 | 0.07719476  | 0.054148007 | 0.052752206 |
| 0.023941163 | 0.106497089 | 0.100863546 | 0.04185165  |
| 0.010565345 | 0.032855158 | 0.02943509  | 0.127393771 |
| 0.047146632 | 0.025435209 | 0.109636017 | 0.073332305 |
| 0.09670648  | 0.121160907 | 0.15814925  | 0.271674103 |
| 0.094039356 | 0.069609839 | 0.182844452 | 0.00939175  |
| 0.165395088 | 0.029525894 | 0.036183691 | 0.133297491 |
| 0.062782073 | 0.234152545 | 0.027091357 | 0.136815186 |
| 0.081599992 | 0.144539496 | 0.220733186 | 0.003364113 |
| 0.153906871 | 0.129857238 | 0.299486925 | 0.080616626 |
| 0.099679316 | 0.176926782 | 0.021732004 | 0.139729741 |
| 0.136593096 | 0.108284311 | 0.171097832 | 0.131096947 |



|             |             |             |             |
|-------------|-------------|-------------|-------------|
| 0.161565185 | 0.234932224 | 0.109342301 | 0.188533086 |
| 0.139925499 | 0.0529848   | 0.017696051 | 0.255722092 |
| 0.163426274 | 0.246935182 | 0.102633415 | 0.158727657 |
| 0.049466652 | 0.008666453 | 0.247726281 | 0.187600289 |
| 0.127640933 | 0.173765723 | 0.316302273 | 0.091309322 |
| 0.212903404 | 0.034604969 | 0.012213631 | 0.1708907   |
| 0.107453712 | 0.162217173 | 0.091276949 | 0.173211971 |
| 0.118334194 | 0.061435536 | 0.077629683 | 0.073366757 |
| 0.108145257 | 0.062497053 | 0.179343907 | 0.131127419 |
| 0.142630128 | 0.062488437 | 0.035631099 | 0.285409029 |
| 0.014535974 | 0.022976258 | 0.153110618 | 0.077295288 |
| 0.041763962 | 0.093515524 | 0.025993274 | 0.049528386 |
| 0.022028289 | 0.115677417 | 0.283169577 | 0.023767383 |
| 0.036031926 | 0.050167855 | 0.312521782 | 0.098700726 |
| 0.153326074 | 0.168000063 | 0.136143048 | 0.136253054 |
| 0.201782653 | 0.135559439 | 0.091779771 | 0.236966923 |
| 0.139395359 | 0.141044901 | 0.154884786 | 0.009126998 |
| 0.237549068 | 0.034817907 | 0.005977385 | 0.155561251 |
| 0.168235585 | 0.10669544  | 0.001118473 | 0.05337055  |
| 0.141978905 | 0.271821144 | 0.106426256 | 0.175359414 |
| 0.011218607 | 0.283536289 | 0.061684579 | 0.197607716 |
| 0.12828853  | 0.06856811  | 0.091162662 | 0.132147979 |
| 0.126301923 | 0.167338248 | 0.074419408 | 0.146411539 |
| 0.117972096 | 0.119084404 | 0.017500344 | 0.206229314 |
| 0.134818967 | 0.139830819 | 0.181244513 | 0.144294859 |
| 0.204223073 | 0.280008471 | 0.166585601 | 0.020734134 |
| 0.014593103 | 0.049688446 | 0.009164457 | 0.00638563  |
| 0.088233484 | 0.056517277 | 0.182663987 | 0.244469976 |
| 0.174597699 | 0.095749812 | 0.034430115 | 0.140582242 |
| 0.171826395 | 0.217953777 | 0.090022315 | 0.005973893 |
| 0.011558293 | 0.008512132 | 0.150936857 | 0.246869687 |
| 0.16434475  | 0.004047143 | 0.051484257 | 0.023326186 |
| 0.037778781 | 0.179197349 | 0.137436628 | 0.275087216 |
| 0.223293941 | 0.182690925 | 0.011039742 | 0.281664778 |
| 0.030994915 | 0.106654705 | 0.170773236 | 0.12036848  |
| 0.165113768 | 0.200421035 | 0.182641859 | 0.199579955 |
| 0.019254333 | 0.297614607 | 0.211519009 | 0.024335895 |
| 0.106279966 | 0.122206355 | 0.065202704 | 0.293310162 |
| 0.119408822 | 0.021757604 | 0.022539334 | 0.007820359 |
| 0.035816644 | 0.231402653 | 0.049841628 | 0.213681508 |
| 0.172230319 | 0.261534421 | 0.103381074 | 0.123412541 |
| 0.015759186 | 0.121422331 | 0.139292084 | 0.002891514 |
| 0.240425164 | 0.08845443  | 0.164070252 | 0.003106737 |
| 0.061115277 | 0.198686556 | 0.014538068 | 0.128763238 |
| 0.035342956 | 0.138881074 | 0.199294797 | 0.22725508  |
| 0.140664293 | 0.087944978 | 0.27125712  | 0.290988908 |
| 0.077938361 | 0.171867508 | 0.123739572 | 0.046666607 |
| 0.035675404 | 0.094140859 | 0.222620151 | 0.149917784 |
| 0.062168113 | 0.240351998 | 0.026006417 | 0.190589545 |
| 0.164303636 | 0.188164046 | 0.157438044 | 0.10828238  |
| 0.046253129 | 0.114191734 | 0.083100017 | 0.006592954 |
| 0.210310505 | 0.196129149 | 0.168646248 | 0.022474668 |
| 0.107930194 | 0.12802104  | 0.072932915 | 0.052045581 |
| 0.097593986 | 0.061743213 | 0.039213593 | 0.291129045 |

|             |             |             |             |
|-------------|-------------|-------------|-------------|
| 0.202751155 | 0.147158925 | 0.070153762 | 0.048989325 |
| 0.172305095 | 0.140524266 | 0.015316539 | 0.127834595 |
| 0.277588718 | 0.129940089 | 0.22540279  | 0.238625347 |
| 0.043709449 | 0.141291492 | 0.191735242 | 0.090336376 |
| 0.109790748 | 0.145902398 | 0.136253321 | 0.017719002 |
| 0.022167173 | 0.175781392 | 0.026068972 | 0.248430004 |
| 0.141330657 | 0.065742082 | 0.035273314 | 0.304635701 |
| 0.054774207 | 0.197610518 | 0.032592417 | 0.048132772 |
| 0.286625998 | 0.141690712 | 0.246717324 | 0.049340576 |
| 0.024701443 | 0.115137974 | 0.021189132 | 0.193480335 |
| 0.088750385 | 0.137304303 | 0.087666275 | 0.158289477 |
| 0.039237726 | 0.158038005 | 0.190113525 | 0.060319338 |
| 0.021412494 | 0.029803733 | 0.126993419 | 0.024402917 |
| 0.033720831 | 0.244802456 | 0.106216609 | 0.100969478 |
| 0.073930812 | 0.130261315 | 0.182112797 | 0.019796359 |
| 0.146427652 | 0.139996043 | 0.025263043 | 0.164194127 |
| 0.133803646 | 0.173685622 | 0.113873658 | 0.029379217 |
| 0.07355976  | 0.136504228 | 0.165682091 | 0.142018365 |
| 0.233556393 | 0.224608436 | 0.110412181 | 0.155728474 |
| 0.084576792 | 0.134562577 | 0.027636178 | 0.228865436 |
| 0.035398839 |             |             |             |
| GSTT2       | 0.069115939 | 0.078488409 | 0.064329091 |
| 0.132546383 | 0.11212157  | 0.036806017 | 0.102677289 |
| 0.026810178 | 0.078711035 | 0.041829354 | 0.120029739 |
| 0.092289104 | 0.083787617 | 0.044834942 | 0.016152291 |
| 0.180185641 | 0.222238262 | 0.04192569  | 0.191210671 |
| 0.123998684 | 0.045280147 | 0.216212301 | 0.124163292 |
| 0.081138853 | 0.192273308 | 0.198030813 | 0.103884407 |
| 0.131377303 | 0.215287866 | 0.025246133 | 0.077844427 |
| 0.22376995  | 0.083023953 | 0.057339053 | 0.14440741  |
| 0.055193356 | 0.047989819 | 0.057780511 | 0.022923651 |
| 0.06563074  | 0.10805262  | 0.118434635 | 0.178181979 |
| 0.128853184 | 0.04489971  | 0.150109364 | 0.138938792 |
| 0.017676689 | 0.20349019  | 0.012879691 | 0.042443739 |
| 0.04673982  | 0.059780472 | 0.035645372 | 0.085482137 |
| 0.044550009 | 0.015200718 | 0.047775104 | 0.03383455  |
| 0.15300747  | 0.012776785 | 0.054730423 | 0.053890447 |
| 0.023428072 | 0.050956415 | 0.209250418 | 0.070410292 |
| 0.053333856 | 0.047247069 | 0.099161793 | 0.057593579 |
| 0.012366534 | 0.134725937 | 0.17166317  | 0.035834103 |
| 0.298394806 | 0.155194782 | 0.213389119 | 0.118914546 |
| 0.12272418  | 0.057581255 | 0.13872781  | 0.115091455 |
| 0.167376374 | 0.185727272 | 0.08957764  | 0.164644467 |
| 0.071277009 | 0.104393334 | 0.082119983 | 0.206345184 |
| 0.129925676 | 0.069764263 | 0.147107993 | 0.241384546 |
| 0.070354739 | 0.069474075 | 0.046997155 | 0.074837774 |
| 0.030148063 | 0.200987271 | 0.050542547 | 0.103535526 |
| 0.048192373 | 0.094071702 | 0.290089678 | 0.082714048 |
| 0.227143576 | 0.017993223 | 0.1940232   | 0.110465278 |
| 0.125683619 | 0.077765621 | 0.2702274   | 0.091785062 |
| 0.098673056 | 0.079589057 | 0.071438605 | 0.166322151 |
| 0.108396277 | 0.161075826 | 0.069628719 | 0.225368284 |
| 0.046913317 | 0.077585203 | 0.038535183 | 0.112532455 |
| 0.033454373 | 0.050621327 | 0.08512273  | 0.127689323 |

|             |             |             |             |
|-------------|-------------|-------------|-------------|
| 0.260565307 | 0.120174912 | 0.074129741 | 0.069544021 |
| 0.099974585 | 0.0431481   | 0.111401483 | 0.041524419 |
| 0.073436048 | 0.137569128 | 0.001848727 | 0.110385712 |
| 0.075339765 | 0.130202598 | 0.275556624 | 0.075901249 |
| 0.179205283 | 0.078166202 | 0.18798562  | 0.107891971 |
| 0.047291217 | 0.209966961 | 0.024285438 | 0.193695113 |
| 0.031371498 | 0.189577861 | 0.165145147 | 0.092952978 |
| 0.104457066 | 0.05285981  | 0.261641956 | 0.040480486 |
| 0.022635496 | 0.183898004 | 0.084263241 | 0.043875317 |
| 0.036800373 | 0.068132687 | 0.037504314 | 0.217815674 |
| 0.111678481 | 0.176839061 | 0.027430583 | 0.073036675 |
| 0.072581227 | 0.17415377  | 0.013118469 | 0.097944793 |
| 0.022274394 | 0.105633666 | 0.087343469 | 0.09550025  |
| 0.256831238 | 0.130555435 | 0.007811304 | 0.049239259 |
| 0.069368653 | 0.012663873 | 0.131062001 | 0.122073607 |
| 0.047165011 | 0.118683624 | 0.003957652 | 0.185355093 |
| 0.033892297 | 0.188996369 | 0.135712598 | 0.293221922 |
| 0.056774973 | 0.229596124 | 0.034213761 | 0.089810943 |
| 0.067624434 | 0.057501062 | 0.023294473 | 0.102450424 |
| 0.229985257 | 0.027429774 | 0.086979511 | 0.125172053 |
| 0.098341912 | 0.126932172 | 0.154830482 | 0.043389536 |
| 0.100266261 | 0.089464141 | 0.155718611 | 0.194743582 |
| 0.092043902 | 0.018270746 | 0.049713585 | 0.061742718 |
| 0.021898074 | 0.068220777 | 0.055715568 | 0.010832337 |
| 0.151209045 | 0.059544304 | 0.042691315 | 0.127331497 |
| 0.046400246 | 0.092732546 | 0.040531895 | 0.148929589 |
| 1           | 0.095327614 | 0.117545632 | 0.064861745 |
| 0.078483157 | 0.070449952 | 0.131163645 | 0.046591127 |
| 0.079899978 | 0.143609938 | 0.052123538 | 0.047334377 |
| 0.061258472 | 0.223556093 | 0.127620795 | 0.028335269 |
| 0.084135127 | 0.038532704 | 0.029792503 | 0.048399265 |
| 0.041174063 | 0.132139858 | 0.122081907 | 0.060892759 |
| 0.19682203  | 0.244885981 | 0.078234379 | 0.160733575 |
| 0.028832553 | 0.104009983 | 0.245478544 | 0.016723867 |
| 0.106149994 | 0.017959875 | 0.008426834 | 0.076706068 |
| 0.112817186 | 0.123374509 | 0.085689765 | 0.288945614 |
| 0.079077411 | 0.199457011 | 0.133386799 | 0.018295092 |
| 0.049864109 | 0.061597766 | 0.176250763 | 0.172945031 |
| 0.042709393 | 0.104068882 | 0.116664733 | 0.048948317 |
| 0.047479366 | 0.238767355 | 0.085079427 | 0.238277843 |
| 0.261393032 | 0.131843587 | 0.078331466 | 0.313268611 |
| 0.236625044 | 0.078788629 | 0.035753156 | 0.284538184 |
| 0.091340721 | 0.210828545 | 0.067158344 | 0.109918899 |
| 0.155657153 | 0.120868686 | 0.19071282  | 0.072998219 |
| 0.050827462 | 0.08778666  | 0.245771653 | 0.122604172 |
| 0.227319121 | 0.045017334 | 0.010208757 | 0.098244278 |
| 0.065951694 | 0.064988888 | 0.158042281 | 0.101558747 |
| 0.051159471 | 0.021875277 | 0.230046948 | 0.059944738 |
| 0.047853994 | 0.135590102 | 0.087718123 | 0.061066372 |
| 0.071915066 | 0.066734528 | 0.043040113 | 0.117456547 |
| 0.060277156 | 0.082672933 | 0.110932028 | 0.078766034 |
| 0.036774905 | 0.11776959  | 0.058587536 | 0.022263601 |
| 0.156994365 | 0.059106264 | 0.144022108 | 0.136082712 |
| 0.029073164 | 0.017128685 | 0.215338919 | 0.18672836  |

|             |             |             |             |
|-------------|-------------|-------------|-------------|
| 0.088290144 | 0.069604402 | 0.059786358 | 0.088889994 |
| 0.085962323 | 0.078066975 | 0.065183689 | 0.255135966 |
| 0.260013291 | 0.062099692 | 0.055669975 | 0.079350382 |
| 0.135370977 | 0.012668487 | 0.108410103 | 0.07269602  |
| 0.172426497 | 0.034646609 | 0.005237418 | 0.022379666 |
| 0.206482109 | 0.14882557  | 0.048931678 | 0.079572051 |
| 0.008015545 | 0.130986741 | 0.035896174 | 0.09247322  |
| 0.065109163 | 0.217071346 | 0.174503944 | 0.07117051  |
| 0.079302404 | 0.072432779 | 0.078193941 | 0.095689816 |
| 0.080406841 | 0.055914648 | 0.05723223  | 0.25663155  |
| 0.083263863 | 0.065615538 | 0.081196151 | 0.059595277 |
| 0.12346885  | 0.167337008 | 0.194067409 | 0.100171022 |
| 0.0564856   | 0.026932865 | 0.012133624 | 0.073412959 |
| 0.028175949 | 0.164105441 | 0.076677963 | 0.138088193 |
| 0.10026512  | 0.174172723 | 0.04521445  | 0.064921015 |
| 0.085202455 | 0.113013084 | 0.101230629 | 0.016832928 |
| 0.013732981 | 0.156279303 | 0.078078179 | 0.208426878 |
| 0.085222542 | 0.008316179 | 0.132166434 | 0.051231776 |
| 0.06200815  | 0.142948336 | 0.067980233 | 0.197863994 |
| 0.099923319 | 0.219003508 | 0.0228314   | 0.163305078 |
| 0.188899736 | 0.024219004 | 0.105075317 | 0.056903359 |
| 0.211605812 | 0.16948185  | 0.046747619 | 0.117494037 |
| 0.03964101  | 0.245331184 | 0.095363908 | 0.052535325 |
| 0.104281533 | 0.221993704 | 0.179622503 | 0.154544947 |
| 0.051005692 | 0.166266759 | 0.201613741 | 0.006266012 |
| 0.10375101  | 0.110335949 | 0.140001367 | 0.119352946 |
| 0.095177332 | 0.173892719 | 0.225590164 | 0.056834763 |
| 0.137413656 | 0.053832459 | 0.141213871 | 0.008908366 |
| 0.09978045  | 0.180351234 | 0.064927052 | 0.035808924 |
| 0.027901503 | 0.068555874 | 0.045556278 | 0.219142592 |
| 0.046698168 | 0.258467859 | 0.133238693 | 0.135468092 |
| 0.215385885 | 0.06268785  | 0.193450783 | 0.125140793 |
| 0.04350902  | 0.138194366 | 0.05314862  | 0.026999774 |
| 0.081153134 | 0.075355109 | 0.108636515 | 0.047744893 |
| 0.031518831 | 0.140186806 | 0.057438556 | 0.091293612 |
| 0.059331582 | 0.075142782 | 0.077118955 | 0.097024516 |
| 0.112893433 | 0.045249243 | 0.063699784 | 0.061973212 |
| 0.140500701 | 0.133660854 | 0.056183427 | 0.141072914 |
| 0.195025498 | 0.071022218 | 0.103977554 | 0.014085486 |
| 0.061776583 | 0.033106588 | 0.126773045 | 0.168699782 |
| 0.062315819 | 0.049242942 | 0.088572998 | 0.172476443 |
| 0.080099112 | 0.054850238 | 0.035950404 | 0.084435139 |
| 0.239764523 | 0.147450181 | 0.109778397 | 0.126113441 |
| 0.025602961 | 0.08171668  | 0.087582599 | 0.060670738 |
| 0.05076076  | 0.140410987 | 0.062111859 | 0.013499085 |
| 0.10674177  | 0.057860453 | 0.136879763 | 0.308906816 |
| 0.229458093 | 0.205427106 | 0.030348147 | 0.171554423 |
| 0.031726608 | 0.18559183  | 0.014950536 | 0.14912708  |
| 0.200587739 | 0.032516171 | 0.187426269 | 0.065813997 |
| 0.151804438 | 0.056457557 | 0.105579284 | 0.251624119 |
| 0.046388191 | 0.080769849 | 0.092289469 | 0.1634346   |
| 0.057034499 | 0.169859655 | 0.211967895 | 0.025186332 |
| 0.024036917 | 0.025269339 | 0.075026846 | 0.060076194 |
| 0.10209934  | 0.137925964 | 0.032489338 | 0.177045824 |

|             |             |             |             |
|-------------|-------------|-------------|-------------|
| 0.106275125 | 0.038621601 | 0.062894873 | 0.061254634 |
| 0.223983206 | 0.073240627 | 0.019858633 | 0.097776873 |
| 0.080431827 | 0.205115996 | 0.031883982 | 0.046293406 |
| 0.115131257 | 0.050026158 | 0.087880042 | 0.065097501 |
| 0.097984426 | 0.185897461 | 0.036679011 | 0.071734877 |
| 0.074146936 | 0.04275936  | 0.101675105 | 0.105269811 |
| 0.026372183 |             |             |             |
| GZMK        | 0.479461869 | 0.527628997 | 0.465494109 |
| 0.497736907 | 0.50869121  | 0.444118838 | 0.264424847 |
| 0.217026132 | 0.117952353 | 0.008371491 | 0.038441146 |
| 0.511229999 | 0.273432943 | 0.334456905 | 0.400948973 |
| 0.492177866 | 0.179526043 | 0.393544326 | 0.29808714  |
| 0.478679415 | 0.119660065 | 0.48258612  | 0.121099469 |
| 0.35307628  | 0.144497321 | 0.09734403  | 0.345019513 |
| 0.506332334 | 0.10994737  | 0.396664196 | 0.447982735 |
| 0.12557291  | 0.499065558 | 0.530916929 | 0.525351505 |
| 0.526695156 | 0.456083697 | 0.013240978 | 0.368721921 |
| 0.473097767 | 0.523574337 | 0.477122405 | 0.40507294  |
| 0.059704747 | 0.495932615 | 0.31084951  | 0.473371976 |
| 0.272938336 | 0.046822953 | 0.282313374 | 0.447023018 |
| 0.494567075 | 0.521545768 | 0.268956336 | 0.207931436 |
| 0.278322723 | 0.271508709 | 0.35515517  | 0.375828631 |
| 0.286514064 | 0.190078584 | 0.499265277 | 0.122170905 |
| 0.185355388 | 0.291567105 | 0.190570587 | 0.312175178 |
| 0.421975465 | 0.443928285 | 0.022412823 | 0.469896871 |
| 0.004421783 | 0.452793662 | 0.445011997 | 0.391585162 |
| 0.057631416 | 0.032674187 | 0.221527538 | 0.41466899  |
| 0.516655514 | 0.46135823  | 0.538815947 | 0.533347654 |
| 0.236130094 | 0.351121169 | 0.468820763 | 0.22566869  |
| 0.497030325 | 0.233835461 | 0.137094927 | 0.499627808 |
| 0.538403591 | 0.531710208 | 0.258907545 | 0.323726119 |
| 0.505078362 | 0.492380429 | 0.504408923 | 0.517163492 |
| 0.433436424 | 0.067078088 | 0.475495483 | 0.530141785 |
| 0.451369566 | 0.390007994 | 0.200189636 | 0.474700829 |
| 0.077681863 | 0.419335402 | 0.431303419 | 0.190823439 |
| 0.518996678 | 0.026727753 | 0.269452717 | 0.436026152 |
| 0.251674465 | 0.508113304 | 0.525496183 | 0.239659099 |
| 0.478299679 | 0.028409187 | 0.188265667 | 0.042929618 |
| 0.39489951  | 0.186523306 | 0.49962411  | 0.526046866 |
| 0.276883238 | 0.464625451 | 0.322349977 | 0.00312424  |
| 0.037551154 | 0.218593781 | 0.505471923 | 0.417964091 |
| 0.498168629 | 0.432953245 | 0.309334679 | 0.451936256 |
| 0.522699552 | 0.538053161 | 0.075195256 | 0.123163871 |
| 0.501594626 | 0.219391015 | 0.299064378 | 0.525997967 |
| 0.391431968 | 0.142125044 | 0.165217499 | 0.529260914 |
| 0.44422222  | 0.113192088 | 0.377433089 | 0.491442171 |
| 0.419150852 | 0.438174566 | 0.136730345 | 0.347634984 |
| 0.068685897 | 0.494839475 | 0.038626224 | 0.378332185 |
| 0.34965081  | 0.194082769 | 0.012776117 | 0.30718721  |
| 0.36035054  | 0.512092872 | 0.483347785 | 0.134765541 |
| 0.395225417 | 0.493651652 | 0.369292093 | 0.514960117 |
| 0.018566509 | 0.058979507 | 0.316309602 | 0.527445071 |
| 0.338425685 | 0.521231997 | 0.362393204 | 0.367814999 |
| 0.352007534 | 0.518675226 | 0.003859653 | 0.508883173 |

|             |             |             |             |
|-------------|-------------|-------------|-------------|
| 0.534558382 | 0.342360338 | 0.492182584 | 0.48785599  |
| 0.461924083 | 0.523824803 | 0.04813421  | 0.493571999 |
| 0.410724504 | 0.100475221 | 0.535520308 | 0.212035066 |
| 0.474618875 | 0.059372692 | 0.379405803 | 0.512613825 |
| 0.510246936 | 0.011502161 | 0.273114209 | 0.459123865 |
| 0.036015182 | 0.124053047 | 0.491412607 | 0.487679662 |
| 0.470206119 | 0.516367614 | 0.530792207 | 0.445436453 |
| 0.514885792 | 0.279817279 | 0.016229373 | 0.388383554 |
| 0.505320962 | 0.454586023 | 0.46073815  | 0.29584989  |
| 0.387552172 | 0.498824666 | 0.489511522 | 0.264638983 |
| 0.061045641 | 0.372674052 | 0.028907197 | 0.417545669 |
| 0.455098877 | 0.163665233 | 0.473155333 | 0.171643878 |
| 0.095327614 | 1           | 0.225052508 | 0.322669807 |
| 0.164470421 | 0.490490981 | 0.304290816 | 0.314805295 |
| 0.292189791 | 0.213136587 | 0.437920244 | 0.464722936 |
| 0.051611538 | 0.128123816 | 0.017183805 | 0.460634845 |
| 0.198291148 | 0.432811763 | 0.42615968  | 0.475823588 |
| 0.392885384 | 0.151464514 | 0.47749555  | 0.348611477 |
| 0.149889346 | 0.021096427 | 0.508938655 | 0.477660951 |
| 0.389746654 | 0.19789472  | 0.053747419 | 0.420704708 |
| 0.528586076 | 0.387186977 | 0.306093162 | 0.505566778 |
| 0.03444823  | 0.530184178 | 0.329314914 | 0.165125163 |
| 0.471624913 | 0.333058954 | 0.518309393 | 0.080196014 |
| 0.449410299 | 0.484481217 | 0.372117994 | 0.246661124 |
| 0.446160456 | 0.491408933 | 0.042614635 | 0.468630951 |
| 0.466564184 | 0.044516504 | 0.527390912 | 0.16409453  |
| 0.028427765 | 0.517207641 | 0.526825933 | 0.100401221 |
| 0.103435211 | 0.42588983  | 0.060451341 | 0.363081863 |
| 0.522126204 | 0.494981866 | 0.513869449 | 0.266202725 |
| 0.058576066 | 0.017335788 | 0.257515298 | 0.463098242 |
| 0.522556632 | 0.515343049 | 0.31899472  | 0.463969061 |
| 0.300580293 | 0.422558165 | 0.165950065 | 0.529116716 |
| 0.216370471 | 0.522040176 | 0.009250423 | 0.520894176 |
| 0.52543836  | 0.339023957 | 0.112708656 | 0.37746484  |
| 0.45848405  | 0.063783848 | 0.239487717 | 0.507527699 |
| 0.50108768  | 0.413303874 | 0.440957855 | 0.496403615 |
| 0.023301987 | 0.057052005 | 0.470769614 | 0.231521499 |
| 0.473956106 | 0.274270017 | 0.06828814  | 0.379575458 |
| 0.063414174 | 0.485001181 | 0.522888366 | 0.086217727 |
| 0.417965411 | 0.354981722 | 0.456234297 | 0.050985381 |
| 0.515243229 | 0.501729963 | 0.533552377 | 0.197349827 |
| 0.513836266 | 0.514925177 | 0.492676711 | 0.101280717 |
| 0.023928936 | 0.527432571 | 0.461244937 | 0.033492775 |
| 0.530278267 | 0.277490123 | 0.021652273 | 0.498186035 |
| 0.232255596 | 0.456084236 | 0.005433686 | 0.092239976 |
| 0.051253762 | 0.525703475 | 0.494537831 | 0.445940402 |
| 0.307195068 | 0.429663822 | 0.006582682 | 0.517583978 |
| 0.501024667 | 0.020541734 | 0.182058789 | 0.520092662 |
| 0.512038389 | 0.531391451 | 0.403684155 | 0.528673654 |
| 0.516190108 | 0.515787114 | 0.304512951 | 0.340487297 |
| 0.517214226 | 0.500225837 | 0.490460335 | 0.476224917 |
| 0.52984403  | 0.503488786 | 0.351376058 | 0.023603746 |
| 0.179072711 | 0.254939063 | 0.395918594 | 0.12150506  |
| 0.376375695 | 0.190447829 | 0.501011686 | 0.531892988 |

|             |             |             |             |
|-------------|-------------|-------------|-------------|
| 0.530396883 | 0.007007414 | 0.187585498 | 0.510070282 |
| 0.495599738 | 0.516553893 | 0.024110731 | 0.007713998 |
| 0.009155    | 0.030632379 | 0.426073532 | 0.300152621 |
| 0.518566557 | 0.304746935 | 0.006907573 | 0.056535241 |
| 0.344877103 | 0.486707344 | 0.513606096 | 0.455090885 |
| 0.512193999 | 0.105277355 | 0.368813849 | 0.469520309 |
| 0.09678052  | 0.377281943 | 0.534815517 | 0.483136997 |
| 0.051247454 | 0.307563962 | 0.424784551 | 0.527366428 |
| 0.096144239 | 0.390208087 | 0.513963387 | 0.406571994 |
| 0.015897489 | 0.108691197 | 0.091182103 | 0.510276904 |
| 0.515720341 | 0.113864164 | 0.050955983 | 0.172365286 |
| 0.165490363 | 0.52398544  | 0.220152441 | 0.534296503 |
| 0.512078464 | 0.513092762 | 0.097512672 | 0.492980141 |
| 0.058052151 | 0.500877295 | 0.425479351 | 0.076663749 |
| 0.336723992 | 0.01618732  | 0.482061756 | 0.221027545 |
| 0.384891113 | 0.458654217 | 0.256492427 | 0.022396525 |
| 0.22614761  | 0.071770941 | 0.536499322 | 0.531439676 |
| 0.041926809 | 0.288204575 | 0.362723746 | 0.471174679 |
| 0.34256058  | 0.521232443 | 0.517462761 | 0.483495264 |
| 0.114794127 | 0.166110902 | 0.476317844 | 0.459216968 |
| 0.283676604 | 0.536377287 | 0.392839481 | 0.522145384 |
| 0.473258276 | 0.493595773 | 0.512459276 | 0.428939629 |
| 0.29935434  | 0.463818318 | 0.453245272 | 0.03000674  |
| 0.424913734 | 0.536239181 | 0.411730918 | 0.214080414 |
| 0.337472878 | 0.466255081 | 0.057217138 | 0.200179733 |
| 0.404498823 | 0.368543798 | 0.191361718 | 0.50809171  |
| 0.447702301 | 0.463863241 | 0.047338153 | 0.08700385  |
| 0.544160026 | 0.46808886  | 0.179965045 | 0.509707023 |
| 0.212656451 | 0.432588711 | 0.522402166 | 0.52287493  |
| 0.435913188 | 0.523994266 | 0.497104457 | 0.468792476 |
| 0.459864555 | 0.32365888  | 0.536826951 | 0.10151651  |
| 0.115744168 | 0.48150934  | 0.138808238 | 0.119546953 |
| 0.188510155 | 0.036849428 | 0.373273582 | 0.500308278 |
| 0.452948171 | 0.470315197 | 0.366206593 | 0.106522007 |
| 0.395160048 | 0.413049075 | 0.43360673  | 0.256785054 |
| 0.111207803 | 0.513897356 | 0.013218451 | 0.073874553 |
| 0.462779122 | 0.521084325 | 0.480696687 | 0.301565642 |
| 0.37609932  | 0.172250575 | 0.377072624 | 0.349444351 |
| 0.405977906 | 0.423483988 | 0.518278065 | 0.043891953 |
| 0.026592701 | 0.534786232 | 0.430526152 | 0.025569368 |
| 0.108297586 | 0.437788789 | 0.336496592 | 0.315253835 |
| 0.028972861 | 0.50561589  | 0.411098872 | 0.507245041 |
| 0.413154262 | 0.083934083 | 0.396067367 | 0.106527329 |
| 0.072270486 | 0.456968779 | 0.471243312 | 0.523054318 |
| 0.409554389 | 0.50476372  | 0.454714973 | 0.510764233 |
| 0.140813704 | 0.439067599 | 0.038679889 | 0.509132502 |
| 0.490980485 |             |             |             |
| H2-AA       | 0.177271681 | 0.194380012 | 0.166679207 |
| 0.167726419 | 0.167561042 | 0.061999608 | 0.046463186 |
| 0.015755051 | 0.046264294 | 0.002832034 | 0.043921069 |
| 0.202935659 | 0.058188622 | 0.026470918 | 0.033202768 |
| 0.252523844 | 0.116706629 | 0.070429936 | 0.100464598 |
| 0.158885993 | 0.00958284  | 0.247190692 | 0.036361585 |
| 0.169955361 | 0.136715526 | 0.063624812 | 0.154770542 |

|             |             |             |             |
|-------------|-------------|-------------|-------------|
| 0.194496095 | 0.075761295 | 0.032813768 | 0.100732753 |
| 0.138402278 | 0.170367856 | 0.175436063 | 0.235361956 |
| 0.179441235 | 0.142864179 | 0.018608431 | 0.023542761 |
| 0.148280506 | 0.223467168 | 0.150693655 | 0.131875557 |
| 0.025808678 | 0.132521881 | 0.079871527 | 0.264088537 |
| 0.020427209 | 0.055645002 | 0.012785075 | 0.11749905  |
| 0.142724734 | 0.124097981 | 0.021844518 | 0.031397691 |
| 0.044337485 | 0.011665925 | 0.124371931 | 0.050711885 |
| 0.070661246 | 0.006456502 | 0.163184455 | 0.021509016 |
| 0.021747628 | 0.033984762 | 0.160900621 | 0.041081466 |
| 0.138079153 | 0.093147775 | 0.014545865 | 0.180060001 |
| 0.000597564 | 0.156911362 | 0.263163836 | 0.124152386 |
| 0.083405603 | 0.022625792 | 0.154108684 | 0.095151951 |
| 0.208283062 | 0.175465369 | 0.27688799  | 0.270551481 |
| 0.093954006 | 0.187935788 | 0.231909012 | 0.065522974 |
| 0.167353764 | 0.039038501 | 0.041376044 | 0.287339354 |
| 0.273012694 | 0.196319376 | 0.125261175 | 0.260391391 |
| 0.135543908 | 0.160225162 | 0.091380477 | 0.11846873  |
| 0.071655602 | 0.172168259 | 0.134716596 | 0.241286547 |
| 0.111539966 | 0.260942895 | 0.166676202 | 0.124074819 |
| 0.069838501 | 0.035137753 | 0.16180025  | 0.075335349 |
| 0.214191635 | 0.015204945 | 0.236605283 | 0.080924852 |
| 0.090767759 | 0.168009034 | 0.21336617  | 0.068575319 |
| 0.183769693 | 0.03294531  | 0.126176889 | 0.082298329 |
| 0.048970993 | 0.250468038 | 0.132456018 | 0.18667653  |
| 0.021509748 | 0.083860072 | 0.053848755 | 0.026107509 |
| 0.08551873  | 0.143710197 | 0.175970745 | 0.099954007 |
| 0.183212329 | 0.160520777 | 0.079359128 | 0.095784455 |
| 0.192727068 | 0.277517273 | 0.001908449 | 0.033337225 |
| 0.114961871 | 0.14444433  | 0.160209608 | 0.141176941 |
| 0.185665392 | 0.02433654  | 0.057557551 | 0.240281274 |
| 0.110573196 | 0.051631062 | 0.039555244 | 0.256057265 |
| 0.037237221 | 0.278648661 | 0.050166568 | 0.04975658  |
| 0.016558684 | 0.180108889 | 0.117952574 | 0.052482396 |
| 0.065204754 | 0.138940662 | 0.021952531 | 0.03055491  |
| 0.030383144 | 0.152765646 | 0.138074787 | 0.076243678 |
| 0.072599196 | 0.236015685 | 0.038462105 | 0.130171377 |
| 0.013892819 | 0.053424345 | 0.023161621 | 0.215813593 |
| 0.033135486 | 0.262412996 | 0.071145242 | 0.128785553 |
| 0.22460656  | 0.230732971 | 0.01355866  | 0.14930684  |
| 0.206799526 | 0.023802936 | 0.144610199 | 0.226285228 |
| 0.131728489 | 0.192160904 | 0.007911293 | 0.229476327 |
| 0.078829108 | 0.059744154 | 0.269954232 | 0.14501998  |
| 0.16081556  | 0.059897632 | 0.031509259 | 0.261759987 |
| 0.181856653 | 0.012641306 | 0.016988804 | 0.119705938 |
| 0.127841287 | 0.007177043 | 0.167924275 | 0.156965499 |
| 0.129572235 | 0.255198583 | 0.266665473 | 0.126649701 |
| 0.151998173 | 0.048310444 | 0.044116862 | 0.271355812 |
| 0.22384654  | 0.056159637 | 0.122702535 | 0.038298722 |
| 0.049523839 | 0.161227764 | 0.166750651 | 0.019933351 |
| 0.029862505 | 0.049843298 | 0.007111065 | 0.150085894 |
| 0.151816959 | 0.023807724 | 0.113934828 | 0.120090814 |
| 0.117545632 | 0.225052508 | 1           | 0.228136856 |
| 0.248408067 | 0.089469936 | 0.080392055 | 0.026523887 |



|             |             |             |             |
|-------------|-------------|-------------|-------------|
| 0.058272461 | 0.089858152 | 0.107818553 | 0.077219072 |
| 0.007483639 | 0.065532527 | 0.106242779 | 0.057737151 |
| 0.034858747 | 0.044194038 | 0.036229679 | 0.105009003 |
| 0.038274548 | 0.038031513 | 0.138981822 | 0.154737579 |
| 0.13927117  | 0.052983095 | 0.19236424  | 0.212490641 |
| 0.060712686 | 0.047754969 | 0.077980662 | 0.033385974 |
| 0.190048395 | 0.032545476 | 0.015313801 | 0.150922194 |
| 0.036181701 | 0.263485806 | 0.051059128 | 0.131083654 |
| 0.120618414 | 0.106128074 | 0.219551003 | 0.011118036 |
| 0.087630529 | 0.141789766 | 0.197979392 | 0.111859864 |
| 0.098671417 | 0.142929231 | 0.017886386 | 0.120540706 |
| 0.109097825 | 0.051534951 | 0.222363135 | 0.147885222 |
| 0.071354763 | 0.273229846 | 0.189425431 | 0.122928451 |
| 0.113548217 | 0.069258743 | 0.005161425 | 0.249725108 |
| 0.21146082  | 0.257137758 | 0.141354213 | 0.208538951 |
| 0.029691324 | 0.015008745 | 0.221174931 | 0.193477637 |
| 0.155648325 | 0.240053655 | 0.169729447 | 0.160652431 |
| 0.125874492 | 0.087368693 | 0.006947736 | 0.229429891 |
| 0.131295753 | 0.189686981 | 0.029869934 | 0.26175415  |
| 0.169593942 | 0.026183644 | 0.108860246 | 0.050453789 |
| 0.097189479 | 0.034551934 | 0.056221793 | 0.166865492 |
| 0.162029385 | 0.091625204 | 0.073404218 | 0.204929616 |
| 0.006056324 | 0.012104915 | 0.208720795 | 0.237209865 |
| 0.056264358 | 0.087737716 | 0.240432039 | 0.030125438 |
| 0.031965552 | 0.136347457 | 0.253803707 | 0.063750196 |
| 0.045440568 | 0.026428503 | 0.286723431 | 0.041405136 |
| 0.259368231 | 0.217811619 | 0.17321366  | 0.040059176 |
| 0.19583769  | 0.21084893  | 0.200886811 | 0.123064079 |
| 0.086918608 | 0.196517929 | 0.109041193 | 0.015222452 |
| 0.236686916 | 0.015116521 | 0.012193313 | 0.169783818 |
| 0.076466057 | 0.115916092 | 0.001076348 | 0.090609073 |
| 0.154537588 | 0.300204878 | 0.147326829 | 0.10450566  |
| 0.010469008 | 0.154934508 | 0.04226024  | 0.247965848 |
| 0.163062157 | 0.085900807 | 0.197409887 | 0.176519592 |
| 0.230850229 | 0.184675061 | 0.202394546 | 0.242372834 |
| 0.196331582 | 0.173923238 | 0.031626923 | 0.203127477 |
| 0.158553172 | 0.21796207  | 0.142086176 | 0.147554318 |
| 0.203615174 | 0.279203548 | 0.125802614 | 0.014449566 |
| 0.1060069   | 0.016369679 | 0.027410964 | 0.040767567 |
| 0.047695445 | 0.11014781  | 0.195238858 | 0.25552424  |
| 0.242968825 | 0.035040598 | 0.016713936 | 0.157939091 |
| 0.148213157 | 0.204289305 | 0.062169305 | 0.014606337 |
| 0.01415821  | 0.08628581  | 0.084854477 | 0.213864075 |
| 0.213478953 | 0.010261154 | 0.017893858 | 0.007145074 |
| 0.053800852 | 0.297694481 | 0.178454938 | 0.204554578 |
| 0.248339487 | 0.081348097 | 0.02416805  | 0.196906792 |
| 0.115190651 | 0.064329081 | 0.236153271 | 0.139248915 |
| 0.102231679 | 0.185873759 | 0.081189467 | 0.214104731 |
| 0.220599896 | 0.234438047 | 0.198179734 | 0.049103779 |
| 0.055801176 | 0.130527397 | 0.09853856  | 0.267540618 |
| 0.172515305 | 0.051731482 | 0.050766321 | 0.007114132 |
| 0.029909573 | 0.234282187 | 0.056710253 | 0.253918697 |
| 0.163358749 | 0.237450493 | 0.160035313 | 0.156655477 |
| 0.045107566 | 0.156379855 | 0.255060555 | 0.005327798 |

|             |             |             |             |
|-------------|-------------|-------------|-------------|
| 0.113107627 | 0.043100864 | 0.196737686 | 0.058584078 |
| 0.028760425 | 0.117618069 | 0.100784955 | 0.098596594 |
| 0.198297824 | 0.089210761 | 0.243610034 | 0.292618942 |
| 0.142087422 | 0.044901547 | 0.200617268 | 0.19035976  |
| 0.036533617 | 0.191361934 | 0.154761089 | 0.067498483 |
| 0.019180839 | 0.197501673 | 0.14591054  | 0.101848013 |
| 0.020988236 | 0.283032568 | 0.071650257 | 0.237812759 |
| 0.128725333 | 0.184968795 | 0.201997171 | 0.102267006 |
| 0.163815567 | 0.084598763 | 0.080706064 | 0.007277707 |
| 0.13808606  | 0.223798889 | 0.078496197 | 0.114173648 |
| 0.139771911 | 0.231165306 | 0.036579417 | 0.024751644 |
| 0.235864814 | 0.039085715 | 0.043402441 | 0.253508841 |
| 0.106779627 | 0.106965991 | 0.018423675 | 0.088603497 |
| 0.207348198 | 0.142587333 | 0.019173567 | 0.133783367 |
| 0.145088373 | 0.165262712 | 0.247270019 | 0.282406268 |
| 0.06925263  | 0.174236141 | 0.146874778 | 0.085653408 |
| 0.111371245 | 0.092139564 | 0.17957218  | 0.005003009 |
| 0.10435669  | 0.145582123 | 0.03968795  | 0.158609934 |
| 0.079477105 | 0.084857592 | 0.13924769  | 0.253101153 |
| 0.109586035 | 0.178879615 | 0.025218443 | 0.075606788 |
| 0.241832219 | 0.079996928 | 0.196812955 | 0.026543763 |
| 0.041605777 | 0.158518575 | 0.02879808  | 0.088266925 |
| 0.119972218 | 0.190755346 | 0.198253286 | 0.132977377 |
| 0.15156656  | 0.187332063 | 0.149053536 | 0.028396141 |
| 0.029006863 | 0.070093516 | 0.177750982 | 0.016099405 |
| 0.010476205 | 0.265056631 | 0.060682556 | 0.1068718   |
| 0.103897093 | 0.09352721  | 0.07612733  | 0.053339601 |
| 0.1238332   | 0.21467634  | 0.030077552 | 0.18768064  |
| 0.078579729 | 0.066326295 | 0.082536073 | 0.033094486 |
| 0.04877637  | 0.132412269 | 0.230690896 | 0.197072077 |
| 0.197024388 | 0.227209731 | 0.115212824 | 0.160870145 |
| 0.073730233 | 0.14032887  | 0.018040491 | 0.190196055 |
| 0.07509485  |             |             |             |

|             |             |             |             |
|-------------|-------------|-------------|-------------|
| H2-AB1      | 0.244832957 | 0.292711957 | 0.199994416 |
| 0.196012251 | 0.18226755  | 0.090160686 | 0.038085969 |
| 0.018359444 | 0.033831941 | 0.000672817 | 0.020476078 |
| 0.248100547 | 0.055800266 | 0.031409938 | 0.05298758  |
| 0.269588089 | 0.079616002 | 0.080281653 | 0.075911735 |
| 0.179194137 | 0.007788673 | 0.245689848 | 0.022686959 |
| 0.18235596  | 0.093699559 | 0.034248474 | 0.14651852  |
| 0.235734553 | 0.039710188 | 0.047175391 | 0.127412531 |
| 0.087992944 | 0.22970967  | 0.288653    | 0.267173975 |
| 0.298964529 | 0.214969348 | 0.009018852 | 0.034089247 |
| 0.214611305 | 0.280545192 | 0.173181242 | 0.119570871 |
| 0.012026804 | 0.228178836 | 0.065769295 | 0.276380477 |
| 0.028638609 | 0.023342049 | 0.017618653 | 0.1990198   |
| 0.24367335  | 0.167265033 | 0.024097483 | 0.024473615 |
| 0.051512949 | 0.017203086 | 0.156093669 | 0.074651338 |
| 0.054388379 | 0.008503681 | 0.268388066 | 0.016647572 |
| 0.024987702 | 0.032695377 | 0.118113029 | 0.039075377 |
| 0.170648892 | 0.138798506 | 0.00555886  | 0.247056124 |
| 0.001720309 | 0.167933182 | 0.254912875 | 0.154407439 |
| 0.032809057 | 0.008019488 | 0.117873921 | 0.098210809 |
| 0.261758469 | 0.277828292 | 0.348979043 | 0.360899132 |

|             |             |             |             |
|-------------|-------------|-------------|-------------|
| 0.074148559 | 0.152523829 | 0.261527901 | 0.048358157 |
| 0.239791065 | 0.029414757 | 0.031390137 | 0.299927843 |
| 0.352491472 | 0.307059906 | 0.103614424 | 0.203296026 |
| 0.193882562 | 0.241567128 | 0.119880642 | 0.136547649 |
| 0.103601216 | 0.104853954 | 0.218254321 | 0.335337957 |
| 0.173233031 | 0.266484521 | 0.100229948 | 0.163626566 |
| 0.035329607 | 0.055533532 | 0.152915884 | 0.0640204   |
| 0.269907938 | 0.006221818 | 0.167021634 | 0.088378861 |
| 0.08096363  | 0.230922675 | 0.331199189 | 0.047963715 |
| 0.19394394  | 0.012845013 | 0.128919487 | 0.038310942 |
| 0.059640476 | 0.25381737  | 0.23931175  | 0.243209775 |
| 0.025673021 | 0.105412037 | 0.047894656 | 0.007240712 |
| 0.035894304 | 0.124344431 | 0.250893621 | 0.108695544 |
| 0.228784087 | 0.261693012 | 0.068639601 | 0.148733409 |
| 0.258602926 | 0.348915824 | 0.003544045 | 0.021771782 |
| 0.136710267 | 0.121638389 | 0.115324389 | 0.178954877 |
| 0.158724761 | 0.018311077 | 0.035797844 | 0.330254426 |
| 0.17821304  | 0.024879725 | 0.051555342 | 0.264790323 |
| 0.051367722 | 0.260237373 | 0.031370339 | 0.049445681 |
| 0.00841107  | 0.297957505 | 0.055449332 | 0.062528575 |
| 0.094007899 | 0.107079952 | 0.009127275 | 0.03342818  |
| 0.038435139 | 0.226553827 | 0.250218566 | 0.0420935   |
| 0.066850873 | 0.2415466   | 0.052148759 | 0.178664352 |
| 0.005027719 | 0.02660223  | 0.035266328 | 0.303899161 |
| 0.052026498 | 0.35892074  | 0.071779248 | 0.132349076 |
| 0.175622559 | 0.280523923 | 0.009708118 | 0.252600072 |
| 0.324260433 | 0.037307986 | 0.155120383 | 0.248893416 |
| 0.164291329 | 0.244064426 | 0.011039247 | 0.239899188 |
| 0.123158795 | 0.033941126 | 0.344834896 | 0.087614074 |
| 0.25645737  | 0.025762786 | 0.036759973 | 0.357156388 |
| 0.260494372 | 0.005420821 | 0.021296607 | 0.139675711 |
| 0.062724888 | 0.006765335 | 0.215712239 | 0.176800021 |
| 0.145558965 | 0.310293505 | 0.322884943 | 0.157201412 |
| 0.167632523 | 0.039847953 | 0.016889069 | 0.236937849 |
| 0.295274569 | 0.089869351 | 0.199212222 | 0.038457111 |
| 0.07918765  | 0.245522696 | 0.254563536 | 0.032888279 |
| 0.013757461 | 0.054119986 | 0.003524389 | 0.14228668  |
| 0.241867614 | 0.017680532 | 0.151805811 | 0.092287547 |
| 0.064861745 | 0.322669807 | 0.228136856 | 1           |
| 0.245538436 | 0.113087501 | 0.065176351 | 0.031129265 |
| 0.059932    | 0.068401812 | 0.127467588 | 0.089478973 |
| 0.003777904 | 0.037531828 | 0.055048332 | 0.080424872 |
| 0.031176374 | 0.057557449 | 0.047215212 | 0.155684987 |
| 0.0483635   | 0.026106415 | 0.139165816 | 0.178269656 |
| 0.094604915 | 0.017711684 | 0.287498502 | 0.222803997 |
| 0.099155236 | 0.036938035 | 0.035976552 | 0.05565144  |
| 0.254056131 | 0.052902226 | 0.024268319 | 0.218907946 |
| 0.018245377 | 0.340887894 | 0.051362101 | 0.072120707 |
| 0.1292299   | 0.082769848 | 0.270975598 | 0.010897029 |
| 0.115066905 | 0.220872346 | 0.170499015 | 0.08021858  |
| 0.161213535 | 0.166075991 | 0.007481328 | 0.184769607 |
| 0.166288718 | 0.020766124 | 0.329220549 | 0.100403177 |
| 0.02748982  | 0.320317928 | 0.259793629 | 0.057792915 |
| 0.065379782 | 0.07424759  | 0.003339643 | 0.19873857  |

|             |             |             |             |
|-------------|-------------|-------------|-------------|
| 0.305581271 | 0.26361507  | 0.203684559 | 0.203206863 |
| 0.013058949 | 0.004853623 | 0.167786911 | 0.232614933 |
| 0.263791038 | 0.350623015 | 0.12694438  | 0.161917092 |
| 0.093974083 | 0.111592586 | 0.009813007 | 0.323689178 |
| 0.13557622  | 0.300864187 | 0.009172254 | 0.339637545 |
| 0.287598818 | 0.03640381  | 0.063856087 | 0.057131412 |
| 0.151079311 | 0.01689259  | 0.050085578 | 0.2668314   |
| 0.234294022 | 0.094442271 | 0.091264225 | 0.237282146 |
| 0.0022207   | 0.00612108  | 0.226925832 | 0.244280343 |
| 0.072197675 | 0.075746949 | 0.22398673  | 0.042798907 |
| 0.014363148 | 0.212812743 | 0.304064878 | 0.036490919 |
| 0.068278055 | 0.039657552 | 0.271846882 | 0.017998803 |
| 0.362922757 | 0.336868207 | 0.282125745 | 0.033058921 |
| 0.263728695 | 0.314614026 | 0.262592139 | 0.070132497 |
| 0.033990172 | 0.317252634 | 0.151869979 | 0.006865932 |
| 0.294297725 | 0.022992207 | 0.003937708 | 0.256792742 |
| 0.052508658 | 0.210295243 | 0.000554272 | 0.109696843 |
| 0.089102527 | 0.359828052 | 0.247760952 | 0.128916584 |
| 0.017557217 | 0.157316745 | 0.024343116 | 0.357902487 |
| 0.254826335 | 0.03494914  | 0.154753065 | 0.253141604 |
| 0.316180665 | 0.285036208 | 0.212605052 | 0.330607282 |
| 0.249254263 | 0.287041377 | 0.033559357 | 0.156930184 |
| 0.219608025 | 0.342274446 | 0.187329985 | 0.230086011 |
| 0.258322883 | 0.301094709 | 0.105046571 | 0.00505209  |
| 0.108602187 | 0.018335373 | 0.048242271 | 0.032162111 |
| 0.071567943 | 0.080303395 | 0.288839053 | 0.315797011 |
| 0.335689605 | 0.010494316 | 0.016041084 | 0.229943192 |
| 0.204137017 | 0.266926873 | 0.033677876 | 0.00905941  |
| 0.011011406 | 0.041236396 | 0.096586821 | 0.161700268 |
| 0.308592154 | 0.018721346 | 0.004731885 | 0.004155802 |
| 0.057450502 | 0.322287279 | 0.278456252 | 0.201697613 |
| 0.322786904 | 0.045435554 | 0.034993169 | 0.207918332 |
| 0.070368975 | 0.10797328  | 0.322933963 | 0.222380739 |
| 0.052814029 | 0.145639152 | 0.098816999 | 0.281487538 |
| 0.230015232 | 0.195012275 | 0.245394485 | 0.057879485 |
| 0.026852238 | 0.078100836 | 0.057905983 | 0.305443962 |
| 0.292143505 | 0.030610423 | 0.022005797 | 0.01137343  |
| 0.021472277 | 0.306693641 | 0.042516291 | 0.339252856 |
| 0.217148119 | 0.267297982 | 0.099926617 | 0.252781636 |
| 0.022774972 | 0.257687987 | 0.246051635 | 0.006935753 |
| 0.111768689 | 0.015557304 | 0.305684638 | 0.070665981 |
| 0.035806431 | 0.153294511 | 0.117020003 | 0.042999592 |
| 0.229051309 | 0.043831407 | 0.308168458 | 0.36252218  |
| 0.076012146 | 0.045233738 | 0.165848512 | 0.209294027 |
| 0.043883434 | 0.224881021 | 0.25799356  | 0.104857124 |
| 0.012778957 | 0.200016594 | 0.172765773 | 0.147380787 |
| 0.025546425 | 0.356342968 | 0.084121117 | 0.344951754 |
| 0.181488277 | 0.269460494 | 0.297215309 | 0.108378031 |
| 0.158212967 | 0.116249706 | 0.107635859 | 0.002997398 |
| 0.132357251 | 0.278375361 | 0.091056463 | 0.09090092  |
| 0.108828615 | 0.278383396 | 0.020330929 | 0.035455555 |
| 0.273936795 | 0.054957575 | 0.032103185 | 0.286299196 |
| 0.137897206 | 0.155789118 | 0.009560545 | 0.050659583 |
| 0.314032331 | 0.223942248 | 0.019019618 | 0.172205705 |

|             |             |             |             |
|-------------|-------------|-------------|-------------|
| 0.091029659 | 0.1583935   | 0.31639234  | 0.346921936 |
| 0.100336588 | 0.246476169 | 0.192872518 | 0.118546846 |
| 0.177357989 | 0.07668967  | 0.29012644  | 0.005656182 |
| 0.079042183 | 0.200027053 | 0.025038569 | 0.082333626 |
| 0.045967701 | 0.038342271 | 0.189490983 | 0.272383954 |
| 0.142861835 | 0.176994319 | 0.039559712 | 0.046006257 |
| 0.208601976 | 0.107386414 | 0.180052582 | 0.02328373  |
| 0.023661967 | 0.259325953 | 0.010896195 | 0.044330064 |
| 0.143799611 | 0.261787431 | 0.222406281 | 0.105869913 |
| 0.181625527 | 0.145786835 | 0.121793451 | 0.038477661 |
| 0.040746509 | 0.101649865 | 0.251044048 | 0.009087074 |
| 0.003644593 | 0.334962162 | 0.082270563 | 0.05230498  |
| 0.077733449 | 0.138441848 | 0.082969041 | 0.05651403  |
| 0.059367704 | 0.324298181 | 0.043844167 | 0.213749675 |
| 0.086393505 | 0.035030506 | 0.14078034  | 0.027436798 |
| 0.029208308 | 0.21576137  | 0.265940389 | 0.313241203 |
| 0.197800665 | 0.24448267  | 0.204760674 | 0.230217441 |
| 0.06465193  | 0.190787465 | 0.007716322 | 0.245125633 |
| 0.105038776 |             |             |             |

|             |             |             |             |
|-------------|-------------|-------------|-------------|
| H2-EB1      | 0.130246323 | 0.139462223 | 0.135682239 |
| 0.109183116 | 0.119376387 | 0.039581391 | 0.025186565 |
| 0.006461125 | 0.024989172 | 0.00101997  | 0.029143716 |
| 0.156860421 | 0.032647322 | 0.013160635 | 0.018787737 |
| 0.174607032 | 0.068226484 | 0.047530688 | 0.058840699 |
| 0.101734216 | 0.003396522 | 0.17105771  | 0.015738047 |
| 0.11862646  | 0.105401412 | 0.04026261  | 0.134754774 |
| 0.127950445 | 0.048658377 | 0.019663087 | 0.061146413 |
| 0.079360695 | 0.117129375 | 0.130086116 | 0.177363828 |
| 0.136313332 | 0.107025264 | 0.008693793 | 0.014310373 |
| 0.101623332 | 0.168090299 | 0.095591746 | 0.081624587 |
| 0.011052611 | 0.094485943 | 0.046234142 | 0.208363783 |
| 0.009794003 | 0.02990367  | 0.006935429 | 0.081550214 |
| 0.105794341 | 0.090884327 | 0.011535568 | 0.01689635  |
| 0.027819458 | 0.006167152 | 0.10603632  | 0.030071793 |
| 0.040053825 | 0.002947086 | 0.121641992 | 0.009747655 |
| 0.010475553 | 0.018474469 | 0.097659992 | 0.022235027 |
| 0.1238327   | 0.060299166 | 0.005407614 | 0.148629561 |
| 0.001941835 | 0.099198352 | 0.199095473 | 0.123078879 |
| 0.053042792 | 0.010414895 | 0.113930485 | 0.056651879 |
| 0.140803706 | 0.130327351 | 0.204809172 | 0.205821713 |
| 0.053564967 | 0.13276567  | 0.200914616 | 0.038621632 |
| 0.11775149  | 0.021347214 | 0.020462048 | 0.204438163 |
| 0.203116001 | 0.146112609 | 0.074022171 | 0.1999532   |
| 0.093650084 | 0.110664367 | 0.06626656  | 0.0856444   |
| 0.060254231 | 0.118193785 | 0.095998156 | 0.178256902 |
| 0.074978017 | 0.258173694 | 0.120776859 | 0.078020427 |
| 0.040995835 | 0.019068717 | 0.101829792 | 0.041738778 |
| 0.145317821 | 0.006659681 | 0.18568295  | 0.048554673 |
| 0.048073471 | 0.118056413 | 0.163601954 | 0.03836923  |
| 0.137351657 | 0.015678047 | 0.103186287 | 0.043035351 |
| 0.025371485 | 0.235759529 | 0.098561606 | 0.126838759 |
| 0.009255915 | 0.050490674 | 0.030593966 | 0.013952796 |
| 0.048737319 | 0.087159288 | 0.127967627 | 0.0658607   |
| 0.126041445 | 0.127450393 | 0.055486533 | 0.06399061  |

|             |             |             |             |
|-------------|-------------|-------------|-------------|
| 0.153862642 | 0.205697389 | 0.000918149 | 0.014145861 |
| 0.078138638 | 0.085643237 | 0.100497154 | 0.100542854 |
| 0.14102645  | 0.009911744 | 0.032231688 | 0.17465073  |
| 0.073722931 | 0.028145615 | 0.024815975 | 0.178105578 |
| 0.019738382 | 0.227333706 | 0.02624027  | 0.029473908 |
| 0.006214064 | 0.139662656 | 0.082382877 | 0.031639832 |
| 0.046700182 | 0.09055347  | 0.009957372 | 0.016329247 |
| 0.014857584 | 0.110407133 | 0.104769166 | 0.044653032 |
| 0.043800673 | 0.170073906 | 0.022664255 | 0.091212759 |
| 0.007492495 | 0.025409024 | 0.013873368 | 0.155433475 |
| 0.019362601 | 0.197500561 | 0.040444727 | 0.096373314 |
| 0.160549759 | 0.162579435 | 0.010089738 | 0.108921236 |
| 0.15688846  | 0.014675237 | 0.099369031 | 0.168714933 |
| 0.113259333 | 0.13109178  | 0.004566755 | 0.155302128 |
| 0.052287588 | 0.034489381 | 0.195594809 | 0.099304099 |
| 0.117189632 | 0.037618473 | 0.018034319 | 0.215021309 |
| 0.14269518  | 0.006046548 | 0.008941694 | 0.07382675  |
| 0.083201803 | 0.002473979 | 0.115202242 | 0.102860818 |
| 0.089133276 | 0.188116652 | 0.188148238 | 0.113557622 |
| 0.109253014 | 0.02681341  | 0.022384609 | 0.217673704 |
| 0.167617483 | 0.035998831 | 0.084413765 | 0.017322874 |
| 0.032149914 | 0.113595425 | 0.127726299 | 0.011588986 |
| 0.015986193 | 0.028293657 | 0.00291673  | 0.109084738 |
| 0.115531461 | 0.010095868 | 0.091553686 | 0.066793896 |
| 0.078483157 | 0.164470421 | 0.248408067 | 0.245538436 |
| 1           | 0.058860908 | 0.046571161 | 0.013341133 |
| 0.036134054 | 0.047591225 | 0.088824335 | 0.056728543 |
| 0.00241891  | 0.039513771 | 0.071377863 | 0.045844764 |
| 0.019347039 | 0.031258665 | 0.024855449 | 0.070763445 |
| 0.018712233 | 0.018058577 | 0.099520757 | 0.112053211 |
| 0.087572422 | 0.033272644 | 0.138250039 | 0.143899571 |
| 0.038535336 | 0.022161694 | 0.044357434 | 0.019892112 |
| 0.131015662 | 0.020724327 | 0.009278566 | 0.102458672 |
| 0.017816026 | 0.193090765 | 0.02665696  | 0.090943269 |
| 0.097272281 | 0.064564909 | 0.149816841 | 0.005688015 |
| 0.05651804  | 0.097575244 | 0.138798637 | 0.080161365 |
| 0.066477277 | 0.093040661 | 0.007105521 | 0.084404504 |
| 0.074592251 | 0.029585674 | 0.165463662 | 0.091106799 |
| 0.046981723 | 0.212478767 | 0.146414964 | 0.082011591 |
| 0.080298586 | 0.044583522 | 0.001517527 | 0.178159707 |
| 0.15294211  | 0.179206806 | 0.100152783 | 0.186278298 |
| 0.013918811 | 0.007564655 | 0.184279785 | 0.158547933 |
| 0.114055519 | 0.184118028 | 0.109649893 | 0.127472459 |
| 0.075411298 | 0.067101976 | 0.00272114  | 0.169315209 |
| 0.086153765 | 0.139997683 | 0.014773515 | 0.209407755 |
| 0.128753533 | 0.014880959 | 0.083479023 | 0.028934533 |
| 0.063980221 | 0.016724222 | 0.029426481 | 0.121461225 |
| 0.113675089 | 0.066443791 | 0.056441664 | 0.144817491 |
| 0.00203453  | 0.004263584 | 0.162400576 | 0.204513854 |
| 0.039209413 | 0.05550532  | 0.261401318 | 0.014756322 |
| 0.014476702 | 0.094143083 | 0.179768774 | 0.035828775 |
| 0.029234169 | 0.014868901 | 0.212070418 | 0.022427646 |
| 0.210896723 | 0.16830417  | 0.126989172 | 0.018528061 |
| 0.143288999 | 0.160790018 | 0.17984572  | 0.085495479 |

|             |             |             |             |
|-------------|-------------|-------------|-------------|
| 0.064327292 | 0.150345014 | 0.072048124 | 0.007019684 |
| 0.164494205 | 0.00829479  | 0.005632799 | 0.118493832 |
| 0.043435366 | 0.084351615 | 0.000334501 | 0.074560588 |
| 0.103065069 | 0.225320977 | 0.10806814  | 0.06391955  |
| 0.006247571 | 0.099816767 | 0.027707341 | 0.187606436 |
| 0.116570659 | 0.055722419 | 0.137447048 | 0.13203577  |
| 0.193066581 | 0.131426569 | 0.194359708 | 0.190735845 |
| 0.16148783  | 0.131622947 | 0.014419933 | 0.140724111 |
| 0.109037596 | 0.173285225 | 0.093971085 | 0.10283883  |
| 0.139018931 | 0.208292321 | 0.0765042   | 0.005931219 |
| 0.077150774 | 0.008332501 | 0.018738756 | 0.024103866 |
| 0.029034675 | 0.067273615 | 0.141971354 | 0.182603703 |
| 0.184893222 | 0.022524706 | 0.006651817 | 0.113644058 |
| 0.096872483 | 0.13889098  | 0.035730907 | 0.010317524 |
| 0.009730076 | 0.068883769 | 0.050758887 | 0.161717261 |
| 0.157838313 | 0.005166722 | 0.008222932 | 0.002255093 |
| 0.027134304 | 0.251843683 | 0.129829853 | 0.132295784 |
| 0.190922962 | 0.045775247 | 0.012767572 | 0.127902999 |
| 0.075008673 | 0.043242177 | 0.175819167 | 0.096546845 |
| 0.05654216  | 0.140196529 | 0.054212673 | 0.147825549 |
| 0.248493987 | 0.165535763 | 0.148484069 | 0.025692842 |
| 0.031642085 | 0.084903297 | 0.058443522 | 0.191273671 |
| 0.132551242 | 0.028228497 | 0.028249301 | 0.003164547 |
| 0.014260564 | 0.168647519 | 0.027527902 | 0.184400038 |
| 0.109202157 | 0.160200002 | 0.102446133 | 0.11298578  |
| 0.023082206 | 0.114624273 | 0.227671217 | 0.002540872 |
| 0.079702306 | 0.021119324 | 0.15031268  | 0.045245667 |
| 0.01655652  | 0.076000511 | 0.07126187  | 0.061302443 |
| 0.178618729 | 0.053313158 | 0.173927577 | 0.223617067 |
| 0.092065117 | 0.023429234 | 0.143188654 | 0.129879861 |
| 0.020128115 | 0.130218145 | 0.112372671 | 0.049686449 |
| 0.007586112 | 0.163439085 | 0.092509554 | 0.068453111 |
| 0.009560417 | 0.208506965 | 0.043351593 | 0.177477249 |
| 0.087769061 | 0.131755831 | 0.150385386 | 0.064989376 |
| 0.115170634 | 0.055689266 | 0.050057195 | 0.00285078  |
| 0.088293636 | 0.157255802 | 0.049434943 | 0.075191612 |
| 0.099166118 | 0.211168274 | 0.016774158 | 0.013164746 |
| 0.240679382 | 0.022562678 | 0.019764573 | 0.173794389 |
| 0.068945916 | 0.07203458  | 0.007223716 | 0.05244919  |
| 0.150698541 | 0.100160152 | 0.008463494 | 0.089784971 |
| 0.097005881 | 0.116692355 | 0.186849161 | 0.218641828 |
| 0.042945613 | 0.124642357 | 0.095974813 | 0.054219624 |
| 0.07436561  | 0.054986303 | 0.132275355 | 0.001630835 |
| 0.068614371 | 0.108017411 | 0.019001974 | 0.113445924 |
| 0.046449016 | 0.049704433 | 0.124526965 | 0.17700709  |
| 0.101075897 | 0.118107683 | 0.012487976 | 0.040449032 |
| 0.180145463 | 0.057491096 | 0.134307063 | 0.01391632  |
| 0.019764711 | 0.115557142 | 0.015519175 | 0.052753213 |
| 0.104079218 | 0.141375807 | 0.17429029  | 0.094872682 |
| 0.117410661 | 0.121958348 | 0.096208531 | 0.016080275 |
| 0.019105243 | 0.044918616 | 0.130828468 | 0.006994497 |
| 0.003562701 | 0.190395301 | 0.039882153 | 0.06689622  |
| 0.061319079 | 0.06444611  | 0.040170368 | 0.028708048 |
| 0.085147856 | 0.166757645 | 0.019186471 | 0.142223899 |

|             |             |             |             |
|-------------|-------------|-------------|-------------|
| 0.046747551 | 0.031638909 | 0.055207532 | 0.016505059 |
| 0.023527647 | 0.092564309 | 0.195077838 | 0.149579388 |
| 0.158809874 | 0.153659005 | 0.082101932 | 0.113908168 |
| 0.041671491 | 0.115739241 | 0.007389293 | 0.128894874 |
| 0.062048753 |             |             |             |
| H2-Q10      | 0.275297602 | 0.48837042  | 0.167122108 |
| 0.364559483 | 0.239878602 | 0.223276286 | 0.177821981 |
| 0.123930786 | 0.062077972 | 0.025639773 | 0.046432889 |
| 0.241092713 | 0.205209977 | 0.249767874 | 0.157096907 |
| 0.322255505 | 0.138094223 | 0.153115771 | 0.183677488 |
| 0.295885087 | 0.115751174 | 0.312453203 | 0.095020395 |
| 0.136599811 | 0.089549736 | 0.082742891 | 0.148047513 |
| 0.398011563 | 0.08518033  | 0.219924924 | 0.302045949 |
| 0.071665627 | 0.346958163 | 0.459356567 | 0.322535835 |
| 0.456598573 | 0.24531391  | 0.015610279 | 0.209528211 |
| 0.33776712  | 0.319785467 | 0.309162352 | 0.234041396 |
| 0.065732864 | 0.441810655 | 0.200066873 | 0.195052528 |
| 0.125276388 | 0.053880082 | 0.149166997 | 0.395929893 |
| 0.450270504 | 0.250702489 | 0.148084754 | 0.154063585 |
| 0.213384875 | 0.182751822 | 0.168576445 | 0.237164636 |
| 0.198227368 | 0.134609033 | 0.448920492 | 0.085831254 |
| 0.105855931 | 0.160605512 | 0.108465381 | 0.19324578  |
| 0.160817118 | 0.292040423 | 0.021759286 | 0.2002444   |
| 0.016949412 | 0.264483598 | 0.193422989 | 0.134154527 |
| 0.051710303 | 0.075108339 | 0.124005132 | 0.243132758 |
| 0.412105114 | 0.37409658  | 0.443272957 | 0.436760863 |
| 0.182649404 | 0.166461396 | 0.18431476  | 0.17543074  |
| 0.356733012 | 0.184026169 | 0.078663461 | 0.337565849 |
| 0.44948667  | 0.481184847 | 0.136658568 | 0.150451254 |
| 0.391111504 | 0.441759114 | 0.213778665 | 0.246005831 |
| 0.17254346  | 0.031121516 | 0.412668488 | 0.474144472 |
| 0.337701997 | 0.152193928 | 0.124150601 | 0.363362423 |
| 0.06126513  | 0.174095662 | 0.263176935 | 0.138393554 |
| 0.425859976 | 0.02600878  | 0.141372535 | 0.256213621 |
| 0.113969819 | 0.340949788 | 0.461898375 | 0.164324683 |
| 0.208784824 | 0.042905155 | 0.075168378 | 0.03039521  |
| 0.214009613 | 0.071041971 | 0.4282584   | 0.451277598 |
| 0.188099648 | 0.231143292 | 0.183446966 | 0.004607613 |
| 0.035868194 | 0.091755595 | 0.369901316 | 0.182512066 |
| 0.306210217 | 0.281698736 | 0.186090435 | 0.297571361 |
| 0.270416301 | 0.4343703   | 0.042065913 | 0.090095403 |
| 0.226455262 | 0.096329727 | 0.17929082  | 0.259292664 |
| 0.198631483 | 0.099889293 | 0.135305819 | 0.470225472 |
| 0.393406346 | 0.103181244 | 0.162654227 | 0.31037158  |
| 0.245053341 | 0.204522105 | 0.107180595 | 0.260194655 |
| 0.084961703 | 0.41640147  | 0.029710701 | 0.168461561 |
| 0.12294909  | 0.139735042 | 0.008568218 | 0.178300891 |
| 0.213845957 | 0.421608843 | 0.399900994 | 0.093294662 |
| 0.265974548 | 0.268318927 | 0.178347465 | 0.357728479 |
| 0.034113928 | 0.042512302 | 0.139441238 | 0.488709457 |
| 0.214123054 | 0.430960801 | 0.192980096 | 0.154042939 |
| 0.181368563 | 0.365692268 | 0.000949133 | 0.445749271 |
| 0.469080852 | 0.150472497 | 0.277607634 | 0.216427243 |
| 0.172773984 | 0.419490115 | 0.017099612 | 0.322207918 |



|             |             |             |             |
|-------------|-------------|-------------|-------------|
| 0.240776818 | 0.07041774  | 0.458234761 | 0.146201736 |
| 0.406352409 | 0.059143946 | 0.223848108 | 0.339351277 |
| 0.333859488 | 0.011196361 | 0.164441395 | 0.293447981 |
| 0.022775941 | 0.104459856 | 0.293101939 | 0.291270553 |
| 0.223714006 | 0.331026268 | 0.438987714 | 0.164816455 |
| 0.243884175 | 0.164751136 | 0.012584623 | 0.171221713 |
| 0.315271584 | 0.184097892 | 0.412869942 | 0.171755927 |
| 0.174137364 | 0.441752227 | 0.323020506 | 0.132114805 |
| 0.062839612 | 0.208500226 | 0.036684218 | 0.193665189 |
| 0.292754632 | 0.185606894 | 0.173980108 | 0.084467934 |
| 0.070449952 | 0.490490981 | 0.089469936 | 0.113087501 |
| 0.058860908 | 1           | 0.169115836 | 0.278146848 |
| 0.248000897 | 0.123478866 | 0.173636992 | 0.205423534 |
| 0.066671307 | 0.123742875 | 0.006698222 | 0.250056904 |
| 0.247294022 | 0.290825367 | 0.286973216 | 0.302484204 |
| 0.257823268 | 0.191017538 | 0.250092713 | 0.121527704 |
| 0.079548159 | 0.023883007 | 0.468618973 | 0.271517028 |
| 0.266830292 | 0.123707121 | 0.043585453 | 0.244058206 |
| 0.462408702 | 0.187748571 | 0.12682791  | 0.456820846 |
| 0.021455906 | 0.423730779 | 0.259234746 | 0.118503531 |
| 0.253997986 | 0.227137223 | 0.412767475 | 0.044107288 |
| 0.197782268 | 0.460012027 | 0.166592724 | 0.143993155 |
| 0.399035796 | 0.274509515 | 0.052573674 | 0.304011119 |
| 0.317869903 | 0.05264815  | 0.481661674 | 0.107736948 |
| 0.0260412   | 0.294871432 | 0.336563123 | 0.069971298 |
| 0.064365812 | 0.260785589 | 0.061637719 | 0.188938671 |
| 0.487430429 | 0.338934965 | 0.376169973 | 0.098939133 |
| 0.074346043 | 0.062053572 | 0.118662596 | 0.169872618 |
| 0.463300671 | 0.459461226 | 0.17657606  | 0.245201274 |
| 0.181981984 | 0.177606217 | 0.100621467 | 0.478165829 |
| 0.069653225 | 0.454611691 | 0.010958894 | 0.329421067 |
| 0.453993072 | 0.186089119 | 0.081316411 | 0.216471365 |
| 0.37087952  | 0.054858277 | 0.126627635 | 0.46334755  |
| 0.378289232 | 0.178395899 | 0.184585755 | 0.267390135 |
| 0.034052921 | 0.065029119 | 0.188413357 | 0.079898236 |
| 0.228611246 | 0.142791379 | 0.022513488 | 0.174761306 |
| 0.086990929 | 0.450279223 | 0.386501523 | 0.055524313 |
| 0.227152279 | 0.147433285 | 0.230360826 | 0.049348365 |
| 0.376416846 | 0.42502216  | 0.477183876 | 0.12229909  |
| 0.344433035 | 0.4476542   | 0.210903855 | 0.060358046 |
| 0.020247634 | 0.454421152 | 0.257348196 | 0.051409971 |
| 0.435560667 | 0.146371596 | 0.066549972 | 0.46611443  |
| 0.14682909  | 0.393720763 | 0.003851493 | 0.021355555 |
| 0.024492418 | 0.377860341 | 0.432510185 | 0.273586169 |
| 0.176820536 | 0.200406211 | 0.002108288 | 0.459227354 |
| 0.476064046 | 0.017225365 | 0.086656773 | 0.369299736 |
| 0.316836064 | 0.483590687 | 0.154986451 | 0.394108255 |
| 0.254049667 | 0.45839051  | 0.222158824 | 0.182204154 |
| 0.407181185 | 0.425973466 | 0.31926142  | 0.408503593 |
| 0.442565383 | 0.285927543 | 0.205986185 | 0.032750781 |
| 0.053782423 | 0.157143102 | 0.180169618 | 0.088831089 |
| 0.190392606 | 0.112329667 | 0.421179263 | 0.417011046 |
| 0.441023442 | 0.008396073 | 0.139003174 | 0.356032595 |
| 0.418719268 | 0.431412908 | 0.010002916 | 0.002519673 |

|             |             |             |             |
|-------------|-------------|-------------|-------------|
| 0.002795022 | 0.026142904 | 0.217046616 | 0.136989687 |
| 0.434473627 | 0.203829183 | 0.012194739 | 0.059751542 |
| 0.178182424 | 0.22594902  | 0.47665447  | 0.289926627 |
| 0.319383481 | 0.079021105 | 0.241246132 | 0.297355091 |
| 0.058571608 | 0.205391092 | 0.454899392 | 0.455316771 |
| 0.030025429 | 0.136909064 | 0.178610944 | 0.461672708 |
| 0.030527698 | 0.201168224 | 0.272208502 | 0.247122185 |
| 0.008242098 | 0.064685072 | 0.053991231 | 0.339165473 |
| 0.446586762 | 0.14768248  | 0.079955061 | 0.101489061 |
| 0.167123525 | 0.402259348 | 0.18307275  | 0.473042473 |
| 0.399338296 | 0.399847154 | 0.05730994  | 0.434872689 |
| 0.053808757 | 0.456976985 | 0.190362813 | 0.045273604 |
| 0.14796938  | 0.014718168 | 0.410603754 | 0.106817934 |
| 0.221476178 | 0.260283667 | 0.08005276  | 0.016259377 |
| 0.064264885 | 0.060634735 | 0.447838207 | 0.385577509 |
| 0.02137642  | 0.153133441 | 0.168366346 | 0.238816615 |
| 0.191640337 | 0.38030628  | 0.46229644  | 0.204876723 |
| 0.108366217 | 0.059841234 | 0.310009548 | 0.259393897 |
| 0.186381219 | 0.442803504 | 0.204399163 | 0.464116411 |
| 0.277597944 | 0.387653077 | 0.425417157 | 0.210153096 |
| 0.15498171  | 0.206427829 | 0.31789772  | 0.055629182 |
| 0.207616232 | 0.438087046 | 0.179197262 | 0.121062293 |
| 0.207206343 | 0.173930992 | 0.036787153 | 0.077539062 |
| 0.145520012 | 0.206937359 | 0.17747665  | 0.373993621 |
| 0.227776713 | 0.273943473 | 0.04391483  | 0.053955188 |
| 0.493913625 | 0.373279439 | 0.10093021  | 0.312381144 |
| 0.116749091 | 0.211535837 | 0.341274028 | 0.339426527 |
| 0.15829516  | 0.427658322 | 0.362319529 | 0.344528482 |
| 0.426825246 | 0.180034974 | 0.477158487 | 0.064975133 |
| 0.049539476 | 0.230764771 | 0.153961081 | 0.072577758 |
| 0.148932683 | 0.025391307 | 0.129702588 | 0.312407255 |
| 0.175376554 | 0.29010591  | 0.17661461  | 0.065458022 |
| 0.185245034 | 0.150060778 | 0.215302202 | 0.194193434 |
| 0.118242658 | 0.470329266 | 0.013388885 | 0.059458628 |
| 0.202376163 | 0.343033733 | 0.213646006 | 0.151860284 |
| 0.145600932 | 0.079139599 | 0.223926368 | 0.185778998 |
| 0.265597871 | 0.163760688 | 0.352835593 | 0.030588044 |
| 0.041093125 | 0.451653798 | 0.177889895 | 0.012789552 |
| 0.052505888 | 0.202854461 | 0.153085198 | 0.181074534 |
| 0.018152636 | 0.436158923 | 0.211667463 | 0.212927445 |
| 0.211528529 | 0.063353028 | 0.311269172 | 0.050937015 |
| 0.039494342 | 0.410304799 | 0.174916259 | 0.461370305 |
| 0.15603623  | 0.370506961 | 0.388541236 | 0.383355054 |
| 0.055058174 | 0.150232774 | 0.040401654 | 0.378839322 |
| 0.196809204 |             |             |             |
| HACE1       | 0.243898897 | 0.298926513 | 0.140188714 |
| 0.353505679 | 0.20141269  | 0.188466292 | 0.230501841 |
| 0.219130273 | 0.139789412 | 0.036756549 | 0.038260803 |
| 0.191748552 | 0.103359233 | 0.165761756 | 0.111497073 |
| 0.376790808 | 0.131840275 | 0.176388581 | 0.285039007 |
| 0.353599574 | 0.192824501 | 0.329973901 | 0.240469312 |
| 0.121946324 | 0.099499406 | 0.147311583 | 0.112934165 |
| 0.393261124 | 0.163184141 | 0.130264977 | 0.330105397 |
| 0.171393831 | 0.295457457 | 0.252902377 | 0.225882299 |

|             |             |             |             |
|-------------|-------------|-------------|-------------|
| 0.228342688 | 0.202278654 | 0.054560936 | 0.128825816 |
| 0.296244133 | 0.260939806 | 0.359496365 | 0.300281707 |
| 0.163527429 | 0.239482345 | 0.261553668 | 0.21774187  |
| 0.149316317 | 0.088604099 | 0.131331692 | 0.24501386  |
| 0.207127624 | 0.160926954 | 0.225817268 | 0.213987904 |
| 0.059712035 | 0.132139915 | 0.049653699 | 0.227244507 |
| 0.235542496 | 0.128705235 | 0.224055075 | 0.15954063  |
| 0.11303977  | 0.246205791 | 0.151279756 | 0.232294528 |
| 0.094593264 | 0.264096025 | 0.16895897  | 0.143323093 |
| 0.016043528 | 0.375819569 | 0.239525199 | 0.063167607 |
| 0.144945236 | 0.069835546 | 0.168632647 | 0.293855643 |
| 0.373961854 | 0.25102426  | 0.321774657 | 0.291130843 |
| 0.133753174 | 0.210176166 | 0.127735991 | 0.203670284 |
| 0.286354457 | 0.194856374 | 0.169146809 | 0.354216818 |
| 0.315626785 | 0.258329376 | 0.166545426 | 0.202869683 |
| 0.247177381 | 0.297757569 | 0.138109186 | 0.150452161 |
| 0.079554214 | 0.098440922 | 0.229081607 | 0.298278978 |
| 0.255466982 | 0.081820362 | 0.166121399 | 0.33356145  |
| 0.189173583 | 0.124319555 | 0.344351532 | 0.118180422 |
| 0.380655557 | 0.119000087 | 0.154725139 | 0.240011877 |
| 0.244696876 | 0.279761633 | 0.247814955 | 0.248735084 |
| 0.175246589 | 0.086081263 | 0.050847165 | 0.147657872 |
| 0.145799673 | 0.047628669 | 0.203782113 | 0.324948874 |
| 0.193623214 | 0.128909753 | 0.251202898 | 0.041847616 |
| 0.098803448 | 0.175396845 | 0.229445408 | 0.196487546 |
| 0.316837648 | 0.18223651  | 0.141509689 | 0.222911368 |
| 0.166686857 | 0.316506355 | 0.023097293 | 0.262906178 |
| 0.202679158 | 0.178437693 | 0.298626933 | 0.184624341 |
| 0.160774926 | 0.275301028 | 0.236931073 | 0.328299729 |
| 0.271444095 | 0.217818648 | 0.147588275 | 0.354667013 |
| 0.116023013 | 0.175751627 | 0.254164617 | 0.182017308 |
| 0.184626091 | 0.211261598 | 0.086634786 | 0.193987562 |
| 0.061708466 | 0.090178661 | 0.122152054 | 0.202225657 |
| 0.145861901 | 0.221457448 | 0.194365224 | 0.247120444 |
| 0.186277692 | 0.272148847 | 0.16810169  | 0.206660372 |
| 0.03544792  | 0.196653411 | 0.114347542 | 0.298397014 |
| 0.172111072 | 0.30425241  | 0.231788265 | 0.181965401 |
| 0.232868765 | 0.350531625 | 0.009026947 | 0.238572637 |
| 0.254925988 | 0.100602715 | 0.203028603 | 0.232897139 |
| 0.087522614 | 0.335725153 | 0.021643678 | 0.343432825 |
| 0.196628811 | 0.240143766 | 0.351157138 | 0.169985525 |
| 0.24128594  | 0.129165461 | 0.167907632 | 0.215068106 |
| 0.167872569 | 0.038257329 | 0.144833998 | 0.342294888 |
| 0.084904599 | 0.178866528 | 0.302764281 | 0.321056064 |
| 0.222121686 | 0.311397428 | 0.377072219 | 0.074260918 |
| 0.188034487 | 0.268575819 | 0.103347117 | 0.185961156 |
| 0.268947622 | 0.07973872  | 0.259531887 | 0.246014505 |
| 0.146652913 | 0.278735912 | 0.196329529 | 0.064338069 |
| 0.171008949 | 0.220643221 | 0.082617726 | 0.179691903 |
| 0.20447024  | 0.154948895 | 0.110393143 | 0.181347516 |
| 0.131163645 | 0.304290816 | 0.080392055 | 0.065176351 |
| 0.046571161 | 0.169115836 | 1           | 0.101020659 |
| 0.071092179 | 0.208686733 | 0.111173719 | 0.132663416 |
| 0.164273866 | 0.168202115 | 0.06063487  | 0.062552749 |

|             |             |             |             |
|-------------|-------------|-------------|-------------|
| 0.065365049 | 0.078713573 | 0.072634696 | 0.21181819  |
| 0.147159802 | 0.11918532  | 0.158716748 | 0.118187041 |
| 0.140508298 | 0.098734787 | 0.293012884 | 0.350691534 |
| 0.203133978 | 0.254411478 | 0.1560888   | 0.058204077 |
| 0.313285208 | 0.111195476 | 0.102664496 | 0.288849275 |
| 0.138550097 | 0.328371945 | 0.132237276 | 0.158142073 |
| 0.093933345 | 0.228426267 | 0.383283421 | 0.060157489 |
| 0.216400685 | 0.269770856 | 0.25159742  | 0.158568554 |
| 0.217030981 | 0.304811956 | 0.151080647 | 0.225165485 |
| 0.211740368 | 0.132135217 | 0.28031977  | 0.130217808 |
| 0.111000138 | 0.247224906 | 0.19593427  | 0.169117492 |
| 0.152401595 | 0.145577878 | 0.176862122 | 0.26806192  |
| 0.30346219  | 0.342608875 | 0.222360568 | 0.120624955 |
| 0.144352893 | 0.028293743 | 0.144293591 | 0.150768154 |
| 0.239011985 | 0.262209879 | 0.267318713 | 0.119699215 |
| 0.313891919 | 0.102599669 | 0.130250668 | 0.289358159 |
| 0.141557133 | 0.268309398 | 0.082032224 | 0.223977725 |
| 0.221012599 | 0.140660384 | 0.112344161 | 0.221657828 |
| 0.235882404 | 0.186434328 | 0.278609288 | 0.252511244 |
| 0.287209257 | 0.153306265 | 0.115145885 | 0.272098921 |
| 0.123392211 | 0.189717408 | 0.201198161 | 0.071481815 |
| 0.123720612 | 0.216488838 | 0.019526725 | 0.176486742 |
| 0.126355122 | 0.25568764  | 0.342091006 | 0.118997175 |
| 0.129170041 | 0.165825394 | 0.275203866 | 0.170413658 |
| 0.222078079 | 0.247190348 | 0.257462051 | 0.289880427 |
| 0.23872118  | 0.243832215 | 0.109663572 | 0.174616387 |
| 0.082807479 | 0.239650058 | 0.266003711 | 0.068951033 |
| 0.35590897  | 0.117065288 | 0.043261378 | 0.303384657 |
| 0.270886154 | 0.19875066  | 0.028383183 | 0.045397438 |
| 0.100936159 | 0.319428318 | 0.231707409 | 0.331037449 |
| 0.073725774 | 0.327632626 | 0.019879919 | 0.287683906 |
| 0.258572834 | 0.062139441 | 0.1169181   | 0.206096792 |
| 0.171463721 | 0.302797727 | 0.082463849 | 0.230245855 |
| 0.144027204 | 0.222839522 | 0.172863921 | 0.247651592 |
| 0.281376042 | 0.218198911 | 0.314271338 | 0.284484914 |
| 0.332370832 | 0.282112846 | 0.312554506 | 0.105816268 |
| 0.083505437 | 0.182204084 | 0.060314945 | 0.073512611 |
| 0.201786651 | 0.137509953 | 0.283736265 | 0.342783286 |
| 0.26336157  | 0.061653379 | 0.229609047 | 0.226066406 |
| 0.340274131 | 0.373569702 | 0.107639426 | 0.018536247 |
| 0.013617375 | 0.030038515 | 0.285010581 | 0.186355356 |
| 0.283185838 | 0.059868198 | 0.066176259 | 0.194115744 |
| 0.208717238 | 0.183461539 | 0.25903148  | 0.394256607 |
| 0.255722522 | 0.201347929 | 0.081836824 | 0.395059957 |
| 0.094968528 | 0.172740641 | 0.28219394  | 0.267574127 |
| 0.143746006 | 0.188001959 | 0.161978891 | 0.357287921 |
| 0.016240482 | 0.255881359 | 0.205445085 | 0.138982959 |
| 0.067696934 | 0.136401041 | 0.12607306  | 0.348183035 |
| 0.211057663 | 0.085218531 | 0.070060306 | 0.073120225 |
| 0.164064156 | 0.320102494 | 0.182044178 | 0.334381867 |
| 0.326804126 | 0.390551658 | 0.106827832 | 0.260107128 |
| 0.09433442  | 0.22887784  | 0.12016166  | 0.049469089 |
| 0.200034214 | 0.11499177  | 0.22670576  | 0.040707109 |
| 0.150291088 | 0.292690753 | 0.093597455 | 0.073673285 |

|             |             |             |             |
|-------------|-------------|-------------|-------------|
| 0.05729841  | 0.139269545 | 0.335344534 | 0.293142022 |
| 0.095483087 | 0.264071193 | 0.230464073 | 0.314059926 |
| 0.214500804 | 0.309168752 | 0.246950238 | 0.101702586 |
| 0.201556933 | 0.062645889 | 0.356169642 | 0.219636674 |
| 0.195737728 | 0.334284888 | 0.110150048 | 0.298220927 |
| 0.263976556 | 0.303846171 | 0.252976963 | 0.255531679 |
| 0.093722065 | 0.206624776 | 0.2414933   | 0.085929002 |
| 0.288999165 | 0.316558159 | 0.220325376 | 0.101339515 |
| 0.154837942 | 0.114259819 | 0.206558948 | 0.092508227 |
| 0.071682105 | 0.19945299  | 0.190693112 | 0.398599484 |
| 0.261676916 | 0.227848162 | 0.199464416 | 0.11918235  |
| 0.300965321 | 0.27191924  | 0.20047876  | 0.262729617 |
| 0.224331915 | 0.217302993 | 0.270828212 | 0.259154296 |
| 0.118129513 | 0.245386981 | 0.318041311 | 0.224144533 |
| 0.256171913 | 0.272617675 | 0.261544172 | 0.165850342 |
| 0.085162686 | 0.172930022 | 0.128273373 | 0.164005725 |
| 0.219823991 | 0.108805497 | 0.054703192 | 0.3353146   |
| 0.065467859 | 0.289222836 | 0.125080471 | 0.174297478 |
| 0.210377543 | 0.131221873 | 0.277902131 | 0.197091626 |
| 0.143608819 | 0.241981506 | 0.052701398 | 0.16393742  |
| 0.076272044 | 0.246340417 | 0.108883315 | 0.200640157 |
| 0.076373604 | 0.139265903 | 0.242458141 | 0.156369379 |
| 0.071142624 | 0.105089451 | 0.241399792 | 0.168148672 |
| 0.146387347 | 0.350119203 | 0.154109819 | 0.089595587 |
| 0.110816806 | 0.198395232 | 0.201206666 | 0.142424073 |
| 0.075529616 | 0.225653292 | 0.092927135 | 0.185874092 |
| 0.27473914  | 0.21675973  | 0.217033257 | 0.147350681 |
| 0.23002289  | 0.24926843  | 0.1538398   | 0.240035643 |
| 0.144014907 | 0.356394315 | 0.222013067 | 0.239233532 |
| 0.159035445 | 0.118395449 | 0.163784932 | 0.345989501 |
| 0.067251024 |             |             |             |

|             |             |             |             |
|-------------|-------------|-------------|-------------|
| HBA-A1      | 0.139039883 | 0.303785278 | 0.070068692 |
| 0.298960578 | 0.147001187 | 0.163439858 | 0.153312214 |
| 0.038760941 | 0.035302446 | 0.057665309 | 0.060730991 |
| 0.14424841  | 0.118260358 | 0.133259155 | 0.040190495 |
| 0.224539691 | 0.081300197 | 0.040394331 | 0.153901774 |
| 0.207575455 | 0.07986499  | 0.259660454 | 0.058591453 |
| 0.02769526  | 0.055906591 | 0.074666333 | 0.059528925 |
| 0.280324867 | 0.074427308 | 0.160956728 | 0.218940265 |
| 0.024415214 | 0.201772574 | 0.261546466 | 0.253541096 |
| 0.257437199 | 0.119563761 | 0.007135716 | 0.098967677 |
| 0.18634061  | 0.209870451 | 0.223207675 | 0.232481426 |
| 0.060463684 | 0.254657657 | 0.201877006 | 0.116419747 |
| 0.032133199 | 0.059221722 | 0.064503325 | 0.223464122 |
| 0.280183736 | 0.177520623 | 0.064700597 | 0.118518722 |
| 0.132185014 | 0.071890004 | 0.054719966 | 0.163058151 |
| 0.174933147 | 0.073735115 | 0.269677314 | 0.057735053 |
| 0.034965387 | 0.064477122 | 0.035691381 | 0.118875139 |
| 0.039262819 | 0.17521229  | 0.013817912 | 0.097777403 |
| 0.030681981 | 0.188729987 | 0.114193561 | 0.039094445 |
| 0.053047246 | 0.116731631 | 0.049724285 | 0.250382553 |
| 0.272564143 | 0.191185988 | 0.297488077 | 0.273562919 |
| 0.110337753 | 0.077047235 | 0.085375273 | 0.119518717 |
| 0.204028526 | 0.177451712 | 0.035519448 | 0.245593885 |

|             |             |             |             |
|-------------|-------------|-------------|-------------|
| 0.296335671 | 0.290281228 | 0.050421535 | 0.086309289 |
| 0.299700083 | 0.269764782 | 0.111489999 | 0.136466495 |
| 0.056767316 | 0.009976713 | 0.254536124 | 0.302095306 |
| 0.193798118 | 0.059845538 | 0.093484088 | 0.254466707 |
| 0.041469421 | 0.036887895 | 0.252636225 | 0.061711306 |
| 0.28561063  | 0.026423197 | 0.084370063 | 0.224737375 |
| 0.02620633  | 0.205394777 | 0.271422544 | 0.145661034 |
| 0.099909406 | 0.05210988  | 0.026494767 | 0.014735347 |
| 0.066831037 | 0.016361847 | 0.238486628 | 0.34340315  |
| 0.065714188 | 0.061240533 | 0.09847928  | 0.004880703 |
| 0.028999108 | 0.018514036 | 0.220791555 | 0.070500619 |
| 0.18071736  | 0.132830404 | 0.121034856 | 0.170988634 |
| 0.164733813 | 0.286648483 | 0.022734501 | 0.046663433 |
| 0.151153536 | 0.020086434 | 0.161994068 | 0.173119142 |
| 0.135112394 | 0.047256789 | 0.098006755 | 0.299206521 |
| 0.237863557 | 0.100806112 | 0.045856107 | 0.226849134 |
| 0.091083278 | 0.136717501 | 0.06549544  | 0.156233006 |
| 0.072886675 | 0.23163667  | 0.020546189 | 0.068917149 |
| 0.034750151 | 0.068053236 | 0.003288943 | 0.103467924 |
| 0.088523224 | 0.309689161 | 0.207958573 | 0.05875964  |
| 0.186747262 | 0.206930907 | 0.086833949 | 0.300663077 |
| 0.061679388 | 0.022942303 | 0.049544956 | 0.325786534 |
| 0.1620117   | 0.250122614 | 0.066168591 | 0.043460495 |
| 0.129668036 | 0.237931671 | 0.000108982 | 0.258967846 |
| 0.275060057 | 0.056817507 | 0.279712533 | 0.125159994 |
| 0.073658276 | 0.313563624 | 0.003035276 | 0.241823036 |
| 0.128535289 | 0.041591576 | 0.299041555 | 0.133294345 |
| 0.2260967   | 0.06506062  | 0.097463888 | 0.195765017 |
| 0.212276709 | 0.007955975 | 0.117711446 | 0.230181462 |
| 0.011199757 | 0.064138881 | 0.166651758 | 0.227218175 |
| 0.187122266 | 0.196385646 | 0.297874993 | 0.066952993 |
| 0.157953352 | 0.079569883 | 0.007795775 | 0.091246972 |
| 0.170650087 | 0.037282868 | 0.256513708 | 0.064997184 |
| 0.094852785 | 0.280479149 | 0.176757143 | 0.041771263 |
| 0.066627868 | 0.124544267 | 0.043153004 | 0.120766064 |
| 0.145779705 | 0.15394261  | 0.079287957 | 0.019545735 |
| 0.046591127 | 0.314805295 | 0.026523887 | 0.031129265 |
| 0.013341133 | 0.278146848 | 0.101020659 | 1           |
| 0.17498481  | 0.051500219 | 0.055204432 | 0.076725403 |
| 0.062989396 | 0.111589321 | 0.001584699 | 0.105839955 |
| 0.225501265 | 0.174829717 | 0.17997388  | 0.181288953 |
| 0.089825689 | 0.175849093 | 0.175968134 | 0.023454379 |
| 0.033435182 | 0.028095347 | 0.289730101 | 0.187042671 |
| 0.162065862 | 0.056970926 | 0.028701323 | 0.081994248 |
| 0.340601576 | 0.150537821 | 0.035312641 | 0.325776075 |
| 0.010531151 | 0.258867167 | 0.148428377 | 0.106650191 |
| 0.133288079 | 0.219013585 | 0.282872248 | 0.023485607 |
| 0.111494503 | 0.300230288 | 0.085358708 | 0.091310766 |
| 0.26991783  | 0.197309963 | 0.053030477 | 0.169142726 |
| 0.19221489  | 0.057598721 | 0.294772936 | 0.049773123 |
| 0.023827046 | 0.180707672 | 0.228694093 | 0.059794308 |
| 0.038491301 | 0.225396948 | 0.046693257 | 0.161002548 |
| 0.317208571 | 0.277675926 | 0.269613698 | 0.024139124 |
| 0.081139406 | 0.119240245 | 0.042129324 | 0.076558841 |

|             |             |             |             |
|-------------|-------------|-------------|-------------|
| 0.266156352 | 0.276247314 | 0.118187379 | 0.177588128 |
| 0.163412531 | 0.057680217 | 0.028002376 | 0.312252027 |
| 0.009924378 | 0.253740912 | 0.009996353 | 0.195052154 |
| 0.259005786 | 0.105214183 | 0.066533014 | 0.1767321   |
| 0.252734737 | 0.042927203 | 0.037370368 | 0.28510883  |
| 0.232568444 | 0.069577905 | 0.068872004 | 0.157758116 |
| 0.041060994 | 0.049996076 | 0.112844453 | 0.016391848 |
| 0.086876524 | 0.05812     | 0.005093782 | 0.038972209 |
| 0.095066382 | 0.303500958 | 0.247808079 | 0.038170097 |
| 0.220285342 | 0.034285089 | 0.162597465 | 0.044901082 |
| 0.22300666  | 0.230725534 | 0.282729751 | 0.044033899 |
| 0.202169638 | 0.283362669 | 0.132582791 | 0.03094878  |
| 0.018810851 | 0.258129677 | 0.147616072 | 0.063770964 |
| 0.294354202 | 0.087298579 | 0.125776373 | 0.29215669  |
| 0.107810245 | 0.211082968 | 0.004608392 | 0.002240368 |
| 0.007954729 | 0.233325944 | 0.25674704  | 0.187685035 |
| 0.094389075 | 0.130358643 | 0.000148713 | 0.266187238 |
| 0.311512779 | 0.014506355 | 0.026285527 | 0.238741064 |
| 0.199123237 | 0.287734407 | 0.06382999  | 0.257779431 |
| 0.175705954 | 0.271621064 | 0.120233416 | 0.147392985 |
| 0.294146226 | 0.239128492 | 0.203435958 | 0.240330866 |
| 0.321580576 | 0.185008485 | 0.201819967 | 0.039272515 |
| 0.014614158 | 0.081881648 | 0.068695529 | 0.060984113 |
| 0.117367554 | 0.055362349 | 0.244088623 | 0.271422305 |
| 0.285334558 | 0.009857722 | 0.06476582  | 0.217224615 |
| 0.287830889 | 0.282070729 | 0.00251445  | 0.000923861 |
| 0.000814111 | 0.029164893 | 0.156164428 | 0.064310856 |
| 0.264111403 | 0.096271527 | 0.015594847 | 0.042271377 |
| 0.059427393 | 0.152271806 | 0.298255144 | 0.231550611 |
| 0.175399285 | 0.04453151  | 0.126804714 | 0.21119187  |
| 0.034535318 | 0.100835824 | 0.305715516 | 0.290777381 |
| 0.011139949 | 0.057424302 | 0.066242151 | 0.316220353 |
| 0.006819128 | 0.144782058 | 0.165653174 | 0.104971564 |
| 0.002203302 | 0.031880229 | 0.028694541 | 0.210836609 |
| 0.252369385 | 0.157419901 | 0.105945172 | 0.032355885 |
| 0.145662586 | 0.242245707 | 0.121595386 | 0.303935543 |
| 0.27893979  | 0.298478725 | 0.021452915 | 0.258844249 |
| 0.048930275 | 0.278579622 | 0.10551187  | 0.023322938 |
| 0.039114604 | 0.009652003 | 0.22639039  | 0.054834332 |
| 0.097939767 | 0.151436328 | 0.019692113 | 0.009272791 |
| 0.01136654  | 0.045443508 | 0.315043179 | 0.241047917 |
| 0.007269326 | 0.051341681 | 0.089803078 | 0.143444809 |
| 0.143226336 | 0.313260487 | 0.273880342 | 0.121084326 |
| 0.078298127 | 0.009071243 | 0.213718911 | 0.14946265  |
| 0.063997567 | 0.286564626 | 0.079012304 | 0.272339014 |
| 0.154576553 | 0.215189475 | 0.256819413 | 0.164030363 |
| 0.044847272 | 0.12587633  | 0.295744461 | 0.081464062 |
| 0.141444752 | 0.326439934 | 0.079062997 | 0.063822218 |
| 0.165412917 | 0.08419537  | 0.013424894 | 0.011947233 |
| 0.058374041 | 0.177853993 | 0.111334758 | 0.252301242 |
| 0.128787761 | 0.157906444 | 0.019237248 | 0.032498525 |
| 0.295804041 | 0.208608685 | 0.044571281 | 0.231540581 |
| 0.059220544 | 0.156435284 | 0.199466753 | 0.202357451 |
| 0.028539476 | 0.299309114 | 0.241000902 | 0.306791961 |

|             |             |             |             |
|-------------|-------------|-------------|-------------|
| 0.286903322 | 0.127743356 | 0.282652386 | 0.022650813 |
| 0.020144448 | 0.119257383 | 0.143886153 | 0.046311984 |
| 0.134280351 | 0.015543083 | 0.026428939 | 0.207455924 |
| 0.047331447 | 0.276849355 | 0.035583163 | 0.030681237 |
| 0.101290232 | 0.047162332 | 0.154429851 | 0.155452148 |
| 0.109248249 | 0.294451496 | 0.012813106 | 0.039148621 |
| 0.067845814 | 0.215703017 | 0.133245788 | 0.064557853 |
| 0.034256781 | 0.01884088  | 0.183311992 | 0.111540823 |
| 0.199641243 | 0.030611484 | 0.225043415 | 0.018215337 |
| 0.041110695 | 0.295127817 | 0.077171463 | 0.004469273 |
| 0.013211586 | 0.101735913 | 0.030435123 | 0.081533185 |
| 0.00948109  | 0.26302091  | 0.123682411 | 0.120442848 |
| 0.150168235 | 0.031849492 | 0.169303767 | 0.013909216 |
| 0.01395792  | 0.238413714 | 0.088086766 | 0.269092421 |
| 0.052471482 | 0.306329703 | 0.209824173 | 0.242848458 |
| 0.011611527 | 0.059448815 | 0.03709648  | 0.235118913 |
| 0.074747367 |             |             |             |

|             |             |             |             |
|-------------|-------------|-------------|-------------|
| HBB-B1      | 0.12584815  | 0.262909073 | 0.077811639 |
| 0.244462685 | 0.149852632 | 0.104998145 | 0.09393243  |
| 0.015839908 | 0.018806514 | 0.029387909 | 0.064856823 |
| 0.16252633  | 0.085405227 | 0.099296228 | 0.027057671 |
| 0.211151166 | 0.127151611 | 0.031548881 | 0.125354806 |
| 0.163424885 | 0.035467752 | 0.268246565 | 0.037633937 |
| 0.038647526 | 0.107692308 | 0.089586148 | 0.089787156 |
| 0.231282857 | 0.086847417 | 0.091873321 | 0.144513149 |
| 0.029663517 | 0.169720031 | 0.226725323 | 0.296234962 |
| 0.235704291 | 0.105452441 | 0.003921275 | 0.05672624  |
| 0.145577816 | 0.210839325 | 0.169690338 | 0.20080288  |
| 0.037355365 | 0.199651445 | 0.150003062 | 0.136970319 |
| 0.010142325 | 0.072563672 | 0.026887448 | 0.163270121 |
| 0.242908652 | 0.167414573 | 0.030330483 | 0.07371079  |
| 0.103404234 | 0.033679357 | 0.085931771 | 0.089616121 |
| 0.133582646 | 0.02640446  | 0.239338238 | 0.018510611 |
| 0.013415156 | 0.034485927 | 0.052722775 | 0.069112147 |
| 0.055143967 | 0.117139465 | 0.004697205 | 0.109433099 |
| 0.015462562 | 0.146390488 | 0.13221802  | 0.058529726 |
| 0.072065216 | 0.095033793 | 0.073284697 | 0.178891327 |
| 0.232060007 | 0.16730263  | 0.305164184 | 0.281662891 |
| 0.094636345 | 0.084512384 | 0.113846734 | 0.122857973 |
| 0.16912376  | 0.124914693 | 0.019269632 | 0.254495066 |
| 0.302164678 | 0.265822575 | 0.048639058 | 0.113530068 |
| 0.243070493 | 0.21601217  | 0.100285038 | 0.136917815 |
| 0.06754253  | 0.014648078 | 0.204795211 | 0.294475062 |
| 0.14069322  | 0.10382997  | 0.134537397 | 0.181623844 |
| 0.045174969 | 0.022351257 | 0.219150503 | 0.04448889  |
| 0.245979308 | 0.011083403 | 0.129980089 | 0.162866288 |
| 0.014041571 | 0.177731764 | 0.262636418 | 0.107699219 |
| 0.11409004  | 0.040722015 | 0.03370088  | 0.017574637 |
| 0.037372061 | 0.031637533 | 0.195797729 | 0.300758211 |
| 0.025761527 | 0.045585626 | 0.06346916  | 0.00660192  |
| 0.045118956 | 0.013775839 | 0.209835368 | 0.057889757 |
| 0.152993085 | 0.124747613 | 0.132726193 | 0.122006587 |
| 0.185847848 | 0.294279619 | 0.006339181 | 0.027721195 |
| 0.13518782  | 0.014769764 | 0.156406369 | 0.168704545 |



|             |             |             |             |
|-------------|-------------|-------------|-------------|
| 0.178472528 | 0.02495742  | 0.087754238 | 0.279090524 |
| 0.164992277 | 0.088173452 | 0.029978735 | 0.226379258 |
| 0.057010108 | 0.195562475 | 0.053100853 | 0.145395105 |
| 0.037343224 | 0.218637223 | 0.044949085 | 0.042677983 |
| 0.026015342 | 0.07663563  | 0.001229036 | 0.052094814 |
| 0.039466852 | 0.278159646 | 0.176636922 | 0.053228387 |
| 0.166424809 | 0.222222071 | 0.049021049 | 0.27368423  |
| 0.043688964 | 0.013684168 | 0.025552163 | 0.304813748 |
| 0.081183008 | 0.248229624 | 0.058057657 | 0.050183263 |
| 0.157175727 | 0.216631101 | 0.000121    | 0.214792437 |
| 0.258027306 | 0.031935065 | 0.297393162 | 0.134174492 |
| 0.088296516 | 0.27285404  | 0.001715938 | 0.234816776 |
| 0.090232621 | 0.035951722 | 0.289783052 | 0.177580472 |
| 0.195746162 | 0.083198322 | 0.059077768 | 0.219465862 |
| 0.236280129 | 0.005634854 | 0.049652868 | 0.161889959 |
| 0.021094814 | 0.019027025 | 0.137358343 | 0.186647302 |
| 0.161712562 | 0.193330797 | 0.283494364 | 0.086053046 |
| 0.163118145 | 0.05157264  | 0.005871245 | 0.12403237  |
| 0.165243686 | 0.022394639 | 0.189345949 | 0.040865685 |
| 0.062173291 | 0.231003704 | 0.1689723   | 0.016263003 |
| 0.053407889 | 0.072740054 | 0.01938057  | 0.128316172 |
| 0.127613919 | 0.108593033 | 0.079610439 | 0.014391737 |
| 0.079899978 | 0.292189791 | 0.058272461 | 0.059932    |
| 0.036134054 | 0.248000897 | 0.071092179 | 0.17498481  |
| 1           | 0.0488736   | 0.067149808 | 0.071622496 |
| 0.025354846 | 0.13419111  | 0.002243258 | 0.133134634 |
| 0.184009776 | 0.201447318 | 0.187439537 | 0.138914771 |
| 0.057482168 | 0.126819268 | 0.205173665 | 0.027486813 |
| 0.052085853 | 0.040651231 | 0.251339506 | 0.171157969 |
| 0.098261257 | 0.041259179 | 0.037966307 | 0.053690532 |
| 0.299831451 | 0.089723774 | 0.017426782 | 0.261053482 |
| 0.006021274 | 0.250484885 | 0.118234274 | 0.149523311 |
| 0.188321921 | 0.210715637 | 0.244025756 | 0.009156116 |
| 0.080112552 | 0.236869085 | 0.087215735 | 0.116726549 |
| 0.201615637 | 0.15837211  | 0.02485306  | 0.135288831 |
| 0.154918311 | 0.073998668 | 0.281040536 | 0.071065488 |
| 0.036863549 | 0.204903891 | 0.23838141  | 0.079018223 |
| 0.057272622 | 0.191626547 | 0.011085221 | 0.192162067 |
| 0.287567392 | 0.28608153  | 0.231808119 | 0.040287355 |
| 0.078517555 | 0.114416787 | 0.068157768 | 0.088244958 |
| 0.224658157 | 0.2796448   | 0.119624636 | 0.24593013  |
| 0.137716984 | 0.068540161 | 0.005830367 | 0.30193256  |
| 0.007319552 | 0.224312501 | 0.012476692 | 0.216752212 |
| 0.232886137 | 0.054877757 | 0.113494998 | 0.102143182 |
| 0.182100636 | 0.033460538 | 0.025994664 | 0.247694318 |
| 0.187566091 | 0.06913804  | 0.069546451 | 0.15295887  |
| 0.012978159 | 0.015505526 | 0.122784009 | 0.032325015 |
| 0.073626065 | 0.055969007 | 0.01290862  | 0.023354596 |
| 0.061230057 | 0.240309589 | 0.240708748 | 0.03322471  |
| 0.140817434 | 0.019596867 | 0.188538931 | 0.042266277 |
| 0.247641473 | 0.223424485 | 0.24463492  | 0.026537053 |
| 0.198546609 | 0.278418688 | 0.180012846 | 0.043126336 |
| 0.037161785 | 0.242495593 | 0.106034304 | 0.039248901 |
| 0.271370315 | 0.037387758 | 0.103525651 | 0.23777596  |

|             |             |             |             |
|-------------|-------------|-------------|-------------|
| 0.078897901 | 0.166330394 | 0.001042598 | 0.002154669 |
| 0.011822759 | 0.246567058 | 0.212201299 | 0.124343006 |
| 0.046730884 | 0.105600886 | 0.000307862 | 0.261316389 |
| 0.268261001 | 0.031015588 | 0.033877074 | 0.238936371 |
| 0.240768718 | 0.241272689 | 0.103169013 | 0.281886554 |
| 0.221698714 | 0.247690332 | 0.057728766 | 0.167117143 |
| 0.250302928 | 0.243366355 | 0.157080567 | 0.187291948 |
| 0.289780496 | 0.203513476 | 0.166077912 | 0.023524051 |
| 0.012687236 | 0.034071034 | 0.057265845 | 0.041370312 |
| 0.065611278 | 0.073673793 | 0.219872568 | 0.260035581 |
| 0.297200192 | 0.015687862 | 0.022105339 | 0.196845812 |
| 0.217311145 | 0.235733478 | 0.001765866 | 0.000877923 |
| 0.000688851 | 0.049144516 | 0.101884592 | 0.083190758 |
| 0.245211321 | 0.036929189 | 0.017888057 | 0.010015717 |
| 0.028382756 | 0.20682467  | 0.263721997 | 0.20363119  |
| 0.180957643 | 0.048980063 | 0.099295931 | 0.177655811 |
| 0.039898716 | 0.066677838 | 0.30650891  | 0.224914678 |
| 0.010883779 | 0.069248376 | 0.053825271 | 0.275256055 |
| 0.018668526 | 0.166992871 | 0.179259664 | 0.072963282 |
| 0.002173662 | 0.052915326 | 0.040888464 | 0.205022556 |
| 0.233310469 | 0.142922516 | 0.104186376 | 0.010312066 |
| 0.12838575  | 0.226088388 | 0.105122885 | 0.290195376 |
| 0.225791213 | 0.274004663 | 0.025301909 | 0.211556501 |
| 0.038054731 | 0.244037731 | 0.166785298 | 0.006406958 |
| 0.04142363  | 0.007163079 | 0.220204304 | 0.04693897  |
| 0.059842107 | 0.110835962 | 0.015750172 | 0.018598128 |
| 0.014218477 | 0.069188276 | 0.300240477 | 0.259255796 |
| 0.009953901 | 0.031968238 | 0.099199797 | 0.127198569 |
| 0.075217321 | 0.292824916 | 0.228125579 | 0.108106894 |
| 0.042385019 | 0.01201345  | 0.163752884 | 0.115912286 |
| 0.034058356 | 0.289807327 | 0.084961752 | 0.258432074 |
| 0.119482288 | 0.180395763 | 0.244964879 | 0.122319927 |
| 0.046583192 | 0.093816385 | 0.200148269 | 0.037389344 |
| 0.121061858 | 0.313329749 | 0.055050956 | 0.066304765 |
| 0.206539265 | 0.113723304 | 0.004876021 | 0.005168605 |
| 0.097274942 | 0.092572908 | 0.059131248 | 0.231292646 |
| 0.095135563 | 0.122570055 | 0.005711566 | 0.043316878 |
| 0.262405076 | 0.161059811 | 0.012751147 | 0.189355765 |
| 0.067296126 | 0.15928546  | 0.204625971 | 0.225249571 |
| 0.024446595 | 0.278306087 | 0.190728586 | 0.22523317  |
| 0.206836952 | 0.093873305 | 0.24562663  | 0.00386451  |
| 0.021801819 | 0.115402    | 0.128562361 | 0.068912287 |
| 0.132623319 | 0.016638615 | 0.045730119 | 0.20535521  |
| 0.067377518 | 0.271536948 | 0.013540154 | 0.019675048 |
| 0.122877743 | 0.039365371 | 0.155707582 | 0.094205769 |
| 0.071146301 | 0.250690749 | 0.010864805 | 0.052095331 |
| 0.095923636 | 0.203981256 | 0.193058959 | 0.078108527 |
| 0.04778289  | 0.020598405 | 0.186260592 | 0.059407334 |
| 0.171232967 | 0.019882887 | 0.208028673 | 0.006355102 |
| 0.016292696 | 0.285803082 | 0.056547967 | 0.005227639 |
| 0.009505606 | 0.075343997 | 0.024983253 | 0.051572302 |
| 0.022425248 | 0.266161014 | 0.07626551  | 0.130201101 |
| 0.09722189  | 0.031092644 | 0.112812227 | 0.006412784 |
| 0.005852287 | 0.187592348 | 0.108461726 | 0.254247716 |

|             |             |             |             |
|-------------|-------------|-------------|-------------|
| 0.063118711 | 0.292180307 | 0.157496767 | 0.218708621 |
| 0.006935679 | 0.063599095 | 0.016430624 | 0.197253984 |
| 0.089181709 |             |             |             |
| HBS1L       | 0.148276142 | 0.193547449 | 0.114980108 |
| 0.267996357 | 0.172417425 | 0.109533896 | 0.195923291 |
| 0.050571804 | 0.114483273 | 0.023203126 | 0.072422958 |
| 0.140892486 | 0.070656159 | 0.063712445 | 0.045679325 |
| 0.316942609 | 0.111827792 | 0.078332126 | 0.264715948 |
| 0.241951295 | 0.070978847 | 0.309489807 | 0.127353399 |
| 0.083167732 | 0.135457756 | 0.185304768 | 0.138215371 |
| 0.266298686 | 0.20267933  | 0.075481032 | 0.188440898 |
| 0.103043562 | 0.177896437 | 0.152078472 | 0.207345939 |
| 0.137819454 | 0.114796487 | 0.018712832 | 0.06858204  |
| 0.160409268 | 0.218988097 | 0.252697557 | 0.267177226 |
| 0.105825611 | 0.126014827 | 0.251237732 | 0.20045675  |
| 0.034841391 | 0.104812737 | 0.045890757 | 0.127717189 |
| 0.124053284 | 0.138633882 | 0.097446166 | 0.155452305 |
| 0.050299491 | 0.038500029 | 0.03482549  | 0.099927939 |
| 0.234358255 | 0.040003945 | 0.139395885 | 0.093231688 |
| 0.065756352 | 0.106636355 | 0.101014372 | 0.132714907 |
| 0.077637242 | 0.133974418 | 0.07172465  | 0.098602421 |
| 0.00552036  | 0.266063688 | 0.211987462 | 0.071061025 |
| 0.184190325 | 0.060325194 | 0.139517886 | 0.233796535 |
| 0.251889484 | 0.141046203 | 0.254120121 | 0.227700372 |
| 0.080870288 | 0.198704495 | 0.12709904  | 0.157057578 |
| 0.178517235 | 0.165648212 | 0.060633065 | 0.318492334 |
| 0.245727263 | 0.167871369 | 0.134878026 | 0.254281938 |
| 0.178583925 | 0.177191636 | 0.098059547 | 0.138391737 |
| 0.06541374  | 0.087090354 | 0.141103092 | 0.214040374 |
| 0.127470412 | 0.10262025  | 0.22735233  | 0.190520485 |
| 0.170550115 | 0.0288185   | 0.301888046 | 0.043440147 |
| 0.260714864 | 0.089997921 | 0.219383507 | 0.184239643 |
| 0.090507555 | 0.170337249 | 0.16650249  | 0.243561257 |
| 0.142791517 | 0.05755803  | 0.059379842 | 0.104365045 |
| 0.049517935 | 0.039380714 | 0.112114551 | 0.231154497 |
| 0.047652466 | 0.065460075 | 0.17253884  | 0.040802934 |
| 0.09332593  | 0.077227963 | 0.144128323 | 0.111490155 |
| 0.208867373 | 0.106239738 | 0.154709958 | 0.115399832 |
| 0.13839061  | 0.253453704 | 0.004725877 | 0.128999073 |
| 0.14993304  | 0.089851892 | 0.317754834 | 0.13838948  |
| 0.212424706 | 0.107892114 | 0.179040991 | 0.234503111 |
| 0.141379436 | 0.201535671 | 0.053490899 | 0.297265086 |
| 0.05541735  | 0.202597552 | 0.164471035 | 0.103152787 |
| 0.097151275 | 0.136227049 | 0.105321142 | 0.094610987 |
| 0.051436122 | 0.071563012 | 0.046735743 | 0.10416868  |
| 0.046840702 | 0.158835712 | 0.106269126 | 0.194955471 |
| 0.140879597 | 0.262083665 | 0.076781433 | 0.152441209 |
| 0.051772292 | 0.09750748  | 0.041266059 | 0.206071659 |
| 0.072462582 | 0.211759003 | 0.107557401 | 0.128579495 |
| 0.270311104 | 0.258627795 | 0.003734153 | 0.13597732  |
| 0.168601205 | 0.036649177 | 0.183994735 | 0.181752993 |
| 0.108118212 | 0.244784762 | 0.004123802 | 0.271631446 |
| 0.085545412 | 0.17433837  | 0.264685931 | 0.242827513 |
| 0.138592969 | 0.176293767 | 0.080009101 | 0.176794107 |

|             |             |             |             |
|-------------|-------------|-------------|-------------|
| 0.124056158 | 0.028509674 | 0.074635553 | 0.239222603 |
| 0.086339798 | 0.063419521 | 0.191147948 | 0.243851592 |
| 0.213827785 | 0.233183394 | 0.285431464 | 0.095509864 |
| 0.166547184 | 0.138300449 | 0.075537823 | 0.20424561  |
| 0.183920261 | 0.036258848 | 0.142203812 | 0.106435428 |
| 0.059415259 | 0.173271505 | 0.125829861 | 0.031655622 |
| 0.162320063 | 0.140622689 | 0.032247344 | 0.211081671 |
| 0.126692485 | 0.086010425 | 0.110524615 | 0.07719476  |
| 0.143609938 | 0.213136587 | 0.089858152 | 0.068401812 |
| 0.047591225 | 0.123478866 | 0.208686733 | 0.051500219 |
| 0.0488736   | 1           | 0.107116766 | 0.105620546 |
| 0.073619841 | 0.163355635 | 0.047059638 | 0.036643708 |
| 0.042132513 | 0.047235322 | 0.041446867 | 0.117893323 |
| 0.047954138 | 0.064140577 | 0.157185791 | 0.068553003 |
| 0.120331226 | 0.128539708 | 0.18944609  | 0.270815422 |
| 0.086958837 | 0.146564551 | 0.135936763 | 0.020397075 |
| 0.224801152 | 0.05973122  | 0.030166483 | 0.188309763 |
| 0.06126692  | 0.244330334 | 0.07216918  | 0.226278751 |
| 0.084698749 | 0.231973268 | 0.278364167 | 0.034233837 |
| 0.118586155 | 0.159223346 | 0.22554773  | 0.190490668 |
| 0.11260909  | 0.220688063 | 0.09255941  | 0.11835885  |
| 0.10916684  | 0.141097673 | 0.187790544 | 0.096432463 |
| 0.135354929 | 0.201905455 | 0.166429108 | 0.235982336 |
| 0.165034325 | 0.142977561 | 0.059866714 | 0.316745683 |
| 0.2080485   | 0.314971349 | 0.163893459 | 0.103187881 |
| 0.126292934 | 0.028413575 | 0.146083758 | 0.112103461 |
| 0.134257843 | 0.183244873 | 0.254491451 | 0.137833436 |
| 0.30708903  | 0.095349351 | 0.027769882 | 0.207407674 |
| 0.050250908 | 0.160506533 | 0.076734957 | 0.192389037 |
| 0.134534577 | 0.061514074 | 0.162936372 | 0.160844592 |
| 0.122481964 | 0.148724198 | 0.110441103 | 0.151439211 |
| 0.192596706 | 0.142086248 | 0.093867605 | 0.184575597 |
| 0.06026016  | 0.092947308 | 0.199683562 | 0.06089004  |
| 0.085654773 | 0.171603107 | 0.021694689 | 0.056693644 |
| 0.094332859 | 0.157462599 | 0.245268681 | 0.128695403 |
| 0.087773114 | 0.054181474 | 0.26536963  | 0.158287564 |
| 0.179402889 | 0.158835523 | 0.153378478 | 0.114183744 |
| 0.159430717 | 0.175258644 | 0.106778887 | 0.170741606 |
| 0.121122037 | 0.150296995 | 0.143438157 | 0.038809263 |
| 0.260551056 | 0.04502845  | 0.041019404 | 0.183782672 |
| 0.238260233 | 0.099768527 | 0.010835529 | 0.016538207 |
| 0.086150557 | 0.252651274 | 0.13956565  | 0.194850862 |
| 0.027247101 | 0.223447242 | 0.016034048 | 0.196881768 |
| 0.159772894 | 0.08100462  | 0.107051882 | 0.147082157 |
| 0.141736356 | 0.180492683 | 0.112324938 | 0.187333331 |
| 0.123603599 | 0.140804862 | 0.08323105  | 0.305332803 |
| 0.191801832 | 0.150576703 | 0.185208758 | 0.159828268 |
| 0.234911327 | 0.240785932 | 0.307071195 | 0.08837302  |
| 0.089413038 | 0.078231769 | 0.031631816 | 0.076830788 |
| 0.088894176 | 0.122007944 | 0.170966046 | 0.258948559 |
| 0.194383409 | 0.081329313 | 0.066764928 | 0.147678616 |
| 0.20336331  | 0.248340584 | 0.05441609  | 0.013517121 |
| 0.003899228 | 0.062002443 | 0.182507312 | 0.209689706 |
| 0.19577584  | 0.014916093 | 0.062130664 | 0.061873347 |

|             |             |             |             |
|-------------|-------------|-------------|-------------|
| 0.074928469 | 0.196357049 | 0.164835588 | 0.321443622 |
| 0.187203257 | 0.16451814  | 0.038672832 | 0.289138106 |
| 0.121682669 | 0.071382254 | 0.210512226 | 0.158286798 |
| 0.098139911 | 0.202105449 | 0.08064066  | 0.252722798 |
| 0.021203916 | 0.268314171 | 0.146271093 | 0.071758959 |
| 0.036224306 | 0.14248239  | 0.147425268 | 0.269062943 |
| 0.12952692  | 0.076086111 | 0.074514459 | 0.014098348 |
| 0.115097224 | 0.225361827 | 0.100776078 | 0.241979364 |
| 0.212858906 | 0.301483276 | 0.102304835 | 0.158129298 |
| 0.141160453 | 0.135586797 | 0.150536586 | 0.011910333 |
| 0.100721827 | 0.07631446  | 0.140771458 | 0.049479005 |
| 0.063576486 | 0.155694172 | 0.085513583 | 0.083196848 |
| 0.044754515 | 0.141846895 | 0.264015951 | 0.241080159 |
| 0.08013849  | 0.125792711 | 0.218982444 | 0.210583676 |
| 0.111680766 | 0.248633572 | 0.142439694 | 0.063500809 |
| 0.112565626 | 0.034472473 | 0.219220846 | 0.108549355 |
| 0.058778103 | 0.258087451 | 0.086392761 | 0.201349673 |
| 0.149214207 | 0.186194522 | 0.172164924 | 0.217747155 |
| 0.073496859 | 0.11273249  | 0.160450907 | 0.039752231 |
| 0.219242052 | 0.245325892 | 0.119769714 | 0.097956515 |
| 0.210630079 | 0.112184575 | 0.094728474 | 0.014368623 |
| 0.080068828 | 0.101049234 | 0.107192103 | 0.303329119 |
| 0.134771886 | 0.117636164 | 0.064625933 | 0.135426762 |
| 0.191312903 | 0.155852648 | 0.067503899 | 0.182427091 |
| 0.203013431 | 0.250461057 | 0.194468346 | 0.208715692 |
| 0.051930199 | 0.170230812 | 0.191768822 | 0.137600442 |
| 0.141861191 | 0.251959458 | 0.160478766 | 0.026739844 |
| 0.113730506 | 0.107509758 | 0.099127443 | 0.210015203 |
| 0.223149806 | 0.102326606 | 0.040803147 | 0.266519939 |
| 0.048188762 | 0.260393234 | 0.029039594 | 0.101245531 |
| 0.224410453 | 0.068647534 | 0.260027905 | 0.12025022  |
| 0.098238542 | 0.149638398 | 0.043231224 | 0.151233293 |
| 0.057291316 | 0.189511076 | 0.12653202  | 0.1617497   |
| 0.058350461 | 0.095158547 | 0.256870225 | 0.071084531 |
| 0.04434899  | 0.034639686 | 0.177266636 | 0.061858694 |
| 0.072234417 | 0.257848031 | 0.072827982 | 0.067039337 |
| 0.08939988  | 0.106164466 | 0.060892712 | 0.102290277 |
| 0.090807556 | 0.162476751 | 0.06533011  | 0.163646718 |
| 0.178634217 | 0.132134425 | 0.09550693  | 0.066902203 |
| 0.098799507 | 0.129873842 | 0.141265056 | 0.154744654 |
| 0.123448675 | 0.307119724 | 0.111810112 | 0.154727992 |
| 0.047445381 | 0.080306208 | 0.099981044 | 0.223131769 |
| 0.052992061 |             |             |             |

|             |             |             |             |
|-------------|-------------|-------------|-------------|
| HDDC2       | 0.281162426 | 0.414755873 | 0.204549272 |
| 0.323210673 | 0.219276351 | 0.173117107 | 0.095321109 |
| 0.037342643 | 0.089931673 | 0.003348282 | 0.038411989 |
| 0.246500965 | 0.076044184 | 0.054829305 | 0.102912415 |
| 0.36568433  | 0.066693236 | 0.092293202 | 0.132141827 |
| 0.268482872 | 0.026294776 | 0.320898749 | 0.047775714 |
| 0.134332572 | 0.086250911 | 0.059781512 | 0.16187898  |
| 0.350880433 | 0.063634584 | 0.103113475 | 0.221982641 |
| 0.054216774 | 0.297742058 | 0.392151099 | 0.307102496 |
| 0.377146757 | 0.25556851  | 0.002920726 | 0.07872232  |
| 0.294468926 | 0.376974641 | 0.277779908 | 0.199108363 |

|             |             |             |             |
|-------------|-------------|-------------|-------------|
| 0.028764793 | 0.32613698  | 0.141771061 | 0.268739151 |
| 0.048758055 | 0.035718734 | 0.044982999 | 0.30318915  |
| 0.339873389 | 0.251911986 | 0.057068629 | 0.065549789 |
| 0.076896508 | 0.034288797 | 0.097478054 | 0.140324262 |
| 0.113690211 | 0.02502497  | 0.362200826 | 0.055717098 |
| 0.052933323 | 0.063299087 | 0.071503292 | 0.078743795 |
| 0.138217535 | 0.227795726 | 0.01053922  | 0.222030164 |
| 0.000178705 | 0.261281172 | 0.239064304 | 0.158729442 |
| 0.038197635 | 0.013497062 | 0.079470702 | 0.192244455 |
| 0.368866462 | 0.33995771  | 0.434940133 | 0.442155    |
| 0.067019268 | 0.149832193 | 0.221375943 | 0.070379163 |
| 0.339645748 | 0.075377892 | 0.039909214 | 0.374558461 |
| 0.440900843 | 0.405346084 | 0.12428809  | 0.197495929 |
| 0.326493125 | 0.358055092 | 0.165878764 | 0.184964687 |
| 0.140741429 | 0.051343713 | 0.328372816 | 0.426412754 |
| 0.251837387 | 0.174647906 | 0.107900036 | 0.261188548 |
| 0.04175672  | 0.067786643 | 0.243321736 | 0.038913597 |
| 0.3870969   | 0.022970779 | 0.145619909 | 0.165587254 |
| 0.074054243 | 0.303999073 | 0.41713823  | 0.102070618 |
| 0.188778574 | 0.012571522 | 0.114436433 | 0.028241204 |
| 0.076591023 | 0.083071489 | 0.330606666 | 0.364614606 |
| 0.044175733 | 0.119659485 | 0.099575481 | 0.004863136 |
| 0.026632408 | 0.077104864 | 0.292964214 | 0.122101499 |
| 0.303613758 | 0.290534032 | 0.119525874 | 0.227027147 |
| 0.29582721  | 0.432338445 | 0.011305248 | 0.04580592  |
| 0.206432339 | 0.080029052 | 0.16694461  | 0.224230131 |
| 0.196698866 | 0.040206882 | 0.05362045  | 0.447583656 |
| 0.29011743  | 0.048298082 | 0.068114687 | 0.334414306 |
| 0.09341123  | 0.237496267 | 0.048132983 | 0.069675354 |
| 0.024397331 | 0.381566164 | 0.029983204 | 0.097344502 |
| 0.162104427 | 0.065043695 | 0.006568817 | 0.073000351 |
| 0.064523882 | 0.336242637 | 0.323567046 | 0.054374678 |
| 0.101645209 | 0.306266232 | 0.09085981  | 0.275004185 |
| 0.016752432 | 0.028264048 | 0.060252517 | 0.405681786 |
| 0.107494871 | 0.422222552 | 0.087978325 | 0.127678975 |
| 0.196879392 | 0.377695341 | 0.002816065 | 0.357300423 |
| 0.420247759 | 0.061782277 | 0.216859342 | 0.252513471 |
| 0.221795601 | 0.368353034 | 0.008759272 | 0.298886206 |
| 0.166986036 | 0.044948313 | 0.446923204 | 0.111546826 |
| 0.331256046 | 0.040554877 | 0.070830252 | 0.393924311 |
| 0.290030558 | 0.007915168 | 0.060553528 | 0.254442344 |
| 0.031680612 | 0.029390494 | 0.287231475 | 0.277482134 |
| 0.260944342 | 0.367485193 | 0.42438335  | 0.203825104 |
| 0.220400656 | 0.069401715 | 0.014399994 | 0.205759862 |
| 0.335665326 | 0.101914653 | 0.312198479 | 0.077391644 |
| 0.115639227 | 0.365072111 | 0.303628814 | 0.068665427 |
| 0.033585155 | 0.108869187 | 0.008691634 | 0.220953389 |
| 0.31415907  | 0.041799202 | 0.227185196 | 0.054148007 |
| 0.052123538 | 0.437920244 | 0.107818553 | 0.127467588 |
| 0.088824335 | 0.173636992 | 0.111173719 | 0.055204432 |
| 0.067149808 | 0.107116766 | 1           | 0.143875278 |
| 0.016900495 | 0.050161919 | 0.017677242 | 0.076388901 |
| 0.03883009  | 0.070667392 | 0.066976352 | 0.221395712 |
| 0.065156352 | 0.03466576  | 0.182011797 | 0.137709155 |

|             |             |             |             |
|-------------|-------------|-------------|-------------|
| 0.084220213 | 0.017805388 | 0.401884516 | 0.293507064 |
| 0.165274118 | 0.076972601 | 0.031308449 | 0.06186969  |
| 0.374704853 | 0.111928289 | 0.046507472 | 0.345679814 |
| 0.016850131 | 0.427071943 | 0.075271022 | 0.091223065 |
| 0.125594167 | 0.13325071  | 0.399312113 | 0.034683391 |
| 0.166082402 | 0.335678964 | 0.183395735 | 0.115316037 |
| 0.249369706 | 0.262036831 | 0.021302768 | 0.246364897 |
| 0.223737039 | 0.025887986 | 0.420761636 | 0.065238895 |
| 0.022774298 | 0.328291507 | 0.342141032 | 0.070034233 |
| 0.061987716 | 0.143960572 | 0.01621868  | 0.236372821 |
| 0.425106841 | 0.348111114 | 0.312742195 | 0.118298634 |
| 0.029074437 | 0.005208015 | 0.109101717 | 0.203255857 |
| 0.35560942  | 0.419312091 | 0.147445778 | 0.179387774 |
| 0.15699371  | 0.165586503 | 0.024240418 | 0.42393612  |
| 0.07079129  | 0.389498001 | 0.009307726 | 0.384211554 |
| 0.377564423 | 0.07280586  | 0.069446836 | 0.135154457 |
| 0.239063266 | 0.038173899 | 0.061291133 | 0.365979183 |
| 0.360501068 | 0.16413206  | 0.140970832 | 0.258839168 |
| 0.009957837 | 0.02139548  | 0.283699464 | 0.11872133  |
| 0.118565186 | 0.114929726 | 0.047186513 | 0.074533457 |
| 0.027946037 | 0.333645955 | 0.362639916 | 0.075278984 |
| 0.144441796 | 0.066678001 | 0.278954321 | 0.03075988  |
| 0.413628825 | 0.396127884 | 0.384380803 | 0.051563402 |
| 0.302195437 | 0.40918252  | 0.250280652 | 0.055459115 |
| 0.023262682 | 0.397120591 | 0.22837487  | 0.01164269  |
| 0.397784277 | 0.054676469 | 0.008527047 | 0.37697135  |
| 0.096489164 | 0.284076227 | 0.00455711  | 0.035919698 |
| 0.041147528 | 0.407152522 | 0.363106605 | 0.221049178 |
| 0.041184423 | 0.208662725 | 0.006437823 | 0.431854389 |
| 0.364703245 | 0.024383956 | 0.098153965 | 0.320297498 |
| 0.329697812 | 0.396321611 | 0.197745729 | 0.399967375 |
| 0.252268252 | 0.376590902 | 0.070086113 | 0.209265728 |
| 0.340078577 | 0.4024947   | 0.280341948 | 0.341355224 |
| 0.359020391 | 0.321463075 | 0.192635746 | 0.017666726 |
| 0.165264368 | 0.049411822 | 0.083827051 | 0.068562156 |
| 0.132126052 | 0.096253442 | 0.367818425 | 0.402123827 |
| 0.405039653 | 0.008726102 | 0.038041899 | 0.309822774 |
| 0.322326024 | 0.389803206 | 0.017634063 | 0.011627302 |
| 0.00440379  | 0.035102402 | 0.172240956 | 0.153205806 |
| 0.414278541 | 0.035848986 | 0.006329052 | 0.014803771 |
| 0.081746436 | 0.312384343 | 0.384828299 | 0.29411644  |
| 0.353883882 | 0.049183676 | 0.069281727 | 0.294694172 |
| 0.080412427 | 0.152781389 | 0.415904898 | 0.348419155 |
| 0.032628139 | 0.152698062 | 0.110135304 | 0.409182431 |
| 0.062243207 | 0.211894601 | 0.250192    | 0.100219247 |
| 0.009633627 | 0.068844322 | 0.079739709 | 0.36873296  |
| 0.367764118 | 0.039157775 | 0.025560255 | 0.024395301 |
| 0.049499291 | 0.389048531 | 0.062681338 | 0.442652842 |
| 0.328332695 | 0.369478697 | 0.058647454 | 0.374789717 |
| 0.057950262 | 0.349757942 | 0.202792486 | 0.012926762 |
| 0.086830037 | 0.01261691  | 0.351377541 | 0.117155675 |
| 0.064489525 | 0.219979123 | 0.180499259 | 0.023455349 |
| 0.121698969 | 0.041259292 | 0.425591885 | 0.421058724 |
| 0.033398539 | 0.082664385 | 0.171563597 | 0.249283218 |

|             |             |             |             |
|-------------|-------------|-------------|-------------|
| 0.097159836 | 0.333801783 | 0.364243698 | 0.148049273 |
| 0.041920541 | 0.059874225 | 0.26052625  | 0.197421022 |
| 0.046501573 | 0.437572822 | 0.13788323  | 0.433701914 |
| 0.25818401  | 0.366661446 | 0.380563626 | 0.21150148  |
| 0.104111428 | 0.178335755 | 0.212700546 | 0.00880699  |
| 0.187719505 | 0.378549016 | 0.13062244  | 0.105224255 |
| 0.151743384 | 0.231616773 | 0.02733926  | 0.027000762 |
| 0.181018357 | 0.121557222 | 0.05477694  | 0.381951811 |
| 0.188059835 | 0.216676434 | 0.013227898 | 0.077026445 |
| 0.422913362 | 0.334624728 | 0.049321392 | 0.271546888 |
| 0.091728621 | 0.250963221 | 0.350113049 | 0.369241526 |
| 0.119186978 | 0.333194331 | 0.287553322 | 0.206654068 |
| 0.290977143 | 0.148191509 | 0.398476295 | 0.014750288 |
| 0.129387996 | 0.20860225  | 0.0495242   | 0.073961889 |
| 0.076414499 | 0.032920204 | 0.123970859 | 0.323712333 |
| 0.111249542 | 0.248671921 | 0.054137179 | 0.049473538 |
| 0.201515822 | 0.115399111 | 0.228526803 | 0.059524686 |
| 0.042749481 | 0.373691892 | 0.010262749 | 0.039106589 |
| 0.113356621 | 0.371409265 | 0.224132589 | 0.104576306 |
| 0.145498948 | 0.080297041 | 0.172309928 | 0.080930314 |
| 0.071968481 | 0.092709664 | 0.35817246  | 0.017792232 |
| 0.010524192 | 0.42379061  | 0.113762323 | 0.021742365 |
| 0.061815539 | 0.192168732 | 0.070851105 | 0.129882589 |
| 0.02867254  | 0.396296067 | 0.099668105 | 0.24109731  |
| 0.157000042 | 0.037356351 | 0.212496458 | 0.039554949 |
| 0.034629727 | 0.302463659 | 0.249787343 | 0.396971228 |
| 0.158730437 | 0.350563836 | 0.298024004 | 0.301392301 |
| 0.041689521 | 0.175909259 | 0.022528291 | 0.342125878 |
| 0.129919442 |             |             |             |

|             |             |             |             |
|-------------|-------------|-------------|-------------|
| HDGFRP3     | 0.290884264 | 0.45003621  | 0.186513394 |
| 0.369102695 | 0.225734064 | 0.218849299 | 0.125862406 |
| 0.058127061 | 0.09119759  | 0.006759176 | 0.036311946 |
| 0.237017946 | 0.075859699 | 0.079375138 | 0.119596282 |
| 0.380843792 | 0.063872975 | 0.102541262 | 0.15147792  |
| 0.309167599 | 0.049624741 | 0.335151932 | 0.066512116 |
| 0.117609319 | 0.070985708 | 0.067200563 | 0.139059352 |
| 0.391455155 | 0.071109213 | 0.137320127 | 0.274182514 |
| 0.052085157 | 0.324165322 | 0.419929483 | 0.303607719 |
| 0.40057043  | 0.263631098 | 0.00377095  | 0.116959761 |
| 0.32969561  | 0.377485982 | 0.322889371 | 0.226687278 |
| 0.044310827 | 0.369149799 | 0.175055475 | 0.246102202 |
| 0.07408191  | 0.033397264 | 0.067222763 | 0.347981472 |
| 0.375589612 | 0.264593618 | 0.085511275 | 0.09512107  |
| 0.080103847 | 0.057932574 | 0.086590828 | 0.187202708 |
| 0.139483465 | 0.047159787 | 0.395828679 | 0.079609348 |
| 0.075995024 | 0.085319917 | 0.065790866 | 0.109027137 |
| 0.123871759 | 0.274985101 | 0.015903717 | 0.21275661  |
| 0.002151121 | 0.294583897 | 0.22101354  | 0.131301792 |
| 0.036943879 | 0.018035827 | 0.075401854 | 0.242160027 |
| 0.405925978 | 0.359847622 | 0.442188279 | 0.447946677 |
| 0.06602365  | 0.146579186 | 0.191622923 | 0.088850027 |
| 0.361600121 | 0.100716903 | 0.042587456 | 0.377467806 |
| 0.448566853 | 0.432569317 | 0.100117455 | 0.172717518 |
| 0.367721601 | 0.399689036 | 0.182270419 | 0.199745309 |



|             |             |             |             |
|-------------|-------------|-------------|-------------|
| 0.140228186 | 0.039475718 | 0.369900087 | 0.444467274 |
| 0.296233888 | 0.132998894 | 0.097071735 | 0.313997086 |
| 0.047063334 | 0.085319843 | 0.27965885  | 0.040539096 |
| 0.418504433 | 0.030775398 | 0.12272368  | 0.205985726 |
| 0.089219004 | 0.337496844 | 0.431008765 | 0.123799141 |
| 0.174552653 | 0.01404721  | 0.083542766 | 0.027385867 |
| 0.088681178 | 0.053282952 | 0.367816418 | 0.402171415 |
| 0.065164985 | 0.135763062 | 0.123890914 | 0.004901227 |
| 0.024248835 | 0.074049043 | 0.314455602 | 0.13509766  |
| 0.337164322 | 0.293479125 | 0.132972698 | 0.25916939  |
| 0.279856575 | 0.438541649 | 0.016923297 | 0.070162884 |
| 0.208782317 | 0.078501613 | 0.18161582  | 0.241992924 |
| 0.17204984  | 0.060095864 | 0.071598301 | 0.46808763  |
| 0.341619933 | 0.059004718 | 0.087003343 | 0.338414396 |
| 0.130009869 | 0.202599499 | 0.061048977 | 0.089080627 |
| 0.041605829 | 0.389578337 | 0.023786817 | 0.117581564 |
| 0.12821067  | 0.05528799  | 0.009564692 | 0.103238284 |
| 0.088899918 | 0.370107251 | 0.350018494 | 0.063257798 |
| 0.120427309 | 0.306228374 | 0.118679526 | 0.302020502 |
| 0.023890564 | 0.029276618 | 0.078611029 | 0.433175179 |
| 0.151227457 | 0.428243399 | 0.107595312 | 0.123785909 |
| 0.185387585 | 0.404066621 | 0.001873765 | 0.390143413 |
| 0.438229468 | 0.078024987 | 0.228561945 | 0.23786854  |
| 0.190220376 | 0.408983725 | 0.005833384 | 0.317683227 |
| 0.196612824 | 0.055521715 | 0.462632757 | 0.106598069 |
| 0.363425208 | 0.045148882 | 0.094450001 | 0.380742531 |
| 0.287269972 | 0.006181234 | 0.093200638 | 0.303763753 |
| 0.024899056 | 0.056861989 | 0.319988423 | 0.320696844 |
| 0.281457797 | 0.379262205 | 0.446822196 | 0.172610021 |
| 0.214577303 | 0.086432188 | 0.01275546  | 0.176180166 |
| 0.344220616 | 0.108917319 | 0.366553651 | 0.09819307  |
| 0.138046746 | 0.410022441 | 0.315884788 | 0.126224481 |
| 0.046567951 | 0.147332957 | 0.011255044 | 0.210834382 |
| 0.323992158 | 0.065086001 | 0.207652718 | 0.052752206 |
| 0.047334377 | 0.464722936 | 0.077219072 | 0.089478973 |
| 0.056728543 | 0.205423534 | 0.132663416 | 0.076725403 |
| 0.071622496 | 0.105620546 | 0.143875278 | 1           |
| 0.032077093 | 0.057479277 | 0.012697604 | 0.079810767 |
| 0.046167362 | 0.080697222 | 0.076242803 | 0.254132165 |
| 0.081916753 | 0.041312294 | 0.173335986 | 0.126678309 |
| 0.075531013 | 0.018290046 | 0.436622239 | 0.310612772 |
| 0.210298276 | 0.095145597 | 0.031759768 | 0.076344186 |
| 0.414916517 | 0.140326902 | 0.060109757 | 0.395853568 |
| 0.019561405 | 0.440961637 | 0.101281799 | 0.083729578 |
| 0.116198855 | 0.151689025 | 0.436387815 | 0.037231038 |
| 0.191618317 | 0.38571334  | 0.180329237 | 0.11721221  |
| 0.293825628 | 0.287453491 | 0.02917025  | 0.284621639 |
| 0.251467674 | 0.028914911 | 0.438103171 | 0.058494034 |
| 0.021875112 | 0.317751001 | 0.346906566 | 0.065706007 |
| 0.060195544 | 0.169604769 | 0.034793253 | 0.225215893 |
| 0.457342032 | 0.35822761  | 0.352850948 | 0.094331806 |
| 0.040941856 | 0.006775376 | 0.087775837 | 0.183033583 |
| 0.392749402 | 0.428387542 | 0.153487241 | 0.164590822 |
| 0.178910283 | 0.151857019 | 0.049983419 | 0.443361815 |

|             |             |             |             |
|-------------|-------------|-------------|-------------|
| 0.063686298 | 0.415295249 | 0.00971045  | 0.368295586 |
| 0.40142779  | 0.097048311 | 0.063833142 | 0.179677133 |
| 0.289724428 | 0.049525406 | 0.079966437 | 0.401716257 |
| 0.401207407 | 0.15078997  | 0.148520981 | 0.265861119 |
| 0.019399558 | 0.040563719 | 0.265386137 | 0.081993776 |
| 0.145159924 | 0.12882041  | 0.021610779 | 0.094801177 |
| 0.040797482 | 0.38001207  | 0.377959326 | 0.079984065 |
| 0.186712274 | 0.089704501 | 0.267113535 | 0.038253574 |
| 0.398772926 | 0.407047186 | 0.418274118 | 0.073775637 |
| 0.310116739 | 0.424885009 | 0.224676038 | 0.052999554 |
| 0.019984896 | 0.415065828 | 0.266698415 | 0.019897103 |
| 0.420592037 | 0.078552473 | 0.012864022 | 0.423877591 |
| 0.119160461 | 0.321868676 | 0.006098161 | 0.027485558 |
| 0.030730289 | 0.400365987 | 0.398452239 | 0.270406223 |
| 0.064209161 | 0.232852588 | 0.005275961 | 0.441719838 |
| 0.401786578 | 0.017712791 | 0.076100425 | 0.325016229 |
| 0.312176218 | 0.437498418 | 0.149499278 | 0.391215512 |
| 0.232554633 | 0.406478299 | 0.086453074 | 0.20558283  |
| 0.371352119 | 0.406858911 | 0.317984604 | 0.384634368 |
| 0.393929271 | 0.318635996 | 0.221247551 | 0.024162307 |
| 0.12885694  | 0.076887884 | 0.100832013 | 0.118737244 |
| 0.171823212 | 0.099353427 | 0.391507629 | 0.425216079 |
| 0.409112476 | 0.008236191 | 0.067982208 | 0.319864462 |
| 0.375111383 | 0.430896785 | 0.01630149  | 0.006278142 |
| 0.003071039 | 0.024944194 | 0.21332494  | 0.132320707 |
| 0.432524117 | 0.059609031 | 0.008083245 | 0.028439968 |
| 0.108183817 | 0.271546676 | 0.418826537 | 0.319306224 |
| 0.348295801 | 0.055050716 | 0.088575318 | 0.327660409 |
| 0.066164698 | 0.182429821 | 0.427966529 | 0.396332252 |
| 0.030823634 | 0.139207482 | 0.119161018 | 0.451100827 |
| 0.032147318 | 0.201909197 | 0.248748317 | 0.114373029 |
| 0.009499187 | 0.061352321 | 0.072844958 | 0.375487443 |
| 0.392088909 | 0.042973877 | 0.027014021 | 0.028045431 |
| 0.071056925 | 0.406154922 | 0.077432996 | 0.462860028 |
| 0.377214965 | 0.399428584 | 0.048993109 | 0.414364488 |
| 0.048150033 | 0.378364073 | 0.169405108 | 0.02202998  |
| 0.092005403 | 0.014068799 | 0.364679161 | 0.113081483 |
| 0.083650656 | 0.253704388 | 0.14783655  | 0.018162657 |
| 0.081386374 | 0.038781795 | 0.450530352 | 0.412476868 |
| 0.024891232 | 0.116902156 | 0.166921785 | 0.268201666 |
| 0.133946754 | 0.362235879 | 0.401547108 | 0.16466469  |
| 0.066807152 | 0.041112069 | 0.300229439 | 0.221903892 |
| 0.069665275 | 0.446177767 | 0.139925846 | 0.453089323 |
| 0.284210757 | 0.397336738 | 0.397468025 | 0.239694931 |
| 0.089938515 | 0.199514431 | 0.267415479 | 0.016531643 |
| 0.205628639 | 0.406327271 | 0.153740918 | 0.091340855 |
| 0.151304946 | 0.199418961 | 0.042622067 | 0.034020349 |
| 0.140308107 | 0.170146535 | 0.078330228 | 0.404391289 |
| 0.214356414 | 0.237664761 | 0.022413147 | 0.072435356 |
| 0.456218987 | 0.373358747 | 0.072606087 | 0.31530203  |
| 0.089706704 | 0.251243785 | 0.354830244 | 0.353675236 |
| 0.127973715 | 0.361456424 | 0.320839427 | 0.256936191 |
| 0.346656127 | 0.176868924 | 0.43268648  | 0.025938219 |
| 0.060715921 | 0.216303774 | 0.064315919 | 0.063140081 |

|             |             |             |             |
|-------------|-------------|-------------|-------------|
| 0.085448512 | 0.031771948 | 0.095758827 | 0.331040656 |
| 0.093638861 | 0.271021537 | 0.071396883 | 0.060123347 |
| 0.186335609 | 0.122102125 | 0.234512078 | 0.086947037 |
| 0.056432147 | 0.410765464 | 0.011578511 | 0.039759553 |
| 0.095723353 | 0.366947593 | 0.192774219 | 0.106746101 |
| 0.114451788 | 0.069373182 | 0.186950854 | 0.106434057 |
| 0.089887575 | 0.08778374  | 0.367454101 | 0.024861436 |
| 0.018415028 | 0.443512314 | 0.127931582 | 0.016845421 |
| 0.068359485 | 0.221632517 | 0.081513597 | 0.145542164 |
| 0.021388604 | 0.406162509 | 0.12702138  | 0.235920293 |
| 0.203926739 | 0.045238633 | 0.257804252 | 0.040496452 |
| 0.043036902 | 0.34078771  | 0.212436962 | 0.414543818 |
| 0.139826935 | 0.374769461 | 0.337122798 | 0.32723958  |
| 0.043469442 | 0.16382884  | 0.032019774 | 0.376712298 |
| 0.115468712 |             |             |             |
| HERPUD2     | 0.029465729 | 0.05065862  | 0.015817908 |
| 0.132399827 | 0.047396951 | 0.06769673  | 0.250970676 |
| 0.086551514 | 0.073694262 | 0.132431654 | 0.040499997 |
| 0.023770619 | 0.034666183 | 0.084166686 | 0.020886823 |
| 0.101285961 | 0.048697588 | 0.026381838 | 0.210121198 |
| 0.111829558 | 0.212369026 | 0.108977101 | 0.159416904 |
| 0.009296843 | 0.037345373 | 0.134853668 | 0.022403209 |
| 0.109060906 | 0.140441794 | 0.073653842 | 0.121102595 |
| 0.034299913 | 0.051992311 | 0.033095358 | 0.04933159  |
| 0.026005037 | 0.021800884 | 0.024978598 | 0.070604646 |
| 0.049680365 | 0.049415905 | 0.123706348 | 0.174310709 |
| 0.163088516 | 0.035205161 | 0.241587834 | 0.033772287 |
| 0.034874893 | 0.069520996 | 0.073351054 | 0.041224686 |
| 0.029852054 | 0.036878078 | 0.128714707 | 0.223791747 |
| 0.021986456 | 0.065798421 | 0.003636075 | 0.085849308 |
| 0.229098846 | 0.115421396 | 0.031192742 | 0.129083075 |
| 0.037788391 | 0.114670321 | 0.028087167 | 0.162473279 |
| 0.007487839 | 0.063191758 | 0.125439078 | 0.011418559 |
| 0.055530198 | 0.130708197 | 0.04297646  | 0.005546115 |
| 0.130608734 | 0.094326966 | 0.041345755 | 0.191080809 |
| 0.086689016 | 0.027774704 | 0.058227195 | 0.044371799 |
| 0.038096153 | 0.059603747 | 0.013583475 | 0.128393913 |
| 0.048268015 | 0.235469842 | 0.054774554 | 0.090942528 |
| 0.054506729 | 0.036097661 | 0.036756367 | 0.05941141  |
| 0.071672376 | 0.055491379 | 0.02944875  | 0.040885233 |
| 0.012097625 | 0.015153658 | 0.040526257 | 0.047552812 |
| 0.047060128 | 0.008119492 | 0.088447577 | 0.101530145 |
| 0.13127164  | 0.011401323 | 0.174427399 | 0.020436635 |
| 0.088779652 | 0.152046869 | 0.053892541 | 0.142233226 |
| 0.035814902 | 0.047837313 | 0.030447057 | 0.252620166 |
| 0.027572693 | 0.05890054  | 0.005378731 | 0.059967957 |
| 0.026115257 | 0.001901902 | 0.025419944 | 0.087496349 |
| 0.066571513 | 0.016540358 | 0.150259897 | 0.034737984 |
| 0.050771288 | 0.015629969 | 0.03194178  | 0.040578642 |
| 0.063193366 | 0.015159394 | 0.079780179 | 0.043316914 |
| 0.02103856  | 0.056686113 | 0.011664292 | 0.172110861 |
| 0.055091516 | 0.019856928 | 0.188183623 | 0.0359274   |
| 0.059765713 | 0.171182882 | 0.181983567 | 0.057320336 |
| 0.057946053 | 0.241287595 | 0.027026004 | 0.093746075 |

|             |             |             |             |
|-------------|-------------|-------------|-------------|
| 0.032835942 | 0.036143332 | 0.174407047 | 0.091707772 |
| 0.203758905 | 0.023165579 | 0.037620117 | 0.059943597 |
| 0.006715742 | 0.018457101 | 0.054735109 | 0.140193163 |
| 0.044665213 | 0.048263286 | 0.020503092 | 0.161555543 |
| 0.10666839  | 0.074876228 | 0.057288165 | 0.058069264 |
| 0.081202469 | 0.080913266 | 0.031455993 | 0.05317217  |
| 0.079201698 | 0.040176293 | 0.062864478 | 0.029317531 |
| 0.088823514 | 0.074838214 | 0.000450057 | 0.03329709  |
| 0.032608126 | 0.026839605 | 0.079142959 | 0.035411584 |
| 0.013659016 | 0.091995417 | 0.001818049 | 0.095948342 |
| 0.033175616 | 0.155082205 | 0.065295085 | 0.120859802 |
| 0.031108191 | 0.141925822 | 0.075023239 | 0.024379862 |
| 0.020230717 | 0.027471664 | 0.144300104 | 0.146625969 |
| 0.024216429 | 0.16878723  | 0.057285125 | 0.113301546 |
| 0.091538796 | 0.050907807 | 0.081059151 | 0.01087715  |
| 0.047646479 | 0.139323356 | 0.051220511 | 0.037264739 |
| 0.034908979 | 0.005801661 | 0.051599787 | 0.103108692 |
| 0.027441057 | 0.052649734 | 0.021803399 | 0.017181936 |
| 0.237827916 | 0.130875493 | 0.097679265 | 0.066947406 |
| 0.022969858 | 0.13595293  | 0.017929752 | 0.023941163 |
| 0.061258472 | 0.051611538 | 0.007483639 | 0.003777904 |
| 0.00241891  | 0.066671307 | 0.164273866 | 0.062989396 |
| 0.025354846 | 0.073619841 | 0.016900495 | 0.032077093 |
| 1           | 0.138489478 | 0.008568837 | 0.008243111 |
| 0.039672801 | 0.023607861 | 0.024174962 | 0.041020828 |
| 0.034385343 | 0.071980713 | 0.053381026 | 0.007164773 |
| 0.035983338 | 0.107033299 | 0.049139051 | 0.093808994 |
| 0.051307468 | 0.136281569 | 0.091794266 | 0.006120687 |
| 0.078381442 | 0.050674717 | 0.025643833 | 0.072173059 |
| 0.053742215 | 0.054713571 | 0.051955899 | 0.11189787  |
| 0.018342025 | 0.173999119 | 0.096097628 | 0.031304758 |
| 0.049858471 | 0.054829132 | 0.069236983 | 0.078565974 |
| 0.04607272  | 0.096747964 | 0.172334423 | 0.034311408 |
| 0.035493805 | 0.135883346 | 0.039418303 | 0.028638251 |
| 0.08709534  | 0.035105665 | 0.033930175 | 0.12725586  |
| 0.069609669 | 0.102151257 | 0.210919959 | 0.106950206 |
| 0.053974937 | 0.107268295 | 0.053176949 | 0.010658706 |
| 0.193629418 | 0.054270067 | 0.024727432 | 0.013890677 |
| 0.03142369  | 0.033072364 | 0.121567386 | 0.034748308 |
| 0.21916616  | 0.018772034 | 0.048154178 | 0.047692076 |
| 0.006601838 | 0.033802593 | 0.080409001 | 0.029258435 |
| 0.026293611 | 0.068749968 | 0.065216251 | 0.164794124 |
| 0.057357374 | 0.183756698 | 0.085496241 | 0.037799454 |
| 0.058719511 | 0.041935639 | 0.025942245 | 0.045784764 |
| 0.215189893 | 0.210219846 | 0.038844345 | 0.003683584 |
| 0.033021109 | 0.080149105 | 0.000223998 | 0.035508405 |
| 0.124069297 | 0.055143263 | 0.063929069 | 0.068656403 |
| 0.071457277 | 0.034010724 | 0.063446535 | 0.180004995 |
| 0.025875913 | 0.026342989 | 0.035861914 | 0.125172623 |
| 0.033181222 | 0.035354414 | 0.011723735 | 0.072316184 |
| 0.056506438 | 0.027481207 | 0.056954422 | 0.069171904 |
| 0.077817923 | 0.06880156  | 0.092899359 | 0.056655611 |
| 0.222366516 | 0.024429045 | 0.032363114 | 0.000785123 |
| 0.017627949 | 0.050458656 | 0.034971287 | 0.116410258 |

|             |             |             |             |
|-------------|-------------|-------------|-------------|
| 0.043882334 | 0.096363812 | 0.001783042 | 0.036604621 |
| 0.044807194 | 0.03051391  | 0.01602587  | 0.0310378   |
| 0.019054188 | 0.048091995 | 0.010565881 | 0.033046943 |
| 0.018667786 | 0.028702324 | 0.076377393 | 0.118204151 |
| 0.068551302 | 0.022703026 | 0.07429037  | 0.049839395 |
| 0.081060729 | 0.051622116 | 0.214485664 | 0.166060133 |
| 0.010912668 | 0.137180302 | 0.015734656 | 0.04385061  |
| 0.065147964 | 0.046953836 | 0.039049481 | 0.067478521 |
| 0.038227475 | 0.068456128 | 0.133014858 | 0.035830117 |
| 0.090381712 | 0.084939166 | 0.02193577  | 0.004242805 |
| 0.00085812  | 0.014692858 | 0.122841466 | 0.051988071 |
| 0.043590351 | 0.021895479 | 0.101393752 | 0.204850738 |
| 0.046088094 | 0.027773154 | 0.041050048 | 0.147787348 |
| 0.031445284 | 0.113376992 | 0.037126277 | 0.122762651 |
| 0.031937135 | 0.027145395 | 0.047754261 | 0.053394809 |
| 0.040039842 | 0.050275701 | 0.027335202 | 0.082824024 |
| 0.000204645 | 0.086828496 | 0.027918199 | 0.042966507 |
| 0.014153506 | 0.048407305 | 0.054921541 | 0.067586641 |
| 0.023551498 | 0.061507648 | 0.059654579 | 0.018312207 |
| 0.172286758 | 0.054087579 | 0.083929547 | 0.058669349 |
| 0.084504107 | 0.110473747 | 0.022863553 | 0.042369179 |
| 0.072779882 | 0.0321763   | 0.021037095 | 0.022955267 |
| 0.028948123 | 0.064930992 | 0.024196658 | 0.011980902 |
| 0.05926927  | 0.065172189 | 0.010396375 | 0.029215772 |
| 0.001744786 | 0.083110664 | 0.074986547 | 0.045286993 |
| 0.018465298 | 0.101033638 | 0.066430032 | 0.065801487 |
| 0.143420571 | 0.097010864 | 0.036096145 | 0.018133876 |
| 0.212592847 | 0.001519353 | 0.105542673 | 0.037487127 |
| 0.082435436 | 0.058225287 | 0.030043225 | 0.040822971 |
| 0.048069318 | 0.047059795 | 0.035632204 | 0.128770082 |
| 0.009999427 | 0.045323071 | 0.123591525 | 0.151009808 |
| 0.107631035 | 0.0766195   | 0.059814657 | 0.0262886   |
| 0.090084595 | 0.010206567 | 0.085380732 | 0.006471061 |
| 0.00501119  | 0.114057259 | 0.116619539 | 0.097515762 |
| 0.055378366 | 0.040026698 | 0.11582807  | 0.057034162 |
| 0.04533226  | 0.045541282 | 0.097459349 | 0.076580604 |
| 0.08908887  | 0.088138603 | 0.036768033 | 0.034802034 |
| 0.009121208 | 0.047750607 | 0.078182327 | 0.090377074 |
| 0.061342841 | 0.182566272 | 0.037123152 | 0.081590885 |
| 0.018224785 | 0.019646206 | 0.104405654 | 0.080914665 |
| 0.195942443 | 0.046069586 | 0.002309845 | 0.075265737 |
| 0.003923648 | 0.121834159 | 0.016677061 | 0.055133804 |
| 0.052458431 | 0.015604182 | 0.093614711 | 0.199865044 |
| 0.112025074 | 0.038764564 | 0.03612418  | 0.093576589 |
| 0.006332649 | 0.042741142 | 0.018327391 | 0.056880139 |
| 0.004525875 | 0.015842799 | 0.133502724 | 0.079224475 |
| 0.037590421 | 0.005239793 | 0.042829137 | 0.101384789 |
| 0.19303208  | 0.065098787 | 0.030557639 | 0.019067122 |
| 0.022141655 | 0.032282902 | 0.023728669 | 0.053670452 |
| 0.025438319 | 0.02834734  | 0.051488088 | 0.031910009 |
| 0.133962385 | 0.111067891 | 0.03885433  | 0.031551533 |
| 0.07870387  | 0.038575667 | 0.016615792 | 0.029356788 |
| 0.017288567 | 0.119849293 | 0.031382886 | 0.041290894 |
| 0.017009168 | 0.00917166  | 0.169928485 | 0.072919075 |

|                      |             |             |             |
|----------------------|-------------|-------------|-------------|
| 0.007553932          |             |             |             |
| HIST1H1C 0.075537171 | 0.111035791 | 0.05458369  |             |
| 0.193063811          | 0.125253958 | 0.06318772  | 0.178449096 |
| 0.050343157          | 0.090624821 | 0.103792091 | 0.149577284 |
| 0.092250387          | 0.125249517 | 0.100533607 | 0.024613102 |
| 0.205638432          | 0.227952252 | 0.04079293  | 0.254799088 |
| 0.164738874          | 0.109732996 | 0.254844972 | 0.182568903 |
| 0.058473892          | 0.1702966   | 0.22086044  | 0.085381699 |
| 0.178440954          | 0.231570657 | 0.054229994 | 0.126264851 |
| 0.165714362          | 0.105908206 | 0.079559012 | 0.168880928 |
| 0.074983734          | 0.053951174 | 0.05255356  | 0.046564335 |
| 0.085528554          | 0.124171141 | 0.1671517   | 0.248839618 |
| 0.198224004          | 0.068074733 | 0.236207432 | 0.121498844 |
| 0.028920638          | 0.228982057 | 0.028410837 | 0.065166739 |
| 0.071093165          | 0.082444327 | 0.063230065 | 0.150287076 |
| 0.083277376          | 0.03596027  | 0.045095923 | 0.063397214 |
| 0.238928387          | 0.035066836 | 0.078592601 | 0.093319244 |
| 0.04556317           | 0.077672789 | 0.159724247 | 0.121017442 |
| 0.040178123          | 0.071846827 | 0.119401665 | 0.053154905 |
| 0.044185228          | 0.174180285 | 0.146065395 | 0.028541726 |
| 0.272666404          | 0.262217519 | 0.161034213 | 0.199119882 |
| 0.162405731          | 0.070912591 | 0.166865728 | 0.136504823 |
| 0.198530738          | 0.156351124 | 0.073065307 | 0.21737986  |
| 0.092490514          | 0.1901681   | 0.088411831 | 0.228462459 |
| 0.15718308           | 0.095966387 | 0.143733056 | 0.192178693 |
| 0.112218931          | 0.101168094 | 0.058829559 | 0.096288908 |
| 0.033363867          | 0.111064048 | 0.077088948 | 0.133096688 |
| 0.071113394          | 0.06467941  | 0.262757634 | 0.129994064 |
| 0.220505878          | 0.02413161  | 0.264280439 | 0.116059942 |
| 0.165934311          | 0.110382459 | 0.213756557 | 0.159257058 |
| 0.087988583          | 0.100846814 | 0.092650785 | 0.242289373 |
| 0.098205506          | 0.198388887 | 0.047988108 | 0.177834413 |
| 0.063463246          | 0.040789528 | 0.057424456 | 0.165764306 |
| 0.068660325          | 0.064395408 | 0.127500468 | 0.09887713  |
| 0.222365324          | 0.078741456 | 0.094150657 | 0.07191646  |
| 0.119977093          | 0.048252656 | 0.140735412 | 0.062491735 |
| 0.081581027          | 0.164014651 | 0.004455744 | 0.157238424 |
| 0.096623557          | 0.09066817  | 0.314221086 | 0.095920178 |
| 0.179579565          | 0.12529994  | 0.240981421 | 0.13875252  |
| 0.076103898          | 0.273981114 | 0.030697426 | 0.21598615  |
| 0.058838988          | 0.165384016 | 0.208745958 | 0.150664714 |
| 0.19873027           | 0.069497286 | 0.186537735 | 0.054810131 |
| 0.024170183          | 0.162013183 | 0.067879941 | 0.081050141 |
| 0.064452068          | 0.104397615 | 0.052564923 | 0.223878933 |
| 0.175549795          | 0.195851846 | 0.046257269 | 0.114606879 |
| 0.124738134          | 0.165396097 | 0.021359468 | 0.134406469 |
| 0.048514132          | 0.122628192 | 0.106251379 | 0.07840054  |
| 0.239836562          | 0.157443646 | 0.002643181 | 0.071855917 |
| 0.091955931          | 0.020457822 | 0.185795676 | 0.114007941 |
| 0.046157936          | 0.167042612 | 0.003391737 | 0.218800587 |
| 0.048216392          | 0.190336291 | 0.166647477 | 0.304809716 |
| 0.075883713          | 0.245398466 | 0.064311639 | 0.095784092 |
| 0.081597346          | 0.052403792 | 0.055508199 | 0.158814615 |
| 0.147511408          | 0.073754175 | 0.105128175 | 0.170744738 |

|             |             |             |             |
|-------------|-------------|-------------|-------------|
| 0.133573658 | 0.136515335 | 0.189966216 | 0.041360916 |
| 0.120456004 | 0.123056629 | 0.123858259 | 0.151344208 |
| 0.099582503 | 0.023805966 | 0.07878911  | 0.102562281 |
| 0.033177111 | 0.099169715 | 0.067161639 | 0.020956363 |
| 0.203721292 | 0.102424491 | 0.081731633 | 0.135402395 |
| 0.05543708  | 0.202886738 | 0.043888275 | 0.106497089 |
| 0.223556093 | 0.128123816 | 0.065532527 | 0.037531828 |
| 0.039513771 | 0.123742875 | 0.168202115 | 0.111589321 |
| 0.13419111  | 0.163355635 | 0.050161919 | 0.057479277 |
| 0.138489478 | 1           | 0.055534917 | 0.038801736 |
| 0.173183627 | 0.068352816 | 0.059010627 | 0.071272169 |
| 0.07493235  | 0.236027058 | 0.144520051 | 0.043530459 |
| 0.152470182 | 0.212937561 | 0.108879096 | 0.182004256 |
| 0.050412783 | 0.146628807 | 0.217381695 | 0.029362103 |
| 0.156089644 | 0.037224687 | 0.014048902 | 0.122101372 |
| 0.094240432 | 0.145908939 | 0.150634693 | 0.288233819 |
| 0.08832633  | 0.281097034 | 0.174244752 | 0.024386848 |
| 0.067368075 | 0.096861433 | 0.153879669 | 0.178450085 |
| 0.073293254 | 0.141407651 | 0.183723498 | 0.065743559 |
| 0.069611874 | 0.256885358 | 0.111395439 | 0.195485395 |
| 0.204877457 | 0.130952207 | 0.10020968  | 0.274283667 |
| 0.185104888 | 0.136516276 | 0.085523438 | 0.277951394 |
| 0.125602868 | 0.251265348 | 0.102655841 | 0.063671616 |
| 0.238560526 | 0.216225177 | 0.125248787 | 0.059306644 |
| 0.073861275 | 0.108770973 | 0.246282183 | 0.137567874 |
| 0.287127448 | 0.049593067 | 0.023165657 | 0.129672262 |
| 0.036350785 | 0.086158211 | 0.141432641 | 0.107838989 |
| 0.071489142 | 0.044354097 | 0.205817471 | 0.115379473 |
| 0.080366777 | 0.177524986 | 0.100156179 | 0.08812201  |
| 0.100693918 | 0.07284966  | 0.048292928 | 0.123304962 |
| 0.119956924 | 0.156805927 | 0.105052716 | 0.04340257  |
| 0.052616442 | 0.125285772 | 0.021647004 | 0.035174395 |
| 0.249354593 | 0.095268349 | 0.16690791  | 0.141732573 |
| 0.062237713 | 0.026588389 | 0.202635457 | 0.212980773 |
| 0.099106153 | 0.084473106 | 0.085403462 | 0.120686203 |
| 0.100910021 | 0.102961067 | 0.065646126 | 0.188110816 |
| 0.180586822 | 0.081560999 | 0.076313618 | 0.139711738 |
| 0.174041353 | 0.028900069 | 0.220995014 | 0.106422502 |
| 0.222953718 | 0.051762036 | 0.008732459 | 0.008464421 |
| 0.114590521 | 0.158662645 | 0.072132035 | 0.121243927 |
| 0.021345684 | 0.147368208 | 0.013826902 | 0.112442084 |
| 0.097822896 | 0.156560553 | 0.120390909 | 0.093960871 |
| 0.087303259 | 0.102090699 | 0.060772838 | 0.114698393 |
| 0.088030289 | 0.078462936 | 0.120551862 | 0.262434725 |
| 0.123712326 | 0.080765734 | 0.111178743 | 0.085674217 |
| 0.171776917 | 0.166151401 | 0.265554798 | 0.158706953 |
| 0.039245195 | 0.057561639 | 0.02122136  | 0.101824029 |
| 0.047791671 | 0.162773899 | 0.097925425 | 0.167500704 |
| 0.124106755 | 0.132246588 | 0.092866535 | 0.08687634  |
| 0.130369294 | 0.152638259 | 0.057344402 | 0.008687642 |
| 0.004476056 | 0.121011077 | 0.121413779 | 0.159645967 |
| 0.110326017 | 0.024410404 | 0.144957426 | 0.106411101 |
| 0.084897857 | 0.129708917 | 0.097707541 | 0.244093206 |
| 0.103839161 | 0.222242993 | 0.05351334  | 0.199671398 |

|             |             |             |             |
|-------------|-------------|-------------|-------------|
| 0.156210267 | 0.034541291 | 0.135564128 | 0.089724726 |
| 0.147879191 | 0.134299156 | 0.050067806 | 0.161708777 |
| 0.016441655 | 0.236815908 | 0.101471144 | 0.089712771 |
| 0.05708234  | 0.177860717 | 0.156868612 | 0.168234068 |
| 0.070011281 | 0.253443236 | 0.264553998 | 0.015564398 |
| 0.202716122 | 0.133835409 | 0.216171423 | 0.150689389 |
| 0.139099864 | 0.222218588 | 0.155270806 | 0.082316352 |
| 0.17196046  | 0.078819424 | 0.117824459 | 0.014701849 |
| 0.077516658 | 0.148327352 | 0.080322083 | 0.042250429 |
| 0.054013139 | 0.090316466 | 0.035361962 | 0.145087192 |
| 0.023466608 | 0.241722575 | 0.173886766 | 0.14824725  |
| 0.120321979 | 0.090159376 | 0.168194846 | 0.132971425 |
| 0.084894974 | 0.191669867 | 0.078234193 | 0.039038218 |
| 0.160251867 | 0.035049645 | 0.148512951 | 0.065064494 |
| 0.064947638 | 0.165643334 | 0.07808066  | 0.113597143 |
| 0.076375793 | 0.096035691 | 0.099700146 | 0.137942237 |
| 0.09178302  | 0.062580182 | 0.12187129  | 0.138116883 |
| 0.16438982  | 0.180687062 | 0.068042425 | 0.135160805 |
| 0.226814454 | 0.058556304 | 0.106288005 | 0.012689936 |
| 0.043494635 | 0.069093706 | 0.220081226 | 0.199970498 |
| 0.079853903 | 0.067162789 | 0.113951979 | 0.158589144 |
| 0.108973861 | 0.07679802  | 0.062484426 | 0.121957114 |
| 0.201618334 | 0.170201247 | 0.117472249 | 0.129036406 |
| 0.026738864 | 0.118853295 | 0.12482943  | 0.115008675 |
| 0.08628217  | 0.188266555 | 0.087896695 | 0.029652421 |
| 0.081860576 | 0.062663784 | 0.235329958 | 0.235523701 |
| 0.294111775 | 0.158097526 | 0.022672702 | 0.186755996 |
| 0.02691241  | 0.248757346 | 0.023842726 | 0.141917892 |
| 0.170480714 | 0.032105592 | 0.202346716 | 0.135766891 |
| 0.233138    | 0.084713176 | 0.096994579 | 0.232083914 |
| 0.042025681 | 0.100823322 | 0.090997426 | 0.144857076 |
| 0.044185699 | 0.107992491 | 0.260262758 | 0.049632215 |
| 0.05520306  | 0.025859601 | 0.097001707 | 0.076222591 |
| 0.172359955 | 0.168858918 | 0.041827129 | 0.098260968 |
| 0.076411178 | 0.049281422 | 0.059726449 | 0.094935416 |
| 0.138108287 | 0.093924551 | 0.040087114 | 0.09756832  |
| 0.124080697 | 0.206248795 | 0.050101887 | 0.04925075  |
| 0.106828272 | 0.073732933 | 0.072039742 | 0.086369824 |
| 0.070347624 | 0.242110899 | 0.055390847 | 0.100281055 |
| 0.048493914 | 0.036686141 | 0.151844003 | 0.135644978 |
| 0.029451724 |             |             |             |
| HIST1H2AC   | 0.033161014 | 0.013591984 | 0.042667399 |
| 0.024387573 | 0.037463294 | 0.005692311 | 0.019099739 |
| 0.010220928 | 0.007774509 | 0.000723632 | 0.003150735 |
| 0.035345449 | 0.001653796 | 0.004961589 | 0.003347819 |
| 0.062905225 | 0.055170952 | 0.043913831 | 0.058933905 |
| 0.040820175 | 0.005765308 | 0.058684787 | 0.031737708 |
| 0.058125961 | 0.058250358 | 0.053516685 | 0.038230606 |
| 0.033037204 | 0.070952081 | 0.0019891   | 0.01806596  |
| 0.187099023 | 0.027324933 | 0.010347465 | 0.029561161 |
| 0.0097372   | 0.022953111 | 0.022099558 | 0.002079883 |
| 0.022500323 | 0.028101927 | 0.032517009 | 0.037525734 |
| 0.023017462 | 0.007215802 | 0.0271271   | 0.077811794 |
| 0.002459007 | 0.027989127 | 0.002389836 | 0.007730434 |



|             |             |             |             |
|-------------|-------------|-------------|-------------|
| 0.005490403 | 0.009354411 | 0.011301669 | 0.014836759 |
| 0.000477987 | 0.002654494 | 0.006587451 | 0.006895404 |
| 0.030632064 | 0.001665901 | 0.008125323 | 0.003794698 |
| 0.001557941 | 0.024092584 | 0.140363337 | 0.019851566 |
| 0.033931572 | 0.012020425 | 0.033540221 | 0.031069526 |
| 7.06E-05    | 0.047963239 | 0.111506747 | 0.014807738 |
| 0.153100395 | 0.006224133 | 0.158155844 | 0.019544145 |
| 0.032518916 | 0.018493961 | 0.032018785 | 0.026961742 |
| 0.019110501 | 0.144747467 | 0.049459742 | 0.038259563 |
| 0.019542823 | 0.012667    | 0.009529423 | 0.066846943 |
| 0.029428147 | 0.011592135 | 0.034584554 | 0.162143746 |
| 0.007991925 | 0.013134381 | 0.011687019 | 0.016257687 |
| 0.005850332 | 0.203330612 | 0.007177962 | 0.02088105  |
| 0.012550191 | 0.056248332 | 0.122299956 | 0.017956946 |
| 0.147493063 | 0.005789759 | 0.045566408 | 0.018470733 |
| 0.031084678 | 0.018030206 | 0.144351323 | 0.013756014 |
| 0.061433012 | 0.023489721 | 0.01326808  | 0.042114834 |
| 0.055757264 | 0.014989074 | 0.004478903 | 0.216484657 |
| 0.002581827 | 0.048904921 | 0.005595336 | 0.017367552 |
| 0.005913365 | 0.009339565 | 0.027189285 | 0.090448032 |
| 0.120761708 | 0.070033731 | 0.01842168  | 0.055698208 |
| 0.039970333 | 0.01746656  | 0.016413769 | 0.009638089 |
| 0.017906802 | 0.032963402 | 4.13E-05    | 0.04501163  |
| 0.017170332 | 0.108202011 | 0.10446255  | 0.01731712  |
| 0.046377663 | 0.032044166 | 0.063122983 | 0.022982116 |
| 0.008303811 | 0.065162943 | 0.017123874 | 0.065924952 |
| 0.002032591 | 0.073109013 | 0.075288193 | 0.015674614 |
| 0.016954638 | 0.00965885  | 0.200605604 | 0.023090948 |
| 0.001940365 | 0.021968095 | 0.070630561 | 0.011400459 |
| 0.002050338 | 0.007353597 | 0.006937522 | 0.138207215 |
| 0.020250329 | 0.051627698 | 0.00933215  | 0.007298953 |
| 0.001434808 | 0.050443237 | 0.005852107 | 0.016683872 |
| 0.002831776 | 0.030732022 | 0.040979126 | 0.074993354 |
| 0.115978349 | 0.040221466 | 0.034868557 | 0.007767048 |
| 0.012635141 | 0.004025584 | 0.017439625 | 0.066227335 |
| 0.014135504 | 0.021361322 | 0.001927325 | 0.060210442 |
| 0.012118606 | 0.138907692 | 0.033118537 | 0.085569022 |
| 0.012451004 | 0.073383172 | 0.007261327 | 0.026100502 |
| 0.012352316 | 0.00524898  | 0.002945204 | 0.022167018 |
| 0.229878658 | 0.00312829  | 0.035292842 | 0.031290055 |
| 0.01832198  | 0.051020755 | 0.040446928 | 0.01230858  |
| 0.024423352 | 0.038956831 | 0.076120229 | 0.12537686  |
| 0.039871226 | 0.002047047 | 0.007932209 | 0.013466068 |
| 0.006911049 | 0.011313663 | 0.014073215 | 0.000408867 |
| 0.044836522 | 0.014895718 | 0.002289855 | 0.036054926 |
| 0.0156786   | 0.00549632  | 0.012976086 | 0.100863546 |
| 0.127620795 | 0.017183805 | 0.106242779 | 0.055048332 |
| 0.071377863 | 0.006698222 | 0.06063487  | 0.001584699 |
| 0.002243258 | 0.047059638 | 0.017677242 | 0.012697604 |
| 0.008568837 | 0.055534917 | 1           | 0.003609734 |
| 0.001243334 | 0.00229015  | 0.001473306 | 0.010587044 |
| 0.005325835 | 0.004841121 | 0.022162758 | 0.05364285  |
| 0.101612024 | 0.14676134  | 0.014153524 | 0.064652951 |
| 0.006010003 | 0.031310204 | 0.18119015  | 0.000471681 |

|             |             |             |             |
|-------------|-------------|-------------|-------------|
| 0.016119393 | 0.001078377 | 0.003214458 | 0.010060589 |
| 0.046732127 | 0.035233674 | 0.005334659 | 0.090171453 |
| 0.014374116 | 0.03835335  | 0.033050753 | 0.000491245 |
| 0.020344776 | 0.008610171 | 0.138016669 | 0.049137899 |
| 0.005006668 | 0.02758207  | 0.00847716  | 0.014434102 |
| 0.010883977 | 0.088585214 | 0.016154073 | 0.084654128 |
| 0.203493093 | 0.052194438 | 0.013061069 | 0.179274885 |
| 0.156263543 | 0.006477441 | 0.005586377 | 0.112972946 |
| 0.015677706 | 0.053707412 | 0.008600269 | 0.140865051 |
| 0.029941131 | 0.001831259 | 0.179013124 | 0.054004391 |
| 0.0083071   | 0.018334773 | 0.133675535 | 0.019480773 |
| 0.077646216 | 0.009558021 | 0.000964274 | 0.017458594 |
| 0.079852813 | 0.013954441 | 0.127786112 | 0.030119966 |
| 0.008124386 | 0.004063739 | 0.071226371 | 0.008805566 |
| 0.006798355 | 0.053945329 | 0.076604736 | 0.009680614 |
| 0.015528101 | 0.020697769 | 0.009128997 | 0.056400668 |
| 0.008438658 | 0.010572422 | 0.05044342  | 0.075304516 |
| 0.006707014 | 0.051236591 | 0.030851094 | 0.007108197 |
| 0.013773862 | 0.007260958 | 0.047199783 | 0.030782194 |
| 0.001476796 | 0.008601725 | 0.10091024  | 0.086790792 |
| 0.021531846 | 0.017813051 | 0.009788572 | 0.056194741 |
| 0.025199054 | 0.01289797  | 0.015852954 | 0.245373714 |
| 0.218487795 | 0.011906422 | 0.020384271 | 0.004202865 |
| 0.032342548 | 0.001811046 | 0.001724932 | 0.012918373 |
| 0.071118993 | 0.006016089 | 0.00136386  | 0.055053429 |
| 0.240389784 | 0.051439836 | 0.007243198 | 0.022758175 |
| 0.000177982 | 0.07450887  | 0.087489252 | 0.022666644 |
| 0.008841978 | 0.120531441 | 0.079601036 | 0.012686701 |
| 0.017529224 | 0.01410999  | 0.031106958 | 0.018222058 |
| 0.01753502  | 0.008423044 | 0.001908899 | 0.093543143 |
| 0.012498374 | 0.013574078 | 0.023884014 | 0.012675257 |
| 0.023515811 | 0.070425952 | 0.047297402 | 0.017577084 |
| 0.013089646 | 0.005795446 | 0.000666698 | 0.002906957 |
| 0.00760569  | 0.047755253 | 0.019268971 | 0.037651859 |
| 0.019836733 | 0.159300346 | 0.007632037 | 0.013284585 |
| 0.016262684 | 0.028022224 | 0.136649336 | 0.009426514 |
| 0.009785983 | 0.012148748 | 0.022795919 | 0.165828841 |
| 0.01822834  | 8.27E-06    | 0.063368284 | 0.008343425 |
| 0.013324816 | 0.051445978 | 0.010375962 | 0.064135302 |
| 0.041643284 | 0.135980337 | 0.0005744   | 0.060322305 |
| 0.032623079 | 0.009407961 | 0.019116691 | 0.007817863 |
| 0.217542761 | 0.135471992 | 0.034419638 | 0.023825959 |
| 0.02421041  | 0.114367664 | 0.033819616 | 0.003455945 |
| 0.101499317 | 0.140331123 | 0.083612162 | 0.06170838  |
| 0.00832436  | 0.007794311 | 0.014843336 | 0.000337034 |
| 0.009483202 | 0.03299706  | 0.01781095  | 0.026778851 |
| 0.019172569 | 0.044410735 | 0.101130602 | 0.009710126 |
| 0.006350701 | 0.007736528 | 0.053535372 | 0.000362393 |
| 0.110570097 | 0.119302773 | 0.015592459 | 0.000854057 |
| 0.005332883 | 0.027067464 | 0.008707282 | 0.206898807 |
| 0.035392361 | 0.119853244 | 0.026633619 | 0.039697467 |
| 0.228352575 | 0.030770382 | 0.133575264 | 0.069476241 |
| 0.008196628 | 0.023294478 | 0.00825051  | 0.004168374 |
| 0.012437664 | 0.039985013 | 0.032807702 | 0.015319294 |

|             |             |             |             |
|-------------|-------------|-------------|-------------|
| 0.008345213 | 0.036351156 | 0.005771962 | 0.021375107 |
| 0.021221765 | 0.022529128 | 0.015372615 | 0.022012769 |
| 0.017123911 | 0.013231201 | 0.006070361 | 0.001732112 |
| 0.055679932 | 0.024627664 | 0.034506552 | 0.014027195 |
| 0.03878376  | 0.037761043 | 0.045585044 | 0.006903111 |
| 0.035744812 | 0.004277287 | 0.012840635 | 0.056221713 |
| 0.028320118 | 0.014510451 | 0.021875798 | 0.063145485 |
| 0.015585934 | 0.013189027 | 0.004463525 | 0.016163049 |
| 0.189698521 | 0.038730995 | 0.039303921 | 0.04374929  |
| 0.012649134 | 0.01218911  | 0.020381804 | 0.005832499 |
| 0.006357313 | 0.047768536 | 0.010382849 | 0.003253638 |
| 0.014284238 | 0.02508064  | 0.008522484 | 0.238969777 |
| 0.062735708 | 0.114075653 | 0.015231794 | 0.066830545 |
| 0.012015351 | 0.037759859 | 0.003834711 | 0.036954331 |
| 0.123330974 | 0.03114143  | 0.080124655 | 0.008046248 |
| 0.012296844 | 0.007498748 | 0.018601505 | 0.1724807   |
| 0.016612488 | 0.017381555 | 0.020121513 | 0.092275334 |
| 0.016371301 | 0.147689751 | 0.058258617 | 0.004476675 |
| 0.000703969 | 0.005300708 | 0.015026312 | 0.014657133 |
| 0.01867449  | 0.034913    | 0.015167029 | 0.189477442 |
| 0.044406573 | 0.017684705 | 0.061375002 | 0.005598997 |
| 0.264849265 | 0.013061578 | 0.001446868 | 0.040250304 |
| 0.023345054 | 0.137852134 | 0.007621075 | 0.010126754 |
| 0.084936193 | 0.009622346 | 0.051596001 | 0.011571469 |
| 0.104077255 | 0.039696993 | 0.006865922 | 0.014250761 |
| 0.037365972 | 0.033878707 | 0.021907475 | 0.031272759 |
| 0.004290936 |             |             |             |
| HIST1H2BG   | 0.266182136 | 0.449516585 | 0.13066544  |
| 0.272271286 | 0.194503317 | 0.153268238 | 0.054043279 |
| 0.027235121 | 0.012240145 | 0.004483925 | 0.015195745 |
| 0.256638765 | 0.087395962 | 0.079526913 | 0.049580064 |
| 0.262516071 | 0.064362175 | 0.064892419 | 0.079365492 |
| 0.223936951 | 0.018510751 | 0.263940378 | 0.018264443 |
| 0.070912371 | 0.038870613 | 0.020545035 | 0.066163059 |
| 0.316471408 | 0.021498751 | 0.11663465  | 0.211717014 |
| 0.030894123 | 0.315484728 | 0.444874715 | 0.326461475 |
| 0.473242355 | 0.235395998 | 0.009013772 | 0.056904263 |
| 0.289088984 | 0.284937696 | 0.227272623 | 0.149627406 |
| 0.010606106 | 0.412737787 | 0.084945346 | 0.192810934 |
| 0.033358667 | 0.015296387 | 0.037518401 | 0.346059458 |
| 0.442805899 | 0.223329592 | 0.03260715  | 0.031910469 |
| 0.105113224 | 0.050983315 | 0.116726547 | 0.15935582  |
| 0.073491569 | 0.02657019  | 0.444790949 | 0.013162428 |
| 0.028667136 | 0.043163728 | 0.05606072  | 0.062816892 |
| 0.089517954 | 0.221633299 | 0.002955757 | 0.230913103 |
| 0.003190725 | 0.189084075 | 0.17918107  | 0.07109277  |
| 0.01470263  | 0.022647484 | 0.05980155  | 0.15393879  |
| 0.344897208 | 0.368729909 | 0.422276569 | 0.429384788 |
| 0.087277859 | 0.093481225 | 0.180330644 | 0.053241762 |
| 0.312973464 | 0.049697948 | 0.022065612 | 0.295251547 |
| 0.430737075 | 0.476806451 | 0.054142415 | 0.098157992 |
| 0.319235002 | 0.386903904 | 0.136424178 | 0.156537236 |
| 0.074804475 | 0.014982592 | 0.373222304 | 0.462848194 |
| 0.287722284 | 0.129789247 | 0.054958925 | 0.279941886 |

|             |             |             |             |
|-------------|-------------|-------------|-------------|
| 0.016175022 | 0.065287074 | 0.186334804 | 0.08278858  |
| 0.357106921 | 0.002566508 | 0.084244775 | 0.155939101 |
| 0.039039168 | 0.300788277 | 0.471736154 | 0.05367066  |
| 0.170560705 | 0.014272362 | 0.039373969 | 0.00983794  |
| 0.082483735 | 0.059169448 | 0.421852463 | 0.384725961 |
| 0.055676863 | 0.10538944  | 0.05601564  | 0.001043792 |
| 0.012899591 | 0.042339089 | 0.385542941 | 0.106733709 |
| 0.256396118 | 0.297265526 | 0.061262438 | 0.252359063 |
| 0.28466541  | 0.417009545 | 0.009112216 | 0.016355282 |
| 0.164915014 | 0.043772298 | 0.098139948 | 0.247634029 |
| 0.118585533 | 0.018398996 | 0.036007066 | 0.430564539 |
| 0.321113647 | 0.024111444 | 0.068172945 | 0.262535577 |
| 0.081948035 | 0.186967042 | 0.026522192 | 0.096439235 |
| 0.014154959 | 0.431048567 | 0.013563586 | 0.077772509 |
| 0.052348567 | 0.093673011 | 0.001503228 | 0.061610815 |
| 0.065934263 | 0.387199032 | 0.413483263 | 0.024687055 |
| 0.120661159 | 0.233906525 | 0.093689981 | 0.313610192 |
| 0.006067252 | 0.010357372 | 0.064252337 | 0.466736387 |
| 0.1389412   | 0.428734087 | 0.066777047 | 0.063203326 |
| 0.117486875 | 0.30897286  | 0.000435224 | 0.423014346 |
| 0.469060137 | 0.071485998 | 0.243143886 | 0.214231095 |
| 0.115576597 | 0.344047262 | 0.009091627 | 0.279869338 |
| 0.212561255 | 0.016358748 | 0.421694141 | 0.066131479 |
| 0.397937    | 0.014249006 | 0.074122478 | 0.356280553 |
| 0.3780312   | 0.003167867 | 0.049623765 | 0.200072072 |
| 0.010109084 | 0.014533586 | 0.246575496 | 0.214503477 |
| 0.158338307 | 0.30319834  | 0.388407674 | 0.103231073 |
| 0.184389407 | 0.046353873 | 0.003058117 | 0.129264703 |
| 0.304631729 | 0.090334279 | 0.347824053 | 0.043216717 |
| 0.145869629 | 0.387165341 | 0.327134991 | 0.039729427 |
| 0.010351421 | 0.08664415  | 0.007852982 | 0.105482364 |
| 0.279246215 | 0.047454456 | 0.122138128 | 0.04185165  |
| 0.028335269 | 0.460634845 | 0.057737151 | 0.080424872 |
| 0.045844764 | 0.250056904 | 0.062552749 | 0.105839955 |
| 0.133134634 | 0.036643708 | 0.076388901 | 0.079810767 |
| 0.008243111 | 0.038801736 | 0.003609734 | 1           |
| 0.129058628 | 0.155499675 | 0.155701274 | 0.271525273 |
| 0.109456452 | 0.077656019 | 0.164414303 | 0.059327378 |
| 0.030013858 | 0.006071895 | 0.430896497 | 0.217978251 |
| 0.204931334 | 0.027750547 | 0.013595551 | 0.134739595 |
| 0.404941421 | 0.11980373  | 0.041097185 | 0.387642138 |
| 0.005276974 | 0.398240184 | 0.095148548 | 0.046765618 |
| 0.171319641 | 0.112669324 | 0.335139551 | 0.008798621 |
| 0.158594665 | 0.407777475 | 0.103517376 | 0.048066438 |
| 0.354019163 | 0.210119445 | 0.008052707 | 0.271429521 |
| 0.298046866 | 0.013814279 | 0.478528001 | 0.055503984 |
| 0.007741043 | 0.29932361  | 0.326181184 | 0.023822576 |
| 0.020763192 | 0.129623064 | 0.006327168 | 0.140266394 |
| 0.448934083 | 0.288205378 | 0.33058623  | 0.053237141 |
| 0.014693429 | 0.028011667 | 0.063239027 | 0.16478052  |
| 0.45564144  | 0.475889654 | 0.10004883  | 0.181886053 |
| 0.089747791 | 0.074705735 | 0.01957769  | 0.461755854 |
| 0.035711374 | 0.447480093 | 0.002261333 | 0.340127543 |
| 0.461791351 | 0.090434773 | 0.029098599 | 0.098882628 |

|             |             |             |             |
|-------------|-------------|-------------|-------------|
| 0.30778008  | 0.008809515 | 0.036845688 | 0.441398596 |
| 0.316023513 | 0.064314384 | 0.069461756 | 0.256555418 |
| 0.003301413 | 0.008639143 | 0.154387978 | 0.051722165 |
| 0.083330686 | 0.04239674  | 0.026205536 | 0.054453266 |
| 0.018758534 | 0.395657092 | 0.360484302 | 0.011972526 |
| 0.159825897 | 0.044131526 | 0.21727663  | 0.009427769 |
| 0.397988776 | 0.442717689 | 0.461274914 | 0.029725623 |
| 0.356713806 | 0.442969302 | 0.25430621  | 0.021395546 |
| 0.006966027 | 0.465518466 | 0.200126426 | 0.010383339 |
| 0.387772495 | 0.06123793  | 0.020445406 | 0.411677685 |
| 0.04698294  | 0.389912288 | 0.000161281 | 0.014824959 |
| 0.011842589 | 0.368723151 | 0.398869095 | 0.190920853 |
| 0.049305689 | 0.150765961 | 0.001896138 | 0.463995129 |
| 0.444508446 | 0.00614685  | 0.04452924  | 0.378675227 |
| 0.356256386 | 0.445325194 | 0.106612035 | 0.404183829 |
| 0.289846691 | 0.464038534 | 0.067849869 | 0.111142592 |
| 0.343264278 | 0.458690694 | 0.251457497 | 0.350375552 |
| 0.391977787 | 0.274862681 | 0.113611407 | 0.00400431  |
| 0.018458413 | 0.038078896 | 0.067177875 | 0.021983285 |
| 0.127233885 | 0.038791378 | 0.401249339 | 0.381994117 |
| 0.449825359 | 0.002029076 | 0.026631057 | 0.341049559 |
| 0.334257825 | 0.357992944 | 0.003175477 | 0.000730623 |
| 0.0012532   | 0.011787264 | 0.139214029 | 0.07195155  |
| 0.407290566 | 0.067744751 | 0.002051805 | 0.007768974 |
| 0.052903484 | 0.242424168 | 0.456670263 | 0.217323208 |
| 0.32014087  | 0.02359489  | 0.084934311 | 0.226633534 |
| 0.021405002 | 0.174476744 | 0.441261765 | 0.395880696 |
| 0.011151894 | 0.063308102 | 0.112115282 | 0.393848249 |
| 0.03189446  | 0.152113174 | 0.29355958  | 0.086647163 |
| 0.003987446 | 0.023380228 | 0.015356211 | 0.304766986 |
| 0.469373846 | 0.061575254 | 0.030144582 | 0.031740307 |
| 0.041597937 | 0.375804068 | 0.056806731 | 0.441598661 |
| 0.324910567 | 0.332590016 | 0.029800257 | 0.388275493 |
| 0.01320433  | 0.453743807 | 0.156059747 | 0.009201369 |
| 0.064973509 | 0.003437879 | 0.442227557 | 0.044778505 |
| 0.080936474 | 0.205425675 | 0.029942915 | 0.007104895 |
| 0.041577271 | 0.021020918 | 0.398627792 | 0.379044666 |
| 0.010845262 | 0.038483184 | 0.099451495 | 0.201101114 |
| 0.08695793  | 0.317551122 | 0.438075507 | 0.160223784 |
| 0.017880844 | 0.056339964 | 0.234979823 | 0.228661931 |
| 0.052876166 | 0.421958329 | 0.078906843 | 0.45172142  |
| 0.230538049 | 0.346498853 | 0.421255699 | 0.120132194 |
| 0.09637888  | 0.161255047 | 0.221040744 | 0.009460433 |
| 0.130232212 | 0.397026968 | 0.098299845 | 0.050039266 |
| 0.103947331 | 0.185568074 | 0.006971079 | 0.035526026 |
| 0.146662611 | 0.123453698 | 0.050433708 | 0.313377408 |
| 0.185852449 | 0.238953778 | 0.008310097 | 0.014526295 |
| 0.467900013 | 0.319890266 | 0.018186829 | 0.243193344 |
| 0.045858139 | 0.135346977 | 0.336394792 | 0.353872526 |
| 0.067194233 | 0.411472002 | 0.300508448 | 0.268376947 |
| 0.355238362 | 0.072436932 | 0.456694353 | 0.010803782 |
| 0.019234493 | 0.248897838 | 0.044656567 | 0.029530771 |
| 0.047769376 | 0.007005995 | 0.082790444 | 0.279939213 |
| 0.110061083 | 0.238401728 | 0.066640855 | 0.016573655 |

|             |             |             |             |
|-------------|-------------|-------------|-------------|
| 0.1351576   | 0.098168663 | 0.156903213 | 0.048120849 |
| 0.031238603 | 0.444016768 | 0.003542899 | 0.019566848 |
| 0.151018693 | 0.311117653 | 0.193178453 | 0.057012306 |
| 0.085225825 | 0.041498619 | 0.129226388 | 0.085608623 |
| 0.135616575 | 0.081767477 | 0.315225501 | 0.004170275 |
| 0.006005618 | 0.419322002 | 0.106854163 | 0.005600971 |
| 0.021697171 | 0.170017111 | 0.065372289 | 0.052472537 |
| 0.008294093 | 0.458966429 | 0.088075149 | 0.185701861 |
| 0.116765888 | 0.016639906 | 0.264129877 | 0.013648986 |
| 0.008046182 | 0.378726417 | 0.170908736 | 0.473971465 |
| 0.106130565 | 0.304358477 | 0.356668031 | 0.371897345 |
| 0.020918547 | 0.143870118 | 0.0049603   | 0.321051811 |
| 0.119633366 |             |             |             |
| HIST1H4C    | 0.076167243 | 0.1776603   | 0.04188282  |
| 0.19295636  | 0.110067276 | 0.076228847 | 0.098813483 |
| 0.016441608 | 0.010318351 | 0.04234069  | 0.056193845 |
| 0.109160723 | 0.074818292 | 0.127994901 | 0.016056571 |
| 0.148426649 | 0.144257646 | 0.019806711 | 0.125149175 |
| 0.125306065 | 0.050172113 | 0.216801925 | 0.043226349 |
| 0.022157047 | 0.094946254 | 0.095786439 | 0.055443401 |
| 0.173414613 | 0.090002131 | 0.083026248 | 0.117676105 |
| 0.028395914 | 0.118194699 | 0.143335835 | 0.234256546 |
| 0.151548042 | 0.06003889  | 0.00564473  | 0.04947348  |
| 0.093810175 | 0.13239879  | 0.130784    | 0.188387153 |
| 0.050165252 | 0.133145283 | 0.150421673 | 0.085900055 |
| 0.005625914 | 0.088292015 | 0.023890997 | 0.106385078 |
| 0.165839217 | 0.114518171 | 0.027458746 | 0.080401669 |
| 0.085695186 | 0.039993327 | 0.063401153 | 0.074138098 |
| 0.144350533 | 0.03193059  | 0.158577754 | 0.013323886 |
| 0.008960496 | 0.032436575 | 0.049817948 | 0.073893985 |
| 0.030916803 | 0.079449018 | 0.005315615 | 0.063414853 |
| 0.024507902 | 0.110274363 | 0.089924801 | 0.0285863   |
| 0.084886894 | 0.114810737 | 0.06778912  | 0.168407408 |
| 0.167460827 | 0.100479816 | 0.212619167 | 0.184642896 |
| 0.105980387 | 0.063492798 | 0.067560819 | 0.143192627 |
| 0.107670868 | 0.145635815 | 0.014392377 | 0.186306608 |
| 0.20699176  | 0.17680382  | 0.039143129 | 0.079883607 |
| 0.178621703 | 0.1471165   | 0.065727115 | 0.100905679 |
| 0.039195869 | 0.010672282 | 0.137109504 | 0.202564115 |
| 0.096534531 | 0.060938571 | 0.125439358 | 0.146262145 |
| 0.051266881 | 0.015004229 | 0.195777994 | 0.046441174 |
| 0.176324841 | 0.012542622 | 0.104916058 | 0.156721093 |
| 0.009925373 | 0.118171976 | 0.167944999 | 0.11463346  |
| 0.079078819 | 0.048108103 | 0.014720677 | 0.01937825  |
| 0.025109341 | 0.018741574 | 0.124405017 | 0.236055947 |
| 0.032936522 | 0.035585032 | 0.057974502 | 0.008867625 |
| 0.054825364 | 0.007033547 | 0.151645443 | 0.041705667 |
| 0.101206824 | 0.068740308 | 0.116771642 | 0.083813133 |
| 0.116123276 | 0.20337579  | 0.00406377  | 0.031021372 |
| 0.096589178 | 0.009848092 | 0.148247286 | 0.125517696 |
| 0.138905154 | 0.029272421 | 0.107922614 | 0.185297699 |
| 0.113541141 | 0.112143738 | 0.021436738 | 0.167960025 |
| 0.050860519 | 0.142434646 | 0.065506389 | 0.182333601 |
| 0.057253988 | 0.13395459  | 0.047877908 | 0.031926153 |

|             |             |             |             |
|-------------|-------------|-------------|-------------|
| 0.011025524 | 0.062690861 | 0.001233687 | 0.051523729 |
| 0.032314739 | 0.206351335 | 0.108475382 | 0.058666652 |
| 0.191399356 | 0.164155172 | 0.039808496 | 0.222095668 |
| 0.04492725  | 0.012108865 | 0.018916412 | 0.220737106 |
| 0.072555202 | 0.159522333 | 0.05266756  | 0.031620581 |
| 0.125751813 | 0.145821431 | 5.55E-05    | 0.139061716 |
| 0.164547333 | 0.02369588  | 0.282264082 | 0.088263773 |
| 0.047543519 | 0.203503423 | 0.000989283 | 0.19074278  |
| 0.06357594  | 0.039248983 | 0.198774505 | 0.182335649 |
| 0.126330834 | 0.097615281 | 0.058735975 | 0.130272705 |
| 0.167050375 | 0.005346065 | 0.049195377 | 0.128283401 |
| 0.019565796 | 0.023790343 | 0.089345402 | 0.142138059 |
| 0.115368983 | 0.122430708 | 0.201768362 | 0.04576712  |
| 0.122728569 | 0.052485383 | 0.005066497 | 0.084112889 |
| 0.100978683 | 0.010345713 | 0.128684207 | 0.038371073 |
| 0.04446024  | 0.155532888 | 0.10404673  | 0.008538713 |
| 0.067104417 | 0.066173142 | 0.02391388  | 0.087682842 |
| 0.07090935  | 0.153084083 | 0.042924477 | 0.010565345 |
| 0.084135127 | 0.198291148 | 0.034858747 | 0.031176374 |
| 0.019347039 | 0.247294022 | 0.065365049 | 0.225501265 |
| 0.184009776 | 0.042132513 | 0.03883009  | 0.046167362 |
| 0.039672801 | 0.173183627 | 0.001243334 | 0.129058628 |
| 1           | 0.229848837 | 0.216835812 | 0.101913992 |
| 0.068103795 | 0.141507187 | 0.175974812 | 0.014156001 |
| 0.040516537 | 0.052356017 | 0.168712474 | 0.123611573 |
| 0.073162645 | 0.039017228 | 0.044815009 | 0.040824065 |
| 0.230628582 | 0.071362365 | 0.011823046 | 0.197128548 |
| 0.004942946 | 0.165154194 | 0.13996954  | 0.154422157 |
| 0.170386396 | 0.231523529 | 0.170750094 | 0.005070611 |
| 0.056661975 | 0.172070708 | 0.06102156  | 0.0984537   |
| 0.159108024 | 0.118772601 | 0.02565551  | 0.087762556 |
| 0.115501606 | 0.100517716 | 0.188631457 | 0.073431502 |
| 0.043315504 | 0.133797204 | 0.15895126  | 0.078237024 |
| 0.051530373 | 0.185692987 | 0.016187921 | 0.154553466 |
| 0.196558361 | 0.227243684 | 0.168625342 | 0.022645502 |
| 0.109161083 | 0.150906663 | 0.049421016 | 0.04970554  |
| 0.148833636 | 0.184018407 | 0.108991943 | 0.211665087 |
| 0.132998854 | 0.041594035 | 0.004386181 | 0.208781876 |
| 0.00301502  | 0.143271449 | 0.016920163 | 0.133428527 |
| 0.148493907 | 0.052665532 | 0.110508164 | 0.092807917 |
| 0.141232179 | 0.037768804 | 0.023850225 | 0.16778399  |
| 0.120154174 | 0.043160676 | 0.042293821 | 0.10817239  |
| 0.020599204 | 0.018025165 | 0.072313474 | 0.016525454 |
| 0.053080941 | 0.042683728 | 0.005164188 | 0.017070538 |
| 0.083078724 | 0.175559833 | 0.173142152 | 0.026882858 |
| 0.122055565 | 0.013261542 | 0.138445362 | 0.052246369 |
| 0.150970006 | 0.136925816 | 0.162056668 | 0.028847617 |
| 0.139107593 | 0.182954542 | 0.113243692 | 0.040305569 |
| 0.039878564 | 0.152935849 | 0.069719544 | 0.042897833 |
| 0.197995691 | 0.034196188 | 0.129956371 | 0.163420908 |
| 0.079421834 | 0.108386462 | 0.000945952 | 0.000644402 |
| 0.009396739 | 0.163711721 | 0.13481386  | 0.096014458 |
| 0.044841891 | 0.078096607 | 0.000136213 | 0.167694665 |
| 0.191120114 | 0.03127873  | 0.024585263 | 0.169790644 |

|             |             |             |             |
|-------------|-------------|-------------|-------------|
| 0.155400053 | 0.161071528 | 0.057907515 | 0.186886819 |
| 0.158200579 | 0.1621682   | 0.050823672 | 0.135534925 |
| 0.183797804 | 0.150062374 | 0.10938809  | 0.121345755 |
| 0.227314319 | 0.141011867 | 0.152308862 | 0.032806567 |
| 0.004180739 | 0.034896626 | 0.039907222 | 0.027747857 |
| 0.047144658 | 0.062002574 | 0.143335289 | 0.182333723 |
| 0.204894462 | 0.020203493 | 0.02688431  | 0.134920501 |
| 0.163580324 | 0.164920755 | 0.000967123 | 0.000383658 |
| 0.000306862 | 0.03401915  | 0.083892232 | 0.058160992 |
| 0.157228972 | 0.037297951 | 0.027908428 | 0.014219731 |
| 0.023735562 | 0.132864703 | 0.180480816 | 0.163362588 |
| 0.109764301 | 0.054984541 | 0.10348785  | 0.134233191 |
| 0.030719399 | 0.042592558 | 0.214028595 | 0.156016922 |
| 0.010625551 | 0.046319599 | 0.037975041 | 0.19671688  |
| 0.009006993 | 0.137760478 | 0.128985966 | 0.070162768 |
| 0.00164255  | 0.044993651 | 0.032433557 | 0.138777668 |
| 0.149840855 | 0.196347407 | 0.146111063 | 0.008945301 |
| 0.168791719 | 0.151528022 | 0.131957798 | 0.198330393 |
| 0.167115225 | 0.212660639 | 0.021989569 | 0.134180608 |
| 0.030654551 | 0.168269844 | 0.11427541  | 0.005024464 |
| 0.030483377 | 0.008874726 | 0.14292567  | 0.023486099 |
| 0.062629106 | 0.077697891 | 0.005243955 | 0.018768802 |
| 0.006076165 | 0.080180353 | 0.214519097 | 0.168875468 |
| 0.008522968 | 0.026748301 | 0.072505012 | 0.087897535 |
| 0.071526922 | 0.235769474 | 0.150666389 | 0.072510339 |
| 0.053886432 | 0.005590512 | 0.126043741 | 0.082653142 |
| 0.040711845 | 0.198943072 | 0.065236648 | 0.165302937 |
| 0.075515013 | 0.11198622  | 0.163072978 | 0.091343601 |
| 0.028023085 | 0.063657922 | 0.177294227 | 0.048059047 |
| 0.095004623 | 0.243205818 | 0.038408977 | 0.051766713 |
| 0.194440172 | 0.063588684 | 0.004072428 | 0.002706397 |
| 0.052495454 | 0.081710564 | 0.079118139 | 0.164954985 |
| 0.067677443 | 0.084683018 | 0.007001481 | 0.035123423 |
| 0.173451344 | 0.09969149  | 0.008669136 | 0.139216577 |
| 0.059678008 | 0.11557222  | 0.131136593 | 0.146571884 |
| 0.013406344 | 0.213215215 | 0.144941816 | 0.2093729   |
| 0.154103349 | 0.080931154 | 0.159765993 | 0.003907678 |
| 0.010466667 | 0.076109489 | 0.169154247 | 0.06351426  |
| 0.15674853  | 0.015698842 | 0.023470216 | 0.149242014 |
| 0.040357081 | 0.251483895 | 0.011062505 | 0.013951532 |
| 0.089252533 | 0.023062341 | 0.12155975  | 0.11341692  |
| 0.091157744 | 0.169443154 | 0.009814905 | 0.060836789 |
| 0.069937465 | 0.128028918 | 0.132891599 | 0.061745581 |
| 0.027307403 | 0.015327667 | 0.176553323 | 0.054398076 |
| 0.191152877 | 0.009050257 | 0.131869298 | 0.00514586  |
| 0.028036456 | 0.201176127 | 0.038537014 | 0.003466541 |
| 0.005492865 | 0.045783248 | 0.0200005   | 0.042310002 |
| 0.020572612 | 0.174637215 | 0.060472799 | 0.081977994 |
| 0.080280124 | 0.036054744 | 0.076417697 | 0.003892934 |
| 0.004067165 | 0.12837317  | 0.06035581  | 0.164958241 |
| 0.037073537 | 0.236129299 | 0.099586083 | 0.161040586 |
| 0.003621941 | 0.033709119 | 0.020920547 | 0.13681193  |
| 0.055149726 |             |             |             |

HIST1H4D 0.219337391

0.419743498

0.109632766



|             |             |             |             |
|-------------|-------------|-------------|-------------|
| 0.306805495 | 0.182733818 | 0.169182248 | 0.086007088 |
| 0.036065062 | 0.02178726  | 0.020978278 | 0.035024901 |
| 0.22427702  | 0.131291253 | 0.119830366 | 0.052816109 |
| 0.263059509 | 0.0863342   | 0.055881731 | 0.110066037 |
| 0.229208686 | 0.040371074 | 0.281028544 | 0.034023955 |
| 0.053862687 | 0.052472567 | 0.03747708  | 0.066499573 |
| 0.328380364 | 0.037103028 | 0.142216618 | 0.230000515 |
| 0.030002445 | 0.283474765 | 0.393134342 | 0.324891255 |
| 0.405177822 | 0.193097874 | 0.008412122 | 0.073907062 |
| 0.262698104 | 0.274904799 | 0.238344172 | 0.193910948 |
| 0.026416281 | 0.371946332 | 0.127530564 | 0.168050767 |
| 0.036492455 | 0.035845242 | 0.049677796 | 0.314297121 |
| 0.406019059 | 0.218595553 | 0.043642697 | 0.055772588 |
| 0.147595187 | 0.062111668 | 0.104341711 | 0.172961825 |
| 0.109716277 | 0.042044478 | 0.396081128 | 0.026628489 |
| 0.031991286 | 0.051965681 | 0.051715596 | 0.085134383 |
| 0.065665327 | 0.217664579 | 0.006438396 | 0.173782105 |
| 0.012121493 | 0.201276039 | 0.158552491 | 0.058415207 |
| 0.026855751 | 0.067590958 | 0.057430574 | 0.197409413 |
| 0.340120026 | 0.306500762 | 0.401822124 | 0.389954226 |
| 0.125982552 | 0.088382978 | 0.140458804 | 0.081680722 |
| 0.286722498 | 0.090906836 | 0.035176993 | 0.294206375 |
| 0.40584775  | 0.427140401 | 0.062441612 | 0.096278641 |
| 0.340014206 | 0.364369331 | 0.137626674 | 0.158139412 |
| 0.073953641 | 0.012936366 | 0.34642331  | 0.426916121 |
| 0.265014719 | 0.101272276 | 0.072590396 | 0.291295141 |
| 0.024422457 | 0.062834419 | 0.224383224 | 0.087335274 |
| 0.356954828 | 0.008203813 | 0.087860262 | 0.191174914 |
| 0.036323042 | 0.281502684 | 0.414093721 | 0.084712796 |
| 0.148335501 | 0.036010146 | 0.041103749 | 0.011981344 |
| 0.09588423  | 0.040606167 | 0.364403945 | 0.406091772 |
| 0.070559856 | 0.095580479 | 0.072724627 | 0.002304845 |
| 0.02153188  | 0.032566679 | 0.333265906 | 0.094336955 |
| 0.236303171 | 0.231115428 | 0.08435503  | 0.232441628 |
| 0.249940082 | 0.390132158 | 0.01781629  | 0.027449564 |
| 0.179193715 | 0.033712862 | 0.125131477 | 0.231661784 |
| 0.138399258 | 0.030913594 | 0.056522472 | 0.407505477 |
| 0.309201507 | 0.046907654 | 0.060082924 | 0.268664979 |
| 0.096359546 | 0.180034248 | 0.041298366 | 0.132858796 |
| 0.033278264 | 0.368151514 | 0.017519212 | 0.079216356 |
| 0.053164647 | 0.099344046 | 0.001905524 | 0.079817015 |
| 0.093279068 | 0.389819067 | 0.338455116 | 0.035398639 |
| 0.157962605 | 0.238276647 | 0.096257104 | 0.347661585 |
| 0.022590609 | 0.017080845 | 0.061244987 | 0.444520857 |
| 0.158775426 | 0.37620868  | 0.074616052 | 0.056636813 |
| 0.129450024 | 0.300545742 | 0.000220169 | 0.382057974 |
| 0.414620224 | 0.071737159 | 0.290715882 | 0.185123408 |
| 0.101889579 | 0.363479302 | 0.007749568 | 0.283585537 |
| 0.187089785 | 0.024151978 | 0.40039207  | 0.095285925 |
| 0.344880782 | 0.028867476 | 0.086757673 | 0.303195838 |
| 0.332543592 | 0.005825913 | 0.073930928 | 0.2247854   |
| 0.010759101 | 0.029452169 | 0.22340367  | 0.234140078 |
| 0.179209164 | 0.272505823 | 0.379533579 | 0.092667302 |
| 0.190556325 | 0.060892738 | 0.004990733 | 0.119919687 |

|             |             |             |             |
|-------------|-------------|-------------|-------------|
| 0.258598496 | 0.070323763 | 0.334295711 | 0.059168096 |
| 0.133656213 | 0.372296472 | 0.278874145 | 0.039615768 |
| 0.024259658 | 0.102465659 | 0.02461812  | 0.119253924 |
| 0.230698713 | 0.098210677 | 0.108775187 | 0.032855158 |
| 0.038532704 | 0.432811763 | 0.044194038 | 0.057557449 |
| 0.031258665 | 0.290825367 | 0.078713573 | 0.174829717 |
| 0.201447318 | 0.047235322 | 0.070667392 | 0.080697222 |
| 0.023607861 | 0.068352816 | 0.00229015  | 0.155499675 |
| 0.229848837 | 1           | 0.196856837 | 0.246871879 |
| 0.122479671 | 0.155520378 | 0.192616082 | 0.04506274  |
| 0.036629859 | 0.012164908 | 0.401036933 | 0.220253164 |
| 0.200605122 | 0.04172969  | 0.019867629 | 0.140447994 |
| 0.413244404 | 0.145430001 | 0.041179576 | 0.394655001 |
| 0.008089289 | 0.360434967 | 0.141365056 | 0.071061444 |
| 0.174024358 | 0.162302587 | 0.33909617  | 0.015567618 |
| 0.144750912 | 0.393610082 | 0.099246816 | 0.064990579 |
| 0.35223313  | 0.221003674 | 0.022926814 | 0.242464535 |
| 0.27421818  | 0.028889534 | 0.433385281 | 0.062463415 |
| 0.012557834 | 0.264331566 | 0.309607277 | 0.03548678  |
| 0.028022091 | 0.176084134 | 0.016534395 | 0.157384602 |
| 0.428578534 | 0.307560115 | 0.328561533 | 0.040282283 |
| 0.036983674 | 0.077001914 | 0.054639073 | 0.130271886 |
| 0.401065662 | 0.419540901 | 0.111006975 | 0.204819282 |
| 0.119339186 | 0.073496601 | 0.024631109 | 0.434216818 |
| 0.023209427 | 0.388856846 | 0.004758342 | 0.29265554  |
| 0.400602697 | 0.104382062 | 0.045356895 | 0.129605544 |
| 0.312593791 | 0.018936115 | 0.039218694 | 0.407823235 |
| 0.299655339 | 0.069769277 | 0.072482468 | 0.225386222 |
| 0.012329979 | 0.019973436 | 0.145366546 | 0.03662302  |
| 0.086157453 | 0.049646713 | 0.015543552 | 0.055303616 |
| 0.048402978 | 0.389501706 | 0.335785334 | 0.021786873 |
| 0.194719908 | 0.043823364 | 0.204812157 | 0.019410971 |
| 0.344622409 | 0.37017121  | 0.415965287 | 0.037653156 |
| 0.307551102 | 0.407032668 | 0.213060682 | 0.024460458 |
| 0.010710914 | 0.402647182 | 0.189031091 | 0.029946535 |
| 0.377131146 | 0.077054741 | 0.067833046 | 0.391562439 |
| 0.067137101 | 0.329768844 | 0.001094258 | 0.007223226 |
| 0.010227516 | 0.332490868 | 0.365539198 | 0.200779955 |
| 0.068994892 | 0.14887351  | 0.000489873 | 0.404724558 |
| 0.426604054 | 0.010599531 | 0.039816276 | 0.346511336 |
| 0.312945083 | 0.407535252 | 0.094525443 | 0.373341862 |
| 0.266327348 | 0.408295663 | 0.107954874 | 0.130345776 |
| 0.358859026 | 0.384943139 | 0.251291322 | 0.32835886  |
| 0.395605593 | 0.250277458 | 0.150691316 | 0.013167601 |
| 0.018110729 | 0.053318059 | 0.078144711 | 0.035133483 |
| 0.132279939 | 0.051801338 | 0.361421221 | 0.358254944 |
| 0.414511502 | 0.00415505  | 0.042671436 | 0.312944082 |
| 0.343836225 | 0.352607903 | 0.002606762 | 0.001013701 |
| 0.00123104  | 0.02314948  | 0.151778385 | 0.071599265 |
| 0.373257155 | 0.099004191 | 0.006029416 | 0.018362517 |
| 0.065235247 | 0.218863608 | 0.421118382 | 0.238525124 |
| 0.269891372 | 0.031653777 | 0.127799789 | 0.234542264 |
| 0.030351942 | 0.149446035 | 0.42084064  | 0.381837876 |
| 0.010986375 | 0.061432641 | 0.097119391 | 0.391465816 |

|             |             |             |             |
|-------------|-------------|-------------|-------------|
| 0.019227401 | 0.157783028 | 0.253989844 | 0.114790551 |
| 0.002686284 | 0.029112693 | 0.021772061 | 0.280863304 |
| 0.398820973 | 0.126257517 | 0.072487307 | 0.042556804 |
| 0.086679328 | 0.33921876  | 0.099471782 | 0.414658064 |
| 0.332850817 | 0.345219999 | 0.027023927 | 0.359698799 |
| 0.027207048 | 0.411898436 | 0.145169345 | 0.016693252 |
| 0.0549274   | 0.005567957 | 0.367591919 | 0.055285371 |
| 0.094919635 | 0.195381572 | 0.028202375 | 0.007999696 |
| 0.027924692 | 0.033093035 | 0.39493033  | 0.343514867 |
| 0.009255493 | 0.04500116  | 0.100189942 | 0.186199498 |
| 0.114554715 | 0.348416922 | 0.397196809 | 0.159394424 |
| 0.037214512 | 0.029178702 | 0.244809141 | 0.211570526 |
| 0.065028411 | 0.393183321 | 0.090720904 | 0.402498549 |
| 0.212840449 | 0.308052739 | 0.378846853 | 0.143405486 |
| 0.079481015 | 0.162053354 | 0.270216181 | 0.035234344 |
| 0.144708065 | 0.400437165 | 0.094798749 | 0.069955269 |
| 0.135735976 | 0.143454753 | 0.008686788 | 0.026465387 |
| 0.108606796 | 0.153041545 | 0.082021744 | 0.308728845 |
| 0.171831187 | 0.223463251 | 0.012091221 | 0.022825946 |
| 0.42477473  | 0.290804812 | 0.030284972 | 0.258224075 |
| 0.051393262 | 0.150099425 | 0.295397095 | 0.306309725 |
| 0.053483345 | 0.396780482 | 0.301573565 | 0.312973441 |
| 0.355889905 | 0.092856671 | 0.411685066 | 0.017286885 |
| 0.025568592 | 0.196324068 | 0.094860606 | 0.035464918 |
| 0.079110596 | 0.010623442 | 0.061348272 | 0.265220451 |
| 0.086008843 | 0.274815305 | 0.058644234 | 0.023187718 |
| 0.124811547 | 0.076558244 | 0.164802343 | 0.084626965 |
| 0.069312838 | 0.412885384 | 0.006981961 | 0.027526341 |
| 0.119781547 | 0.295712833 | 0.185014453 | 0.062294714 |
| 0.070156327 | 0.031478361 | 0.157009446 | 0.105365624 |
| 0.18696559  | 0.066573533 | 0.303573324 | 0.009220292 |
| 0.016674086 | 0.396345617 | 0.103530217 | 0.004928954 |
| 0.016192857 | 0.144844146 | 0.053693641 | 0.070133106 |
| 0.009027189 | 0.400527731 | 0.106566924 | 0.165958204 |
| 0.134399634 | 0.023509666 | 0.237452865 | 0.016222706 |
| 0.010449215 | 0.344579987 | 0.141684855 | 0.414151911 |
| 0.083311831 | 0.330927907 | 0.312478091 | 0.340882453 |
| 0.018757747 | 0.106559672 | 0.014139919 | 0.305256825 |
| 0.113465477 |             |             |             |

|                      |             |             |             |
|----------------------|-------------|-------------|-------------|
| HIST1H4M 0.215174954 | 0.422295723 | 0.100162139 |             |
| 0.296021241          | 0.169199863 | 0.177470357 | 0.081874083 |
| 0.041980174          | 0.019137887 | 0.018588918 | 0.026857378 |
| 0.207733659          | 0.124134395 | 0.128400123 | 0.057397547 |
| 0.242942155          | 0.072255125 | 0.054386403 | 0.097880986 |
| 0.222245393          | 0.044788244 | 0.253886142 | 0.031504459 |
| 0.049060172          | 0.040875796 | 0.031103183 | 0.057687166 |
| 0.31894196           | 0.031045337 | 0.154926706 | 0.235801218 |
| 0.024798293          | 0.281764176 | 0.402182133 | 0.295982457 |
| 0.413707977          | 0.192375868 | 0.008354159 | 0.083716363 |
| 0.267122064          | 0.258141065 | 0.232764443 | 0.177574003 |
| 0.023890287          | 0.393010921 | 0.117341362 | 0.148926688 |
| 0.042370472          | 0.027243654 | 0.05676185  | 0.334381013 |
| 0.420818725          | 0.210885785 | 0.048848451 | 0.055681123 |
| 0.140749469          | 0.077811523 | 0.095038582 | 0.191253767 |

|             |             |             |             |
|-------------|-------------|-------------|-------------|
| 0.099875886 | 0.054149898 | 0.405607732 | 0.027153719 |
| 0.034078779 | 0.053067632 | 0.043617039 | 0.085483968 |
| 0.062131633 | 0.228961623 | 0.005799408 | 0.16565068  |
| 0.012360946 | 0.192262398 | 0.139427362 | 0.053429967 |
| 0.019715765 | 0.056385294 | 0.049280969 | 0.191817941 |
| 0.33138839  | 0.310861923 | 0.379249601 | 0.37181456  |
| 0.11030704  | 0.076142056 | 0.124498606 | 0.075323621 |
| 0.286155495 | 0.08441584  | 0.032571014 | 0.267058631 |
| 0.38513292  | 0.430277585 | 0.053471936 | 0.078885308 |
| 0.341296986 | 0.372006798 | 0.133541919 | 0.14701578  |
| 0.072752205 | 0.009453244 | 0.358830135 | 0.415018228 |
| 0.278544994 | 0.084236829 | 0.055962657 | 0.298157328 |
| 0.020156839 | 0.068959131 | 0.206885961 | 0.081420209 |
| 0.346110503 | 0.007193078 | 0.069036707 | 0.188175374 |
| 0.034915252 | 0.278207216 | 0.411435042 | 0.075757467 |
| 0.133167779 | 0.028178912 | 0.034066511 | 0.009097573 |
| 0.09826783  | 0.032742663 | 0.385315777 | 0.397075916 |
| 0.08101736  | 0.095127028 | 0.068832003 | 0.001431061 |
| 0.015714945 | 0.029407624 | 0.330841037 | 0.090956319 |
| 0.230171548 | 0.232264994 | 0.077892616 | 0.244573374 |
| 0.234767229 | 0.368209534 | 0.021758985 | 0.026466072 |
| 0.169349274 | 0.030494982 | 0.107618555 | 0.222701809 |
| 0.115225848 | 0.0314591   | 0.052235572 | 0.396316902 |
| 0.328711794 | 0.039171167 | 0.063097254 | 0.244762506 |
| 0.104326214 | 0.151578045 | 0.038091767 | 0.133345935 |
| 0.032343909 | 0.370701804 | 0.012157344 | 0.080904196 |
| 0.050931772 | 0.08366493  | 0.001591135 | 0.084747792 |
| 0.100161526 | 0.389969996 | 0.355861017 | 0.030740866 |
| 0.147343877 | 0.214648273 | 0.103825585 | 0.341378733 |
| 0.018827572 | 0.014113846 | 0.068872357 | 0.437350135 |
| 0.182347137 | 0.362818189 | 0.073392892 | 0.052761751 |
| 0.108256366 | 0.286395502 | 0.000132167 | 0.39636057  |
| 0.414631254 | 0.080071744 | 0.266787261 | 0.169160975 |
| 0.092345925 | 0.352803131 | 0.007900334 | 0.262279089 |
| 0.19986372  | 0.021183606 | 0.382062945 | 0.07517111  |
| 0.352643541 | 0.022992922 | 0.090297165 | 0.286118865 |
| 0.320102904 | 0.004975724 | 0.08254978  | 0.222467442 |
| 0.007450894 | 0.03434254  | 0.220191772 | 0.224378294 |
| 0.168379926 | 0.256997616 | 0.359907885 | 0.082913699 |
| 0.174477262 | 0.058039767 | 0.003553554 | 0.100054044 |
| 0.248281405 | 0.07427118  | 0.35184947  | 0.060755862 |
| 0.145154782 | 0.378439807 | 0.277170712 | 0.045800912 |
| 0.02132221  | 0.105011561 | 0.022427264 | 0.104666334 |
| 0.232566362 | 0.096726977 | 0.102462273 | 0.02943509  |
| 0.029792503 | 0.42615968  | 0.036229679 | 0.047215212 |
| 0.024855449 | 0.286973216 | 0.072634696 | 0.17997388  |
| 0.187439537 | 0.041446867 | 0.066976352 | 0.076242803 |
| 0.024174962 | 0.059010627 | 0.001473306 | 0.155701274 |
| 0.216835812 | 0.196856837 | 1           | 0.256378241 |
| 0.131778156 | 0.142259906 | 0.170274313 | 0.041696159 |
| 0.029419042 | 0.008848163 | 0.403337534 | 0.203666304 |
| 0.222008463 | 0.0395419   | 0.015439345 | 0.152310018 |
| 0.406433379 | 0.158455499 | 0.046785055 | 0.400996058 |
| 0.006495526 | 0.345415726 | 0.138842437 | 0.054368205 |

|             |             |             |             |
|-------------|-------------|-------------|-------------|
| 0.153523524 | 0.143488773 | 0.327013796 | 0.016154146 |
| 0.147655896 | 0.407624775 | 0.086737612 | 0.055410608 |
| 0.374591694 | 0.212859652 | 0.020158524 | 0.249418198 |
| 0.283036016 | 0.022873928 | 0.428176054 | 0.050927635 |
| 0.009046908 | 0.242445451 | 0.295570423 | 0.026208874 |
| 0.022262683 | 0.167493897 | 0.018851932 | 0.132255985 |
| 0.424262564 | 0.278907523 | 0.328739547 | 0.034759149 |
| 0.031993449 | 0.064178152 | 0.04430069  | 0.119297404 |
| 0.417232056 | 0.40956222  | 0.095650427 | 0.177105612 |
| 0.105401961 | 0.070459302 | 0.032215492 | 0.423808838 |
| 0.021583379 | 0.39447953  | 0.003347346 | 0.273856186 |
| 0.410836871 | 0.116448964 | 0.035518585 | 0.132089088 |
| 0.331004707 | 0.016487762 | 0.03951892  | 0.416190679 |
| 0.30117501  | 0.063922334 | 0.072448882 | 0.213019882 |
| 0.011946582 | 0.019941126 | 0.130636567 | 0.030408045 |
| 0.088313919 | 0.046281951 | 0.011060217 | 0.061328629 |
| 0.04218682  | 0.402203093 | 0.318084357 | 0.017707624 |
| 0.207657196 | 0.049693497 | 0.179868498 | 0.016128619 |
| 0.326891542 | 0.367719891 | 0.426174346 | 0.038532019 |
| 0.29864716  | 0.400093444 | 0.194724497 | 0.019525196 |
| 0.007268877 | 0.4055669   | 0.193412402 | 0.026868766 |
| 0.361957747 | 0.090077498 | 0.056998662 | 0.399064014 |
| 0.059889628 | 0.353155444 | 0.001161134 | 0.006537714 |
| 0.007272955 | 0.309118152 | 0.378126742 | 0.204147162 |
| 0.08281629  | 0.140464106 | 0.000187092 | 0.395468692 |
| 0.43423128  | 0.006789662 | 0.032059118 | 0.337505643 |
| 0.292810979 | 0.4152563   | 0.078831676 | 0.353651789 |
| 0.244188439 | 0.416552264 | 0.107910531 | 0.109870156 |
| 0.354829878 | 0.380381358 | 0.250663162 | 0.338260142 |
| 0.38458735  | 0.227447283 | 0.136187375 | 0.011345688 |
| 0.015619549 | 0.05918837  | 0.085019289 | 0.032707212 |
| 0.144759326 | 0.043864238 | 0.359943743 | 0.341531425 |
| 0.398071619 | 0.002729669 | 0.048304279 | 0.309821694 |
| 0.349206573 | 0.346272419 | 0.001894906 | 0.00072634  |
| 0.001103183 | 0.015519445 | 0.152384696 | 0.058362767 |
| 0.366803802 | 0.11871442  | 0.004507857 | 0.020328511 |
| 0.06582839  | 0.190835101 | 0.426578298 | 0.220001754 |
| 0.255816588 | 0.026816329 | 0.135846546 | 0.22118487  |
| 0.022709377 | 0.163036091 | 0.405270806 | 0.396961583 |
| 0.008446649 | 0.051012144 | 0.095802466 | 0.382757858 |
| 0.01455669  | 0.135030688 | 0.239030881 | 0.11632451  |
| 0.002058672 | 0.022750815 | 0.016917369 | 0.262319349 |
| 0.408168396 | 0.108564932 | 0.057753438 | 0.04943146  |
| 0.082546244 | 0.327451308 | 0.091485556 | 0.400759748 |
| 0.330710081 | 0.325284407 | 0.020824875 | 0.369276438 |
| 0.021058969 | 0.423085689 | 0.12116538  | 0.020715411 |
| 0.052694206 | 0.004079503 | 0.367122709 | 0.051177872 |
| 0.100368785 | 0.19753128  | 0.025452277 | 0.005293359 |
| 0.02384205  | 0.025578549 | 0.377247273 | 0.320260362 |
| 0.006481777 | 0.046404601 | 0.08596292  | 0.176030015 |
| 0.121692591 | 0.329724439 | 0.411372363 | 0.159982353 |
| 0.037235001 | 0.02492719  | 0.2406939   | 0.216723348 |
| 0.075283737 | 0.372078167 | 0.087397326 | 0.39570028  |
| 0.214602229 | 0.308693962 | 0.373265916 | 0.13652336  |

|             |             |             |             |
|-------------|-------------|-------------|-------------|
| 0.070252269 | 0.163035424 | 0.278578735 | 0.033306351 |
| 0.133382737 | 0.382847607 | 0.094499863 | 0.057713796 |
| 0.113651389 | 0.128392388 | 0.008161914 | 0.030397621 |
| 0.093552972 | 0.168172101 | 0.079504258 | 0.290208424 |
| 0.173606327 | 0.227888481 | 0.012976467 | 0.017721334 |
| 0.426510217 | 0.299785455 | 0.032566168 | 0.254172073 |
| 0.041680158 | 0.133317417 | 0.280609191 | 0.28415765  |
| 0.054995304 | 0.392590901 | 0.300887093 | 0.323498325 |
| 0.376470208 | 0.08489409  | 0.420173739 | 0.022125374 |
| 0.019171134 | 0.192810111 | 0.08508705  | 0.026013352 |
| 0.065712504 | 0.007730291 | 0.056596434 | 0.24506336  |
| 0.080514257 | 0.251809243 | 0.069187346 | 0.020260126 |
| 0.1065955   | 0.07589994  | 0.146239898 | 0.083059898 |
| 0.061383822 | 0.424239883 | 0.005172043 | 0.021907893 |
| 0.10775741  | 0.284662421 | 0.161244739 | 0.05604853  |
| 0.062545807 | 0.026278494 | 0.137615317 | 0.114623718 |
| 0.190338967 | 0.066278122 | 0.295449481 | 0.008658727 |
| 0.015572598 | 0.378679075 | 0.104874123 | 0.003400262 |
| 0.014272444 | 0.149544861 | 0.054648058 | 0.068309656 |
| 0.005996933 | 0.394041783 | 0.112458836 | 0.151911787 |
| 0.134162817 | 0.020084501 | 0.259444037 | 0.015113268 |
| 0.009351384 | 0.360632541 | 0.126405903 | 0.415859484 |
| 0.073253886 | 0.307068123 | 0.333773192 | 0.339716399 |
| 0.017478743 | 0.1011214   | 0.012505974 | 0.29945034  |
| 0.105577998 |             |             |             |
| HIST2H2BE   | 0.326136735 | 0.49508281  | 0.261610432 |
| 0.312736149 | 0.306137693 | 0.289185683 | 0.174024745 |
| 0.189945125 | 0.052513382 | 0.004240387 | 0.013686722 |
| 0.300151157 | 0.145539362 | 0.226694669 | 0.226719019 |
| 0.297967793 | 0.092826175 | 0.2850565   | 0.187818654 |
| 0.316236839 | 0.09578002  | 0.278915609 | 0.075668616 |
| 0.189637736 | 0.061207158 | 0.048183419 | 0.159012843 |
| 0.378364287 | 0.05509362  | 0.280971855 | 0.315630788 |
| 0.077604031 | 0.375996384 | 0.5006322   | 0.29298712  |
| 0.493581874 | 0.303065736 | 0.018591687 | 0.229714764 |
| 0.389490172 | 0.301194897 | 0.31485477  | 0.241995924 |
| 0.03443055  | 0.492499661 | 0.187454158 | 0.270363644 |
| 0.198175093 | 0.019961784 | 0.224370695 | 0.45774827  |
| 0.460198467 | 0.297336266 | 0.207509216 | 0.130650965 |
| 0.138487425 | 0.250531645 | 0.16050658  | 0.289861842 |
| 0.182764836 | 0.172847174 | 0.464419418 | 0.067763537 |
| 0.133076312 | 0.243170986 | 0.112456712 | 0.234330067 |
| 0.22654787  | 0.333091354 | 0.021202221 | 0.282163041 |
| 0.003642743 | 0.297714628 | 0.265725824 | 0.179881675 |
| 0.030704136 | 0.01590183  | 0.129695857 | 0.264836118 |
| 0.40259167  | 0.441898572 | 0.40676154  | 0.418248293 |
| 0.125808814 | 0.217674618 | 0.260562335 | 0.129761237 |
| 0.393763293 | 0.141784518 | 0.083768856 | 0.294853773 |
| 0.418030363 | 0.491783975 | 0.135084615 | 0.17679692  |
| 0.350722976 | 0.464448297 | 0.286416482 | 0.291627579 |
| 0.200703517 | 0.033852433 | 0.430127845 | 0.456513645 |
| 0.385656538 | 0.195392819 | 0.101447002 | 0.362699819 |
| 0.047505213 | 0.270555047 | 0.260885652 | 0.136313372 |
| 0.412879275 | 0.014447834 | 0.141269359 | 0.287703973 |

|             |             |             |             |
|-------------|-------------|-------------|-------------|
| 0.175865164 | 0.353589475 | 0.474728183 | 0.151686925 |
| 0.291962827 | 0.015732432 | 0.072003626 | 0.027648471 |
| 0.245959136 | 0.084180171 | 0.483547911 | 0.398734479 |
| 0.240856089 | 0.271824371 | 0.224012752 | 0.00151205  |
| 0.018586577 | 0.143540538 | 0.377147191 | 0.301944181 |
| 0.324739883 | 0.35126268  | 0.150878356 | 0.344224724 |
| 0.290472332 | 0.402416934 | 0.045962772 | 0.087032424 |
| 0.296392969 | 0.146087426 | 0.179055256 | 0.320378078 |
| 0.196282215 | 0.11060795  | 0.106390976 | 0.458964572 |
| 0.439137495 | 0.07040788  | 0.3001027   | 0.290480473 |
| 0.247851379 | 0.231041674 | 0.095478047 | 0.224661526 |
| 0.05084526  | 0.45242266  | 0.018792837 | 0.290910183 |
| 0.15101028  | 0.105195021 | 0.013650126 | 0.249371163 |
| 0.216102124 | 0.377565437 | 0.472607241 | 0.089431117 |
| 0.25553218  | 0.278537765 | 0.297154828 | 0.295299789 |
| 0.006641151 | 0.039982289 | 0.274302879 | 0.462154558 |
| 0.267820338 | 0.442967941 | 0.232644357 | 0.208934115 |
| 0.19400055  | 0.354425654 | 0.002324946 | 0.4868076   |
| 0.487282955 | 0.271774264 | 0.277209706 | 0.299945738 |
| 0.234104722 | 0.373873934 | 0.039324505 | 0.304439449 |
| 0.302371113 | 0.067262116 | 0.434662123 | 0.109614082 |
| 0.447365931 | 0.029357457 | 0.292319393 | 0.338167597 |
| 0.31569477  | 0.008295163 | 0.20914485  | 0.302848586 |
| 0.018236286 | 0.104154553 | 0.324047473 | 0.294866865 |
| 0.260953819 | 0.334857776 | 0.407814125 | 0.214051028 |
| 0.295048373 | 0.20967572  | 0.010301688 | 0.211902144 |
| 0.343236603 | 0.274746486 | 0.440728683 | 0.197998944 |
| 0.291328735 | 0.446708627 | 0.349869154 | 0.15689934  |
| 0.035778459 | 0.27993108  | 0.018427529 | 0.217411473 |
| 0.355723349 | 0.101254191 | 0.258870969 | 0.127393771 |
| 0.048399265 | 0.475823588 | 0.105009003 | 0.155684987 |
| 0.070763445 | 0.302484204 | 0.21181819  | 0.181288953 |
| 0.138914771 | 0.117893323 | 0.221395712 | 0.254132165 |
| 0.041020828 | 0.071272169 | 0.010587044 | 0.271525273 |
| 0.101913992 | 0.246871879 | 0.256378241 | 1           |
| 0.290896242 | 0.086640282 | 0.257843297 | 0.180142252 |
| 0.07072217  | 0.011222282 | 0.47686453  | 0.294145192 |
| 0.311146276 | 0.123292919 | 0.032374451 | 0.24826585  |
| 0.414830695 | 0.25026805  | 0.254613359 | 0.429730695 |
| 0.022952089 | 0.420151114 | 0.179978185 | 0.082825105 |
| 0.254193093 | 0.196064895 | 0.391631199 | 0.044643754 |
| 0.328405686 | 0.463498519 | 0.230416733 | 0.118292819 |
| 0.404517143 | 0.314210667 | 0.026742018 | 0.341291868 |
| 0.342200579 | 0.02439047  | 0.482659628 | 0.087640984 |
| 0.015482932 | 0.295552773 | 0.303469265 | 0.053473718 |
| 0.051837277 | 0.240318825 | 0.053610405 | 0.198164554 |
| 0.471592819 | 0.284117992 | 0.343301037 | 0.137726104 |
| 0.032409024 | 0.008905933 | 0.14197852  | 0.272537838 |
| 0.505158251 | 0.457916429 | 0.201584732 | 0.234057864 |
| 0.187703411 | 0.20694979  | 0.165563842 | 0.454222408 |
| 0.146914854 | 0.498749102 | 0.005753979 | 0.322731471 |
| 0.489803282 | 0.281505047 | 0.049326506 | 0.257260584 |
| 0.374702751 | 0.037294636 | 0.189865477 | 0.475019971 |
| 0.394638411 | 0.218807758 | 0.220272605 | 0.320261717 |

|             |             |             |             |
|-------------|-------------|-------------|-------------|
| 0.01641136  | 0.04743927  | 0.255387387 | 0.105972759 |
| 0.273060143 | 0.154577074 | 0.027200389 | 0.291692196 |
| 0.032630483 | 0.443890484 | 0.373381105 | 0.035877154 |
| 0.263334176 | 0.269350614 | 0.265612031 | 0.03057626  |
| 0.37064181  | 0.463183414 | 0.504170857 | 0.161458485 |
| 0.353673448 | 0.432831815 | 0.258601708 | 0.058529841 |
| 0.011412261 | 0.484330736 | 0.314345984 | 0.016919522 |
| 0.409859546 | 0.231345392 | 0.009905111 | 0.478722936 |
| 0.153672564 | 0.463917753 | 0.002310295 | 0.057908954 |
| 0.027501878 | 0.366359976 | 0.463117624 | 0.316683973 |
| 0.208578313 | 0.292115709 | 0.005771795 | 0.473207049 |
| 0.468850975 | 0.008306736 | 0.091222243 | 0.352958594 |
| 0.295112986 | 0.511172398 | 0.188745609 | 0.364280989 |
| 0.280593912 | 0.475626403 | 0.191168884 | 0.185299434 |
| 0.376062732 | 0.447048749 | 0.333102011 | 0.44670439  |
| 0.399555921 | 0.295064519 | 0.211392605 | 0.013405742 |
| 0.070746557 | 0.21885895  | 0.197425726 | 0.051894112 |
| 0.284045235 | 0.087239934 | 0.446250088 | 0.396549347 |
| 0.416039218 | 0.003740135 | 0.15266333  | 0.364459207 |
| 0.414260647 | 0.426434081 | 0.01792381  | 0.003305063 |
| 0.005318078 | 0.008735074 | 0.306034133 | 0.166262911 |
| 0.438507062 | 0.192254725 | 0.003990408 | 0.054206161 |
| 0.204433349 | 0.254051418 | 0.478432396 | 0.281967536 |
| 0.338218965 | 0.066773872 | 0.198734788 | 0.300453276 |
| 0.039880927 | 0.281329916 | 0.420903863 | 0.470017606 |
| 0.033400355 | 0.171348568 | 0.308249361 | 0.434797064 |
| 0.036339902 | 0.228876732 | 0.314262958 | 0.229301111 |
| 0.013679966 | 0.052982253 | 0.041269776 | 0.335455389 |
| 0.480075407 | 0.053654987 | 0.021727665 | 0.152665837 |
| 0.093726153 | 0.408470845 | 0.119951189 | 0.45495165  |
| 0.380084175 | 0.353593419 | 0.052931481 | 0.463925233 |
| 0.027509051 | 0.474474825 | 0.211256166 | 0.048086112 |
| 0.223396763 | 0.010862473 | 0.441996166 | 0.082424592 |
| 0.298384091 | 0.323055315 | 0.110723348 | 0.01159151  |
| 0.100822068 | 0.037745607 | 0.403945641 | 0.366814549 |
| 0.023437751 | 0.205980559 | 0.212571716 | 0.30711237  |
| 0.255834656 | 0.313630776 | 0.494532245 | 0.275335992 |
| 0.079234267 | 0.100146338 | 0.318301381 | 0.315115669 |
| 0.248955243 | 0.417688468 | 0.194192313 | 0.477380361 |
| 0.321940193 | 0.433250293 | 0.428625199 | 0.256369948 |
| 0.162052413 | 0.307467099 | 0.289962954 | 0.016916158 |
| 0.266060973 | 0.380822015 | 0.302303242 | 0.088698819 |
| 0.172646616 | 0.250508708 | 0.051899567 | 0.169898956 |
| 0.202668477 | 0.268955064 | 0.122407812 | 0.355204079 |
| 0.32373454  | 0.315121273 | 0.057712413 | 0.037379784 |
| 0.510164457 | 0.426938319 | 0.117507266 | 0.305926722 |
| 0.130039394 | 0.234738956 | 0.345548668 | 0.333095716 |
| 0.2657226   | 0.391682696 | 0.36527633  | 0.303797477 |
| 0.433825322 | 0.205516731 | 0.502219564 | 0.109389288 |
| 0.047935967 | 0.316038925 | 0.070795712 | 0.065454207 |
| 0.111278628 | 0.017766191 | 0.177185224 | 0.307917127 |
| 0.24543319  | 0.279388088 | 0.313411958 | 0.05961587  |
| 0.231096255 | 0.292713298 | 0.257631113 | 0.170799803 |
| 0.056901985 | 0.479620893 | 0.006855633 | 0.043691318 |



|             |             |             |             |
|-------------|-------------|-------------|-------------|
| 0.267692774 | 0.341212774 | 0.239281155 | 0.16430783  |
| 0.176249519 | 0.101987321 | 0.220844287 | 0.271091303 |
| 0.242179135 | 0.257725545 | 0.34671825  | 0.030001659 |
| 0.022406117 | 0.427777982 | 0.296652029 | 0.01535279  |
| 0.071662426 | 0.30556287  | 0.256537226 | 0.162623338 |
| 0.014075851 | 0.433543111 | 0.258846126 | 0.290733936 |
| 0.282702008 | 0.056808747 | 0.381578436 | 0.076689354 |
| 0.055280473 | 0.454860842 | 0.260137889 | 0.481184535 |
| 0.245842549 | 0.303654284 | 0.462755231 | 0.37937203  |
| 0.096395723 | 0.267002621 | 0.023380369 | 0.388691728 |
| 0.255783746 |             |             |             |
| HIST3H2A    | 0.261745717 | 0.395316488 | 0.116501145 |
| 0.331560265 | 0.208257858 | 0.185911858 | 0.133999581 |
| 0.065907997 | 0.015898044 | 0.010200407 | 0.011642327 |
| 0.221677609 | 0.059046691 | 0.112616215 | 0.039268837 |
| 0.313998598 | 0.06034152  | 0.098350668 | 0.167958092 |
| 0.312685057 | 0.059176773 | 0.304667369 | 0.042794097 |
| 0.046323456 | 0.035312824 | 0.042557417 | 0.056967819 |
| 0.385129028 | 0.048041028 | 0.166317784 | 0.320635486 |
| 0.036300609 | 0.346457572 | 0.357505989 | 0.283049938 |
| 0.351684333 | 0.216091145 | 0.029536701 | 0.075025037 |
| 0.315621729 | 0.25807677  | 0.320352517 | 0.229591489 |
| 0.025971404 | 0.353968344 | 0.165155518 | 0.189846787 |
| 0.037819161 | 0.018639584 | 0.08668895  | 0.331257601 |
| 0.330575823 | 0.191670919 | 0.089565753 | 0.085036379 |
| 0.046403561 | 0.11896704  | 0.032945068 | 0.255279565 |
| 0.161015611 | 0.085972126 | 0.340230683 | 0.022176723 |
| 0.033623377 | 0.123850451 | 0.053965525 | 0.154787354 |
| 0.062675496 | 0.272242636 | 0.019601572 | 0.173958232 |
| 0.007279428 | 0.287619697 | 0.199642619 | 0.043070431 |
| 0.042680068 | 0.027316746 | 0.075756726 | 0.248373674 |
| 0.388382717 | 0.316855322 | 0.376361368 | 0.355254637 |
| 0.062915778 | 0.135448318 | 0.139929343 | 0.087792204 |
| 0.320902411 | 0.110720171 | 0.031038601 | 0.325309285 |
| 0.375399415 | 0.376550896 | 0.043763565 | 0.122742941 |
| 0.302368274 | 0.376181305 | 0.12906108  | 0.153475414 |
| 0.046540558 | 0.013114253 | 0.321313896 | 0.391341429 |
| 0.311357396 | 0.086142534 | 0.081918852 | 0.373114449 |
| 0.046607556 | 0.043025764 | 0.273195439 | 0.068954008 |
| 0.39628565  | 0.010167875 | 0.100744047 | 0.243184648 |
| 0.044527546 | 0.298010186 | 0.353216781 | 0.134100322 |
| 0.177231516 | 0.022611476 | 0.014231679 | 0.022853387 |
| 0.061819996 | 0.018455659 | 0.319895782 | 0.39257097  |
| 0.100611248 | 0.061374302 | 0.132304251 | 0.003893768 |
| 0.020159076 | 0.036607076 | 0.332977529 | 0.158434045 |
| 0.292765605 | 0.227518648 | 0.07257195  | 0.283263438 |
| 0.212331119 | 0.373286761 | 0.007996831 | 0.048428956 |
| 0.187014873 | 0.041216141 | 0.179264655 | 0.230903311 |
| 0.12512402  | 0.0600806   | 0.09182466  | 0.386179242 |
| 0.345110115 | 0.079799529 | 0.106899614 | 0.307430306 |
| 0.056778696 | 0.168895886 | 0.079103541 | 0.144362618 |
| 0.043185181 | 0.312720836 | 0.020807521 | 0.149173021 |
| 0.020829859 | 0.053974612 | 0.010124921 | 0.156811959 |
| 0.051732686 | 0.317397327 | 0.307508455 | 0.076483124 |

|             |             |             |             |
|-------------|-------------|-------------|-------------|
| 0.188663627 | 0.248399606 | 0.170277246 | 0.277801389 |
| 0.008023952 | 0.024199842 | 0.116989058 | 0.406331617 |
| 0.224194895 | 0.368525987 | 0.096523875 | 0.069933455 |
| 0.154056098 | 0.326989109 | 0.000400933 | 0.346096831 |
| 0.360030107 | 0.109418462 | 0.249731702 | 0.226562521 |
| 0.085143683 | 0.356833094 | 0.008676057 | 0.337066764 |
| 0.248507136 | 0.054170935 | 0.395652281 | 0.102609692 |
| 0.334351155 | 0.037000384 | 0.149007018 | 0.259331353 |
| 0.267546229 | 0.009540898 | 0.115806176 | 0.300466124 |
| 0.012965518 | 0.044027561 | 0.285120221 | 0.268564217 |
| 0.180421672 | 0.297623391 | 0.396060589 | 0.069459405 |
| 0.19311724  | 0.124184225 | 0.010159935 | 0.136131498 |
| 0.283218888 | 0.042899914 | 0.332200076 | 0.071978721 |
| 0.180672209 | 0.351343596 | 0.257173691 | 0.022645988 |
| 0.040718224 | 0.179901082 | 0.021309894 | 0.120723272 |
| 0.236360434 | 0.064332133 | 0.102781278 | 0.047146632 |
| 0.041174063 | 0.392885384 | 0.038274548 | 0.0483635   |
| 0.018712233 | 0.257823268 | 0.147159802 | 0.089825689 |
| 0.057482168 | 0.047954138 | 0.065156352 | 0.081916753 |
| 0.034385343 | 0.07493235  | 0.005325835 | 0.109456452 |
| 0.068103795 | 0.122479671 | 0.131778156 | 0.290896242 |
| 1           | 0.072143579 | 0.167578712 | 0.0333774   |
| 0.030082884 | 0.022373872 | 0.38178813  | 0.279564129 |
| 0.256222926 | 0.05542095  | 0.034997088 | 0.053446844 |
| 0.396156396 | 0.135953534 | 0.073522405 | 0.379713219 |
| 0.014769266 | 0.37111409  | 0.063135897 | 0.077444861 |
| 0.129868742 | 0.185303702 | 0.368595202 | 0.010156243 |
| 0.224849429 | 0.381533226 | 0.152131261 | 0.06392273  |
| 0.339175057 | 0.282857976 | 0.023796669 | 0.261268459 |
| 0.29670409  | 0.038422109 | 0.387676904 | 0.043449848 |
| 0.024041094 | 0.26029813  | 0.249909279 | 0.055802767 |
| 0.035661724 | 0.152987134 | 0.028565159 | 0.181811903 |
| 0.388035082 | 0.323023426 | 0.293214109 | 0.044282113 |
| 0.040132595 | 0.025146245 | 0.072318506 | 0.143303565 |
| 0.363362068 | 0.364887545 | 0.174042103 | 0.146863182 |
| 0.18375176  | 0.054935805 | 0.04006432  | 0.383353695 |
| 0.028625092 | 0.371694215 | 0.011678302 | 0.266558532 |
| 0.340608899 | 0.182957713 | 0.038081339 | 0.183390265 |
| 0.321106927 | 0.030849912 | 0.08434493  | 0.358522526 |
| 0.312860235 | 0.075078412 | 0.062700241 | 0.284332449 |
| 0.016852068 | 0.033406412 | 0.152454486 | 0.023896182 |
| 0.085988939 | 0.062607648 | 0.006786777 | 0.076179495 |
| 0.028199765 | 0.365476306 | 0.372192828 | 0.014351458 |
| 0.175591967 | 0.068042466 | 0.240907049 | 0.035630455 |
| 0.286683116 | 0.33790754  | 0.372708578 | 0.0846823   |
| 0.321764888 | 0.335161451 | 0.158503877 | 0.044492081 |
| 0.017122629 | 0.347310581 | 0.248443634 | 0.013842901 |
| 0.402934438 | 0.125762827 | 0.022326497 | 0.388987364 |
| 0.124674871 | 0.315909275 | 0.000932646 | 0.008033225 |
| 0.012660565 | 0.343657359 | 0.321986944 | 0.301064422 |
| 0.064451658 | 0.238172594 | 0.002615763 | 0.377185678 |
| 0.373275841 | 0.009177136 | 0.028616754 | 0.302535013 |
| 0.23860101  | 0.399995088 | 0.072559834 | 0.30347826  |
| 0.204368025 | 0.342543756 | 0.070890223 | 0.154214594 |

|             |             |             |             |
|-------------|-------------|-------------|-------------|
| 0.335514608 | 0.320498437 | 0.301972756 | 0.338010726 |
| 0.403608706 | 0.274676315 | 0.201173162 | 0.015081465 |
| 0.010535069 | 0.116160853 | 0.040027136 | 0.0155558   |
| 0.195801387 | 0.034979875 | 0.353084953 | 0.379050969 |
| 0.35653019  | 0.010031648 | 0.054501669 | 0.307425693 |
| 0.388402911 | 0.389603043 | 0.008015249 | 0.000852834 |
| 0.001215611 | 0.006182807 | 0.245460483 | 0.096823557 |
| 0.345671997 | 0.039568269 | 0.010541441 | 0.041359204 |
| 0.048108693 | 0.190872729 | 0.373771017 | 0.311665154 |
| 0.279795874 | 0.054530887 | 0.057482014 | 0.315915408 |
| 0.016753662 | 0.202963229 | 0.365678231 | 0.366732256 |
| 0.019013516 | 0.086172869 | 0.151791053 | 0.398034462 |
| 0.006448238 | 0.201598885 | 0.26304389  | 0.063099738 |
| 0.008244876 | 0.030519277 | 0.020707952 | 0.332127394 |
| 0.334917019 | 0.044611247 | 0.026126585 | 0.039181039 |
| 0.070842235 | 0.366481011 | 0.059507621 | 0.400040209 |
| 0.355431919 | 0.384312125 | 0.024739872 | 0.333858536 |
| 0.01910083  | 0.359522183 | 0.11956528  | 0.009876699 |
| 0.087976467 | 0.01142917  | 0.336754682 | 0.015155888 |
| 0.156580714 | 0.276871585 | 0.016005055 | 0.011757685 |
| 0.014859933 | 0.039077052 | 0.379618026 | 0.329130968 |
| 0.012832559 | 0.077660598 | 0.137361782 | 0.258800649 |
| 0.181566893 | 0.335515537 | 0.359102616 | 0.125844436 |
| 0.050850463 | 0.024246596 | 0.323538115 | 0.255058386 |
| 0.126382881 | 0.384876567 | 0.052843158 | 0.377192118 |
| 0.263746857 | 0.337955567 | 0.344920035 | 0.175472585 |
| 0.045986665 | 0.196425598 | 0.279316129 | 0.019266178 |
| 0.197123841 | 0.385028319 | 0.164922353 | 0.027633001 |
| 0.123074805 | 0.128196431 | 0.025298349 | 0.031989035 |
| 0.084350421 | 0.202006457 | 0.069496012 | 0.366728259 |
| 0.255729996 | 0.266629307 | 0.042305619 | 0.018691352 |
| 0.399430302 | 0.313631234 | 0.030173142 | 0.260059075 |
| 0.088361569 | 0.160007644 | 0.298154294 | 0.303867613 |
| 0.044981879 | 0.355989353 | 0.363447483 | 0.307232253 |
| 0.357380287 | 0.147959868 | 0.367980131 | 0.04242478  |
| 0.015463083 | 0.227299799 | 0.045492345 | 0.057492772 |
| 0.111016733 | 0.011114521 | 0.033775712 | 0.321485428 |
| 0.06842522  | 0.296136431 | 0.069241711 | 0.021839389 |
| 0.161579048 | 0.116658675 | 0.209154258 | 0.112275273 |
| 0.037706487 | 0.356971797 | 0.006456711 | 0.044212931 |
| 0.104923799 | 0.277329254 | 0.134383145 | 0.078657172 |
| 0.032674518 | 0.032143004 | 0.190118304 | 0.162433029 |
| 0.122871332 | 0.042548317 | 0.274291387 | 0.01459657  |
| 0.027858065 | 0.400344162 | 0.138314673 | 0.008841573 |
| 0.022352945 | 0.195064115 | 0.077740858 | 0.04032576  |
| 0.012614428 | 0.335334871 | 0.103978289 | 0.174983686 |
| 0.203902574 | 0.042530718 | 0.286522163 | 0.020689566 |
| 0.022529064 | 0.350111014 | 0.143380839 | 0.358289035 |
| 0.110252715 | 0.34991874  | 0.315479017 | 0.340481578 |
| 0.023601978 | 0.11824226  | 0.017797213 | 0.35920221  |
| 0.079898268 |             |             |             |
| HIST4H4     | 0.073745951 | 0.135035857 | 0.043350587 |
| 0.195581513 | 0.109321479 | 0.069554841 | 0.143339827 |
| 0.037350545 | 0.013697056 | 0.056914495 | 0.034782087 |

|             |             |             |             |
|-------------|-------------|-------------|-------------|
| 0.099313237 | 0.055546255 | 0.153822601 | 0.016437094 |
| 0.165552302 | 0.170767288 | 0.03080978  | 0.196837196 |
| 0.146909932 | 0.082096523 | 0.226573567 | 0.082656719 |
| 0.024677291 | 0.106353274 | 0.12796178  | 0.052843533 |
| 0.182984519 | 0.134440531 | 0.068507397 | 0.13538262  |
| 0.061408583 | 0.115279665 | 0.102811759 | 0.19048643  |
| 0.102036658 | 0.056183275 | 0.016508846 | 0.043419372 |
| 0.093334819 | 0.117529545 | 0.148514701 | 0.231116977 |
| 0.085931067 | 0.096395364 | 0.196040074 | 0.092700243 |
| 0.008600984 | 0.10687686  | 0.032354406 | 0.083158567 |
| 0.105331056 | 0.084408559 | 0.04959972  | 0.110566375 |
| 0.04084808  | 0.049528276 | 0.036071714 | 0.081588733 |
| 0.191097784 | 0.045648175 | 0.105945683 | 0.018338238 |
| 0.008472409 | 0.060392731 | 0.079772973 | 0.118478209 |
| 0.026547347 | 0.080809371 | 0.017404122 | 0.05287374  |
| 0.026894417 | 0.143434593 | 0.110991792 | 0.019914151 |
| 0.159851758 | 0.128637729 | 0.107162895 | 0.188868066 |
| 0.166373074 | 0.083133816 | 0.179049759 | 0.14486561  |
| 0.138265244 | 0.098224654 | 0.058289016 | 0.191918071 |
| 0.09782126  | 0.177300176 | 0.031640185 | 0.194884285 |
| 0.170673877 | 0.123529006 | 0.051262985 | 0.110679441 |
| 0.135567633 | 0.120133755 | 0.063310583 | 0.088752042 |
| 0.028267666 | 0.02350419  | 0.097527066 | 0.156796691 |
| 0.08937188  | 0.050405005 | 0.176244361 | 0.151836427 |
| 0.108061036 | 0.019304692 | 0.234763756 | 0.076310789 |
| 0.173655657 | 0.027208291 | 0.135989801 | 0.164695639 |
| 0.021574513 | 0.111742407 | 0.116560041 | 0.179609783 |
| 0.085003974 | 0.092571231 | 0.010343419 | 0.055154363 |
| 0.022194233 | 0.017675742 | 0.081323307 | 0.202058033 |
| 0.05299869  | 0.029861858 | 0.09058531  | 0.025444745 |
| 0.101068015 | 0.012790319 | 0.118880174 | 0.061072351 |
| 0.10721351  | 0.054836024 | 0.108690897 | 0.075691866 |
| 0.086309575 | 0.170380345 | 0.002929182 | 0.068210943 |
| 0.103075047 | 0.019324576 | 0.221756651 | 0.102381357 |
| 0.14743931  | 0.07074003  | 0.176898997 | 0.153006473 |
| 0.09574669  | 0.193184062 | 0.029887184 | 0.191730167 |
| 0.037453781 | 0.141832269 | 0.132794723 | 0.212701204 |
| 0.096208065 | 0.089498196 | 0.090251531 | 0.051823519 |
| 0.007885549 | 0.058019556 | 0.007241938 | 0.079285042 |
| 0.03757167  | 0.139979635 | 0.072126242 | 0.127903312 |
| 0.220616706 | 0.165299712 | 0.051308721 | 0.163064758 |
| 0.034130229 | 0.030607727 | 0.024529468 | 0.168691021 |
| 0.071239731 | 0.133518628 | 0.087279246 | 0.045534035 |
| 0.1699315   | 0.147766944 | 0.000358851 | 0.098619286 |
| 0.115548412 | 0.027551418 | 0.245354532 | 0.097191005 |
| 0.035436509 | 0.185080634 | 0.002147642 | 0.2108794   |
| 0.063871762 | 0.095973643 | 0.174039657 | 0.23109037  |
| 0.095756004 | 0.14409097  | 0.068900554 | 0.097038928 |
| 0.110752407 | 0.008964253 | 0.062072444 | 0.143874278 |
| 0.04333844  | 0.038407645 | 0.094716759 | 0.156912729 |
| 0.111137169 | 0.121244511 | 0.190956627 | 0.032225769 |
| 0.118640073 | 0.099257991 | 0.015993049 | 0.104905003 |
| 0.094751302 | 0.006968231 | 0.102133308 | 0.061705999 |
| 0.045896372 | 0.121174734 | 0.077970816 | 0.004665124 |

|             |             |             |             |
|-------------|-------------|-------------|-------------|
| 0.117643595 | 0.087123304 | 0.051905502 | 0.096105165 |
| 0.05801881  | 0.162902669 | 0.034982081 | 0.025435209 |
| 0.132139858 | 0.151464514 | 0.038031513 | 0.026106415 |
| 0.018058577 | 0.191017538 | 0.11918532  | 0.175849093 |
| 0.126819268 | 0.064140577 | 0.03466576  | 0.041312294 |
| 0.071980713 | 0.236027058 | 0.004841121 | 0.077656019 |
| 0.141507187 | 0.155520378 | 0.142259906 | 0.086640282 |
| 0.072143579 | 1           | 0.169241135 | 0.016686178 |
| 0.066020649 | 0.109847378 | 0.13050766  | 0.150710039 |
| 0.069840328 | 0.06887964  | 0.104023492 | 0.020111602 |
| 0.187754006 | 0.056652357 | 0.015188419 | 0.153413028 |
| 0.018392823 | 0.144309725 | 0.122265117 | 0.204962912 |
| 0.122567695 | 0.280817339 | 0.168796037 | 0.005002967 |
| 0.064134466 | 0.128886397 | 0.095494428 | 0.115571233 |
| 0.117194617 | 0.132649014 | 0.037464003 | 0.078231272 |
| 0.100285866 | 0.170446201 | 0.139701209 | 0.104387984 |
| 0.098418697 | 0.124483827 | 0.11136443  | 0.141607906 |
| 0.094345978 | 0.155201379 | 0.036329266 | 0.197645883 |
| 0.151276563 | 0.234186227 | 0.121319663 | 0.031468929 |
| 0.155153809 | 0.118375056 | 0.070901404 | 0.051744473 |
| 0.103283632 | 0.133444249 | 0.173442868 | 0.168137679 |
| 0.204793667 | 0.033290236 | 0.006068329 | 0.157492435 |
| 0.00625907  | 0.107589247 | 0.050157839 | 0.103633147 |
| 0.097875857 | 0.060355426 | 0.137748937 | 0.10497495  |
| 0.116202486 | 0.078419009 | 0.055166981 | 0.120911492 |
| 0.102568147 | 0.046628092 | 0.038217272 | 0.11777762  |
| 0.044559446 | 0.035785812 | 0.075340579 | 0.017293758 |
| 0.04300104  | 0.063183294 | 0.004572403 | 0.023453448 |
| 0.111556771 | 0.127372252 | 0.170492132 | 0.037389975 |
| 0.084350273 | 0.020105424 | 0.157706413 | 0.108548893 |
| 0.108535471 | 0.101397563 | 0.114949507 | 0.067602799 |
| 0.115637595 | 0.127578501 | 0.072330506 | 0.0891394   |
| 0.08447675  | 0.106541654 | 0.076902033 | 0.06311463  |
| 0.181596853 | 0.041418086 | 0.105822373 | 0.131010322 |
| 0.145327487 | 0.074860865 | 0.003175315 | 0.001437403 |
| 0.024589489 | 0.152128067 | 0.094093884 | 0.115260036 |
| 0.037579054 | 0.113366013 | 0.000873866 | 0.129651768 |
| 0.136400935 | 0.056738418 | 0.033183882 | 0.121579146 |
| 0.106054161 | 0.126423785 | 0.046212452 | 0.134111995 |
| 0.113411545 | 0.105950746 | 0.047772976 | 0.175238489 |
| 0.152538915 | 0.100244838 | 0.118349731 | 0.102624637 |
| 0.201863234 | 0.142593583 | 0.201326539 | 0.056558905 |
| 0.00425096  | 0.052796974 | 0.025229611 | 0.018681805 |
| 0.054139412 | 0.077605224 | 0.119032487 | 0.166080005 |
| 0.153566745 | 0.055436902 | 0.048450881 | 0.106255725 |
| 0.154476834 | 0.158297454 | 0.005702222 | 0.001323287 |
| 0.001849693 | 0.0278756   | 0.107068041 | 0.090750717 |
| 0.123879428 | 0.026930297 | 0.063778813 | 0.036718392 |
| 0.039212042 | 0.11439088  | 0.127887145 | 0.205210968 |
| 0.098974444 | 0.108085531 | 0.069747588 | 0.168091572 |
| 0.037212287 | 0.0423844   | 0.164151375 | 0.116320716 |
| 0.032043823 | 0.069200181 | 0.051942369 | 0.174386181 |
| 0.005718664 | 0.178248671 | 0.11513108  | 0.061322335 |
| 0.006396502 | 0.075618545 | 0.049582407 | 0.145583929 |

|             |             |             |             |
|-------------|-------------|-------------|-------------|
| 0.096185223 | 0.18139055  | 0.156745755 | 0.010412539 |
| 0.186794476 | 0.136218875 | 0.177890762 | 0.165354544 |
| 0.157766496 | 0.219949593 | 0.033686934 | 0.100426308 |
| 0.027373911 | 0.114686042 | 0.100711294 | 0.00930374  |
| 0.054816904 | 0.030108373 | 0.102756136 | 0.010342816 |
| 0.076260777 | 0.090684574 | 0.004715839 | 0.042014846 |
| 0.006290601 | 0.137795897 | 0.182645148 | 0.144279794 |
| 0.023637168 | 0.046696813 | 0.111438715 | 0.111720444 |
| 0.096931676 | 0.212151149 | 0.106673349 | 0.054616304 |
| 0.081214736 | 0.006721639 | 0.148161309 | 0.083470215 |
| 0.06365595  | 0.172259123 | 0.049688754 | 0.129805466 |
| 0.079243832 | 0.100656152 | 0.120068832 | 0.108273651 |
| 0.022529749 | 0.069212241 | 0.153461542 | 0.070932658 |
| 0.13699683  | 0.205653117 | 0.055801636 | 0.053139921 |
| 0.192275693 | 0.050282765 | 0.01143745  | 0.004990466 |
| 0.037851565 | 0.086230853 | 0.09893964  | 0.178764271 |
| 0.081779506 | 0.084224731 | 0.019120938 | 0.050977578 |
| 0.132335798 | 0.085042079 | 0.016674171 | 0.129126644 |
| 0.115490391 | 0.120714264 | 0.119158962 | 0.126656654 |
| 0.013402698 | 0.157260163 | 0.143470543 | 0.172731611 |
| 0.118184542 | 0.122505517 | 0.113825658 | 0.012722883 |
| 0.012602432 | 0.066528301 | 0.163485406 | 0.118860287 |
| 0.232888371 | 0.035528963 | 0.016191665 | 0.16288914  |
| 0.027524946 | 0.259251122 | 0.013281605 | 0.02591281  |
| 0.111960528 | 0.028027805 | 0.153274409 | 0.149392079 |
| 0.118706703 | 0.115687301 | 0.02304605  | 0.123025601 |
| 0.050697909 | 0.106278766 | 0.096224567 | 0.095662602 |
| 0.020991613 | 0.027092724 | 0.211826585 | 0.065213119 |
| 0.127181021 | 0.008200632 | 0.107214627 | 0.015873008 |
| 0.06066804  | 0.178298282 | 0.049753222 | 0.012251738 |
| 0.007633758 | 0.046655994 | 0.036912999 | 0.037983001 |
| 0.046854821 | 0.116776959 | 0.044531229 | 0.08061533  |
| 0.108254345 | 0.08702937  | 0.066697406 | 0.007732137 |
| 0.015067148 | 0.101867989 | 0.05908842  | 0.113290918 |
| 0.047366763 | 0.235890122 | 0.07454579  | 0.126385824 |
| 0.010445782 | 0.031801016 | 0.046159286 | 0.135405693 |
| 0.036421677 |             |             |             |

|             |             |             |             |
|-------------|-------------|-------------|-------------|
| HPCAL1      | 0.284378297 | 0.450201075 | 0.176331146 |
| 0.38713625  | 0.244251027 | 0.193701296 | 0.147075112 |
| 0.088697927 | 0.096606059 | 0.025652756 | 0.066374418 |
| 0.281059414 | 0.194563519 | 0.164242987 | 0.128430038 |
| 0.38880488  | 0.176005624 | 0.130564312 | 0.17954842  |
| 0.31286074  | 0.079427811 | 0.38071629  | 0.109133497 |
| 0.162776828 | 0.153280366 | 0.114911668 | 0.187104997 |
| 0.418231149 | 0.122543948 | 0.132618834 | 0.277022913 |
| 0.111934339 | 0.338292409 | 0.410349923 | 0.367801576 |
| 0.402857332 | 0.247681211 | 0.015434448 | 0.135006311 |
| 0.323925996 | 0.371158293 | 0.318236092 | 0.267374468 |
| 0.077145655 | 0.363593439 | 0.185919531 | 0.263072606 |
| 0.093123694 | 0.09116783  | 0.083983342 | 0.324974521 |
| 0.376744501 | 0.247693762 | 0.11031907  | 0.131679586 |
| 0.154299762 | 0.08618555  | 0.168269502 | 0.18219514  |
| 0.17114289  | 0.06397716  | 0.390443433 | 0.087369997 |
| 0.069245726 | 0.118211912 | 0.147720707 | 0.139907757 |

|             |             |             |             |
|-------------|-------------|-------------|-------------|
| 0.161831229 | 0.257959131 | 0.029406285 | 0.219450615 |
| 0.009000667 | 0.299145625 | 0.255468177 | 0.142280245 |
| 0.089572097 | 0.079243971 | 0.162925769 | 0.247385539 |
| 0.425458106 | 0.35115882  | 0.48232403  | 0.461600534 |
| 0.20683352  | 0.182911035 | 0.198647708 | 0.178412367 |
| 0.351276055 | 0.150996541 | 0.117838164 | 0.414413584 |
| 0.482959192 | 0.437907268 | 0.189145046 | 0.191686952 |
| 0.362510981 | 0.396439558 | 0.181543078 | 0.197283293 |
| 0.166589252 | 0.072601567 | 0.349610429 | 0.471840082 |
| 0.291232576 | 0.169836077 | 0.174362041 | 0.330462213 |
| 0.091832066 | 0.133791467 | 0.310765439 | 0.130805521 |
| 0.445301606 | 0.038934125 | 0.18754474  | 0.217556904 |
| 0.130369047 | 0.344808333 | 0.43677446  | 0.158652104 |
| 0.209914613 | 0.064670743 | 0.130436271 | 0.059328009 |
| 0.182237405 | 0.109285089 | 0.347143889 | 0.445435576 |
| 0.11805994  | 0.189035492 | 0.153922251 | 0.013966589 |
| 0.074475128 | 0.123462989 | 0.345005021 | 0.149898079 |
| 0.322030545 | 0.273511028 | 0.191744862 | 0.254037792 |
| 0.297039674 | 0.470347245 | 0.026396769 | 0.096062025 |
| 0.239789433 | 0.123808489 | 0.213706015 | 0.258070942 |
| 0.227022493 | 0.096829942 | 0.140369326 | 0.481238116 |
| 0.324961106 | 0.117405852 | 0.107955492 | 0.387793549 |
| 0.162507951 | 0.261406655 | 0.120128206 | 0.199079615 |
| 0.074201892 | 0.380796736 | 0.07035387  | 0.125741877 |
| 0.139556704 | 0.165805399 | 0.015779053 | 0.114852173 |
| 0.168316604 | 0.383071509 | 0.329585126 | 0.118760182 |
| 0.201412197 | 0.336446282 | 0.112384956 | 0.342180324 |
| 0.039110633 | 0.073327056 | 0.077515476 | 0.469263878 |
| 0.14538545  | 0.450235016 | 0.188229642 | 0.180872832 |
| 0.226750568 | 0.407350717 | 0.003005644 | 0.384582476 |
| 0.438010915 | 0.087655096 | 0.301152993 | 0.270498675 |
| 0.159602737 | 0.432624474 | 0.019388952 | 0.371700706 |
| 0.202130567 | 0.096597513 | 0.48981737  | 0.183742915 |
| 0.362752627 | 0.090535657 | 0.134575952 | 0.373563458 |
| 0.328978938 | 0.020018025 | 0.093116989 | 0.294747561 |
| 0.0565655   | 0.064844006 | 0.302570043 | 0.320879785 |
| 0.253566315 | 0.378785025 | 0.480769836 | 0.157306145 |
| 0.249236334 | 0.143817643 | 0.031418977 | 0.211230471 |
| 0.339686986 | 0.133799666 | 0.348761702 | 0.154475121 |
| 0.142750953 | 0.403206319 | 0.314410658 | 0.074746484 |
| 0.077949767 | 0.1394681   | 0.047215462 | 0.204451975 |
| 0.282974822 | 0.13570507  | 0.158544174 | 0.109636017 |
| 0.122081907 | 0.47749555  | 0.138981822 | 0.139165816 |
| 0.099520757 | 0.250092713 | 0.158716748 | 0.175968134 |
| 0.205173665 | 0.157185791 | 0.182011797 | 0.173335986 |
| 0.053381026 | 0.144520051 | 0.022162758 | 0.164414303 |
| 0.175974812 | 0.192616082 | 0.170274313 | 0.257843297 |
| 0.167578712 | 0.169241135 | 1           | 0.147539935 |
| 0.144535396 | 0.048775202 | 0.438207564 | 0.330237339 |
| 0.202906703 | 0.136531668 | 0.078572872 | 0.144698391 |
| 0.44450808  | 0.13791752  | 0.073104673 | 0.404298326 |
| 0.044671071 | 0.449197782 | 0.199636802 | 0.163934536 |
| 0.215561995 | 0.206676552 | 0.441609772 | 0.047142879 |
| 0.184226555 | 0.389428788 | 0.190513912 | 0.182384489 |

|             |             |             |             |
|-------------|-------------|-------------|-------------|
| 0.314401514 | 0.296833278 | 0.062072054 | 0.276863968 |
| 0.277252207 | 0.080294681 | 0.463041944 | 0.158314121 |
| 0.055855844 | 0.352355491 | 0.34639669  | 0.114186182 |
| 0.116859272 | 0.191348032 | 0.044925281 | 0.267929406 |
| 0.469943187 | 0.41159662  | 0.339971812 | 0.146046822 |
| 0.086130277 | 0.054781179 | 0.162818269 | 0.196342994 |
| 0.3912562   | 0.453253477 | 0.190429766 | 0.232296674 |
| 0.201199629 | 0.181055007 | 0.047168471 | 0.471965716 |
| 0.095281867 | 0.415292248 | 0.025156248 | 0.366045221 |
| 0.395558527 | 0.102322236 | 0.137010044 | 0.161172726 |
| 0.303847745 | 0.076236302 | 0.12402708  | 0.411772987 |
| 0.361199164 | 0.183031675 | 0.179060833 | 0.300396301 |
| 0.034669519 | 0.054526021 | 0.241250685 | 0.123469684 |
| 0.167114856 | 0.166791364 | 0.050852115 | 0.123474719 |
| 0.094750143 | 0.38070458  | 0.423175676 | 0.095539688 |
| 0.173604313 | 0.1063835   | 0.30995556  | 0.072707911 |
| 0.403891794 | 0.408074166 | 0.420376067 | 0.113011613 |
| 0.343459412 | 0.434725686 | 0.24154298  | 0.104795895 |
| 0.052329104 | 0.41912564  | 0.247192972 | 0.054345177 |
| 0.455649198 | 0.07620389  | 0.05978926  | 0.422297378 |
| 0.148520868 | 0.309416772 | 0.006347829 | 0.034723171 |
| 0.061364277 | 0.436035882 | 0.375954212 | 0.260137086 |
| 0.08666316  | 0.237816728 | 0.005523448 | 0.457722962 |
| 0.420422472 | 0.050976551 | 0.140043135 | 0.35644494  |
| 0.345973255 | 0.437695015 | 0.179044489 | 0.41984145  |
| 0.287126317 | 0.401554383 | 0.167995042 | 0.229681527 |
| 0.39589994  | 0.405897071 | 0.323682189 | 0.370610384 |
| 0.441697914 | 0.350452665 | 0.234807786 | 0.04213094  |
| 0.095780956 | 0.091016845 | 0.129930659 | 0.089762352 |
| 0.155708821 | 0.163601646 | 0.409836801 | 0.444838918 |
| 0.453237194 | 0.023004644 | 0.097490767 | 0.339904665 |
| 0.389523648 | 0.436928015 | 0.025643936 | 0.009257598 |
| 0.011735812 | 0.06905689  | 0.203258055 | 0.181050298 |
| 0.43138699  | 0.098053485 | 0.022468081 | 0.048345409 |
| 0.168507532 | 0.305330411 | 0.426700246 | 0.351745385 |
| 0.354595084 | 0.107188474 | 0.155947115 | 0.343466527 |
| 0.116480852 | 0.168151458 | 0.465995633 | 0.386719036 |
| 0.059759557 | 0.17201474  | 0.1394752   | 0.462305785 |
| 0.056070206 | 0.250702491 | 0.296355772 | 0.204677278 |
| 0.019984199 | 0.119165929 | 0.099991421 | 0.393664065 |
| 0.387061581 | 0.150864525 | 0.104454292 | 0.05651409  |
| 0.143623338 | 0.415834915 | 0.184749597 | 0.487546972 |
| 0.388936574 | 0.44339981  | 0.097076245 | 0.388427848 |
| 0.076816987 | 0.394755165 | 0.208265817 | 0.044116453 |
| 0.162919308 | 0.032575264 | 0.381884109 | 0.118675984 |
| 0.132076561 | 0.254990329 | 0.118310141 | 0.042655777 |
| 0.103813982 | 0.105018384 | 0.471641104 | 0.438314597 |
| 0.055020747 | 0.134051731 | 0.191665809 | 0.280490572 |
| 0.137344297 | 0.408060168 | 0.397527711 | 0.168808081 |
| 0.092320874 | 0.082278575 | 0.320680429 | 0.240764378 |
| 0.114017278 | 0.48050425  | 0.191291199 | 0.460538569 |
| 0.275392018 | 0.37624343  | 0.408685577 | 0.219487078 |
| 0.168766298 | 0.204832869 | 0.273718389 | 0.053003949 |
| 0.231105251 | 0.450407476 | 0.14588594  | 0.188939451 |



|             |             |             |             |
|-------------|-------------|-------------|-------------|
| 0.215985713 | 0.198316244 | 0.043160309 | 0.062062009 |
| 0.150728039 | 0.160343939 | 0.149227851 | 0.427232149 |
| 0.222115253 | 0.25690609  | 0.037533874 | 0.101055604 |
| 0.459068885 | 0.339319934 | 0.094562014 | 0.313666416 |
| 0.153592002 | 0.236036696 | 0.379310258 | 0.388307384 |
| 0.13304288  | 0.395328852 | 0.350043025 | 0.285287181 |
| 0.344360771 | 0.167253562 | 0.425724954 | 0.041719878 |
| 0.114590667 | 0.22743035  | 0.146319624 | 0.120997959 |
| 0.161957986 | 0.0606913   | 0.14047154  | 0.368772647 |
| 0.154043764 | 0.331070081 | 0.104326436 | 0.096654426 |
| 0.210604783 | 0.116015443 | 0.257739051 | 0.138282837 |
| 0.13235758  | 0.407408513 | 0.029539481 | 0.094890934 |
| 0.170365024 | 0.366389426 | 0.226804148 | 0.192855709 |
| 0.171771371 | 0.116625374 | 0.223006081 | 0.112551913 |
| 0.14763715  | 0.143468083 | 0.365113597 | 0.046431507 |
| 0.041383836 | 0.479288107 | 0.13791784  | 0.03679029  |
| 0.063370137 | 0.187121096 | 0.140187163 | 0.164862317 |
| 0.05057289  | 0.414476618 | 0.122904342 | 0.237573417 |
| 0.190761807 | 0.08955261  | 0.242741928 | 0.06036889  |
| 0.060322797 | 0.35075688  | 0.220462859 | 0.423704099 |
| 0.165147104 | 0.422046614 | 0.314738986 | 0.350086507 |
| 0.085514069 | 0.152737083 | 0.053949129 | 0.38288415  |
| 0.162680386 |             |             |             |

|             |             |             |             |
|-------------|-------------|-------------|-------------|
| HPSE        | 0.287553008 | 0.322668571 | 0.237224702 |
| 0.260147893 | 0.212589056 | 0.128708888 | 0.072617002 |
| 0.02646713  | 0.047353857 | 0.000967322 | 0.013697108 |
| 0.247872109 | 0.030842106 | 0.033161349 | 0.058343465 |
| 0.352496785 | 0.052829735 | 0.125939096 | 0.124837639 |
| 0.251404126 | 0.012993947 | 0.29589953  | 0.031038221 |
| 0.132861459 | 0.073020965 | 0.049237148 | 0.155833516 |
| 0.303903178 | 0.062434553 | 0.063852031 | 0.184716707 |
| 0.070326136 | 0.273200369 | 0.307441528 | 0.262552887 |
| 0.298357823 | 0.255870972 | 0.006995928 | 0.046460949 |
| 0.270874944 | 0.330600457 | 0.245122456 | 0.169081986 |
| 0.016910513 | 0.248657663 | 0.111180734 | 0.310035081 |
| 0.0342283   | 0.018496485 | 0.033481741 | 0.233844684 |
| 0.246654298 | 0.189627033 | 0.048380254 | 0.047087103 |
| 0.026049947 | 0.023885421 | 0.059904358 | 0.110010072 |
| 0.090002662 | 0.016592014 | 0.277476355 | 0.025524918 |
| 0.027965286 | 0.064578922 | 0.082020932 | 0.071383435 |
| 0.149967054 | 0.192989598 | 0.010702314 | 0.241583494 |
| 0.000459007 | 0.248735837 | 0.293451623 | 0.149765455 |
| 0.051454194 | 0.006107649 | 0.112225439 | 0.148519617 |
| 0.323574268 | 0.307531877 | 0.374022874 | 0.379960607 |
| 0.042347697 | 0.206636602 | 0.251806999 | 0.059492997 |
| 0.290269033 | 0.051068493 | 0.03049876  | 0.357784224 |
| 0.376491457 | 0.316394796 | 0.073381205 | 0.253989612 |
| 0.229693038 | 0.281258229 | 0.148651193 | 0.160857613 |
| 0.100374723 | 0.079224848 | 0.243968353 | 0.351353347 |
| 0.215220732 | 0.215286472 | 0.125469782 | 0.21542585  |
| 0.051924699 | 0.044898738 | 0.215756187 | 0.037187399 |
| 0.331426514 | 0.012506777 | 0.182834477 | 0.124577941 |
| 0.083945951 | 0.279197145 | 0.333880593 | 0.087208786 |
| 0.208206087 | 0.011810881 | 0.064652953 | 0.040644608 |

|             |             |             |             |
|-------------|-------------|-------------|-------------|
| 0.040872255 | 0.09143892  | 0.249415562 | 0.279491817 |
| 0.0252665   | 0.070334384 | 0.088042263 | 0.008435666 |
| 0.029159881 | 0.105419159 | 0.255452253 | 0.152946012 |
| 0.300315746 | 0.279177204 | 0.088619926 | 0.183403669 |
| 0.254993451 | 0.374768138 | 0.003383528 | 0.036433695 |
| 0.169748652 | 0.099704819 | 0.175301449 | 0.190994006 |
| 0.176668849 | 0.030933861 | 0.05458107  | 0.369981209 |
| 0.221077104 | 0.046770811 | 0.080476594 | 0.325173341 |
| 0.039705407 | 0.250718723 | 0.04716096  | 0.053201842 |
| 0.012393653 | 0.298596434 | 0.047494809 | 0.103657458 |
| 0.070229598 | 0.047651536 | 0.016967457 | 0.061471104 |
| 0.031745194 | 0.239035748 | 0.255718665 | 0.073370576 |
| 0.084400149 | 0.28551911  | 0.081479685 | 0.191460376 |
| 0.005639345 | 0.030744506 | 0.055981564 | 0.31980647  |
| 0.075411271 | 0.381655804 | 0.08416876  | 0.154413574 |
| 0.221548954 | 0.351804761 | 0.009528613 | 0.27075522  |
| 0.333206025 | 0.052335628 | 0.164479954 | 0.279251886 |
| 0.18626482  | 0.295796976 | 0.006574667 | 0.28859311  |
| 0.151929138 | 0.059218694 | 0.386497433 | 0.110639377 |
| 0.276295951 | 0.038931922 | 0.055585321 | 0.359285776 |
| 0.234588425 | 0.004023771 | 0.040753608 | 0.206416947 |
| 0.04865738  | 0.012021853 | 0.285422842 | 0.246274216 |
| 0.204713494 | 0.373150396 | 0.377037864 | 0.170611396 |
| 0.187585588 | 0.071802981 | 0.02119644  | 0.26081254  |
| 0.340176327 | 0.058463698 | 0.239441373 | 0.046892998 |
| 0.101151232 | 0.283299714 | 0.262966339 | 0.035409606 |
| 0.027834273 | 0.092944137 | 0.004054071 | 0.194428238 |
| 0.283300457 | 0.016535923 | 0.190633653 | 0.073332305 |
| 0.060892759 | 0.348611477 | 0.154737579 | 0.178269656 |
| 0.112053211 | 0.121527704 | 0.118187041 | 0.023454379 |
| 0.027486813 | 0.068553003 | 0.137709155 | 0.126678309 |
| 0.007164773 | 0.043530459 | 0.05364285  | 0.059327378 |
| 0.014156001 | 0.04506274  | 0.041696159 | 0.180142252 |
| 0.0333774   | 0.016686178 | 0.147539935 | 1           |
| 0.082385344 | 0.027450908 | 0.318481957 | 0.298314075 |
| 0.131633314 | 0.052725676 | 0.044596582 | 0.027475946 |
| 0.287537158 | 0.069383429 | 0.040763773 | 0.252264565 |
| 0.025529633 | 0.384039801 | 0.035030162 | 0.092419902 |
| 0.106259486 | 0.112039551 | 0.345484647 | 0.013147608 |
| 0.158367299 | 0.248477053 | 0.242791232 | 0.10765099  |
| 0.176579338 | 0.225182552 | 0.010412799 | 0.22265114  |
| 0.185437443 | 0.027228961 | 0.338469203 | 0.059446555 |
| 0.039220761 | 0.335426547 | 0.267276228 | 0.092448247 |
| 0.083206165 | 0.093853516 | 0.007804517 | 0.251906666 |
| 0.335043342 | 0.312547882 | 0.229807817 | 0.178424922 |
| 0.018903809 | 0.001983303 | 0.171151622 | 0.248455298 |
| 0.274984824 | 0.34905753  | 0.179221916 | 0.146589208 |
| 0.153667846 | 0.109143246 | 0.014013348 | 0.338203928 |
| 0.112176264 | 0.319643296 | 0.013661536 | 0.347618142 |
| 0.289481597 | 0.05320202  | 0.06626645  | 0.096376271 |
| 0.178439812 | 0.031213837 | 0.071583058 | 0.282292855 |
| 0.295512395 | 0.136137511 | 0.114159296 | 0.274545492 |
| 0.004926376 | 0.011753995 | 0.289141763 | 0.130090047 |
| 0.092245169 | 0.106279372 | 0.065439277 | 0.048571547 |

|             |             |             |             |
|-------------|-------------|-------------|-------------|
| 0.015544183 | 0.23800262  | 0.34473208  | 0.045375192 |
| 0.086364052 | 0.057151622 | 0.310183314 | 0.032163148 |
| 0.357968701 | 0.343665243 | 0.296905396 | 0.05073672  |
| 0.270897962 | 0.321318619 | 0.2229573   | 0.092545868 |
| 0.0431486   | 0.320338179 | 0.215008223 | 0.008542968 |
| 0.338926586 | 0.038165425 | 0.002858469 | 0.297035634 |
| 0.101287526 | 0.22144568  | 0.002610812 | 0.08370298  |
| 0.068566332 | 0.391771488 | 0.271585347 | 0.194140916 |
| 0.024480477 | 0.235682139 | 0.023735448 | 0.371223258 |
| 0.269635154 | 0.026813749 | 0.092144806 | 0.249799718 |
| 0.284485859 | 0.318418643 | 0.195149361 | 0.324942282 |
| 0.214868221 | 0.289432669 | 0.028263349 | 0.214159038 |
| 0.253909493 | 0.33210175  | 0.250962923 | 0.277216914 |
| 0.293560996 | 0.336437222 | 0.166036856 | 0.008217872 |
| 0.113912639 | 0.037854354 | 0.044307943 | 0.036888698 |
| 0.110906972 | 0.07070488  | 0.316274641 | 0.36305674  |
| 0.334159274 | 0.017075385 | 0.021969773 | 0.244260784 |
| 0.257337617 | 0.333603955 | 0.047196886 | 0.009795185 |
| 0.009956461 | 0.020633796 | 0.152226166 | 0.211159647 |
| 0.341217988 | 0.013724969 | 0.007499366 | 0.00839658  |
| 0.057095777 | 0.311495096 | 0.293682851 | 0.279501152 |
| 0.35304038  | 0.057577968 | 0.025790249 | 0.29186314  |
| 0.05159352  | 0.141306208 | 0.335288492 | 0.25455089  |
| 0.052043567 | 0.205494442 | 0.129362823 | 0.33663108  |
| 0.066698565 | 0.234976468 | 0.244814677 | 0.04113407  |
| 0.030422526 | 0.079188549 | 0.063618524 | 0.368137933 |
| 0.287010012 | 0.017159106 | 0.013602222 | 0.009347819 |
| 0.025513391 | 0.350870119 | 0.035208274 | 0.373704678 |
| 0.271310095 | 0.327601253 | 0.064614931 | 0.289518463 |
| 0.021222243 | 0.261768805 | 0.217632879 | 0.007822471 |
| 0.130516626 | 0.019340172 | 0.30029818  | 0.046684564 |
| 0.051182402 | 0.210848705 | 0.114213966 | 0.035984049 |
| 0.12447287  | 0.044996891 | 0.350754682 | 0.385093614 |
| 0.05912141  | 0.072234105 | 0.226212881 | 0.281025367 |
| 0.075198228 | 0.263547392 | 0.276587828 | 0.115452286 |
| 0.020323637 | 0.087359898 | 0.236692365 | 0.177357105 |
| 0.031524237 | 0.387280803 | 0.067986864 | 0.369694997 |
| 0.238673385 | 0.32783198  | 0.307970501 | 0.173455359 |
| 0.075738856 | 0.155126203 | 0.142264989 | 0.003950749 |
| 0.194523532 | 0.307856944 | 0.143750137 | 0.057491924 |
| 0.128438344 | 0.255162216 | 0.033231014 | 0.030341725 |
| 0.213145426 | 0.085991384 | 0.029225184 | 0.362700165 |
| 0.187043239 | 0.18722352  | 0.014770546 | 0.054658133 |
| 0.341072959 | 0.277979007 | 0.027636782 | 0.221490344 |
| 0.137919535 | 0.217012656 | 0.342776044 | 0.354909558 |
| 0.086746246 | 0.254955945 | 0.237414912 | 0.142059263 |
| 0.208070634 | 0.139302893 | 0.309635106 | 0.009654491 |
| 0.057881816 | 0.209971619 | 0.020441929 | 0.114037561 |
| 0.07169518  | 0.040393505 | 0.102567106 | 0.325407974 |
| 0.106331678 | 0.211436662 | 0.032031792 | 0.055041353 |
| 0.246472918 | 0.144216058 | 0.23789707  | 0.042066392 |
| 0.022271713 | 0.275312667 | 0.014067476 | 0.052781481 |
| 0.110712312 | 0.297863357 | 0.194260981 | 0.132362396 |
| 0.095311969 | 0.101119203 | 0.161894386 | 0.058712883 |

|             |             |             |             |
|-------------|-------------|-------------|-------------|
| 0.041373611 | 0.064326532 | 0.285679917 | 0.01588931  |
| 0.006303642 | 0.372641419 | 0.113447794 | 0.049375987 |
| 0.073355569 | 0.191386651 | 0.076171883 | 0.053711672 |
| 0.052576958 | 0.316708904 | 0.060278463 | 0.247928008 |
| 0.145287896 | 0.044968508 | 0.174889284 | 0.029714394 |
| 0.044927897 | 0.240086572 | 0.279111274 | 0.313764125 |
| 0.229286337 | 0.297125089 | 0.232065525 | 0.243840291 |
| 0.065031168 | 0.209459842 | 0.013126068 | 0.306269765 |
| 0.097926147 |             |             |             |
| HSD17B12    | 0.108820485 | 0.127032155 | 0.110181501 |
| 0.181425077 | 0.135680309 | 0.0616153   | 0.108579708 |
| 0.02666335  | 0.109577355 | 0.021097443 | 0.076981628 |
| 0.128202539 | 0.061215133 | 0.039572429 | 0.030377337 |
| 0.239434553 | 0.133822578 | 0.06207693  | 0.186987114 |
| 0.15975814  | 0.032722303 | 0.249063585 | 0.092553108 |
| 0.08678466  | 0.183919    | 0.170680813 | 0.148188583 |
| 0.182010528 | 0.200900187 | 0.034785581 | 0.105642677 |
| 0.147722334 | 0.119178677 | 0.101354138 | 0.173939355 |
| 0.095014453 | 0.084989951 | 0.020555071 | 0.034444018 |
| 0.108008842 | 0.17569772  | 0.154207253 | 0.196784113 |
| 0.089391191 | 0.079075502 | 0.16078518  | 0.186822647 |
| 0.025512973 | 0.124429956 | 0.020194082 | 0.074813597 |
| 0.081158854 | 0.089244381 | 0.045699012 | 0.087139968 |
| 0.032678047 | 0.015937501 | 0.0480609   | 0.050381937 |
| 0.140028303 | 0.014891248 | 0.09304137  | 0.062133038 |
| 0.020995321 | 0.056424653 | 0.132086639 | 0.075214715 |
| 0.072661102 | 0.078875219 | 0.05140214  | 0.089300683 |
| 0.004144737 | 0.175178655 | 0.206652459 | 0.068649717 |
| 0.2201529   | 0.067775342 | 0.170781752 | 0.137301922 |
| 0.174110686 | 0.099851529 | 0.197747625 | 0.173967565 |
| 0.104719606 | 0.197615618 | 0.119946545 | 0.133947635 |
| 0.117217861 | 0.099638279 | 0.084115346 | 0.257018752 |
| 0.189980453 | 0.114596996 | 0.123071482 | 0.272854156 |
| 0.112062782 | 0.110741586 | 0.081700181 | 0.098739428 |
| 0.059789317 | 0.163965005 | 0.085142915 | 0.154933875 |
| 0.07944693  | 0.124234627 | 0.271223775 | 0.113791356 |
| 0.167317208 | 0.026179501 | 0.216657197 | 0.059246344 |
| 0.180150967 | 0.069915347 | 0.258211572 | 0.101293372 |
| 0.093508967 | 0.126367542 | 0.119667971 | 0.159413307 |
| 0.129271751 | 0.077950094 | 0.088697464 | 0.13006819  |
| 0.044576709 | 0.076247996 | 0.070797424 | 0.156989478 |
| 0.026702109 | 0.048933847 | 0.093277726 | 0.067463043 |
| 0.153994291 | 0.106794539 | 0.103709239 | 0.087384884 |
| 0.146960622 | 0.080341788 | 0.133623814 | 0.067035196 |
| 0.112554417 | 0.193525585 | 0.003757264 | 0.084948304 |
| 0.112431116 | 0.105358079 | 0.265842848 | 0.097443999 |
| 0.212572429 | 0.063689767 | 0.13815215  | 0.169462149 |
| 0.079947074 | 0.157245432 | 0.034465727 | 0.245811905 |
| 0.032921196 | 0.217269454 | 0.122099782 | 0.074007136 |
| 0.057531373 | 0.09386493  | 0.181347336 | 0.057889277 |
| 0.04385974  | 0.096340662 | 0.050217675 | 0.051174627 |
| 0.04098109  | 0.106178927 | 0.0684415   | 0.175926608 |
| 0.096788045 | 0.221247313 | 0.037878732 | 0.10669241  |
| 0.047848112 | 0.114625533 | 0.020317403 | 0.144411234 |

|             |             |             |             |
|-------------|-------------|-------------|-------------|
| 0.033194101 | 0.162585038 | 0.092274599 | 0.124672625 |
| 0.276123267 | 0.194822243 | 0.011947089 | 0.088185162 |
| 0.117834424 | 0.021041023 | 0.144721308 | 0.15948314  |
| 0.084970882 | 0.172611287 | 0.004866231 | 0.212374088 |
| 0.053806946 | 0.154629164 | 0.197483284 | 0.253693826 |
| 0.094155019 | 0.178006433 | 0.037329493 | 0.147528105 |
| 0.097217326 | 0.026232619 | 0.032186029 | 0.136754921 |
| 0.153521183 | 0.022909744 | 0.131005172 | 0.173833681 |
| 0.14891226  | 0.188932853 | 0.21524372  | 0.081083171 |
| 0.132085161 | 0.089888814 | 0.094349689 | 0.231835686 |
| 0.142196192 | 0.022960338 | 0.086956171 | 0.060386405 |
| 0.035937426 | 0.113902723 | 0.094592559 | 0.016400027 |
| 0.12200003  | 0.069453894 | 0.031309643 | 0.184116296 |
| 0.086941587 | 0.052470259 | 0.077829602 | 0.09670648  |
| 0.19682203  | 0.149889346 | 0.13927117  | 0.094604915 |
| 0.087572422 | 0.079548159 | 0.140508298 | 0.033435182 |
| 0.052085853 | 0.120331226 | 0.084220213 | 0.075531013 |
| 0.035983338 | 0.152470182 | 0.101612024 | 0.030013858 |
| 0.040516537 | 0.036629859 | 0.029419042 | 0.07072217  |
| 0.030082884 | 0.066020649 | 0.144535396 | 0.082385344 |
| 1           | 0.16215726  | 0.127511332 | 0.209397619 |
| 0.047558582 | 0.095307707 | 0.165196022 | 0.016016807 |
| 0.149160232 | 0.032077733 | 0.014864929 | 0.114738186 |
| 0.084083978 | 0.18100817  | 0.062069524 | 0.247771134 |
| 0.080134516 | 0.179029807 | 0.195667259 | 0.023152156 |
| 0.069526333 | 0.096848705 | 0.209359672 | 0.19641427  |
| 0.067110573 | 0.141473234 | 0.066643535 | 0.082226576 |
| 0.072031514 | 0.151672155 | 0.134794468 | 0.148416188 |
| 0.179920916 | 0.182598563 | 0.122533364 | 0.270010196 |
| 0.232504495 | 0.091085447 | 0.026916794 | 0.310402517 |
| 0.145133729 | 0.252982243 | 0.101894403 | 0.143745818 |
| 0.101662243 | 0.034776003 | 0.185187604 | 0.113521949 |
| 0.08770782  | 0.138100732 | 0.227498468 | 0.139764909 |
| 0.224464966 | 0.073122245 | 0.010230244 | 0.150122603 |
| 0.075110658 | 0.109563774 | 0.088015075 | 0.15397205  |
| 0.090428945 | 0.028297979 | 0.213643307 | 0.076176537 |
| 0.0746813   | 0.117404607 | 0.081663088 | 0.102966808 |
| 0.120905231 | 0.103880696 | 0.079590041 | 0.149535088 |
| 0.037626333 | 0.046477422 | 0.177354354 | 0.09179646  |
| 0.053582045 | 0.141876354 | 0.06012347  | 0.026840276 |
| 0.093616971 | 0.093541816 | 0.190691147 | 0.146626862 |
| 0.043899289 | 0.027811097 | 0.24373313  | 0.140587062 |
| 0.144528675 | 0.117133476 | 0.1022828   | 0.072991734 |
| 0.117739565 | 0.128400183 | 0.097649392 | 0.212860104 |
| 0.197188983 | 0.107560727 | 0.091518559 | 0.053006419 |
| 0.184200789 | 0.019312267 | 0.041601078 | 0.118498462 |
| 0.168788594 | 0.061429481 | 0.013755476 | 0.033476939 |
| 0.154760322 | 0.20748389  | 0.089738585 | 0.109074529 |
| 0.013028542 | 0.163148335 | 0.022172985 | 0.145895686 |
| 0.105330319 | 0.143429592 | 0.13871504  | 0.104885646 |
| 0.123692716 | 0.119259975 | 0.122109847 | 0.148801062 |
| 0.111690049 | 0.095710031 | 0.042179161 | 0.281524606 |
| 0.128029999 | 0.111155773 | 0.126754936 | 0.103984579 |
| 0.163798752 | 0.211951077 | 0.211709025 | 0.06274299  |

|             |             |             |             |
|-------------|-------------|-------------|-------------|
| 0.104722776 | 0.032050674 | 0.024097972 | 0.077743571 |
| 0.046417877 | 0.161100628 | 0.125435723 | 0.190233874 |
| 0.151004748 | 0.112175958 | 0.03759758  | 0.099557894 |
| 0.127351192 | 0.168463072 | 0.086321887 | 0.028022078 |
| 0.026064995 | 0.126587905 | 0.09805523  | 0.241416768 |
| 0.139601603 | 0.009606581 | 0.068953924 | 0.03273967  |
| 0.070952462 | 0.194771019 | 0.110092219 | 0.236466207 |
| 0.152452554 | 0.153322296 | 0.023007785 | 0.207189247 |
| 0.156844971 | 0.042768616 | 0.158666512 | 0.094831057 |
| 0.13328118  | 0.206263041 | 0.063801145 | 0.171785127 |
| 0.046026044 | 0.24779419  | 0.122637646 | 0.050667461 |
| 0.069530409 | 0.201477014 | 0.162617235 | 0.209026453 |
| 0.088331021 | 0.085292488 | 0.103411391 | 0.006500722 |
| 0.075004774 | 0.159823606 | 0.097170045 | 0.177991661 |
| 0.140414047 | 0.221383167 | 0.13804377  | 0.101732833 |
| 0.083283517 | 0.090011423 | 0.174311792 | 0.016202475 |
| 0.110957334 | 0.099466835 | 0.103192302 | 0.05223947  |
| 0.032408546 | 0.100778846 | 0.081782463 | 0.128592441 |
| 0.072167058 | 0.17741597  | 0.190146442 | 0.196258989 |
| 0.147010371 | 0.070792344 | 0.228901631 | 0.167891289 |
| 0.056963935 | 0.180430234 | 0.092573318 | 0.0481343   |
| 0.055884861 | 0.059501173 | 0.145775379 | 0.074077168 |
| 0.027990119 | 0.199078503 | 0.063386805 | 0.147610534 |
| 0.098492428 | 0.124691573 | 0.121322171 | 0.140831395 |
| 0.07832992  | 0.07317674  | 0.088020999 | 0.038932372 |
| 0.174472395 | 0.176468541 | 0.079204098 | 0.140075154 |
| 0.195471447 | 0.108787619 | 0.067944848 | 0.017443793 |
| 0.094698513 | 0.048697545 | 0.076635471 | 0.225289575 |
| 0.087777812 | 0.077466825 | 0.042360595 | 0.164258988 |
| 0.130083525 | 0.097442819 | 0.046215533 | 0.126544008 |
| 0.221605538 | 0.192634091 | 0.164277611 | 0.174808188 |
| 0.035683184 | 0.115697308 | 0.122118165 | 0.080185404 |
| 0.080937564 | 0.161014088 | 0.107294195 | 0.013055185 |
| 0.117397119 | 0.080164467 | 0.081058147 | 0.259677053 |
| 0.179872167 | 0.16470002  | 0.04673224  | 0.210915843 |
| 0.045720492 | 0.196068157 | 0.015637943 | 0.141601058 |
| 0.212928645 | 0.051595195 | 0.213040668 | 0.064461159 |
| 0.10261879  | 0.096740539 | 0.072229345 | 0.170779109 |
| 0.05398127  | 0.13473316  | 0.127632622 | 0.186556773 |
| 0.066026825 | 0.123771861 | 0.201595308 | 0.034711551 |
| 0.027640786 | 0.031741371 | 0.127491029 | 0.05818605  |
| 0.046901086 | 0.193928741 | 0.053608599 | 0.127045195 |
| 0.07186992  | 0.06500332  | 0.054561872 | 0.066790187 |
| 0.161505093 | 0.11674514  | 0.030851036 | 0.135728066 |
| 0.106109314 | 0.129266696 | 0.054831479 | 0.041389286 |
| 0.095141516 | 0.084022042 | 0.138482301 | 0.108707498 |
| 0.13119538  | 0.227056402 | 0.067134477 | 0.10139287  |
| 0.08235012  | 0.072330374 | 0.073670865 | 0.15079537  |
| 0.044803837 |             |             |             |
| HSPA1A      | 0.01606097  | 0.016394757 | 0.017535803 |
| 0.052701105 | 0.040732079 | 0.011787679 | 0.084350877 |
| 0.025102474 | 0.08174286  | 0.079372595 | 0.116286974 |
| 0.02365629  | 0.048040118 | 0.031226091 | 0.006674575 |
| 0.072583453 | 0.170523241 | 0.016897522 | 0.144839346 |

|             |             |             |             |
|-------------|-------------|-------------|-------------|
| 0.052121083 | 0.060126256 | 0.095430514 | 0.155368493 |
| 0.036160184 | 0.142380882 | 0.200504771 | 0.045592466 |
| 0.046587357 | 0.204976004 | 0.009334675 | 0.031263478 |
| 0.206239818 | 0.021958672 | 0.009568356 | 0.045115827 |
| 0.008402561 | 0.009768517 | 0.078363812 | 0.012245284 |
| 0.016204126 | 0.03043692  | 0.049923287 | 0.103664973 |
| 0.187641617 | 0.007348351 | 0.108859492 | 0.047697887 |
| 0.011323534 | 0.221539236 | 0.007093177 | 0.007846    |
| 0.007287881 | 0.015865199 | 0.027357058 | 0.078421087 |
| 0.021680635 | 0.009289006 | 0.014733988 | 0.011871967 |
| 0.119497902 | 0.010003488 | 0.00912355  | 0.065735898 |
| 0.018400287 | 0.037465177 | 0.156523761 | 0.050888998 |
| 0.016112368 | 0.013166174 | 0.199306164 | 0.011494201 |
| 0.028677535 | 0.06316279  | 0.06913809  | 0.009075673 |
| 0.317804666 | 0.188532334 | 0.147720798 | 0.066516383 |
| 0.03885671  | 0.010316931 | 0.037406774 | 0.02704567  |
| 0.115699397 | 0.105342032 | 0.023857113 | 0.139284575 |
| 0.016813227 | 0.086150311 | 0.070918194 | 0.081095925 |
| 0.033377969 | 0.012548457 | 0.103267384 | 0.134400035 |
| 0.018749356 | 0.015529394 | 0.013815067 | 0.026584208 |
| 0.009847842 | 0.180388855 | 0.009692336 | 0.023312757 |
| 0.010988471 | 0.026856539 | 0.209142431 | 0.028170914 |
| 0.270543817 | 0.006492231 | 0.106386405 | 0.069642535 |
| 0.039171003 | 0.142308975 | 0.158389738 | 0.046963517 |
| 0.07971905  | 0.020636363 | 0.012429754 | 0.142682365 |
| 0.037044102 | 0.202955098 | 0.029163071 | 0.292850124 |
| 0.023331068 | 0.030356592 | 0.005311357 | 0.033531522 |
| 0.0266666   | 0.021953589 | 0.062090632 | 0.246434364 |
| 0.303033816 | 0.0824445   | 0.015733223 | 0.029171423 |
| 0.031860138 | 0.006793316 | 0.06617287  | 0.009408888 |
| 0.015898921 | 0.03704827  | 0.000909194 | 0.145286245 |
| 0.025653633 | 0.095905038 | 0.199238126 | 0.02105377  |
| 0.086241925 | 0.09941458  | 0.180571072 | 0.026058922 |
| 0.010508046 | 0.225053657 | 0.009045459 | 0.079040806 |
| 0.015405711 | 0.07396678  | 0.19127665  | 0.059944155 |
| 0.161444854 | 0.007976962 | 0.274606719 | 0.018605993 |
| 0.007373025 | 0.110036357 | 0.166651599 | 0.028937893 |
| 0.020724777 | 0.01503463  | 0.004851196 | 0.220986031 |
| 0.064635647 | 0.07137876  | 0.010982528 | 0.01947343  |
| 0.099432813 | 0.231142205 | 0.004346425 | 0.022352383 |
| 0.007604547 | 0.023568111 | 0.061696424 | 0.050242199 |
| 0.146829677 | 0.04205327  | 0.008834918 | 0.008004033 |
| 0.012116776 | 0.003607553 | 0.051700196 | 0.039539792 |
| 0.012068612 | 0.03764812  | 0.001722881 | 0.07660805  |
| 0.007617466 | 0.222762117 | 0.037035465 | 0.213496187 |
| 0.010154143 | 0.247023559 | 0.018024903 | 0.018689038 |
| 0.012440105 | 0.068401248 | 0.014880087 | 0.045829236 |
| 0.249861327 | 0.036764959 | 0.026471511 | 0.052926817 |
| 0.041025249 | 0.037746081 | 0.048386487 | 0.011140558 |
| 0.035809987 | 0.070382727 | 0.254274962 | 0.087963967 |
| 0.02283215  | 0.004842545 | 0.01044329  | 0.052698597 |
| 0.005031319 | 0.014848476 | 0.009980922 | 0.005036369 |
| 0.201185981 | 0.035213189 | 0.057728961 | 0.059999948 |
| 0.008395366 | 0.094800246 | 0.010107111 | 0.121160907 |

|             |             |             |             |
|-------------|-------------|-------------|-------------|
| 0.244885981 | 0.021096427 | 0.052983095 | 0.017711684 |
| 0.033272644 | 0.023883007 | 0.098734787 | 0.028095347 |
| 0.040651231 | 0.128539708 | 0.017805388 | 0.018290046 |
| 0.107033299 | 0.212937561 | 0.14676134  | 0.006071895 |
| 0.052356017 | 0.012164908 | 0.008848163 | 0.011222282 |
| 0.022373872 | 0.109847378 | 0.048775202 | 0.027450908 |
| 0.16215726  | 1           | 0.016523036 | 0.06838032  |
| 0.007144197 | 0.108729939 | 0.305319919 | 0.004071489 |
| 0.02965169  | 0.005091055 | 0.002840129 | 0.019459706 |
| 0.160239099 | 0.032255061 | 0.056600389 | 0.22423672  |
| 0.024652079 | 0.13341712  | 0.044006345 | 0.013165572 |
| 0.016268192 | 0.013121697 | 0.095510832 | 0.115880256 |
| 0.008571475 | 0.040831195 | 0.181889426 | 0.010697391 |
| 0.01021615  | 0.296442243 | 0.016688228 | 0.180523712 |
| 0.315969596 | 0.037627082 | 0.017992639 | 0.296091981 |
| 0.220963722 | 0.037332047 | 0.063287792 | 0.161694172 |
| 0.020445453 | 0.08799814  | 0.016532467 | 0.0550236   |
| 0.210223891 | 0.136592974 | 0.104745045 | 0.018627123 |
| 0.008063979 | 0.016854739 | 0.16516906  | 0.044479407 |
| 0.170752508 | 0.017733804 | 0.00930538  | 0.021742805 |
| 0.037401889 | 0.011432171 | 0.285225215 | 0.023380981 |
| 0.007633678 | 0.009101887 | 0.184637201 | 0.034262122 |
| 0.011386943 | 0.196921168 | 0.082962799 | 0.011142415 |
| 0.01808796  | 0.030105039 | 0.015605736 | 0.03777431  |
| 0.123540668 | 0.142348206 | 0.039278925 | 0.033768615 |
| 0.013622499 | 0.091152874 | 0.022974058 | 0.011695628 |
| 0.197125593 | 0.012648778 | 0.044234829 | 0.14672927  |
| 0.00918341  | 0.008926762 | 0.091789028 | 0.259945502 |
| 0.017420439 | 0.012007406 | 0.010292602 | 0.098034342 |
| 0.019618764 | 0.015174204 | 0.012934788 | 0.23733116  |
| 0.29145099  | 0.010067833 | 0.016595686 | 0.102847124 |
| 0.040705351 | 0.005567096 | 0.137263386 | 0.016025586 |
| 0.152866915 | 0.004795003 | 0.011614795 | 0.010394019 |
| 0.204365426 | 0.042181025 | 0.008321387 | 0.032967267 |
| 0.003081417 | 0.063914984 | 0.03791069  | 0.018561328 |
| 0.012714721 | 0.252614416 | 0.115327789 | 0.014498259 |
| 0.015387235 | 0.014613001 | 0.02300265  | 0.020545129 |
| 0.01784671  | 0.00893619  | 0.042543113 | 0.155394622 |
| 0.022185157 | 0.010518149 | 0.025550289 | 0.012801964 |
| 0.03729312  | 0.057905431 | 0.129405496 | 0.182932889 |
| 0.038556346 | 0.019892708 | 0.003707746 | 0.065282525 |
| 0.009457323 | 0.133554084 | 0.015818278 | 0.040729624 |
| 0.021581287 | 0.278534612 | 0.051176689 | 0.013592738 |
| 0.025152885 | 0.033760891 | 0.140854258 | 0.018119836 |
| 0.00751744  | 0.125911292 | 0.038357207 | 0.122089546 |
| 0.018522858 | 0.003495426 | 0.264886183 | 0.08957479  |
| 0.043326539 | 0.043311151 | 0.012920081 | 0.098145489 |
| 0.024115512 | 0.250417426 | 0.010548446 | 0.073465735 |
| 0.155184234 | 0.005009606 | 0.024381671 | 0.011705008 |
| 0.253549194 | 0.099030527 | 0.015744128 | 0.033978684 |
| 0.012067287 | 0.13230912  | 0.0245954   | 0.028985785 |
| 0.132169392 | 0.208753595 | 0.183030715 | 0.05175402  |
| 0.007418354 | 0.137147379 | 0.199189623 | 0.003425689 |
| 0.103628201 | 0.028899295 | 0.120678393 | 0.02989497  |



|             |             |             |             |
|-------------|-------------|-------------|-------------|
| 0.02913102  | 0.065730185 | 0.190093267 | 0.010888104 |
| 0.14879981  | 0.008849348 | 0.050208973 | 0.006267853 |
| 0.054848972 | 0.297936208 | 0.010945846 | 0.016085294 |
| 0.012960698 | 0.022384699 | 0.023213319 | 0.263875284 |
| 0.016489748 | 0.280389407 | 0.038796328 | 0.035778377 |
| 0.222024506 | 0.055516792 | 0.107350514 | 0.04856551  |
| 0.024487233 | 0.048860979 | 0.009012865 | 0.005718031 |
| 0.109089609 | 0.033059218 | 0.042574281 | 0.011726112 |
| 0.025346295 | 0.037875638 | 0.02829042  | 0.018836581 |
| 0.015715898 | 0.017255448 | 0.01524557  | 0.049076175 |
| 0.052721421 | 0.013355541 | 0.023941206 | 0.095189413 |
| 0.073383224 | 0.04041633  | 0.024357608 | 0.086426242 |
| 0.112806456 | 0.016033239 | 0.159850604 | 0.005984159 |
| 0.013177782 | 0.01409432  | 0.130472995 | 0.062119929 |
| 0.020456268 | 0.011874084 | 0.148325346 | 0.177583708 |
| 0.016061767 | 0.011689532 | 0.037536215 | 0.027874266 |
| 0.185622785 | 0.070998108 | 0.027749966 | 0.03210036  |
| 0.008650408 | 0.018963434 | 0.02667318  | 0.019719348 |
| 0.011389013 | 0.10089386  | 0.01095942  | 0.017083529 |
| 0.079353764 | 0.012722285 | 0.127049402 | 0.26233132  |
| 0.201674058 | 0.256624047 | 0.007234532 | 0.064211737 |
| 0.005982684 | 0.087279578 | 0.005988534 | 0.164363752 |
| 0.097264638 | 0.008908156 | 0.095745127 | 0.052653755 |
| 0.159434792 | 0.009974899 | 0.150093973 | 0.289217422 |
| 0.01018181  | 0.019123929 | 0.025657986 | 0.10307236  |
| 0.018968124 | 0.124534774 | 0.128920987 | 0.011045276 |
| 0.007678568 | 0.00781031  | 0.017455352 | 0.092995128 |
| 0.194123614 | 0.038388193 | 0.009930977 | 0.212172413 |
| 0.09200787  | 0.009785915 | 0.037664705 | 0.042041147 |
| 0.246785093 | 0.013054792 | 0.006877275 | 0.030706228 |
| 0.043176675 | 0.258922961 | 0.006293876 | 0.043866495 |
| 0.161268684 | 0.009294111 | 0.023195501 | 0.010819222 |
| 0.0354764   | 0.075701893 | 0.005802247 | 0.016211009 |
| 0.054407492 | 0.009134006 | 0.172666161 | 0.031627904 |
| 0.004921973 |             |             |             |
| HVCN1       | 0.474082639 | 0.518668958 | 0.443627773 |
| 0.478142547 | 0.477582377 | 0.445900494 | 0.253051525 |
| 0.227958433 | 0.10505188  | 0.006899853 | 0.028924975 |
| 0.485744054 | 0.244961143 | 0.322901111 | 0.397233165 |
| 0.466355628 | 0.150675601 | 0.395376478 | 0.277967024 |
| 0.464777624 | 0.118897734 | 0.447291457 | 0.110938657 |
| 0.318979284 | 0.118411401 | 0.081303711 | 0.304238377 |
| 0.491817804 | 0.093433726 | 0.4020614   | 0.448149487 |
| 0.109091909 | 0.492561497 | 0.528315794 | 0.486702077 |
| 0.522205373 | 0.455216412 | 0.01270779  | 0.362900209 |
| 0.47490166  | 0.498200005 | 0.464787643 | 0.379258233 |
| 0.052431849 | 0.501429785 | 0.290678925 | 0.441723574 |
| 0.281095606 | 0.036443338 | 0.300720157 | 0.455483591 |
| 0.491010841 | 0.496331359 | 0.274544073 | 0.195436404 |
| 0.244717684 | 0.285361156 | 0.310274957 | 0.391048212 |
| 0.266666184 | 0.204226155 | 0.493124642 | 0.114828508 |
| 0.181605796 | 0.296635932 | 0.16507599  | 0.30926421  |
| 0.384641608 | 0.452143039 | 0.021527655 | 0.453515483 |
| 0.003817818 | 0.439956653 | 0.414164583 | 0.35660217  |

|             |             |             |             |
|-------------|-------------|-------------|-------------|
| 0.047351966 | 0.025027098 | 0.193738108 | 0.397356262 |
| 0.502238753 | 0.461053653 | 0.511924048 | 0.509316059 |
| 0.203991925 | 0.32378897  | 0.433641118 | 0.199631679 |
| 0.493043536 | 0.217539643 | 0.129340809 | 0.466851695 |
| 0.512916133 | 0.522040059 | 0.228004709 | 0.289680823 |
| 0.491733297 | 0.489004496 | 0.487817671 | 0.484799885 |
| 0.400156661 | 0.054792278 | 0.47297022  | 0.510920079 |
| 0.457707074 | 0.34900863  | 0.171704192 | 0.472962644 |
| 0.066919562 | 0.417452462 | 0.40465595  | 0.173640567 |
| 0.503584633 | 0.023572156 | 0.234143605 | 0.419948985 |
| 0.24148081  | 0.498107854 | 0.512992282 | 0.222947548 |
| 0.449458667 | 0.022758474 | 0.160351857 | 0.036297286 |
| 0.376350296 | 0.15763052  | 0.504319442 | 0.507420301 |
| 0.283060585 | 0.431189552 | 0.312491042 | 0.002014506 |
| 0.029461789 | 0.200343447 | 0.492660169 | 0.412248624 |
| 0.486420241 | 0.432592982 | 0.274570219 | 0.459553494 |
| 0.495323349 | 0.511066122 | 0.077504247 | 0.115918758 |
| 0.483081809 | 0.201755832 | 0.272396354 | 0.502136164 |
| 0.349447902 | 0.139393776 | 0.148480374 | 0.511873091 |
| 0.452248726 | 0.100366839 | 0.388737066 | 0.462478482 |
| 0.397682333 | 0.393920792 | 0.125266208 | 0.322405717 |
| 0.062775937 | 0.488344083 | 0.030035707 | 0.388624003 |
| 0.322215375 | 0.162958233 | 0.012520618 | 0.315078405 |
| 0.348005598 | 0.496174539 | 0.488471361 | 0.122030756 |
| 0.369765453 | 0.45742147  | 0.383278887 | 0.49465326  |
| 0.014237183 | 0.052779158 | 0.338952629 | 0.510590301 |
| 0.356212489 | 0.504043559 | 0.34236522  | 0.337860061 |
| 0.316243222 | 0.498838331 | 0.003594008 | 0.509952484 |
| 0.524102133 | 0.363704409 | 0.456122189 | 0.463798848 |
| 0.429460595 | 0.504050806 | 0.050527031 | 0.46546679  |
| 0.423126101 | 0.090802077 | 0.512803149 | 0.182528451 |
| 0.472007294 | 0.048333543 | 0.379058941 | 0.487752168 |
| 0.487322392 | 0.010291814 | 0.283824214 | 0.449913564 |
| 0.028313678 | 0.1268404   | 0.484806578 | 0.467692352 |
| 0.44403759  | 0.494432034 | 0.506990965 | 0.410472087 |
| 0.483871308 | 0.27412328  | 0.01359289  | 0.351115613 |
| 0.490106721 | 0.439216698 | 0.46405373  | 0.286709943 |
| 0.404636691 | 0.492377791 | 0.48107622  | 0.256777764 |
| 0.053142871 | 0.372201571 | 0.026927793 | 0.383491243 |
| 0.454724723 | 0.146953558 | 0.45299841  | 0.15814925  |
| 0.078234379 | 0.508938655 | 0.19236424  | 0.287498502 |
| 0.138250039 | 0.468618973 | 0.293012884 | 0.289730101 |
| 0.251339506 | 0.18944609  | 0.401884516 | 0.436622239 |
| 0.049139051 | 0.108879096 | 0.014153524 | 0.430896497 |
| 0.168712474 | 0.401036933 | 0.403337534 | 0.47686453  |
| 0.38178813  | 0.13050766  | 0.438207564 | 0.318481957 |
| 0.127511332 | 0.016523036 | 1           | 0.455369599 |
| 0.405280464 | 0.183797271 | 0.045112637 | 0.398894307 |
| 0.510305791 | 0.394877966 | 0.331283136 | 0.496352984 |
| 0.031089769 | 0.509446401 | 0.294686386 | 0.139953144 |
| 0.425939401 | 0.303850834 | 0.500240072 | 0.076036419 |
| 0.453276897 | 0.4814723   | 0.34790254  | 0.214046528 |
| 0.449880006 | 0.477138319 | 0.037418395 | 0.468797223 |
| 0.46714766  | 0.03607961  | 0.513511998 | 0.138379682 |

|             |             |             |             |
|-------------|-------------|-------------|-------------|
| 0.022595279 | 0.485898548 | 0.500264457 | 0.08491898  |
| 0.087131563 | 0.397429489 | 0.061733269 | 0.326621162 |
| 0.507656668 | 0.460382222 | 0.497956079 | 0.236070175 |
| 0.049385857 | 0.012388383 | 0.225518949 | 0.442300802 |
| 0.522987874 | 0.498190818 | 0.293217548 | 0.416845276 |
| 0.278709998 | 0.385963337 | 0.180752978 | 0.510323605 |
| 0.207054831 | 0.518222369 | 0.007321094 | 0.493105519 |
| 0.521782763 | 0.354831368 | 0.091925107 | 0.372537889 |
| 0.461460012 | 0.056290706 | 0.234750334 | 0.501602327 |
| 0.494395724 | 0.382605872 | 0.412592572 | 0.477856666 |
| 0.021577916 | 0.053735101 | 0.440756621 | 0.199976014 |
| 0.44896471  | 0.249475978 | 0.054973065 | 0.38641595  |
| 0.052351313 | 0.480794939 | 0.500656181 | 0.072048949 |
| 0.41479597  | 0.369997491 | 0.420419392 | 0.043643891 |
| 0.491384354 | 0.492108194 | 0.529829855 | 0.193891523 |
| 0.497544321 | 0.497840137 | 0.458177498 | 0.086858715 |
| 0.018348616 | 0.519608502 | 0.465159899 | 0.027580904 |
| 0.509447935 | 0.299095949 | 0.016047262 | 0.493679193 |
| 0.217860592 | 0.46502393  | 0.005219509 | 0.088063386 |
| 0.04218516  | 0.498831431 | 0.493560559 | 0.446263592 |
| 0.315442008 | 0.417199136 | 0.00552816  | 0.502456487 |
| 0.493571079 | 0.015237226 | 0.154823835 | 0.500492625 |
| 0.483574967 | 0.527098474 | 0.361981571 | 0.502385139 |
| 0.481943521 | 0.508675237 | 0.285642701 | 0.30582172  |
| 0.503214122 | 0.487174846 | 0.48560497  | 0.476938057 |
| 0.509818931 | 0.471270155 | 0.327402609 | 0.020087832 |
| 0.158538481 | 0.266706789 | 0.378856921 | 0.103152321 |
| 0.392930114 | 0.1630246   | 0.492839087 | 0.508946317 |
| 0.508005171 | 0.005190013 | 0.188427873 | 0.498744406 |
| 0.491191085 | 0.503570495 | 0.0219043   | 0.006796944 |
| 0.008489221 | 0.022082764 | 0.422902996 | 0.269656742 |
| 0.504156936 | 0.304612083 | 0.005232299 | 0.057679495 |
| 0.327221292 | 0.444682083 | 0.504559268 | 0.431377133 |
| 0.491832114 | 0.0915466   | 0.347544376 | 0.451434053 |
| 0.078258101 | 0.395695467 | 0.512372315 | 0.482454123 |
| 0.043893605 | 0.278179919 | 0.424921833 | 0.509919744 |
| 0.078626788 | 0.355465548 | 0.490319379 | 0.379450158 |
| 0.014093951 | 0.090492398 | 0.075412651 | 0.487114602 |
| 0.510821272 | 0.092256078 | 0.038792043 | 0.180118418 |
| 0.147479487 | 0.506576066 | 0.194584486 | 0.514351224 |
| 0.500352672 | 0.488113238 | 0.080420348 | 0.490679668 |
| 0.047060311 | 0.497000018 | 0.379439302 | 0.078966961 |
| 0.318084591 | 0.013422343 | 0.472877447 | 0.191729882 |
| 0.391638484 | 0.460647476 | 0.231990608 | 0.017245285 |
| 0.201465207 | 0.058987474 | 0.511854335 | 0.503328842 |
| 0.034189265 | 0.28112391  | 0.334335884 | 0.456570761 |
| 0.349698804 | 0.493890271 | 0.516430404 | 0.4709938   |
| 0.106978807 | 0.147133918 | 0.467814298 | 0.462461138 |
| 0.290572788 | 0.511115722 | 0.353820797 | 0.508564833 |
| 0.474497864 | 0.489253219 | 0.49848648  | 0.411912995 |
| 0.260949756 | 0.464907139 | 0.446348668 | 0.026351926 |
| 0.40516666  | 0.510081549 | 0.414569014 | 0.181001212 |
| 0.297367793 | 0.433942087 | 0.05540149  | 0.210729572 |
| 0.369113897 | 0.378571001 | 0.172677052 | 0.485740446 |

|             |             |             |             |
|-------------|-------------|-------------|-------------|
| 0.450239361 | 0.46656639  | 0.047967211 | 0.071785401 |
| 0.534728593 | 0.470893432 | 0.179628715 | 0.493097356 |
| 0.190881863 | 0.397068533 | 0.501109711 | 0.494913691 |
| 0.422866354 | 0.506268703 | 0.490450602 | 0.461673384 |
| 0.462101943 | 0.306059595 | 0.531678779 | 0.114724614 |
| 0.097637095 | 0.472016348 | 0.11782432  | 0.101476338 |
| 0.16745603  | 0.029966734 | 0.337817372 | 0.473894296 |
| 0.421474361 | 0.437394788 | 0.379877065 | 0.093984649 |
| 0.359918156 | 0.417439059 | 0.401724942 | 0.247453168 |
| 0.095266974 | 0.50886628  | 0.010442839 | 0.061981629 |
| 0.429557998 | 0.503735603 | 0.436538528 | 0.271798613 |
| 0.333148361 | 0.149810525 | 0.343211403 | 0.36210904  |
| 0.391172409 | 0.404657178 | 0.501863194 | 0.041907471 |
| 0.024224269 | 0.512288216 | 0.435934841 | 0.021120351 |
| 0.096154656 | 0.445349142 | 0.32860994  | 0.285160339 |
| 0.022451737 | 0.489418563 | 0.407645296 | 0.475837361 |
| 0.408046515 | 0.074221477 | 0.410548488 | 0.103559922 |
| 0.068657464 | 0.460829075 | 0.442675599 | 0.513517842 |
| 0.383856266 | 0.47447014  | 0.464824519 | 0.498340123 |
| 0.134528123 | 0.42806171  | 0.034529885 | 0.497219843 |

0.464316465

| ICA1        | 0.353971459 | 0.467129935 | 0.318355665 |
|-------------|-------------|-------------|-------------|
| 0.396858474 | 0.354612558 | 0.253859646 | 0.267901074 |
| 0.235900368 | 0.153892727 | 0.016192304 | 0.044082513 |
| 0.323682712 | 0.196080267 | 0.254929261 | 0.243945505 |
| 0.430048891 | 0.207848801 | 0.352107507 | 0.330470423 |
| 0.371877843 | 0.148773846 | 0.374635895 | 0.202295327 |
| 0.308020062 | 0.165656152 | 0.148580676 | 0.269033169 |
| 0.462422205 | 0.169537245 | 0.213272994 | 0.337438442 |
| 0.227026097 | 0.397339426 | 0.431708961 | 0.328303808 |
| 0.4135368   | 0.309072243 | 0.042077686 | 0.230660022 |
| 0.398937515 | 0.373133545 | 0.374470109 | 0.346503105 |
| 0.113919424 | 0.394597308 | 0.29465376  | 0.360708282 |
| 0.222161883 | 0.082205035 | 0.196936214 | 0.373593654 |
| 0.371184778 | 0.277257177 | 0.267724098 | 0.226897905 |
| 0.146672774 | 0.190549384 | 0.182896038 | 0.236009989 |
| 0.292829747 | 0.146268899 | 0.39275266  | 0.144787622 |
| 0.161214956 | 0.309850613 | 0.255142517 | 0.300417779 |
| 0.283686991 | 0.322811516 | 0.085236864 | 0.267226891 |
| 0.006847902 | 0.368485814 | 0.377022686 | 0.216280163 |
| 0.127496938 | 0.053289101 | 0.284804332 | 0.317604608 |
| 0.47216676  | 0.407998048 | 0.47482584  | 0.460102306 |
| 0.230282863 | 0.37614352  | 0.304682617 | 0.25655415  |
| 0.404169313 | 0.226184582 | 0.188495594 | 0.427257055 |
| 0.475739607 | 0.440905531 | 0.280950374 | 0.339471778 |
| 0.349436106 | 0.435302044 | 0.301339511 | 0.333813272 |
| 0.237381499 | 0.139186347 | 0.366129915 | 0.471144    |
| 0.350557547 | 0.263851137 | 0.249495909 | 0.382356983 |
| 0.16629063  | 0.283869232 | 0.358003494 | 0.208649401 |
| 0.484188292 | 0.065912292 | 0.291494392 | 0.310909153 |
| 0.35522886  | 0.390517482 | 0.436344641 | 0.280716481 |
| 0.363213659 | 0.067661212 | 0.132744315 | 0.124831781 |
| 0.298364289 | 0.15435741  | 0.367491804 | 0.436560785 |
| 0.252396264 | 0.318208793 | 0.331382619 | 0.022480262 |

|             |             |             |             |
|-------------|-------------|-------------|-------------|
| 0.092094484 | 0.299512529 | 0.36472309  | 0.365356951 |
| 0.393126435 | 0.320742242 | 0.249740378 | 0.302279848 |
| 0.284235311 | 0.46768173  | 0.039084593 | 0.215514822 |
| 0.332541673 | 0.301513962 | 0.334714488 | 0.311954487 |
| 0.319786068 | 0.227405162 | 0.241314953 | 0.492332559 |
| 0.377149508 | 0.188345973 | 0.293714459 | 0.408557349 |
| 0.246896406 | 0.335307725 | 0.230269    | 0.293147527 |
| 0.122178432 | 0.388734529 | 0.094169362 | 0.320529026 |
| 0.185792897 | 0.187764028 | 0.066190184 | 0.267391645 |
| 0.254155806 | 0.354085292 | 0.358179617 | 0.239975712 |
| 0.320090204 | 0.35899022  | 0.260327891 | 0.303437252 |
| 0.024904079 | 0.151139593 | 0.212023736 | 0.462845654 |
| 0.184301094 | 0.477005937 | 0.369230341 | 0.360677503 |
| 0.348743287 | 0.448407887 | 0.010932529 | 0.404364165 |
| 0.442831834 | 0.207599583 | 0.316417897 | 0.360680963 |
| 0.256577896 | 0.435161126 | 0.041886721 | 0.394926279 |
| 0.262175149 | 0.207164306 | 0.502202277 | 0.246716953 |
| 0.397464596 | 0.112770241 | 0.280270521 | 0.371362636 |
| 0.30430005  | 0.027606025 | 0.19459493  | 0.339806371 |
| 0.093678188 | 0.142282679 | 0.378519188 | 0.349017623 |
| 0.3153993   | 0.425831459 | 0.500957895 | 0.241220231 |
| 0.348353472 | 0.32577092  | 0.064190483 | 0.354772299 |
| 0.396039757 | 0.239248904 | 0.383584663 | 0.304884752 |
| 0.21928552  | 0.422837587 | 0.335907347 | 0.139695623 |
| 0.120579251 | 0.3067394   | 0.051178613 | 0.329055421 |
| 0.333520949 | 0.162220382 | 0.265566701 | 0.271674103 |
| 0.160733575 | 0.477660951 | 0.212490641 | 0.222803997 |
| 0.143899571 | 0.271517028 | 0.350691534 | 0.187042671 |
| 0.171157969 | 0.270815422 | 0.293507064 | 0.310612772 |
| 0.093808994 | 0.182004256 | 0.064652951 | 0.217978251 |
| 0.123611573 | 0.220253164 | 0.203666304 | 0.294145192 |
| 0.279564129 | 0.150710039 | 0.330237339 | 0.298314075 |
| 0.209397619 | 0.06838032  | 0.455369599 | 1           |
| 0.25455919  | 0.265571431 | 0.134711743 | 0.194871825 |
| 0.436850532 | 0.18397551  | 0.193821971 | 0.409749999 |
| 0.102447782 | 0.477066238 | 0.238772525 | 0.212280642 |
| 0.281598203 | 0.312154767 | 0.47793941  | 0.07129968  |
| 0.306889382 | 0.406806186 | 0.387040212 | 0.252309635 |
| 0.327379452 | 0.349320127 | 0.094184425 | 0.329010542 |
| 0.310609867 | 0.102755906 | 0.464117245 | 0.212297338 |
| 0.08688871  | 0.364576651 | 0.323147413 | 0.18072635  |
| 0.18078207  | 0.267665545 | 0.102639373 | 0.349067174 |
| 0.470751283 | 0.400207946 | 0.33281703  | 0.280532167 |
| 0.106566105 | 0.022721256 | 0.294335588 | 0.315319736 |
| 0.41219752  | 0.449216455 | 0.36226664  | 0.293438924 |
| 0.335659083 | 0.266542357 | 0.151237031 | 0.461135023 |
| 0.286730276 | 0.44734949  | 0.044564309 | 0.365832859 |
| 0.402345566 | 0.216597526 | 0.151161109 | 0.278541452 |
| 0.327404067 | 0.133593634 | 0.334319254 | 0.419515173 |
| 0.402807334 | 0.315048874 | 0.279769734 | 0.3544122   |
| 0.05767866  | 0.114281928 | 0.340468811 | 0.206052224 |
| 0.290905797 | 0.309133604 | 0.068092966 | 0.299475365 |
| 0.103187476 | 0.388860875 | 0.458182914 | 0.126815072 |
| 0.199824328 | 0.283775169 | 0.375168237 | 0.120718562 |

|             |             |             |             |
|-------------|-------------|-------------|-------------|
| 0.391239721 | 0.431421523 | 0.435370231 | 0.293663703 |
| 0.366849028 | 0.417880518 | 0.24663286  | 0.199278702 |
| 0.072164361 | 0.427516311 | 0.319465514 | 0.052726744 |
| 0.476226494 | 0.168422634 | 0.03054114  | 0.451852104 |
| 0.302204822 | 0.345515857 | 0.015179238 | 0.110304442 |
| 0.127089829 | 0.457479581 | 0.391071017 | 0.33104118  |
| 0.147677412 | 0.385341764 | 0.023404888 | 0.474351774 |
| 0.418661128 | 0.058007484 | 0.225322497 | 0.342600147 |
| 0.314793253 | 0.471240563 | 0.258273181 | 0.389425801 |
| 0.277889602 | 0.401051853 | 0.250169135 | 0.335925215 |
| 0.394339852 | 0.405356025 | 0.380943463 | 0.417315547 |
| 0.445008332 | 0.372487669 | 0.335038474 | 0.056853793 |
| 0.167808424 | 0.219899161 | 0.175381398 | 0.108155033 |
| 0.233452319 | 0.213224874 | 0.443428217 | 0.470281357 |
| 0.433900991 | 0.035532186 | 0.216200884 | 0.351953868 |
| 0.429094999 | 0.48306716  | 0.087654175 | 0.019811607 |
| 0.018156049 | 0.042649676 | 0.331685786 | 0.339702654 |
| 0.445551817 | 0.13700421  | 0.032190318 | 0.110351997 |
| 0.331475546 | 0.31640738  | 0.428607799 | 0.388692501 |
| 0.391361725 | 0.198357138 | 0.186531813 | 0.406686643 |
| 0.132391211 | 0.232581728 | 0.446013511 | 0.40752124  |
| 0.13911674  | 0.339210327 | 0.330275586 | 0.482787137 |
| 0.067778942 | 0.369389744 | 0.319166008 | 0.27251567  |
| 0.060958167 | 0.178337505 | 0.147876959 | 0.442843804 |
| 0.392902083 | 0.113537874 | 0.073686993 | 0.115034122 |
| 0.174719379 | 0.455771267 | 0.236149963 | 0.496775281 |
| 0.419318491 | 0.463767027 | 0.160066928 | 0.415223931 |
| 0.090103914 | 0.396128427 | 0.301478402 | 0.059806903 |
| 0.374050088 | 0.070533356 | 0.39983533  | 0.112165237 |
| 0.268043957 | 0.334206475 | 0.20865218  | 0.069648262 |
| 0.183174618 | 0.141569931 | 0.469024352 | 0.442601832 |
| 0.113001996 | 0.330679912 | 0.379388477 | 0.376664669 |
| 0.258151207 | 0.38932177  | 0.414462189 | 0.233741721 |
| 0.160389109 | 0.173885589 | 0.383122532 | 0.292756902 |
| 0.256376939 | 0.48799715  | 0.249880018 | 0.481024399 |
| 0.341330763 | 0.439216328 | 0.417438768 | 0.330064989 |
| 0.241736817 | 0.297039326 | 0.271052863 | 0.050451741 |
| 0.38012107  | 0.436837153 | 0.344982738 | 0.190848276 |
| 0.288625056 | 0.275705101 | 0.150478078 | 0.184850614 |
| 0.233838841 | 0.223658418 | 0.216902292 | 0.475086167 |
| 0.316436312 | 0.305871348 | 0.123481781 | 0.137540206 |
| 0.481483571 | 0.397415083 | 0.206832541 | 0.329409219 |
| 0.306941481 | 0.33658201  | 0.40534557  | 0.399022681 |
| 0.296403967 | 0.381186043 | 0.393866265 | 0.277305642 |
| 0.367750109 | 0.338365959 | 0.440381884 | 0.133484467 |
| 0.142196854 | 0.28324998  | 0.146373289 | 0.205491628 |
| 0.247983204 | 0.09800877  | 0.207389742 | 0.406873783 |
| 0.242547284 | 0.350316475 | 0.245559054 | 0.185304566 |
| 0.367597475 | 0.297575051 | 0.38283223  | 0.234122059 |
| 0.145568821 | 0.408387321 | 0.037312716 | 0.158116218 |
| 0.263327286 | 0.370867349 | 0.276368427 | 0.340316589 |
| 0.247124938 | 0.245201067 | 0.34756248  | 0.23321815  |
| 0.185195793 | 0.289544981 | 0.368012418 | 0.101538638 |
| 0.072796761 | 0.495886651 | 0.295155746 | 0.088136366 |

|             |             |             |             |
|-------------|-------------|-------------|-------------|
| 0.160168362 | 0.266588446 | 0.359333736 | 0.24291143  |
| 0.081191741 | 0.40329909  | 0.211030639 | 0.34264906  |
| 0.335518605 | 0.186173617 | 0.30549197  | 0.170876751 |
| 0.180966609 | 0.387081206 | 0.315101375 | 0.425663869 |
| 0.352592251 | 0.414243879 | 0.361296409 | 0.365991339 |
| 0.228642816 | 0.270613588 | 0.094981507 | 0.441856952 |
| 0.238228796 |             |             |             |

| IDE         | 0.280712766 | 0.421557348 | 0.218932404 |
|-------------|-------------|-------------|-------------|
| 0.274661106 | 0.239399886 | 0.311745125 | 0.175962617 |
| 0.256443185 | 0.049176294 | 0.005499403 | 0.007439439 |
| 0.245055799 | 0.104769112 | 0.237425422 | 0.241436501 |
| 0.246338985 | 0.05696702  | 0.282554189 | 0.167394658 |
| 0.288310613 | 0.124449088 | 0.219539419 | 0.072620594 |
| 0.125650713 | 0.036735725 | 0.033577404 | 0.108172809 |
| 0.323756063 | 0.04001072  | 0.305513547 | 0.326082609 |
| 0.051680067 | 0.319132484 | 0.438353697 | 0.223894486 |
| 0.421911454 | 0.277791418 | 0.01588107  | 0.233291488 |
| 0.359244032 | 0.247286219 | 0.289925676 | 0.21158609  |
| 0.03229375  | 0.460918115 | 0.173001646 | 0.206652154 |
| 0.255435394 | 0.01272752  | 0.31022794  | 0.436815311 |
| 0.407155306 | 0.251052148 | 0.252703981 | 0.129482472 |
| 0.097273457 | 0.30803489  | 0.102896299 | 0.345719902 |
| 0.160251701 | 0.262037783 | 0.398263714 | 0.072106273 |
| 0.12193823  | 0.269793164 | 0.068383169 | 0.255711338 |
| 0.151865149 | 0.333242332 | 0.024304272 | 0.230913802 |
| 0.006590496 | 0.277145262 | 0.201986594 | 0.127566794 |
| 0.020856957 | 0.011944486 | 0.083175874 | 0.247669727 |
| 0.338187497 | 0.389115795 | 0.312525922 | 0.321370767 |
| 0.087833988 | 0.164668408 | 0.185371923 | 0.101711813 |
| 0.341007532 | 0.136649215 | 0.090526324 | 0.230637107 |
| 0.323426011 | 0.410655311 | 0.091092729 | 0.12336335  |
| 0.304401422 | 0.412812673 | 0.267977491 | 0.236649901 |
| 0.163040928 | 0.018804745 | 0.381112426 | 0.363519578 |
| 0.371118174 | 0.12710301  | 0.068362747 | 0.335435245 |
| 0.03463447  | 0.303055698 | 0.224164793 | 0.105354352 |
| 0.347116312 | 0.015544917 | 0.090116799 | 0.26514016  |
| 0.156751641 | 0.309547394 | 0.389077107 | 0.13882941  |
| 0.224658852 | 0.012722046 | 0.044430683 | 0.018315141 |
| 0.224020698 | 0.046682406 | 0.44220438  | 0.332920835 |
| 0.265163631 | 0.196074445 | 0.217000028 | 0.000268081 |
| 0.01083261  | 0.106634638 | 0.304314238 | 0.28346889  |
| 0.290649815 | 0.303067197 | 0.11484085  | 0.323489332 |
| 0.234069006 | 0.305461471 | 0.077061569 | 0.087622033 |
| 0.273981016 | 0.103182567 | 0.14256596  | 0.265421004 |
| 0.143299733 | 0.129416616 | 0.08836245  | 0.375507928 |
| 0.427585118 | 0.05999475  | 0.330025838 | 0.240186194 |
| 0.210742858 | 0.160643248 | 0.082782736 | 0.192225982 |
| 0.050573878 | 0.379885693 | 0.009630591 | 0.321503411 |
| 0.123338843 | 0.057161845 | 0.014404973 | 0.296701684 |
| 0.229224732 | 0.313940217 | 0.42389962  | 0.074377203 |
| 0.218518073 | 0.216567265 | 0.342757234 | 0.267683855 |
| 0.005214317 | 0.037385726 | 0.338697266 | 0.37573758  |
| 0.335536051 | 0.352413202 | 0.206824235 | 0.160196717 |
| 0.142452473 | 0.290027044 | 0.002669216 | 0.440787237 |

|             |             |             |             |
|-------------|-------------|-------------|-------------|
| 0.405531609 | 0.336846685 | 0.224675238 | 0.239125204 |
| 0.177561547 | 0.314366538 | 0.048473285 | 0.250442247 |
| 0.324913764 | 0.057622808 | 0.342801272 | 0.075018844 |
| 0.391449472 | 0.019951568 | 0.3009955   | 0.25397232  |
| 0.24106688  | 0.006486568 | 0.279916721 | 0.291395034 |
| 0.009244559 | 0.140093797 | 0.297657464 | 0.269037862 |
| 0.227259226 | 0.263694204 | 0.322549019 | 0.161968587 |
| 0.237817748 | 0.216554632 | 0.0077876   | 0.151243334 |
| 0.276634249 | 0.213481816 | 0.419743525 | 0.201286567 |
| 0.330980819 | 0.396180927 | 0.288814383 | 0.149184128 |
| 0.031655807 | 0.288385705 | 0.02600659  | 0.17369928  |
| 0.309481162 | 0.089743357 | 0.215000888 | 0.094039356 |
| 0.028832553 | 0.389746654 | 0.060712686 | 0.099155236 |
| 0.038535336 | 0.266830292 | 0.203133978 | 0.162065862 |
| 0.098261257 | 0.086958837 | 0.165274118 | 0.210298276 |
| 0.051307468 | 0.050412783 | 0.006010003 | 0.204931334 |
| 0.073162645 | 0.200605122 | 0.222008463 | 0.311146276 |
| 0.256222926 | 0.069840328 | 0.202906703 | 0.131633314 |
| 0.047558582 | 0.007144197 | 0.405280464 | 0.25455919  |
| 1           | 0.11406418  | 0.021934883 | 0.207141465 |
| 0.341172936 | 0.295865529 | 0.33151918  | 0.374665909 |
| 0.023294203 | 0.328012133 | 0.141782119 | 0.055185109 |
| 0.176814125 | 0.16118188  | 0.327046652 | 0.048830562 |
| 0.321007547 | 0.415126497 | 0.185167165 | 0.085428125 |
| 0.38640472  | 0.284389776 | 0.027193523 | 0.317044793 |
| 0.315853252 | 0.016860665 | 0.395270377 | 0.051748526 |
| 0.009509899 | 0.235286775 | 0.240916798 | 0.036320031 |
| 0.035148022 | 0.208313308 | 0.080447177 | 0.145927047 |
| 0.393623417 | 0.226886609 | 0.284178264 | 0.090190451 |
| 0.026672012 | 0.005163518 | 0.088595118 | 0.223044462 |
| 0.451551406 | 0.364095081 | 0.157908428 | 0.170132824 |
| 0.16004806  | 0.153325603 | 0.243449066 | 0.365522572 |
| 0.12318103  | 0.428768202 | 0.003927819 | 0.235784658 |
| 0.422908591 | 0.334866477 | 0.030756901 | 0.266276251 |
| 0.363577619 | 0.034065673 | 0.184708778 | 0.418152032 |
| 0.343915996 | 0.178474431 | 0.186542371 | 0.269566024 |
| 0.022522497 | 0.050290203 | 0.205736898 | 0.063642273 |
| 0.231605771 | 0.122032718 | 0.012697033 | 0.303039471 |
| 0.027263066 | 0.395298623 | 0.292673267 | 0.026914694 |
| 0.271808172 | 0.310928552 | 0.197296433 | 0.024785702 |
| 0.281409069 | 0.381624713 | 0.441858355 | 0.164133945 |
| 0.2758969   | 0.350866376 | 0.190457205 | 0.039065511 |
| 0.006176439 | 0.409368069 | 0.323003716 | 0.018354768 |
| 0.32575824  | 0.326343262 | 0.007494538 | 0.423936402 |
| 0.142364262 | 0.436030387 | 0.007192829 | 0.047513868 |
| 0.015350227 | 0.275334989 | 0.416778887 | 0.320148315 |
| 0.274344627 | 0.265800203 | 0.002844694 | 0.380034547 |
| 0.409637092 | 0.004210981 | 0.052064379 | 0.277459103 |
| 0.221738639 | 0.448881389 | 0.129516275 | 0.277270827 |
| 0.217481745 | 0.403108473 | 0.179181105 | 0.138139541 |
| 0.326209661 | 0.358188801 | 0.313781289 | 0.414137352 |
| 0.324766655 | 0.229321878 | 0.182510175 | 0.012318156 |
| 0.052527771 | 0.278836966 | 0.195420669 | 0.037533081 |
| 0.342724899 | 0.060878456 | 0.384622106 | 0.30848429  |



|             |             |             |             |
|-------------|-------------|-------------|-------------|
| 0.325162781 | 0.002011733 | 0.187488468 | 0.301269164 |
| 0.376903337 | 0.36457719  | 0.014762663 | 0.003847334 |
| 0.005694261 | 0.004250242 | 0.301755475 | 0.120592324 |
| 0.36253599  | 0.237095727 | 0.002900336 | 0.076395016 |
| 0.209669716 | 0.184411625 | 0.407375813 | 0.243069289 |
| 0.262336261 | 0.047199202 | 0.191396164 | 0.268287741 |
| 0.023162642 | 0.315576077 | 0.333721454 | 0.427624984 |
| 0.021622134 | 0.124392258 | 0.30332662  | 0.362163951 |
| 0.017736115 | 0.167557821 | 0.255442817 | 0.190204284 |
| 0.009255302 | 0.033224057 | 0.02633734  | 0.25849843  |
| 0.407448213 | 0.035317438 | 0.013620398 | 0.197172392 |
| 0.082959324 | 0.325604244 | 0.101063513 | 0.363519486 |
| 0.334372503 | 0.2810764   | 0.026950375 | 0.41720322  |
| 0.017256179 | 0.414627247 | 0.143490798 | 0.068477451 |
| 0.184269643 | 0.008212032 | 0.362072593 | 0.059050902 |
| 0.32184539  | 0.323943782 | 0.084258966 | 0.005323265 |
| 0.065864719 | 0.02381376  | 0.318576344 | 0.274414437 |
| 0.012651726 | 0.200402578 | 0.16854705  | 0.27248312  |
| 0.308499543 | 0.261284517 | 0.443339923 | 0.271794627 |
| 0.077757136 | 0.058854899 | 0.306756434 | 0.320640696 |
| 0.275209753 | 0.321508755 | 0.144081968 | 0.391212226 |
| 0.31233574  | 0.377780185 | 0.347733813 | 0.241107518 |
| 0.091461277 | 0.319294415 | 0.293475125 | 0.023542135 |
| 0.242305036 | 0.297279672 | 0.307028842 | 0.060851494 |
| 0.123009918 | 0.183147662 | 0.048362389 | 0.210752303 |
| 0.139550141 | 0.324077566 | 0.097598885 | 0.282607433 |
| 0.324585134 | 0.319159866 | 0.062239806 | 0.024843396 |
| 0.433050411 | 0.392651452 | 0.156857223 | 0.287904688 |
| 0.09771194  | 0.183747911 | 0.270041065 | 0.243836367 |
| 0.222850067 | 0.31671588  | 0.321481797 | 0.30301905  |
| 0.411119938 | 0.186543933 | 0.436734908 | 0.188044302 |
| 0.031340575 | 0.26952898  | 0.054022808 | 0.041484788 |
| 0.088367293 | 0.011532247 | 0.120379717 | 0.250484405 |
| 0.175252014 | 0.224928326 | 0.317617398 | 0.052124214 |
| 0.164288122 | 0.28304388  | 0.205946515 | 0.188114085 |
| 0.047129145 | 0.420682827 | 0.004922707 | 0.02869332  |
| 0.186890281 | 0.277733899 | 0.17091269  | 0.126866158 |
| 0.11490402  | 0.061015612 | 0.170924202 | 0.33202896  |
| 0.239141395 | 0.225178852 | 0.290376658 | 0.043767418 |
| 0.024535156 | 0.336418261 | 0.323950555 | 0.009404648 |
| 0.043271637 | 0.307352323 | 0.230426656 | 0.131032583 |
| 0.006867857 | 0.341517084 | 0.270424811 | 0.231571464 |
| 0.288467709 | 0.045357082 | 0.391293248 | 0.076040896 |
| 0.055531209 | 0.423407174 | 0.201540026 | 0.399985027 |
| 0.188728062 | 0.245814284 | 0.445472677 | 0.312813974 |
| 0.096039311 | 0.227554249 | 0.025578403 | 0.329552113 |
| 0.211948692 |             |             |             |
| IDH1        | 0.139307051 | 0.187278891 | 0.09654765  |
| 0.287373607 | 0.149704853 | 0.138206017 | 0.263578935 |
| 0.094995802 | 0.142753997 | 0.04363769  | 0.051298842 |
| 0.117706205 | 0.060047736 | 0.082246245 | 0.054826411 |
| 0.297966481 | 0.081318433 | 0.088321573 | 0.301223379 |
| 0.259031349 | 0.129309159 | 0.275365004 | 0.18285953  |
| 0.055818106 | 0.087105696 | 0.162947021 | 0.094504942 |

|             |             |             |             |
|-------------|-------------|-------------|-------------|
| 0.281267218 | 0.181588087 | 0.102319214 | 0.231731322 |
| 0.087036825 | 0.176517157 | 0.147328285 | 0.166412421 |
| 0.127944074 | 0.112650254 | 0.01995613  | 0.086576783 |
| 0.174111211 | 0.196291238 | 0.273773518 | 0.286815622 |
| 0.145508789 | 0.133449982 | 0.299133229 | 0.156823619 |
| 0.059369157 | 0.089891548 | 0.07999869  | 0.140929158 |
| 0.121235283 | 0.123030022 | 0.15400318  | 0.207061849 |
| 0.036973998 | 0.059970381 | 0.022050915 | 0.142372627 |
| 0.26775395  | 0.079760466 | 0.132567435 | 0.144972319 |
| 0.065367411 | 0.153856144 | 0.072982029 | 0.185685329 |
| 0.049490175 | 0.166220035 | 0.113156719 | 0.078619502 |
| 0.012734052 | 0.295110047 | 0.170638689 | 0.044645622 |
| 0.158915827 | 0.061846818 | 0.100458082 | 0.273477204 |
| 0.253553678 | 0.137657695 | 0.221823499 | 0.194240227 |
| 0.069497944 | 0.170311765 | 0.086424614 | 0.156826039 |
| 0.179611692 | 0.214224013 | 0.094272362 | 0.278349071 |
| 0.214976608 | 0.155347247 | 0.106644254 | 0.19277909  |
| 0.184439553 | 0.184880051 | 0.098703872 | 0.11938162  |
| 0.05090631  | 0.060117224 | 0.142464175 | 0.19101566  |
| 0.144079023 | 0.059913335 | 0.175411632 | 0.220471255 |
| 0.16051844  | 0.039404625 | 0.315433948 | 0.039104434 |
| 0.263824711 | 0.140788915 | 0.152944967 | 0.209471379 |
| 0.104306605 | 0.174329163 | 0.148872703 | 0.293497242 |
| 0.116433095 | 0.059998961 | 0.03796179  | 0.095852026 |
| 0.061764736 | 0.019632679 | 0.112655276 | 0.231583154 |
| 0.074484756 | 0.054525574 | 0.213186167 | 0.037686244 |
| 0.075009669 | 0.068273393 | 0.130650025 | 0.118136501 |
| 0.20868034  | 0.097186724 | 0.136461879 | 0.129608481 |
| 0.111811995 | 0.218312493 | 0.013673682 | 0.180443388 |
| 0.15630384  | 0.074560554 | 0.312464243 | 0.122431765 |
| 0.165557194 | 0.166003314 | 0.196430852 | 0.219369481 |
| 0.163867864 | 0.228157666 | 0.067881984 | 0.274684536 |
| 0.061949252 | 0.143690249 | 0.187183825 | 0.10861033  |
| 0.144562096 | 0.122715427 | 0.06721989  | 0.125146002 |
| 0.041669114 | 0.045666716 | 0.065191181 | 0.162808582 |
| 0.070496646 | 0.151348167 | 0.103072009 | 0.209280486 |
| 0.146638755 | 0.225271411 | 0.102788638 | 0.150962601 |
| 0.054194112 | 0.122288066 | 0.061646109 | 0.191219098 |
| 0.109523415 | 0.186916739 | 0.115956946 | 0.108050952 |
| 0.225124058 | 0.249095458 | 0.002764992 | 0.137905958 |
| 0.153266211 | 0.055199086 | 0.167304957 | 0.152665169 |
| 0.077962672 | 0.248162847 | 0.005833363 | 0.252751952 |
| 0.100895168 | 0.194360224 | 0.239964592 | 0.196812023 |
| 0.137196596 | 0.152404111 | 0.099203378 | 0.140301188 |
| 0.101580588 | 0.032780854 | 0.131540037 | 0.278320395 |
| 0.058855122 | 0.125924286 | 0.195045213 | 0.257522053 |
| 0.211939119 | 0.210502284 | 0.265841183 | 0.066642411 |
| 0.143620635 | 0.184932464 | 0.075631006 | 0.151459504 |
| 0.164254574 | 0.029512161 | 0.158030599 | 0.142336384 |
| 0.076272011 | 0.179415624 | 0.113909894 | 0.03556369  |
| 0.192789175 | 0.184204129 | 0.064748218 | 0.186896062 |
| 0.121316858 | 0.113339653 | 0.089885827 | 0.069609839 |
| 0.104009983 | 0.19789472  | 0.047754969 | 0.036938035 |
| 0.022161694 | 0.123707121 | 0.254411478 | 0.056970926 |

|             |             |             |             |
|-------------|-------------|-------------|-------------|
| 0.041259179 | 0.146564551 | 0.076972601 | 0.095145597 |
| 0.136281569 | 0.146628807 | 0.031310204 | 0.027750547 |
| 0.039017228 | 0.04172969  | 0.0395419   | 0.123292919 |
| 0.05542095  | 0.06887964  | 0.136531668 | 0.052725676 |
| 0.095307707 | 0.108729939 | 0.183797271 | 0.265571431 |
| 0.11406418  | 1           | 0.117899314 | 0.019124038 |
| 0.219460949 | 0.082616501 | 0.049812672 | 0.195129065 |
| 0.087053902 | 0.217740426 | 0.074959027 | 0.178023978 |
| 0.059799724 | 0.236941547 | 0.281277775 | 0.065413115 |
| 0.132841609 | 0.167457417 | 0.20552668  | 0.157679192 |
| 0.125956463 | 0.231676254 | 0.141726722 | 0.127551789 |
| 0.116219912 | 0.127627203 | 0.171304978 | 0.072355039 |
| 0.108877737 | 0.164672439 | 0.13874923  | 0.198058974 |
| 0.132194827 | 0.149250041 | 0.1311774   | 0.263921934 |
| 0.1985757   | 0.281485983 | 0.156710429 | 0.06534529  |
| 0.140185912 | 0.025189759 | 0.094422082 | 0.091057797 |
| 0.133208179 | 0.15930159  | 0.240004967 | 0.10356213  |
| 0.330037282 | 0.070213905 | 0.05404333  | 0.188014964 |
| 0.045150317 | 0.15367184  | 0.07159948  | 0.151306497 |
| 0.125854176 | 0.090855896 | 0.115665693 | 0.209484321 |
| 0.143846883 | 0.178835412 | 0.137169099 | 0.149546625 |
| 0.195569781 | 0.126388071 | 0.084177359 | 0.168469431 |
| 0.120607205 | 0.148256691 | 0.167319222 | 0.033810097 |
| 0.080192697 | 0.166059229 | 0.008539965 | 0.071904116 |
| 0.109989655 | 0.163256096 | 0.224113567 | 0.128271111 |
| 0.106854918 | 0.073774919 | 0.2130724   | 0.170378482 |
| 0.143922614 | 0.141331908 | 0.14972089  | 0.150741884 |
| 0.140489455 | 0.156373719 | 0.073406442 | 0.137079387 |
| 0.084967215 | 0.13802316  | 0.165042969 | 0.052271581 |
| 0.244920909 | 0.080105894 | 0.046199436 | 0.189331495 |
| 0.288376473 | 0.103650233 | 0.032354596 | 0.012022248 |
| 0.05953554  | 0.214310354 | 0.140204055 | 0.235851251 |
| 0.043850987 | 0.238803429 | 0.007479756 | 0.174196215 |
| 0.15867841  | 0.056505074 | 0.069008255 | 0.127815    |
| 0.109314774 | 0.180949228 | 0.069953052 | 0.154554935 |
| 0.09314586  | 0.130498205 | 0.100777011 | 0.264755155 |
| 0.196171234 | 0.127922918 | 0.206838064 | 0.172624865 |
| 0.2287519   | 0.198881635 | 0.331963898 | 0.120355898 |
| 0.072600211 | 0.131873487 | 0.033554822 | 0.073233186 |
| 0.12808825  | 0.101766954 | 0.16684031  | 0.234756254 |
| 0.167800524 | 0.067105778 | 0.12446025  | 0.137968853 |
| 0.226387637 | 0.254039894 | 0.056372586 | 0.017646373 |
| 0.005688744 | 0.038209974 | 0.218943905 | 0.166500945 |
| 0.18216387  | 0.024833654 | 0.064593581 | 0.128182708 |
| 0.096782129 | 0.140577119 | 0.158617316 | 0.32781894  |
| 0.15950052  | 0.148807302 | 0.046241933 | 0.302275291 |
| 0.089699316 | 0.088499457 | 0.18748624  | 0.167872676 |
| 0.085753738 | 0.161931542 | 0.088483205 | 0.249982482 |
| 0.007965972 | 0.220444302 | 0.122874636 | 0.077817368 |
| 0.031924502 | 0.104662311 | 0.115568595 | 0.241585133 |
| 0.118223324 | 0.066509851 | 0.061523711 | 0.023470025 |
| 0.136450245 | 0.205563671 | 0.114067896 | 0.221577792 |
| 0.22476785  | 0.292144243 | 0.066602795 | 0.161508128 |
| 0.106110371 | 0.131678545 | 0.098804563 | 0.026182485 |

|             |             |             |             |
|-------------|-------------|-------------|-------------|
| 0.092137861 | 0.084517057 | 0.12528985  | 0.037697708 |
| 0.081215025 | 0.179532879 | 0.072595334 | 0.05572707  |
| 0.027069041 | 0.112441971 | 0.242248918 | 0.200694536 |
| 0.056478243 | 0.157086502 | 0.194456014 | 0.209334356 |
| 0.172579105 | 0.241742894 | 0.143760728 | 0.065267325 |
| 0.161923312 | 0.018617941 | 0.248590135 | 0.120780778 |
| 0.083084956 | 0.225982132 | 0.072079252 | 0.184126731 |
| 0.163920679 | 0.186798344 | 0.15507198  | 0.247758709 |
| 0.044478705 | 0.132199872 | 0.19488245  | 0.075075232 |
| 0.240692499 | 0.225279627 | 0.145159964 | 0.077771053 |
| 0.170454565 | 0.074584275 | 0.120852936 | 0.022785484 |
| 0.04743617  | 0.150500869 | 0.121446616 | 0.291606912 |
| 0.154687756 | 0.130952999 | 0.097531711 | 0.116356302 |
| 0.183203294 | 0.166654308 | 0.129439221 | 0.194547376 |
| 0.182540131 | 0.222074903 | 0.170599751 | 0.168799461 |
| 0.047441201 | 0.156608981 | 0.207378851 | 0.158881975 |
| 0.160269788 | 0.288930222 | 0.15540638  | 0.068411088 |
| 0.07578696  | 0.094057687 | 0.108276778 | 0.158983279 |
| 0.227933182 | 0.090546495 | 0.02262952  | 0.239960832 |
| 0.030546412 | 0.243754917 | 0.039191568 | 0.106362918 |
| 0.173056582 | 0.070367278 | 0.235061738 | 0.173491636 |
| 0.11267322  | 0.147345673 | 0.045053805 | 0.125851269 |
| 0.037553971 | 0.173677069 | 0.086678673 | 0.141676537 |
| 0.038092072 | 0.065025936 | 0.239143265 | 0.108179636 |
| 0.049828368 | 0.03161007  | 0.167304677 | 0.11971139  |
| 0.115930761 | 0.23445614  | 0.089231964 | 0.051435193 |
| 0.062318519 | 0.115887975 | 0.065683537 | 0.103439184 |
| 0.055034427 | 0.137845592 | 0.081000536 | 0.137004824 |
| 0.224535355 | 0.13781308  | 0.115981354 | 0.080533285 |
| 0.137465826 | 0.139317229 | 0.10641598  | 0.140724611 |
| 0.095133594 | 0.290809484 | 0.121463884 | 0.143810935 |
| 0.0614837   | 0.066622013 | 0.158671959 | 0.227940998 |
| 0.043220854 |             |             |             |

|             |             |             |             |
|-------------|-------------|-------------|-------------|
| IER3        | 0.048692426 | 0.044951167 | 0.043507413 |
| 0.097913908 | 0.08018928  | 0.026986548 | 0.111969338 |
| 0.039856751 | 0.07081262  | 0.04652881  | 0.070086802 |
| 0.058844671 | 0.049554533 | 0.039235277 | 0.011148822 |
| 0.139840806 | 0.172300919 | 0.044035674 | 0.202934422 |
| 0.106737021 | 0.061245241 | 0.160674168 | 0.152376186 |
| 0.056825527 | 0.12901329  | 0.184450554 | 0.062393051 |
| 0.100181865 | 0.207677709 | 0.018916647 | 0.068647064 |
| 0.249198736 | 0.060126467 | 0.030724864 | 0.085502638 |
| 0.028001993 | 0.03237258  | 0.102602273 | 0.017921502 |
| 0.047760529 | 0.065881377 | 0.100187953 | 0.15351872  |
| 0.15079149  | 0.025029541 | 0.1429836   | 0.100378014 |
| 0.020064202 | 0.164680895 | 0.014808556 | 0.025836801 |
| 0.022833897 | 0.033531482 | 0.047158273 | 0.093691072 |
| 0.020594676 | 0.017487135 | 0.01881507  | 0.030476993 |
| 0.15606777  | 0.017139963 | 0.027921319 | 0.055182495 |
| 0.022679334 | 0.069221926 | 0.195767467 | 0.083040747 |
| 0.033005768 | 0.036611953 | 0.201471414 | 0.034918076 |
| 0.015920345 | 0.123734929 | 0.138860615 | 0.016697405 |
| 0.336792422 | 0.129442519 | 0.205676684 | 0.10383081  |
| 0.088717897 | 0.035020166 | 0.083619265 | 0.065491006 |

|             |             |             |             |
|-------------|-------------|-------------|-------------|
| 0.125096372 | 0.18095062  | 0.055122119 | 0.153064919 |
| 0.047618767 | 0.100848876 | 0.090340669 | 0.150792672 |
| 0.076751945 | 0.036690201 | 0.116924454 | 0.206023104 |
| 0.040963808 | 0.043257342 | 0.029985463 | 0.048848062 |
| 0.014711122 | 0.201792858 | 0.027937014 | 0.058963337 |
| 0.034001023 | 0.053134177 | 0.249877814 | 0.065722928 |
| 0.290322196 | 0.014264873 | 0.165781989 | 0.10368891  |
| 0.089343265 | 0.103378302 | 0.21900854  | 0.077564727 |
| 0.119142731 | 0.054266318 | 0.03667274  | 0.182357918 |
| 0.081570829 | 0.183144686 | 0.029442434 | 0.307608989 |
| 0.035524155 | 0.043479307 | 0.019430813 | 0.071650696 |
| 0.041598094 | 0.033737728 | 0.098025825 | 0.183541327 |
| 0.268148728 | 0.130375847 | 0.044484762 | 0.07024183  |
| 0.076950104 | 0.024934777 | 0.074780484 | 0.02896939  |
| 0.038840249 | 0.083363426 | 0.001331066 | 0.153402215 |
| 0.053128858 | 0.144477607 | 0.273327775 | 0.047638793 |
| 0.120082263 | 0.116604321 | 0.219314871 | 0.064284659 |
| 0.031364291 | 0.250860515 | 0.025684232 | 0.148426317 |
| 0.019478325 | 0.12485831  | 0.218058775 | 0.081592442 |
| 0.140806278 | 0.026276956 | 0.258411685 | 0.045757715 |
| 0.00989646  | 0.12584866  | 0.186583259 | 0.053373155 |
| 0.027623346 | 0.035381893 | 0.019147472 | 0.283594587 |
| 0.096169273 | 0.124213617 | 0.028267387 | 0.040179734 |
| 0.052020833 | 0.2483429   | 0.014133798 | 0.055894408 |
| 0.019231803 | 0.063573495 | 0.089134428 | 0.082637274 |
| 0.214898229 | 0.092454718 | 0.012656097 | 0.026348578 |
| 0.036054604 | 0.011530076 | 0.083648849 | 0.09136733  |
| 0.024195549 | 0.078082591 | 0.004760876 | 0.14580554  |
| 0.026122154 | 0.26321214  | 0.085255839 | 0.248389547 |
| 0.032569765 | 0.231686787 | 0.034397718 | 0.047692839 |
| 0.033494678 | 0.068198876 | 0.025794643 | 0.08821385  |
| 0.245513664 | 0.039340245 | 0.067226742 | 0.097575063 |
| 0.06777828  | 0.088292365 | 0.104579634 | 0.020836947 |
| 0.067475483 | 0.113958008 | 0.249876221 | 0.151839557 |
| 0.061950504 | 0.010093644 | 0.030315252 | 0.066373126 |
| 0.017273831 | 0.039993788 | 0.030625369 | 0.006569781 |
| 0.186969432 | 0.063183256 | 0.0566293   | 0.089473816 |
| 0.027680373 | 0.083048277 | 0.023162836 | 0.182844452 |
| 0.245478544 | 0.053747419 | 0.077980662 | 0.035976552 |
| 0.044357434 | 0.043585453 | 0.1560888   | 0.028701323 |
| 0.037966307 | 0.135936763 | 0.031308449 | 0.031759768 |
| 0.091794266 | 0.217381695 | 0.18119015  | 0.013595551 |
| 0.044815009 | 0.019867629 | 0.015439345 | 0.032374451 |
| 0.034997088 | 0.104023492 | 0.078572872 | 0.044596582 |
| 0.165196022 | 0.305319919 | 0.045112637 | 0.134711743 |
| 0.021934883 | 0.117899314 | 1           | 0.007508261 |
| 0.065386231 | 0.011682974 | 0.008708347 | 0.04648452  |
| 0.189205822 | 0.078254484 | 0.05559872  | 0.248304325 |
| 0.043110601 | 0.175266116 | 0.094495496 | 0.013456749 |
| 0.043444581 | 0.036194728 | 0.171597371 | 0.130824198 |
| 0.025051241 | 0.084485376 | 0.151419374 | 0.032696483 |
| 0.031089065 | 0.272466607 | 0.046407204 | 0.198911311 |
| 0.325790059 | 0.084683491 | 0.040403352 | 0.334495064 |
| 0.235128642 | 0.051804886 | 0.060362205 | 0.233402202 |

|             |             |             |             |
|-------------|-------------|-------------|-------------|
| 0.051843686 | 0.151909493 | 0.03783904  | 0.087823699 |
| 0.16751666  | 0.085732506 | 0.166297453 | 0.050270221 |
| 0.026996288 | 0.046710184 | 0.254472142 | 0.067347203 |
| 0.237918472 | 0.024710757 | 0.015169337 | 0.054358894 |
| 0.074267124 | 0.036506959 | 0.238074955 | 0.056693449 |
| 0.025399044 | 0.021853394 | 0.17699945  | 0.056865425 |
| 0.03068565  | 0.169406742 | 0.120975897 | 0.032880823 |
| 0.046166828 | 0.047423284 | 0.025232442 | 0.090968292 |
| 0.09527449  | 0.127557452 | 0.07604674  | 0.049039994 |
| 0.023848972 | 0.109612767 | 0.031769687 | 0.022814781 |
| 0.147723246 | 0.033900245 | 0.101270731 | 0.113602994 |
| 0.017882915 | 0.018769772 | 0.166812891 | 0.243551858 |
| 0.045351658 | 0.037777494 | 0.032008512 | 0.12979534  |
| 0.053663114 | 0.039886324 | 0.03016684  | 0.297885741 |
| 0.290017236 | 0.031902097 | 0.045104781 | 0.07219461  |
| 0.091019258 | 0.013229746 | 0.08322582  | 0.044231474 |
| 0.207459992 | 0.018780367 | 0.00875047  | 0.025308323 |
| 0.230514689 | 0.097300055 | 0.025762322 | 0.073204459 |
| 0.005876108 | 0.130381964 | 0.05698648  | 0.052200043 |
| 0.035255989 | 0.20511043  | 0.134811611 | 0.038179004 |
| 0.038514182 | 0.042738759 | 0.040226656 | 0.049321109 |
| 0.040759523 | 0.027747035 | 0.049916153 | 0.213392624 |
| 0.051048131 | 0.032422271 | 0.062650734 | 0.037504431 |
| 0.081150375 | 0.119220369 | 0.181361024 | 0.127661119 |
| 0.038654277 | 0.035017202 | 0.00545442  | 0.046266808 |
| 0.025765925 | 0.123021506 | 0.046209445 | 0.091955047 |
| 0.054382009 | 0.247234225 | 0.060714761 | 0.038033766 |
| 0.060729412 | 0.079375584 | 0.180087942 | 0.019774098 |
| 0.013237185 | 0.082612384 | 0.076539785 | 0.188878766 |
| 0.048917643 | 0.004903904 | 0.190832831 | 0.091420044 |
| 0.058060228 | 0.083621002 | 0.036488923 | 0.172648365 |
| 0.063574238 | 0.267279578 | 0.012458087 | 0.143233527 |
| 0.132371593 | 0.018740746 | 0.058339702 | 0.033019851 |
| 0.287495532 | 0.153105683 | 0.044182942 | 0.076752636 |
| 0.015686429 | 0.211468039 | 0.061928927 | 0.034550619 |
| 0.162400505 | 0.204074456 | 0.158313926 | 0.114225692 |
| 0.024960796 | 0.108373276 | 0.146007288 | 0.006883372 |
| 0.091974465 | 0.073001962 | 0.117697583 | 0.072258903 |
| 0.06622802  | 0.128446152 | 0.208634777 | 0.031998978 |
| 0.113436017 | 0.0278864   | 0.083016933 | 0.007517404 |
| 0.10448437  | 0.281249086 | 0.035087986 | 0.01330347  |
| 0.027244185 | 0.059045407 | 0.027860952 | 0.247616241 |
| 0.027149765 | 0.265212635 | 0.082891448 | 0.081939675 |
| 0.252202452 | 0.075793879 | 0.179259781 | 0.109275861 |
| 0.046525588 | 0.091580151 | 0.028554956 | 0.014413722 |
| 0.099766619 | 0.062727333 | 0.092597459 | 0.035349565 |
| 0.039381169 | 0.087048702 | 0.03117604  | 0.052186097 |
| 0.044679175 | 0.049645024 | 0.042602389 | 0.081217424 |
| 0.068996618 | 0.035341898 | 0.045374809 | 0.067739033 |
| 0.130622477 | 0.083960782 | 0.058451676 | 0.07942426  |
| 0.138172155 | 0.039393017 | 0.188301503 | 0.017580751 |
| 0.030852184 | 0.029506257 | 0.125631697 | 0.129030938 |
| 0.055394831 | 0.035628008 | 0.172006314 | 0.147384159 |
| 0.045623129 | 0.035248706 | 0.04420078  | 0.057620995 |

|             |             |             |             |
|-------------|-------------|-------------|-------------|
| 0.265972536 | 0.107111646 | 0.069713133 | 0.077614835 |
| 0.017864613 | 0.045964032 | 0.065207065 | 0.040374091 |
| 0.031130223 | 0.147763199 | 0.033254141 | 0.027989212 |
| 0.080381581 | 0.038578559 | 0.103700457 | 0.327121934 |
| 0.23917958  | 0.225462198 | 0.01341798  | 0.13176643  |
| 0.0153297   | 0.140145198 | 0.01410765  | 0.162366233 |
| 0.168322959 | 0.028635173 | 0.161407704 | 0.06850897  |
| 0.133970693 | 0.029403935 | 0.124643586 | 0.302293015 |
| 0.025214037 | 0.047108426 | 0.045852888 | 0.147819983 |
| 0.028377001 | 0.16944261  | 0.183018644 | 0.024995498 |
| 0.012790601 | 0.018183655 | 0.04296624  | 0.097719763 |
| 0.164775606 | 0.088467348 | 0.028178587 | 0.238311744 |
| 0.11779592  | 0.030164036 | 0.071111806 | 0.042616128 |
| 0.238175172 | 0.036741827 | 0.013222829 | 0.065732413 |
| 0.079850871 | 0.275397018 | 0.022175276 | 0.059867067 |
| 0.19361311  | 0.030035278 | 0.055487959 | 0.033338298 |
| 0.080388423 | 0.133719845 | 0.021246335 | 0.04323256  |
| 0.091632311 | 0.028450377 | 0.141178461 | 0.077092494 |
| 0.011854036 |             |             |             |

| IFI204      | 0.231410214 | 0.419562308 | 0.1103093   |
|-------------|-------------|-------------|-------------|
| 0.261273152 | 0.159748136 | 0.167676194 | 0.056822317 |
| 0.020185099 | 0.003970514 | 0.001769638 | 0.004195836 |
| 0.218401068 | 0.024257134 | 0.064822721 | 0.035936872 |
| 0.232259406 | 0.035147699 | 0.05641395  | 0.073468338 |
| 0.204618913 | 0.016730337 | 0.231573863 | 0.011749269 |
| 0.035520717 | 0.023730031 | 0.016609956 | 0.053228912 |
| 0.296842708 | 0.018658925 | 0.127252116 | 0.207674364 |
| 0.012844365 | 0.278605449 | 0.412604481 | 0.282302904 |
| 0.430554245 | 0.208513298 | 0.001266126 | 0.058867193 |
| 0.271564795 | 0.25515176  | 0.211811624 | 0.142915066 |
| 0.007012978 | 0.396027675 | 0.086009778 | 0.154813975 |
| 0.010347287 | 0.007598196 | 0.046761905 | 0.335595568 |
| 0.422422707 | 0.204669122 | 0.034351365 | 0.035618388 |
| 0.029601301 | 0.050534698 | 0.050423669 | 0.169303955 |
| 0.071614077 | 0.034537227 | 0.409410185 | 0.004976878 |
| 0.008085812 | 0.043275531 | 0.026061003 | 0.064622902 |
| 0.060038509 | 0.217043881 | 0.000820327 | 0.191973263 |
| 0.001592034 | 0.176099809 | 0.14115173  | 0.056343801 |
| 0.011339199 | 0.007246089 | 0.037620599 | 0.153720258 |
| 0.319440168 | 0.331372432 | 0.372165957 | 0.378821333 |
| 0.028449275 | 0.072427986 | 0.136159254 | 0.041995192 |
| 0.289538607 | 0.054619471 | 0.005871872 | 0.254351722 |
| 0.379269708 | 0.434991056 | 0.021983359 | 0.075588829 |
| 0.312283173 | 0.366223948 | 0.128327307 | 0.141772488 |
| 0.059231202 | 0.004366901 | 0.352820258 | 0.413317147 |
| 0.274575241 | 0.093592223 | 0.044149044 | 0.269213027 |
| 0.011128435 | 0.037896324 | 0.171949103 | 0.016074156 |
| 0.328717583 | 0.001593821 | 0.06288468  | 0.150106048 |
| 0.013123437 | 0.279623235 | 0.423691114 | 0.052525195 |
| 0.136123113 | 0.002736562 | 0.008644961 | 0.004052697 |
| 0.029405636 | 0.019285873 | 0.399051029 | 0.362586029 |
| 0.027385285 | 0.046846901 | 0.056549874 | 0.000330481 |
| 0.005711443 | 0.00825582  | 0.337842694 | 0.091719645 |
| 0.234238615 | 0.259258503 | 0.057609164 | 0.234136583 |

|             |             |             |             |
|-------------|-------------|-------------|-------------|
| 0.238892483 | 0.363304021 | 0.005494246 | 0.012001404 |
| 0.152422871 | 0.01229774  | 0.085715601 | 0.231957921 |
| 0.100738956 | 0.01399376  | 0.030438936 | 0.390877561 |
| 0.317505928 | 0.022571882 | 0.064580039 | 0.22779118  |
| 0.053507376 | 0.147357463 | 0.019277786 | 0.080435756 |
| 0.008721496 | 0.391939259 | 0.0064307   | 0.07401352  |
| 0.016734869 | 0.019996887 | 0.000287416 | 0.066719325 |
| 0.026497933 | 0.368383383 | 0.379110076 | 0.020349593 |
| 0.110682692 | 0.199404599 | 0.096115658 | 0.306303705 |
| 0.002273541 | 0.002378851 | 0.066888124 | 0.424980927 |
| 0.15304163  | 0.37370474  | 0.046958946 | 0.042151719 |
| 0.096101279 | 0.279313848 | 0.000146514 | 0.400367651 |
| 0.425522032 | 0.077678321 | 0.225751469 | 0.172407527 |
| 0.097504457 | 0.326834463 | 0.002221502 | 0.243338661 |
| 0.199087035 | 0.012126023 | 0.374848209 | 0.055482959 |
| 0.364980495 | 0.011729782 | 0.076894837 | 0.306825456 |
| 0.32917665  | 0.001634698 | 0.061173327 | 0.196512186 |
| 0.003551838 | 0.011631509 | 0.222090614 | 0.203871268 |
| 0.150932892 | 0.262022782 | 0.347254968 | 0.088928952 |
| 0.1622895   | 0.045940627 | 0.000526049 | 0.100636529 |
| 0.26500952  | 0.020983329 | 0.339770259 | 0.030913808 |
| 0.138718007 | 0.372689324 | 0.303064712 | 0.013052568 |
| 0.009527374 | 0.086261347 | 0.002175606 | 0.095045435 |
| 0.251925266 | 0.030358457 | 0.108256627 | 0.00939175  |
| 0.016723867 | 0.420704708 | 0.033385974 | 0.05565144  |
| 0.019892112 | 0.244058206 | 0.058204077 | 0.081994248 |
| 0.053690532 | 0.020397075 | 0.06186969  | 0.076344186 |
| 0.006120687 | 0.029362103 | 0.000471681 | 0.134739595 |
| 0.040824065 | 0.140447994 | 0.152310018 | 0.24826585  |
| 0.053446844 | 0.020111602 | 0.144698391 | 0.027475946 |
| 0.016016807 | 0.004071489 | 0.398894307 | 0.194871825 |
| 0.207141465 | 0.019124038 | 0.007508261 | 1           |
| 0.375200767 | 0.133730241 | 0.043707247 | 0.373213849 |
| 0.001146197 | 0.347840509 | 0.055423425 | 0.038539749 |
| 0.143478048 | 0.10674181  | 0.310482904 | 0.003922708 |
| 0.143659908 | 0.390625102 | 0.084443112 | 0.041512701 |
| 0.350879098 | 0.193326128 | 0.002816928 | 0.259858225 |
| 0.272714439 | 0.00958753  | 0.42951037  | 0.022695894 |
| 0.004621457 | 0.2508155   | 0.299939433 | 0.018680348 |
| 0.014308794 | 0.129403026 | 0.004731572 | 0.11648519  |
| 0.414430107 | 0.253642738 | 0.314486639 | 0.031461846 |
| 0.011668414 | 0.007311824 | 0.043589477 | 0.131662842 |
| 0.42587704  | 0.42024227  | 0.082171889 | 0.155887575 |
| 0.082410476 | 0.0544326   | 0.00956035  | 0.415916379 |
| 0.007328752 | 0.409066904 | 0.001137976 | 0.289511749 |
| 0.425835146 | 0.097610157 | 0.021001881 | 0.105450472 |
| 0.306337804 | 0.006756956 | 0.025907807 | 0.414178046 |
| 0.297547347 | 0.057315929 | 0.062759735 | 0.214259843 |
| 0.002008176 | 0.003299083 | 0.134524172 | 0.023347476 |
| 0.083777667 | 0.031905515 | 0.004131819 | 0.039539783 |
| 0.00857559  | 0.384366787 | 0.313415782 | 0.006018435 |
| 0.17388712  | 0.036433322 | 0.175441429 | 0.006943882 |
| 0.342731909 | 0.389530813 | 0.431371127 | 0.021085743 |
| 0.30785667  | 0.401762274 | 0.206303442 | 0.013741465 |



|             |             |             |             |
|-------------|-------------|-------------|-------------|
| 0.00395197  | 0.420558519 | 0.188672041 | 0.003555174 |
| 0.347563015 | 0.071620961 | 0.006306255 | 0.38960725  |
| 0.044479287 | 0.367385584 | 0.000275283 | 0.002681169 |
| 0.003464598 | 0.312256838 | 0.38387665  | 0.183872505 |
| 0.059463594 | 0.132485326 | 0.00011615  | 0.408362927 |
| 0.422896263 | 0.002556635 | 0.014943143 | 0.336839394 |
| 0.305125155 | 0.416353458 | 0.082957743 | 0.355145439 |
| 0.250033446 | 0.428654806 | 0.019218311 | 0.094358575 |
| 0.333482296 | 0.404973882 | 0.237616926 | 0.337410195 |
| 0.354157929 | 0.232304662 | 0.108918835 | 0.002576429 |
| 0.004606827 | 0.045602662 | 0.055837586 | 0.008107646 |
| 0.13529522  | 0.022675617 | 0.368635213 | 0.334678975 |
| 0.395820614 | 0.001091726 | 0.016356263 | 0.312702206 |
| 0.32300076  | 0.334058955 | 0.00047891  | 0.000228301 |
| 0.000311732 | 0.002654178 | 0.131960459 | 0.055771111 |
| 0.367129334 | 0.035286674 | 0.001246238 | 0.00365217  |
| 0.023249229 | 0.193531973 | 0.422441323 | 0.195335743 |
| 0.271216793 | 0.014806173 | 0.063652611 | 0.204272658 |
| 0.006450753 | 0.167135478 | 0.394305794 | 0.382620613 |
| 0.003387251 | 0.049396655 | 0.096050403 | 0.364158507 |
| 0.009091993 | 0.123587281 | 0.246164881 | 0.048708987 |
| 0.000528851 | 0.012911577 | 0.00870951  | 0.26085878  |
| 0.429909467 | 0.025229056 | 0.01199569  | 0.01086618  |
| 0.033963075 | 0.329718885 | 0.031477956 | 0.395134516 |
| 0.30986573  | 0.301577332 | 0.007969139 | 0.373168871 |
| 0.003263691 | 0.421081679 | 0.122711613 | 0.00383377  |
| 0.04506773  | 0.001060873 | 0.391113743 | 0.012180098 |
| 0.079072245 | 0.193575905 | 0.007225514 | 0.002525748 |
| 0.012232372 | 0.012276666 | 0.362365172 | 0.327028551 |
| 0.002671681 | 0.030470217 | 0.081556454 | 0.174007466 |
| 0.095433659 | 0.299888145 | 0.412406154 | 0.158358477 |
| 0.013724549 | 0.009063284 | 0.222675613 | 0.214188776 |
| 0.040061777 | 0.369158004 | 0.04830413  | 0.406897597 |
| 0.212599716 | 0.312856372 | 0.38980928  | 0.11736482  |
| 0.020588268 | 0.158135369 | 0.231399443 | 0.003773963 |
| 0.117212503 | 0.358221425 | 0.093600114 | 0.017143381 |
| 0.093373054 | 0.146306597 | 0.001939161 | 0.008809133 |
| 0.109796388 | 0.138138221 | 0.021906964 | 0.277609956 |
| 0.169428004 | 0.222314348 | 0.002206124 | 0.008201186 |
| 0.430677986 | 0.303929767 | 0.007407878 | 0.239993993 |
| 0.035253559 | 0.120057065 | 0.289912472 | 0.295172669 |
| 0.038528106 | 0.375394409 | 0.28188489  | 0.27337901  |
| 0.353648579 | 0.07001193  | 0.425690142 | 0.00474373  |
| 0.004361424 | 0.210144968 | 0.025745507 | 0.020779649 |
| 0.042762142 | 0.002399059 | 0.047851674 | 0.238241431 |
| 0.090401458 | 0.214418571 | 0.027872372 | 0.004435652 |
| 0.106414871 | 0.084728162 | 0.137526798 | 0.054466974 |
| 0.014102121 | 0.418935773 | 0.000592365 | 0.011268125 |
| 0.113942095 | 0.279174895 | 0.158440851 | 0.045850141 |
| 0.037130192 | 0.013197976 | 0.113952783 | 0.097269076 |
| 0.145513526 | 0.020426775 | 0.293612514 | 0.001334977 |
| 0.002701419 | 0.372928376 | 0.100666327 | 0.000881959 |
| 0.004592328 | 0.156725358 | 0.03483267  | 0.02860355  |
| 0.003293776 | 0.407331422 | 0.09994229  | 0.154738533 |

|             |             |             |             |
|-------------|-------------|-------------|-------------|
| 0.11481636  | 0.009330091 | 0.25989164  | 0.004094071 |
| 0.002032616 | 0.354407965 | 0.136060131 | 0.428350779 |
| 0.081007551 | 0.274581697 | 0.342293454 | 0.339105497 |
| 0.004681062 | 0.120416301 | 0.002737107 | 0.294955398 |
| 0.106797653 |             |             |             |
| IFNG        | 0.399565145 | 0.529375599 | 0.380704019 |
| 0.462264913 | 0.459899314 | 0.398645234 | 0.290571905 |
| 0.226744212 | 0.123674708 | 0.016934985 | 0.050021622 |
| 0.434228931 | 0.284249649 | 0.354724622 | 0.344690103 |
| 0.447726202 | 0.193120473 | 0.342634194 | 0.314748264 |
| 0.44429836  | 0.154079565 | 0.451844194 | 0.148099319 |
| 0.301150067 | 0.147230543 | 0.118111444 | 0.305073247 |
| 0.459828136 | 0.129167807 | 0.378116067 | 0.418579205 |
| 0.128319732 | 0.434711934 | 0.515170484 | 0.46975052  |
| 0.506692625 | 0.370003103 | 0.017389503 | 0.362497255 |
| 0.403394833 | 0.450198231 | 0.445138098 | 0.404313802 |
| 0.082872653 | 0.485348655 | 0.330289655 | 0.409921724 |
| 0.255703739 | 0.062217877 | 0.275509356 | 0.441337502 |
| 0.482823354 | 0.454509868 | 0.278954836 | 0.239246857 |
| 0.280662614 | 0.283455917 | 0.298991766 | 0.346598406 |
| 0.314085624 | 0.208220896 | 0.488130879 | 0.141523344 |
| 0.191520415 | 0.29837513  | 0.188284634 | 0.326807109 |
| 0.34932446  | 0.388365662 | 0.032640523 | 0.376843578 |
| 0.009093446 | 0.424019789 | 0.395336896 | 0.30887667  |
| 0.072067064 | 0.053391902 | 0.218478955 | 0.415494178 |
| 0.460473291 | 0.435210241 | 0.473016095 | 0.477201765 |
| 0.248552933 | 0.330227581 | 0.38988804  | 0.253313905 |
| 0.423510598 | 0.266827189 | 0.142961468 | 0.454677122 |
| 0.482980524 | 0.523662493 | 0.255140554 | 0.301392099 |
| 0.446374092 | 0.479289747 | 0.435498598 | 0.467183573 |
| 0.363090846 | 0.064408892 | 0.446760868 | 0.508592061 |
| 0.386956634 | 0.320339541 | 0.20710466  | 0.434830277 |
| 0.094213004 | 0.359226308 | 0.424006503 | 0.192117665 |
| 0.46236644  | 0.038542643 | 0.258967741 | 0.433826907 |
| 0.240290742 | 0.436796696 | 0.511188022 | 0.266788326 |
| 0.420032394 | 0.0412192   | 0.158723608 | 0.050668882 |
| 0.37275764  | 0.149408571 | 0.477639275 | 0.472809506 |
| 0.295300315 | 0.425331256 | 0.3345891   | 0.005376998 |
| 0.046713843 | 0.198701313 | 0.431082134 | 0.375260666 |
| 0.436923431 | 0.342951928 | 0.311292644 | 0.389290789 |
| 0.435430726 | 0.467955057 | 0.070685386 | 0.148725552 |
| 0.449659323 | 0.203590919 | 0.309966224 | 0.463842313 |
| 0.367170593 | 0.167494892 | 0.195227069 | 0.51411327  |
| 0.428855036 | 0.142523245 | 0.335000543 | 0.448960015 |
| 0.406264311 | 0.391671608 | 0.163734012 | 0.368983222 |
| 0.099684682 | 0.471893321 | 0.044085222 | 0.348740276 |
| 0.284242625 | 0.196009201 | 0.016143156 | 0.313716275 |
| 0.354206392 | 0.443403187 | 0.455570054 | 0.154012932 |
| 0.406540686 | 0.450757192 | 0.343044538 | 0.458812738 |
| 0.030057777 | 0.070113723 | 0.282321024 | 0.512423732 |
| 0.316520129 | 0.480807907 | 0.357699089 | 0.331568548 |
| 0.338215522 | 0.457124251 | 0.002918983 | 0.49531308  |
| 0.520776449 | 0.301095062 | 0.465531575 | 0.423998141 |
| 0.379359541 | 0.469884205 | 0.039127587 | 0.457302694 |

|             |             |             |             |
|-------------|-------------|-------------|-------------|
| 0.350945318 | 0.118429509 | 0.494430305 | 0.226776992 |
| 0.451913923 | 0.077168216 | 0.379737047 | 0.420980828 |
| 0.427145791 | 0.01513663  | 0.279816257 | 0.434380762 |
| 0.039070545 | 0.155979765 | 0.428188844 | 0.451357505 |
| 0.43295714  | 0.444920721 | 0.470718049 | 0.361720508 |
| 0.464639471 | 0.292601264 | 0.020946093 | 0.347305623 |
| 0.424759529 | 0.382377216 | 0.448903558 | 0.308690812 |
| 0.332442109 | 0.479206285 | 0.400496113 | 0.241750832 |
| 0.083921423 | 0.373726478 | 0.041082919 | 0.384843602 |
| 0.36586594  | 0.208834781 | 0.388938516 | 0.165395088 |
| 0.106149994 | 0.528586076 | 0.190048395 | 0.254056131 |
| 0.131015662 | 0.462408702 | 0.313285208 | 0.340601576 |
| 0.299831451 | 0.224801152 | 0.374704853 | 0.414916517 |
| 0.078381442 | 0.156089644 | 0.016119393 | 0.404941421 |
| 0.230628582 | 0.413244404 | 0.406433379 | 0.414830695 |
| 0.396156396 | 0.187754006 | 0.44450808  | 0.287537158 |
| 0.149160232 | 0.02965169  | 0.510305791 | 0.436850532 |
| 0.341172936 | 0.219460949 | 0.065386231 | 0.375200767 |
| 1           | 0.347376194 | 0.269340672 | 0.468862306 |
| 0.040561609 | 0.465487212 | 0.347659721 | 0.180690598 |
| 0.426101579 | 0.351007736 | 0.462614791 | 0.082068931 |
| 0.400668296 | 0.482212778 | 0.344779566 | 0.250107621 |
| 0.406402677 | 0.453380845 | 0.062692122 | 0.394450254 |
| 0.400723803 | 0.061365902 | 0.523407291 | 0.168502462 |
| 0.036617418 | 0.442839328 | 0.447914071 | 0.113820567 |
| 0.111217893 | 0.420913986 | 0.084905341 | 0.349765005 |
| 0.523975424 | 0.459312    | 0.450018782 | 0.225200794 |
| 0.083783987 | 0.031628582 | 0.235836082 | 0.37787923  |
| 0.508248054 | 0.502204508 | 0.319098003 | 0.423570877 |
| 0.315363012 | 0.369275317 | 0.17335896  | 0.510507146 |
| 0.176627493 | 0.509185818 | 0.014158255 | 0.436268935 |
| 0.504633199 | 0.326797188 | 0.123422515 | 0.379611518 |
| 0.403013123 | 0.083360681 | 0.244925341 | 0.501428548 |
| 0.430409981 | 0.37383686  | 0.385834168 | 0.436718696 |
| 0.038544171 | 0.083806242 | 0.405637064 | 0.185630424 |
| 0.430322166 | 0.275134594 | 0.0513053   | 0.356149317 |
| 0.089331696 | 0.469556659 | 0.461632315 | 0.096589337 |
| 0.388266086 | 0.322283804 | 0.415505459 | 0.068728328 |
| 0.424323355 | 0.482886892 | 0.522880308 | 0.217224852 |
| 0.439668812 | 0.486541815 | 0.403661879 | 0.108493576 |
| 0.029464042 | 0.508183929 | 0.401432337 | 0.047485891 |
| 0.471391148 | 0.265412313 | 0.039362655 | 0.504209979 |
| 0.253647119 | 0.437715609 | 0.006421227 | 0.065126623 |
| 0.050477122 | 0.454633255 | 0.481587051 | 0.415547332 |
| 0.292702077 | 0.399658602 | 0.005853536 | 0.510015277 |
| 0.502857011 | 0.024977048 | 0.17032395  | 0.442042944 |
| 0.422364268 | 0.529756519 | 0.333526511 | 0.445561546 |
| 0.436260745 | 0.500699398 | 0.329933037 | 0.334174503 |
| 0.455409434 | 0.47866035  | 0.433627762 | 0.456280562 |
| 0.476077333 | 0.444926263 | 0.360061009 | 0.037833403 |
| 0.146187058 | 0.268889212 | 0.340978651 | 0.131728339 |
| 0.337331765 | 0.19380855  | 0.468488228 | 0.468578717 |
| 0.472479579 | 0.010617436 | 0.215265402 | 0.434197581 |
| 0.443430214 | 0.465611852 | 0.024310258 | 0.006753463 |

|             |             |             |             |
|-------------|-------------|-------------|-------------|
| 0.007288683 | 0.034505322 | 0.409631738 | 0.279351737 |
| 0.48153336  | 0.294424944 | 0.012224246 | 0.079993539 |
| 0.333068136 | 0.416691801 | 0.511131107 | 0.432484807 |
| 0.428463169 | 0.123046928 | 0.362027504 | 0.4365656   |
| 0.101812328 | 0.314285127 | 0.484022423 | 0.487697645 |
| 0.055891857 | 0.285966009 | 0.371276901 | 0.488981015 |
| 0.070739281 | 0.372530853 | 0.442553491 | 0.402757046 |
| 0.016598762 | 0.1138731   | 0.098244507 | 0.450945132 |
| 0.493882123 | 0.142594955 | 0.070164226 | 0.167651869 |
| 0.204840417 | 0.453167357 | 0.247687877 | 0.510129829 |
| 0.457416274 | 0.470224722 | 0.099455196 | 0.485343652 |
| 0.07446545  | 0.492086072 | 0.370224457 | 0.076052032 |
| 0.306790881 | 0.02194055  | 0.454388286 | 0.19624794  |
| 0.377881789 | 0.407065417 | 0.210222996 | 0.026050565 |
| 0.169428757 | 0.085612915 | 0.473846102 | 0.455348119 |
| 0.042281959 | 0.296750326 | 0.338073839 | 0.421548326 |
| 0.340391621 | 0.47768012  | 0.506951526 | 0.405596673 |
| 0.150202905 | 0.131506955 | 0.437701682 | 0.395732306 |
| 0.301277678 | 0.47689953  | 0.368970461 | 0.516430113 |
| 0.406014161 | 0.443779547 | 0.463622937 | 0.407455489 |
| 0.273714962 | 0.406025364 | 0.428390973 | 0.047924058 |
| 0.403031681 | 0.480573882 | 0.373659699 | 0.209103829 |
| 0.338000007 | 0.376718189 | 0.068492983 | 0.169585363 |
| 0.317494368 | 0.352252898 | 0.22881851  | 0.458485018 |
| 0.397412402 | 0.399638945 | 0.062646763 | 0.095172034 |
| 0.540946313 | 0.427772131 | 0.188912059 | 0.457092345 |
| 0.216300862 | 0.405931849 | 0.443156138 | 0.445371533 |
| 0.363437269 | 0.456671119 | 0.446430919 | 0.436697576 |
| 0.442830626 | 0.332104582 | 0.52587907  | 0.113535284 |
| 0.108201049 | 0.40374428  | 0.174111678 | 0.126886656 |
| 0.217279726 | 0.042893316 | 0.289004819 | 0.451585803 |
| 0.363291914 | 0.45378139  | 0.337771166 | 0.114570351 |
| 0.363891746 | 0.34157856  | 0.409195328 | 0.287119911 |
| 0.139864205 | 0.507636055 | 0.017754837 | 0.087901972 |
| 0.38716142  | 0.442925856 | 0.411857751 | 0.290375098 |
| 0.311188182 | 0.160801028 | 0.379564982 | 0.334895356 |
| 0.388596702 | 0.35002301  | 0.439563753 | 0.054155673 |
| 0.043908308 | 0.482177691 | 0.373311303 | 0.02627759  |
| 0.106548088 | 0.368810293 | 0.310193955 | 0.315827004 |
| 0.031485937 | 0.474923407 | 0.380894887 | 0.439576682 |
| 0.399590412 | 0.100239211 | 0.344476381 | 0.106809619 |
| 0.080995255 | 0.448398869 | 0.388104348 | 0.508589454 |
| 0.346091277 | 0.469987475 | 0.439647764 | 0.441794763 |
| 0.127296843 | 0.345683138 | 0.055890555 | 0.449426094 |
| 0.403058171 |             |             |             |
| IFNGR1      | 0.219410892 | 0.41241728  | 0.118238913 |
| 0.280346566 | 0.131552035 | 0.234028471 | 0.132867601 |
| 0.13679862  | 0.057287001 | 0.01407858  | 0.013264406 |
| 0.156381538 | 0.087922741 | 0.161444169 | 0.184977076 |
| 0.215496202 | 0.036412971 | 0.118771203 | 0.10587895  |
| 0.213592176 | 0.103502864 | 0.178669665 | 0.057425796 |
| 0.063734899 | 0.029698457 | 0.031125876 | 0.077803874 |
| 0.306389696 | 0.034516602 | 0.207793601 | 0.266148352 |
| 0.02074892  | 0.268371606 | 0.421365088 | 0.184085913 |

|             |             |             |             |
|-------------|-------------|-------------|-------------|
| 0.398445015 | 0.221900589 | 0.002361547 | 0.19254821  |
| 0.309098824 | 0.244133952 | 0.232169772 | 0.141043891 |
| 0.0340673   | 0.43527854  | 0.131424362 | 0.115810607 |
| 0.145711491 | 0.014784204 | 0.197118932 | 0.405631393 |
| 0.413199717 | 0.188360185 | 0.156860583 | 0.112032625 |
| 0.092649585 | 0.161036819 | 0.071260438 | 0.260638788 |
| 0.11208755  | 0.171829815 | 0.391001292 | 0.087530249 |
| 0.073414663 | 0.130776085 | 0.03004802  | 0.146601366 |
| 0.081004846 | 0.302488397 | 0.012532569 | 0.138438626 |
| 0.007262559 | 0.20061928  | 0.10114379  | 0.088267066 |
| 0.014492691 | 0.01553383  | 0.038470574 | 0.178005768 |
| 0.311988928 | 0.335658467 | 0.304718123 | 0.311289682 |
| 0.057672145 | 0.07759171  | 0.096374233 | 0.072453152 |
| 0.310986996 | 0.122994614 | 0.061566387 | 0.204017833 |
| 0.316228902 | 0.399509446 | 0.060617514 | 0.067280931 |
| 0.342334785 | 0.390213796 | 0.172641078 | 0.148247141 |
| 0.134124436 | 0.008155541 | 0.378698631 | 0.350990374 |
| 0.324039637 | 0.069778423 | 0.044654284 | 0.306043293 |
| 0.020343218 | 0.164611188 | 0.165977413 | 0.040051461 |
| 0.328615187 | 0.022058536 | 0.051087617 | 0.169964189 |
| 0.063528055 | 0.281800631 | 0.377870485 | 0.099199721 |
| 0.111055003 | 0.009520671 | 0.040724997 | 0.0079832   |
| 0.136033513 | 0.023812171 | 0.423614117 | 0.342925353 |
| 0.132500562 | 0.112385354 | 0.130414195 | 0.000158949 |
| 0.006946988 | 0.039239288 | 0.263345007 | 0.119960107 |
| 0.234154904 | 0.257316622 | 0.102927966 | 0.284646984 |
| 0.189857115 | 0.293599395 | 0.087902537 | 0.057702562 |
| 0.174646854 | 0.037983235 | 0.086031522 | 0.169314071 |
| 0.100592051 | 0.080531672 | 0.055472778 | 0.36968688  |
| 0.403229833 | 0.044617487 | 0.137212035 | 0.197570955 |
| 0.1632969   | 0.093889382 | 0.048258911 | 0.119431306 |
| 0.042470454 | 0.366733248 | 0.005213861 | 0.153680605 |
| 0.11776467  | 0.031145444 | 0.004007569 | 0.165466517 |
| 0.177078961 | 0.341610954 | 0.385762817 | 0.040169843 |
| 0.131789075 | 0.158296441 | 0.167923953 | 0.283660575 |
| 0.01779731  | 0.01988991  | 0.153170905 | 0.368473617 |
| 0.252724151 | 0.320042825 | 0.111430136 | 0.085309906 |
| 0.084121491 | 0.273992697 | 0.000993945 | 0.429452593 |
| 0.395300345 | 0.171960126 | 0.15989567  | 0.134124979 |
| 0.119227611 | 0.326499258 | 0.019499006 | 0.19165185  |
| 0.234262276 | 0.032024008 | 0.328935817 | 0.052623929 |
| 0.354565686 | 0.018350845 | 0.163729791 | 0.244286687 |
| 0.229138181 | 0.00440212  | 0.199695153 | 0.240565826 |
| 0.004282051 | 0.117609673 | 0.233705738 | 0.218991361 |
| 0.170990225 | 0.234296627 | 0.306399565 | 0.115044266 |
| 0.145486276 | 0.114326472 | 0.004204042 | 0.080620565 |
| 0.235070553 | 0.120391579 | 0.412433837 | 0.135587518 |
| 0.186873803 | 0.396647279 | 0.265189628 | 0.114351091 |
| 0.031284979 | 0.161108387 | 0.028372137 | 0.12359155  |
| 0.276809574 | 0.087979816 | 0.137472401 | 0.029525894 |
| 0.017959875 | 0.387186977 | 0.032545476 | 0.052902226 |
| 0.020724327 | 0.187748571 | 0.111195476 | 0.150537821 |
| 0.089723774 | 0.05973122  | 0.111928289 | 0.140326902 |
| 0.050674717 | 0.037224687 | 0.001078377 | 0.11980373  |

|             |             |             |             |
|-------------|-------------|-------------|-------------|
| 0.071362365 | 0.145430001 | 0.158455499 | 0.25026805  |
| 0.135953534 | 0.056652357 | 0.13791752  | 0.069383429 |
| 0.032077733 | 0.005091055 | 0.394877966 | 0.18397551  |
| 0.295865529 | 0.082616501 | 0.011682974 | 0.133730241 |
| 0.347376194 | 1           | 0.168269514 | 0.383956784 |
| 0.012177942 | 0.301656381 | 0.114325328 | 0.040279574 |
| 0.108955495 | 0.110167704 | 0.319189176 | 0.055336008 |
| 0.164103007 | 0.407499293 | 0.090605914 | 0.067956036 |
| 0.377988501 | 0.208875925 | 0.027768268 | 0.276607339 |
| 0.275544904 | 0.012971817 | 0.381014318 | 0.027828638 |
| 0.005661321 | 0.185908484 | 0.247930687 | 0.023639008 |
| 0.022722186 | 0.17063285  | 0.069954425 | 0.088925337 |
| 0.395696767 | 0.202635252 | 0.300101843 | 0.043659112 |
| 0.028692731 | 0.006354917 | 0.041422169 | 0.109822264 |
| 0.42609937  | 0.347470512 | 0.080183513 | 0.118883774 |
| 0.098602972 | 0.116262733 | 0.120611263 | 0.363646842 |
| 0.038424045 | 0.394779623 | 0.002492505 | 0.223034154 |
| 0.409988848 | 0.181666387 | 0.026023123 | 0.183514131 |
| 0.353630821 | 0.031109215 | 0.078062663 | 0.411261801 |
| 0.336337515 | 0.12668941  | 0.146121582 | 0.171600744 |
| 0.02776478  | 0.038559443 | 0.12513814  | 0.034075527 |
| 0.155772058 | 0.080510028 | 0.00590101  | 0.158487691 |
| 0.030432113 | 0.401750012 | 0.257010517 | 0.031315258 |
| 0.226235657 | 0.16228262  | 0.120322721 | 0.019289424 |
| 0.276533502 | 0.347879096 | 0.427379311 | 0.076610619 |
| 0.236298469 | 0.357748063 | 0.130542645 | 0.019372343 |
| 0.003825681 | 0.391214151 | 0.243858138 | 0.02157434  |
| 0.305553382 | 0.196577184 | 0.014028831 | 0.410735927 |
| 0.087236459 | 0.391710459 | 0.01391169  | 0.013697477 |
| 0.005959548 | 0.24814732  | 0.420553012 | 0.236833076 |
| 0.222978547 | 0.139710699 | 0.001559659 | 0.352379539 |
| 0.41325341  | 0.003290295 | 0.027893946 | 0.268699857 |
| 0.218436131 | 0.423392224 | 0.085941872 | 0.283098003 |
| 0.157912774 | 0.395433571 | 0.140150164 | 0.088482606 |
| 0.343278547 | 0.341376619 | 0.280798577 | 0.393272102 |
| 0.313794897 | 0.166973028 | 0.123420185 | 0.017509861 |
| 0.048127087 | 0.165456382 | 0.191246799 | 0.046427984 |
| 0.226090042 | 0.048821979 | 0.353368332 | 0.2846924   |
| 0.318793529 | 0.001345966 | 0.119104344 | 0.283140929 |
| 0.363232674 | 0.344295204 | 0.004165751 | 0.003941129 |
| 0.002773535 | 0.006207829 | 0.168857039 | 0.063950654 |
| 0.353513752 | 0.203425224 | 0.002616214 | 0.052985371 |
| 0.132784454 | 0.129297116 | 0.401763132 | 0.189607879 |
| 0.228049556 | 0.025125999 | 0.194607035 | 0.207588699 |
| 0.020487778 | 0.22778899  | 0.336242031 | 0.428133493 |
| 0.008084459 | 0.066906319 | 0.130878472 | 0.356584211 |
| 0.010521186 | 0.090439259 | 0.169981976 | 0.153255502 |
| 0.001656475 | 0.020945129 | 0.021471882 | 0.224281626 |
| 0.388298483 | 0.036316907 | 0.015093088 | 0.111384675 |
| 0.086310685 | 0.291336559 | 0.080375745 | 0.349572485 |
| 0.327709352 | 0.268079069 | 0.01255222  | 0.4150256   |
| 0.019561041 | 0.404358888 | 0.087396656 | 0.064950901 |
| 0.075963458 | 0.0039621   | 0.322271615 | 0.079569068 |
| 0.175174447 | 0.225541807 | 0.068277732 | 0.002509083 |

|             |             |             |             |
|-------------|-------------|-------------|-------------|
| 0.036827498 | 0.015462021 | 0.320298057 | 0.258908788 |
| 0.004473374 | 0.110631669 | 0.087332683 | 0.165880437 |
| 0.191764025 | 0.26404561  | 0.431190438 | 0.180689784 |
| 0.071315796 | 0.017706336 | 0.245263132 | 0.231992026 |
| 0.137793263 | 0.303872846 | 0.121884039 | 0.36930939  |
| 0.260060497 | 0.338090052 | 0.331938727 | 0.166045407 |
| 0.048724781 | 0.200086282 | 0.286581249 | 0.035798399 |
| 0.137323156 | 0.295333951 | 0.144191827 | 0.057419091 |
| 0.090101311 | 0.099902377 | 0.018339095 | 0.072433388 |
| 0.07730618  | 0.235189016 | 0.068767223 | 0.257191941 |
| 0.192479316 | 0.253188992 | 0.020242255 | 0.022952596 |
| 0.413085025 | 0.364386422 | 0.129002089 | 0.255414151 |
| 0.047923504 | 0.124935978 | 0.240608206 | 0.217498175 |
| 0.117143313 | 0.31250019  | 0.292547203 | 0.288605542 |
| 0.409753383 | 0.117931274 | 0.426256225 | 0.101191396 |
| 0.027949033 | 0.160133277 | 0.060204491 | 0.022343322 |
| 0.061654147 | 0.007740954 | 0.073695771 | 0.192286508 |
| 0.097881085 | 0.163200106 | 0.14209333  | 0.031881045 |
| 0.083289205 | 0.119889627 | 0.11474777  | 0.150707666 |
| 0.048048294 | 0.42610072  | 0.003776307 | 0.015399337 |
| 0.096281148 | 0.283312902 | 0.113964326 | 0.073930314 |
| 0.073113761 | 0.024096556 | 0.105235996 | 0.195127589 |
| 0.195017401 | 0.110069639 | 0.301542951 | 0.033450057 |
| 0.018868216 | 0.315018953 | 0.166110831 | 0.002921128 |
| 0.017354791 | 0.192356004 | 0.085499226 | 0.119809649 |
| 0.003252083 | 0.332587053 | 0.207378203 | 0.129600348 |
| 0.167224475 | 0.022835628 | 0.333922202 | 0.038687001 |
| 0.025423608 | 0.388100896 | 0.110314068 | 0.38448854  |
| 0.084989167 | 0.236673939 | 0.40851131  | 0.2861472   |
| 0.037765645 | 0.107754551 | 0.028048875 | 0.2929995   |
| 0.145393008 |             |             |             |

|             |             |             |             |
|-------------|-------------|-------------|-------------|
| IFT57       | 0.252452199 | 0.341942681 | 0.10605668  |
| 0.232642931 | 0.114153332 | 0.215570304 | 0.082973437 |
| 0.129273864 | 0.021639145 | 0.001763695 | 0.001591876 |
| 0.143688239 | 0.023553638 | 0.069114375 | 0.085260044 |
| 0.208592691 | 0.013309167 | 0.118510671 | 0.084319876 |
| 0.23354132  | 0.057389413 | 0.1475994   | 0.032160923 |
| 0.037389101 | 0.009104649 | 0.010786129 | 0.028186705 |
| 0.294113382 | 0.013051249 | 0.157606746 | 0.292771531 |
| 0.017985989 | 0.284797267 | 0.357233535 | 0.130903078 |
| 0.32795922  | 0.251174634 | 0.007125227 | 0.07359726  |
| 0.344774914 | 0.195056621 | 0.244154792 | 0.118276028 |
| 0.013019538 | 0.38787446  | 0.086343263 | 0.115137964 |
| 0.10711679  | 0.003695786 | 0.131566711 | 0.395880857 |
| 0.311028315 | 0.135673696 | 0.118767996 | 0.048950642 |
| 0.017745791 | 0.113188954 | 0.019192802 | 0.309735206 |
| 0.069136185 | 0.11198926  | 0.307133516 | 0.031961478 |
| 0.046275717 | 0.123198183 | 0.019469744 | 0.115155365 |
| 0.040083374 | 0.339143458 | 0.017048188 | 0.140314178 |
| 0.002051561 | 0.23086746  | 0.110939184 | 0.03226021  |
| 0.007395152 | 0.002400375 | 0.023982974 | 0.151006327 |
| 0.29911222  | 0.340175332 | 0.242160101 | 0.247275726 |
| 0.020125536 | 0.068968829 | 0.077958908 | 0.029273174 |
| 0.311953426 | 0.04935916  | 0.042058203 | 0.180568123 |

|             |             |             |             |
|-------------|-------------|-------------|-------------|
| 0.25028008  | 0.318251867 | 0.027777846 | 0.053910801 |
| 0.245024435 | 0.360380456 | 0.113037579 | 0.086709853 |
| 0.040858765 | 0.006827046 | 0.311720776 | 0.279762617 |
| 0.34187128  | 0.03813902  | 0.021228514 | 0.314649032 |
| 0.014038117 | 0.10185264  | 0.144037881 | 0.028053567 |
| 0.306009755 | 0.009238239 | 0.029777438 | 0.138673001 |
| 0.066543276 | 0.270498878 | 0.298448731 | 0.064399534 |
| 0.100632285 | 0.003502238 | 0.010825268 | 0.008284347 |
| 0.076337916 | 0.010452712 | 0.357509759 | 0.268276505 |
| 0.100186073 | 0.04957251  | 0.092190085 | 0.000354587 |
| 0.003340385 | 0.039412063 | 0.237430127 | 0.138660596 |
| 0.256438071 | 0.261930287 | 0.029776967 | 0.306526184 |
| 0.146657138 | 0.237252084 | 0.033548384 | 0.042665881 |
| 0.148862846 | 0.039230585 | 0.073684854 | 0.144175133 |
| 0.050081753 | 0.067398976 | 0.03138617  | 0.305318867 |
| 0.398683419 | 0.022674223 | 0.133950523 | 0.184057479 |
| 0.056273374 | 0.067522323 | 0.03424892  | 0.052313464 |
| 0.020857959 | 0.297704153 | 0.002941951 | 0.174351344 |
| 0.034883441 | 0.011971186 | 0.011346148 | 0.161660536 |
| 0.071862627 | 0.233621352 | 0.345128176 | 0.031158539 |
| 0.069752818 | 0.130196005 | 0.19351415  | 0.185573477 |
| 0.001265825 | 0.019397216 | 0.1838958   | 0.290147073 |
| 0.274244047 | 0.284354263 | 0.06863302  | 0.053442819 |
| 0.063578703 | 0.252399027 | 0.001346173 | 0.363848781 |
| 0.315351447 | 0.170794479 | 0.10431458  | 0.147369221 |
| 0.062971865 | 0.259972904 | 0.026615159 | 0.182313062 |
| 0.28943769  | 0.026742037 | 0.276595295 | 0.023835601 |
| 0.325830827 | 0.00654512  | 0.101574302 | 0.191827158 |
| 0.169149686 | 0.004379939 | 0.145961359 | 0.243291357 |
| 0.003170381 | 0.068775393 | 0.268419924 | 0.195066352 |
| 0.125334482 | 0.227738966 | 0.2671935   | 0.050810506 |
| 0.106656321 | 0.092319667 | 0.00449514  | 0.064047364 |
| 0.239167813 | 0.056291858 | 0.365260288 | 0.084372887 |
| 0.238620704 | 0.33191379  | 0.234932604 | 0.042198156 |
| 0.013535667 | 0.150233766 | 0.013622498 | 0.071744542 |
| 0.282276983 | 0.024658547 | 0.096468867 | 0.036183691 |
| 0.008426834 | 0.306093162 | 0.015313801 | 0.024268319 |
| 0.009278566 | 0.12682791  | 0.102664496 | 0.035312641 |
| 0.017426782 | 0.030166483 | 0.046507472 | 0.060109757 |
| 0.025643833 | 0.014048902 | 0.003214458 | 0.041097185 |
| 0.011823046 | 0.041179576 | 0.046785055 | 0.254613359 |
| 0.073522405 | 0.015188419 | 0.073104673 | 0.040763773 |
| 0.014864929 | 0.002840129 | 0.331283136 | 0.193821971 |
| 0.33151918  | 0.049812672 | 0.008708347 | 0.043707247 |
| 0.269340672 | 0.168269514 | 1           | 0.306134499 |
| 0.013012272 | 0.269320185 | 0.031588934 | 0.016197564 |
| 0.040492605 | 0.064566452 | 0.288759268 | 0.03026494  |
| 0.220739197 | 0.343385101 | 0.096430074 | 0.023659257 |
| 0.321373417 | 0.206635232 | 0.013844852 | 0.283952237 |
| 0.271153599 | 0.005743533 | 0.307354246 | 0.013231287 |
| 0.003784301 | 0.163518848 | 0.170413803 | 0.013649865 |
| 0.01194643  | 0.073047596 | 0.046518395 | 0.074344562 |
| 0.311891956 | 0.163611628 | 0.218068829 | 0.02787246  |
| 0.009264665 | 0.00044665  | 0.025400488 | 0.116441742 |



|             |             |             |             |
|-------------|-------------|-------------|-------------|
| 0.362722787 | 0.275229406 | 0.075450675 | 0.052273606 |
| 0.087526426 | 0.04109634  | 0.117732002 | 0.279984345 |
| 0.053682483 | 0.353373616 | 0.002245866 | 0.180220227 |
| 0.328908526 | 0.182340391 | 0.008130139 | 0.14565384  |
| 0.317325804 | 0.016180186 | 0.086228089 | 0.330630185 |
| 0.304706056 | 0.05689566  | 0.052784158 | 0.192804158 |
| 0.012760351 | 0.024315069 | 0.113125118 | 0.017128383 |
| 0.064392764 | 0.044089936 | 0.003030115 | 0.127932389 |
| 0.007772523 | 0.322012167 | 0.244772177 | 0.009870793 |
| 0.147861468 | 0.1393768   | 0.115586    | 0.010978738 |
| 0.209176894 | 0.301705924 | 0.353428059 | 0.076463033 |
| 0.22189206  | 0.263709296 | 0.087631988 | 0.014642744 |
| 0.002228254 | 0.319000761 | 0.28769524  | 0.005209721 |
| 0.271551687 | 0.193805969 | 0.001299583 | 0.357125079 |
| 0.068966307 | 0.364364169 | 0.006012067 | 0.020056825 |
| 0.006110526 | 0.223629276 | 0.341893912 | 0.28095479  |
| 0.083050672 | 0.186711299 | 0.001604639 | 0.299846392 |
| 0.322039231 | 0.001448472 | 0.014935988 | 0.206596352 |
| 0.153051183 | 0.375248137 | 0.037767624 | 0.202870992 |
| 0.109344954 | 0.3066624   | 0.052778609 | 0.06481246  |
| 0.269052951 | 0.268535882 | 0.291948252 | 0.371080985 |
| 0.261864949 | 0.156316041 | 0.104131923 | 0.005887352 |
| 0.020924249 | 0.132455532 | 0.049150811 | 0.009550652 |
| 0.291201744 | 0.016581394 | 0.321896819 | 0.252093143 |
| 0.242330367 | 0.00108091  | 0.086345754 | 0.245932853 |
| 0.338778364 | 0.32237913  | 0.009694387 | 0.002533834 |
| 0.003396489 | 0.000939598 | 0.201855266 | 0.046918735 |
| 0.293662341 | 0.059579526 | 0.001477015 | 0.044862097 |
| 0.069189569 | 0.097014192 | 0.319437286 | 0.189974909 |
| 0.218662175 | 0.017930839 | 0.04566794  | 0.227020339 |
| 0.006971548 | 0.304176903 | 0.252227811 | 0.361200504 |
| 0.009964739 | 0.045678609 | 0.146168927 | 0.30127899  |
| 0.003732005 | 0.081550348 | 0.158396949 | 0.051434748 |
| 0.005272056 | 0.010676853 | 0.009445937 | 0.226553411 |
| 0.309928848 | 0.006649645 | 0.002618786 | 0.075842879 |
| 0.024030898 | 0.272208042 | 0.027130605 | 0.290987552 |
| 0.287197359 | 0.238528423 | 0.007978623 | 0.352719491 |
| 0.005837487 | 0.323636129 | 0.047371006 | 0.027874253 |
| 0.065051316 | 0.004866194 | 0.280993303 | 0.012805929 |
| 0.10796677  | 0.28711417  | 0.031682971 | 0.00198003  |
| 0.020324809 | 0.007648122 | 0.252392018 | 0.216267841 |
| 0.005190325 | 0.087289609 | 0.07695201  | 0.203006776 |
| 0.189825374 | 0.200325007 | 0.360880725 | 0.121183513 |
| 0.032703993 | 0.016992017 | 0.272311482 | 0.259553333 |
| 0.107949766 | 0.254207554 | 0.03573845  | 0.314508658 |
| 0.294448134 | 0.340830378 | 0.272091923 | 0.14200852  |
| 0.020804637 | 0.220705807 | 0.217443965 | 0.008922762 |
| 0.14035118  | 0.228933843 | 0.182799343 | 0.015092455 |
| 0.037028846 | 0.080202253 | 0.029632295 | 0.093459894 |
| 0.047374474 | 0.232426429 | 0.027944302 | 0.252318708 |
| 0.259001975 | 0.276392998 | 0.036900907 | 0.008669305 |
| 0.350618667 | 0.365326168 | 0.080652878 | 0.212970958 |
| 0.036104738 | 0.086551157 | 0.220716331 | 0.192164256 |
| 0.074787815 | 0.236779824 | 0.295949724 | 0.218879853 |

|             |             |             |             |
|-------------|-------------|-------------|-------------|
| 0.353629885 | 0.095886998 | 0.349457534 | 0.118212671 |
| 0.011320082 | 0.174773684 | 0.013394229 | 0.014218614 |
| 0.030024561 | 0.004751694 | 0.028254119 | 0.194447523 |
| 0.041324159 | 0.128180123 | 0.121575754 | 0.018550658 |
| 0.073170254 | 0.142658173 | 0.110080975 | 0.065262561 |
| 0.013094974 | 0.331057966 | 0.001890111 | 0.010091659 |
| 0.045082738 | 0.231516333 | 0.060235996 | 0.039820465 |
| 0.028190888 | 0.01959017  | 0.073316384 | 0.185474697 |
| 0.06183877  | 0.065895898 | 0.238334166 | 0.029327797 |
| 0.01291925  | 0.27176291  | 0.167942333 | 0.004519057 |
| 0.016923079 | 0.249244379 | 0.086830773 | 0.037780552 |
| 0.002417986 | 0.251552114 | 0.10265451  | 0.116163115 |
| 0.176321796 | 0.020190967 | 0.378410537 | 0.03996247  |
| 0.033442025 | 0.366065612 | 0.103495868 | 0.308300354 |
| 0.07638992  | 0.191484316 | 0.395559331 | 0.246124942 |
| 0.044267711 | 0.121611119 | 0.014266616 | 0.300628832 |
| 0.059342852 |             |             |             |

| IFT80       | 0.399044869 | 0.516783635 | 0.360926095 |
|-------------|-------------|-------------|-------------|
| 0.450354745 | 0.42744466  | 0.42345842  | 0.275427601 |
| 0.235214446 | 0.107060112 | 0.01355089  | 0.036743505 |
| 0.411442627 | 0.24836656  | 0.345481323 | 0.35641835  |
| 0.419972097 | 0.149010176 | 0.335075574 | 0.281639165 |
| 0.430561004 | 0.15293981  | 0.412979501 | 0.126576987 |
| 0.258895698 | 0.111570715 | 0.092108054 | 0.262950463 |
| 0.4507004   | 0.101288655 | 0.410337295 | 0.427735386 |
| 0.097115609 | 0.434209682 | 0.513228011 | 0.436937603 |
| 0.502985063 | 0.3785042   | 0.012877446 | 0.374427403 |
| 0.414538739 | 0.434515015 | 0.435737604 | 0.372739687 |
| 0.067517704 | 0.495356888 | 0.305502129 | 0.372311218 |
| 0.262698856 | 0.044177156 | 0.307884869 | 0.453305015 |
| 0.486390874 | 0.451858414 | 0.285626671 | 0.223032247 |
| 0.257316164 | 0.309558354 | 0.262356716 | 0.378145349 |
| 0.285643029 | 0.237593784 | 0.484361162 | 0.132946058 |
| 0.190114678 | 0.298082476 | 0.145675973 | 0.320500415 |
| 0.314254016 | 0.411253651 | 0.0266756   | 0.366599457 |
| 0.008002619 | 0.408578759 | 0.353037757 | 0.286215116 |
| 0.05163808  | 0.038401471 | 0.172673698 | 0.40200276  |
| 0.452822291 | 0.428948972 | 0.451692863 | 0.443652788 |
| 0.200645501 | 0.28509446  | 0.355922245 | 0.213565669 |
| 0.430855576 | 0.248225668 | 0.123886452 | 0.419554413 |
| 0.450944575 | 0.511935042 | 0.210508472 | 0.253249889 |
| 0.456278032 | 0.47357679  | 0.428814377 | 0.442244347 |
| 0.345508678 | 0.044842959 | 0.44835384  | 0.480124787 |
| 0.407283542 | 0.279002977 | 0.164062018 | 0.442629655 |
| 0.071459659 | 0.367416404 | 0.392169345 | 0.159533579 |
| 0.454946407 | 0.031859057 | 0.209097618 | 0.42380495  |
| 0.21117125  | 0.437175919 | 0.496259675 | 0.238933443 |
| 0.38438811  | 0.028219041 | 0.131378397 | 0.035560617 |
| 0.355863435 | 0.118137526 | 0.490521961 | 0.468345121 |
| 0.293916489 | 0.390014051 | 0.317520992 | 0.002738777 |
| 0.030772961 | 0.164323087 | 0.430431753 | 0.360021435 |
| 0.429418302 | 0.352189264 | 0.275269695 | 0.41149759  |
| 0.422906611 | 0.450370779 | 0.084211297 | 0.130603902 |
| 0.43763521  | 0.167393218 | 0.267604993 | 0.451973715 |

|             |             |             |             |
|-------------|-------------|-------------|-------------|
| 0.319062397 | 0.155035503 | 0.163154885 | 0.486804712 |
| 0.43851964  | 0.116649986 | 0.34662525  | 0.415686637 |
| 0.402211345 | 0.341166529 | 0.136640097 | 0.335050997 |
| 0.085594861 | 0.467235918 | 0.028370182 | 0.354159547 |
| 0.271953309 | 0.151067541 | 0.012344739 | 0.32639394  |
| 0.348410643 | 0.451531771 | 0.4658868   | 0.125510526 |
| 0.374784057 | 0.412994882 | 0.365808687 | 0.460070064 |
| 0.02371488  | 0.054508137 | 0.31506784  | 0.487896496 |
| 0.356251882 | 0.451004447 | 0.320917753 | 0.2903031   |
| 0.288646911 | 0.442339539 | 0.002283361 | 0.499939551 |
| 0.508443583 | 0.333993699 | 0.434243147 | 0.393528358 |
| 0.361859786 | 0.462704907 | 0.039373094 | 0.424929217 |
| 0.37283681  | 0.095480039 | 0.458046093 | 0.182484088 |
| 0.447032633 | 0.056968313 | 0.386899109 | 0.40976132  |
| 0.421645801 | 0.011661885 | 0.307580238 | 0.431585118 |
| 0.025310397 | 0.162940909 | 0.425099084 | 0.434919751 |
| 0.41545055  | 0.426309239 | 0.453000037 | 0.343994772 |
| 0.434613    | 0.27559619  | 0.014091068 | 0.298532107 |
| 0.415724946 | 0.375592079 | 0.45474568  | 0.294171745 |
| 0.360304065 | 0.471913954 | 0.406898187 | 0.253797978 |
| 0.067779266 | 0.376207501 | 0.0347728   | 0.349355169 |
| 0.380120913 | 0.187177832 | 0.383753377 | 0.133297491 |
| 0.076706068 | 0.505566778 | 0.150922194 | 0.218907946 |
| 0.102458672 | 0.456820846 | 0.288849275 | 0.325776075 |
| 0.261053482 | 0.188309763 | 0.345679814 | 0.395853568 |
| 0.072173059 | 0.122101372 | 0.010060589 | 0.387642138 |
| 0.197128548 | 0.394655001 | 0.400996058 | 0.429730695 |
| 0.379713219 | 0.153413028 | 0.404298326 | 0.252264565 |
| 0.114738186 | 0.019459706 | 0.496352984 | 0.409749999 |
| 0.374665909 | 0.195129065 | 0.04648452  | 0.373213849 |
| 0.468862306 | 0.383956784 | 0.306134499 | 1           |
| 0.030211164 | 0.445019569 | 0.313318779 | 0.14151388  |
| 0.383447006 | 0.311194461 | 0.452979087 | 0.083313387 |
| 0.407964367 | 0.480634621 | 0.304902132 | 0.208948144 |
| 0.414195303 | 0.440475035 | 0.051628113 | 0.409208248 |
| 0.415560781 | 0.043630042 | 0.503092905 | 0.126897771 |
| 0.024225169 | 0.415296086 | 0.441101743 | 0.085925759 |
| 0.08340241  | 0.405782279 | 0.085004669 | 0.300350924 |
| 0.503624558 | 0.422934551 | 0.457064594 | 0.185025896 |
| 0.065720373 | 0.021280558 | 0.189182581 | 0.355785197 |
| 0.511751784 | 0.477741064 | 0.274872862 | 0.379212905 |
| 0.279420528 | 0.340887227 | 0.199998672 | 0.48462986  |
| 0.152556794 | 0.501509291 | 0.009048346 | 0.420115456 |
| 0.504650264 | 0.356440433 | 0.092417933 | 0.38500491  |
| 0.427190533 | 0.067535376 | 0.223395203 | 0.496422359 |
| 0.440185766 | 0.347652858 | 0.366082794 | 0.414428393 |
| 0.033458411 | 0.074525852 | 0.376860834 | 0.151772654 |
| 0.422456081 | 0.239621525 | 0.036830624 | 0.367805586 |
| 0.069824934 | 0.468534314 | 0.441758888 | 0.076449564 |
| 0.416114295 | 0.3385668   | 0.369791493 | 0.052463557 |
| 0.415882539 | 0.467677662 | 0.520047762 | 0.198544319 |
| 0.432154526 | 0.46724394  | 0.38224773  | 0.081044322 |
| 0.018555615 | 0.499204366 | 0.413044953 | 0.037500493 |
| 0.458364323 | 0.305875606 | 0.02859788  | 0.495549058 |

|             |             |             |             |
|-------------|-------------|-------------|-------------|
| 0.225275472 | 0.452555812 | 0.006453535 | 0.056034371 |
| 0.034213221 | 0.431268388 | 0.485879292 | 0.420956814 |
| 0.332477675 | 0.377356098 | 0.003614059 | 0.485241193 |
| 0.496570937 | 0.015376126 | 0.131227574 | 0.440817829 |
| 0.409126915 | 0.521526691 | 0.296523855 | 0.43537075  |
| 0.41407491  | 0.496151696 | 0.312683335 | 0.287641643 |
| 0.460024779 | 0.463470488 | 0.436273925 | 0.454853288 |
| 0.466363225 | 0.409892747 | 0.327882781 | 0.029936806 |
| 0.127470316 | 0.289622683 | 0.353710537 | 0.114055896 |
| 0.368888145 | 0.155743498 | 0.45294947  | 0.451864042 |
| 0.442510844 | 0.006250177 | 0.21427746  | 0.43930332  |
| 0.452056345 | 0.453895982 | 0.017460471 | 0.005571708 |
| 0.005637853 | 0.02252204  | 0.407901122 | 0.233961834 |
| 0.461711344 | 0.324242766 | 0.007818927 | 0.075812722 |
| 0.310826788 | 0.377563674 | 0.501809011 | 0.402140873 |
| 0.41513862  | 0.095346253 | 0.367504912 | 0.414256123 |
| 0.075393877 | 0.343034886 | 0.454158481 | 0.490373062 |
| 0.039516212 | 0.242589718 | 0.365627928 | 0.462505644 |
| 0.054881768 | 0.32258046  | 0.421467257 | 0.378963199 |
| 0.010916617 | 0.084682504 | 0.074709596 | 0.426788674 |
| 0.492032254 | 0.110475091 | 0.049212074 | 0.188399326 |
| 0.180329571 | 0.444259733 | 0.210145102 | 0.478065803 |
| 0.458089361 | 0.447589813 | 0.07155656  | 0.485450658 |
| 0.0578173   | 0.490064182 | 0.321857085 | 0.078318128 |
| 0.268790843 | 0.014698824 | 0.4403137   | 0.178592597 |
| 0.38903042  | 0.413199248 | 0.189086965 | 0.016135709 |
| 0.143555255 | 0.061193362 | 0.460759326 | 0.434903956 |
| 0.027852456 | 0.280403041 | 0.294193593 | 0.399757617 |
| 0.357084721 | 0.459656749 | 0.509320503 | 0.418680756 |
| 0.136646404 | 0.105300846 | 0.432372512 | 0.408109795 |
| 0.304470453 | 0.44904476  | 0.338885367 | 0.493674991 |
| 0.41532162  | 0.431093797 | 0.445276322 | 0.393718824 |
| 0.226964823 | 0.418111693 | 0.442594766 | 0.040909644 |
| 0.374939237 | 0.465044319 | 0.37220125  | 0.169288282 |
| 0.290400439 | 0.350060734 | 0.058500878 | 0.171900129 |
| 0.288292587 | 0.38307396  | 0.196183656 | 0.436232929 |
| 0.402446092 | 0.413110871 | 0.056163121 | 0.072359582 |
| 0.526978387 | 0.427908772 | 0.189191235 | 0.455681757 |
| 0.176574055 | 0.370119261 | 0.42756038  | 0.422719343 |
| 0.355908949 | 0.457182206 | 0.448943644 | 0.450781863 |
| 0.449822611 | 0.30582806  | 0.521442676 | 0.125457911 |
| 0.085564596 | 0.398779285 | 0.145165555 | 0.095120414 |
| 0.180567709 | 0.029382412 | 0.263918914 | 0.421222441 |
| 0.342809266 | 0.417456581 | 0.353601232 | 0.091978805 |
| 0.315568511 | 0.343159373 | 0.368680455 | 0.280104225 |
| 0.113241916 | 0.506477622 | 0.011666208 | 0.063896878 |
| 0.357453221 | 0.44051049  | 0.374691366 | 0.24490444  |
| 0.272633655 | 0.124592458 | 0.335095734 | 0.363262218 |
| 0.401731448 | 0.337378968 | 0.441128492 | 0.046899281 |
| 0.035846    | 0.453663687 | 0.382510765 | 0.017002761 |
| 0.086189437 | 0.384662665 | 0.28454352  | 0.293515873 |
| 0.019798796 | 0.455760828 | 0.409812218 | 0.411798206 |
| 0.394247623 | 0.077887662 | 0.366165515 | 0.099334996 |
| 0.067458614 | 0.451134928 | 0.36001013  | 0.49747429  |

|             |             |             |             |
|-------------|-------------|-------------|-------------|
| 0.310416319 | 0.44161049  | 0.455160406 | 0.44509237  |
| 0.109091056 | 0.339222563 | 0.046025993 | 0.446290053 |
| 0.397468338 |             |             |             |
| IIIGP1      | 0.041075483 | 0.030652104 | 0.03795836  |
| 0.070463951 | 0.043542317 | 0.024342499 | 0.086475135 |
| 0.054150187 | 0.021956807 | 0.004658798 | 0.003798694 |
| 0.041439198 | 0.002769859 | 0.028183477 | 0.010282844 |
| 0.094373735 | 0.058875273 | 0.051789845 | 0.146976919 |
| 0.079816383 | 0.048903771 | 0.087717127 | 0.098429317 |
| 0.025577695 | 0.050373078 | 0.079233795 | 0.029125641 |
| 0.079107862 | 0.099876921 | 0.013576731 | 0.061140327 |
| 0.114301663 | 0.048493322 | 0.023083876 | 0.040734389 |
| 0.019408652 | 0.031469131 | 0.008320153 | 0.011953261 |
| 0.046202723 | 0.046254556 | 0.072952591 | 0.09801644  |
| 0.064408521 | 0.020772524 | 0.095735209 | 0.065918183 |
| 0.006184824 | 0.043663785 | 0.022276467 | 0.021975376 |
| 0.015316126 | 0.01780722  | 0.064377203 | 0.066661455 |
| 0.00093271  | 0.015204287 | 0.004017899 | 0.033220459 |
| 0.09328799  | 0.023370105 | 0.018588384 | 0.015696604 |
| 0.001311757 | 0.071573349 | 0.080597693 | 0.076314793 |
| 0.015403498 | 0.039403417 | 0.07900934  | 0.024220417 |
| 0.000935817 | 0.102935943 | 0.092563366 | 0.008155651 |
| 0.178674018 | 0.016855126 | 0.105848064 | 0.067986059 |
| 0.064376821 | 0.030396992 | 0.050456092 | 0.039053646 |
| 0.031523371 | 0.120888632 | 0.028966594 | 0.077266649 |
| 0.039959629 | 0.061096176 | 0.025596717 | 0.088504709 |
| 0.046902381 | 0.023733695 | 0.036926619 | 0.115869536 |
| 0.0267451   | 0.031997103 | 0.026020227 | 0.026432461 |
| 0.008685964 | 0.074639313 | 0.019366366 | 0.036678837 |
| 0.033856556 | 0.024735949 | 0.117148316 | 0.055216168 |
| 0.176364979 | 0.013869713 | 0.106505469 | 0.008305451 |
| 0.06839942  | 0.057670954 | 0.100731827 | 0.048475349 |
| 0.055910951 | 0.048527536 | 0.023650505 | 0.127149844 |
| 0.052274176 | 0.023368833 | 0.001545484 | 0.170475408 |
| 0.005261618 | 0.01258582  | 0.014528205 | 0.047019945 |
| 0.0263463   | 0.00900092  | 0.085147028 | 0.083704004 |
| 0.101863809 | 0.038273413 | 0.028517087 | 0.065124734 |
| 0.060000382 | 0.022245231 | 0.032407582 | 0.025745099 |
| 0.021266556 | 0.048621257 | 0.00071909  | 0.119264223 |
| 0.046285056 | 0.049025058 | 0.16464468  | 0.025659231 |
| 0.059628211 | 0.123009213 | 0.128876778 | 0.043755232 |
| 0.028197408 | 0.151018007 | 0.028861864 | 0.099040308 |
| 0.006164041 | 0.060809989 | 0.151946261 | 0.04318833  |
| 0.060644129 | 0.017847647 | 0.120950922 | 0.060217347 |
| 0.003111588 | 0.014712901 | 0.052589657 | 0.056463101 |
| 0.013089578 | 0.01993814  | 0.014397284 | 0.200973274 |
| 0.051268213 | 0.066479876 | 0.030823237 | 0.024147677 |
| 0.003308487 | 0.082493456 | 0.017722909 | 0.034534664 |
| 0.02064836  | 0.04387974  | 0.093518202 | 0.058964842 |
| 0.120814633 | 0.069310883 | 0.002378238 | 0.020971902 |
| 0.024044569 | 0.01592091  | 0.042145592 | 0.062713918 |
| 0.012622504 | 0.055022922 | 0.00111566  | 0.091425414 |
| 0.028659394 | 0.205662385 | 0.054938081 | 0.109692692 |
| 0.025647065 | 0.100645036 | 0.025898049 | 0.028188067 |

|             |             |             |             |
|-------------|-------------|-------------|-------------|
| 0.018102236 | 0.00485267  | 0.030989128 | 0.068782402 |
| 0.097278205 | 0.031094697 | 0.054812072 | 0.070814988 |
| 0.04380818  | 0.064109493 | 0.068910232 | 0.010559756 |
| 0.037415846 | 0.108881096 | 0.074885158 | 0.091308217 |
| 0.047330345 | 0.001737536 | 0.025583282 | 0.051703651 |
| 0.020378751 | 0.030710702 | 0.021443511 | 0.000530628 |
| 0.111212534 | 0.050346922 | 0.019272045 | 0.054253631 |
| 0.023610072 | 0.026176071 | 0.015019034 | 0.062782073 |
| 0.112817186 | 0.03444823  | 0.036181701 | 0.018245377 |
| 0.017816026 | 0.021455906 | 0.138550097 | 0.010531151 |
| 0.006021274 | 0.06126692  | 0.016850131 | 0.019561405 |
| 0.053742215 | 0.094240432 | 0.046732127 | 0.005276974 |
| 0.004942946 | 0.008089289 | 0.006495526 | 0.022952089 |
| 0.014769266 | 0.018392823 | 0.044671071 | 0.025529633 |
| 0.084083978 | 0.160239099 | 0.031089769 | 0.102447782 |
| 0.023294203 | 0.087053902 | 0.189205822 | 0.001146197 |
| 0.040561609 | 0.012177942 | 0.013012272 | 0.030211164 |
| 1           | 0.049644324 | 0.013768205 | 0.106558824 |
| 0.016368499 | 0.093159313 | 0.069510401 | 0.001717336 |
| 0.036963371 | 0.025865936 | 0.132004136 | 0.061082606 |
| 0.019425817 | 0.068630796 | 0.031598325 | 0.030534055 |
| 0.027215431 | 0.131416566 | 0.030390456 | 0.06600651  |
| 0.182971527 | 0.052756502 | 0.021263337 | 0.178357033 |
| 0.130553658 | 0.024361966 | 0.045179527 | 0.12717525  |
| 0.034759399 | 0.086199844 | 0.021830125 | 0.055055187 |
| 0.078244165 | 0.003338696 | 0.085096211 | 0.043065846 |
| 0.020010141 | 0.029239889 | 0.164678455 | 0.028449018 |
| 0.15779413  | 0.012045676 | 0.003734756 | 0.033547213 |
| 0.034757769 | 0.027373639 | 0.15434003  | 0.031064284 |
| 0.017419916 | 0.022836977 | 0.069828793 | 0.045349467 |
| 0.025957226 | 0.117039268 | 0.119403855 | 0.024006218 |
| 0.034839758 | 0.030573736 | 0.017431626 | 0.065767498 |
| 0.052548913 | 0.038249824 | 0.052087662 | 0.021434935 |
| 0.012057559 | 0.067582645 | 0.006871479 | 0.022160404 |
| 0.032799776 | 0.023175416 | 0.068167674 | 0.040805762 |
| 0.011201295 | 0.025911351 | 0.093412646 | 0.147965857 |
| 0.026968277 | 0.026937808 | 0.023116554 | 0.121654021 |
| 0.033948224 | 0.024271173 | 0.013356916 | 0.186238559 |
| 0.149174235 | 0.022362143 | 0.045279303 | 0.004659326 |
| 0.057310236 | 0.020454569 | 0.006466463 | 0.034270045 |
| 0.162599511 | 0.015284658 | 0.010468485 | 0.006699979 |
| 0.096254427 | 0.062003618 | 0.019180068 | 0.06653561  |
| 0.006035602 | 0.113627153 | 0.004823279 | 0.034644407 |
| 0.024075544 | 0.081466184 | 0.036414404 | 0.021537205 |
| 0.021450195 | 0.032084532 | 0.019728447 | 0.027722069 |
| 0.020650876 | 0.017879883 | 0.011111161 | 0.114358833 |
| 0.03656777  | 0.020290486 | 0.059731075 | 0.032486266 |
| 0.051490221 | 0.070721684 | 0.116162734 | 0.050364643 |
| 0.006756933 | 0.037616085 | 0.003547511 | 0.002119923 |
| 0.03255135  | 0.048828533 | 0.037177072 | 0.058481689 |
| 0.03335243  | 0.155540037 | 0.037965355 | 0.02535041  |
| 0.050823088 | 0.060230324 | 0.06096598  | 0.007206773 |
| 0.008882291 | 0.00979308  | 0.063862852 | 0.121651647 |
| 0.03298297  | 0.001984215 | 0.102947435 | 0.053147444 |

|             |             |             |             |
|-------------|-------------|-------------|-------------|
| 0.032264044 | 0.04311311  | 0.023738071 | 0.123225414 |
| 0.04389971  | 0.148037099 | 0.005294099 | 0.110786121 |
| 0.027533426 | 0.021715486 | 0.036000413 | 0.024389278 |
| 0.128871951 | 0.095608636 | 0.048762723 | 0.052984938 |
| 0.003555228 | 0.116552503 | 0.040386848 | 0.011055121 |
| 0.013781244 | 0.097261345 | 0.065517159 | 0.076290894 |
| 0.01638668  | 0.017922282 | 0.025067663 | 0.000944001 |
| 0.043297285 | 0.050122559 | 0.048069137 | 0.046497819 |
| 0.052624483 | 0.0840702   | 0.045567109 | 0.024592968 |
| 0.006879084 | 0.019750421 | 0.0376633   | 0.002468064 |
| 0.094530421 | 0.134226307 | 0.023748697 | 0.001456998 |
| 0.024822364 | 0.056351725 | 0.006801894 | 0.102591791 |
| 0.01115562  | 0.134062558 | 0.05034855  | 0.048426358 |
| 0.098605471 | 0.069607753 | 0.130426964 | 0.092761052 |
| 0.055438624 | 0.05624075  | 0.021342319 | 0.01181223  |
| 0.053185794 | 0.008359798 | 0.078614579 | 0.035176606 |
| 0.034152564 | 0.053698688 | 0.010595616 | 0.036399148 |
| 0.046774597 | 0.041619781 | 0.027607955 | 0.064772927 |
| 0.007615483 | 0.038148572 | 0.032223631 | 0.010984466 |
| 0.11551398  | 0.047967985 | 0.061302736 | 0.019360503 |
| 0.055990632 | 0.021723558 | 0.03110604  | 0.005980012 |
| 0.015727995 | 0.031468136 | 0.030038033 | 0.09151926  |
| 0.054088244 | 0.036844861 | 0.0281288   | 0.060111049 |
| 0.031820371 | 0.030641867 | 0.027639075 | 0.041328668 |
| 0.179038722 | 0.058935157 | 0.049087302 | 0.046463173 |
| 0.010735589 | 0.025410928 | 0.053223592 | 0.026781496 |
| 0.023923633 | 0.112394593 | 0.02358166  | 0.027759397 |
| 0.005851215 | 0.026837152 | 0.027360145 | 0.175801009 |
| 0.130710769 | 0.079304204 | 0.005904166 | 0.083735112 |
| 0.007055281 | 0.073708599 | 0.007076098 | 0.025085651 |
| 0.091827182 | 0.031234829 | 0.100211961 | 0.052953701 |
| 0.03489862  | 0.020197582 | 0.011693988 | 0.166430354 |
| 0.010784164 | 0.033477747 | 0.020039098 | 0.098454975 |
| 0.009239149 | 0.055580998 | 0.094254505 | 0.029958096 |
| 0.006640347 | 0.004585669 | 0.031231844 | 0.033909046 |
| 0.068603049 | 0.056165912 | 0.038685935 | 0.076638789 |
| 0.005790476 | 0.028716736 | 0.056985889 | 0.013019865 |
| 0.116529412 | 0.020940672 | 0.009441494 | 0.042336872 |
| 0.074183407 | 0.174396843 | 0.022569601 | 0.006367746 |
| 0.105683927 | 0.025831138 | 0.039664056 | 0.022223627 |
| 0.061205926 | 0.078148518 | 0.018788876 | 0.026963468 |
| 0.031955315 | 0.023720635 | 0.076636643 | 0.058639274 |
| 0.007357529 |             |             |             |

|             |             |             |             |
|-------------|-------------|-------------|-------------|
| IL10RA      | 0.451123998 | 0.52589732  | 0.457584605 |
| 0.455665142 | 0.50243909  | 0.378386701 | 0.260479682 |
| 0.216073652 | 0.12409474  | 0.00726514  | 0.040202592 |
| 0.48509188  | 0.252252458 | 0.298914491 | 0.349908579 |
| 0.485849473 | 0.203176044 | 0.414042378 | 0.314712342 |
| 0.465802065 | 0.114801302 | 0.476311353 | 0.137564284 |
| 0.398227856 | 0.162679898 | 0.113675498 | 0.353572676 |
| 0.470653919 | 0.128791943 | 0.327080327 | 0.410118347 |
| 0.174703254 | 0.46201773  | 0.517085013 | 0.490209827 |
| 0.511042333 | 0.415548683 | 0.022960992 | 0.316569574 |
| 0.42722999  | 0.479748568 | 0.456901482 | 0.396213907 |

|             |             |             |             |
|-------------|-------------|-------------|-------------|
| 0.06818937  | 0.473310515 | 0.305415888 | 0.485425553 |
| 0.258397395 | 0.055017857 | 0.240812097 | 0.43296887  |
| 0.465140291 | 0.459536175 | 0.261801176 | 0.206721138 |
| 0.236015343 | 0.240814452 | 0.325674321 | 0.323988246 |
| 0.29210856  | 0.159711287 | 0.482010652 | 0.120605947 |
| 0.188648437 | 0.304243804 | 0.243588007 | 0.308767648 |
| 0.438403275 | 0.389077263 | 0.033108851 | 0.443716409 |
| 0.003566169 | 0.447203055 | 0.473551144 | 0.370799521 |
| 0.077618957 | 0.033526539 | 0.27411465  | 0.38967719  |
| 0.479168002 | 0.460388183 | 0.493138568 | 0.497414338 |
| 0.245390902 | 0.402469465 | 0.471839458 | 0.240836067 |
| 0.446275167 | 0.222772578 | 0.146279787 | 0.493565696 |
| 0.498268395 | 0.523519922 | 0.289169891 | 0.369374739 |
| 0.427031521 | 0.474658608 | 0.44959193  | 0.48429109  |
| 0.382246004 | 0.103437289 | 0.433382808 | 0.517202576 |
| 0.392747959 | 0.401853379 | 0.231326421 | 0.428243506 |
| 0.105149759 | 0.380588734 | 0.424472097 | 0.217460061 |
| 0.477363626 | 0.031956486 | 0.311448236 | 0.404575212 |
| 0.307327395 | 0.459002747 | 0.520440848 | 0.251922507 |
| 0.489593433 | 0.035846624 | 0.186005804 | 0.068737833 |
| 0.372136713 | 0.213850869 | 0.469784372 | 0.464839979 |
| 0.270129573 | 0.461633267 | 0.331460108 | 0.006926057 |
| 0.054120715 | 0.284149216 | 0.452451893 | 0.437730571 |
| 0.476613341 | 0.380886394 | 0.299039722 | 0.393498898 |
| 0.47152007  | 0.495632258 | 0.05141104  | 0.145270093 |
| 0.458574599 | 0.288870981 | 0.327604058 | 0.484261461 |
| 0.393039886 | 0.15868691  | 0.189641042 | 0.523490498 |
| 0.41273023  | 0.131516132 | 0.371121438 | 0.485593859 |
| 0.370402524 | 0.448755101 | 0.164383951 | 0.337395998 |
| 0.077320588 | 0.481860931 | 0.05902622  | 0.372134379 |
| 0.305479391 | 0.220034041 | 0.023868706 | 0.291262751 |
| 0.312772934 | 0.429223269 | 0.461304002 | 0.169822568 |
| 0.383435667 | 0.485765805 | 0.340105443 | 0.433627921 |
| 0.017422844 | 0.081216206 | 0.286920174 | 0.50892234  |
| 0.277391103 | 0.509351262 | 0.383116731 | 0.409921274 |
| 0.38290063  | 0.48718426  | 0.006155033 | 0.487323629 |
| 0.527443355 | 0.295493264 | 0.448852727 | 0.494333852 |
| 0.42942675  | 0.468652078 | 0.048595707 | 0.487680082 |
| 0.362487903 | 0.131703618 | 0.510762697 | 0.235353937 |
| 0.458639679 | 0.073805167 | 0.355132136 | 0.463950463 |
| 0.444934237 | 0.015088721 | 0.231960803 | 0.429064183 |
| 0.059096288 | 0.117750777 | 0.467653729 | 0.460224087 |
| 0.434124922 | 0.495106741 | 0.49559534  | 0.408230712 |
| 0.490107494 | 0.297792749 | 0.027587716 | 0.423292937 |
| 0.476600741 | 0.422921927 | 0.432011407 | 0.2973849   |
| 0.335786431 | 0.469106753 | 0.428529377 | 0.231759273 |
| 0.072461077 | 0.360754195 | 0.028072397 | 0.411419412 |
| 0.400929891 | 0.154575111 | 0.434488992 | 0.234152545 |
| 0.123374509 | 0.530184178 | 0.263485806 | 0.340887894 |
| 0.193090765 | 0.423730779 | 0.328371945 | 0.258867167 |
| 0.250484885 | 0.244330334 | 0.427071943 | 0.440961637 |
| 0.054713571 | 0.145908939 | 0.035233674 | 0.398240184 |
| 0.165154194 | 0.360434967 | 0.345415726 | 0.420151114 |
| 0.37111409  | 0.144309725 | 0.449197782 | 0.384039801 |



|             |             |             |             |
|-------------|-------------|-------------|-------------|
| 0.18100817  | 0.032255061 | 0.509446401 | 0.477066238 |
| 0.328012133 | 0.217740426 | 0.078254484 | 0.347840509 |
| 0.465487212 | 0.301656381 | 0.269320185 | 0.445019569 |
| 0.049644324 | 1           | 0.303001965 | 0.188806893 |
| 0.441176139 | 0.334161617 | 0.478868386 | 0.072265613 |
| 0.428867886 | 0.461097457 | 0.416632672 | 0.262015418 |
| 0.376170493 | 0.465854228 | 0.049351091 | 0.411931249 |
| 0.404400215 | 0.058605679 | 0.529706508 | 0.200510006 |
| 0.044493659 | 0.497973862 | 0.461173343 | 0.129918961 |
| 0.133480053 | 0.374864284 | 0.062385337 | 0.388832862 |
| 0.520413427 | 0.481170453 | 0.440167279 | 0.319552585 |
| 0.066718816 | 0.016333289 | 0.314987391 | 0.460379729 |
| 0.502390498 | 0.516957461 | 0.360532931 | 0.431137714 |
| 0.322996568 | 0.400005666 | 0.156366454 | 0.512372356 |
| 0.2808759   | 0.519588944 | 0.016248459 | 0.481749977 |
| 0.504313949 | 0.294964008 | 0.130421034 | 0.343951238 |
| 0.382838169 | 0.078302501 | 0.283744405 | 0.49246065  |
| 0.442137587 | 0.407174187 | 0.401849938 | 0.491651836 |
| 0.025876043 | 0.06714047  | 0.465540571 | 0.268253356 |
| 0.435912907 | 0.304315348 | 0.087099009 | 0.366403014 |
| 0.069112088 | 0.444769557 | 0.498029667 | 0.098435422 |
| 0.333773079 | 0.340408737 | 0.477052749 | 0.067025573 |
| 0.458229321 | 0.506528746 | 0.517912013 | 0.230852617 |
| 0.472706385 | 0.488861629 | 0.445517702 | 0.141089873 |
| 0.038251731 | 0.517163832 | 0.423369916 | 0.03445163  |
| 0.491238946 | 0.226768264 | 0.019823491 | 0.495859012 |
| 0.257791234 | 0.432438073 | 0.004743972 | 0.121421802 |
| 0.083862361 | 0.501625935 | 0.4727589   | 0.419094605 |
| 0.231465161 | 0.447062466 | 0.016029302 | 0.532060775 |
| 0.485352672 | 0.03150412  | 0.22937244  | 0.45467714  |
| 0.452321538 | 0.52940455  | 0.395592598 | 0.466329516 |
| 0.464888288 | 0.497635315 | 0.279185977 | 0.364950588 |
| 0.447277144 | 0.496831039 | 0.448303549 | 0.455055327 |
| 0.479598591 | 0.502375377 | 0.35643639  | 0.028194276 |
| 0.195789923 | 0.236378181 | 0.308888424 | 0.120528467 |
| 0.328530902 | 0.208724949 | 0.481632847 | 0.497709239 |
| 0.482394619 | 0.012958563 | 0.188489711 | 0.44849528  |
| 0.437504183 | 0.471978578 | 0.043822135 | 0.00986062  |
| 0.012579632 | 0.034680338 | 0.411734942 | 0.348912673 |
| 0.492614923 | 0.223025686 | 0.011173703 | 0.062339013 |
| 0.342715339 | 0.474375485 | 0.503374402 | 0.455336686 |
| 0.483313897 | 0.139725509 | 0.289091996 | 0.466575183 |
| 0.11586141  | 0.329101017 | 0.48747765  | 0.467223359 |
| 0.083865123 | 0.35657109  | 0.423449243 | 0.487766887 |
| 0.109416933 | 0.422788027 | 0.487055907 | 0.368090932 |
| 0.032503245 | 0.140989678 | 0.115374237 | 0.500717431 |
| 0.496566304 | 0.110553094 | 0.054683141 | 0.146381202 |
| 0.15893699  | 0.485961503 | 0.221940347 | 0.522817205 |
| 0.457205592 | 0.487653277 | 0.138639171 | 0.480329482 |
| 0.067907176 | 0.481216278 | 0.428020163 | 0.062297127 |
| 0.389619613 | 0.028245208 | 0.472970657 | 0.188129719 |
| 0.347710706 | 0.432337447 | 0.26617578  | 0.039278621 |
| 0.252521009 | 0.094767727 | 0.487100853 | 0.496772753 |
| 0.071498081 | 0.313226848 | 0.402459191 | 0.476737808 |

|             |             |             |             |
|-------------|-------------|-------------|-------------|
| 0.306327942 | 0.474381145 | 0.497801377 | 0.400417614 |
| 0.121283911 | 0.21448     | 0.451034397 | 0.411031309 |
| 0.277553591 | 0.49820509  | 0.363957676 | 0.533825684 |
| 0.430980834 | 0.463033617 | 0.472549614 | 0.406569421 |
| 0.331662299 | 0.416832366 | 0.383842801 | 0.027523404 |
| 0.430001248 | 0.487296219 | 0.414552944 | 0.214975856 |
| 0.340911345 | 0.452410622 | 0.085072664 | 0.205887168 |
| 0.394670172 | 0.309953473 | 0.202179827 | 0.492423907 |
| 0.427237266 | 0.412065703 | 0.06698327  | 0.106034943 |
| 0.544883709 | 0.43431617  | 0.173435756 | 0.455723957 |
| 0.263021478 | 0.428807695 | 0.488688009 | 0.496412747 |
| 0.433047276 | 0.455358329 | 0.451489862 | 0.394145592 |
| 0.412994963 | 0.339120922 | 0.523120673 | 0.099860717 |
| 0.13282614  | 0.453090141 | 0.135508957 | 0.159623558 |
| 0.208862966 | 0.054992577 | 0.358982394 | 0.498554142 |
| 0.423983123 | 0.454893738 | 0.348112535 | 0.133136599 |
| 0.436568309 | 0.411558818 | 0.451908443 | 0.236636625 |
| 0.114517845 | 0.492626035 | 0.01949369  | 0.102937401 |
| 0.443351996 | 0.462709846 | 0.446305674 | 0.336692148 |
| 0.377707954 | 0.235020353 | 0.391190997 | 0.302199224 |
| 0.313541995 | 0.41331804  | 0.453096687 | 0.052345965 |
| 0.033164406 | 0.499176134 | 0.396113874 | 0.047158491 |
| 0.154757601 | 0.404569771 | 0.383231492 | 0.301023984 |
| 0.048711864 | 0.484335554 | 0.335539542 | 0.496167043 |
| 0.397809482 | 0.11519303  | 0.337792691 | 0.124941063 |
| 0.102402748 | 0.441498876 | 0.466345593 | 0.514097798 |
| 0.448251049 | 0.479441023 | 0.434854717 | 0.451114304 |
| 0.177629433 | 0.426100335 | 0.046516969 | 0.47332815  |
| 0.419065886 |             |             |             |
| IL10RB      | 0.162217892 | 0.305698033 | 0.094686924 |
| 0.325680517 | 0.188480425 | 0.156224908 | 0.16677764  |
| 0.036603721 | 0.037959897 | 0.039416145 | 0.060331105 |
| 0.172528527 | 0.089637485 | 0.118504702 | 0.041990416 |
| 0.287999087 | 0.111692513 | 0.053639117 | 0.195865804 |
| 0.246294696 | 0.070966056 | 0.33089459  | 0.06962304  |
| 0.045993556 | 0.093949509 | 0.117552809 | 0.095612962 |
| 0.309826286 | 0.121322416 | 0.13115575  | 0.22176598  |
| 0.042874505 | 0.21928397  | 0.254824425 | 0.294482295 |
| 0.250235984 | 0.134188874 | 0.007230366 | 0.092947731 |
| 0.198351747 | 0.248783407 | 0.256713198 | 0.275376474 |
| 0.066613791 | 0.231761252 | 0.232409758 | 0.163403156 |
| 0.026851546 | 0.067982484 | 0.052468881 | 0.207351752 |
| 0.254568818 | 0.193936562 | 0.065430781 | 0.129639573 |
| 0.088374744 | 0.058974615 | 0.054697028 | 0.142163932 |
| 0.204307028 | 0.053442194 | 0.259450947 | 0.05008387  |
| 0.030907532 | 0.073497044 | 0.060777903 | 0.128683657 |
| 0.060274639 | 0.17123571  | 0.015608809 | 0.122500586 |
| 0.023364339 | 0.227354725 | 0.16543139  | 0.057585327 |
| 0.09616101  | 0.100686371 | 0.086594675 | 0.270874413 |
| 0.30592705  | 0.200843384 | 0.339684711 | 0.311921454 |
| 0.094412523 | 0.123959582 | 0.11941784  | 0.159221992 |
| 0.216946574 | 0.184806528 | 0.033187091 | 0.316824298 |
| 0.335114706 | 0.28885785  | 0.056906827 | 0.14735656  |
| 0.288209299 | 0.268572619 | 0.126995806 | 0.164533805 |

|             |             |             |             |
|-------------|-------------|-------------|-------------|
| 0.06965427  | 0.02144347  | 0.242097562 | 0.323310799 |
| 0.188942288 | 0.09090193  | 0.156359383 | 0.254310976 |
| 0.073770382 | 0.03280242  | 0.306317338 | 0.051069486 |
| 0.313617328 | 0.027106646 | 0.144654717 | 0.231726136 |
| 0.033507817 | 0.225086449 | 0.277984606 | 0.179853662 |
| 0.131542777 | 0.047250757 | 0.033279443 | 0.029882046 |
| 0.054117458 | 0.022666988 | 0.217866666 | 0.349209973 |
| 0.044587108 | 0.060311654 | 0.115998161 | 0.010610178 |
| 0.0502898   | 0.027330574 | 0.232885765 | 0.091828718 |
| 0.219501281 | 0.14449667  | 0.156398465 | 0.163764752 |
| 0.189775833 | 0.331068606 | 0.010034501 | 0.062993643 |
| 0.163865228 | 0.029720837 | 0.232244929 | 0.197777616 |
| 0.185469517 | 0.056586743 | 0.134587295 | 0.324526537 |
| 0.21813971  | 0.138332894 | 0.052293006 | 0.287884168 |
| 0.080572582 | 0.191962901 | 0.091629009 | 0.160438584 |
| 0.067724685 | 0.229771843 | 0.047292858 | 0.075286104 |
| 0.030089168 | 0.068069272 | 0.005962948 | 0.101005118 |
| 0.064148831 | 0.297609849 | 0.195897453 | 0.094828551 |
| 0.20083579  | 0.270774517 | 0.083320475 | 0.282025914 |
| 0.054020113 | 0.029419423 | 0.045469241 | 0.334044823 |
| 0.12523187  | 0.282248961 | 0.085484149 | 0.070523735 |
| 0.199260967 | 0.284196048 | 0.000746423 | 0.240707256 |
| 0.27861926  | 0.050003951 | 0.292930843 | 0.164671111 |
| 0.097107562 | 0.335889686 | 0.002118302 | 0.29718437  |
| 0.123005693 | 0.070447518 | 0.340491361 | 0.197935734 |
| 0.225694696 | 0.107478598 | 0.095140758 | 0.234357958 |
| 0.219638887 | 0.008549404 | 0.094896656 | 0.248310278 |
| 0.02683024  | 0.04554519  | 0.197562473 | 0.269233677 |
| 0.21962813  | 0.246880787 | 0.346830439 | 0.089343853 |
| 0.188362987 | 0.096796541 | 0.013127706 | 0.143850072 |
| 0.206284597 | 0.033344805 | 0.239697407 | 0.072438305 |
| 0.085987011 | 0.276825399 | 0.190826481 | 0.041237159 |
| 0.093322949 | 0.133618969 | 0.026228493 | 0.166122077 |
| 0.158096151 | 0.127352127 | 0.098544449 | 0.027091357 |
| 0.085689765 | 0.329314914 | 0.051059128 | 0.051362101 |
| 0.02665696  | 0.259234746 | 0.132237276 | 0.148428377 |
| 0.118234274 | 0.07216918  | 0.075271022 | 0.101281799 |
| 0.051955899 | 0.150634693 | 0.005334659 | 0.095148548 |
| 0.13996954  | 0.141365056 | 0.138842437 | 0.179978185 |
| 0.063135897 | 0.122265117 | 0.199636802 | 0.035030162 |
| 0.062069524 | 0.056600389 | 0.294686386 | 0.238772525 |
| 0.141782119 | 0.074959027 | 0.05559872  | 0.055423425 |
| 0.347659721 | 0.114325328 | 0.031588934 | 0.313318779 |
| 0.013768205 | 0.303001965 | 1           | 0.166797955 |
| 0.146227803 | 0.260450801 | 0.322368027 | 0.017803985 |
| 0.122009111 | 0.280013833 | 0.132867937 | 0.142668668 |
| 0.22915051  | 0.220673771 | 0.047361582 | 0.176471207 |
| 0.181900299 | 0.092246592 | 0.302940608 | 0.066747142 |
| 0.051902122 | 0.231404797 | 0.251793009 | 0.112544594 |
| 0.078878061 | 0.225402392 | 0.033462854 | 0.240708558 |
| 0.326194077 | 0.344326229 | 0.271453181 | 0.047464077 |
| 0.10573981  | 0.088255999 | 0.079055212 | 0.102503255 |
| 0.249952951 | 0.293316768 | 0.174493263 | 0.204824983 |
| 0.219557828 | 0.075381181 | 0.019879112 | 0.326948528 |

|             |             |             |             |
|-------------|-------------|-------------|-------------|
| 0.014707342 | 0.255168381 | 0.021839579 | 0.238133084 |
| 0.248052965 | 0.08566053  | 0.113769759 | 0.172319864 |
| 0.225428083 | 0.065999113 | 0.053765313 | 0.27423936  |
| 0.247152124 | 0.094241825 | 0.085812226 | 0.195233367 |
| 0.032812381 | 0.045401499 | 0.157975236 | 0.029763507 |
| 0.107686175 | 0.093070027 | 0.00828409  | 0.040954497 |
| 0.096169735 | 0.279158775 | 0.293027247 | 0.050236168 |
| 0.177646476 | 0.036915938 | 0.230392058 | 0.073770329 |
| 0.25318414  | 0.245170384 | 0.271679211 | 0.058249446 |
| 0.223706128 | 0.293190406 | 0.158399372 | 0.064924685 |
| 0.046183528 | 0.258746663 | 0.160585838 | 0.075924083 |
| 0.3309649   | 0.063492173 | 0.096045073 | 0.28756938  |
| 0.14764613  | 0.190534887 | 0.004350603 | 0.003823313 |
| 0.017551119 | 0.286112072 | 0.243666057 | 0.19958332  |
| 0.065755189 | 0.170341818 | 0.001092344 | 0.289008609 |
| 0.29356967  | 0.031719229 | 0.039700942 | 0.24608817  |
| 0.221904645 | 0.287326779 | 0.092341693 | 0.281961543 |
| 0.195423741 | 0.263904537 | 0.07792312  | 0.222561539 |
| 0.291487586 | 0.250291775 | 0.219542742 | 0.239385777 |
| 0.341479635 | 0.247072878 | 0.253765188 | 0.040871107 |
| 0.022517565 | 0.074595473 | 0.060563847 | 0.077875637 |
| 0.107791941 | 0.087386883 | 0.25553756  | 0.317317092 |
| 0.30427143  | 0.023886525 | 0.05144006  | 0.222731647 |
| 0.285820073 | 0.310346463 | 0.005898431 | 0.001655765 |
| 0.001500559 | 0.038251948 | 0.171341049 | 0.112413083 |
| 0.283473523 | 0.049015568 | 0.029455495 | 0.031672939 |
| 0.057987591 | 0.204357826 | 0.291736313 | 0.288545193 |
| 0.215453324 | 0.077769851 | 0.089685262 | 0.261899496 |
| 0.04873466  | 0.096375106 | 0.324364006 | 0.269730486 |
| 0.020903889 | 0.101680785 | 0.0776716   | 0.342100573 |
| 0.010321103 | 0.209434607 | 0.191974975 | 0.082385654 |
| 0.006045936 | 0.06633593  | 0.056576306 | 0.266816935 |
| 0.244379717 | 0.125296889 | 0.098558833 | 0.016623478 |
| 0.149701036 | 0.276873182 | 0.11761174  | 0.336171886 |
| 0.291150117 | 0.34962764  | 0.035952987 | 0.253818773 |
| 0.049808838 | 0.257650304 | 0.15171831  | 0.018943163 |
| 0.06156144  | 0.016851287 | 0.235016464 | 0.049408283 |
| 0.086242135 | 0.166795558 | 0.025303284 | 0.023470071 |
| 0.015731766 | 0.078611109 | 0.35236204  | 0.291496032 |
| 0.016258391 | 0.067989213 | 0.141570002 | 0.185336932 |
| 0.129006149 | 0.340318035 | 0.257697239 | 0.119065862 |
| 0.080696229 | 0.01404234  | 0.238256529 | 0.150552437 |
| 0.059695703 | 0.332333765 | 0.090784531 | 0.293611996 |
| 0.165341131 | 0.232981098 | 0.268719996 | 0.190751837 |
| 0.052857185 | 0.12912591  | 0.263782573 | 0.061801603 |
| 0.180714069 | 0.357036156 | 0.095773699 | 0.069242159 |
| 0.222330125 | 0.115134969 | 0.018487561 | 0.010237087 |
| 0.082862921 | 0.149426687 | 0.100690461 | 0.307950157 |
| 0.141639868 | 0.156163265 | 0.020488487 | 0.057093632 |
| 0.302494869 | 0.211660708 | 0.036334692 | 0.252442788 |
| 0.104256439 | 0.210685543 | 0.240459051 | 0.247294053 |
| 0.035534729 | 0.301269697 | 0.246401047 | 0.269148456 |
| 0.255335998 | 0.167627118 | 0.276708945 | 0.013902512 |
| 0.025101658 | 0.137281861 | 0.124465347 | 0.092818687 |

|             |             |             |             |
|-------------|-------------|-------------|-------------|
| 0.177870805 | 0.028879937 | 0.03822657  | 0.264409515 |
| 0.059875013 | 0.323852826 | 0.026126412 | 0.047580339 |
| 0.157787408 | 0.057998274 | 0.21418565  | 0.148654474 |
| 0.09917752  | 0.276017885 | 0.019947971 | 0.071986572 |
| 0.079832825 | 0.233437169 | 0.164483454 | 0.104076231 |
| 0.039907397 | 0.030744732 | 0.242469789 | 0.09337823  |
| 0.147420226 | 0.028418816 | 0.240514244 | 0.019914964 |
| 0.037238788 | 0.337355666 | 0.081439172 | 0.011115836 |
| 0.022046483 | 0.113285193 | 0.040419146 | 0.073986636 |
| 0.027173626 | 0.273732185 | 0.105607277 | 0.159034191 |
| 0.169164293 | 0.056940052 | 0.153437699 | 0.015594473 |
| 0.019747106 | 0.222805307 | 0.119836868 | 0.267826934 |
| 0.081828897 | 0.359128443 | 0.191799538 | 0.248241253 |
| 0.015960129 | 0.077613897 | 0.037177151 | 0.264655136 |
| 0.077052042 |             |             |             |
| IL15        | 0.101463119 | 0.141814739 | 0.083999193 |
| 0.212954778 | 0.14870285  | 0.071620242 | 0.153018606 |
| 0.051795278 | 0.151253916 | 0.07430052  | 0.194636936 |
| 0.121952347 | 0.151240865 | 0.09582067  | 0.044008736 |
| 0.247304413 | 0.276761868 | 0.051813234 | 0.232962244 |
| 0.179518185 | 0.093524354 | 0.285036159 | 0.19717104  |
| 0.113058949 | 0.265379418 | 0.276177209 | 0.147956161 |
| 0.202174452 | 0.275760945 | 0.051610566 | 0.128439515 |
| 0.218075035 | 0.12714942  | 0.107588005 | 0.201246833 |
| 0.10201648  | 0.075769546 | 0.040550169 | 0.060848007 |
| 0.107315035 | 0.170137045 | 0.1803041   | 0.244498265 |
| 0.203911429 | 0.087344867 | 0.216715634 | 0.165434071 |
| 0.038402862 | 0.275704513 | 0.027531419 | 0.082438178 |
| 0.09297541  | 0.104845612 | 0.066270951 | 0.146916939 |
| 0.100531855 | 0.03321463  | 0.082692108 | 0.062317255 |
| 0.205165404 | 0.028708287 | 0.103969733 | 0.120011619 |
| 0.055551456 | 0.073160718 | 0.214948726 | 0.100512067 |
| 0.07775117  | 0.084194367 | 0.10356969  | 0.077933412 |
| 0.023752481 | 0.189569908 | 0.185349939 | 0.060420518 |
| 0.276485189 | 0.224741643 | 0.21682439  | 0.188082847 |
| 0.190966848 | 0.097113875 | 0.212189993 | 0.182256822 |
| 0.225233336 | 0.180489675 | 0.107078219 | 0.243261508 |
| 0.119608542 | 0.156048385 | 0.110153623 | 0.273243884 |
| 0.202614466 | 0.126666796 | 0.216914635 | 0.242309425 |
| 0.134583129 | 0.12473023  | 0.077531097 | 0.114823079 |
| 0.069027011 | 0.185840806 | 0.098153857 | 0.170459955 |
| 0.085241201 | 0.101708997 | 0.283846446 | 0.136882398 |
| 0.250702166 | 0.037743226 | 0.265971544 | 0.116737138 |
| 0.1965294   | 0.129729686 | 0.251888024 | 0.146777937 |
| 0.124890316 | 0.127077075 | 0.127046202 | 0.212058954 |
| 0.123254062 | 0.183621813 | 0.111738335 | 0.208300756 |
| 0.082816677 | 0.087371531 | 0.077557522 | 0.188711662 |
| 0.064249185 | 0.097158773 | 0.117288817 | 0.108408918 |
| 0.269218835 | 0.126016741 | 0.115711991 | 0.08115413  |
| 0.147836582 | 0.071696173 | 0.18581693  | 0.074558821 |
| 0.114634318 | 0.208876362 | 0.00552934  | 0.167441948 |
| 0.116397736 | 0.137591158 | 0.308120596 | 0.113813483 |
| 0.220216304 | 0.125627906 | 0.235304006 | 0.179924698 |
| 0.090969803 | 0.239841455 | 0.03362689  | 0.254417438 |

|             |             |             |             |
|-------------|-------------|-------------|-------------|
| 0.079046005 | 0.212168533 | 0.214822848 | 0.149156262 |
| 0.170217021 | 0.098158185 | 0.247047678 | 0.057327269 |
| 0.057728167 | 0.202992947 | 0.067577925 | 0.067852251 |
| 0.078785852 | 0.128484577 | 0.072640075 | 0.224591684 |
| 0.147028356 | 0.236742423 | 0.045036508 | 0.132185311 |
| 0.135354366 | 0.184157374 | 0.021878192 | 0.165822186 |
| 0.045140876 | 0.163977608 | 0.135721199 | 0.134066309 |
| 0.275435737 | 0.197266444 | 0.006207776 | 0.095371223 |
| 0.125494036 | 0.021927622 | 0.190945337 | 0.14758884  |
| 0.075597807 | 0.195954145 | 0.004988257 | 0.239398421 |
| 0.056125249 | 0.21430368  | 0.210764636 | 0.304641499 |
| 0.099575865 | 0.277012743 | 0.059089164 | 0.140735998 |
| 0.10746455  | 0.053237925 | 0.046306631 | 0.166148454 |
| 0.211782463 | 0.066291466 | 0.130570804 | 0.192553435 |
| 0.163008531 | 0.180177726 | 0.23139163  | 0.070140306 |
| 0.145130357 | 0.114994368 | 0.141786278 | 0.198887732 |
| 0.134432781 | 0.042143884 | 0.097461584 | 0.121743597 |
| 0.037931282 | 0.125471943 | 0.093799045 | 0.033884524 |
| 0.212155718 | 0.093075819 | 0.067550307 | 0.177095565 |
| 0.080455026 | 0.181587719 | 0.069134197 | 0.136815186 |
| 0.288945614 | 0.165125163 | 0.131083654 | 0.072120707 |
| 0.090943269 | 0.118503531 | 0.158142073 | 0.106650191 |
| 0.149523311 | 0.226278751 | 0.091223065 | 0.083729578 |
| 0.11189787  | 0.288233819 | 0.090171453 | 0.046765618 |
| 0.154422157 | 0.071061444 | 0.054368205 | 0.082825105 |
| 0.077444861 | 0.204962912 | 0.163934536 | 0.092419902 |
| 0.247771134 | 0.22423672  | 0.139953144 | 0.212280642 |
| 0.055185109 | 0.178023978 | 0.248304325 | 0.038539749 |
| 0.180690598 | 0.040279574 | 0.016197564 | 0.14151388  |
| 0.106558824 | 0.188806893 | 0.166797955 | 1           |
| 0.099705915 | 0.249925685 | 0.210115706 | 0.036893281 |
| 0.075656097 | 0.11572617  | 0.184040963 | 0.239019235 |
| 0.083186301 | 0.158416806 | 0.170667809 | 0.083350119 |
| 0.081153524 | 0.269135279 | 0.146193772 | 0.257001345 |
| 0.233317886 | 0.174761171 | 0.134677698 | 0.277845255 |
| 0.267373037 | 0.133939682 | 0.071798668 | 0.318826941 |
| 0.160430285 | 0.28594422  | 0.124462896 | 0.127501067 |
| 0.235755038 | 0.157879776 | 0.175867642 | 0.088293819 |
| 0.096777846 | 0.146364299 | 0.245140455 | 0.16214854  |
| 0.271428135 | 0.095908035 | 0.022837561 | 0.166436895 |
| 0.067900673 | 0.115155657 | 0.14678046  | 0.152564034 |
| 0.097842892 | 0.038652914 | 0.290503474 | 0.107166294 |
| 0.089958025 | 0.2036866   | 0.117208079 | 0.113834777 |
| 0.12931258  | 0.110926156 | 0.083841105 | 0.148807155 |
| 0.100063061 | 0.132439785 | 0.151816543 | 0.099111528 |
| 0.073083267 | 0.187752957 | 0.053845793 | 0.047107857 |
| 0.247206217 | 0.113912487 | 0.20124665  | 0.226846082 |
| 0.064132467 | 0.037814403 | 0.243990105 | 0.23037775  |
| 0.143193149 | 0.117868313 | 0.112204921 | 0.12707922  |
| 0.126495529 | 0.138915976 | 0.097493994 | 0.241289094 |
| 0.228893965 | 0.112491133 | 0.092158095 | 0.13118885  |
| 0.207127659 | 0.025448723 | 0.172026704 | 0.132218375 |
| 0.200502049 | 0.067628381 | 0.011334472 | 0.020684957 |
| 0.178520347 | 0.206878407 | 0.097019884 | 0.126839464 |

|             |             |             |             |
|-------------|-------------|-------------|-------------|
| 0.022125131 | 0.162545073 | 0.021955499 | 0.151324825 |
| 0.122001877 | 0.220072434 | 0.201650872 | 0.11972731  |
| 0.124590337 | 0.130227163 | 0.100709239 | 0.156868282 |
| 0.117758781 | 0.105644    | 0.122701585 | 0.29711635  |
| 0.147762865 | 0.114812062 | 0.13157023  | 0.109479334 |
| 0.194779988 | 0.209541248 | 0.261414097 | 0.157794763 |
| 0.101920198 | 0.046726895 | 0.036898504 | 0.153346179 |
| 0.051194476 | 0.254551565 | 0.128211488 | 0.205984139 |
| 0.162570624 | 0.146866394 | 0.088865095 | 0.110188584 |
| 0.147346802 | 0.183280984 | 0.08162261  | 0.018519654 |
| 0.01037565  | 0.2032989   | 0.120398101 | 0.201314561 |
| 0.147042731 | 0.025867938 | 0.137472417 | 0.084680791 |
| 0.114656858 | 0.183169913 | 0.125133608 | 0.262713096 |
| 0.143417234 | 0.251948084 | 0.063294066 | 0.221260461 |
| 0.255091678 | 0.042442759 | 0.174160509 | 0.110562502 |
| 0.187139064 | 0.173861855 | 0.058003245 | 0.193917407 |
| 0.046765433 | 0.261587715 | 0.126332932 | 0.116692563 |
| 0.074008815 | 0.267539732 | 0.249584683 | 0.209971726 |
| 0.095978131 | 0.255417703 | 0.274661745 | 0.015348302 |
| 0.198335992 | 0.168995383 | 0.232518601 | 0.191805965 |
| 0.160113824 | 0.250676593 | 0.221759882 | 0.109050835 |
| 0.214924584 | 0.101702435 | 0.162912808 | 0.018473325 |
| 0.113046895 | 0.158839807 | 0.108162094 | 0.086810669 |
| 0.048031266 | 0.103747208 | 0.088555077 | 0.194169139 |
| 0.063684912 | 0.287379263 | 0.213399965 | 0.198164961 |
| 0.176017577 | 0.112780214 | 0.200996768 | 0.158974336 |
| 0.074578868 | 0.215478606 | 0.102215888 | 0.050760672 |
| 0.154703743 | 0.06508369  | 0.161229319 | 0.076963786 |
| 0.062235703 | 0.210976023 | 0.125230572 | 0.152357752 |
| 0.096104846 | 0.12577758  | 0.131230827 | 0.155248634 |
| 0.14497097  | 0.074602742 | 0.121758713 | 0.11088209  |
| 0.178110891 | 0.209771695 | 0.075930385 | 0.225494756 |
| 0.241892737 | 0.092268627 | 0.113690461 | 0.018167639 |
| 0.074100895 | 0.065059744 | 0.215033173 | 0.237054154 |
| 0.090141832 | 0.080510755 | 0.092423212 | 0.252717469 |
| 0.14149272  | 0.100419136 | 0.076370317 | 0.142600585 |
| 0.214847076 | 0.207497593 | 0.157476672 | 0.172995732 |
| 0.050954784 | 0.141113434 | 0.139811566 | 0.113009908 |
| 0.099408593 | 0.187584402 | 0.116711637 | 0.025330504 |
| 0.156236531 | 0.080709261 | 0.240642776 | 0.259629908 |
| 0.251344883 | 0.224870252 | 0.053727742 | 0.220578386 |
| 0.047252802 | 0.251618259 | 0.030315723 | 0.197994816 |
| 0.205308359 | 0.042547378 | 0.226378967 | 0.11156504  |
| 0.244857642 | 0.1098703   | 0.115369425 | 0.265814802 |
| 0.056616034 | 0.137143976 | 0.128410601 | 0.198480254 |
| 0.092503865 | 0.168173628 | 0.255777496 | 0.045005091 |
| 0.047472103 | 0.045715874 | 0.130667048 | 0.084218598 |
| 0.13406359  | 0.209283438 | 0.049620756 | 0.140644843 |
| 0.112641963 | 0.063000604 | 0.080639594 | 0.139800868 |
| 0.201376823 | 0.127613694 | 0.042753934 | 0.130078705 |
| 0.124041155 | 0.224713495 | 0.059906585 | 0.065959414 |
| 0.129782962 | 0.092018568 | 0.110849783 | 0.11692137  |
| 0.099736976 | 0.268375995 | 0.072310895 | 0.119676423 |
| 0.075384396 | 0.056356429 | 0.156974148 | 0.162037711 |

|             |             |             |             |
|-------------|-------------|-------------|-------------|
| 0.043848145 |             |             |             |
| IL18        | 0.277877747 | 0.441672436 | 0.162504062 |
| 0.32269337  | 0.238681627 | 0.156814138 | 0.079718306 |
| 0.037464716 | 0.034581535 | 0.01081115  | 0.046295766 |
| 0.290106972 | 0.139073373 | 0.102332251 | 0.06759778  |
| 0.338828534 | 0.135007348 | 0.081156462 | 0.125019675 |
| 0.266719074 | 0.031083532 | 0.349778002 | 0.044287991 |
| 0.128183651 | 0.099912138 | 0.0591886   | 0.127424025 |
| 0.361671615 | 0.060805144 | 0.110524946 | 0.22583827  |
| 0.076318232 | 0.324852664 | 0.411104695 | 0.38647083  |
| 0.426088383 | 0.235675568 | 0.014412567 | 0.076530625 |
| 0.290608217 | 0.336941402 | 0.268097233 | 0.207779936 |
| 0.030523304 | 0.35911148  | 0.127149006 | 0.255830475 |
| 0.043913818 | 0.049869638 | 0.041115966 | 0.307625783 |
| 0.39046124  | 0.243774416 | 0.048323883 | 0.060531092 |
| 0.14535214  | 0.053255382 | 0.170187974 | 0.146709375 |
| 0.111758021 | 0.029565971 | 0.405401075 | 0.02985924  |
| 0.04325374  | 0.060342823 | 0.11954709  | 0.078946799 |
| 0.139634981 | 0.215540514 | 0.009618312 | 0.241855776 |
| 0.005134102 | 0.237617738 | 0.245052623 | 0.111290792 |
| 0.046693764 | 0.05181607  | 0.124066031 | 0.193095049 |
| 0.384958844 | 0.348648231 | 0.475830432 | 0.468459521 |
| 0.155603564 | 0.145186191 | 0.22400891  | 0.105172888 |
| 0.32349269  | 0.075838068 | 0.044773659 | 0.383344393 |
| 0.477882454 | 0.452144701 | 0.117397756 | 0.168250758 |
| 0.329210035 | 0.376233385 | 0.153824188 | 0.190473772 |
| 0.112466268 | 0.048131677 | 0.344635806 | 0.479917533 |
| 0.267104566 | 0.179604883 | 0.110836062 | 0.288013429 |
| 0.047694138 | 0.080078982 | 0.251922037 | 0.115894968 |
| 0.399003416 | 0.01050425  | 0.15209967  | 0.182609854 |
| 0.073633487 | 0.316545109 | 0.455178407 | 0.089182966 |
| 0.213080746 | 0.034987331 | 0.084233926 | 0.03337058  |
| 0.119100569 | 0.114447981 | 0.358074068 | 0.413603656 |
| 0.068798868 | 0.155939695 | 0.080592593 | 0.006691193 |
| 0.044307949 | 0.083981844 | 0.37251651  | 0.125765382 |
| 0.290729413 | 0.279729506 | 0.115842367 | 0.2335521   |
| 0.310375977 | 0.470043672 | 0.010489921 | 0.038534981 |
| 0.195675838 | 0.088699261 | 0.163123524 | 0.26931935  |
| 0.185840248 | 0.036642864 | 0.076602465 | 0.459551968 |
| 0.294055613 | 0.056220543 | 0.070354261 | 0.341075532 |
| 0.112103675 | 0.266645225 | 0.059116416 | 0.13885241  |
| 0.032041557 | 0.400020886 | 0.047299834 | 0.086388777 |
| 0.083587245 | 0.170642633 | 0.00577945  | 0.069592101 |
| 0.09053833  | 0.381808642 | 0.349407954 | 0.059438507 |
| 0.148971549 | 0.309882114 | 0.09145473  | 0.324822754 |
| 0.020045759 | 0.030376644 | 0.05720156  | 0.473198529 |
| 0.118248349 | 0.453395568 | 0.110698765 | 0.114538106 |
| 0.191808406 | 0.362304485 | 0.001384206 | 0.380063367 |
| 0.45010472  | 0.063118635 | 0.291521675 | 0.263536517 |
| 0.145758886 | 0.385138747 | 0.01079783  | 0.347231565 |
| 0.187953361 | 0.043822881 | 0.471279317 | 0.125854538 |
| 0.368002038 | 0.046186906 | 0.087359    | 0.390721566 |
| 0.372799313 | 0.009976497 | 0.052046171 | 0.235436756 |
| 0.037408609 | 0.023505136 | 0.271964758 | 0.263476367 |



|             |             |             |             |
|-------------|-------------|-------------|-------------|
| 0.204008859 | 0.355822402 | 0.44928674  | 0.132529516 |
| 0.230522164 | 0.072787875 | 0.013086409 | 0.199236058 |
| 0.333859496 | 0.111076737 | 0.320548637 | 0.072922958 |
| 0.126069042 | 0.379554952 | 0.322555998 | 0.050786428 |
| 0.031215459 | 0.10177144  | 0.015459911 | 0.158292478 |
| 0.273208069 | 0.080538467 | 0.145233039 | 0.081599992 |
| 0.079077411 | 0.471624913 | 0.120618414 | 0.1292299   |
| 0.097272281 | 0.253997986 | 0.093933345 | 0.133288079 |
| 0.188321921 | 0.084698749 | 0.125594167 | 0.116198855 |
| 0.018342025 | 0.08832633  | 0.014374116 | 0.171319641 |
| 0.170386396 | 0.174024358 | 0.153523524 | 0.254193093 |
| 0.129868742 | 0.122567695 | 0.215561995 | 0.106259486 |
| 0.080134516 | 0.024652079 | 0.425939401 | 0.281598203 |
| 0.176814125 | 0.059799724 | 0.043110601 | 0.143478048 |
| 0.426101579 | 0.108955495 | 0.040492605 | 0.383447006 |
| 0.016368499 | 0.441176139 | 0.146227803 | 0.099705915 |
| 1           | 0.16620033  | 0.386552199 | 0.016922733 |
| 0.164963991 | 0.3793961   | 0.157535331 | 0.105778246 |
| 0.306754493 | 0.249414522 | 0.024025876 | 0.260392289 |
| 0.271906359 | 0.043113771 | 0.472862124 | 0.123090133 |
| 0.02994577  | 0.356111575 | 0.353788578 | 0.061034319 |
| 0.061569088 | 0.158189533 | 0.012668116 | 0.22687106  |
| 0.456632054 | 0.375225095 | 0.334980926 | 0.108890822 |
| 0.040927968 | 0.053566584 | 0.128045451 | 0.195100577 |
| 0.401636655 | 0.476483068 | 0.158586206 | 0.236148331 |
| 0.144703211 | 0.122635943 | 0.023551518 | 0.474672927 |
| 0.064059945 | 0.420656652 | 0.011125814 | 0.383729153 |
| 0.413992819 | 0.082701429 | 0.0810651   | 0.117240158 |
| 0.279810491 | 0.027814439 | 0.065501868 | 0.410385936 |
| 0.32830838  | 0.107551218 | 0.107781137 | 0.294140495 |
| 0.009813021 | 0.020654617 | 0.209913309 | 0.106655801 |
| 0.116754861 | 0.088189481 | 0.060404718 | 0.071553341 |
| 0.048424039 | 0.370744146 | 0.410461884 | 0.04008286  |
| 0.152288468 | 0.056479538 | 0.299971092 | 0.030829691 |
| 0.424943222 | 0.426795696 | 0.424052511 | 0.054408984 |
| 0.365211954 | 0.44349251  | 0.282034079 | 0.060902049 |
| 0.029182072 | 0.434676963 | 0.207501851 | 0.024129893 |
| 0.43422563  | 0.053080974 | 0.043967188 | 0.400623532 |
| 0.08025317  | 0.321229908 | 0.000704272 | 0.026162528 |
| 0.040342753 | 0.431218376 | 0.366516968 | 0.210309599 |
| 0.049906141 | 0.194129497 | 0.006271429 | 0.470785098 |
| 0.417804821 | 0.02781421  | 0.10672635  | 0.37922832  |
| 0.379308221 | 0.426419593 | 0.153662903 | 0.434586953 |
| 0.319547322 | 0.423131668 | 0.100542109 | 0.184959024 |
| 0.360438811 | 0.439616359 | 0.272076676 | 0.338035128 |
| 0.422787216 | 0.34643467  | 0.171528454 | 0.014770992 |
| 0.046219409 | 0.04387064  | 0.082148313 | 0.052237188 |
| 0.120662818 | 0.093713899 | 0.398688618 | 0.432216675 |
| 0.468773632 | 0.01087395  | 0.041982974 | 0.341147383 |
| 0.34316302  | 0.392290155 | 0.011453672 | 0.002801208 |
| 0.003197759 | 0.042774232 | 0.161383077 | 0.126677427 |
| 0.419873756 | 0.066199317 | 0.009616367 | 0.015211553 |
| 0.087556194 | 0.316599774 | 0.432264734 | 0.289268685 |
| 0.355780243 | 0.062095898 | 0.105389448 | 0.28610916  |

|             |             |             |             |
|-------------|-------------|-------------|-------------|
| 0.066343158 | 0.150861916 | 0.46629178  | 0.368263314 |
| 0.035861087 | 0.110491465 | 0.119862424 | 0.42799498  |
| 0.067404315 | 0.229650804 | 0.317768617 | 0.129998223 |
| 0.012519944 | 0.068287499 | 0.050438295 | 0.368912144 |
| 0.417831478 | 0.11759273  | 0.073991897 | 0.033122603 |
| 0.078591877 | 0.408555171 | 0.106947645 | 0.475846452 |
| 0.347054916 | 0.400009915 | 0.080887245 | 0.369276767 |
| 0.041993829 | 0.407157496 | 0.222557002 | 0.012271041 |
| 0.108676473 | 0.014776083 | 0.414488156 | 0.079685094 |
| 0.084909941 | 0.218035608 | 0.062733518 | 0.029034553 |
| 0.081912963 | 0.062224783 | 0.44959091  | 0.438484615 |
| 0.037439302 | 0.067486012 | 0.156197493 | 0.245599971 |
| 0.093983899 | 0.372290029 | 0.395814813 | 0.157231527 |
| 0.038561326 | 0.09406518  | 0.267950332 | 0.220494519 |
| 0.066291766 | 0.474704183 | 0.128697357 | 0.460175301 |
| 0.238089067 | 0.351820865 | 0.421991757 | 0.158572252 |
| 0.167842866 | 0.169330451 | 0.229198575 | 0.020271915 |
| 0.176399805 | 0.441243454 | 0.114891262 | 0.112336394 |
| 0.165684801 | 0.22392133  | 0.019488598 | 0.038505245 |
| 0.182979446 | 0.119913213 | 0.092805276 | 0.381508567 |
| 0.19420663  | 0.232091261 | 0.0171755   | 0.048655438 |
| 0.45678289  | 0.309957454 | 0.032668349 | 0.271825963 |
| 0.091223761 | 0.196453863 | 0.374216012 | 0.404578497 |
| 0.094827556 | 0.409235903 | 0.315620141 | 0.260995118 |
| 0.323281372 | 0.111775162 | 0.426408791 | 0.013748345 |
| 0.055914447 | 0.248085613 | 0.090841266 | 0.074261464 |
| 0.090153099 | 0.02811319  | 0.126032018 | 0.34730983  |
| 0.143739691 | 0.304642865 | 0.072595011 | 0.043954702 |
| 0.203186961 | 0.103658332 | 0.22419707  | 0.069137094 |
| 0.070844394 | 0.408143866 | 0.012965851 | 0.056486747 |
| 0.168272406 | 0.339608888 | 0.244538032 | 0.114857965 |
| 0.144528528 | 0.094806538 | 0.192420862 | 0.083875274 |
| 0.122026264 | 0.109736484 | 0.337425678 | 0.01156263  |
| 0.015808329 | 0.466773818 | 0.110239501 | 0.021220431 |
| 0.052492966 | 0.168922852 | 0.09585046  | 0.095670877 |
| 0.032796086 | 0.44842386  | 0.08931772  | 0.229524991 |
| 0.141267963 | 0.045526427 | 0.225199219 | 0.028321813 |
| 0.022532846 | 0.338962871 | 0.216385096 | 0.444920871 |
| 0.144628262 | 0.379511973 | 0.306080203 | 0.364765601 |
| 0.04067519  | 0.157253007 | 0.016703226 | 0.3509438   |
| 0.129396907 |             |             |             |
| IL18R1      | 0.202463071 | 0.312179461 | 0.121378272 |
| 0.361468205 | 0.213234937 | 0.167787927 | 0.237543218 |
| 0.138324635 | 0.140251376 | 0.087284367 | 0.116487075 |
| 0.19896642  | 0.20781257  | 0.222914636 | 0.102501825 |
| 0.35589774  | 0.246657749 | 0.118577299 | 0.268063346 |
| 0.307010286 | 0.191490214 | 0.370582977 | 0.242330634 |
| 0.131207062 | 0.182983961 | 0.224250504 | 0.154127397 |
| 0.368069927 | 0.228266401 | 0.128847051 | 0.272702114 |
| 0.174386999 | 0.262319262 | 0.258309663 | 0.29179105  |
| 0.245355126 | 0.163960093 | 0.042081879 | 0.149532766 |
| 0.242147799 | 0.272405784 | 0.315640726 | 0.320524968 |
| 0.209117359 | 0.234742376 | 0.272218456 | 0.208812479 |
| 0.103105684 | 0.183081687 | 0.098195922 | 0.220978121 |

|             |             |             |             |
|-------------|-------------|-------------|-------------|
| 0.23481902  | 0.186726056 | 0.161427392 | 0.238197013 |
| 0.153221167 | 0.115661454 | 0.104716661 | 0.171846859 |
| 0.27028256  | 0.102971059 | 0.247360956 | 0.162642946 |
| 0.10484127  | 0.171392136 | 0.188899386 | 0.205314225 |
| 0.111813878 | 0.20739193  | 0.109933067 | 0.138366216 |
| 0.038322153 | 0.307417935 | 0.221715074 | 0.082924398 |
| 0.195595421 | 0.204106633 | 0.205173087 | 0.29909857  |
| 0.354895078 | 0.225771542 | 0.358794668 | 0.322946135 |
| 0.254846953 | 0.198546036 | 0.136803498 | 0.296087187 |
| 0.25427935  | 0.255082492 | 0.149196792 | 0.371103142 |
| 0.351190568 | 0.28376704  | 0.212344393 | 0.200948766 |
| 0.277482339 | 0.287513359 | 0.137308864 | 0.171929222 |
| 0.11075268  | 0.100244013 | 0.237644136 | 0.330719243 |
| 0.215943882 | 0.109895002 | 0.238433768 | 0.297026516 |
| 0.206476759 | 0.106349691 | 0.358701147 | 0.164679084 |
| 0.364828108 | 0.114628764 | 0.207605537 | 0.250801893 |
| 0.171591067 | 0.258615148 | 0.27402093  | 0.266819374 |
| 0.169193456 | 0.152229983 | 0.08444563  | 0.138066632 |
| 0.173958937 | 0.069666813 | 0.209726819 | 0.360262682 |
| 0.169699449 | 0.169488587 | 0.219404964 | 0.048901111 |
| 0.155475639 | 0.133563467 | 0.242906531 | 0.14197312  |
| 0.269529432 | 0.161908296 | 0.224039756 | 0.18809338  |
| 0.193582209 | 0.351106483 | 0.023177055 | 0.221107033 |
| 0.196502035 | 0.144891423 | 0.303456927 | 0.204751475 |
| 0.214312289 | 0.207675394 | 0.284385286 | 0.344571717 |
| 0.239241247 | 0.26441066  | 0.101447042 | 0.352822615 |
| 0.167578759 | 0.216631583 | 0.254949321 | 0.269218666 |
| 0.222409041 | 0.227100113 | 0.12832263  | 0.127125788 |
| 0.080993487 | 0.184487013 | 0.055820365 | 0.155972859 |
| 0.179093948 | 0.270172977 | 0.193956632 | 0.236255306 |
| 0.254621913 | 0.302580773 | 0.114065635 | 0.259726964 |
| 0.098745766 | 0.161623099 | 0.071231017 | 0.335401463 |
| 0.138128503 | 0.309916094 | 0.22411432  | 0.172725269 |
| 0.251375272 | 0.332807139 | 0.003592557 | 0.242240371 |
| 0.276568276 | 0.07266255  | 0.278438281 | 0.213690426 |
| 0.102802567 | 0.356475041 | 0.01257279  | 0.351988691 |
| 0.151085939 | 0.212616449 | 0.370113858 | 0.26430896  |
| 0.23766619  | 0.202778102 | 0.161107151 | 0.239124706 |
| 0.208769753 | 0.044404896 | 0.123075613 | 0.301844279 |
| 0.102673624 | 0.15169192  | 0.248409845 | 0.309475885 |
| 0.234487978 | 0.293086517 | 0.388808161 | 0.098152973 |
| 0.209331369 | 0.217164695 | 0.084068533 | 0.188683326 |
| 0.244948862 | 0.093252316 | 0.247132424 | 0.222514976 |
| 0.108036925 | 0.284417619 | 0.200286309 | 0.076126526 |
| 0.206614974 | 0.176584215 | 0.099498159 | 0.190807096 |
| 0.178631998 | 0.278823805 | 0.106655211 | 0.144539496 |
| 0.199457011 | 0.333058954 | 0.106128074 | 0.082769848 |
| 0.064564909 | 0.227137223 | 0.228426267 | 0.219013585 |
| 0.210715637 | 0.231973268 | 0.13325071  | 0.151689025 |
| 0.173999119 | 0.281097034 | 0.03835335  | 0.112669324 |
| 0.231523529 | 0.162302587 | 0.143488773 | 0.196064895 |
| 0.185303702 | 0.280817339 | 0.206676552 | 0.112039551 |
| 0.179029807 | 0.13341712  | 0.303850834 | 0.312154767 |
| 0.16118188  | 0.236941547 | 0.175266116 | 0.10674181  |

|             |             |             |             |
|-------------|-------------|-------------|-------------|
| 0.351007736 | 0.110167704 | 0.064566452 | 0.311194461 |
| 0.093159313 | 0.334161617 | 0.260450801 | 0.249925685 |
| 0.16620033  | 1           | 0.369940172 | 0.057139192 |
| 0.162118674 | 0.280055127 | 0.201506746 | 0.230923238 |
| 0.224786977 | 0.27417631  | 0.184627347 | 0.198002915 |
| 0.199705769 | 0.202388599 | 0.306749592 | 0.205409687 |
| 0.136751831 | 0.26078822  | 0.238440491 | 0.208022891 |
| 0.186763028 | 0.203799413 | 0.140110206 | 0.296587254 |
| 0.329942115 | 0.384459054 | 0.255381773 | 0.120229841 |
| 0.227956362 | 0.137969989 | 0.164837483 | 0.131910222 |
| 0.247003391 | 0.294083542 | 0.248952897 | 0.187678465 |
| 0.296945097 | 0.136262929 | 0.08007397  | 0.327291194 |
| 0.084141306 | 0.26785333  | 0.085050168 | 0.247913515 |
| 0.239087616 | 0.106863169 | 0.200374392 | 0.198707961 |
| 0.231530882 | 0.191276333 | 0.191247705 | 0.269787532 |
| 0.269873085 | 0.165035242 | 0.138639402 | 0.246078148 |
| 0.129403775 | 0.182110348 | 0.191144177 | 0.084104591 |
| 0.151781189 | 0.219431943 | 0.028476566 | 0.127934653 |
| 0.240013565 | 0.27338147  | 0.340782547 | 0.158198911 |
| 0.152229818 | 0.107215773 | 0.285351325 | 0.192798528 |
| 0.25432418  | 0.254413539 | 0.27032602  | 0.209031278 |
| 0.245253902 | 0.282283198 | 0.146115546 | 0.179344637 |
| 0.112992892 | 0.257005775 | 0.202676111 | 0.140595768 |
| 0.367589932 | 0.080311138 | 0.165038038 | 0.302191814 |
| 0.253104283 | 0.191588168 | 0.016175207 | 0.022163447 |
| 0.094614893 | 0.327982064 | 0.239303719 | 0.258563633 |
| 0.084513096 | 0.247840735 | 0.009442141 | 0.303423495 |
| 0.285095896 | 0.098479857 | 0.151138486 | 0.240251713 |
| 0.213659187 | 0.301118163 | 0.114430787 | 0.276601272 |
| 0.187987642 | 0.249392175 | 0.23586885  | 0.271616052 |
| 0.301553509 | 0.244271438 | 0.267722258 | 0.26077998  |
| 0.361326735 | 0.28982082  | 0.312994736 | 0.137727207 |
| 0.077062436 | 0.137446398 | 0.089523476 | 0.139695131 |
| 0.13956317  | 0.208768236 | 0.278214458 | 0.353030283 |
| 0.305395839 | 0.071919252 | 0.192042566 | 0.234661128 |
| 0.32011707  | 0.353563139 | 0.050473849 | 0.010787343 |
| 0.007498532 | 0.087473674 | 0.224898904 | 0.191726979 |
| 0.295349635 | 0.094208409 | 0.086443956 | 0.150827889 |
| 0.20249207  | 0.219673157 | 0.284687935 | 0.369105894 |
| 0.247417508 | 0.222513871 | 0.14985353  | 0.342651593 |
| 0.154254911 | 0.121351357 | 0.325500841 | 0.271573701 |
| 0.122288825 | 0.184994583 | 0.116830552 | 0.367695097 |
| 0.027228497 | 0.269358853 | 0.216771343 | 0.210067558 |
| 0.04245946  | 0.177219217 | 0.159144461 | 0.326732742 |
| 0.232687108 | 0.252758736 | 0.208587695 | 0.058413744 |
| 0.27800554  | 0.313364346 | 0.297857007 | 0.356411744 |
| 0.321085563 | 0.400519873 | 0.141895543 | 0.258946989 |
| 0.155741314 | 0.250106908 | 0.158824601 | 0.048208127 |
| 0.165520541 | 0.100825032 | 0.239984633 | 0.087868216 |
| 0.144279467 | 0.220653405 | 0.08746767  | 0.090265836 |
| 0.058132694 | 0.202763162 | 0.369764288 | 0.31772293  |
| 0.091077987 | 0.200896593 | 0.203066631 | 0.253030459 |
| 0.165494823 | 0.354573627 | 0.25532141  | 0.112887836 |
| 0.224088301 | 0.060327879 | 0.301883795 | 0.182357046 |

|             |             |             |             |
|-------------|-------------|-------------|-------------|
| 0.165425119 | 0.359567455 | 0.174751232 | 0.309690504 |
| 0.209232768 | 0.269058905 | 0.27399539  | 0.231709159 |
| 0.151269209 | 0.164889413 | 0.25942869  | 0.151099361 |
| 0.247549867 | 0.364601233 | 0.144371198 | 0.18607726  |
| 0.25137734  | 0.124687087 | 0.119765706 | 0.052511547 |
| 0.086053898 | 0.166240006 | 0.290478862 | 0.375927549 |
| 0.192684913 | 0.190508595 | 0.124071123 | 0.161248331 |
| 0.311656144 | 0.237736356 | 0.150609292 | 0.26685274  |
| 0.220626424 | 0.23601719  | 0.271148552 | 0.276090601 |
| 0.102113683 | 0.288669176 | 0.291088256 | 0.254291911 |
| 0.256169463 | 0.233373693 | 0.274729773 | 0.082328856 |
| 0.104171663 | 0.160393242 | 0.274960571 | 0.192643157 |
| 0.293186006 | 0.124276209 | 0.075375817 | 0.325386005 |
| 0.089502628 | 0.345190819 | 0.097571289 | 0.17136237  |
| 0.208492847 | 0.087530626 | 0.272198568 | 0.23008523  |
| 0.260300588 | 0.264543773 | 0.067446601 | 0.200261143 |
| 0.108492335 | 0.253473856 | 0.154078626 | 0.223111581 |
| 0.110293081 | 0.137532331 | 0.280815365 | 0.117944308 |
| 0.129392299 | 0.099663486 | 0.252368257 | 0.106812474 |
| 0.156830818 | 0.368473621 | 0.111077046 | 0.070092518 |
| 0.094691922 | 0.143862448 | 0.148847641 | 0.195278609 |
| 0.091457068 | 0.262834622 | 0.110673316 | 0.185958694 |
| 0.219741684 | 0.205662962 | 0.174349475 | 0.093188308 |
| 0.132747996 | 0.236521259 | 0.147486368 | 0.263886718 |
| 0.129516308 | 0.395473676 | 0.201582009 | 0.255792293 |
| 0.094556597 | 0.097476929 | 0.16206412  | 0.313004313 |
| 0.094624202 |             |             |             |

|             |             |             |             |
|-------------|-------------|-------------|-------------|
| IL18RAP     | 0.409855154 | 0.515946496 | 0.418033034 |
| 0.468404994 | 0.468186797 | 0.395299531 | 0.328071791 |
| 0.277976755 | 0.172094895 | 0.016485079 | 0.049392265 |
| 0.435920783 | 0.259057591 | 0.342311665 | 0.375885979 |
| 0.479203453 | 0.205173082 | 0.41238962  | 0.367132278 |
| 0.470735098 | 0.175643973 | 0.467343701 | 0.195777736 |
| 0.346713169 | 0.168927191 | 0.144596518 | 0.33763309  |
| 0.47048806  | 0.162864917 | 0.347177316 | 0.42898185  |
| 0.176311886 | 0.432489673 | 0.495152768 | 0.449203715 |
| 0.477645098 | 0.377978174 | 0.022812374 | 0.356533563 |
| 0.40919818  | 0.455273758 | 0.466108548 | 0.432930846 |
| 0.10715367  | 0.460959577 | 0.363948505 | 0.443877837 |
| 0.299748732 | 0.073091355 | 0.290264239 | 0.429339907 |
| 0.445089587 | 0.429224364 | 0.332058577 | 0.272663103 |
| 0.225174177 | 0.272194534 | 0.266192285 | 0.342985125 |
| 0.344634042 | 0.212187147 | 0.458149815 | 0.179115479 |
| 0.205560219 | 0.357703381 | 0.225456438 | 0.366772691 |
| 0.365739325 | 0.391376628 | 0.055833718 | 0.375570524 |
| 0.007647591 | 0.466853316 | 0.438416636 | 0.318878738 |
| 0.09829092  | 0.049672274 | 0.261017318 | 0.428137534 |
| 0.465511412 | 0.438623031 | 0.479150147 | 0.477765439 |
| 0.249650208 | 0.394487175 | 0.397454634 | 0.279638879 |
| 0.420894219 | 0.28409557  | 0.189596261 | 0.474648768 |
| 0.486697603 | 0.498669396 | 0.296888357 | 0.3592718   |
| 0.416984171 | 0.474730168 | 0.443655888 | 0.463644559 |
| 0.366245438 | 0.099717168 | 0.424906716 | 0.499492698 |
| 0.376140382 | 0.329630922 | 0.2464309   | 0.431279638 |

|             |             |             |             |
|-------------|-------------|-------------|-------------|
| 0.130869665 | 0.392531814 | 0.451257428 | 0.201094023 |
| 0.478125284 | 0.059504447 | 0.298717408 | 0.429513373 |
| 0.330609711 | 0.439102563 | 0.490445424 | 0.313239608 |
| 0.443970258 | 0.049697084 | 0.174672141 | 0.080000093 |
| 0.385507399 | 0.162812233 | 0.444520925 | 0.455317831 |
| 0.308791755 | 0.420559958 | 0.388630691 | 0.010303479 |
| 0.063826695 | 0.268035155 | 0.403289983 | 0.428642439 |
| 0.458932221 | 0.347431808 | 0.326697958 | 0.374567707 |
| 0.416008778 | 0.470548055 | 0.070430765 | 0.204551622 |
| 0.463898394 | 0.26924359  | 0.361561487 | 0.445377221 |
| 0.392404027 | 0.225657881 | 0.233868353 | 0.518151428 |
| 0.423198837 | 0.177048268 | 0.373566437 | 0.477544415 |
| 0.379271093 | 0.408187686 | 0.209783242 | 0.361138337 |
| 0.118828481 | 0.44882386  | 0.062442463 | 0.399228355 |
| 0.29628916  | 0.190797667 | 0.034446572 | 0.345827729 |
| 0.360875733 | 0.405508197 | 0.426829019 | 0.208479218 |
| 0.402670498 | 0.46783034  | 0.357827178 | 0.420006161 |
| 0.029649866 | 0.110180393 | 0.298327868 | 0.497260086 |
| 0.296850265 | 0.48786147  | 0.413457173 | 0.400659889 |
| 0.386618846 | 0.472839911 | 0.006546067 | 0.471766755 |
| 0.500102813 | 0.30735637  | 0.441115927 | 0.451137737 |
| 0.383690724 | 0.462255508 | 0.046844811 | 0.473667951 |
| 0.34509376  | 0.170970842 | 0.506108717 | 0.255844881 |
| 0.440152558 | 0.097954486 | 0.379947203 | 0.40754486  |
| 0.386066936 | 0.020499011 | 0.289625428 | 0.452377992 |
| 0.060240551 | 0.179211048 | 0.449190353 | 0.474019708 |
| 0.448490882 | 0.462919859 | 0.488609518 | 0.365127456 |
| 0.469753393 | 0.355037088 | 0.037324088 | 0.395267019 |
| 0.433654164 | 0.361969534 | 0.438547939 | 0.362334057 |
| 0.328535271 | 0.470907538 | 0.381707864 | 0.235370799 |
| 0.110756795 | 0.401341936 | 0.049477262 | 0.425129123 |
| 0.363496599 | 0.199763032 | 0.399412697 | 0.220733186 |
| 0.133386799 | 0.518309393 | 0.219551003 | 0.270975598 |
| 0.149816841 | 0.412767475 | 0.383283421 | 0.282872248 |
| 0.244025756 | 0.278364167 | 0.399312113 | 0.436387815 |
| 0.096097628 | 0.174244752 | 0.033050753 | 0.335139551 |
| 0.170750094 | 0.33909617  | 0.327013796 | 0.391631199 |
| 0.368595202 | 0.168796037 | 0.441609772 | 0.345484647 |
| 0.195667259 | 0.044006345 | 0.500240072 | 0.47793941  |
| 0.327046652 | 0.281277775 | 0.094495496 | 0.310482904 |
| 0.462614791 | 0.319189176 | 0.288759268 | 0.452979087 |
| 0.069510401 | 0.478868386 | 0.322368027 | 0.210115706 |
| 0.386552199 | 0.369940172 | 1           | 0.098977802 |
| 0.417250566 | 0.46037697  | 0.417394227 | 0.287730015 |
| 0.379141675 | 0.471482635 | 0.082547828 | 0.388466266 |
| 0.378399695 | 0.078789511 | 0.507449256 | 0.192890774 |
| 0.05567885  | 0.450109466 | 0.419473538 | 0.153363244 |
| 0.153616707 | 0.396689338 | 0.111241176 | 0.394694206 |
| 0.513806569 | 0.471679292 | 0.414294472 | 0.282247812 |
| 0.099409673 | 0.021343037 | 0.283373654 | 0.405719275 |
| 0.479480736 | 0.487159667 | 0.37606623  | 0.402088334 |
| 0.369480768 | 0.381413316 | 0.197200348 | 0.497695456 |
| 0.254755261 | 0.495937624 | 0.024338025 | 0.424660587 |
| 0.473202753 | 0.31813784  | 0.146929111 | 0.39129597  |

|             |             |             |             |
|-------------|-------------|-------------|-------------|
| 0.374134292 | 0.119270315 | 0.324085143 | 0.479092319 |
| 0.431908686 | 0.418026203 | 0.407988334 | 0.454960156 |
| 0.052785397 | 0.108129055 | 0.445800473 | 0.21981261  |
| 0.429208167 | 0.341627949 | 0.060595784 | 0.392517634 |
| 0.100770958 | 0.444847787 | 0.466259721 | 0.131025619 |
| 0.343738145 | 0.372751232 | 0.447237237 | 0.09726334  |
| 0.418752931 | 0.472583444 | 0.498695905 | 0.284872095 |
| 0.421557706 | 0.467998433 | 0.372986621 | 0.154883696 |
| 0.045504109 | 0.486422368 | 0.420245774 | 0.054444568 |
| 0.471199407 | 0.262441439 | 0.031346692 | 0.496227632 |
| 0.316623174 | 0.409651252 | 0.014201586 | 0.097582366 |
| 0.08236752  | 0.459235838 | 0.460376343 | 0.436749412 |
| 0.263406353 | 0.457233067 | 0.011526832 | 0.504527976 |
| 0.477089869 | 0.037799055 | 0.20940352  | 0.40619858  |
| 0.393382906 | 0.51953123  | 0.346031074 | 0.41847614  |
| 0.406620549 | 0.468627738 | 0.324070407 | 0.381522388 |
| 0.435105207 | 0.456915535 | 0.4482424   | 0.459166507 |
| 0.458607959 | 0.463540242 | 0.40233993  | 0.050359697 |
| 0.205471953 | 0.294265001 | 0.314359529 | 0.143983227 |
| 0.34758964  | 0.229980872 | 0.470650497 | 0.465590341 |
| 0.461030006 | 0.018481489 | 0.255522098 | 0.409228368 |
| 0.446861172 | 0.48630008  | 0.050026215 | 0.014150694 |
| 0.013740491 | 0.040083909 | 0.436798232 | 0.346497178 |
| 0.480521577 | 0.246739748 | 0.018993217 | 0.106354028 |
| 0.395212854 | 0.421743429 | 0.48665139  | 0.470316678 |
| 0.432544825 | 0.16299835  | 0.311099332 | 0.47584237  |
| 0.128310658 | 0.313895723 | 0.474869719 | 0.467820517 |
| 0.09008344  | 0.355744471 | 0.408450941 | 0.497556047 |
| 0.075502428 | 0.41318801  | 0.433796872 | 0.386707325 |
| 0.032071727 | 0.15325997  | 0.135871757 | 0.471964299 |
| 0.460399695 | 0.126781368 | 0.068673455 | 0.16448375  |
| 0.208433649 | 0.454623547 | 0.264852669 | 0.513877228 |
| 0.450687549 | 0.47961494  | 0.127139606 | 0.474585921 |
| 0.087127161 | 0.460051621 | 0.378890427 | 0.089151308 |
| 0.3785241   | 0.03932529  | 0.437427282 | 0.187128687 |
| 0.370497982 | 0.430368345 | 0.27044754  | 0.040992673 |
| 0.207434054 | 0.110821479 | 0.47825012  | 0.451552503 |
| 0.069420325 | 0.370065502 | 0.406994364 | 0.465722705 |
| 0.358545389 | 0.468129597 | 0.482002834 | 0.381796617 |
| 0.176816056 | 0.156492339 | 0.460971659 | 0.395271629 |
| 0.31716068  | 0.487142022 | 0.362293925 | 0.513880323 |
| 0.418200621 | 0.458581666 | 0.4518496   | 0.444805915 |
| 0.275348031 | 0.421575297 | 0.403136708 | 0.05311781  |
| 0.457491884 | 0.460795141 | 0.428227475 | 0.228358932 |
| 0.350951019 | 0.378123462 | 0.111644853 | 0.205036961 |
| 0.316601963 | 0.34571864  | 0.238924461 | 0.480310296 |
| 0.420899007 | 0.396526687 | 0.092029288 | 0.129661109 |
| 0.528992782 | 0.435021644 | 0.247944669 | 0.456971405 |
| 0.281523798 | 0.436498236 | 0.444878321 | 0.441483033 |
| 0.398830519 | 0.41808846  | 0.442833514 | 0.398567164 |
| 0.422271145 | 0.392873081 | 0.504193852 | 0.148184028 |
| 0.142491212 | 0.395499071 | 0.170603216 | 0.170109102 |
| 0.251444026 | 0.069017404 | 0.289758313 | 0.473500848 |
| 0.345309352 | 0.455318359 | 0.339374167 | 0.165243557 |

|             |             |             |             |
|-------------|-------------|-------------|-------------|
| 0.409253529 | 0.380096875 | 0.453150766 | 0.30275315  |
| 0.153070253 | 0.477950619 | 0.026736163 | 0.11894861  |
| 0.359286572 | 0.433120495 | 0.39345993  | 0.353821926 |
| 0.321218909 | 0.209044243 | 0.408019079 | 0.338324758 |
| 0.317180464 | 0.372871261 | 0.42669035  | 0.089125735 |
| 0.058252931 | 0.493756279 | 0.402039799 | 0.049136969 |
| 0.141274613 | 0.383607862 | 0.37311294  | 0.333481229 |
| 0.050089462 | 0.450579162 | 0.352832132 | 0.457071123 |
| 0.437929529 | 0.143959165 | 0.341425656 | 0.15452464  |
| 0.137639337 | 0.434912968 | 0.412746932 | 0.483153408 |
| 0.400164485 | 0.475313068 | 0.423028209 | 0.41136613  |
| 0.195040447 | 0.366473505 | 0.082334428 | 0.455912306 |
| 0.376061763 |             |             |             |
| IL1R2       | 0.043875518 | 0.078466481 | 0.036495162 |
| 0.102457547 | 0.040402754 | 0.070427572 | 0.084652511 |
| 0.027840343 | 0.022557719 | 0.002317912 | 0.004898557 |
| 0.036669095 | 0.003632255 | 0.02305005  | 0.031485195 |
| 0.087611313 | 0.014004235 | 0.022651867 | 0.07418839  |
| 0.071500546 | 0.042942171 | 0.07296342  | 0.044658093 |
| 0.015345674 | 0.025792664 | 0.042328699 | 0.03964038  |
| 0.09166205  | 0.041360754 | 0.057785891 | 0.075849942 |
| 0.007483593 | 0.053685334 | 0.068340861 | 0.051369724 |
| 0.058153727 | 0.041466095 | 3.98E-05    | 0.043115115 |
| 0.063792129 | 0.078387644 | 0.081232222 | 0.082261247 |
| 0.028210629 | 0.064529603 | 0.093447676 | 0.04126995  |
| 0.003191567 | 0.020241747 | 0.036539459 | 0.067897313 |
| 0.06266436  | 0.054510907 | 0.057198481 | 0.069328507 |
| 0.003109723 | 0.019427847 | 0.006799096 | 0.057906028 |
| 0.070047915 | 0.034234268 | 0.06166081  | 0.031074139 |
| 0.001148921 | 0.040524274 | 0.008067225 | 0.046799136 |
| 0.016129722 | 0.07047453  | 0.005897367 | 0.02476408  |
| 0.000151089 | 0.08723177  | 0.03774792  | 0.025121766 |
| 0.023799849 | 0.005521393 | 0.013010542 | 0.086234535 |
| 0.08063585  | 0.054832696 | 0.076166163 | 0.071686307 |
| 0.007087514 | 0.031107774 | 0.024543916 | 0.034794423 |
| 0.069535786 | 0.076231684 | 0.006940856 | 0.077114251 |
| 0.076203595 | 0.067594931 | 0.022097276 | 0.043968489 |
| 0.088533136 | 0.079304715 | 0.03973999  | 0.035677095 |
| 0.028610148 | 0.006108704 | 0.068189114 | 0.071007077 |
| 0.05432463  | 0.017123845 | 0.034752538 | 0.073219679 |
| 0.02336299  | 0.013118086 | 0.085757391 | 0.00063992  |
| 0.090116274 | 0.038483348 | 0.031944557 | 0.064171585 |
| 0.009955192 | 0.061973196 | 0.06534321  | 0.078301028 |
| 0.029866732 | 0.000607914 | 0.0049062   | 0.008559576 |
| 0.017351056 | 0.003037156 | 0.058591551 | 0.087013179 |
| 0.01179571  | 0.009117303 | 0.058090569 | 0.002774142 |
| 0.007118272 | 0.003548591 | 0.043578151 | 0.025426388 |
| 0.062337745 | 0.039448666 | 0.053974541 | 0.0519535   |
| 0.045804957 | 0.073492538 | 0.009402667 | 0.041574032 |
| 0.064158134 | 0.00548264  | 0.066125518 | 0.041073315 |
| 0.053772062 | 0.042510104 | 0.035416788 | 0.086016509 |
| 0.075417813 | 0.044988341 | 0.017923597 | 0.076148694 |
| 0.025372688 | 0.038534628 | 0.03195811  | 0.023476001 |
| 0.022287552 | 0.05911732  | 0.007413943 | 0.035653434 |



|             |             |                      |             |
|-------------|-------------|----------------------|-------------|
| 0.018242943 | 0.002870814 | 0.00112876           | 0.055843602 |
| 0.026472593 | 0.071049678 | 0.05001976           | 0.034167968 |
| 0.032458182 | 0.065670176 | 0.032148636          | 0.070261442 |
| 0.006662492 | 0.007338972 | 0.023976787          | 0.073612406 |
| 0.050885077 | 0.064642626 | 0.02386432           | 0.030727196 |
| 0.053293285 | 0.079612841 | 4.75E-06 0.068432098 |             |
| 0.067678501 | 0.028696081 | 0.053368565          | 0.039583335 |
| 0.0411953   | 0.093497014 | 0.000227337          | 0.062257051 |
| 0.036718116 | 0.033899556 | 0.082126604          | 0.041537888 |
| 0.05980363  | 0.030575795 | 0.027694704          | 0.054204491 |
| 0.042480698 | 0.009074794 | 0.064159612          | 0.095615548 |
| 0.004927129 | 0.040094805 | 0.060129406          | 0.080539295 |
| 0.086592284 | 0.064249495 | 0.084917513          | 0.037638573 |
| 0.04186469  | 0.045044169 | 0.00257902           | 0.035157574 |
| 0.050857227 | 0.004025072 | 0.072518558          | 0.048622389 |
| 0.031284446 | 0.08373266  | 0.048356991          | 0.003411771 |
| 0.04764575  | 0.055015981 | 0.001714315          | 0.073785583 |
| 0.055422541 | 0.026861962 | 0.045467068          | 0.003364113 |
| 0.018295092 | 0.080196014 | 0.011118036          | 0.010897029 |
| 0.005688015 | 0.044107288 | 0.060157489          | 0.023485607 |
| 0.009156116 | 0.034233837 | 0.034683391          | 0.037231038 |
| 0.031304758 | 0.024386848 | 0.000491245          | 0.008798621 |
| 0.005070611 | 0.015567618 | 0.016154146          | 0.044643754 |
| 0.010156243 | 0.005002967 | 0.047142879          | 0.013147608 |
| 0.023152156 | 0.013165572 | 0.076036419          | 0.07129968  |
| 0.048830562 | 0.065413115 | 0.013456749          | 0.003922708 |
| 0.082068931 | 0.055336008 | 0.03026494           | 0.083313387 |
| 0.001717336 | 0.072265613 | 0.017803985          | 0.036893281 |
| 0.016922733 | 0.057139192 | 0.098977802          | 1           |
| 0.040420588 | 0.075560081 | 0.045723444          | 0.049235641 |
| 0.05973031  | 0.07173204  | 0.017465306          | 0.049602957 |
| 0.042805962 | 0.018546538 | 0.069933071          | 0.008828815 |
| 0.012591305 | 0.048696301 | 0.05896089           | 0.035848463 |
| 0.026134513 | 0.063665445 | 0.03036948           | 0.063325355 |
| 0.083191683 | 0.078724149 | 0.067517662          | 0.01496934  |
| 0.031478105 | 0.000799289 | 0.015360127          | 0.027620994 |
| 0.061571684 | 0.06300611  | 0.043334259          | 0.035773903 |
| 0.075085173 | 0.037032042 | 0.004458981          | 0.075118953 |
| 0.002877875 | 0.065203411 | 0.008039827          | 0.055300975 |
| 0.060462566 | 0.037034326 | 0.029649331          | 0.076525906 |
| 0.066427449 | 0.04664059  | 0.026520678          | 0.067881124 |
| 0.080692282 | 0.059724658 | 0.045124044          | 0.042427104 |
| 0.023372843 | 0.014235723 | 0.06138836           | 0.008935894 |
| 0.032930002 | 0.058180422 | 0.000879184          | 0.03021394  |
| 0.014694426 | 0.076187652 | 0.063749241          | 0.035216611 |
| 0.064657087 | 0.028441588 | 0.048330995          | 0.032722704 |
| 0.058144578 | 0.05667152  | 0.068007044          | 0.026643636 |
| 0.045319929 | 0.069614367 | 0.028207435          | 0.019185805 |
| 0.010180138 | 0.061634239 | 0.055810574          | 0.002778329 |
| 0.079275133 | 0.040969457 | 0.003918646          | 0.078618046 |
| 0.066227172 | 0.049932912 | 0.0014908            | 0.000164156 |
| 0.00464152  | 0.064930646 | 0.072228429          | 0.074309701 |
| 0.028825001 | 0.056421364 | 5.72E-06 0.065994289 |             |
| 0.072976862 | 0.009056408 | 0.01075516           | 0.04933226  |

|             |             |             |             |
|-------------|-------------|-------------|-------------|
| 0.043939255 | 0.075233182 | 0.030700165 | 0.063042505 |
| 0.033634503 | 0.061327196 | 0.011188192 | 0.070449781 |
| 0.08409263  | 0.055679286 | 0.070990987 | 0.076122556 |
| 0.076427247 | 0.051574652 | 0.093537665 | 0.026116336 |
| 0.012473353 | 0.049500581 | 0.029558946 | 0.00479432  |
| 0.058013961 | 0.024905502 | 0.065872336 | 0.072361436 |
| 0.063854659 | 0.006873708 | 0.027702429 | 0.054578491 |
| 0.084472039 | 0.088054261 | 0.001041996 | 0.000527647 |
| 0.000688459 | 0.009413369 | 0.0617036   | 0.037439125 |
| 0.073909319 | 0.010537527 | 0.008122413 | 0.016215159 |
| 0.015248592 | 0.045535297 | 0.071087915 | 0.08729696  |
| 0.05152522  | 0.021270666 | 0.02826234  | 0.081960097 |
| 0.022842635 | 0.037096939 | 0.072564625 | 0.080655228 |
| 0.005777092 | 0.040033019 | 0.022699638 | 0.090907357 |
| 0.002123566 | 0.043976475 | 0.035088569 | 0.02514058  |
| 0.00017521  | 0.020685939 | 0.032190178 | 0.06676678  |
| 0.055102412 | 0.010146332 | 0.007549438 | 0.000750894 |
| 0.042479127 | 0.06507544  | 0.021671168 | 0.079968218 |
| 0.079094218 | 0.086010851 | 0.005639036 | 0.078914135 |
| 0.007155226 | 0.061266678 | 0.028069265 | 0.002437472 |
| 0.015775466 | 0.006214703 | 0.049377237 | 0.011950167 |
| 0.022204024 | 0.057328766 | 0.020733859 | 0.005266057 |
| 0.007249423 | 0.016904477 | 0.085729196 | 0.067867518 |
| 0.00339601  | 0.042605504 | 0.041456922 | 0.051415306 |
| 0.066468046 | 0.086478659 | 0.068800064 | 0.034219955 |
| 0.044474974 | 0.000529759 | 0.078027661 | 0.041721529 |
| 0.019925113 | 0.074484733 | 0.035568073 | 0.072827864 |
| 0.061945361 | 0.070556544 | 0.063233132 | 0.096983932 |
| 0.004218601 | 0.052930285 | 0.088027867 | 0.007596043 |
| 0.069835493 | 0.074235729 | 0.04264028  | 0.022461814 |
| 0.046719764 | 0.023389782 | 0.003022744 | 0.001135846 |
| 0.016372709 | 0.069228512 | 0.01288709  | 0.084670814 |
| 0.046742495 | 0.050293505 | 0.002188865 | 0.031628863 |
| 0.075815134 | 0.074307235 | 0.030226258 | 0.076993634 |
| 0.029985519 | 0.078014401 | 0.055331831 | 0.053998175 |
| 0.016327969 | 0.057924118 | 0.072674946 | 0.065486769 |
| 0.076836561 | 0.0807046   | 0.07058063  | 0.010738305 |
| 0.004629331 | 0.027461077 | 0.027904045 | 0.024482008 |
| 0.04475179  | 0.010215154 | 0.009550687 | 0.062916333 |
| 0.011525252 | 0.062654319 | 0.009021904 | 0.004262002 |
| 0.036900327 | 0.019734317 | 0.054209305 | 0.057759012 |
| 0.0160575   | 0.071408393 | 0.000511689 | 0.01445877  |
| 0.010326542 | 0.075991059 | 0.032469078 | 0.031622945 |
| 0.016949762 | 0.005431357 | 0.055239015 | 0.047444108 |
| 0.026718033 | 0.002654604 | 0.075710282 | 0.005849875 |
| 0.012717892 | 0.076445241 | 0.030814909 | 0.001647007 |
| 0.001263165 | 0.040646094 | 0.010517144 | 0.032903693 |
| 0.005554163 | 0.057603242 | 0.057352584 | 0.044495653 |
| 0.064778898 | 0.019573329 | 0.051669354 | 0.001447603 |
| 0.010511622 | 0.061191323 | 0.036539695 | 0.062989269 |
| 0.021652023 | 0.088153701 | 0.059987844 | 0.050034539 |
| 0.002457107 | 0.02222412  | 0.03243792  | 0.076522922 |
| 0.032204062 |             |             |             |

IL2RB 0.356617241

0.467982967

0.208121944

|             |             |             |             |
|-------------|-------------|-------------|-------------|
| 0.332276435 | 0.234083744 | 0.229250688 | 0.160927121 |
| 0.202479255 | 0.054570709 | 0.00402814  | 0.010361247 |
| 0.246732183 | 0.096662039 | 0.173425485 | 0.172591626 |
| 0.34191602  | 0.078148198 | 0.279877417 | 0.17908937  |
| 0.335998608 | 0.098479944 | 0.275425577 | 0.0875555   |
| 0.165320796 | 0.051364943 | 0.048339768 | 0.120498645 |
| 0.413387163 | 0.056301481 | 0.196740415 | 0.345115882 |
| 0.091883219 | 0.401768418 | 0.459927344 | 0.253508974 |
| 0.441410223 | 0.322855494 | 0.031308357 | 0.16735052  |
| 0.419470073 | 0.304749009 | 0.342389175 | 0.19847156  |
| 0.0393937   | 0.452121407 | 0.162592605 | 0.218769534 |
| 0.182621322 | 0.019588179 | 0.192050513 | 0.440223392 |
| 0.39830627  | 0.212832724 | 0.208685268 | 0.124119672 |
| 0.079225254 | 0.207722228 | 0.093713908 | 0.290295552 |
| 0.165283727 | 0.15209494  | 0.412928076 | 0.066191506 |
| 0.129090657 | 0.254968879 | 0.111848701 | 0.219691422 |
| 0.170952576 | 0.358729838 | 0.039972736 | 0.231497527 |
| 0.00327634  | 0.317864255 | 0.225776801 | 0.120695085 |
| 0.037073073 | 0.013029537 | 0.12692149  | 0.212684503 |
| 0.432078942 | 0.438429634 | 0.402194333 | 0.404148226 |
| 0.09804868  | 0.208217563 | 0.193242838 | 0.114416106 |
| 0.408540402 | 0.120688813 | 0.08735999  | 0.326453005 |
| 0.409117906 | 0.447214666 | 0.122029367 | 0.161978558 |
| 0.32737038  | 0.457024042 | 0.202505435 | 0.211308291 |
| 0.131156768 | 0.042739402 | 0.393951417 | 0.434941725 |
| 0.39467448  | 0.141486261 | 0.093605627 | 0.391373583 |
| 0.0610088   | 0.216148185 | 0.235567818 | 0.123802238 |
| 0.438094919 | 0.020624678 | 0.124955104 | 0.222392084 |
| 0.206020481 | 0.368010267 | 0.430990863 | 0.147321907 |
| 0.235822867 | 0.017810924 | 0.047337595 | 0.04207996  |
| 0.195713351 | 0.06423954  | 0.425724817 | 0.391809745 |
| 0.22236823  | 0.202415267 | 0.218572507 | 0.003979408 |
| 0.022611593 | 0.158276216 | 0.364391603 | 0.281692017 |
| 0.367337678 | 0.343664356 | 0.112779369 | 0.351330231 |
| 0.246696803 | 0.39993406  | 0.032119466 | 0.108965859 |
| 0.222881481 | 0.166261962 | 0.167963396 | 0.239435215 |
| 0.150955964 | 0.134849955 | 0.111521242 | 0.449672005 |
| 0.435725072 | 0.077404678 | 0.275112842 | 0.312624909 |
| 0.167872495 | 0.175397055 | 0.11077613  | 0.17718498  |
| 0.059001738 | 0.406216572 | 0.023111574 | 0.272844303 |
| 0.100072587 | 0.081626371 | 0.03130727  | 0.232095847 |
| 0.157420839 | 0.335143269 | 0.421570247 | 0.10795531  |
| 0.200691123 | 0.242104158 | 0.255179917 | 0.267425324 |
| 0.005104652 | 0.0573535   | 0.238943129 | 0.435736456 |
| 0.237640369 | 0.440610007 | 0.215719915 | 0.194300907 |
| 0.168991337 | 0.381822799 | 0.003858629 | 0.443164639 |
| 0.444002123 | 0.216791873 | 0.190803486 | 0.25712005  |
| 0.160067221 | 0.376486968 | 0.039493022 | 0.31758555  |
| 0.316974324 | 0.088690951 | 0.43835069  | 0.096564147 |
| 0.424612377 | 0.03219659  | 0.245068873 | 0.321095132 |
| 0.281706337 | 0.011206393 | 0.174676027 | 0.313785561 |
| 0.024607877 | 0.110221845 | 0.368067738 | 0.285288445 |
| 0.19396992  | 0.363952737 | 0.426021166 | 0.142384949 |
| 0.218420137 | 0.217491772 | 0.018689982 | 0.180693561 |

|             |             |             |             |
|-------------|-------------|-------------|-------------|
| 0.367291008 | 0.189715181 | 0.419770919 | 0.191031977 |
| 0.235562599 | 0.425130802 | 0.3328368   | 0.107360967 |
| 0.04301254  | 0.249326065 | 0.020808551 | 0.171278278 |
| 0.355961501 | 0.080660607 | 0.184379475 | 0.153906871 |
| 0.049864109 | 0.449410299 | 0.087630529 | 0.115066905 |
| 0.05651804  | 0.197782268 | 0.216400685 | 0.111494503 |
| 0.080112552 | 0.118586155 | 0.166082402 | 0.191618317 |
| 0.049858471 | 0.067368075 | 0.020344776 | 0.158594665 |
| 0.056661975 | 0.144750912 | 0.147655896 | 0.328405686 |
| 0.224849429 | 0.064134466 | 0.184226555 | 0.158367299 |
| 0.069526333 | 0.016268192 | 0.453276897 | 0.306889382 |
| 0.321007547 | 0.132841609 | 0.043444581 | 0.143659908 |
| 0.400668296 | 0.164103007 | 0.220739197 | 0.407964367 |
| 0.036963371 | 0.428867886 | 0.122009111 | 0.075656097 |
| 0.164963991 | 0.162118674 | 0.417250566 | 0.040420588 |
| 1           | 0.433748576 | 0.222293897 | 0.099953067 |
| 0.371348743 | 0.295677095 | 0.034619206 | 0.348230431 |
| 0.339459477 | 0.029047763 | 0.449591731 | 0.080146598 |
| 0.022323813 | 0.293621007 | 0.278502056 | 0.06043572  |
| 0.057003738 | 0.163405643 | 0.067081993 | 0.169703456 |
| 0.444939273 | 0.297186239 | 0.316564321 | 0.129187522 |
| 0.034877172 | 0.005514637 | 0.134005545 | 0.214271621 |
| 0.456250439 | 0.42416235  | 0.19500268  | 0.155104067 |
| 0.179495776 | 0.146790748 | 0.172848971 | 0.425308119 |
| 0.177821246 | 0.471039625 | 0.011058453 | 0.313988382 |
| 0.432802504 | 0.225511706 | 0.044182595 | 0.210145004 |
| 0.359745259 | 0.047800222 | 0.224544194 | 0.432353196 |
| 0.398638376 | 0.176914981 | 0.156799734 | 0.315068302 |
| 0.022771862 | 0.061432068 | 0.201911447 | 0.089087422 |
| 0.196697159 | 0.149191226 | 0.022640036 | 0.264758759 |
| 0.030974107 | 0.410294443 | 0.399414646 | 0.03671249  |
| 0.169170641 | 0.254169833 | 0.235144141 | 0.040152844 |
| 0.344796413 | 0.434133008 | 0.459773304 | 0.193467962 |
| 0.353614721 | 0.391772449 | 0.171333931 | 0.071781658 |
| 0.015909771 | 0.438524664 | 0.336038227 | 0.014882086 |
| 0.424871786 | 0.184193771 | 0.007116503 | 0.462249286 |
| 0.162458322 | 0.420131152 | 0.003287361 | 0.065735153 |
| 0.038438143 | 0.38380197  | 0.419134478 | 0.337631534 |
| 0.134870522 | 0.272989875 | 0.011628764 | 0.453499617 |
| 0.426203903 | 0.010939273 | 0.087939046 | 0.32515885  |
| 0.266436876 | 0.489999628 | 0.132301881 | 0.335522989 |
| 0.203369429 | 0.418951819 | 0.152180284 | 0.160849816 |
| 0.365099509 | 0.401083188 | 0.36633348  | 0.44169775  |
| 0.400786707 | 0.291829904 | 0.185616418 | 0.017463329 |
| 0.065315237 | 0.206859577 | 0.116535377 | 0.038806839 |
| 0.261432298 | 0.075539416 | 0.437976463 | 0.411198524 |
| 0.388563507 | 0.007233662 | 0.157992258 | 0.351602036 |
| 0.427163252 | 0.449500443 | 0.034706264 | 0.004853841 |
| 0.006519338 | 0.00693723  | 0.263708554 | 0.159998179 |
| 0.422089505 | 0.112498701 | 0.007148074 | 0.071964281 |
| 0.183580904 | 0.199483049 | 0.436851142 | 0.302824216 |
| 0.352321266 | 0.080061268 | 0.120238667 | 0.340198662 |
| 0.037200208 | 0.299841375 | 0.395965304 | 0.43937202  |
| 0.051176421 | 0.165386455 | 0.271128006 | 0.438977762 |

|             |             |             |             |
|-------------|-------------|-------------|-------------|
| 0.025285816 | 0.198650176 | 0.275579749 | 0.162372379 |
| 0.026416162 | 0.05658466  | 0.044932984 | 0.375593773 |
| 0.421157608 | 0.03725414  | 0.017367672 | 0.121923055 |
| 0.078017253 | 0.423252978 | 0.099805639 | 0.448510971 |
| 0.391129016 | 0.383028334 | 0.05741581  | 0.43555654  |
| 0.028385808 | 0.423653353 | 0.15246204  | 0.034799483 |
| 0.225111976 | 0.020779052 | 0.410548331 | 0.047338522 |
| 0.238406858 | 0.347594434 | 0.095217775 | 0.017200294 |
| 0.084884134 | 0.042562475 | 0.402328675 | 0.370694115 |
| 0.03453759  | 0.220460629 | 0.199161672 | 0.308283583 |
| 0.216611902 | 0.317340332 | 0.449639782 | 0.176384178 |
| 0.084690154 | 0.095095491 | 0.356625627 | 0.312864914 |
| 0.233702921 | 0.420255781 | 0.132854617 | 0.459492911 |
| 0.353571571 | 0.447680549 | 0.40364683  | 0.210419953 |
| 0.122473507 | 0.252160109 | 0.261945979 | 0.016227464 |
| 0.234199536 | 0.37587751  | 0.281901314 | 0.065919325 |
| 0.132507834 | 0.176295803 | 0.088739589 | 0.172452868 |
| 0.137929746 | 0.214334876 | 0.10966567  | 0.399231085 |
| 0.317149226 | 0.327989268 | 0.090889479 | 0.039671062 |
| 0.48355705  | 0.431185052 | 0.123094314 | 0.29069454  |
| 0.140392069 | 0.185217109 | 0.35455569  | 0.339675636 |
| 0.218280698 | 0.362817059 | 0.389918757 | 0.27592928  |
| 0.40919804  | 0.197382379 | 0.459127232 | 0.132689662 |
| 0.046621766 | 0.273360129 | 0.055291052 | 0.073354613 |
| 0.10823109  | 0.024443158 | 0.116464051 | 0.335133865 |
| 0.160110197 | 0.233762022 | 0.26160167  | 0.067843967 |
| 0.202431485 | 0.258992283 | 0.221825775 | 0.146005204 |
| 0.049981123 | 0.428847232 | 0.008848602 | 0.053744339 |
| 0.179268691 | 0.33487687  | 0.155787555 | 0.154445552 |
| 0.126133569 | 0.110413088 | 0.186221687 | 0.219533011 |
| 0.138437992 | 0.204864078 | 0.334647714 | 0.043541832 |
| 0.031867866 | 0.434964244 | 0.24314109  | 0.026366792 |
| 0.085994475 | 0.292343644 | 0.263833073 | 0.125970062 |
| 0.019606366 | 0.389568379 | 0.175726754 | 0.221223295 |
| 0.245637822 | 0.075904374 | 0.386048569 | 0.094879076 |
| 0.087379601 | 0.433748014 | 0.198183459 | 0.434424205 |
| 0.218707841 | 0.323880366 | 0.435501209 | 0.366678795 |
| 0.118148654 | 0.208382577 | 0.03293503  | 0.421280111 |
| 0.160779127 |             |             |             |

|             |             |             |             |
|-------------|-------------|-------------|-------------|
| IL6ST       | 0.430643812 | 0.50185546  | 0.37611855  |
| 0.446902616 | 0.425741184 | 0.442242614 | 0.24641238  |
| 0.236254245 | 0.085692919 | 0.008114657 | 0.024395666 |
| 0.429519508 | 0.221103271 | 0.330744844 | 0.359244337 |
| 0.414963708 | 0.126925664 | 0.355070959 | 0.254223191 |
| 0.432594851 | 0.132201325 | 0.398271208 | 0.101872296 |
| 0.251882176 | 0.091441269 | 0.069190619 | 0.242047323 |
| 0.458746088 | 0.077732352 | 0.425335269 | 0.441009075 |
| 0.08562308  | 0.461118563 | 0.512211211 | 0.435718287 |
| 0.505333082 | 0.41602268  | 0.012535462 | 0.360283471 |
| 0.447285119 | 0.441970286 | 0.436695678 | 0.348315222 |
| 0.048536818 | 0.50142213  | 0.273637092 | 0.373606527 |
| 0.269946502 | 0.030454778 | 0.322603775 | 0.457129566 |
| 0.485925159 | 0.461181017 | 0.278889031 | 0.190926951 |
| 0.23262697  | 0.324193517 | 0.257380637 | 0.408143851 |

|             |             |             |             |
|-------------|-------------|-------------|-------------|
| 0.253509333 | 0.243313294 | 0.481121337 | 0.105468641 |
| 0.174055485 | 0.295246574 | 0.131994242 | 0.308198432 |
| 0.316254191 | 0.443678529 | 0.020790924 | 0.397661357 |
| 0.005745909 | 0.406526229 | 0.351063006 | 0.285307583 |
| 0.038432802 | 0.025476074 | 0.157022194 | 0.383141801 |
| 0.465165133 | 0.431856831 | 0.462448053 | 0.459966313 |
| 0.178206562 | 0.272070447 | 0.365340961 | 0.181510077 |
| 0.459368897 | 0.213975696 | 0.113207402 | 0.41216466  |
| 0.464173102 | 0.503127717 | 0.185463887 | 0.234169405 |
| 0.470468286 | 0.469437864 | 0.438884851 | 0.436018612 |
| 0.337996176 | 0.037842267 | 0.457856522 | 0.471325856 |
| 0.445481899 | 0.279217452 | 0.139198408 | 0.461423709 |
| 0.056140144 | 0.391518815 | 0.37130039  | 0.156761726 |
| 0.467683761 | 0.021392676 | 0.188120974 | 0.411707153 |
| 0.202610674 | 0.462132424 | 0.487776178 | 0.207830481 |
| 0.391624369 | 0.020507271 | 0.116774448 | 0.02812605  |
| 0.354248809 | 0.11476089  | 0.501029646 | 0.478934921 |
| 0.29426403  | 0.379003991 | 0.297876174 | 0.001087975 |
| 0.022422444 | 0.159965009 | 0.462060418 | 0.375086572 |
| 0.444693979 | 0.394194912 | 0.240331885 | 0.449206197 |
| 0.441069386 | 0.4613154   | 0.089155152 | 0.10875686  |
| 0.442105149 | 0.159729914 | 0.239231858 | 0.465581917 |
| 0.293973525 | 0.136577569 | 0.136559969 | 0.470563531 |
| 0.447444308 | 0.092248745 | 0.37794812  | 0.409262982 |
| 0.383545717 | 0.32936517  | 0.114420686 | 0.31214271  |
| 0.064962691 | 0.467522111 | 0.02153606  | 0.372404519 |
| 0.263922117 | 0.13644707  | 0.010409396 | 0.328587987 |
| 0.338588524 | 0.471946613 | 0.480269386 | 0.105731791 |
| 0.354646597 | 0.400899261 | 0.392546158 | 0.470822273 |
| 0.013967772 | 0.044441634 | 0.353836665 | 0.47805159  |
| 0.387894393 | 0.45678424  | 0.307178647 | 0.277755858 |
| 0.26549197  | 0.450003904 | 0.002169998 | 0.501900483 |
| 0.500433866 | 0.373812485 | 0.421771098 | 0.402947304 |
| 0.364218964 | 0.469667293 | 0.045300047 | 0.421130427 |
| 0.416860884 | 0.078311565 | 0.46619231  | 0.15404346  |
| 0.449045307 | 0.040677686 | 0.39052225  | 0.429539634 |
| 0.449421482 | 0.009386036 | 0.309260681 | 0.430747618 |
| 0.019531018 | 0.144095117 | 0.444904595 | 0.428912857 |
| 0.401220171 | 0.438404306 | 0.460337157 | 0.343865859 |
| 0.428218467 | 0.261791326 | 0.010224546 | 0.28697891  |
| 0.439329548 | 0.388756421 | 0.452362026 | 0.271363355 |
| 0.40463569  | 0.469925494 | 0.440834373 | 0.245912146 |
| 0.049035852 | 0.371671502 | 0.027334169 | 0.326955338 |
| 0.418047943 | 0.15276185  | 0.394306287 | 0.129857238 |
| 0.061597766 | 0.484481217 | 0.141789766 | 0.220872346 |
| 0.097575244 | 0.460012027 | 0.269770856 | 0.300230288 |
| 0.236869085 | 0.159223346 | 0.335678964 | 0.38571334  |
| 0.054829132 | 0.096861433 | 0.008610171 | 0.407777475 |
| 0.172070708 | 0.393610082 | 0.407624775 | 0.463498519 |
| 0.381533226 | 0.128886397 | 0.389428788 | 0.248477053 |
| 0.096848705 | 0.013121697 | 0.4814723   | 0.406806186 |
| 0.415126497 | 0.167457417 | 0.036194728 | 0.390625102 |
| 0.482212778 | 0.407499293 | 0.343385101 | 0.480634621 |
| 0.025865936 | 0.461097457 | 0.280013833 | 0.11572617  |

|             |             |             |             |
|-------------|-------------|-------------|-------------|
| 0.3793961   | 0.280055127 | 0.46037697  | 0.075560081 |
| 0.433748576 | 1           | 0.294374065 | 0.178078358 |
| 0.451736006 | 0.44307703  | 0.03725766  | 0.446246034 |
| 0.453894706 | 0.031055473 | 0.489279705 | 0.110790905 |
| 0.01737082  | 0.424973473 | 0.454247699 | 0.068030183 |
| 0.067099766 | 0.381720226 | 0.069763076 | 0.275514549 |
| 0.483003441 | 0.410489873 | 0.474577789 | 0.177288201 |
| 0.046649734 | 0.014224292 | 0.176348473 | 0.376654907 |
| 0.515632882 | 0.464176832 | 0.255106394 | 0.364255701 |
| 0.250973736 | 0.32562935  | 0.209121066 | 0.472670013 |
| 0.160632904 | 0.499392471 | 0.005798335 | 0.435483818 |
| 0.506935147 | 0.3822626   | 0.072344748 | 0.373606092 |
| 0.460927818 | 0.049659837 | 0.214531821 | 0.490105313 |
| 0.463091697 | 0.328989643 | 0.353994288 | 0.429534173 |
| 0.023209713 | 0.057298863 | 0.372941801 | 0.145864456 |
| 0.413354625 | 0.211313623 | 0.035624899 | 0.381932824 |
| 0.049444411 | 0.470190695 | 0.453639736 | 0.056826077 |
| 0.427084336 | 0.356514264 | 0.360323819 | 0.038136797 |
| 0.437775227 | 0.464233539 | 0.516857809 | 0.183727141 |
| 0.459049499 | 0.459996195 | 0.396790364 | 0.067563502 |
| 0.013078409 | 0.496921229 | 0.439590308 | 0.026871868 |
| 0.469011842 | 0.333073518 | 0.018126835 | 0.48272657  |
| 0.198818154 | 0.467632415 | 0.004789868 | 0.063551692 |
| 0.028537302 | 0.442106198 | 0.483407128 | 0.433026245 |
| 0.346485951 | 0.377576371 | 0.003454684 | 0.471787873 |
| 0.485534503 | 0.010390625 | 0.116082108 | 0.465781768 |
| 0.429230347 | 0.512694158 | 0.290183754 | 0.452519925 |
| 0.42727914  | 0.493610996 | 0.286590804 | 0.259646502 |
| 0.476569779 | 0.458898461 | 0.455269786 | 0.455044701 |
| 0.477871898 | 0.410916453 | 0.298508917 | 0.019221308 |
| 0.11161884  | 0.289841801 | 0.355511851 | 0.088725175 |
| 0.401528612 | 0.129900547 | 0.458838664 | 0.462641362 |
| 0.463898519 | 0.003741369 | 0.197184677 | 0.468006359 |
| 0.472808354 | 0.469250108 | 0.015516447 | 0.004879628 |
| 0.005920772 | 0.01556359  | 0.409727799 | 0.216657411 |
| 0.464752688 | 0.335029312 | 0.004501733 | 0.06366256  |
| 0.294259661 | 0.375626581 | 0.491510193 | 0.390183822 |
| 0.436435493 | 0.077734684 | 0.351906404 | 0.411449282 |
| 0.058661488 | 0.389629924 | 0.470094762 | 0.481739973 |
| 0.032796351 | 0.223851673 | 0.393569845 | 0.476088302 |
| 0.052837065 | 0.303708888 | 0.441897058 | 0.352743494 |
| 0.009735558 | 0.068660975 | 0.05732618  | 0.432921728 |
| 0.495338299 | 0.086459201 | 0.034775027 | 0.202586866 |
| 0.146185163 | 0.463525079 | 0.178397829 | 0.4713802   |
| 0.473299016 | 0.446489835 | 0.060472022 | 0.478712662 |
| 0.041052092 | 0.488735961 | 0.311117275 | 0.075317165 |
| 0.26799994  | 0.010656763 | 0.440338883 | 0.157238381 |
| 0.402318063 | 0.437565847 | 0.17478298  | 0.011831203 |
| 0.143599729 | 0.047371598 | 0.46858919  | 0.446059038 |
| 0.023268568 | 0.262017522 | 0.279433763 | 0.407965389 |
| 0.362648217 | 0.457727217 | 0.508647883 | 0.445217074 |
| 0.108832313 | 0.110868737 | 0.442008201 | 0.443221528 |
| 0.305430754 | 0.461395613 | 0.311965713 | 0.479133801 |
| 0.445391236 | 0.455610288 | 0.463381824 | 0.378595848 |

|             |             |             |             |
|-------------|-------------|-------------|-------------|
| 0.212899442 | 0.44378178  | 0.447587486 | 0.028725779 |
| 0.365391138 | 0.471581984 | 0.387488177 | 0.144536501 |
| 0.258114912 | 0.363184743 | 0.049864599 | 0.200850341 |
| 0.299453693 | 0.399396723 | 0.163780772 | 0.438716057 |
| 0.429565991 | 0.448530287 | 0.050027336 | 0.054808182 |
| 0.514959325 | 0.447336587 | 0.173210296 | 0.46306133  |
| 0.157859023 | 0.347044131 | 0.446358155 | 0.437842108 |
| 0.367491923 | 0.478258899 | 0.469438356 | 0.464352796 |
| 0.461427978 | 0.279651506 | 0.516020892 | 0.12901381  |
| 0.07124589  | 0.432505041 | 0.113645604 | 0.079131816 |
| 0.150801914 | 0.021391939 | 0.269050375 | 0.422460735 |
| 0.360045251 | 0.400260452 | 0.384360924 | 0.07560786  |
| 0.302515164 | 0.377669781 | 0.352346701 | 0.253837642 |
| 0.087630819 | 0.500140857 | 0.008230141 | 0.05053612  |
| 0.37467248  | 0.458528711 | 0.370621237 | 0.223253925 |
| 0.268586641 | 0.114591485 | 0.307473642 | 0.383618064 |
| 0.406955417 | 0.356404233 | 0.460710854 | 0.038197755 |
| 0.025933095 | 0.466728578 | 0.411973807 | 0.013893517 |
| 0.076308513 | 0.419696963 | 0.293326263 | 0.258390753 |
| 0.015025711 | 0.452010331 | 0.418597941 | 0.417135848 |
| 0.390120738 | 0.063560462 | 0.411947423 | 0.092293317 |
| 0.058161139 | 0.452780306 | 0.370818026 | 0.492998145 |
| 0.317236835 | 0.432115851 | 0.466064737 | 0.472651834 |
| 0.110084734 | 0.370373996 | 0.032291649 | 0.464558153 |

0.416869314

| ILDR1       | 0.318478819 | 0.353240043 | 0.211488637 |
|-------------|-------------|-------------|-------------|
| 0.341962212 | 0.249501169 | 0.167193597 | 0.167687884 |
| 0.147312851 | 0.12280349  | 0.010567853 | 0.036323014 |
| 0.271838666 | 0.111981999 | 0.1313682   | 0.126134835 |
| 0.426667165 | 0.177820259 | 0.239977838 | 0.233070753 |
| 0.351391703 | 0.091528487 | 0.371627292 | 0.167450641 |
| 0.255676253 | 0.147361543 | 0.134621327 | 0.193673146 |
| 0.405623162 | 0.154017132 | 0.098299797 | 0.285119686 |
| 0.266224324 | 0.34247578  | 0.314486742 | 0.292573011 |
| 0.298597606 | 0.264697789 | 0.065247247 | 0.110888076 |
| 0.332225829 | 0.327225695 | 0.343897439 | 0.259798063 |
| 0.099194974 | 0.276107207 | 0.185486561 | 0.315573009 |
| 0.131853063 | 0.080009638 | 0.094025743 | 0.268609229 |
| 0.252487128 | 0.191514099 | 0.161913503 | 0.146319306 |
| 0.070167566 | 0.093478004 | 0.105166723 | 0.179288843 |
| 0.191951761 | 0.068853262 | 0.280392177 | 0.099480543 |
| 0.099755558 | 0.202314812 | 0.262385331 | 0.182873297 |
| 0.198918371 | 0.254940977 | 0.103278913 | 0.227898842 |
| 0.003614767 | 0.358931856 | 0.334905851 | 0.133612167 |
| 0.146778586 | 0.042648664 | 0.275080848 | 0.231572144 |
| 0.410091919 | 0.32412559  | 0.407007573 | 0.38521273  |
| 0.168606636 | 0.30775565  | 0.217122588 | 0.190857768 |
| 0.332061562 | 0.136334926 | 0.151214967 | 0.424721559 |
| 0.402036428 | 0.326396027 | 0.227073942 | 0.284653012 |
| 0.258184432 | 0.33195826  | 0.157414713 | 0.185193304 |
| 0.125999742 | 0.200254327 | 0.262327854 | 0.377708927 |
| 0.271194451 | 0.187147751 | 0.220064012 | 0.313922594 |
| 0.185530377 | 0.152278342 | 0.31524867  | 0.177120484 |
| 0.416563378 | 0.064311841 | 0.25390525  | 0.195179575 |



|             |             |             |             |
|-------------|-------------|-------------|-------------|
| 0.317760942 | 0.327006153 | 0.327941568 | 0.198061681 |
| 0.245587156 | 0.07312062  | 0.098408662 | 0.179248516 |
| 0.169214177 | 0.141577368 | 0.250457746 | 0.347886468 |
| 0.146067029 | 0.191220202 | 0.216813228 | 0.043753569 |
| 0.121215157 | 0.312991954 | 0.295308996 | 0.244551512 |
| 0.363355384 | 0.259041756 | 0.157506028 | 0.232681062 |
| 0.238917346 | 0.404728203 | 0.013831977 | 0.185217747 |
| 0.213440673 | 0.316364364 | 0.271773774 | 0.227112199 |
| 0.214999325 | 0.176869358 | 0.199579218 | 0.399592299 |
| 0.275217072 | 0.162437629 | 0.174159694 | 0.408139603 |
| 0.122937688 | 0.258531553 | 0.204308852 | 0.174040574 |
| 0.097667864 | 0.283040319 | 0.134843265 | 0.191756961 |
| 0.101375748 | 0.160067061 | 0.107631637 | 0.150628932 |
| 0.130647958 | 0.255411145 | 0.25106446  | 0.232805637 |
| 0.188525197 | 0.326906524 | 0.137721832 | 0.222813538 |
| 0.019031707 | 0.174971173 | 0.108411098 | 0.360352247 |
| 0.124934119 | 0.403350531 | 0.261108174 | 0.290705233 |
| 0.275047693 | 0.405737132 | 0.019654293 | 0.285380678 |
| 0.33057219  | 0.099058705 | 0.215319807 | 0.320767518 |
| 0.147006191 | 0.358450219 | 0.029231332 | 0.388044018 |
| 0.207960541 | 0.214500847 | 0.430612468 | 0.200280395 |
| 0.300474976 | 0.114315681 | 0.149951202 | 0.315866367 |
| 0.237495169 | 0.031063922 | 0.093066417 | 0.29996502  |
| 0.147076186 | 0.084632153 | 0.346308643 | 0.3174881   |
| 0.222877541 | 0.401540551 | 0.444731858 | 0.136266433 |
| 0.220533323 | 0.227192794 | 0.105191414 | 0.274167164 |
| 0.360054163 | 0.12968231  | 0.275667477 | 0.196971591 |
| 0.144453669 | 0.315993897 | 0.264399594 | 0.069867886 |
| 0.110321273 | 0.176778973 | 0.037233494 | 0.212396482 |
| 0.26901621  | 0.096730578 | 0.148972249 | 0.299486925 |
| 0.176250763 | 0.372117994 | 0.197979392 | 0.170499015 |
| 0.138798637 | 0.166592724 | 0.25159742  | 0.085358708 |
| 0.087215735 | 0.22554773  | 0.183395735 | 0.180329237 |
| 0.069236983 | 0.153879669 | 0.138016669 | 0.103517376 |
| 0.06102156  | 0.099246816 | 0.086737612 | 0.230416733 |
| 0.152131261 | 0.095494428 | 0.190513912 | 0.242791232 |
| 0.209359672 | 0.095510832 | 0.34790254  | 0.387040212 |
| 0.185167165 | 0.20552668  | 0.171597371 | 0.084443112 |
| 0.344779566 | 0.090605914 | 0.096430074 | 0.304902132 |
| 0.132004136 | 0.416632672 | 0.132867937 | 0.184040963 |
| 0.157535331 | 0.201506746 | 0.417394227 | 0.045723444 |
| 0.222293897 | 0.294374065 | 1           | 0.193390368 |
| 0.302866319 | 0.083346173 | 0.260528153 | 0.224264    |
| 0.113986257 | 0.35734965  | 0.209319173 | 0.23698303  |
| 0.349386321 | 0.255104948 | 0.192620411 | 0.124883905 |
| 0.1354558   | 0.072122971 | 0.309100472 | 0.197301007 |
| 0.386873917 | 0.249672211 | 0.267575114 | 0.362667983 |
| 0.017609135 | 0.28113486  | 0.23825533  | 0.092501588 |
| 0.35258076  | 0.2871236   | 0.1667947   | 0.291839831 |
| 0.158940558 | 0.084213492 | 0.361003582 | 0.256520339 |
| 0.338490332 | 0.07251305  | 0.322279384 | 0.296719701 |
| 0.103081763 | 0.14070908  | 0.155599206 | 0.284829852 |
| 0.128784633 | 0.276744747 | 0.303233817 | 0.234524912 |
| 0.202977786 | 0.158256331 | 0.345851776 | 0.321659668 |
|             |             |             | 0.049083001 |

|             |             |             |             |
|-------------|-------------|-------------|-------------|
| 0.096622226 | 0.267697823 | 0.19052489  | 0.155412764 |
| 0.246290764 | 0.077188898 | 0.173368362 | 0.084543514 |
| 0.277263829 | 0.420350291 | 0.117710186 | 0.108549369 |
| 0.165391797 | 0.363740908 | 0.1298766   | 0.320629016 |
| 0.3378007   | 0.314018438 | 0.23709544  | 0.313096923 |
| 0.315763165 | 0.178554208 | 0.235376995 | 0.110041845 |
| 0.316003368 | 0.273573354 | 0.042644871 | 0.41231763  |
| 0.073910583 | 0.021385838 | 0.341201196 | 0.232267594 |
| 0.238677617 | 0.010940721 | 0.133013442 | 0.194265095 |
| 0.425649169 | 0.275640872 | 0.292838446 | 0.056929194 |
| 0.337858014 | 0.057946808 | 0.382540273 | 0.300399623 |
| 0.085749715 | 0.231364041 | 0.265607543 | 0.255629994 |
| 0.356426436 | 0.168562263 | 0.312472888 | 0.210654236 |
| 0.286311175 | 0.136604226 | 0.266431834 | 0.302944674 |
| 0.307345298 | 0.324642421 | 0.316476612 | 0.369602995 |
| 0.377686977 | 0.255848079 | 0.054333899 | 0.14931552  |
| 0.11971526  | 0.073774896 | 0.074622979 | 0.167958098 |
| 0.177219385 | 0.351223942 | 0.417260896 | 0.347098266 |
| 0.062495266 | 0.137916926 | 0.275686279 | 0.34045894  |
| 0.408407674 | 0.153255362 | 0.022615972 | 0.027003611 |
| 0.044419113 | 0.239636117 | 0.296226691 | 0.352706578 |
| 0.050034935 | 0.046926813 | 0.085173293 | 0.214174263 |
| 0.280359684 | 0.314038517 | 0.393580265 | 0.358246257 |
| 0.211664015 | 0.077836725 | 0.404580168 | 0.132398118 |
| 0.181794917 | 0.355093693 | 0.291364563 | 0.206868829 |
| 0.292044607 | 0.20395222  | 0.398272451 | 0.064292099 |
| 0.30703879  | 0.283844113 | 0.144192124 | 0.121424967 |
| 0.19602207  | 0.156834416 | 0.431007377 | 0.279355209 |
| 0.077420025 | 0.063123021 | 0.05213323  | 0.109395928 |
| 0.39634401  | 0.161545901 | 0.411915318 | 0.341646998 |
| 0.424936592 | 0.197825972 | 0.303336294 | 0.081644552 |
| 0.27990814  | 0.202431519 | 0.031514409 | 0.311723319 |
| 0.113899742 | 0.309714109 | 0.06066217  | 0.135733767 |
| 0.297694259 | 0.163198739 | 0.117821696 | 0.164141331 |
| 0.158593834 | 0.394621064 | 0.396610268 | 0.183905046 |
| 0.237398946 | 0.298215784 | 0.364525283 | 0.141191055 |
| 0.330270976 | 0.294127507 | 0.119175338 | 0.114595093 |
| 0.186770937 | 0.346115367 | 0.237919597 | 0.148293287 |
| 0.425292652 | 0.143203426 | 0.384854573 | 0.290823258 |
| 0.362268974 | 0.324652144 | 0.223973311 | 0.189141624 |
| 0.207935715 | 0.201118422 | 0.033717075 | 0.282217977 |
| 0.365807103 | 0.214935257 | 0.142052785 | 0.193053457 |
| 0.199202921 | 0.179240309 | 0.13111807  | 0.149740097 |
| 0.140663629 | 0.150595558 | 0.452141791 | 0.270912802 |
| 0.246649292 | 0.133273815 | 0.13921617  | 0.368061337 |
| 0.307349469 | 0.131390945 | 0.270619034 | 0.292349373 |
| 0.235450379 | 0.365420838 | 0.368385938 | 0.18840203  |
| 0.291227151 | 0.327429145 | 0.200850556 | 0.259107034 |
| 0.233225983 | 0.320408346 | 0.082517374 | 0.130050198 |
| 0.23897246  | 0.096975006 | 0.228988476 | 0.194699913 |
| 0.134394395 | 0.130939326 | 0.407036528 | 0.1380029   |
| 0.294998433 | 0.136197118 | 0.189581145 | 0.286413825 |
| 0.184645661 | 0.309890014 | 0.13123075  | 0.107761967 |
| 0.287794645 | 0.052005845 | 0.187116536 | 0.153424665 |

|             |             |             |             |
|-------------|-------------|-------------|-------------|
| 0.302800961 | 0.164211327 | 0.277210063 | 0.169452515 |
| 0.279565912 | 0.236936895 | 0.111378635 | 0.073185067 |
| 0.1732198   | 0.292536671 | 0.099375979 | 0.071010446 |
| 0.428911127 | 0.159466703 | 0.15891632  | 0.194086079 |
| 0.223524962 | 0.282035388 | 0.145555086 | 0.132431999 |
| 0.306580155 | 0.091692541 | 0.253927955 | 0.22451407  |
| 0.209447014 | 0.223204055 | 0.139629533 | 0.209326274 |
| 0.282759002 | 0.244775378 | 0.315043084 | 0.270784822 |
| 0.380846115 | 0.254242371 | 0.287461429 | 0.23579734  |
| 0.189155317 | 0.089607753 | 0.38537937  | 0.114631083 |
| IMPDH2      | 0.143505945 | 0.217855063 | 0.12013592  |
| 0.278469562 | 0.178741196 | 0.113559041 | 0.164599091 |
| 0.048483898 | 0.177556422 | 0.040204969 | 0.14706486  |
| 0.152814977 | 0.116474728 | 0.081129639 | 0.070913361 |
| 0.306789895 | 0.17115496  | 0.062712556 | 0.22231029  |
| 0.222062234 | 0.076034087 | 0.322169982 | 0.150091661 |
| 0.112850417 | 0.204706796 | 0.208471319 | 0.164660011 |
| 0.261822141 | 0.210397418 | 0.074876457 | 0.167595418 |
| 0.128452714 | 0.171651894 | 0.176768424 | 0.240925325 |
| 0.165569083 | 0.117269664 | 0.013204345 | 0.080031883 |
| 0.15788661  | 0.249152664 | 0.22799786  | 0.261788305 |
| 0.144656373 | 0.144301164 | 0.234177763 | 0.198265962 |
| 0.048069546 | 0.174392015 | 0.036645921 | 0.136238243 |
| 0.155229815 | 0.159088073 | 0.070155941 | 0.136047042 |
| 0.093366362 | 0.032977644 | 0.085151503 | 0.088493082 |
| 0.199993489 | 0.03077782  | 0.170144293 | 0.131680786 |
| 0.058840282 | 0.07174678  | 0.131233657 | 0.106256767 |
| 0.089178012 | 0.12883194  | 0.051992283 | 0.109018048 |
| 0.012527423 | 0.22965495  | 0.200804583 | 0.090753345 |
| 0.166688369 | 0.115242457 | 0.140209165 | 0.223270525 |
| 0.253205256 | 0.152428239 | 0.286109438 | 0.260997659 |
| 0.142383339 | 0.174806413 | 0.135195935 | 0.181486522 |
| 0.178504254 | 0.159109617 | 0.083659959 | 0.323971263 |
| 0.279647924 | 0.198549787 | 0.174336847 | 0.243903871 |
| 0.208083973 | 0.189579953 | 0.116443385 | 0.149672223 |
| 0.102938441 | 0.123943128 | 0.161314377 | 0.244263123 |
| 0.129507772 | 0.119336453 | 0.241442722 | 0.180789471 |
| 0.150647394 | 0.04724848  | 0.294000779 | 0.063059526 |
| 0.26302922  | 0.110784852 | 0.223555465 | 0.172767303 |
| 0.102278104 | 0.182688371 | 0.200497605 | 0.203655348 |
| 0.136583214 | 0.086244401 | 0.125708645 | 0.106593133 |
| 0.07619312  | 0.072086066 | 0.135199987 | 0.254813116 |
| 0.052757042 | 0.100740205 | 0.127245781 | 0.04824499  |
| 0.141438488 | 0.096507366 | 0.158897456 | 0.091916046 |
| 0.201200675 | 0.117742075 | 0.192046467 | 0.11283945  |
| 0.165586836 | 0.281397503 | 0.009628783 | 0.129653149 |
| 0.153493543 | 0.100828366 | 0.288028716 | 0.147925732 |
| 0.238543031 | 0.096823264 | 0.157024579 | 0.263468676 |
| 0.144522899 | 0.167064592 | 0.043181091 | 0.296581777 |
| 0.095771893 | 0.224710423 | 0.137199868 | 0.112553299 |
| 0.110377006 | 0.162793851 | 0.129320778 | 0.070809749 |
| 0.09733475  | 0.116287438 | 0.031196202 | 0.078146262 |
| 0.08264406  | 0.196858155 | 0.125125089 | 0.146674541 |
| 0.13805981  | 0.2824391   | 0.059110896 | 0.187396157 |

|             |             |             |             |
|-------------|-------------|-------------|-------------|
| 0.10658954  | 0.103089918 | 0.030875547 | 0.236174672 |
| 0.066659773 | 0.232776702 | 0.116620033 | 0.133639763 |
| 0.272191173 | 0.268211643 | 0.005025414 | 0.158709353 |
| 0.200213209 | 0.031913226 | 0.21343148  | 0.17378686  |
| 0.126736113 | 0.269880374 | 0.004020637 | 0.267391771 |
| 0.081291407 | 0.140093211 | 0.288696203 | 0.257245405 |
| 0.156068625 | 0.184448651 | 0.063727694 | 0.212457729 |
| 0.151878841 | 0.025029982 | 0.063891057 | 0.215516076 |
| 0.119314935 | 0.06497768  | 0.180311992 | 0.24996114  |
| 0.233153115 | 0.244120229 | 0.302768927 | 0.11917802  |
| 0.175668393 | 0.100536524 | 0.069777813 | 0.20639853  |
| 0.188893457 | 0.05550934  | 0.159457478 | 0.113938027 |
| 0.055742552 | 0.197778557 | 0.14486686  | 0.06212643  |
| 0.150885781 | 0.111348122 | 0.040594362 | 0.229730655 |
| 0.135594837 | 0.133468941 | 0.1200028   | 0.080616626 |
| 0.172945031 | 0.246661124 | 0.111859864 | 0.08021858  |
| 0.080161365 | 0.143993155 | 0.158568554 | 0.091310766 |
| 0.116726549 | 0.190490668 | 0.115316037 | 0.11721221  |
| 0.078565974 | 0.178450085 | 0.049137899 | 0.048066438 |
| 0.0984537   | 0.064990579 | 0.055410608 | 0.118292819 |
| 0.06392273  | 0.115571233 | 0.182384489 | 0.10765099  |
| 0.19641427  | 0.115880256 | 0.214046528 | 0.252309635 |
| 0.085428125 | 0.157679192 | 0.130824198 | 0.041512701 |
| 0.250107621 | 0.067956036 | 0.023659257 | 0.208948144 |
| 0.061082606 | 0.262015418 | 0.142668668 | 0.239019235 |
| 0.105778246 | 0.230923238 | 0.287730015 | 0.049235641 |
| 0.099953067 | 0.178078358 | 0.193390368 | 1           |
| 0.126874893 | 0.202211569 | 0.106880758 | 0.128113302 |
| 0.115959731 | 0.145371351 | 0.218758028 | 0.153577331 |
| 0.121561591 | 0.222952411 | 0.202638494 | 0.216526319 |
| 0.190996646 | 0.166898599 | 0.059754631 | 0.322088055 |
| 0.241651574 | 0.331130529 | 0.190259619 | 0.116522612 |
| 0.15280234  | 0.062314423 | 0.135767245 | 0.11572041  |
| 0.158048627 | 0.217599617 | 0.216640141 | 0.179671055 |
| 0.261054789 | 0.127556575 | 0.02513251  | 0.242925926 |
| 0.058825098 | 0.180512377 | 0.06775033  | 0.219364756 |
| 0.163223568 | 0.049307241 | 0.215167726 | 0.139740563 |
| 0.135134268 | 0.153443631 | 0.090024826 | 0.181092306 |
| 0.203683521 | 0.142248618 | 0.11751992  | 0.17704566  |
| 0.068263473 | 0.091060817 | 0.211371644 | 0.09626123  |
| 0.09542559  | 0.184074564 | 0.039613799 | 0.053473332 |
| 0.163859414 | 0.177048818 | 0.251288302 | 0.221564544 |
| 0.102181254 | 0.046692375 | 0.261351934 | 0.14584591  |
| 0.217056985 | 0.184152091 | 0.180240558 | 0.093802488 |
| 0.167882725 | 0.216439242 | 0.138621007 | 0.150728297 |
| 0.124896634 | 0.181315892 | 0.135344537 | 0.096873849 |
| 0.270593567 | 0.036698653 | 0.087827449 | 0.202766438 |
| 0.188954563 | 0.113980005 | 0.016914051 | 0.020576801 |
| 0.105578893 | 0.267572429 | 0.165989196 | 0.165793937 |
| 0.032467053 | 0.185696732 | 0.01072416  | 0.223765368 |
| 0.189030033 | 0.125254644 | 0.149431367 | 0.171867386 |
| 0.179862744 | 0.201159559 | 0.136519838 | 0.228492037 |
| 0.152985309 | 0.173345544 | 0.103859728 | 0.307596697 |
| 0.213848139 | 0.18349782  | 0.18382704  | 0.174394145 |

|             |             |             |             |
|-------------|-------------|-------------|-------------|
| 0.253444844 | 0.249439689 | 0.280295104 | 0.107113429 |
| 0.150493364 | 0.05557895  | 0.061372296 | 0.182854911 |
| 0.077309224 | 0.224789689 | 0.191103904 | 0.27248732  |
| 0.230869847 | 0.068759734 | 0.078626046 | 0.16019646  |
| 0.207131252 | 0.255466355 | 0.047563302 | 0.018504291 |
| 0.008385459 | 0.149251216 | 0.148651046 | 0.198092926 |
| 0.224723959 | 0.033275198 | 0.065323868 | 0.057326781 |
| 0.11523258  | 0.228862917 | 0.195541136 | 0.296798913 |
| 0.200328345 | 0.151476272 | 0.073291777 | 0.262652396 |
| 0.206000779 | 0.06671652  | 0.248817496 | 0.177112569 |
| 0.100710564 | 0.185897589 | 0.069405925 | 0.272421788 |
| 0.04333626  | 0.251143914 | 0.154844188 | 0.116823832 |
| 0.035627727 | 0.192983793 | 0.209815225 | 0.263553    |
| 0.158497825 | 0.156052188 | 0.15358194  | 0.015221703 |
| 0.151921905 | 0.232291632 | 0.170177985 | 0.270197042 |
| 0.223419711 | 0.306157728 | 0.133165375 | 0.181924696 |
| 0.157415743 | 0.161780073 | 0.182238336 | 0.023133985 |
| 0.093149242 | 0.075950581 | 0.163182817 | 0.128842657 |
| 0.052739364 | 0.138249893 | 0.138283124 | 0.09980129  |
| 0.075016364 | 0.161350906 | 0.292491189 | 0.267467967 |
| 0.095343936 | 0.111774824 | 0.204994969 | 0.19126803  |
| 0.093664555 | 0.273858618 | 0.167932335 | 0.083403789 |
| 0.125253095 | 0.04540653  | 0.20161834  | 0.107024595 |
| 0.053312461 | 0.283410893 | 0.148188047 | 0.228988429 |
| 0.141986631 | 0.191986637 | 0.19600965  | 0.20958833  |
| 0.112294379 | 0.106056086 | 0.170351197 | 0.070563924 |
| 0.200259715 | 0.27332448  | 0.095212806 | 0.205378158 |
| 0.244239592 | 0.127053509 | 0.072054594 | 0.017815292 |
| 0.09849758  | 0.094283573 | 0.149344436 | 0.296342865 |
| 0.116382274 | 0.114288927 | 0.045743107 | 0.219216265 |
| 0.217346961 | 0.163182678 | 0.084489163 | 0.202495146 |
| 0.172424824 | 0.26264136  | 0.214365129 | 0.225812181 |
| 0.069012539 | 0.198274563 | 0.184412171 | 0.152550804 |
| 0.155334992 | 0.208818123 | 0.189434587 | 0.021471947 |
| 0.135152548 | 0.107279911 | 0.174677673 | 0.185696311 |
| 0.199342787 | 0.148291914 | 0.066780787 | 0.257896094 |
| 0.055502184 | 0.270305661 | 0.033010812 | 0.157432018 |
| 0.207338189 | 0.058010723 | 0.244279405 | 0.109566045 |
| 0.169888032 | 0.179973968 | 0.070581808 | 0.145650226 |
| 0.06399127  | 0.208586503 | 0.164513509 | 0.166383134 |
| 0.103402643 | 0.114529853 | 0.250292279 | 0.058885314 |
| 0.060571983 | 0.051035767 | 0.203109908 | 0.067031227 |
| 0.070610016 | 0.278809222 | 0.068390367 | 0.074231099 |
| 0.084955485 | 0.096830947 | 0.066381954 | 0.164842417 |
| 0.111927628 | 0.196247908 | 0.070290121 | 0.171335375 |
| 0.155632853 | 0.131051762 | 0.095930198 | 0.052665464 |
| 0.09094794  | 0.143677825 | 0.148784536 | 0.184941715 |
| 0.114170358 | 0.320869388 | 0.123165571 | 0.167136179 |
| 0.059583489 | 0.081804378 | 0.11373628  | 0.220004076 |
| 0.067696062 |             |             |             |
| INSL6       | 0.360539091 | 0.469663968 | 0.295447885 |
| 0.370151313 | 0.335929874 | 0.386345326 | 0.200664156 |
| 0.220079458 | 0.059332987 | 0.007871939 | 0.015546712 |
| 0.354508594 | 0.183477905 | 0.302729215 | 0.295290931 |

|             |             |             |             |
|-------------|-------------|-------------|-------------|
| 0.328745036 | 0.095041198 | 0.294823545 | 0.201323586 |
| 0.355556814 | 0.119119731 | 0.313844931 | 0.077483598 |
| 0.179609093 | 0.063157706 | 0.046923492 | 0.171744292 |
| 0.384561599 | 0.053756951 | 0.384449075 | 0.384532936 |
| 0.061156659 | 0.392126025 | 0.485972908 | 0.351523831 |
| 0.480764514 | 0.35260157  | 0.012180219 | 0.30235163  |
| 0.387321686 | 0.354867841 | 0.360157809 | 0.281824478 |
| 0.035975661 | 0.491089545 | 0.217982637 | 0.289459166 |
| 0.236927859 | 0.021201696 | 0.307207156 | 0.445409786 |
| 0.468629152 | 0.374021611 | 0.241823111 | 0.150657848 |
| 0.191032374 | 0.31282485  | 0.198378071 | 0.38059683  |
| 0.200219044 | 0.243653715 | 0.455209963 | 0.079353359 |
| 0.134826217 | 0.254233253 | 0.09558663  | 0.266835796 |
| 0.230348058 | 0.392125904 | 0.016646825 | 0.326016404 |
| 0.006806975 | 0.333238864 | 0.27269753  | 0.206327953 |
| 0.026511069 | 0.022083951 | 0.115117481 | 0.315655748 |
| 0.389041802 | 0.408035834 | 0.37825616  | 0.376120988 |
| 0.144428072 | 0.20486514  | 0.279542988 | 0.139189775 |
| 0.388632649 | 0.174476928 | 0.097534659 | 0.324935118 |
| 0.380549507 | 0.471733686 | 0.134675119 | 0.169518918 |
| 0.399344113 | 0.437849345 | 0.365294941 | 0.346966474 |
| 0.259247148 | 0.023543724 | 0.419323048 | 0.420605751 |
| 0.396082491 | 0.207974934 | 0.100258933 | 0.403442481 |
| 0.039008029 | 0.350096609 | 0.29722894  | 0.137782149 |
| 0.391236283 | 0.014582689 | 0.135015203 | 0.343881696 |
| 0.157178127 | 0.392361032 | 0.45304262  | 0.162938304 |
| 0.312614022 | 0.01728713  | 0.081045955 | 0.018729077 |
| 0.305967282 | 0.08196489  | 0.486502493 | 0.405505627 |
| 0.273641416 | 0.291556393 | 0.240058325 | 2.42E-05    |
| 0.01522194  | 0.117384654 | 0.39507993  | 0.314484965 |
| 0.365769194 | 0.335743146 | 0.178492548 | 0.396788554 |
| 0.357621298 | 0.375251248 | 0.090076295 | 0.082279333 |
| 0.370394962 | 0.11555959  | 0.181586921 | 0.38502086  |
| 0.223208876 | 0.114361156 | 0.105063515 | 0.422451659 |
| 0.426432449 | 0.069671785 | 0.335465094 | 0.327823857 |
| 0.309800422 | 0.252050705 | 0.088288103 | 0.266685501 |
| 0.051212064 | 0.438358877 | 0.013910446 | 0.329123426 |
| 0.197156044 | 0.103831576 | 0.007862104 | 0.296421007 |
| 0.300777618 | 0.402178628 | 0.463874842 | 0.078797309 |
| 0.298349934 | 0.31286285  | 0.358936638 | 0.404053657 |
| 0.009436691 | 0.034597844 | 0.333294481 | 0.433401816 |
| 0.37209697  | 0.395597022 | 0.246887415 | 0.204547161 |
| 0.198789189 | 0.367282499 | 0.001837566 | 0.483808852 |
| 0.466578524 | 0.359481561 | 0.349206195 | 0.322776785 |
| 0.273361719 | 0.392411102 | 0.04755974  | 0.341243518 |
| 0.38172066  | 0.056910038 | 0.386495643 | 0.112974567 |
| 0.425349854 | 0.027396515 | 0.342697813 | 0.345898041 |
| 0.378033775 | 0.007592238 | 0.287852044 | 0.359329385 |
| 0.011874245 | 0.125543556 | 0.369136622 | 0.350028803 |
| 0.316457848 | 0.352857711 | 0.37685335  | 0.257698203 |
| 0.345394071 | 0.221548285 | 0.006729633 | 0.21576191  |
| 0.360418987 | 0.306589538 | 0.435154429 | 0.223878071 |
| 0.379095592 | 0.432470917 | 0.373531568 | 0.188160606 |
| 0.034844071 | 0.314417323 | 0.027156075 | 0.247247081 |

|             |             |             |               |
|-------------|-------------|-------------|---------------|
| 0.350895672 | 0.127318422 | 0.305098337 | 0.099679316   |
| 0.042709393 | 0.446160456 | 0.098671417 | 0.161213535   |
| 0.066477277 | 0.399035796 | 0.217030981 | 0.26991783    |
| 0.201615637 | 0.11260909  | 0.249369706 | 0.293825628   |
| 0.04607272  | 0.073293254 | 0.005006668 | 0.354019163   |
| 0.159108024 | 0.35223313  | 0.374591694 | 0.404517143   |
| 0.339175057 | 0.117194617 | 0.314401514 | 0.176579338   |
| 0.067110573 | 0.008571475 | 0.449880006 | 0.327379452   |
| 0.38640472  | 0.125956463 | 0.025051241 | 0.350879098   |
| 0.406402677 | 0.377988501 | 0.321373417 | 0.414195303   |
| 0.019425817 | 0.376170493 | 0.22915051  | 0.083186301   |
| 0.306754493 | 0.224786977 | 0.379141675 | 0.05973031    |
| 0.371348743 | 0.451736006 | 0.224264    | 0.126874893 1 |
| 0.365305604 | 0.029124654 | 0.389206505 | 0.406981703   |
| 0.02221102  | 0.455156155 | 0.080651528 | 0.011222538   |
| 0.340536151 | 0.371212725 | 0.046346579 | 0.04577686    |
| 0.313252595 | 0.061565896 | 0.206503039 | 0.447389117   |
| 0.326151254 | 0.39850956  | 0.124774526 | 0.034352977   |
| 0.013956568 | 0.125851444 | 0.302338455 | 0.498145947   |
| 0.427328014 | 0.19628782  | 0.290035647 | 0.194419265   |
| 0.240114816 | 0.199077637 | 0.426223839 | 0.122898537   |
| 0.471991199 | 0.003579456 | 0.347113182 | 0.482604125   |
| 0.363629309 | 0.049706913 | 0.315452965 | 0.41670055    |
| 0.034833845 | 0.173770175 | 0.468116137 | 0.387590347   |
| 0.245263855 | 0.272692918 | 0.353588705 | 0.01912502    |
| 0.043616644 | 0.285101091 | 0.100431266 | 0.324666629   |
| 0.151588502 | 0.024276697 | 0.325731133 | 0.037927862   |
| 0.437138898 | 0.373896897 | 0.03596755  | 0.377612337   |
| 0.309610436 | 0.278222443 | 0.026440765 | 0.356557498   |
| 0.430874651 | 0.493524882 | 0.150067605 | 0.385395674   |
| 0.415425906 | 0.315137882 | 0.046280139 | 0.008041059   |
| 0.467771528 | 0.378012839 | 0.022585422 | 0.38764624    |
| 0.331193158 | 0.016279618 | 0.45677614  | 0.154009617   |
| 0.462056709 | 0.004854122 | 0.047193776 | 0.018004397   |
| 0.356698966 | 0.46066568  | 0.370226634 | 0.331668313   |
| 0.305985522 | 0.001718133 | 0.433046898 | 0.464110513   |
| 0.00630709  | 0.079052969 | 0.392140517 | 0.352494973   |
| 0.485633935 | 0.21417762  | 0.371787394 | 0.351823911   |
| 0.466310944 | 0.245403998 | 0.192332348 | 0.407430692   |
| 0.42335043  | 0.389400844 | 0.427239098 | 0.40167799    |
| 0.324299107 | 0.233389148 | 0.013346563 | 0.069323254   |
| 0.264594557 | 0.299880513 | 0.05784671  | 0.368003805   |
| 0.091129175 | 0.417715845 | 0.377331971 | 0.38738559    |
| 0.001996439 | 0.17222423  | 0.398245317 | 0.410032456   |
| 0.392940754 | 0.010405763 | 0.003936088 | 0.004972539   |
| 0.009870531 | 0.344096817 | 0.158268625 | 0.407299669   |
| 0.327714821 | 0.00284554  | 0.058102746 | 0.243146544   |
| 0.289388192 | 0.463231926 | 0.313082559 | 0.354196998   |
| 0.05479804  | 0.310467071 | 0.334339605 | 0.037401682   |
| 0.356744611 | 0.393504873 | 0.462050632 | 0.021550905   |
| 0.159744987 | 0.343577625 | 0.396935277 | 0.035214473   |
| 0.232078344 | 0.36756798  | 0.28917121  | 0.006490211   |
| 0.0458867   | 0.035741568 | 0.347480148 | 0.470534176   |
| 0.071098499 | 0.027405325 | 0.208213072 | 0.118413766   |

|             |             |             |             |
|-------------|-------------|-------------|-------------|
| 0.38199099  | 0.144844715 | 0.411296573 | 0.402649645 |
| 0.365270305 | 0.039227194 | 0.452483859 | 0.026133927 |
| 0.470463527 | 0.235531436 | 0.073275092 | 0.212195119 |
| 0.00699443  | 0.412359326 | 0.112183418 | 0.371150306 |
| 0.378310073 | 0.115593748 | 0.006864994 | 0.099221444 |
| 0.033285113 | 0.384104093 | 0.359233206 | 0.014551244 |
| 0.203053458 | 0.213265503 | 0.332824191 | 0.330899683 |
| 0.377841112 | 0.488379692 | 0.386454497 | 0.083206988 |
| 0.082428077 | 0.375689464 | 0.396353121 | 0.279771572 |
| 0.37697411  | 0.233803285 | 0.44086315  | 0.381763434 |
| 0.389855923 | 0.400406364 | 0.30329641  | 0.155168548 |
| 0.389258568 | 0.391454952 | 0.027838186 | 0.296316166 |
| 0.389629433 | 0.327470652 | 0.104879678 | 0.194323159 |
| 0.28079519  | 0.03513735  | 0.19690936  | 0.229039904 |
| 0.367405048 | 0.129537207 | 0.355197377 | 0.373804518 |
| 0.39855072  | 0.042507276 | 0.034598943 | 0.481733318 |
| 0.399283042 | 0.149523323 | 0.387620398 | 0.115784941 |
| 0.261438968 | 0.365970597 | 0.35266217  | 0.28160173  |
| 0.40695748  | 0.40480861  | 0.414096885 | 0.432323746 |
| 0.215994673 | 0.488379143 | 0.13601094  | 0.04853096  |
| 0.364320209 | 0.088894111 | 0.053965474 | 0.115517547 |
| 0.013485726 | 0.202625247 | 0.338798428 | 0.287366087 |
| 0.32331163  | 0.343927515 | 0.054484942 | 0.22651735  |
| 0.318424205 | 0.273431954 | 0.220383737 | 0.069217011 |
| 0.476298602 | 0.005285944 | 0.035179547 | 0.305018081 |
| 0.377764693 | 0.288882991 | 0.168176042 | 0.195355032 |
| 0.078188475 | 0.237556518 | 0.362509991 | 0.378004762 |
| 0.296093695 | 0.383568536 | 0.031644225 | 0.021306213 |
| 0.384801226 | 0.36913415  | 0.008756979 | 0.047930916 |
| 0.357137733 | 0.243987676 | 0.190518299 | 0.008945318 |
| 0.408746008 | 0.36228518  | 0.326449361 | 0.326484571 |
| 0.045890986 | 0.377318015 | 0.075730281 | 0.042722977 |
| 0.442866907 | 0.288769498 | 0.462614281 | 0.243606364 |
| 0.348813148 | 0.457504295 | 0.404739836 | 0.090162364 |
| 0.299657467 | 0.024028428 | 0.388463484 | 0.343786481 |
| IRAK2       | 0.339530905 | 0.491863403 | 0.267646196 |
| 0.399562446 | 0.315558551 | 0.263117724 | 0.262155362 |
| 0.23231218  | 0.131841519 | 0.016904742 | 0.037652454 |
| 0.281296826 | 0.187900585 | 0.254196178 | 0.245095557 |
| 0.399857133 | 0.151313554 | 0.293951515 | 0.28665388  |
| 0.361371472 | 0.157812523 | 0.344617274 | 0.169930519 |
| 0.230453887 | 0.119092596 | 0.116376342 | 0.220143915 |
| 0.458161085 | 0.130378603 | 0.241775064 | 0.352901634 |
| 0.137805307 | 0.398200316 | 0.461908726 | 0.310480052 |
| 0.439287614 | 0.302223832 | 0.026261293 | 0.252619606 |
| 0.403113807 | 0.362919135 | 0.37290503  | 0.312713694 |
| 0.095697516 | 0.433604167 | 0.276777644 | 0.296928491 |
| 0.220516594 | 0.059873546 | 0.220496794 | 0.412719036 |
| 0.406595769 | 0.272558828 | 0.272356929 | 0.223387616 |
| 0.150751483 | 0.217368934 | 0.155743131 | 0.264178872 |
| 0.273696875 | 0.174799482 | 0.422520549 | 0.142057182 |
| 0.160645622 | 0.291629896 | 0.168420791 | 0.288972839 |
| 0.234777642 | 0.343782041 | 0.063421968 | 0.233607523 |
| 0.007167786 | 0.350009666 | 0.302147699 | 0.189625592 |



|             |             |             |             |
|-------------|-------------|-------------|-------------|
| 0.083985933 | 0.042734979 | 0.193858465 | 0.31167223  |
| 0.465708968 | 0.415213234 | 0.462314166 | 0.453141654 |
| 0.182620837 | 0.287195663 | 0.254570789 | 0.214402323 |
| 0.415548476 | 0.222124221 | 0.149791729 | 0.391876551 |
| 0.466774463 | 0.465388218 | 0.222882538 | 0.253627638 |
| 0.377886832 | 0.459568458 | 0.282906226 | 0.305465351 |
| 0.222349427 | 0.0738241   | 0.401388424 | 0.475726718 |
| 0.372141554 | 0.206253312 | 0.179646675 | 0.400099429 |
| 0.115818484 | 0.252642109 | 0.323978339 | 0.150673547 |
| 0.481820972 | 0.056375158 | 0.211144377 | 0.313231439 |
| 0.252219534 | 0.383891968 | 0.452368006 | 0.253678305 |
| 0.302220625 | 0.045272608 | 0.108801662 | 0.073186104 |
| 0.265179762 | 0.101067431 | 0.406791042 | 0.449145912 |
| 0.260988618 | 0.288551492 | 0.313673731 | 0.010509751 |
| 0.053336229 | 0.199679256 | 0.365286915 | 0.307097068 |
| 0.376615095 | 0.321347797 | 0.225596178 | 0.32963661  |
| 0.275487813 | 0.455496113 | 0.047195943 | 0.184051389 |
| 0.313387876 | 0.203939851 | 0.27468895  | 0.290209728 |
| 0.26608079  | 0.2038694   | 0.194967636 | 0.496373087 |
| 0.417226123 | 0.154552393 | 0.26507574  | 0.372553765 |
| 0.256640265 | 0.269912458 | 0.187001806 | 0.269451613 |
| 0.115845667 | 0.411082167 | 0.050418761 | 0.300475755 |
| 0.181695696 | 0.13819141  | 0.037909496 | 0.27171288  |
| 0.247711717 | 0.37965018  | 0.391240076 | 0.178096578 |
| 0.295016124 | 0.313719265 | 0.264812645 | 0.320431335 |
| 0.024715737 | 0.099663593 | 0.217872913 | 0.475558004 |
| 0.214932927 | 0.46658797  | 0.314473765 | 0.279170608 |
| 0.273751587 | 0.430384182 | 0.004263319 | 0.440529917 |
| 0.463730385 | 0.214641366 | 0.29586702  | 0.305867449 |
| 0.238181215 | 0.439587421 | 0.034710107 | 0.364381946 |
| 0.274267247 | 0.151366072 | 0.492691831 | 0.190062327 |
| 0.414529734 | 0.082598989 | 0.291890604 | 0.358152632 |
| 0.306147238 | 0.020962493 | 0.220127708 | 0.350013689 |
| 0.048293504 | 0.165168877 | 0.366472934 | 0.338149982 |
| 0.302276584 | 0.396104396 | 0.483760491 | 0.220203138 |
| 0.315374477 | 0.288165237 | 0.037721469 | 0.269089237 |
| 0.374364691 | 0.235563922 | 0.419166173 | 0.285177592 |
| 0.222278534 | 0.447964873 | 0.337302394 | 0.148911166 |
| 0.101136716 | 0.307174387 | 0.048417484 | 0.288648792 |
| 0.342284771 | 0.16190437  | 0.253530222 | 0.176926782 |
| 0.104068882 | 0.491408933 | 0.142929231 | 0.166075991 |
| 0.093040661 | 0.274509515 | 0.304811956 | 0.197309963 |
| 0.15837211  | 0.220688063 | 0.262036831 | 0.287453491 |
| 0.096747964 | 0.141407651 | 0.02758207  | 0.210119445 |
| 0.118772601 | 0.221003674 | 0.212859652 | 0.314210667 |
| 0.282857976 | 0.132649014 | 0.296833278 | 0.225182552 |
| 0.141473234 | 0.040831195 | 0.477138319 | 0.349320127 |
| 0.284389776 | 0.231676254 | 0.084485376 | 0.193326128 |
| 0.453380845 | 0.208875925 | 0.206635232 | 0.440475035 |
| 0.068630796 | 0.465854228 | 0.220673771 | 0.158416806 |
| 0.249414522 | 0.27417631  | 0.471482635 | 0.07173204  |
| 0.295677095 | 0.44307703  | 0.302866319 | 0.202211569 |
| 0.365305604 | 1           | 0.078739307 | 0.333118706 |
| 0.32385162  | 0.070231747 | 0.477328486 | 0.142713804 |

|             |             |             |             |
|-------------|-------------|-------------|-------------|
| 0.050051305 | 0.329809839 | 0.325991592 | 0.123845676 |
| 0.117575197 | 0.269959136 | 0.109257658 | 0.279063892 |
| 0.487242867 | 0.37259552  | 0.355420521 | 0.189413126 |
| 0.089065914 | 0.018816613 | 0.200150228 | 0.261348872 |
| 0.445577208 | 0.453678471 | 0.284654195 | 0.258128081 |
| 0.287340688 | 0.249645347 | 0.161788857 | 0.470386402 |
| 0.180402628 | 0.467689858 | 0.025797679 | 0.352305092 |
| 0.43363948  | 0.240113096 | 0.107766465 | 0.293680814 |
| 0.358038275 | 0.107318421 | 0.269088587 | 0.446022738 |
| 0.420302969 | 0.284927446 | 0.262937457 | 0.321232548 |
| 0.054471049 | 0.11079348  | 0.292485589 | 0.13936515  |
| 0.280501649 | 0.253687492 | 0.037624974 | 0.304096882 |
| 0.082106083 | 0.427508547 | 0.432610709 | 0.099198444 |
| 0.226869483 | 0.279646172 | 0.307076664 | 0.089546117 |
| 0.38558614  | 0.438651917 | 0.465153452 | 0.251561632 |
| 0.360516392 | 0.431049372 | 0.225956301 | 0.125946403 |
| 0.038550599 | 0.44704465  | 0.323647527 | 0.040558855 |
| 0.469551231 | 0.194625094 | 0.027212412 | 0.478849007 |
| 0.257933688 | 0.381247077 | 0.010503294 | 0.065966742 |
| 0.064848138 | 0.427815907 | 0.426381635 | 0.341930175 |
| 0.175448979 | 0.333969741 | 0.010527565 | 0.475715325 |
| 0.448326189 | 0.030774597 | 0.148402419 | 0.351691512 |
| 0.305475163 | 0.495543496 | 0.215452455 | 0.38762776  |
| 0.252399191 | 0.429356165 | 0.254497691 | 0.27249867  |
| 0.411337761 | 0.416662086 | 0.381481557 | 0.440650031 |
| 0.447713464 | 0.332687217 | 0.301925695 | 0.050094968 |
| 0.13192458  | 0.23899257  | 0.186261966 | 0.095810943 |
| 0.243829217 | 0.16226348  | 0.44719396  | 0.456465581 |
| 0.433856563 | 0.018762728 | 0.213224321 | 0.365466861 |
| 0.450864021 | 0.484499017 | 0.045862664 | 0.010008036 |
| 0.009581707 | 0.027411121 | 0.325883189 | 0.246411275 |
| 0.453068335 | 0.156564873 | 0.019773439 | 0.111228412 |
| 0.278231567 | 0.268627954 | 0.455230058 | 0.361867628 |
| 0.368690825 | 0.14019979  | 0.203085586 | 0.37992778  |
| 0.093897488 | 0.246921785 | 0.449466931 | 0.447825017 |
| 0.078522533 | 0.254137873 | 0.286877199 | 0.488920392 |
| 0.043976761 | 0.296621224 | 0.289854136 | 0.272116893 |
| 0.028933001 | 0.114453256 | 0.104531113 | 0.411275778 |
| 0.419711485 | 0.094510836 | 0.053357244 | 0.131285766 |
| 0.167211587 | 0.448604619 | 0.197368456 | 0.495087742 |
| 0.428809653 | 0.444966779 | 0.09721634  | 0.4449479   |
| 0.077560631 | 0.429119514 | 0.241378175 | 0.059705973 |
| 0.275424477 | 0.039222419 | 0.406909436 | 0.111571224 |
| 0.281324812 | 0.330231971 | 0.17454755  | 0.035540254 |
| 0.127810491 | 0.092380629 | 0.46623919  | 0.41977919  |
| 0.056205767 | 0.300452891 | 0.289060455 | 0.324832089 |
| 0.270413427 | 0.386405323 | 0.449481075 | 0.23036116  |
| 0.161672566 | 0.104936206 | 0.374982261 | 0.294958594 |
| 0.267032391 | 0.472700946 | 0.239115916 | 0.485332484 |
| 0.347110255 | 0.446802441 | 0.427026781 | 0.315107695 |
| 0.18586462  | 0.286312607 | 0.302518347 | 0.046508989 |
| 0.328883758 | 0.435194937 | 0.312086919 | 0.153480986 |
| 0.243573777 | 0.235110333 | 0.112223855 | 0.144379176 |
| 0.189727355 | 0.246500904 | 0.195852407 | 0.449007174 |

|             |             |             |             |
|-------------|-------------|-------------|-------------|
| 0.295817906 | 0.315386818 | 0.09918794  | 0.099140591 |
| 0.500333664 | 0.420475301 | 0.193443651 | 0.331037228 |
| 0.217307251 | 0.30037819  | 0.382087534 | 0.373548971 |
| 0.267032148 | 0.395482009 | 0.403957029 | 0.305660693 |
| 0.410126376 | 0.303765093 | 0.469451296 | 0.139905176 |
| 0.108874454 | 0.258970051 | 0.132100213 | 0.133745295 |
| 0.203090263 | 0.055898085 | 0.171698621 | 0.372312105 |
| 0.21127913  | 0.317727661 | 0.257528034 | 0.12580824  |
| 0.287551818 | 0.259359034 | 0.320717649 | 0.236501923 |
| 0.123063965 | 0.444720864 | 0.023791229 | 0.101946857 |
| 0.228862543 | 0.378258921 | 0.245559264 | 0.251559332 |
| 0.200364405 | 0.156150837 | 0.295351789 | 0.250414975 |
| 0.204006141 | 0.244722707 | 0.376773425 | 0.082326019 |
| 0.06387402  | 0.4824561   | 0.274766811 | 0.041045852 |
| 0.113717639 | 0.26062514  | 0.281181198 | 0.236741342 |
| 0.040640962 | 0.416119354 | 0.234955315 | 0.299244132 |
| 0.32171103  | 0.127499007 | 0.335193019 | 0.126430996 |
| 0.127240913 | 0.416324136 | 0.266125209 | 0.44747948  |
| 0.269941746 | 0.398233243 | 0.399362698 | 0.376554769 |
| 0.14606461  | 0.230284346 | 0.078417913 | 0.436709817 |
| 0.227000961 |             |             |             |
| ISG20       | 0.025283134 | 0.038366754 | 0.018730966 |
| 0.109667038 | 0.04726179  | 0.043399462 | 0.195703232 |
| 0.054819102 | 0.034804841 | 0.045198511 | 0.024650628 |
| 0.027253488 | 0.015075021 | 0.063152234 | 0.014797805 |
| 0.100297199 | 0.083554293 | 0.023209654 | 0.213236042 |
| 0.090601938 | 0.143702524 | 0.116473936 | 0.165075003 |
| 0.014968131 | 0.074370186 | 0.179413375 | 0.034706076 |
| 0.091222285 | 0.184524915 | 0.042100088 | 0.082193658 |
| 0.062702099 | 0.040044098 | 0.024184265 | 0.055116451 |
| 0.019690009 | 0.017885452 | 0.01075148  | 0.042782979 |
| 0.036765723 | 0.047691874 | 0.097380212 | 0.167809408 |
| 0.15595519  | 0.022875256 | 0.210638565 | 0.042017787 |
| 0.007317766 | 0.112316127 | 0.037743063 | 0.025579337 |
| 0.021101713 | 0.031481897 | 0.087185938 | 0.181878236 |
| 0.008697914 | 0.032458953 | 0.005902253 | 0.046833634 |
| 0.207510818 | 0.056260527 | 0.022553426 | 0.050168202 |
| 0.009911617 | 0.082895839 | 0.051454297 | 0.114744905 |
| 0.010283811 | 0.040494563 | 0.061673792 | 0.012106872 |
| 0.016235721 | 0.113642066 | 0.054208152 | 0.007721582 |
| 0.208562494 | 0.062688898 | 0.071730079 | 0.146419551 |
| 0.072413445 | 0.021500131 | 0.056425413 | 0.041930662 |
| 0.036705693 | 0.075974231 | 0.017651565 | 0.144298841 |
| 0.037174071 | 0.195434823 | 0.024361063 | 0.097449352 |
| 0.051806099 | 0.027920119 | 0.049234136 | 0.089108574 |
| 0.051807699 | 0.040222458 | 0.024933908 | 0.039606962 |
| 0.013058799 | 0.031180569 | 0.027188234 | 0.041549013 |
| 0.02969547  | 0.014128332 | 0.142524525 | 0.070065034 |
| 0.186437169 | 0.008916596 | 0.164438825 | 0.010111139 |
| 0.075455149 | 0.127850026 | 0.092150747 | 0.105278234 |
| 0.028845453 | 0.039866952 | 0.02531723  | 0.235373525 |
| 0.033910939 | 0.033598641 | 0.004344692 | 0.104209005 |
| 0.014325519 | 0.004625447 | 0.016616703 | 0.07200069  |
| 0.034262014 | 0.013275097 | 0.124313196 | 0.067759077 |

|             |             |             |             |
|-------------|-------------|-------------|-------------|
| 0.098919274 | 0.010770454 | 0.026535382 | 0.036419651 |
| 0.052606396 | 0.012441435 | 0.088227046 | 0.026633855 |
| 0.022308534 | 0.054591235 | 0.004727911 | 0.163495051 |
| 0.051392569 | 0.01960621  | 0.212872201 | 0.033680814 |
| 0.083374352 | 0.148390898 | 0.205184345 | 0.04950685  |
| 0.035563698 | 0.266145073 | 0.018198287 | 0.099521047 |
| 0.023768528 | 0.054934272 | 0.190475987 | 0.087606481 |
| 0.166508822 | 0.018513058 | 0.088863459 | 0.042548078 |
| 0.004915668 | 0.016767326 | 0.027108095 | 0.09027477  |
| 0.021347108 | 0.036883692 | 0.01373091  | 0.199546614 |
| 0.098547926 | 0.082469464 | 0.033579031 | 0.047718013 |
| 0.030962609 | 0.053540061 | 0.016866064 | 0.044390577 |
| 0.037856837 | 0.036898341 | 0.062382356 | 0.038406032 |
| 0.119818244 | 0.067469705 | 0.00045032  | 0.023227328 |
| 0.026073731 | 0.01613319  | 0.080892084 | 0.039569304 |
| 0.015117179 | 0.077029104 | 0.001094028 | 0.096864421 |
| 0.020607125 | 0.193027323 | 0.059901328 | 0.175297178 |
| 0.023526295 | 0.201160074 | 0.047294644 | 0.024885347 |
| 0.019780171 | 0.021097886 | 0.076625399 | 0.110108466 |
| 0.05601489  | 0.097165433 | 0.046276909 | 0.095031978 |
| 0.078306451 | 0.04965008  | 0.07559866  | 0.013244366 |
| 0.048957787 | 0.122369617 | 0.033029286 | 0.057484968 |
| 0.032292151 | 0.002139151 | 0.032528295 | 0.09063369  |
| 0.016630732 | 0.038902802 | 0.019129567 | 0.003391571 |
| 0.252492051 | 0.087734112 | 0.033530002 | 0.075078008 |
| 0.017836561 | 0.118234743 | 0.016622413 | 0.021732004 |
| 0.116664733 | 0.042614635 | 0.017886386 | 0.007481328 |
| 0.007105521 | 0.052573674 | 0.151080647 | 0.053030477 |
| 0.02485306  | 0.09255941  | 0.021302768 | 0.02917025  |
| 0.172334423 | 0.183723498 | 0.00847716  | 0.008052707 |
| 0.02565551  | 0.022926814 | 0.020158524 | 0.026742018 |
| 0.023796669 | 0.037464003 | 0.062072054 | 0.010412799 |
| 0.066643535 | 0.181889426 | 0.037418395 | 0.094184425 |
| 0.027193523 | 0.141726722 | 0.151419374 | 0.002816928 |
| 0.062692122 | 0.027768268 | 0.013844852 | 0.051628113 |
| 0.031598325 | 0.049351091 | 0.047361582 | 0.170667809 |
| 0.024025876 | 0.184627347 | 0.082547828 | 0.017465306 |
| 0.034619206 | 0.03725766  | 0.083346173 | 0.106880758 |
| 0.029124654 | 0.078739307 | 1           | 0.024998231 |
| 0.024952818 | 0.203801633 | 0.033072882 | 0.054355414 |
| 0.159191317 | 0.039798812 | 0.031567612 | 0.197966326 |
| 0.120623224 | 0.083349007 | 0.113248087 | 0.141243637 |
| 0.043727614 | 0.112860573 | 0.039249455 | 0.020830098 |
| 0.215984166 | 0.029268144 | 0.046529577 | 0.016671748 |
| 0.021810317 | 0.029491346 | 0.14831622  | 0.046733635 |
| 0.225044095 | 0.021286992 | 0.009555354 | 0.04126504  |
| 0.005060381 | 0.025879289 | 0.135809314 | 0.029800171 |
| 0.019317029 | 0.037171672 | 0.115499007 | 0.106548357 |
| 0.036851907 | 0.203047702 | 0.084953192 | 0.02797855  |
| 0.042911942 | 0.044936985 | 0.025186764 | 0.044766491 |
| 0.134901476 | 0.090167563 | 0.04430424  | 0.008826238 |
| 0.026415114 | 0.092325357 | 0.001319508 | 0.025203834 |
| 0.098914918 | 0.037488159 | 0.061399753 | 0.079841974 |
| 0.04083778  | 0.023058193 | 0.079080711 | 0.223186792 |

|             |             |             |             |
|-------------|-------------|-------------|-------------|
| 0.025674077 | 0.022035909 | 0.026250778 | 0.111130821 |
| 0.029623798 | 0.030232471 | 0.013728019 | 0.124740154 |
| 0.120556661 | 0.02188635  | 0.038792097 | 0.027624362 |
| 0.069055529 | 0.033466297 | 0.043976823 | 0.040655684 |
| 0.215626536 | 0.015298533 | 0.013270324 | 0.000538223 |
| 0.037055815 | 0.052232082 | 0.024295826 | 0.080311796 |
| 0.019799562 | 0.087715264 | 0.001397898 | 0.032142723 |
| 0.033317831 | 0.077411197 | 0.027779596 | 0.02679448  |
| 0.020804584 | 0.035249764 | 0.017256321 | 0.032632766 |
| 0.021976621 | 0.021411986 | 0.029702945 | 0.148513365 |
| 0.05477617  | 0.019565832 | 0.056385232 | 0.03481167  |
| 0.068822676 | 0.058153402 | 0.204790503 | 0.164925817 |
| 0.007290867 | 0.077752344 | 0.010653977 | 0.017790856 |
| 0.037508654 | 0.069996788 | 0.032384756 | 0.06147321  |
| 0.035772955 | 0.130539084 | 0.077364237 | 0.028757808 |
| 0.06435635  | 0.068213373 | 0.014611316 | 0.008179812 |
| 0.000969919 | 0.022447797 | 0.085750958 | 0.080012757 |
| 0.036431913 | 0.007829868 | 0.148483461 | 0.091667093 |
| 0.030058818 | 0.037563015 | 0.030911578 | 0.143201004 |
| 0.030814335 | 0.158391047 | 0.028104279 | 0.113053945 |
| 0.043457765 | 0.015927821 | 0.043249103 | 0.035610191 |
| 0.060829243 | 0.069496657 | 0.023287081 | 0.067823574 |
| 0.001430039 | 0.111369572 | 0.029170329 | 0.036093318 |
| 0.01019643  | 0.091725702 | 0.092813697 | 0.066208786 |
| 0.017692839 | 0.06546663  | 0.071022406 | 0.004317058 |
| 0.163233394 | 0.046656477 | 0.0943683   | 0.051781132 |
| 0.064882229 | 0.102985463 | 0.034499573 | 0.030139756 |
| 0.039863452 | 0.023234825 | 0.034021162 | 0.005699487 |
| 0.037123233 | 0.086128105 | 0.020243669 | 0.005866427 |
| 0.035764324 | 0.048610689 | 0.006708495 | 0.067084248 |
| 0.003102664 | 0.146745637 | 0.067407922 | 0.047095197 |
| 0.03573525  | 0.08444457  | 0.086791848 | 0.062015936 |
| 0.088721282 | 0.089513492 | 0.02507849  | 0.014447277 |
| 0.169639609 | 0.001673027 | 0.086231591 | 0.027594027 |
| 0.051323484 | 0.055747124 | 0.031683184 | 0.035010805 |
| 0.035669019 | 0.035880864 | 0.030337589 | 0.106093496 |
| 0.00880184  | 0.035640265 | 0.08044674  | 0.052250041 |
| 0.106934443 | 0.068483258 | 0.046459772 | 0.031136416 |
| 0.116266052 | 0.012832116 | 0.034876645 | 0.002191908 |
| 0.008103765 | 0.061938883 | 0.079836127 | 0.091865373 |
| 0.041581493 | 0.029568642 | 0.038556697 | 0.093882126 |
| 0.035343907 | 0.031484747 | 0.041363467 | 0.061398078 |
| 0.127067259 | 0.093272992 | 0.036269664 | 0.037387881 |
| 0.008230757 | 0.03830802  | 0.060435141 | 0.059978623 |
| 0.038413066 | 0.166087712 | 0.027222246 | 0.024951958 |
| 0.019105118 | 0.01719846  | 0.114034739 | 0.141240705 |
| 0.230160046 | 0.066262294 | 0.003870732 | 0.077580824 |
| 0.005338493 | 0.121226848 | 0.007174644 | 0.02697591  |
| 0.071163674 | 0.012986455 | 0.104811064 | 0.145730043 |
| 0.08823231  | 0.027335748 | 0.019374292 | 0.151439195 |
| 0.008123753 | 0.037548911 | 0.024515498 | 0.082182753 |
| 0.008135484 | 0.02439855  | 0.151141449 | 0.047479592 |
| 0.025847021 | 0.002262282 | 0.036459294 | 0.038345694 |
| 0.134874715 | 0.060252022 | 0.023057409 | 0.022266468 |

|             |             |             |             |
|-------------|-------------|-------------|-------------|
| 0.010903261 | 0.021650643 | 0.02443996  | 0.043425472 |
| 0.062978279 | 0.024252615 | 0.031536756 | 0.034495796 |
| 0.096166917 | 0.151784939 | 0.022164763 | 0.021731574 |
| 0.047282124 | 0.025942337 | 0.02083339  | 0.023439154 |
| 0.023121688 | 0.116151162 | 0.019434454 | 0.032460773 |
| 0.009816056 | 0.009850095 | 0.147156593 | 0.059982609 |
| 0.008979034 |             |             |             |
| ITGB2       | 0.35450398  | 0.485377996 | 0.322069236 |
| 0.325595505 | 0.3211225   | 0.32464489  | 0.173748423 |
| 0.205672369 | 0.064315226 | 0.003331725 | 0.011110487 |
| 0.343514764 | 0.132767313 | 0.228525122 | 0.275781606 |
| 0.32271079  | 0.090284345 | 0.343365482 | 0.195337835 |
| 0.337887355 | 0.088659353 | 0.295937901 | 0.077230138 |
| 0.212486937 | 0.064606138 | 0.045863599 | 0.17887908  |
| 0.370276208 | 0.055303285 | 0.277089511 | 0.334485358 |
| 0.086156805 | 0.363625605 | 0.502020421 | 0.311380561 |
| 0.493780073 | 0.346212394 | 0.015551218 | 0.234392826 |
| 0.397455432 | 0.332436424 | 0.331161717 | 0.255885824 |
| 0.032873084 | 0.491477765 | 0.192608798 | 0.306557991 |
| 0.239761451 | 0.01833205  | 0.243478858 | 0.451364378 |
| 0.457806463 | 0.31896317  | 0.220234891 | 0.129017944 |
| 0.12412611  | 0.227329094 | 0.174497499 | 0.308990991 |
| 0.175383274 | 0.169782888 | 0.45989407  | 0.070826541 |
| 0.11827189  | 0.25047762  | 0.11567173  | 0.242050691 |
| 0.246534144 | 0.344985048 | 0.020371692 | 0.329425934 |
| 0.003321322 | 0.323736915 | 0.295975285 | 0.211360535 |
| 0.03061621  | 0.012600377 | 0.136222353 | 0.269304413 |
| 0.394523764 | 0.455144302 | 0.39966541  | 0.413633922 |
| 0.126789    | 0.238554598 | 0.288609823 | 0.127616662 |
| 0.390245834 | 0.138596582 | 0.103552286 | 0.314127774 |
| 0.412070661 | 0.483719477 | 0.137494596 | 0.195469982 |
| 0.3398416   | 0.455057409 | 0.339409053 | 0.315391443 |
| 0.239721541 | 0.040569531 | 0.417552987 | 0.447099706 |
| 0.385328202 | 0.221372338 | 0.108187022 | 0.345691557 |
| 0.046835844 | 0.35351562  | 0.274385583 | 0.141910918 |
| 0.40509883  | 0.014444026 | 0.14965187  | 0.281660342 |
| 0.211907882 | 0.366739803 | 0.47490631  | 0.151361402 |
| 0.319991244 | 0.015911472 | 0.080977227 | 0.028583087 |
| 0.273227676 | 0.0988277   | 0.484793347 | 0.383513065 |
| 0.223329104 | 0.270772759 | 0.227727759 | 0.001458211 |
| 0.018748132 | 0.168795432 | 0.36508087  | 0.343583712 |
| 0.358629898 | 0.371928978 | 0.15790987  | 0.337040972 |
| 0.325232068 | 0.391460036 | 0.064614964 | 0.088772019 |
| 0.333911287 | 0.160687153 | 0.18602591  | 0.342051387 |
| 0.214268317 | 0.114882099 | 0.102944872 | 0.457303785 |
| 0.42869409  | 0.066756465 | 0.347808575 | 0.319711153 |
| 0.241117216 | 0.25247639  | 0.090521221 | 0.215909214 |
| 0.041466923 | 0.455686272 | 0.019634951 | 0.326709751 |
| 0.18076939  | 0.095967615 | 0.016099178 | 0.255567044 |
| 0.246209645 | 0.364360985 | 0.474452593 | 0.092007664 |
| 0.249310187 | 0.300193515 | 0.314957186 | 0.320965195 |
| 0.005020408 | 0.045466307 | 0.298103565 | 0.447770269 |
| 0.275821414 | 0.444201847 | 0.25662418  | 0.239047353 |
| 0.210794933 | 0.35755335  | 0.00520148  | 0.488192186 |

|             |             |             |             |
|-------------|-------------|-------------|-------------|
| 0.48624416  | 0.30612656  | 0.28870983  | 0.33146534  |
| 0.263064677 | 0.36892517  | 0.048646657 | 0.324718382 |
| 0.337692742 | 0.069998412 | 0.427588458 | 0.111012834 |
| 0.449764702 | 0.027405465 | 0.279941072 | 0.345461105 |
| 0.321509154 | 0.007075517 | 0.218749821 | 0.318197936 |
| 0.019604579 | 0.093301087 | 0.359730821 | 0.326791892 |
| 0.2859548   | 0.35070082  | 0.400710727 | 0.24838188  |
| 0.316576691 | 0.221263786 | 0.010823805 | 0.241367277 |
| 0.354842122 | 0.274185506 | 0.440507807 | 0.205110243 |
| 0.327434755 | 0.446906433 | 0.357759136 | 0.164079426 |
| 0.033039656 | 0.277585334 | 0.019113354 | 0.24347373  |
| 0.368224969 | 0.08552515  | 0.293398458 | 0.139729741 |
| 0.048948317 | 0.468630951 | 0.120540706 | 0.184769607 |
| 0.084404504 | 0.304011119 | 0.225165485 | 0.169142726 |
| 0.135288831 | 0.11835885  | 0.246364897 | 0.284621639 |
| 0.034311408 | 0.065743559 | 0.014434102 | 0.271429521 |
| 0.087762556 | 0.242464535 | 0.249418198 | 0.341291868 |
| 0.261268459 | 0.078231272 | 0.276863968 | 0.22265114  |
| 0.082226576 | 0.010697391 | 0.468797223 | 0.329010542 |
| 0.317044793 | 0.127551789 | 0.032696483 | 0.259858225 |
| 0.394450254 | 0.276607339 | 0.283952237 | 0.409208248 |
| 0.030534055 | 0.411931249 | 0.176471207 | 0.083350119 |
| 0.260392289 | 0.198002915 | 0.388466266 | 0.049602957 |
| 0.348230431 | 0.446246034 | 0.260528153 | 0.128113302 |
| 0.389206505 | 0.333118706 | 0.024998231 | 1           |
| 0.346766632 | 0.022296657 | 0.477132454 | 0.0888649   |
| 0.015539854 | 0.335681516 | 0.320904902 | 0.055342898 |
| 0.058118738 | 0.241489985 | 0.049624864 | 0.214205406 |
| 0.466758774 | 0.303749805 | 0.326697638 | 0.165786001 |
| 0.028593637 | 0.005222366 | 0.155248663 | 0.327368681 |
| 0.503320935 | 0.455996007 | 0.212924475 | 0.250823969 |
| 0.193723095 | 0.223768783 | 0.172301425 | 0.446175901 |
| 0.20148688  | 0.498531045 | 0.005349618 | 0.324347518 |
| 0.489413151 | 0.277083712 | 0.050874259 | 0.257969641 |
| 0.366495146 | 0.036976328 | 0.205391428 | 0.476358918 |
| 0.391323123 | 0.24311674  | 0.256403021 | 0.351528584 |
| 0.015192784 | 0.038181041 | 0.298242921 | 0.128521453 |
| 0.291113087 | 0.165359948 | 0.034090632 | 0.297178778 |
| 0.03063572  | 0.424961193 | 0.36607828  | 0.039752869 |
| 0.269451209 | 0.30198071  | 0.286775823 | 0.028884781 |
| 0.374979159 | 0.46937906  | 0.502852618 | 0.164222923 |
| 0.347755693 | 0.432856292 | 0.285008708 | 0.063490274 |
| 0.011996335 | 0.489780378 | 0.357764212 | 0.019340825 |
| 0.393268094 | 0.243737162 | 0.006942775 | 0.472587844 |
| 0.160014187 | 0.462546617 | 0.006903718 | 0.089593916 |
| 0.032789616 | 0.362734769 | 0.466050449 | 0.334708945 |
| 0.227419331 | 0.32228106  | 0.0061784   | 0.47219749  |
| 0.461513396 | 0.008909712 | 0.097033922 | 0.340098403 |
| 0.314477878 | 0.507670877 | 0.217285459 | 0.362048818 |
| 0.311087763 | 0.472341207 | 0.181579756 | 0.198029518 |
| 0.371352367 | 0.449691511 | 0.360769198 | 0.453861887 |
| 0.380817038 | 0.325079503 | 0.218914394 | 0.010891125 |
| 0.093045516 | 0.214859416 | 0.234866847 | 0.054244342 |
| 0.317961343 | 0.096705061 | 0.45643525  | 0.384455343 |

|             |             |             |             |
|-------------|-------------|-------------|-------------|
| 0.411589423 | 0.003579598 | 0.153632094 | 0.352557798 |
| 0.402270823 | 0.421879422 | 0.024460436 | 0.00694226  |
| 0.010501727 | 0.009326391 | 0.312609733 | 0.190530043 |
| 0.440284437 | 0.214715984 | 0.003414502 | 0.048612751 |
| 0.256946506 | 0.284309985 | 0.470133881 | 0.303159386 |
| 0.346699013 | 0.064121672 | 0.205686459 | 0.328888195 |
| 0.041175034 | 0.320831158 | 0.415526618 | 0.457011971 |
| 0.036229631 | 0.19271173  | 0.357017333 | 0.425245826 |
| 0.042788694 | 0.240647175 | 0.345321908 | 0.225183596 |
| 0.016189426 | 0.057941977 | 0.043580622 | 0.34202503  |
| 0.479200965 | 0.046928544 | 0.019427069 | 0.14683199  |
| 0.086367127 | 0.398746293 | 0.124695387 | 0.447805191 |
| 0.375364504 | 0.341243782 | 0.051568903 | 0.46856156  |
| 0.022415495 | 0.467252342 | 0.236337764 | 0.061910863 |
| 0.261946871 | 0.011689748 | 0.441693419 | 0.091105707 |
| 0.292886854 | 0.35974537  | 0.139290568 | 0.011466105 |
| 0.13296799  | 0.037472688 | 0.393225015 | 0.364525747 |
| 0.027346748 | 0.215652082 | 0.246126931 | 0.347145813 |
| 0.272201056 | 0.327426698 | 0.49312846  | 0.331561505 |
| 0.06803361  | 0.118206878 | 0.349225793 | 0.357757012 |
| 0.228676964 | 0.409945583 | 0.197577538 | 0.479766339 |
| 0.356363443 | 0.436444857 | 0.423740691 | 0.281193304 |
| 0.153874371 | 0.354902551 | 0.300770925 | 0.017806659 |
| 0.29945416  | 0.362840405 | 0.34046428  | 0.098494475 |
| 0.177550559 | 0.286274279 | 0.05129925  | 0.228919982 |
| 0.238912823 | 0.284371209 | 0.106813865 | 0.348038966 |
| 0.358504824 | 0.35276202  | 0.048924423 | 0.040539851 |
| 0.506536914 | 0.430914283 | 0.146298413 | 0.345124958 |
| 0.142959541 | 0.251448085 | 0.351822749 | 0.335938023 |
| 0.297412122 | 0.372583995 | 0.353197159 | 0.315034208 |
| 0.416710618 | 0.216126355 | 0.501715877 | 0.118020074 |
| 0.053397841 | 0.34610868  | 0.063516356 | 0.068741497 |
| 0.108771967 | 0.020260426 | 0.207092432 | 0.332220161 |
| 0.271022415 | 0.286191434 | 0.29511609  | 0.073740114 |
| 0.24763288  | 0.348400864 | 0.280177304 | 0.172662024 |
| 0.056399097 | 0.473261523 | 0.00729527  | 0.043078015 |
| 0.279327297 | 0.339957544 | 0.261972862 | 0.191521213 |
| 0.200628841 | 0.108915997 | 0.226007695 | 0.285764746 |
| 0.245870406 | 0.31165794  | 0.351935202 | 0.037870373 |
| 0.017711178 | 0.419122557 | 0.357616998 | 0.019389139 |
| 0.066131563 | 0.34595118  | 0.286547841 | 0.165427357 |
| 0.015469829 | 0.425288247 | 0.270884144 | 0.325821683 |
| 0.305800367 | 0.058115906 | 0.380602693 | 0.08953081  |
| 0.064544629 | 0.452341552 | 0.303462192 | 0.478102426 |
| 0.290155745 | 0.314412516 | 0.464982595 | 0.362339759 |
| 0.139299145 | 0.325670369 | 0.023283018 | 0.382046293 |
| 0.295816207 |             |             |             |
| JAZF1       | 0.336531927 | 0.485012136 | 0.286669904 |
| 0.314237157 | 0.311116435 | 0.305740935 | 0.167425347 |
| 0.202157008 | 0.050961977 | 0.004897673 | 0.011273154 |
| 0.334417382 | 0.146781861 | 0.246734786 | 0.239508461 |
| 0.303765239 | 0.095122134 | 0.309836804 | 0.188630421 |
| 0.323852963 | 0.090629765 | 0.286470895 | 0.071551963 |
| 0.188949678 | 0.061532677 | 0.042630464 | 0.158082853 |



|             |             |             |             |
|-------------|-------------|-------------|-------------|
| 0.367865951 | 0.050600734 | 0.282556089 | 0.329674906 |
| 0.079382539 | 0.366815642 | 0.499189974 | 0.310210507 |
| 0.495594905 | 0.323363572 | 0.021480264 | 0.221673475 |
| 0.389347253 | 0.310001913 | 0.319008656 | 0.249029399 |
| 0.03061433  | 0.495750677 | 0.184542684 | 0.286380508 |
| 0.213734963 | 0.018991235 | 0.237771353 | 0.450747144 |
| 0.462310833 | 0.306319298 | 0.20800865  | 0.121809147 |
| 0.138459002 | 0.245179799 | 0.172407188 | 0.309826468 |
| 0.173578764 | 0.177062125 | 0.460455246 | 0.059727246 |
| 0.11214547  | 0.240091952 | 0.113296325 | 0.237209465 |
| 0.224387003 | 0.331570534 | 0.019547741 | 0.309639899 |
| 0.004724345 | 0.307387979 | 0.280285348 | 0.181489015 |
| 0.029239641 | 0.017408773 | 0.13242829  | 0.26283745  |
| 0.39081479  | 0.446616325 | 0.397325213 | 0.407052859 |
| 0.13913512  | 0.220647686 | 0.272244427 | 0.126988477 |
| 0.383493826 | 0.137337655 | 0.101381257 | 0.300979545 |
| 0.408950812 | 0.485533443 | 0.133314731 | 0.177658179 |
| 0.338875977 | 0.454978319 | 0.314237354 | 0.301672765 |
| 0.212166246 | 0.033204666 | 0.417575933 | 0.448588644 |
| 0.385559247 | 0.207158411 | 0.102074048 | 0.350811288 |
| 0.043621618 | 0.326251246 | 0.265293573 | 0.163773742 |
| 0.403100167 | 0.011917626 | 0.141357457 | 0.284259043 |
| 0.183993787 | 0.357369261 | 0.4722164   | 0.145666269 |
| 0.312399256 | 0.019642725 | 0.07099441  | 0.025902047 |
| 0.270921244 | 0.091859517 | 0.484025428 | 0.389770724 |
| 0.244815514 | 0.262454946 | 0.216522428 | 0.001150852 |
| 0.018445443 | 0.149378793 | 0.373667321 | 0.326579002 |
| 0.335567822 | 0.357296777 | 0.146917188 | 0.334223211 |
| 0.313169    | 0.38922533  | 0.059366713 | 0.078911585 |
| 0.3249472   | 0.143984204 | 0.176473933 | 0.335553567 |
| 0.20501595  | 0.109341942 | 0.101922129 | 0.450964709 |
| 0.431109016 | 0.065781696 | 0.327513551 | 0.307045756 |
| 0.233162539 | 0.244593661 | 0.090037177 | 0.234575414 |
| 0.043321805 | 0.451891071 | 0.018491773 | 0.315301892 |
| 0.158284029 | 0.10729877  | 0.013306473 | 0.252639517 |
| 0.240230115 | 0.368257332 | 0.473140157 | 0.086075779 |
| 0.262765901 | 0.2862893   | 0.313605214 | 0.320858716 |
| 0.004976696 | 0.042894878 | 0.29306142  | 0.454386371 |
| 0.283357166 | 0.439171947 | 0.246431582 | 0.213624365 |
| 0.197904285 | 0.344832662 | 0.003324619 | 0.489132837 |
| 0.483520061 | 0.305182812 | 0.29534651  | 0.319300336 |
| 0.235228588 | 0.365324511 | 0.056753912 | 0.318959007 |
| 0.337646022 | 0.063273337 | 0.423071643 | 0.108679725 |
| 0.448567233 | 0.026093744 | 0.287612454 | 0.331378884 |
| 0.322029868 | 0.007458637 | 0.214950081 | 0.306833836 |
| 0.017065834 | 0.091699462 | 0.338106845 | 0.307256677 |
| 0.264554295 | 0.327277944 | 0.395831313 | 0.219229395 |
| 0.310061784 | 0.21458113  | 0.00985141  | 0.223991121 |
| 0.339288576 | 0.264857346 | 0.437537317 | 0.197382526 |
| 0.33033586  | 0.441756898 | 0.349095719 | 0.135783333 |
| 0.030752215 | 0.269669599 | 0.023857288 | 0.220458225 |
| 0.349553407 | 0.095211369 | 0.261612506 | 0.136593096 |
| 0.047479366 | 0.466564184 | 0.109097825 | 0.166288718 |
| 0.074592251 | 0.317869903 | 0.211740368 | 0.19221489  |

|             |             |             |             |
|-------------|-------------|-------------|-------------|
| 0.154918311 | 0.10916684  | 0.223737039 | 0.251467674 |
| 0.035493805 | 0.069611874 | 0.010883977 | 0.298046866 |
| 0.115501606 | 0.27421818  | 0.283036016 | 0.342200579 |
| 0.29670409  | 0.100285866 | 0.277252207 | 0.185437443 |
| 0.072031514 | 0.01021615  | 0.46714766  | 0.310609867 |
| 0.315853252 | 0.116219912 | 0.031089065 | 0.272714439 |
| 0.400723803 | 0.275544904 | 0.271153599 | 0.415560781 |
| 0.027215431 | 0.404400215 | 0.181900299 | 0.081153524 |
| 0.271906359 | 0.199705769 | 0.378399695 | 0.042805962 |
| 0.339459477 | 0.453894706 | 0.23698303  | 0.115959731 |
| 0.406981703 | 0.32385162  | 0.024952818 | 0.346766632 |
| 1           | 0.023060621 | 0.479625362 | 0.089822919 |
| 0.01437925  | 0.319395046 | 0.308160738 | 0.05022699  |
| 0.050765064 | 0.241674205 | 0.047401261 | 0.201450595 |
| 0.464659982 | 0.295022056 | 0.326590001 | 0.143227027 |
| 0.029118106 | 0.010476035 | 0.144331333 | 0.303288048 |
| 0.507197147 | 0.455700332 | 0.204287965 | 0.252221871 |
| 0.18424861  | 0.203385009 | 0.157668977 | 0.447697458 |
| 0.169570297 | 0.497227204 | 0.004956704 | 0.309085378 |
| 0.489639681 | 0.292319982 | 0.048092773 | 0.250982329 |
| 0.376020997 | 0.032630125 | 0.191183061 | 0.478147448 |
| 0.378380539 | 0.216966909 | 0.227006503 | 0.342970724 |
| 0.01491653  | 0.036937961 | 0.265564867 | 0.110840628 |
| 0.265985355 | 0.144326838 | 0.031361013 | 0.287101389 |
| 0.031513289 | 0.432891015 | 0.365724968 | 0.031717205 |
| 0.269878125 | 0.278768655 | 0.27454979  | 0.0268137   |
| 0.366045119 | 0.463456499 | 0.504512725 | 0.156541494 |
| 0.346057371 | 0.429143154 | 0.275271509 | 0.056881404 |
| 0.010715899 | 0.48727227  | 0.336980508 | 0.018887075 |
| 0.39456788  | 0.252034251 | 0.010892525 | 0.472092034 |
| 0.148290166 | 0.468091049 | 0.003905412 | 0.069113475 |
| 0.027268304 | 0.357049339 | 0.459718614 | 0.324533987 |
| 0.227235516 | 0.302776568 | 0.005012448 | 0.468933482 |
| 0.468320413 | 0.00803013  | 0.089034257 | 0.346951146 |
| 0.30522831  | 0.506688505 | 0.1979752   | 0.359732648 |
| 0.309420979 | 0.471979865 | 0.197616366 | 0.183908336 |
| 0.37297312  | 0.444819623 | 0.345165371 | 0.445402663 |
| 0.388199324 | 0.309071776 | 0.207937824 | 0.01051987  |
| 0.065218999 | 0.211163858 | 0.21665092  | 0.042468496 |
| 0.306771629 | 0.086097186 | 0.452424385 | 0.380651449 |
| 0.41429634  | 0.003231022 | 0.146161903 | 0.357317311 |
| 0.405515915 | 0.414818391 | 0.018791191 | 0.005044585 |
| 0.007730337 | 0.008922752 | 0.304179689 | 0.171311015 |
| 0.432179636 | 0.220308328 | 0.003402957 | 0.050721864 |
| 0.229508045 | 0.269747379 | 0.472991852 | 0.291002193 |
| 0.33255882  | 0.061008334 | 0.215559732 | 0.312709756 |
| 0.036734678 | 0.311117871 | 0.416693351 | 0.460306284 |
| 0.031616812 | 0.168514355 | 0.349672499 | 0.421464368 |
| 0.038126925 | 0.233046423 | 0.344084513 | 0.229841687 |
| 0.013733356 | 0.051492842 | 0.036236818 | 0.326011243 |
| 0.479749374 | 0.057094098 | 0.023465907 | 0.168864787 |
| 0.091322431 | 0.394994414 | 0.128371969 | 0.444402085 |
| 0.373592024 | 0.339903189 | 0.048101024 | 0.458980674 |
| 0.021916637 | 0.47686652  | 0.224673917 | 0.053753774 |

|             |             |             |             |
|-------------|-------------|-------------|-------------|
| 0.244664577 | 0.010194427 | 0.443957986 | 0.079817857 |
| 0.312740594 | 0.346303713 | 0.105647668 | 0.010185353 |
| 0.10856863  | 0.037205146 | 0.389853583 | 0.356949331 |
| 0.023403434 | 0.191732218 | 0.224143936 | 0.326849925 |
| 0.270850693 | 0.321415291 | 0.49427065  | 0.314755037 |
| 0.066027468 | 0.112521776 | 0.338785192 | 0.354806092 |
| 0.245836338 | 0.40654021  | 0.188584243 | 0.472955458 |
| 0.340123028 | 0.424910445 | 0.422633071 | 0.259470502 |
| 0.154841368 | 0.342605294 | 0.301097038 | 0.020133463 |
| 0.282776712 | 0.367209206 | 0.316523089 | 0.09296956  |
| 0.172621351 | 0.265502686 | 0.042429975 | 0.229697203 |
| 0.220781591 | 0.28190477  | 0.113005584 | 0.340638351 |
| 0.350165903 | 0.351414636 | 0.049363203 | 0.033779472 |
| 0.504382708 | 0.418406355 | 0.126848887 | 0.326373129 |
| 0.130862848 | 0.232040279 | 0.342341495 | 0.324782302 |
| 0.26030578  | 0.38248361  | 0.356970122 | 0.323035663 |
| 0.425416955 | 0.197846631 | 0.499166968 | 0.122776774 |
| 0.049283574 | 0.34023173  | 0.068622434 | 0.062996557 |
| 0.109100198 | 0.016609032 | 0.188462611 | 0.32123283  |
| 0.262552925 | 0.286796463 | 0.305196489 | 0.059998576 |
| 0.233149814 | 0.321629101 | 0.264605238 | 0.173289389 |
| 0.057958045 | 0.475495012 | 0.006552521 | 0.041821436 |
| 0.288861248 | 0.333224413 | 0.254103879 | 0.174435424 |
| 0.184413297 | 0.098335032 | 0.220584264 | 0.292254108 |
| 0.267555864 | 0.297706004 | 0.342737811 | 0.033002526 |
| 0.019431666 | 0.416833155 | 0.345749725 | 0.015905597 |
| 0.05558793  | 0.320830438 | 0.279042034 | 0.151102031 |
| 0.013312326 | 0.425858058 | 0.262122472 | 0.304530416 |
| 0.288096852 | 0.053727032 | 0.383064141 | 0.080482785 |
| 0.053706038 | 0.459774933 | 0.279953854 | 0.479599817 |
| 0.26361508  | 0.307354642 | 0.464156727 | 0.37191984  |
| 0.120552857 | 0.294165849 | 0.021205542 | 0.376319508 |
| 0.28565222  |             |             |             |

|             |             |             |             |
|-------------|-------------|-------------|-------------|
| KCNJ8       | 0.028474273 | 0.036356149 | 0.025351404 |
| 0.095317027 | 0.064227136 | 0.02503861  | 0.130638116 |
| 0.035688441 | 0.084139966 | 0.108117957 | 0.13474873  |
| 0.039603782 | 0.076304324 | 0.056658035 | 0.010819424 |
| 0.111623791 | 0.197975779 | 0.022873699 | 0.200736506 |
| 0.085750374 | 0.088276006 | 0.147507071 | 0.177302559 |
| 0.037645953 | 0.151654589 | 0.222390843 | 0.057053306 |
| 0.08357062  | 0.234626751 | 0.021833502 | 0.059276116 |
| 0.183138322 | 0.041442119 | 0.022781623 | 0.079290768 |
| 0.020575646 | 0.018411023 | 0.070100244 | 0.022776756 |
| 0.031654458 | 0.053142677 | 0.085375715 | 0.161912003 |
| 0.208056237 | 0.018812445 | 0.167658338 | 0.066005144 |
| 0.016517698 | 0.238677182 | 0.014242947 | 0.019083293 |
| 0.019191267 | 0.031848633 | 0.043305916 | 0.117300159 |
| 0.040568023 | 0.018209257 | 0.021663789 | 0.025688864 |
| 0.178774986 | 0.020309498 | 0.022309872 | 0.079633305 |
| 0.027059153 | 0.054870706 | 0.151801121 | 0.081478377 |
| 0.020554951 | 0.027138094 | 0.174528852 | 0.019407106 |
| 0.042912624 | 0.099122249 | 0.089748877 | 0.012901968 |
| 0.327743144 | 0.247569336 | 0.151948004 | 0.115482462 |
| 0.070982761 | 0.021888445 | 0.068990431 | 0.051563821 |

|             |             |             |             |
|-------------|-------------|-------------|-------------|
| 0.150641408 | 0.122064474 | 0.034323636 | 0.179004989 |
| 0.033364084 | 0.138796851 | 0.080654752 | 0.124618353 |
| 0.062740617 | 0.02899534  | 0.115677556 | 0.152831187 |
| 0.041294012 | 0.034126715 | 0.02508807  | 0.046233781 |
| 0.014795567 | 0.136557262 | 0.023240627 | 0.047688709 |
| 0.023939828 | 0.034816678 | 0.242297656 | 0.055833055 |
| 0.256148049 | 0.010547888 | 0.166287981 | 0.085648055 |
| 0.072263442 | 0.136569088 | 0.181700277 | 0.086211311 |
| 0.078046749 | 0.039265189 | 0.027969217 | 0.19863352  |
| 0.052843704 | 0.21565066  | 0.032818889 | 0.240645798 |
| 0.035833044 | 0.028930703 | 0.014518799 | 0.068143533 |
| 0.041760197 | 0.031827741 | 0.091119681 | 0.17691259  |
| 0.273239322 | 0.072066135 | 0.032545058 | 0.040984557 |
| 0.053846446 | 0.014148683 | 0.096810316 | 0.020787259 |
| 0.03000508  | 0.067793199 | 0.00210881  | 0.158524146 |
| 0.045895328 | 0.084140285 | 0.256926482 | 0.039690429 |
| 0.1204521   | 0.117289492 | 0.228559512 | 0.051708641 |
| 0.024531774 | 0.276910523 | 0.014679532 | 0.120769749 |
| 0.027508412 | 0.101542843 | 0.208780436 | 0.098101813 |
| 0.195824593 | 0.019109695 | 0.234042012 | 0.02972975  |
| 0.010644208 | 0.12878882  | 0.11910769  | 0.049804493 |
| 0.035737609 | 0.034840654 | 0.013078881 | 0.242251687 |
| 0.1096889   | 0.108780137 | 0.020928516 | 0.04338001  |
| 0.1192493   | 0.20911411  | 0.008594352 | 0.047623068 |
| 0.018263637 | 0.044907113 | 0.076102738 | 0.056062858 |
| 0.183855845 | 0.071985452 | 0.004299293 | 0.020007904 |
| 0.027575774 | 0.007788952 | 0.095331563 | 0.057904354 |
| 0.019452757 | 0.072387725 | 0.002128176 | 0.120685218 |
| 0.016321069 | 0.220992396 | 0.068496795 | 0.267504583 |
| 0.022994528 | 0.272119991 | 0.033572348 | 0.034475753 |
| 0.026739148 | 0.067517119 | 0.029983314 | 0.081341325 |
| 0.194268339 | 0.055449115 | 0.045556642 | 0.089081759 |
| 0.069042924 | 0.061454008 | 0.085350144 | 0.017694701 |
| 0.059691348 | 0.097239304 | 0.191632749 | 0.105876375 |
| 0.039538337 | 0.008311898 | 0.024712559 | 0.072917918 |
| 0.011186381 | 0.033051867 | 0.021057064 | 0.008684849 |
| 0.224395535 | 0.059687723 | 0.077143163 | 0.084551864 |
| 0.017244182 | 0.147556464 | 0.017269787 | 0.108284311 |
| 0.238767355 | 0.044516504 | 0.051534951 | 0.020766124 |
| 0.029585674 | 0.05264815  | 0.132135217 | 0.057598721 |
| 0.073998668 | 0.141097673 | 0.025887986 | 0.028914911 |
| 0.135883346 | 0.256885358 | 0.088585214 | 0.013814279 |
| 0.100517716 | 0.028889534 | 0.022873928 | 0.02439047  |
| 0.038422109 | 0.170446201 | 0.080294681 | 0.027228961 |
| 0.151672155 | 0.296442243 | 0.03607961  | 0.102755906 |
| 0.016860665 | 0.127627203 | 0.272466607 | 0.00958753  |
| 0.061365902 | 0.012971817 | 0.005743533 | 0.043630042 |
| 0.131416566 | 0.058605679 | 0.092246592 | 0.269135279 |
| 0.043113771 | 0.202388599 | 0.078789511 | 0.018546538 |
| 0.029047763 | 0.031055473 | 0.113986257 | 0.145371351 |
| 0.02221102  | 0.070231747 | 0.203801633 | 0.022296657 |
| 0.023060621 | 1           | 0.036283226 | 0.185244664 |
| 0.283743244 | 0.060178086 | 0.036414665 | 0.306505139 |
| 0.20614524  | 0.071831453 | 0.081812237 | 0.207343042 |

|             |             |             |             |
|-------------|-------------|-------------|-------------|
| 0.043666999 | 0.139785216 | 0.036392915 | 0.04972058  |
| 0.241703417 | 0.195861602 | 0.108943734 | 0.026933147 |
| 0.020316018 | 0.035628741 | 0.203102068 | 0.074223098 |
| 0.228978807 | 0.024911633 | 0.014431695 | 0.045639619 |
| 0.030404196 | 0.025862941 | 0.224808652 | 0.041646657 |
| 0.019204818 | 0.019448704 | 0.201652725 | 0.063100794 |
| 0.027148852 | 0.198345654 | 0.089041886 | 0.026516107 |
| 0.036681973 | 0.043127848 | 0.024543093 | 0.059360728 |
| 0.138890308 | 0.164567913 | 0.055721488 | 0.030770324 |
| 0.024295208 | 0.101199386 | 0.018304146 | 0.018117968 |
| 0.238814761 | 0.030371697 | 0.075723604 | 0.14263463  |
| 0.022726622 | 0.013589196 | 0.125233596 | 0.252441711 |
| 0.034056624 | 0.025792472 | 0.024782504 | 0.109861673 |
| 0.037509435 | 0.033246416 | 0.023797922 | 0.222907556 |
| 0.252114608 | 0.02345963  | 0.030934937 | 0.131685614 |
| 0.074860173 | 0.012555389 | 0.197452352 | 0.035527249 |
| 0.195609796 | 0.013171289 | 0.011942253 | 0.006836602 |
| 0.151427207 | 0.070359469 | 0.020465885 | 0.058937089 |
| 0.008130099 | 0.09034597  | 0.020692289 | 0.037900157 |
| 0.030398649 | 0.208806012 | 0.109018788 | 0.03138086  |
| 0.030353981 | 0.032671125 | 0.031705416 | 0.04105478  |
| 0.033887673 | 0.0219218   | 0.072336374 | 0.200127431 |
| 0.047023323 | 0.02355883  | 0.047455787 | 0.028159483 |
| 0.072651494 | 0.086448304 | 0.188870292 | 0.188205374 |
| 0.032312144 | 0.035420225 | 0.007542841 | 0.078814433 |
| 0.019411925 | 0.141098327 | 0.032997959 | 0.072462791 |
| 0.044052153 | 0.219418356 | 0.071574647 | 0.029155815 |
| 0.051727984 | 0.063605701 | 0.090746473 | 0.012717237 |
| 0.005615793 | 0.124952955 | 0.065287519 | 0.133813598 |
| 0.038099914 | 0.009042252 | 0.222787764 | 0.10921618  |
| 0.057070756 | 0.064947095 | 0.030138677 | 0.14831142  |
| 0.041321    | 0.244099332 | 0.023080358 | 0.113343152 |
| 0.153160387 | 0.011002133 | 0.049692972 | 0.027994401 |
| 0.199297174 | 0.108965701 | 0.024417482 | 0.06608768  |
| 0.010827347 | 0.170836461 | 0.042748364 | 0.048138276 |
| 0.089336984 | 0.18974797  | 0.166851395 | 0.081869002 |
| 0.018651107 | 0.197062708 | 0.245547709 | 0.006991335 |
| 0.152851351 | 0.053183633 | 0.165713057 | 0.057936612 |
| 0.057612068 | 0.111856156 | 0.167285964 | 0.025175409 |
| 0.16513362  | 0.02221325  | 0.069066583 | 0.010159667 |
| 0.060157501 | 0.233001841 | 0.024165921 | 0.022556168 |
| 0.025958778 | 0.039804411 | 0.02352896  | 0.203056717 |
| 0.014749564 | 0.271567329 | 0.073068078 | 0.062232657 |
| 0.164073644 | 0.067790952 | 0.128054707 | 0.071626996 |
| 0.046315426 | 0.090335565 | 0.02225355  | 0.012960463 |
| 0.140349224 | 0.02766389  | 0.0737921   | 0.023852843 |
| 0.039537475 | 0.068731813 | 0.042563355 | 0.038629921 |
| 0.02972799  | 0.034118568 | 0.03267773  | 0.079299139 |
| 0.061319501 | 0.02572811  | 0.052262599 | 0.131514299 |
| 0.106357474 | 0.077279326 | 0.037022874 | 0.103463471 |
| 0.161334789 | 0.024428392 | 0.13568868  | 0.007354203 |
| 0.018857952 | 0.030554422 | 0.174697697 | 0.100794358 |
| 0.035694271 | 0.024447777 | 0.143082408 | 0.165549371 |
| 0.035258238 | 0.025139163 | 0.049344651 | 0.053207125 |

|             |             |             |             |
|-------------|-------------|-------------|-------------|
| 0.198872567 | 0.104058824 | 0.04811206  | 0.054325386 |
| 0.011882266 | 0.041738484 | 0.051989602 | 0.045613275 |
| 0.027760104 | 0.139891044 | 0.025888119 | 0.023886751 |
| 0.075875306 | 0.023062097 | 0.182044458 | 0.26182333  |
| 0.263986864 | 0.208001246 | 0.009532844 | 0.098826188 |
| 0.010139091 | 0.14376567  | 0.010174972 | 0.151534132 |
| 0.119968501 | 0.013738358 | 0.132412483 | 0.092003103 |
| 0.203622727 | 0.024580497 | 0.128093582 | 0.270234273 |
| 0.01718329  | 0.037483113 | 0.042184577 | 0.120906871 |
| 0.023521336 | 0.10612861  | 0.184898927 | 0.023051637 |
| 0.020930641 | 0.010987277 | 0.035260203 | 0.091219699 |
| 0.207967546 | 0.07043027  | 0.017954738 | 0.147492054 |
| 0.076900243 | 0.018257325 | 0.041968676 | 0.058936562 |
| 0.187891249 | 0.028963696 | 0.015755727 | 0.047679223 |
| 0.071226935 | 0.243460843 | 0.015126093 | 0.04605402  |
| 0.135673654 | 0.022177807 | 0.033613292 | 0.025210375 |
| 0.04241513  | 0.127768092 | 0.014961792 | 0.034865453 |
| 0.048629963 | 0.014204239 | 0.177722931 | 0.057630203 |
| 0.010098552 |             |             |             |

| KCNK5       | 0.490665133 | 0.518930537 | 0.467838089 |
|-------------|-------------|-------------|-------------|
| 0.478866792 | 0.498233468 | 0.432433614 | 0.23390921  |
| 0.203630572 | 0.095907502 | 0.005724585 | 0.029418918 |
| 0.521617104 | 0.256971917 | 0.315925762 | 0.379802614 |
| 0.476238989 | 0.166901013 | 0.393580635 | 0.271539898 |
| 0.463861579 | 0.100509435 | 0.463809441 | 0.100916008 |
| 0.345661173 | 0.129785155 | 0.079375092 | 0.322713666 |
| 0.496596941 | 0.091096766 | 0.383948933 | 0.437109691 |
| 0.117857237 | 0.504534799 | 0.53063224  | 0.520468037 |
| 0.531065895 | 0.46967194  | 0.013744347 | 0.338471802 |
| 0.479041765 | 0.515204602 | 0.460600916 | 0.378120635 |
| 0.045943314 | 0.497742913 | 0.278476939 | 0.469967249 |
| 0.258028149 | 0.037632075 | 0.268918126 | 0.445196119 |
| 0.494705129 | 0.513051588 | 0.246620793 | 0.17760913  |
| 0.262959012 | 0.261315751 | 0.356532263 | 0.372832748 |
| 0.256337081 | 0.17584937  | 0.497790811 | 0.097309891 |
| 0.166226978 | 0.273632354 | 0.183460209 | 0.289162123 |
| 0.419527606 | 0.443824496 | 0.018030209 | 0.488647497 |
| 0.00323224  | 0.43579905  | 0.440782634 | 0.382014293 |
| 0.048158775 | 0.025982772 | 0.212420994 | 0.385930183 |
| 0.510748287 | 0.477008684 | 0.536824742 | 0.535072864 |
| 0.225088367 | 0.336940277 | 0.474673855 | 0.20049224  |
| 0.500736521 | 0.203763832 | 0.127896805 | 0.485677159 |
| 0.537663195 | 0.528588771 | 0.240066938 | 0.306446535 |
| 0.496482169 | 0.496732106 | 0.495405605 | 0.501230993 |
| 0.414127647 | 0.061715147 | 0.481470507 | 0.534645601 |
| 0.458929221 | 0.394608941 | 0.181457337 | 0.469234447 |
| 0.065922618 | 0.421192106 | 0.405123164 | 0.195987328 |
| 0.513416576 | 0.018846306 | 0.254337109 | 0.412052525 |
| 0.2391689   | 0.510332899 | 0.523810374 | 0.211151803 |
| 0.481965119 | 0.024198343 | 0.175618017 | 0.037445293 |
| 0.387207352 | 0.192029049 | 0.504530108 | 0.519367038 |
| 0.265063423 | 0.448731912 | 0.294884421 | 0.002015101 |
| 0.031918382 | 0.213984108 | 0.518581134 | 0.418293102 |
| 0.492987535 | 0.452474993 | 0.276123924 | 0.458999025 |

|             |             |             |             |
|-------------|-------------|-------------|-------------|
| 0.528790188 | 0.536128669 | 0.071303526 | 0.102831231 |
| 0.492385178 | 0.212551865 | 0.272968881 | 0.525708479 |
| 0.370176815 | 0.123618469 | 0.144545461 | 0.529424462 |
| 0.449090996 | 0.094941109 | 0.380755852 | 0.478336537 |
| 0.390139075 | 0.430878124 | 0.119315213 | 0.328998395 |
| 0.054053378 | 0.497757883 | 0.034168862 | 0.373640262 |
| 0.331033364 | 0.19072402  | 0.011004461 | 0.28981811  |
| 0.340682871 | 0.511549764 | 0.492363446 | 0.118513422 |
| 0.375619634 | 0.476366538 | 0.366512054 | 0.509330959 |
| 0.012192607 | 0.05177513  | 0.321022619 | 0.531279283 |
| 0.335256317 | 0.528943246 | 0.34353406  | 0.35188149  |
| 0.331439397 | 0.509854168 | 0.003847254 | 0.509359901 |
| 0.532263484 | 0.34961361  | 0.477830665 | 0.490433774 |
| 0.450829772 | 0.513150105 | 0.054545791 | 0.482711831 |
| 0.424811879 | 0.086093435 | 0.532944971 | 0.190812726 |
| 0.488309881 | 0.047383296 | 0.363477002 | 0.518252996 |
| 0.524986052 | 0.010053356 | 0.25329121  | 0.439259306 |
| 0.031783872 | 0.103056377 | 0.48892902  | 0.466811712 |
| 0.442660734 | 0.513071326 | 0.524165242 | 0.433913642 |
| 0.503245453 | 0.26036332  | 0.013442704 | 0.379225408 |
| 0.511336866 | 0.453794834 | 0.46491662  | 0.269461177 |
| 0.400811426 | 0.501357871 | 0.502456711 | 0.23845366  |
| 0.047147088 | 0.349851919 | 0.024574776 | 0.389484994 |
| 0.466367569 | 0.139616807 | 0.463960581 | 0.171097832 |
| 0.085079427 | 0.527390912 | 0.222363135 | 0.329220549 |
| 0.165463662 | 0.481661674 | 0.28031977  | 0.294772936 |
| 0.281040536 | 0.187790544 | 0.420761636 | 0.438103171 |
| 0.039418303 | 0.111395439 | 0.016154073 | 0.478528001 |
| 0.188631457 | 0.433385281 | 0.428176054 | 0.482659628 |
| 0.387676904 | 0.139701209 | 0.463041944 | 0.338469203 |
| 0.134794468 | 0.016688228 | 0.513511998 | 0.464117245 |
| 0.395270377 | 0.171304978 | 0.046407204 | 0.42951037  |
| 0.523407291 | 0.381014318 | 0.307354246 | 0.503092905 |
| 0.030390456 | 0.529706508 | 0.302940608 | 0.146193772 |
| 0.472862124 | 0.306749592 | 0.507449256 | 0.069933071 |
| 0.449591731 | 0.489279705 | 0.35734965  | 0.218758028 |
| 0.455156155 | 0.477328486 | 0.033072882 | 0.477132454 |
| 0.479625362 | 0.036283226 | 1           | 0.15531031  |
| 0.023505193 | 0.518882552 | 0.525052486 | 0.08618353  |
| 0.090053019 | 0.397416046 | 0.0472616   | 0.340587893 |
| 0.524146203 | 0.477730172 | 0.509073978 | 0.261206365 |
| 0.045642335 | 0.014742187 | 0.250371842 | 0.475474523 |
| 0.525375765 | 0.525891799 | 0.30070128  | 0.453460318 |
| 0.27294861  | 0.398820152 | 0.153643426 | 0.532909359 |
| 0.222966978 | 0.522591792 | 0.007017973 | 0.523499336 |
| 0.528589765 | 0.33528306  | 0.097532535 | 0.34978367  |
| 0.462356221 | 0.049754018 | 0.225069619 | 0.504516427 |
| 0.497488001 | 0.385020309 | 0.415338812 | 0.499973225 |
| 0.016649656 | 0.043782936 | 0.455724259 | 0.230294119 |
| 0.448566285 | 0.244125149 | 0.072765056 | 0.369014679 |
| 0.049915333 | 0.488300106 | 0.522345422 | 0.06768726  |
| 0.403855568 | 0.345571424 | 0.445662561 | 0.040339969 |
| 0.522670519 | 0.503653143 | 0.532527377 | 0.179279929 |
| 0.525136131 | 0.521065705 | 0.501134578 | 0.090835125 |

|             |             |             |             |
|-------------|-------------|-------------|-------------|
| 0.019860446 | 0.529196963 | 0.459357331 | 0.026235703 |
| 0.525807888 | 0.27289617  | 0.016602607 | 0.501821196 |
| 0.205940303 | 0.464120782 | 0.003910398 | 0.100045648 |
| 0.047352781 | 0.525855723 | 0.490905667 | 0.433752616 |
| 0.294428616 | 0.416643597 | 0.00652831  | 0.52451428  |
| 0.501031549 | 0.016966203 | 0.172417679 | 0.528627515 |
| 0.522577395 | 0.525802261 | 0.396825583 | 0.532686942 |
| 0.525723437 | 0.515766357 | 0.2817452   | 0.314094778 |
| 0.513213704 | 0.502124659 | 0.485778204 | 0.481196779 |
| 0.525387739 | 0.497852414 | 0.320364644 | 0.016568901 |
| 0.155371801 | 0.23543506  | 0.379737971 | 0.096080874 |
| 0.374103969 | 0.167497446 | 0.510943012 | 0.527732911 |
| 0.537104618 | 0.005247236 | 0.16477872  | 0.518163827 |
| 0.49150151  | 0.510834116 | 0.022109738 | 0.007064342 |
| 0.009470531 | 0.025441739 | 0.408085082 | 0.284586703 |
| 0.522091803 | 0.294756606 | 0.00477961  | 0.046006086 |
| 0.320982109 | 0.483035707 | 0.508361191 | 0.435074671 |
| 0.518582845 | 0.09188179  | 0.348960057 | 0.453910671 |
| 0.082748341 | 0.390784065 | 0.537006026 | 0.480423138 |
| 0.046022997 | 0.287477896 | 0.435123943 | 0.52114958  |
| 0.09935627  | 0.373920329 | 0.5254232   | 0.38058505  |
| 0.015003213 | 0.095842365 | 0.075448746 | 0.504479689 |
| 0.520470965 | 0.100927317 | 0.042772543 | 0.174109546 |
| 0.140903722 | 0.525441117 | 0.197379313 | 0.534475789 |
| 0.50546672  | 0.500612215 | 0.090121763 | 0.486126802 |
| 0.045792081 | 0.501990531 | 0.419324051 | 0.069647052 |
| 0.333784847 | 0.013166617 | 0.499781844 | 0.197149913 |
| 0.377406619 | 0.458313339 | 0.231374255 | 0.019312004 |
| 0.227390183 | 0.062487532 | 0.529173403 | 0.53115874  |
| 0.038923471 | 0.259851562 | 0.346735523 | 0.465449497 |
| 0.32587363  | 0.507560663 | 0.516320564 | 0.48654062  |
| 0.09228077  | 0.180269422 | 0.467034641 | 0.469756634 |
| 0.270140099 | 0.535334056 | 0.363707808 | 0.5229379   |
| 0.476425455 | 0.498520424 | 0.521095262 | 0.400026973 |
| 0.294269562 | 0.464456064 | 0.436600592 | 0.022953642 |
| 0.40643081  | 0.529561853 | 0.404564829 | 0.194262321 |
| 0.310760218 | 0.474497208 | 0.048056488 | 0.215763652 |
| 0.417171238 | 0.355215036 | 0.167135846 | 0.497426133 |
| 0.451033732 | 0.473858791 | 0.041271452 | 0.071088725 |
| 0.538073281 | 0.473116883 | 0.157983168 | 0.496427295 |
| 0.19651569  | 0.40359677  | 0.526968245 | 0.528123388 |
| 0.428551441 | 0.527145355 | 0.495881736 | 0.460386862 |
| 0.462904425 | 0.292400972 | 0.533732876 | 0.095185358 |
| 0.104765391 | 0.498457585 | 0.117679485 | 0.107400481 |
| 0.16605054  | 0.030247769 | 0.380503359 | 0.49285327  |
| 0.470236888 | 0.450651637 | 0.369681029 | 0.091382255 |
| 0.38275219  | 0.425697651 | 0.413928932 | 0.229045923 |
| 0.0933065   | 0.509546885 | 0.010421986 | 0.064554809 |
| 0.483585325 | 0.520082391 | 0.47655086  | 0.282382845 |
| 0.372972989 | 0.165736452 | 0.351459094 | 0.342311249 |
| 0.399108063 | 0.43589844  | 0.517268872 | 0.036155772 |
| 0.020235983 | 0.53318641  | 0.436033193 | 0.023381596 |
| 0.097581604 | 0.442398533 | 0.338483816 | 0.278164339 |
| 0.025508599 | 0.516504835 | 0.39374828  | 0.501612383 |



|             |             |             |             |
|-------------|-------------|-------------|-------------|
| 0.390252851 | 0.072695189 | 0.407538436 | 0.099619975 |
| 0.062662547 | 0.469495834 | 0.475496359 | 0.523716314 |
| 0.412611923 | 0.487266064 | 0.457915983 | 0.518426813 |
| 0.140029893 | 0.455735301 | 0.028976115 | 0.506268198 |
| 0.499045026 |             |             |             |
| KDELC1      | 0.122030145 | 0.139306582 | 0.09798554  |
| 0.17518318  | 0.16116159  | 0.053890945 | 0.090462124 |
| 0.022549818 | 0.037022394 | 0.020849969 | 0.063509464 |
| 0.155341843 | 0.067388925 | 0.051546673 | 0.016682158 |
| 0.237582109 | 0.198084258 | 0.061868285 | 0.182745029 |
| 0.169510405 | 0.029019614 | 0.275721723 | 0.07155606  |
| 0.088295881 | 0.170521716 | 0.14718749  | 0.111974776 |
| 0.189778075 | 0.163537879 | 0.036207919 | 0.109888721 |
| 0.171007371 | 0.141867245 | 0.110571219 | 0.216966239 |
| 0.111300717 | 0.088019466 | 0.051679948 | 0.025843056 |
| 0.11287752  | 0.160013866 | 0.158290315 | 0.194535253 |
| 0.062040695 | 0.088943842 | 0.139720719 | 0.199426886 |
| 0.015498356 | 0.10749703  | 0.015629563 | 0.080309569 |
| 0.092578691 | 0.091299613 | 0.033927208 | 0.068683198 |
| 0.039240799 | 0.020377887 | 0.05264328  | 0.052753224 |
| 0.141717024 | 0.013231122 | 0.106458829 | 0.024884905 |
| 0.015835159 | 0.054860231 | 0.197294207 | 0.074590491 |
| 0.079685281 | 0.076932505 | 0.046412476 | 0.10813344  |
| 0.006889668 | 0.170317471 | 0.239026684 | 0.050007811 |
| 0.236748003 | 0.090691609 | 0.241571127 | 0.134418829 |
| 0.187293409 | 0.1109871   | 0.220010404 | 0.191737353 |
| 0.138927351 | 0.222023311 | 0.144141981 | 0.15194683  |
| 0.121011536 | 0.090215784 | 0.057896882 | 0.27752217  |
| 0.209836978 | 0.131563971 | 0.102567008 | 0.267744214 |
| 0.109502815 | 0.121802676 | 0.069369141 | 0.103236948 |
| 0.0385681   | 0.135743059 | 0.092380658 | 0.178836039 |
| 0.087330677 | 0.143841608 | 0.272743764 | 0.127102982 |
| 0.18176013  | 0.020037474 | 0.220979975 | 0.120815832 |
| 0.190728787 | 0.029393614 | 0.293576971 | 0.112049763 |
| 0.076784494 | 0.132112055 | 0.135173226 | 0.143881117 |
| 0.165063614 | 0.104017043 | 0.049240348 | 0.148256471 |
| 0.044292054 | 0.080470537 | 0.079474824 | 0.173458516 |
| 0.029778682 | 0.051395696 | 0.083441079 | 0.061493326 |
| 0.17065296  | 0.106067983 | 0.138614365 | 0.103609271 |
| 0.152271902 | 0.085957676 | 0.103758553 | 0.074946143 |
| 0.125510576 | 0.218981494 | 0.001551308 | 0.069375045 |
| 0.104593564 | 0.110039298 | 0.271188421 | 0.122483536 |
| 0.197835224 | 0.053647504 | 0.162306735 | 0.178033697 |
| 0.084021706 | 0.164643719 | 0.039151797 | 0.257377935 |
| 0.027423361 | 0.252294866 | 0.137855815 | 0.109293747 |
| 0.052620987 | 0.104597821 | 0.222680595 | 0.056454192 |
| 0.018818416 | 0.168247155 | 0.043864735 | 0.04922534  |
| 0.030810294 | 0.11679032  | 0.079595337 | 0.185610016 |
| 0.134101342 | 0.230962678 | 0.041174156 | 0.115300859 |
| 0.032250485 | 0.09941599  | 0.022067191 | 0.169653471 |
| 0.035455033 | 0.184257351 | 0.098776929 | 0.111280682 |
| 0.280570277 | 0.191235398 | 0.005209708 | 0.095994125 |
| 0.130761468 | 0.02179731  | 0.177526915 | 0.187648096 |
| 0.06684647  | 0.174109872 | 0.005219741 | 0.256267503 |

|             |             |             |             |
|-------------|-------------|-------------|-------------|
| 0.064694308 | 0.150000707 | 0.214775748 | 0.274487534 |
| 0.109257336 | 0.167833322 | 0.044569969 | 0.154746469 |
| 0.127485365 | 0.031490702 | 0.025240683 | 0.131216955 |
| 0.154015881 | 0.01425141  | 0.135916823 | 0.161277027 |
| 0.117147808 | 0.195193741 | 0.23298437  | 0.060128485 |
| 0.140577294 | 0.090151079 | 0.081367333 | 0.245227464 |
| 0.155062155 | 0.022091852 | 0.089180857 | 0.049014847 |
| 0.041297109 | 0.11828922  | 0.104824163 | 0.009021911 |
| 0.101111414 | 0.069174522 | 0.02606286  | 0.13783011  |
| 0.085441744 | 0.059070048 | 0.059352173 | 0.131096947 |
| 0.238277843 | 0.16409453  | 0.147885222 | 0.100403177 |
| 0.091106799 | 0.107736948 | 0.130217808 | 0.049773123 |
| 0.071065488 | 0.096432463 | 0.065238895 | 0.058494034 |
| 0.028638251 | 0.195485395 | 0.084654128 | 0.055503984 |
| 0.073431502 | 0.062463415 | 0.050927635 | 0.087640984 |
| 0.043449848 | 0.104387984 | 0.158314121 | 0.059446555 |
| 0.148416188 | 0.180523712 | 0.138379682 | 0.212297338 |
| 0.051748526 | 0.072355039 | 0.198911311 | 0.022695894 |
| 0.168502462 | 0.027828638 | 0.013231287 | 0.126897771 |
| 0.06600651  | 0.200510006 | 0.066747142 | 0.257001345 |
| 0.123090133 | 0.205409687 | 0.192890774 | 0.008828815 |
| 0.080146598 | 0.110790905 | 0.209319173 | 0.153577331 |
| 0.080651528 | 0.142713804 | 0.054355414 | 0.0888649   |
| 0.089822919 | 0.185244664 | 0.15531031  | 1           |
| 0.2039737   | 0.206774288 | 0.127995727 | 0.256980167 |
| 0.198979272 | 0.091035288 | 0.015696516 | 0.308757063 |
| 0.156221143 | 0.273992634 | 0.109775792 | 0.13478833  |
| 0.104033851 | 0.082121147 | 0.227521932 | 0.12145632  |
| 0.101741281 | 0.161438994 | 0.268905524 | 0.164226847 |
| 0.218188271 | 0.052823755 | 0.007311195 | 0.169397171 |
| 0.065153881 | 0.124721817 | 0.09761264  | 0.168527507 |
| 0.1026861   | 0.032935917 | 0.19305918  | 0.066502907 |
| 0.084288556 | 0.08371324  | 0.087583046 | 0.114903397 |
| 0.116180754 | 0.071820675 | 0.050098105 | 0.187437987 |
| 0.025265658 | 0.03808027  | 0.144931606 | 0.083927929 |
| 0.047739711 | 0.105528444 | 0.060212816 | 0.025056576 |
| 0.083501886 | 0.104975636 | 0.226018453 | 0.064477741 |
| 0.043147714 | 0.021869895 | 0.286425471 | 0.131341972 |
| 0.155648507 | 0.133815401 | 0.115025798 | 0.075790388 |
| 0.154463272 | 0.139882196 | 0.115591637 | 0.228571404 |
| 0.20592952  | 0.12139431  | 0.088836968 | 0.045044502 |
| 0.210154377 | 0.017718715 | 0.063018668 | 0.127899978 |
| 0.151558202 | 0.073076285 | 0.001621251 | 0.025529424 |
| 0.136552965 | 0.234535081 | 0.092264015 | 0.110573083 |
| 0.01130078  | 0.170193061 | 0.029851414 | 0.167609584 |
| 0.119385085 | 0.131159834 | 0.131204087 | 0.12936025  |
| 0.141959867 | 0.132280951 | 0.10656746  | 0.163349915 |
| 0.13884608  | 0.109821624 | 0.041967344 | 0.261526484 |
| 0.13211     | 0.127824382 | 0.124966407 | 0.10541594  |
| 0.193052782 | 0.244670855 | 0.191759484 | 0.04163059  |
| 0.033020347 | 0.027682764 | 0.01630494  | 0.038495355 |
| 0.043562181 | 0.117214246 | 0.139003813 | 0.215268819 |
| 0.175714195 | 0.120808876 | 0.028115314 | 0.116731387 |
| 0.135094071 | 0.174801021 | 0.061371132 | 0.008871963 |

|             |             |             |             |
|-------------|-------------|-------------|-------------|
| 0.011445494 | 0.084365501 | 0.099916473 | 0.22709809  |
| 0.14720378  | 0.0091129   | 0.076550491 | 0.02502047  |
| 0.047356859 | 0.208803427 | 0.126017098 | 0.24214073  |
| 0.168495609 | 0.185651413 | 0.023810633 | 0.212460705 |
| 0.107785139 | 0.046640352 | 0.177220212 | 0.102081345 |
| 0.13384731  | 0.180537484 | 0.077980048 | 0.181979221 |
| 0.042149436 | 0.292775401 | 0.164773327 | 0.043412134 |
| 0.074914291 | 0.17853056  | 0.110593652 | 0.229045313 |
| 0.104063266 | 0.113309285 | 0.123808499 | 0.006599495 |
| 0.08148806  | 0.18228558  | 0.095424043 | 0.196763745 |
| 0.146224046 | 0.242368113 | 0.162674744 | 0.102760524 |
| 0.06547006  | 0.106169785 | 0.191789455 | 0.00629601  |
| 0.13091284  | 0.094177484 | 0.128705465 | 0.024705477 |
| 0.040125711 | 0.107867436 | 0.029888207 | 0.146913101 |
| 0.045712694 | 0.214721003 | 0.203327726 | 0.215540045 |
| 0.144555554 | 0.057168913 | 0.223321374 | 0.18035315  |
| 0.052101751 | 0.193982547 | 0.102785238 | 0.046660327 |
| 0.04699704  | 0.088251734 | 0.153737278 | 0.085419137 |
| 0.034846566 | 0.223980633 | 0.052494146 | 0.162347482 |
| 0.097620375 | 0.129571008 | 0.139961089 | 0.107761794 |
| 0.107301502 | 0.0708651   | 0.088529766 | 0.032740076 |
| 0.166834869 | 0.205825555 | 0.078699438 | 0.093193386 |
| 0.200893571 | 0.119534671 | 0.056300126 | 0.0188152   |
| 0.105874462 | 0.044793314 | 0.082525076 | 0.238100696 |
| 0.100399469 | 0.086811226 | 0.050272935 | 0.09838807  |
| 0.145220206 | 0.096703582 | 0.020393876 | 0.12179111  |
| 0.238810144 | 0.163588288 | 0.182096083 | 0.208093769 |
| 0.028971446 | 0.142815562 | 0.139325448 | 0.093930195 |
| 0.089798648 | 0.133366574 | 0.117570583 | 0.008792743 |
| 0.062760797 | 0.108405962 | 0.082458567 | 0.281789486 |
| 0.201498937 | 0.109837972 | 0.044932488 | 0.245377611 |
| 0.056816584 | 0.234660854 | 0.017743478 | 0.087575778 |
| 0.250855643 | 0.056457953 | 0.224732886 | 0.060849721 |
| 0.089649979 | 0.106600198 | 0.061168923 | 0.217302326 |
| 0.085809351 | 0.129782901 | 0.13740665  | 0.169692528 |
| 0.055584745 | 0.139176607 | 0.229336375 | 0.034915411 |
| 0.038037768 | 0.030557595 | 0.121528412 | 0.029187747 |
| 0.048211445 | 0.21984529  | 0.052810754 | 0.11195137  |
| 0.076595611 | 0.06599551  | 0.074230566 | 0.039727345 |
| 0.172342324 | 0.137726567 | 0.027030928 | 0.142251248 |
| 0.096279687 | 0.148410213 | 0.061484963 | 0.028496106 |
| 0.06395367  | 0.09633158  | 0.136044793 | 0.12626052  |
| 0.143200759 | 0.245275704 | 0.073267385 | 0.128743476 |
| 0.062088069 | 0.076501585 | 0.043757966 | 0.165171899 |
| 0.044453325 |             |             |             |

|             |             |             |             |
|-------------|-------------|-------------|-------------|
| KIF5C       | 0.024850305 | 0.022401028 | 0.0267043   |
| 0.060736913 | 0.052596845 | 0.013997353 | 0.081962845 |
| 0.026658521 | 0.078123961 | 0.051911205 | 0.097759456 |
| 0.034197287 | 0.045312498 | 0.029255156 | 0.007683318 |
| 0.091502573 | 0.178519124 | 0.024933442 | 0.15425176  |
| 0.064695488 | 0.050680728 | 0.113148903 | 0.14744474  |
| 0.050573368 | 0.147740669 | 0.189062189 | 0.054344751 |
| 0.058047759 | 0.20244426  | 0.009911886 | 0.037400546 |
| 0.249731435 | 0.030972864 | 0.01407985  | 0.056098156 |

|             |             |             |             |
|-------------|-------------|-------------|-------------|
| 0.012692064 | 0.015616595 | 0.090458168 | 0.011557856 |
| 0.023251808 | 0.039991568 | 0.060380402 | 0.110873107 |
| 0.16267805  | 0.010757459 | 0.108239253 | 0.067060531 |
| 0.012984799 | 0.201336605 | 0.00743581  | 0.011276552 |
| 0.010313677 | 0.019958555 | 0.029021462 | 0.073041431 |
| 0.019439054 | 0.009345341 | 0.017463812 | 0.014331506 |
| 0.119469976 | 0.009310951 | 0.013055021 | 0.055890352 |
| 0.01861016  | 0.042729891 | 0.191307886 | 0.053703218 |
| 0.023547254 | 0.017562558 | 0.198609809 | 0.018844459 |
| 0.017867316 | 0.077139601 | 0.095666555 | 0.012519751 |
| 0.328879599 | 0.151561951 | 0.178586342 | 0.069523495 |
| 0.050175114 | 0.016184106 | 0.049359921 | 0.03716897  |
| 0.119854977 | 0.136698857 | 0.036147585 | 0.136871376 |
| 0.023781955 | 0.078855545 | 0.076788565 | 0.101765214 |
| 0.044507397 | 0.017801763 | 0.11435038  | 0.169045212 |
| 0.022445047 | 0.02117713  | 0.017576001 | 0.032020544 |
| 0.011322716 | 0.228071195 | 0.013278956 | 0.031810046 |
| 0.015513832 | 0.03937936  | 0.229492972 | 0.034712361 |
| 0.28229328  | 0.008664022 | 0.117423885 | 0.085541196 |
| 0.050490401 | 0.121144862 | 0.190413202 | 0.049860874 |
| 0.100386862 | 0.028549301 | 0.018062696 | 0.143224559 |
| 0.052355832 | 0.196541965 | 0.032894059 | 0.328514813 |
| 0.026266696 | 0.043661151 | 0.008171156 | 0.040718134 |
| 0.027426167 | 0.026234061 | 0.067172316 | 0.237176923 |
| 0.311655547 | 0.115921623 | 0.022655113 | 0.041284143 |
| 0.043641682 | 0.011464268 | 0.065813263 | 0.013185706 |
| 0.022483281 | 0.049281144 | 0.000760108 | 0.143255714 |
| 0.031741835 | 0.130343628 | 0.219128552 | 0.027738908 |
| 0.097890258 | 0.09900867  | 0.184322618 | 0.035089562 |
| 0.01419885  | 0.220273576 | 0.012921925 | 0.098832312 |
| 0.015154267 | 0.094372793 | 0.194677057 | 0.059656919 |
| 0.138916749 | 0.012134953 | 0.301046268 | 0.024181604 |
| 0.008585646 | 0.124540966 | 0.186004636 | 0.031120064 |
| 0.020442121 | 0.018783335 | 0.007934809 | 0.240966943 |
| 0.068016169 | 0.087270674 | 0.013834004 | 0.022751643 |
| 0.0730159   | 0.249134904 | 0.006007593 | 0.029662251 |
| 0.008713249 | 0.03406104  | 0.070999558 | 0.065025251 |
| 0.173689517 | 0.055001594 | 0.013948947 | 0.011677422 |
| 0.01754201  | 0.004858668 | 0.056920855 | 0.05664697  |
| 0.016347668 | 0.045809756 | 0.002771466 | 0.095368594 |
| 0.011307704 | 0.234981967 | 0.049212644 | 0.224474954 |
| 0.015121066 | 0.236212266 | 0.019814115 | 0.027202271 |
| 0.01775904  | 0.068590218 | 0.014439306 | 0.052788051 |
| 0.288954608 | 0.031167908 | 0.036817389 | 0.062210903 |
| 0.046241621 | 0.052643845 | 0.062581256 | 0.014734074 |
| 0.043857391 | 0.078125722 | 0.277197748 | 0.116542815 |
| 0.033970304 | 0.006652441 | 0.014057358 | 0.053331735 |
| 0.007271065 | 0.019906772 | 0.015001587 | 0.005127648 |
| 0.180428864 | 0.038656451 | 0.049153425 | 0.068991425 |
| 0.013210866 | 0.079052952 | 0.014052195 | 0.161565185 |
| 0.261393032 | 0.028427765 | 0.071354763 | 0.02748982  |
| 0.046981723 | 0.0260412   | 0.111000138 | 0.023827046 |
| 0.036863549 | 0.135354929 | 0.022774298 | 0.021875112 |
| 0.08709534  | 0.204877457 | 0.203493093 | 0.007741043 |

|             |              |             |             |
|-------------|--------------|-------------|-------------|
| 0.043315504 | 0.012557834  | 0.009046908 | 0.015482932 |
| 0.024041094 | 0.0098418697 | 0.055855844 | 0.039220761 |
| 0.179920916 | 0.315969596  | 0.022595279 | 0.08688871  |
| 0.009509899 | 0.108877737  | 0.325790059 | 0.004621457 |
| 0.036617418 | 0.005661321  | 0.003784301 | 0.024225169 |
| 0.182971527 | 0.044493659  | 0.051902122 | 0.233317886 |
| 0.02994577  | 0.136751831  | 0.05567885  | 0.012591305 |
| 0.022323813 | 0.01737082   | 0.124883905 | 0.121561591 |
| 0.011222538 | 0.050051305  | 0.159191317 | 0.015539854 |
| 0.01437925  | 0.283743244  | 0.023505193 | 0.2039737   |
| 1           | 0.052892673  | 0.023459883 | 0.318732272 |
| 0.237719619 | 0.037017998  | 0.05224135  | 0.18827293  |
| 0.027264901 | 0.10479571   | 0.020610019 | 0.077454469 |
| 0.183300903 | 0.1036204    | 0.139940241 | 0.029696177 |
| 0.011922739 | 0.02417463   | 0.196047938 | 0.050673334 |
| 0.184038375 | 0.020428071  | 0.009606818 | 0.029233186 |
| 0.060242685 | 0.01700337   | 0.28086348  | 0.033434267 |
| 0.011435168 | 0.010398127  | 0.184471047 | 0.03518976  |
| 0.014525619 | 0.182948199  | 0.097866277 | 0.01559913  |
| 0.024146201 | 0.035660354  | 0.018120349 | 0.053441241 |
| 0.098591887 | 0.124362799  | 0.052206845 | 0.048892501 |
| 0.015731242 | 0.098727861  | 0.034833612 | 0.014197954 |
| 0.167813486 | 0.01641464   | 0.059621902 | 0.139179269 |
| 0.009620928 | 0.01103654   | 0.119058955 | 0.248295708 |
| 0.02512977  | 0.018376708  | 0.014774051 | 0.107023712 |
| 0.028473506 | 0.020867071  | 0.01837093  | 0.272645554 |
| 0.306645059 | 0.015023124  | 0.022755183 | 0.084716223 |
| 0.052724569 | 0.006103095  | 0.100560878 | 0.021632894 |
| 0.161842292 | 0.007607562  | 0.0093426   | 0.020126878 |
| 0.255998564 | 0.0584959    | 0.011818592 | 0.040338892 |
| 0.003004345 | 0.082571592  | 0.061107931 | 0.026983219 |
| 0.017081652 | 0.260779433  | 0.141304357 | 0.020010523 |
| 0.021836191 | 0.020517151  | 0.030774944 | 0.027908112 |
| 0.024320608 | 0.012961374  | 0.040195584 | 0.175715432 |
| 0.027616443 | 0.015906279  | 0.033432456 | 0.0178219   |
| 0.046636572 | 0.078164074  | 0.136676943 | 0.150072365 |
| 0.045084282 | 0.020165793  | 0.003893362 | 0.056873053 |
| 0.01203661  | 0.136321788  | 0.022841281 | 0.054008489 |
| 0.029620021 | 0.274905083  | 0.04776685  | 0.019065126 |
| 0.031571026 | 0.04392118   | 0.184061256 | 0.021696011 |
| 0.011022633 | 0.118980964  | 0.045056986 | 0.154897189 |
| 0.02572521  | 0.003003142  | 0.236298672 | 0.078197644 |
| 0.047298988 | 0.058299233  | 0.017830602 | 0.116400704 |
| 0.03594981  | 0.267546059  | 0.009490704 | 0.091127345 |
| 0.159653553 | 0.007729309  | 0.032346779 | 0.01561317  |
| 0.302045899 | 0.12533084   | 0.023322632 | 0.043348622 |
| 0.017877943 | 0.161205949  | 0.035299217 | 0.028155151 |
| 0.168788491 | 0.229104076  | 0.1889171   | 0.07008769  |
| 0.011253413 | 0.119445967  | 0.174776614 | 0.003739791 |
| 0.088828326 | 0.040253467  | 0.114238805 | 0.040196306 |
| 0.036420479 | 0.080674876  | 0.226778754 | 0.015213836 |
| 0.13573209  | 0.012666379  | 0.064356726 | 0.005329584 |
| 0.073979369 | 0.312942691  | 0.016769324 | 0.01531707  |
| 0.014393621 | 0.030514927  | 0.028275609 | 0.295071939 |

|             |             |             |             |
|-------------|-------------|-------------|-------------|
| 0.025441249 | 0.29018147  | 0.04910443  | 0.04915191  |
| 0.278216657 | 0.060686971 | 0.135999819 | 0.066263562 |
| 0.026007652 | 0.057374462 | 0.012933526 | 0.007508518 |
| 0.094624678 | 0.055448489 | 0.053209746 | 0.016683036 |
| 0.026245125 | 0.050921803 | 0.029045201 | 0.026929543 |
| 0.022301433 | 0.024928197 | 0.021603968 | 0.054489553 |
| 0.065726046 | 0.017861512 | 0.025627155 | 0.070232869 |
| 0.088219986 | 0.050117263 | 0.032616814 | 0.088096658 |
| 0.11841413  | 0.024865923 | 0.178570138 | 0.009622414 |
| 0.020774519 | 0.015253943 | 0.119295496 | 0.079872229 |
| 0.028510698 | 0.016845325 | 0.154466591 | 0.17788989  |
| 0.022595061 | 0.016666873 | 0.035772169 | 0.033756722 |
| 0.222130606 | 0.081253878 | 0.039782415 | 0.046035253 |
| 0.012493626 | 0.024512206 | 0.034422032 | 0.021824221 |
| 0.014634255 | 0.109316275 | 0.015644553 | 0.017140331 |
| 0.088124567 | 0.019821539 | 0.109473447 | 0.303362374 |
| 0.203642895 | 0.268676404 | 0.010809735 | 0.08426767  |
| 0.009313521 | 0.097960484 | 0.007843881 | 0.175477486 |
| 0.12710535  | 0.014466256 | 0.116680334 | 0.048570065 |
| 0.14035457  | 0.013795524 | 0.148448628 | 0.309583765 |
| 0.015250462 | 0.025912541 | 0.03236199  | 0.121538116 |
| 0.02530673  | 0.167194851 | 0.141987383 | 0.012421179 |
| 0.007407461 | 0.011896876 | 0.023432307 | 0.092961217 |
| 0.168552239 | 0.051067112 | 0.013930795 | 0.265194097 |
| 0.119237264 | 0.014596408 | 0.051852477 | 0.040685805 |
| 0.2842902   | 0.018704779 | 0.007370142 | 0.042457037 |
| 0.048996468 | 0.277094917 | 0.00921658  | 0.051101964 |
| 0.184112409 | 0.013364396 | 0.035101686 | 0.015886335 |
| 0.054345477 | 0.088779977 | 0.008838408 | 0.022128628 |
| 0.075090651 | 0.015509103 | 0.152008378 | 0.042480059 |
| 0.00676249  |             |             |             |

|             |             |             |             |
|-------------|-------------|-------------|-------------|
| KLF7        | 0.361905724 | 0.499870041 | 0.364043128 |
| 0.353320202 | 0.382474994 | 0.244894606 | 0.179087294 |
| 0.142753516 | 0.097245945 | 0.005711722 | 0.035418058 |
| 0.382056237 | 0.197221202 | 0.208960837 | 0.233321993 |
| 0.389392691 | 0.196868198 | 0.314300674 | 0.243035418 |
| 0.334270072 | 0.071905796 | 0.368511153 | 0.108344193 |
| 0.352500611 | 0.161527405 | 0.099866418 | 0.299244142 |
| 0.41881702  | 0.114416665 | 0.19868543  | 0.27800727  |
| 0.187182498 | 0.389949648 | 0.485285602 | 0.378271977 |
| 0.485280037 | 0.324343298 | 0.028335429 | 0.197000102 |
| 0.38534693  | 0.384209348 | 0.321071249 | 0.297503813 |
| 0.055069153 | 0.432017565 | 0.22048836  | 0.397320063 |
| 0.174079382 | 0.055790491 | 0.142450968 | 0.388605589 |
| 0.430712479 | 0.32215553  | 0.168257616 | 0.141513581 |
| 0.173286342 | 0.143356681 | 0.28293164  | 0.203451786 |
| 0.211845847 | 0.089316036 | 0.45234147  | 0.08138273  |
| 0.119554324 | 0.206746761 | 0.247148305 | 0.212528565 |
| 0.360187504 | 0.291519858 | 0.028189445 | 0.343650339 |
| 0.002711459 | 0.324457166 | 0.396752941 | 0.293296019 |
| 0.081226066 | 0.033129453 | 0.269342083 | 0.269273456 |
| 0.44704955  | 0.446155343 | 0.502354457 | 0.505568236 |
| 0.225657316 | 0.346383731 | 0.386421536 | 0.198577045 |
| 0.401937598 | 0.15620622  | 0.129797287 | 0.406310432 |

|             |             |             |             |
|-------------|-------------|-------------|-------------|
| 0.509093739 | 0.500062376 | 0.252552735 | 0.329659657 |
| 0.354048928 | 0.445147867 | 0.327427815 | 0.3593959   |
| 0.284676115 | 0.127142745 | 0.396900198 | 0.51503527  |
| 0.343841132 | 0.360079672 | 0.218094824 | 0.339253901 |
| 0.100583612 | 0.283630203 | 0.317053681 | 0.211317332 |
| 0.459534386 | 0.024683206 | 0.292022848 | 0.275543387 |
| 0.268105637 | 0.388678365 | 0.505907414 | 0.187860367 |
| 0.397540192 | 0.040769222 | 0.170730702 | 0.077562513 |
| 0.284095952 | 0.236985025 | 0.426830041 | 0.431816429 |
| 0.178591238 | 0.345318489 | 0.231867265 | 0.010442125 |
| 0.065201473 | 0.277102847 | 0.402121608 | 0.337475665 |
| 0.368569987 | 0.370577146 | 0.229908096 | 0.29520868  |
| 0.351761245 | 0.495994857 | 0.030687571 | 0.109879127 |
| 0.334996639 | 0.273540236 | 0.266941038 | 0.354733445 |
| 0.328840627 | 0.115445129 | 0.156988703 | 0.518002029 |
| 0.369309947 | 0.109061634 | 0.261467715 | 0.376932291 |
| 0.245938183 | 0.38601247  | 0.135570609 | 0.255665179 |
| 0.055043054 | 0.458902268 | 0.075958273 | 0.258897535 |
| 0.22153625  | 0.216547593 | 0.025702846 | 0.187915785 |
| 0.224057133 | 0.388762695 | 0.423675567 | 0.150425406 |
| 0.286588793 | 0.377041374 | 0.220603547 | 0.316788424 |
| 0.013745159 | 0.083247945 | 0.180233353 | 0.498968429 |
| 0.165496051 | 0.518125426 | 0.30354609  | 0.350372066 |
| 0.329837577 | 0.429928374 | 0.009337282 | 0.450044239 |
| 0.507606172 | 0.189507309 | 0.337529516 | 0.392672052 |
| 0.318846233 | 0.421472348 | 0.041731724 | 0.374480631 |
| 0.252077054 | 0.117839137 | 0.518308841 | 0.210346732 |
| 0.437759065 | 0.070000025 | 0.231036565 | 0.433893853 |
| 0.365988968 | 0.014121625 | 0.137371317 | 0.292596733 |
| 0.076206236 | 0.065727919 | 0.353398005 | 0.332979993 |
| 0.308962787 | 0.427913971 | 0.495244321 | 0.309152982 |
| 0.370941251 | 0.220730317 | 0.032611683 | 0.376766988 |
| 0.413334517 | 0.294139246 | 0.392943412 | 0.210843317 |
| 0.221281642 | 0.44191313  | 0.379841838 | 0.141064803 |
| 0.058580087 | 0.237024545 | 0.022967225 | 0.319336228 |
| 0.364241378 | 0.110031333 | 0.308389409 | 0.234932224 |
| 0.131843587 | 0.517207641 | 0.273229846 | 0.320317928 |
| 0.212478767 | 0.294871432 | 0.247224906 | 0.180707672 |
| 0.204903891 | 0.201905455 | 0.328291507 | 0.317751001 |
| 0.035105665 | 0.130952207 | 0.052194438 | 0.29932361  |
| 0.133797204 | 0.264331566 | 0.242445451 | 0.295552773 |
| 0.26029813  | 0.124483827 | 0.352355491 | 0.335426547 |
| 0.182598563 | 0.037627082 | 0.485898548 | 0.364576651 |
| 0.235286775 | 0.164672439 | 0.084683491 | 0.2508155   |
| 0.442839328 | 0.185908484 | 0.163518848 | 0.415296086 |
| 0.052756502 | 0.497973862 | 0.231404797 | 0.174761171 |
| 0.356111575 | 0.26078822  | 0.450109466 | 0.048696301 |
| 0.293621007 | 0.424973473 | 0.349386321 | 0.222952411 |
| 0.340536151 | 0.329809839 | 0.039798812 | 0.335681516 |
| 0.319395046 | 0.060178086 | 0.518882552 | 0.206774288 |
| 0.052892673 | 1           | 0.36472331  | 0.127459572 |
| 0.137660442 | 0.261052939 | 0.036993373 | 0.328671822 |
| 0.504712836 | 0.37569373  | 0.351646841 | 0.316010663 |
| 0.055961457 | 0.017393935 | 0.310092109 | 0.374952908 |

|             |             |             |             |
|-------------|-------------|-------------|-------------|
| 0.467194443 | 0.516058387 | 0.304094946 | 0.349651846 |
| 0.251429866 | 0.297284759 | 0.090312449 | 0.506309406 |
| 0.279307587 | 0.496192374 | 0.019472865 | 0.415880455 |
| 0.473114916 | 0.181148933 | 0.129000423 | 0.220347899 |
| 0.324611723 | 0.065048395 | 0.22478932  | 0.466797271 |
| 0.401558823 | 0.304169038 | 0.294797735 | 0.377788956 |
| 0.018268211 | 0.044632076 | 0.363440472 | 0.274535935 |
| 0.302767475 | 0.243915434 | 0.117427177 | 0.239801326 |
| 0.0614854   | 0.407573617 | 0.456546175 | 0.085115802 |
| 0.206284389 | 0.223014673 | 0.392712159 | 0.06102104  |
| 0.460163747 | 0.4991109   | 0.487132791 | 0.173461234 |
| 0.396968248 | 0.478763399 | 0.343644777 | 0.147899493 |
| 0.049308464 | 0.498321404 | 0.289621089 | 0.033846082 |
| 0.471883678 | 0.132187031 | 0.018434838 | 0.466178362 |
| 0.198714785 | 0.392050944 | 0.005056266 | 0.132776625 |
| 0.107052706 | 0.477115962 | 0.435191232 | 0.282645019 |
| 0.136804923 | 0.337955074 | 0.022213298 | 0.53086867  |
| 0.457704845 | 0.042271623 | 0.23468457  | 0.388825256 |
| 0.383026436 | 0.501483894 | 0.33400686  | 0.446508439 |
| 0.361503139 | 0.469937301 | 0.194678107 | 0.303378484 |
| 0.395354168 | 0.488096324 | 0.346907484 | 0.425423011 |
| 0.442767392 | 0.397683149 | 0.266126804 | 0.022014108 |
| 0.162038007 | 0.141467051 | 0.207506268 | 0.08954783  |
| 0.208102996 | 0.187959418 | 0.474364485 | 0.474418349 |
| 0.48845966  | 0.01732722  | 0.123683504 | 0.378718559 |
| 0.401405298 | 0.462776412 | 0.053262102 | 0.012173699 |
| 0.017194394 | 0.041401328 | 0.27856738  | 0.318822871 |
| 0.482311242 | 0.139071205 | 0.012917182 | 0.040013722 |
| 0.2701672   | 0.387827992 | 0.477269368 | 0.343548286 |
| 0.424586927 | 0.131190361 | 0.192590221 | 0.347415019 |
| 0.114608872 | 0.221898798 | 0.488594441 | 0.425952777 |
| 0.095877763 | 0.312575349 | 0.320717139 | 0.478558355 |
| 0.128169865 | 0.355064663 | 0.37602791  | 0.260892205 |
| 0.04311628  | 0.146574781 | 0.109583069 | 0.42794719  |
| 0.46948914  | 0.100549592 | 0.057447351 | 0.091340034 |
| 0.11746575  | 0.467132863 | 0.185609237 | 0.523402932 |
| 0.399474833 | 0.431158442 | 0.150396746 | 0.446172196 |
| 0.05589888  | 0.450950695 | 0.373301072 | 0.044862047 |
| 0.345251554 | 0.033961366 | 0.466644793 | 0.13989665  |
| 0.226874685 | 0.302573322 | 0.210186075 | 0.051533639 |
| 0.247943685 | 0.100450313 | 0.477874109 | 0.476137575 |
| 0.093557512 | 0.22072535  | 0.347821451 | 0.364667016 |
| 0.196433922 | 0.374067621 | 0.461520613 | 0.28163636  |
| 0.080268785 | 0.239801418 | 0.327356324 | 0.287727257 |
| 0.179638655 | 0.512811258 | 0.267879402 | 0.528002125 |
| 0.321623521 | 0.446589573 | 0.463246721 | 0.285738415 |
| 0.298647052 | 0.289401144 | 0.249477154 | 0.022653813 |
| 0.331482208 | 0.445298858 | 0.296176298 | 0.195912533 |
| 0.279324801 | 0.366862654 | 0.068602512 | 0.169136752 |
| 0.341232136 | 0.19091824  | 0.153611244 | 0.439332606 |
| 0.302216312 | 0.295346255 | 0.051995528 | 0.099396765 |
| 0.523782834 | 0.40216799  | 0.120578706 | 0.320960547 |
| 0.243697091 | 0.325900343 | 0.433446794 | 0.437170542 |
| 0.315480522 | 0.41461773  | 0.364996059 | 0.261404425 |



|             |             |             |             |
|-------------|-------------|-------------|-------------|
| 0.371229393 | 0.248992434 | 0.492549894 | 0.061250956 |
| 0.124624453 | 0.334617926 | 0.108468723 | 0.163644431 |
| 0.173703237 | 0.063839737 | 0.309812027 | 0.385839856 |
| 0.343692365 | 0.344425363 | 0.225883132 | 0.129339078 |
| 0.372893222 | 0.304492612 | 0.360247478 | 0.159642769 |
| 0.096915601 | 0.457227176 | 0.022617149 | 0.107646984 |
| 0.360857509 | 0.389794463 | 0.357950605 | 0.301778519 |
| 0.32651038  | 0.242434909 | 0.310459639 | 0.190195187 |
| 0.207637606 | 0.330343232 | 0.390642568 | 0.045260284 |
| 0.025551717 | 0.509306996 | 0.283287943 | 0.065356581 |
| 0.137480022 | 0.274253341 | 0.318503471 | 0.211853298 |
| 0.065419783 | 0.475015704 | 0.207561406 | 0.386058682 |
| 0.274018661 | 0.110630412 | 0.301244902 | 0.103069753 |
| 0.092977861 | 0.410106074 | 0.378557681 | 0.494563164 |
| 0.3876995   | 0.383991415 | 0.390879067 | 0.391218544 |
| 0.181930724 | 0.330952369 | 0.037575751 | 0.420614841 |
| 0.310390427 |             |             |             |

|             |             |             |             |
|-------------|-------------|-------------|-------------|
| KLHDC10     | 0.31379928  | 0.519662633 | 0.32598148  |
| 0.339024352 | 0.3552489   | 0.287781956 | 0.178062622 |
| 0.118464712 | 0.099957485 | 0.00685496  | 0.043768598 |
| 0.351179857 | 0.212920611 | 0.216244613 | 0.279728169 |
| 0.341185217 | 0.144139124 | 0.238534179 | 0.204047437 |
| 0.314037022 | 0.074075274 | 0.344575632 | 0.085602737 |
| 0.271464683 | 0.12985423  | 0.083865281 | 0.288286611 |
| 0.380092761 | 0.091757758 | 0.251707951 | 0.280947307 |
| 0.090542677 | 0.350161037 | 0.516743685 | 0.380675355 |
| 0.515435592 | 0.294967227 | 0.006468633 | 0.255149772 |
| 0.355477568 | 0.371176166 | 0.314943428 | 0.281618138 |
| 0.04629523  | 0.467279218 | 0.218754622 | 0.337148491 |
| 0.16304641  | 0.044228036 | 0.163105272 | 0.416692746 |
| 0.48545919  | 0.374555015 | 0.160622528 | 0.146683337 |
| 0.23642842  | 0.153778398 | 0.2979011   | 0.222232972 |
| 0.20044357  | 0.105061612 | 0.491779386 | 0.093073015 |
| 0.13761747  | 0.170158748 | 0.142143958 | 0.192485197 |
| 0.323961762 | 0.285265326 | 0.01318376  | 0.320790729 |
| 0.002922926 | 0.296418346 | 0.310018401 | 0.324593786 |
| 0.046756958 | 0.029152025 | 0.163448968 | 0.281237823 |
| 0.408342544 | 0.43049977  | 0.472732136 | 0.489177769 |
| 0.178962976 | 0.243170939 | 0.344362884 | 0.167779117 |
| 0.387358516 | 0.166181229 | 0.086400078 | 0.353377938 |
| 0.485239085 | 0.527196647 | 0.203413393 | 0.243644603 |
| 0.390249651 | 0.454051413 | 0.347477357 | 0.376152055 |
| 0.346075527 | 0.055538239 | 0.436931535 | 0.508421755 |
| 0.336322754 | 0.306436734 | 0.159676868 | 0.320130578 |
| 0.058432304 | 0.261635983 | 0.299262913 | 0.123251749 |
| 0.424483264 | 0.021655359 | 0.210880478 | 0.292347773 |
| 0.161284461 | 0.359270459 | 0.52664648  | 0.16629194  |
| 0.327269377 | 0.02143409  | 0.177087319 | 0.031676437 |
| 0.263017145 | 0.16155622  | 0.479245402 | 0.430218284 |
| 0.158884149 | 0.344282127 | 0.211106634 | 0.002918897 |
| 0.032224491 | 0.14589422  | 0.378700706 | 0.258550302 |
| 0.329819056 | 0.356592537 | 0.250900776 | 0.29466189  |
| 0.372753892 | 0.465170454 | 0.04636648  | 0.082428062 |
| 0.338571454 | 0.151298847 | 0.213584757 | 0.364621005 |

|             |             |             |             |
|-------------|-------------|-------------|-------------|
| 0.303110078 | 0.086443104 | 0.117063387 | 0.510006033 |
| 0.390736189 | 0.082346824 | 0.219431888 | 0.340353579 |
| 0.308519437 | 0.330051143 | 0.092426911 | 0.236794703 |
| 0.047930222 | 0.491742774 | 0.033640411 | 0.221388959 |
| 0.291034678 | 0.155306856 | 0.006689964 | 0.179872813 |
| 0.238432356 | 0.429166204 | 0.4618645   | 0.092800407 |
| 0.269049122 | 0.355628161 | 0.216772682 | 0.357975746 |
| 0.02109827  | 0.039062803 | 0.175230322 | 0.501959655 |
| 0.198211842 | 0.48274436  | 0.238400052 | 0.26522616  |
| 0.260442302 | 0.38727541  | 0.002804653 | 0.489159278 |
| 0.533199732 | 0.194812358 | 0.352838846 | 0.331291761 |
| 0.359207618 | 0.413044666 | 0.025616134 | 0.337207055 |
| 0.246083249 | 0.069401813 | 0.486756261 | 0.168019845 |
| 0.442374775 | 0.051996049 | 0.237351785 | 0.419390835 |
| 0.364723427 | 0.008283872 | 0.163186242 | 0.301519714 |
| 0.031061323 | 0.076246855 | 0.320513248 | 0.332966266 |
| 0.340639433 | 0.369740833 | 0.449978662 | 0.355915388 |
| 0.364751011 | 0.172248465 | 0.012007787 | 0.286346136 |
| 0.362369891 | 0.328693492 | 0.422949816 | 0.194618244 |
| 0.227172698 | 0.463860866 | 0.375830489 | 0.207462946 |
| 0.047508215 | 0.233609641 | 0.018487845 | 0.315375516 |
| 0.363124587 | 0.121306875 | 0.348348657 | 0.109342301 |
| 0.078331466 | 0.526825933 | 0.189425431 | 0.259793629 |
| 0.146414964 | 0.336563123 | 0.19593427  | 0.228694093 |
| 0.23838141  | 0.166429108 | 0.342141032 | 0.346906566 |
| 0.033930175 | 0.10020968  | 0.013061069 | 0.326181184 |
| 0.15895126  | 0.309607277 | 0.295570423 | 0.303469265 |
| 0.249909279 | 0.11136443  | 0.34639669  | 0.267276228 |
| 0.122533364 | 0.017992639 | 0.500264457 | 0.323147413 |
| 0.240916798 | 0.13874923  | 0.040403352 | 0.299939433 |
| 0.447914071 | 0.247930687 | 0.170413803 | 0.441101743 |
| 0.021263337 | 0.461173343 | 0.251793009 | 0.134677698 |
| 0.353788578 | 0.238440491 | 0.419473538 | 0.05896089  |
| 0.278502056 | 0.454247699 | 0.255104948 | 0.202638494 |
| 0.371212725 | 0.325991592 | 0.031567612 | 0.320904902 |
| 0.308160738 | 0.036414665 | 0.525052486 | 0.127995727 |
| 0.023459883 | 0.36472331  | 1           | 0.080348864 |
| 0.083948875 | 0.310439085 | 0.035956728 | 0.270346661 |
| 0.518197094 | 0.352456912 | 0.382102479 | 0.206452804 |
| 0.047486854 | 0.015967391 | 0.196235582 | 0.316125845 |
| 0.50174422  | 0.514809543 | 0.219560784 | 0.355321442 |
| 0.209127246 | 0.339240232 | 0.093431414 | 0.511378137 |
| 0.137113781 | 0.505444499 | 0.00740145  | 0.393021062 |
| 0.516143286 | 0.195923311 | 0.100647221 | 0.247774906 |
| 0.341373339 | 0.048843974 | 0.14422983  | 0.495321684 |
| 0.410462547 | 0.313300521 | 0.336723527 | 0.327535224 |
| 0.015894728 | 0.038159321 | 0.344058123 | 0.196972741 |
| 0.348273229 | 0.206149745 | 0.064851495 | 0.2317536   |
| 0.053151034 | 0.446723506 | 0.392655257 | 0.080211569 |
| 0.281419794 | 0.212159342 | 0.325766292 | 0.039156419 |
| 0.456424746 | 0.496309378 | 0.519001798 | 0.118628612 |
| 0.360064974 | 0.502566143 | 0.369159243 | 0.076533635 |
| 0.021385652 | 0.520869465 | 0.289713396 | 0.026777953 |
| 0.435754625 | 0.155302717 | 0.020501363 | 0.480935085 |

|             |             |             |             |
|-------------|-------------|-------------|-------------|
| 0.156799914 | 0.425775492 | 0.004073553 | 0.060814619 |
| 0.041400775 | 0.41467321  | 0.483172486 | 0.279644776 |
| 0.193526947 | 0.27663647  | 0.004729302 | 0.517005454 |
| 0.49111711  | 0.020259575 | 0.151507908 | 0.392610266 |
| 0.37694718  | 0.512954894 | 0.327124484 | 0.448605222 |
| 0.374632219 | 0.511444129 | 0.211725267 | 0.256160001 |
| 0.406963239 | 0.506203041 | 0.317191834 | 0.434635623 |
| 0.420979744 | 0.354439521 | 0.248078849 | 0.019629471 |
| 0.166554087 | 0.147783179 | 0.294220772 | 0.119340493 |
| 0.222696152 | 0.160897168 | 0.458379308 | 0.432389417 |
| 0.480700064 | 0.006130526 | 0.112304309 | 0.376951104 |
| 0.394723816 | 0.435815758 | 0.015195059 | 0.006043249 |
| 0.005421668 | 0.035151665 | 0.269905963 | 0.221155872 |
| 0.484411881 | 0.198336162 | 0.005852449 | 0.031807355 |
| 0.233617492 | 0.365550572 | 0.506347518 | 0.30902116  |
| 0.373508252 | 0.077713546 | 0.27015252  | 0.311815556 |
| 0.091212813 | 0.22356321  | 0.487304113 | 0.464813739 |
| 0.037321145 | 0.229973059 | 0.256232368 | 0.466052259 |
| 0.095706267 | 0.2800923   | 0.348883195 | 0.296171518 |
| 0.009796555 | 0.090287959 | 0.083004188 | 0.358594442 |
| 0.508525852 | 0.098142526 | 0.047723373 | 0.096694512 |
| 0.125212293 | 0.429038905 | 0.163760249 | 0.503349318 |
| 0.388300802 | 0.381679892 | 0.080983942 | 0.480520071 |
| 0.056231814 | 0.486475552 | 0.333232901 | 0.046625587 |
| 0.21828664  | 0.011789637 | 0.460474342 | 0.212698978 |
| 0.231865826 | 0.2846041   | 0.223546919 | 0.019914444 |
| 0.187888446 | 0.057949928 | 0.463081572 | 0.433892142 |
| 0.033119449 | 0.188260006 | 0.254575688 | 0.307523514 |
| 0.205420868 | 0.363154948 | 0.499156825 | 0.330466377 |
| 0.081430685 | 0.121941683 | 0.305486985 | 0.285168503 |
| 0.16432311  | 0.473886449 | 0.316514193 | 0.519900037 |
| 0.30072797  | 0.428208286 | 0.467248902 | 0.296054054 |
| 0.24096648  | 0.292580087 | 0.300194367 | 0.021686591 |
| 0.281961745 | 0.427746388 | 0.251284335 | 0.186335673 |
| 0.266013191 | 0.347400414 | 0.036076218 | 0.104564359 |
| 0.313011339 | 0.225126682 | 0.140586677 | 0.376253127 |
| 0.274117386 | 0.289902815 | 0.02490547  | 0.080302279 |
| 0.534609188 | 0.410353015 | 0.114614771 | 0.346006113 |
| 0.150081053 | 0.324332402 | 0.382138005 | 0.382531479 |
| 0.310396074 | 0.424341065 | 0.339058472 | 0.307688123 |
| 0.406318023 | 0.223270576 | 0.52588887  | 0.047791248 |
| 0.103672295 | 0.316108449 | 0.1142293   | 0.093535676 |
| 0.138487685 | 0.031780305 | 0.303467168 | 0.342006476 |
| 0.338867772 | 0.331552716 | 0.214221787 | 0.080028674 |
| 0.286137994 | 0.254820078 | 0.306311301 | 0.170491838 |
| 0.088503745 | 0.504535745 | 0.010656834 | 0.056506033 |
| 0.33316091  | 0.391009044 | 0.371935607 | 0.220911398 |
| 0.306861551 | 0.13071434  | 0.272928871 | 0.205715006 |
| 0.279601816 | 0.285602295 | 0.398860636 | 0.027383365 |
| 0.017460012 | 0.469551547 | 0.260866428 | 0.019303431 |
| 0.086418725 | 0.275142999 | 0.204210705 | 0.254795012 |
| 0.02557572  | 0.494598638 | 0.279233946 | 0.360599544 |
| 0.264477676 | 0.058515924 | 0.30739741  | 0.068981036 |
| 0.045073052 | 0.421455376 | 0.338216847 | 0.518533364 |

|             |             |             |             |
|-------------|-------------|-------------|-------------|
| 0.28356906  | 0.353819103 | 0.4229008   | 0.385524575 |
| 0.083352594 | 0.296140937 | 0.028797405 | 0.380962835 |
| 0.357263038 |             |             |             |
| KLRA10      | 0.074680964 | 0.085193922 | 0.06848609  |
| 0.155798342 | 0.114252793 | 0.049537288 | 0.14342839  |
| 0.057998235 | 0.168848459 | 0.062448814 | 0.150281537 |
| 0.085570806 | 0.096574102 | 0.068405084 | 0.034060059 |
| 0.202444326 | 0.242756686 | 0.053359328 | 0.22788671  |
| 0.147568623 | 0.094813651 | 0.223140664 | 0.227874464 |
| 0.108386957 | 0.233930003 | 0.281833374 | 0.122829156 |
| 0.150454511 | 0.290225533 | 0.03333987  | 0.09931605  |
| 0.286583096 | 0.090357567 | 0.061412376 | 0.132216054 |
| 0.055988016 | 0.053517696 | 0.066962337 | 0.044220232 |
| 0.07639166  | 0.118364092 | 0.145123811 | 0.202847664 |
| 0.229217413 | 0.049156163 | 0.191340547 | 0.137893188 |
| 0.037908773 | 0.258608991 | 0.023449539 | 0.049575803 |
| 0.048548817 | 0.06590666  | 0.069795367 | 0.14145558  |
| 0.052469912 | 0.026729359 | 0.046922441 | 0.045547409 |
| 0.187300958 | 0.025363786 | 0.057148165 | 0.126533523 |
| 0.050164442 | 0.080029722 | 0.240089685 | 0.095326679 |
| 0.063318471 | 0.060377209 | 0.181034686 | 0.054187069 |
| 0.018323107 | 0.165812345 | 0.166687873 | 0.042683576 |
| 0.330772452 | 0.176269713 | 0.23685605  | 0.149733615 |
| 0.13777218  | 0.061757339 | 0.140156369 | 0.116690637 |
| 0.176840758 | 0.190415364 | 0.081214214 | 0.222320729 |
| 0.081605856 | 0.13283346  | 0.120230723 | 0.214836427 |
| 0.131771248 | 0.071971208 | 0.202199259 | 0.243172028 |
| 0.081409946 | 0.078274655 | 0.053824413 | 0.081104908 |
| 0.04582164  | 0.261499339 | 0.056636473 | 0.105020313 |
| 0.056466734 | 0.076961515 | 0.277221041 | 0.098272859 |
| 0.324849026 | 0.029638755 | 0.221204857 | 0.107295819 |
| 0.140294802 | 0.174546516 | 0.242459433 | 0.111110334 |
| 0.161513509 | 0.088228722 | 0.072365697 | 0.210347818 |
| 0.101067103 | 0.191525661 | 0.082235972 | 0.317889868 |
| 0.063522646 | 0.07428374  | 0.041392623 | 0.121104598 |
| 0.058584121 | 0.072285355 | 0.117527468 | 0.177167754 |
| 0.319644749 | 0.166772852 | 0.07194792  | 0.077752768 |
| 0.116000506 | 0.045442932 | 0.14672328  | 0.048997177 |
| 0.071220082 | 0.139100031 | 0.003654489 | 0.214914954 |
| 0.084074249 | 0.180477976 | 0.304369859 | 0.075797747 |
| 0.174171929 | 0.156919223 | 0.252320829 | 0.115565122 |
| 0.057253141 | 0.263994533 | 0.031054313 | 0.204620193 |
| 0.052874856 | 0.16606806  | 0.255946837 | 0.114108346 |
| 0.189106465 | 0.054201983 | 0.30452939  | 0.054315581 |
| 0.038321298 | 0.16625084  | 0.150017891 | 0.063624561 |
| 0.057599108 | 0.07171952  | 0.039459537 | 0.283497646 |
| 0.112774992 | 0.183358764 | 0.037254057 | 0.075827282 |
| 0.111337365 | 0.264190186 | 0.018364517 | 0.099880457 |
| 0.03055678  | 0.107380272 | 0.134517253 | 0.13614257  |
| 0.256877771 | 0.147173358 | 0.013584641 | 0.053262972 |
| 0.071677635 | 0.016276635 | 0.124431176 | 0.120254459 |
| 0.052222684 | 0.132498458 | 0.004727804 | 0.189584302 |
| 0.038641797 | 0.290346648 | 0.142389306 | 0.279296958 |
| 0.059728524 | 0.298691765 | 0.048049338 | 0.089357324 |

|             |             |             |             |
|-------------|-------------|-------------|-------------|
| 0.060292998 | 0.066735419 | 0.038255311 | 0.132234712 |
| 0.292928087 | 0.07002285  | 0.102079961 | 0.150443827 |
| 0.122519938 | 0.136831495 | 0.16454575  | 0.047213101 |
| 0.103794215 | 0.124714443 | 0.238773622 | 0.183585079 |
| 0.097808109 | 0.02768984  | 0.05874169  | 0.118985918 |
| 0.025959088 | 0.076461148 | 0.057019733 | 0.024369681 |
| 0.24715725  | 0.083122951 | 0.065825468 | 0.147086031 |
| 0.05274074  | 0.140984538 | 0.049085886 | 0.188533086 |
| 0.313268611 | 0.100401221 | 0.122928451 | 0.057792915 |
| 0.082011591 | 0.069971298 | 0.169117492 | 0.059794308 |
| 0.079018223 | 0.235982336 | 0.070034233 | 0.065706007 |
| 0.12725586  | 0.274283667 | 0.179274885 | 0.023822576 |
| 0.078237024 | 0.03548678  | 0.026208874 | 0.053473718 |
| 0.055802767 | 0.141607906 | 0.114186182 | 0.092448247 |
| 0.270010196 | 0.296091981 | 0.08491898  | 0.18072635  |
| 0.036320031 | 0.198058974 | 0.334495064 | 0.018680348 |
| 0.113820567 | 0.023639008 | 0.013649865 | 0.085925759 |
| 0.178357033 | 0.129918961 | 0.112544594 | 0.277845255 |
| 0.061034319 | 0.208022891 | 0.153363244 | 0.035848463 |
| 0.06043572  | 0.068030183 | 0.192620411 | 0.216526319 |
| 0.046346579 | 0.123845676 | 0.197966326 | 0.055342898 |
| 0.05022699  | 0.306505139 | 0.08618353  | 0.256980167 |
| 0.318732272 | 0.127459572 | 0.080348864 | 1           |
| 0.315960495 | 0.088818639 | 0.089207669 | 0.289689979 |
| 0.09735488  | 0.217822823 | 0.074442046 | 0.137751991 |
| 0.242852379 | 0.100438712 | 0.188492041 | 0.070844341 |
| 0.053556494 | 0.086378415 | 0.254150432 | 0.104040093 |
| 0.269355707 | 0.069733011 | 0.025455481 | 0.100096369 |
| 0.094281721 | 0.06833296  | 0.232218846 | 0.100744847 |
| 0.052814059 | 0.028988499 | 0.273540485 | 0.086948442 |
| 0.054270857 | 0.255493242 | 0.151436548 | 0.064403041 |
| 0.086582405 | 0.094622289 | 0.062421648 | 0.117969804 |
| 0.126296319 | 0.167569042 | 0.125104426 | 0.094525378 |
| 0.052676943 | 0.197389564 | 0.049205119 | 0.043749312 |
| 0.229810776 | 0.06573259  | 0.146795089 | 0.246638932 |
| 0.037072036 | 0.036562389 | 0.208597964 | 0.293646421 |
| 0.086780758 | 0.070483273 | 0.063239198 | 0.162712104 |
| 0.083146129 | 0.079612539 | 0.056903861 | 0.318208402 |
| 0.303289256 | 0.063277876 | 0.070552823 | 0.115606148 |
| 0.143587779 | 0.019262671 | 0.118476616 | 0.081460028 |
| 0.220769873 | 0.037163783 | 0.017716117 | 0.031714099 |
| 0.268421445 | 0.149008628 | 0.054465216 | 0.103739961 |
| 0.013268516 | 0.155322641 | 0.050171321 | 0.093546778 |
| 0.068625476 | 0.26649911  | 0.210345693 | 0.069510193 |
| 0.072157804 | 0.079069435 | 0.072314841 | 0.093264834 |
| 0.06946198  | 0.057397536 | 0.091710567 | 0.274032305 |
| 0.092291247 | 0.064680811 | 0.097363284 | 0.069359406 |
| 0.129193738 | 0.165063154 | 0.236295993 | 0.189409245 |
| 0.113816045 | 0.045042413 | 0.020554356 | 0.129688556 |
| 0.039490115 | 0.241559567 | 0.080681653 | 0.145252206 |
| 0.097418107 | 0.225842283 | 0.09490464  | 0.067358882 |
| 0.099696419 | 0.12948978  | 0.17178552  | 0.029491695 |
| 0.015766815 | 0.169042335 | 0.103432567 | 0.21292267  |
| 0.091664663 | 0.013198626 | 0.196572016 | 0.110004809 |

|             |             |             |             |
|-------------|-------------|-------------|-------------|
| 0.107923126 | 0.13160346  | 0.071304674 | 0.225215365 |
| 0.102076674 | 0.316147495 | 0.034293393 | 0.189994764 |
| 0.248508826 | 0.029674456 | 0.105761542 | 0.064747679 |
| 0.298486218 | 0.185538781 | 0.050649544 | 0.130635444 |
| 0.034643625 | 0.239679578 | 0.087228781 | 0.079489825 |
| 0.145130626 | 0.307833815 | 0.286086719 | 0.164738091 |
| 0.051483003 | 0.174873653 | 0.215711075 | 0.011187392 |
| 0.161248824 | 0.117333329 | 0.192288616 | 0.124712613 |
| 0.109486445 | 0.187590941 | 0.266000659 | 0.064720245 |
| 0.205746621 | 0.055178691 | 0.121084882 | 0.015704728 |
| 0.12623862  | 0.267825525 | 0.063263229 | 0.053451467 |
| 0.036310267 | 0.082654977 | 0.086927158 | 0.277637403 |
| 0.060449162 | 0.327106081 | 0.142097856 | 0.135661401 |
| 0.272149839 | 0.128365027 | 0.204038408 | 0.139536474 |
| 0.062333687 | 0.146885482 | 0.057296613 | 0.029180183 |
| 0.163435149 | 0.074607551 | 0.128367147 | 0.053027516 |
| 0.057949476 | 0.142643253 | 0.087082719 | 0.094930718 |
| 0.071000091 | 0.085960531 | 0.078625377 | 0.130131787 |
| 0.117744319 | 0.054933841 | 0.07918915  | 0.098122433 |
| 0.162750669 | 0.137478979 | 0.072084267 | 0.175625062 |
| 0.191402014 | 0.065112705 | 0.20153311  | 0.020141282 |
| 0.050777886 | 0.047368827 | 0.192687326 | 0.186259525 |
| 0.073105166 | 0.054959049 | 0.154108768 | 0.280156349 |
| 0.085300085 | 0.065605799 | 0.084734448 | 0.099099043 |
| 0.256141819 | 0.170409115 | 0.110471314 | 0.1204687   |
| 0.044042768 | 0.082616812 | 0.098373347 | 0.068481733 |
| 0.05869984  | 0.187601651 | 0.066535979 | 0.03304906  |
| 0.154451795 | 0.056260251 | 0.184493979 | 0.31396153  |
| 0.24802268  | 0.307026046 | 0.035890467 | 0.177028652 |
| 0.029657198 | 0.189013982 | 0.024891214 | 0.249223306 |
| 0.194156367 | 0.037296664 | 0.202116908 | 0.094482872 |
| 0.215401656 | 0.060572521 | 0.152100944 | 0.334619425 |
| 0.036139231 | 0.088562948 | 0.080631284 | 0.201264499 |
| 0.068085201 | 0.214458961 | 0.221567582 | 0.0344766   |
| 0.022927314 | 0.035718717 | 0.082654743 | 0.124956227 |
| 0.175159899 | 0.142571716 | 0.038953174 | 0.24249778  |
| 0.159121757 | 0.048419905 | 0.090320408 | 0.112575019 |
| 0.281994554 | 0.072116392 | 0.027182443 | 0.100810049 |
| 0.109435212 | 0.309524075 | 0.038207037 | 0.084261321 |
| 0.219500847 | 0.054511979 | 0.086056738 | 0.065545475 |
| 0.09617303  | 0.198486605 | 0.041816343 | 0.073372957 |
| 0.108248735 | 0.043650378 | 0.202458901 | 0.118752337 |
| 0.024513779 |             |             |             |

|             |             |             |             |
|-------------|-------------|-------------|-------------|
| KLRB1C      | 0.078663922 | 0.086790243 | 0.078934297 |
| 0.150218433 | 0.112937418 | 0.047714769 | 0.120185348 |
| 0.038010768 | 0.134920645 | 0.038717652 | 0.104584127 |
| 0.093193295 | 0.068692397 | 0.0448621   | 0.027883628 |
| 0.20185691  | 0.176785503 | 0.053630211 | 0.202980254 |
| 0.140102028 | 0.054514558 | 0.218297143 | 0.148817415 |
| 0.090382194 | 0.190251336 | 0.199417424 | 0.118527464 |
| 0.147338998 | 0.229911734 | 0.028651279 | 0.09105469  |
| 0.219729492 | 0.089859191 | 0.064523371 | 0.134102737 |
| 0.059365124 | 0.058141816 | 0.040672095 | 0.030005274 |
| 0.07877952  | 0.126490263 | 0.134976915 | 0.189262805 |

|             |             |             |             |
|-------------|-------------|-------------|-------------|
| 0.151613796 | 0.050800355 | 0.168202095 | 0.148086591 |
| 0.029258873 | 0.185181827 | 0.018543685 | 0.049986579 |
| 0.05066634  | 0.065052106 | 0.04867543  | 0.099909506 |
| 0.034957337 | 0.016337297 | 0.041360293 | 0.041529643 |
| 0.156046011 | 0.016395219 | 0.059359107 | 0.088525936 |
| 0.028988673 | 0.062228032 | 0.182025069 | 0.081700157 |
| 0.054458934 | 0.059328362 | 0.107401556 | 0.060971001 |
| 0.010263126 | 0.157323596 | 0.175953179 | 0.044116312 |
| 0.27620668  | 0.115482747 | 0.182025955 | 0.131823973 |
| 0.13698409  | 0.066048091 | 0.145007281 | 0.122168182 |
| 0.132529118 | 0.193059443 | 0.087951943 | 0.152232226 |
| 0.083093655 | 0.111102593 | 0.099339984 | 0.215470718 |
| 0.136968982 | 0.074720069 | 0.149899575 | 0.255874407 |
| 0.080162599 | 0.078258159 | 0.059275427 | 0.079613697 |
| 0.040149585 | 0.226259186 | 0.056818098 | 0.108134993 |
| 0.056870319 | 0.089264153 | 0.28168663  | 0.092431978 |
| 0.220805778 | 0.025995677 | 0.205664702 | 0.080495207 |
| 0.139535314 | 0.117744645 | 0.250479108 | 0.095217155 |
| 0.126700486 | 0.092504777 | 0.076845966 | 0.181204095 |
| 0.104843873 | 0.130207123 | 0.078649382 | 0.222454294 |
| 0.048580125 | 0.071892943 | 0.043445184 | 0.118835763 |
| 0.036397676 | 0.052312094 | 0.099528975 | 0.126701759 |
| 0.241238498 | 0.138682817 | 0.073370059 | 0.078284076 |
| 0.117293931 | 0.050629469 | 0.122587801 | 0.047938333 |
| 0.076403717 | 0.142586691 | 0.003246158 | 0.138201335 |
| 0.086184615 | 0.140229017 | 0.283411442 | 0.074922507 |
| 0.182062585 | 0.099280333 | 0.174305879 | 0.119734399 |
| 0.05615475  | 0.202689697 | 0.030119636 | 0.207599995 |
| 0.036136705 | 0.177805841 | 0.16361634  | 0.077534124 |
| 0.107612331 | 0.057858355 | 0.238315322 | 0.051784462 |
| 0.033800094 | 0.121827277 | 0.100942402 | 0.053464729 |
| 0.044612265 | 0.072374618 | 0.041723602 | 0.220192174 |
| 0.098272399 | 0.18581796  | 0.033359076 | 0.076055169 |
| 0.073702091 | 0.189348325 | 0.017022174 | 0.101384852 |
| 0.026930605 | 0.113628854 | 0.098867826 | 0.111538251 |
| 0.262479486 | 0.151655677 | 0.017212387 | 0.05567962  |
| 0.075689451 | 0.016176243 | 0.119886235 | 0.126432949 |
| 0.05704874  | 0.132518816 | 0.004413823 | 0.184821681 |
| 0.039035743 | 0.19990575  | 0.14612903  | 0.268497831 |
| 0.06224518  | 0.220463485 | 0.036327883 | 0.098400043 |
| 0.063606402 | 0.041931598 | 0.03166551  | 0.120193591 |
| 0.233882978 | 0.038052552 | 0.103000865 | 0.148171451 |
| 0.120984238 | 0.1444353   | 0.166952933 | 0.053354735 |
| 0.105270317 | 0.100484052 | 0.166653843 | 0.200695148 |
| 0.103752184 | 0.020710857 | 0.059482678 | 0.079092121 |
| 0.026116846 | 0.078104603 | 0.061852432 | 0.017370806 |
| 0.162786314 | 0.069941759 | 0.043261274 | 0.154218092 |
| 0.056563873 | 0.083140749 | 0.052618349 | 0.139925499 |
| 0.236625044 | 0.103435211 | 0.113548217 | 0.065379782 |
| 0.080298586 | 0.064365812 | 0.152401595 | 0.038491301 |
| 0.057272622 | 0.165034325 | 0.061987716 | 0.060195544 |
| 0.069609669 | 0.185104888 | 0.156263543 | 0.020763192 |
| 0.051530373 | 0.028022091 | 0.022262683 | 0.051837277 |
| 0.035661724 | 0.094345978 | 0.116859272 | 0.083206165 |

|             |             |             |             |
|-------------|-------------|-------------|-------------|
| 0.232504495 | 0.220963722 | 0.087131563 | 0.18078207  |
| 0.035148022 | 0.132194827 | 0.235128642 | 0.014308794 |
| 0.111217893 | 0.022722186 | 0.01194643  | 0.08340241  |
| 0.130553658 | 0.133480053 | 0.078878061 | 0.267373037 |
| 0.061569088 | 0.186763028 | 0.153616707 | 0.026134513 |
| 0.057003738 | 0.067099766 | 0.197301007 | 0.190996646 |
| 0.04577686  | 0.117575197 | 0.120623224 | 0.058118738 |
| 0.050765064 | 0.20614524  | 0.090053019 | 0.198979272 |
| 0.237719619 | 0.137660442 | 0.083948875 | 0.315960495 |
| 1           | 0.080307812 | 0.05074166  | 0.293256562 |
| 0.100190916 | 0.215421537 | 0.072866745 | 0.124726642 |
| 0.154244569 | 0.06043594  | 0.177959289 | 0.081645618 |
| 0.055866238 | 0.091584223 | 0.240106217 | 0.108901571 |
| 0.242805395 | 0.055530553 | 0.015278413 | 0.103497729 |
| 0.086514517 | 0.07160338  | 0.154134279 | 0.107323845 |
| 0.055917921 | 0.024713475 | 0.220835751 | 0.072830938 |
| 0.053471688 | 0.172200077 | 0.103977278 | 0.067366929 |
| 0.086859818 | 0.085606514 | 0.057710343 | 0.120524043 |
| 0.073926006 | 0.092011782 | 0.137086947 | 0.089702592 |
| 0.043953087 | 0.14757305  | 0.052600423 | 0.029275896 |
| 0.155764703 | 0.064422664 | 0.149391698 | 0.195137877 |
| 0.033222665 | 0.026027451 | 0.212576324 | 0.194657159 |
| 0.094431661 | 0.075768424 | 0.066030371 | 0.10475559  |
| 0.084908884 | 0.084231308 | 0.062871852 | 0.250538928 |
| 0.243810723 | 0.067826431 | 0.07092444  | 0.08985807  |
| 0.142394749 | 0.016660343 | 0.072651332 | 0.082240226 |
| 0.195266484 | 0.03855623  | 0.018049138 | 0.034039119 |
| 0.223772621 | 0.156123627 | 0.057019595 | 0.094930201 |
| 0.010460217 | 0.150617656 | 0.037890841 | 0.098677018 |
| 0.07024946  | 0.213703004 | 0.170045193 | 0.071345755 |
| 0.079886658 | 0.081174617 | 0.084301166 | 0.099602047 |
| 0.075751306 | 0.060300366 | 0.055609592 | 0.272265268 |
| 0.092598635 | 0.069685698 | 0.098391687 | 0.071670785 |
| 0.126601583 | 0.171786013 | 0.2145329   | 0.115604564 |
| 0.107722699 | 0.034953999 | 0.017184988 | 0.09912643  |
| 0.037195721 | 0.199832121 | 0.085655468 | 0.146083356 |
| 0.102706712 | 0.160479809 | 0.059249054 | 0.068556445 |
| 0.096988776 | 0.129348408 | 0.138474497 | 0.032090339 |
| 0.022198596 | 0.149263329 | 0.091220863 | 0.229053584 |
| 0.095869277 | 0.009670658 | 0.127750234 | 0.06226702  |
| 0.087089328 | 0.144383136 | 0.073142548 | 0.215560499 |
| 0.109631826 | 0.212075413 | 0.02348891  | 0.184090402 |
| 0.197763125 | 0.030293507 | 0.110093889 | 0.064432718 |
| 0.218170026 | 0.195645781 | 0.052454045 | 0.129899878 |
| 0.036642954 | 0.235737843 | 0.0909761   | 0.055644225 |
| 0.115995458 | 0.248724775 | 0.223057328 | 0.167766113 |
| 0.054591834 | 0.119399596 | 0.154360268 | 0.007519235 |
| 0.100124775 | 0.118730965 | 0.135791156 | 0.128350031 |
| 0.107939954 | 0.184061578 | 0.198562425 | 0.067139555 |
| 0.126073063 | 0.057207185 | 0.13512077  | 0.015557051 |
| 0.105591512 | 0.183842435 | 0.067184079 | 0.045762779 |
| 0.029468199 | 0.081661351 | 0.07743426  | 0.207499024 |
| 0.062271886 | 0.235414919 | 0.142916023 | 0.143124081 |
| 0.219948515 | 0.084994435 | 0.21533533  | 0.142539084 |



|             |             |             |             |
|-------------|-------------|-------------|-------------|
| 0.054055698 | 0.143964193 | 0.059511031 | 0.032000866 |
| 0.09435331  | 0.06638879  | 0.124001793 | 0.05457297  |
| 0.03504895  | 0.147219705 | 0.064365539 | 0.100143318 |
| 0.072411683 | 0.088392337 | 0.081670375 | 0.12398506  |
| 0.088505717 | 0.055636237 | 0.071628133 | 0.066955783 |
| 0.160646579 | 0.135715489 | 0.070215774 | 0.150318399 |
| 0.185944666 | 0.073998591 | 0.126175408 | 0.018118839 |
| 0.061363076 | 0.041826279 | 0.119711157 | 0.185520785 |
| 0.071805856 | 0.055881863 | 0.088328203 | 0.221833362 |
| 0.088135099 | 0.067087777 | 0.061849003 | 0.099364291 |
| 0.244539185 | 0.168012221 | 0.119220412 | 0.127259933 |
| 0.034716045 | 0.082376927 | 0.095001513 | 0.063256894 |
| 0.056929283 | 0.16838385  | 0.069525405 | 0.020627256 |
| 0.12953249  | 0.058016416 | 0.1186894   | 0.295983493 |
| 0.212700852 | 0.248703903 | 0.034063942 | 0.176734798 |
| 0.029653513 | 0.177294079 | 0.016943615 | 0.209726912 |
| 0.196095346 | 0.039562359 | 0.198065904 | 0.072353732 |
| 0.151062219 | 0.062354593 | 0.11535361  | 0.232319441 |
| 0.037687184 | 0.092358166 | 0.089033326 | 0.180282174 |
| 0.058804506 | 0.167690331 | 0.203540039 | 0.030441251 |
| 0.021115665 | 0.030483302 | 0.087174934 | 0.091941443 |
| 0.097568618 | 0.145663779 | 0.041268905 | 0.199577495 |
| 0.107484528 | 0.048728325 | 0.068276312 | 0.07873735  |
| 0.227805378 | 0.075634155 | 0.024103119 | 0.105448578 |
| 0.099826009 | 0.209478249 | 0.038154955 | 0.060447967 |
| 0.157168417 | 0.056073271 | 0.09822938  | 0.069110842 |
| 0.107349359 | 0.192121669 | 0.043077416 | 0.072697489 |
| 0.099863601 | 0.049955871 | 0.130571658 | 0.117807904 |
| 0.027297982 |             |             |             |

|             |             |             |             |
|-------------|-------------|-------------|-------------|
| KLRB1F      | 0.219089152 | 0.412853061 | 0.122413255 |
| 0.378640703 | 0.202865655 | 0.216756152 | 0.187425673 |
| 0.094221246 | 0.109204926 | 0.046117795 | 0.089039144 |
| 0.198205832 | 0.17668115  | 0.184156859 | 0.134940127 |
| 0.327493374 | 0.124474716 | 0.09167243  | 0.176473694 |
| 0.286315093 | 0.136620653 | 0.326572406 | 0.12668391  |
| 0.100813356 | 0.107614076 | 0.125015072 | 0.141921188 |
| 0.372914896 | 0.122404249 | 0.176369425 | 0.280128907 |
| 0.060399879 | 0.282939344 | 0.367934324 | 0.299098361 |
| 0.352701579 | 0.193895938 | 0.00712668  | 0.194727821 |
| 0.275752057 | 0.313208082 | 0.306172392 | 0.261634714 |
| 0.106815273 | 0.340942324 | 0.222512037 | 0.182242701 |
| 0.094584451 | 0.086420954 | 0.107235327 | 0.31358268  |
| 0.358462989 | 0.243883484 | 0.130437077 | 0.187749751 |
| 0.184490486 | 0.11194964  | 0.115887565 | 0.199093356 |
| 0.195803897 | 0.104023931 | 0.36124486  | 0.148013988 |
| 0.101217718 | 0.119286917 | 0.081684219 | 0.153835066 |
| 0.110275168 | 0.249354232 | 0.028526791 | 0.153627007 |
| 0.019024115 | 0.268266115 | 0.171280229 | 0.109112258 |
| 0.069933871 | 0.093811271 | 0.09510448  | 0.28641139  |
| 0.372507844 | 0.28841729  | 0.400654345 | 0.385408823 |
| 0.141944463 | 0.122977209 | 0.135531062 | 0.179451149 |
| 0.303274965 | 0.207845967 | 0.075443752 | 0.337791332 |
| 0.403244858 | 0.391934103 | 0.134454548 | 0.132523673 |
| 0.377948765 | 0.369897251 | 0.159564847 | 0.181268756 |

|             |             |             |             |
|-------------|-------------|-------------|-------------|
| 0.149145678 | 0.033321051 | 0.345347506 | 0.404561157 |
| 0.266838564 | 0.099383843 | 0.127920728 | 0.318887783 |
| 0.075632385 | 0.104768137 | 0.301216616 | 0.074068454 |
| 0.388391219 | 0.062308745 | 0.121961218 | 0.248651875 |
| 0.085677947 | 0.290465722 | 0.377026587 | 0.176050473 |
| 0.142143264 | 0.047655102 | 0.087037944 | 0.03522362  |
| 0.141964292 | 0.047249895 | 0.328026701 | 0.416499585 |
| 0.120823238 | 0.162632073 | 0.162052164 | 0.008457655 |
| 0.046400511 | 0.063960608 | 0.285926451 | 0.106796011 |
| 0.274038196 | 0.214206279 | 0.208062195 | 0.238444371 |
| 0.2373722   | 0.39173194  | 0.039216574 | 0.112609631 |
| 0.203217374 | 0.068186729 | 0.193268957 | 0.2235479   |
| 0.172210403 | 0.10830122  | 0.141029309 | 0.41812141  |
| 0.322685779 | 0.128116606 | 0.088191353 | 0.309216208 |
| 0.211536424 | 0.178039618 | 0.114184025 | 0.192119543 |
| 0.116308163 | 0.330544054 | 0.035904858 | 0.1039419   |
| 0.125742654 | 0.097217349 | 0.009278761 | 0.130371542 |
| 0.171061657 | 0.377655052 | 0.296767196 | 0.098771924 |
| 0.194082058 | 0.280788493 | 0.113296252 | 0.335129074 |
| 0.08249097  | 0.048964265 | 0.073161582 | 0.415833245 |
| 0.180114069 | 0.3598543   | 0.146696988 | 0.124289571 |
| 0.17145317  | 0.346102304 | 0.00076773  | 0.353823174 |
| 0.383961287 | 0.079695561 | 0.273716735 | 0.188509099 |
| 0.13323624  | 0.40328629  | 0.007944512 | 0.304626162 |
| 0.174828344 | 0.083182603 | 0.41371655  | 0.151723162 |
| 0.316061557 | 0.092782067 | 0.149735533 | 0.297039147 |
| 0.265699171 | 0.013580521 | 0.13785212  | 0.305201242 |
| 0.028241817 | 0.133370216 | 0.256739301 | 0.306177718 |
| 0.262838325 | 0.300371276 | 0.40619395  | 0.130367643 |
| 0.205305938 | 0.132271655 | 0.018833272 | 0.135524196 |
| 0.264308913 | 0.119582937 | 0.345838676 | 0.164085632 |
| 0.127342902 | 0.380244302 | 0.257926792 | 0.130473178 |
| 0.104169476 | 0.158092615 | 0.046065906 | 0.180555249 |
| 0.239408136 | 0.207916878 | 0.141429185 | 0.0529848   |
| 0.078788629 | 0.42588983  | 0.069258743 | 0.07424759  |
| 0.044583522 | 0.260785589 | 0.145577878 | 0.225396948 |
| 0.191626547 | 0.142977561 | 0.143960572 | 0.169604769 |
| 0.102151257 | 0.136516276 | 0.006477441 | 0.129623064 |
| 0.185692987 | 0.176084134 | 0.167493897 | 0.240318825 |
| 0.152987134 | 0.155201379 | 0.191348032 | 0.093853516 |
| 0.091085447 | 0.037332047 | 0.397429489 | 0.267665545 |
| 0.208313308 | 0.149250041 | 0.051804886 | 0.129403026 |
| 0.420913986 | 0.17063285  | 0.073047596 | 0.405782279 |
| 0.024361966 | 0.374864284 | 0.225402392 | 0.133939682 |
| 0.158189533 | 0.203799413 | 0.396689338 | 0.063665445 |
| 0.163405643 | 0.381720226 | 0.1354558   | 0.166898599 |
| 0.313252595 | 0.269959136 | 0.083349007 | 0.241489985 |
| 0.241674205 | 0.071831453 | 0.397416046 | 0.091035288 |
| 0.037017998 | 0.261052939 | 0.310439085 | 0.088818639 |
| 0.080307812 | 1           | 0.090871507 | 0.210412818 |
| 0.425233691 | 0.350326325 | 0.345699225 | 0.075586049 |
| 0.114298017 | 0.063092103 | 0.0891612   | 0.126497298 |
| 0.357372842 | 0.377160022 | 0.147017533 | 0.180388568 |
| 0.19585267  | 0.162834847 | 0.068798281 | 0.412715622 |

|             |             |             |             |
|-------------|-------------|-------------|-------------|
| 0.040545456 | 0.358333595 | 0.018335127 | 0.293311289 |
| 0.355959211 | 0.115135753 | 0.107871013 | 0.211660691 |
| 0.304077485 | 0.092722189 | 0.096540828 | 0.376047185 |
| 0.344158928 | 0.167103231 | 0.16530535  | 0.22327048  |
| 0.064759615 | 0.09434053  | 0.189997585 | 0.06146736  |
| 0.181375565 | 0.155131905 | 0.014984054 | 0.117341595 |
| 0.124763774 | 0.381498337 | 0.336594292 | 0.106767472 |
| 0.23712927  | 0.099346503 | 0.226352414 | 0.076591276 |
| 0.325437865 | 0.336167516 | 0.381157968 | 0.104827506 |
| 0.273006826 | 0.384131094 | 0.183780654 | 0.064323865 |
| 0.030575713 | 0.360713561 | 0.223206515 | 0.073684463 |
| 0.39295924  | 0.097045998 | 0.08887013  | 0.393237531 |
| 0.149499619 | 0.287200333 | 0.009383731 | 0.011270945 |
| 0.025458454 | 0.335785364 | 0.357750121 | 0.25712379  |
| 0.133881333 | 0.193736849 | 0.001042714 | 0.377605543 |
| 0.393793988 | 0.029004044 | 0.078619955 | 0.306044844 |
| 0.268227562 | 0.395322554 | 0.119443617 | 0.348117538 |
| 0.215197903 | 0.365972939 | 0.19788064  | 0.195693945 |
| 0.372280863 | 0.340594897 | 0.286624692 | 0.341878074 |
| 0.396731485 | 0.263897517 | 0.244761496 | 0.069355122 |
| 0.080699403 | 0.124730085 | 0.153720709 | 0.146920485 |
| 0.161761231 | 0.136222325 | 0.34146396  | 0.376013588 |
| 0.374278646 | 0.014867196 | 0.135412955 | 0.293069592 |
| 0.370858384 | 0.392091486 | 0.010259831 | 0.003636634 |
| 0.002396934 | 0.047664739 | 0.209837638 | 0.114711201 |
| 0.377518648 | 0.141873186 | 0.021912095 | 0.073675389 |
| 0.148777493 | 0.219355497 | 0.393421808 | 0.306613064 |
| 0.271119937 | 0.086604012 | 0.207985587 | 0.295570742 |
| 0.089693863 | 0.149950534 | 0.399659962 | 0.383348928 |
| 0.031345705 | 0.120450855 | 0.096353526 | 0.4245099   |
| 0.023063339 | 0.185970391 | 0.217059842 | 0.216191394 |
| 0.006962072 | 0.079060263 | 0.086531812 | 0.311646695 |
| 0.344265924 | 0.152374424 | 0.098011542 | 0.057096485 |
| 0.202398107 | 0.346863218 | 0.181809306 | 0.417100159 |
| 0.363950241 | 0.385791631 | 0.054651635 | 0.367316661 |
| 0.098136234 | 0.358597699 | 0.140687073 | 0.046152711 |
| 0.094989754 | 0.020719175 | 0.312590365 | 0.148067909 |
| 0.134980304 | 0.219258725 | 0.09969836  | 0.021944657 |
| 0.050266852 | 0.072475044 | 0.42006196  | 0.34693184  |
| 0.021471863 | 0.141567587 | 0.133281509 | 0.215522827 |
| 0.162154479 | 0.375780748 | 0.369653932 | 0.157128358 |
| 0.154554494 | 0.029413915 | 0.2858636   | 0.200882635 |
| 0.123017432 | 0.395143373 | 0.203923165 | 0.388006652 |
| 0.235188386 | 0.326301051 | 0.350313325 | 0.231813853 |
| 0.110140917 | 0.178404916 | 0.326187833 | 0.081580517 |
| 0.193167872 | 0.403476421 | 0.122607088 | 0.142422725 |
| 0.194156003 | 0.136611952 | 0.040812099 | 0.03415818  |
| 0.093132987 | 0.203923264 | 0.178041471 | 0.356846921 |
| 0.184817309 | 0.216403801 | 0.037545447 | 0.091096074 |
| 0.408398705 | 0.31326568  | 0.116276188 | 0.305222615 |
| 0.104147324 | 0.2243602   | 0.291969061 | 0.291564839 |
| 0.109295031 | 0.362890178 | 0.312033779 | 0.315992058 |
| 0.356768975 | 0.174369946 | 0.388715729 | 0.047050029 |
| 0.066403756 | 0.172316605 | 0.191385698 | 0.077768498 |

|             |             |             |             |
|-------------|-------------|-------------|-------------|
| 0.15800323  | 0.040646407 | 0.08684647  | 0.289718667 |
| 0.100507396 | 0.302475927 | 0.095123663 | 0.079145723 |
| 0.148097313 | 0.080487217 | 0.210321009 | 0.191939353 |
| 0.148476127 | 0.387834304 | 0.022645588 | 0.066742144 |
| 0.108377648 | 0.316692702 | 0.170638426 | 0.132219853 |
| 0.109171427 | 0.060544421 | 0.205701485 | 0.12526654  |
| 0.175235897 | 0.09326677  | 0.323435117 | 0.04528061  |
| 0.058763701 | 0.400576573 | 0.110578877 | 0.013927292 |
| 0.049036757 | 0.16567611  | 0.088075596 | 0.212278596 |
| 0.023635256 | 0.35769721  | 0.163672412 | 0.185895228 |
| 0.200450117 | 0.07052476  | 0.232554914 | 0.04538788  |
| 0.045851554 | 0.317952736 | 0.147673478 | 0.367568086 |
| 0.097306636 | 0.379896229 | 0.296709161 | 0.309552978 |
| 0.038639432 | 0.104192808 | 0.07505715  | 0.333303162 |
| 0.125092607 |             |             |             |
| KLRD1       | 0.04035813  | 0.063079365 | 0.019984338 |
| 0.143813133 | 0.046157915 | 0.091952701 | 0.255247013 |
| 0.123431097 | 0.065676656 | 0.083220002 | 0.01627125  |
| 0.026082169 | 0.020783596 | 0.081547285 | 0.029801526 |
| 0.107740029 | 0.0261628   | 0.038232586 | 0.196716192 |
| 0.127989596 | 0.224697028 | 0.098360909 | 0.148970746 |
| 0.008675962 | 0.021600923 | 0.091539775 | 0.01886647  |
| 0.126605194 | 0.102468657 | 0.090006465 | 0.15331289  |
| 0.024273702 | 0.065560628 | 0.045086256 | 0.042965666 |
| 0.034638011 | 0.032303    | 0.015919234 | 0.079860686 |
| 0.07175245  | 0.055943876 | 0.141727601 | 0.164824472 |
| 0.131072617 | 0.051069725 | 0.229658919 | 0.034987698 |
| 0.048535636 | 0.035960858 | 0.110029881 | 0.061538195 |
| 0.03896674  | 0.038711801 | 0.165946893 | 0.212828863 |
| 0.011184975 | 0.084218055 | 0.002207213 | 0.127043191 |
| 0.200634606 | 0.156807865 | 0.040044544 | 0.120283303 |
| 0.035842659 | 0.144323428 | 0.017906496 | 0.187196336 |
| 0.007155714 | 0.093783367 | 0.101799595 | 0.014464969 |
| 0.035569391 | 0.152004492 | 0.042775882 | 0.005735542 |
| 0.084034423 | 0.042331218 | 0.027892308 | 0.194231335 |
| 0.101892389 | 0.040259104 | 0.061526572 | 0.049102986 |
| 0.019274224 | 0.055956993 | 0.013423357 | 0.095638135 |
| 0.064377783 | 0.21448545  | 0.053492366 | 0.088187365 |
| 0.058714988 | 0.044877754 | 0.023570918 | 0.050412381 |
| 0.082270963 | 0.072540638 | 0.037240102 | 0.039920114 |
| 0.012691399 | 0.00867117  | 0.053071788 | 0.053693312 |
| 0.068886699 | 0.006851665 | 0.060328092 | 0.127088116 |
| 0.094000803 | 0.016527184 | 0.166294815 | 0.01146076  |
| 0.103502575 | 0.122268204 | 0.03750529  | 0.141310199 |
| 0.035843123 | 0.062151807 | 0.037634087 | 0.23360782  |
| 0.027728354 | 0.028192885 | 0.003995918 | 0.041066888 |
| 0.023355353 | 0.000990278 | 0.036964471 | 0.094752137 |
| 0.065819395 | 0.012417494 | 0.160574673 | 0.019533565 |
| 0.027287416 | 0.013195998 | 0.037573224 | 0.051981959 |
| 0.079741752 | 0.022872674 | 0.063400197 | 0.061859001 |
| 0.022435423 | 0.05953383  | 0.015049262 | 0.16960159  |
| 0.063462052 | 0.016159379 | 0.160594309 | 0.037821003 |
| 0.047613101 | 0.188579038 | 0.143332696 | 0.067352486 |
| 0.084029481 | 0.18863638  | 0.041333943 | 0.095084546 |

|             |             |             |             |
|-------------|-------------|-------------|-------------|
| 0.031157806 | 0.028688001 | 0.145428745 | 0.071852966 |
| 0.157914496 | 0.03041468  | 0.019157109 | 0.087412224 |
| 0.006193395 | 0.007499169 | 0.050686402 | 0.181723769 |
| 0.044415121 | 0.053601818 | 0.030271814 | 0.136509488 |
| 0.089045235 | 0.06953797  | 0.083052234 | 0.060820232 |
| 0.046761182 | 0.06031885  | 0.05270427  | 0.059917775 |
| 0.116870141 | 0.048055468 | 0.063050419 | 0.029508955 |
| 0.074149759 | 0.087505663 | 0.000988543 | 0.046563513 |
| 0.041148419 | 0.046639285 | 0.065701462 | 0.038721178 |
| 0.014439686 | 0.10271367  | 0.00288384  | 0.093709518 |
| 0.051580456 | 0.134387181 | 0.072333417 | 0.079670895 |
| 0.042639867 | 0.090238165 | 0.084324303 | 0.027948688 |
| 0.021447142 | 0.017725336 | 0.192370766 | 0.169317689 |
| 0.013308125 | 0.190207787 | 0.07541444  | 0.126638659 |
| 0.096387243 | 0.0596769   | 0.088129111 | 0.011282857 |
| 0.046003067 | 0.156783161 | 0.032935206 | 0.032867377 |
| 0.043955539 | 0.005632929 | 0.072870476 | 0.113160834 |
| 0.044742014 | 0.068076748 | 0.028902307 | 0.019277231 |
| 0.187718477 | 0.153869542 | 0.080939198 | 0.065456427 |
| 0.033930115 | 0.100520814 | 0.02170547  | 0.017696051 |
| 0.035753156 | 0.060451341 | 0.005161425 | 0.003339643 |
| 0.001517527 | 0.061637719 | 0.176862122 | 0.046693257 |
| 0.011085221 | 0.059866714 | 0.01621868  | 0.034793253 |
| 0.210919959 | 0.085523438 | 0.005586377 | 0.006327168 |
| 0.016187921 | 0.016534395 | 0.018851932 | 0.053610405 |
| 0.028565159 | 0.036329266 | 0.044925281 | 0.007804517 |
| 0.026916794 | 0.063287792 | 0.061733269 | 0.102639373 |
| 0.080447177 | 0.1311774   | 0.060362205 | 0.004731572 |
| 0.084905341 | 0.069954425 | 0.046518395 | 0.085004669 |
| 0.045179527 | 0.062385337 | 0.033462854 | 0.071798668 |
| 0.012668116 | 0.140110206 | 0.111241176 | 0.03036948  |
| 0.067081993 | 0.069763076 | 0.072122971 | 0.059754631 |
| 0.061565896 | 0.109257658 | 0.113248087 | 0.049624864 |
| 0.047401261 | 0.081812237 | 0.0472616   | 0.015696516 |
| 0.05224135  | 0.036993373 | 0.035956728 | 0.089207669 |
| 0.05074166  | 0.090871507 | 1           | 0.088286174 |
| 0.06413036  | 0.099065983 | 0.059519068 | 0.009588932 |
| 0.135099305 | 0.015933739 | 0.018063142 | 0.017254884 |
| 0.04342062  | 0.038737355 | 0.10594346  | 0.025330882 |
| 0.200167601 | 0.017369137 | 0.065758309 | 0.053946071 |
| 0.007418648 | 0.045522503 | 0.051261415 | 0.03182814  |
| 0.035221957 | 0.095194171 | 0.039263316 | 0.185217334 |
| 0.07768056  | 0.159062123 | 0.096498298 | 0.049223656 |
| 0.07614679  | 0.042947938 | 0.02887863  | 0.051938652 |
| 0.172889578 | 0.160991583 | 0.043066577 | 0.002928654 |
| 0.035152158 | 0.076414844 | 0.000351975 | 0.047886865 |
| 0.07362202  | 0.068382328 | 0.070048747 | 0.048693626 |
| 0.08157568  | 0.053265985 | 0.057615424 | 0.13383499  |
| 0.029230404 | 0.034357716 | 0.047652154 | 0.133838769 |
| 0.038161243 | 0.041300556 | 0.011252988 | 0.052755629 |
| 0.031532902 | 0.035988449 | 0.082247248 | 0.045460278 |
| 0.084619527 | 0.108513294 | 0.038813753 | 0.073315865 |
| 0.216923531 | 0.03711444  | 0.041282288 | 0.001188233 |
| 0.010218652 | 0.054432564 | 0.048170707 | 0.148325062 |

|             |             |             |             |
|-------------|-------------|-------------|-------------|
| 0.059029865 | 0.113103887 | 0.001193401 | 0.044263033 |
| 0.055619347 | 0.016254887 | 0.009345398 | 0.033845824 |
| 0.020091178 | 0.063528491 | 0.009347884 | 0.035212844 |
| 0.017691113 | 0.03684129  | 0.055633237 | 0.099327925 |
| 0.07985489  | 0.028154701 | 0.097798204 | 0.07050196  |
| 0.086631781 | 0.051997344 | 0.201556247 | 0.119355305 |
| 0.010666439 | 0.18013606  | 0.018275646 | 0.031002685 |
| 0.103538195 | 0.034336104 | 0.051181878 | 0.073626326 |
| 0.041925928 | 0.039446093 | 0.136754188 | 0.043079073 |
| 0.113676635 | 0.102471037 | 0.019413612 | 0.004487974 |
| 0.0013169   | 0.005605977 | 0.146022305 | 0.046072458 |
| 0.053103153 | 0.022305017 | 0.062872293 | 0.190230327 |
| 0.046071155 | 0.025108521 | 0.050698192 | 0.150767993 |
| 0.037674134 | 0.079888473 | 0.033033465 | 0.136844134 |
| 0.017619553 | 0.047002974 | 0.052176636 | 0.070319979 |
| 0.025263111 | 0.047282569 | 0.037695639 | 0.094799826 |
| 0.000199231 | 0.072117051 | 0.029774592 | 0.034587306 |
| 0.010425476 | 0.031797117 | 0.039496672 | 0.074686428 |
| 0.031135127 | 0.025549535 | 0.023727374 | 0.021179453 |
| 0.131601693 | 0.062866535 | 0.061523912 | 0.066548631 |
| 0.101372818 | 0.114747613 | 0.010978887 | 0.057936972 |
| 0.036657187 | 0.041662746 | 0.016448725 | 0.033331724 |
| 0.030893878 | 0.040457554 | 0.030772396 | 0.008421892 |
| 0.070937502 | 0.09013968  | 0.01048699  | 0.015268986 |
| 0.001533529 | 0.049070447 | 0.079796067 | 0.048421887 |
| 0.009883205 | 0.11433452  | 0.064929385 | 0.079190522 |
| 0.18774747  | 0.096616858 | 0.049110699 | 0.02331763  |
| 0.185933431 | 0.000877438 | 0.128708064 | 0.053121801 |
| 0.094809966 | 0.062880931 | 0.024173888 | 0.050574506 |
| 0.068972739 | 0.064000883 | 0.042715591 | 0.144354815 |
| 0.00531732  | 0.063946984 | 0.140100086 | 0.112629196 |
| 0.118303768 | 0.077349849 | 0.083391124 | 0.015835255 |
| 0.063352649 | 0.010887292 | 0.07230098  | 0.010370572 |
| 0.004859339 | 0.155099834 | 0.07280671  | 0.106852078 |
| 0.076406736 | 0.056714865 | 0.09567452  | 0.041173179 |
| 0.057391728 | 0.065844415 | 0.111179571 | 0.089849202 |
| 0.074572312 | 0.081388562 | 0.043350245 | 0.037113693 |
| 0.012187222 | 0.051562102 | 0.095372515 | 0.101296132 |
| 0.081379399 | 0.18701465  | 0.04898032  | 0.112714688 |
| 0.011092827 | 0.024646569 | 0.063306016 | 0.05469306  |
| 0.146870566 | 0.02976218  | 0.002225242 | 0.077843269 |
| 0.003970019 | 0.105492706 | 0.020235287 | 0.044703801 |
| 0.045932676 | 0.023966544 | 0.08780452  | 0.20473859  |
| 0.069004022 | 0.049833975 | 0.020635145 | 0.059034999 |
| 0.005523945 | 0.050580158 | 0.01530172  | 0.050319857 |
| 0.003498647 | 0.010054902 | 0.107634391 | 0.11130739  |
| 0.034984342 | 0.005449081 | 0.051988522 | 0.110313427 |
| 0.133905971 | 0.071620091 | 0.04630459  | 0.011825057 |
| 0.016240888 | 0.049492129 | 0.027802805 | 0.04010696  |
| 0.013716051 | 0.032862689 | 0.060666509 | 0.03406327  |
| 0.162274153 | 0.088190045 | 0.06244818  | 0.031219887 |
| 0.074179723 | 0.055006101 | 0.018857569 | 0.037006647 |
| 0.019371616 | 0.11477523  | 0.048491772 | 0.047636043 |
| 0.019273025 | 0.012781048 | 0.135090873 | 0.089004704 |

0.008065221

| KLRE1       | 0.249408455 | 0.332607282 | 0.202173081 |
|-------------|-------------|-------------|-------------|
| 0.348061464 | 0.253157404 | 0.152620785 | 0.221705017 |
| 0.127533527 | 0.195344243 | 0.036411906 | 0.123867249 |
| 0.245946354 | 0.210692496 | 0.179526233 | 0.143667272 |
| 0.403704675 | 0.305208887 | 0.188461509 | 0.294364217 |
| 0.312899449 | 0.123793197 | 0.394502789 | 0.233536816 |
| 0.27902491  | 0.283082156 | 0.257273717 | 0.283055673 |
| 0.374110636 | 0.274439035 | 0.109645358 | 0.245808504 |
| 0.29595868  | 0.286760475 | 0.284768524 | 0.320639447 |
| 0.273566825 | 0.203664981 | 0.047395013 | 0.148795891 |
| 0.265069368 | 0.324462064 | 0.312352632 | 0.287006354 |
| 0.178166064 | 0.241927729 | 0.258246227 | 0.284854037 |
| 0.120059392 | 0.195156182 | 0.088916852 | 0.226641552 |
| 0.243385541 | 0.201853784 | 0.15830205  | 0.212301379 |
| 0.147955129 | 0.092930428 | 0.175814358 | 0.142105398 |
| 0.267071374 | 0.070086769 | 0.2664009   | 0.157398757 |
| 0.115603352 | 0.181995502 | 0.315602293 | 0.197658652 |
| 0.227034666 | 0.204961659 | 0.101864268 | 0.189286989 |
| 0.011579435 | 0.314315499 | 0.295370447 | 0.176646131 |
| 0.240614726 | 0.129323914 | 0.331989874 | 0.247845239 |
| 0.374407721 | 0.264741975 | 0.406046136 | 0.377878    |
| 0.281211121 | 0.324895937 | 0.220340709 | 0.304620572 |
| 0.283665517 | 0.216596016 | 0.176028989 | 0.423669328 |
| 0.399408222 | 0.310466111 | 0.325896265 | 0.341456799 |
| 0.269592426 | 0.297661633 | 0.182360885 | 0.233445611 |
| 0.183813883 | 0.233701166 | 0.245400647 | 0.367044444 |
| 0.220111391 | 0.227760186 | 0.340862968 | 0.276160057 |
| 0.254442035 | 0.142925989 | 0.335378734 | 0.19157418  |
| 0.384445636 | 0.109062805 | 0.344567138 | 0.21107228  |
| 0.276325205 | 0.284930495 | 0.312379321 | 0.269408757 |
| 0.250632464 | 0.134251056 | 0.178847066 | 0.209323458 |
| 0.201144175 | 0.179526709 | 0.224060116 | 0.353385373 |
| 0.147519973 | 0.243795431 | 0.239698613 | 0.066765209 |
| 0.210740536 | 0.276109007 | 0.266805873 | 0.209647335 |
| 0.306046732 | 0.206694678 | 0.277057114 | 0.190741592 |
| 0.238951862 | 0.401236231 | 0.01663674  | 0.220618497 |
| 0.208249887 | 0.28520624  | 0.330731145 | 0.220218509 |
| 0.316515389 | 0.19055227  | 0.282131748 | 0.383483815 |
| 0.233706209 | 0.250359093 | 0.13505824  | 0.395896513 |
| 0.180725305 | 0.296988546 | 0.261074051 | 0.2484393   |
| 0.157967471 | 0.261675831 | 0.210674363 | 0.159894828 |
| 0.152553493 | 0.255260588 | 0.076659726 | 0.147028924 |
| 0.174507717 | 0.270647762 | 0.216546978 | 0.282863603 |
| 0.254251286 | 0.345001984 | 0.118655293 | 0.245735473 |
| 0.074482162 | 0.201154283 | 0.081898348 | 0.354537516 |
| 0.103511237 | 0.367086527 | 0.286611416 | 0.312229007 |
| 0.345259738 | 0.37552797  | 0.011911486 | 0.257628879 |
| 0.312163008 | 0.082274266 | 0.256376773 | 0.275238987 |
| 0.186855693 | 0.360342741 | 0.019213081 | 0.373755482 |
| 0.153548372 | 0.256112102 | 0.41588191  | 0.331830834 |
| 0.261584749 | 0.225339724 | 0.159927173 | 0.306932178 |
| 0.238000816 | 0.044978192 | 0.10141243  | 0.279945744 |
| 0.199676803 | 0.103204177 | 0.283019874 | 0.311978854 |

|             |             |             |             |
|-------------|-------------|-------------|-------------|
| 0.244355241 | 0.358481941 | 0.428439351 | 0.18170606  |
| 0.247823926 | 0.231766208 | 0.122615242 | 0.316969988 |
| 0.303779238 | 0.148810021 | 0.246778019 | 0.232892802 |
| 0.105156816 | 0.295512811 | 0.236251806 | 0.094028698 |
| 0.189448257 | 0.185691107 | 0.062009253 | 0.286013852 |
| 0.220141541 | 0.19129522  | 0.168788432 | 0.255722092 |
| 0.284538184 | 0.363081863 | 0.249725108 | 0.19873857  |
| 0.178159707 | 0.188938671 | 0.26806192  | 0.161002548 |
| 0.192162067 | 0.316745683 | 0.236372821 | 0.225215893 |
| 0.106950206 | 0.277951394 | 0.112972946 | 0.140266394 |
| 0.154553466 | 0.157384602 | 0.132255985 | 0.198164554 |
| 0.181811903 | 0.197645883 | 0.267929406 | 0.251906666 |
| 0.310402517 | 0.161694172 | 0.326621162 | 0.349067174 |
| 0.145927047 | 0.263921934 | 0.233402202 | 0.11648519  |
| 0.349765005 | 0.088925337 | 0.074344562 | 0.300350924 |
| 0.12717525  | 0.388832862 | 0.240708558 | 0.318826941 |
| 0.22687106  | 0.296587254 | 0.394694206 | 0.063325355 |
| 0.169703456 | 0.275514549 | 0.309100472 | 0.322088055 |
| 0.206503039 | 0.279063892 | 0.141243637 | 0.214205406 |
| 0.201450595 | 0.207343042 | 0.340587893 | 0.308757063 |
| 0.18827293  | 0.328671822 | 0.270346661 | 0.289689979 |
| 0.293256562 | 0.210412818 | 0.088286174 | 1           |
| 0.353690472 | 0.410248961 | 0.25728915  | 0.28361865  |
| 0.187517608 | 0.069555222 | 0.322671325 | 0.195614467 |
| 0.262732046 | 0.338413062 | 0.329568858 | 0.256693129 |
| 0.307199902 | 0.227477627 | 0.066518757 | 0.357874212 |
| 0.205199023 | 0.299397718 | 0.10301389  | 0.314253719 |
| 0.264211171 | 0.098084318 | 0.279246622 | 0.175860644 |
| 0.212691999 | 0.198335599 | 0.243665098 | 0.284608354 |
| 0.29249788  | 0.259066792 | 0.214864114 | 0.291020665 |
| 0.080584009 | 0.132837455 | 0.256471881 | 0.222323729 |
| 0.200002832 | 0.317482825 | 0.09781207  | 0.154884069 |
| 0.191289747 | 0.266439462 | 0.384349828 | 0.226598518 |
| 0.119826781 | 0.1363634   | 0.352474468 | 0.203230549 |
| 0.316492264 | 0.302227976 | 0.289573046 | 0.226317922 |
| 0.280182948 | 0.316063556 | 0.192565496 | 0.28936457  |
| 0.178136858 | 0.292208683 | 0.215716656 | 0.099970974 |
| 0.394530186 | 0.068014995 | 0.083903782 | 0.312852737 |
| 0.279907569 | 0.201513279 | 0.013582147 | 0.077865139 |
| 0.214545336 | 0.397830177 | 0.255548531 | 0.244165985 |
| 0.070485007 | 0.273398492 | 0.035637168 | 0.353633478 |
| 0.290301324 | 0.159173361 | 0.301874427 | 0.26336175  |
| 0.263221016 | 0.321120083 | 0.227123664 | 0.323131255 |
| 0.223559613 | 0.272825839 | 0.20188559  | 0.341152604 |
| 0.300799053 | 0.290481317 | 0.27833123  | 0.275177939 |
| 0.364923147 | 0.35638899  | 0.289677765 | 0.110932895 |
| 0.195690635 | 0.117303581 | 0.110580821 | 0.168669067 |
| 0.125385184 | 0.30914095  | 0.310782653 | 0.395961714 |
| 0.345515649 | 0.09686657  | 0.154734516 | 0.255130413 |
| 0.309909238 | 0.373420802 | 0.112508839 | 0.024553336 |
| 0.020012714 | 0.136075937 | 0.205985168 | 0.34048121  |
| 0.333895756 | 0.071232749 | 0.082927152 | 0.098407951 |
| 0.24736671  | 0.295222509 | 0.301162986 | 0.379163674 |
| 0.314491145 | 0.279452695 | 0.13193786  | 0.362048275 |



|             |             |             |             |
|-------------|-------------|-------------|-------------|
| 0.253139891 | 0.126963825 | 0.358749996 | 0.270877278 |
| 0.215713495 | 0.331943077 | 0.170155969 | 0.384246506 |
| 0.092327618 | 0.330683718 | 0.256163357 | 0.225079829 |
| 0.092000478 | 0.296878384 | 0.259999785 | 0.387840245 |
| 0.259509713 | 0.204141055 | 0.17930999  | 0.049039418 |
| 0.212263955 | 0.358100393 | 0.278919671 | 0.396928795 |
| 0.320778689 | 0.416468475 | 0.262148006 | 0.277197588 |
| 0.174441963 | 0.26254659  | 0.273885296 | 0.04022002  |
| 0.282165461 | 0.13450817  | 0.277270536 | 0.137390507 |
| 0.140933936 | 0.230456844 | 0.204321822 | 0.163933026 |
| 0.174482605 | 0.259460539 | 0.398747371 | 0.384999135 |
| 0.200537074 | 0.240651651 | 0.326274482 | 0.296646585 |
| 0.138245748 | 0.350868719 | 0.269339399 | 0.123578516 |
| 0.176215973 | 0.164268911 | 0.299366021 | 0.189077368 |
| 0.14710457  | 0.412139936 | 0.237094384 | 0.355599386 |
| 0.231328754 | 0.305934908 | 0.306224202 | 0.232176641 |
| 0.263137908 | 0.169288468 | 0.211122537 | 0.078799859 |
| 0.271222652 | 0.376904131 | 0.185135154 | 0.278780084 |
| 0.317415445 | 0.190592588 | 0.153061934 | 0.079199226 |
| 0.17616327  | 0.125897634 | 0.250361022 | 0.417178329 |
| 0.202828203 | 0.198395267 | 0.113526542 | 0.251309723 |
| 0.340158234 | 0.258877069 | 0.14662065  | 0.266349765 |
| 0.334939039 | 0.287243766 | 0.330783144 | 0.344800368 |
| 0.181591747 | 0.294605678 | 0.289030769 | 0.208221989 |
| 0.239109338 | 0.277381227 | 0.297673856 | 0.060376789 |
| 0.204775946 | 0.193973562 | 0.221164125 | 0.307140724 |
| 0.299775808 | 0.202410632 | 0.165340377 | 0.374356319 |
| 0.162765688 | 0.327132071 | 0.116096306 | 0.247178905 |
| 0.320440998 | 0.144244564 | 0.305468061 | 0.183618243 |
| 0.223144841 | 0.275934666 | 0.088285599 | 0.261703179 |
| 0.180327734 | 0.292234982 | 0.222413639 | 0.344523087 |
| 0.225225465 | 0.290631819 | 0.320208097 | 0.108643291 |
| 0.111819626 | 0.167051954 | 0.283829065 | 0.107348624 |
| 0.105997181 | 0.410353814 | 0.14206132  | 0.156238465 |
| 0.189493532 | 0.164529838 | 0.228718288 | 0.2370209   |
| 0.182590336 | 0.300913411 | 0.115184712 | 0.236699218 |
| 0.206705857 | 0.251374988 | 0.172055386 | 0.126467229 |
| 0.186962762 | 0.24369184  | 0.217730738 | 0.295961223 |
| 0.254106075 | 0.401688766 | 0.211499019 | 0.267861474 |
| 0.177418349 | 0.148422938 | 0.140121446 | 0.336904487 |

|             |             |             |             |
|-------------|-------------|-------------|-------------|
| 0.146157096 |             |             |             |
| KLRG1       | 0.471181973 | 0.526426963 | 0.455351757 |
| 0.495970075 | 0.495940678 | 0.448353474 | 0.267488376 |
| 0.223325224 | 0.119312962 | 0.009112668 | 0.037168863 |
| 0.500035277 | 0.268358512 | 0.33884501  | 0.404233541 |
| 0.483840426 | 0.172761343 | 0.388944428 | 0.296771866 |
| 0.473593479 | 0.124815699 | 0.47285152  | 0.122638787 |
| 0.336270917 | 0.139027263 | 0.095630364 | 0.33369938  |
| 0.502925763 | 0.10815197  | 0.401917136 | 0.449226077 |
| 0.119494398 | 0.492626575 | 0.530139616 | 0.513270301 |
| 0.524448709 | 0.450369918 | 0.012518024 | 0.372509117 |
| 0.470650931 | 0.516363805 | 0.473150635 | 0.402873401 |
| 0.060759577 | 0.498222169 | 0.311903081 | 0.459468158 |
| 0.278273166 | 0.045990063 | 0.291686967 | 0.449473205 |

|             |             |             |             |
|-------------|-------------|-------------|-------------|
| 0.495392368 | 0.514405096 | 0.275289327 | 0.210584065 |
| 0.27187096  | 0.27641659  | 0.340778823 | 0.381342363 |
| 0.285511232 | 0.199278572 | 0.49816747  | 0.125465964 |
| 0.182711049 | 0.293315497 | 0.180253806 | 0.315311104 |
| 0.40234512  | 0.44634645  | 0.022853824 | 0.456730342 |
| 0.004895062 | 0.449482512 | 0.431112935 | 0.377740475 |
| 0.056113963 | 0.032974368 | 0.211167128 | 0.414614335 |
| 0.511221815 | 0.456279041 | 0.529572823 | 0.523597259 |
| 0.230051138 | 0.339840502 | 0.450485799 | 0.223164966 |
| 0.492304008 | 0.236821083 | 0.140130905 | 0.488855765 |
| 0.529432427 | 0.529249193 | 0.25008537  | 0.311941487 |
| 0.504151567 | 0.489615227 | 0.502842802 | 0.508066348 |
| 0.427369227 | 0.062642815 | 0.47322227  | 0.52232913  |
| 0.450997558 | 0.37161025  | 0.193871851 | 0.474333449 |
| 0.075591277 | 0.422583798 | 0.427525151 | 0.184091758 |
| 0.514391094 | 0.02776068  | 0.258102221 | 0.434826398 |
| 0.246671692 | 0.504709974 | 0.521924567 | 0.240032119 |
| 0.46416189  | 0.028484232 | 0.181458011 | 0.040925703 |
| 0.393072758 | 0.173682238 | 0.500521936 | 0.5225128   |
| 0.278919885 | 0.448252364 | 0.322409509 | 0.002967241 |
| 0.035878537 | 0.208981984 | 0.497071176 | 0.411118576 |
| 0.491482687 | 0.426453264 | 0.305401072 | 0.450557243 |
| 0.511298047 | 0.527844006 | 0.080930436 | 0.124346378 |
| 0.499813936 | 0.208315909 | 0.293890424 | 0.516187443 |
| 0.382324305 | 0.145290363 | 0.163668146 | 0.523080463 |
| 0.445264193 | 0.113001602 | 0.37669653  | 0.482955938 |
| 0.415695944 | 0.423174242 | 0.135608279 | 0.344627892 |
| 0.069789304 | 0.491813977 | 0.036250239 | 0.379871846 |
| 0.344941104 | 0.1827709   | 0.012625164 | 0.312678378 |
| 0.367794424 | 0.508468142 | 0.482140338 | 0.132604336 |
| 0.391352575 | 0.482640942 | 0.371890485 | 0.513418572 |
| 0.019028145 | 0.058686862 | 0.319581001 | 0.521203294 |
| 0.345702969 | 0.512216683 | 0.358862255 | 0.357195982 |
| 0.342498056 | 0.512456263 | 0.003722077 | 0.51010229  |
| 0.53166472  | 0.347786843 | 0.485919713 | 0.474567075 |
| 0.449118113 | 0.520828188 | 0.047955237 | 0.484314052 |
| 0.410586706 | 0.09928449  | 0.527297962 | 0.206393208 |
| 0.470695042 | 0.058216947 | 0.379384508 | 0.501124471 |
| 0.50025111  | 0.011359593 | 0.282766151 | 0.458290808 |
| 0.03344407  | 0.129510264 | 0.48543187  | 0.484662041 |
| 0.466910912 | 0.506919983 | 0.522988953 | 0.433546499 |
| 0.504533041 | 0.280767982 | 0.015748612 | 0.37486866  |
| 0.495776284 | 0.440067898 | 0.461441837 | 0.298125071 |
| 0.390009242 | 0.497087803 | 0.482390254 | 0.262710849 |
| 0.061603112 | 0.373651214 | 0.030843963 | 0.411172827 |
| 0.449536712 | 0.165304854 | 0.463382845 | 0.163426274 |
| 0.091340721 | 0.522126204 | 0.21146082  | 0.305581271 |
| 0.15294211  | 0.487430429 | 0.30346219  | 0.317208571 |
| 0.287567392 | 0.2080485   | 0.425106841 | 0.457342032 |
| 0.053974937 | 0.125602868 | 0.015677706 | 0.448934083 |
| 0.196558361 | 0.428578534 | 0.424262564 | 0.471592819 |
| 0.388035082 | 0.151276563 | 0.469943187 | 0.335043342 |
| 0.145133729 | 0.020445453 | 0.507656668 | 0.470751283 |
| 0.393623417 | 0.1985757   | 0.051843686 | 0.414430107 |

|             |             |             |             |
|-------------|-------------|-------------|-------------|
| 0.523975424 | 0.395696767 | 0.311891956 | 0.503624558 |
| 0.034759399 | 0.520413427 | 0.326194077 | 0.160430285 |
| 0.456632054 | 0.329942115 | 0.513806569 | 0.083191683 |
| 0.444939273 | 0.483003441 | 0.362667983 | 0.241651574 |
| 0.447389117 | 0.487242867 | 0.043727614 | 0.466758774 |
| 0.464659982 | 0.043666999 | 0.524146203 | 0.156221143 |
| 0.027264901 | 0.504712836 | 0.518197094 | 0.09735488  |
| 0.100190916 | 0.425233691 | 0.06413036  | 0.353690472 |
| 1           | 0.485881732 | 0.50959481  | 0.252738915 |
| 0.058934597 | 0.017222289 | 0.243963787 | 0.45078392  |
| 0.522662922 | 0.507102122 | 0.311238774 | 0.453144    |
| 0.29750349  | 0.411989861 | 0.171025581 | 0.522420143 |
| 0.20755567  | 0.519993687 | 0.009003635 | 0.50778464  |
| 0.523870896 | 0.344054114 | 0.109171074 | 0.380805293 |
| 0.460788179 | 0.064373219 | 0.236998315 | 0.508032005 |
| 0.497624029 | 0.406576998 | 0.437433001 | 0.485514701 |
| 0.024866335 | 0.0583206   | 0.4606102   | 0.217514862 |
| 0.466934151 | 0.269515375 | 0.062047845 | 0.379835454 |
| 0.064015889 | 0.483536522 | 0.513491242 | 0.085490619 |
| 0.422338979 | 0.358210638 | 0.44240019  | 0.050728092 |
| 0.504677651 | 0.497383027 | 0.533254909 | 0.196955457 |
| 0.503396559 | 0.508569243 | 0.477249465 | 0.097122017 |
| 0.022685962 | 0.524882959 | 0.460180528 | 0.034918197 |
| 0.522304929 | 0.287322066 | 0.022142459 | 0.499044425 |
| 0.231719229 | 0.457267378 | 0.006382241 | 0.087442619 |
| 0.047701266 | 0.514113172 | 0.495725308 | 0.445661523 |
| 0.318243972 | 0.423808458 | 0.005687349 | 0.512567504 |
| 0.501792633 | 0.019493672 | 0.171576231 | 0.511232823 |
| 0.50105342  | 0.531056735 | 0.388896557 | 0.519206145 |
| 0.503654342 | 0.513940303 | 0.306501492 | 0.332662749 |
| 0.515338355 | 0.495086618 | 0.489247958 | 0.475138738 |
| 0.52410406  | 0.490117907 | 0.349016664 | 0.024146075 |
| 0.173608867 | 0.261419319 | 0.4000884   | 0.119912901 |
| 0.381920698 | 0.185700325 | 0.496319199 | 0.522663401 |
| 0.521912597 | 0.006718481 | 0.192505297 | 0.503133949 |
| 0.495015378 | 0.5122117   | 0.023067577 | 0.007846082 |
| 0.009169829 | 0.029506804 | 0.424794504 | 0.290042772 |
| 0.512351868 | 0.315009179 | 0.006887758 | 0.059273292 |
| 0.347000493 | 0.471562477 | 0.512533375 | 0.449410663 |
| 0.500840324 | 0.101853677 | 0.373774818 | 0.464265239 |
| 0.093238705 | 0.378051522 | 0.527565386 | 0.485430761 |
| 0.048396184 | 0.297233429 | 0.420149567 | 0.522670293 |
| 0.087905376 | 0.378212446 | 0.502102908 | 0.403094216 |
| 0.014747315 | 0.104185777 | 0.088019911 | 0.499525488 |
| 0.513178906 | 0.112168443 | 0.050106917 | 0.175372094 |
| 0.167309594 | 0.514905788 | 0.219969018 | 0.526617226 |
| 0.510156859 | 0.506347312 | 0.090556045 | 0.494191592 |
| 0.056544766 | 0.500625079 | 0.409818319 | 0.082359572 |
| 0.327326492 | 0.015740569 | 0.474305598 | 0.21735891  |
| 0.387551551 | 0.456482685 | 0.250326824 | 0.020660964 |
| 0.21424566  | 0.069255544 | 0.529174324 | 0.519902035 |
| 0.038840645 | 0.287344409 | 0.353967117 | 0.463537587 |
| 0.350141746 | 0.516330831 | 0.518266313 | 0.484103959 |
| 0.11661274  | 0.153146559 | 0.474353607 | 0.457866716 |

|             |             |             |             |
|-------------|-------------|-------------|-------------|
| 0.285528732 | 0.526641902 | 0.385513557 | 0.518580583 |
| 0.4713096   | 0.488915699 | 0.505207618 | 0.428864841 |
| 0.281509143 | 0.464991854 | 0.456747507 | 0.032353525 |
| 0.422185951 | 0.528522591 | 0.409315064 | 0.209920743 |
| 0.329553229 | 0.449150092 | 0.055960048 | 0.201694532 |
| 0.387186648 | 0.376612604 | 0.188789052 | 0.500348385 |
| 0.444914094 | 0.462853303 | 0.047037515 | 0.08464364  |
| 0.542336271 | 0.466081878 | 0.187200676 | 0.508182267 |
| 0.206361389 | 0.424659038 | 0.51254291  | 0.509664671 |
| 0.424952863 | 0.517357577 | 0.494302002 | 0.470947816 |
| 0.460984774 | 0.322133413 | 0.536187024 | 0.107356025 |
| 0.111169092 | 0.470353346 | 0.138795418 | 0.114320229 |
| 0.186401109 | 0.035589186 | 0.356679681 | 0.489344092 |
| 0.435726775 | 0.462708553 | 0.363474978 | 0.105265217 |
| 0.380762221 | 0.406130564 | 0.423993372 | 0.262547758 |
| 0.1117066   | 0.514412212 | 0.013058852 | 0.071054918 |
| 0.443897247 | 0.514932421 | 0.466248159 | 0.294794377 |
| 0.360546967 | 0.161168555 | 0.369708977 | 0.356605475 |
| 0.410445359 | 0.412670227 | 0.513739163 | 0.046183898 |
| 0.027388191 | 0.526195406 | 0.432264315 | 0.023866919 |
| 0.100719473 | 0.434189834 | 0.328448211 | 0.311469722 |
| 0.026857598 | 0.497055399 | 0.415626938 | 0.495552907 |
| 0.414517868 | 0.08217528  | 0.397463772 | 0.106421998 |
| 0.071947987 | 0.455830691 | 0.457497843 | 0.520027637 |
| 0.394977564 | 0.497705901 | 0.456999661 | 0.503790095 |
| 0.140132137 | 0.427181319 | 0.040026937 | 0.50366831  |
| 0.484357368 |             |             |             |
| KLRK1       | 0.319928967 | 0.473440792 | 0.326010795 |
| 0.403874559 | 0.407868522 | 0.266302022 | 0.297104384 |
| 0.197286597 | 0.175732853 | 0.029791452 | 0.092512831 |
| 0.354129397 | 0.292288285 | 0.30005407  | 0.255861295 |
| 0.42253824  | 0.291964636 | 0.299560247 | 0.360707072 |
| 0.375334438 | 0.159507726 | 0.427924737 | 0.219955381 |
| 0.34085443  | 0.241285623 | 0.207093993 | 0.341493186 |
| 0.44748628  | 0.223262237 | 0.238081396 | 0.311830354 |
| 0.235056624 | 0.373749195 | 0.430849556 | 0.397442758 |
| 0.41976362  | 0.275586564 | 0.03541841  | 0.269559908 |
| 0.359134062 | 0.382696797 | 0.367597826 | 0.398817813 |
| 0.144484856 | 0.384815849 | 0.343274724 | 0.389610072 |
| 0.203252527 | 0.134613511 | 0.180065353 | 0.353945484 |
| 0.385838609 | 0.332116075 | 0.243217499 | 0.262894174 |
| 0.241824414 | 0.189467948 | 0.271282027 | 0.220420997 |
| 0.34252323  | 0.137181539 | 0.406169619 | 0.169631263 |
| 0.173672163 | 0.273929187 | 0.293411219 | 0.299829077 |
| 0.331855558 | 0.287695824 | 0.069622992 | 0.285012544 |
| 0.012366668 | 0.374200667 | 0.400318995 | 0.269609416 |
| 0.161451393 | 0.103137529 | 0.32308199  | 0.362680098 |
| 0.459251534 | 0.381856046 | 0.496477512 | 0.48027322  |
| 0.318627637 | 0.389442999 | 0.348446039 | 0.330676404 |
| 0.381617999 | 0.281519567 | 0.185586785 | 0.43846302  |
| 0.497235414 | 0.455202104 | 0.341713122 | 0.379431413 |
| 0.370180708 | 0.425407788 | 0.332873804 | 0.393733125 |
| 0.298956823 | 0.148812815 | 0.371624144 | 0.489602462 |
| 0.321473562 | 0.319747411 | 0.315675308 | 0.361567664 |

|             |             |             |             |
|-------------|-------------|-------------|-------------|
| 0.187180319 | 0.268321737 | 0.408509978 | 0.233008307 |
| 0.473290466 | 0.075340381 | 0.355009651 | 0.358870984 |
| 0.304274761 | 0.370128687 | 0.451072607 | 0.316324452 |
| 0.388778869 | 0.093326075 | 0.193303241 | 0.127484614 |
| 0.327762023 | 0.193709738 | 0.366592409 | 0.455163157 |
| 0.247357923 | 0.386778711 | 0.333868538 | 0.026251749 |
| 0.124279842 | 0.276723892 | 0.367186523 | 0.334712282 |
| 0.364835841 | 0.298107571 | 0.341267385 | 0.280531636 |
| 0.326899793 | 0.48922007  | 0.038496737 | 0.213043725 |
| 0.362829134 | 0.286987734 | 0.380131979 | 0.35732128  |
| 0.40227839  | 0.209563187 | 0.280741528 | 0.501217299 |
| 0.354302951 | 0.22603089  | 0.251521441 | 0.414970722 |
| 0.318982698 | 0.406605026 | 0.246933732 | 0.363947803 |
| 0.149272204 | 0.395540224 | 0.1212735   | 0.278758805 |
| 0.23593078  | 0.270679046 | 0.043002157 | 0.250845256 |
| 0.291618485 | 0.385461192 | 0.352196708 | 0.249169314 |
| 0.385635303 | 0.421709777 | 0.238017214 | 0.332492066 |
| 0.054431527 | 0.143440735 | 0.178096339 | 0.483139578 |
| 0.184028212 | 0.475570252 | 0.380614211 | 0.377952776 |
| 0.405126207 | 0.438032867 | 0.006872668 | 0.401305554 |
| 0.454738898 | 0.184786113 | 0.399754627 | 0.38038726  |
| 0.310301094 | 0.446871703 | 0.032459579 | 0.414029363 |
| 0.227131362 | 0.208030379 | 0.513115177 | 0.326146568 |
| 0.387354432 | 0.159701834 | 0.292444076 | 0.38811367  |
| 0.328859428 | 0.031309824 | 0.193332435 | 0.349575449 |
| 0.110341897 | 0.144064368 | 0.344937097 | 0.383555498 |
| 0.369500118 | 0.412645811 | 0.506638788 | 0.297940972 |
| 0.406204307 | 0.308127443 | 0.063529551 | 0.39371989  |
| 0.375101181 | 0.28240908  | 0.372815605 | 0.314361829 |
| 0.204938248 | 0.42314202  | 0.332021809 | 0.172275308 |
| 0.150131189 | 0.309980693 | 0.059833953 | 0.387891235 |
| 0.311813086 | 0.236527396 | 0.298768641 | 0.246935182 |
| 0.210828545 | 0.494981866 | 0.257137758 | 0.26361507  |
| 0.179206806 | 0.338934965 | 0.342608875 | 0.277675926 |
| 0.28608153  | 0.314971349 | 0.348111114 | 0.35822761  |
| 0.107268295 | 0.251265348 | 0.053707412 | 0.288205378 |
| 0.227243684 | 0.307560115 | 0.278907523 | 0.284117992 |
| 0.323023426 | 0.234186227 | 0.41159662  | 0.312547882 |
| 0.252982243 | 0.08799814  | 0.460382222 | 0.400207946 |
| 0.226886609 | 0.281485983 | 0.151909493 | 0.253642738 |
| 0.459312    | 0.202635252 | 0.163611628 | 0.422934551 |
| 0.086199844 | 0.481170453 | 0.344326229 | 0.28594422  |
| 0.375225095 | 0.384459054 | 0.471679292 | 0.078724149 |
| 0.297186239 | 0.410489873 | 0.386873917 | 0.331130529 |
| 0.326151254 | 0.37259552  | 0.112860573 | 0.303749805 |
| 0.295022056 | 0.139785216 | 0.477730172 | 0.273992634 |
| 0.10479571  | 0.37569373  | 0.352456912 | 0.217822823 |
| 0.215421537 | 0.350326325 | 0.099065983 | 0.410248961 |
| 0.485881732 | 1           | 0.355958794 | 0.29702954  |
| 0.150949467 | 0.058506083 | 0.328858801 | 0.322076186 |
| 0.411407739 | 0.466848593 | 0.386839358 | 0.393137724 |
| 0.369085467 | 0.336823264 | 0.122547072 | 0.483688455 |
| 0.223478209 | 0.440249568 | 0.049600917 | 0.3844213   |
| 0.411057678 | 0.210318678 | 0.220790356 | 0.302417319 |

|             |             |             |             |
|-------------|-------------|-------------|-------------|
| 0.319752667 | 0.152622999 | 0.288862929 | 0.426051609 |
| 0.393954108 | 0.361530027 | 0.333375226 | 0.369539909 |
| 0.065613577 | 0.124147808 | 0.373687885 | 0.237683248 |
| 0.346436534 | 0.345050624 | 0.084244252 | 0.275790614 |
| 0.157999015 | 0.398220946 | 0.452373109 | 0.170465843 |
| 0.240831187 | 0.243700837 | 0.421731003 | 0.142933985 |
| 0.413320886 | 0.431105525 | 0.43852258  | 0.261812028 |
| 0.366301973 | 0.442623586 | 0.310376745 | 0.213729201 |
| 0.092175116 | 0.434547528 | 0.287921477 | 0.083398509 |
| 0.482364333 | 0.154682424 | 0.070630371 | 0.447364939 |
| 0.314615634 | 0.332984164 | 0.010382629 | 0.081402145 |
| 0.128374878 | 0.460542578 | 0.393363031 | 0.319343663 |
| 0.165607533 | 0.374362374 | 0.018579676 | 0.480522913 |
| 0.431334054 | 0.080736767 | 0.270451682 | 0.363892109 |
| 0.341910133 | 0.465084904 | 0.32222443  | 0.419904929 |
| 0.339724308 | 0.416527946 | 0.305340765 | 0.398626354 |
| 0.403957424 | 0.420801691 | 0.351718527 | 0.397793294 |
| 0.459699971 | 0.404029503 | 0.381472496 | 0.077271894 |
| 0.188203987 | 0.204981709 | 0.224402442 | 0.168903206 |
| 0.216267982 | 0.284952904 | 0.431235766 | 0.476167661 |
| 0.458189071 | 0.042574804 | 0.212081782 | 0.355527872 |
| 0.415675519 | 0.470627853 | 0.063034289 | 0.014473315 |
| 0.013676496 | 0.08239449  | 0.334991341 | 0.364340834 |
| 0.452089523 | 0.168842005 | 0.041338405 | 0.102849136 |
| 0.33834485  | 0.381194984 | 0.442844711 | 0.409562595 |
| 0.383329821 | 0.223442389 | 0.255909942 | 0.392464934 |
| 0.189751111 | 0.193888413 | 0.471816384 | 0.40812298  |
| 0.134900317 | 0.362477269 | 0.299814046 | 0.489293814 |
| 0.094006364 | 0.419578711 | 0.352955007 | 0.35683126  |
| 0.049285326 | 0.219118396 | 0.188462049 | 0.430499547 |
| 0.403442812 | 0.204990068 | 0.1377587   | 0.107365857 |
| 0.245970054 | 0.450348247 | 0.313170073 | 0.509273229 |
| 0.414060697 | 0.468726708 | 0.195841634 | 0.411341622 |
| 0.135197565 | 0.405675606 | 0.378135457 | 0.06259781  |
| 0.350104371 | 0.069188753 | 0.401936653 | 0.183677692 |
| 0.273656739 | 0.305546143 | 0.232329523 | 0.083686051 |
| 0.197069652 | 0.182213937 | 0.490438451 | 0.457106361 |
| 0.114618651 | 0.313156665 | 0.39342559  | 0.374051292 |
| 0.253276308 | 0.412938544 | 0.415648525 | 0.265704133 |
| 0.189974881 | 0.174639635 | 0.35270945  | 0.271953243 |
| 0.248603961 | 0.502366416 | 0.343931513 | 0.484032601 |
| 0.305498804 | 0.41399588  | 0.426655059 | 0.360167307 |
| 0.321162438 | 0.290723881 | 0.298153416 | 0.073164114 |
| 0.391519652 | 0.464401077 | 0.311427195 | 0.28014301  |
| 0.387307462 | 0.317878471 | 0.120092526 | 0.134920012 |
| 0.279182622 | 0.229054106 | 0.286402789 | 0.463074725 |
| 0.299689376 | 0.276824548 | 0.098635624 | 0.181293917 |
| 0.484243758 | 0.3723416   | 0.190212413 | 0.346391467 |
| 0.320071139 | 0.401390194 | 0.401651736 | 0.407503196 |
| 0.30002135  | 0.406571034 | 0.375306397 | 0.294980564 |
| 0.365208212 | 0.357108289 | 0.445506729 | 0.094175355 |
| 0.17421891  | 0.296488116 | 0.232452257 | 0.237333652 |
| 0.304861145 | 0.114409346 | 0.256539333 | 0.404526572 |
| 0.29041132  | 0.421067258 | 0.234619656 | 0.198501719 |

|             |             |             |             |
|-------------|-------------|-------------|-------------|
| 0.407069303 | 0.262379067 | 0.421623941 | 0.268483335 |
| 0.210101209 | 0.42117814  | 0.048833057 | 0.185587845 |
| 0.318609296 | 0.377455221 | 0.359880323 | 0.373469899 |
| 0.309865136 | 0.258806693 | 0.415450915 | 0.223776837 |
| 0.24743692  | 0.289658994 | 0.375701077 | 0.089551097 |
| 0.082495292 | 0.504302908 | 0.272853008 | 0.080685103 |
| 0.16751991  | 0.254130448 | 0.318072319 | 0.317183689 |
| 0.095642041 | 0.427598524 | 0.244034775 | 0.381858466 |
| 0.338783374 | 0.191741092 | 0.271969084 | 0.13630354  |
| 0.14498602  | 0.37202589  | 0.342031847 | 0.438087566 |
| 0.351209345 | 0.436333279 | 0.341118353 | 0.372305268 |
| 0.175753881 | 0.267367181 | 0.105558708 | 0.420621473 |
| 0.287031045 |             |             |             |
| LAIR1       | 0.323195076 | 0.519110304 | 0.305297853 |
| 0.368278256 | 0.360758973 | 0.336383693 | 0.217546207 |
| 0.159365345 | 0.096868128 | 0.01038647  | 0.040244483 |
| 0.340396154 | 0.21264687  | 0.26354177  | 0.296788597 |
| 0.3490617   | 0.129981217 | 0.25519623  | 0.224087152 |
| 0.345242712 | 0.110415382 | 0.348602181 | 0.09972652  |
| 0.233279721 | 0.105012684 | 0.083953764 | 0.248357089 |
| 0.383187492 | 0.090101189 | 0.320254677 | 0.33092442  |
| 0.079792748 | 0.352763346 | 0.514497728 | 0.374512425 |
| 0.507340845 | 0.305744415 | 0.007874482 | 0.310678923 |
| 0.361685945 | 0.369799922 | 0.350534882 | 0.30306724  |
| 0.055564549 | 0.484912262 | 0.249698314 | 0.316505373 |
| 0.197075294 | 0.040224562 | 0.221198998 | 0.44016592  |
| 0.489933807 | 0.390620385 | 0.20925871  | 0.18121437  |
| 0.240459066 | 0.222425423 | 0.249285489 | 0.280917851 |
| 0.232487879 | 0.16412859  | 0.491134285 | 0.112249882 |
| 0.164528179 | 0.215654564 | 0.124101166 | 0.240187476 |
| 0.288886729 | 0.319205712 | 0.017739683 | 0.308337661 |
| 0.005544809 | 0.323977949 | 0.294172223 | 0.276937856 |
| 0.043697663 | 0.032561277 | 0.145882711 | 0.326183102 |
| 0.406272994 | 0.423216531 | 0.44502922  | 0.458907959 |
| 0.167497509 | 0.235738573 | 0.314249809 | 0.1794275   |
| 0.38720245  | 0.2012894   | 0.088573494 | 0.353164481 |
| 0.457540998 | 0.519194515 | 0.182355615 | 0.219989185 |
| 0.398570192 | 0.46571969  | 0.356317034 | 0.382006729 |
| 0.318831367 | 0.040811591 | 0.450405427 | 0.489390263 |
| 0.356048284 | 0.25482511  | 0.143315023 | 0.34627536  |
| 0.058854372 | 0.279569944 | 0.322335259 | 0.121537712 |
| 0.422041498 | 0.026387978 | 0.184763471 | 0.343154358 |
| 0.16289467  | 0.354429958 | 0.507076888 | 0.191248594 |
| 0.31646004  | 0.021749441 | 0.13267276  | 0.028849615 |
| 0.274977511 | 0.112424629 | 0.489817776 | 0.431464502 |
| 0.20900242  | 0.344805413 | 0.249229766 | 0.002310445 |
| 0.026623898 | 0.133631229 | 0.371715703 | 0.276307337 |
| 0.349273617 | 0.339214482 | 0.250645374 | 0.323591951 |
| 0.362913236 | 0.438280866 | 0.060883706 | 0.101404928 |
| 0.352320328 | 0.137824167 | 0.221391173 | 0.378404949 |
| 0.278898143 | 0.110744739 | 0.130748821 | 0.4929719   |
| 0.420782711 | 0.093757534 | 0.257175949 | 0.342481353 |
| 0.350917952 | 0.296843443 | 0.105408318 | 0.265890005 |
| 0.066873311 | 0.47606298  | 0.02532528  | 0.259578126 |

|             |             |             |             |
|-------------|-------------|-------------|-------------|
| 0.256478845 | 0.133727701 | 0.007878067 | 0.235974901 |
| 0.271262301 | 0.428525835 | 0.465809155 | 0.098375258 |
| 0.300932097 | 0.351940635 | 0.270305122 | 0.38232633  |
| 0.024921096 | 0.039288323 | 0.224678264 | 0.492700301 |
| 0.263835085 | 0.456450099 | 0.253862711 | 0.247280797 |
| 0.246085714 | 0.373129359 | 0.001680294 | 0.49594799  |
| 0.517899568 | 0.23949624  | 0.364017081 | 0.323295707 |
| 0.333682887 | 0.410252985 | 0.024597683 | 0.348323747 |
| 0.283439245 | 0.074667939 | 0.465331771 | 0.159022381 |
| 0.443386088 | 0.051173603 | 0.298022358 | 0.378377054 |
| 0.357927682 | 0.008376498 | 0.225818986 | 0.344335316 |
| 0.023035207 | 0.120835407 | 0.342711483 | 0.35688822  |
| 0.356546968 | 0.355726208 | 0.432449062 | 0.321461091 |
| 0.363279686 | 0.202979045 | 0.010888125 | 0.255829338 |
| 0.344524094 | 0.333545583 | 0.44474586  | 0.225519002 |
| 0.26756418  | 0.47024616  | 0.35832634  | 0.245493261 |
| 0.056332548 | 0.290710949 | 0.023066207 | 0.305191554 |
| 0.353333238 | 0.154668338 | 0.340369706 | 0.102633415 |
| 0.067158344 | 0.513869449 | 0.141354213 | 0.203684559 |
| 0.100152783 | 0.376169973 | 0.222360568 | 0.269613698 |
| 0.231808119 | 0.163893459 | 0.312742195 | 0.352850948 |
| 0.053176949 | 0.102655841 | 0.008600269 | 0.33058623  |
| 0.168625342 | 0.328561533 | 0.328739547 | 0.343301037 |
| 0.293214109 | 0.121319663 | 0.339971812 | 0.229807817 |
| 0.101894403 | 0.016532467 | 0.497956079 | 0.33281703  |
| 0.284178264 | 0.156710429 | 0.03783904  | 0.314486639 |
| 0.450018782 | 0.300101843 | 0.218068829 | 0.457064594 |
| 0.021830125 | 0.440167279 | 0.271453181 | 0.124462896 |
| 0.334980926 | 0.255381773 | 0.414294472 | 0.067517662 |
| 0.316564321 | 0.474577789 | 0.249672211 | 0.190259619 |
| 0.39850956  | 0.355420521 | 0.039249455 | 0.326697638 |
| 0.326590001 | 0.036392915 | 0.509073978 | 0.109775792 |
| 0.020610019 | 0.351646841 | 0.382102479 | 0.074442046 |
| 0.072866745 | 0.345699225 | 0.059519068 | 0.25728915  |
| 0.50959481  | 0.355958794 | 1           | 0.165205813 |
| 0.055427607 | 0.018233811 | 0.165443938 | 0.295859831 |
| 0.508629785 | 0.488826526 | 0.222562011 | 0.332202319 |
| 0.226382168 | 0.316646254 | 0.140914715 | 0.49395423  |
| 0.118719974 | 0.500238548 | 0.00718827  | 0.364457396 |
| 0.510568665 | 0.258145279 | 0.085807651 | 0.306378396 |
| 0.367984961 | 0.055421865 | 0.16397895  | 0.49604093  |
| 0.414039708 | 0.306614046 | 0.326583645 | 0.334716782 |
| 0.024313299 | 0.058010967 | 0.326514445 | 0.144510256 |
| 0.371112442 | 0.207571917 | 0.036338431 | 0.279222476 |
| 0.059899845 | 0.465632393 | 0.375507458 | 0.074725673 |
| 0.341177726 | 0.253187252 | 0.312845065 | 0.042995206 |
| 0.415904381 | 0.475014769 | 0.519659177 | 0.145060637 |
| 0.355885883 | 0.481108902 | 0.341949546 | 0.068072199 |
| 0.016647647 | 0.505518381 | 0.323967785 | 0.031312822 |
| 0.425838118 | 0.215247495 | 0.024887346 | 0.490505087 |
| 0.177905974 | 0.443154204 | 0.004484993 | 0.046836107 |
| 0.029932543 | 0.38328413  | 0.48773621  | 0.327138571 |
| 0.257413174 | 0.297285474 | 0.003420487 | 0.493150203 |
| 0.495685648 | 0.014257229 | 0.119790713 | 0.377966928 |



|             |             |             |             |
|-------------|-------------|-------------|-------------|
| 0.35409163  | 0.517055296 | 0.275324864 | 0.414148411 |
| 0.355528861 | 0.50538833  | 0.249675878 | 0.248430452 |
| 0.407906921 | 0.478935695 | 0.344814906 | 0.444648177 |
| 0.419506805 | 0.346023349 | 0.270112554 | 0.02494951  |
| 0.131616119 | 0.208340995 | 0.30836198  | 0.124004538 |
| 0.274645518 | 0.143398789 | 0.448089097 | 0.416480294 |
| 0.45310383  | 0.005264005 | 0.155400684 | 0.371252238 |
| 0.412901417 | 0.436259349 | 0.013067089 | 0.004177052 |
| 0.003966372 | 0.023861342 | 0.318964712 | 0.198492108 |
| 0.468674307 | 0.254458269 | 0.006278021 | 0.050280865 |
| 0.246438837 | 0.33296871  | 0.505714557 | 0.326149001 |
| 0.348318055 | 0.078740709 | 0.30813799  | 0.332750271 |
| 0.074005347 | 0.259986012 | 0.46456092  | 0.484697891 |
| 0.032427937 | 0.211334651 | 0.275535216 | 0.46391197  |
| 0.058028302 | 0.270489153 | 0.347677548 | 0.317276988 |
| 0.008242788 | 0.075561056 | 0.071942152 | 0.353225489 |
| 0.500222214 | 0.097374107 | 0.04422496  | 0.128159132 |
| 0.149836587 | 0.415720577 | 0.17233692  | 0.484821286 |
| 0.395264087 | 0.37303945  | 0.065681601 | 0.485377441 |
| 0.056505937 | 0.489183991 | 0.288916353 | 0.057331981 |
| 0.211052286 | 0.011350232 | 0.444145882 | 0.187846008 |
| 0.290347344 | 0.318667282 | 0.18760105  | 0.01482547  |
| 0.136164691 | 0.051784588 | 0.446909534 | 0.39842764  |
| 0.024054538 | 0.222327253 | 0.242639712 | 0.319423905 |
| 0.263113329 | 0.381634978 | 0.506771271 | 0.346287453 |
| 0.110726802 | 0.091073704 | 0.338377329 | 0.314975856 |
| 0.218529876 | 0.447342631 | 0.312675346 | 0.500109075 |
| 0.328502766 | 0.427122932 | 0.452170282 | 0.323741899 |
| 0.208279839 | 0.323517457 | 0.355320305 | 0.029799715 |
| 0.297710438 | 0.416949053 | 0.282684529 | 0.157195428 |
| 0.257645912 | 0.312371929 | 0.044658539 | 0.115459293 |
| 0.262421924 | 0.290364295 | 0.162967394 | 0.364273791 |
| 0.30761468  | 0.320697239 | 0.036891016 | 0.069766221 |
| 0.529219441 | 0.420113355 | 0.13896218  | 0.37364133  |
| 0.1443464   | 0.324575521 | 0.356331875 | 0.357790812 |
| 0.310138396 | 0.420494017 | 0.354595959 | 0.360103559 |
| 0.437551342 | 0.249425491 | 0.524364837 | 0.074155773 |
| 0.077261003 | 0.325715188 | 0.127024576 | 0.082136717 |
| 0.147854538 | 0.026009301 | 0.246498119 | 0.346964245 |
| 0.302783703 | 0.347403866 | 0.264414629 | 0.077270392 |
| 0.269445194 | 0.267442602 | 0.307245978 | 0.217216518 |
| 0.095357721 | 0.509801513 | 0.010215269 | 0.053128566 |
| 0.30729504  | 0.373572493 | 0.336360983 | 0.204191012 |
| 0.254905778 | 0.109884798 | 0.281853791 | 0.263615817 |
| 0.32783359  | 0.273580242 | 0.383405977 | 0.032606219 |
| 0.025727374 | 0.450143617 | 0.287620047 | 0.013992073 |
| 0.082477716 | 0.30577127  | 0.214257725 | 0.268900793 |
| 0.018154317 | 0.471779422 | 0.336632899 | 0.35290669  |
| 0.309337291 | 0.061220195 | 0.336919513 | 0.07211941  |
| 0.049666575 | 0.436506125 | 0.309433686 | 0.50512645  |
| 0.259735271 | 0.368041408 | 0.442676115 | 0.384624204 |
| 0.078784956 | 0.282623368 | 0.035430231 | 0.382425155 |
| 0.341832915 |             |             |             |
| LAT2        | 0.239311612 | 0.23757706  | 0.213218559 |

|             |             |             |             |
|-------------|-------------|-------------|-------------|
| 0.212250819 | 0.198949458 | 0.087394908 | 0.064719113 |
| 0.029134299 | 0.057315089 | 0.002090653 | 0.024266122 |
| 0.236560115 | 0.047686667 | 0.032131333 | 0.046394481 |
| 0.321070045 | 0.099484151 | 0.116199429 | 0.132735744 |
| 0.21788585  | 0.014420341 | 0.286139724 | 0.048142052 |
| 0.183099706 | 0.108934967 | 0.063644067 | 0.15313496  |
| 0.255573503 | 0.080038935 | 0.043904036 | 0.145326285 |
| 0.161988254 | 0.225656542 | 0.216708152 | 0.245640739 |
| 0.214005358 | 0.198369027 | 0.024587936 | 0.030627344 |
| 0.209814138 | 0.266701595 | 0.205527376 | 0.162836867 |
| 0.029550049 | 0.170399989 | 0.101952813 | 0.312356609 |
| 0.034643102 | 0.042708751 | 0.022061264 | 0.158652956 |
| 0.168347808 | 0.141869162 | 0.038193606 | 0.041766564 |
| 0.031853552 | 0.018103361 | 0.086116241 | 0.078234595 |
| 0.088548641 | 0.011351671 | 0.1937846   | 0.029473874 |
| 0.029205916 | 0.058398306 | 0.165754045 | 0.06321469  |
| 0.144692701 | 0.13799437  | 0.024553567 | 0.215414333 |
| 0.000589003 | 0.221796538 | 0.320254711 | 0.121001277 |
| 0.088440937 | 0.015180696 | 0.168138465 | 0.123598228 |
| 0.269754285 | 0.231437637 | 0.318272904 | 0.309974858 |
| 0.08232183  | 0.241853108 | 0.247891169 | 0.070829055 |
| 0.222150603 | 0.047401562 | 0.056087183 | 0.341115496 |
| 0.314335045 | 0.231566734 | 0.127123347 | 0.301476326 |
| 0.16256477  | 0.207286005 | 0.114976153 | 0.134795093 |
| 0.072084936 | 0.185733852 | 0.16709223  | 0.28038078  |
| 0.156481784 | 0.239273759 | 0.171418573 | 0.170321014 |
| 0.082070137 | 0.051701529 | 0.20202533  | 0.081678799 |
| 0.275118614 | 0.019735814 | 0.24272722  | 0.102781458 |
| 0.138141033 | 0.221816623 | 0.24810884  | 0.090298465 |
| 0.220214676 | 0.031040026 | 0.096927927 | 0.100214252 |
| 0.058434913 | 0.184141916 | 0.164804902 | 0.223570754 |
| 0.031811777 | 0.087364947 | 0.079225027 | 0.02777291  |
| 0.078465307 | 0.193033231 | 0.210789773 | 0.151142938 |
| 0.250546252 | 0.208534464 | 0.080044445 | 0.1330898   |
| 0.212625064 | 0.318982912 | 0.002761707 | 0.049751718 |
| 0.146149875 | 0.187517091 | 0.198390443 | 0.164698697 |
| 0.189843473 | 0.039718118 | 0.070417443 | 0.290480542 |
| 0.152195109 | 0.06193206  | 0.067138529 | 0.315445004 |
| 0.04077333  | 0.282640984 | 0.064431986 | 0.056164117 |
| 0.020487848 | 0.212822962 | 0.107164691 | 0.088255394 |
| 0.066339078 | 0.106474431 | 0.042129766 | 0.050370617 |
| 0.037591318 | 0.172774005 | 0.172777345 | 0.10251429  |
| 0.084839043 | 0.271488526 | 0.062134968 | 0.145795901 |
| 0.008665648 | 0.072794912 | 0.041096884 | 0.251895779 |
| 0.049992471 | 0.315910923 | 0.094371449 | 0.165488505 |
| 0.258393156 | 0.295052936 | 0.022898732 | 0.186708291 |
| 0.243829924 | 0.038985912 | 0.152010405 | 0.281271763 |
| 0.142594493 | 0.235964009 | 0.012345097 | 0.281043896 |
| 0.11624939  | 0.083525883 | 0.322686671 | 0.144533173 |
| 0.203709414 | 0.058186038 | 0.044565283 | 0.291426543 |
| 0.194327303 | 0.012124994 | 0.027573855 | 0.165177296 |
| 0.128246523 | 0.012204972 | 0.234259767 | 0.20526586  |
| 0.158245823 | 0.323141011 | 0.325054657 | 0.130991701 |
| 0.173388245 | 0.074874934 | 0.057805044 | 0.305475292 |

|             |             |             |             |
|-------------|-------------|-------------|-------------|
| 0.286738715 | 0.061379411 | 0.162262381 | 0.054093296 |
| 0.075453636 | 0.203140486 | 0.2027875   | 0.024862701 |
| 0.035646208 | 0.07508252  | 0.008032443 | 0.175691663 |
| 0.202685863 | 0.023590752 | 0.137870048 | 0.158727657 |
| 0.109918899 | 0.266202725 | 0.208538951 | 0.203206863 |
| 0.186278298 | 0.098939133 | 0.120624955 | 0.024139124 |
| 0.040287355 | 0.103187881 | 0.118298634 | 0.094331806 |
| 0.010658706 | 0.063671616 | 0.140865051 | 0.053237141 |
| 0.022645502 | 0.040282283 | 0.034759149 | 0.137726104 |
| 0.044282113 | 0.031468929 | 0.146046822 | 0.178424922 |
| 0.143745818 | 0.0550236   | 0.236070175 | 0.280532167 |
| 0.090190451 | 0.06534529  | 0.087823699 | 0.031461846 |
| 0.225200794 | 0.043659112 | 0.02787246  | 0.185025896 |
| 0.055055187 | 0.319552585 | 0.047464077 | 0.127501067 |
| 0.108890822 | 0.120229841 | 0.282247812 | 0.01496934  |
| 0.129187522 | 0.177288201 | 0.267575114 | 0.116522612 |
| 0.124774526 | 0.189413126 | 0.020830098 | 0.165786001 |
| 0.143227027 | 0.04972058  | 0.261206365 | 0.13478833  |
| 0.077454469 | 0.316010663 | 0.206452804 | 0.137751991 |
| 0.124726642 | 0.075586049 | 0.009588932 | 0.28361865  |
| 0.252738915 | 0.29702954  | 0.165205813 | 1           |
| 0.029186611 | 0.006940837 | 0.236679522 | 0.24154149  |
| 0.192464812 | 0.274918937 | 0.216173856 | 0.147699836 |
| 0.164125015 | 0.088966009 | 0.013601936 | 0.264977717 |
| 0.195747816 | 0.23611528  | 0.034465232 | 0.29228597  |
| 0.202037979 | 0.039938446 | 0.094696613 | 0.071140483 |
| 0.127889361 | 0.0438296   | 0.089277518 | 0.202875112 |
| 0.211651389 | 0.113825469 | 0.085129904 | 0.264208617 |
| 0.008406729 | 0.017727612 | 0.25567875  | 0.209202863 |
| 0.067955968 | 0.110660398 | 0.153698784 | 0.046495754 |
| 0.029465052 | 0.167468629 | 0.313006201 | 0.066723007 |
| 0.055382359 | 0.045022787 | 0.332851067 | 0.048759775 |
| 0.285472898 | 0.261909324 | 0.211544368 | 0.063896025 |
| 0.234755426 | 0.239984266 | 0.192168363 | 0.147956034 |
| 0.086631229 | 0.233745887 | 0.162348179 | 0.015183649 |
| 0.28885635  | 0.025308173 | 0.006839235 | 0.215638051 |
| 0.10892778  | 0.149620091 | 0.002444113 | 0.133966312 |
| 0.171296561 | 0.355502788 | 0.183022677 | 0.154081162 |
| 0.014475927 | 0.225685575 | 0.058577492 | 0.29445633  |
| 0.19541026  | 0.073622335 | 0.187220527 | 0.198642148 |
| 0.238695655 | 0.233581203 | 0.189547901 | 0.262512537 |
| 0.197057943 | 0.203761432 | 0.035717387 | 0.234639444 |
| 0.193667827 | 0.24812806  | 0.198711592 | 0.19767788  |
| 0.245144742 | 0.329151824 | 0.159861711 | 0.015565657 |
| 0.129695732 | 0.02829773  | 0.029236262 | 0.037369054 |
| 0.077318573 | 0.10594854  | 0.246686442 | 0.309326712 |
| 0.272359151 | 0.038244061 | 0.026987011 | 0.19149778  |
| 0.196578112 | 0.266216727 | 0.104492392 | 0.019503284 |
| 0.022668919 | 0.048929068 | 0.124397581 | 0.259459275 |
| 0.258893265 | 0.01196435  | 0.018816977 | 0.012486056 |
| 0.074253376 | 0.305611361 | 0.21318007  | 0.266085362 |
| 0.30498713  | 0.094585664 | 0.023835693 | 0.268016637 |
| 0.097959166 | 0.100455272 | 0.268221326 | 0.176239472 |
| 0.129456771 | 0.231053311 | 0.123233387 | 0.265832676 |

|             |             |             |             |
|-------------|-------------|-------------|-------------|
| 0.132374687 | 0.271717218 | 0.231291671 | 0.050578151 |
| 0.083645659 | 0.134441534 | 0.102446577 | 0.33704066  |
| 0.20246066  | 0.034501002 | 0.0330207   | 0.010607897 |
| 0.029762892 | 0.29069502  | 0.057869832 | 0.303227044 |
| 0.21073939  | 0.29329061  | 0.15250703  | 0.199254117 |
| 0.038555073 | 0.186866423 | 0.239057533 | 0.008259732 |
| 0.158388898 | 0.055491926 | 0.233946541 | 0.044029223 |
| 0.041043206 | 0.174452284 | 0.122686383 | 0.097005541 |
| 0.189263926 | 0.086516836 | 0.286395509 | 0.336721646 |
| 0.158472052 | 0.069449509 | 0.258209637 | 0.265045474 |
| 0.057163494 | 0.223713243 | 0.19213708  | 0.081838747 |
| 0.024916747 | 0.187276783 | 0.20416018  | 0.142808719 |
| 0.031521522 | 0.331803985 | 0.068846092 | 0.287433956 |
| 0.18470075  | 0.247398191 | 0.237986124 | 0.138987862 |
| 0.137009742 | 0.12198806  | 0.102468955 | 0.007318738 |
| 0.190764872 | 0.258203671 | 0.126044634 | 0.093574576 |
| 0.137573877 | 0.239109274 | 0.060597593 | 0.046134846 |
| 0.217434676 | 0.058408394 | 0.045713958 | 0.324970771 |
| 0.159735573 | 0.148784796 | 0.031032818 | 0.089080837 |
| 0.254291364 | 0.195008582 | 0.032017254 | 0.171431218 |
| 0.186616332 | 0.193329655 | 0.300236314 | 0.324106397 |
| 0.090383956 | 0.199360431 | 0.194842603 | 0.105404538 |
| 0.143881232 | 0.129575507 | 0.219128958 | 0.011626431 |
| 0.103506371 | 0.183336687 | 0.033233533 | 0.177371946 |
| 0.090241786 | 0.093380288 | 0.119008941 | 0.314717009 |
| 0.105371806 | 0.203823659 | 0.037148616 | 0.098643293 |
| 0.282947203 | 0.12444627  | 0.244418028 | 0.035848813 |
| 0.038741214 | 0.190464487 | 0.030930292 | 0.096152915 |
| 0.115962563 | 0.229925099 | 0.182217986 | 0.1606601   |
| 0.135238033 | 0.206878285 | 0.172443218 | 0.043973473 |
| 0.030091598 | 0.0852313   | 0.215629565 | 0.02733267  |
| 0.013662925 | 0.317854836 | 0.093329109 | 0.13411363  |
| 0.126201189 | 0.140903435 | 0.112366195 | 0.058060618 |
| 0.121405457 | 0.239931585 | 0.038608564 | 0.226030394 |
| 0.11720127  | 0.08559504  | 0.120100459 | 0.050794122 |
| 0.083117454 | 0.173287853 | 0.26770453  | 0.231076392 |
| 0.249690161 | 0.268307441 | 0.154715919 | 0.193088219 |
| 0.122570425 | 0.183784627 | 0.023611757 | 0.252760781 |
| 0.078443762 |             |             |             |

|             |             |             |             |
|-------------|-------------|-------------|-------------|
| LATS2       | 0.029475313 | 0.050311373 | 0.023083755 |
| 0.131324156 | 0.065533208 | 0.044931096 | 0.198498082 |
| 0.044292144 | 0.10959457  | 0.158276025 | 0.141116816 |
| 0.03596599  | 0.077669314 | 0.072928343 | 0.017692302 |
| 0.121492566 | 0.134433535 | 0.020745376 | 0.222914429 |
| 0.102364944 | 0.137996859 | 0.156312701 | 0.187522214 |
| 0.023636795 | 0.115810481 | 0.231739424 | 0.055910918 |
| 0.103848683 | 0.237869364 | 0.044180418 | 0.083603255 |
| 0.092482725 | 0.047549192 | 0.031815427 | 0.083248541 |
| 0.02744471  | 0.020413694 | 0.031823454 | 0.050802982 |
| 0.039238678 | 0.064772822 | 0.108910977 | 0.196451795 |
| 0.23100013  | 0.027933477 | 0.23513343  | 0.055482993 |
| 0.022841989 | 0.19607534  | 0.029952542 | 0.029092982 |
| 0.029108289 | 0.044664642 | 0.0696746   | 0.187119399 |
| 0.052903629 | 0.030326673 | 0.017467356 | 0.041962786 |

|             |             |             |             |
|-------------|-------------|-------------|-------------|
| 0.231464615 | 0.044509074 | 0.032022586 | 0.1314293   |
| 0.036738551 | 0.068325457 | 0.07849577  | 0.111053072 |
| 0.016543264 | 0.040036944 | 0.127665725 | 0.017051317 |
| 0.0617053   | 0.116379808 | 0.069075186 | 0.014078695 |
| 0.249552235 | 0.230702076 | 0.093829735 | 0.170399688 |
| 0.086174977 | 0.026206121 | 0.078755998 | 0.06019429  |
| 0.108802065 | 0.091621495 | 0.027343762 | 0.187047045 |
| 0.042956093 | 0.215262928 | 0.066904279 | 0.127758807 |
| 0.072830997 | 0.039177204 | 0.088639224 | 0.117485779 |
| 0.06785226  | 0.047623032 | 0.032723009 | 0.055997259 |
| 0.021497054 | 0.06196819  | 0.035674945 | 0.058138273 |
| 0.032998849 | 0.024306565 | 0.19653703  | 0.076342086 |
| 0.201845134 | 0.010881275 | 0.198489586 | 0.046611098 |
| 0.088719691 | 0.17413225  | 0.131638223 | 0.125634754 |
| 0.052009962 | 0.047432702 | 0.036066042 | 0.247570672 |
| 0.042159852 | 0.142471449 | 0.026273538 | 0.127393039 |
| 0.035269881 | 0.012682387 | 0.021977157 | 0.092093896 |
| 0.049489959 | 0.032116239 | 0.119857084 | 0.093489533 |
| 0.158380295 | 0.034969938 | 0.036486454 | 0.035748259 |
| 0.061252308 | 0.015987441 | 0.128834264 | 0.029432181 |
| 0.032929312 | 0.076819804 | 0.006425148 | 0.165672033 |
| 0.056282759 | 0.042996166 | 0.253138673 | 0.045034841 |
| 0.117276374 | 0.127020995 | 0.225965735 | 0.065364984 |
| 0.038436825 | 0.289187764 | 0.015878757 | 0.122392252 |
| 0.043925345 | 0.081893759 | 0.192696214 | 0.110544918 |
| 0.230081285 | 0.025541979 | 0.119895263 | 0.034945421 |
| 0.01478103  | 0.074009156 | 0.06192419  | 0.075168973 |
| 0.048850248 | 0.053094768 | 0.018361524 | 0.203604135 |
| 0.124933221 | 0.113959104 | 0.029163042 | 0.064741642 |
| 0.165944999 | 0.129726989 | 0.012073002 | 0.060957152 |
| 0.034925699 | 0.049709437 | 0.069324774 | 0.045877394 |
| 0.157381706 | 0.084035881 | 0.001240681 | 0.029372643 |
| 0.036530842 | 0.011241732 | 0.114054353 | 0.04907644  |
| 0.023969377 | 0.097302416 | 0.001023948 | 0.121665395 |
| 0.020405257 | 0.187092609 | 0.080122144 | 0.24131488  |
| 0.029693951 | 0.257152748 | 0.049527539 | 0.038098235 |
| 0.030120362 | 0.045351676 | 0.066463596 | 0.117297382 |
| 0.092694628 | 0.105937617 | 0.052356236 | 0.115373583 |
| 0.101855068 | 0.064279462 | 0.097780188 | 0.021743387 |
| 0.065839121 | 0.106988753 | 0.101558698 | 0.077556246 |
| 0.040984899 | 0.009199958 | 0.039030159 | 0.087375807 |
| 0.014832685 | 0.048383704 | 0.025266854 | 0.019041423 |
| 0.265550519 | 0.087622884 | 0.094039999 | 0.099090528 |
| 0.021810643 | 0.190642625 | 0.022973531 | 0.049466652 |
| 0.155657153 | 0.058576066 | 0.029691324 | 0.013058949 |
| 0.013918811 | 0.074346043 | 0.144352893 | 0.081139406 |
| 0.078517555 | 0.126292934 | 0.029074437 | 0.040941856 |
| 0.193629418 | 0.238560526 | 0.029941131 | 0.014693429 |
| 0.109161083 | 0.036983674 | 0.031993449 | 0.032409024 |
| 0.040132595 | 0.155153809 | 0.086130277 | 0.018903809 |
| 0.101662243 | 0.210223891 | 0.049385857 | 0.106566105 |
| 0.026672012 | 0.140185912 | 0.16751666  | 0.011668414 |
| 0.083783987 | 0.028692731 | 0.009264665 | 0.065720373 |
| 0.078244165 | 0.066718816 | 0.10573981  | 0.235755038 |

|             |             |             |             |
|-------------|-------------|-------------|-------------|
| 0.040927968 | 0.227956362 | 0.099409673 | 0.031478105 |
| 0.034877172 | 0.046649734 | 0.092501588 | 0.15280234  |
| 0.034352977 | 0.089065914 | 0.215984166 | 0.028593637 |
| 0.029118106 | 0.241703417 | 0.045642335 | 0.104033851 |
| 0.183300903 | 0.055961457 | 0.047486854 | 0.242852379 |
| 0.154244569 | 0.114298017 | 0.135099305 | 0.187517608 |
| 0.058934597 | 0.150949467 | 0.055427607 | 0.029186611 |
| 1           | 0.171815883 | 0.064093231 | 0.021336028 |
| 0.028709855 | 0.042578624 | 0.16886132  | 0.076013994 |
| 0.248286329 | 0.032071475 | 0.022896364 | 0.057839915 |
| 0.012809528 | 0.033473511 | 0.132845541 | 0.044893239 |
| 0.026911471 | 0.031589909 | 0.172442122 | 0.112695051 |
| 0.041616575 | 0.202780324 | 0.071655484 | 0.037136071 |
| 0.053023425 | 0.054357678 | 0.035509783 | 0.05426969  |
| 0.19019561  | 0.200353882 | 0.058311879 | 0.015962229 |
| 0.037278023 | 0.107487821 | 0.006078826 | 0.022136987 |
| 0.242126743 | 0.047466747 | 0.078178775 | 0.15067748  |
| 0.05116384  | 0.018141616 | 0.105858855 | 0.236837856 |
| 0.03911515  | 0.030709905 | 0.034708779 | 0.098630971 |
| 0.039465917 | 0.044010379 | 0.024629694 | 0.143028837 |
| 0.15352135  | 0.030533849 | 0.040671402 | 0.137652747 |
| 0.088086488 | 0.025029818 | 0.214924285 | 0.050742241 |
| 0.218181261 | 0.019010966 | 0.024077978 | 0.00213723  |
| 0.064827719 | 0.070566617 | 0.031477139 | 0.080877843 |
| 0.021606319 | 0.090299145 | 0.005191855 | 0.044415209 |
| 0.043761981 | 0.114213668 | 0.060781325 | 0.038653649 |
| 0.032975433 | 0.0445263   | 0.028833534 | 0.049037061 |
| 0.034322132 | 0.03083605  | 0.092114092 | 0.194104574 |
| 0.067080433 | 0.029096825 | 0.061220351 | 0.040315154 |
| 0.089690783 | 0.079400337 | 0.233761408 | 0.2183366   |
| 0.031746535 | 0.064088579 | 0.015492947 | 0.108962163 |
| 0.031179918 | 0.122760874 | 0.04020321  | 0.082165173 |
| 0.051860376 | 0.136575165 | 0.10068576  | 0.036873802 |
| 0.073366497 | 0.08148112  | 0.039388064 | 0.007959206 |
| 0.002480456 | 0.089382801 | 0.088683376 | 0.098198397 |
| 0.048982463 | 0.018977783 | 0.156500144 | 0.144567373 |
| 0.05948569  | 0.058775755 | 0.042186021 | 0.163268799 |
| 0.041502645 | 0.177360087 | 0.041372747 | 0.124556282 |
| 0.115604967 | 0.014728872 | 0.061514988 | 0.043777267 |
| 0.097489982 | 0.087940405 | 0.02200562  | 0.08646861  |
| 0.004740705 | 0.142987843 | 0.039512492 | 0.064079933 |
| 0.034765908 | 0.122270561 | 0.133849522 | 0.083014558 |
| 0.025396977 | 0.182701179 | 0.200687913 | 0.009139239 |
| 0.195001877 | 0.060642272 | 0.160058653 | 0.070050938 |
| 0.078176807 | 0.128007675 | 0.086065581 | 0.037689066 |
| 0.164437155 | 0.031369002 | 0.056453166 | 0.018014149 |
| 0.03984744  | 0.128802159 | 0.02818815  | 0.035301075 |
| 0.036971092 | 0.047194524 | 0.024913277 | 0.097814703 |
| 0.008145956 | 0.178984839 | 0.091389437 | 0.066013341 |
| 0.067720755 | 0.079748441 | 0.102666957 | 0.068968544 |
| 0.077836902 | 0.115612792 | 0.032538615 | 0.018750083 |
| 0.194636586 | 0.008235461 | 0.0889093   | 0.028476641 |
| 0.04812403  | 0.076658876 | 0.053968799 | 0.047188941 |
| 0.037286807 | 0.042999931 | 0.041096674 | 0.116571009 |

|             |             |             |             |
|-------------|-------------|-------------|-------------|
| 0.037806134 | 0.033246236 | 0.093900265 | 0.178710372 |
| 0.111950269 | 0.094878811 | 0.041094002 | 0.089543873 |
| 0.171860717 | 0.020821585 | 0.100193601 | 0.004714152 |
| 0.014067633 | 0.059327672 | 0.186528561 | 0.110511884 |
| 0.039651192 | 0.030035553 | 0.105592715 | 0.14279554  |
| 0.046567336 | 0.035978512 | 0.075291553 | 0.074833188 |
| 0.144239826 | 0.124886727 | 0.049168094 | 0.052541447 |
| 0.011649818 | 0.05481025  | 0.065971394 | 0.073909703 |
| 0.04501613  | 0.174871167 | 0.036571048 | 0.03275621  |
| 0.054757593 | 0.022223724 | 0.20641741  | 0.176087795 |
| 0.267996169 | 0.131247962 | 0.00689934  | 0.096119714 |
| 0.008482078 | 0.161910626 | 0.011271597 | 0.114737024 |
| 0.09243083  | 0.012674161 | 0.127669144 | 0.150290701 |
| 0.214946955 | 0.037062808 | 0.087356714 | 0.177402659 |
| 0.013335687 | 0.048541513 | 0.042789919 | 0.099472522 |
| 0.017488436 | 0.049400031 | 0.191394576 | 0.038227898 |
| 0.037092408 | 0.008313945 | 0.047293766 | 0.090830221 |
| 0.206504854 | 0.080085291 | 0.020826832 | 0.05907589  |
| 0.046790066 | 0.022962287 | 0.026310063 | 0.084323317 |
| 0.087336388 | 0.036577163 | 0.035313923 | 0.046776433 |
| 0.100010362 | 0.162786174 | 0.022369709 | 0.035153123 |
| 0.09489166  | 0.030762051 | 0.028590907 | 0.032995354 |
| 0.028706627 | 0.150215246 | 0.022465026 | 0.043204131 |
| 0.025223604 | 0.012115889 | 0.197342322 | 0.068916194 |
| 0.012240318 |             |             |             |

| LCN2        | 0.004252509 | 0.013118694 | 0.002795096 |
|-------------|-------------|-------------|-------------|
| 0.035827787 | 0.021969508 | 0.006904059 | 0.0486002   |
| 0.005403318 | 0.003893667 | 0.041168163 | 0.057571014 |
| 0.013000889 | 0.019336451 | 0.058779994 | 0.001117473 |
| 0.025972845 | 0.153966279 | 0.001810778 | 0.068168367 |
| 0.022103717 | 0.038122368 | 0.061402975 | 0.041469801 |
| 0.004820472 | 0.090688478 | 0.118327682 | 0.016416492 |
| 0.025242223 | 0.102785349 | 0.012544024 | 0.017765229 |
| 0.03276261  | 0.011147423 | 0.007095118 | 0.051085013 |
| 0.007972092 | 0.002148854 | 0.005864497 | 0.009810352 |
| 0.005698767 | 0.013302433 | 0.022442088 | 0.072987176 |
| 0.072502493 | 0.006714006 | 0.072494062 | 0.012964262 |
| 0.000357137 | 0.147002984 | 0.00320922  | 0.00481486  |
| 0.010161324 | 0.013142749 | 0.007555344 | 0.04908908  |
| 0.019112602 | 0.010994565 | 0.018894391 | 0.008027027 |
| 0.085248283 | 0.00885582  | 0.009783379 | 0.007055791 |
| 0.00124951  | 0.010369563 | 0.047013062 | 0.028745453 |
| 0.004341357 | 0.005280261 | 0.011217871 | 0.003831077 |
| 0.027639757 | 0.020370009 | 0.019679228 | 0.002515259 |
| 0.146828517 | 0.205556563 | 0.056265727 | 0.053059811 |
| 0.020663279 | 0.004194544 | 0.026815882 | 0.017692729 |
| 0.089816627 | 0.024510257 | 0.008363044 | 0.123044887 |
| 0.006699124 | 0.090428827 | 0.004014363 | 0.039032605 |
| 0.023870784 | 0.011954832 | 0.023116957 | 0.033327659 |
| 0.019631499 | 0.010618354 | 0.006679153 | 0.018351357 |
| 0.00458386  | 0.014251179 | 0.008553608 | 0.019687972 |
| 0.006298553 | 0.011329307 | 0.108032588 | 0.02009351  |
| 0.078957154 | 0.001450218 | 0.068061189 | 0.013949581 |
| 0.021602611 | 0.019267186 | 0.068511844 | 0.046960223 |

|             |             |                      |             |
|-------------|-------------|----------------------|-------------|
| 0.004112471 | 0.009914145 | 0.010540879          | 0.074111157 |
| 0.014255322 | 0.033731023 | 0.002292175          | 0.041372665 |
| 0.003514646 | 0.00744159  | 0.005011471          | 0.035016948 |
| 0.013651082 | 0.008584479 | 0.021519424          | 0.042880723 |
| 0.11341111  | 0.002940668 | 0.015070451          | 0.006477038 |
| 0.009932029 | 0.001737036 | 0.059010543          | 0.005414234 |
| 0.010284363 | 0.025306431 | 0.000209283          | 0.030057948 |
| 0.013576441 | 0.005295334 | 0.088693548          | 0.017334012 |
| 0.053795706 | 0.022488773 | 0.109442694          | 0.016509396 |
| 0.006752151 | 0.136458522 | 0.002069024          | 0.035549872 |
| 0.013150632 | 0.043259298 | 0.073919287          | 0.104997902 |
| 0.084438879 | 0.006177018 | 0.099274411          | 0.004025502 |
| 0.001024184 | 0.054795755 | 0.002405422          | 0.013947922 |
| 0.010058425 | 0.022122322 | 0.003737583          | 0.064821088 |
| 0.092942539 | 0.038188516 | 0.004756998          | 0.033283934 |
| 0.049091703 | 0.014899739 | 0.001235991          | 0.023390145 |
| 0.008153898 | 0.012763952 | 0.022028694          | 0.008062349 |
| 0.058776104 | 0.017079835 | 7.55E-05 0.006864281 |             |
| 0.00981712  | 0.001510078 | 0.089457404          | 0.012403528 |
| 0.004023663 | 0.028853307 | 7.48E-05 0.046385995 |             |
| 0.004188143 | 0.049512892 | 0.022687333          | 0.1618358   |
| 0.007031133 | 0.156770664 | 0.015126817          | 0.009340178 |
| 0.017156113 | 0.00502233  | 0.010260223          | 0.022608702 |
| 0.040708485 | 0.013519876 | 0.007552146          | 0.026418096 |
| 0.020832314 | 0.012447647 | 0.027939302          | 0.004018451 |
| 0.023402429 | 0.024220992 | 0.010303173          | 0.025660154 |
| 0.007190262 | 0.000822551 | 0.0078817            | 0.014646988 |
| 0.002778646 | 0.0112246   | 0.005472659          | 0.000529515 |
| 0.09849819  | 0.017180932 | 0.011846705          | 0.021567754 |
| 0.002026842 | 0.143364878 | 0.002468212          | 0.008666453 |
| 0.120868686 | 0.017335788 | 0.015008745          | 0.004853623 |
| 0.007564655 | 0.062053572 | 0.028293743          | 0.119240245 |
| 0.114416787 | 0.028413575 | 0.005208015          | 0.006775376 |
| 0.054270067 | 0.216225177 | 0.001831259          | 0.028011667 |
| 0.150906663 | 0.077001914 | 0.064178152          | 0.008905933 |
| 0.025146245 | 0.118375056 | 0.054781179          | 0.001983303 |
| 0.034776003 | 0.136592974 | 0.012388383          | 0.022721256 |
| 0.005163518 | 0.025189759 | 0.085732506          | 0.007311824 |
| 0.031628582 | 0.006354917 | 0.00044665           | 0.021280558 |
| 0.003338696 | 0.016333289 | 0.088255999          | 0.157879776 |
| 0.053566584 | 0.137969989 | 0.021343037          | 0.000799289 |
| 0.005514637 | 0.014224292 | 0.017609135          | 0.062314423 |
| 0.013956568 | 0.018816613 | 0.029268144          | 0.005222366 |
| 0.010476035 | 0.195861602 | 0.014742187          | 0.082121147 |
| 0.1036204   | 0.017393935 | 0.015967391          | 0.100438712 |
| 0.06043594  | 0.063092103 | 0.015933739          | 0.069555222 |
| 0.017222289 | 0.058506083 | 0.018233811          | 0.006940837 |
| 0.171815883 | 1           | 0.027870991          | 0.003869649 |
| 0.007976692 | 0.014439476 | 0.059420461          | 0.071726352 |
| 0.073343285 | 0.00711017  | 0.000487282          | 0.020186969 |
| 0.000522522 | 0.007743007 | 0.063606873          | 0.01187338  |
| 0.007359965 | 0.008398857 | 0.127517351          | 0.022569347 |
| 0.013290366 | 0.050545074 | 0.012367732          | 0.011345085 |
| 0.008162462 | 0.007962408 | 0.00577388           | 0.015453628 |



|             |             |             |             |
|-------------|-------------|-------------|-------------|
| 0.037698546 | 0.028817601 | 0.008764856 | 0.004206968 |
| 0.008613095 | 0.020185864 | 0.002542178 | 0.002094425 |
| 0.121918844 | 0.014779526 | 0.024473931 | 0.025259489 |
| 0.017129582 | 0.001036828 | 0.037147839 | 0.093134902 |
| 0.011083016 | 0.007313407 | 0.009545347 | 0.019849923 |
| 0.014206556 | 0.014211585 | 0.012181618 | 0.052159215 |
| 0.096327735 | 0.008272401 | 0.004919176 | 0.025565843 |
| 0.026785668 | 0.003938938 | 0.180099535 | 0.012221668 |
| 0.051100245 | 0.004379213 | 0.000456709 | 0.000186882 |
| 0.015113683 | 0.019862872 | 0.006509583 | 0.013483756 |
| 0.006152555 | 0.015421306 | 0.000191418 | 0.012122105 |
| 0.015398858 | 0.070520961 | 0.018235711 | 0.017001283 |
| 0.014553753 | 0.010620057 | 0.009011361 | 0.018285182 |
| 0.021863386 | 0.009559447 | 0.019861219 | 0.064710623 |
| 0.020326283 | 0.008370253 | 0.010832943 | 0.006889063 |
| 0.035534142 | 0.02459148  | 0.066284177 | 0.068376366 |
| 0.000549348 | 0.00955105  | 0.00439185  | 0.0091845   |
| 0.003344706 | 0.047023974 | 0.009750564 | 0.023363187 |
| 0.020843478 | 0.078889659 | 0.015631643 | 0.01103913  |
| 0.01812198  | 0.017692886 | 0.00109445  | 0.00015072  |
| 9.82E-05    | 0.047841706 | 0.016347323 | 0.025060856 |
| 0.011465255 | 0.007726223 | 0.102648113 | 0.018523109 |
| 0.008065015 | 0.022640386 | 0.013452138 | 0.042606428 |
| 0.008521562 | 0.076663676 | 0.029335937 | 0.02644162  |
| 0.034334932 | 0.001410825 | 0.023073787 | 0.010702648 |
| 0.019958428 | 0.017346905 | 0.004476839 | 0.023277903 |
| 0.003042835 | 0.057318204 | 0.017551297 | 0.024585598 |
| 0.001843468 | 0.050874846 | 0.034879581 | 0.018660975 |
| 0.00770034  | 0.240833626 | 0.240394324 | 0.000840556 |
| 0.149443222 | 0.014727143 | 0.109235947 | 0.020376219 |
| 0.020245459 | 0.040931466 | 0.031325498 | 0.006987349 |
| 0.018908975 | 0.011122275 | 0.031163089 | 0.000765799 |
| 0.010241595 | 0.02715733  | 0.009037702 | 0.006384052 |
| 0.014571977 | 0.007305512 | 0.000602019 | 0.049889055 |
| 0.000687711 | 0.130287693 | 0.028391028 | 0.018648096 |
| 0.016070248 | 0.009791833 | 0.025174392 | 0.012716576 |
| 0.015320337 | 0.046420942 | 0.008412147 | 0.005840687 |
| 0.05317659  | 0.001326467 | 0.019394121 | 0.006816084 |
| 0.015603856 | 0.023802865 | 0.021168166 | 0.011564498 |
| 0.004622117 | 0.006466267 | 0.012287122 | 0.018384155 |
| 0.014980249 | 0.004949224 | 0.031024683 | 0.036743675 |
| 0.025097588 | 0.040143598 | 0.004512412 | 0.033363105 |
| 0.112013318 | 0.00543444  | 0.002931799 | 0.000137085 |
| 0.005215413 | 0.011565724 | 0.076335451 | 0.025825093 |
| 0.006856412 | 0.006423533 | 0.007230112 | 0.03687827  |
| 0.011987767 | 0.004602964 | 0.002914912 | 0.018638902 |
| 0.045856276 | 0.031563173 | 0.012542451 | 0.016529492 |
| 0.000771869 | 0.026067682 | 0.01765756  | 0.037285663 |
| 0.012627343 | 0.032265508 | 0.009222998 | 0.001683368 |
| 0.002575446 | 0.006092437 | 0.177737011 | 0.076125264 |
| 0.145810707 | 0.028878128 | 0.002094229 | 0.027460529 |
| 0.003691717 | 0.086860346 | 0.001502663 | 0.007104341 |
| 0.029861913 | 0.001007911 | 0.036497864 | 0.056735267 |
| 0.108564798 | 0.010922619 | 0.010564331 | 0.100393773 |

|             |             |             |             |
|-------------|-------------|-------------|-------------|
| 0.011607117 | 0.009812524 | 0.025576114 | 0.030639671 |
| 0.005356409 | 0.011703239 | 0.087938199 | 0.008208028 |
| 0.048651291 | 0.000585167 | 0.00995478  | 0.0022414   |
| 0.066849444 | 0.02467755  | 0.003250021 | 0.007460513 |
| 0.002098646 | 0.00198839  | 0.005825377 | 0.015967658 |
| 0.0458546   | 0.012837242 | 0.007531644 | 0.010835135 |
| 0.017072944 | 0.054118475 | 0.003587511 | 0.000723057 |
| 0.004653787 | 0.007843055 | 0.005400604 | 0.010129161 |
| 0.005400435 | 0.05593362  | 0.003612759 | 0.016593433 |
| 0.000769654 | 0.00122667  | 0.030777267 | 0.014432266 |
| 0.004581303 |             |             |             |
| LCN4        | 0.222303384 | 0.228200514 | 0.177205226 |
| 0.225618978 | 0.21678246  | 0.084891892 | 0.08260797  |
| 0.040077757 | 0.060603797 | 0.006763642 | 0.046125045 |
| 0.233735167 | 0.075950656 | 0.052123308 | 0.042171499 |
| 0.332383874 | 0.179895589 | 0.108830385 | 0.16990619  |
| 0.237149791 | 0.027338183 | 0.324380803 | 0.080523419 |
| 0.202586377 | 0.153020536 | 0.105872102 | 0.142580883 |
| 0.267987342 | 0.115847379 | 0.048641846 | 0.157695499 |
| 0.258781169 | 0.229402614 | 0.196215524 | 0.268008576 |
| 0.195816955 | 0.171399411 | 0.065154294 | 0.037061969 |
| 0.197465118 | 0.245120182 | 0.223040644 | 0.195275115 |
| 0.056223605 | 0.157418542 | 0.127343467 | 0.302763035 |
| 0.038449539 | 0.083888795 | 0.022803046 | 0.146281936 |
| 0.156117329 | 0.139278836 | 0.045461632 | 0.058093183 |
| 0.049189687 | 0.026835399 | 0.098206638 | 0.082227819 |
| 0.121981707 | 0.015064914 | 0.180446846 | 0.036655579 |
| 0.039728212 | 0.069988867 | 0.268258712 | 0.079380349 |
| 0.148578835 | 0.131503589 | 0.053463795 | 0.194358899 |
| 0.00168561  | 0.237204285 | 0.332662792 | 0.091163954 |
| 0.139974449 | 0.043424278 | 0.255979344 | 0.14772983  |
| 0.278086891 | 0.207182206 | 0.31945378  | 0.299234411 |
| 0.143740118 | 0.272390187 | 0.234507908 | 0.121749147 |
| 0.208725703 | 0.066022744 | 0.073564597 | 0.364958665 |
| 0.311058672 | 0.218860227 | 0.173743977 | 0.320608945 |
| 0.15973602  | 0.202036078 | 0.103988275 | 0.141281083 |
| 0.066436167 | 0.243705867 | 0.157596164 | 0.27667778  |
| 0.150592619 | 0.216676138 | 0.216574833 | 0.183402096 |
| 0.151368281 | 0.055661153 | 0.238741201 | 0.153015291 |
| 0.281190756 | 0.030854191 | 0.286558762 | 0.125720967 |
| 0.17430063  | 0.212753557 | 0.228808408 | 0.120513656 |
| 0.233314814 | 0.072583814 | 0.090114681 | 0.180436509 |
| 0.081182192 | 0.191364567 | 0.146760137 | 0.235567963 |
| 0.050645825 | 0.116553103 | 0.095792116 | 0.056288033 |
| 0.149123265 | 0.244513918 | 0.216760844 | 0.159668847 |
| 0.247667037 | 0.173540138 | 0.094001434 | 0.129427676 |
| 0.199225606 | 0.321811608 | 0.002744752 | 0.082153043 |
| 0.144087048 | 0.250747447 | 0.252459982 | 0.177266183 |
| 0.203393101 | 0.064389927 | 0.122360183 | 0.279180207 |
| 0.145476054 | 0.101233711 | 0.068115129 | 0.334895937 |
| 0.054349423 | 0.299410371 | 0.119401425 | 0.093270162 |
| 0.047527257 | 0.189275092 | 0.18582768  | 0.089873156 |
| 0.052561879 | 0.196798856 | 0.069085154 | 0.060317494 |
| 0.048928991 | 0.170796366 | 0.152358279 | 0.150887401 |

|             |             |             |             |
|-------------|-------------|-------------|-------------|
| 0.117524069 | 0.290155317 | 0.066914281 | 0.150002798 |
| 0.017628051 | 0.123300651 | 0.041152488 | 0.254142318 |
| 0.05329412  | 0.301646578 | 0.13186406  | 0.183465591 |
| 0.293949872 | 0.289191511 | 0.017767765 | 0.169396566 |
| 0.223932642 | 0.037863999 | 0.180203539 | 0.283969939 |
| 0.116106253 | 0.2409657   | 0.013549912 | 0.320216465 |
| 0.113794182 | 0.136766336 | 0.321723846 | 0.197807224 |
| 0.190901203 | 0.101713668 | 0.055808289 | 0.260648443 |
| 0.192914792 | 0.027142912 | 0.03089409  | 0.17946886  |
| 0.201205959 | 0.020537678 | 0.228067797 | 0.214455492 |
| 0.155047288 | 0.31004905  | 0.333535246 | 0.102797672 |
| 0.182767904 | 0.094558999 | 0.09974306  | 0.312545799 |
| 0.268711326 | 0.067932591 | 0.151663855 | 0.075064307 |
| 0.07293121  | 0.19267597  | 0.184094409 | 0.025619245 |
| 0.065576394 | 0.088802555 | 0.015788143 | 0.169426832 |
| 0.170117337 | 0.050419527 | 0.111047415 | 0.247726281 |
| 0.19071282  | 0.257515298 | 0.221174931 | 0.167786911 |
| 0.184279785 | 0.118662596 | 0.144293591 | 0.042129324 |
| 0.068157768 | 0.146083758 | 0.109101717 | 0.087775837 |
| 0.024727432 | 0.125248787 | 0.179013124 | 0.063239027 |
| 0.049421016 | 0.054639073 | 0.04430069  | 0.14197852  |
| 0.072318506 | 0.070901404 | 0.162818269 | 0.171151622 |
| 0.185187604 | 0.104745045 | 0.225518949 | 0.294335588 |
| 0.088595118 | 0.094422082 | 0.166297453 | 0.043589477 |
| 0.235836082 | 0.041422169 | 0.025400488 | 0.189182581 |
| 0.085096211 | 0.314987391 | 0.079055212 | 0.175867642 |
| 0.128045451 | 0.164837483 | 0.283373654 | 0.015360127 |
| 0.134005545 | 0.176348473 | 0.28113486  | 0.135767245 |
| 0.125851444 | 0.200150228 | 0.046529577 | 0.155248663 |
| 0.144331333 | 0.108943734 | 0.250371842 | 0.227521932 |
| 0.139940241 | 0.310092109 | 0.196235582 | 0.188492041 |
| 0.177959289 | 0.0891612   | 0.018063142 | 0.322671325 |
| 0.243963787 | 0.328858801 | 0.165443938 | 0.236679522 |
| 0.064093231 | 0.027870991 | 1           | 0.212402137 |
| 0.178364646 | 0.261408541 | 0.274063933 | 0.163603825 |
| 0.208460101 | 0.091421335 | 0.018881965 | 0.259326972 |
| 0.199830902 | 0.218839467 | 0.074359205 | 0.274159493 |
| 0.182497176 | 0.045905839 | 0.139244935 | 0.081643013 |
| 0.129238425 | 0.07297892  | 0.129855612 | 0.190551323 |
| 0.197392119 | 0.103028755 | 0.074646358 | 0.278520502 |
| 0.019312234 | 0.03968663  | 0.227274827 | 0.204064521 |
| 0.070308377 | 0.139697206 | 0.145589298 | 0.057263405 |
| 0.062666841 | 0.166230209 | 0.327506273 | 0.083771654 |
| 0.057913149 | 0.049115258 | 0.364883598 | 0.093407744 |
| 0.258333794 | 0.237754611 | 0.196750219 | 0.101917728 |
| 0.241450797 | 0.224137894 | 0.177192521 | 0.21750454  |
| 0.142354448 | 0.211800935 | 0.153681944 | 0.029317191 |
| 0.30286965  | 0.026495628 | 0.022904827 | 0.208234688 |
| 0.140261837 | 0.136463101 | 0.001937555 | 0.103208207 |
| 0.236809197 | 0.353876647 | 0.163538877 | 0.164703083 |
| 0.015040994 | 0.242204102 | 0.089075324 | 0.278861026 |
| 0.1894293   | 0.120211432 | 0.245656781 | 0.198527369 |
| 0.220717821 | 0.222421551 | 0.159269226 | 0.248760061 |
| 0.194816287 | 0.188034733 | 0.058772499 | 0.267978229 |

|             |             |             |             |
|-------------|-------------|-------------|-------------|
| 0.193297948 | 0.224132022 | 0.195038892 | 0.182455408 |
| 0.263356036 | 0.343063317 | 0.192723807 | 0.033398491 |
| 0.09665198  | 0.034137302 | 0.028419094 | 0.048623569 |
| 0.075178467 | 0.140232474 | 0.232257206 | 0.317956235 |
| 0.265783537 | 0.075803677 | 0.043090311 | 0.188626174 |
| 0.201448071 | 0.267271619 | 0.127244269 | 0.01714602  |
| 0.018323006 | 0.069608455 | 0.139413735 | 0.271585644 |
| 0.242351756 | 0.015534725 | 0.046045453 | 0.025966904 |
| 0.092402788 | 0.293292786 | 0.204761443 | 0.29792633  |
| 0.285220309 | 0.175064802 | 0.032388018 | 0.289065797 |
| 0.135047507 | 0.09115261  | 0.263264575 | 0.169083461 |
| 0.210984439 | 0.234205583 | 0.125435469 | 0.269427531 |
| 0.11561417  | 0.322272746 | 0.24155098  | 0.070801988 |
| 0.126323451 | 0.19228519  | 0.137794568 | 0.343599992 |
| 0.184497407 | 0.076287533 | 0.07564966  | 0.014599506 |
| 0.058042478 | 0.290301511 | 0.099733562 | 0.299931048 |
| 0.215032698 | 0.318538457 | 0.250771851 | 0.180326403 |
| 0.071161802 | 0.176838306 | 0.237128788 | 0.007957602 |
| 0.192218657 | 0.108106202 | 0.221243887 | 0.04113502  |
| 0.04931059  | 0.176187701 | 0.094092192 | 0.168646    |
| 0.153271452 | 0.16281787  | 0.291357735 | 0.328510156 |
| 0.235237109 | 0.092772018 | 0.274017829 | 0.271303124 |
| 0.064673193 | 0.242494772 | 0.177527254 | 0.073997499 |
| 0.046967207 | 0.230101426 | 0.218337885 | 0.141164172 |
| 0.049940431 | 0.333016634 | 0.08324171  | 0.269929096 |
| 0.171368419 | 0.229144197 | 0.229118639 | 0.14051932  |
| 0.199397366 | 0.117085549 | 0.112086249 | 0.016796817 |
| 0.206069702 | 0.276449545 | 0.127499942 | 0.117841988 |
| 0.170732633 | 0.209172206 | 0.101964954 | 0.05155881  |
| 0.181775186 | 0.062340324 | 0.090282553 | 0.338927096 |
| 0.164143051 | 0.145074537 | 0.068615356 | 0.118688579 |
| 0.241998973 | 0.176118445 | 0.038034216 | 0.17312605  |
| 0.232508944 | 0.200455956 | 0.287663776 | 0.320328347 |
| 0.090609905 | 0.207175065 | 0.205887229 | 0.117823645 |
| 0.143426564 | 0.149867265 | 0.202037542 | 0.016704212 |
| 0.112501857 | 0.183970201 | 0.067811994 | 0.234509561 |
| 0.137418594 | 0.135843231 | 0.109511761 | 0.339204244 |
| 0.096397423 | 0.24772079  | 0.048818845 | 0.132572277 |
| 0.315670308 | 0.111557016 | 0.275105118 | 0.049046193 |
| 0.073652187 | 0.178013198 | 0.052822832 | 0.182201381 |
| 0.121434453 | 0.210795692 | 0.175247464 | 0.185730792 |
| 0.140688944 | 0.290247717 | 0.221040116 | 0.048639328 |
| 0.035585718 | 0.0932277   | 0.196992102 | 0.037703829 |
| 0.037524246 | 0.323950721 | 0.087807855 | 0.189566695 |
| 0.190008222 | 0.12810721  | 0.151744559 | 0.073089786 |
| 0.187412932 | 0.226902223 | 0.039233158 | 0.219485517 |
| 0.127756976 | 0.156731901 | 0.11323062  | 0.065580132 |
| 0.114722611 | 0.164411526 | 0.23212553  | 0.214666898 |
| 0.234182985 | 0.298475594 | 0.138644096 | 0.200175252 |
| 0.135028495 | 0.153541605 | 0.043450603 | 0.257612037 |
| 0.068767195 |             |             |             |
| LEF1        | 0.376209355 | 0.452207511 | 0.262806271 |
| 0.300430357 | 0.227218516 | 0.172748221 | 0.091567989 |
| 0.09392414  | 0.054592301 | 0.001205143 | 0.011635238 |

|             |             |             |             |
|-------------|-------------|-------------|-------------|
| 0.312719693 | 0.092621357 | 0.105113961 | 0.145304662 |
| 0.356557954 | 0.100742244 | 0.2428111   | 0.134824894 |
| 0.288530721 | 0.033044696 | 0.295846139 | 0.055307011 |
| 0.246568428 | 0.085454459 | 0.044672981 | 0.178730788 |
| 0.378688661 | 0.054859974 | 0.106581794 | 0.249739299 |
| 0.129485365 | 0.375073458 | 0.457243072 | 0.300644298 |
| 0.456781961 | 0.345575573 | 0.024527283 | 0.100958971 |
| 0.383850699 | 0.35314861  | 0.281757981 | 0.169053367 |
| 0.022950812 | 0.406380693 | 0.112127584 | 0.29465948  |
| 0.114430677 | 0.0221591   | 0.086272802 | 0.368993503 |
| 0.387034809 | 0.21657129  | 0.102474187 | 0.067868057 |
| 0.073700142 | 0.079241348 | 0.156783282 | 0.177972221 |
| 0.106116739 | 0.048431445 | 0.410967164 | 0.038984826 |
| 0.061588266 | 0.131735984 | 0.159315899 | 0.120592038 |
| 0.238875358 | 0.28064927  | 0.01749531  | 0.305499801 |
| 6.55E-05    | 0.274295876 | 0.282244573 | 0.188724697 |
| 0.041865995 | 0.009228324 | 0.172316181 | 0.158182599 |
| 0.407763745 | 0.451371156 | 0.450014311 | 0.459467553 |
| 0.117193011 | 0.230347727 | 0.257106529 | 0.095787594 |
| 0.388456518 | 0.071738194 | 0.090511601 | 0.363659758 |
| 0.457750644 | 0.455586919 | 0.148966134 | 0.21224922  |
| 0.297704862 | 0.408435974 | 0.200188711 | 0.202217722 |
| 0.165547702 | 0.096715796 | 0.355920966 | 0.463795184 |
| 0.331432007 | 0.241816221 | 0.120504108 | 0.30478483  |
| 0.055728826 | 0.19338398  | 0.214028269 | 0.140266994 |
| 0.419557629 | 0.010983613 | 0.17641384  | 0.145017853 |
| 0.201465726 | 0.371497097 | 0.468200946 | 0.097270198 |
| 0.264977381 | 0.019457863 | 0.102859387 | 0.051624776 |
| 0.167682682 | 0.173820972 | 0.401970827 | 0.369297856 |
| 0.105217889 | 0.193291629 | 0.133213927 | 0.005765632 |
| 0.03450496  | 0.223156784 | 0.373375127 | 0.240087032 |
| 0.353912736 | 0.393333219 | 0.111692698 | 0.28243646  |
| 0.305335054 | 0.44475769  | 0.018415761 | 0.060169537 |
| 0.207557088 | 0.208308906 | 0.148985872 | 0.244314035 |
| 0.185636218 | 0.067621232 | 0.079153088 | 0.471404658 |
| 0.343998712 | 0.051933456 | 0.187819959 | 0.343746202 |
| 0.120519575 | 0.235749364 | 0.07407111  | 0.128483859 |
| 0.022156179 | 0.435221959 | 0.045753668 | 0.182073736 |
| 0.136451601 | 0.117190975 | 0.023644401 | 0.111487538 |
| 0.121418664 | 0.327364219 | 0.412180719 | 0.088960922 |
| 0.148172846 | 0.276608643 | 0.142072703 | 0.261151758 |
| 0.003247454 | 0.055789289 | 0.127068599 | 0.441226988 |
| 0.130265102 | 0.493780862 | 0.189067565 | 0.240231752 |
| 0.196739052 | 0.398343768 | 0.012478551 | 0.422292865 |
| 0.469945779 | 0.129968972 | 0.195055302 | 0.311125932 |
| 0.196973666 | 0.364922493 | 0.04266746  | 0.325782207 |
| 0.256937556 | 0.070640656 | 0.46942159  | 0.10744787  |
| 0.418518433 | 0.030404393 | 0.128287764 | 0.409722942 |
| 0.330842732 | 0.008032241 | 0.075657926 | 0.240460752 |
| 0.050853394 | 0.031384947 | 0.346276078 | 0.26474626  |
| 0.187375487 | 0.412673838 | 0.446567994 | 0.189319663 |
| 0.216542493 | 0.13568425  | 0.02279711  | 0.249879233 |
| 0.411966557 | 0.177825592 | 0.359545561 | 0.119259864 |
| 0.179502269 | 0.399693142 | 0.367419752 | 0.071285839 |

|             |             |             |             |
|-------------|-------------|-------------|-------------|
| 0.025288885 | 0.135163966 | 0.012008476 | 0.18528638  |
| 0.372862852 | 0.041874836 | 0.196633827 | 0.187600289 |
| 0.072998219 | 0.463098242 | 0.193477637 | 0.232614933 |
| 0.158547933 | 0.169872618 | 0.150768154 | 0.076558841 |
| 0.088244958 | 0.112103461 | 0.203255857 | 0.183033583 |
| 0.013890677 | 0.059306644 | 0.054004391 | 0.16478052  |
| 0.04970554  | 0.130271886 | 0.119297404 | 0.272537838 |
| 0.143303565 | 0.051744473 | 0.196342994 | 0.248455298 |
| 0.113521949 | 0.018627123 | 0.442300802 | 0.315319736 |
| 0.223044462 | 0.091057797 | 0.050270221 | 0.131662842 |
| 0.37787923  | 0.109822264 | 0.116441742 | 0.355785197 |
| 0.043065846 | 0.460379729 | 0.102503255 | 0.088293819 |
| 0.195100577 | 0.131910222 | 0.405719275 | 0.027620994 |
| 0.214271621 | 0.376654907 | 0.23825533  | 0.11572041  |
| 0.302338455 | 0.261348872 | 0.016671748 | 0.327368681 |
| 0.303288048 | 0.026933147 | 0.475474523 | 0.12145632  |
| 0.029696177 | 0.374952908 | 0.316125845 | 0.070844341 |
| 0.081645618 | 0.126497298 | 0.017254884 | 0.195614467 |
| 0.45078392  | 0.322076186 | 0.295859831 | 0.24154149  |
| 0.021336028 | 0.003869649 | 0.212402137 | 1           |
| 0.436661965 | 0.475910659 | 0.186385165 | 0.18872567  |
| 0.139591116 | 0.17175151  | 0.053881441 | 0.451280511 |
| 0.276944623 | 0.47387674  | 0.010587014 | 0.386655429 |
| 0.441372335 | 0.108720568 | 0.06375345  | 0.117845455 |
| 0.289232654 | 0.031586051 | 0.157394536 | 0.42585872  |
| 0.368593809 | 0.181463553 | 0.172948967 | 0.338945953 |
| 0.00712944  | 0.018937454 | 0.246225239 | 0.207780708 |
| 0.163735001 | 0.141510185 | 0.100156366 | 0.156401058 |
| 0.021994892 | 0.355687154 | 0.425634    | 0.041805658 |
| 0.119923475 | 0.156306025 | 0.292693655 | 0.029580195 |
| 0.429013341 | 0.482282969 | 0.450526039 | 0.110822343 |
| 0.37474914  | 0.429151016 | 0.24360199  | 0.096714228 |
| 0.02842214  | 0.469939412 | 0.283962078 | 0.012084664 |
| 0.422222587 | 0.081034244 | 0.003897061 | 0.424856013 |
| 0.111983004 | 0.378095202 | 0.002954553 | 0.16768314  |
| 0.084448013 | 0.45049873  | 0.40119505  | 0.246658796 |
| 0.071689704 | 0.250235829 | 0.024270527 | 0.499252444 |
| 0.406796048 | 0.023543872 | 0.154076854 | 0.34625184  |
| 0.352368401 | 0.465126961 | 0.213778093 | 0.400284554 |
| 0.269949388 | 0.428756535 | 0.094826313 | 0.171922429 |
| 0.34498609  | 0.459302033 | 0.329299637 | 0.40202611  |
| 0.384894759 | 0.35204595  | 0.143208435 | 0.007902424 |
| 0.11642259  | 0.08064134  | 0.111240171 | 0.036257037 |
| 0.17047739  | 0.09920408  | 0.454146922 | 0.429882328 |
| 0.441564848 | 0.009437044 | 0.066253688 | 0.348266932 |
| 0.360319248 | 0.421945158 | 0.056454062 | 0.01197105  |
| 0.024827581 | 0.018263793 | 0.178552682 | 0.214447796 |
| 0.443848588 | 0.068387933 | 0.00537881  | 0.0204867   |
| 0.161492065 | 0.292872596 | 0.428245468 | 0.288298322 |
| 0.418663423 | 0.07362228  | 0.089957346 | 0.317468272 |
| 0.061167675 | 0.235101014 | 0.434099584 | 0.381467926 |
| 0.070786391 | 0.207130162 | 0.234510692 | 0.422894965 |
| 0.09763844  | 0.214204035 | 0.322925036 | 0.130511223 |
| 0.042403011 | 0.087457241 | 0.06046473  | 0.406205144 |

|             |             |             |             |
|-------------|-------------|-------------|-------------|
| 0.437968186 | 0.037094529 | 0.020074775 | 0.056467711 |
| 0.047634636 | 0.436378138 | 0.087434541 | 0.473589756 |
| 0.354764319 | 0.379306464 | 0.093953131 | 0.412570441 |
| 0.023223471 | 0.412525299 | 0.227121294 | 0.027305874 |
| 0.258188764 | 0.021903939 | 0.44670045  | 0.067723694 |
| 0.132177395 | 0.290004809 | 0.148475109 | 0.03280532  |
| 0.212317794 | 0.053691698 | 0.417175206 | 0.440663207 |
| 0.074146295 | 0.134439187 | 0.230346754 | 0.31547746  |
| 0.114529259 | 0.314354494 | 0.426570733 | 0.167893899 |
| 0.034851144 | 0.209696568 | 0.30377916  | 0.279569954 |
| 0.104753523 | 0.466115001 | 0.135983586 | 0.494711494 |
| 0.322875936 | 0.434297963 | 0.425293958 | 0.163889137 |
| 0.173498357 | 0.220593292 | 0.192397636 | 0.0076222   |
| 0.206734557 | 0.380420431 | 0.205032556 | 0.102461029 |
| 0.140488321 | 0.246452293 | 0.047327849 | 0.157630435 |
| 0.235760792 | 0.126776957 | 0.067891411 | 0.405084422 |
| 0.264976172 | 0.292432013 | 0.034198221 | 0.052564088 |
| 0.482231278 | 0.38834625  | 0.072314489 | 0.27011438  |
| 0.157928599 | 0.182612423 | 0.417886447 | 0.416194903 |
| 0.215973888 | 0.356372562 | 0.335592391 | 0.211307896 |
| 0.326775074 | 0.140928351 | 0.454023882 | 0.04425418  |
| 0.083561828 | 0.29223345  | 0.041140091 | 0.100934148 |
| 0.08586891  | 0.038762771 | 0.210311796 | 0.359769279 |
| 0.224471037 | 0.228286373 | 0.148268642 | 0.077529262 |
| 0.237546836 | 0.236542625 | 0.218997419 | 0.076898374 |
| 0.040360187 | 0.410626434 | 0.012764685 | 0.061215155 |
| 0.229551054 | 0.360453528 | 0.207690762 | 0.189550053 |
| 0.212341192 | 0.175030368 | 0.166672231 | 0.114400227 |
| 0.100184478 | 0.235254037 | 0.356734162 | 0.029450311 |
| 0.010452916 | 0.461683844 | 0.19849996  | 0.056799939 |
| 0.09144279  | 0.251238802 | 0.240546109 | 0.103410533 |
| 0.044608157 | 0.430674258 | 0.109951971 | 0.250579803 |
| 0.162157547 | 0.066426261 | 0.296321493 | 0.073973478 |
| 0.071229194 | 0.389226941 | 0.272548746 | 0.459110756 |
| 0.290153198 | 0.32470072  | 0.379186754 | 0.351052717 |
| 0.174888159 | 0.250185131 | 0.016943516 | 0.392813604 |
| 0.191027064 |             |             |             |
| LGALS1      | 0.489892443 | 0.522412896 | 0.427608752 |
| 0.446068072 | 0.439561659 | 0.455469809 | 0.202952476 |
| 0.209076701 | 0.068599364 | 0.003307922 | 0.015984571 |
| 0.48046598  | 0.202825119 | 0.297561245 | 0.380043974 |
| 0.421430404 | 0.111611722 | 0.380161814 | 0.220281402 |
| 0.432406081 | 0.09276642  | 0.395084256 | 0.073890504 |
| 0.271204894 | 0.081808159 | 0.049937068 | 0.246909291 |
| 0.471268219 | 0.058532664 | 0.41398786  | 0.440092699 |
| 0.077759689 | 0.501499036 | 0.513123938 | 0.459311078 |
| 0.511019861 | 0.486748258 | 0.010239258 | 0.333909641 |
| 0.495678065 | 0.477668541 | 0.433460439 | 0.322102801 |
| 0.030402691 | 0.499850778 | 0.234210805 | 0.402488566 |
| 0.268324198 | 0.020293354 | 0.305859863 | 0.493223353 |
| 0.507762541 | 0.491914683 | 0.243070832 | 0.147847118 |
| 0.220372022 | 0.292963569 | 0.292147979 | 0.416252154 |
| 0.210666735 | 0.205923682 | 0.516706672 | 0.077808596 |
| 0.153239046 | 0.263624524 | 0.125463202 | 0.27219928  |

|             |             |             |             |
|-------------|-------------|-------------|-------------|
| 0.353167393 | 0.475424486 | 0.012502126 | 0.475034858 |
| 0.002717155 | 0.400185926 | 0.369204879 | 0.330150156 |
| 0.027590828 | 0.014707627 | 0.148930575 | 0.351844679 |
| 0.488810409 | 0.503657604 | 0.499631906 | 0.508735891 |
| 0.163203321 | 0.267032655 | 0.41333496  | 0.149269739 |
| 0.506688746 | 0.17038622  | 0.100759924 | 0.420615287 |
| 0.505312757 | 0.523089412 | 0.170775916 | 0.229786035 |
| 0.497279951 | 0.515616662 | 0.475883744 | 0.449794112 |
| 0.368649923 | 0.035285378 | 0.512661442 | 0.521359435 |
| 0.494577346 | 0.319887994 | 0.123448296 | 0.473629224 |
| 0.041326271 | 0.430695505 | 0.348733068 | 0.15729133  |
| 0.490870611 | 0.011645777 | 0.180302568 | 0.383785646 |
| 0.195153019 | 0.506647314 | 0.519843307 | 0.168928199 |
| 0.419273775 | 0.013741449 | 0.124621109 | 0.021420929 |
| 0.348282597 | 0.136164164 | 0.50297413  | 0.500371729 |
| 0.262105038 | 0.386177816 | 0.260009191 | 0.001106233 |
| 0.01653324  | 0.162819496 | 0.519024536 | 0.393158991 |
| 0.47342709  | 0.481422613 | 0.2156797   | 0.494253895 |
| 0.498930978 | 0.49830338  | 0.085356866 | 0.079072332 |
| 0.458791011 | 0.159072816 | 0.211146283 | 0.497106729 |
| 0.288529184 | 0.104256734 | 0.105897338 | 0.515522238 |
| 0.491429646 | 0.066012309 | 0.402279821 | 0.416697809 |
| 0.363259494 | 0.344377206 | 0.086957155 | 0.279905875 |
| 0.039695476 | 0.50724398  | 0.017338556 | 0.377920074 |
| 0.291225628 | 0.130515941 | 0.007288516 | 0.295828339 |
| 0.321212863 | 0.514528384 | 0.491220587 | 0.083809093 |
| 0.326001648 | 0.406735394 | 0.397225691 | 0.497679366 |
| 0.006656053 | 0.033994318 | 0.373150968 | 0.523814521 |
| 0.39132355  | 0.513472455 | 0.289159249 | 0.281059062 |
| 0.254202551 | 0.476097806 | 0.002802822 | 0.507700466 |
| 0.519671272 | 0.403230019 | 0.419972156 | 0.435937159 |
| 0.405575666 | 0.488931977 | 0.055864178 | 0.425545245 |
| 0.4690428   | 0.059197522 | 0.502349413 | 0.132474967 |
| 0.51602257  | 0.027418673 | 0.363497638 | 0.493138129 |
| 0.513424778 | 0.006290085 | 0.276771799 | 0.419333332 |
| 0.016184309 | 0.101655555 | 0.477859188 | 0.428977807 |
| 0.398140427 | 0.475746741 | 0.485739941 | 0.386832887 |
| 0.443308671 | 0.229938413 | 0.006825826 | 0.297426326 |
| 0.493210999 | 0.437015727 | 0.50292502  | 0.236000163 |
| 0.45256913  | 0.518051848 | 0.512976501 | 0.243693823 |
| 0.030536212 | 0.340169495 | 0.018299921 | 0.321565075 |
| 0.4913845   | 0.111153226 | 0.43977526  | 0.127640933 |
| 0.050827462 | 0.522556632 | 0.155648325 | 0.263791038 |
| 0.114055519 | 0.463300671 | 0.239011985 | 0.266156352 |
| 0.224658157 | 0.134257843 | 0.35560942  | 0.392749402 |
| 0.03142369  | 0.073861275 | 0.0083071   | 0.45564144  |
| 0.148833636 | 0.401065662 | 0.417232056 | 0.505158251 |
| 0.363362068 | 0.103283632 | 0.3912562   | 0.274984824 |
| 0.08770782  | 0.008063979 | 0.522987874 | 0.41219752  |
| 0.451551406 | 0.133208179 | 0.026996288 | 0.42587704  |
| 0.508248054 | 0.42609937  | 0.362722787 | 0.511751784 |
| 0.020010141 | 0.502390498 | 0.249952951 | 0.096777846 |
| 0.401636655 | 0.247003391 | 0.479480736 | 0.061571684 |
| 0.456250439 | 0.515632882 | 0.291839831 | 0.158048627 |



|             |             |             |             |
|-------------|-------------|-------------|-------------|
| 0.498145947 | 0.445577208 | 0.021810317 | 0.503320935 |
| 0.507197147 | 0.020316018 | 0.525375765 | 0.101741281 |
| 0.011922739 | 0.467194443 | 0.50174422  | 0.053556494 |
| 0.055866238 | 0.357372842 | 0.04342062  | 0.262732046 |
| 0.522662922 | 0.411407739 | 0.508629785 | 0.192464812 |
| 0.028709855 | 0.007976692 | 0.178364646 | 0.436661965 |
| 1           | 0.521843202 | 0.235663354 | 0.375900043 |
| 0.218090308 | 0.336658726 | 0.182132349 | 0.522631875 |
| 0.184828559 | 0.517166598 | 0.002721544 | 0.488210939 |
| 0.507423441 | 0.37278712  | 0.059759988 | 0.339673853 |
| 0.497819682 | 0.032334154 | 0.191924064 | 0.519923312 |
| 0.503709479 | 0.325800123 | 0.367632421 | 0.461366782 |
| 0.011761061 | 0.033552846 | 0.396539867 | 0.167139443 |
| 0.416450845 | 0.186818849 | 0.045382619 | 0.371890707 |
| 0.031661983 | 0.513298049 | 0.484148557 | 0.042393895 |
| 0.42855424  | 0.361931109 | 0.368682428 | 0.024471691 |
| 0.502608782 | 0.514356627 | 0.516988715 | 0.152196971 |
| 0.510714844 | 0.520635828 | 0.460104739 | 0.056946681 |
| 0.009357137 | 0.515448849 | 0.473631803 | 0.01769327  |
| 0.494638395 | 0.326653542 | 0.009283506 | 0.518992691 |
| 0.16446586  | 0.480359933 | 0.003365299 | 0.086816406 |
| 0.026119053 | 0.480250634 | 0.506692979 | 0.431319234 |
| 0.341254618 | 0.375921775 | 0.003580778 | 0.520416622 |
| 0.521557309 | 0.007440328 | 0.113350558 | 0.520574898 |
| 0.495311871 | 0.520487278 | 0.323599618 | 0.506919508 |
| 0.48187838  | 0.514609432 | 0.247196254 | 0.241114537 |
| 0.507683931 | 0.511313209 | 0.482239084 | 0.508354391 |
| 0.500781338 | 0.435052025 | 0.265272047 | 0.009607552 |
| 0.114614842 | 0.25050003  | 0.38144313  | 0.070020152 |
| 0.418375451 | 0.115212078 | 0.519365317 | 0.492635161 |
| 0.518502964 | 0.001397473 | 0.155732437 | 0.520657344 |
| 0.496550414 | 0.49648536  | 0.013767858 | 0.004783501 |
| 0.007056089 | 0.012274003 | 0.393988564 | 0.212618039 |
| 0.519125714 | 0.331511293 | 0.001239314 | 0.040424453 |
| 0.281394784 | 0.409798949 | 0.523790172 | 0.379335971 |
| 0.492014165 | 0.060006703 | 0.335441968 | 0.409796929 |
| 0.048774184 | 0.447966995 | 0.517298375 | 0.511521656 |
| 0.02713402  | 0.217822891 | 0.428856042 | 0.503613454 |
| 0.067383764 | 0.295112739 | 0.489956344 | 0.33010789  |
| 0.008739714 | 0.058697891 | 0.045350314 | 0.457454194 |
| 0.506289739 | 0.066687012 | 0.023982932 | 0.196671473 |
| 0.10845119  | 0.504351247 | 0.149069693 | 0.513678833 |
| 0.497211313 | 0.454532017 | 0.05400345  | 0.511340817 |
| 0.027015486 | 0.516082712 | 0.334825663 | 0.071061936 |
| 0.27606482  | 0.00670796  | 0.515233245 | 0.158440044 |
| 0.389649214 | 0.462160755 | 0.1830197   | 0.008983854 |
| 0.175556482 | 0.036381173 | 0.496399475 | 0.488579918 |
| 0.02095202  | 0.227442626 | 0.276420671 | 0.426241314 |
| 0.337927969 | 0.465790732 | 0.512218661 | 0.501794074 |
| 0.072451178 | 0.137086378 | 0.448148335 | 0.490734668 |
| 0.269944406 | 0.499555438 | 0.301864905 | 0.521336611 |
| 0.487967659 | 0.508328567 | 0.522158491 | 0.362504068 |
| 0.218547532 | 0.474459454 | 0.440959313 | 0.016487827 |
| 0.355583167 | 0.494531282 | 0.395556495 | 0.1350648   |

|             |             |             |             |
|-------------|-------------|-------------|-------------|
| 0.237447437 | 0.424626278 | 0.03607294  | 0.233011736 |
| 0.362107525 | 0.38852769  | 0.127425816 | 0.452370809 |
| 0.455726697 | 0.494688757 | 0.034478083 | 0.042751795 |
| 0.523629958 | 0.502069067 | 0.146398461 | 0.479772335 |
| 0.141885546 | 0.3358537   | 0.497011405 | 0.484644712 |
| 0.404879529 | 0.521093453 | 0.490997813 | 0.470636079 |
| 0.499915837 | 0.24557746  | 0.517729846 | 0.107756809 |
| 0.065886372 | 0.494755555 | 0.083500988 | 0.067502489 |
| 0.120241495 | 0.016006044 | 0.32554475  | 0.437209832 |
| 0.427707951 | 0.387752153 | 0.393807461 | 0.06345591  |
| 0.303729212 | 0.432863163 | 0.344391813 | 0.209139679 |
| 0.064090006 | 0.516137583 | 0.005317171 | 0.038812565 |
| 0.433127235 | 0.504135242 | 0.406235709 | 0.213128406 |
| 0.298392495 | 0.112769614 | 0.28198858  | 0.373223138 |
| 0.408632468 | 0.408403885 | 0.5086164   | 0.027306185 |
| 0.013743104 | 0.501714415 | 0.450072543 | 0.012269135 |
| 0.068154341 | 0.46874913  | 0.301402769 | 0.228325218 |
| 0.01237383  | 0.518963187 | 0.414376576 | 0.447728987 |
| 0.372007949 | 0.047993059 | 0.46594781  | 0.082032051 |
| 0.045717474 | 0.508243856 | 0.421086095 | 0.519536505 |
| 0.351229637 | 0.431565073 | 0.483594833 | 0.520244876 |
| 0.113575414 | 0.446026347 | 0.018724645 | 0.491962903 |
| 0.476498395 |             |             |             |

LGALS3 0.476730561

0.516558228

0.46593584

|             |             |             |             |
|-------------|-------------|-------------|-------------|
| 0.4554911   | 0.489804183 | 0.401424818 | 0.213689692 |
| 0.178665831 | 0.090898978 | 0.004741827 | 0.029810986 |
| 0.516819842 | 0.2497141   | 0.29056479  | 0.35668823  |
| 0.462759673 | 0.170444181 | 0.376942719 | 0.256683306 |
| 0.441949079 | 0.085985495 | 0.454163679 | 0.092966889 |
| 0.357646804 | 0.134574962 | 0.077659158 | 0.329431669 |
| 0.473449348 | 0.089127147 | 0.349062017 | 0.406012854 |
| 0.121753061 | 0.484193808 | 0.528662704 | 0.515163849 |
| 0.532667072 | 0.454539085 | 0.013611163 | 0.311192246 |
| 0.4556163   | 0.503277923 | 0.436605933 | 0.360157462 |
| 0.042112767 | 0.489843112 | 0.260434012 | 0.470491329 |
| 0.235910753 | 0.037399103 | 0.236068942 | 0.435078481 |
| 0.491873115 | 0.497921658 | 0.219188441 | 0.162065759 |
| 0.25912275  | 0.230858936 | 0.373720664 | 0.33859707  |
| 0.240003141 | 0.148953095 | 0.497523655 | 0.087567071 |
| 0.155132986 | 0.247962189 | 0.19084053  | 0.263853329 |
| 0.431637216 | 0.413492358 | 0.015760572 | 0.488745578 |
| 0.002602507 | 0.413332818 | 0.440539121 | 0.392589328 |
| 0.048093611 | 0.024773975 | 0.218458267 | 0.361408442 |
| 0.489894481 | 0.460438702 | 0.525166371 | 0.524898613 |
| 0.225138223 | 0.335628645 | 0.483790543 | 0.193521291 |
| 0.478879124 | 0.187141804 | 0.119000753 | 0.47659541  |
| 0.525741235 | 0.529817698 | 0.239575027 | 0.310373701 |
| 0.471937348 | 0.47258539  | 0.478170192 | 0.490954283 |
| 0.411343234 | 0.067354169 | 0.458828762 | 0.520318515 |
| 0.432716533 | 0.413067997 | 0.183378825 | 0.439944808 |
| 0.064745614 | 0.398806835 | 0.387872919 | 0.196898272 |
| 0.491865934 | 0.016631368 | 0.261113322 | 0.386043795 |
| 0.233567097 | 0.490972142 | 0.528363561 | 0.196699508 |
| 0.479011771 | 0.023580487 | 0.183925238 | 0.03827613  |

|             |             |             |             |
|-------------|-------------|-------------|-------------|
| 0.36948331  | 0.212999671 | 0.500074446 | 0.49698627  |
| 0.2385214   | 0.44567959  | 0.273086577 | 0.002210956 |
| 0.033257231 | 0.218374696 | 0.50469238  | 0.402614298 |
| 0.475330539 | 0.441519963 | 0.269788836 | 0.430999042 |
| 0.523194152 | 0.525205923 | 0.061489294 | 0.094031508 |
| 0.469835121 | 0.217275594 | 0.264679332 | 0.513094599 |
| 0.368798196 | 0.110053885 | 0.137550087 | 0.512482835 |
| 0.420025399 | 0.089146881 | 0.357070476 | 0.466267283 |
| 0.370884723 | 0.436982166 | 0.111984336 | 0.312636446 |
| 0.047926463 | 0.500731296 | 0.036927014 | 0.344955112 |
| 0.327147186 | 0.199934317 | 0.010378622 | 0.259345961 |
| 0.316220063 | 0.491758247 | 0.490762909 | 0.113909224 |
| 0.357922407 | 0.468804227 | 0.335030716 | 0.487485682 |
| 0.011321284 | 0.049403454 | 0.290347064 | 0.513682604 |
| 0.300524071 | 0.517057408 | 0.329630339 | 0.351642456 |
| 0.330282734 | 0.493569751 | 0.004176531 | 0.50406858  |
| 0.53502932  | 0.317625568 | 0.463835001 | 0.484831713 |
| 0.451033299 | 0.491804666 | 0.050823936 | 0.469965958 |
| 0.398775145 | 0.082215791 | 0.518538303 | 0.190177769 |
| 0.469817821 | 0.046602169 | 0.334258937 | 0.514771452 |
| 0.51743336  | 0.009432822 | 0.221840424 | 0.411584389 |
| 0.034751139 | 0.08672189  | 0.469594735 | 0.446383191 |
| 0.42519503  | 0.502879044 | 0.508951451 | 0.436837462 |
| 0.491099995 | 0.240089248 | 0.01341598  | 0.384937427 |
| 0.500928712 | 0.447326609 | 0.438488957 | 0.247332645 |
| 0.371454589 | 0.478523971 | 0.489745051 | 0.22818834  |
| 0.043425178 | 0.321239372 | 0.021076667 | 0.381406075 |
| 0.450818374 | 0.128191432 | 0.455376806 | 0.173765723 |
| 0.08778666  | 0.515343049 | 0.240053655 | 0.350623015 |
| 0.184118028 | 0.459461226 | 0.262209879 | 0.276247314 |
| 0.2796448   | 0.183244873 | 0.419312091 | 0.428387542 |
| 0.033072364 | 0.108770973 | 0.018334773 | 0.475889654 |
| 0.184018407 | 0.419540901 | 0.40956222  | 0.457916429 |
| 0.364887545 | 0.133444249 | 0.453253477 | 0.34905753  |
| 0.138100732 | 0.016854739 | 0.498190818 | 0.449216455 |
| 0.364095081 | 0.15930159  | 0.046710184 | 0.42024227  |
| 0.502204508 | 0.347470512 | 0.275229406 | 0.477741064 |
| 0.029239889 | 0.516957461 | 0.293316768 | 0.146364299 |
| 0.476483068 | 0.294083542 | 0.487159667 | 0.06300611  |
| 0.42416235  | 0.464176832 | 0.35258076  | 0.217599617 |
| 0.427328014 | 0.453678471 | 0.029491346 | 0.455996007 |
| 0.455700332 | 0.035628741 | 0.525891799 | 0.161438994 |
| 0.02417463  | 0.516058387 | 0.514809543 | 0.086378415 |
| 0.091584223 | 0.377160022 | 0.038737355 | 0.338413062 |
| 0.507102122 | 0.466848593 | 0.488826526 | 0.274918937 |
| 0.042578624 | 0.014439476 | 0.261408541 | 0.475910659 |
| 0.521843202 | 1           | 0.294588116 | 0.453532281 |
| 0.260160833 | 0.396068511 | 0.133148498 | 0.51738226  |
| 0.229007302 | 0.522250714 | 0.006947864 | 0.519541199 |
| 0.5288442   | 0.300651069 | 0.099596599 | 0.320164086 |
| 0.433125647 | 0.046020505 | 0.211631668 | 0.50192269  |
| 0.475273154 | 0.374920733 | 0.405473269 | 0.488869358 |
| 0.013827808 | 0.037931332 | 0.451309781 | 0.249171157 |
| 0.433802491 | 0.237542221 | 0.085778844 | 0.338638786 |

|             |             |             |             |
|-------------|-------------|-------------|-------------|
| 0.047255487 | 0.463057326 | 0.509236794 | 0.066539736 |
| 0.373509286 | 0.316053299 | 0.444534432 | 0.038191808 |
| 0.517086108 | 0.509566575 | 0.529958391 | 0.164834659 |
| 0.512813045 | 0.507220508 | 0.506683858 | 0.092729283 |
| 0.02113984  | 0.532198703 | 0.433101517 | 0.024628726 |
| 0.508390323 | 0.238390665 | 0.015539931 | 0.483215797 |
| 0.193225242 | 0.458044221 | 0.00330489  | 0.107618469 |
| 0.051691554 | 0.517850294 | 0.486272608 | 0.404149952 |
| 0.262860387 | 0.399120045 | 0.007640538 | 0.519914887 |
| 0.491316595 | 0.018257473 | 0.182500582 | 0.515007026 |
| 0.520397766 | 0.521975613 | 0.408302166 | 0.523991645 |
| 0.52448084  | 0.517178102 | 0.260211702 | 0.310296459 |
| 0.489320059 | 0.510354126 | 0.460204985 | 0.456788764 |
| 0.505563238 | 0.494081559 | 0.304404712 | 0.014683494 |
| 0.158760288 | 0.206123496 | 0.36205578  | 0.095606567 |
| 0.340996671 | 0.168907215 | 0.493027281 | 0.514021284 |
| 0.525580114 | 0.005437197 | 0.145562159 | 0.499462287 |
| 0.463626414 | 0.488912343 | 0.022818022 | 0.007060878 |
| 0.009798338 | 0.027431515 | 0.379959626 | 0.287363575 |
| 0.505683156 | 0.268095211 | 0.004574395 | 0.038211391 |
| 0.305314419 | 0.488205904 | 0.507108977 | 0.418012766 |
| 0.511308785 | 0.090719    | 0.325796911 | 0.435136667 |
| 0.085552091 | 0.364807717 | 0.522967783 | 0.466267205 |
| 0.04790586  | 0.289585765 | 0.416317707 | 0.500738875 |
| 0.114926968 | 0.371513594 | 0.518732778 | 0.361806506 |
| 0.016120433 | 0.098775281 | 0.076589428 | 0.49305955  |
| 0.522985488 | 0.099845954 | 0.043075158 | 0.151966272 |
| 0.130508553 | 0.510592098 | 0.189245874 | 0.519150451 |
| 0.481397089 | 0.483488782 | 0.096624058 | 0.481195677 |
| 0.044489741 | 0.49934986  | 0.430852443 | 0.061836067 |
| 0.331466406 | 0.013184486 | 0.487754066 | 0.199241054 |
| 0.344893592 | 0.432227107 | 0.233571309 | 0.021201439 |
| 0.244159964 | 0.063307022 | 0.513478566 | 0.523846676 |
| 0.042662001 | 0.24172167  | 0.344092118 | 0.450911174 |
| 0.292733275 | 0.488979476 | 0.511595235 | 0.467723503 |
| 0.082106928 | 0.198428269 | 0.441533759 | 0.44472952  |
| 0.24264535  | 0.523739431 | 0.357169522 | 0.520047134 |
| 0.451981597 | 0.478506935 | 0.506237635 | 0.377390102 |
| 0.307641353 | 0.436239546 | 0.405184977 | 0.019776152 |
| 0.388804342 | 0.513598899 | 0.380619573 | 0.196703671 |
| 0.308197624 | 0.484217578 | 0.044851278 | 0.203943547 |
| 0.434992941 | 0.320149165 | 0.158450677 | 0.481618843 |
| 0.425843794 | 0.447693901 | 0.0365322   | 0.071669209 |
| 0.537642905 | 0.449354016 | 0.140395253 | 0.473763813 |
| 0.195575176 | 0.394737996 | 0.5180874   | 0.52349269  |
| 0.42117292  | 0.509422679 | 0.469512545 | 0.430321067 |
| 0.434256164 | 0.275764209 | 0.531901556 | 0.078479954 |
| 0.105455893 | 0.488904047 | 0.112135358 | 0.110116344 |
| 0.159209765 | 0.031275509 | 0.397042634 | 0.482134089 |
| 0.479469321 | 0.436773254 | 0.341808167 | 0.090200322 |
| 0.385119605 | 0.411613689 | 0.405612687 | 0.20704536  |
| 0.088714891 | 0.505816035 | 0.010492084 | 0.065176186 |
| 0.491584925 | 0.503120263 | 0.482004902 | 0.281241339 |
| 0.387515324 | 0.175256617 | 0.342642198 | 0.306914118 |

|             |             |             |             |
|-------------|-------------|-------------|-------------|
| 0.373511697 | 0.430371713 | 0.49963788  | 0.031997071 |
| 0.01741585  | 0.518991549 | 0.409339425 | 0.025486107 |
| 0.10158912  | 0.420442707 | 0.329027261 | 0.266881741 |
| 0.028162918 | 0.505374295 | 0.363544998 | 0.497153382 |
| 0.363573456 | 0.070768872 | 0.380374652 | 0.092930646 |
| 0.059018986 | 0.445361128 | 0.477833605 | 0.526733745 |
| 0.41757805  | 0.471627402 | 0.449033388 | 0.500380211 |
| 0.138003936 | 0.454568646 | 0.025684686 | 0.485299436 |
| 0.491823768 |             |             |             |
| LMNA        | 0.254782737 | 0.298404339 | 0.161521333 |
| 0.331516392 | 0.237586721 | 0.147823381 | 0.199146692 |
| 0.153280757 | 0.1241941   | 0.031784223 | 0.064454852 |
| 0.234800691 | 0.142451468 | 0.163363103 | 0.095772992 |
| 0.396593079 | 0.24949096  | 0.190279639 | 0.269893863 |
| 0.33540487  | 0.134814675 | 0.378464537 | 0.228238267 |
| 0.207590981 | 0.17875153  | 0.195536121 | 0.168656742 |
| 0.376687559 | 0.211683362 | 0.097699974 | 0.271518272 |
| 0.313881595 | 0.297041399 | 0.250792226 | 0.283524555 |
| 0.238618712 | 0.201251853 | 0.10331517  | 0.10883888  |
| 0.272736536 | 0.277688912 | 0.329160453 | 0.290332373 |
| 0.162605674 | 0.222536699 | 0.2231594   | 0.273325251 |
| 0.114288573 | 0.140440389 | 0.087097299 | 0.21589478  |
| 0.206597399 | 0.169484488 | 0.163511862 | 0.185613485 |
| 0.086427375 | 0.103077476 | 0.096148703 | 0.164598164 |
| 0.237688491 | 0.077937339 | 0.229485312 | 0.115584581 |
| 0.100365155 | 0.206532586 | 0.30515467  | 0.201733755 |
| 0.15727175  | 0.214457785 | 0.160688317 | 0.178590725 |
| 0.013768686 | 0.342471827 | 0.305988796 | 0.093731216 |
| 0.226312268 | 0.106990915 | 0.313258418 | 0.254151087 |
| 0.371213065 | 0.252556321 | 0.363061901 | 0.329936505 |
| 0.228963471 | 0.296388144 | 0.180682347 | 0.260263247 |
| 0.273812479 | 0.180692228 | 0.168046141 | 0.405874249 |
| 0.353920925 | 0.270481387 | 0.243354684 | 0.271605966 |
| 0.231167335 | 0.282125984 | 0.133513214 | 0.169161812 |
| 0.09824662  | 0.208274869 | 0.217600502 | 0.327100704 |
| 0.225989276 | 0.151240408 | 0.264876907 | 0.293880498 |
| 0.266705347 | 0.123039204 | 0.341070564 | 0.223752632 |
| 0.37586498  | 0.094053559 | 0.270259418 | 0.213894999 |
| 0.295639396 | 0.27715267  | 0.267084497 | 0.245059545 |
| 0.223471905 | 0.140264897 | 0.080941007 | 0.248256452 |
| 0.172079304 | 0.116264673 | 0.19566569  | 0.325929054 |
| 0.169711741 | 0.182279389 | 0.230383999 | 0.078151186 |
| 0.194428945 | 0.283667822 | 0.257361696 | 0.21179814  |
| 0.314065661 | 0.190071964 | 0.174683821 | 0.195111437 |
| 0.200387661 | 0.360736422 | 0.012328865 | 0.239093547 |
| 0.193636989 | 0.295776833 | 0.321944139 | 0.20936762  |
| 0.215298406 | 0.221378504 | 0.284897199 | 0.342277564 |
| 0.229763487 | 0.246672575 | 0.144077698 | 0.389736039 |
| 0.125007952 | 0.25060397  | 0.285430044 | 0.224290972 |
| 0.17242771  | 0.222050493 | 0.194550857 | 0.165650448 |
| 0.070866162 | 0.213519602 | 0.135890356 | 0.15601034  |
| 0.136741701 | 0.226499024 | 0.192433684 | 0.302966963 |
| 0.225295787 | 0.317293364 | 0.126353943 | 0.208387624 |
| 0.040850419 | 0.237149877 | 0.089220895 | 0.318425553 |

|             |             |             |             |
|-------------|-------------|-------------|-------------|
| 0.117523738 | 0.33753843  | 0.270223362 | 0.250509485 |
| 0.291763865 | 0.357329446 | 0.01241522  | 0.228197033 |
| 0.268128714 | 0.080973765 | 0.231527587 | 0.281254219 |
| 0.110163448 | 0.330495339 | 0.023265698 | 0.385516102 |
| 0.17258698  | 0.28184589  | 0.38044818  | 0.25841345  |
| 0.243767634 | 0.183948958 | 0.156049753 | 0.254965686 |
| 0.204446203 | 0.052687899 | 0.0954032   | 0.291960857 |
| 0.188238592 | 0.109862616 | 0.293844532 | 0.303448448 |
| 0.208993199 | 0.342454803 | 0.404501686 | 0.100962376 |
| 0.210386164 | 0.250298706 | 0.15026245  | 0.256014539 |
| 0.294586866 | 0.103120814 | 0.228672637 | 0.214147853 |
| 0.119699729 | 0.266205394 | 0.211091216 | 0.058436649 |
| 0.176120582 | 0.178977514 | 0.065386901 | 0.193892923 |
| 0.200713555 | 0.164922297 | 0.113383753 | 0.316302273 |
| 0.245771653 | 0.31899472  | 0.169729447 | 0.12694438  |
| 0.109649893 | 0.17657606  | 0.267318713 | 0.118187379 |
| 0.119624636 | 0.254491451 | 0.147445778 | 0.153487241 |
| 0.121567386 | 0.246282183 | 0.133675535 | 0.10004883  |
| 0.108991943 | 0.111006975 | 0.095650427 | 0.201584732 |
| 0.174042103 | 0.173442868 | 0.190429766 | 0.179221916 |
| 0.227498468 | 0.16516906  | 0.293217548 | 0.36226664  |
| 0.157908428 | 0.240004967 | 0.254472142 | 0.082171889 |
| 0.319098003 | 0.080183513 | 0.075450675 | 0.274872862 |
| 0.164678455 | 0.360532931 | 0.174493263 | 0.245140455 |
| 0.158586206 | 0.248952897 | 0.37606623  | 0.043334259 |
| 0.19500268  | 0.255106394 | 0.2871236   | 0.216640141 |
| 0.19628782  | 0.284654195 | 0.14831622  | 0.212924475 |
| 0.204287965 | 0.203102068 | 0.30070128  | 0.268905524 |
| 0.196047938 | 0.304094946 | 0.219560784 | 0.254150432 |
| 0.240106217 | 0.147017533 | 0.10594346  | 0.329568858 |
| 0.311238774 | 0.386839358 | 0.222562011 | 0.216173856 |
| 0.16886132  | 0.059420461 | 0.274063933 | 0.186385165 |
| 0.235663354 | 0.294588116 | 1           | 0.167557024 |
| 0.303413089 | 0.131461979 | 0.083614647 | 0.312639301 |
| 0.218363059 | 0.273164423 | 0.126965104 | 0.268931806 |
| 0.226147366 | 0.099711489 | 0.187647713 | 0.164469492 |
| 0.207479184 | 0.184023952 | 0.289639405 | 0.251259572 |
| 0.268192249 | 0.173852634 | 0.12879557  | 0.310510644 |
| 0.090747694 | 0.158551552 | 0.223715125 | 0.144165398 |
| 0.13965936  | 0.249225125 | 0.05977271  | 0.152163756 |
| 0.157634558 | 0.24108042  | 0.381557369 | 0.139191509 |
| 0.104568958 | 0.13333243  | 0.352161581 | 0.204169823 |
| 0.260838224 | 0.268477676 | 0.256413676 | 0.274342187 |
| 0.272960863 | 0.263835193 | 0.149132674 | 0.286669681 |
| 0.165003766 | 0.252462181 | 0.228637073 | 0.079833656 |
| 0.377942786 | 0.068459521 | 0.065279476 | 0.289688648 |
| 0.273364248 | 0.187522974 | 0.010395135 | 0.076903937 |
| 0.211389614 | 0.373044135 | 0.219802003 | 0.273929176 |
| 0.053726034 | 0.317798631 | 0.052725441 | 0.317062539 |
| 0.256431952 | 0.127704941 | 0.232171055 | 0.231260047 |
| 0.213004974 | 0.296738061 | 0.132706377 | 0.266630497 |
| 0.186313531 | 0.232320817 | 0.172156995 | 0.289006217 |
| 0.271068345 | 0.244636327 | 0.283690992 | 0.2589428   |
| 0.347768281 | 0.34568926  | 0.290750563 | 0.101196047 |

|             |             |             |             |
|-------------|-------------|-------------|-------------|
| 0.099398336 | 0.126680564 | 0.06055191  | 0.089141619 |
| 0.14399822  | 0.202238053 | 0.290211893 | 0.375460285 |
| 0.299658312 | 0.109018187 | 0.170652262 | 0.235373355 |
| 0.307286079 | 0.362450154 | 0.148254227 | 0.018721054 |
| 0.018750656 | 0.064948064 | 0.235792065 | 0.280387661 |
| 0.294187995 | 0.051657117 | 0.095700256 | 0.132733627 |
| 0.210880363 | 0.24715442  | 0.264764063 | 0.396274872 |
| 0.294187047 | 0.294799981 | 0.084698259 | 0.387208806 |
| 0.158261614 | 0.141809795 | 0.31055659  | 0.246078577 |
| 0.255304046 | 0.267396801 | 0.170029644 | 0.357973248 |
| 0.045063821 | 0.325017079 | 0.252647482 | 0.157613225 |
| 0.13430425  | 0.233713243 | 0.181852636 | 0.385212962 |
| 0.222431825 | 0.145737943 | 0.130048328 | 0.052472185 |
| 0.174183099 | 0.343551669 | 0.228022824 | 0.359890591 |
| 0.309285388 | 0.409259483 | 0.240469082 | 0.244819093 |
| 0.124132949 | 0.231239076 | 0.182354737 | 0.03071188  |
| 0.283608292 | 0.176719764 | 0.252212086 | 0.053251633 |
| 0.137736532 | 0.259649061 | 0.108496323 | 0.165389362 |
| 0.104654553 | 0.241226919 | 0.358212332 | 0.343883986 |
| 0.212604489 | 0.23907752  | 0.28102838  | 0.325795747 |
| 0.145873583 | 0.322171109 | 0.239022229 | 0.098932645 |
| 0.169693278 | 0.15786425  | 0.324848441 | 0.202454494 |
| 0.168138339 | 0.376620709 | 0.140172981 | 0.318384386 |
| 0.237682033 | 0.294413011 | 0.272738601 | 0.216340504 |
| 0.195586729 | 0.177036989 | 0.200350417 | 0.071870398 |
| 0.27896703  | 0.345635558 | 0.189036125 | 0.156529604 |
| 0.222984675 | 0.156822356 | 0.216465599 | 0.103644477 |
| 0.111549038 | 0.136391556 | 0.229324789 | 0.417054816 |
| 0.237074184 | 0.207836012 | 0.196908109 | 0.166332674 |
| 0.306976024 | 0.245539867 | 0.135114328 | 0.247871483 |
| 0.324168624 | 0.23147502  | 0.309009129 | 0.317899207 |
| 0.13777485  | 0.264080635 | 0.299066883 | 0.20005061  |
| 0.225870969 | 0.245376953 | 0.260735585 | 0.091253521 |
| 0.123433421 | 0.199957246 | 0.165275914 | 0.280235159 |
| 0.273034892 | 0.174017019 | 0.093936152 | 0.381710137 |
| 0.107705632 | 0.32109966  | 0.120807133 | 0.215669144 |
| 0.281406708 | 0.137077052 | 0.313228443 | 0.166455549 |
| 0.176351807 | 0.23791731  | 0.080966262 | 0.274208152 |
| 0.132795219 | 0.251819896 | 0.148498626 | 0.2816025   |
| 0.135791016 | 0.279216535 | 0.276305744 | 0.106979584 |
| 0.07779116  | 0.136820275 | 0.243005875 | 0.121177836 |
| 0.139920108 | 0.383890248 | 0.131424382 | 0.178471633 |
| 0.189671975 | 0.17601804  | 0.259161253 | 0.151641964 |
| 0.17032564  | 0.254458194 | 0.08310535  | 0.219469596 |
| 0.222055519 | 0.291277616 | 0.18085105  | 0.136439178 |
| 0.232312825 | 0.23307964  | 0.193138118 | 0.256279918 |
| 0.215942073 | 0.381099827 | 0.198624943 | 0.254449958 |
| 0.20116658  | 0.139000924 | 0.140473091 | 0.341245162 |
| 0.090075628 |             |             |             |
| LOC547323   | 0.260317841 | 0.429313286 | 0.168026409 |
| 0.347947423 | 0.234833433 | 0.166682576 | 0.112475334 |
| 0.055333207 | 0.079975086 | 0.02191493  | 0.084660655 |
| 0.275991815 | 0.197060458 | 0.139131252 | 0.10789376  |
| 0.354975496 | 0.186964962 | 0.10233667  | 0.148330958 |

|             |             |             |             |
|-------------|-------------|-------------|-------------|
| 0.271068901 | 0.053203858 | 0.364302558 | 0.081665076 |
| 0.165781492 | 0.169532008 | 0.109768651 | 0.197035586 |
| 0.370845233 | 0.113450512 | 0.113347442 | 0.229780637 |
| 0.101115515 | 0.305210789 | 0.393498902 | 0.378717317 |
| 0.397074412 | 0.225263953 | 0.011498586 | 0.113958648 |
| 0.283760428 | 0.357655083 | 0.275496512 | 0.236472425 |
| 0.061822539 | 0.339302014 | 0.157072715 | 0.255987112 |
| 0.066158454 | 0.09629584  | 0.058780288 | 0.293906802 |
| 0.371530326 | 0.2468493   | 0.073941741 | 0.102163082 |
| 0.184408486 | 0.064121146 | 0.217220953 | 0.145345283 |
| 0.141707812 | 0.042281427 | 0.384361269 | 0.065289079 |
| 0.059648916 | 0.082127329 | 0.146024138 | 0.104053466 |
| 0.170706624 | 0.217047247 | 0.016583601 | 0.219859785 |
| 0.008405552 | 0.251130409 | 0.241549634 | 0.159118066 |
| 0.081722386 | 0.086435916 | 0.15751424  | 0.213630197 |
| 0.385618208 | 0.327607795 | 0.473219708 | 0.459458114 |
| 0.21022672  | 0.161714089 | 0.209502322 | 0.162406287 |
| 0.317083912 | 0.124537291 | 0.082597427 | 0.393973938 |
| 0.474657784 | 0.430265982 | 0.178473151 | 0.185457673 |
| 0.342853674 | 0.36475419  | 0.169360759 | 0.195760226 |
| 0.173467534 | 0.071935741 | 0.332989918 | 0.463579639 |
| 0.255531432 | 0.191094467 | 0.171081794 | 0.284766571 |
| 0.076678054 | 0.109553302 | 0.277547367 | 0.121614832 |
| 0.40314429  | 0.027378249 | 0.189205231 | 0.190867806 |
| 0.102045222 | 0.315357321 | 0.434848318 | 0.125355153 |
| 0.200188045 | 0.058553817 | 0.152292402 | 0.049046343 |
| 0.157804396 | 0.140687317 | 0.335274245 | 0.418318976 |
| 0.08567781  | 0.188753064 | 0.116839242 | 0.012396166 |
| 0.074106189 | 0.105300807 | 0.336108887 | 0.122193044 |
| 0.288556446 | 0.261780548 | 0.189845067 | 0.221671022 |
| 0.3042875   | 0.46260051  | 0.018686024 | 0.067004916 |
| 0.213492487 | 0.108515183 | 0.188807999 | 0.253355405 |
| 0.224432885 | 0.062038491 | 0.116943316 | 0.460292532 |
| 0.28628138  | 0.095373818 | 0.083920034 | 0.357472322 |
| 0.154315613 | 0.272985533 | 0.091607375 | 0.180125583 |
| 0.054931287 | 0.377511955 | 0.073237281 | 0.092373945 |
| 0.142453347 | 0.190980955 | 0.008706891 | 0.081876619 |
| 0.139929002 | 0.379719429 | 0.319153228 | 0.092948679 |
| 0.181134205 | 0.326133916 | 0.087665153 | 0.334131638 |
| 0.044450276 | 0.0527189   | 0.056693269 | 0.456925027 |
| 0.116523361 | 0.43601437  | 0.153541526 | 0.16260586  |
| 0.215921038 | 0.375320924 | 0.002479078 | 0.364583794 |
| 0.431808841 | 0.06646415  | 0.299330015 | 0.253385561 |
| 0.164268411 | 0.402220688 | 0.012944491 | 0.344766382 |
| 0.172194742 | 0.072591233 | 0.469760079 | 0.180249277 |
| 0.344555639 | 0.086751424 | 0.108011004 | 0.384512083 |
| 0.341956613 | 0.01558632  | 0.066424378 | 0.249585093 |
| 0.05726582  | 0.040636832 | 0.268372534 | 0.286558215 |
| 0.235222147 | 0.35710153  | 0.453105494 | 0.167268987 |
| 0.238922807 | 0.10438575  | 0.023310327 | 0.208763483 |
| 0.320945665 | 0.134068107 | 0.317802521 | 0.115354591 |
| 0.11829944  | 0.377597574 | 0.307121735 | 0.073564383 |
| 0.061905437 | 0.108282595 | 0.030857833 | 0.191947949 |
| 0.264586775 | 0.123752851 | 0.155406375 | 0.091309322 |



|             |             |             |             |
|-------------|-------------|-------------|-------------|
| 0.122604172 | 0.463969061 | 0.160652431 | 0.161917092 |
| 0.127472459 | 0.245201274 | 0.119699215 | 0.177588128 |
| 0.24593013  | 0.137833436 | 0.179387774 | 0.164590822 |
| 0.034748308 | 0.137567874 | 0.019480773 | 0.181886053 |
| 0.211665087 | 0.204819282 | 0.177105612 | 0.234057864 |
| 0.146863182 | 0.168137679 | 0.232296674 | 0.146589208 |
| 0.139764909 | 0.044479407 | 0.416845276 | 0.293438924 |
| 0.170132824 | 0.10356213  | 0.067347203 | 0.155887575 |
| 0.423570877 | 0.118883774 | 0.052273606 | 0.379212905 |
| 0.028449018 | 0.431137714 | 0.204824983 | 0.16214854  |
| 0.236148331 | 0.187678465 | 0.402088334 | 0.035773903 |
| 0.155104067 | 0.364255701 | 0.1667947   | 0.179671055 |
| 0.290035647 | 0.258128081 | 0.046733635 | 0.250823969 |
| 0.252221871 | 0.074223098 | 0.453460318 | 0.164226847 |
| 0.050673334 | 0.349651846 | 0.355321442 | 0.104040093 |
| 0.108901571 | 0.180388568 | 0.025330882 | 0.256693129 |
| 0.453144    | 0.393137724 | 0.332202319 | 0.147699836 |
| 0.076013994 | 0.071726352 | 0.163603825 | 0.18872567  |
| 0.375900043 | 0.453532281 | 0.167557024 | 1           |
| 0.169593851 | 0.182924345 | 0.030893724 | 0.46454277  |
| 0.07894093  | 0.396535332 | 0.019934795 | 0.373023074 |
| 0.389748852 | 0.079174995 | 0.145351074 | 0.131006613 |
| 0.273265931 | 0.057927371 | 0.088404318 | 0.39653656  |
| 0.33258714  | 0.166173337 | 0.170737071 | 0.276041612 |
| 0.022026743 | 0.036438028 | 0.230986438 | 0.142603543 |
| 0.158650631 | 0.143978256 | 0.073524268 | 0.092222615 |
| 0.091162508 | 0.358759785 | 0.39779392  | 0.091061784 |
| 0.159676594 | 0.077385564 | 0.300196146 | 0.058316157 |
| 0.415672044 | 0.401406961 | 0.404691788 | 0.07722257  |
| 0.331708048 | 0.436035962 | 0.269535625 | 0.092480837 |
| 0.051636522 | 0.413122692 | 0.209120589 | 0.051520039 |
| 0.427538233 | 0.055629446 | 0.071365252 | 0.392252459 |
| 0.113892857 | 0.292319523 | 0.003239695 | 0.031179067 |
| 0.058567286 | 0.42233723  | 0.359148846 | 0.213550164 |
| 0.071589677 | 0.198108981 | 0.004978656 | 0.448559199 |
| 0.404671963 | 0.054254464 | 0.148771238 | 0.355907388 |
| 0.367622013 | 0.410754294 | 0.196229336 | 0.429864714 |
| 0.305571625 | 0.399640827 | 0.143728943 | 0.217310438 |
| 0.369005883 | 0.41294598  | 0.279824147 | 0.335623361 |
| 0.416452649 | 0.340494367 | 0.202602309 | 0.032729607 |
| 0.093255493 | 0.06216388  | 0.127724652 | 0.100988226 |
| 0.122358709 | 0.16507401  | 0.385548355 | 0.42421135  |
| 0.454037739 | 0.020014064 | 0.066287553 | 0.322783376 |
| 0.344828033 | 0.395910478 | 0.01761136  | 0.00665851  |
| 0.00680138  | 0.091010804 | 0.165545551 | 0.165698938 |
| 0.415909296 | 0.089797147 | 0.018848439 | 0.027137024 |
| 0.137209302 | 0.322181508 | 0.414649078 | 0.3088034   |
| 0.342778528 | 0.091622116 | 0.151705321 | 0.29804851  |
| 0.125637839 | 0.140740299 | 0.461289294 | 0.359631436 |
| 0.049995726 | 0.157430583 | 0.11345306  | 0.431802799 |
| 0.085954949 | 0.237244205 | 0.290589088 | 0.18847826  |
| 0.015378592 | 0.116320361 | 0.097133872 | 0.365658565 |
| 0.386976064 | 0.174285754 | 0.122392836 | 0.039440108 |
| 0.12918442  | 0.392423756 | 0.170538737 | 0.469409647 |

|             |             |             |             |
|-------------|-------------|-------------|-------------|
| 0.353043142 | 0.408952843 | 0.102751864 | 0.365488503 |
| 0.07697643  | 0.382983446 | 0.230273056 | 0.028727353 |
| 0.137200252 | 0.024659588 | 0.377541756 | 0.144136464 |
| 0.104983547 | 0.213342468 | 0.115322095 | 0.043025863 |
| 0.115876965 | 0.100116354 | 0.454789845 | 0.433679032 |
| 0.051797593 | 0.099414667 | 0.171587774 | 0.244995232 |
| 0.103692675 | 0.386605998 | 0.37881466  | 0.163458739 |
| 0.068017551 | 0.092034314 | 0.273122849 | 0.209731342 |
| 0.082498667 | 0.467377105 | 0.195924922 | 0.446268829 |
| 0.237282829 | 0.343684304 | 0.40054339  | 0.18721588  |
| 0.192787491 | 0.173096143 | 0.242678959 | 0.042189783 |
| 0.195350497 | 0.436859914 | 0.115376626 | 0.202346325 |
| 0.217942978 | 0.214009085 | 0.02797619  | 0.044521995 |
| 0.17474388  | 0.128116052 | 0.133647514 | 0.38855065  |
| 0.184845549 | 0.222916191 | 0.022102536 | 0.099099389 |
| 0.439965218 | 0.305731872 | 0.062669571 | 0.287223686 |
| 0.13154713  | 0.225197315 | 0.366253525 | 0.385568476 |
| 0.122253889 | 0.389643653 | 0.308140608 | 0.26114413  |
| 0.31400129  | 0.133732306 | 0.410791273 | 0.020842696 |
| 0.10471924  | 0.217489505 | 0.148541463 | 0.112885769 |
| 0.141143582 | 0.056095574 | 0.162869028 | 0.342441821 |
| 0.167779656 | 0.314419198 | 0.08171068  | 0.08125603  |
| 0.203253089 | 0.096786143 | 0.236311024 | 0.108407988 |
| 0.124070553 | 0.394510771 | 0.025992769 | 0.085057011 |
| 0.182805413 | 0.348768351 | 0.25166537  | 0.174486859 |
| 0.192630043 | 0.113991073 | 0.209025289 | 0.086174219 |
| 0.146205665 | 0.13124639  | 0.348369889 | 0.026999711 |
| 0.027899812 | 0.458993268 | 0.112322525 | 0.031828581 |
| 0.060138489 | 0.161758666 | 0.11168858  | 0.154337703 |
| 0.051637525 | 0.422434713 | 0.107928623 | 0.231032844 |
| 0.154512254 | 0.070311961 | 0.21019049  | 0.043076987 |
| 0.038535519 | 0.321547413 | 0.218664161 | 0.419165932 |
| 0.153084983 | 0.39675795  | 0.288242817 | 0.337129293 |
| 0.060459729 | 0.146755384 | 0.037650338 | 0.344366173 |
| 0.166180002 |             |             |             |
| LPIN1       | 0.2121861   | 0.284636796 | 0.134161751 |
| 0.352528513 | 0.210028754 | 0.167247669 | 0.293293011 |
| 0.201340813 | 0.203067274 | 0.06920836  | 0.099248563 |
| 0.188043253 | 0.174535094 | 0.210768387 | 0.128592552 |
| 0.375063308 | 0.235038208 | 0.171486646 | 0.328088029 |
| 0.327802156 | 0.232692877 | 0.358731587 | 0.324943061 |
| 0.168887255 | 0.189348356 | 0.259727021 | 0.17774666  |
| 0.369431714 | 0.27415231  | 0.119345849 | 0.285909669 |
| 0.239956256 | 0.263696084 | 0.2335141   | 0.252722427 |
| 0.214591052 | 0.170937743 | 0.059841399 | 0.166386915 |
| 0.249984439 | 0.26520554  | 0.335516344 | 0.317890584 |
| 0.254346999 | 0.211190657 | 0.2959816   | 0.220675065 |
| 0.144570441 | 0.180604591 | 0.125691909 | 0.209906207 |
| 0.197712005 | 0.169777284 | 0.232189437 | 0.291698819 |
| 0.112706373 | 0.133370844 | 0.086018183 | 0.178364844 |
| 0.316634965 | 0.125571785 | 0.21488434  | 0.219025634 |
| 0.142176033 | 0.247185463 | 0.227687266 | 0.258272081 |
| 0.131631447 | 0.216651921 | 0.190065574 | 0.13490115  |
| 0.026605407 | 0.343127546 | 0.239424496 | 0.093571735 |

|             |             |             |             |
|-------------|-------------|-------------|-------------|
| 0.240749467 | 0.149081808 | 0.247735768 | 0.299245884 |
| 0.352206384 | 0.219008783 | 0.330272104 | 0.296823058 |
| 0.221294235 | 0.261527648 | 0.135972112 | 0.314492829 |
| 0.25609412  | 0.277481214 | 0.190592801 | 0.370699366 |
| 0.322329275 | 0.249910165 | 0.255662996 | 0.248438224 |
| 0.248206996 | 0.271004482 | 0.140766441 | 0.180386578 |
| 0.116958726 | 0.151018075 | 0.214301835 | 0.297687209 |
| 0.213772755 | 0.118562317 | 0.270627911 | 0.295606559 |
| 0.282554614 | 0.124915518 | 0.36131835  | 0.15439436  |
| 0.359851981 | 0.173458397 | 0.240984388 | 0.243409836 |
| 0.266468303 | 0.254027714 | 0.241669264 | 0.331879164 |
| 0.177623976 | 0.14462832  | 0.089607317 | 0.212203359 |
| 0.179385023 | 0.075743986 | 0.184089364 | 0.325193367 |
| 0.203137796 | 0.183324961 | 0.296276059 | 0.071569061 |
| 0.180137895 | 0.204293225 | 0.218797046 | 0.188230084 |
| 0.286968962 | 0.158737382 | 0.233966348 | 0.187432251 |
| 0.174048372 | 0.325639906 | 0.022462585 | 0.327465101 |
| 0.193932205 | 0.219092764 | 0.328487082 | 0.187323429 |
| 0.22912561  | 0.305673031 | 0.339544072 | 0.32152039  |
| 0.231425002 | 0.321238688 | 0.13688773  | 0.358235574 |
| 0.167939359 | 0.204117611 | 0.337926626 | 0.255598477 |
| 0.26847113  | 0.200929554 | 0.156265661 | 0.175560925 |
| 0.09160229  | 0.163600574 | 0.120675863 | 0.202593257 |
| 0.179806146 | 0.227873633 | 0.173364377 | 0.328261604 |
| 0.253899671 | 0.295725468 | 0.135087704 | 0.216066954 |
| 0.085435732 | 0.242082221 | 0.095037593 | 0.29656241  |
| 0.135905369 | 0.292856465 | 0.280888958 | 0.232863902 |
| 0.271239519 | 0.337301992 | 0.007922493 | 0.216671872 |
| 0.245937113 | 0.087672666 | 0.231423451 | 0.223748182 |
| 0.115499708 | 0.333960756 | 0.016525912 | 0.347207615 |
| 0.15357119  | 0.314917357 | 0.350063506 | 0.283086123 |
| 0.218546373 | 0.233958378 | 0.189260192 | 0.22097033  |
| 0.174088252 | 0.056390117 | 0.1491746   | 0.319512054 |
| 0.144281707 | 0.206964583 | 0.267515123 | 0.31573255  |
| 0.236329971 | 0.299964445 | 0.375174902 | 0.107168766 |
| 0.198483741 | 0.294472443 | 0.140895917 | 0.213619588 |
| 0.24917073  | 0.102989443 | 0.230355456 | 0.291478462 |
| 0.11045751  | 0.261298176 | 0.184691633 | 0.088458206 |
| 0.264487556 | 0.225068371 | 0.104435928 | 0.22481919  |
| 0.180034137 | 0.253774545 | 0.1160142   | 0.212903404 |
| 0.227319121 | 0.300580293 | 0.125874492 | 0.093974083 |
| 0.075411298 | 0.181981984 | 0.313891919 | 0.163412531 |
| 0.137716984 | 0.30708903  | 0.15699371  | 0.178910283 |
| 0.21916616  | 0.287127448 | 0.077646216 | 0.089747791 |
| 0.132998854 | 0.119339186 | 0.105401961 | 0.187703411 |
| 0.18375176  | 0.204793667 | 0.201199629 | 0.153667846 |
| 0.224464966 | 0.170752508 | 0.278709998 | 0.335659083 |
| 0.16004806  | 0.330037282 | 0.237918472 | 0.082410476 |
| 0.315363012 | 0.098602972 | 0.087526426 | 0.279420528 |
| 0.15779413  | 0.322996568 | 0.219557828 | 0.271428135 |
| 0.144703211 | 0.296945097 | 0.369480768 | 0.075085173 |
| 0.179495776 | 0.250973736 | 0.256520339 | 0.261054789 |
| 0.194419265 | 0.287340688 | 0.225044095 | 0.193723095 |
| 0.18424861  | 0.228978807 | 0.27294861  | 0.218188271 |

|             |             |             |             |
|-------------|-------------|-------------|-------------|
| 0.184038375 | 0.251429866 | 0.209127246 | 0.269355707 |
| 0.242805395 | 0.19585267  | 0.200167601 | 0.307199902 |
| 0.29750349  | 0.369085467 | 0.226382168 | 0.164125015 |
| 0.248286329 | 0.073343285 | 0.208460101 | 0.139591116 |
| 0.218090308 | 0.260160833 | 0.303413089 | 0.169593851 |
| 1           | 0.153818533 | 0.11824474  | 0.290240344 |
| 0.141168576 | 0.246140563 | 0.127439062 | 0.232595432 |
| 0.20820447  | 0.119769127 | 0.212508509 | 0.211268158 |
| 0.208993264 | 0.269990364 | 0.293732168 | 0.237161024 |
| 0.267344752 | 0.207342048 | 0.158693684 | 0.252823843 |
| 0.169003832 | 0.253415592 | 0.206445374 | 0.106553784 |
| 0.167219954 | 0.297877    | 0.032542749 | 0.177726794 |
| 0.229160165 | 0.242226665 | 0.332105808 | 0.207460214 |
| 0.130398853 | 0.15680615  | 0.292533791 | 0.25985597  |
| 0.228912116 | 0.232892133 | 0.239764452 | 0.315254146 |
| 0.228502725 | 0.24598498  | 0.124115628 | 0.254277904 |
| 0.148061032 | 0.227272119 | 0.220637357 | 0.117929075 |
| 0.351049203 | 0.09176498  | 0.10407172  | 0.280710865 |
| 0.341578673 | 0.171748754 | 0.02716224  | 0.041472205 |
| 0.149391035 | 0.319397916 | 0.214646195 | 0.284564606 |
| 0.082495942 | 0.290570583 | 0.023239137 | 0.278494104 |
| 0.247240979 | 0.120000133 | 0.18864085  | 0.208144426 |
| 0.182405473 | 0.278364616 | 0.123917048 | 0.241837625 |
| 0.15699215  | 0.215106331 | 0.238903001 | 0.286385829 |
| 0.274005094 | 0.214588619 | 0.276251898 | 0.250915571 |
| 0.330830618 | 0.289661633 | 0.333492539 | 0.175767661 |
| 0.123049116 | 0.183708826 | 0.083508768 | 0.145365068 |
| 0.153643296 | 0.236800089 | 0.260121501 | 0.340945298 |
| 0.267967942 | 0.10394291  | 0.252659621 | 0.214964914 |
| 0.309558837 | 0.350002737 | 0.111198381 | 0.020127673 |
| 0.01176235  | 0.077151481 | 0.252201308 | 0.252576803 |
| 0.274056393 | 0.074875254 | 0.11209152  | 0.214954978 |
| 0.248643844 | 0.206152218 | 0.249821305 | 0.390648378 |
| 0.245424909 | 0.297299591 | 0.123032279 | 0.371391876 |
| 0.17930991  | 0.129127094 | 0.287815168 | 0.246462012 |
| 0.198905118 | 0.253377909 | 0.148028512 | 0.348934916 |
| 0.029050775 | 0.280253842 | 0.201707909 | 0.20558381  |
| 0.080737477 | 0.226374201 | 0.216133233 | 0.337898656 |
| 0.200725503 | 0.180842756 | 0.15769638  | 0.06560599  |
| 0.267907164 | 0.306571065 | 0.285186769 | 0.331192555 |
| 0.308533817 | 0.391246804 | 0.181512885 | 0.239351782 |
| 0.181179965 | 0.215428339 | 0.161708864 | 0.05070316  |
| 0.226594242 | 0.162108258 | 0.214171722 | 0.081413713 |
| 0.161464796 | 0.240967173 | 0.13124568  | 0.128872322 |
| 0.078882314 | 0.237154001 | 0.343619314 | 0.300705579 |
| 0.143199451 | 0.301182903 | 0.261358724 | 0.281603561 |
| 0.178213627 | 0.323535735 | 0.226988839 | 0.097794691 |
| 0.284025802 | 0.079797028 | 0.31682922  | 0.181511799 |
| 0.205526082 | 0.337556255 | 0.177965733 | 0.286553709 |
| 0.222408857 | 0.270852964 | 0.246598018 | 0.252417646 |
| 0.155322397 | 0.172323706 | 0.236187052 | 0.133612597 |
| 0.273156285 | 0.32864616  | 0.186393355 | 0.183710802 |
| 0.254107216 | 0.121046282 | 0.231405324 | 0.073695516 |
| 0.087715889 | 0.16796207  | 0.30012141  | 0.386957072 |

|             |             |             |             |
|-------------|-------------|-------------|-------------|
| 0.211835881 | 0.189986484 | 0.207989389 | 0.210864609 |
| 0.284589938 | 0.236891379 | 0.2149631   | 0.255592266 |
| 0.299910854 | 0.244123326 | 0.262379355 | 0.262689808 |
| 0.136839718 | 0.248301118 | 0.286596489 | 0.218264348 |
| 0.231480907 | 0.310538143 | 0.245597203 | 0.129976012 |
| 0.13830895  | 0.157294279 | 0.239569466 | 0.254268155 |
| 0.331674035 | 0.178008866 | 0.079198339 | 0.332268521 |
| 0.089084853 | 0.317729494 | 0.122593186 | 0.238522416 |
| 0.23573097  | 0.117544128 | 0.289293975 | 0.253048919 |
| 0.249026818 | 0.230545481 | 0.086720973 | 0.256935565 |
| 0.104411545 | 0.241692331 | 0.131605834 | 0.276910222 |
| 0.118204376 | 0.196302137 | 0.290922697 | 0.132418889 |
| 0.099011798 | 0.117256274 | 0.236123653 | 0.17566456  |
| 0.20257901  | 0.347640176 | 0.129104189 | 0.121973116 |
| 0.155549628 | 0.160819151 | 0.207403765 | 0.222020686 |
| 0.129780758 | 0.227942403 | 0.115069099 | 0.189156012 |
| 0.246655232 | 0.294547264 | 0.172245517 | 0.152203008 |
| 0.248263044 | 0.217499844 | 0.153550983 | 0.231254238 |
| 0.169245899 | 0.376628037 | 0.188419151 | 0.230244874 |
| 0.153711703 | 0.104700992 | 0.228410766 | 0.316973675 |
| 0.090088749 |             |             |             |
| LRPPRC      | 0.244734587 | 0.397387255 | 0.180986483 |
| 0.322081407 | 0.20712738  | 0.171516234 | 0.103353125 |
| 0.02951298  | 0.090444136 | 0.0051194   | 0.052400171 |
| 0.218263449 | 0.077629239 | 0.04914273  | 0.093305098 |
| 0.34397793  | 0.058778181 | 0.074421762 | 0.129111374 |
| 0.249326032 | 0.02734342  | 0.310557782 | 0.045268938 |
| 0.106300368 | 0.082947092 | 0.065785133 | 0.171543546 |
| 0.329981264 | 0.071975964 | 0.108406309 | 0.208716738 |
| 0.037423055 | 0.268953392 | 0.371787546 | 0.297610111 |
| 0.356480621 | 0.22192575  | 0.001506891 | 0.084359029 |
| 0.26446193  | 0.368439134 | 0.263501478 | 0.199554234 |
| 0.031333023 | 0.308532351 | 0.152957053 | 0.239123815 |
| 0.040937136 | 0.038644407 | 0.044825664 | 0.28548608  |
| 0.331283268 | 0.2537792   | 0.055971582 | 0.07563474  |
| 0.082564001 | 0.031709196 | 0.090218772 | 0.131571257 |
| 0.120455795 | 0.026546806 | 0.351117016 | 0.061791179 |
| 0.04964475  | 0.056528665 | 0.052671073 | 0.075787247 |
| 0.123456142 | 0.211680808 | 0.008156691 | 0.192496351 |
| 0.000691846 | 0.240919555 | 0.206389955 | 0.165429383 |
| 0.038516237 | 0.016085944 | 0.062543032 | 0.199581795 |
| 0.343173455 | 0.305443371 | 0.414529285 | 0.422553851 |
| 0.057728132 | 0.129364547 | 0.199089504 | 0.068701664 |
| 0.314071165 | 0.087971174 | 0.032482016 | 0.35298538  |
| 0.421032464 | 0.389530961 | 0.106245298 | 0.180100435 |
| 0.333996264 | 0.337263989 | 0.163293323 | 0.183369691 |
| 0.140686161 | 0.035991508 | 0.321124832 | 0.406266466 |
| 0.231302595 | 0.157552673 | 0.106295776 | 0.246267909 |
| 0.036062198 | 0.051046265 | 0.242414958 | 0.027566723 |
| 0.362815467 | 0.025041793 | 0.136318126 | 0.170362946 |
| 0.052071628 | 0.279503051 | 0.396883026 | 0.107057283 |
| 0.162855123 | 0.011023688 | 0.118220139 | 0.020398062 |
| 0.06247331  | 0.059863604 | 0.31607451  | 0.356855423 |
| 0.036409298 | 0.104043082 | 0.097724687 | 0.004046078 |

|             |             |             |             |
|-------------|-------------|-------------|-------------|
| 0.022675451 | 0.051109097 | 0.269785512 | 0.099747471 |
| 0.275325059 | 0.257630314 | 0.141495702 | 0.21013477  |
| 0.279313155 | 0.411978404 | 0.010810061 | 0.041605734 |
| 0.195852643 | 0.05539802  | 0.162546652 | 0.211210337 |
| 0.198455707 | 0.034111086 | 0.052953249 | 0.427126053 |
| 0.274737076 | 0.051741137 | 0.056285719 | 0.309354544 |
| 0.095902667 | 0.220266733 | 0.041156811 | 0.0655142   |
| 0.025743406 | 0.359659582 | 0.023730983 | 0.083265894 |
| 0.159429318 | 0.05419147  | 0.003949561 | 0.069413463 |
| 0.060208491 | 0.340129707 | 0.302439462 | 0.049848768 |
| 0.100163754 | 0.29602647  | 0.080745195 | 0.279471829 |
| 0.027966225 | 0.020266459 | 0.051056422 | 0.389776701 |
| 0.105476101 | 0.388068947 | 0.070757863 | 0.105614913 |
| 0.1859024   | 0.354854628 | 0.001299421 | 0.34016702  |
| 0.400913222 | 0.054433848 | 0.218873092 | 0.21905895  |
| 0.228071911 | 0.361636045 | 0.005058808 | 0.275454087 |
| 0.147058451 | 0.038620346 | 0.423106063 | 0.115990356 |
| 0.30853172  | 0.045999098 | 0.068409732 | 0.37355118  |
| 0.275466286 | 0.007491337 | 0.064313427 | 0.24872283  |
| 0.023326877 | 0.031333331 | 0.259628156 | 0.271107743 |
| 0.276257928 | 0.336311342 | 0.400276047 | 0.211876828 |
| 0.208808482 | 0.06264371  | 0.010546898 | 0.181120339 |
| 0.299238    | 0.089079006 | 0.300776243 | 0.067274595 |
| 0.101643253 | 0.353680777 | 0.281176657 | 0.076563145 |
| 0.03753699  | 0.106653809 | 0.008802105 | 0.229773407 |
| 0.287838688 | 0.046488685 | 0.226668355 | 0.034604969 |
| 0.045017334 | 0.422558165 | 0.087368693 | 0.111592586 |
| 0.067101976 | 0.177606217 | 0.102599669 | 0.057680217 |
| 0.068540161 | 0.095349351 | 0.165586503 | 0.151857019 |
| 0.018772034 | 0.049593067 | 0.009558021 | 0.074705735 |
| 0.041594035 | 0.073496601 | 0.070459302 | 0.20694979  |
| 0.054935805 | 0.033290236 | 0.181055007 | 0.109143246 |
| 0.073122245 | 0.017733804 | 0.385963337 | 0.266542357 |
| 0.153325603 | 0.070213905 | 0.024710757 | 0.0544326   |
| 0.369275317 | 0.116262733 | 0.04109634  | 0.340887227 |
| 0.012045676 | 0.400005666 | 0.075381181 | 0.095908035 |
| 0.122635943 | 0.136262929 | 0.381413316 | 0.037032042 |
| 0.146790748 | 0.32562935  | 0.158940558 | 0.127556575 |
| 0.240114816 | 0.249645347 | 0.021286992 | 0.223768783 |
| 0.203385009 | 0.024911633 | 0.398820152 | 0.052823755 |
| 0.020428071 | 0.297284759 | 0.339240232 | 0.069733011 |
| 0.055530553 | 0.162834847 | 0.017369137 | 0.227477627 |
| 0.411989861 | 0.336823264 | 0.316646254 | 0.088966009 |
| 0.032071475 | 0.00711017  | 0.091421335 | 0.17175151  |
| 0.336658726 | 0.396068511 | 0.131461979 | 0.182924345 |
| 0.153818533 | 1           | 0.020384252 | 0.408491183 |
| 0.041826341 | 0.362915472 | 0.007743894 | 0.364637502 |
| 0.360180047 | 0.068808695 | 0.073372123 | 0.142788336 |
| 0.230518388 | 0.037583691 | 0.044547455 | 0.350049774 |
| 0.348628135 | 0.16916556  | 0.155048324 | 0.225623434 |
| 0.011628689 | 0.02231925  | 0.271458014 | 0.089064753 |
| 0.12467015  | 0.10606955  | 0.031436023 | 0.059704705 |
| 0.030978384 | 0.327113441 | 0.329915079 | 0.080873628 |
| 0.159170687 | 0.052649936 | 0.252652202 | 0.029733746 |

|             |             |             |             |
|-------------|-------------|-------------|-------------|
| 0.394549067 | 0.366666381 | 0.365632623 | 0.039967231 |
| 0.274413194 | 0.397984254 | 0.243912266 | 0.046023541 |
| 0.021202114 | 0.374721749 | 0.20631769  | 0.013094781 |
| 0.374081424 | 0.052840677 | 0.012368187 | 0.361035329 |
| 0.09494643  | 0.265240308 | 0.003934701 | 0.019850626 |
| 0.027336116 | 0.373127852 | 0.35123644  | 0.206451799 |
| 0.045427685 | 0.1828482   | 0.003428037 | 0.402115149 |
| 0.352393953 | 0.021465424 | 0.078532022 | 0.303139818 |
| 0.314092103 | 0.373923401 | 0.195792644 | 0.387255133 |
| 0.236532934 | 0.364280628 | 0.06454041  | 0.208860834 |
| 0.330565752 | 0.380689676 | 0.257755216 | 0.320155812 |
| 0.34464861  | 0.292941083 | 0.197769435 | 0.020464129 |
| 0.152050645 | 0.049791596 | 0.084851113 | 0.090097326 |
| 0.121298462 | 0.093986057 | 0.33774123  | 0.37939881  |
| 0.385845259 | 0.007757673 | 0.034879754 | 0.288474313 |
| 0.308134957 | 0.366163241 | 0.010191053 | 0.006701229 |
| 0.002767599 | 0.040865207 | 0.162965653 | 0.134437288 |
| 0.392848575 | 0.035575611 | 0.00612281  | 0.014385266 |
| 0.067250515 | 0.295260696 | 0.371142452 | 0.276630524 |
| 0.31808753  | 0.040338195 | 0.071090977 | 0.270706431 |
| 0.082969942 | 0.133925003 | 0.401411894 | 0.338658246 |
| 0.022480944 | 0.140710044 | 0.08956633  | 0.394565756 |
| 0.0477937   | 0.192769267 | 0.22328142  | 0.098041677 |
| 0.00572941  | 0.057997507 | 0.076027491 | 0.334969505 |
| 0.35020747  | 0.043136381 | 0.02823127  | 0.017538818 |
| 0.054147705 | 0.359033729 | 0.058544619 | 0.420341404 |
| 0.315242074 | 0.349977594 | 0.046320008 | 0.360036894 |
| 0.0633495   | 0.334641801 | 0.192728256 | 0.01407729  |
| 0.065270665 | 0.009413799 | 0.323218171 | 0.146565005 |
| 0.061284244 | 0.193638966 | 0.171175543 | 0.018121835 |
| 0.092832152 | 0.035398545 | 0.414066393 | 0.394280232 |
| 0.021711509 | 0.07066138  | 0.150125561 | 0.217566037 |
| 0.09537524  | 0.329985429 | 0.347844051 | 0.143472016 |
| 0.044881992 | 0.035861884 | 0.237913839 | 0.1737723   |
| 0.038434711 | 0.412031886 | 0.142267916 | 0.407951477 |
| 0.233579942 | 0.337772717 | 0.359337282 | 0.217265177 |
| 0.087023897 | 0.159968415 | 0.222383784 | 0.01066962  |
| 0.172831064 | 0.367989654 | 0.112285483 | 0.108657017 |
| 0.162720931 | 0.210457459 | 0.020874233 | 0.017301139 |
| 0.162261491 | 0.123091395 | 0.053654353 | 0.353885527 |
| 0.161951938 | 0.193386772 | 0.009602936 | 0.07628029  |
| 0.400390434 | 0.312870493 | 0.044680007 | 0.265330896 |
| 0.079428565 | 0.260878895 | 0.320088703 | 0.337880692 |
| 0.097678286 | 0.322397808 | 0.26607633  | 0.209553228 |
| 0.283721668 | 0.148859406 | 0.381222089 | 0.011233259 |
| 0.100306108 | 0.182949545 | 0.056619434 | 0.067093263 |
| 0.078745503 | 0.028661644 | 0.099846439 | 0.293686499 |
| 0.099546352 | 0.245167329 | 0.042779594 | 0.041101623 |
| 0.179717871 | 0.093313965 | 0.210048543 | 0.065918839 |
| 0.045370874 | 0.3642824   | 0.009939693 | 0.031193652 |
| 0.100182965 | 0.357913924 | 0.225226232 | 0.095260261 |
| 0.125836033 | 0.056244944 | 0.170034554 | 0.076087725 |
| 0.079115009 | 0.063973737 | 0.346347251 | 0.015567208 |
| 0.010725182 | 0.397646099 | 0.097367005 | 0.013144915 |

|             |             |             |             |
|-------------|-------------|-------------|-------------|
| 0.050245514 | 0.170870357 | 0.048426771 | 0.131836352 |
| 0.021194226 | 0.381186873 | 0.108256617 | 0.224398818 |
| 0.152413556 | 0.029449827 | 0.193919892 | 0.027690407 |
| 0.025101588 | 0.28215699  | 0.222907357 | 0.37762092  |
| 0.129909835 | 0.343109689 | 0.277459097 | 0.281903787 |
| 0.026159143 | 0.146713279 | 0.022902471 | 0.313866201 |
| 0.12742016  |             |             |             |
| LRR40       | 0.141710989 | 0.190443503 | 0.053242655 |
| 0.182474651 | 0.07787972  | 0.177282804 | 0.127446325 |
| 0.106318285 | 0.007120647 | 0.001575136 | 0.000795837 |
| 0.074474689 | 0.003372679 | 0.062777476 | 0.03715074  |
| 0.157760338 | 0.010727978 | 0.085728683 | 0.112046169 |
| 0.198452955 | 0.08804952  | 0.11770931  | 0.044259275 |
| 0.015612633 | 0.00709446  | 0.02038685  | 0.017639479 |
| 0.216495978 | 0.02421574  | 0.147259043 | 0.2605807   |
| 0.013602991 | 0.181890588 | 0.174159745 | 0.079527215 |
| 0.152253668 | 0.124946468 | 0.003124288 | 0.069197818 |
| 0.213023915 | 0.108262816 | 0.216434693 | 0.121364377 |
| 0.023963468 | 0.205229469 | 0.11874305  | 0.069367342 |
| 0.015609593 | 0.005099066 | 0.151677671 | 0.229445131 |
| 0.154834922 | 0.085711125 | 0.141093729 | 0.086333725 |
| 0.002594408 | 0.139198466 | 0.004595849 | 0.283746631 |
| 0.107478877 | 0.165027394 | 0.152391227 | 0.016913912 |
| 0.016043036 | 0.156993883 | 0.012893266 | 0.157856581 |
| 0.018017423 | 0.232828551 | 0.013898277 | 0.064916347 |
| 0.00209977  | 0.206601996 | 0.072683505 | 0.013135682 |
| 0.017258503 | 0.003048993 | 0.020230275 | 0.169264572 |
| 0.207684377 | 0.16786658  | 0.137471141 | 0.132775189 |
| 0.00739602  | 0.060468987 | 0.039126385 | 0.037639042 |
| 0.18144982  | 0.082682118 | 0.00599312  | 0.129297171 |
| 0.13778876  | 0.159815125 | 0.01304571  | 0.045328887 |
| 0.155147437 | 0.217089875 | 0.065915191 | 0.066345472 |
| 0.017219321 | 0.00369719  | 0.176521717 | 0.15227251  |
| 0.217606063 | 0.017462993 | 0.02507948  | 0.251082262 |
| 0.027993076 | 0.034990731 | 0.143515706 | 0.003690626 |
| 0.20362412  | 0.014961967 | 0.026443491 | 0.149559998 |
| 0.028755208 | 0.16244458  | 0.139672978 | 0.103100562 |
| 0.059950786 | 0.001288258 | 0.000771692 | 0.012318247 |
| 0.010438959 | 0.002289105 | 0.173398092 | 0.176476862 |
| 0.062877657 | 0.019687188 | 0.133400431 | 0.002155469 |
| 0.004768682 | 0.007885573 | 0.133954764 | 0.11145192  |
| 0.186114473 | 0.112027905 | 0.029886986 | 0.187247991 |
| 0.067182803 | 0.136275796 | 0.004417329 | 0.067571482 |
| 0.092299846 | 0.015077025 | 0.093194497 | 0.10340021  |
| 0.036991566 | 0.084387713 | 0.056256093 | 0.168359214 |
| 0.257663412 | 0.052407261 | 0.118360755 | 0.130191093 |
| 0.034991446 | 0.040460608 | 0.054618619 | 0.052966095 |
| 0.038259223 | 0.132754237 | 0.004124179 | 0.150490995 |
| 0.00493413  | 0.002992706 | 0.005303985 | 0.204039091 |
| 0.022374311 | 0.131409388 | 0.158481503 | 0.053714839 |
| 0.078232271 | 0.090160847 | 0.202493957 | 0.111917437 |
| 0.001121126 | 0.008523648 | 0.159278232 | 0.162623999 |
| 0.2603919   | 0.147194987 | 0.052205779 | 0.0323718   |
| 0.056617663 | 0.165135687 | 0.000238978 | 0.179511802 |



|             |             |             |             |
|-------------|-------------|-------------|-------------|
| 0.151053917 | 0.129524059 | 0.076903177 | 0.085926347 |
| 0.031072189 | 0.175340459 | 0.001589647 | 0.141181077 |
| 0.184342618 | 0.047155142 | 0.162315607 | 0.03074612  |
| 0.170147677 | 0.016185058 | 0.137769935 | 0.090240378 |
| 0.079638856 | 0.001573156 | 0.182900035 | 0.226974783 |
| 0.003316219 | 0.089805669 | 0.18546042  | 0.160724641 |
| 0.098978241 | 0.136532308 | 0.170803472 | 0.024459697 |
| 0.068160556 | 0.12348307  | 0.002488852 | 0.042561774 |
| 0.137622643 | 0.009005375 | 0.217132601 | 0.07201858  |
| 0.146957442 | 0.192771718 | 0.116006934 | 0.010019429 |
| 0.035387763 | 0.186073679 | 0.003838153 | 0.055094592 |
| 0.136620297 | 0.030996816 | 0.05028301  | 0.012213631 |
| 0.010208757 | 0.165950065 | 0.006947736 | 0.009813007 |
| 0.00272114  | 0.100621467 | 0.130250668 | 0.028002376 |
| 0.005830367 | 0.027769882 | 0.024240418 | 0.049983419 |
| 0.048154178 | 0.023165657 | 0.000964274 | 0.01957769  |
| 0.004386181 | 0.024631109 | 0.032215492 | 0.165563842 |
| 0.04006432  | 0.006068329 | 0.047168471 | 0.014013348 |
| 0.010230244 | 0.00930538  | 0.180752978 | 0.151237031 |
| 0.243449066 | 0.05404333  | 0.015169337 | 0.00956035  |
| 0.17335896  | 0.120611263 | 0.117732002 | 0.199998672 |
| 0.003734756 | 0.156366454 | 0.019879112 | 0.022837561 |
| 0.023551518 | 0.08007397  | 0.197200348 | 0.004458981 |
| 0.172848971 | 0.209121066 | 0.084213492 | 0.02513251  |
| 0.199077637 | 0.161788857 | 0.009555354 | 0.172301425 |
| 0.157668977 | 0.014431695 | 0.153643426 | 0.007311195 |
| 0.009606818 | 0.090312449 | 0.093431414 | 0.025455481 |
| 0.015278413 | 0.068798281 | 0.065758309 | 0.066518757 |
| 0.171025581 | 0.122547072 | 0.140914715 | 0.013601936 |
| 0.022896364 | 0.000487282 | 0.018881965 | 0.053881441 |
| 0.182132349 | 0.133148498 | 0.083614647 | 0.030893724 |
| 0.11824474  | 0.020384252 | 1           | 0.148214451 |
| 0.009521012 | 0.176749448 | 0.007433521 | 0.092205875 |
| 0.152742379 | 0.190938361 | 0.009600807 | 0.177032977 |
| 0.211216534 | 0.032547152 | 0.086534516 | 0.170341665 |
| 0.19064033  | 0.041332083 | 0.0304963   | 0.123019403 |
| 0.021534146 | 0.031349953 | 0.070334253 | 0.005481188 |
| 0.05705082  | 0.044015621 | 0.000129924 | 0.089525685 |
| 0.009857757 | 0.19817814  | 0.155363447 | 0.009380861 |
| 0.123285225 | 0.101347454 | 0.083315124 | 0.025887426 |
| 0.095387886 | 0.140384783 | 0.178215974 | 0.091197925 |
| 0.124402321 | 0.128748433 | 0.037123045 | 0.020588661 |
| 0.005106118 | 0.145734162 | 0.196240695 | 0.002070236 |
| 0.176058383 | 0.193315817 | 0.001444095 | 0.208699659 |
| 0.110852967 | 0.187203196 | 0.002162939 | 0.00129086  |
| 0.004218177 | 0.126578463 | 0.174184334 | 0.252758136 |
| 0.073593559 | 0.165523607 | 0.000542562 | 0.150036742 |
| 0.174944295 | 0.002258726 | 0.006327848 | 0.106383916 |
| 0.067233687 | 0.20827734  | 0.017266127 | 0.097222212 |
| 0.051704928 | 0.148967955 | 0.017841193 | 0.065187472 |
| 0.167760682 | 0.119688497 | 0.195131086 | 0.212639033 |
| 0.171681616 | 0.10182871  | 0.128004225 | 0.013243862 |
| 0.002548854 | 0.197876939 | 0.020557683 | 0.00339389  |
| 0.247747953 | 0.012311605 | 0.168068431 | 0.159925292 |

|             |             |             |             |
|-------------|-------------|-------------|-------------|
| 0.120336145 | 0.004642948 | 0.075898693 | 0.135460674 |
| 0.237066548 | 0.215673794 | 0.002367117 | 0.000452871 |
| 0.000184312 | 0.000335516 | 0.207492416 | 0.039304582 |
| 0.152127843 | 0.021211076 | 0.006697679 | 0.042099379 |
| 0.030006854 | 0.049624859 | 0.168194779 | 0.166931882 |
| 0.115198775 | 0.029409809 | 0.02529776  | 0.190661787 |
| 0.003482092 | 0.185611537 | 0.131980038 | 0.212072051 |
| 0.009505157 | 0.042389733 | 0.096229652 | 0.196920811 |
| 0.000385984 | 0.071246835 | 0.087864397 | 0.024657254 |
| 0.001418421 | 0.009898595 | 0.011036491 | 0.148991925 |
| 0.144272172 | 0.004916616 | 0.002870061 | 0.011718631 |
| 0.036182353 | 0.164671847 | 0.021638923 | 0.164249305 |
| 0.202874948 | 0.177452523 | 0.004374971 | 0.191059827 |
| 0.002402985 | 0.159572686 | 0.026407021 | 0.003805211 |
| 0.042723224 | 0.007649293 | 0.13490328  | 0.002338722 |
| 0.111632746 | 0.211017843 | 0.004701183 | 0.003236779 |
| 0.003024732 | 0.01138457  | 0.158622896 | 0.118417521 |
| 0.003314134 | 0.10067211  | 0.064890797 | 0.14768751  |
| 0.20912712  | 0.142705472 | 0.182882685 | 0.065504255 |
| 0.055132673 | 0.001475421 | 0.217920389 | 0.158799009 |
| 0.109273945 | 0.146500094 | 0.01805256  | 0.162578788 |
| 0.181372522 | 0.194062896 | 0.145994184 | 0.129842937 |
| 0.004329412 | 0.146981508 | 0.187891747 | 0.00445775  |
| 0.121148254 | 0.148564656 | 0.159340518 | 0.004746652 |
| 0.037597535 | 0.037140918 | 0.014201987 | 0.008274045 |
| 0.018553583 | 0.233231136 | 0.024277099 | 0.180700507 |
| 0.190037125 | 0.165613897 | 0.015389706 | 0.009680438 |
| 0.188631041 | 0.209621451 | 0.032814038 | 0.154937309 |
| 0.043734949 | 0.074035608 | 0.117652432 | 0.101524765 |
| 0.034575633 | 0.138419947 | 0.207070178 | 0.174922824 |
| 0.234391138 | 0.130479641 | 0.17654864  | 0.054488944 |
| 0.001300865 | 0.100028935 | 0.015031966 | 0.020707875 |
| 0.05252945  | 0.00518445  | 0.007572813 | 0.137811524 |
| 0.017036906 | 0.111289604 | 0.048863043 | 0.005153736 |
| 0.0596229   | 0.088768822 | 0.10078982  | 0.107271499 |
| 0.011419192 | 0.170474214 | 0.000646792 | 0.016723445 |
| 0.020259151 | 0.11934961  | 0.028876219 | 0.033934479 |
| 0.007270672 | 0.009329935 | 0.081235444 | 0.189810524 |
| 0.047803137 | 0.007806736 | 0.127974269 | 0.008186923 |
| 0.022341098 | 0.163881879 | 0.103319244 | 0.002211903 |
| 0.005858585 | 0.168346579 | 0.048929854 | 0.023324707 |
| 0.003048118 | 0.121259302 | 0.09812014  | 0.072361621 |
| 0.186554914 | 0.031120391 | 0.243496413 | 0.009028313 |
| 0.017846424 | 0.19608247  | 0.048354546 | 0.145501356 |
| 0.045219093 | 0.146106209 | 0.210506865 | 0.153485429 |
| 0.005067638 | 0.057657966 | 0.021653214 | 0.206567587 |
| 0.024420465 |             |             |             |

|             |             |             |             |
|-------------|-------------|-------------|-------------|
| LRRK1       | 0.459521336 | 0.529180163 | 0.449618016 |
| 0.478032602 | 0.495528886 | 0.416991355 | 0.249761663 |
| 0.199646374 | 0.11053942  | 0.008446098 | 0.039218004 |
| 0.501535818 | 0.275448149 | 0.323971165 | 0.372600069 |
| 0.4753006   | 0.185591702 | 0.371691943 | 0.287941159 |
| 0.457547923 | 0.110694474 | 0.47178333  | 0.11590446  |
| 0.348019034 | 0.148082417 | 0.096264183 | 0.339494195 |

|             |             |             |             |
|-------------|-------------|-------------|-------------|
| 0.486194244 | 0.108316195 | 0.372893513 | 0.42410816  |
| 0.126582701 | 0.47902983  | 0.530796978 | 0.518519823 |
| 0.529218198 | 0.434373617 | 0.013650066 | 0.344253536 |
| 0.449595647 | 0.505411552 | 0.455207091 | 0.392589271 |
| 0.057397877 | 0.493475368 | 0.297673978 | 0.463469271 |
| 0.250678488 | 0.048601123 | 0.257781883 | 0.441808149 |
| 0.49596943  | 0.503377992 | 0.247627116 | 0.195667309 |
| 0.28039342  | 0.252348645 | 0.361889292 | 0.351078554 |
| 0.27557077  | 0.172635003 | 0.500933665 | 0.112256663 |
| 0.173570799 | 0.271083927 | 0.19400103  | 0.293891343 |
| 0.413795443 | 0.417759351 | 0.021014788 | 0.456812166 |
| 0.004463663 | 0.432146012 | 0.436875759 | 0.380394424 |
| 0.058477295 | 0.035140167 | 0.224090653 | 0.395892391 |
| 0.49645055  | 0.452169444 | 0.524309993 | 0.517626815 |
| 0.242863957 | 0.343375894 | 0.461846645 | 0.223192927 |
| 0.473836233 | 0.223869084 | 0.134377643 | 0.487080393 |
| 0.523267409 | 0.535124224 | 0.257596545 | 0.319482447 |
| 0.483533852 | 0.47243148  | 0.484205561 | 0.502838399 |
| 0.418293655 | 0.068422281 | 0.453634881 | 0.513841649 |
| 0.42778182  | 0.390909436 | 0.201220425 | 0.452290977 |
| 0.076769865 | 0.398638531 | 0.417443122 | 0.19578965  |
| 0.499285494 | 0.024743523 | 0.270999162 | 0.41770453  |
| 0.241397137 | 0.487495563 | 0.530030664 | 0.229671457 |
| 0.470143399 | 0.030246189 | 0.189335223 | 0.043165123 |
| 0.385371765 | 0.193809148 | 0.497337079 | 0.508232243 |
| 0.261473221 | 0.452336214 | 0.304147708 | 0.003372089 |
| 0.039307642 | 0.2144524   | 0.490528112 | 0.40029239  |
| 0.476146418 | 0.413733293 | 0.3016919   | 0.427698628 |
| 0.509739773 | 0.523397051 | 0.068587124 | 0.115356423 |
| 0.484035267 | 0.215259917 | 0.291649916 | 0.511728058 |
| 0.388323329 | 0.132743755 | 0.161934006 | 0.512230194 |
| 0.419522425 | 0.110570051 | 0.354293914 | 0.478420442 |
| 0.40056769  | 0.437605735 | 0.132754449 | 0.343185398 |
| 0.065211789 | 0.496833719 | 0.040836135 | 0.354838867 |
| 0.334884706 | 0.203363231 | 0.011958839 | 0.285743436 |
| 0.346875414 | 0.494030187 | 0.481470931 | 0.131233307 |
| 0.387675378 | 0.482037791 | 0.345130513 | 0.499141084 |
| 0.018248305 | 0.058196529 | 0.292006128 | 0.510680085 |
| 0.3148242   | 0.504627197 | 0.350495224 | 0.358258369 |
| 0.347629199 | 0.499247817 | 0.003768845 | 0.507693469 |
| 0.537898386 | 0.319445991 | 0.485152574 | 0.475984541 |
| 0.445454551 | 0.504729417 | 0.047179564 | 0.481370778 |
| 0.389245521 | 0.097110197 | 0.518640036 | 0.212787841 |
| 0.462531356 | 0.059545073 | 0.358225267 | 0.497824403 |
| 0.499992698 | 0.011578229 | 0.250593479 | 0.43564065  |
| 0.037376255 | 0.111520097 | 0.468493574 | 0.467280341 |
| 0.450030064 | 0.498612334 | 0.514100405 | 0.431094163 |
| 0.501999001 | 0.265601246 | 0.016288373 | 0.385131325 |
| 0.487017352 | 0.437086529 | 0.442798037 | 0.280320683 |
| 0.365613994 | 0.476829374 | 0.471079377 | 0.24335329  |
| 0.058641525 | 0.349464431 | 0.028728648 | 0.404062355 |
| 0.432026034 | 0.160553838 | 0.450494454 | 0.1708907   |
| 0.098244278 | 0.529116716 | 0.229429891 | 0.323689178 |
| 0.169315209 | 0.478165829 | 0.289358159 | 0.312252027 |

|             |             |             |             |
|-------------|-------------|-------------|-------------|
| 0.30193256  | 0.207407674 | 0.42393612  | 0.443361815 |
| 0.047692076 | 0.129672262 | 0.017458594 | 0.461755854 |
| 0.208781876 | 0.434216818 | 0.423808838 | 0.454222408 |
| 0.383353695 | 0.157492435 | 0.471965716 | 0.338203928 |
| 0.150122603 | 0.021742805 | 0.510323605 | 0.461135023 |
| 0.365522572 | 0.188014964 | 0.054358894 | 0.415916379 |
| 0.510507146 | 0.363646842 | 0.279984345 | 0.48462986  |
| 0.033547213 | 0.512372356 | 0.326948528 | 0.166436895 |
| 0.474672927 | 0.327291194 | 0.497695456 | 0.075118953 |
| 0.425308119 | 0.472670013 | 0.361003582 | 0.242925926 |
| 0.426223839 | 0.470386402 | 0.04126504  | 0.446175901 |
| 0.447697458 | 0.045639619 | 0.532909359 | 0.169397171 |
| 0.029233186 | 0.506309406 | 0.511378137 | 0.100096369 |
| 0.103497729 | 0.412715622 | 0.053946071 | 0.357874212 |
| 0.522420143 | 0.483688455 | 0.49395423  | 0.264977717 |
| 0.057839915 | 0.020186969 | 0.259326972 | 0.451280511 |
| 0.522631875 | 0.51738226  | 0.312639301 | 0.46454277  |
| 0.290240344 | 0.408491183 | 0.148214451 | 1           |
| 0.210136458 | 0.523266298 | 0.00941422  | 0.506578509 |
| 0.526788834 | 0.316936189 | 0.114867329 | 0.353999006 |
| 0.436813042 | 0.06084685  | 0.226983842 | 0.509414153 |
| 0.476433618 | 0.395731258 | 0.422600586 | 0.482187971 |
| 0.021616009 | 0.052642491 | 0.454223519 | 0.233356518 |
| 0.451846073 | 0.263413341 | 0.073392803 | 0.354498598 |
| 0.063740629 | 0.463738073 | 0.508104724 | 0.082865204 |
| 0.395377496 | 0.327959483 | 0.44897639  | 0.0498647   |
| 0.500847729 | 0.505563797 | 0.534601875 | 0.185555956 |
| 0.499287734 | 0.498311373 | 0.485507882 | 0.101380784 |
| 0.02498805  | 0.530587218 | 0.434820644 | 0.033865757 |
| 0.512969705 | 0.255421107 | 0.0236134   | 0.497745434 |
| 0.22153425  | 0.453499461 | 0.004766696 | 0.089765217 |
| 0.052525211 | 0.512007683 | 0.492473333 | 0.420969169 |
| 0.285773972 | 0.410824163 | 0.006611821 | 0.523225908 |
| 0.503552392 | 0.021877918 | 0.185160154 | 0.505152189 |
| 0.502442555 | 0.531572589 | 0.399533021 | 0.515216565 |
| 0.510567537 | 0.518263734 | 0.296350959 | 0.333979519 |
| 0.497280517 | 0.505504646 | 0.466824225 | 0.454330731 |
| 0.513373722 | 0.492263151 | 0.338177535 | 0.02254043  |
| 0.167380999 | 0.233191081 | 0.377230829 | 0.115308639 |
| 0.349736773 | 0.188553643 | 0.481792348 | 0.515164186 |
| 0.516460219 | 0.007314311 | 0.173064694 | 0.491296017 |
| 0.472873733 | 0.494830835 | 0.02332518  | 0.007491632 |
| 0.009091941 | 0.032973094 | 0.402290121 | 0.295854693 |
| 0.498802103 | 0.289625495 | 0.007111028 | 0.051479556 |
| 0.329740579 | 0.481022703 | 0.516214061 | 0.439490962 |
| 0.495862132 | 0.104339113 | 0.358147202 | 0.451182291 |
| 0.098070183 | 0.353412966 | 0.519439972 | 0.481118556 |
| 0.051320066 | 0.299959518 | 0.407339428 | 0.507500816 |
| 0.100771023 | 0.385018907 | 0.504175916 | 0.395193692 |
| 0.015882488 | 0.109452524 | 0.089610763 | 0.493890599 |
| 0.518255363 | 0.120091461 | 0.054870342 | 0.161514548 |
| 0.162183531 | 0.505547769 | 0.219695692 | 0.516710962 |
| 0.490886052 | 0.497270156 | 0.10008715  | 0.490622493 |
| 0.057700211 | 0.503152858 | 0.426162301 | 0.071951442 |

|             |             |             |             |
|-------------|-------------|-------------|-------------|
| 0.329186415 | 0.016217444 | 0.474448964 | 0.215252905 |
| 0.365306389 | 0.435027482 | 0.24218574  | 0.023462885 |
| 0.223841321 | 0.073739586 | 0.519448779 | 0.517415493 |
| 0.043242372 | 0.268546733 | 0.354639918 | 0.453195509 |
| 0.319976411 | 0.505990188 | 0.516839502 | 0.464654699 |
| 0.107187249 | 0.170952154 | 0.455309877 | 0.438674558 |
| 0.266351449 | 0.521224204 | 0.383241236 | 0.52636347  |
| 0.449063353 | 0.47065306  | 0.494843697 | 0.406907569 |
| 0.304215686 | 0.44062077  | 0.431107322 | 0.029673686 |
| 0.409554774 | 0.521217589 | 0.387521194 | 0.216436621 |
| 0.335038381 | 0.457930472 | 0.052393214 | 0.191496322 |
| 0.402676312 | 0.343573949 | 0.187432996 | 0.490603341 |
| 0.425691695 | 0.442954401 | 0.043769509 | 0.085376658 |
| 0.54649023  | 0.442887196 | 0.165306804 | 0.487927031 |
| 0.209395576 | 0.418703851 | 0.507085239 | 0.510939941 |
| 0.413567175 | 0.50792139  | 0.476439239 | 0.449455886 |
| 0.437213456 | 0.307314981 | 0.537474978 | 0.090967134 |
| 0.115175428 | 0.466387037 | 0.139534763 | 0.120296611 |
| 0.186062363 | 0.037137699 | 0.370731327 | 0.486714322 |
| 0.449276612 | 0.460513131 | 0.344778807 | 0.103260892 |
| 0.389576065 | 0.391623723 | 0.422205183 | 0.243622472 |
| 0.110974586 | 0.514519494 | 0.013428476 | 0.07490693  |
| 0.462975163 | 0.501365069 | 0.477346387 | 0.297345913 |
| 0.375312439 | 0.172912355 | 0.369982772 | 0.326728493 |
| 0.396197503 | 0.411010486 | 0.498122353 | 0.041141711 |
| 0.025477517 | 0.51861634  | 0.408482329 | 0.026159818 |
| 0.104552814 | 0.411479909 | 0.325604092 | 0.300513769 |
| 0.030287007 | 0.491598953 | 0.386549082 | 0.493806799 |
| 0.389508322 | 0.082511204 | 0.372575294 | 0.101715885 |
| 0.067781657 | 0.450594184 | 0.460216665 | 0.527082883 |
| 0.400569812 | 0.490903732 | 0.449586129 | 0.493715926 |
| 0.137118223 | 0.422543673 | 0.03669079  | 0.488003603 |
| 0.480585767 |             |             |             |

| LTB         | 0.296853099 | 0.20667614  | 0.2229276   |
|-------------|-------------|-------------|-------------|
| 0.174198182 | 0.164852835 | 0.086876284 | 0.05285411  |
| 0.045027512 | 0.010215607 | 0.000180354 | 0.001288144 |
| 0.233133496 | 0.006845567 | 0.027239576 | 0.030429589 |
| 0.286340756 | 0.046171114 | 0.208830141 | 0.118209714 |
| 0.229894838 | 0.012199635 | 0.216312911 | 0.030201241 |
| 0.117564339 | 0.042337917 | 0.028406107 | 0.078192434 |
| 0.251638456 | 0.040852616 | 0.038441692 | 0.168837496 |
| 0.12690836  | 0.255769565 | 0.200623831 | 0.167169036 |
| 0.194646055 | 0.25593372  | 0.027067869 | 0.020666056 |
| 0.26377838  | 0.207174709 | 0.204630295 | 0.127663729 |
| 0.011752877 | 0.17442245  | 0.072928436 | 0.286525533 |
| 0.017713071 | 0.009326533 | 0.032507171 | 0.17195987  |
| 0.14026329  | 0.094703276 | 0.052115777 | 0.029477527 |
| 0.003388657 | 0.026060902 | 0.022805833 | 0.109727434 |
| 0.065090508 | 0.016967253 | 0.163680555 | 0.005494239 |
| 0.008000663 | 0.095318185 | 0.118648107 | 0.078845677 |
| 0.101863928 | 0.174115802 | 0.015665978 | 0.232986515 |
| 0.000372584 | 0.242265736 | 0.323200539 | 0.062317879 |
| 0.059476416 | 0.001700709 | 0.152411902 | 0.09846017  |
| 0.26529026  | 0.267706963 | 0.251772947 | 0.2437691   |

|             |             |             |             |
|-------------|-------------|-------------|-------------|
| 0.024523471 | 0.255275693 | 0.198489378 | 0.045330999 |
| 0.232298653 | 0.029671917 | 0.025126957 | 0.277579268 |
| 0.248709859 | 0.194962998 | 0.045926293 | 0.241025493 |
| 0.117309851 | 0.203956157 | 0.098706992 | 0.095649868 |
| 0.035063559 | 0.094338156 | 0.14401378  | 0.230201981 |
| 0.193041029 | 0.156307609 | 0.106640405 | 0.18815525  |
| 0.070013822 | 0.050865046 | 0.162849174 | 0.045296672 |
| 0.262979772 | 0.006447584 | 0.164843682 | 0.082331873 |
| 0.10277159  | 0.239938746 | 0.207117064 | 0.071313735 |
| 0.225871344 | 0.008620349 | 0.011110977 | 0.083286204 |
| 0.019797565 | 0.064621089 | 0.15637017  | 0.180026713 |
| 0.028380578 | 0.033790816 | 0.08189419  | 0.015921743 |
| 0.037973337 | 0.090698441 | 0.207418678 | 0.245138671 |
| 0.278222864 | 0.242272311 | 0.034409358 | 0.155101577 |
| 0.160584346 | 0.251694558 | 0.001085948 | 0.043089545 |
| 0.130949688 | 0.114116459 | 0.160986352 | 0.139252341 |
| 0.110211374 | 0.04553236  | 0.059331244 | 0.2456211   |
| 0.167081777 | 0.045569733 | 0.134898109 | 0.281497728 |
| 0.015303179 | 0.19562012  | 0.062822908 | 0.045608107 |
| 0.010510059 | 0.185514629 | 0.067579524 | 0.154212049 |
| 0.011976875 | 0.021267196 | 0.040024802 | 0.073188136 |
| 0.013228916 | 0.120309433 | 0.174686828 | 0.107346688 |
| 0.070067481 | 0.199959266 | 0.101497107 | 0.100146204 |
| 0.00031987  | 0.031805465 | 0.085683157 | 0.206359045 |
| 0.064689415 | 0.294197828 | 0.099546542 | 0.155425416 |
| 0.197472117 | 0.27425787  | 0.02434291  | 0.176661573 |
| 0.205883291 | 0.069949179 | 0.098334725 | 0.297559274 |
| 0.082245174 | 0.192589348 | 0.013275089 | 0.260865725 |
| 0.179105554 | 0.089885311 | 0.271552188 | 0.081497715 |
| 0.210261639 | 0.027151749 | 0.050209888 | 0.22430747  |
| 0.149310724 | 0.003269894 | 0.032552298 | 0.158605976 |
| 0.07385868  | 0.009073571 | 0.27423666  | 0.180470078 |
| 0.104113282 | 0.315033438 | 0.282840384 | 0.06948557  |
| 0.130545166 | 0.102596076 | 0.026038974 | 0.259377181 |
| 0.306691184 | 0.014708204 | 0.1610346   | 0.042620101 |
| 0.123310525 | 0.182427982 | 0.1941614   | 0.004769908 |
| 0.021281228 | 0.085625538 | 0.002788001 | 0.111597858 |
| 0.219110008 | 0.008213018 | 0.097891401 | 0.107453712 |
| 0.065951694 | 0.216370471 | 0.131295753 | 0.13557622  |
| 0.086153765 | 0.069653225 | 0.141557133 | 0.009924378 |
| 0.007319552 | 0.050250908 | 0.07079129  | 0.063686298 |
| 0.006601838 | 0.036350785 | 0.079852813 | 0.035711374 |
| 0.00301502  | 0.023209427 | 0.021583379 | 0.146914854 |
| 0.028625092 | 0.00625907  | 0.095281867 | 0.112176264 |
| 0.075110658 | 0.037401889 | 0.207054831 | 0.286730276 |
| 0.12318103  | 0.045150317 | 0.074267124 | 0.007328752 |
| 0.176627493 | 0.038424045 | 0.053682483 | 0.152556794 |
| 0.034757769 | 0.2808759   | 0.014707342 | 0.067900673 |
| 0.064059945 | 0.084141306 | 0.254755261 | 0.002877875 |
| 0.177821246 | 0.160632904 | 0.296719701 | 0.058825098 |
| 0.122898537 | 0.180402628 | 0.005060381 | 0.20148688  |
| 0.169570297 | 0.030404196 | 0.222966978 | 0.065153881 |
| 0.060242685 | 0.279307587 | 0.137113781 | 0.094281721 |
| 0.086514517 | 0.040545456 | 0.007418648 | 0.205199023 |

|             |             |             |             |
|-------------|-------------|-------------|-------------|
| 0.20755567  | 0.223478209 | 0.118719974 | 0.195747816 |
| 0.012809528 | 0.000522522 | 0.199830902 | 0.276944623 |
| 0.184828559 | 0.229007302 | 0.218363059 | 0.07894093  |
| 0.141168576 | 0.041826341 | 0.009521012 | 0.210136458 |
| 1           | 0.232087005 | 0.027926049 | 0.221313998 |
| 0.176974385 | 0.056677246 | 0.040063504 | 0.06210876  |
| 0.131996496 | 0.027219232 | 0.138349919 | 0.181510206 |
| 0.193338856 | 0.073930412 | 0.048979447 | 0.304852341 |
| 0.003831807 | 0.00662229  | 0.206707206 | 0.108819566 |
| 0.044617554 | 0.078676068 | 0.029064069 | 0.052447538 |
| 0.006296133 | 0.142221683 | 0.305875792 | 0.016006238 |
| 0.037651952 | 0.068811409 | 0.286031531 | 0.034679839 |
| 0.214733174 | 0.246700591 | 0.193135471 | 0.087652786 |
| 0.229736379 | 0.182693623 | 0.117409305 | 0.136969027 |
| 0.058647707 | 0.208689594 | 0.210687075 | 0.002833675 |
| 0.253866902 | 0.039461859 | 0.000421724 | 0.202794629 |
| 0.107313035 | 0.163632531 | 0.001427267 | 0.113598483 |
| 0.103238074 | 0.315756365 | 0.161009384 | 0.184753445 |
| 0.01294291  | 0.287505472 | 0.040406758 | 0.263454819 |
| 0.166246799 | 0.030483575 | 0.070586894 | 0.156605941 |
| 0.169891683 | 0.225778336 | 0.104328606 | 0.186415008 |
| 0.137818811 | 0.169550691 | 0.008293158 | 0.160794652 |
| 0.160085739 | 0.205403236 | 0.226550889 | 0.207265908 |
| 0.209153902 | 0.291865834 | 0.121070121 | 0.004819506 |
| 0.02473093  | 0.04029737  | 0.013438636 | 0.003647642 |
| 0.116959762 | 0.040583739 | 0.252694756 | 0.269854206 |
| 0.21490341  | 0.030776819 | 0.021680393 | 0.17312048  |
| 0.197021869 | 0.257380458 | 0.07974594  | 0.008801153 |
| 0.021448705 | 0.003599169 | 0.141409911 | 0.233247574 |
| 0.222568535 | 0.004274082 | 0.011629857 | 0.008633977 |
| 0.03833929  | 0.207362479 | 0.180194077 | 0.248397785 |
| 0.298214527 | 0.077144393 | 0.009186686 | 0.282718913 |
| 0.018771304 | 0.165640098 | 0.206653692 | 0.158866121 |
| 0.093269056 | 0.1981593   | 0.214459219 | 0.228460852 |
| 0.031093218 | 0.227584473 | 0.230435617 | 0.017714166 |
| 0.06052809  | 0.076875369 | 0.04166897  | 0.325740211 |
| 0.177027804 | 0.005717558 | 0.005181068 | 0.00588889  |
| 0.013051367 | 0.274559635 | 0.024744829 | 0.256161151 |
| 0.197594883 | 0.256731178 | 0.052463855 | 0.18245444  |
| 0.004166761 | 0.165775537 | 0.145240892 | 0.003338184 |
| 0.232659262 | 0.035482668 | 0.225812998 | 0.00315532  |
| 0.051601008 | 0.241733316 | 0.024479684 | 0.056778398 |
| 0.073916023 | 0.053155208 | 0.221869271 | 0.273664654 |
| 0.090948975 | 0.074919306 | 0.263474385 | 0.327767566 |
| 0.072519146 | 0.168178932 | 0.177890262 | 0.069265267 |
| 0.0134334   | 0.076356097 | 0.235912504 | 0.19370656  |
| 0.04104907  | 0.27639493  | 0.022991814 | 0.258282523 |
| 0.22802445  | 0.265370721 | 0.204836643 | 0.112379088 |
| 0.026476669 | 0.153948456 | 0.08058155  | 0.001470772 |
| 0.203843644 | 0.198574256 | 0.197990124 | 0.017537385 |
| 0.070375081 | 0.181275203 | 0.035070346 | 0.055320732 |
| 0.14833124  | 0.065249297 | 0.014848221 | 0.309696407 |
| 0.238411619 | 0.1898931   | 0.022875991 | 0.031086547 |
| 0.230718641 | 0.210454598 | 0.013523054 | 0.14852991  |

|             |             |             |             |
|-------------|-------------|-------------|-------------|
| 0.190547493 | 0.122650909 | 0.28662107  | 0.28081233  |
| 0.066577291 | 0.156254465 | 0.208382128 | 0.087362648 |
| 0.136099534 | 0.115335234 | 0.194688005 | 0.013516564 |
| 0.018281961 | 0.215256099 | 0.008177904 | 0.138997197 |
| 0.063050361 | 0.038087576 | 0.058964909 | 0.302158015 |
| 0.0736081   | 0.150283247 | 0.030066628 | 0.030624301 |
| 0.246574751 | 0.216011437 | 0.215674695 | 0.029740986 |
| 0.008920853 | 0.15909234  | 0.007698145 | 0.078030746 |
| 0.0899617   | 0.18469133  | 0.097697109 | 0.13979644  |
| 0.050496515 | 0.114398041 | 0.125876929 | 0.060780982 |
| 0.018281224 | 0.034864392 | 0.174230149 | 0.014022136 |
| 0.00722336  | 0.277130052 | 0.146132484 | 0.066520093 |
| 0.039063226 | 0.195578252 | 0.162971386 | 0.015604414 |
| 0.08019012  | 0.185379815 | 0.0277679   | 0.194401633 |
| 0.13172113  | 0.078529145 | 0.164897719 | 0.026096095 |
| 0.050108706 | 0.18851762  | 0.240948004 | 0.198687135 |
| 0.293018668 | 0.204912466 | 0.173124316 | 0.177137759 |
| 0.093930845 | 0.231610357 | 0.010000213 | 0.266397072 |
| 0.05230859  |             |             |             |

| LXN         | 0.508718448 | 0.515997587 | 0.464791419 |
|-------------|-------------|-------------|-------------|
| 0.459035441 | 0.469254015 | 0.444532939 | 0.215819644 |
| 0.21771954  | 0.081318491 | 0.003238396 | 0.018500398 |
| 0.507665602 | 0.213167199 | 0.294972593 | 0.383962533 |
| 0.454475187 | 0.131075679 | 0.418202589 | 0.246150971 |
| 0.455540326 | 0.094419645 | 0.425471712 | 0.086740807 |
| 0.318428791 | 0.098854387 | 0.060100902 | 0.279952446 |
| 0.487984078 | 0.070886098 | 0.391691898 | 0.444650324 |
| 0.101194523 | 0.513632298 | 0.518626411 | 0.480085797 |
| 0.517737236 | 0.496040116 | 0.013402834 | 0.328714434 |
| 0.500894389 | 0.496982275 | 0.453066694 | 0.345148444 |
| 0.035592997 | 0.495998901 | 0.250737822 | 0.446856776 |
| 0.272623415 | 0.025001982 | 0.293710009 | 0.474128987 |
| 0.483081224 | 0.494506107 | 0.25475242  | 0.158955629 |
| 0.217219522 | 0.277574947 | 0.304817258 | 0.400522038 |
| 0.229136298 | 0.190605864 | 0.499065268 | 0.084636492 |
| 0.162159167 | 0.283606658 | 0.15604191  | 0.2844385   |
| 0.392612207 | 0.469526381 | 0.016717753 | 0.494791042 |
| 0.002062654 | 0.428502023 | 0.416129014 | 0.355068028 |
| 0.035939222 | 0.015687526 | 0.182549201 | 0.363321219 |
| 0.504470241 | 0.501297766 | 0.515678728 | 0.520815463 |
| 0.182684961 | 0.312045847 | 0.451069112 | 0.16658935  |
| 0.514255572 | 0.178175926 | 0.116338994 | 0.454055265 |
| 0.518981882 | 0.512801251 | 0.203796135 | 0.27198088  |
| 0.487722288 | 0.508747503 | 0.484636932 | 0.470333039 |
| 0.382103622 | 0.050018515 | 0.494751697 | 0.525656715 |
| 0.484742497 | 0.358141465 | 0.147621813 | 0.475577718 |
| 0.053473709 | 0.435318621 | 0.373503177 | 0.17696197  |
| 0.505974173 | 0.014551778 | 0.215119691 | 0.391493081 |
| 0.235864333 | 0.515311612 | 0.512849197 | 0.187906538 |
| 0.461915608 | 0.016867041 | 0.14234743  | 0.030497965 |
| 0.368031282 | 0.163528745 | 0.504526488 | 0.503521784 |
| 0.269432954 | 0.415144851 | 0.28463296  | 0.000463272 |
| 0.022462118 | 0.202085994 | 0.52050598  | 0.42889521  |
| 0.49529388  | 0.480635638 | 0.233054724 | 0.484960333 |



|             |             |             |             |
|-------------|-------------|-------------|-------------|
| 0.511356828 | 0.515519964 | 0.075868683 | 0.093416671 |
| 0.476902635 | 0.200055413 | 0.241110764 | 0.510182428 |
| 0.320794652 | 0.118547809 | 0.122794114 | 0.522275849 |
| 0.474839547 | 0.077643514 | 0.415519309 | 0.450441272 |
| 0.362536295 | 0.38389565  | 0.103932521 | 0.292982159 |
| 0.044449102 | 0.495280709 | 0.024587083 | 0.398691173 |
| 0.305573623 | 0.152318778 | 0.011172172 | 0.300543744 |
| 0.320791412 | 0.501271473 | 0.49635392  | 0.103256026 |
| 0.341127903 | 0.438193708 | 0.396144548 | 0.488956697 |
| 0.007013118 | 0.044436857 | 0.366223949 | 0.523076979 |
| 0.363066441 | 0.526019912 | 0.323120023 | 0.326375232 |
| 0.29162893  | 0.497939471 | 0.00387392  | 0.501637284 |
| 0.511316533 | 0.39040279  | 0.433149008 | 0.476646515 |
| 0.427929912 | 0.496658509 | 0.060640451 | 0.455890981 |
| 0.460345108 | 0.074819962 | 0.517826848 | 0.154386908 |
| 0.506456177 | 0.034205127 | 0.366273049 | 0.506609467 |
| 0.513105802 | 0.008371997 | 0.264254086 | 0.433245277 |
| 0.023721606 | 0.102242661 | 0.498300834 | 0.447879107 |
| 0.415181901 | 0.502966172 | 0.505891454 | 0.406924126 |
| 0.470217182 | 0.254423915 | 0.010474086 | 0.343475611 |
| 0.514714421 | 0.448292276 | 0.484118855 | 0.255987029 |
| 0.43998844  | 0.508722342 | 0.513509819 | 0.234536857 |
| 0.036663332 | 0.351245664 | 0.020026207 | 0.352367397 |
| 0.492176323 | 0.113139941 | 0.458595407 | 0.162217173 |
| 0.064988888 | 0.522040176 | 0.189686981 | 0.300864187 |
| 0.139997683 | 0.454611691 | 0.268309398 | 0.253740912 |
| 0.224312501 | 0.160506533 | 0.389498001 | 0.415295249 |
| 0.033802593 | 0.086158211 | 0.013954441 | 0.447480093 |
| 0.143271449 | 0.388856846 | 0.39447953  | 0.498749102 |
| 0.371694215 | 0.107589247 | 0.415292248 | 0.319643296 |
| 0.109563774 | 0.011432171 | 0.518222369 | 0.44734949  |
| 0.428768202 | 0.15367184  | 0.036506959 | 0.409066904 |
| 0.509185818 | 0.394779623 | 0.353373616 | 0.501509291 |
| 0.027373639 | 0.519588944 | 0.255168381 | 0.115155657 |
| 0.420656652 | 0.26785333  | 0.495937624 | 0.065203411 |
| 0.471039625 | 0.499392471 | 0.338490332 | 0.180512377 |
| 0.471991199 | 0.467689858 | 0.025879289 | 0.498531045 |
| 0.497227204 | 0.025862941 | 0.522591792 | 0.124721817 |
| 0.01700337  | 0.496192374 | 0.505444499 | 0.06833296  |
| 0.07160338  | 0.358333595 | 0.045522503 | 0.299397718 |
| 0.519993687 | 0.440249568 | 0.500238548 | 0.23611528  |
| 0.033473511 | 0.007743007 | 0.218839467 | 0.47387674  |
| 0.517166598 | 0.522250714 | 0.273164423 | 0.396535332 |
| 0.246140563 | 0.362915472 | 0.176749448 | 0.523266298 |
| 0.232087005 | 1           | 0.004740388 | 0.50694011  |
| 0.516119084 | 0.359562613 | 0.072647033 | 0.343118433 |
| 0.477296673 | 0.039931799 | 0.225074983 | 0.504321311 |
| 0.504976028 | 0.356118088 | 0.387134052 | 0.493122053 |
| 0.013303965 | 0.038140519 | 0.43329395  | 0.203087873 |
| 0.426515275 | 0.216873265 | 0.059766128 | 0.38969183  |
| 0.035420798 | 0.496014418 | 0.508218785 | 0.051986306 |
| 0.401275387 | 0.377388237 | 0.411115341 | 0.031164195 |
| 0.511461391 | 0.511836899 | 0.517159839 | 0.176448479 |
| 0.522944642 | 0.51535804  | 0.473402452 | 0.075500792 |

|             |              |             |             |
|-------------|--------------|-------------|-------------|
| 0.013771268 | 0.511071894  | 0.480842837 | 0.018371263 |
| 0.511147857 | 0.303523709  | 0.009090722 | 0.511234952 |
| 0.187909204 | 0.471429438  | 0.003554666 | 0.10923258  |
| 0.038686482 | 0.507642968  | 0.487766617 | 0.443136305 |
| 0.303884182 | 0.412776119  | 0.006129976 | 0.524767332 |
| 0.50601124  | 0.0111102756 | 0.143640464 | 0.519347746 |
| 0.503310532 | 0.512288029  | 0.357314921 | 0.513947249 |
| 0.495553392 | 0.497451201  | 0.254238899 | 0.274442604 |
| 0.505679879 | 0.50524394   | 0.492584492 | 0.499540722 |
| 0.509109601 | 0.471155421  | 0.290392091 | 0.011713774 |
| 0.13872817  | 0.248934807  | 0.361600299 | 0.075901689 |
| 0.408164452 | 0.135067092  | 0.519786053 | 0.512285643 |
| 0.523561253 | 0.00312383   | 0.161813911 | 0.520817273 |
| 0.495960691 | 0.507514181  | 0.021204289 | 0.006556389 |
| 0.009285876 | 0.015650557  | 0.41012061  | 0.254557484 |
| 0.520847813 | 0.291345841  | 0.002599175 | 0.04444043  |
| 0.303056154 | 0.443411335  | 0.511119705 | 0.41123394  |
| 0.514302488 | 0.076040758  | 0.31686587  | 0.440555507 |
| 0.06179961  | 0.436364412  | 0.521669083 | 0.494083284 |
| 0.038958372 | 0.259825402  | 0.455648054 | 0.511032453 |
| 0.082009642 | 0.336384566  | 0.513028975 | 0.340566257 |
| 0.013697991 | 0.075454368  | 0.058585903 | 0.489689864 |
| 0.50748344  | 0.071197965  | 0.02728035  | 0.186790703 |
| 0.114136249 | 0.520682387  | 0.162133876 | 0.523495292 |
| 0.50138172  | 0.47744316   | 0.071959989 | 0.497966284 |
| 0.033218541 | 0.497309062  | 0.370741786 | 0.067954911 |
| 0.323469519 | 0.010243893  | 0.510341997 | 0.162454466 |
| 0.386741506 | 0.476692     | 0.213372454 | 0.013908399 |
| 0.211608759 | 0.047169069  | 0.509118746 | 0.511291155 |
| 0.03158166  | 0.255647743  | 0.320084878 | 0.462122835 |
| 0.335353868 | 0.479206818  | 0.504830377 | 0.485842929 |
| 0.079642338 | 0.169950593  | 0.466195468 | 0.491459364 |
| 0.277298764 | 0.517502277  | 0.317308704 | 0.524571315 |
| 0.497094426 | 0.513428075  | 0.521973381 | 0.382258256 |
| 0.251142324 | 0.481634396  | 0.428742783 | 0.016453659 |
| 0.388219972 | 0.505437335  | 0.423326268 | 0.153335547 |
| 0.261534051 | 0.455581786  | 0.047500545 | 0.246827007 |
| 0.392477071 | 0.370349577  | 0.139627181 | 0.480982462 |
| 0.471652853 | 0.495171972  | 0.04187263  | 0.054511176 |
| 0.518202361 | 0.496429147  | 0.156116303 | 0.484883791 |
| 0.173675694 | 0.365551928  | 0.517766997 | 0.510665578 |
| 0.436400011 | 0.516001345  | 0.49919729  | 0.453440027 |
| 0.478123794 | 0.272725558  | 0.516533331 | 0.110677907 |
| 0.084604441 | 0.510439113  | 0.089077141 | 0.087428256 |
| 0.138357732 | 0.022636299  | 0.352576887 | 0.471689308 |
| 0.450385539 | 0.410995172  | 0.398359927 | 0.077290202 |
| 0.349491576 | 0.461055447  | 0.382518071 | 0.21184468  |
| 0.071338819 | 0.497247895  | 0.007235404 | 0.050859909 |
| 0.457203331 | 0.513469831  | 0.429310029 | 0.249917319 |
| 0.334370243 | 0.145484001  | 0.311369458 | 0.362804927 |
| 0.375398981 | 0.435702712  | 0.511961783 | 0.032764826 |
| 0.016255886 | 0.518158842  | 0.459722003 | 0.019295622 |
| 0.088058328 | 0.475550484  | 0.343643612 | 0.24343115  |
| 0.018722056 | 0.514239193  | 0.39485628  | 0.479759119 |

|             |             |             |             |
|-------------|-------------|-------------|-------------|
| 0.38809568  | 0.061693567 | 0.445503767 | 0.099520899 |
| 0.060191182 | 0.491974703 | 0.460020172 | 0.509253877 |
| 0.401689572 | 0.454479041 | 0.465684412 | 0.51860154  |
| 0.140528087 | 0.47369161  | 0.022927892 | 0.506820838 |
| 0.481298429 |             |             |             |
| LY6E        | 0.009015989 | 0.007205882 | 0.009869707 |
| 0.029696768 | 0.023030594 | 0.006598865 | 0.062399082 |
| 0.019687178 | 0.04843786  | 0.049146603 | 0.049289477 |
| 0.012306166 | 0.019576446 | 0.015704826 | 0.003042781 |
| 0.044488483 | 0.085972307 | 0.013566545 | 0.10943277  |
| 0.033858453 | 0.04093926  | 0.055162612 | 0.106663681 |
| 0.018579472 | 0.070652531 | 0.132742741 | 0.023693566 |
| 0.027571378 | 0.145023606 | 0.005216021 | 0.020512975 |
| 0.138580413 | 0.012497107 | 0.003593143 | 0.021574112 |
| 0.002749385 | 0.005049987 | 0.083537664 | 0.006542287 |
| 0.009209211 | 0.014891366 | 0.032152904 | 0.065688495 |
| 0.120413553 | 0.002603268 | 0.073226455 | 0.028700966 |
| 0.007232369 | 0.119854576 | 0.005629266 | 0.003368654 |
| 0.002148388 | 0.007096008 | 0.02433906  | 0.057612565 |
| 0.006828815 | 0.006757356 | 0.004251413 | 0.00788386  |
| 0.085330909 | 0.008327375 | 0.003168716 | 0.038801771 |
| 0.01091864  | 0.034067512 | 0.094323253 | 0.039818337 |
| 0.0085491   | 0.007857012 | 0.215923345 | 0.005595469 |
| 0.018178541 | 0.044323181 | 0.045392644 | 0.003861913 |
| 0.260596051 | 0.094594881 | 0.104648434 | 0.041616206 |
| 0.021833649 | 0.004638458 | 0.017960726 | 0.012320925 |
| 0.054421691 | 0.078513689 | 0.012681341 | 0.08689579  |
| 0.008953007 | 0.057014645 | 0.048269809 | 0.047089803 |
| 0.015671872 | 0.004890159 | 0.056946007 | 0.091594531 |
| 0.008439976 | 0.00745081  | 0.006758209 | 0.013546999 |
| 0.003690441 | 0.116110743 | 0.003933451 | 0.010447761 |
| 0.005792061 | 0.013644046 | 0.137454244 | 0.016996452 |
| 0.223713516 | 0.003151169 | 0.067415561 | 0.038218956 |
| 0.021923582 | 0.109484992 | 0.103707829 | 0.028886596 |
| 0.0576965   | 0.010847932 | 0.004737069 | 0.108297849 |
| 0.023102574 | 0.128326195 | 0.010683308 | 0.234107466 |
| 0.012034141 | 0.013400316 | 0.001092298 | 0.01655535  |
| 0.017772901 | 0.009583899 | 0.050279767 | 0.21703491  |
| 0.189577198 | 0.054074831 | 0.007302036 | 0.022359271 |
| 0.019145365 | 0.002686614 | 0.034529813 | 0.004996865 |
| 0.006766158 | 0.017967809 | 0.000466501 | 0.108775991 |
| 0.01461598  | 0.068385985 | 0.143694336 | 0.010649461 |
| 0.04731682  | 0.078351601 | 0.14534858  | 0.012227744 |
| 0.005268995 | 0.183678702 | 0.00704837  | 0.047608153 |
| 0.00608431  | 0.040689021 | 0.155426077 | 0.03613793  |
| 0.112608341 | 0.002624991 | 0.181894495 | 0.015635088 |
| 0.00253912  | 0.052424967 | 0.19907885  | 0.023844206 |
| 0.009573153 | 0.005925488 | 0.000831853 | 0.197653445 |
| 0.040077729 | 0.039332574 | 0.008362136 | 0.008268976 |
| 0.046869515 | 0.18940307  | 0.003497769 | 0.009932858 |
| 0.004693516 | 0.011239753 | 0.040174568 | 0.033020654 |
| 0.095992427 | 0.023251009 | 0.00849881  | 0.002847212 |
| 0.004665575 | 0.002585464 | 0.025521517 | 0.024341425 |
| 0.005400507 | 0.019188611 | 0.001649451 | 0.046838313 |

|             |             |             |             |
|-------------|-------------|-------------|-------------|
| 0.004402056 | 0.199940488 | 0.018436874 | 0.137312375 |
| 0.004294293 | 0.182850725 | 0.012832323 | 0.00798183  |
| 0.004901327 | 0.062954731 | 0.010966109 | 0.029735751 |
| 0.165018982 | 0.026173546 | 0.016076917 | 0.03088043  |
| 0.022007217 | 0.020719991 | 0.025721584 | 0.004701634 |
| 0.018926272 | 0.061544    | 0.238667774 | 0.055946787 |
| 0.012243256 | 0.001810535 | 0.004630618 | 0.033312284 |
| 0.002952026 | 0.006702558 | 0.004194065 | 0.001902533 |
| 0.162119086 | 0.026242415 | 0.042478013 | 0.033880484 |
| 0.003793671 | 0.047109245 | 0.004883374 | 0.091276949 |
| 0.158042281 | 0.009250423 | 0.029869934 | 0.009172254 |
| 0.014773515 | 0.010958894 | 0.082032224 | 0.009996353 |
| 0.012476692 | 0.076734957 | 0.009307726 | 0.00971045  |
| 0.080409001 | 0.141432641 | 0.127786112 | 0.002261333 |
| 0.016920163 | 0.004758342 | 0.003347346 | 0.005753979 |
| 0.011678302 | 0.050157839 | 0.025156248 | 0.013661536 |
| 0.088015075 | 0.285225215 | 0.007321094 | 0.044564309 |
| 0.003927819 | 0.07159948  | 0.238074955 | 0.001137976 |
| 0.014158255 | 0.002492505 | 0.002245866 | 0.009048346 |
| 0.15434003  | 0.016248459 | 0.021839579 | 0.14678046  |
| 0.011125814 | 0.085050168 | 0.024338025 | 0.008039827 |
| 0.011058453 | 0.005798335 | 0.07251305  | 0.06775033  |
| 0.003579456 | 0.025797679 | 0.135809314 | 0.005349618 |
| 0.004956704 | 0.224808652 | 0.007017973 | 0.09761264  |
| 0.28086348  | 0.019472865 | 0.00740145  | 0.232218846 |
| 0.154134279 | 0.018335127 | 0.051261415 | 0.10301389  |
| 0.009003635 | 0.049600917 | 0.00718827  | 0.034465232 |
| 0.132845541 | 0.063606873 | 0.074359205 | 0.010587014 |
| 0.002721544 | 0.006947864 | 0.126965104 | 0.019934795 |
| 0.127439062 | 0.007743894 | 0.007433521 | 0.00941422  |
| 0.027926049 | 0.004740388 | 1           | 0.01071974  |
| 0.002315079 | 0.006664489 | 0.108677448 | 0.022920799 |
| 0.005459695 | 0.143886714 | 0.069282028 | 0.00433604  |
| 0.009080948 | 0.017628839 | 0.007656225 | 0.023273861 |
| 0.099920184 | 0.112075467 | 0.021965119 | 0.016173374 |
| 0.006825132 | 0.059017339 | 0.011071194 | 0.007698547 |
| 0.105463615 | 0.005476714 | 0.024632303 | 0.078967484 |
| 0.004167226 | 0.00662351  | 0.057298801 | 0.213681156 |
| 0.007160169 | 0.004859048 | 0.003886609 | 0.078559226 |
| 0.009830342 | 0.005931443 | 0.004984913 | 0.200363453 |
| 0.240533542 | 0.003622645 | 0.010180172 | 0.048489623 |
| 0.021603544 | 0.004179171 | 0.064775209 | 0.007433466 |
| 0.125703933 | 0.001039526 | 0.010698521 | 0.008240714 |
| 0.146106234 | 0.022276136 | 0.00298978  | 0.022754854 |
| 0.001483565 | 0.048125985 | 0.037821282 | 0.008190748 |
| 0.005118123 | 0.162266758 | 0.064253281 | 0.006032247 |
| 0.006029472 | 0.006510377 | 0.010676125 | 0.00846946  |
| 0.007439691 | 0.002963991 | 0.021856051 | 0.099934473 |
| 0.010627567 | 0.003763534 | 0.015028122 | 0.006096171 |
| 0.019021835 | 0.033189883 | 0.088150008 | 0.131310498 |
| 0.018924939 | 0.016790961 | 0.001092281 | 0.025806837 |
| 0.00659318  | 0.062592627 | 0.007331487 | 0.021464503 |
| 0.00923368  | 0.279415652 | 0.034576102 | 0.006261011 |
| 0.01379115  | 0.018370839 | 0.144878163 | 0.015187575 |

|             |             |             |             |
|-------------|-------------|-------------|-------------|
| 0.005031038 | 0.053150267 | 0.027517422 | 0.087006842 |
| 0.00821121  | 0.001030195 | 0.222872709 | 0.077037806 |
| 0.02319471  | 0.021231081 | 0.005139831 | 0.06513766  |
| 0.012321422 | 0.190958292 | 0.003537776 | 0.049277085 |
| 0.078781237 | 0.002796875 | 0.010627837 | 0.005081007 |
| 0.20373269  | 0.070757646 | 0.011433168 | 0.017275083 |
| 0.004521862 | 0.089379682 | 0.012960131 | 0.012247375 |
| 0.119358982 | 0.122252441 | 0.105629596 | 0.030527589 |
| 0.002145014 | 0.056282671 | 0.090870432 | 0.002282409 |
| 0.054035138 | 0.01514587  | 0.058776206 | 0.014236433 |
| 0.015538145 | 0.037743599 | 0.117108067 | 0.004537994 |
| 0.086305942 | 0.003124058 | 0.025007895 | 0.003268761 |
| 0.042511176 | 0.269773291 | 0.004353125 | 0.004608356 |
| 0.008940186 | 0.014914707 | 0.010915663 | 0.190127431 |
| 0.007615369 | 0.189239367 | 0.019005471 | 0.017529382 |
| 0.164512982 | 0.041050874 | 0.076208607 | 0.03287977  |
| 0.018245962 | 0.025215223 | 0.003298333 | 0.002231698 |
| 0.071053105 | 0.019009426 | 0.027762203 | 0.006638569 |
| 0.017495203 | 0.018751703 | 0.01064375  | 0.008428369 |
| 0.009391128 | 0.008893857 | 0.0065917   | 0.031157884 |
| 0.023951849 | 0.008250992 | 0.012656588 | 0.054624251 |
| 0.051670209 | 0.019748909 | 0.019296778 | 0.035092135 |
| 0.061813361 | 0.007699371 | 0.153202855 | 0.004514557 |
| 0.00597831  | 0.009035184 | 0.071370671 | 0.037346923 |
| 0.014093373 | 0.006787846 | 0.14777716  | 0.098533246 |
| 0.006981582 | 0.005753781 | 0.026100899 | 0.01440105  |
| 0.150243502 | 0.040730876 | 0.014031593 | 0.016284396 |
| 0.004282164 | 0.008108679 | 0.015629305 | 0.009599699 |
| 0.00521218  | 0.075992571 | 0.004201878 | 0.017057253 |
| 0.046559436 | 0.0068132   | 0.058632814 | 0.208651107 |
| 0.148557617 | 0.172347663 | 0.002503392 | 0.039418469 |
| 0.002615744 | 0.050144656 | 0.003710511 | 0.098867348 |
| 0.066345866 | 0.006265652 | 0.063351237 | 0.036116399 |
| 0.08090126  | 0.003658951 | 0.099724842 | 0.221207586 |
| 0.004779101 | 0.009061388 | 0.010795338 | 0.070943817 |
| 0.007416177 | 0.081043805 | 0.083380041 | 0.008080047 |
| 0.002843928 | 0.003646834 | 0.007989281 | 0.084216804 |
| 0.165835651 | 0.019458521 | 0.006553536 | 0.172954669 |
| 0.067457647 | 0.005925743 | 0.02634382  | 0.018713637 |
| 0.166253779 | 0.004976876 | 0.003560388 | 0.016996249 |
| 0.030624933 | 0.197432836 | 0.003043802 | 0.037169201 |
| 0.148461928 | 0.004008855 | 0.012537134 | 0.004015173 |
| 0.024172845 | 0.04225439  | 0.001939743 | 0.007554839 |
| 0.041582791 | 0.004956594 | 0.133863684 | 0.018183676 |
| 0.001899124 |             |             |             |

|             |             |             |             |
|-------------|-------------|-------------|-------------|
| LY96        | 0.358377943 | 0.509831602 | 0.387003384 |
| 0.348308905 | 0.405196702 | 0.281137298 | 0.176321269 |
| 0.127430856 | 0.099854583 | 0.003815394 | 0.038578208 |
| 0.399886027 | 0.207295154 | 0.204209249 | 0.276005368 |
| 0.382360055 | 0.168745166 | 0.298222248 | 0.22281227  |
| 0.34673739  | 0.065587222 | 0.379514588 | 0.089969568 |
| 0.359910513 | 0.149404376 | 0.089037663 | 0.330216259 |
| 0.385683843 | 0.099382544 | 0.235302268 | 0.292972326 |
| 0.135570293 | 0.368427033 | 0.507406793 | 0.410330033 |

|             |             |             |             |
|-------------|-------------|-------------|-------------|
| 0.508398859 | 0.331910298 | 0.012837645 | 0.234208759 |
| 0.366799731 | 0.397616225 | 0.340272721 | 0.294316457 |
| 0.044066461 | 0.450580016 | 0.218980665 | 0.405843498 |
| 0.171995792 | 0.044607006 | 0.153867416 | 0.405270892 |
| 0.458641143 | 0.384005754 | 0.166195466 | 0.140251528 |
| 0.210149455 | 0.151564526 | 0.323478977 | 0.222773109 |
| 0.206752655 | 0.093079961 | 0.477005885 | 0.084389362 |
| 0.138836604 | 0.1929353   | 0.201241792 | 0.201521047 |
| 0.40742175  | 0.286093756 | 0.016888377 | 0.377588304 |
| 0.00132628  | 0.32875832  | 0.384981279 | 0.368559445 |
| 0.057725752 | 0.023303057 | 0.222853883 | 0.283475732 |
| 0.417686376 | 0.445268004 | 0.483107286 | 0.500316441 |
| 0.196938463 | 0.313932729 | 0.420388399 | 0.178168998 |
| 0.396989059 | 0.154413335 | 0.098495738 | 0.396994603 |
| 0.494305398 | 0.51829285  | 0.242974083 | 0.308813488 |
| 0.363967913 | 0.447420391 | 0.35945189  | 0.396449723 |
| 0.349194147 | 0.093009694 | 0.419399403 | 0.510992997 |
| 0.336037811 | 0.382739052 | 0.189202493 | 0.317823563 |
| 0.074834061 | 0.278733576 | 0.31879748  | 0.160867186 |
| 0.431656138 | 0.020470509 | 0.266795641 | 0.296098571 |
| 0.217034058 | 0.366124355 | 0.523258907 | 0.174264121 |
| 0.397445231 | 0.023815204 | 0.201021926 | 0.050240648 |
| 0.278444382 | 0.22782743  | 0.460825415 | 0.417611759 |
| 0.169599719 | 0.386379518 | 0.228115725 | 0.004810919 |
| 0.042670909 | 0.223482407 | 0.390785777 | 0.317263281 |
| 0.36860656  | 0.376518487 | 0.24964699  | 0.297755762 |
| 0.404788601 | 0.479282945 | 0.034628915 | 0.091582723 |
| 0.355839627 | 0.228157303 | 0.244071968 | 0.392380007 |
| 0.333262892 | 0.094401045 | 0.130140595 | 0.511302661 |
| 0.376699239 | 0.088284631 | 0.255781186 | 0.381880597 |
| 0.295180057 | 0.388602226 | 0.1083312   | 0.24361729  |
| 0.045549447 | 0.486955992 | 0.050501924 | 0.251902293 |
| 0.293529133 | 0.195584385 | 0.012660846 | 0.185883872 |
| 0.225298057 | 0.403738062 | 0.456306182 | 0.115997529 |
| 0.280597206 | 0.39558428  | 0.230855878 | 0.34814694  |
| 0.014290365 | 0.052571918 | 0.19103257  | 0.496026784 |
| 0.188984952 | 0.502791578 | 0.276325599 | 0.33605726  |
| 0.309234527 | 0.400572997 | 0.005177735 | 0.472542234 |
| 0.527199357 | 0.202382314 | 0.35882216  | 0.398808396 |
| 0.3965988   | 0.403504303 | 0.034161476 | 0.378605728 |
| 0.266054419 | 0.088021012 | 0.498247203 | 0.188723258 |
| 0.443356408 | 0.056225195 | 0.244920634 | 0.436612485 |
| 0.378987179 | 0.010560149 | 0.148410192 | 0.314691565 |
| 0.051396379 | 0.06729248  | 0.359189988 | 0.350808647 |
| 0.348284178 | 0.399914702 | 0.463658581 | 0.385515983 |
| 0.39553556  | 0.194709588 | 0.018986723 | 0.357989127 |
| 0.390543932 | 0.36597033  | 0.403080222 | 0.203171367 |
| 0.240584433 | 0.448666132 | 0.383242897 | 0.194595815 |
| 0.047771878 | 0.246367363 | 0.015751909 | 0.34153082  |
| 0.376991684 | 0.105712818 | 0.380988553 | 0.173211971 |
| 0.101558747 | 0.520894176 | 0.26175415  | 0.339637545 |
| 0.209407755 | 0.329421067 | 0.223977725 | 0.195052154 |
| 0.216752212 | 0.192389037 | 0.384211554 | 0.368295586 |
| 0.029258435 | 0.107838989 | 0.030119966 | 0.340127543 |

|             |             |             |             |
|-------------|-------------|-------------|-------------|
| 0.133428527 | 0.29265554  | 0.273856186 | 0.322731471 |
| 0.266558532 | 0.103633147 | 0.366045221 | 0.347618142 |
| 0.15397205  | 0.023380981 | 0.493105519 | 0.365832859 |
| 0.235784658 | 0.151306497 | 0.056693449 | 0.289511749 |
| 0.436268935 | 0.223034154 | 0.180220227 | 0.420115456 |
| 0.031064284 | 0.481749977 | 0.238133084 | 0.152564034 |
| 0.383729153 | 0.247913515 | 0.424660587 | 0.055300975 |
| 0.313988382 | 0.435483818 | 0.322279384 | 0.219364756 |
| 0.347113182 | 0.352305092 | 0.029800171 | 0.324347518 |
| 0.309085378 | 0.041646657 | 0.523499336 | 0.168527507 |
| 0.033434267 | 0.415880455 | 0.393021062 | 0.100744847 |
| 0.107323845 | 0.293311289 | 0.03182814  | 0.314253719 |
| 0.50778464  | 0.3844213   | 0.364457396 | 0.29228597  |
| 0.044893239 | 0.01187338  | 0.274159493 | 0.386655429 |
| 0.488210939 | 0.519541199 | 0.268931806 | 0.373023074 |
| 0.232595432 | 0.364637502 | 0.092205875 | 0.506578509 |
| 0.221313998 | 0.50694011  | 0.01071974  | 1           |
| 0.503111276 | 0.196594687 | 0.113051612 | 0.242142945 |
| 0.322021339 | 0.052107419 | 0.185739774 | 0.478610628 |
| 0.407002644 | 0.342451889 | 0.345353015 | 0.384404017 |
| 0.01324442  | 0.037696373 | 0.392749929 | 0.274480887 |
| 0.356349801 | 0.238700945 | 0.105758922 | 0.257124405 |
| 0.047958047 | 0.422959069 | 0.416937828 | 0.083399483 |
| 0.25464718  | 0.23400458  | 0.389048651 | 0.044930523 |
| 0.467493962 | 0.507424149 | 0.505016075 | 0.144002567 |
| 0.38300859  | 0.492420975 | 0.405784125 | 0.109671522 |
| 0.031292648 | 0.516444261 | 0.314006351 | 0.022937945 |
| 0.447318932 | 0.145485748 | 0.0136132   | 0.469783632 |
| 0.175711764 | 0.415007488 | 0.002536045 | 0.110224797 |
| 0.073009076 | 0.444909441 | 0.462484297 | 0.299883099 |
| 0.162510689 | 0.326666526 | 0.014675343 | 0.52925094  |
| 0.469207283 | 0.027798457 | 0.210794634 | 0.392755121 |
| 0.395312105 | 0.506703132 | 0.379145167 | 0.449539497 |
| 0.403323515 | 0.497251691 | 0.199328691 | 0.29312124  |
| 0.389720578 | 0.509560548 | 0.336218433 | 0.426968154 |
| 0.420892614 | 0.411351341 | 0.262993312 | 0.01765132  |
| 0.197984874 | 0.145975749 | 0.260855811 | 0.108177861 |
| 0.22805363  | 0.177545735 | 0.463556094 | 0.450093242 |
| 0.483397246 | 0.009243529 | 0.112713511 | 0.379769572 |
| 0.386348774 | 0.440684097 | 0.030854898 | 0.008008482 |
| 0.010011051 | 0.036670502 | 0.291647152 | 0.285631186 |
| 0.484906882 | 0.160666099 | 0.006877623 | 0.031160821 |
| 0.245845818 | 0.419107593 | 0.492391327 | 0.343201485 |
| 0.404445354 | 0.101438788 | 0.226710644 | 0.349412882 |
| 0.108476541 | 0.24140034  | 0.483936768 | 0.442907524 |
| 0.063596468 | 0.294542218 | 0.307336087 | 0.463761871 |
| 0.138175629 | 0.336541388 | 0.396892929 | 0.288081659 |
| 0.022818257 | 0.118048198 | 0.100554335 | 0.398661727 |
| 0.498701812 | 0.089133674 | 0.044052329 | 0.095196234 |
| 0.111262689 | 0.449273598 | 0.16265355  | 0.510682209 |
| 0.38140235  | 0.392473063 | 0.123819034 | 0.464731973 |
| 0.057725358 | 0.4700787   | 0.387805164 | 0.041252162 |
| 0.293416622 | 0.018578852 | 0.471131432 | 0.195025374 |
| 0.236451307 | 0.315777412 | 0.261270544 | 0.034105291 |

|             |             |             |             |
|-------------|-------------|-------------|-------------|
| 0.261404905 | 0.073267314 | 0.463760088 | 0.456251314 |
| 0.061044401 | 0.214339149 | 0.314564101 | 0.361263631 |
| 0.202110143 | 0.374720613 | 0.482441123 | 0.324608222 |
| 0.076844212 | 0.204598501 | 0.331037974 | 0.307075178 |
| 0.175063954 | 0.490566344 | 0.319623378 | 0.526829921 |
| 0.327946398 | 0.440515006 | 0.468386588 | 0.306270586 |
| 0.308146157 | 0.309224171 | 0.28518722  | 0.015407473 |
| 0.317396295 | 0.427482511 | 0.292983283 | 0.196091129 |
| 0.28202981  | 0.411927982 | 0.051963403 | 0.135778408 |
| 0.379728117 | 0.213188382 | 0.142132835 | 0.398405897 |
| 0.310125518 | 0.310597196 | 0.034798006 | 0.091681213 |
| 0.530431126 | 0.409449519 | 0.110494499 | 0.353184672 |
| 0.198027188 | 0.352228266 | 0.406925108 | 0.416167646 |
| 0.365800616 | 0.414877284 | 0.343025619 | 0.295176783 |
| 0.381544337 | 0.243635682 | 0.512563133 | 0.050123085 |
| 0.125589373 | 0.365144349 | 0.102077484 | 0.12850575  |
| 0.149601478 | 0.043744867 | 0.360839465 | 0.393340586 |
| 0.392839718 | 0.353652461 | 0.244420901 | 0.097465745 |
| 0.358859191 | 0.312366833 | 0.352825527 | 0.156547984 |
| 0.082471117 | 0.481845001 | 0.014144981 | 0.076561457 |
| 0.393328114 | 0.392502507 | 0.404750638 | 0.265323204 |
| 0.368338849 | 0.203525219 | 0.301260508 | 0.202028254 |
| 0.242264373 | 0.337365129 | 0.393138377 | 0.030389399 |
| 0.01730276  | 0.483678228 | 0.285606464 | 0.037813228 |
| 0.135149524 | 0.307619615 | 0.27292884  | 0.249325298 |
| 0.043144968 | 0.493267641 | 0.256045676 | 0.414045014 |
| 0.279740804 | 0.078274598 | 0.302655603 | 0.085287846 |
| 0.064588955 | 0.413459802 | 0.40555056  | 0.513770208 |
| 0.373292197 | 0.377144478 | 0.411688347 | 0.386569684 |
| 0.124966449 | 0.359717402 | 0.027925326 | 0.395190954 |
| 0.36854002  |             |             |             |

|             |             |             |             |
|-------------|-------------|-------------|-------------|
| LYPD6B      | 0.483055485 | 0.521423074 | 0.436195733 |
| 0.437044675 | 0.439370714 | 0.437874605 | 0.189498569 |
| 0.178722274 | 0.070776436 | 0.002700706 | 0.018100563 |
| 0.481685831 | 0.206365324 | 0.274181282 | 0.381826168 |
| 0.41760316  | 0.112831856 | 0.355742697 | 0.208711787 |
| 0.41600967  | 0.079175691 | 0.393920037 | 0.067904047 |
| 0.284559526 | 0.087950034 | 0.050201942 | 0.266181718 |
| 0.45826783  | 0.058384989 | 0.391047506 | 0.414108279 |
| 0.074534496 | 0.488541664 | 0.514416478 | 0.467043441 |
| 0.514415541 | 0.481832253 | 0.007667144 | 0.323756337 |
| 0.480180635 | 0.485936989 | 0.417846951 | 0.312005443 |
| 0.027949397 | 0.492306286 | 0.224676161 | 0.407960857 |
| 0.246009133 | 0.020809398 | 0.272928177 | 0.482498195 |
| 0.509535022 | 0.501519467 | 0.21774796  | 0.138833474 |
| 0.232673499 | 0.255127418 | 0.320356999 | 0.381792409 |
| 0.20031593  | 0.174314864 | 0.519648885 | 0.074984668 |
| 0.148021394 | 0.233207774 | 0.124626729 | 0.24563818  |
| 0.375643306 | 0.45281212  | 0.009791064 | 0.482122446 |
| 0.001765911 | 0.383398874 | 0.368268442 | 0.365303734 |
| 0.026656225 | 0.013757298 | 0.147314909 | 0.337284962 |
| 0.478559418 | 0.49976279  | 0.504203002 | 0.517039018 |
| 0.16272638  | 0.260961826 | 0.430455592 | 0.144579209 |
| 0.500276392 | 0.161375225 | 0.092456108 | 0.42081163  |



|             |             |             |             |
|-------------|-------------|-------------|-------------|
| 0.51067616  | 0.526574498 | 0.175592749 | 0.233490993 |
| 0.49650819  | 0.506984035 | 0.475661719 | 0.454437071 |
| 0.395099578 | 0.036550532 | 0.510533966 | 0.524923656 |
| 0.47563602  | 0.342731895 | 0.124951741 | 0.450658349 |
| 0.038940652 | 0.407778357 | 0.33901821  | 0.145528062 |
| 0.48190248  | 0.010829966 | 0.185036396 | 0.367871262 |
| 0.179822396 | 0.496786015 | 0.527194783 | 0.159239329 |
| 0.417011582 | 0.012328419 | 0.1437      | 0.019988048 |
| 0.333715249 | 0.151366858 | 0.504548735 | 0.494682449 |
| 0.229747964 | 0.393231617 | 0.242748176 | 0.001329843 |
| 0.016329387 | 0.157119019 | 0.51400199  | 0.368318559 |
| 0.462805378 | 0.485075141 | 0.222632612 | 0.477079916 |
| 0.513900423 | 0.503459509 | 0.078681358 | 0.070799744 |
| 0.452833227 | 0.154369359 | 0.204531566 | 0.495306936 |
| 0.297956428 | 0.090450732 | 0.098402829 | 0.517468473 |
| 0.475311155 | 0.06122448  | 0.365837138 | 0.412357405 |
| 0.362989875 | 0.355469784 | 0.079185419 | 0.265172587 |
| 0.034698757 | 0.515584109 | 0.01762774  | 0.344941419 |
| 0.322186234 | 0.134596929 | 0.00536024  | 0.262680756 |
| 0.305061072 | 0.518449681 | 0.494155253 | 0.07725078  |
| 0.310774519 | 0.410065302 | 0.361438581 | 0.497962196 |
| 0.007088087 | 0.030104525 | 0.334588777 | 0.523863828 |
| 0.356689205 | 0.516006755 | 0.274152664 | 0.283481534 |
| 0.255164992 | 0.472154647 | 0.002610474 | 0.505801044 |
| 0.525866906 | 0.367206606 | 0.419626925 | 0.433683771 |
| 0.434383752 | 0.484141181 | 0.051077132 | 0.41692473  |
| 0.44210468  | 0.054012443 | 0.503690614 | 0.133224793 |
| 0.511386654 | 0.027151409 | 0.335389994 | 0.509597283 |
| 0.523747657 | 0.005685549 | 0.248100166 | 0.402316412 |
| 0.016564055 | 0.087434606 | 0.465312787 | 0.419612686 |
| 0.401521271 | 0.475357748 | 0.483212314 | 0.418669307 |
| 0.445654837 | 0.207060468 | 0.006232292 | 0.302652898 |
| 0.492415258 | 0.453656698 | 0.492234142 | 0.220622785 |
| 0.421587096 | 0.51372339  | 0.516694519 | 0.248297699 |
| 0.028378409 | 0.313880168 | 0.015666594 | 0.329397898 |
| 0.494560804 | 0.104269871 | 0.459895926 | 0.118334194 |
| 0.051159471 | 0.52543836  | 0.169593942 | 0.287598818 |
| 0.128753533 | 0.453993072 | 0.221012599 | 0.259005786 |
| 0.232886137 | 0.134534577 | 0.377564423 | 0.40142779  |
| 0.026293611 | 0.071489142 | 0.008124386 | 0.461791351 |
| 0.148493907 | 0.400602697 | 0.410836871 | 0.489803282 |
| 0.340608899 | 0.097875857 | 0.395558527 | 0.289481597 |
| 0.090428945 | 0.007633678 | 0.521782763 | 0.402345566 |
| 0.422908591 | 0.125854176 | 0.025399044 | 0.425835146 |
| 0.504633199 | 0.409988848 | 0.328908526 | 0.504650264 |
| 0.017419916 | 0.504313949 | 0.248052965 | 0.097842892 |
| 0.413992819 | 0.239087616 | 0.473202753 | 0.060462566 |
| 0.432802504 | 0.506935147 | 0.284829852 | 0.163223568 |
| 0.482604125 | 0.43363948  | 0.019317029 | 0.489413151 |
| 0.489639681 | 0.019204818 | 0.528589765 | 0.1026861   |
| 0.011435168 | 0.473114916 | 0.516143286 | 0.052814059 |
| 0.055917921 | 0.355959211 | 0.035221957 | 0.264211171 |
| 0.523870896 | 0.411057678 | 0.510568665 | 0.202037979 |
| 0.026911471 | 0.007359965 | 0.182497176 | 0.441372335 |

|             |             |             |             |
|-------------|-------------|-------------|-------------|
| 0.507423441 | 0.5288442   | 0.226147366 | 0.389748852 |
| 0.20820447  | 0.360180047 | 0.152742379 | 0.526788834 |
| 0.176974385 | 0.516119084 | 0.002315079 | 0.503111276 |
| 1           | 0.336059589 | 0.06272323  | 0.320860157 |
| 0.478672585 | 0.030134743 | 0.171230232 | 0.518420768 |
| 0.500589127 | 0.336360401 | 0.383123389 | 0.450885741 |
| 0.009644898 | 0.028524474 | 0.406668563 | 0.184726851 |
| 0.421123964 | 0.18592572  | 0.052957948 | 0.34740967  |
| 0.029878794 | 0.507225767 | 0.478232672 | 0.044837868 |
| 0.418635004 | 0.335223859 | 0.369519332 | 0.022639184 |
| 0.518974627 | 0.519652643 | 0.516230982 | 0.133522573 |
| 0.507941297 | 0.529722895 | 0.486376299 | 0.055342992 |
| 0.009394897 | 0.520590463 | 0.453920498 | 0.016110701 |
| 0.490303508 | 0.289624351 | 0.008670483 | 0.512073233 |
| 0.152882039 | 0.473224386 | 0.002832603 | 0.088000982 |
| 0.0263659   | 0.483376804 | 0.507891734 | 0.4066019   |
| 0.318955632 | 0.357212075 | 0.003472808 | 0.524894577 |
| 0.519175921 | 0.007857853 | 0.119499576 | 0.5265821   |
| 0.513212743 | 0.515399626 | 0.351320769 | 0.520485165 |
| 0.497106424 | 0.519733995 | 0.236110458 | 0.24243871  |
| 0.503322145 | 0.522824784 | 0.465571429 | 0.499231818 |
| 0.493815099 | 0.43667363  | 0.25702764  | 0.008831067 |
| 0.131056017 | 0.219448148 | 0.395336639 | 0.074806469 |
| 0.386533991 | 0.119946972 | 0.515113734 | 0.491174787 |
| 0.525592984 | 0.001202644 | 0.134637388 | 0.52009138  |
| 0.480536849 | 0.487589356 | 0.012192984 | 0.004592609 |
| 0.006637548 | 0.014448482 | 0.370426313 | 0.213632211 |
| 0.522627493 | 0.311652311 | 0.000830197 | 0.032100936 |
| 0.267284758 | 0.427695318 | 0.524400507 | 0.368482233 |
| 0.496788479 | 0.056750272 | 0.335249839 | 0.395486111 |
| 0.053125497 | 0.423114745 | 0.523000397 | 0.504775263 |
| 0.025625007 | 0.220197991 | 0.401144785 | 0.499077332 |
| 0.081411352 | 0.293091715 | 0.487789462 | 0.330087175 |
| 0.007584687 | 0.060011359 | 0.047961616 | 0.454119476 |
| 0.511696954 | 0.067184401 | 0.024154995 | 0.175536325 |
| 0.103522959 | 0.502374396 | 0.144046148 | 0.515062216 |
| 0.486160663 | 0.447326009 | 0.055650408 | 0.510035472 |
| 0.028460648 | 0.515579082 | 0.352839532 | 0.064176779 |
| 0.262687995 | 0.005871257 | 0.51769119  | 0.181732744 |
| 0.355900668 | 0.437689709 | 0.203491523 | 0.009179151 |
| 0.195975135 | 0.035659753 | 0.498266755 | 0.496476733 |
| 0.020913794 | 0.211020533 | 0.271368502 | 0.41150923  |
| 0.306312649 | 0.462675939 | 0.510019306 | 0.502839861 |
| 0.066043769 | 0.141634348 | 0.427030316 | 0.468352452 |
| 0.237449233 | 0.502618116 | 0.318353559 | 0.524259488 |
| 0.473520838 | 0.502338225 | 0.525725722 | 0.354914186 |
| 0.230510655 | 0.45420814  | 0.425377973 | 0.013966579 |
| 0.341182974 | 0.493749373 | 0.368794435 | 0.145661948 |
| 0.242566184 | 0.447189094 | 0.030824474 | 0.202279819 |
| 0.389507302 | 0.3587345   | 0.120411996 | 0.44541262  |
| 0.429031546 | 0.475589423 | 0.026711497 | 0.045274156 |
| 0.522933572 | 0.494399192 | 0.132316747 | 0.471609581 |
| 0.13630186  | 0.341871458 | 0.498757188 | 0.491781593 |
| 0.413306304 | 0.520802363 | 0.473731997 | 0.453125502 |

|             |             |             |             |
|-------------|-------------|-------------|-------------|
| 0.486153947 | 0.23459984  | 0.518722372 | 0.084516367 |
| 0.073009655 | 0.488542978 | 0.082314782 | 0.067128452 |
| 0.114856013 | 0.015916768 | 0.358400112 | 0.431660029 |
| 0.451886363 | 0.382133054 | 0.363567906 | 0.060592802 |
| 0.304971544 | 0.415546221 | 0.339800038 | 0.192075713 |
| 0.061719578 | 0.517053009 | 0.005045441 | 0.037069253 |
| 0.447591594 | 0.511050121 | 0.43025511  | 0.21109503  |
| 0.325088104 | 0.11420185  | 0.277160609 | 0.338402064 |
| 0.399576625 | 0.407452671 | 0.514504104 | 0.023566383 |
| 0.011116364 | 0.500607199 | 0.423336167 | 0.011761418 |
| 0.069334484 | 0.45314119  | 0.27764     | 0.235308022 |
| 0.012793023 | 0.529464346 | 0.404994489 | 0.454503585 |
| 0.349192429 | 0.043736181 | 0.44360862  | 0.074043348 |
| 0.039937815 | 0.496489977 | 0.43540438  | 0.524946937 |
| 0.352726414 | 0.428141913 | 0.475077041 | 0.515440026 |
| 0.102728068 | 0.451713909 | 0.016706144 | 0.480392634 |
| 0.497033179 |             |             |             |
| LYSMD2      | 0.240565736 | 0.370010721 | 0.094889611 |
| 0.278886031 | 0.137590819 | 0.225009965 | 0.132988256 |
| 0.197809862 | 0.034781036 | 0.010481747 | 0.007251398 |
| 0.158886252 | 0.067720707 | 0.161919055 | 0.106174993 |
| 0.236263981 | 0.038569215 | 0.140892755 | 0.117338333 |
| 0.265590853 | 0.130600694 | 0.192479152 | 0.06821844  |
| 0.055801564 | 0.021948709 | 0.029247382 | 0.048762938 |
| 0.334772617 | 0.032775968 | 0.194086017 | 0.331390905 |
| 0.03445909  | 0.307965608 | 0.360049876 | 0.173444091 |
| 0.337115291 | 0.221182238 | 0.02540745  | 0.136702788 |
| 0.332802702 | 0.208130052 | 0.280727724 | 0.159891222 |
| 0.036105666 | 0.391995677 | 0.121907139 | 0.124519757 |
| 0.138968568 | 0.013380241 | 0.202106084 | 0.387549153 |
| 0.331941967 | 0.157304346 | 0.185469947 | 0.106822036 |
| 0.054404226 | 0.235239302 | 0.039139066 | 0.334193591 |
| 0.120582319 | 0.212619401 | 0.325645264 | 0.057844818 |
| 0.081424227 | 0.198515998 | 0.042000974 | 0.181896139 |
| 0.062121252 | 0.328428928 | 0.036239286 | 0.135675832 |
| 0.010488258 | 0.254043847 | 0.12440177  | 0.044856353 |
| 0.020294533 | 0.01563739  | 0.050255654 | 0.202766115 |
| 0.333839647 | 0.320206894 | 0.281403832 | 0.276245008 |
| 0.057067721 | 0.090428019 | 0.08495022  | 0.073830689 |
| 0.31421401  | 0.10628366  | 0.06639127  | 0.218237215 |
| 0.286581354 | 0.34291832  | 0.056786525 | 0.064729869 |
| 0.283275293 | 0.378909701 | 0.116718086 | 0.110322079 |
| 0.063303985 | 0.011101629 | 0.330172422 | 0.317490915 |
| 0.345168496 | 0.050076091 | 0.04262025  | 0.362989962 |
| 0.03382186  | 0.134757399 | 0.190876638 | 0.066752044 |
| 0.342586282 | 0.019943181 | 0.049537238 | 0.193704692 |
| 0.093386851 | 0.278694792 | 0.314421825 | 0.108048227 |
| 0.114367834 | 0.013887242 | 0.01840505  | 0.018111287 |
| 0.136724912 | 0.018194509 | 0.352205811 | 0.325547504 |
| 0.222236632 | 0.099060872 | 0.156208369 | 0.001800126 |
| 0.010435999 | 0.056668535 | 0.270268192 | 0.148493667 |
| 0.262832588 | 0.229313842 | 0.065122109 | 0.311060864 |
| 0.158544222 | 0.276003657 | 0.048317659 | 0.08375461  |
| 0.162707215 | 0.059705135 | 0.102956578 | 0.174811401 |

|             |             |             |             |
|-------------|-------------|-------------|-------------|
| 0.072900305 | 0.122151821 | 0.076920786 | 0.331437193 |
| 0.405546357 | 0.058844298 | 0.171112434 | 0.216317458 |
| 0.116684313 | 0.086968275 | 0.079214441 | 0.133014937 |
| 0.063634834 | 0.29917255  | 0.007977601 | 0.185489345 |
| 0.046762022 | 0.036573657 | 0.01853044  | 0.213176254 |
| 0.132505312 | 0.276297087 | 0.33092114  | 0.064171514 |
| 0.140346512 | 0.159765127 | 0.208569877 | 0.231367189 |
| 0.006901083 | 0.036735242 | 0.192574534 | 0.336809248 |
| 0.312557566 | 0.30234469  | 0.12669953  | 0.078897546 |
| 0.08241072  | 0.272228345 | 0.000973355 | 0.366869786 |
| 0.330092384 | 0.181177234 | 0.152760702 | 0.158157371 |
| 0.069291084 | 0.303065415 | 0.026828646 | 0.228544185 |
| 0.285075403 | 0.053262541 | 0.312516521 | 0.050055807 |
| 0.330837715 | 0.020096751 | 0.205054769 | 0.200382671 |
| 0.198840921 | 0.011141556 | 0.191484153 | 0.282163106 |
| 0.007013829 | 0.138590894 | 0.266105854 | 0.224387902 |
| 0.146332289 | 0.236302371 | 0.306932255 | 0.060570658 |
| 0.131255838 | 0.163240826 | 0.009623722 | 0.074532737 |
| 0.239312184 | 0.088656267 | 0.372208701 | 0.14462448  |
| 0.226844873 | 0.351119989 | 0.235272499 | 0.066328868 |
| 0.036032873 | 0.190303176 | 0.03430126  | 0.086301344 |
| 0.248453034 | 0.081647262 | 0.09044686  | 0.061435536 |
| 0.021875277 | 0.339023957 | 0.026183644 | 0.03640381  |
| 0.014880959 | 0.186089119 | 0.140660384 | 0.105214183 |
| 0.054877757 | 0.061514074 | 0.07280586  | 0.097048311 |
| 0.068749968 | 0.044354097 | 0.004063739 | 0.090434773 |
| 0.052665532 | 0.104382062 | 0.116448964 | 0.281505047 |
| 0.182957713 | 0.060355426 | 0.102322236 | 0.05320202  |
| 0.028297979 | 0.009101887 | 0.354831368 | 0.216597526 |
| 0.334866477 | 0.090855896 | 0.021853394 | 0.097610157 |
| 0.326797188 | 0.181666387 | 0.182340391 | 0.356440433 |
| 0.022836977 | 0.294964008 | 0.08566053  | 0.038652914 |
| 0.082701429 | 0.106863169 | 0.31813784  | 0.037034326 |
| 0.225511706 | 0.3822626   | 0.103081763 | 0.049307241 |
| 0.363629309 | 0.240113096 | 0.037171672 | 0.277083712 |
| 0.292319982 | 0.019448704 | 0.33528306  | 0.032935917 |
| 0.010398127 | 0.181148933 | 0.195923311 | 0.028988499 |
| 0.024713475 | 0.115135753 | 0.095194171 | 0.098084318 |
| 0.344054114 | 0.210318678 | 0.258145279 | 0.039938446 |
| 0.031589909 | 0.008398857 | 0.045905839 | 0.108720568 |
| 0.37278712  | 0.300651069 | 0.099711489 | 0.079174995 |
| 0.119769127 | 0.068808695 | 0.190938361 | 0.316936189 |
| 0.056677246 | 0.359562613 | 0.006664489 | 0.196594687 |
| 0.336059589 | 1           | 0.021060878 | 0.184845073 |
| 0.350429822 | 0.035915295 | 0.137493838 | 0.350376447 |
| 0.310363899 | 0.087725921 | 0.081601509 | 0.212105615 |
| 0.034454408 | 0.064318942 | 0.114298608 | 0.025099642 |
| 0.110619109 | 0.075563835 | 0.004843399 | 0.191332641 |
| 0.027681542 | 0.364436954 | 0.280227178 | 0.020111435 |
| 0.18829159  | 0.174550812 | 0.141431343 | 0.02799147  |
| 0.223415758 | 0.304441966 | 0.368496407 | 0.140446544 |
| 0.251441758 | 0.287354998 | 0.101429834 | 0.02934931  |
| 0.006100123 | 0.325606283 | 0.272828922 | 0.015482486 |
| 0.316856227 | 0.206349918 | 0.011460108 | 0.382477336 |

|             |             |             |             |
|-------------|-------------|-------------|-------------|
| 0.10835198  | 0.358084243 | 0.006534381 | 0.016469556 |
| 0.010292372 | 0.249677474 | 0.342863675 | 0.307892541 |
| 0.144436065 | 0.199039471 | 0.001864887 | 0.318677157 |
| 0.35663441  | 0.004131387 | 0.028376746 | 0.240504754 |
| 0.172312197 | 0.392322628 | 0.051193182 | 0.230478898 |
| 0.1334731   | 0.324147656 | 0.130706555 | 0.085698391 |
| 0.306979438 | 0.278644893 | 0.299559995 | 0.36575952  |
| 0.318148992 | 0.181401467 | 0.140726914 | 0.018615578 |
| 0.021384588 | 0.215252177 | 0.078422237 | 0.022580672 |
| 0.277896105 | 0.035462748 | 0.330369552 | 0.290075129 |
| 0.276930572 | 0.00365052  | 0.161597142 | 0.271636736 |
| 0.379375472 | 0.35118083  | 0.011963492 | 0.002250138 |
| 0.002604015 | 0.00309036  | 0.233951473 | 0.064190183 |
| 0.30765957  | 0.122622447 | 0.005741427 | 0.102743895 |
| 0.114263508 | 0.113925309 | 0.347615649 | 0.229940713 |
| 0.222523088 | 0.042365422 | 0.103080015 | 0.255947331 |
| 0.015348848 | 0.266591513 | 0.289904929 | 0.385885694 |
| 0.01840035  | 0.065656094 | 0.151389649 | 0.342301448 |
| 0.005821733 | 0.108477764 | 0.184127075 | 0.112955173 |
| 0.007661711 | 0.021971191 | 0.019188301 | 0.249417606 |
| 0.320495241 | 0.02972976  | 0.013691322 | 0.144800099 |
| 0.07256055  | 0.299498405 | 0.07097628  | 0.325468966 |
| 0.325350632 | 0.288894327 | 0.017964483 | 0.352661557 |
| 0.018341239 | 0.348115409 | 0.061828835 | 0.039211639 |
| 0.098111959 | 0.010967548 | 0.295031194 | 0.024715029 |
| 0.208475718 | 0.287627423 | 0.034775812 | 0.005104348 |
| 0.023076367 | 0.021542165 | 0.296508322 | 0.241093493 |
| 0.00909689  | 0.141496635 | 0.088856579 | 0.211066652 |
| 0.220346807 | 0.252907596 | 0.370900263 | 0.125605531 |
| 0.082105047 | 0.024928615 | 0.300524841 | 0.264529662 |
| 0.227908987 | 0.290683725 | 0.071457234 | 0.330694195 |
| 0.279973228 | 0.33334427  | 0.29867596  | 0.158233603 |
| 0.046011074 | 0.217999061 | 0.275776591 | 0.029297818 |
| 0.157462788 | 0.285018718 | 0.174171241 | 0.03235193  |
| 0.069780386 | 0.083773541 | 0.051223479 | 0.10474708  |
| 0.049747065 | 0.265526457 | 0.085781273 | 0.285245904 |
| 0.260784388 | 0.280732799 | 0.082817316 | 0.018342205 |
| 0.371711053 | 0.346452626 | 0.115961543 | 0.23780247  |
| 0.063505519 | 0.106927294 | 0.233416279 | 0.214781776 |
| 0.096245029 | 0.286640268 | 0.335816713 | 0.285798475 |
| 0.39126996  | 0.123483551 | 0.361815464 | 0.182971913 |
| 0.019299698 | 0.183919342 | 0.046541065 | 0.029478033 |
| 0.071762158 | 0.009897044 | 0.042053847 | 0.226047457 |
| 0.067206644 | 0.182575133 | 0.198910141 | 0.033775444 |
| 0.089094068 | 0.126759393 | 0.135879828 | 0.142267372 |
| 0.042007794 | 0.353599415 | 0.004891071 | 0.026051687 |
| 0.07872851  | 0.242954351 | 0.076442196 | 0.070269296 |
| 0.046475673 | 0.034430663 | 0.106444427 | 0.21263444  |
| 0.122910923 | 0.09586106  | 0.249518371 | 0.043262844 |
| 0.040756751 | 0.311045787 | 0.15622702  | 0.007138228 |
| 0.029143215 | 0.220682527 | 0.132376403 | 0.077646881 |
| 0.005400048 | 0.277694933 | 0.142612478 | 0.125838598 |
| 0.198963961 | 0.043024843 | 0.364083265 | 0.057106331 |
| 0.049669503 | 0.373023973 | 0.101751534 | 0.325978217 |

|             |             |             |             |
|-------------|-------------|-------------|-------------|
| 0.083863279 | 0.244636726 | 0.375948392 | 0.287638842 |
| 0.052919013 | 0.102748201 | 0.032331622 | 0.323457369 |
| 0.083093343 |             |             |             |
| LYZ2        | 0.063690267 | 0.092611884 | 0.064131779 |
| 0.153115473 | 0.10820617  | 0.046263305 | 0.114354622 |
| 0.024052835 | 0.136579032 | 0.056297311 | 0.199400019 |
| 0.085793584 | 0.109489024 | 0.051453998 | 0.027983461 |
| 0.182054774 | 0.208493366 | 0.031232429 | 0.178505413 |
| 0.119284263 | 0.050731208 | 0.220316452 | 0.128501333 |
| 0.077341289 | 0.24301323  | 0.225000456 | 0.136285198 |
| 0.135811324 | 0.236799645 | 0.032063696 | 0.078877396 |
| 0.147668698 | 0.078612503 | 0.068704234 | 0.154523698 |
| 0.064916872 | 0.047519839 | 0.019932519 | 0.035672084 |
| 0.06563035  | 0.130890264 | 0.119790584 | 0.188872451 |
| 0.147874119 | 0.052736188 | 0.171918564 | 0.126627477 |
| 0.020169434 | 0.245617276 | 0.01475842  | 0.049098016 |
| 0.059578862 | 0.077177421 | 0.035556663 | 0.100834197 |
| 0.074636791 | 0.014212252 | 0.068568694 | 0.034851197 |
| 0.157087203 | 0.013881134 | 0.067219205 | 0.08966747  |
| 0.030199268 | 0.040662932 | 0.145498162 | 0.065182331 |
| 0.052203106 | 0.050493737 | 0.057309895 | 0.052750662 |
| 0.01572348  | 0.128439833 | 0.139527198 | 0.054049326 |
| 0.242946283 | 0.17790863  | 0.145312087 | 0.13492737  |
| 0.12681491  | 0.06004513  | 0.15304982  | 0.130207146 |
| 0.160772235 | 0.140048973 | 0.082726494 | 0.165586648 |
| 0.076606624 | 0.125120141 | 0.07408868  | 0.206586946 |
| 0.145491279 | 0.08297493  | 0.16109797  | 0.215237739 |
| 0.094690278 | 0.078146887 | 0.058183831 | 0.086534079 |
| 0.054193455 | 0.156086907 | 0.062639457 | 0.116375959 |
| 0.050203202 | 0.092132711 | 0.279455327 | 0.08405311  |
| 0.174319354 | 0.019414589 | 0.201036829 | 0.067076697 |
| 0.132175878 | 0.105792423 | 0.23657883  | 0.100455673 |
| 0.071903111 | 0.083007308 | 0.085206637 | 0.167557203 |
| 0.087628205 | 0.132422769 | 0.118331732 | 0.143506861 |
| 0.046884525 | 0.075464845 | 0.047682331 | 0.129793217 |
| 0.029510018 | 0.058026185 | 0.081225209 | 0.089538199 |
| 0.221191437 | 0.07880258  | 0.072977633 | 0.050243745 |
| 0.09713043  | 0.04560744  | 0.159120619 | 0.04385123  |
| 0.08451478  | 0.149773362 | 0.003518092 | 0.102739297 |
| 0.084831359 | 0.083727841 | 0.252238668 | 0.076780291 |
| 0.207351767 | 0.069109071 | 0.153739987 | 0.124575937 |
| 0.054116032 | 0.18486608  | 0.018452054 | 0.189958339 |
| 0.048814783 | 0.183594702 | 0.130638837 | 0.086155796 |
| 0.104055146 | 0.06427996  | 0.208196505 | 0.033447385 |
| 0.049893743 | 0.148913855 | 0.03870346  | 0.040478302 |
| 0.04783582  | 0.089565709 | 0.044095797 | 0.158588548 |
| 0.104808387 | 0.187904144 | 0.024587572 | 0.095133061 |
| 0.132625682 | 0.122277194 | 0.011083087 | 0.111418893 |
| 0.024921135 | 0.110891278 | 0.078747445 | 0.088250993 |
| 0.240376208 | 0.139661642 | 0.005474009 | 0.059839642 |
| 0.083428924 | 0.011783123 | 0.14809624  | 0.103858579 |
| 0.067737983 | 0.138857188 | 0.002470098 | 0.169412538 |
| 0.031128769 | 0.138947028 | 0.148203867 | 0.291744777 |
| 0.061766198 | 0.234217888 | 0.03266046  | 0.104739484 |

|             |             |             |             |
|-------------|-------------|-------------|-------------|
| 0.07452045  | 0.036501803 | 0.028749616 | 0.110943843 |
| 0.178920639 | 0.034773879 | 0.083763627 | 0.139788021 |
| 0.133295413 | 0.127413059 | 0.163351589 | 0.066340439 |
| 0.110022669 | 0.070907849 | 0.102485023 | 0.16979229  |
| 0.089532929 | 0.023674859 | 0.060511298 | 0.069555598 |
| 0.020726982 | 0.082059292 | 0.061693228 | 0.022599643 |
| 0.153821932 | 0.058478718 | 0.043107036 | 0.161736119 |
| 0.05215566  | 0.116018847 | 0.056235576 | 0.077629683 |
| 0.230046948 | 0.112708656 | 0.108860246 | 0.063856087 |
| 0.083479023 | 0.081316411 | 0.112344161 | 0.066533014 |
| 0.113494998 | 0.162936372 | 0.069446836 | 0.063833142 |
| 0.065216251 | 0.205817471 | 0.071226371 | 0.029098599 |
| 0.110508164 | 0.045356895 | 0.035518585 | 0.049326506 |
| 0.038081339 | 0.137748937 | 0.137010044 | 0.06626645  |
| 0.213643307 | 0.184637201 | 0.091925107 | 0.151161109 |
| 0.030756901 | 0.115665693 | 0.17699945  | 0.021001881 |
| 0.123422515 | 0.026023123 | 0.008130139 | 0.092417933 |
| 0.069828793 | 0.130421034 | 0.113769759 | 0.290503474 |
| 0.0810651   | 0.200374392 | 0.146929111 | 0.029649331 |
| 0.044182595 | 0.072344748 | 0.14070908  | 0.215167726 |
| 0.049706913 | 0.107766465 | 0.115499007 | 0.050874259 |
| 0.048092773 | 0.201652725 | 0.097532535 | 0.19305918  |
| 0.184471047 | 0.129000423 | 0.100647221 | 0.273540485 |
| 0.220835751 | 0.107871013 | 0.039263316 | 0.279246622 |
| 0.109171074 | 0.220790356 | 0.085807651 | 0.094696613 |
| 0.172442122 | 0.127517351 | 0.139244935 | 0.06375345  |
| 0.059759988 | 0.099596599 | 0.187647713 | 0.145351074 |
| 0.212508509 | 0.073372123 | 0.009600807 | 0.114867329 |
| 0.040063504 | 0.072647033 | 0.108677448 | 0.113051612 |
| 0.06272323  | 0.021060878 | 1           | 0.072396901 |
| 0.054496267 | 0.150477856 | 0.060959779 | 0.073337712 |
| 0.086110593 | 0.088872424 | 0.067007956 | 0.097992505 |
| 0.064131155 | 0.077432083 | 0.126211091 | 0.082182172 |
| 0.049368259 | 0.134496594 | 0.054966329 | 0.022316746 |
| 0.1890751   | 0.072282381 | 0.136817198 | 0.215165121 |
| 0.043577344 | 0.017906573 | 0.188573729 | 0.166744485 |
| 0.105193992 | 0.077186681 | 0.07131973  | 0.066242557 |
| 0.081624232 | 0.097146532 | 0.078464269 | 0.178554607 |
| 0.20084556  | 0.073543335 | 0.056619176 | 0.105581661 |
| 0.141257312 | 0.013873226 | 0.138780977 | 0.084335568 |
| 0.154422788 | 0.039526945 | 0.010988421 | 0.013679026 |
| 0.14251341  | 0.147974011 | 0.062725723 | 0.078165553 |
| 0.01247551  | 0.108361716 | 0.014123202 | 0.101295484 |
| 0.078988576 | 0.208927162 | 0.158985288 | 0.08095472  |
| 0.093868319 | 0.082310965 | 0.099809309 | 0.116184159 |
| 0.089709935 | 0.068808117 | 0.070360562 | 0.264824343 |
| 0.100746616 | 0.077586975 | 0.08484716  | 0.068798585 |
| 0.13195187  | 0.155010294 | 0.207464323 | 0.120149302 |
| 0.101520762 | 0.027060177 | 0.025924381 | 0.143336109 |
| 0.02894106  | 0.221764359 | 0.082692617 | 0.142682197 |
| 0.114265347 | 0.118814918 | 0.046837476 | 0.071356155 |
| 0.093588885 | 0.121949366 | 0.057010964 | 0.018948357 |
| 0.010207696 | 0.241145635 | 0.075735222 | 0.178317406 |
| 0.100261279 | 0.013897072 | 0.104465549 | 0.044627497 |

|             |             |             |             |
|-------------|-------------|-------------|-------------|
| 0.071112025 | 0.15463466  | 0.081473482 | 0.190881683 |
| 0.099186567 | 0.168256693 | 0.039834391 | 0.152864647 |
| 0.243958588 | 0.023202417 | 0.123385908 | 0.069617852 |
| 0.128460242 | 0.153983953 | 0.034488632 | 0.132467613 |
| 0.051123759 | 0.208775428 | 0.084993301 | 0.0753141   |
| 0.050547965 | 0.224974922 | 0.225341332 | 0.147047283 |
| 0.061357906 | 0.203886186 | 0.236094473 | 0.006627988 |
| 0.133347    | 0.112471943 | 0.160746378 | 0.13253631  |
| 0.105911941 | 0.177681251 | 0.16963188  | 0.070583777 |
| 0.18015142  | 0.064316322 | 0.150133307 | 0.012932882 |
| 0.06510009  | 0.110882589 | 0.068939122 | 0.089892178 |
| 0.02652384  | 0.062430043 | 0.079867837 | 0.161186598 |
| 0.054204496 | 0.220125868 | 0.152861551 | 0.144799224 |
| 0.136131484 | 0.062740133 | 0.162975385 | 0.106482398 |
| 0.04566528  | 0.15792735  | 0.064334458 | 0.035345902 |
| 0.096478817 | 0.042164363 | 0.103863542 | 0.04551686  |
| 0.028138877 | 0.149439036 | 0.09570678  | 0.102237424 |
| 0.059929388 | 0.080274721 | 0.087094684 | 0.119399787 |
| 0.102962231 | 0.046351218 | 0.081638057 | 0.079363993 |
| 0.130055154 | 0.148158634 | 0.046411055 | 0.211237985 |
| 0.226839317 | 0.073308822 | 0.064973368 | 0.007966626 |
| 0.064818716 | 0.039407276 | 0.13535473  | 0.166255061 |
| 0.053028819 | 0.048220789 | 0.045295838 | 0.23498182  |
| 0.091859395 | 0.062775072 | 0.046809255 | 0.099974922 |
| 0.175319925 | 0.179415161 | 0.110219706 | 0.12374434  |
| 0.02951532  | 0.094109862 | 0.087646347 | 0.072855852 |
| 0.060715402 | 0.14402507  | 0.075319004 | 0.010607494 |
| 0.141405299 | 0.049742335 | 0.179669645 | 0.23692671  |
| 0.209812841 | 0.195970572 | 0.040622765 | 0.15546278  |
| 0.032861841 | 0.189558683 | 0.013012254 | 0.155766895 |
| 0.162961489 | 0.02526982  | 0.173409141 | 0.075131089 |
| 0.184881707 | 0.071185213 | 0.098868384 | 0.187471409 |
| 0.040886787 | 0.098717502 | 0.115565658 | 0.149830504 |
| 0.072000048 | 0.113891408 | 0.20435916  | 0.025715521 |
| 0.033524093 | 0.02454468  | 0.093393575 | 0.056480254 |
| 0.079378328 | 0.144901643 | 0.030134003 | 0.108052263 |
| 0.073335771 | 0.037520911 | 0.040081868 | 0.103914808 |
| 0.175035134 | 0.086982923 | 0.029385319 | 0.097707515 |
| 0.082175983 | 0.144772556 | 0.033362387 | 0.038044714 |
| 0.081352089 | 0.055395681 | 0.087463133 | 0.076565136 |
| 0.074657284 | 0.200137947 | 0.04263533  | 0.075630455 |
| 0.046979916 | 0.038166386 | 0.111469588 | 0.10491197  |
| 0.035075031 |             |             |             |
| MAN2A1      | 0.234792281 | 0.386955948 | 0.117768283 |
| 0.369929743 | 0.180358823 | 0.247352399 | 0.256984749 |
| 0.205080378 | 0.128632571 | 0.042695145 | 0.044389066 |
| 0.171604161 | 0.126384078 | 0.208902374 | 0.170247828 |
| 0.322575038 | 0.08498118  | 0.149630157 | 0.215277715 |
| 0.319249089 | 0.222870354 | 0.282869594 | 0.174984089 |
| 0.095871475 | 0.067554596 | 0.109918718 | 0.113202001 |
| 0.387093657 | 0.11457593  | 0.199316197 | 0.343709887 |
| 0.064668362 | 0.30265313  | 0.34789371  | 0.227019742 |
| 0.318056586 | 0.209473664 | 0.014620018 | 0.238459548 |
| 0.313452191 | 0.275477069 | 0.343311545 | 0.250390014 |



|             |             |             |             |
|-------------|-------------|-------------|-------------|
| 0.12529649  | 0.344153745 | 0.241203194 | 0.164028105 |
| 0.16948519  | 0.056512383 | 0.204172604 | 0.342101397 |
| 0.31862626  | 0.206414679 | 0.249839009 | 0.249112175 |
| 0.115102719 | 0.200619031 | 0.065718314 | 0.277190067 |
| 0.238796844 | 0.208383096 | 0.323312391 | 0.191136272 |
| 0.151084442 | 0.230340721 | 0.073634892 | 0.242270755 |
| 0.099268768 | 0.306623994 | 0.066593765 | 0.136597608 |
| 0.018707858 | 0.314470696 | 0.159674326 | 0.085994713 |
| 0.064655979 | 0.053381883 | 0.088804891 | 0.300645951 |
| 0.3771445   | 0.293858862 | 0.341477074 | 0.327733262 |
| 0.100186818 | 0.143783437 | 0.108419583 | 0.170133217 |
| 0.321687726 | 0.236967771 | 0.097242029 | 0.302509719 |
| 0.34377378  | 0.349039979 | 0.125454435 | 0.125045192 |
| 0.343266165 | 0.375023813 | 0.155410111 | 0.172610561 |
| 0.124337502 | 0.029563867 | 0.331404979 | 0.352320266 |
| 0.305606009 | 0.077504336 | 0.10595945  | 0.362600525 |
| 0.091217393 | 0.138094804 | 0.292750022 | 0.066829826 |
| 0.38935825  | 0.088995079 | 0.102605398 | 0.259323806 |
| 0.135495573 | 0.292938097 | 0.326414281 | 0.226596966 |
| 0.13418305  | 0.035325954 | 0.050171364 | 0.045156462 |
| 0.154931759 | 0.030329678 | 0.314348401 | 0.379356211 |
| 0.208539312 | 0.160394427 | 0.252939867 | 0.008376921 |
| 0.034063274 | 0.082452996 | 0.261009992 | 0.156939396 |
| 0.296591291 | 0.212198231 | 0.174995287 | 0.275388271 |
| 0.18827919  | 0.335719778 | 0.052579583 | 0.189489103 |
| 0.196839234 | 0.089377374 | 0.188984335 | 0.198377324 |
| 0.144739881 | 0.202594781 | 0.165555963 | 0.378996987 |
| 0.365876448 | 0.151322719 | 0.152877899 | 0.288228861 |
| 0.209400607 | 0.129191406 | 0.158879322 | 0.190880678 |
| 0.161633284 | 0.294763599 | 0.025039975 | 0.184889801 |
| 0.102116298 | 0.061146737 | 0.028011365 | 0.232860992 |
| 0.186169363 | 0.316823465 | 0.287243129 | 0.134020535 |
| 0.20187798  | 0.236647998 | 0.181679096 | 0.276714339 |
| 0.053212703 | 0.071523836 | 0.145594914 | 0.365105617 |
| 0.248975294 | 0.326396968 | 0.189966588 | 0.137988057 |
| 0.148244685 | 0.337385024 | 0.001355811 | 0.341418768 |
| 0.340080657 | 0.136701874 | 0.210240645 | 0.180235136 |
| 0.119208868 | 0.373861398 | 0.01314155  | 0.28646935  |
| 0.217529333 | 0.1224769   | 0.371612485 | 0.125185332 |
| 0.307528452 | 0.079714106 | 0.228393733 | 0.241682585 |
| 0.208278449 | 0.017686349 | 0.231566062 | 0.351100433 |
| 0.022719699 | 0.25024862  | 0.286896249 | 0.308073866 |
| 0.241670715 | 0.28592081  | 0.373843098 | 0.109247388 |
| 0.176310489 | 0.216530191 | 0.026822878 | 0.119029456 |
| 0.259774686 | 0.121410035 | 0.359310398 | 0.238462487 |
| 0.165754591 | 0.366441867 | 0.235876954 | 0.143593703 |
| 0.126489226 | 0.24631355  | 0.058728352 | 0.17364822  |
| 0.246558848 | 0.195157999 | 0.132837138 | 0.073366757 |
| 0.059944738 | 0.37746484  | 0.050453789 | 0.057131412 |
| 0.028934533 | 0.216471365 | 0.221657828 | 0.1767321   |
| 0.102143182 | 0.160844592 | 0.135154457 | 0.179677133 |
| 0.164794124 | 0.115379473 | 0.008805566 | 0.098882628 |
| 0.092807917 | 0.129605544 | 0.132089088 | 0.257260584 |
| 0.183390265 | 0.10497495  | 0.161172726 | 0.096376271 |

|             |             |             |             |
|-------------|-------------|-------------|-------------|
| 0.076176537 | 0.034262122 | 0.372537889 | 0.278541452 |
| 0.266276251 | 0.209484321 | 0.056865425 | 0.105450472 |
| 0.379611518 | 0.183514131 | 0.14565384  | 0.38500491  |
| 0.045349467 | 0.343951238 | 0.172319864 | 0.107166294 |
| 0.117240158 | 0.198707961 | 0.39129597  | 0.076525906 |
| 0.210145004 | 0.373606092 | 0.155599206 | 0.139740563 |
| 0.315452965 | 0.293680814 | 0.106548357 | 0.257969641 |
| 0.250982329 | 0.063100794 | 0.34978367  | 0.066502907 |
| 0.03518976  | 0.220347899 | 0.247774906 | 0.086948442 |
| 0.072830938 | 0.211660691 | 0.185217334 | 0.175860644 |
| 0.380805293 | 0.302417319 | 0.306378396 | 0.071140483 |
| 0.112695051 | 0.022569347 | 0.081643013 | 0.117845455 |
| 0.339673853 | 0.320164086 | 0.164469492 | 0.131006613 |
| 0.211268158 | 0.142788336 | 0.177032977 | 0.353999006 |
| 0.06210876  | 0.343118433 | 0.022920799 | 0.242142945 |
| 0.320860157 | 0.184845073 | 0.072396901 | 1           |
| 0.31803793  | 0.122639276 | 0.178249436 | 0.344666146 |
| 0.350531039 | 0.176346898 | 0.158846095 | 0.224057689 |
| 0.102810307 | 0.164200665 | 0.172147875 | 0.048004209 |
| 0.189744236 | 0.178919283 | 0.008249073 | 0.208494826 |
| 0.099915603 | 0.366787774 | 0.316337767 | 0.095958527 |
| 0.227793982 | 0.188729517 | 0.19768205  | 0.092415801 |
| 0.262761951 | 0.303595996 | 0.355091278 | 0.200286933 |
| 0.251908081 | 0.32057799  | 0.127830525 | 0.070976274 |
| 0.023713075 | 0.320803998 | 0.272396783 | 0.051205841 |
| 0.368083363 | 0.169166493 | 0.045159997 | 0.388777937 |
| 0.212862894 | 0.293384725 | 0.01924253  | 0.01717398  |
| 0.025647983 | 0.29835807  | 0.339347969 | 0.328395783 |
| 0.17159969  | 0.237379989 | 0.002586829 | 0.336328788 |
| 0.357677559 | 0.018472383 | 0.063536188 | 0.257765821 |
| 0.20094007  | 0.386086264 | 0.092576732 | 0.275690434 |
| 0.156430034 | 0.321729755 | 0.220390762 | 0.166899394 |
| 0.346634851 | 0.287940552 | 0.318187171 | 0.35741996  |
| 0.362844261 | 0.232814316 | 0.2507113   | 0.083268083 |
| 0.076761052 | 0.241792332 | 0.134811416 | 0.108094451 |
| 0.235311113 | 0.107795762 | 0.326911846 | 0.346928657 |
| 0.309491064 | 0.0150765   | 0.237217205 | 0.275099209 |
| 0.39403467  | 0.397668776 | 0.021958774 | 0.005716958 |
| 0.002595247 | 0.017744633 | 0.270965413 | 0.119569896 |
| 0.34173547  | 0.145142251 | 0.023219918 | 0.157031468 |
| 0.188335305 | 0.162182215 | 0.354213125 | 0.316814419 |
| 0.249034415 | 0.102025266 | 0.176890042 | 0.322708147 |
| 0.059953021 | 0.200045095 | 0.335029475 | 0.380141026 |
| 0.041459599 | 0.132199129 | 0.139703489 | 0.40206755  |
| 0.011924267 | 0.165319853 | 0.191003473 | 0.201181474 |
| 0.011342911 | 0.065549882 | 0.077087006 | 0.303496528 |
| 0.304741992 | 0.080304851 | 0.047604058 | 0.102786018 |
| 0.192076177 | 0.333658757 | 0.156996451 | 0.373276331 |
| 0.36606903  | 0.365097374 | 0.044537003 | 0.357954045 |
| 0.082252868 | 0.326995827 | 0.104575184 | 0.055997647 |
| 0.122964667 | 0.030077227 | 0.280044518 | 0.086434521 |
| 0.201849884 | 0.272606503 | 0.096708412 | 0.018362611 |
| 0.042014542 | 0.061216099 | 0.370544608 | 0.295234084 |
| 0.021637259 | 0.244048242 | 0.146576641 | 0.239897588 |

|             |             |             |             |
|-------------|-------------|-------------|-------------|
| 0.227629038 | 0.329839359 | 0.351526615 | 0.136771599 |
| 0.218401157 | 0.02699951  | 0.325372984 | 0.227373646 |
| 0.221750234 | 0.346186932 | 0.163166439 | 0.352254696 |
| 0.273917657 | 0.341440962 | 0.313540791 | 0.248719246 |
| 0.080175488 | 0.210287743 | 0.330335421 | 0.082527769 |
| 0.210285777 | 0.348745695 | 0.183989927 | 0.090864297 |
| 0.157201319 | 0.106506887 | 0.101431741 | 0.063248412 |
| 0.069697656 | 0.265297244 | 0.184128912 | 0.355300483 |
| 0.234613717 | 0.245155214 | 0.096540789 | 0.078229771 |
| 0.38076437  | 0.339630958 | 0.200068421 | 0.294684478 |
| 0.122087664 | 0.195365339 | 0.262339276 | 0.249399355 |
| 0.137613122 | 0.311531758 | 0.336728108 | 0.304998602 |
| 0.369010722 | 0.236867326 | 0.360086548 | 0.145689308 |
| 0.056462423 | 0.170710332 | 0.142697111 | 0.074964482 |
| 0.165534076 | 0.038075819 | 0.065246105 | 0.277645593 |
| 0.083644273 | 0.260528499 | 0.161825691 | 0.090441537 |
| 0.138322925 | 0.121395442 | 0.202741823 | 0.249153613 |
| 0.125980152 | 0.353967288 | 0.019216616 | 0.067491686 |
| 0.090340276 | 0.287992902 | 0.113069043 | 0.13493495  |
| 0.082060226 | 0.063518029 | 0.19037864  | 0.19391419  |
| 0.152031614 | 0.106831957 | 0.292355617 | 0.086890902 |
| 0.092807585 | 0.36160922  | 0.148238123 | 0.016598359 |
| 0.067367845 | 0.208158882 | 0.135130352 | 0.208783568 |
| 0.018539662 | 0.297778558 | 0.194452492 | 0.165228898 |
| 0.253204858 | 0.09586183  | 0.2851811   | 0.082800942 |
| 0.097108515 | 0.326865823 | 0.127630676 | 0.324042994 |
| 0.109843317 | 0.338869464 | 0.318949561 | 0.288570774 |
| 0.062166495 | 0.103608425 | 0.10877133  | 0.349722095 |
| 0.107371704 |             |             |             |

|             |             |             |             |
|-------------|-------------|-------------|-------------|
| MAN2A2      | 0.339799391 | 0.479865942 | 0.2866969   |
| 0.363131962 | 0.326298084 | 0.372701962 | 0.217307219 |
| 0.241866028 | 0.069685709 | 0.009715601 | 0.016622728 |
| 0.33355001  | 0.173347429 | 0.301703881 | 0.293118103 |
| 0.325820274 | 0.097432534 | 0.30229212  | 0.216567758 |
| 0.353743607 | 0.136213903 | 0.309619207 | 0.093221228 |
| 0.178665542 | 0.066141185 | 0.054378067 | 0.170853121 |
| 0.374441647 | 0.062321031 | 0.364029115 | 0.377587398 |
| 0.06901341  | 0.370504144 | 0.488762864 | 0.329908433 |
| 0.478088988 | 0.330175982 | 0.013581164 | 0.298103536 |
| 0.371871832 | 0.339468408 | 0.356400417 | 0.288367283 |
| 0.045499843 | 0.493452144 | 0.231160394 | 0.282354694 |
| 0.255283043 | 0.024605596 | 0.31053233  | 0.452860583 |
| 0.465176817 | 0.347890002 | 0.261250135 | 0.166480142 |
| 0.168422079 | 0.308039793 | 0.178178433 | 0.367803951 |
| 0.211982218 | 0.250972955 | 0.455823636 | 0.093812919 |
| 0.137472736 | 0.272675214 | 0.100239736 | 0.28333172  |
| 0.217924525 | 0.376547713 | 0.022716949 | 0.301022308 |
| 0.008228432 | 0.336869945 | 0.270458022 | 0.192876941 |
| 0.032299749 | 0.024397772 | 0.120723847 | 0.31902702  |
| 0.378795723 | 0.416830257 | 0.380049539 | 0.388814279 |
| 0.143519281 | 0.21401212  | 0.262311185 | 0.150289961 |
| 0.369710102 | 0.186985148 | 0.112950906 | 0.318405337 |
| 0.391947932 | 0.474938425 | 0.13842644  | 0.17602874  |
| 0.372920243 | 0.451943623 | 0.354042597 | 0.332821819 |

|             |             |             |             |
|-------------|-------------|-------------|-------------|
| 0.246176898 | 0.027673663 | 0.424289522 | 0.431788759 |
| 0.377652095 | 0.194775005 | 0.107764515 | 0.388697827 |
| 0.047059523 | 0.348859527 | 0.302294296 | 0.136791465 |
| 0.392536377 | 0.02047631  | 0.139350706 | 0.339457444 |
| 0.175097447 | 0.374517444 | 0.455593891 | 0.179413704 |
| 0.301658332 | 0.020539688 | 0.078956449 | 0.023518711 |
| 0.303526349 | 0.077077888 | 0.481354631 | 0.392690403 |
| 0.278380138 | 0.27715091  | 0.25451277  | 0.001154988 |
| 0.01838534  | 0.127124162 | 0.362374001 | 0.317560227 |
| 0.356567928 | 0.325327278 | 0.18239591  | 0.36938083  |
| 0.329412088 | 0.370665865 | 0.089825592 | 0.100204894 |
| 0.360120363 | 0.124731487 | 0.194472681 | 0.360200282 |
| 0.22236987  | 0.13571667  | 0.118565449 | 0.439712492 |
| 0.439880506 | 0.081838724 | 0.336159855 | 0.324243505 |
| 0.297717756 | 0.244139566 | 0.101977542 | 0.265231348 |
| 0.061758757 | 0.435116465 | 0.016495604 | 0.334592148 |
| 0.186099682 | 0.098651191 | 0.011608199 | 0.309112363 |
| 0.306531215 | 0.378629555 | 0.456756342 | 0.092572187 |
| 0.296293329 | 0.307182547 | 0.351553502 | 0.374369725 |
| 0.01131806  | 0.043512779 | 0.323302728 | 0.444239758 |
| 0.353881258 | 0.409129688 | 0.259651751 | 0.21268276  |
| 0.205910407 | 0.356729265 | 0.002365858 | 0.485445395 |
| 0.469482953 | 0.345665366 | 0.332375383 | 0.312439141 |
| 0.255972483 | 0.376198781 | 0.045729139 | 0.334973748 |
| 0.357764026 | 0.069639469 | 0.406097199 | 0.119891444 |
| 0.432032047 | 0.03297358  | 0.337083026 | 0.319228496 |
| 0.339315255 | 0.009163849 | 0.295282905 | 0.356841109 |
| 0.014478391 | 0.142013599 | 0.358576613 | 0.3491293   |
| 0.312944193 | 0.341238407 | 0.380241637 | 0.240650924 |
| 0.331574251 | 0.240659136 | 0.009454897 | 0.216726874 |
| 0.341589092 | 0.279821765 | 0.447947445 | 0.240393482 |
| 0.356253165 | 0.446472343 | 0.341440389 | 0.185253334 |
| 0.043931354 | 0.322218711 | 0.03264515  | 0.250245162 |
| 0.331841495 | 0.133701692 | 0.287088532 | 0.108145257 |
| 0.047853994 | 0.45848405  | 0.097189479 | 0.151079311 |
| 0.063980221 | 0.37087952  | 0.235882404 | 0.252734737 |
| 0.182100636 | 0.122481964 | 0.239063266 | 0.289724428 |
| 0.057357374 | 0.080366777 | 0.006798355 | 0.30778008  |
| 0.141232179 | 0.312593791 | 0.331004707 | 0.374702751 |
| 0.321106927 | 0.116202486 | 0.303847745 | 0.178439812 |
| 0.0746813   | 0.011386943 | 0.461460012 | 0.327404067 |
| 0.363577619 | 0.143846883 | 0.03068565  | 0.306337804 |
| 0.403013123 | 0.353630821 | 0.317325804 | 0.427190533 |
| 0.025957226 | 0.382838169 | 0.225428083 | 0.089958025 |
| 0.279810491 | 0.231530882 | 0.374134292 | 0.066427449 |
| 0.359745259 | 0.460927818 | 0.234524912 | 0.135134268 |
| 0.41670055  | 0.358038275 | 0.036851907 | 0.366495146 |
| 0.376020997 | 0.027148852 | 0.462356221 | 0.084288556 |
| 0.014525619 | 0.324611723 | 0.341373339 | 0.054270857 |
| 0.053471688 | 0.304077485 | 0.07768056  | 0.212691999 |
| 0.460788179 | 0.319752667 | 0.367984961 | 0.127889361 |
| 0.041616575 | 0.013290366 | 0.129238425 | 0.289232654 |
| 0.497819682 | 0.433125647 | 0.207479184 | 0.273265931 |
| 0.208993264 | 0.230518388 | 0.211216534 | 0.436813042 |

|             |             |             |             |
|-------------|-------------|-------------|-------------|
| 0.131996496 | 0.477296673 | 0.005459695 | 0.322021339 |
| 0.478672585 | 0.350429822 | 0.054496267 | 0.31803793  |
| 1           | 0.044858381 | 0.193723848 | 0.473732848 |
| 0.38002276  | 0.246910003 | 0.268309676 | 0.341649817 |
| 0.026486269 | 0.054670758 | 0.281588452 | 0.098009898 |
| 0.31464907  | 0.165872701 | 0.022556793 | 0.324525316 |
| 0.045301024 | 0.443985674 | 0.357995066 | 0.043249693 |
| 0.350721361 | 0.315396144 | 0.275293718 | 0.033938554 |
| 0.34507468  | 0.435127346 | 0.496480632 | 0.169930635 |
| 0.355978289 | 0.421408626 | 0.28412208  | 0.054025371 |
| 0.010391571 | 0.468900301 | 0.367712186 | 0.028815467 |
| 0.379527371 | 0.322901446 | 0.017357136 | 0.471044598 |
| 0.173532263 | 0.457680852 | 0.007481097 | 0.048831473 |
| 0.021552791 | 0.339124261 | 0.463923859 | 0.366675543 |
| 0.316023073 | 0.313383409 | 0.002378166 | 0.442334652 |
| 0.469720752 | 0.008038275 | 0.082308015 | 0.35587673  |
| 0.319826748 | 0.497365071 | 0.202037099 | 0.345598028 |
| 0.319908737 | 0.464778261 | 0.242389264 | 0.200872905 |
| 0.382215288 | 0.422111233 | 0.378881558 | 0.443452597 |
| 0.380954552 | 0.314706497 | 0.244853766 | 0.017893563 |
| 0.074809047 | 0.277648182 | 0.280737089 | 0.063538577 |
| 0.359391159 | 0.098541347 | 0.430984782 | 0.362357206 |
| 0.395260717 | 0.003361712 | 0.19590685  | 0.36498857  |
| 0.409592743 | 0.407000719 | 0.014128766 | 0.004737931 |
| 0.006608495 | 0.010750447 | 0.345583959 | 0.167195038 |
| 0.420102911 | 0.305897382 | 0.004627242 | 0.072533747 |
| 0.260783697 | 0.274485794 | 0.468828575 | 0.316462634 |
| 0.333943376 | 0.063704259 | 0.287838312 | 0.336337087 |
| 0.041526752 | 0.334418105 | 0.404865285 | 0.470808741 |
| 0.026794531 | 0.169473333 | 0.338157506 | 0.418491262 |
| 0.03168174  | 0.234990817 | 0.343428045 | 0.280269029 |
| 0.00906624  | 0.052205324 | 0.04168136  | 0.337384624 |
| 0.464966574 | 0.07044951  | 0.029250104 | 0.191291653 |
| 0.126811692 | 0.371252081 | 0.154221588 | 0.428641476 |
| 0.385408243 | 0.35600719  | 0.042650451 | 0.461982953 |
| 0.029335279 | 0.469377726 | 0.225298867 | 0.08507302  |
| 0.222208474 | 0.010105746 | 0.413661939 | 0.106331194 |
| 0.359498027 | 0.369434232 | 0.11978405  | 0.008661556 |
| 0.096574915 | 0.038444606 | 0.383286441 | 0.338569954 |
| 0.017680016 | 0.223051964 | 0.223642853 | 0.332416762 |
| 0.336899143 | 0.362823156 | 0.491459935 | 0.359418678 |
| 0.096657105 | 0.078820236 | 0.371229632 | 0.374238548 |
| 0.284591935 | 0.385199845 | 0.226493276 | 0.452947282 |
| 0.366068923 | 0.407623036 | 0.406583072 | 0.309589049 |
| 0.146998894 | 0.375210843 | 0.374365399 | 0.035013556 |
| 0.306224021 | 0.367768844 | 0.333627288 | 0.107823517 |
| 0.195801674 | 0.259661812 | 0.044542066 | 0.203014173 |
| 0.20909981  | 0.359773458 | 0.137669028 | 0.348122495 |
| 0.364463782 | 0.37493508  | 0.052142095 | 0.040460168 |
| 0.492090897 | 0.414335385 | 0.172245381 | 0.375790956 |
| 0.128594353 | 0.262812855 | 0.346790851 | 0.330695276 |
| 0.272155773 | 0.376295234 | 0.385890456 | 0.388719838 |
| 0.442601716 | 0.232379927 | 0.492930616 | 0.153419074 |
| 0.05031865  | 0.33700135  | 0.093848221 | 0.061187557 |

|             |             |             |             |
|-------------|-------------|-------------|-------------|
| 0.127001891 | 0.017612507 | 0.183265487 | 0.331288071 |
| 0.256240923 | 0.317340674 | 0.330789856 | 0.066490849 |
| 0.228298278 | 0.309070459 | 0.277168945 | 0.233576591 |
| 0.077011063 | 0.478667325 | 0.007446157 | 0.041515378 |
| 0.271943774 | 0.352931584 | 0.267483169 | 0.179393227 |
| 0.183661259 | 0.083178035 | 0.243264788 | 0.354774926 |
| 0.34080251  | 0.278023067 | 0.358584313 | 0.043883993 |
| 0.027862026 | 0.397247677 | 0.361601041 | 0.011584009 |
| 0.052763079 | 0.341890622 | 0.252236925 | 0.193137438 |
| 0.01106807  | 0.40923234  | 0.342360385 | 0.315877201 |
| 0.336029342 | 0.05626713  | 0.380409235 | 0.083171162 |
| 0.055002232 | 0.450982324 | 0.275362244 | 0.463046873 |
| 0.242168098 | 0.340551726 | 0.459819183 | 0.371342556 |
| 0.104519062 | 0.281410374 | 0.032584652 | 0.373253001 |
| 0.311532603 |             |             |             |
| MAP2K6      | 0.042143943 | 0.056539317 | 0.036393205 |
| 0.142375532 | 0.070099652 | 0.054481292 | 0.214408278 |
| 0.066027685 | 0.172093096 | 0.093175747 | 0.086090007 |
| 0.04109492  | 0.051162256 | 0.05534053  | 0.028622855 |
| 0.148885374 | 0.093057755 | 0.036825664 | 0.243043324 |
| 0.123751108 | 0.13505413  | 0.155698451 | 0.218736385 |
| 0.033371626 | 0.100103259 | 0.214417184 | 0.065922068 |
| 0.121757171 | 0.235994181 | 0.043122274 | 0.101387918 |
| 0.102936013 | 0.058843906 | 0.037640479 | 0.073619155 |
| 0.030661735 | 0.030826524 | 0.028587318 | 0.051330892 |
| 0.054810168 | 0.079299017 | 0.131529779 | 0.196486357 |
| 0.225941552 | 0.032625435 | 0.239024596 | 0.071586459 |
| 0.037464048 | 0.150238989 | 0.03948547  | 0.036799213 |
| 0.030030317 | 0.046700243 | 0.098846824 | 0.189060604 |
| 0.026853978 | 0.029796532 | 0.012163321 | 0.052523653 |
| 0.220317523 | 0.047962198 | 0.034288868 | 0.174324682 |
| 0.046239047 | 0.093751514 | 0.07476393  | 0.125580161 |
| 0.021246139 | 0.05558048  | 0.169584202 | 0.022336147 |
| 0.026731414 | 0.151967767 | 0.086457874 | 0.019558871 |
| 0.235653403 | 0.114459038 | 0.090976465 | 0.170116819 |
| 0.101444751 | 0.035152246 | 0.084154    | 0.066631077 |
| 0.069912052 | 0.114747603 | 0.033019881 | 0.155765629 |
| 0.056892745 | 0.192266755 | 0.08811673  | 0.140903872 |
| 0.078653517 | 0.042479326 | 0.09582467  | 0.143225394 |
| 0.069807753 | 0.056100724 | 0.041397529 | 0.05708924  |
| 0.025314417 | 0.081981036 | 0.040171492 | 0.062008478 |
| 0.042497779 | 0.027299432 | 0.185682353 | 0.087662424 |
| 0.210453344 | 0.016338773 | 0.202827997 | 0.03264581  |
| 0.104561818 | 0.240229282 | 0.131054853 | 0.118925027 |
| 0.082982455 | 0.05938092  | 0.040015913 | 0.262773761 |
| 0.04947737  | 0.09917812  | 0.030988618 | 0.148159127 |
| 0.034058009 | 0.013490321 | 0.02534881  | 0.092162125 |
| 0.04938717  | 0.029824386 | 0.146431391 | 0.097143222 |
| 0.136630757 | 0.05360492  | 0.03813201  | 0.052064277 |
| 0.082267361 | 0.023038534 | 0.116081833 | 0.037919101 |
| 0.036310068 | 0.082381653 | 0.006847275 | 0.205526619 |
| 0.069252496 | 0.061990953 | 0.264357717 | 0.045303556 |
| 0.116353709 | 0.166499458 | 0.207455525 | 0.075155602 |
| 0.047997382 | 0.271401472 | 0.024830321 | 0.141008652 |

|             |             |             |             |
|-------------|-------------|-------------|-------------|
| 0.037765545 | 0.081030347 | 0.200307628 | 0.079070449 |
| 0.198966485 | 0.029530908 | 0.108716085 | 0.05539882  |
| 0.021246196 | 0.045013154 | 0.105763304 | 0.092854167 |
| 0.047379554 | 0.050214063 | 0.022004103 | 0.229869497 |
| 0.098082388 | 0.120729796 | 0.039830872 | 0.057992354 |
| 0.110567548 | 0.165453797 | 0.019100169 | 0.062233906 |
| 0.039506786 | 0.059123474 | 0.079011439 | 0.067258517 |
| 0.170375534 | 0.104918645 | 0.00538713  | 0.034306101 |
| 0.041309746 | 0.016820772 | 0.089304141 | 0.062835479 |
| 0.031735085 | 0.104970123 | 0.002452643 | 0.126930117 |
| 0.027581506 | 0.227360307 | 0.090182828 | 0.204497864 |
| 0.035337655 | 0.228991569 | 0.050340757 | 0.045153323 |
| 0.028497272 | 0.041334063 | 0.076432505 | 0.138582651 |
| 0.101943691 | 0.118743779 | 0.073120909 | 0.134038866 |
| 0.116754715 | 0.082779026 | 0.109746522 | 0.028181807 |
| 0.068795466 | 0.133641303 | 0.139469862 | 0.092858612 |
| 0.054686868 | 0.01109276  | 0.046658696 | 0.113126281 |
| 0.020659544 | 0.055492624 | 0.030721623 | 0.021178641 |
| 0.268701766 | 0.103521769 | 0.08475869  | 0.120904219 |
| 0.032082067 | 0.125162177 | 0.033766199 | 0.062497053 |
| 0.135590102 | 0.063783848 | 0.034551934 | 0.01689259  |
| 0.016724222 | 0.054858277 | 0.186434328 | 0.042927203 |
| 0.033460538 | 0.148724198 | 0.038173899 | 0.049525406 |
| 0.183756698 | 0.177524986 | 0.053945329 | 0.008809515 |
| 0.037768804 | 0.018936115 | 0.016487762 | 0.037294636 |
| 0.030849912 | 0.078419009 | 0.076236302 | 0.031213837 |
| 0.117404607 | 0.196921168 | 0.056290706 | 0.133593634 |
| 0.034065673 | 0.178835412 | 0.169406742 | 0.006756956 |
| 0.083360681 | 0.031109215 | 0.016180186 | 0.067535376 |
| 0.117039268 | 0.078302501 | 0.065999113 | 0.2036866   |
| 0.027814439 | 0.191276333 | 0.119270315 | 0.04664059  |
| 0.047800222 | 0.049659837 | 0.128784633 | 0.153443631 |
| 0.034833845 | 0.107318421 | 0.203047702 | 0.036976328 |
| 0.032630125 | 0.198345654 | 0.049754018 | 0.08371324  |
| 0.182948199 | 0.065048395 | 0.048843974 | 0.255493242 |
| 0.172200077 | 0.092722189 | 0.159062123 | 0.198335599 |
| 0.064373219 | 0.152622999 | 0.055421865 | 0.0438296   |
| 0.202780324 | 0.050545074 | 0.07297892  | 0.031586051 |
| 0.032334154 | 0.046020505 | 0.184023952 | 0.057927371 |
| 0.269990364 | 0.037583691 | 0.032547152 | 0.06084685  |
| 0.027219232 | 0.039931799 | 0.143886714 | 0.052107419 |
| 0.030134743 | 0.035915295 | 0.150477856 | 0.122639276 |
| 0.044858381 | 1           | 0.10177381  | 0.04082884  |
| 0.067440171 | 0.074930624 | 0.045868535 | 0.065993575 |
| 0.197391871 | 0.200334286 | 0.08177476  | 0.022812418 |
| 0.039784761 | 0.140755265 | 0.006711887 | 0.03383666  |
| 0.177391667 | 0.049335001 | 0.088474823 | 0.186620592 |
| 0.044971916 | 0.032565222 | 0.116950992 | 0.248486787 |
| 0.04428253  | 0.03692762  | 0.039004135 | 0.127428959 |
| 0.04341681  | 0.046798504 | 0.024067986 | 0.165637818 |
| 0.153638275 | 0.034906284 | 0.059129449 | 0.096211603 |
| 0.096267692 | 0.03219743  | 0.087578153 | 0.058214695 |
| 0.25727212  | 0.022517012 | 0.0512445   | 0.006795959 |
| 0.087133629 | 0.082513484 | 0.036981823 | 0.104414043 |

|             |             |             |             |
|-------------|-------------|-------------|-------------|
| 0.020522066 | 0.124228661 | 0.010856303 | 0.051145213 |
| 0.04554578  | 0.112439801 | 0.067800268 | 0.038381952 |
| 0.033741201 | 0.052012864 | 0.03428642  | 0.050931994 |
| 0.031836107 | 0.033048169 | 0.075491772 | 0.209697298 |
| 0.071782185 | 0.032618837 | 0.079871506 | 0.051382134 |
| 0.090455711 | 0.090471623 | 0.250008983 | 0.217865149 |
| 0.065412753 | 0.078667705 | 0.015137848 | 0.092746125 |
| 0.04530261  | 0.123898046 | 0.048486615 | 0.091973471 |
| 0.053544797 | 0.142259687 | 0.112015798 | 0.041049709 |
| 0.084313606 | 0.097565111 | 0.084903967 | 0.021004319 |
| 0.005492129 | 0.067378493 | 0.110005458 | 0.127283237 |
| 0.057356235 | 0.012678333 | 0.14526171  | 0.157230231 |
| 0.074888113 | 0.063562527 | 0.044751741 | 0.187511361 |
| 0.053475221 | 0.178542003 | 0.027806401 | 0.154876109 |
| 0.117455797 | 0.022603151 | 0.063616961 | 0.049055719 |
| 0.124961971 | 0.121276318 | 0.032224052 | 0.096263559 |
| 0.005281634 | 0.148924469 | 0.042079293 | 0.054084094 |
| 0.053974681 | 0.134398068 | 0.162662149 | 0.102803149 |
| 0.027739801 | 0.087334832 | 0.104831193 | 0.010548654 |
| 0.14215798  | 0.071812765 | 0.12213217  | 0.077772966 |
| 0.088436962 | 0.138227699 | 0.083772206 | 0.045687535 |
| 0.141317463 | 0.033159204 | 0.055201056 | 0.024264878 |
| 0.055602635 | 0.154096777 | 0.031544485 | 0.029992042 |
| 0.03768543  | 0.066277098 | 0.049866627 | 0.103109819 |
| 0.0150253   | 0.156099764 | 0.097011804 | 0.075143306 |
| 0.085306402 | 0.111170986 | 0.132366264 | 0.094293099 |
| 0.092378918 | 0.112320926 | 0.036882935 | 0.020554976 |
| 0.188872619 | 0.010900499 | 0.110267478 | 0.036719831 |
| 0.050422592 | 0.084653727 | 0.049662774 | 0.055422537 |
| 0.054463857 | 0.057896964 | 0.045087553 | 0.146764351 |
| 0.031193464 | 0.046618541 | 0.090038015 | 0.126478447 |
| 0.142140879 | 0.092062505 | 0.064082415 | 0.081078506 |
| 0.141244744 | 0.026247501 | 0.148197218 | 0.008909444 |
| 0.016881707 | 0.067850569 | 0.137779998 | 0.132642606 |
| 0.055781765 | 0.039601826 | 0.120486483 | 0.169032604 |
| 0.053231058 | 0.048764769 | 0.117701683 | 0.083481541 |
| 0.170259109 | 0.140101028 | 0.060081122 | 0.06003355  |
| 0.020253184 | 0.051693006 | 0.076556032 | 0.06514967  |
| 0.048544591 | 0.21534672  | 0.041648057 | 0.050933661 |
| 0.075836685 | 0.027058014 | 0.130651733 | 0.188539267 |
| 0.236446562 | 0.162910376 | 0.008887819 | 0.111072994 |
| 0.009412497 | 0.143651975 | 0.014979205 | 0.15010723  |
| 0.106598768 | 0.021928453 | 0.143947125 | 0.139356474 |
| 0.154913615 | 0.039829984 | 0.090688427 | 0.169102665 |
| 0.012092768 | 0.059779357 | 0.039252608 | 0.117033799 |
| 0.019585594 | 0.061832227 | 0.176569988 | 0.045945091 |
| 0.022055693 | 0.011645844 | 0.057169475 | 0.161295688 |
| 0.184466721 | 0.088344605 | 0.031476654 | 0.087418192 |
| 0.061950898 | 0.036019569 | 0.037617653 | 0.084622032 |
| 0.09728649  | 0.038229379 | 0.034897582 | 0.058461739 |
| 0.125360284 | 0.182562855 | 0.029639093 | 0.062724871 |
| 0.166753332 | 0.036505538 | 0.040763523 | 0.036212775 |
| 0.04350801  | 0.15080841  | 0.028569154 | 0.044443645 |
| 0.047895721 | 0.019320954 | 0.245793236 | 0.084989731 |



|             |             |             |             |
|-------------|-------------|-------------|-------------|
| 0.013090717 |             |             |             |
| MAPKAPK3    | 0.243473873 | 0.238069462 | 0.135769155 |
| 0.283454512 | 0.182419836 | 0.15154774  | 0.187400311 |
| 0.141663731 | 0.060190613 | 0.01341373  | 0.012869666 |
| 0.181002322 | 0.04150553  | 0.079966758 | 0.048165433 |
| 0.339718124 | 0.074860173 | 0.176453523 | 0.263918879 |
| 0.332491333 | 0.099734346 | 0.283946016 | 0.132267682 |
| 0.076743393 | 0.04812616  | 0.079362225 | 0.0639403   |
| 0.346118501 | 0.097747647 | 0.101213599 | 0.301014101 |
| 0.143106398 | 0.279482286 | 0.201645512 | 0.182581925 |
| 0.182147423 | 0.195855375 | 0.084988038 | 0.058489007 |
| 0.279623979 | 0.207914869 | 0.325035125 | 0.250722617 |
| 0.081713048 | 0.194723307 | 0.207592694 | 0.213526733 |
| 0.085511976 | 0.041712499 | 0.092580492 | 0.206227084 |
| 0.154029069 | 0.118882524 | 0.153752869 | 0.124448605 |
| 0.019998846 | 0.087289443 | 0.020867812 | 0.212030376 |
| 0.199653782 | 0.08382871  | 0.172172835 | 0.064176652 |
| 0.056898366 | 0.213539474 | 0.117169309 | 0.2088977   |
| 0.060549397 | 0.238452412 | 0.145391408 | 0.14199305  |
| 0.007503028 | 0.358481804 | 0.253231384 | 0.034171862 |
| 0.120046839 | 0.029878209 | 0.136604035 | 0.236944051 |
| 0.331127211 | 0.227628418 | 0.263821265 | 0.236472889 |
| 0.071335281 | 0.237041755 | 0.1224475   | 0.11279641  |
| 0.252764857 | 0.124178882 | 0.10320797  | 0.314164569 |
| 0.25662847  | 0.202616361 | 0.088749667 | 0.206244376 |
| 0.177363361 | 0.249857543 | 0.108115446 | 0.119555896 |
| 0.032659067 | 0.082124905 | 0.176592133 | 0.241210587 |
| 0.231329915 | 0.076853396 | 0.136776301 | 0.299338846 |
| 0.143520419 | 0.071411707 | 0.293120833 | 0.101228052 |
| 0.330199854 | 0.057914196 | 0.150908172 | 0.195259825 |
| 0.189572471 | 0.248769302 | 0.194646874 | 0.216181251 |
| 0.182702895 | 0.053910572 | 0.019057669 | 0.130129186 |
| 0.083514722 | 0.031104269 | 0.159109008 | 0.256023672 |
| 0.123669572 | 0.065619733 | 0.204649612 | 0.038260726 |
| 0.069606044 | 0.146109638 | 0.204764833 | 0.234675196 |
| 0.30157624  | 0.166042794 | 0.068578458 | 0.199761088 |
| 0.134258355 | 0.262190057 | 0.009500569 | 0.162150624 |
| 0.167573479 | 0.15490627  | 0.282654676 | 0.159719818 |
| 0.127124743 | 0.172251735 | 0.165753095 | 0.265504761 |
| 0.229751381 | 0.160766071 | 0.147988019 | 0.321252819 |
| 0.047111346 | 0.159010212 | 0.173834142 | 0.107049585 |
| 0.100186416 | 0.165915715 | 0.06734011  | 0.213044547 |
| 0.021416746 | 0.057699545 | 0.139503512 | 0.201795542 |
| 0.065774311 | 0.158167094 | 0.158801875 | 0.211042103 |
| 0.149235569 | 0.231156951 | 0.174153628 | 0.14628263  |
| 0.009912192 | 0.149586714 | 0.129134522 | 0.2378917   |
| 0.150457548 | 0.264407131 | 0.142412336 | 0.122170938 |
| 0.21969777  | 0.304177113 | 0.010146938 | 0.188271739 |
| 0.199696082 | 0.104480179 | 0.154189677 | 0.239050428 |
| 0.064382423 | 0.265395306 | 0.020536484 | 0.320739473 |
| 0.198667217 | 0.186621003 | 0.293161872 | 0.138994905 |
| 0.206115588 | 0.079301183 | 0.125099133 | 0.174272567 |
| 0.134251582 | 0.030615403 | 0.119820672 | 0.297174966 |
| 0.071153268 | 0.088368289 | 0.292290535 | 0.268819317 |

|             |             |             |             |
|-------------|-------------|-------------|-------------|
| 0.16356772  | 0.285491142 | 0.323012398 | 0.050711735 |
| 0.155780452 | 0.226126051 | 0.090451881 | 0.189234381 |
| 0.253941242 | 0.038305387 | 0.207145005 | 0.130118433 |
| 0.14704228  | 0.220626045 | 0.167047246 | 0.024887156 |
| 0.100579425 | 0.207802803 | 0.044227746 | 0.139382592 |
| 0.179926559 | 0.064856869 | 0.085573479 | 0.179343907 |
| 0.087718123 | 0.239487717 | 0.056221793 | 0.050085578 |
| 0.029426481 | 0.126627635 | 0.278609288 | 0.037370368 |
| 0.025994664 | 0.110441103 | 0.061291133 | 0.079966437 |
| 0.085496241 | 0.100156179 | 0.076604736 | 0.036845688 |
| 0.023850225 | 0.039218694 | 0.03951892  | 0.189865477 |
| 0.08434493  | 0.055166981 | 0.12402708  | 0.071583058 |
| 0.081663088 | 0.082962799 | 0.234750334 | 0.334319254 |
| 0.184708778 | 0.137169099 | 0.120975897 | 0.025907807 |
| 0.244925341 | 0.078062663 | 0.086228089 | 0.223395203 |
| 0.119403855 | 0.283744405 | 0.053765313 | 0.117208079 |
| 0.065501868 | 0.191247705 | 0.324085143 | 0.026520678 |
| 0.224544194 | 0.214531821 | 0.276744747 | 0.090024826 |
| 0.173770175 | 0.269088587 | 0.084953192 | 0.205391428 |
| 0.191183061 | 0.089041886 | 0.225069619 | 0.087583046 |
| 0.097866277 | 0.22478932  | 0.14422983  | 0.151436548 |
| 0.103977278 | 0.096540828 | 0.096498298 | 0.243665098 |
| 0.236998315 | 0.288862929 | 0.16397895  | 0.089277518 |
| 0.071655484 | 0.012367732 | 0.129855612 | 0.157394536 |
| 0.191924064 | 0.211631668 | 0.289639405 | 0.088404318 |
| 0.293732168 | 0.044547455 | 0.086534516 | 0.226983842 |
| 0.138349919 | 0.225074983 | 0.069282028 | 0.185739774 |
| 0.171230232 | 0.137493838 | 0.060959779 | 0.178249436 |
| 0.193723848 | 0.10177381  | 1           | 0.197358305 |
| 0.234492497 | 0.09063747  | 0.056902571 | 0.280903178 |
| 0.065178797 | 0.110408791 | 0.174817161 | 0.044624291 |
| 0.068917537 | 0.122597121 | 0.0150415   | 0.106545836 |
| 0.056659882 | 0.196897076 | 0.316103458 | 0.051355936 |
| 0.086157369 | 0.104014594 | 0.269117893 | 0.11202039  |
| 0.175250972 | 0.207418109 | 0.203871596 | 0.20553171  |
| 0.219101517 | 0.184242416 | 0.084606937 | 0.150919461 |
| 0.071568664 | 0.190600231 | 0.252142766 | 0.028091784 |
| 0.306520444 | 0.106105848 | 0.015982893 | 0.246746027 |
| 0.256528549 | 0.166254113 | 0.011520269 | 0.048949368 |
| 0.092207111 | 0.286793804 | 0.176728662 | 0.312623893 |
| 0.035995604 | 0.348378655 | 0.032992102 | 0.241239891 |
| 0.198790983 | 0.042116925 | 0.077118022 | 0.163869031 |
| 0.133218873 | 0.250620789 | 0.061140882 | 0.176052505 |
| 0.114737917 | 0.170642817 | 0.077238977 | 0.21756034  |
| 0.21789547  | 0.17260492  | 0.283448711 | 0.238743183 |
| 0.275958611 | 0.26626463  | 0.264604914 | 0.05060179  |
| 0.037305965 | 0.146481146 | 0.019945254 | 0.025136265 |
| 0.19322312  | 0.064564147 | 0.244644562 | 0.297329706 |
| 0.209693023 | 0.057601873 | 0.132352406 | 0.189217635 |
| 0.288064597 | 0.322138695 | 0.118542526 | 0.012067051 |
| 0.012900043 | 0.011770756 | 0.269121226 | 0.18960155  |
| 0.227784943 | 0.022235018 | 0.047924603 | 0.12365965  |
| 0.110557885 | 0.155142037 | 0.201951212 | 0.362477378 |
| 0.235538264 | 0.145310976 | 0.027969052 | 0.376824076 |

|             |             |             |             |
|-------------|-------------|-------------|-------------|
| 0.045850133 | 0.175833846 | 0.220168129 | 0.20926168  |
| 0.13711866  | 0.17059215  | 0.191264175 | 0.292026549 |
| 0.009280141 | 0.254732463 | 0.1965279   | 0.057482373 |
| 0.092122581 | 0.084351869 | 0.066769673 | 0.3275414   |
| 0.165000269 | 0.034462913 | 0.03097548  | 0.042112771 |
| 0.068824165 | 0.284137122 | 0.084785552 | 0.275930509 |
| 0.27111512  | 0.339223852 | 0.083810259 | 0.204478671 |
| 0.041961009 | 0.178713666 | 0.10290054  | 0.02048271  |
| 0.17400465  | 0.106837099 | 0.194425592 | 0.011006267 |
| 0.114308182 | 0.296681626 | 0.041963748 | 0.065026238 |
| 0.03529815  | 0.092160227 | 0.26825506  | 0.249809731 |
| 0.095166812 | 0.16007076  | 0.243347307 | 0.327302939 |
| 0.19284326  | 0.24413676  | 0.194458817 | 0.074860293 |
| 0.098516093 | 0.063418579 | 0.337178693 | 0.212334548 |
| 0.123788409 | 0.282554053 | 0.041984986 | 0.247379938 |
| 0.246909064 | 0.269432567 | 0.206491666 | 0.205159852 |
| 0.054786487 | 0.190568882 | 0.178720506 | 0.035910409 |
| 0.277148113 | 0.254727421 | 0.244611436 | 0.041076643 |
| 0.115104658 | 0.102477998 | 0.189453492 | 0.090117913 |
| 0.064507899 | 0.164227019 | 0.09656741  | 0.363529022 |
| 0.277207721 | 0.213798043 | 0.189460081 | 0.058975051 |
| 0.245095372 | 0.233551171 | 0.103660346 | 0.210672118 |
| 0.21659158  | 0.171712349 | 0.244043083 | 0.233454784 |
| 0.066359248 | 0.192073578 | 0.287305508 | 0.170273208 |
| 0.203224521 | 0.247743087 | 0.205204783 | 0.120095939 |
| 0.042112209 | 0.175708038 | 0.05154453  | 0.155875381 |
| 0.168882835 | 0.074345551 | 0.026266847 | 0.321617603 |
| 0.042405037 | 0.241722858 | 0.083060352 | 0.10436293  |
| 0.220130236 | 0.156029305 | 0.264408303 | 0.122493801 |
| 0.063990974 | 0.1826859   | 0.032831602 | 0.125516524 |
| 0.06009336  | 0.193873274 | 0.081040399 | 0.14361525  |
| 0.038337409 | 0.115424532 | 0.215085067 | 0.145879623 |
| 0.04067697  | 0.063687705 | 0.186775161 | 0.10530487  |
| 0.095342001 | 0.299681685 | 0.155333544 | 0.0943577   |
| 0.093340077 | 0.198395355 | 0.164384977 | 0.056033115 |
| 0.063932683 | 0.17542916  | 0.064116803 | 0.1677161   |
| 0.250920813 | 0.164136944 | 0.201128529 | 0.101947784 |
| 0.18630716  | 0.211856312 | 0.144686239 | 0.190030523 |
| 0.16749326  | 0.294302718 | 0.186651146 | 0.203168036 |
| 0.138066069 | 0.125760898 | 0.088459961 | 0.317105855 |
| 0.043155603 |             |             |             |
| MAPRE2      | 0.46378464  | 0.500459948 | 0.422541301 |
| 0.453982707 | 0.443114503 | 0.443579463 | 0.219924377 |
| 0.209208932 | 0.083311561 | 0.00549743  | 0.021503958 |
| 0.473204341 | 0.222070804 | 0.310589169 | 0.38286204  |
| 0.429162819 | 0.127853127 | 0.366414153 | 0.239588359 |
| 0.432475677 | 0.102080885 | 0.410248683 | 0.087116341 |
| 0.277861777 | 0.097362532 | 0.061841204 | 0.26755108  |
| 0.470060967 | 0.071674433 | 0.39931761  | 0.431172046 |
| 0.086649077 | 0.480662774 | 0.518858598 | 0.466322906 |
| 0.517158956 | 0.456332455 | 0.010053632 | 0.33953864  |
| 0.471249315 | 0.479142538 | 0.43295125  | 0.342922926 |
| 0.039028126 | 0.499874374 | 0.255505613 | 0.406566002 |
| 0.267987129 | 0.027453305 | 0.294009797 | 0.456175466 |

|             |             |             |             |
|-------------|-------------|-------------|-------------|
| 0.491244555 | 0.486688219 | 0.247166496 | 0.164743175 |
| 0.235453238 | 0.276880324 | 0.303742888 | 0.392541398 |
| 0.228925723 | 0.199801982 | 0.48634842  | 0.092056695 |
| 0.153608363 | 0.262933905 | 0.136252626 | 0.280495655 |
| 0.351783227 | 0.451652675 | 0.014819973 | 0.45014381  |
| 0.003888456 | 0.404299727 | 0.375765098 | 0.334275301 |
| 0.034954154 | 0.020986478 | 0.161782514 | 0.365071254 |
| 0.482758013 | 0.46949881  | 0.496903924 | 0.499181418 |
| 0.183498454 | 0.279205611 | 0.408122509 | 0.170166897 |
| 0.484473755 | 0.190332548 | 0.11466485  | 0.430805448 |
| 0.500430576 | 0.507773943 | 0.189022986 | 0.246936113 |
| 0.489875364 | 0.491306585 | 0.478549585 | 0.457275026 |
| 0.382804001 | 0.041243522 | 0.483771185 | 0.50739123  |
| 0.464383197 | 0.324997346 | 0.142044696 | 0.460698379 |
| 0.049325127 | 0.426305958 | 0.36671645  | 0.162137962 |
| 0.485938902 | 0.016009685 | 0.198080584 | 0.390886754 |
| 0.202618096 | 0.493277071 | 0.499289577 | 0.187658222 |
| 0.418066008 | 0.018550962 | 0.141263882 | 0.025558932 |
| 0.357315106 | 0.143342523 | 0.507828544 | 0.497419491 |
| 0.258441571 | 0.389647932 | 0.271135243 | 0.000379188 |
| 0.021466803 | 0.169283555 | 0.494327481 | 0.383668455 |
| 0.463756066 | 0.443728139 | 0.240945322 | 0.461633884 |
| 0.488829495 | 0.494100352 | 0.086971915 | 0.090104543 |
| 0.46494406  | 0.164250693 | 0.231264418 | 0.488177788 |
| 0.313634095 | 0.114771859 | 0.120729962 | 0.504755564 |
| 0.460235924 | 0.078688175 | 0.377291531 | 0.427873303 |
| 0.370995312 | 0.360544659 | 0.098649203 | 0.296809276 |
| 0.047601828 | 0.481221938 | 0.021859166 | 0.36541921  |
| 0.303397101 | 0.142004285 | 0.008262898 | 0.293176935 |
| 0.339579823 | 0.501481241 | 0.491214008 | 0.095408927 |
| 0.341013998 | 0.420701332 | 0.37413169  | 0.496314129 |
| 0.010251937 | 0.040821313 | 0.338338344 | 0.509340432 |
| 0.364936966 | 0.49726025  | 0.304364372 | 0.294932908 |
| 0.275477433 | 0.475973425 | 0.003205976 | 0.505373653 |
| 0.510284814 | 0.371639864 | 0.435910675 | 0.432128775 |
| 0.405782123 | 0.490327431 | 0.05195977  | 0.432805955 |
| 0.432126923 | 0.068705864 | 0.49724194  | 0.152223786 |
| 0.483616598 | 0.035402394 | 0.35579463  | 0.480956185 |
| 0.494392728 | 0.007300809 | 0.274776883 | 0.420241828 |
| 0.020004137 | 0.107577443 | 0.462977216 | 0.438601884 |
| 0.412711076 | 0.471444611 | 0.485479802 | 0.391205764 |
| 0.452521064 | 0.240120339 | 0.008963219 | 0.312771798 |
| 0.476967069 | 0.416417027 | 0.475488933 | 0.250751524 |
| 0.4155401   | 0.497801721 | 0.485552818 | 0.240834469 |
| 0.038805756 | 0.338909611 | 0.023163223 | 0.343777211 |
| 0.457832555 | 0.127968587 | 0.431370253 | 0.131127419 |
| 0.061066372 | 0.507527699 | 0.166865492 | 0.2668314   |
| 0.121461225 | 0.46334755  | 0.252511244 | 0.28510883  |
| 0.247694318 | 0.151439211 | 0.365979183 | 0.401716257 |
| 0.037799454 | 0.08812201  | 0.009680614 | 0.441398596 |
| 0.16778399  | 0.407823235 | 0.416190679 | 0.475019971 |
| 0.358522526 | 0.120911492 | 0.411772987 | 0.282292855 |
| 0.102966808 | 0.011142415 | 0.501602327 | 0.419515173 |
| 0.418152032 | 0.149546625 | 0.032880823 | 0.414178046 |

|             |             |             |             |
|-------------|-------------|-------------|-------------|
| 0.501428548 | 0.411261801 | 0.330630185 | 0.496422359 |
| 0.024006218 | 0.49246065  | 0.27423936  | 0.113834777 |
| 0.410385936 | 0.269787532 | 0.479092319 | 0.067881124 |
| 0.432353196 | 0.490105313 | 0.303233817 | 0.181092306 |
| 0.468116137 | 0.446022738 | 0.02797855  | 0.476358918 |
| 0.478147448 | 0.026516107 | 0.504516427 | 0.114903397 |
| 0.01559913  | 0.466797271 | 0.495321684 | 0.064403041 |
| 0.067366929 | 0.376047185 | 0.049223656 | 0.284608354 |
| 0.508032005 | 0.426051609 | 0.49604093  | 0.202875112 |
| 0.037136071 | 0.011345085 | 0.190551323 | 0.42585872  |
| 0.519923312 | 0.50192269  | 0.251259572 | 0.39653656  |
| 0.237161024 | 0.350049774 | 0.170341665 | 0.509414153 |
| 0.181510206 | 0.504321311 | 0.00433604  | 0.478610628 |
| 0.518420768 | 0.350376447 | 0.073337712 | 0.344666146 |
| 0.473732848 | 0.04082884  | 0.197358305 | 1           |
| 0.486173812 | 0.342777187 | 0.384292486 | 0.452723018 |
| 0.01569162  | 0.039386424 | 0.405678171 | 0.175891302 |
| 0.421248589 | 0.206056049 | 0.048414128 | 0.358301702 |
| 0.041836021 | 0.489249692 | 0.479554709 | 0.053864122 |
| 0.418724291 | 0.346300257 | 0.37994006  | 0.031155902 |
| 0.488724325 | 0.485451035 | 0.521123586 | 0.159626886 |
| 0.49015311  | 0.503581295 | 0.451694595 | 0.066092838 |
| 0.012568134 | 0.510994442 | 0.454179248 | 0.024778141 |
| 0.489635248 | 0.30547049  | 0.01382255  | 0.496533318 |
| 0.180880558 | 0.469676885 | 0.005276142 | 0.081664123 |
| 0.030592651 | 0.476719281 | 0.487075611 | 0.421824098 |
| 0.333583044 | 0.377998253 | 0.003630428 | 0.499600187 |
| 0.498578211 | 0.010478689 | 0.125245253 | 0.502894968 |
| 0.48507674  | 0.509671456 | 0.335392212 | 0.49848995  |
| 0.47852726  | 0.502337784 | 0.263870932 | 0.263636203 |
| 0.50050386  | 0.483095423 | 0.472755868 | 0.48296564  |
| 0.496297263 | 0.439126959 | 0.285873862 | 0.013428867 |
| 0.128090501 | 0.245965262 | 0.389756054 | 0.083304898 |
| 0.393262396 | 0.13465214  | 0.497288648 | 0.487607794 |
| 0.506576328 | 0.002870885 | 0.164662094 | 0.498761402 |
| 0.483531052 | 0.4886139   | 0.015427499 | 0.00586646  |
| 0.007985414 | 0.017158386 | 0.390258766 | 0.229588904 |
| 0.502678653 | 0.329468955 | 0.002949238 | 0.045190839 |
| 0.303726922 | 0.418849672 | 0.499096101 | 0.391845512 |
| 0.478486936 | 0.069375541 | 0.35053633  | 0.415599383 |
| 0.059929959 | 0.405385198 | 0.508669269 | 0.484679823 |
| 0.031260985 | 0.233605911 | 0.410561218 | 0.497605801 |
| 0.070979438 | 0.311583681 | 0.478074751 | 0.348406993 |
| 0.009709492 | 0.069974794 | 0.055608002 | 0.455830811 |
| 0.50808086  | 0.08176201  | 0.03226648  | 0.186917918 |
| 0.126767294 | 0.491214558 | 0.172480986 | 0.504143666 |
| 0.490396547 | 0.460474893 | 0.060958081 | 0.484484511 |
| 0.033894418 | 0.492245471 | 0.350794273 | 0.079217912 |
| 0.281820728 | 0.008831569 | 0.483828983 | 0.17631398  |
| 0.377213715 | 0.444685502 | 0.196434496 | 0.011426847 |
| 0.179652653 | 0.044690896 | 0.495006828 | 0.484619658 |
| 0.024526964 | 0.236305248 | 0.292998277 | 0.423947745 |
| 0.335896797 | 0.473689132 | 0.510525379 | 0.491156168 |
| 0.083541953 | 0.133175413 | 0.44498598  | 0.465518095 |

|             |             |             |             |
|-------------|-------------|-------------|-------------|
| 0.264132613 | 0.494707876 | 0.322130631 | 0.501646592 |
| 0.466608139 | 0.484692348 | 0.500586278 | 0.376498639 |
| 0.227737701 | 0.459715844 | 0.438843428 | 0.023147334 |
| 0.369501929 | 0.493919462 | 0.384718421 | 0.158267495 |
| 0.26221678  | 0.416752914 | 0.038637381 | 0.214469085 |
| 0.35758726  | 0.37722594  | 0.143013409 | 0.454908302 |
| 0.435789844 | 0.469517248 | 0.035687541 | 0.053217194 |
| 0.515685757 | 0.472917645 | 0.160458739 | 0.480805859 |
| 0.156466284 | 0.35544357  | 0.487812127 | 0.476874242 |
| 0.391425922 | 0.506532133 | 0.477852062 | 0.462793494 |
| 0.473377304 | 0.262533425 | 0.520742606 | 0.105166495 |
| 0.077339068 | 0.464871125 | 0.100634749 | 0.078295351 |
| 0.137999082 | 0.02081707  | 0.325757564 | 0.439827266 |
| 0.415032787 | 0.403450668 | 0.362881973 | 0.076104868 |
| 0.31597319  | 0.402547538 | 0.360031581 | 0.22569079  |
| 0.079182104 | 0.500914065 | 0.007450052 | 0.046447794 |
| 0.419738386 | 0.494275264 | 0.417048631 | 0.234023192 |
| 0.307458981 | 0.120389384 | 0.302574543 | 0.359358985 |
| 0.409755429 | 0.399153592 | 0.499016937 | 0.033948165 |
| 0.017330456 | 0.496057803 | 0.434386271 | 0.0147622   |
| 0.071258381 | 0.436678887 | 0.296475595 | 0.249451933 |
| 0.01559711  | 0.495460557 | 0.40603355  | 0.449647363 |
| 0.376140126 | 0.056013937 | 0.425490287 | 0.086753148 |
| 0.051355802 | 0.475009619 | 0.418611706 | 0.502788449 |
| 0.350468996 | 0.443350422 | 0.464041172 | 0.498518396 |
| 0.120404508 | 0.419943507 | 0.02473721  | 0.480776111 |
| 0.469336227 |             |             |             |

|             |             |             |             |
|-------------|-------------|-------------|-------------|
| METTL1      | 0.400178784 | 0.512088443 | 0.384924136 |
| 0.416359702 | 0.405875295 | 0.393607736 | 0.25140378  |
| 0.227402419 | 0.122370694 | 0.007238334 | 0.029126272 |
| 0.392245808 | 0.195723911 | 0.276085332 | 0.374931523 |
| 0.411757417 | 0.126170454 | 0.364776573 | 0.265351761 |
| 0.412846831 | 0.125919612 | 0.38520598  | 0.121659483 |
| 0.284522819 | 0.106100812 | 0.085292492 | 0.275515713 |
| 0.423716777 | 0.097078025 | 0.348841319 | 0.396664801 |
| 0.101941865 | 0.413502394 | 0.515084039 | 0.393926379 |
| 0.499153844 | 0.384199809 | 0.010900771 | 0.336938813 |
| 0.404048455 | 0.424572083 | 0.415263819 | 0.339708437 |
| 0.059632397 | 0.487631075 | 0.278320627 | 0.378807931 |
| 0.272553963 | 0.035723292 | 0.284890523 | 0.454601219 |
| 0.46955145  | 0.419442019 | 0.280559993 | 0.201988218 |
| 0.194675667 | 0.256742472 | 0.233959755 | 0.34298495  |
| 0.256098632 | 0.198188409 | 0.475760811 | 0.131770884 |
| 0.192671801 | 0.293190138 | 0.142745325 | 0.294744849 |
| 0.33050506  | 0.393608275 | 0.027846822 | 0.365420152 |
| 0.00350226  | 0.399768257 | 0.355624739 | 0.312962495 |
| 0.048461671 | 0.021725005 | 0.169163617 | 0.361645118 |
| 0.427973186 | 0.446174902 | 0.433735371 | 0.448244254 |
| 0.16315286  | 0.294169755 | 0.358983097 | 0.18550454  |
| 0.417922481 | 0.20981398  | 0.119538131 | 0.401717008 |
| 0.446315444 | 0.505109331 | 0.208251509 | 0.264069217 |
| 0.412935598 | 0.470316625 | 0.415922489 | 0.416354668 |
| 0.350527559 | 0.054589804 | 0.441027176 | 0.475157831 |
| 0.384061886 | 0.282586552 | 0.156899318 | 0.40535613  |

|             |             |             |             |
|-------------|-------------|-------------|-------------|
| 0.071120204 | 0.358030531 | 0.36293692  | 0.133803806 |
| 0.430710335 | 0.032625028 | 0.206283779 | 0.373266709 |
| 0.238232744 | 0.418850733 | 0.495151555 | 0.221545117 |
| 0.37413291  | 0.021110431 | 0.139523115 | 0.038937042 |
| 0.311998672 | 0.123176612 | 0.4861882   | 0.421585964 |
| 0.25447059  | 0.369231052 | 0.309217594 | 0.002856607 |
| 0.028220033 | 0.186012234 | 0.394145243 | 0.365629094 |
| 0.42481461  | 0.363259655 | 0.254197853 | 0.386760525 |
| 0.401520298 | 0.427237017 | 0.069868351 | 0.132501495 |
| 0.41339114  | 0.189723622 | 0.256299372 | 0.413591207 |
| 0.302383641 | 0.15167397  | 0.146382047 | 0.490258021 |
| 0.435455695 | 0.104044213 | 0.349749199 | 0.398869488 |
| 0.350755633 | 0.325279015 | 0.128347926 | 0.271632736 |
| 0.070676584 | 0.470794989 | 0.028220587 | 0.357720808 |
| 0.294636659 | 0.125000991 | 0.016228104 | 0.299448702 |
| 0.299027983 | 0.402404199 | 0.469121672 | 0.12534328  |
| 0.315395716 | 0.392915781 | 0.345507744 | 0.401982089 |
| 0.016642744 | 0.055656682 | 0.304559225 | 0.474039778 |
| 0.309438428 | 0.46064887  | 0.312386163 | 0.3144578   |
| 0.28284769  | 0.430093116 | 0.003612902 | 0.495974509 |
| 0.508408552 | 0.312342406 | 0.372758102 | 0.390648242 |
| 0.376502392 | 0.426706482 | 0.038708937 | 0.39646001  |
| 0.351712252 | 0.099242675 | 0.461577823 | 0.165534196 |
| 0.447675663 | 0.051310444 | 0.342716419 | 0.399381278 |
| 0.380495458 | 0.010234039 | 0.271447966 | 0.406069371 |
| 0.028428335 | 0.144528875 | 0.423396117 | 0.414686987 |
| 0.400816064 | 0.422759315 | 0.432450993 | 0.357990008 |
| 0.406300375 | 0.264398272 | 0.016036522 | 0.303398868 |
| 0.413320979 | 0.374015265 | 0.450699008 | 0.280738284 |
| 0.338091701 | 0.467775332 | 0.389654256 | 0.256474964 |
| 0.061847342 | 0.352366485 | 0.026244399 | 0.350627166 |
| 0.38392291  | 0.13682311  | 0.40287078  | 0.142630128 |
| 0.071915066 | 0.50108768  | 0.162029385 | 0.234294022 |
| 0.113675089 | 0.378289232 | 0.287209257 | 0.232568444 |
| 0.187566091 | 0.192596706 | 0.360501068 | 0.401207407 |
| 0.058719511 | 0.100693918 | 0.015528101 | 0.316023513 |
| 0.120154174 | 0.299655339 | 0.30117501  | 0.394638411 |
| 0.312860235 | 0.102568147 | 0.361199164 | 0.295512395 |
| 0.120905231 | 0.01808796  | 0.494395724 | 0.402807334 |
| 0.343915996 | 0.195569781 | 0.046166828 | 0.297547347 |
| 0.430409981 | 0.336337515 | 0.304706056 | 0.440185766 |
| 0.034839758 | 0.442137587 | 0.247152124 | 0.12931258  |
| 0.32830838  | 0.269873085 | 0.431908686 | 0.080692282 |
| 0.398638376 | 0.463091697 | 0.321659668 | 0.203683521 |
| 0.387590347 | 0.420302969 | 0.042911942 | 0.391323123 |
| 0.378380539 | 0.036681973 | 0.497488001 | 0.116180754 |
| 0.024146201 | 0.401558823 | 0.410462547 | 0.086582405 |
| 0.086859818 | 0.344158928 | 0.07614679  | 0.29249788  |
| 0.497624029 | 0.393954108 | 0.414039708 | 0.211651389 |
| 0.053023425 | 0.008162462 | 0.197392119 | 0.368593809 |
| 0.503709479 | 0.475273154 | 0.268192249 | 0.33258714  |
| 0.267344752 | 0.348628135 | 0.19064033  | 0.476433618 |
| 0.193338856 | 0.504976028 | 0.009080948 | 0.407002644 |
| 0.500589127 | 0.310363899 | 0.086110593 | 0.350531039 |

|             |             |             |             |
|-------------|-------------|-------------|-------------|
| 0.38002276  | 0.067440171 | 0.234492497 | 0.486173812 |
| 1           | 0.36231839  | 0.373743397 | 0.400662018 |
| 0.027778396 | 0.06737757  | 0.393509421 | 0.173525948 |
| 0.402827319 | 0.251976956 | 0.041697966 | 0.364933206 |
| 0.053021698 | 0.449527855 | 0.417637965 | 0.083449326 |
| 0.353092895 | 0.3583703   | 0.360438881 | 0.050117227 |
| 0.405646874 | 0.476897738 | 0.513347074 | 0.20096893  |
| 0.40221314  | 0.462586851 | 0.36133351  | 0.087041002 |
| 0.01910764  | 0.499741394 | 0.409407353 | 0.0272576   |
| 0.426958891 | 0.269680998 | 0.013514755 | 0.491338372 |
| 0.221484654 | 0.447582411 | 0.007619422 | 0.081059305 |
| 0.042383483 | 0.41538268  | 0.485130522 | 0.402023993 |
| 0.275678593 | 0.381262598 | 0.006386726 | 0.490222225 |
| 0.478616728 | 0.015548611 | 0.139553654 | 0.400351284 |
| 0.382224488 | 0.51988437  | 0.30561322  | 0.405325545 |
| 0.376469335 | 0.488309014 | 0.256562054 | 0.281619518 |
| 0.419034221 | 0.467101488 | 0.419910342 | 0.461278003 |
| 0.42241421  | 0.397645331 | 0.308760837 | 0.025526547 |
| 0.179439337 | 0.263932753 | 0.32209478  | 0.113445073 |
| 0.352163635 | 0.154679163 | 0.457083349 | 0.42774442  |
| 0.435865131 | 0.006314288 | 0.194016026 | 0.406549662 |
| 0.419894556 | 0.446787539 | 0.025798061 | 0.007811574 |
| 0.007384443 | 0.01992633  | 0.389315185 | 0.247899838 |
| 0.467373072 | 0.247376908 | 0.006592996 | 0.06694702  |
| 0.30590404  | 0.367183403 | 0.490145721 | 0.385150219 |
| 0.409816112 | 0.093391853 | 0.288021335 | 0.403077918 |
| 0.078091172 | 0.336063857 | 0.446788067 | 0.478802184 |
| 0.046466887 | 0.26559199  | 0.363142907 | 0.45951838  |
| 0.061642422 | 0.311035057 | 0.393718716 | 0.323883549 |
| 0.014811548 | 0.08825326  | 0.083123743 | 0.417997207 |
| 0.486780688 | 0.073720405 | 0.032519383 | 0.154044133 |
| 0.140102751 | 0.424694462 | 0.173668603 | 0.478599394 |
| 0.425216068 | 0.41732035  | 0.074366054 | 0.48899486  |
| 0.053019752 | 0.475361571 | 0.310233938 | 0.071148194 |
| 0.282935806 | 0.016053241 | 0.439367807 | 0.175418559 |
| 0.33920631  | 0.402177121 | 0.246510387 | 0.01796171  |
| 0.178819931 | 0.056215942 | 0.434768781 | 0.416918663 |
| 0.034030063 | 0.29487249  | 0.30389048  | 0.401436299 |
| 0.32219991  | 0.415617377 | 0.502073123 | 0.384987221 |
| 0.120464586 | 0.115961114 | 0.409115148 | 0.383724356 |
| 0.268037115 | 0.441224812 | 0.315052898 | 0.500101435 |
| 0.410410197 | 0.449860983 | 0.442813145 | 0.384886578 |
| 0.211656596 | 0.402086702 | 0.38405954  | 0.026555169 |
| 0.366750959 | 0.421910056 | 0.381254378 | 0.159443341 |
| 0.260936048 | 0.356084522 | 0.071066489 | 0.177185485 |
| 0.293502371 | 0.339352893 | 0.161652053 | 0.421027143 |
| 0.391068539 | 0.38923576  | 0.054972198 | 0.078922903 |
| 0.52538752  | 0.443856838 | 0.191504512 | 0.424073216 |
| 0.182518792 | 0.363035925 | 0.413681318 | 0.405628956 |
| 0.393308389 | 0.407964664 | 0.414401228 | 0.382607551 |
| 0.429967334 | 0.30432022  | 0.518388597 | 0.119353834 |
| 0.096021865 | 0.383819672 | 0.108201131 | 0.098515622 |
| 0.160018965 | 0.033219626 | 0.273050555 | 0.405235453 |
| 0.329224245 | 0.37224531  | 0.331275584 | 0.099048827 |



|             |             |             |             |
|-------------|-------------|-------------|-------------|
| 0.316811475 | 0.367138238 | 0.359279245 | 0.236376238 |
| 0.090091524 | 0.494535319 | 0.011528781 | 0.061641755 |
| 0.326498598 | 0.423241669 | 0.350021073 | 0.248292801 |
| 0.279618526 | 0.138602543 | 0.307372772 | 0.321504807 |
| 0.305484569 | 0.336767163 | 0.42017744  | 0.050238535 |
| 0.028881874 | 0.44631445  | 0.375591355 | 0.022410366 |
| 0.105139554 | 0.392957223 | 0.292766126 | 0.279056501 |
| 0.022699822 | 0.451207567 | 0.360813001 | 0.408642497 |
| 0.380971511 | 0.078795321 | 0.359894557 | 0.108551561 |
| 0.082084923 | 0.444755258 | 0.373469457 | 0.493124527 |
| 0.333838466 | 0.406358321 | 0.458213629 | 0.404610068 |
| 0.12774111  | 0.360259713 | 0.043574466 | 0.425489884 |
| 0.37112624  |             |             |             |
| MIPEP       | 0.264384399 | 0.393581771 | 0.190159337 |
| 0.358590484 | 0.219998728 | 0.195082791 | 0.144228507 |
| 0.064408619 | 0.134603917 | 0.008779166 | 0.049078801 |
| 0.221513524 | 0.083612507 | 0.074979765 | 0.125745254 |
| 0.386710448 | 0.076757619 | 0.101921463 | 0.179158911 |
| 0.299541592 | 0.055868108 | 0.336802036 | 0.089490363 |
| 0.130281529 | 0.097166417 | 0.091834735 | 0.160597835 |
| 0.37451226  | 0.096198778 | 0.121430853 | 0.257409046 |
| 0.066691896 | 0.293285931 | 0.359347327 | 0.28576596  |
| 0.334598661 | 0.238784316 | 0.004460054 | 0.104717475 |
| 0.297281878 | 0.36733572  | 0.313466473 | 0.241494463 |
| 0.05835036  | 0.30738133  | 0.195739974 | 0.251744356 |
| 0.073007413 | 0.052899737 | 0.06251153  | 0.295735026 |
| 0.309948348 | 0.244678882 | 0.093536905 | 0.106373784 |
| 0.07702128  | 0.04932021  | 0.080234947 | 0.164938175 |
| 0.156917797 | 0.043105996 | 0.330350817 | 0.103558743 |
| 0.07404735  | 0.090471642 | 0.0771644   | 0.112153685 |
| 0.125021374 | 0.248014875 | 0.025087263 | 0.189085857 |
| 0.001766757 | 0.302526115 | 0.231993473 | 0.137096429 |
| 0.055688867 | 0.023310313 | 0.087858888 | 0.240230199 |
| 0.378861183 | 0.312872774 | 0.411881106 | 0.407187969 |
| 0.075108103 | 0.162717566 | 0.187031602 | 0.102977495 |
| 0.331495642 | 0.113635196 | 0.06270715  | 0.380706539 |
| 0.415161134 | 0.36937251  | 0.137853144 | 0.206084457 |
| 0.332861932 | 0.352151054 | 0.171446424 | 0.184680568 |
| 0.141424172 | 0.059487778 | 0.314994854 | 0.396075815 |
| 0.25518782  | 0.136606442 | 0.125308874 | 0.285267596 |
| 0.065810466 | 0.079645648 | 0.288848504 | 0.041921074 |
| 0.397386736 | 0.052293128 | 0.148814247 | 0.198870212 |
| 0.098475001 | 0.302869757 | 0.372599532 | 0.150821889 |
| 0.175824638 | 0.020908291 | 0.110095632 | 0.041915737 |
| 0.088418641 | 0.059647075 | 0.300151699 | 0.369843906 |
| 0.062715471 | 0.119505737 | 0.135775316 | 0.008861181 |
| 0.037388879 | 0.087446817 | 0.268390424 | 0.132226798 |
| 0.314057769 | 0.25509131  | 0.145900389 | 0.229373197 |
| 0.261983435 | 0.407702824 | 0.017091747 | 0.087174198 |
| 0.218337602 | 0.090309905 | 0.211171295 | 0.213858084 |
| 0.201546306 | 0.078191    | 0.085686331 | 0.429466813 |
| 0.295856083 | 0.078812362 | 0.077344511 | 0.34889946  |
| 0.112406339 | 0.217341057 | 0.080182801 | 0.088543027 |
| 0.051453029 | 0.333857435 | 0.037246019 | 0.117235852 |

|             |             |             |             |
|-------------|-------------|-------------|-------------|
| 0.159655011 | 0.060385982 | 0.014193197 | 0.103965885 |
| 0.087918376 | 0.320983673 | 0.286057444 | 0.083208703 |
| 0.119301496 | 0.31244125  | 0.107276014 | 0.272183853 |
| 0.030028239 | 0.04866169  | 0.069956056 | 0.382535637 |
| 0.128137713 | 0.387856586 | 0.113331276 | 0.147361752 |
| 0.217182213 | 0.386436858 | 0.002990549 | 0.33134504  |
| 0.378946379 | 0.06971336  | 0.22056162  | 0.239357511 |
| 0.199419553 | 0.382778926 | 0.008940076 | 0.310949027 |
| 0.168944892 | 0.07693952  | 0.431570377 | 0.132774532 |
| 0.307745099 | 0.06501125  | 0.086339162 | 0.345662867 |
| 0.24981776  | 0.011176267 | 0.090120461 | 0.297370467 |
| 0.039539489 | 0.06290651  | 0.296691521 | 0.31229463  |
| 0.288634179 | 0.359689    | 0.423226618 | 0.18081175  |
| 0.215977294 | 0.09849265  | 0.02494734  | 0.197731538 |
| 0.315556322 | 0.097820522 | 0.313041994 | 0.119013172 |
| 0.120308143 | 0.358323189 | 0.27156625  | 0.086242641 |
| 0.065987587 | 0.143594121 | 0.018586824 | 0.240624992 |
| 0.290131702 | 0.069554249 | 0.212422343 | 0.062488437 |
| 0.066734528 | 0.413303874 | 0.091625204 | 0.094442271 |
| 0.066443791 | 0.178395899 | 0.153306265 | 0.069577905 |
| 0.06913804  | 0.142086248 | 0.16413206  | 0.15078997  |
| 0.041935639 | 0.07284966  | 0.020697769 | 0.064314384 |
| 0.043160676 | 0.069769277 | 0.063922334 | 0.218807758 |
| 0.075078412 | 0.046628092 | 0.183031675 | 0.136137511 |
| 0.103880696 | 0.030105039 | 0.382605872 | 0.315048874 |
| 0.178474431 | 0.126388071 | 0.047423284 | 0.057315929 |
| 0.37383686  | 0.12668941  | 0.05689566  | 0.347652858 |
| 0.030573736 | 0.407174187 | 0.094241825 | 0.110926156 |
| 0.107551218 | 0.165035242 | 0.418026203 | 0.059724658 |
| 0.176914981 | 0.328989643 | 0.202977786 | 0.142248618 |
| 0.245263855 | 0.284927446 | 0.044936985 | 0.24311674  |
| 0.216966909 | 0.043127848 | 0.385020309 | 0.071820675 |
| 0.035660354 | 0.304169038 | 0.313300521 | 0.094622289 |
| 0.085606514 | 0.167103231 | 0.042947938 | 0.259066792 |
| 0.406576998 | 0.361530027 | 0.306614046 | 0.113825469 |
| 0.054357678 | 0.007962408 | 0.103028755 | 0.181463553 |
| 0.325800123 | 0.374920733 | 0.173852634 | 0.166173337 |
| 0.207342048 | 0.16916556  | 0.041332083 | 0.395731258 |
| 0.073930412 | 0.356118088 | 0.017628839 | 0.342451889 |
| 0.336360401 | 0.087725921 | 0.088872424 | 0.176346898 |
| 0.246910003 | 0.074930624 | 0.09063747  | 0.342777187 |
| 0.36231839  | 1           | 0.155432972 | 0.252784457 |
| 0.028450697 | 0.049524179 | 0.281290046 | 0.098302524 |
| 0.129396327 | 0.158464546 | 0.027627016 | 0.096347915 |
| 0.051186403 | 0.325550275 | 0.354634297 | 0.11367276  |
| 0.160131674 | 0.089540982 | 0.276191852 | 0.058167217 |
| 0.360942675 | 0.352067177 | 0.354293471 | 0.084182394 |
| 0.276150378 | 0.373081748 | 0.203378757 | 0.074509196 |
| 0.033514787 | 0.354475803 | 0.245344577 | 0.02427946  |
| 0.394028022 | 0.07196837  | 0.01553518  | 0.368408721 |
| 0.143566436 | 0.259860227 | 0.011893297 | 0.030779359 |
| 0.047307806 | 0.382574509 | 0.34013938  | 0.256991956 |
| 0.053678003 | 0.238512844 | 0.006642484 | 0.391608357 |
| 0.34494482  | 0.032837884 | 0.099567764 | 0.288091911 |

|                     |             |             |             |
|---------------------|-------------|-------------|-------------|
| 0.279615169         | 0.378112258 | 0.165341065 | 0.356648133 |
| 0.21384644          | 0.338180795 | 0.095169428 | 0.24203805  |
| 0.341540308         | 0.348050583 | 0.298934312 | 0.338624701 |
| 0.361118551         | 0.309178028 | 0.246952668 | 0.03924714  |
| 0.188218279         | 0.07588904  | 0.093795412 | 0.096276308 |
| 0.155263876         | 0.121093118 | 0.346090348 | 0.393147303 |
| 0.366693714         | 0.015369832 | 0.071257711 | 0.287668458 |
| 0.339274631         | 0.400426648 | 0.0264972   | 0.013834991 |
| 0.005320333         | 0.040934262 | 0.208359969 | 0.164410182 |
| 0.390117343         | 0.045010126 | 0.013831557 | 0.03674158  |
| 0.112021413         | 0.276294402 | 0.359058814 | 0.332865214 |
| 0.325849161         | 0.073312807 | 0.082631818 | 0.330111324 |
| 0.099609089         | 0.155786798 | 0.387347484 | 0.341476781 |
| 0.045392827         | 0.16743176  | 0.114191765 | 0.41472732  |
| 0.038010392         | 0.221982537 | 0.226390632 | 0.118624357 |
| 0.014154542         | 0.088716848 | 0.108631836 | 0.366259873 |
| 0.322718242         | 0.050471086 | 0.035491467 | 0.029843344 |
| 0.080688337         | 0.372468792 | 0.090190074 | 0.422768138 |
| 0.343056412         | 0.38731301  | 0.063558634 | 0.359427161 |
| 0.078931785         | 0.318951606 | 0.175810546 | 0.023612903 |
| 0.099197797         | 0.023382723 | 0.309035427 | 0.121926407 |
| 0.076042615         | 0.236844889 | 0.199497082 | 0.030043042 |
| 0.099842238         | 0.056832295 | 0.418447752 | 0.389650036 |
| 0.039060803         | 0.125068747 | 0.189094955 | 0.263278763 |
| 0.131305291         | 0.345132856 | 0.339824341 | 0.144599015 |
| 0.080701299         | 0.044881856 | 0.289867325 | 0.197897141 |
| 0.067051194         | 0.415163906 | 0.154195845 | 0.401230029 |
| 0.266470899         | 0.358560333 | 0.345942438 | 0.25677666  |
| 0.093151101         | 0.189455328 | 0.242925671 | 0.021329226 |
| 0.223043505         | 0.372698877 | 0.151322452 | 0.12135617  |
| 0.167012878         | 0.189407068 | 0.049429336 | 0.032175027 |
| 0.136136052         | 0.153295566 | 0.080966085 | 0.397417304 |
| 0.201242017         | 0.217979529 | 0.027350155 | 0.106465635 |
| 0.396867795         | 0.330469635 | 0.089867952 | 0.290531168 |
| 0.113091888         | 0.274807193 | 0.328174816 | 0.333529242 |
| 0.125365742         | 0.313761693 | 0.298057803 | 0.223093269 |
| 0.294993839         | 0.199619559 | 0.368804707 | 0.030075601 |
| 0.123366224         | 0.18778887  | 0.075314159 | 0.0890535   |
| 0.106552944         | 0.050979186 | 0.098731827 | 0.327321834 |
| 0.086801568         | 0.268100108 | 0.064497374 | 0.078253946 |
| 0.202544376         | 0.11346708  | 0.248724889 | 0.091142266 |
| 0.066952149         | 0.34855434  | 0.018976066 | 0.056646329 |
| 0.088502024         | 0.353871931 | 0.191092644 | 0.126036339 |
| 0.125701999         | 0.083276608 | 0.200832437 | 0.100228245 |
| 0.075360813         | 0.08623249  | 0.345482134 | 0.042721911 |
| 0.026365965         | 0.409413451 | 0.122649936 | 0.028746958 |
| 0.07216846          | 0.19700606  | 0.083575904 | 0.162129386 |
| 0.035221764         | 0.348407925 | 0.113565218 | 0.234869648 |
| 0.198877178         | 0.062364046 | 0.214714528 | 0.056774072 |
| 0.063146633         | 0.290832883 | 0.221118409 | 0.354156024 |
| 0.148379076         | 0.370734452 | 0.282050183 | 0.282680567 |
| 0.056046725         | 0.153384327 | 0.052329883 | 0.350276654 |
| 0.111950767         |             |             |             |
| MKI67IP 0.256322846 | 0.421418902 | 0.183488445 |             |

|             |             |             |             |
|-------------|-------------|-------------|-------------|
| 0.351113108 | 0.196289863 | 0.202962244 | 0.11707711  |
| 0.047042809 | 0.113077557 | 0.008033087 | 0.037318892 |
| 0.221444481 | 0.079746079 | 0.06722806  | 0.128378905 |
| 0.347493232 | 0.05560617  | 0.084946019 | 0.137464    |
| 0.264795021 | 0.041062979 | 0.303325479 | 0.058872442 |
| 0.099190829 | 0.077569387 | 0.061734767 | 0.149186419 |
| 0.359177468 | 0.067292213 | 0.122313975 | 0.239029014 |
| 0.038391229 | 0.283847085 | 0.400336166 | 0.283722131 |
| 0.378501296 | 0.240802554 | 0.001472285 | 0.103169904 |
| 0.299550988 | 0.380521568 | 0.279534015 | 0.214242125 |
| 0.040723299 | 0.346182091 | 0.165708745 | 0.227342488 |
| 0.067190266 | 0.035370613 | 0.061522393 | 0.319879969 |
| 0.360253492 | 0.246082795 | 0.070549749 | 0.082358048 |
| 0.072442562 | 0.040829402 | 0.087392582 | 0.162057785 |
| 0.121630888 | 0.036932106 | 0.373090587 | 0.088108184 |
| 0.050601711 | 0.06666799  | 0.049124469 | 0.091728787 |
| 0.103225576 | 0.250484809 | 0.01097502  | 0.191145994 |
| 0.001502512 | 0.260597617 | 0.196714586 | 0.14213618  |
| 0.034562546 | 0.01691007  | 0.057920149 | 0.215641528 |
| 0.367045457 | 0.331254204 | 0.418260622 | 0.422301156 |
| 0.061436925 | 0.123598176 | 0.171992574 | 0.074932563 |
| 0.334884171 | 0.096738884 | 0.051011303 | 0.344123621 |
| 0.426279105 | 0.408019251 | 0.097378106 | 0.161178177 |
| 0.359899107 | 0.364358856 | 0.192810221 | 0.181283196 |
| 0.156366785 | 0.03332067  | 0.344368005 | 0.415593256 |
| 0.266617704 | 0.130530339 | 0.095871569 | 0.277464919 |
| 0.036237131 | 0.07701748  | 0.254319716 | 0.029970128 |
| 0.387192931 | 0.033493839 | 0.115161939 | 0.177840717 |
| 0.067454808 | 0.313405778 | 0.411586597 | 0.114458052 |
| 0.153349453 | 0.012767366 | 0.125842446 | 0.019793338 |
| 0.077378368 | 0.051299292 | 0.346934826 | 0.379795719 |
| 0.048957378 | 0.102910429 | 0.104935846 | 0.004072849 |
| 0.021995864 | 0.054909932 | 0.276890431 | 0.108854169 |
| 0.293749881 | 0.275643967 | 0.132151953 | 0.232533254 |
| 0.269486536 | 0.407878595 | 0.020885677 | 0.054354842 |
| 0.214900488 | 0.055581883 | 0.161553617 | 0.209149767 |
| 0.184230092 | 0.049160056 | 0.054980586 | 0.447049656 |
| 0.31280713  | 0.052654449 | 0.067493133 | 0.316589777 |
| 0.10613335  | 0.196803504 | 0.04761234  | 0.071226813 |
| 0.031187645 | 0.372297197 | 0.021191014 | 0.101683722 |
| 0.166282753 | 0.044396604 | 0.00569019  | 0.085828321 |
| 0.091775834 | 0.35771524  | 0.324659837 | 0.050865618 |
| 0.102870725 | 0.285524825 | 0.095803103 | 0.301775941 |
| 0.026756265 | 0.025697133 | 0.062722038 | 0.404850208 |
| 0.131713472 | 0.398798431 | 0.089122124 | 0.108175624 |
| 0.176299063 | 0.379763251 | 0.002480635 | 0.374459622 |
| 0.41926818  | 0.07020799  | 0.219202581 | 0.212967743 |
| 0.19872727  | 0.392668314 | 0.006546154 | 0.277624863 |
| 0.171836817 | 0.043396864 | 0.433008677 | 0.103362955 |
| 0.33357504  | 0.04088053  | 0.073322522 | 0.368777893 |
| 0.270183102 | 0.005943768 | 0.085942192 | 0.26971389  |
| 0.020371368 | 0.044801891 | 0.279839492 | 0.299455609 |
| 0.284598857 | 0.34713408  | 0.413554952 | 0.188471322 |
| 0.205903198 | 0.073525588 | 0.010974963 | 0.167433782 |

|             |             |             |             |
|-------------|-------------|-------------|-------------|
| 0.308598595 | 0.089215421 | 0.345971795 | 0.087372586 |
| 0.123339411 | 0.388957684 | 0.297421781 | 0.088879449 |
| 0.040855411 | 0.118566863 | 0.014494039 | 0.226614646 |
| 0.303638914 | 0.053603543 | 0.210735932 | 0.035631099 |
| 0.043040113 | 0.440957855 | 0.073404218 | 0.091264225 |
| 0.056441664 | 0.184585755 | 0.115145885 | 0.068872004 |
| 0.069546451 | 0.093867605 | 0.140970832 | 0.148520981 |
| 0.025942245 | 0.048292928 | 0.009128997 | 0.069461756 |
| 0.042293821 | 0.072482468 | 0.072448882 | 0.220272605 |
| 0.062700241 | 0.038217272 | 0.179060833 | 0.114159296 |
| 0.079590041 | 0.015605736 | 0.412592572 | 0.279769734 |
| 0.186542371 | 0.084177359 | 0.025232442 | 0.062759735 |
| 0.385834168 | 0.146121582 | 0.052784158 | 0.366082794 |
| 0.017431626 | 0.401849938 | 0.085812226 | 0.083841105 |
| 0.107781137 | 0.138639402 | 0.407988334 | 0.045124044 |
| 0.156799734 | 0.353994288 | 0.158256331 | 0.11751992  |
| 0.272692918 | 0.262937457 | 0.025186764 | 0.256403021 |
| 0.227006503 | 0.024543093 | 0.415338812 | 0.050098105 |
| 0.018120349 | 0.294797735 | 0.336723527 | 0.062421648 |
| 0.057710343 | 0.16530535  | 0.02887863  | 0.214864114 |
| 0.437433001 | 0.333375226 | 0.326583645 | 0.085129904 |
| 0.035509783 | 0.00577388  | 0.074646358 | 0.172948967 |
| 0.367632421 | 0.405473269 | 0.12879557  | 0.170737071 |
| 0.158693684 | 0.155048324 | 0.0304963   | 0.422600586 |
| 0.048979447 | 0.387134052 | 0.007656225 | 0.345353015 |
| 0.383123389 | 0.081601509 | 0.067007956 | 0.158846095 |
| 0.268309676 | 0.045868535 | 0.056902571 | 0.384292486 |
| 0.373743397 | 0.155432972 | 1           | 0.228715799 |
| 0.018177932 | 0.027699239 | 0.266688187 | 0.079009239 |
| 0.120976042 | 0.116176936 | 0.022995987 | 0.073726217 |
| 0.036582805 | 0.352001982 | 0.338236323 | 0.087790827 |
| 0.176787342 | 0.074102692 | 0.236474366 | 0.032495066 |
| 0.38942968  | 0.38216841  | 0.39664787  | 0.052104369 |
| 0.27333238  | 0.413437731 | 0.221059162 | 0.04308191  |
| 0.01834129  | 0.398065548 | 0.239147348 | 0.020212348 |
| 0.380592248 | 0.071623063 | 0.011989424 | 0.395583474 |
| 0.104110235 | 0.294482724 | 0.013906112 | 0.023399368 |
| 0.025333513 | 0.369270835 | 0.385518581 | 0.231552642 |
| 0.061990257 | 0.19613849  | 0.001888164 | 0.412241078 |
| 0.382582074 | 0.019147273 | 0.067311794 | 0.301093981 |
| 0.310922782 | 0.406406923 | 0.167314142 | 0.385728151 |
| 0.228683937 | 0.385034395 | 0.074705248 | 0.197261307 |
| 0.359735811 | 0.386824487 | 0.295691702 | 0.362580874 |
| 0.359931609 | 0.284154587 | 0.204884597 | 0.022784838 |
| 0.159859415 | 0.062391642 | 0.114742132 | 0.09733922  |
| 0.151250135 | 0.101902934 | 0.368346653 | 0.383346148 |
| 0.393367155 | 0.006931031 | 0.05259815  | 0.294735948 |
| 0.346226061 | 0.394188524 | 0.0120749   | 0.011312023 |
| 0.005151442 | 0.035503574 | 0.177568197 | 0.125513782 |
| 0.411135289 | 0.055419015 | 0.006613358 | 0.022466967 |
| 0.099316988 | 0.268493128 | 0.392993313 | 0.287843519 |
| 0.318159708 | 0.040323621 | 0.087777346 | 0.288938814 |
| 0.075254091 | 0.160031527 | 0.413580659 | 0.371006932 |
| 0.0217472   | 0.129577278 | 0.100888317 | 0.417466708 |

|             |             |             |             |
|-------------|-------------|-------------|-------------|
| 0.035471437 | 0.177826271 | 0.222007817 | 0.108240706 |
| 0.00611864  | 0.0573772   | 0.072066593 | 0.334818437 |
| 0.368843782 | 0.041377563 | 0.026937007 | 0.023753293 |
| 0.063364973 | 0.362813361 | 0.071842297 | 0.433072571 |
| 0.349831999 | 0.363325509 | 0.036068006 | 0.395669519 |
| 0.044965393 | 0.359689687 | 0.17109754  | 0.040785482 |
| 0.072113002 | 0.010280766 | 0.333834771 | 0.143952269 |
| 0.071203449 | 0.21948436  | 0.177467132 | 0.014281843 |
| 0.088436928 | 0.034318531 | 0.422531637 | 0.387399336 |
| 0.019295508 | 0.087406337 | 0.153496422 | 0.23336194  |
| 0.121268717 | 0.342817552 | 0.380689292 | 0.167690084 |
| 0.053242629 | 0.029866846 | 0.266206376 | 0.200445589 |
| 0.050208003 | 0.41467623  | 0.138780141 | 0.427454942 |
| 0.262808145 | 0.363535433 | 0.368869422 | 0.237045288 |
| 0.070907543 | 0.187126123 | 0.251106316 | 0.019019133 |
| 0.192220758 | 0.372902444 | 0.128257252 | 0.114286691 |
| 0.146526238 | 0.189791521 | 0.023186153 | 0.027261704 |
| 0.140893531 | 0.154703629 | 0.058966232 | 0.364646408 |
| 0.181326462 | 0.219210156 | 0.011920054 | 0.075611918 |
| 0.425397979 | 0.346239578 | 0.076655527 | 0.295813447 |
| 0.077027321 | 0.244380941 | 0.332323743 | 0.324474924 |
| 0.105119703 | 0.331085125 | 0.288214378 | 0.236260093 |
| 0.318123547 | 0.156984993 | 0.411320936 | 0.021325594 |
| 0.078535038 | 0.18288008  | 0.058605235 | 0.056886142 |
| 0.076852292 | 0.03135131  | 0.097441248 | 0.29035406  |
| 0.087653938 | 0.243502319 | 0.052157473 | 0.054816104 |
| 0.15981046  | 0.101260803 | 0.204962279 | 0.080299554 |
| 0.054541091 | 0.392884474 | 0.011597968 | 0.030531836 |
| 0.086097571 | 0.36590028  | 0.203430311 | 0.097270452 |
| 0.112046253 | 0.049296649 | 0.162195266 | 0.094745557 |
| 0.089404964 | 0.072914985 | 0.367031688 | 0.02773185  |
| 0.013586404 | 0.407603432 | 0.120608227 | 0.013370764 |
| 0.039005811 | 0.188792426 | 0.058461672 | 0.13128843  |
| 0.018429553 | 0.382166266 | 0.11715535  | 0.216545724 |
| 0.178530049 | 0.033365509 | 0.227388711 | 0.033967397 |
| 0.033213594 | 0.318078005 | 0.211809881 | 0.39328764  |
| 0.123129029 | 0.346597503 | 0.311930996 | 0.28923875  |
| 0.040254959 | 0.146566699 | 0.031168937 | 0.332006564 |
| 0.124637686 |             |             |             |

|             |             |             |             |
|-------------|-------------|-------------|-------------|
| MLF1        | 0.384055182 | 0.490595093 | 0.316962071 |
| 0.357903907 | 0.350828234 | 0.232791064 | 0.18528385  |
| 0.18862736  | 0.076889762 | 0.005743717 | 0.022252418 |
| 0.344008177 | 0.164149051 | 0.21558469  | 0.199855293 |
| 0.397565235 | 0.171211124 | 0.35014449  | 0.246966733 |
| 0.350303727 | 0.089368203 | 0.344468216 | 0.114611493 |
| 0.298740334 | 0.117721772 | 0.084870956 | 0.220415757 |
| 0.441681342 | 0.098926404 | 0.19846915  | 0.318288441 |
| 0.195776751 | 0.421546981 | 0.472370453 | 0.330783048 |
| 0.467326879 | 0.336847976 | 0.057453624 | 0.18232743  |
| 0.416591486 | 0.358414494 | 0.34652665  | 0.281264309 |
| 0.055151184 | 0.43686722  | 0.21143951  | 0.355126364 |
| 0.189360206 | 0.043461918 | 0.164426966 | 0.404630529 |
| 0.408901528 | 0.269950709 | 0.198126098 | 0.143280844 |
| 0.129009304 | 0.180195451 | 0.191866369 | 0.233098957 |

|             |             |             |             |
|-------------|-------------|-------------|-------------|
| 0.213372858 | 0.114553543 | 0.432269748 | 0.074351898 |
| 0.122483787 | 0.259034994 | 0.241762768 | 0.241889287 |
| 0.293175189 | 0.322820014 | 0.045817309 | 0.306117123 |
| 0.003563397 | 0.329021351 | 0.372969202 | 0.202782234 |
| 0.077625224 | 0.028443454 | 0.261353828 | 0.261808809 |
| 0.466189025 | 0.455125184 | 0.481244193 | 0.477077193 |
| 0.199880946 | 0.343570021 | 0.326504225 | 0.185202041 |
| 0.416727109 | 0.15097826  | 0.136355884 | 0.404217025 |
| 0.485487531 | 0.480244278 | 0.219649887 | 0.292683143 |
| 0.337920928 | 0.455842959 | 0.281724786 | 0.30934537  |
| 0.202965107 | 0.111640496 | 0.389041451 | 0.495998866 |
| 0.373882615 | 0.277956    | 0.186594146 | 0.3777901   |
| 0.106862357 | 0.277746196 | 0.300268649 | 0.24506218  |
| 0.474580802 | 0.02453573  | 0.251509194 | 0.27135936  |
| 0.302590657 | 0.398032846 | 0.476859381 | 0.191711493 |
| 0.378007419 | 0.041935202 | 0.102893578 | 0.088065396 |
| 0.279064083 | 0.166337316 | 0.415749517 | 0.428781111 |
| 0.229081146 | 0.306792606 | 0.251350232 | 0.011532507 |
| 0.06004542  | 0.292224241 | 0.409678742 | 0.373245112 |
| 0.391146161 | 0.366106463 | 0.18027227  | 0.323844438 |
| 0.302121482 | 0.477099688 | 0.028791092 | 0.127782556 |
| 0.305733142 | 0.292693509 | 0.259058942 | 0.321327744 |
| 0.266574221 | 0.14510653  | 0.166120332 | 0.501309783 |
| 0.393635599 | 0.114112966 | 0.305768596 | 0.382246918 |
| 0.213160615 | 0.322992965 | 0.155442057 | 0.256800075 |
| 0.066182391 | 0.433061065 | 0.068395164 | 0.301404662 |
| 0.149259954 | 0.191326993 | 0.044105959 | 0.224919867 |
| 0.207449815 | 0.363095736 | 0.416755107 | 0.166764772 |
| 0.284595596 | 0.331355808 | 0.255121973 | 0.29719558  |
| 0.008610408 | 0.097716509 | 0.220453729 | 0.485949516 |
| 0.181044355 | 0.50851966  | 0.314396771 | 0.317960595 |
| 0.294707416 | 0.431237512 | 0.00917923  | 0.442213602 |
| 0.481480276 | 0.215490932 | 0.293640506 | 0.372945272 |
| 0.242087238 | 0.414715139 | 0.054091639 | 0.382548588 |
| 0.293276921 | 0.133251705 | 0.506641028 | 0.182167747 |
| 0.440211554 | 0.061318802 | 0.256740259 | 0.392707477 |
| 0.341426212 | 0.017572405 | 0.153186066 | 0.303033238 |
| 0.069585119 | 0.083614289 | 0.38125989  | 0.31092105  |
| 0.264133843 | 0.42713273  | 0.493884342 | 0.223365137 |
| 0.329210911 | 0.259152977 | 0.038451497 | 0.331014471 |
| 0.418026407 | 0.253580734 | 0.399069221 | 0.222429348 |
| 0.239185653 | 0.435134428 | 0.368360116 | 0.113690006 |
| 0.059533516 | 0.262175416 | 0.026752845 | 0.2645975   |
| 0.360919263 | 0.106973207 | 0.250937854 | 0.285409029 |
| 0.117456547 | 0.496403615 | 0.204929616 | 0.237282146 |
| 0.144817491 | 0.267390135 | 0.272098921 | 0.157758116 |
| 0.15295887  | 0.184575597 | 0.258839168 | 0.265861119 |
| 0.045784764 | 0.123304962 | 0.056400668 | 0.256555418 |
| 0.10817239  | 0.225386222 | 0.213019882 | 0.320261717 |
| 0.284332449 | 0.11777762  | 0.300396301 | 0.274545492 |
| 0.149535088 | 0.03777431  | 0.477856666 | 0.3544122   |
| 0.269566024 | 0.168469431 | 0.090968292 | 0.214259843 |
| 0.436718696 | 0.171600744 | 0.192804158 | 0.414428393 |
| 0.065767498 | 0.491651836 | 0.195233367 | 0.148807155 |

|             |             |             |             |
|-------------|-------------|-------------|-------------|
| 0.294140495 | 0.246078148 | 0.454960156 | 0.042427104 |
| 0.315068302 | 0.429534173 | 0.345851776 | 0.17704566  |
| 0.353588705 | 0.321232548 | 0.044766491 | 0.351528584 |
| 0.342970724 | 0.059360728 | 0.499973225 | 0.187437987 |
| 0.053441241 | 0.377788956 | 0.327535224 | 0.117969804 |
| 0.120524043 | 0.22327048  | 0.051938652 | 0.291020665 |
| 0.485514701 | 0.369539909 | 0.334716782 | 0.264208617 |
| 0.05426969  | 0.015453628 | 0.278520502 | 0.338945953 |
| 0.461366782 | 0.488869358 | 0.310510644 | 0.276041612 |
| 0.252823843 | 0.225623434 | 0.123019403 | 0.482187971 |
| 0.304852341 | 0.493122053 | 0.023273861 | 0.384404017 |
| 0.450885741 | 0.212105615 | 0.097992505 | 0.224057689 |
| 0.341649817 | 0.065993575 | 0.280903178 | 0.452723018 |
| 0.400662018 | 0.252784457 | 0.228715799 | 1           |
| 0.023225433 | 0.058333509 | 0.308061295 | 0.199321556 |
| 0.258946502 | 0.221796471 | 0.074953939 | 0.270239564 |
| 0.054020626 | 0.405759464 | 0.47008405  | 0.062905279 |
| 0.184972259 | 0.251378655 | 0.359691778 | 0.064002369 |
| 0.416412484 | 0.481004729 | 0.475487929 | 0.223077316 |
| 0.406358944 | 0.442310501 | 0.267602241 | 0.147398655 |
| 0.044717907 | 0.474655614 | 0.318827592 | 0.027574152 |
| 0.478712838 | 0.154562727 | 0.015153812 | 0.469672791 |
| 0.212247999 | 0.399847583 | 0.003615008 | 0.128864274 |
| 0.101088359 | 0.469832878 | 0.418156441 | 0.310445039 |
| 0.129631126 | 0.355824863 | 0.028834437 | 0.513807309 |
| 0.445031559 | 0.033558112 | 0.195342673 | 0.371698762 |
| 0.339663558 | 0.503390245 | 0.243267005 | 0.405939043 |
| 0.296028943 | 0.444587701 | 0.190811766 | 0.267202942 |
| 0.387877917 | 0.453060296 | 0.371943459 | 0.434217719 |
| 0.447778196 | 0.37391728  | 0.254783811 | 0.022669398 |
| 0.107679945 | 0.175285659 | 0.153490747 | 0.060441598 |
| 0.22600128  | 0.145764918 | 0.474921352 | 0.474636805 |
| 0.460430248 | 0.018714088 | 0.152266085 | 0.37818292  |
| 0.42478983  | 0.476172372 | 0.066942817 | 0.010174296 |
| 0.017340551 | 0.022803251 | 0.297574263 | 0.289979937 |
| 0.463429398 | 0.12492392  | 0.014669656 | 0.06176412  |
| 0.257219522 | 0.313600484 | 0.461615215 | 0.345250121 |
| 0.417368515 | 0.139788984 | 0.156986482 | 0.373595216 |
| 0.083116936 | 0.259037729 | 0.460921507 | 0.426582455 |
| 0.108573915 | 0.28195676  | 0.354350363 | 0.476577161 |
| 0.072905742 | 0.333724485 | 0.347950622 | 0.228656205 |
| 0.061396916 | 0.124518605 | 0.086965631 | 0.440857258 |
| 0.446193571 | 0.079631956 | 0.044005364 | 0.110979891 |
| 0.109336487 | 0.473210724 | 0.167139689 | 0.510471056 |
| 0.408964651 | 0.441206888 | 0.138356644 | 0.435110645 |
| 0.046049017 | 0.439594927 | 0.291718935 | 0.041106926 |
| 0.368824291 | 0.042089482 | 0.457292674 | 0.080546065 |
| 0.255785144 | 0.337277998 | 0.147099407 | 0.049497045 |
| 0.176863098 | 0.095099367 | 0.461609378 | 0.453799653 |
| 0.093496903 | 0.245490507 | 0.330858511 | 0.367048449 |
| 0.218002812 | 0.366316265 | 0.452854562 | 0.235509196 |
| 0.088985755 | 0.223616337 | 0.365138929 | 0.313504951 |
| 0.22956507  | 0.498753033 | 0.204555067 | 0.511722654 |
| 0.34786479  | 0.458765279 | 0.447920463 | 0.265298433 |



|             |             |             |             |
|-------------|-------------|-------------|-------------|
| 0.249711652 | 0.288192525 | 0.247580423 | 0.022584763 |
| 0.328175953 | 0.435809432 | 0.329320431 | 0.136237346 |
| 0.230330666 | 0.295736882 | 0.098498876 | 0.22349948  |
| 0.257742745 | 0.199384918 | 0.155797012 | 0.455737472 |
| 0.325202032 | 0.324777476 | 0.091857149 | 0.076424919 |
| 0.514092349 | 0.413976511 | 0.128041553 | 0.309667817 |
| 0.247180278 | 0.277761246 | 0.426219761 | 0.424288034 |
| 0.283583029 | 0.403261168 | 0.39695101  | 0.270618425 |
| 0.382831684 | 0.250345288 | 0.476494869 | 0.100554072 |
| 0.093607152 | 0.323204401 | 0.091715681 | 0.15394596  |
| 0.170794113 | 0.056547281 | 0.218176234 | 0.402891191 |
| 0.273957525 | 0.317247619 | 0.26805072  | 0.120046953 |
| 0.345915785 | 0.323765719 | 0.338919832 | 0.164739891 |
| 0.085697813 | 0.439139768 | 0.021533175 | 0.111396043 |
| 0.311358005 | 0.370558053 | 0.273329541 | 0.273982258 |
| 0.240335787 | 0.233107977 | 0.289457314 | 0.213909972 |
| 0.178779386 | 0.306962913 | 0.367783859 | 0.052818556 |
| 0.036149927 | 0.505145699 | 0.295768018 | 0.069864042 |
| 0.139325175 | 0.277590956 | 0.378034123 | 0.171895024 |
| 0.058653365 | 0.44263073  | 0.187382961 | 0.337793975 |
| 0.284804823 | 0.126850852 | 0.336681584 | 0.119252992 |
| 0.117571694 | 0.425816392 | 0.321764065 | 0.472075479 |
| 0.36425574  | 0.382647781 | 0.402452018 | 0.396091097 |
| 0.207897295 | 0.301714631 | 0.040907587 | 0.444878002 |
| 0.243155652 |             |             |             |

| MOSPD1      | 0.012792785 | 0.021737781 | 0.008854066 |
|-------------|-------------|-------------|-------------|
| 0.079929088 | 0.025549967 | 0.03644355  | 0.195059983 |
| 0.064750914 | 0.065735512 | 0.13869429  | 0.027995847 |
| 0.011942256 | 0.01819586  | 0.057660424 | 0.013858079 |
| 0.060436257 | 0.040483819 | 0.015171687 | 0.164338678 |
| 0.062459272 | 0.182653091 | 0.067504181 | 0.157713003 |
| 0.006104759 | 0.035266318 | 0.127979178 | 0.016963472 |
| 0.060611852 | 0.138322898 | 0.037905126 | 0.065302045 |
| 0.032008503 | 0.023297719 | 0.01297602  | 0.026353634 |
| 0.009563521 | 0.009212701 | 0.015268142 | 0.045798931 |
| 0.02313589  | 0.027208324 | 0.068813857 | 0.124930409 |
| 0.166917996 | 0.013549823 | 0.185666026 | 0.019749221 |
| 0.018891074 | 0.066296702 | 0.046890593 | 0.016280376 |
| 0.011470279 | 0.01745806  | 0.093338533 | 0.18418193  |
| 0.009087396 | 0.034817223 | 0.002012951 | 0.042777651 |
| 0.168405977 | 0.07666323  | 0.012074281 | 0.098424252 |
| 0.016497718 | 0.07574067  | 0.023255075 | 0.112767459 |
| 0.003783991 | 0.030944155 | 0.106036008 | 0.004634605 |
| 0.045332911 | 0.080028992 | 0.026308687 | 0.003155791 |
| 0.136463294 | 0.072192014 | 0.033767749 | 0.123127003 |
| 0.04488527  | 0.010982898 | 0.029196881 | 0.020657146 |
| 0.023087182 | 0.042385911 | 0.006594519 | 0.103291506 |
| 0.021855677 | 0.189318925 | 0.04927715  | 0.053645806 |
| 0.026751245 | 0.01445687  | 0.024647746 | 0.04560462  |
| 0.036325789 | 0.023975287 | 0.017614913 | 0.02294446  |
| 0.007922185 | 0.013910901 | 0.016421887 | 0.021292333 |
| 0.020429053 | 0.004630894 | 0.079345666 | 0.051900443 |
| 0.127401501 | 0.006499206 | 0.11833256  | 0.010329868 |
| 0.046552431 | 0.154510053 | 0.043349772 | 0.083207846 |

|             |             |             |             |
|-------------|-------------|-------------|-------------|
| 0.022652569 | 0.023992696 | 0.012157796 | 0.204869476 |
| 0.015066051 | 0.051828931 | 0.003634491 | 0.063203537 |
| 0.013199391 | 0.001239362 | 0.009008944 | 0.045413106 |
| 0.03731819  | 0.00709651  | 0.105188059 | 0.050148915 |
| 0.056850843 | 0.009259056 | 0.012875504 | 0.022376596 |
| 0.032073514 | 0.005665147 | 0.062817386 | 0.017913676 |
| 0.009539175 | 0.027816911 | 0.007467725 | 0.160073841 |
| 0.033371266 | 0.011662501 | 0.146586293 | 0.016691483 |
| 0.044085477 | 0.153533706 | 0.154960466 | 0.027422796 |
| 0.024928137 | 0.220550786 | 0.013301905 | 0.057812831 |
| 0.018560256 | 0.023428182 | 0.151510025 | 0.060844181 |
| 0.175027702 | 0.008528501 | 0.042772622 | 0.035731318 |
| 0.003579426 | 0.010322919 | 0.051481347 | 0.090850477 |
| 0.027178435 | 0.022065783 | 0.006767034 | 0.148381574 |
| 0.067643641 | 0.045632964 | 0.027785635 | 0.030418288 |
| 0.068723394 | 0.065645286 | 0.013713421 | 0.02388661  |
| 0.038441184 | 0.018017051 | 0.046559026 | 0.021253482 |
| 0.06737905  | 0.041259396 | 0.000629548 | 0.013094936 |
| 0.013057299 | 0.013329459 | 0.047511711 | 0.018980011 |
| 0.007051613 | 0.050734859 | 0.001091849 | 0.055643647 |
| 0.013867591 | 0.150923584 | 0.032489373 | 0.102715739 |
| 0.012323279 | 0.142848322 | 0.039121489 | 0.01095537  |
| 0.008114287 | 0.022981321 | 0.09675176  | 0.085425732 |
| 0.02769888  | 0.134098992 | 0.028597967 | 0.069990394 |
| 0.058488574 | 0.026777835 | 0.043047144 | 0.005930201 |
| 0.027077789 | 0.104482019 | 0.047849301 | 0.02635064  |
| 0.01617746  | 0.001741778 | 0.022810744 | 0.079531299 |
| 0.012037134 | 0.024057445 | 0.008928175 | 0.007435668 |
| 0.241137337 | 0.078147457 | 0.108988999 | 0.048627525 |
| 0.009276196 | 0.104804053 | 0.008854933 | 0.014535974 |
| 0.060277156 | 0.023301987 | 0.006056324 | 0.0022207   |
| 0.00203453  | 0.034052921 | 0.123392211 | 0.041060994 |
| 0.012978159 | 0.06026016  | 0.009957837 | 0.019399558 |
| 0.215189893 | 0.119956924 | 0.008438658 | 0.003301413 |
| 0.020599204 | 0.012329979 | 0.011946582 | 0.01641136  |
| 0.016852068 | 0.044559446 | 0.034669519 | 0.004926376 |
| 0.037626333 | 0.123540668 | 0.021577916 | 0.05767866  |
| 0.022522497 | 0.120607205 | 0.09527449  | 0.002008176 |
| 0.038544171 | 0.02776478  | 0.012760351 | 0.033458411 |
| 0.052548913 | 0.025876043 | 0.032812381 | 0.100063061 |
| 0.009813021 | 0.129403775 | 0.052785397 | 0.023372843 |
| 0.022771862 | 0.023209713 | 0.049083001 | 0.068263473 |
| 0.01912502  | 0.054471049 | 0.134901476 | 0.015192784 |
| 0.01491653  | 0.138890308 | 0.016649656 | 0.025265658 |
| 0.098591887 | 0.018268211 | 0.015894728 | 0.126296319 |
| 0.073926006 | 0.064759615 | 0.172889578 | 0.080584009 |
| 0.024866335 | 0.065613577 | 0.024313299 | 0.008406729 |
| 0.19019561  | 0.037698546 | 0.019312234 | 0.00712944  |
| 0.011761061 | 0.013827808 | 0.090747694 | 0.022026743 |
| 0.169003832 | 0.011628689 | 0.021534146 | 0.021616009 |
| 0.003831807 | 0.013303965 | 0.099920184 | 0.01324442  |
| 0.009644898 | 0.034454408 | 0.064131155 | 0.102810307 |
| 0.026486269 | 0.197391871 | 0.065178797 | 0.01569162  |
| 0.027778396 | 0.028450697 | 0.018177932 | 0.023225433 |

|             |             |             |             |
|-------------|-------------|-------------|-------------|
| 1           | 0.139246285 | 0.024138039 | 0.00275213  |
| 0.017790073 | 0.066675117 | 0.000254788 | 0.018821966 |
| 0.09525721  | 0.023471152 | 0.032729725 | 0.066811532 |
| 0.037327061 | 0.020289992 | 0.039446493 | 0.187486227 |
| 0.011343959 | 0.010288335 | 0.014240727 | 0.098569278 |
| 0.013850686 | 0.015364556 | 0.005103298 | 0.071353729 |
| 0.068447827 | 0.010666864 | 0.028302474 | 0.063023832 |
| 0.038877841 | 0.03853404  | 0.070836837 | 0.025300402 |
| 0.184627706 | 0.008340993 | 0.041347489 | 0.000487525 |
| 0.017276712 | 0.02554527  | 0.014194446 | 0.062901329 |
| 0.025986101 | 0.059035252 | 0.001114795 | 0.015434699 |
| 0.019044468 | 0.038162707 | 0.011413068 | 0.012677218 |
| 0.008510537 | 0.020314618 | 0.006574465 | 0.015250571 |
| 0.008750271 | 0.010892959 | 0.038002838 | 0.090954986 |
| 0.034711564 | 0.008569842 | 0.03985874  | 0.022334834 |
| 0.040992256 | 0.028670771 | 0.158787783 | 0.174690524 |
| 0.008886495 | 0.089055495 | 0.009919586 | 0.03197188  |
| 0.033208924 | 0.045365752 | 0.01722121  | 0.033806451 |
| 0.017299286 | 0.090040614 | 0.094766055 | 0.014786146 |
| 0.045798341 | 0.043123728 | 0.020636893 | 0.005746628 |
| 0.002135995 | 0.013368546 | 0.068832195 | 0.042005998 |
| 0.019548841 | 0.010740844 | 0.128369521 | 0.151830787 |
| 0.027990367 | 0.015732421 | 0.016865796 | 0.095397967 |
| 0.014471841 | 0.101138842 | 0.0233272   | 0.074958128 |
| 0.024777338 | 0.011088605 | 0.022573392 | 0.022720029 |
| 0.035321995 | 0.039486372 | 0.014175195 | 0.041818643 |
| 8.97E-05    | 0.059593304 | 0.013097641 | 0.026171248 |
| 0.013314882 | 0.049720957 | 0.056683624 | 0.035939127 |
| 0.008379333 | 0.039009966 | 0.045096868 | 0.006640011 |
| 0.143813846 | 0.024853584 | 0.070312086 | 0.027918547 |
| 0.044289271 | 0.062922855 | 0.01583291  | 0.01809372  |
| 0.046227142 | 0.012396087 | 0.01372188  | 0.021303098 |
| 0.020807981 | 0.060901126 | 0.009018387 | 0.007053943 |
| 0.032293437 | 0.032649851 | 0.007169878 | 0.033519322 |
| 0.001018559 | 0.083967469 | 0.038573055 | 0.022504002 |
| 0.016402998 | 0.073099862 | 0.050500075 | 0.037832373 |
| 0.093269036 | 0.055485254 | 0.014227205 | 0.008992044 |
| 0.180195562 | 0.000631748 | 0.059589889 | 0.017156399 |
| 0.050970106 | 0.028706232 | 0.019574885 | 0.017894446 |
| 0.023488001 | 0.020974566 | 0.014831594 | 0.088125537 |
| 0.004694363 | 0.023899895 | 0.069434789 | 0.1438679   |
| 0.075471507 | 0.038948616 | 0.033943157 | 0.018404037 |
| 0.067049057 | 0.004708585 | 0.057369148 | 0.003552622 |
| 0.0023694   | 0.065075369 | 0.068082679 | 0.054910201 |
| 0.026992212 | 0.018369828 | 0.072745157 | 0.061678989 |
| 0.019115249 | 0.019832898 | 0.071904577 | 0.042741117 |
| 0.076537892 | 0.058877242 | 0.018063664 | 0.016549619 |
| 0.004446539 | 0.020804623 | 0.038634625 | 0.046713394 |
| 0.026556177 | 0.136216156 | 0.014959701 | 0.053530833 |
| 0.013721009 | 0.007766388 | 0.083033458 | 0.077235778 |
| 0.165884293 | 0.047144158 | 0.001110404 | 0.042044929 |
| 0.00158635  | 0.075287025 | 0.00534761  | 0.043220241 |
| 0.034539763 | 0.00713526  | 0.06103989  | 0.153914802 |
| 0.084554616 | 0.015703027 | 0.036744323 | 0.090444187 |

|             |             |             |             |
|-------------|-------------|-------------|-------------|
| 0.002589675 | 0.020777002 | 0.010283332 | 0.049435854 |
| 0.002683121 | 0.01042116  | 0.093596955 | 0.044235894 |
| 0.020309172 | 0.00182993  | 0.020916853 | 0.093048271 |
| 0.146928685 | 0.032299416 | 0.016876096 | 0.018055725 |
| 0.011472878 | 0.013941997 | 0.014680298 | 0.032520982 |
| 0.030499827 | 0.011177798 | 0.027435902 | 0.017317125 |
| 0.086370939 | 0.107484385 | 0.015365362 | 0.020798885 |
| 0.062678043 | 0.015735036 | 0.008877147 | 0.011347188 |
| 0.010272733 | 0.071450268 | 0.011662678 | 0.016986038 |
| 0.013284148 | 0.003905988 | 0.158903556 | 0.035749345 |
| 0.003655896 |             |             |             |
| MPND        | 0.038377691 | 0.05559524  | 0.021361764 |
| 0.13701372  | 0.060389859 | 0.064881399 | 0.24230119  |
| 0.078938492 | 0.040145522 | 0.047180949 | 0.025761663 |
| 0.028755207 | 0.018524555 | 0.071863425 | 0.01965261  |
| 0.124802101 | 0.059662789 | 0.035399605 | 0.231027189 |
| 0.132497344 | 0.181724638 | 0.129390221 | 0.16877749  |
| 0.015275633 | 0.045247356 | 0.157506658 | 0.029532094 |
| 0.119880152 | 0.162114517 | 0.06568332  | 0.128386851 |
| 0.054334068 | 0.063029339 | 0.036078875 | 0.056943925 |
| 0.028674641 | 0.027004186 | 0.026494337 | 0.062388394 |
| 0.056382881 | 0.056929633 | 0.144726598 | 0.180161242 |
| 0.157782101 | 0.036333471 | 0.240810027 | 0.046635476 |
| 0.018958207 | 0.069156198 | 0.061461417 | 0.04394851  |
| 0.030145148 | 0.042494729 | 0.127901401 | 0.214710534 |
| 0.011852135 | 0.064310994 | 0.004135775 | 0.082111258 |
| 0.246777864 | 0.0929708   | 0.03381862  | 0.062041961 |
| 0.029142329 | 0.128122796 | 0.043807133 | 0.16512032  |
| 0.012158972 | 0.066656021 | 0.088062235 | 0.015457605 |
| 0.024987357 | 0.152406679 | 0.059554273 | 0.007879904 |
| 0.165915217 | 0.049826721 | 0.061568274 | 0.19612234  |
| 0.098168661 | 0.03269883  | 0.067311723 | 0.052972888 |
| 0.026134872 | 0.085477908 | 0.020312632 | 0.144741647 |
| 0.056264333 | 0.211450911 | 0.026924061 | 0.111808996 |
| 0.062899377 | 0.03993795  | 0.038678912 | 0.084183818 |
| 0.069983866 | 0.060279902 | 0.030783092 | 0.049109097 |
| 0.012704178 | 0.022588333 | 0.044141643 | 0.054486902 |
| 0.051225008 | 0.012127997 | 0.109732937 | 0.107593036 |
| 0.176307603 | 0.01022923  | 0.193229175 | 0.013238472 |
| 0.099310219 | 0.116617241 | 0.075325833 | 0.15117958  |
| 0.034714914 | 0.053846029 | 0.034155044 | 0.265496415 |
| 0.036693315 | 0.035384691 | 0.00378439  | 0.093973577 |
| 0.013456459 | 0.002848224 | 0.0269371   | 0.08999873  |
| 0.053744599 | 0.018368003 | 0.173285672 | 0.049828198 |
| 0.066840935 | 0.014870318 | 0.037958435 | 0.052774778 |
| 0.079606405 | 0.01882678  | 0.081461138 | 0.047888166 |
| 0.024837007 | 0.067409521 | 0.0033211   | 0.200295164 |
| 0.055353413 | 0.022822691 | 0.226879813 | 0.043732835 |
| 0.067511859 | 0.175410819 | 0.215238936 | 0.064099211 |
| 0.060036269 | 0.269906962 | 0.033337872 | 0.110173422 |
| 0.032700592 | 0.046022424 | 0.208161606 | 0.092265167 |
| 0.207213223 | 0.025865435 | 0.056390464 | 0.066055875 |
| 0.00400128  | 0.013898022 | 0.048771294 | 0.136075824 |
| 0.021015266 | 0.04829356  | 0.022986751 | 0.20401318  |

|             |             |             |             |
|-------------|-------------|-------------|-------------|
| 0.112960246 | 0.089601815 | 0.063308996 | 0.053560018 |
| 0.042579216 | 0.054415037 | 0.0333721   | 0.058128387 |
| 0.07069529  | 0.048225438 | 0.07366401  | 0.040803244 |
| 0.112779035 | 0.08817897  | 0.000514919 | 0.034538084 |
| 0.036465439 | 0.02391645  | 0.079209436 | 0.046485963 |
| 0.017972649 | 0.096303426 | 0.000618808 | 0.115380317 |
| 0.035689147 | 0.199118672 | 0.075966535 | 0.142014989 |
| 0.035220438 | 0.169230493 | 0.084041445 | 0.03042099  |
| 0.023122233 | 0.018177179 | 0.116695888 | 0.158840928 |
| 0.040336625 | 0.151705004 | 0.07213408  | 0.123800716 |
| 0.097311593 | 0.064680648 | 0.093927536 | 0.013861165 |
| 0.05272641  | 0.151007923 | 0.040807588 | 0.05163488  |
| 0.045399907 | 0.004716026 | 0.052341064 | 0.100964746 |
| 0.026959566 | 0.055270675 | 0.025158737 | 0.011866105 |
| 0.253307425 | 0.145798915 | 0.035718497 | 0.076218472 |
| 0.028447637 | 0.127282339 | 0.023177978 | 0.022976258 |
| 0.082672933 | 0.057052005 | 0.012104915 | 0.00612108  |
| 0.004263584 | 0.065029119 | 0.189717408 | 0.049996076 |
| 0.015505526 | 0.092947308 | 0.02139548  | 0.040563719 |
| 0.210219846 | 0.156805927 | 0.010572422 | 0.008639143 |
| 0.018025165 | 0.019973436 | 0.019941126 | 0.04743927  |
| 0.033406412 | 0.035785812 | 0.054526021 | 0.011753995 |
| 0.046477422 | 0.142348206 | 0.053735101 | 0.114281928 |
| 0.050290203 | 0.148256691 | 0.127557452 | 0.003299083 |
| 0.083806242 | 0.038559443 | 0.024315069 | 0.074525852 |
| 0.038249824 | 0.06714047  | 0.045401499 | 0.132439785 |
| 0.020654617 | 0.182110348 | 0.108129055 | 0.014235723 |
| 0.061432068 | 0.057298863 | 0.096622226 | 0.091060817 |
| 0.043616644 | 0.11079348  | 0.090167563 | 0.038181041 |
| 0.036937961 | 0.164567913 | 0.043782936 | 0.03808027  |
| 0.124362799 | 0.044632076 | 0.038159321 | 0.167569042 |
| 0.092011782 | 0.09434053  | 0.160991583 | 0.132837455 |
| 0.0583206   | 0.124147808 | 0.058010967 | 0.017727612 |
| 0.200353882 | 0.028817601 | 0.03968663  | 0.018937454 |
| 0.033552846 | 0.037931332 | 0.158551552 | 0.036438028 |
| 0.253415592 | 0.02231925  | 0.031349953 | 0.052642491 |
| 0.00662229  | 0.038140519 | 0.112075467 | 0.037696373 |
| 0.028524474 | 0.064318942 | 0.077432083 | 0.164200665 |
| 0.054670758 | 0.200334286 | 0.110408791 | 0.039386424 |
| 0.06737757  | 0.049524179 | 0.027699239 | 0.058333509 |
| 0.139246285 | 1           | 0.050297108 | 0.006367194 |
| 0.03853808  | 0.100994193 | 0.000551981 | 0.043112554 |
| 0.085934815 | 0.056756522 | 0.07698669  | 0.064885514 |
| 0.060855153 | 0.039233002 | 0.08476844  | 0.214237644 |
| 0.031062895 | 0.031310646 | 0.038144155 | 0.152482035 |
| 0.040761078 | 0.038481286 | 0.014574399 | 0.10791392  |
| 0.08259318  | 0.030371314 | 0.064822357 | 0.036495539 |
| 0.089706049 | 0.055249555 | 0.044243901 | 0.060672694 |
| 0.254721179 | 0.026389787 | 0.012344151 | 0.001134037 |
| 0.027372395 | 0.062962076 | 0.036319855 | 0.131544176 |
| 0.031197157 | 0.122694788 | 0.004454631 | 0.043160502 |
| 0.045530795 | 0.042173513 | 0.020632793 | 0.034839628 |
| 0.021963793 | 0.052567495 | 0.013968404 | 0.037119155 |
| 0.020882926 | 0.031368598 | 0.040580461 | 0.145779833 |

|             |             |             |             |
|-------------|-------------|-------------|-------------|
| 0.068271087 | 0.026617828 | 0.079393076 | 0.052489697 |
| 0.088802593 | 0.067607545 | 0.234585276 | 0.157298361 |
| 0.008438957 | 0.130047529 | 0.011682667 | 0.028751854 |
| 0.064381131 | 0.054544209 | 0.042995982 | 0.082216133 |
| 0.042728248 | 0.097588317 | 0.109205283 | 0.040147229 |
| 0.093603644 | 0.095294517 | 0.02147983  | 0.001885461 |
| 0.000457882 | 0.008960743 | 0.142472294 | 0.072152723 |
| 0.049079988 | 0.009122108 | 0.124691704 | 0.118355894 |
| 0.03315117  | 0.035647911 | 0.043952553 | 0.171415644 |
| 0.04061726  | 0.159123869 | 0.026591169 | 0.146789617 |
| 0.028623122 | 0.029516515 | 0.052276586 | 0.054999193 |
| 0.056780226 | 0.073754716 | 0.032455536 | 0.092412624 |
| 0.000665395 | 0.112611024 | 0.03439076  | 0.035910034 |
| 0.015924119 | 0.065072826 | 0.07391838  | 0.08599955  |
| 0.026190207 | 0.042586947 | 0.041874629 | 0.00803113  |
| 0.155514336 | 0.066981651 | 0.080198766 | 0.06709846  |
| 0.090483046 | 0.126071571 | 0.027919567 | 0.044981044 |
| 0.053136477 | 0.033415488 | 0.027117713 | 0.008651676 |
| 0.040690523 | 0.072500229 | 0.028368693 | 0.006121572 |
| 0.058226095 | 0.074653259 | 0.008199782 | 0.050106093 |
| 0.002197997 | 0.105807492 | 0.084694773 | 0.055257678 |
| 0.025917641 | 0.129509178 | 0.088100796 | 0.083957215 |
| 0.127750057 | 0.101642675 | 0.03771509  | 0.017055059 |
| 0.215881568 | 0.002231412 | 0.116000508 | 0.03954514  |
| 0.084233951 | 0.069209783 | 0.031663458 | 0.04721145  |
| 0.055398949 | 0.056435953 | 0.040813777 | 0.133996018 |
| 0.008613812 | 0.047075422 | 0.111821009 | 0.058173288 |
| 0.122254706 | 0.085340446 | 0.072417771 | 0.019281578 |
| 0.100771831 | 0.014806092 | 0.081137547 | 0.003794609 |
| 0.007298133 | 0.10093778  | 0.093521774 | 0.117533982 |
| 0.064695374 | 0.042508832 | 0.094967054 | 0.070103014 |
| 0.050647595 | 0.05103191  | 0.04600038  | 0.079128193 |
| 0.123847161 | 0.10535135  | 0.045062857 | 0.044487906 |
| 0.014629713 | 0.051641867 | 0.084718289 | 0.082729535 |
| 0.06102872  | 0.213525185 | 0.040039529 | 0.035988091 |
| 0.011269837 | 0.026098192 | 0.09440623  | 0.117075047 |
| 0.218297118 | 0.051417041 | 0.003247548 | 0.09473387  |
| 0.00524244  | 0.135174584 | 0.015318877 | 0.040905062 |
| 0.075989691 | 0.021656344 | 0.118417127 | 0.175118638 |
| 0.071223424 | 0.040163019 | 0.025637145 | 0.131426926 |
| 0.008185955 | 0.047853354 | 0.021214778 | 0.070032911 |
| 0.006127216 | 0.024464761 | 0.158429126 | 0.069717676 |
| 0.027994284 | 0.003751724 | 0.046352468 | 0.055416574 |
| 0.155435712 | 0.076040333 | 0.030804163 | 0.019302004 |
| 0.029861476 | 0.042011707 | 0.032760278 | 0.048291573 |
| 0.042516905 | 0.032849852 | 0.04643142  | 0.042963196 |
| 0.146392299 | 0.153652868 | 0.040839875 | 0.021689428 |
| 0.06029137  | 0.03987378  | 0.022585057 | 0.032671902 |
| 0.026555778 | 0.133645631 | 0.033289937 | 0.047657303 |
| 0.012932438 | 0.01301073  | 0.13391849  | 0.086136619 |
| 0.007733564 |             |             |             |
| MRPL23      | 0.329931436 | 0.45073384  | 0.265501719 |
| 0.358374999 | 0.254739621 | 0.198215184 | 0.156847138 |
| 0.110663066 | 0.152186503 | 0.006291985 | 0.044373063 |

|             |             |             |             |
|-------------|-------------|-------------|-------------|
| 0.280013352 | 0.138303456 | 0.135028364 | 0.212645491 |
| 0.4033424   | 0.137555    | 0.222038439 | 0.196761854 |
| 0.315275838 | 0.066034722 | 0.346491373 | 0.112691084 |
| 0.276125122 | 0.149431553 | 0.1088656   | 0.27512232  |
| 0.404556627 | 0.123328548 | 0.13213939  | 0.267863601 |
| 0.141784632 | 0.348059185 | 0.428375617 | 0.31969174  |
| 0.412181577 | 0.298771739 | 0.011788023 | 0.163537143 |
| 0.354910798 | 0.394068475 | 0.31917326  | 0.223001852 |
| 0.063996332 | 0.369900096 | 0.186317836 | 0.293792655 |
| 0.138389039 | 0.058865359 | 0.107808849 | 0.3452099   |
| 0.367497378 | 0.249127263 | 0.145325212 | 0.136012511 |
| 0.116381057 | 0.090408159 | 0.178431459 | 0.17734656  |
| 0.173313755 | 0.066294644 | 0.391824351 | 0.111007089 |
| 0.104540411 | 0.158020948 | 0.168960119 | 0.15868506  |
| 0.263957574 | 0.276418569 | 0.031040622 | 0.252843233 |
| 0.001327405 | 0.307780992 | 0.273338976 | 0.256572723 |
| 0.078538838 | 0.025448743 | 0.18822109  | 0.213251478 |
| 0.422568698 | 0.392049294 | 0.466260107 | 0.46799246  |
| 0.145151036 | 0.255848542 | 0.254825819 | 0.157146614 |
| 0.379868566 | 0.134358939 | 0.108929216 | 0.404971291 |
| 0.471567237 | 0.437149646 | 0.220070042 | 0.265286138 |
| 0.341329409 | 0.401022733 | 0.232446178 | 0.249723183 |
| 0.250514435 | 0.11858244  | 0.355170626 | 0.459946255 |
| 0.304104552 | 0.244241166 | 0.183200375 | 0.31223     |
| 0.095873395 | 0.184741971 | 0.273121065 | 0.105521051 |
| 0.436943457 | 0.044087183 | 0.224572843 | 0.192339119 |
| 0.215145652 | 0.359327371 | 0.445021414 | 0.165663336 |
| 0.254142418 | 0.030891992 | 0.179678941 | 0.070955553 |
| 0.183944706 | 0.158954413 | 0.364120559 | 0.398944135 |
| 0.118229381 | 0.240429947 | 0.193645526 | 0.012262305 |
| 0.059087027 | 0.205878344 | 0.333431554 | 0.219478097 |
| 0.35737625  | 0.329412797 | 0.211436331 | 0.263628406 |
| 0.302799757 | 0.460369731 | 0.025246332 | 0.115124283 |
| 0.235067456 | 0.206585098 | 0.2146656   | 0.246312044 |
| 0.257728997 | 0.108530511 | 0.128901919 | 0.484290064 |
| 0.334310764 | 0.101235273 | 0.166501237 | 0.374878915 |
| 0.184529698 | 0.263859947 | 0.117438758 | 0.162470498 |
| 0.054838272 | 0.402238323 | 0.065975576 | 0.181192686 |
| 0.236872921 | 0.127901538 | 0.026152408 | 0.137230794 |
| 0.16096333  | 0.351228805 | 0.356812887 | 0.132684808 |
| 0.18464527  | 0.32263116  | 0.143275633 | 0.290075614 |
| 0.021792659 | 0.076827719 | 0.114589124 | 0.44052796  |
| 0.133098087 | 0.466746276 | 0.223731383 | 0.285599427 |
| 0.254356901 | 0.426333704 | 0.009161173 | 0.393742871 |
| 0.449360564 | 0.117792866 | 0.22727204  | 0.287968865 |
| 0.261944726 | 0.406756139 | 0.022543453 | 0.342815047 |
| 0.212181355 | 0.114259823 | 0.485714639 | 0.17269661  |
| 0.377055542 | 0.076206169 | 0.154228281 | 0.408511103 |
| 0.304978257 | 0.013694335 | 0.106592758 | 0.28769368  |
| 0.071111592 | 0.068106966 | 0.341646773 | 0.316428616 |
| 0.259195194 | 0.416168374 | 0.470500979 | 0.258590441 |
| 0.254180647 | 0.169630682 | 0.035442463 | 0.275015814 |
| 0.383632098 | 0.200063252 | 0.356439855 | 0.180047195 |
| 0.148522613 | 0.405134436 | 0.337581659 | 0.131967431 |

|             |             |             |             |
|-------------|-------------|-------------|-------------|
| 0.06939609  | 0.175493029 | 0.021161104 | 0.278084446 |
| 0.345336571 | 0.085356614 | 0.250129484 | 0.153110618 |
| 0.110932028 | 0.470769614 | 0.208720795 | 0.226925832 |
| 0.162400576 | 0.188413357 | 0.201198161 | 0.112844453 |
| 0.122784009 | 0.199683562 | 0.283699464 | 0.265386137 |
| 0.038844345 | 0.105052716 | 0.05044342  | 0.154387978 |
| 0.072313474 | 0.145366546 | 0.130636567 | 0.255387387 |
| 0.152454486 | 0.075340579 | 0.241250685 | 0.289141763 |
| 0.177354354 | 0.039278925 | 0.440756621 | 0.340468811 |
| 0.205736898 | 0.167319222 | 0.07604674  | 0.134524172 |
| 0.405637064 | 0.12513814  | 0.113125118 | 0.376860834 |
| 0.052087662 | 0.465540571 | 0.157975236 | 0.151816543 |
| 0.209913309 | 0.191144177 | 0.445800473 | 0.06138836  |
| 0.201911447 | 0.372941801 | 0.267697823 | 0.211371644 |
| 0.285101091 | 0.292485589 | 0.04430424  | 0.298242921 |
| 0.265564867 | 0.055721488 | 0.455724259 | 0.144931606 |
| 0.052206845 | 0.363440472 | 0.344058123 | 0.125104426 |
| 0.137086947 | 0.189997585 | 0.043066577 | 0.256471881 |
| 0.4606102   | 0.373687885 | 0.326514445 | 0.25567875  |
| 0.058311879 | 0.008764856 | 0.227274827 | 0.246225239 |
| 0.396539867 | 0.451309781 | 0.223715125 | 0.230986438 |
| 0.206445374 | 0.271458014 | 0.070334253 | 0.454223519 |
| 0.206707206 | 0.43329395  | 0.021965119 | 0.392749929 |
| 0.406668563 | 0.114298608 | 0.126211091 | 0.172147875 |
| 0.281588452 | 0.08177476  | 0.174817161 | 0.405678171 |
| 0.393509421 | 0.281290046 | 0.266688187 | 0.308061295 |
| 0.024138039 | 0.050297108 | 1           | 0.222174147 |
| 0.231156681 | 0.239912304 | 0.082592127 | 0.178446587 |
| 0.058609331 | 0.361728079 | 0.415436616 | 0.127141987 |
| 0.149013622 | 0.174313385 | 0.308243088 | 0.068049316 |
| 0.424770466 | 0.435343068 | 0.423349189 | 0.143373973 |
| 0.338260408 | 0.431159301 | 0.242437406 | 0.132269787 |
| 0.050933492 | 0.432259213 | 0.278917045 | 0.029566889 |
| 0.43786481  | 0.088349942 | 0.013952752 | 0.422379779 |
| 0.175402679 | 0.324222677 | 0.011689414 | 0.101431416 |
| 0.098900292 | 0.445814877 | 0.392786067 | 0.266323541 |
| 0.092962155 | 0.259077903 | 0.017032224 | 0.470542588 |
| 0.398757085 | 0.046281945 | 0.193602807 | 0.335623862 |
| 0.339697339 | 0.445210208 | 0.265137759 | 0.409498643 |
| 0.259246762 | 0.405361463 | 0.141830392 | 0.24989857  |
| 0.369373014 | 0.425184005 | 0.334435441 | 0.391296327 |
| 0.400346395 | 0.357877504 | 0.218934112 | 0.031704098 |
| 0.25581821  | 0.110615443 | 0.162381194 | 0.117109145 |
| 0.168319404 | 0.186032115 | 0.420023425 | 0.444030731 |
| 0.432433712 | 0.019859766 | 0.104696679 | 0.333797124 |
| 0.373294677 | 0.441443243 | 0.055704253 | 0.019247406 |
| 0.015193589 | 0.04981446  | 0.204506655 | 0.259135604 |
| 0.446100754 | 0.085474445 | 0.014867658 | 0.041418917 |
| 0.213743755 | 0.31021367  | 0.417417419 | 0.335388462 |
| 0.392463979 | 0.113888433 | 0.132437093 | 0.348191828 |
| 0.131320338 | 0.194973561 | 0.442676481 | 0.38254343  |
| 0.086067633 | 0.271038782 | 0.197124185 | 0.451701326 |
| 0.096306689 | 0.253257801 | 0.285494963 | 0.193829412 |
| 0.034674363 | 0.142480474 | 0.137691379 | 0.414197452 |



|             |             |             |             |
|-------------|-------------|-------------|-------------|
| 0.397363578 | 0.070229758 | 0.045928353 | 0.054954019 |
| 0.099508949 | 0.430041932 | 0.141433137 | 0.481823562 |
| 0.37620761  | 0.415149334 | 0.1205584   | 0.410435167 |
| 0.071397252 | 0.382098912 | 0.258630684 | 0.041214245 |
| 0.237251714 | 0.035089516 | 0.390234604 | 0.159628162 |
| 0.143495514 | 0.274051991 | 0.286822017 | 0.049623351 |
| 0.224662281 | 0.088004774 | 0.454587156 | 0.448081838 |
| 0.082674741 | 0.200790257 | 0.266137003 | 0.30697615  |
| 0.141519431 | 0.359531565 | 0.401836321 | 0.178858607 |
| 0.085941977 | 0.139249842 | 0.315217296 | 0.243768221 |
| 0.121905988 | 0.474626692 | 0.229201838 | 0.476634882 |
| 0.306784749 | 0.417259778 | 0.41005855  | 0.237124366 |
| 0.196113635 | 0.214234252 | 0.233101923 | 0.021654693 |
| 0.24530115  | 0.408440205 | 0.209254343 | 0.183663109 |
| 0.217775676 | 0.244354673 | 0.074901429 | 0.094533561 |
| 0.224227091 | 0.14705436  | 0.119134195 | 0.432276171 |
| 0.237728435 | 0.259955478 | 0.04273991  | 0.130668293 |
| 0.465868619 | 0.378828618 | 0.125864422 | 0.306247735 |
| 0.19717172  | 0.269976879 | 0.397415933 | 0.397696816 |
| 0.250639088 | 0.358918336 | 0.333109558 | 0.232976602 |
| 0.327626809 | 0.218148856 | 0.435282841 | 0.049631046 |
| 0.154170413 | 0.243861888 | 0.090712022 | 0.143961626 |
| 0.143586297 | 0.075662467 | 0.222134779 | 0.367625485 |
| 0.210326977 | 0.270821855 | 0.138663776 | 0.128776902 |
| 0.267071486 | 0.198756516 | 0.262607428 | 0.127003673 |
| 0.088308675 | 0.402469293 | 0.024857745 | 0.091292645 |
| 0.20145935  | 0.382235781 | 0.244263868 | 0.24416032  |
| 0.252255572 | 0.184121833 | 0.227866446 | 0.12620514  |
| 0.120949791 | 0.207748678 | 0.377628675 | 0.052678389 |
| 0.026419722 | 0.468761534 | 0.183854237 | 0.061145832 |
| 0.127944499 | 0.232703888 | 0.20215939  | 0.210925379 |
| 0.063191983 | 0.414753932 | 0.149611789 | 0.266329401 |
| 0.206144457 | 0.09853281  | 0.259673198 | 0.094738909 |
| 0.099281139 | 0.351003937 | 0.266593797 | 0.427164994 |
| 0.269130742 | 0.378736307 | 0.339390772 | 0.333628251 |
| 0.139665673 | 0.216007191 | 0.050140352 | 0.394043764 |
| 0.205508963 |             |             |             |

|             |             |             |             |
|-------------|-------------|-------------|-------------|
| MRPL48      | 0.190546835 | 0.203283409 | 0.18547234  |
| 0.160193024 | 0.158214286 | 0.065326381 | 0.039552048 |
| 0.011154161 | 0.035385885 | 0.000879384 | 0.021410445 |
| 0.202816078 | 0.033893001 | 0.018996211 | 0.030779026 |
| 0.247274244 | 0.066674566 | 0.074648339 | 0.084400031 |
| 0.152504318 | 0.005647591 | 0.225719957 | 0.021229122 |
| 0.136864715 | 0.099985483 | 0.046673609 | 0.156425432 |
| 0.189476304 | 0.057300575 | 0.031905398 | 0.098052934 |
| 0.085191325 | 0.172320736 | 0.190658505 | 0.220018911 |
| 0.193212372 | 0.161181424 | 0.008352876 | 0.023184412 |
| 0.157290689 | 0.232735501 | 0.145953804 | 0.114240204 |
| 0.013080062 | 0.143053358 | 0.068104905 | 0.267183473 |
| 0.015805439 | 0.026937489 | 0.012990717 | 0.128357324 |
| 0.152513904 | 0.129543905 | 0.021120087 | 0.026086393 |
| 0.028275269 | 0.010443795 | 0.087774959 | 0.051082323 |
| 0.057858912 | 0.005912336 | 0.17356783  | 0.014909332 |
| 0.017029797 | 0.031291022 | 0.099395034 | 0.03586926  |

|             |             |             |             |
|-------------|-------------|-------------|-------------|
| 0.146561501 | 0.098615696 | 0.007555684 | 0.193551002 |
| 0.001904591 | 0.152092097 | 0.255134026 | 0.143453576 |
| 0.057123884 | 0.008349468 | 0.126871359 | 0.085376662 |
| 0.206089284 | 0.192819976 | 0.275153539 | 0.277630355 |
| 0.051557725 | 0.17265762  | 0.240319219 | 0.047740033 |
| 0.178108707 | 0.030726394 | 0.024765401 | 0.273874752 |
| 0.273886403 | 0.206313401 | 0.084882883 | 0.244831708 |
| 0.138320366 | 0.167560234 | 0.094093546 | 0.116014504 |
| 0.077575538 | 0.117056321 | 0.144159077 | 0.245245959 |
| 0.117290935 | 0.2681894   | 0.13434237  | 0.120291788 |
| 0.049500791 | 0.028168862 | 0.143347178 | 0.041894491 |
| 0.212843237 | 0.009016372 | 0.205860787 | 0.072499518 |
| 0.064906343 | 0.173372108 | 0.227226026 | 0.055871481 |
| 0.177551088 | 0.014045345 | 0.096491412 | 0.047048665 |
| 0.032880626 | 0.19149252  | 0.146862695 | 0.180625633 |
| 0.01360845  | 0.060251806 | 0.049399024 | 0.012611484 |
| 0.042596043 | 0.103758708 | 0.175965386 | 0.098226386 |
| 0.188332412 | 0.184326397 | 0.06962999  | 0.100530649 |
| 0.200333031 | 0.276257185 | 0.001663646 | 0.02113221  |
| 0.113826363 | 0.102331795 | 0.133899454 | 0.138399672 |
| 0.169007123 | 0.01615858  | 0.04174419  | 0.247501508 |
| 0.117876097 | 0.036008702 | 0.0408916   | 0.242798897 |
| 0.026671139 | 0.260766216 | 0.035242138 | 0.038180965 |
| 0.008069048 | 0.198813951 | 0.075370648 | 0.052826442 |
| 0.060516491 | 0.077389908 | 0.013242786 | 0.028068433 |
| 0.020044412 | 0.154459155 | 0.154819867 | 0.058578465 |
| 0.058640235 | 0.222359626 | 0.039011619 | 0.126429334 |
| 0.006238517 | 0.030524917 | 0.024861765 | 0.216073714 |
| 0.033178546 | 0.271885691 | 0.056437895 | 0.128940701 |
| 0.199719534 | 0.233306462 | 0.012462734 | 0.162169653 |
| 0.221399096 | 0.025010862 | 0.126605655 | 0.224404557 |
| 0.150180869 | 0.188827929 | 0.006270072 | 0.210827408 |
| 0.082378237 | 0.046286409 | 0.271069287 | 0.111464131 |
| 0.171477626 | 0.04077457  | 0.029069504 | 0.279925153 |
| 0.18382295  | 0.006184812 | 0.016301829 | 0.116002665 |
| 0.076718109 | 0.004682423 | 0.173909768 | 0.151392708 |
| 0.130501584 | 0.261953564 | 0.261930738 | 0.145526118 |
| 0.145030672 | 0.041663017 | 0.024790659 | 0.260899154 |
| 0.23709361  | 0.045584681 | 0.130691404 | 0.027508105 |
| 0.051968164 | 0.169330579 | 0.179193559 | 0.017650844 |
| 0.020720579 | 0.046337089 | 0.003137332 | 0.148569042 |
| 0.175012064 | 0.012108089 | 0.133677248 | 0.077295288 |
| 0.078766034 | 0.231521499 | 0.237209865 | 0.244280343 |
| 0.204513854 | 0.079898236 | 0.071481815 | 0.016391848 |
| 0.032325015 | 0.06089004  | 0.11872133  | 0.081993776 |
| 0.003683584 | 0.04340257  | 0.075304516 | 0.051722165 |
| 0.016525454 | 0.03662302  | 0.030408045 | 0.105972759 |
| 0.023896182 | 0.017293758 | 0.123469684 | 0.130090047 |
| 0.09179646  | 0.033768615 | 0.199976014 | 0.206052224 |
| 0.063642273 | 0.033810097 | 0.049039994 | 0.023347476 |
| 0.185630424 | 0.034075527 | 0.017128383 | 0.151772654 |
| 0.021434935 | 0.268253356 | 0.029763507 | 0.099111528 |
| 0.106655801 | 0.084104591 | 0.21981261  | 0.008935894 |
| 0.089087422 | 0.145864456 | 0.19052489  | 0.09626123  |

|             |             |             |             |
|-------------|-------------|-------------|-------------|
| 0.100431266 | 0.13936515  | 0.008826238 | 0.128521453 |
| 0.110840628 | 0.030770324 | 0.230294119 | 0.083927929 |
| 0.048892501 | 0.274535935 | 0.196972741 | 0.094525378 |
| 0.089702592 | 0.06146736  | 0.002928654 | 0.222323729 |
| 0.217514862 | 0.237683248 | 0.144510256 | 0.209202863 |
| 0.015962229 | 0.004206968 | 0.204064521 | 0.207780708 |
| 0.167139443 | 0.249171157 | 0.144165398 | 0.142603543 |
| 0.106553784 | 0.089064753 | 0.005481188 | 0.233356518 |
| 0.108819566 | 0.203087873 | 0.016173374 | 0.274480887 |
| 0.184726851 | 0.025099642 | 0.082182172 | 0.048004209 |
| 0.098009898 | 0.022812418 | 0.044624291 | 0.175891302 |
| 0.173525948 | 0.098302524 | 0.079009239 | 0.199321556 |
| 0.00275213  | 0.006367194 | 0.222174147 | 1           |
| 0.058054189 | 0.078401035 | 0.185258012 | 0.025574748 |
| 0.014895985 | 0.141003735 | 0.247185489 | 0.041663961 |
| 0.045429471 | 0.026847207 | 0.268300046 | 0.027540878 |
| 0.275582966 | 0.235012469 | 0.184597872 | 0.028742347 |
| 0.19604065  | 0.220677306 | 0.206503535 | 0.099806932 |
| 0.061448314 | 0.211622148 | 0.115359652 | 0.007014824 |
| 0.231584008 | 0.015321769 | 0.00400545  | 0.176368626 |
| 0.063982616 | 0.12761206  | 0.001006664 | 0.088512172 |
| 0.102762299 | 0.300732997 | 0.16188867  | 0.102972436 |
| 0.010573633 | 0.149484621 | 0.030683759 | 0.25949787  |
| 0.168800667 | 0.047360377 | 0.135952337 | 0.17963984  |
| 0.238708102 | 0.194055423 | 0.215115997 | 0.248927984 |
| 0.194905977 | 0.186031778 | 0.020125346 | 0.180440262 |
| 0.160005076 | 0.235680725 | 0.144458296 | 0.158299477 |
| 0.194778717 | 0.270968739 | 0.110166525 | 0.007028159 |
| 0.100691676 | 0.015309108 | 0.026458529 | 0.026711353 |
| 0.050754232 | 0.069590158 | 0.20476904  | 0.252570872 |
| 0.245637257 | 0.02263131  | 0.0104097   | 0.163524394 |
| 0.147400823 | 0.206392531 | 0.04471294  | 0.012384897 |
| 0.010415224 | 0.046603388 | 0.08145468  | 0.20158513  |
| 0.22495796  | 0.007251785 | 0.008420194 | 0.003688155 |
| 0.03808821  | 0.298155274 | 0.186024163 | 0.189169595 |
| 0.261379585 | 0.05547356  | 0.01683814  | 0.188142817 |
| 0.071273734 | 0.071164405 | 0.237859485 | 0.146834686 |
| 0.062527897 | 0.180931218 | 0.081357056 | 0.214408066 |
| 0.176653707 | 0.207858628 | 0.193476211 | 0.032230831 |
| 0.033294528 | 0.091744447 | 0.066147181 | 0.265604249 |
| 0.186987995 | 0.023295783 | 0.021555731 | 0.005902269 |
| 0.018078547 | 0.238950901 | 0.031278082 | 0.256492299 |
| 0.162681027 | 0.224946891 | 0.097754981 | 0.170974241 |
| 0.026287654 | 0.164582006 | 0.245418776 | 0.003571662 |
| 0.106038103 | 0.022948322 | 0.207741656 | 0.045267564 |
| 0.02618478  | 0.119640119 | 0.095923013 | 0.056112182 |
| 0.175282556 | 0.054873006 | 0.241529536 | 0.296552835 |
| 0.09074532  | 0.038686398 | 0.187971763 | 0.187693325 |
| 0.034331893 | 0.180554338 | 0.166113951 | 0.071916881 |
| 0.011153888 | 0.149505221 | 0.141109985 | 0.104439552 |
| 0.015455093 | 0.282569434 | 0.054222234 | 0.249521126 |
| 0.137680201 | 0.198741589 | 0.211016713 | 0.101179108 |
| 0.109291798 | 0.088734385 | 0.077182384 | 0.002993563 |
| 0.128661857 | 0.214422131 | 0.07977552  | 0.072043805 |

|             |             |             |             |
|-------------|-------------|-------------|-------------|
| 0.116524208 | 0.248902256 | 0.023602083 | 0.019187522 |
| 0.254012581 | 0.038635008 | 0.023182597 | 0.247547419 |
| 0.108013712 | 0.111041686 | 0.009763259 | 0.057010516 |
| 0.217775651 | 0.156705631 | 0.014083257 | 0.133431011 |
| 0.122770133 | 0.160437339 | 0.25216797  | 0.285144592 |
| 0.06124977  | 0.171899494 | 0.144292915 | 0.080550595 |
| 0.115115149 | 0.084692671 | 0.192348092 | 0.003449899 |
| 0.081430688 | 0.149334116 | 0.019791604 | 0.12768906  |
| 0.058464382 | 0.049794396 | 0.132582743 | 0.241803291 |
| 0.11776832  | 0.155812992 | 0.018743956 | 0.048506283 |
| 0.225853984 | 0.089110012 | 0.182948661 | 0.021741558 |
| 0.020656527 | 0.168431324 | 0.014098152 | 0.058635218 |
| 0.117245342 | 0.202735689 | 0.194091396 | 0.11855598  |
| 0.12063309  | 0.130034925 | 0.125980805 | 0.027775448 |
| 0.025768632 | 0.059137505 | 0.189420287 | 0.00990582  |
| 0.004404501 | 0.262444352 | 0.063304678 | 0.069505502 |
| 0.074368332 | 0.103971901 | 0.054403026 | 0.04040804  |
| 0.081060589 | 0.225161025 | 0.031672456 | 0.191954608 |
| 0.074897636 | 0.039721013 | 0.089430596 | 0.025170387 |
| 0.033036857 | 0.139220659 | 0.248530346 | 0.209478096 |
| 0.204702539 | 0.210468669 | 0.128509929 | 0.161911808 |
| 0.054351807 | 0.160128852 | 0.009746683 | 0.192133028 |
| 0.080558602 |             |             |             |

|             |             |             |             |
|-------------|-------------|-------------|-------------|
| MRPS27      | 0.281912908 | 0.466422787 | 0.161113191 |
| 0.36831363  | 0.222333405 | 0.231356083 | 0.127117497 |
| 0.056843101 | 0.062131851 | 0.006945094 | 0.032202715 |
| 0.226171462 | 0.076555131 | 0.084219255 | 0.105334944 |
| 0.358818067 | 0.05582004  | 0.092632048 | 0.142854378 |
| 0.30922378  | 0.052641862 | 0.324573099 | 0.055904865 |
| 0.092000869 | 0.053337767 | 0.055678844 | 0.106502954 |
| 0.389792528 | 0.057043877 | 0.160066943 | 0.286830821 |
| 0.039879961 | 0.327252595 | 0.434533339 | 0.301804025 |
| 0.417723603 | 0.25542233  | 0.003351752 | 0.119857648 |
| 0.330688867 | 0.352934504 | 0.325294563 | 0.222242015 |
| 0.038893538 | 0.393793637 | 0.172414039 | 0.21788215  |
| 0.069200457 | 0.027603176 | 0.072599693 | 0.371204072 |
| 0.401786518 | 0.2703417   | 0.07994197  | 0.090866154 |
| 0.087001197 | 0.067368595 | 0.077435343 | 0.206834529 |
| 0.139996989 | 0.053366064 | 0.415800276 | 0.071479917 |
| 0.078980487 | 0.086359648 | 0.053907583 | 0.11365363  |
| 0.103489612 | 0.28264605  | 0.012212311 | 0.205046933 |
| 0.003271371 | 0.284633628 | 0.198363672 | 0.103576153 |
| 0.029561375 | 0.019193029 | 0.061744628 | 0.251973635 |
| 0.408173489 | 0.362479302 | 0.436482664 | 0.442015901 |
| 0.060372368 | 0.128204819 | 0.173811969 | 0.082735481 |
| 0.359510922 | 0.105955057 | 0.033927394 | 0.359543235 |
| 0.443487006 | 0.449039013 | 0.080366437 | 0.144138163 |
| 0.383709527 | 0.419834895 | 0.1727746   | 0.194388193 |
| 0.114137003 | 0.025420508 | 0.39250083  | 0.450706671 |
| 0.309358692 | 0.113827327 | 0.082736837 | 0.329302389 |
| 0.037222029 | 0.081445355 | 0.272676248 | 0.038562379 |
| 0.41640535  | 0.023231274 | 0.104169902 | 0.219787793 |
| 0.069713722 | 0.332306895 | 0.440619637 | 0.118982408 |
| 0.162972104 | 0.011363802 | 0.057877304 | 0.019431691 |

|             |             |             |             |
|-------------|-------------|-------------|-------------|
| 0.08762419  | 0.039424854 | 0.392885332 | 0.415189553 |
| 0.067546878 | 0.128880466 | 0.11847836  | 0.003050035 |
| 0.018167774 | 0.056051083 | 0.326929215 | 0.129666784 |
| 0.330727793 | 0.287286779 | 0.116687821 | 0.274450525 |
| 0.275462274 | 0.433355174 | 0.018209937 | 0.059058826 |
| 0.201579694 | 0.061298249 | 0.167088534 | 0.250469736 |
| 0.152854316 | 0.053498522 | 0.065132901 | 0.467546239 |
| 0.364464088 | 0.055025059 | 0.087894312 | 0.320442984 |
| 0.139720755 | 0.183304918 | 0.053612017 | 0.09187261  |
| 0.04147668  | 0.400424047 | 0.016619576 | 0.113539992 |
| 0.096677862 | 0.050278101 | 0.006142021 | 0.111017256 |
| 0.086859586 | 0.391693806 | 0.370822137 | 0.052342975 |
| 0.128408897 | 0.292189811 | 0.12705171  | 0.316731266 |
| 0.021795965 | 0.02237583  | 0.085635998 | 0.447937994 |
| 0.17489349  | 0.422542702 | 0.092889142 | 0.098535475 |
| 0.164304764 | 0.387679974 | 0.00111724  | 0.408733063 |
| 0.448906091 | 0.084384405 | 0.234229187 | 0.22241368  |
| 0.168193577 | 0.41125896  | 0.005592411 | 0.312307685 |
| 0.206706376 | 0.043909188 | 0.457746263 | 0.095409583 |
| 0.374638999 | 0.036798353 | 0.104960343 | 0.36510946  |
| 0.294885314 | 0.004913126 | 0.104792035 | 0.308645599 |
| 0.016610737 | 0.059359995 | 0.312589512 | 0.314735114 |
| 0.266483392 | 0.358356603 | 0.439830791 | 0.15052778  |
| 0.210282469 | 0.084145129 | 0.008487201 | 0.150374178 |
| 0.331040211 | 0.105003903 | 0.387548338 | 0.09211621  |
| 0.146314695 | 0.423170548 | 0.317221922 | 0.134398529 |
| 0.039984377 | 0.155678731 | 0.010036567 | 0.18393283  |
| 0.317598848 | 0.071930151 | 0.187952094 | 0.041763962 |
| 0.036774905 | 0.473956106 | 0.056264358 | 0.072197675 |
| 0.039209413 | 0.228611246 | 0.123720612 | 0.086876524 |
| 0.073626065 | 0.085654773 | 0.118565186 | 0.145159924 |
| 0.033021109 | 0.052616442 | 0.006707014 | 0.083330686 |
| 0.053080941 | 0.086157453 | 0.088313919 | 0.273060143 |
| 0.085988939 | 0.04300104  | 0.167114856 | 0.092245169 |
| 0.053582045 | 0.013622499 | 0.44896471  | 0.290905797 |
| 0.231605771 | 0.080192697 | 0.023848972 | 0.083777667 |
| 0.430322166 | 0.155772058 | 0.064392764 | 0.422456081 |
| 0.012057559 | 0.435912907 | 0.107686175 | 0.073083267 |
| 0.116754861 | 0.151781189 | 0.429208167 | 0.032930002 |
| 0.196697159 | 0.413354625 | 0.155412764 | 0.09542559  |
| 0.324666629 | 0.280501649 | 0.026415114 | 0.291113087 |
| 0.265985355 | 0.024295208 | 0.448566285 | 0.047739711 |
| 0.015731242 | 0.302767475 | 0.348273229 | 0.052676943 |
| 0.043953087 | 0.181375565 | 0.035152158 | 0.200002832 |
| 0.466934151 | 0.346436534 | 0.371112442 | 0.067955968 |
| 0.037278023 | 0.008613095 | 0.070308377 | 0.163735001 |
| 0.416450845 | 0.433802491 | 0.13965936  | 0.158650631 |
| 0.167219954 | 0.12467015  | 0.05705082  | 0.451846073 |
| 0.044617554 | 0.426515275 | 0.006825132 | 0.356349801 |
| 0.421123964 | 0.110619109 | 0.049368259 | 0.189744236 |
| 0.31464907  | 0.039784761 | 0.068917537 | 0.421248589 |
| 0.402827319 | 0.129396327 | 0.120976042 | 0.258946502 |
| 0.017790073 | 0.03853808  | 0.231156681 | 0.058054189 |
| 1           | 0.104886595 | 0.01314888  | 0.090433141 |

|             |             |             |             |
|-------------|-------------|-------------|-------------|
| 0.038844425 | 0.408666705 | 0.372790218 | 0.056440787 |
| 0.21272844  | 0.081435963 | 0.246445793 | 0.03084835  |
| 0.387166123 | 0.4102899   | 0.437900801 | 0.065101894 |
| 0.316139669 | 0.432858872 | 0.216470819 | 0.038733024 |
| 0.013470029 | 0.426403557 | 0.26682412  | 0.019824059 |
| 0.424833619 | 0.08929861  | 0.014737946 | 0.43812068  |
| 0.109747128 | 0.34684408  | 0.003488711 | 0.016096585 |
| 0.01908412  | 0.384514846 | 0.417057192 | 0.275838753 |
| 0.072539773 | 0.218849107 | 0.00340293  | 0.444130461 |
| 0.425855713 | 0.011665884 | 0.056706414 | 0.339521538 |
| 0.304552779 | 0.454219821 | 0.123270755 | 0.386751993 |
| 0.230904818 | 0.426233974 | 0.08715268  | 0.1828576   |
| 0.383173615 | 0.412509348 | 0.316402543 | 0.397002766 |
| 0.405385881 | 0.301907347 | 0.211338648 | 0.021400242 |
| 0.082043709 | 0.085767994 | 0.096464215 | 0.100550672 |
| 0.182139718 | 0.076653384 | 0.39583517  | 0.419415629 |
| 0.410860527 | 0.005472001 | 0.069941981 | 0.333102622 |
| 0.388058664 | 0.433713346 | 0.008969683 | 0.002658621 |
| 0.001669034 | 0.016637299 | 0.218148826 | 0.108787182 |
| 0.435936995 | 0.06841472  | 0.006303074 | 0.027458668 |
| 0.095746636 | 0.246761541 | 0.440757819 | 0.30499671  |
| 0.336192567 | 0.045422518 | 0.095519692 | 0.314229621 |
| 0.045927633 | 0.190690927 | 0.430615588 | 0.42241843  |
| 0.021197543 | 0.112792028 | 0.115480393 | 0.456498312 |
| 0.021720579 | 0.185396059 | 0.24489516  | 0.115931541 |
| 0.006042211 | 0.044965525 | 0.051906981 | 0.359735834 |
| 0.41127181  | 0.043079649 | 0.024864565 | 0.03322453  |
| 0.071576291 | 0.403647988 | 0.072825146 | 0.464415423 |
| 0.382985559 | 0.395774761 | 0.037283536 | 0.428991457 |
| 0.040226443 | 0.401082753 | 0.150028104 | 0.019668921 |
| 0.075553558 | 0.009575141 | 0.375659555 | 0.090333631 |
| 0.09068102  | 0.255658503 | 0.096292738 | 0.01201887  |
| 0.052587171 | 0.030153    | 0.449671206 | 0.399047766 |
| 0.015578985 | 0.10199191  | 0.143181786 | 0.251758927 |
| 0.142262668 | 0.364915353 | 0.42424451  | 0.169894867 |
| 0.065203902 | 0.030869561 | 0.30164333  | 0.228277733 |
| 0.072960222 | 0.440103043 | 0.126195975 | 0.453559518 |
| 0.279046883 | 0.395287535 | 0.405708725 | 0.227362969 |
| 0.081199408 | 0.19854191  | 0.292148145 | 0.017137774 |
| 0.190734083 | 0.415119316 | 0.148956705 | 0.069788449 |
| 0.142961498 | 0.180248628 | 0.032338748 | 0.029458819 |
| 0.12257785  | 0.188408745 | 0.079966085 | 0.390067741 |
| 0.216615594 | 0.243120248 | 0.02120818  | 0.050606607 |
| 0.470165365 | 0.380193223 | 0.063873749 | 0.321267049 |
| 0.075191961 | 0.229541228 | 0.343003718 | 0.34120145  |
| 0.109638025 | 0.384181666 | 0.32993925  | 0.285790212 |
| 0.378760235 | 0.164127087 | 0.450451787 | 0.025597627 |
| 0.041570134 | 0.21685334  | 0.063880133 | 0.049883883 |
| 0.080608384 | 0.020799461 | 0.079257517 | 0.319642399 |
| 0.087200792 | 0.273492826 | 0.074876106 | 0.047057484 |
| 0.166675701 | 0.114225585 | 0.219817764 | 0.093519659 |
| 0.051079784 | 0.434025496 | 0.007979378 | 0.031411316 |
| 0.095236178 | 0.35720297  | 0.178596527 | 0.08562235  |
| 0.089297245 | 0.052257136 | 0.181072595 | 0.117645747 |

|             |             |             |             |
|-------------|-------------|-------------|-------------|
| 0.10574195  | 0.080638702 | 0.363943949 | 0.019232    |
| 0.017419676 | 0.441998465 | 0.125462656 | 0.010065393 |
| 0.054652682 | 0.221101867 | 0.072071957 | 0.134862589 |
| 0.013531608 | 0.416149881 | 0.142075903 | 0.219644287 |
| 0.201612951 | 0.03617695  | 0.277962445 | 0.032349849 |
| 0.030410816 | 0.360351938 | 0.186077695 | 0.427961296 |
| 0.120061337 | 0.370748179 | 0.35945586  | 0.345238704 |
| 0.029927094 | 0.151022282 | 0.026355719 | 0.379545711 |
| 0.11046634  |             |             |             |
| MRPS28      | 0.192306217 | 0.252998502 | 0.146569179 |
| 0.316327455 | 0.200531376 | 0.146219493 | 0.197843161 |
| 0.072481089 | 0.147742716 | 0.021463642 | 0.06459211  |
| 0.170148707 | 0.076638419 | 0.070712654 | 0.075712754 |
| 0.363876734 | 0.106682432 | 0.101742688 | 0.256056107 |
| 0.286759289 | 0.083122061 | 0.336185615 | 0.149121172 |
| 0.110471092 | 0.118677944 | 0.151243781 | 0.147950117 |
| 0.319630956 | 0.170729821 | 0.094697987 | 0.228956279 |
| 0.117343261 | 0.222725043 | 0.208461382 | 0.232574615 |
| 0.189512556 | 0.157140379 | 0.016508954 | 0.08209826  |
| 0.214656715 | 0.273084305 | 0.295169958 | 0.279595522 |
| 0.11752516  | 0.177203701 | 0.253252616 | 0.227554293 |
| 0.062039287 | 0.095493121 | 0.05816034  | 0.17860226  |
| 0.171856211 | 0.169344805 | 0.108380311 | 0.1502078   |
| 0.052266918 | 0.04543054  | 0.049190491 | 0.131800454 |
| 0.21945644  | 0.046446846 | 0.191484588 | 0.13145757  |
| 0.070879472 | 0.119766322 | 0.110672069 | 0.145368304 |
| 0.089380711 | 0.181756021 | 0.07078584  | 0.130220255 |
| 0.005662732 | 0.305576479 | 0.235547922 | 0.087938488 |
| 0.141284914 | 0.05159368  | 0.124504246 | 0.256640401 |
| 0.308213257 | 0.194447919 | 0.307751751 | 0.284269888 |
| 0.087964141 | 0.210577826 | 0.147197022 | 0.142291851 |
| 0.230205449 | 0.159813755 | 0.082432632 | 0.356259697 |
| 0.301718546 | 0.223596441 | 0.142728677 | 0.257736307 |
| 0.226905174 | 0.234280831 | 0.129915468 | 0.156073904 |
| 0.080860947 | 0.10287019  | 0.190881434 | 0.26893117  |
| 0.174120287 | 0.111749761 | 0.200926122 | 0.235756928 |
| 0.134979209 | 0.052607466 | 0.322993781 | 0.051788064 |
| 0.316535403 | 0.102273217 | 0.204568456 | 0.199978533 |
| 0.129787805 | 0.22349555  | 0.222108712 | 0.230929328 |
| 0.160378531 | 0.050242596 | 0.08546308  | 0.102118724 |
| 0.073008294 | 0.04878611  | 0.161046887 | 0.279709518 |
| 0.065123837 | 0.090151565 | 0.174918496 | 0.036494365 |
| 0.088155515 | 0.109181989 | 0.184916106 | 0.135977975 |
| 0.263489437 | 0.149250944 | 0.156042066 | 0.15476586  |
| 0.173078641 | 0.305769511 | 0.009153797 | 0.148192761 |
| 0.17678534  | 0.117894692 | 0.306945857 | 0.1660864   |
| 0.210498689 | 0.122060247 | 0.153871235 | 0.298043288 |
| 0.191813703 | 0.167367694 | 0.072377212 | 0.334436827 |
| 0.084286307 | 0.210278375 | 0.138165683 | 0.097620885 |
| 0.100735403 | 0.184812789 | 0.084045974 | 0.116221503 |
| 0.07728702  | 0.072519658 | 0.050007212 | 0.121721489 |
| 0.074634342 | 0.205140917 | 0.152383068 | 0.171079563 |
| 0.139998958 | 0.294587525 | 0.095140906 | 0.1876205   |
| 0.049335058 | 0.103773417 | 0.057120399 | 0.259773385 |

|             |             |             |             |
|-------------|-------------|-------------|-------------|
| 0.096793908 | 0.268855313 | 0.119691028 | 0.142513292 |
| 0.272991842 | 0.318046928 | 0.005544736 | 0.188505441 |
| 0.225089781 | 0.052247943 | 0.196162073 | 0.211665791 |
| 0.132186527 | 0.300194821 | 0.00583406  | 0.303108843 |
| 0.117988133 | 0.152110228 | 0.324262928 | 0.208690563 |
| 0.190044458 | 0.134642313 | 0.087417632 | 0.227360036 |
| 0.156228691 | 0.024856765 | 0.091180524 | 0.278416181 |
| 0.087132764 | 0.08119708  | 0.244367165 | 0.291645077 |
| 0.250883437 | 0.291436702 | 0.343523371 | 0.117141845 |
| 0.184383954 | 0.143652637 | 0.068181206 | 0.216118759 |
| 0.233947667 | 0.055515825 | 0.197202235 | 0.129550555 |
| 0.083183347 | 0.232492143 | 0.170308069 | 0.059888448 |
| 0.133597928 | 0.160500439 | 0.033013575 | 0.235257769 |
| 0.176298859 | 0.093664697 | 0.139704322 | 0.093515524 |
| 0.11776959  | 0.274270017 | 0.087737716 | 0.075746949 |
| 0.05550532  | 0.142791379 | 0.216488838 | 0.05812     |
| 0.055969007 | 0.171603107 | 0.114929726 | 0.12882041  |
| 0.080149105 | 0.125285772 | 0.051236591 | 0.04239674  |
| 0.042683728 | 0.049646713 | 0.046281951 | 0.154577074 |
| 0.062607648 | 0.063183294 | 0.166791364 | 0.106279372 |
| 0.141876354 | 0.091152874 | 0.249475978 | 0.309133604 |
| 0.122032718 | 0.166059229 | 0.109612767 | 0.031905515 |
| 0.275134594 | 0.080510028 | 0.044089936 | 0.239621525 |
| 0.067582645 | 0.304315348 | 0.093070027 | 0.187752957 |
| 0.088189481 | 0.219431943 | 0.341627949 | 0.058180422 |
| 0.149191226 | 0.211313623 | 0.246290764 | 0.184074564 |
| 0.151588502 | 0.253687492 | 0.092325357 | 0.165359948 |
| 0.144326838 | 0.101199386 | 0.244125149 | 0.105528444 |
| 0.098727861 | 0.243915434 | 0.206149745 | 0.197389564 |
| 0.14757305  | 0.155131905 | 0.076414844 | 0.317482825 |
| 0.269515375 | 0.345050624 | 0.207571917 | 0.110660398 |
| 0.107487821 | 0.020185864 | 0.139697206 | 0.141510185 |
| 0.186818849 | 0.237542221 | 0.249225125 | 0.143978256 |
| 0.297877    | 0.10606955  | 0.044015621 | 0.263413341 |
| 0.078676068 | 0.216873265 | 0.059017339 | 0.238700945 |
| 0.18592572  | 0.075563835 | 0.134496594 | 0.178919283 |
| 0.165872701 | 0.140755265 | 0.122597121 | 0.206056049 |
| 0.251976956 | 0.158464546 | 0.116176936 | 0.221796471 |
| 0.066675117 | 0.100994193 | 0.239912304 | 0.078401035 |
| 0.104886595 | 1           | 0.023824903 | 0.076278851 |
| 0.098706126 | 0.20563026  | 0.293840768 | 0.155175663 |
| 0.111132343 | 0.070060325 | 0.285950587 | 0.126323214 |
| 0.228249309 | 0.213619501 | 0.209033803 | 0.124468001 |
| 0.198420544 | 0.230262639 | 0.129979775 | 0.144661966 |
| 0.08994292  | 0.205194578 | 0.19152664  | 0.048987363 |
| 0.312239631 | 0.058598021 | 0.033661332 | 0.243057097 |
| 0.233885653 | 0.143064966 | 0.01564414  | 0.02757224  |
| 0.093714559 | 0.302869324 | 0.194292217 | 0.236047367 |
| 0.036932135 | 0.258263134 | 0.016014706 | 0.254888949 |
| 0.211877912 | 0.074108147 | 0.121233907 | 0.184429836 |
| 0.176503501 | 0.242050861 | 0.123476068 | 0.232864243 |
| 0.145230783 | 0.193380882 | 0.088954898 | 0.306317798 |
| 0.239032244 | 0.201438033 | 0.23759951  | 0.21968744  |
| 0.283586233 | 0.279640099 | 0.311016194 | 0.086366214 |



|             |             |             |             |
|-------------|-------------|-------------|-------------|
| 0.140876994 | 0.091116306 | 0.046798316 | 0.110473171 |
| 0.121058368 | 0.147085348 | 0.227621779 | 0.313282244 |
| 0.243656228 | 0.054638432 | 0.096241447 | 0.187271701 |
| 0.257329681 | 0.310958849 | 0.06269593  | 0.015195154 |
| 0.00830413  | 0.060957804 | 0.210100845 | 0.215101219 |
| 0.255887996 | 0.0264398   | 0.049315703 | 0.072944324 |
| 0.111289135 | 0.222004183 | 0.220382277 | 0.352001121 |
| 0.237599177 | 0.137619998 | 0.051429239 | 0.332892692 |
| 0.133328933 | 0.103861837 | 0.262986404 | 0.212407859 |
| 0.103282421 | 0.212964279 | 0.10244731  | 0.313894148 |
| 0.02491919  | 0.266050843 | 0.175148439 | 0.094225937 |
| 0.043919075 | 0.138823174 | 0.156509672 | 0.318502839 |
| 0.178924544 | 0.071329169 | 0.065952085 | 0.01942096  |
| 0.107150718 | 0.277944016 | 0.116254395 | 0.303609326 |
| 0.2650133   | 0.347852072 | 0.106271655 | 0.217526664 |
| 0.110565464 | 0.183562313 | 0.159096974 | 0.026798268 |
| 0.11253658  | 0.074690968 | 0.188366802 | 0.072721608 |
| 0.071612043 | 0.199775097 | 0.136827067 | 0.075465497 |
| 0.066680451 | 0.112353349 | 0.318797828 | 0.292441408 |
| 0.08411353  | 0.143830198 | 0.23622527  | 0.254096214 |
| 0.133006437 | 0.288031601 | 0.197390784 | 0.088100355 |
| 0.122302087 | 0.044187641 | 0.264961421 | 0.143414879 |
| 0.068835902 | 0.313873993 | 0.110180394 | 0.263447334 |
| 0.195877939 | 0.246904381 | 0.22162298  | 0.252348106 |
| 0.086900396 | 0.144015179 | 0.194341302 | 0.044753051 |
| 0.247940975 | 0.291489157 | 0.150633481 | 0.119469962 |
| 0.199836248 | 0.134218889 | 0.108315321 | 0.027280362 |
| 0.093748527 | 0.128964766 | 0.116303395 | 0.355731602 |
| 0.171281361 | 0.152980221 | 0.070092876 | 0.152026384 |
| 0.253343382 | 0.21403556  | 0.102179466 | 0.231967388 |
| 0.193647691 | 0.27227432  | 0.247523937 | 0.251788845 |
| 0.082808105 | 0.213086961 | 0.234415328 | 0.169511936 |
| 0.189764348 | 0.261731639 | 0.219017436 | 0.039165639 |
| 0.101677342 | 0.136820029 | 0.102819378 | 0.176850641 |
| 0.187951374 | 0.113348965 | 0.052698646 | 0.305020753 |
| 0.055784978 | 0.27444947  | 0.047320737 | 0.132005706 |
| 0.232482171 | 0.091446755 | 0.274437338 | 0.121663144 |
| 0.105701236 | 0.203417228 | 0.047642505 | 0.117786212 |
| 0.06368352  | 0.236594964 | 0.14110439  | 0.163905647 |
| 0.080106143 | 0.112800301 | 0.251476752 | 0.087012036 |
| 0.052318327 | 0.052585387 | 0.227759343 | 0.080335791 |
| 0.070108688 | 0.315156142 | 0.096763865 | 0.071102268 |
| 0.104552603 | 0.145584177 | 0.086020877 | 0.132388866 |
| 0.080120616 | 0.211073748 | 0.081540183 | 0.195972619 |
| 0.211420998 | 0.131116023 | 0.136647574 | 0.074337693 |
| 0.121880655 | 0.17950537  | 0.169588791 | 0.207600047 |
| 0.144905739 | 0.342614937 | 0.159687215 | 0.192978391 |
| 0.075577491 | 0.107228866 | 0.10927458  | 0.278993637 |
| 0.065391967 |             |             |             |
| MRRF        | 0.063653902 | 0.055278074 | 0.078308006 |
| 0.040900647 | 0.055384039 | 0.01217147  | 0.007875242 |
| 0.002083111 | 0.004092048 | 0.000148417 | 0.007214238 |
| 0.091624829 | 0.007431572 | 0.004778409 | 0.005665461 |
| 0.079270217 | 0.048184005 | 0.023817408 | 0.024982983 |

|             |             |             |             |
|-------------|-------------|-------------|-------------|
| 0.040197354 | 0.000660446 | 0.080397629 | 0.005799662 |
| 0.07896692  | 0.079571    | 0.018990417 | 0.082757062 |
| 0.052311885 | 0.023627098 | 0.005445627 | 0.021398179 |
| 0.052887805 | 0.051432393 | 0.052605605 | 0.09199444  |
| 0.058248849 | 0.050419409 | 0.004039205 | 0.003706254 |
| 0.042124349 | 0.075714675 | 0.036088383 | 0.033294887 |
| 0.003458963 | 0.035847659 | 0.015954846 | 0.125378183 |
| 0.001286513 | 0.014370398 | 0.00172248  | 0.029198317 |
| 0.040892177 | 0.035347221 | 0.003518454 | 0.005155338 |
| 0.005935631 | 0.001630401 | 0.065373336 | 0.009492235 |
| 0.014895129 | 1.83E-05    | 0.047855039 | 0.00099953  |
| 0.001330273 | 0.006826937 | 0.072716367 | 0.007511097 |
| 0.079001767 | 0.021291284 | 0.001393944 | 0.086992842 |
| 0.002034839 | 0.040706978 | 0.121658722 | 0.075520128 |
| 0.033926552 | 0.002631863 | 0.085136874 | 0.018691837 |
| 0.058452843 | 0.058149577 | 0.095990282 | 0.095992732 |
| 0.021188451 | 0.077336781 | 0.130218824 | 0.017501511 |
| 0.049017321 | 0.006802207 | 0.007004822 | 0.099605155 |
| 0.094095948 | 0.060535209 | 0.033554943 | 0.125991388 |
| 0.032337045 | 0.042030151 | 0.027418497 | 0.037941242 |
| 0.027996707 | 0.073399366 | 0.034544585 | 0.079420708 |
| 0.028333119 | 0.211185219 | 0.076296295 | 0.028773248 |
| 0.024298222 | 0.00663594  | 0.04130741  | 0.01513076  |
| 0.061159792 | 0.001516699 | 0.128882701 | 0.016374486 |
| 0.015723669 | 0.051013589 | 0.071887287 | 0.014496315 |
| 0.082681165 | 0.005303708 | 0.031558981 | 0.029787058 |
| 0.005280674 | 0.19601716  | 0.037467028 | 0.050280416 |
| 0.002552502 | 0.017029252 | 0.011322186 | 0.009461836 |
| 0.034416911 | 0.025731206 | 0.059512817 | 0.033475504 |
| 0.053481527 | 0.062240813 | 0.022626798 | 0.023546174 |
| 0.077136171 | 0.09620063  | 7.82E-05    | 0.005489632 |
| 0.03434542  | 0.03266428  | 0.047354057 | 0.045936679 |
| 0.080548474 | 0.003854448 | 0.015441736 | 0.074341503 |
| 0.025583521 | 0.012887946 | 0.010599814 | 0.087180592 |
| 0.005032779 | 0.150951919 | 0.013198707 | 0.013275615 |
| 0.001775202 | 0.060996901 | 0.076076551 | 0.013315677 |
| 0.011288337 | 0.031452262 | 0.003343536 | 0.005151755 |
| 0.002780232 | 0.041553855 | 0.04246622  | 0.024038009 |
| 0.018829494 | 0.081339642 | 0.008026284 | 0.035611836 |
| 0.001236885 | 0.007486513 | 0.00505368  | 0.066076723 |
| 0.005351883 | 0.095109182 | 0.019867524 | 0.054526492 |
| 0.090971274 | 0.071116944 | 0.004924475 | 0.042632745 |
| 0.067045315 | 0.005562751 | 0.045553766 | 0.095582838 |
| 0.055138509 | 0.051509209 | 0.001833869 | 0.074493176 |
| 0.021717603 | 0.018397202 | 0.087843273 | 0.056557417 |
| 0.049403492 | 0.01973029  | 0.006005264 | 0.109977193 |
| 0.072784837 | 0.002162857 | 0.001892996 | 0.025697297 |
| 0.064358816 | 0.000119111 | 0.048647371 | 0.039080099 |
| 0.032174342 | 0.089915588 | 0.084089949 | 0.05883499  |
| 0.052454578 | 0.011449575 | 0.007707467 | 0.14829286  |
| 0.082242645 | 0.006538687 | 0.029147626 | 0.006185532 |
| 0.012952867 | 0.042754325 | 0.059086971 | 0.00102571  |
| 0.006302128 | 0.008953395 | 0.00133242  | 0.049450101 |
| 0.049286763 | 0.002946585 | 0.039289001 | 0.025993274 |

|             |             |             |             |
|-------------|-------------|-------------|-------------|
| 0.058587536 | 0.06828814  | 0.240432039 | 0.22398673  |
| 0.261401318 | 0.022513488 | 0.019526725 | 0.005093782 |
| 0.01290862  | 0.021694689 | 0.047186513 | 0.021610779 |
| 0.000223998 | 0.021647004 | 0.030851094 | 0.026205536 |
| 0.005164188 | 0.015543552 | 0.011060217 | 0.027200389 |
| 0.006786777 | 0.004572403 | 0.050852115 | 0.065439277 |
| 0.06012347  | 0.022974058 | 0.054973065 | 0.068092966 |
| 0.012697033 | 0.008539965 | 0.031769687 | 0.004131819 |
| 0.0513053   | 0.00590101  | 0.003030115 | 0.036830624 |
| 0.006871479 | 0.087099009 | 0.00828409  | 0.053845793 |
| 0.060404718 | 0.028476566 | 0.060595784 | 0.000879184 |
| 0.022640036 | 0.035624899 | 0.077188898 | 0.039613799 |
| 0.024276697 | 0.037624974 | 0.001319508 | 0.034090632 |
| 0.031361013 | 0.018304146 | 0.072765056 | 0.060212816 |
| 0.034833612 | 0.117427177 | 0.064851495 | 0.049205119 |
| 0.052600423 | 0.014984054 | 0.000351975 | 0.09781207  |
| 0.062047845 | 0.084244252 | 0.036338431 | 0.153698784 |
| 0.006078826 | 0.002542178 | 0.145589298 | 0.100156366 |
| 0.045382619 | 0.085778844 | 0.05977271  | 0.073524268 |
| 0.032542749 | 0.031436023 | 0.000129924 | 0.073392803 |
| 0.029064069 | 0.059766128 | 0.011071194 | 0.105758922 |
| 0.052957948 | 0.004843399 | 0.054966329 | 0.008249073 |
| 0.022556793 | 0.006711887 | 0.0150415   | 0.048414128 |
| 0.041697966 | 0.027627016 | 0.022995987 | 0.074953939 |
| 0.000254788 | 0.000551981 | 0.082592127 | 0.185258012 |
| 0.01314888  | 0.023824903 | 1           | 0.005543619 |
| 0.003555066 | 0.03388561  | 0.086880803 | 0.011063825 |
| 0.008066856 | 0.005421109 | 0.121099186 | 0.011030005 |
| 0.105980253 | 0.077977767 | 0.051104542 | 0.0085026   |
| 0.070323517 | 0.068747102 | 0.106724336 | 0.060781171 |
| 0.052735836 | 0.065450122 | 0.027103149 | 0.001185562 |
| 0.07143414  | 0.002063004 | 0.001305077 | 0.045242382 |
| 0.017648451 | 0.032982381 | 0.0001108   | 0.033940369 |
| 0.070364704 | 0.115649202 | 0.040247442 | 0.022857024 |
| 0.001366293 | 0.045670256 | 0.012113954 | 0.086769654 |
| 0.045647947 | 0.047202321 | 0.077362386 | 0.05971337  |
| 0.10665602  | 0.052015836 | 0.137422959 | 0.092402113 |
| 0.094949477 | 0.053447559 | 0.002290304 | 0.070806324 |
| 0.04234952  | 0.080824312 | 0.036979937 | 0.038465992 |
| 0.057836379 | 0.111765471 | 0.029888479 | 0.001728109 |
| 0.017373141 | 0.002024072 | 0.005864599 | 0.003312643 |
| 0.009477511 | 0.035741978 | 0.062846717 | 0.082121115 |
| 0.087902216 | 0.017871043 | 0.001385704 | 0.048831952 |
| 0.035894371 | 0.055291087 | 0.012654019 | 0.005327928 |
| 0.005132388 | 0.025665937 | 0.017766007 | 0.104258825 |
| 0.066166865 | 0.000792242 | 0.005195322 | 0.000228511 |
| 0.006741362 | 0.156213694 | 0.051168952 | 0.058155202 |
| 0.09665333  | 0.027365263 | 0.004162937 | 0.055575211 |
| 0.029696558 | 0.016888667 | 0.078789588 | 0.034338954 |
| 0.030825985 | 0.081974867 | 0.028456112 | 0.058615617 |
| 0.216438474 | 0.094737261 | 0.082611094 | 0.007751826 |
| 0.011329472 | 0.058343915 | 0.032215764 | 0.092472495 |
| 0.056254946 | 0.010803671 | 0.011643578 | 0.000488349 |
| 0.005236191 | 0.075953459 | 0.010615374 | 0.0806003   |

|             |             |             |             |
|-------------|-------------|-------------|-------------|
| 0.041823083 | 0.069949553 | 0.048394491 | 0.041982752 |
| 0.005011436 | 0.046507933 | 0.163334852 | 0.00033948  |
| 0.051453206 | 0.010393521 | 0.070821961 | 0.008701216 |
| 0.005955598 | 0.031469683 | 0.015164174 | 0.050018692 |
| 0.105269297 | 0.038292341 | 0.073887847 | 0.111784737 |
| 0.057804612 | 0.008549261 | 0.083482651 | 0.063186262 |
| 0.006144801 | 0.054244671 | 0.043158609 | 0.019364863 |
| 0.002092527 | 0.080358593 | 0.037710101 | 0.029991249 |
| 0.003472599 | 0.098083431 | 0.017346796 | 0.078855056 |
| 0.03619646  | 0.054135028 | 0.066934238 | 0.022380591 |
| 0.035986461 | 0.023192739 | 0.015410551 | 0.000496845 |
| 0.040004622 | 0.067116921 | 0.020973601 | 0.028270945 |
| 0.049912489 | 0.141460557 | 0.003837446 | 0.00380219  |
| 0.194764552 | 0.00616665  | 0.005093414 | 0.078162187 |
| 0.030036234 | 0.031181862 | 0.001756936 | 0.026526722 |
| 0.061891845 | 0.037362717 | 0.001176762 | 0.03277565  |
| 0.05891263  | 0.049852524 | 0.093748637 | 0.117423005 |
| 0.018267109 | 0.051271251 | 0.039375102 | 0.018121123 |
| 0.025287398 | 0.020549353 | 0.052394021 | 8.52E-05    |
| 0.022831753 | 0.055705554 | 0.006640081 | 0.079045129 |
| 0.02219184  | 0.023201062 | 0.099639116 | 0.087335877 |
| 0.071477952 | 0.052589837 | 0.00313845  | 0.008747482 |
| 0.108542314 | 0.029622543 | 0.066661855 | 0.004115304 |
| 0.005386414 | 0.043752267 | 0.004010149 | 0.036235451 |
| 0.074042744 | 0.061083708 | 0.107166636 | 0.057079109 |
| 0.070488384 | 0.066673619 | 0.044605307 | 0.005217543 |
| 0.006764194 | 0.011861097 | 0.054175363 | 0.001435073 |
| 0.000985367 | 0.086685506 | 0.017745726 | 0.027984732 |
| 0.014437297 | 0.025155729 | 0.023148555 | 0.006939989 |
| 0.080314596 | 0.075319622 | 0.005254888 | 0.07217107  |
| 0.015886676 | 0.019127863 | 0.019980185 | 0.004202058 |
| 0.005642339 | 0.036263506 | 0.122763787 | 0.064910112 |
| 0.105619052 | 0.066301121 | 0.030438522 | 0.048737061 |
| 0.01400177  | 0.06767485  | 0.001957243 | 0.053607803 |
| 0.032996281 |             |             |             |
| MS4A4C      | 0.305189616 | 0.402245031 | 0.14508602  |
| 0.329237173 | 0.180092014 | 0.235337348 | 0.142639179 |
| 0.097842569 | 0.034739951 | 0.003230728 | 0.005376222 |
| 0.199255555 | 0.034288444 | 0.070649246 | 0.065437262 |
| 0.330443238 | 0.026210646 | 0.14313511  | 0.163092695 |
| 0.331959886 | 0.058561872 | 0.25572059  | 0.051720059 |
| 0.049568427 | 0.021240272 | 0.030504556 | 0.056200111 |
| 0.399067971 | 0.03693744  | 0.172628734 | 0.36034884  |
| 0.031676489 | 0.358197553 | 0.382348262 | 0.210422916 |
| 0.349793192 | 0.273123899 | 0.010968196 | 0.082482331 |
| 0.381079599 | 0.271491242 | 0.349996697 | 0.202194768 |
| 0.024750101 | 0.382420067 | 0.159201874 | 0.189817202 |
| 0.072496237 | 0.010565793 | 0.124807154 | 0.392131082 |
| 0.322747407 | 0.189838303 | 0.142334053 | 0.088904137 |
| 0.025751347 | 0.104203101 | 0.022782849 | 0.305411051 |
| 0.141302248 | 0.101621081 | 0.333114752 | 0.039803156 |
| 0.056735986 | 0.163282327 | 0.034567507 | 0.161499898 |
| 0.061468796 | 0.352474652 | 0.029171032 | 0.173580201 |
| 0.001853519 | 0.339296302 | 0.189212134 | 0.049279226 |

|             |             |             |             |
|-------------|-------------|-------------|-------------|
| 0.025796729 | 0.006565982 | 0.049554803 | 0.235413251 |
| 0.395997052 | 0.361942188 | 0.341387676 | 0.336080868 |
| 0.03186468  | 0.131205256 | 0.127233795 | 0.056717157 |
| 0.375016222 | 0.091238218 | 0.04129224  | 0.299054664 |
| 0.3449392   | 0.365065755 | 0.04896566  | 0.116637575 |
| 0.300837366 | 0.406528639 | 0.138957065 | 0.1387994   |
| 0.049386567 | 0.015076641 | 0.342534727 | 0.362324361 |
| 0.354515353 | 0.069516243 | 0.055999702 | 0.381189997 |
| 0.036921625 | 0.069104959 | 0.246866253 | 0.033030401 |
| 0.410284684 | 0.018391737 | 0.073585482 | 0.214151941 |
| 0.076318637 | 0.321779432 | 0.345888077 | 0.131254575 |
| 0.159806612 | 0.008296915 | 0.016842406 | 0.020045334 |
| 0.069952419 | 0.016091571 | 0.345908418 | 0.354985902 |
| 0.088964411 | 0.061705567 | 0.165223837 | 0.00249472  |
| 0.009463539 | 0.050410895 | 0.291517645 | 0.182830132 |
| 0.33765165  | 0.273054704 | 0.058529516 | 0.325353379 |
| 0.194733287 | 0.338968952 | 0.018436594 | 0.065115515 |
| 0.201036933 | 0.054512013 | 0.157374672 | 0.205842668 |
| 0.101392743 | 0.078446822 | 0.06693489  | 0.388264154 |
| 0.407926065 | 0.059432909 | 0.141709327 | 0.292226916 |
| 0.05971595  | 0.127869341 | 0.066260442 | 0.077949405 |
| 0.036126483 | 0.326767481 | 0.009598287 | 0.204177045 |
| 0.035531021 | 0.022986999 | 0.018029018 | 0.192016144 |
| 0.060399735 | 0.283164378 | 0.335402512 | 0.070088001 |
| 0.119248243 | 0.217242412 | 0.213793516 | 0.235300172 |
| 0.003838219 | 0.031270038 | 0.169910435 | 0.366410868 |
| 0.252599845 | 0.363687338 | 0.090673085 | 0.081405339 |
| 0.132446325 | 0.34881378  | 0.001175192 | 0.373356544 |
| 0.361985282 | 0.14877963  | 0.169798092 | 0.220670192 |
| 0.098156336 | 0.34796837  | 0.013429531 | 0.290649602 |
| 0.282274304 | 0.057142667 | 0.380386388 | 0.063605701 |
| 0.352074757 | 0.022201749 | 0.141402314 | 0.254409886 |
| 0.219782974 | 0.008698481 | 0.151073654 | 0.338958319 |
| 0.009222456 | 0.070101673 | 0.338023406 | 0.278954781 |
| 0.195025344 | 0.314040389 | 0.378510139 | 0.078679319 |
| 0.166208984 | 0.142189019 | 0.011210562 | 0.123041837 |
| 0.309713314 | 0.054463951 | 0.371523977 | 0.091030754 |
| 0.214894316 | 0.374871465 | 0.267902927 | 0.037379448 |
| 0.034637919 | 0.206300398 | 0.014150975 | 0.129458879 |
| 0.305576042 | 0.037267158 | 0.134532352 | 0.049528386 |
| 0.022263601 | 0.379575458 | 0.030125438 | 0.042798907 |
| 0.014756322 | 0.174761306 | 0.176486742 | 0.038972209 |
| 0.023354596 | 0.056693644 | 0.074533457 | 0.094801177 |
| 0.035508405 | 0.035174395 | 0.007108197 | 0.054453266 |
| 0.017070538 | 0.055303616 | 0.061328629 | 0.291692196 |
| 0.076179495 | 0.023453448 | 0.123474719 | 0.048571547 |
| 0.026840276 | 0.011695628 | 0.38641595  | 0.299475365 |
| 0.303039471 | 0.071904116 | 0.022814781 | 0.039539783 |
| 0.356149317 | 0.158487691 | 0.127932389 | 0.367805586 |
| 0.022160404 | 0.366403014 | 0.040954497 | 0.047107857 |
| 0.071553341 | 0.127934653 | 0.392517634 | 0.03021394  |
| 0.264758759 | 0.381932824 | 0.173368362 | 0.053473332 |
| 0.325731133 | 0.304096882 | 0.025203834 | 0.297178778 |
| 0.287101389 | 0.018117968 | 0.369014679 | 0.025056576 |

|             |             |             |             |
|-------------|-------------|-------------|-------------|
| 0.014197954 | 0.239801326 | 0.2317536   | 0.043749312 |
| 0.029275896 | 0.117341595 | 0.047886865 | 0.154884069 |
| 0.379835454 | 0.275790614 | 0.279222476 | 0.046495754 |
| 0.022136987 | 0.002094425 | 0.057263405 | 0.156401058 |
| 0.371890707 | 0.338638786 | 0.152163756 | 0.092222615 |
| 0.177726794 | 0.059704705 | 0.089525685 | 0.354498598 |
| 0.052447538 | 0.38969183  | 0.007698547 | 0.257124405 |
| 0.34740967  | 0.191332641 | 0.022316746 | 0.208494826 |
| 0.324525316 | 0.03383666  | 0.106545836 | 0.358301702 |
| 0.364933206 | 0.096347915 | 0.073726217 | 0.270239564 |
| 0.018821966 | 0.043112554 | 0.178446587 | 0.025574748 |
| 0.090433141 | 0.076278851 | 0.005543619 | 1           |
| 0.015885891 | 0.364994146 | 0.345230939 | 0.020996729 |
| 0.167931313 | 0.123197867 | 0.207947688 | 0.029025962 |
| 0.273824467 | 0.345930969 | 0.379434392 | 0.097780654 |
| 0.292238177 | 0.317380725 | 0.126565495 | 0.038254546 |
| 0.009243368 | 0.349223704 | 0.318100207 | 0.007140567 |
| 0.378493813 | 0.168232441 | 0.003705527 | 0.40516816  |
| 0.136758601 | 0.342956661 | 0.004587729 | 0.018324981 |
| 0.01421902  | 0.325417078 | 0.356017428 | 0.358654141 |
| 0.069624343 | 0.279172993 | 0.003682424 | 0.369267106 |
| 0.360268705 | 0.005343234 | 0.028980406 | 0.265159943 |
| 0.203922382 | 0.417484344 | 0.068216909 | 0.27146131  |
| 0.157237587 | 0.334749948 | 0.068707714 | 0.139048249 |
| 0.333637408 | 0.313243391 | 0.345217205 | 0.391648951 |
| 0.354243208 | 0.249293455 | 0.198471468 | 0.01388146  |
| 0.029087567 | 0.15278429  | 0.040437075 | 0.016818785 |
| 0.280122345 | 0.028695281 | 0.366660772 | 0.358649485 |
| 0.31476228  | 0.005539429 | 0.077373251 | 0.303384372 |
| 0.403556323 | 0.413761288 | 0.015928088 | 0.003000698 |
| 0.002295668 | 0.003061846 | 0.28201222  | 0.097490771 |
| 0.354706718 | 0.036875839 | 0.00517476  | 0.047622605 |
| 0.070096005 | 0.162736317 | 0.361587934 | 0.310356512 |
| 0.290155515 | 0.041871886 | 0.042371415 | 0.341316614 |
| 0.016930154 | 0.270539661 | 0.329027429 | 0.390909888 |
| 0.021506657 | 0.097106112 | 0.171058518 | 0.397196442 |
| 0.006270128 | 0.164066158 | 0.221381465 | 0.058576484 |
| 0.008875341 | 0.023230177 | 0.022949741 | 0.335996147 |
| 0.330537878 | 0.013639096 | 0.007091156 | 0.058330866 |
| 0.040354921 | 0.368193876 | 0.039527311 | 0.382069779 |
| 0.362513695 | 0.357826631 | 0.019316425 | 0.377857758 |
| 0.019740818 | 0.34657791  | 0.08896335  | 0.015876922 |
| 0.089579581 | 0.012376759 | 0.321274808 | 0.016719801 |
| 0.131628709 | 0.337034888 | 0.04091623  | 0.007366194 |
| 0.024396047 | 0.02059397  | 0.354703077 | 0.30929342  |
| 0.012436323 | 0.116500023 | 0.140736    | 0.286320024 |
| 0.215504746 | 0.294633867 | 0.375098799 | 0.129027931 |
| 0.05243027  | 0.022065453 | 0.355731027 | 0.278099417 |
| 0.103049869 | 0.357249283 | 0.046539036 | 0.381569757 |
| 0.33709954  | 0.396287133 | 0.336608586 | 0.213452658 |
| 0.033689597 | 0.250741687 | 0.267660949 | 0.010685979 |
| 0.217169943 | 0.326591643 | 0.226873497 | 0.024704657 |
| 0.082417696 | 0.122991188 | 0.051303161 | 0.051104323 |
| 0.073690034 | 0.242234837 | 0.045418355 | 0.374282143 |

|             |             |             |             |
|-------------|-------------|-------------|-------------|
| 0.30436377  | 0.304553423 | 0.048372129 | 0.020472107 |
| 0.406386956 | 0.388648412 | 0.069669137 | 0.270165905 |
| 0.081915476 | 0.162307945 | 0.291880732 | 0.279254676 |
| 0.076692836 | 0.299563013 | 0.373276987 | 0.259021325 |
| 0.374080902 | 0.180654611 | 0.380006396 | 0.075687622 |
| 0.02354493  | 0.218651792 | 0.025146164 | 0.043723343 |
| 0.075235835 | 0.011898161 | 0.03232896  | 0.302451248 |
| 0.059148197 | 0.22084168  | 0.098406675 | 0.029472928 |
| 0.145624409 | 0.161528449 | 0.200362948 | 0.100226288 |
| 0.023986155 | 0.358457519 | 0.004470038 | 0.02703433  |
| 0.070177398 | 0.300543825 | 0.10022209  | 0.072553833 |
| 0.03696701  | 0.035425281 | 0.148005511 | 0.196323439 |
| 0.073176931 | 0.059977642 | 0.297349451 | 0.032704205 |
| 0.023035851 | 0.373785558 | 0.174977509 | 0.010071055 |
| 0.036120783 | 0.269911168 | 0.086423508 | 0.054381756 |
| 0.007755989 | 0.308538309 | 0.121633829 | 0.180890265 |
| 0.240550843 | 0.037685542 | 0.34735411  | 0.053048956 |
| 0.049652028 | 0.369037672 | 0.155437221 | 0.349655286 |
| 0.121361349 | 0.305185114 | 0.37395258  | 0.308539318 |
| 0.043602089 | 0.145855752 | 0.025764037 | 0.389871555 |
| 0.076476617 |             |             |             |
| MS4A6C      | 0.028955516 | 0.053426512 | 0.023371685 |
| 0.133376329 | 0.067149618 | 0.044807316 | 0.178175791 |
| 0.032903098 | 0.052536397 | 0.093498833 | 0.080055692 |
| 0.038598053 | 0.046607192 | 0.085975108 | 0.015845583 |
| 0.118121215 | 0.13732019  | 0.01831458  | 0.207377939 |
| 0.097720014 | 0.110350315 | 0.162496791 | 0.139289964 |
| 0.020609303 | 0.127088186 | 0.225427268 | 0.059170667 |
| 0.103098761 | 0.23413651  | 0.04226351  | 0.079839484 |
| 0.069391857 | 0.0467024   | 0.034116535 | 0.093489757 |
| 0.03041734  | 0.020636747 | 0.012231686 | 0.047456681 |
| 0.038916698 | 0.067673691 | 0.102519544 | 0.199573467 |
| 0.167462821 | 0.030113476 | 0.225578277 | 0.055289215 |
| 0.012009734 | 0.148850217 | 0.026091879 | 0.029603517 |
| 0.033225519 | 0.047905411 | 0.055480125 | 0.163967519 |
| 0.033814872 | 0.027739253 | 0.017736505 | 0.040124827 |
| 0.211306828 | 0.039191545 | 0.035548194 | 0.064634484 |
| 0.016529285 | 0.055267837 | 0.066772195 | 0.104197452 |
| 0.016572045 | 0.03872489  | 0.049139954 | 0.018366186 |
| 0.049562753 | 0.106321572 | 0.06782292  | 0.015396612 |
| 0.241496203 | 0.159598538 | 0.091566719 | 0.166437359 |
| 0.087194217 | 0.027363354 | 0.084952884 | 0.064819467 |
| 0.072383176 | 0.085876078 | 0.028238315 | 0.202381424 |
| 0.04142761  | 0.209807891 | 0.035473881 | 0.129657594 |
| 0.078799221 | 0.042803405 | 0.05343112  | 0.114786711 |
| 0.072014419 | 0.049090075 | 0.037455354 | 0.059617233 |
| 0.02396782  | 0.039012792 | 0.038012093 | 0.063147658 |
| 0.033717292 | 0.026641754 | 0.209227975 | 0.075396162 |
| 0.174098716 | 0.00995402  | 0.199298174 | 0.031619424 |
| 0.088969071 | 0.091576701 | 0.134653379 | 0.121918516 |
| 0.024976516 | 0.050223846 | 0.039918948 | 0.224575015 |
| 0.041074984 | 0.095311903 | 0.015999871 | 0.088203734 |
| 0.0189194   | 0.009853787 | 0.024295794 | 0.098192272 |
| 0.028468339 | 0.020396174 | 0.098282524 | 0.064053208 |

|             |             |             |             |
|-------------|-------------|-------------|-------------|
| 0.135640444 | 0.01750354  | 0.039793122 | 0.033382592 |
| 0.060537573 | 0.016958264 | 0.136730161 | 0.028538191 |
| 0.036448898 | 0.081621766 | 0.003725665 | 0.123868339 |
| 0.05702947  | 0.019617209 | 0.243588928 | 0.04820033  |
| 0.125907194 | 0.097055762 | 0.21405597  | 0.069335983 |
| 0.03817432  | 0.268673606 | 0.01479681  | 0.124700371 |
| 0.03470014  | 0.088551891 | 0.165015736 | 0.123313393 |
| 0.149466456 | 0.027762381 | 0.120298043 | 0.029901803 |
| 0.007992371 | 0.043476636 | 0.023413829 | 0.065317023 |
| 0.031042279 | 0.05986062  | 0.019979321 | 0.177642418 |
| 0.13710299  | 0.119497439 | 0.025960727 | 0.073811274 |
| 0.097649875 | 0.061277383 | 0.010257304 | 0.066589225 |
| 0.034021764 | 0.052794605 | 0.065237842 | 0.044280258 |
| 0.161334759 | 0.086669543 | 0.001670733 | 0.031565614 |
| 0.039990001 | 0.010554204 | 0.129734605 | 0.047984928 |
| 0.02460608  | 0.10371016  | 0.000435725 | 0.124617334 |
| 0.020348929 | 0.157489178 | 0.084535918 | 0.253798373 |
| 0.031633856 | 0.25220157  | 0.043845329 | 0.042194505 |
| 0.034223513 | 0.016898349 | 0.060298053 | 0.107038174 |
| 0.073247715 | 0.064971968 | 0.050620361 | 0.119111651 |
| 0.101669624 | 0.066313247 | 0.102006634 | 0.0235561   |
| 0.068641495 | 0.092933231 | 0.04300863  | 0.079413798 |
| 0.042024485 | 0.004987534 | 0.041771045 | 0.069941343 |
| 0.014772199 | 0.051256156 | 0.027275841 | 0.012238895 |
| 0.236008367 | 0.076306562 | 0.049288812 | 0.100003288 |
| 0.021925067 | 0.159354568 | 0.022414511 | 0.022028289 |
| 0.156994365 | 0.063414174 | 0.031965552 | 0.014363148 |
| 0.014476702 | 0.086990929 | 0.126355122 | 0.095066382 |
| 0.061230057 | 0.094332859 | 0.027946037 | 0.040797482 |
| 0.124069297 | 0.249354593 | 0.013773862 | 0.018758534 |
| 0.083078724 | 0.048402978 | 0.04218682  | 0.032630483 |
| 0.028199765 | 0.111556771 | 0.094750143 | 0.015544183 |
| 0.093616971 | 0.197125593 | 0.052351313 | 0.103187476 |
| 0.027263066 | 0.109989655 | 0.147723246 | 0.00857559  |
| 0.089331696 | 0.030432113 | 0.007772523 | 0.069824934 |
| 0.032799776 | 0.069112088 | 0.096169735 | 0.247206217 |
| 0.048424039 | 0.240013565 | 0.100770958 | 0.014694426 |
| 0.030974107 | 0.049444411 | 0.084543514 | 0.163859414 |
| 0.037927862 | 0.082106083 | 0.098914918 | 0.03063572  |
| 0.031513289 | 0.238814761 | 0.049915333 | 0.083501886 |
| 0.167813486 | 0.0614854   | 0.053151034 | 0.229810776 |
| 0.155764703 | 0.124763774 | 0.07362202  | 0.191289747 |
| 0.064015889 | 0.157999015 | 0.059899845 | 0.029465052 |
| 0.242126743 | 0.121918844 | 0.062666841 | 0.021994892 |
| 0.031661983 | 0.047255487 | 0.157634558 | 0.091162508 |
| 0.229160165 | 0.030978384 | 0.009857757 | 0.063740629 |
| 0.006296133 | 0.035420798 | 0.105463615 | 0.047958047 |
| 0.029878794 | 0.027681542 | 0.1890751   | 0.099915603 |
| 0.045301024 | 0.177391667 | 0.056659882 | 0.041836021 |
| 0.053021698 | 0.051186403 | 0.036582805 | 0.054020626 |
| 0.09525721  | 0.085934815 | 0.058609331 | 0.014895985 |
| 0.038844425 | 0.098706126 | 0.003555066 | 0.015885891 |
| 1           | 0.050083149 | 0.081243337 | 0.098417296 |
| 0.052635916 | 0.014683211 | 0.106781514 | 0.209415861 |



|             |             |             |             |
|-------------|-------------|-------------|-------------|
| 0.043170424 | 0.033509272 | 0.038073421 | 0.076521388 |
| 0.041102645 | 0.049582025 | 0.028227864 | 0.128284839 |
| 0.149324083 | 0.033978346 | 0.039610193 | 0.153958268 |
| 0.090185034 | 0.022989931 | 0.145804295 | 0.052939085 |
| 0.193256216 | 0.020657991 | 0.014147082 | 0.001201436 |
| 0.039024318 | 0.073403623 | 0.034138311 | 0.07282058  |
| 0.025476601 | 0.081576103 | 0.001917438 | 0.047845543 |
| 0.048772748 | 0.098633485 | 0.037777407 | 0.042764388 |
| 0.038298091 | 0.047222202 | 0.031217584 | 0.054713686 |
| 0.040210889 | 0.034578448 | 0.049122829 | 0.195487966 |
| 0.071362128 | 0.032424084 | 0.061434518 | 0.042091312 |
| 0.095846716 | 0.082282046 | 0.220207994 | 0.137802233 |
| 0.016807501 | 0.052713396 | 0.018589595 | 0.073637793 |
| 0.028439345 | 0.117540704 | 0.043310822 | 0.084710924 |
| 0.057734779 | 0.11832634  | 0.062293739 | 0.038191725 |
| 0.07393362  | 0.082653759 | 0.01567384  | 0.003889649 |
| 0.001518873 | 0.056751073 | 0.078139632 | 0.095739574 |
| 0.05280771  | 0.014370235 | 0.139484008 | 0.059961653 |
| 0.037883392 | 0.064495281 | 0.046397684 | 0.156168848 |
| 0.04348653  | 0.154247111 | 0.041575759 | 0.118946271 |
| 0.062214634 | 0.014205915 | 0.068142275 | 0.045844974 |
| 0.05140309  | 0.08320597  | 0.020992854 | 0.09046794  |
| 0.003688923 | 0.139520034 | 0.041957043 | 0.046019697 |
| 0.015857885 | 0.122043151 | 0.112453681 | 0.082152045 |
| 0.028514536 | 0.133731286 | 0.14325879  | 0.004835061 |
| 0.201280206 | 0.06140993  | 0.150819365 | 0.074640062 |
| 0.081585367 | 0.131781499 | 0.043125296 | 0.040082277 |
| 0.074627673 | 0.034614483 | 0.064469231 | 0.014367969 |
| 0.037189447 | 0.061385357 | 0.030962446 | 0.021694552 |
| 0.035445213 | 0.044543624 | 0.012515588 | 0.074191727 |
| 0.004903771 | 0.171942442 | 0.096632327 | 0.069994099 |
| 0.034982577 | 0.062814599 | 0.101942733 | 0.06631718  |
| 0.071606952 | 0.122585946 | 0.035526474 | 0.023569321 |
| 0.14154318  | 0.004352056 | 0.086472287 | 0.029628    |
| 0.039401846 | 0.081512477 | 0.050558225 | 0.05053623  |
| 0.035539231 | 0.043146221 | 0.043862702 | 0.10883625  |
| 0.021088664 | 0.032509674 | 0.095800797 | 0.120353178 |
| 0.108712748 | 0.102644962 | 0.035542591 | 0.055565767 |
| 0.188467305 | 0.022492203 | 0.03692849  | 0.002429808 |
| 0.01591985  | 0.057740806 | 0.105847433 | 0.108962708 |
| 0.037146314 | 0.029970866 | 0.04054858  | 0.116119896 |
| 0.050068872 | 0.035792025 | 0.036594073 | 0.080831716 |
| 0.13439848  | 0.123509127 | 0.052949257 | 0.054886745 |
| 0.009030824 | 0.061699513 | 0.064198007 | 0.082068403 |
| 0.047325713 | 0.153959053 | 0.040010705 | 0.013148336 |
| 0.025476918 | 0.022424013 | 0.169954108 | 0.164319641 |
| 0.261582386 | 0.080844904 | 0.007703674 | 0.095129016 |
| 0.009373766 | 0.171525446 | 0.005524794 | 0.075759226 |
| 0.088817337 | 0.011497249 | 0.12551712  | 0.150715221 |
| 0.130734008 | 0.040737209 | 0.05751251  | 0.163031874 |
| 0.01450792  | 0.049451826 | 0.048979775 | 0.102183149 |
| 0.013668405 | 0.028196849 | 0.193649416 | 0.035080821 |
| 0.049055955 | 0.004820023 | 0.050221205 | 0.043707334 |
| 0.098087864 | 0.084792131 | 0.021323958 | 0.028438857 |

|             |             |             |             |
|-------------|-------------|-------------|-------------|
| 0.018779378 | 0.021519777 | 0.020625415 | 0.053828996 |
| 0.079311281 | 0.040567457 | 0.033697197 | 0.048490404 |
| 0.092908595 | 0.131571074 | 0.022464402 | 0.014904418 |
| 0.039307238 | 0.032839987 | 0.029165467 | 0.036142894 |
| 0.027955326 | 0.155441636 | 0.023452307 | 0.046254514 |
| 0.012971007 | 0.012374267 | 0.107224994 | 0.068238436 |
| 0.013498562 |             |             |             |
| MS4A6D      | 0.408901357 | 0.502017657 | 0.359185174 |
| 0.43459571  | 0.408718568 | 0.430178515 | 0.241913288 |
| 0.21941779  | 0.088157094 | 0.008967072 | 0.027202171 |
| 0.409937734 | 0.222915104 | 0.320924492 | 0.3550806   |
| 0.399713462 | 0.123323986 | 0.32687271  | 0.245192431 |
| 0.413308852 | 0.129836106 | 0.385741051 | 0.099535166 |
| 0.241108097 | 0.091378615 | 0.06991791  | 0.240396679 |
| 0.441305828 | 0.077740764 | 0.417069295 | 0.422192203 |
| 0.078318589 | 0.439764186 | 0.511338261 | 0.424193545 |
| 0.503770384 | 0.395490633 | 0.010373224 | 0.361152602 |
| 0.425868981 | 0.430170623 | 0.419971793 | 0.338482642 |
| 0.048881151 | 0.49849054  | 0.26947551  | 0.357276221 |
| 0.253911509 | 0.031385878 | 0.310711471 | 0.454083526 |
| 0.487809972 | 0.454147398 | 0.266890992 | 0.190834367 |
| 0.242622622 | 0.307874963 | 0.254852166 | 0.388852173 |
| 0.24888751  | 0.234484382 | 0.481358854 | 0.108057052 |
| 0.174305557 | 0.275896988 | 0.123130353 | 0.29307721  |
| 0.306215608 | 0.423584448 | 0.019258968 | 0.377418171 |
| 0.005704004 | 0.388568178 | 0.332304489 | 0.284114744 |
| 0.037136019 | 0.026413557 | 0.147134839 | 0.374167275 |
| 0.447348301 | 0.425121267 | 0.448446708 | 0.446599131 |
| 0.173164954 | 0.255343298 | 0.351028832 | 0.177254482 |
| 0.442361214 | 0.213903887 | 0.105269126 | 0.397846732 |
| 0.45027403  | 0.503238799 | 0.18241284  | 0.224178295 |
| 0.462772733 | 0.459990846 | 0.424898846 | 0.427059619 |
| 0.33950806  | 0.034831657 | 0.445739332 | 0.458562664 |
| 0.424907515 | 0.269826819 | 0.135233777 | 0.442021389 |
| 0.053728475 | 0.367700685 | 0.359705455 | 0.142331903 |
| 0.450710304 | 0.022195445 | 0.180840635 | 0.401528072 |
| 0.185067312 | 0.442055945 | 0.487792319 | 0.202944218 |
| 0.371064471 | 0.019571673 | 0.118373054 | 0.025831595 |
| 0.339222297 | 0.11011042  | 0.50013397  | 0.466087519 |
| 0.276740217 | 0.371101838 | 0.287981207 | 0.000944053 |
| 0.021454793 | 0.144754517 | 0.442356274 | 0.347025109 |
| 0.424320135 | 0.376808375 | 0.242690091 | 0.43005674  |
| 0.428578766 | 0.447236572 | 0.089164507 | 0.104630695 |
| 0.428225307 | 0.146326309 | 0.230384892 | 0.450224338 |
| 0.289248762 | 0.129384299 | 0.131512953 | 0.46239051  |
| 0.433158334 | 0.090140708 | 0.347695923 | 0.393164071 |
| 0.384345733 | 0.318390488 | 0.109153116 | 0.30195696  |
| 0.064774715 | 0.468240102 | 0.020261418 | 0.347601275 |
| 0.270120635 | 0.131692679 | 0.008678988 | 0.311112928 |
| 0.328364208 | 0.463370937 | 0.477436138 | 0.099612447 |
| 0.342509642 | 0.388375433 | 0.370864951 | 0.463192035 |
| 0.016385083 | 0.040834995 | 0.329820355 | 0.466492612 |
| 0.372328737 | 0.439686374 | 0.290556634 | 0.264186338 |
| 0.255382279 | 0.433468632 | 0.001834625 | 0.50115493  |

|             |             |             |             |
|-------------|-------------|-------------|-------------|
| 0.500844394 | 0.350887948 | 0.413652621 | 0.382144943 |
| 0.361196041 | 0.456666069 | 0.040669322 | 0.403104394 |
| 0.392139604 | 0.073808371 | 0.451166693 | 0.151058976 |
| 0.442543681 | 0.040956571 | 0.376177721 | 0.41715953  |
| 0.436100354 | 0.008981025 | 0.300859487 | 0.416883401 |
| 0.0181312   | 0.143483208 | 0.423487223 | 0.414798989 |
| 0.396038223 | 0.419766657 | 0.444251435 | 0.342876052 |
| 0.41663812  | 0.246105298 | 0.009424587 | 0.273685256 |
| 0.419883124 | 0.381327176 | 0.447809104 | 0.263064227 |
| 0.38034654  | 0.458532374 | 0.424978415 | 0.248146904 |
| 0.049358988 | 0.355995486 | 0.026921507 | 0.321713482 |
| 0.402360172 | 0.154936453 | 0.388429385 | 0.115677417 |
| 0.059106264 | 0.485001181 | 0.136347457 | 0.212812743 |
| 0.094143083 | 0.450279223 | 0.25568764  | 0.303500958 |
| 0.240309589 | 0.157462599 | 0.333645955 | 0.38001207  |
| 0.055143263 | 0.095268349 | 0.007260958 | 0.395657092 |
| 0.175559833 | 0.389501706 | 0.402203093 | 0.443890484 |
| 0.365476306 | 0.127372252 | 0.38070458  | 0.23800262  |
| 0.093541816 | 0.012648778 | 0.480794939 | 0.388860875 |
| 0.395298623 | 0.163256096 | 0.033900245 | 0.384366787 |
| 0.469556659 | 0.401750012 | 0.322012167 | 0.468534314 |
| 0.023175416 | 0.444769557 | 0.279158775 | 0.113912487 |
| 0.370744146 | 0.27338147  | 0.444847787 | 0.076187652 |
| 0.410294443 | 0.470190695 | 0.277263829 | 0.177048818 |
| 0.437138898 | 0.427508547 | 0.037488159 | 0.424961193 |
| 0.432891015 | 0.030371697 | 0.488300106 | 0.104975636 |
| 0.01641464  | 0.407573617 | 0.446723506 | 0.06573259  |
| 0.064422664 | 0.381498337 | 0.068382328 | 0.266439462 |
| 0.483536522 | 0.398220946 | 0.465632393 | 0.167468629 |
| 0.047466747 | 0.014779526 | 0.166230209 | 0.355687154 |
| 0.513298049 | 0.463057326 | 0.24108042  | 0.358759785 |
| 0.242226665 | 0.327113441 | 0.19817814  | 0.463738073 |
| 0.142221683 | 0.496014418 | 0.005476714 | 0.422959069 |
| 0.507225767 | 0.364436954 | 0.072282381 | 0.366787774 |
| 0.443985674 | 0.049335001 | 0.196897076 | 0.489249692 |
| 0.449527855 | 0.325550275 | 0.352001982 | 0.405759464 |
| 0.023471152 | 0.056756522 | 0.361728079 | 0.141003735 |
| 0.408666705 | 0.20563026  | 0.03388561  | 0.364994146 |
| 0.050083149 | 1           | 0.433993263 | 0.058656105 |
| 0.425462675 | 0.337755861 | 0.344508565 | 0.037250099 |
| 0.426331123 | 0.460879671 | 0.515931074 | 0.17094564  |
| 0.439560581 | 0.453178993 | 0.388218935 | 0.06323916  |
| 0.012403367 | 0.495579006 | 0.417889451 | 0.026329111 |
| 0.452847323 | 0.318715589 | 0.019584321 | 0.4810688   |
| 0.190514929 | 0.463210888 | 0.004883076 | 0.055739196 |
| 0.025956213 | 0.425014299 | 0.484950393 | 0.413487708 |
| 0.343085653 | 0.355559297 | 0.002701947 | 0.469190036 |
| 0.486440635 | 0.010151853 | 0.111483852 | 0.453033745 |
| 0.418253441 | 0.509818985 | 0.286456869 | 0.441958414 |
| 0.416252265 | 0.494265899 | 0.286535863 | 0.252384347 |
| 0.465003585 | 0.458837356 | 0.43529904  | 0.444580503 |
| 0.461842546 | 0.393425998 | 0.29142509  | 0.020199535 |
| 0.114037801 | 0.277334175 | 0.359455985 | 0.093428519 |
| 0.381501256 | 0.129062449 | 0.440763544 | 0.446031506 |

|             |             |             |             |
|-------------|-------------|-------------|-------------|
| 0.450322734 | 0.003523797 | 0.187141741 | 0.453395303 |
| 0.455891314 | 0.452284532 | 0.013160069 | 0.004641461 |
| 0.004857051 | 0.016411576 | 0.392110387 | 0.20569094  |
| 0.450694403 | 0.33239462  | 0.004382254 | 0.060641854 |
| 0.28166047  | 0.365038057 | 0.491654555 | 0.374746215 |
| 0.418172887 | 0.073871701 | 0.360024127 | 0.392613062 |
| 0.059050266 | 0.366669612 | 0.457415983 | 0.482470797 |
| 0.029596738 | 0.213896178 | 0.363574517 | 0.461387868 |
| 0.05228567  | 0.290799286 | 0.421188805 | 0.352747321 |
| 0.00780749  | 0.066117425 | 0.057612373 | 0.414472034 |
| 0.494958441 | 0.088272952 | 0.035642868 | 0.19614246  |
| 0.148706894 | 0.446132864 | 0.175312914 | 0.456231035 |
| 0.457550817 | 0.430659311 | 0.057091616 | 0.479001999 |
| 0.043831263 | 0.48841044  | 0.30293501  | 0.070721541 |
| 0.245697962 | 0.009670345 | 0.434966853 | 0.166892893 |
| 0.38431517  | 0.413382101 | 0.176012631 | 0.011040723 |
| 0.138511304 | 0.045613445 | 0.456039623 | 0.431518834 |
| 0.020860313 | 0.250706116 | 0.264013772 | 0.384535565 |
| 0.347538892 | 0.446308471 | 0.507652995 | 0.433553769 |
| 0.109903901 | 0.099893724 | 0.421136708 | 0.419681279 |
| 0.288819355 | 0.446039946 | 0.315312247 | 0.476819985 |
| 0.424727969 | 0.437274886 | 0.449575706 | 0.369947591 |
| 0.206339434 | 0.424102179 | 0.439817083 | 0.029201879 |
| 0.34745391  | 0.458217791 | 0.362399173 | 0.145502355 |
| 0.255758016 | 0.351423315 | 0.046109788 | 0.174833872 |
| 0.289736337 | 0.386622589 | 0.161785456 | 0.421127858 |
| 0.4034712   | 0.426999001 | 0.0445867   | 0.055650426 |
| 0.513246401 | 0.43102826  | 0.167851328 | 0.449167789 |
| 0.147710638 | 0.341352417 | 0.427256623 | 0.421043555 |
| 0.355736105 | 0.465217719 | 0.450306947 | 0.453129292 |
| 0.447898427 | 0.271139219 | 0.515725755 | 0.118348225 |
| 0.073116235 | 0.409699044 | 0.116701316 | 0.075058689 |
| 0.147200169 | 0.020393701 | 0.264820468 | 0.403636844 |
| 0.350160065 | 0.38866778  | 0.360455567 | 0.071626543 |
| 0.288226747 | 0.351203992 | 0.338685041 | 0.250195249 |
| 0.088411332 | 0.5019351   | 0.007667661 | 0.04774762  |
| 0.360104511 | 0.447233691 | 0.365096551 | 0.21309565  |
| 0.264128288 | 0.106457345 | 0.298263543 | 0.367552353 |
| 0.4061468   | 0.339610591 | 0.4495834   | 0.035744265 |
| 0.025263239 | 0.450266212 | 0.38678759  | 0.012091135 |
| 0.072758309 | 0.397910515 | 0.2665629   | 0.264627167 |
| 0.013950231 | 0.445799247 | 0.417562968 | 0.401441969 |
| 0.373306739 | 0.059181023 | 0.392034353 | 0.0869004   |
| 0.052968511 | 0.447525607 | 0.356099569 | 0.492501853 |
| 0.297105565 | 0.419752193 | 0.462419861 | 0.456733242 |
| 0.096284696 | 0.350223877 | 0.032477677 | 0.444965598 |
| 0.41015728  |             |             |             |

|             |             |             |             |
|-------------|-------------|-------------|-------------|
| MSC         | 0.407872878 | 0.515712132 | 0.410720593 |
| 0.417537186 | 0.46484567  | 0.331207887 | 0.258500247 |
| 0.230470525 | 0.11406336  | 0.010244929 | 0.037604155 |
| 0.451999788 | 0.245177148 | 0.304247722 | 0.290470223 |
| 0.453563424 | 0.22429571  | 0.409134727 | 0.326453679 |
| 0.439725679 | 0.12466232  | 0.451059454 | 0.15357238  |
| 0.369828524 | 0.164203677 | 0.119762729 | 0.310190495 |

|             |             |             |             |
|-------------|-------------|-------------|-------------|
| 0.446187001 | 0.137012425 | 0.287220708 | 0.384070704 |
| 0.210075697 | 0.422825616 | 0.496249095 | 0.448614103 |
| 0.490270925 | 0.365817683 | 0.042127117 | 0.273305365 |
| 0.410883952 | 0.420097393 | 0.426321216 | 0.38825294  |
| 0.078500845 | 0.457586185 | 0.299129477 | 0.45617435  |
| 0.245407082 | 0.063767812 | 0.224988906 | 0.419197697 |
| 0.441754755 | 0.390416099 | 0.259407049 | 0.204873438 |
| 0.207190333 | 0.236116885 | 0.280852436 | 0.2990884   |
| 0.293936128 | 0.157469939 | 0.46014556  | 0.112370476 |
| 0.169124212 | 0.31461997  | 0.274330033 | 0.315212506 |
| 0.380490159 | 0.347936657 | 0.048025232 | 0.395058368 |
| 0.005774911 | 0.42909251  | 0.463398387 | 0.291528072 |
| 0.095826359 | 0.045165119 | 0.304040816 | 0.367223013 |
| 0.469640177 | 0.455305552 | 0.497581314 | 0.495381057 |
| 0.268579586 | 0.412522743 | 0.423497464 | 0.254540632 |
| 0.420796703 | 0.221655628 | 0.169518915 | 0.462345505 |
| 0.503547478 | 0.50685656  | 0.288970446 | 0.366919368 |
| 0.36979224  | 0.471413354 | 0.397995288 | 0.435791695 |
| 0.308668899 | 0.118662171 | 0.414859684 | 0.516656604 |
| 0.375380425 | 0.363235394 | 0.244628648 | 0.396848772 |
| 0.126586626 | 0.362462525 | 0.410496973 | 0.266161695 |
| 0.48172727  | 0.035325818 | 0.317993252 | 0.379005222 |
| 0.338378687 | 0.415115671 | 0.502243983 | 0.260320779 |
| 0.47395795  | 0.052440194 | 0.15420338  | 0.090614896 |
| 0.371919281 | 0.205321225 | 0.441253159 | 0.452464681 |
| 0.285781066 | 0.416524327 | 0.330247799 | 0.011621237 |
| 0.070740499 | 0.309561808 | 0.411644435 | 0.441721825 |
| 0.437261581 | 0.3645683   | 0.270884543 | 0.346068739 |
| 0.407025332 | 0.491042153 | 0.045243175 | 0.161476611 |
| 0.422599145 | 0.313497997 | 0.337785086 | 0.439254722 |
| 0.372598905 | 0.180351395 | 0.214409291 | 0.522382307 |
| 0.407475531 | 0.151133027 | 0.364865562 | 0.462912653 |
| 0.318786858 | 0.428130358 | 0.191270389 | 0.350110751 |
| 0.090236728 | 0.45666729  | 0.076010325 | 0.369633591 |
| 0.231611848 | 0.23881521  | 0.037423737 | 0.29082759  |
| 0.30161153  | 0.397111865 | 0.433931289 | 0.198091428 |
| 0.38713547  | 0.450348995 | 0.325413059 | 0.379734894 |
| 0.0168421   | 0.107687554 | 0.271473076 | 0.509567156 |
| 0.250381943 | 0.514610315 | 0.396588322 | 0.395746134 |
| 0.38290714  | 0.443395159 | 0.008069382 | 0.467308767 |
| 0.507948946 | 0.277348819 | 0.420464731 | 0.470292849 |
| 0.34639309  | 0.436986342 | 0.055408558 | 0.470104001 |
| 0.333096915 | 0.156351755 | 0.520506835 | 0.246698804 |
| 0.451629562 | 0.084204923 | 0.341127342 | 0.407414682 |
| 0.387385393 | 0.020156025 | 0.216412954 | 0.397126068 |
| 0.073438054 | 0.117407606 | 0.427641505 | 0.425574774 |
| 0.381318987 | 0.449897089 | 0.502454768 | 0.326383451 |
| 0.452031341 | 0.320198932 | 0.038899363 | 0.41691256  |
| 0.428917613 | 0.349061585 | 0.421027748 | 0.298638743 |
| 0.309321515 | 0.460184918 | 0.377815272 | 0.174683517 |
| 0.082362354 | 0.345535735 | 0.037619344 | 0.372331118 |
| 0.365115201 | 0.162145915 | 0.353599699 | 0.283169577 |
| 0.144022108 | 0.522888366 | 0.253803707 | 0.304064878 |
| 0.179768774 | 0.386501523 | 0.342091006 | 0.247808079 |

|             |             |             |             |
|-------------|-------------|-------------|-------------|
| 0.240708748 | 0.245268681 | 0.362639916 | 0.377959326 |
| 0.063929069 | 0.16690791  | 0.047199783 | 0.360484302 |
| 0.173142152 | 0.335785334 | 0.318084357 | 0.373381105 |
| 0.372192828 | 0.170492132 | 0.423175676 | 0.34473208  |
| 0.190691147 | 0.044234829 | 0.500656181 | 0.458182914 |
| 0.292673267 | 0.224113567 | 0.101270731 | 0.313415782 |
| 0.461632315 | 0.257010517 | 0.244772177 | 0.441758888 |
| 0.068167674 | 0.498029667 | 0.293027247 | 0.20124665  |
| 0.410461884 | 0.340782547 | 0.466259721 | 0.063749241 |
| 0.399414646 | 0.453639736 | 0.420350291 | 0.251288302 |
| 0.373896897 | 0.432610709 | 0.061399753 | 0.36607828  |
| 0.365724968 | 0.075723604 | 0.522345422 | 0.226018453 |
| 0.059621902 | 0.456546175 | 0.392655257 | 0.146795089 |
| 0.149391698 | 0.336594292 | 0.070048747 | 0.384349828 |
| 0.513491242 | 0.452373109 | 0.375507458 | 0.313006201 |
| 0.078178775 | 0.024473931 | 0.327506273 | 0.425634    |
| 0.484148557 | 0.509236794 | 0.381557369 | 0.39779392  |
| 0.332105808 | 0.329915079 | 0.155363447 | 0.508104724 |
| 0.305875792 | 0.508218785 | 0.024632303 | 0.416937828 |
| 0.478232672 | 0.280227178 | 0.136817198 | 0.316337767 |
| 0.357995066 | 0.088474823 | 0.316103458 | 0.479554709 |
| 0.417637965 | 0.354634297 | 0.338236323 | 0.47008405  |
| 0.032729725 | 0.07698669  | 0.415436616 | 0.247185489 |
| 0.372790218 | 0.293840768 | 0.086880803 | 0.345230939 |
| 0.081243337 | 0.433993263 | 1           | 0.092991949 |
| 0.281012591 | 0.319012377 | 0.462250591 | 0.081188527 |
| 0.436417658 | 0.493971619 | 0.501225021 | 0.259567076 |
| 0.427879242 | 0.472685177 | 0.377451339 | 0.166227821 |
| 0.050247618 | 0.497938462 | 0.383832126 | 0.042357234 |
| 0.486269935 | 0.211065864 | 0.026556426 | 0.490841773 |
| 0.272757461 | 0.414376786 | 0.006083953 | 0.123636818 |
| 0.102709843 | 0.467860558 | 0.447702303 | 0.392488512 |
| 0.198926979 | 0.441841305 | 0.020398892 | 0.52763356  |
| 0.474921206 | 0.040370627 | 0.236316808 | 0.39488185  |
| 0.39039109  | 0.522246673 | 0.339484613 | 0.430648984 |
| 0.414226068 | 0.473740436 | 0.2771533   | 0.35769834  |
| 0.413057067 | 0.475390916 | 0.411250587 | 0.449009815 |
| 0.461939455 | 0.471119813 | 0.349362251 | 0.033101273 |
| 0.150684707 | 0.230958827 | 0.245640428 | 0.099199562 |
| 0.299757111 | 0.204584735 | 0.484379284 | 0.480323668 |
| 0.481652195 | 0.019754849 | 0.198299619 | 0.392355317 |
| 0.437456627 | 0.485032744 | 0.058444064 | 0.011758569 |
| 0.015792343 | 0.03580127  | 0.390429766 | 0.355447126 |
| 0.483760334 | 0.196771256 | 0.017331004 | 0.076653618 |
| 0.345344638 | 0.426913547 | 0.489037469 | 0.441144039 |
| 0.431268514 | 0.164437051 | 0.252582574 | 0.448929465 |
| 0.114882735 | 0.293641671 | 0.486208297 | 0.453448359 |
| 0.107285961 | 0.350398549 | 0.423007643 | 0.495457992 |
| 0.094356832 | 0.42504673  | 0.455083453 | 0.337211766 |
| 0.047852133 | 0.153894212 | 0.115592536 | 0.465018846 |
| 0.471688777 | 0.123202516 | 0.067060297 | 0.14506829  |
| 0.165880404 | 0.474955767 | 0.238759699 | 0.527231831 |
| 0.423961395 | 0.45623291  | 0.15503126  | 0.46112111  |
| 0.067915352 | 0.465498866 | 0.396138898 | 0.061420525 |

|             |             |             |             |
|-------------|-------------|-------------|-------------|
| 0.41749248  | 0.041940373 | 0.466477869 | 0.137999355 |
| 0.339167034 | 0.407068661 | 0.207556502 | 0.051062294 |
| 0.219466344 | 0.116139496 | 0.482800319 | 0.461795806 |
| 0.091114043 | 0.310650236 | 0.409895348 | 0.461175864 |
| 0.295733296 | 0.43357062  | 0.478657688 | 0.342957163 |
| 0.125846704 | 0.229047045 | 0.429611019 | 0.38134051  |
| 0.287780113 | 0.509559272 | 0.308500808 | 0.528598344 |
| 0.388309734 | 0.462230553 | 0.466401895 | 0.371241677 |
| 0.318516657 | 0.38470173  | 0.341573853 | 0.036245436 |
| 0.426075258 | 0.454518794 | 0.403728202 | 0.203086564 |
| 0.327886167 | 0.394143657 | 0.10139101  | 0.232242817 |
| 0.343137391 | 0.281374487 | 0.215516582 | 0.459913229 |
| 0.408343921 | 0.37739649  | 0.090324993 | 0.10560597  |
| 0.535789449 | 0.424330845 | 0.175546799 | 0.408306424 |
| 0.290571966 | 0.388488305 | 0.441571889 | 0.448443938 |
| 0.371304981 | 0.425599297 | 0.416946135 | 0.354391098 |
| 0.406378343 | 0.333288672 | 0.503658547 | 0.116664486 |
| 0.125979728 | 0.413955397 | 0.142178758 | 0.180974162 |
| 0.229034798 | 0.066699345 | 0.300407745 | 0.47372294  |
| 0.370198635 | 0.436307513 | 0.329759559 | 0.148692222 |
| 0.431315376 | 0.387020378 | 0.441629409 | 0.23774037  |
| 0.127332404 | 0.471208141 | 0.025007874 | 0.128005728 |
| 0.406861134 | 0.39883208  | 0.390514914 | 0.348981648 |
| 0.328110855 | 0.253906903 | 0.389231952 | 0.288184303 |
| 0.278498773 | 0.387330164 | 0.390017134 | 0.064887471 |
| 0.045417903 | 0.514328922 | 0.378059036 | 0.064118888 |
| 0.152462835 | 0.35832965  | 0.415836534 | 0.25919446  |
| 0.061539558 | 0.467569118 | 0.282098224 | 0.449882428 |
| 0.379603711 | 0.143074067 | 0.337249441 | 0.140617294 |
| 0.124527231 | 0.437748565 | 0.419256557 | 0.496218423 |
| 0.434911955 | 0.446721229 | 0.416852442 | 0.406527941 |
| 0.212873222 | 0.378624642 | 0.056249883 | 0.442660521 |
| 0.35392414  |             |             |             |

| MTHFD1      | 0.046050213 | 0.072328141 | 0.055022358 |
|-------------|-------------|-------------|-------------|
| 0.145307377 | 0.078810415 | 0.054637097 | 0.149818457 |
| 0.024254807 | 0.16634486  | 0.037257952 | 0.099795818 |
| 0.050633983 | 0.038700836 | 0.035099467 | 0.037686342 |
| 0.15952851  | 0.086522715 | 0.027784181 | 0.173448805 |
| 0.105597017 | 0.060178358 | 0.170217589 | 0.119452941 |
| 0.0457515   | 0.167185227 | 0.232738776 | 0.136513666 |
| 0.114633071 | 0.252355948 | 0.035827794 | 0.074853945 |
| 0.061436678 | 0.056467976 | 0.052247843 | 0.097614742 |
| 0.044134608 | 0.036972449 | 0.00473925  | 0.054574613 |
| 0.053526613 | 0.119602299 | 0.112383516 | 0.171625579 |
| 0.121177556 | 0.039603777 | 0.198482402 | 0.090452241 |
| 0.016490771 | 0.123025178 | 0.023498062 | 0.040972594 |
| 0.04353666  | 0.069842732 | 0.056801406 | 0.143987723 |
| 0.029785091 | 0.014194314 | 0.022526858 | 0.034577729 |
| 0.1631587   | 0.022473023 | 0.049649815 | 0.108475416 |
| 0.023190047 | 0.047084088 | 0.056238093 | 0.070419873 |
| 0.039415316 | 0.049153308 | 0.038764815 | 0.031313589 |
| 0.007255393 | 0.122962269 | 0.092297808 | 0.058458726 |
| 0.193579648 | 0.060093551 | 0.079338218 | 0.142385762 |
| 0.101546701 | 0.043215568 | 0.110550103 | 0.096034286 |

|             |             |             |             |
|-------------|-------------|-------------|-------------|
| 0.04445714  | 0.104208922 | 0.051578389 | 0.130365461 |
| 0.064624315 | 0.148618227 | 0.038093501 | 0.159751296 |
| 0.106047202 | 0.059694028 | 0.075508064 | 0.173832481 |
| 0.091167196 | 0.062616124 | 0.055513704 | 0.072937052 |
| 0.065586796 | 0.068289908 | 0.052282561 | 0.081895106 |
| 0.040296575 | 0.051965953 | 0.214227461 | 0.070578171 |
| 0.147343435 | 0.010632047 | 0.181873146 | 0.013539345 |
| 0.107381415 | 0.130825258 | 0.160620476 | 0.095835779 |
| 0.037277294 | 0.065713059 | 0.060487377 | 0.188160255 |
| 0.052572473 | 0.040966127 | 0.059554405 | 0.077382976 |
| 0.018571943 | 0.018250032 | 0.035786827 | 0.101795453 |
| 0.014945705 | 0.026127265 | 0.098539311 | 0.047616288 |
| 0.101325331 | 0.031107348 | 0.043815938 | 0.036700351 |
| 0.082463876 | 0.032907555 | 0.176381583 | 0.035784308 |
| 0.058415614 | 0.108233488 | 0.005403408 | 0.111033261 |
| 0.073377177 | 0.032898833 | 0.22336968  | 0.051879999 |
| 0.166442019 | 0.075302531 | 0.130807877 | 0.098614335 |
| 0.047819755 | 0.178718859 | 0.015637723 | 0.146362312 |
| 0.036522281 | 0.113490937 | 0.111067318 | 0.054841234 |
| 0.079031644 | 0.046498821 | 0.108375704 | 0.0329731   |
| 0.044205461 | 0.032387206 | 0.023286001 | 0.048265425 |
| 0.026846817 | 0.071778478 | 0.031084481 | 0.142622734 |
| 0.071091145 | 0.150032755 | 0.023560852 | 0.075190198 |
| 0.095217825 | 0.059250538 | 0.0106364   | 0.078200435 |
| 0.026222848 | 0.076618607 | 0.058810179 | 0.078578205 |
| 0.187146878 | 0.11991003  | 0.003232567 | 0.045959417 |
| 0.061098281 | 0.010521321 | 0.10030339  | 0.067495673 |
| 0.074965073 | 0.119631648 | 0.000640035 | 0.118679153 |
| 0.02240844  | 0.140233726 | 0.112213643 | 0.222591524 |
| 0.043950732 | 0.224247744 | 0.031372145 | 0.078034514 |
| 0.042811001 | 0.015010046 | 0.047401524 | 0.117041006 |
| 0.086739295 | 0.04976281  | 0.071521444 | 0.13579726  |
| 0.157386191 | 0.101087963 | 0.125562795 | 0.073742138 |
| 0.08216998  | 0.070747696 | 0.052700649 | 0.117032464 |
| 0.065748841 | 0.011253459 | 0.053428569 | 0.067938429 |
| 0.015785391 | 0.06960127  | 0.043646055 | 0.026179831 |
| 0.198335134 | 0.066844148 | 0.026255906 | 0.178303238 |
| 0.045644455 | 0.070439783 | 0.067668295 | 0.023767383 |
| 0.136082712 | 0.086217727 | 0.063750196 | 0.036490919 |
| 0.035828775 | 0.055524313 | 0.118997175 | 0.038170097 |
| 0.03322471  | 0.128695403 | 0.075278984 | 0.079984065 |
| 0.068656403 | 0.141732573 | 0.030782194 | 0.011972526 |
| 0.026882858 | 0.021786873 | 0.017707624 | 0.035877154 |
| 0.014351458 | 0.037389975 | 0.095539688 | 0.045375192 |
| 0.146626862 | 0.14672927  | 0.072048949 | 0.126815072 |
| 0.026914694 | 0.128271111 | 0.113602994 | 0.006018435 |
| 0.096589337 | 0.031315258 | 0.009870793 | 0.076449564 |
| 0.040805762 | 0.098435422 | 0.050236168 | 0.226846082 |
| 0.04008286  | 0.158198911 | 0.131025619 | 0.035216611 |
| 0.03671249  | 0.056826077 | 0.117710186 | 0.221564544 |
| 0.03596755  | 0.099198444 | 0.079841974 | 0.039752869 |
| 0.031717205 | 0.14263463  | 0.06768726  | 0.064477741 |
| 0.139179269 | 0.085115802 | 0.080211569 | 0.246638932 |
| 0.195137877 | 0.106767472 | 0.048693626 | 0.226598518 |



|             |             |             |             |
|-------------|-------------|-------------|-------------|
| 0.085490619 | 0.170465843 | 0.074725673 | 0.066723007 |
| 0.15067748  | 0.025259489 | 0.083771654 | 0.041805658 |
| 0.042393895 | 0.066539736 | 0.139191509 | 0.091061784 |
| 0.207460214 | 0.080873628 | 0.009380861 | 0.082865204 |
| 0.016006238 | 0.051986306 | 0.078967484 | 0.083399483 |
| 0.044837868 | 0.020111435 | 0.215165121 | 0.095958527 |
| 0.043249693 | 0.186620592 | 0.051355936 | 0.053864122 |
| 0.083449326 | 0.11367276  | 0.087790827 | 0.062905279 |
| 0.066811532 | 0.064885514 | 0.127141987 | 0.041663961 |
| 0.056440787 | 0.155175663 | 0.011063825 | 0.020996729 |
| 0.098417296 | 0.058656105 | 0.092991949 | 1           |
| 0.051651576 | 0.021888471 | 0.128118918 | 0.174185701 |
| 0.076003099 | 0.052813495 | 0.052226145 | 0.059312692 |
| 0.049675147 | 0.072523751 | 0.048862447 | 0.13831812  |
| 0.150472682 | 0.051444302 | 0.053434385 | 0.054740673 |
| 0.105226235 | 0.017636468 | 0.047842325 | 0.068569335 |
| 0.172960543 | 0.027644083 | 0.034880512 | 0.005743713 |
| 0.058694573 | 0.102841714 | 0.052853247 | 0.077936389 |
| 0.018287401 | 0.094584536 | 0.004716312 | 0.069800314 |
| 0.058256083 | 0.113132649 | 0.060810017 | 0.05273484  |
| 0.058889557 | 0.062757091 | 0.081707273 | 0.082667638 |
| 0.050007653 | 0.049587315 | 0.036247728 | 0.239091021 |
| 0.083926223 | 0.052937963 | 0.075257855 | 0.059065961 |
| 0.095759191 | 0.107083419 | 0.218587559 | 0.116439051 |
| 0.109971553 | 0.040285946 | 0.03165614  | 0.121836452 |
| 0.031721376 | 0.166912872 | 0.059074686 | 0.107102878 |
| 0.076024722 | 0.097760875 | 0.038733601 | 0.050126049 |
| 0.080057243 | 0.103316046 | 0.03445527  | 0.026261541 |
| 0.004940729 | 0.105138839 | 0.078041557 | 0.144648722 |
| 0.07925082  | 0.008417666 | 0.078663924 | 0.040361057 |
| 0.043097722 | 0.106129495 | 0.060063756 | 0.165961707 |
| 0.070004589 | 0.121273006 | 0.030575834 | 0.133452553 |
| 0.130715552 | 0.018966686 | 0.08849612  | 0.058585887 |
| 0.054666806 | 0.145976706 | 0.023412055 | 0.110008818 |
| 0.012330304 | 0.14492488  | 0.04754927  | 0.043192716 |
| 0.020059493 | 0.166531773 | 0.205833535 | 0.11151721  |
| 0.041878796 | 0.063658956 | 0.076534474 | 0.003251653 |
| 0.113367705 | 0.083290127 | 0.079328652 | 0.098971287 |
| 0.090235258 | 0.138921358 | 0.060162806 | 0.061448135 |
| 0.10846461  | 0.044360673 | 0.094531167 | 0.012312008 |
| 0.042995814 | 0.054349097 | 0.042675769 | 0.067910797 |
| 0.022402204 | 0.052393436 | 0.082991496 | 0.08230069  |
| 0.026552838 | 0.132413091 | 0.12219805  | 0.103954253 |
| 0.050778525 | 0.077681699 | 0.130567528 | 0.083424283 |
| 0.055342308 | 0.127278639 | 0.048845513 | 0.029325017 |
| 0.107926125 | 0.008537087 | 0.088538663 | 0.032301496 |
| 0.022833274 | 0.107286578 | 0.080150535 | 0.075091201 |
| 0.05290968  | 0.066987972 | 0.061704672 | 0.150933383 |
| 0.029603223 | 0.041327666 | 0.084955451 | 0.050745089 |
| 0.1170318   | 0.108404717 | 0.044470349 | 0.102721535 |
| 0.185876899 | 0.047627109 | 0.047879147 | 0.003188388 |
| 0.036386259 | 0.048715288 | 0.065116244 | 0.135050213 |
| 0.041420607 | 0.035608807 | 0.023921996 | 0.213787173 |
| 0.068626912 | 0.057154304 | 0.056673093 | 0.093662707 |

|             |             |             |             |
|-------------|-------------|-------------|-------------|
| 0.136830796 | 0.190130985 | 0.07635071  | 0.080168045 |
| 0.024093361 | 0.063900884 | 0.068030072 | 0.060310597 |
| 0.050999504 | 0.175615956 | 0.057535556 | 0.009942266 |
| 0.087892728 | 0.029393214 | 0.095279028 | 0.17967925  |
| 0.175723528 | 0.112751761 | 0.022426352 | 0.111110382 |
| 0.017433782 | 0.1392151   | 0.005962007 | 0.095165813 |
| 0.113710328 | 0.019420547 | 0.140755722 | 0.090268854 |
| 0.094153654 | 0.055492009 | 0.053768851 | 0.118477899 |
| 0.017418464 | 0.08624395  | 0.078291622 | 0.12362927  |
| 0.034522362 | 0.040313354 | 0.16307794  | 0.027043751 |
| 0.02384269  | 0.008974327 | 0.081809651 | 0.056658874 |
| 0.049859284 | 0.104562838 | 0.025016394 | 0.04404782  |
| 0.038763537 | 0.034618063 | 0.019697096 | 0.083495238 |
| 0.1005451   | 0.059407241 | 0.039654172 | 0.076297499 |
| 0.093164623 | 0.097097036 | 0.026947515 | 0.025493388 |
| 0.062008637 | 0.040203344 | 0.064160002 | 0.052866172 |
| 0.050111742 | 0.16098329  | 0.033746951 | 0.049824384 |
| 0.021632352 | 0.026749566 | 0.104723418 | 0.084524445 |
| 0.026346477 |             |             |             |

|             |             |             |             |
|-------------|-------------|-------------|-------------|
| MX1         | 0.220445588 | 0.434795112 | 0.129465479 |
| 0.31062464  | 0.170416824 | 0.237290901 | 0.17073869  |
| 0.121504242 | 0.072295979 | 0.022643183 | 0.034742668 |
| 0.166489349 | 0.130698316 | 0.193608948 | 0.187783726 |
| 0.243655769 | 0.059225757 | 0.118868458 | 0.133445675 |
| 0.235709397 | 0.127685044 | 0.217703053 | 0.075449281 |
| 0.085380383 | 0.047621718 | 0.056173846 | 0.108890491 |
| 0.324418845 | 0.056770413 | 0.246263832 | 0.271843715 |
| 0.029008678 | 0.278240319 | 0.425208718 | 0.221906885 |
| 0.407747816 | 0.212009605 | 0.003495491 | 0.254660261 |
| 0.296496708 | 0.265299533 | 0.256991165 | 0.17778934  |
| 0.053298802 | 0.425383677 | 0.175069636 | 0.131673252 |
| 0.132631291 | 0.02797979  | 0.187579309 | 0.394224491 |
| 0.425293171 | 0.220209895 | 0.160714302 | 0.158980984 |
| 0.159791599 | 0.183117991 | 0.102498432 | 0.243656318 |
| 0.159136896 | 0.174249097 | 0.410680987 | 0.118925666 |
| 0.10646946  | 0.141130403 | 0.044814104 | 0.166923488 |
| 0.111154684 | 0.285925562 | 0.013674164 | 0.145959013 |
| 0.010759074 | 0.212722297 | 0.121433097 | 0.115136911 |
| 0.023436607 | 0.030754763 | 0.055306211 | 0.215136464 |
| 0.332814343 | 0.327251936 | 0.340548381 | 0.346695456 |
| 0.08197473  | 0.099507289 | 0.123164352 | 0.108859352 |
| 0.315206148 | 0.173700908 | 0.052094099 | 0.239271356 |
| 0.351087794 | 0.422867048 | 0.084483962 | 0.090393407 |
| 0.374609604 | 0.401851352 | 0.186774368 | 0.191482678 |
| 0.165391987 | 0.012147414 | 0.396148579 | 0.383279645 |
| 0.311176539 | 0.092130913 | 0.066059565 | 0.315526784 |
| 0.031942806 | 0.149965741 | 0.19819322  | 0.050779059 |
| 0.347765064 | 0.031359021 | 0.074387825 | 0.221573582 |
| 0.070169669 | 0.284023561 | 0.399191292 | 0.132357972 |
| 0.134044439 | 0.013500628 | 0.055040945 | 0.011953675 |
| 0.153978551 | 0.032580144 | 0.420679304 | 0.376218417 |
| 0.149212691 | 0.165291062 | 0.16042544  | 0.000983539 |
| 0.012107352 | 0.047603267 | 0.284679127 | 0.128201523 |
| 0.246910896 | 0.24768442  | 0.157851279 | 0.279674313 |

|             |             |             |             |
|-------------|-------------|-------------|-------------|
| 0.211352305 | 0.332594156 | 0.075891102 | 0.075842571 |
| 0.188761625 | 0.049091971 | 0.117689964 | 0.195425613 |
| 0.132968996 | 0.085760158 | 0.081296479 | 0.395027138 |
| 0.39259745  | 0.066796673 | 0.136346213 | 0.220170565 |
| 0.244139505 | 0.123398065 | 0.06566043  | 0.162537763 |
| 0.06869459  | 0.377578081 | 0.009034951 | 0.146246447 |
| 0.138186482 | 0.052901975 | 0.003888005 | 0.17503361  |
| 0.190741381 | 0.379862571 | 0.381813576 | 0.05377443  |
| 0.176516504 | 0.190996328 | 0.16929792  | 0.312591596 |
| 0.040082638 | 0.020922425 | 0.143414288 | 0.401834608 |
| 0.2404045   | 0.339609705 | 0.131140574 | 0.10377181  |
| 0.111393642 | 0.292881024 | 0.000254136 | 0.425490133 |
| 0.413489838 | 0.152841125 | 0.198499592 | 0.145886727 |
| 0.152865504 | 0.354132247 | 0.011219893 | 0.220965732 |
| 0.21403523  | 0.042571305 | 0.361585237 | 0.081681271 |
| 0.358685109 | 0.034110897 | 0.200506132 | 0.269883674 |
| 0.255011058 | 0.005834454 | 0.210812894 | 0.264301092 |
| 0.007459388 | 0.148324544 | 0.241344817 | 0.241576979 |
| 0.206320709 | 0.253247839 | 0.33861457  | 0.146538291 |
| 0.179878449 | 0.124879065 | 0.005172825 | 0.101879782 |
| 0.245603035 | 0.155690098 | 0.40772365  | 0.153510215 |
| 0.163487747 | 0.409175401 | 0.273284957 | 0.175170263 |
| 0.050815933 | 0.194597987 | 0.026391681 | 0.157433599 |
| 0.272784229 | 0.146887428 | 0.164373317 | 0.036031926 |
| 0.029073164 | 0.417965411 | 0.045440568 | 0.068278055 |
| 0.029234169 | 0.227152279 | 0.129170041 | 0.220285342 |
| 0.140817434 | 0.087773114 | 0.144441796 | 0.186712274 |
| 0.071457277 | 0.062237713 | 0.001476796 | 0.159825897 |
| 0.122055565 | 0.194719908 | 0.207657196 | 0.263334176 |
| 0.175591967 | 0.084350273 | 0.173604313 | 0.086364052 |
| 0.043899289 | 0.00918341  | 0.41479597  | 0.199824328 |
| 0.271808172 | 0.106854918 | 0.017882915 | 0.17388712  |
| 0.388266086 | 0.226235657 | 0.147861468 | 0.416114295 |
| 0.011201295 | 0.333773079 | 0.177646476 | 0.064132467 |
| 0.152288468 | 0.152229818 | 0.343738145 | 0.064657087 |
| 0.169170641 | 0.427084336 | 0.108549369 | 0.102181254 |
| 0.377612337 | 0.226869483 | 0.04083778  | 0.269451209 |
| 0.269878125 | 0.022726622 | 0.403855568 | 0.043147714 |
| 0.009620928 | 0.206284389 | 0.281419794 | 0.037072036 |
| 0.033222665 | 0.23712927  | 0.08157568  | 0.119826781 |
| 0.422338979 | 0.240831187 | 0.341177726 | 0.055382359 |
| 0.05116384  | 0.017129582 | 0.057913149 | 0.119923475 |
| 0.42855424  | 0.373509286 | 0.104568958 | 0.159676594 |
| 0.130398853 | 0.159170687 | 0.123285225 | 0.395377496 |
| 0.037651952 | 0.401275387 | 0.004167226 | 0.25464718  |
| 0.418635004 | 0.18829159  | 0.043577344 | 0.227793982 |
| 0.350721361 | 0.044971916 | 0.086157369 | 0.418724291 |
| 0.353092895 | 0.160131674 | 0.176787342 | 0.184972259 |
| 0.037327061 | 0.060855153 | 0.149013622 | 0.045429471 |
| 0.21272844  | 0.111132343 | 0.008066856 | 0.167931313 |
| 0.052635916 | 0.425462675 | 0.281012591 | 0.051651576 |
| 1           | 0.151204259 | 0.144502131 | 0.030586324 |
| 0.303443368 | 0.358808431 | 0.435225068 | 0.089065229 |
| 0.257895987 | 0.385325729 | 0.154750974 | 0.027742879 |

|             |             |             |             |
|-------------|-------------|-------------|-------------|
| 0.00681819  | 0.400532499 | 0.234385179 | 0.029610992 |
| 0.339906458 | 0.179464496 | 0.031514848 | 0.423955077 |
| 0.111355364 | 0.379873072 | 0.007208547 | 0.011827453 |
| 0.008511174 | 0.275372634 | 0.423164887 | 0.24488082  |
| 0.237638619 | 0.147615707 | 0.001331983 | 0.37437992  |
| 0.429603542 | 0.005701624 | 0.041602349 | 0.29747961  |
| 0.241277969 | 0.432837759 | 0.11154754  | 0.314969917 |
| 0.178478967 | 0.415293307 | 0.18329431  | 0.121909456 |
| 0.360735526 | 0.362638884 | 0.276991846 | 0.385436732 |
| 0.348740244 | 0.193621748 | 0.163772451 | 0.030794929 |
| 0.060161294 | 0.179748152 | 0.219178627 | 0.095884662 |
| 0.201975349 | 0.074298762 | 0.355270537 | 0.320277916 |
| 0.347796374 | 0.002663659 | 0.139172222 | 0.299464464 |
| 0.373177222 | 0.364060767 | 0.004226062 | 0.001917389 |
| 0.00135897  | 0.01230454  | 0.191438907 | 0.080981661 |
| 0.374470346 | 0.233844362 | 0.004928845 | 0.058901442 |
| 0.14057073  | 0.153268438 | 0.42513129  | 0.214400604 |
| 0.243547517 | 0.039867585 | 0.256234971 | 0.225757792 |
| 0.035108094 | 0.200715592 | 0.367954655 | 0.440314246 |
| 0.011659638 | 0.088403624 | 0.130394364 | 0.388222035 |
| 0.015326703 | 0.120786096 | 0.185828664 | 0.211811437 |
| 0.002065922 | 0.032428193 | 0.036638866 | 0.249001949 |
| 0.402461293 | 0.067953627 | 0.030469202 | 0.099972468 |
| 0.137140526 | 0.317757761 | 0.110413557 | 0.381606359 |
| 0.343667317 | 0.301304469 | 0.022472505 | 0.419069744 |
| 0.041887022 | 0.41376037  | 0.116519554 | 0.050922723 |
| 0.084748629 | 0.005656128 | 0.336292551 | 0.126711293 |
| 0.192919983 | 0.219658165 | 0.084798892 | 0.004903895 |
| 0.043738948 | 0.025105353 | 0.360924126 | 0.2900019   |
| 0.006616801 | 0.137939134 | 0.105172207 | 0.173157403 |
| 0.1979709   | 0.30164832  | 0.435151973 | 0.19133784  |
| 0.113378135 | 0.022892141 | 0.251878343 | 0.218105773 |
| 0.157661282 | 0.338216136 | 0.182096579 | 0.388329229 |
| 0.247582285 | 0.341660474 | 0.356168944 | 0.198010876 |
| 0.078905599 | 0.185626479 | 0.318028801 | 0.04495929  |
| 0.154480251 | 0.339870555 | 0.149423688 | 0.080101032 |
| 0.136710614 | 0.123111917 | 0.026509388 | 0.053832651 |
| 0.096347803 | 0.231707796 | 0.115204655 | 0.283501436 |
| 0.185653753 | 0.236909568 | 0.026505208 | 0.038907608 |
| 0.431436374 | 0.359145602 | 0.120807887 | 0.274999216 |
| 0.063206443 | 0.16971349  | 0.256412468 | 0.243932135 |
| 0.137949906 | 0.349719744 | 0.302439982 | 0.316465177 |
| 0.418750657 | 0.151872234 | 0.43778564  | 0.07239968  |
| 0.035222762 | 0.170226299 | 0.107494582 | 0.033955327 |
| 0.090875948 | 0.011693874 | 0.092098831 | 0.217913748 |
| 0.120565399 | 0.201664461 | 0.153697851 | 0.039623191 |
| 0.111265882 | 0.120213877 | 0.146532259 | 0.188840391 |
| 0.076488638 | 0.442370309 | 0.005945899 | 0.024620666 |
| 0.123433091 | 0.299047441 | 0.149635062 | 0.091388464 |
| 0.098681884 | 0.035565581 | 0.147919861 | 0.192679976 |
| 0.243159473 | 0.117861156 | 0.313194572 | 0.026716461 |
| 0.0280225   | 0.34771262  | 0.153683046 | 0.003717694 |
| 0.03165108  | 0.186973127 | 0.091778103 | 0.187581688 |
| 0.005647863 | 0.3649295   | 0.254152502 | 0.157168408 |

|             |             |             |             |
|-------------|-------------|-------------|-------------|
| 0.190787422 | 0.031882367 | 0.309843137 | 0.036447954 |
| 0.026824113 | 0.377266586 | 0.126645159 | 0.402215636 |
| 0.098427095 | 0.27811141  | 0.389049421 | 0.310588758 |
| 0.030701088 | 0.116201159 | 0.036741924 | 0.310317173 |
| 0.166621041 |             |             |             |
| MXI1        | 0.304721489 | 0.380026178 | 0.148834622 |
| 0.306883228 | 0.15859656  | 0.232448041 | 0.129160082 |
| 0.117325102 | 0.040710882 | 0.003030439 | 0.00358884  |
| 0.186443045 | 0.029785203 | 0.066071894 | 0.084528946 |
| 0.306710976 | 0.021997615 | 0.154321031 | 0.14601261  |
| 0.308076115 | 0.060016865 | 0.223681999 | 0.054399972 |
| 0.052355455 | 0.017327786 | 0.023929665 | 0.050568073 |
| 0.375579868 | 0.031128811 | 0.153412555 | 0.342894735 |
| 0.031266343 | 0.339188911 | 0.373096336 | 0.180028478 |
| 0.337507914 | 0.28370751  | 0.00881433  | 0.076475215 |
| 0.387756688 | 0.261250326 | 0.324255821 | 0.181672205 |
| 0.025067099 | 0.377506173 | 0.141832145 | 0.179233539 |
| 0.098489944 | 0.008607928 | 0.134692707 | 0.39022949  |
| 0.309172808 | 0.168999666 | 0.1411136   | 0.076975587 |
| 0.020499794 | 0.090197932 | 0.021352125 | 0.303666108 |
| 0.117088329 | 0.098787455 | 0.31741116  | 0.046417892 |
| 0.065224917 | 0.154338701 | 0.031264066 | 0.152074144 |
| 0.0535548   | 0.360117033 | 0.030634242 | 0.16851815  |
| 0.001623627 | 0.321336775 | 0.174024708 | 0.047567152 |
| 0.020681942 | 0.00496805  | 0.040782735 | 0.208610392 |
| 0.374695911 | 0.365060956 | 0.31208065  | 0.310055123 |
| 0.028331806 | 0.120214317 | 0.114358776 | 0.046284004 |
| 0.363447989 | 0.078317139 | 0.050813406 | 0.267824679 |
| 0.317230105 | 0.344520964 | 0.045081085 | 0.105105077 |
| 0.280284167 | 0.386477684 | 0.145505948 | 0.127322066 |
| 0.049257871 | 0.015291802 | 0.325637128 | 0.334096861 |
| 0.356559736 | 0.061459259 | 0.047551239 | 0.360693577 |
| 0.02991161  | 0.085968614 | 0.220969502 | 0.031332539 |
| 0.384349495 | 0.020246914 | 0.061271316 | 0.183120666 |
| 0.093026781 | 0.320658409 | 0.327397334 | 0.11496138  |
| 0.142054818 | 0.007677804 | 0.017384786 | 0.018755084 |
| 0.068283511 | 0.015640981 | 0.341993272 | 0.323759408 |
| 0.090038826 | 0.058343094 | 0.147592022 | 0.002282324 |
| 0.008225322 | 0.054528203 | 0.267076551 | 0.181747492 |
| 0.330253756 | 0.283749353 | 0.049755941 | 0.31493013  |
| 0.179071384 | 0.307163176 | 0.021566178 | 0.066927583 |
| 0.193645281 | 0.058482994 | 0.137099449 | 0.180554901 |
| 0.088485666 | 0.085731416 | 0.05529873  | 0.367103356 |
| 0.402752692 | 0.048928565 | 0.148884993 | 0.26991299  |
| 0.05624397  | 0.109768025 | 0.055719788 | 0.062836172 |
| 0.032071143 | 0.31286854  | 0.007556644 | 0.214516104 |
| 0.040680752 | 0.017345306 | 0.021995961 | 0.182219759 |
| 0.067425193 | 0.258776258 | 0.331588026 | 0.06179456  |
| 0.098988517 | 0.193456354 | 0.21023221  | 0.214590485 |
| 0.003035356 | 0.03315993  | 0.17156232  | 0.335434035 |
| 0.247227598 | 0.345506334 | 0.085992741 | 0.079015338 |
| 0.116899288 | 0.339054005 | 0.002695685 | 0.366194979 |
| 0.34535342  | 0.156753899 | 0.143489064 | 0.205552678 |
| 0.090523379 | 0.326679262 | 0.017517045 | 0.258264779 |

|             |             |             |             |
|-------------|-------------|-------------|-------------|
| 0.287516248 | 0.051229116 | 0.35244737  | 0.051218126 |
| 0.341551465 | 0.01706661  | 0.120351561 | 0.241536029 |
| 0.193306104 | 0.006346633 | 0.151970632 | 0.313233683 |
| 0.008377425 | 0.072588332 | 0.337660828 | 0.269159041 |
| 0.183094648 | 0.305456872 | 0.350599723 | 0.073996046 |
| 0.149605151 | 0.132396072 | 0.01168315  | 0.112016131 |
| 0.304347346 | 0.05813617  | 0.373368254 | 0.098636576 |
| 0.22587271  | 0.361113344 | 0.261559939 | 0.043608515 |
| 0.028778815 | 0.188927864 | 0.018203923 | 0.120930459 |
| 0.312143631 | 0.031591503 | 0.130325115 | 0.050167855 |
| 0.017128685 | 0.354981722 | 0.026428503 | 0.039657552 |
| 0.014868901 | 0.147433285 | 0.165825394 | 0.034285089 |
| 0.019596867 | 0.054181474 | 0.066678001 | 0.089704501 |
| 0.034010724 | 0.026588389 | 0.008601725 | 0.044131526 |
| 0.013261542 | 0.043823364 | 0.049693497 | 0.269350614 |
| 0.068042466 | 0.020105424 | 0.1063835   | 0.057151622 |
| 0.027811097 | 0.008926762 | 0.369997491 | 0.283775169 |
| 0.310928552 | 0.073774919 | 0.018769772 | 0.036433322 |
| 0.322283804 | 0.16228262  | 0.1393768   | 0.3385668   |
| 0.025911351 | 0.340408737 | 0.036915938 | 0.037814403 |
| 0.056479538 | 0.107215773 | 0.372751232 | 0.028441588 |
| 0.254169833 | 0.356514264 | 0.165391797 | 0.046692375 |
| 0.309610436 | 0.279646172 | 0.023058193 | 0.30198071  |
| 0.278768655 | 0.013589196 | 0.345571424 | 0.021869895 |
| 0.01103654  | 0.223014673 | 0.212159342 | 0.036562389 |
| 0.026027451 | 0.099346503 | 0.053265985 | 0.1363634   |
| 0.358210638 | 0.243700837 | 0.253187252 | 0.045022787 |
| 0.018141616 | 0.001036828 | 0.049115258 | 0.156306025 |
| 0.361931109 | 0.316053299 | 0.13333243  | 0.077385564 |
| 0.15680615  | 0.052649936 | 0.101347454 | 0.327959483 |
| 0.068811409 | 0.377388237 | 0.00662351  | 0.23400458  |
| 0.335223859 | 0.174550812 | 0.017906573 | 0.188729517 |
| 0.315396144 | 0.032565222 | 0.104014594 | 0.346300257 |
| 0.3583703   | 0.089540982 | 0.074102692 | 0.251378655 |
| 0.020289992 | 0.039233002 | 0.174313385 | 0.026847207 |
| 0.081435963 | 0.070060325 | 0.005421109 | 0.123197867 |
| 0.014683211 | 0.337755861 | 0.319012377 | 0.021888471 |
| 0.151204259 | 1           | 0.184583689 | 0.024131005 |
| 0.257138555 | 0.335054416 | 0.367149303 | 0.096809663 |
| 0.262108417 | 0.298801234 | 0.112450583 | 0.032964629 |
| 0.007234569 | 0.338611297 | 0.330929009 | 0.007716214 |
| 0.342683998 | 0.176644019 | 0.002457854 | 0.390714237 |
| 0.125118879 | 0.341439709 | 0.010306857 | 0.026393756 |
| 0.014790948 | 0.300037865 | 0.350239174 | 0.341741021 |
| 0.071320534 | 0.268888167 | 0.00364503  | 0.348395205 |
| 0.339746503 | 0.004724717 | 0.027727258 | 0.234861404 |
| 0.188770728 | 0.404179584 | 0.061863239 | 0.248825772 |
| 0.138873835 | 0.318691513 | 0.062648106 | 0.122318776 |
| 0.313029147 | 0.296527244 | 0.347372181 | 0.393493909 |
| 0.320345512 | 0.226029429 | 0.175575091 | 0.012619203 |
| 0.037639833 | 0.144861401 | 0.042750874 | 0.017039939 |
| 0.292181477 | 0.029195163 | 0.358203677 | 0.329519167 |
| 0.289679733 | 0.004213935 | 0.083197024 | 0.275306987 |
| 0.386940533 | 0.393494808 | 0.020910471 | 0.005210484 |

|             |             |             |             |
|-------------|-------------|-------------|-------------|
| 0.003409912 | 0.002532509 | 0.261283999 | 0.090674244 |
| 0.339265458 | 0.041028904 | 0.004465011 | 0.051451253 |
| 0.08400226  | 0.145014501 | 0.339444806 | 0.283355237 |
| 0.277584211 | 0.03328575  | 0.041209864 | 0.321992763 |
| 0.015532675 | 0.291220852 | 0.30392279  | 0.372979006 |
| 0.021399993 | 0.091995383 | 0.173302465 | 0.370226341 |
| 0.006034891 | 0.140658964 | 0.200880168 | 0.055256747 |
| 0.010182537 | 0.021341164 | 0.021929344 | 0.313239486 |
| 0.316762287 | 0.010563143 | 0.005482378 | 0.052510728 |
| 0.03391719  | 0.34105232  | 0.038905531 | 0.354785736 |
| 0.348846791 | 0.325216855 | 0.016122608 | 0.372668607 |
| 0.01434849  | 0.328921067 | 0.078189976 | 0.024146411 |
| 0.088597751 | 0.011859926 | 0.302973264 | 0.017009871 |
| 0.122658814 | 0.332921774 | 0.050400198 | 0.006091005 |
| 0.029201103 | 0.016310928 | 0.324744751 | 0.284980998 |
| 0.012200767 | 0.1121984   | 0.135836436 | 0.281583402 |
| 0.21257946  | 0.262643743 | 0.363872326 | 0.13028533  |
| 0.047628815 | 0.022116906 | 0.33851017  | 0.278661446 |
| 0.097132931 | 0.327787895 | 0.043797585 | 0.365336744 |
| 0.343223855 | 0.393521888 | 0.310949271 | 0.206195711 |
| 0.028226888 | 0.253971097 | 0.244218844 | 0.011924413 |
| 0.209031133 | 0.290611135 | 0.22831265  | 0.024450874 |
| 0.067097275 | 0.115099525 | 0.052071883 | 0.070993701 |
| 0.068141015 | 0.238051227 | 0.040158986 | 0.348273211 |
| 0.297996412 | 0.300065617 | 0.044036069 | 0.02001864  |
| 0.387545327 | 0.39229435  | 0.090687573 | 0.25884758  |
| 0.073665957 | 0.143678309 | 0.280112091 | 0.252269181 |
| 0.087663328 | 0.269241337 | 0.344077715 | 0.235041981 |
| 0.354340381 | 0.165323706 | 0.368163878 | 0.100315558 |
| 0.021152887 | 0.205779692 | 0.020775618 | 0.0363594   |
| 0.061934068 | 0.013060639 | 0.032158145 | 0.273916343 |
| 0.05136051  | 0.188103789 | 0.097255287 | 0.034350782 |
| 0.126781303 | 0.172650562 | 0.178716854 | 0.091938596 |
| 0.022208046 | 0.341948294 | 0.004463051 | 0.021194013 |
| 0.057966848 | 0.284884269 | 0.087000706 | 0.069756579 |
| 0.035872741 | 0.033990313 | 0.124248259 | 0.187636809 |
| 0.0634522   | 0.064688586 | 0.286197874 | 0.043950111 |
| 0.020536668 | 0.34456235  | 0.188743777 | 0.011454997 |
| 0.034302498 | 0.28202842  | 0.094926747 | 0.050203564 |
| 0.006939166 | 0.284528687 | 0.108980215 | 0.167699073 |
| 0.237830038 | 0.036464978 | 0.354858094 | 0.060719629 |
| 0.057478919 | 0.365181761 | 0.149947422 | 0.330046757 |
| 0.118954065 | 0.270520201 | 0.377974051 | 0.280091178 |
| 0.056797856 | 0.150145483 | 0.02830523  | 0.364605402 |
| 0.070370136 |             |             |             |
| MYADM       | 0.334973268 | 0.429972108 | 0.284204092 |
| 0.365714037 | 0.334582381 | 0.176919656 | 0.19849323  |
| 0.141569098 | 0.122269121 | 0.013401319 | 0.061632338 |
| 0.308570415 | 0.201031636 | 0.194179655 | 0.169659699 |
| 0.431205722 | 0.265996557 | 0.272151252 | 0.278927368 |
| 0.346663021 | 0.093687859 | 0.40086439  | 0.163898067 |
| 0.351222423 | 0.212345322 | 0.162274129 | 0.287170565 |
| 0.425232451 | 0.178888436 | 0.147404457 | 0.281950998 |
| 0.283124347 | 0.37113377  | 0.389893255 | 0.362101982 |

|             |             |             |             |
|-------------|-------------|-------------|-------------|
| 0.384379948 | 0.279245872 | 0.05760511  | 0.163703878 |
| 0.34648098  | 0.367509063 | 0.342733323 | 0.293300855 |
| 0.099933342 | 0.339176992 | 0.236694933 | 0.349809322 |
| 0.143928517 | 0.105069566 | 0.111971585 | 0.313501324 |
| 0.334311352 | 0.23733049  | 0.166671748 | 0.170469357 |
| 0.153354599 | 0.123995226 | 0.221645248 | 0.177381504 |
| 0.245241761 | 0.078646164 | 0.362858709 | 0.102159206 |
| 0.127596184 | 0.212557534 | 0.334624516 | 0.21398483  |
| 0.312048454 | 0.259637781 | 0.06693537  | 0.261288155 |
| 0.005264884 | 0.333100262 | 0.372530027 | 0.222037224 |
| 0.154885764 | 0.065587699 | 0.349442695 | 0.250314929 |
| 0.44236326  | 0.370573857 | 0.482519942 | 0.466279701 |
| 0.263545682 | 0.378061277 | 0.319095845 | 0.252773332 |
| 0.363560962 | 0.178054566 | 0.149739415 | 0.45289087  |
| 0.480262518 | 0.41551452  | 0.303873034 | 0.365166412 |
| 0.31430006  | 0.386874528 | 0.240694445 | 0.298714118 |
| 0.210873402 | 0.20170517  | 0.325882842 | 0.463781919 |
| 0.295639605 | 0.308747961 | 0.285278226 | 0.331225055 |
| 0.183642486 | 0.201709853 | 0.313799302 | 0.241976475 |
| 0.451289731 | 0.050485191 | 0.34678208  | 0.248744729 |
| 0.311968697 | 0.355550838 | 0.418174593 | 0.229728204 |
| 0.351203092 | 0.081528134 | 0.157803287 | 0.159534922 |
| 0.248959906 | 0.228045147 | 0.321890464 | 0.410610793 |
| 0.178637272 | 0.314715588 | 0.248603639 | 0.034354005 |
| 0.133483835 | 0.32834197  | 0.360518042 | 0.300567613 |
| 0.36872936  | 0.297331967 | 0.2382821   | 0.256622734 |
| 0.298325425 | 0.479988855 | 0.018116934 | 0.166105453 |
| 0.266130147 | 0.342617649 | 0.315059049 | 0.276182888 |
| 0.323583512 | 0.156453159 | 0.228053979 | 0.4703963   |
| 0.310318751 | 0.175244632 | 0.209476714 | 0.419254333 |
| 0.208034703 | 0.360138755 | 0.208751926 | 0.264855087 |
| 0.099857912 | 0.363399269 | 0.149138306 | 0.221244313 |
| 0.162210558 | 0.273459493 | 0.059819486 | 0.174272487 |
| 0.186606786 | 0.333384423 | 0.319806824 | 0.230864096 |
| 0.284707365 | 0.35587349  | 0.174885059 | 0.283825302 |
| 0.028182164 | 0.145614663 | 0.132774849 | 0.446846901 |
| 0.130139603 | 0.471685487 | 0.316811924 | 0.356970008 |
| 0.357524131 | 0.429510558 | 0.011470658 | 0.354900886 |
| 0.418119802 | 0.131150995 | 0.28820324  | 0.337238494 |
| 0.241518925 | 0.406283524 | 0.032285504 | 0.409438569 |
| 0.217537794 | 0.195228671 | 0.497125463 | 0.273815853 |
| 0.361862868 | 0.131509438 | 0.206470995 | 0.386628908 |
| 0.316499059 | 0.031047682 | 0.11437436  | 0.29709217  |
| 0.148427483 | 0.08193915  | 0.348882811 | 0.323985104 |
| 0.260530446 | 0.426379283 | 0.495692778 | 0.229062105 |
| 0.314391099 | 0.243611401 | 0.077915966 | 0.375310476 |
| 0.389559714 | 0.223173764 | 0.323183042 | 0.22502773  |
| 0.150099511 | 0.376429511 | 0.319901154 | 0.10885758  |
| 0.109002073 | 0.222498056 | 0.035888409 | 0.297478495 |
| 0.301462158 | 0.143188525 | 0.227213119 | 0.312521782 |
| 0.215338919 | 0.456234297 | 0.286723431 | 0.271846882 |
| 0.212070418 | 0.230360826 | 0.275203866 | 0.162597465 |
| 0.188538931 | 0.26536963  | 0.278954321 | 0.267113535 |
| 0.063446535 | 0.202635457 | 0.10091024  | 0.21727663  |



|             |             |             |             |
|-------------|-------------|-------------|-------------|
| 0.138445362 | 0.204812157 | 0.179868498 | 0.265612031 |
| 0.240907049 | 0.157706413 | 0.30995556  | 0.310183314 |
| 0.24373313  | 0.091789028 | 0.420419392 | 0.375168237 |
| 0.197296433 | 0.2130724   | 0.166812891 | 0.175441429 |
| 0.415505459 | 0.120322721 | 0.115586    | 0.369791493 |
| 0.093412646 | 0.477052749 | 0.230392058 | 0.243990105 |
| 0.299971092 | 0.285351325 | 0.447237237 | 0.048330995 |
| 0.235144141 | 0.360323819 | 0.363740908 | 0.261351934 |
| 0.278222443 | 0.307076664 | 0.079080711 | 0.286775823 |
| 0.27454979  | 0.125233596 | 0.445662561 | 0.286425471 |
| 0.119058955 | 0.392712159 | 0.325766292 | 0.208597964 |
| 0.212576324 | 0.226352414 | 0.057615424 | 0.352474468 |
| 0.44240019  | 0.421731003 | 0.312845065 | 0.332851067 |
| 0.105858855 | 0.037147839 | 0.364883598 | 0.292693655 |
| 0.368682428 | 0.444534432 | 0.352161581 | 0.300196146 |
| 0.292533791 | 0.252652202 | 0.083315124 | 0.44897639  |
| 0.286031531 | 0.411115341 | 0.057298801 | 0.389048651 |
| 0.369519332 | 0.141431343 | 0.188573729 | 0.19768205  |
| 0.275293718 | 0.116950992 | 0.269117893 | 0.37994006  |
| 0.360438881 | 0.276191852 | 0.236474366 | 0.359691778 |
| 0.039446493 | 0.08476844  | 0.308243088 | 0.268300046 |
| 0.246445793 | 0.285950587 | 0.121099186 | 0.207947688 |
| 0.106781514 | 0.344508565 | 0.462250591 | 0.128118918 |
| 0.144502131 | 0.184583689 | 1           | 0.121968489 |
| 0.402707485 | 0.414835197 | 0.393896448 | 0.223774803 |
| 0.370779412 | 0.404530001 | 0.24731137  | 0.239529554 |
| 0.108994799 | 0.400947257 | 0.26884654  | 0.051747844 |
| 0.467831962 | 0.095287887 | 0.038229351 | 0.402784776 |
| 0.248646622 | 0.297974274 | 0.004841311 | 0.119051479 |
| 0.18457012  | 0.477311645 | 0.343700489 | 0.27940605  |
| 0.090306411 | 0.317365982 | 0.04539322  | 0.464735931 |
| 0.379823067 | 0.090752984 | 0.303758817 | 0.341249122 |
| 0.33434348  | 0.425439278 | 0.277324329 | 0.398180162 |
| 0.275771376 | 0.374327972 | 0.197898564 | 0.33352074  |
| 0.357411791 | 0.397920409 | 0.331478826 | 0.358881576 |
| 0.431396133 | 0.40693307  | 0.28345439  | 0.05136705  |
| 0.162310688 | 0.133383368 | 0.133053078 | 0.108514281 |
| 0.157901779 | 0.233541441 | 0.409232646 | 0.47181235  |
| 0.435818053 | 0.051673372 | 0.141465385 | 0.333580187 |
| 0.374524929 | 0.444239608 | 0.096560866 | 0.015814971 |
| 0.018044816 | 0.068002361 | 0.248724174 | 0.358407074 |
| 0.422233903 | 0.090741821 | 0.039887245 | 0.067333107 |
| 0.254987116 | 0.327972979 | 0.397838255 | 0.381352933 |
| 0.40000378  | 0.222945164 | 0.145998037 | 0.387139177 |
| 0.170531143 | 0.184006562 | 0.440540404 | 0.354332596 |
| 0.182657949 | 0.35000124  | 0.261289251 | 0.454314471 |
| 0.116196438 | 0.375705287 | 0.329150069 | 0.237823825 |
| 0.088339934 | 0.22242159  | 0.17209789  | 0.451535227 |
| 0.367052613 | 0.140074633 | 0.101056747 | 0.068290379 |
| 0.153141921 | 0.447130757 | 0.224115455 | 0.48643796  |
| 0.37835963  | 0.457642167 | 0.244763356 | 0.364584914 |
| 0.103493587 | 0.360972468 | 0.333684157 | 0.034711098 |
| 0.359225996 | 0.086012948 | 0.388428273 | 0.114627586 |
| 0.190801008 | 0.287364701 | 0.193538704 | 0.116655648 |

|             |             |             |             |
|-------------|-------------|-------------|-------------|
| 0.218297392 | 0.181257966 | 0.462529368 | 0.462156142 |
| 0.172203703 | 0.247425276 | 0.364993432 | 0.343706364 |
| 0.166475077 | 0.380326471 | 0.367964695 | 0.180784638 |
| 0.121218138 | 0.249434633 | 0.34105094  | 0.251737592 |
| 0.179536409 | 0.495714664 | 0.240850941 | 0.461402613 |
| 0.29477475  | 0.397485984 | 0.401757231 | 0.255462605 |
| 0.323166831 | 0.214023603 | 0.229480469 | 0.037915412 |
| 0.314362706 | 0.437470717 | 0.256488684 | 0.215349561 |
| 0.298897201 | 0.281238888 | 0.129146329 | 0.134700512 |
| 0.25895741  | 0.143731793 | 0.207133983 | 0.467772106 |
| 0.25909738  | 0.262701657 | 0.099212177 | 0.155230025 |
| 0.447154184 | 0.341300277 | 0.123868579 | 0.298459131 |
| 0.320999751 | 0.308587411 | 0.41141729  | 0.427837336 |
| 0.25514959  | 0.371368726 | 0.353274215 | 0.241846216 |
| 0.311342913 | 0.272219299 | 0.400381491 | 0.064547569 |
| 0.156514658 | 0.270640104 | 0.149695858 | 0.254314047 |
| 0.239882713 | 0.124291025 | 0.230577032 | 0.424987846 |
| 0.251293079 | 0.326800449 | 0.184054933 | 0.182287686 |
| 0.386196265 | 0.234476609 | 0.35506299  | 0.166922282 |
| 0.142273431 | 0.368258146 | 0.048008049 | 0.197366928 |
| 0.281948889 | 0.352305782 | 0.284713248 | 0.339337269 |
| 0.281756933 | 0.326193564 | 0.332876397 | 0.147433141 |
| 0.145475163 | 0.250666326 | 0.343804362 | 0.068399637 |
| 0.06038063  | 0.493901176 | 0.209447633 | 0.127069762 |
| 0.210648567 | 0.220706873 | 0.320490813 | 0.211591405 |
| 0.131217025 | 0.400601347 | 0.149026151 | 0.318898774 |
| 0.24680979  | 0.194922448 | 0.24476143  | 0.126287031 |
| 0.150938615 | 0.335603644 | 0.302801246 | 0.403915369 |
| 0.352642809 | 0.41929475  | 0.302758566 | 0.351638139 |
| 0.200678079 | 0.239419595 | 0.074333563 | 0.410366603 |
| 0.209682286 |             |             |             |
| MYB         | 0.035685136 | 0.043835771 | 0.030790351 |
| 0.115604091 | 0.06734626  | 0.037614222 | 0.175228879 |
| 0.057294009 | 0.130547842 | 0.098198721 | 0.10275458  |
| 0.038903799 | 0.057132825 | 0.055022673 | 0.018813289 |
| 0.13153189  | 0.137316979 | 0.032875642 | 0.229209766 |
| 0.107872735 | 0.121298257 | 0.149443199 | 0.21832621  |
| 0.037991358 | 0.11871498  | 0.220480195 | 0.058902983 |
| 0.101736506 | 0.238519603 | 0.030955682 | 0.081083324 |
| 0.158659866 | 0.050364037 | 0.028133493 | 0.071163093 |
| 0.023696732 | 0.024500624 | 0.056199599 | 0.034530049 |
| 0.042819867 | 0.063271964 | 0.110395616 | 0.177580473 |
| 0.235624729 | 0.023969962 | 0.203431164 | 0.06934048  |
| 0.028528813 | 0.189277806 | 0.025616702 | 0.026516819 |
| 0.022251325 | 0.037092918 | 0.073305093 | 0.155575322 |
| 0.028915867 | 0.024993851 | 0.014248973 | 0.038775847 |
| 0.204592546 | 0.033578915 | 0.026182039 | 0.13132504  |
| 0.0391514   | 0.081299459 | 0.118050888 | 0.10798675  |
| 0.021071144 | 0.040825784 | 0.21083894  | 0.020540929 |
| 0.034412921 | 0.129410534 | 0.090775512 | 0.015022403 |
| 0.291158717 | 0.16124035  | 0.12372043  | 0.142368027 |
| 0.085097953 | 0.027601081 | 0.073069253 | 0.056174862 |
| 0.099279896 | 0.126824028 | 0.033222183 | 0.16599137  |
| 0.044223586 | 0.162982387 | 0.090750437 | 0.132012609 |

|             |             |             |             |
|-------------|-------------|-------------|-------------|
| 0.067308413 | 0.03327698  | 0.109950159 | 0.152744022 |
| 0.051380165 | 0.043357668 | 0.031159491 | 0.049615016 |
| 0.01781609  | 0.121585793 | 0.029721746 | 0.051841013 |
| 0.032578718 | 0.029324285 | 0.210370919 | 0.071344484 |
| 0.253025185 | 0.013836177 | 0.184891402 | 0.054559167 |
| 0.086925651 | 0.207142705 | 0.154727548 | 0.102332405 |
| 0.094547863 | 0.048169908 | 0.031592237 | 0.238440356 |
| 0.05187256  | 0.158134845 | 0.029789054 | 0.225664853 |
| 0.035107121 | 0.019459116 | 0.018297866 | 0.075955932 |
| 0.051312808 | 0.031909122 | 0.125057601 | 0.155469722 |
| 0.209875982 | 0.075132937 | 0.033961088 | 0.050353989 |
| 0.069070569 | 0.017921057 | 0.101002251 | 0.029047618 |
| 0.031182984 | 0.072112383 | 0.003605466 | 0.209466188 |
| 0.055343894 | 0.084801069 | 0.269712294 | 0.040887691 |
| 0.112081176 | 0.162148108 | 0.228127893 | 0.060415053 |
| 0.034711489 | 0.287163175 | 0.021441826 | 0.130587304 |
| 0.032555445 | 0.086794233 | 0.221862714 | 0.084996185 |
| 0.223004376 | 0.022431315 | 0.174599813 | 0.045188349 |
| 0.014582192 | 0.075624402 | 0.146212634 | 0.074313105 |
| 0.040753568 | 0.038801216 | 0.016331242 | 0.257086556 |
| 0.101096482 | 0.113086906 | 0.031464778 | 0.045813277 |
| 0.111065179 | 0.215903733 | 0.014742073 | 0.051658081 |
| 0.028002127 | 0.050187506 | 0.083942399 | 0.064807617 |
| 0.178108816 | 0.08723469  | 0.005536636 | 0.0251022   |
| 0.032001902 | 0.012165098 | 0.084818967 | 0.061407579 |
| 0.024087329 | 0.084632155 | 0.002373363 | 0.123956294 |
| 0.022014921 | 0.247613921 | 0.076624052 | 0.229766763 |
| 0.027807806 | 0.254162542 | 0.043336639 | 0.037573362 |
| 0.025193459 | 0.058391805 | 0.050943303 | 0.110571226 |
| 0.160760772 | 0.094651137 | 0.060365752 | 0.110195447 |
| 0.089332819 | 0.072044482 | 0.095312441 | 0.021073824 |
| 0.06201046  | 0.123710791 | 0.196653986 | 0.100278881 |
| 0.046838875 | 0.00999762  | 0.033502081 | 0.100256012 |
| 0.015858873 | 0.041621893 | 0.02438982  | 0.014479743 |
| 0.260093509 | 0.085236545 | 0.083537783 | 0.100282404 |
| 0.023767968 | 0.137682689 | 0.02424891  | 0.098700726 |
| 0.18672836  | 0.050985381 | 0.041405136 | 0.017998803 |
| 0.022427646 | 0.049348365 | 0.170413658 | 0.044901082 |
| 0.042266277 | 0.158287564 | 0.03075988  | 0.038253574 |
| 0.180004995 | 0.212980773 | 0.086790792 | 0.009427769 |
| 0.052246369 | 0.019410971 | 0.016128619 | 0.03057626  |
| 0.035630455 | 0.108548893 | 0.072707911 | 0.032163148 |
| 0.140587062 | 0.259945502 | 0.043643891 | 0.120718562 |
| 0.024785702 | 0.170378482 | 0.243551858 | 0.006943882 |
| 0.068728328 | 0.019289424 | 0.010978738 | 0.052463557 |
| 0.147965857 | 0.067025573 | 0.073770329 | 0.23037775  |
| 0.030829691 | 0.192798528 | 0.09726334  | 0.032722704 |
| 0.040152844 | 0.038136797 | 0.1298766   | 0.14584591  |
| 0.026440765 | 0.089546117 | 0.223186792 | 0.028884781 |
| 0.0268137   | 0.252441711 | 0.040339969 | 0.131341972 |
| 0.248295708 | 0.06102104  | 0.039156419 | 0.293646421 |
| 0.194657159 | 0.076591276 | 0.13383499  | 0.203230549 |
| 0.050728092 | 0.142933985 | 0.042995206 | 0.048759775 |
| 0.236837856 | 0.093134902 | 0.093407744 | 0.029580195 |

|             |             |             |             |
|-------------|-------------|-------------|-------------|
| 0.024471691 | 0.038191808 | 0.204169823 | 0.058316157 |
| 0.25985597  | 0.029733746 | 0.025887426 | 0.0498647   |
| 0.034679839 | 0.031164195 | 0.213681156 | 0.044930523 |
| 0.022639184 | 0.02799147  | 0.166744485 | 0.092415801 |
| 0.033938554 | 0.248486787 | 0.11202039  | 0.031155902 |
| 0.050117227 | 0.058167217 | 0.032495066 | 0.064002369 |
| 0.187486227 | 0.214237644 | 0.068049316 | 0.027540878 |
| 0.03084835  | 0.126323214 | 0.011030005 | 0.029025962 |
| 0.209415861 | 0.037250099 | 0.081188527 | 0.174185701 |
| 0.030586324 | 0.024131005 | 0.121968489 | 1           |
| 0.036510064 | 0.02968666  | 0.029614093 | 0.140692493 |
| 0.039455381 | 0.036860306 | 0.021712101 | 0.209547715 |
| 0.209580055 | 0.027041333 | 0.045409999 | 0.112263397 |
| 0.083710046 | 0.021343748 | 0.122772534 | 0.04457888  |
| 0.240966349 | 0.016694914 | 0.026005708 | 0.0088806   |
| 0.134577684 | 0.075091688 | 0.026332273 | 0.084005534 |
| 0.012342472 | 0.114476934 | 0.02097343  | 0.042372104 |
| 0.035031549 | 0.162923351 | 0.090622096 | 0.032584528 |
| 0.029087675 | 0.040210508 | 0.030688667 | 0.042470574 |
| 0.029515485 | 0.025258677 | 0.074923241 | 0.206260365 |
| 0.055556575 | 0.026024708 | 0.06309663  | 0.037861239 |
| 0.078587157 | 0.088252781 | 0.222770329 | 0.227733398 |
| 0.050939121 | 0.058651839 | 0.009895714 | 0.085890739 |
| 0.032005769 | 0.134642285 | 0.038899341 | 0.080827017 |
| 0.045455928 | 0.197631168 | 0.103026197 | 0.033437635 |
| 0.066044277 | 0.079162258 | 0.113638452 | 0.01728336  |
| 0.006370549 | 0.083644357 | 0.091236772 | 0.136231018 |
| 0.04534512  | 0.009596533 | 0.207593541 | 0.154732002 |
| 0.068983533 | 0.061110163 | 0.034900803 | 0.171250389 |
| 0.046737662 | 0.23316109  | 0.022926111 | 0.137965663 |
| 0.13688707  | 0.016800934 | 0.0529024   | 0.036116591 |
| 0.190638256 | 0.121498882 | 0.030090717 | 0.078472206 |
| 0.006956633 | 0.162492805 | 0.040989264 | 0.050202405 |
| 0.087288047 | 0.173026507 | 0.178299699 | 0.09332273  |
| 0.021317243 | 0.120892568 | 0.151404516 | 0.009164604 |
| 0.148998036 | 0.06174131  | 0.141039227 | 0.065084455 |
| 0.07050362  | 0.123380927 | 0.133060217 | 0.033006832 |
| 0.162475749 | 0.025479573 | 0.057438418 | 0.016035851 |
| 0.062839549 | 0.228430629 | 0.02630615  | 0.023629401 |
| 0.032114025 | 0.054694685 | 0.037698463 | 0.168198593 |
| 0.015558754 | 0.221473535 | 0.081379069 | 0.066153654 |
| 0.140949865 | 0.101164853 | 0.136000437 | 0.08671767  |
| 0.069106906 | 0.09665447  | 0.027463497 | 0.014984578 |
| 0.184199738 | 0.019914282 | 0.093398321 | 0.030004266 |
| 0.050844904 | 0.074015431 | 0.045457511 | 0.04466477  |
| 0.041907816 | 0.045229658 | 0.036599231 | 0.111747559 |
| 0.044055251 | 0.035620591 | 0.067043966 | 0.126564662 |
| 0.127724688 | 0.08084905  | 0.054055183 | 0.085939051 |
| 0.143428494 | 0.024354355 | 0.180289317 | 0.009267777 |
| 0.016639298 | 0.047258556 | 0.163898564 | 0.117449439 |
| 0.047719727 | 0.031492007 | 0.166802049 | 0.17831287  |
| 0.04186927  | 0.035589255 | 0.085515012 | 0.065616775 |
| 0.198457262 | 0.121034983 | 0.052782032 | 0.055619592 |
| 0.01733371  | 0.043648875 | 0.06373759  | 0.051733389 |

|             |             |             |             |
|-------------|-------------|-------------|-------------|
| 0.035894058 | 0.185456363 | 0.031405764 | 0.042684383 |
| 0.077516473 | 0.025016351 | 0.150908056 | 0.236480574 |
| 0.254104515 | 0.204355355 | 0.00883372  | 0.106054126 |
| 0.008925607 | 0.139749119 | 0.014135498 | 0.166216044 |
| 0.116754752 | 0.018985507 | 0.14127416  | 0.113248386 |
| 0.177401855 | 0.029627657 | 0.125753629 | 0.23496914  |
| 0.01326932  | 0.046057522 | 0.036611567 | 0.1205138   |
| 0.020913626 | 0.094330812 | 0.181029297 | 0.034030901 |
| 0.01800893  | 0.012111549 | 0.043148657 | 0.138376762 |
| 0.227626082 | 0.076976284 | 0.024876198 | 0.136893973 |
| 0.083041862 | 0.0277083   | 0.046217632 | 0.073828982 |
| 0.154553158 | 0.031116558 | 0.023177696 | 0.052726885 |
| 0.100688204 | 0.245444794 | 0.021840828 | 0.061747756 |
| 0.185986239 | 0.027844622 | 0.036681508 | 0.028484693 |
| 0.045308925 | 0.135982357 | 0.020464765 | 0.037832481 |
| 0.057483548 | 0.016970356 | 0.234113138 | 0.071498775 |
| 0.010276551 |             |             |             |

| MYC         | 0.405904329 | 0.50845355  | 0.430688305 |
|-------------|-------------|-------------|-------------|
| 0.388532264 | 0.431343561 | 0.328087379 | 0.179760178 |
| 0.133761586 | 0.099128054 | 0.003677054 | 0.034699862 |
| 0.450888209 | 0.222252324 | 0.226700729 | 0.322225515 |
| 0.40914635  | 0.16086206  | 0.316770547 | 0.222420144 |
| 0.372028336 | 0.065136109 | 0.402645221 | 0.082951919 |
| 0.358452461 | 0.144530405 | 0.078524216 | 0.342893184 |
| 0.398597394 | 0.089568099 | 0.272786667 | 0.326350829 |
| 0.116111174 | 0.402396001 | 0.518528671 | 0.455524965 |
| 0.521996731 | 0.386948402 | 0.009339291 | 0.262307259 |
| 0.376302747 | 0.451888765 | 0.367233899 | 0.310890561 |
| 0.038669223 | 0.465652807 | 0.225762706 | 0.432763864 |
| 0.191201778 | 0.039080062 | 0.178302641 | 0.412849264 |
| 0.477116411 | 0.43784482  | 0.174588931 | 0.139637331 |
| 0.234886531 | 0.165390942 | 0.368322122 | 0.258361932 |
| 0.205916117 | 0.104744026 | 0.487900134 | 0.082651858 |
| 0.137191689 | 0.194520205 | 0.181062881 | 0.209286085 |
| 0.423736994 | 0.333492028 | 0.01283805  | 0.429543942 |
| 0.001220511 | 0.350375807 | 0.398844095 | 0.409499022 |
| 0.047821981 | 0.021279363 | 0.205498723 | 0.303124173 |
| 0.414089399 | 0.446964185 | 0.463377949 | 0.484636898 |
| 0.201624999 | 0.305849998 | 0.45293725  | 0.1722711   |
| 0.404476461 | 0.15859418  | 0.102408829 | 0.424315532 |
| 0.477017816 | 0.523271897 | 0.236336423 | 0.301334812 |
| 0.400228009 | 0.443695471 | 0.418805877 | 0.437823442 |
| 0.406382891 | 0.075878948 | 0.424440462 | 0.501044999 |
| 0.348727259 | 0.40989018  | 0.179671299 | 0.354899218 |
| 0.061794434 | 0.325583974 | 0.335772193 | 0.158900379 |
| 0.416742782 | 0.016980798 | 0.256053826 | 0.318968861 |
| 0.206864738 | 0.413923799 | 0.528564411 | 0.170759685 |
| 0.422394831 | 0.020971071 | 0.212128577 | 0.038044409 |
| 0.30484757  | 0.232733455 | 0.481479859 | 0.418801396 |
| 0.178402197 | 0.404278996 | 0.230350988 | 0.002749623 |
| 0.034491775 | 0.204650026 | 0.42042863  | 0.333050464 |
| 0.405738077 | 0.381448373 | 0.25988222  | 0.347539892 |
| 0.46668918  | 0.459899537 | 0.046914012 | 0.081892726 |
| 0.404415582 | 0.204653271 | 0.237914397 | 0.437313626 |

|             |             |             |             |
|-------------|-------------|-------------|-------------|
| 0.351518133 | 0.089323537 | 0.119597144 | 0.500580175 |
| 0.379837692 | 0.079177458 | 0.279828602 | 0.410440886 |
| 0.32071855  | 0.410257349 | 0.09686188  | 0.255223298 |
| 0.039532812 | 0.498929239 | 0.040087415 | 0.274649978 |
| 0.344007185 | 0.187076489 | 0.00879894  | 0.198268951 |
| 0.258752445 | 0.417056225 | 0.47431996  | 0.102291616 |
| 0.294961352 | 0.422548594 | 0.257471182 | 0.412302172 |
| 0.012704964 | 0.044628188 | 0.217023217 | 0.488949979 |
| 0.224109133 | 0.489276654 | 0.283514077 | 0.336176666 |
| 0.308612559 | 0.429674947 | 0.004574128 | 0.488028335 |
| 0.533417665 | 0.23915578  | 0.39994574  | 0.42766762  |
| 0.440546541 | 0.419898636 | 0.039310552 | 0.404172497 |
| 0.312491981 | 0.075164891 | 0.477217564 | 0.181333469 |
| 0.447524664 | 0.047420519 | 0.262111842 | 0.463867626 |
| 0.444777004 | 0.008497153 | 0.168664925 | 0.343496922 |
| 0.039204514 | 0.066602539 | 0.398183353 | 0.384866514 |
| 0.38394495  | 0.443210614 | 0.440499351 | 0.434206475 |
| 0.434558395 | 0.19444025  | 0.013894903 | 0.365468109 |
| 0.435456683 | 0.405414742 | 0.410716039 | 0.208571888 |
| 0.286740005 | 0.450607886 | 0.418934881 | 0.210120227 |
| 0.0406878   | 0.258232006 | 0.016714094 | 0.36260219  |
| 0.388323566 | 0.105301662 | 0.428229099 | 0.153326074 |
| 0.088290144 | 0.515243229 | 0.259368231 | 0.362922757 |
| 0.210896723 | 0.376416846 | 0.222078079 | 0.22300666  |
| 0.247641473 | 0.179402889 | 0.413628825 | 0.398772926 |
| 0.025875913 | 0.099106153 | 0.021531846 | 0.397988776 |
| 0.150970006 | 0.344622409 | 0.326891542 | 0.37064181  |
| 0.286683116 | 0.108535471 | 0.403891794 | 0.357968701 |
| 0.144528675 | 0.017420439 | 0.491384354 | 0.391239721 |
| 0.281409069 | 0.143922614 | 0.045351658 | 0.342731909 |
| 0.424323355 | 0.276533502 | 0.209176894 | 0.415882539 |
| 0.026968277 | 0.458229321 | 0.25318414  | 0.143193149 |
| 0.424943222 | 0.25432418  | 0.418752931 | 0.058144578 |
| 0.344796413 | 0.437775227 | 0.320629016 | 0.217056985 |
| 0.356557498 | 0.38558614  | 0.025674077 | 0.374979159 |
| 0.366045119 | 0.034056624 | 0.522670519 | 0.155648507 |
| 0.02512977  | 0.460163747 | 0.456424746 | 0.086780758 |
| 0.094431661 | 0.325437865 | 0.029230404 | 0.316492264 |
| 0.504677651 | 0.413320886 | 0.415904381 | 0.285472898 |
| 0.03911515  | 0.011083016 | 0.258333794 | 0.429013341 |
| 0.502608782 | 0.517086108 | 0.260838224 | 0.415672044 |
| 0.228912116 | 0.394549067 | 0.095387886 | 0.500847729 |
| 0.214733174 | 0.511461391 | 0.007160169 | 0.467493962 |
| 0.518974627 | 0.223415758 | 0.105193992 | 0.262761951 |
| 0.34507468  | 0.04428253  | 0.175250972 | 0.488724325 |
| 0.405646874 | 0.360942675 | 0.38942968  | 0.416412484 |
| 0.011343959 | 0.031062895 | 0.424770466 | 0.275582966 |
| 0.387166123 | 0.228249309 | 0.105980253 | 0.273824467 |
| 0.043170424 | 0.426331123 | 0.436417658 | 0.076003099 |
| 0.303443368 | 0.257138555 | 0.402707485 | 0.036510064 |
| 1           | 0.509314457 | 0.516185961 | 0.134320538 |
| 0.433206641 | 0.495202951 | 0.467485144 | 0.092375853 |
| 0.023626594 | 0.527377879 | 0.357337856 | 0.021570996 |
| 0.434396345 | 0.173569624 | 0.012865293 | 0.469730946 |

|             |             |             |             |
|-------------|-------------|-------------|-------------|
| 0.168153593 | 0.432230854 | 0.003156995 | 0.110699548 |
| 0.057814702 | 0.456461377 | 0.476193301 | 0.328689511 |
| 0.20184166  | 0.339408776 | 0.008683014 | 0.522140348 |
| 0.476940191 | 0.021725426 | 0.192683857 | 0.439487092 |
| 0.464918363 | 0.507902954 | 0.415553851 | 0.463232041 |
| 0.46592473  | 0.509300412 | 0.215255389 | 0.291851879 |
| 0.412312393 | 0.515402155 | 0.383157108 | 0.429297201 |
| 0.425819058 | 0.440513149 | 0.268173664 | 0.014140918 |
| 0.197120605 | 0.154934357 | 0.325406077 | 0.103911503 |
| 0.265176768 | 0.174000668 | 0.462244584 | 0.444946543 |
| 0.477442481 | 0.006062764 | 0.112405261 | 0.420550745 |
| 0.380657865 | 0.422166653 | 0.023535833 | 0.00807385  |
| 0.009668254 | 0.034722093 | 0.310944682 | 0.277464051 |
| 0.479705291 | 0.20420585  | 0.004581894 | 0.028256942 |
| 0.264260097 | 0.459059244 | 0.496967727 | 0.361998756 |
| 0.449967366 | 0.084736546 | 0.273330812 | 0.372270352 |
| 0.098055419 | 0.287054325 | 0.477042483 | 0.448525658 |
| 0.048391534 | 0.283922597 | 0.337199974 | 0.447002767 |
| 0.143098749 | 0.337313322 | 0.444259616 | 0.315349108 |
| 0.0155156   | 0.104031806 | 0.086596675 | 0.43169958  |
| 0.513624206 | 0.090186577 | 0.041396754 | 0.108699586 |
| 0.112055028 | 0.438619485 | 0.166093202 | 0.494649826 |
| 0.403059934 | 0.415307656 | 0.101344105 | 0.472253985 |
| 0.048597778 | 0.483227886 | 0.416742847 | 0.04975733  |
| 0.291667487 | 0.013037055 | 0.472461068 | 0.221371804 |
| 0.264539781 | 0.351714215 | 0.269915319 | 0.02424212  |
| 0.276310566 | 0.062573871 | 0.445976385 | 0.465191535 |
| 0.046960845 | 0.20860407  | 0.31608292  | 0.386373255 |
| 0.226536513 | 0.420332203 | 0.495220357 | 0.396550381 |
| 0.070159705 | 0.196490804 | 0.36425392  | 0.357622588 |
| 0.182400276 | 0.467740769 | 0.343868108 | 0.52130893  |
| 0.376503392 | 0.431266214 | 0.464387612 | 0.331620849 |
| 0.298711999 | 0.357721271 | 0.329622371 | 0.015430355 |
| 0.33508203  | 0.44063243  | 0.312258115 | 0.205436187 |
| 0.288951141 | 0.457365713 | 0.039774115 | 0.152959891 |
| 0.425424239 | 0.247629634 | 0.135643294 | 0.417315014 |
| 0.343526136 | 0.362358771 | 0.02691277  | 0.081536219 |
| 0.529668214 | 0.408920356 | 0.117946505 | 0.402199882 |
| 0.181599785 | 0.368491956 | 0.452092347 | 0.463127256 |
| 0.389975153 | 0.428558188 | 0.384996307 | 0.344975662 |
| 0.386102721 | 0.243125861 | 0.521961051 | 0.05310755  |
| 0.122246688 | 0.411149258 | 0.100727966 | 0.110759209 |
| 0.141981487 | 0.034898925 | 0.402853266 | 0.419849934 |
| 0.442580754 | 0.377308451 | 0.263231711 | 0.087532722 |
| 0.356562137 | 0.345849122 | 0.36245761  | 0.166607017 |
| 0.080449588 | 0.493747779 | 0.011023085 | 0.062821573 |
| 0.4369133   | 0.441268682 | 0.455851635 | 0.264822868 |
| 0.396679218 | 0.17676908  | 0.304366974 | 0.232002794 |
| 0.296809246 | 0.377173086 | 0.434892454 | 0.027930474 |
| 0.013736928 | 0.461116192 | 0.330723509 | 0.028016662 |
| 0.105747248 | 0.349189299 | 0.271893817 | 0.255900112 |
| 0.032726864 | 0.493821701 | 0.299243693 | 0.449382494 |
| 0.300971373 | 0.064539003 | 0.307913985 | 0.080852339 |
| 0.053923114 | 0.421444808 | 0.446554864 | 0.521462877 |

|             |             |             |             |
|-------------|-------------|-------------|-------------|
| 0.386010089 | 0.410445296 | 0.425938488 | 0.416725211 |
| 0.122095294 | 0.405814214 | 0.023696879 | 0.408045041 |
| 0.443384033 |             |             |             |
| MYL4        | 0.491735745 | 0.494698768 | 0.470318649 |
| 0.431245815 | 0.463260606 | 0.400580531 | 0.191885614 |
| 0.182083831 | 0.078201955 | 0.002345264 | 0.019191328 |
| 0.50466207  | 0.205915255 | 0.262009413 | 0.359351375 |
| 0.44147196  | 0.136693708 | 0.396889448 | 0.230351378 |
| 0.428558605 | 0.075023962 | 0.417444443 | 0.078610538 |
| 0.340990081 | 0.107169954 | 0.059753084 | 0.296148747 |
| 0.459139537 | 0.070481247 | 0.339898226 | 0.401849531 |
| 0.108206359 | 0.487072277 | 0.519341477 | 0.477028684 |
| 0.522706066 | 0.478337984 | 0.013076787 | 0.291370496 |
| 0.469143451 | 0.487405084 | 0.422898417 | 0.325302573 |
| 0.032014028 | 0.486536021 | 0.230907266 | 0.454005309 |
| 0.244842461 | 0.025466149 | 0.242142631 | 0.436914064 |
| 0.477876233 | 0.479344238 | 0.216850083 | 0.140435009 |
| 0.213770859 | 0.229014212 | 0.331236134 | 0.348116914 |
| 0.21036481  | 0.14806067  | 0.482544084 | 0.074847793 |
| 0.148366125 | 0.246747666 | 0.167349872 | 0.251090162 |
| 0.416914725 | 0.426621696 | 0.013906405 | 0.499197173 |
| 0.001304919 | 0.400963642 | 0.421951018 | 0.379087869 |
| 0.036959596 | 0.014778062 | 0.192722276 | 0.333269097 |
| 0.478547014 | 0.479885974 | 0.504620763 | 0.511379495 |
| 0.185061106 | 0.315402351 | 0.470514685 | 0.161435507 |
| 0.485535943 | 0.159267109 | 0.108542035 | 0.447284888 |
| 0.507642539 | 0.509703065 | 0.207283633 | 0.283154317 |
| 0.457128537 | 0.47572996  | 0.46824906  | 0.460987214 |
| 0.38674536  | 0.059505292 | 0.464249488 | 0.50949335  |
| 0.447708059 | 0.389641212 | 0.153353117 | 0.434824883 |
| 0.053083518 | 0.40931586  | 0.354856491 | 0.179560246 |
| 0.479783146 | 0.012644009 | 0.227986495 | 0.358608454 |
| 0.230407859 | 0.491197313 | 0.508709186 | 0.172400579 |
| 0.461548223 | 0.016913476 | 0.159460441 | 0.032363176 |
| 0.340832772 | 0.195154311 | 0.50021089  | 0.475806599 |
| 0.229574561 | 0.411887874 | 0.25658071  | 0.000820189 |
| 0.024553713 | 0.214137309 | 0.50202242  | 0.409284959 |
| 0.474421619 | 0.468651357 | 0.229592275 | 0.445293117 |
| 0.509654352 | 0.505297581 | 0.060709278 | 0.083225773 |
| 0.452581947 | 0.209598028 | 0.234409098 | 0.49372831  |
| 0.325694425 | 0.101814881 | 0.1156117   | 0.503189017 |
| 0.432506436 | 0.072188611 | 0.379437012 | 0.439937082 |
| 0.337349816 | 0.397868145 | 0.096302746 | 0.273119405 |
| 0.037608072 | 0.491330163 | 0.028438054 | 0.357945205 |
| 0.310438977 | 0.163184015 | 0.010426937 | 0.255761577 |
| 0.290900726 | 0.476407505 | 0.496254601 | 0.099305632 |
| 0.319862107 | 0.434177073 | 0.347912201 | 0.461971668 |
| 0.006406636 | 0.043098926 | 0.315679212 | 0.501279843 |
| 0.308574164 | 0.51367394  | 0.308552689 | 0.335761576 |
| 0.296374556 | 0.481059025 | 0.00466894  | 0.496865576 |
| 0.517133691 | 0.338697365 | 0.417930098 | 0.474082061 |
| 0.437444193 | 0.471762128 | 0.056512247 | 0.442468707 |
| 0.421005977 | 0.071597616 | 0.502830544 | 0.156398468 |
| 0.480902122 | 0.03427199  | 0.323283217 | 0.507722649 |



|             |             |              |             |
|-------------|-------------|--------------|-------------|
| 0.505096238 | 0.007238939 | 0.218170277  | 0.396801325 |
| 0.028270769 | 0.079673368 | 0.473896328  | 0.425134604 |
| 0.398293091 | 0.494641466 | 0.489635642  | 0.420296489 |
| 0.459006596 | 0.227990945 | 0.0111106117 | 0.357617595 |
| 0.504966776 | 0.445939023 | 0.447536089  | 0.229375404 |
| 0.394455207 | 0.478480765 | 0.496712733  | 0.222776852 |
| 0.033341477 | 0.311352526 | 0.01638242   | 0.349475988 |
| 0.473413907 | 0.100597903 | 0.454745042  | 0.168000063 |
| 0.069604402 | 0.501729963 | 0.217811619  | 0.336868207 |
| 0.16830417  | 0.42502216  | 0.247190348  | 0.230725534 |
| 0.223424485 | 0.158835523 | 0.396127884  | 0.407047186 |
| 0.026342989 | 0.084473106 | 0.017813051  | 0.442717689 |
| 0.136925816 | 0.37017121  | 0.367719891  | 0.463183414 |
| 0.33790754  | 0.101397563 | 0.408074166  | 0.343665243 |
| 0.117133476 | 0.012007406 | 0.492108194  | 0.431421523 |
| 0.381624713 | 0.141331908 | 0.037777494  | 0.389530813 |
| 0.482886892 | 0.347879096 | 0.301705924  | 0.467677662 |
| 0.026937808 | 0.506528746 | 0.245170384  | 0.117868313 |
| 0.426795696 | 0.254413539 | 0.472583444  | 0.05667152  |
| 0.434133008 | 0.464233539 | 0.3378007    | 0.184152091 |
| 0.430874651 | 0.438651917 | 0.022035909  | 0.46937906  |
| 0.463456499 | 0.025792472 | 0.503653143  | 0.133815401 |
| 0.018376708 | 0.4991109   | 0.496309378  | 0.070483273 |
| 0.075768424 | 0.336167516 | 0.034357716  | 0.302227976 |
| 0.497383027 | 0.431105525 | 0.475014769  | 0.261909324 |
| 0.030709905 | 0.007313407 | 0.237754611  | 0.482282969 |
| 0.514356627 | 0.509566575 | 0.268477676  | 0.401406961 |
| 0.232892133 | 0.366666381 | 0.140384783  | 0.505563797 |
| 0.246700591 | 0.511836899 | 0.004859048  | 0.507424149 |
| 0.519652643 | 0.304441966 | 0.077186681  | 0.303595996 |
| 0.435127346 | 0.03692762  | 0.207418109  | 0.485451035 |
| 0.476897738 | 0.352067177 | 0.38216841   | 0.481004729 |
| 0.010288335 | 0.031310646 | 0.435343068  | 0.235012469 |
| 0.4102899   | 0.213619501 | 0.077977767  | 0.345930969 |
| 0.033509272 | 0.460879671 | 0.493971619  | 0.052813495 |
| 0.358808431 | 0.335054416 | 0.414835197  | 0.02968666  |
| 0.509314457 | 1           | 0.516348463  | 0.157397252 |
| 0.507613038 | 0.500096377 | 0.486261581  | 0.079946016 |
| 0.015773124 | 0.519186113 | 0.446039032  | 0.017767626 |
| 0.490602985 | 0.248735491 | 0.008146458  | 0.479504342 |
| 0.174201968 | 0.463527474 | 0.003090526  | 0.127274203 |
| 0.045637556 | 0.502060548 | 0.477087435  | 0.402270711 |
| 0.259688027 | 0.392239274 | 0.008199025  | 0.5108013   |
| 0.477102064 | 0.013057216 | 0.159367454  | 0.503889399 |
| 0.505359489 | 0.506317209 | 0.380719627  | 0.506847481 |
| 0.498288477 | 0.502124521 | 0.229006546  | 0.275427183 |
| 0.475763348 | 0.494636568 | 0.459974686  | 0.466698471 |
| 0.484988061 | 0.470978983 | 0.273371697  | 0.01007598  |
| 0.150816739 | 0.204185329 | 0.344346596  | 0.07630434  |
| 0.357697479 | 0.140216447 | 0.497218926  | 0.497430389 |
| 0.511747886 | 0.003525558 | 0.135619001  | 0.497186664 |
| 0.458155881 | 0.480603613 | 0.023232091  | 0.00677776  |
| 0.010556269 | 0.018181818 | 0.372515418  | 0.264556833 |
| 0.502402371 | 0.252128898 | 0.002531617  | 0.033761928 |

|             |             |             |             |
|-------------|-------------|-------------|-------------|
| 0.28813053  | 0.458048448 | 0.48613882  | 0.392516294 |
| 0.510494619 | 0.075916365 | 0.288637647 | 0.418764616 |
| 0.067314943 | 0.39585207  | 0.50676237  | 0.458476307 |
| 0.042483924 | 0.269075581 | 0.430611541 | 0.48688274  |
| 0.105006301 | 0.33759754  | 0.506280342 | 0.318618946 |
| 0.015799797 | 0.081475183 | 0.062258068 | 0.478948273 |
| 0.513360973 | 0.070449291 | 0.027854918 | 0.155282884 |
| 0.103075113 | 0.504028419 | 0.155784693 | 0.506489466 |
| 0.471058778 | 0.45843731  | 0.080812334 | 0.47009787  |
| 0.0328036   | 0.484899812 | 0.391936021 | 0.059617601 |
| 0.325020994 | 0.010589944 | 0.495103647 | 0.170088213 |
| 0.338368307 | 0.44026276  | 0.225435094 | 0.016564796 |
| 0.242378902 | 0.049022683 | 0.492041628 | 0.506532337 |
| 0.037411389 | 0.232290871 | 0.32260564  | 0.446012671 |
| 0.287854133 | 0.457665658 | 0.501063868 | 0.465017699 |
| 0.067884094 | 0.198212714 | 0.432675641 | 0.456176848 |
| 0.235320365 | 0.506418131 | 0.315926063 | 0.507478557 |
| 0.465590774 | 0.488526973 | 0.503000107 | 0.356999051 |
| 0.269907654 | 0.443267978 | 0.38629028  | 0.013486715 |
| 0.369816548 | 0.487402158 | 0.389856081 | 0.161575924 |
| 0.262223656 | 0.476665018 | 0.042985699 | 0.22774706  |
| 0.423854893 | 0.319289539 | 0.129461815 | 0.464007915 |
| 0.43653341  | 0.459461156 | 0.034947828 | 0.057094342 |
| 0.517622696 | 0.463942306 | 0.13386798  | 0.457448469 |
| 0.176241295 | 0.360836214 | 0.510806493 | 0.509287972 |
| 0.433359848 | 0.493800227 | 0.4631581   | 0.411826732 |
| 0.436976111 | 0.254365713 | 0.517404118 | 0.083412286 |
| 0.089384873 | 0.497359596 | 0.08398505  | 0.093096721 |
| 0.132061771 | 0.024838284 | 0.384185232 | 0.461365616 |
| 0.467873658 | 0.396140687 | 0.355042475 | 0.079424172 |
| 0.357734041 | 0.442433941 | 0.376785249 | 0.184334368 |
| 0.067032469 | 0.488919926 | 0.00788648  | 0.052835008 |
| 0.470618205 | 0.495906336 | 0.442660867 | 0.253420867 |
| 0.359404865 | 0.161470464 | 0.303694845 | 0.308909385 |
| 0.340982163 | 0.436503927 | 0.493517244 | 0.029295763 |
| 0.01308728  | 0.50254842  | 0.424917359 | 0.023134727 |
| 0.095121473 | 0.445151918 | 0.333055593 | 0.233846627 |
| 0.022692798 | 0.50149125  | 0.352277433 | 0.482021702 |
| 0.353409857 | 0.060666641 | 0.403465615 | 0.090559929 |
| 0.057069355 | 0.457801387 | 0.472454482 | 0.509955108 |
| 0.416414216 | 0.438029975 | 0.454714779 | 0.494643789 |
| 0.142790844 | 0.477637834 | 0.019905904 | 0.480352986 |
| 0.475821082 |             |             |             |

|             |             |             |             |
|-------------|-------------|-------------|-------------|
| MY01F       | 0.494945702 | 0.528597826 | 0.446085362 |
| 0.468062802 | 0.46119696  | 0.462978211 | 0.220729496 |
| 0.213834345 | 0.082181778 | 0.004444594 | 0.020342935 |
| 0.496622269 | 0.22348796  | 0.311198813 | 0.398286825 |
| 0.44590538  | 0.126586606 | 0.388283786 | 0.24133095  |
| 0.449825844 | 0.100128515 | 0.421973831 | 0.08506337  |
| 0.293028542 | 0.096329033 | 0.059796592 | 0.275120959 |
| 0.488881229 | 0.069744494 | 0.416904972 | 0.449149907 |
| 0.087363667 | 0.50809306  | 0.515892476 | 0.48313214  |
| 0.5149319   | 0.487698385 | 0.010225977 | 0.350844604 |
| 0.498802476 | 0.5001201   | 0.45085227  | 0.347757946 |

|             |             |             |             |
|-------------|-------------|-------------|-------------|
| 0.036652364 | 0.497006932 | 0.256293593 | 0.426160007 |
| 0.273663977 | 0.025480611 | 0.30647839  | 0.486905084 |
| 0.504858999 | 0.508917773 | 0.253887988 | 0.164145865 |
| 0.238313658 | 0.287990277 | 0.312276903 | 0.411884721 |
| 0.230615093 | 0.20444703  | 0.515973045 | 0.090129674 |
| 0.161900729 | 0.272778829 | 0.138985637 | 0.284954829 |
| 0.373509038 | 0.476046337 | 0.01447405  | 0.480219285 |
| 0.003036278 | 0.419757245 | 0.391833487 | 0.353412704 |
| 0.033356611 | 0.018089286 | 0.164848172 | 0.372710494 |
| 0.504618879 | 0.50141004  | 0.51893555  | 0.524599799 |
| 0.181393485 | 0.288326477 | 0.431915409 | 0.167065496 |
| 0.514315983 | 0.188050138 | 0.111871042 | 0.446460884 |
| 0.523354207 | 0.526166422 | 0.193483728 | 0.253791252 |
| 0.510716011 | 0.519208772 | 0.495041149 | 0.474583343 |
| 0.396791235 | 0.041347262 | 0.512601871 | 0.533243631 |
| 0.491262448 | 0.341416639 | 0.141325664 | 0.481398914 |
| 0.04850121  | 0.437484829 | 0.373865538 | 0.163594396 |
| 0.507351284 | 0.014867938 | 0.201498708 | 0.401594339 |
| 0.209926813 | 0.516837419 | 0.52425877  | 0.187313809 |
| 0.438948329 | 0.016516357 | 0.14339351  | 0.025278383 |
| 0.36691565  | 0.149265541 | 0.507561603 | 0.516867512 |
| 0.267539773 | 0.409667731 | 0.278669019 | 0.000107861 |
| 0.020317596 | 0.175206585 | 0.522283398 | 0.402675166 |
| 0.486970806 | 0.477420787 | 0.241681831 | 0.491059442 |
| 0.514658836 | 0.517126    | 0.086889418 | 0.089263662 |
| 0.480909691 | 0.172054609 | 0.233259131 | 0.511559772 |
| 0.318722938 | 0.114172568 | 0.119018807 | 0.529653838 |
| 0.48829782  | 0.076234568 | 0.39878691  | 0.442206469 |
| 0.383006413 | 0.371965444 | 0.09792677  | 0.298401346 |
| 0.045605025 | 0.506746324 | 0.02113997  | 0.384156893 |
| 0.317354887 | 0.144158618 | 0.008265761 | 0.302296762 |
| 0.339140086 | 0.524831544 | 0.493746532 | 0.094903267 |
| 0.345500477 | 0.434325257 | 0.39454079  | 0.513908755 |
| 0.00898171  | 0.039407984 | 0.362131373 | 0.534527127 |
| 0.382878316 | 0.524828799 | 0.31025616  | 0.304822828 |
| 0.279793442 | 0.496096265 | 0.003111332 | 0.504515345 |
| 0.523345622 | 0.39396763  | 0.445475245 | 0.454761557 |
| 0.428752531 | 0.507994072 | 0.055124442 | 0.447651415 |
| 0.459673709 | 0.067947607 | 0.52015515  | 0.151096091 |
| 0.513993948 | 0.033607805 | 0.370413399 | 0.507940486 |
| 0.521227571 | 0.007365552 | 0.281495144 | 0.436716028 |
| 0.019622682 | 0.108053398 | 0.488802271 | 0.451693955 |
| 0.425056642 | 0.494074223 | 0.50580193  | 0.41142377  |
| 0.470043707 | 0.244582889 | 0.008520405 | 0.323033324 |
| 0.50439526  | 0.447205912 | 0.502038328 | 0.254859742 |
| 0.442396122 | 0.523792303 | 0.517096477 | 0.251459321 |
| 0.036822825 | 0.351609541 | 0.021270539 | 0.351989468 |
| 0.491500623 | 0.123599619 | 0.458780204 | 0.136143048 |
| 0.059786358 | 0.533552377 | 0.17321366  | 0.282125745 |
| 0.126989172 | 0.477183876 | 0.257462051 | 0.282729751 |
| 0.24463492  | 0.153378478 | 0.384380803 | 0.418274118 |
| 0.035861914 | 0.085403462 | 0.009788572 | 0.461274914 |
| 0.162056668 | 0.415965287 | 0.426174346 | 0.504170857 |
| 0.372708578 | 0.114949507 | 0.420376067 | 0.296905396 |

|             |             |             |             |
|-------------|-------------|-------------|-------------|
| 0.1022828   | 0.010292602 | 0.529829855 | 0.435370231 |
| 0.441858355 | 0.14972089  | 0.032008512 | 0.431371127 |
| 0.522880308 | 0.427379311 | 0.353428059 | 0.520047762 |
| 0.023116554 | 0.517912013 | 0.271679211 | 0.112204921 |
| 0.424052511 | 0.27032602  | 0.498695905 | 0.068007044 |
| 0.459773304 | 0.516857809 | 0.314018438 | 0.180240558 |
| 0.493524882 | 0.465153452 | 0.026250778 | 0.502852618 |
| 0.504512725 | 0.024782504 | 0.532527377 | 0.115025798 |
| 0.014774051 | 0.487132791 | 0.519001798 | 0.063239198 |
| 0.066030371 | 0.381157968 | 0.047652154 | 0.289573046 |
| 0.533254909 | 0.43852258  | 0.519659177 | 0.211544368 |
| 0.034708779 | 0.009545347 | 0.196750219 | 0.450526039 |
| 0.516988715 | 0.529958391 | 0.256413676 | 0.404691788 |
| 0.239764452 | 0.365632623 | 0.178215974 | 0.534601875 |
| 0.193135471 | 0.517159839 | 0.003886609 | 0.505016075 |
| 0.516230982 | 0.368496407 | 0.07131973  | 0.355091278 |
| 0.496480632 | 0.039004135 | 0.203871596 | 0.521123586 |
| 0.513347074 | 0.354293471 | 0.39664787  | 0.475487929 |
| 0.014240727 | 0.038144155 | 0.423349189 | 0.184597872 |
| 0.437900801 | 0.209033803 | 0.051104542 | 0.379434392 |
| 0.038073421 | 0.515931074 | 0.501225021 | 0.052226145 |
| 0.435225068 | 0.367149303 | 0.393896448 | 0.029614093 |
| 0.516185961 | 0.516348463 | 1           | 0.1633064   |
| 0.518418415 | 0.530105162 | 0.476646051 | 0.065995324 |
| 0.011849271 | 0.515986313 | 0.47891066  | 0.020930881 |
| 0.512022641 | 0.319637303 | 0.011570132 | 0.523846098 |
| 0.181531065 | 0.470677342 | 0.004226906 | 0.088431011 |
| 0.030894098 | 0.499680882 | 0.505895783 | 0.441525688 |
| 0.340587495 | 0.393610769 | 0.003892539 | 0.528432549 |
| 0.524958058 | 0.009760376 | 0.128787923 | 0.529698409 |
| 0.509988914 | 0.522970342 | 0.35073116  | 0.523362639 |
| 0.500223298 | 0.513783034 | 0.265745832 | 0.267089598 |
| 0.52174414  | 0.514122936 | 0.494034009 | 0.510445201 |
| 0.51647663  | 0.457802655 | 0.289761713 | 0.01232829  |
| 0.133530797 | 0.254521115 | 0.398550192 | 0.081936835 |
| 0.41454083  | 0.133566113 | 0.524790362 | 0.510436429 |
| 0.531727891 | 0.002432014 | 0.164559028 | 0.527481334 |
| 0.505837847 | 0.510934338 | 0.015709538 | 0.00578704  |
| 0.007643345 | 0.016002838 | 0.406912687 | 0.23511548  |
| 0.529632336 | 0.332595724 | 0.002317542 | 0.044248321 |
| 0.303158447 | 0.436002015 | 0.527039485 | 0.403729763 |
| 0.505072614 | 0.068956452 | 0.353971695 | 0.430783378 |
| 0.059109596 | 0.435599041 | 0.532338463 | 0.512450628 |
| 0.031421351 | 0.240709845 | 0.432683888 | 0.519071938 |
| 0.075114452 | 0.32037346  | 0.502569903 | 0.356004592 |
| 0.009708604 | 0.069249216 | 0.055048677 | 0.477583514 |
| 0.506496847 | 0.077204834 | 0.029293653 | 0.194312604 |
| 0.122675473 | 0.517489802 | 0.167215416 | 0.528560806 |
| 0.510614451 | 0.476658749 | 0.062179628 | 0.513275045 |
| 0.033211966 | 0.514137105 | 0.362288439 | 0.075230732 |
| 0.292332062 | 0.008318871 | 0.51480086  | 0.178600009 |
| 0.393449852 | 0.468567292 | 0.206234799 | 0.011187776 |
| 0.191837295 | 0.043407942 | 0.516071113 | 0.508292581 |
| 0.024694592 | 0.244230312 | 0.300359673 | 0.443311082 |

|             |             |             |             |
|-------------|-------------|-------------|-------------|
| 0.345334052 | 0.488871984 | 0.509846416 | 0.509293442 |
| 0.082200392 | 0.142693822 | 0.462810664 | 0.491097058 |
| 0.274797781 | 0.517703466 | 0.329554605 | 0.529900181 |
| 0.493311924 | 0.513768038 | 0.529657806 | 0.38690391  |
| 0.23755603  | 0.48257909  | 0.453302063 | 0.019754    |
| 0.378380353 | 0.513498932 | 0.404961847 | 0.155984119 |
| 0.263862947 | 0.442016084 | 0.040070476 | 0.225208797 |
| 0.379048398 | 0.390640055 | 0.141934143 | 0.473643533 |
| 0.459657577 | 0.495609874 | 0.036365528 | 0.052368502 |
| 0.528493508 | 0.503258056 | 0.159530194 | 0.497366544 |
| 0.158051928 | 0.364876753 | 0.511965804 | 0.501807364 |
| 0.419201719 | 0.530846693 | 0.501100791 | 0.478808606 |
| 0.498689882 | 0.267447919 | 0.518653582 | 0.108232419 |
| 0.079290825 | 0.49651296  | 0.096212124 | 0.07823238  |
| 0.136153059 | 0.019936729 | 0.345029223 | 0.458506937 |
| 0.441739641 | 0.413105878 | 0.387807141 | 0.073126313 |
| 0.327581851 | 0.433082942 | 0.37019032  | 0.224228403 |
| 0.075143832 | 0.516797703 | 0.006648058 | 0.04545181  |
| 0.445165817 | 0.520156224 | 0.433168164 | 0.236783758 |
| 0.322704613 | 0.124873242 | 0.306996466 | 0.374100186 |
| 0.416858079 | 0.420526278 | 0.522996952 | 0.031426349 |
| 0.016130593 | 0.518866123 | 0.454406832 | 0.014573929 |
| 0.075362725 | 0.467417148 | 0.310282249 | 0.25346666  |
| 0.015257276 | 0.525139355 | 0.422923694 | 0.468929671 |
| 0.387997331 | 0.05502717  | 0.454256318 | 0.090070411 |
| 0.051537203 | 0.503860775 | 0.441737586 | 0.521016218 |
| 0.369091222 | 0.456925288 | 0.473824575 | 0.525752079 |
| 0.12126028  | 0.451267835 | 0.022998962 | 0.504294397 |
| 0.493331287 |             |             |             |
| MY01G       | 0.185958345 | 0.197414052 | 0.099454941 |
| 0.270148586 | 0.154862185 | 0.142732454 | 0.226308476 |
| 0.148097999 | 0.068478567 | 0.027942313 | 0.018154257 |
| 0.136343706 | 0.044483347 | 0.091913323 | 0.043209113 |
| 0.299595853 | 0.071981049 | 0.140783262 | 0.286512099 |
| 0.30546431  | 0.132830582 | 0.25893058  | 0.156291424 |
| 0.053499931 | 0.048002298 | 0.098409097 | 0.054911864 |
| 0.31061955  | 0.117606983 | 0.104841846 | 0.288652511 |
| 0.120152768 | 0.231605186 | 0.159843084 | 0.153534839 |
| 0.14058178  | 0.147009182 | 0.078195437 | 0.066799258 |
| 0.228033702 | 0.173132681 | 0.306061564 | 0.259242039 |
| 0.10952838  | 0.157489705 | 0.240532719 | 0.166124174 |
| 0.082743808 | 0.051497802 | 0.101424031 | 0.170483867 |
| 0.123840278 | 0.103086687 | 0.171963015 | 0.159614372 |
| 0.021896167 | 0.09918064  | 0.015231846 | 0.203866431 |
| 0.234817098 | 0.104714436 | 0.137747152 | 0.081625891 |
| 0.061352897 | 0.221454011 | 0.094307681 | 0.230683039 |
| 0.044397969 | 0.209041006 | 0.171568248 | 0.098930164 |
| 0.015307185 | 0.333979051 | 0.200046447 | 0.025460475 |
| 0.136989531 | 0.044837668 | 0.117776223 | 0.255734623 |
| 0.286831772 | 0.172843874 | 0.217570051 | 0.189718157 |
| 0.069214197 | 0.202798972 | 0.08861474  | 0.129635706 |
| 0.20895907  | 0.158910342 | 0.101243085 | 0.272742925 |
| 0.210268309 | 0.162049541 | 0.082079073 | 0.176291851 |
| 0.161462637 | 0.208995736 | 0.092632032 | 0.107173422 |

|             |             |             |             |
|-------------|-------------|-------------|-------------|
| 0.02826848  | 0.063559996 | 0.148063392 | 0.196085449 |
| 0.194835627 | 0.05391909  | 0.135556501 | 0.276521396 |
| 0.16061562  | 0.055724963 | 0.295554913 | 0.078299326 |
| 0.287117938 | 0.078985426 | 0.131976808 | 0.208412943 |
| 0.157456967 | 0.20356999  | 0.151760645 | 0.2549453   |
| 0.141272931 | 0.063962536 | 0.015083034 | 0.126460893 |
| 0.070550825 | 0.019363846 | 0.125084871 | 0.229118367 |
| 0.135042817 | 0.056746365 | 0.224295693 | 0.041723863 |
| 0.071713517 | 0.108741954 | 0.161029613 | 0.191230371 |
| 0.25262224  | 0.12012623  | 0.075467778 | 0.170505995 |
| 0.102406298 | 0.215730723 | 0.010072225 | 0.186767159 |
| 0.148284881 | 0.116337952 | 0.292975384 | 0.132457332 |
| 0.1168039   | 0.19588491  | 0.193268071 | 0.218981265 |
| 0.198936566 | 0.201016081 | 0.123083578 | 0.280049031 |
| 0.047706995 | 0.127710284 | 0.202757346 | 0.117230508 |
| 0.139707629 | 0.127197845 | 0.064410204 | 0.194164246 |
| 0.017443984 | 0.048488229 | 0.143813077 | 0.216905218 |
| 0.065820418 | 0.136290761 | 0.121193224 | 0.229641377 |
| 0.157229685 | 0.202588836 | 0.164550272 | 0.131243008 |
| 0.018519722 | 0.154469868 | 0.114746343 | 0.197500163 |
| 0.152284352 | 0.206738274 | 0.139125557 | 0.100773024 |
| 0.20013986  | 0.259637541 | 0.006606559 | 0.150970565 |
| 0.157356851 | 0.090817743 | 0.146272646 | 0.184891926 |
| 0.051284461 | 0.23786724  | 0.012997833 | 0.282605096 |
| 0.161922541 | 0.207377342 | 0.243794696 | 0.14767285  |
| 0.161167872 | 0.100281397 | 0.133496147 | 0.132358876 |
| 0.102522823 | 0.033498302 | 0.140093406 | 0.292589581 |
| 0.062265446 | 0.118412145 | 0.242501884 | 0.252762965 |
| 0.15929073  | 0.22905002  | 0.274601091 | 0.039925462 |
| 0.136639278 | 0.238388158 | 0.094461995 | 0.150684706 |
| 0.196197133 | 0.030225892 | 0.177099555 | 0.136736162 |
| 0.121682025 | 0.185097418 | 0.126629131 | 0.025460425 |
| 0.137213967 | 0.219349609 | 0.062719211 | 0.130573394 |
| 0.136914954 | 0.088687146 | 0.069795433 | 0.136253054 |
| 0.088889994 | 0.197349827 | 0.040059176 | 0.033058921 |
| 0.018528061 | 0.12229909  | 0.289880427 | 0.044033899 |
| 0.026537053 | 0.114183744 | 0.051563402 | 0.073775637 |
| 0.125172623 | 0.120686203 | 0.056194741 | 0.029725623 |
| 0.028847617 | 0.037653156 | 0.038532019 | 0.161458485 |
| 0.0846823   | 0.067602799 | 0.113011613 | 0.05073672  |
| 0.072991734 | 0.098034342 | 0.193891523 | 0.293663703 |
| 0.164133945 | 0.150741884 | 0.12979534  | 0.021085743 |
| 0.217224852 | 0.076610619 | 0.076463033 | 0.198544319 |
| 0.121654021 | 0.230852617 | 0.058249446 | 0.12707922  |
| 0.054408984 | 0.209031278 | 0.284872095 | 0.026643636 |
| 0.193467962 | 0.183727141 | 0.23709544  | 0.093802488 |
| 0.150067605 | 0.251561632 | 0.111130821 | 0.164222923 |
| 0.156541494 | 0.109861673 | 0.179279929 | 0.075790388 |
| 0.107023712 | 0.173461234 | 0.118628612 | 0.162712104 |
| 0.10475559  | 0.104827506 | 0.133838769 | 0.226317922 |
| 0.196955457 | 0.261812028 | 0.145060637 | 0.063896025 |
| 0.098630971 | 0.019849923 | 0.101917728 | 0.110822343 |
| 0.152196971 | 0.164834659 | 0.274342187 | 0.07722257  |
| 0.315254146 | 0.039967231 | 0.091197925 | 0.185555956 |

|             |             |             |             |
|-------------|-------------|-------------|-------------|
| 0.087652786 | 0.176448479 | 0.078559226 | 0.144002567 |
| 0.133522573 | 0.140446544 | 0.066242557 | 0.200286933 |
| 0.169930635 | 0.127428959 | 0.20553171  | 0.159626886 |
| 0.20096893  | 0.084182394 | 0.052104369 | 0.223077316 |
| 0.098569278 | 0.152482035 | 0.143373973 | 0.028742347 |
| 0.065101894 | 0.124468001 | 0.0085026   | 0.097780654 |
| 0.076521388 | 0.17094564  | 0.259567076 | 0.059312692 |
| 0.089065229 | 0.096809663 | 0.223774803 | 0.140692493 |
| 0.134320538 | 0.157397252 | 0.1633064   | 1           |
| 0.171627732 | 0.147231724 | 0.062966396 | 0.146146562 |
| 0.074880003 | 0.146989267 | 0.216311768 | 0.038401405 |
| 0.262018334 | 0.111520684 | 0.028063534 | 0.20839631  |
| 0.286345766 | 0.130275676 | 0.015293715 | 0.02711187  |
| 0.073794479 | 0.228604943 | 0.143434465 | 0.29715449  |
| 0.040516439 | 0.310363452 | 0.022813567 | 0.18796691  |
| 0.16490369  | 0.042251021 | 0.059615591 | 0.131926662 |
| 0.100648545 | 0.204660441 | 0.046360256 | 0.139995903 |
| 0.0881018   | 0.134620547 | 0.089558666 | 0.210634771 |
| 0.1913615   | 0.130683827 | 0.246946302 | 0.197708774 |
| 0.241389169 | 0.214977249 | 0.285516326 | 0.075489854 |
| 0.030014552 | 0.167522328 | 0.018687738 | 0.030501293 |
| 0.177599842 | 0.064108377 | 0.192953269 | 0.24965573  |
| 0.1671455   | 0.066797763 | 0.15497294  | 0.153998091 |
| 0.259154887 | 0.279081042 | 0.103501902 | 0.010346746 |
| 0.007480134 | 0.012389175 | 0.267613614 | 0.160577913 |
| 0.184097933 | 0.023698861 | 0.060842385 | 0.16649395  |
| 0.105472687 | 0.120497743 | 0.164417992 | 0.34154462  |
| 0.179070444 | 0.157416816 | 0.029816031 | 0.341957861 |
| 0.045200233 | 0.140724143 | 0.18064135  | 0.178719303 |
| 0.12221506  | 0.147767985 | 0.150347376 | 0.254280787 |
| 0.005338848 | 0.227980768 | 0.15067903  | 0.058918327 |
| 0.069655604 | 0.078466936 | 0.068314048 | 0.27095341  |
| 0.127153875 | 0.043008742 | 0.039520524 | 0.042702628 |
| 0.092252831 | 0.233204341 | 0.094946321 | 0.227279724 |
| 0.242106749 | 0.303409265 | 0.07004299  | 0.167644896 |
| 0.053762637 | 0.143374155 | 0.080374508 | 0.02247768  |
| 0.137889134 | 0.110815899 | 0.146668657 | 0.010855109 |
| 0.119816957 | 0.25350901  | 0.033298471 | 0.060172309 |
| 0.02112751  | 0.100620454 | 0.231154241 | 0.198331601 |
| 0.076033596 | 0.170655799 | 0.209286619 | 0.272518675 |
| 0.207923848 | 0.222999909 | 0.156881331 | 0.061252724 |
| 0.132543342 | 0.036323329 | 0.304118397 | 0.173727601 |
| 0.132888688 | 0.231216876 | 0.03998853  | 0.19543607  |
| 0.205094683 | 0.218326281 | 0.164596078 | 0.207164454 |
| 0.041413275 | 0.16356561  | 0.182985686 | 0.057344466 |
| 0.257615051 | 0.222528456 | 0.214038857 | 0.038836362 |
| 0.117619588 | 0.073250651 | 0.200425594 | 0.058747127 |
| 0.043192037 | 0.172541786 | 0.118478829 | 0.315414656 |
| 0.233123453 | 0.176312904 | 0.213727119 | 0.062900849 |
| 0.197992345 | 0.192010051 | 0.11441132  | 0.189635208 |
| 0.203630126 | 0.164549474 | 0.189156645 | 0.179648602 |
| 0.050954039 | 0.162304098 | 0.252996678 | 0.166494123 |
| 0.179413017 | 0.266371389 | 0.1648942   | 0.136144385 |
| 0.037489327 | 0.131336065 | 0.067189885 | 0.151041592 |

|             |             |             |             |
|-------------|-------------|-------------|-------------|
| 0.197442396 | 0.074346625 | 0.017201184 | 0.270236207 |
| 0.029528645 | 0.233491991 | 0.07122926  | 0.104776458 |
| 0.183178399 | 0.1158443   | 0.240452069 | 0.153849548 |
| 0.082384213 | 0.150046329 | 0.038030418 | 0.133175188 |
| 0.042807038 | 0.160394512 | 0.064900626 | 0.129984839 |
| 0.026529924 | 0.087071768 | 0.216174341 | 0.148380683 |
| 0.042294706 | 0.045889335 | 0.154496338 | 0.121048675 |
| 0.13288747  | 0.248224532 | 0.129310454 | 0.076798813 |
| 0.080168681 | 0.160897744 | 0.126204228 | 0.061224012 |
| 0.05621737  | 0.137256087 | 0.06559908  | 0.133789382 |
| 0.253869483 | 0.169522862 | 0.166994245 | 0.093919616 |
| 0.187693561 | 0.171971955 | 0.105661704 | 0.148112286 |
| 0.120742015 | 0.271912874 | 0.14961571  | 0.168058255 |
| 0.102404145 | 0.086132766 | 0.115461494 | 0.26897249  |
| 0.032784835 |             |             |             |
| MY05A       | 0.37347214  | 0.515541046 | 0.352369885 |
| 0.344627416 | 0.392131511 | 0.291671428 | 0.178024668 |
| 0.166969787 | 0.065079765 | 0.003994527 | 0.021326814 |
| 0.402211452 | 0.191564191 | 0.23578473  | 0.23950937  |
| 0.368223059 | 0.153735768 | 0.332985154 | 0.224347447 |
| 0.361714455 | 0.078257969 | 0.36175326  | 0.085740053 |
| 0.295642916 | 0.106252964 | 0.067137486 | 0.237967281 |
| 0.400862795 | 0.076919793 | 0.260320074 | 0.326019774 |
| 0.133005268 | 0.397491168 | 0.515390643 | 0.390281519 |
| 0.518552041 | 0.341572207 | 0.027724344 | 0.223647493 |
| 0.395799963 | 0.362984222 | 0.352455762 | 0.290142344 |
| 0.038377407 | 0.481253536 | 0.209961642 | 0.378185833 |
| 0.187703525 | 0.032427675 | 0.185848482 | 0.434908385 |
| 0.467182655 | 0.354010198 | 0.189802318 | 0.134372712 |
| 0.18003036  | 0.204679597 | 0.25284953  | 0.267953082 |
| 0.205852294 | 0.125791818 | 0.480586363 | 0.065643843 |
| 0.129117193 | 0.235022184 | 0.193841154 | 0.232143397 |
| 0.334311318 | 0.313719221 | 0.022090662 | 0.373017121 |
| 0.002638667 | 0.342105303 | 0.374481517 | 0.257218119 |
| 0.049315774 | 0.02241506  | 0.214607586 | 0.286614926 |
| 0.431031531 | 0.465402134 | 0.467944642 | 0.478634972 |
| 0.193689231 | 0.305740749 | 0.377137885 | 0.167535589 |
| 0.40918453  | 0.150110043 | 0.105189342 | 0.378449915 |
| 0.477790936 | 0.520540048 | 0.203823359 | 0.266590784 |
| 0.355287598 | 0.468530187 | 0.338484106 | 0.366809812 |
| 0.260969619 | 0.070460103 | 0.426977642 | 0.506686806 |
| 0.372610441 | 0.314999955 | 0.158638036 | 0.353273241 |
| 0.069336088 | 0.304693366 | 0.313543475 | 0.20776455  |
| 0.443242872 | 0.014819759 | 0.227825975 | 0.308768379 |
| 0.230586771 | 0.37890904  | 0.515690753 | 0.171222693 |
| 0.403504649 | 0.025215927 | 0.118374314 | 0.047899258 |
| 0.304343357 | 0.169973981 | 0.477252895 | 0.42373578  |
| 0.225068751 | 0.354114579 | 0.239770893 | 0.003953553 |
| 0.035723129 | 0.22136603  | 0.41490828  | 0.362567611 |
| 0.375831864 | 0.380226527 | 0.195437636 | 0.327714918 |
| 0.375407436 | 0.46356118  | 0.03878753  | 0.092504654 |
| 0.353227978 | 0.224641968 | 0.232521568 | 0.396292125 |
| 0.281565665 | 0.108962859 | 0.132560325 | 0.501681287 |
| 0.410561451 | 0.085628596 | 0.313654228 | 0.373247464 |



|             |             |             |             |
|-------------|-------------|-------------|-------------|
| 0.270228812 | 0.347222112 | 0.114907667 | 0.268391143 |
| 0.048604852 | 0.482346732 | 0.040949527 | 0.300898    |
| 0.196535358 | 0.187875011 | 0.017387578 | 0.227456452 |
| 0.233756398 | 0.395136302 | 0.47486958  | 0.117275452 |
| 0.302653948 | 0.365204551 | 0.284049165 | 0.341904424 |
| 0.0074476   | 0.055995827 | 0.248208107 | 0.501059173 |
| 0.231310005 | 0.501226115 | 0.289804139 | 0.29517989  |
| 0.278137162 | 0.392845354 | 0.004407515 | 0.488649498 |
| 0.521677694 | 0.254950975 | 0.351099971 | 0.40062958  |
| 0.308684244 | 0.399832023 | 0.04906482  | 0.386229384 |
| 0.315395838 | 0.086928533 | 0.488707077 | 0.162656455 |
| 0.46519662  | 0.043171472 | 0.286634566 | 0.399583157 |
| 0.374792812 | 0.011688523 | 0.172893807 | 0.326355664 |
| 0.039604093 | 0.077321473 | 0.371610368 | 0.342927437 |
| 0.307546612 | 0.38681537  | 0.459248602 | 0.288930558 |
| 0.377109698 | 0.226155569 | 0.017403104 | 0.32172541  |
| 0.390860692 | 0.328038575 | 0.422864609 | 0.210202668 |
| 0.291684997 | 0.455700447 | 0.383661663 | 0.150641899 |
| 0.040947614 | 0.274184893 | 0.018897479 | 0.283196032 |
| 0.37258229  | 0.107101302 | 0.317112476 | 0.201782653 |
| 0.085962323 | 0.513836266 | 0.19583769  | 0.263728695 |
| 0.143288999 | 0.344433035 | 0.23872118  | 0.202169638 |
| 0.198546609 | 0.159430717 | 0.302195437 | 0.310116739 |
| 0.033181222 | 0.100910021 | 0.025199054 | 0.356713806 |
| 0.139107593 | 0.307551102 | 0.29864716  | 0.353673448 |
| 0.321764888 | 0.115637595 | 0.343459412 | 0.270897962 |
| 0.117739565 | 0.019618764 | 0.497544321 | 0.366849028 |
| 0.2758969   | 0.140489455 | 0.053663114 | 0.30785667  |
| 0.439668812 | 0.236298469 | 0.22189206  | 0.432154526 |
| 0.033948224 | 0.472706385 | 0.223706128 | 0.126495529 |
| 0.365211954 | 0.245253902 | 0.421557706 | 0.045319929 |
| 0.353614721 | 0.459049499 | 0.313096923 | 0.167882725 |
| 0.385395674 | 0.360516392 | 0.029623798 | 0.347755693 |
| 0.346057371 | 0.037509435 | 0.525136131 | 0.154463272 |
| 0.028473506 | 0.396968248 | 0.360064974 | 0.083146129 |
| 0.084908884 | 0.273006826 | 0.038161243 | 0.280182948 |
| 0.503396559 | 0.366301973 | 0.355885883 | 0.234755426 |
| 0.039465917 | 0.014206556 | 0.241450797 | 0.37474914  |
| 0.510714844 | 0.512813045 | 0.272960863 | 0.331708048 |
| 0.228502725 | 0.274413194 | 0.124402321 | 0.499287734 |
| 0.229736379 | 0.522944642 | 0.009830342 | 0.38300859  |
| 0.507941297 | 0.251441758 | 0.081624232 | 0.251908081 |
| 0.355978289 | 0.04341681  | 0.219101517 | 0.49015311  |
| 0.40221314  | 0.276150378 | 0.27333238  | 0.406358944 |
| 0.013850686 | 0.040761078 | 0.338260408 | 0.19604065  |
| 0.316139669 | 0.198420544 | 0.070323517 | 0.292238177 |
| 0.041102645 | 0.439560581 | 0.427879242 | 0.049675147 |
| 0.257895987 | 0.262108417 | 0.370779412 | 0.039455381 |
| 0.433206641 | 0.507613038 | 0.518418415 | 0.171627732 |
| 1           | 0.474244077 | 0.355656162 | 0.097704594 |
| 0.023807195 | 0.517404865 | 0.336169568 | 0.019981964 |
| 0.452732772 | 0.187221988 | 0.013156123 | 0.485991938 |
| 0.176575347 | 0.450676045 | 0.001958063 | 0.100299345 |
| 0.058740248 | 0.434301605 | 0.464240899 | 0.330115539 |

|             |             |             |             |
|-------------|-------------|-------------|-------------|
| 0.177802029 | 0.347693105 | 0.013510611 | 0.526766873 |
| 0.482007226 | 0.018754361 | 0.165615832 | 0.392261487 |
| 0.365763833 | 0.525026204 | 0.287335441 | 0.421860037 |
| 0.381224084 | 0.497747672 | 0.209982345 | 0.255284407 |
| 0.392979875 | 0.495859792 | 0.353662182 | 0.444557575 |
| 0.43253097  | 0.396083505 | 0.250734441 | 0.014061718 |
| 0.103004467 | 0.180178975 | 0.218255499 | 0.06350928  |
| 0.266886762 | 0.130921023 | 0.479114052 | 0.446715887 |
| 0.473564274 | 0.007635416 | 0.133041232 | 0.390386883 |
| 0.412314996 | 0.44998135  | 0.030396878 | 0.00602764  |
| 0.009704139 | 0.019130216 | 0.318496397 | 0.251920552 |
| 0.47448057  | 0.177447083 | 0.006201492 | 0.041942814 |
| 0.243178781 | 0.364819242 | 0.498737357 | 0.344406728 |
| 0.394838595 | 0.097068408 | 0.216157911 | 0.358911252 |
| 0.068860609 | 0.281867403 | 0.471390974 | 0.460249987 |
| 0.059822249 | 0.249286441 | 0.363814322 | 0.464120647 |
| 0.081726931 | 0.322624091 | 0.411866822 | 0.269929472 |
| 0.026042934 | 0.090614549 | 0.065433168 | 0.394035144 |
| 0.504220842 | 0.08050234  | 0.036629527 | 0.133629197 |
| 0.105899807 | 0.453179177 | 0.155460306 | 0.504428337 |
| 0.393382321 | 0.395179258 | 0.102265083 | 0.467318973 |
| 0.038556853 | 0.487701351 | 0.325932601 | 0.041767621 |
| 0.314637346 | 0.018390064 | 0.485569702 | 0.11120564  |
| 0.289809898 | 0.353250299 | 0.154161336 | 0.026475074 |
| 0.178616778 | 0.064611846 | 0.449573961 | 0.434089405 |
| 0.051809749 | 0.218326816 | 0.298333956 | 0.377947998 |
| 0.237380417 | 0.36736186  | 0.497965235 | 0.316442413 |
| 0.074785426 | 0.197590189 | 0.35828294  | 0.34818341  |
| 0.229003578 | 0.479594473 | 0.248645754 | 0.52351     |
| 0.347558879 | 0.451210372 | 0.469351537 | 0.287102962 |
| 0.26596566  | 0.336459947 | 0.296660718 | 0.016421674 |
| 0.323706721 | 0.424093993 | 0.330310193 | 0.1390016   |
| 0.240772849 | 0.358524661 | 0.056855554 | 0.196528708 |
| 0.315184183 | 0.243045164 | 0.14290986  | 0.399478563 |
| 0.356756964 | 0.347075709 | 0.053180814 | 0.058265833 |
| 0.538105051 | 0.422639396 | 0.112358346 | 0.348822194 |
| 0.190235959 | 0.300865953 | 0.401622578 | 0.402409681 |
| 0.324207512 | 0.421121816 | 0.374352327 | 0.317456545 |
| 0.410838921 | 0.234274334 | 0.518027269 | 0.080910686 |
| 0.082515409 | 0.391038818 | 0.089709327 | 0.109978176 |
| 0.144310903 | 0.03157431  | 0.275671263 | 0.395026128 |
| 0.355198498 | 0.35014476  | 0.305402159 | 0.082432072 |
| 0.335464724 | 0.345604124 | 0.339650052 | 0.167408993 |
| 0.073574831 | 0.487236945 | 0.011109493 | 0.071729989 |
| 0.388890521 | 0.373641145 | 0.341465786 | 0.23972246  |
| 0.281971608 | 0.179838502 | 0.288312868 | 0.248789026 |
| 0.256240163 | 0.343502227 | 0.375678367 | 0.031030189 |
| 0.021095854 | 0.482449203 | 0.325170713 | 0.033104897 |
| 0.107839283 | 0.32784586  | 0.328098351 | 0.193432394 |
| 0.032302332 | 0.480549393 | 0.254534237 | 0.384179662 |
| 0.296360814 | 0.079501078 | 0.348465938 | 0.093031406 |
| 0.067334777 | 0.449263854 | 0.363963947 | 0.515910403 |
| 0.357141961 | 0.366534581 | 0.442322878 | 0.406023168 |
| 0.140406915 | 0.350640613 | 0.024834233 | 0.412913302 |

|             |             |             |             |
|-------------|-------------|-------------|-------------|
| 0.332082256 |             |             |             |
| N4BP2       | 0.438310513 | 0.51659032  | 0.432578824 |
| 0.444201425 | 0.457205826 | 0.400684942 | 0.214401524 |
| 0.167867234 | 0.099657318 | 0.005943977 | 0.034152998 |
| 0.473270844 | 0.245189892 | 0.28405086  | 0.369914346 |
| 0.436030098 | 0.154223015 | 0.334987645 | 0.243614657 |
| 0.41588048  | 0.089178464 | 0.42890915  | 0.091613385 |
| 0.321280953 | 0.129392186 | 0.078539134 | 0.322338722 |
| 0.450311255 | 0.088669685 | 0.352224739 | 0.388295991 |
| 0.099879289 | 0.449751112 | 0.528589288 | 0.486838434 |
| 0.529258289 | 0.423979183 | 0.008410789 | 0.324783696 |
| 0.429063616 | 0.487470448 | 0.415071435 | 0.347917231 |
| 0.044113368 | 0.490306373 | 0.259835009 | 0.428574467 |
| 0.230216758 | 0.038066002 | 0.236412553 | 0.435759158 |
| 0.498335181 | 0.48982315  | 0.2139613   | 0.166635395 |
| 0.264662687 | 0.221490179 | 0.359398784 | 0.32688332  |
| 0.234210946 | 0.15131018  | 0.500104483 | 0.098524014 |
| 0.1538296   | 0.229040271 | 0.159445615 | 0.252125776 |
| 0.397081491 | 0.398106502 | 0.013633064 | 0.44531018  |
| 0.003078556 | 0.388575099 | 0.393573793 | 0.389761404 |
| 0.044080205 | 0.025703481 | 0.185798138 | 0.355880357 |
| 0.464333992 | 0.444397686 | 0.499957889 | 0.500974613 |
| 0.205902385 | 0.297073536 | 0.439921965 | 0.18649098  |
| 0.455208079 | 0.192739753 | 0.110878186 | 0.446961173 |
| 0.50175552  | 0.52877984  | 0.222858428 | 0.281464209 |
| 0.47086726  | 0.45729826  | 0.468475608 | 0.472801806 |
| 0.423918165 | 0.055380346 | 0.448950279 | 0.497028619 |
| 0.411476567 | 0.374027646 | 0.170439138 | 0.419013395 |
| 0.058070159 | 0.378137969 | 0.372056343 | 0.160019715 |
| 0.467737057 | 0.018905663 | 0.235159193 | 0.376354449 |
| 0.2010864   | 0.465659369 | 0.526208728 | 0.192214326 |
| 0.427975798 | 0.021186476 | 0.187387408 | 0.031082653 |
| 0.347066013 | 0.182160012 | 0.503545512 | 0.481503138 |
| 0.219901054 | 0.418627066 | 0.260537523 | 0.001697997 |
| 0.02923377  | 0.18063056  | 0.470453124 | 0.355509442 |
| 0.445276124 | 0.414443342 | 0.277228723 | 0.410726511 |
| 0.499664097 | 0.498658827 | 0.069275973 | 0.090535631 |
| 0.452745039 | 0.179558207 | 0.247808373 | 0.482624142 |
| 0.354139204 | 0.104387227 | 0.128580143 | 0.494684171 |
| 0.407664892 | 0.085935816 | 0.321316375 | 0.436105133 |
| 0.378347838 | 0.401411675 | 0.102439376 | 0.294863266 |
| 0.048615348 | 0.499527253 | 0.030785167 | 0.315526844 |
| 0.348469625 | 0.172026823 | 0.007521255 | 0.248806412 |
| 0.318050261 | 0.485866009 | 0.487812332 | 0.102282121 |
| 0.337771671 | 0.444842573 | 0.312962071 | 0.482966845 |
| 0.015382176 | 0.042621573 | 0.268956169 | 0.493049472 |
| 0.2962848   | 0.486570716 | 0.301901271 | 0.321683185 |
| 0.305406391 | 0.46967504  | 0.003205746 | 0.506428329 |
| 0.534007703 | 0.299697969 | 0.447501176 | 0.437435708 |
| 0.445665703 | 0.478206444 | 0.041709277 | 0.435124689 |
| 0.369769896 | 0.074149987 | 0.493669042 | 0.179932965 |
| 0.454404342 | 0.046301895 | 0.317812804 | 0.491316711 |
| 0.48950126  | 0.008293706 | 0.227928492 | 0.398358708 |
| 0.028443705 | 0.09209194  | 0.439084539 | 0.432182029 |

|             |             |             |             |
|-------------|-------------|-------------|-------------|
| 0.425584194 | 0.471362609 | 0.482694621 | 0.436627102 |
| 0.46656924  | 0.220969592 | 0.01111301  | 0.346305733 |
| 0.465293335 | 0.427992161 | 0.435158056 | 0.241172669 |
| 0.347511092 | 0.466613918 | 0.465259463 | 0.246254284 |
| 0.044804707 | 0.308749726 | 0.021483549 | 0.375845765 |
| 0.430540234 | 0.132992417 | 0.448576518 | 0.135559439 |
| 0.078066975 | 0.514925177 | 0.21084893  | 0.314614026 |
| 0.160790018 | 0.4476542   | 0.243832215 | 0.283362669 |
| 0.278418688 | 0.175258644 | 0.40918252  | 0.424885009 |
| 0.035354414 | 0.102961067 | 0.01289797  | 0.442969302 |
| 0.182954542 | 0.407032668 | 0.400093444 | 0.432831815 |
| 0.335161451 | 0.127578501 | 0.434725686 | 0.321318619 |
| 0.128400183 | 0.015174204 | 0.497840137 | 0.417880518 |
| 0.350866376 | 0.156373719 | 0.039886324 | 0.401762274 |
| 0.486541815 | 0.357748063 | 0.263709296 | 0.46724394  |
| 0.024271173 | 0.488861629 | 0.293190406 | 0.138915976 |
| 0.44349251  | 0.282283198 | 0.467998433 | 0.069614367 |
| 0.391772449 | 0.459996195 | 0.315763165 | 0.216439242 |
| 0.415425906 | 0.431049372 | 0.030232471 | 0.432856292 |
| 0.429143154 | 0.033246416 | 0.521065705 | 0.139882196 |
| 0.020867071 | 0.478763399 | 0.502566143 | 0.079612539 |
| 0.084231308 | 0.384131094 | 0.041300556 | 0.316063556 |
| 0.508569243 | 0.442623586 | 0.481108902 | 0.239984266 |
| 0.044010379 | 0.014211585 | 0.224137894 | 0.429151016 |
| 0.520635828 | 0.507220508 | 0.263835193 | 0.436035962 |
| 0.24598498  | 0.397984254 | 0.128748433 | 0.498311373 |
| 0.182693623 | 0.51535804  | 0.005931443 | 0.492420975 |
| 0.529722895 | 0.287354998 | 0.097146532 | 0.32057799  |
| 0.421408626 | 0.046798504 | 0.184242416 | 0.503581295 |
| 0.462586851 | 0.373081748 | 0.413437731 | 0.442310501 |
| 0.015364556 | 0.038481286 | 0.431159301 | 0.220677306 |
| 0.432858872 | 0.230262639 | 0.068747102 | 0.317380725 |
| 0.049582025 | 0.453178993 | 0.472685177 | 0.072523751 |
| 0.385325729 | 0.298801234 | 0.404530001 | 0.036860306 |
| 0.495202951 | 0.500096377 | 0.530105162 | 0.147231724 |
| 0.474244077 | 1           | 0.482122597 | 0.079342836 |
| 0.018281538 | 0.529397974 | 0.411008969 | 0.026871687 |
| 0.48140154  | 0.236299155 | 0.017398762 | 0.483420441 |
| 0.183237985 | 0.454624733 | 0.004180389 | 0.083276651 |
| 0.040701457 | 0.482542931 | 0.493712235 | 0.383631446 |
| 0.278904232 | 0.363776777 | 0.004738578 | 0.510022226 |
| 0.494651781 | 0.01634591  | 0.159369171 | 0.491819407 |
| 0.496236995 | 0.519052684 | 0.390784581 | 0.504819222 |
| 0.494242371 | 0.519022201 | 0.257551412 | 0.29435739  |
| 0.478053575 | 0.505531247 | 0.438788917 | 0.443863777 |
| 0.482377094 | 0.454952329 | 0.295600231 | 0.016421273 |
| 0.169427742 | 0.203124669 | 0.390301609 | 0.10931079  |
| 0.328939604 | 0.166996683 | 0.468313591 | 0.485014404 |
| 0.501798053 | 0.004597391 | 0.143941517 | 0.475326607 |
| 0.446738806 | 0.467631601 | 0.016968189 | 0.006414443 |
| 0.007812621 | 0.028813876 | 0.36033951  | 0.258121761 |
| 0.487974621 | 0.283714874 | 0.00430359  | 0.037652956 |
| 0.294650535 | 0.457827432 | 0.508637769 | 0.392896556 |
| 0.476076046 | 0.080124499 | 0.345104185 | 0.406567146 |

|             |             |             |             |
|-------------|-------------|-------------|-------------|
| 0.084542606 | 0.341894197 | 0.503518235 | 0.47203585  |
| 0.037971079 | 0.264408127 | 0.368338144 | 0.482573629 |
| 0.10093091  | 0.336771418 | 0.472594016 | 0.362917065 |
| 0.011006786 | 0.090393145 | 0.075658487 | 0.457450751 |
| 0.521321834 | 0.0995125   | 0.04301002  | 0.143492694 |
| 0.135595797 | 0.479732498 | 0.185392779 | 0.495892388 |
| 0.464217582 | 0.457684051 | 0.080755837 | 0.486839278 |
| 0.04672586  | 0.499323301 | 0.400365881 | 0.066732023 |
| 0.282975173 | 0.010783827 | 0.467035861 | 0.226200744 |
| 0.325798565 | 0.401608424 | 0.243106249 | 0.017029345 |
| 0.221434155 | 0.056499554 | 0.49433329  | 0.494408425 |
| 0.032757584 | 0.229097399 | 0.310887879 | 0.411022373 |
| 0.28709175  | 0.473102859 | 0.514170078 | 0.463886364 |
| 0.085730546 | 0.151943761 | 0.41538817  | 0.414346644 |
| 0.224934289 | 0.495543515 | 0.366094982 | 0.513301404 |
| 0.426671255 | 0.454970361 | 0.483382366 | 0.374590223 |
| 0.273141415 | 0.41438246  | 0.406664684 | 0.022443739 |
| 0.36366553  | 0.491951252 | 0.348186132 | 0.198634408 |
| 0.299625142 | 0.446925579 | 0.038354373 | 0.169368393 |
| 0.398491023 | 0.320513888 | 0.15348127  | 0.451926235 |
| 0.390043976 | 0.41954483  | 0.029977177 | 0.072811255 |
| 0.534472671 | 0.433952835 | 0.144678844 | 0.463792651 |
| 0.172002822 | 0.386108346 | 0.484151828 | 0.485446081 |
| 0.396904404 | 0.490334819 | 0.443525648 | 0.424910953 |
| 0.425514298 | 0.266244502 | 0.533725365 | 0.072638986 |
| 0.102587565 | 0.442835694 | 0.116617857 | 0.096422531 |
| 0.151307068 | 0.028460558 | 0.372906728 | 0.444088289 |
| 0.440239024 | 0.414680192 | 0.310743757 | 0.084784352 |
| 0.344833548 | 0.366545658 | 0.375917294 | 0.210705927 |
| 0.090405996 | 0.512024194 | 0.009843656 | 0.056329689 |
| 0.439822184 | 0.487665261 | 0.462623489 | 0.258274943 |
| 0.364043378 | 0.144045702 | 0.323114686 | 0.297488684 |
| 0.381415879 | 0.388116796 | 0.487422916 | 0.031408845 |
| 0.017043139 | 0.490859456 | 0.380884597 | 0.019086747 |
| 0.087083765 | 0.394314311 | 0.276757007 | 0.279534642 |
| 0.022855102 | 0.486635211 | 0.375303099 | 0.464850634 |
| 0.349937965 | 0.061690625 | 0.362981281 | 0.082099365 |
| 0.050981972 | 0.440772507 | 0.44019837  | 0.523461647 |
| 0.366007984 | 0.451152935 | 0.448810627 | 0.473377076 |
| 0.113330372 | 0.412460062 | 0.027023692 | 0.457498038 |

0.480832338

|             |             |             |             |
|-------------|-------------|-------------|-------------|
| N6AMT1      | 0.301396513 | 0.473151704 | 0.239538646 |
| 0.288064391 | 0.251528507 | 0.162576898 | 0.089150854 |
| 0.054213351 | 0.053386666 | 0.002402405 | 0.033341294 |
| 0.27517124  | 0.149278897 | 0.116281304 | 0.157378252 |
| 0.306251311 | 0.117683416 | 0.152431844 | 0.117693685 |
| 0.236488954 | 0.02872013  | 0.282599137 | 0.042348227 |
| 0.235041679 | 0.110900934 | 0.052401937 | 0.227781389 |
| 0.331399873 | 0.057690868 | 0.132142066 | 0.205094985 |
| 0.075853773 | 0.321998863 | 0.477570963 | 0.329513793 |
| 0.491580307 | 0.277734438 | 0.006025795 | 0.132124938 |
| 0.312811829 | 0.350963838 | 0.240175113 | 0.168998013 |
| 0.021829814 | 0.413836796 | 0.118950828 | 0.25459736  |
| 0.084747697 | 0.030637027 | 0.073948278 | 0.358556513 |

|             |             |             |             |
|-------------|-------------|-------------|-------------|
| 0.443766938 | 0.250149698 | 0.07437666  | 0.070902919 |
| 0.167057577 | 0.074835325 | 0.284645022 | 0.142914435 |
| 0.110979125 | 0.041685953 | 0.459546996 | 0.041108756 |
| 0.0722351   | 0.087092355 | 0.126769688 | 0.098729807 |
| 0.27814013  | 0.231219285 | 0.005436607 | 0.268360113 |
| 0.000549396 | 0.208081507 | 0.234521168 | 0.268554806 |
| 0.032707841 | 0.017251143 | 0.137667565 | 0.158018154 |
| 0.365678791 | 0.405715947 | 0.459268858 | 0.480891231 |
| 0.138340252 | 0.178838188 | 0.285021873 | 0.103437317 |
| 0.349321508 | 0.083952545 | 0.051143733 | 0.332731395 |
| 0.471437095 | 0.497445299 | 0.152497809 | 0.188805479 |
| 0.336118513 | 0.399674963 | 0.222919984 | 0.250724803 |
| 0.244526119 | 0.056791563 | 0.387127236 | 0.487161924 |
| 0.28857207  | 0.285963058 | 0.119867296 | 0.265936264 |
| 0.038340911 | 0.155073338 | 0.191968806 | 0.101548244 |
| 0.379185096 | 0.008696729 | 0.174128195 | 0.167907018 |
| 0.105786439 | 0.324935171 | 0.508717022 | 0.089674687 |
| 0.245838848 | 0.014358276 | 0.16182619  | 0.0250743   |
| 0.164337409 | 0.197173414 | 0.436452105 | 0.382642179 |
| 0.084391125 | 0.251458206 | 0.112750637 | 0.002413428 |
| 0.02752166  | 0.121889894 | 0.368183574 | 0.168798729 |
| 0.290448793 | 0.351631913 | 0.161641639 | 0.253361505 |
| 0.328439771 | 0.455247139 | 0.018611661 | 0.039493085 |
| 0.212291916 | 0.125907682 | 0.135953349 | 0.247439713 |
| 0.220532847 | 0.039336497 | 0.06781119  | 0.476000446 |
| 0.324534116 | 0.045001578 | 0.129119895 | 0.293122965 |
| 0.182260565 | 0.264699202 | 0.052516712 | 0.1458451   |
| 0.020795516 | 0.472608582 | 0.033606559 | 0.124244667 |
| 0.207255358 | 0.151814976 | 0.00385323  | 0.087983114 |
| 0.130753436 | 0.390766232 | 0.433616643 | 0.056961985 |
| 0.165639769 | 0.267977248 | 0.11653139  | 0.304248687 |
| 0.01098688  | 0.023917609 | 0.093259638 | 0.470224927 |
| 0.11528927  | 0.47272675  | 0.150340611 | 0.195835995 |
| 0.188059733 | 0.355334997 | 0.002753321 | 0.441556847 |
| 0.507692901 | 0.105345748 | 0.234750954 | 0.244662251 |
| 0.267256782 | 0.364593381 | 0.018832459 | 0.283114333 |
| 0.199329649 | 0.04074127  | 0.462374787 | 0.119909232 |
| 0.40983135  | 0.033128306 | 0.128952257 | 0.433545259 |
| 0.37317819  | 0.005735715 | 0.072087508 | 0.210197415 |
| 0.03210909  | 0.027366435 | 0.278507609 | 0.238601363 |
| 0.210177671 | 0.358835743 | 0.421846977 | 0.267631435 |
| 0.250326829 | 0.092747811 | 0.008816669 | 0.227598832 |
| 0.35360662  | 0.241998031 | 0.359648034 | 0.101527509 |
| 0.134955287 | 0.409653787 | 0.363984461 | 0.116363426 |
| 0.023173772 | 0.124426192 | 0.008278222 | 0.209894233 |
| 0.341557763 | 0.061573221 | 0.240325396 | 0.091779771 |
| 0.065183689 | 0.492676711 | 0.200886811 | 0.262592139 |
| 0.17984572  | 0.210903855 | 0.109663572 | 0.132582791 |
| 0.180012846 | 0.106778887 | 0.250280652 | 0.224676038 |
| 0.011723735 | 0.065646126 | 0.015852954 | 0.25430621  |
| 0.113243692 | 0.213060682 | 0.194724497 | 0.258601708 |
| 0.158503877 | 0.072330506 | 0.24154298  | 0.2229573   |
| 0.097649392 | 0.012934788 | 0.458177498 | 0.24663286  |
| 0.190457205 | 0.073406442 | 0.03016684  | 0.206303442 |

|             |             |             |             |
|-------------|-------------|-------------|-------------|
| 0.403661879 | 0.130542645 | 0.087631988 | 0.38224773  |
| 0.013356916 | 0.445517702 | 0.158399372 | 0.097493994 |
| 0.282034079 | 0.146115546 | 0.372986621 | 0.028207435 |
| 0.171333931 | 0.396790364 | 0.178554208 | 0.138621007 |
| 0.315137882 | 0.225956301 | 0.013728019 | 0.285008708 |
| 0.275271509 | 0.023797922 | 0.501134578 | 0.115591637 |
| 0.01837093  | 0.343644777 | 0.369159243 | 0.056903861 |
| 0.062871852 | 0.183780654 | 0.011252988 | 0.192565496 |
| 0.477249465 | 0.310376745 | 0.341949546 | 0.192168363 |
| 0.024629694 | 0.012181618 | 0.177192521 | 0.24360199  |
| 0.460104739 | 0.506683858 | 0.149132674 | 0.269535625 |
| 0.124115628 | 0.243912266 | 0.037123045 | 0.485507882 |
| 0.117409305 | 0.473402452 | 0.004984913 | 0.405784125 |
| 0.486376299 | 0.101429834 | 0.078464269 | 0.127830525 |
| 0.28412208  | 0.024067986 | 0.084606937 | 0.451694595 |
| 0.36133351  | 0.203378757 | 0.221059162 | 0.267602241 |
| 0.005103298 | 0.014574399 | 0.242437406 | 0.206503535 |
| 0.216470819 | 0.129979775 | 0.106724336 | 0.126565495 |
| 0.028227864 | 0.388218935 | 0.377451339 | 0.048862447 |
| 0.154750974 | 0.112450583 | 0.24731137  | 0.021712101 |
| 0.467485144 | 0.486261581 | 0.476646051 | 0.062966396 |
| 0.355656162 | 0.482122597 | 1           | 0.059772693 |
| 0.019154891 | 0.499457819 | 0.221613613 | 0.01347894  |
| 0.405522844 | 0.07164803  | 0.011607483 | 0.4263606   |
| 0.086367393 | 0.384179068 | 0.000826704 | 0.065035287 |
| 0.04293144  | 0.415664099 | 0.432823998 | 0.194241943 |
| 0.091713542 | 0.17419324  | 0.007101929 | 0.504324807 |
| 0.442186949 | 0.018803911 | 0.142773946 | 0.382445473 |
| 0.397584913 | 0.464325424 | 0.278453798 | 0.449184205 |
| 0.301972465 | 0.483458436 | 0.113520185 | 0.175660397 |
| 0.355740767 | 0.504589486 | 0.271726254 | 0.378645231 |
| 0.38470885  | 0.311730759 | 0.14520484  | 0.008391362 |
| 0.121816609 | 0.065968632 | 0.177762295 | 0.071546902 |
| 0.127332033 | 0.117592183 | 0.426816292 | 0.412276137 |
| 0.473575862 | 0.004795291 | 0.050050307 | 0.352903298 |
| 0.334462687 | 0.386414154 | 0.012992873 | 0.004072219 |
| 0.005361178 | 0.03493344  | 0.153074424 | 0.16911211  |
| 0.454845183 | 0.100794799 | 0.003296919 | 0.011376815 |
| 0.131910094 | 0.300959235 | 0.467503663 | 0.235360755 |
| 0.376755471 | 0.052990619 | 0.150854828 | 0.247178031 |
| 0.074526359 | 0.177633627 | 0.468036598 | 0.402257625 |
| 0.032212207 | 0.171567824 | 0.167466205 | 0.418322752 |
| 0.142512377 | 0.203833615 | 0.291992244 | 0.183846586 |
| 0.010568277 | 0.072963563 | 0.059157701 | 0.346947296 |
| 0.487061586 | 0.07095685  | 0.035696077 | 0.04716021  |
| 0.065080334 | 0.408459983 | 0.098748636 | 0.477397934 |
| 0.335903641 | 0.347900615 | 0.08090653  | 0.426359157 |
| 0.034926351 | 0.449979734 | 0.280586233 | 0.021415117 |
| 0.161362698 | 0.008274236 | 0.454074236 | 0.160777146 |
| 0.127089647 | 0.213136861 | 0.161620593 | 0.020847221 |
| 0.195711841 | 0.044617958 | 0.431863313 | 0.435742645 |
| 0.035552466 | 0.100436214 | 0.180456648 | 0.225262634 |
| 0.101551638 | 0.3235219   | 0.451770498 | 0.208577043 |
| 0.035597421 | 0.149387505 | 0.239428147 | 0.222512567 |

|             |             |             |             |
|-------------|-------------|-------------|-------------|
| 0.085260929 | 0.461083905 | 0.216352047 | 0.496446036 |
| 0.25757256  | 0.389421362 | 0.445199284 | 0.170367897 |
| 0.226839401 | 0.172506619 | 0.206000885 | 0.008336856 |
| 0.174237354 | 0.400650919 | 0.149376889 | 0.145802553 |
| 0.185742788 | 0.286795333 | 0.019475695 | 0.067773274 |
| 0.287095479 | 0.11251046  | 0.082018781 | 0.347599573 |
| 0.186374376 | 0.238337644 | 0.01209264  | 0.055682935 |
| 0.494488386 | 0.35904714  | 0.049491426 | 0.262420256 |
| 0.107132719 | 0.214313249 | 0.380624215 | 0.396472603 |
| 0.211417699 | 0.397174317 | 0.294250486 | 0.229244082 |
| 0.339269869 | 0.125178774 | 0.483927668 | 0.017822987 |
| 0.081488922 | 0.252276438 | 0.066584976 | 0.075040475 |
| 0.083540573 | 0.024614131 | 0.276850896 | 0.304046615 |
| 0.28236729  | 0.22743528  | 0.128177825 | 0.049990614 |
| 0.218462327 | 0.171565161 | 0.205612421 | 0.081101726 |
| 0.050983026 | 0.457659751 | 0.00804517  | 0.042259765 |
| 0.284041221 | 0.365910327 | 0.298666367 | 0.156736752 |
| 0.273227159 | 0.123861853 | 0.178288765 | 0.103123414 |
| 0.1634753   | 0.206293933 | 0.366569572 | 0.011880269 |
| 0.00687985  | 0.447320307 | 0.156002559 | 0.019790758 |
| 0.074334853 | 0.194836774 | 0.141410143 | 0.149280424 |
| 0.027467623 | 0.488341533 | 0.148578909 | 0.257989187 |
| 0.146396141 | 0.037329147 | 0.256414885 | 0.037166611 |
| 0.02523682  | 0.374126169 | 0.263664014 | 0.498005655 |
| 0.225773632 | 0.318156118 | 0.370386282 | 0.359412214 |
| 0.059242923 | 0.223309776 | 0.011873143 | 0.341228699 |
| 0.25704125  |             |             |             |

| NAIP2       | 0.095161901 | 0.086836152 | 0.085456713 |
|-------------|-------------|-------------|-------------|
| 0.142794172 | 0.122437228 | 0.045339496 | 0.113562436 |
| 0.04858621  | 0.094522674 | 0.025785687 | 0.067669853 |
| 0.10428536  | 0.057883642 | 0.044724763 | 0.023016667 |
| 0.212914163 | 0.186826919 | 0.072262428 | 0.212438047 |
| 0.156141047 | 0.055516695 | 0.22026392  | 0.154013943 |
| 0.108976302 | 0.157403277 | 0.172993827 | 0.095928738 |
| 0.155109678 | 0.193923966 | 0.027259154 | 0.100576531 |
| 0.301594779 | 0.105606437 | 0.064952895 | 0.132167314 |
| 0.060314558 | 0.067628099 | 0.091917914 | 0.025012781 |
| 0.089256914 | 0.118318651 | 0.14689769  | 0.180504807 |
| 0.135034685 | 0.052114549 | 0.152498814 | 0.167680152 |
| 0.030841161 | 0.15283662  | 0.01936409  | 0.052672385 |
| 0.048085589 | 0.060385057 | 0.054079879 | 0.089363911 |
| 0.026670087 | 0.020036756 | 0.034252224 | 0.046822574 |
| 0.155706918 | 0.017392062 | 0.058051565 | 0.064412448 |
| 0.033778181 | 0.079524697 | 0.246325904 | 0.090213076 |
| 0.061655232 | 0.064906902 | 0.168588417 | 0.071848526 |
| 0.007441684 | 0.175246999 | 0.210375702 | 0.036092306 |
| 0.284454314 | 0.094241874 | 0.235477917 | 0.12617843  |
| 0.145661223 | 0.07382385  | 0.145071836 | 0.122466001 |
| 0.134513404 | 0.235741813 | 0.102161223 | 0.151174141 |
| 0.090278447 | 0.094490677 | 0.100937022 | 0.225003339 |
| 0.136317675 | 0.074375058 | 0.156169931 | 0.274465566 |
| 0.071012961 | 0.081523933 | 0.052942833 | 0.077189528 |
| 0.028919483 | 0.273958451 | 0.056002786 | 0.109587202 |
| 0.063463892 | 0.095529578 | 0.263765386 | 0.10124772  |



|             |             |                      |             |
|-------------|-------------|----------------------|-------------|
| 0.269112857 | 0.02803017  | 0.203904016          | 0.120500781 |
| 0.146777877 | 0.096333766 | 0.26275293           | 0.095711775 |
| 0.173375883 | 0.09829531  | 0.076170233          | 0.178339952 |
| 0.128291282 | 0.148713976 | 0.053163749          | 0.315579384 |
| 0.05148447  | 0.082187326 | 0.043301009          | 0.115034232 |
| 0.047562767 | 0.057822382 | 0.110995993          | 0.152747005 |
| 0.257894854 | 0.20172849  | 0.082453349          | 0.106023391 |
| 0.132279728 | 0.056838276 | 0.08860239           | 0.053854361 |
| 0.075392204 | 0.145177233 | 0.001909473          | 0.158807399 |
| 0.083494826 | 0.212964759 | 0.295123068          | 0.080680323 |
| 0.157644645 | 0.120450547 | 0.192388737          | 0.118609026 |
| 0.059293727 | 0.2080407   | 0.04158638           | 0.217504471 |
| 0.030720767 | 0.181171559 | 0.203555999          | 0.081181703 |
| 0.115869589 | 0.057898952 | 0.272296385          | 0.06654846  |
| 0.022701021 | 0.146429876 | 0.180758861          | 0.061682291 |
| 0.037673783 | 0.064777864 | 0.043665241          | 0.261149613 |
| 0.102946697 | 0.182507294 | 0.042408274          | 0.066124729 |
| 0.042439187 | 0.245205232 | 0.02328552           | 0.10135321  |
| 0.028956112 | 0.121571594 | 0.117715145          | 0.127220057 |
| 0.2660064   | 0.155801415 | 0.023695449          | 0.055523253 |
| 0.075039966 | 0.019468777 | 0.109510948          | 0.151325373 |
| 0.049358959 | 0.125939519 | 0.007233606          | 0.205117737 |
| 0.048214467 | 0.245846815 | 0.148906691          | 0.247695888 |
| 0.066737816 | 0.194164358 | 0.04254616           | 0.097146538 |
| 0.064915983 | 0.056454558 | 0.030251979          | 0.124886296 |
| 0.282048656 | 0.03950362  | 0.118336355          | 0.143486143 |
| 0.102668897 | 0.15589958  | 0.171896152          | 0.043024965 |
| 0.102948118 | 0.12058446  | 0.234502642          | 0.219486862 |
| 0.118178861 | 0.023032894 | 0.058795 0.083624412 |             |
| 0.031675727 | 0.076315845 | 0.0642655            | 0.013235857 |
| 0.152192502 | 0.078566322 | 0.041290556          | 0.130034083 |
| 0.060991888 | 0.074255113 | 0.048231783          | 0.236966923 |
| 0.255135966 | 0.101280717 | 0.123064079          | 0.070132497 |
| 0.085495479 | 0.060358046 | 0.174616387          | 0.03094878  |
| 0.043126336 | 0.170741606 | 0.055459115          | 0.052999554 |
| 0.072316184 | 0.188110816 | 0.245373714          | 0.021395546 |
| 0.040305569 | 0.024460458 | 0.019525196          | 0.058529841 |
| 0.044492081 | 0.0891394   | 0.104795895          | 0.092545868 |
| 0.212860104 | 0.23733116  | 0.086858715          | 0.199278702 |
| 0.039065511 | 0.137079387 | 0.297885741          | 0.013741465 |
| 0.108493576 | 0.019372343 | 0.014642744          | 0.081044322 |
| 0.186238559 | 0.141089873 | 0.064924685          | 0.241289094 |
| 0.060902049 | 0.179344637 | 0.154883696          | 0.019185805 |
| 0.071781658 | 0.067563502 | 0.235376995          | 0.150728297 |
| 0.046280139 | 0.125946403 | 0.124740154          | 0.063490274 |
| 0.056881404 | 0.222907556 | 0.090835125          | 0.228571404 |
| 0.272645554 | 0.147899493 | 0.076533635          | 0.318208402 |
| 0.250538928 | 0.064323865 | 0.052755629          | 0.28936457  |
| 0.097122017 | 0.213729201 | 0.068072199          | 0.147956034 |
| 0.143028837 | 0.052159215 | 0.21750454           | 0.096714228 |
| 0.056946681 | 0.092729283 | 0.286669681          | 0.092480837 |
| 0.254277904 | 0.046023541 | 0.020588661          | 0.101380784 |
| 0.136969027 | 0.075500792 | 0.200363453          | 0.109671522 |
| 0.055342992 | 0.02934931  | 0.178554607          | 0.070976274 |

|             |             |             |             |
|-------------|-------------|-------------|-------------|
| 0.054025371 | 0.165637818 | 0.150919461 | 0.066092838 |
| 0.087041002 | 0.074509196 | 0.04308191  | 0.147398655 |
| 0.071353729 | 0.10791392  | 0.132269787 | 0.099806932 |
| 0.038733024 | 0.144661966 | 0.060781171 | 0.038254546 |
| 0.128284839 | 0.06323916  | 0.166227821 | 0.13831812  |
| 0.027742879 | 0.032964629 | 0.239529554 | 0.209547715 |
| 0.092375853 | 0.079946016 | 0.065995324 | 0.146146562 |
| 0.097704594 | 0.079342836 | 0.059772693 | 1           |
| 0.255494876 | 0.067969684 | 0.079732837 | 0.062380529 |
| 0.149909234 | 0.018244771 | 0.053210491 | 0.083308595 |
| 0.209439685 | 0.041226002 | 0.009688589 | 0.057552836 |
| 0.294665147 | 0.168923195 | 0.054498095 | 0.108325817 |
| 0.008375438 | 0.183900683 | 0.086910109 | 0.103294    |
| 0.068098922 | 0.209679639 | 0.196089952 | 0.072075945 |
| 0.076695767 | 0.083667595 | 0.073914485 | 0.094132606 |
| 0.073960892 | 0.058820529 | 0.056950646 | 0.259470646 |
| 0.087852637 | 0.070126391 | 0.104698847 | 0.073136731 |
| 0.129556635 | 0.189995816 | 0.206345623 | 0.102559001 |
| 0.078326549 | 0.039090526 | 0.011173151 | 0.059494504 |
| 0.0424618   | 0.156768181 | 0.090136381 | 0.155229514 |
| 0.10175368  | 0.191694971 | 0.064770008 | 0.072084229 |
| 0.10026701  | 0.134557909 | 0.223252473 | 0.028255715 |
| 0.020499994 | 0.092777768 | 0.104540715 | 0.248220211 |
| 0.094996153 | 0.007198237 | 0.1446801   | 0.075000273 |
| 0.08423751  | 0.142253727 | 0.071920783 | 0.229966503 |
| 0.121619196 | 0.271546481 | 0.017602329 | 0.204785261 |
| 0.163575699 | 0.037219314 | 0.106342462 | 0.063596904 |
| 0.321907597 | 0.210050114 | 0.071247957 | 0.130181812 |
| 0.03622867  | 0.26456006  | 0.106322704 | 0.047392054 |
| 0.190279248 | 0.245935922 | 0.195708255 | 0.187679739 |
| 0.054742019 | 0.09643672  | 0.124154988 | 0.009396486 |
| 0.086584964 | 0.130696709 | 0.123130647 | 0.129880805 |
| 0.1091735   | 0.191003928 | 0.258442404 | 0.065451902 |
| 0.116771429 | 0.057021505 | 0.128558114 | 0.009325479 |
| 0.142366511 | 0.256709504 | 0.072734809 | 0.02325175  |
| 0.034239548 | 0.097868677 | 0.061219502 | 0.264344425 |
| 0.065087441 | 0.261841632 | 0.139689584 | 0.147116723 |
| 0.306950451 | 0.102472169 | 0.238979365 | 0.170704254 |
| 0.056931723 | 0.136478811 | 0.059079493 | 0.028062744 |
| 0.093770947 | 0.113542627 | 0.138259366 | 0.063498839 |
| 0.046604006 | 0.152019461 | 0.050222613 | 0.102794451 |
| 0.082005317 | 0.096478663 | 0.083823045 | 0.113280452 |
| 0.107097629 | 0.061280006 | 0.064986791 | 0.04821454  |
| 0.172742646 | 0.134516318 | 0.088832595 | 0.106448586 |
| 0.157581548 | 0.080430475 | 0.202505762 | 0.030534935 |
| 0.064468226 | 0.041535539 | 0.12181266  | 0.200726833 |
| 0.090707733 | 0.064403069 | 0.15521067  | 0.178297692 |
| 0.089838325 | 0.070499158 | 0.055828915 | 0.093540224 |
| 0.289997742 | 0.150992884 | 0.127846024 | 0.13982128  |
| 0.04134072  | 0.08146281  | 0.105294702 | 0.059577173 |
| 0.056931544 | 0.172264853 | 0.068640385 | 0.029064833 |
| 0.113263334 | 0.073061579 | 0.0969932   | 0.332192705 |
| 0.215042065 | 0.246165865 | 0.033830673 | 0.200606586 |
| 0.031904455 | 0.17689593  | 0.024401794 | 0.199784387 |

|             |             |             |             |
|-------------|-------------|-------------|-------------|
| 0.231948315 | 0.054503703 | 0.215330765 | 0.065872406 |
| 0.124236359 | 0.059750698 | 0.113367501 | 0.293613323 |
| 0.044615886 | 0.089327919 | 0.077047129 | 0.179663295 |
| 0.058228478 | 0.245109695 | 0.208330808 | 0.033881082 |
| 0.016671526 | 0.038644998 | 0.082063894 | 0.097702651 |
| 0.121665474 | 0.151814049 | 0.047928695 | 0.285981603 |
| 0.172229491 | 0.058757579 | 0.108106708 | 0.061849743 |
| 0.271144392 | 0.075121759 | 0.020842911 | 0.113541113 |
| 0.106211485 | 0.277619999 | 0.043609506 | 0.083142823 |
| 0.218424467 | 0.059352446 | 0.106653101 | 0.069558724 |
| 0.136336926 | 0.18919533  | 0.045589454 | 0.078617776 |
| 0.136626604 | 0.060953566 | 0.125427815 | 0.130643216 |
| 0.023986932 |             |             |             |

| NAIP5       | 0.020444719 | 0.018023595 | 0.025936929 |
|-------------|-------------|-------------|-------------|
| 0.048451037 | 0.045940418 | 0.00989736  | 0.058921188 |
| 0.016009821 | 0.079108892 | 0.040597258 | 0.113248393 |
| 0.03115624  | 0.042617154 | 0.020625544 | 0.006519877 |
| 0.077896938 | 0.174506846 | 0.019414046 | 0.120594645 |
| 0.049664308 | 0.031532544 | 0.09921299  | 0.113892635 |
| 0.053127212 | 0.168561247 | 0.179489587 | 0.061938843 |
| 0.045384316 | 0.193958252 | 0.006372481 | 0.025666482 |
| 0.234093908 | 0.024009104 | 0.011379409 | 0.051572506 |
| 0.010472069 | 0.012872802 | 0.063142469 | 0.008437974 |
| 0.017723802 | 0.036664281 | 0.045325782 | 0.090424359 |
| 0.134901643 | 0.008090426 | 0.084521467 | 0.063278332 |
| 0.0093418   | 0.204091839 | 0.004254193 | 0.00820083  |
| 0.008264584 | 0.017072437 | 0.018032298 | 0.05415803  |
| 0.019006338 | 0.005254865 | 0.02218572  | 0.008855273 |
| 0.090291645 | 0.004925216 | 0.010643917 | 0.046770906 |
| 0.013046086 | 0.027512868 | 0.183648546 | 0.036133412 |
| 0.024518059 | 0.012262218 | 0.135882125 | 0.017565525 |
| 0.011906737 | 0.058755226 | 0.088043244 | 0.015063886 |
| 0.30533337  | 0.138763618 | 0.168807278 | 0.051746549 |
| 0.040013105 | 0.013114227 | 0.043607016 | 0.033128056 |
| 0.115330707 | 0.122665088 | 0.036032004 | 0.117115846 |
| 0.018734623 | 0.05985453  | 0.065672256 | 0.08985664  |
| 0.039332636 | 0.014751658 | 0.109892595 | 0.166630753 |
| 0.017957299 | 0.016194607 | 0.01569389  | 0.027915896 |
| 0.012704693 | 0.252983514 | 0.010266128 | 0.027120014 |
| 0.01122424  | 0.044953795 | 0.229987507 | 0.024653485 |
| 0.242418721 | 0.006973169 | 0.095067919 | 0.075425025 |
| 0.040285004 | 0.102313606 | 0.192665499 | 0.035950677 |
| 0.084343028 | 0.023140434 | 0.015516007 | 0.110452985 |
| 0.046763899 | 0.173253985 | 0.044751181 | 0.289668    |
| 0.021530499 | 0.057796242 | 0.006332765 | 0.032717548 |
| 0.017223106 | 0.023496814 | 0.047371107 | 0.220309574 |
| 0.312597162 | 0.110046111 | 0.018550754 | 0.032042301 |
| 0.035097825 | 0.009830457 | 0.065324807 | 0.009412694 |
| 0.021132666 | 0.043383592 | 0.00049255  | 0.106012632 |
| 0.02637966  | 0.120157981 | 0.186458206 | 0.023079715 |
| 0.099021298 | 0.067328351 | 0.145295227 | 0.029788807 |
| 0.009998847 | 0.176881317 | 0.00887257  | 0.085986935 |
| 0.012323318 | 0.095656965 | 0.149544043 | 0.046214156 |
| 0.098662078 | 0.010266231 | 0.31503189  | 0.016279314 |

|             |             |             |             |
|-------------|-------------|-------------|-------------|
| 0.010037037 | 0.127527749 | 0.138999501 | 0.019101562 |
| 0.016310014 | 0.015629099 | 0.006233938 | 0.19694122  |
| 0.052289579 | 0.079916833 | 0.008584806 | 0.018970315 |
| 0.075630769 | 0.206478603 | 0.003514738 | 0.024607158 |
| 0.005107209 | 0.029532653 | 0.057601354 | 0.0619722   |
| 0.164701087 | 0.046560867 | 0.017142861 | 0.009156584 |
| 0.014837287 | 0.003000055 | 0.04946028  | 0.050480961 |
| 0.016972804 | 0.037589134 | 0.002184051 | 0.079457195 |
| 0.007883298 | 0.19100883  | 0.042269123 | 0.2151258   |
| 0.012010311 | 0.223475298 | 0.012716412 | 0.025986131 |
| 0.015945484 | 0.053720432 | 0.008487429 | 0.03832054  |
| 0.307999389 | 0.018069612 | 0.029100035 | 0.050858765 |
| 0.040433708 | 0.046296065 | 0.053161641 | 0.016207266 |
| 0.03925579  | 0.055037748 | 0.243307312 | 0.116383075 |
| 0.029215271 | 0.005953044 | 0.010451282 | 0.038352946 |
| 0.004862627 | 0.015728742 | 0.01293215  | 0.004318864 |
| 0.148358357 | 0.025546592 | 0.03595965  | 0.067312864 |
| 0.010982358 | 0.059481163 | 0.013267594 | 0.139395359 |
| 0.260013291 | 0.023928936 | 0.086918608 | 0.033990172 |
| 0.064327292 | 0.020247634 | 0.082807479 | 0.018810851 |
| 0.037161785 | 0.121122037 | 0.023262682 | 0.019984896 |
| 0.056506438 | 0.180586822 | 0.218487795 | 0.006966027 |
| 0.039878564 | 0.010710914 | 0.007268877 | 0.011412261 |
| 0.017122629 | 0.08447675  | 0.052329104 | 0.0431486   |
| 0.197188983 | 0.29145099  | 0.018348616 | 0.072164361 |
| 0.006176439 | 0.084967215 | 0.290017236 | 0.00395197  |
| 0.029464042 | 0.003825681 | 0.002228254 | 0.018555615 |
| 0.149174235 | 0.038251731 | 0.046183528 | 0.228893965 |
| 0.029182072 | 0.112992892 | 0.045504109 | 0.010180138 |
| 0.015909771 | 0.013078409 | 0.110041845 | 0.124896634 |
| 0.008041059 | 0.038550599 | 0.120556661 | 0.011996335 |
| 0.010715899 | 0.252114608 | 0.019860446 | 0.20592952  |
| 0.306645059 | 0.049308464 | 0.021385652 | 0.303289256 |
| 0.243810723 | 0.030575713 | 0.031532902 | 0.178136858 |
| 0.022685962 | 0.092175116 | 0.016647647 | 0.086631229 |
| 0.15352135  | 0.096327735 | 0.142354448 | 0.02842214  |
| 0.009357137 | 0.02113984  | 0.165003766 | 0.051636522 |
| 0.148061032 | 0.021202114 | 0.005106118 | 0.02498805  |
| 0.058647707 | 0.013771268 | 0.240533542 | 0.031292648 |
| 0.009394897 | 0.006100123 | 0.20084556  | 0.023713075 |
| 0.010391571 | 0.153638275 | 0.071568664 | 0.012568134 |
| 0.01910764  | 0.033514787 | 0.01834129  | 0.044717907 |
| 0.068447827 | 0.08259318  | 0.050933492 | 0.061448314 |
| 0.013470029 | 0.08994292  | 0.052735836 | 0.009243368 |
| 0.149324083 | 0.012403367 | 0.050247618 | 0.150472682 |
| 0.00681819  | 0.007234569 | 0.108994799 | 0.209580055 |
| 0.023626594 | 0.015773124 | 0.011849271 | 0.074880003 |
| 0.023807195 | 0.018281538 | 0.019154891 | 0.255494876 |
| 1           | 0.012702234 | 0.016825101 | 0.078144315 |
| 0.043438286 | 0.003339749 | 0.090835409 | 0.016799369 |
| 0.125118806 | 0.005630856 | 0.0078772   | 0.022421152 |
| 0.269725298 | 0.052262212 | 0.009416997 | 0.027933041 |
| 0.001893659 | 0.064350022 | 0.061952108 | 0.023230204 |
| 0.013596768 | 0.285596006 | 0.152298812 | 0.017100645 |

|              |             |             |             |
|--------------|-------------|-------------|-------------|
| 0.021267919  | 0.016190593 | 0.036137269 | 0.025832101 |
| 0.02367932   | 0.010749323 | 0.028652798 | 0.164443771 |
| 0.0222118513 | 0.014053575 | 0.025674436 | 0.013712555 |
| 0.037643693  | 0.07109187  | 0.110645692 | 0.122165951 |
| 0.058205564  | 0.011630851 | 0.003776545 | 0.06226528  |
| 0.007584901  | 0.150301769 | 0.018802352 | 0.045628648 |
| 0.026254415  | 0.253708627 | 0.030940131 | 0.015509774 |
| 0.023432528  | 0.034913213 | 0.170704153 | 0.024876039 |
| 0.013727451  | 0.161075858 | 0.031133591 | 0.152528169 |
| 0.021847506  | 0.002114268 | 0.200455276 | 0.048251047 |
| 0.040471282  | 0.059866777 | 0.01447198  | 0.094490534 |
| 0.032203184  | 0.226854891 | 0.007648758 | 0.072252749 |
| 0.180109949  | 0.005267223 | 0.02827359  | 0.011767549 |
| 0.274542161  | 0.122350713 | 0.017790131 | 0.035087011 |
| 0.030234505  | 0.145174772 | 0.030793222 | 0.024091544 |
| 0.160155144  | 0.241916168 | 0.201311274 | 0.060105297 |
| 0.009331252  | 0.116859308 | 0.179724561 | 0.002097202 |
| 0.070384977  | 0.033412118 | 0.099900334 | 0.034280587 |
| 0.028250412  | 0.066553428 | 0.230713238 | 0.012052749 |
| 0.125460359  | 0.010115101 | 0.070386511 | 0.004194468 |
| 0.064993135  | 0.263908396 | 0.014154569 | 0.020415975 |
| 0.00915083   | 0.022213194 | 0.033013203 | 0.300356789 |
| 0.034127013  | 0.27322999  | 0.041888601 | 0.044864522 |
| 0.285575282  | 0.043664815 | 0.125523567 | 0.054291956 |
| 0.016239196  | 0.048035294 | 0.010172459 | 0.006399356 |
| 0.067006864  | 0.060420461 | 0.039744944 | 0.012372383 |
| 0.016065564  | 0.044537247 | 0.028738767 | 0.022947479 |
| 0.016938401  | 0.019832906 | 0.018175743 | 0.043648964 |
| 0.06893224   | 0.01311963  | 0.018252649 | 0.055640648 |
| 0.071460455  | 0.042141074 | 0.023610618 | 0.103523629 |
| 0.114929629  | 0.025942993 | 0.132847972 | 0.007085227 |
| 0.024252329  | 0.009486072 | 0.094597329 | 0.066282289 |
| 0.020587226  | 0.012442443 | 0.100614419 | 0.192996783 |
| 0.018405681  | 0.012745512 | 0.02583321  | 0.027325917 |
| 0.199028623  | 0.074677221 | 0.035613501 | 0.041981878 |
| 0.011038939  | 0.020120433 | 0.025618056 | 0.015678252 |
| 0.010485126  | 0.085043869 | 0.012683582 | 0.008924959 |
| 0.098695482  | 0.016445378 | 0.096162015 | 0.292879129 |
| 0.168919451  | 0.27908282  | 0.013423098 | 0.071692309 |
| 0.009792412  | 0.082117161 | 0.005133692 | 0.175868329 |
| 0.117490425  | 0.011450531 | 0.101104042 | 0.0334      |
| 0.126970377  | 0.011026296 | 0.14616978  | 0.276419286 |
| 0.014971539  | 0.022414556 | 0.03508726  | 0.117369911 |
| 0.029373233  | 0.165548985 | 0.120512595 | 0.007460588 |
| 0.005624588  | 0.01068073  | 0.020210906 | 0.071034945 |
| 0.115649966  | 0.04350986  | 0.010343304 | 0.268849302 |
| 0.109324252  | 0.010870839 | 0.040796254 | 0.037266896 |
| 0.306693738  | 0.01635288  | 0.005155973 | 0.038679134 |
| 0.034922287  | 0.226966819 | 0.006246235 | 0.038748959 |
| 0.1471945    | 0.010065677 | 0.035181276 | 0.013366808 |
| 0.052107663  | 0.074929918 | 0.00647071  | 0.017562153 |
| 0.06722928   | 0.014449106 | 0.11880924  | 0.033322027 |
| 0.006673367  |             |             |             |

NCALD 0.494141843

0.517614771

0.462593634

|             |             |             |             |
|-------------|-------------|-------------|-------------|
| 0.448946821 | 0.462014533 | 0.430920791 | 0.197892514 |
| 0.184526032 | 0.078736764 | 0.003019077 | 0.020058028 |
| 0.505825547 | 0.216931472 | 0.279868892 | 0.383554976 |
| 0.440487142 | 0.12952741  | 0.379799131 | 0.226858139 |
| 0.431949175 | 0.080336251 | 0.418120579 | 0.076201304 |
| 0.315535009 | 0.102250688 | 0.057434599 | 0.290626165 |
| 0.471559814 | 0.067343284 | 0.374729236 | 0.417406548 |
| 0.091289492 | 0.496361439 | 0.517499368 | 0.48699026  |
| 0.520581111 | 0.487599289 | 0.009636116 | 0.318149887 |
| 0.483964047 | 0.501784838 | 0.4298252   | 0.331158509 |
| 0.031725527 | 0.489860587 | 0.237057763 | 0.439497009 |
| 0.251870921 | 0.024801587 | 0.263800938 | 0.467500328 |
| 0.494612204 | 0.502988079 | 0.22232199  | 0.145402887 |
| 0.232730066 | 0.245031475 | 0.339482067 | 0.371958838 |
| 0.212231327 | 0.164698211 | 0.509040569 | 0.07920807  |
| 0.147723429 | 0.243425335 | 0.146919673 | 0.255224462 |
| 0.400191922 | 0.448869996 | 0.011800005 | 0.498279642 |
| 0.001827717 | 0.401415775 | 0.402164951 | 0.381801877 |
| 0.032842052 | 0.0157619   | 0.172056038 | 0.346386148 |
| 0.49096514  | 0.498262358 | 0.518960423 | 0.527507865 |
| 0.182231407 | 0.29231239  | 0.456919134 | 0.159252318 |
| 0.502779747 | 0.168225019 | 0.106466852 | 0.445886928 |
| 0.52370156  | 0.520679906 | 0.197374268 | 0.263465463 |
| 0.49190831  | 0.502354904 | 0.48907902  | 0.470540562 |
| 0.407914992 | 0.047224362 | 0.497424569 | 0.530493421 |
| 0.470327383 | 0.373479876 | 0.144273556 | 0.453316582 |
| 0.046737467 | 0.422843069 | 0.358598787 | 0.165336325 |
| 0.493775229 | 0.012443133 | 0.211358517 | 0.373495804 |
| 0.20641203  | 0.507068582 | 0.52411705  | 0.171948882 |
| 0.447640704 | 0.015511165 | 0.159363051 | 0.025739699 |
| 0.351241538 | 0.175279691 | 0.505909474 | 0.500701372 |
| 0.234805908 | 0.410582987 | 0.255089823 | 0.000110571 |
| 0.021059183 | 0.18463036  | 0.518288584 | 0.393167045 |
| 0.477577877 | 0.483687771 | 0.237108153 | 0.468695434 |
| 0.526028776 | 0.517888731 | 0.074146077 | 0.078852457 |
| 0.468783481 | 0.180075638 | 0.226084592 | 0.505542117 |
| 0.324705574 | 0.098823324 | 0.110374    | 0.524457623 |
| 0.462617521 | 0.069337356 | 0.375816621 | 0.438796256 |
| 0.361069752 | 0.388022206 | 0.089825581 | 0.279678471 |
| 0.037514254 | 0.506543527 | 0.023197626 | 0.357083329 |
| 0.330747319 | 0.152666388 | 0.00747011  | 0.265192967 |
| 0.313967875 | 0.512746178 | 0.496845093 | 0.090041313 |
| 0.326008439 | 0.435433142 | 0.358482289 | 0.498051258 |
| 0.007481241 | 0.03740681  | 0.327156648 | 0.526533637 |
| 0.338778194 | 0.526829577 | 0.299422674 | 0.314886503 |
| 0.283830613 | 0.48961984  | 0.003565969 | 0.499501439 |
| 0.521024106 | 0.359548153 | 0.435621991 | 0.462367708 |
| 0.446135934 | 0.493586689 | 0.055219687 | 0.440946558 |
| 0.437924099 | 0.063793646 | 0.516921841 | 0.150810399 |
| 0.506018318 | 0.032128948 | 0.334431516 | 0.521299865 |
| 0.527311141 | 0.006692236 | 0.240312421 | 0.410020257 |
| 0.022051382 | 0.085514933 | 0.477987962 | 0.435972241 |
| 0.414022295 | 0.496447579 | 0.500134676 | 0.431480953 |
| 0.46746079  | 0.222838511 | 0.008563586 | 0.337721551 |

|             |             |             |             |
|-------------|-------------|-------------|-------------|
| 0.507708606 | 0.453826816 | 0.481020877 | 0.232628343 |
| 0.415438021 | 0.50906622  | 0.51799015  | 0.23843908  |
| 0.03230918  | 0.318545539 | 0.017663095 | 0.35225803  |
| 0.491141922 | 0.10782822  | 0.466525059 | 0.141044901 |
| 0.062099692 | 0.527432571 | 0.196517929 | 0.317252634 |
| 0.150345014 | 0.454421152 | 0.239650058 | 0.258129677 |
| 0.242495593 | 0.150296995 | 0.397120591 | 0.415065828 |
| 0.027481207 | 0.081560999 | 0.011906422 | 0.465518466 |
| 0.152935849 | 0.402647182 | 0.4055669   | 0.484330736 |
| 0.347310581 | 0.106541654 | 0.41912564  | 0.320338179 |
| 0.107560727 | 0.010067833 | 0.519608502 | 0.427516311 |
| 0.409368069 | 0.13802316  | 0.031902097 | 0.420558519 |
| 0.508183929 | 0.391214151 | 0.319000761 | 0.499204366 |
| 0.022362143 | 0.517163832 | 0.258746663 | 0.112491133 |
| 0.434676963 | 0.257005775 | 0.486422368 | 0.061634239 |
| 0.438524664 | 0.496921229 | 0.316003368 | 0.181315892 |
| 0.467771528 | 0.44704465  | 0.02188635  | 0.489780378 |
| 0.48727227  | 0.02345963  | 0.529196963 | 0.12139431  |
| 0.015023124 | 0.498321404 | 0.520869465 | 0.063277876 |
| 0.067826431 | 0.360713561 | 0.035988449 | 0.292208683 |
| 0.524882959 | 0.434547528 | 0.505518381 | 0.233745887 |
| 0.030533849 | 0.008272401 | 0.211800935 | 0.469939412 |
| 0.515448849 | 0.532198703 | 0.252462181 | 0.413122692 |
| 0.227272119 | 0.374721749 | 0.145734162 | 0.530587218 |
| 0.208689594 | 0.511071894 | 0.003622645 | 0.516444261 |
| 0.520590463 | 0.325606283 | 0.073543335 | 0.320803998 |
| 0.468900301 | 0.034906284 | 0.190600231 | 0.510994442 |
| 0.499741394 | 0.354475803 | 0.398065548 | 0.474655614 |
| 0.010666864 | 0.030371314 | 0.432259213 | 0.211622148 |
| 0.426403557 | 0.205194578 | 0.065450122 | 0.349223704 |
| 0.033978346 | 0.495579006 | 0.497938462 | 0.051444302 |
| 0.400532499 | 0.338611297 | 0.400947257 | 0.027041333 |
| 0.527377879 | 0.519186113 | 0.515986313 | 0.146989267 |
| 0.517404865 | 0.529397974 | 0.499457819 | 0.067969684 |
| 0.012702234 | 1           | 0.458911222 | 0.01859044  |
| 0.503268136 | 0.2746618   | 0.00953949  | 0.508009949 |
| 0.168183394 | 0.466064392 | 0.003381321 | 0.103611131 |
| 0.035050778 | 0.504686589 | 0.494751242 | 0.412414678 |
| 0.299103525 | 0.381146078 | 0.004937413 | 0.529690669 |
| 0.511431533 | 0.010732819 | 0.140768424 | 0.528086655 |
| 0.524389013 | 0.510969232 | 0.377359162 | 0.52913882  |
| 0.513427632 | 0.509164348 | 0.241498987 | 0.267216226 |
| 0.505038654 | 0.519612894 | 0.47540224  | 0.494376307 |
| 0.50354288  | 0.464354812 | 0.274427866 | 0.010067185 |
| 0.14505418  | 0.215781529 | 0.388333045 | 0.07911291  |
| 0.378737861 | 0.136371001 | 0.518782582 | 0.506410458 |
| 0.53351789  | 0.002424781 | 0.139619712 | 0.519836296 |
| 0.481950239 | 0.496753431 | 0.016778529 | 0.005960169 |
| 0.008787052 | 0.017841356 | 0.378232413 | 0.243929956 |
| 0.525952335 | 0.295160463 | 0.001864453 | 0.034060383 |
| 0.289256485 | 0.455698936 | 0.51779642  | 0.391383348 |
| 0.513596591 | 0.067040745 | 0.328023147 | 0.417181144 |
| 0.0627075   | 0.414208374 | 0.530405725 | 0.492746142 |
| 0.033105069 | 0.248390933 | 0.422132072 | 0.506554697 |

|             |             |             |             |
|-------------|-------------|-------------|-------------|
| 0.093981991 | 0.322889577 | 0.507873185 | 0.339186007 |
| 0.010815048 | 0.072734589 | 0.056578035 | 0.476667357 |
| 0.512789317 | 0.074120471 | 0.028320181 | 0.16785774  |
| 0.10933761  | 0.513641685 | 0.158401326 | 0.524598725 |
| 0.49208451  | 0.466043039 | 0.06782162  | 0.50089285  |
| 0.031596485 | 0.504484887 | 0.384300937 | 0.066832924 |
| 0.297089796 | 0.008109759 | 0.516282343 | 0.186423099 |
| 0.354789385 | 0.447178056 | 0.220132718 | 0.01251608  |
| 0.222145264 | 0.043727769 | 0.509658221 | 0.514657595 |
| 0.028203735 | 0.224656237 | 0.30393582  | 0.437069056 |
| 0.306004426 | 0.476185923 | 0.50323287  | 0.500919409 |
| 0.069298909 | 0.166559317 | 0.440936939 | 0.472528556 |
| 0.240237888 | 0.517881918 | 0.329767075 | 0.528289074 |
| 0.47838438  | 0.504920408 | 0.526237595 | 0.368130866 |
| 0.253961571 | 0.460114561 | 0.419276044 | 0.01543908  |
| 0.366180192 | 0.505230112 | 0.384697616 | 0.16306137  |
| 0.263071691 | 0.469618681 | 0.03578734  | 0.217994769 |
| 0.415062907 | 0.347865384 | 0.129718505 | 0.466178898 |
| 0.439555582 | 0.477161482 | 0.030072862 | 0.053268113 |
| 0.520602358 | 0.488488117 | 0.139809883 | 0.479919563 |
| 0.158738784 | 0.36245899  | 0.517275282 | 0.511643389 |
| 0.424347324 | 0.521140268 | 0.479731107 | 0.446430335 |
| 0.472131947 | 0.250979025 | 0.516369541 | 0.08589548  |
| 0.084734795 | 0.49878953  | 0.088457404 | 0.08115595  |
| 0.128387996 | 0.020764024 | 0.379641639 | 0.456571026 |
| 0.468219262 | 0.402202313 | 0.359695811 | 0.072055031 |
| 0.336485764 | 0.430944968 | 0.367131243 | 0.196427237 |
| 0.06891406  | 0.50532048  | 0.006690786 | 0.045482877 |
| 0.467676062 | 0.517194959 | 0.452460382 | 0.239919773 |
| 0.350945827 | 0.135784238 | 0.299548427 | 0.331440974 |
| 0.386348634 | 0.42962988  | 0.518388984 | 0.027674713 |
| 0.012554943 | 0.514983988 | 0.435209046 | 0.016631428 |
| 0.078799094 | 0.453344942 | 0.306047881 | 0.243239296 |
| 0.017414681 | 0.527386102 | 0.388704772 | 0.477853287 |
| 0.360444508 | 0.052619045 | 0.429655079 | 0.083244377 |
| 0.048208154 | 0.487545158 | 0.463093111 | 0.51899509  |
| 0.387919841 | 0.447170402 | 0.458245543 | 0.515581079 |
| 0.124055641 | 0.469514988 | 0.019309931 | 0.490948802 |
| 0.503848374 |             |             |             |

|             |             |             |             |
|-------------|-------------|-------------|-------------|
| NDFIP2      | 0.346367155 | 0.479131295 | 0.286387984 |
| 0.336079469 | 0.293657852 | 0.296987942 | 0.206573464 |
| 0.254025166 | 0.085747289 | 0.005572325 | 0.012938359 |
| 0.2875485   | 0.123141389 | 0.225386255 | 0.273634846 |
| 0.330591373 | 0.08831559  | 0.352104915 | 0.222115874 |
| 0.331745249 | 0.11985662  | 0.276722682 | 0.108025556 |
| 0.201016548 | 0.066172569 | 0.058797613 | 0.168714798 |
| 0.407158599 | 0.070948016 | 0.256168482 | 0.332275152 |
| 0.09886046  | 0.384407209 | 0.48032008  | 0.261938256 |
| 0.457892193 | 0.328824593 | 0.020061832 | 0.23410585  |
| 0.420709415 | 0.319425415 | 0.32643551  | 0.259606557 |
| 0.049932056 | 0.470500092 | 0.213393986 | 0.280325232 |
| 0.26794314  | 0.02326168  | 0.260156834 | 0.450497321 |
| 0.421502743 | 0.270356457 | 0.266865001 | 0.158565958 |
| 0.102618362 | 0.236880294 | 0.129504994 | 0.294985911 |



|             |             |             |             |
|-------------|-------------|-------------|-------------|
| 0.199683487 | 0.191250401 | 0.430620637 | 0.099518177 |
| 0.142150482 | 0.29818907  | 0.117992481 | 0.274315102 |
| 0.215554126 | 0.364148451 | 0.039075304 | 0.266526832 |
| 0.004033463 | 0.329037835 | 0.279529826 | 0.178791175 |
| 0.041475293 | 0.015066057 | 0.13949435  | 0.274341741 |
| 0.424599809 | 0.446826759 | 0.403186306 | 0.408365237 |
| 0.119194323 | 0.248972359 | 0.244370787 | 0.14069619  |
| 0.408931386 | 0.157818506 | 0.123026083 | 0.312640291 |
| 0.412932565 | 0.459989938 | 0.146955517 | 0.200260272 |
| 0.344785126 | 0.459792247 | 0.30126625  | 0.281341287 |
| 0.206847667 | 0.048145069 | 0.406809982 | 0.438301195 |
| 0.398992897 | 0.182730936 | 0.11573735  | 0.378388671 |
| 0.064879643 | 0.319038626 | 0.275318489 | 0.131037701 |
| 0.433902119 | 0.02755392  | 0.149057877 | 0.279004638 |
| 0.246604965 | 0.377380148 | 0.447421483 | 0.183359248 |
| 0.287653464 | 0.020756305 | 0.074478191 | 0.041283981 |
| 0.245040396 | 0.080213609 | 0.449093275 | 0.394683467 |
| 0.250396006 | 0.247924123 | 0.265196431 | 0.003457495 |
| 0.024113025 | 0.185039398 | 0.352267958 | 0.342152808 |
| 0.3580704   | 0.357495192 | 0.157481084 | 0.346252735 |
| 0.264521184 | 0.395959608 | 0.056500369 | 0.128375873 |
| 0.308917521 | 0.178846631 | 0.20583654  | 0.288647843 |
| 0.202486597 | 0.162491553 | 0.126461218 | 0.460838062 |
| 0.442080641 | 0.089932914 | 0.341720076 | 0.303120505 |
| 0.221406665 | 0.223138587 | 0.122300887 | 0.211418066 |
| 0.064165308 | 0.423889641 | 0.023917209 | 0.346742736 |
| 0.163593887 | 0.08426794  | 0.029775991 | 0.284318393 |
| 0.232283602 | 0.350515115 | 0.438098934 | 0.121588751 |
| 0.242725593 | 0.277619661 | 0.315623587 | 0.281418053 |
| 0.007654598 | 0.066444161 | 0.295766159 | 0.438846873 |
| 0.258257302 | 0.441777513 | 0.27303814  | 0.247509626 |
| 0.212940841 | 0.386344541 | 0.006209702 | 0.465657582 |
| 0.461814132 | 0.286065967 | 0.251758448 | 0.303088126 |
| 0.22764537  | 0.386915534 | 0.04786065  | 0.302450004 |
| 0.308816258 | 0.099750791 | 0.438763021 | 0.117946214 |
| 0.431374391 | 0.037384136 | 0.286309777 | 0.332732468 |
| 0.280640178 | 0.009498542 | 0.236928074 | 0.316675125 |
| 0.025349565 | 0.132276808 | 0.357238193 | 0.314003847 |
| 0.273619012 | 0.362180106 | 0.421846028 | 0.209923144 |
| 0.288777698 | 0.260625264 | 0.019155877 | 0.228586522 |
| 0.36278366  | 0.24339155  | 0.442316299 | 0.241633282 |
| 0.29247898  | 0.442766479 | 0.341648021 | 0.156609549 |
| 0.051355904 | 0.302006066 | 0.028236247 | 0.240383012 |
| 0.368202921 | 0.096760076 | 0.262306835 | 0.154884786 |
| 0.055669975 | 0.461244937 | 0.109041193 | 0.151869979 |
| 0.072048124 | 0.257348196 | 0.266003711 | 0.147616072 |
| 0.106034304 | 0.143438157 | 0.22837487  | 0.266698415 |
| 0.056954422 | 0.076313618 | 0.020384271 | 0.200126426 |
| 0.069719544 | 0.189031091 | 0.193412402 | 0.314345984 |
| 0.248443634 | 0.076902033 | 0.247192972 | 0.215008223 |
| 0.091518559 | 0.016595686 | 0.465159899 | 0.319465514 |
| 0.323003716 | 0.165042969 | 0.045104781 | 0.188672041 |
| 0.401432337 | 0.243858138 | 0.28769524  | 0.413044953 |
| 0.045279303 | 0.423369916 | 0.160585838 | 0.092158095 |

|             |             |             |             |
|-------------|-------------|-------------|-------------|
| 0.207501851 | 0.202676111 | 0.420245774 | 0.055810574 |
| 0.336038227 | 0.439590308 | 0.273573354 | 0.135344537 |
| 0.378012839 | 0.323647527 | 0.038792097 | 0.357764212 |
| 0.336980508 | 0.030934937 | 0.459357331 | 0.088836968 |
| 0.022755183 | 0.289621089 | 0.289713396 | 0.070552823 |
| 0.07092444  | 0.223206515 | 0.082247248 | 0.215716656 |
| 0.460180528 | 0.287921477 | 0.323967785 | 0.162348179 |
| 0.040671402 | 0.004919176 | 0.153681944 | 0.283962078 |
| 0.473631803 | 0.433101517 | 0.228637073 | 0.209120589 |
| 0.220637357 | 0.20631769  | 0.196240695 | 0.434820644 |
| 0.210687075 | 0.480842837 | 0.010180172 | 0.314006351 |
| 0.453920498 | 0.272828922 | 0.056619176 | 0.272396783 |
| 0.367712186 | 0.059129449 | 0.252142766 | 0.454179248 |
| 0.409407353 | 0.245344577 | 0.239147348 | 0.318827592 |
| 0.028302474 | 0.064822357 | 0.278917045 | 0.115359652 |
| 0.26682412  | 0.19152664  | 0.027103149 | 0.318100207 |
| 0.039610193 | 0.417889451 | 0.383832126 | 0.053434385 |
| 0.234385179 | 0.330929009 | 0.26884654  | 0.045409999 |
| 0.357337856 | 0.446039032 | 0.47891066  | 0.216311768 |
| 0.336169568 | 0.411008969 | 0.221613613 | 0.079732837 |
| 0.016825101 | 0.458911222 | 1           | 0.024007438 |
| 0.412541072 | 0.24497149  | 0.008004024 | 0.474017807 |
| 0.198621682 | 0.432248162 | 0.010555656 | 0.087643208 |
| 0.041141781 | 0.374675335 | 0.446747696 | 0.335206112 |
| 0.206342015 | 0.333782489 | 0.008927921 | 0.458500675 |
| 0.442720127 | 0.012178753 | 0.0989545   | 0.325300676 |
| 0.2766783   | 0.501291215 | 0.185310979 | 0.346975544 |
| 0.245347975 | 0.43781242  | 0.188666891 | 0.205491036 |
| 0.378017253 | 0.415655098 | 0.372298209 | 0.460909195 |
| 0.393229254 | 0.291794821 | 0.237627481 | 0.020333598 |
| 0.108476991 | 0.249965156 | 0.194520605 | 0.058600408 |
| 0.306532777 | 0.104051414 | 0.449664586 | 0.401096677 |
| 0.396087057 | 0.006739409 | 0.195181843 | 0.349106308 |
| 0.428444185 | 0.450043215 | 0.038334157 | 0.008582941 |
| 0.010928082 | 0.009822178 | 0.326671762 | 0.199402798 |
| 0.436750628 | 0.173889731 | 0.006892739 | 0.080663242 |
| 0.2677284   | 0.242237859 | 0.449844746 | 0.303273696 |
| 0.348819957 | 0.0836775   | 0.17480539  | 0.325676346 |
| 0.047557622 | 0.297592135 | 0.40645651  | 0.452544866 |
| 0.050015234 | 0.207191194 | 0.338155882 | 0.442269604 |
| 0.033249295 | 0.238925393 | 0.288887693 | 0.213879577 |
| 0.023409171 | 0.068394143 | 0.056585046 | 0.358874325 |
| 0.43842136  | 0.044737833 | 0.020553227 | 0.151663927 |
| 0.098420599 | 0.412843101 | 0.131804792 | 0.451632496 |
| 0.396746183 | 0.371983337 | 0.056470557 | 0.459827547 |
| 0.030699228 | 0.438485022 | 0.201140739 | 0.066318577 |
| 0.268975373 | 0.01969808  | 0.412527051 | 0.079479674 |
| 0.291840085 | 0.342991848 | 0.14883585  | 0.015829759 |
| 0.119408315 | 0.046263769 | 0.404345486 | 0.36821299  |
| 0.034430104 | 0.264949028 | 0.253280123 | 0.336530944 |
| 0.285584377 | 0.317447962 | 0.470568722 | 0.265754738 |
| 0.098281873 | 0.100266353 | 0.343706261 | 0.315634826 |
| 0.258053992 | 0.416876564 | 0.182643393 | 0.469690492 |
| 0.355014306 | 0.452279242 | 0.407878449 | 0.289684779 |

|             |             |             |             |
|-------------|-------------|-------------|-------------|
| 0.135253826 | 0.327892058 | 0.275160994 | 0.024771032 |
| 0.305968323 | 0.370872983 | 0.352111428 | 0.095594242 |
| 0.17087258  | 0.235539789 | 0.084791116 | 0.212085234 |
| 0.186372261 | 0.276915636 | 0.123735294 | 0.385524398 |
| 0.341602812 | 0.325575427 | 0.079724928 | 0.052338564 |
| 0.494832484 | 0.443601519 | 0.183255668 | 0.30893606  |
| 0.164626201 | 0.247215659 | 0.355193736 | 0.328516115 |
| 0.285884615 | 0.362702249 | 0.375721563 | 0.27769296  |
| 0.416588765 | 0.249271534 | 0.480426253 | 0.162550534 |
| 0.06212115  | 0.290487503 | 0.06852724  | 0.082161853 |
| 0.127795428 | 0.029305494 | 0.16446154  | 0.312341105 |
| 0.209662221 | 0.268183228 | 0.293043017 | 0.094896303 |
| 0.241209062 | 0.326775169 | 0.27781187  | 0.19292297  |
| 0.066034341 | 0.450177679 | 0.011393265 | 0.055765572 |
| 0.21833918  | 0.347347288 | 0.214341567 | 0.19987412  |
| 0.166083845 | 0.11723262  | 0.227599227 | 0.283320208 |
| 0.196344496 | 0.274665606 | 0.353924651 | 0.063341016 |
| 0.031750427 | 0.429697904 | 0.336367553 | 0.027264806 |
| 0.082716443 | 0.320567863 | 0.298173951 | 0.172255333 |
| 0.020324856 | 0.397755389 | 0.24203658  | 0.290236353 |
| 0.321565162 | 0.080698275 | 0.387161846 | 0.11224356  |
| 0.100902112 | 0.444167708 | 0.266274412 | 0.447793994 |
| 0.272021496 | 0.314938271 | 0.451568355 | 0.356498754 |
| 0.155750079 | 0.276240199 | 0.040937088 | 0.409248323 |
| 0.230055704 |             |             |             |

|             |             |             |             |
|-------------|-------------|-------------|-------------|
| NECAP2      | 0.014297421 | 0.027857065 | 0.012412202 |
| 0.074957688 | 0.033967538 | 0.027086551 | 0.098562749 |
| 0.023938559 | 0.014754462 | 0.024666804 | 0.016283409 |
| 0.019985286 | 0.007317772 | 0.070754214 | 0.010446334 |
| 0.058116546 | 0.073496032 | 0.010440601 | 0.11155972  |
| 0.052200919 | 0.06813344  | 0.084293902 | 0.073578533 |
| 0.008710624 | 0.063407934 | 0.113335619 | 0.028714792 |
| 0.055765391 | 0.123833996 | 0.022523195 | 0.045530251 |
| 0.037440212 | 0.023890798 | 0.018362084 | 0.047886021 |
| 0.016227298 | 0.011438894 | 0.000879284 | 0.024630109 |
| 0.022101473 | 0.036042587 | 0.051891736 | 0.115281688 |
| 0.107304151 | 0.017410939 | 0.128528745 | 0.025936661 |
| 0.004035183 | 0.075465875 | 0.016840929 | 0.016222602 |
| 0.018904755 | 0.023751564 | 0.030678864 | 0.083519075 |
| 0.005590637 | 0.017128459 | 0.010737431 | 0.025511396 |
| 0.103323183 | 0.026349211 | 0.019419444 | 0.028306751 |
| 0.000828592 | 0.030046759 | 0.032152285 | 0.069731348 |
| 0.007175303 | 0.023400671 | 0.013831501 | 0.009514204 |
| 0.018565607 | 0.053967666 | 0.033958314 | 0.007437407 |
| 0.130308506 | 0.092376128 | 0.045163728 | 0.093811091 |
| 0.045934443 | 0.01492128  | 0.044015992 | 0.032385656 |
| 0.049735486 | 0.044519328 | 0.012585139 | 0.142719843 |
| 0.020549526 | 0.125352052 | 0.009927003 | 0.064138822 |
| 0.041100088 | 0.022258856 | 0.020711981 | 0.055168229 |
| 0.039969777 | 0.025792075 | 0.028303279 | 0.029419393 |
| 0.013402004 | 0.021155779 | 0.020342149 | 0.032591437 |
| 0.020754218 | 0.012365008 | 0.116487554 | 0.042459589 |
| 0.07889966  | 0.011750638 | 0.112092772 | 0.007528289 |
| 0.046889216 | 0.049441283 | 0.065061278 | 0.064539877 |

|             |             |             |             |
|-------------|-------------|-------------|-------------|
| 0.012915813 | 0.030054826 | 0.020895482 | 0.120474005 |
| 0.018863386 | 0.024069914 | 0.00263598  | 0.039542482 |
| 0.004279128 | 0.005038781 | 0.013677969 | 0.053870807 |
| 0.016999875 | 0.008062861 | 0.044923262 | 0.034563459 |
| 0.075559367 | 0.00825506  | 0.020675921 | 0.018952546 |
| 0.032472904 | 0.009320929 | 0.074480206 | 0.01561702  |
| 0.017962759 | 0.040578347 | 0.001088162 | 0.06411275  |
| 0.033106382 | 0.008639534 | 0.131153124 | 0.023073257 |
| 0.065328889 | 0.054985502 | 0.118013431 | 0.036621852 |
| 0.021128667 | 0.148947901 | 0.009409274 | 0.066450467 |
| 0.016870193 | 0.04372681  | 0.081083712 | 0.079643643 |
| 0.080421034 | 0.014005463 | 0.060648652 | 0.017451334 |
| 0.003561412 | 0.014245305 | 0.004750873 | 0.039341146 |
| 0.030011166 | 0.033028853 | 0.010741325 | 0.090312339 |
| 0.086022113 | 0.061636394 | 0.014612426 | 0.043555673 |
| 0.028303891 | 0.02328125  | 0.006252744 | 0.034978019 |
| 0.022482499 | 0.027058709 | 0.040812468 | 0.023196694 |
| 0.088724934 | 0.048026223 | 0.00087952  | 0.017571178 |
| 0.020952213 | 0.007486448 | 0.073963866 | 0.022899067 |
| 0.011264423 | 0.060142692 | 7.90E-05    | 0.066087059 |
| 0.012481422 | 0.078818623 | 0.043828954 | 0.135184221 |
| 0.017008631 | 0.129803267 | 0.021682047 | 0.02146171  |
| 0.017210388 | 0.000847643 | 0.040409675 | 0.053154733 |
| 0.038182832 | 0.033243527 | 0.02600506  | 0.072057135 |
| 0.053884944 | 0.035140467 | 0.05370598  | 0.011292418 |
| 0.033838834 | 0.052365341 | 0.012048708 | 0.040438183 |
| 0.021535106 | 0.001507195 | 0.025624247 | 0.034807869 |
| 0.00931798  | 0.028760162 | 0.013981828 | 0.002389941 |
| 0.126869656 | 0.039360973 | 0.007470549 | 0.052589455 |
| 0.01129726  | 0.101014257 | 0.010308358 | 0.009126998 |
| 0.079350382 | 0.033492775 | 0.015222452 | 0.006865932 |
| 0.007019684 | 0.051409971 | 0.068951033 | 0.063770964 |
| 0.039248901 | 0.038809263 | 0.01164269  | 0.019897103 |
| 0.069171904 | 0.139711738 | 0.004202865 | 0.010383339 |
| 0.042897833 | 0.029946535 | 0.026868766 | 0.016919522 |
| 0.013842901 | 0.06311463  | 0.054345177 | 0.008542968 |
| 0.053006419 | 0.102847124 | 0.027580904 | 0.052726744 |
| 0.018354768 | 0.052271581 | 0.07219461  | 0.003555174 |
| 0.047485891 | 0.02157434  | 0.005209721 | 0.037500493 |
| 0.004659326 | 0.03445163  | 0.075924083 | 0.13118885  |
| 0.024129893 | 0.140595768 | 0.054444568 | 0.002778329 |
| 0.014882086 | 0.026871868 | 0.042644871 | 0.096873849 |
| 0.022585422 | 0.040558855 | 0.027624362 | 0.019340825 |
| 0.018887075 | 0.131685614 | 0.026235703 | 0.045044502 |
| 0.084716223 | 0.033846082 | 0.026777953 | 0.115606148 |
| 0.08985807  | 0.073684463 | 0.045460278 | 0.099970974 |
| 0.034918197 | 0.083398509 | 0.031312822 | 0.015183649 |
| 0.137652747 | 0.025565843 | 0.029317191 | 0.012084664 |
| 0.01769327  | 0.024628726 | 0.079833656 | 0.051520039 |
| 0.117929075 | 0.013094781 | 0.002070236 | 0.033865757 |
| 0.002833675 | 0.018371263 | 0.048489623 | 0.022937945 |
| 0.016110701 | 0.015482486 | 0.105581661 | 0.051205841 |
| 0.028815467 | 0.096211603 | 0.028091784 | 0.024778141 |
| 0.0272576   | 0.02427946  | 0.020212348 | 0.027574152 |

|             |             |             |             |
|-------------|-------------|-------------|-------------|
| 0.063023832 | 0.036495539 | 0.029566889 | 0.007014824 |
| 0.019824059 | 0.048987363 | 0.001185562 | 0.007140567 |
| 0.153958268 | 0.026329111 | 0.042357234 | 0.054740673 |
| 0.029610992 | 0.007716214 | 0.051747844 | 0.112263397 |
| 0.021570996 | 0.017767626 | 0.020930881 | 0.038401405 |
| 0.019981964 | 0.026871687 | 0.01347894  | 0.062380529 |
| 0.078144315 | 0.01859044  | 0.024007438 | 1           |
| 0.044887395 | 0.015619353 | 0.056129748 | 0.028769473 |
| 0.105413582 | 0.011549169 | 0.00368377  | 0.000287422 |
| 0.01873774  | 0.036614955 | 0.019208765 | 0.038383013 |
| 0.024324927 | 0.042854327 | 0.000149939 | 0.024473473 |
| 0.027509822 | 0.048258382 | 0.015278232 | 0.021827717 |
| 0.019935155 | 0.025667314 | 0.014403609 | 0.027749142 |
| 0.020949689 | 0.018663526 | 0.017005568 | 0.10304799  |
| 0.039740612 | 0.016512282 | 0.037120386 | 0.024808323 |
| 0.052281399 | 0.041418946 | 0.113269769 | 0.067833615 |
| 0.00420246  | 0.030076749 | 0.016085716 | 0.014669601 |
| 0.017752491 | 0.070145675 | 0.024581804 | 0.042390929 |
| 0.030496281 | 0.058412143 | 0.047064419 | 0.019024844 |
| 0.041582485 | 0.044882812 | 0.003377769 | 0.000411203 |
| 0.001320797 | 0.021573819 | 0.039831668 | 0.049188217 |
| 0.028275937 | 0.01625946  | 0.083731414 | 0.033182246 |
| 0.039087599 | 0.032083995 | 0.025101924 | 0.080132707 |
| 0.02253934  | 0.070037286 | 0.02486867  | 0.062349056 |
| 0.027592208 | 0.00859699  | 0.036630904 | 0.024789368 |
| 0.023399054 | 0.040700338 | 0.012632214 | 0.049206189 |
| 0.001651355 | 0.066311136 | 0.021103935 | 0.021429205 |
| 0.001969489 | 0.06433116  | 0.050679312 | 0.040152521 |
| 0.015059337 | 0.085493165 | 0.100775902 | 0.000510425 |
| 0.118641592 | 0.03030913  | 0.138212835 | 0.039030358 |
| 0.047203375 | 0.070792467 | 0.017334855 | 0.022322366 |
| 0.008539084 | 0.018988485 | 0.032658524 | 0.009700516 |
| 0.021586283 | 0.030090627 | 0.016042369 | 0.0074992   |
| 0.020328332 | 0.024682212 | 0.003571412 | 0.031731495 |
| 0.002500032 | 0.082805437 | 0.049538396 | 0.034217642 |
| 0.016436916 | 0.028836499 | 0.057778818 | 0.035926736 |
| 0.04633362  | 0.065944664 | 0.020140931 | 0.019348948 |
| 0.066844151 | 0.001033788 | 0.048226881 | 0.018193645 |
| 0.020287685 | 0.041711791 | 0.023471249 | 0.026403172 |
| 0.019889726 | 0.022838116 | 0.02159325  | 0.057960315 |
| 0.006057373 | 0.018724956 | 0.05536128  | 0.063067519 |
| 0.065264489 | 0.054289656 | 0.019510781 | 0.033783397 |
| 0.100884502 | 0.010598158 | 0.00522194  | 0.00056591  |
| 0.007532128 | 0.038446913 | 0.055183894 | 0.055435421 |
| 0.020474004 | 0.017411737 | 0.007151975 | 0.05430091  |
| 0.026612302 | 0.019201578 | 0.019585563 | 0.050458202 |
| 0.073715196 | 0.060662826 | 0.029422206 | 0.0263553   |
| 0.003967882 | 0.03307527  | 0.033216086 | 0.051148761 |
| 0.026821268 | 0.076981087 | 0.022016603 | 0.008355558 |
| 0.00208303  | 0.010446671 | 0.100877657 | 0.078412367 |
| 0.139791834 | 0.044779646 | 0.003718545 | 0.046395676 |
| 0.004044645 | 0.092778533 | 0.00281023  | 0.0433625   |
| 0.040647672 | 0.005925757 | 0.064157043 | 0.102743366 |
| 0.09436727  | 0.022552508 | 0.043566994 | 0.080964275 |

|             |             |             |             |
|-------------|-------------|-------------|-------------|
| 0.006411973 | 0.024824767 | 0.024337749 | 0.057663752 |
| 0.005728664 | 0.012897091 | 0.100742297 | 0.021391274 |
| 0.03706555  | 0.001780471 | 0.027842627 | 0.011621243 |
| 0.051805217 | 0.043868445 | 0.016042681 | 0.012340684 |
| 0.001409853 | 0.01141539  | 0.01156216  | 0.024565111 |
| 0.039610158 | 0.020004064 | 0.016950583 | 0.025566772 |
| 0.054577967 | 0.068400292 | 0.013463577 | 0.000813302 |
| 0.016314947 | 0.01929039  | 0.014576742 | 0.018795495 |
| 0.014466797 | 0.081101322 | 0.013248456 | 0.023233151 |
| 0.003632375 | 0.006292826 | 0.059859345 | 0.035539207 |
| 0.006634223 |             |             |             |
| NEDD4L      | 0.423921044 | 0.526509466 | 0.418069153 |
| 0.461589936 | 0.49096965  | 0.378954994 | 0.295230962 |
| 0.245438037 | 0.131366955 | 0.013221605 | 0.047284671 |
| 0.462421648 | 0.27672437  | 0.338891925 | 0.334402819 |
| 0.479908269 | 0.221755126 | 0.401224552 | 0.346292599 |
| 0.470197201 | 0.148675832 | 0.478960845 | 0.165562197 |
| 0.362280277 | 0.168101789 | 0.131112985 | 0.330177554 |
| 0.471594601 | 0.146422599 | 0.342986348 | 0.421954021 |
| 0.181268343 | 0.449050023 | 0.506757414 | 0.479629868 |
| 0.497459043 | 0.384610382 | 0.028789425 | 0.331520333 |
| 0.411836083 | 0.456147973 | 0.462974213 | 0.421147697 |
| 0.088126592 | 0.469891721 | 0.336469322 | 0.459619024 |
| 0.263123358 | 0.068713248 | 0.26066418  | 0.432154347 |
| 0.458734363 | 0.4401923   | 0.290340839 | 0.239872885 |
| 0.248117363 | 0.270752572 | 0.297554729 | 0.33483105  |
| 0.327974163 | 0.188824437 | 0.47313563  | 0.138286051 |
| 0.19642826  | 0.333667236 | 0.247689606 | 0.342558508 |
| 0.391368755 | 0.383107911 | 0.045540763 | 0.402817343 |
| 0.006900578 | 0.455853719 | 0.457466848 | 0.318258967 |
| 0.092080358 | 0.049902968 | 0.279952102 | 0.414091814 |
| 0.473014213 | 0.448489698 | 0.492678426 | 0.492805439 |
| 0.270030563 | 0.400206368 | 0.429951237 | 0.271446856 |
| 0.427770765 | 0.259170465 | 0.165319737 | 0.487018769 |
| 0.50018051  | 0.516466276 | 0.298918749 | 0.361484913 |
| 0.418630258 | 0.480544455 | 0.431448975 | 0.473287604 |
| 0.350404547 | 0.098716271 | 0.431560737 | 0.517214048 |
| 0.38074354  | 0.360346549 | 0.244248384 | 0.434261628 |
| 0.122462928 | 0.374555692 | 0.443238006 | 0.234002499 |
| 0.47839236  | 0.041869395 | 0.310864038 | 0.42812706  |
| 0.311281513 | 0.442795806 | 0.508457322 | 0.286166553 |
| 0.474425193 | 0.047976357 | 0.166750192 | 0.077239335 |
| 0.394387573 | 0.185383692 | 0.45659821  | 0.462478345 |
| 0.308392174 | 0.450015077 | 0.361041238 | 0.009192496 |
| 0.063517795 | 0.271983324 | 0.432867902 | 0.434440321 |
| 0.461829652 | 0.355895702 | 0.309697396 | 0.382545562 |
| 0.439667202 | 0.486047352 | 0.057220258 | 0.172129447 |
| 0.458111968 | 0.279794985 | 0.350482758 | 0.472017334 |
| 0.394261187 | 0.191280341 | 0.222476748 | 0.525069283 |
| 0.420961907 | 0.160666861 | 0.368788199 | 0.48379606  |
| 0.379003039 | 0.434567329 | 0.195322494 | 0.377175447 |
| 0.104216082 | 0.465574315 | 0.064455734 | 0.381881471 |
| 0.273490762 | 0.230048105 | 0.028696953 | 0.322382428 |
| 0.336247181 | 0.414695643 | 0.443352285 | 0.193538248 |

|             |             |             |             |
|-------------|-------------|-------------|-------------|
| 0.417042104 | 0.478934771 | 0.351741454 | 0.429976881 |
| 0.023803476 | 0.097130606 | 0.292253807 | 0.514621558 |
| 0.28995404  | 0.503974893 | 0.40180738  | 0.392890241 |
| 0.387456931 | 0.473431813 | 0.005319575 | 0.480733407 |
| 0.51607413  | 0.300403877 | 0.460870575 | 0.474770224 |
| 0.385272348 | 0.463994648 | 0.049729421 | 0.490655822 |
| 0.353633033 | 0.152206593 | 0.516122969 | 0.255340978 |
| 0.452600866 | 0.089171024 | 0.381926547 | 0.425859311 |
| 0.41919667  | 0.020203375 | 0.258025694 | 0.441201199 |
| 0.060927455 | 0.147261131 | 0.451777256 | 0.462517137 |
| 0.430050928 | 0.471283171 | 0.494830794 | 0.363553251 |
| 0.485802012 | 0.331806398 | 0.032927697 | 0.407991088 |
| 0.447745455 | 0.386123931 | 0.435452341 | 0.329822489 |
| 0.331505515 | 0.472024368 | 0.398669257 | 0.215682585 |
| 0.092408284 | 0.385086385 | 0.040697637 | 0.405233837 |
| 0.366525567 | 0.193099634 | 0.394464435 | 0.237549068 |
| 0.135370977 | 0.530278267 | 0.236686916 | 0.294297725 |
| 0.164494205 | 0.435560667 | 0.35590897  | 0.294354202 |
| 0.271370315 | 0.260551056 | 0.397784277 | 0.420592037 |
| 0.077817923 | 0.174041353 | 0.032342548 | 0.387772495 |
| 0.197995691 | 0.377131146 | 0.361957747 | 0.409859546 |
| 0.402934438 | 0.181596853 | 0.455649198 | 0.338926586 |
| 0.184200789 | 0.040705351 | 0.509447935 | 0.476226494 |
| 0.32575824  | 0.244920909 | 0.091019258 | 0.347563015 |
| 0.471391148 | 0.305553382 | 0.271551687 | 0.458364323 |
| 0.057310236 | 0.491238946 | 0.3309649   | 0.207127659 |
| 0.43422563  | 0.367589932 | 0.471199407 | 0.079275133 |
| 0.424871786 | 0.469011842 | 0.41231763  | 0.270593567 |
| 0.38764624  | 0.469551231 | 0.069055529 | 0.393268094 |
| 0.39456788  | 0.074860173 | 0.525807888 | 0.210154377 |
| 0.052724569 | 0.471883678 | 0.435754625 | 0.143587779 |
| 0.142394749 | 0.39295924  | 0.084619527 | 0.394530186 |
| 0.522304929 | 0.482364333 | 0.425838118 | 0.28885635  |
| 0.088086488 | 0.026785668 | 0.30286965  | 0.422222587 |
| 0.494638395 | 0.508390323 | 0.377942786 | 0.427538233 |
| 0.351049203 | 0.374081424 | 0.176058383 | 0.512969705 |
| 0.253866902 | 0.511147857 | 0.021603544 | 0.447318932 |
| 0.490303508 | 0.316856227 | 0.141257312 | 0.368083363 |
| 0.379527371 | 0.096267692 | 0.306520444 | 0.489635248 |
| 0.426958891 | 0.394028022 | 0.380592248 | 0.478712838 |
| 0.038877841 | 0.089706049 | 0.43786481  | 0.231584008 |
| 0.424833619 | 0.312239631 | 0.07143414  | 0.378493813 |
| 0.090185034 | 0.452847323 | 0.486269935 | 0.105226235 |
| 0.339906458 | 0.342683998 | 0.467831962 | 0.083710046 |
| 0.434396345 | 0.490602985 | 0.512022641 | 0.262018334 |
| 0.452732772 | 0.48140154  | 0.405522844 | 0.149909234 |
| 0.043438286 | 0.503268136 | 0.412541072 | 0.044887395 |
| 1           | 0.244697342 | 0.032176872 | 0.50070133  |
| 0.287377379 | 0.423248214 | 0.006137112 | 0.09624937  |
| 0.082039991 | 0.479956734 | 0.464803637 | 0.428061817 |
| 0.243561604 | 0.450964403 | 0.01333557  | 0.523623932 |
| 0.488638039 | 0.035793961 | 0.221089808 | 0.433752738 |
| 0.419234733 | 0.529126609 | 0.356811869 | 0.43948524  |
| 0.440534583 | 0.485933566 | 0.318456851 | 0.373247345 |

|             |             |             |             |
|-------------|-------------|-------------|-------------|
| 0.440588773 | 0.478142023 | 0.442826084 | 0.456388241 |
| 0.475497958 | 0.484894786 | 0.381748484 | 0.039943616 |
| 0.16678635  | 0.267193819 | 0.295609712 | 0.122201989 |
| 0.332385441 | 0.215267023 | 0.479798583 | 0.48247544  |
| 0.480248926 | 0.016734333 | 0.222787064 | 0.430463184 |
| 0.443787473 | 0.484649897 | 0.043585374 | 0.009974827 |
| 0.011312714 | 0.037826824 | 0.426973431 | 0.34337922  |
| 0.488277685 | 0.237930823 | 0.016351969 | 0.086317963 |
| 0.357638752 | 0.444693299 | 0.501281686 | 0.466352075 |
| 0.451425246 | 0.158704612 | 0.308318677 | 0.471418422 |
| 0.119383362 | 0.315273476 | 0.489002827 | 0.472109057 |
| 0.088456067 | 0.345770847 | 0.417787703 | 0.499603468 |
| 0.086767729 | 0.428614423 | 0.467980567 | 0.390801121 |
| 0.032440069 | 0.147143852 | 0.12019874  | 0.48584401  |
| 0.480997053 | 0.136189733 | 0.071018034 | 0.166062633 |
| 0.194785364 | 0.467087838 | 0.255435428 | 0.526095383 |
| 0.452473504 | 0.488279159 | 0.139291062 | 0.475479633 |
| 0.080506372 | 0.477285897 | 0.403656409 | 0.067305122 |
| 0.384861678 | 0.034889303 | 0.461577792 | 0.172333705 |
| 0.373366389 | 0.429768818 | 0.229906158 | 0.042126878 |
| 0.208033386 | 0.109924891 | 0.485271267 | 0.471843327 |
| 0.071072785 | 0.333725806 | 0.400785074 | 0.468531588 |
| 0.333219668 | 0.476391988 | 0.492471582 | 0.381376995 |
| 0.151737951 | 0.187428812 | 0.458050115 | 0.403492846 |
| 0.314901591 | 0.501551779 | 0.358588909 | 0.527056798 |
| 0.415997398 | 0.459756122 | 0.468764326 | 0.414954909 |
| 0.318700092 | 0.413785292 | 0.397129177 | 0.042072816 |
| 0.441467058 | 0.479961766 | 0.41636086  | 0.218584374 |
| 0.354895607 | 0.404598371 | 0.097158942 | 0.203968468 |
| 0.345230126 | 0.326600188 | 0.238645184 | 0.486433926 |
| 0.425230582 | 0.40381584  | 0.08589513  | 0.112279843 |
| 0.541829801 | 0.431573174 | 0.19596893  | 0.45150231  |
| 0.274877156 | 0.425624873 | 0.462340876 | 0.469315062 |
| 0.393641932 | 0.442101544 | 0.452311464 | 0.405004559 |
| 0.424801651 | 0.361474752 | 0.515571894 | 0.123845652 |
| 0.134363509 | 0.426918177 | 0.165489934 | 0.168372889 |
| 0.241577492 | 0.06020772  | 0.310638537 | 0.491317653 |
| 0.38369064  | 0.469833139 | 0.354636067 | 0.142054055 |
| 0.427569496 | 0.385403815 | 0.456382066 | 0.274869836 |
| 0.141152842 | 0.488748588 | 0.022810942 | 0.117849278 |
| 0.414821364 | 0.439942495 | 0.419337556 | 0.343111642 |
| 0.339848988 | 0.224301384 | 0.411727294 | 0.325125977 |
| 0.329711855 | 0.390828038 | 0.430934979 | 0.064676058 |
| 0.049547415 | 0.506636618 | 0.392128453 | 0.047213711 |
| 0.145454585 | 0.382679906 | 0.385830854 | 0.310342608 |
| 0.050217184 | 0.473013709 | 0.341242695 | 0.469386203 |
| 0.413287502 | 0.133560434 | 0.341683443 | 0.137258069 |
| 0.113983953 | 0.443219524 | 0.426815876 | 0.503057415 |
| 0.415526294 | 0.483659093 | 0.428308585 | 0.436571154 |
| 0.175861889 | 0.381563286 | 0.062724279 | 0.464073591 |
| 0.390902914 |             |             |             |
| NFYB        | 0.192881338 | 0.312171572 | 0.074644414 |
| 0.2349079   | 0.09679906  | 0.218536803 | 0.12232848  |
| 0.20699188  | 0.037416962 | 0.012357084 | 0.004801213 |



|             |             |                      |             |
|-------------|-------------|----------------------|-------------|
| 0.117516621 | 0.046550013 | 0.143461671          | 0.113034352 |
| 0.180726005 | 0.022015521 | 0.11763414           | 0.094919515 |
| 0.210383864 | 0.134696935 | 0.138654646          | 0.062064929 |
| 0.035733799 | 0.013978801 | 0.021244494          | 0.034747836 |
| 0.276036748 | 0.024477986 | 0.183310355          | 0.293342647 |
| 0.019690817 | 0.245695339 | 0.313172213          | 0.122753592 |
| 0.285604426 | 0.189054211 | 0.010315388          | 0.131621582 |
| 0.291050116 | 0.168324469 | 0.227854869          | 0.128287252 |
| 0.032775022 | 0.356201746 | 0.105098 0.088191924 |             |
| 0.145870948 | 0.00919797  | 0.229021058          | 0.356578265 |
| 0.29342157  | 0.126880697 | 0.191921483          | 0.097960628 |
| 0.03840773  | 0.209816125 | 0.02524522           | 0.326051683 |
| 0.095598346 | 0.238326918 | 0.27791186           | 0.06504262  |
| 0.06957241  | 0.173836374 | 0.022226676          | 0.162595545 |
| 0.040319246 | 0.311175422 | 0.030726 0.09964577  |             |
| 0.010965246 | 0.208539105 | 0.084727738          | 0.033888982 |
| 0.013247924 | 0.01102938  | 0.028573111          | 0.170132132 |
| 0.269823718 | 0.273168466 | 0.215872084          | 0.213374174 |
| 0.035416243 | 0.06068499  | 0.056388085          | 0.053807102 |
| 0.26531122  | 0.096580177 | 0.06708511           | 0.158626877 |
| 0.221890662 | 0.285138392 | 0.038066003          | 0.042984282 |
| 0.249725267 | 0.32694383  | 0.103536746          | 0.085110057 |
| 0.05437174  | 0.005964481 | 0.291285968          | 0.251040967 |
| 0.31026769  | 0.03172012  | 0.027993953          | 0.311698063 |
| 0.022103637 | 0.130005362 | 0.149428124          | 0.038110987 |
| 0.280264567 | 0.022367008 | 0.030256953          | 0.156856085 |
| 0.071069718 | 0.236599713 | 0.258816973          | 0.090599765 |
| 0.078152884 | 0.009865708 | 0.013420842          | 0.010549905 |
| 0.106589704 | 0.00991368  | 0.318846434          | 0.267721399 |
| 0.178587912 | 0.065580964 | 0.132129447          | 0.00083743  |
| 0.005742202 | 0.035889019 | 0.20770467           | 0.114726753 |
| 0.211213641 | 0.195502243 | 0.051444511          | 0.274697452 |
| 0.120721662 | 0.208665792 | 0.069830207          | 0.072802945 |
| 0.140639389 | 0.035561499 | 0.074356969          | 0.130177804 |
| 0.052737643 | 0.117833855 | 0.055955262          | 0.271014557 |
| 0.377247877 | 0.045305311 | 0.149367431          | 0.163239448 |
| 0.094685963 | 0.056893261 | 0.05829771           | 0.095972912 |
| 0.051809904 | 0.252699493 | 0.00396657           | 0.171192596 |
| 0.043100287 | 0.017117084 | 0.013665548          | 0.202945696 |
| 0.130087726 | 0.232581926 | 0.291496199          | 0.046217466 |
| 0.103388686 | 0.115577556 | 0.191194059          | 0.197375479 |
| 0.007471058 | 0.029491181 | 0.185257238          | 0.270452072 |
| 0.317431057 | 0.237239873 | 0.097789 0.057667253 |             |
| 0.056520414 | 0.220668038 | 0.000975807          | 0.328987908 |
| 0.275787443 | 0.183395554 | 0.114041176          | 0.112446343 |
| 0.053551817 | 0.253760366 | 0.02555913           | 0.16596222  |
| 0.25553071  | 0.039983573 | 0.244573651          | 0.033137641 |
| 0.281982459 | 0.013953221 | 0.167492572          | 0.153933853 |
| 0.149567251 | 0.006784658 | 0.213633041          | 0.240653512 |
| 0.003421239 | 0.151468211 | 0.21803629           | 0.187034996 |
| 0.123685637 | 0.183080094 | 0.238773179          | 0.047675534 |
| 0.097709205 | 0.138607842 | 0.00677356           | 0.049601928 |
| 0.187398727 | 0.06639078  | 0.346669631          | 0.134052734 |
| 0.216514712 | 0.308422897 | 0.192559362          | 0.063738021 |

|             |             |             |             |
|-------------|-------------|-------------|-------------|
| 0.030675983 | 0.16441785  | 0.041773727 | 0.068851371 |
| 0.215434594 | 0.066634918 | 0.074121871 | 0.034817907 |
| 0.012668487 | 0.277490123 | 0.015116521 | 0.022992207 |
| 0.00829479  | 0.146371596 | 0.117065288 | 0.087298579 |
| 0.037387758 | 0.04502845  | 0.054676469 | 0.078552473 |
| 0.06880156  | 0.028900069 | 0.001811046 | 0.06123793  |
| 0.034196188 | 0.077054741 | 0.090077498 | 0.231345392 |
| 0.125762827 | 0.041418086 | 0.07620389  | 0.038165425 |
| 0.019312267 | 0.005567096 | 0.299095949 | 0.168422634 |
| 0.326343262 | 0.080105894 | 0.013229746 | 0.071620961 |
| 0.265412313 | 0.196577184 | 0.193805969 | 0.305875606 |
| 0.020454569 | 0.226768264 | 0.063492173 | 0.025448723 |
| 0.053080974 | 0.080311138 | 0.262441439 | 0.040969457 |
| 0.184193771 | 0.333073518 | 0.073910583 | 0.036698653 |
| 0.331193158 | 0.194625094 | 0.033466297 | 0.243737162 |
| 0.252034251 | 0.012555389 | 0.27289617  | 0.017718715 |
| 0.006103095 | 0.132187031 | 0.155302717 | 0.019262671 |
| 0.016660343 | 0.097045998 | 0.108513294 | 0.068014995 |
| 0.287322066 | 0.154682424 | 0.215247495 | 0.025308173 |
| 0.025029818 | 0.003938938 | 0.026495628 | 0.081034244 |
| 0.326653542 | 0.238390665 | 0.068459521 | 0.055629446 |
| 0.09176498  | 0.052840677 | 0.193315817 | 0.255421107 |
| 0.039461859 | 0.303523709 | 0.004179171 | 0.145485748 |
| 0.289624351 | 0.206349918 | 0.013873226 | 0.169166493 |
| 0.322901446 | 0.03219743  | 0.106105848 | 0.30547049  |
| 0.269680998 | 0.07196837  | 0.071623063 | 0.154562727 |
| 0.03853404  | 0.055249555 | 0.088349942 | 0.015321769 |
| 0.08929861  | 0.058598021 | 0.002063004 | 0.168232441 |
| 0.022989931 | 0.318715589 | 0.211065864 | 0.017636468 |
| 0.179464496 | 0.176644019 | 0.095287887 | 0.021343748 |
| 0.173569624 | 0.248735491 | 0.319637303 | 0.111520684 |
| 0.187221988 | 0.236299155 | 0.07164803  | 0.018244771 |
| 0.003339749 | 0.2746618   | 0.24497149  | 0.015619353 |
| 0.244697342 | 1           | 0.008358712 | 0.331765938 |
| 0.088960464 | 0.324655177 | 0.017209461 | 0.012044964 |
| 0.00548825  | 0.184998528 | 0.309554993 | 0.266176611 |
| 0.170056469 | 0.154928519 | 0.000268842 | 0.253357573 |
| 0.308709967 | 0.002347092 | 0.016159519 | 0.186097774 |
| 0.131118874 | 0.336430118 | 0.036101289 | 0.179410394 |
| 0.096735283 | 0.274525792 | 0.112983514 | 0.061040654 |
| 0.264904233 | 0.224979674 | 0.262929834 | 0.330296305 |
| 0.251267859 | 0.127417862 | 0.112321468 | 0.017100829 |
| 0.01911477  | 0.214644282 | 0.081001434 | 0.019676633 |
| 0.279850136 | 0.025477258 | 0.27762624  | 0.221182588 |
| 0.216557331 | 0.002051158 | 0.155397493 | 0.217626094 |
| 0.330655907 | 0.291049651 | 0.008198457 | 0.003814273 |
| 0.002594442 | 0.001872739 | 0.195670018 | 0.043760346 |
| 0.254757918 | 0.134767136 | 0.003914507 | 0.101866484 |
| 0.105360258 | 0.079063879 | 0.293065844 | 0.17757234  |
| 0.169120609 | 0.02645715  | 0.09897219  | 0.202516124 |
| 0.010306297 | 0.252746133 | 0.230995787 | 0.345640087 |
| 0.010299624 | 0.045713469 | 0.123242862 | 0.281103133 |
| 0.003002858 | 0.071255979 | 0.13264072  | 0.08893272  |
| 0.00368425  | 0.013850309 | 0.01344936  | 0.185813199 |

|             |             |             |             |
|-------------|-------------|-------------|-------------|
| 0.270988086 | 0.018821485 | 0.008450762 | 0.138589161 |
| 0.062208612 | 0.231619932 | 0.056640463 | 0.257428424 |
| 0.278509852 | 0.223309751 | 0.00869434  | 0.316540825 |
| 0.01298158  | 0.299407145 | 0.040861237 | 0.054093822 |
| 0.068539196 | 0.006993914 | 0.235298311 | 0.021888867 |
| 0.182516634 | 0.245563344 | 0.030899223 | 0.002316859 |
| 0.01592287  | 0.012967449 | 0.233669889 | 0.180362957 |
| 0.004422242 | 0.119330319 | 0.064511554 | 0.163088513 |
| 0.221285441 | 0.200673713 | 0.327956928 | 0.115982233 |
| 0.072617412 | 0.012178939 | 0.251891352 | 0.231746197 |
| 0.185975139 | 0.221592704 | 0.055250207 | 0.269247178 |
| 0.247868153 | 0.283872959 | 0.239621874 | 0.140593125 |
| 0.024615738 | 0.202096394 | 0.252625755 | 0.034671037 |
| 0.128851426 | 0.218946124 | 0.146603614 | 0.024093263 |
| 0.048420817 | 0.058278467 | 0.034901727 | 0.098106396 |
| 0.033528506 | 0.272502859 | 0.058485126 | 0.220207415 |
| 0.218640543 | 0.248075081 | 0.054085039 | 0.013594876 |
| 0.311500746 | 0.311635811 | 0.142404735 | 0.205009501 |
| 0.042694131 | 0.08112493  | 0.179208139 | 0.155051627 |
| 0.077338043 | 0.227225479 | 0.27856713  | 0.252953474 |
| 0.357156443 | 0.102681453 | 0.31306809  | 0.218064175 |
| 0.014222981 | 0.136276425 | 0.035925234 | 0.017813356 |
| 0.052387351 | 0.006851332 | 0.02916785  | 0.163553671 |
| 0.046070482 | 0.132447509 | 0.15581236  | 0.026904658 |
| 0.057284663 | 0.104532106 | 0.097314954 | 0.139308747 |
| 0.034052159 | 0.309583095 | 0.003522751 | 0.015436727 |
| 0.049816464 | 0.201967669 | 0.053262538 | 0.051336845 |
| 0.030871332 | 0.018473037 | 0.074863603 | 0.211478187 |
| 0.112610098 | 0.073770415 | 0.212453936 | 0.052606162 |
| 0.033203233 | 0.240097009 | 0.146781553 | 0.003860823 |
| 0.016372252 | 0.193365805 | 0.093861787 | 0.063871278 |
| 0.002591783 | 0.220061279 | 0.138703895 | 0.093138999 |
| 0.176720212 | 0.029262028 | 0.343384665 | 0.052652166 |
| 0.041988036 | 0.333283452 | 0.074704288 | 0.269638831 |
| 0.057935202 | 0.186329168 | 0.349589979 | 0.227214839 |
| 0.044917341 | 0.078965509 | 0.03370108  | 0.261403392 |
| 0.068443776 |             |             |             |

|             |             |             |             |
|-------------|-------------|-------------|-------------|
| NGP         | 0.005039617 | 0.016882065 | 0.00387292  |
| 0.054646771 | 0.024533438 | 0.014466262 | 0.089933216 |
| 0.010267831 | 0.01069305  | 0.084608555 | 0.064969211 |
| 0.012193076 | 0.028209397 | 0.069175742 | 0.003816457 |
| 0.036001152 | 0.130286046 | 0.002531247 | 0.09687434  |
| 0.030800698 | 0.07109797  | 0.073636672 | 0.068314738 |
| 0.004983978 | 0.093486482 | 0.154582616 | 0.022718386 |
| 0.034666218 | 0.140384877 | 0.022035767 | 0.026596254 |
| 0.028687453 | 0.012429488 | 0.009057397 | 0.051128696 |
| 0.008784158 | 0.003019654 | 0.004685959 | 0.023740777 |
| 0.007966557 | 0.019821521 | 0.033051773 | 0.101635    |
| 0.111513146 | 0.008465326 | 0.120276969 | 0.014145507 |
| 0.001405675 | 0.154269417 | 0.008964776 | 0.007089677 |
| 0.012234885 | 0.018618725 | 0.018155741 | 0.09543072  |
| 0.027041669 | 0.01439101  | 0.015846711 | 0.012748013 |
| 0.124044212 | 0.019687852 | 0.011686884 | 0.020947276 |
| 0.003418438 | 0.017108642 | 0.034715539 | 0.044817936 |

|             |             |             |             |
|-------------|-------------|-------------|-------------|
| 0.004200999 | 0.008945391 | 0.014140086 | 0.003522708 |
| 0.056094548 | 0.030976147 | 0.019139192 | 0.004006976 |
| 0.156264707 | 0.189865821 | 0.045489038 | 0.083189384 |
| 0.027275593 | 0.005167959 | 0.031162294 | 0.020892227 |
| 0.076228679 | 0.025996577 | 0.007413145 | 0.142912456 |
| 0.009463211 | 0.144590347 | 0.008790242 | 0.047352514 |
| 0.028022681 | 0.013903133 | 0.026643131 | 0.038252769 |
| 0.030945466 | 0.014332203 | 0.010691476 | 0.024350446 |
| 0.008842745 | 0.013242463 | 0.011802465 | 0.022309907 |
| 0.00828688  | 0.009166275 | 0.11956586  | 0.026561465 |
| 0.091926516 | 0.002226258 | 0.093603668 | 0.015245746 |
| 0.028652859 | 0.047238664 | 0.065397495 | 0.065647063 |
| 0.005150989 | 0.013143329 | 0.01216343  | 0.115650007 |
| 0.012594861 | 0.049491048 | 0.00407325  | 0.039081033 |
| 0.005266051 | 0.004628481 | 0.006407763 | 0.044381208 |
| 0.016059284 | 0.009625034 | 0.037561482 | 0.041236914 |
| 0.102904049 | 0.002499893 | 0.013971973 | 0.007141078 |
| 0.013792567 | 0.002310121 | 0.088148753 | 0.00712859  |
| 0.011783769 | 0.029150705 | 0.001359985 | 0.052890852 |
| 0.019623197 | 0.004669759 | 0.114600861 | 0.018657842 |
| 0.065165547 | 0.039662283 | 0.131957467 | 0.02166328  |
| 0.010324098 | 0.17504365  | 0.002658665 | 0.043711078 |
| 0.02070232  | 0.040992876 | 0.088542066 | 0.106785615 |
| 0.116723657 | 0.007390595 | 0.081003617 | 0.006229893 |
| 0.002554648 | 0.035373954 | 0.003516533 | 0.02452331  |
| 0.01553894  | 0.028322997 | 0.004440281 | 0.079961497 |
| 0.098874504 | 0.047627747 | 0.006859581 | 0.042281293 |
| 0.072889166 | 0.017014262 | 0.001906374 | 0.026432629 |
| 0.013426821 | 0.014338609 | 0.026992712 | 0.010647405 |
| 0.067741612 | 0.024104776 | 6.27E-05    | 0.008915341 |
| 0.011772235 | 0.002340393 | 0.096267542 | 0.012294479 |
| 0.006665555 | 0.040509814 | 7.30E-05    | 0.05093678  |
| 0.004653794 | 0.065632764 | 0.027839434 | 0.176767598 |
| 0.008130357 | 0.186678841 | 0.020539724 | 0.011183748 |
| 0.015431647 | 0.00713187  | 0.027044572 | 0.038269052 |
| 0.036132768 | 0.035375175 | 0.010582453 | 0.041515711 |
| 0.038907764 | 0.016089703 | 0.034782184 | 0.0067768   |
| 0.028548352 | 0.034818759 | 0.010537415 | 0.026007136 |
| 0.008715617 | 0.000991684 | 0.012067626 | 0.027143013 |
| 0.003397715 | 0.016063078 | 0.006469871 | 0.002181639 |
| 0.152127651 | 0.028579905 | 0.027920431 | 0.035846746 |
| 0.00333867  | 0.169217032 | 0.004757147 | 0.005977385 |
| 0.108410103 | 0.021652273 | 0.012193313 | 0.003937708 |
| 0.005632799 | 0.066549972 | 0.043261378 | 0.125776373 |
| 0.103525651 | 0.041019404 | 0.008527047 | 0.012864022 |
| 0.092899359 | 0.220995014 | 0.001724932 | 0.020445406 |
| 0.129956371 | 0.067833046 | 0.056998662 | 0.009905111 |
| 0.022326497 | 0.105822373 | 0.05978926  | 0.002858469 |
| 0.041601078 | 0.137263386 | 0.016047262 | 0.03054114  |
| 0.007494538 | 0.046199436 | 0.08322582  | 0.006306255 |
| 0.039362655 | 0.014028831 | 0.001299583 | 0.02859788  |
| 0.006466463 | 0.019823491 | 0.096045073 | 0.172026704 |
| 0.043967188 | 0.165038038 | 0.031346692 | 0.003918646 |
| 0.007116503 | 0.018126835 | 0.021385838 | 0.087827449 |

|             |             |             |             |
|-------------|-------------|-------------|-------------|
| 0.016279618 | 0.027212412 | 0.043976823 | 0.006942775 |
| 0.010892525 | 0.197452352 | 0.016602607 | 0.063018668 |
| 0.100560878 | 0.018434838 | 0.020501363 | 0.118476616 |
| 0.072651332 | 0.08887013  | 0.038813753 | 0.083903782 |
| 0.022142459 | 0.070630371 | 0.024887346 | 0.006839235 |
| 0.214924285 | 0.180099535 | 0.022904827 | 0.003897061 |
| 0.009283506 | 0.015539931 | 0.065279476 | 0.071365252 |
| 0.10407172  | 0.012368187 | 0.001444095 | 0.0236134   |
| 0.000421724 | 0.009090722 | 0.064775209 | 0.0136132   |
| 0.008670483 | 0.011460108 | 0.138780977 | 0.045159997 |
| 0.017357136 | 0.087578153 | 0.015982893 | 0.01382255  |
| 0.013514755 | 0.01553518  | 0.011989424 | 0.015153812 |
| 0.070836837 | 0.044243901 | 0.013952752 | 0.00400545  |
| 0.014737946 | 0.033661332 | 0.001305077 | 0.003705527 |
| 0.145804295 | 0.019584321 | 0.026556426 | 0.047842325 |
| 0.031514848 | 0.002457854 | 0.038229351 | 0.122772534 |
| 0.012865293 | 0.008146458 | 0.011570132 | 0.028063534 |
| 0.013156123 | 0.017398762 | 0.011607483 | 0.053210491 |
| 0.090835409 | 0.00953949  | 0.008004024 | 0.056129748 |
| 0.032176872 | 0.008358712 | 1           | 0.016459706 |
| 0.080432446 | 0.005060934 | 0.004102246 | 0.00036874  |
| 0.013246995 | 0.021905837 | 0.009541841 | 0.02117905  |
| 0.014137361 | 0.020646015 | 0.000119373 | 0.013576099 |
| 0.018727202 | 0.066841796 | 0.016166701 | 0.017623103 |
| 0.01476915  | 0.013495737 | 0.010815111 | 0.020859607 |
| 0.020151831 | 0.011134178 | 0.0257034   | 0.084859474 |
| 0.028390216 | 0.009144925 | 0.016363598 | 0.010421839 |
| 0.041140394 | 0.02623709  | 0.102697597 | 0.107324055 |
| 0.001760439 | 0.020647078 | 0.0100755   | 0.024309259 |
| 0.006597768 | 0.064301572 | 0.011666761 | 0.027747056 |
| 0.022299504 | 0.077113671 | 0.029993141 | 0.012498909 |
| 0.025400991 | 0.024878958 | 0.001690067 | 0.000522262 |
| 0.000164319 | 0.046511317 | 0.025428244 | 0.029338114 |
| 0.015186518 | 0.011847737 | 0.111126509 | 0.03377935  |
| 0.013573573 | 0.023932287 | 0.016260879 | 0.057976149 |
| 0.009800221 | 0.081156467 | 0.041906862 | 0.036461246 |
| 0.038387474 | 0.002151817 | 0.026798038 | 0.015171295 |
| 0.01860401  | 0.02282004  | 0.00454625  | 0.031439363 |
| 0.001904949 | 0.060012745 | 0.01504932  | 0.033451163 |
| 0.002337716 | 0.058333719 | 0.050992205 | 0.022516228 |
| 0.0084429   | 0.215334308 | 0.215464855 | 0.001508058 |
| 0.193349514 | 0.017358904 | 0.125329577 | 0.024750847 |
| 0.028356964 | 0.051056207 | 0.023482347 | 0.01065838  |
| 0.034574968 | 0.012382448 | 0.03024676  | 0.003347652 |
| 0.009405771 | 0.028915235 | 0.00883999  | 0.010938027 |
| 0.017455292 | 0.010005708 | 0.001500525 | 0.041193439 |
| 0.000839915 | 0.123735727 | 0.036640433 | 0.021698722 |
| 0.013104819 | 0.018903175 | 0.03038056  | 0.015646786 |
| 0.029068012 | 0.059706766 | 0.010686447 | 0.008469213 |
| 0.093799324 | 0.000546419 | 0.026728533 | 0.00783591  |
| 0.019815967 | 0.027439952 | 0.031835898 | 0.013969958 |
| 0.006982052 | 0.009102807 | 0.014005678 | 0.037717064 |
| 0.009963806 | 0.007726284 | 0.050554483 | 0.070522348 |
| 0.035040218 | 0.046688394 | 0.006927401 | 0.039570736 |

|             |             |             |             |
|-------------|-------------|-------------|-------------|
| 0.131802644 | 0.005327415 | 0.006238693 | 0.000193861 |
| 0.004432914 | 0.023183425 | 0.088377724 | 0.033623371 |
| 0.008399761 | 0.007684222 | 0.010218944 | 0.056994902 |
| 0.014799948 | 0.007530172 | 0.0093692   | 0.029069031 |
| 0.050514069 | 0.049292907 | 0.013963109 | 0.016524911 |
| 0.001293777 | 0.02843238  | 0.021833744 | 0.0480725   |
| 0.017597085 | 0.056944109 | 0.01174138  | 0.003695859 |
| 0.00606886  | 0.005299732 | 0.19847183  | 0.077046089 |
| 0.175665931 | 0.034958288 | 0.002132166 | 0.030744823 |
| 0.002918485 | 0.098831983 | 0.001509219 | 0.013907368 |
| 0.029882592 | 0.001299721 | 0.046115379 | 0.094629555 |
| 0.131119003 | 0.014068623 | 0.018105055 | 0.095866232 |
| 0.00722459  | 0.014210604 | 0.026278947 | 0.038526942 |
| 0.005466201 | 0.008985106 | 0.106265747 | 0.013659853 |
| 0.053892275 | 0.00060744  | 0.014790358 | 0.007667515 |
| 0.081572189 | 0.028788992 | 0.004587797 | 0.00673843  |
| 0.003207534 | 0.00320913  | 0.005085695 | 0.030194757 |
| 0.039789526 | 0.013887953 | 0.016930394 | 0.01300078  |
| 0.030299296 | 0.060147656 | 0.004954249 | 0.001791292 |
| 0.007107028 | 0.00936741  | 0.006080827 | 0.01125626  |
| 0.005156383 | 0.070893673 | 0.005182833 | 0.017403532 |
| 0.001212799 | 0.00146669  | 0.058087012 | 0.018907154 |
| 0.005592433 |             |             |             |

| NME4        | 0.468520442 | 0.512100337 | 0.427348926 |
|-------------|-------------|-------------|-------------|
| 0.478026085 | 0.461377859 | 0.459550142 | 0.264530134 |
| 0.255250147 | 0.104251658 | 0.008005005 | 0.025844801 |
| 0.469737559 | 0.231670696 | 0.338384494 | 0.397644305 |
| 0.457668592 | 0.140859756 | 0.404884549 | 0.282551855 |
| 0.467666593 | 0.134933153 | 0.434437198 | 0.116236772 |
| 0.293363771 | 0.106843354 | 0.078382545 | 0.27872379  |
| 0.493026935 | 0.090411591 | 0.419687849 | 0.463556591 |
| 0.104358607 | 0.491674818 | 0.521455655 | 0.465673053 |
| 0.512205107 | 0.452025853 | 0.014081824 | 0.372360521 |
| 0.479223746 | 0.482960356 | 0.468490776 | 0.379125127 |
| 0.054752485 | 0.503105458 | 0.296127907 | 0.422371865 |
| 0.300103471 | 0.034217996 | 0.332600506 | 0.459905229 |
| 0.485241006 | 0.482408026 | 0.300465133 | 0.205048019 |
| 0.230331606 | 0.314999253 | 0.277069533 | 0.416268778 |
| 0.272005691 | 0.237134552 | 0.485079477 | 0.118180385 |
| 0.18317471  | 0.319724416 | 0.153970675 | 0.329372686 |
| 0.354017737 | 0.466349558 | 0.025002015 | 0.434274178 |
| 0.005060463 | 0.445361993 | 0.398098166 | 0.322753948 |
| 0.045843681 | 0.025180566 | 0.182793912 | 0.404386446 |
| 0.499513524 | 0.456730918 | 0.496226858 | 0.491995817 |
| 0.194893446 | 0.314372894 | 0.405422454 | 0.197631963 |
| 0.490872791 | 0.224761031 | 0.13388322  | 0.452609559 |
| 0.49719546  | 0.511400577 | 0.214110552 | 0.273423492 |
| 0.488431892 | 0.489091399 | 0.480010633 | 0.470397165 |
| 0.37607223  | 0.049264862 | 0.470398892 | 0.498083469 |
| 0.466387932 | 0.316727029 | 0.161629634 | 0.483446977 |
| 0.066691745 | 0.429243057 | 0.403546512 | 0.171155637 |
| 0.501349154 | 0.025258437 | 0.217355088 | 0.427078435 |
| 0.24465283  | 0.497292377 | 0.499327804 | 0.228870261 |
| 0.434048043 | 0.023545205 | 0.137597564 | 0.035517435 |

|             |             |             |             |
|-------------|-------------|-------------|-------------|
| 0.377573022 | 0.136226714 | 0.500826304 | 0.503174316 |
| 0.306460264 | 0.410801107 | 0.326113579 | 0.001925319 |
| 0.027403755 | 0.194029207 | 0.483766187 | 0.418396877 |
| 0.484026052 | 0.423605029 | 0.262997381 | 0.466542583 |
| 0.472552101 | 0.494599608 | 0.08931978  | 0.124446334 |
| 0.480119329 | 0.192879508 | 0.269433535 | 0.490320185 |
| 0.329886791 | 0.153608289 | 0.151333224 | 0.501458496 |
| 0.461312364 | 0.103125775 | 0.408805364 | 0.452210627 |
| 0.391409775 | 0.368456319 | 0.129617637 | 0.325032275 |
| 0.068621292 | 0.476513502 | 0.027064025 | 0.409955144 |
| 0.29840293  | 0.14831659  | 0.014205155 | 0.342239115 |
| 0.357620638 | 0.486837391 | 0.482833495 | 0.123990539 |
| 0.371295474 | 0.440034939 | 0.408578613 | 0.488070331 |
| 0.014000368 | 0.054806112 | 0.366025787 | 0.500730379 |
| 0.383658748 | 0.490732007 | 0.347517736 | 0.323557352 |
| 0.302508244 | 0.491460499 | 0.003418095 | 0.507134074 |
| 0.511776924 | 0.387273625 | 0.444804489 | 0.44851236  |
| 0.400811618 | 0.49974582  | 0.051470627 | 0.457700882 |
| 0.435841664 | 0.093444876 | 0.500388627 | 0.173810484 |
| 0.46866011  | 0.046718723 | 0.398956114 | 0.464754881 |
| 0.468888442 | 0.010448224 | 0.312952359 | 0.458444755 |
| 0.025332972 | 0.145841415 | 0.483867407 | 0.466426167 |
| 0.435989115 | 0.482335411 | 0.496840772 | 0.380201754 |
| 0.467393093 | 0.289628256 | 0.013564492 | 0.33144734  |
| 0.479549342 | 0.414791161 | 0.468550642 | 0.297024195 |
| 0.421494903 | 0.490725013 | 0.469022482 | 0.253219205 |
| 0.055278528 | 0.390094711 | 0.030471543 | 0.368327161 |
| 0.447577167 | 0.151690025 | 0.432824345 | 0.155561251 |
| 0.07269602  | 0.498186035 | 0.169783818 | 0.256792742 |
| 0.118493832 | 0.46611443  | 0.303384657 | 0.29215669  |
| 0.23777596  | 0.183782672 | 0.37697135  | 0.423877591 |
| 0.056655611 | 0.106422502 | 0.012918373 | 0.411677685 |
| 0.163420908 | 0.391562439 | 0.399064014 | 0.478722936 |
| 0.388987364 | 0.131010322 | 0.422297378 | 0.297035634 |
| 0.118498462 | 0.016025586 | 0.493679193 | 0.451852104 |
| 0.423936402 | 0.189331495 | 0.044231474 | 0.38960725  |
| 0.504209979 | 0.410735927 | 0.357125079 | 0.495549058 |
| 0.034270045 | 0.495859012 | 0.28756938  | 0.132218375 |
| 0.400623532 | 0.302191814 | 0.496227632 | 0.078618046 |
| 0.462249286 | 0.48272657  | 0.341201196 | 0.202766438 |
| 0.45677614  | 0.478849007 | 0.040655684 | 0.472587844 |
| 0.472092034 | 0.035527249 | 0.501821196 | 0.127899978 |
| 0.021632894 | 0.466178362 | 0.480935085 | 0.081460028 |
| 0.082240226 | 0.393237531 | 0.073315865 | 0.312852737 |
| 0.499044425 | 0.447364939 | 0.490505087 | 0.215638051 |
| 0.050742241 | 0.012221668 | 0.208234688 | 0.424856013 |
| 0.518992691 | 0.483215797 | 0.289688648 | 0.392252459 |
| 0.280710865 | 0.361035329 | 0.208699659 | 0.497745434 |
| 0.202794629 | 0.511234952 | 0.007433466 | 0.469783632 |
| 0.512073233 | 0.382477336 | 0.084335568 | 0.388777937 |
| 0.471044598 | 0.058214695 | 0.246746027 | 0.496533318 |
| 0.491338372 | 0.368408721 | 0.395583474 | 0.469672791 |
| 0.025300402 | 0.060672694 | 0.422379779 | 0.176368626 |
| 0.43812068  | 0.243057097 | 0.045242382 | 0.40516816  |

|             |             |             |             |
|-------------|-------------|-------------|-------------|
| 0.052939085 | 0.4810688   | 0.490841773 | 0.068569335 |
| 0.423955077 | 0.390714237 | 0.402784776 | 0.04457888  |
| 0.469730946 | 0.479504342 | 0.523846098 | 0.20839631  |
| 0.485991938 | 0.483420441 | 0.4263606   | 0.083308595 |
| 0.016799369 | 0.508009949 | 0.474017807 | 0.028769473 |
| 0.50070133  | 0.331765938 | 0.016459706 | 1           |
| 0.224766811 | 0.466157836 | 0.00657949  | 0.083670017 |
| 0.038285641 | 0.482201137 | 0.489100716 | 0.460474161 |
| 0.338865424 | 0.421702906 | 0.00496182  | 0.489004745 |
| 0.489256213 | 0.013458305 | 0.138962114 | 0.486282903 |
| 0.459420616 | 0.523627222 | 0.329880537 | 0.482014926 |
| 0.456866091 | 0.498233973 | 0.294985621 | 0.293897024 |
| 0.500603431 | 0.470774683 | 0.491364753 | 0.478833178 |
| 0.503801543 | 0.453500596 | 0.328275213 | 0.021223872 |
| 0.142141763 | 0.29560246  | 0.371554845 | 0.097623442 |
| 0.417530914 | 0.152451511 | 0.487535569 | 0.497485114 |
| 0.491926333 | 0.005033141 | 0.208302019 | 0.490677357 |
| 0.497018332 | 0.501874151 | 0.022309654 | 0.007069964 |
| 0.008326646 | 0.018604283 | 0.436447784 | 0.25642237  |
| 0.493389062 | 0.32365475  | 0.005455101 | 0.068647838 |
| 0.335015081 | 0.41636686  | 0.497096555 | 0.42966473  |
| 0.475747834 | 0.090397667 | 0.349524316 | 0.452329402 |
| 0.070084901 | 0.408893083 | 0.498123473 | 0.483467427 |
| 0.042188257 | 0.264713156 | 0.433811087 | 0.504872818 |
| 0.063917656 | 0.342069772 | 0.475969379 | 0.370656982 |
| 0.013576903 | 0.083686084 | 0.069787289 | 0.475519412 |
| 0.499856268 | 0.087888602 | 0.036665881 | 0.198401291 |
| 0.151178099 | 0.497056391 | 0.19376968  | 0.502465416 |
| 0.501870284 | 0.48181671  | 0.072303715 | 0.487687768 |
| 0.044736301 | 0.491384627 | 0.349602176 | 0.082796149 |
| 0.314199527 | 0.01379104  | 0.46173975  | 0.171770171 |
| 0.413610172 | 0.470885157 | 0.212607544 | 0.015374422 |
| 0.178240983 | 0.056192849 | 0.500046619 | 0.483978996 |
| 0.031130043 | 0.29395122  | 0.325444734 | 0.454919421 |
| 0.37706192  | 0.486715713 | 0.512972736 | 0.467317534 |
| 0.114867116 | 0.13232444  | 0.47552227  | 0.470502427 |
| 0.315196353 | 0.496128348 | 0.333455542 | 0.497047549 |
| 0.479642337 | 0.486628384 | 0.487461338 | 0.41428517  |
| 0.234316082 | 0.476054707 | 0.456629654 | 0.029787423 |
| 0.407748595 | 0.498914621 | 0.427887144 | 0.165530256 |
| 0.282762697 | 0.403830526 | 0.060304772 | 0.226163867 |
| 0.336116572 | 0.404310869 | 0.173713009 | 0.47931868  |
| 0.461527838 | 0.474177467 | 0.055070158 | 0.066945809 |
| 0.527041123 | 0.472255841 | 0.19587088  | 0.49255911  |
| 0.186861178 | 0.383376501 | 0.485931161 | 0.47496736  |
| 0.409011884 | 0.496155914 | 0.495402037 | 0.47015991  |
| 0.46913222  | 0.311733197 | 0.52444127  | 0.139006498 |
| 0.088116264 | 0.462284804 | 0.11663935  | 0.095640363 |
| 0.167493555 | 0.027945914 | 0.302886601 | 0.462931956 |
| 0.389598344 | 0.428803575 | 0.394143838 | 0.093027254 |
| 0.343001293 | 0.420947735 | 0.393216103 | 0.263563394 |
| 0.095779613 | 0.503268797 | 0.010306886 | 0.060105376 |
| 0.400587714 | 0.491583973 | 0.404731928 | 0.262326473 |
| 0.302783878 | 0.138403628 | 0.336186119 | 0.390843233 |



|             |             |             |             |
|-------------|-------------|-------------|-------------|
| 0.395891748 | 0.396793544 | 0.491531079 | 0.046671136 |
| 0.027747882 | 0.50050262  | 0.450323523 | 0.019577322 |
| 0.089790411 | 0.450789486 | 0.333473842 | 0.27777694  |
| 0.019945053 | 0.473116447 | 0.418673619 | 0.458259879 |
| 0.422549519 | 0.075475356 | 0.423420664 | 0.108672467 |
| 0.073512659 | 0.463332805 | 0.418871928 | 0.50177326  |
| 0.367030361 | 0.465346096 | 0.468494009 | 0.491988635 |
| 0.138822495 | 0.41308793  | 0.037366738 | 0.496595763 |
| 0.443521555 |             |             |             |
| NOD1        | 0.173602017 | 0.221506401 | 0.108838158 |
| 0.312972283 | 0.175158979 | 0.151112747 | 0.253545168 |
| 0.189166124 | 0.178023847 | 0.067343186 | 0.069018805 |
| 0.145894112 | 0.11048423  | 0.157462374 | 0.092380835 |
| 0.330211625 | 0.160687334 | 0.127746598 | 0.308484045 |
| 0.300748615 | 0.22477417  | 0.308885541 | 0.300079517 |
| 0.107727738 | 0.128113442 | 0.209849894 | 0.112876351 |
| 0.323538478 | 0.223647605 | 0.109105773 | 0.268231818 |
| 0.189673046 | 0.219314511 | 0.177022331 | 0.194579695 |
| 0.157759043 | 0.138972129 | 0.057218197 | 0.122705532 |
| 0.212997044 | 0.214713724 | 0.308465974 | 0.303514162 |
| 0.238673974 | 0.163621795 | 0.291652011 | 0.182066209 |
| 0.127918132 | 0.140366054 | 0.105694275 | 0.169381356 |
| 0.145798245 | 0.132957182 | 0.206356318 | 0.250362419 |
| 0.063658973 | 0.107512625 | 0.04431768  | 0.170622952 |
| 0.266910495 | 0.114102952 | 0.160113277 | 0.201839213 |
| 0.110667163 | 0.213076273 | 0.161491813 | 0.215728255 |
| 0.077295278 | 0.193945154 | 0.20879885  | 0.102036124 |
| 0.02753679  | 0.326531346 | 0.204875502 | 0.052988127 |
| 0.204123457 | 0.116608063 | 0.176317552 | 0.289236189 |
| 0.299393325 | 0.171673318 | 0.259033271 | 0.227558478 |
| 0.147962056 | 0.199701387 | 0.102947873 | 0.243171451 |
| 0.210534615 | 0.226842277 | 0.1692707   | 0.314416537 |
| 0.251185094 | 0.187064859 | 0.177334465 | 0.206418261 |
| 0.201207665 | 0.218689801 | 0.112462087 | 0.133490984 |
| 0.069965374 | 0.117713561 | 0.166539206 | 0.228092455 |
| 0.180621244 | 0.069615584 | 0.197220389 | 0.263300166 |
| 0.24789178  | 0.088286241 | 0.339845585 | 0.106718817 |
| 0.30451041  | 0.18255037  | 0.165337712 | 0.22768503  |
| 0.219839025 | 0.210776791 | 0.178495362 | 0.28645199  |
| 0.141550391 | 0.120181255 | 0.052864029 | 0.190676234 |
| 0.123657969 | 0.042307841 | 0.137379627 | 0.265860872 |
| 0.166984954 | 0.113184719 | 0.242841879 | 0.071002915 |
| 0.146726147 | 0.154471061 | 0.167461505 | 0.152318027 |
| 0.249867953 | 0.121278329 | 0.16300799  | 0.157591933 |
| 0.128878868 | 0.2550927   | 0.018839478 | 0.312647942 |
| 0.167864185 | 0.166904892 | 0.329957671 | 0.147758197 |
| 0.165978567 | 0.296043748 | 0.285669225 | 0.254073663 |
| 0.193818845 | 0.281319699 | 0.102178827 | 0.311328038 |
| 0.111878432 | 0.16247962  | 0.298419356 | 0.182087198 |
| 0.253136752 | 0.146545623 | 0.122389628 | 0.14942131  |
| 0.054561792 | 0.099943627 | 0.138716946 | 0.180186024 |
| 0.134678233 | 0.173447026 | 0.128335799 | 0.288551177 |
| 0.179220784 | 0.249203375 | 0.126210982 | 0.16930474  |
| 0.070735263 | 0.229434185 | 0.077495981 | 0.22835628  |

|             |             |             |             |
|-------------|-------------|-------------|-------------|
| 0.129598326 | 0.226966038 | 0.21484187  | 0.165200762 |
| 0.242361228 | 0.286572365 | 0.008094743 | 0.165078377 |
| 0.183191223 | 0.068095516 | 0.188718089 | 0.185304179 |
| 0.074505457 | 0.279928886 | 0.012667908 | 0.300087699 |
| 0.132006393 | 0.289554467 | 0.279994569 | 0.205567115 |
| 0.168605929 | 0.194612125 | 0.141790848 | 0.164498913 |
| 0.124197306 | 0.051357676 | 0.133973174 | 0.300702524 |
| 0.11636896  | 0.201789946 | 0.233247143 | 0.286526851 |
| 0.210170484 | 0.248707979 | 0.309386008 | 0.062426985 |
| 0.162585274 | 0.251567789 | 0.139578946 | 0.172373226 |
| 0.201414211 | 0.06056171  | 0.18782955  | 0.244131399 |
| 0.096816049 | 0.208421803 | 0.139492391 | 0.062868534 |
| 0.245754334 | 0.201678169 | 0.10521274  | 0.179107116 |
| 0.142331005 | 0.200561257 | 0.0891798   | 0.168235585 |
| 0.172426497 | 0.232255596 | 0.076466057 | 0.052508658 |
| 0.043435366 | 0.14682909  | 0.270886154 | 0.107810245 |
| 0.078897901 | 0.238260233 | 0.096489164 | 0.119160461 |
| 0.222366516 | 0.222953718 | 0.071118993 | 0.04698294  |
| 0.079421834 | 0.067137101 | 0.059889628 | 0.153672564 |
| 0.124674871 | 0.145327487 | 0.148520868 | 0.101287526 |
| 0.168788594 | 0.152866915 | 0.217860592 | 0.302204822 |
| 0.142364262 | 0.288376473 | 0.207459992 | 0.044479287 |
| 0.253647119 | 0.087236459 | 0.068966307 | 0.225275472 |
| 0.162599511 | 0.257791234 | 0.14764613  | 0.200502049 |
| 0.08025317  | 0.253104283 | 0.316623174 | 0.066227172 |
| 0.162458322 | 0.198818154 | 0.232267594 | 0.188954563 |
| 0.154009617 | 0.257933688 | 0.215626536 | 0.160014187 |
| 0.148290166 | 0.195609796 | 0.205940303 | 0.151558202 |
| 0.161842292 | 0.198714785 | 0.156799914 | 0.220769873 |
| 0.195266484 | 0.149499619 | 0.216923531 | 0.279907569 |
| 0.231719229 | 0.314615634 | 0.177905974 | 0.10892778  |
| 0.218181261 | 0.051100245 | 0.140261837 | 0.111983004 |
| 0.16446586  | 0.193225242 | 0.273364248 | 0.113892857 |
| 0.341578673 | 0.09494643  | 0.110852967 | 0.22153425  |
| 0.107313035 | 0.187909204 | 0.125703933 | 0.175711764 |
| 0.152882039 | 0.10835198  | 0.154422788 | 0.212862894 |
| 0.173532263 | 0.25727212  | 0.256528549 | 0.180880558 |
| 0.221484654 | 0.143566436 | 0.104110235 | 0.212247999 |
| 0.184627706 | 0.254721179 | 0.175402679 | 0.063982616 |
| 0.109747128 | 0.233885653 | 0.017648451 | 0.136758601 |
| 0.193256216 | 0.190514929 | 0.272757461 | 0.172960543 |
| 0.111355364 | 0.125118879 | 0.248646622 | 0.240966349 |
| 0.168153593 | 0.174201968 | 0.181531065 | 0.286345766 |
| 0.176575347 | 0.183237985 | 0.086367393 | 0.209439685 |
| 0.125118806 | 0.168183394 | 0.198621682 | 0.105413582 |
| 0.287377379 | 0.088960464 | 0.080432446 | 0.224766811 |
| 1           | 0.13055645  | 0.036930468 | 0.030728593 |
| 0.120834038 | 0.25469153  | 0.164260011 | 0.27043207  |
| 0.060568924 | 0.279661604 | 0.020576379 | 0.211361535 |
| 0.189067363 | 0.096672285 | 0.127240536 | 0.154506146 |
| 0.130182825 | 0.218999141 | 0.070555653 | 0.178636057 |
| 0.112439855 | 0.158221347 | 0.175717332 | 0.268721535 |
| 0.222351431 | 0.155103309 | 0.243910816 | 0.205402787 |
| 0.270183898 | 0.238136313 | 0.3336612   | 0.171865566 |

|             |             |             |             |
|-------------|-------------|-------------|-------------|
| 0.089699385 | 0.161901654 | 0.051731046 | 0.108103523 |
| 0.148714274 | 0.172827176 | 0.204232227 | 0.277284015 |
| 0.200692595 | 0.099087522 | 0.238156115 | 0.16611694  |
| 0.265489125 | 0.296257455 | 0.114972213 | 0.018779941 |
| 0.011119867 | 0.051170125 | 0.246471215 | 0.181550709 |
| 0.213080827 | 0.050834949 | 0.111795612 | 0.231636038 |
| 0.195778088 | 0.157700217 | 0.189715498 | 0.362417949 |
| 0.193833536 | 0.25127755  | 0.078774307 | 0.343347126 |
| 0.129306065 | 0.11297732  | 0.219754199 | 0.195601067 |
| 0.177201714 | 0.184080734 | 0.116278476 | 0.287902902 |
| 0.014541116 | 0.250945118 | 0.156309096 | 0.137929885 |
| 0.080164686 | 0.174178656 | 0.171631508 | 0.284739121 |
| 0.145677179 | 0.121789012 | 0.112981827 | 0.050288693 |
| 0.213983947 | 0.247001743 | 0.216164983 | 0.261237662 |
| 0.26224718  | 0.336121322 | 0.131170392 | 0.188006078 |
| 0.137616185 | 0.160623615 | 0.111202317 | 0.047164631 |
| 0.166596511 | 0.162923822 | 0.158469053 | 0.048246823 |
| 0.117987368 | 0.218694653 | 0.091502396 | 0.106688948 |
| 0.047329079 | 0.189887689 | 0.276533488 | 0.234513936 |
| 0.118329984 | 0.257255243 | 0.22010809  | 0.254039263 |
| 0.187884668 | 0.269732329 | 0.173266945 | 0.076601954 |
| 0.25941027  | 0.048884046 | 0.289859115 | 0.153413678 |
| 0.169160515 | 0.266751262 | 0.113193415 | 0.22067433  |
| 0.193230519 | 0.222218868 | 0.186382951 | 0.244102777 |
| 0.090334519 | 0.152349411 | 0.21034857  | 0.129172433 |
| 0.264218794 | 0.263404847 | 0.173448479 | 0.122178658 |
| 0.172450758 | 0.089060765 | 0.236199627 | 0.058792436 |
| 0.056068    | 0.165581054 | 0.235680445 | 0.335318076 |
| 0.192391291 | 0.160149806 | 0.216226416 | 0.168211561 |
| 0.220036011 | 0.19519047  | 0.204759438 | 0.219758951 |
| 0.237379189 | 0.217959802 | 0.20824255  | 0.202714706 |
| 0.09053021  | 0.18980491  | 0.245303998 | 0.185026893 |
| 0.18863769  | 0.286695642 | 0.186620262 | 0.139629328 |
| 0.094184667 | 0.123173992 | 0.179453279 | 0.199502909 |
| 0.26592869  | 0.157438559 | 0.041798605 | 0.283381697 |
| 0.046956843 | 0.276236191 | 0.088875767 | 0.209638665 |
| 0.198479721 | 0.090623883 | 0.26331164  | 0.210972682 |
| 0.199391858 | 0.174423739 | 0.080407488 | 0.214492729 |
| 0.055732546 | 0.190772837 | 0.09512456  | 0.203882105 |
| 0.066316412 | 0.140857438 | 0.257432629 | 0.122914726 |
| 0.05990777  | 0.072214038 | 0.186834979 | 0.198663232 |
| 0.208201796 | 0.278664286 | 0.110076421 | 0.110124743 |
| 0.122083979 | 0.141584261 | 0.156756694 | 0.158305059 |
| 0.10505231  | 0.165867459 | 0.079918339 | 0.155466843 |
| 0.248192541 | 0.267670585 | 0.145727015 | 0.129708297 |
| 0.251612425 | 0.172390215 | 0.120965294 | 0.170544403 |
| 0.116631439 | 0.322931183 | 0.148447723 | 0.17860872  |
| 0.132778711 | 0.083079711 | 0.234425724 | 0.269801081 |
| 0.049247109 |             |             |             |
| NQ02        | 0.444128667 | 0.465572897 | 0.365567792 |
| 0.374755327 | 0.364674473 | 0.410429392 | 0.164360129 |
| 0.195573767 | 0.048339501 | 0.001521327 | 0.009120625 |
| 0.410915484 | 0.15201728  | 0.251286454 | 0.327928767 |
| 0.350179341 | 0.079460784 | 0.34737087  | 0.175019588 |

|             |             |             |             |
|-------------|-------------|-------------|-------------|
| 0.371814714 | 0.078255324 | 0.318521624 | 0.055512759 |
| 0.216581606 | 0.055185573 | 0.033510105 | 0.185052544 |
| 0.405760571 | 0.039874811 | 0.377941206 | 0.394993239 |
| 0.058712886 | 0.449972757 | 0.469312259 | 0.375745364 |
| 0.471261888 | 0.448216787 | 0.009716874 | 0.283309966 |
| 0.453654998 | 0.400650506 | 0.374025352 | 0.2580154   |
| 0.020724473 | 0.468902391 | 0.184974128 | 0.332797035 |
| 0.243975197 | 0.012263969 | 0.29291029  | 0.464807703 |
| 0.464013825 | 0.419409686 | 0.21824164  | 0.115565794 |
| 0.167832784 | 0.283793092 | 0.224763531 | 0.397683893 |
| 0.166507527 | 0.201274208 | 0.468315385 | 0.057612658 |
| 0.134504622 | 0.238862317 | 0.09476698  | 0.236252112 |
| 0.288719315 | 0.44173227  | 0.010174297 | 0.422171578 |
| 0.001862403 | 0.34272865  | 0.303805931 | 0.26504849  |
| 0.018328961 | 0.008655906 | 0.113196503 | 0.29216032  |
| 0.423339145 | 0.465490157 | 0.422216388 | 0.4354674   |
| 0.119935484 | 0.214848568 | 0.34497993  | 0.110981594 |
| 0.454786592 | 0.132132717 | 0.079624168 | 0.34421562  |
| 0.429070964 | 0.468585242 | 0.126428054 | 0.176761061 |
| 0.430928956 | 0.466329634 | 0.404721013 | 0.371523907 |
| 0.293298946 | 0.024751816 | 0.467343577 | 0.452907552 |
| 0.461338654 | 0.254944234 | 0.088382836 | 0.424483322 |
| 0.029473942 | 0.387309182 | 0.282398066 | 0.131182419 |
| 0.424277502 | 0.00754419  | 0.133977892 | 0.324551218 |
| 0.164914075 | 0.447924515 | 0.463020571 | 0.131791793 |
| 0.352540429 | 0.009009693 | 0.087522717 | 0.015325028 |
| 0.290875664 | 0.102745398 | 0.483220486 | 0.428649575 |
| 0.237963825 | 0.313930503 | 0.218395782 | 0.002901691 |
| 0.010435303 | 0.132874942 | 0.463844497 | 0.352142136 |
| 0.415131485 | 0.448323692 | 0.159441257 | 0.461537465 |
| 0.425003325 | 0.42174232  | 0.077808998 | 0.062137681 |
| 0.388101434 | 0.129608677 | 0.163201134 | 0.42793164  |
| 0.218865751 | 0.087153471 | 0.080234234 | 0.446532692 |
| 0.459365547 | 0.047992226 | 0.385673375 | 0.342800046 |
| 0.299303914 | 0.269793519 | 0.067004776 | 0.225529058 |
| 0.029593556 | 0.461291788 | 0.011121573 | 0.35027593  |
| 0.230224059 | 0.095479717 | 0.006202474 | 0.271190791 |
| 0.266551914 | 0.447216512 | 0.475522977 | 0.063861378 |
| 0.266520081 | 0.327566093 | 0.380910299 | 0.423640013 |
| 0.003315942 | 0.025593151 | 0.375928734 | 0.456738109 |
| 0.38050779  | 0.448761699 | 0.236346704 | 0.225424296 |
| 0.195354381 | 0.405411625 | 0.002311858 | 0.468325931 |
| 0.465112627 | 0.397244448 | 0.338910376 | 0.370141428 |
| 0.333973563 | 0.415765463 | 0.055317582 | 0.354050486 |
| 0.450981935 | 0.044764369 | 0.428704092 | 0.095011434 |
| 0.473730606 | 0.017678926 | 0.327786566 | 0.422314071 |
| 0.447269909 | 0.004675167 | 0.255496644 | 0.362194294 |
| 0.010588555 | 0.08998632  | 0.424954534 | 0.359038523 |
| 0.324494009 | 0.406364676 | 0.41121098  | 0.314515201 |
| 0.362575136 | 0.196307064 | 0.004459633 | 0.234137016 |
| 0.434095631 | 0.38177791  | 0.462543146 | 0.195950407 |
| 0.440411554 | 0.463230296 | 0.460251003 | 0.211940025 |
| 0.020913246 | 0.301740991 | 0.013619203 | 0.251050512 |
| 0.452645118 | 0.08317298  | 0.375320573 | 0.10669544  |

|             |             |             |             |
|-------------|-------------|-------------|-------------|
| 0.034646609 | 0.456084236 | 0.115916092 | 0.210295243 |
| 0.084351615 | 0.393720763 | 0.19875066  | 0.211082968 |
| 0.166330394 | 0.099768527 | 0.284076227 | 0.321868676 |
| 0.024429045 | 0.051762036 | 0.006016089 | 0.389912288 |
| 0.108386462 | 0.329768844 | 0.353155444 | 0.463917753 |
| 0.315909275 | 0.074860865 | 0.309416772 | 0.22144568  |
| 0.061429481 | 0.004795003 | 0.46502393  | 0.345515857 |
| 0.436030387 | 0.103650233 | 0.018780367 | 0.367385584 |
| 0.437715609 | 0.391710459 | 0.364364169 | 0.452555812 |
| 0.015284658 | 0.432438073 | 0.190534887 | 0.067628381 |
| 0.321229908 | 0.191588168 | 0.409651252 | 0.049932912 |
| 0.420131152 | 0.467632415 | 0.238677617 | 0.113980005 |
| 0.462056709 | 0.381247077 | 0.015298533 | 0.462546617 |
| 0.468091049 | 0.013171289 | 0.464120782 | 0.073076285 |
| 0.007607562 | 0.392050944 | 0.425775492 | 0.037163783 |
| 0.03855623  | 0.287200333 | 0.03711444  | 0.201513279 |
| 0.457267378 | 0.332984164 | 0.443154204 | 0.149620091 |
| 0.019010966 | 0.004379213 | 0.136463101 | 0.378095202 |
| 0.480359933 | 0.458044221 | 0.187522974 | 0.292319523 |
| 0.171748754 | 0.265240308 | 0.187203196 | 0.453499461 |
| 0.163632531 | 0.471429438 | 0.001039526 | 0.415007488 |
| 0.473224386 | 0.358084243 | 0.039526945 | 0.293384725 |
| 0.457680852 | 0.022517012 | 0.166254113 | 0.469676885 |
| 0.447582411 | 0.259860227 | 0.294482724 | 0.399847583 |
| 0.008340993 | 0.026389787 | 0.324222677 | 0.12761206  |
| 0.34684408  | 0.143064966 | 0.032982381 | 0.342956661 |
| 0.020657991 | 0.463210888 | 0.414376786 | 0.027644083 |
| 0.379873072 | 0.341439709 | 0.297974274 | 0.016694914 |
| 0.432230854 | 0.463527474 | 0.470677342 | 0.130275676 |
| 0.450676045 | 0.454624733 | 0.384179068 | 0.041226002 |
| 0.005630856 | 0.466064392 | 0.432248162 | 0.011549169 |
| 0.423248214 | 0.324655177 | 0.005060934 | 0.466157836 |
| 0.13055645  | 1           | 0.002375202 | 0.08032183  |
| 0.018394065 | 0.406355803 | 0.463300355 | 0.386564416 |
| 0.316388933 | 0.323625371 | 0.003008949 | 0.459017339 |
| 0.467459923 | 0.004144244 | 0.08275247  | 0.453943817 |
| 0.421370423 | 0.470737267 | 0.253050006 | 0.430894119 |
| 0.402700483 | 0.466299688 | 0.201324256 | 0.183832497 |
| 0.440661796 | 0.457144241 | 0.426682231 | 0.463426753 |
| 0.429669752 | 0.360332767 | 0.209954297 | 0.005899777 |
| 0.083696732 | 0.234556537 | 0.317602534 | 0.048086996 |
| 0.401599597 | 0.080555373 | 0.464761026 | 0.420349665 |
| 0.446501717 | 0.000225625 | 0.134882026 | 0.462212466 |
| 0.441313284 | 0.432198705 | 0.011042885 | 0.003624444 |
| 0.005682264 | 0.006700998 | 0.348033447 | 0.164181791 |
| 0.455061151 | 0.296666457 | 0.000461503 | 0.034551592 |
| 0.22915412  | 0.329665084 | 0.46882589  | 0.312958508 |
| 0.427165829 | 0.043999369 | 0.274012062 | 0.347012557 |
| 0.031935109 | 0.440625681 | 0.443404641 | 0.465927697 |
| 0.020026234 | 0.169347151 | 0.393737605 | 0.434662419 |
| 0.049294071 | 0.23259488  | 0.423601295 | 0.261026168 |
| 0.006892696 | 0.040291181 | 0.030268318 | 0.387823991 |
| 0.465117453 | 0.044368311 | 0.014502482 | 0.190882601 |
| 0.079468813 | 0.439209541 | 0.110037008 | 0.44253349  |

|             |             |             |             |
|-------------|-------------|-------------|-------------|
| 0.434069012 | 0.380890687 | 0.038223944 | 0.464348593 |
| 0.017721782 | 0.470566448 | 0.260123747 | 0.060114961 |
| 0.232100344 | 0.004416622 | 0.466668093 | 0.114168891 |
| 0.357532537 | 0.420490195 | 0.141112001 | 0.005587364 |
| 0.138633917 | 0.024505381 | 0.419985987 | 0.412255799 |
| 0.014750434 | 0.19273286  | 0.220588982 | 0.368011607 |
| 0.306956731 | 0.387361216 | 0.469749032 | 0.442126405 |
| 0.055379824 | 0.115607476 | 0.392111319 | 0.452844441 |
| 0.247908782 | 0.424606761 | 0.232575022 | 0.46003268  |
| 0.444613914 | 0.458795056 | 0.461581728 | 0.299994035 |
| 0.167266003 | 0.42995555  | 0.384337005 | 0.010898348 |
| 0.295531676 | 0.417408433 | 0.358236632 | 0.093946086 |
| 0.176792276 | 0.356858096 | 0.0305264   | 0.235467082 |
| 0.298973893 | 0.359961436 | 0.09593329  | 0.382219387 |
| 0.418736735 | 0.456164953 | 0.031457067 | 0.028061872 |
| 0.468335205 | 0.461391561 | 0.122887385 | 0.410657646 |
| 0.109111307 | 0.264790823 | 0.427787196 | 0.411967835 |
| 0.356669883 | 0.453876593 | 0.435764519 | 0.414730653 |
| 0.459590261 | 0.198580968 | 0.468938168 | 0.108635884 |
| 0.045197406 | 0.448599032 | 0.058077677 | 0.048118059 |
| 0.089068647 | 0.010299928 | 0.26391062  | 0.366922706 |
| 0.362857601 | 0.313253271 | 0.378640358 | 0.046186323 |
| 0.242497104 | 0.406726087 | 0.277818681 | 0.17256291  |
| 0.043847648 | 0.466972318 | 0.003174425 | 0.027304267 |
| 0.367006331 | 0.43526014  | 0.322273641 | 0.163162806 |
| 0.233990256 | 0.08662386  | 0.220833008 | 0.351233311 |
| 0.350741353 | 0.35604695  | 0.440835228 | 0.021247978 |
| 0.010169195 | 0.428865737 | 0.413710781 | 0.008708256 |
| 0.05387523  | 0.440083149 | 0.268649843 | 0.174085099 |
| 0.00787676  | 0.457753812 | 0.368651764 | 0.375097464 |
| 0.322914408 | 0.035955798 | 0.451974584 | 0.070565397 |
| 0.037286611 | 0.472109144 | 0.353182254 | 0.467535188 |
| 0.296230114 | 0.354153951 | 0.461228731 | 0.463115338 |
| 0.097142993 | 0.402330819 | 0.012930739 | 0.432267129 |
| 0.404512897 |             |             |             |
| NR4A1       | 0.003324549 | 0.005274608 | 0.0055843   |
| 0.019266897 | 0.002435678 | 0.016808203 | 0.039778569 |
| 0.026517816 | 0.058621921 | 0.007586391 | 0.001247431 |
| 0.003399041 | 0.000483072 | 0.011033716 | 0.018881424 |
| 0.012249785 | 0.002293739 | 0.005239901 | 0.030354198 |
| 0.010453344 | 0.03465797  | 0.009055933 | 0.038552506 |
| 0.000789079 | 0.006487793 | 0.01808983  | 0.006546605 |
| 0.014946359 | 0.025119317 | 0.0062371   | 0.014362186 |
| 0.003616127 | 0.004237987 | 0.004006515 | 0.00330125  |
| 0.002601968 | 0.004146052 | 1.73E-05    | 0.011060289 |
| 0.008735205 | 0.010279148 | 0.011342314 | 0.02468764  |
| 0.032432477 | 0.00434454  | 0.03860276  | 0.004180862 |
| 0.005437424 | 0.01077617  | 0.022984716 | 0.004694054 |
| 0.003369245 | 0.003078163 | 0.035551788 | 0.038068383 |
| 0.000194853 | 0.004019321 | 0.000237946 | 0.012128057 |
| 0.019552566 | 0.020736587 | 0.002886325 | 0.028134831 |
| 0.000180557 | 0.014003114 | 0.001366994 | 0.024195153 |
| 0.000431601 | 0.011195997 | 0.009961076 | 0.001392071 |
| 0.000421977 | 0.018684847 | 0.004507787 | 0.001735146 |

|              |              |              |              |
|--------------|--------------|--------------|--------------|
| 0.0016254921 | 0.0007036717 | 0.000248861  | 0.0019255974 |
| 0.0010412359 | 0.0003807529 | 0.0006014404 | 0.0004421811 |
| 0.0002811141 | 0.0005781952 | 0.0000810453 | 0.0012649325 |
| 0.0006042993 | 0.0033909483 | 0.000842667  | 0.0008330237 |
| 0.0005736333 | 0.0003262688 | 0.0003549032 | 0.0007688102 |
| 0.0009108507 | 0.0005579531 | 0.0014530914 | 0.000433939  |
| 0.0008249524 | 0.0002668901 | 0.0003791666 | 0.0004389364 |
| 0.0006746904 | 0.0000763436 | 0.0011824532 | 0.00102483   |
| 0.0012889634 | 0.0013966364 | 0.0019061781 | 0.0000331884 |
| 0.0011193325 | 0.0069694616 | 0.0004320659 | 0.0009217745 |
| 0.0005978443 | 0.0010348321 | 0.0003215552 | 0.0036833256 |
| 0.0001860427 | 0.0001259698 | 0.0000572976 | 0.0005717994 |
| 0.0001618644 | 0.0000187358 | 0.0002795957 | 0.0009081128 |
| 0.0003933887 | 0.0000517535 | 0.002102958  | 0.0004929778 |
| 0.0005142533 | 0.0001467536 | 0.0002041499 | 0.0005411454 |
| 0.0008780172 | 0.0002652857 | 0.0013697658 | 0.0003750268 |
| 0.0001783805 | 0.0004706533 | 0.00039445   | 0.0036378579 |
| 0.0014512919 | 0.0001079872 | 0.0020479825 | 0.0002326458 |
| 0.0010478472 | 0.0046358961 | 0.0015372211 | 0.0007228191 |
| 0.0007186892 | 0.0028410841 | 0.000383493  | 0.001236173  |
| 0.0002249779 | 0.0003267312 | 0.0016472171 | 0.0005169563 |
| 0.0017260772 | 0.0002480175 | 0.0003556167 | 0.0013349927 |
| 0.0004819859 | 0.0000160144 | 0.0003836328 | 0.0019762706 |
| 0.0013700494 | 0.0004611813 | 0.0001874936 | 0.0019907182 |
| 0.0006140089 | 0.0006632933 | 0.0007049492 | 0.0007709045 |
| 0.0006851112 | 0.0012333011 | 0.0003945063 | 0.0004556091 |
| 0.0009464915 | 0.0004542891 | 0.0011729415 | 0.0004965989 |
| 0.0011957276 | 0.0013657019 | 0.000142833  | 0.0004371431 |
| 0.0003620895 | 0.0007731761 | 0.000643502  | 0.000292887  |
| 0.0002492375 | 0.0014440206 | 8.16E-05     | 0.0007726834 |
| 0.0004168293 | 0.002535432  | 0.0007038655 | 0.0010997719 |
| 0.0003225441 | 0.0017674099 | 0.0004394268 | 0.0003417071 |
| 0.0001331949 | 0.0000146338 | 0.0031994594 | 0.0016270416 |
| 0.0002762964 | 0.0026724079 | 0.0006664749 | 0.0021454505 |
| 0.0018016595 | 0.0007299617 | 0.000909981  | 0.0003321459 |
| 0.0004911393 | 0.0024910169 | 0.0006113951 | 0.0006040451 |
| 0.0004972014 | 0.0000114705 | 0.0007935608 | 0.0022157861 |
| 0.0004348075 | 0.0007369392 | 0.0003020467 | 0.0000538675 |
| 0.0041671071 | 0.001038294  | 0.0003939886 | 0.0019979266 |
| 0.0003361785 | 0.0009623804 | 0.0003952953 | 0.0001118473 |
| 0.0005237418 | 0.0005433686 | 0.0001076348 | 0.0000554272 |
| 0.0000334501 | 0.0003851493 | 0.0028383183 | 0.0004608392 |
| 0.0001042598 | 0.0010835529 | 0.000455711  | 0.0006098161 |
| 0.0032363114 | 0.0008732459 | 0.000136386  | 0.0000161281 |
| 0.0000945952 | 0.0001094258 | 0.0001161134 | 0.0002310295 |
| 0.0000932646 | 0.0003175315 | 0.0006347829 | 0.0002610812 |
| 0.0013755476 | 0.0011614795 | 0.0005219509 | 0.0015179238 |
| 0.0007192829 | 0.0032354596 | 0.000875047  | 0.0000275283 |
| 0.0006421227 | 0.001391169  | 0.0006012067 | 0.0006453535 |
| 0.0010468485 | 0.0004743972 | 0.0004350603 | 0.0011334472 |
| 0.0000704272 | 0.0016175207 | 0.0014201586 | 0.00014908   |
| 0.0003287361 | 0.0004789868 | 0.0010940721 | 0.0016914051 |
| 0.0004854122 | 0.0010503294 | 0.0013270324 | 0.0006903718 |
| 0.0003905412 | 0.0011942253 | 0.0003910398 | 0.0001621251 |

|             |             |             |             |
|-------------|-------------|-------------|-------------|
| 0.0093426   | 0.005056266 | 0.004073553 | 0.017716117 |
| 0.018049138 | 0.009383731 | 0.041282288 | 0.013582147 |
| 0.006382241 | 0.010382629 | 0.004484993 | 0.002444113 |
| 0.024077978 | 0.000456709 | 0.001937555 | 0.002954553 |
| 0.003365299 | 0.00330489  | 0.010395135 | 0.003239695 |
| 0.02716224  | 0.003934701 | 0.002162939 | 0.004766696 |
| 0.001427267 | 0.003554666 | 0.010698521 | 0.002536045 |
| 0.002832603 | 0.006534381 | 0.010988421 | 0.01924253  |
| 0.007481097 | 0.0512445   | 0.011520269 | 0.005276142 |
| 0.007619422 | 0.011893297 | 0.013906112 | 0.003615008 |
| 0.041347489 | 0.012344151 | 0.011689414 | 0.001006664 |
| 0.003488711 | 0.01564414  | 0.0001108   | 0.004587729 |
| 0.014147082 | 0.004883076 | 0.006083953 | 0.034880512 |
| 0.007208547 | 0.010306857 | 0.004841311 | 0.026005708 |
| 0.003156995 | 0.003090526 | 0.004226906 | 0.015293715 |
| 0.001958063 | 0.004180389 | 0.000826704 | 0.009688589 |
| 0.0078772   | 0.003381321 | 0.010555656 | 0.00368377  |
| 0.006137112 | 0.017209461 | 0.004102246 | 0.00657949  |
| 0.036930468 | 0.002375202 | 1           | 0.00037164  |
| 0.002854327 | 0.004952199 | 0.005182908 | 0.012274922 |
| 0.011135762 | 0.01225228  | 0.000150712 | 0.003662637 |
| 0.005191329 | 0.00689707  | 0.001076028 | 0.002205277 |
| 0.002602843 | 0.005467623 | 0.002841634 | 0.00368683  |
| 0.002174516 | 0.00280702  | 0.00324346  | 0.015533197 |
| 0.01092241  | 0.002294265 | 0.01554475  | 0.008787679 |
| 0.006392036 | 0.004964587 | 0.029283835 | 0.02861401  |
| 0.007038061 | 0.018478367 | 0.006766891 | 0.001615462 |
| 0.014113214 | 0.01299496  | 0.006389836 | 0.005501317 |
| 0.003954617 | 0.009709946 | 0.018772259 | 0.00298331  |
| 0.01142028  | 0.011331372 | 0.003534877 | 0.012954143 |
| 0.000836214 | 0.003018589 | 0.010337255 | 0.010445122 |
| 0.005428386 | 0.003851065 | 0.013134578 | 0.021887237 |
| 0.040037963 | 0.003188749 | 0.003765984 | 0.017323597 |
| 0.003791458 | 0.007195154 | 0.004992315 | 0.01561367  |
| 0.004717216 | 0.003915557 | 0.005246174 | 0.005590609 |
| 0.00351102  | 0.008640368 | 0.004268003 | 0.009324729 |
| 0.000302439 | 0.00630847  | 0.002168908 | 0.00310711  |
| 0.000286504 | 0.008252665 | 0.015875446 | 0.006268392 |
| 0.00223057  | 0.002967711 | 0.005156537 | 0.000353039 |
| 0.019091943 | 0.004573663 | 0.014942227 | 0.005955209 |
| 0.012872641 | 0.01177297  | 0.000636748 | 0.006498004 |
| 0.001429774 | 0.003128566 | 0.002741867 | 0.002735234 |
| 0.005299992 | 0.008554286 | 0.002106727 | 0.001526229 |
| 0.004754138 | 0.009168653 | 0.006946821 | 0.002217206 |
| 0.00097004  | 0.007263655 | 0.007596464 | 0.004552841 |
| 0.001946381 | 0.015482275 | 0.015530857 | 0.00939391  |
| 0.029491095 | 0.010891289 | 0.004216281 | 0.008630742 |
| 0.024222207 | 0.000269365 | 0.015152377 | 0.006748614 |
| 0.005273086 | 0.005641677 | 0.002827472 | 0.004895145 |
| 0.008677381 | 0.005854228 | 0.003484483 | 0.029779406 |
| 3.41E-05    | 0.014626094 | 0.014049985 | 0.018305662 |
| 0.023851006 | 0.005897101 | 0.009906593 | 0.006506092 |
| 0.008105995 | 0.001355496 | 0.002294116 | 0.000675907 |
| 0.000668872 | 0.020050171 | 0.00430677  | 0.010791967 |



|             |             |             |             |
|-------------|-------------|-------------|-------------|
| 0.006420797 | 0.006745823 | 0.001774861 | 0.023840096 |
| 0.004893168 | 0.006530168 | 0.070979412 | 0.015663894 |
| 0.011918541 | 0.012068688 | 0.005347863 | 0.002685715 |
| 0.001264781 | 0.003350944 | 0.0076827   | 0.008603084 |
| 0.006283053 | 0.030956466 | 0.004456132 | 0.020026644 |
| 0.003119348 | 0.001070583 | 0.009118582 | 0.008033131 |
| 0.018132052 | 0.009909887 | 0.000577631 | 0.005739601 |
| 0.000293505 | 0.008127591 | 0.00059946  | 0.015421778 |
| 0.003614941 | 0.002121749 | 0.011850092 | 0.034553743 |
| 0.01640639  | 0.004185049 | 0.000798205 | 0.00653079  |
| 6.87E-05    | 0.00636519  | 0.001996812 | 0.0166351   |
| 0.000693022 | 0.000883599 | 0.00925671  | 0.016795349 |
| 0.003959556 | 0.001098172 | 0.008668154 | 0.044392962 |
| 0.014353633 | 0.006360448 | 0.013360921 | 0.002959779 |
| 8.81E-05    | 0.003668795 | 0.002643624 | 0.00780766  |
| 0.003461427 | 0.002189815 | 0.006584993 | 0.003601942 |
| 0.021178332 | 0.012697141 | 0.004725581 | 0.001327763 |
| 0.018786976 | 0.004606416 | 0.0032249   | 0.002772022 |
| 0.002673561 | 0.010663977 | 0.003899217 | 0.002807477 |
| 0.006351147 | 0.001496823 | 0.053704991 | 0.007563255 |
| 0.001703464 |             |             |             |
| NR4A2       | 0.144876581 | 0.088071934 | 0.129924252 |
| 0.058789861 | 0.064136673 | 0.030327002 | 0.012645623 |
| 0.013254082 | 0.00289099  | 0.000148323 | 0.000174803 |
| 0.109552086 | 0.000885039 | 0.007026639 | 0.013511442 |
| 0.110926495 | 0.014654642 | 0.101497172 | 0.033238014 |
| 0.081490907 | 0.002025147 | 0.076942422 | 0.006869939 |
| 0.06235975  | 0.01700753  | 0.007099282 | 0.041284287 |
| 0.091147956 | 0.011549255 | 0.010728569 | 0.055518609 |
| 0.057506589 | 0.106819852 | 0.096360936 | 0.066062392 |
| 0.096022117 | 0.136689565 | 0.001743562 | 0.005826643 |
| 0.114209054 | 0.094072413 | 0.069324104 | 0.037312709 |
| 0.002305784 | 0.079955921 | 0.018894591 | 0.141572976 |
| 0.002912232 | 0.001922016 | 0.009591143 | 0.075582704 |
| 0.064335808 | 0.038495378 | 0.014976458 | 0.006433662 |
| 0.000585258 | 0.006720876 | 0.014357444 | 0.036169855 |
| 0.015815671 | 0.003964451 | 0.076073381 | 0.001279514 |
| 0.000457385 | 0.027635588 | 0.049379744 | 0.021938164 |
| 0.062551707 | 0.06919938  | 0.003893899 | 0.134007673 |
| 0.000639995 | 0.084268244 | 0.154774213 | 0.044471502 |
| 0.017324098 | 0.000162962 | 0.063172908 | 0.027646306 |
| 0.099497514 | 0.134966022 | 0.10583481  | 0.109839325 |
| 0.008569133 | 0.116547807 | 0.11244952  | 0.012366834 |
| 0.101904692 | 0.006180666 | 0.004545782 | 0.107827726 |
| 0.106669468 | 0.088637285 | 0.016631683 | 0.109550169 |
| 0.043857847 | 0.081817071 | 0.045136854 | 0.036758482 |
| 0.019134116 | 0.058536079 | 0.062862342 | 0.099502491 |
| 0.082840627 | 0.103845204 | 0.0371084   | 0.06437366  |
| 0.020170179 | 0.022897957 | 0.050910634 | 0.006454792 |
| 0.100947141 | 0.001476796 | 0.06905919  | 0.023410133 |
| 0.045073492 | 0.10315587  | 0.099769378 | 0.01805133  |
| 0.100782025 | 0.000799397 | 0.002894563 | 0.032983974 |
| 0.003282065 | 0.057800943 | 0.078003937 | 0.064440848 |
| 0.007806458 | 0.013395056 | 0.02337742  | 0.005316209 |

|                      |             |                      |             |
|----------------------|-------------|----------------------|-------------|
| 0.01206969           | 0.072536003 | 0.089072852          | 0.104202859 |
| 0.11547093           | 0.14583061  | 0.010805508          | 0.064673557 |
| 0.075043875          | 0.105871761 | 8.99E-05 0.011134117 |             |
| 0.050821049          | 0.056499686 | 0.051121469          | 0.052934722 |
| 0.043082211          | 0.011950917 | 0.01417901           | 0.104540121 |
| 0.06721462           | 0.010411078 | 0.054122081          | 0.10860977  |
| 0.004407232          | 0.08892291  | 0.016450736          | 0.011845459 |
| 0.001711655          | 0.094701191 | 0.026701579          | 0.05826041  |
| 0.007116727          | 0.008068026 | 0.012578179          | 0.019321037 |
| 0.004420007          | 0.047536287 | 0.092639922          | 0.032635428 |
| 0.019180804          | 0.076584689 | 0.034214996          | 0.036152287 |
| 7.58E-05 0.011586257 | 0.031590093 | 0.083809509          |             |
| 0.020736315          | 0.137016854 | 0.039500594          | 0.076027715 |
| 0.077392327          | 0.114071853 | 0.01005693           | 0.082956483 |
| 0.098929359          | 0.025708855 | 0.031856339          | 0.136029394 |
| 0.046732041          | 0.071496092 | 0.001216098          | 0.094749839 |
| 0.07613769           | 0.028489657 | 0.113218054          | 0.024848267 |
| 0.097442535          | 0.00649536  | 0.014034476          | 0.118544635 |
| 0.069976644          | 0.000107402 | 0.008402996          | 0.049963474 |
| 0.03672176           | 0.001585426 | 0.113438785          | 0.063720969 |
| 0.038448205          | 0.142673286 | 0.111634214          | 0.040869744 |
| 0.04920005           | 0.029914025 | 0.010036983          | 0.128917365 |
| 0.14824902           | 0.007281543 | 0.067782529          | 0.010851633 |
| 0.049447202          | 0.076088986 | 0.094110586          | 0.000942927 |
| 0.00428145           | 0.02376388  | 0.000161116          | 0.045207551 |
| 0.117649403          | 0.001337154 | 0.053377896          | 0.05337055  |
| 0.022379666          | 0.092239976 | 0.090609073          | 0.109696843 |
| 0.074560588          | 0.021355555 | 0.045397438          | 0.002240368 |
| 0.002154669          | 0.016538207 | 0.035919698          | 0.027485558 |
| 0.000785123          | 0.008464421 | 0.055053429          | 0.014824959 |
| 0.000644402          | 0.007223226 | 0.006537714          | 0.057908954 |
| 0.008033225          | 0.001437403 | 0.034723171          | 0.08370298  |
| 0.033476939          | 0.010394019 | 0.088063386          | 0.110304442 |
| 0.047513868          | 0.012022248 | 0.025308323          | 0.002681169 |
| 0.065126623          | 0.013697477 | 0.020056825          | 0.056034371 |
| 0.006699979          | 0.121421802 | 0.003823313          | 0.020684957 |
| 0.026162528          | 0.022163447 | 0.097582366          | 0.000164156 |
| 0.065735153          | 0.063551692 | 0.133013442          | 0.020576801 |
| 0.047193776          | 0.065966742 | 0.000538223          | 0.089593916 |
| 0.069113475          | 0.006836602 | 0.100045648          | 0.025529424 |
| 0.020126878          | 0.132776625 | 0.060814619          | 0.031714099 |
| 0.034039119          | 0.011270945 | 0.001188233          | 0.077865139 |
| 0.087442619          | 0.081402145 | 0.046836107          | 0.133966312 |
| 0.00213723           | 0.000186882 | 0.103208207          | 0.16768314  |
| 0.086816406          | 0.107618469 | 0.076903937          | 0.031179067 |
| 0.041472205          | 0.019850626 | 0.00129086           | 0.089765217 |
| 0.113598483          | 0.10923258  | 0.008240714          | 0.110224797 |
| 0.088000982          | 0.016469556 | 0.013679026          | 0.01717398  |
| 0.048831473          | 0.006795959 | 0.048949368          | 0.081664123 |
| 0.081059305          | 0.030779359 | 0.023399368          | 0.128864274 |
| 0.000487525          | 0.001134037 | 0.101431416          | 0.088512172 |
| 0.016096585          | 0.02757224  | 0.033940369          | 0.018324981 |
| 0.001201436          | 0.055739196 | 0.123636818          | 0.005743713 |
| 0.011827453          | 0.026393756 | 0.119051479          | 0.0088806   |

|             |             |             |             |
|-------------|-------------|-------------|-------------|
| 0.110699548 | 0.127274203 | 0.088431011 | 0.02711187  |
| 0.100299345 | 0.083276651 | 0.065035287 | 0.057552836 |
| 0.022421152 | 0.103611131 | 0.087643208 | 0.000287422 |
| 0.09624937  | 0.012044964 | 0.00036874  | 0.083670017 |
| 0.030728593 | 0.08032183  | 0.00037164  | 1           |
| 0.061262149 | 0.141455305 | 0.075348125 | 0.062632949 |
| 0.004264868 | 0.1117982   | 0.010752899 | 0.123597097 |
| 0.069451821 | 0.011463698 | 0.031725015 | 0.068565924 |
| 0.08791846  | 0.097456249 | 0.066230242 | 0.086450124 |
| 0.066071279 | 0.08117856  | 0.001833205 | 0.057615249 |
| 0.060333384 | 0.107405635 | 0.088709005 | 0.089353639 |
| 0.076132562 | 0.126856513 | 0.034926368 | 0.000552075 |
| 0.011535243 | 0.009665574 | 0.005781577 | 0.000476286 |
| 0.042098439 | 0.015710306 | 0.114178316 | 0.109588011 |
| 0.096374179 | 0.010496267 | 0.005047726 | 0.074277146 |
| 0.071690669 | 0.099866233 | 0.040217478 | 0.001370458 |
| 0.010601753 | 0.00139784  | 0.045438371 | 0.109150306 |
| 0.099132963 | 0.001316715 | 0.002364626 | 0.001652093 |
| 0.014522654 | 0.105975507 | 0.077553103 | 0.085454217 |
| 0.147916495 | 0.023245315 | 0.002410373 | 0.102052692 |
| 0.007072749 | 0.074358096 | 0.088426734 | 0.064701918 |
| 0.042257836 | 0.094078171 | 0.094947359 | 0.088418851 |
| 0.03804433  | 0.086249237 | 0.101642527 | 0.004682651 |
| 0.007344752 | 0.030655521 | 0.016055513 | 0.136314062 |
| 0.089212352 | 0.001163734 | 0.001044902 | 0.000472166 |
| 0.002341217 | 0.118755667 | 0.006422417 | 0.107284629 |
| 0.074043021 | 0.092598803 | 0.021028508 | 0.081929391 |
| 0.000427846 | 0.075236277 | 0.07488642  | 0.000660976 |
| 0.117468219 | 0.012441239 | 0.110911932 | 0.001466565 |
| 0.015349916 | 0.093366462 | 0.013716801 | 0.023291322 |
| 0.073603231 | 0.015499857 | 0.086739585 | 0.121811594 |
| 0.050666239 | 0.02349601  | 0.11626346  | 0.138385047 |
| 0.020704738 | 0.058106993 | 0.081314092 | 0.03094536  |
| 0.002367804 | 0.044783794 | 0.082224109 | 0.080072757 |
| 0.010571525 | 0.117448715 | 0.008098518 | 0.118754767 |
| 0.101255705 | 0.120918994 | 0.091946021 | 0.037446423 |
| 0.011762845 | 0.061064197 | 0.024369404 | 0.000127857 |
| 0.075409249 | 0.073797772 | 0.076452159 | 0.00710391  |
| 0.022389667 | 0.119047883 | 0.006437729 | 0.008253453 |
| 0.10924682  | 0.020082561 | 0.003184652 | 0.119826219 |
| 0.093607106 | 0.080399916 | 0.003415174 | 0.011411109 |
| 0.101673648 | 0.093341404 | 0.003902062 | 0.053521555 |
| 0.079729863 | 0.046359344 | 0.135106252 | 0.131726678 |
| 0.037720723 | 0.060862215 | 0.075522952 | 0.027326403 |
| 0.051680176 | 0.035282676 | 0.089884341 | 0.003651025 |
| 0.002585897 | 0.099718953 | 0.001455695 | 0.054564617 |
| 0.015325502 | 0.015261967 | 0.048588827 | 0.117647582 |
| 0.046075901 | 0.047707806 | 0.010490142 | 0.009933895 |
| 0.105810451 | 0.112349992 | 0.080606189 | 0.006600935 |
| 0.002086879 | 0.070804124 | 0.001260404 | 0.025149586 |
| 0.046583082 | 0.083698076 | 0.049716963 | 0.054406622 |
| 0.029590291 | 0.065419945 | 0.037840314 | 0.017956044 |
| 0.005524177 | 0.018397887 | 0.078456013 | 0.002454002 |
| 0.001017055 | 0.112481273 | 0.063983987 | 0.044983683 |

|             |             |             |             |
|-------------|-------------|-------------|-------------|
| 0.005684815 | 0.089688547 | 0.072908419 | 0.00481683  |
| 0.041122847 | 0.088199135 | 0.00868788  | 0.091792418 |
| 0.042422492 | 0.024648248 | 0.07035085  | 0.001583658 |
| 0.02897621  | 0.082039996 | 0.145427559 | 0.095383234 |
| 0.174001073 | 0.070199657 | 0.082090296 | 0.071378855 |
| 0.033249647 | 0.142028247 | 0.001884702 | 0.10445562  |
| 0.025710544 |             |             |             |

| NRN1        | 0.062342607 | 0.041457334 | 0.07166423  |
|-------------|-------------|-------------|-------------|
| 0.067699908 | 0.078763728 | 0.017628598 | 0.046765775 |
| 0.015407716 | 0.035246894 | 0.005277287 | 0.025183024 |
| 0.074493848 | 0.016612605 | 0.01423694  | 0.008432201 |
| 0.133112833 | 0.112100476 | 0.054205702 | 0.11750029  |
| 0.084650839 | 0.013930616 | 0.135036073 | 0.059221639 |
| 0.087665129 | 0.121112717 | 0.111355    | 0.081506497 |
| 0.079971671 | 0.134903641 | 0.008460341 | 0.043689858 |
| 0.211321245 | 0.058689048 | 0.031253916 | 0.080854225 |
| 0.029885045 | 0.042945897 | 0.048818064 | 0.008136109 |
| 0.047816299 | 0.070795927 | 0.074373504 | 0.093317077 |
| 0.046051264 | 0.022673977 | 0.069448487 | 0.138009862 |
| 0.008274653 | 0.065326767 | 0.006155052 | 0.022747712 |
| 0.020699588 | 0.030009347 | 0.02141491  | 0.037021956 |
| 0.006739344 | 0.006317127 | 0.018638101 | 0.017402982 |
| 0.073468514 | 0.004586077 | 0.026803135 | 0.016449905 |
| 0.009180721 | 0.038944342 | 0.184419084 | 0.039301091 |
| 0.058711941 | 0.028952733 | 0.066683938 | 0.056136264 |
| 0.000935262 | 0.097031216 | 0.176717346 | 0.032785148 |
| 0.231277189 | 0.027735605 | 0.219386834 | 0.053578719 |
| 0.077786174 | 0.041685332 | 0.084417584 | 0.071953627 |
| 0.052781953 | 0.201906289 | 0.090906379 | 0.082405757 |
| 0.047726824 | 0.03726571  | 0.038538138 | 0.145808163 |
| 0.078500875 | 0.036401613 | 0.069484747 | 0.248960912 |
| 0.029309274 | 0.037832122 | 0.029124515 | 0.04372005  |
| 0.017221808 | 0.209955658 | 0.024198505 | 0.058996068 |
| 0.029559468 | 0.102495021 | 0.215536279 | 0.045180209 |
| 0.201621954 | 0.010167409 | 0.107967077 | 0.0595264   |
| 0.077313147 | 0.031348595 | 0.240161683 | 0.039279639 |
| 0.0878965   | 0.054192334 | 0.039902291 | 0.089498775 |
| 0.100280164 | 0.060405908 | 0.02884298  | 0.225061432 |
| 0.01615385  | 0.070819677 | 0.019027996 | 0.05353246  |
| 0.011255191 | 0.02128801  | 0.054095367 | 0.099304061 |
| 0.168328007 | 0.127064397 | 0.045864285 | 0.075914787 |
| 0.078978984 | 0.036144611 | 0.048957841 | 0.024280153 |
| 0.0477621   | 0.085485468 | 0.000268262 | 0.068892757 |
| 0.044382022 | 0.133507067 | 0.191799006 | 0.045587642 |
| 0.111051104 | 0.047817334 | 0.114988737 | 0.063245735 |
| 0.024502567 | 0.120763061 | 0.02474614  | 0.139643644 |
| 0.007937113 | 0.149447494 | 0.118056441 | 0.038708993 |
| 0.033046122 | 0.02974405  | 0.257414038 | 0.036075332 |
| 0.008491096 | 0.073878253 | 0.107414007 | 0.024088027 |
| 0.00884287  | 0.028029377 | 0.020798945 | 0.190793736 |
| 0.050194805 | 0.117727465 | 0.018400626 | 0.028225751 |
| 0.011764284 | 0.114741768 | 0.010360762 | 0.05064574  |
| 0.009106611 | 0.073669278 | 0.066433621 | 0.107879327 |
| 0.205440086 | 0.091320573 | 0.032122991 | 0.02503618  |

|             |             |              |             |
|-------------|-------------|--------------|-------------|
| 0.038296635 | 0.008388249 | 0.055029037  | 0.115674782 |
| 0.035064329 | 0.061268522 | 0.003977091  | 0.126608354 |
| 0.024041545 | 0.177751815 | 0.084737398  | 0.175720372 |
| 0.03379337  | 0.137270884 | 0.016916942  | 0.064628967 |
| 0.037189259 | 0.024044026 | 0.008791566  | 0.056338588 |
| 0.239085129 | 0.007604196 | 0.070055715  | 0.074659464 |
| 0.051613265 | 0.103332064 | 0.098652518  | 0.031802513 |
| 0.061655262 | 0.065140056 | 0.138064766  | 0.201692096 |
| 0.078541273 | 0.008240535 | 0.024599988  | 0.029995266 |
| 0.014820482 | 0.034807525 | 0.036879136  | 0.003016965 |
| 0.0841376   | 0.033208141 | 0.010490401  | 0.084342576 |
| 0.035420636 | 0.018007127 | 0.031069066  | 0.141978905 |
| 0.206482109 | 0.051253762 | 0.154537588  | 0.089102527 |
| 0.103065069 | 0.024492418 | 0.100936159  | 0.007954729 |
| 0.011822759 | 0.086150557 | 0.0411147528 | 0.030730289 |
| 0.017627949 | 0.114590521 | 0.240389784  | 0.011842589 |
| 0.009396739 | 0.010227516 | 0.007272955  | 0.027501878 |
| 0.012660565 | 0.024589489 | 0.061364277  | 0.068566332 |
| 0.154760322 | 0.204365426 | 0.04218516   | 0.127089829 |
| 0.015350227 | 0.05953554  | 0.230514689  | 0.003464598 |
| 0.050477122 | 0.005959548 | 0.006110526  | 0.034213221 |
| 0.096254427 | 0.083862361 | 0.017551119  | 0.178520347 |
| 0.040342753 | 0.094614893 | 0.08236752   | 0.00464152  |
| 0.038438143 | 0.028537302 | 0.194265095  | 0.105578893 |
| 0.018004397 | 0.064848138 | 0.037055815  | 0.032789616 |
| 0.027268304 | 0.151427207 | 0.047352781  | 0.136552965 |
| 0.255998564 | 0.107052706 | 0.041400775  | 0.268421445 |
| 0.223772621 | 0.025458454 | 0.010218652  | 0.214545336 |
| 0.047701266 | 0.128374878 | 0.029932543  | 0.171296561 |
| 0.064827719 | 0.015113683 | 0.236809197  | 0.084448013 |
| 0.026119053 | 0.051691554 | 0.211389614  | 0.058567286 |
| 0.149391035 | 0.027336116 | 0.004218177  | 0.052525211 |
| 0.103238074 | 0.038686482 | 0.146106234  | 0.073009076 |
| 0.0263659   | 0.010292372 | 0.14251341   | 0.025647983 |
| 0.021552791 | 0.087133629 | 0.092207111  | 0.030592651 |
| 0.042383483 | 0.047307806 | 0.025333513  | 0.101088359 |
| 0.017276712 | 0.027372395 | 0.098900292  | 0.102762299 |
| 0.01908412  | 0.093714559 | 0.070364704  | 0.01421902  |
| 0.039024318 | 0.025956213 | 0.102709843  | 0.058694573 |
| 0.008511174 | 0.014790948 | 0.18457012   | 0.134577684 |
| 0.057814702 | 0.045637556 | 0.030894098  | 0.073794479 |
| 0.058740248 | 0.040701457 | 0.04293144   | 0.294665147 |
| 0.269725298 | 0.035050778 | 0.041141781  | 0.01873774  |
| 0.082039991 | 0.00548825  | 0.013246995  | 0.038285641 |
| 0.120834038 | 0.018394065 | 0.002854327  | 0.061262149 |
| 1           | 0.112652098 | 0.024229218  | 0.05024693  |
| 0.002127235 | 0.11944004  | 0.094676373  | 0.059016794 |
| 0.030207513 | 0.165033805 | 0.123687556  | 0.037777212 |
| 0.049580548 | 0.040169545 | 0.0687777    | 0.054416375 |
| 0.048831427 | 0.02789091  | 0.012205359  | 0.183173184 |
| 0.039895226 | 0.039219479 | 0.053549177  | 0.034253774 |
| 0.065092131 | 0.13763636  | 0.108930283  | 0.034460167 |
| 0.047951307 | 0.013109941 | 0.003750263  | 0.019807526 |
| 0.017202344 | 0.090835719 | 0.048659709  | 0.090478184 |

|             |             |             |             |
|-------------|-------------|-------------|-------------|
| 0.056932758 | 0.181595123 | 0.014901156 | 0.036847828 |
| 0.044790563 | 0.069298243 | 0.179951    | 0.02281438  |
| 0.016496175 | 0.052248575 | 0.048583212 | 0.232548134 |
| 0.050351926 | 0.001039017 | 0.088399463 | 0.01738496  |
| 0.028391765 | 0.11276867  | 0.033448029 | 0.134313858 |
| 0.083570117 | 0.192838366 | 0.004199377 | 0.120731464 |
| 0.082937585 | 0.018417799 | 0.056683442 | 0.026540235 |
| 0.203335754 | 0.192105121 | 0.048590668 | 0.06514166  |
| 0.040567999 | 0.200969309 | 0.071705556 | 0.012734502 |
| 0.150854223 | 0.200472403 | 0.133250294 | 0.12375578  |
| 0.026783206 | 0.029541278 | 0.045547577 | 0.001826308 |
| 0.029625834 | 0.076162096 | 0.042805404 | 0.071244797 |
| 0.051686908 | 0.106419218 | 0.163382307 | 0.029968193 |
| 0.042571801 | 0.025834748 | 0.113241032 | 0.002147516 |
| 0.128809576 | 0.136891978 | 0.040709272 | 0.007828373 |
| 0.013290072 | 0.052826244 | 0.031839131 | 0.227361139 |
| 0.054497235 | 0.191158591 | 0.074389963 | 0.095138263 |
| 0.232163275 | 0.049401987 | 0.199184337 | 0.11623512  |
| 0.020375179 | 0.068308047 | 0.026496566 | 0.013042355 |
| 0.028666225 | 0.100347929 | 0.071911456 | 0.033087804 |
| 0.015860252 | 0.090514372 | 0.020461012 | 0.056841491 |
| 0.044123022 | 0.052282812 | 0.044428117 | 0.055160418 |
| 0.05866799  | 0.030784163 | 0.022787142 | 0.010978117 |
| 0.105341279 | 0.069819147 | 0.053133701 | 0.045094562 |
| 0.098704015 | 0.07254621  | 0.097338595 | 0.015110046 |
| 0.069223514 | 0.01340054  | 0.034308154 | 0.120623648 |
| 0.050877529 | 0.032640422 | 0.059136376 | 0.109142665 |
| 0.044873734 | 0.034088166 | 0.014217448 | 0.044694378 |
| 0.251622574 | 0.092081728 | 0.084232993 | 0.096674694 |
| 0.0222493   | 0.038852982 | 0.051250371 | 0.021621345 |
| 0.022094884 | 0.093802003 | 0.03240863  | 0.006391744 |
| 0.06327323  | 0.048439346 | 0.028110477 | 0.318610047 |
| 0.126862901 | 0.144765554 | 0.031030455 | 0.132716494 |
| 0.028026592 | 0.096233761 | 0.006944343 | 0.101096255 |
| 0.197779228 | 0.040700314 | 0.147451023 | 0.023114546 |
| 0.037983108 | 0.026170333 | 0.055901466 | 0.230519872 |
| 0.036493195 | 0.048563605 | 0.055636419 | 0.148292588 |
| 0.036101302 | 0.165325721 | 0.126256743 | 0.011864938 |
| 0.00506889  | 0.017653164 | 0.042781826 | 0.034793829 |
| 0.034984073 | 0.087275594 | 0.026751439 | 0.229076576 |
| 0.110396591 | 0.032904972 | 0.067184754 | 0.017298881 |
| 0.276682404 | 0.040226891 | 0.006774953 | 0.080574419 |
| 0.049595961 | 0.173698509 | 0.018908602 | 0.039247597 |
| 0.110670018 | 0.027074399 | 0.092536263 | 0.035305133 |
| 0.134397534 | 0.103057455 | 0.020045199 | 0.039552259 |
| 0.082036631 | 0.051972345 | 0.038738728 | 0.071032233 |
| 0.014442675 |             |             |             |
| NRP1        | 0.413674118 | 0.513542895 | 0.440830466 |
| 0.414400359 | 0.475487579 | 0.321979475 | 0.239180038 |
| 0.194808049 | 0.123578098 | 0.007647497 | 0.042528673 |
| 0.466675769 | 0.248639232 | 0.272912354 | 0.302052833 |
| 0.460631749 | 0.228507919 | 0.395525385 | 0.310124871 |
| 0.428857869 | 0.101708582 | 0.457919585 | 0.140078595 |
| 0.413499511 | 0.184450839 | 0.121348221 | 0.356122949 |

| 0.431142     | 0.138620537 | 0.270420062 | 0.363068528 |
|--------------|-------------|-------------|-------------|
| 0.210063571  | 0.419005957 | 0.498149632 | 0.465679066 |
| 0.494156935  | 0.373825353 | 0.03098699  | 0.266707071 |
| 0.39686646   | 0.441737694 | 0.415788593 | 0.378243214 |
| 0.070336971  | 0.448329676 | 0.286324712 | 0.481764149 |
| 0.226056189  | 0.064837773 | 0.19914756  | 0.407740415 |
| 0.441873942  | 0.407426349 | 0.232331381 | 0.190106581 |
| 0.217691817  | 0.200243099 | 0.323283044 | 0.273801472 |
| 0.277257222  | 0.12893449  | 0.462623432 | 0.109319484 |
| 0.162331325  | 0.278527006 | 0.281696902 | 0.281666547 |
| 0.430094366  | 0.336271408 | 0.037611921 | 0.416174994 |
| 0.0033308917 | 0.417360081 | 0.47939511  | 0.349505571 |
| 0.093525526  | 0.038518187 | 0.31091698  | 0.352069701 |
| 0.457074057  | 0.453480953 | 0.503105983 | 0.506189398 |
| 0.266556219  | 0.417902333 | 0.462477643 | 0.244280404 |
| 0.41595606   | 0.205925704 | 0.158668548 | 0.473849801 |
| 0.510296994  | 0.510198384 | 0.309282239 | 0.39053314  |
| 0.370631727  | 0.460970897 | 0.408382135 | 0.449190378 |
| 0.349918121  | 0.133427024 | 0.41173654  | 0.520006837 |
| 0.35792011   | 0.414621735 | 0.254496085 | 0.379908049 |
| 0.120717156  | 0.348556081 | 0.402567468 | 0.242606932 |
| 0.47076688   | 0.0327415   | 0.339861318 | 0.362367236 |
| 0.324757746  | 0.415920161 | 0.51153748  | 0.244224156 |
| 0.486582596  | 0.045920539 | 0.195965273 | 0.087871727 |
| 0.357217062  | 0.249969558 | 0.44060281  | 0.443039308 |
| 0.245171084  | 0.434465051 | 0.309261853 | 0.010839443 |
| 0.07083845   | 0.318183097 | 0.40887882  | 0.422001788 |
| 0.436692569  | 0.372282366 | 0.286276291 | 0.338797831 |
| 0.433485307  | 0.497308636 | 0.041467825 | 0.144419314 |
| 0.425819291  | 0.319530588 | 0.331326517 | 0.444353607 |
| 0.397478941  | 0.154917203 | 0.196590398 | 0.525243237 |
| 0.390379865  | 0.137764226 | 0.335946521 | 0.468721746 |
| 0.320501964  | 0.458888352 | 0.172994272 | 0.325091526 |
| 0.075029551  | 0.466948205 | 0.080206819 | 0.341477953 |
| 0.278257355  | 0.249478906 | 0.030423679 | 0.255930431 |
| 0.285668957  | 0.398148838 | 0.435628034 | 0.184732687 |
| 0.364639071  | 0.466057026 | 0.295641924 | 0.384688583 |
| 0.017142105  | 0.097838541 | 0.244122571 | 0.507463128 |
| 0.2266686    | 0.519629553 | 0.381506482 | 0.419582255 |
| 0.395816497  | 0.450474623 | 0.008537568 | 0.465020232 |
| 0.515685486  | 0.252971457 | 0.422894659 | 0.483119822 |
| 0.393434196  | 0.430005378 | 0.051206994 | 0.467610891 |
| 0.31721591   | 0.144988999 | 0.522470433 | 0.251639258 |
| 0.447253551  | 0.083304607 | 0.311102357 | 0.427630006 |
| 0.404575136  | 0.018294109 | 0.191464869 | 0.384449597 |
| 0.079663963  | 0.097798105 | 0.425885858 | 0.422679156 |
| 0.394234431  | 0.463386629 | 0.499303925 | 0.376090156 |
| 0.464713113  | 0.287995612 | 0.036953655 | 0.444269397 |
| 0.440889812  | 0.374178652 | 0.409545607 | 0.278994383 |
| 0.290896292  | 0.454929489 | 0.382684947 | 0.182889293 |
| 0.075275546  | 0.318518828 | 0.030467889 | 0.396148115 |
| 0.371844763  | 0.144369252 | 0.38909748  | 0.271821144 |
| 0.14882557   | 0.525703475 | 0.300204878 | 0.359828052 |
| 0.225320977  | 0.377860341 | 0.319428318 | 0.233325944 |

|             |             |             |             |
|-------------|-------------|-------------|-------------|
| 0.246567058 | 0.252651274 | 0.407152522 | 0.400365987 |
| 0.050458656 | 0.158662645 | 0.051439836 | 0.368723151 |
| 0.163711721 | 0.332490868 | 0.309118152 | 0.366359976 |
| 0.343657359 | 0.152128067 | 0.436035882 | 0.391771488 |
| 0.20748389  | 0.042181025 | 0.498831431 | 0.457479581 |
| 0.275334989 | 0.214310354 | 0.097300055 | 0.312256838 |
| 0.454633255 | 0.24814732  | 0.223629276 | 0.431268388 |
| 0.062003618 | 0.501625935 | 0.286112072 | 0.206878407 |
| 0.431218376 | 0.327982064 | 0.459235838 | 0.064930646 |
| 0.38380197  | 0.442106198 | 0.425649169 | 0.267572429 |
| 0.356698966 | 0.427815907 | 0.052232082 | 0.362734769 |
| 0.357049339 | 0.070359469 | 0.525855723 | 0.234535081 |
| 0.0584959   | 0.477115962 | 0.41467321  | 0.149008628 |
| 0.156123627 | 0.335785364 | 0.054432564 | 0.397830177 |
| 0.514113172 | 0.460542578 | 0.38328413  | 0.355502788 |
| 0.070566617 | 0.019862872 | 0.353876647 | 0.45049873  |
| 0.480250634 | 0.517850294 | 0.373044135 | 0.42233723  |
| 0.319397916 | 0.373127852 | 0.126578463 | 0.512007683 |
| 0.315756365 | 0.507642968 | 0.022276136 | 0.444909441 |
| 0.483376804 | 0.249677474 | 0.147974011 | 0.29835807  |
| 0.339124261 | 0.082513484 | 0.286793804 | 0.476719281 |
| 0.41538268  | 0.382574509 | 0.369270835 | 0.469832878 |
| 0.02554527  | 0.062962076 | 0.445814877 | 0.300732997 |
| 0.384514846 | 0.302869324 | 0.115649202 | 0.325417078 |
| 0.073403623 | 0.425014299 | 0.467860558 | 0.102841714 |
| 0.275372634 | 0.300037865 | 0.477311645 | 0.075091688 |
| 0.456461377 | 0.502060548 | 0.499680882 | 0.228604943 |
| 0.434301605 | 0.482542931 | 0.415664099 | 0.168923195 |
| 0.052262212 | 0.504686589 | 0.374675335 | 0.036614955 |
| 0.479956734 | 0.184998528 | 0.021905837 | 0.482201137 |
| 0.25469153  | 0.406355803 | 0.004952199 | 0.141455305 |
| 0.112652098 | 1           | 0.44889322  | 0.373268167 |
| 0.184430901 | 0.428398645 | 0.022280171 | 0.534203158 |
| 0.46997562  | 0.044054879 | 0.265075759 | 0.40762142  |
| 0.418300022 | 0.51546957  | 0.394697292 | 0.445488071 |
| 0.439521708 | 0.478781466 | 0.259312644 | 0.369421169 |
| 0.406513906 | 0.489847007 | 0.403832162 | 0.439680553 |
| 0.45149121  | 0.486636123 | 0.341102906 | 0.02937562  |
| 0.193606377 | 0.199153227 | 0.261692266 | 0.109568037 |
| 0.278535967 | 0.221040396 | 0.480467325 | 0.478870189 |
| 0.489369772 | 0.018798372 | 0.168157308 | 0.399281709 |
| 0.418730833 | 0.474247833 | 0.058063776 | 0.013026604 |
| 0.016951344 | 0.044058176 | 0.369187771 | 0.374783518 |
| 0.488816816 | 0.181986586 | 0.014825448 | 0.058359795 |
| 0.331095125 | 0.46513666  | 0.488222118 | 0.435388188 |
| 0.449513881 | 0.157631353 | 0.250578066 | 0.440917805 |
| 0.132452724 | 0.281475552 | 0.49197598  | 0.444600007 |
| 0.106734864 | 0.372791578 | 0.403247267 | 0.488757736 |
| 0.130281869 | 0.432659352 | 0.463453811 | 0.338593983 |
| 0.044779735 | 0.165341248 | 0.128552508 | 0.473793971 |
| 0.477589709 | 0.119332843 | 0.064829791 | 0.126301405 |
| 0.152630654 | 0.473399258 | 0.226510352 | 0.528903882 |
| 0.410825684 | 0.455929007 | 0.168100764 | 0.459969386 |
| 0.072252845 | 0.463244791 | 0.436929589 | 0.055932088 |



|             |             |             |             |
|-------------|-------------|-------------|-------------|
| 0.412082224 | 0.037946016 | 0.469417559 | 0.170633671 |
| 0.306668941 | 0.391210124 | 0.2571259   | 0.054634829 |
| 0.275865181 | 0.115554331 | 0.483818997 | 0.472810683 |
| 0.097929635 | 0.292597476 | 0.417380792 | 0.456284047 |
| 0.266313671 | 0.436622868 | 0.475523126 | 0.35028199  |
| 0.111706907 | 0.255723982 | 0.414153633 | 0.368916001 |
| 0.248084709 | 0.513766031 | 0.336462684 | 0.533318677 |
| 0.384986693 | 0.457906984 | 0.469817457 | 0.370368067 |
| 0.350287419 | 0.374493435 | 0.329992766 | 0.028228125 |
| 0.41649482  | 0.450867942 | 0.382846466 | 0.228561893 |
| 0.34031175  | 0.436998933 | 0.08928207  | 0.205041764 |
| 0.393969032 | 0.258894378 | 0.197754279 | 0.462523442 |
| 0.389657509 | 0.368075477 | 0.069395431 | 0.117348909 |
| 0.53453816  | 0.418073054 | 0.159364177 | 0.407535923 |
| 0.288823101 | 0.407599508 | 0.456146307 | 0.469263924 |
| 0.396269442 | 0.422018033 | 0.406901657 | 0.340889691 |
| 0.390185787 | 0.322231334 | 0.504586774 | 0.088901231 |
| 0.151894371 | 0.418149082 | 0.135524843 | 0.18752095  |
| 0.216746401 | 0.069744709 | 0.356748743 | 0.478145926 |
| 0.409344407 | 0.433173622 | 0.303978919 | 0.146461474 |
| 0.44854172  | 0.38306539  | 0.44479676  | 0.212969825 |
| 0.11979199  | 0.470892095 | 0.024725195 | 0.124122661 |
| 0.433992369 | 0.416428619 | 0.431062922 | 0.357734304 |
| 0.383628904 | 0.273094583 | 0.385703576 | 0.259048207 |
| 0.268698198 | 0.400319333 | 0.404401025 | 0.055773329 |
| 0.034860073 | 0.512770969 | 0.361815848 | 0.066686479 |
| 0.16433422  | 0.354409473 | 0.390854434 | 0.273597813 |
| 0.06769721  | 0.478786439 | 0.277311498 | 0.472258948 |
| 0.359071557 | 0.131974071 | 0.317633518 | 0.131779355 |
| 0.114131261 | 0.424864024 | 0.456284581 | 0.502344185 |
| 0.45905781  | 0.449867672 | 0.407984196 | 0.402448139 |
| 0.205551485 | 0.401296155 | 0.0489212   | 0.430424191 |
| 0.383823896 |             |             |             |

|             |             |             |             |
|-------------|-------------|-------------|-------------|
| NSG2        | 0.449823259 | 0.492999844 | 0.409157713 |
| 0.433507272 | 0.411541268 | 0.446349889 | 0.208435554 |
| 0.19886373  | 0.086070061 | 0.004201362 | 0.019731974 |
| 0.438785786 | 0.19712425  | 0.279583597 | 0.403617545 |
| 0.404638047 | 0.103630885 | 0.347629786 | 0.216520788 |
| 0.408753945 | 0.096409406 | 0.376871652 | 0.078422225 |
| 0.259048121 | 0.084383781 | 0.054769298 | 0.256269115 |
| 0.446904268 | 0.063396338 | 0.400545485 | 0.415504014 |
| 0.069439582 | 0.460164859 | 0.507695312 | 0.430098662 |
| 0.502410502 | 0.451532879 | 0.006367054 | 0.345853836 |
| 0.461335663 | 0.465335295 | 0.413625409 | 0.314939452 |
| 0.034495259 | 0.490139079 | 0.238903769 | 0.377460754 |
| 0.26446237  | 0.022329244 | 0.300259615 | 0.461971618 |
| 0.480024145 | 0.478009312 | 0.243622756 | 0.15758031  |
| 0.216733036 | 0.266128826 | 0.276437446 | 0.387962761 |
| 0.21032039  | 0.199798208 | 0.483657105 | 0.094901169 |
| 0.155365722 | 0.248658343 | 0.111000561 | 0.260818065 |
| 0.336983196 | 0.44904709  | 0.012456354 | 0.430373039 |
| 0.002531996 | 0.382859037 | 0.340321672 | 0.340886419 |
| 0.027898302 | 0.01466719  | 0.133724426 | 0.345934642 |
| 0.460693797 | 0.464623477 | 0.471916969 | 0.480892825 |

|             |             |             |             |
|-------------|-------------|-------------|-------------|
| 0.149858082 | 0.24797947  | 0.382714046 | 0.147203026 |
| 0.478263396 | 0.177444326 | 0.098823423 | 0.400016584 |
| 0.47764619  | 0.489555649 | 0.170437825 | 0.221781242 |
| 0.484583024 | 0.484637943 | 0.464472429 | 0.433511116 |
| 0.387398556 | 0.033665628 | 0.485120303 | 0.488592564 |
| 0.457018997 | 0.298535449 | 0.121621042 | 0.441949137 |
| 0.041051976 | 0.404165743 | 0.338215225 | 0.125086394 |
| 0.464488303 | 0.015760323 | 0.171661193 | 0.369460625 |
| 0.179953823 | 0.474587143 | 0.487276822 | 0.171782465 |
| 0.380600142 | 0.012616947 | 0.137378601 | 0.020040143 |
| 0.32633246  | 0.123773011 | 0.504369036 | 0.475394717 |
| 0.236158297 | 0.366255085 | 0.2572564   | 0.000681804 |
| 0.016016048 | 0.145488987 | 0.469478433 | 0.352078074 |
| 0.445454428 | 0.444732457 | 0.228186454 | 0.458646783 |
| 0.471321241 | 0.469834468 | 0.09288711  | 0.082676575 |
| 0.443872253 | 0.142601425 | 0.206005451 | 0.46112407  |
| 0.286315251 | 0.104953433 | 0.103113281 | 0.490076977 |
| 0.462454784 | 0.067453358 | 0.358714701 | 0.395523518 |
| 0.365247434 | 0.323823215 | 0.084612981 | 0.258196859 |
| 0.041934104 | 0.475466852 | 0.016298986 | 0.349609883 |
| 0.323469613 | 0.113674591 | 0.006386337 | 0.281789557 |
| 0.317090422 | 0.4917054   | 0.487559862 | 0.081267205 |
| 0.302349649 | 0.390783388 | 0.364483738 | 0.478334351 |
| 0.009994708 | 0.032740845 | 0.337784998 | 0.490302377 |
| 0.365813662 | 0.478053462 | 0.272608725 | 0.272844009 |
| 0.245484151 | 0.455071115 | 0.002594142 | 0.496263661 |
| 0.493936457 | 0.368460367 | 0.398728347 | 0.399919098 |
| 0.411171305 | 0.470212121 | 0.046466053 | 0.395460612 |
| 0.420406986 | 0.05894363  | 0.475116187 | 0.130838723 |
| 0.476394927 | 0.029834874 | 0.339268042 | 0.468318985 |
| 0.471650274 | 0.006186332 | 0.27755595  | 0.406679657 |
| 0.015364836 | 0.109363303 | 0.447877174 | 0.417340039 |
| 0.404150645 | 0.449019511 | 0.459445466 | 0.396892917 |
| 0.423530263 | 0.218204516 | 0.006879554 | 0.280109678 |
| 0.458615126 | 0.416563704 | 0.476446416 | 0.237965887 |
| 0.407560187 | 0.492392184 | 0.478016211 | 0.260487159 |
| 0.034610833 | 0.32668105  | 0.019028672 | 0.329651052 |
| 0.465254841 | 0.112786126 | 0.443348351 | 0.106426256 |
| 0.048931678 | 0.494537831 | 0.147326829 | 0.247760952 |
| 0.10806814  | 0.432510185 | 0.231707409 | 0.25674704  |
| 0.212201299 | 0.13956565  | 0.363106605 | 0.398452239 |
| 0.034971287 | 0.072132035 | 0.007243198 | 0.398869095 |
| 0.13481386  | 0.365539198 | 0.378126742 | 0.463117624 |
| 0.321986944 | 0.094093884 | 0.375954212 | 0.271585347 |
| 0.089738585 | 0.008321387 | 0.493560559 | 0.391071017 |
| 0.416778887 | 0.140204055 | 0.025762322 | 0.38387665  |
| 0.481587051 | 0.420553012 | 0.341893912 | 0.485879292 |
| 0.019180068 | 0.4727589   | 0.243666057 | 0.097019884 |
| 0.366516968 | 0.239303719 | 0.460376343 | 0.072228429 |
| 0.419134478 | 0.483407128 | 0.275640872 | 0.165989196 |
| 0.46066568  | 0.426381635 | 0.024295826 | 0.466050449 |
| 0.459718614 | 0.020465885 | 0.490905667 | 0.092264015 |
| 0.011818592 | 0.435191232 | 0.483172486 | 0.054465216 |
| 0.057019595 | 0.357750121 | 0.048170707 | 0.255548531 |

|             |             |             |             |
|-------------|-------------|-------------|-------------|
| 0.495725308 | 0.393363031 | 0.48773621  | 0.183022677 |
| 0.031477139 | 0.006509583 | 0.163538877 | 0.40119505  |
| 0.506692979 | 0.486272608 | 0.219802003 | 0.359148846 |
| 0.214646195 | 0.35123644  | 0.174184334 | 0.492473333 |
| 0.161009384 | 0.487766617 | 0.00298978  | 0.462484297 |
| 0.507891734 | 0.342863675 | 0.062725723 | 0.339347969 |
| 0.463923859 | 0.036981823 | 0.176728662 | 0.487075611 |
| 0.485130522 | 0.34013938  | 0.385518581 | 0.418156441 |
| 0.014194446 | 0.036319855 | 0.392786067 | 0.16188867  |
| 0.417057192 | 0.194292217 | 0.040247442 | 0.356017428 |
| 0.034138311 | 0.484950393 | 0.447702303 | 0.052853247 |
| 0.423164887 | 0.350239174 | 0.343700489 | 0.026332273 |
| 0.476193301 | 0.477087435 | 0.505895783 | 0.143434465 |
| 0.464240899 | 0.493712235 | 0.432823998 | 0.054498095 |
| 0.009416997 | 0.494751242 | 0.446747696 | 0.019208765 |
| 0.464803637 | 0.309554993 | 0.009541841 | 0.489100716 |
| 0.164260011 | 0.463300355 | 0.005182908 | 0.075348125 |
| 0.024229218 | 0.44889322  | 1           | 0.408292398 |
| 0.340782783 | 0.35131398  | 0.002652161 | 0.484866573 |
| 0.490007414 | 0.007885744 | 0.108253582 | 0.484555987 |
| 0.464478554 | 0.491155549 | 0.322037315 | 0.481128893 |
| 0.447292496 | 0.48878689  | 0.242794427 | 0.239200379 |
| 0.486617092 | 0.477095664 | 0.456727666 | 0.480980309 |
| 0.468914017 | 0.405610876 | 0.26536703  | 0.012221015 |
| 0.143428083 | 0.244539817 | 0.401723746 | 0.084766101 |
| 0.395012778 | 0.121762495 | 0.483150813 | 0.462605309 |
| 0.485181198 | 0.001689812 | 0.154976211 | 0.485740249 |
| 0.468971207 | 0.471353566 | 0.012439754 | 0.005386765 |
| 0.006440529 | 0.014354549 | 0.374842225 | 0.204614493 |
| 0.492752645 | 0.321719325 | 0.001687032 | 0.041389276 |
| 0.278991809 | 0.390385672 | 0.491413325 | 0.363033855 |
| 0.458646225 | 0.057714539 | 0.340392805 | 0.388508005 |
| 0.053996978 | 0.407406328 | 0.4887252   | 0.484319547 |
| 0.024821732 | 0.214253807 | 0.379004565 | 0.479339322 |
| 0.064774303 | 0.276700466 | 0.441319447 | 0.329541505 |
| 0.006913197 | 0.059343403 | 0.05162678  | 0.429076504 |
| 0.495596138 | 0.064330434 | 0.023768528 | 0.180902427 |
| 0.113099301 | 0.471004464 | 0.147143022 | 0.484482566 |
| 0.472224724 | 0.4304023   | 0.049796923 | 0.487386426 |
| 0.03176309  | 0.479436269 | 0.31825358  | 0.07551881  |
| 0.246201675 | 0.006577102 | 0.47073082  | 0.184889789 |
| 0.356021034 | 0.427665589 | 0.213643244 | 0.008584353 |
| 0.175339045 | 0.035322043 | 0.473841075 | 0.461142411 |
| 0.018857204 | 0.227691182 | 0.262281015 | 0.394793213 |
| 0.326096427 | 0.446747015 | 0.498697226 | 0.482517933 |
| 0.07947518  | 0.110456528 | 0.420871592 | 0.446470524 |
| 0.24603291  | 0.469768481 | 0.313615019 | 0.489110242 |
| 0.458755945 | 0.478101324 | 0.488258613 | 0.367566719 |
| 0.199463149 | 0.44793099  | 0.429702143 | 0.018540366 |
| 0.340494833 | 0.466475983 | 0.368501109 | 0.143552169 |
| 0.23582858  | 0.398390004 | 0.035356449 | 0.189905722 |
| 0.3376772   | 0.376292626 | 0.124263876 | 0.4282084   |
| 0.414928243 | 0.454566472 | 0.030129131 | 0.049729255 |
| 0.49513757  | 0.476516541 | 0.159257809 | 0.464520224 |

|             |             |             |             |
|-------------|-------------|-------------|-------------|
| 0.133890943 | 0.338773565 | 0.4627112   | 0.449523964 |
| 0.397227576 | 0.485940991 | 0.457263499 | 0.445184558 |
| 0.470710229 | 0.247790228 | 0.506874129 | 0.101280658 |
| 0.074538617 | 0.44124244  | 0.086899019 | 0.065117428 |
| 0.118747094 | 0.01703779  | 0.315861296 | 0.406907515 |
| 0.394302627 | 0.36733715  | 0.351707803 | 0.065551004 |
| 0.283477695 | 0.39040143  | 0.32865881  | 0.211360157 |
| 0.067095791 | 0.488673953 | 0.005626972 | 0.036739749 |
| 0.382271841 | 0.486788537 | 0.390992565 | 0.206789244 |
| 0.291893721 | 0.101877122 | 0.271144039 | 0.352238643 |
| 0.387921929 | 0.373649709 | 0.491901182 | 0.030233287 |
| 0.014296712 | 0.47053884  | 0.415465625 | 0.01099523  |
| 0.066134208 | 0.43753117  | 0.260479971 | 0.248775288 |
| 0.011852695 | 0.48519301  | 0.41650918  | 0.425007016 |
| 0.360316927 | 0.046022959 | 0.427144363 | 0.080014174 |
| 0.045405928 | 0.469107931 | 0.399294766 | 0.485130561 |
| 0.321548118 | 0.413337271 | 0.461561658 | 0.478651834 |
| 0.101471056 | 0.410185404 | 0.022335296 | 0.461200894 |
| 0.459907536 |             |             |             |

|             |             |             |             |
|-------------|-------------|-------------|-------------|
| NSMAF       | 0.326170759 | 0.461016053 | 0.250991774 |
| 0.369974421 | 0.300208663 | 0.295512156 | 0.282540658 |
| 0.312899863 | 0.113574285 | 0.015753315 | 0.023946696 |
| 0.264213565 | 0.153342467 | 0.277377551 | 0.2523024   |
| 0.358386062 | 0.117838744 | 0.335933586 | 0.287881203 |
| 0.352788993 | 0.199061909 | 0.297652143 | 0.173534928 |
| 0.194885121 | 0.08296283  | 0.096114039 | 0.171494116 |
| 0.434351532 | 0.109055806 | 0.283011596 | 0.370082528 |
| 0.122027258 | 0.386176159 | 0.437694103 | 0.261395661 |
| 0.411183863 | 0.294457348 | 0.033046989 | 0.270070052 |
| 0.405348038 | 0.313738265 | 0.365156144 | 0.305097896 |
| 0.093087415 | 0.432286876 | 0.27762803  | 0.270056249 |
| 0.270164415 | 0.04311663  | 0.292395686 | 0.423147913 |
| 0.384920005 | 0.261189779 | 0.336236074 | 0.234471457 |
| 0.122388578 | 0.298415258 | 0.117655256 | 0.305777874 |
| 0.276874333 | 0.253105995 | 0.395937907 | 0.144836894 |
| 0.185262653 | 0.368038834 | 0.140725106 | 0.342111344 |
| 0.199524194 | 0.36445539  | 0.076811338 | 0.225255417 |
| 0.010021134 | 0.355422271 | 0.279298588 | 0.151412805 |
| 0.069370332 | 0.033778953 | 0.164967037 | 0.325717883 |
| 0.439762331 | 0.402103903 | 0.402868474 | 0.395802314 |
| 0.147672862 | 0.271698964 | 0.223323546 | 0.196819217 |
| 0.398621825 | 0.226025315 | 0.148002607 | 0.33857098  |
| 0.407899224 | 0.42941389  | 0.179745121 | 0.218227986 |
| 0.350264481 | 0.449639372 | 0.276446207 | 0.286039595 |
| 0.186039181 | 0.056002296 | 0.388065728 | 0.426014867 |
| 0.384963739 | 0.164496447 | 0.145603109 | 0.407643054 |
| 0.106109605 | 0.282580096 | 0.317707832 | 0.145917968 |
| 0.450171309 | 0.055588248 | 0.170894607 | 0.329934148 |
| 0.271035314 | 0.36552376  | 0.409853299 | 0.257750339 |
| 0.283401085 | 0.03692656  | 0.071186431 | 0.06543384  |
| 0.267987285 | 0.071050834 | 0.398809731 | 0.411886305 |
| 0.323325602 | 0.263525614 | 0.342574497 | 0.00833501  |
| 0.039532992 | 0.19040345  | 0.340553747 | 0.341425403 |
| 0.363513326 | 0.304864538 | 0.190164444 | 0.341018316 |

|             |             |             |             |
|-------------|-------------|-------------|-------------|
| 0.236563972 | 0.39722514  | 0.058609758 | 0.203703324 |
| 0.306666764 | 0.194785364 | 0.260004032 | 0.284313392 |
| 0.219735974 | 0.242618992 | 0.193000834 | 0.449027669 |
| 0.433135135 | 0.150069815 | 0.332201348 | 0.327486105 |
| 0.253396227 | 0.225408512 | 0.191548592 | 0.267710699 |
| 0.126900403 | 0.378070117 | 0.035573888 | 0.35941106  |
| 0.142720708 | 0.103805178 | 0.048205049 | 0.347157829 |
| 0.256108231 | 0.34417767  | 0.382413158 | 0.177661851 |
| 0.295887044 | 0.287198463 | 0.333877742 | 0.286757925 |
| 0.018257731 | 0.100135199 | 0.295551229 | 0.432113041 |
| 0.271834864 | 0.419909263 | 0.314080466 | 0.254576768 |
| 0.239891903 | 0.392749225 | 0.00435189  | 0.425174261 |
| 0.424048873 | 0.275267819 | 0.27042871  | 0.292115232 |
| 0.204930797 | 0.401940763 | 0.040060509 | 0.327635638 |
| 0.296598028 | 0.153149404 | 0.439366239 | 0.156441164 |
| 0.399502465 | 0.066984376 | 0.345647008 | 0.305225591 |
| 0.264849286 | 0.019535024 | 0.285109922 | 0.347789337 |
| 0.035276206 | 0.21616518  | 0.359320979 | 0.326639611 |
| 0.286626316 | 0.356844839 | 0.434159549 | 0.184556726 |
| 0.291607963 | 0.331025003 | 0.033597385 | 0.2316556   |
| 0.344800912 | 0.225526906 | 0.421109064 | 0.309499247 |
| 0.268401276 | 0.427298406 | 0.310381898 | 0.161411062 |
| 0.097322858 | 0.363169785 | 0.050040857 | 0.254593048 |
| 0.328085738 | 0.160461906 | 0.235376496 | 0.175359414 |
| 0.079572051 | 0.445940402 | 0.10450566  | 0.128916584 |
| 0.06391955  | 0.273586169 | 0.331037449 | 0.187685035 |
| 0.124343006 | 0.194850862 | 0.221049178 | 0.270406223 |
| 0.116410258 | 0.121243927 | 0.022758175 | 0.190920853 |
| 0.096014458 | 0.200779955 | 0.204147162 | 0.316683973 |
| 0.301064422 | 0.115260036 | 0.260137086 | 0.194140916 |
| 0.109074529 | 0.032967267 | 0.446263592 | 0.33104118  |
| 0.320148315 | 0.235851251 | 0.073204459 | 0.183872505 |
| 0.415547332 | 0.236833076 | 0.28095479  | 0.420956814 |
| 0.06653561  | 0.419094605 | 0.19958332  | 0.126839464 |
| 0.210309599 | 0.258563633 | 0.436749412 | 0.074309701 |
| 0.337631534 | 0.433026245 | 0.292838446 | 0.165793937 |
| 0.370226634 | 0.341930175 | 0.080311796 | 0.334708945 |
| 0.324533987 | 0.058937089 | 0.433752616 | 0.110573083 |
| 0.040338892 | 0.282645019 | 0.279644776 | 0.103739961 |
| 0.094930201 | 0.25712379  | 0.148325062 | 0.244165985 |
| 0.445661523 | 0.319343663 | 0.327138571 | 0.154081162 |
| 0.080877843 | 0.013483756 | 0.164703083 | 0.246658796 |
| 0.431319234 | 0.404149952 | 0.273929176 | 0.213550164 |
| 0.284564606 | 0.206451799 | 0.252758136 | 0.420969169 |
| 0.184753445 | 0.443136305 | 0.022754854 | 0.299883099 |
| 0.4066019   | 0.307892541 | 0.078165553 | 0.328395783 |
| 0.366675543 | 0.104414043 | 0.312623893 | 0.421824098 |
| 0.402023993 | 0.256991956 | 0.231552642 | 0.310445039 |
| 0.062901329 | 0.131544176 | 0.266323541 | 0.102972436 |
| 0.275838753 | 0.236047367 | 0.022857024 | 0.358654141 |
| 0.07282058  | 0.413487708 | 0.392488512 | 0.077936389 |
| 0.24488082  | 0.341741021 | 0.27940605  | 0.084005534 |
| 0.328689511 | 0.402270711 | 0.441525688 | 0.29715449  |
| 0.330115539 | 0.383631446 | 0.194241943 | 0.108325817 |

|             |             |             |             |
|-------------|-------------|-------------|-------------|
| 0.027933041 | 0.412414678 | 0.335206112 | 0.038383013 |
| 0.428061817 | 0.266176611 | 0.02117905  | 0.460474161 |
| 0.27043207  | 0.386564416 | 0.012274922 | 0.062632949 |
| 0.05024693  | 0.373268167 | 0.408292398 | 1           |
| 0.214071026 | 0.355400366 | 0.009801527 | 0.429875084 |
| 0.422557481 | 0.020118102 | 0.112450902 | 0.31348295  |
| 0.253803874 | 0.475761384 | 0.168351    | 0.329716142 |
| 0.223222681 | 0.398626843 | 0.254043716 | 0.240530743 |
| 0.381450815 | 0.372432119 | 0.376388277 | 0.435806192 |
| 0.411199756 | 0.287698925 | 0.295869538 | 0.047394363 |
| 0.099686475 | 0.321978478 | 0.175137859 | 0.078994448 |
| 0.304702507 | 0.126844018 | 0.420723731 | 0.410647134 |
| 0.379046461 | 0.014862158 | 0.275680483 | 0.338799793 |
| 0.443861149 | 0.459412472 | 0.046710867 | 0.008406024 |
| 0.008283693 | 0.014325068 | 0.367955231 | 0.215471021 |
| 0.413766666 | 0.179474904 | 0.017618563 | 0.148027114 |
| 0.286418684 | 0.228404708 | 0.425555111 | 0.333986385 |
| 0.329449904 | 0.129905711 | 0.19411715  | 0.36035887  |
| 0.064821383 | 0.276301936 | 0.395188358 | 0.43884746  |
| 0.070635953 | 0.226100708 | 0.32102273  | 0.452500541 |
| 0.026810604 | 0.267908704 | 0.271720283 | 0.249777839 |
| 0.028935328 | 0.088771837 | 0.080364503 | 0.370909742 |
| 0.391463526 | 0.071254217 | 0.037433591 | 0.171495726 |
| 0.15796048  | 0.411527157 | 0.178106012 | 0.445343112 |
| 0.408957338 | 0.403285032 | 0.074164111 | 0.428145429 |
| 0.059199527 | 0.405515101 | 0.194667603 | 0.068385818 |
| 0.274412127 | 0.03730038  | 0.375745209 | 0.079138136 |
| 0.332483731 | 0.343591421 | 0.138575501 | 0.025555877 |
| 0.095175505 | 0.073079042 | 0.413886461 | 0.361529451 |
| 0.043599747 | 0.338792972 | 0.269635649 | 0.335041541 |
| 0.330139259 | 0.342940293 | 0.433270777 | 0.231575507 |
| 0.175077887 | 0.087509691 | 0.373259122 | 0.301455455 |
| 0.33689673  | 0.416215265 | 0.200814833 | 0.442218804 |
| 0.34688757  | 0.431665041 | 0.388152333 | 0.318627273 |
| 0.146961889 | 0.313961885 | 0.29979556  | 0.04858818  |
| 0.332714299 | 0.387191768 | 0.361376808 | 0.109740923 |
| 0.20440935  | 0.204447772 | 0.137449851 | 0.184977318 |
| 0.155139747 | 0.300935381 | 0.190706284 | 0.410155264 |
| 0.336174582 | 0.318355929 | 0.139029381 | 0.074953584 |
| 0.468615005 | 0.418792074 | 0.227887    | 0.312468776 |
| 0.20202295  | 0.271389078 | 0.340189932 | 0.321355857 |
| 0.267069578 | 0.360698104 | 0.395770881 | 0.302528275 |
| 0.41551777  | 0.313474808 | 0.442985851 | 0.216598037 |
| 0.072521825 | 0.264414556 | 0.112686736 | 0.110138734 |
| 0.188427979 | 0.044160081 | 0.13531273  | 0.33388368  |
| 0.181649841 | 0.300253803 | 0.317318319 | 0.118157836 |
| 0.258704409 | 0.29079937  | 0.304411954 | 0.263339441 |
| 0.10607913  | 0.420105269 | 0.018942843 | 0.087550739 |
| 0.199789997 | 0.336292771 | 0.201182389 | 0.222818119 |
| 0.154080014 | 0.131708966 | 0.275234802 | 0.313587295 |
| 0.206325777 | 0.240581083 | 0.338668933 | 0.094611235 |
| 0.073026014 | 0.433067417 | 0.309967155 | 0.034210943 |
| 0.107171663 | 0.292962213 | 0.310572008 | 0.212058708 |
| 0.028635207 | 0.369436914 | 0.257384566 | 0.279013615 |

|             |             |             |             |
|-------------|-------------|-------------|-------------|
| 0.35907524  | 0.126318132 | 0.36698065  | 0.141059425 |
| 0.142926539 | 0.415869225 | 0.237402838 | 0.41019565  |
| 0.252553534 | 0.350700605 | 0.409103318 | 0.353297756 |
| 0.152652446 | 0.228857325 | 0.080739613 | 0.420369729 |
| 0.201995757 |             |             |             |
| NUP50       | 0.161919903 | 0.33179597  | 0.069809191 |
| 0.249688392 | 0.097765753 | 0.223702798 | 0.10569759  |
| 0.076549804 | 0.031763031 | 0.017432616 | 0.008796094 |
| 0.112485657 | 0.041528755 | 0.097190338 | 0.086263472 |
| 0.171735984 | 0.0163967   | 0.052773211 | 0.080274624 |
| 0.184954079 | 0.078926976 | 0.147388981 | 0.034938513 |
| 0.021394003 | 0.01230822  | 0.018238224 | 0.029440743 |
| 0.256596732 | 0.019562667 | 0.186443639 | 0.247382167 |
| 0.008687204 | 0.211894657 | 0.329530864 | 0.14295672  |
| 0.306640096 | 0.165290067 | 0.001312721 | 0.111191487 |
| 0.246677161 | 0.188373332 | 0.203019769 | 0.133507732 |
| 0.026642465 | 0.35699163  | 0.118913942 | 0.081855438 |
| 0.077220079 | 0.00884118  | 0.116734384 | 0.335582765 |
| 0.33720148  | 0.155235518 | 0.086548369 | 0.072360517 |
| 0.049746719 | 0.097001464 | 0.026462771 | 0.256250376 |
| 0.085058148 | 0.116687955 | 0.312972816 | 0.063818083 |
| 0.038104422 | 0.071237891 | 0.011566904 | 0.104880354 |
| 0.028006665 | 0.264765629 | 0.00761933  | 0.096077937 |
| 0.011108241 | 0.170504228 | 0.07305657  | 0.030965309 |
| 0.008102939 | 0.014171174 | 0.015106327 | 0.183339037 |
| 0.25479443  | 0.253374998 | 0.235461998 | 0.236178858 |
| 0.026933879 | 0.042500797 | 0.058263825 | 0.040393378 |
| 0.242057545 | 0.092483409 | 0.027851092 | 0.160018517 |
| 0.243969188 | 0.312853379 | 0.02301668  | 0.039630244 |
| 0.302407591 | 0.320204737 | 0.117787048 | 0.095205036 |
| 0.05558496  | 0.00296064  | 0.315095001 | 0.272604325 |
| 0.274732654 | 0.031447006 | 0.02344686  | 0.272351965 |
| 0.010597422 | 0.074363304 | 0.153237671 | 0.019016128 |
| 0.266832941 | 0.017259326 | 0.025715423 | 0.16200858  |
| 0.026793759 | 0.22696538  | 0.288977629 | 0.074374103 |
| 0.066701073 | 0.007962675 | 0.014288895 | 0.003735607 |
| 0.056522202 | 0.007247164 | 0.340434431 | 0.290353825 |
| 0.073320782 | 0.046528679 | 0.076200709 | 0.000198282 |
| 0.003661422 | 0.01514965  | 0.204516934 | 0.071571313 |
| 0.18808013  | 0.185736951 | 0.053282047 | 0.237845587 |
| 0.138202494 | 0.225464422 | 0.057333956 | 0.035406489 |
| 0.136237964 | 0.013908174 | 0.07015962  | 0.13383773  |
| 0.057949011 | 0.047766578 | 0.03150622  | 0.290213585 |
| 0.346297228 | 0.02893075  | 0.070762182 | 0.156027084 |
| 0.085015024 | 0.062020779 | 0.026356299 | 0.063294838 |
| 0.033942952 | 0.276545593 | 0.00228494  | 0.096743345 |
| 0.045610342 | 0.012271189 | 0.002244782 | 0.124009035 |
| 0.095772039 | 0.289203026 | 0.299038995 | 0.020542995 |
| 0.082982981 | 0.126337627 | 0.131356227 | 0.247288129 |
| 0.018064785 | 0.010134594 | 0.10190851  | 0.294236644 |
| 0.266655799 | 0.239395328 | 0.050745076 | 0.032023968 |
| 0.056448344 | 0.219482245 | 0.00056187  | 0.343290944 |
| 0.304328289 | 0.107749149 | 0.139058405 | 0.095625074 |
| 0.062827221 | 0.277536119 | 0.005930411 | 0.155769807 |

|             |             |             |             |
|-------------|-------------|-------------|-------------|
| 0.195421169 | 0.016913576 | 0.25676876  | 0.031415088 |
| 0.277418522 | 0.011253619 | 0.090926136 | 0.177659692 |
| 0.170024159 | 0.001824448 | 0.170613174 | 0.219509955 |
| 0.001786853 | 0.089249404 | 0.185256804 | 0.195069125 |
| 0.153226797 | 0.178422242 | 0.243302829 | 0.055998567 |
| 0.104299008 | 0.060704581 | 0.002008269 | 0.047005838 |
| 0.174539034 | 0.046052689 | 0.356545292 | 0.068016968 |
| 0.159138861 | 0.327819801 | 0.197014969 | 0.069138583 |
| 0.022505645 | 0.12378478  | 0.020179794 | 0.078591737 |
| 0.205132249 | 0.065317857 | 0.085026808 | 0.011218607 |
| 0.008015545 | 0.307195068 | 0.010469008 | 0.017557217 |
| 0.006247571 | 0.176820536 | 0.073725774 | 0.094389075 |
| 0.046730884 | 0.027247101 | 0.041184423 | 0.064209161 |
| 0.043882334 | 0.021345684 | 0.000177982 | 0.049305689 |
| 0.044841891 | 0.068994892 | 0.08281629  | 0.208578313 |
| 0.064451658 | 0.037579054 | 0.08666316  | 0.024480477 |
| 0.013028542 | 0.003081417 | 0.315442008 | 0.147677412 |
| 0.274344627 | 0.043850987 | 0.005876108 | 0.059463594 |
| 0.292702077 | 0.222978547 | 0.083050672 | 0.332477675 |
| 0.006035602 | 0.231465161 | 0.065755189 | 0.022125131 |
| 0.049906141 | 0.084513096 | 0.263406353 | 0.028825001 |
| 0.134870522 | 0.346485951 | 0.056929194 | 0.032467053 |
| 0.331668313 | 0.175448979 | 0.019799562 | 0.227419331 |
| 0.227235516 | 0.008130099 | 0.294428616 | 0.01130078  |
| 0.003004345 | 0.136804923 | 0.193526947 | 0.013268516 |
| 0.010460217 | 0.133881333 | 0.059029865 | 0.070485007 |
| 0.318243972 | 0.165607533 | 0.257413174 | 0.014475927 |
| 0.021606319 | 0.006152555 | 0.015040994 | 0.071689704 |
| 0.341254618 | 0.262860387 | 0.053726034 | 0.071589677 |
| 0.082495942 | 0.045427685 | 0.073593559 | 0.285773972 |
| 0.01294291  | 0.303884182 | 0.001483565 | 0.162510689 |
| 0.318955632 | 0.144436065 | 0.01247551  | 0.17159969  |
| 0.316023073 | 0.020522066 | 0.035995604 | 0.333583044 |
| 0.275678593 | 0.053678003 | 0.061990257 | 0.129631126 |
| 0.025986101 | 0.031197157 | 0.092962155 | 0.010573633 |
| 0.072539773 | 0.036932135 | 0.001366293 | 0.069624343 |
| 0.025476601 | 0.343085653 | 0.198926979 | 0.018287401 |
| 0.237638619 | 0.071320534 | 0.090306411 | 0.012342472 |
| 0.20184166  | 0.259688027 | 0.340587495 | 0.040516439 |
| 0.177802029 | 0.278904232 | 0.091713542 | 0.008375438 |
| 0.001893659 | 0.299103525 | 0.206342015 | 0.024324927 |
| 0.243561604 | 0.170056469 | 0.014137361 | 0.338865424 |
| 0.060568924 | 0.316388933 | 0.011135762 | 0.004264868 |
| 0.002127235 | 0.184430901 | 0.340782783 | 0.214071026 |
| 1           | 0.115659155 | 0.001732207 | 0.265206828 |
| 0.340422408 | 0.001488393 | 0.009577351 | 0.208712658 |
| 0.158266373 | 0.340142501 | 0.037536648 | 0.213412243 |
| 0.11484797  | 0.311584322 | 0.078571675 | 0.065173822 |
| 0.288420639 | 0.253672456 | 0.236305883 | 0.323776711 |
| 0.260134136 | 0.125383692 | 0.114745863 | 0.014614922 |
| 0.017901987 | 0.110205363 | 0.099352688 | 0.032850035 |
| 0.210911114 | 0.023110949 | 0.274518642 | 0.22365364  |
| 0.243007423 | 0.0008208   | 0.081547747 | 0.219727039 |
| 0.313763513 | 0.284199982 | 0.001727024 | 0.001684608 |



|             |             |             |             |
|-------------|-------------|-------------|-------------|
| 0.001113605 | 0.002873841 | 0.157711663 | 0.031179602 |
| 0.276960049 | 0.136606861 | 0.002150004 | 0.040414199 |
| 0.06915105  | 0.091848138 | 0.323658312 | 0.16062548  |
| 0.166162933 | 0.012609162 | 0.11208407  | 0.173734085 |
| 0.00867446  | 0.188148656 | 0.263055752 | 0.36171261  |
| 0.003426517 | 0.030897105 | 0.076735911 | 0.295450528 |
| 0.002849608 | 0.065261922 | 0.124668571 | 0.074008082 |
| 0.000635752 | 0.009007797 | 0.009977626 | 0.171246717 |
| 0.300139016 | 0.023242563 | 0.010738063 | 0.061187026 |
| 0.060371181 | 0.22535586  | 0.047920072 | 0.273685959 |
| 0.280330349 | 0.221478223 | 0.004805884 | 0.337716156 |
| 0.011429818 | 0.322512825 | 0.047896226 | 0.044249902 |
| 0.029218151 | 0.00214951  | 0.241510079 | 0.04052815  |
| 0.097727562 | 0.187795711 | 0.024366597 | 0.001040696 |
| 0.010728789 | 0.00753613  | 0.257814981 | 0.19187606  |
| 0.001562247 | 0.055793745 | 0.052792142 | 0.130538406 |
| 0.179062073 | 0.224111869 | 0.349349077 | 0.143660979 |
| 0.05221164  | 0.005149199 | 0.210494364 | 0.19031109  |
| 0.074912672 | 0.233291073 | 0.055624104 | 0.281732768 |
| 0.206260928 | 0.265092323 | 0.255070991 | 0.147545594 |
| 0.01769047  | 0.166142918 | 0.288137108 | 0.037580095 |
| 0.108588737 | 0.242639249 | 0.098269209 | 0.024096754 |
| 0.054602533 | 0.064491406 | 0.010047971 | 0.029204227 |
| 0.039015406 | 0.254336598 | 0.042733345 | 0.205085372 |
| 0.158521711 | 0.203319032 | 0.01334594  | 0.011273653 |
| 0.326620361 | 0.293583776 | 0.077190364 | 0.226341044 |
| 0.023205338 | 0.095580284 | 0.179279064 | 0.156915979 |
| 0.04356007  | 0.256679092 | 0.242858697 | 0.281838439 |
| 0.363332592 | 0.088163641 | 0.339860772 | 0.059557244 |
| 0.009011631 | 0.117098681 | 0.040917372 | 0.010430611 |
| 0.038063675 | 0.003766924 | 0.0240807   | 0.148024581 |
| 0.033248366 | 0.143128243 | 0.062107401 | 0.019194465 |
| 0.051181372 | 0.066014582 | 0.091172517 | 0.10692829  |
| 0.034115797 | 0.348406511 | 0.003147698 | 0.007683861 |
| 0.037542669 | 0.217045858 | 0.071146027 | 0.030320152 |
| 0.024031705 | 0.008704675 | 0.077872561 | 0.158001718 |
| 0.133305999 | 0.04221044  | 0.23690929  | 0.020365653 |
| 0.015387277 | 0.246286019 | 0.111753137 | 0.001098534 |
| 0.007341904 | 0.154540978 | 0.034319435 | 0.064807396 |
| 0.00130072  | 0.252281778 | 0.143143813 | 0.094368274 |
| 0.153905911 | 0.011978931 | 0.287683338 | 0.015959995 |
| 0.012816928 | 0.31662218  | 0.073067032 | 0.294190294 |
| 0.040365472 | 0.198973341 | 0.332733142 | 0.228815042 |
| 0.015417442 | 0.068732698 | 0.020356718 | 0.237702131 |
| 0.063568363 |             |             |             |
| OASL2       | 0.35446669  | 0.426788022 | 0.247529509 |
| 0.377799876 | 0.279642483 | 0.216961225 | 0.235371885 |
| 0.249931694 | 0.117987012 | 0.012408917 | 0.026594746 |
| 0.272601644 | 0.134269295 | 0.210362131 | 0.187634664 |
| 0.421101177 | 0.156521063 | 0.333921969 | 0.286622531 |
| 0.385946616 | 0.146539512 | 0.354161909 | 0.18602042  |
| 0.242297952 | 0.113520674 | 0.117247761 | 0.186279447 |
| 0.454312228 | 0.135654044 | 0.172482343 | 0.355314135 |
| 0.214491976 | 0.398068304 | 0.391767937 | 0.289166533 |

|             |             |             |             |
|-------------|-------------|-------------|-------------|
| 0.369914115 | 0.305803696 | 0.063686427 | 0.179662977 |
| 0.402212947 | 0.336280102 | 0.384899943 | 0.277166494 |
| 0.101213991 | 0.366999967 | 0.242783688 | 0.282442284 |
| 0.215037798 | 0.059489769 | 0.18287837  | 0.359507788 |
| 0.32544591  | 0.211935624 | 0.260510622 | 0.196425505 |
| 0.09151512  | 0.187593262 | 0.112996279 | 0.256482202 |
| 0.249453939 | 0.145300647 | 0.349634431 | 0.120931793 |
| 0.145338807 | 0.316392149 | 0.221323319 | 0.28329292  |
| 0.212369688 | 0.331450576 | 0.106874789 | 0.233240597 |
| 0.006659741 | 0.383808561 | 0.308468345 | 0.142772978 |
| 0.112201218 | 0.038797973 | 0.243614059 | 0.260620531 |
| 0.460112321 | 0.390637591 | 0.429429094 | 0.412066904 |
| 0.171946652 | 0.328779253 | 0.228778574 | 0.209156299 |
| 0.391381814 | 0.184991448 | 0.169336885 | 0.406483853 |
| 0.428779753 | 0.39405878  | 0.214577748 | 0.273978242 |
| 0.311890866 | 0.412780485 | 0.225365761 | 0.247231974 |
| 0.154154034 | 0.124706935 | 0.334465905 | 0.424876891 |
| 0.3523942   | 0.186847667 | 0.193632858 | 0.389510808 |
| 0.158164517 | 0.237725142 | 0.314670573 | 0.195820268 |
| 0.466525771 | 0.061084649 | 0.227176414 | 0.255187947 |
| 0.348508731 | 0.375245016 | 0.385619102 | 0.246085736 |
| 0.29166016  | 0.059698915 | 0.079887743 | 0.129661429 |
| 0.235444172 | 0.107501737 | 0.332109044 | 0.400956074 |
| 0.250276865 | 0.241944078 | 0.30249983  | 0.023627304 |
| 0.078956405 | 0.291318847 | 0.34251052  | 0.339443237 |
| 0.398104392 | 0.302723326 | 0.175388016 | 0.30511359  |
| 0.248322681 | 0.425276475 | 0.029318363 | 0.21677873  |
| 0.255624328 | 0.291906571 | 0.283230394 | 0.247213123 |
| 0.229099968 | 0.236088839 | 0.218074053 | 0.448904499 |
| 0.369368196 | 0.170722495 | 0.284211929 | 0.395216795 |
| 0.181779454 | 0.24558863  | 0.2232551   | 0.238311674 |
| 0.120324733 | 0.343218977 | 0.080965053 | 0.304797252 |
| 0.116144878 | 0.140255947 | 0.093468339 | 0.258747541 |
| 0.196292159 | 0.307355841 | 0.327883097 | 0.232247537 |
| 0.260545165 | 0.306744107 | 0.244131076 | 0.262350921 |
| 0.015777007 | 0.156797441 | 0.207583909 | 0.417735562 |
| 0.192689483 | 0.441252799 | 0.32493201  | 0.300421374 |
| 0.277296839 | 0.42952192  | 0.012021427 | 0.367442348 |
| 0.393702554 | 0.188014532 | 0.228363774 | 0.305507221 |
| 0.177938683 | 0.402230141 | 0.042441862 | 0.388570333 |
| 0.276529562 | 0.207176347 | 0.463487678 | 0.189176459 |
| 0.370482967 | 0.091714831 | 0.253701346 | 0.325647482 |
| 0.263465502 | 0.026506709 | 0.176865591 | 0.347303864 |
| 0.08566909  | 0.144565214 | 0.3870117   | 0.339636836 |
| 0.236260392 | 0.409395958 | 0.471189399 | 0.160764125 |
| 0.261480012 | 0.31563522  | 0.071371828 | 0.278394142 |
| 0.383243317 | 0.181737802 | 0.36199519  | 0.271377021 |
| 0.20011773  | 0.388116524 | 0.305137941 | 0.107095076 |
| 0.109505433 | 0.282612242 | 0.046850229 | 0.244555686 |
| 0.316892584 | 0.129662298 | 0.194188521 | 0.283536289 |
| 0.130986741 | 0.429663822 | 0.154934508 | 0.157316745 |
| 0.099816767 | 0.200406211 | 0.327632626 | 0.130358643 |
| 0.105600886 | 0.223447242 | 0.208662725 | 0.232852588 |
| 0.096363812 | 0.147368208 | 0.07450887  | 0.150765961 |

|             |             |             |             |
|-------------|-------------|-------------|-------------|
| 0.078096607 | 0.14887351  | 0.140464106 | 0.292115709 |
| 0.238172594 | 0.113366013 | 0.237816728 | 0.235682139 |
| 0.163148335 | 0.063914984 | 0.417199136 | 0.385341764 |
| 0.265800203 | 0.238803429 | 0.130381964 | 0.132485326 |
| 0.399658602 | 0.139710699 | 0.186711299 | 0.377356098 |
| 0.113627153 | 0.447062466 | 0.170341818 | 0.162545073 |
| 0.194129497 | 0.247840735 | 0.457233067 | 0.056421364 |
| 0.272989875 | 0.377576371 | 0.337858014 | 0.185696732 |
| 0.305985522 | 0.333969741 | 0.087715264 | 0.32228106  |
| 0.302776568 | 0.09034597  | 0.416643597 | 0.170193061 |
| 0.082571592 | 0.337955074 | 0.27663647  | 0.155322641 |
| 0.150617656 | 0.193736849 | 0.113103887 | 0.273398492 |
| 0.423808458 | 0.374362374 | 0.297285474 | 0.225685575 |
| 0.090299145 | 0.015421306 | 0.242204102 | 0.250235829 |
| 0.375921775 | 0.399120045 | 0.317798631 | 0.198108981 |
| 0.290570583 | 0.1828482   | 0.165523607 | 0.410824163 |
| 0.287505472 | 0.412776119 | 0.048125985 | 0.326666526 |
| 0.357212075 | 0.199039471 | 0.108361716 | 0.237379989 |
| 0.313383409 | 0.124228661 | 0.348378655 | 0.377998253 |
| 0.381262598 | 0.238512844 | 0.19613849  | 0.355824863 |
| 0.059035252 | 0.122694788 | 0.259077903 | 0.149484621 |
| 0.218849107 | 0.258263134 | 0.045670256 | 0.279172993 |
| 0.081576103 | 0.355559297 | 0.441841305 | 0.094584536 |
| 0.147615707 | 0.268888167 | 0.317365982 | 0.114476934 |
| 0.339408776 | 0.392239274 | 0.393610769 | 0.310363452 |
| 0.347693105 | 0.363776777 | 0.17419324  | 0.183900683 |
| 0.064350022 | 0.381146078 | 0.333782489 | 0.042854327 |
| 0.450964403 | 0.154928519 | 0.020646015 | 0.421702906 |
| 0.279661604 | 0.323625371 | 0.01225228  | 0.1117982   |
| 0.11944004  | 0.428398645 | 0.35131398  | 0.355400366 |
| 0.115659155 | 1           | 0.033572979 | 0.431712169 |
| 0.375172339 | 0.046598298 | 0.175788225 | 0.304817818 |
| 0.265706546 | 0.43927886  | 0.173174159 | 0.334910136 |
| 0.212990723 | 0.353851618 | 0.198691846 | 0.264562125 |
| 0.358816212 | 0.355136014 | 0.381918947 | 0.397932414 |
| 0.416840506 | 0.356095547 | 0.276374392 | 0.051583498 |
| 0.119619797 | 0.219123499 | 0.114019448 | 0.072327629 |
| 0.2340033   | 0.155213274 | 0.413722929 | 0.443917802 |
| 0.38290328  | 0.036436797 | 0.219758615 | 0.325798836 |
| 0.418094221 | 0.466844273 | 0.108571077 | 0.0154053   |
| 0.018959516 | 0.023950166 | 0.296243367 | 0.281438286 |
| 0.404663831 | 0.098625236 | 0.03282019  | 0.127316942 |
| 0.278023673 | 0.245174288 | 0.3851149   | 0.392570041 |
| 0.370527923 | 0.187289074 | 0.124014904 | 0.41874767  |
| 0.093684491 | 0.248876721 | 0.394527139 | 0.376633513 |
| 0.147034151 | 0.282870549 | 0.300474977 | 0.451995007 |
| 0.041502039 | 0.299723037 | 0.293972808 | 0.197649798 |
| 0.081023887 | 0.144608127 | 0.11634854  | 0.434458197 |
| 0.347439147 | 0.075332069 | 0.049599403 | 0.107907764 |
| 0.136089956 | 0.435192991 | 0.182628265 | 0.455714086 |
| 0.400789861 | 0.44584869  | 0.137005785 | 0.379754644 |
| 0.067633406 | 0.355143555 | 0.210818609 | 0.048844523 |
| 0.345243585 | 0.079627044 | 0.364697187 | 0.06240805  |
| 0.238492985 | 0.356595322 | 0.148654102 | 0.065666215 |

|             |             |             |             |
|-------------|-------------|-------------|-------------|
| 0.131666293 | 0.120082401 | 0.42728658  | 0.402350481 |
| 0.110825032 | 0.317810091 | 0.319589896 | 0.371679398 |
| 0.232625331 | 0.355645076 | 0.37697742  | 0.167034273 |
| 0.149563078 | 0.153315563 | 0.395516004 | 0.297008678 |
| 0.255448653 | 0.448619143 | 0.170180261 | 0.438478654 |
| 0.346618095 | 0.426413631 | 0.375852425 | 0.266092434 |
| 0.177648277 | 0.253087452 | 0.256564562 | 0.041961366 |
| 0.321759693 | 0.399326759 | 0.321892381 | 0.124417859 |
| 0.20849459  | 0.199718508 | 0.185485017 | 0.193970635 |
| 0.161264797 | 0.199153689 | 0.182826563 | 0.466814439 |
| 0.324088339 | 0.307281761 | 0.166145188 | 0.104229317 |
| 0.441034394 | 0.384191898 | 0.188769377 | 0.309626266 |
| 0.27807305  | 0.255170709 | 0.380046552 | 0.368159266 |
| 0.242969587 | 0.342749915 | 0.391100139 | 0.260023145 |
| 0.346906292 | 0.296747212 | 0.397345619 | 0.159189544 |
| 0.098366    | 0.264615411 | 0.105794168 | 0.178909879 |
| 0.208979197 | 0.086554664 | 0.136814661 | 0.40176078  |
| 0.168107958 | 0.294649997 | 0.235953512 | 0.168321469 |
| 0.300312037 | 0.269211104 | 0.312391941 | 0.200290021 |
| 0.111169334 | 0.364040973 | 0.035794749 | 0.146929822 |
| 0.190744318 | 0.33464441  | 0.184842893 | 0.275658009 |
| 0.166145617 | 0.221803785 | 0.27806442  | 0.208323268 |
| 0.127482636 | 0.232823225 | 0.330061923 | 0.110759885 |
| 0.080106152 | 0.461838074 | 0.255072268 | 0.094433192 |
| 0.158914058 | 0.272933201 | 0.356170221 | 0.177259637 |
| 0.073660702 | 0.352457189 | 0.159234917 | 0.264356334 |
| 0.295330114 | 0.188939873 | 0.31197277  | 0.161397378 |
| 0.205238282 | 0.368349271 | 0.238486506 | 0.378517389 |
| 0.296842414 | 0.388801473 | 0.344079018 | 0.341502755 |
| 0.233209844 | 0.217528977 | 0.09119387  | 0.437760463 |
| 0.158225292 |             |             |             |
| OCIAD2      | 0.016815813 | 0.005458611 | 0.015654013 |
| 0.006949766 | 0.019192076 | 0.001509388 | 0.004189832 |
| 0.003458885 | 0.000844156 | 0.000136069 | 0.000609059 |
| 0.014121876 | 0.000213426 | 0.00108064  | 0.000621456 |
| 0.024187423 | 0.016983546 | 0.020569685 | 0.015897326 |
| 0.018020505 | 0.000936221 | 0.021626764 | 0.006383157 |
| 0.030446434 | 0.012225465 | 0.012299762 | 0.010984471 |
| 0.011606105 | 0.01473175  | 0.000173376 | 0.007140164 |
| 0.082304382 | 0.01397722  | 0.004320805 | 0.011337946 |
| 0.00426668  | 0.01093497  | 0.004903466 | 0.000278856 |
| 0.009679406 | 0.009033493 | 0.013855081 | 0.009124371 |
| 0.003507865 | 0.002999938 | 0.005791886 | 0.033402573 |
| 0.000488438 | 0.00440266  | 0.000392943 | 0.003557345 |
| 0.001891244 | 0.004134169 | 0.003211553 | 0.002886855 |
| 7.63E-05    | 0.00157142  | 0.002078912 | 0.002946223 |
| 0.008844507 | 3.38E-05    | 0.003449527 | 0.000318582 |
| 0.000777341 | 0.010472828 | 0.071146277 | 0.006609266 |
| 0.025572123 | 0.004958295 | 0.011242492 | 0.016768431 |
| 4.22E-05    | 0.017872068 | 0.05301498  | 0.005553783 |
| 0.038103483 | 0.000714483 | 0.072894586 | 0.005748214 |
| 0.012582103 | 0.008722545 | 0.012092968 | 0.011083008 |
| 0.005020326 | 0.069746379 | 0.030173247 | 0.009899912 |
| 0.008335577 | 0.001886303 | 0.000858713 | 0.026450533 |

|             |             |             |             |
|-------------|-------------|-------------|-------------|
| 0.011209669 | 0.004867853 | 0.010615023 | 0.062748245 |
| 0.002032535 | 0.005563871 | 0.003017459 | 0.006340521 |
| 0.001023967 | 0.082559382 | 0.003128145 | 0.008586481 |
| 0.005816197 | 0.026505708 | 0.031872875 | 0.007233942 |
| 0.048509954 | 0.001903425 | 0.013691584 | 0.006030892 |
| 0.011489514 | 0.002440407 | 0.05423705  | 0.005090771 |
| 0.022780583 | 0.008635237 | 0.005510585 | 0.010129359 |
| 0.027587176 | 0.001138865 | 0.000441097 | 0.08657728  |
| 0.000559056 | 0.021877173 | 0.002448872 | 0.005589666 |
| 0.002585425 | 0.007481386 | 0.009563267 | 0.02561047  |
| 0.031093927 | 0.049034594 | 0.009502972 | 0.029972712 |
| 0.018644884 | 0.008452425 | 0.002993179 | 0.004934872 |
| 0.007341306 | 0.013656156 | 0.000431428 | 0.012512808 |
| 0.004724124 | 0.067523209 | 0.033201148 | 0.008316026 |
| 0.011229344 | 0.008171752 | 0.018330364 | 0.008489277 |
| 0.003513805 | 0.015343648 | 0.009549971 | 0.02276802  |
| 0.00082024  | 0.0266971   | 0.0235788   | 0.004845989 |
| 0.004535564 | 0.00421491  | 0.06222799  | 0.009622075 |
| 0.000247777 | 0.011425027 | 0.026611933 | 0.004131842 |
| 0.000149855 | 0.002222991 | 0.003576681 | 0.043662818 |
| 0.0069506   | 0.018820147 | 0.004983105 | 0.001525054 |
| 1.19E-05    | 0.013256004 | 0.003515379 | 0.006484569 |
| 0.000919563 | 0.013180855 | 0.014297407 | 0.030269679 |
| 0.038408307 | 0.014463458 | 0.001821589 | 0.003018415 |
| 0.005232399 | 0.001766688 | 0.004712253 | 0.031524903 |
| 0.006472285 | 0.006474359 | 0.000197246 | 0.02520305  |
| 0.006385114 | 0.042755534 | 0.012927907 | 0.021942097 |
| 0.005625895 | 0.016504163 | 0.003985193 | 0.010750963 |
| 0.005507489 | 0.000258722 | 7.22E-06    | 0.007874876 |
| 0.093793453 | 0.000622457 | 0.016297521 | 0.009652968 |
| 0.004975535 | 0.021230285 | 0.015182908 | 0.004310438 |
| 0.008066257 | 0.012805792 | 0.025306454 | 0.047515391 |
| 0.018958433 | 0.002495343 | 0.002918228 | 0.003365774 |
| 0.003343206 | 0.004036352 | 0.00563706  | 0.000536922 |
| 0.008767645 | 0.006727802 | 1.55E-05    | 0.008980046 |
| 0.00753945  | 0.000976455 | 0.005871153 | 0.061684579 |
| 0.035896174 | 0.006582682 | 0.04226024  | 0.024343116 |
| 0.027707341 | 0.002108288 | 0.019879919 | 0.000148713 |
| 0.000307862 | 0.016034048 | 0.006437823 | 0.005275961 |
| 0.001783042 | 0.013826902 | 0.087489252 | 0.001896138 |
| 0.000136213 | 0.000489873 | 0.000187092 | 0.005771795 |
| 0.002615763 | 0.000873866 | 0.005523448 | 0.023735448 |
| 0.022172985 | 0.03791069  | 0.00552816  | 0.023404888 |
| 0.002844694 | 0.007479756 | 0.05698648  | 0.00011615  |
| 0.005853536 | 0.001559659 | 0.001604639 | 0.003614059 |
| 0.004823279 | 0.016029302 | 0.001092344 | 0.021955499 |
| 0.006271429 | 0.009442141 | 0.011526832 | 5.72E-06    |
| 0.011628764 | 0.003454684 | 0.057946808 | 0.01072416  |
| 0.001718133 | 0.010527565 | 0.001397898 | 0.0061784   |
| 0.005012448 | 0.020692289 | 0.00652831  | 0.029851414 |
| 0.061107931 | 0.022213298 | 0.004729302 | 0.050171321 |
| 0.037890841 | 0.001042714 | 0.001193401 | 0.035637168 |
| 0.005687349 | 0.018579676 | 0.003420487 | 0.058577492 |
| 0.005191855 | 0.000191418 | 0.089075324 | 0.024270527 |

|             |             |             |             |
|-------------|-------------|-------------|-------------|
| 0.003580778 | 0.007640538 | 0.052725441 | 0.004978656 |
| 0.023239137 | 0.003428037 | 0.000542562 | 0.006611821 |
| 0.040406758 | 0.006129976 | 0.037821282 | 0.014675343 |
| 0.003472808 | 0.001864887 | 0.014123202 | 0.002586829 |
| 0.002378166 | 0.010856303 | 0.032992102 | 0.003630428 |
| 0.006386726 | 0.006642484 | 0.001888164 | 0.028834437 |
| 0.001114795 | 0.004454631 | 0.017032224 | 0.030683759 |
| 0.00340293  | 0.016014706 | 0.012113954 | 0.003682424 |
| 0.001917438 | 0.002701947 | 0.020398892 | 0.004716312 |
| 0.001331983 | 0.00364503  | 0.04539322  | 0.02097343  |
| 0.008683014 | 0.008199025 | 0.003892539 | 0.022813567 |
| 0.013510611 | 0.004738578 | 0.007101929 | 0.086910109 |
| 0.061952108 | 0.004937413 | 0.008927921 | 0.000149939 |
| 0.01333557  | 0.000268842 | 0.000119373 | 0.00496182  |
| 0.020576379 | 0.003008949 | 0.000150712 | 0.010752899 |
| 0.094676373 | 0.022280171 | 0.002652161 | 0.009801527 |
| 0.001732207 | 0.033572979 | 1           | 0.009956996 |
| 0.003109614 | 0.027423751 | 0.032073548 | 0.005799586 |
| 0.006278823 | 0.005839756 | 0.009778434 | 0.006523941 |
| 0.006302237 | 0.003544243 | 0.000423713 | 0.028870832 |
| 0.00369985  | 0.006127366 | 0.008630365 | 0.004914236 |
| 0.008979371 | 0.032204456 | 0.012744243 | 0.002896349 |
| 0.003031446 | 0.002166507 | 0.001484358 | 0.000309935 |
| 0.003240292 | 0.008990743 | 0.007558653 | 0.016501487 |
| 0.007505477 | 0.045540236 | 0.002198368 | 0.006019117 |
| 0.005816359 | 0.010783806 | 0.046115007 | 0.000228292 |
| 0.0008153   | 0.001245976 | 0.010673836 | 0.057765818 |
| 0.007205422 | 0.000847548 | 0.014083631 | 0.002047788 |
| 0.002814124 | 0.019948002 | 0.004216463 | 0.022093616 |
| 0.020118539 | 0.054641977 | 0.001366358 | 0.022819595 |
| 0.007297109 | 0.004947582 | 0.006813568 | 0.002971839 |
| 0.100223734 | 0.054497893 | 0.017957207 | 0.008960128 |
| 0.008752029 | 0.047827703 | 0.016487476 | 0.000646132 |
| 0.018935548 | 0.038448468 | 0.022851385 | 0.028065192 |
| 0.003733807 | 0.001191417 | 0.001981097 | 3.37E-05    |
| 0.001289104 | 0.016142467 | 0.003115551 | 0.010578256 |
| 0.00664814  | 0.016158133 | 0.05655531  | 0.003689238 |
| 0.001700357 | 0.003087678 | 0.018038248 | 3.46E-05    |
| 0.050929116 | 0.038769268 | 0.007615163 | 0.000456926 |
| 0.002167486 | 0.012166296 | 0.002409671 | 0.088299798 |
| 0.01142141  | 0.03072246  | 0.009719825 | 0.01607244  |
| 0.09486123  | 0.01393129  | 0.045824412 | 0.030551714 |
| 0.00222375  | 0.006904972 | 0.003325325 | 0.001032327 |
| 0.003219062 | 0.04194704  | 0.012195237 | 0.006665411 |
| 0.004030839 | 0.014863301 | 0.00174852  | 0.008669909 |
| 0.009124117 | 0.010282816 | 0.006469404 | 0.005807323 |
| 0.012940657 | 0.004604883 | 0.001027852 | 5.51E-05    |
| 0.017272898 | 0.009405542 | 0.015930283 | 0.001955905 |
| 0.010308933 | 0.019780613 | 0.025199056 | 0.001431717 |
| 0.015701806 | 0.000903284 | 0.004137386 | 0.022386723 |
| 0.014294775 | 0.006374337 | 0.012699569 | 0.012956892 |
| 0.006483392 | 0.005710066 | 0.00057873  | 0.004814835 |
| 0.070410158 | 0.013276284 | 0.016216889 | 0.020748776 |
| 0.010038701 | 0.005000517 | 0.008239666 | 0.001456464 |

|             |             |             |             |
|-------------|-------------|-------------|-------------|
| 0.002326488 | 0.015363082 | 0.004167    | 0.001003722 |
| 0.001191079 | 0.01547021  | 0.001288746 | 0.084174288 |
| 0.01564735  | 0.027539602 | 0.005816612 | 0.030112517 |
| 0.005982693 | 0.012953168 | 0.00312465  | 0.008270895 |
| 0.063100286 | 0.016970703 | 0.03240152  | 0.001252464 |
| 0.001475992 | 0.002795365 | 0.001199388 | 0.060427068 |
| 0.011067802 | 0.006275737 | 0.006463825 | 0.023744989 |
| 0.006191728 | 0.107020743 | 0.020227188 | 0.00146549  |
| 0.000793391 | 0.003345509 | 0.005042268 | 0.001369363 |
| 0.004775982 | 0.013964228 | 0.005867149 | 0.078815376 |
| 0.046475596 | 0.009943193 | 0.03708574  | 0.001476627 |
| 0.098238234 | 0.005861847 | 0.000419698 | 0.01900668  |
| 0.007977499 | 0.047594034 | 0.00387693  | 0.000501421 |
| 0.030251511 | 0.004101442 | 0.021132502 | 0.004966815 |
| 0.053934894 | 0.013246247 | 0.00325065  | 0.006977404 |
| 0.006275153 | 0.017182783 | 0.003543614 | 0.013876775 |
| 0.001186071 |             |             |             |
| OSBPL3      | 0.500961498 | 0.517537419 | 0.489107626 |
| 0.469536877 | 0.507452197 | 0.415266807 | 0.227434194 |
| 0.201128971 | 0.097009768 | 0.004370957 | 0.028040212 |
| 0.531303178 | 0.244424902 | 0.297264052 | 0.371927259 |
| 0.48478841  | 0.172834327 | 0.416826657 | 0.274552181 |
| 0.466847042 | 0.092986067 | 0.468650541 | 0.101970925 |
| 0.378790231 | 0.135540539 | 0.081135836 | 0.335553319 |
| 0.492860717 | 0.093925095 | 0.357653266 | 0.428080045 |
| 0.135343911 | 0.505519244 | 0.528718128 | 0.519299261 |
| 0.529564184 | 0.476297598 | 0.016682119 | 0.318899744 |
| 0.477509561 | 0.515189068 | 0.460033352 | 0.374428225 |
| 0.045097984 | 0.490779368 | 0.272732586 | 0.492773805 |
| 0.257246357 | 0.037504566 | 0.253339844 | 0.440650116 |
| 0.485097481 | 0.503637493 | 0.242047242 | 0.171891838 |
| 0.245164089 | 0.245898158 | 0.357855573 | 0.357318017 |
| 0.253215133 | 0.160200085 | 0.49329716  | 0.093209632 |
| 0.168216939 | 0.277021778 | 0.204415999 | 0.285035154 |
| 0.44681271  | 0.43390636  | 0.019662    | 0.504402982 |
| 0.002349553 | 0.44058614  | 0.465930534 | 0.39548778  |
| 0.051988587 | 0.023127638 | 0.233552667 | 0.375873541 |
| 0.508800795 | 0.475600207 | 0.534964696 | 0.533624309 |
| 0.225677435 | 0.362536889 | 0.498998769 | 0.200896223 |
| 0.497634648 | 0.193545095 | 0.128982912 | 0.494312462 |
| 0.534961238 | 0.52700157  | 0.251522581 | 0.329873923 |
| 0.476659038 | 0.485311286 | 0.489222855 | 0.501386348 |
| 0.409814146 | 0.075418076 | 0.465532871 | 0.528202306 |
| 0.449898738 | 0.419867801 | 0.191360976 | 0.458917069 |
| 0.072078685 | 0.420006823 | 0.404218661 | 0.207369781 |
| 0.509700934 | 0.018672812 | 0.273013164 | 0.399954791 |
| 0.264412663 | 0.507961738 | 0.525096093 | 0.210390555 |
| 0.502118228 | 0.024542468 | 0.179827694 | 0.044379124 |
| 0.381453135 | 0.215457521 | 0.497497648 | 0.505722766 |
| 0.257908327 | 0.457441276 | 0.296553517 | 0.002725264 |
| 0.035475372 | 0.24474491  | 0.515043319 | 0.438613963 |
| 0.50036552  | 0.455819564 | 0.271686943 | 0.448687265 |
| 0.529154437 | 0.535849615 | 0.061737069 | 0.106149563 |
| 0.485945253 | 0.244120167 | 0.281591902 | 0.524269095 |

|             |             |             |             |
|-------------|-------------|-------------|-------------|
| 0.375847195 | 0.124903018 | 0.147917464 | 0.523209583 |
| 0.433934348 | 0.096081698 | 0.390345941 | 0.486086566 |
| 0.373332301 | 0.44681606  | 0.123936008 | 0.320178171 |
| 0.052233181 | 0.498144646 | 0.039800962 | 0.378576042 |
| 0.327327231 | 0.200098758 | 0.013893343 | 0.281690932 |
| 0.321462044 | 0.49167746  | 0.490361616 | 0.127095462 |
| 0.368520027 | 0.482941106 | 0.36131414  | 0.486851855 |
| 0.010434302 | 0.056936991 | 0.316518616 | 0.520255844 |
| 0.313522104 | 0.530229818 | 0.353401769 | 0.378238744 |
| 0.346719723 | 0.512376126 | 0.005042137 | 0.50347517  |
| 0.53266779  | 0.338389966 | 0.465453226 | 0.510079254 |
| 0.458521008 | 0.502780305 | 0.056668494 | 0.489335245 |
| 0.419156654 | 0.09341804  | 0.531333236 | 0.196191682 |
| 0.479918222 | 0.048994106 | 0.354407796 | 0.521916044 |
| 0.517779969 | 0.010424284 | 0.235199619 | 0.432617685 |
| 0.038776845 | 0.095822682 | 0.495702628 | 0.464337188 |
| 0.436708286 | 0.52327591  | 0.524261277 | 0.440000748 |
| 0.503948803 | 0.264469376 | 0.016058636 | 0.404118928 |
| 0.521835551 | 0.459639485 | 0.448447714 | 0.266924635 |
| 0.391340496 | 0.48738399  | 0.499288588 | 0.232482295 |
| 0.047178663 | 0.34502387  | 0.022096781 | 0.394058279 |
| 0.467223017 | 0.128663848 | 0.469491297 | 0.197607716 |
| 0.09247322  | 0.517583978 | 0.247965848 | 0.357902487 |
| 0.187606436 | 0.459227354 | 0.287683906 | 0.266187238 |
| 0.261316389 | 0.196881768 | 0.431854389 | 0.441719838 |
| 0.036604621 | 0.112442084 | 0.022666644 | 0.463995129 |
| 0.167694665 | 0.404724558 | 0.395468692 | 0.473207049 |
| 0.377185678 | 0.129651768 | 0.457722962 | 0.371223258 |
| 0.145895686 | 0.018561328 | 0.502456487 | 0.474351774 |
| 0.380034547 | 0.174196215 | 0.052200043 | 0.408362927 |
| 0.510015277 | 0.352379539 | 0.299846392 | 0.485241193 |
| 0.034644407 | 0.532060775 | 0.289008609 | 0.151324825 |
| 0.470785098 | 0.303423495 | 0.504527976 | 0.065994289 |
| 0.453499617 | 0.471787873 | 0.382540273 | 0.223765368 |
| 0.433046898 | 0.475715325 | 0.032142723 | 0.47219749  |
| 0.468933482 | 0.037900157 | 0.52451428  | 0.167609584 |
| 0.026983219 | 0.53086867  | 0.517005454 | 0.093546778 |
| 0.098677018 | 0.377605543 | 0.044263033 | 0.353633478 |
| 0.512567504 | 0.480522913 | 0.493150203 | 0.29445633  |
| 0.044415209 | 0.012122105 | 0.278861026 | 0.499252444 |
| 0.520416622 | 0.519914887 | 0.317062539 | 0.448559199 |
| 0.278494104 | 0.402115149 | 0.150036742 | 0.523225908 |
| 0.263454819 | 0.524767332 | 0.008190748 | 0.52925094  |
| 0.524894577 | 0.318677157 | 0.101295484 | 0.336328788 |
| 0.442334652 | 0.051145213 | 0.241239891 | 0.499600187 |
| 0.490222225 | 0.391608357 | 0.412241078 | 0.513807309 |
| 0.015434699 | 0.043160502 | 0.470542588 | 0.25949787  |
| 0.444130461 | 0.254888949 | 0.086769654 | 0.369267106 |
| 0.047845543 | 0.469190036 | 0.52763356  | 0.069800314 |
| 0.37437992  | 0.348395205 | 0.464735931 | 0.042372104 |
| 0.522140348 | 0.5108013   | 0.528432549 | 0.18796691  |
| 0.526766873 | 0.510022226 | 0.504324807 | 0.103294    |
| 0.023230204 | 0.529690669 | 0.458500675 | 0.024473473 |
| 0.523623932 | 0.253357573 | 0.013576099 | 0.489004745 |



|             |             |             |             |
|-------------|-------------|-------------|-------------|
| 0.211361535 | 0.459017339 | 0.003662637 | 0.123597097 |
| 0.059016794 | 0.534203158 | 0.484866573 | 0.429875084 |
| 0.265206828 | 0.431712169 | 0.009956996 | 1           |
| 0.488037155 | 0.019515902 | 0.193528694 | 0.519605545 |
| 0.520267475 | 0.525243218 | 0.411788979 | 0.526610431 |
| 0.52393151  | 0.511930876 | 0.267178354 | 0.324947004 |
| 0.497864775 | 0.506442906 | 0.481840794 | 0.470378286 |
| 0.516839002 | 0.512805608 | 0.32056004  | 0.015924068 |
| 0.16902494  | 0.225110147 | 0.354658312 | 0.094725779 |
| 0.363261762 | 0.173328315 | 0.505340461 | 0.529495187 |
| 0.530464388 | 0.006307875 | 0.15976961  | 0.510360808 |
| 0.47905692  | 0.506584338 | 0.028867379 | 0.008082615 |
| 0.01125814  | 0.025784528 | 0.406340492 | 0.308698555 |
| 0.515461417 | 0.261386772 | 0.005185885 | 0.044119505 |
| 0.324190603 | 0.496192555 | 0.504446318 | 0.440471457 |
| 0.529326282 | 0.100347354 | 0.316716705 | 0.460932647 |
| 0.087962821 | 0.386062533 | 0.528279188 | 0.467114354 |
| 0.056121872 | 0.312136679 | 0.449262034 | 0.513652682 |
| 0.113411456 | 0.391103626 | 0.533293986 | 0.364212394 |
| 0.020322725 | 0.105741247 | 0.082121088 | 0.515801216 |
| 0.518088505 | 0.094086576 | 0.040667867 | 0.162379076 |
| 0.131889818 | 0.527845261 | 0.192805051 | 0.530202462 |
| 0.495926309 | 0.500453971 | 0.104346143 | 0.482734255 |
| 0.046323088 | 0.495640946 | 0.434987663 | 0.063037187 |
| 0.363651738 | 0.015778099 | 0.49538168  | 0.188979809 |
| 0.363238036 | 0.459998825 | 0.246277156 | 0.023899837 |
| 0.255922353 | 0.067447889 | 0.523775502 | 0.536160822 |
| 0.049109868 | 0.26858026  | 0.368929989 | 0.480994942 |
| 0.311347319 | 0.498040944 | 0.510411314 | 0.470089212 |
| 0.088861124 | 0.213264449 | 0.465576003 | 0.464740498 |
| 0.26389556  | 0.536047204 | 0.357001119 | 0.522243474 |
| 0.475968587 | 0.497007989 | 0.513968858 | 0.395845501 |
| 0.312994094 | 0.458605412 | 0.412610352 | 0.019567627 |
| 0.413680201 | 0.522273708 | 0.415630624 | 0.19476031  |
| 0.31194605  | 0.495017238 | 0.055351807 | 0.227736942 |
| 0.438995234 | 0.334078722 | 0.16440264  | 0.503426622 |
| 0.455307749 | 0.467575801 | 0.045033703 | 0.075831736 |
| 0.539097308 | 0.465521184 | 0.153830956 | 0.486356329 |
| 0.21454127  | 0.408361673 | 0.533530398 | 0.537503645 |
| 0.448778952 | 0.513712821 | 0.488419099 | 0.435256418 |
| 0.442540021 | 0.297138919 | 0.530559874 | 0.091908321 |
| 0.111426372 | 0.508293815 | 0.110453971 | 0.119981165 |
| 0.168028132 | 0.034819477 | 0.398236082 | 0.504551841 |
| 0.482752236 | 0.448001633 | 0.368619378 | 0.099400893 |
| 0.407789116 | 0.446996451 | 0.427872301 | 0.216051288 |
| 0.089385398 | 0.501967179 | 0.011484274 | 0.071730014 |
| 0.495576286 | 0.514443318 | 0.478706557 | 0.298774245 |
| 0.391555366 | 0.193098867 | 0.356892243 | 0.325063997 |
| 0.361795558 | 0.452698307 | 0.509105473 | 0.037228557 |
| 0.019723841 | 0.532446588 | 0.435678026 | 0.03052355  |
| 0.115290444 | 0.447273771 | 0.365727103 | 0.273102366 |
| 0.031454001 | 0.508300268 | 0.369258161 | 0.515908935 |
| 0.387835829 | 0.080300129 | 0.395933802 | 0.10644348  |
| 0.071411021 | 0.456018882 | 0.496776058 | 0.523546992 |

|             |             |             |             |
|-------------|-------------|-------------|-------------|
| 0.447883899 | 0.484869684 | 0.45346171  | 0.510458776 |
| 0.158530952 | 0.478751974 | 0.028851795 | 0.50623551  |
| 0.489412827 |             |             |             |
| PACSIN1     | 0.447672606 | 0.506455105 | 0.405307593 |
| 0.459218622 | 0.442774624 | 0.443613991 | 0.233657373 |
| 0.211861508 | 0.087875816 | 0.007667402 | 0.026077261 |
| 0.463301765 | 0.239673687 | 0.327392744 | 0.375316611 |
| 0.429179327 | 0.136677717 | 0.351292971 | 0.250152226 |
| 0.433234472 | 0.114075565 | 0.416253526 | 0.094946266 |
| 0.271372992 | 0.10289816  | 0.068870625 | 0.268286614 |
| 0.470070368 | 0.078358089 | 0.4114765   | 0.433218013 |
| 0.087344192 | 0.472189351 | 0.520414543 | 0.469508624 |
| 0.517551064 | 0.435776744 | 0.010284116 | 0.353884227 |
| 0.458286469 | 0.472650769 | 0.435862806 | 0.354760211 |
| 0.044829646 | 0.50170267  | 0.269637374 | 0.399055672 |
| 0.259632577 | 0.032140135 | 0.298510453 | 0.450002187 |
| 0.495977835 | 0.486558036 | 0.253995517 | 0.179062537 |
| 0.255521012 | 0.287384371 | 0.302403056 | 0.391687413 |
| 0.244473978 | 0.210661887 | 0.489778572 | 0.100274779 |
| 0.161047723 | 0.267743208 | 0.138408192 | 0.289069412 |
| 0.342614477 | 0.443081358 | 0.016520331 | 0.429730753 |
| 0.005059819 | 0.405952774 | 0.37021165  | 0.32293601  |
| 0.03841612  | 0.026518316 | 0.164453512 | 0.378305547 |
| 0.480037799 | 0.451270043 | 0.493201978 | 0.492030136 |
| 0.194513956 | 0.277996177 | 0.396970139 | 0.182190495 |
| 0.474782009 | 0.207289386 | 0.116421032 | 0.43233865  |
| 0.495519227 | 0.513239461 | 0.197028559 | 0.247624431 |
| 0.491243101 | 0.484401697 | 0.468817187 | 0.460198975 |
| 0.378522528 | 0.040529242 | 0.475709773 | 0.500919309 |
| 0.45236608  | 0.316062578 | 0.148416495 | 0.460981962 |
| 0.053383906 | 0.409844837 | 0.376491436 | 0.163313798 |
| 0.483747354 | 0.018748567 | 0.201924389 | 0.404814865 |
| 0.198700037 | 0.482596233 | 0.502586127 | 0.199830033 |
| 0.413026324 | 0.021062752 | 0.140631482 | 0.026779483 |
| 0.367136921 | 0.137745493 | 0.506703616 | 0.499948568 |
| 0.268461307 | 0.395304142 | 0.281537636 | 0.000855704 |
| 0.023552791 | 0.162625882 | 0.485124713 | 0.373703576 |
| 0.455353114 | 0.420497034 | 0.253781353 | 0.452325709 |
| 0.479656586 | 0.49039136  | 0.08956209  | 0.096734091 |
| 0.464511978 | 0.160511765 | 0.240068833 | 0.487703262 |
| 0.320765718 | 0.121572317 | 0.130493892 | 0.498076496 |
| 0.452674823 | 0.087014998 | 0.364200188 | 0.428573838 |
| 0.387272842 | 0.361368062 | 0.106248843 | 0.314272616 |
| 0.055447336 | 0.4815022   | 0.023182504 | 0.359133128 |
| 0.299571314 | 0.149882998 | 0.008234326 | 0.301036413 |
| 0.348568167 | 0.500432019 | 0.486693081 | 0.100510359 |
| 0.356492064 | 0.4235487   | 0.371858878 | 0.500808629 |
| 0.013569823 | 0.042728355 | 0.3307311   | 0.50528997  |
| 0.367369112 | 0.486118047 | 0.307465114 | 0.290275589 |
| 0.279724264 | 0.470523898 | 0.002660955 | 0.507644718 |
| 0.513640841 | 0.3635585   | 0.448492707 | 0.424032255 |
| 0.397614715 | 0.490891721 | 0.048715221 | 0.435413044 |
| 0.418227796 | 0.072715121 | 0.492698269 | 0.161853446 |
| 0.470099129 | 0.040233462 | 0.366899405 | 0.467891911 |

|             |             |             |             |
|-------------|-------------|-------------|-------------|
| 0.486810782 | 0.008565163 | 0.284900463 | 0.426507183 |
| 0.02056568  | 0.119272735 | 0.453293321 | 0.440407428 |
| 0.417562282 | 0.461607299 | 0.483117124 | 0.382891835 |
| 0.455784537 | 0.246984109 | 0.009535472 | 0.310012653 |
| 0.4627984   | 0.408256784 | 0.466148076 | 0.261618867 |
| 0.403314863 | 0.490448563 | 0.471037387 | 0.241672699 |
| 0.044547111 | 0.347662778 | 0.026539018 | 0.347512536 |
| 0.438800124 | 0.146200508 | 0.420832929 | 0.12828853  |
| 0.065109163 | 0.501024667 | 0.163062157 | 0.254826335 |
| 0.116570659 | 0.476064046 | 0.258572834 | 0.311512779 |
| 0.268261001 | 0.159772894 | 0.364703245 | 0.401786578 |
| 0.044807194 | 0.097822896 | 0.008841978 | 0.444508446 |
| 0.191120114 | 0.426604054 | 0.43423128  | 0.468850975 |
| 0.373275841 | 0.136400935 | 0.420422472 | 0.269635154 |
| 0.105330319 | 0.012714721 | 0.493571079 | 0.418661128 |
| 0.409637092 | 0.15867841  | 0.035255989 | 0.422896263 |
| 0.502857011 | 0.41325341  | 0.322039231 | 0.496570937 |
| 0.024075544 | 0.485352672 | 0.29356967  | 0.122001877 |
| 0.417804821 | 0.285095896 | 0.477089869 | 0.072976862 |
| 0.426203903 | 0.485534503 | 0.300399623 | 0.189030033 |
| 0.464110513 | 0.448326189 | 0.033317831 | 0.461513396 |
| 0.468320413 | 0.030398649 | 0.501031549 | 0.119385085 |
| 0.017081652 | 0.457704845 | 0.49111711  | 0.068625476 |
| 0.07024946  | 0.393793988 | 0.055619347 | 0.290301324 |
| 0.501792633 | 0.431334054 | 0.495685648 | 0.19541026  |
| 0.043761981 | 0.015398858 | 0.1894293   | 0.406796048 |
| 0.521557309 | 0.491316595 | 0.256431952 | 0.404671963 |
| 0.247240979 | 0.352393953 | 0.174944295 | 0.503552392 |
| 0.166246799 | 0.50601124  | 0.005118123 | 0.469207283 |
| 0.519175921 | 0.35663441  | 0.078988576 | 0.357677559 |
| 0.469720752 | 0.04554578  | 0.198790983 | 0.498578211 |
| 0.478616728 | 0.34494482  | 0.382582074 | 0.445031559 |
| 0.019044468 | 0.045530795 | 0.398757085 | 0.168800667 |
| 0.425855713 | 0.211877912 | 0.045647947 | 0.360268705 |
| 0.048772748 | 0.486440635 | 0.474921206 | 0.058256083 |
| 0.429603542 | 0.339746503 | 0.379823067 | 0.035031549 |
| 0.476940191 | 0.477102064 | 0.524958058 | 0.16490369  |
| 0.482007226 | 0.494651781 | 0.442186949 | 0.068098922 |
| 0.013596768 | 0.511431533 | 0.442720127 | 0.027509822 |
| 0.488638039 | 0.308709967 | 0.018727202 | 0.489256213 |
| 0.189067363 | 0.467459923 | 0.005191329 | 0.069451821 |
| 0.030207513 | 0.46997562  | 0.490007414 | 0.422557481 |
| 0.340422408 | 0.375172339 | 0.003109614 | 0.488037155 |
| 1           | 0.011515289 | 0.126734208 | 0.497222277 |
| 0.474773735 | 0.515000317 | 0.329652539 | 0.491957455 |
| 0.473576814 | 0.505327607 | 0.28429965  | 0.270515221 |
| 0.499935466 | 0.476291907 | 0.465842308 | 0.471581227 |
| 0.497210658 | 0.434999351 | 0.297792381 | 0.016672251 |
| 0.124284057 | 0.256006145 | 0.389673573 | 0.090303824 |
| 0.38748795  | 0.140407955 | 0.484822238 | 0.484007571 |
| 0.499503849 | 0.003458802 | 0.174072861 | 0.491780748 |
| 0.48177898  | 0.484546209 | 0.014415359 | 0.00570897  |
| 0.006792706 | 0.019315758 | 0.39464706  | 0.228931967 |
| 0.493099446 | 0.341096011 | 0.003887016 | 0.050846318 |

|             |             |             |             |
|-------------|-------------|-------------|-------------|
| 0.303548348 | 0.413937298 | 0.49866748  | 0.396776538 |
| 0.464627459 | 0.074273339 | 0.372268631 | 0.416276192 |
| 0.063944969 | 0.388527166 | 0.503628064 | 0.478830737 |
| 0.031625246 | 0.232690398 | 0.396900378 | 0.495345288 |
| 0.067260861 | 0.316477397 | 0.470064936 | 0.367239712 |
| 0.008963794 | 0.072879886 | 0.059218557 | 0.450926811 |
| 0.508379877 | 0.094567629 | 0.038449876 | 0.192499756 |
| 0.143300177 | 0.483987966 | 0.185413195 | 0.498430148 |
| 0.488190095 | 0.462895954 | 0.063051823 | 0.482369207 |
| 0.039732398 | 0.497004286 | 0.349116515 | 0.077672098 |
| 0.274268781 | 0.009557273 | 0.46927035  | 0.181517819 |
| 0.385195115 | 0.4371112   | 0.191061758 | 0.01210537  |
| 0.167720747 | 0.048764881 | 0.494185897 | 0.478061677 |
| 0.024252886 | 0.242246145 | 0.291318916 | 0.416469189 |
| 0.343317563 | 0.479717904 | 0.513900512 | 0.48004602  |
| 0.094951535 | 0.123945655 | 0.444663599 | 0.454280169 |
| 0.274981493 | 0.489768851 | 0.333269997 | 0.490467129 |
| 0.454162295 | 0.471818868 | 0.492061175 | 0.382244818 |
| 0.232176077 | 0.45261876  | 0.449480585 | 0.027883409 |
| 0.370870231 | 0.495786523 | 0.377720716 | 0.164750337 |
| 0.274862901 | 0.401836408 | 0.040392072 | 0.19853583  |
| 0.342589153 | 0.38292679  | 0.157745374 | 0.453362824 |
| 0.427194634 | 0.459094278 | 0.038231534 | 0.057190306 |
| 0.52149563  | 0.460450004 | 0.165473861 | 0.480307963 |
| 0.158918161 | 0.361813748 | 0.476041439 | 0.468596119 |
| 0.378567425 | 0.50467614  | 0.47688707  | 0.471283042 |
| 0.470212126 | 0.271305987 | 0.524439242 | 0.108121157 |
| 0.081092124 | 0.450917326 | 0.115342727 | 0.081291661 |
| 0.149281377 | 0.021971578 | 0.313172367 | 0.438357974 |
| 0.403959537 | 0.414451916 | 0.360282427 | 0.076829439 |
| 0.316223553 | 0.382146584 | 0.363710065 | 0.241876319 |
| 0.089427634 | 0.507223915 | 0.007974582 | 0.049814027 |
| 0.413176638 | 0.487236121 | 0.415923014 | 0.236370237 |
| 0.303433    | 0.118905386 | 0.314021165 | 0.365241318 |
| 0.427188875 | 0.385020037 | 0.49093642  | 0.034983878 |
| 0.020870738 | 0.491954737 | 0.420436488 | 0.014231428 |
| 0.071773661 | 0.420674193 | 0.288459317 | 0.263831107 |
| 0.016037981 | 0.485510019 | 0.416593023 | 0.441904129 |
| 0.379472144 | 0.059304299 | 0.41273988  | 0.089150288 |
| 0.051792725 | 0.463124194 | 0.404426931 | 0.505800897 |
| 0.336646568 | 0.44987359  | 0.462738387 | 0.493477784 |
| 0.112344492 | 0.396680435 | 0.028657145 | 0.475799142 |
| 0.46305208  |             |             |             |
| PARVG       | 0.01546396  | 0.014991219 | 0.022624459 |
| 0.041060231 | 0.036909686 | 0.007806634 | 0.047831143 |
| 0.008120374 | 0.06194918  | 0.027346072 | 0.098305516 |
| 0.026526531 | 0.034686631 | 0.014462575 | 0.004630116 |
| 0.064713593 | 0.128744255 | 0.013068456 | 0.098372269 |
| 0.037149029 | 0.018085479 | 0.085162253 | 0.067804717 |
| 0.036347299 | 0.166090948 | 0.168884094 | 0.066924035 |
| 0.036451922 | 0.182976651 | 0.004952427 | 0.018902195 |
| 0.130469051 | 0.017860052 | 0.009375255 | 0.047385594 |
| 0.008639082 | 0.009810924 | 0.027828618 | 0.006880359 |
| 0.013291252 | 0.033350905 | 0.034943183 | 0.077729526 |

|             |             |             |             |
|-------------|-------------|-------------|-------------|
| 0.082534578 | 0.006274471 | 0.072368627 | 0.054065515 |
| 0.004598231 | 0.162069417 | 0.003004469 | 0.006192554 |
| 0.006969011 | 0.015523303 | 0.013082152 | 0.044880934 |
| 0.01624075  | 0.003257347 | 0.018911639 | 0.006086769 |
| 0.074290878 | 0.003316723 | 0.008745502 | 0.031878156 |
| 0.008483799 | 0.018273064 | 0.109744717 | 0.025761433 |
| 0.021416386 | 0.008973723 | 0.069034159 | 0.014053914 |
| 0.006089548 | 0.045530894 | 0.070799451 | 0.016801368 |
| 0.267848927 | 0.099962411 | 0.132995942 | 0.041700998 |
| 0.031982887 | 0.010142509 | 0.038303243 | 0.02905627  |
| 0.077755148 | 0.093613992 | 0.031208113 | 0.097659006 |
| 0.014896396 | 0.052160495 | 0.042431972 | 0.076564944 |
| 0.034538458 | 0.012399892 | 0.08019291  | 0.145060281 |
| 0.015886869 | 0.012836932 | 0.013946996 | 0.024903904 |
| 0.013458894 | 0.158452082 | 0.008344491 | 0.023262741 |
| 0.008054133 | 0.044514962 | 0.215972164 | 0.01838245  |
| 0.183407082 | 0.003963011 | 0.079055312 | 0.039510956 |
| 0.032943526 | 0.069242284 | 0.17608909  | 0.028439638 |
| 0.043858188 | 0.018299743 | 0.013369542 | 0.091186872 |
| 0.037461869 | 0.104500492 | 0.044264892 | 0.160963248 |
| 0.013655649 | 0.045451147 | 0.004987808 | 0.028097236 |
| 0.008198678 | 0.01390992  | 0.03606996  | 0.133507189 |
| 0.200794964 | 0.05618742  | 0.014390199 | 0.0217139   |
| 0.026656476 | 0.007799332 | 0.067448688 | 0.006817846 |
| 0.019429111 | 0.037621195 | 0.0004483   | 0.060945281 |
| 0.024120586 | 0.062017022 | 0.153543963 | 0.019090634 |
| 0.102226716 | 0.03920365  | 0.115063908 | 0.025648925 |
| 0.007546734 | 0.145315166 | 0.005482472 | 0.072964021 |
| 0.007943966 | 0.090622689 | 0.10660746  | 0.037588671 |
| 0.053483711 | 0.008821762 | 0.24844273  | 0.011051198 |
| 0.009462351 | 0.084526676 | 0.065677525 | 0.013185771 |
| 0.010582928 | 0.013924848 | 0.004786441 | 0.150931655 |
| 0.042434957 | 0.070003253 | 0.005668478 | 0.017758735 |
| 0.060403429 | 0.120709331 | 0.002088795 | 0.020961261 |
| 0.003441107 | 0.024653525 | 0.038393674 | 0.050573392 |
| 0.145706203 | 0.03867835  | 0.010359823 | 0.007494772 |
| 0.012727224 | 0.002042225 | 0.04625918  | 0.040500276 |
| 0.017352532 | 0.032430413 | 0.001767628 | 0.063518996 |
| 0.005307227 | 0.141679683 | 0.036090749 | 0.202414516 |
| 0.009421585 | 0.211087115 | 0.008816988 | 0.023509284 |
| 0.014302657 | 0.037648171 | 0.006238185 | 0.030004094 |
| 0.191541792 | 0.009536399 | 0.021872404 | 0.041886389 |
| 0.037210789 | 0.037560553 | 0.044618031 | 0.01774851  |
| 0.035306303 | 0.039991172 | 0.141092008 | 0.102347598 |
| 0.02317728  | 0.00367309  | 0.008157736 | 0.025225744 |
| 0.003322222 | 0.012989872 | 0.010856064 | 0.002533295 |
| 0.124461484 | 0.018101006 | 0.023640708 | 0.065732892 |
| 0.008793205 | 0.03737673  | 0.01255539  | 0.06856811  |
| 0.217071346 | 0.020541734 | 0.085900807 | 0.03494914  |
| 0.055722419 | 0.017225365 | 0.062139441 | 0.014506355 |
| 0.031015588 | 0.08100462  | 0.024383956 | 0.017712791 |
| 0.03051391  | 0.156560553 | 0.120531441 | 0.00614685  |
| 0.03127873  | 0.010599531 | 0.006789662 | 0.008306736 |
| 0.009177136 | 0.056738418 | 0.050976551 | 0.026813749 |

|             |             |             |             |
|-------------|-------------|-------------|-------------|
| 0.143429592 | 0.252614416 | 0.015237226 | 0.058007484 |
| 0.004210981 | 0.056505074 | 0.20511043  | 0.002556635 |
| 0.024977048 | 0.003290295 | 0.001448472 | 0.015376126 |
| 0.081466184 | 0.03150412  | 0.031719229 | 0.220072434 |
| 0.02781421  | 0.098479857 | 0.037799055 | 0.009056408 |
| 0.010939273 | 0.010390625 | 0.085749715 | 0.125254644 |
| 0.00630709  | 0.030774597 | 0.077411197 | 0.008909712 |
| 0.00803013  | 0.208806012 | 0.016966203 | 0.131159834 |
| 0.260779433 | 0.042271623 | 0.020259575 | 0.26649911  |
| 0.213703004 | 0.029004044 | 0.016254887 | 0.159173361 |
| 0.019493672 | 0.080736767 | 0.014257229 | 0.073622335 |
| 0.114213668 | 0.070520961 | 0.120211432 | 0.023543872 |
| 0.007440328 | 0.018257473 | 0.127704941 | 0.054254464 |
| 0.120000133 | 0.021465424 | 0.002258726 | 0.021877918 |
| 0.030483575 | 0.011102756 | 0.162266758 | 0.027798457 |
| 0.007857853 | 0.004131387 | 0.208927162 | 0.018472383 |
| 0.008038275 | 0.112439801 | 0.042116925 | 0.010478689 |
| 0.015548611 | 0.032837884 | 0.019147273 | 0.033558112 |
| 0.038162707 | 0.042173513 | 0.046281945 | 0.047360377 |
| 0.011665884 | 0.074108147 | 0.047202321 | 0.005343234 |
| 0.098633485 | 0.010151853 | 0.040370627 | 0.113132649 |
| 0.005701624 | 0.004724717 | 0.090752984 | 0.162923351 |
| 0.021725426 | 0.013057216 | 0.009760376 | 0.042251021 |
| 0.018754361 | 0.01634591  | 0.018803911 | 0.209679639 |
| 0.285596006 | 0.010732819 | 0.012178753 | 0.048258382 |
| 0.035793961 | 0.002347092 | 0.066841796 | 0.013458305 |
| 0.096672285 | 0.004144244 | 0.00689707  | 0.011463698 |
| 0.165033805 | 0.044054879 | 0.007885744 | 0.020118102 |
| 0.001488393 | 0.046598298 | 0.027423751 | 0.019515902 |
| 0.011515289 | 1           | 0.106638459 | 0.014700687 |
| 0.020561173 | 0.012947095 | 0.040363585 | 0.024255815 |
| 0.023078286 | 0.00900167  | 0.019021349 | 0.14876345  |
| 0.0194066   | 0.012203131 | 0.019840022 | 0.010813845 |
| 0.031121321 | 0.058519491 | 0.094101328 | 0.078481862 |
| 0.04521418  | 0.007918705 | 0.003482848 | 0.045586977 |
| 0.005251887 | 0.110264146 | 0.015306613 | 0.037339639 |
| 0.023358753 | 0.21247335  | 0.015374336 | 0.012824125 |
| 0.018384485 | 0.027937426 | 0.087918472 | 0.021540962 |
| 0.009555557 | 0.160519129 | 0.022416952 | 0.131095302 |
| 0.018559691 | 0.001271622 | 0.133950482 | 0.023751198 |
| 0.024090866 | 0.057470744 | 0.012033963 | 0.076320953 |
| 0.026376313 | 0.159621417 | 0.006053696 | 0.056180417 |
| 0.146172735 | 0.003455794 | 0.025237228 | 0.009518079 |
| 0.148207267 | 0.103865925 | 0.012057919 | 0.029126797 |
| 0.030217126 | 0.120666507 | 0.024852459 | 0.017296553 |
| 0.076385506 | 0.187250827 | 0.153272667 | 0.048266554 |
| 0.007734956 | 0.090700161 | 0.137947598 | 0.001268451 |
| 0.054685997 | 0.026626965 | 0.066401701 | 0.029010617 |
| 0.022878077 | 0.055187098 | 0.142273841 | 0.009954646 |
| 0.100908972 | 0.008374255 | 0.071115582 | 0.002672228 |
| 0.047013084 | 0.145841275 | 0.011432198 | 0.019974343 |
| 0.006500729 | 0.015872235 | 0.02638015  | 0.190761004 |
| 0.026701679 | 0.21266811  | 0.036452977 | 0.039405805 |
| 0.168908887 | 0.027660413 | 0.102731732 | 0.04039078  |

|             |             |             |             |
|-------------|-------------|-------------|-------------|
| 0.011846258 | 0.042396712 | 0.008232908 | 0.00577351  |
| 0.039823597 | 0.033647685 | 0.030274401 | 0.009129518 |
| 0.008844408 | 0.038080726 | 0.024202381 | 0.019327669 |
| 0.012867287 | 0.015435674 | 0.015387112 | 0.037628565 |
| 0.04676636  | 0.01038708  | 0.015065289 | 0.035706734 |
| 0.057296561 | 0.035969009 | 0.016176558 | 0.090965629 |
| 0.113005897 | 0.024002369 | 0.062495236 | 0.003065166 |
| 0.024856207 | 0.0069714   | 0.055333878 | 0.053535118 |
| 0.014310287 | 0.009478592 | 0.044906792 | 0.143007128 |
| 0.015152002 | 0.009893171 | 0.016134719 | 0.022778714 |
| 0.156288841 | 0.069041827 | 0.029563797 | 0.035723656 |
| 0.006674983 | 0.016935328 | 0.019845991 | 0.01270986  |
| 0.008196672 | 0.068269271 | 0.010496552 | 0.004142415 |
| 0.090043306 | 0.012111012 | 0.069955743 | 0.249557232 |
| 0.143820509 | 0.180261918 | 0.012719049 | 0.057394841 |
| 0.009985469 | 0.070193085 | 0.00235026  | 0.103816366 |
| 0.096239338 | 0.007802693 | 0.082915009 | 0.027073219 |
| 0.085429661 | 0.009234555 | 0.084398079 | 0.20378306  |
| 0.013288196 | 0.020441785 | 0.03717848  | 0.103445763 |
| 0.023755038 | 0.091969389 | 0.102275887 | 0.005424361 |
| 0.00528721  | 0.00618187  | 0.018330384 | 0.041983153 |
| 0.060837464 | 0.036400191 | 0.007662651 | 0.15521912  |
| 0.055880029 | 0.007580083 | 0.019998343 | 0.027055931 |
| 0.219897641 | 0.014278673 | 0.004400162 | 0.033022511 |
| 0.025711031 | 0.13520304  | 0.004238565 | 0.025959026 |
| 0.076067094 | 0.007737144 | 0.032072553 | 0.011314681 |
| 0.04113622  | 0.064848377 | 0.004827431 | 0.014027642 |
| 0.03688087  | 0.011550731 | 0.074570679 | 0.025677948 |
| 0.007436259 |             |             |             |
| PCYT1A      | 0.148598995 | 0.155820723 | 0.137647356 |
| 0.173128007 | 0.169985299 | 0.057942632 | 0.07532012  |
| 0.018191701 | 0.039124465 | 0.004636459 | 0.040767422 |
| 0.169376582 | 0.041732448 | 0.030357183 | 0.023425624 |
| 0.264733829 | 0.134633689 | 0.070929963 | 0.153014349 |
| 0.170512817 | 0.017655044 | 0.269163212 | 0.056243413 |
| 0.138578839 | 0.156894133 | 0.120367716 | 0.149667101 |
| 0.192835872 | 0.13494542  | 0.033745286 | 0.106221641 |
| 0.138146426 | 0.152217489 | 0.128898653 | 0.215497014 |
| 0.127786545 | 0.109758914 | 0.020498232 | 0.026515807 |
| 0.127261502 | 0.191799753 | 0.164978632 | 0.167294695 |
| 0.039709723 | 0.098175443 | 0.118201704 | 0.246898977 |
| 0.012498825 | 0.070190611 | 0.014977602 | 0.092053705 |
| 0.102116095 | 0.108306805 | 0.032517783 | 0.055698871 |
| 0.02601125  | 0.014727813 | 0.053866741 | 0.050114496 |
| 0.114225698 | 0.009609547 | 0.119306569 | 0.022216831 |
| 0.022918974 | 0.048893203 | 0.164804077 | 0.058126306 |
| 0.116807006 | 0.083422166 | 0.025519592 | 0.134020713 |
| 0.000757274 | 0.17867812  | 0.262686603 | 0.088680225 |
| 0.160217967 | 0.028239113 | 0.202707807 | 0.118372575 |
| 0.197664295 | 0.132279699 | 0.239641133 | 0.222245993 |
| 0.066001227 | 0.222522527 | 0.192415822 | 0.103964343 |
| 0.141980111 | 0.065166268 | 0.031596281 | 0.295592328 |
| 0.231218082 | 0.148512797 | 0.1008857   | 0.302724876 |
| 0.116616739 | 0.134207546 | 0.077047454 | 0.115946595 |

|             |             |             |             |
|-------------|-------------|-------------|-------------|
| 0.053730984 | 0.122059375 | 0.105360472 | 0.197147865 |
| 0.092333175 | 0.195385304 | 0.232857694 | 0.122403588 |
| 0.136336655 | 0.019402418 | 0.198779258 | 0.050057261 |
| 0.201206586 | 0.022055162 | 0.289796501 | 0.097430371 |
| 0.067547004 | 0.143001239 | 0.156662352 | 0.115712827 |
| 0.177384232 | 0.035419228 | 0.058199963 | 0.116557191 |
| 0.031261381 | 0.096663558 | 0.092434848 | 0.171060582 |
| 0.016924358 | 0.048051523 | 0.080209976 | 0.039586489 |
| 0.108122733 | 0.085836616 | 0.144125742 | 0.104805482 |
| 0.174013226 | 0.111591386 | 0.099759313 | 0.080807784 |
| 0.151802157 | 0.242537534 | 0.000931515 | 0.055435759 |
| 0.110389243 | 0.107666485 | 0.231921798 | 0.130995558 |
| 0.203956472 | 0.040286115 | 0.110088782 | 0.200568508 |
| 0.092322905 | 0.107543276 | 0.039622852 | 0.265337905 |
| 0.02808116  | 0.268436266 | 0.095992881 | 0.067463037 |
| 0.029155971 | 0.126830787 | 0.163468085 | 0.057177272 |
| 0.028418986 | 0.097179591 | 0.029181046 | 0.041614936 |
| 0.018915185 | 0.122088623 | 0.094779359 | 0.140156862 |
| 0.094171619 | 0.241892364 | 0.040866067 | 0.11097065  |
| 0.016324447 | 0.055759573 | 0.022532149 | 0.178538291 |
| 0.032043188 | 0.212028102 | 0.079911707 | 0.142154012 |
| 0.273113584 | 0.214145488 | 0.007329795 | 0.109204617 |
| 0.152799067 | 0.021785828 | 0.147689389 | 0.21427844  |
| 0.105266053 | 0.178399025 | 0.003951458 | 0.243650812 |
| 0.066157451 | 0.116786518 | 0.236794674 | 0.21442268  |
| 0.123401019 | 0.121901932 | 0.038617391 | 0.196246774 |
| 0.137456168 | 0.022026332 | 0.021783713 | 0.134247832 |
| 0.13447798  | 0.011522377 | 0.1590694   | 0.164484045 |
| 0.133640544 | 0.228454831 | 0.248026501 | 0.09637456  |
| 0.146244458 | 0.072947604 | 0.052444999 | 0.272411062 |
| 0.188523792 | 0.027214829 | 0.097398743 | 0.047886672 |
| 0.041933552 | 0.130769933 | 0.125786558 | 0.011284732 |
| 0.070682945 | 0.065395197 | 0.00864859  | 0.161799146 |
| 0.114579372 | 0.031504526 | 0.092543163 | 0.091162662 |
| 0.174503944 | 0.182058789 | 0.197409887 | 0.154753065 |
| 0.137447048 | 0.086656773 | 0.1169181   | 0.026285527 |
| 0.033877074 | 0.107051882 | 0.098153965 | 0.076100425 |
| 0.01602587  | 0.120390909 | 0.079601036 | 0.04452924  |
| 0.024585263 | 0.039816276 | 0.032059118 | 0.091222243 |
| 0.028616754 | 0.033183882 | 0.140043135 | 0.092144806 |
| 0.13871504  | 0.115327789 | 0.154823835 | 0.225322497 |
| 0.052064379 | 0.069008255 | 0.134811611 | 0.014943143 |
| 0.17032395  | 0.027893946 | 0.014935988 | 0.131227574 |
| 0.036414404 | 0.22937244  | 0.039700942 | 0.201650872 |
| 0.10672635  | 0.151138486 | 0.20940352  | 0.01075516  |
| 0.087939046 | 0.116082108 | 0.231364041 | 0.149431367 |
| 0.079052969 | 0.148402419 | 0.027779596 | 0.097033922 |
| 0.089034257 | 0.109018788 | 0.172417679 | 0.131204087 |
| 0.141304357 | 0.23468457  | 0.151507908 | 0.210345693 |
| 0.170045193 | 0.078619955 | 0.009345398 | 0.301874427 |
| 0.171576231 | 0.270451682 | 0.119790713 | 0.187220527 |
| 0.060781325 | 0.018235711 | 0.245656781 | 0.154076854 |
| 0.113350558 | 0.182500582 | 0.232171055 | 0.148771238 |
| 0.18864085  | 0.078532022 | 0.006327848 | 0.185160154 |



|             |             |             |             |
|-------------|-------------|-------------|-------------|
| 0.070586894 | 0.143640464 | 0.064253281 | 0.210794634 |
| 0.119499576 | 0.028376746 | 0.158985288 | 0.063536188 |
| 0.082308015 | 0.067800268 | 0.077118022 | 0.125245253 |
| 0.139553654 | 0.099567764 | 0.067311794 | 0.195342673 |
| 0.011413068 | 0.020632793 | 0.193602807 | 0.135952337 |
| 0.056706414 | 0.121233907 | 0.077362386 | 0.028980406 |
| 0.037777407 | 0.111483852 | 0.236316808 | 0.060810017 |
| 0.041602349 | 0.027727258 | 0.303758817 | 0.090622096 |
| 0.192683857 | 0.159367454 | 0.128787923 | 0.059615591 |
| 0.165615832 | 0.159369171 | 0.142773946 | 0.196089952 |
| 0.152298812 | 0.140768424 | 0.0989545   | 0.015278232 |
| 0.221089808 | 0.016159519 | 0.016166701 | 0.138962114 |
| 0.127240536 | 0.08275247  | 0.001076028 | 0.031725015 |
| 0.123687556 | 0.265075759 | 0.108253582 | 0.112450902 |
| 0.009577351 | 0.175788225 | 0.032073548 | 0.193528694 |
| 0.126734208 | 0.106638459 | 1           | 0.13806658  |
| 0.166693345 | 0.14676625  | 0.155155768 | 0.187145202 |
| 0.149563685 | 0.125250735 | 0.026328453 | 0.261717067 |
| 0.137930635 | 0.154278643 | 0.131137129 | 0.11853693  |
| 0.189464534 | 0.266965607 | 0.17576983  | 0.027595498 |
| 0.057645098 | 0.024316347 | 0.018185829 | 0.032709066 |
| 0.046126398 | 0.10792842  | 0.153703661 | 0.23448293  |
| 0.191118285 | 0.079627173 | 0.017714984 | 0.12799939  |
| 0.136400554 | 0.187433623 | 0.052564582 | 0.008803847 |
| 0.006201303 | 0.063239823 | 0.099479298 | 0.250136431 |
| 0.169648203 | 0.004956833 | 0.041603829 | 0.011800844 |
| 0.035466401 | 0.250072576 | 0.137766658 | 0.236590347 |
| 0.204816573 | 0.142922393 | 0.018717612 | 0.217524125 |
| 0.095921072 | 0.052595426 | 0.191317457 | 0.111941617 |
| 0.102718725 | 0.222476094 | 0.076927957 | 0.193946198 |
| 0.068460547 | 0.28052205  | 0.171275841 | 0.036910011 |
| 0.054269393 | 0.161218751 | 0.123922229 | 0.258110324 |
| 0.120732401 | 0.04661392  | 0.050253501 | 0.003910113 |
| 0.048892089 | 0.204796709 | 0.05843734  | 0.215734455 |
| 0.150804951 | 0.24175563  | 0.136271949 | 0.120500407 |
| 0.06101917  | 0.114911699 | 0.220269336 | 0.003267879 |
| 0.126160547 | 0.054727024 | 0.145398574 | 0.027812543 |
| 0.032248648 | 0.113509546 | 0.055059665 | 0.129133773 |
| 0.074209871 | 0.144208398 | 0.220000685 | 0.251631839 |
| 0.114903482 | 0.06158478  | 0.230404017 | 0.1928089   |
| 0.04427985  | 0.187711799 | 0.11446888  | 0.050350219 |
| 0.034622734 | 0.084200967 | 0.1518521   | 0.086639133 |
| 0.02559859  | 0.246943753 | 0.061711605 | 0.18798976  |
| 0.113177435 | 0.153848668 | 0.158832421 | 0.118524458 |
| 0.10422021  | 0.07712383  | 0.081048888 | 0.009586755 |
| 0.161217892 | 0.205723393 | 0.085051604 | 0.074146702 |
| 0.175484846 | 0.169079951 | 0.046831485 | 0.013042629 |
| 0.155347042 | 0.041073961 | 0.043972746 | 0.255153021 |
| 0.103538684 | 0.091265281 | 0.026671664 | 0.104528844 |
| 0.163530302 | 0.115798904 | 0.016698529 | 0.12547543  |
| 0.206386316 | 0.186212315 | 0.206647864 | 0.240713535 |
| 0.048730579 | 0.144514498 | 0.139272622 | 0.080845254 |
| 0.092889943 | 0.133728724 | 0.133862795 | 0.005174759 |
| 0.074309464 | 0.123157395 | 0.047436273 | 0.244890612 |

|             |             |             |             |
|-------------|-------------|-------------|-------------|
| 0.140930993 | 0.082641233 | 0.073409093 | 0.26024874  |
| 0.077950568 | 0.203208694 | 0.015102252 | 0.061650452 |
| 0.276045566 | 0.070899932 | 0.227967745 | 0.042512468 |
| 0.041268397 | 0.118335895 | 0.027302778 | 0.152726561 |
| 0.093565171 | 0.157297908 | 0.155501515 | 0.165851466 |
| 0.083303163 | 0.128338766 | 0.199763313 | 0.030893958 |
| 0.025558898 | 0.029510504 | 0.144132894 | 0.01820468  |
| 0.019876292 | 0.236131137 | 0.053720548 | 0.089405219 |
| 0.099432245 | 0.082359225 | 0.067961725 | 0.040156638 |
| 0.151053152 | 0.159975827 | 0.029626566 | 0.174801344 |
| 0.093592835 | 0.107062532 | 0.066426192 | 0.031803076 |
| 0.048694702 | 0.102668088 | 0.186148188 | 0.144416774 |
| 0.182181371 | 0.239719176 | 0.084998925 | 0.135536484 |
| 0.044359739 | 0.107191635 | 0.027256516 | 0.177858639 |
| 0.056211221 |             |             |             |
| PDE4B       | 0.353578234 | 0.521260591 | 0.336724665 |
| 0.353482842 | 0.380263342 | 0.308226893 | 0.174905231 |
| 0.140178208 | 0.069467396 | 0.005334054 | 0.028407919 |
| 0.387048067 | 0.210331756 | 0.240039476 | 0.264269299 |
| 0.354499067 | 0.141024924 | 0.274951244 | 0.205365181 |
| 0.343375708 | 0.074726278 | 0.355128079 | 0.075488904 |
| 0.263770025 | 0.10682491  | 0.065771196 | 0.247954439 |
| 0.377494428 | 0.073383272 | 0.280401552 | 0.316525385 |
| 0.093981327 | 0.368837852 | 0.5258829   | 0.40074312  |
| 0.529408097 | 0.333760651 | 0.011819372 | 0.248512309 |
| 0.368509099 | 0.378012784 | 0.340004261 | 0.28566984  |
| 0.036327516 | 0.488654271 | 0.21087656  | 0.350812816 |
| 0.17620873  | 0.03330779  | 0.183274701 | 0.434742432 |
| 0.493248802 | 0.385258744 | 0.172845173 | 0.135366141 |
| 0.22539236  | 0.191820099 | 0.286366211 | 0.262711502 |
| 0.198833802 | 0.123121798 | 0.498355313 | 0.07094811  |
| 0.124601444 | 0.196727662 | 0.149943288 | 0.212094914 |
| 0.32566359  | 0.311991282 | 0.013310243 | 0.359459524 |
| 0.003230874 | 0.318856577 | 0.332814954 | 0.285660856 |
| 0.040105438 | 0.025578223 | 0.170755431 | 0.290385763 |
| 0.40735555  | 0.44788624  | 0.459499408 | 0.474819336 |
| 0.187311903 | 0.256411757 | 0.3623218   | 0.160856202 |
| 0.39251193  | 0.157410001 | 0.089675132 | 0.367893959 |
| 0.472203927 | 0.531594951 | 0.190178109 | 0.236201852 |
| 0.374819805 | 0.464239522 | 0.354284626 | 0.377496023 |
| 0.304697972 | 0.04965754  | 0.440384359 | 0.504790819 |
| 0.355963469 | 0.306361232 | 0.145406206 | 0.341072814 |
| 0.053479321 | 0.295437704 | 0.305941074 | 0.160190869 |
| 0.422511047 | 0.01415467  | 0.202879543 | 0.3123723   |
| 0.170230478 | 0.367506226 | 0.527517251 | 0.161094582 |
| 0.364699424 | 0.021074542 | 0.135527837 | 0.030463287 |
| 0.290468146 | 0.155141114 | 0.495834248 | 0.424183135 |
| 0.195928127 | 0.352911358 | 0.218251982 | 0.001957962 |
| 0.027802468 | 0.162544343 | 0.396271929 | 0.303370081 |
| 0.359359517 | 0.367387819 | 0.216261201 | 0.329213086 |
| 0.395521485 | 0.452996547 | 0.048893439 | 0.07649015  |
| 0.358920357 | 0.162186476 | 0.210993463 | 0.396758684 |
| 0.286774383 | 0.089153068 | 0.114761093 | 0.500014966 |
| 0.406756333 | 0.075932916 | 0.266418891 | 0.358056467 |

|             |             |             |             |
|-------------|-------------|-------------|-------------|
| 0.299982961 | 0.335455424 | 0.093206097 | 0.261726475 |
| 0.044414262 | 0.497585806 | 0.029561678 | 0.259909172 |
| 0.241373214 | 0.168697437 | 0.007651063 | 0.207046503 |
| 0.245979812 | 0.419048785 | 0.484692523 | 0.091607492 |
| 0.293604274 | 0.363218131 | 0.259868594 | 0.378733655 |
| 0.011579853 | 0.039274206 | 0.22214493  | 0.502704276 |
| 0.236204457 | 0.483448066 | 0.255568175 | 0.262619825 |
| 0.256315624 | 0.373118311 | 0.002642716 | 0.502048684 |
| 0.533988306 | 0.238989323 | 0.369655102 | 0.365851537 |
| 0.338118534 | 0.398262763 | 0.037969178 | 0.365745605 |
| 0.299334633 | 0.065862485 | 0.476131198 | 0.154851072 |
| 0.457968177 | 0.040256821 | 0.273217815 | 0.400054264 |
| 0.395155707 | 0.008078844 | 0.177938741 | 0.322361137 |
| 0.027126661 | 0.075106521 | 0.352440282 | 0.343523899 |
| 0.328161416 | 0.376704949 | 0.439432793 | 0.324649001 |
| 0.382053319 | 0.190601987 | 0.010645231 | 0.289771718 |
| 0.37326898  | 0.341887728 | 0.430260489 | 0.197134473 |
| 0.277966913 | 0.462565561 | 0.377706228 | 0.176771597 |
| 0.037945247 | 0.256583076 | 0.018292797 | 0.291634433 |
| 0.364698886 | 0.116503428 | 0.340045354 | 0.132147979 |
| 0.07117051  | 0.520092662 | 0.176519592 | 0.253141604 |
| 0.13203577  | 0.369299736 | 0.206096792 | 0.238741064 |
| 0.238936371 | 0.147082157 | 0.320297498 | 0.325016229 |
| 0.0310378   | 0.093960871 | 0.012686701 | 0.378675227 |
| 0.169790644 | 0.346511336 | 0.337505643 | 0.352958594 |
| 0.302535013 | 0.121579146 | 0.35644494  | 0.249799718 |
| 0.104885646 | 0.014498259 | 0.500492625 | 0.342600147 |
| 0.277459103 | 0.127815    | 0.038179004 | 0.336839394 |
| 0.442042944 | 0.268699857 | 0.206596352 | 0.440817829 |
| 0.021537205 | 0.45467714  | 0.24608817  | 0.11972731  |
| 0.37922832  | 0.240251713 | 0.40619858  | 0.04933226  |
| 0.32515885  | 0.465781768 | 0.265607543 | 0.171867386 |
| 0.392140517 | 0.351691512 | 0.02679448  | 0.340098403 |
| 0.346951146 | 0.03138086  | 0.528627515 | 0.12936025  |
| 0.020010523 | 0.388825256 | 0.392610266 | 0.069510193 |
| 0.071345755 | 0.306044844 | 0.033845824 | 0.26336175  |
| 0.511232823 | 0.363892109 | 0.377966928 | 0.198642148 |
| 0.038653649 | 0.017001283 | 0.198527369 | 0.34625184  |
| 0.520574898 | 0.515007026 | 0.231260047 | 0.355907388 |
| 0.208144426 | 0.303139818 | 0.106383916 | 0.505152189 |
| 0.156605941 | 0.519347746 | 0.006032247 | 0.392755121 |
| 0.5265821   | 0.240504754 | 0.08095472  | 0.257765821 |
| 0.35587673  | 0.038381952 | 0.163869031 | 0.502894968 |
| 0.400351284 | 0.288091911 | 0.301093981 | 0.371698762 |
| 0.012677218 | 0.034839628 | 0.335623862 | 0.17963984  |
| 0.339521538 | 0.184429836 | 0.05971337  | 0.265159943 |
| 0.042764388 | 0.453033745 | 0.39488185  | 0.05273484  |
| 0.29747961  | 0.234861404 | 0.341249122 | 0.032584528 |
| 0.439487092 | 0.503889399 | 0.529698409 | 0.131926662 |
| 0.392261487 | 0.491819407 | 0.382445473 | 0.072075945 |
| 0.017100645 | 0.528086655 | 0.325300676 | 0.021827717 |
| 0.433752738 | 0.186097774 | 0.017623103 | 0.486282903 |
| 0.154506146 | 0.453943817 | 0.002205277 | 0.068565924 |
| 0.037777212 | 0.40762142  | 0.484555987 | 0.31348295  |

|             |             |             |             |
|-------------|-------------|-------------|-------------|
| 0.208712658 | 0.304817818 | 0.005799586 | 0.519605545 |
| 0.497222277 | 0.014700687 | 0.13806658  | 1           |
| 0.390365716 | 0.523218356 | 0.303028384 | 0.432192236 |
| 0.40080046  | 0.51670272  | 0.219849047 | 0.242777178 |
| 0.400100393 | 0.506557353 | 0.348638812 | 0.441975061 |
| 0.421037431 | 0.37644988  | 0.243041328 | 0.01388948  |
| 0.112390502 | 0.167250004 | 0.275479797 | 0.077182494 |
| 0.258879543 | 0.132182852 | 0.467935312 | 0.425137137 |
| 0.475853561 | 0.004702514 | 0.119770239 | 0.387105211 |
| 0.400448427 | 0.433233123 | 0.015696384 | 0.004786591 |
| 0.00615599  | 0.022518797 | 0.299121813 | 0.2169521   |
| 0.478012536 | 0.214900266 | 0.004347301 | 0.033433702 |
| 0.232002045 | 0.369486492 | 0.511936916 | 0.325272534 |
| 0.382965317 | 0.07494741  | 0.267874071 | 0.334457777 |
| 0.06719592  | 0.269292282 | 0.477288816 | 0.472095804 |
| 0.036669037 | 0.217325032 | 0.310920264 | 0.457191601 |
| 0.081861517 | 0.290890795 | 0.393757351 | 0.295772969 |
| 0.011567406 | 0.077561632 | 0.060846174 | 0.375562218 |
| 0.520095899 | 0.091540282 | 0.040276888 | 0.136191361 |
| 0.114546115 | 0.430753627 | 0.157088982 | 0.496781117 |
| 0.384142237 | 0.374702109 | 0.076737339 | 0.479754601 |
| 0.040109676 | 0.502249233 | 0.325955187 | 0.043278181 |
| 0.245870709 | 0.010667874 | 0.477984303 | 0.152886366 |
| 0.274700988 | 0.328066406 | 0.164830233 | 0.01695257  |
| 0.167110605 | 0.052448602 | 0.445942769 | 0.419593628 |
| 0.031656873 | 0.189174664 | 0.258807171 | 0.339286853 |
| 0.230924934 | 0.381294238 | 0.512098817 | 0.350975046 |
| 0.072863274 | 0.144307718 | 0.340046922 | 0.335395249 |
| 0.199956383 | 0.464321687 | 0.283690843 | 0.517975547 |
| 0.337802641 | 0.43314989  | 0.469011901 | 0.291870943 |
| 0.245627655 | 0.328714638 | 0.321392648 | 0.018612301 |
| 0.297382433 | 0.41906894  | 0.287524545 | 0.153151611 |
| 0.248517062 | 0.35756919  | 0.036193475 | 0.141597878 |
| 0.317221891 | 0.251710741 | 0.137524182 | 0.369105735 |
| 0.323791524 | 0.338636721 | 0.031968192 | 0.056905505 |
| 0.539348927 | 0.415951554 | 0.107309422 | 0.363711861 |
| 0.151526463 | 0.307496454 | 0.387724649 | 0.396702956 |
| 0.310585676 | 0.427234893 | 0.363076692 | 0.340839149 |
| 0.418916246 | 0.217853056 | 0.531370158 | 0.061717267 |
| 0.084483802 | 0.367127179 | 0.100227135 | 0.086730842 |
| 0.132520899 | 0.02378373  | 0.292422626 | 0.37065335  |
| 0.360930973 | 0.347824311 | 0.268938947 | 0.069297633 |
| 0.296178911 | 0.299045307 | 0.31605507  | 0.171325214 |
| 0.076961642 | 0.5090189   | 0.008652336 | 0.053691557 |
| 0.380057396 | 0.380910463 | 0.368587706 | 0.212796152 |
| 0.288464573 | 0.133658563 | 0.274684851 | 0.242984579 |
| 0.304734479 | 0.330585471 | 0.383732348 | 0.024423351 |
| 0.016670033 | 0.463993156 | 0.304241915 | 0.018319046 |
| 0.080059118 | 0.311868621 | 0.248457555 | 0.219453514 |
| 0.021732258 | 0.491953107 | 0.288252101 | 0.374784669 |
| 0.281087861 | 0.057281398 | 0.333974174 | 0.070262324 |
| 0.04450513  | 0.444454868 | 0.351192881 | 0.526394909 |
| 0.305934901 | 0.368764027 | 0.445426175 | 0.397229394 |
| 0.094904504 | 0.328585084 | 0.021964796 | 0.386229455 |

| 0.367960745 |             |             |             |  |
|-------------|-------------|-------------|-------------|--|
| PDE4D       | 0.323289804 | 0.500316977 | 0.346376456 |  |
| 0.312903868 | 0.35123185  | 0.255395849 | 0.138597142 |  |
| 0.098544225 | 0.073944402 | 0.003858584 | 0.031380611 |  |
| 0.379953294 | 0.201259067 | 0.189786346 | 0.243189588 |  |
| 0.328322798 | 0.148593229 | 0.242268637 | 0.177891846 |  |
| 0.29338052  | 0.049246738 | 0.332525187 | 0.064660362 |  |
| 0.29203361  | 0.130684238 | 0.064736692 | 0.283812021 |  |
| 0.356336108 | 0.073896263 | 0.213041384 | 0.255121105 |  |
| 0.098598962 | 0.343081568 | 0.508544894 | 0.38781222  |  |
| 0.518428858 | 0.305622991 | 0.008413071 | 0.20183782  |  |
| 0.345281932 | 0.36652677  | 0.288528412 | 0.254038352 |  |
| 0.030968359 | 0.454657998 | 0.17919434  | 0.356126613 |  |
| 0.141696204 | 0.036454117 | 0.132425766 | 0.395299272 |  |
| 0.474599792 | 0.353848172 | 0.127554421 | 0.107067901 |  |
| 0.213579058 | 0.1263224   | 0.341386649 | 0.19917133  |  |
| 0.163522983 | 0.077439709 | 0.482703071 | 0.060355384 |  |
| 0.100432436 | 0.144324477 | 0.158067575 | 0.161406194 |  |
| 0.343572093 | 0.263297875 | 0.009265909 | 0.353998771 |  |
| 0.001466932 | 0.274897844 | 0.329004284 | 0.33152057  |  |
| 0.0414008   | 0.022774579 | 0.177831195 | 0.240151789 |  |
| 0.388025605 | 0.43544992  | 0.466512663 | 0.485151874 |  |
| 0.18829868  | 0.247403155 | 0.376171683 | 0.144657587 |  |
| 0.373457122 | 0.127274837 | 0.086183968 | 0.347677587 |  |
| 0.479290016 | 0.51970011  | 0.19776734  | 0.248054857 |  |
| 0.356099835 | 0.431487082 | 0.340434382 | 0.359342591 |  |
| 0.331910367 | 0.064304525 | 0.41307355  | 0.501988696 |  |
| 0.32221701  | 0.356032353 | 0.155290232 | 0.294485775 |  |
| 0.050166951 | 0.262202585 | 0.271975892 | 0.146050399 |  |
| 0.404116177 | 0.012168052 | 0.219879071 | 0.253908673 |  |
| 0.161667037 | 0.35244142  | 0.527077413 | 0.134349671 |  |
| 0.351197566 | 0.020648161 | 0.187281969 | 0.031219161 |  |
| 0.25808564  | 0.21933297  | 0.470386757 | 0.405240351 |  |
| 0.139364159 | 0.330059796 | 0.175355389 | 0.002565121 |  |
| 0.032026256 | 0.163805775 | 0.383647278 | 0.262854179 |  |
| 0.320762846 | 0.371254657 | 0.214206402 | 0.278603188 |  |
| 0.386797028 | 0.458298301 | 0.037355005 | 0.060651484 |  |
| 0.328935482 | 0.163326989 | 0.192878026 | 0.361162476 |  |
| 0.299614318 | 0.06653465  | 0.097836872 | 0.495629909 |  |
| 0.36287141  | 0.064337698 | 0.214585068 | 0.33648847  |  |
| 0.256479368 | 0.353953946 | 0.076998799 | 0.218001294 |  |
| 0.030482697 | 0.493184493 | 0.037400964 | 0.209380561 |  |
| 0.271909344 | 0.178187778 | 0.006278806 | 0.149788914 |  |
| 0.21543361  | 0.406745597 | 0.462456946 | 0.081532265 |  |
| 0.247407151 | 0.347654876 | 0.196372518 | 0.343843063 |  |
| 0.011070057 | 0.036637014 | 0.16205077  | 0.490393203 |  |
| 0.172531395 | 0.48774253  | 0.228333426 | 0.267254478 |  |
| 0.256975357 | 0.371346272 | 0.003968413 | 0.478257728 |  |
| 0.529205562 | 0.185170453 | 0.342240899 | 0.350174992 |  |
| 0.34987132  | 0.386393535 | 0.033168016 | 0.332589993 |  |
| 0.247084057 | 0.058517759 | 0.475010616 | 0.156801097 |  |
| 0.440425331 | 0.040315097 | 0.203309875 | 0.427614843 |  |
| 0.377223985 | 0.007410276 | 0.12618872  | 0.268081288 |  |
| 0.034352684 | 0.046364923 | 0.313123772 | 0.30758438  |  |

|             |             |             |             |
|-------------|-------------|-------------|-------------|
| 0.304501685 | 0.366446909 | 0.435424989 | 0.350211343 |
| 0.359867383 | 0.151043508 | 0.011216894 | 0.308029697 |
| 0.36559917  | 0.319092146 | 0.396904355 | 0.161065478 |
| 0.225613679 | 0.441312879 | 0.380923397 | 0.153462429 |
| 0.03175951  | 0.195794046 | 0.015136182 | 0.292042763 |
| 0.359204254 | 0.089360844 | 0.332148157 | 0.126301923 |
| 0.079302404 | 0.512038389 | 0.230850229 | 0.316180665 |
| 0.193066581 | 0.316836064 | 0.171463721 | 0.199123237 |
| 0.240768718 | 0.141736356 | 0.329697812 | 0.312176218 |
| 0.019054188 | 0.087303259 | 0.017529224 | 0.356256386 |
| 0.155400053 | 0.312945083 | 0.292810979 | 0.295112986 |
| 0.23860101  | 0.106054161 | 0.345973255 | 0.284485859 |
| 0.123692716 | 0.015387235 | 0.483574967 | 0.314793253 |
| 0.221738639 | 0.109314774 | 0.038514182 | 0.305125155 |
| 0.422364268 | 0.218436131 | 0.153051183 | 0.409126915 |
| 0.021450195 | 0.452321538 | 0.221904645 | 0.124590337 |
| 0.379308221 | 0.213659187 | 0.393382906 | 0.043939255 |
| 0.266436876 | 0.429230347 | 0.255629994 | 0.179862744 |
| 0.352494973 | 0.305475163 | 0.020804584 | 0.314477878 |
| 0.30522831  | 0.030353981 | 0.522577395 | 0.141959867 |
| 0.021836191 | 0.383026436 | 0.37694718  | 0.072157804 |
| 0.079886658 | 0.268227562 | 0.020091178 | 0.263221016 |
| 0.50105342  | 0.341910133 | 0.35409163  | 0.238695655 |
| 0.032975433 | 0.014553753 | 0.220717821 | 0.352368401 |
| 0.495311871 | 0.520397766 | 0.213004974 | 0.367622013 |
| 0.182405473 | 0.314092103 | 0.067233687 | 0.502442555 |
| 0.169891683 | 0.503310532 | 0.006029472 | 0.395312105 |
| 0.513212743 | 0.172312197 | 0.093868319 | 0.20094007  |
| 0.319826748 | 0.033741201 | 0.133218873 | 0.48507674  |
| 0.382224488 | 0.279615169 | 0.310922782 | 0.339663558 |
| 0.008510537 | 0.021963793 | 0.339697339 | 0.238708102 |
| 0.304552779 | 0.176503501 | 0.10665602  | 0.203922382 |
| 0.038298091 | 0.418253441 | 0.39039109  | 0.058889557 |
| 0.241277969 | 0.188770728 | 0.33434348  | 0.029087675 |
| 0.464918363 | 0.505359489 | 0.509988914 | 0.100648545 |
| 0.365763833 | 0.496236995 | 0.397584913 | 0.076695767 |
| 0.021267919 | 0.524389013 | 0.2766783   | 0.019935155 |
| 0.419234733 | 0.131118874 | 0.01476915  | 0.459420616 |
| 0.130182825 | 0.421370423 | 0.002602843 | 0.08791846  |
| 0.049580548 | 0.418300022 | 0.464478554 | 0.253803874 |
| 0.158266373 | 0.265706546 | 0.006278823 | 0.520267475 |
| 0.474773735 | 0.020561173 | 0.166693345 | 0.390365716 |
| 1           | 0.49792167  | 0.351906084 | 0.450861859 |
| 0.402524887 | 0.505836229 | 0.177732506 | 0.239192968 |
| 0.38274144  | 0.515426787 | 0.303643182 | 0.414799383 |
| 0.402914701 | 0.363711241 | 0.213624199 | 0.010917206 |
| 0.142392141 | 0.113366628 | 0.265471212 | 0.081093493 |
| 0.201332682 | 0.147322548 | 0.458066568 | 0.420587063 |
| 0.484530099 | 0.005357125 | 0.08375083  | 0.369217272 |
| 0.367100813 | 0.411325574 | 0.017593955 | 0.006751043 |
| 0.008294503 | 0.035392256 | 0.238611179 | 0.228017726 |
| 0.472999571 | 0.171607683 | 0.004069529 | 0.020268994 |
| 0.212901078 | 0.388323895 | 0.492559188 | 0.290966899 |
| 0.38054925  | 0.068984242 | 0.232850116 | 0.296410451 |

|             |             |             |             |
|-------------|-------------|-------------|-------------|
| 0.084060245 | 0.221476199 | 0.481316748 | 0.436396276 |
| 0.039070697 | 0.226498673 | 0.269300915 | 0.439894801 |
| 0.13738579  | 0.280673454 | 0.373068053 | 0.262113433 |
| 0.012278065 | 0.088418319 | 0.068811598 | 0.351893312 |
| 0.51061192  | 0.09065952  | 0.043348975 | 0.084782369 |
| 0.094853797 | 0.420394323 | 0.145183009 | 0.492165242 |
| 0.363203281 | 0.36152364  | 0.087429204 | 0.458626443 |
| 0.03886038  | 0.480605687 | 0.36405627  | 0.041192987 |
| 0.237718659 | 0.010666821 | 0.472924238 | 0.184559434 |
| 0.209627502 | 0.275443113 | 0.199074314 | 0.021260491 |
| 0.231021742 | 0.055913561 | 0.442501223 | 0.43499271  |
| 0.04032059  | 0.153012835 | 0.258374387 | 0.308264201 |
| 0.174220564 | 0.346831509 | 0.486103603 | 0.3264437   |
| 0.052003454 | 0.17691093  | 0.289828652 | 0.287615854 |
| 0.13998645  | 0.468467038 | 0.280345846 | 0.51722196  |
| 0.294706509 | 0.415397122 | 0.462988489 | 0.25768051  |
| 0.262978102 | 0.283253114 | 0.263446937 | 0.01451199  |
| 0.268509838 | 0.409901924 | 0.238561691 | 0.183236637 |
| 0.246745739 | 0.38167555  | 0.027147871 | 0.1237429   |
| 0.367815891 | 0.190639776 | 0.112842653 | 0.359842845 |
| 0.269575887 | 0.289757447 | 0.019106732 | 0.065551445 |
| 0.522588324 | 0.389806471 | 0.088022248 | 0.323580476 |
| 0.148006943 | 0.294704936 | 0.389513733 | 0.393284658 |
| 0.296019447 | 0.411204998 | 0.321252889 | 0.281537243 |
| 0.375332814 | 0.186654211 | 0.513924929 | 0.037772625 |
| 0.100280782 | 0.335160811 | 0.089723576 | 0.093236919 |
| 0.118523866 | 0.02948635  | 0.347211068 | 0.342225838 |
| 0.381095894 | 0.314365451 | 0.200788434 | 0.070283036 |
| 0.293725347 | 0.267588511 | 0.294411789 | 0.132397796 |
| 0.071404622 | 0.486972305 | 0.009365459 | 0.053543061 |
| 0.381844514 | 0.378067327 | 0.394364077 | 0.221331202 |
| 0.337770548 | 0.146526123 | 0.251310935 | 0.179738711 |
| 0.25711883  | 0.309587002 | 0.383644268 | 0.021026022 |
| 0.010710216 | 0.460578044 | 0.261902307 | 0.023540761 |
| 0.077569913 | 0.26679624  | 0.216685729 | 0.198353701 |
| 0.029121515 | 0.495736019 | 0.233084754 | 0.364958198 |
| 0.232031396 | 0.051731606 | 0.292858801 | 0.062776768 |
| 0.038961585 | 0.412484215 | 0.366672289 | 0.51945403  |
| 0.314082919 | 0.337030186 | 0.409195616 | 0.376993098 |
| 0.098932657 | 0.324698976 | 0.018096795 | 0.363130078 |
| 0.374671694 |             |             |             |
| PDK1        | 0.507925971 | 0.524711932 | 0.461650827 |
| 0.491897243 | 0.487609562 | 0.475204376 | 0.254507094 |
| 0.253151935 | 0.096240538 | 0.005761237 | 0.022945281 |
| 0.507396276 | 0.232844789 | 0.33618384  | 0.409723782 |
| 0.477571222 | 0.142689629 | 0.431715796 | 0.279521019 |
| 0.486088319 | 0.122273195 | 0.450997655 | 0.107378786 |
| 0.316667772 | 0.106919862 | 0.072979565 | 0.288990002 |
| 0.514469006 | 0.08497761  | 0.427375645 | 0.478837396 |
| 0.108639367 | 0.525076958 | 0.521909185 | 0.493043382 |
| 0.516198169 | 0.492210852 | 0.014878113 | 0.368147077 |
| 0.512376215 | 0.509958424 | 0.484870675 | 0.381810044 |
| 0.047854907 | 0.502532266 | 0.288920704 | 0.451340418 |
| 0.306227868 | 0.031172882 | 0.331733275 | 0.480704626 |

|             |             |             |             |
|-------------|-------------|-------------|-------------|
| 0.484584637 | 0.509399895 | 0.293937824 | 0.192276746 |
| 0.233294388 | 0.316128643 | 0.300159655 | 0.431661065 |
| 0.264825109 | 0.228181055 | 0.50008252  | 0.107086847 |
| 0.18320726  | 0.321199361 | 0.162714301 | 0.327146313 |
| 0.385039414 | 0.49077147  | 0.022238849 | 0.480787416 |
| 0.003900891 | 0.459759991 | 0.424709105 | 0.347706737 |
| 0.04338383  | 0.021812083 | 0.191602534 | 0.405415455 |
| 0.52616229  | 0.497470601 | 0.527380873 | 0.526579706 |
| 0.198325726 | 0.328930158 | 0.442404712 | 0.19323626  |
| 0.523289458 | 0.21340399  | 0.132072319 | 0.474386205 |
| 0.529335745 | 0.514535659 | 0.217433222 | 0.285050896 |
| 0.510173231 | 0.52112548  | 0.504636782 | 0.491392026 |
| 0.391836971 | 0.051976831 | 0.502654671 | 0.532914826 |
| 0.497895079 | 0.346916967 | 0.162774714 | 0.5042703   |
| 0.063671416 | 0.457632576 | 0.409196856 | 0.184406381 |
| 0.526981287 | 0.020810297 | 0.226070104 | 0.431690845 |
| 0.253579683 | 0.52888525  | 0.511049513 | 0.220669335 |
| 0.46593691  | 0.021391329 | 0.143208167 | 0.034954157 |
| 0.392605585 | 0.152844682 | 0.504283092 | 0.526881868 |
| 0.305502048 | 0.430597692 | 0.321968865 | 0.001390896 |
| 0.026477138 | 0.207833264 | 0.523075811 | 0.446433046 |
| 0.513423489 | 0.467042669 | 0.259607763 | 0.497466503 |
| 0.510515483 | 0.526277691 | 0.086125449 | 0.115625097 |
| 0.500638727 | 0.206608477 | 0.269629323 | 0.522684585 |
| 0.339648181 | 0.145072167 | 0.145746814 | 0.533534393 |
| 0.489502417 | 0.096010632 | 0.435646905 | 0.472898709 |
| 0.396283961 | 0.391305487 | 0.124032381 | 0.327368179 |
| 0.060197097 | 0.488311967 | 0.027179941 | 0.426102367 |
| 0.30961027  | 0.156510445 | 0.013649474 | 0.342087791 |
| 0.358605913 | 0.515202943 | 0.490335568 | 0.120803574 |
| 0.376927972 | 0.459864409 | 0.425530111 | 0.510466818 |
| 0.01075535  | 0.053007399 | 0.386573743 | 0.533648859 |
| 0.394655348 | 0.528578775 | 0.352716569 | 0.339973497 |
| 0.312095048 | 0.517437008 | 0.003943684 | 0.506414663 |
| 0.512078732 | 0.409955431 | 0.459902279 | 0.48194331  |
| 0.427728638 | 0.521859575 | 0.058793617 | 0.479462741 |
| 0.469290678 | 0.089414567 | 0.531184511 | 0.172662434 |
| 0.506689754 | 0.042767352 | 0.405300454 | 0.503145117 |
| 0.508713075 | 0.009839141 | 0.306616156 | 0.469137964 |
| 0.025888654 | 0.13162879  | 0.514073533 | 0.48118327  |
| 0.44547161  | 0.514071685 | 0.524242458 | 0.405991754 |
| 0.490320459 | 0.289258321 | 0.012780179 | 0.351424781 |
| 0.517541036 | 0.448161575 | 0.497930826 | 0.293147495 |
| 0.451365815 | 0.52128662  | 0.509432411 | 0.257312272 |
| 0.04862648  | 0.392953598 | 0.02645856  | 0.376412355 |
| 0.486801994 | 0.140696249 | 0.461132211 | 0.167338248 |
| 0.072432779 | 0.531391451 | 0.184675061 | 0.285036208 |
| 0.131426569 | 0.483590687 | 0.302797727 | 0.287734407 |
| 0.241272689 | 0.180492683 | 0.396321611 | 0.437498418 |
| 0.048091995 | 0.102090699 | 0.01410999  | 0.445325194 |
| 0.161071528 | 0.407535252 | 0.4152563   | 0.511172398 |
| 0.399995088 | 0.126423785 | 0.437695015 | 0.318418643 |
| 0.119259975 | 0.014613001 | 0.527098474 | 0.471240563 |
| 0.448881389 | 0.180949228 | 0.042738759 | 0.416353458 |



|             |             |             |             |
|-------------|-------------|-------------|-------------|
| 0.529756519 | 0.423392224 | 0.375248137 | 0.521526691 |
| 0.032084532 | 0.52940455  | 0.287326779 | 0.130227163 |
| 0.426419593 | 0.301118163 | 0.51953123  | 0.075233182 |
| 0.489999628 | 0.512694158 | 0.356426436 | 0.201159559 |
| 0.485633935 | 0.495543496 | 0.035249764 | 0.507670877 |
| 0.506688505 | 0.032671125 | 0.525802261 | 0.132280951 |
| 0.020517151 | 0.501483894 | 0.512954894 | 0.079069435 |
| 0.081174617 | 0.395322554 | 0.063528491 | 0.321120083 |
| 0.531056735 | 0.465084904 | 0.517055296 | 0.233581203 |
| 0.0445263   | 0.010620057 | 0.222421551 | 0.465126961 |
| 0.520487278 | 0.521975613 | 0.296738061 | 0.410754294 |
| 0.278364616 | 0.373923401 | 0.20827734  | 0.531572589 |
| 0.225778336 | 0.512288029 | 0.006510377 | 0.506703132 |
| 0.515399626 | 0.392322628 | 0.082310965 | 0.386086264 |
| 0.497365071 | 0.052012864 | 0.250620789 | 0.509671456 |
| 0.51988437  | 0.378112258 | 0.406406923 | 0.503390245 |
| 0.020314618 | 0.052567495 | 0.445210208 | 0.194055423 |
| 0.454219821 | 0.242050861 | 0.052015836 | 0.417484344 |
| 0.047222202 | 0.509818985 | 0.522246673 | 0.062757091 |
| 0.432837759 | 0.404179584 | 0.425439278 | 0.040210508 |
| 0.507902954 | 0.506317209 | 0.522970342 | 0.204660441 |
| 0.525026204 | 0.519052684 | 0.464325424 | 0.083667595 |
| 0.016190593 | 0.510969232 | 0.501291215 | 0.025667314 |
| 0.529126609 | 0.336430118 | 0.013495737 | 0.523627222 |
| 0.218999141 | 0.470737267 | 0.005467623 | 0.097456249 |
| 0.040169545 | 0.51546957  | 0.491155549 | 0.475761384 |
| 0.340142501 | 0.43927886  | 0.005839756 | 0.525243218 |
| 0.515000317 | 0.012947095 | 0.14676625  | 0.523218356 |
| 0.49792167  | 1           | 0.353005803 | 0.51668376  |
| 0.493801125 | 0.499462339 | 0.288634456 | 0.298681369 |
| 0.526172972 | 0.497517325 | 0.516285803 | 0.511036496 |
| 0.530287345 | 0.482848794 | 0.326161876 | 0.017294411 |
| 0.144288604 | 0.290285639 | 0.382965249 | 0.090606615 |
| 0.435467814 | 0.150648847 | 0.524605937 | 0.527102514 |
| 0.527720846 | 0.004382437 | 0.198582237 | 0.526904858 |
| 0.520489634 | 0.528677426 | 0.02285743  | 0.006932242 |
| 0.009191532 | 0.017588763 | 0.446732648 | 0.267660651 |
| 0.528110927 | 0.324588074 | 0.004384808 | 0.060221819 |
| 0.339136309 | 0.445762357 | 0.517193567 | 0.441940753 |
| 0.515160752 | 0.088288046 | 0.349265175 | 0.469263313 |
| 0.068265444 | 0.441945046 | 0.530852072 | 0.506229815 |
| 0.042980413 | 0.274346946 | 0.466600062 | 0.531448797 |
| 0.0729376   | 0.35578628  | 0.514330621 | 0.37345882  |
| 0.014744736 | 0.083762214 | 0.067101662 | 0.504419109 |
| 0.504517678 | 0.083781943 | 0.033776194 | 0.205098597 |
| 0.140123672 | 0.530632089 | 0.188856991 | 0.53502699  |
| 0.525831744 | 0.503121778 | 0.075393363 | 0.504951985 |
| 0.04038382  | 0.498623421 | 0.373421445 | 0.08042311  |
| 0.334726243 | 0.012850076 | 0.504125251 | 0.171755659 |
| 0.422091559 | 0.497716223 | 0.217820129 | 0.015399508 |
| 0.197063562 | 0.054429218 | 0.526961987 | 0.517889588 |
| 0.032799012 | 0.290287858 | 0.338826445 | 0.480820418 |
| 0.377374864 | 0.505766109 | 0.511675358 | 0.498682724 |
| 0.102770277 | 0.154197213 | 0.49544891  | 0.50352813  |

|             |             |             |             |
|-------------|-------------|-------------|-------------|
| 0.314676097 | 0.528428575 | 0.339079963 | 0.527803062 |
| 0.510261657 | 0.521136958 | 0.52431565  | 0.418627625 |
| 0.252056582 | 0.50122158  | 0.465630225 | 0.024629253 |
| 0.419004509 | 0.525242034 | 0.448817721 | 0.16579782  |
| 0.28565991  | 0.442961753 | 0.057499317 | 0.248902228 |
| 0.373147277 | 0.409526992 | 0.166439338 | 0.502900536 |
| 0.490262148 | 0.50662835  | 0.052668313 | 0.063243141 |
| 0.523985643 | 0.504926234 | 0.18703292  | 0.51352768  |
| 0.190355253 | 0.391762471 | 0.522846813 | 0.511960747 |
| 0.43885485  | 0.528506745 | 0.520833335 | 0.485758903 |
| 0.495706199 | 0.308466503 | 0.523029386 | 0.13360697  |
| 0.08838749  | 0.505241714 | 0.108493083 | 0.09634292  |
| 0.161865469 | 0.026779052 | 0.335600649 | 0.489337342 |
| 0.431865036 | 0.441386711 | 0.418023739 | 0.091549372 |
| 0.362099526 | 0.459212874 | 0.407873115 | 0.252495446 |
| 0.088102412 | 0.502445602 | 0.009295382 | 0.058833288 |
| 0.442508839 | 0.522326011 | 0.43154586  | 0.269134262 |
| 0.32587165  | 0.148291558 | 0.341318568 | 0.398582547 |
| 0.405049187 | 0.43338883  | 0.522810282 | 0.042811969 |
| 0.023455617 | 0.53181223  | 0.477899556 | 0.020606966 |
| 0.093412361 | 0.484244947 | 0.357326258 | 0.27308832  |
| 0.020287834 | 0.511800178 | 0.426861437 | 0.488969157 |
| 0.428273153 | 0.073166507 | 0.454562869 | 0.10923636  |
| 0.071047255 | 0.498199927 | 0.454102793 | 0.506622048 |
| 0.399540956 | 0.482291326 | 0.469794995 | 0.527339796 |
| 0.146712006 | 0.458112666 | 0.031987322 | 0.525482162 |
| 0.476505386 |             |             |             |
| PDLIM1      | 0.256985723 | 0.37061899  | 0.203363765 |
| 0.271779915 | 0.204380704 | 0.132954197 | 0.06400214  |
| 0.030747745 | 0.08541463  | 0.002948399 | 0.047592684 |
| 0.254398427 | 0.100506108 | 0.057474619 | 0.103802754 |
| 0.322330835 | 0.101779224 | 0.089203992 | 0.102931595 |
| 0.2198813   | 0.01891544  | 0.296128264 | 0.043795561 |
| 0.193629859 | 0.133014723 | 0.066337004 | 0.21327695  |
| 0.298977168 | 0.072343229 | 0.074868524 | 0.170699671 |
| 0.078596625 | 0.261880872 | 0.356199522 | 0.310520373 |
| 0.355735939 | 0.231126472 | 0.004037239 | 0.073600734 |
| 0.252245973 | 0.351751998 | 0.222435248 | 0.1664295   |
| 0.026933234 | 0.287079799 | 0.105382042 | 0.273266806 |
| 0.046334113 | 0.046907866 | 0.034468632 | 0.254106652 |
| 0.312777998 | 0.223048401 | 0.046142385 | 0.054367501 |
| 0.096075876 | 0.030056417 | 0.182670104 | 0.102955795 |
| 0.082887753 | 0.018482904 | 0.334834581 | 0.046293075 |
| 0.044422993 | 0.050449321 | 0.109934868 | 0.055545523 |
| 0.194477668 | 0.181152004 | 0.007657991 | 0.232047882 |
| 0.000434058 | 0.209414725 | 0.241577351 | 0.212897001 |
| 0.04546542  | 0.017840106 | 0.117498265 | 0.146487898 |
| 0.320683801 | 0.31114001  | 0.415777566 | 0.425167348 |
| 0.100707252 | 0.143606389 | 0.241295235 | 0.080780198 |
| 0.292733384 | 0.05830139  | 0.048337277 | 0.347809202 |
| 0.421370835 | 0.377263245 | 0.151803276 | 0.199423046 |
| 0.279178326 | 0.306956872 | 0.155057004 | 0.170487162 |
| 0.181586968 | 0.08545466  | 0.286059571 | 0.402625923 |
| 0.212072762 | 0.222617243 | 0.11922868  | 0.212295455 |

|             |             |             |             |
|-------------|-------------|-------------|-------------|
| 0.046439173 | 0.078077147 | 0.204477337 | 0.058131056 |
| 0.337069205 | 0.017714142 | 0.159890293 | 0.127814423 |
| 0.087388843 | 0.274767843 | 0.397450827 | 0.073582084 |
| 0.188962255 | 0.017832629 | 0.195431047 | 0.035870699 |
| 0.090655991 | 0.190494    | 0.298032692 | 0.32263906  |
| 0.041248226 | 0.146536604 | 0.075294028 | 0.007107949 |
| 0.041224769 | 0.107875394 | 0.279036479 | 0.105521325 |
| 0.262525673 | 0.277200857 | 0.135928395 | 0.18612884  |
| 0.295116104 | 0.411463848 | 0.00967343  | 0.038564584 |
| 0.180779563 | 0.108175464 | 0.141992558 | 0.208354147 |
| 0.196993375 | 0.032517035 | 0.056063521 | 0.409917866 |
| 0.235850087 | 0.04412629  | 0.060346031 | 0.308168652 |
| 0.098092945 | 0.262124738 | 0.047350121 | 0.079536729 |
| 0.018652466 | 0.35761226  | 0.052117884 | 0.073320242 |
| 0.18982185  | 0.111433614 | 0.006535384 | 0.048238182 |
| 0.073030919 | 0.306813031 | 0.295365245 | 0.056044703 |
| 0.089256243 | 0.287845091 | 0.065665185 | 0.250930691 |
| 0.01791341  | 0.031804968 | 0.042367186 | 0.376607154 |
| 0.076986792 | 0.404146176 | 0.10034469  | 0.160226646 |
| 0.19210443  | 0.339387776 | 0.005374312 | 0.319773664 |
| 0.394287951 | 0.046893069 | 0.205719626 | 0.246823392 |
| 0.207943138 | 0.324805942 | 0.010717937 | 0.273549525 |
| 0.140484442 | 0.045886553 | 0.414529386 | 0.110176256 |
| 0.303283862 | 0.046860863 | 0.060256559 | 0.398600926 |
| 0.295435136 | 0.008733543 | 0.037533391 | 0.194908153 |
| 0.052615244 | 0.018065237 | 0.24698537  | 0.234049286 |
| 0.216778593 | 0.344639377 | 0.388616235 | 0.199156472 |
| 0.204789474 | 0.060504844 | 0.017008128 | 0.22189478  |
| 0.315384672 | 0.123586933 | 0.264752319 | 0.070917143 |
| 0.094387045 | 0.320933352 | 0.290488254 | 0.066739521 |
| 0.030009335 | 0.075752922 | 0.008661139 | 0.196888939 |
| 0.27992979  | 0.040026006 | 0.198050117 | 0.074419408 |
| 0.078193941 | 0.403684155 | 0.202394546 | 0.212605052 |
| 0.194359708 | 0.154986451 | 0.082463849 | 0.06382999  |
| 0.103169013 | 0.112324938 | 0.197745729 | 0.149499278 |
| 0.010565881 | 0.060772838 | 0.031106958 | 0.106612035 |
| 0.057907515 | 0.094525443 | 0.078831676 | 0.188745609 |
| 0.072559834 | 0.046212452 | 0.179044489 | 0.195149361 |
| 0.122109847 | 0.02300265  | 0.361981571 | 0.258273181 |
| 0.129516275 | 0.069953052 | 0.040226656 | 0.082957743 |
| 0.333526511 | 0.085941872 | 0.037767624 | 0.296523855 |
| 0.019728447 | 0.395592598 | 0.092341693 | 0.100709239 |
| 0.153662903 | 0.114430787 | 0.346031074 | 0.030700165 |
| 0.132301881 | 0.290183754 | 0.168562263 | 0.136519838 |
| 0.21417762  | 0.215452455 | 0.017256321 | 0.217285459 |
| 0.1979752   | 0.031705416 | 0.396825583 | 0.10656746  |
| 0.030774944 | 0.33400686  | 0.327124484 | 0.072314841 |
| 0.084301166 | 0.119443617 | 0.009347884 | 0.227123664 |
| 0.388896557 | 0.32222443  | 0.275324864 | 0.189547901 |
| 0.028833534 | 0.009011361 | 0.159269226 | 0.213778093 |
| 0.323599618 | 0.408302166 | 0.132706377 | 0.196229336 |
| 0.123917048 | 0.195792644 | 0.017266127 | 0.399533021 |
| 0.104328606 | 0.357314921 | 0.010676125 | 0.379145167 |
| 0.351320769 | 0.051193182 | 0.099809309 | 0.092576732 |

|             |             |             |             |
|-------------|-------------|-------------|-------------|
| 0.202037099 | 0.03428642  | 0.061140882 | 0.335392212 |
| 0.30561322  | 0.165341065 | 0.167314142 | 0.243267005 |
| 0.006574465 | 0.013968404 | 0.265137759 | 0.215115997 |
| 0.123270755 | 0.123476068 | 0.137422959 | 0.068216909 |
| 0.031217584 | 0.286456869 | 0.339484613 | 0.081707273 |
| 0.11154754  | 0.061863239 | 0.277324329 | 0.030688667 |
| 0.415553851 | 0.380719627 | 0.35073116  | 0.046360256 |
| 0.287335441 | 0.390784581 | 0.278453798 | 0.073914485 |
| 0.036137269 | 0.377359162 | 0.185310979 | 0.014403609 |
| 0.356811869 | 0.036101289 | 0.010815111 | 0.329880537 |
| 0.070555653 | 0.253050006 | 0.002841634 | 0.066230242 |
| 0.0687777   | 0.394697292 | 0.322037315 | 0.168351    |
| 0.037536648 | 0.173174159 | 0.009778434 | 0.411788979 |
| 0.329652539 | 0.040363585 | 0.155155768 | 0.303028384 |
| 0.351906084 | 0.353005803 | 1           | 0.397245003 |
| 0.27245446  | 0.353291527 | 0.067843819 | 0.19158502  |
| 0.296824865 | 0.394376723 | 0.235174588 | 0.292732328 |
| 0.323516123 | 0.316262011 | 0.151143771 | 0.013948329 |
| 0.184459918 | 0.033179266 | 0.099442816 | 0.078226697 |
| 0.096417261 | 0.128786697 | 0.339875353 | 0.370799714 |
| 0.39740328  | 0.011583162 | 0.030769396 | 0.278315119 |
| 0.269551033 | 0.335224876 | 0.023616297 | 0.011702077 |
| 0.008603871 | 0.06736355  | 0.127505089 | 0.154238786 |
| 0.37975375  | 0.038670743 | 0.007056844 | 0.00945149  |
| 0.090365794 | 0.337393287 | 0.350919629 | 0.249571074 |
| 0.341653378 | 0.055986931 | 0.076006836 | 0.24886979  |
| 0.113556229 | 0.124306656 | 0.39772602  | 0.297364674 |
| 0.043976374 | 0.156606421 | 0.097061993 | 0.360187118 |
| 0.164618568 | 0.204092268 | 0.252321675 | 0.110781178 |
| 0.014743997 | 0.095993106 | 0.093349606 | 0.338227732 |
| 0.348629054 | 0.057733814 | 0.040359833 | 0.020239963 |
| 0.049091362 | 0.353616119 | 0.075573278 | 0.410463292 |
| 0.282508229 | 0.32873096  | 0.091603396 | 0.327846343 |
| 0.05439635  | 0.321518867 | 0.240252143 | 0.015832114 |
| 0.114221513 | 0.015113532 | 0.339760108 | 0.154535369 |
| 0.056741808 | 0.179508244 | 0.205922933 | 0.037027664 |
| 0.212571603 | 0.056787614 | 0.388570323 | 0.410071651 |
| 0.055979089 | 0.07374855  | 0.165947031 | 0.222396584 |
| 0.06716879  | 0.298776133 | 0.326341401 | 0.137711829 |
| 0.03116146  | 0.123409183 | 0.214473166 | 0.17111621  |
| 0.041571537 | 0.415523353 | 0.160545553 | 0.407792124 |
| 0.217251598 | 0.320873432 | 0.355712996 | 0.163052778 |
| 0.165470342 | 0.146867176 | 0.16641762  | 0.008438363 |
| 0.16003389  | 0.34824156  | 0.101951213 | 0.156649205 |
| 0.14526061  | 0.259497456 | 0.022345689 | 0.033437407 |
| 0.231256511 | 0.086112407 | 0.056610105 | 0.338194855 |
| 0.1544617   | 0.185547228 | 0.010198563 | 0.090476412 |
| 0.384971605 | 0.282151977 | 0.041273227 | 0.232078885 |
| 0.098825432 | 0.216193893 | 0.343679947 | 0.368551538 |
| 0.135359103 | 0.307952495 | 0.242021357 | 0.171314853 |
| 0.241881057 | 0.108462318 | 0.36273811  | 0.010133036 |
| 0.135426971 | 0.200126854 | 0.056065997 | 0.088201881 |
| 0.070858725 | 0.046133904 | 0.205661375 | 0.298754163 |
| 0.161398041 | 0.224474427 | 0.054361431 | 0.059637049 |

|             |             |             |             |
|-------------|-------------|-------------|-------------|
| 0.20049966  | 0.101362357 | 0.203951877 | 0.048069911 |
| 0.049813751 | 0.336577263 | 0.014551592 | 0.050213505 |
| 0.147199636 | 0.334860533 | 0.250475073 | 0.136102258 |
| 0.222411806 | 0.122009949 | 0.151621094 | 0.056690499 |
| 0.06630361  | 0.117416905 | 0.323785635 | 0.015745752 |
| 0.007644767 | 0.395079772 | 0.095543064 | 0.035559113 |
| 0.0721812   | 0.157413366 | 0.084626606 | 0.12447688  |
| 0.049526396 | 0.384260695 | 0.072846206 | 0.232087182 |
| 0.118021017 | 0.041444954 | 0.173549081 | 0.037524466 |
| 0.033242045 | 0.266369714 | 0.261389967 | 0.375689451 |
| 0.166859913 | 0.313068649 | 0.254882804 | 0.27387761  |
| 0.057851667 | 0.17549861  | 0.017947076 | 0.293901    |
| 0.141071091 |             |             |             |

PECAM1 0.384000203

0.520118314

0.401773424

|             |             |             |             |
|-------------|-------------|-------------|-------------|
| 0.396996714 | 0.427404591 | 0.330220453 | 0.196335333 |
| 0.139499225 | 0.105034599 | 0.006637938 | 0.042999886 |
| 0.438467423 | 0.250405516 | 0.251129141 | 0.314788002 |
| 0.406458988 | 0.175895565 | 0.298187195 | 0.236710349 |
| 0.372804748 | 0.077507747 | 0.409375197 | 0.09343381  |
| 0.332553792 | 0.154350724 | 0.089364042 | 0.336754713 |
| 0.400359005 | 0.100265489 | 0.284966819 | 0.33071524  |
| 0.115752273 | 0.392170296 | 0.521185936 | 0.458931216 |
| 0.523296473 | 0.362283076 | 0.009561576 | 0.27668248  |
| 0.363663627 | 0.44255833  | 0.369412708 | 0.328680345 |
| 0.047239667 | 0.470804674 | 0.244159016 | 0.41560177  |
| 0.188231725 | 0.048494452 | 0.184526011 | 0.416438144 |
| 0.485696062 | 0.432942923 | 0.182014363 | 0.155867525 |
| 0.259800538 | 0.17557563  | 0.365341002 | 0.260786846 |
| 0.224187355 | 0.114846306 | 0.493774834 | 0.09330261  |
| 0.137116663 | 0.199793111 | 0.181017614 | 0.221434443 |
| 0.392893921 | 0.327318468 | 0.014719791 | 0.400385015 |
| 0.002692289 | 0.351798039 | 0.386745212 | 0.379204432 |
| 0.054196514 | 0.031064691 | 0.206672405 | 0.319362473 |
| 0.411693687 | 0.441853429 | 0.478259253 | 0.493579412 |
| 0.222878928 | 0.300371357 | 0.425189649 | 0.190496929 |
| 0.392125026 | 0.180125127 | 0.111476377 | 0.423755818 |
| 0.490783538 | 0.531090488 | 0.244714252 | 0.296263668 |
| 0.402998333 | 0.454589312 | 0.413326238 | 0.437063867 |
| 0.397807709 | 0.071062927 | 0.432410679 | 0.513286098 |
| 0.340172382 | 0.384868033 | 0.189873157 | 0.357773138 |
| 0.067265594 | 0.319531718 | 0.349140271 | 0.164763249 |
| 0.427800846 | 0.020617499 | 0.25796781  | 0.334395249 |
| 0.200311985 | 0.404569671 | 0.533233201 | 0.186616255 |
| 0.411634133 | 0.026378421 | 0.212194601 | 0.039216269 |
| 0.320573115 | 0.212900245 | 0.481078364 | 0.429021345 |
| 0.190663487 | 0.402411944 | 0.240014185 | 0.003446624 |
| 0.03909376  | 0.191130091 | 0.410101261 | 0.321656395 |
| 0.39420519  | 0.36854849  | 0.27734053  | 0.338927832 |
| 0.451988747 | 0.470023516 | 0.051863999 | 0.089446882 |
| 0.407995809 | 0.191359044 | 0.249604471 | 0.433787367 |
| 0.361738888 | 0.097793248 | 0.132852527 | 0.513217508 |
| 0.388757804 | 0.091104223 | 0.268538496 | 0.411808226 |
| 0.335896234 | 0.40803437  | 0.106860104 | 0.280239348 |
| 0.048642291 | 0.49769703  | 0.042638862 | 0.270589107 |

|             |             |             |             |
|-------------|-------------|-------------|-------------|
| 0.332440204 | 0.198428824 | 0.008691624 | 0.207932919 |
| 0.279406843 | 0.42416152  | 0.468005593 | 0.109296183 |
| 0.316450354 | 0.424769521 | 0.255885721 | 0.421635592 |
| 0.018027496 | 0.048651643 | 0.211523745 | 0.505835856 |
| 0.229274726 | 0.494130438 | 0.290094405 | 0.322294692 |
| 0.313331631 | 0.423301651 | 0.00383112  | 0.492925079 |
| 0.53793214  | 0.236506037 | 0.419277523 | 0.413365587 |
| 0.417084136 | 0.423136003 | 0.037653718 | 0.407441841 |
| 0.30214792  | 0.080359587 | 0.491262786 | 0.196671332 |
| 0.449932037 | 0.055662356 | 0.271453428 | 0.443466059 |
| 0.434858291 | 0.010166287 | 0.18032347  | 0.349899438 |
| 0.039079658 | 0.076130955 | 0.385155084 | 0.389237992 |
| 0.388537157 | 0.428789578 | 0.454113888 | 0.411854759 |
| 0.43918491  | 0.204272586 | 0.014722658 | 0.356795922 |
| 0.414929607 | 0.382419977 | 0.420336269 | 0.221871974 |
| 0.27966483  | 0.462393659 | 0.401456525 | 0.204141974 |
| 0.048712117 | 0.266366248 | 0.022081032 | 0.366085307 |
| 0.367359506 | 0.128024875 | 0.404433964 | 0.146411539 |
| 0.095689816 | 0.528673654 | 0.242372834 | 0.330607282 |
| 0.190735845 | 0.394108255 | 0.230245855 | 0.257779431 |
| 0.281886554 | 0.187333331 | 0.399967375 | 0.391215512 |
| 0.033046943 | 0.114698393 | 0.018222058 | 0.404183829 |
| 0.186886819 | 0.373341862 | 0.353651789 | 0.364280989 |
| 0.30347826  | 0.134111995 | 0.41984145  | 0.324942282 |
| 0.148801062 | 0.020545129 | 0.502385139 | 0.389425801 |
| 0.277270827 | 0.154554935 | 0.049321109 | 0.355145439 |
| 0.445561546 | 0.283098003 | 0.202870992 | 0.43537075  |
| 0.027722069 | 0.466329516 | 0.281961543 | 0.156868282 |
| 0.434586953 | 0.276601272 | 0.41847614  | 0.063042505 |
| 0.335522989 | 0.452519925 | 0.312472888 | 0.228492037 |
| 0.371787394 | 0.38762776  | 0.032632766 | 0.362048818 |
| 0.359732648 | 0.04105478  | 0.532686942 | 0.163349915 |
| 0.027908112 | 0.446508439 | 0.448605222 | 0.093264834 |
| 0.099602047 | 0.348117538 | 0.035212844 | 0.323131255 |
| 0.519206145 | 0.419904929 | 0.414148411 | 0.262512537 |
| 0.049037061 | 0.018285182 | 0.248760061 | 0.400284554 |
| 0.506919508 | 0.523991645 | 0.266630497 | 0.429864714 |
| 0.241837625 | 0.387255133 | 0.097222212 | 0.515216565 |
| 0.186415008 | 0.513947249 | 0.00846946  | 0.449539497 |
| 0.520485165 | 0.230478898 | 0.116184159 | 0.275690434 |
| 0.345598028 | 0.050931994 | 0.176052505 | 0.49848995  |
| 0.405325545 | 0.356648133 | 0.385728151 | 0.405939043 |
| 0.015250571 | 0.037119155 | 0.409498643 | 0.248927984 |
| 0.386751993 | 0.232864243 | 0.092402113 | 0.27146131  |
| 0.054713686 | 0.441958414 | 0.430648984 | 0.082667638 |
| 0.314969917 | 0.248825772 | 0.398180162 | 0.042470574 |
| 0.463232041 | 0.506847481 | 0.523362639 | 0.139995903 |
| 0.421860037 | 0.504819222 | 0.449184205 | 0.094132606 |
| 0.025832101 | 0.52913882  | 0.346975544 | 0.027749142 |
| 0.43948524  | 0.179410394 | 0.020859607 | 0.482014926 |
| 0.178636057 | 0.430894119 | 0.00368683  | 0.086450124 |
| 0.054416375 | 0.445488071 | 0.481128893 | 0.329716142 |
| 0.213412243 | 0.334910136 | 0.006523941 | 0.526610431 |
| 0.491957455 | 0.024255815 | 0.187145202 | 0.432192236 |

|             |             |             |             |
|-------------|-------------|-------------|-------------|
| 0.450861859 | 0.51668376  | 0.397245003 | 1           |
| 0.459857867 | 0.51390434  | 0.23887816  | 0.299706711 |
| 0.414156022 | 0.513970049 | 0.379103495 | 0.436153664 |
| 0.428633106 | 0.431778465 | 0.283211108 | 0.018618851 |
| 0.180590924 | 0.164224017 | 0.330437011 | 0.1120664   |
| 0.26197523  | 0.183942584 | 0.468543411 | 0.438691218 |
| 0.489611338 | 0.007173462 | 0.12400981  | 0.411753287 |
| 0.394498216 | 0.436468367 | 0.020940931 | 0.007909938 |
| 0.008694417 | 0.040874192 | 0.31458141  | 0.272330073 |
| 0.487617249 | 0.222840998 | 0.006175664 | 0.033962705 |
| 0.271569764 | 0.446837686 | 0.508014129 | 0.368241145 |
| 0.42914459  | 0.090723755 | 0.300364189 | 0.373029697 |
| 0.104434566 | 0.272597574 | 0.492272408 | 0.461231502 |
| 0.047169791 | 0.275202265 | 0.325077057 | 0.464118314 |
| 0.12533439  | 0.34111275  | 0.433546505 | 0.34028278  |
| 0.013946855 | 0.108289128 | 0.090503293 | 0.422493127 |
| 0.514038889 | 0.112817302 | 0.05408796  | 0.11597212  |
| 0.133957942 | 0.434720741 | 0.188405319 | 0.508262327 |
| 0.402801061 | 0.418988043 | 0.100399092 | 0.478194613 |
| 0.056254158 | 0.491861576 | 0.409526578 | 0.055145454 |
| 0.280963791 | 0.014162598 | 0.472667079 | 0.226681508 |
| 0.275103155 | 0.345244062 | 0.24873672  | 0.02470783  |
| 0.241395792 | 0.070133235 | 0.461879773 | 0.453878069 |
| 0.04430445  | 0.211493862 | 0.312581745 | 0.376971387 |
| 0.237587746 | 0.429431256 | 0.501958928 | 0.390502125 |
| 0.082258278 | 0.171484318 | 0.366491211 | 0.350567184 |
| 0.19300419  | 0.48035206  | 0.354001901 | 0.52711512  |
| 0.363311032 | 0.432661916 | 0.471997914 | 0.338568902 |
| 0.296227539 | 0.353370449 | 0.343400097 | 0.022471512 |
| 0.339555704 | 0.443310918 | 0.304328156 | 0.219589935 |
| 0.306795855 | 0.426104448 | 0.039722995 | 0.142727614 |
| 0.393074213 | 0.256482051 | 0.154596322 | 0.414241017 |
| 0.335646311 | 0.354459276 | 0.029050262 | 0.087072318 |
| 0.538358863 | 0.410849649 | 0.126659668 | 0.404794831 |
| 0.18405386  | 0.372408348 | 0.43758088  | 0.448496907 |
| 0.359097247 | 0.427455933 | 0.385426036 | 0.358194397 |
| 0.401331077 | 0.252047816 | 0.528360002 | 0.057035244 |
| 0.125880784 | 0.391057186 | 0.122439771 | 0.113905833 |
| 0.158291156 | 0.037015506 | 0.373451344 | 0.415448188 |
| 0.419534631 | 0.392328468 | 0.258055298 | 0.090762869 |
| 0.349468458 | 0.318403542 | 0.364412472 | 0.186495958 |
| 0.09770426  | 0.503792754 | 0.012600577 | 0.067861547 |
| 0.422614698 | 0.431144099 | 0.451730482 | 0.268669732 |
| 0.376157767 | 0.16535042  | 0.318310002 | 0.240734941 |
| 0.321749232 | 0.358789051 | 0.425430844 | 0.030775527 |
| 0.01795701  | 0.47566986  | 0.323301913 | 0.026031138 |
| 0.09606468  | 0.329155701 | 0.261389814 | 0.268935216 |
| 0.032633981 | 0.499081472 | 0.307411048 | 0.433042958 |
| 0.306319168 | 0.068938605 | 0.310335352 | 0.082679101 |
| 0.053818037 | 0.428551222 | 0.420055353 | 0.525673882 |
| 0.358549244 | 0.418897827 | 0.425292139 | 0.410111835 |
| 0.114956723 | 0.369525531 | 0.028924027 | 0.401861003 |
| 0.434051972 |             |             |             |
| PELI1       | 0.320902604 | 0.499111812 | 0.258700257 |

|             |             |             |             |
|-------------|-------------|-------------|-------------|
| 0.321745638 | 0.279773345 | 0.187887482 | 0.115513775 |
| 0.07966777  | 0.058414167 | 0.005388914 | 0.031978107 |
| 0.299681202 | 0.185290936 | 0.162447346 | 0.171131608 |
| 0.331839261 | 0.146007506 | 0.185786274 | 0.153175888 |
| 0.265360513 | 0.043634353 | 0.308558487 | 0.058517085 |
| 0.232686692 | 0.120928854 | 0.061483554 | 0.22452498  |
| 0.374258427 | 0.069212636 | 0.160655346 | 0.239832338 |
| 0.095423439 | 0.353024078 | 0.494300449 | 0.35130128  |
| 0.505512807 | 0.292121525 | 0.010988236 | 0.152488402 |
| 0.345254191 | 0.361282563 | 0.268856344 | 0.211651841 |
| 0.030365915 | 0.44014167  | 0.149546995 | 0.282089061 |
| 0.104899807 | 0.039746884 | 0.098218189 | 0.381270631 |
| 0.461258859 | 0.265098552 | 0.100009682 | 0.090789459 |
| 0.186963828 | 0.100770654 | 0.276423789 | 0.170724718 |
| 0.140927902 | 0.06033175  | 0.470613055 | 0.048715687 |
| 0.076367091 | 0.11774399  | 0.150111238 | 0.133133305 |
| 0.265031997 | 0.259475993 | 0.009801766 | 0.272329284 |
| 0.002395725 | 0.239093901 | 0.269379126 | 0.237997747 |
| 0.04348777  | 0.029513766 | 0.165411011 | 0.193254222 |
| 0.404636983 | 0.425868084 | 0.486011637 | 0.495400034 |
| 0.183269785 | 0.209186352 | 0.292764003 | 0.132287514 |
| 0.373553249 | 0.110037225 | 0.077490616 | 0.358411307 |
| 0.495508884 | 0.514192732 | 0.175526017 | 0.20952965  |
| 0.357117341 | 0.430788969 | 0.253248815 | 0.279450642 |
| 0.240753935 | 0.060886956 | 0.40223972  | 0.512292035 |
| 0.318955072 | 0.284874492 | 0.142581783 | 0.30568155  |
| 0.050079511 | 0.199590288 | 0.222942023 | 0.14457649  |
| 0.420505737 | 0.011330667 | 0.194932435 | 0.203929243 |
| 0.135766043 | 0.35685358  | 0.521048623 | 0.116847089 |
| 0.28631915  | 0.025053522 | 0.15065261  | 0.032719968 |
| 0.218985813 | 0.188754538 | 0.447066023 | 0.422423506 |
| 0.117957491 | 0.266087256 | 0.1438439   | 0.003649514 |
| 0.035966697 | 0.141695254 | 0.394753238 | 0.21058819  |
| 0.314768153 | 0.355764278 | 0.176312252 | 0.276019316 |
| 0.330631969 | 0.477026044 | 0.027646719 | 0.053805212 |
| 0.256246496 | 0.142473748 | 0.167776761 | 0.282887323 |
| 0.251106216 | 0.058634864 | 0.092141417 | 0.50242882  |
| 0.355041225 | 0.062357512 | 0.16341009  | 0.326141298 |
| 0.200145967 | 0.295417929 | 0.073255149 | 0.19533679  |
| 0.030405711 | 0.478921669 | 0.040928974 | 0.162197583 |
| 0.190417645 | 0.178566115 | 0.00658716  | 0.119506539 |
| 0.173642131 | 0.409075047 | 0.43924843  | 0.076734963 |
| 0.213894441 | 0.283606968 | 0.149922316 | 0.333329253 |
| 0.011602225 | 0.037415258 | 0.120295389 | 0.502044191 |
| 0.137275789 | 0.496988428 | 0.191795475 | 0.214628924 |
| 0.219603908 | 0.383646482 | 0.003694427 | 0.463069985 |
| 0.520992849 | 0.137421498 | 0.28268894  | 0.279401026 |
| 0.254623366 | 0.400028725 | 0.028818631 | 0.318447427 |
| 0.22782888  | 0.05526475  | 0.49168377  | 0.144960352 |
| 0.432850553 | 0.041178762 | 0.16334256  | 0.42867167  |
| 0.388067243 | 0.008573533 | 0.095877675 | 0.238051901 |
| 0.035879779 | 0.037709894 | 0.301197766 | 0.264416749 |
| 0.232302525 | 0.377300422 | 0.456810547 | 0.254284473 |
| 0.289374807 | 0.129234385 | 0.012244657 | 0.257209622 |



|             |             |             |             |
|-------------|-------------|-------------|-------------|
| 0.371359537 | 0.233725877 | 0.385991826 | 0.133633565 |
| 0.166070341 | 0.436463013 | 0.37742255  | 0.104125132 |
| 0.031048195 | 0.154611742 | 0.016249347 | 0.230369833 |
| 0.342832863 | 0.084851585 | 0.23830127  | 0.117972096 |
| 0.080406841 | 0.516190108 | 0.196331582 | 0.249254263 |
| 0.16148783  | 0.254049667 | 0.144027204 | 0.175705954 |
| 0.221698714 | 0.123603599 | 0.252268252 | 0.232554633 |
| 0.018667786 | 0.088030289 | 0.01753502  | 0.289846691 |
| 0.158200579 | 0.266327348 | 0.244188439 | 0.280593912 |
| 0.204368025 | 0.113411545 | 0.287126317 | 0.214868221 |
| 0.111690049 | 0.01784671  | 0.481943521 | 0.277889602 |
| 0.217481745 | 0.09314586  | 0.040759523 | 0.250033446 |
| 0.436260745 | 0.157912774 | 0.109344954 | 0.41407491  |
| 0.020650876 | 0.464888288 | 0.195423741 | 0.117758781 |
| 0.319547322 | 0.187987642 | 0.406620549 | 0.033634503 |
| 0.203369429 | 0.42727914  | 0.210654236 | 0.152985309 |
| 0.351823911 | 0.252399191 | 0.021976621 | 0.311087763 |
| 0.309420979 | 0.033887673 | 0.525723437 | 0.13884608  |
| 0.024320608 | 0.361503139 | 0.374632219 | 0.06946198  |
| 0.075751306 | 0.215197903 | 0.017691113 | 0.223559613 |
| 0.503654342 | 0.339724308 | 0.355528861 | 0.197057943 |
| 0.034322132 | 0.021863386 | 0.194816287 | 0.269949388 |
| 0.48187838  | 0.52448084  | 0.186313531 | 0.305571625 |
| 0.15699215  | 0.236532934 | 0.051704928 | 0.510567537 |
| 0.137818811 | 0.495553392 | 0.007439691 | 0.403323515 |
| 0.497106424 | 0.1334731   | 0.089709935 | 0.156430034 |
| 0.319908737 | 0.031836107 | 0.114737917 | 0.47852726  |
| 0.376469335 | 0.21384644  | 0.228683937 | 0.296028943 |
| 0.008750271 | 0.020882926 | 0.259246762 | 0.194905977 |
| 0.230904818 | 0.145230783 | 0.094949477 | 0.157237587 |
| 0.040210889 | 0.416252265 | 0.414226068 | 0.050007653 |
| 0.178478967 | 0.138873835 | 0.275771376 | 0.029515485 |
| 0.46592473  | 0.498288477 | 0.500223298 | 0.0881018   |
| 0.381224084 | 0.494242371 | 0.301972465 | 0.073960892 |
| 0.02367932  | 0.513427632 | 0.245347975 | 0.020949689 |
| 0.440534583 | 0.096735283 | 0.020151831 | 0.456866091 |
| 0.112439855 | 0.402700483 | 0.002174516 | 0.066071279 |
| 0.048831427 | 0.439521708 | 0.447292496 | 0.223222681 |
| 0.11484797  | 0.212990723 | 0.006302237 | 0.52393151  |
| 0.473576814 | 0.023078286 | 0.149563685 | 0.40080046  |
| 0.402524887 | 0.493801125 | 0.27245446  | 0.459857867 |
| 1           | 0.493218961 | 0.153161813 | 0.20208753  |
| 0.391418583 | 0.506579498 | 0.306034789 | 0.407198035 |
| 0.423327491 | 0.331165247 | 0.178231998 | 0.011547219 |
| 0.099575621 | 0.088952426 | 0.188645574 | 0.063583055 |
| 0.149341151 | 0.128410499 | 0.459971489 | 0.438363541 |
| 0.496684785 | 0.006797458 | 0.070289694 | 0.376417559 |
| 0.375107658 | 0.422731127 | 0.016453741 | 0.006019028 |
| 0.007258565 | 0.036401876 | 0.186984031 | 0.194289952 |
| 0.472640706 | 0.130657837 | 0.005402281 | 0.019077419 |
| 0.172844082 | 0.307129373 | 0.488808316 | 0.268279794 |
| 0.38875717  | 0.067823251 | 0.185494375 | 0.281003685 |
| 0.07652815  | 0.197288495 | 0.492821442 | 0.428821426 |
| 0.039214063 | 0.186588595 | 0.212127551 | 0.45142003  |

|             |             |             |             |
|-------------|-------------|-------------|-------------|
| 0.113895596 | 0.240798964 | 0.318238892 | 0.218146599 |
| 0.012969088 | 0.083408038 | 0.061827373 | 0.372235897 |
| 0.495614885 | 0.096737984 | 0.050442779 | 0.072780345 |
| 0.088473486 | 0.432832738 | 0.134767902 | 0.504993122 |
| 0.372265223 | 0.387640587 | 0.085298619 | 0.444866782 |
| 0.037474016 | 0.473459694 | 0.298146797 | 0.030585612 |
| 0.200725578 | 0.012110379 | 0.472181678 | 0.134834742 |
| 0.166736961 | 0.245548005 | 0.137529863 | 0.023425292 |
| 0.173860443 | 0.058738479 | 0.45872397  | 0.452047519 |
| 0.040937407 | 0.122708982 | 0.215840903 | 0.252939522 |
| 0.135673853 | 0.358512407 | 0.47333938  | 0.238561321 |
| 0.046654246 | 0.15629814  | 0.279219454 | 0.257113033 |
| 0.116785572 | 0.48773777  | 0.219220276 | 0.517983018 |
| 0.282914247 | 0.410863393 | 0.466854344 | 0.198999665 |
| 0.233368312 | 0.213704397 | 0.233848549 | 0.016539001 |
| 0.217641049 | 0.432024862 | 0.185384024 | 0.15909165  |
| 0.213113674 | 0.290418608 | 0.024959805 | 0.096976569 |
| 0.282712614 | 0.142588198 | 0.105819672 | 0.381579186 |
| 0.216843177 | 0.272430282 | 0.019387799 | 0.058623131 |
| 0.520279094 | 0.378172489 | 0.069826071 | 0.28865575  |
| 0.133292305 | 0.233585511 | 0.40162007  | 0.412083719 |
| 0.215286293 | 0.423557157 | 0.335301788 | 0.262827969 |
| 0.371648616 | 0.152682377 | 0.502637615 | 0.031192653 |
| 0.090143075 | 0.2678998   | 0.0874978   | 0.089119014 |
| 0.110851247 | 0.029436883 | 0.267391672 | 0.332914353 |
| 0.298867509 | 0.261226457 | 0.155541478 | 0.063508183 |
| 0.246585426 | 0.199102905 | 0.243613877 | 0.111184548 |
| 0.071139763 | 0.476074124 | 0.009970837 | 0.055342048 |
| 0.31127533  | 0.379426191 | 0.31213868  | 0.190152423 |
| 0.264024655 | 0.132556675 | 0.215007165 | 0.139229907 |
| 0.204521339 | 0.24651685  | 0.383247389 | 0.018971707 |
| 0.012054188 | 0.480550483 | 0.198561386 | 0.024258601 |
| 0.066240468 | 0.206060974 | 0.18243312  | 0.158029319 |
| 0.030780962 | 0.494468188 | 0.171223577 | 0.281751633 |
| 0.180453972 | 0.051112198 | 0.283380383 | 0.05501835  |
| 0.034990439 | 0.406049497 | 0.281064298 | 0.51236797  |
| 0.250333686 | 0.350995035 | 0.390150794 | 0.387363311 |
| 0.084063611 | 0.239402276 | 0.017833037 | 0.37554401  |
| 0.279145263 |             |             |             |

|             |             |             |             |
|-------------|-------------|-------------|-------------|
| PHF11       | 0.46537115  | 0.507998209 | 0.425295457 |
| 0.437308284 | 0.442728219 | 0.427747015 | 0.194892993 |
| 0.172386119 | 0.074023545 | 0.003529818 | 0.021686807 |
| 0.474271949 | 0.215889687 | 0.278896093 | 0.369848353 |
| 0.417970718 | 0.121790495 | 0.342284842 | 0.214518991 |
| 0.413781026 | 0.082495333 | 0.401053078 | 0.072226168 |
| 0.287452934 | 0.0948249   | 0.056037258 | 0.274343653 |
| 0.453155777 | 0.06415136  | 0.38519049  | 0.405998042 |
| 0.078298146 | 0.475501829 | 0.513770083 | 0.471670562 |
| 0.517546674 | 0.459062053 | 0.007815707 | 0.326946437 |
| 0.461931838 | 0.481334881 | 0.415273056 | 0.31903945  |
| 0.031491943 | 0.489517104 | 0.232484745 | 0.406327029 |
| 0.238312097 | 0.023961689 | 0.262162698 | 0.460619555 |
| 0.492436529 | 0.498628479 | 0.213611397 | 0.145752425 |
| 0.244869288 | 0.251296289 | 0.330172122 | 0.367210204 |

|             |             |             |             |
|-------------|-------------|-------------|-------------|
| 0.208655885 | 0.170417985 | 0.503970042 | 0.07941828  |
| 0.150199419 | 0.229549919 | 0.130921871 | 0.246613034 |
| 0.376321002 | 0.435411839 | 0.010216267 | 0.467625753 |
| 0.002380505 | 0.380203718 | 0.368298256 | 0.364635603 |
| 0.029666006 | 0.016781954 | 0.153979666 | 0.343067671 |
| 0.471986962 | 0.477745771 | 0.500646924 | 0.510770761 |
| 0.171603069 | 0.265421305 | 0.42792505  | 0.154593866 |
| 0.48382522  | 0.16973269  | 0.092056435 | 0.423942452 |
| 0.505920892 | 0.51208315  | 0.181286562 | 0.23989412  |
| 0.49015383  | 0.492042157 | 0.469025343 | 0.458761668 |
| 0.396370031 | 0.038825479 | 0.494920542 | 0.516416969 |
| 0.456674272 | 0.344582917 | 0.132947276 | 0.441910973 |
| 0.042353253 | 0.391781292 | 0.346174727 | 0.148257043 |
| 0.47476234  | 0.012176328 | 0.19367692  | 0.372540108 |
| 0.180111498 | 0.485229285 | 0.512294047 | 0.165710566 |
| 0.414074619 | 0.013917139 | 0.148396526 | 0.021597583 |
| 0.334741702 | 0.153790962 | 0.508412002 | 0.490808813 |
| 0.227743248 | 0.401339909 | 0.244950479 | 0.000542584 |
| 0.018483723 | 0.157797612 | 0.503285119 | 0.359328575 |
| 0.454603436 | 0.460010098 | 0.235120593 | 0.457235824 |
| 0.50634706  | 0.500153402 | 0.075008568 | 0.074587644 |
| 0.445221078 | 0.156521133 | 0.212827097 | 0.493280627 |
| 0.306237903 | 0.091666832 | 0.105208234 | 0.508248221 |
| 0.455996013 | 0.066393071 | 0.35119418  | 0.413292989 |
| 0.373361518 | 0.361750173 | 0.083367083 | 0.274404838 |
| 0.03845501  | 0.495718208 | 0.019667195 | 0.330545331 |
| 0.317800075 | 0.143562553 | 0.005508817 | 0.258474373 |
| 0.307782783 | 0.511871922 | 0.495557144 | 0.081353729 |
| 0.319630433 | 0.41582262  | 0.346868227 | 0.49479704  |
| 0.009138776 | 0.031088321 | 0.313924458 | 0.515649864 |
| 0.343170498 | 0.504529677 | 0.277290344 | 0.285166013 |
| 0.263087353 | 0.467197367 | 0.002413064 | 0.497869112 |
| 0.509927789 | 0.345348512 | 0.427279874 | 0.427875462 |
| 0.43129965  | 0.481002991 | 0.044121232 | 0.419494569 |
| 0.420017344 | 0.057137226 | 0.498255457 | 0.142610749 |
| 0.493441812 | 0.030933701 | 0.333509257 | 0.50116405  |
| 0.515021902 | 0.006081776 | 0.243471391 | 0.39975626  |
| 0.018288021 | 0.089554956 | 0.454471631 | 0.420466098 |
| 0.404884395 | 0.469672824 | 0.480234787 | 0.416749237 |
| 0.446065991 | 0.207210183 | 0.0067711   | 0.30672366  |
| 0.480196644 | 0.445546473 | 0.474897701 | 0.221592841 |
| 0.397883251 | 0.500581122 | 0.500325197 | 0.255341092 |
| 0.031778761 | 0.313416602 | 0.016222389 | 0.335211334 |
| 0.471937002 | 0.114020697 | 0.449880418 | 0.119084404 |
| 0.055914648 | 0.515787114 | 0.173923238 | 0.287041377 |
| 0.131622947 | 0.45839051  | 0.222839522 | 0.271621064 |
| 0.247690332 | 0.140804862 | 0.376590902 | 0.406478299 |
| 0.028702324 | 0.078462936 | 0.008423044 | 0.464038534 |
| 0.1621682   | 0.408295663 | 0.416552264 | 0.475626403 |
| 0.342543756 | 0.105950746 | 0.401554383 | 0.289432669 |
| 0.095710031 | 0.00893619  | 0.508675237 | 0.401051853 |
| 0.403108473 | 0.130498205 | 0.027747035 | 0.428654806 |
| 0.500699398 | 0.395433571 | 0.3066624   | 0.496151696 |
| 0.017879883 | 0.497635315 | 0.263904537 | 0.105644    |

|             |             |             |             |
|-------------|-------------|-------------|-------------|
| 0.423131668 | 0.249392175 | 0.468627738 | 0.061327196 |
| 0.418951819 | 0.493610996 | 0.286311175 | 0.173345544 |
| 0.466310944 | 0.429356165 | 0.021411986 | 0.472341207 |
| 0.471979865 | 0.0219218   | 0.515766357 | 0.109821624 |
| 0.012961374 | 0.469937301 | 0.511444129 | 0.057397536 |
| 0.060300366 | 0.365972939 | 0.03684129  | 0.272825839 |
| 0.513940303 | 0.416527946 | 0.50538833  | 0.203761432 |
| 0.03083605  | 0.009559447 | 0.188034733 | 0.428756535 |
| 0.514609432 | 0.517178102 | 0.232320817 | 0.399640827 |
| 0.215106331 | 0.364280628 | 0.148967955 | 0.518263734 |
| 0.169550691 | 0.497451201 | 0.002963991 | 0.497251691 |
| 0.519733995 | 0.324147656 | 0.068808117 | 0.321729755 |
| 0.464778261 | 0.033048169 | 0.170642817 | 0.502337784 |
| 0.488309014 | 0.338180795 | 0.385034395 | 0.444587701 |
| 0.010892959 | 0.031368598 | 0.405361463 | 0.186031778 |
| 0.426233974 | 0.193380882 | 0.053447559 | 0.334749948 |
| 0.034578448 | 0.494265899 | 0.473740436 | 0.049587315 |
| 0.415293307 | 0.318691513 | 0.374327972 | 0.025258677 |
| 0.509300412 | 0.502124521 | 0.513783034 | 0.134620547 |
| 0.497747672 | 0.519022201 | 0.483458436 | 0.058820529 |
| 0.010749323 | 0.509164348 | 0.43781242  | 0.018663526 |
| 0.485933566 | 0.274525792 | 0.011134178 | 0.498233973 |
| 0.158221347 | 0.466299688 | 0.00280702  | 0.08117856  |
| 0.02789091  | 0.478781466 | 0.48878689  | 0.398626843 |
| 0.311584322 | 0.353851618 | 0.003544243 | 0.511930876 |
| 0.505327607 | 0.00900167  | 0.125250735 | 0.51670272  |
| 0.505836229 | 0.499462339 | 0.353291527 | 0.51390434  |
| 0.493218961 | 1           | 0.240759551 | 0.251681388 |
| 0.494574386 | 0.506968748 | 0.453797762 | 0.48116551  |
| 0.490785683 | 0.437909189 | 0.264650645 | 0.010381615 |
| 0.132700754 | 0.216022437 | 0.392244191 | 0.085498248 |
| 0.368622295 | 0.128541586 | 0.499256439 | 0.487908307 |
| 0.517501093 | 0.001848288 | 0.13767641  | 0.505732784 |
| 0.470454338 | 0.47952501  | 0.012257737 | 0.004362251 |
| 0.006255521 | 0.016674172 | 0.366469676 | 0.218131164 |
| 0.510635668 | 0.311968349 | 0.001620521 | 0.033273474 |
| 0.269039937 | 0.429842746 | 0.510896174 | 0.370931056 |
| 0.486115337 | 0.061212936 | 0.340576531 | 0.394397856 |
| 0.058207234 | 0.397306    | 0.516218441 | 0.48905751  |
| 0.027284336 | 0.225665398 | 0.38553273  | 0.493516544 |
| 0.082384193 | 0.300035833 | 0.4812495   | 0.337956355 |
| 0.007981509 | 0.06464504  | 0.052358668 | 0.450412801 |
| 0.512373469 | 0.075703302 | 0.028402621 | 0.16199965  |
| 0.112351303 | 0.493648522 | 0.15302213  | 0.50795717  |
| 0.4790418   | 0.447692695 | 0.060376866 | 0.492470901 |
| 0.032052225 | 0.497806028 | 0.359921232 | 0.06407119  |
| 0.26119872  | 0.006617552 | 0.500958788 | 0.19124258  |
| 0.349108882 | 0.423733227 | 0.204257174 | 0.01038495  |
| 0.192373333 | 0.039236599 | 0.495797678 | 0.492120489 |
| 0.022254235 | 0.213405986 | 0.275060651 | 0.405940867 |
| 0.300354891 | 0.464514252 | 0.502725471 | 0.490117561 |
| 0.071390952 | 0.139477147 | 0.420608445 | 0.449607983 |
| 0.234994547 | 0.498132036 | 0.329081044 | 0.511459447 |
| 0.455148341 | 0.485885237 | 0.513343751 | 0.35600568  |

|             |             |             |             |
|-------------|-------------|-------------|-------------|
| 0.24023804  | 0.43704644  | 0.423103057 | 0.015992236 |
| 0.341492787 | 0.49345652  | 0.357929356 | 0.153924613 |
| 0.255573855 | 0.441138006 | 0.032030071 | 0.18804211  |
| 0.385061933 | 0.350131868 | 0.130326532 | 0.443143237 |
| 0.414032703 | 0.455482977 | 0.027351934 | 0.049678383 |
| 0.508671217 | 0.474922667 | 0.131356449 | 0.468472581 |
| 0.141504526 | 0.349789131 | 0.490841247 | 0.486310059 |
| 0.402500113 | 0.514409957 | 0.463411587 | 0.449790026 |
| 0.471562492 | 0.239976688 | 0.514325394 | 0.078847229 |
| 0.073377789 | 0.474607157 | 0.091530833 | 0.071793556 |
| 0.122520758 | 0.017733391 | 0.352983738 | 0.43118335  |
| 0.443196239 | 0.390500467 | 0.349424959 | 0.064292951 |
| 0.310723874 | 0.394411709 | 0.344767466 | 0.197850951 |
| 0.068299658 | 0.501116466 | 0.005895623 | 0.040459439 |
| 0.442858644 | 0.499503302 | 0.434789378 | 0.217159858 |
| 0.328393252 | 0.118368506 | 0.287708948 | 0.326065745 |
| 0.402469423 | 0.390669338 | 0.502843778 | 0.023886468 |
| 0.012498882 | 0.495870046 | 0.403412786 | 0.012405017 |
| 0.073474108 | 0.433386471 | 0.271882161 | 0.24511485  |
| 0.014157871 | 0.517669266 | 0.400573828 | 0.452695    |
| 0.348022696 | 0.046801878 | 0.420818957 | 0.07217134  |
| 0.040456812 | 0.476372007 | 0.426873314 | 0.508585082 |
| 0.347558131 | 0.432441289 | 0.455089476 | 0.504799152 |
| 0.099592637 | 0.43255247  | 0.01841927  | 0.471643597 |
| 0.48716637  |             |             |             |

| PHF21A      | 0.173144653 | 0.299878728 | 0.090199765 |
|-------------|-------------|-------------|-------------|
| 0.329065556 | 0.162001387 | 0.176321428 | 0.208689814 |
| 0.067129242 | 0.021853662 | 0.015461905 | 0.016432594 |
| 0.154364228 | 0.033719198 | 0.124355065 | 0.046710109 |
| 0.285292383 | 0.073624573 | 0.06786439  | 0.227202423 |
| 0.263840185 | 0.101710347 | 0.286842745 | 0.087954799 |
| 0.036292965 | 0.058413624 | 0.092419331 | 0.067677217 |
| 0.330616387 | 0.09792484  | 0.155119437 | 0.275598873 |
| 0.03357581  | 0.238752297 | 0.253945498 | 0.233427319 |
| 0.236475376 | 0.14563072  | 0.004628386 | 0.096846659 |
| 0.224971981 | 0.227105852 | 0.286661913 | 0.271551379 |
| 0.061374606 | 0.244162173 | 0.251596369 | 0.148844114 |
| 0.017064879 | 0.046124482 | 0.088186448 | 0.23284811  |
| 0.240247151 | 0.175643075 | 0.116568029 | 0.155298796 |
| 0.035475127 | 0.084340301 | 0.027108578 | 0.196605111 |
| 0.230648394 | 0.095803556 | 0.24114759  | 0.030577139 |
| 0.023434624 | 0.114839196 | 0.043168772 | 0.164604638 |
| 0.045649396 | 0.213252959 | 0.015742277 | 0.103547044 |
| 0.006382185 | 0.269462742 | 0.150468483 | 0.040368497 |
| 0.076035818 | 0.032333142 | 0.065893374 | 0.28485391  |
| 0.311265505 | 0.20823073  | 0.301067155 | 0.273328797 |
| 0.049483175 | 0.114080925 | 0.095717911 | 0.130588486 |
| 0.239797353 | 0.194700055 | 0.020673172 | 0.286931507 |
| 0.297353785 | 0.269374654 | 0.056035492 | 0.123052743 |
| 0.280629387 | 0.281542257 | 0.116025911 | 0.146319489 |
| 0.053668709 | 0.012219568 | 0.24413076  | 0.295267997 |
| 0.215737751 | 0.061895222 | 0.113341341 | 0.29244189  |
| 0.073300328 | 0.034734617 | 0.30101385  | 0.020629845 |
| 0.329462545 | 0.032240879 | 0.10438212  | 0.251488449 |

|             |             |             |             |
|-------------|-------------|-------------|-------------|
| 0.028677022 | 0.227325468 | 0.253278921 | 0.210038955 |
| 0.123098608 | 0.022897149 | 0.009304904 | 0.030051659 |
| 0.025503513 | 0.011737148 | 0.217460849 | 0.338338563 |
| 0.061471234 | 0.044126648 | 0.165879639 | 0.007143108 |
| 0.031256473 | 0.012213137 | 0.213687717 | 0.106018267 |
| 0.225301608 | 0.145535762 | 0.116877864 | 0.194390452 |
| 0.159877212 | 0.293476333 | 0.006823053 | 0.084706738 |
| 0.181129722 | 0.020126898 | 0.222622776 | 0.173951757 |
| 0.150128786 | 0.093941254 | 0.134881582 | 0.307655177 |
| 0.25754632  | 0.142479816 | 0.067959832 | 0.275551032 |
| 0.063107679 | 0.145366188 | 0.113029316 | 0.146949906 |
| 0.079636054 | 0.219683456 | 0.027734    | 0.116760987 |
| 0.019054052 | 0.021428466 | 0.005304845 | 0.150619549 |
| 0.039606865 | 0.263170911 | 0.196162463 | 0.104978323 |
| 0.18720787  | 0.226894753 | 0.12690954  | 0.25621443  |
| 0.015990981 | 0.018709475 | 0.074791126 | 0.308167987 |
| 0.175364375 | 0.263966362 | 0.093985337 | 0.067907673 |
| 0.165757055 | 0.278284106 | 9.74E-05    | 0.247873491 |
| 0.260851852 | 0.073720567 | 0.245271586 | 0.158063534 |
| 0.079626546 | 0.32338316  | 0.002407972 | 0.278640342 |
| 0.152216846 | 0.084269716 | 0.316175056 | 0.148565068 |
| 0.226196237 | 0.081208437 | 0.125007043 | 0.192879237 |
| 0.183876902 | 0.0057507   | 0.142259255 | 0.292000478 |
| 0.016237729 | 0.083742583 | 0.211980792 | 0.262572317 |
| 0.208782363 | 0.229497292 | 0.325083302 | 0.068776366 |
| 0.170422754 | 0.133013623 | 0.008422923 | 0.117562871 |
| 0.201107128 | 0.016497622 | 0.254761867 | 0.102501933 |
| 0.114835951 | 0.276888471 | 0.175142571 | 0.013316224 |
| 0.097603053 | 0.173132617 | 0.02160747  | 0.146470446 |
| 0.165642131 | 0.115238274 | 0.09330541  | 0.017500344 |
| 0.05723223  | 0.304512951 | 0.031626923 | 0.033559357 |
| 0.014419933 | 0.222158824 | 0.172863921 | 0.120233416 |
| 0.057728766 | 0.08323105  | 0.070086113 | 0.086453074 |
| 0.076377393 | 0.120551862 | 0.001908899 | 0.067849869 |
| 0.050823672 | 0.107954874 | 0.107910531 | 0.191168884 |
| 0.070890223 | 0.047772976 | 0.167995042 | 0.028263349 |
| 0.042179161 | 0.042543113 | 0.285642701 | 0.250169135 |
| 0.179181105 | 0.100777011 | 0.049916153 | 0.019218311 |
| 0.329933037 | 0.140150164 | 0.052778609 | 0.312683335 |
| 0.011111161 | 0.279185977 | 0.07792312  | 0.122701585 |
| 0.100542109 | 0.23586885  | 0.324070407 | 0.011188192 |
| 0.152180284 | 0.286590804 | 0.136604226 | 0.103859728 |
| 0.245403998 | 0.254497691 | 0.029702945 | 0.181579756 |
| 0.197616366 | 0.072336374 | 0.2817452   | 0.041967344 |
| 0.040195584 | 0.194678107 | 0.211725267 | 0.091710567 |
| 0.055609592 | 0.19788064  | 0.055633237 | 0.20188559  |
| 0.306501492 | 0.305340765 | 0.249675878 | 0.035717387 |
| 0.092114092 | 0.019861219 | 0.058772499 | 0.094826313 |
| 0.247196254 | 0.260211702 | 0.172156995 | 0.143728943 |
| 0.238903001 | 0.06454041  | 0.017841193 | 0.296350959 |
| 0.008293158 | 0.254238899 | 0.021856051 | 0.199328691 |
| 0.236110458 | 0.130706555 | 0.070360562 | 0.220390762 |
| 0.242389264 | 0.075491772 | 0.077238977 | 0.263870932 |
| 0.256562054 | 0.095169428 | 0.074705248 | 0.190811766 |

|             |             |             |             |
|-------------|-------------|-------------|-------------|
| 0.038002838 | 0.040580461 | 0.141830392 | 0.020125346 |
| 0.08715268  | 0.088954898 | 0.002290304 | 0.068707714 |
| 0.049122829 | 0.286535863 | 0.2771533   | 0.036247728 |
| 0.18329431  | 0.062648106 | 0.197898564 | 0.074923241 |
| 0.215255389 | 0.229006546 | 0.265745832 | 0.089558666 |
| 0.209982345 | 0.257551412 | 0.113520185 | 0.056950646 |
| 0.028652798 | 0.241498987 | 0.188666891 | 0.017005568 |
| 0.318456851 | 0.112983514 | 0.0257034   | 0.294985621 |
| 0.175717332 | 0.201324256 | 0.00324346  | 0.001833205 |
| 0.012205359 | 0.259312644 | 0.242794427 | 0.254043716 |
| 0.078571675 | 0.198691846 | 0.000423713 | 0.267178354 |
| 0.28429965  | 0.019021349 | 0.026328453 | 0.219849047 |
| 0.177732506 | 0.288634456 | 0.067843819 | 0.23887816  |
| 0.153161813 | 0.240759551 | 1           | 0.189352433 |
| 0.294545967 | 0.221759948 | 0.244844322 | 0.254127148 |
| 0.323737158 | 0.209788753 | 0.266633928 | 0.045383315 |
| 0.008869974 | 0.12010806  | 0.050637356 | 0.017089873 |
| 0.155732021 | 0.055511896 | 0.252103046 | 0.29525608  |
| 0.267168423 | 0.018999604 | 0.064557769 | 0.22129982  |
| 0.313448709 | 0.31802926  | 0.003903802 | 0.001425019 |
| 0.000385882 | 0.00898463  | 0.220732737 | 0.09758139  |
| 0.266362244 | 0.031053532 | 0.023132588 | 0.040202495 |
| 0.0448483   | 0.157526681 | 0.274215891 | 0.30346405  |
| 0.196927977 | 0.075788873 | 0.090070186 | 0.283637183 |
| 0.025325304 | 0.124576916 | 0.289253586 | 0.283066295 |
| 0.018137663 | 0.090431095 | 0.094506202 | 0.334134269 |
| 0.004555654 | 0.186238611 | 0.172890375 | 0.073869509 |
| 0.002152953 | 0.045361412 | 0.044021235 | 0.25768119  |
| 0.225539914 | 0.061583563 | 0.041094295 | 0.019940127 |
| 0.142988053 | 0.271616854 | 0.097218446 | 0.309198057 |
| 0.302251421 | 0.336935636 | 0.018138151 | 0.257097671 |
| 0.032096382 | 0.251419431 | 0.103353896 | 0.006894689 |
| 0.061725234 | 0.014373052 | 0.216023158 | 0.01386254  |
| 0.119344855 | 0.201789333 | 0.011754078 | 0.015977419 |
| 0.009712567 | 0.061236116 | 0.322597216 | 0.253744286 |
| 0.009877991 | 0.096167953 | 0.13094461  | 0.196032236 |
| 0.187115752 | 0.314082452 | 0.256637333 | 0.108083417 |
| 0.105625238 | 0.004629237 | 0.271013199 | 0.174105285 |
| 0.092376914 | 0.299112631 | 0.072451306 | 0.275165663 |
| 0.199147209 | 0.248320352 | 0.250763671 | 0.212051004 |
| 0.018411306 | 0.164360539 | 0.283679455 | 0.024908494 |
| 0.198604319 | 0.318096656 | 0.124279795 | 0.034638518 |
| 0.160843906 | 0.089898968 | 0.014927009 | 0.007262714 |
| 0.057344256 | 0.199110393 | 0.070249746 | 0.309358106 |
| 0.17697583  | 0.190335902 | 0.016766552 | 0.042885861 |
| 0.292443248 | 0.232955289 | 0.031091614 | 0.238483134 |
| 0.096724238 | 0.188397083 | 0.213447605 | 0.216376111 |
| 0.038020182 | 0.268013939 | 0.279936843 | 0.270883553 |
| 0.27713545  | 0.199610059 | 0.267047025 | 0.02328116  |
| 0.016363728 | 0.132982697 | 0.095984267 | 0.074352354 |
| 0.173419131 | 0.017912181 | 0.026423446 | 0.251830364 |
| 0.045701044 | 0.285202928 | 0.031021559 | 0.016787224 |
| 0.136116836 | 0.070948702 | 0.204153195 | 0.177725857 |
| 0.056021088 | 0.267003421 | 0.006340116 | 0.062580228 |

|             |             |             |             |
|-------------|-------------|-------------|-------------|
| 0.061120477 | 0.234411724 | 0.115569026 | 0.08994288  |
| 0.02911075  | 0.021692739 | 0.216643296 | 0.143551618 |
| 0.128145238 | 0.015094457 | 0.233701765 | 0.015984471 |
| 0.04074284  | 0.309846429 | 0.104566644 | 0.004961717 |
| 0.01009972  | 0.13363092  | 0.047856256 | 0.065136063 |
| 0.016556319 | 0.239026953 | 0.118147783 | 0.142840716 |
| 0.20413397  | 0.059551665 | 0.186844297 | 0.01630987  |
| 0.017950019 | 0.238041449 | 0.108150617 | 0.249506203 |
| 0.074688111 | 0.332283235 | 0.214111989 | 0.240674395 |
| 0.009365004 | 0.073498145 | 0.044918743 | 0.277395491 |
| 0.069107131 |             |             |             |
| PHPT1       | 0.227598023 | 0.311590734 | 0.167153091 |
| 0.344859879 | 0.234010307 | 0.151714569 | 0.219566848 |
| 0.119515992 | 0.206403272 | 0.038465657 | 0.13038754  |
| 0.221205205 | 0.188840895 | 0.161497491 | 0.133497446 |
| 0.39303184  | 0.268189263 | 0.156424321 | 0.275068569 |
| 0.305510261 | 0.130209385 | 0.38494003  | 0.238239509 |
| 0.236492908 | 0.260441944 | 0.26081559  | 0.255827333 |
| 0.35976336  | 0.273065917 | 0.099461085 | 0.241311469 |
| 0.251092728 | 0.265958848 | 0.262905578 | 0.300793489 |
| 0.249423694 | 0.185516725 | 0.037516154 | 0.143498105 |
| 0.246735999 | 0.311120182 | 0.308803201 | 0.292462545 |
| 0.188335408 | 0.223236372 | 0.249453035 | 0.264832313 |
| 0.110512866 | 0.194468415 | 0.082519611 | 0.212210129 |
| 0.225061995 | 0.1970154   | 0.153463609 | 0.21676239  |
| 0.134722397 | 0.084591569 | 0.143470024 | 0.138380805 |
| 0.257194059 | 0.068419637 | 0.246726818 | 0.174279651 |
| 0.116664646 | 0.167289258 | 0.263176054 | 0.183831937 |
| 0.189943945 | 0.1963735   | 0.102038708 | 0.168340022 |
| 0.012388814 | 0.310531419 | 0.273865398 | 0.154491592 |
| 0.228442432 | 0.126890795 | 0.27897365  | 0.257764841 |
| 0.355902899 | 0.240945319 | 0.380863956 | 0.352976497 |
| 0.239142193 | 0.277416698 | 0.183744027 | 0.289232684 |
| 0.265878334 | 0.216310586 | 0.157483722 | 0.407629849 |
| 0.37419173  | 0.287160885 | 0.293934685 | 0.297462319 |
| 0.26312449  | 0.280062283 | 0.156223563 | 0.202451517 |
| 0.164619338 | 0.202142115 | 0.232149797 | 0.34138702  |
| 0.205116298 | 0.182475916 | 0.309175445 | 0.265357367 |
| 0.2419971   | 0.118584865 | 0.339770145 | 0.148679833 |
| 0.36592315  | 0.125983275 | 0.299419857 | 0.21071159  |
| 0.238295454 | 0.265559803 | 0.287294708 | 0.26295394  |
| 0.203340448 | 0.120205115 | 0.164517033 | 0.18923962  |
| 0.170677733 | 0.13760314  | 0.206323655 | 0.337950398 |
| 0.130773325 | 0.209297848 | 0.226806873 | 0.06357385  |
| 0.191451725 | 0.225790012 | 0.242849731 | 0.173088256 |
| 0.291224251 | 0.186091748 | 0.267425991 | 0.179107225 |
| 0.221047451 | 0.376773149 | 0.015691208 | 0.224601059 |
| 0.199135965 | 0.239452372 | 0.306217823 | 0.206630382 |
| 0.280010737 | 0.189731803 | 0.2696378   | 0.360892099 |
| 0.221441754 | 0.247923575 | 0.112256496 | 0.37968337  |
| 0.170599469 | 0.262177529 | 0.24994716  | 0.220200528 |
| 0.166622094 | 0.239431729 | 0.185454886 | 0.136758889 |
| 0.141866329 | 0.209055812 | 0.070456722 | 0.136191791 |
| 0.158173296 | 0.257315276 | 0.19719043  | 0.265161379 |



|             |             |             |             |
|-------------|-------------|-------------|-------------|
| 0.22544523  | 0.33512318  | 0.102397066 | 0.235012826 |
| 0.085588742 | 0.184781544 | 0.069017482 | 0.330605567 |
| 0.102043047 | 0.337286329 | 0.250442964 | 0.273581658 |
| 0.304572816 | 0.35906551  | 0.009511411 | 0.237995166 |
| 0.288144941 | 0.068662629 | 0.247519951 | 0.252591846 |
| 0.164753861 | 0.348312622 | 0.014184055 | 0.356101427 |
| 0.140074535 | 0.245771898 | 0.391743307 | 0.30567616  |
| 0.240010935 | 0.226698545 | 0.143862039 | 0.283831846 |
| 0.215791183 | 0.043118105 | 0.097989203 | 0.281788259 |
| 0.176413497 | 0.113261543 | 0.26826001  | 0.309715715 |
| 0.251309302 | 0.336898265 | 0.406383091 | 0.160071495 |
| 0.219465611 | 0.212457643 | 0.114945384 | 0.264937503 |
| 0.280143116 | 0.127602507 | 0.233496307 | 0.224247772 |
| 0.096231659 | 0.279373858 | 0.215470812 | 0.096443699 |
| 0.200509451 | 0.172086611 | 0.060432202 | 0.261520381 |
| 0.204553246 | 0.192516357 | 0.148451461 | 0.206229314 |
| 0.25663155  | 0.340487297 | 0.203127477 | 0.156930184 |
| 0.140724111 | 0.182204154 | 0.247651592 | 0.147392985 |
| 0.167117143 | 0.305332803 | 0.209265728 | 0.20558283  |
| 0.118204151 | 0.262434725 | 0.093543143 | 0.111142592 |
| 0.135534925 | 0.130345776 | 0.109870156 | 0.185299434 |
| 0.154214594 | 0.175238489 | 0.229681527 | 0.214159038 |
| 0.281524606 | 0.155394622 | 0.30582172  | 0.335925215 |
| 0.138139541 | 0.264755155 | 0.213392624 | 0.094358575 |
| 0.334174503 | 0.088482606 | 0.06481246  | 0.287641643 |
| 0.114358833 | 0.364950588 | 0.222561539 | 0.29711635  |
| 0.184959024 | 0.271616052 | 0.381522388 | 0.070449781 |
| 0.160849816 | 0.259646502 | 0.266431834 | 0.307596697 |
| 0.192332348 | 0.27249867  | 0.148513365 | 0.198029518 |
| 0.183908336 | 0.200127431 | 0.314094778 | 0.261526484 |
| 0.175715432 | 0.303378484 | 0.256160001 | 0.274032305 |
| 0.272265268 | 0.195693945 | 0.099327925 | 0.341152604 |
| 0.332662749 | 0.398626354 | 0.248430452 | 0.234639444 |
| 0.194104574 | 0.064710623 | 0.267978229 | 0.171922429 |
| 0.241114537 | 0.310296459 | 0.289006217 | 0.217310438 |
| 0.286385829 | 0.208860834 | 0.065187472 | 0.333979519 |
| 0.160794652 | 0.274442604 | 0.099934473 | 0.29312124  |
| 0.24243871  | 0.085698391 | 0.264824343 | 0.166899394 |
| 0.200872905 | 0.209697298 | 0.21756034  | 0.263636203 |
| 0.281619518 | 0.24203805  | 0.197261307 | 0.267202942 |
| 0.090954986 | 0.145779833 | 0.24989857  | 0.180440262 |
| 0.1828576   | 0.306317798 | 0.070806324 | 0.139048249 |
| 0.195487966 | 0.252384347 | 0.35769834  | 0.239091021 |
| 0.121909456 | 0.122318776 | 0.33352074  | 0.206260365 |
| 0.291851879 | 0.275427183 | 0.267089598 | 0.210634771 |
| 0.255284407 | 0.29435739  | 0.175660397 | 0.259470646 |
| 0.164443771 | 0.267216226 | 0.205491036 | 0.10304799  |
| 0.373247345 | 0.061040654 | 0.084859474 | 0.293897024 |
| 0.268721535 | 0.183832497 | 0.015533197 | 0.057615249 |
| 0.183173184 | 0.369421169 | 0.239200379 | 0.240530743 |
| 0.065173822 | 0.264562125 | 0.028870832 | 0.324947004 |
| 0.270515221 | 0.14876345  | 0.261717067 | 0.242777178 |
| 0.239192968 | 0.298681369 | 0.19158502  | 0.299706711 |
| 0.20208753  | 0.251681388 | 0.189352433 | 1           |

|             |             |             |             |
|-------------|-------------|-------------|-------------|
| 0.286936421 | 0.265081324 | 0.264915348 | 0.258487569 |
| 0.346142677 | 0.333536513 | 0.298096234 | 0.124499263 |
| 0.194979979 | 0.113531145 | 0.100690714 | 0.182207378 |
| 0.122143882 | 0.291889775 | 0.285218431 | 0.373867033 |
| 0.318246523 | 0.092498223 | 0.154171891 | 0.236144004 |
| 0.296283812 | 0.356385252 | 0.097104929 | 0.021505716 |
| 0.015428331 | 0.132005131 | 0.207206358 | 0.295163006 |
| 0.312566118 | 0.063283159 | 0.084059738 | 0.104028116 |
| 0.222590708 | 0.275302894 | 0.280466005 | 0.373929167 |
| 0.289803094 | 0.260930759 | 0.121062355 | 0.352886804 |
| 0.246611281 | 0.116725997 | 0.334680364 | 0.256330043 |
| 0.190947919 | 0.295305841 | 0.136855199 | 0.368028996 |
| 0.070303965 | 0.301159063 | 0.230851644 | 0.20590626  |
| 0.07788506  | 0.272439537 | 0.259653681 | 0.365901698 |
| 0.236835742 | 0.190107703 | 0.169356872 | 0.04180106  |
| 0.213102905 | 0.334583713 | 0.260592678 | 0.37222867  |
| 0.307651513 | 0.401021707 | 0.228455628 | 0.26099856  |
| 0.186180926 | 0.24112077  | 0.22710397  | 0.039551461 |
| 0.230901538 | 0.126594761 | 0.250438027 | 0.137368803 |
| 0.122244977 | 0.217207713 | 0.200324669 | 0.147617309 |
| 0.141176247 | 0.237369234 | 0.380826161 | 0.359066686 |
| 0.169730638 | 0.231420063 | 0.280630515 | 0.279160307 |
| 0.126583128 | 0.339864025 | 0.249549891 | 0.110821305 |
| 0.189114568 | 0.119993643 | 0.288228035 | 0.172725826 |
| 0.132885488 | 0.385792002 | 0.224484128 | 0.329075499 |
| 0.217923979 | 0.286703541 | 0.282571648 | 0.236578346 |
| 0.219587239 | 0.159657104 | 0.212388522 | 0.081503453 |
| 0.254918222 | 0.358451876 | 0.158691298 | 0.259752285 |
| 0.290216508 | 0.169952775 | 0.149724172 | 0.060272322 |
| 0.138848843 | 0.128278066 | 0.240508417 | 0.39982932  |
| 0.189295865 | 0.182859358 | 0.108245376 | 0.252942474 |
| 0.316187834 | 0.244237331 | 0.14782358  | 0.259870732 |
| 0.296234024 | 0.272231741 | 0.30484812  | 0.316814752 |
| 0.159446049 | 0.275343953 | 0.273007199 | 0.202585354 |
| 0.227538149 | 0.264485203 | 0.276118518 | 0.057360183 |
| 0.187112849 | 0.174286867 | 0.220617594 | 0.276437731 |
| 0.284570077 | 0.193940884 | 0.132990591 | 0.354048129 |
| 0.128788174 | 0.320960028 | 0.099049614 | 0.234803849 |
| 0.272524693 | 0.116396866 | 0.297892237 | 0.180062172 |
| 0.217578399 | 0.257598392 | 0.085424055 | 0.239011395 |
| 0.140390498 | 0.277377705 | 0.185103384 | 0.302700123 |
| 0.189065734 | 0.242630383 | 0.288953172 | 0.095809604 |
| 0.096917618 | 0.131821384 | 0.269830347 | 0.111849422 |
| 0.111770445 | 0.384640779 | 0.116941844 | 0.133608325 |
| 0.175568965 | 0.155380605 | 0.186484323 | 0.236558059 |
| 0.161048807 | 0.276984549 | 0.106701011 | 0.22539783  |
| 0.202962784 | 0.235864266 | 0.159675697 | 0.116016217 |
| 0.178042179 | 0.224416463 | 0.20006183  | 0.271343234 |
| 0.206386979 | 0.39246336  | 0.195512028 | 0.247961404 |
| 0.14445214  | 0.127817868 | 0.15341352  | 0.319289025 |
| 0.120493554 |             |             |             |
| PHTF2       | 0.367650451 | 0.522529996 | 0.353551304 |
| 0.421755938 | 0.396630721 | 0.382147523 | 0.261716098 |
| 0.221698677 | 0.120691372 | 0.01450987  | 0.037566873 |

|             |             |             |             |
|-------------|-------------|-------------|-------------|
| 0.392473906 | 0.241255565 | 0.318266244 | 0.3452901   |
| 0.400209677 | 0.152235962 | 0.319042779 | 0.277515829 |
| 0.398207929 | 0.141480416 | 0.393221044 | 0.130287173 |
| 0.255403053 | 0.121789053 | 0.09515046  | 0.266940827 |
| 0.421078412 | 0.106853342 | 0.351036046 | 0.386791336 |
| 0.102618446 | 0.394740867 | 0.515769735 | 0.410343174 |
| 0.502801591 | 0.349613003 | 0.011861329 | 0.335269932 |
| 0.387026993 | 0.413332379 | 0.400262686 | 0.359992118 |
| 0.069829367 | 0.490151243 | 0.294016399 | 0.362290133 |
| 0.250408114 | 0.049297071 | 0.27527245  | 0.446680131 |
| 0.482691041 | 0.409659534 | 0.267988845 | 0.213511216 |
| 0.233274426 | 0.254182606 | 0.252006023 | 0.330580674 |
| 0.270158834 | 0.203049936 | 0.481986141 | 0.133509559 |
| 0.161547074 | 0.273546625 | 0.147891139 | 0.296734415 |
| 0.297086641 | 0.369891685 | 0.028578992 | 0.340597707 |
| 0.007376967 | 0.386464394 | 0.344826511 | 0.277781916 |
| 0.056945048 | 0.039795917 | 0.175527495 | 0.369773487 |
| 0.428895746 | 0.435975543 | 0.454841096 | 0.460173382 |
| 0.205889528 | 0.280834514 | 0.336899818 | 0.209424865 |
| 0.40345807  | 0.236402338 | 0.14067797  | 0.400228638 |
| 0.465789219 | 0.514666636 | 0.219576235 | 0.256776018 |
| 0.413788592 | 0.47624455  | 0.409552959 | 0.412351929 |
| 0.339701145 | 0.051068737 | 0.442800294 | 0.492800496 |
| 0.373330144 | 0.274532816 | 0.172159275 | 0.399095721 |
| 0.075352405 | 0.358549882 | 0.373084447 | 0.155083754 |
| 0.44699374  | 0.035283219 | 0.213224645 | 0.380852557 |
| 0.213406331 | 0.406645118 | 0.50358971  | 0.234096706 |
| 0.368606469 | 0.03216488  | 0.141829031 | 0.039135002 |
| 0.348024275 | 0.124361335 | 0.481169279 | 0.446277244 |
| 0.261489277 | 0.357220125 | 0.30086111  | 0.003681996 |
| 0.035429768 | 0.167106749 | 0.386445699 | 0.339315909 |
| 0.397932753 | 0.345242782 | 0.270232356 | 0.362968224 |
| 0.393609266 | 0.443992737 | 0.084689223 | 0.130460441 |
| 0.423024343 | 0.167539734 | 0.264394267 | 0.411657589 |
| 0.323272139 | 0.155422821 | 0.160882552 | 0.504701666 |
| 0.434256148 | 0.118193405 | 0.312200785 | 0.401374632 |
| 0.354266045 | 0.337771846 | 0.136951678 | 0.312607191 |
| 0.080909847 | 0.470778576 | 0.03295394  | 0.331743879 |
| 0.276534495 | 0.149352775 | 0.013687767 | 0.293710561 |
| 0.337910717 | 0.422355712 | 0.456882002 | 0.129205103 |
| 0.346206529 | 0.394607801 | 0.322579348 | 0.423127496 |
| 0.023512956 | 0.062455178 | 0.273176861 | 0.497535039 |
| 0.301805207 | 0.468157435 | 0.316884096 | 0.291067157 |
| 0.290490405 | 0.41739129  | 0.003367334 | 0.500032741 |
| 0.514888765 | 0.298340063 | 0.409944444 | 0.376205156 |
| 0.342634556 | 0.43106881  | 0.042848601 | 0.400974927 |
| 0.331090435 | 0.099890434 | 0.477989587 | 0.186725297 |
| 0.448319095 | 0.060598464 | 0.337420906 | 0.381788075 |
| 0.383681588 | 0.013108598 | 0.273239741 | 0.396592536 |
| 0.029109077 | 0.144307132 | 0.391269516 | 0.41051497  |
| 0.394434583 | 0.402193589 | 0.450577337 | 0.330488975 |
| 0.415735536 | 0.267137511 | 0.016925095 | 0.301752286 |
| 0.387448306 | 0.330234909 | 0.45371042  | 0.286702711 |
| 0.319887327 | 0.478537505 | 0.371605443 | 0.210620828 |

|             |             |             |             |
|-------------|-------------|-------------|-------------|
| 0.069799346 | 0.333994092 | 0.04018942  | 0.347670208 |
| 0.357044333 | 0.170690817 | 0.359576731 | 0.134818967 |
| 0.083263863 | 0.517214226 | 0.158553172 | 0.219608025 |
| 0.109037596 | 0.407181185 | 0.281376042 | 0.294146226 |
| 0.250302928 | 0.191801832 | 0.340078577 | 0.371352119 |
| 0.068551302 | 0.123712326 | 0.012498374 | 0.343264278 |
| 0.183797804 | 0.358859026 | 0.354829878 | 0.376062732 |
| 0.335514608 | 0.152538915 | 0.39589994  | 0.253909493 |
| 0.128029999 | 0.022185157 | 0.503214122 | 0.394339852 |
| 0.326209661 | 0.196171234 | 0.051048131 | 0.333482296 |
| 0.455409434 | 0.343278547 | 0.269052951 | 0.460024779 |
| 0.03656777  | 0.447277144 | 0.291487586 | 0.147762865 |
| 0.360438811 | 0.301553509 | 0.435105207 | 0.08409263  |
| 0.365099509 | 0.476569779 | 0.302944674 | 0.213848139 |
| 0.407430692 | 0.411337761 | 0.05477617  | 0.371352367 |
| 0.37297312  | 0.047023323 | 0.513213704 | 0.13211     |
| 0.027616443 | 0.395354168 | 0.406963239 | 0.092291247 |
| 0.092598635 | 0.372280863 | 0.07985489  | 0.300799053 |
| 0.515338355 | 0.403957424 | 0.407906921 | 0.193667827 |
| 0.067080433 | 0.020326283 | 0.193297948 | 0.34498609  |
| 0.507683931 | 0.489320059 | 0.271068345 | 0.369005883 |
| 0.274005094 | 0.330565752 | 0.167760682 | 0.497280517 |
| 0.160085739 | 0.505679879 | 0.010627567 | 0.389720578 |
| 0.503322145 | 0.306979438 | 0.100746616 | 0.346634851 |
| 0.382215288 | 0.071782185 | 0.21789547  | 0.50050386  |
| 0.419034221 | 0.341540308 | 0.359735811 | 0.387877917 |
| 0.034711564 | 0.068271087 | 0.369373014 | 0.160005076 |
| 0.383173615 | 0.239032244 | 0.04234952  | 0.333637408 |
| 0.071362128 | 0.465003585 | 0.413057067 | 0.083926223 |
| 0.360735526 | 0.313029147 | 0.357411791 | 0.055556575 |
| 0.412312393 | 0.475763348 | 0.52174414  | 0.1913615   |
| 0.392979875 | 0.478053575 | 0.355740767 | 0.087852637 |
| 0.022118513 | 0.505038654 | 0.378017253 | 0.039740612 |
| 0.440588773 | 0.264904233 | 0.028390216 | 0.500603431 |
| 0.222351431 | 0.440661796 | 0.01092241  | 0.060333384 |
| 0.039895226 | 0.406513906 | 0.486617092 | 0.381450815 |
| 0.288420639 | 0.358816212 | 0.00369985  | 0.497864775 |
| 0.499935466 | 0.0194066   | 0.137930635 | 0.400100393 |
| 0.38274144  | 0.526172972 | 0.296824865 | 0.414156022 |
| 0.391418583 | 0.494574386 | 0.294545967 | 0.286936421 |
| 1           | 0.469637275 | 0.406923885 | 0.461912092 |
| 0.432207562 | 0.390055841 | 0.317317127 | 0.031149168 |
| 0.140669083 | 0.25319222  | 0.334240526 | 0.107089278 |
| 0.328430465 | 0.165099785 | 0.467045699 | 0.425559632 |
| 0.458338639 | 0.007688477 | 0.196460689 | 0.399056272 |
| 0.435287076 | 0.457374395 | 0.020605677 | 0.008771706 |
| 0.007866968 | 0.027975415 | 0.368662304 | 0.242320311 |
| 0.474721345 | 0.283773254 | 0.008957812 | 0.073155671 |
| 0.317285739 | 0.366425565 | 0.503667234 | 0.385499444 |
| 0.38806068  | 0.097015949 | 0.33843263  | 0.392749843 |
| 0.08304763  | 0.302167191 | 0.470752221 | 0.487422886 |
| 0.043264295 | 0.245451717 | 0.344142533 | 0.476166563 |
| 0.058765271 | 0.316907097 | 0.392912113 | 0.358356852 |
| 0.012140956 | 0.093126351 | 0.081581429 | 0.402059892 |

|             |             |             |             |
|-------------|-------------|-------------|-------------|
| 0.488958934 | 0.110879926 | 0.05306836  | 0.171346706 |
| 0.173661362 | 0.425351802 | 0.212673183 | 0.49481649  |
| 0.421615046 | 0.420780909 | 0.073807585 | 0.489393414 |
| 0.058251421 | 0.489386948 | 0.319452764 | 0.080077152 |
| 0.269408609 | 0.017122006 | 0.444417916 | 0.17598696  |
| 0.342661906 | 0.37944705  | 0.198419764 | 0.018576596 |
| 0.153855966 | 0.067319381 | 0.454834157 | 0.408765229 |
| 0.032465711 | 0.264748496 | 0.297768126 | 0.380134187 |
| 0.32530339  | 0.430883503 | 0.508122498 | 0.389513145 |
| 0.12754616  | 0.106084779 | 0.4029137   | 0.373543148 |
| 0.267435269 | 0.457690311 | 0.320390095 | 0.507320593 |
| 0.382972596 | 0.440171497 | 0.454151527 | 0.37630845  |
| 0.215311486 | 0.39113103  | 0.39591622  | 0.044171552 |
| 0.366887346 | 0.428314107 | 0.347739343 | 0.183806064 |
| 0.285363122 | 0.332969637 | 0.056445232 | 0.166894331 |
| 0.28008903  | 0.336741051 | 0.182810259 | 0.411814707 |
| 0.368485852 | 0.378289527 | 0.05055075  | 0.080365922 |
| 0.533850746 | 0.431853935 | 0.196500022 | 0.423238476 |
| 0.181747772 | 0.356762152 | 0.401263045 | 0.396100917 |
| 0.328844943 | 0.418798284 | 0.410645512 | 0.399686507 |
| 0.442908781 | 0.295082904 | 0.523932633 | 0.120249007 |
| 0.103469675 | 0.360208516 | 0.141226042 | 0.101635297 |
| 0.181129028 | 0.034648276 | 0.26000881  | 0.397992405 |
| 0.323291958 | 0.392605827 | 0.30175707  | 0.100571575 |
| 0.308010521 | 0.318610491 | 0.358283415 | 0.26162471  |
| 0.11771448  | 0.505670196 | 0.013337261 | 0.067960919 |
| 0.33211627  | 0.410830461 | 0.361964038 | 0.255730013 |
| 0.271725582 | 0.126711356 | 0.321957498 | 0.325445619 |
| 0.354367714 | 0.329918635 | 0.411190202 | 0.054969598 |
| 0.035484226 | 0.463919445 | 0.363656204 | 0.020704933 |
| 0.079404514 | 0.3440291   | 0.272718091 | 0.279874473 |
| 0.023532234 | 0.460766999 | 0.359307067 | 0.390280786 |
| 0.365052012 | 0.081289439 | 0.350904647 | 0.104800439 |
| 0.07278246  | 0.45053747  | 0.351783901 | 0.501518644 |
| 0.305652187 | 0.416377642 | 0.447973778 | 0.399227288 |
| 0.122038555 | 0.319900257 | 0.050411359 | 0.410425539 |
| 0.377928836 |             |             |             |

|             |             |             |             |
|-------------|-------------|-------------|-------------|
| PLEK        | 0.467172286 | 0.490845906 | 0.452146969 |
| 0.417856714 | 0.45052305  | 0.386526366 | 0.177519082 |
| 0.150496565 | 0.075851966 | 0.002320688 | 0.022642688 |
| 0.490287599 | 0.212482655 | 0.247426317 | 0.349238478 |
| 0.42254661  | 0.134861024 | 0.347515123 | 0.211183817 |
| 0.401976408 | 0.066150917 | 0.406555053 | 0.069602007 |
| 0.33175493  | 0.109946879 | 0.058463706 | 0.304064993 |
| 0.437934986 | 0.067540192 | 0.331450649 | 0.374470917 |
| 0.093898137 | 0.463620244 | 0.516723561 | 0.47929566  |
| 0.52366679  | 0.456194895 | 0.008802065 | 0.288176441 |
| 0.443184377 | 0.482760802 | 0.399252814 | 0.310061095 |
| 0.029150426 | 0.479371621 | 0.219126478 | 0.436513004 |
| 0.214211523 | 0.025796443 | 0.217915328 | 0.425884097 |
| 0.483066039 | 0.486425536 | 0.189516548 | 0.131829577 |
| 0.237049905 | 0.206620185 | 0.360623718 | 0.32109957  |
| 0.198238406 | 0.130951823 | 0.485638313 | 0.070924548 |
| 0.141576628 | 0.211388676 | 0.15442693  | 0.223479622 |

|             |             |             |             |
|-------------|-------------|-------------|-------------|
| 0.420383876 | 0.401167439 | 0.009956265 | 0.487297893 |
| 0.001110052 | 0.371484381 | 0.397321262 | 0.400415535 |
| 0.033390059 | 0.015232316 | 0.177976802 | 0.318981981 |
| 0.459288339 | 0.465435833 | 0.500220189 | 0.510669055 |
| 0.181642688 | 0.288312357 | 0.467374723 | 0.153864877 |
| 0.468767052 | 0.152785854 | 0.09252543  | 0.433788017 |
| 0.50423359  | 0.510993943 | 0.201470091 | 0.268639006 |
| 0.458343423 | 0.465046396 | 0.456805139 | 0.458940167 |
| 0.405441916 | 0.053028063 | 0.463209979 | 0.507156019 |
| 0.425581451 | 0.395507577 | 0.147424854 | 0.410873624 |
| 0.046606565 | 0.374556554 | 0.338570429 | 0.159855699 |
| 0.461919648 | 0.01121831  | 0.220487865 | 0.345089556 |
| 0.194401428 | 0.471817244 | 0.511584235 | 0.158576191 |
| 0.439266568 | 0.014771697 | 0.173366082 | 0.026699423 |
| 0.324753432 | 0.199583203 | 0.500765456 | 0.468824917 |
| 0.201453937 | 0.41260885  | 0.232787747 | 0.000252624 |
| 0.022414195 | 0.184902137 | 0.492596175 | 0.363538538 |
| 0.4490491   | 0.457510264 | 0.235332575 | 0.425277381 |
| 0.514613875 | 0.501138441 | 0.058773294 | 0.07118     |
| 0.435202055 | 0.182978686 | 0.21812907  | 0.487702902 |
| 0.324854834 | 0.084435896 | 0.104723857 | 0.497361111 |
| 0.417614785 | 0.065194514 | 0.333304437 | 0.420525186 |
| 0.344554863 | 0.394321864 | 0.083684768 | 0.261104728 |
| 0.033379716 | 0.495189855 | 0.025974638 | 0.312782623 |
| 0.331095074 | 0.164881128 | 0.0064718   | 0.226269474 |
| 0.277967647 | 0.483894063 | 0.494959799 | 0.085585644 |
| 0.305715216 | 0.42578047  | 0.312790345 | 0.466525394 |
| 0.007646695 | 0.034340636 | 0.279235164 | 0.498925665 |
| 0.288542843 | 0.504302086 | 0.279359881 | 0.31339398  |
| 0.282407723 | 0.463675437 | 0.003442792 | 0.493681533 |
| 0.518814836 | 0.306090031 | 0.418302024 | 0.449320472 |
| 0.452494761 | 0.462449742 | 0.046398819 | 0.422366904 |
| 0.390984767 | 0.060404021 | 0.494415111 | 0.152434544 |
| 0.472666727 | 0.032885378 | 0.300240382 | 0.511761806 |
| 0.512548212 | 0.006397602 | 0.199849573 | 0.375765509 |
| 0.025138453 | 0.070283644 | 0.446694735 | 0.407151792 |
| 0.394590972 | 0.477006024 | 0.476751766 | 0.44013072  |
| 0.450667189 | 0.197655506 | 0.008597773 | 0.341809553 |
| 0.486407877 | 0.450653561 | 0.437821378 | 0.208308843 |
| 0.363716368 | 0.472719259 | 0.492258569 | 0.231015718 |
| 0.030306923 | 0.285038197 | 0.013991642 | 0.344817216 |
| 0.463017803 | 0.099459591 | 0.458819336 | 0.139830819 |
| 0.065615538 | 0.500225837 | 0.21796207  | 0.342274446 |
| 0.173285225 | 0.425973466 | 0.218198911 | 0.239128492 |
| 0.243366355 | 0.150576703 | 0.4024947   | 0.406858911 |
| 0.022703026 | 0.080765734 | 0.013574078 | 0.458690694 |
| 0.150062374 | 0.384943139 | 0.380381358 | 0.447048749 |
| 0.320498437 | 0.100244838 | 0.405897071 | 0.33210175  |
| 0.111155773 | 0.010518149 | 0.487174846 | 0.405356025 |
| 0.358188801 | 0.127922918 | 0.032422271 | 0.404973882 |
| 0.47866035  | 0.341376619 | 0.268535882 | 0.463470488 |
| 0.020290486 | 0.496831039 | 0.250291775 | 0.114812062 |
| 0.439616359 | 0.244271438 | 0.456915535 | 0.055679286 |
| 0.401083188 | 0.458898461 | 0.307345298 | 0.18349782  |

|             |             |             |             |
|-------------|-------------|-------------|-------------|
| 0.42335043  | 0.416662086 | 0.019565832 | 0.449691511 |
| 0.444819623 | 0.02355883  | 0.502124659 | 0.127824382 |
| 0.015906279 | 0.488096324 | 0.506203041 | 0.064680811 |
| 0.069685698 | 0.340594897 | 0.028154701 | 0.290481317 |
| 0.495086618 | 0.420801691 | 0.478935695 | 0.24812806  |
| 0.029096825 | 0.008370253 | 0.224132022 | 0.459302033 |
| 0.511313209 | 0.510354126 | 0.244636327 | 0.41294598  |
| 0.214588619 | 0.380689676 | 0.119688497 | 0.505504646 |
| 0.205403236 | 0.50524394  | 0.003763534 | 0.509560548 |
| 0.522824784 | 0.278644893 | 0.077586975 | 0.287940552 |
| 0.422111233 | 0.032618837 | 0.17260492  | 0.483095423 |
| 0.467101488 | 0.348050583 | 0.386824487 | 0.453060296 |
| 0.008569842 | 0.026617828 | 0.425184005 | 0.235680725 |
| 0.412509348 | 0.201438033 | 0.080824312 | 0.313243391 |
| 0.032424084 | 0.458837356 | 0.475390916 | 0.052937963 |
| 0.362638884 | 0.296527244 | 0.397920409 | 0.026024708 |
| 0.515402155 | 0.494636568 | 0.514122936 | 0.130683827 |
| 0.495859792 | 0.505531247 | 0.504589486 | 0.070126391 |
| 0.014053575 | 0.519612894 | 0.415655098 | 0.016512282 |
| 0.478142023 | 0.224979674 | 0.009144925 | 0.470774683 |
| 0.155103309 | 0.457144241 | 0.002294265 | 0.107405635 |
| 0.039219479 | 0.489847007 | 0.477095664 | 0.372432119 |
| 0.253672456 | 0.355136014 | 0.006127366 | 0.506442906 |
| 0.476291907 | 0.012203131 | 0.154278643 | 0.506557353 |
| 0.515426787 | 0.497517325 | 0.394376723 | 0.513970049 |
| 0.506579498 | 0.506968748 | 0.221759948 | 0.265081324 |
| 0.469637275 | 1           | 0.433783843 | 0.45318347  |
| 0.474589517 | 0.45582623  | 0.258712649 | 0.00927823  |
| 0.154945935 | 0.180591598 | 0.361085607 | 0.083414901 |
| 0.327706863 | 0.139644409 | 0.485173495 | 0.485757312 |
| 0.51270502  | 0.002752561 | 0.117385033 | 0.490788413 |
| 0.440314808 | 0.463527163 | 0.016620935 | 0.005668316 |
| 0.008004935 | 0.020694478 | 0.343429039 | 0.245583947 |
| 0.498605116 | 0.254280839 | 0.001901143 | 0.026763683 |
| 0.262545808 | 0.460798477 | 0.486396094 | 0.3694388   |
| 0.497113095 | 0.067306519 | 0.301952347 | 0.390850526 |
| 0.068847152 | 0.366972941 | 0.507254106 | 0.453849166 |
| 0.034773248 | 0.251776569 | 0.384419239 | 0.476779638 |
| 0.11535187  | 0.320140718 | 0.491484039 | 0.320771204 |
| 0.011014467 | 0.076581992 | 0.06078563  | 0.458573492 |
| 0.517899377 | 0.074941138 | 0.029381731 | 0.13910089  |
| 0.101555033 | 0.490466784 | 0.149721148 | 0.499973833 |
| 0.455657929 | 0.442035354 | 0.076455473 | 0.466143288 |
| 0.034124146 | 0.484989385 | 0.397246381 | 0.053070629 |
| 0.285349027 | 0.008133909 | 0.491564814 | 0.195954213 |
| 0.311326198 | 0.405613173 | 0.230468277 | 0.014680493 |
| 0.242205886 | 0.045198496 | 0.487389567 | 0.501385147 |
| 0.031626891 | 0.206122258 | 0.296552288 | 0.411318664 |
| 0.261516853 | 0.4513924   | 0.498423247 | 0.464289565 |
| 0.062442852 | 0.184103709 | 0.40341322  | 0.427641823 |
| 0.207317577 | 0.498964328 | 0.331109782 | 0.502134258 |
| 0.438062374 | 0.471631255 | 0.50166207  | 0.341137076 |
| 0.275124796 | 0.415063881 | 0.379062287 | 0.01232917  |
| 0.340440512 | 0.482821507 | 0.347351244 | 0.167918577 |

|             |             |             |             |
|-------------|-------------|-------------|-------------|
| 0.264119842 | 0.479227589 | 0.03333254  | 0.18546313  |
| 0.434115028 | 0.299778688 | 0.123779209 | 0.443125482 |
| 0.398585797 | 0.433008604 | 0.025547129 | 0.056496038 |
| 0.512482916 | 0.449842288 | 0.116989333 | 0.445879535 |
| 0.156620365 | 0.356708582 | 0.497181677 | 0.501436885 |
| 0.418263269 | 0.494242013 | 0.441291909 | 0.404968485 |
| 0.429232804 | 0.234485313 | 0.516110131 | 0.063496458 |
| 0.089811393 | 0.478132165 | 0.086076123 | 0.084811426 |
| 0.123241969 | 0.021876108 | 0.401518633 | 0.440060522 |
| 0.478736199 | 0.386176028 | 0.321746919 | 0.069214102 |
| 0.339568184 | 0.400755905 | 0.356733674 | 0.172356534 |
| 0.065467248 | 0.490951961 | 0.006712843 | 0.046695736 |
| 0.474729775 | 0.492253297 | 0.459309625 | 0.235737362 |
| 0.374051814 | 0.147105519 | 0.291826978 | 0.282474374 |
| 0.351926645 | 0.413459264 | 0.49044466  | 0.022618302 |
| 0.010663672 | 0.492152915 | 0.38555314  | 0.018059691 |
| 0.087841101 | 0.416690177 | 0.285489086 | 0.239670477 |
| 0.020156776 | 0.508249894 | 0.353256123 | 0.469987612 |
| 0.324847701 | 0.050969109 | 0.38301896  | 0.076158095 |
| 0.043823542 | 0.445256667 | 0.460946057 | 0.51192515  |
| 0.386833749 | 0.427636709 | 0.444849849 | 0.487442402 |
| 0.113159412 | 0.457305819 | 0.017040475 | 0.4592201   |
| 0.491199813 |             |             |             |

PLEKHB2 0.347989823

0.49999741

0.332336377

|             |             |             |             |
|-------------|-------------|-------------|-------------|
| 0.369860525 | 0.353827429 | 0.337779531 | 0.255232568 |
| 0.278678862 | 0.114349452 | 0.010876524 | 0.022049954 |
| 0.346707606 | 0.174162912 | 0.284347539 | 0.311443481 |
| 0.370542005 | 0.128486152 | 0.376872049 | 0.279550226 |
| 0.384773905 | 0.148476532 | 0.345667538 | 0.141809973 |
| 0.241623329 | 0.098092536 | 0.084705231 | 0.218592613 |
| 0.433824327 | 0.100417362 | 0.29362557  | 0.371227371 |
| 0.126009198 | 0.39357092  | 0.491457913 | 0.330171544 |
| 0.470642132 | 0.329027175 | 0.022971585 | 0.27892264  |
| 0.422320815 | 0.351432265 | 0.37835095  | 0.328636278 |
| 0.070909034 | 0.474162798 | 0.271048625 | 0.337162914 |
| 0.290361835 | 0.038926883 | 0.282774423 | 0.445924251 |
| 0.437258329 | 0.32294728  | 0.2991145   | 0.201662765 |
| 0.142164515 | 0.256551241 | 0.173235218 | 0.321086833 |
| 0.252975154 | 0.210197253 | 0.445852197 | 0.127249973 |
| 0.152422755 | 0.325977583 | 0.154062537 | 0.318339157 |
| 0.25601851  | 0.361232775 | 0.047562631 | 0.304715947 |
| 0.006601652 | 0.383350114 | 0.33698557  | 0.215209124 |
| 0.060827278 | 0.027976656 | 0.18151621  | 0.333357087 |
| 0.448459668 | 0.447961165 | 0.439738641 | 0.439073552 |
| 0.171671884 | 0.299692292 | 0.292042177 | 0.190830818 |
| 0.417745455 | 0.207689903 | 0.164543261 | 0.357464256 |
| 0.448366648 | 0.480445893 | 0.197091146 | 0.251951003 |
| 0.370127412 | 0.472321139 | 0.359209285 | 0.343797407 |
| 0.258648206 | 0.062871246 | 0.416223348 | 0.468746663 |
| 0.39728651  | 0.228709898 | 0.160117507 | 0.390861255 |
| 0.087219117 | 0.365208769 | 0.342220577 | 0.166697375 |
| 0.461584221 | 0.038598434 | 0.197593125 | 0.335893911 |
| 0.278526794 | 0.393747265 | 0.469066409 | 0.233369507 |
| 0.346380855 | 0.03394816  | 0.102725735 | 0.054134535 |



|             |             |             |             |
|-------------|-------------|-------------|-------------|
| 0.311063183 | 0.10520694  | 0.450105989 | 0.429721406 |
| 0.287304595 | 0.301795294 | 0.312255159 | 0.005686456 |
| 0.037570447 | 0.213650881 | 0.368868914 | 0.379276578 |
| 0.379146352 | 0.353781439 | 0.212381794 | 0.342926559 |
| 0.318062326 | 0.429891076 | 0.070586195 | 0.156932131 |
| 0.375545546 | 0.206314996 | 0.262093134 | 0.344820241 |
| 0.269648934 | 0.194536682 | 0.166545535 | 0.490887957 |
| 0.441159137 | 0.12251128  | 0.357342574 | 0.36958533  |
| 0.272189924 | 0.288199526 | 0.156638854 | 0.275039265 |
| 0.085141522 | 0.436494021 | 0.036064813 | 0.377082126 |
| 0.203902034 | 0.12009654  | 0.032517668 | 0.317066272 |
| 0.296954637 | 0.378265549 | 0.434433397 | 0.154504939 |
| 0.307518811 | 0.344892753 | 0.336774936 | 0.328722505 |
| 0.013672519 | 0.087296955 | 0.300748926 | 0.470315906 |
| 0.279931622 | 0.465953848 | 0.334312687 | 0.296821249 |
| 0.273965122 | 0.411059358 | 0.006790566 | 0.47516953  |
| 0.481467152 | 0.305672989 | 0.326041813 | 0.358228297 |
| 0.271381762 | 0.420358633 | 0.053906794 | 0.368165328 |
| 0.321940845 | 0.126020386 | 0.472024012 | 0.165071615 |
| 0.440337177 | 0.05613963  | 0.323909327 | 0.355051774 |
| 0.304564885 | 0.013881074 | 0.266700214 | 0.369350339 |
| 0.035457158 | 0.152172711 | 0.376939549 | 0.375935899 |
| 0.334685683 | 0.382168543 | 0.456055939 | 0.25417952  |
| 0.357636225 | 0.306341666 | 0.025990535 | 0.287150657 |
| 0.374122005 | 0.273426916 | 0.448271222 | 0.292450823 |
| 0.315270421 | 0.461747275 | 0.353824206 | 0.16915363  |
| 0.071770554 | 0.338865722 | 0.043840894 | 0.303350724 |
| 0.364299998 | 0.135347706 | 0.301374167 | 0.181244513 |
| 0.081196151 | 0.490460335 | 0.142086176 | 0.187329985 |
| 0.093971085 | 0.31926142  | 0.314271338 | 0.203435958 |
| 0.157080567 | 0.185208758 | 0.280341948 | 0.317984604 |
| 0.07429037  | 0.111178743 | 0.023884014 | 0.251457497 |
| 0.10938809  | 0.251291322 | 0.250663162 | 0.333102011 |
| 0.301972756 | 0.118349731 | 0.323682189 | 0.250962923 |
| 0.126754936 | 0.025550289 | 0.48560497  | 0.380943463 |
| 0.313781289 | 0.206838064 | 0.062650734 | 0.237616926 |
| 0.433627762 | 0.280798577 | 0.291948252 | 0.436273925 |
| 0.059731075 | 0.448303549 | 0.219542742 | 0.13157023  |
| 0.272076676 | 0.267722258 | 0.4482424   | 0.070990987 |
| 0.36633348  | 0.455269786 | 0.324642421 | 0.18382704  |
| 0.389400844 | 0.381481557 | 0.056385232 | 0.360769198 |
| 0.345165371 | 0.047455787 | 0.485778204 | 0.124966407 |
| 0.033432456 | 0.346907484 | 0.317191834 | 0.097363284 |
| 0.098391687 | 0.286624692 | 0.097798204 | 0.27833123  |
| 0.489247958 | 0.351718527 | 0.344814906 | 0.198711592 |
| 0.061220351 | 0.010832943 | 0.195038892 | 0.329299637 |
| 0.482239084 | 0.460204985 | 0.283690992 | 0.279824147 |
| 0.276251898 | 0.257755216 | 0.195131086 | 0.466824225 |
| 0.226550889 | 0.492584492 | 0.015028122 | 0.336218433 |
| 0.465571429 | 0.299559995 | 0.08484716  | 0.318187171 |
| 0.378881558 | 0.079871506 | 0.283448711 | 0.472755868 |
| 0.419910342 | 0.298934312 | 0.295691702 | 0.371943459 |
| 0.03985874  | 0.079393076 | 0.334435441 | 0.144458296 |
| 0.316402543 | 0.23759951  | 0.036979937 | 0.345217205 |

|             |             |              |             |
|-------------|-------------|--------------|-------------|
| 0.061434518 | 0.43529904  | 0.411250587  | 0.075257855 |
| 0.276991846 | 0.347372181 | 0.331478826  | 0.06309663  |
| 0.383157108 | 0.459974686 | 0.494034009  | 0.246946302 |
| 0.353662182 | 0.438788917 | 0.271726254  | 0.104698847 |
| 0.025674436 | 0.47540224  | 0.372298209  | 0.037120386 |
| 0.442826084 | 0.262929834 | 0.016363598  | 0.491364753 |
| 0.243910816 | 0.426682231 | 0.01554475   | 0.088709005 |
| 0.053549177 | 0.403832162 | 0.456727666  | 0.376388277 |
| 0.236305883 | 0.381918947 | 0.008630365  | 0.481840794 |
| 0.465842308 | 0.019840022 | 0.131137129  | 0.348638812 |
| 0.303643182 | 0.516285803 | 0.235174588  | 0.379103495 |
| 0.306034789 | 0.453797762 | 0.244844322  | 0.264915348 |
| 0.406923885 | 0.433783843 | 1            | 0.468277589 |
| 0.425537009 | 0.353034129 | 0.298374597  | 0.030416904 |
| 0.12900205  | 0.272430248 | 0.241126961  | 0.078691982 |
| 0.328482362 | 0.144833245 | 0.46811553   | 0.429293607 |
| 0.429291801 | 0.010547129 | 0.225894352  | 0.366081938 |
| 0.447407323 | 0.47291555  | 0.042624735  | 0.01188501  |
| 0.014091665 | 0.01810675  | 0.36846871   | 0.249932071 |
| 0.45927907  | 0.213377835 | 0.0111105473 | 0.098198024 |
| 0.328746393 | 0.303415545 | 0.470890177  | 0.368018133 |
| 0.364789692 | 0.109697541 | 0.23085622   | 0.384135533 |
| 0.069644363 | 0.299431802 | 0.441422457  | 0.465154566 |
| 0.062655994 | 0.252745479 | 0.37528297   | 0.471638064 |
| 0.043787614 | 0.30123927  | 0.345497225  | 0.28003384  |
| 0.026497246 | 0.095211377 | 0.07778204   | 0.381061505 |
| 0.450167658 | 0.073760427 | 0.036955432  | 0.168091812 |
| 0.140265156 | 0.433115649 | 0.18589273   | 0.483236384 |
| 0.420004106 | 0.405944901 | 0.075980394  | 0.470597005 |
| 0.044916421 | 0.455141137 | 0.261139406  | 0.082977621 |
| 0.314823549 | 0.026889703 | 0.427105406  | 0.108391646 |
| 0.332700847 | 0.381329298 | 0.175807008  | 0.022726454 |
| 0.143467602 | 0.068586029 | 0.439516876  | 0.398990636 |
| 0.045254233 | 0.298713178 | 0.310624413  | 0.387531876 |
| 0.326284815 | 0.359936579 | 0.481978306  | 0.315237522 |
| 0.125539152 | 0.11757368  | 0.389608679  | 0.355181595 |
| 0.290341153 | 0.450399912 | 0.237459418  | 0.493085528 |
| 0.364832363 | 0.457962386 | 0.430363024  | 0.347527062 |
| 0.176225026 | 0.372618359 | 0.32841281   | 0.040334651 |
| 0.369262024 | 0.406478599 | 0.384454153  | 0.139840991 |
| 0.231663211 | 0.279949509 | 0.090551409  | 0.226625296 |
| 0.22734269  | 0.310923495 | 0.165394918  | 0.412857706 |
| 0.37740959  | 0.352250571 | 0.085878623  | 0.074155176 |
| 0.514849197 | 0.443258912 | 0.220100707  | 0.367736708 |
| 0.206613124 | 0.308740376 | 0.377527274  | 0.354189477 |
| 0.310265076 | 0.389621741 | 0.393117475  | 0.32828425  |
| 0.426859176 | 0.299928677 | 0.495691348  | 0.174869484 |
| 0.088138447 | 0.328390813 | 0.103724492  | 0.110436458 |
| 0.17385537  | 0.041713452 | 0.201639829  | 0.369505302 |
| 0.253936802 | 0.338786289 | 0.309771461  | 0.121385299 |
| 0.296675455 | 0.345675982 | 0.341014224  | 0.242330979 |
| 0.099747441 | 0.467454661 | 0.016913061  | 0.077188193 |
| 0.26822577  | 0.369572536 | 0.27584619   | 0.257881331 |
| 0.212451348 | 0.143155508 | 0.291599447  | 0.317604128 |

|             |             |             |             |
|-------------|-------------|-------------|-------------|
| 0.249773791 | 0.317238982 | 0.376614221 | 0.08038231  |
| 0.043448029 | 0.462290795 | 0.376475771 | 0.03449016  |
| 0.091141989 | 0.340019122 | 0.332160843 | 0.22064114  |
| 0.028989433 | 0.420923238 | 0.282508205 | 0.346182032 |
| 0.369033774 | 0.103654952 | 0.374036036 | 0.129802042 |
| 0.115726911 | 0.450177785 | 0.316535282 | 0.466943073 |
| 0.315432822 | 0.360021799 | 0.444027175 | 0.374289384 |
| 0.181973726 | 0.305478012 | 0.057314267 | 0.425274242 |
| 0.284570007 |             |             |             |
| PLEKHF1     | 0.446094079 | 0.49432551  | 0.406524287 |
| 0.436537571 | 0.413549947 | 0.439210598 | 0.240260676 |
| 0.260282387 | 0.096942322 | 0.005656696 | 0.018252156 |
| 0.430003954 | 0.189390568 | 0.301495857 | 0.39404019  |
| 0.418396231 | 0.112858011 | 0.404158147 | 0.254139484 |
| 0.43417655  | 0.123868144 | 0.384711041 | 0.10361568  |
| 0.264209964 | 0.087270651 | 0.063967359 | 0.244565884 |
| 0.456467123 | 0.075644687 | 0.388309242 | 0.437636037 |
| 0.092807484 | 0.45914997  | 0.510927279 | 0.408001784 |
| 0.498282648 | 0.439484905 | 0.01243591  | 0.339073983 |
| 0.461474013 | 0.444339151 | 0.433346082 | 0.339018633 |
| 0.046275205 | 0.497645123 | 0.263917945 | 0.384394392 |
| 0.308640009 | 0.026176128 | 0.331203204 | 0.459048607 |
| 0.470166553 | 0.43555627  | 0.294384452 | 0.182081371 |
| 0.182113713 | 0.29559032  | 0.232829661 | 0.404720279 |
| 0.237439114 | 0.230935125 | 0.468713706 | 0.110069842 |
| 0.164155699 | 0.312204487 | 0.131319769 | 0.310605652 |
| 0.316828998 | 0.452359485 | 0.023776331 | 0.407824915 |
| 0.003859952 | 0.416962361 | 0.362501791 | 0.293757193 |
| 0.037928016 | 0.017450667 | 0.157213564 | 0.364168693 |
| 0.463005624 | 0.446474116 | 0.44933968  | 0.447721561 |
| 0.160315895 | 0.285870041 | 0.364001397 | 0.167329334 |
| 0.463553318 | 0.196386323 | 0.130367048 | 0.406493504 |
| 0.451497694 | 0.491752876 | 0.184232188 | 0.243492081 |
| 0.447618158 | 0.459468073 | 0.451390881 | 0.417633184 |
| 0.341975973 | 0.044099903 | 0.43871802  | 0.454259446 |
| 0.447957363 | 0.278963475 | 0.137526058 | 0.45171932  |
| 0.056957374 | 0.433651334 | 0.360465975 | 0.150435625 |
| 0.463678614 | 0.022628128 | 0.186118319 | 0.380720818 |
| 0.236922911 | 0.468632488 | 0.481037065 | 0.204099357 |
| 0.393863802 | 0.01836705  | 0.119916493 | 0.030996911 |
| 0.347368068 | 0.11759388  | 0.494655177 | 0.457030426 |
| 0.283539645 | 0.355898084 | 0.300175602 | 0.001249481 |
| 0.021965471 | 0.184061084 | 0.443099791 | 0.404075747 |
| 0.456295765 | 0.409327416 | 0.224575774 | 0.445830597 |
| 0.430508725 | 0.446880897 | 0.092416974 | 0.114397966 |
| 0.447150831 | 0.178821105 | 0.237860869 | 0.4414711   |
| 0.287601119 | 0.147713008 | 0.130057244 | 0.462703107 |
| 0.441071784 | 0.087905256 | 0.408227939 | 0.411283079 |
| 0.341884717 | 0.322059068 | 0.114165566 | 0.279065279 |
| 0.057475859 | 0.464159509 | 0.021912288 | 0.406061112 |
| 0.276527967 | 0.116719679 | 0.014814349 | 0.331364548 |
| 0.33169576  | 0.441742636 | 0.478720657 | 0.111261745 |
| 0.322450534 | 0.39284958  | 0.398625675 | 0.439980445 |
| 0.009735154 | 0.052075324 | 0.371790364 | 0.456147701 |

|             |             |             |             |
|-------------|-------------|-------------|-------------|
| 0.370073481 | 0.453690183 | 0.317654359 | 0.299445307 |
| 0.267578669 | 0.455647513 | 0.004391735 | 0.498832831 |
| 0.494576501 | 0.390870376 | 0.386373752 | 0.413051321 |
| 0.365502553 | 0.45766007  | 0.0570728   | 0.411781844 |
| 0.42449644  | 0.084667944 | 0.45719318  | 0.144903699 |
| 0.445875709 | 0.037305595 | 0.365885132 | 0.426507101 |
| 0.42171992  | 0.008970875 | 0.304191717 | 0.42501369  |
| 0.021363485 | 0.136078708 | 0.458619072 | 0.430429394 |
| 0.396095757 | 0.447808216 | 0.453531722 | 0.346731928 |
| 0.420232056 | 0.275384821 | 0.012219125 | 0.297341899 |
| 0.449806928 | 0.375110645 | 0.44969665  | 0.278607867 |
| 0.415706933 | 0.458648792 | 0.439652137 | 0.232456121 |
| 0.046635292 | 0.364628266 | 0.027250873 | 0.332646404 |
| 0.431434452 | 0.122346703 | 0.405409336 | 0.144294859 |
| 0.059595277 | 0.476224917 | 0.147554318 | 0.230086011 |
| 0.10283883  | 0.408503593 | 0.284484914 | 0.240330866 |
| 0.187291948 | 0.159828268 | 0.341355224 | 0.384634368 |
| 0.049839395 | 0.085674217 | 0.012675257 | 0.350375552 |
| 0.121345755 | 0.32835886  | 0.338260142 | 0.44670439  |
| 0.338010726 | 0.102624637 | 0.370610384 | 0.277216914 |
| 0.103984579 | 0.012801964 | 0.476938057 | 0.417315547 |
| 0.414137352 | 0.172624865 | 0.037504431 | 0.337410195 |
| 0.456280562 | 0.393272102 | 0.371080985 | 0.454853288 |
| 0.032486266 | 0.455055327 | 0.239385777 | 0.109479334 |
| 0.338035128 | 0.26077998  | 0.459166507 | 0.076122556 |
| 0.44169775  | 0.455044701 | 0.316476612 | 0.174394145 |
| 0.427239098 | 0.440650031 | 0.03481167  | 0.453861887 |
| 0.445402663 | 0.028159483 | 0.481196779 | 0.10541594  |
| 0.0178219   | 0.425423011 | 0.434635623 | 0.069359406 |
| 0.071670785 | 0.341878074 | 0.07050196  | 0.275177939 |
| 0.475138738 | 0.397793294 | 0.444648177 | 0.19767788  |
| 0.040315154 | 0.006889063 | 0.182455408 | 0.40202611  |
| 0.508354391 | 0.456788764 | 0.2589428   | 0.335623361 |
| 0.250915571 | 0.320155812 | 0.212639033 | 0.454330731 |
| 0.207265908 | 0.499540722 | 0.006096171 | 0.426968154 |
| 0.499231818 | 0.36575952  | 0.068798585 | 0.35741996  |
| 0.443452597 | 0.051382134 | 0.238743183 | 0.48296564  |
| 0.461278003 | 0.338624701 | 0.362580874 | 0.434217719 |
| 0.022334834 | 0.052489697 | 0.391296327 | 0.158299477 |
| 0.397002766 | 0.21968744  | 0.038465992 | 0.391648951 |
| 0.042091312 | 0.444580503 | 0.449009815 | 0.059065961 |
| 0.385436732 | 0.393493909 | 0.358881576 | 0.037861239 |
| 0.429297201 | 0.466698471 | 0.510445201 | 0.197708774 |
| 0.444557575 | 0.443863777 | 0.378645231 | 0.073136731 |
| 0.013712555 | 0.494376307 | 0.460909195 | 0.024808323 |
| 0.456388241 | 0.330296305 | 0.010421839 | 0.478833178 |
| 0.205402787 | 0.463426753 | 0.008787679 | 0.089353639 |
| 0.034253774 | 0.439680553 | 0.480980309 | 0.435806192 |
| 0.323776711 | 0.397932414 | 0.004914236 | 0.470378286 |
| 0.471581227 | 0.010813845 | 0.11853693  | 0.441975061 |
| 0.414799383 | 0.511036496 | 0.292732328 | 0.436153664 |
| 0.407198035 | 0.48116551  | 0.254127148 | 0.258487569 |
| 0.461912092 | 0.45318347  | 0.468277589 | 1           |
| 0.456410298 | 0.409829626 | 0.292953327 | 0.017198421 |

|             |             |             |             |
|-------------|-------------|-------------|-------------|
| 0.138632246 | 0.287537646 | 0.346055166 | 0.079911973 |
| 0.414745603 | 0.130409306 | 0.458677857 | 0.452224036 |
| 0.446905224 | 0.003937374 | 0.199772894 | 0.454176094 |
| 0.464025404 | 0.4675965   | 0.02291706  | 0.007871136 |
| 0.009913738 | 0.013917853 | 0.408304005 | 0.233029687 |
| 0.45854018  | 0.295904389 | 0.004125714 | 0.064920444 |
| 0.321411085 | 0.370154053 | 0.478639855 | 0.391293376 |
| 0.44304929  | 0.077160598 | 0.303538571 | 0.418910214 |
| 0.05744539  | 0.407834191 | 0.452711723 | 0.47099898  |
| 0.037941704 | 0.240156381 | 0.422701018 | 0.463656898 |
| 0.054451531 | 0.301312358 | 0.431645551 | 0.321868592 |
| 0.013553545 | 0.071967161 | 0.059650977 | 0.436962384 |
| 0.48491433  | 0.064881463 | 0.026203435 | 0.198665287 |
| 0.123947296 | 0.457644919 | 0.164795915 | 0.460392472 |
| 0.464981383 | 0.437094094 | 0.059406803 | 0.480051619 |
| 0.03429006  | 0.475831985 | 0.304085972 | 0.085871226 |
| 0.296986044 | 0.012246743 | 0.434764017 | 0.146012722 |
| 0.382273418 | 0.453965382 | 0.202176599 | 0.012467841 |
| 0.167636741 | 0.045753272 | 0.452966757 | 0.440178588 |
| 0.027640504 | 0.276909009 | 0.299104113 | 0.428182448 |
| 0.362361842 | 0.436832219 | 0.502540991 | 0.44183601  |
| 0.098782519 | 0.120805743 | 0.447209317 | 0.452325833 |
| 0.292837002 | 0.451054903 | 0.286465392 | 0.479835792 |
| 0.462351902 | 0.461537179 | 0.448461434 | 0.384624524 |
| 0.194110053 | 0.460015464 | 0.417085146 | 0.025330622 |
| 0.379838642 | 0.447501464 | 0.419713121 | 0.140013355 |
| 0.238664023 | 0.366656977 | 0.057690743 | 0.238744875 |
| 0.30281139  | 0.386974631 | 0.142669136 | 0.440128936 |
| 0.445473256 | 0.454527487 | 0.053149962 | 0.05675896  |
| 0.510400274 | 0.453033475 | 0.199334258 | 0.457635689 |
| 0.168396635 | 0.340856358 | 0.449647985 | 0.431145164 |
| 0.388799846 | 0.448812695 | 0.460978739 | 0.427191884 |
| 0.439419864 | 0.285128565 | 0.510942748 | 0.149178581 |
| 0.078566571 | 0.429145069 | 0.091261476 | 0.082047618 |
| 0.141977853 | 0.024290114 | 0.274684346 | 0.420888893 |
| 0.350260826 | 0.375407298 | 0.376881716 | 0.087757055 |
| 0.3049      | 0.416932599 | 0.354560588 | 0.237551027 |
| 0.077784805 | 0.487446131 | 0.008607036 | 0.050257448 |
| 0.351695846 | 0.455275992 | 0.352935172 | 0.236796646 |
| 0.264479448 | 0.121987436 | 0.292065385 | 0.37909781  |
| 0.345077833 | 0.381085923 | 0.457824652 | 0.048916106 |
| 0.023474241 | 0.45657728  | 0.446766953 | 0.018467695 |
| 0.078464789 | 0.440941325 | 0.320573651 | 0.242537343 |
| 0.016736545 | 0.43170603  | 0.386283372 | 0.418160625 |
| 0.397875712 | 0.067226769 | 0.413125596 | 0.10754424  |
| 0.073306486 | 0.452940334 | 0.388478484 | 0.483945875 |
| 0.344616749 | 0.415539423 | 0.470502868 | 0.449866776 |
| 0.144044409 | 0.399813968 | 0.033452603 | 0.463854491 |
| 0.403288185 |             |             |             |
| PLSCR1      | 0.395686891 | 0.527462011 | 0.379726255 |
| 0.449382795 | 0.462652247 | 0.373365675 | 0.29003977  |
| 0.238758235 | 0.118939749 | 0.016990399 | 0.047113332 |
| 0.436026256 | 0.279481068 | 0.354709162 | 0.317026152 |
| 0.449110183 | 0.212885695 | 0.362280659 | 0.330074294 |

|             |             |             |             |
|-------------|-------------|-------------|-------------|
| 0.446322312 | 0.155069438 | 0.455143823 | 0.15901258  |
| 0.314647477 | 0.15494493  | 0.124263495 | 0.298712256 |
| 0.453663471 | 0.137209425 | 0.349404678 | 0.411506491 |
| 0.156843247 | 0.428905486 | 0.507858388 | 0.462318699 |
| 0.500062641 | 0.360415307 | 0.026701284 | 0.33005289  |
| 0.396727981 | 0.433057808 | 0.441766483 | 0.408370005 |
| 0.08807993  | 0.477461644 | 0.329255962 | 0.419159754 |
| 0.25520421  | 0.067761844 | 0.261764949 | 0.435352575 |
| 0.469124799 | 0.42614383  | 0.279703027 | 0.235713851 |
| 0.256215302 | 0.278708157 | 0.287380848 | 0.334116129 |
| 0.319160111 | 0.198852875 | 0.478887639 | 0.133868219 |
| 0.18402604  | 0.314046865 | 0.219345487 | 0.335773728 |
| 0.348025629 | 0.373175972 | 0.041160698 | 0.373865637 |
| 0.009917485 | 0.42923011  | 0.415687469 | 0.286585964 |
| 0.085157885 | 0.058969066 | 0.250211188 | 0.407109381 |
| 0.457476775 | 0.441050607 | 0.485929034 | 0.484800159 |
| 0.268402436 | 0.359059026 | 0.39151288  | 0.267446355 |
| 0.412241345 | 0.262550582 | 0.160046751 | 0.457496158 |
| 0.493874437 | 0.51890414  | 0.268161373 | 0.321710377 |
| 0.414427043 | 0.481101646 | 0.417995509 | 0.453386394 |
| 0.331232602 | 0.079693049 | 0.437269285 | 0.514850975 |
| 0.377348273 | 0.324397202 | 0.225104648 | 0.425397288 |
| 0.110301094 | 0.360989802 | 0.427414732 | 0.227990963 |
| 0.472531746 | 0.039773591 | 0.280220016 | 0.423729826 |
| 0.273144931 | 0.426138527 | 0.507455785 | 0.27597692  |
| 0.436380637 | 0.051423764 | 0.150425806 | 0.065352163 |
| 0.381207534 | 0.160097496 | 0.46337877  | 0.465141244 |
| 0.307887452 | 0.419092647 | 0.340683433 | 0.007931091 |
| 0.05801217  | 0.231930324 | 0.419823999 | 0.399356123 |
| 0.434233997 | 0.345678776 | 0.299149818 | 0.372130357 |
| 0.41825245  | 0.477825567 | 0.061233816 | 0.160921695 |
| 0.44074626  | 0.236518509 | 0.328441024 | 0.453669173 |
| 0.370096894 | 0.182505912 | 0.214735763 | 0.520263555 |
| 0.425756964 | 0.1562444   | 0.34708158  | 0.455407855 |
| 0.375443441 | 0.402292244 | 0.184095563 | 0.381804566 |
| 0.106134361 | 0.46346175  | 0.05600562  | 0.359485712 |
| 0.251355613 | 0.216886497 | 0.023371221 | 0.316856054 |
| 0.34568693  | 0.423449628 | 0.445200889 | 0.176859355 |
| 0.416405647 | 0.451250188 | 0.341173493 | 0.430136371 |
| 0.02655945  | 0.087395083 | 0.280790778 | 0.517024807 |
| 0.297229891 | 0.493716208 | 0.378875642 | 0.349604272 |
| 0.356904066 | 0.449518679 | 0.003991919 | 0.485793214 |
| 0.515563672 | 0.295269761 | 0.456533731 | 0.43641159  |
| 0.353656964 | 0.452568148 | 0.045005235 | 0.46616264  |
| 0.34444459  | 0.137396135 | 0.508103955 | 0.241745934 |
| 0.453228417 | 0.084833156 | 0.3754895   | 0.402514799 |
| 0.407939306 | 0.018272219 | 0.263881946 | 0.425106409 |
| 0.050142615 | 0.14950704  | 0.424828576 | 0.44445367  |
| 0.412208451 | 0.441628037 | 0.486286974 | 0.334514321 |
| 0.460244478 | 0.314026344 | 0.027914413 | 0.367355436 |
| 0.419255015 | 0.361156963 | 0.442610127 | 0.315062923 |
| 0.325092804 | 0.475936224 | 0.381633525 | 0.209735636 |
| 0.089754315 | 0.372622829 | 0.045449088 | 0.377651457 |
| 0.354229306 | 0.20766952  | 0.36282142  | 0.204223073 |

|             |             |             |             |
|-------------|-------------|-------------|-------------|
| 0.12346885  | 0.52984403  | 0.203615174 | 0.258322883 |
| 0.139018931 | 0.442565383 | 0.332370832 | 0.321580576 |
| 0.289780496 | 0.234911327 | 0.359020391 | 0.393929271 |
| 0.081060729 | 0.171776917 | 0.023515811 | 0.391977787 |
| 0.227314319 | 0.395605593 | 0.38458735  | 0.399555921 |
| 0.403608706 | 0.201863234 | 0.441697914 | 0.293560996 |
| 0.163798752 | 0.03729312  | 0.509818931 | 0.445008332 |
| 0.324766655 | 0.2287519   | 0.081150375 | 0.354157929 |
| 0.476077333 | 0.313794897 | 0.261864949 | 0.466363225 |
| 0.051490221 | 0.479598591 | 0.341479635 | 0.194779988 |
| 0.422787216 | 0.361326735 | 0.458607959 | 0.076427247 |
| 0.400786707 | 0.477871898 | 0.369602995 | 0.253444844 |
| 0.40167799  | 0.447713464 | 0.068822676 | 0.380817038 |
| 0.388199324 | 0.072651494 | 0.525387739 | 0.193052782 |
| 0.046636572 | 0.442767392 | 0.420979744 | 0.129193738 |
| 0.126601583 | 0.396731485 | 0.086631781 | 0.364923147 |
| 0.52410406  | 0.459699971 | 0.419506805 | 0.245144742 |
| 0.089690783 | 0.035534142 | 0.263356036 | 0.384894759 |
| 0.500781338 | 0.505563238 | 0.347768281 | 0.416452649 |
| 0.330830618 | 0.34464861  | 0.171681616 | 0.513373722 |
| 0.209153902 | 0.509109601 | 0.019021835 | 0.420892614 |
| 0.493815099 | 0.318148992 | 0.13195187  | 0.362844261 |
| 0.380954552 | 0.090455711 | 0.275958611 | 0.496297263 |
| 0.42241421  | 0.361118551 | 0.359931609 | 0.447778196 |
| 0.040992256 | 0.088802593 | 0.400346395 | 0.194778717 |
| 0.405385881 | 0.283586233 | 0.057836379 | 0.354243208 |
| 0.095846716 | 0.461842546 | 0.461939455 | 0.095759191 |
| 0.348740244 | 0.320345512 | 0.431396133 | 0.078587157 |
| 0.425819058 | 0.484988061 | 0.51647663  | 0.241389169 |
| 0.43253097  | 0.482377094 | 0.38470885  | 0.129556635 |
| 0.037643693 | 0.50354288  | 0.393229254 | 0.052281399 |
| 0.475497958 | 0.251267859 | 0.041140394 | 0.503801543 |
| 0.270183898 | 0.429669752 | 0.006392036 | 0.076132562 |
| 0.065092131 | 0.45149121  | 0.468914017 | 0.411199756 |
| 0.260134136 | 0.416840506 | 0.008979371 | 0.516839002 |
| 0.497210658 | 0.031121321 | 0.189464534 | 0.421037431 |
| 0.402914701 | 0.530287345 | 0.323516123 | 0.428633106 |
| 0.423327491 | 0.490785683 | 0.323737158 | 0.346142677 |
| 0.432207562 | 0.474589517 | 0.425537009 | 0.456410298 |
| 1           | 0.451454572 | 0.364539421 | 0.03974579  |
| 0.135945272 | 0.264849698 | 0.298932039 | 0.118273296 |
| 0.325500631 | 0.199338329 | 0.476425408 | 0.463351531 |
| 0.478402202 | 0.014561526 | 0.222219375 | 0.415180649 |
| 0.447107443 | 0.478787734 | 0.033660916 | 0.007886774 |
| 0.009683913 | 0.035939345 | 0.408725389 | 0.303539009 |
| 0.483699381 | 0.262771377 | 0.015827131 | 0.08732444  |
| 0.342647322 | 0.413347    | 0.506330923 | 0.440530237 |
| 0.422280142 | 0.143228422 | 0.325022352 | 0.444084316 |
| 0.1069054   | 0.304270475 | 0.488549993 | 0.479499766 |
| 0.072632055 | 0.304336191 | 0.39011073  | 0.498022696 |
| 0.072015436 | 0.394324314 | 0.444669698 | 0.385870733 |
| 0.025382286 | 0.129147162 | 0.104229418 | 0.453395636 |
| 0.484333625 | 0.148299926 | 0.076987565 | 0.164935418 |
| 0.203906312 | 0.456315579 | 0.259988387 | 0.52050069  |

|             |             |             |             |
|-------------|-------------|-------------|-------------|
| 0.441656931 | 0.467929008 | 0.117823461 | 0.477153255 |
| 0.074560179 | 0.48483515  | 0.373684051 | 0.074205693 |
| 0.343734651 | 0.029958053 | 0.458724093 | 0.166242278 |
| 0.374708171 | 0.407842382 | 0.195219266 | 0.034307992 |
| 0.172467426 | 0.101153303 | 0.481236568 | 0.445686082 |
| 0.056361626 | 0.306012114 | 0.362915081 | 0.434785098 |
| 0.333623271 | 0.464398822 | 0.498422705 | 0.378576104 |
| 0.150219132 | 0.155508134 | 0.438949923 | 0.390510972 |
| 0.310866143 | 0.49236711  | 0.344785874 | 0.521587108 |
| 0.396222406 | 0.451353694 | 0.465616057 | 0.396236659 |
| 0.287688705 | 0.397576647 | 0.401034207 | 0.050500957 |
| 0.416556011 | 0.466507249 | 0.385392909 | 0.208535185 |
| 0.340534811 | 0.36992654  | 0.081037999 | 0.192464625 |
| 0.313275441 | 0.331719148 | 0.238864219 | 0.459043327 |
| 0.402794408 | 0.39089919  | 0.078052941 | 0.099146112 |
| 0.541508064 | 0.427193224 | 0.18933197  | 0.439779301 |
| 0.245533064 | 0.3987635   | 0.437533825 | 0.440901848 |
| 0.353195107 | 0.437825505 | 0.437961168 | 0.412253524 |
| 0.436277734 | 0.338660348 | 0.518663078 | 0.122551318 |
| 0.11113545  | 0.402464205 | 0.17461179  | 0.147502109 |
| 0.233927206 | 0.051939383 | 0.278535114 | 0.45987408  |
| 0.35454313  | 0.455950563 | 0.340085697 | 0.129231566 |
| 0.385847434 | 0.350239859 | 0.423128725 | 0.28258113  |
| 0.14565631  | 0.496357531 | 0.021927376 | 0.106380558 |
| 0.389050256 | 0.420561201 | 0.397765654 | 0.312891179 |
| 0.305834182 | 0.187568936 | 0.392269814 | 0.325340364 |
| 0.354855266 | 0.355630626 | 0.415352842 | 0.062309647 |
| 0.050777244 | 0.498952565 | 0.375449004 | 0.036952962 |
| 0.118176504 | 0.359594022 | 0.34841431  | 0.293818494 |
| 0.040910497 | 0.471825566 | 0.343037686 | 0.437591496 |
| 0.398449912 | 0.120606956 | 0.345572923 | 0.119303754 |
| 0.097502202 | 0.448778207 | 0.387950322 | 0.50407923  |
| 0.367721023 | 0.465466462 | 0.431747393 | 0.425064125 |
| 0.154532233 | 0.345223675 | 0.061066032 | 0.442530596 |
| 0.377007097 |             |             |             |
| PLXDC1      | 0.360149067 | 0.48356311  | 0.342683369 |
| 0.371554162 | 0.385956612 | 0.232487536 | 0.205544951 |
| 0.158272381 | 0.113930668 | 0.00905868  | 0.046907458 |
| 0.360562555 | 0.209228844 | 0.219373024 | 0.218924984 |
| 0.418844428 | 0.230663432 | 0.319578944 | 0.27734165  |
| 0.344842922 | 0.091161537 | 0.379487758 | 0.139901728 |
| 0.364762509 | 0.183335191 | 0.130191482 | 0.304674267 |
| 0.436918229 | 0.146505512 | 0.193077439 | 0.294175802 |
| 0.233298723 | 0.395497865 | 0.454523538 | 0.366871438 |
| 0.450343086 | 0.31194098  | 0.040860773 | 0.202588096 |
| 0.381922386 | 0.384659421 | 0.342958539 | 0.317693837 |
| 0.077697686 | 0.402902777 | 0.246466278 | 0.395197576 |
| 0.176518352 | 0.074792303 | 0.14408584  | 0.368877019 |
| 0.397247681 | 0.301521815 | 0.186576806 | 0.169686414 |
| 0.173397762 | 0.152680233 | 0.258485792 | 0.197744567 |
| 0.245931562 | 0.096387605 | 0.423436326 | 0.09919134  |
| 0.135021369 | 0.234015669 | 0.292847331 | 0.235765946 |
| 0.354149485 | 0.290089794 | 0.045785622 | 0.314020928 |
| 0.004034352 | 0.336076924 | 0.406922596 | 0.269216021 |



|             |             |             |             |
|-------------|-------------|-------------|-------------|
| 0.111776004 | 0.045832823 | 0.313888901 | 0.285127605 |
| 0.460979768 | 0.423286989 | 0.504432906 | 0.499028514 |
| 0.248526658 | 0.382126771 | 0.371365583 | 0.233911381 |
| 0.398861422 | 0.180130482 | 0.142178315 | 0.435737023 |
| 0.507215373 | 0.474643889 | 0.283966495 | 0.360052743 |
| 0.347919796 | 0.434618641 | 0.30496909  | 0.3540354   |
| 0.262210007 | 0.15683832  | 0.37738439  | 0.504340267 |
| 0.33578061  | 0.344229869 | 0.253428545 | 0.351599429 |
| 0.139095627 | 0.260933108 | 0.336590597 | 0.232150779 |
| 0.470802325 | 0.036885802 | 0.325564052 | 0.288033823 |
| 0.307392982 | 0.385325391 | 0.476843177 | 0.222340841 |
| 0.398236957 | 0.05531924  | 0.165170466 | 0.11166002  |
| 0.288754218 | 0.228299218 | 0.390009515 | 0.43588631  |
| 0.199716393 | 0.359869624 | 0.263470459 | 0.018518305 |
| 0.091038161 | 0.313199892 | 0.394668797 | 0.34687952  |
| 0.382471931 | 0.343832307 | 0.24809578  | 0.290389774 |
| 0.321542587 | 0.500251277 | 0.026803254 | 0.145654126 |
| 0.321863599 | 0.319173662 | 0.306673082 | 0.341749701 |
| 0.339228626 | 0.145128336 | 0.198434355 | 0.509924207 |
| 0.357970064 | 0.144026205 | 0.261132697 | 0.402588053 |
| 0.252069888 | 0.388790464 | 0.176619925 | 0.278954014 |
| 0.07983326  | 0.424847245 | 0.103121289 | 0.264954832 |
| 0.200057767 | 0.246912847 | 0.041027494 | 0.203083814 |
| 0.222138933 | 0.374766583 | 0.386689685 | 0.19405722  |
| 0.307837502 | 0.382138496 | 0.220781996 | 0.310066495 |
| 0.020217153 | 0.110614978 | 0.176093505 | 0.489050568 |
| 0.157720394 | 0.508675382 | 0.332289622 | 0.368508762 |
| 0.358148722 | 0.441974243 | 0.009923771 | 0.418801933 |
| 0.478480062 | 0.177884507 | 0.334938926 | 0.389508192 |
| 0.297867232 | 0.427577852 | 0.037567791 | 0.394248129 |
| 0.246749864 | 0.157572644 | 0.522010493 | 0.246105255 |
| 0.415479235 | 0.096701761 | 0.244925439 | 0.418959399 |
| 0.349290367 | 0.021316443 | 0.142143877 | 0.299859825 |
| 0.103532635 | 0.083332301 | 0.365034991 | 0.334835496 |
| 0.308374229 | 0.437525848 | 0.509046509 | 0.283902842 |
| 0.367646532 | 0.252413484 | 0.049150301 | 0.390951008 |
| 0.412539082 | 0.278874584 | 0.375338496 | 0.235224024 |
| 0.203273733 | 0.426341703 | 0.362212008 | 0.142162467 |
| 0.083390994 | 0.256547045 | 0.028488202 | 0.327812305 |
| 0.345271181 | 0.133976138 | 0.287997606 | 0.280008471 |
| 0.167337008 | 0.503488786 | 0.279203548 | 0.301094709 |
| 0.208292321 | 0.285927543 | 0.282112846 | 0.185008485 |
| 0.203513476 | 0.240785932 | 0.321463075 | 0.318635996 |
| 0.051622116 | 0.166151401 | 0.070425952 | 0.274862681 |
| 0.141011867 | 0.250277458 | 0.227447283 | 0.295064519 |
| 0.274676315 | 0.142593583 | 0.350452665 | 0.336437222 |
| 0.211951077 | 0.057905431 | 0.471270155 | 0.372487669 |
| 0.229321878 | 0.198881635 | 0.119220369 | 0.232304662 |
| 0.444926263 | 0.166973028 | 0.156316041 | 0.409892747 |
| 0.070721684 | 0.502375377 | 0.247072878 | 0.209541248 |
| 0.34643467  | 0.28982082  | 0.463540242 | 0.051574652 |
| 0.291829904 | 0.410916453 | 0.377686977 | 0.249439689 |
| 0.324299107 | 0.332687217 | 0.058153402 | 0.325079503 |
| 0.309071776 | 0.086448304 | 0.497852414 | 0.244670855 |

|             |             |             |             |
|-------------|-------------|-------------|-------------|
| 0.078164074 | 0.397683149 | 0.354439521 | 0.165063154 |
| 0.171786013 | 0.263897517 | 0.051997344 | 0.35638899  |
| 0.490117907 | 0.404029503 | 0.346023349 | 0.329151824 |
| 0.079400337 | 0.02459148  | 0.343063317 | 0.35204595  |
| 0.435052025 | 0.494081559 | 0.34568926  | 0.340494367 |
| 0.289661633 | 0.292941083 | 0.10182871  | 0.492263151 |
| 0.291865834 | 0.471155421 | 0.033189883 | 0.411351341 |
| 0.43667363  | 0.181401467 | 0.155010294 | 0.232814316 |
| 0.314706497 | 0.090471623 | 0.26626463  | 0.439126959 |
| 0.397645331 | 0.309178028 | 0.284154587 | 0.37391728  |
| 0.028670771 | 0.067607545 | 0.357877504 | 0.270968739 |
| 0.301907347 | 0.279640099 | 0.111765471 | 0.249293455 |
| 0.082282046 | 0.393425998 | 0.471119813 | 0.107083419 |
| 0.193621748 | 0.226029429 | 0.40693307  | 0.088252781 |
| 0.440513149 | 0.470978983 | 0.457802655 | 0.214977249 |
| 0.396083505 | 0.454952329 | 0.311730759 | 0.189995816 |
| 0.07109187  | 0.464354812 | 0.291794821 | 0.041418946 |
| 0.484894786 | 0.127417862 | 0.02623709  | 0.453500596 |
| 0.238136313 | 0.360332767 | 0.004964587 | 0.126856513 |
| 0.13763636  | 0.486636123 | 0.405610876 | 0.287698925 |
| 0.125383692 | 0.356095547 | 0.032204456 | 0.512805608 |
| 0.434999351 | 0.058519491 | 0.266965607 | 0.37644988  |
| 0.363711241 | 0.482848794 | 0.316262011 | 0.431778465 |
| 0.331165247 | 0.437909189 | 0.209788753 | 0.333536513 |
| 0.390055841 | 0.45582623  | 0.353034129 | 0.409829626 |
| 0.451454572 | 1           | 0.295532022 | 0.034937117 |
| 0.168436054 | 0.156747007 | 0.181469136 | 0.107562485 |
| 0.198962955 | 0.214842661 | 0.457072853 | 0.487073429 |
| 0.473871524 | 0.029225748 | 0.148167306 | 0.369540727 |
| 0.405774494 | 0.471018257 | 0.071962049 | 0.013376986 |
| 0.017279065 | 0.04945392  | 0.29200656  | 0.349228184 |
| 0.467238666 | 0.126411439 | 0.022575514 | 0.057708352 |
| 0.281255167 | 0.372770068 | 0.454419432 | 0.360093879 |
| 0.421718431 | 0.176017212 | 0.182044775 | 0.374473544 |
| 0.138107136 | 0.214403919 | 0.477216774 | 0.408309878 |
| 0.133200279 | 0.345158791 | 0.315425989 | 0.482978934 |
| 0.116696112 | 0.385195155 | 0.358202193 | 0.269918752 |
| 0.062837043 | 0.180284116 | 0.138771426 | 0.450098007 |
| 0.433377901 | 0.118867712 | 0.074087829 | 0.088455447 |
| 0.14161575  | 0.472118631 | 0.210459922 | 0.520725562 |
| 0.40401813  | 0.455890871 | 0.192647082 | 0.422544519 |
| 0.07646421  | 0.421431746 | 0.366337922 | 0.04299516  |
| 0.371192598 | 0.054076558 | 0.441494842 | 0.133373346 |
| 0.231962933 | 0.303369467 | 0.210747936 | 0.075693582 |
| 0.23336502  | 0.134078327 | 0.48418801  | 0.478926202 |
| 0.124090577 | 0.257916122 | 0.374250197 | 0.369496022 |
| 0.202061742 | 0.387706801 | 0.431887976 | 0.246483598 |
| 0.107928963 | 0.244046033 | 0.347136804 | 0.277868326 |
| 0.201605826 | 0.517107515 | 0.270012662 | 0.510766716 |
| 0.320709105 | 0.438611144 | 0.447807707 | 0.294617981 |
| 0.321480985 | 0.2737734   | 0.246753264 | 0.030036184 |
| 0.346482934 | 0.454611551 | 0.30504592  | 0.205564365 |
| 0.3028828   | 0.340380665 | 0.103149146 | 0.161975263 |
| 0.309377794 | 0.186703677 | 0.191092729 | 0.465179572 |

|             |             |             |             |
|-------------|-------------|-------------|-------------|
| 0.296833464 | 0.290107064 | 0.078917701 | 0.125540767 |
| 0.503810428 | 0.389244313 | 0.133300348 | 0.317011407 |
| 0.289696615 | 0.33938868  | 0.432353862 | 0.440371943 |
| 0.308244343 | 0.407191993 | 0.374295231 | 0.26392561  |
| 0.358705098 | 0.282151148 | 0.463966709 | 0.071347156 |
| 0.137514224 | 0.315193016 | 0.131532181 | 0.205695991 |
| 0.212529067 | 0.087693626 | 0.277011353 | 0.413052914 |
| 0.311382868 | 0.357509358 | 0.229448    | 0.15744428  |
| 0.399448201 | 0.292542585 | 0.38188145  | 0.178362545 |
| 0.121390083 | 0.429360049 | 0.032392513 | 0.146455621 |
| 0.338188625 | 0.381520599 | 0.337177389 | 0.331225032 |
| 0.312704439 | 0.286500692 | 0.34158803  | 0.188390595 |
| 0.190910949 | 0.307776918 | 0.378144226 | 0.056833308 |
| 0.04159335  | 0.516116661 | 0.26690811  | 0.088401454 |
| 0.180583664 | 0.259715706 | 0.342727849 | 0.229623298 |
| 0.08948334  | 0.451379904 | 0.19721835  | 0.375078196 |
| 0.287486378 | 0.150929393 | 0.288515225 | 0.120295813 |
| 0.123993822 | 0.38915081  | 0.357954523 | 0.464503098 |
| 0.388974401 | 0.410166278 | 0.363121374 | 0.385542782 |
| 0.195558619 | 0.303294331 | 0.054545289 | 0.431615838 |
| 0.272848942 |             |             |             |
| PMAIP1      | 0.2272493   | 0.335597568 | 0.156075272 |
| 0.38299075  | 0.21952823  | 0.194313972 | 0.318763686 |
| 0.202841629 | 0.226215154 | 0.070064777 | 0.110193037 |
| 0.199331982 | 0.203135855 | 0.234836586 | 0.168758999 |
| 0.384952547 | 0.219903866 | 0.177371258 | 0.332188734 |
| 0.334724612 | 0.243629694 | 0.365417795 | 0.309293273 |
| 0.177558346 | 0.191151687 | 0.25362306  | 0.207833672 |
| 0.39349141  | 0.264892072 | 0.155170107 | 0.301921211 |
| 0.188735857 | 0.283607945 | 0.282809536 | 0.274377378 |
| 0.261159607 | 0.189151779 | 0.035076768 | 0.217425955 |
| 0.274497708 | 0.298978184 | 0.348232506 | 0.316825933 |
| 0.242055042 | 0.25666032  | 0.325357561 | 0.220895131 |
| 0.161741937 | 0.16936485  | 0.150772431 | 0.25099143  |
| 0.247506605 | 0.199670549 | 0.250376202 | 0.318271865 |
| 0.147382728 | 0.150298408 | 0.108478417 | 0.19525386  |
| 0.334254308 | 0.145502082 | 0.263417339 | 0.25302937  |
| 0.159587716 | 0.249489072 | 0.194193721 | 0.271659113 |
| 0.151635922 | 0.241951285 | 0.139466752 | 0.14655166  |
| 0.024853861 | 0.343256024 | 0.22776333  | 0.123575147 |
| 0.199048511 | 0.13824014  | 0.217632394 | 0.312658595 |
| 0.379246123 | 0.251536449 | 0.367547946 | 0.338073048 |
| 0.217096205 | 0.253974171 | 0.151501799 | 0.314049952 |
| 0.288000498 | 0.308447679 | 0.179952692 | 0.380384002 |
| 0.362334708 | 0.300243136 | 0.259838528 | 0.248496017 |
| 0.298095374 | 0.314122976 | 0.1759472   | 0.216605888 |
| 0.159063005 | 0.117733401 | 0.260684623 | 0.341996214 |
| 0.241502331 | 0.134095553 | 0.259090242 | 0.318825728 |
| 0.233024813 | 0.145260987 | 0.361609359 | 0.132861752 |
| 0.390441509 | 0.168302827 | 0.23481875  | 0.256845014 |
| 0.238939136 | 0.280432745 | 0.290179694 | 0.339789708 |
| 0.19277896  | 0.112716516 | 0.113295306 | 0.1521998   |
| 0.201562531 | 0.076321049 | 0.23040331  | 0.36726649  |
| 0.207895434 | 0.213083245 | 0.311739849 | 0.046345732 |

|             |             |             |             |
|-------------|-------------|-------------|-------------|
| 0.13954307  | 0.174941443 | 0.245426536 | 0.193730124 |
| 0.301920067 | 0.184122101 | 0.276829726 | 0.213071875 |
| 0.200164178 | 0.361351874 | 0.033145244 | 0.304510425 |
| 0.210268675 | 0.188920653 | 0.3230302   | 0.205629419 |
| 0.25569336  | 0.286050806 | 0.312780666 | 0.368102528 |
| 0.27136938  | 0.295659445 | 0.146927584 | 0.362693075 |
| 0.218736013 | 0.210037155 | 0.299023169 | 0.269527845 |
| 0.252136068 | 0.246028237 | 0.117371472 | 0.187707393 |
| 0.131358537 | 0.153594555 | 0.07519988  | 0.219763567 |
| 0.215005913 | 0.277516325 | 0.214114255 | 0.282650619 |
| 0.273062654 | 0.306608909 | 0.152839407 | 0.257160647 |
| 0.097903723 | 0.186455126 | 0.108095897 | 0.34298522  |
| 0.155177063 | 0.327854907 | 0.282903531 | 0.239939127 |
| 0.277460533 | 0.362582401 | 0.005317555 | 0.265123795 |
| 0.296041583 | 0.104727187 | 0.249580619 | 0.223706885 |
| 0.151345939 | 0.373946663 | 0.015994901 | 0.3484647   |
| 0.167699994 | 0.26561822  | 0.388126114 | 0.278684631 |
| 0.256732147 | 0.213232123 | 0.213210295 | 0.255214866 |
| 0.20439857  | 0.045680829 | 0.18068159  | 0.338118968 |
| 0.105861843 | 0.229141671 | 0.28240439  | 0.334286523 |
| 0.26409322  | 0.318800393 | 0.405407941 | 0.142820332 |
| 0.221530302 | 0.288261326 | 0.096925802 | 0.220329184 |
| 0.268633678 | 0.130360944 | 0.27558249  | 0.309312775 |
| 0.121390641 | 0.309888145 | 0.215837867 | 0.125152038 |
| 0.248046972 | 0.249707132 | 0.097263403 | 0.262139669 |
| 0.210322537 | 0.273676472 | 0.150769463 | 0.166585601 |
| 0.194067409 | 0.351376058 | 0.125802614 | 0.105046571 |
| 0.0765042   | 0.205986185 | 0.312554506 | 0.201819967 |
| 0.166077912 | 0.307071195 | 0.192635746 | 0.221247551 |
| 0.214485664 | 0.265554798 | 0.047297402 | 0.113611407 |
| 0.152308862 | 0.150691316 | 0.136187375 | 0.211392605 |
| 0.201173162 | 0.201326539 | 0.234807786 | 0.166036856 |
| 0.211709025 | 0.129405496 | 0.327402609 | 0.335038474 |
| 0.182510175 | 0.331963898 | 0.181361024 | 0.108918835 |
| 0.360061009 | 0.123420185 | 0.104131923 | 0.327882781 |
| 0.116162734 | 0.35643639  | 0.253765188 | 0.261414097 |
| 0.171528454 | 0.312994736 | 0.40233993  | 0.093537665 |
| 0.185616418 | 0.298508917 | 0.255848079 | 0.280295104 |
| 0.233389148 | 0.301925695 | 0.204790503 | 0.218914394 |
| 0.207937824 | 0.188870292 | 0.320364644 | 0.191759484 |
| 0.136676943 | 0.266126804 | 0.248078849 | 0.236295993 |
| 0.2145329   | 0.244761496 | 0.201556247 | 0.289677765 |
| 0.349016664 | 0.381472496 | 0.270112554 | 0.159861711 |
| 0.233761408 | 0.066284177 | 0.192723807 | 0.143208435 |
| 0.265272047 | 0.304404712 | 0.290750563 | 0.202602309 |
| 0.333492539 | 0.197769435 | 0.128004225 | 0.338177535 |
| 0.121070121 | 0.290392091 | 0.088150008 | 0.262993312 |
| 0.25702764  | 0.140726914 | 0.207464323 | 0.2507113   |
| 0.244853766 | 0.250008983 | 0.264604914 | 0.285873862 |
| 0.308760837 | 0.246952668 | 0.204884597 | 0.254783811 |
| 0.158787783 | 0.234585276 | 0.218934112 | 0.110166525 |
| 0.211338648 | 0.311016194 | 0.029888479 | 0.198471468 |
| 0.220207994 | 0.29142509  | 0.349362251 | 0.218587559 |
| 0.163772451 | 0.175575091 | 0.28345439  | 0.222770329 |

|             |             |             |             |
|-------------|-------------|-------------|-------------|
| 0.268173664 | 0.273371697 | 0.289761713 | 0.285516326 |
| 0.250734441 | 0.295600231 | 0.14520484  | 0.206345623 |
| 0.110645692 | 0.274427866 | 0.237627481 | 0.113269769 |
| 0.381748484 | 0.112321468 | 0.102697597 | 0.328275213 |
| 0.3336612   | 0.209954297 | 0.029283835 | 0.034926368 |
| 0.108930283 | 0.341102906 | 0.26536703  | 0.295869538 |
| 0.114745863 | 0.276374392 | 0.012744243 | 0.32056004  |
| 0.297792381 | 0.094101328 | 0.17576983  | 0.243041328 |
| 0.213624199 | 0.326161876 | 0.151143771 | 0.283211108 |
| 0.178231998 | 0.264650645 | 0.266633928 | 0.298096234 |
| 0.317317127 | 0.258712649 | 0.298374597 | 0.292953327 |
| 0.364539421 | 0.295532022 | 1           | 0.165020174 |
| 0.148732262 | 0.204363146 | 0.123964522 | 0.180512247 |
| 0.168112167 | 0.246567819 | 0.29761399  | 0.36958119  |
| 0.309594983 | 0.0708776   | 0.260096776 | 0.247855969 |
| 0.345962214 | 0.384550352 | 0.072111053 | 0.017830889 |
| 0.009501703 | 0.078881251 | 0.255875432 | 0.245676961 |
| 0.318923688 | 0.105389134 | 0.082348041 | 0.196956895 |
| 0.264752386 | 0.22007219  | 0.300138064 | 0.386922964 |
| 0.266799394 | 0.24803446  | 0.168960644 | 0.370342666 |
| 0.179835087 | 0.143581105 | 0.332922117 | 0.296963509 |
| 0.141545268 | 0.253454665 | 0.157789991 | 0.390932491 |
| 0.031915426 | 0.267950437 | 0.213392713 | 0.251766277 |
| 0.048970721 | 0.201195532 | 0.208469165 | 0.349335674 |
| 0.247173434 | 0.185356771 | 0.147838902 | 0.074587265 |
| 0.288626689 | 0.335420689 | 0.289859541 | 0.373684813 |
| 0.34304731  | 0.410325229 | 0.148875485 | 0.289351752 |
| 0.182835335 | 0.262624026 | 0.183273112 | 0.063538009 |
| 0.212090664 | 0.109966504 | 0.250245492 | 0.122391757 |
| 0.183179172 | 0.249850666 | 0.163848025 | 0.09107957  |
| 0.086667173 | 0.195683871 | 0.384778274 | 0.3306894   |
| 0.099237514 | 0.30882282  | 0.260470327 | 0.276887186 |
| 0.203634525 | 0.355289521 | 0.276611289 | 0.121817234 |
| 0.293287728 | 0.067465448 | 0.326598292 | 0.19680213  |
| 0.213229036 | 0.371891748 | 0.226636295 | 0.331246281 |
| 0.242794476 | 0.304990499 | 0.28814124  | 0.268550968 |
| 0.162099516 | 0.186687426 | 0.273556707 | 0.134056382 |
| 0.271009888 | 0.364561641 | 0.200190239 | 0.207036417 |
| 0.279540074 | 0.131938952 | 0.180567241 | 0.070445713 |
| 0.105351062 | 0.18929333  | 0.300020357 | 0.401101303 |
| 0.215685302 | 0.20886136  | 0.154023113 | 0.208171192 |
| 0.333989873 | 0.275634903 | 0.234112629 | 0.286300329 |
| 0.266571658 | 0.271748273 | 0.285298621 | 0.283876194 |
| 0.161474468 | 0.288489075 | 0.310250565 | 0.252197779 |
| 0.276796144 | 0.327981171 | 0.297119917 | 0.123729021 |
| 0.14388585  | 0.168269566 | 0.256008993 | 0.215661421 |
| 0.31773196  | 0.144057248 | 0.099047054 | 0.335478252 |
| 0.110419739 | 0.324149093 | 0.138019697 | 0.213393153 |
| 0.240555639 | 0.129325699 | 0.27847134  | 0.281887136 |
| 0.250555133 | 0.283440574 | 0.068413133 | 0.203270266 |
| 0.123017635 | 0.280080977 | 0.163976289 | 0.272433787 |
| 0.141032663 | 0.165239527 | 0.305832532 | 0.156244943 |
| 0.134770215 | 0.131824569 | 0.276897347 | 0.154715567 |
| 0.169117272 | 0.381088362 | 0.14828178  | 0.079724789 |

|             |             |             |             |
|-------------|-------------|-------------|-------------|
| 0.136263236 | 0.174191163 | 0.193850482 | 0.273812859 |
| 0.093801688 | 0.272994544 | 0.157014124 | 0.199280663 |
| 0.253803024 | 0.235435433 | 0.198993336 | 0.138975571 |
| 0.197784711 | 0.256102426 | 0.16189781  | 0.278889003 |
| 0.174784773 | 0.3967518   | 0.228389207 | 0.261592207 |
| 0.128315436 | 0.112737704 | 0.209949319 | 0.340891189 |
| 0.121184512 |             |             |             |
| PMS2        | 0.011374812 | 0.020288434 | 0.010115863 |
| 0.073714742 | 0.031041367 | 0.025916083 | 0.165276951 |
| 0.031925046 | 0.095587153 | 0.124977168 | 0.08604388  |
| 0.012821933 | 0.032567556 | 0.0406032   | 0.012084769 |
| 0.065764471 | 0.064872508 | 0.010915646 | 0.158026202 |
| 0.056306441 | 0.118416688 | 0.080950285 | 0.143415443 |
| 0.011104803 | 0.073872183 | 0.196947453 | 0.03424403  |
| 0.052920274 | 0.199654757 | 0.027832498 | 0.047332726 |
| 0.044466902 | 0.01988959  | 0.011402941 | 0.034200524 |
| 0.008692471 | 0.007565261 | 0.015946196 | 0.039079461 |
| 0.016933591 | 0.030833603 | 0.062502062 | 0.122567135 |
| 0.1670863   | 0.009946221 | 0.17643423  | 0.025295914 |
| 0.012394176 | 0.117378906 | 0.023094618 | 0.011867853 |
| 0.009962629 | 0.021025233 | 0.059728772 | 0.165487053 |
| 0.02052877  | 0.0192299   | 0.004650795 | 0.023270645 |
| 0.170708624 | 0.036842241 | 0.011180854 | 0.120949845 |
| 0.023479599 | 0.05046794  | 0.036274524 | 0.078037653 |
| 0.007345011 | 0.020186104 | 0.101375107 | 0.005202497 |
| 0.035563954 | 0.069966255 | 0.032333154 | 0.007250452 |
| 0.19477274  | 0.110646998 | 0.050046321 | 0.111810558 |
| 0.040958654 | 0.008992214 | 0.032916936 | 0.02387891  |
| 0.037780756 | 0.051641356 | 0.010377192 | 0.1208764   |
| 0.019023471 | 0.171035011 | 0.037823334 | 0.064233106 |
| 0.029987207 | 0.014042485 | 0.047122158 | 0.06995523  |
| 0.034188131 | 0.020216978 | 0.015773843 | 0.027294572 |
| 0.012090714 | 0.031533171 | 0.014559985 | 0.022356056 |
| 0.013645612 | 0.009367494 | 0.124385058 | 0.038519992 |
| 0.163683836 | 0.003731108 | 0.119481939 | 0.01350497  |
| 0.042510668 | 0.185380658 | 0.074066314 | 0.07711575  |
| 0.025588184 | 0.019636425 | 0.012435981 | 0.197298573 |
| 0.017801519 | 0.06811288  | 0.01267417  | 0.085855929 |
| 0.013769376 | 0.003675627 | 0.007199781 | 0.04280439  |
| 0.024431122 | 0.012141501 | 0.090347872 | 0.070795252 |
| 0.092510549 | 0.014708349 | 0.012194023 | 0.017438648 |
| 0.029120769 | 0.004952186 | 0.089081936 | 0.013044134 |
| 0.012400285 | 0.032218143 | 0.003937446 | 0.139266011 |
| 0.030227968 | 0.019025896 | 0.168833907 | 0.0180875   |
| 0.066893116 | 0.108615678 | 0.161463169 | 0.027746832 |
| 0.017474332 | 0.234645014 | 0.007682444 | 0.062829054 |
| 0.021257726 | 0.037117888 | 0.15150033  | 0.0585545   |
| 0.163819624 | 0.008416654 | 0.079416965 | 0.020941101 |
| 0.008024941 | 0.024581648 | 0.048049115 | 0.054317765 |
| 0.02222468  | 0.022354706 | 0.005502192 | 0.157513049 |
| 0.065923239 | 0.058690154 | 0.016120832 | 0.029043297 |
| 0.126157477 | 0.082589096 | 0.006429335 | 0.023836728 |
| 0.019993551 | 0.01859437  | 0.041248146 | 0.028123092 |
| 0.091742907 | 0.040640994 | 0.000756811 | 0.010603101 |

|             |             |             |             |
|-------------|-------------|-------------|-------------|
| 0.01295775  | 0.005667516 | 0.053212793 | 0.021363983 |
| 0.012547973 | 0.047616711 | 0.000542242 | 0.058525572 |
| 0.007896366 | 0.159010589 | 0.034656772 | 0.152905926 |
| 0.010218901 | 0.219640253 | 0.030100001 | 0.01404981  |
| 0.009400441 | 0.028246016 | 0.055185942 | 0.07315386  |
| 0.054913706 | 0.090984002 | 0.024929693 | 0.065405242 |
| 0.064803333 | 0.028320363 | 0.044728131 | 0.011286301 |
| 0.032708468 | 0.076250423 | 0.077051152 | 0.038693179 |
| 0.016083498 | 0.003243455 | 0.016889604 | 0.066603035 |
| 0.006173353 | 0.020494162 | 0.008616886 | 0.009912586 |
| 0.269264814 | 0.060647024 | 0.064256314 | 0.065075533 |
| 0.008448069 | 0.105751472 | 0.012343231 | 0.020734134 |
| 0.100171022 | 0.023603746 | 0.014449566 | 0.00505209  |
| 0.005931219 | 0.032750781 | 0.105816268 | 0.039272515 |
| 0.023524051 | 0.08837302  | 0.017666726 | 0.024162307 |
| 0.166060133 | 0.158706953 | 0.017577084 | 0.00400431  |
| 0.032806567 | 0.013167601 | 0.011345688 | 0.013405742 |
| 0.015081465 | 0.056558905 | 0.04213094  | 0.008217872 |
| 0.06274299  | 0.182932889 | 0.020087832 | 0.056853793 |
| 0.012318156 | 0.120355898 | 0.127661119 | 0.002576429 |
| 0.037833403 | 0.017509861 | 0.005887352 | 0.029936806 |
| 0.050364643 | 0.028194276 | 0.040871107 | 0.157794763 |
| 0.014770992 | 0.137727207 | 0.050359697 | 0.026116336 |
| 0.017463329 | 0.019221308 | 0.054333899 | 0.107113429 |
| 0.013346563 | 0.050094968 | 0.164925817 | 0.010891125 |
| 0.01051987  | 0.188205374 | 0.016568901 | 0.04163059  |
| 0.150072365 | 0.022014108 | 0.019629471 | 0.189409245 |
| 0.115604564 | 0.069355122 | 0.119355305 | 0.110932895 |
| 0.024146075 | 0.077271894 | 0.02494951  | 0.015565657 |
| 0.2183366   | 0.068376366 | 0.033398491 | 0.007902424 |
| 0.009607552 | 0.014683494 | 0.101196047 | 0.032729607 |
| 0.175767661 | 0.020464129 | 0.013243862 | 0.02254043  |
| 0.004819506 | 0.011713774 | 0.131310498 | 0.01765132  |
| 0.008831067 | 0.018615578 | 0.120149302 | 0.083268083 |
| 0.017893563 | 0.217865149 | 0.05060179  | 0.013428867 |
| 0.025526547 | 0.03924714  | 0.022784838 | 0.022669398 |
| 0.174690524 | 0.157298361 | 0.031704098 | 0.007028159 |
| 0.021400242 | 0.086366214 | 0.001728109 | 0.01388146  |
| 0.137802233 | 0.020199535 | 0.033101273 | 0.116439051 |
| 0.030794929 | 0.012619203 | 0.05136705  | 0.227733398 |
| 0.014140918 | 0.01007598  | 0.01232829  | 0.075489854 |
| 0.014061718 | 0.016421273 | 0.008391362 | 0.102559001 |
| 0.122165951 | 0.010067185 | 0.020333598 | 0.067833615 |
| 0.039943616 | 0.017100829 | 0.107324055 | 0.021223872 |
| 0.171865566 | 0.005899777 | 0.02861401  | 0.000552075 |
| 0.034460167 | 0.02937562  | 0.012221015 | 0.047394363 |
| 0.014614922 | 0.051583498 | 0.002896349 | 0.015924068 |
| 0.016672251 | 0.078481862 | 0.027595498 | 0.01388948  |
| 0.010917206 | 0.017294411 | 0.013948329 | 0.018618851 |
| 0.011547219 | 0.010381615 | 0.045383315 | 0.124499263 |
| 0.031149168 | 0.00927823  | 0.030416904 | 0.017198421 |
| 0.03974579  | 0.034937117 | 0.165020174 | 1           |
| 0.02460823  | 0.052233289 | 0.00944901  | 0.061748125 |
| 0.017806313 | 0.07507696  | 0.014768729 | 0.036095352 |

|             |             |             |             |
|-------------|-------------|-------------|-------------|
| 0.018907948 | 0.136212079 | 0.06510794  | 0.014326213 |
| 0.035675888 | 0.038811694 | 0.028875117 | 0.007187513 |
| 0.001099201 | 0.048171223 | 0.055892677 | 0.059729618 |
| 0.019777339 | 0.007364543 | 0.15763613  | 0.113852251 |
| 0.027919055 | 0.024968933 | 0.015772534 | 0.095050975 |
| 0.015970015 | 0.133500208 | 0.021550125 | 0.069431066 |
| 0.068037258 | 0.006000406 | 0.024237523 | 0.018760778 |
| 0.055782608 | 0.057396631 | 0.009566323 | 0.040096635 |
| 0.001505934 | 0.078033177 | 0.013800809 | 0.031556638 |
| 0.019874502 | 0.089493607 | 0.110760395 | 0.039001441 |
| 0.007845959 | 0.071863486 | 0.086351111 | 0.004252599 |
| 0.14455655  | 0.025368065 | 0.073440442 | 0.029088414 |
| 0.037289434 | 0.063569456 | 0.040911905 | 0.015476861 |
| 0.119558343 | 0.010703252 | 0.024474095 | 0.01214479  |
| 0.020447848 | 0.088589364 | 0.008622424 | 0.018578961 |
| 0.020524454 | 0.023255773 | 0.016724739 | 0.066983737 |
| 0.003201347 | 0.125659846 | 0.04171587  | 0.027224718 |
| 0.034967336 | 0.063718851 | 0.058753301 | 0.034010463 |
| 0.054395061 | 0.056940843 | 0.011834106 | 0.00728655  |
| 0.172225292 | 0.001952087 | 0.047092009 | 0.011329438 |
| 0.032057406 | 0.031927187 | 0.032017785 | 0.01770668  |
| 0.017521962 | 0.018202073 | 0.01496468  | 0.083232171 |
| 0.013317042 | 0.016415705 | 0.055391485 | 0.11726205  |
| 0.0670964   | 0.041858115 | 0.023593323 | 0.042180687 |
| 0.100621845 | 0.00747901  | 0.072783271 | 0.001526346 |
| 0.004658276 | 0.038698006 | 0.09678016  | 0.055557791 |
| 0.018856275 | 0.012547821 | 0.069490215 | 0.11300078  |
| 0.017698701 | 0.015828311 | 0.058479021 | 0.037919124 |
| 0.094282435 | 0.079303809 | 0.019010419 | 0.020133115 |
| 0.005447338 | 0.021186667 | 0.031193722 | 0.036269913 |
| 0.019915495 | 0.133505269 | 0.013417564 | 0.022921304 |
| 0.039950294 | 0.007397659 | 0.104370505 | 0.122596841 |
| 0.188054595 | 0.087699588 | 0.002646359 | 0.04581734  |
| 0.002716147 | 0.084183525 | 0.004464596 | 0.067542185 |
| 0.048207621 | 0.005271377 | 0.071239846 | 0.113545352 |
| 0.113238874 | 0.014032027 | 0.060353419 | 0.127125677 |
| 0.003982391 | 0.022273286 | 0.017785541 | 0.060883473 |
| 0.006151645 | 0.021247502 | 0.112571198 | 0.023640003 |
| 0.016157465 | 0.002359899 | 0.021107901 | 0.077965085 |
| 0.156842565 | 0.033851682 | 0.009773744 | 0.034485298 |
| 0.026828312 | 0.010518032 | 0.011922102 | 0.050339156 |
| 0.061825172 | 0.012506576 | 0.022795255 | 0.021162077 |
| 0.065428565 | 0.118061425 | 0.008934288 | 0.023141461 |
| 0.070946263 | 0.011368319 | 0.012016443 | 0.01105923  |
| 0.012644887 | 0.07824203  | 0.00817872  | 0.016121286 |
| 0.01144515  | 0.004165976 | 0.174097092 | 0.031924244 |
| 0.004718082 |             |             |             |

|             |             |             |             |
|-------------|-------------|-------------|-------------|
| PN01        | 0.120909847 | 0.159209631 | 0.154629063 |
| 0.169227576 | 0.109194065 | 0.08536496  | 0.07499018  |
| 0.015946806 | 0.056989305 | 0.001113151 | 0.011817241 |
| 0.102010613 | 0.008272754 | 0.016447166 | 0.090739688 |
| 0.223037315 | 0.034236661 | 0.057192304 | 0.096766366 |
| 0.132117443 | 0.0140044   | 0.176091602 | 0.04220014  |
| 0.094729142 | 0.097931335 | 0.089132669 | 0.198613398 |



|             |             |                    |             |
|-------------|-------------|--------------------|-------------|
| 0.158459567 | 0.106300443 | 0.037023174        | 0.090394235 |
| 0.038464295 | 0.10896954  | 0.144702626        | 0.131004814 |
| 0.126422338 | 0.116040861 | 5.46E-05 0.0518828 |             |
| 0.120186709 | 0.236902941 | 0.138462143        | 0.122201622 |
| 0.03058384  | 0.104420602 | 0.110709284        | 0.170304083 |
| 0.008264076 | 0.034092293 | 0.022999715        | 0.10607325  |
| 0.11190959  | 0.129363395 | 0.04123743         | 0.060644627 |
| 0.007785781 | 0.009671447 | 0.034383799        | 0.047359393 |
| 0.076915335 | 0.010303986 | 0.127118126        | 0.038017823 |
| 0.007866465 | 0.03559803  | 0.038665008        | 0.041923069 |
| 0.101481161 | 0.094669461 | 0.004223636        | 0.096734638 |
| 0.000589279 | 0.147410871 | 0.144004036        | 0.181231868 |
| 0.062601692 | 0.004263034 | 0.055621989        | 0.105856858 |
| 0.160509236 | 0.128346917 | 0.195033193        | 0.201108246 |
| 0.014712603 | 0.114902332 | 0.125715539        | 0.050215301 |
| 0.148629209 | 0.05730083  | 0.008305168        | 0.209221145 |
| 0.197279638 | 0.146025629 | 0.064134165        | 0.195411457 |
| 0.151268034 | 0.132108212 | 0.103810775        | 0.098787222 |
| 0.140045058 | 0.058626364 | 0.122138779        | 0.165676506 |
| 0.087342512 | 0.120407035 | 0.119946275        | 0.094951617 |
| 0.05260394  | 0.020379877 | 0.14362927         | 0.003125868 |
| 0.170321538 | 0.041013547 | 0.131707869        | 0.073531086 |
| 0.030998264 | 0.129999307 | 0.159617906        | 0.087760919 |
| 0.088662867 | 0.002788357 | 0.035699132        | 0.032148056 |
| 0.00634966  | 0.039337391 | 0.109644505        | 0.144296371 |
| 0.008548535 | 0.033651327 | 0.06836726         | 0.012122001 |
| 0.032144718 | 0.022900321 | 0.09113941         | 0.058067153 |
| 0.151337785 | 0.123057812 | 0.128243509        | 0.078696428 |
| 0.138124714 | 0.193850632 | 0.001946474        | 0.042811806 |
| 0.110490958 | 0.032681192 | 0.135356199        | 0.083924233 |
| 0.161980225 | 0.028777458 | 0.042088699        | 0.200113183 |
| 0.102641129 | 0.050917784 | 0.028269194        | 0.186029903 |
| 0.034842805 | 0.14540817  | 0.037331121        | 0.024924862 |
| 0.014060672 | 0.143216949 | 0.044493605        | 0.046796379 |
| 0.088988296 | 0.009536387 | 0.003758426        | 0.034112366 |
| 0.013841142 | 0.132130495 | 0.105339558        | 0.059597897 |
| 0.039486372 | 0.186903662 | 0.032130359        | 0.109161885 |
| 0.007155719 | 0.011359273 | 0.020671455        | 0.147153887 |
| 0.032685836 | 0.175015478 | 0.045965941        | 0.121014273 |
| 0.163051763 | 0.203991606 | 0.003080438        | 0.12487456  |
| 0.161495548 | 0.020555293 | 0.089421054        | 0.126521048 |
| 0.206447363 | 0.172736648 | 0.000731712        | 0.134430989 |
| 0.051086498 | 0.057567341 | 0.202585965        | 0.105611827 |
| 0.112951053 | 0.06958064  | 0.02518243         | 0.206095005 |
| 0.096184905 | 0.001390457 | 0.032534845        | 0.131608571 |
| 0.048236694 | 0.015062498 | 0.140219608        | 0.163881636 |
| 0.210499013 | 0.198916382 | 0.197935817        | 0.20416317  |
| 0.114296032 | 0.042606924 | 0.00896957         | 0.160224955 |
| 0.156338182 | 0.017048597 | 0.118555358        | 0.045548511 |
| 0.035568276 | 0.146108909 | 0.121674717        | 0.015171575 |
| 0.054491006 | 0.055091627 | 0.001720642        | 0.231066867 |
| 0.154014919 | 0.015517412 | 0.202370333        | 0.014593103 |
| 0.0564856   | 0.179072711 | 0.1060069          | 0.108602187 |
| 0.077150774 | 0.053782423 | 0.083505437        | 0.014614158 |

|             |             |             |             |
|-------------|-------------|-------------|-------------|
| 0.012687236 | 0.089413038 | 0.165264368 | 0.12885694  |
| 0.010912668 | 0.039245195 | 0.013089646 | 0.018458413 |
| 0.004180739 | 0.018110729 | 0.015619549 | 0.070746557 |
| 0.010535069 | 0.00425096  | 0.095780956 | 0.113912639 |
| 0.104722776 | 0.038556346 | 0.158538481 | 0.167808424 |
| 0.052527771 | 0.072600211 | 0.038654277 | 0.004606827 |
| 0.146187058 | 0.048127087 | 0.020924249 | 0.127470316 |
| 0.006756933 | 0.195789923 | 0.022517565 | 0.101920198 |
| 0.046219409 | 0.077062436 | 0.205471953 | 0.012473353 |
| 0.065315237 | 0.11161884  | 0.14931552  | 0.150493364 |
| 0.069323254 | 0.13192458  | 0.007290867 | 0.093045516 |
| 0.065218999 | 0.032312144 | 0.155371801 | 0.033020347 |
| 0.045084282 | 0.162038007 | 0.166554087 | 0.113816045 |
| 0.107722699 | 0.080699403 | 0.010666439 | 0.195690635 |
| 0.173608867 | 0.188203987 | 0.131616119 | 0.129695732 |
| 0.031746535 | 0.000549348 | 0.09665198  | 0.11642259  |
| 0.114614842 | 0.158760288 | 0.099398336 | 0.093255493 |
| 0.123049116 | 0.152050645 | 0.002548854 | 0.167380999 |
| 0.02473093  | 0.13872817  | 0.018924939 | 0.197984874 |
| 0.131056017 | 0.021384588 | 0.101520762 | 0.076761052 |
| 0.074809047 | 0.065412753 | 0.037305965 | 0.128090501 |
| 0.179439337 | 0.188218279 | 0.159859415 | 0.107679945 |
| 0.008886495 | 0.008438957 | 0.25581821  | 0.100691676 |
| 0.082043709 | 0.140876994 | 0.017373141 | 0.029087567 |
| 0.016807501 | 0.114037801 | 0.150684707 | 0.109971553 |
| 0.060161294 | 0.037639833 | 0.162310688 | 0.050939121 |
| 0.197120605 | 0.150816739 | 0.133530797 | 0.030014552 |
| 0.103004467 | 0.169427742 | 0.121816609 | 0.078326549 |
| 0.058205564 | 0.14505418  | 0.108476991 | 0.00420246  |
| 0.16678635  | 0.01911477  | 0.001760439 | 0.142141763 |
| 0.089699385 | 0.083696732 | 0.007038061 | 0.011535243 |
| 0.047951307 | 0.193606377 | 0.143428083 | 0.099686475 |
| 0.017901987 | 0.119619797 | 0.003031446 | 0.16902494  |
| 0.124284057 | 0.04521418  | 0.057645098 | 0.112390502 |
| 0.142392141 | 0.144288604 | 0.184459918 | 0.180590924 |
| 0.099575621 | 0.132700754 | 0.008869974 | 0.194979979 |
| 0.140669083 | 0.154945935 | 0.12900205  | 0.138632246 |
| 0.135945272 | 0.168436054 | 0.148732262 | 0.02460823  |
| 1           | 0.025412821 | 0.057636564 | 0.025182591 |
| 0.05330264  | 0.105687205 | 0.138883011 | 0.179758506 |
| 0.157841114 | 0.026367019 | 0.015303236 | 0.110742492 |
| 0.124513367 | 0.175160851 | 0.012816714 | 0.010814035 |
| 0.002679022 | 0.026639688 | 0.083252437 | 0.162017695 |
| 0.182677154 | 0.004961897 | 0.013073623 | 0.005712603 |
| 0.030229478 | 0.193911228 | 0.136268063 | 0.169047847 |
| 0.169015362 | 0.046699665 | 0.02277717  | 0.160666461 |
| 0.064881094 | 0.053203886 | 0.170975204 | 0.125628683 |
| 0.030253565 | 0.181899083 | 0.043985465 | 0.179580706 |
| 0.038413882 | 0.13358036  | 0.088947346 | 0.033543946 |
| 0.00539085  | 0.100023075 | 0.131213592 | 0.189099038 |
| 0.123273989 | 0.012180181 | 0.012840723 | 0.001326976 |
| 0.029548611 | 0.164325698 | 0.028158641 | 0.189204108 |
| 0.137270909 | 0.173057036 | 0.03114892  | 0.155600938 |
| 0.015195426 | 0.110566288 | 0.136522646 | 0.004614685 |

|             |             |             |             |
|-------------|-------------|-------------|-------------|
| 0.056412629 | 0.014030628 | 0.115611068 | 0.045900856 |
| 0.02016918  | 0.091616265 | 0.112980301 | 0.037463462 |
| 0.088346818 | 0.04446317  | 0.19737733  | 0.205899043 |
| 0.032799997 | 0.063473339 | 0.144743169 | 0.131616465 |
| 0.043722541 | 0.152944213 | 0.126261039 | 0.063861601 |
| 0.030562154 | 0.008865788 | 0.114980602 | 0.066040587 |
| 0.01358648  | 0.194687127 | 0.090773322 | 0.177491487 |
| 0.116439009 | 0.161055475 | 0.142762872 | 0.174998491 |
| 0.019711301 | 0.076902077 | 0.088165498 | 0.002581807 |
| 0.120052926 | 0.154159856 | 0.06954204  | 0.058832317 |
| 0.119131682 | 0.138761178 | 0.008920091 | 0.002579796 |
| 0.11663005  | 0.049791799 | 0.015979801 | 0.195659711 |
| 0.072489666 | 0.073797783 | 0.002287227 | 0.128056425 |
| 0.158953717 | 0.146133747 | 0.025262302 | 0.135904028 |
| 0.093875949 | 0.22088924  | 0.161454068 | 0.166192277 |
| 0.069989486 | 0.11279202  | 0.104378777 | 0.066978135 |
| 0.094817664 | 0.132357252 | 0.147875159 | 0.003244172 |
| 0.040700068 | 0.071241745 | 0.024303987 | 0.10133304  |
| 0.062133592 | 0.052735047 | 0.078614741 | 0.157097949 |
| 0.052839462 | 0.115777159 | 0.008304957 | 0.020771426 |
| 0.138234998 | 0.0561158   | 0.145423505 | 0.035083391 |
| 0.020677279 | 0.134078314 | 0.00682235  | 0.041286983 |
| 0.038624151 | 0.195109573 | 0.134678696 | 0.104040273 |
| 0.074624534 | 0.043585638 | 0.106306667 | 0.02785612  |
| 0.020084435 | 0.01074106  | 0.181505175 | 0.008358405 |
| 0.005355789 | 0.180864357 | 0.0491023   | 0.019535867 |
| 0.016179285 | 0.090154353 | 0.025964273 | 0.076645013 |
| 0.056041485 | 0.149026392 | 0.049365611 | 0.141652954 |
| 0.090940034 | 0.035223955 | 0.066642475 | 0.008755385 |
| 0.022266363 | 0.096491759 | 0.170628451 | 0.14018295  |
| 0.112761128 | 0.176547486 | 0.099632872 | 0.095558728 |
| 0.010264127 | 0.097634255 | 0.025620771 | 0.146102319 |
| 0.067149194 |             |             |             |

|             |             |             |             |
|-------------|-------------|-------------|-------------|
| POLDIP2     | 0.184752578 | 0.27658558  | 0.077928306 |
| 0.284151166 | 0.124729342 | 0.222969489 | 0.196388314 |
| 0.209278505 | 0.06299778  | 0.028792073 | 0.012943014 |
| 0.114924852 | 0.051297262 | 0.13482852  | 0.087541831 |
| 0.238002464 | 0.034388319 | 0.1027833   | 0.174966977 |
| 0.275738002 | 0.192753982 | 0.193496526 | 0.117968018 |
| 0.037823732 | 0.022595154 | 0.050537216 | 0.037772155 |
| 0.313302652 | 0.054426902 | 0.194086021 | 0.335972228 |
| 0.036333065 | 0.246045897 | 0.24811594  | 0.136945511 |
| 0.218608188 | 0.164732547 | 0.020793232 | 0.129395723 |
| 0.27179877  | 0.177161773 | 0.295581497 | 0.200303225 |
| 0.079994715 | 0.27198674  | 0.194434361 | 0.107409238 |
| 0.133526704 | 0.024097054 | 0.17701149  | 0.28944268  |
| 0.221410675 | 0.13087213  | 0.203940699 | 0.152953638 |
| 0.037293035 | 0.183573255 | 0.018587435 | 0.319496536 |
| 0.169410795 | 0.205480736 | 0.221771676 | 0.113720107 |
| 0.093324704 | 0.198435451 | 0.034257906 | 0.205978545 |
| 0.035779299 | 0.292749926 | 0.071367286 | 0.090855601 |
| 0.019539032 | 0.28185621  | 0.112575323 | 0.025897652 |
| 0.034963197 | 0.025891178 | 0.041733827 | 0.255879486 |
| 0.295730345 | 0.224280647 | 0.221905044 | 0.208208213 |

|             |             |             |             |
|-------------|-------------|-------------|-------------|
| 0.042747599 | 0.091256147 | 0.062339654 | 0.086898636 |
| 0.252052181 | 0.142473887 | 0.075167231 | 0.207265156 |
| 0.222447401 | 0.237014163 | 0.053405158 | 0.075240739 |
| 0.241873098 | 0.296448039 | 0.10305789  | 0.099832094 |
| 0.041647806 | 0.013106597 | 0.244219219 | 0.233703578 |
| 0.272241223 | 0.031119861 | 0.048079798 | 0.332244408 |
| 0.055763928 | 0.08774398  | 0.229205004 | 0.039352887 |
| 0.300102277 | 0.059276654 | 0.048147589 | 0.220469061 |
| 0.094102533 | 0.226346699 | 0.212946553 | 0.165879057 |
| 0.092868925 | 0.019586957 | 0.013595037 | 0.029998017 |
| 0.096400642 | 0.009091844 | 0.231939636 | 0.274936082 |
| 0.182976457 | 0.066996255 | 0.172240561 | 0.005834988 |
| 0.016602972 | 0.046781507 | 0.188131039 | 0.133950605 |
| 0.240620008 | 0.151974459 | 0.068309161 | 0.246410397 |
| 0.112397399 | 0.217864397 | 0.041234573 | 0.141603249 |
| 0.149588069 | 0.05199835  | 0.151814143 | 0.139094989 |
| 0.072115771 | 0.177073776 | 0.103449159 | 0.259719884 |
| 0.324734739 | 0.094799482 | 0.11986872  | 0.209138212 |
| 0.097176105 | 0.074171173 | 0.110643942 | 0.107327161 |
| 0.116998874 | 0.1952043   | 0.011175509 | 0.17942395  |
| 0.031566269 | 0.022552064 | 0.036428864 | 0.243635965 |
| 0.112792025 | 0.208824348 | 0.210748166 | 0.090866657 |
| 0.122877386 | 0.154951653 | 0.205970787 | 0.185545406 |
| 0.020221003 | 0.05845281  | 0.161815572 | 0.249910225 |
| 0.293621554 | 0.221786753 | 0.111055463 | 0.064830063 |
| 0.098114999 | 0.246029113 | 0.001141283 | 0.252591133 |
| 0.226051498 | 0.140953262 | 0.137030925 | 0.13062306  |
| 0.052838415 | 0.270733576 | 0.01376338  | 0.215081409 |
| 0.217028701 | 0.086361973 | 0.252997271 | 0.060817232 |
| 0.230542896 | 0.038433262 | 0.161492227 | 0.143186702 |
| 0.127014741 | 0.015366557 | 0.228441232 | 0.312459497 |
| 0.01030787  | 0.208368326 | 0.239596256 | 0.239984251 |
| 0.164192832 | 0.201555855 | 0.264118111 | 0.041970648 |
| 0.11734002  | 0.170880839 | 0.0199862   | 0.071533466 |
| 0.187074124 | 0.050209606 | 0.291194167 | 0.163872262 |
| 0.177210867 | 0.272789737 | 0.163020196 | 0.066698045 |
| 0.078180766 | 0.229170711 | 0.053065832 | 0.09838265  |
| 0.182455139 | 0.106697968 | 0.077921281 | 0.049688446 |
| 0.026932865 | 0.254939063 | 0.016369679 | 0.018335373 |
| 0.008332501 | 0.157143102 | 0.182204084 | 0.081881648 |
| 0.034071034 | 0.078231769 | 0.049411822 | 0.076887884 |
| 0.137180302 | 0.057561639 | 0.005795446 | 0.038078896 |
| 0.034896626 | 0.053318059 | 0.05918837  | 0.21885895  |
| 0.116160853 | 0.052796974 | 0.091016845 | 0.037854354 |
| 0.032050674 | 0.019892708 | 0.266706789 | 0.219899161 |
| 0.278836966 | 0.131873487 | 0.035017202 | 0.045602662 |
| 0.268889212 | 0.165456382 | 0.132455532 | 0.289622683 |
| 0.037616085 | 0.236378181 | 0.074595473 | 0.046726895 |
| 0.04387064  | 0.137446398 | 0.294265001 | 0.049500581 |
| 0.206859577 | 0.289841801 | 0.11971526  | 0.05557895  |
| 0.264594557 | 0.23899257  | 0.077752344 | 0.214859416 |
| 0.211163858 | 0.035420225 | 0.23543506  | 0.027682764 |
| 0.020165793 | 0.141467051 | 0.147783179 | 0.045042413 |
| 0.034953999 | 0.124730085 | 0.18013606  | 0.117303581 |

|             |             |             |             |
|-------------|-------------|-------------|-------------|
| 0.261419319 | 0.204981709 | 0.208340995 | 0.02829773  |
| 0.064088579 | 0.00955105  | 0.034137302 | 0.08064134  |
| 0.25050003  | 0.206123496 | 0.126680564 | 0.06216388  |
| 0.183708826 | 0.049791596 | 0.197876939 | 0.233191081 |
| 0.04029737  | 0.248934807 | 0.016790961 | 0.145975749 |
| 0.219448148 | 0.215252177 | 0.027060177 | 0.241792332 |
| 0.277648182 | 0.078667705 | 0.146481146 | 0.245965262 |
| 0.263932753 | 0.07588904  | 0.062391642 | 0.175285659 |
| 0.089055495 | 0.130047529 | 0.110615443 | 0.015309108 |
| 0.085767994 | 0.091116306 | 0.002024072 | 0.15278429  |
| 0.052713396 | 0.277334175 | 0.230958827 | 0.040285946 |
| 0.179748152 | 0.144861401 | 0.133383368 | 0.058651839 |
| 0.154934357 | 0.204185329 | 0.254521115 | 0.167522328 |
| 0.180178975 | 0.203124669 | 0.065968632 | 0.039090526 |
| 0.011630851 | 0.215781529 | 0.249965156 | 0.030076749 |
| 0.267193819 | 0.214644282 | 0.020647078 | 0.29560246  |
| 0.161901654 | 0.234556537 | 0.018478367 | 0.009665574 |
| 0.013109941 | 0.199153227 | 0.244539817 | 0.321978478 |
| 0.110205363 | 0.219123499 | 0.002166507 | 0.225110147 |
| 0.256006145 | 0.007918705 | 0.024316347 | 0.167250004 |
| 0.113366628 | 0.290285639 | 0.033179266 | 0.164224017 |
| 0.088952426 | 0.216022437 | 0.12010806  | 0.113531145 |
| 0.25319222  | 0.180591598 | 0.272430248 | 0.287537646 |
| 0.264849698 | 0.156747007 | 0.204363146 | 0.052233289 |
| 0.025412821 | 1           | 0.053370833 | 0.038085391 |
| 0.2709792   | 0.041451525 | 0.240764015 | 0.242391747 |
| 0.195772641 | 0.009691844 | 0.21309992  | 0.197730368 |
| 0.330610394 | 0.308796799 | 0.019419148 | 0.003920368 |
| 0.002166469 | 0.004455295 | 0.266247728 | 0.064008308 |
| 0.232612477 | 0.084118538 | 0.016659859 | 0.169809932 |
| 0.111000538 | 0.089414765 | 0.247496222 | 0.255143052 |
| 0.168833059 | 0.06107842  | 0.076984344 | 0.271377255 |
| 0.021055546 | 0.208608727 | 0.215182992 | 0.294235304 |
| 0.027561515 | 0.064809749 | 0.120549236 | 0.292643652 |
| 0.002573005 | 0.11693457  | 0.1315004   | 0.092458756 |
| 0.010751279 | 0.028288724 | 0.031993303 | 0.221614615 |
| 0.205027555 | 0.030711363 | 0.018519635 | 0.094280794 |
| 0.101235374 | 0.239143159 | 0.078885665 | 0.254696524 |
| 0.286056365 | 0.271388059 | 0.018684126 | 0.264598254 |
| 0.033580172 | 0.232262374 | 0.048879814 | 0.045953021 |
| 0.072752303 | 0.024496349 | 0.191914324 | 0.022339532 |
| 0.145982918 | 0.264278205 | 0.033810687 | 0.008906938 |
| 0.013367338 | 0.030785672 | 0.249243622 | 0.188261637 |
| 0.011615652 | 0.167494697 | 0.099804724 | 0.202201531 |
| 0.267250623 | 0.230769817 | 0.258572235 | 0.094489407 |
| 0.143557154 | 0.011661496 | 0.296251628 | 0.206182527 |
| 0.192984298 | 0.230158012 | 0.058369706 | 0.240524957 |
| 0.237332301 | 0.264559761 | 0.212206134 | 0.200942368 |
| 0.028113747 | 0.192467081 | 0.27632106  | 0.062637233 |
| 0.182191505 | 0.23684336  | 0.186382619 | 0.030330943 |
| 0.072431344 | 0.05848833  | 0.090287438 | 0.060404615 |
| 0.031561247 | 0.286527479 | 0.10254685  | 0.268736261 |
| 0.233392267 | 0.218146184 | 0.116387029 | 0.031745305 |
| 0.271048799 | 0.275990018 | 0.161396982 | 0.224819936 |

|             |             |             |             |
|-------------|-------------|-------------|-------------|
| 0.068530162 | 0.12637928  | 0.178909503 | 0.160074114 |
| 0.066460428 | 0.212174621 | 0.288265781 | 0.252390078 |
| 0.307990564 | 0.185424103 | 0.254223522 | 0.203115593 |
| 0.020103209 | 0.129357962 | 0.063629452 | 0.036542638 |
| 0.092053262 | 0.020170751 | 0.020031041 | 0.205926461 |
| 0.029931612 | 0.185942008 | 0.128401833 | 0.051945861 |
| 0.091201591 | 0.09944747  | 0.150516184 | 0.165854853 |
| 0.063411584 | 0.249006539 | 0.010596238 | 0.03793824  |
| 0.034319907 | 0.19168087  | 0.056790015 | 0.065273098 |
| 0.025589973 | 0.029513503 | 0.13258686  | 0.219956129 |
| 0.079123171 | 0.051809029 | 0.196625833 | 0.084637556 |
| 0.083849797 | 0.251117697 | 0.136120325 | 0.010805568 |
| 0.036234448 | 0.191271895 | 0.095410041 | 0.086802798 |
| 0.008301204 | 0.186250502 | 0.125432131 | 0.107990514 |
| 0.245516075 | 0.068022234 | 0.278948909 | 0.06586393  |
| 0.083610316 | 0.2665184   | 0.078384688 | 0.216577519 |
| 0.06342091  | 0.239137197 | 0.264470445 | 0.210373633 |
| 0.047717998 | 0.074345042 | 0.080111367 | 0.282582907 |
| 0.042859831 |             |             |             |

|             |             |             |             |
|-------------|-------------|-------------|-------------|
| POLK        | 0.190601012 | 0.392773728 | 0.116273112 |
| 0.278825066 | 0.132286831 | 0.202195325 | 0.082726009 |
| 0.026836248 | 0.045877482 | 0.008092306 | 0.019042927 |
| 0.160195072 | 0.046833666 | 0.052402596 | 0.094440768 |
| 0.221931913 | 0.021264045 | 0.049210886 | 0.075700047 |
| 0.185406691 | 0.029319481 | 0.198082572 | 0.022283992 |
| 0.03627428  | 0.027617812 | 0.024796007 | 0.077563999 |
| 0.274479683 | 0.028134313 | 0.137928001 | 0.196231033 |
| 0.009223861 | 0.221701201 | 0.395614642 | 0.213393209 |
| 0.379917584 | 0.196871199 | 0.000592081 | 0.093627259 |
| 0.249349206 | 0.288359806 | 0.199646976 | 0.144146639 |
| 0.017283281 | 0.366591081 | 0.113947053 | 0.130145849 |
| 0.045059557 | 0.012292111 | 0.062395559 | 0.325047615 |
| 0.396515156 | 0.213209197 | 0.048705987 | 0.058749374 |
| 0.058807244 | 0.037006656 | 0.056911857 | 0.1595753   |
| 0.076062465 | 0.042723447 | 0.382167007 | 0.052038481 |
| 0.025516548 | 0.040469731 | 0.014453776 | 0.06546997  |
| 0.05438171  | 0.226295956 | 0.002116131 | 0.144417721 |
| 0.003156248 | 0.169619336 | 0.106248465 | 0.091206542 |
| 0.010779737 | 0.009731439 | 0.020306721 | 0.168105381 |
| 0.285076001 | 0.295961294 | 0.329110639 | 0.340784174 |
| 0.029649992 | 0.056217913 | 0.106025784 | 0.038152539 |
| 0.274432106 | 0.078439671 | 0.021841998 | 0.221908928 |
| 0.342397676 | 0.392333464 | 0.034026207 | 0.070164964 |
| 0.355771285 | 0.340342762 | 0.160344907 | 0.131873948 |
| 0.112173446 | 0.006069855 | 0.347559949 | 0.35782236  |
| 0.248475268 | 0.074070094 | 0.04107143  | 0.234568365 |
| 0.009877597 | 0.05793458  | 0.168015646 | 0.0134802   |
| 0.302449282 | 0.012429875 | 0.049014246 | 0.14265782  |
| 0.020928633 | 0.259781391 | 0.389286347 | 0.065558915 |
| 0.092700601 | 0.004511615 | 0.05008623  | 0.003294022 |
| 0.049212348 | 0.018521123 | 0.380178361 | 0.333783457 |
| 0.029347547 | 0.054185292 | 0.060846825 | 0.000360204 |
| 0.005037919 | 0.015883651 | 0.239630552 | 0.06547187  |
| 0.211454782 | 0.242349627 | 0.088473363 | 0.214889166 |

|             |             |             |             |
|-------------|-------------|-------------|-------------|
| 0.223210784 | 0.31579638  | 0.042232289 | 0.019427013 |
| 0.166555337 | 0.014750768 | 0.081181954 | 0.165368902 |
| 0.107232834 | 0.020155843 | 0.024968029 | 0.379784947 |
| 0.31156311  | 0.024224166 | 0.048839248 | 0.204287173 |
| 0.07826726  | 0.114374487 | 0.016847572 | 0.050031846 |
| 0.01505468  | 0.366496742 | 0.004093875 | 0.067857318 |
| 0.104740054 | 0.018014344 | 0.000470885 | 0.067592384 |
| 0.071445239 | 0.362456849 | 0.342575834 | 0.018343261 |
| 0.074922099 | 0.187705855 | 0.07862462  | 0.302667303 |
| 0.019937387 | 0.006252476 | 0.055323085 | 0.363834759 |
| 0.150281903 | 0.321171111 | 0.041060125 | 0.046588281 |
| 0.088032483 | 0.277956185 | 0.000618655 | 0.388171887 |
| 0.398576153 | 0.067684504 | 0.177787652 | 0.131288449 |
| 0.136120545 | 0.330857476 | 0.003787261 | 0.184627417 |
| 0.156181599 | 0.012918671 | 0.340286135 | 0.04935883  |
| 0.314736449 | 0.015128328 | 0.059140272 | 0.294509531 |
| 0.243847511 | 0.00137685  | 0.095815141 | 0.205232297 |
| 0.003424852 | 0.033090568 | 0.202034151 | 0.222397841 |
| 0.2134958   | 0.24423463  | 0.311312497 | 0.13352084  |
| 0.147074907 | 0.04093969  | 0.001586868 | 0.082750706 |
| 0.227841433 | 0.055129932 | 0.356906039 | 0.044775597 |
| 0.11762725  | 0.373473957 | 0.262543615 | 0.068943789 |
| 0.017675811 | 0.086403328 | 0.008726923 | 0.136579387 |
| 0.261453614 | 0.039517284 | 0.150997352 | 0.009164457 |
| 0.012133624 | 0.395918594 | 0.027410964 | 0.048242271 |
| 0.018738756 | 0.180169618 | 0.060314945 | 0.068695529 |
| 0.057265845 | 0.031631816 | 0.083827051 | 0.100832013 |
| 0.015734656 | 0.02122136  | 0.000666698 | 0.067177875 |
| 0.039907222 | 0.078144711 | 0.085019289 | 0.197425726 |
| 0.040027136 | 0.025229611 | 0.129930659 | 0.044307943 |
| 0.024097972 | 0.003707746 | 0.378856921 | 0.175381398 |
| 0.195420669 | 0.033554822 | 0.00545442  | 0.055837586 |
| 0.340978651 | 0.191246799 | 0.049150811 | 0.353710537 |
| 0.003547511 | 0.308888424 | 0.060563847 | 0.036898504 |
| 0.082148313 | 0.089523476 | 0.314359529 | 0.029558946 |
| 0.116535377 | 0.355511851 | 0.073774896 | 0.061372296 |
| 0.299880513 | 0.186261966 | 0.010653977 | 0.234866847 |
| 0.21665092  | 0.007542841 | 0.379737971 | 0.01630494  |
| 0.003893362 | 0.207506268 | 0.294220772 | 0.020554356 |
| 0.017184988 | 0.153720709 | 0.018275646 | 0.110580821 |
| 0.4000884   | 0.224402442 | 0.30836198  | 0.029236262 |
| 0.015492947 | 0.00439185  | 0.028419094 | 0.111240171 |
| 0.38144313  | 0.36205578  | 0.06055191  | 0.127724652 |
| 0.083508768 | 0.084851113 | 0.020557683 | 0.377230829 |
| 0.013438636 | 0.361600299 | 0.001092281 | 0.260855811 |
| 0.395336639 | 0.078422237 | 0.025924381 | 0.134811416 |
| 0.280737089 | 0.015137848 | 0.019945254 | 0.389756054 |
| 0.32209478  | 0.093795412 | 0.114742132 | 0.153490747 |
| 0.009919586 | 0.011682667 | 0.162381194 | 0.026458529 |
| 0.096464215 | 0.046798316 | 0.005864599 | 0.040437075 |
| 0.018589595 | 0.359455985 | 0.245640428 | 0.03165614  |
| 0.219178627 | 0.042750874 | 0.133053078 | 0.009895714 |
| 0.325406077 | 0.344346596 | 0.398550192 | 0.018687738 |
| 0.218255499 | 0.390301609 | 0.177762295 | 0.011173151 |

|             |             |             |             |
|-------------|-------------|-------------|-------------|
| 0.003776545 | 0.388333045 | 0.194520605 | 0.016085716 |
| 0.295609712 | 0.081001434 | 0.0100755   | 0.371554845 |
| 0.051731046 | 0.317602534 | 0.006766891 | 0.005781577 |
| 0.003750263 | 0.261692266 | 0.401723746 | 0.175137859 |
| 0.099352688 | 0.114019448 | 0.001484358 | 0.354658312 |
| 0.389673573 | 0.003482848 | 0.018185829 | 0.275479797 |
| 0.265471212 | 0.382965249 | 0.099442816 | 0.330437011 |
| 0.188645574 | 0.392244191 | 0.050637356 | 0.100690714 |
| 0.334240526 | 0.361085607 | 0.241126961 | 0.346055166 |
| 0.298932039 | 0.181469136 | 0.123964522 | 0.00944901  |
| 0.057636564 | 0.053370833 | 1           | 0.053761623 |
| 0.141799166 | 0.040243273 | 0.329109643 | 0.286345439 |
| 0.341483533 | 0.0010507   | 0.033108191 | 0.263569531 |
| 0.305657811 | 0.319961902 | 0.001362396 | 0.002907539 |
| 0.001673773 | 0.011996878 | 0.125993525 | 0.052853292 |
| 0.365161545 | 0.081926594 | 0.001341137 | 0.011007565 |
| 0.055836391 | 0.175762062 | 0.389144538 | 0.180913425 |
| 0.236435975 | 0.010897943 | 0.098859199 | 0.186010263 |
| 0.021589418 | 0.149294938 | 0.361492053 | 0.378329811 |
| 0.003420186 | 0.053448238 | 0.068525937 | 0.348712898 |
| 0.012398803 | 0.091522708 | 0.163812265 | 0.073995969 |
| 0.00047323  | 0.015573299 | 0.019488048 | 0.222228081 |
| 0.377204421 | 0.024728712 | 0.012459235 | 0.021975603 |
| 0.042299258 | 0.279563263 | 0.039053311 | 0.358142529 |
| 0.298738735 | 0.262753115 | 0.008137831 | 0.392580311 |
| 0.015090227 | 0.373513109 | 0.102408173 | 0.030295227 |
| 0.030843208 | 0.001492587 | 0.307084292 | 0.105180198 |
| 0.060485872 | 0.166731133 | 0.066453023 | 0.002005306 |
| 0.031214765 | 0.00905794  | 0.339657438 | 0.287872039 |
| 0.002715046 | 0.036612861 | 0.073667684 | 0.145258631 |
| 0.109193719 | 0.276585507 | 0.395291674 | 0.183497444 |
| 0.028528093 | 0.008535578 | 0.19797215  | 0.174517286 |
| 0.029653623 | 0.319499246 | 0.083176082 | 0.369728553 |
| 0.209969661 | 0.303313095 | 0.328379093 | 0.169089056 |
| 0.028994431 | 0.155623461 | 0.258129147 | 0.017139695 |
| 0.116883173 | 0.305263411 | 0.082656254 | 0.051862697 |
| 0.088952701 | 0.125292339 | 0.004505821 | 0.014748813 |
| 0.092044285 | 0.164786501 | 0.029544522 | 0.249028968 |
| 0.135098271 | 0.190239747 | 0.002902664 | 0.022536283 |
| 0.393552733 | 0.316413661 | 0.046237406 | 0.258409601 |
| 0.028897659 | 0.14972159  | 0.250067079 | 0.233397148 |
| 0.050735607 | 0.30939971  | 0.236229079 | 0.248449277 |
| 0.33616721  | 0.087300878 | 0.40879623  | 0.012301975 |
| 0.02423077  | 0.138967236 | 0.036404645 | 0.017371734 |
| 0.03840717  | 0.00605063  | 0.051973508 | 0.187233863 |
| 0.063459154 | 0.170391848 | 0.03239682  | 0.018074273 |
| 0.077925288 | 0.067001841 | 0.117415805 | 0.07159637  |
| 0.028095292 | 0.409711426 | 0.003223937 | 0.007608771 |
| 0.062806152 | 0.302795284 | 0.148123056 | 0.04514551  |
| 0.050928438 | 0.01198482  | 0.094994621 | 0.092102538 |
| 0.123833058 | 0.043913071 | 0.323213647 | 0.009957202 |
| 0.005015674 | 0.317698624 | 0.098423295 | 0.001538941 |
| 0.008615771 | 0.149011346 | 0.023483402 | 0.077210904 |
| 0.002855613 | 0.352438311 | 0.134059102 | 0.142338735 |



|             |             |             |             |
|-------------|-------------|-------------|-------------|
| 0.127579297 | 0.008135933 | 0.231537953 | 0.010012944 |
| 0.007263874 | 0.318584032 | 0.131077729 | 0.379747272 |
| 0.062482167 | 0.249528356 | 0.329556263 | 0.257640628 |
| 0.012108863 | 0.102359389 | 0.011393886 | 0.258297498 |
| 0.111631113 |             |             |             |
| PPP1R9B     | 0.051261391 | 0.105696308 | 0.04816175  |
| 0.159625229 | 0.08564199  | 0.077450772 | 0.120288079 |
| 0.014121021 | 0.036425642 | 0.006345659 | 0.041921793 |
| 0.052382811 | 0.010171058 | 0.038658534 | 0.03891729  |
| 0.148909007 | 0.063723419 | 0.020159815 | 0.116070967 |
| 0.105878099 | 0.047703162 | 0.17075055  | 0.066928747 |
| 0.035011266 | 0.112426605 | 0.164348718 | 0.122855184 |
| 0.118518527 | 0.164421538 | 0.056348774 | 0.079522087 |
| 0.026697129 | 0.065152121 | 0.079755443 | 0.118335044 |
| 0.072069956 | 0.04249344  | 0.000259044 | 0.085980852 |
| 0.061035736 | 0.134580146 | 0.11590176  | 0.15136803  |
| 0.08283822  | 0.063459291 | 0.172854769 | 0.077203404 |
| 0.003082937 | 0.076074539 | 0.025217539 | 0.06225669  |
| 0.077263735 | 0.103999917 | 0.038763135 | 0.121292428 |
| 0.015102133 | 0.017991558 | 0.034779829 | 0.042139197 |
| 0.135872527 | 0.024056711 | 0.084594564 | 0.047001155 |
| 0.006725787 | 0.031808933 | 0.031256356 | 0.058191515 |
| 0.042829575 | 0.057914011 | 0.005665416 | 0.038384021 |
| 0.002534121 | 0.102781295 | 0.069656932 | 0.072867789 |
| 0.095678614 | 0.035058576 | 0.045095858 | 0.156335269 |
| 0.113436388 | 0.057578183 | 0.133549211 | 0.126872591 |
| 0.025829552 | 0.067915973 | 0.05473715  | 0.109098141 |
| 0.076462432 | 0.139218088 | 0.003084485 | 0.154098981 |
| 0.131282361 | 0.093796751 | 0.043410812 | 0.113318482 |
| 0.134177685 | 0.087275645 | 0.063543604 | 0.095337658 |
| 0.084873646 | 0.026108772 | 0.086071968 | 0.112058767 |
| 0.053496713 | 0.049329642 | 0.137477115 | 0.081725381 |
| 0.070135289 | 0.009926332 | 0.170077997 | 0.00186591  |
| 0.115596996 | 0.053718855 | 0.10724691  | 0.110843828 |
| 0.014788123 | 0.077960625 | 0.092198792 | 0.130379337 |
| 0.044448665 | 0.004597163 | 0.010505864 | 0.026734812 |
| 0.005275341 | 0.012798075 | 0.06382732  | 0.128505399 |
| 0.012246965 | 0.037598491 | 0.072826589 | 0.01686109  |
| 0.047808203 | 0.007536922 | 0.063258038 | 0.028394511 |
| 0.090865477 | 0.044193842 | 0.195822325 | 0.046597997 |
| 0.074479649 | 0.132777599 | 0.001156524 | 0.061582739 |
| 0.064432856 | 0.012648512 | 0.15858683  | 0.07286943  |
| 0.132712605 | 0.035733474 | 0.087498651 | 0.124846684 |
| 0.067602699 | 0.109660417 | 0.015378582 | 0.126731083 |
| 0.07342649  | 0.095274433 | 0.057102512 | 0.054696983 |
| 0.05558396  | 0.07298633  | 0.046636918 | 0.024309513 |
| 0.031713004 | 0.014916084 | 0.001594945 | 0.04058247  |
| 0.019243758 | 0.118296967 | 0.054125913 | 0.068590445 |
| 0.073524086 | 0.150341802 | 0.024403768 | 0.108192625 |
| 0.043289519 | 0.009157248 | 0.011338886 | 0.110236718 |
| 0.037699127 | 0.094535154 | 0.040150768 | 0.049784172 |
| 0.131256659 | 0.127782212 | 0.000174966 | 0.071248536 |
| 0.092846532 | 0.011389527 | 0.117559999 | 0.057481429 |
| 0.092975198 | 0.143850118 | 0.000587371 | 0.114275156 |

|             |             |             |             |
|-------------|-------------|-------------|-------------|
| 0.02766354  | 0.061583639 | 0.133483165 | 0.162646891 |
| 0.065295638 | 0.14204699  | 0.036115963 | 0.105674067 |
| 0.064091184 | 0.001206659 | 0.05312373  | 0.121720197 |
| 0.034501087 | 0.04091619  | 0.077666621 | 0.145101942 |
| 0.180041578 | 0.108188634 | 0.139757747 | 0.093357126 |
| 0.082394731 | 0.042390689 | 0.005962475 | 0.080514012 |
| 0.07492634  | 0.010841918 | 0.081216365 | 0.043263855 |
| 0.018846183 | 0.100603083 | 0.06264519  | 0.04108921  |
| 0.116913672 | 0.067365962 | 0.002489875 | 0.156282459 |
| 0.059943614 | 0.080607269 | 0.081295413 | 0.00638563  |
| 0.073412959 | 0.12150506  | 0.040767567 | 0.032162111 |
| 0.024103866 | 0.088831089 | 0.073512611 | 0.060984113 |
| 0.041370312 | 0.076830788 | 0.068562156 | 0.118737244 |
| 0.04385061  | 0.101824029 | 0.002906957 | 0.021983285 |
| 0.027747857 | 0.035133483 | 0.032707212 | 0.051894112 |
| 0.0155558   | 0.018681805 | 0.089762352 | 0.036888698 |
| 0.077743571 | 0.065282525 | 0.103152321 | 0.108155033 |
| 0.037533081 | 0.073233186 | 0.046266808 | 0.008107646 |
| 0.131728339 | 0.046427984 | 0.009550652 | 0.114055896 |
| 0.002119923 | 0.120528467 | 0.077875637 | 0.153346179 |
| 0.052237188 | 0.139695131 | 0.143983227 | 0.00479432  |
| 0.038806839 | 0.088725175 | 0.074622979 | 0.182854911 |
| 0.05784671  | 0.095810943 | 0.017790856 | 0.054244342 |
| 0.042468496 | 0.078814433 | 0.096080874 | 0.038495355 |
| 0.056873053 | 0.08954783  | 0.119340493 | 0.129688556 |
| 0.09912643  | 0.146920485 | 0.031002685 | 0.168669067 |
| 0.119912901 | 0.168903206 | 0.124004538 | 0.037369054 |
| 0.108962163 | 0.0091845   | 0.048623569 | 0.036257037 |
| 0.070020152 | 0.095606567 | 0.089141619 | 0.100988226 |
| 0.145365068 | 0.090097326 | 0.00339389  | 0.115308639 |
| 0.003647642 | 0.075901689 | 0.025806837 | 0.108177861 |
| 0.074806469 | 0.022580672 | 0.143336109 | 0.108094451 |
| 0.063538577 | 0.092746125 | 0.025136265 | 0.083304898 |
| 0.113445073 | 0.096276308 | 0.09733922  | 0.060441598 |
| 0.03197188  | 0.028751854 | 0.117109145 | 0.026711353 |
| 0.100550672 | 0.110473171 | 0.003312643 | 0.016818785 |
| 0.073637793 | 0.093428519 | 0.099199562 | 0.121836452 |
| 0.095884662 | 0.017039939 | 0.108514281 | 0.085890739 |
| 0.103911503 | 0.07630434  | 0.081936835 | 0.030501293 |
| 0.06350928  | 0.10931079  | 0.071546902 | 0.059494504 |
| 0.06226528  | 0.07911291  | 0.058600408 | 0.014669601 |
| 0.122201989 | 0.019676633 | 0.024309259 | 0.097623442 |
| 0.108103523 | 0.048086996 | 0.001615462 | 0.000476286 |
| 0.019807526 | 0.109568037 | 0.084766101 | 0.078994448 |
| 0.032850035 | 0.072327629 | 0.000309935 | 0.094725779 |
| 0.090303824 | 0.045586977 | 0.032709066 | 0.077182494 |
| 0.081093493 | 0.090606615 | 0.078226697 | 0.1120664   |
| 0.063583055 | 0.085498248 | 0.017089873 | 0.182207378 |
| 0.107089278 | 0.083414901 | 0.078691982 | 0.079911973 |
| 0.118273296 | 0.107562485 | 0.180512247 | 0.061748125 |
| 0.025182591 | 0.038085391 | 0.053761623 | 1           |
| 0.035301945 | 0.127210827 | 0.076309713 | 0.127723379 |
| 0.102189337 | 0.033044852 | 0.031578224 | 0.067096879 |
| 0.097670534 | 0.120330526 | 0.002074327 | 0.000817764 |

|             |             |             |             |
|-------------|-------------|-------------|-------------|
| 0.000221696 | 0.039959635 | 0.075462002 | 0.081670935 |
| 0.107151734 | 0.014412845 | 0.035505786 | 0.015874607 |
| 0.026936201 | 0.106931785 | 0.094664082 | 0.139318758 |
| 0.07893581  | 0.062351121 | 0.048618236 | 0.116404442 |
| 0.066663128 | 0.024000409 | 0.118028845 | 0.090433563 |
| 0.017890898 | 0.094805255 | 0.019185432 | 0.137987018 |
| 0.010069174 | 0.106618393 | 0.053512993 | 0.049807441 |
| 0.001107536 | 0.085229395 | 0.114994024 | 0.109888197 |
| 0.073074515 | 0.059413306 | 0.05681112  | 0.000573454 |
| 0.110091222 | 0.100448268 | 0.067000512 | 0.125689919 |
| 0.11008678  | 0.144043607 | 0.027207116 | 0.09272094  |
| 0.020488086 | 0.071222927 | 0.088571795 | 0.002422869 |
| 0.023633883 | 0.014571825 | 0.064529504 | 0.064745854 |
| 0.024022429 | 0.052153038 | 0.029881158 | 0.0319089   |
| 0.014395294 | 0.065466691 | 0.153227065 | 0.120278294 |
| 0.014317991 | 0.057803997 | 0.082787562 | 0.071041798 |
| 0.051984016 | 0.148952403 | 0.07780864  | 0.043300736 |
| 0.080979342 | 0.00169434  | 0.084528281 | 0.036876983 |
| 0.019058473 | 0.127737238 | 0.100525752 | 0.101573994 |
| 0.054903834 | 0.083031848 | 0.089810945 | 0.141150291 |
| 0.017460382 | 0.040806447 | 0.119603254 | 0.012630162 |
| 0.085104233 | 0.139698365 | 0.036012006 | 0.062769971 |
| 0.183267098 | 0.055222742 | 0.005450631 | 0.000378574 |
| 0.040349314 | 0.062654261 | 0.054968507 | 0.13137357  |
| 0.039465084 | 0.038993924 | 0.002961779 | 0.124250893 |
| 0.099614928 | 0.076775813 | 0.019544302 | 0.119961666 |
| 0.070910777 | 0.188021464 | 0.086174304 | 0.089882912 |
| 0.027079848 | 0.0985264   | 0.074829113 | 0.091505659 |
| 0.080264781 | 0.134394578 | 0.090284795 | 0.003029544 |
| 0.006584229 | 0.037367853 | 0.100126716 | 0.087658081 |
| 0.119814658 | 0.045769998 | 0.02394798  | 0.104047624 |
| 0.021305124 | 0.146299273 | 0.005752927 | 0.01748339  |
| 0.085827257 | 0.017744048 | 0.115042908 | 0.088109233 |
| 0.063701711 | 0.090960493 | 0.005759729 | 0.055431447 |
| 0.021282615 | 0.100039777 | 0.092486369 | 0.074049391 |
| 0.032465133 | 0.019658718 | 0.144079571 | 0.027675102 |
| 0.046108725 | 0.003621358 | 0.101115191 | 0.003625823 |
| 0.02269314  | 0.124809427 | 0.022164264 | 0.007031362 |
| 0.006531995 | 0.042695768 | 0.011769471 | 0.093917051 |
| 0.037745027 | 0.094800235 | 0.06751611  | 0.077561994 |
| 0.09040856  | 0.042922163 | 0.039435189 | 0.001917317 |
| 0.01113743  | 0.057946122 | 0.055664179 | 0.082105752 |
| 0.035211403 | 0.169439127 | 0.053157251 | 0.072722628 |
| 0.00146183  | 0.027678942 | 0.043658901 | 0.095360228 |
| 0.032016387 |             |             |             |
| PPP3CA      | 0.28034508  | 0.40775897  | 0.174826886 |
| 0.287508091 | 0.18358225  | 0.251462394 | 0.174559661 |
| 0.264165591 | 0.060658722 | 0.006686339 | 0.007069152 |
| 0.180853166 | 0.078306731 | 0.193621911 | 0.205872526 |
| 0.255883897 | 0.04712298  | 0.251709099 | 0.161860487 |
| 0.270176155 | 0.138170056 | 0.195799749 | 0.087493795 |
| 0.103323295 | 0.032308924 | 0.036267168 | 0.088267356 |
| 0.348802077 | 0.043054434 | 0.241198521 | 0.323176596 |
| 0.050744824 | 0.325629171 | 0.413321189 | 0.179437347 |

|             |             |             |             |
|-------------|-------------|-------------|-------------|
| 0.386021765 | 0.271994723 | 0.015245477 | 0.197184312 |
| 0.374562691 | 0.243999554 | 0.282821319 | 0.183064748 |
| 0.040109724 | 0.435080538 | 0.162298441 | 0.164170643 |
| 0.233589602 | 0.013847429 | 0.285414271 | 0.427674977 |
| 0.371464941 | 0.183595671 | 0.262221969 | 0.135390949 |
| 0.065000678 | 0.257173794 | 0.065581894 | 0.317005396 |
| 0.15182413  | 0.247140673 | 0.367051021 | 0.08349746  |
| 0.115099375 | 0.267490507 | 0.058961902 | 0.238951806 |
| 0.11338293  | 0.35686696  | 0.037822345 | 0.165220105 |
| 0.006403208 | 0.261770363 | 0.163654146 | 0.093421456 |
| 0.023939153 | 0.010907019 | 0.072459564 | 0.211239956 |
| 0.354855163 | 0.378003522 | 0.30904972  | 0.312338255 |
| 0.068861967 | 0.145322808 | 0.135376367 | 0.092976664 |
| 0.350779694 | 0.130954003 | 0.096766196 | 0.231750179 |
| 0.317663236 | 0.383405992 | 0.083109995 | 0.108380587 |
| 0.302421384 | 0.410879062 | 0.205135489 | 0.180890112 |
| 0.122816156 | 0.019746644 | 0.363612144 | 0.349354435 |
| 0.373584682 | 0.091172236 | 0.062264039 | 0.355854974 |
| 0.040967017 | 0.244415787 | 0.190700266 | 0.078735766 |
| 0.364790791 | 0.02521788  | 0.076646825 | 0.217131879 |
| 0.158875891 | 0.317561866 | 0.361952772 | 0.140730836 |
| 0.175645862 | 0.0127886   | 0.034488262 | 0.022812884 |
| 0.191005072 | 0.033478508 | 0.40477568  | 0.334944187 |
| 0.233973233 | 0.148093204 | 0.215291095 | 0.001662141 |
| 0.011705768 | 0.098114821 | 0.287240579 | 0.240783806 |
| 0.294401885 | 0.289023922 | 0.097832362 | 0.326270209 |
| 0.184636098 | 0.30185337  | 0.07464761  | 0.107982246 |
| 0.220517769 | 0.097499825 | 0.132794494 | 0.195612754 |
| 0.116771087 | 0.153786113 | 0.090872466 | 0.372433536 |
| 0.431762891 | 0.066755766 | 0.277914837 | 0.230369489 |
| 0.163668964 | 0.122644303 | 0.091274099 | 0.154524223 |
| 0.059034011 | 0.350774773 | 0.010152927 | 0.288842451 |
| 0.096460804 | 0.041723938 | 0.022634673 | 0.279423524 |
| 0.193050646 | 0.295555025 | 0.385432466 | 0.082656168 |
| 0.175074457 | 0.170276049 | 0.28886764  | 0.240242116 |
| 0.006053956 | 0.047046109 | 0.285576856 | 0.360416861 |
| 0.281528312 | 0.344531252 | 0.186717625 | 0.142059978 |
| 0.122940733 | 0.306820431 | 0.002842672 | 0.415697849 |
| 0.379233522 | 0.275771842 | 0.167499413 | 0.187336603 |
| 0.132514341 | 0.324200097 | 0.040949766 | 0.229935985 |
| 0.299738209 | 0.069698742 | 0.344085936 | 0.067310784 |
| 0.374171739 | 0.022789199 | 0.253793765 | 0.242171356 |
| 0.217083728 | 0.009183747 | 0.25819794  | 0.278362063 |
| 0.010098652 | 0.158488978 | 0.2989944   | 0.239676382 |
| 0.186030583 | 0.275006803 | 0.332170276 | 0.119692728 |
| 0.182464837 | 0.217388228 | 0.011560733 | 0.124676741 |
| 0.281645595 | 0.150254165 | 0.412233037 | 0.202798738 |
| 0.25321677  | 0.39065097  | 0.276084074 | 0.117162083 |
| 0.040401103 | 0.259150759 | 0.032823092 | 0.147803418 |
| 0.307491917 | 0.080146177 | 0.165534559 | 0.088233484 |
| 0.028175949 | 0.376375695 | 0.047695445 | 0.071567943 |
| 0.029034675 | 0.190392606 | 0.201786651 | 0.117367554 |
| 0.065611278 | 0.088894176 | 0.132126052 | 0.171823212 |
| 0.065147964 | 0.047791671 | 0.00760569  | 0.127233885 |

|             |             |             |             |
|-------------|-------------|-------------|-------------|
| 0.047144658 | 0.132279939 | 0.144759326 | 0.284045235 |
| 0.195801387 | 0.054139412 | 0.155708821 | 0.110906972 |
| 0.046417877 | 0.009457323 | 0.392930114 | 0.233452319 |
| 0.342724899 | 0.12808825  | 0.025765925 | 0.13529522  |
| 0.337331765 | 0.226090042 | 0.291201744 | 0.368888145 |
| 0.03255135  | 0.328530902 | 0.107791941 | 0.051194476 |
| 0.120662818 | 0.13956317  | 0.34758964  | 0.058013961 |
| 0.261432298 | 0.401528612 | 0.167958098 | 0.077309224 |
| 0.368003805 | 0.243829217 | 0.037508654 | 0.317961343 |
| 0.306771629 | 0.019411925 | 0.374103969 | 0.043562181 |
| 0.01203661  | 0.208102996 | 0.222696152 | 0.039490115 |
| 0.037195721 | 0.161761231 | 0.103538195 | 0.125385184 |
| 0.381920698 | 0.216267982 | 0.274645518 | 0.077318573 |
| 0.031179918 | 0.003344706 | 0.075178467 | 0.17047739  |
| 0.418375451 | 0.340996671 | 0.14399822  | 0.122358709 |
| 0.153643296 | 0.121298462 | 0.247747953 | 0.349736773 |
| 0.116959762 | 0.408164452 | 0.00659318  | 0.22805363  |
| 0.386533991 | 0.277896105 | 0.02894106  | 0.235311113 |
| 0.359391159 | 0.04530261  | 0.19322312  | 0.393262396 |
| 0.352163635 | 0.155263876 | 0.151250135 | 0.22600128  |
| 0.033208924 | 0.064381131 | 0.168319404 | 0.050754232 |
| 0.182139718 | 0.121058368 | 0.009477511 | 0.280122345 |
| 0.028439345 | 0.381501256 | 0.299757111 | 0.031721376 |
| 0.201975349 | 0.292181477 | 0.157901779 | 0.032005769 |
| 0.265176768 | 0.357697479 | 0.41454083  | 0.177599842 |
| 0.266886762 | 0.328939604 | 0.127332033 | 0.0424618   |
| 0.007584901 | 0.378737861 | 0.306532777 | 0.017752491 |
| 0.332385441 | 0.279850136 | 0.006597768 | 0.417530914 |
| 0.148714274 | 0.401599597 | 0.014113214 | 0.042098439 |
| 0.017202344 | 0.278535967 | 0.395012778 | 0.304702507 |
| 0.210911114 | 0.2340033   | 0.003240292 | 0.363261762 |
| 0.38748795  | 0.005251887 | 0.046126398 | 0.258879543 |
| 0.201332682 | 0.435467814 | 0.096417261 | 0.26197523  |
| 0.149341151 | 0.368622295 | 0.155732021 | 0.122143882 |
| 0.328430465 | 0.327706863 | 0.328482362 | 0.414745603 |
| 0.325500631 | 0.198962955 | 0.168112167 | 0.017806313 |
| 0.05330264  | 0.2709792   | 0.141799166 | 0.035301945 |
| 1           | 0.055771227 | 0.376362194 | 0.313198851 |
| 0.307703829 | 0.003624373 | 0.195570343 | 0.291779295 |
| 0.391250343 | 0.380621254 | 0.020494493 | 0.006040976 |
| 0.005986852 | 0.004065461 | 0.260983184 | 0.109421044 |
| 0.353369923 | 0.169438314 | 0.004928086 | 0.09778177  |
| 0.191371231 | 0.135925689 | 0.383468104 | 0.232175369 |
| 0.26178144  | 0.05163423  | 0.141620954 | 0.26706591  |
| 0.023269079 | 0.296793757 | 0.320409274 | 0.415803091 |
| 0.025936408 | 0.114706459 | 0.246956116 | 0.368857268 |
| 0.012102277 | 0.140721143 | 0.197146826 | 0.151044763 |
| 0.01106436  | 0.03346356  | 0.029750842 | 0.273182434 |
| 0.368385012 | 0.02737259  | 0.011819151 | 0.164325214 |
| 0.078792163 | 0.328161339 | 0.08927425  | 0.358940657 |
| 0.346021962 | 0.29845575  | 0.025181161 | 0.405896983 |
| 0.019992395 | 0.382499859 | 0.105987907 | 0.062258114 |
| 0.162985288 | 0.012772126 | 0.334608101 | 0.043956666 |
| 0.260326327 | 0.304338284 | 0.080598737 | 0.006462573 |

|             |             |             |             |
|-------------|-------------|-------------|-------------|
| 0.053603398 | 0.025249151 | 0.320535405 | 0.272969906 |
| 0.014304444 | 0.209765421 | 0.15014757  | 0.231961557 |
| 0.277134773 | 0.259130979 | 0.416700578 | 0.194107072 |
| 0.089527224 | 0.044304072 | 0.307214522 | 0.283361523 |
| 0.248263877 | 0.319818191 | 0.111908161 | 0.378754537 |
| 0.316942829 | 0.383894735 | 0.332553931 | 0.213099844 |
| 0.066458827 | 0.259703241 | 0.261696497 | 0.026975346 |
| 0.214523642 | 0.294877221 | 0.273665932 | 0.051429463 |
| 0.100585353 | 0.130386997 | 0.066224272 | 0.178958142 |
| 0.096244921 | 0.269007832 | 0.088250258 | 0.305619061 |
| 0.271932084 | 0.300493541 | 0.075033533 | 0.028203591 |
| 0.416583871 | 0.39851227  | 0.181129138 | 0.259548768 |
| 0.095937179 | 0.154334982 | 0.268896551 | 0.240486597 |
| 0.184578431 | 0.298391098 | 0.337959078 | 0.267561411 |
| 0.403519489 | 0.18299302  | 0.41137642  | 0.217030728 |
| 0.03194894  | 0.201509283 | 0.048796922 | 0.042235282 |
| 0.08693382  | 0.014640567 | 0.083099201 | 0.23777896  |
| 0.118946851 | 0.177086489 | 0.257933349 | 0.055040455 |
| 0.137242509 | 0.231620051 | 0.175156526 | 0.177179726 |
| 0.046381523 | 0.393446587 | 0.005934308 | 0.0311633   |
| 0.124219031 | 0.27884512  | 0.119884828 | 0.115984018 |
| 0.08604361  | 0.055522634 | 0.14607998  | 0.285720992 |
| 0.162290539 | 0.171480636 | 0.289403989 | 0.062159392 |
| 0.033247699 | 0.337545159 | 0.263385003 | 0.011571194 |
| 0.044667341 | 0.256872975 | 0.202489692 | 0.116180741 |
| 0.007827974 | 0.313931411 | 0.214591071 | 0.179408295 |
| 0.255418233 | 0.053723938 | 0.390893706 | 0.089973514 |
| 0.074400362 | 0.407177079 | 0.154341043 | 0.370037019 |
| 0.154693229 | 0.247947168 | 0.426175408 | 0.299875466 |
| 0.098831102 | 0.172115462 | 0.038100692 | 0.347299096 |
| 0.149864374 |             |             |             |
| PPT1        | 0.111958042 | 0.164061131 | 0.102845985 |
| 0.225663359 | 0.148833173 | 0.084671828 | 0.138503119 |
| 0.026507446 | 0.124915457 | 0.033319174 | 0.110767575 |
| 0.12797305  | 0.075676488 | 0.053190318 | 0.040787686 |
| 0.257233883 | 0.127719638 | 0.051819317 | 0.197490534 |
| 0.178424674 | 0.044917734 | 0.278857628 | 0.096156173 |
| 0.073940952 | 0.187207884 | 0.19474701  | 0.161344044 |
| 0.208988029 | 0.219503758 | 0.052997933 | 0.127053812 |
| 0.097592702 | 0.132329753 | 0.130895715 | 0.203412684 |
| 0.12265427  | 0.089961875 | 0.010113702 | 0.057129902 |
| 0.120565774 | 0.206780143 | 0.179715681 | 0.228625438 |
| 0.104170937 | 0.104045277 | 0.20337125  | 0.174473266 |
| 0.028397917 | 0.131812528 | 0.027380078 | 0.097529334 |
| 0.112973313 | 0.120967349 | 0.052278722 | 0.117838039 |
| 0.054888943 | 0.021527781 | 0.057069728 | 0.063770329 |
| 0.171962928 | 0.021716491 | 0.125672242 | 0.08291549  |
| 0.029238569 | 0.056872515 | 0.096037285 | 0.087001954 |
| 0.071508908 | 0.094727353 | 0.035167295 | 0.088957077 |
| 0.008772454 | 0.186187385 | 0.180590799 | 0.081062411 |
| 0.192595389 | 0.087003291 | 0.130703554 | 0.181240823 |
| 0.201262275 | 0.114522685 | 0.232195802 | 0.20834128  |
| 0.101050301 | 0.164958869 | 0.116315561 | 0.150980489 |
| 0.1366779   | 0.138353595 | 0.059708242 | 0.276568431 |

|             |             |             |             |
|-------------|-------------|-------------|-------------|
| 0.225393033 | 0.149190661 | 0.114855157 | 0.240048079 |
| 0.158634174 | 0.140000433 | 0.097829775 | 0.123612354 |
| 0.081719774 | 0.104035534 | 0.116466027 | 0.190251159 |
| 0.096020659 | 0.114107393 | 0.259565426 | 0.137738109 |
| 0.141881141 | 0.026102171 | 0.251410473 | 0.043738744 |
| 0.207689798 | 0.078038859 | 0.229178186 | 0.135182545 |
| 0.067071076 | 0.143665936 | 0.152168895 | 0.182110266 |
| 0.117129868 | 0.066791042 | 0.089530243 | 0.084077392 |
| 0.04427363  | 0.055838598 | 0.096500553 | 0.199865323 |
| 0.029360467 | 0.05956648  | 0.104805311 | 0.045272934 |
| 0.123271269 | 0.067029698 | 0.121738915 | 0.076113172 |
| 0.15996281  | 0.089390609 | 0.179972852 | 0.082126784 |
| 0.13233082  | 0.227244817 | 0.004929891 | 0.085747061 |
| 0.124978093 | 0.069862992 | 0.270534178 | 0.115858383 |
| 0.228292692 | 0.061897371 | 0.140548857 | 0.20647297  |
| 0.104037668 | 0.16506528  | 0.033135103 | 0.254907725 |
| 0.052120879 | 0.210810955 | 0.112431338 | 0.08873845  |
| 0.070492064 | 0.120855433 | 0.131990742 | 0.055851955 |
| 0.058229359 | 0.084527084 | 0.025049192 | 0.059464707 |
| 0.048309136 | 0.150049561 | 0.089643121 | 0.149325144 |
| 0.115995562 | 0.245813075 | 0.043232474 | 0.146915289 |
| 0.08003751  | 0.077036464 | 0.021864507 | 0.18222335  |
| 0.046501076 | 0.184206225 | 0.087238732 | 0.108626286 |
| 0.262683095 | 0.219268409 | 0.005679327 | 0.115918528 |
| 0.151083104 | 0.023123746 | 0.181353681 | 0.147933374 |
| 0.105111206 | 0.215383397 | 0.00235072  | 0.224817247 |
| 0.059817011 | 0.128724442 | 0.231271196 | 0.264903629 |
| 0.115213838 | 0.190826113 | 0.04817864  | 0.172825191 |
| 0.118114378 | 0.017306734 | 0.047331621 | 0.16857358  |
| 0.105194335 | 0.033572436 | 0.141666204 | 0.207716389 |
| 0.195568904 | 0.201086997 | 0.246227762 | 0.101647035 |
| 0.151016861 | 0.086096903 | 0.058842903 | 0.199409051 |
| 0.150662971 | 0.029105839 | 0.116879981 | 0.067300413 |
| 0.040358834 | 0.148205555 | 0.112281811 | 0.032997398 |
| 0.138951866 | 0.085432126 | 0.028179116 | 0.210061576 |
| 0.101516305 | 0.078728495 | 0.096004716 | 0.056517277 |
| 0.164105441 | 0.190447829 | 0.11014781  | 0.080303395 |
| 0.067273615 | 0.112329667 | 0.137509953 | 0.055362349 |
| 0.073673793 | 0.122007944 | 0.096253442 | 0.099353427 |
| 0.046953836 | 0.162773899 | 0.047755253 | 0.038791378 |
| 0.062002574 | 0.051801338 | 0.043864238 | 0.087239934 |
| 0.034979875 | 0.077605224 | 0.163601646 | 0.07070488  |
| 0.161100628 | 0.133554084 | 0.1630246   | 0.213224874 |
| 0.060878456 | 0.101766954 | 0.123021506 | 0.022675617 |
| 0.19380855  | 0.048821979 | 0.016581394 | 0.155743498 |
| 0.048828533 | 0.208724949 | 0.087386883 | 0.254551565 |
| 0.093713899 | 0.208768236 | 0.229980872 | 0.024905502 |
| 0.075539416 | 0.129900547 | 0.177219385 | 0.224789689 |
| 0.091129175 | 0.16226348  | 0.069996788 | 0.096705061 |
| 0.086097186 | 0.141098327 | 0.167497446 | 0.117214246 |
| 0.136321788 | 0.187959418 | 0.160897168 | 0.241559567 |
| 0.199832121 | 0.136222325 | 0.034336104 | 0.30914095  |
| 0.185700325 | 0.284952904 | 0.143398789 | 0.10594854  |
| 0.122760874 | 0.047023974 | 0.140232474 | 0.09920408  |

|             |             |             |             |
|-------------|-------------|-------------|-------------|
| 0.115212078 | 0.168907215 | 0.202238053 | 0.16507401  |
| 0.236800089 | 0.093986057 | 0.012311605 | 0.188553643 |
| 0.040583739 | 0.135067092 | 0.062592627 | 0.177545735 |
| 0.119946972 | 0.035462748 | 0.221764359 | 0.107795762 |
| 0.098541347 | 0.123898046 | 0.064564147 | 0.13465214  |
| 0.154679163 | 0.121093118 | 0.101902934 | 0.145764918 |
| 0.045365752 | 0.054544209 | 0.186032115 | 0.069590158 |
| 0.076653384 | 0.147085348 | 0.035741978 | 0.028695281 |
| 0.117540704 | 0.129062449 | 0.204584735 | 0.166912872 |
| 0.074298762 | 0.029195163 | 0.233541441 | 0.134642285 |
| 0.174000668 | 0.140216447 | 0.133566113 | 0.064108377 |
| 0.130921023 | 0.166996683 | 0.117592183 | 0.156768181 |
| 0.150301769 | 0.136371001 | 0.104051414 | 0.070145675 |
| 0.215267023 | 0.025477258 | 0.064301572 | 0.152451511 |
| 0.172827176 | 0.080555373 | 0.01299496  | 0.015710306 |
| 0.090835719 | 0.221040396 | 0.121762495 | 0.126844018 |
| 0.023110949 | 0.155213274 | 0.008990743 | 0.173328315 |
| 0.140407955 | 0.110264146 | 0.10792842  | 0.132182852 |
| 0.147322548 | 0.150648847 | 0.128786697 | 0.183942584 |
| 0.128410499 | 0.128541586 | 0.055511896 | 0.291889775 |
| 0.165099785 | 0.139644409 | 0.144833245 | 0.130409306 |
| 0.199338329 | 0.214842661 | 0.246567819 | 0.07507696  |
| 0.105687205 | 0.041451525 | 0.040243273 | 0.127210827 |
| 0.055771227 | 1           | 0.147020965 | 0.218969066 |
| 0.183260531 | 0.080520851 | 0.04474543  | 0.121769777 |
| 0.158501675 | 0.200216505 | 0.041843671 | 0.016349904 |
| 0.009696469 | 0.128692006 | 0.114932714 | 0.199706176 |
| 0.173325334 | 0.017214036 | 0.059393761 | 0.035186369 |
| 0.073619969 | 0.20410107  | 0.145638472 | 0.252292655 |
| 0.161399697 | 0.128295257 | 0.039294638 | 0.217053808 |
| 0.152175298 | 0.048258806 | 0.197086781 | 0.12869686  |
| 0.080994332 | 0.181184887 | 0.055991864 | 0.212329532 |
| 0.036014528 | 0.233719201 | 0.126463017 | 0.068793172 |
| 0.033952927 | 0.174041183 | 0.161767557 | 0.218028431 |
| 0.116762344 | 0.108548247 | 0.11917902  | 0.007421137 |
| 0.107347418 | 0.182588003 | 0.111463435 | 0.213663216 |
| 0.173928132 | 0.251402638 | 0.101011719 | 0.134443768 |
| 0.098435762 | 0.119107124 | 0.175680533 | 0.015366118 |
| 0.081102739 | 0.062635651 | 0.123528809 | 0.085673881 |
| 0.040179927 | 0.106666431 | 0.086166131 | 0.08603054  |
| 0.053860125 | 0.149089171 | 0.234351844 | 0.219942253 |
| 0.082923861 | 0.07511665  | 0.196886697 | 0.160328023 |
| 0.071293719 | 0.223566489 | 0.122830822 | 0.063894864 |
| 0.075260528 | 0.032824669 | 0.159466867 | 0.081422947 |
| 0.032253472 | 0.229065963 | 0.089757037 | 0.177412101 |
| 0.108229694 | 0.145471708 | 0.150283627 | 0.173695239 |
| 0.073248762 | 0.080736649 | 0.128791124 | 0.05323431  |
| 0.172225206 | 0.218970528 | 0.076202241 | 0.150213631 |
| 0.234270607 | 0.110153881 | 0.049150151 | 0.010375066 |
| 0.090465442 | 0.068533489 | 0.096851921 | 0.243533871 |
| 0.089176644 | 0.085560954 | 0.029336796 | 0.168622605 |
| 0.163818773 | 0.120968815 | 0.050623443 | 0.160759347 |
| 0.176412214 | 0.229710765 | 0.175670126 | 0.185323819 |
| 0.036702745 | 0.152134583 | 0.141395128 | 0.114600581 |



|             |             |             |             |
|-------------|-------------|-------------|-------------|
| 0.111381565 | 0.180323455 | 0.140946275 | 0.01166169  |
| 0.097830067 | 0.08360851  | 0.111457456 | 0.207002615 |
| 0.192548174 | 0.130290108 | 0.046624131 | 0.215634329 |
| 0.046830332 | 0.231104251 | 0.01640636  | 0.127480238 |
| 0.189874018 | 0.04583308  | 0.215834631 | 0.090298905 |
| 0.124265442 | 0.132423444 | 0.061260607 | 0.134878102 |
| 0.054704575 | 0.163466109 | 0.149761087 | 0.166166474 |
| 0.064641242 | 0.082143508 | 0.223171931 | 0.042927106 |
| 0.045811771 | 0.028843873 | 0.15849201  | 0.0465479   |
| 0.046538909 | 0.223891451 | 0.05385494  | 0.067870274 |
| 0.055700949 | 0.072291098 | 0.040074353 | 0.096900535 |
| 0.110135322 | 0.150218692 | 0.05013575  | 0.141126976 |
| 0.125392682 | 0.099738996 | 0.068106015 | 0.030296941 |
| 0.064177594 | 0.105293522 | 0.129416378 | 0.138844567 |
| 0.103124507 | 0.267687415 | 0.087471648 | 0.126205123 |
| 0.043066935 | 0.06645148  | 0.077489881 | 0.170574746 |
| 0.053983383 |             |             |             |

|             |             |             |             |
|-------------|-------------|-------------|-------------|
| PQLC3       | 0.46870552  | 0.510097167 | 0.444995901 |
| 0.440783103 | 0.449542141 | 0.409440563 | 0.222546511 |
| 0.227211701 | 0.090379306 | 0.004755478 | 0.020109896 |
| 0.483667146 | 0.211022677 | 0.296083528 | 0.360276165 |
| 0.442956578 | 0.143200135 | 0.416524398 | 0.260908581 |
| 0.441313859 | 0.10112271  | 0.418712045 | 0.099756539 |
| 0.313413157 | 0.10839094  | 0.06837658  | 0.276706269 |
| 0.466920305 | 0.081322257 | 0.350710025 | 0.421617534 |
| 0.11939309  | 0.474869983 | 0.523835969 | 0.455148547 |
| 0.519734137 | 0.452240106 | 0.017154214 | 0.304842829 |
| 0.462454879 | 0.466784307 | 0.433916235 | 0.350759082 |
| 0.043172695 | 0.498262805 | 0.257908978 | 0.43607073  |
| 0.273217627 | 0.030764478 | 0.276520125 | 0.450377563 |
| 0.479753583 | 0.44751514  | 0.2566478   | 0.166168241 |
| 0.199334446 | 0.257066647 | 0.284482085 | 0.368341104 |
| 0.235649263 | 0.181675996 | 0.483254286 | 0.091320954 |
| 0.148327668 | 0.289105546 | 0.171375399 | 0.291096816 |
| 0.365637846 | 0.430754947 | 0.022066887 | 0.453918516 |
| 0.003117628 | 0.421989206 | 0.41635616  | 0.322342236 |
| 0.045160957 | 0.020296258 | 0.199636065 | 0.355262448 |
| 0.47717341  | 0.465273473 | 0.481925583 | 0.477830141 |
| 0.197114805 | 0.326175624 | 0.422330321 | 0.180125493 |
| 0.468329155 | 0.185165403 | 0.138326484 | 0.442769683 |
| 0.482182672 | 0.513768218 | 0.213682007 | 0.284193987 |
| 0.442260405 | 0.466238972 | 0.460742851 | 0.444429261 |
| 0.355794364 | 0.060901985 | 0.432848867 | 0.482041296 |
| 0.438902079 | 0.343132923 | 0.163550669 | 0.445138707 |
| 0.064305224 | 0.436000917 | 0.374109514 | 0.193559621 |
| 0.477958628 | 0.018451677 | 0.227769443 | 0.373944694 |
| 0.259875957 | 0.483272415 | 0.508888087 | 0.200534226 |
| 0.45124274  | 0.02321226  | 0.141138207 | 0.038992837 |
| 0.371681767 | 0.165553688 | 0.496672641 | 0.469330494 |
| 0.267811616 | 0.389559126 | 0.28852366  | 0.00224359  |
| 0.029471718 | 0.222808683 | 0.472045461 | 0.428816979 |
| 0.46965021  | 0.424202212 | 0.234454703 | 0.432871407 |
| 0.467387509 | 0.479796614 | 0.074848301 | 0.106366637 |
| 0.46090807  | 0.215362757 | 0.256265421 | 0.472855866 |

|             |             |             |             |
|-------------|-------------|-------------|-------------|
| 0.325706939 | 0.13406797  | 0.137466948 | 0.488209638 |
| 0.424408788 | 0.089897136 | 0.401500765 | 0.445358434 |
| 0.33284582  | 0.381982613 | 0.118331582 | 0.298093878 |
| 0.050919355 | 0.484857518 | 0.031691502 | 0.392510388 |
| 0.279298189 | 0.158243711 | 0.01596673  | 0.296998241 |
| 0.324107483 | 0.448661214 | 0.486682434 | 0.120192902 |
| 0.341157858 | 0.428322913 | 0.370904421 | 0.44982929  |
| 0.008201026 | 0.058385523 | 0.336805084 | 0.48004305  |
| 0.325120243 | 0.483665098 | 0.338837067 | 0.33466562  |
| 0.305002687 | 0.47509148  | 0.005665766 | 0.504814785 |
| 0.518352109 | 0.3607382   | 0.418534487 | 0.461798487 |
| 0.387282259 | 0.468252409 | 0.063737462 | 0.447378583 |
| 0.418426515 | 0.089368705 | 0.483478233 | 0.167999036 |
| 0.462884204 | 0.04123112  | 0.345734064 | 0.461144201 |
| 0.460196595 | 0.010162541 | 0.252302769 | 0.41401686  |
| 0.030392581 | 0.10268607  | 0.468119549 | 0.436317436 |
| 0.397088303 | 0.478453357 | 0.480170533 | 0.370389949 |
| 0.453850698 | 0.270871246 | 0.014742187 | 0.352696805 |
| 0.479336022 | 0.389192159 | 0.442387909 | 0.264446167 |
| 0.400518123 | 0.462364641 | 0.459983235 | 0.203158762 |
| 0.043957263 | 0.338948411 | 0.025712381 | 0.35079543  |
| 0.434450619 | 0.118140316 | 0.412928505 | 0.182663987 |
| 0.076677963 | 0.501011686 | 0.195238858 | 0.288839053 |
| 0.141971354 | 0.421179263 | 0.283736265 | 0.244088623 |
| 0.219872568 | 0.170966046 | 0.367818425 | 0.391507629 |
| 0.039049481 | 0.097925425 | 0.019268971 | 0.401249339 |
| 0.143335289 | 0.361421221 | 0.359943743 | 0.446250088 |
| 0.353084953 | 0.119032487 | 0.409836801 | 0.316274641 |
| 0.125435723 | 0.015818278 | 0.492839087 | 0.443428217 |
| 0.384622106 | 0.16684031  | 0.046209445 | 0.368635213 |
| 0.468488228 | 0.353368332 | 0.321896819 | 0.45294947  |
| 0.037177072 | 0.481632847 | 0.25553756  | 0.128211488 |
| 0.398688618 | 0.278214458 | 0.470650497 | 0.065872336 |
| 0.437976463 | 0.458838664 | 0.351223942 | 0.191103904 |
| 0.417715845 | 0.44719396  | 0.032384756 | 0.45643525  |
| 0.452424385 | 0.032997959 | 0.510943012 | 0.139003813 |
| 0.022841281 | 0.474364485 | 0.458379308 | 0.080681653 |
| 0.085655468 | 0.34146396  | 0.051181878 | 0.310782653 |
| 0.496319199 | 0.431235766 | 0.448089097 | 0.246686442 |
| 0.04020321  | 0.009750564 | 0.232257206 | 0.454146922 |
| 0.519365317 | 0.493027281 | 0.290211893 | 0.385548355 |
| 0.260121501 | 0.33774123  | 0.168068431 | 0.481792348 |
| 0.252694756 | 0.519786053 | 0.007331487 | 0.463556094 |
| 0.515113734 | 0.330369552 | 0.082692617 | 0.326911846 |
| 0.430984782 | 0.048486615 | 0.244644562 | 0.497288648 |
| 0.457083349 | 0.346090348 | 0.368346653 | 0.474921352 |
| 0.01722121  | 0.042995982 | 0.420023425 | 0.20476904  |
| 0.39583517  | 0.227621779 | 0.062846717 | 0.366660772 |
| 0.043310822 | 0.440763544 | 0.484379284 | 0.059074686 |
| 0.355270537 | 0.358203677 | 0.409232646 | 0.038899341 |
| 0.462244584 | 0.497218926 | 0.524790362 | 0.192953269 |
| 0.479114052 | 0.468313591 | 0.426816292 | 0.090136381 |
| 0.018802352 | 0.518782582 | 0.449664586 | 0.024581804 |
| 0.479798583 | 0.27762624  | 0.011666761 | 0.487535569 |

|             |             |             |             |
|-------------|-------------|-------------|-------------|
| 0.204232227 | 0.464761026 | 0.006389836 | 0.114178316 |
| 0.048659709 | 0.480467325 | 0.483150813 | 0.420723731 |
| 0.274518642 | 0.413722929 | 0.007558653 | 0.505340461 |
| 0.484822238 | 0.015306613 | 0.153703661 | 0.467935312 |
| 0.458066568 | 0.524605937 | 0.339875353 | 0.468543411 |
| 0.459971489 | 0.499256439 | 0.252103046 | 0.285218431 |
| 0.467045699 | 0.485173495 | 0.46811553  | 0.458677857 |
| 0.476425408 | 0.457072853 | 0.29761399  | 0.014768729 |
| 0.138883011 | 0.240764015 | 0.329109643 | 0.076309713 |
| 0.376362194 | 0.147020965 | 1           | 0.480285242 |
| 0.478514951 | 0.005315816 | 0.171693258 | 0.469899985 |
| 0.45981894  | 0.476103705 | 0.028651476 | 0.009171264 |
| 0.012981036 | 0.018929462 | 0.393429674 | 0.27247589  |
| 0.473114547 | 0.267365387 | 0.004702862 | 0.051537211 |
| 0.325701004 | 0.424720975 | 0.495460522 | 0.410678806 |
| 0.478453174 | 0.088301382 | 0.294440543 | 0.435214056 |
| 0.068795164 | 0.389172693 | 0.478641287 | 0.46932495  |
| 0.048809614 | 0.271693514 | 0.447561221 | 0.475363799 |
| 0.07901153  | 0.345071847 | 0.482903621 | 0.328784868 |
| 0.019060764 | 0.088409636 | 0.066618294 | 0.469662012 |
| 0.505456706 | 0.078387654 | 0.033395777 | 0.178126707 |
| 0.121786458 | 0.482067938 | 0.178352941 | 0.483685735 |
| 0.469058498 | 0.461297744 | 0.080442054 | 0.482844537 |
| 0.035756747 | 0.49080134  | 0.364181122 | 0.074139588 |
| 0.344284442 | 0.014842301 | 0.467257659 | 0.149171425 |
| 0.364697981 | 0.453094818 | 0.205645734 | 0.018137556 |
| 0.20794533  | 0.057548972 | 0.474991465 | 0.478441495 |
| 0.040375024 | 0.261724391 | 0.338112888 | 0.45535893  |
| 0.32615905  | 0.457117755 | 0.50995012  | 0.445900257 |
| 0.085299859 | 0.174707956 | 0.452080587 | 0.458337249 |
| 0.271393032 | 0.483714536 | 0.29946482  | 0.50978557  |
| 0.460261544 | 0.466790159 | 0.4690628   | 0.374522265 |
| 0.244907122 | 0.455566637 | 0.396121023 | 0.022309807 |
| 0.396840047 | 0.472901432 | 0.415604855 | 0.162358251 |
| 0.266846057 | 0.420385244 | 0.055022787 | 0.25675027  |
| 0.364455938 | 0.342856596 | 0.147461491 | 0.464734098 |
| 0.449318783 | 0.457311753 | 0.049325787 | 0.062423012 |
| 0.531299537 | 0.443649237 | 0.171292933 | 0.459617154 |
| 0.194976882 | 0.358790681 | 0.486454121 | 0.4773159   |
| 0.397930307 | 0.467462178 | 0.467091448 | 0.416550642 |
| 0.424118538 | 0.280911422 | 0.524585335 | 0.119036908 |
| 0.092393045 | 0.465223147 | 0.096048317 | 0.101501586 |
| 0.152945411 | 0.029791822 | 0.325189229 | 0.458424655 |
| 0.408823613 | 0.403989164 | 0.360896115 | 0.094410372 |
| 0.353881595 | 0.433999994 | 0.387215407 | 0.217065533 |
| 0.082256404 | 0.49608378  | 0.010172257 | 0.061898639 |
| 0.42047897  | 0.469494067 | 0.403834911 | 0.271335098 |
| 0.316917076 | 0.157908836 | 0.31822649  | 0.342556872 |
| 0.34067319  | 0.424266612 | 0.468538491 | 0.043293288 |
| 0.020636665 | 0.485614395 | 0.446427763 | 0.026627529 |
| 0.089108298 | 0.431007505 | 0.357101655 | 0.237029548 |
| 0.024517839 | 0.462237017 | 0.351944506 | 0.45707004  |
| 0.381355864 | 0.075083168 | 0.393189526 | 0.111098795 |
| 0.074183654 | 0.457987224 | 0.437799295 | 0.509522119 |

|             |             |             |             |
|-------------|-------------|-------------|-------------|
| 0.400616603 | 0.440377164 | 0.463687731 | 0.468719369 |
| 0.16927692  | 0.437630528 | 0.029352111 | 0.476179655 |
| 0.436069842 |             |             |             |
| PRDM1       | 0.421562819 | 0.525117305 | 0.426745065 |
| 0.447323854 | 0.488918214 | 0.360936818 | 0.276393411 |
| 0.223440159 | 0.130063402 | 0.010725343 | 0.046200784 |
| 0.461774195 | 0.261776222 | 0.312995168 | 0.325871177 |
| 0.475740586 | 0.221652887 | 0.398858627 | 0.3331182   |
| 0.457861018 | 0.130625845 | 0.473917023 | 0.157273563 |
| 0.382607429 | 0.172076072 | 0.129113572 | 0.343108181 |
| 0.45799279  | 0.144772367 | 0.317694544 | 0.401916273 |
| 0.188807945 | 0.439873982 | 0.50674261  | 0.476010461 |
| 0.499421987 | 0.381428384 | 0.02810745  | 0.313418097 |
| 0.401748939 | 0.454489251 | 0.449418299 | 0.406012117 |
| 0.082670801 | 0.464705223 | 0.320789221 | 0.468498274 |
| 0.252816217 | 0.066043311 | 0.238156534 | 0.426024831 |
| 0.456191107 | 0.43433837  | 0.269606508 | 0.224129655 |
| 0.238568151 | 0.245416993 | 0.308138192 | 0.312807736 |
| 0.311873108 | 0.166033356 | 0.473962722 | 0.129407633 |
| 0.19359307  | 0.312585477 | 0.256727683 | 0.321036321 |
| 0.409721076 | 0.368085988 | 0.041974742 | 0.407960403 |
| 0.005411892 | 0.442918151 | 0.463604114 | 0.33587622  |
| 0.091621426 | 0.044750972 | 0.288033749 | 0.395517618 |
| 0.462892939 | 0.451590862 | 0.498041613 | 0.500789863 |
| 0.262810343 | 0.406787784 | 0.444121681 | 0.263190056 |
| 0.420335095 | 0.240474096 | 0.155887958 | 0.484110941 |
| 0.505777177 | 0.518017741 | 0.297451349 | 0.371789123 |
| 0.404901074 | 0.475338814 | 0.427152325 | 0.472714126 |
| 0.356266025 | 0.108842479 | 0.429245924 | 0.521003954 |
| 0.371206296 | 0.378913302 | 0.246436981 | 0.416070839 |
| 0.12164175  | 0.359961616 | 0.431823301 | 0.229548502 |
| 0.476301842 | 0.038899821 | 0.319898555 | 0.408541117 |
| 0.316894994 | 0.435264198 | 0.512467129 | 0.271729236 |
| 0.475015876 | 0.04618593  | 0.175808171 | 0.080028055 |
| 0.37043902  | 0.20310516  | 0.455024336 | 0.455569566 |
| 0.282795824 | 0.452246975 | 0.345004739 | 0.009619609 |
| 0.064549408 | 0.285483378 | 0.426378758 | 0.428083034 |
| 0.456323082 | 0.363191976 | 0.305988638 | 0.367984335 |
| 0.43852112  | 0.492374691 | 0.04900837  | 0.164352999 |
| 0.443096006 | 0.29288602  | 0.345026522 | 0.465100792 |
| 0.39334832  | 0.176418495 | 0.213828411 | 0.527368668 |
| 0.412086008 | 0.15249912  | 0.35806932  | 0.477834787 |
| 0.365310382 | 0.440439974 | 0.186308414 | 0.35582903  |
| 0.094428263 | 0.468344795 | 0.068185034 | 0.365606015 |
| 0.276656204 | 0.232215563 | 0.02899117  | 0.296833976 |
| 0.315836897 | 0.412181406 | 0.444130699 | 0.189572616 |
| 0.398269767 | 0.476325208 | 0.331848164 | 0.414814483 |
| 0.022112895 | 0.093626987 | 0.272724653 | 0.514296662 |
| 0.267737152 | 0.510807306 | 0.39506379  | 0.40318211  |
| 0.389810624 | 0.468419073 | 0.00593726  | 0.477504178 |
| 0.519280098 | 0.279425232 | 0.446797691 | 0.475368848 |
| 0.394468448 | 0.452083032 | 0.044636908 | 0.483080037 |
| 0.340194041 | 0.149500126 | 0.520394229 | 0.253432642 |
| 0.453578423 | 0.087513826 | 0.358392037 | 0.429475278 |

|             |             |             |             |
|-------------|-------------|-------------|-------------|
| 0.415149518 | 0.018171705 | 0.233616661 | 0.423344623 |
| 0.066219478 | 0.13070062  | 0.446099494 | 0.452245218 |
| 0.423234189 | 0.471744841 | 0.497991015 | 0.37361782  |
| 0.476193183 | 0.312655597 | 0.033370794 | 0.418107798 |
| 0.447933009 | 0.391488805 | 0.429702657 | 0.308679488 |
| 0.315007339 | 0.469292421 | 0.394721546 | 0.219924003 |
| 0.087012458 | 0.364951415 | 0.034752944 | 0.404827979 |
| 0.3702457   | 0.176319858 | 0.398314807 | 0.244469976 |
| 0.138088193 | 0.531892988 | 0.25552424  | 0.315797011 |
| 0.182603703 | 0.417011046 | 0.342783286 | 0.271422305 |
| 0.260035581 | 0.258948559 | 0.402123827 | 0.425216079 |
| 0.067478521 | 0.167500704 | 0.037651859 | 0.381994117 |
| 0.182333723 | 0.358254944 | 0.341531425 | 0.396549347 |
| 0.379050969 | 0.166080005 | 0.444838918 | 0.36305674  |
| 0.190233874 | 0.040729624 | 0.508946317 | 0.470281357 |
| 0.30848429  | 0.234756254 | 0.091955047 | 0.334678975 |
| 0.468578717 | 0.2846924   | 0.252093143 | 0.451864042 |
| 0.058481689 | 0.497709239 | 0.317317092 | 0.205984139 |
| 0.432216675 | 0.353030283 | 0.465590341 | 0.072361436 |
| 0.411198524 | 0.462641362 | 0.417260896 | 0.27248732  |
| 0.377331971 | 0.456465581 | 0.06147321  | 0.384455343 |
| 0.380651449 | 0.072462791 | 0.527732911 | 0.215268819 |
| 0.054008489 | 0.474418349 | 0.432389417 | 0.145252206 |
| 0.146083356 | 0.376013588 | 0.073626326 | 0.395961714 |
| 0.522663401 | 0.476167661 | 0.416480294 | 0.309326712 |
| 0.082165173 | 0.023363187 | 0.317956235 | 0.429882328 |
| 0.492635161 | 0.514021284 | 0.375460285 | 0.42421135  |
| 0.340945298 | 0.37939881  | 0.159925292 | 0.515164186 |
| 0.269854206 | 0.512285643 | 0.021464503 | 0.450093242 |
| 0.491174787 | 0.290075129 | 0.142682197 | 0.346928657 |
| 0.362357206 | 0.091973471 | 0.297329706 | 0.487607794 |
| 0.42774442  | 0.393147303 | 0.383346148 | 0.474636805 |
| 0.033806451 | 0.082216133 | 0.444030731 | 0.252570872 |
| 0.419415629 | 0.313282244 | 0.082121115 | 0.358649485 |
| 0.084710924 | 0.446031506 | 0.480323668 | 0.107102878 |
| 0.320277916 | 0.329519167 | 0.47181235  | 0.080827017 |
| 0.444946543 | 0.497430389 | 0.510436429 | 0.24965573  |
| 0.446715887 | 0.485014404 | 0.412276137 | 0.155229514 |
| 0.045628648 | 0.506410458 | 0.401096677 | 0.042390929 |
| 0.48247544  | 0.221182588 | 0.027747056 | 0.497485114 |
| 0.277284015 | 0.420349665 | 0.005501317 | 0.109588011 |
| 0.090478184 | 0.478870189 | 0.462605309 | 0.410647134 |
| 0.22365364  | 0.443917802 | 0.016501487 | 0.529495187 |
| 0.484007571 | 0.037339639 | 0.23448293  | 0.425137137 |
| 0.420587063 | 0.527102514 | 0.370799714 | 0.438691218 |
| 0.438363541 | 0.487908307 | 0.29525608  | 0.373867033 |
| 0.425559632 | 0.485757312 | 0.429293607 | 0.452224036 |
| 0.463351531 | 0.487073429 | 0.36958119  | 0.036095352 |
| 0.179758506 | 0.242391747 | 0.286345439 | 0.127723379 |
| 0.313198851 | 0.218969066 | 0.480285242 | 1           |
| 0.48473337  | 0.017108098 | 0.203210035 | 0.419044425 |
| 0.436440656 | 0.482730764 | 0.047772309 | 0.010159767 |
| 0.012064216 | 0.038901616 | 0.409595091 | 0.351867449 |
| 0.490878662 | 0.218756951 | 0.01568845  | 0.074965709 |

|             |             |             |             |
|-------------|-------------|-------------|-------------|
| 0.348505943 | 0.452499733 | 0.499814569 | 0.456073792 |
| 0.452299563 | 0.158302753 | 0.286344566 | 0.462138524 |
| 0.12417698  | 0.30362873  | 0.491935165 | 0.465463958 |
| 0.093942872 | 0.358268451 | 0.40799714  | 0.499169485 |
| 0.099193118 | 0.428783394 | 0.465720789 | 0.369017118 |
| 0.036067198 | 0.15183391  | 0.124316503 | 0.483113928 |
| 0.483812879 | 0.128094847 | 0.067439343 | 0.141736365 |
| 0.179824606 | 0.47164698  | 0.24342916  | 0.529265491 |
| 0.440024361 | 0.478183071 | 0.148838605 | 0.473503988 |
| 0.078276403 | 0.474309988 | 0.415057594 | 0.063402971 |
| 0.39032509  | 0.035417916 | 0.466003705 | 0.177474249 |
| 0.349464795 | 0.415191468 | 0.24588748  | 0.045764916 |
| 0.228885709 | 0.10989579  | 0.487928004 | 0.47088498  |
| 0.078206675 | 0.325128129 | 0.405845386 | 0.465026897 |
| 0.308095613 | 0.463553022 | 0.4892259   | 0.371742777 |
| 0.139239034 | 0.204414899 | 0.441668861 | 0.388975984 |
| 0.288975807 | 0.50768454  | 0.356200964 | 0.532158381 |
| 0.406109478 | 0.462289034 | 0.471261955 | 0.402658778 |
| 0.329175001 | 0.397494339 | 0.375177009 | 0.035758335 |
| 0.431889329 | 0.470436816 | 0.403734169 | 0.220125136 |
| 0.351576111 | 0.419074611 | 0.096632861 | 0.198834482 |
| 0.362137716 | 0.303608543 | 0.226259569 | 0.479650567 |
| 0.410843927 | 0.388950293 | 0.078851484 | 0.11522793  |
| 0.542426843 | 0.429674736 | 0.18059553  | 0.438617214 |
| 0.278624656 | 0.424818675 | 0.46164298  | 0.470138344 |
| 0.403798019 | 0.43123245  | 0.435218311 | 0.38360991  |
| 0.415027695 | 0.351831846 | 0.515250069 | 0.106592361 |
| 0.131434797 | 0.425496719 | 0.155076453 | 0.173820876 |
| 0.232355352 | 0.063301627 | 0.324441119 | 0.48716681  |
| 0.389975153 | 0.458263351 | 0.336006629 | 0.144653865 |
| 0.435599172 | 0.384700785 | 0.453208516 | 0.253321995 |
| 0.132886648 | 0.486071546 | 0.023759483 | 0.119007024 |
| 0.41749934  | 0.433113515 | 0.42416027  | 0.346247235 |
| 0.35574487  | 0.24069206  | 0.404774695 | 0.297366773 |
| 0.307962855 | 0.385225175 | 0.423351353 | 0.060030205 |
| 0.04378712  | 0.510387859 | 0.377158741 | 0.052255051 |
| 0.159185084 | 0.376844382 | 0.383202973 | 0.302105677 |
| 0.054987306 | 0.478920706 | 0.321616651 | 0.474744463 |
| 0.398863056 | 0.132531932 | 0.334506205 | 0.131528828 |
| 0.113740518 | 0.437675727 | 0.436247535 | 0.505666946 |
| 0.429047938 | 0.473575265 | 0.423394367 | 0.426524339 |
| 0.180974237 | 0.388138962 | 0.057351084 | 0.45319233  |

|             |             |             |             |
|-------------|-------------|-------------|-------------|
| 0.38694912  |             |             |             |
| PRDX4       | 0.432997047 | 0.525990963 | 0.433704755 |
| 0.438873528 | 0.47007894  | 0.369994485 | 0.218980874 |
| 0.172233721 | 0.099310781 | 0.007299136 | 0.03740406  |
| 0.486531894 | 0.265350826 | 0.292228168 | 0.332678709 |
| 0.44631299  | 0.187795715 | 0.347569566 | 0.264631947 |
| 0.421207002 | 0.091133698 | 0.447010299 | 0.102817    |
| 0.346608407 | 0.150478286 | 0.089458544 | 0.331542906 |
| 0.44975394  | 0.101635179 | 0.324059228 | 0.381142607 |
| 0.12958808  | 0.446498551 | 0.528060299 | 0.498171223 |
| 0.530467663 | 0.406972385 | 0.014652808 | 0.299493337 |
| 0.414522502 | 0.475811958 | 0.415721793 | 0.362915792 |

|             |             |             |             |
|-------------|-------------|-------------|-------------|
| 0.050166408 | 0.485313139 | 0.267341063 | 0.451539465 |
| 0.221328372 | 0.047429798 | 0.218663269 | 0.430300372 |
| 0.491321562 | 0.465027231 | 0.212738439 | 0.170065154 |
| 0.266297963 | 0.215401285 | 0.368083129 | 0.308389578 |
| 0.248228498 | 0.140971932 | 0.498582025 | 0.094241309 |
| 0.148564181 | 0.238616934 | 0.199696651 | 0.259903931 |
| 0.407240611 | 0.375567791 | 0.018277119 | 0.442909606 |
| 0.003704982 | 0.397270148 | 0.427321339 | 0.369239799 |
| 0.057342198 | 0.033777795 | 0.227752716 | 0.355679882 |
| 0.461139241 | 0.453730473 | 0.496336525 | 0.490385111 |
| 0.244703086 | 0.333734644 | 0.455152298 | 0.208135753 |
| 0.438327159 | 0.197174916 | 0.128173991 | 0.462934764 |
| 0.49470547  | 0.53555753  | 0.252791796 | 0.314263713 |
| 0.440641151 | 0.465451151 | 0.450957881 | 0.471786858 |
| 0.395473787 | 0.07299575  | 0.438231504 | 0.516097848 |
| 0.390234372 | 0.398398159 | 0.198499525 | 0.411123574 |
| 0.07343217  | 0.368806917 | 0.386179793 | 0.200815162 |
| 0.463863467 | 0.020460689 | 0.271544639 | 0.376024427 |
| 0.230767    | 0.454317916 | 0.534082452 | 0.206597205 |
| 0.45866986  | 0.030645237 | 0.1915653   | 0.043641309 |
| 0.362685249 | 0.212855603 | 0.490154417 | 0.470636165 |
| 0.233240262 | 0.431083559 | 0.271814    | 0.003606351 |
| 0.040948504 | 0.216066853 | 0.462599596 | 0.37726048  |
| 0.442432668 | 0.389706921 | 0.280486765 | 0.388294007 |
| 0.486573296 | 0.495464706 | 0.058156838 | 0.100928688 |
| 0.451115921 | 0.215487326 | 0.274056869 | 0.481072762 |
| 0.37698943  | 0.115502703 | 0.149399507 | 0.514559163 |
| 0.403939079 | 0.100679242 | 0.322589437 | 0.454129426 |
| 0.358459987 | 0.434281706 | 0.122096607 | 0.320464727 |
| 0.055333427 | 0.498761466 | 0.044110722 | 0.321732316 |
| 0.315312259 | 0.214032195 | 0.011381386 | 0.247752756 |
| 0.314328559 | 0.456018138 | 0.477908254 | 0.123370076 |
| 0.360050578 | 0.458369353 | 0.305895261 | 0.461759517 |
| 0.015520869 | 0.056114462 | 0.256627584 | 0.51116915  |
| 0.271896665 | 0.498543531 | 0.330832001 | 0.346146376 |
| 0.337075433 | 0.466942817 | 0.004177424 | 0.502074403 |
| 0.539852069 | 0.28374793  | 0.458945689 | 0.460390816 |
| 0.42226841  | 0.466943119 | 0.047085309 | 0.456014198 |
| 0.356185278 | 0.090275958 | 0.492892315 | 0.20677445  |
| 0.461465175 | 0.056152972 | 0.31759379  | 0.475480672 |
| 0.477503682 | 0.011204499 | 0.210443951 | 0.393082479 |
| 0.040150343 | 0.088375143 | 0.434127968 | 0.430141724 |
| 0.412631615 | 0.472079554 | 0.483252456 | 0.410737928 |
| 0.477140268 | 0.240249634 | 0.016305504 | 0.382803366 |
| 0.461249878 | 0.408868251 | 0.431442331 | 0.249401195 |
| 0.331151621 | 0.468953299 | 0.443143811 | 0.208255618 |
| 0.05137169  | 0.307333845 | 0.026257551 | 0.380155896 |
| 0.40061435  | 0.141414341 | 0.419680195 | 0.174597699 |
| 0.10026512  | 0.530396883 | 0.242968825 | 0.335689605 |
| 0.184893222 | 0.441023442 | 0.26336157  | 0.285334558 |
| 0.297200192 | 0.194383409 | 0.405039653 | 0.409112476 |
| 0.038227475 | 0.124106755 | 0.019836733 | 0.449825359 |
| 0.204894462 | 0.414511502 | 0.398071619 | 0.416039218 |
| 0.35653019  | 0.153566745 | 0.453237194 | 0.334159274 |

|             |             |             |             |
|-------------|-------------|-------------|-------------|
| 0.151004748 | 0.021581287 | 0.508005171 | 0.433900991 |
| 0.325162781 | 0.167800524 | 0.054382009 | 0.395820614 |
| 0.472479579 | 0.318793529 | 0.242330367 | 0.442510844 |
| 0.03335243  | 0.482394619 | 0.30427143  | 0.162570624 |
| 0.468773632 | 0.305395839 | 0.461030006 | 0.063854659 |
| 0.388563507 | 0.463898519 | 0.347098266 | 0.230869847 |
| 0.38738559  | 0.433856563 | 0.035772955 | 0.411589423 |
| 0.41429634  | 0.044052153 | 0.537104618 | 0.175714195 |
| 0.029620021 | 0.48845966  | 0.480700064 | 0.097418107 |
| 0.102706712 | 0.374278646 | 0.041925928 | 0.345515649 |
| 0.521912597 | 0.458189071 | 0.45310383  | 0.272359151 |
| 0.051860376 | 0.020843478 | 0.265783537 | 0.441564848 |
| 0.518502964 | 0.525580114 | 0.299658312 | 0.454037739 |
| 0.267967942 | 0.385845259 | 0.120336145 | 0.516460219 |
| 0.21490341  | 0.523561253 | 0.00923368  | 0.483397246 |
| 0.525592984 | 0.276930572 | 0.114265347 | 0.309491064 |
| 0.395260717 | 0.053544797 | 0.209693023 | 0.506576328 |
| 0.435865131 | 0.366693714 | 0.393367155 | 0.460430248 |
| 0.017299286 | 0.042728248 | 0.432433712 | 0.245637257 |
| 0.410860527 | 0.243656228 | 0.087902216 | 0.31476228  |
| 0.057734779 | 0.450322734 | 0.481652195 | 0.076024722 |
| 0.347796374 | 0.289679733 | 0.435818053 | 0.045455928 |
| 0.477442481 | 0.511747886 | 0.531727891 | 0.1671455   |
| 0.473564274 | 0.501798053 | 0.473575862 | 0.10175368  |
| 0.026254415 | 0.53351789  | 0.396087057 | 0.030496281 |
| 0.480248926 | 0.216557331 | 0.022299504 | 0.491926333 |
| 0.200692595 | 0.446501717 | 0.003954617 | 0.096374179 |
| 0.056932758 | 0.489369772 | 0.485181198 | 0.379046461 |
| 0.243007423 | 0.38290328  | 0.007505477 | 0.530464388 |
| 0.499503849 | 0.023358753 | 0.191118285 | 0.475853561 |
| 0.484530099 | 0.527720846 | 0.39740328  | 0.489611338 |
| 0.496684785 | 0.517501093 | 0.267168423 | 0.318246523 |
| 0.458338639 | 0.51270502  | 0.429291801 | 0.446905224 |
| 0.478402202 | 0.473871524 | 0.309594983 | 0.018907948 |
| 0.157841114 | 0.195772641 | 0.341483533 | 0.102189337 |
| 0.307703829 | 0.183260531 | 0.478514951 | 0.48473337  |
| 1           | 0.00751678  | 0.146688854 | 0.458545127 |
| 0.431845327 | 0.45745808  | 0.024276517 | 0.007730474 |
| 0.010072018 | 0.035191923 | 0.361054348 | 0.291826953 |
| 0.488185371 | 0.253346084 | 0.006685445 | 0.042129195 |
| 0.304485015 | 0.471609449 | 0.513822345 | 0.410257196 |
| 0.472671842 | 0.100125526 | 0.322090439 | 0.419516998 |
| 0.097460565 | 0.319642817 | 0.491496936 | 0.470451976 |
| 0.052664231 | 0.29112078  | 0.384743882 | 0.469828689 |
| 0.114341218 | 0.373915623 | 0.486557482 | 0.364808019 |
| 0.017288423 | 0.10997459  | 0.085965841 | 0.467937065 |
| 0.519104906 | 0.118584097 | 0.055432266 | 0.141780021 |
| 0.144905772 | 0.474871156 | 0.20639575  | 0.510862112 |
| 0.451523003 | 0.465498528 | 0.104459674 | 0.483077158 |
| 0.052492338 | 0.501211707 | 0.426496814 | 0.062522596 |
| 0.323873466 | 0.016085878 | 0.481407616 | 0.202402333 |
| 0.326754758 | 0.398978593 | 0.227530956 | 0.025263549 |
| 0.234180504 | 0.074375448 | 0.48595832  | 0.493497082 |
| 0.047345488 | 0.238269588 | 0.343843506 | 0.427737521 |



|             |             |             |             |
|-------------|-------------|-------------|-------------|
| 0.279125318 | 0.47180201  | 0.511128024 | 0.429475626 |
| 0.08995345  | 0.188675158 | 0.41846454  | 0.405973171 |
| 0.23481804  | 0.49337661  | 0.356541484 | 0.530942783 |
| 0.413039156 | 0.441743844 | 0.475434005 | 0.368026034 |
| 0.308932493 | 0.403226355 | 0.384332816 | 0.025706603 |
| 0.382100031 | 0.488476253 | 0.354553025 | 0.214451437 |
| 0.320596195 | 0.451007581 | 0.046564461 | 0.183467578 |
| 0.407525149 | 0.297419922 | 0.171382069 | 0.460344749 |
| 0.39209089  | 0.408722487 | 0.038132646 | 0.0817288   |
| 0.54558538  | 0.419685257 | 0.142002127 | 0.447298637 |
| 0.20415006  | 0.391151926 | 0.483380841 | 0.491434804 |
| 0.384332701 | 0.473637421 | 0.43899032  | 0.405440162 |
| 0.414474279 | 0.277544467 | 0.534287333 | 0.075651124 |
| 0.116382484 | 0.444227646 | 0.128258967 | 0.12078658  |
| 0.173812746 | 0.037254203 | 0.373806099 | 0.462700957 |
| 0.444960216 | 0.433155517 | 0.309799919 | 0.097924611 |
| 0.380849426 | 0.368658457 | 0.400891371 | 0.211852648 |
| 0.10361379  | 0.508969396 | 0.013332906 | 0.074441139 |
| 0.462503065 | 0.468135069 | 0.468943272 | 0.289962809 |
| 0.376993723 | 0.17852455  | 0.348442447 | 0.285690494 |
| 0.359424559 | 0.399478706 | 0.463330919 | 0.036038475 |
| 0.021511214 | 0.488671771 | 0.377200655 | 0.028571472 |
| 0.100842533 | 0.3751936   | 0.31361791  | 0.27027597  |
| 0.033072034 | 0.497659298 | 0.337280801 | 0.470995043 |
| 0.349283685 | 0.07844484  | 0.335510874 | 0.093406078 |
| 0.062523541 | 0.444899798 | 0.45006282  | 0.530053443 |
| 0.395964148 | 0.459800837 | 0.439634031 | 0.460536816 |
| 0.137212298 | 0.407715692 | 0.031138566 | 0.452178641 |
| 0.459072733 |             |             |             |

|             |             |             |             |
|-------------|-------------|-------------|-------------|
| PRKCZ       | 0.006635153 | 0.005047048 | 0.008713251 |
| 0.022404548 | 0.019645952 | 0.004130583 | 0.045355379 |
| 0.014074191 | 0.053410984 | 0.05092222  | 0.068639418 |
| 0.010589839 | 0.021392626 | 0.012931877 | 0.002615172 |
| 0.036072623 | 0.103564708 | 0.009894147 | 0.0867563   |
| 0.025041266 | 0.032189113 | 0.047627454 | 0.100671434 |
| 0.0217975   | 0.087948701 | 0.129101339 | 0.025578761 |
| 0.020211624 | 0.140446997 | 0.003097676 | 0.013292004 |
| 0.158736178 | 0.008895741 | 0.002186675 | 0.019277332 |
| 0.001591067 | 0.003575851 | 0.073331469 | 0.004498734 |
| 0.006127362 | 0.012497048 | 0.022990941 | 0.053043285 |
| 0.123298733 | 0.00115994  | 0.057170976 | 0.025766552 |
| 0.00563628  | 0.147680013 | 0.002990997 | 0.00167544  |
| 0.001078125 | 0.005587488 | 0.015039079 | 0.043442277 |
| 0.007883535 | 0.003817946 | 0.006181662 | 0.004378691 |
| 0.066334902 | 0.004464293 | 0.002000798 | 0.037097652 |
| 0.008730126 | 0.022142891 | 0.110339456 | 0.027137385 |
| 0.008542728 | 0.004790991 | 0.190658256 | 0.004775617 |
| 0.017515439 | 0.032226444 | 0.040894194 | 0.004186135 |
| 0.251957997 | 0.111457618 | 0.101782899 | 0.030662053 |
| 0.016185501 | 0.00304807  | 0.014866115 | 0.010096333 |
| 0.064986873 | 0.070700088 | 0.012011037 | 0.078738413 |
| 0.006163266 | 0.044161495 | 0.047864083 | 0.040252171 |
| 0.012900224 | 0.0034117   | 0.063678933 | 0.08901869  |
| 0.006073138 | 0.00495256  | 0.005452185 | 0.011238092 |

|             |             |             |             |
|-------------|-------------|-------------|-------------|
| 0.003877849 | 0.151852729 | 0.002437601 | 0.008135977 |
| 0.003560485 | 0.0147576   | 0.139144283 | 0.011244187 |
| 0.207445627 | 0.002718058 | 0.05413491  | 0.042746283 |
| 0.016236777 | 0.111086671 | 0.105144963 | 0.020721904 |
| 0.056160013 | 0.008026219 | 0.003455795 | 0.085272745 |
| 0.020133386 | 0.150478188 | 0.015621508 | 0.256817464 |
| 0.011096539 | 0.019868178 | 6.36E-05    | 0.012422121 |
| 0.013529178 | 0.009915202 | 0.035508399 | 0.257683995 |
| 0.235032989 | 0.062266238 | 0.005504758 | 0.016753446 |
| 0.014244486 | 0.00170309  | 0.033475991 | 0.002997373 |
| 0.005861523 | 0.014833468 | 0.000279558 | 0.099364515 |
| 0.011089242 | 0.073601837 | 0.124200394 | 0.008347382 |
| 0.046338133 | 0.066002583 | 0.120948533 | 0.009416364 |
| 0.00297695  | 0.155528005 | 0.00451785  | 0.039952156 |
| 0.005589544 | 0.040449662 | 0.132592028 | 0.029373556 |
| 0.103957097 | 0.001592048 | 0.220618127 | 0.009850884 |
| 0.00306234  | 0.065563737 | 0.183797833 | 0.014572119 |
| 0.00852732  | 0.004422776 | 0.000292805 | 0.168146195 |
| 0.031889023 | 0.035139587 | 0.004815986 | 0.006370104 |
| 0.059742815 | 0.194326743 | 0.001761472 | 0.007526715 |
| 0.002397157 | 0.008881434 | 0.036246714 | 0.030579607 |
| 0.09040385  | 0.018300617 | 0.010816281 | 0.001498368 |
| 0.003288329 | 0.00127053  | 0.02192742  | 0.020646091 |
| 0.0050664   | 0.014639124 | 0.001442614 | 0.038452107 |
| 0.002527644 | 0.169547319 | 0.014727534 | 0.13445249  |
| 0.002783142 | 0.179207809 | 0.008187918 | 0.006930134 |
| 0.004011685 | 0.059218107 | 0.006282259 | 0.020486847 |
| 0.213091697 | 0.019155683 | 0.011585871 | 0.023939938 |
| 0.017926908 | 0.017080061 | 0.020600205 | 0.004677163 |
| 0.016188654 | 0.044012883 | 0.259792501 | 0.054882445 |
| 0.009632485 | 0.001698407 | 0.002779076 | 0.02791402  |
| 0.001553275 | 0.004586021 | 0.003058064 | 0.001702367 |
| 0.139976384 | 0.017192686 | 0.038653198 | 0.031150874 |
| 0.00250176  | 0.04539551  | 0.004045571 | 0.095749812 |
| 0.174172723 | 0.007007414 | 0.035040598 | 0.010494316 |
| 0.022524706 | 0.008396073 | 0.061653379 | 0.009857722 |
| 0.015687862 | 0.081329313 | 0.008726102 | 0.008236191 |
| 0.068456128 | 0.132246588 | 0.159300346 | 0.002029076 |
| 0.020203493 | 0.00415505  | 0.002729669 | 0.003740135 |
| 0.010031648 | 0.055436902 | 0.023004644 | 0.017075385 |
| 0.112175958 | 0.278534612 | 0.005190013 | 0.035532186 |
| 0.002011733 | 0.067105778 | 0.247234225 | 0.001091726 |
| 0.010617436 | 0.001345966 | 0.00108091  | 0.006250177 |
| 0.155540037 | 0.012958563 | 0.023886525 | 0.146866394 |
| 0.01087395  | 0.071919252 | 0.018481489 | 0.006873708 |
| 0.007233662 | 0.003741369 | 0.062495266 | 0.068759734 |
| 0.001996439 | 0.018762728 | 0.130539084 | 0.003579598 |
| 0.003231022 | 0.219418356 | 0.005247236 | 0.120808876 |
| 0.274905083 | 0.01732722  | 0.006130526 | 0.225842283 |
| 0.160479809 | 0.014867196 | 0.039446093 | 0.09686657  |
| 0.006718481 | 0.042574804 | 0.005264005 | 0.038244061 |
| 0.136575165 | 0.078889659 | 0.075803677 | 0.009437044 |
| 0.001397473 | 0.005437197 | 0.109018187 | 0.020014064 |
| 0.10394291  | 0.007757673 | 0.004642948 | 0.007314311 |

|             |             |             |             |
|-------------|-------------|-------------|-------------|
| 0.030776819 | 0.00312383  | 0.279415652 | 0.009243529 |
| 0.001202644 | 0.00365052  | 0.118814918 | 0.0150765   |
| 0.003361712 | 0.142259687 | 0.057601873 | 0.002870885 |
| 0.006314288 | 0.015369832 | 0.006931031 | 0.018714088 |
| 0.090040614 | 0.097588317 | 0.019859766 | 0.02263131  |
| 0.005472001 | 0.054638432 | 0.017871043 | 0.005539429 |
| 0.11832634  | 0.003523797 | 0.019754849 | 0.097760875 |
| 0.002663659 | 0.004213935 | 0.051673372 | 0.197631168 |
| 0.006062764 | 0.003525558 | 0.002432014 | 0.066797763 |
| 0.007635416 | 0.004597391 | 0.004795291 | 0.191694971 |
| 0.253708627 | 0.002424781 | 0.006739409 | 0.058412143 |
| 0.016734333 | 0.002051158 | 0.077113671 | 0.005033141 |
| 0.099087522 | 0.000225625 | 0.009709946 | 0.010496267 |
| 0.181595123 | 0.018798372 | 0.001689812 | 0.014862158 |
| 0.0008208   | 0.036436797 | 0.045540236 | 0.006307875 |
| 0.003458802 | 0.21247335  | 0.079627173 | 0.004702514 |
| 0.005357125 | 0.004382437 | 0.011583162 | 0.007173462 |
| 0.006797458 | 0.001848288 | 0.018999604 | 0.092498223 |
| 0.007688477 | 0.002752561 | 0.010547129 | 0.003937374 |
| 0.014561526 | 0.029225748 | 0.0708776   | 0.136212079 |
| 0.026367019 | 0.009691844 | 0.0010507   | 0.033044852 |
| 0.003624373 | 0.080520851 | 0.005315816 | 0.017108098 |
| 0.00751678  | 1           | 0.027680196 | 0.004503385 |
| 0.009316457 | 0.013467116 | 0.158210534 | 0.01883912  |
| 0.006801961 | 0.083275566 | 0.018424585 | 0.084210646 |
| 0.006247833 | 0.000814186 | 0.246900257 | 0.06127968  |
| 0.022590036 | 0.020897089 | 0.003565066 | 0.051696214 |
| 0.010187788 | 0.185810686 | 0.003278577 | 0.037697874 |
| 0.103555503 | 0.001306823 | 0.008551176 | 0.003147048 |
| 0.225764931 | 0.067242962 | 0.008256162 | 0.012960886 |
| 0.007807451 | 0.080749402 | 0.010791485 | 0.011908108 |
| 0.132354533 | 0.151126305 | 0.131552757 | 0.024827224 |
| 0.001107379 | 0.069506252 | 0.117732614 | 0.001512855 |
| 0.051608347 | 0.011668415 | 0.063507971 | 0.011203538 |
| 0.011115089 | 0.029905705 | 0.143855472 | 0.00288853  |
| 0.0972671   | 0.001866264 | 0.026453556 | 0.002726728 |
| 0.037100805 | 0.286796121 | 0.003103691 | 0.006679603 |
| 0.005549629 | 0.00993777  | 0.013518585 | 0.236733087 |
| 0.01090248  | 0.206972907 | 0.015139371 | 0.014916877 |
| 0.201247035 | 0.032700545 | 0.069211734 | 0.025728137 |
| 0.011042857 | 0.020158983 | 0.001904075 | 0.001658312 |
| 0.063838358 | 0.024847534 | 0.019612099 | 0.004368086 |
| 0.012796884 | 0.015360381 | 0.011900383 | 0.006374664 |
| 0.006263478 | 0.00622224  | 0.004894733 | 0.023403402 |
| 0.029337221 | 0.005378046 | 0.008472374 | 0.054884633 |
| 0.040614073 | 0.015840076 | 0.013006822 | 0.046750985 |
| 0.060230579 | 0.007373271 | 0.14036449  | 0.003641776 |
| 0.006362176 | 0.005233549 | 0.071005247 | 0.029493662 |
| 0.009426881 | 0.004381696 | 0.124516109 | 0.124256392 |
| 0.004944121 | 0.003632342 | 0.021053602 | 0.010843435 |
| 0.137237092 | 0.036088931 | 0.01167523  | 0.013968496 |
| 0.003935061 | 0.006158138 | 0.010754644 | 0.0065276   |
| 0.003112727 | 0.058551179 | 0.002726805 | 0.010722785 |
| 0.057905652 | 0.005178127 | 0.064206868 | 0.205606183 |

|             |             |             |             |
|-------------|-------------|-------------|-------------|
| 0.128487131 | 0.211416798 | 0.003261056 | 0.032354864 |
| 0.002459954 | 0.0419676   | 0.002611482 | 0.11698988  |
| 0.060704286 | 0.004433556 | 0.054258728 | 0.025402101 |
| 0.090245849 | 0.002292569 | 0.125852367 | 0.222736734 |
| 0.004484637 | 0.006954395 | 0.011101233 | 0.067136209 |
| 0.009471393 | 0.096052141 | 0.071834288 | 0.004518017 |
| 0.002140408 | 0.003755596 | 0.00608039  | 0.076509994 |
| 0.151591629 | 0.015539302 | 0.004387615 | 0.20749239  |
| 0.072418111 | 0.003795394 | 0.024489412 | 0.01964845  |
| 0.216046048 | 0.003792456 | 0.002232309 | 0.014616631 |
| 0.021063855 | 0.202326281 | 0.001345203 | 0.031874756 |
| 0.143615675 | 0.002346551 | 0.011551952 | 0.002757445 |
| 0.022237618 | 0.034589834 | 0.000525781 | 0.00545788  |
| 0.043307266 | 0.004138217 | 0.128928504 | 0.013252767 |
| 0.001643043 |             |             |             |
| PRKX        | 0.133309974 | 0.192532291 | 0.064546861 |
| 0.270147287 | 0.118985538 | 0.174877198 | 0.25883728  |
| 0.142654747 | 0.048336969 | 0.042395538 | 0.014326223 |
| 0.094270954 | 0.031434679 | 0.113915394 | 0.047242669 |
| 0.229935504 | 0.040793239 | 0.090562942 | 0.238772978 |
| 0.260073634 | 0.178472065 | 0.206388108 | 0.120119044 |
| 0.024420708 | 0.03095825  | 0.082430682 | 0.03929606  |
| 0.274922707 | 0.094829811 | 0.149580456 | 0.286531019 |
| 0.038680756 | 0.184868055 | 0.157287113 | 0.124994465 |
| 0.136147756 | 0.113289341 | 0.017901004 | 0.099704508 |
| 0.197024539 | 0.149609221 | 0.270528587 | 0.244126763 |
| 0.091920097 | 0.167211513 | 0.258315254 | 0.100277462 |
| 0.06856192  | 0.030836035 | 0.137875881 | 0.179284948 |
| 0.137865577 | 0.101603353 | 0.182324782 | 0.19094976  |
| 0.019113057 | 0.125727716 | 0.009359258 | 0.237293826 |
| 0.226463055 | 0.165389885 | 0.143137296 | 0.087614401 |
| 0.039959052 | 0.199228944 | 0.034642478 | 0.242881533 |
| 0.025847147 | 0.212406232 | 0.068699266 | 0.066868447 |
| 0.026217823 | 0.272505681 | 0.114789822 | 0.019367308 |
| 0.079590862 | 0.036464968 | 0.053004143 | 0.279630225 |
| 0.248786442 | 0.146611309 | 0.183225464 | 0.160610633 |
| 0.034107747 | 0.113150242 | 0.052409465 | 0.114655929 |
| 0.179254325 | 0.206826814 | 0.059965221 | 0.204764835 |
| 0.179626216 | 0.157677788 | 0.034436239 | 0.097979427 |
| 0.187378974 | 0.206370633 | 0.090970682 | 0.091535225 |
| 0.02940552  | 0.014400565 | 0.158649094 | 0.173826869 |
| 0.188580875 | 0.029098613 | 0.085919597 | 0.270177987 |
| 0.090287603 | 0.040355067 | 0.265205915 | 0.028331659 |
| 0.249128723 | 0.061996455 | 0.071308575 | 0.220337824 |
| 0.058559495 | 0.177782748 | 0.142405353 | 0.242297825 |
| 0.084762616 | 0.028298245 | 0.008411839 | 0.041623604 |
| 0.046574386 | 0.005063987 | 0.135570287 | 0.22754164  |
| 0.093347697 | 0.030201095 | 0.193317709 | 0.012780592 |
| 0.028899308 | 0.031109614 | 0.135289503 | 0.124695097 |
| 0.201535926 | 0.095735224 | 0.082424518 | 0.165550511 |
| 0.085086824 | 0.178424604 | 0.017831178 | 0.146074495 |
| 0.132555951 | 0.032512331 | 0.218481533 | 0.111021033 |
| 0.088670913 | 0.170289324 | 0.151017943 | 0.198807226 |
| 0.212552012 | 0.169077647 | 0.097547681 | 0.210934981 |

|             |             |             |             |
|-------------|-------------|-------------|-------------|
| 0.049728336 | 0.080201185 | 0.144205665 | 0.112534824 |
| 0.115755628 | 0.120412671 | 0.023826076 | 0.155876311 |
| 0.012670658 | 0.016832422 | 0.038687646 | 0.24442838  |
| 0.06436669  | 0.153370402 | 0.120962209 | 0.145052541 |
| 0.147300021 | 0.160674788 | 0.155332786 | 0.149697741 |
| 0.024686787 | 0.057706314 | 0.111330105 | 0.185729629 |
| 0.207267324 | 0.165676677 | 0.099991663 | 0.05905878  |
| 0.131284188 | 0.215548152 | 0.001402343 | 0.156687538 |
| 0.149304026 | 0.09722403  | 0.140137277 | 0.115768632 |
| 0.042314184 | 0.234247556 | 0.005260725 | 0.214223043 |
| 0.145798314 | 0.128337748 | 0.20646586  | 0.106246097 |
| 0.150143311 | 0.076394135 | 0.134230694 | 0.107561584 |
| 0.088501739 | 0.014091355 | 0.218107123 | 0.286618954 |
| 0.016965896 | 0.139077729 | 0.192755971 | 0.239940622 |
| 0.163571258 | 0.172932097 | 0.229620752 | 0.034190082 |
| 0.11159028  | 0.200115839 | 0.025088352 | 0.0829748   |
| 0.143622287 | 0.017184118 | 0.197484367 | 0.124832208 |
| 0.117431456 | 0.192534966 | 0.110395739 | 0.028827894 |
| 0.132502208 | 0.225237538 | 0.054000763 | 0.111779635 |
| 0.116921268 | 0.094751008 | 0.058885198 | 0.034430115 |
| 0.04521445  | 0.187585498 | 0.016713936 | 0.016041084 |
| 0.006651817 | 0.139003174 | 0.229609047 | 0.06476582  |
| 0.022105339 | 0.066764928 | 0.038041899 | 0.067982208 |
| 0.133014858 | 0.092866535 | 0.007632037 | 0.026631057 |
| 0.02688431  | 0.042671436 | 0.048304279 | 0.15266333  |
| 0.054501669 | 0.048450881 | 0.097490767 | 0.021969773 |
| 0.03759758  | 0.051176689 | 0.188427873 | 0.216200884 |
| 0.187488468 | 0.12446025  | 0.060714761 | 0.016356263 |
| 0.215265402 | 0.119104344 | 0.086345754 | 0.21427746  |
| 0.037965355 | 0.188489711 | 0.05144006  | 0.088865095 |
| 0.041982974 | 0.192042566 | 0.255522098 | 0.027702429 |
| 0.157992258 | 0.197184677 | 0.137916926 | 0.078626046 |
| 0.17222423  | 0.213224321 | 0.077364237 | 0.153632094 |
| 0.146161903 | 0.071574647 | 0.16477872  | 0.028115314 |
| 0.04776685  | 0.123683504 | 0.112304309 | 0.09490464  |
| 0.059249054 | 0.135412955 | 0.136754188 | 0.154734516 |
| 0.192505297 | 0.212081782 | 0.155400684 | 0.026987011 |
| 0.10068576  | 0.015631643 | 0.043090311 | 0.066253688 |
| 0.155732437 | 0.145562159 | 0.170652262 | 0.066287553 |
| 0.252659621 | 0.034879754 | 0.075898693 | 0.173064694 |
| 0.021680393 | 0.161813911 | 0.034576102 | 0.112713511 |
| 0.134637388 | 0.161597142 | 0.046837476 | 0.237217205 |
| 0.19590685  | 0.112015798 | 0.132352406 | 0.164662094 |
| 0.194016026 | 0.071257711 | 0.05259815  | 0.152266085 |
| 0.094766055 | 0.109205283 | 0.104696679 | 0.0104097   |
| 0.069941981 | 0.096241447 | 0.001385704 | 0.077373251 |
| 0.062293739 | 0.187141741 | 0.198299619 | 0.038733601 |
| 0.139172222 | 0.083197024 | 0.141465385 | 0.103026197 |
| 0.112405261 | 0.135619001 | 0.164559028 | 0.15497294  |
| 0.133041232 | 0.143941517 | 0.050050307 | 0.064770008 |
| 0.030940131 | 0.139619712 | 0.195181843 | 0.047064419 |
| 0.222787064 | 0.155397493 | 0.029993141 | 0.208302019 |
| 0.238156115 | 0.134882026 | 0.018772259 | 0.005047726 |
| 0.014901156 | 0.168157308 | 0.154976211 | 0.275680483 |

|             |             |             |             |
|-------------|-------------|-------------|-------------|
| 0.081547747 | 0.219758615 | 0.002198368 | 0.15976961  |
| 0.174072861 | 0.015374336 | 0.017714984 | 0.119770239 |
| 0.08375083  | 0.198582237 | 0.030769396 | 0.12400981  |
| 0.070289694 | 0.13767641  | 0.064557769 | 0.154171891 |
| 0.196460689 | 0.117385033 | 0.225894352 | 0.199772894 |
| 0.222219375 | 0.148167306 | 0.260096776 | 0.06510794  |
| 0.015303236 | 0.21309992  | 0.033108191 | 0.031578224 |
| 0.195570343 | 0.04474543  | 0.171693258 | 0.203210035 |
| 0.146688854 | 0.027680196 | 1           | 0.137797296 |
| 0.259240318 | 0.252738299 | 0.020148598 | 0.003890788 |
| 0.003013037 | 0.006496088 | 0.245026369 | 0.086495689 |
| 0.170462142 | 0.037163414 | 0.03794665  | 0.138922761 |
| 0.068375023 | 0.082936051 | 0.167955157 | 0.271505463 |
| 0.131492379 | 0.086185794 | 0.045663608 | 0.268493405 |
| 0.020294809 | 0.131827385 | 0.165524285 | 0.195378255 |
| 0.029478928 | 0.08353439  | 0.101378734 | 0.238181867 |
| 0.001276738 | 0.141819848 | 0.105523738 | 0.050937565 |
| 0.013634361 | 0.041351583 | 0.039088244 | 0.196804222 |
| 0.125660309 | 0.031794149 | 0.025773293 | 0.033161983 |
| 0.118032865 | 0.18611354  | 0.074246162 | 0.200103164 |
| 0.233873374 | 0.255637889 | 0.017839368 | 0.175337278 |
| 0.029056969 | 0.147105393 | 0.051666413 | 0.040316212 |
| 0.069799877 | 0.03232008  | 0.126354465 | 0.01225053  |
| 0.121296979 | 0.212187483 | 0.016951602 | 0.016324715 |
| 0.006276889 | 0.052858049 | 0.208440004 | 0.154643346 |
| 0.014319379 | 0.137874631 | 0.125277512 | 0.189329811 |
| 0.253616011 | 0.212686584 | 0.165044691 | 0.070417516 |
| 0.139835633 | 0.006508621 | 0.266043471 | 0.150883589 |
| 0.131106205 | 0.188863425 | 0.039549502 | 0.171859346 |
| 0.173621727 | 0.188598334 | 0.147146929 | 0.210035701 |
| 0.015554627 | 0.146070995 | 0.237498585 | 0.076493235 |
| 0.202295104 | 0.203016288 | 0.165930957 | 0.023245311 |
| 0.10128182  | 0.046085729 | 0.068986432 | 0.025232117 |
| 0.02541038  | 0.235778433 | 0.080687172 | 0.246619156 |
| 0.185167964 | 0.153303546 | 0.093139244 | 0.038219568 |
| 0.187444115 | 0.185735005 | 0.100766919 | 0.1988625   |
| 0.1096235   | 0.139931811 | 0.145430548 | 0.128934957 |
| 0.029575581 | 0.159352545 | 0.226346486 | 0.207068933 |
| 0.207013169 | 0.229533923 | 0.16670419  | 0.108543288 |
| 0.014169317 | 0.092089698 | 0.061197506 | 0.071117444 |
| 0.158728411 | 0.026606586 | 0.010701861 | 0.193148318 |
| 0.019404949 | 0.203380843 | 0.043424732 | 0.05155903  |
| 0.103332123 | 0.073248801 | 0.168526746 | 0.207034486 |
| 0.064507132 | 0.161901417 | 0.018516409 | 0.064226625 |
| 0.026639372 | 0.142871473 | 0.051524328 | 0.081584979 |
| 0.012121656 | 0.021165475 | 0.170749926 | 0.174767678 |
| 0.068197763 | 0.020113488 | 0.146633689 | 0.075954539 |
| 0.087839352 | 0.207156536 | 0.109815284 | 0.014309396 |
| 0.022200441 | 0.133858382 | 0.060925927 | 0.049064492 |
| 0.016925412 | 0.125834865 | 0.095808434 | 0.09510255  |
| 0.249354835 | 0.088642993 | 0.174158863 | 0.03687476  |
| 0.069408786 | 0.173531371 | 0.065340056 | 0.140283172 |
| 0.060972958 | 0.237786271 | 0.156362966 | 0.149660548 |
| 0.033801509 | 0.054040392 | 0.080379181 | 0.228123217 |

0.030002781

| PRPS2       | 0.366787285 | 0.518895664 | 0.340635798 |
|-------------|-------------|-------------|-------------|
| 0.357773899 | 0.372356182 | 0.325550736 | 0.186954033 |
| 0.172862061 | 0.072600408 | 0.004598532 | 0.021758362 |
| 0.380950049 | 0.191548769 | 0.243513115 | 0.280075373 |
| 0.358456902 | 0.124572655 | 0.306972568 | 0.21402667  |
| 0.357267272 | 0.086088923 | 0.346300252 | 0.08153951  |
| 0.254083509 | 0.093050931 | 0.061333424 | 0.22928215  |
| 0.385682999 | 0.070053741 | 0.295512263 | 0.339159615 |
| 0.093268588 | 0.381354738 | 0.526299369 | 0.378576959 |
| 0.52251171  | 0.348023196 | 0.013852122 | 0.257210388 |
| 0.386860491 | 0.373536087 | 0.354521841 | 0.287456086 |
| 0.037063512 | 0.497200677 | 0.215793964 | 0.34678403  |
| 0.203790337 | 0.028677202 | 0.216007216 | 0.451248161 |
| 0.484898678 | 0.373659561 | 0.204280626 | 0.143203325 |
| 0.190463259 | 0.217493453 | 0.239346115 | 0.291678893 |
| 0.203674703 | 0.148061491 | 0.489454391 | 0.07618572  |
| 0.132039857 | 0.230000676 | 0.142025316 | 0.234256504 |
| 0.306572245 | 0.336107254 | 0.017645423 | 0.355224061 |
| 0.002725513 | 0.338087204 | 0.331984444 | 0.26327091  |
| 0.038212177 | 0.019876735 | 0.163319224 | 0.297134689 |
| 0.413057164 | 0.456904052 | 0.445563171 | 0.459853648 |
| 0.168651549 | 0.259790374 | 0.345143488 | 0.154197081 |
| 0.404324241 | 0.159535065 | 0.099006434 | 0.362626486 |
| 0.458020181 | 0.522195796 | 0.184280268 | 0.230275148 |
| 0.370168887 | 0.47164733  | 0.355686438 | 0.365393196 |
| 0.285751086 | 0.047087812 | 0.440509067 | 0.492213782 |
| 0.372927735 | 0.279311986 | 0.135723617 | 0.358596499 |
| 0.054500613 | 0.315891248 | 0.307344027 | 0.15379769  |
| 0.428008989 | 0.015951409 | 0.189491695 | 0.31822289  |
| 0.188299065 | 0.37575094  | 0.51468189  | 0.16888674  |
| 0.362930631 | 0.018702313 | 0.117434636 | 0.031447237 |
| 0.298524667 | 0.13324592  | 0.497272354 | 0.419053395 |
| 0.221344893 | 0.336996387 | 0.239809204 | 0.001794632 |
| 0.024883197 | 0.168452749 | 0.389793844 | 0.328252896 |
| 0.372239372 | 0.37243245  | 0.201113187 | 0.348477123 |
| 0.379696945 | 0.439110483 | 0.055434386 | 0.087027944 |
| 0.367267151 | 0.169453385 | 0.211973502 | 0.389806835 |
| 0.270230419 | 0.106419675 | 0.116391969 | 0.493889308 |
| 0.426114216 | 0.077476839 | 0.299479484 | 0.35840547  |
| 0.291308135 | 0.314134286 | 0.099951857 | 0.255096584 |
| 0.047411148 | 0.490113405 | 0.026222825 | 0.298209631 |
| 0.229569378 | 0.144577614 | 0.010620356 | 0.237875336 |
| 0.251959119 | 0.404754085 | 0.487061237 | 0.097321547 |
| 0.288888719 | 0.352260807 | 0.294109229 | 0.368498051 |
| 0.009033452 | 0.04378632  | 0.260198774 | 0.491452536 |
| 0.261475064 | 0.477117909 | 0.267507184 | 0.264709465 |
| 0.24938337  | 0.377392645 | 0.00301153  | 0.50567694  |
| 0.524548578 | 0.273603491 | 0.351373095 | 0.368895317 |
| 0.322486769 | 0.395387133 | 0.045876858 | 0.364865378 |
| 0.32322459  | 0.071742209 | 0.468033916 | 0.143623879 |
| 0.460379425 | 0.037141534 | 0.295165503 | 0.383218817 |
| 0.377765654 | 0.009387927 | 0.203014817 | 0.339448693 |
| 0.024829444 | 0.090390399 | 0.368706153 | 0.349427195 |

|             |             |             |             |
|-------------|-------------|-------------|-------------|
| 0.326296723 | 0.37802852  | 0.434455994 | 0.304651929 |
| 0.37438444  | 0.214762346 | 0.011648688 | 0.280770675 |
| 0.378046723 | 0.332993965 | 0.440335015 | 0.216432568 |
| 0.304864342 | 0.464467495 | 0.37495389  | 0.172094277 |
| 0.039077444 | 0.28045916  | 0.019993835 | 0.286073548 |
| 0.373412196 | 0.109553299 | 0.338248637 | 0.140582242 |
| 0.064921015 | 0.510070282 | 0.157939091 | 0.229943192 |
| 0.113644058 | 0.356032595 | 0.226066406 | 0.217224615 |
| 0.196845812 | 0.147678616 | 0.309822774 | 0.319864462 |
| 0.035830117 | 0.08687634  | 0.013284585 | 0.341049559 |
| 0.134920501 | 0.312944082 | 0.309821694 | 0.364459207 |
| 0.307425693 | 0.106255725 | 0.339904665 | 0.244260784 |
| 0.099557894 | 0.013592738 | 0.498744406 | 0.351953868 |
| 0.301269164 | 0.137968853 | 0.038033766 | 0.312702206 |
| 0.434197581 | 0.283140929 | 0.245932853 | 0.43930332  |
| 0.02535041  | 0.44849528  | 0.222731647 | 0.110188584 |
| 0.341147383 | 0.234661128 | 0.409228368 | 0.054578491 |
| 0.351602036 | 0.468006359 | 0.275686279 | 0.16019646  |
| 0.398245317 | 0.365466861 | 0.028757808 | 0.352557798 |
| 0.357317311 | 0.029155815 | 0.518163827 | 0.116731387 |
| 0.019065126 | 0.378718559 | 0.376951104 | 0.067358882 |
| 0.068556445 | 0.293069592 | 0.043079073 | 0.255130413 |
| 0.503133949 | 0.355527872 | 0.371252238 | 0.19149778  |
| 0.036873802 | 0.01103913  | 0.188626174 | 0.348266932 |
| 0.520657344 | 0.499462287 | 0.235373355 | 0.322783376 |
| 0.214964914 | 0.288474313 | 0.135460674 | 0.491296017 |
| 0.17312048  | 0.520817273 | 0.006261011 | 0.379769572 |
| 0.52009138  | 0.271636736 | 0.071356155 | 0.275099209 |
| 0.36498857  | 0.041049709 | 0.189217635 | 0.498761402 |
| 0.406549662 | 0.287668458 | 0.294735948 | 0.37818292  |
| 0.014786146 | 0.040147229 | 0.333797124 | 0.163524394 |
| 0.333102622 | 0.187271701 | 0.048831952 | 0.303384372 |
| 0.038191725 | 0.453395303 | 0.392355317 | 0.050126049 |
| 0.299464464 | 0.275306987 | 0.333580187 | 0.033437635 |
| 0.420550745 | 0.497186664 | 0.527481334 | 0.153998091 |
| 0.390386883 | 0.475326607 | 0.352903298 | 0.072084229 |
| 0.015509774 | 0.519836296 | 0.349106308 | 0.019024844 |
| 0.430463184 | 0.217626094 | 0.012498909 | 0.490677357 |
| 0.16611694  | 0.462212466 | 0.00298331  | 0.074277146 |
| 0.036847828 | 0.399281709 | 0.485740249 | 0.338799793 |
| 0.219727039 | 0.325798836 | 0.006019117 | 0.510360808 |
| 0.491780748 | 0.012824125 | 0.12799939  | 0.387105211 |
| 0.369217272 | 0.526904858 | 0.278315119 | 0.411753287 |
| 0.376417559 | 0.505732784 | 0.22129982  | 0.236144004 |
| 0.399056272 | 0.490788413 | 0.366081938 | 0.454176094 |
| 0.415180649 | 0.369540727 | 0.247855969 | 0.014326213 |
| 0.110742492 | 0.197730368 | 0.263569531 | 0.067096879 |
| 0.291779295 | 0.121769777 | 0.469899985 | 0.419044425 |
| 0.458545127 | 0.004503385 | 0.137797296 | 1           |
| 0.411921065 | 0.439436958 | 0.018685989 | 0.005345051 |
| 0.007048329 | 0.016905811 | 0.322921606 | 0.215659978 |
| 0.471538085 | 0.212097154 | 0.004187836 | 0.042972906 |
| 0.243546102 | 0.347031654 | 0.504074694 | 0.333111315 |
| 0.381652971 | 0.075530923 | 0.252845331 | 0.347347874 |



|             |             |             |             |
|-------------|-------------|-------------|-------------|
| 0.059612874 | 0.296678764 | 0.461504603 | 0.477258543 |
| 0.038260783 | 0.217034171 | 0.337382157 | 0.45505282  |
| 0.065786479 | 0.285532994 | 0.387566735 | 0.287290141 |
| 0.013134697 | 0.07251613  | 0.057710357 | 0.378761102 |
| 0.510064304 | 0.073494147 | 0.03116765  | 0.158881141 |
| 0.109205847 | 0.429516007 | 0.148238091 | 0.488066941 |
| 0.388825235 | 0.375438835 | 0.069873751 | 0.483734382 |
| 0.036798296 | 0.497426826 | 0.297657085 | 0.048057331 |
| 0.258817701 | 0.011563148 | 0.469929159 | 0.12962533  |
| 0.297913237 | 0.353945125 | 0.163010304 | 0.015497807 |
| 0.157452289 | 0.048883856 | 0.435651293 | 0.406828585 |
| 0.030909746 | 0.212532838 | 0.262257215 | 0.354699301 |
| 0.258781412 | 0.375406856 | 0.512692212 | 0.347183699 |
| 0.078598187 | 0.134737103 | 0.358523745 | 0.354393567 |
| 0.228269905 | 0.453142825 | 0.261845804 | 0.511936146 |
| 0.359953727 | 0.443465438 | 0.461062769 | 0.303273738 |
| 0.217953074 | 0.352229001 | 0.328436709 | 0.017915432 |
| 0.31087971  | 0.406458505 | 0.32105643  | 0.136025931 |
| 0.229030316 | 0.339588458 | 0.045105807 | 0.167026334 |
| 0.29099385  | 0.275295065 | 0.133001242 | 0.374622471 |
| 0.350801559 | 0.358880881 | 0.041501885 | 0.053484295 |
| 0.53622583  | 0.430915151 | 0.126366673 | 0.366939336 |
| 0.154250338 | 0.299920348 | 0.384912106 | 0.387651014 |
| 0.321747392 | 0.413955637 | 0.377686771 | 0.343328892 |
| 0.427537083 | 0.230780803 | 0.528078512 | 0.086736423 |
| 0.082590819 | 0.37138948  | 0.088635355 | 0.083679462 |
| 0.130636761 | 0.023002308 | 0.266025321 | 0.372195559 |
| 0.337958606 | 0.338604233 | 0.302644216 | 0.070809413 |
| 0.290626238 | 0.326650812 | 0.316589301 | 0.180292731 |
| 0.071140643 | 0.503694324 | 0.007990377 | 0.052125761 |
| 0.353385539 | 0.380721717 | 0.33625011  | 0.211166504 |
| 0.262620927 | 0.129665344 | 0.267822772 | 0.274428614 |
| 0.28771967  | 0.334096701 | 0.380434079 | 0.030733914 |
| 0.01898824  | 0.456401688 | 0.33210505  | 0.0188836   |
| 0.080248468 | 0.335930762 | 0.272295374 | 0.211968688 |
| 0.019773815 | 0.473806544 | 0.29663581  | 0.36912002  |
| 0.302556745 | 0.060742877 | 0.356021761 | 0.082641484 |
| 0.054320051 | 0.454691174 | 0.346385847 | 0.516383108 |
| 0.309752427 | 0.363430795 | 0.460714709 | 0.392950024 |
| 0.10840159  | 0.335143494 | 0.024725349 | 0.394534054 |
| 0.350874891 |             |             |             |
| PRR13       | 0.399956686 | 0.50829755  | 0.362900717 |
| 0.44552005  | 0.416669006 | 0.414619998 | 0.301930892 |
| 0.304120061 | 0.119017856 | 0.015367647 | 0.029566553 |
| 0.402762233 | 0.229700246 | 0.358221579 | 0.354625662 |
| 0.425615525 | 0.149849664 | 0.388719461 | 0.314680659 |
| 0.446351965 | 0.182921881 | 0.407314128 | 0.154936475 |
| 0.258395915 | 0.109110823 | 0.096479042 | 0.246614453 |
| 0.455396289 | 0.110500685 | 0.389687046 | 0.444622579 |
| 0.119480373 | 0.43369439  | 0.500082397 | 0.405144703 |
| 0.482908033 | 0.375996141 | 0.022315181 | 0.358033822 |
| 0.419684179 | 0.414855312 | 0.446416087 | 0.385965194 |
| 0.080600273 | 0.487852621 | 0.321207517 | 0.375651911 |
| 0.312641269 | 0.045523209 | 0.343990695 | 0.454615239 |

|             |             |             |             |
|-------------|-------------|-------------|-------------|
| 0.459223811 | 0.40461924  | 0.339857727 | 0.241989405 |
| 0.20341921  | 0.334432917 | 0.216821126 | 0.394978485 |
| 0.303082648 | 0.270470031 | 0.461859201 | 0.145152364 |
| 0.188023473 | 0.360069518 | 0.160789875 | 0.366893202 |
| 0.290808816 | 0.41784633  | 0.045103192 | 0.350855801 |
| 0.009386517 | 0.436337773 | 0.368705697 | 0.248313398 |
| 0.062335306 | 0.038096841 | 0.190375319 | 0.406534359 |
| 0.450513056 | 0.436589149 | 0.434215981 | 0.436190078 |
| 0.203651204 | 0.31535701  | 0.335694185 | 0.223783348 |
| 0.422134371 | 0.257050791 | 0.163594003 | 0.415707684 |
| 0.443779585 | 0.49334703  | 0.218738538 | 0.267298987 |
| 0.419031879 | 0.476151819 | 0.419948889 | 0.416599976 |
| 0.307114106 | 0.054275822 | 0.432609538 | 0.47209021  |
| 0.404615002 | 0.258811392 | 0.173211932 | 0.448884999 |
| 0.089127187 | 0.395360138 | 0.402490471 | 0.180848388 |
| 0.450896491 | 0.040981837 | 0.214925173 | 0.420549294 |
| 0.267532304 | 0.43305132  | 0.476453769 | 0.267522525 |
| 0.391122569 | 0.035857941 | 0.116156405 | 0.04916194  |
| 0.369289987 | 0.111485708 | 0.468080881 | 0.445182243 |
| 0.346624441 | 0.366536597 | 0.35821518  | 0.004678385 |
| 0.037100485 | 0.199449621 | 0.405364438 | 0.406088938 |
| 0.43601164  | 0.339992432 | 0.257404949 | 0.404390599 |
| 0.384431717 | 0.425104941 | 0.08714085  | 0.167221451 |
| 0.440165652 | 0.200494852 | 0.291550624 | 0.424415037 |
| 0.311063465 | 0.206755224 | 0.187645731 | 0.486557777 |
| 0.448750871 | 0.137532786 | 0.391450354 | 0.423152899 |
| 0.359237764 | 0.330425321 | 0.169680295 | 0.34149294  |
| 0.102727086 | 0.445207103 | 0.033993088 | 0.413665225 |
| 0.237671578 | 0.144750323 | 0.025030937 | 0.373258332 |
| 0.36011586  | 0.403739283 | 0.446765576 | 0.158083577 |
| 0.379108735 | 0.40249302  | 0.399052651 | 0.41946361  |
| 0.019865173 | 0.079476187 | 0.3493565   | 0.47916709  |
| 0.361022822 | 0.454933281 | 0.365577021 | 0.310057448 |
| 0.301438591 | 0.439716866 | 0.004053091 | 0.487489771 |
| 0.489880425 | 0.362241945 | 0.408284971 | 0.402483652 |
| 0.321403204 | 0.445677969 | 0.051797018 | 0.429973982 |
| 0.383315252 | 0.125413228 | 0.463428671 | 0.187853136 |
| 0.443844681 | 0.062579506 | 0.404707039 | 0.374677504 |
| 0.377214277 | 0.015836074 | 0.33187361  | 0.442049635 |
| 0.031204772 | 0.190222894 | 0.433880203 | 0.439456857 |
| 0.399977081 | 0.422266017 | 0.442880506 | 0.300353871 |
| 0.422766564 | 0.334510103 | 0.022131816 | 0.309015068 |
| 0.408981894 | 0.337201329 | 0.455711602 | 0.33248914  |
| 0.374664457 | 0.468312356 | 0.379662233 | 0.216827734 |
| 0.080649208 | 0.404463471 | 0.04893031  | 0.34557788  |
| 0.360872533 | 0.18243543  | 0.353543039 | 0.171826395 |
| 0.085202455 | 0.495599738 | 0.148213157 | 0.204137017 |
| 0.096872483 | 0.418719268 | 0.340274131 | 0.287830889 |
| 0.217311145 | 0.20336331  | 0.322326024 | 0.375111383 |
| 0.090381712 | 0.130369294 | 0.016262684 | 0.334257825 |
| 0.163580324 | 0.343836225 | 0.349206573 | 0.414260647 |
| 0.388402911 | 0.154476834 | 0.389523648 | 0.257337617 |
| 0.127351192 | 0.025152885 | 0.491191085 | 0.429094999 |
| 0.376903337 | 0.226387637 | 0.060729412 | 0.32300076  |

|             |             |             |             |
|-------------|-------------|-------------|-------------|
| 0.443430214 | 0.363232674 | 0.338778364 | 0.452056345 |
| 0.050823088 | 0.437504183 | 0.285820073 | 0.147346802 |
| 0.34316302  | 0.32011707  | 0.446861172 | 0.084472039 |
| 0.427163252 | 0.472808354 | 0.34045894  | 0.207131252 |
| 0.410032456 | 0.450864021 | 0.06435635  | 0.402270823 |
| 0.405515915 | 0.051727984 | 0.49150151  | 0.135094071 |
| 0.031571026 | 0.401405298 | 0.394723816 | 0.099696419 |
| 0.096988776 | 0.370858384 | 0.113676635 | 0.309909238 |
| 0.495015378 | 0.415675519 | 0.412901417 | 0.196578112 |
| 0.073366497 | 0.01812198  | 0.201448071 | 0.360319248 |
| 0.496550414 | 0.463626414 | 0.307286079 | 0.344828033 |
| 0.309558837 | 0.308134957 | 0.237066548 | 0.472873733 |
| 0.197021869 | 0.495960691 | 0.01379115  | 0.386348774 |
| 0.480536849 | 0.379375472 | 0.093588885 | 0.39403467  |
| 0.409592743 | 0.084313606 | 0.288064597 | 0.483531052 |
| 0.419894556 | 0.339274631 | 0.346226061 | 0.42478983  |
| 0.045798341 | 0.093603644 | 0.373294677 | 0.147400823 |
| 0.388058664 | 0.257329681 | 0.035894371 | 0.403556323 |
| 0.07393362  | 0.455891314 | 0.437456627 | 0.080057243 |
| 0.373177222 | 0.386940533 | 0.374524929 | 0.066044277 |
| 0.380657865 | 0.458155881 | 0.505837847 | 0.259154887 |
| 0.412314996 | 0.446738806 | 0.334462687 | 0.10026701  |
| 0.023432528 | 0.481950239 | 0.428444185 | 0.041582485 |
| 0.443787473 | 0.330655907 | 0.025400991 | 0.497018332 |
| 0.265489125 | 0.441313284 | 0.01142028  | 0.071690669 |
| 0.044790563 | 0.418730833 | 0.468971207 | 0.443861149 |
| 0.313763513 | 0.418094221 | 0.005816359 | 0.47905692  |
| 0.48177898  | 0.018384485 | 0.136400554 | 0.400448427 |
| 0.367100813 | 0.520489634 | 0.269551033 | 0.394498216 |
| 0.375107658 | 0.470454338 | 0.313448709 | 0.296283812 |
| 0.435287076 | 0.440314808 | 0.447407323 | 0.464025404 |
| 0.447107443 | 0.405774494 | 0.345962214 | 0.035675888 |
| 0.124513367 | 0.330610394 | 0.305657811 | 0.097670534 |
| 0.391250343 | 0.158501675 | 0.45981894  | 0.436440656 |
| 0.431845327 | 0.009316457 | 0.259240318 | 0.411921065 |
| 1           | 0.460366161 | 0.030556287 | 0.008361996 |
| 0.009603947 | 0.020219913 | 0.434134409 | 0.256596267 |
| 0.455904918 | 0.293632387 | 0.011155493 | 0.110595866 |
| 0.349967518 | 0.353264328 | 0.484651525 | 0.421544273 |
| 0.401029921 | 0.114465051 | 0.317109625 | 0.436712249 |
| 0.075113023 | 0.35299816  | 0.444529477 | 0.4814367   |
| 0.054816481 | 0.262325379 | 0.407901135 | 0.468817158 |
| 0.046679598 | 0.336824774 | 0.40984337  | 0.357211755 |
| 0.019246914 | 0.094328017 | 0.079795299 | 0.428479188 |
| 0.465839262 | 0.099829243 | 0.047109078 | 0.20581398  |
| 0.180872637 | 0.429513689 | 0.21935975  | 0.478824986 |
| 0.448787742 | 0.444970141 | 0.077422595 | 0.47665751  |
| 0.055292419 | 0.472423042 | 0.30151479  | 0.093566933 |
| 0.316629396 | 0.023242601 | 0.430103217 | 0.138540777 |
| 0.414522469 | 0.437366529 | 0.181678842 | 0.020332326 |
| 0.141369011 | 0.071516577 | 0.437592185 | 0.411981345 |
| 0.037424489 | 0.327107686 | 0.325127719 | 0.42825866  |
| 0.392613019 | 0.440472002 | 0.495074839 | 0.385700772 |
| 0.153322462 | 0.113405816 | 0.452564103 | 0.417163459 |

|             |             |             |             |
|-------------|-------------|-------------|-------------|
| 0.353246252 | 0.441746335 | 0.297311786 | 0.490038592 |
| 0.424578524 | 0.444788554 | 0.435421872 | 0.404147144 |
| 0.20853455  | 0.432745187 | 0.422148875 | 0.049399215 |
| 0.409111709 | 0.438162677 | 0.420575268 | 0.160965776 |
| 0.277235596 | 0.323864036 | 0.0857887   | 0.223731736 |
| 0.260468991 | 0.391262554 | 0.205324798 | 0.44105475  |
| 0.430481636 | 0.418628909 | 0.086658663 | 0.076962003 |
| 0.51955856  | 0.437270328 | 0.234037391 | 0.44190674  |
| 0.208337089 | 0.360126318 | 0.415120622 | 0.402842903 |
| 0.349924429 | 0.418127259 | 0.450268997 | 0.425442279 |
| 0.446195681 | 0.336804476 | 0.506081868 | 0.18836626  |
| 0.089203185 | 0.389275544 | 0.136725863 | 0.110262922 |
| 0.199203014 | 0.037673375 | 0.231421877 | 0.426114643 |
| 0.305497465 | 0.410321424 | 0.378857488 | 0.114128147 |
| 0.326603912 | 0.372512516 | 0.383051503 | 0.299402619 |
| 0.120219941 | 0.485470644 | 0.015580837 | 0.077974274 |
| 0.325838092 | 0.41428527  | 0.335006434 | 0.270036645 |
| 0.245333659 | 0.140429335 | 0.34083714  | 0.390643955 |
| 0.349286519 | 0.342803233 | 0.412935093 | 0.073758057 |
| 0.049905699 | 0.453393922 | 0.417357157 | 0.02590135  |
| 0.094017965 | 0.392212814 | 0.341658156 | 0.270445992 |
| 0.024930526 | 0.432101774 | 0.372933782 | 0.399914356 |
| 0.426492994 | 0.102408494 | 0.375278723 | 0.127702732 |
| 0.102372338 | 0.455608354 | 0.353309828 | 0.478070803 |
| 0.329994181 | 0.431915223 | 0.452257047 | 0.416609582 |
| 0.155280365 | 0.336080643 | 0.061104857 | 0.444330292 |
| 0.351865211 |             |             |             |

|             |             |             |             |
|-------------|-------------|-------------|-------------|
| PRUNE       | 0.439372555 | 0.520478364 | 0.426979421 |
| 0.476447423 | 0.47642643  | 0.419037345 | 0.313287848 |
| 0.28972591  | 0.142526069 | 0.012774567 | 0.037820024 |
| 0.454530697 | 0.24724563  | 0.349477232 | 0.380568079 |
| 0.48220012  | 0.184988822 | 0.434539757 | 0.34871124  |
| 0.485564741 | 0.167363433 | 0.464500683 | 0.170224193 |
| 0.334792071 | 0.143462961 | 0.119091563 | 0.311496223 |
| 0.487713863 | 0.135949762 | 0.371626433 | 0.453352875 |
| 0.160631672 | 0.462824336 | 0.507641142 | 0.457108871 |
| 0.491906199 | 0.409433422 | 0.024133365 | 0.359690912 |
| 0.441169878 | 0.464417887 | 0.479972051 | 0.422392245 |
| 0.088007524 | 0.479564215 | 0.345592711 | 0.446095931 |
| 0.314628087 | 0.056738214 | 0.31249406  | 0.446019494 |
| 0.458085428 | 0.443949746 | 0.335176038 | 0.253107153 |
| 0.220733681 | 0.300328096 | 0.262695703 | 0.376900958 |
| 0.327524354 | 0.228751795 | 0.468715247 | 0.154700187 |
| 0.202525813 | 0.369250856 | 0.210909794 | 0.372289823 |
| 0.365672183 | 0.422894733 | 0.048344077 | 0.401526636 |
| 0.007114045 | 0.475297673 | 0.43990916  | 0.310507369 |
| 0.080253091 | 0.040079269 | 0.244749481 | 0.428081873 |
| 0.486406386 | 0.451086838 | 0.472449926 | 0.469711182 |
| 0.235348231 | 0.384482452 | 0.405740584 | 0.255430034 |
| 0.449185831 | 0.265732942 | 0.174536471 | 0.476360478 |
| 0.47630331  | 0.506213055 | 0.270711981 | 0.338044315 |
| 0.436774603 | 0.481825896 | 0.455463415 | 0.46785972  |
| 0.35692145  | 0.08432377  | 0.433351241 | 0.49691157  |
| 0.412009373 | 0.326850145 | 0.219232542 | 0.458845691 |

|             |             |             |             |
|-------------|-------------|-------------|-------------|
| 0.111805839 | 0.419709584 | 0.443880936 | 0.207098218 |
| 0.485221645 | 0.045405271 | 0.275771325 | 0.43702012  |
| 0.321148621 | 0.464634312 | 0.496259086 | 0.291368281 |
| 0.455012636 | 0.041069365 | 0.15157378  | 0.067435417 |
| 0.393226982 | 0.155127056 | 0.463979007 | 0.471125145 |
| 0.327923693 | 0.425051083 | 0.3817788   | 0.007160646 |
| 0.051121779 | 0.260873168 | 0.43444439  | 0.452105921 |
| 0.480282033 | 0.362603892 | 0.298966639 | 0.410500969 |
| 0.43385287  | 0.471724411 | 0.074921587 | 0.183696346 |
| 0.474051102 | 0.260662689 | 0.33980995  | 0.466131771 |
| 0.370790835 | 0.212195491 | 0.212433267 | 0.512379549 |
| 0.436412794 | 0.15466334  | 0.409007477 | 0.479704561 |
| 0.380360154 | 0.399797025 | 0.190496714 | 0.360069735 |
| 0.104732536 | 0.459766131 | 0.05028729  | 0.424701442 |
| 0.281706645 | 0.181159828 | 0.03060886  | 0.361916586 |
| 0.359947175 | 0.423675104 | 0.4479257   | 0.187712512 |
| 0.403554328 | 0.465104763 | 0.392198565 | 0.438047493 |
| 0.021431227 | 0.095781587 | 0.33711992  | 0.496437786 |
| 0.330058376 | 0.486003118 | 0.407749356 | 0.384501297 |
| 0.365784721 | 0.486261762 | 0.006109028 | 0.486373552 |
| 0.506936733 | 0.343911718 | 0.444151219 | 0.464554999 |
| 0.382743297 | 0.477321428 | 0.052770566 | 0.481760139 |
| 0.384508462 | 0.150237059 | 0.495565579 | 0.22902894  |
| 0.451397303 | 0.078356578 | 0.403290415 | 0.425038406 |
| 0.41109036  | 0.017153457 | 0.303891734 | 0.464804485 |
| 0.048873254 | 0.17319075  | 0.472851022 | 0.479734296 |
| 0.443099126 | 0.477858844 | 0.487484718 | 0.361046287 |
| 0.476023162 | 0.352998767 | 0.029708163 | 0.382998951 |
| 0.457481248 | 0.379843796 | 0.449068748 | 0.350198925 |
| 0.367278145 | 0.474324828 | 0.410150503 | 0.236137254 |
| 0.090959599 | 0.413660892 | 0.042925279 | 0.404746037 |
| 0.389771738 | 0.183978681 | 0.407098125 | 0.217953777 |
| 0.113013084 | 0.516553893 | 0.204289305 | 0.266926873 |
| 0.13889098  | 0.431412908 | 0.373569702 | 0.282070729 |
| 0.235733478 | 0.248340584 | 0.389803206 | 0.430896785 |
| 0.084939166 | 0.152638259 | 0.028022224 | 0.357992944 |
| 0.164920755 | 0.352607903 | 0.346272419 | 0.426434081 |
| 0.389603043 | 0.158297454 | 0.436928015 | 0.333603955 |
| 0.168463072 | 0.033760891 | 0.503570495 | 0.48306716  |
| 0.36457719  | 0.254039894 | 0.079375584 | 0.334058955 |
| 0.465611852 | 0.344295204 | 0.32237913  | 0.453895982 |
| 0.060230324 | 0.471978578 | 0.310346463 | 0.183280984 |
| 0.392290155 | 0.353563139 | 0.48630008  | 0.088054261 |
| 0.449500443 | 0.469250108 | 0.408407674 | 0.255466355 |
| 0.392940754 | 0.484499017 | 0.068213373 | 0.421879422 |
| 0.414818391 | 0.063605701 | 0.510834116 | 0.174801021 |
| 0.04392118  | 0.462776412 | 0.435815758 | 0.12948978  |
| 0.129348408 | 0.392091486 | 0.102471037 | 0.373420802 |
| 0.5122117   | 0.470627853 | 0.436259349 | 0.266216727 |
| 0.08148112  | 0.017692886 | 0.267271619 | 0.421945158 |
| 0.49648536  | 0.488912343 | 0.362450154 | 0.395910478 |
| 0.350002737 | 0.366163241 | 0.215673794 | 0.494830835 |
| 0.257380458 | 0.507514181 | 0.018370839 | 0.440684097 |
| 0.487589356 | 0.35118083  | 0.121949366 | 0.397668776 |

|             |             |             |             |
|-------------|-------------|-------------|-------------|
| 0.407000719 | 0.097565111 | 0.322138695 | 0.4886139   |
| 0.446787539 | 0.400426648 | 0.394188524 | 0.476172372 |
| 0.043123728 | 0.095294517 | 0.441443243 | 0.206392531 |
| 0.433713346 | 0.310958849 | 0.055291087 | 0.413761288 |
| 0.082653759 | 0.452284532 | 0.485032744 | 0.103316046 |
| 0.364060767 | 0.393494808 | 0.444239608 | 0.079162258 |
| 0.422166653 | 0.480603613 | 0.510934338 | 0.279081042 |
| 0.44998135  | 0.467631601 | 0.386414154 | 0.134557909 |
| 0.034913213 | 0.496753431 | 0.450043215 | 0.044882812 |
| 0.484649897 | 0.291049651 | 0.024878958 | 0.501874151 |
| 0.296257455 | 0.432198705 | 0.011331372 | 0.099866233 |
| 0.069298243 | 0.474247833 | 0.471353566 | 0.459412472 |
| 0.284199982 | 0.466844273 | 0.010783806 | 0.506584338 |
| 0.484546209 | 0.027937426 | 0.187433623 | 0.433233123 |
| 0.411325574 | 0.528677426 | 0.335224876 | 0.436468367 |
| 0.422731127 | 0.47952501  | 0.31802926  | 0.356385252 |
| 0.457374395 | 0.463527163 | 0.47291555  | 0.4675965   |
| 0.478787734 | 0.471018257 | 0.384550352 | 0.038811694 |
| 0.175160851 | 0.308796799 | 0.319961902 | 0.120330526 |
| 0.380621254 | 0.200216505 | 0.476103705 | 0.482730764 |
| 0.45745808  | 0.013467116 | 0.252738299 | 0.439436958 |
| 0.460366161 | 1           | 0.043865654 | 0.011477088 |
| 0.012472187 | 0.029043631 | 0.453460863 | 0.325469635 |
| 0.479498497 | 0.265367859 | 0.013886889 | 0.099534927 |
| 0.387713081 | 0.421464913 | 0.493967304 | 0.469745114 |
| 0.454205049 | 0.143319319 | 0.314493119 | 0.483031863 |
| 0.102545133 | 0.352343584 | 0.468877716 | 0.47722485  |
| 0.077680999 | 0.332596348 | 0.439991742 | 0.489298171 |
| 0.069825599 | 0.402016826 | 0.456658812 | 0.380731507 |
| 0.028793665 | 0.129623084 | 0.10976159  | 0.485154563 |
| 0.474788462 | 0.110847394 | 0.055475648 | 0.188324612 |
| 0.187803178 | 0.472111169 | 0.24256737  | 0.507431198 |
| 0.472779569 | 0.489743577 | 0.111245396 | 0.482568238 |
| 0.068904283 | 0.473388755 | 0.369611413 | 0.08371174  |
| 0.379421893 | 0.031330928 | 0.448013228 | 0.166589547 |
| 0.397983351 | 0.46023082  | 0.239182949 | 0.032168411 |
| 0.19587039  | 0.092533935 | 0.476798477 | 0.466223273 |
| 0.058541529 | 0.359977543 | 0.392904407 | 0.48045014  |
| 0.376077847 | 0.477539686 | 0.495911811 | 0.406312554 |
| 0.158136414 | 0.158649094 | 0.480497724 | 0.430615226 |
| 0.336923891 | 0.476496613 | 0.343664345 | 0.514778996 |
| 0.447334279 | 0.462189562 | 0.454728756 | 0.439084999 |
| 0.266085967 | 0.448986649 | 0.421222742 | 0.044384491 |
| 0.454568772 | 0.477154074 | 0.451374806 | 0.198530813 |
| 0.327788928 | 0.388493004 | 0.102761639 | 0.228704318 |
| 0.322091841 | 0.370137908 | 0.222556716 | 0.491335945 |
| 0.453092471 | 0.430711409 | 0.090630001 | 0.10374264  |
| 0.534967183 | 0.443209562 | 0.235527132 | 0.473033821 |
| 0.260479268 | 0.419939862 | 0.464684363 | 0.458523163 |
| 0.408101821 | 0.444368739 | 0.470013323 | 0.423148169 |
| 0.432991907 | 0.375720955 | 0.514493416 | 0.158642147 |
| 0.12115146  | 0.427220644 | 0.14886156  | 0.147911874 |
| 0.227216193 | 0.053463268 | 0.290706631 | 0.48353195  |
| 0.359935127 | 0.454485425 | 0.375319955 | 0.144920129 |

|             |             |             |             |
|-------------|-------------|-------------|-------------|
| 0.399987989 | 0.412110199 | 0.447016122 | 0.294822354 |
| 0.13195411  | 0.487944626 | 0.020603891 | 0.101621633 |
| 0.378267821 | 0.451740823 | 0.392850614 | 0.33009652  |
| 0.310136064 | 0.195189158 | 0.392539082 | 0.366963193 |
| 0.335307403 | 0.398570195 | 0.446917902 | 0.077013932 |
| 0.049456966 | 0.484452541 | 0.433113393 | 0.040859245 |
| 0.129999635 | 0.416349518 | 0.389648315 | 0.311242419 |
| 0.039823463 | 0.453825392 | 0.370178045 | 0.463949928 |
| 0.446639208 | 0.126069814 | 0.360139169 | 0.145775539 |
| 0.123370074 | 0.450027426 | 0.419695851 | 0.492397614 |
| 0.405090903 | 0.478418977 | 0.44357817  | 0.441938405 |
| 0.188409366 | 0.390918889 | 0.065889598 | 0.480080069 |
| 0.389182979 |             |             |             |

| PSAP        | 0.045016799 | 0.021096261 | 0.046904639 |
|-------------|-------------|-------------|-------------|
| 0.040499669 | 0.040655744 | 0.013442606 | 0.041791457 |
| 0.030886345 | 0.013610959 | 0.001054881 | 0.002161454 |
| 0.038789169 | 0.001338678 | 0.010323069 | 0.006735682 |
| 0.080750927 | 0.042378526 | 0.067614704 | 0.091924703 |
| 0.063746932 | 0.017598874 | 0.066713966 | 0.055681002 |
| 0.043482848 | 0.042423753 | 0.056024528 | 0.0318187   |
| 0.053287276 | 0.076404023 | 0.005923764 | 0.038514868 |
| 0.151962367 | 0.040519313 | 0.016380709 | 0.02987731  |
| 0.014219133 | 0.033727029 | 0.016503182 | 0.005324737 |
| 0.038457058 | 0.03594794  | 0.053867033 | 0.056857963 |
| 0.035069373 | 0.013481103 | 0.048134432 | 0.076520962 |
| 0.004019764 | 0.025743874 | 0.009653847 | 0.015358422 |
| 0.009045631 | 0.012182528 | 0.035209096 | 0.030674314 |
| 0.000299554 | 0.007915869 | 0.003470747 | 0.01905644  |
| 0.050343805 | 0.00803929  | 0.012390234 | 0.008497016 |
| 0.001826769 | 0.055969298 | 0.100129949 | 0.04429718  |
| 0.025338883 | 0.026616016 | 0.065803155 | 0.031706246 |
| 0.000194335 | 0.078939374 | 0.108904915 | 0.011877821 |
| 0.149128092 | 0.00609986  | 0.122112353 | 0.036114638 |
| 0.048747948 | 0.027692124 | 0.038708011 | 0.031930993 |
| 0.016921915 | 0.145913425 | 0.039614708 | 0.044566527 |
| 0.031736929 | 0.024572364 | 0.013876023 | 0.075682966 |
| 0.035989049 | 0.016681597 | 0.033287615 | 0.142203478 |
| 0.013967455 | 0.022564074 | 0.017324596 | 0.019379819 |
| 0.006490004 | 0.137440166 | 0.012397727 | 0.026934697 |
| 0.024002829 | 0.036467643 | 0.104440113 | 0.034704896 |
| 0.158358384 | 0.009951756 | 0.06624158  | 0.011006767 |
| 0.047836688 | 0.036621692 | 0.110393307 | 0.024972813 |
| 0.078710491 | 0.03662665  | 0.017826711 | 0.072220256 |
| 0.056677665 | 0.013508605 | 0.002331573 | 0.209540436 |
| 0.003100316 | 0.0231359   | 0.009822237 | 0.026934043 |
| 0.014154652 | 0.008667196 | 0.054040086 | 0.08545856  |
| 0.095087021 | 0.069513685 | 0.023588405 | 0.075221313 |
| 0.056646761 | 0.023803015 | 0.01883587  | 0.018899602 |
| 0.019187267 | 0.038910891 | 0.000138562 | 0.082656153 |
| 0.027524384 | 0.091043482 | 0.126056736 | 0.020409579 |
| 0.04481634  | 0.075712006 | 0.082033448 | 0.032047499 |
| 0.017911987 | 0.090975837 | 0.031500425 | 0.081233569 |
| 0.003149624 | 0.059907494 | 0.108594551 | 0.021381726 |
| 0.03035035  | 0.013559988 | 0.138896635 | 0.0494402   |

|             |             |             |             |
|-------------|-------------|-------------|-------------|
| 0.002428392 | 0.013001801 | 0.091010305 | 0.031654896 |
| 0.004291451 | 0.011115742 | 0.011213047 | 0.173998453 |
| 0.027798016 | 0.056953343 | 0.022189031 | 0.011469021 |
| 0.001304257 | 0.072479431 | 0.015777043 | 0.023204711 |
| 0.009798591 | 0.038519416 | 0.059935034 | 0.076266919 |
| 0.111414306 | 0.055994545 | 0.021132829 | 0.01356937  |
| 0.017642443 | 0.010734565 | 0.021494613 | 0.070769521 |
| 0.013971653 | 0.032939819 | 0.001799242 | 0.072682576 |
| 0.023170453 | 0.186481215 | 0.042718638 | 0.079824999 |
| 0.019512648 | 0.073415148 | 0.015144093 | 0.027605932 |
| 0.013456421 | 0.004807007 | 0.011781253 | 0.042790671 |
| 0.157393548 | 0.011904433 | 0.053034027 | 0.048351254 |
| 0.027472876 | 0.062747107 | 0.053065357 | 0.011435193 |
| 0.029229867 | 0.074652569 | 0.093914302 | 0.108766728 |
| 0.048921379 | 0.002023394 | 0.015878927 | 0.028493592 |
| 0.015724062 | 0.019215269 | 0.018925925 | 0.00048132  |
| 0.067566319 | 0.032811868 | 0.005217011 | 0.04321466  |
| 0.023198904 | 0.009011329 | 0.015797862 | 0.090022315 |
| 0.101230629 | 0.024110731 | 0.062169305 | 0.033677876 |
| 0.035730907 | 0.010002916 | 0.107639426 | 0.00251445  |
| 0.001765866 | 0.05441609  | 0.017634063 | 0.01630149  |
| 0.02193577  | 0.057344402 | 0.136649336 | 0.003175477 |
| 0.000967123 | 0.002606762 | 0.001894906 | 0.01792381  |
| 0.008015249 | 0.005702222 | 0.025643936 | 0.047196886 |
| 0.086321887 | 0.140854258 | 0.0219043   | 0.087654175 |
| 0.014762663 | 0.056372586 | 0.180087942 | 0.00047891  |
| 0.024310258 | 0.004165751 | 0.009694387 | 0.017460471 |
| 0.06096598  | 0.043822135 | 0.005898431 | 0.08162261  |
| 0.011453672 | 0.050473849 | 0.050026215 | 0.001041996 |
| 0.034706264 | 0.015516447 | 0.153255362 | 0.047563302 |
| 0.010405763 | 0.045862664 | 0.014611316 | 0.024460436 |
| 0.018791191 | 0.090746473 | 0.022109738 | 0.061371132 |
| 0.184061256 | 0.053262102 | 0.015195059 | 0.17178552  |
| 0.138474497 | 0.010259831 | 0.019413612 | 0.112508839 |
| 0.023067577 | 0.063034289 | 0.013067089 | 0.104492392 |
| 0.039388064 | 0.00109445  | 0.127244269 | 0.056454062 |
| 0.013767858 | 0.022818022 | 0.148254227 | 0.01761136  |
| 0.111198381 | 0.010191053 | 0.002367117 | 0.02332518  |
| 0.07974594  | 0.021204289 | 0.144878163 | 0.030854898 |
| 0.012192984 | 0.011963492 | 0.057010964 | 0.021958774 |
| 0.014128766 | 0.084903967 | 0.118542526 | 0.015427499 |
| 0.025798061 | 0.0264972   | 0.0120749   | 0.066942817 |
| 0.020636893 | 0.02147983  | 0.055704253 | 0.04471294  |
| 0.008969683 | 0.06269593  | 0.012654019 | 0.015928088 |
| 0.01567384  | 0.013160069 | 0.058444064 | 0.03445527  |
| 0.004226062 | 0.020910471 | 0.096560866 | 0.113638452 |
| 0.023535833 | 0.023232091 | 0.015709538 | 0.103501902 |
| 0.030396878 | 0.016968189 | 0.012992873 | 0.223252473 |
| 0.170704153 | 0.016778529 | 0.038334157 | 0.003377769 |
| 0.043585374 | 0.008198457 | 0.001690067 | 0.022309654 |
| 0.114972213 | 0.011042885 | 0.003534877 | 0.040217478 |
| 0.179951    | 0.058063776 | 0.012439754 | 0.046710867 |
| 0.001727024 | 0.108571077 | 0.046115007 | 0.028867379 |
| 0.014415359 | 0.087918472 | 0.052564582 | 0.015696384 |



|             |             |             |             |
|-------------|-------------|-------------|-------------|
| 0.017593955 | 0.02285743  | 0.023616297 | 0.020940931 |
| 0.016453741 | 0.012257737 | 0.003903802 | 0.097104929 |
| 0.020605677 | 0.016620935 | 0.042624735 | 0.02291706  |
| 0.033660916 | 0.071962049 | 0.072111053 | 0.028875117 |
| 0.012816714 | 0.019419148 | 0.001362396 | 0.002074327 |
| 0.020494493 | 0.041843671 | 0.028651476 | 0.047772309 |
| 0.024276517 | 0.158210534 | 0.020148598 | 0.018685989 |
| 0.030556287 | 0.043865654 | 1           | 0.012092897 |
| 0.012619998 | 0.007192479 | 0.044941356 | 0.151548965 |
| 0.025584052 | 0.000357896 | 0.073702637 | 0.024431829 |
| 0.020530394 | 0.044395277 | 0.015731694 | 0.090906237 |
| 0.046748856 | 0.137999289 | 0.001311008 | 0.089324771 |
| 0.026244439 | 0.019967711 | 0.024701229 | 0.01468387  |
| 0.194628196 | 0.128200556 | 0.050542108 | 0.035647589 |
| 0.008349891 | 0.110768698 | 0.036819815 | 0.005067708 |
| 0.066234328 | 0.113521561 | 0.075528723 | 0.074181793 |
| 0.011919002 | 0.006692013 | 0.011578615 | 0.000841127 |
| 0.015243701 | 0.042932948 | 0.022049052 | 0.035438219 |
| 0.032126548 | 0.060139956 | 0.064663487 | 0.016644421 |
| 0.004912132 | 0.012350535 | 0.039300089 | 0.001030175 |
| 0.118205552 | 0.130841433 | 0.020072701 | 0.000774359 |
| 0.013097022 | 0.049011282 | 0.009636969 | 0.148292498 |
| 0.024890879 | 0.109321323 | 0.035224303 | 0.043858574 |
| 0.168255215 | 0.058259719 | 0.142070348 | 0.093496961 |
| 0.024661819 | 0.032880166 | 0.014021639 | 0.006434496 |
| 0.025873595 | 0.021246427 | 0.05712605  | 0.027498259 |
| 0.019798307 | 0.043783175 | 0.006517218 | 0.028855233 |
| 0.036968659 | 0.035334556 | 0.020618221 | 0.039879888 |
| 0.009831068 | 0.026384364 | 0.013777785 | 0.002691344 |
| 0.084142432 | 0.032034747 | 0.060228043 | 0.011708904 |
| 0.0371958   | 0.029974659 | 0.049322232 | 0.007544396 |
| 0.023727181 | 0.013601116 | 0.016328695 | 0.07515521  |
| 0.048783824 | 0.02609023  | 0.029548922 | 0.060688529 |
| 0.023221228 | 0.023883018 | 0.013337933 | 0.02620214  |
| 0.193835335 | 0.046046087 | 0.046442875 | 0.045604222 |
| 0.014535626 | 0.016663068 | 0.035482955 | 0.011984882 |
| 0.013201925 | 0.079976863 | 0.016331777 | 0.013722323 |
| 0.010836681 | 0.029380841 | 0.010252639 | 0.201819261 |
| 0.078735699 | 0.101634264 | 0.009407954 | 0.077237104 |
| 0.008682818 | 0.046680258 | 0.006183745 | 0.031124234 |
| 0.10794182  | 0.043651177 | 0.089174198 | 0.019587634 |
| 0.015238458 | 0.012378187 | 0.015851656 | 0.158873031 |
| 0.01218852  | 0.024393125 | 0.016682544 | 0.092936511 |
| 0.011197307 | 0.10348518  | 0.065962275 | 0.014002126 |
| 0.001526729 | 0.00588032  | 0.021330224 | 0.025775845 |
| 0.034398667 | 0.044603889 | 0.029145938 | 0.161649599 |
| 0.022129748 | 0.030428482 | 0.070523636 | 0.007661668 |
| 0.184509742 | 0.015946958 | 0.003859226 | 0.042191097 |
| 0.047776236 | 0.157711019 | 0.016821133 | 0.012468227 |
| 0.14295938  | 0.017556803 | 0.049715468 | 0.016034166 |
| 0.09646193  | 0.052026473 | 0.013432371 | 0.019555805 |
| 0.040340971 | 0.036682336 | 0.041720252 | 0.047423931 |
| 0.004907958 |             |             |             |
| PTGR1       | 0.009211745 | 0.00690037  | 0.01403475  |

|             |             |             |             |
|-------------|-------------|-------------|-------------|
| 0.012652821 | 0.006128004 | 0.007466806 | 0.010993962 |
| 0.006210221 | 0.04083131  | 0.000611393 | 0.001176651 |
| 0.010183821 | 0.000378082 | 0.002758148 | 0.00904463  |
| 0.017685858 | 0.006852247 | 0.009875905 | 0.018530187 |
| 0.010566651 | 0.00484995  | 0.013655974 | 0.014180313 |
| 0.007385275 | 0.016639087 | 0.01431009  | 0.014348467 |
| 0.01341256  | 0.020636131 | 0.001847473 | 0.00830174  |
| 0.016150279 | 0.007329349 | 0.005856443 | 0.007576936 |
| 0.004882271 | 0.008761141 | 0.000121233 | 0.003022303 |
| 0.009533262 | 0.013554625 | 0.009862426 | 0.015677153 |
| 0.008465596 | 0.004841955 | 0.014790037 | 0.015664551 |
| 0.000594466 | 0.009386926 | 0.005307295 | 0.004755843 |
| 0.004028476 | 0.004173279 | 0.010445342 | 0.011124363 |
| 0.000171585 | 0.000862    | 0.001381083 | 0.004768378 |
| 0.00906768  | 0.002582093 | 0.00422289  | 0.00801437  |
| 8.75E-05    | 0.007478532 | 0.009522788 | 0.007393163 |
| 0.00463793  | 0.007667306 | 0.006809174 | 0.0063849   |
| 4.35E-06    | 0.016172849 | 0.017099179 | 0.006178886 |
| 0.022887152 | 0.001484832 | 0.013737323 | 0.008000898 |
| 0.011563999 | 0.007454575 | 0.010754958 | 0.0091473   |
| 0.003813669 | 0.017692125 | 0.007199304 | 0.007228063 |
| 0.008734792 | 0.008375958 | 0.005030733 | 0.015870384 |
| 0.010229263 | 0.005415957 | 0.012021894 | 0.025685078 |
| 0.006088486 | 0.006820392 | 0.007923064 | 0.005350029 |
| 0.008732598 | 0.01964709  | 0.004131961 | 0.007660154 |
| 0.005794415 | 0.008919258 | 0.023468162 | 0.007223054 |
| 0.017563567 | 0.005945766 | 0.013947822 | 0.00074072  |
| 0.01266824  | 0.023005573 | 0.019049733 | 0.00424228  |
| 0.011504981 | 0.010926546 | 0.006315635 | 0.015377176 |
| 0.010033695 | 0.00135284  | 0.00117989  | 0.017726285 |
| 0.001393621 | 0.006098448 | 0.003786414 | 0.008294974 |
| 0.001451434 | 0.001439408 | 0.010510299 | 0.009760578 |
| 0.013709711 | 0.006638104 | 0.004903033 | 0.009464074 |
| 0.010922784 | 0.006750646 | 0.010564061 | 0.004063238 |
| 0.006116486 | 0.009800443 | 0.002529798 | 0.013842719 |
| 0.012279947 | 0.006500413 | 0.020534167 | 0.004713191 |
| 0.017960314 | 0.015073974 | 0.010166696 | 0.010217742 |
| 0.005617718 | 0.01387478  | 0.004377749 | 0.018671709 |
| 0.000881443 | 0.014615206 | 0.012018351 | 0.003407154 |
| 0.003354511 | 0.00548172  | 0.020084402 | 0.008931485 |
| 0.006700029 | 0.001474757 | 0.005742499 | 0.006186661 |
| 0.003298688 | 0.004433792 | 0.00366167  | 0.020529174 |
| 0.004196364 | 0.013022966 | 0.003920227 | 0.005703758 |
| 0.000852674 | 0.021092025 | 0.003025879 | 0.006872496 |
| 0.002657126 | 0.010092054 | 0.009430071 | 0.012883363 |
| 0.02160989  | 0.014963093 | 0.001282791 | 0.005462102 |
| 0.006234653 | 0.003695546 | 0.00638291  | 0.011927208 |
| 0.006541345 | 0.011055907 | 0.000190477 | 0.012470477 |
| 0.004732508 | 0.02281382  | 0.011366442 | 0.017342973 |
| 0.005783377 | 0.014917244 | 0.001896782 | 0.008760651 |
| 0.004148034 | 0.000132283 | 0.005990334 | 0.009958681 |
| 0.017141311 | 0.002815817 | 0.010014837 | 0.013217984 |
| 0.012580803 | 0.013899422 | 0.013116508 | 0.007479318 |
| 0.008603342 | 0.013062454 | 0.008319702 | 0.023187328 |

|             |             |             |             |
|-------------|-------------|-------------|-------------|
| 0.010615559 | 0.000306618 | 0.005750173 | 0.008967358 |
| 0.004326125 | 0.007084011 | 0.006268115 | 1.82E-05    |
| 0.014791917 | 0.004530245 | 0.000917425 | 0.020880766 |
| 0.006788491 | 0.001716622 | 0.007310506 | 0.005973893 |
| 0.016832928 | 0.007713998 | 0.014606337 | 0.00905941  |
| 0.010317524 | 0.002519673 | 0.018536247 | 0.000923861 |
| 0.000877923 | 0.013517121 | 0.011627302 | 0.006278142 |
| 0.004242805 | 0.008687642 | 0.009426514 | 0.000730623 |
| 0.000383658 | 0.001013701 | 0.00072634  | 0.003305063 |
| 0.000852834 | 0.001323287 | 0.009257598 | 0.009795185 |
| 0.028022078 | 0.018119836 | 0.006796944 | 0.019811607 |
| 0.003847334 | 0.017646373 | 0.019774098 | 0.000228301 |
| 0.006753463 | 0.003941129 | 0.002533834 | 0.005571708 |
| 0.007206773 | 0.00986062  | 0.001655765 | 0.018519654 |
| 0.002801208 | 0.010787343 | 0.014150694 | 0.000527647 |
| 0.004853841 | 0.004879628 | 0.022615972 | 0.018504291 |
| 0.003936088 | 0.010008036 | 0.008179812 | 0.00694226  |
| 0.005044585 | 0.012717237 | 0.007064342 | 0.008871963 |
| 0.021696011 | 0.012173699 | 0.006043249 | 0.029491695 |
| 0.032090339 | 0.003636634 | 0.004487974 | 0.024553336 |
| 0.007846082 | 0.014473315 | 0.004177052 | 0.019503284 |
| 0.007959206 | 0.00015072  | 0.01714602  | 0.01197105  |
| 0.004783501 | 0.007060878 | 0.018721054 | 0.00665851  |
| 0.020127673 | 0.006701229 | 0.000452871 | 0.007491632 |
| 0.008801153 | 0.006556389 | 0.015187575 | 0.008008482 |
| 0.004592609 | 0.002250138 | 0.018948357 | 0.005716958 |
| 0.004737931 | 0.021004319 | 0.012067051 | 0.00586646  |
| 0.007811574 | 0.013834991 | 0.011312023 | 0.010174296 |
| 0.005746628 | 0.001885461 | 0.019247406 | 0.012384897 |
| 0.002658621 | 0.015195154 | 0.005327928 | 0.003000698 |
| 0.003889649 | 0.004641461 | 0.011758569 | 0.026261541 |
| 0.001917389 | 0.005210484 | 0.015814971 | 0.01728336  |
| 0.00807385  | 0.00677776  | 0.00578704  | 0.010346746 |
| 0.00602764  | 0.006414443 | 0.004072219 | 0.028255715 |
| 0.024876039 | 0.005960169 | 0.008582941 | 0.000411203 |
| 0.009974827 | 0.003814273 | 0.000522262 | 0.007069964 |
| 0.018779941 | 0.003624444 | 0.012954143 | 0.001370458 |
| 0.02281438  | 0.013026604 | 0.005386765 | 0.008406024 |
| 0.001684608 | 0.0154053   | 0.000228292 | 0.008082615 |
| 0.00570897  | 0.021540962 | 0.008803847 | 0.004786591 |
| 0.006751043 | 0.006932242 | 0.011702077 | 0.007909938 |
| 0.006019028 | 0.004362251 | 0.001425019 | 0.021505716 |
| 0.008771706 | 0.005668316 | 0.01188501  | 0.007871136 |
| 0.007886774 | 0.013376986 | 0.017830889 | 0.007187513 |
| 0.010814035 | 0.003920368 | 0.002907539 | 0.000817764 |
| 0.006040976 | 0.016349904 | 0.009171264 | 0.010159767 |
| 0.007730474 | 0.01883912  | 0.003890788 | 0.005345051 |
| 0.008361996 | 0.011477088 | 0.012092897 | 1           |
| 0.001005298 | 0.00703347  | 0.006511399 | 0.029256898 |
| 0.008426582 | 0.000602027 | 0.008543304 | 0.003463318 |
| 0.011264988 | 0.012602279 | 0.005212357 | 0.018307287 |
| 0.009996167 | 0.01323061  | 0.001697219 | 0.017187162 |
| 0.009909918 | 0.004388763 | 0.008207961 | 0.005263757 |
| 0.013702875 | 0.021933574 | 0.007810606 | 0.009739391 |

|             |             |             |             |
|-------------|-------------|-------------|-------------|
| 0.003524863 | 0.016955322 | 0.007213266 | 0.001970153 |
| 0.000943244 | 0.025674407 | 0.024580113 | 0.013904748 |
| 0.004290371 | 0.001905609 | 0.003521006 | 0.000423745 |
| 0.004683625 | 0.009171064 | 0.006356943 | 0.009642867 |
| 0.009188762 | 0.013489189 | 0.006635331 | 0.006670191 |
| 0.001554507 | 0.004459338 | 0.011512661 | 0.000372886 |
| 0.014500537 | 0.012495975 | 0.005451679 | 0.001485284 |
| 0.002206561 | 0.010037252 | 0.01005019  | 0.014469333 |
| 0.010253908 | 0.017958647 | 0.010053859 | 0.011503228 |
| 0.017100252 | 0.00896698  | 0.026937125 | 0.015279158 |
| 0.007818818 | 0.010435534 | 0.00516734  | 0.004395951 |
| 0.004954546 | 0.00208184  | 0.013161023 | 0.007765226 |
| 0.001926215 | 0.01089985  | 0.003117414 | 0.0086379   |
| 0.008885751 | 0.008802421 | 0.006701097 | 0.016342831 |
| 0.001349368 | 0.011927582 | 0.004950019 | 0.002285008 |
| 0.019318137 | 0.007930869 | 0.009241645 | 0.008117084 |
| 0.010885122 | 0.007151153 | 0.002857322 | 0.000751429 |
| 0.007359242 | 0.004980459 | 0.0019177   | 0.015572115 |
| 0.00852677  | 0.007326231 | 0.00146509  | 0.029549585 |
| 0.007235359 | 0.007316588 | 0.024837329 | 0.009746663 |
| 0.025630933 | 0.014409678 | 0.01075094  | 0.00997025  |
| 0.003076612 | 0.004646634 | 0.008467199 | 0.00377987  |
| 0.004492901 | 0.017713492 | 0.00588037  | 0.003799861 |
| 0.02089398  | 0.004668563 | 0.003205032 | 0.027000006 |
| 0.013191742 | 0.017479829 | 0.004325745 | 0.013050062 |
| 0.002947351 | 0.009020341 | 0.000492217 | 0.005682588 |
| 0.015016076 | 0.006510745 | 0.016503822 | 0.006788721 |
| 0.006330571 | 0.004809788 | 0.000566868 | 0.015786835 |
| 0.002405391 | 0.009540737 | 0.006582264 | 0.023978444 |
| 0.004901229 | 0.008751134 | 0.011261864 | 0.005286627 |
| 0.000988348 | 0.00422296  | 0.008963009 | 0.00512126  |
| 0.003500579 | 0.01094153  | 0.00954723  | 0.013753809 |
| 0.000626226 | 0.005391996 | 0.006106358 | 0.005597586 |
| 0.023006554 | 0.005090388 | 0.002201614 | 0.00844139  |
| 0.009420035 | 0.014997572 | 0.00443371  | 0.019556123 |
| 0.018118975 | 0.005360456 | 0.013017825 | 0.005376814 |
| 0.014024444 | 0.012434313 | 0.004568696 | 0.004702714 |
| 0.008176526 | 0.007864289 | 0.014534727 | 0.010392164 |
| 0.004137066 |             |             |             |

|             |             |             |             |
|-------------|-------------|-------------|-------------|
| PTGS2       | 0.013507237 | 0.007927597 | 0.017976145 |
| 0.010791348 | 0.00835542  | 0.004358312 | 0.00502208  |
| 0.007707564 | 0.002550964 | 0.000347029 | 0.000217522 |
| 0.015099421 | 0.000491164 | 0.002744773 | 0.002545404 |
| 0.016192909 | 0.005673803 | 0.017617125 | 0.011446043 |
| 0.011803316 | 0.00201833  | 0.012665072 | 0.005129617 |
| 0.007267195 | 0.009475657 | 0.004705044 | 0.008716439 |
| 0.014103473 | 0.007505861 | 0.00149405  | 0.007929778 |
| 0.016397737 | 0.010982506 | 0.008001381 | 0.008262128 |
| 0.007428964 | 0.013261159 | 0.000233974 | 0.001015982 |
| 0.013427649 | 0.012984233 | 0.008818409 | 0.011695194 |
| 0.002881641 | 0.007050329 | 0.006619362 | 0.018090498 |
| 0.002087528 | 0.003232991 | 0.002186384 | 0.006363276 |
| 0.005222974 | 0.003211232 | 0.004720358 | 0.002740888 |
| 5.88E-05    | 0.001039616 | 0.001660455 | 0.005195075 |

|             |             |             |             |
|-------------|-------------|-------------|-------------|
| 0.004064143 | 0.001260273 | 0.006047865 | 0.001740442 |
| 0.000424036 | 0.00583058  | 0.010778001 | 0.006191823 |
| 0.005812075 | 0.009193124 | 0.00192273  | 0.01289411  |
| 1.72E-05    | 0.01397949  | 0.025344999 | 0.004157044 |
| 0.01244404  | 0.000601877 | 0.014685358 | 0.005331493 |
| 0.012588837 | 0.01206988  | 0.012411852 | 0.010748888 |
| 0.005130937 | 0.02451008  | 0.010078211 | 0.005691492 |
| 0.010235837 | 0.003729519 | 0.044823741 | 0.01574534  |
| 0.01212751  | 0.007335797 | 0.004801142 | 0.022418385 |
| 0.005133526 | 0.007875313 | 0.009927346 | 0.003492918 |
| 0.002925755 | 0.01705525  | 0.004886112 | 0.009491971 |
| 0.009132935 | 0.010741995 | 0.01533576  | 0.00868815  |
| 0.008276053 | 0.011211032 | 0.011248001 | 0.001828815 |
| 0.013650379 | 0.002728543 | 0.016775633 | 0.003363392 |
| 0.011155565 | 0.014149245 | 0.008396512 | 0.008034236 |
| 0.014565483 | 0.001461831 | 0.002377377 | 0.010368096 |
| 0.002272417 | 0.006842    | 0.005611914 | 0.008677387 |
| 0.002209639 | 0.001179374 | 0.004468    | 0.00352752  |
| 0.009148364 | 0.022751475 | 0.008111752 | 0.016551373 |
| 0.013262938 | 0.011597219 | 0.004256781 | 0.006498465 |
| 0.007342464 | 0.011398962 | 0.000847479 | 0.005202161 |
| 0.013579123 | 0.009038687 | 0.014958789 | 0.004956553 |
| 0.012463653 | 0.008760146 | 0.005420947 | 0.011576057 |
| 0.006417371 | 0.006708486 | 0.007384969 | 0.020138145 |
| 0.000610469 | 0.015742106 | 0.007274128 | 0.003231537 |
| 0.000956981 | 0.006930384 | 0.013877365 | 0.011167332 |
| 0.001267742 | 0.001728935 | 0.004903009 | 0.005114049 |
| 0.01228862  | 0.004807818 | 0.006163688 | 0.013695852 |
| 0.00389753  | 0.012690964 | 0.003739985 | 0.005424722 |
| 0.000137981 | 0.014582208 | 0.003677505 | 0.008470609 |
| 0.002890052 | 0.013799057 | 0.014629198 | 0.013845113 |
| 0.021261507 | 0.015537873 | 0.001175832 | 0.007264537 |
| 0.008141987 | 0.005513201 | 0.006196605 | 0.01857674  |
| 0.004410299 | 0.010936565 | 0.001255617 | 0.014739031 |
| 0.008951782 | 0.012444611 | 0.013060805 | 0.01079807  |
| 0.008625231 | 0.005086717 | 0.001576223 | 0.010769763 |
| 0.006226928 | 0.000178294 | 0.002732727 | 0.007152608 |
| 0.011294587 | 0.000528003 | 0.012302652 | 0.011291022 |
| 0.006483829 | 0.017583894 | 0.014758353 | 0.004100742 |
| 0.007433462 | 0.011614469 | 0.005162241 | 0.026638273 |
| 0.014382928 | 0.000349232 | 0.006895122 | 0.004166063 |
| 0.006636935 | 0.008163377 | 0.008554724 | 4.82E-05    |
| 0.003908228 | 0.003343932 | 0.007006154 | 0.012059341 |
| 0.009343305 | 0.000635143 | 0.004703504 | 0.011558293 |
| 0.013732981 | 0.009155    | 0.01415821  | 0.011011406 |
| 0.009730076 | 0.002795022 | 0.013617375 | 0.000814111 |
| 0.000688851 | 0.003899228 | 0.00440379  | 0.003071039 |
| 0.00085812  | 0.004476056 | 0.009785983 | 0.0012532   |
| 0.000306862 | 0.00123104  | 0.001103183 | 0.005318078 |
| 0.001215611 | 0.001849693 | 0.011735812 | 0.009956461 |
| 0.026064995 | 0.00751744  | 0.008489221 | 0.018156049 |
| 0.005694261 | 0.005688744 | 0.013237185 | 0.000311732 |
| 0.007288683 | 0.002773535 | 0.003396489 | 0.005637853 |
| 0.008882291 | 0.012579632 | 0.001500559 | 0.01037565  |

|             |             |             |             |
|-------------|-------------|-------------|-------------|
| 0.003197759 | 0.007498532 | 0.013740491 | 0.000688459 |
| 0.006519338 | 0.005920772 | 0.027003611 | 0.008385459 |
| 0.004972539 | 0.009581707 | 0.000969919 | 0.010501727 |
| 0.007730337 | 0.005615793 | 0.009470531 | 0.011445494 |
| 0.011022633 | 0.017194394 | 0.005421668 | 0.015766815 |
| 0.022198596 | 0.002396934 | 0.0013169   | 0.020012714 |
| 0.009169829 | 0.013676496 | 0.003966372 | 0.022668919 |
| 0.002480456 | 9.82E-05    | 0.018323006 | 0.024827581 |
| 0.007056089 | 0.009798338 | 0.018750656 | 0.00680138  |
| 0.01176235  | 0.002767599 | 0.000184312 | 0.009091941 |
| 0.021448705 | 0.009285876 | 0.005031038 | 0.010011051 |
| 0.006637548 | 0.002604015 | 0.010207696 | 0.002595247 |
| 0.006608495 | 0.005492129 | 0.012900043 | 0.007985414 |
| 0.007384443 | 0.005320333 | 0.005151442 | 0.017340551 |
| 0.002135995 | 0.000457882 | 0.015193589 | 0.010415224 |
| 0.001669034 | 0.00830413  | 0.005132388 | 0.002295668 |
| 0.001518873 | 0.004857051 | 0.015792343 | 0.004940729 |
| 0.00135897  | 0.003409912 | 0.018044816 | 0.006370549 |
| 0.009668254 | 0.010556269 | 0.007643345 | 0.007480134 |
| 0.009704139 | 0.007812621 | 0.005361178 | 0.020499994 |
| 0.013727451 | 0.008787052 | 0.010928082 | 0.001320797 |
| 0.011312714 | 0.002594442 | 0.000164319 | 0.008326646 |
| 0.011119867 | 0.005682264 | 0.000836214 | 0.010601753 |
| 0.016496175 | 0.016951344 | 0.006440529 | 0.008283693 |
| 0.001113605 | 0.018959516 | 0.0008153   | 0.01125814  |
| 0.006792706 | 0.009555557 | 0.006201303 | 0.00615599  |
| 0.008294503 | 0.009191532 | 0.008603871 | 0.008694417 |
| 0.007258565 | 0.006255521 | 0.000385882 | 0.015428331 |
| 0.007866968 | 0.008004935 | 0.014091665 | 0.009913738 |
| 0.009683913 | 0.017279065 | 0.009501703 | 0.001099201 |
| 0.002679022 | 0.002166469 | 0.001673773 | 0.000221696 |
| 0.005986852 | 0.009696469 | 0.012981036 | 0.012064216 |
| 0.010072018 | 0.006801961 | 0.003013037 | 0.007048329 |
| 0.009603947 | 0.012472187 | 0.012619998 | 0.001005298 |
| 1           | 0.00289238  | 0.005856558 | 0.02791109  |
| 0.009824573 | 0.000668282 | 0.002450016 | 0.002656706 |
| 0.006677491 | 0.013711911 | 0.006942063 | 0.016561907 |
| 0.015374801 | 0.007136416 | 0.000524988 | 0.017136144 |
| 0.004516712 | 0.007471321 | 0.009696818 | 0.005855382 |
| 0.011133923 | 0.017960024 | 0.017448712 | 0.010348209 |
| 0.003010109 | 0.016404449 | 0.011702893 | 0.001498017 |
| 0.008405384 | 0.015132263 | 0.007344721 | 0.016903068 |
| 0.006289626 | 0.001132204 | 0.001751648 | 0.00014051  |
| 0.001582575 | 0.011619886 | 0.005030917 | 0.011917028 |
| 0.009401771 | 0.014023213 | 0.00459566  | 0.007416189 |
| 0.00015291  | 0.006522943 | 0.011360952 | 0.007291249 |
| 0.03232886  | 0.006915693 | 0.009142403 | 0.000487756 |
| 0.002191792 | 0.013040006 | 0.002342865 | 0.007464353 |
| 0.009447094 | 0.011163059 | 0.00990363  | 0.013508819 |
| 0.014437061 | 0.004092803 | 0.030441751 | 0.022229078 |
| 0.006540684 | 0.009452123 | 0.007223414 | 0.005278059 |
| 0.001034426 | 0.004678859 | 0.014346828 | 0.011174587 |
| 0.001927124 | 0.013272469 | 0.001407306 | 0.011455588 |
| 0.012595403 | 0.011526954 | 0.007945066 | 0.008174639 |

|             |             |             |             |
|-------------|-------------|-------------|-------------|
| 0.00127888  | 0.009600857 | 0.003904803 | 0.002973683 |
| 0.026354934 | 0.008716015 | 0.012392128 | 0.007144461 |
| 0.006369441 | 0.009507534 | 0.001267224 | 0.006313622 |
| 0.009405424 | 0.003872665 | 0.00093012  | 0.016877442 |
| 0.012821288 | 0.010945344 | 0.000995892 | 0.007254262 |
| 0.009226617 | 0.008594694 | 0.005261832 | 0.008773651 |
| 0.026643574 | 0.008172345 | 0.017536655 | 0.014326013 |
| 0.002634721 | 0.005692899 | 0.010025458 | 0.003966939 |
| 0.00504406  | 0.007835291 | 0.007714549 | 0.003613087 |
| 0.001982736 | 0.008416832 | 0.001158183 | 0.01868686  |
| 0.006712429 | 0.00938197  | 0.004142183 | 0.016143086 |
| 0.003576027 | 0.008452596 | 0.001181726 | 0.004449298 |
| 0.016073776 | 0.011273993 | 0.013502234 | 0.002791379 |
| 0.003233632 | 0.006064437 | 0.002078358 | 0.009283006 |
| 0.003977361 | 0.009174173 | 0.006747662 | 0.020445501 |
| 0.003589786 | 0.009995939 | 0.007674814 | 0.003891291 |
| 0.001178343 | 0.002231514 | 0.009070462 | 0.009456217 |
| 0.001160192 | 0.013209516 | 0.01593482  | 0.012716104 |
| 0.000508556 | 0.007563179 | 0.014246046 | 0.001058346 |
| 0.014304822 | 0.006660054 | 0.000941649 | 0.010908971 |
| 0.007577964 | 0.01057477  | 0.006608564 | 0.000295342 |
| 0.012100782 | 0.008647151 | 0.018519668 | 0.007840733 |
| 0.025041256 | 0.011269275 | 0.006463437 | 0.005869164 |
| 0.070289472 | 0.013231069 | 0.002889272 | 0.012549986 |
| 0.00318784  |             |             |             |

| PTPLAD1     | 0.012365018 | 0.022006952 | 0.020815619 |
|-------------|-------------|-------------|-------------|
| 0.046561596 | 0.033148095 | 0.010041731 | 0.036902638 |
| 0.002864003 | 0.033509694 | 0.014758286 | 0.089387423 |
| 0.026022257 | 0.025839854 | 0.013993658 | 0.007190281 |
| 0.055732128 | 0.118246771 | 0.00536546  | 0.063255972 |
| 0.027258572 | 0.011182965 | 0.081844455 | 0.038746733 |
| 0.027675267 | 0.22091835  | 0.161116551 | 0.100059143 |
| 0.033974811 | 0.158729038 | 0.007033911 | 0.014768846 |
| 0.044596449 | 0.015166961 | 0.015291645 | 0.062172324 |
| 0.014733156 | 0.009094802 | 0.001577013 | 0.011041631 |
| 0.011887174 | 0.046094588 | 0.027481283 | 0.070507317 |
| 0.049346018 | 0.010012889 | 0.066107941 | 0.043331995 |
| 0.00129227  | 0.15801445  | 0.002273031 | 0.008531642 |
| 0.014244211 | 0.025064238 | 0.006976719 | 0.038851587 |
| 0.01923126  | 0.002052104 | 0.042817676 | 0.004996431 |
| 0.057581173 | 0.002232586 | 0.015897139 | 0.015036491 |
| 0.002496805 | 0.00695997  | 0.053359382 | 0.014012495 |
| 0.021953229 | 0.008562766 | 0.005245843 | 0.013096285 |
| 0.003204243 | 0.030987924 | 0.045191254 | 0.034411249 |
| 0.155745346 | 0.051820777 | 0.067470076 | 0.040206704 |
| 0.030350401 | 0.011562317 | 0.048477219 | 0.039574789 |
| 0.044855567 | 0.04657003  | 0.029759789 | 0.080000327 |
| 0.016376306 | 0.052780208 | 0.012406796 | 0.070745421 |
| 0.045376726 | 0.020402941 | 0.059219413 | 0.103488513 |
| 0.028061612 | 0.016283056 | 0.018635525 | 0.02971719  |
| 0.03202961  | 0.060902454 | 0.013737127 | 0.03201507  |
| 0.008199426 | 0.052890608 | 0.182699022 | 0.016293064 |
| 0.081558676 | 0.002681166 | 0.069273576 | 0.008039927 |
| 0.033458791 | 0.036768845 | 0.142113702 | 0.027488485 |

|             |             |             |             |
|-------------|-------------|-------------|-------------|
| 0.008645901 | 0.018908889 | 0.022381565 | 0.063343557 |
| 0.026523605 | 0.026476894 | 0.0493613   | 0.048019926 |
| 0.006195981 | 0.040848239 | 0.009526596 | 0.03737842  |
| 0.003124234 | 0.011415585 | 0.021069536 | 0.043458313 |
| 0.117279628 | 0.008257149 | 0.016209601 | 0.009019534 |
| 0.020728362 | 0.009318122 | 0.106384529 | 0.00724497  |
| 0.028840001 | 0.046333719 | 0.000787721 | 0.02687767  |
| 0.02783512  | 0.01154598  | 0.102233247 | 0.020642444 |
| 0.128820265 | 0.014488902 | 0.06200053  | 0.034533071 |
| 0.009418858 | 0.084702268 | 0.00231965  | 0.062910754 |
| 0.01256343  | 0.095483156 | 0.044369785 | 0.032114159 |
| 0.024930122 | 0.015831575 | 0.147725094 | 0.0050845   |
| 0.014742275 | 0.036489374 | 0.003286968 | 0.007069764 |
| 0.007671985 | 0.027190805 | 0.008347971 | 0.060595608 |
| 0.035152941 | 0.073032893 | 0.003142743 | 0.03301547  |
| 0.048462374 | 0.017987285 | 0.001042607 | 0.030066176 |
| 0.003543242 | 0.028587206 | 0.021811762 | 0.033524918 |
| 0.115424905 | 0.038445939 | 0.000933622 | 0.012912218 |
| 0.021113412 | 0.001559524 | 0.064227237 | 0.028862479 |
| 0.03220256  | 0.041234235 | 0.000281643 | 0.049939191 |
| 0.004324993 | 0.053106905 | 0.042648657 | 0.187768425 |
| 0.012684355 | 0.172518299 | 0.005918163 | 0.034457951 |
| 0.023628529 | 0.009888285 | 0.005591473 | 0.02648692  |
| 0.09060628  | 0.005485519 | 0.016753623 | 0.040727929 |
| 0.052464392 | 0.034534695 | 0.047224745 | 0.036373897 |
| 0.039416749 | 0.016992635 | 0.016825483 | 0.077429756 |
| 0.020543833 | 0.002176337 | 0.011928435 | 0.016588173 |
| 0.002840961 | 0.01953679  | 0.014965318 | 0.002787    |
| 0.081729651 | 0.011421567 | 0.007575291 | 0.08293049  |
| 0.011031237 | 0.038562771 | 0.020265853 | 0.008512132 |
| 0.156279303 | 0.030632379 | 0.08628581  | 0.041236396 |
| 0.068883769 | 0.026142904 | 0.030038515 | 0.029164893 |
| 0.049144516 | 0.062002443 | 0.035102402 | 0.024944194 |
| 0.014692858 | 0.121011077 | 0.012148748 | 0.011787264 |
| 0.03401915  | 0.02314948  | 0.015519445 | 0.008735074 |
| 0.006182807 | 0.0278756   | 0.06905689  | 0.020633796 |
| 0.126587905 | 0.125911292 | 0.022082764 | 0.042649676 |
| 0.004250242 | 0.038209974 | 0.082612384 | 0.002654178 |
| 0.034505322 | 0.006207829 | 0.000939598 | 0.02252204  |
| 0.00979308  | 0.034680338 | 0.038251948 | 0.2032989   |
| 0.042774232 | 0.087473674 | 0.040083909 | 0.009413369 |
| 0.00693723  | 0.01556359  | 0.044441913 | 0.149251216 |
| 0.009870531 | 0.027411121 | 0.022447797 | 0.009326391 |
| 0.008922752 | 0.124952955 | 0.025441739 | 0.084365501 |
| 0.118980964 | 0.041401328 | 0.035151665 | 0.169042335 |
| 0.149263329 | 0.047664739 | 0.005605977 | 0.136075937 |
| 0.029506804 | 0.08239449  | 0.023861342 | 0.048929068 |
| 0.089382801 | 0.047841706 | 0.069608455 | 0.018263793 |
| 0.012274003 | 0.027431515 | 0.064948064 | 0.091010804 |
| 0.077151481 | 0.040865207 | 0.000335516 | 0.032973094 |
| 0.003599169 | 0.015650557 | 0.053150267 | 0.036670502 |
| 0.014448482 | 0.00309036  | 0.241145635 | 0.017744633 |
| 0.010750447 | 0.067378493 | 0.011770756 | 0.017158386 |
| 0.01992633  | 0.040934262 | 0.035503574 | 0.022803251 |



|             |             |             |             |
|-------------|-------------|-------------|-------------|
| 0.013368546 | 0.008960743 | 0.04981446  | 0.046603388 |
| 0.016637299 | 0.060957804 | 0.025665937 | 0.003061846 |
| 0.056751073 | 0.016411576 | 0.03580127  | 0.105138839 |
| 0.01230454  | 0.002532509 | 0.068002361 | 0.083644357 |
| 0.034722093 | 0.018181818 | 0.016002838 | 0.012389175 |
| 0.019130216 | 0.028813876 | 0.03493344  | 0.092777768 |
| 0.161075858 | 0.017841356 | 0.009822178 | 0.021573819 |
| 0.037826824 | 0.001872739 | 0.046511317 | 0.018604283 |
| 0.051170125 | 0.006700998 | 0.003018589 | 0.00139784  |
| 0.052248575 | 0.044058176 | 0.014354549 | 0.014325068 |
| 0.002873841 | 0.023950166 | 0.001245976 | 0.025784528 |
| 0.019315758 | 0.160519129 | 0.063239823 | 0.022518797 |
| 0.035392256 | 0.017588763 | 0.06736355  | 0.040874192 |
| 0.036401876 | 0.016674172 | 0.00898463  | 0.132005131 |
| 0.027975415 | 0.020694478 | 0.01810675  | 0.013917853 |
| 0.035939345 | 0.04945392  | 0.078881251 | 0.048171223 |
| 0.026639688 | 0.004455295 | 0.011996878 | 0.039959635 |
| 0.004065461 | 0.128692006 | 0.018929462 | 0.038901616 |
| 0.035191923 | 0.083275566 | 0.006496088 | 0.016905811 |
| 0.020219913 | 0.029043631 | 0.007192479 | 0.00703347  |
| 0.00289238  | 1           | 0.014574919 | 0.083710101 |
| 0.026342384 | 0.00205444  | 0.054341887 | 0.004752137 |
| 0.011190892 | 0.073025604 | 0.019793465 | 0.058066202 |
| 0.025580353 | 0.068897287 | 0.015396152 | 0.03933576  |
| 0.120932314 | 0.002887765 | 0.038372298 | 0.014995793 |
| 0.031059222 | 0.068510569 | 0.005860292 | 0.034930046 |
| 0.044123657 | 0.082620639 | 0.022996967 | 0.022940658 |
| 0.00628034  | 0.141572017 | 0.142303586 | 0.039468737 |
| 0.014137933 | 0.093788091 | 0.114380352 | 0.000383014 |
| 0.062275506 | 0.026968459 | 0.057589144 | 0.036713581 |
| 0.025366341 | 0.052235819 | 0.054140855 | 0.015898576 |
| 0.054087982 | 0.014783681 | 0.09133249  | 0.002137999 |
| 0.018104894 | 0.027338266 | 0.015660442 | 0.036651039 |
| 0.004658525 | 0.010772714 | 0.018381128 | 0.089970222 |
| 0.02047662  | 0.132775769 | 0.046926704 | 0.046289965 |
| 0.042668986 | 0.01398321  | 0.061345097 | 0.024264375 |
| 0.008713673 | 0.054047016 | 0.013922084 | 0.010329619 |
| 0.028064666 | 0.006076805 | 0.022690991 | 0.008014173 |
| 0.004084135 | 0.044202693 | 0.048322454 | 0.025995893 |
| 0.011265837 | 0.016395013 | 0.022296524 | 0.03964028  |
| 0.022246518 | 0.00927204  | 0.021652789 | 0.01576795  |
| 0.039172989 | 0.045321145 | 0.007941504 | 0.102445512 |
| 0.140703852 | 0.027780021 | 0.0056742   | 0.000414304 |
| 0.034031795 | 0.007176917 | 0.028105261 | 0.045526207 |
| 0.008609474 | 0.008826467 | 0.002959725 | 0.148658912 |
| 0.021393219 | 0.01219979  | 0.005442113 | 0.027793037 |
| 0.071497855 | 0.081625886 | 0.03038926  | 0.03773302  |
| 0.005603461 | 0.025208509 | 0.018767902 | 0.018290563 |
| 0.012088613 | 0.04685452  | 0.017333439 | 0.000485634 |
| 0.045738861 | 0.009755923 | 0.083949594 | 0.137345462 |
| 0.099464061 | 0.077912622 | 0.021164878 | 0.043869583 |
| 0.013615596 | 0.069554199 | 0.000864883 | 0.025379393 |
| 0.061264286 | 0.003912319 | 0.059154667 | 0.023502514 |
| 0.055963341 | 0.017011568 | 0.022055312 | 0.08990767  |

|             |             |             |             |
|-------------|-------------|-------------|-------------|
| 0.015290167 | 0.030168402 | 0.068508587 | 0.07361099  |
| 0.034243736 | 0.026620195 | 0.08378274  | 0.00427234  |
| 0.01340999  | 0.002047103 | 0.027781417 | 0.007566057 |
| 0.014620242 | 0.040321614 | 0.005420888 | 0.019765746 |
| 0.008779414 | 0.005761318 | 0.005836607 | 0.032940431 |
| 0.113193617 | 0.024221828 | 0.008215366 | 0.031255451 |
| 0.017949413 | 0.045887407 | 0.004607632 | 0.004346846 |
| 0.008583522 | 0.01044175  | 0.03194058  | 0.019016862 |
| 0.022010692 | 0.069081797 | 0.007221116 | 0.016867284 |
| 0.005461302 | 0.008917427 | 0.030690787 | 0.023030522 |
| 0.016934993 |             |             |             |
| PTPN11      | 0.311479271 | 0.436821088 | 0.183057193 |
| 0.379330188 | 0.236086802 | 0.244047315 | 0.252128869 |
| 0.256347516 | 0.104927072 | 0.018459645 | 0.026923632 |
| 0.222985944 | 0.130386169 | 0.227707467 | 0.188051368 |
| 0.372441595 | 0.108498021 | 0.25343791  | 0.253466407 |
| 0.367649592 | 0.186082395 | 0.314346431 | 0.170017683 |
| 0.156578609 | 0.076233039 | 0.099469896 | 0.139389981 |
| 0.436785557 | 0.10984315  | 0.214979053 | 0.376592381 |
| 0.112371658 | 0.377334904 | 0.402434422 | 0.259498168 |
| 0.375181835 | 0.27381114  | 0.033740402 | 0.217736487 |
| 0.385458339 | 0.307746796 | 0.381615729 | 0.253265913 |
| 0.099095237 | 0.394257352 | 0.243901028 | 0.213922414 |
| 0.212225031 | 0.047150068 | 0.222969002 | 0.391533092 |
| 0.350855154 | 0.216920999 | 0.280143017 | 0.217830098 |
| 0.103462955 | 0.241195882 | 0.088401975 | 0.299290281 |
| 0.250836741 | 0.204312896 | 0.365593931 | 0.13737575  |
| 0.171829116 | 0.307450709 | 0.12541235  | 0.288748583 |
| 0.154639475 | 0.349030429 | 0.081423747 | 0.188999702 |
| 0.011234266 | 0.358200988 | 0.218824595 | 0.11275431  |
| 0.073510536 | 0.038650578 | 0.145001284 | 0.280319887 |
| 0.437796199 | 0.370611474 | 0.395567025 | 0.382940488 |
| 0.128075541 | 0.226320602 | 0.168418343 | 0.183654087 |
| 0.381900312 | 0.205864037 | 0.122916122 | 0.352234551 |
| 0.397998476 | 0.400609278 | 0.158284134 | 0.183908784 |
| 0.340644568 | 0.427375411 | 0.202177817 | 0.222672967 |
| 0.138369899 | 0.05319222  | 0.363986566 | 0.40919133  |
| 0.363450491 | 0.124731259 | 0.132695441 | 0.406771804 |
| 0.109689582 | 0.200451775 | 0.299365332 | 0.121198354 |
| 0.446266927 | 0.061122293 | 0.148009552 | 0.27125585  |
| 0.225821284 | 0.349431381 | 0.380350062 | 0.236390012 |
| 0.216081017 | 0.039463323 | 0.056602592 | 0.068823789 |
| 0.203223959 | 0.055415977 | 0.359230274 | 0.406658175 |
| 0.27002512  | 0.213524931 | 0.296354738 | 0.010642822 |
| 0.042761573 | 0.159026756 | 0.324544146 | 0.26256103  |
| 0.363016664 | 0.276424303 | 0.165085382 | 0.324972585 |
| 0.224402331 | 0.391852768 | 0.039241303 | 0.198342324 |
| 0.229683516 | 0.167317949 | 0.23064359  | 0.232978702 |
| 0.179718954 | 0.223897159 | 0.186466535 | 0.432458076 |
| 0.407835204 | 0.151648475 | 0.247653344 | 0.338626958 |
| 0.20618444  | 0.17745717  | 0.186829734 | 0.228419221 |
| 0.136298607 | 0.345064706 | 0.037277669 | 0.274315799 |
| 0.106079118 | 0.091474327 | 0.049576534 | 0.281435201 |
| 0.196920035 | 0.32851119  | 0.343647651 | 0.170887516 |

|             |             |             |             |
|-------------|-------------|-------------|-------------|
| 0.248503778 | 0.26713304  | 0.253842964 | 0.277192078 |
| 0.022001132 | 0.09801927  | 0.215681785 | 0.414741054 |
| 0.249729365 | 0.401286871 | 0.260430767 | 0.208488128 |
| 0.202534769 | 0.391634547 | 0.003416822 | 0.388060594 |
| 0.393694512 | 0.193371878 | 0.215196983 | 0.242296332 |
| 0.15362875  | 0.398767411 | 0.027209083 | 0.341166562 |
| 0.277152258 | 0.151309588 | 0.431774314 | 0.144236026 |
| 0.368994197 | 0.072885537 | 0.283016906 | 0.29032952  |
| 0.248669388 | 0.019879065 | 0.2265151   | 0.363570928 |
| 0.037090943 | 0.202560845 | 0.355852042 | 0.326730561 |
| 0.229563382 | 0.352996253 | 0.433301956 | 0.137006079 |
| 0.22538683  | 0.281755396 | 0.037569097 | 0.184979996 |
| 0.333313899 | 0.172989436 | 0.393654504 | 0.26632527  |
| 0.206431029 | 0.402926732 | 0.286829923 | 0.132892392 |
| 0.104928606 | 0.300762634 | 0.047770811 | 0.205973911 |
| 0.303673431 | 0.157094961 | 0.174330688 | 0.150936857 |
| 0.078078179 | 0.426073532 | 0.084854477 | 0.096586821 |
| 0.050758887 | 0.217046616 | 0.285010581 | 0.156164428 |
| 0.101884592 | 0.182507312 | 0.172240956 | 0.21332494  |
| 0.122841466 | 0.121413779 | 0.022795919 | 0.139214029 |
| 0.083892232 | 0.151778385 | 0.152384696 | 0.306034133 |
| 0.245460483 | 0.107068041 | 0.203258055 | 0.152226166 |
| 0.09805523  | 0.038357207 | 0.422902996 | 0.331685786 |
| 0.301755475 | 0.218943905 | 0.076539785 | 0.131960459 |
| 0.409631738 | 0.168857039 | 0.201855266 | 0.407901122 |
| 0.063862852 | 0.411734942 | 0.171341049 | 0.120398101 |
| 0.161383077 | 0.224898904 | 0.436798232 | 0.0617036   |
| 0.263708554 | 0.409727799 | 0.239636117 | 0.148651046 |
| 0.344096817 | 0.325883189 | 0.085750958 | 0.312609733 |
| 0.304179689 | 0.065287519 | 0.408085082 | 0.099916473 |
| 0.045056986 | 0.27856738  | 0.269905963 | 0.103432567 |
| 0.091220863 | 0.209837638 | 0.146022305 | 0.205985168 |
| 0.424794504 | 0.334991341 | 0.318964712 | 0.124397581 |
| 0.088683376 | 0.016347323 | 0.139413735 | 0.178552682 |
| 0.393988564 | 0.379959626 | 0.235792065 | 0.165545551 |
| 0.252201308 | 0.162965653 | 0.207492416 | 0.402290121 |
| 0.141409911 | 0.41012061  | 0.027517422 | 0.291647152 |
| 0.370426313 | 0.233951473 | 0.075735222 | 0.270965413 |
| 0.345583959 | 0.110005458 | 0.269121226 | 0.390258766 |
| 0.389315185 | 0.208359969 | 0.177568197 | 0.297574263 |
| 0.068832195 | 0.142472294 | 0.204506655 | 0.08145468  |
| 0.218148826 | 0.210100845 | 0.017766007 | 0.28201222  |
| 0.078139632 | 0.392110387 | 0.390429766 | 0.078041557 |
| 0.191438907 | 0.261283999 | 0.248724174 | 0.091236772 |
| 0.310944682 | 0.372515418 | 0.406912687 | 0.267613614 |
| 0.318496397 | 0.36033951  | 0.153074424 | 0.104540715 |
| 0.031133591 | 0.378232413 | 0.326671762 | 0.039831668 |
| 0.426973431 | 0.195670018 | 0.025428244 | 0.436447784 |
| 0.246471215 | 0.348033447 | 0.010337255 | 0.045438371 |
| 0.048583212 | 0.369187771 | 0.374842225 | 0.367955231 |
| 0.157711663 | 0.296243367 | 0.010673836 | 0.406340492 |
| 0.39464706  | 0.022416952 | 0.099479298 | 0.299121813 |
| 0.238611179 | 0.446732648 | 0.127505089 | 0.31458141  |
| 0.186984031 | 0.366469676 | 0.220732737 | 0.207206358 |

|             |             |             |             |
|-------------|-------------|-------------|-------------|
| 0.368662304 | 0.343429039 | 0.36846871  | 0.408304005 |
| 0.408725389 | 0.29200656  | 0.255875432 | 0.055892677 |
| 0.083252437 | 0.266247728 | 0.125993525 | 0.075462002 |
| 0.260983184 | 0.114932714 | 0.393429674 | 0.409595091 |
| 0.361054348 | 0.018424585 | 0.245026369 | 0.322921606 |
| 0.434134409 | 0.453460863 | 0.044941356 | 0.006511399 |
| 0.005856558 | 0.014574919 | 1           | 0.180946401 |
| 0.393498013 | 0.129496287 | 0.02222792  | 0.145371285 |
| 0.231530233 | 0.196629344 | 0.398622766 | 0.354018217 |
| 0.318773986 | 0.130758146 | 0.150431779 | 0.376627886 |
| 0.062848076 | 0.254546247 | 0.379546638 | 0.412532984 |
| 0.0715022   | 0.192139047 | 0.236361827 | 0.446546434 |
| 0.020712526 | 0.223254814 | 0.249240596 | 0.204931656 |
| 0.028994263 | 0.085044548 | 0.080523898 | 0.375749826 |
| 0.356230693 | 0.069841292 | 0.039996091 | 0.1292998   |
| 0.15261851  | 0.404267189 | 0.161808627 | 0.432617272 |
| 0.402985104 | 0.413342619 | 0.071916782 | 0.397911469 |
| 0.065989524 | 0.372721069 | 0.151162504 | 0.050904067 |
| 0.218578655 | 0.041858462 | 0.34743673  | 0.06418975  |
| 0.260248145 | 0.338144639 | 0.111334176 | 0.028690648 |
| 0.071096249 | 0.074791938 | 0.410846802 | 0.354748266 |
| 0.04318292  | 0.297208842 | 0.220606583 | 0.310116045 |
| 0.259052302 | 0.347102256 | 0.39825273  | 0.161603301 |
| 0.177935344 | 0.068043778 | 0.37749077  | 0.284158181 |
| 0.282889358 | 0.40939461  | 0.165907605 | 0.417736099 |
| 0.333175092 | 0.412009573 | 0.366228042 | 0.257080143 |
| 0.123109413 | 0.245979395 | 0.303237954 | 0.049873066 |
| 0.266128162 | 0.387230501 | 0.278119194 | 0.09428955  |
| 0.176496981 | 0.150157249 | 0.139797588 | 0.127472527 |
| 0.112129289 | 0.248306016 | 0.185448585 | 0.418871644 |
| 0.301866897 | 0.300576616 | 0.140236312 | 0.074954987 |
| 0.441137967 | 0.393697992 | 0.190117517 | 0.309906631 |
| 0.180653432 | 0.223607666 | 0.328811553 | 0.314500093 |
| 0.20444088  | 0.348682713 | 0.389763625 | 0.29965224  |
| 0.393049308 | 0.2738271   | 0.410033305 | 0.175455279 |
| 0.064296916 | 0.231977196 | 0.111693569 | 0.10578584  |
| 0.17956019  | 0.046565401 | 0.098165073 | 0.343428629 |
| 0.130180731 | 0.277244268 | 0.24489073  | 0.111940812 |
| 0.212540328 | 0.210844021 | 0.249469134 | 0.230082296 |
| 0.104317629 | 0.38920223  | 0.021101531 | 0.090253556 |
| 0.146756327 | 0.323643992 | 0.151191261 | 0.187563089 |
| 0.117388701 | 0.117355946 | 0.236559248 | 0.23575563  |
| 0.152916935 | 0.175083519 | 0.323369744 | 0.090831885 |
| 0.082095891 | 0.426345174 | 0.222249901 | 0.034579722 |
| 0.10514305  | 0.264207394 | 0.246366952 | 0.186242975 |
| 0.030364644 | 0.346462512 | 0.194573146 | 0.212848425 |
| 0.289208944 | 0.126942362 | 0.338870313 | 0.118708006 |
| 0.136612887 | 0.383761221 | 0.17530957  | 0.378891407 |
| 0.193497373 | 0.365570413 | 0.371764149 | 0.3405248   |
| 0.119158357 | 0.16212196  | 0.087011906 | 0.415784152 |
| 0.141261208 |             |             |             |
| PTPN6       | 0.246485602 | 0.272390296 | 0.193427476 |
| 0.28839289  | 0.226123566 | 0.121810093 | 0.123528979 |
| 0.082094088 | 0.126879657 | 0.012435547 | 0.057202151 |

|             |             |             |             |
|-------------|-------------|-------------|-------------|
| 0.238692188 | 0.101854357 | 0.087027274 | 0.084655602 |
| 0.38139274  | 0.19101735  | 0.148441859 | 0.213381156 |
| 0.285133852 | 0.059810605 | 0.353162759 | 0.142635368 |
| 0.226522474 | 0.184324524 | 0.152162621 | 0.188411143 |
| 0.328363227 | 0.170647976 | 0.069103608 | 0.208972409 |
| 0.267057885 | 0.260782287 | 0.235064638 | 0.273625218 |
| 0.224803963 | 0.200193494 | 0.049137518 | 0.070970391 |
| 0.244005611 | 0.290039045 | 0.275659483 | 0.24418854  |
| 0.098758612 | 0.195208916 | 0.175845235 | 0.3024352   |
| 0.076814918 | 0.110573269 | 0.047899905 | 0.18641882  |
| 0.187986458 | 0.162433225 | 0.094434824 | 0.110203084 |
| 0.061708579 | 0.047347367 | 0.100867996 | 0.116843426 |
| 0.156014868 | 0.034061559 | 0.212071709 | 0.085497826 |
| 0.063811469 | 0.118677753 | 0.257692794 | 0.114473358 |
| 0.164466712 | 0.177999536 | 0.082784462 | 0.192514236 |
| 0.00309455  | 0.295708496 | 0.323863429 | 0.117343825 |
| 0.172392989 | 0.055509156 | 0.263128571 | 0.195922984 |
| 0.330858922 | 0.240875849 | 0.353089233 | 0.328349327 |
| 0.165325831 | 0.266678942 | 0.210858533 | 0.172644671 |
| 0.252661141 | 0.106077715 | 0.13004013  | 0.395123335 |
| 0.345732779 | 0.252555076 | 0.22208183  | 0.312288484 |
| 0.206077577 | 0.247594326 | 0.133749322 | 0.157995919 |
| 0.104601895 | 0.244611874 | 0.193593156 | 0.309283118 |
| 0.189876733 | 0.177876234 | 0.2334893   | 0.231975737 |
| 0.189261188 | 0.09461175  | 0.289324618 | 0.142520111 |
| 0.337371701 | 0.067216784 | 0.256282663 | 0.15927493  |
| 0.239698837 | 0.25636146  | 0.259802937 | 0.162200572 |
| 0.225320547 | 0.085139198 | 0.116204906 | 0.192846224 |
| 0.120541864 | 0.159178083 | 0.178460492 | 0.284399661 |
| 0.083685212 | 0.142986655 | 0.144311602 | 0.061033144 |
| 0.16178182  | 0.268651849 | 0.230687565 | 0.1753406   |
| 0.290330722 | 0.196135388 | 0.147276621 | 0.162304986 |
| 0.211816604 | 0.350547575 | 0.007950793 | 0.144042664 |
| 0.183205376 | 0.268631575 | 0.284518657 | 0.188946111 |
| 0.220213731 | 0.123447832 | 0.172489116 | 0.327802918 |
| 0.190738616 | 0.149481005 | 0.094952125 | 0.375566415 |
| 0.086054159 | 0.280389884 | 0.172102882 | 0.129962203 |
| 0.080902686 | 0.217571627 | 0.180810053 | 0.120118587 |
| 0.090803247 | 0.166640344 | 0.089726048 | 0.090238108 |
| 0.091101998 | 0.205394385 | 0.178793748 | 0.207374712 |
| 0.136344189 | 0.315915392 | 0.089919111 | 0.185150801 |
| 0.029310177 | 0.170998377 | 0.056914818 | 0.290090131 |
| 0.078339654 | 0.331508772 | 0.191838163 | 0.244023888 |
| 0.304591729 | 0.34313677  | 0.021817401 | 0.208430409 |
| 0.258396993 | 0.053728789 | 0.201139505 | 0.287280776 |
| 0.128737678 | 0.298093375 | 0.018654983 | 0.344795739 |
| 0.139734677 | 0.19411556  | 0.364266636 | 0.20549056  |
| 0.222610044 | 0.138020506 | 0.086346036 | 0.277576992 |
| 0.198544602 | 0.031859886 | 0.053960606 | 0.236660907 |
| 0.193614911 | 0.049791964 | 0.269838004 | 0.271873611 |
| 0.203459289 | 0.345406768 | 0.380272793 | 0.114480723 |
| 0.204150447 | 0.151799157 | 0.120013476 | 0.297412385 |
| 0.294418091 | 0.087580476 | 0.197964638 | 0.138820624 |
| 0.094630899 | 0.240443242 | 0.208109012 | 0.045379602 |

|             |             |             |             |
|-------------|-------------|-------------|-------------|
| 0.109974153 | 0.121053538 | 0.033213973 | 0.208477054 |
| 0.203096941 | 0.080861503 | 0.133103568 | 0.246869687 |
| 0.208426878 | 0.300152621 | 0.213864075 | 0.161700268 |
| 0.161717261 | 0.136989687 | 0.186355356 | 0.064310856 |
| 0.083190758 | 0.209689706 | 0.153205806 | 0.132320707 |
| 0.051988071 | 0.159645967 | 0.165828841 | 0.07195155  |
| 0.058160992 | 0.071599265 | 0.058362767 | 0.166262911 |
| 0.096823557 | 0.090750717 | 0.181050298 | 0.211159647 |
| 0.241416768 | 0.122089546 | 0.269656742 | 0.339702654 |
| 0.120592324 | 0.166500945 | 0.188878766 | 0.055771111 |
| 0.279351737 | 0.063950654 | 0.046918735 | 0.233961834 |
| 0.121651647 | 0.348912673 | 0.112413083 | 0.201314561 |
| 0.126677427 | 0.191726979 | 0.346497178 | 0.037439125 |
| 0.159998179 | 0.216657411 | 0.296226691 | 0.198092926 |
| 0.158268625 | 0.246411275 | 0.080012757 | 0.190530043 |
| 0.171311015 | 0.133813598 | 0.284586703 | 0.22709809  |
| 0.154897189 | 0.318822871 | 0.221155872 | 0.21292267  |
| 0.229053584 | 0.114711201 | 0.046072458 | 0.34048121  |
| 0.290042772 | 0.364340834 | 0.198492108 | 0.259459275 |
| 0.098198397 | 0.025060856 | 0.271585644 | 0.214447796 |
| 0.212618039 | 0.287363575 | 0.280387661 | 0.165698938 |
| 0.252576803 | 0.134437288 | 0.039304582 | 0.295854693 |
| 0.233247574 | 0.254557484 | 0.087006842 | 0.285631186 |
| 0.213632211 | 0.064190183 | 0.178317406 | 0.119569896 |
| 0.167195038 | 0.127283237 | 0.18960155  | 0.229588904 |
| 0.247899838 | 0.164410182 | 0.125513782 | 0.289979937 |
| 0.042005998 | 0.072152723 | 0.259135604 | 0.20158513  |
| 0.108787182 | 0.215101219 | 0.104258825 | 0.097490771 |
| 0.095739574 | 0.20569094  | 0.355447126 | 0.144648722 |
| 0.080981661 | 0.090674244 | 0.358407074 | 0.136231018 |
| 0.277464051 | 0.264556833 | 0.23511548  | 0.160577913 |
| 0.251920552 | 0.258121761 | 0.16911211  | 0.248220211 |
| 0.152528169 | 0.243929956 | 0.199402798 | 0.049188217 |
| 0.34337922  | 0.043760346 | 0.029338114 | 0.25642237  |
| 0.181550709 | 0.164181791 | 0.010445122 | 0.109150306 |
| 0.232548134 | 0.374783518 | 0.204614493 | 0.215471021 |
| 0.031179602 | 0.281438286 | 0.057765818 | 0.308698555 |
| 0.228931967 | 0.131095302 | 0.250136431 | 0.2169521   |
| 0.228017726 | 0.267660651 | 0.154238786 | 0.272330073 |
| 0.194289952 | 0.218131164 | 0.09758139  | 0.295163006 |
| 0.242320311 | 0.245583947 | 0.249932071 | 0.233029687 |
| 0.303539009 | 0.349228184 | 0.245676961 | 0.059729618 |
| 0.162017695 | 0.064008308 | 0.052853292 | 0.081670935 |
| 0.109421044 | 0.199706176 | 0.27247589  | 0.351867449 |
| 0.291826953 | 0.084210646 | 0.086495689 | 0.215659978 |
| 0.256596267 | 0.325469635 | 0.151548965 | 0.029256898 |
| 0.02791109  | 0.083710101 | 0.180946401 | 1           |
| 0.284646591 | 0.029344345 | 0.058714781 | 0.056135734 |
| 0.159762671 | 0.286151718 | 0.241542686 | 0.351674045 |
| 0.304221493 | 0.20660965  | 0.055742311 | 0.343488575 |
| 0.170570072 | 0.117758409 | 0.298402191 | 0.213366836 |
| 0.217917817 | 0.259827005 | 0.140445282 | 0.323148772 |
| 0.085037741 | 0.317388645 | 0.241226643 | 0.111979123 |
| 0.121376148 | 0.234343202 | 0.189156922 | 0.374024978 |

|             |             |             |             |
|-------------|-------------|-------------|-------------|
| 0.210306535 | 0.091526752 | 0.088964737 | 0.027362984 |
| 0.096313391 | 0.322269691 | 0.149744262 | 0.341572717 |
| 0.268200503 | 0.367380891 | 0.224262633 | 0.22681523  |
| 0.095420885 | 0.20882826  | 0.216087661 | 0.021633517 |
| 0.237246961 | 0.125906368 | 0.23987776  | 0.065748097 |
| 0.075925949 | 0.218525421 | 0.155885389 | 0.155921137 |
| 0.167635778 | 0.186433123 | 0.336228913 | 0.351672241 |
| 0.221276005 | 0.158226331 | 0.289610508 | 0.304957257 |
| 0.099792468 | 0.287684541 | 0.216637262 | 0.094964166 |
| 0.088849064 | 0.17529676  | 0.271730719 | 0.171941285 |
| 0.083457508 | 0.365254131 | 0.124342857 | 0.308055926 |
| 0.215388598 | 0.275147848 | 0.257799292 | 0.196094387 |
| 0.180400691 | 0.153949947 | 0.15424714  | 0.033820967 |
| 0.252605638 | 0.311559039 | 0.159838177 | 0.166424698 |
| 0.182999089 | 0.192487068 | 0.136555331 | 0.073736598 |
| 0.15311045  | 0.095537491 | 0.12774746  | 0.388163761 |
| 0.197178557 | 0.178457901 | 0.091414975 | 0.17421726  |
| 0.284122042 | 0.223921647 | 0.090879301 | 0.22157881  |
| 0.265384373 | 0.236788844 | 0.311941345 | 0.325677508 |
| 0.127498098 | 0.234155797 | 0.249471418 | 0.152115809 |
| 0.184577398 | 0.198198568 | 0.242259212 | 0.040411994 |
| 0.16143049  | 0.186387843 | 0.099269158 | 0.247728152 |
| 0.176739422 | 0.173621915 | 0.118368052 | 0.360619773 |
| 0.106858073 | 0.274334308 | 0.07220726  | 0.195221432 |
| 0.295724676 | 0.12510657  | 0.298232421 | 0.089595207 |
| 0.113546594 | 0.216530502 | 0.067513819 | 0.202095509 |
| 0.11579764  | 0.25255554  | 0.171782479 | 0.253146401 |
| 0.157463462 | 0.273383239 | 0.240033626 | 0.072548704 |
| 0.047020306 | 0.120561792 | 0.241037009 | 0.082390811 |
| 0.060577661 | 0.361400729 | 0.114961815 | 0.189412794 |
| 0.171783746 | 0.158031991 | 0.188317147 | 0.123877531 |
| 0.180249374 | 0.247851093 | 0.056567999 | 0.231992273 |
| 0.175084177 | 0.197289788 | 0.146464407 | 0.103106329 |
| 0.174674436 | 0.202254746 | 0.23447785  | 0.244056617 |
| 0.222115615 | 0.343705768 | 0.174847766 | 0.222596235 |
| 0.187686906 | 0.158535688 | 0.085569531 | 0.303716822 |
| 0.083294163 |             |             |             |

|             |             |             |             |
|-------------|-------------|-------------|-------------|
| PUS7L       | 0.454671415 | 0.522271876 | 0.448314159 |
| 0.455325181 | 0.469354461 | 0.411476476 | 0.237661477 |
| 0.20393748  | 0.111351891 | 0.005969844 | 0.031470506 |
| 0.475676024 | 0.23255647  | 0.293536753 | 0.384533359 |
| 0.457349536 | 0.156453981 | 0.384761998 | 0.271151395 |
| 0.444160044 | 0.103642253 | 0.440421358 | 0.108573764 |
| 0.337328661 | 0.129609828 | 0.085561469 | 0.32193335  |
| 0.467208329 | 0.097959756 | 0.356523766 | 0.413160481 |
| 0.118548077 | 0.46390628  | 0.529543185 | 0.476152828 |
| 0.52380123  | 0.437482333 | 0.01174598  | 0.331625207 |
| 0.44532516  | 0.488048893 | 0.440575318 | 0.366698939 |
| 0.051286316 | 0.493111984 | 0.279228746 | 0.445006034 |
| 0.259333708 | 0.039287482 | 0.26019435  | 0.446534701 |
| 0.487946165 | 0.479486814 | 0.25014094  | 0.184573864 |
| 0.235194847 | 0.241488748 | 0.31995386  | 0.346852847 |
| 0.255049572 | 0.169395177 | 0.49426642  | 0.111097428 |
| 0.168776797 | 0.273719005 | 0.174913844 | 0.285360522 |

|             |             |             |             |
|-------------|-------------|-------------|-------------|
| 0.400729983 | 0.416236235 | 0.020537031 | 0.445718436 |
| 0.00309635  | 0.421718708 | 0.417801555 | 0.375079659 |
| 0.051298917 | 0.024508277 | 0.203860547 | 0.374213998 |
| 0.478322478 | 0.457725807 | 0.496236432 | 0.493205769 |
| 0.205084958 | 0.330637762 | 0.440669866 | 0.198699652 |
| 0.465109336 | 0.204808361 | 0.127869792 | 0.460851251 |
| 0.496573661 | 0.525893101 | 0.237457151 | 0.303950064 |
| 0.461720571 | 0.470459584 | 0.470289147 | 0.472495995 |
| 0.406503935 | 0.065888045 | 0.443034408 | 0.497039344 |
| 0.42119821  | 0.365990402 | 0.181854733 | 0.435655829 |
| 0.070375597 | 0.402851377 | 0.391744756 | 0.172017095 |
| 0.47988203  | 0.02380674  | 0.2475947   | 0.390936484 |
| 0.244356039 | 0.474862736 | 0.522503175 | 0.215492209 |
| 0.446627834 | 0.023987164 | 0.1749644   | 0.040294602 |
| 0.357798645 | 0.176119155 | 0.49813365  | 0.479350738 |
| 0.248551659 | 0.42278425  | 0.295124287 | 0.002737255 |
| 0.033285518 | 0.214889966 | 0.46518122  | 0.398499644 |
| 0.46774293  | 0.41364746  | 0.277241792 | 0.421132043 |
| 0.487202983 | 0.495687819 | 0.069595859 | 0.112347886 |
| 0.464934466 | 0.211049138 | 0.272691405 | 0.480328911 |
| 0.3573277   | 0.130757764 | 0.146409973 | 0.504582992 |
| 0.420117201 | 0.099336401 | 0.361959501 | 0.454912538 |
| 0.371712597 | 0.403113154 | 0.122800984 | 0.304565496 |
| 0.058089718 | 0.494775933 | 0.035132264 | 0.359587638 |
| 0.335383894 | 0.168234603 | 0.012916132 | 0.282561409 |
| 0.322760287 | 0.466568164 | 0.484716596 | 0.124002961 |
| 0.349736638 | 0.45504466  | 0.34397286  | 0.465782244 |
| 0.014257227 | 0.055818061 | 0.301347086 | 0.493352313 |
| 0.308274049 | 0.485636309 | 0.334390777 | 0.352452346 |
| 0.32450338  | 0.483262953 | 0.00438454  | 0.506604408 |
| 0.531414578 | 0.321684161 | 0.438781633 | 0.458177311 |
| 0.437234222 | 0.480353689 | 0.04815582  | 0.45259474  |
| 0.385128455 | 0.093139257 | 0.494999722 | 0.188893487 |
| 0.460032579 | 0.051497254 | 0.341822544 | 0.479531721 |
| 0.466745307 | 0.009700245 | 0.248370844 | 0.422162668 |
| 0.03421104  | 0.109264823 | 0.462582671 | 0.45033847  |
| 0.433193586 | 0.485009977 | 0.490104803 | 0.422199456 |
| 0.473811926 | 0.258777159 | 0.015369643 | 0.364532622 |
| 0.476297172 | 0.423497605 | 0.444378848 | 0.271641985 |
| 0.365059281 | 0.471026783 | 0.457499192 | 0.243850536 |
| 0.053152169 | 0.341684659 | 0.024343432 | 0.3878443   |
| 0.433549823 | 0.135997292 | 0.451020445 | 0.16434475  |
| 0.085222542 | 0.518566557 | 0.213478953 | 0.308592154 |
| 0.157838313 | 0.434473627 | 0.283185838 | 0.264111403 |
| 0.245211321 | 0.19577584  | 0.414278541 | 0.432524117 |
| 0.043590351 | 0.110326017 | 0.01822834  | 0.407290566 |
| 0.157228972 | 0.373257155 | 0.366803802 | 0.438507062 |
| 0.345671997 | 0.123879428 | 0.43138699  | 0.341217988 |
| 0.139601603 | 0.018522858 | 0.504156936 | 0.445551817 |
| 0.36253599  | 0.18216387  | 0.048917643 | 0.367129334 |
| 0.48153336  | 0.353513752 | 0.293662341 | 0.461711344 |
| 0.03298297  | 0.492614923 | 0.283473523 | 0.147042731 |
| 0.419873756 | 0.295349635 | 0.480521577 | 0.073909319 |
| 0.422089505 | 0.464752688 | 0.352706578 | 0.224723959 |



|             |             |             |             |
|-------------|-------------|-------------|-------------|
| 0.407299669 | 0.453068335 | 0.036431913 | 0.440284437 |
| 0.432179636 | 0.038099914 | 0.522091803 | 0.14720378  |
| 0.02572521  | 0.482311242 | 0.484411881 | 0.091664663 |
| 0.095869277 | 0.377518648 | 0.053103153 | 0.333895756 |
| 0.512351868 | 0.452089523 | 0.468674307 | 0.258893265 |
| 0.048982463 | 0.011465255 | 0.242351756 | 0.443848588 |
| 0.519125714 | 0.505683156 | 0.294187995 | 0.415909296 |
| 0.274056393 | 0.392848575 | 0.152127843 | 0.498802103 |
| 0.222568535 | 0.520847813 | 0.00821121  | 0.484906882 |
| 0.522627493 | 0.30765957  | 0.100261279 | 0.34173547  |
| 0.420102911 | 0.057356235 | 0.227784943 | 0.502678653 |
| 0.467373072 | 0.390117343 | 0.411135289 | 0.463429398 |
| 0.019548841 | 0.049079988 | 0.446100754 | 0.22495796  |
| 0.435936995 | 0.255887996 | 0.066166865 | 0.354706718 |
| 0.05280771  | 0.450694403 | 0.483760334 | 0.07925082  |
| 0.374470346 | 0.339265458 | 0.422233903 | 0.04534512  |
| 0.479705291 | 0.502402371 | 0.529632336 | 0.184097933 |
| 0.47448057  | 0.487974621 | 0.454845183 | 0.094996153 |
| 0.021847506 | 0.525952335 | 0.436750628 | 0.028275937 |
| 0.488277685 | 0.254757918 | 0.015186518 | 0.493389062 |
| 0.213080827 | 0.455061151 | 0.005428386 | 0.099132963 |
| 0.050351926 | 0.488816816 | 0.492752645 | 0.413766666 |
| 0.276960049 | 0.404663831 | 0.007205422 | 0.515461417 |
| 0.493099446 | 0.018559691 | 0.169648203 | 0.478012536 |
| 0.472999571 | 0.528110927 | 0.37975375  | 0.487617249 |
| 0.472640706 | 0.510635668 | 0.266362244 | 0.312566118 |
| 0.474721345 | 0.498605116 | 0.45927907  | 0.45854018  |
| 0.483699381 | 0.467238666 | 0.318923688 | 0.019777339 |
| 0.182677154 | 0.232612477 | 0.365161545 | 0.107151734 |
| 0.353369923 | 0.173325334 | 0.473114547 | 0.490878662 |
| 0.488185371 | 0.006247833 | 0.170462142 | 0.471538085 |
| 0.455904918 | 0.479498497 | 0.025584052 | 0.008426582 |
| 0.009824573 | 0.026342384 | 0.393498013 | 0.284646591 |
| 1           | 0.267379976 | 0.005743161 | 0.049563974 |
| 0.32289997  | 0.452187006 | 0.507344242 | 0.419598435 |
| 0.482121905 | 0.095465882 | 0.322223853 | 0.436546539 |
| 0.087808622 | 0.358960194 | 0.491754717 | 0.47721973  |
| 0.049264834 | 0.29211218  | 0.405177227 | 0.485740414 |
| 0.092406685 | 0.358667721 | 0.474169116 | 0.35995233  |
| 0.016167702 | 0.101515032 | 0.084813559 | 0.476155645 |
| 0.512249025 | 0.091741229 | 0.04053944  | 0.159142259 |
| 0.139827111 | 0.48682898  | 0.192568513 | 0.495783344 |
| 0.4710855   | 0.470799276 | 0.089870638 | 0.492215164 |
| 0.049995895 | 0.494484715 | 0.391730783 | 0.069375898 |
| 0.322307091 | 0.01505469  | 0.467227178 | 0.200875777 |
| 0.34686944  | 0.431764207 | 0.255527781 | 0.020825165 |
| 0.226763201 | 0.063725373 | 0.492701823 | 0.493376671 |
| 0.041090998 | 0.269741644 | 0.342158157 | 0.444041466 |
| 0.313344035 | 0.473816715 | 0.514289316 | 0.449408083 |
| 0.099599651 | 0.163040233 | 0.442183626 | 0.43021576  |
| 0.255269004 | 0.495387894 | 0.355729842 | 0.519878558 |
| 0.446224154 | 0.463949932 | 0.473376699 | 0.397416613 |
| 0.270818548 | 0.436235823 | 0.408135394 | 0.024007679 |
| 0.395614469 | 0.488791896 | 0.392165371 | 0.192040366 |

|             |             |             |             |
|-------------|-------------|-------------|-------------|
| 0.301363526 | 0.439390825 | 0.0549416   | 0.196823323 |
| 0.382952636 | 0.335932213 | 0.164230584 | 0.471536974 |
| 0.422031903 | 0.433305258 | 0.043954569 | 0.080305136 |
| 0.540339672 | 0.440269734 | 0.169817602 | 0.470777152 |
| 0.199550145 | 0.398788031 | 0.487750408 | 0.485701535 |
| 0.418321187 | 0.477817125 | 0.458026106 | 0.420657895 |
| 0.422237561 | 0.298396041 | 0.533678249 | 0.095443297 |
| 0.111761107 | 0.449494962 | 0.11538826  | 0.110858905 |
| 0.166558231 | 0.034490853 | 0.355549539 | 0.463518474 |
| 0.421479779 | 0.423126145 | 0.33699453  | 0.100785552 |
| 0.367651188 | 0.401751483 | 0.401350232 | 0.226391776 |
| 0.094060266 | 0.507888105 | 0.012004136 | 0.066811941 |
| 0.424565169 | 0.485438586 | 0.43971333  | 0.281510393 |
| 0.352509248 | 0.164202936 | 0.34042932  | 0.319919115 |
| 0.352114594 | 0.410005912 | 0.482034081 | 0.041266865 |
| 0.022104007 | 0.493511675 | 0.410874508 | 0.025858959 |
| 0.102633591 | 0.417889496 | 0.321113    | 0.28644461  |
| 0.027594583 | 0.479551459 | 0.372020331 | 0.473818472 |
| 0.382243751 | 0.077169598 | 0.370991528 | 0.10348512  |
| 0.071251018 | 0.449545928 | 0.448166803 | 0.518764324 |
| 0.394300006 | 0.46000475  | 0.456322575 | 0.468247906 |
| 0.142206257 | 0.426651886 | 0.034034086 | 0.4739863   |
| 0.455225736 |             |             |             |

|             |             |             |             |
|-------------|-------------|-------------|-------------|
| PVR         | 0.145316706 | 0.319765381 | 0.064380657 |
| 0.240128829 | 0.09618163  | 0.201099174 | 0.089623262 |
| 0.037894725 | 0.009704141 | 0.011807733 | 0.004886912 |
| 0.118153397 | 0.021906431 | 0.089525571 | 0.047010627 |
| 0.158887926 | 0.017055088 | 0.042651566 | 0.0728247   |
| 0.165743441 | 0.048647998 | 0.15097356  | 0.019293259 |
| 0.01410834  | 0.012394188 | 0.016590004 | 0.029040561 |
| 0.240859202 | 0.01887333  | 0.171308055 | 0.214696745 |
| 0.005562915 | 0.194013208 | 0.313493832 | 0.159875385 |
| 0.303413943 | 0.145883032 | 0.000754161 | 0.089835334 |
| 0.218477827 | 0.181478455 | 0.178205943 | 0.133842469 |
| 0.015439576 | 0.337196999 | 0.109894872 | 0.078930353 |
| 0.022793787 | 0.006887762 | 0.091708005 | 0.298408306 |
| 0.340392856 | 0.15014155  | 0.059710551 | 0.062308363 |
| 0.027044052 | 0.075495682 | 0.021108174 | 0.216812294 |
| 0.078453747 | 0.092085032 | 0.311320762 | 0.019447804 |
| 0.010768893 | 0.053512824 | 0.009019788 | 0.090449311 |
| 0.024613204 | 0.224826627 | 0.002047401 | 0.096120405 |
| 0.012770865 | 0.146734912 | 0.070580361 | 0.029288505 |
| 0.009162248 | 0.011378136 | 0.014998751 | 0.171586622 |
| 0.240787853 | 0.233202936 | 0.239365246 | 0.23705606  |
| 0.016766051 | 0.039407905 | 0.058283961 | 0.039219072 |
| 0.216549973 | 0.090995087 | 0.011500837 | 0.157412572 |
| 0.246762886 | 0.310735772 | 0.011474726 | 0.037889757 |
| 0.295272705 | 0.298296353 | 0.11373412  | 0.095608117 |
| 0.048255845 | 0.001443739 | 0.295433906 | 0.274359837 |
| 0.246369275 | 0.034192766 | 0.026437281 | 0.249575512 |
| 0.008568686 | 0.040637198 | 0.149267825 | 0.011210433 |
| 0.251278407 | 0.006156493 | 0.027774779 | 0.152322783 |
| 0.009069203 | 0.218587137 | 0.288496856 | 0.065311269 |
| 0.066684871 | 0.005687096 | 0.00590448  | 0.002105409 |

|             |             |             |             |
|-------------|-------------|-------------|-------------|
| 0.025786087 | 0.004618861 | 0.324005891 | 0.293728028 |
| 0.034495068 | 0.024171224 | 0.060860768 | 0.000235191 |
| 0.003435425 | 0.005195466 | 0.209414163 | 0.062127464 |
| 0.168568307 | 0.168869561 | 0.055178025 | 0.205320092 |
| 0.141110632 | 0.227033076 | 0.02871931  | 0.019363364 |
| 0.127058073 | 0.004819939 | 0.067110779 | 0.13801802  |
| 0.061689287 | 0.025937667 | 0.030152669 | 0.282407338 |
| 0.305584291 | 0.028460505 | 0.058948172 | 0.151699834 |
| 0.051364526 | 0.068346682 | 0.019729029 | 0.070604229 |
| 0.018120659 | 0.268947755 | 0.002464622 | 0.075217887 |
| 0.015845652 | 0.00794691  | 0.000484089 | 0.10003747  |
| 0.042909549 | 0.300801237 | 0.281141228 | 0.01816281  |
| 0.093302346 | 0.127425054 | 0.104774129 | 0.267773763 |
| 0.008157597 | 0.00350442  | 0.077408547 | 0.299997942 |
| 0.230107803 | 0.234401274 | 0.039085568 | 0.024385422 |
| 0.056528929 | 0.205896812 | 0.000211237 | 0.326604237 |
| 0.298416627 | 0.089957161 | 0.16322539  | 0.091080606 |
| 0.057686784 | 0.273764341 | 0.001815219 | 0.15655797  |
| 0.172986653 | 0.012263759 | 0.252253518 | 0.03679628  |
| 0.267272369 | 0.01166254  | 0.079456079 | 0.178328132 |
| 0.185307381 | 0.000845049 | 0.139665635 | 0.191977011 |
| 0.00121775  | 0.038723404 | 0.162803871 | 0.183077506 |
| 0.140923424 | 0.169508537 | 0.239161949 | 0.053263662 |
| 0.1057372   | 0.050811104 | 0.000534116 | 0.047722545 |
| 0.163001759 | 0.016037419 | 0.329062211 | 0.038550588 |
| 0.138130533 | 0.315162287 | 0.195334314 | 0.02296908  |
| 0.018117379 | 0.100968169 | 0.010155172 | 0.073355118 |
| 0.179080387 | 0.04657695  | 0.073166441 | 0.004047143 |
| 0.008316179 | 0.304746935 | 0.010261154 | 0.018721346 |
| 0.005166722 | 0.203829183 | 0.059868198 | 0.096271527 |
| 0.036929189 | 0.014916093 | 0.035848986 | 0.059609031 |
| 0.021895479 | 0.024410404 | 8.27E-06    | 0.067744751 |
| 0.037297951 | 0.099004191 | 0.11871442  | 0.192254725 |
| 0.039568269 | 0.026930297 | 0.098053485 | 0.013724969 |
| 0.009606581 | 0.003495426 | 0.304612083 | 0.13700421  |
| 0.237095727 | 0.024833654 | 0.004903904 | 0.035286674 |
| 0.294424944 | 0.203425224 | 0.059579526 | 0.324242766 |
| 0.001984215 | 0.223025686 | 0.049015568 | 0.025867938 |
| 0.066199317 | 0.094208409 | 0.246739748 | 0.010537527 |
| 0.112498701 | 0.335029312 | 0.050034935 | 0.033275198 |
| 0.327714821 | 0.156564873 | 0.007829868 | 0.214715984 |
| 0.220308328 | 0.009042252 | 0.294756606 | 0.0091129   |
| 0.003003142 | 0.139071205 | 0.198336162 | 0.013198626 |
| 0.009670658 | 0.141873186 | 0.022305017 | 0.071232749 |
| 0.315009179 | 0.168842005 | 0.254458269 | 0.01196435  |
| 0.018977783 | 0.007726223 | 0.015534725 | 0.068387933 |
| 0.331511293 | 0.268095211 | 0.051657117 | 0.089797147 |
| 0.074875254 | 0.035575611 | 0.021211076 | 0.289625495 |
| 0.004274082 | 0.291345841 | 0.001030195 | 0.160666099 |
| 0.311652311 | 0.122622447 | 0.013897072 | 0.145142251 |
| 0.305897382 | 0.012678333 | 0.022235018 | 0.329468955 |
| 0.247376908 | 0.045010126 | 0.055419015 | 0.12492392  |
| 0.010740844 | 0.009122108 | 0.085474445 | 0.007251785 |
| 0.06841472  | 0.0264398   | 0.000792242 | 0.036875839 |

|             |             |             |             |
|-------------|-------------|-------------|-------------|
| 0.014370235 | 0.33239462  | 0.196771256 | 0.008417666 |
| 0.233844362 | 0.041028904 | 0.090741821 | 0.009596533 |
| 0.20420585  | 0.252128898 | 0.332595724 | 0.023698861 |
| 0.177447083 | 0.283714874 | 0.100794799 | 0.007198237 |
| 0.002114268 | 0.295160463 | 0.173889731 | 0.01625946  |
| 0.237930823 | 0.134767136 | 0.011847737 | 0.32365475  |
| 0.050834949 | 0.296666457 | 0.003851065 | 0.001316715 |
| 0.001039017 | 0.181986586 | 0.321719325 | 0.179474904 |
| 0.136606861 | 0.098625236 | 0.000847548 | 0.261386772 |
| 0.341096011 | 0.001271622 | 0.004956833 | 0.214900266 |
| 0.171607683 | 0.324588074 | 0.038670743 | 0.222840998 |
| 0.130657837 | 0.311968349 | 0.031053532 | 0.063283159 |
| 0.283773254 | 0.254280839 | 0.213377835 | 0.295904389 |
| 0.262771377 | 0.126411439 | 0.105389134 | 0.007364543 |
| 0.004961897 | 0.084118538 | 0.081926594 | 0.014412845 |
| 0.169438314 | 0.017214036 | 0.267365387 | 0.218756951 |
| 0.253346084 | 0.000814186 | 0.037163414 | 0.212097154 |
| 0.293632387 | 0.265367859 | 0.000357896 | 0.000602027 |
| 0.000668282 | 0.00205444  | 0.129496287 | 0.029344345 |
| 0.267379976 | 1           | 0.002067897 | 0.012693464 |
| 0.028501608 | 0.096538048 | 0.321797987 | 0.149658575 |
| 0.158176346 | 0.009634213 | 0.090339185 | 0.157215148 |
| 0.003796979 | 0.156581716 | 0.270924226 | 0.340086683 |
| 0.001427594 | 0.027216013 | 0.068367183 | 0.284462996 |
| 0.001770077 | 0.065891803 | 0.130824524 | 0.044709585 |
| 0.000182211 | 0.007283704 | 0.00612626  | 0.160687145 |
| 0.299555415 | 0.02013997  | 0.010202947 | 0.018783214 |
| 0.05360429  | 0.213615514 | 0.036628651 | 0.27095352  |
| 0.267254675 | 0.217495468 | 0.002287789 | 0.314861384 |
| 0.00411892  | 0.321599427 | 0.05446851  | 0.020934231 |
| 0.024772839 | 0.000850478 | 0.24287195  | 0.017217235 |
| 0.089667422 | 0.161945382 | 0.007129248 | 0.000724227 |
| 0.00450556  | 0.007608108 | 0.256987288 | 0.192330417 |
| 0.000706865 | 0.033175474 | 0.050082488 | 0.118065764 |
| 0.152018664 | 0.23277404  | 0.336191479 | 0.147477627 |
| 0.02911836  | 0.002319227 | 0.191183057 | 0.176300021 |
| 0.048739446 | 0.233027063 | 0.03886606  | 0.27567658  |
| 0.175211223 | 0.236612013 | 0.255469905 | 0.12651505  |
| 0.008258943 | 0.145135251 | 0.279580963 | 0.023055055 |
| 0.098606881 | 0.250865698 | 0.079465947 | 0.011897265 |
| 0.063066405 | 0.064512178 | 0.002401161 | 0.011151302 |
| 0.042182187 | 0.219899862 | 0.021542372 | 0.192356732 |
| 0.135517935 | 0.181503215 | 0.003827501 | 0.006991605 |
| 0.316509958 | 0.258236784 | 0.023999993 | 0.221464224 |
| 0.02167724  | 0.089086859 | 0.177453577 | 0.157807053 |
| 0.022675375 | 0.267683462 | 0.226127709 | 0.292567665 |
| 0.342467332 | 0.072511979 | 0.329184171 | 0.016020273 |
| 0.003076758 | 0.11366999  | 0.031160017 | 0.01038931  |
| 0.040510017 | 0.001810155 | 0.018739446 | 0.142754592 |
| 0.035489278 | 0.153132983 | 0.022628488 | 0.007170274 |
| 0.049799882 | 0.054679632 | 0.087129396 | 0.102781928 |
| 0.020060482 | 0.341650454 | 0.001690456 | 0.006783689 |
| 0.043185413 | 0.202307943 | 0.08094015  | 0.02975261  |
| 0.014913774 | 0.004055764 | 0.080351127 | 0.134010208 |

|             |             |             |             |
|-------------|-------------|-------------|-------------|
| 0.170580007 | 0.01559595  | 0.224082282 | 0.005609528 |
| 0.006541601 | 0.245545617 | 0.097307427 | 0.000344555 |
| 0.00212152  | 0.126036045 | 0.020266637 | 0.030914861 |
| 0.001057092 | 0.257654084 | 0.131261873 | 0.089212609 |
| 0.130985676 | 0.007671404 | 0.251787404 | 0.00449032  |
| 0.003141216 | 0.298540244 | 0.068785852 | 0.293283977 |
| 0.03726393  | 0.200610644 | 0.298205575 | 0.227939197 |
| 0.005484826 | 0.063082721 | 0.007978186 | 0.21895112  |
| 0.068024942 |             |             |             |
| QPRT        | 0.004817473 | 0.005153679 | 0.005393896 |
| 0.02680685  | 0.017188132 | 0.005878679 | 0.065735349 |
| 0.016392257 | 0.04540353  | 0.090585534 | 0.061623849 |
| 0.007691522 | 0.021433945 | 0.01939563  | 0.002547341 |
| 0.032920611 | 0.077777312 | 0.007518593 | 0.097951402 |
| 0.026119365 | 0.050807291 | 0.046086295 | 0.104913257 |
| 0.010151184 | 0.06352915  | 0.13645794  | 0.01833516  |
| 0.021636615 | 0.14413307  | 0.005566686 | 0.016928385 |
| 0.094458163 | 0.008095857 | 0.00186226  | 0.017820585 |
| 0.001121078 | 0.002419055 | 0.059008685 | 0.007670901 |
| 0.005767887 | 0.010990167 | 0.02560788  | 0.062775933 |
| 0.141396326 | 0.001191158 | 0.076539146 | 0.01748089  |
| 0.006065242 | 0.127384935 | 0.005494645 | 0.001831817 |
| 0.001160078 | 0.005914238 | 0.021448903 | 0.064485531 |
| 0.009023183 | 0.00700169  | 0.003821528 | 0.006605748 |
| 0.085675131 | 0.009839806 | 0.001905403 | 0.046226098 |
| 0.009623513 | 0.02682206  | 0.064126384 | 0.037816362 |
| 0.00466031  | 0.005626639 | 0.175819032 | 0.00265849  |
| 0.042223891 | 0.033488854 | 0.028008921 | 0.002472618 |
| 0.234618361 | 0.137262167 | 0.073329781 | 0.042355783 |
| 0.016464464 | 0.002156816 | 0.013497762 | 0.008690701 |
| 0.052126798 | 0.051923408 | 0.006988431 | 0.089894519 |
| 0.005648104 | 0.068657082 | 0.038706362 | 0.035621172 |
| 0.011657123 | 0.003184951 | 0.042124848 | 0.063076744 |
| 0.007773469 | 0.005315494 | 0.005542911 | 0.011582709 |
| 0.003243794 | 0.072766657 | 0.002734709 | 0.007607433 |
| 0.003808777 | 0.007880963 | 0.1193001   | 0.013835504 |
| 0.18683633  | 0.002268716 | 0.061839928 | 0.028929199 |
| 0.016498194 | 0.120540374 | 0.077352682 | 0.02890597  |
| 0.036741528 | 0.007577615 | 0.002879642 | 0.105969767 |
| 0.014010857 | 0.131484018 | 0.008190484 | 0.167611393 |
| 0.010139697 | 0.007432724 | 0.000300252 | 0.014498812 |
| 0.016084813 | 0.007432698 | 0.042777173 | 0.203581305 |
| 0.167146425 | 0.029670916 | 0.004853419 | 0.013511435 |
| 0.012921912 | 0.000559451 | 0.037603047 | 0.003232511 |
| 0.004568221 | 0.013246601 | 0.000715571 | 0.099885027 |
| 0.011419331 | 0.036997057 | 0.123920088 | 0.00807214  |
| 0.040357637 | 0.069665362 | 0.138356727 | 0.008957944 |
| 0.00365676  | 0.184041922 | 0.004358463 | 0.035957388 |
| 0.006878571 | 0.029426297 | 0.135821441 | 0.038405897 |
| 0.131585472 | 0.000984107 | 0.143993357 | 0.010284149 |
| 0.001937449 | 0.04222009  | 0.137360176 | 0.021758732 |
| 0.011089145 | 0.005310577 | 0.000875062 | 0.162339425 |
| 0.040856337 | 0.031560815 | 0.006087291 | 0.008173435 |
| 0.074179151 | 0.142730022 | 0.002149015 | 0.007689943 |

|             |             |             |             |
|-------------|-------------|-------------|-------------|
| 0.004472496 | 0.007161584 | 0.031081464 | 0.021279174 |
| 0.075150866 | 0.017121234 | 0.003303725 | 0.001381808 |
| 0.00281768  | 0.001717825 | 0.025608896 | 0.014516114 |
| 0.003606708 | 0.01656663  | 0.000604896 | 0.036219454 |
| 0.002520218 | 0.163597318 | 0.013587674 | 0.128283802 |
| 0.00241054  | 0.18758052  | 0.011712212 | 0.005013564 |
| 0.003292841 | 0.046151729 | 0.012492052 | 0.025407285 |
| 0.118197454 | 0.031494412 | 0.010502729 | 0.026923204 |
| 0.020172948 | 0.013739736 | 0.019519734 | 0.003295275 |
| 0.015090533 | 0.050386546 | 0.164345017 | 0.036576474 |
| 0.007253534 | 0.001128928 | 0.003400127 | 0.029969947 |
| 0.0017523   | 0.005034945 | 0.002306918 | 0.002234696 |
| 0.176899834 | 0.023583604 | 0.049740311 | 0.028432191 |
| 0.001644905 | 0.064644122 | 0.003068923 | 0.051484257 |
| 0.132166434 | 0.006907573 | 0.017893858 | 0.004731885 |
| 0.008222932 | 0.012194739 | 0.066176259 | 0.015594847 |
| 0.017888057 | 0.062130664 | 0.006329052 | 0.008083245 |
| 0.101393752 | 0.144957426 | 0.063368284 | 0.002051805 |
| 0.027908428 | 0.006029416 | 0.004507857 | 0.003990408 |
| 0.010541441 | 0.063778813 | 0.022468081 | 0.007499366 |
| 0.068953924 | 0.264886183 | 0.005232299 | 0.032190318 |
| 0.002900336 | 0.064593581 | 0.190832831 | 0.001246238 |
| 0.012224246 | 0.002616214 | 0.001477015 | 0.007818927 |
| 0.102947435 | 0.011173703 | 0.029455495 | 0.137472417 |
| 0.009616367 | 0.086443956 | 0.018993217 | 0.008122413 |
| 0.007148074 | 0.004501733 | 0.046926813 | 0.065323868 |
| 0.00284554  | 0.019773439 | 0.148483461 | 0.003414502 |
| 0.003402957 | 0.222787764 | 0.00477961  | 0.076550491 |
| 0.236298672 | 0.012917182 | 0.005852449 | 0.196572016 |
| 0.127750234 | 0.021912095 | 0.062872293 | 0.082927152 |
| 0.006887758 | 0.041338405 | 0.006278021 | 0.018816977 |
| 0.156500144 | 0.102648113 | 0.046045453 | 0.00537881  |
| 0.001239314 | 0.004574395 | 0.095700256 | 0.018848439 |
| 0.11209152  | 0.00612281  | 0.006697679 | 0.007111028 |
| 0.011629857 | 0.002599175 | 0.222872709 | 0.006877623 |
| 0.000830197 | 0.005741427 | 0.104465549 | 0.023219918 |
| 0.004627242 | 0.14526171  | 0.047924603 | 0.002949238 |
| 0.006592996 | 0.013831557 | 0.006613358 | 0.014669656 |
| 0.128369521 | 0.124691704 | 0.014867658 | 0.008420194 |
| 0.006303074 | 0.049315703 | 0.005195322 | 0.00517476  |
| 0.139484008 | 0.004382254 | 0.017331004 | 0.078663924 |
| 0.004928845 | 0.004465011 | 0.039887245 | 0.207593541 |
| 0.004581894 | 0.002531617 | 0.002317542 | 0.060842385 |
| 0.006201492 | 0.00430359  | 0.003296919 | 0.1446801   |
| 0.200455276 | 0.001864453 | 0.006892739 | 0.083731414 |
| 0.016351969 | 0.003914507 | 0.111126509 | 0.005455101 |
| 0.111795612 | 0.000461503 | 0.013134578 | 0.002364626 |
| 0.088399463 | 0.014825448 | 0.001687032 | 0.017618563 |
| 0.002150004 | 0.03282019  | 0.014083631 | 0.005185885 |
| 0.003887016 | 0.133950482 | 0.041603829 | 0.004347301 |
| 0.004069529 | 0.004384808 | 0.007056844 | 0.006175664 |
| 0.005402281 | 0.001620521 | 0.023132588 | 0.084059738 |
| 0.008957812 | 0.001901143 | 0.011105473 | 0.004125714 |
| 0.015827131 | 0.022575514 | 0.082348041 | 0.15763613  |

|             |             |             |             |
|-------------|-------------|-------------|-------------|
| 0.013073623 | 0.016659859 | 0.001341137 | 0.035505786 |
| 0.004928086 | 0.059393761 | 0.004702862 | 0.01568845  |
| 0.006685445 | 0.246900257 | 0.03794665  | 0.004187836 |
| 0.011155493 | 0.013886889 | 0.073702637 | 0.008543304 |
| 0.002450016 | 0.054341887 | 0.02222792  | 0.058714781 |
| 0.005743161 | 0.002067897 | 1           | 0.084275095 |
| 0.021158778 | 0.014658249 | 0.003676513 | 0.051953423 |
| 0.007330054 | 0.155378596 | 0.00504665  | 0.037131116 |
| 0.067508153 | 0.001237147 | 0.008197218 | 0.003775641 |
| 0.133027935 | 0.047681411 | 0.006563951 | 0.013836735 |
| 0.002288036 | 0.066058773 | 0.008288956 | 0.013072878 |
| 0.073042753 | 0.09837883  | 0.088513591 | 0.020504391 |
| 0.000657784 | 0.07460452  | 0.114844065 | 0.001830476 |
| 0.06988031  | 0.010156887 | 0.067087877 | 0.010473385 |
| 0.0128211   | 0.030461588 | 0.079539617 | 0.002969819 |
| 0.083648003 | 0.00182514  | 0.018431165 | 0.005007609 |
| 0.02536179  | 0.215445218 | 0.002255138 | 0.005330909 |
| 0.008059704 | 0.009894949 | 0.007227088 | 0.137840553 |
| 0.003510437 | 0.162623853 | 0.015304463 | 0.012041722 |
| 0.099748154 | 0.032839215 | 0.053127858 | 0.021373249 |
| 0.017639852 | 0.02262419  | 0.00189408  | 0.001911947 |
| 0.081656047 | 0.007971399 | 0.021246086 | 0.004293267 |
| 0.015635673 | 0.013549175 | 0.010626704 | 0.005516293 |
| 0.00590765  | 0.005565524 | 0.004359382 | 0.027950236 |
| 0.016287835 | 0.005692032 | 0.013498598 | 0.091933826 |
| 0.040224689 | 0.016705706 | 0.012445366 | 0.033526975 |
| 0.061549887 | 0.004103147 | 0.106662911 | 0.002207255 |
| 0.003090612 | 0.009137381 | 0.080605616 | 0.027354833 |
| 0.008995719 | 0.004324543 | 0.119127186 | 0.08747474  |
| 0.004731946 | 0.003569712 | 0.026354685 | 0.012750311 |
| 0.109445031 | 0.034841959 | 0.009065894 | 0.010270762 |
| 0.002275393 | 0.006769244 | 0.011649628 | 0.01030444  |
| 0.004255418 | 0.066395547 | 0.002595296 | 0.014466025 |
| 0.030464263 | 0.003652861 | 0.075839866 | 0.156508367 |
| 0.144639377 | 0.14358266  | 0.001329146 | 0.027640758 |
| 0.001327738 | 0.04622042  | 0.002386349 | 0.088346669 |
| 0.043816062 | 0.002956723 | 0.048119551 | 0.043917324 |
| 0.099384842 | 0.002467008 | 0.098925732 | 0.179485474 |
| 0.002752926 | 0.00631209  | 0.008523811 | 0.055101631 |
| 0.004567418 | 0.045479377 | 0.075057398 | 0.00710379  |
| 0.004407951 | 0.001938204 | 0.005837371 | 0.072359063 |
| 0.181972228 | 0.014334384 | 0.004232575 | 0.104138993 |
| 0.037863302 | 0.003351524 | 0.015066157 | 0.019394657 |
| 0.117363594 | 0.003208325 | 0.00375956  | 0.011337185 |
| 0.026762268 | 0.158038203 | 0.001594955 | 0.023161335 |
| 0.100106488 | 0.002435818 | 0.006817917 | 0.002274884 |
| 0.012530144 | 0.036576635 | 0.000405576 | 0.005521599 |
| 0.02327879  | 0.002129206 | 0.143531296 | 0.012862726 |
| 0.001283364 |             |             |             |
| RAB18       | 0.043423753 | 0.058326223 | 0.021145417 |
| 0.133759642 | 0.048965676 | 0.075336853 | 0.233543862 |
| 0.139057575 | 0.037632649 | 0.069136689 | 0.01175273  |
| 0.030551326 | 0.016541808 | 0.086790305 | 0.0213081   |
| 0.109623066 | 0.03657709  | 0.044941565 | 0.210843559 |

|             |             |             |             |
|-------------|-------------|-------------|-------------|
| 0.131432208 | 0.21602221  | 0.103143435 | 0.152367806 |
| 0.009903382 | 0.025406253 | 0.093749781 | 0.017670351 |
| 0.128251586 | 0.106345754 | 0.07435111  | 0.151078278 |
| 0.038501616 | 0.07090649  | 0.041651587 | 0.045555315 |
| 0.032827164 | 0.03332636  | 0.027743154 | 0.057813971 |
| 0.072989271 | 0.052319499 | 0.138869498 | 0.166022783 |
| 0.130085897 | 0.047171344 | 0.210792991 | 0.039899843 |
| 0.034950112 | 0.041141501 | 0.100221652 | 0.055688979 |
| 0.034170904 | 0.032621972 | 0.158240543 | 0.188635571 |
| 0.007175801 | 0.0909841   | 0.002343307 | 0.123385498 |
| 0.200285652 | 0.145758092 | 0.036131006 | 0.06440804  |
| 0.02052316  | 0.159511241 | 0.028699656 | 0.195678816 |
| 0.007596012 | 0.088306448 | 0.107152489 | 0.016215235 |
| 0.030961267 | 0.156417132 | 0.052760315 | 0.004734525 |
| 0.111470745 | 0.03850962  | 0.042288021 | 0.177626215 |
| 0.103004777 | 0.040482687 | 0.061722917 | 0.047796745 |
| 0.021080249 | 0.070397063 | 0.015213581 | 0.10368988  |
| 0.063696595 | 0.190893    | 0.056826735 | 0.092969837 |
| 0.058219138 | 0.041942038 | 0.02697081  | 0.059454325 |
| 0.067622533 | 0.067763541 | 0.033503966 | 0.037338346 |
| 0.009480641 | 0.013023961 | 0.045695008 | 0.052591731 |
| 0.068297026 | 0.00830242  | 0.072652437 | 0.129338442 |
| 0.123572443 | 0.016892732 | 0.167303301 | 0.015711343 |
| 0.10420667  | 0.09636421  | 0.047668165 | 0.133313976 |
| 0.034908795 | 0.062622611 | 0.035450274 | 0.235209878 |
| 0.034789416 | 0.035006043 | 0.002486057 | 0.065294617 |
| 0.020055687 | 0.001618991 | 0.032526674 | 0.090703653 |
| 0.087957721 | 0.012487647 | 0.161041609 | 0.031005838 |
| 0.042375993 | 0.014684035 | 0.04023088  | 0.063568862 |
| 0.07990729  | 0.022957982 | 0.053633118 | 0.060923923 |
| 0.022145996 | 0.059801186 | 0.008486421 | 0.178250782 |
| 0.063185517 | 0.018106685 | 0.178633911 | 0.038031101 |
| 0.049565555 | 0.209489457 | 0.16906097  | 0.064120584 |
| 0.076742437 | 0.214340652 | 0.04614836  | 0.102571424 |
| 0.02372748  | 0.03420349  | 0.181465475 | 0.085831213 |
| 0.168459529 | 0.028249651 | 0.032850701 | 0.101073357 |
| 0.003224306 | 0.009319189 | 0.061584919 | 0.186328775 |
| 0.031143359 | 0.045937827 | 0.027876302 | 0.173197119 |
| 0.100418542 | 0.071259408 | 0.08629137  | 0.053759004 |
| 0.025249861 | 0.064155454 | 0.056304001 | 0.058345332 |
| 0.107694071 | 0.049547875 | 0.077481617 | 0.032454869 |
| 0.08457204  | 0.086033203 | 0.000894561 | 0.042610518 |
| 0.038278306 | 0.050041212 | 0.067854865 | 0.046314235 |
| 0.01207734  | 0.095432863 | 0.003799773 | 0.10498682  |
| 0.056716546 | 0.166451876 | 0.071790774 | 0.093446016 |
| 0.041460309 | 0.101189888 | 0.086626993 | 0.026935525 |
| 0.022085233 | 0.021616118 | 0.160921687 | 0.159192826 |
| 0.02212841  | 0.156298453 | 0.076135432 | 0.118459659 |
| 0.079565653 | 0.061353505 | 0.089253025 | 0.009106986 |
| 0.0481158   | 0.182252547 | 0.038422302 | 0.040521272 |
| 0.045780148 | 0.003761884 | 0.063818642 | 0.109271932 |
| 0.048682383 | 0.061099378 | 0.028439516 | 0.007753517 |
| 0.189307183 | 0.148046438 | 0.095281412 | 0.059141913 |
| 0.031598025 | 0.096394457 | 0.018093539 | 0.023326186 |



|             |             |             |             |
|-------------|-------------|-------------|-------------|
| 0.051231776 | 0.056535241 | 0.007145074 | 0.004155802 |
| 0.002255093 | 0.059751542 | 0.194115744 | 0.042271377 |
| 0.010015717 | 0.061873347 | 0.014803771 | 0.028439968 |
| 0.204850738 | 0.106411101 | 0.008343425 | 0.007768974 |
| 0.014219731 | 0.018362517 | 0.020328511 | 0.054206161 |
| 0.041359204 | 0.036718392 | 0.048345409 | 0.00839658  |
| 0.03273967  | 0.08957479  | 0.057679495 | 0.110351997 |
| 0.076395016 | 0.128182708 | 0.091420044 | 0.00365217  |
| 0.079993539 | 0.052985371 | 0.044862097 | 0.075812722 |
| 0.053147444 | 0.062339013 | 0.031672939 | 0.084680791 |
| 0.015211553 | 0.150827889 | 0.106354028 | 0.016215159 |
| 0.071964281 | 0.06366256  | 0.085173293 | 0.057326781 |
| 0.058102746 | 0.111228412 | 0.091667093 | 0.048612751 |
| 0.050721864 | 0.10921618  | 0.046006086 | 0.02502047  |
| 0.078197644 | 0.040013722 | 0.031807355 | 0.110004809 |
| 0.06226702  | 0.073675389 | 0.190230327 | 0.098407951 |
| 0.059273292 | 0.102849136 | 0.050280865 | 0.012486056 |
| 0.144567373 | 0.018523109 | 0.025966904 | 0.0204867   |
| 0.040424453 | 0.038211391 | 0.132733627 | 0.027137024 |
| 0.214954978 | 0.014385266 | 0.042099379 | 0.051479556 |
| 0.008633977 | 0.0444043   | 0.077037806 | 0.031160821 |
| 0.032100936 | 0.102743895 | 0.044627497 | 0.157031468 |
| 0.072533747 | 0.157230231 | 0.12365965  | 0.045190839 |
| 0.06694702  | 0.03674158  | 0.022466967 | 0.06176412  |
| 0.151830787 | 0.118355894 | 0.041418917 | 0.003688155 |
| 0.027458668 | 0.072944324 | 0.000228511 | 0.047622605 |
| 0.059961653 | 0.060641854 | 0.076653618 | 0.040361057 |
| 0.058901442 | 0.051451253 | 0.067333107 | 0.154732002 |
| 0.028256942 | 0.033761928 | 0.044248321 | 0.16649395  |
| 0.041942814 | 0.037652956 | 0.011376815 | 0.075000273 |
| 0.048251047 | 0.034060383 | 0.080663242 | 0.033182246 |
| 0.086317963 | 0.101866484 | 0.03377935  | 0.068647838 |
| 0.231636038 | 0.034551592 | 0.021887237 | 0.001652093 |
| 0.01738496  | 0.058359795 | 0.041389276 | 0.148027114 |
| 0.040414199 | 0.127316942 | 0.002047788 | 0.044119505 |
| 0.050846318 | 0.023751198 | 0.011800844 | 0.033433702 |
| 0.020268994 | 0.060221819 | 0.00945149  | 0.033962705 |
| 0.019077419 | 0.033273474 | 0.040202495 | 0.104028116 |
| 0.073155671 | 0.026763683 | 0.098198024 | 0.064920444 |
| 0.08732444  | 0.057708352 | 0.196956895 | 0.113852251 |
| 0.005712603 | 0.169809932 | 0.011007565 | 0.015874607 |
| 0.09778177  | 0.035186369 | 0.051537211 | 0.074965709 |
| 0.042129195 | 0.06127968  | 0.138922761 | 0.042972906 |
| 0.110595866 | 0.099534927 | 0.024431829 | 0.003463318 |
| 0.002656706 | 0.004752137 | 0.145371285 | 0.056135734 |
| 0.049563974 | 0.012693464 | 0.084275095 | 1           |
| 0.03635368  | 0.027076185 | 0.046499525 | 0.160395075 |
| 0.039315305 | 0.106567585 | 0.023805619 | 0.144485855 |
| 0.015010894 | 0.04803496  | 0.050604137 | 0.061948195 |
| 0.039448831 | 0.052341487 | 0.048074785 | 0.08931197  |
| 8.37E-05    | 0.088167222 | 0.035445919 | 0.031426447 |
| 0.014567884 | 0.040680472 | 0.040259757 | 0.079983147 |
| 0.028779586 | 0.026262544 | 0.025401121 | 0.017395798 |
| 0.124597561 | 0.064413923 | 0.066438598 | 0.065356907 |

|             |             |             |             |
|-------------|-------------|-------------|-------------|
| 0.096407463 | 0.117934731 | 0.01400612  | 0.050444963 |
| 0.027099039 | 0.039377168 | 0.018830521 | 0.022152502 |
| 0.043539774 | 0.053862656 | 0.031413167 | 0.003567929 |
| 0.08282277  | 0.096374623 | 0.005875734 | 0.026185428 |
| 0.001567844 | 0.07157081  | 0.076104849 | 0.049461367 |
| 0.016576558 | 0.11230893  | 0.077071747 | 0.089920776 |
| 0.182536992 | 0.093532339 | 0.044593488 | 0.019708188 |
| 0.170596797 | 0.001757577 | 0.134645684 | 0.058437007 |
| 0.118123578 | 0.063911278 | 0.019310493 | 0.049231411 |
| 0.069306112 | 0.061735143 | 0.041571669 | 0.125152748 |
| 0.005090362 | 0.064625202 | 0.117458166 | 0.089191381 |
| 0.127664818 | 0.076485727 | 0.091975186 | 0.012485607 |
| 0.064944637 | 0.011632069 | 0.068144163 | 0.012123745 |
| 0.005563874 | 0.133084995 | 0.069186853 | 0.111426427 |
| 0.085168269 | 0.060542169 | 0.104353924 | 0.040795761 |
| 0.054148235 | 0.060123792 | 0.07287032  | 0.080009824 |
| 0.097547791 | 0.074424396 | 0.045738633 | 0.040335712 |
| 0.010831323 | 0.049642024 | 0.100371932 | 0.091933155 |
| 0.071945169 | 0.180100558 | 0.044544198 | 0.107717822 |
| 0.009363202 | 0.028286274 | 0.062265547 | 0.075825131 |
| 0.169252519 | 0.033925383 | 0.002279096 | 0.086573698 |
| 0.004344268 | 0.112144151 | 0.020333677 | 0.03493773  |
| 0.0553112   | 0.027664247 | 0.096074096 | 0.183999444 |
| 0.058920968 | 0.043966155 | 0.020950461 | 0.086893076 |
| 0.007156228 | 0.04701845  | 0.015752653 | 0.058991886 |
| 0.003758481 | 0.014553514 | 0.116596764 | 0.111770146 |
| 0.029002144 | 0.004801594 | 0.046686942 | 0.086826061 |
| 0.141547685 | 0.073046404 | 0.051699397 | 0.015883198 |
| 0.013595207 | 0.047594534 | 0.039297204 | 0.030824546 |
| 0.023691795 | 0.031134434 | 0.04297707  | 0.034629152 |
| 0.156283142 | 0.118640995 | 0.060246842 | 0.026667335 |
| 0.069858968 | 0.053863812 | 0.020786727 | 0.035266508 |
| 0.024256058 | 0.115253693 | 0.044134005 | 0.048155241 |
| 0.021357142 | 0.014110706 | 0.12154615  | 0.089848169 |
| 0.007625049 |             |             |             |
| RABGAP1L    | 0.24574366  | 0.334088989 | 0.154298484 |
| 0.359061392 | 0.188687891 | 0.203604691 | 0.180621572 |
| 0.085368815 | 0.046114079 | 0.012960101 | 0.011013633 |
| 0.209552154 | 0.031089016 | 0.097574925 | 0.071824484 |
| 0.356944829 | 0.059060123 | 0.126099032 | 0.227219063 |
| 0.318096471 | 0.073220843 | 0.317332589 | 0.082475066 |
| 0.057222373 | 0.058831241 | 0.074457989 | 0.08963463  |
| 0.389513076 | 0.094920972 | 0.119536169 | 0.300364923 |
| 0.057976478 | 0.287275596 | 0.296165165 | 0.241430578 |
| 0.272612746 | 0.220842289 | 0.007001392 | 0.083531645 |
| 0.308802836 | 0.294822124 | 0.319390748 | 0.278308889 |
| 0.054063543 | 0.277845793 | 0.226084475 | 0.21479028  |
| 0.054184271 | 0.029957595 | 0.093756064 | 0.265692288 |
| 0.256415189 | 0.175447575 | 0.121777203 | 0.122279062 |
| 0.020096202 | 0.065504603 | 0.028009077 | 0.211928762 |
| 0.178568863 | 0.07521435  | 0.266704099 | 0.044090083 |
| 0.023857548 | 0.134182825 | 0.057960581 | 0.178418693 |
| 0.062270058 | 0.265748583 | 0.025501908 | 0.160255932 |
| 0.006152292 | 0.329276998 | 0.221990661 | 0.058261498 |

|             |             |             |             |
|-------------|-------------|-------------|-------------|
| 0.078695775 | 0.022005562 | 0.087561046 | 0.262781195 |
| 0.378308447 | 0.281087484 | 0.351273017 | 0.324615947 |
| 0.042575691 | 0.174344087 | 0.129629026 | 0.11226173  |
| 0.293318935 | 0.142481379 | 0.050376149 | 0.342695618 |
| 0.348722082 | 0.299108535 | 0.05063237  | 0.179677385 |
| 0.28019538  | 0.317122156 | 0.175607279 | 0.15848419  |
| 0.070593876 | 0.02952239  | 0.256651504 | 0.332879551 |
| 0.271647656 | 0.089185627 | 0.133167871 | 0.317874501 |
| 0.076173205 | 0.074644457 | 0.313776855 | 0.033849923 |
| 0.385528328 | 0.031177166 | 0.131439289 | 0.206589507 |
| 0.060822791 | 0.313187182 | 0.293899214 | 0.189153679 |
| 0.161889176 | 0.024757543 | 0.01973335  | 0.040549229 |
| 0.044663602 | 0.020606986 | 0.24560733  | 0.348254373 |
| 0.053039255 | 0.04449471  | 0.159727618 | 0.010276058 |
| 0.036330428 | 0.043614312 | 0.245012215 | 0.171064948 |
| 0.313517669 | 0.21220223  | 0.10526924  | 0.218352294 |
| 0.190809471 | 0.337247169 | 0.012241579 | 0.090942528 |
| 0.213864932 | 0.040437683 | 0.244037943 | 0.189969622 |
| 0.165332888 | 0.101134894 | 0.11679527  | 0.36590504  |
| 0.28411342  | 0.117666561 | 0.109781506 | 0.346791584 |
| 0.050035593 | 0.178923711 | 0.102006609 | 0.108348719 |
| 0.049493999 | 0.252836409 | 0.037716333 | 0.164335955 |
| 0.025474621 | 0.023400614 | 0.018430985 | 0.155540547 |
| 0.054712274 | 0.261270186 | 0.229086205 | 0.123119108 |
| 0.151342966 | 0.269314566 | 0.142630983 | 0.245572529 |
| 0.011161027 | 0.042186593 | 0.09408027  | 0.331316507 |
| 0.161573043 | 0.334711014 | 0.122610722 | 0.106663974 |
| 0.213942877 | 0.370329619 | 0.009315684 | 0.281256001 |
| 0.300808106 | 0.096512626 | 0.21488509  | 0.219798108 |
| 0.098446462 | 0.367643131 | 0.006575572 | 0.322837781 |
| 0.197296066 | 0.102175695 | 0.375789658 | 0.137995866 |
| 0.271450661 | 0.06598955  | 0.104222695 | 0.254774682 |
| 0.194860216 | 0.005667174 | 0.130100862 | 0.303891434 |
| 0.028842228 | 0.053905105 | 0.291971396 | 0.331145559 |
| 0.23193333  | 0.326936892 | 0.392035589 | 0.088912677 |
| 0.192474208 | 0.157490358 | 0.017809327 | 0.180414346 |
| 0.285806016 | 0.024290121 | 0.297340588 | 0.100392879 |
| 0.145809859 | 0.318413728 | 0.228813183 | 0.022983185 |
| 0.077084842 | 0.168639726 | 0.02228718  | 0.184855866 |
| 0.225588629 | 0.056810009 | 0.120168696 | 0.037778781 |
| 0.06200815  | 0.344877103 | 0.053800852 | 0.057450502 |
| 0.027134304 | 0.178182424 | 0.208717238 | 0.059427393 |
| 0.028382756 | 0.074928469 | 0.081746436 | 0.108183817 |
| 0.046088094 | 0.084897857 | 0.013324816 | 0.052903484 |
| 0.023735562 | 0.065235247 | 0.06582839  | 0.204433349 |
| 0.048108693 | 0.039212042 | 0.168507532 | 0.057095777 |
| 0.070952462 | 0.043326539 | 0.327221292 | 0.331475546 |
| 0.209669716 | 0.096782129 | 0.058060228 | 0.023249229 |
| 0.333068136 | 0.132784454 | 0.069189569 | 0.310826788 |
| 0.032264044 | 0.342715339 | 0.057987591 | 0.114656858 |
| 0.087556194 | 0.20249207  | 0.395212854 | 0.015248592 |
| 0.183580904 | 0.294259661 | 0.214174263 | 0.11523258  |
| 0.243146544 | 0.278231567 | 0.030058818 | 0.256946506 |
| 0.229508045 | 0.057070756 | 0.320982109 | 0.047356859 |

|             |             |             |             |
|-------------|-------------|-------------|-------------|
| 0.047298988 | 0.2701672   | 0.233617492 | 0.107923126 |
| 0.087089328 | 0.148777493 | 0.046071155 | 0.24736671  |
| 0.347000493 | 0.33834485  | 0.246438837 | 0.074253376 |
| 0.05948569  | 0.008065015 | 0.092402788 | 0.161492065 |
| 0.281394784 | 0.305314419 | 0.210880363 | 0.137209302 |
| 0.248643844 | 0.067250515 | 0.030006854 | 0.329740579 |
| 0.03833929  | 0.303056154 | 0.02319471  | 0.245845818 |
| 0.267284758 | 0.114263508 | 0.071112025 | 0.188335305 |
| 0.260783697 | 0.074888113 | 0.110557885 | 0.303726922 |
| 0.30590404  | 0.112021413 | 0.099316988 | 0.257219522 |
| 0.027990367 | 0.03315117  | 0.213743755 | 0.03808821  |
| 0.095746636 | 0.111289135 | 0.006741362 | 0.070096005 |
| 0.037883392 | 0.28166047  | 0.345344638 | 0.043097722 |
| 0.14057073  | 0.08400226  | 0.254987116 | 0.068983533 |
| 0.264260097 | 0.28813053  | 0.303158447 | 0.105472687 |
| 0.243178781 | 0.294650535 | 0.131910094 | 0.08423751  |
| 0.040471282 | 0.289256485 | 0.2677284   | 0.039087599 |
| 0.357638752 | 0.105360258 | 0.013573573 | 0.335015081 |
| 0.195778088 | 0.22915412  | 0.040037963 | 0.014522654 |
| 0.028391765 | 0.331095125 | 0.278991809 | 0.286418684 |
| 0.06915105  | 0.278023673 | 0.002814124 | 0.324190603 |
| 0.303548348 | 0.024090866 | 0.035466401 | 0.232002045 |
| 0.212901078 | 0.339136309 | 0.090365794 | 0.271569764 |
| 0.172844082 | 0.269039937 | 0.0448483   | 0.222590708 |
| 0.317285739 | 0.262545808 | 0.328746393 | 0.321411085 |
| 0.342647322 | 0.281255167 | 0.264752386 | 0.027919055 |
| 0.030229478 | 0.111000538 | 0.055836391 | 0.026936201 |
| 0.191371231 | 0.073619969 | 0.325701004 | 0.348505943 |
| 0.304485015 | 0.022590036 | 0.068375023 | 0.243546102 |
| 0.349967518 | 0.387713081 | 0.020530394 | 0.011264988 |
| 0.006677491 | 0.011190892 | 0.231530233 | 0.159762671 |
| 0.32289997  | 0.028501608 | 0.021158778 | 0.03635368  |
| 1           | 0.201275958 | 0.299649345 | 0.353718678 |
| 0.275329962 | 0.075554062 | 0.050495787 | 0.358131747 |
| 0.025125634 | 0.172396085 | 0.324644266 | 0.296383599 |
| 0.031624972 | 0.143299372 | 0.150025598 | 0.379158343 |
| 0.007594914 | 0.221078107 | 0.213085115 | 0.055514791 |
| 0.012543344 | 0.066049061 | 0.052054319 | 0.335700838 |
| 0.255511093 | 0.028277589 | 0.023436517 | 0.020958264 |
| 0.079707015 | 0.326581919 | 0.082549818 | 0.364646819 |
| 0.350280593 | 0.386116168 | 0.022603569 | 0.304163904 |
| 0.017437642 | 0.270026758 | 0.134272597 | 0.025763107 |
| 0.116564847 | 0.020961198 | 0.260564259 | 0.018448277 |
| 0.102930067 | 0.272238511 | 0.030776963 | 0.02151548  |
| 0.02170964  | 0.058617622 | 0.359880903 | 0.316859322 |
| 0.022013832 | 0.1108246   | 0.214864492 | 0.292975281 |
| 0.190110434 | 0.325271183 | 0.290644548 | 0.146043789 |
| 0.065560396 | 0.016508419 | 0.333969083 | 0.230909236 |
| 0.076427274 | 0.357291586 | 0.057770215 | 0.338765441 |
| 0.266219204 | 0.319865836 | 0.286049863 | 0.242254806 |
| 0.024955343 | 0.213351688 | 0.246997249 | 0.032911291 |
| 0.266339924 | 0.333690413 | 0.186495231 | 0.036615311 |
| 0.146266774 | 0.129162074 | 0.031444252 | 0.028717841 |
| 0.086235298 | 0.193138124 | 0.047286081 | 0.384423193 |

|             |             |             |             |
|-------------|-------------|-------------|-------------|
| 0.236416347 | 0.234284164 | 0.02758856  | 0.050730934 |
| 0.340607648 | 0.292222034 | 0.064549824 | 0.294591325 |
| 0.143997231 | 0.206420296 | 0.298187294 | 0.270687238 |
| 0.053672143 | 0.27265289  | 0.30579549  | 0.238739688 |
| 0.277961009 | 0.217227534 | 0.308561367 | 0.036389263 |
| 0.023377599 | 0.171190009 | 0.047763419 | 0.097944985 |
| 0.141089817 | 0.031765975 | 0.03855699  | 0.312787435 |
| 0.05633125  | 0.272613102 | 0.031161757 | 0.074705717 |
| 0.181095169 | 0.121255112 | 0.25384231  | 0.140683994 |
| 0.044006289 | 0.287061901 | 0.014217954 | 0.06516894  |
| 0.066305955 | 0.271507326 | 0.128603391 | 0.14016925  |
| 0.035742974 | 0.037379417 | 0.208644707 | 0.140013242 |
| 0.08223652  | 0.038483821 | 0.283159941 | 0.051302879 |
| 0.025917045 | 0.369750151 | 0.167023507 | 0.019784748 |
| 0.019921135 | 0.18997817  | 0.079797685 | 0.051995034 |
| 0.029693397 | 0.263776115 | 0.094714411 | 0.18973524  |
| 0.245463503 | 0.072273236 | 0.226479837 | 0.031497786 |
| 0.046102582 | 0.278585054 | 0.164593827 | 0.282456527 |
| 0.136140178 | 0.34958444  | 0.251362184 | 0.2544268   |
| 0.049071789 | 0.127520577 | 0.041202666 | 0.340663271 |
| 0.074716869 |             |             |             |
| RAI12       | 0.319892979 | 0.456764943 | 0.292789135 |
| 0.335056489 | 0.307723247 | 0.171709499 | 0.140049941 |
| 0.085653175 | 0.107481123 | 0.006672593 | 0.059167273 |
| 0.304312196 | 0.192082419 | 0.151314823 | 0.183440542 |
| 0.380401119 | 0.201849774 | 0.210194852 | 0.195503876 |
| 0.287556649 | 0.050990108 | 0.353168901 | 0.093209839 |
| 0.330275008 | 0.196099464 | 0.112076594 | 0.31396393  |
| 0.381955724 | 0.123513674 | 0.138525339 | 0.235552458 |
| 0.166975944 | 0.343052175 | 0.435663709 | 0.363198743 |
| 0.437389597 | 0.282691707 | 0.016784294 | 0.153259848 |
| 0.327692147 | 0.38455767  | 0.287802046 | 0.239737075 |
| 0.053803706 | 0.370107619 | 0.18113103  | 0.330115653 |
| 0.112466271 | 0.073734373 | 0.088470303 | 0.328837537 |
| 0.387497242 | 0.259561116 | 0.112960391 | 0.117513162 |
| 0.175914056 | 0.087894117 | 0.295939045 | 0.150449912 |
| 0.174250998 | 0.053154616 | 0.411594162 | 0.075634289 |
| 0.093908824 | 0.133997491 | 0.228468994 | 0.145526338 |
| 0.333824385 | 0.241356056 | 0.020621373 | 0.272529921 |
| 0.001817342 | 0.268012435 | 0.32310281  | 0.298034858 |
| 0.086786798 | 0.039063045 | 0.2446481   | 0.206886106 |
| 0.407684263 | 0.388933869 | 0.491159331 | 0.493398573 |
| 0.214208465 | 0.28419293  | 0.333417347 | 0.178136853 |
| 0.360292929 | 0.130618668 | 0.103285107 | 0.408413324 |
| 0.496277262 | 0.460530399 | 0.255756047 | 0.30264883  |
| 0.334496552 | 0.392947147 | 0.252484714 | 0.294679729 |
| 0.273407309 | 0.136686447 | 0.355744773 | 0.48789727  |
| 0.28549556  | 0.347209366 | 0.219088484 | 0.290938591 |
| 0.096280217 | 0.186959567 | 0.254602053 | 0.156947148 |
| 0.422885202 | 0.02683649  | 0.285123466 | 0.208921827 |
| 0.196379656 | 0.346321713 | 0.473001637 | 0.15516493  |
| 0.315511503 | 0.041378125 | 0.218817919 | 0.07431376  |
| 0.213956613 | 0.267013408 | 0.372147488 | 0.405106327 |
| 0.116468789 | 0.297108446 | 0.173894708 | 0.012707723 |

|             |             |             |             |
|-------------|-------------|-------------|-------------|
| 0.075567207 | 0.225128275 | 0.362267197 | 0.229230056 |
| 0.330852868 | 0.328862413 | 0.229867977 | 0.248328714 |
| 0.33125336  | 0.486038553 | 0.020586758 | 0.087334197 |
| 0.259014539 | 0.225585111 | 0.227136468 | 0.271363096 |
| 0.312411484 | 0.081983672 | 0.13326763  | 0.489563287 |
| 0.310895533 | 0.098442911 | 0.160025221 | 0.369080272 |
| 0.203340149 | 0.350656493 | 0.112370875 | 0.201519174 |
| 0.046970531 | 0.423087001 | 0.089206741 | 0.166162981 |
| 0.236869575 | 0.223079244 | 0.017191514 | 0.120889618 |
| 0.167708326 | 0.369829901 | 0.368366579 | 0.126904752 |
| 0.2226779   | 0.328454066 | 0.137684151 | 0.304486059 |
| 0.023078799 | 0.070368607 | 0.104999148 | 0.466782858 |
| 0.114111051 | 0.486059431 | 0.233149272 | 0.302714015 |
| 0.293925267 | 0.406032759 | 0.007407316 | 0.397472549 |
| 0.471021015 | 0.113835399 | 0.279980969 | 0.30690603  |
| 0.295473076 | 0.397801859 | 0.025757584 | 0.34883465  |
| 0.198783    | 0.100685617 | 0.496762803 | 0.210039603 |
| 0.384751946 | 0.081217328 | 0.15834673  | 0.434516731 |
| 0.353796635 | 0.015035518 | 0.089492523 | 0.250925572 |
| 0.08747439  | 0.045909211 | 0.31286857  | 0.287330284 |
| 0.259031513 | 0.407367514 | 0.473004039 | 0.2945246   |
| 0.304900245 | 0.15416847  | 0.0327724   | 0.334341526 |
| 0.380894605 | 0.242732442 | 0.339304819 | 0.160462819 |
| 0.138786489 | 0.398272672 | 0.347660416 | 0.117302595 |
| 0.05858737  | 0.164898133 | 0.020001048 | 0.289873196 |
| 0.327138437 | 0.097036357 | 0.26365029  | 0.179197349 |
| 0.142948336 | 0.486707344 | 0.297694481 | 0.322287279 |
| 0.251843683 | 0.22594902  | 0.183461539 | 0.152271806 |
| 0.20682467  | 0.196357049 | 0.312384343 | 0.271546676 |
| 0.027773154 | 0.129708917 | 0.051445978 | 0.242424168 |
| 0.132864703 | 0.218863608 | 0.190835101 | 0.254051418 |
| 0.190872729 | 0.11439088  | 0.305330411 | 0.311495096 |
| 0.194771019 | 0.043311151 | 0.444682083 | 0.31640738  |
| 0.184411625 | 0.140577119 | 0.083621002 | 0.193531973 |
| 0.416691801 | 0.129297116 | 0.097014192 | 0.377563674 |
| 0.04311311  | 0.474375485 | 0.204357826 | 0.183169913 |
| 0.316599774 | 0.219673157 | 0.421743429 | 0.045535297 |
| 0.199483049 | 0.375626581 | 0.280359684 | 0.228862917 |
| 0.289388192 | 0.268627954 | 0.037563015 | 0.284309985 |
| 0.269747379 | 0.064947095 | 0.483035707 | 0.208803427 |
| 0.058299233 | 0.387827992 | 0.365550572 | 0.13160346  |
| 0.144383136 | 0.219355497 | 0.025108521 | 0.295222509 |
| 0.471562477 | 0.381194984 | 0.33296871  | 0.305611361 |
| 0.058775755 | 0.022640386 | 0.293292786 | 0.292872596 |
| 0.409798949 | 0.488205904 | 0.24715442  | 0.322181508 |
| 0.206152218 | 0.295260696 | 0.049624859 | 0.481022703 |
| 0.207362479 | 0.443411335 | 0.021231081 | 0.419107593 |
| 0.427695318 | 0.113925309 | 0.15463466  | 0.162182215 |
| 0.274485794 | 0.063562527 | 0.155142037 | 0.418849672 |
| 0.367183403 | 0.276294402 | 0.268493128 | 0.313600484 |
| 0.015732421 | 0.035647911 | 0.31021367  | 0.298155274 |
| 0.246761541 | 0.222004183 | 0.156213694 | 0.162736317 |
| 0.064495281 | 0.365038057 | 0.426913547 | 0.106129495 |
| 0.153268438 | 0.145014501 | 0.327972979 | 0.061110163 |

|             |             |             |             |
|-------------|-------------|-------------|-------------|
| 0.459059244 | 0.458048448 | 0.436002015 | 0.120497743 |
| 0.364819242 | 0.457827432 | 0.300959235 | 0.142253727 |
| 0.059866777 | 0.455698936 | 0.242237859 | 0.032083995 |
| 0.444693299 | 0.079063879 | 0.023932287 | 0.41636686  |
| 0.157700217 | 0.329665084 | 0.003188749 | 0.105975507 |
| 0.11276867  | 0.46513666  | 0.390385672 | 0.228404708 |
| 0.091848138 | 0.245174288 | 0.019948002 | 0.496192555 |
| 0.413937298 | 0.057470744 | 0.250072576 | 0.369486492 |
| 0.388323895 | 0.445762357 | 0.337393287 | 0.446837686 |
| 0.307129373 | 0.429842746 | 0.157526681 | 0.275302894 |
| 0.366425565 | 0.460798477 | 0.303415545 | 0.370154053 |
| 0.413347    | 0.372770068 | 0.22007219  | 0.024968933 |
| 0.193911228 | 0.089414765 | 0.175762062 | 0.106931785 |
| 0.135925689 | 0.20410107  | 0.424720975 | 0.452499733 |
| 0.471609449 | 0.020897089 | 0.082936051 | 0.347031654 |
| 0.353264328 | 0.421464913 | 0.044395277 | 0.012602279 |
| 0.013711911 | 0.073025604 | 0.196629344 | 0.286151718 |
| 0.452187006 | 0.096538048 | 0.014658249 | 0.027076185 |
| 0.201275958 | 1           | 0.435796763 | 0.310537964 |
| 0.402861952 | 0.121286561 | 0.160762319 | 0.316624226 |
| 0.149615527 | 0.171799522 | 0.472021617 | 0.37699763  |
| 0.089291273 | 0.282956296 | 0.211851559 | 0.446086932 |
| 0.176152668 | 0.303128175 | 0.316160308 | 0.226690822 |
| 0.034068688 | 0.159547102 | 0.130841751 | 0.408846504 |
| 0.425362433 | 0.114386496 | 0.073539981 | 0.055801599 |
| 0.108283438 | 0.435381875 | 0.166455869 | 0.496371924 |
| 0.361025912 | 0.410765665 | 0.162455669 | 0.399617953 |
| 0.07462329  | 0.404124289 | 0.354770728 | 0.030457685 |
| 0.259440287 | 0.032488269 | 0.42264275  | 0.177966127 |
| 0.150975162 | 0.243478003 | 0.234511749 | 0.061632174 |
| 0.268924277 | 0.108108169 | 0.463531338 | 0.471464334 |
| 0.097440393 | 0.164333634 | 0.287387057 | 0.283540525 |
| 0.12971861  | 0.364491767 | 0.408824304 | 0.20869311  |
| 0.069036454 | 0.218635064 | 0.286435533 | 0.232979758 |
| 0.116842465 | 0.496039862 | 0.264973778 | 0.490787419 |
| 0.276878964 | 0.397512735 | 0.431289794 | 0.22689928  |
| 0.299533911 | 0.199739354 | 0.21722821  | 0.020382323 |
| 0.25216669  | 0.429761999 | 0.19822209  | 0.228441486 |
| 0.267983932 | 0.318364963 | 0.051678792 | 0.093241768 |
| 0.316917746 | 0.126279557 | 0.134135887 | 0.416093049 |
| 0.214620536 | 0.248222594 | 0.032583286 | 0.122771986 |
| 0.47618426  | 0.350645362 | 0.086296579 | 0.287818199 |
| 0.209418473 | 0.289777208 | 0.410513798 | 0.430025465 |
| 0.251279924 | 0.387940797 | 0.321251906 | 0.232340722 |
| 0.319906071 | 0.198875745 | 0.444983312 | 0.031442468 |
| 0.158684069 | 0.258168346 | 0.112926014 | 0.164244156 |
| 0.156069022 | 0.072685149 | 0.306229165 | 0.370172842 |
| 0.296968266 | 0.281234259 | 0.14477134  | 0.115116284 |
| 0.319667131 | 0.204052145 | 0.293270263 | 0.1193498   |
| 0.098797576 | 0.414569856 | 0.026027235 | 0.105681323 |
| 0.303143373 | 0.37821288  | 0.334652231 | 0.266162042 |
| 0.336470778 | 0.228693269 | 0.263209233 | 0.121082    |
| 0.158575545 | 0.248484025 | 0.372627947 | 0.034088307 |
| 0.021321586 | 0.483447934 | 0.186671209 | 0.063911046 |

|             |             |             |             |
|-------------|-------------|-------------|-------------|
| 0.132003799 | 0.202914305 | 0.216029746 | 0.205417107 |
| 0.077970304 | 0.453525508 | 0.154077053 | 0.313304565 |
| 0.194884965 | 0.095387171 | 0.239522469 | 0.076300998 |
| 0.071368099 | 0.349712134 | 0.319038947 | 0.455643747 |
| 0.311942389 | 0.380217261 | 0.32860301  | 0.354181989 |
| 0.127402889 | 0.24794028  | 0.035367541 | 0.377328535 |
| 0.262651394 |             |             |             |
| RAMP1       | 0.464379256 | 0.509020385 | 0.426076676 |
| 0.463080162 | 0.463928398 | 0.441320454 | 0.229275885 |
| 0.202757026 | 0.087251518 | 0.005978669 | 0.026886442 |
| 0.478704058 | 0.236431881 | 0.313769596 | 0.37806428  |
| 0.442660772 | 0.140554348 | 0.363096431 | 0.250099893 |
| 0.442828776 | 0.10545085  | 0.428868089 | 0.092389419 |
| 0.296856165 | 0.107264797 | 0.070302401 | 0.284486462 |
| 0.475933172 | 0.079504913 | 0.404850209 | 0.4324781   |
| 0.09313651  | 0.484152845 | 0.524523773 | 0.484292919 |
| 0.52348286  | 0.451086065 | 0.010585596 | 0.350018464 |
| 0.466346045 | 0.487699192 | 0.443484733 | 0.355269587 |
| 0.04281343  | 0.500600107 | 0.267470652 | 0.419392814 |
| 0.258594861 | 0.031684532 | 0.28499975  | 0.450953678 |
| 0.496533897 | 0.501437024 | 0.246638436 | 0.175326533 |
| 0.254864581 | 0.278431583 | 0.320577616 | 0.384850647 |
| 0.244087105 | 0.195291904 | 0.494609207 | 0.097078078 |
| 0.165757859 | 0.265953109 | 0.148567293 | 0.283826659 |
| 0.374893054 | 0.444904716 | 0.015507948 | 0.453975136 |
| 0.00392267  | 0.411968967 | 0.388888643 | 0.349581419 |
| 0.039089972 | 0.023687039 | 0.174522816 | 0.37851311  |
| 0.489408777 | 0.465019542 | 0.508028316 | 0.509563156 |
| 0.194525989 | 0.293194395 | 0.426108379 | 0.183233375 |
| 0.485938068 | 0.201317977 | 0.110953443 | 0.447585434 |
| 0.510735832 | 0.518558887 | 0.204518377 | 0.262590985 |
| 0.495956392 | 0.492798778 | 0.475504166 | 0.473643823 |
| 0.392198129 | 0.045446016 | 0.484807333 | 0.515006077 |
| 0.457352864 | 0.340956075 | 0.153774918 | 0.46250119  |
| 0.054962426 | 0.407066367 | 0.381150054 | 0.166510808 |
| 0.491928472 | 0.017726969 | 0.214222733 | 0.406307652 |
| 0.205389112 | 0.49163727  | 0.509826527 | 0.198178405 |
| 0.431803599 | 0.019524562 | 0.148013277 | 0.028447182 |
| 0.36455237  | 0.151023689 | 0.509674279 | 0.505419022 |
| 0.261450758 | 0.416617437 | 0.281108354 | 0.000889324 |
| 0.024387659 | 0.175892364 | 0.499891777 | 0.38473334  |
| 0.469360142 | 0.437670119 | 0.258912512 | 0.458968426 |
| 0.50086422  | 0.507163963 | 0.080210248 | 0.095521274 |
| 0.467009478 | 0.174939677 | 0.2455307   | 0.501764061 |
| 0.329839391 | 0.116583938 | 0.130419694 | 0.510842589 |
| 0.455390162 | 0.085709307 | 0.369601462 | 0.439775927 |
| 0.393376884 | 0.378746018 | 0.105819753 | 0.311187099 |
| 0.053076181 | 0.488752913 | 0.024835459 | 0.357744431 |
| 0.312703963 | 0.15805868  | 0.00832837  | 0.293438108 |
| 0.335684255 | 0.508581372 | 0.493313456 | 0.102090317 |
| 0.35632111  | 0.439737779 | 0.368463439 | 0.502251084 |
| 0.012708612 | 0.041700615 | 0.327984717 | 0.516324241 |
| 0.357338385 | 0.502517153 | 0.311433848 | 0.308250539 |
| 0.290983802 | 0.48239752  | 0.002642029 | 0.508310149 |



|             |             |             |             |
|-------------|-------------|-------------|-------------|
| 0.519966221 | 0.355885066 | 0.451937798 | 0.443468834 |
| 0.423518331 | 0.496970625 | 0.047086977 | 0.447183391 |
| 0.421427103 | 0.073670502 | 0.506867141 | 0.165965759 |
| 0.481708643 | 0.040709193 | 0.36552263  | 0.489744328 |
| 0.503036754 | 0.008363454 | 0.271516528 | 0.429720839 |
| 0.022907246 | 0.112337106 | 0.467053619 | 0.447018024 |
| 0.42619005  | 0.479849835 | 0.495886249 | 0.406299897 |
| 0.467521349 | 0.243383179 | 0.009827953 | 0.326368197 |
| 0.481304152 | 0.4356387   | 0.47037422  | 0.257523644 |
| 0.401820857 | 0.498161103 | 0.48608366  | 0.254398564 |
| 0.043505014 | 0.348714012 | 0.022554365 | 0.358015956 |
| 0.456083196 | 0.139998984 | 0.443288036 | 0.137436628 |
| 0.067980233 | 0.513606096 | 0.178454938 | 0.278456252 |
| 0.129829853 | 0.47665447  | 0.25903148  | 0.298255144 |
| 0.263721997 | 0.164835588 | 0.384828299 | 0.418826537 |
| 0.041050048 | 0.097707541 | 0.010375962 | 0.456670263 |
| 0.180480816 | 0.421118382 | 0.426578298 | 0.478432396 |
| 0.373771017 | 0.127887145 | 0.426700246 | 0.293682851 |
| 0.110092219 | 0.012920081 | 0.504559268 | 0.428607799 |
| 0.407375813 | 0.158617316 | 0.036488923 | 0.422441323 |
| 0.511131107 | 0.401763132 | 0.319437286 | 0.501809011 |
| 0.023738071 | 0.503374402 | 0.291736313 | 0.125133608 |
| 0.432264734 | 0.284687935 | 0.48665139  | 0.071087915 |
| 0.436851142 | 0.491510193 | 0.314038517 | 0.195541136 |
| 0.463231926 | 0.455230058 | 0.030911578 | 0.470133881 |
| 0.472991852 | 0.030138677 | 0.508361191 | 0.126017098 |
| 0.017830602 | 0.477269368 | 0.506347518 | 0.071304674 |
| 0.073142548 | 0.393421808 | 0.050698192 | 0.301162986 |
| 0.512533375 | 0.442844711 | 0.505714557 | 0.21318007  |
| 0.042186021 | 0.013452138 | 0.204761443 | 0.428245468 |
| 0.523790172 | 0.507108977 | 0.264764063 | 0.414649078 |
| 0.249821305 | 0.371142452 | 0.168194779 | 0.516214061 |
| 0.180194077 | 0.511119705 | 0.005139831 | 0.492391327 |
| 0.524400507 | 0.347615649 | 0.081473482 | 0.354213125 |
| 0.468828575 | 0.044751741 | 0.201951212 | 0.499096101 |
| 0.490145721 | 0.359058814 | 0.392993313 | 0.461615215 |
| 0.016865796 | 0.043952553 | 0.417417419 | 0.186024163 |
| 0.440757819 | 0.220382277 | 0.051168952 | 0.361587934 |
| 0.046397684 | 0.491654555 | 0.489037469 | 0.060063756 |
| 0.42513129  | 0.339444806 | 0.397838255 | 0.034900803 |
| 0.496967727 | 0.48613882  | 0.527039485 | 0.164417992 |
| 0.498737357 | 0.508637769 | 0.467503663 | 0.071920783 |
| 0.01447198  | 0.51779642  | 0.449844746 | 0.025101924 |
| 0.501281686 | 0.293065844 | 0.016260879 | 0.497096555 |
| 0.189715498 | 0.46882589  | 0.003765984 | 0.077553103 |
| 0.033448029 | 0.488222118 | 0.491413325 | 0.425555111 |
| 0.323658312 | 0.3851149   | 0.004216463 | 0.504446318 |
| 0.49866748  | 0.012033963 | 0.137766658 | 0.511936916 |
| 0.492559188 | 0.517193567 | 0.350919629 | 0.508014129 |
| 0.488808316 | 0.510896174 | 0.274215891 | 0.280466005 |
| 0.503667234 | 0.486396094 | 0.470890177 | 0.478639855 |
| 0.506330923 | 0.454419432 | 0.300138064 | 0.015772534 |
| 0.136268063 | 0.247496222 | 0.389144538 | 0.094664082 |
| 0.383468104 | 0.145638472 | 0.495460522 | 0.499814569 |

|             |             |             |             |
|-------------|-------------|-------------|-------------|
| 0.513822345 | 0.003565066 | 0.167955157 | 0.504074694 |
| 0.484651525 | 0.493967304 | 0.015731694 | 0.005212357 |
| 0.006942063 | 0.019793465 | 0.398622766 | 0.241542686 |
| 0.507344242 | 0.321797987 | 0.003676513 | 0.046499525 |
| 0.299649345 | 0.435796763 | 1           | 0.404398955 |
| 0.485970557 | 0.077242682 | 0.359210511 | 0.42483984  |
| 0.067727016 | 0.393074289 | 0.51638342  | 0.484466551 |
| 0.034603955 | 0.247629932 | 0.404489077 | 0.505332187 |
| 0.076118032 | 0.329653619 | 0.486638767 | 0.367543815 |
| 0.010411122 | 0.077468353 | 0.062932317 | 0.468125699 |
| 0.514958695 | 0.091006774 | 0.036642676 | 0.1788329   |
| 0.137474436 | 0.500349141 | 0.180893685 | 0.512667888 |
| 0.493292546 | 0.472345177 | 0.070240527 | 0.48388633  |
| 0.040773866 | 0.498326419 | 0.367947379 | 0.069689224 |
| 0.286551393 | 0.009854294 | 0.485187438 | 0.189646072 |
| 0.377162654 | 0.442593961 | 0.206783507 | 0.013545824 |
| 0.185965161 | 0.049944076 | 0.50679837  | 0.497074541 |
| 0.027239297 | 0.246438175 | 0.302506881 | 0.429303705 |
| 0.33222242  | 0.486084524 | 0.515372808 | 0.483800862 |
| 0.092443794 | 0.139425416 | 0.448065703 | 0.456841241 |
| 0.269434363 | 0.505759735 | 0.346149765 | 0.505157521 |
| 0.462335953 | 0.485132549 | 0.505670537 | 0.38599554  |
| 0.251652791 | 0.451735269 | 0.444669307 | 0.023138061 |
| 0.375272619 | 0.507458533 | 0.384622    | 0.16847771  |
| 0.28225032  | 0.429069936 | 0.042285461 | 0.198157307 |
| 0.368594368 | 0.37224706  | 0.157338992 | 0.466038139 |
| 0.433338131 | 0.461983733 | 0.03805126  | 0.059930781 |
| 0.525763698 | 0.470430604 | 0.155867129 | 0.485876322 |
| 0.165901362 | 0.375251668 | 0.493757541 | 0.48969448  |
| 0.401612315 | 0.51558884  | 0.481369852 | 0.466724282 |
| 0.471773805 | 0.274620674 | 0.527895378 | 0.097370734 |
| 0.08391855  | 0.470517758 | 0.111933714 | 0.086357257 |
| 0.149064501 | 0.023079751 | 0.33579575  | 0.454361111 |
| 0.426314362 | 0.421895653 | 0.367073353 | 0.078114382 |
| 0.33485887  | 0.398297092 | 0.375857591 | 0.231229603 |
| 0.085432917 | 0.508574053 | 0.00829655  | 0.051880258 |
| 0.436469693 | 0.500421458 | 0.434972526 | 0.243493966 |
| 0.326737798 | 0.131709841 | 0.321980087 | 0.351922419 |
| 0.413037676 | 0.396955468 | 0.502018431 | 0.03240192  |
| 0.019255219 | 0.505991415 | 0.419168027 | 0.015839454 |
| 0.082427264 | 0.434226359 | 0.299080814 | 0.270094071 |
| 0.017827025 | 0.502422567 | 0.413520758 | 0.463300207 |
| 0.380675824 | 0.060757448 | 0.4157154   | 0.085922567 |
| 0.0525009   | 0.469059115 | 0.427022082 | 0.512278725 |
| 0.359227686 | 0.459276916 | 0.46299428  | 0.505017909 |
| 0.11369822  | 0.421005474 | 0.026742935 | 0.487000496 |
| 0.475547434 |             |             |             |
| RAP2A       | 0.321211962 | 0.442392804 | 0.294125176 |
| 0.407498347 | 0.363408557 | 0.257993647 | 0.331456367 |
| 0.266544986 | 0.188314076 | 0.03271462  | 0.068722943 |
| 0.307125307 | 0.236924831 | 0.299211827 | 0.246474702 |
| 0.42874867  | 0.250125773 | 0.330928911 | 0.387019566 |
| 0.375378843 | 0.207670537 | 0.386002711 | 0.267536072 |
| 0.297486073 | 0.197016647 | 0.20296725  | 0.279401193 |

|             |             |             |             |
|-------------|-------------|-------------|-------------|
| 0.458887687 | 0.223585908 | 0.231181702 | 0.341624742 |
| 0.247101668 | 0.376889881 | 0.397692816 | 0.327955007 |
| 0.377791159 | 0.275528143 | 0.049898392 | 0.261985188 |
| 0.371172315 | 0.358944447 | 0.381113615 | 0.389144374 |
| 0.169091019 | 0.364481008 | 0.354561448 | 0.34907902  |
| 0.23632067  | 0.121510951 | 0.213033828 | 0.347650566 |
| 0.344916102 | 0.278465158 | 0.305712271 | 0.293960333 |
| 0.173124967 | 0.216998037 | 0.182345711 | 0.234964921 |
| 0.35954927  | 0.174804728 | 0.365569008 | 0.19429483  |
| 0.184041291 | 0.341754527 | 0.274818427 | 0.344883555 |
| 0.27118111  | 0.308525044 | 0.117295261 | 0.242779291 |
| 0.013783233 | 0.383224736 | 0.371058593 | 0.204181049 |
| 0.170962513 | 0.090293328 | 0.306095376 | 0.359737229 |
| 0.460859779 | 0.367792261 | 0.458137042 | 0.436163477 |
| 0.271491554 | 0.387902722 | 0.287912853 | 0.322886771 |
| 0.379987521 | 0.293376461 | 0.217452011 | 0.427365092 |
| 0.456856719 | 0.411864881 | 0.315663804 | 0.353778991 |
| 0.346900246 | 0.413445296 | 0.297267676 | 0.341094326 |
| 0.236607751 | 0.146843317 | 0.346194452 | 0.447680502 |
| 0.329014427 | 0.248014561 | 0.290598479 | 0.380850989 |
| 0.214970478 | 0.269336974 | 0.395494474 | 0.221872892 |
| 0.473108009 | 0.100656526 | 0.314994269 | 0.34916136  |
| 0.35593384  | 0.366939507 | 0.403381872 | 0.348864047 |
| 0.353327208 | 0.097131294 | 0.138554726 | 0.153259641 |
| 0.313872166 | 0.140809603 | 0.334879938 | 0.434413691 |
| 0.291187127 | 0.331063676 | 0.379215695 | 0.032659695 |
| 0.122724533 | 0.293352186 | 0.341494867 | 0.353997971 |
| 0.375730134 | 0.280838759 | 0.295327028 | 0.287154136 |
| 0.266739066 | 0.45134398  | 0.042133169 | 0.277761925 |
| 0.337935655 | 0.301569192 | 0.385993214 | 0.309108373 |
| 0.345227534 | 0.286178487 | 0.309063892 | 0.469766238 |
| 0.358347779 | 0.256491707 | 0.27961627  | 0.408044278 |
| 0.27792895  | 0.339688036 | 0.295367235 | 0.345429855 |
| 0.186195748 | 0.353606918 | 0.115995265 | 0.319710257 |
| 0.185737469 | 0.212647689 | 0.077755446 | 0.298976969 |
| 0.283662752 | 0.344714513 | 0.321919292 | 0.293973773 |
| 0.366069639 | 0.373043477 | 0.262910219 | 0.302128016 |
| 0.045898842 | 0.18711396  | 0.205414447 | 0.444083691 |
| 0.191948224 | 0.444107518 | 0.399981681 | 0.364961186 |
| 0.377054036 | 0.434346718 | 0.008539348 | 0.37326507  |
| 0.409926991 | 0.200643074 | 0.340076087 | 0.349247737 |
| 0.249423246 | 0.4324188   | 0.037777444 | 0.39733548  |
| 0.241735514 | 0.258837126 | 0.484073233 | 0.298363484 |
| 0.365077022 | 0.160542861 | 0.309297346 | 0.342358011 |
| 0.284011082 | 0.038783031 | 0.22394185  | 0.352536414 |
| 0.110133773 | 0.195407652 | 0.358925015 | 0.364907708 |
| 0.335992177 | 0.402957788 | 0.489260348 | 0.232619347 |
| 0.357562087 | 0.368679656 | 0.084897016 | 0.354039973 |
| 0.364558199 | 0.234501158 | 0.363193812 | 0.357163353 |
| 0.207536171 | 0.40192345  | 0.305582726 | 0.150672417 |
| 0.177631231 | 0.340947188 | 0.077207036 | 0.350962026 |
| 0.299862898 | 0.231886455 | 0.255855262 | 0.275087216 |
| 0.197863994 | 0.455090885 | 0.204554578 | 0.201697613 |
| 0.132295784 | 0.289926627 | 0.394256607 | 0.231550611 |

|             |             |             |             |
|-------------|-------------|-------------|-------------|
| 0.20363119  | 0.321443622 | 0.29411644  | 0.319306224 |
| 0.147787348 | 0.244093206 | 0.064135302 | 0.217323208 |
| 0.163362588 | 0.238525124 | 0.220001754 | 0.281967536 |
| 0.311665154 | 0.205210968 | 0.351745385 | 0.279501152 |
| 0.236466207 | 0.098145489 | 0.431377133 | 0.388692501 |
| 0.243069289 | 0.32781894  | 0.172648365 | 0.195335743 |
| 0.432484807 | 0.189607879 | 0.189974909 | 0.402140873 |
| 0.123225414 | 0.455336686 | 0.288545193 | 0.262713096 |
| 0.289268685 | 0.369105894 | 0.470316678 | 0.08729696  |
| 0.302824216 | 0.390183822 | 0.393580265 | 0.296798913 |
| 0.313082559 | 0.361867628 | 0.143201004 | 0.303159386 |
| 0.291002193 | 0.14831142  | 0.435074671 | 0.24214073  |
| 0.116400704 | 0.343548286 | 0.30902116  | 0.225215365 |
| 0.215560499 | 0.306613064 | 0.150767993 | 0.379163674 |
| 0.449410663 | 0.409562595 | 0.326149001 | 0.266085362 |
| 0.163268799 | 0.042606428 | 0.29792633  | 0.288298322 |
| 0.379335971 | 0.418012766 | 0.396274872 | 0.3088034   |
| 0.390648378 | 0.276630524 | 0.166931882 | 0.439490962 |
| 0.248397785 | 0.41123394  | 0.06513766  | 0.343201485 |
| 0.368482233 | 0.229940713 | 0.190881683 | 0.316814419 |
| 0.316462634 | 0.187511361 | 0.362477378 | 0.391845512 |
| 0.385150219 | 0.332865214 | 0.287843519 | 0.345250121 |
| 0.095397967 | 0.171415644 | 0.335388462 | 0.189169595 |
| 0.30499671  | 0.352001121 | 0.058155202 | 0.310356512 |
| 0.156168848 | 0.374746215 | 0.441144039 | 0.165961707 |
| 0.214400604 | 0.283355237 | 0.381352933 | 0.171250389 |
| 0.361998756 | 0.392516294 | 0.403729763 | 0.34154462  |
| 0.344406728 | 0.392896556 | 0.235360755 | 0.229966503 |
| 0.094490534 | 0.391383348 | 0.303273696 | 0.080132707 |
| 0.466352075 | 0.17757234  | 0.057976149 | 0.42966473  |
| 0.362417949 | 0.312958508 | 0.017323597 | 0.085454217 |
| 0.134313858 | 0.435388188 | 0.363033855 | 0.333986385 |
| 0.16062548  | 0.392570041 | 0.022093616 | 0.440471457 |
| 0.396776538 | 0.076320953 | 0.236590347 | 0.325272534 |
| 0.290966899 | 0.441940753 | 0.249571074 | 0.368241145 |
| 0.268279794 | 0.370931056 | 0.30346405  | 0.373929167 |
| 0.385499444 | 0.3694388   | 0.368018133 | 0.391293376 |
| 0.440530237 | 0.360093879 | 0.386922964 | 0.095050975 |
| 0.169047847 | 0.255143052 | 0.180913425 | 0.139318758 |
| 0.232175369 | 0.252292655 | 0.410678806 | 0.456073792 |
| 0.410257196 | 0.051696214 | 0.271505463 | 0.333111315 |
| 0.421544273 | 0.469745114 | 0.090906237 | 0.018307287 |
| 0.016561907 | 0.058066202 | 0.354018217 | 0.351674045 |
| 0.419598435 | 0.149658575 | 0.051953423 | 0.160395075 |
| 0.353718678 | 0.310537964 | 0.404398955 | 1           |
| 0.361893366 | 0.248400273 | 0.21266013  | 0.409052414 |
| 0.162916213 | 0.210630613 | 0.426907583 | 0.388671042 |
| 0.159909505 | 0.352179067 | 0.312035722 | 0.472447435 |
| 0.05892251  | 0.392394158 | 0.30648039  | 0.315031254 |
| 0.065607215 | 0.209746016 | 0.182437509 | 0.42788937  |
| 0.35814714  | 0.160922902 | 0.111009089 | 0.122264626 |
| 0.243765346 | 0.433866879 | 0.297639092 | 0.476200488 |
| 0.411589606 | 0.465641851 | 0.180077767 | 0.387757392 |
| 0.129445637 | 0.368905582 | 0.300076015 | 0.068964684 |

|             |             |             |             |
|-------------|-------------|-------------|-------------|
| 0.366047879 | 0.094242187 | 0.364508781 | 0.126369875 |
| 0.287981578 | 0.319080512 | 0.206506638 | 0.086280621 |
| 0.159576994 | 0.183151588 | 0.460000899 | 0.42088239  |
| 0.122321974 | 0.37258312  | 0.389224828 | 0.370897108 |
| 0.284268546 | 0.394830693 | 0.385195022 | 0.224973058 |
| 0.229694906 | 0.15092836  | 0.380356824 | 0.272282843 |
| 0.294622385 | 0.468779994 | 0.27988307  | 0.448195737 |
| 0.320187613 | 0.409259407 | 0.390093968 | 0.358399383 |
| 0.251767505 | 0.288500124 | 0.284633208 | 0.083404383 |
| 0.399761485 | 0.433614355 | 0.342203234 | 0.223242384 |
| 0.332578389 | 0.255009095 | 0.181698408 | 0.162730966 |
| 0.211462352 | 0.239667814 | 0.287767649 | 0.468487263 |
| 0.307929478 | 0.286224358 | 0.159431614 | 0.173400791 |
| 0.4511794   | 0.37016559  | 0.242021486 | 0.326932928 |
| 0.339083831 | 0.363641433 | 0.378995938 | 0.375316164 |
| 0.280141583 | 0.369464517 | 0.385287433 | 0.284782664 |
| 0.355487559 | 0.387293095 | 0.409328289 | 0.155615307 |
| 0.158391988 | 0.264824672 | 0.208450716 | 0.239143314 |
| 0.315700553 | 0.122935277 | 0.188273899 | 0.399804194 |
| 0.222998163 | 0.380915833 | 0.250662825 | 0.216919349 |
| 0.376152747 | 0.26922357  | 0.402755297 | 0.292480719 |
| 0.203603852 | 0.383795124 | 0.053296196 | 0.200132204 |
| 0.249840846 | 0.353344152 | 0.275758392 | 0.363660829 |
| 0.237662736 | 0.249333725 | 0.39247633  | 0.246001764 |
| 0.202191563 | 0.265335179 | 0.349950033 | 0.133899958 |
| 0.117014349 | 0.47813221  | 0.281413329 | 0.095014847 |
| 0.172197583 | 0.25145066  | 0.351233333 | 0.287163485 |
| 0.095538676 | 0.37524715  | 0.225200413 | 0.336139246 |
| 0.360605521 | 0.233478885 | 0.282478776 | 0.175118587 |
| 0.210226388 | 0.360224912 | 0.295089747 | 0.39307356  |
| 0.329258448 | 0.425711579 | 0.330062308 | 0.348503616 |
| 0.216186503 | 0.240221643 | 0.141908845 | 0.426254615 |
| 0.22682359  |             |             |             |

RAPGEF6 0.389560173

0.50701374

0.409082153

|             |             |             |             |
|-------------|-------------|-------------|-------------|
| 0.353373441 | 0.409773143 | 0.292457299 | 0.183578608 |
| 0.166075674 | 0.090591022 | 0.003099795 | 0.024282505 |
| 0.416552277 | 0.181230461 | 0.214867698 | 0.278990587 |
| 0.394890915 | 0.159118602 | 0.36749471  | 0.238124486 |
| 0.371825507 | 0.072194463 | 0.378777661 | 0.096191251 |
| 0.359669639 | 0.129009201 | 0.079061612 | 0.291674761 |
| 0.401756213 | 0.092330905 | 0.237807477 | 0.319665979 |
| 0.157804585 | 0.390829653 | 0.508410936 | 0.395587618 |
| 0.505992982 | 0.362661708 | 0.023592872 | 0.223669613 |
| 0.397735783 | 0.393456562 | 0.359598221 | 0.300194421 |
| 0.043066656 | 0.460935569 | 0.22015223  | 0.420569017 |
| 0.209112226 | 0.037047851 | 0.177952415 | 0.419797384 |
| 0.448951769 | 0.364702393 | 0.194222221 | 0.140124279 |
| 0.166215408 | 0.172406079 | 0.273179417 | 0.251290036 |
| 0.208668224 | 0.108822371 | 0.468447185 | 0.079006943 |
| 0.136302247 | 0.235180543 | 0.214655872 | 0.230257625 |
| 0.386643583 | 0.313777259 | 0.023943241 | 0.39632867  |
| 0.001424446 | 0.358116704 | 0.411440973 | 0.320136378 |
| 0.059053625 | 0.019179803 | 0.237912807 | 0.287421798 |
| 0.432977509 | 0.468319306 | 0.475327132 | 0.488383448 |

|             |             |             |             |
|-------------|-------------|-------------|-------------|
| 0.191812537 | 0.344819051 | 0.416602776 | 0.175711266 |
| 0.411694008 | 0.150796374 | 0.119590764 | 0.401602313 |
| 0.485690074 | 0.509859292 | 0.232473053 | 0.315845594 |
| 0.350917323 | 0.456996438 | 0.366457922 | 0.384654802 |
| 0.307525256 | 0.101965217 | 0.414108008 | 0.50379377  |
| 0.361557988 | 0.363239246 | 0.185063354 | 0.337744917 |
| 0.080989059 | 0.326785112 | 0.325473891 | 0.192901333 |
| 0.444797414 | 0.019687036 | 0.262558494 | 0.299113675 |
| 0.271083951 | 0.38473788  | 0.513253306 | 0.181450685 |
| 0.421988158 | 0.026078741 | 0.154566626 | 0.059689314 |
| 0.295232442 | 0.212426071 | 0.460929936 | 0.414261565 |
| 0.199469242 | 0.365080215 | 0.248132598 | 0.005515537 |
| 0.043415284 | 0.27068247  | 0.398214466 | 0.379718446 |
| 0.395609018 | 0.394303093 | 0.217958286 | 0.319001046 |
| 0.395248815 | 0.470678661 | 0.03733941  | 0.103722539 |
| 0.369639306 | 0.26879986  | 0.253872477 | 0.39253345  |
| 0.314840465 | 0.115547338 | 0.137944668 | 0.50875388  |
| 0.393586833 | 0.091549761 | 0.31672261  | 0.396606167 |
| 0.2666631   | 0.379281435 | 0.121321236 | 0.248922302 |
| 0.047053866 | 0.479300636 | 0.051651574 | 0.307219782 |
| 0.247689309 | 0.180958431 | 0.021996205 | 0.217136177 |
| 0.233200043 | 0.384215199 | 0.461100431 | 0.132833225 |
| 0.287002189 | 0.391426462 | 0.270732306 | 0.336408611 |
| 0.008407724 | 0.067479824 | 0.23432739  | 0.489047048 |
| 0.208265396 | 0.509186208 | 0.308590433 | 0.358265675 |
| 0.314604739 | 0.410662115 | 0.00821185  | 0.475619341 |
| 0.518724894 | 0.240424921 | 0.345324097 | 0.426706146 |
| 0.358395798 | 0.402363066 | 0.049821793 | 0.394889392 |
| 0.303095556 | 0.102482496 | 0.496942254 | 0.179411406 |
| 0.453976561 | 0.050945243 | 0.265201882 | 0.4219635   |
| 0.369237591 | 0.01086801  | 0.164285061 | 0.330128757 |
| 0.054897625 | 0.073411236 | 0.388969893 | 0.36240635  |
| 0.334975043 | 0.416682116 | 0.467926783 | 0.341779259 |
| 0.39364199  | 0.230856672 | 0.023972451 | 0.369464582 |
| 0.408529889 | 0.347911967 | 0.412708416 | 0.221343652 |
| 0.277878073 | 0.449940377 | 0.386044633 | 0.168535229 |
| 0.046731899 | 0.269705936 | 0.018164056 | 0.326201927 |
| 0.388672094 | 0.096661286 | 0.361753318 | 0.223293941 |
| 0.099923319 | 0.512193999 | 0.248339487 | 0.322786904 |
| 0.190922962 | 0.319383481 | 0.255722522 | 0.175399285 |
| 0.180957643 | 0.187203257 | 0.353883882 | 0.348295801 |
| 0.031445284 | 0.103839161 | 0.041643284 | 0.32014087  |
| 0.109764301 | 0.269891372 | 0.255816588 | 0.338218965 |
| 0.279795874 | 0.098974444 | 0.354595084 | 0.35304038  |
| 0.152452554 | 0.024115512 | 0.491832114 | 0.391361725 |
| 0.262336261 | 0.15950052  | 0.063574238 | 0.271216793 |
| 0.428463169 | 0.228049556 | 0.218662175 | 0.41513862  |
| 0.04389971  | 0.483313897 | 0.215453324 | 0.143417234 |
| 0.355780243 | 0.247417508 | 0.432544825 | 0.05152522  |
| 0.352321266 | 0.436435493 | 0.358246257 | 0.200328345 |
| 0.354196998 | 0.368690825 | 0.030814335 | 0.346699013 |
| 0.33255882  | 0.041321    | 0.518582845 | 0.168495609 |
| 0.03594981  | 0.424586927 | 0.373508252 | 0.102076674 |
| 0.109631826 | 0.271119937 | 0.037674134 | 0.314491145 |

|             |             |             |             |
|-------------|-------------|-------------|-------------|
| 0.500840324 | 0.383329821 | 0.348318055 | 0.30498713  |
| 0.041502645 | 0.008521562 | 0.285220309 | 0.418663423 |
| 0.492014165 | 0.511308785 | 0.294187047 | 0.342778528 |
| 0.245424909 | 0.31808753  | 0.115198775 | 0.495862132 |
| 0.298214527 | 0.514302488 | 0.012321422 | 0.404445354 |
| 0.496788479 | 0.222523088 | 0.099186567 | 0.249034415 |
| 0.333943376 | 0.053475221 | 0.235538264 | 0.478486936 |
| 0.409816112 | 0.325849161 | 0.318159708 | 0.417368515 |
| 0.014471841 | 0.04061726  | 0.392463979 | 0.261379585 |
| 0.336192567 | 0.237599177 | 0.09665333  | 0.290155515 |
| 0.04348653  | 0.418172887 | 0.431268514 | 0.070004589 |
| 0.243547517 | 0.277584211 | 0.40000378  | 0.046737662 |
| 0.449967366 | 0.510494619 | 0.505072614 | 0.179070444 |
| 0.394838595 | 0.476076046 | 0.376755471 | 0.121619196 |
| 0.032203184 | 0.513596591 | 0.348819957 | 0.02253934  |
| 0.451425246 | 0.169120609 | 0.009800221 | 0.475747834 |
| 0.193833536 | 0.427165829 | 0.003791458 | 0.147916495 |
| 0.083570117 | 0.449513881 | 0.458646225 | 0.329449904 |
| 0.166162933 | 0.370527923 | 0.020118539 | 0.529326282 |
| 0.464627459 | 0.026376313 | 0.204816573 | 0.382965317 |
| 0.38054925  | 0.515160752 | 0.341653378 | 0.42914459  |
| 0.38875717  | 0.486115337 | 0.196927977 | 0.289803094 |
| 0.38806068  | 0.497113095 | 0.364789692 | 0.44304929  |
| 0.422280142 | 0.421718431 | 0.266799394 | 0.015970015 |
| 0.169015362 | 0.168833059 | 0.236435975 | 0.07893581  |
| 0.26178144  | 0.161399697 | 0.478453174 | 0.452299563 |
| 0.472671842 | 0.010187788 | 0.131492379 | 0.381652971 |
| 0.401029921 | 0.454205049 | 0.046748856 | 0.009996167 |
| 0.015374801 | 0.025580353 | 0.318773986 | 0.304221493 |
| 0.482121905 | 0.158176346 | 0.007330054 | 0.039315305 |
| 0.275329962 | 0.402861952 | 0.485970557 | 0.361893366 |
| 1           | 0.109257494 | 0.204360489 | 0.376793879 |
| 0.089895042 | 0.277534021 | 0.471992274 | 0.443243102 |
| 0.077930947 | 0.305869739 | 0.370540201 | 0.465144234 |
| 0.113288899 | 0.347730773 | 0.413326986 | 0.268025961 |
| 0.035981929 | 0.117573309 | 0.089817203 | 0.416718313 |
| 0.490790255 | 0.073214039 | 0.035760656 | 0.112905423 |
| 0.102517697 | 0.457735952 | 0.160663489 | 0.508357927 |
| 0.3911256   | 0.399231576 | 0.121788571 | 0.465797577 |
| 0.04411098  | 0.467640439 | 0.36514147  | 0.045421405 |
| 0.352693088 | 0.023723987 | 0.475547231 | 0.138111028 |
| 0.262141438 | 0.356455176 | 0.22671968  | 0.03540128  |
| 0.253756319 | 0.07389983  | 0.454791453 | 0.450721985 |
| 0.07198582  | 0.239699153 | 0.343999757 | 0.402545021 |
| 0.228088792 | 0.371323132 | 0.483930736 | 0.327472786 |
| 0.075732309 | 0.230809202 | 0.361800367 | 0.342177165 |
| 0.204553097 | 0.487909149 | 0.2733902   | 0.527719222 |
| 0.359441994 | 0.459088227 | 0.463177206 | 0.311881323 |
| 0.279067574 | 0.34155934  | 0.284759711 | 0.015466864 |
| 0.348154608 | 0.419116908 | 0.346200722 | 0.167528966 |
| 0.258625164 | 0.401779576 | 0.067525434 | 0.199590048 |
| 0.361574821 | 0.229941302 | 0.13768811  | 0.412576556 |
| 0.356665947 | 0.342038906 | 0.050749444 | 0.080077678 |
| 0.531737321 | 0.425288455 | 0.128178185 | 0.360013489 |

|             |             |             |             |
|-------------|-------------|-------------|-------------|
| 0.222166321 | 0.335644741 | 0.416339976 | 0.420285602 |
| 0.372823373 | 0.405277195 | 0.361660604 | 0.296871317 |
| 0.38654336  | 0.256750891 | 0.509943456 | 0.074708685 |
| 0.111657248 | 0.390033767 | 0.087236344 | 0.134658157 |
| 0.151713584 | 0.045839948 | 0.326630007 | 0.412383618 |
| 0.373996001 | 0.351586354 | 0.280360543 | 0.109771571 |
| 0.371925235 | 0.371474285 | 0.368208575 | 0.162657101 |
| 0.075837853 | 0.473578032 | 0.015196582 | 0.082937063 |
| 0.385468089 | 0.386172352 | 0.368228371 | 0.281788915 |
| 0.331008103 | 0.220169688 | 0.30180198  | 0.229198341 |
| 0.226683616 | 0.37274106  | 0.387930791 | 0.040574201 |
| 0.01974998  | 0.486081563 | 0.33576229  | 0.04985803  |
| 0.135350304 | 0.341822576 | 0.344120509 | 0.216451796 |
| 0.045808642 | 0.47574782  | 0.247061189 | 0.420356091 |
| 0.306813984 | 0.091986765 | 0.329863988 | 0.103347604 |
| 0.087349535 | 0.430837779 | 0.414643531 | 0.506761894 |
| 0.413779275 | 0.376753675 | 0.427824396 | 0.389266592 |
| 0.177962678 | 0.392005292 | 0.029818978 | 0.413981544 |
| 0.348174563 |             |             |             |

| RBM38       | 0.087396742 | 0.092666388 | 0.065953555 |
|-------------|-------------|-------------|-------------|
| 0.16357653  | 0.12496678  | 0.055280806 | 0.159356826 |
| 0.056963084 | 0.082456676 | 0.041706162 | 0.076383863 |
| 0.091367843 | 0.063758582 | 0.058195593 | 0.020973469 |
| 0.214673254 | 0.173574454 | 0.06430165  | 0.254879212 |
| 0.17370035  | 0.084789916 | 0.232487197 | 0.175063975 |
| 0.075873747 | 0.12622746  | 0.195131586 | 0.079725834 |
| 0.168561902 | 0.213502582 | 0.040884696 | 0.123460982 |
| 0.233107968 | 0.109178108 | 0.066534131 | 0.134540519 |
| 0.060959828 | 0.060570166 | 0.095937526 | 0.034745664 |
| 0.089896709 | 0.111882334 | 0.170159025 | 0.212467567 |
| 0.160924712 | 0.056193663 | 0.199532764 | 0.142008822 |
| 0.030551273 | 0.155163548 | 0.027746911 | 0.058472269 |
| 0.051903073 | 0.0665907   | 0.073315363 | 0.129829584 |
| 0.033730296 | 0.032835318 | 0.025820086 | 0.061301226 |
| 0.212362878 | 0.030484558 | 0.061506199 | 0.074891452 |
| 0.044918589 | 0.101840701 | 0.195960621 | 0.121318494 |
| 0.050015241 | 0.072613562 | 0.185907854 | 0.059400058 |
| 0.017072857 | 0.192287647 | 0.181179617 | 0.027170188 |
| 0.297409593 | 0.121240633 | 0.206267745 | 0.16720522  |
| 0.15465207  | 0.070258221 | 0.144167058 | 0.119647417 |
| 0.125302886 | 0.212580278 | 0.084244688 | 0.176820925 |
| 0.092043104 | 0.139000486 | 0.08394545  | 0.224564145 |
| 0.13505481  | 0.077345347 | 0.135764613 | 0.236590685 |
| 0.082781921 | 0.089609334 | 0.050241105 | 0.082581908 |
| 0.024024182 | 0.174023692 | 0.062669314 | 0.111773731 |
| 0.068643117 | 0.070386243 | 0.252351031 | 0.120373932 |
| 0.275576722 | 0.022869442 | 0.237644228 | 0.102604639 |
| 0.155184542 | 0.107754904 | 0.234551838 | 0.131207823 |
| 0.135803151 | 0.096709294 | 0.075687402 | 0.230582701 |
| 0.114600545 | 0.145703288 | 0.033678054 | 0.26896971  |
| 0.050663457 | 0.045168425 | 0.045935233 | 0.129870848 |
| 0.06118856  | 0.056129498 | 0.142724659 | 0.133581774 |
| 0.218283746 | 0.135027334 | 0.084497336 | 0.100836095 |
| 0.13291259  | 0.049682198 | 0.100281281 | 0.060690386 |



|             |             |             |             |
|-------------|-------------|-------------|-------------|
| 0.070308375 | 0.145133855 | 0.002247497 | 0.180202534 |
| 0.084977182 | 0.157211612 | 0.325563583 | 0.086180168 |
| 0.149568314 | 0.140045448 | 0.242971956 | 0.120099219 |
| 0.068483261 | 0.267207789 | 0.043311956 | 0.214186226 |
| 0.038094391 | 0.15823026  | 0.231907877 | 0.107707882 |
| 0.166354597 | 0.05727171  | 0.209034499 | 0.071858658 |
| 0.016682115 | 0.129971947 | 0.155550538 | 0.086569163 |
| 0.040124529 | 0.073152575 | 0.044753294 | 0.287410264 |
| 0.134621969 | 0.181986134 | 0.053405434 | 0.075526818 |
| 0.057030658 | 0.215923142 | 0.028499888 | 0.107762933 |
| 0.041686612 | 0.115228044 | 0.10905841  | 0.103222926 |
| 0.25130733  | 0.154017952 | 0.007568332 | 0.058243166 |
| 0.075416224 | 0.022470194 | 0.12646316  | 0.133928798 |
| 0.043343218 | 0.137370923 | 0.004662564 | 0.214543552 |
| 0.051016852 | 0.261017613 | 0.149680925 | 0.263413594 |
| 0.067869496 | 0.224198271 | 0.061784285 | 0.08670836  |
| 0.063897985 | 0.060761    | 0.047198687 | 0.153394231 |
| 0.201730344 | 0.063823997 | 0.118711624 | 0.157111261 |
| 0.113298289 | 0.144275407 | 0.174914461 | 0.036249455 |
| 0.104279767 | 0.146276018 | 0.192238392 | 0.179340027 |
| 0.108096066 | 0.021294536 | 0.065702352 | 0.095066099 |
| 0.034330404 | 0.082283341 | 0.060863032 | 0.016200594 |
| 0.197435764 | 0.107755394 | 0.049250966 | 0.124956368 |
| 0.057227867 | 0.11228208  | 0.044175542 | 0.182690925 |
| 0.219003508 | 0.105277355 | 0.081348097 | 0.045435554 |
| 0.045775247 | 0.079021105 | 0.201347929 | 0.04453151  |
| 0.048980063 | 0.16451814  | 0.049183676 | 0.055050716 |
| 0.113376992 | 0.222242993 | 0.135980337 | 0.02359489  |
| 0.054984541 | 0.031653777 | 0.026816329 | 0.066773872 |
| 0.054530887 | 0.108085531 | 0.107188474 | 0.057577968 |
| 0.153322296 | 0.250417426 | 0.0915466   | 0.198357138 |
| 0.047199202 | 0.148807302 | 0.267279578 | 0.014806173 |
| 0.123046928 | 0.025125999 | 0.017930839 | 0.095346253 |
| 0.148037099 | 0.139725509 | 0.077769851 | 0.251948084 |
| 0.062095898 | 0.222513871 | 0.16299835  | 0.021270666 |
| 0.080061268 | 0.077734684 | 0.211664015 | 0.151476272 |
| 0.05479804  | 0.14019979  | 0.158391047 | 0.064121672 |
| 0.061008334 | 0.244099332 | 0.09188179  | 0.185651413 |
| 0.267546059 | 0.131190361 | 0.077713546 | 0.316147495 |
| 0.212075413 | 0.086604012 | 0.079888473 | 0.279452695 |
| 0.101853677 | 0.223442389 | 0.078740709 | 0.094585664 |
| 0.177360087 | 0.076663676 | 0.175064802 | 0.07362228  |
| 0.060006703 | 0.090719    | 0.294799981 | 0.091622116 |
| 0.297299591 | 0.040338195 | 0.029409809 | 0.104339113 |
| 0.077144393 | 0.076040758 | 0.190958292 | 0.101438788 |
| 0.056750272 | 0.042365422 | 0.168256693 | 0.102025266 |
| 0.063704259 | 0.178542003 | 0.145310976 | 0.069375541 |
| 0.093391853 | 0.073312807 | 0.040323621 | 0.139788984 |
| 0.101138842 | 0.159123869 | 0.113888433 | 0.05547356  |
| 0.045422518 | 0.137619998 | 0.027365263 | 0.041871886 |
| 0.154247111 | 0.073871701 | 0.164437051 | 0.121273006 |
| 0.039867585 | 0.03328575  | 0.222945164 | 0.23316109  |
| 0.084736546 | 0.075916365 | 0.068956452 | 0.157416816 |
| 0.097068408 | 0.080124499 | 0.052990619 | 0.271546481 |

|             |             |             |             |
|-------------|-------------|-------------|-------------|
| 0.226854891 | 0.067040745 | 0.0836775   | 0.070037286 |
| 0.158704612 | 0.02645715  | 0.081156467 | 0.090397667 |
| 0.25127755  | 0.043999369 | 0.007195154 | 0.023245315 |
| 0.192838366 | 0.157631353 | 0.057714539 | 0.129905711 |
| 0.012609162 | 0.187289074 | 0.054641977 | 0.100347354 |
| 0.074273339 | 0.159621417 | 0.142922393 | 0.07494741  |
| 0.068984242 | 0.088288046 | 0.055986931 | 0.090723755 |
| 0.067823251 | 0.061212936 | 0.075788873 | 0.260930759 |
| 0.097015949 | 0.067306519 | 0.109697541 | 0.077160598 |
| 0.143228422 | 0.176017212 | 0.24803446  | 0.133500208 |
| 0.046699665 | 0.06107842  | 0.010897943 | 0.062351121 |
| 0.05163423  | 0.128295257 | 0.088301382 | 0.158302753 |
| 0.100125526 | 0.185810686 | 0.086185794 | 0.075530923 |
| 0.114465051 | 0.143319319 | 0.137999289 | 0.01323061  |
| 0.007136416 | 0.068897287 | 0.130758146 | 0.20660965  |
| 0.095465882 | 0.009634213 | 0.155378596 | 0.106567585 |
| 0.075554062 | 0.121286561 | 0.077242682 | 0.248400273 |
| 0.109257494 | 1           | 0.022742054 | 0.216262637 |
| 0.132754997 | 0.039103124 | 0.107722472 | 0.072458317 |
| 0.253423898 | 0.179741084 | 0.066088472 | 0.140908507 |
| 0.016712206 | 0.258685833 | 0.099580383 | 0.054441966 |
| 0.129403706 | 0.18901279  | 0.161695292 | 0.181109738 |
| 0.05574824  | 0.113423331 | 0.132138057 | 0.011950926 |
| 0.118499202 | 0.131480135 | 0.134457883 | 0.131861991 |
| 0.120947157 | 0.204339613 | 0.205680589 | 0.06927238  |
| 0.139000772 | 0.060650402 | 0.10625624  | 0.009056392 |
| 0.117989022 | 0.230587956 | 0.070874514 | 0.020062387 |
| 0.047119444 | 0.10347139  | 0.040453027 | 0.204819958 |
| 0.031324294 | 0.237397911 | 0.147283627 | 0.138482626 |
| 0.207235631 | 0.110941688 | 0.20956249  | 0.161805963 |
| 0.078427623 | 0.152043023 | 0.062932842 | 0.028430071 |
| 0.13385271  | 0.065957231 | 0.152283539 | 0.064883286 |
| 0.061593439 | 0.150091157 | 0.050645377 | 0.100795552 |
| 0.082463663 | 0.096724942 | 0.085001961 | 0.130203873 |
| 0.090466913 | 0.063715647 | 0.0878914   | 0.06590917  |
| 0.177752613 | 0.146876003 | 0.092724589 | 0.08451538  |
| 0.172514619 | 0.062979558 | 0.206193353 | 0.020782268 |
| 0.045306636 | 0.058418785 | 0.157348941 | 0.204469955 |
| 0.095030841 | 0.066491888 | 0.187818173 | 0.14853183  |
| 0.093116564 | 0.074034793 | 0.059836527 | 0.103330457 |
| 0.27212523  | 0.158159963 | 0.116229331 | 0.128133256 |
| 0.033284816 | 0.090578971 | 0.117563705 | 0.078740686 |
| 0.068562664 | 0.205330733 | 0.071546391 | 0.03665373  |
| 0.079019937 | 0.06927242  | 0.125733853 | 0.305186781 |
| 0.265791739 | 0.188505258 | 0.020367395 | 0.198748152 |
| 0.025722135 | 0.204132394 | 0.027153793 | 0.156096293 |
| 0.211490946 | 0.047534413 | 0.217952593 | 0.100447081 |
| 0.140067083 | 0.064831108 | 0.095943825 | 0.273341381 |
| 0.039432286 | 0.088268517 | 0.06831784  | 0.159875594 |
| 0.040223331 | 0.176077539 | 0.238819552 | 0.046331681 |
| 0.024160852 | 0.028160872 | 0.08191002  | 0.092375774 |
| 0.169273431 | 0.1533391   | 0.046096662 | 0.183769489 |
| 0.152589857 | 0.059994891 | 0.088632899 | 0.068663865 |
| 0.190092239 | 0.075534059 | 0.029501851 | 0.104037338 |

|             |             |             |             |
|-------------|-------------|-------------|-------------|
| 0.128878709 | 0.267526747 | 0.049047247 | 0.07274743  |
| 0.185536308 | 0.063344373 | 0.082468674 | 0.070189729 |
| 0.104192406 | 0.208210385 | 0.049050351 | 0.085705556 |
| 0.083912271 | 0.047481616 | 0.146611444 | 0.137622616 |
| 0.021601903 |             |             |             |
| RCN3        | 0.166712409 | 0.365457071 | 0.088378477 |
| 0.306645403 | 0.139585932 | 0.200058617 | 0.128345966 |
| 0.031753451 | 0.037002423 | 0.023873429 | 0.033505511 |
| 0.154319581 | 0.072432136 | 0.092610387 | 0.057280635 |
| 0.228932667 | 0.039385795 | 0.044264859 | 0.116043924 |
| 0.203153328 | 0.056177417 | 0.231370206 | 0.036977264 |
| 0.027457421 | 0.037421793 | 0.045534339 | 0.063311507 |
| 0.292446522 | 0.04674602  | 0.175133725 | 0.223937297 |
| 0.012352138 | 0.219810215 | 0.337883854 | 0.23763831  |
| 0.326009097 | 0.15646147  | 0.001107387 | 0.111229557 |
| 0.224647256 | 0.249350668 | 0.223323422 | 0.193777181 |
| 0.032501761 | 0.324930936 | 0.167797586 | 0.122291485 |
| 0.032804505 | 0.027012859 | 0.073322871 | 0.288673747 |
| 0.354828846 | 0.207372629 | 0.063925967 | 0.098188139 |
| 0.094559835 | 0.057933209 | 0.045625611 | 0.177988519 |
| 0.129965836 | 0.06874838  | 0.335935451 | 0.054540639 |
| 0.03250646  | 0.055122799 | 0.018935878 | 0.09439394  |
| 0.043752703 | 0.212749815 | 0.006154523 | 0.116155507 |
| 0.009309947 | 0.188626226 | 0.108228529 | 0.05494862  |
| 0.024310735 | 0.037445723 | 0.030072882 | 0.22400973  |
| 0.291377754 | 0.245194214 | 0.321896789 | 0.313081145 |
| 0.051456198 | 0.063211382 | 0.09279807  | 0.070368841 |
| 0.248981128 | 0.138078916 | 0.024261005 | 0.237829611 |
| 0.327397983 | 0.35330224  | 0.039278823 | 0.074651745 |
| 0.354106126 | 0.324191505 | 0.132383297 | 0.140129414 |
| 0.078137049 | 0.005802342 | 0.318005049 | 0.341983202 |
| 0.2297101   | 0.062525522 | 0.060281899 | 0.261080502 |
| 0.021177795 | 0.041423618 | 0.215460724 | 0.023422678 |
| 0.309914944 | 0.019196609 | 0.061393244 | 0.197327487 |
| 0.020239616 | 0.238280097 | 0.337415289 | 0.107889492 |
| 0.097401782 | 0.015868575 | 0.027242367 | 0.006145114 |
| 0.055856992 | 0.013689166 | 0.317845634 | 0.361405467 |
| 0.042115589 | 0.052380031 | 0.086176368 | 0.00128873  |
| 0.01040401  | 0.013692303 | 0.236341106 | 0.068007576 |
| 0.199471716 | 0.180932685 | 0.107646671 | 0.203226695 |
| 0.196155301 | 0.309367302 | 0.032481564 | 0.030590326 |
| 0.168874453 | 0.014298858 | 0.116844001 | 0.177122178 |
| 0.121133594 | 0.033459223 | 0.053801252 | 0.351119524 |
| 0.295641398 | 0.055122317 | 0.048121347 | 0.219741318 |
| 0.084523583 | 0.123230352 | 0.036370858 | 0.095032695 |
| 0.036329371 | 0.305812111 | 0.008321691 | 0.072078803 |
| 0.055814359 | 0.030736758 | 0.001114432 | 0.093422328 |
| 0.074648964 | 0.35696002  | 0.278331176 | 0.033826931 |
| 0.125290681 | 0.198291455 | 0.090343496 | 0.326346844 |
| 0.036902431 | 0.011147145 | 0.05694493  | 0.361630364 |
| 0.176725917 | 0.290546599 | 0.051968735 | 0.043340111 |
| 0.104411241 | 0.26270133  | 8.73E-05    | 0.337015197 |
| 0.345246365 | 0.067702163 | 0.23584347  | 0.128907274 |
| 0.098331564 | 0.338984926 | 0.003417723 | 0.215819258 |

|             |             |             |             |
|-------------|-------------|-------------|-------------|
| 0.148424981 | 0.024141674 | 0.329492408 | 0.082236287 |
| 0.279332039 | 0.033329276 | 0.084545597 | 0.239341606 |
| 0.234931022 | 0.003709287 | 0.125329153 | 0.236575582 |
| 0.004810224 | 0.054162398 | 0.188192758 | 0.231177103 |
| 0.208644179 | 0.219518861 | 0.314034036 | 0.092240973 |
| 0.157718003 | 0.060873829 | 0.003213515 | 0.083887338 |
| 0.200077286 | 0.041110921 | 0.321943089 | 0.057126228 |
| 0.113282227 | 0.343972311 | 0.221573165 | 0.049032758 |
| 0.039431108 | 0.11369997  | 0.021517244 | 0.127563659 |
| 0.200018039 | 0.086168586 | 0.109525482 | 0.011039742 |
| 0.0228314   | 0.368813849 | 0.02416805  | 0.034993169 |
| 0.012767572 | 0.241246132 | 0.081836824 | 0.126804714 |
| 0.099295931 | 0.038672832 | 0.069281727 | 0.088575318 |
| 0.037126277 | 0.05351334  | 0.0005744   | 0.084934311 |
| 0.10348785  | 0.127799789 | 0.135846546 | 0.198734788 |
| 0.057482014 | 0.069747588 | 0.155947115 | 0.025790249 |
| 0.023007785 | 0.010548446 | 0.347544376 | 0.186531813 |
| 0.191396164 | 0.046241933 | 0.012458087 | 0.063652611 |
| 0.362027504 | 0.194607035 | 0.04566794  | 0.367504912 |
| 0.005294099 | 0.289091996 | 0.089685262 | 0.063294066 |
| 0.105389448 | 0.14985353  | 0.311099332 | 0.02826234  |
| 0.120238667 | 0.351906404 | 0.077836725 | 0.073291777 |
| 0.310467071 | 0.203085586 | 0.028104279 | 0.205686459 |
| 0.215559732 | 0.023080358 | 0.348960057 | 0.023810633 |
| 0.009490704 | 0.192590221 | 0.27015252  | 0.034293393 |
| 0.02348891  | 0.207985587 | 0.033033465 | 0.13193786  |
| 0.373774818 | 0.255909942 | 0.30813799  | 0.023835693 |
| 0.041372747 | 0.029335937 | 0.032388018 | 0.089957346 |
| 0.335441968 | 0.325796911 | 0.084698259 | 0.151705321 |
| 0.123032279 | 0.071090977 | 0.02529776  | 0.358147202 |
| 0.009186686 | 0.31686587  | 0.003537776 | 0.226710644 |
| 0.335249839 | 0.103080015 | 0.039834391 | 0.176890042 |
| 0.287838312 | 0.027806401 | 0.027969052 | 0.35053633  |
| 0.288021335 | 0.082631818 | 0.087777346 | 0.156986482 |
| 0.0233272   | 0.026591169 | 0.132437093 | 0.01683814  |
| 0.095519692 | 0.051429239 | 0.004162937 | 0.042371415 |
| 0.041575759 | 0.360024127 | 0.252582574 | 0.030575834 |
| 0.256234971 | 0.041209864 | 0.145998037 | 0.022926111 |
| 0.273330812 | 0.288637647 | 0.353971695 | 0.029816031 |
| 0.216157911 | 0.345104185 | 0.150854828 | 0.017602329 |
| 0.007648758 | 0.328023147 | 0.17480539  | 0.02486867  |
| 0.308318677 | 0.09897219  | 0.041906862 | 0.349524316 |
| 0.078774307 | 0.274012062 | 0.004992315 | 0.002410373 |
| 0.004199377 | 0.250578066 | 0.340392805 | 0.19411715  |
| 0.11208407  | 0.124014904 | 0.001366358 | 0.316716705 |
| 0.372268631 | 0.006053696 | 0.018717612 | 0.267874071 |
| 0.232850116 | 0.349265175 | 0.076006836 | 0.300364189 |
| 0.185494375 | 0.340576531 | 0.090070186 | 0.121062355 |
| 0.33843263  | 0.301952347 | 0.23085622  | 0.303538571 |
| 0.325022352 | 0.182044775 | 0.168960644 | 0.021550125 |
| 0.02277717  | 0.076984344 | 0.098859199 | 0.048618236 |
| 0.141620954 | 0.039294638 | 0.294440543 | 0.286344566 |
| 0.322090439 | 0.003278577 | 0.045663608 | 0.252845331 |
| 0.317109625 | 0.314493119 | 0.001311008 | 0.001697219 |

|             |             |             |             |
|-------------|-------------|-------------|-------------|
| 0.000524988 | 0.015396152 | 0.150431779 | 0.055742311 |
| 0.322223853 | 0.090339185 | 0.00504665  | 0.023805619 |
| 0.050495787 | 0.160762319 | 0.359210511 | 0.21266013  |
| 0.204360489 | 0.022742054 | 1           | 0.205025082 |
| 0.023117194 | 0.128737631 | 0.345230008 | 0.358918756 |
| 0.005057568 | 0.052213201 | 0.068458463 | 0.348816598 |
| 0.006920603 | 0.115206551 | 0.167320768 | 0.089334256 |
| 0.000562866 | 0.020320827 | 0.02052537  | 0.219971076 |
| 0.321570532 | 0.06584718  | 0.037402558 | 0.02865379  |
| 0.09454376  | 0.268825547 | 0.065818499 | 0.341084268 |
| 0.305453077 | 0.290891158 | 0.010962626 | 0.337816913 |
| 0.030738709 | 0.341716466 | 0.099845417 | 0.019174745 |
| 0.033075737 | 0.003456839 | 0.27121499  | 0.069334518 |
| 0.084490086 | 0.166490712 | 0.0298904   | 0.003546512 |
| 0.014754356 | 0.020864511 | 0.341429155 | 0.268052854 |
| 0.003363037 | 0.046211742 | 0.078663187 | 0.144973224 |
| 0.140900799 | 0.312073453 | 0.34774982  | 0.154953299 |
| 0.052580408 | 0.006762567 | 0.217146625 | 0.169806409 |
| 0.047085564 | 0.310341544 | 0.079566561 | 0.327933845 |
| 0.188322814 | 0.265092271 | 0.304675991 | 0.176649347 |
| 0.031083208 | 0.151702846 | 0.311860077 | 0.037705595 |
| 0.131449869 | 0.329032754 | 0.08324958  | 0.049085707 |
| 0.123900919 | 0.099175013 | 0.007327732 | 0.011585405 |
| 0.069098021 | 0.194114112 | 0.056764408 | 0.258363197 |
| 0.138173472 | 0.184956642 | 0.007139577 | 0.023344641 |
| 0.357723081 | 0.270749442 | 0.044128171 | 0.256170077 |
| 0.039672008 | 0.156180572 | 0.223103467 | 0.219759156 |
| 0.034062635 | 0.319652184 | 0.25590734  | 0.304363425 |
| 0.340173364 | 0.112208968 | 0.356654441 | 0.017591577 |
| 0.021781146 | 0.130817492 | 0.077885241 | 0.027012181 |
| 0.078683336 | 0.00770103  | 0.033906317 | 0.200903934 |
| 0.054943303 | 0.225679926 | 0.032080246 | 0.017892279 |
| 0.087381885 | 0.056682416 | 0.137130089 | 0.123643413 |
| 0.054435055 | 0.369073359 | 0.004581104 | 0.017539565 |
| 0.064983335 | 0.268034018 | 0.137789028 | 0.052401662 |
| 0.03698945  | 0.012275408 | 0.137146413 | 0.116418951 |
| 0.179494501 | 0.034175631 | 0.282003456 | 0.012091787 |
| 0.016608326 | 0.31568967  | 0.090507298 | 0.00190149  |
| 0.008801769 | 0.126346997 | 0.02347989  | 0.079582087 |
| 0.004294873 | 0.315478417 | 0.153322149 | 0.130973469 |
| 0.145710784 | 0.015546849 | 0.211473396 | 0.012684947 |
| 0.008933931 | 0.291264433 | 0.105132513 | 0.333431514 |
| 0.054778209 | 0.288792991 | 0.280262188 | 0.264299342 |
| 0.009166591 | 0.076579485 | 0.022553496 | 0.257907287 |
| 0.097805208 |             |             |             |
| REEP5       | 0.346155657 | 0.463313651 | 0.32082106  |
| 0.400961369 | 0.375773113 | 0.282846651 | 0.313484493 |
| 0.286103467 | 0.163142565 | 0.020638039 | 0.046016328 |
| 0.330553892 | 0.207969063 | 0.293651339 | 0.263048441 |
| 0.423782522 | 0.213051117 | 0.378912873 | 0.368261921 |
| 0.393341815 | 0.189996489 | 0.385706293 | 0.234653863 |
| 0.30339304  | 0.162286011 | 0.1620247   | 0.265312008 |
| 0.464707894 | 0.182824342 | 0.247847397 | 0.353217945 |
| 0.230525421 | 0.397337819 | 0.426152431 | 0.334101342 |

|             |             |             |             |
|-------------|-------------|-------------|-------------|
| 0.405593232 | 0.301823863 | 0.048663954 | 0.263340509 |
| 0.400148943 | 0.360543674 | 0.383862442 | 0.378999123 |
| 0.134678062 | 0.396491022 | 0.333263468 | 0.365868402 |
| 0.258348922 | 0.087135923 | 0.23559684  | 0.379710013 |
| 0.367866068 | 0.293901669 | 0.318451641 | 0.266548486 |
| 0.154455531 | 0.236246573 | 0.176976747 | 0.263632971 |
| 0.33419783  | 0.186504049 | 0.38837612  | 0.170474937 |
| 0.188355315 | 0.365165343 | 0.256577411 | 0.3524721   |
| 0.281695244 | 0.333202306 | 0.103626586 | 0.271878511 |
| 0.009982657 | 0.403459328 | 0.385891106 | 0.209655473 |
| 0.136119863 | 0.061343282 | 0.28816983  | 0.358660876 |
| 0.471431049 | 0.400980197 | 0.46093739  | 0.444944442 |
| 0.238164082 | 0.392118716 | 0.304412392 | 0.284777297 |
| 0.401660049 | 0.263595194 | 0.205361039 | 0.416535763 |
| 0.461869418 | 0.433727064 | 0.285395708 | 0.343712664 |
| 0.351202177 | 0.437700728 | 0.317646566 | 0.350917279 |
| 0.237843272 | 0.132231216 | 0.367924298 | 0.460358449 |
| 0.357311233 | 0.253094737 | 0.255353693 | 0.395008557 |
| 0.181832799 | 0.304477864 | 0.391101629 | 0.220047566 |
| 0.482337479 | 0.078858533 | 0.292431205 | 0.35222701  |
| 0.376826982 | 0.385706605 | 0.424604164 | 0.321077402 |
| 0.372865885 | 0.073724537 | 0.123906196 | 0.131390378 |
| 0.319979471 | 0.137943856 | 0.366212754 | 0.436183289 |
| 0.301684281 | 0.333395032 | 0.37837566  | 0.023627952 |
| 0.093763385 | 0.304455132 | 0.359149978 | 0.394631217 |
| 0.391901621 | 0.309748755 | 0.264965597 | 0.310417144 |
| 0.284983943 | 0.454458293 | 0.044747451 | 0.254289952 |
| 0.353468242 | 0.308770378 | 0.363321928 | 0.329748568 |
| 0.325429762 | 0.272910213 | 0.273782203 | 0.482717675 |
| 0.387119561 | 0.216760099 | 0.328542263 | 0.399562592 |
| 0.274752354 | 0.335399427 | 0.26397681  | 0.327768217 |
| 0.152898479 | 0.378075102 | 0.091893453 | 0.359563043 |
| 0.182555279 | 0.186917933 | 0.075385876 | 0.319216916 |
| 0.283382229 | 0.351349986 | 0.354804806 | 0.266556051 |
| 0.356379484 | 0.375825587 | 0.299629441 | 0.301073795 |
| 0.028946786 | 0.165916253 | 0.246021061 | 0.45616748  |
| 0.217619659 | 0.462260262 | 0.40043191  | 0.370291511 |
| 0.36116044  | 0.441215375 | 0.0096638   | 0.401905691 |
| 0.432641584 | 0.236484128 | 0.335681586 | 0.372681336 |
| 0.258713769 | 0.433601314 | 0.044049822 | 0.396077128 |
| 0.268774449 | 0.232112442 | 0.491123897 | 0.25846958  |
| 0.393500466 | 0.122991843 | 0.32648351  | 0.352368791 |
| 0.292441361 | 0.030944154 | 0.236633812 | 0.36735149  |
| 0.090878035 | 0.184945821 | 0.37855026  | 0.37838248  |
| 0.338312008 | 0.413494257 | 0.492250689 | 0.239639704 |
| 0.364204447 | 0.373718497 | 0.069109307 | 0.354394756 |
| 0.383952925 | 0.2528356   | 0.389304951 | 0.349457913 |
| 0.243987498 | 0.422131003 | 0.325392687 | 0.158484339 |
| 0.141918478 | 0.358264326 | 0.061716159 | 0.342391826 |
| 0.326724163 | 0.194079332 | 0.273604249 | 0.281664778 |
| 0.163305078 | 0.469520309 | 0.196906792 | 0.207918332 |
| 0.127902999 | 0.297355091 | 0.395059957 | 0.21119187  |
| 0.177655811 | 0.289138106 | 0.294694172 | 0.327660409 |
| 0.122762651 | 0.199671398 | 0.060322305 | 0.226633534 |

|             |             |             |             |
|-------------|-------------|-------------|-------------|
| 0.134233191 | 0.234542264 | 0.22118487  | 0.300453276 |
| 0.315915408 | 0.168091572 | 0.343466527 | 0.29186314  |
| 0.207189247 | 0.073465735 | 0.451434053 | 0.406686643 |
| 0.268287741 | 0.302275291 | 0.143233527 | 0.204272658 |
| 0.4365656   | 0.207588699 | 0.227020339 | 0.414256123 |
| 0.110786121 | 0.466575183 | 0.261899496 | 0.221260461 |
| 0.28610916  | 0.342651593 | 0.47584237  | 0.081960097 |
| 0.340198662 | 0.411449282 | 0.404580168 | 0.262652396 |
| 0.334339605 | 0.37992778  | 0.113053945 | 0.328888195 |
| 0.312709756 | 0.113343152 | 0.453910671 | 0.212460705 |
| 0.091127345 | 0.347415019 | 0.311815556 | 0.189994764 |
| 0.184090402 | 0.295570742 | 0.136844134 | 0.362048275 |
| 0.464265239 | 0.392464934 | 0.332750271 | 0.268016637 |
| 0.124556282 | 0.02644162  | 0.289065797 | 0.317468272 |
| 0.409796929 | 0.435136667 | 0.387208806 | 0.29804851  |
| 0.371391876 | 0.270706431 | 0.190661787 | 0.451182291 |
| 0.282718913 | 0.440555507 | 0.049277085 | 0.349412882 |
| 0.395486111 | 0.255947331 | 0.152864647 | 0.322708147 |
| 0.336337087 | 0.154876109 | 0.376824076 | 0.415599383 |
| 0.403077918 | 0.330111324 | 0.288938814 | 0.373595216 |
| 0.074958128 | 0.146789617 | 0.348191828 | 0.188142817 |
| 0.314229621 | 0.332892692 | 0.055575211 | 0.341316614 |
| 0.118946271 | 0.392613062 | 0.448929465 | 0.133452553 |
| 0.225757792 | 0.321992763 | 0.387139177 | 0.137965663 |
| 0.372270352 | 0.418764616 | 0.430783378 | 0.341957861 |
| 0.358911252 | 0.406567146 | 0.247178031 | 0.204785261 |
| 0.072252749 | 0.417181144 | 0.325676346 | 0.062349056 |
| 0.471418422 | 0.202516124 | 0.036461246 | 0.452329402 |
| 0.343347126 | 0.347012557 | 0.01561367  | 0.102052692 |
| 0.120731464 | 0.440917805 | 0.388508005 | 0.36035887  |
| 0.173734085 | 0.41874767  | 0.022819595 | 0.460932647 |
| 0.416276192 | 0.056180417 | 0.217524125 | 0.334457777 |
| 0.296410451 | 0.469263313 | 0.24886979  | 0.373029697 |
| 0.281003685 | 0.394397856 | 0.283637183 | 0.352886804 |
| 0.392749843 | 0.390850526 | 0.384135533 | 0.418910214 |
| 0.444084316 | 0.374473544 | 0.370342666 | 0.069431066 |
| 0.160666461 | 0.271377255 | 0.186010263 | 0.116404442 |
| 0.26706591  | 0.217053808 | 0.435214056 | 0.462138524 |
| 0.419516998 | 0.037697874 | 0.268493405 | 0.347347874 |
| 0.436712249 | 0.483031863 | 0.089324771 | 0.017187162 |
| 0.017136144 | 0.03933576  | 0.376627886 | 0.343488575 |
| 0.436546539 | 0.157215148 | 0.037131116 | 0.144485855 |
| 0.358131747 | 0.316624226 | 0.42483984  | 0.409052414 |
| 0.376793879 | 0.216262637 | 0.205025082 | 1           |
| 0.131313063 | 0.239650277 | 0.43404729  | 0.411753629 |
| 0.143491919 | 0.346776816 | 0.355097704 | 0.481093077 |
| 0.056518846 | 0.384496394 | 0.330489087 | 0.29687184  |
| 0.063328213 | 0.178575482 | 0.151061074 | 0.433069347 |
| 0.384829585 | 0.122098319 | 0.077892817 | 0.134823524 |
| 0.203001511 | 0.448061213 | 0.259555041 | 0.486910951 |
| 0.421876696 | 0.460841311 | 0.15774788  | 0.413383061 |
| 0.097756809 | 0.392528684 | 0.29608724  | 0.070130413 |
| 0.38769041  | 0.077203859 | 0.389208518 | 0.111085479 |
| 0.309491005 | 0.348520475 | 0.203784504 | 0.068445108 |

|             |             |             |             |
|-------------|-------------|-------------|-------------|
| 0.164777836 | 0.147214083 | 0.461047902 | 0.425139714 |
| 0.108251617 | 0.378758143 | 0.392009124 | 0.400971332 |
| 0.302760032 | 0.386224725 | 0.412886624 | 0.246944706 |
| 0.197347485 | 0.161229645 | 0.390080734 | 0.297182223 |
| 0.308007695 | 0.474550732 | 0.262795419 | 0.469194915 |
| 0.343063876 | 0.436480546 | 0.407274701 | 0.362897323 |
| 0.23975801  | 0.321885206 | 0.290735882 | 0.062683872 |
| 0.410597843 | 0.431734099 | 0.382001943 | 0.189470808 |
| 0.302101635 | 0.272598011 | 0.175993055 | 0.200153255 |
| 0.223500776 | 0.261366805 | 0.249547899 | 0.469933148 |
| 0.347369366 | 0.307958695 | 0.15496509  | 0.140312666 |
| 0.475493991 | 0.399168593 | 0.240119697 | 0.33616548  |
| 0.322325871 | 0.355703834 | 0.391247781 | 0.381709079 |
| 0.309916889 | 0.377781713 | 0.398818677 | 0.287561936 |
| 0.377195518 | 0.378832099 | 0.435415131 | 0.169873139 |
| 0.133055962 | 0.297426506 | 0.165279945 | 0.209786654 |
| 0.275405303 | 0.099586562 | 0.195664933 | 0.399007481 |
| 0.238168585 | 0.376700814 | 0.284666813 | 0.196997149 |
| 0.37735698  | 0.315704315 | 0.404562231 | 0.277192062 |
| 0.16192914  | 0.406026142 | 0.040650932 | 0.167821859 |
| 0.263372779 | 0.361540882 | 0.275366627 | 0.348787798 |
| 0.236314543 | 0.241993169 | 0.374483104 | 0.271508519 |
| 0.205500646 | 0.293081648 | 0.35978691  | 0.121482908 |
| 0.093200067 | 0.485674887 | 0.319886959 | 0.085524737 |
| 0.168139283 | 0.291075513 | 0.386566721 | 0.263506859 |
| 0.077658656 | 0.391029708 | 0.238274632 | 0.354736753 |
| 0.379359589 | 0.206693041 | 0.315552813 | 0.182482143 |
| 0.20315901  | 0.389720255 | 0.314717843 | 0.416100759 |
| 0.35451035  | 0.411240034 | 0.364717788 | 0.363314225 |
| 0.234138165 | 0.274356773 | 0.114376998 | 0.442356386 |
| 0.240421553 |             |             |             |

|             |             |             |             |
|-------------|-------------|-------------|-------------|
| REX02       | 0.057025491 | 0.07847184  | 0.066658079 |
| 0.12883998  | 0.095428893 | 0.038637613 | 0.093762994 |
| 0.01384605  | 0.070838817 | 0.014266574 | 0.088561969 |
| 0.074331261 | 0.043297953 | 0.027950731 | 0.022810886 |
| 0.166345281 | 0.136286717 | 0.028472526 | 0.147618288 |
| 0.099508909 | 0.028274503 | 0.188872388 | 0.080503178 |
| 0.069418435 | 0.216884462 | 0.207241995 | 0.155188392 |
| 0.112768439 | 0.214701521 | 0.025214704 | 0.062321207 |
| 0.086006709 | 0.065447288 | 0.058817375 | 0.131622055 |
| 0.054496082 | 0.042614839 | 0.006682315 | 0.030571187 |
| 0.055070838 | 0.125067599 | 0.102044376 | 0.153729254 |
| 0.075720995 | 0.042648777 | 0.142825152 | 0.122981145 |
| 0.007202116 | 0.137705432 | 0.011299898 | 0.040829162 |
| 0.048708058 | 0.072312758 | 0.030935749 | 0.083827813 |
| 0.029071498 | 0.009484806 | 0.040643657 | 0.026042955 |
| 0.129146287 | 0.009520501 | 0.056514335 | 0.041431727 |
| 0.014743917 | 0.033058162 | 0.095957923 | 0.047651583 |
| 0.059086864 | 0.042295123 | 0.021900359 | 0.047736956 |
| 0.00247243  | 0.11175512  | 0.128300544 | 0.069636879 |
| 0.203789773 | 0.050812465 | 0.125053322 | 0.108242731 |
| 0.105156261 | 0.051620812 | 0.133256989 | 0.117071777 |
| 0.053345752 | 0.126825066 | 0.083971455 | 0.125901557 |
| 0.068222628 | 0.097503909 | 0.02842717  | 0.184226933 |



|             |             |             |             |
|-------------|-------------|-------------|-------------|
| 0.127243703 | 0.070473542 | 0.097464317 | 0.211344228 |
| 0.08151028  | 0.065160189 | 0.051168423 | 0.076485072 |
| 0.058123065 | 0.087896624 | 0.053828504 | 0.099286998 |
| 0.03985791  | 0.095637448 | 0.245957093 | 0.065566185 |
| 0.143875666 | 0.00936796  | 0.166885629 | 0.019857399 |
| 0.112081559 | 0.057350441 | 0.225001678 | 0.079439996 |
| 0.030396835 | 0.069311585 | 0.074016143 | 0.139329447 |
| 0.079866552 | 0.040392838 | 0.078930632 | 0.092993976 |
| 0.017153562 | 0.045350978 | 0.039828029 | 0.105237194 |
| 0.011378901 | 0.02895165  | 0.070842475 | 0.051202699 |
| 0.125565841 | 0.033891157 | 0.058977619 | 0.041750597 |
| 0.084570087 | 0.04148618  | 0.152392376 | 0.036115623 |
| 0.078141734 | 0.132089778 | 0.001376424 | 0.069262567 |
| 0.074727866 | 0.037796857 | 0.213548694 | 0.064555813 |
| 0.197377956 | 0.044856636 | 0.119706612 | 0.108973821 |
| 0.044247785 | 0.146213407 | 0.014760763 | 0.165283057 |
| 0.028911164 | 0.170630297 | 0.099274705 | 0.058052102 |
| 0.048794004 | 0.056749496 | 0.161420377 | 0.027593132 |
| 0.031483302 | 0.057306505 | 0.015637626 | 0.03106917  |
| 0.016704186 | 0.074756764 | 0.037210029 | 0.131093319 |
| 0.074435685 | 0.16846484  | 0.018879273 | 0.076575205 |
| 0.05231103  | 0.045602777 | 0.008679838 | 0.092182617 |
| 0.018082371 | 0.096790502 | 0.056388093 | 0.088852929 |
| 0.217029684 | 0.123178283 | 0.002183434 | 0.050237451 |
| 0.07250789  | 0.009026056 | 0.115886902 | 0.094849395 |
| 0.082131694 | 0.116352785 | 0.000991506 | 0.139314894 |
| 0.024222237 | 0.117732941 | 0.129150631 | 0.251784526 |
| 0.052134017 | 0.206450094 | 0.024109668 | 0.099336217 |
| 0.063589725 | 0.022623258 | 0.021679704 | 0.094393655 |
| 0.114947588 | 0.019287231 | 0.074210915 | 0.117470962 |
| 0.128518794 | 0.11522882  | 0.140167924 | 0.079966307 |
| 0.094074805 | 0.055805587 | 0.041990575 | 0.161650309 |
| 0.080010929 | 0.01135185  | 0.049306606 | 0.048177441 |
| 0.016077145 | 0.069706588 | 0.054011679 | 0.011142121 |
| 0.131021882 | 0.047870827 | 0.013504762 | 0.165810789 |
| 0.050163151 | 0.054092442 | 0.066287974 | 0.030994915 |
| 0.188899736 | 0.09678052  | 0.115190651 | 0.070368975 |
| 0.075008673 | 0.058571608 | 0.094968528 | 0.034535318 |
| 0.039898716 | 0.121682669 | 0.080412427 | 0.066164698 |
| 0.031937135 | 0.156210267 | 0.032623079 | 0.021405002 |
| 0.030719399 | 0.030351942 | 0.022709377 | 0.039880927 |
| 0.016753662 | 0.037212287 | 0.116480852 | 0.05159352  |
| 0.156844971 | 0.155184234 | 0.078258101 | 0.132391211 |
| 0.023162642 | 0.089699316 | 0.132371593 | 0.006450753 |
| 0.101812328 | 0.020487778 | 0.006971548 | 0.075393877 |
| 0.027533426 | 0.11586141  | 0.04873466  | 0.255091678 |
| 0.066343158 | 0.154254911 | 0.128310658 | 0.022842635 |
| 0.037200208 | 0.058661488 | 0.132398118 | 0.206000779 |
| 0.037401682 | 0.093897488 | 0.043457765 | 0.041175034 |
| 0.036734678 | 0.153160387 | 0.082748341 | 0.107785139 |
| 0.159653553 | 0.114608872 | 0.091212813 | 0.248508826 |
| 0.197763125 | 0.089693863 | 0.017619553 | 0.253139891 |
| 0.093238705 | 0.189751111 | 0.074005347 | 0.097959166 |
| 0.115604967 | 0.034334932 | 0.135047507 | 0.061167675 |

|             |             |             |             |
|-------------|-------------|-------------|-------------|
| 0.048774184 | 0.085552091 | 0.158261614 | 0.125637839 |
| 0.17930991  | 0.082969942 | 0.003482092 | 0.098070183 |
| 0.018771304 | 0.06179961  | 0.078781237 | 0.108476541 |
| 0.053125497 | 0.015348848 | 0.243958588 | 0.059953021 |
| 0.041526752 | 0.117455797 | 0.045850133 | 0.059929959 |
| 0.078091172 | 0.099609089 | 0.075254091 | 0.083116936 |
| 0.024777338 | 0.028623122 | 0.131320338 | 0.071273734 |
| 0.045927633 | 0.133328933 | 0.029696558 | 0.016930154 |
| 0.062214634 | 0.059050266 | 0.114882735 | 0.130715552 |
| 0.035108094 | 0.015532675 | 0.170531143 | 0.13688707  |
| 0.098055419 | 0.067314943 | 0.059109596 | 0.045200233 |
| 0.068860609 | 0.084542606 | 0.074526359 | 0.163575699 |
| 0.180109949 | 0.0627075   | 0.047557622 | 0.027592208 |
| 0.119383362 | 0.010306297 | 0.038387474 | 0.070084901 |
| 0.129306065 | 0.031935109 | 0.004717216 | 0.007072749 |
| 0.082937585 | 0.132452724 | 0.053996978 | 0.064821383 |
| 0.00867446  | 0.093684491 | 0.007297109 | 0.087962821 |
| 0.063944969 | 0.146172735 | 0.095921072 | 0.06719592  |
| 0.084060245 | 0.068265444 | 0.113556229 | 0.104434566 |
| 0.07652815  | 0.058207234 | 0.025325304 | 0.246611281 |
| 0.08304763  | 0.068847152 | 0.069644363 | 0.05744539  |
| 0.1069054   | 0.138107136 | 0.179835087 | 0.068037258 |
| 0.064881094 | 0.021055546 | 0.021589418 | 0.066663128 |
| 0.023269079 | 0.152175298 | 0.068795164 | 0.12417698  |
| 0.097460565 | 0.103555503 | 0.020294809 | 0.059612874 |
| 0.075113023 | 0.102545133 | 0.026244439 | 0.009909918 |
| 0.004516712 | 0.120932314 | 0.062848076 | 0.170570072 |
| 0.087808622 | 0.003796979 | 0.067508153 | 0.015010894 |
| 0.025125634 | 0.149615527 | 0.067727016 | 0.162916213 |
| 0.089895042 | 0.132754997 | 0.023117194 | 0.131313063 |
| 1           | 0.0188525   | 0.105370665 | 0.057943085 |
| 0.066454056 | 0.158675301 | 0.028098595 | 0.112420449 |
| 0.03604456  | 0.182853213 | 0.071387878 | 0.039927328 |
| 0.02105834  | 0.179772516 | 0.187335023 | 0.131448405 |
| 0.051749886 | 0.073525784 | 0.082415429 | 0.001926446 |
| 0.085690477 | 0.09774896  | 0.075806438 | 0.114035702 |
| 0.086018163 | 0.148321433 | 0.081468677 | 0.061151633 |
| 0.102979719 | 0.052251526 | 0.1430442   | 0.005708721 |
| 0.056522415 | 0.047884556 | 0.057710733 | 0.050282444 |
| 0.018845642 | 0.051526552 | 0.057234643 | 0.116873576 |
| 0.035118611 | 0.167046138 | 0.13252839  | 0.131391786 |
| 0.068109788 | 0.05288824  | 0.146547802 | 0.092188792 |
| 0.034389486 | 0.131121685 | 0.053233579 | 0.028383449 |
| 0.061786776 | 0.01971327  | 0.084638596 | 0.035527145 |
| 0.016926344 | 0.130365137 | 0.080320163 | 0.089260685 |
| 0.052601244 | 0.071183773 | 0.074782945 | 0.112009053 |
| 0.049545366 | 0.038933738 | 0.06374224  | 0.020179442 |
| 0.111836972 | 0.122182857 | 0.039967031 | 0.099940017 |
| 0.199169128 | 0.074423776 | 0.02829677  | 0.002986593 |
| 0.067875351 | 0.02995014  | 0.047415644 | 0.145033049 |
| 0.04336363  | 0.03907457  | 0.016205941 | 0.180501308 |
| 0.077702567 | 0.055312644 | 0.019502463 | 0.082667863 |
| 0.15308113  | 0.178470959 | 0.096863382 | 0.112905704 |
| 0.025531184 | 0.074872188 | 0.071076574 | 0.052940413 |

|             |             |             |             |
|-------------|-------------|-------------|-------------|
| 0.048090771 | 0.130791986 | 0.063565548 | 0.003559005 |
| 0.078366403 | 0.042877325 | 0.090585213 | 0.218170177 |
| 0.166262174 | 0.100339636 | 0.0383397   | 0.135699236 |
| 0.03288554  | 0.151774569 | 0.005424883 | 0.056840264 |
| 0.154752198 | 0.023104541 | 0.150111276 | 0.053597555 |
| 0.062257764 | 0.059529317 | 0.038328395 | 0.144073548 |
| 0.036246622 | 0.093656196 | 0.110609503 | 0.132162396 |
| 0.056589856 | 0.062265995 | 0.170594168 | 0.018923655 |
| 0.021650252 | 0.009553243 | 0.084886764 | 0.021771874 |
| 0.0288722   | 0.123512874 | 0.023978512 | 0.046029481 |
| 0.040556076 | 0.033688372 | 0.025448356 | 0.06064769  |
| 0.136450758 | 0.076031424 | 0.025869788 | 0.094184562 |
| 0.067531455 | 0.09669985  | 0.026300635 | 0.019834581 |
| 0.034871911 | 0.044248438 | 0.090324381 | 0.065499718 |
| 0.07350901  | 0.169575158 | 0.035165938 | 0.060514298 |
| 0.019616758 | 0.037465617 | 0.052339092 | 0.089108235 |
| 0.036053237 |             |             |             |
| RFC2        | 0.29892488  | 0.408984944 | 0.226272628 |
| 0.239692933 | 0.214379368 | 0.2564992   | 0.125593685 |
| 0.207638216 | 0.036790725 | 0.001373175 | 0.003761422 |
| 0.236619425 | 0.075379156 | 0.166357725 | 0.208692023 |
| 0.227562258 | 0.045350381 | 0.298638653 | 0.133123347 |
| 0.252551345 | 0.075129154 | 0.187542367 | 0.051686127 |
| 0.133109472 | 0.029784673 | 0.022624812 | 0.097145075 |
| 0.308550493 | 0.028436125 | 0.230048131 | 0.273624156 |
| 0.053074169 | 0.323320617 | 0.439093473 | 0.193654002 |
| 0.426381952 | 0.295028    | 0.016412189 | 0.170495452 |
| 0.368865233 | 0.234158229 | 0.249548308 | 0.167965711 |
| 0.018726273 | 0.453087849 | 0.126406597 | 0.204164391 |
| 0.211643233 | 0.007569412 | 0.239799224 | 0.430874571 |
| 0.391505529 | 0.213501306 | 0.200333077 | 0.087139332 |
| 0.065289128 | 0.222885135 | 0.089962275 | 0.28473761  |
| 0.117089531 | 0.17492238  | 0.389182734 | 0.046376796 |
| 0.098031158 | 0.230732323 | 0.067439921 | 0.197195676 |
| 0.153689505 | 0.324009576 | 0.019204343 | 0.238454858 |
| 0.001784587 | 0.245459468 | 0.199295634 | 0.125048293 |
| 0.015602748 | 0.004733715 | 0.080459051 | 0.188799762 |
| 0.328746584 | 0.412781404 | 0.304877496 | 0.319299724 |
| 0.068316562 | 0.160157847 | 0.186562201 | 0.072655219 |
| 0.346547564 | 0.089161181 | 0.077669935 | 0.211664991 |
| 0.316327182 | 0.404195294 | 0.080135399 | 0.11770091  |
| 0.273238548 | 0.401074338 | 0.235514247 | 0.202778034 |
| 0.1412707   | 0.021322735 | 0.364374643 | 0.355463596 |
| 0.365878903 | 0.129180689 | 0.05694594  | 0.312046152 |
| 0.027879212 | 0.277270645 | 0.181559156 | 0.099410987 |
| 0.335609071 | 0.008768067 | 0.082500006 | 0.202606571 |
| 0.166680564 | 0.310152832 | 0.389771748 | 0.10212296  |
| 0.221441059 | 0.007880879 | 0.03983999  | 0.017687872 |
| 0.192934519 | 0.051453016 | 0.441193719 | 0.305207223 |
| 0.20602832  | 0.171684972 | 0.175511468 | 0.000188275 |
| 0.00852909  | 0.119030489 | 0.305688332 | 0.282802395 |
| 0.278739938 | 0.337474225 | 0.084637841 | 0.318641379 |
| 0.217004728 | 0.299542499 | 0.053172417 | 0.065522962 |
| 0.238847117 | 0.115485241 | 0.117013142 | 0.235269428 |

|             |             |             |             |
|-------------|-------------|-------------|-------------|
| 0.121140571 | 0.09791779  | 0.065210942 | 0.367413814 |
| 0.409897682 | 0.040807015 | 0.320774538 | 0.215156271 |
| 0.156587262 | 0.148105484 | 0.063591348 | 0.142050409 |
| 0.028553755 | 0.388015789 | 0.008922779 | 0.301218234 |
| 0.110016327 | 0.049295206 | 0.016165672 | 0.234046101 |
| 0.170548113 | 0.28704227  | 0.437797881 | 0.062278131 |
| 0.166955978 | 0.189502387 | 0.29631994  | 0.219972353 |
| 0.001412717 | 0.03238331  | 0.310853255 | 0.359929477 |
| 0.2608682   | 0.361539142 | 0.180041064 | 0.158022846 |
| 0.125686583 | 0.2863862   | 0.003926938 | 0.435872434 |
| 0.404843496 | 0.30405663  | 0.178601826 | 0.236501565 |
| 0.166022085 | 0.290366884 | 0.05927906  | 0.220941221 |
| 0.303614412 | 0.048042529 | 0.335806542 | 0.058416854 |
| 0.396795885 | 0.012932449 | 0.233640766 | 0.26285555  |
| 0.237275513 | 0.005353225 | 0.199583622 | 0.242349274 |
| 0.009388193 | 0.086951814 | 0.287515712 | 0.227021051 |
| 0.186432238 | 0.272540835 | 0.313798081 | 0.150448773 |
| 0.208229887 | 0.181349298 | 0.006961436 | 0.147853377 |
| 0.293997204 | 0.199787734 | 0.399591993 | 0.159495876 |
| 0.307810374 | 0.379349191 | 0.301501354 | 0.113556497 |
| 0.019138453 | 0.231812912 | 0.015401344 | 0.148368508 |
| 0.333388751 | 0.050288378 | 0.203875564 | 0.106654705 |
| 0.024219004 | 0.377281943 | 0.064329081 | 0.10797328  |
| 0.043242177 | 0.205391092 | 0.172740641 | 0.100835824 |
| 0.066677838 | 0.071382254 | 0.152781389 | 0.182429821 |
| 0.027145395 | 0.034541291 | 0.009407961 | 0.174476744 |
| 0.042592558 | 0.149446035 | 0.163036091 | 0.281329916 |
| 0.202963229 | 0.0423844   | 0.168151458 | 0.141306208 |
| 0.042768616 | 0.005009606 | 0.395695467 | 0.232581728 |
| 0.315576077 | 0.088499457 | 0.018740746 | 0.167135478 |
| 0.314285127 | 0.22778899  | 0.304176903 | 0.343034886 |
| 0.021715486 | 0.329101017 | 0.096375106 | 0.042442759 |
| 0.150861916 | 0.121351357 | 0.313895723 | 0.037096939 |
| 0.299841375 | 0.389629924 | 0.181794917 | 0.06671652  |
| 0.356744611 | 0.246921785 | 0.015927821 | 0.320831158 |
| 0.311117871 | 0.011002133 | 0.390784065 | 0.046640352 |
| 0.007729309 | 0.221898798 | 0.22356321  | 0.029674456 |
| 0.030293507 | 0.149950534 | 0.047002974 | 0.126963825 |
| 0.378051522 | 0.193888413 | 0.259986012 | 0.100455272 |
| 0.014728872 | 0.001410825 | 0.09115261  | 0.235101014 |
| 0.447966995 | 0.364807717 | 0.141809795 | 0.140740299 |
| 0.129127094 | 0.133925003 | 0.185611537 | 0.353412966 |
| 0.165640098 | 0.436364412 | 0.002796875 | 0.24140034  |
| 0.423114745 | 0.266591513 | 0.023202417 | 0.200045095 |
| 0.334418105 | 0.022603151 | 0.175833846 | 0.405385198 |
| 0.336063857 | 0.155786798 | 0.160031527 | 0.259037729 |
| 0.011088605 | 0.029516515 | 0.194973561 | 0.071164405 |
| 0.190690927 | 0.103861837 | 0.016888667 | 0.270539661 |
| 0.014205915 | 0.366669612 | 0.293641671 | 0.018966686 |
| 0.200715592 | 0.291220852 | 0.184006562 | 0.016800934 |
| 0.287054325 | 0.39585207  | 0.435599041 | 0.140724143 |
| 0.281867403 | 0.341894197 | 0.177633627 | 0.037219314 |
| 0.005267223 | 0.414208374 | 0.297592135 | 0.00859699  |
| 0.315273476 | 0.252746133 | 0.002151817 | 0.408893083 |

|             |             |             |             |
|-------------|-------------|-------------|-------------|
| 0.11297732  | 0.440625681 | 0.003915557 | 0.074358096 |
| 0.018417799 | 0.281475552 | 0.407406328 | 0.276301936 |
| 0.188148656 | 0.248876721 | 0.004947582 | 0.386062533 |
| 0.388527166 | 0.003455794 | 0.052595426 | 0.269292282 |
| 0.221476199 | 0.441945046 | 0.124306656 | 0.272597574 |
| 0.197288495 | 0.397306    | 0.124576916 | 0.116725997 |
| 0.302167191 | 0.366972941 | 0.299431802 | 0.407834191 |
| 0.304270475 | 0.214403919 | 0.143581105 | 0.006000406 |
| 0.053203886 | 0.208608727 | 0.149294938 | 0.024000409 |
| 0.296793757 | 0.048258806 | 0.389172693 | 0.30362873  |
| 0.319642817 | 0.001306823 | 0.131827385 | 0.296678764 |
| 0.35299816  | 0.352343584 | 0.019967711 | 0.004388763 |
| 0.007471321 | 0.002887765 | 0.254546247 | 0.117758409 |
| 0.358960194 | 0.156581716 | 0.001237147 | 0.04803496  |
| 0.172396085 | 0.171799522 | 0.393074289 | 0.210630613 |
| 0.277534021 | 0.039103124 | 0.128737631 | 0.239650277 |
| 0.0188525   | 1           | 0.321852062 | 0.404308037 |
| 0.023473229 | 0.120891372 | 0.30495668  | 0.342846295 |
| 0.020548522 | 0.151334057 | 0.242417498 | 0.142145508 |
| 0.012751521 | 0.029416521 | 0.021484774 | 0.263575344 |
| 0.410585176 | 0.020446933 | 0.007270826 | 0.148627039 |
| 0.049037556 | 0.327324507 | 0.069378131 | 0.355783172 |
| 0.313099622 | 0.26608729  | 0.026737331 | 0.408237339 |
| 0.010859279 | 0.404082899 | 0.132896074 | 0.048918906 |
| 0.194004226 | 0.007281521 | 0.373638405 | 0.043745499 |
| 0.256727128 | 0.30087012  | 0.085582522 | 0.005316986 |
| 0.080896018 | 0.019044541 | 0.302637208 | 0.277478161 |
| 0.015466383 | 0.172008974 | 0.161410398 | 0.261527521 |
| 0.238068551 | 0.227618977 | 0.433860755 | 0.232537181 |
| 0.047416116 | 0.078821962 | 0.270229004 | 0.29732959  |
| 0.213909134 | 0.317677219 | 0.112109513 | 0.394339149 |
| 0.304785472 | 0.386538875 | 0.345897763 | 0.198394697 |
| 0.085327973 | 0.290462526 | 0.22346364  | 0.009725819 |
| 0.214090584 | 0.277263652 | 0.293748815 | 0.047486817 |
| 0.09552917  | 0.184828757 | 0.045863741 | 0.240344907 |
| 0.145665662 | 0.24670108  | 0.065056645 | 0.278705867 |
| 0.305728583 | 0.294032569 | 0.051114465 | 0.019379889 |
| 0.427285231 | 0.395999956 | 0.119516355 | 0.242099688 |
| 0.09136609  | 0.154100779 | 0.279422638 | 0.252837307 |
| 0.226137392 | 0.296925399 | 0.308972067 | 0.234293718 |
| 0.377405362 | 0.151775432 | 0.430145086 | 0.14895688  |
| 0.028959972 | 0.266993127 | 0.03120941  | 0.037984256 |
| 0.064597637 | 0.010179341 | 0.123029909 | 0.230634764 |
| 0.175051713 | 0.183097638 | 0.286006416 | 0.042100045 |
| 0.157118277 | 0.305380752 | 0.182605157 | 0.124770852 |
| 0.028433005 | 0.403470908 | 0.003368837 | 0.024028859 |
| 0.182599041 | 0.27434864  | 0.151832597 | 0.116081406 |
| 0.113020801 | 0.066274117 | 0.138659771 | 0.263444315 |
| 0.16569273  | 0.226118014 | 0.282245937 | 0.030826842 |
| 0.013583027 | 0.330536148 | 0.305540027 | 0.012052055 |
| 0.044121045 | 0.299009364 | 0.240011885 | 0.095467186 |
| 0.007175321 | 0.33985403  | 0.2045175   | 0.216656155 |
| 0.239604918 | 0.038456223 | 0.388761011 | 0.076663829 |
| 0.053779421 | 0.418288031 | 0.205014289 | 0.400292044 |

|             |             |             |             |
|-------------|-------------|-------------|-------------|
| 0.203926186 | 0.21502355  | 0.447717015 | 0.303325792 |
| 0.110514519 | 0.248557457 | 0.015135482 | 0.325838243 |
| 0.193460216 |             |             |             |
| RGS1        | 0.431568162 | 0.530516495 | 0.433403258 |
| 0.458559944 | 0.478158298 | 0.388283583 | 0.243645792 |
| 0.187353035 | 0.115084868 | 0.009721401 | 0.043553963 |
| 0.482265641 | 0.277813644 | 0.312813057 | 0.354681475 |
| 0.459490222 | 0.19353148  | 0.351681706 | 0.284988609 |
| 0.436239737 | 0.107089913 | 0.460748463 | 0.117859169 |
| 0.344499115 | 0.158053819 | 0.101546348 | 0.342395289 |
| 0.463419716 | 0.114233745 | 0.343595105 | 0.397698683 |
| 0.13102963  | 0.450240175 | 0.527993035 | 0.503125088 |
| 0.526295595 | 0.405873627 | 0.01379399  | 0.326179068 |
| 0.419857372 | 0.486105819 | 0.432619085 | 0.385044845 |
| 0.060343683 | 0.486424567 | 0.29289948  | 0.452032765 |
| 0.236970706 | 0.05401418  | 0.236816794 | 0.434004348 |
| 0.492187949 | 0.477001102 | 0.23380232  | 0.193131969 |
| 0.278012292 | 0.22992909  | 0.362004666 | 0.321758595 |
| 0.271173252 | 0.157351254 | 0.498869445 | 0.11260289  |
| 0.16251757  | 0.255469319 | 0.198542479 | 0.280860931 |
| 0.402975706 | 0.386861468 | 0.0214798   | 0.432624571 |
| 0.004835112 | 0.413758882 | 0.427673222 | 0.372458991 |
| 0.063306917 | 0.039368666 | 0.228495838 | 0.380640298 |
| 0.471832332 | 0.450038352 | 0.50242185  | 0.493146037 |
| 0.250998204 | 0.339855405 | 0.44758819  | 0.225994502 |
| 0.444354612 | 0.22136109  | 0.137419376 | 0.473500408 |
| 0.500382122 | 0.535624773 | 0.263272491 | 0.321284692 |
| 0.456204286 | 0.471089727 | 0.464214919 | 0.485156661 |
| 0.410711226 | 0.073202373 | 0.443075823 | 0.517722095 |
| 0.396008159 | 0.387861241 | 0.208875302 | 0.424269665 |
| 0.080534753 | 0.3774658   | 0.407192087 | 0.195459503 |
| 0.474927804 | 0.026300458 | 0.276499441 | 0.398489044 |
| 0.237671944 | 0.460926856 | 0.532209074 | 0.228228293 |
| 0.455659294 | 0.034066907 | 0.196717661 | 0.046046639 |
| 0.372618945 | 0.199802164 | 0.488721538 | 0.48349945  |
| 0.247317173 | 0.439092447 | 0.293606699 | 0.00418501  |
| 0.043947352 | 0.214471146 | 0.460711984 | 0.380442705 |
| 0.451008343 | 0.384598578 | 0.303650195 | 0.394621953 |
| 0.486959957 | 0.500997649 | 0.06451566  | 0.115304677 |
| 0.465657875 | 0.214338173 | 0.291491863 | 0.485468883 |
| 0.390515811 | 0.130426307 | 0.163881768 | 0.519983489 |
| 0.411122209 | 0.113854659 | 0.327704204 | 0.465473087 |
| 0.381571799 | 0.435346725 | 0.13437666  | 0.337030956 |
| 0.066282214 | 0.495144721 | 0.045445971 | 0.332935587 |
| 0.331079982 | 0.210000903 | 0.012315958 | 0.266779959 |
| 0.336007613 | 0.465604964 | 0.472635309 | 0.133883273 |
| 0.377345308 | 0.470841362 | 0.317192114 | 0.475138099 |
| 0.020457994 | 0.061178473 | 0.263622442 | 0.514543219 |
| 0.285745293 | 0.496942539 | 0.345325751 | 0.354473209 |
| 0.348620977 | 0.478069441 | 0.004021537 | 0.503161525 |
| 0.539029088 | 0.29077577  | 0.47316076  | 0.459322035 |
| 0.429893156 | 0.481776424 | 0.044832769 | 0.465700939 |
| 0.357854609 | 0.099662386 | 0.497867616 | 0.219786475 |
| 0.459880909 | 0.064291766 | 0.334935692 | 0.474990357 |

|             |             |             |             |
|-------------|-------------|-------------|-------------|
| 0.473358421 | 0.012110313 | 0.232224223 | 0.413457677 |
| 0.041164757 | 0.105256116 | 0.441782352 | 0.449551088 |
| 0.435712287 | 0.477634026 | 0.49268132  | 0.418368521 |
| 0.488174615 | 0.257017146 | 0.017927502 | 0.384364667 |
| 0.461753113 | 0.411791824 | 0.438958191 | 0.272091281 |
| 0.334810816 | 0.475738411 | 0.441775481 | 0.2263489   |
| 0.061475016 | 0.32855588  | 0.030764607 | 0.399969706 |
| 0.401336224 | 0.160778176 | 0.429063994 | 0.170773236 |
| 0.105075317 | 0.534815517 | 0.236153271 | 0.322933963 |
| 0.175819167 | 0.454899392 | 0.28219394  | 0.305715516 |
| 0.30650891  | 0.210512226 | 0.415904898 | 0.427966529 |
| 0.047754261 | 0.135564128 | 0.019116691 | 0.441261765 |
| 0.214028595 | 0.42084064  | 0.405270806 | 0.420903863 |
| 0.365678231 | 0.164151375 | 0.465995633 | 0.335288492 |
| 0.158666512 | 0.024381671 | 0.512372315 | 0.446013511 |
| 0.333721454 | 0.18748624  | 0.058339702 | 0.394305794 |
| 0.484022423 | 0.336242031 | 0.252227811 | 0.454158481 |
| 0.036000413 | 0.48747765  | 0.324364006 | 0.174160509 |
| 0.46629178  | 0.325500841 | 0.474869719 | 0.072564625 |
| 0.395965304 | 0.470094762 | 0.355093693 | 0.248817496 |
| 0.393504873 | 0.449466931 | 0.043249103 | 0.415526618 |
| 0.416693351 | 0.049692972 | 0.537006026 | 0.177220212 |
| 0.032346779 | 0.488594441 | 0.487304113 | 0.105761542 |
| 0.110093889 | 0.399659962 | 0.052176636 | 0.358749996 |
| 0.527565386 | 0.471816384 | 0.46456092  | 0.268221326 |
| 0.061514988 | 0.023073787 | 0.263264575 | 0.434099584 |
| 0.517298375 | 0.522967783 | 0.31055659  | 0.461289294 |
| 0.287815168 | 0.401411894 | 0.131980038 | 0.519439972 |
| 0.206653692 | 0.521669083 | 0.010627837 | 0.483936768 |
| 0.523000397 | 0.289904929 | 0.123385908 | 0.335029475 |
| 0.404865285 | 0.063616961 | 0.220168129 | 0.508669269 |
| 0.446788067 | 0.387347484 | 0.413580659 | 0.460921507 |
| 0.022573392 | 0.052276586 | 0.442676481 | 0.237859485 |
| 0.430615588 | 0.262986404 | 0.078789588 | 0.329027429 |
| 0.068142275 | 0.457415983 | 0.486208297 | 0.08849612  |
| 0.367954655 | 0.30392279  | 0.440540404 | 0.0529024   |
| 0.477042483 | 0.50676237  | 0.532338463 | 0.18064135  |
| 0.471390974 | 0.503518235 | 0.468036598 | 0.106342462 |
| 0.02827359  | 0.530405725 | 0.40645651  | 0.036630904 |
| 0.489002827 | 0.230995787 | 0.026798038 | 0.498123473 |
| 0.219754199 | 0.443404641 | 0.005246174 | 0.088426734 |
| 0.056683442 | 0.49197598  | 0.4887252   | 0.395188358 |
| 0.263055752 | 0.394527139 | 0.006813568 | 0.528279188 |
| 0.503628064 | 0.025237228 | 0.191317457 | 0.477288816 |
| 0.481316748 | 0.530852072 | 0.39772602  | 0.492272408 |
| 0.492821442 | 0.516218441 | 0.289253586 | 0.334680364 |
| 0.470752221 | 0.507254106 | 0.441422457 | 0.452711723 |
| 0.488549993 | 0.477216774 | 0.332922117 | 0.024237523 |
| 0.170975204 | 0.215182992 | 0.361492053 | 0.118028845 |
| 0.320409274 | 0.197086781 | 0.478641287 | 0.491935165 |
| 0.491496936 | 0.008551176 | 0.165524285 | 0.461504603 |
| 0.444529477 | 0.468877716 | 0.024701229 | 0.008207961 |
| 0.009696818 | 0.038372298 | 0.379546638 | 0.298402191 |
| 0.491754717 | 0.270924226 | 0.008197218 | 0.050604137 |

|             |             |             |             |
|-------------|-------------|-------------|-------------|
| 0.324644266 | 0.472021617 | 0.51638342  | 0.426907583 |
| 0.471992274 | 0.107722472 | 0.345230008 | 0.43404729  |
| 0.105370665 | 0.321852062 | 1           | 0.477627648 |
| 0.054155214 | 0.300398142 | 0.384392274 | 0.481491137 |
| 0.105533953 | 0.382282513 | 0.481919499 | 0.387173359 |
| 0.016825065 | 0.116503314 | 0.095149134 | 0.474357258 |
| 0.51454671  | 0.128203873 | 0.061428403 | 0.148204402 |
| 0.164525573 | 0.479375062 | 0.224484888 | 0.515059086 |
| 0.464646034 | 0.478514031 | 0.10484005  | 0.488341494 |
| 0.060885565 | 0.500700888 | 0.425428447 | 0.069928642 |
| 0.323676147 | 0.017781167 | 0.474637911 | 0.218441706 |
| 0.341410605 | 0.407531781 | 0.242218709 | 0.026082815 |
| 0.226768952 | 0.079632972 | 0.496572281 | 0.496692193 |
| 0.046855012 | 0.258687033 | 0.352597633 | 0.434649301 |
| 0.299760655 | 0.487039387 | 0.512892428 | 0.438090709 |
| 0.106564976 | 0.170862189 | 0.432140583 | 0.409459826 |
| 0.249857261 | 0.49857219  | 0.37772577  | 0.531145187 |
| 0.420210728 | 0.444917272 | 0.474904062 | 0.392928738 |
| 0.304068169 | 0.413498212 | 0.40582962  | 0.032072941 |
| 0.398443161 | 0.498606364 | 0.364941661 | 0.227164271 |
| 0.337722831 | 0.442707098 | 0.051742289 | 0.1786139   |
| 0.393920897 | 0.317304844 | 0.188486044 | 0.47144964  |
| 0.398126585 | 0.41300319  | 0.04223089  | 0.09162424  |
| 0.547751683 | 0.424710283 | 0.161049531 | 0.464083132 |
| 0.21247633  | 0.411287869 | 0.484325727 | 0.489915528 |
| 0.390104155 | 0.479523892 | 0.448823751 | 0.422017149 |
| 0.422825989 | 0.300525347 | 0.535899438 | 0.084028046 |
| 0.122970305 | 0.43752778  | 0.144530189 | 0.126189067 |
| 0.189785432 | 0.040988401 | 0.364090607 | 0.469467319 |
| 0.431633787 | 0.449094521 | 0.314962504 | 0.107444409 |
| 0.384677912 | 0.365652797 | 0.41395459  | 0.236222765 |
| 0.117195367 | 0.512427243 | 0.01520929  | 0.079411962 |
| 0.446538536 | 0.476304578 | 0.4702767   | 0.301059266 |
| 0.373479247 | 0.175978164 | 0.36593495  | 0.30157433  |
| 0.375326308 | 0.394755115 | 0.472141687 | 0.042320907 |
| 0.026428027 | 0.494986776 | 0.384243475 | 0.028595748 |
| 0.103340789 | 0.38017259  | 0.312669964 | 0.296524777 |
| 0.033811765 | 0.494978334 | 0.358733373 | 0.475728885 |
| 0.370818333 | 0.085225589 | 0.339638512 | 0.099091158 |
| 0.068690181 | 0.446325514 | 0.446567692 | 0.527262438 |
| 0.390290999 | 0.475505723 | 0.440379982 | 0.463353988 |
| 0.137507283 | 0.399151573 | 0.038576262 | 0.461052814 |
| 0.460276315 |             |             |             |
| RGS10       | 0.439534873 | 0.495249814 | 0.386800511 |
| 0.452191931 | 0.422575633 | 0.458384238 | 0.247138423 |
| 0.239066645 | 0.09194281  | 0.007471371 | 0.02364365  |
| 0.429469222 | 0.21487225  | 0.322683702 | 0.388584862 |
| 0.417341689 | 0.117182207 | 0.359615509 | 0.250084757 |
| 0.433694797 | 0.130714423 | 0.394123386 | 0.100187998 |
| 0.252015032 | 0.0888391   | 0.066829939 | 0.246968494 |
| 0.463170128 | 0.075643552 | 0.435144063 | 0.446431502 |
| 0.079152039 | 0.465832914 | 0.510203594 | 0.432050807 |
| 0.500888536 | 0.430505993 | 0.009933739 | 0.373059111 |
| 0.459158512 | 0.453246005 | 0.440027785 | 0.345531871 |



|             |             |             |             |
|-------------|-------------|-------------|-------------|
| 0.046993495 | 0.499070632 | 0.27315895  | 0.374058374 |
| 0.280248311 | 0.028409038 | 0.336410622 | 0.456918496 |
| 0.482709551 | 0.471676291 | 0.28593945  | 0.191350432 |
| 0.228048958 | 0.319769415 | 0.254777692 | 0.417399824 |
| 0.248861624 | 0.24704804  | 0.47635817  | 0.11159432  |
| 0.17876881  | 0.294606129 | 0.122172376 | 0.305643425 |
| 0.319053398 | 0.458041533 | 0.01962602  | 0.402787159 |
| 0.004743362 | 0.409514317 | 0.346511843 | 0.301043567 |
| 0.035524265 | 0.021699787 | 0.146915155 | 0.383314591 |
| 0.470362037 | 0.44326017  | 0.4668698   | 0.46731599  |
| 0.166222365 | 0.265085343 | 0.365821471 | 0.173339712 |
| 0.472753121 | 0.21237011  | 0.112543349 | 0.410940468 |
| 0.469885246 | 0.496471704 | 0.183347014 | 0.230458777 |
| 0.484102791 | 0.481642888 | 0.452363421 | 0.438789878 |
| 0.356613814 | 0.035630723 | 0.47297235  | 0.478407924 |
| 0.456936947 | 0.278259999 | 0.133825769 | 0.465877591 |
| 0.052552892 | 0.40126283  | 0.368107598 | 0.141090831 |
| 0.473669294 | 0.022082481 | 0.181181557 | 0.409728399 |
| 0.198876569 | 0.470523589 | 0.482029099 | 0.205105968 |
| 0.386334107 | 0.017703207 | 0.122188824 | 0.025657461 |
| 0.349347281 | 0.111702332 | 0.501597975 | 0.484191932 |
| 0.286218778 | 0.375659857 | 0.298100804 | 0.000580802 |
| 0.020049248 | 0.153841773 | 0.463587511 | 0.371954355 |
| 0.450922053 | 0.410324991 | 0.241819299 | 0.462001226 |
| 0.449522406 | 0.46532389  | 0.096027345 | 0.106870073 |
| 0.451502064 | 0.153491376 | 0.233055159 | 0.465040924 |
| 0.29307038  | 0.135338645 | 0.129133583 | 0.480830725 |
| 0.463219822 | 0.08768741  | 0.379891117 | 0.408676769 |
| 0.387815575 | 0.324121315 | 0.108862131 | 0.29768806  |
| 0.061457899 | 0.466116766 | 0.019249262 | 0.378688816 |
| 0.288793217 | 0.123810638 | 0.009526266 | 0.33028631  |
| 0.340809282 | 0.482692762 | 0.480536014 | 0.10075614  |
| 0.341909997 | 0.400000414 | 0.39813438  | 0.478841305 |
| 0.013941769 | 0.042097183 | 0.363195248 | 0.484662516 |
| 0.397588157 | 0.464339165 | 0.301085319 | 0.27882639  |
| 0.260192582 | 0.457043624 | 0.002222067 | 0.500802413 |
| 0.495794568 | 0.385563695 | 0.416420455 | 0.402038993 |
| 0.380844461 | 0.476757724 | 0.046567625 | 0.415385856 |
| 0.424899122 | 0.074998209 | 0.47207456  | 0.147451536 |
| 0.460380734 | 0.038328026 | 0.387302587 | 0.439938393 |
| 0.452872897 | 0.008682718 | 0.319551197 | 0.436738091 |
| 0.017738513 | 0.146932888 | 0.452896345 | 0.433891132 |
| 0.412006709 | 0.4439496   | 0.4638076   | 0.361206612 |
| 0.430377696 | 0.257805109 | 0.00948408  | 0.282743281 |
| 0.446774212 | 0.400982029 | 0.468745981 | 0.274828516 |
| 0.415489687 | 0.483539079 | 0.453132668 | 0.259010104 |
| 0.047495569 | 0.372902861 | 0.026546848 | 0.333876343 |
| 0.437266997 | 0.14524656  | 0.415452795 | 0.12036848  |
| 0.056903359 | 0.483136997 | 0.139248915 | 0.222380739 |
| 0.096546845 | 0.455316771 | 0.267574127 | 0.290777381 |
| 0.224914678 | 0.158286798 | 0.348419155 | 0.396332252 |
| 0.053394809 | 0.089724726 | 0.007817863 | 0.395880696 |
| 0.156016922 | 0.381837876 | 0.396961583 | 0.470017606 |
| 0.366732256 | 0.116320716 | 0.386719036 | 0.25455089  |

|             |             |             |             |
|-------------|-------------|-------------|-------------|
| 0.094831057 | 0.011705008 | 0.482454123 | 0.40752124  |
| 0.427624984 | 0.167872676 | 0.033019851 | 0.382620613 |
| 0.487697645 | 0.428133493 | 0.361200504 | 0.490373062 |
| 0.024389278 | 0.467223359 | 0.269730486 | 0.110562502 |
| 0.368263314 | 0.271573701 | 0.467820517 | 0.080655228 |
| 0.43937202  | 0.481739973 | 0.291364563 | 0.177112569 |
| 0.462050632 | 0.447825017 | 0.035610191 | 0.457011971 |
| 0.460306284 | 0.027994401 | 0.480423138 | 0.102081345 |
| 0.01561317  | 0.425952777 | 0.464813739 | 0.064747679 |
| 0.064432718 | 0.383348928 | 0.070319979 | 0.270877278 |
| 0.485430761 | 0.40812298  | 0.484697891 | 0.176239472 |
| 0.043777267 | 0.010702648 | 0.169083461 | 0.381467926 |
| 0.511521656 | 0.466267205 | 0.246078577 | 0.359631436 |
| 0.246462012 | 0.338658246 | 0.212072051 | 0.481118556 |
| 0.158866121 | 0.494083284 | 0.005081007 | 0.442907524 |
| 0.504775263 | 0.385885694 | 0.069617852 | 0.380141026 |
| 0.470808741 | 0.049055719 | 0.20926168  | 0.484679823 |
| 0.478802184 | 0.341476781 | 0.371006932 | 0.426582455 |
| 0.022720029 | 0.054999193 | 0.38254343  | 0.146834686 |
| 0.42241843  | 0.212407859 | 0.034338954 | 0.390909888 |
| 0.045844974 | 0.482470797 | 0.453448359 | 0.058585887 |
| 0.440314246 | 0.372979006 | 0.354332596 | 0.036116591 |
| 0.448525658 | 0.458476307 | 0.512450628 | 0.178719303 |
| 0.460249987 | 0.47203585  | 0.402257625 | 0.063596904 |
| 0.011767549 | 0.492746142 | 0.452544866 | 0.024789368 |
| 0.472109057 | 0.345640087 | 0.015171295 | 0.483467427 |
| 0.195601067 | 0.465927697 | 0.005590609 | 0.064701918 |
| 0.026540235 | 0.444600007 | 0.484319547 | 0.43884746  |
| 0.36171261  | 0.376633513 | 0.002971839 | 0.467114354 |
| 0.478830737 | 0.009518079 | 0.111941617 | 0.472095804 |
| 0.436396276 | 0.506229815 | 0.297364674 | 0.461231502 |
| 0.428821426 | 0.48905751  | 0.283066295 | 0.256330043 |
| 0.487422886 | 0.453849166 | 0.465154566 | 0.47099898  |
| 0.479499766 | 0.408309878 | 0.296963509 | 0.018760778 |
| 0.125628683 | 0.294235304 | 0.378329811 | 0.090433563 |
| 0.415803091 | 0.12869686  | 0.46932495  | 0.465463958 |
| 0.470451976 | 0.003147048 | 0.195378255 | 0.477258543 |
| 0.4814367   | 0.47722485  | 0.01468387  | 0.005263757 |
| 0.005855382 | 0.014995793 | 0.412532984 | 0.213366836 |
| 0.47721973  | 0.340086683 | 0.003775641 | 0.061948195 |
| 0.296383599 | 0.37699763  | 0.484466551 | 0.388671042 |
| 0.443243102 | 0.072458317 | 0.358918756 | 0.411753629 |
| 0.057943085 | 0.404308037 | 0.477627648 | 1           |
| 0.030129562 | 0.222733815 | 0.39277659  | 0.483288402 |
| 0.053295975 | 0.29564926  | 0.438582542 | 0.354220726 |
| 0.008473765 | 0.065901111 | 0.057257723 | 0.434820783 |
| 0.491397894 | 0.078112602 | 0.030497432 | 0.205956851 |
| 0.141282306 | 0.46899982  | 0.170943133 | 0.478385689 |
| 0.480928701 | 0.446443746 | 0.055623633 | 0.478294904 |
| 0.040331113 | 0.483134047 | 0.308365427 | 0.078790463 |
| 0.260567641 | 0.009508944 | 0.448650053 | 0.168566843 |
| 0.400632757 | 0.444060956 | 0.192319652 | 0.010531429 |
| 0.150292032 | 0.04348239  | 0.47436478  | 0.451034743 |
| 0.021172479 | 0.263765835 | 0.27555303  | 0.408253037 |

|             |             |             |             |
|-------------|-------------|-------------|-------------|
| 0.368618063 | 0.459653292 | 0.5056383   | 0.460401489 |
| 0.107381022 | 0.104177447 | 0.444842888 | 0.450537609 |
| 0.299034354 | 0.465490497 | 0.318312294 | 0.472302155 |
| 0.458778049 | 0.468860397 | 0.472828317 | 0.388517649 |
| 0.20352297  | 0.456309259 | 0.455926408 | 0.027057903 |
| 0.364933272 | 0.473013108 | 0.392270662 | 0.144913192 |
| 0.252512184 | 0.368847789 | 0.048062509 | 0.198097631 |
| 0.303288556 | 0.410339176 | 0.154670402 | 0.4406848   |
| 0.433428208 | 0.458123553 | 0.045759382 | 0.055078558 |
| 0.507568282 | 0.465129467 | 0.181991241 | 0.471620087 |
| 0.15130748  | 0.350559731 | 0.451172392 | 0.439777931 |
| 0.383075381 | 0.483030435 | 0.474143214 | 0.468321393 |
| 0.474061826 | 0.280313164 | 0.512387215 | 0.131653765 |
| 0.074859639 | 0.433700895 | 0.107705791 | 0.074663261 |
| 0.14394315  | 0.020356047 | 0.277687854 | 0.419866998 |
| 0.363835108 | 0.393250666 | 0.384756529 | 0.073903962 |
| 0.295596493 | 0.385887683 | 0.348234395 | 0.252726803 |
| 0.083131904 | 0.496605884 | 0.007446525 | 0.046172924 |
| 0.368350602 | 0.473139515 | 0.373072342 | 0.219502997 |
| 0.271799039 | 0.108299666 | 0.299362163 | 0.391159673 |
| 0.406806395 | 0.360987498 | 0.475885865 | 0.038810752 |
| 0.023752244 | 0.470334407 | 0.422110635 | 0.012657899 |
| 0.073752207 | 0.434140017 | 0.284155912 | 0.265381815 |
| 0.013625053 | 0.462104398 | 0.434729514 | 0.420161423 |
| 0.394234117 | 0.059232513 | 0.425675922 | 0.093252274 |
| 0.057161444 | 0.459703792 | 0.378164361 | 0.486961441 |
| 0.316100441 | 0.431216481 | 0.467420851 | 0.477057029 |
| 0.107568231 | 0.38070015  | 0.032076799 | 0.470000303 |
| 0.430235305 |             |             |             |

|             |             |             |             |
|-------------|-------------|-------------|-------------|
| RGS16       | 0.063262576 | 0.043250964 | 0.058921885 |
| 0.080244676 | 0.08403838  | 0.022983382 | 0.07671603  |
| 0.030014037 | 0.033474208 | 0.009242959 | 0.022112522 |
| 0.066754558 | 0.016833004 | 0.022573544 | 0.008838347 |
| 0.142335111 | 0.116194721 | 0.062783462 | 0.163176549 |
| 0.105906264 | 0.031435519 | 0.144711627 | 0.092164128 |
| 0.073681492 | 0.097840486 | 0.129472456 | 0.060312157 |
| 0.093659117 | 0.152787846 | 0.013329519 | 0.061696763 |
| 0.225102361 | 0.066871951 | 0.03137818  | 0.07633174  |
| 0.029000661 | 0.042154415 | 0.085365827 | 0.011765731 |
| 0.054324838 | 0.065297831 | 0.095114551 | 0.116042898 |
| 0.06976697  | 0.024856651 | 0.098636199 | 0.123365216 |
| 0.012746467 | 0.069418914 | 0.011680336 | 0.026580862 |
| 0.020900792 | 0.030208704 | 0.039262989 | 0.061111395 |
| 0.006263014 | 0.01331979  | 0.011318857 | 0.027551047 |
| 0.110882255 | 0.011085997 | 0.02710173  | 0.022029023 |
| 0.013804005 | 0.067437223 | 0.190560292 | 0.066507756 |
| 0.046481295 | 0.037102933 | 0.122015389 | 0.048449174 |
| 0.003347268 | 0.122246579 | 0.169869123 | 0.020440651 |
| 0.276622919 | 0.036186201 | 0.226565806 | 0.076165683 |
| 0.087670845 | 0.041995968 | 0.081226165 | 0.067015297 |
| 0.054161226 | 0.214098257 | 0.074257202 | 0.107398672 |
| 0.05131745  | 0.058651949 | 0.044435184 | 0.149433849 |
| 0.075042467 | 0.036138165 | 0.067446113 | 0.232246112 |
| 0.03253932  | 0.042612026 | 0.0280707   | 0.044437307 |

|             |             |             |             |
|-------------|-------------|-------------|-------------|
| 0.012332557 | 0.171404641 | 0.02642763  | 0.057968532 |
| 0.035913392 | 0.068810163 | 0.212649142 | 0.060063833 |
| 0.268159375 | 0.010934321 | 0.134193638 | 0.069676866 |
| 0.085883768 | 0.045000096 | 0.222287988 | 0.057273225 |
| 0.098109743 | 0.056913295 | 0.037215935 | 0.133523205 |
| 0.097316174 | 0.075972751 | 0.015222718 | 0.278574733 |
| 0.018651287 | 0.039395363 | 0.019672689 | 0.059751954 |
| 0.020949507 | 0.021614313 | 0.084196867 | 0.1227011   |
| 0.181444042 | 0.119339463 | 0.047835457 | 0.092216829 |
| 0.087939665 | 0.032697987 | 0.048873758 | 0.030177197 |
| 0.041203482 | 0.083034707 | 0.000342002 | 0.114448416 |
| 0.046877174 | 0.143826504 | 0.236249423 | 0.047714343 |
| 0.098551074 | 0.086911644 | 0.171164748 | 0.062928793 |
| 0.030411565 | 0.18164251  | 0.033927977 | 0.145221093 |
| 0.009991565 | 0.126446294 | 0.182060048 | 0.0547538   |
| 0.064454522 | 0.02748444  | 0.247221517 | 0.051293808 |
| 0.005317259 | 0.070385632 | 0.161130465 | 0.04442782  |
| 0.010863837 | 0.028889659 | 0.021052795 | 0.264419718 |
| 0.069192874 | 0.117160295 | 0.029287658 | 0.029513463 |
| 0.013026066 | 0.145821124 | 0.016747032 | 0.051863194 |
| 0.01548673  | 0.069917129 | 0.08404549  | 0.10253908  |
| 0.206907745 | 0.09418516  | 0.023358812 | 0.02588819  |
| 0.036458847 | 0.012311106 | 0.059308192 | 0.11341337  |
| 0.02693665  | 0.067020802 | 0.00461038  | 0.141989657 |
| 0.030574767 | 0.250767349 | 0.084549109 | 0.188244448 |
| 0.035030219 | 0.164518109 | 0.02877519  | 0.053349377 |
| 0.033280381 | 0.034049452 | 0.017370919 | 0.076685249 |
| 0.224454647 | 0.018656965 | 0.078937897 | 0.086714375 |
| 0.055524776 | 0.101001149 | 0.102276723 | 0.022154547 |
| 0.060871341 | 0.102668816 | 0.175427958 | 0.174742837 |
| 0.076437167 | 0.007971096 | 0.028444544 | 0.045899054 |
| 0.019248331 | 0.037525759 | 0.034240053 | 0.003800255 |
| 0.127768639 | 0.054879706 | 0.01780085  | 0.078545068 |
| 0.034420044 | 0.030604748 | 0.026422421 | 0.165113768 |
| 0.211605812 | 0.051247454 | 0.102231679 | 0.052814029 |
| 0.05654216  | 0.030025429 | 0.143746006 | 0.011139949 |
| 0.010883779 | 0.098139911 | 0.032628139 | 0.030823634 |
| 0.040039842 | 0.147879191 | 0.217542761 | 0.011151894 |
| 0.010625551 | 0.010986375 | 0.008446649 | 0.033400355 |
| 0.019013516 | 0.032043823 | 0.059759557 | 0.052043567 |
| 0.13328118  | 0.253549194 | 0.043893605 | 0.13911674  |
| 0.021622134 | 0.085753738 | 0.287495532 | 0.003387251 |
| 0.055891857 | 0.008084459 | 0.009964739 | 0.039516212 |
| 0.128871951 | 0.083865123 | 0.020903889 | 0.187139064 |
| 0.035861087 | 0.122288825 | 0.09008344  | 0.005777092 |
| 0.051176421 | 0.032796351 | 0.206868829 | 0.100710564 |
| 0.021550905 | 0.078522533 | 0.060829243 | 0.036229631 |
| 0.031616812 | 0.199297174 | 0.046022997 | 0.13384731  |
| 0.302045899 | 0.095877763 | 0.037321145 | 0.298486218 |
| 0.218170026 | 0.031345705 | 0.025263111 | 0.215713495 |
| 0.048396184 | 0.134900317 | 0.032427937 | 0.129456771 |
| 0.097489982 | 0.019958428 | 0.210984439 | 0.070786391 |
| 0.02713402  | 0.04790586  | 0.255304046 | 0.049995726 |
| 0.198905118 | 0.022480944 | 0.009505157 | 0.051320066 |

|             |             |             |             |
|-------------|-------------|-------------|-------------|
| 0.093269056 | 0.038958372 | 0.20373269  | 0.063596468 |
| 0.025625007 | 0.01840035  | 0.128460242 | 0.041459599 |
| 0.026794531 | 0.124961971 | 0.13711866  | 0.031260985 |
| 0.046466887 | 0.045392827 | 0.0217472   | 0.108573915 |
| 0.035321995 | 0.056780226 | 0.086067633 | 0.062527897 |
| 0.021197543 | 0.103282421 | 0.030825985 | 0.021506657 |
| 0.05140309  | 0.029596738 | 0.107285961 | 0.054666806 |
| 0.011659638 | 0.021399993 | 0.182657949 | 0.190638256 |
| 0.048391534 | 0.042483924 | 0.031421351 | 0.12221506  |
| 0.059822249 | 0.037971079 | 0.032212207 | 0.321907597 |
| 0.274542161 | 0.033105069 | 0.050015234 | 0.023399054 |
| 0.088456067 | 0.010299624 | 0.01860401  | 0.042188257 |
| 0.177201714 | 0.020026234 | 0.00351102  | 0.042257836 |
| 0.203335754 | 0.106734864 | 0.024821732 | 0.070635953 |
| 0.003426517 | 0.147034151 | 0.100223734 | 0.056121872 |
| 0.031625246 | 0.148207267 | 0.102718725 | 0.036669037 |
| 0.039070697 | 0.042980413 | 0.043976374 | 0.047169791 |
| 0.039214063 | 0.027284336 | 0.018137663 | 0.190947919 |
| 0.043264295 | 0.034773248 | 0.062655994 | 0.037941704 |
| 0.072632055 | 0.133200279 | 0.141545268 | 0.055782608 |
| 0.030253565 | 0.027561515 | 0.003420186 | 0.017890898 |
| 0.025936408 | 0.080994332 | 0.048809614 | 0.093942872 |
| 0.052664231 | 0.225764931 | 0.029478928 | 0.038260783 |
| 0.054816481 | 0.077680999 | 0.194628196 | 0.013702875 |
| 0.011133923 | 0.031059222 | 0.0715022   | 0.217917817 |
| 0.049264834 | 0.001427594 | 0.133027935 | 0.039448831 |
| 0.031624972 | 0.089291273 | 0.034603955 | 0.159909505 |
| 0.077930947 | 0.253423898 | 0.005057568 | 0.143491919 |
| 0.066454056 | 0.023473229 | 0.054155214 | 0.030129562 |
| 1           | 0.183093915 | 0.058244418 | 0.071311017 |
| 0.015302671 | 0.21379218  | 0.070079076 | 0.015098097 |
| 0.189890061 | 0.186648171 | 0.123986229 | 0.127660765 |
| 0.025617633 | 0.031853135 | 0.046806941 | 0.002962414 |
| 0.045775421 | 0.078965525 | 0.053396324 | 0.07142854  |
| 0.060049454 | 0.118557452 | 0.155683261 | 0.031413703 |
| 0.047893753 | 0.026520788 | 0.084922923 | 0.002610379 |
| 0.139264618 | 0.183626791 | 0.039069687 | 0.004750554 |
| 0.021563685 | 0.065859351 | 0.021641975 | 0.230898692 |
| 0.028655824 | 0.218287952 | 0.076366467 | 0.087493059 |
| 0.21645694  | 0.075532378 | 0.19985914  | 0.128966632 |
| 0.035336253 | 0.074579228 | 0.027773475 | 0.012671948 |
| 0.053512547 | 0.073734394 | 0.089842403 | 0.038282527 |
| 0.030890986 | 0.088348462 | 0.019379752 | 0.054979123 |
| 0.050521366 | 0.055726209 | 0.043167875 | 0.067846606 |
| 0.049676993 | 0.035685504 | 0.031467006 | 0.017648902 |
| 0.125063498 | 0.074217406 | 0.070867538 | 0.033488319 |
| 0.100076134 | 0.053083506 | 0.155881007 | 0.019343426 |
| 0.042072594 | 0.022085969 | 0.05115792  | 0.131803161 |
| 0.064581051 | 0.037975514 | 0.113771108 | 0.100023589 |
| 0.045901453 | 0.037921467 | 0.021073454 | 0.050275094 |
| 0.282870772 | 0.094264533 | 0.079180581 | 0.088497416 |
| 0.021296666 | 0.040908158 | 0.06220122  | 0.028604851 |
| 0.027167532 | 0.128371176 | 0.032777642 | 0.014805358 |
| 0.044664194 | 0.05040651  | 0.037102391 | 0.335409158 |

|             |             |             |             |
|-------------|-------------|-------------|-------------|
| 0.173860848 | 0.140530189 | 0.016434213 | 0.142396632 |
| 0.019057392 | 0.112012664 | 0.010904535 | 0.100870402 |
| 0.197629922 | 0.044836636 | 0.161757585 | 0.040747547 |
| 0.046271056 | 0.027123773 | 0.06228939  | 0.283909169 |
| 0.029820568 | 0.046287368 | 0.041302481 | 0.146397583 |
| 0.024162471 | 0.154886023 | 0.151849499 | 0.02002966  |
| 0.006343827 | 0.014601779 | 0.041324365 | 0.054557949 |
| 0.070454976 | 0.088554223 | 0.031304503 | 0.220863443 |
| 0.131983829 | 0.039135768 | 0.085748995 | 0.019061226 |
| 0.253111207 | 0.037106603 | 0.009433683 | 0.076285308 |
| 0.07150477  | 0.242449199 | 0.02420261  | 0.041302563 |
| 0.147238689 | 0.03035991  | 0.072811832 | 0.033900524 |
| 0.12046311  | 0.114167531 | 0.022547236 | 0.042929358 |
| 0.078839251 | 0.0442072   | 0.06256281  | 0.080694732 |
| 0.010981381 |             |             |             |
| RHOQ        | 0.249273731 | 0.281198213 | 0.195221803 |
| 0.296472614 | 0.228616777 | 0.130233401 | 0.130886992 |
| 0.075695116 | 0.131652793 | 0.010218411 | 0.054417362 |
| 0.227523574 | 0.088628654 | 0.076981518 | 0.089014394 |
| 0.389871674 | 0.155038415 | 0.136896318 | 0.211522207 |
| 0.292421246 | 0.057888037 | 0.352320532 | 0.134170625 |
| 0.215128217 | 0.158943838 | 0.142269039 | 0.184154019 |
| 0.331254259 | 0.156981608 | 0.074095102 | 0.215916268 |
| 0.21731314  | 0.263431991 | 0.242670945 | 0.268499014 |
| 0.229621255 | 0.202859973 | 0.034430545 | 0.075567775 |
| 0.24775322  | 0.300391333 | 0.28803435  | 0.242777641 |
| 0.092592801 | 0.200465127 | 0.183150735 | 0.299886178 |
| 0.074938467 | 0.092336846 | 0.04799451  | 0.195332084 |
| 0.193437461 | 0.174082229 | 0.094581193 | 0.110140657 |
| 0.05912835  | 0.046099847 | 0.089946898 | 0.121137379 |
| 0.161387751 | 0.033915547 | 0.219776607 | 0.09272931  |
| 0.077165834 | 0.113333865 | 0.212661402 | 0.114205175 |
| 0.160309727 | 0.185651622 | 0.071591248 | 0.189149778 |
| 0.00237713  | 0.302464511 | 0.312219128 | 0.122936494 |
| 0.142487065 | 0.042732924 | 0.218714524 | 0.2061518   |
| 0.334599337 | 0.244223824 | 0.354540189 | 0.335383131 |
| 0.129222261 | 0.258196779 | 0.212540547 | 0.153503241 |
| 0.261127925 | 0.10125697  | 0.099626204 | 0.395689981 |
| 0.348534697 | 0.259676668 | 0.199717789 | 0.306208453 |
| 0.217245863 | 0.254690101 | 0.1371636   | 0.165670012 |
| 0.107910921 | 0.204546851 | 0.205016541 | 0.31345109  |
| 0.194369589 | 0.173370927 | 0.200929167 | 0.236572035 |
| 0.16368753  | 0.081898221 | 0.293009841 | 0.104613858 |
| 0.340512701 | 0.068397212 | 0.242317879 | 0.167395485 |
| 0.215770387 | 0.257519488 | 0.265461652 | 0.165485861 |
| 0.214874941 | 0.062140469 | 0.114214601 | 0.159676589 |
| 0.100544095 | 0.13258452  | 0.1861684   | 0.286842093 |
| 0.076108453 | 0.140018286 | 0.142202222 | 0.04845374  |
| 0.124958585 | 0.230237926 | 0.229253463 | 0.170107631 |
| 0.299213895 | 0.200312909 | 0.145018109 | 0.168219712 |
| 0.213037808 | 0.354596671 | 0.00666725  | 0.139295239 |
| 0.180469866 | 0.240180039 | 0.280027399 | 0.190759091 |
| 0.214273094 | 0.113990477 | 0.152594093 | 0.334440125 |
| 0.199526347 | 0.13302353  | 0.088264891 | 0.36912894  |

|             |             |             |             |
|-------------|-------------|-------------|-------------|
| 0.089706669 | 0.266237611 | 0.151785632 | 0.112276714 |
| 0.076280514 | 0.223924856 | 0.140617222 | 0.121097116 |
| 0.097933508 | 0.133049963 | 0.076608333 | 0.093462813 |
| 0.080681851 | 0.21260664  | 0.185644208 | 0.180642705 |
| 0.127099425 | 0.317127791 | 0.093557123 | 0.18622978  |
| 0.029774191 | 0.134354032 | 0.058465273 | 0.292878924 |
| 0.082658689 | 0.332666632 | 0.170376408 | 0.227038432 |
| 0.293787242 | 0.350661386 | 0.017291341 | 0.214462216 |
| 0.265760867 | 0.053050623 | 0.194800089 | 0.279167232 |
| 0.145102945 | 0.30380152  | 0.012412187 | 0.33781296  |
| 0.139015258 | 0.171788932 | 0.36866879  | 0.189917682 |
| 0.226787776 | 0.122974159 | 0.084137324 | 0.285422195 |
| 0.196012232 | 0.025738557 | 0.058555527 | 0.249775133 |
| 0.158082397 | 0.054238184 | 0.279678825 | 0.280833311 |
| 0.221347585 | 0.350589533 | 0.382472161 | 0.128354318 |
| 0.20149508  | 0.137150063 | 0.097740013 | 0.283089763 |
| 0.298336923 | 0.091895502 | 0.206979707 | 0.131825422 |
| 0.093726622 | 0.248855923 | 0.210975243 | 0.059656195 |
| 0.103575856 | 0.131066714 | 0.024512724 | 0.219307989 |
| 0.214788464 | 0.074958557 | 0.150575105 | 0.200421035 |
| 0.16948185  | 0.307563962 | 0.185873759 | 0.145639152 |
| 0.140196529 | 0.136909064 | 0.188001959 | 0.057424302 |
| 0.069248376 | 0.202105449 | 0.152698062 | 0.139207482 |
| 0.050275701 | 0.134299156 | 0.135471992 | 0.063308102 |
| 0.046319599 | 0.061432641 | 0.051012144 | 0.171348568 |
| 0.086172869 | 0.069200181 | 0.17201474  | 0.205494442 |
| 0.206263041 | 0.099030527 | 0.278179919 | 0.339210327 |
| 0.124392258 | 0.161931542 | 0.153105683 | 0.049396655 |
| 0.285966009 | 0.066906319 | 0.045678609 | 0.242589718 |
| 0.095608636 | 0.35657109  | 0.101680785 | 0.173861855 |
| 0.110491465 | 0.184994583 | 0.355744471 | 0.040033019 |
| 0.165386455 | 0.223851673 | 0.292044607 | 0.185897589 |
| 0.159744987 | 0.254137873 | 0.069496657 | 0.19271173  |
| 0.168514355 | 0.108965701 | 0.287477896 | 0.180537484 |
| 0.12533084  | 0.312575349 | 0.229973059 | 0.185538781 |
| 0.195645781 | 0.120450855 | 0.047282569 | 0.331943077 |
| 0.297233429 | 0.362477269 | 0.211334651 | 0.231053311 |
| 0.087940405 | 0.017346905 | 0.234205583 | 0.207130162 |
| 0.217822891 | 0.289585765 | 0.267396801 | 0.157430583 |
| 0.253377909 | 0.140710044 | 0.042389733 | 0.299959518 |
| 0.1981593   | 0.259825402 | 0.070757646 | 0.294542218 |
| 0.220197991 | 0.065656094 | 0.153983953 | 0.132199129 |
| 0.169473333 | 0.121276318 | 0.17059215  | 0.233605911 |
| 0.26559199  | 0.16743176  | 0.129577278 | 0.28195676  |
| 0.039486372 | 0.073754716 | 0.271038782 | 0.180931218 |
| 0.112792028 | 0.212964279 | 0.081974867 | 0.097106112 |
| 0.08320597  | 0.213896178 | 0.350398549 | 0.145976706 |
| 0.088403624 | 0.091995383 | 0.35000124  | 0.121498882 |
| 0.283922597 | 0.269075581 | 0.240709845 | 0.147767985 |
| 0.249286441 | 0.264408127 | 0.171567824 | 0.210050114 |
| 0.122350713 | 0.248390933 | 0.207191194 | 0.040700338 |
| 0.345770847 | 0.045713469 | 0.02282004  | 0.264713156 |
| 0.184080734 | 0.169347151 | 0.008640368 | 0.094078171 |
| 0.192105121 | 0.372791578 | 0.214253807 | 0.226100708 |

|             |             |             |             |
|-------------|-------------|-------------|-------------|
| 0.030897105 | 0.282870549 | 0.054497893 | 0.312136679 |
| 0.232690398 | 0.103865925 | 0.222476094 | 0.217325032 |
| 0.226498673 | 0.274346946 | 0.156606421 | 0.275202265 |
| 0.186588595 | 0.225665398 | 0.090431095 | 0.295305841 |
| 0.245451717 | 0.251776569 | 0.252745479 | 0.240156381 |
| 0.304336191 | 0.345158791 | 0.253454665 | 0.057396631 |
| 0.181899083 | 0.064809749 | 0.053448238 | 0.094805255 |
| 0.114706459 | 0.181184887 | 0.271693514 | 0.358268451 |
| 0.29112078  | 0.067242962 | 0.08353439  | 0.217034171 |
| 0.262325379 | 0.332596348 | 0.128200556 | 0.021933574 |
| 0.017960024 | 0.068510569 | 0.192139047 | 0.259827005 |
| 0.29211218  | 0.027216013 | 0.047681411 | 0.052341487 |
| 0.143299372 | 0.282956296 | 0.247629932 | 0.352179067 |
| 0.305869739 | 0.179741084 | 0.052213201 | 0.346776816 |
| 0.158675301 | 0.120891372 | 0.300398142 | 0.222733815 |
| 0.183093915 | 1           | 0.132793341 | 0.332101875 |
| 0.074323171 | 0.305018829 | 0.231860173 | 0.104204803 |
| 0.100125196 | 0.20005199  | 0.18187283  | 0.376557193 |
| 0.216538786 | 0.073215049 | 0.068330183 | 0.022622158 |
| 0.088491268 | 0.328400175 | 0.126735051 | 0.34605696  |
| 0.274674565 | 0.367532415 | 0.19431531  | 0.237569008 |
| 0.097717591 | 0.211958529 | 0.207944433 | 0.020026543 |
| 0.202351254 | 0.101101226 | 0.240124316 | 0.074594903 |
| 0.07129376  | 0.220139176 | 0.178085722 | 0.12916218  |
| 0.15600578  | 0.149768394 | 0.344126619 | 0.353599925 |
| 0.177653455 | 0.162216685 | 0.278272953 | 0.302708211 |
| 0.102990137 | 0.288674273 | 0.222815742 | 0.095235201 |
| 0.090799289 | 0.141398251 | 0.271858811 | 0.167933615 |
| 0.07831134  | 0.367327094 | 0.127094024 | 0.313703467 |
| 0.221168284 | 0.285867144 | 0.262165894 | 0.211089996 |
| 0.16348284  | 0.15392319  | 0.162078072 | 0.027299244 |
| 0.248550466 | 0.314213163 | 0.162668268 | 0.146329175 |
| 0.180829822 | 0.195658221 | 0.135729219 | 0.057268649 |
| 0.150460602 | 0.10195352  | 0.117263164 | 0.391605267 |
| 0.195881753 | 0.175947453 | 0.080592428 | 0.166365207 |
| 0.291093013 | 0.235882045 | 0.087356328 | 0.227918828 |
| 0.229136921 | 0.252646673 | 0.309686979 | 0.323043496 |
| 0.134921849 | 0.236659454 | 0.249635622 | 0.154979414 |
| 0.191741492 | 0.211498948 | 0.250143138 | 0.036141618 |
| 0.138060671 | 0.185372044 | 0.088927505 | 0.211144121 |
| 0.155449157 | 0.150612796 | 0.109770232 | 0.35704658  |
| 0.096381141 | 0.270845779 | 0.069220886 | 0.172859175 |
| 0.290004353 | 0.125733055 | 0.295714324 | 0.0854343   |
| 0.097428476 | 0.224418697 | 0.056588079 | 0.166214464 |
| 0.100674912 | 0.261393612 | 0.170445056 | 0.219789045 |
| 0.148157366 | 0.240221927 | 0.237320693 | 0.073122887 |
| 0.044510606 | 0.103974049 | 0.248678217 | 0.071188712 |
| 0.053093353 | 0.362600845 | 0.110890514 | 0.151703642 |
| 0.18730946  | 0.168928231 | 0.161538646 | 0.131267941 |
| 0.146008492 | 0.254669894 | 0.063178244 | 0.236981918 |
| 0.185774164 | 0.167990093 | 0.151078817 | 0.095730287 |
| 0.157559211 | 0.204390946 | 0.233340158 | 0.248920449 |
| 0.215442608 | 0.345540655 | 0.181845484 | 0.224814914 |
| 0.147552726 | 0.158218105 | 0.08015157  | 0.308479586 |



|             |             |             |             |
|-------------|-------------|-------------|-------------|
| 0.076874904 |             |             |             |
| ROM1        | 0.381539391 | 0.435485666 | 0.189535088 |
| 0.314696732 | 0.208100706 | 0.202980847 | 0.098586799 |
| 0.151649439 | 0.035710407 | 0.002576555 | 0.005308945 |
| 0.282224333 | 0.063199279 | 0.120429877 | 0.108151528 |
| 0.346998191 | 0.065761286 | 0.238597589 | 0.134091314 |
| 0.333420645 | 0.057237714 | 0.277433521 | 0.060549863 |
| 0.131160217 | 0.040795297 | 0.031456505 | 0.085160932 |
| 0.413856149 | 0.039287886 | 0.126040949 | 0.329304799 |
| 0.102090751 | 0.409761978 | 0.430901638 | 0.254602241 |
| 0.41912155  | 0.344865644 | 0.052445263 | 0.089483876 |
| 0.431179351 | 0.299268645 | 0.324904304 | 0.186139942 |
| 0.025346719 | 0.42262319  | 0.113780295 | 0.247085445 |
| 0.131358115 | 0.014246464 | 0.117608683 | 0.400898001 |
| 0.361640066 | 0.186378521 | 0.134754879 | 0.071559433 |
| 0.043703339 | 0.121519167 | 0.067246889 | 0.268962885 |
| 0.103097963 | 0.086288275 | 0.378418852 | 0.036262428 |
| 0.060024581 | 0.179840847 | 0.111007983 | 0.151170815 |
| 0.123560465 | 0.345594721 | 0.03559405  | 0.259639063 |
| 0.002181321 | 0.322564728 | 0.256713715 | 0.078989967 |
| 0.033150319 | 0.009717038 | 0.122147232 | 0.188035082 |
| 0.431067186 | 0.446732117 | 0.400046402 | 0.393836383 |
| 0.085751561 | 0.17777596  | 0.175870837 | 0.080878473 |
| 0.397385418 | 0.071869203 | 0.09455936  | 0.335134354 |
| 0.404274683 | 0.417220459 | 0.092030941 | 0.140551315 |
| 0.285997713 | 0.427884582 | 0.158523748 | 0.14571391  |
| 0.083465725 | 0.050106498 | 0.348207177 | 0.421292716 |
| 0.389665851 | 0.115045527 | 0.076804075 | 0.377478478 |
| 0.050821955 | 0.1869722   | 0.230530319 | 0.153826525 |
| 0.437005066 | 0.012198459 | 0.104352487 | 0.172657293 |
| 0.196396303 | 0.384115055 | 0.410617297 | 0.097627597 |
| 0.218381247 | 0.020963531 | 0.034933815 | 0.045563564 |
| 0.152367171 | 0.064617498 | 0.386576399 | 0.371241307 |
| 0.155153825 | 0.130240837 | 0.142028137 | 0.005140091 |
| 0.024006313 | 0.17188574  | 0.369988005 | 0.240086878 |
| 0.374537814 | 0.356602218 | 0.069316854 | 0.330362133 |
| 0.243492123 | 0.393603754 | 0.022369797 | 0.074534085 |
| 0.210044902 | 0.161129917 | 0.1459638   | 0.233636074 |
| 0.111360059 | 0.099829756 | 0.0818565   | 0.435289108 |
| 0.396743168 | 0.054941044 | 0.21934985  | 0.334748881 |
| 0.090196525 | 0.172088627 | 0.084830861 | 0.126365165 |
| 0.033842345 | 0.380795452 | 0.027096405 | 0.212739213 |
| 0.060278121 | 0.071059692 | 0.03894437  | 0.152790487 |
| 0.114132522 | 0.297725709 | 0.391810374 | 0.090972988 |
| 0.140045136 | 0.244040524 | 0.192514222 | 0.245800408 |
| 0.002022203 | 0.063656564 | 0.168017952 | 0.416600899 |
| 0.203844943 | 0.450716445 | 0.176672913 | 0.157596142 |
| 0.150734343 | 0.38783049  | 0.008666197 | 0.412502165 |
| 0.418591316 | 0.158781469 | 0.183427714 | 0.293304926 |
| 0.100944154 | 0.361138912 | 0.057577447 | 0.336306326 |
| 0.335139854 | 0.074499711 | 0.433934299 | 0.072966591 |
| 0.41472378  | 0.022652641 | 0.148846421 | 0.318483916 |
| 0.278566708 | 0.009221818 | 0.101358156 | 0.286002408 |
| 0.028632134 | 0.053583454 | 0.373994884 | 0.277928793 |

|             |             |             |             |
|-------------|-------------|-------------|-------------|
| 0.169483629 | 0.382122638 | 0.428679778 | 0.090757023 |
| 0.188348952 | 0.167891808 | 0.022018455 | 0.170038559 |
| 0.387872521 | 0.112307298 | 0.385134781 | 0.127215925 |
| 0.249374185 | 0.395331432 | 0.331399463 | 0.048920119 |
| 0.027010211 | 0.154203526 | 0.019896781 | 0.121196284 |
| 0.343169777 | 0.045039951 | 0.129400397 | 0.182641859 |
| 0.046747619 | 0.424784551 | 0.081189467 | 0.098816999 |
| 0.054212673 | 0.178610944 | 0.161978891 | 0.066242151 |
| 0.053825271 | 0.08064066  | 0.110135304 | 0.119161018 |
| 0.027335202 | 0.050067806 | 0.034419638 | 0.112115282 |
| 0.037975041 | 0.097119391 | 0.095802466 | 0.308249361 |
| 0.151791053 | 0.051942369 | 0.1394752   | 0.129362823 |
| 0.063801145 | 0.015744128 | 0.424921833 | 0.330275586 |
| 0.30332662  | 0.088483205 | 0.044182942 | 0.096050403 |
| 0.371276901 | 0.130878472 | 0.146168927 | 0.365627928 |
| 0.048762723 | 0.423449243 | 0.0776716   | 0.058003245 |
| 0.119862424 | 0.116830552 | 0.408450941 | 0.022699638 |
| 0.271128006 | 0.393569845 | 0.20395222  | 0.069405925 |
| 0.343577625 | 0.286877199 | 0.023287081 | 0.357017333 |
| 0.349672499 | 0.024417482 | 0.435123943 | 0.077980048 |
| 0.023322632 | 0.320717139 | 0.256232368 | 0.050649544 |
| 0.052454045 | 0.096353526 | 0.037695639 | 0.170155969 |
| 0.420149567 | 0.299814046 | 0.275535216 | 0.123233387 |
| 0.02200562  | 0.004476839 | 0.125435469 | 0.234510692 |
| 0.428856042 | 0.416317707 | 0.170029644 | 0.11345306  |
| 0.148028512 | 0.08956633  | 0.096229652 | 0.407339428 |
| 0.214459219 | 0.455648054 | 0.011433168 | 0.307336087 |
| 0.401144785 | 0.151389649 | 0.034488632 | 0.139703489 |
| 0.338157506 | 0.032224052 | 0.191264175 | 0.410561218 |
| 0.363142907 | 0.114191765 | 0.100888317 | 0.354350363 |
| 0.014175195 | 0.032455536 | 0.197124185 | 0.081357056 |
| 0.115480393 | 0.10244731  | 0.028456112 | 0.171058518 |
| 0.020992854 | 0.363574517 | 0.423007643 | 0.023412055 |
| 0.130394364 | 0.173302465 | 0.261289251 | 0.030090717 |
| 0.337199974 | 0.430611541 | 0.432683888 | 0.150347376 |
| 0.363814322 | 0.368338144 | 0.167466205 | 0.071247957 |
| 0.017790131 | 0.422132072 | 0.338155882 | 0.012632214 |
| 0.417787703 | 0.123242862 | 0.00454625  | 0.433811087 |
| 0.116278476 | 0.393737605 | 0.004268003 | 0.094947359 |
| 0.048590668 | 0.403247267 | 0.379004565 | 0.32102273  |
| 0.076735911 | 0.300474977 | 0.017957207 | 0.449262034 |
| 0.396900378 | 0.012057919 | 0.076927957 | 0.310920264 |
| 0.269300915 | 0.466600062 | 0.097061993 | 0.325077057 |
| 0.212127551 | 0.38553273  | 0.094506202 | 0.136855199 |
| 0.344142533 | 0.384419239 | 0.37528297  | 0.422701018 |
| 0.39011073  | 0.315425989 | 0.157789991 | 0.009566323 |
| 0.043985465 | 0.120549236 | 0.068525937 | 0.019185432 |
| 0.246956116 | 0.055991864 | 0.447561221 | 0.40799714  |
| 0.384743882 | 0.008256162 | 0.101378734 | 0.337382157 |
| 0.407901135 | 0.439991742 | 0.050542108 | 0.007810606 |
| 0.017448712 | 0.005860292 | 0.236361827 | 0.140445282 |
| 0.405177227 | 0.068367183 | 0.006563951 | 0.048074785 |
| 0.150025598 | 0.211851559 | 0.404489077 | 0.312035722 |
| 0.370540201 | 0.066088472 | 0.068458463 | 0.355097704 |

|             |             |             |             |
|-------------|-------------|-------------|-------------|
| 0.028098595 | 0.30495668  | 0.384392274 | 0.39277659  |
| 0.058244418 | 0.132793341 | 1           | 0.418563207 |
| 0.023267223 | 0.193434933 | 0.305878282 | 0.098190133 |
| 0.043364495 | 0.050984467 | 0.032543157 | 0.392783202 |
| 0.393156624 | 0.026276623 | 0.013854888 | 0.087326687 |
| 0.046129357 | 0.421420495 | 0.075271788 | 0.4387835   |
| 0.377511424 | 0.385893595 | 0.052907854 | 0.399093466 |
| 0.014893834 | 0.396444525 | 0.123727399 | 0.029214134 |
| 0.224173381 | 0.023862346 | 0.411316763 | 0.024940653 |
| 0.159532881 | 0.365845408 | 0.062638014 | 0.019271629 |
| 0.078591934 | 0.03968958  | 0.384068798 | 0.375659392 |
| 0.046064883 | 0.1433949   | 0.178008238 | 0.347921995 |
| 0.165711773 | 0.305279404 | 0.417199307 | 0.151557915 |
| 0.044020596 | 0.118596229 | 0.368866944 | 0.340652022 |
| 0.152730059 | 0.421375059 | 0.076986453 | 0.451113166 |
| 0.35957604  | 0.439002655 | 0.388136824 | 0.172881285 |
| 0.091999919 | 0.264451978 | 0.222703569 | 0.012558443 |
| 0.227049572 | 0.360600573 | 0.234027325 | 0.049154242 |
| 0.090278555 | 0.170144513 | 0.066131931 | 0.216375419 |
| 0.116434999 | 0.184619404 | 0.067824611 | 0.409844991 |
| 0.344102539 | 0.345254303 | 0.074252135 | 0.028298105 |
| 0.460767045 | 0.403818085 | 0.088759286 | 0.277442922 |
| 0.128305329 | 0.145862115 | 0.37804688  | 0.356411982 |
| 0.144619904 | 0.339509085 | 0.387284924 | 0.245704723 |
| 0.363747287 | 0.132559213 | 0.427824705 | 0.105361448 |
| 0.038173124 | 0.293208026 | 0.03326513  | 0.067807316 |
| 0.078147691 | 0.02449021  | 0.088407643 | 0.356061827 |
| 0.120224758 | 0.229936738 | 0.171180891 | 0.062706533 |
| 0.180007026 | 0.212609378 | 0.216311962 | 0.089959611 |
| 0.035427919 | 0.388219891 | 0.010115802 | 0.051024355 |
| 0.140089499 | 0.31838499  | 0.126164139 | 0.133961023 |
| 0.093819171 | 0.108389975 | 0.144219531 | 0.156118373 |
| 0.083729161 | 0.178872718 | 0.318011012 | 0.041880604 |
| 0.02158438  | 0.436911282 | 0.216683982 | 0.04038909  |
| 0.058542201 | 0.286916491 | 0.254864858 | 0.06881809  |
| 0.023994087 | 0.365526809 | 0.094013737 | 0.212152405 |
| 0.207409478 | 0.069498141 | 0.370003773 | 0.083215642 |
| 0.083757801 | 0.421772124 | 0.206987561 | 0.411987272 |
| 0.195515448 | 0.316233377 | 0.403327395 | 0.352523586 |
| 0.165742656 | 0.211180475 | 0.022030187 | 0.421536668 |
| 0.110366558 |             |             |             |
| RORA        | 0.43860143  | 0.528046827 | 0.429946969 |
| 0.490887259 | 0.492397724 | 0.424746029 | 0.31356154  |
| 0.261059569 | 0.144727712 | 0.014404574 | 0.046561735 |
| 0.466614918 | 0.272600012 | 0.358737879 | 0.383254244 |
| 0.489757288 | 0.199675072 | 0.403555886 | 0.347242648 |
| 0.48444214  | 0.162495024 | 0.482386046 | 0.167608158 |
| 0.342733243 | 0.157202885 | 0.127357768 | 0.334265231 |
| 0.494082045 | 0.142008652 | 0.383750812 | 0.450203662 |
| 0.153443642 | 0.466694192 | 0.514405448 | 0.48719906  |
| 0.502130263 | 0.407872748 | 0.019943051 | 0.373849905 |
| 0.439137842 | 0.483598438 | 0.482134155 | 0.432195611 |
| 0.089710058 | 0.482454012 | 0.353751779 | 0.454029645 |
| 0.295056222 | 0.063427578 | 0.298382765 | 0.443401005 |

|             |             |             |             |
|-------------|-------------|-------------|-------------|
| 0.472200482 | 0.474201829 | 0.315858815 | 0.256253333 |
| 0.258122044 | 0.292119048 | 0.299060109 | 0.369549284 |
| 0.334268192 | 0.218510466 | 0.481338155 | 0.156207034 |
| 0.207534665 | 0.340650082 | 0.21178071  | 0.358842093 |
| 0.38381024  | 0.420357698 | 0.041061663 | 0.409781657 |
| 0.007690032 | 0.469306376 | 0.440955972 | 0.336820585 |
| 0.081398055 | 0.047239816 | 0.245628855 | 0.438756005 |
| 0.493968446 | 0.446067868 | 0.494575368 | 0.480345782 |
| 0.251520632 | 0.37748297  | 0.423772686 | 0.26801582  |
| 0.455072292 | 0.276189976 | 0.165179124 | 0.490651211 |
| 0.49044337  | 0.51839765  | 0.279391885 | 0.342122368 |
| 0.461311965 | 0.481967194 | 0.469667588 | 0.494234637 |
| 0.386546362 | 0.08179164  | 0.442393267 | 0.507761715 |
| 0.413618834 | 0.347230422 | 0.227997998 | 0.461662985 |
| 0.109176492 | 0.405264708 | 0.45502534  | 0.203866534 |
| 0.494918298 | 0.044866311 | 0.286350159 | 0.451429072 |
| 0.293994859 | 0.471524701 | 0.508559746 | 0.29163343  |
| 0.45921748  | 0.04287159  | 0.169961243 | 0.062822841 |
| 0.395378515 | 0.165469439 | 0.472314897 | 0.492089105 |
| 0.311478675 | 0.445948511 | 0.372368642 | 0.006786574 |
| 0.052322443 | 0.242933844 | 0.450900231 | 0.428803812 |
| 0.480429432 | 0.368775569 | 0.325087621 | 0.413090879 |
| 0.458689689 | 0.4939515   | 0.073950651 | 0.173850264 |
| 0.483584717 | 0.245371293 | 0.342562613 | 0.487068451 |
| 0.392752349 | 0.195187145 | 0.213247574 | 0.518841522 |
| 0.431465566 | 0.155621196 | 0.382404068 | 0.488100589 |
| 0.410095266 | 0.42019143  | 0.184079663 | 0.374250717 |
| 0.104646966 | 0.469820163 | 0.051097871 | 0.396809856 |
| 0.305951694 | 0.196675922 | 0.02336724  | 0.344069055 |
| 0.370387836 | 0.452598741 | 0.453362867 | 0.179245387 |
| 0.418601229 | 0.48339538  | 0.37578584  | 0.467389998 |
| 0.026860096 | 0.086490214 | 0.313735821 | 0.507590351 |
| 0.328492547 | 0.488800978 | 0.399701677 | 0.383647632 |
| 0.374527024 | 0.495965474 | 0.00466779  | 0.492406311 |
| 0.518508176 | 0.327863186 | 0.474455144 | 0.466361731 |
| 0.409347499 | 0.495992521 | 0.045663228 | 0.491445031 |
| 0.378080478 | 0.141476159 | 0.500847596 | 0.242024283 |
| 0.454194258 | 0.083332828 | 0.400395987 | 0.447746464 |
| 0.439145004 | 0.016445335 | 0.297181935 | 0.467424996 |
| 0.048057294 | 0.16742602  | 0.470977168 | 0.488374174 |
| 0.463348638 | 0.486473942 | 0.502624326 | 0.38976134  |
| 0.492263313 | 0.331946364 | 0.026918734 | 0.388980429 |
| 0.464022898 | 0.401803252 | 0.449656613 | 0.342240701 |
| 0.358045612 | 0.479905627 | 0.424341704 | 0.255491454 |
| 0.092278888 | 0.405762103 | 0.042128009 | 0.42118463  |
| 0.396798726 | 0.200922317 | 0.424243837 | 0.199579955 |
| 0.117494037 | 0.527366428 | 0.214104731 | 0.281487538 |
| 0.147825549 | 0.461672708 | 0.357287921 | 0.316220353 |
| 0.275256055 | 0.252722798 | 0.409182431 | 0.451100827 |
| 0.082824024 | 0.161708777 | 0.023825959 | 0.393848249 |
| 0.19671688  | 0.391465816 | 0.382757858 | 0.434797064 |
| 0.398034462 | 0.174386181 | 0.462305785 | 0.33663108  |
| 0.171785127 | 0.033978684 | 0.509919744 | 0.482787137 |
| 0.362163951 | 0.249982482 | 0.076752636 | 0.364158507 |

|             |             |             |             |
|-------------|-------------|-------------|-------------|
| 0.488981015 | 0.356584211 | 0.30127899  | 0.462505644 |
| 0.052984938 | 0.487766887 | 0.342100573 | 0.193917407 |
| 0.42799498  | 0.367695097 | 0.497556047 | 0.090907357 |
| 0.438977762 | 0.476088302 | 0.398272451 | 0.272421788 |
| 0.396935277 | 0.488920392 | 0.067823574 | 0.425245826 |
| 0.421464368 | 0.06608768  | 0.52114958  | 0.181979221 |
| 0.043348622 | 0.478558355 | 0.466052259 | 0.130635444 |
| 0.129899878 | 0.4245099   | 0.094799826 | 0.384246506 |
| 0.522670293 | 0.489293814 | 0.46391197  | 0.265832676 |
| 0.08646861  | 0.023277903 | 0.269427531 | 0.422894965 |
| 0.503613454 | 0.500738875 | 0.357973248 | 0.431802799 |
| 0.348934916 | 0.394565756 | 0.196920811 | 0.507500816 |
| 0.228460852 | 0.511032453 | 0.017275083 | 0.463761871 |
| 0.499077332 | 0.342301448 | 0.132467613 | 0.40206755  |
| 0.418491262 | 0.096263559 | 0.292026549 | 0.497605801 |
| 0.45951838  | 0.41472732  | 0.417466708 | 0.476577161 |
| 0.041818643 | 0.092412624 | 0.451701326 | 0.214408066 |
| 0.456498312 | 0.313894148 | 0.058615617 | 0.397196442 |
| 0.09046794  | 0.461387868 | 0.495457992 | 0.110008818 |
| 0.388222035 | 0.370226341 | 0.454314471 | 0.078472206 |
| 0.447002767 | 0.48688274  | 0.519071938 | 0.254280787 |
| 0.464120647 | 0.482573629 | 0.418322752 | 0.130181812 |
| 0.035087011 | 0.506554697 | 0.442269604 | 0.049206189 |
| 0.499603468 | 0.281103133 | 0.031439363 | 0.504872818 |
| 0.287902902 | 0.434662419 | 0.009324729 | 0.088418851 |
| 0.06514166  | 0.488757736 | 0.479339322 | 0.452500541 |
| 0.295450528 | 0.451995007 | 0.008960128 | 0.513652682 |
| 0.495345288 | 0.029126797 | 0.193946198 | 0.457191601 |
| 0.439894801 | 0.531448797 | 0.360187118 | 0.464118314 |
| 0.45142003  | 0.493516544 | 0.334134269 | 0.368028996 |
| 0.476166563 | 0.476779638 | 0.471638064 | 0.463656898 |
| 0.498022696 | 0.482978934 | 0.390932491 | 0.040096635 |
| 0.179580706 | 0.292643652 | 0.348712898 | 0.137987018 |
| 0.368857268 | 0.212329532 | 0.475363799 | 0.499169485 |
| 0.469828689 | 0.012960886 | 0.238181867 | 0.45505282  |
| 0.468817158 | 0.489298171 | 0.035647589 | 0.009739391 |
| 0.010348209 | 0.034930046 | 0.446546434 | 0.323148772 |
| 0.485740414 | 0.284462996 | 0.013836735 | 0.08931197  |
| 0.379158343 | 0.446086932 | 0.505332187 | 0.472447435 |
| 0.465144234 | 0.140908507 | 0.348816598 | 0.481093077 |
| 0.112420449 | 0.342846295 | 0.481491137 | 0.483288402 |
| 0.071311017 | 0.332101875 | 0.418563207 | 1           |
| 0.077822991 | 0.408250084 | 0.470454116 | 0.405308294 |
| 0.023593641 | 0.131766623 | 0.114305868 | 0.491565443 |
| 0.487424527 | 0.129840814 | 0.065127445 | 0.175928131 |
| 0.203050962 | 0.48468188  | 0.25660342  | 0.513983168 |
| 0.485465536 | 0.502648509 | 0.113773288 | 0.487385334 |
| 0.077182655 | 0.483771817 | 0.395037071 | 0.083161321 |
| 0.35941001  | 0.028263335 | 0.454367888 | 0.196730971 |
| 0.393944774 | 0.448529666 | 0.249506956 | 0.031813294 |
| 0.200148213 | 0.09467653  | 0.499080421 | 0.485717362 |
| 0.054651251 | 0.343282749 | 0.387439324 | 0.471621101 |
| 0.366434412 | 0.499915865 | 0.503098686 | 0.426641551 |
| 0.159539349 | 0.154569964 | 0.476659449 | 0.426616502 |

|             |             |             |             |
|-------------|-------------|-------------|-------------|
| 0.320540178 | 0.494117461 | 0.379963337 | 0.521113282 |
| 0.444737958 | 0.456891783 | 0.463017316 | 0.445166922 |
| 0.286256177 | 0.443724779 | 0.439109191 | 0.046528673 |
| 0.449826172 | 0.501074815 | 0.426456604 | 0.220158307 |
| 0.352885104 | 0.408246089 | 0.088202751 | 0.202564621 |
| 0.342827137 | 0.370423079 | 0.23251899  | 0.49821981  |
| 0.439203426 | 0.429816148 | 0.075556785 | 0.109042889 |
| 0.541798605 | 0.437700944 | 0.220331832 | 0.48707234  |
| 0.252714438 | 0.439714057 | 0.477474613 | 0.476082198 |
| 0.411866475 | 0.469389403 | 0.474715636 | 0.443049241 |
| 0.436855361 | 0.372277303 | 0.523315459 | 0.132796929 |
| 0.123397555 | 0.433440475 | 0.168058068 | 0.147528174 |
| 0.23306546  | 0.052694882 | 0.311956029 | 0.490597166 |
| 0.382973625 | 0.474639194 | 0.363163929 | 0.139371828 |
| 0.405465517 | 0.392114539 | 0.451661255 | 0.299720395 |
| 0.141447254 | 0.500069827 | 0.020867135 | 0.100797137 |
| 0.400597525 | 0.47040575  | 0.42662748  | 0.330208223 |
| 0.335992541 | 0.191246642 | 0.406669767 | 0.356690941 |
| 0.369767961 | 0.390898054 | 0.466351302 | 0.068741906 |
| 0.047349108 | 0.496473821 | 0.416634494 | 0.0362264   |
| 0.128182528 | 0.408956261 | 0.361673642 | 0.333485975 |
| 0.039085379 | 0.469267357 | 0.3903626   | 0.480500191 |
| 0.439893595 | 0.119379683 | 0.35622001  | 0.131424149 |
| 0.106722863 | 0.448618108 | 0.429739228 | 0.504251785 |
| 0.398777009 | 0.497435367 | 0.44154804  | 0.460083369 |
| 0.165665411 | 0.388923034 | 0.064213182 | 0.485158132 |
| 0.418774252 |             |             |             |
| RPL12       | 0.070826446 | 0.079995656 | 0.082178473 |
| 0.052081544 | 0.063311296 | 0.018585715 | 0.009005361 |
| 0.001674927 | 0.008135683 | 5.92E-05    | 0.017334741 |
| 0.09296691  | 0.015522118 | 0.005041964 | 0.009959053 |
| 0.087627614 | 0.038039201 | 0.019455099 | 0.022104494 |
| 0.044790496 | 0.00067044  | 0.087778886 | 0.004541269 |
| 0.078633903 | 0.076557342 | 0.018113147 | 0.099845961 |
| 0.060547872 | 0.021279036 | 0.008989573 | 0.025801263 |
| 0.029123954 | 0.059534089 | 0.078184021 | 0.108388589 |
| 0.084978077 | 0.059385718 | 0.001399401 | 0.006745188 |
| 0.050229414 | 0.098832421 | 0.042991656 | 0.034960828 |
| 0.0027189   | 0.053507918 | 0.018252398 | 0.124718562 |
| 0.002548949 | 0.012509792 | 0.002434088 | 0.044330933 |
| 0.065031795 | 0.055430463 | 0.003788627 | 0.005962105 |
| 0.016742534 | 0.002029735 | 0.085423153 | 0.012371839 |
| 0.015426914 | 0.00029879  | 0.074036411 | 0.002671463 |
| 0.003981593 | 0.00582197  | 0.048987926 | 0.007322343 |
| 0.092404353 | 0.027819535 | 0.000671119 | 0.096205583 |
| 0.004053945 | 0.042529894 | 0.109542705 | 0.109933421 |
| 0.020621044 | 0.003286241 | 0.058456838 | 0.0237206   |
| 0.069777548 | 0.074311126 | 0.119580614 | 0.125961542 |
| 0.021077755 | 0.0619328   | 0.142096495 | 0.015582659 |
| 0.063102388 | 0.007996672 | 0.004899693 | 0.108677495 |
| 0.119851853 | 0.088749412 | 0.031308257 | 0.111964644 |
| 0.0521459   | 0.058899886 | 0.036407855 | 0.048784569 |
| 0.045169464 | 0.04841621  | 0.055666168 | 0.105596722 |
| 0.037075455 | 0.220459956 | 0.063551255 | 0.034983589 |

|             |             |                      |             |
|-------------|-------------|----------------------|-------------|
| 0.014182657 | 0.006749108 | 0.044568531          | 0.013566453 |
| 0.073021896 | 0.001462101 | 0.111267002          | 0.021153204 |
| 0.01264383  | 0.060212134 | 0.103127143          | 0.013815035 |
| 0.075448422 | 0.003873506 | 0.074541777          | 0.01394589  |
| 0.007959223 | 0.174734232 | 0.060282288          | 0.066500415 |
| 0.002142784 | 0.021721869 | 0.011401864          | 0.003678204 |
| 0.02002069  | 0.028655763 | 0.072320862          | 0.027436992 |
| 0.062024894 | 0.079750055 | 0.031043847          | 0.032340047 |
| 0.100896172 | 0.120556158 | 6.66E-05 0.003933664 |             |
| 0.039783053 | 0.0291903   | 0.041095523          | 0.056101141 |
| 0.086165536 | 0.002652752 | 0.010786616          | 0.099551292 |
| 0.037630355 | 0.009149428 | 0.009542308          | 0.089883756 |
| 0.008866831 | 0.149250835 | 0.008358993          | 0.012067407 |
| 0.001319021 | 0.090553126 | 0.045202054          | 0.011873055 |
| 0.027377066 | 0.044699963 | 0.001454604          | 0.005346654 |
| 0.004496074 | 0.065921865 | 0.065397831          | 0.01437991  |
| 0.018500359 | 0.092537187 | 0.008981564          | 0.05190229  |
| 0.00326808  | 0.005383007 | 0.005411064          | 0.089275042 |
| 0.00808332  | 0.116434881 | 0.015770174          | 0.050819202 |
| 0.082435987 | 0.084811863 | 0.004392168          | 0.064212053 |
| 0.097960096 | 0.006095374 | 0.053916844          | 0.092606849 |
| 0.084753723 | 0.067928786 | 0.00173322           | 0.075207648 |
| 0.024576306 | 0.010553101 | 0.110089242          | 0.049841379 |
| 0.066329918 | 0.01613441  | 0.007169859          | 0.145767382 |
| 0.094267353 | 0.002049649 | 0.003055028          | 0.032258726 |
| 0.039731123 | 0.000384565 | 0.056180423          | 0.047983867 |
| 0.047566252 | 0.102282594 | 0.099984244          | 0.090637555 |
| 0.061503547 | 0.008664374 | 0.00552626           | 0.131391736 |
| 0.094553934 | 0.018132595 | 0.044900164          | 0.006449601 |
| 0.014575091 | 0.062291501 | 0.07753583           | 0.005062485 |
| 0.00501726  | 0.010610855 | 0.000561372          | 0.061207122 |
| 0.068767935 | 0.00322425  | 0.061689557          | 0.019254333 |
| 0.03964101  | 0.096144239 | 0.220599896          | 0.230015232 |
| 0.248493987 | 0.030527698 | 0.016240482          | 0.006819128 |
| 0.018668526 | 0.021203916 | 0.062243207          | 0.032147318 |
| 0.000204645 | 0.016441655 | 0.02421041           | 0.03189446  |
| 0.009006993 | 0.019227401 | 0.01455669           | 0.036339902 |
| 0.006448238 | 0.005718664 | 0.056070206          | 0.066698565 |
| 0.046026044 | 0.012067287 | 0.078626788          | 0.067778942 |
| 0.017736115 | 0.007965972 | 0.015686429          | 0.009091993 |
| 0.070739281 | 0.010521186 | 0.003732005          | 0.054881768 |
| 0.003555228 | 0.109416933 | 0.010321103          | 0.046765433 |
| 0.067404315 | 0.027228497 | 0.075502428          | 0.002123566 |
| 0.025285816 | 0.052837065 | 0.064292099          | 0.04333626  |
| 0.035214473 | 0.043976761 | 0.001430039          | 0.042788694 |
| 0.038126925 | 0.010827347 | 0.09935627           | 0.042149436 |
| 0.017877943 | 0.128169865 | 0.095706267          | 0.034643625 |
| 0.036642954 | 0.023063339 | 0.000199231          | 0.092327618 |
| 0.087905376 | 0.094006364 | 0.058028302          | 0.132374687 |
| 0.004740705 | 0.003042835 | 0.11561417           | 0.09763844  |
| 0.067383764 | 0.114926968 | 0.045063821          | 0.085954949 |
| 0.029050775 | 0.0477937   | 0.000385984          | 0.100771023 |
| 0.031093218 | 0.082009642 | 0.004521862          | 0.138175629 |
| 0.081411352 | 0.005821733 | 0.051123759          | 0.011924267 |

|             |             |             |             |
|-------------|-------------|-------------|-------------|
| 0.03168174  | 0.005281634 | 0.009280141 | 0.070979438 |
| 0.061642422 | 0.038010392 | 0.035471437 | 0.072905742 |
| 8.97E-05    | 0.000665395 | 0.096306689 | 0.176653707 |
| 0.021720579 | 0.02491919  | 0.216438474 | 0.006270128 |
| 0.003688923 | 0.05228567  | 0.094356832 | 0.012330304 |
| 0.015326703 | 0.006034891 | 0.116196438 | 0.006956633 |
| 0.143098749 | 0.105006301 | 0.075114452 | 0.005338848 |
| 0.081726931 | 0.10093091  | 0.142512377 | 0.03622867  |
| 0.030234505 | 0.093981991 | 0.033249295 | 0.001651355 |
| 0.086767729 | 0.003002858 | 0.001904949 | 0.063917656 |
| 0.014541116 | 0.049294071 | 0.000302439 | 0.03804433  |
| 0.040567999 | 0.130281869 | 0.064774303 | 0.026810604 |
| 0.002849608 | 0.041502039 | 0.008752029 | 0.113411456 |
| 0.067260861 | 0.030217126 | 0.068460547 | 0.081861517 |
| 0.13738579  | 0.0729376   | 0.164618568 | 0.12533439  |
| 0.113895596 | 0.082384193 | 0.004555654 | 0.070303965 |
| 0.058765271 | 0.11535187  | 0.043787614 | 0.054451531 |
| 0.072015436 | 0.116696112 | 0.031915426 | 0.001505934 |
| 0.038413882 | 0.002573005 | 0.012398803 | 0.010069174 |
| 0.012102277 | 0.036014528 | 0.07901153  | 0.099193118 |
| 0.114341218 | 0.007807451 | 0.001276738 | 0.065786479 |
| 0.046679598 | 0.069825599 | 0.008349891 | 0.003524863 |
| 0.003010109 | 0.044123657 | 0.020712526 | 0.085037741 |
| 0.092406685 | 0.001770077 | 0.002288036 | 8.37E-05    |
| 0.007594914 | 0.176152668 | 0.076118032 | 0.05892251  |
| 0.113288899 | 0.016712206 | 0.006920603 | 0.056518846 |
| 0.03604456  | 0.020548522 | 0.105533953 | 0.053295975 |
| 0.015302671 | 0.074323171 | 0.023267223 | 0.077822991 |
| 1           | 0.083969729 | 0.08528001  | 0.010679933 |
| 0.007157803 | 0.043775713 | 0.030055617 | 0.100786517 |
| 0.084804938 | 0.011925414 | 0.011516798 | 0.000932342 |
| 0.005583366 | 0.093049172 | 0.009486283 | 0.104516965 |
| 0.054303951 | 0.07927758  | 0.043029548 | 0.064836931 |
| 0.009667789 | 0.068742054 | 0.171924661 | 0.000822113 |
| 0.035023356 | 0.004282445 | 0.092366889 | 0.031459564 |
| 0.00655566  | 0.033385397 | 0.035630674 | 0.029373729 |
| 0.119070233 | 0.023171971 | 0.097062889 | 0.134967808 |
| 0.032995692 | 0.008386512 | 0.068286664 | 0.059750979 |
| 0.007235487 | 0.067490895 | 0.065629202 | 0.028910223 |
| 0.002276711 | 0.094129694 | 0.040040989 | 0.032848569 |
| 0.003153905 | 0.120006372 | 0.028097422 | 0.104601567 |
| 0.043284971 | 0.070830288 | 0.090371523 | 0.029591801 |
| 0.06391261  | 0.026035526 | 0.023657558 | 0.000483349 |
| 0.036868963 | 0.086018322 | 0.019590672 | 0.037933245 |
| 0.055411532 | 0.163744429 | 0.00340922  | 0.003238345 |
| 0.215602796 | 0.009235556 | 0.005403681 | 0.086029032 |
| 0.029984381 | 0.035587169 | 0.000852131 | 0.025304982 |
| 0.086783941 | 0.053555841 | 0.001875354 | 0.044315025 |
| 0.039105807 | 0.063220098 | 0.107685302 | 0.133509417 |
| 0.024236445 | 0.071952658 | 0.04569371  | 0.026196774 |
| 0.038850925 | 0.021470663 | 0.078738352 | 0.000384563 |
| 0.033634047 | 0.06069112  | 0.007063835 | 0.053482074 |
| 0.017604329 | 0.015387133 | 0.122952147 | 0.089667674 |
| 0.085796975 | 0.057656382 | 0.003873445 | 0.01068299  |



|             |             |             |             |
|-------------|-------------|-------------|-------------|
| 0.097967197 | 0.027777226 | 0.064675015 | 0.004822634 |
| 0.005559841 | 0.068959467 | 0.00413547  | 0.020300022 |
| 0.078792026 | 0.084702788 | 0.135351242 | 0.045447785 |
| 0.079413666 | 0.050112721 | 0.043571046 | 0.006232598 |
| 0.010706136 | 0.0202746   | 0.077566986 | 0.001313831 |
| 0.000343724 | 0.104854922 | 0.017463559 | 0.021152575 |
| 0.022478973 | 0.03177244  | 0.015113303 | 0.011602391 |
| 0.048503133 | 0.108521901 | 0.009968228 | 0.082536164 |
| 0.018156458 | 0.00981774  | 0.027239429 | 0.004987682 |
| 0.004721086 | 0.049820327 | 0.131104489 | 0.093320662 |
| 0.09274727  | 0.077608238 | 0.046281647 | 0.0639025   |
| 0.0104613   | 0.071927122 | 0.001496734 | 0.063438827 |
| 0.044055093 |             |             |             |
| RRAS2       | 0.287508405 | 0.362881127 | 0.201135591 |
| 0.352780865 | 0.262798345 | 0.158048954 | 0.192817118 |
| 0.129212886 | 0.1276977   | 0.024060845 | 0.078994732 |
| 0.27469281  | 0.187470727 | 0.173176774 | 0.123368193 |
| 0.419848834 | 0.276382362 | 0.205551856 | 0.268232555 |
| 0.337808749 | 0.106285008 | 0.404215435 | 0.189656336 |
| 0.274507442 | 0.217600227 | 0.191996821 | 0.233700372 |
| 0.40022682  | 0.207417649 | 0.109494821 | 0.268634926 |
| 0.295805818 | 0.328900922 | 0.314917063 | 0.338396092 |
| 0.306407527 | 0.231653991 | 0.07090223  | 0.13139447  |
| 0.299172816 | 0.329038072 | 0.33342082  | 0.279376329 |
| 0.131807068 | 0.272236954 | 0.222925058 | 0.305465297 |
| 0.114923423 | 0.139506875 | 0.088466452 | 0.255373213 |
| 0.266501865 | 0.207270609 | 0.149790673 | 0.175893923 |
| 0.130411095 | 0.102652078 | 0.160696199 | 0.161090279 |
| 0.23973643  | 0.069499213 | 0.292636732 | 0.108739008 |
| 0.109604043 | 0.188957938 | 0.32563528  | 0.193129468 |
| 0.227237991 | 0.226268625 | 0.097672081 | 0.217932936 |
| 0.008879768 | 0.33286442  | 0.323174847 | 0.152353674 |
| 0.197984947 | 0.096982027 | 0.335153488 | 0.245473653 |
| 0.406559013 | 0.302099335 | 0.43234901  | 0.404782946 |
| 0.261769197 | 0.326922729 | 0.228803325 | 0.261766652 |
| 0.314304467 | 0.179910917 | 0.151319771 | 0.442316189 |
| 0.425517274 | 0.341518387 | 0.289065339 | 0.318829526 |
| 0.275907179 | 0.329374214 | 0.171961365 | 0.225362998 |
| 0.150907853 | 0.210274982 | 0.267486869 | 0.399508024 |
| 0.250761003 | 0.226075089 | 0.288835338 | 0.306198055 |
| 0.225025844 | 0.144896186 | 0.333258769 | 0.227455384 |
| 0.41412057  | 0.070791052 | 0.318230922 | 0.212113431 |
| 0.2787347   | 0.310786006 | 0.341819165 | 0.233827463 |
| 0.268008531 | 0.114040121 | 0.128307881 | 0.200144998 |
| 0.202948422 | 0.17604081  | 0.250526099 | 0.37389005  |
| 0.161670079 | 0.246551519 | 0.227791147 | 0.05518353  |
| 0.175518227 | 0.290316677 | 0.307293324 | 0.232876493 |
| 0.336019954 | 0.2352373   | 0.216379893 | 0.218634201 |
| 0.255028159 | 0.42994005  | 0.013736082 | 0.189490826 |
| 0.211748697 | 0.307856651 | 0.301174914 | 0.243632479 |
| 0.276734045 | 0.172365529 | 0.253643795 | 0.409280892 |
| 0.261111169 | 0.210780567 | 0.153827558 | 0.413022487 |
| 0.163936395 | 0.28784667  | 0.239965631 | 0.244144918 |
| 0.13276063  | 0.289463532 | 0.183687371 | 0.172664209 |

|             |             |             |             |
|-------------|-------------|-------------|-------------|
| 0.116277754 | 0.264368166 | 0.080600949 | 0.149341418 |
| 0.154319415 | 0.284047356 | 0.247273503 | 0.258783171 |
| 0.251147222 | 0.350360422 | 0.131686443 | 0.252392892 |
| 0.041831895 | 0.181120027 | 0.095318912 | 0.386308133 |
| 0.116601708 | 0.405592371 | 0.281316671 | 0.294564801 |
| 0.317427121 | 0.394775382 | 0.010715963 | 0.28518975  |
| 0.341510154 | 0.091874591 | 0.260847125 | 0.309103766 |
| 0.168631351 | 0.372670334 | 0.024762107 | 0.404063918 |
| 0.184094987 | 0.22850444  | 0.445139599 | 0.2810156   |
| 0.295314904 | 0.16947272  | 0.16966953  | 0.325759424 |
| 0.264773014 | 0.042241677 | 0.095282089 | 0.292182867 |
| 0.176980152 | 0.088499215 | 0.314038545 | 0.315404417 |
| 0.229904491 | 0.385146109 | 0.456530345 | 0.158847395 |
| 0.243212536 | 0.229213164 | 0.11028463  | 0.308127989 |
| 0.338813762 | 0.153158668 | 0.268515385 | 0.210430941 |
| 0.125207868 | 0.317616334 | 0.262615668 | 0.077842006 |
| 0.143511582 | 0.186288368 | 0.049113342 | 0.244823647 |
| 0.243713029 | 0.159655909 | 0.157226004 | 0.297614607 |
| 0.245331184 | 0.390208087 | 0.234438047 | 0.195012275 |
| 0.165535763 | 0.201168224 | 0.255881359 | 0.144782058 |
| 0.166992871 | 0.268314171 | 0.211894601 | 0.201909197 |
| 0.086828496 | 0.236815908 | 0.114367664 | 0.152113174 |
| 0.137760478 | 0.157783028 | 0.135030688 | 0.228876732 |
| 0.201598885 | 0.178248671 | 0.250702491 | 0.234976468 |
| 0.24779419  | 0.13230912  | 0.355465548 | 0.369389744 |
| 0.167557821 | 0.220444302 | 0.211468039 | 0.123587281 |
| 0.372530853 | 0.090439259 | 0.081550348 | 0.32258046  |
| 0.116552503 | 0.422788027 | 0.209434607 | 0.261587715 |
| 0.229650804 | 0.269358853 | 0.41318801  | 0.043976475 |
| 0.198650176 | 0.303708888 | 0.30703879  | 0.251143914 |
| 0.232078344 | 0.296621224 | 0.111369572 | 0.240647175 |
| 0.233046423 | 0.170836461 | 0.373920329 | 0.292775401 |
| 0.161205949 | 0.355064663 | 0.2800923   | 0.239679578 |
| 0.235737843 | 0.185970391 | 0.072117051 | 0.330683718 |
| 0.378212446 | 0.419578711 | 0.270489153 | 0.271717218 |
| 0.142987843 | 0.057318204 | 0.322272746 | 0.214204035 |
| 0.295112739 | 0.371513594 | 0.325017079 | 0.237244205 |
| 0.280253842 | 0.192769267 | 0.071246835 | 0.385018907 |
| 0.227584473 | 0.336384566 | 0.089379682 | 0.336541388 |
| 0.293091715 | 0.108477764 | 0.208775428 | 0.165319853 |
| 0.234990817 | 0.148924469 | 0.254732463 | 0.311583681 |
| 0.311035057 | 0.221982537 | 0.177826271 | 0.333724485 |
| 0.059593304 | 0.112611024 | 0.253257801 | 0.207858628 |
| 0.185396059 | 0.266050843 | 0.094737261 | 0.164066158 |
| 0.139520034 | 0.290799286 | 0.42504673  | 0.14492488  |
| 0.120786096 | 0.140658964 | 0.375705287 | 0.162492805 |
| 0.337313322 | 0.33759754  | 0.32037346  | 0.227980768 |
| 0.322624091 | 0.336771418 | 0.203833615 | 0.26456006  |
| 0.145174772 | 0.322889577 | 0.238925393 | 0.066311136 |
| 0.428614423 | 0.071255979 | 0.060012745 | 0.342069772 |
| 0.250945118 | 0.23259488  | 0.00630847  | 0.086249237 |
| 0.200969309 | 0.432659352 | 0.276700466 | 0.267908704 |
| 0.065261922 | 0.299723037 | 0.047827703 | 0.391103626 |
| 0.316477397 | 0.120666507 | 0.28052205  | 0.290890795 |

|             |             |             |             |
|-------------|-------------|-------------|-------------|
| 0.280673454 | 0.35578628  | 0.204092268 | 0.34111275  |
| 0.240798964 | 0.300035833 | 0.186238611 | 0.301159063 |
| 0.316907097 | 0.320140718 | 0.30123927  | 0.301312358 |
| 0.394324314 | 0.385195155 | 0.267950437 | 0.078033177 |
| 0.13358036  | 0.11693457  | 0.091522708 | 0.106618393 |
| 0.140721143 | 0.233719201 | 0.345071847 | 0.428783394 |
| 0.373915623 | 0.080749402 | 0.141819848 | 0.285532994 |
| 0.336824774 | 0.402016826 | 0.110768698 | 0.016955322 |
| 0.016404449 | 0.082620639 | 0.223254814 | 0.317388645 |
| 0.358667721 | 0.065891803 | 0.066058773 | 0.088167222 |
| 0.221078107 | 0.303128175 | 0.329653619 | 0.392394158 |
| 0.347730773 | 0.258685833 | 0.115206551 | 0.384496394 |
| 0.182853213 | 0.151334057 | 0.382282513 | 0.29564926  |
| 0.21379218  | 0.305018829 | 0.193434933 | 0.408250084 |
| 0.083969729 | 1           | 0.293653933 | 0.202791384 |
| 0.102593883 | 0.241207202 | 0.190546063 | 0.422388297 |
| 0.289930057 | 0.162567365 | 0.13361886  | 0.056136651 |
| 0.170579408 | 0.39660246  | 0.233255285 | 0.427796317 |
| 0.342186018 | 0.440192845 | 0.255748662 | 0.299256511 |
| 0.129510525 | 0.292640624 | 0.258768832 | 0.028906584 |
| 0.301418958 | 0.123125685 | 0.316614253 | 0.090030862 |
| 0.151937904 | 0.262736045 | 0.149199461 | 0.148374022 |
| 0.157770469 | 0.222662293 | 0.41889776  | 0.412255278 |
| 0.194619737 | 0.226776732 | 0.313315119 | 0.328759263 |
| 0.136577569 | 0.361157417 | 0.297680283 | 0.121509063 |
| 0.143403458 | 0.197042774 | 0.326373072 | 0.21880549  |
| 0.160716745 | 0.443973281 | 0.195332868 | 0.388955252 |
| 0.257554414 | 0.338551879 | 0.338065395 | 0.215806228 |
| 0.27025828  | 0.186035294 | 0.215824203 | 0.05498453  |
| 0.263974802 | 0.401154342 | 0.198459872 | 0.204285143 |
| 0.272305843 | 0.202044796 | 0.154862927 | 0.098325262 |
| 0.176722923 | 0.132150959 | 0.224684379 | 0.445708938 |
| 0.237120718 | 0.227740391 | 0.126563889 | 0.175402674 |
| 0.374118355 | 0.284972134 | 0.118545396 | 0.273507693 |
| 0.317181931 | 0.254375787 | 0.361656054 | 0.380287507 |
| 0.180921207 | 0.32217809  | 0.322796514 | 0.221469017 |
| 0.263077596 | 0.249863448 | 0.32630295  | 0.06436913  |
| 0.160081632 | 0.231534751 | 0.170853354 | 0.275001254 |
| 0.261072594 | 0.154473958 | 0.15727204  | 0.408930915 |
| 0.170476588 | 0.336595884 | 0.137007907 | 0.196694198 |
| 0.322122344 | 0.163837611 | 0.313804896 | 0.160883336 |
| 0.170479639 | 0.30011489  | 0.065704157 | 0.239436908 |
| 0.199427428 | 0.305966378 | 0.208993504 | 0.309489325 |
| 0.208116449 | 0.303847612 | 0.299362071 | 0.114199852 |
| 0.107461547 | 0.181034283 | 0.295622312 | 0.083620329 |
| 0.092182885 | 0.444542229 | 0.15103201  | 0.149653409 |
| 0.201028183 | 0.188398838 | 0.264406374 | 0.188305223 |
| 0.159253372 | 0.32972934  | 0.108192544 | 0.250073445 |
| 0.205376461 | 0.233392138 | 0.200733302 | 0.121105336 |
| 0.171813273 | 0.276089961 | 0.231466517 | 0.327969447 |
| 0.267847444 | 0.412499553 | 0.240419412 | 0.303184694 |
| 0.177462498 | 0.163298113 | 0.102823798 | 0.371939734 |
| 0.14071537  |             |             |             |
| RREB1       | 0.368905609 | 0.505809359 | 0.299162727 |

|             |             |             |             |
|-------------|-------------|-------------|-------------|
| 0.338564495 | 0.327168902 | 0.216918454 | 0.14512584  |
| 0.132455969 | 0.058374332 | 0.004571663 | 0.021333294 |
| 0.342372184 | 0.168507186 | 0.194200752 | 0.180942338 |
| 0.365294063 | 0.158230658 | 0.280496586 | 0.197596541 |
| 0.311151296 | 0.062135625 | 0.325273044 | 0.079769575 |
| 0.271161019 | 0.109636247 | 0.065818138 | 0.212161364 |
| 0.414614984 | 0.076018171 | 0.186269284 | 0.284769324 |
| 0.145671244 | 0.404594385 | 0.497638727 | 0.342736064 |
| 0.503678102 | 0.327299898 | 0.036632366 | 0.165269639 |
| 0.395859024 | 0.357445353 | 0.310314118 | 0.247022522 |
| 0.037277964 | 0.456824961 | 0.175837876 | 0.331956554 |
| 0.147083669 | 0.036088448 | 0.134522281 | 0.408524099 |
| 0.446156731 | 0.274251441 | 0.1466744   | 0.110614377 |
| 0.148340054 | 0.147757328 | 0.225054565 | 0.209593778 |
| 0.173950981 | 0.088687773 | 0.463632946 | 0.053154652 |
| 0.098183448 | 0.187529506 | 0.202415464 | 0.187627558 |
| 0.285370874 | 0.300670542 | 0.022976421 | 0.307269517 |
| 0.002741335 | 0.285619681 | 0.335347793 | 0.211808572 |
| 0.055544608 | 0.025888262 | 0.219387723 | 0.228832826 |
| 0.443750796 | 0.460637861 | 0.488831698 | 0.492508768 |
| 0.192799428 | 0.282355202 | 0.324788532 | 0.154657486 |
| 0.406403312 | 0.124857072 | 0.103920032 | 0.38217527  |
| 0.495781898 | 0.510209938 | 0.192254808 | 0.250867154 |
| 0.346197539 | 0.456287036 | 0.273322766 | 0.30251672  |
| 0.211444841 | 0.082211989 | 0.405733625 | 0.514929918 |
| 0.362319567 | 0.287054959 | 0.158601522 | 0.352464361 |
| 0.073146903 | 0.248477634 | 0.264754088 | 0.215405224 |
| 0.45600021  | 0.014102624 | 0.222802691 | 0.243338708 |
| 0.219533386 | 0.38883837  | 0.50977608  | 0.148275004 |
| 0.35315388  | 0.032090617 | 0.108149465 | 0.056431211 |
| 0.259755196 | 0.176250706 | 0.447482474 | 0.430426751 |
| 0.180274407 | 0.293421048 | 0.19645275  | 0.006354055 |
| 0.044514258 | 0.219172318 | 0.422693115 | 0.309112226 |
| 0.360795344 | 0.376802725 | 0.167826152 | 0.312408245 |
| 0.318031143 | 0.48321201  | 0.027540571 | 0.082898882 |
| 0.288571801 | 0.222249447 | 0.210824472 | 0.320050924 |
| 0.253856878 | 0.094820261 | 0.125397222 | 0.508300382 |
| 0.388007221 | 0.082265639 | 0.250482251 | 0.355385629 |
| 0.20585552  | 0.315472442 | 0.109137702 | 0.232800475 |
| 0.043431357 | 0.467604784 | 0.052017063 | 0.242181311 |
| 0.155378864 | 0.192086074 | 0.020733443 | 0.174535717 |
| 0.191906527 | 0.387067006 | 0.447328974 | 0.115847833 |
| 0.257677847 | 0.310081699 | 0.215146153 | 0.313997952 |
| 0.007238755 | 0.061557265 | 0.18171831  | 0.504866356 |
| 0.164201813 | 0.516759927 | 0.258541553 | 0.267503264 |
| 0.256926096 | 0.411018458 | 0.005628076 | 0.467123379 |
| 0.512484903 | 0.190006266 | 0.294793305 | 0.344556183 |
| 0.245313872 | 0.409067699 | 0.044859973 | 0.357171253 |
| 0.278519107 | 0.087111553 | 0.50591689  | 0.157991944 |
| 0.456647825 | 0.045572041 | 0.219114398 | 0.412737855 |
| 0.375120493 | 0.012706554 | 0.124828907 | 0.270818629 |
| 0.049223586 | 0.056061035 | 0.350874894 | 0.285409922 |
| 0.24631377  | 0.409027031 | 0.481449741 | 0.232173487 |
| 0.314985494 | 0.193409985 | 0.021885966 | 0.300150736 |

|             |             |             |             |
|-------------|-------------|-------------|-------------|
| 0.407797646 | 0.251823028 | 0.402858759 | 0.173689578 |
| 0.22088952  | 0.445292275 | 0.384566561 | 0.105138332 |
| 0.039381295 | 0.211441663 | 0.019864689 | 0.241110828 |
| 0.36250264  | 0.09192637  | 0.245244866 | 0.211519009 |
| 0.095363908 | 0.513963387 | 0.198179734 | 0.245394485 |
| 0.148484069 | 0.272208502 | 0.205445085 | 0.165653174 |
| 0.179259664 | 0.146271093 | 0.250192    | 0.248748317 |
| 0.027918199 | 0.101471144 | 0.033819616 | 0.29355958  |
| 0.128985966 | 0.253989844 | 0.239030881 | 0.314262958 |
| 0.26304389  | 0.11513108  | 0.296355772 | 0.244814677 |
| 0.122637646 | 0.0245954   | 0.490319379 | 0.319166008 |
| 0.255442817 | 0.122874636 | 0.061928927 | 0.246164881 |
| 0.442553491 | 0.169981976 | 0.158396949 | 0.421467257 |
| 0.040386848 | 0.487055907 | 0.191974975 | 0.126332932 |
| 0.317768617 | 0.216771343 | 0.433796872 | 0.035088569 |
| 0.275579749 | 0.441897058 | 0.283844113 | 0.154844188 |
| 0.36756798  | 0.289854136 | 0.029170329 | 0.345321908 |
| 0.344084513 | 0.042748364 | 0.5254232   | 0.164773327 |
| 0.035299217 | 0.37602791  | 0.348883195 | 0.087228781 |
| 0.0909761   | 0.217059842 | 0.029774592 | 0.256163357 |
| 0.502102908 | 0.352955007 | 0.347677548 | 0.231291671 |
| 0.039512492 | 0.017551297 | 0.24155098  | 0.322925036 |
| 0.489956344 | 0.518732778 | 0.252647482 | 0.290589088 |
| 0.201707909 | 0.22328142  | 0.087864397 | 0.504175916 |
| 0.230435617 | 0.513028975 | 0.012960131 | 0.396892929 |
| 0.487789462 | 0.184127075 | 0.084993301 | 0.191003473 |
| 0.343428045 | 0.042079293 | 0.1965279   | 0.478074751 |
| 0.393718716 | 0.226390632 | 0.222007817 | 0.347950622 |
| 0.013097641 | 0.03439076  | 0.285494963 | 0.193476211 |
| 0.24489516  | 0.175148439 | 0.082611094 | 0.221381465 |
| 0.041957043 | 0.421188805 | 0.455083453 | 0.04754927  |
| 0.185828664 | 0.200880168 | 0.329150069 | 0.040989264 |
| 0.444259616 | 0.506280342 | 0.502569903 | 0.15067903  |
| 0.411866822 | 0.472594016 | 0.291992244 | 0.106322704 |
| 0.030793222 | 0.507873185 | 0.288887693 | 0.021103935 |
| 0.467980567 | 0.13264072  | 0.01504932  | 0.475969379 |
| 0.156309096 | 0.423601295 | 0.002168908 | 0.101642527 |
| 0.071705556 | 0.463453811 | 0.441319447 | 0.271720283 |
| 0.124668571 | 0.293972808 | 0.016487476 | 0.533293986 |
| 0.470064936 | 0.024852459 | 0.171275841 | 0.393757351 |
| 0.373068053 | 0.514330621 | 0.252321675 | 0.433546505 |
| 0.318238892 | 0.4812495   | 0.172890375 | 0.230851644 |
| 0.392912113 | 0.491484039 | 0.345497225 | 0.431645551 |
| 0.444669698 | 0.358202193 | 0.213392713 | 0.013800809 |
| 0.088947346 | 0.1315004   | 0.163812265 | 0.053512993 |
| 0.197146826 | 0.126463017 | 0.482903621 | 0.465720789 |
| 0.486557482 | 0.010791485 | 0.105523738 | 0.387566735 |
| 0.40984337  | 0.456658812 | 0.036819815 | 0.007213266 |
| 0.011702893 | 0.022996967 | 0.249240596 | 0.241226643 |
| 0.474169116 | 0.130824524 | 0.008288956 | 0.035445919 |
| 0.213085115 | 0.316160308 | 0.486638767 | 0.30648039  |
| 0.413326986 | 0.099580383 | 0.167320768 | 0.330489087 |
| 0.071387878 | 0.242417498 | 0.481919499 | 0.438582542 |
| 0.070079076 | 0.231860173 | 0.305878282 | 0.470454116 |

|             |             |             |             |
|-------------|-------------|-------------|-------------|
| 0.08528001  | 0.293653933 | 1           | 0.219440017 |
| 0.034279807 | 0.0966433   | 0.065878908 | 0.413755493 |
| 0.486685729 | 0.082096169 | 0.042246555 | 0.094404874 |
| 0.09366393  | 0.465369494 | 0.146256754 | 0.515842535 |
| 0.398110205 | 0.418682208 | 0.111688134 | 0.448832394 |
| 0.036701264 | 0.47166032  | 0.296853521 | 0.034082013 |
| 0.297748675 | 0.023558415 | 0.485402525 | 0.089944819 |
| 0.224702992 | 0.30150391  | 0.129709911 | 0.0340518   |
| 0.171331389 | 0.073065815 | 0.463108358 | 0.457981478 |
| 0.064892364 | 0.179332421 | 0.276821025 | 0.319855296 |
| 0.18137268  | 0.362604762 | 0.476936143 | 0.245334313 |
| 0.061460416 | 0.20714961  | 0.328900523 | 0.299776796 |
| 0.179327059 | 0.501054189 | 0.202620589 | 0.527972405 |
| 0.326339348 | 0.448350456 | 0.469789499 | 0.230431143 |
| 0.24696208  | 0.264600021 | 0.240616881 | 0.017008648 |
| 0.278573487 | 0.43873338  | 0.267250073 | 0.133939879 |
| 0.216161388 | 0.304177113 | 0.053304022 | 0.179932619 |
| 0.277140843 | 0.177235616 | 0.127800633 | 0.424187963 |
| 0.284687103 | 0.313299506 | 0.048944565 | 0.058880104 |
| 0.531360547 | 0.407103441 | 0.09248005  | 0.299066734 |
| 0.188057485 | 0.252508999 | 0.424096719 | 0.428636205 |
| 0.256891682 | 0.42161197  | 0.378330018 | 0.271116297 |
| 0.389176034 | 0.197170421 | 0.501856772 | 0.063350152 |
| 0.080939868 | 0.316629562 | 0.083429436 | 0.117229626 |
| 0.136463575 | 0.037918482 | 0.237653963 | 0.37565306  |
| 0.298037213 | 0.296606199 | 0.228705565 | 0.083579468 |
| 0.305423612 | 0.282040493 | 0.296722332 | 0.135571611 |
| 0.072217531 | 0.467491819 | 0.013551568 | 0.079949025 |
| 0.333531233 | 0.376105858 | 0.291869398 | 0.230331936 |
| 0.252156968 | 0.18584869  | 0.254420908 | 0.185212833 |
| 0.196128248 | 0.288515142 | 0.376391494 | 0.030789662 |
| 0.02078041  | 0.5023213   | 0.261965942 | 0.043543647 |
| 0.100790857 | 0.249935028 | 0.2980443   | 0.154377101 |
| 0.041457049 | 0.478324157 | 0.182889123 | 0.322385872 |
| 0.236741324 | 0.083672912 | 0.327998469 | 0.084784261 |
| 0.067547606 | 0.434566588 | 0.312349788 | 0.506655971 |
| 0.322871425 | 0.366166228 | 0.414076312 | 0.407103637 |
| 0.147523437 | 0.288856144 | 0.024546942 | 0.421057816 |
| 0.267068566 |             |             |             |

|             |             |             |             |
|-------------|-------------|-------------|-------------|
| RRN3        | 0.216009738 | 0.390367484 | 0.124039833 |
| 0.370098641 | 0.204518392 | 0.198236045 | 0.171017379 |
| 0.045118091 | 0.044357182 | 0.01873112  | 0.039272377 |
| 0.202624669 | 0.094522945 | 0.094637778 | 0.061243575 |
| 0.331372892 | 0.067095705 | 0.070249684 | 0.184610651 |
| 0.283073068 | 0.064810728 | 0.331683231 | 0.05953178  |
| 0.052448272 | 0.069312564 | 0.081829624 | 0.102047799 |
| 0.369308487 | 0.088470429 | 0.162874241 | 0.268098631 |
| 0.02934479  | 0.277515931 | 0.344706645 | 0.300848416 |
| 0.329567967 | 0.187104433 | 0.00411816  | 0.112651504 |
| 0.267134181 | 0.309038437 | 0.300420778 | 0.267765663 |
| 0.045099217 | 0.314110012 | 0.222473827 | 0.19022173  |
| 0.034946541 | 0.039173896 | 0.073058141 | 0.290515814 |
| 0.326811425 | 0.224770829 | 0.084035735 | 0.127221776 |
| 0.07238055  | 0.064266004 | 0.046238495 | 0.185125778 |

|             |             |             |             |
|-------------|-------------|-------------|-------------|
| 0.187548496 | 0.061942313 | 0.332509109 | 0.058702599 |
| 0.036974805 | 0.087245872 | 0.044251565 | 0.128944095 |
| 0.07058788  | 0.232248945 | 0.013306379 | 0.153124773 |
| 0.006020256 | 0.270932288 | 0.18275241  | 0.074401858 |
| 0.056972591 | 0.036335382 | 0.065624208 | 0.277289537 |
| 0.368566388 | 0.274978154 | 0.395447732 | 0.374671287 |
| 0.061453103 | 0.12297483  | 0.138464685 | 0.10713252  |
| 0.297395911 | 0.163687434 | 0.035334569 | 0.345104045 |
| 0.395669304 | 0.368953509 | 0.064713648 | 0.145075414 |
| 0.352887469 | 0.349036369 | 0.152799992 | 0.173583532 |
| 0.086414398 | 0.01531386  | 0.3135962   | 0.38922934  |
| 0.249901743 | 0.098345879 | 0.115506757 | 0.307821978 |
| 0.051922598 | 0.038929075 | 0.300397603 | 0.031175042 |
| 0.382749725 | 0.026307741 | 0.121306526 | 0.238824522 |
| 0.035256502 | 0.27779274  | 0.356031932 | 0.168007076 |
| 0.151364455 | 0.018481702 | 0.040307372 | 0.019574296 |
| 0.063299647 | 0.021162863 | 0.297125187 | 0.404431903 |
| 0.050227648 | 0.065577432 | 0.130736294 | 0.004420155 |
| 0.025517579 | 0.027025989 | 0.274485396 | 0.107954833 |
| 0.266734783 | 0.203620745 | 0.14055871  | 0.22693634  |
| 0.233365533 | 0.386533735 | 0.013028961 | 0.056602485 |
| 0.207941289 | 0.030733405 | 0.20325068  | 0.216235804 |
| 0.183784333 | 0.057401986 | 0.094325679 | 0.404622196 |
| 0.30010682  | 0.097886857 | 0.064894796 | 0.319562687 |
| 0.084711362 | 0.192914608 | 0.074054532 | 0.120615611 |
| 0.048179992 | 0.310802059 | 0.024695908 | 0.102179438 |
| 0.051085864 | 0.045712292 | 0.004586292 | 0.118856639 |
| 0.064493273 | 0.352909137 | 0.272254537 | 0.07547872  |
| 0.162803346 | 0.287269502 | 0.107766682 | 0.319913853 |
| 0.031456758 | 0.022834276 | 0.066628037 | 0.39944916  |
| 0.161662898 | 0.352639856 | 0.084738699 | 0.07902339  |
| 0.184238186 | 0.339275563 | 0.000412938 | 0.329078227 |
| 0.36171901  | 0.073299373 | 0.276522939 | 0.200068967 |
| 0.127600547 | 0.388845888 | 0.004977432 | 0.308905261 |
| 0.167061536 | 0.056630265 | 0.406199313 | 0.142652662 |
| 0.29482474  | 0.065888168 | 0.104840684 | 0.28815339  |
| 0.256804111 | 0.010281337 | 0.117237702 | 0.300316874 |
| 0.015297736 | 0.052406592 | 0.250882821 | 0.298575187 |
| 0.256209769 | 0.296131658 | 0.402584382 | 0.113662487 |
| 0.218161216 | 0.100866972 | 0.009821654 | 0.147710557 |
| 0.258375885 | 0.044933137 | 0.316167782 | 0.085941742 |
| 0.121764026 | 0.354458107 | 0.250121061 | 0.040636515 |
| 0.068964029 | 0.152897894 | 0.02111261  | 0.187302383 |
| 0.226895466 | 0.082094728 | 0.137903974 | 0.024335895 |
| 0.052535325 | 0.406571994 | 0.049103779 | 0.057879485 |
| 0.025692842 | 0.247122185 | 0.138982959 | 0.104971564 |
| 0.072963282 | 0.071758959 | 0.100219247 | 0.114373029 |
| 0.042966507 | 0.089712771 | 0.003455945 | 0.086647163 |
| 0.070162768 | 0.114790551 | 0.11632451  | 0.229301111 |
| 0.063099738 | 0.061322335 | 0.204677278 | 0.04113407  |
| 0.050667461 | 0.028985785 | 0.379450158 | 0.27251567  |
| 0.190204284 | 0.077817368 | 0.034550619 | 0.048708987 |
| 0.402757046 | 0.153255502 | 0.051434748 | 0.378963199 |
| 0.011055121 | 0.368090932 | 0.082385654 | 0.116692563 |

|             |             |             |             |
|-------------|-------------|-------------|-------------|
| 0.129998223 | 0.210067558 | 0.386707325 | 0.02514058  |
| 0.162372379 | 0.352743494 | 0.144192124 | 0.116823832 |
| 0.28917121  | 0.272116893 | 0.036093318 | 0.225183596 |
| 0.229841687 | 0.048138276 | 0.38058505  | 0.043412134 |
| 0.028155151 | 0.260892205 | 0.296171518 | 0.079489825 |
| 0.055644225 | 0.216191394 | 0.034587306 | 0.225079829 |
| 0.403094216 | 0.35683126  | 0.317276988 | 0.050578151 |
| 0.064079933 | 0.024585598 | 0.070801988 | 0.130511223 |
| 0.33010789  | 0.361806506 | 0.157613225 | 0.18847826  |
| 0.20558381  | 0.098041677 | 0.024657254 | 0.395193692 |
| 0.017714166 | 0.340566257 | 0.012247375 | 0.288081659 |
| 0.330087175 | 0.112955173 | 0.0753141   | 0.201181474 |
| 0.280269029 | 0.054084094 | 0.057482373 | 0.348406993 |
| 0.323883549 | 0.118624357 | 0.108240706 | 0.228656205 |
| 0.026171248 | 0.035910034 | 0.193829412 | 0.032230831 |
| 0.115931541 | 0.094225937 | 0.007751826 | 0.058576484 |
| 0.046019697 | 0.352747321 | 0.337211766 | 0.043192716 |
| 0.211811437 | 0.055256747 | 0.237823825 | 0.050202405 |
| 0.315349108 | 0.318618946 | 0.356004592 | 0.058918327 |
| 0.269929472 | 0.362917065 | 0.183846586 | 0.047392054 |
| 0.024091544 | 0.339186007 | 0.213879577 | 0.021429205 |
| 0.390801121 | 0.08893272  | 0.033451163 | 0.370656982 |
| 0.137929885 | 0.261026168 | 0.00310711  | 0.004682651 |
| 0.012734502 | 0.338593983 | 0.329541505 | 0.249777839 |
| 0.074008082 | 0.197649798 | 0.000646132 | 0.364212394 |
| 0.367239712 | 0.017296553 | 0.036910011 | 0.295772969 |
| 0.262113433 | 0.37345882  | 0.110781178 | 0.34028278  |
| 0.218146599 | 0.337956355 | 0.073869509 | 0.20590626  |
| 0.358356852 | 0.320771204 | 0.28003384  | 0.321868592 |
| 0.385870733 | 0.269918752 | 0.251766277 | 0.031556638 |
| 0.033543946 | 0.092458756 | 0.073995969 | 0.049807441 |
| 0.151044763 | 0.068793172 | 0.328784868 | 0.369017118 |
| 0.364808019 | 0.011908108 | 0.050937565 | 0.287290141 |
| 0.357211755 | 0.380731507 | 0.005067708 | 0.001970153 |
| 0.001498017 | 0.022940658 | 0.204931656 | 0.111979123 |
| 0.35995233  | 0.044709585 | 0.013072878 | 0.031426447 |
| 0.055514791 | 0.226690822 | 0.367543815 | 0.315031254 |
| 0.268025961 | 0.054441966 | 0.089334256 | 0.29687184  |
| 0.039927328 | 0.142145508 | 0.387173359 | 0.354220726 |
| 0.015098097 | 0.104204803 | 0.098190133 | 0.405308294 |
| 0.010679933 | 0.202791384 | 0.219440017 | 1           |
| 0.003691435 | 0.048394232 | 0.046335117 | 0.316698939 |
| 0.318036799 | 0.060732802 | 0.039922336 | 0.022778085 |
| 0.10607533  | 0.339200102 | 0.073647409 | 0.406692631 |
| 0.346457107 | 0.384703637 | 0.025629504 | 0.339820631 |
| 0.042674253 | 0.335741717 | 0.150033819 | 0.017054343 |
| 0.064426478 | 0.00997873  | 0.297929914 | 0.057980546 |
| 0.09863629  | 0.21640199  | 0.039724946 | 0.013236433 |
| 0.022358097 | 0.048032253 | 0.409395632 | 0.347660917 |
| 0.011054644 | 0.077788295 | 0.141979779 | 0.219040395 |
| 0.154972278 | 0.370977455 | 0.342078933 | 0.141865558 |
| 0.073580964 | 0.013488355 | 0.283160792 | 0.195552517 |
| 0.06761236  | 0.390285363 | 0.098627508 | 0.372696433 |
| 0.228171761 | 0.310155654 | 0.336428386 | 0.229841681 |



|             |             |             |             |
|-------------|-------------|-------------|-------------|
| 0.048652306 | 0.173506172 | 0.304355617 | 0.030340903 |
| 0.197174857 | 0.393751408 | 0.124939594 | 0.06236539  |
| 0.179876084 | 0.137878301 | 0.01790019  | 0.013704922 |
| 0.096335305 | 0.183440308 | 0.073216087 | 0.358565096 |
| 0.182682276 | 0.21077492  | 0.016670953 | 0.046382046 |
| 0.38539404  | 0.295269454 | 0.045270405 | 0.288293922 |
| 0.086576166 | 0.224869748 | 0.289559995 | 0.294283654 |
| 0.047149052 | 0.345684744 | 0.30858216  | 0.292942335 |
| 0.325958121 | 0.17604582  | 0.362110754 | 0.020190886 |
| 0.040803869 | 0.170475122 | 0.074501386 | 0.067841656 |
| 0.130649554 | 0.019095131 | 0.046891175 | 0.297548625 |
| 0.071561397 | 0.306993914 | 0.037604627 | 0.030825169 |
| 0.158226525 | 0.080830718 | 0.21690736  | 0.132297272 |
| 0.059807255 | 0.357872213 | 0.009003285 | 0.043800524 |
| 0.088779786 | 0.310608059 | 0.179244559 | 0.096053527 |
| 0.046494099 | 0.026890386 | 0.209578101 | 0.120931173 |
| 0.131512828 | 0.037046084 | 0.310715555 | 0.019103589 |
| 0.024902687 | 0.395019894 | 0.108947439 | 0.007131691 |
| 0.020537944 | 0.156563754 | 0.044148954 | 0.080596486 |
| 0.015477258 | 0.338906166 | 0.131469712 | 0.181773264 |
| 0.192993926 | 0.038773094 | 0.214117938 | 0.020349177 |
| 0.019858656 | 0.298933017 | 0.154590841 | 0.347105298 |
| 0.095781477 | 0.38130218  | 0.272494213 | 0.295393831 |
| 0.016155321 | 0.104307121 | 0.03202274  | 0.323964315 |
| 0.100742114 |             |             |             |

| RSL1        | 0.031947957 | 0.013198183 | 0.028837513 |
|-------------|-------------|-------------|-------------|
| 0.02555248  | 0.037769936 | 0.006683983 | 0.024759359 |
| 0.016714452 | 0.004606353 | 0.000664654 | 0.001944536 |
| 0.031308604 | 0.001118065 | 0.007572409 | 0.002621088 |
| 0.057325465 | 0.049873499 | 0.045498789 | 0.064607666 |
| 0.046404534 | 0.010944476 | 0.054880792 | 0.037537538 |
| 0.04154486  | 0.036915269 | 0.046373175 | 0.021453203 |
| 0.035654989 | 0.060107678 | 0.003316492 | 0.023768933 |
| 0.156714607 | 0.030957093 | 0.009860032 | 0.025743826 |
| 0.009314338 | 0.020687646 | 0.011000063 | 0.00255322  |
| 0.025223011 | 0.021926358 | 0.036661137 | 0.040300039 |
| 0.028564565 | 0.008112516 | 0.030624911 | 0.059572119 |
| 0.003136508 | 0.023553092 | 0.004136695 | 0.008999243 |
| 0.005442839 | 0.007592672 | 0.014924084 | 0.018087014 |
| 0.000249444 | 0.006042297 | 0.003807116 | 0.011260933 |
| 0.035821387 | 0.003908386 | 0.008007825 | 0.004149459 |
| 0.000453278 | 0.034687151 | 0.124709923 | 0.029325054 |
| 0.021253602 | 0.014784138 | 0.040314593 | 0.026951687 |
| 0.000176366 | 0.05202938  | 0.096154218 | 0.006523532 |
| 0.135508767 | 0.007488449 | 0.135512916 | 0.023680165 |
| 0.03442473  | 0.018281513 | 0.028076842 | 0.022520538 |
| 0.019390728 | 0.130838895 | 0.034636228 | 0.041741914 |
| 0.019258656 | 0.016455271 | 0.005902581 | 0.059458254 |
| 0.025659697 | 0.011038991 | 0.024712888 | 0.118429875 |
| 0.007848858 | 0.014144752 | 0.01054426  | 0.01334798  |
| 0.002909293 | 0.121960257 | 0.007357046 | 0.01907159  |
| 0.015727428 | 0.031569737 | 0.095164366 | 0.023693267 |
| 0.138374861 | 0.006491051 | 0.048577879 | 0.01354168  |
| 0.031565842 | 0.017009537 | 0.107911393 | 0.017418739 |

|             |             |             |             |
|-------------|-------------|-------------|-------------|
| 0.060364318 | 0.023776372 | 0.011547349 | 0.048623747 |
| 0.050280694 | 0.005330876 | 0.001103741 | 0.182202618 |
| 0.002649379 | 0.023002104 | 0.005778543 | 0.018014802 |
| 0.010755183 | 0.008129263 | 0.031183588 | 0.082904506 |
| 0.100942166 | 0.058865416 | 0.020325747 | 0.066331439 |
| 0.041029632 | 0.014719853 | 0.012933305 | 0.01228249  |
| 0.013594078 | 0.029046379 | 9.82E-06    | 0.053033948 |
| 0.016076355 | 0.112571715 | 0.102719966 | 0.016864511 |
| 0.033091614 | 0.040909681 | 0.074556644 | 0.020723031 |
| 0.010076288 | 0.074505527 | 0.023799003 | 0.061040146 |
| 0.002352671 | 0.053488622 | 0.086783613 | 0.020759598 |
| 0.024096562 | 0.008053967 | 0.143795296 | 0.029928718 |
| 0.000765169 | 0.020476228 | 0.062031243 | 0.019285427 |
| 0.002940182 | 0.007128862 | 0.007012905 | 0.144769667 |
| 0.02604545  | 0.044806038 | 0.014122988 | 0.0070404   |
| 0.001044408 | 0.044191478 | 0.009457172 | 0.016371081 |
| 0.005408598 | 0.027524946 | 0.044388746 | 0.05601579  |
| 0.09679924  | 0.036888605 | 0.004699547 | 0.007779482 |
| 0.011130753 | 0.006763984 | 0.017383251 | 0.062281701 |
| 0.00793179  | 0.021121877 | 0.000639058 | 0.06288379  |
| 0.017322981 | 0.138708346 | 0.030039045 | 0.07324851  |
| 0.012874843 | 0.065235824 | 0.010740209 | 0.018692977 |
| 0.010784173 | 0.001711888 | 0.005485131 | 0.025894197 |
| 0.153567164 | 0.005365114 | 0.037557132 | 0.032117556 |
| 0.015566404 | 0.045180962 | 0.038462727 | 0.006000802 |
| 0.021185089 | 0.051730413 | 0.060040861 | 0.089469408 |
| 0.035541065 | 0.001865245 | 0.008997997 | 0.016491745 |
| 0.010097484 | 0.011427349 | 0.012722625 | 0.00025827  |
| 0.049054036 | 0.021421586 | 0.000847062 | 0.026438077 |
| 0.013377311 | 0.007925716 | 0.008091315 | 0.106279966 |
| 0.104281533 | 0.015897489 | 0.055801176 | 0.026852238 |
| 0.031642085 | 0.008242098 | 0.067696934 | 0.002203302 |
| 0.002173662 | 0.036224306 | 0.009633627 | 0.009499187 |
| 0.014153506 | 0.05708234  | 0.101499317 | 0.003987446 |
| 0.00164255  | 0.002686284 | 0.002058672 | 0.013679966 |
| 0.008244876 | 0.006396502 | 0.019984199 | 0.030422526 |
| 0.069530409 | 0.132169392 | 0.014093951 | 0.060958167 |
| 0.009255302 | 0.031924502 | 0.162400505 | 0.000528851 |
| 0.016598762 | 0.001656475 | 0.005272056 | 0.010916617 |
| 0.013781244 | 0.032503245 | 0.006045936 | 0.074008815 |
| 0.012519944 | 0.04245946  | 0.032071727 | 0.00017521  |
| 0.026416162 | 0.009735558 | 0.121424967 | 0.035627727 |
| 0.006490211 | 0.028933001 | 0.01019643  | 0.016189426 |
| 0.013733356 | 0.089336984 | 0.015003213 | 0.074914291 |
| 0.168788491 | 0.04311628  | 0.009796555 | 0.145130626 |
| 0.115995458 | 0.006962072 | 0.010425476 | 0.092000478 |
| 0.014747315 | 0.049285326 | 0.008242788 | 0.083645659 |
| 0.034765908 | 0.001843468 | 0.126323451 | 0.042403011 |
| 0.008739714 | 0.016120433 | 0.13430425  | 0.015378592 |
| 0.080737477 | 0.00572941  | 0.001418421 | 0.015882488 |
| 0.06052809  | 0.013697991 | 0.119358982 | 0.022818257 |
| 0.007584687 | 0.007661711 | 0.050547965 | 0.011342911 |
| 0.00906624  | 0.053974681 | 0.092122581 | 0.009709492 |
| 0.014811548 | 0.014154542 | 0.00611864  | 0.061396916 |

|             |             |             |             |
|-------------|-------------|-------------|-------------|
| 0.013314882 | 0.015924119 | 0.034674363 | 0.033294528 |
| 0.006042211 | 0.043919075 | 0.011329472 | 0.008875341 |
| 0.015857885 | 0.00780749  | 0.047852133 | 0.020059493 |
| 0.002065922 | 0.010182537 | 0.088339934 | 0.087288047 |
| 0.0155156   | 0.015799797 | 0.009708604 | 0.069655604 |
| 0.026042934 | 0.011006786 | 0.010568277 | 0.190279248 |
| 0.160155144 | 0.010815048 | 0.023409171 | 0.001969489 |
| 0.032440069 | 0.00368425  | 0.002337716 | 0.013576903 |
| 0.080164686 | 0.006892696 | 0.000286504 | 0.007344752 |
| 0.150854223 | 0.044779735 | 0.006913197 | 0.028935328 |
| 0.000635752 | 0.081023887 | 0.018935548 | 0.020322725 |
| 0.008963794 | 0.076385506 | 0.054269393 | 0.011567406 |
| 0.012278065 | 0.014744736 | 0.014743997 | 0.013946855 |
| 0.012969088 | 0.007981509 | 0.002152953 | 0.07788506  |
| 0.012140956 | 0.011014467 | 0.026497246 | 0.013553545 |
| 0.025382286 | 0.062837043 | 0.048970721 | 0.019874502 |
| 0.00539085  | 0.010751279 | 0.00047323  | 0.001107536 |
| 0.01106436  | 0.033952927 | 0.019060764 | 0.036067198 |
| 0.017288423 | 0.132354533 | 0.013634361 | 0.013134697 |
| 0.019246914 | 0.028793665 | 0.066234328 | 0.000943244 |
| 0.008405384 | 0.00628034  | 0.028994263 | 0.121376148 |
| 0.016167702 | 0.000182211 | 0.073042753 | 0.014567884 |
| 0.012543344 | 0.034068688 | 0.010411122 | 0.065607215 |
| 0.035981929 | 0.129403706 | 0.000562866 | 0.063328213 |
| 0.02105834  | 0.012751521 | 0.016825065 | 0.008473765 |
| 0.189890061 | 0.100125196 | 0.043364495 | 0.023593641 |
| 0.007157803 | 0.102593883 | 0.034279807 | 0.003691435 |
| 1           | 0.095524542 | 0.053042561 | 0.058001474 |
| 0.007723945 | 0.008323579 | 0.014162378 | 0.000131618 |
| 0.011865631 | 0.031319225 | 0.019103627 | 0.025039303 |
| 0.020533273 | 0.044959188 | 0.074767513 | 0.009328806 |
| 0.003345896 | 0.007962419 | 0.034306711 | 0.000353203 |
| 0.111995733 | 0.11252163  | 0.015150594 | 0.000319833 |
| 0.008519915 | 0.033139508 | 0.003996102 | 0.14359718  |
| 0.01415319  | 0.10285765  | 0.024223027 | 0.032830512 |
| 0.153308439 | 0.033641814 | 0.111742366 | 0.072896648 |
| 0.013040799 | 0.022709235 | 0.00853986  | 0.003727416 |
| 0.0164296   | 0.026047261 | 0.038772253 | 0.01895106  |
| 0.014801121 | 0.032638462 | 0.0043413   | 0.019413325 |
| 0.022748033 | 0.022094955 | 0.013772659 | 0.021673247 |
| 0.013096534 | 0.014122145 | 0.007766479 | 0.002147494 |
| 0.05837107  | 0.02427462  | 0.042731241 | 0.009276256 |
| 0.031933676 | 0.023068935 | 0.032799961 | 0.005334258 |
| 0.017898452 | 0.006836881 | 0.016147033 | 0.054942186 |
| 0.035980276 | 0.017331872 | 0.028212634 | 0.039791    |
| 0.015126707 | 0.013560487 | 0.005051451 | 0.016482277 |
| 0.165350698 | 0.030472975 | 0.0363579   | 0.037307786 |
| 0.009198587 | 0.012490701 | 0.024001612 | 0.007759952 |
| 0.007782842 | 0.048935873 | 0.010040686 | 0.006135204 |
| 0.002649068 | 0.02746127  | 0.009525919 | 0.183508674 |
| 0.066961289 | 0.091659984 | 0.005943047 | 0.066687904 |
| 0.006863763 | 0.039757474 | 0.007351146 | 0.024082127 |
| 0.102827312 | 0.031857244 | 0.071088971 | 0.011883483 |
| 0.012943654 | 0.007428568 | 0.008221838 | 0.152808728 |

|             |             |             |             |
|-------------|-------------|-------------|-------------|
| 0.01363602  | 0.013945635 | 0.012881975 | 0.075538191 |
| 0.008153188 | 0.108504329 | 0.057471797 | 0.00739237  |
| 0.001058019 | 0.003925122 | 0.01239108  | 0.00744185  |
| 0.029426691 | 0.033293172 | 0.017936832 | 0.138293827 |
| 0.016982032 | 0.019560029 | 0.0773048   | 0.004152594 |
| 0.166665816 | 0.01111024  | 0.0017086   | 0.032460413 |
| 0.029271143 | 0.144640101 | 0.010383428 | 0.002146398 |
| 0.067724279 | 0.011476965 | 0.034466087 | 0.010657197 |
| 0.082343365 | 0.038781892 | 0.007696341 | 0.015013536 |
| 0.016403438 | 0.025587545 | 0.025328768 | 0.03306569  |
| 0.002640741 |             |             |             |
| RTP4        | 0.081767709 | 0.090349891 | 0.083547262 |
| 0.145431254 | 0.119847964 | 0.044543115 | 0.104720849 |
| 0.025932993 | 0.109221568 | 0.025165043 | 0.100947096 |
| 0.098485453 | 0.059058588 | 0.035499736 | 0.022884199 |
| 0.203328728 | 0.157478409 | 0.051469797 | 0.186354885 |
| 0.136754955 | 0.036587304 | 0.222366565 | 0.111222017 |
| 0.088833873 | 0.184653294 | 0.194126776 | 0.126838271 |
| 0.143839618 | 0.220316311 | 0.027007263 | 0.084640362 |
| 0.191731458 | 0.091349072 | 0.068004473 | 0.14320191  |
| 0.063758007 | 0.060514574 | 0.032160471 | 0.02726025  |
| 0.077661192 | 0.130901509 | 0.130649706 | 0.178587635 |
| 0.112245215 | 0.052177817 | 0.153158636 | 0.157387174 |
| 0.020516711 | 0.158875878 | 0.014839194 | 0.050698647 |
| 0.053627184 | 0.069638133 | 0.039845951 | 0.087577558 |
| 0.03371439  | 0.013919838 | 0.043047751 | 0.037337678 |
| 0.143873266 | 0.012447737 | 0.063437897 | 0.065576995 |
| 0.024471406 | 0.053490984 | 0.165344397 | 0.069646339 |
| 0.063918424 | 0.05637197  | 0.075332033 | 0.067035268 |
| 0.006455311 | 0.149751087 | 0.183878616 | 0.051088929 |
| 0.263192369 | 0.09085336  | 0.187545949 | 0.122798979 |
| 0.136996417 | 0.06909587  | 0.152617585 | 0.13060709  |
| 0.113723465 | 0.195340973 | 0.100851346 | 0.142549188 |
| 0.084554533 | 0.09866236  | 0.073012205 | 0.222275152 |
| 0.144655548 | 0.079678703 | 0.136497439 | 0.26616903  |
| 0.081130718 | 0.080292561 | 0.057179222 | 0.082346475 |
| 0.042195069 | 0.20951447  | 0.059072214 | 0.114508919 |
| 0.055670964 | 0.104458688 | 0.28392784  | 0.088228439 |
| 0.204737477 | 0.020523296 | 0.196980396 | 0.069184633 |
| 0.139471356 | 0.087050139 | 0.263133754 | 0.090519651 |
| 0.101502439 | 0.09215919  | 0.083026888 | 0.162398886 |
| 0.11177983  | 0.106327675 | 0.072096784 | 0.18664476  |
| 0.040460063 | 0.075850498 | 0.045973809 | 0.119836556 |
| 0.027216854 | 0.049675167 | 0.088446831 | 0.101417134 |
| 0.207035229 | 0.125316346 | 0.077886627 | 0.075949496 |
| 0.117190404 | 0.054213753 | 0.12341339  | 0.0480925   |
| 0.085608607 | 0.151429722 | 0.002022188 | 0.101610198 |
| 0.084672086 | 0.125404112 | 0.271488677 | 0.078443661 |
| 0.188286246 | 0.070248945 | 0.158553268 | 0.124779359 |
| 0.05538895  | 0.181601345 | 0.027882716 | 0.20909365  |
| 0.031229769 | 0.192083136 | 0.141596876 | 0.073595055 |
| 0.079639447 | 0.063106218 | 0.217907696 | 0.04597505  |
| 0.033148654 | 0.11642034  | 0.072080066 | 0.044968493 |
| 0.032784031 | 0.075903991 | 0.044899912 | 0.201531558 |

|             |             |             |             |
|-------------|-------------|-------------|-------------|
| 0.093779943 | 0.19354178  | 0.029964081 | 0.077265596 |
| 0.06114808  | 0.14814694  | 0.015377592 | 0.106355301 |
| 0.024084643 | 0.120475631 | 0.084429732 | 0.116518044 |
| 0.264702352 | 0.152015754 | 0.011735055 | 0.058021224 |
| 0.081040497 | 0.014339757 | 0.121493252 | 0.13364972  |
| 0.06433594  | 0.131484376 | 0.003729807 | 0.186407028 |
| 0.037915854 | 0.180515803 | 0.1521917   | 0.268578759 |
| 0.065044003 | 0.212011719 | 0.033352894 | 0.107925806 |
| 0.07013781  | 0.032594161 | 0.02576097  | 0.113926115 |
| 0.213740689 | 0.02585362  | 0.102923993 | 0.142602153 |
| 0.119877129 | 0.149788238 | 0.170988166 | 0.060136822 |
| 0.109686189 | 0.086659166 | 0.134580152 | 0.211084648 |
| 0.108664285 | 0.020802799 | 0.059311095 | 0.060921437 |
| 0.025034241 | 0.079409378 | 0.065507603 | 0.014759768 |
| 0.144700647 | 0.063172239 | 0.029206768 | 0.154833455 |
| 0.059942938 | 0.065685585 | 0.05734122  | 0.122206355 |
| 0.221993704 | 0.108691197 | 0.130527397 | 0.078100836 |
| 0.084903297 | 0.064685072 | 0.136401041 | 0.031880229 |
| 0.052915326 | 0.14248239  | 0.068844322 | 0.061352321 |
| 0.048407305 | 0.177860717 | 0.140331123 | 0.023380228 |
| 0.044993651 | 0.029112693 | 0.022750815 | 0.052982253 |
| 0.030519277 | 0.075618545 | 0.119165929 | 0.079188549 |
| 0.201477014 | 0.208753595 | 0.090492398 | 0.178337505 |
| 0.033224057 | 0.104662311 | 0.204074456 | 0.012911577 |
| 0.1138731   | 0.020945129 | 0.010676853 | 0.084682504 |
| 0.097261345 | 0.140989678 | 0.06633593  | 0.267539732 |
| 0.068287499 | 0.177219217 | 0.15325997  | 0.020685939 |
| 0.05658466  | 0.068660975 | 0.19602207  | 0.192983793 |
| 0.0458867   | 0.114453256 | 0.091725702 | 0.057941977 |
| 0.051492842 | 0.18974797  | 0.095842365 | 0.17853056  |
| 0.229104076 | 0.146574781 | 0.090287959 | 0.307833815 |
| 0.248724775 | 0.079060263 | 0.031797117 | 0.296878384 |
| 0.104185777 | 0.219118396 | 0.075561056 | 0.134441534 |
| 0.122270561 | 0.050874846 | 0.19228519  | 0.087457241 |
| 0.058697891 | 0.098775281 | 0.233713243 | 0.116320361 |
| 0.226374201 | 0.057997507 | 0.009898595 | 0.109452524 |
| 0.076875369 | 0.075454368 | 0.122252441 | 0.118048198 |
| 0.060011359 | 0.021971191 | 0.224974922 | 0.065549882 |
| 0.052205324 | 0.134398068 | 0.084351869 | 0.069974794 |
| 0.08825326  | 0.088716848 | 0.0573772   | 0.124518605 |
| 0.049720957 | 0.065072826 | 0.142480474 | 0.091744447 |
| 0.044965525 | 0.138823174 | 0.058343915 | 0.023230177 |
| 0.122043151 | 0.066117425 | 0.153894212 | 0.166531773 |
| 0.032428193 | 0.021341164 | 0.22242159  | 0.173026507 |
| 0.104031806 | 0.081475183 | 0.069249216 | 0.078466936 |
| 0.090614549 | 0.090393145 | 0.072963563 | 0.245935922 |
| 0.241916168 | 0.072734589 | 0.068394143 | 0.06433116  |
| 0.147143852 | 0.013850309 | 0.058333719 | 0.083686084 |
| 0.174178656 | 0.040291181 | 0.008252665 | 0.030655521 |
| 0.200472403 | 0.165341248 | 0.059343403 | 0.088771837 |
| 0.009007797 | 0.144608127 | 0.038448468 | 0.105741247 |
| 0.072879886 | 0.187250827 | 0.161218751 | 0.077561632 |
| 0.088418319 | 0.083762214 | 0.095993106 | 0.108289128 |
| 0.083408038 | 0.06464504  | 0.045361412 | 0.272439537 |

|             |             |             |             |
|-------------|-------------|-------------|-------------|
| 0.093126351 | 0.076581992 | 0.095211377 | 0.071967161 |
| 0.129147162 | 0.180284116 | 0.201195532 | 0.089493607 |
| 0.100023075 | 0.028288724 | 0.015573299 | 0.085229395 |
| 0.03346356  | 0.174041183 | 0.088409636 | 0.15183391  |
| 0.10997459  | 0.151126305 | 0.041351583 | 0.07251613  |
| 0.094328017 | 0.129623084 | 0.113521561 | 0.025674407 |
| 0.015132263 | 0.141572017 | 0.085044548 | 0.234343202 |
| 0.101515032 | 0.007283704 | 0.09837883  | 0.040680472 |
| 0.066049061 | 0.159547102 | 0.077468353 | 0.209746016 |
| 0.117573309 | 0.18901279  | 0.020320827 | 0.178575482 |
| 0.179772516 | 0.029416521 | 0.116503314 | 0.065901111 |
| 0.186648171 | 0.20005199  | 0.050984467 | 0.131766623 |
| 0.043775713 | 0.241207202 | 0.0966433   | 0.048394232 |
| 0.095524542 | 1           | 0.197183994 | 0.173627762 |
| 0.059020359 | 0.103977283 | 0.132229876 | 0.005689255 |
| 0.080595732 | 0.124353797 | 0.110173313 | 0.134465102 |
| 0.105774097 | 0.183996121 | 0.188320883 | 0.069197156 |
| 0.114546299 | 0.060520234 | 0.149043464 | 0.008073748 |
| 0.104075935 | 0.144837292 | 0.072594854 | 0.044208585 |
| 0.026551172 | 0.078384582 | 0.072261898 | 0.187753888 |
| 0.064029981 | 0.209259649 | 0.148048398 | 0.153386783 |
| 0.199405739 | 0.06877524  | 0.213366872 | 0.1405848   |
| 0.045652553 | 0.144773823 | 0.062269386 | 0.032136933 |
| 0.071306582 | 0.069187621 | 0.118248088 | 0.053369884 |
| 0.02641723  | 0.154962169 | 0.060570548 | 0.105528919 |
| 0.071051993 | 0.090704764 | 0.086681927 | 0.117123395 |
| 0.090775318 | 0.052931179 | 0.067767198 | 0.043576358 |
| 0.15144372  | 0.140775606 | 0.065314006 | 0.133969971 |
| 0.190647179 | 0.084379303 | 0.097147815 | 0.013585084 |
| 0.073032942 | 0.036394597 | 0.096691127 | 0.186935679 |
| 0.069467084 | 0.05489009  | 0.063968727 | 0.194789077 |
| 0.092300007 | 0.068082849 | 0.04200781  | 0.097533309 |
| 0.238698947 | 0.171666309 | 0.124741964 | 0.138004675 |
| 0.031718324 | 0.087168552 | 0.093766561 | 0.061043295 |
| 0.056826966 | 0.154742215 | 0.07308379  | 0.012373525 |
| 0.12420982  | 0.062089598 | 0.099700546 | 0.297908305 |
| 0.199255708 | 0.205347289 | 0.035602746 | 0.181925625 |
| 0.03446064  | 0.177151302 | 0.014123864 | 0.162486697 |
| 0.206090472 | 0.039904154 | 0.198975721 | 0.060921406 |
| 0.118708985 | 0.065563807 | 0.095777995 | 0.213504385 |
| 0.044042461 | 0.097186129 | 0.099499365 | 0.177006455 |
| 0.060468662 | 0.158338358 | 0.202054734 | 0.026248943 |
| 0.020450926 | 0.028481666 | 0.090124664 | 0.059854703 |
| 0.069254132 | 0.151397053 | 0.03843597  | 0.173040363 |
| 0.101356613 | 0.048570905 | 0.057426453 | 0.070120995 |
| 0.207302739 | 0.082830674 | 0.023336018 | 0.111708638 |
| 0.08979762  | 0.166742704 | 0.037484764 | 0.046525584 |
| 0.119603655 | 0.057150093 | 0.107138619 | 0.074411142 |
| 0.11453078  | 0.193721058 | 0.044324125 | 0.076354539 |
| 0.076744241 | 0.054638713 | 0.094333191 | 0.118796193 |
| 0.030458882 |             |             |             |
| RUVBL2      | 0.060645797 | 0.076043431 | 0.068316035 |
| 0.136545613 | 0.09661283  | 0.045388029 | 0.120604549 |
| 0.021689261 | 0.153468947 | 0.025900009 | 0.123542846 |

|             |             |             |             |
|-------------|-------------|-------------|-------------|
| 0.067989094 | 0.052539044 | 0.029704776 | 0.027469792 |
| 0.180455779 | 0.112649365 | 0.037223311 | 0.176187124 |
| 0.116805326 | 0.040195967 | 0.190875179 | 0.11190537  |
| 0.06890055  | 0.181431671 | 0.225398966 | 0.140041392 |
| 0.121619439 | 0.243532239 | 0.02825019  | 0.074760261 |
| 0.115248373 | 0.06924081  | 0.055297986 | 0.114539598 |
| 0.048943632 | 0.045295697 | 0.01542106  | 0.036917929 |
| 0.060378317 | 0.12134534  | 0.119710807 | 0.166106879 |
| 0.117437989 | 0.040904067 | 0.168325631 | 0.12311746  |
| 0.017486361 | 0.155800078 | 0.016463551 | 0.042110974 |
| 0.043493041 | 0.070224771 | 0.046190317 | 0.109612881 |
| 0.036745456 | 0.012804244 | 0.031115831 | 0.032198294 |
| 0.152976831 | 0.014409015 | 0.051521461 | 0.093559832 |
| 0.03359194  | 0.04919806  | 0.099378937 | 0.064818667 |
| 0.056039979 | 0.048413886 | 0.061474933 | 0.045489206 |
| 0.00478036  | 0.134079565 | 0.133534007 | 0.060312389 |
| 0.230160904 | 0.073935182 | 0.128180697 | 0.126057148 |
| 0.112389698 | 0.051346072 | 0.124837535 | 0.10898978  |
| 0.071936803 | 0.146886341 | 0.077117092 | 0.131967504 |
| 0.071572972 | 0.113273763 | 0.048807361 | 0.187685346 |
| 0.118716848 | 0.064408671 | 0.124233831 | 0.225233963 |
| 0.07987684  | 0.066456106 | 0.050796724 | 0.076924768 |
| 0.052631784 | 0.142578097 | 0.052252925 | 0.092233441 |
| 0.043076042 | 0.078335429 | 0.247000304 | 0.07311179  |
| 0.181855021 | 0.013054717 | 0.182394658 | 0.030986192 |
| 0.116738774 | 0.121256135 | 0.214487745 | 0.089495615 |
| 0.068930546 | 0.071651387 | 0.066577492 | 0.172252294 |
| 0.078180738 | 0.064464876 | 0.08028877  | 0.129359723 |
| 0.027495143 | 0.044979688 | 0.036887757 | 0.10228316  |
| 0.020051124 | 0.041403311 | 0.095831613 | 0.077446836 |
| 0.14318165  | 0.072304304 | 0.055283984 | 0.051935746 |
| 0.096658625 | 0.040347289 | 0.148561651 | 0.038722925 |
| 0.068862005 | 0.12469943  | 0.002616901 | 0.102358258 |
| 0.073988892 | 0.080263566 | 0.245351947 | 0.063140963 |
| 0.177115164 | 0.067705507 | 0.142364733 | 0.10528501  |
| 0.047362934 | 0.178052382 | 0.019700659 | 0.170515771 |
| 0.035005778 | 0.14876783  | 0.126812812 | 0.057865286 |
| 0.080339471 | 0.051268516 | 0.161739787 | 0.036898455 |
| 0.046060333 | 0.070996452 | 0.048997647 | 0.043303376 |
| 0.027018283 | 0.067777401 | 0.034535344 | 0.170961098 |
| 0.076144352 | 0.167756864 | 0.0254278   | 0.068317843 |
| 0.085733267 | 0.101349154 | 0.011962533 | 0.085348952 |
| 0.021846182 | 0.09238954  | 0.066350721 | 0.100141946 |
| 0.223473996 | 0.129991898 | 0.006721025 | 0.047003907 |
| 0.066216665 | 0.010789826 | 0.102297388 | 0.096306691 |
| 0.076605321 | 0.116824419 | 0.00159245  | 0.144654724 |
| 0.026383443 | 0.162393731 | 0.125933059 | 0.244523583 |
| 0.049621205 | 0.228858912 | 0.031630975 | 0.090297914 |
| 0.052279669 | 0.027683636 | 0.030317525 | 0.112481618 |
| 0.147230721 | 0.03483152  | 0.084314104 | 0.131617497 |
| 0.136579815 | 0.120165779 | 0.140742552 | 0.072375259 |
| 0.09208609  | 0.075423548 | 0.09999239  | 0.160581201 |
| 0.083384771 | 0.018318629 | 0.05051799  | 0.061509547 |
| 0.017535872 | 0.068545307 | 0.050631356 | 0.023231981 |

|             |             |             |             |
|-------------|-------------|-------------|-------------|
| 0.172038919 | 0.063941595 | 0.023354139 | 0.169151504 |
| 0.051459058 | 0.06398448  | 0.068209563 | 0.065202704 |
| 0.179622503 | 0.091182103 | 0.09853856  | 0.057905983 |
| 0.058443522 | 0.053991231 | 0.12607306  | 0.028694541 |
| 0.040888464 | 0.147425268 | 0.079739709 | 0.072844958 |
| 0.054921541 | 0.156868612 | 0.083612162 | 0.015356211 |
| 0.032433557 | 0.021772061 | 0.016917369 | 0.041269776 |
| 0.020707952 | 0.049582407 | 0.099991421 | 0.063618524 |
| 0.162617235 | 0.183030715 | 0.075412651 | 0.147876959 |
| 0.02633734  | 0.115568595 | 0.158313926 | 0.00870951  |
| 0.098244507 | 0.021471882 | 0.009445937 | 0.074709596 |
| 0.065517159 | 0.115374237 | 0.056576306 | 0.249584683 |
| 0.050438295 | 0.159144461 | 0.135871757 | 0.032190178 |
| 0.044932984 | 0.05732618  | 0.156834416 | 0.209815225 |
| 0.035741568 | 0.104531113 | 0.092813697 | 0.043580622 |
| 0.036236818 | 0.166851395 | 0.075448746 | 0.110593652 |
| 0.1889171   | 0.109583069 | 0.083004188 | 0.286086719 |
| 0.223057328 | 0.086531812 | 0.039496672 | 0.259999785 |
| 0.088019911 | 0.188462049 | 0.071942152 | 0.102446577 |
| 0.133849522 | 0.034879581 | 0.137794568 | 0.06046473  |
| 0.045350314 | 0.076589428 | 0.181852636 | 0.097133872 |
| 0.216133233 | 0.076027491 | 0.011036491 | 0.089610763 |
| 0.04166897  | 0.058585903 | 0.105629596 | 0.100554335 |
| 0.047961616 | 0.019188301 | 0.225341332 | 0.077087006 |
| 0.04168136  | 0.162662149 | 0.066769673 | 0.055608002 |
| 0.083123743 | 0.108631836 | 0.072066593 | 0.086965631 |
| 0.056683624 | 0.07391838  | 0.137691379 | 0.066147181 |
| 0.051906981 | 0.156509672 | 0.032215764 | 0.022949741 |
| 0.112453681 | 0.057612373 | 0.115592536 | 0.205833535 |
| 0.036638866 | 0.021929344 | 0.17209789  | 0.178299699 |
| 0.086596675 | 0.062258068 | 0.055048677 | 0.068314048 |
| 0.065433168 | 0.075658487 | 0.059157701 | 0.195708255 |
| 0.201311274 | 0.056578035 | 0.056585046 | 0.050679312 |
| 0.12019874  | 0.01344936  | 0.050992205 | 0.069787289 |
| 0.171631508 | 0.030268318 | 0.015875446 | 0.016055513 |
| 0.133250294 | 0.128552508 | 0.05162678  | 0.080364503 |
| 0.009977626 | 0.11634854  | 0.022851385 | 0.082121088 |
| 0.059218557 | 0.153272667 | 0.123922229 | 0.060846174 |
| 0.068811598 | 0.067101662 | 0.093349606 | 0.090503293 |
| 0.061827373 | 0.052358668 | 0.044021235 | 0.259653681 |
| 0.081581429 | 0.06078563  | 0.07778204  | 0.059650977 |
| 0.104229418 | 0.138771426 | 0.208469165 | 0.110760395 |
| 0.131213592 | 0.031993303 | 0.019488048 | 0.114994024 |
| 0.029750842 | 0.161767557 | 0.066618294 | 0.124316503 |
| 0.085965841 | 0.131552757 | 0.039088244 | 0.057710357 |
| 0.079795299 | 0.10976159  | 0.075528723 | 0.024580113 |
| 0.007344721 | 0.142303586 | 0.080523898 | 0.189156922 |
| 0.084813559 | 0.00612626  | 0.088513591 | 0.040259757 |
| 0.052054319 | 0.130841751 | 0.062932317 | 0.182437509 |
| 0.089817203 | 0.161695292 | 0.02052537  | 0.151061074 |
| 0.187335023 | 0.021484774 | 0.095149134 | 0.057257723 |
| 0.123986229 | 0.18187283  | 0.032543157 | 0.114305868 |
| 0.030055617 | 0.190546063 | 0.065878908 | 0.046335117 |
| 0.053042561 | 0.197183994 | 1           | 0.138960114 |



|             |             |             |             |
|-------------|-------------|-------------|-------------|
| 0.046123927 | 0.083591563 | 0.104741458 | 0.004209097 |
| 0.08900521  | 0.099788703 | 0.086516291 | 0.109849047 |
| 0.090558016 | 0.153827726 | 0.134736204 | 0.060603471 |
| 0.158386635 | 0.047000885 | 0.118807142 | 0.008272771 |
| 0.066950373 | 0.103496834 | 0.052459794 | 0.062828901 |
| 0.022257704 | 0.060897735 | 0.099692686 | 0.13808458  |
| 0.049299614 | 0.170322233 | 0.129248314 | 0.124272952 |
| 0.123384314 | 0.077227109 | 0.166022249 | 0.106000227 |
| 0.044698379 | 0.127704599 | 0.05012454  | 0.02660514  |
| 0.085361337 | 0.032536888 | 0.096749824 | 0.037595691 |
| 0.023186744 | 0.124932537 | 0.070431785 | 0.084469775 |
| 0.058397159 | 0.074874487 | 0.069946553 | 0.131025817 |
| 0.065696006 | 0.043380489 | 0.06833341  | 0.039270114 |
| 0.127460132 | 0.117139962 | 0.052862877 | 0.127401045 |
| 0.18670796  | 0.066802551 | 0.086653229 | 0.005959501 |
| 0.05423149  | 0.037166826 | 0.084535902 | 0.15573996  |
| 0.051200899 | 0.040774379 | 0.046404996 | 0.214929838 |
| 0.074602933 | 0.058953399 | 0.048168119 | 0.0882591   |
| 0.183977545 | 0.186848989 | 0.093699893 | 0.105052078 |
| 0.031282907 | 0.069412202 | 0.075260894 | 0.053263231 |
| 0.048777227 | 0.16847395  | 0.059802591 | 0.01057717  |
| 0.130682155 | 0.042534024 | 0.098192191 | 0.244213365 |
| 0.184047495 | 0.174422992 | 0.030549749 | 0.141851042 |
| 0.026355735 | 0.150623938 | 0.010117739 | 0.131622447 |
| 0.162558805 | 0.027904832 | 0.168358411 | 0.066147353 |
| 0.106181048 | 0.055148582 | 0.073354253 | 0.166625013 |
| 0.028657573 | 0.089598865 | 0.086496012 | 0.14376063  |
| 0.052084511 | 0.102115545 | 0.180326764 | 0.023921286 |
| 0.017850955 | 0.017469203 | 0.082114596 | 0.057895581 |
| 0.062532772 | 0.120770802 | 0.027418874 | 0.105787256 |
| 0.093321605 | 0.040481353 | 0.032653645 | 0.0911783   |
| 0.154352601 | 0.067137136 | 0.029255122 | 0.094333066 |
| 0.086770876 | 0.127705561 | 0.028634811 | 0.043765191 |
| 0.09727637  | 0.042953876 | 0.085541541 | 0.058628156 |
| 0.080235922 | 0.170491679 | 0.035275078 | 0.058803803 |
| 0.041438919 | 0.039126236 | 0.108247272 | 0.096817866 |
| 0.02742178  |             |             |             |

| RYK         | 0.380048676 | 0.500407904 | 0.400807882 |
|-------------|-------------|-------------|-------------|
| 0.39050848  | 0.444307386 | 0.302694521 | 0.258926775 |
| 0.223132877 | 0.133421696 | 0.009241945 | 0.041512104 |
| 0.414414467 | 0.225258954 | 0.26882978  | 0.285713602 |
| 0.44013939  | 0.219943685 | 0.403581692 | 0.327863971 |
| 0.420286588 | 0.122420726 | 0.431989828 | 0.165655661 |
| 0.388830172 | 0.173671155 | 0.13272995  | 0.323352172 |
| 0.448464511 | 0.151526752 | 0.256278955 | 0.355737013 |
| 0.227267283 | 0.409638626 | 0.47629506  | 0.411873106 |
| 0.465412678 | 0.338452887 | 0.039554275 | 0.260448245 |
| 0.406474303 | 0.396583487 | 0.407067865 | 0.373566511 |
| 0.085998504 | 0.431699066 | 0.296542491 | 0.44613595  |
| 0.237896988 | 0.068525707 | 0.207315246 | 0.402401702 |
| 0.414172776 | 0.360959035 | 0.258733381 | 0.20997314  |
| 0.185337802 | 0.210860285 | 0.257220676 | 0.267523884 |
| 0.293308204 | 0.141998477 | 0.437919087 | 0.125220027 |
| 0.178744781 | 0.312909802 | 0.283640266 | 0.303838761 |

|             |             |             |             |
|-------------|-------------|-------------|-------------|
| 0.384798918 | 0.320046885 | 0.056159974 | 0.364559656 |
| 0.004157305 | 0.415915569 | 0.455259191 | 0.296913012 |
| 0.106847266 | 0.040594114 | 0.312383658 | 0.350469376 |
| 0.470831308 | 0.443296325 | 0.494849958 | 0.491783724 |
| 0.248338043 | 0.422813445 | 0.409526601 | 0.25295627  |
| 0.419543292 | 0.216791679 | 0.166765831 | 0.444306215 |
| 0.49961492  | 0.486511944 | 0.304306955 | 0.384031445 |
| 0.360900891 | 0.458089618 | 0.368976714 | 0.411256241 |
| 0.301082745 | 0.141851229 | 0.398598444 | 0.504376427 |
| 0.362838865 | 0.355931604 | 0.255344812 | 0.373920968 |
| 0.142651663 | 0.328105517 | 0.396117024 | 0.236569736 |
| 0.481696224 | 0.043910584 | 0.328899002 | 0.3554147   |
| 0.357506167 | 0.395803056 | 0.484108745 | 0.26619601  |
| 0.451440778 | 0.051215251 | 0.164224423 | 0.106831131 |
| 0.336823858 | 0.208459366 | 0.415481111 | 0.442119511 |
| 0.263898418 | 0.404926299 | 0.334030024 | 0.014821871 |
| 0.078613513 | 0.332713545 | 0.395460451 | 0.424501243 |
| 0.414644852 | 0.357775795 | 0.272621276 | 0.317066501 |
| 0.374240403 | 0.490383533 | 0.037809158 | 0.178123283 |
| 0.393575935 | 0.339845567 | 0.344365969 | 0.400470996 |
| 0.367261929 | 0.189075116 | 0.219766688 | 0.516208359 |
| 0.392806724 | 0.159488812 | 0.341519331 | 0.443496117 |
| 0.30030034  | 0.413873236 | 0.202197708 | 0.318789075 |
| 0.095347469 | 0.438514299 | 0.086268603 | 0.352925586 |
| 0.237693717 | 0.226889236 | 0.046101622 | 0.275574435 |
| 0.270530225 | 0.380711476 | 0.410627257 | 0.214233926 |
| 0.356470356 | 0.434494404 | 0.299399918 | 0.336302819 |
| 0.018717923 | 0.119028665 | 0.248163929 | 0.492898879 |
| 0.218920954 | 0.508640629 | 0.38971672  | 0.414572335 |
| 0.387362163 | 0.44489119  | 0.009690407 | 0.444163629 |
| 0.489912611 | 0.245147674 | 0.381335312 | 0.450590731 |
| 0.34386555  | 0.433217297 | 0.049042621 | 0.443617159 |
| 0.295096021 | 0.17518592  | 0.519654989 | 0.251758877 |
| 0.432512648 | 0.094298788 | 0.317385054 | 0.407715824 |
| 0.342055511 | 0.021707034 | 0.200310683 | 0.378005539 |
| 0.088598529 | 0.12112643  | 0.404935718 | 0.405320941 |
| 0.370595363 | 0.433300563 | 0.505416092 | 0.322865254 |
| 0.427232571 | 0.317386709 | 0.048381097 | 0.418621866 |
| 0.414319629 | 0.336418142 | 0.404261025 | 0.299980324 |
| 0.272448801 | 0.445269577 | 0.36757354  | 0.176249168 |
| 0.092827831 | 0.334920819 | 0.03489814  | 0.375593041 |
| 0.364634349 | 0.152166241 | 0.348723479 | 0.293310162 |
| 0.154544947 | 0.510276904 | 0.267540618 | 0.305443962 |
| 0.191273671 | 0.339165473 | 0.348183035 | 0.210836609 |
| 0.205022556 | 0.269062943 | 0.36873296  | 0.375487443 |
| 0.067586641 | 0.168234068 | 0.06170838  | 0.304766986 |
| 0.138777668 | 0.280863304 | 0.262319349 | 0.335455389 |
| 0.332127394 | 0.145583929 | 0.393664065 | 0.368137933 |
| 0.209026453 | 0.05175402  | 0.487114602 | 0.442843804 |
| 0.25849843  | 0.241585133 | 0.114225692 | 0.26085878  |
| 0.450945132 | 0.224281626 | 0.226553411 | 0.426788674 |
| 0.076290894 | 0.500717431 | 0.266816935 | 0.209971726 |
| 0.368912144 | 0.326732742 | 0.471964299 | 0.06676678  |
| 0.375593773 | 0.432921728 | 0.431007377 | 0.263553    |

|             |             |             |             |
|-------------|-------------|-------------|-------------|
| 0.347480148 | 0.411275778 | 0.066208786 | 0.34202503  |
| 0.326011243 | 0.081869002 | 0.504479689 | 0.229045313 |
| 0.07008769  | 0.42794719  | 0.358594442 | 0.164738091 |
| 0.167766113 | 0.311646695 | 0.074686428 | 0.387840245 |
| 0.499525488 | 0.430499547 | 0.353225489 | 0.33704066  |
| 0.083014558 | 0.018660975 | 0.343599992 | 0.406205144 |
| 0.457454194 | 0.49305955  | 0.385212962 | 0.365658565 |
| 0.337898656 | 0.334969505 | 0.148991925 | 0.493890599 |
| 0.325740211 | 0.489689864 | 0.030527589 | 0.398661727 |
| 0.454119476 | 0.249417606 | 0.147047283 | 0.303496528 |
| 0.337384624 | 0.102803149 | 0.3275414   | 0.455830811 |
| 0.417997207 | 0.366259873 | 0.334818437 | 0.440857258 |
| 0.035939127 | 0.08599955  | 0.414197452 | 0.265604249 |
| 0.359735834 | 0.318502839 | 0.092472495 | 0.335996147 |
| 0.082152045 | 0.414472034 | 0.465018846 | 0.11151721  |
| 0.249001949 | 0.313239486 | 0.451535227 | 0.09332273  |
| 0.43169958  | 0.478948273 | 0.477583514 | 0.27095341  |
| 0.394035144 | 0.457450751 | 0.346947296 | 0.187679739 |
| 0.060105297 | 0.476667357 | 0.358874325 | 0.040152521 |
| 0.48584401  | 0.185813199 | 0.022516228 | 0.475519412 |
| 0.284739121 | 0.387823991 | 0.006268392 | 0.136314062 |
| 0.12375578  | 0.473793971 | 0.429076504 | 0.370909742 |
| 0.171246717 | 0.434458197 | 0.028065192 | 0.515801216 |
| 0.450926811 | 0.048266554 | 0.258110324 | 0.375562218 |
| 0.351893312 | 0.504419109 | 0.338227732 | 0.422493127 |
| 0.372235897 | 0.450412801 | 0.25768119  | 0.365901698 |
| 0.402059892 | 0.458573492 | 0.381061505 | 0.436962384 |
| 0.453395636 | 0.450098007 | 0.349335674 | 0.039001441 |
| 0.189099038 | 0.221614615 | 0.222228081 | 0.109888197 |
| 0.273182434 | 0.218028431 | 0.469662012 | 0.483113928 |
| 0.467937065 | 0.024827224 | 0.196804222 | 0.378761102 |
| 0.428479188 | 0.485154563 | 0.074181793 | 0.013904748 |
| 0.016903068 | 0.039468737 | 0.375749826 | 0.374024978 |
| 0.476155645 | 0.160687145 | 0.020504391 | 0.079983147 |
| 0.335700838 | 0.408846504 | 0.468125699 | 0.42788937  |
| 0.416718313 | 0.181109738 | 0.219971076 | 0.433069347 |
| 0.131448405 | 0.263575344 | 0.474357258 | 0.434820783 |
| 0.127660765 | 0.376557193 | 0.392783202 | 0.491565443 |
| 0.100786517 | 0.422388297 | 0.413755493 | 0.316698939 |
| 0.058001474 | 0.173627762 | 0.138960114 | 1           |
| 0.446617769 | 0.110921374 | 0.063428663 | 0.126205371 |
| 0.159921709 | 0.475678852 | 0.227505735 | 0.521458556 |
| 0.418012603 | 0.452052875 | 0.17445884  | 0.446551257 |
| 0.079924977 | 0.438859591 | 0.382634728 | 0.05522908  |
| 0.41799828  | 0.050959811 | 0.446427134 | 0.141880623 |
| 0.30502797  | 0.379329766 | 0.243517232 | 0.063153695 |
| 0.24009997  | 0.125776853 | 0.481604469 | 0.46553607  |
| 0.109366906 | 0.328833461 | 0.416703463 | 0.444252956 |
| 0.272989873 | 0.399142552 | 0.455152398 | 0.301762369 |
| 0.135215097 | 0.232116683 | 0.40157242  | 0.341003296 |
| 0.269562266 | 0.50879914  | 0.304828467 | 0.517334577 |
| 0.360264847 | 0.460143667 | 0.452441061 | 0.36572567  |
| 0.317272086 | 0.352599001 | 0.307805137 | 0.032954504 |
| 0.414908959 | 0.448837521 | 0.391824708 | 0.206184684 |

|             |             |             |             |
|-------------|-------------|-------------|-------------|
| 0.322258024 | 0.377478711 | 0.124190029 | 0.206193725 |
| 0.327914022 | 0.253528805 | 0.212291796 | 0.464273292 |
| 0.379032552 | 0.338558755 | 0.098880769 | 0.125657988 |
| 0.518920538 | 0.418577173 | 0.178769747 | 0.376584334 |
| 0.309019142 | 0.389686052 | 0.424979004 | 0.424611671 |
| 0.376869193 | 0.409129421 | 0.391715171 | 0.311203692 |
| 0.385900385 | 0.343632641 | 0.483065634 | 0.11113859  |
| 0.146910432 | 0.377219243 | 0.13660248  | 0.201366777 |
| 0.232596391 | 0.081320312 | 0.293287158 | 0.451937119 |
| 0.341864971 | 0.409798552 | 0.304991205 | 0.16527683  |
| 0.434618417 | 0.370034113 | 0.435940161 | 0.224984888 |
| 0.125759795 | 0.448577538 | 0.029336944 | 0.141223964 |
| 0.368540773 | 0.38942485  | 0.365915219 | 0.357757783 |
| 0.327241469 | 0.280635977 | 0.381851616 | 0.25804141  |
| 0.230880664 | 0.364164841 | 0.386201781 | 0.071544071 |
| 0.048904944 | 0.51191422  | 0.345591728 | 0.079282649 |
| 0.185750182 | 0.337409939 | 0.405941447 | 0.268069572 |
| 0.075153832 | 0.451387832 | 0.256126147 | 0.432265796 |
| 0.366828924 | 0.158762247 | 0.321048192 | 0.150404049 |
| 0.147005807 | 0.41542869  | 0.407658919 | 0.474771629 |
| 0.435366472 | 0.420848673 | 0.396465088 | 0.391884525 |
| 0.219855164 | 0.360644551 | 0.064677971 | 0.444079021 |
| 0.318947342 |             |             |             |

|             |             |             |             |
|-------------|-------------|-------------|-------------|
| S100A4      | 0.475952445 | 0.510583238 | 0.429020416 |
| 0.422935465 | 0.434198767 | 0.419987952 | 0.17817586  |
| 0.165324436 | 0.064445401 | 0.002292007 | 0.017459394 |
| 0.479285276 | 0.201870847 | 0.263751003 | 0.358475835 |
| 0.408001919 | 0.113665271 | 0.34650643  | 0.200194399 |
| 0.404420535 | 0.072551089 | 0.387562615 | 0.063583202 |
| 0.28509115  | 0.086816068 | 0.048204665 | 0.261627306 |
| 0.445278024 | 0.055985789 | 0.374150216 | 0.398494709 |
| 0.075168854 | 0.479203254 | 0.504100763 | 0.464205697 |
| 0.510208426 | 0.472209886 | 0.008005826 | 0.307730509 |
| 0.467213787 | 0.474583173 | 0.405068842 | 0.301575563 |
| 0.025938584 | 0.481168092 | 0.213989842 | 0.404719876 |
| 0.229425501 | 0.019946697 | 0.254148274 | 0.469162467 |
| 0.500498586 | 0.491872073 | 0.202095657 | 0.130173559 |
| 0.231412342 | 0.243762645 | 0.325750694 | 0.365037612 |
| 0.192059877 | 0.161111111 | 0.511392501 | 0.067831298 |
| 0.142816148 | 0.221196245 | 0.126935828 | 0.233401931 |
| 0.376940433 | 0.436039273 | 0.008913277 | 0.482690364 |
| 0.001651826 | 0.370309715 | 0.365545307 | 0.360869809 |
| 0.025904834 | 0.013409915 | 0.148955698 | 0.324399743 |
| 0.467094561 | 0.491052071 | 0.496721693 | 0.510466179 |
| 0.161912791 | 0.258231829 | 0.43239767  | 0.140523849 |
| 0.487339676 | 0.152379769 | 0.08582775  | 0.413930475 |
| 0.502921498 | 0.518399436 | 0.17116554  | 0.23099104  |
| 0.481468142 | 0.494667838 | 0.461210962 | 0.448127707 |
| 0.383649267 | 0.03695439  | 0.499033499 | 0.517412794 |
| 0.4625386   | 0.347001615 | 0.123202937 | 0.436776767 |
| 0.037839169 | 0.392310967 | 0.329246383 | 0.148834358 |
| 0.46948136  | 0.009399548 | 0.184975273 | 0.355628652 |
| 0.176575336 | 0.486120892 | 0.519897479 | 0.151002771 |
| 0.41528451  | 0.011999019 | 0.140093486 | 0.019804146 |

|             |             |             |             |
|-------------|-------------|-------------|-------------|
| 0.325651652 | 0.156850264 | 0.502884251 | 0.482621134 |
| 0.219597883 | 0.392370165 | 0.231130984 | 0.001359926 |
| 0.016235714 | 0.156649585 | 0.510912714 | 0.361535819 |
| 0.452654337 | 0.478379618 | 0.215418461 | 0.46269832  |
| 0.508571751 | 0.496677984 | 0.071071635 | 0.066306352 |
| 0.436182043 | 0.154749128 | 0.198917379 | 0.49176098  |
| 0.291657843 | 0.083538107 | 0.09535429  | 0.506690697 |
| 0.459974137 | 0.058265124 | 0.35703475  | 0.403581032 |
| 0.353412389 | 0.354608837 | 0.075695224 | 0.259691754 |
| 0.032253069 | 0.507870075 | 0.017904372 | 0.329651693 |
| 0.306462517 | 0.139002303 | 0.005089232 | 0.248074584 |
| 0.290572307 | 0.507978569 | 0.494291344 | 0.074518943 |
| 0.304642884 | 0.403238533 | 0.3470976   | 0.485685183 |
| 0.006374214 | 0.028424749 | 0.320592758 | 0.515442208 |
| 0.340051831 | 0.509143384 | 0.265873632 | 0.277267941 |
| 0.250746512 | 0.461001074 | 0.002544646 | 0.49439619  |
| 0.517387036 | 0.351151192 | 0.412499819 | 0.429112411 |
| 0.426033264 | 0.471086503 | 0.047732099 | 0.410710205 |
| 0.431147066 | 0.051629676 | 0.494686464 | 0.131014839 |
| 0.503531998 | 0.026116416 | 0.32349997  | 0.505042465 |
| 0.522080438 | 0.005397677 | 0.230403559 | 0.387017687 |
| 0.016813519 | 0.079164901 | 0.454707394 | 0.406484052 |
| 0.387062656 | 0.467713606 | 0.473967525 | 0.410975311 |
| 0.436401729 | 0.197157106 | 0.005863991 | 0.301015859 |
| 0.485813851 | 0.448316473 | 0.477689014 | 0.207339512 |
| 0.408322275 | 0.501052008 | 0.510506625 | 0.241780764 |
| 0.026309732 | 0.300497553 | 0.013833833 | 0.318375611 |
| 0.483866034 | 0.099873189 | 0.447531073 | 0.119408822 |
| 0.051005692 | 0.515720341 | 0.172515305 | 0.292143505 |
| 0.132551242 | 0.446586762 | 0.211057663 | 0.252369385 |
| 0.233310469 | 0.12952692  | 0.367764118 | 0.392088909 |
| 0.023551498 | 0.070011281 | 0.00832436  | 0.469373846 |
| 0.149840855 | 0.398820973 | 0.408168396 | 0.480075407 |
| 0.334917019 | 0.096185223 | 0.387061581 | 0.287010012 |
| 0.088331021 | 0.007418354 | 0.510821272 | 0.392902083 |
| 0.407448213 | 0.118223324 | 0.024960796 | 0.429909467 |
| 0.493882123 | 0.388298483 | 0.309928848 | 0.492032254 |
| 0.01638668  | 0.496566304 | 0.244379717 | 0.095978131 |
| 0.417831478 | 0.232687108 | 0.460399695 | 0.055102412 |
| 0.421157608 | 0.495338299 | 0.279355209 | 0.158497825 |
| 0.470534176 | 0.419711485 | 0.017692839 | 0.479200965 |
| 0.479749374 | 0.018651107 | 0.520470965 | 0.104063266 |
| 0.011253413 | 0.46948914  | 0.508525852 | 0.051483003 |
| 0.054591834 | 0.344265924 | 0.031135127 | 0.259509713 |
| 0.513178906 | 0.403442812 | 0.500222214 | 0.20246066  |
| 0.025396977 | 0.00770034  | 0.184497407 | 0.437968186 |
| 0.506289739 | 0.522985488 | 0.222431825 | 0.386976064 |
| 0.200725503 | 0.35020747  | 0.144272172 | 0.518255363 |
| 0.177027804 | 0.50748344  | 0.002145014 | 0.498701812 |
| 0.511696954 | 0.320495241 | 0.061357906 | 0.304741992 |
| 0.464966574 | 0.027739801 | 0.165000269 | 0.50808086  |
| 0.486780688 | 0.322718242 | 0.368843782 | 0.446193571 |
| 0.008379333 | 0.026190207 | 0.397363578 | 0.186987995 |
| 0.41127181  | 0.178924544 | 0.056254946 | 0.330537878 |

|             |             |             |             |
|-------------|-------------|-------------|-------------|
| 0.028514536 | 0.494958441 | 0.471688777 | 0.041878796 |
| 0.402461293 | 0.316762287 | 0.367052613 | 0.021317243 |
| 0.513624206 | 0.513360973 | 0.506496847 | 0.127153875 |
| 0.504220842 | 0.521321834 | 0.487061586 | 0.054742019 |
| 0.009331252 | 0.512789317 | 0.43842136  | 0.015059337 |
| 0.480997053 | 0.270988086 | 0.0084429   | 0.499856268 |
| 0.145677179 | 0.465117453 | 0.00223057  | 0.089212352 |
| 0.026783206 | 0.477589709 | 0.495596138 | 0.391463526 |
| 0.300139016 | 0.347439147 | 0.003733807 | 0.518088505 |
| 0.508379877 | 0.007734956 | 0.120732401 | 0.520095899 |
| 0.51061192  | 0.504517678 | 0.348629054 | 0.514038889 |
| 0.495614885 | 0.512373469 | 0.225539914 | 0.236835742 |
| 0.488958934 | 0.517899377 | 0.450167658 | 0.48491433  |
| 0.484333625 | 0.433377901 | 0.247173434 | 0.007845959 |
| 0.123273989 | 0.205027555 | 0.377204421 | 0.073074515 |
| 0.368385012 | 0.116762344 | 0.505456706 | 0.483812879 |
| 0.519104906 | 0.001107379 | 0.125660309 | 0.510064304 |
| 0.465839262 | 0.474788462 | 0.011919002 | 0.004290371 |
| 0.006289626 | 0.014137933 | 0.356230693 | 0.210306535 |
| 0.512249025 | 0.299555415 | 0.000657784 | 0.028779586 |
| 0.255511093 | 0.425362433 | 0.514958695 | 0.35814714  |
| 0.490790255 | 0.05574824  | 0.321570532 | 0.384829585 |
| 0.051749886 | 0.410585176 | 0.51454671  | 0.491397894 |
| 0.025617633 | 0.216538786 | 0.393156624 | 0.487424527 |
| 0.084804938 | 0.289930057 | 0.486685729 | 0.318036799 |
| 0.007723945 | 0.059020359 | 0.046123927 | 0.446617769 |
| 1           | 0.066860077 | 0.024035123 | 0.162437782 |
| 0.09851465  | 0.494317064 | 0.1391938   | 0.506060679 |
| 0.472795051 | 0.437642981 | 0.05720409  | 0.497088299 |
| 0.027068998 | 0.506323732 | 0.353753214 | 0.058547925 |
| 0.26023901  | 0.00566742  | 0.513686661 | 0.175335108 |
| 0.342856764 | 0.42468159  | 0.193903802 | 0.009379609 |
| 0.195699551 | 0.035204065 | 0.48866125  | 0.490499788 |
| 0.021352189 | 0.201058455 | 0.266667965 | 0.403245868 |
| 0.288794296 | 0.452017552 | 0.499148942 | 0.489501664 |
| 0.061171163 | 0.149750475 | 0.413936584 | 0.456830111 |
| 0.226662812 | 0.495437164 | 0.30943127  | 0.515962907 |
| 0.458383655 | 0.490594406 | 0.518664798 | 0.338602026 |
| 0.236161501 | 0.437930079 | 0.408726821 | 0.012533369 |
| 0.329761014 | 0.485629777 | 0.355922581 | 0.140949086 |
| 0.238734929 | 0.448151206 | 0.02948452  | 0.19849822  |
| 0.394163144 | 0.340045018 | 0.117430728 | 0.435609753 |
| 0.417308033 | 0.461854497 | 0.025389507 | 0.04325087  |
| 0.513360294 | 0.480313142 | 0.120347492 | 0.457905528 |
| 0.134051949 | 0.332519336 | 0.492682167 | 0.488352894 |
| 0.404724289 | 0.513355068 | 0.460842087 | 0.439632995 |
| 0.472251373 | 0.224326854 | 0.50860267  | 0.07598588  |
| 0.068381472 | 0.487838125 | 0.079547341 | 0.066579563 |
| 0.111155358 | 0.015457485 | 0.359151386 | 0.425431101 |
| 0.455372921 | 0.37532492  | 0.352095303 | 0.058032993 |
| 0.303749989 | 0.408518097 | 0.333267931 | 0.181086547 |
| 0.059090992 | 0.506175846 | 0.004776122 | 0.036703299 |
| 0.454317982 | 0.49775101  | 0.428030519 | 0.206826765 |
| 0.325797158 | 0.116257358 | 0.272103092 | 0.320352341 |

|             |             |             |             |
|-------------|-------------|-------------|-------------|
| 0.389407454 | 0.401394302 | 0.500753908 | 0.020631081 |
| 0.010116642 | 0.492824241 | 0.407313004 | 0.011836137 |
| 0.07019215  | 0.441297009 | 0.274372405 | 0.224896582 |
| 0.01300103  | 0.524413558 | 0.387723324 | 0.448597418 |
| 0.334720355 | 0.042474287 | 0.431140401 | 0.070773074 |
| 0.037489047 | 0.484813964 | 0.430185076 | 0.517648278 |
| 0.351387332 | 0.418800993 | 0.463114943 | 0.508732407 |
| 0.099668335 | 0.449051473 | 0.014906161 | 0.469410462 |
| 0.489346099 |             |             |             |
| S100A8      | 0.046537502 | 0.09544771  | 0.03371648  |
| 0.152732525 | 0.092329826 | 0.046989186 | 0.119713512 |
| 0.01684381  | 0.030156661 | 0.078983822 | 0.124453171 |
| 0.073414123 | 0.091584874 | 0.096344441 | 0.012960886 |
| 0.135709777 | 0.194255475 | 0.016782132 | 0.164089605 |
| 0.1030489   | 0.060273141 | 0.203454142 | 0.078450075 |
| 0.027428646 | 0.164863918 | 0.184034593 | 0.075343461 |
| 0.127399111 | 0.17761891  | 0.04825118  | 0.082164119 |
| 0.058299997 | 0.071962605 | 0.068930338 | 0.170580741 |
| 0.069311783 | 0.033943627 | 0.010887483 | 0.039601548 |
| 0.054876272 | 0.099101124 | 0.106574477 | 0.195326631 |
| 0.093672849 | 0.059048098 | 0.17840528  | 0.079012018 |
| 0.006970308 | 0.160742271 | 0.01642651  | 0.050089391 |
| 0.073063078 | 0.075264569 | 0.029899848 | 0.107072922 |
| 0.084678608 | 0.024991245 | 0.048866422 | 0.04142294  |
| 0.175651643 | 0.023214867 | 0.074781016 | 0.03083383  |
| 0.013307257 | 0.034141099 | 0.079632345 | 0.072834683 |
| 0.028365242 | 0.046015532 | 0.019818665 | 0.037886452 |
| 0.038072714 | 0.100796255 | 0.089525091 | 0.026313354 |
| 0.187859373 | 0.204844583 | 0.104893283 | 0.153697059 |
| 0.11646118  | 0.051354098 | 0.143934531 | 0.117166698 |
| 0.124316244 | 0.083282477 | 0.053590901 | 0.189122826 |
| 0.064110806 | 0.167181864 | 0.028808646 | 0.16833634  |
| 0.136278219 | 0.088541957 | 0.062537388 | 0.11900208  |
| 0.106873033 | 0.079702943 | 0.046798652 | 0.080676339 |
| 0.034033853 | 0.031100052 | 0.06774786  | 0.118267821 |
| 0.049986267 | 0.056247432 | 0.211533546 | 0.092938622 |
| 0.116695963 | 0.009964573 | 0.19854877  | 0.056395231 |
| 0.122282357 | 0.033554376 | 0.161374936 | 0.128552771 |
| 0.016985246 | 0.07331809  | 0.08558092  | 0.159860836 |
| 0.065755418 | 0.099654925 | 0.030661487 | 0.056103848 |
| 0.027518435 | 0.022839826 | 0.052460045 | 0.150784473 |
| 0.025592973 | 0.029832001 | 0.068825351 | 0.033019093 |
| 0.123742965 | 0.015740956 | 0.08047191  | 0.034606338 |
| 0.07345629  | 0.034527949 | 0.14502067  | 0.043578124 |
| 0.073531262 | 0.138411271 | 0.003004802 | 0.0592227   |
| 0.074607403 | 0.018134082 | 0.208036441 | 0.080713182 |
| 0.165220518 | 0.046969025 | 0.164566741 | 0.115021921 |
| 0.056991241 | 0.189194508 | 0.014218268 | 0.153553389 |
| 0.040211359 | 0.14438792  | 0.112091218 | 0.156736429 |
| 0.090105114 | 0.063393347 | 0.120039578 | 0.025015155 |
| 0.013028347 | 0.096995262 | 0.007390316 | 0.044641229 |
| 0.032252355 | 0.111141025 | 0.045576383 | 0.114000434 |
| 0.165142523 | 0.154226932 | 0.024912627 | 0.129256514 |
| 0.09937718  | 0.038512653 | 0.010135397 | 0.124616354 |

|             |             |             |             |
|-------------|-------------|-------------|-------------|
| 0.036371044 | 0.096576126 | 0.059558069 | 0.042545653 |
| 0.170308255 | 0.110593357 | 0.000260834 | 0.063957712 |
| 0.083330202 | 0.012007131 | 0.211152678 | 0.072210819 |
| 0.039304331 | 0.141125931 | 0.000912427 | 0.161355191 |
| 0.031336843 | 0.087493485 | 0.134336796 | 0.273169782 |
| 0.062014036 | 0.200630316 | 0.043035678 | 0.082050192 |
| 0.086976022 | 0.016730377 | 0.037602666 | 0.10468566  |
| 0.05935728  | 0.029422545 | 0.062588223 | 0.121828227 |
| 0.106482086 | 0.092198268 | 0.147056274 | 0.038379954 |
| 0.099849217 | 0.062818671 | 0.024266784 | 0.101488039 |
| 0.066131857 | 0.009303832 | 0.064445715 | 0.047384193 |
| 0.021486582 | 0.084340677 | 0.055020492 | 0.009425791 |
| 0.135329023 | 0.059208043 | 0.040494559 | 0.103905899 |
| 0.038234509 | 0.161896479 | 0.032116814 | 0.021757604 |
| 0.166266759 | 0.113864164 | 0.051731482 | 0.030610423 |
| 0.028228497 | 0.14768248  | 0.085218531 | 0.157419901 |
| 0.142922516 | 0.076086111 | 0.039157775 | 0.042973877 |
| 0.061507648 | 0.253443236 | 0.007794311 | 0.061575254 |
| 0.196347407 | 0.126257517 | 0.108564932 | 0.053654987 |
| 0.044611247 | 0.18139055  | 0.150864525 | 0.017159106 |
| 0.085292488 | 0.137147379 | 0.092256078 | 0.113537874 |
| 0.035317438 | 0.066509851 | 0.108373276 | 0.025229056 |
| 0.142594955 | 0.036316907 | 0.006649645 | 0.110475091 |
| 0.017922282 | 0.110553094 | 0.125296889 | 0.255417703 |
| 0.11759273  | 0.252758736 | 0.126781368 | 0.010146332 |
| 0.03725414  | 0.086459201 | 0.077420025 | 0.156052188 |
| 0.071098499 | 0.094510836 | 0.06546663  | 0.046928544 |
| 0.057094098 | 0.197062708 | 0.100927317 | 0.113309285 |
| 0.119445967 | 0.100549592 | 0.098142526 | 0.174873653 |
| 0.119399596 | 0.152374424 | 0.025549535 | 0.204141055 |
| 0.112168443 | 0.204990068 | 0.097374107 | 0.034501002 |
| 0.182701179 | 0.240833626 | 0.076287533 | 0.037094529 |
| 0.066687012 | 0.099845954 | 0.145737943 | 0.174285754 |
| 0.180842756 | 0.043136381 | 0.004916616 | 0.120091461 |
| 0.005717558 | 0.071197965 | 0.056282671 | 0.089133674 |
| 0.067184401 | 0.02972976  | 0.203886186 | 0.080304851 |
| 0.07044951  | 0.087334832 | 0.034462913 | 0.08176201  |
| 0.073720405 | 0.050471086 | 0.041377563 | 0.079631956 |
| 0.039009966 | 0.042586947 | 0.070229758 | 0.023295783 |
| 0.043079649 | 0.071329169 | 0.010803671 | 0.013639096 |
| 0.133731286 | 0.088272952 | 0.123202516 | 0.063658956 |
| 0.067953627 | 0.010563143 | 0.140074633 | 0.120892568 |
| 0.090186577 | 0.070449291 | 0.077204834 | 0.043008742 |
| 0.08050234  | 0.0995125   | 0.07095685  | 0.09643672  |
| 0.116859308 | 0.074120471 | 0.044737833 | 0.085493165 |
| 0.136189733 | 0.018821485 | 0.215334308 | 0.087888602 |
| 0.121789012 | 0.044368311 | 0.002967711 | 0.001163734 |
| 0.029541278 | 0.119332843 | 0.064330434 | 0.071254217 |
| 0.023242563 | 0.075332069 | 0.001191417 | 0.094086576 |
| 0.094567629 | 0.090700161 | 0.04661392  | 0.091540282 |
| 0.09065952  | 0.083781943 | 0.057733814 | 0.112817302 |
| 0.096737984 | 0.075703302 | 0.061583563 | 0.190107703 |
| 0.110879926 | 0.074941138 | 0.073760427 | 0.064881463 |
| 0.148299926 | 0.118867712 | 0.185356771 | 0.071863486 |



|             |             |             |             |
|-------------|-------------|-------------|-------------|
| 0.012180181 | 0.030711363 | 0.024728712 | 0.059413306 |
| 0.02737259  | 0.108548247 | 0.078387654 | 0.128094847 |
| 0.118584097 | 0.069506252 | 0.031794149 | 0.073494147 |
| 0.099829243 | 0.110847394 | 0.006692013 | 0.001905609 |
| 0.001132204 | 0.093788091 | 0.069841292 | 0.091526752 |
| 0.091741229 | 0.02013997  | 0.07460452  | 0.026262544 |
| 0.028277589 | 0.114386496 | 0.091006774 | 0.160922902 |
| 0.073214039 | 0.113423331 | 0.06584718  | 0.122098319 |
| 0.073525784 | 0.020446933 | 0.128203873 | 0.078112602 |
| 0.031853135 | 0.073215049 | 0.026276623 | 0.129840814 |
| 0.011925414 | 0.162567365 | 0.082096169 | 0.060732802 |
| 0.008323579 | 0.103977283 | 0.083591563 | 0.110921374 |
| 0.066860077 | 1           | 0.203620094 | 0.006425474 |
| 0.195058603 | 0.098133518 | 0.154060968 | 0.125345513 |
| 0.108463951 | 0.16929113  | 0.050210368 | 0.068613542 |
| 0.08225444  | 0.076665847 | 0.113396829 | 0.006773233 |
| 0.036620403 | 0.030036198 | 0.070093575 | 0.035734504 |
| 0.039827524 | 0.051790578 | 0.011727572 | 0.060460532 |
| 0.00788324  | 0.163050724 | 0.147926463 | 0.119318753 |
| 0.02710947  | 0.03628165  | 0.095824978 | 0.074437697 |
| 0.054819943 | 0.174377872 | 0.070385297 | 0.038616732 |
| 0.08295788  | 0.008803757 | 0.095287828 | 0.045179169 |
| 0.033050621 | 0.135230898 | 0.067991491 | 0.093812564 |
| 0.046879007 | 0.065828244 | 0.087952759 | 0.091945361 |
| 0.043420131 | 0.040203559 | 0.113436071 | 0.085877855 |
| 0.099819834 | 0.163735219 | 0.031421862 | 0.081700153 |
| 0.230822327 | 0.046144331 | 0.015043965 | 0.002538528 |
| 0.039470139 | 0.050871464 | 0.098029983 | 0.135155979 |
| 0.044584595 | 0.046683411 | 0.018909116 | 0.086826298 |
| 0.092250419 | 0.054112477 | 0.016297346 | 0.097804465 |
| 0.106280165 | 0.130542093 | 0.088221161 | 0.101304669 |
| 0.010723448 | 0.117138912 | 0.091242088 | 0.118232548 |
| 0.075872419 | 0.107214736 | 0.078327436 | 0.005337188 |
| 0.031506739 | 0.043253819 | 0.200101818 | 0.140279554 |
| 0.228479733 | 0.04874864  | 0.018634358 | 0.126088637 |
| 0.025419985 | 0.220687195 | 0.006621441 | 0.04087074  |
| 0.105935454 | 0.01506325  | 0.1323351   | 0.113338144 |
| 0.131744958 | 0.080930468 | 0.034297989 | 0.13131114  |
| 0.04223713  | 0.082283574 | 0.104164453 | 0.093754708 |
| 0.027924087 | 0.028466197 | 0.204206747 | 0.033390966 |
| 0.096553117 | 0.00838126  | 0.081615648 | 0.015948373 |
| 0.05213899  | 0.135385384 | 0.024606793 | 0.017809188 |
| 0.015309936 | 0.027159922 | 0.019992792 | 0.050775837 |
| 0.065716151 | 0.090428038 | 0.037536192 | 0.068232177 |
| 0.072723776 | 0.080236523 | 0.034878378 | 0.009330288 |
| 0.015781632 | 0.060745633 | 0.049551161 | 0.080428739 |
| 0.036526223 | 0.199689597 | 0.043793627 | 0.086913727 |
| 0.008721182 | 0.021650782 | 0.046992786 | 0.092238943 |
| 0.032909438 |             |             |             |
| S100A9      | 0.020488202 | 0.039772232 | 0.018939249 |
| 0.089900471 | 0.056077067 | 0.021822085 | 0.093064378 |
| 0.011845039 | 0.032295016 | 0.091365556 | 0.1278984   |
| 0.039099334 | 0.066897308 | 0.066914163 | 0.00696862  |
| 0.085950457 | 0.197352916 | 0.009739701 | 0.140205144 |

|             |             |             |             |
|-------------|-------------|-------------|-------------|
| 0.060312943 | 0.050023143 | 0.140755298 | 0.081035005 |
| 0.021304113 | 0.182060549 | 0.204954655 | 0.064200984 |
| 0.069881239 | 0.203377109 | 0.02179787  | 0.04274857  |
| 0.072461066 | 0.032894063 | 0.025613341 | 0.101943395 |
| 0.02531453  | 0.013792513 | 0.012090767 | 0.022369713 |
| 0.02367596  | 0.053786924 | 0.060972114 | 0.147148852 |
| 0.108425615 | 0.020876711 | 0.141547342 | 0.051077498 |
| 0.004296025 | 0.190239521 | 0.008498281 | 0.017841383 |
| 0.026762453 | 0.037023897 | 0.020072768 | 0.089309301 |
| 0.05326269  | 0.013102474 | 0.034115668 | 0.018355217 |
| 0.141583258 | 0.013482173 | 0.028212449 | 0.027716468 |
| 0.00825649  | 0.023593373 | 0.085145315 | 0.052145559 |
| 0.017560072 | 0.019554238 | 0.026085348 | 0.01711179  |
| 0.041526005 | 0.062931466 | 0.063096361 | 0.016235888 |
| 0.243295264 | 0.217350368 | 0.108766866 | 0.10114381  |
| 0.060694171 | 0.019589859 | 0.075454991 | 0.05684692  |
| 0.111102501 | 0.071749704 | 0.030767449 | 0.177843123 |
| 0.027558624 | 0.13502076  | 0.028244656 | 0.109618999 |
| 0.06937468  | 0.035110141 | 0.05868891  | 0.110114522 |
| 0.049802738 | 0.032915144 | 0.025584153 | 0.048550843 |
| 0.021509692 | 0.045865036 | 0.025811898 | 0.054447259 |
| 0.019981637 | 0.038806506 | 0.228252093 | 0.04574832  |
| 0.145036173 | 0.005470009 | 0.143827913 | 0.047260003 |
| 0.063426618 | 0.04322714  | 0.159555412 | 0.078336101 |
| 0.015907035 | 0.034912652 | 0.034309524 | 0.140377835 |
| 0.04052848  | 0.116641617 | 0.026500787 | 0.080860944 |
| 0.017493823 | 0.021306776 | 0.017502625 | 0.077191667 |
| 0.016573614 | 0.018613384 | 0.051054036 | 0.061285887 |
| 0.17237622  | 0.015682816 | 0.034891568 | 0.02090776  |
| 0.038138115 | 0.012676877 | 0.122216722 | 0.01679551  |
| 0.03550969  | 0.071991628 | 0.001622012 | 0.061991427 |
| 0.04241487  | 0.01782037  | 0.189288341 | 0.041203119 |
| 0.137077951 | 0.044434429 | 0.163779827 | 0.054198423 |
| 0.021782109 | 0.200830367 | 0.007043148 | 0.101662655 |
| 0.023397615 | 0.108981025 | 0.116637742 | 0.117027759 |
| 0.091024948 | 0.023306408 | 0.171800661 | 0.013834381 |
| 0.007637193 | 0.087049986 | 0.012649631 | 0.02760581  |
| 0.02152876  | 0.04937211  | 0.014862992 | 0.128623329 |
| 0.118523977 | 0.104349215 | 0.01185962  | 0.064393361 |
| 0.105946839 | 0.049735411 | 0.004066052 | 0.056752557 |
| 0.015135212 | 0.044493962 | 0.04865223  | 0.034888136 |
| 0.152470146 | 0.061175929 | 0.000688683 | 0.023117614 |
| 0.032941943 | 0.004835619 | 0.135819748 | 0.042470239 |
| 0.021582881 | 0.075707119 | 0.000527871 | 0.103655097 |
| 0.012167932 | 0.104721843 | 0.068790833 | 0.276236005 |
| 0.02368241  | 0.242650851 | 0.024107098 | 0.038984781 |
| 0.038333931 | 0.018783135 | 0.021066641 | 0.059658848 |
| 0.091726603 | 0.021377824 | 0.030928602 | 0.075907101 |
| 0.067054501 | 0.050167007 | 0.080749871 | 0.02223414  |
| 0.061439195 | 0.050692806 | 0.037922889 | 0.084084333 |
| 0.031701164 | 0.003951992 | 0.025110579 | 0.036048976 |
| 0.008217796 | 0.035426905 | 0.022347247 | 0.00495053  |
| 0.154402041 | 0.035880747 | 0.041019996 | 0.079429298 |
| 0.014474608 | 0.135338612 | 0.015783381 | 0.022539334 |

|             |             |             |             |
|-------------|-------------|-------------|-------------|
| 0.201613741 | 0.050955983 | 0.050766321 | 0.022005797 |
| 0.028249301 | 0.079955061 | 0.070060306 | 0.105945172 |
| 0.104186376 | 0.074514459 | 0.025560255 | 0.027014021 |
| 0.059654579 | 0.264553998 | 0.014843336 | 0.030144582 |
| 0.146111063 | 0.072487307 | 0.057753438 | 0.021727665 |
| 0.026126585 | 0.156745755 | 0.104454292 | 0.013602222 |
| 0.103411391 | 0.199189623 | 0.038792043 | 0.073686993 |
| 0.013620398 | 0.061523711 | 0.146007288 | 0.01199569  |
| 0.070164226 | 0.015093088 | 0.002618786 | 0.049212074 |
| 0.025067663 | 0.054683141 | 0.098558833 | 0.274661745 |
| 0.073991897 | 0.208587695 | 0.068673455 | 0.007549438 |
| 0.017367672 | 0.034775027 | 0.063123021 | 0.15358194  |
| 0.027405325 | 0.053357244 | 0.071022406 | 0.019427069 |
| 0.023465907 | 0.245547709 | 0.042772543 | 0.123808499 |
| 0.174776614 | 0.057447351 | 0.047723373 | 0.215711075 |
| 0.154360268 | 0.098011542 | 0.023727374 | 0.17930999  |
| 0.050106917 | 0.1377587   | 0.04422496  | 0.0330207   |
| 0.200687913 | 0.240394324 | 0.07564966  | 0.020074775 |
| 0.023982932 | 0.043075158 | 0.130048328 | 0.122392836 |
| 0.15769638  | 0.02823127  | 0.002870061 | 0.054870342 |
| 0.005181068 | 0.02728035  | 0.090870432 | 0.044052329 |
| 0.024154995 | 0.013691322 | 0.236094473 | 0.047604058 |
| 0.029250104 | 0.104831193 | 0.03097548  | 0.03226648  |
| 0.032519383 | 0.035491467 | 0.026937007 | 0.044005364 |
| 0.045096868 | 0.041874629 | 0.045928353 | 0.021555731 |
| 0.024864565 | 0.065952085 | 0.011643578 | 0.007091156 |
| 0.14325879  | 0.035642868 | 0.067060297 | 0.076534474 |
| 0.030469202 | 0.005482378 | 0.101056747 | 0.151404516 |
| 0.041396754 | 0.027854918 | 0.029293653 | 0.039520524 |
| 0.036629527 | 0.04301002  | 0.035696077 | 0.124154988 |
| 0.179724561 | 0.028320181 | 0.020553227 | 0.100775902 |
| 0.071018034 | 0.008450762 | 0.215464855 | 0.036665881 |
| 0.112981827 | 0.014502482 | 0.005156537 | 0.001044902 |
| 0.045547577 | 0.064829791 | 0.023768528 | 0.037433591 |
| 0.010738063 | 0.049599403 | 0.001981097 | 0.040667867 |
| 0.038449876 | 0.137947598 | 0.050253501 | 0.040276888 |
| 0.043348975 | 0.033776194 | 0.040359833 | 0.05408796  |
| 0.050442779 | 0.028402621 | 0.041094295 | 0.169356872 |
| 0.05306836  | 0.029381731 | 0.036955432 | 0.026203435 |
| 0.076987565 | 0.074087829 | 0.147838902 | 0.086351111 |
| 0.012840723 | 0.018519635 | 0.012459235 | 0.05681112  |
| 0.011819151 | 0.11917902  | 0.033395777 | 0.067439343 |
| 0.055432266 | 0.117732614 | 0.025773293 | 0.03116765  |
| 0.047109078 | 0.055475648 | 0.011578615 | 0.003521006 |
| 0.001751648 | 0.114380352 | 0.039996091 | 0.088964737 |
| 0.04053944  | 0.010202947 | 0.114844065 | 0.025401121 |
| 0.023436517 | 0.073539981 | 0.036642676 | 0.111009089 |
| 0.035760656 | 0.132138057 | 0.037402558 | 0.077892817 |
| 0.082415429 | 0.007270826 | 0.061428403 | 0.030497432 |
| 0.046806941 | 0.068330183 | 0.013854888 | 0.065127445 |
| 0.011516798 | 0.13361886  | 0.042246555 | 0.039922336 |
| 0.014162378 | 0.132229876 | 0.104741458 | 0.063428663 |
| 0.024035123 | 0.203620094 | 1           | 0.00316192  |
| 0.168942139 | 0.047299514 | 0.1439211   | 0.060727986 |

|             |             |             |             |
|-------------|-------------|-------------|-------------|
| 0.05454431  | 0.101499624 | 0.058725113 | 0.026664561 |
| 0.080967967 | 0.028673456 | 0.085596182 | 0.005607858 |
| 0.030914752 | 0.048974065 | 0.027448953 | 0.025856507 |
| 0.021224746 | 0.025150568 | 0.009392359 | 0.093779432 |
| 0.006627519 | 0.202431549 | 0.07796958  | 0.063153011 |
| 0.042496242 | 0.028476397 | 0.083920464 | 0.044911091 |
| 0.031732652 | 0.101570974 | 0.026020428 | 0.017445793 |
| 0.074523361 | 0.007603257 | 0.05327641  | 0.019641199 |
| 0.020788793 | 0.07017035  | 0.047215571 | 0.04073569  |
| 0.020756535 | 0.027944361 | 0.037388351 | 0.060137383 |
| 0.03402827  | 0.018946091 | 0.057758276 | 0.096212666 |
| 0.072145304 | 0.087813832 | 0.017682075 | 0.077720572 |
| 0.198717555 | 0.024802819 | 0.018581102 | 0.001470658 |
| 0.022869819 | 0.024729957 | 0.0872663   | 0.079667681 |
| 0.021639148 | 0.019885874 | 0.021063074 | 0.108198437 |
| 0.03808134  | 0.021243701 | 0.013531373 | 0.05273725  |
| 0.114409922 | 0.095653693 | 0.044801949 | 0.052727946 |
| 0.005471557 | 0.053536839 | 0.044133162 | 0.058061002 |
| 0.03006915  | 0.086171108 | 0.030100978 | 0.003892376 |
| 0.033577191 | 0.018840586 | 0.182353797 | 0.172180196 |
| 0.223169015 | 0.074438233 | 0.011117247 | 0.077325602 |
| 0.012615247 | 0.151523106 | 0.002902928 | 0.052541082 |
| 0.084314296 | 0.006917345 | 0.099931625 | 0.085150475 |
| 0.133021169 | 0.030930264 | 0.048526628 | 0.165227147 |
| 0.021816447 | 0.038445345 | 0.065539518 | 0.092219093 |
| 0.019778852 | 0.031401409 | 0.165447663 | 0.016547901 |
| 0.050022767 | 0.004296443 | 0.037862286 | 0.01914926  |
| 0.060047842 | 0.069912946 | 0.012083198 | 0.030297634 |
| 0.015364775 | 0.011166966 | 0.014653234 | 0.038284071 |
| 0.104208864 | 0.037334924 | 0.017276135 | 0.040069276 |
| 0.045676138 | 0.099186247 | 0.012336677 | 0.008603565 |
| 0.020324604 | 0.022813662 | 0.028454479 | 0.031130055 |
| 0.024929545 | 0.126655371 | 0.014746555 | 0.038050934 |
| 0.009476693 | 0.009916157 | 0.056967139 | 0.04576525  |
| 0.015590341 |             |             |             |
| SAA3        | 0.125901963 | 0.194353146 | 0.046441622 |
| 0.145272571 | 0.06496964  | 0.125282144 | 0.065667952 |
| 0.064063712 | 0.00295525  | 0.000717096 | 0.000582497 |
| 0.08300356  | 0.00368303  | 0.056134251 | 0.027108861 |
| 0.118136915 | 0.009900735 | 0.054516539 | 0.066106491 |
| 0.141910517 | 0.038992392 | 0.095419021 | 0.016094115 |
| 0.010163107 | 0.00605489  | 0.008450224 | 0.014219691 |
| 0.181821139 | 0.010484578 | 0.10888124  | 0.193933137 |
| 0.007639439 | 0.166376576 | 0.189040241 | 0.086752176 |
| 0.172665402 | 0.122821578 | 0.000559069 | 0.039371817 |
| 0.182317077 | 0.101650218 | 0.14822643  | 0.087723712 |
| 0.007546136 | 0.212840138 | 0.067220102 | 0.05932858  |
| 0.005954849 | 0.003222664 | 0.085126923 | 0.210260418 |
| 0.172414404 | 0.07838441  | 0.073181428 | 0.037493282 |
| 0.003914631 | 0.084316116 | 0.006741026 | 0.203934325 |
| 0.058813045 | 0.092199961 | 0.162541603 | 0.006245841 |
| 0.001282173 | 0.084218308 | 0.009042116 | 0.091912115 |
| 0.016655673 | 0.182826666 | 0.004636213 | 0.066901701 |
| 0.000331927 | 0.139584508 | 0.063641347 | 0.012556605 |

|             |             |             |             |
|-------------|-------------|-------------|-------------|
| 0.008125171 | 0.003102245 | 0.014502679 | 0.108698873 |
| 0.177391204 | 0.169444537 | 0.141967524 | 0.134913733 |
| 0.011270273 | 0.039410037 | 0.038706086 | 0.023269925 |
| 0.170049611 | 0.046145267 | 0.003690244 | 0.108967614 |
| 0.144150692 | 0.172917865 | 0.010803036 | 0.030535669 |
| 0.147706555 | 0.204320291 | 0.059643909 | 0.049924142 |
| 0.017032246 | 0.00174001  | 0.170037696 | 0.161137757 |
| 0.193795004 | 0.02022642  | 0.016939869 | 0.201365756 |
| 0.010195028 | 0.03678417  | 0.097924945 | 0.004114403 |
| 0.185976947 | 0.00386509  | 0.019533199 | 0.103888014 |
| 0.012450788 | 0.145389304 | 0.160483049 | 0.053938317 |
| 0.06023904  | 0.000817767 | 0.0006416   | 0.00442481  |
| 0.009209618 | 0.003300103 | 0.182696967 | 0.173556162 |
| 0.045740878 | 0.015152492 | 0.066494209 | 0.000347559 |
| 0.002829827 | 0.006295313 | 0.137757423 | 0.080078415 |
| 0.134748457 | 0.119883608 | 0.019743224 | 0.179733839 |
| 0.077793419 | 0.136626091 | 0.002584475 | 0.021106903 |
| 0.096835824 | 0.006928659 | 0.05397555  | 0.087576527 |
| 0.035693097 | 0.040171258 | 0.026073164 | 0.17004351  |
| 0.226110151 | 0.023725479 | 0.071208049 | 0.114411886 |
| 0.02043686  | 0.04370108  | 0.026768483 | 0.050217516 |
| 0.014466733 | 0.157561269 | 0.002357634 | 0.105449471 |
| 0.005993875 | 0.004243879 | 0.001357271 | 0.116822918 |
| 0.018614234 | 0.140631664 | 0.173323303 | 0.023869721 |
| 0.065319194 | 0.078028724 | 0.132817914 | 0.124764031 |
| 0.00050759  | 0.007374848 | 0.119877013 | 0.174065092 |
| 0.189770386 | 0.154829597 | 0.037120162 | 0.021689401 |
| 0.041868025 | 0.138618988 | 0.000129746 | 0.197109782 |
| 0.169506624 | 0.10448867  | 0.084093575 | 0.081294671 |
| 0.029884737 | 0.158165813 | 0.009220868 | 0.119603478 |
| 0.166681054 | 0.01778952  | 0.159644075 | 0.021342158 |
| 0.167272283 | 0.006464957 | 0.084728997 | 0.095354602 |
| 0.102240743 | 0.000208788 | 0.106506915 | 0.151097936 |
| 0.00149184  | 0.033244175 | 0.131904627 | 0.115074986 |
| 0.071753371 | 0.114265639 | 0.1566129   | 0.024125414 |
| 0.073116715 | 0.073423969 | 0.001254043 | 0.038075206 |
| 0.120595348 | 0.007582286 | 0.198803859 | 0.040825603 |
| 0.136576788 | 0.180090591 | 0.116276229 | 0.001968772 |
| 0.0118559   | 0.095364786 | 0.001167206 | 0.041644537 |
| 0.125467595 | 0.020000948 | 0.045047355 | 0.007820359 |
| 0.006266012 | 0.172365286 | 0.007114132 | 0.01137343  |
| 0.003164547 | 0.101489061 | 0.073120225 | 0.032355885 |
| 0.010312066 | 0.014098348 | 0.024395301 | 0.028045431 |
| 0.018312207 | 0.015564398 | 0.000337034 | 0.031740307 |
| 0.008945301 | 0.042556804 | 0.04943146  | 0.152665837 |
| 0.039181039 | 0.010412539 | 0.05651409  | 0.009347819 |
| 0.006500722 | 0.003425689 | 0.180118418 | 0.115034122 |
| 0.197172392 | 0.023470025 | 0.006883372 | 0.01086618  |
| 0.167651869 | 0.111384675 | 0.075842879 | 0.188399326 |
| 0.000944001 | 0.146381202 | 0.016623478 | 0.015348302 |
| 0.033122603 | 0.058413744 | 0.16448375  | 0.000750894 |
| 0.121923055 | 0.202586866 | 0.05213323  | 0.015221703 |
| 0.208213072 | 0.131285766 | 0.004317058 | 0.14683199  |
| 0.168864787 | 0.006991335 | 0.174109546 | 0.006599495 |

|             |             |             |             |
|-------------|-------------|-------------|-------------|
| 0.003739791 | 0.091340034 | 0.096694512 | 0.011187392 |
| 0.007519235 | 0.057096485 | 0.021179453 | 0.049039418 |
| 0.175372094 | 0.107365857 | 0.128159132 | 0.010607897 |
| 0.009139239 | 0.000840556 | 0.014599506 | 0.056467711 |
| 0.196671473 | 0.151966272 | 0.052472185 | 0.039440108 |
| 0.06560599  | 0.017538818 | 0.011718631 | 0.161514548 |
| 0.00588889  | 0.186790703 | 0.002282409 | 0.095196234 |
| 0.175536325 | 0.144800099 | 0.006627988 | 0.102786018 |
| 0.191291653 | 0.010548654 | 0.042112771 | 0.186917918 |
| 0.154044133 | 0.029843344 | 0.023753293 | 0.110979891 |
| 0.006640011 | 0.00803113  | 0.054954019 | 0.005902269 |
| 0.03322453  | 0.01942096  | 0.000488349 | 0.058330866 |
| 0.004835061 | 0.19614246  | 0.14506829  | 0.003251653 |
| 0.099972468 | 0.052510728 | 0.068290379 | 0.009164604 |
| 0.108699586 | 0.155282884 | 0.194312604 | 0.042702628 |
| 0.133629197 | 0.143492694 | 0.04716021  | 0.009396486 |
| 0.002097202 | 0.16785774  | 0.151663927 | 0.000510425 |
| 0.166062633 | 0.138589161 | 0.001508058 | 0.198401291 |
| 0.050288693 | 0.190882601 | 0.000353039 | 0.000472166 |
| 0.001826308 | 0.126301405 | 0.180902427 | 0.171495726 |
| 0.061187026 | 0.107907764 | 3.37E-05    | 0.162379076 |
| 0.192499756 | 0.001268451 | 0.003910113 | 0.136191361 |
| 0.084782369 | 0.205098597 | 0.020239963 | 0.11597212  |
| 0.072780345 | 0.16199965  | 0.019940127 | 0.04180106  |
| 0.171346706 | 0.13910089  | 0.168091812 | 0.198665287 |
| 0.164935418 | 0.088455447 | 0.074587265 | 0.004252599 |
| 0.001326976 | 0.094280794 | 0.021975603 | 0.000573454 |
| 0.164325214 | 0.007421137 | 0.178126707 | 0.141736365 |
| 0.141780021 | 0.001512855 | 0.033161983 | 0.158881141 |
| 0.20581398  | 0.188324612 | 0.000841127 | 0.000423745 |
| 0.00014051  | 0.000383014 | 0.1292998   | 0.027362984 |
| 0.159142259 | 0.018783214 | 0.001830476 | 0.017395798 |
| 0.020958264 | 0.055801599 | 0.1788329   | 0.122264626 |
| 0.112905423 | 0.011950926 | 0.02865379  | 0.134823524 |
| 0.001926446 | 0.148627039 | 0.148204402 | 0.205956851 |
| 0.002962414 | 0.022622158 | 0.087326687 | 0.175928131 |
| 0.000932342 | 0.056136651 | 0.094404874 | 0.022778085 |
| 0.000131618 | 0.005689255 | 0.004209097 | 0.126205371 |
| 0.162437782 | 0.006425474 | 0.00316192  | 1           |
| 0.02208369  | 0.155914157 | 0.018523767 | 0.165646238 |
| 0.170911142 | 0.151668129 | 0.002042204 | 0.184130204 |
| 0.00112869  | 0.186598813 | 0.028360507 | 0.000913951 |
| 0.031222719 | 0.002119661 | 0.152245884 | 0.00196955  |
| 0.087902586 | 0.168018109 | 0.002508947 | 0.001039776 |
| 0.003110998 | 0.006599951 | 0.147867249 | 0.118318167 |
| 0.001370899 | 0.036801337 | 0.044560194 | 0.11007468  |
| 0.138691134 | 0.132555614 | 0.19801797  | 0.069787732 |
| 0.020190413 | 0.002033312 | 0.1717427   | 0.163121845 |
| 0.068834542 | 0.146470143 | 0.015176855 | 0.165269201 |
| 0.154224427 | 0.172030417 | 0.155227461 | 0.081794935 |
| 0.004151172 | 0.136724148 | 0.152538318 | 0.002719545 |
| 0.08738104  | 0.145251403 | 0.098798184 | 0.004802742 |
| 0.029365915 | 0.039581864 | 0.002502075 | 0.003544619 |
| 0.023171149 | 0.159688916 | 0.013012093 | 0.146714499 |

|             |             |             |             |
|-------------|-------------|-------------|-------------|
| 0.156428969 | 0.17398765  | 0.005385133 | 0.003820086 |
| 0.192028198 | 0.180937956 | 0.016472085 | 0.12451181  |
| 0.024564274 | 0.051119185 | 0.115582621 | 0.106810967 |
| 0.019145183 | 0.150870532 | 0.193781196 | 0.160430843 |
| 0.214877442 | 0.061569375 | 0.187914521 | 0.03386547  |
| 0.001932627 | 0.090331318 | 0.010416472 | 0.010518282 |
| 0.030056443 | 0.001536281 | 0.012086318 | 0.114064009 |
| 0.023804634 | 0.095096054 | 0.03285665  | 0.002571073 |
| 0.042519306 | 0.063710579 | 0.073089849 | 0.060912812 |
| 0.007362488 | 0.184664662 | 0.000112286 | 0.008054618 |
| 0.031844207 | 0.129018017 | 0.037785432 | 0.022465148 |
| 0.007730422 | 0.00532289  | 0.053595002 | 0.154841638 |
| 0.060848712 | 0.030641122 | 0.133347065 | 0.00261287  |
| 0.007903516 | 0.158056209 | 0.10498089  | 0.001023581 |
| 0.000640885 | 0.112633817 | 0.034235539 | 0.014327226 |
| 0.00139614  | 0.136571807 | 0.064258723 | 0.05954722  |
| 0.103324042 | 0.011671234 | 0.204273474 | 0.001657197 |
| 0.006730517 | 0.203804466 | 0.051690349 | 0.166753305 |
| 0.036703744 | 0.1247316   | 0.206804017 | 0.154410597 |
| 0.002370117 | 0.052438122 | 0.006807357 | 0.17513539  |
| 0.032669209 |             |             |             |

|             |             |             |             |
|-------------|-------------|-------------|-------------|
| SAMD3       | 0.078827564 | 0.152476366 | 0.048757346 |
| 0.249082937 | 0.116378269 | 0.11143144  | 0.247232864 |
| 0.060423041 | 0.098290232 | 0.128592803 | 0.116419197 |
| 0.084139573 | 0.111085287 | 0.119846176 | 0.037592939 |
| 0.204344898 | 0.121761311 | 0.036137056 | 0.248640726 |
| 0.1820269   | 0.158497213 | 0.241740026 | 0.161176423 |
| 0.030499331 | 0.097025471 | 0.178902889 | 0.069226537 |
| 0.211574389 | 0.181553594 | 0.108708061 | 0.172028026 |
| 0.058472307 | 0.119694075 | 0.113828285 | 0.166188322 |
| 0.103617437 | 0.061866215 | 0.015974871 | 0.096987035 |
| 0.107140715 | 0.143066232 | 0.197415032 | 0.271866655 |
| 0.176345326 | 0.1057164   | 0.297106747 | 0.094823373 |
| 0.037796049 | 0.141750553 | 0.060855616 | 0.102092667 |
| 0.1116573   | 0.109304121 | 0.098086404 | 0.215252801 |
| 0.096367841 | 0.057880359 | 0.032209005 | 0.105461191 |
| 0.270983258 | 0.079396004 | 0.114351255 | 0.138749156 |
| 0.052642424 | 0.090193699 | 0.060557015 | 0.152871132 |
| 0.029047402 | 0.107112647 | 0.068791377 | 0.04813315  |
| 0.051402758 | 0.189951101 | 0.10304584  | 0.02756172  |
| 0.152194236 | 0.193128624 | 0.077391844 | 0.268408779 |
| 0.188368223 | 0.088246408 | 0.182710726 | 0.153996222 |
| 0.121132079 | 0.10007057  | 0.055125574 | 0.189173612 |
| 0.117360138 | 0.268637683 | 0.066999843 | 0.212940483 |
| 0.175883018 | 0.130518684 | 0.087794687 | 0.121276435 |
| 0.178491232 | 0.14112048  | 0.074653867 | 0.105854521 |
| 0.0428265   | 0.031493905 | 0.118867717 | 0.159475964 |
| 0.099859572 | 0.041228483 | 0.16724184  | 0.172900204 |
| 0.12669183  | 0.025754082 | 0.282945957 | 0.055737573 |
| 0.196337408 | 0.116834624 | 0.123226512 | 0.213067446 |
| 0.048833132 | 0.1215565   | 0.120941703 | 0.264194282 |
| 0.074843804 | 0.103258407 | 0.031361429 | 0.061483074 |
| 0.05957811  | 0.014432973 | 0.09100885  | 0.21618081  |
| 0.072999226 | 0.053467084 | 0.150747403 | 0.030793635 |

|             |             |             |             |
|-------------|-------------|-------------|-------------|
| 0.086311441 | 0.029677509 | 0.106306813 | 0.060660296 |
| 0.129983882 | 0.057628372 | 0.160361468 | 0.089014563 |
| 0.087752106 | 0.17710943  | 0.016880915 | 0.136728875 |
| 0.11560928  | 0.035105014 | 0.261047443 | 0.104228572 |
| 0.151276553 | 0.120118837 | 0.197529905 | 0.171228032 |
| 0.121200655 | 0.234992873 | 0.033466021 | 0.202074822 |
| 0.08292213  | 0.119029068 | 0.154507749 | 0.153870768 |
| 0.190515149 | 0.095591112 | 0.060324677 | 0.063659154 |
| 0.030553393 | 0.072632291 | 0.023431291 | 0.118428327 |
| 0.085067075 | 0.155727034 | 0.07753447  | 0.149891708 |
| 0.181647853 | 0.183942945 | 0.064222027 | 0.168437421 |
| 0.136846714 | 0.078216167 | 0.031364187 | 0.169568491 |
| 0.095900162 | 0.134833967 | 0.084341038 | 0.055442535 |
| 0.173328747 | 0.174248952 | 0.000383926 | 0.109471821 |
| 0.123269799 | 0.032211769 | 0.207242808 | 0.092463136 |
| 0.051249694 | 0.214955461 | 0.002205076 | 0.203939152 |
| 0.06358922  | 0.126725045 | 0.187133313 | 0.221539637 |
| 0.101313592 | 0.174586068 | 0.087644067 | 0.103181647 |
| 0.093414635 | 0.02793777  | 0.124314501 | 0.212846907 |
| 0.042186528 | 0.132870889 | 0.116203259 | 0.20396394  |
| 0.17852109  | 0.136172461 | 0.206432548 | 0.045912971 |
| 0.122151673 | 0.123836517 | 0.042941938 | 0.096702126 |
| 0.101746403 | 0.023327307 | 0.126091588 | 0.110793733 |
| 0.047297794 | 0.145072484 | 0.08203525  | 0.039178817 |
| 0.195482093 | 0.13841129  | 0.09124586  | 0.138867095 |
| 0.071238723 | 0.22698293  | 0.053695162 | 0.035816644 |
| 0.10375101  | 0.165490363 | 0.029909573 | 0.021472277 |
| 0.014260564 | 0.167123525 | 0.164064156 | 0.145662586 |
| 0.12838575  | 0.115097224 | 0.049499291 | 0.071056925 |
| 0.172286758 | 0.202716122 | 0.009483202 | 0.041597937 |
| 0.168791719 | 0.086679328 | 0.082546244 | 0.093726153 |
| 0.070842235 | 0.186794476 | 0.143623338 | 0.025513391 |
| 0.075004774 | 0.103628201 | 0.147479487 | 0.174719379 |
| 0.082959324 | 0.136450245 | 0.091974465 | 0.033963075 |
| 0.204840417 | 0.086310685 | 0.024030898 | 0.180329571 |
| 0.043297285 | 0.15893699  | 0.149701036 | 0.198335992 |
| 0.078591877 | 0.27800554  | 0.208433649 | 0.042479127 |
| 0.078017253 | 0.146185163 | 0.109395928 | 0.151921905 |
| 0.118413766 | 0.167211587 | 0.163233394 | 0.086367127 |
| 0.091322431 | 0.152851351 | 0.140903722 | 0.08148806  |
| 0.088828326 | 0.11746575  | 0.125212293 | 0.161248824 |
| 0.100124775 | 0.202398107 | 0.131601693 | 0.212263955 |
| 0.167309594 | 0.245970054 | 0.149836587 | 0.029762892 |
| 0.195001877 | 0.149443222 | 0.058042478 | 0.047634636 |
| 0.10845119  | 0.130508553 | 0.174183099 | 0.12918442  |
| 0.267907164 | 0.054147705 | 0.036182353 | 0.162183531 |
| 0.013051367 | 0.114136249 | 0.054035138 | 0.111262689 |
| 0.103522959 | 0.07256055  | 0.133347    | 0.192076177 |
| 0.126811692 | 0.14215798  | 0.068824165 | 0.126767294 |
| 0.140102751 | 0.080688337 | 0.063364973 | 0.109336487 |
| 0.143813846 | 0.155514336 | 0.099508949 | 0.018078547 |
| 0.071576291 | 0.107150718 | 0.005236191 | 0.040354921 |
| 0.201280206 | 0.148706894 | 0.165880404 | 0.113367705 |
| 0.137140526 | 0.03391719  | 0.153141921 | 0.148998036 |



|             |             |             |             |
|-------------|-------------|-------------|-------------|
| 0.112055028 | 0.103075113 | 0.122675473 | 0.092252831 |
| 0.105899807 | 0.135595797 | 0.065080334 | 0.086584964 |
| 0.070384977 | 0.10933761  | 0.098420599 | 0.118641592 |
| 0.194785364 | 0.062208612 | 0.193349514 | 0.151178099 |
| 0.213983947 | 0.079468813 | 0.019091943 | 0.002341217 |
| 0.029625834 | 0.152630654 | 0.113099301 | 0.15796048  |
| 0.060371181 | 0.136089956 | 0.001289104 | 0.131889818 |
| 0.143300177 | 0.054685997 | 0.048892089 | 0.114546115 |
| 0.094853797 | 0.140123672 | 0.049091362 | 0.133957942 |
| 0.088473486 | 0.112351303 | 0.142988053 | 0.213102905 |
| 0.173661362 | 0.101555033 | 0.140265156 | 0.123947296 |
| 0.203906312 | 0.14161575  | 0.288626689 | 0.14455655  |
| 0.029548611 | 0.101235374 | 0.042299258 | 0.110091222 |
| 0.078792163 | 0.107347418 | 0.121786458 | 0.179824606 |
| 0.144905772 | 0.051608347 | 0.118032865 | 0.109205847 |
| 0.180872637 | 0.187803178 | 0.015243701 | 0.004683625 |
| 0.001582575 | 0.062275506 | 0.15261851  | 0.096313391 |
| 0.139827111 | 0.05360429  | 0.06988031  | 0.124597561 |
| 0.079707015 | 0.108283438 | 0.137474436 | 0.243765346 |
| 0.102517697 | 0.118499202 | 0.09454376  | 0.203001511 |
| 0.085690477 | 0.049037556 | 0.164525573 | 0.141282306 |
| 0.045775421 | 0.088491268 | 0.046129357 | 0.203050962 |
| 0.005583366 | 0.170579408 | 0.09366393  | 0.10607533  |
| 0.011865631 | 0.080595732 | 0.08900521  | 0.159921709 |
| 0.09851465  | 0.195058603 | 0.168942139 | 0.02208369  |
| 1           | 0.147129424 | 0.178121288 | 0.176522755 |
| 0.182817789 | 0.237449246 | 0.052595458 | 0.124333816 |
| 0.12987008  | 0.115009548 | 0.085245419 | 0.027406706 |
| 0.045744031 | 0.053249484 | 0.096669179 | 0.058164718 |
| 0.074375857 | 0.105841231 | 0.030625463 | 0.041057314 |
| 0.011026346 | 0.114288184 | 0.205630411 | 0.150308902 |
| 0.028896177 | 0.090790703 | 0.116863347 | 0.121394988 |
| 0.140970472 | 0.230449543 | 0.117633607 | 0.058757911 |
| 0.188967406 | 0.008122303 | 0.172174759 | 0.08060805  |
| 0.071257243 | 0.177279569 | 0.085628918 | 0.138508594 |
| 0.096015093 | 0.120222218 | 0.124875125 | 0.185672242 |
| 0.045070847 | 0.082424871 | 0.212067306 | 0.163991333 |
| 0.159856416 | 0.20974446  | 0.07250625  | 0.094822872 |
| 0.203593693 | 0.04819662  | 0.057282889 | 0.009056972 |
| 0.031629917 | 0.135168891 | 0.188066564 | 0.204666708 |
| 0.088676477 | 0.085831754 | 0.064279105 | 0.098408062 |
| 0.144339196 | 0.109975874 | 0.091375474 | 0.163822969 |
| 0.116237575 | 0.177408188 | 0.118202201 | 0.12129547  |
| 0.023636408 | 0.152508296 | 0.155397825 | 0.183471913 |
| 0.141906778 | 0.206224807 | 0.126046845 | 0.041365938 |
| 0.045475862 | 0.061225348 | 0.224516443 | 0.115104944 |
| 0.248664167 | 0.06564705  | 0.015246988 | 0.168828301 |
| 0.022695943 | 0.252719134 | 0.025390895 | 0.080054215 |
| 0.113197438 | 0.030242093 | 0.172183405 | 0.209007928 |
| 0.20064978  | 0.129506439 | 0.044847508 | 0.107831746 |
| 0.032617974 | 0.127205775 | 0.084692968 | 0.099446075 |
| 0.028520053 | 0.035489328 | 0.232316144 | 0.084545073 |
| 0.100766976 | 0.019511248 | 0.128027989 | 0.067275716 |
| 0.137775631 | 0.184558693 | 0.050642296 | 0.02238736  |

|             |             |             |             |
|-------------|-------------|-------------|-------------|
| 0.031787868 | 0.061130305 | 0.034092323 | 0.115824424 |
| 0.037816556 | 0.118187552 | 0.088228733 | 0.089765161 |
| 0.161487566 | 0.102213866 | 0.077824474 | 0.033956071 |
| 0.05779298  | 0.106567226 | 0.059438884 | 0.11539643  |
| 0.044638473 | 0.260871    | 0.087244053 | 0.122961332 |
| 0.021669857 | 0.032385259 | 0.140014788 | 0.156822678 |
| 0.036615534 |             |             |             |
| SAMSN1      | 0.43681998  | 0.524136549 | 0.429545486 |
| 0.431544908 | 0.471448537 | 0.364668618 | 0.249199683 |
| 0.222137626 | 0.109439535 | 0.006601991 | 0.032424129 |
| 0.460200338 | 0.229254653 | 0.29109347  | 0.325937126 |
| 0.45923199  | 0.184420637 | 0.409883864 | 0.300270794 |
| 0.448873105 | 0.113897912 | 0.445539628 | 0.12989196  |
| 0.363213027 | 0.140477471 | 0.100181399 | 0.311930433 |
| 0.451768679 | 0.114482968 | 0.317915101 | 0.402529424 |
| 0.16448042  | 0.449038455 | 0.516699692 | 0.456637952 |
| 0.509718826 | 0.40214068  | 0.026203171 | 0.298267738 |
| 0.415728972 | 0.447054734 | 0.440399697 | 0.37311121  |
| 0.062112836 | 0.478316322 | 0.28747913  | 0.455953509 |
| 0.254302453 | 0.047032941 | 0.243166151 | 0.439529664 |
| 0.463017391 | 0.429835117 | 0.262919819 | 0.195921579 |
| 0.214605668 | 0.247476401 | 0.286345378 | 0.324257256 |
| 0.27803289  | 0.165732817 | 0.478993881 | 0.107767559 |
| 0.182360785 | 0.307376269 | 0.226880919 | 0.305441157 |
| 0.401475484 | 0.381177445 | 0.034684624 | 0.42043633  |
| 0.003608988 | 0.432307282 | 0.447853108 | 0.326805474 |
| 0.070078833 | 0.029870149 | 0.255988959 | 0.371319308 |
| 0.4587464   | 0.46442809  | 0.479975014 | 0.488293525 |
| 0.22732996  | 0.380867405 | 0.439136556 | 0.222773788 |
| 0.429995165 | 0.208612905 | 0.139076134 | 0.463282909 |
| 0.489563598 | 0.5198255   | 0.263875181 | 0.339575936 |
| 0.402818356 | 0.477344107 | 0.420441586 | 0.453207302 |
| 0.340349296 | 0.092357704 | 0.433351451 | 0.511886985 |
| 0.384523467 | 0.365028489 | 0.20815798  | 0.417884183 |
| 0.098436175 | 0.369726531 | 0.400956254 | 0.214879953 |
| 0.463194655 | 0.028675326 | 0.282853761 | 0.388840034 |
| 0.29904209  | 0.440273156 | 0.514615713 | 0.239075993 |
| 0.466420443 | 0.034024697 | 0.154118216 | 0.065015455 |
| 0.353934727 | 0.190133468 | 0.471290243 | 0.441369408 |
| 0.275843709 | 0.430738289 | 0.324983287 | 0.00614792  |
| 0.047893045 | 0.272194814 | 0.434207806 | 0.43265349  |
| 0.458008745 | 0.378033209 | 0.266173286 | 0.385172514 |
| 0.438593747 | 0.47498958  | 0.050767679 | 0.14103311  |
| 0.435493627 | 0.275079318 | 0.307289641 | 0.460011803 |
| 0.356525765 | 0.158653127 | 0.180136909 | 0.517375262 |
| 0.420855718 | 0.123679161 | 0.374516713 | 0.458225371 |
| 0.34158959  | 0.412171641 | 0.159149376 | 0.323394849 |
| 0.075090113 | 0.478796775 | 0.052207286 | 0.374985194 |
| 0.267606255 | 0.201959003 | 0.025044682 | 0.292538429 |
| 0.294456601 | 0.403351677 | 0.464134882 | 0.162054229 |
| 0.367117789 | 0.450397217 | 0.345631984 | 0.40737727  |
| 0.013817113 | 0.078516839 | 0.29498836  | 0.504784953 |
| 0.278446454 | 0.505722682 | 0.370737251 | 0.380775135 |
| 0.353144144 | 0.461717735 | 0.005780474 | 0.488828714 |

|             |             |             |             |
|-------------|-------------|-------------|-------------|
| 0.522855346 | 0.297686891 | 0.419671727 | 0.470525498 |
| 0.388809638 | 0.443220455 | 0.050046316 | 0.464313484 |
| 0.360746261 | 0.125929093 | 0.504499045 | 0.212903932 |
| 0.461151215 | 0.06504344  | 0.355055862 | 0.431428359 |
| 0.419545092 | 0.014207026 | 0.230572651 | 0.413842333 |
| 0.052461322 | 0.118867696 | 0.450993749 | 0.435150108 |
| 0.402068159 | 0.468093031 | 0.478132591 | 0.365522789 |
| 0.458427722 | 0.295274977 | 0.026022513 | 0.391971971 |
| 0.455611555 | 0.395525462 | 0.434926892 | 0.286093145 |
| 0.335302825 | 0.467809928 | 0.406428718 | 0.210012768 |
| 0.066524634 | 0.354736623 | 0.027512139 | 0.374541726 |
| 0.383605922 | 0.144539047 | 0.401427965 | 0.231402653 |
| 0.110335949 | 0.52398544  | 0.234282187 | 0.306693641 |
| 0.168647519 | 0.402259348 | 0.320102494 | 0.242245707 |
| 0.226088388 | 0.225361827 | 0.389048531 | 0.406154922 |
| 0.054087579 | 0.133835409 | 0.03299706  | 0.375804068 |
| 0.151528022 | 0.33921876  | 0.327451308 | 0.408470845 |
| 0.366481011 | 0.136218875 | 0.415834915 | 0.350870119 |
| 0.159823606 | 0.028899295 | 0.506576066 | 0.455771267 |
| 0.325604244 | 0.205563671 | 0.073001962 | 0.329718885 |
| 0.453167357 | 0.291336559 | 0.272208042 | 0.444259733 |
| 0.050122559 | 0.485961503 | 0.276873182 | 0.168995383 |
| 0.408555171 | 0.313364346 | 0.454623547 | 0.06507544  |
| 0.423252978 | 0.463525079 | 0.39634401  | 0.232291632 |
| 0.38199099  | 0.448604619 | 0.046656477 | 0.398746293 |
| 0.394994414 | 0.053183633 | 0.525441117 | 0.18228558  |
| 0.040253467 | 0.467132863 | 0.429038905 | 0.117333329 |
| 0.118730965 | 0.346863218 | 0.062866535 | 0.358100393 |
| 0.514905788 | 0.450348247 | 0.415720577 | 0.29069502  |
| 0.060642272 | 0.014727143 | 0.290301511 | 0.436378138 |
| 0.504351247 | 0.510592098 | 0.343551669 | 0.392423756 |
| 0.306571065 | 0.359033729 | 0.164671847 | 0.505547769 |
| 0.274559635 | 0.520682387 | 0.01514587  | 0.449273598 |
| 0.502374396 | 0.299498405 | 0.112471943 | 0.333658757 |
| 0.371252081 | 0.071812765 | 0.284137122 | 0.491214558 |
| 0.424694462 | 0.372468792 | 0.362813361 | 0.473210724 |
| 0.024853584 | 0.066981651 | 0.430041932 | 0.238950901 |
| 0.403647988 | 0.277944016 | 0.075953459 | 0.368193876 |
| 0.06140993  | 0.446132864 | 0.474955767 | 0.083290127 |
| 0.317757761 | 0.34105232  | 0.447130757 | 0.06174131  |
| 0.438619485 | 0.504028419 | 0.517489802 | 0.233204341 |
| 0.453179177 | 0.479732498 | 0.408459983 | 0.130696709 |
| 0.033412118 | 0.513641685 | 0.412843101 | 0.03030913  |
| 0.467087838 | 0.231619932 | 0.017358904 | 0.497056391 |
| 0.247001743 | 0.439209541 | 0.004573663 | 0.118755667 |
| 0.076162096 | 0.473399258 | 0.471004464 | 0.411527157 |
| 0.22535586  | 0.435192991 | 0.016142467 | 0.527845261 |
| 0.483987966 | 0.026626965 | 0.204796709 | 0.430753627 |
| 0.420394323 | 0.530632089 | 0.353616119 | 0.434720741 |
| 0.432832738 | 0.493648522 | 0.271616854 | 0.334583713 |
| 0.425351802 | 0.490466784 | 0.433115649 | 0.457644919 |
| 0.456315579 | 0.472118631 | 0.335420689 | 0.025368065 |
| 0.164325698 | 0.239143159 | 0.279563263 | 0.100448268 |
| 0.328161339 | 0.182588003 | 0.482067938 | 0.47164698  |

|             |             |             |             |
|-------------|-------------|-------------|-------------|
| 0.474871156 | 0.011668415 | 0.18611354  | 0.429516007 |
| 0.429513689 | 0.472111169 | 0.042932948 | 0.009171064 |
| 0.011619886 | 0.026968459 | 0.404267189 | 0.322269691 |
| 0.48682898  | 0.213615514 | 0.010156887 | 0.064413923 |
| 0.326581919 | 0.435381875 | 0.500349141 | 0.433866879 |
| 0.457735952 | 0.131480135 | 0.268825547 | 0.448061213 |
| 0.09774896  | 0.327324507 | 0.479375062 | 0.46899982  |
| 0.078965525 | 0.328400175 | 0.421420495 | 0.48468188  |
| 0.093049172 | 0.39660246  | 0.465369494 | 0.339200102 |
| 0.031319225 | 0.124353797 | 0.099788703 | 0.475678852 |
| 0.494317064 | 0.098133518 | 0.047299514 | 0.155914157 |
| 0.147129424 | 1           | 0.204874359 | 0.516671881 |
| 0.43826152  | 0.462976089 | 0.124692371 | 0.47910624  |
| 0.059973601 | 0.481535139 | 0.387693739 | 0.056664848 |
| 0.377247789 | 0.026869498 | 0.472579068 | 0.155181895 |
| 0.349065861 | 0.424874166 | 0.22970463  | 0.034916894 |
| 0.223315807 | 0.085855289 | 0.468597016 | 0.465358142 |
| 0.065452461 | 0.306245019 | 0.378216532 | 0.460216266 |
| 0.304780612 | 0.446732132 | 0.49828823  | 0.377458776 |
| 0.116111813 | 0.203462173 | 0.43788286  | 0.403725214 |
| 0.284085815 | 0.491232907 | 0.324625051 | 0.529389707 |
| 0.419869196 | 0.465704143 | 0.469729244 | 0.382772753 |
| 0.299643187 | 0.407899423 | 0.367653468 | 0.0253758   |
| 0.411359618 | 0.459717942 | 0.409963637 | 0.184988753 |
| 0.3084537   | 0.418872512 | 0.086540046 | 0.212937788 |
| 0.359499519 | 0.30606637  | 0.190107893 | 0.468868152 |
| 0.423204169 | 0.404846755 | 0.071823492 | 0.091004117 |
| 0.543182918 | 0.437530917 | 0.166952384 | 0.430947446 |
| 0.247642956 | 0.394031688 | 0.461474239 | 0.467664933 |
| 0.410606918 | 0.431698915 | 0.438764064 | 0.378925382 |
| 0.417860673 | 0.323241557 | 0.521029185 | 0.108628414 |
| 0.116966801 | 0.438489182 | 0.12178823  | 0.145557403 |
| 0.195369557 | 0.047624482 | 0.322089885 | 0.473913648 |
| 0.393077922 | 0.427906502 | 0.351439894 | 0.121917522 |
| 0.408735703 | 0.407489566 | 0.427077742 | 0.228345885 |
| 0.103698581 | 0.490369038 | 0.017215593 | 0.095692066 |
| 0.416855954 | 0.436205611 | 0.40435336  | 0.3106845   |
| 0.338543082 | 0.219200804 | 0.365959803 | 0.304747275 |
| 0.297198308 | 0.402733883 | 0.426997598 | 0.050777662 |
| 0.03312948  | 0.494152384 | 0.391514429 | 0.043594212 |
| 0.144437216 | 0.395963225 | 0.383188511 | 0.272538547 |
| 0.043025236 | 0.47733447  | 0.320374337 | 0.465650454 |
| 0.386492086 | 0.110083294 | 0.349010953 | 0.124463013 |
| 0.101510864 | 0.447134092 | 0.435023688 | 0.510798208 |
| 0.42507636  | 0.450807079 | 0.441947065 | 0.433618635 |
| 0.174837075 | 0.406542077 | 0.043283328 | 0.455743266 |
| 0.387243598 |             |             |             |
| SAP30BP     | 0.122983956 | 0.199175769 | 0.082286782 |
| 0.281720915 | 0.155980658 | 0.115164646 | 0.203962329 |
| 0.054265699 | 0.063514305 | 0.072982906 | 0.067442557 |
| 0.136866443 | 0.08861318  | 0.126666922 | 0.035749415 |
| 0.265632002 | 0.144397439 | 0.057471804 | 0.263702334 |
| 0.222419402 | 0.098541288 | 0.304073364 | 0.119927237 |
| 0.045072234 | 0.124609208 | 0.166302586 | 0.091485603 |

|             |             |             |             |
|-------------|-------------|-------------|-------------|
| 0.266456977 | 0.181607023 | 0.090068091 | 0.19440026  |
| 0.076840286 | 0.167185601 | 0.156871939 | 0.224795902 |
| 0.147870644 | 0.098663457 | 0.018098832 | 0.06888602  |
| 0.152373703 | 0.193917495 | 0.22809362  | 0.297581888 |
| 0.110826333 | 0.141163439 | 0.268660456 | 0.150517855 |
| 0.034322684 | 0.108732762 | 0.050760966 | 0.130624519 |
| 0.145999757 | 0.128748077 | 0.084286063 | 0.157564594 |
| 0.062555815 | 0.050928681 | 0.037308467 | 0.114240017 |
| 0.241052986 | 0.05641133  | 0.152614029 | 0.070733792 |
| 0.031472244 | 0.092203036 | 0.085412945 | 0.153427627 |
| 0.04559125  | 0.132999497 | 0.049942184 | 0.084532365 |
| 0.03431422  | 0.22975112  | 0.166219656 | 0.039720128 |
| 0.180372555 | 0.151645971 | 0.120895354 | 0.254920476 |
| 0.246888849 | 0.134641483 | 0.252646106 | 0.215989406 |
| 0.13407218  | 0.150105368 | 0.091268398 | 0.203368682 |
| 0.158220878 | 0.212665991 | 0.07458184  | 0.284551743 |
| 0.243981569 | 0.177297781 | 0.081401373 | 0.17860033  |
| 0.195285718 | 0.181163952 | 0.104110242 | 0.130214758 |
| 0.051014708 | 0.045560379 | 0.147123707 | 0.219758797 |
| 0.13460646  | 0.073723854 | 0.219576117 | 0.206220599 |
| 0.138720113 | 0.03308476  | 0.315597652 | 0.082440823 |
| 0.255450323 | 0.059879463 | 0.178820665 | 0.204280813 |
| 0.057875163 | 0.174185622 | 0.171517708 | 0.243404913 |
| 0.11854557  | 0.125618004 | 0.03461565  | 0.070686839 |
| 0.055882829 | 0.024448578 | 0.122888958 | 0.262315913 |
| 0.056249148 | 0.047937674 | 0.14019186  | 0.030497281 |
| 0.098554181 | 0.044839562 | 0.154201805 | 0.094435174 |
| 0.180143908 | 0.094388209 | 0.150426637 | 0.113578223 |
| 0.129524591 | 0.243320989 | 0.00870942  | 0.107520633 |
| 0.150968264 | 0.046016384 | 0.299479335 | 0.138682155 |
| 0.196530972 | 0.102941371 | 0.201633745 | 0.231633116 |
| 0.146831677 | 0.222171775 | 0.048398216 | 0.277602006 |
| 0.051495916 | 0.182197892 | 0.157951464 | 0.171892318 |
| 0.106261492 | 0.136011266 | 0.094237989 | 0.082821658 |
| 0.025499248 | 0.07997356  | 0.024153177 | 0.111463307 |
| 0.071460775 | 0.184947169 | 0.110409317 | 0.170937679 |
| 0.204315586 | 0.240708863 | 0.073935603 | 0.195658154 |
| 0.065568341 | 0.081655762 | 0.037930197 | 0.224944229 |
| 0.092185338 | 0.201093002 | 0.108899501 | 0.084207744 |
| 0.238236295 | 0.238062395 | 0.002773347 | 0.147139843 |
| 0.172334694 | 0.041040837 | 0.245343814 | 0.147041113 |
| 0.066624104 | 0.264155116 | 0.00404983  | 0.273177799 |
| 0.091055894 | 0.139185659 | 0.256106751 | 0.258813471 |
| 0.143918284 | 0.17009948  | 0.082992529 | 0.156395209 |
| 0.13604687  | 0.019016581 | 0.092244468 | 0.221506746 |
| 0.056662549 | 0.058593195 | 0.161397996 | 0.243648622 |
| 0.186415575 | 0.201400826 | 0.278417675 | 0.061058357 |
| 0.160768944 | 0.136271698 | 0.044502577 | 0.158072128 |
| 0.157142062 | 0.022916766 | 0.157245841 | 0.096314088 |
| 0.065779853 | 0.184253766 | 0.122431856 | 0.021578738 |
| 0.155574913 | 0.130041213 | 0.071808652 | 0.164977111 |
| 0.104618797 | 0.140128687 | 0.06881829  | 0.049841628 |
| 0.140001367 | 0.220152441 | 0.056710253 | 0.042516291 |
| 0.027527902 | 0.18307275  | 0.182044178 | 0.121595386 |

|             |             |             |             |
|-------------|-------------|-------------|-------------|
| 0.105122885 | 0.100776078 | 0.062681338 | 0.077432996 |
| 0.083929547 | 0.216171423 | 0.01781095  | 0.056806731 |
| 0.131957798 | 0.099471782 | 0.091485556 | 0.119951189 |
| 0.059507621 | 0.177890762 | 0.184749597 | 0.035208274 |
| 0.097170045 | 0.120678393 | 0.194584486 | 0.236149963 |
| 0.101063513 | 0.114067896 | 0.117697583 | 0.031477956 |
| 0.247687877 | 0.080375745 | 0.027130605 | 0.210145102 |
| 0.048069137 | 0.221940347 | 0.11761174  | 0.232518601 |
| 0.106947645 | 0.297857007 | 0.264852669 | 0.021671168 |
| 0.099805639 | 0.178397829 | 0.161545901 | 0.170177985 |
| 0.144844715 | 0.197368456 | 0.0943683   | 0.124695387 |
| 0.128371969 | 0.165713057 | 0.197379313 | 0.095424043 |
| 0.114238805 | 0.185609237 | 0.163760249 | 0.192288616 |
| 0.135791156 | 0.181809306 | 0.061523912 | 0.278919671 |
| 0.219969018 | 0.313170073 | 0.17233692  | 0.057869832 |
| 0.160058653 | 0.109235947 | 0.099733562 | 0.087434541 |
| 0.149069693 | 0.189245874 | 0.228022824 | 0.170538737 |
| 0.285186769 | 0.058544619 | 0.021638923 | 0.219695692 |
| 0.024744829 | 0.162133876 | 0.058776206 | 0.16265355  |
| 0.144046148 | 0.07097628  | 0.160746378 | 0.156996451 |
| 0.154221588 | 0.12213217  | 0.084785552 | 0.172480986 |
| 0.173668603 | 0.090190074 | 0.071842297 | 0.167139689 |
| 0.070312086 | 0.080198766 | 0.141433137 | 0.031278082 |
| 0.072825146 | 0.116254395 | 0.010615374 | 0.039527311 |
| 0.150819365 | 0.175312914 | 0.238759699 | 0.079328652 |
| 0.110413557 | 0.038905531 | 0.224115455 | 0.141039227 |
| 0.166093202 | 0.155784693 | 0.167215416 | 0.094946321 |
| 0.155460306 | 0.185392779 | 0.098748636 | 0.123130647 |
| 0.099900334 | 0.158401326 | 0.131804792 | 0.138212835 |
| 0.255435428 | 0.056640463 | 0.125329577 | 0.19376968  |
| 0.216164983 | 0.110037008 | 0.014942227 | 0.006422417 |
| 0.042805404 | 0.226510352 | 0.147143022 | 0.178106012 |
| 0.047920072 | 0.182628265 | 0.003115551 | 0.192805051 |
| 0.185413195 | 0.066401701 | 0.05843734  | 0.157088982 |
| 0.145183009 | 0.188856991 | 0.075573278 | 0.188405319 |
| 0.134767902 | 0.15302213  | 0.097218446 | 0.260592678 |
| 0.212673183 | 0.149721148 | 0.18589273  | 0.164795915 |
| 0.259988387 | 0.210459922 | 0.289859541 | 0.073440442 |
| 0.028158641 | 0.078885665 | 0.039053311 | 0.067000512 |
| 0.08927425  | 0.111463435 | 0.178352941 | 0.24342916  |
| 0.20639575  | 0.063507971 | 0.074246162 | 0.148238091 |
| 0.21935975  | 0.24256737  | 0.022049052 | 0.006356943 |
| 0.005030917 | 0.057589144 | 0.161808627 | 0.149744262 |
| 0.192568513 | 0.036628651 | 0.067087877 | 0.066438598 |
| 0.082549818 | 0.166455869 | 0.180893685 | 0.297639092 |
| 0.160663489 | 0.134457883 | 0.065818499 | 0.259555041 |
| 0.075806438 | 0.069378131 | 0.224484888 | 0.170943133 |
| 0.053396324 | 0.126735051 | 0.075271788 | 0.25660342  |
| 0.009486283 | 0.233255285 | 0.146256754 | 0.073647409 |
| 0.019103627 | 0.110173313 | 0.086516291 | 0.227505735 |
| 0.1391938   | 0.154060968 | 0.1439211   | 0.018523767 |
| 0.178121288 | 0.204874359 | 1           | 0.241099143 |
| 0.228057609 | 0.304228856 | 0.058642601 | 0.161394377 |
| 0.072341672 | 0.155054704 | 0.134156757 | 0.02652126  |

|             |             |             |             |
|-------------|-------------|-------------|-------------|
| 0.080536818 | 0.051543417 | 0.145669891 | 0.035041013 |
| 0.079525995 | 0.143620431 | 0.028235356 | 0.051650294 |
| 0.017671089 | 0.141960255 | 0.262927011 | 0.218227497 |
| 0.041750542 | 0.085246115 | 0.178012291 | 0.179327459 |
| 0.132962126 | 0.275142339 | 0.156856319 | 0.081143946 |
| 0.108517881 | 0.017179275 | 0.218364994 | 0.117843708 |
| 0.06587775  | 0.248726268 | 0.072137654 | 0.198156344 |
| 0.133382818 | 0.16794837  | 0.172887242 | 0.18778987  |
| 0.049426786 | 0.110934367 | 0.198163457 | 0.116020566 |
| 0.207992113 | 0.265541415 | 0.096285885 | 0.091166619 |
| 0.226638663 | 0.082147625 | 0.042325374 | 0.014905944 |
| 0.058893622 | 0.123092059 | 0.129116862 | 0.272762856 |
| 0.124335393 | 0.121836856 | 0.046846175 | 0.08690709  |
| 0.197192941 | 0.144601137 | 0.060943634 | 0.197300666 |
| 0.164304353 | 0.197673857 | 0.183203981 | 0.184748285 |
| 0.027797471 | 0.196236109 | 0.196443728 | 0.193145232 |
| 0.1641749   | 0.203193554 | 0.170534137 | 0.028642682 |
| 0.043835609 | 0.095931243 | 0.145908683 | 0.158858136 |
| 0.25593154  | 0.067671745 | 0.02667787  | 0.236394988 |
| 0.038735517 | 0.297768188 | 0.022622586 | 0.09284806  |
| 0.166501606 | 0.050322376 | 0.225221119 | 0.173557973 |
| 0.148375108 | 0.16610114  | 0.052510886 | 0.136937742 |
| 0.05417934  | 0.16939957  | 0.121173044 | 0.14395437  |
| 0.033496756 | 0.047724932 | 0.264468644 | 0.084705947 |
| 0.097638935 | 0.026867874 | 0.170970021 | 0.057612391 |
| 0.079699414 | 0.255071237 | 0.077426068 | 0.035049001 |
| 0.028800564 | 0.084807138 | 0.049794564 | 0.069778998 |
| 0.060273033 | 0.165337869 | 0.068380337 | 0.132422834 |
| 0.171880533 | 0.113066296 | 0.101908315 | 0.03181692  |
| 0.054885034 | 0.145820164 | 0.101215081 | 0.16256723  |
| 0.082351024 | 0.315332302 | 0.117053799 | 0.165056963 |
| 0.037755055 | 0.058452188 | 0.084277192 | 0.208515692 |
| 0.051804648 |             |             |             |

|             |             |             |             |
|-------------|-------------|-------------|-------------|
| SATB1       | 0.473191617 | 0.53176023  | 0.472162245 |
| 0.494546354 | 0.522651677 | 0.419589743 | 0.278252448 |
| 0.228397575 | 0.128708677 | 0.00951264  | 0.043035404 |
| 0.514381228 | 0.28100664  | 0.336473547 | 0.381895694 |
| 0.506835514 | 0.207739141 | 0.415430643 | 0.32645298  |
| 0.488896823 | 0.126599345 | 0.500634818 | 0.14063538  |
| 0.385020367 | 0.165744842 | 0.114674686 | 0.361928066 |
| 0.505425532 | 0.129739799 | 0.368997194 | 0.442465519 |
| 0.160236378 | 0.491572938 | 0.525478299 | 0.526448081 |
| 0.519919942 | 0.441086168 | 0.019554329 | 0.35185334  |
| 0.458969332 | 0.514978326 | 0.482367941 | 0.423371326 |
| 0.070998352 | 0.485732032 | 0.326599067 | 0.495319115 |
| 0.275273971 | 0.057490509 | 0.268700543 | 0.440275039 |
| 0.481219058 | 0.49906851  | 0.277279151 | 0.220783475 |
| 0.267550498 | 0.264049516 | 0.351805175 | 0.357510284 |
| 0.307115656 | 0.181418493 | 0.492258544 | 0.129212224 |
| 0.188286726 | 0.311333694 | 0.230405591 | 0.327150377 |
| 0.436468807 | 0.424047192 | 0.030536336 | 0.464089445 |
| 0.0048783   | 0.4675683   | 0.477722698 | 0.383567036 |
| 0.07482766  | 0.03901272  | 0.263359626 | 0.420003168 |
| 0.513044096 | 0.458192179 | 0.530752407 | 0.518754263 |

|             |             |             |             |
|-------------|-------------|-------------|-------------|
| 0.262320061 | 0.39465226  | 0.48036125  | 0.251595727 |
| 0.479872793 | 0.244290601 | 0.156312163 | 0.515979337 |
| 0.527355054 | 0.530997718 | 0.290725839 | 0.363184345 |
| 0.47555193  | 0.478771851 | 0.490996107 | 0.515878972 |
| 0.41627128  | 0.08968642  | 0.441973988 | 0.517920911 |
| 0.428627906 | 0.407032166 | 0.232081399 | 0.464688714 |
| 0.099225495 | 0.41531176  | 0.449365774 | 0.220069807 |
| 0.513509593 | 0.032432331 | 0.307188587 | 0.436895523 |
| 0.293304836 | 0.495971792 | 0.526255874 | 0.262887172 |
| 0.502178838 | 0.03733127  | 0.194698746 | 0.059993553 |
| 0.405878957 | 0.207529828 | 0.482713745 | 0.510598388 |
| 0.288300541 | 0.476173534 | 0.342760672 | 0.005750096 |
| 0.051170033 | 0.262221777 | 0.488603939 | 0.443275579 |
| 0.499872875 | 0.408470614 | 0.320453719 | 0.428098425 |
| 0.507268648 | 0.530851261 | 0.065603734 | 0.144154197 |
| 0.498736265 | 0.263686344 | 0.333124534 | 0.518473191 |
| 0.413792152 | 0.162221362 | 0.192229922 | 0.523819314 |
| 0.420113124 | 0.134042732 | 0.383610102 | 0.509602883 |
| 0.405228069 | 0.463973398 | 0.163157525 | 0.365702905 |
| 0.080254832 | 0.48853968  | 0.053475294 | 0.38834252  |
| 0.33165736  | 0.221961765 | 0.019509653 | 0.312199374 |
| 0.356307437 | 0.479020875 | 0.469289762 | 0.164409742 |
| 0.411961819 | 0.509517715 | 0.363093728 | 0.487726136 |
| 0.020141907 | 0.077522432 | 0.30619203  | 0.513751654 |
| 0.312798777 | 0.508245567 | 0.39464366  | 0.403900873 |
| 0.388210357 | 0.518274304 | 0.005270508 | 0.499494263 |
| 0.533852798 | 0.325590483 | 0.492881446 | 0.507612246 |
| 0.449998399 | 0.511916492 | 0.051229244 | 0.511546416 |
| 0.39299156  | 0.125422291 | 0.52716314  | 0.241150112 |
| 0.462617671 | 0.073536308 | 0.379518661 | 0.496356823 |
| 0.486650177 | 0.014869719 | 0.26125656  | 0.459151537 |
| 0.050811084 | 0.127156544 | 0.490521246 | 0.491931552 |
| 0.466937237 | 0.519637415 | 0.529676464 | 0.431431063 |
| 0.522442766 | 0.306786648 | 0.023937216 | 0.424829881 |
| 0.501093899 | 0.439005849 | 0.442384488 | 0.313707245 |
| 0.367844493 | 0.4773846   | 0.464977976 | 0.245002294 |
| 0.073567329 | 0.379585797 | 0.033148441 | 0.432069343 |
| 0.429573152 | 0.172609929 | 0.457078076 | 0.213681508 |
| 0.119352946 | 0.534296503 | 0.253918697 | 0.339252856 |
| 0.184400038 | 0.473042473 | 0.334381867 | 0.303935543 |
| 0.290195376 | 0.241979364 | 0.442652842 | 0.462860028 |
| 0.058669349 | 0.150689389 | 0.026778851 | 0.441598661 |
| 0.198330393 | 0.414658064 | 0.400759748 | 0.45495165  |
| 0.400040209 | 0.165354544 | 0.487546972 | 0.373704678 |
| 0.177991661 | 0.02989497  | 0.514351224 | 0.496775281 |
| 0.363519486 | 0.221577792 | 0.072258903 | 0.395134516 |
| 0.510129829 | 0.349572485 | 0.290987552 | 0.478065803 |
| 0.046497819 | 0.522817205 | 0.336171886 | 0.191805965 |
| 0.475846452 | 0.356411744 | 0.513877228 | 0.079968218 |
| 0.448510971 | 0.4713802   | 0.411915318 | 0.270197042 |
| 0.411296573 | 0.495087742 | 0.051781132 | 0.447805191 |
| 0.444402085 | 0.057936612 | 0.534475789 | 0.196763745 |
| 0.040196306 | 0.523402932 | 0.503349318 | 0.124712613 |
| 0.128350031 | 0.417100159 | 0.066548631 | 0.396928795 |



|             |             |             |             |
|-------------|-------------|-------------|-------------|
| 0.526617226 | 0.509273229 | 0.484821286 | 0.303227044 |
| 0.070050938 | 0.020376219 | 0.299931048 | 0.473589756 |
| 0.513678833 | 0.519150451 | 0.359890591 | 0.469409647 |
| 0.331192555 | 0.420341404 | 0.164249305 | 0.516710962 |
| 0.256161151 | 0.523495292 | 0.014236433 | 0.510682209 |
| 0.515062216 | 0.325468966 | 0.13253631  | 0.373276331 |
| 0.428641476 | 0.077772966 | 0.275930509 | 0.504143666 |
| 0.478599394 | 0.422768138 | 0.433072571 | 0.510471056 |
| 0.027918547 | 0.06709846  | 0.481823562 | 0.256492299 |
| 0.464415423 | 0.303609326 | 0.0806003   | 0.382069779 |
| 0.074640062 | 0.456231035 | 0.527231831 | 0.098971287 |
| 0.381606359 | 0.354785736 | 0.48643796  | 0.065084455 |
| 0.494649826 | 0.506489466 | 0.528560806 | 0.227279724 |
| 0.504428337 | 0.495892388 | 0.477397934 | 0.129880805 |
| 0.034280587 | 0.524598725 | 0.451632496 | 0.039030358 |
| 0.526095383 | 0.257428424 | 0.024750847 | 0.502465416 |
| 0.261237662 | 0.44253349  | 0.005955209 | 0.107284629 |
| 0.071244797 | 0.528903882 | 0.484482566 | 0.445343112 |
| 0.273685959 | 0.455714086 | 0.010578256 | 0.530202462 |
| 0.498430148 | 0.029010617 | 0.215734455 | 0.496781117 |
| 0.492165242 | 0.53502699  | 0.410463292 | 0.508262327 |
| 0.504993122 | 0.50795717  | 0.309198057 | 0.37222867  |
| 0.49481649  | 0.499973833 | 0.483236384 | 0.460392472 |
| 0.52050069  | 0.520725562 | 0.373684813 | 0.029088414 |
| 0.189204108 | 0.254696524 | 0.358142529 | 0.125689919 |
| 0.358940657 | 0.213663216 | 0.483685735 | 0.529265491 |
| 0.510862112 | 0.011203538 | 0.200103164 | 0.488066941 |
| 0.478824986 | 0.507431198 | 0.035438219 | 0.009642867 |
| 0.011917028 | 0.036713581 | 0.432617272 | 0.341572717 |
| 0.495783344 | 0.27095352  | 0.010473385 | 0.065356907 |
| 0.364646819 | 0.496371924 | 0.512667888 | 0.476200488 |
| 0.508357927 | 0.131861991 | 0.341084268 | 0.486910951 |
| 0.114035702 | 0.355783172 | 0.515059086 | 0.478385689 |
| 0.07142854  | 0.34605696  | 0.4387835   | 0.513983168 |
| 0.104516965 | 0.427796317 | 0.515842535 | 0.406692631 |
| 0.025039303 | 0.134465102 | 0.109849047 | 0.521458556 |
| 0.506060679 | 0.125345513 | 0.060727986 | 0.165646238 |
| 0.176522755 | 0.516671881 | 0.241099143 | 1           |
| 0.498248445 | 0.519599987 | 0.124191478 | 0.488850381 |
| 0.067451818 | 0.493862596 | 0.44440884  | 0.074558453 |
| 0.38116059  | 0.024387105 | 0.474032008 | 0.208482778 |
| 0.37958983  | 0.457832737 | 0.263450234 | 0.032878791 |
| 0.243112272 | 0.091900643 | 0.526233368 | 0.527902696 |
| 0.059882551 | 0.312999967 | 0.402543162 | 0.490956535 |
| 0.337731245 | 0.516610846 | 0.509654266 | 0.450579847 |
| 0.12675518  | 0.195362023 | 0.480798287 | 0.445999894 |
| 0.293765448 | 0.530382927 | 0.390936929 | 0.533641401 |
| 0.461110155 | 0.475421757 | 0.487932543 | 0.433939107 |
| 0.327619231 | 0.452505654 | 0.430670874 | 0.033777109 |
| 0.448984754 | 0.527747934 | 0.426279057 | 0.230292622 |
| 0.359529794 | 0.467005697 | 0.07390527  | 0.212084268 |
| 0.407067057 | 0.347795144 | 0.211972186 | 0.517874733 |
| 0.449779404 | 0.447955867 | 0.061044524 | 0.10352687  |
| 0.549432546 | 0.441536826 | 0.18845065  | 0.497498196 |

|             |             |             |             |
|-------------|-------------|-------------|-------------|
| 0.253256027 | 0.447447127 | 0.518932966 | 0.523113261 |
| 0.436010207 | 0.50041008  | 0.488303396 | 0.443828389 |
| 0.426200935 | 0.348002484 | 0.53256816  | 0.107414002 |
| 0.132480482 | 0.475514421 | 0.150343929 | 0.149577906 |
| 0.215473161 | 0.05008539  | 0.371680966 | 0.517936861 |
| 0.446214852 | 0.485062111 | 0.363493349 | 0.129320763 |
| 0.433561883 | 0.418722545 | 0.463370521 | 0.26237934  |
| 0.125508502 | 0.505780052 | 0.018343959 | 0.096245125 |
| 0.465364204 | 0.501770416 | 0.478810853 | 0.339491875 |
| 0.386747787 | 0.211315806 | 0.405749315 | 0.336452682 |
| 0.370992529 | 0.430908768 | 0.495287964 | 0.05353567  |
| 0.033753431 | 0.528917599 | 0.426836456 | 0.038411849 |
| 0.13133769  | 0.42490919  | 0.375532708 | 0.319688784 |
| 0.041618602 | 0.487896257 | 0.378539687 | 0.515482997 |
| 0.421108595 | 0.107854053 | 0.367823691 | 0.122467929 |
| 0.093012507 | 0.450077058 | 0.48053376  | 0.521250076 |
| 0.442069605 | 0.512387047 | 0.443663151 | 0.490351225 |
| 0.170142405 | 0.437589542 | 0.047586185 | 0.504409382 |
| 0.464201753 |             |             |             |

|             |             |             |             |
|-------------|-------------|-------------|-------------|
| SCMH1       | 0.378761939 | 0.517723455 | 0.360643472 |
| 0.429181122 | 0.410963109 | 0.382184598 | 0.288967503 |
| 0.264502561 | 0.126431721 | 0.015534588 | 0.034671763 |
| 0.394248688 | 0.229119819 | 0.335557108 | 0.339880231 |
| 0.418626164 | 0.162467104 | 0.363784052 | 0.311083305 |
| 0.425208681 | 0.164632534 | 0.407210046 | 0.156717043 |
| 0.271099506 | 0.123029552 | 0.106075511 | 0.263428941 |
| 0.433785442 | 0.120615436 | 0.347139284 | 0.408741391 |
| 0.128383274 | 0.407279583 | 0.504846271 | 0.404116618 |
| 0.489227069 | 0.35373004  | 0.02013764  | 0.334530444 |
| 0.404582027 | 0.408229247 | 0.424138796 | 0.379783724 |
| 0.084283975 | 0.482806103 | 0.316366497 | 0.378140173 |
| 0.288382834 | 0.052178467 | 0.296355822 | 0.446494203 |
| 0.463229984 | 0.395676801 | 0.305793453 | 0.23531072  |
| 0.208714575 | 0.283821957 | 0.230289418 | 0.347458672 |
| 0.297361782 | 0.226096158 | 0.468929956 | 0.143500538 |
| 0.184720018 | 0.323106232 | 0.171540307 | 0.33931026  |
| 0.299226939 | 0.380320966 | 0.042881949 | 0.341271367 |
| 0.009083956 | 0.416239316 | 0.369467024 | 0.260223562 |
| 0.069613024 | 0.042884547 | 0.201525841 | 0.38960822  |
| 0.447362469 | 0.440577597 | 0.458039227 | 0.459306167 |
| 0.212773514 | 0.319189348 | 0.340668216 | 0.232269117 |
| 0.41223713  | 0.251006124 | 0.157312346 | 0.413375453 |
| 0.467152947 | 0.503746312 | 0.227810803 | 0.280289361 |
| 0.398251689 | 0.47834156  | 0.40946312  | 0.417316376 |
| 0.31523002  | 0.063287177 | 0.435462433 | 0.490990209 |
| 0.387371224 | 0.271767357 | 0.18800693  | 0.414437541 |
| 0.095283174 | 0.371926568 | 0.396769338 | 0.179323752 |
| 0.46254265  | 0.042786615 | 0.230169264 | 0.398975152 |
| 0.265365237 | 0.412370076 | 0.490193217 | 0.26376535  |
| 0.384329535 | 0.040526291 | 0.127088146 | 0.053794446 |
| 0.347943513 | 0.124292163 | 0.465873301 | 0.449125099 |
| 0.301905424 | 0.366214713 | 0.340386144 | 0.005885149 |
| 0.043295916 | 0.20353986  | 0.384999849 | 0.383301105 |
| 0.417825211 | 0.345811228 | 0.268631969 | 0.366521329 |

|             |             |             |             |
|-------------|-------------|-------------|-------------|
| 0.377787797 | 0.448535583 | 0.073876698 | 0.164613891 |
| 0.422571109 | 0.205671527 | 0.296554303 | 0.411854642 |
| 0.323298744 | 0.192959515 | 0.191296224 | 0.504789437 |
| 0.439550181 | 0.141377262 | 0.354667517 | 0.417528876 |
| 0.347245886 | 0.340941151 | 0.16873088  | 0.33170448  |
| 0.100700071 | 0.453552646 | 0.040322834 | 0.373391005 |
| 0.243419635 | 0.153975212 | 0.024036692 | 0.329835821 |
| 0.341102229 | 0.408394389 | 0.444707244 | 0.161194372 |
| 0.36858874  | 0.403110553 | 0.354079766 | 0.402313614 |
| 0.022639019 | 0.081064295 | 0.297977092 | 0.494026421 |
| 0.311811435 | 0.473105693 | 0.358315521 | 0.318832351 |
| 0.312654998 | 0.427671247 | 0.004667305 | 0.487458663 |
| 0.50224961  | 0.311687302 | 0.403450059 | 0.393479784 |
| 0.325600936 | 0.434294842 | 0.043680701 | 0.421357872 |
| 0.343971549 | 0.12872839  | 0.485294366 | 0.200923229 |
| 0.447683908 | 0.070278207 | 0.367789262 | 0.369929263 |
| 0.365233939 | 0.014839447 | 0.290373012 | 0.415659291 |
| 0.037290851 | 0.168807743 | 0.411548938 | 0.427540207 |
| 0.395518586 | 0.413543584 | 0.46454401  | 0.308521351 |
| 0.415630157 | 0.311852724 | 0.024277385 | 0.319720653 |
| 0.396069666 | 0.329243109 | 0.453532893 | 0.315002355 |
| 0.33034934  | 0.47523389  | 0.360973726 | 0.215794296 |
| 0.084343959 | 0.371231734 | 0.045745639 | 0.35203209  |
| 0.358248846 | 0.181280917 | 0.34797751  | 0.172230319 |
| 0.095177332 | 0.512078464 | 0.163358749 | 0.217148119 |
| 0.109202157 | 0.399338296 | 0.326804126 | 0.27893979  |
| 0.225791213 | 0.212858906 | 0.328332695 | 0.377214965 |
| 0.084504107 | 0.139099864 | 0.019172569 | 0.324910567 |
| 0.167115225 | 0.332850817 | 0.330710081 | 0.380084175 |
| 0.355431919 | 0.157766496 | 0.388936574 | 0.271310095 |
| 0.140414047 | 0.02913102  | 0.500352672 | 0.419318491 |
| 0.334372503 | 0.22476785  | 0.06622802  | 0.30986573  |
| 0.457416274 | 0.327709352 | 0.287197359 | 0.458089361 |
| 0.052624483 | 0.457205592 | 0.291150117 | 0.160113824 |
| 0.347054916 | 0.321085563 | 0.450687549 | 0.079094218 |
| 0.391129016 | 0.473299016 | 0.341646998 | 0.223419711 |
| 0.402649645 | 0.428809653 | 0.064882229 | 0.375364504 |
| 0.373592024 | 0.057612068 | 0.50546672  | 0.146224046 |
| 0.036420479 | 0.399474833 | 0.388300802 | 0.109486445 |
| 0.107939954 | 0.363950241 | 0.101372818 | 0.320778689 |
| 0.510156859 | 0.414060697 | 0.395264087 | 0.21073939  |
| 0.078176807 | 0.020245459 | 0.215032698 | 0.354764319 |
| 0.497211313 | 0.481397089 | 0.309285388 | 0.353043142 |
| 0.308533817 | 0.315242074 | 0.202874948 | 0.490886052 |
| 0.197594883 | 0.50138172  | 0.015538145 | 0.38140235  |
| 0.486160663 | 0.325350632 | 0.105911941 | 0.36606903  |
| 0.385408243 | 0.088436962 | 0.27111512  | 0.490396547 |
| 0.425216068 | 0.343056412 | 0.349831999 | 0.408964651 |
| 0.044289271 | 0.090483046 | 0.37620761  | 0.162681027 |
| 0.382985559 | 0.2650133   | 0.041823083 | 0.362513695 |
| 0.081585367 | 0.457550817 | 0.423961395 | 0.090235258 |
| 0.343667317 | 0.348846791 | 0.37835963  | 0.07050362  |
| 0.403059934 | 0.471058778 | 0.510614451 | 0.242106749 |
| 0.393382321 | 0.464217582 | 0.335903641 | 0.1091735   |

|             |             |             |             |
|-------------|-------------|-------------|-------------|
| 0.028250412 | 0.49208451  | 0.396746183 | 0.047203375 |
| 0.452473504 | 0.278509852 | 0.028356964 | 0.501870284 |
| 0.26224718  | 0.434069012 | 0.012872641 | 0.074043021 |
| 0.051686908 | 0.410825684 | 0.472224724 | 0.408957338 |
| 0.280330349 | 0.400789861 | 0.00664814  | 0.495926309 |
| 0.488190095 | 0.022878077 | 0.150804951 | 0.384142237 |
| 0.363203281 | 0.525831744 | 0.282508229 | 0.402801061 |
| 0.372265223 | 0.4790418   | 0.302251421 | 0.307651513 |
| 0.421615046 | 0.455657929 | 0.420004106 | 0.464981383 |
| 0.441656931 | 0.40401813  | 0.34304731  | 0.037289434 |
| 0.137270909 | 0.286056365 | 0.298738735 | 0.11008678  |
| 0.346021962 | 0.173928132 | 0.469058498 | 0.440024361 |
| 0.451523003 | 0.011115089 | 0.233873374 | 0.388825235 |
| 0.448787742 | 0.472779569 | 0.032126548 | 0.009188762 |
| 0.009401771 | 0.025366341 | 0.402985104 | 0.268200503 |
| 0.4710855   | 0.267254675 | 0.0128211   | 0.096407463 |
| 0.350280593 | 0.361025912 | 0.493292546 | 0.411589606 |
| 0.3911256   | 0.120947157 | 0.305453077 | 0.421876696 |
| 0.086018163 | 0.313099622 | 0.464646034 | 0.480928701 |
| 0.060049454 | 0.274674565 | 0.377511424 | 0.485465536 |
| 0.054303951 | 0.342186018 | 0.398110205 | 0.346457107 |
| 0.020533273 | 0.105774097 | 0.090558016 | 0.418012603 |
| 0.472795051 | 0.108463951 | 0.05454431  | 0.170911142 |
| 0.182817789 | 0.43826152  | 0.228057609 | 0.498248445 |
| 1           | 0.433084682 | 0.086949837 | 0.481461273 |
| 0.061308082 | 0.47557309  | 0.316357032 | 0.084812251 |
| 0.313415682 | 0.025668582 | 0.439928548 | 0.149959568 |
| 0.369825356 | 0.402752801 | 0.194132338 | 0.024490352 |
| 0.152675555 | 0.079244016 | 0.459616075 | 0.41123304  |
| 0.043194558 | 0.313130465 | 0.331597215 | 0.412751698 |
| 0.350529213 | 0.42883337  | 0.496598671 | 0.370985136 |
| 0.148461103 | 0.119444307 | 0.425026121 | 0.382830858 |
| 0.308441101 | 0.46491581  | 0.305094403 | 0.50622615  |
| 0.394960572 | 0.452123931 | 0.448471153 | 0.391806378 |
| 0.219354616 | 0.399891346 | 0.392160253 | 0.049682091 |
| 0.398600435 | 0.428798587 | 0.387830083 | 0.176222401 |
| 0.29045997  | 0.329084401 | 0.083273692 | 0.197994374 |
| 0.269626381 | 0.348406419 | 0.206417132 | 0.428785584 |
| 0.395180076 | 0.384304182 | 0.076042119 | 0.087520861 |
| 0.530346084 | 0.437133594 | 0.21827149  | 0.424606459 |
| 0.216452104 | 0.365800251 | 0.404429222 | 0.395801353 |
| 0.344614775 | 0.414565371 | 0.418971632 | 0.394655593 |
| 0.441049948 | 0.331478958 | 0.512987106 | 0.150382086 |
| 0.095380251 | 0.369671443 | 0.144287855 | 0.120915566 |
| 0.205399366 | 0.04416887  | 0.241123862 | 0.41724862  |
| 0.305856571 | 0.405557551 | 0.330757105 | 0.125720591 |
| 0.334325334 | 0.347372918 | 0.384998731 | 0.283593807 |
| 0.126902369 | 0.490716433 | 0.01805442  | 0.085524344 |
| 0.322576586 | 0.398897561 | 0.342508816 | 0.281928258 |
| 0.259038557 | 0.151735779 | 0.34589158  | 0.34072732  |
| 0.327842228 | 0.333032433 | 0.398088243 | 0.072481382 |
| 0.048078322 | 0.473947727 | 0.383116662 | 0.030010611 |
| 0.101003324 | 0.362192028 | 0.324466003 | 0.275809961 |
| 0.030167736 | 0.44833624  | 0.345014561 | 0.400284422 |

|             |             |             |             |
|-------------|-------------|-------------|-------------|
| 0.401837173 | 0.10693428  | 0.361437304 | 0.121924604 |
| 0.10163994  | 0.451003709 | 0.353759346 | 0.488417711 |
| 0.332194926 | 0.424643879 | 0.443848659 | 0.395084619 |
| 0.153509069 | 0.326007375 | 0.063032489 | 0.421349306 |
| 0.345175393 |             |             |             |
| SDCBP2      | 0.370701869 | 0.50309816  | 0.380146147 |
| 0.440532277 | 0.460596734 | 0.342687505 | 0.330067415 |
| 0.262974714 | 0.163061218 | 0.023563774 | 0.062620623 |
| 0.416431056 | 0.286121713 | 0.351635364 | 0.3105153   |
| 0.461952728 | 0.257677654 | 0.381449152 | 0.387320465 |
| 0.449795038 | 0.183355606 | 0.469664047 | 0.218384879 |
| 0.34956749  | 0.197663749 | 0.173131557 | 0.330434    |
| 0.460258213 | 0.19152142  | 0.308241274 | 0.395808557 |
| 0.219281116 | 0.399183964 | 0.469257106 | 0.442796758 |
| 0.455723428 | 0.329371494 | 0.037705859 | 0.319813418 |
| 0.395239128 | 0.415316403 | 0.441774113 | 0.438524751 |
| 0.128983697 | 0.432716696 | 0.369747361 | 0.434137478 |
| 0.264603233 | 0.099385742 | 0.249603907 | 0.40108745  |
| 0.420927222 | 0.39009405  | 0.307555863 | 0.279253159 |
| 0.237802219 | 0.258209775 | 0.268035651 | 0.301943634 |
| 0.364519856 | 0.191493945 | 0.437669195 | 0.171148756 |
| 0.198842389 | 0.347425057 | 0.275960928 | 0.363548889 |
| 0.352870099 | 0.339863016 | 0.071132026 | 0.344965052 |
| 0.011639862 | 0.446446699 | 0.443294047 | 0.280955949 |
| 0.131602495 | 0.078024075 | 0.310314422 | 0.417531506 |
| 0.474047088 | 0.419661219 | 0.493829074 | 0.483025092 |
| 0.301033019 | 0.416138962 | 0.385349627 | 0.320693273 |
| 0.409120768 | 0.296373837 | 0.199598956 | 0.467457478 |
| 0.497427117 | 0.483880734 | 0.323989809 | 0.380173131 |
| 0.383879812 | 0.461244623 | 0.3977329   | 0.444648464 |
| 0.320671969 | 0.123588835 | 0.404207276 | 0.502710371 |
| 0.361741963 | 0.329666786 | 0.285875588 | 0.398127752 |
| 0.1661809   | 0.348781213 | 0.453430487 | 0.248922089 |
| 0.487870852 | 0.065929961 | 0.335721331 | 0.41974558  |
| 0.343136857 | 0.396932806 | 0.475395458 | 0.332562394 |
| 0.44308987  | 0.075366795 | 0.168197679 | 0.109034279 |
| 0.384200905 | 0.178174945 | 0.411083001 | 0.46505325  |
| 0.314090716 | 0.420876914 | 0.386008157 | 0.017771427 |
| 0.09328038  | 0.29114743  | 0.387096057 | 0.416002053 |
| 0.424538998 | 0.326708183 | 0.330842682 | 0.328004607 |
| 0.381493626 | 0.485932722 | 0.05404252  | 0.222738488 |
| 0.430338776 | 0.298619004 | 0.390750998 | 0.424190907 |
| 0.403581867 | 0.238228111 | 0.276459079 | 0.515756515 |
| 0.400184968 | 0.213084668 | 0.340703485 | 0.469223152 |
| 0.358899608 | 0.421799026 | 0.247505793 | 0.396322782 |
| 0.144749902 | 0.425405541 | 0.090631231 | 0.36717032  |
| 0.245462032 | 0.243030113 | 0.044624156 | 0.325791881 |
| 0.343189434 | 0.398888803 | 0.395587326 | 0.245198725 |
| 0.428242295 | 0.461843104 | 0.324124102 | 0.384534408 |
| 0.037133563 | 0.136840395 | 0.258194836 | 0.500101093 |
| 0.256951647 | 0.490446328 | 0.426192046 | 0.400405278 |
| 0.411034128 | 0.44215971  | 0.007011232 | 0.443313399 |
| 0.482331742 | 0.264246363 | 0.442358636 | 0.440156954 |
| 0.340290286 | 0.453445673 | 0.044786186 | 0.473115012 |

|             |             |             |             |
|-------------|-------------|-------------|-------------|
| 0.304426986 | 0.201817444 | 0.517313101 | 0.297767502 |
| 0.423688583 | 0.12690518  | 0.367585839 | 0.387385784 |
| 0.356562158 | 0.027642657 | 0.25579532  | 0.423028562 |
| 0.083970619 | 0.173027128 | 0.411016452 | 0.447937463 |
| 0.414941522 | 0.431734994 | 0.506878276 | 0.321852807 |
| 0.456911487 | 0.364099042 | 0.052161955 | 0.409560826 |
| 0.397676907 | 0.329571114 | 0.413740739 | 0.35896005  |
| 0.284901581 | 0.454064115 | 0.352783816 | 0.198774324 |
| 0.133207107 | 0.38268979  | 0.059455793 | 0.408285659 |
| 0.339776473 | 0.232478942 | 0.345879928 | 0.261534421 |
| 0.173892719 | 0.513092762 | 0.237450493 | 0.267297982 |
| 0.160200002 | 0.399847154 | 0.390551658 | 0.298478725 |
| 0.274004663 | 0.301483276 | 0.369478697 | 0.399428584 |
| 0.110473747 | 0.222218588 | 0.044410735 | 0.332590016 |
| 0.212660639 | 0.345219999 | 0.325284407 | 0.353593419 |
| 0.384312125 | 0.219949593 | 0.44339981  | 0.327601253 |
| 0.221383167 | 0.065730185 | 0.488113238 | 0.463767027 |
| 0.2810764   | 0.292144243 | 0.128446152 | 0.301577332 |
| 0.470224722 | 0.268079069 | 0.238528423 | 0.447589813 |
| 0.0840702   | 0.487653277 | 0.34962764  | 0.250676593 |
| 0.400009915 | 0.400519873 | 0.47961494  | 0.086010851 |
| 0.383028334 | 0.446489835 | 0.424936592 | 0.306157728 |
| 0.365270305 | 0.444966779 | 0.102985463 | 0.341243782 |
| 0.339903189 | 0.111856156 | 0.500612215 | 0.242368113 |
| 0.080674876 | 0.431158442 | 0.381679892 | 0.187590941 |
| 0.184061578 | 0.385791631 | 0.114747613 | 0.416468475 |
| 0.506347312 | 0.468726708 | 0.37303945  | 0.29329061  |
| 0.128007675 | 0.040931466 | 0.318538457 | 0.379306464 |
| 0.454532017 | 0.483488782 | 0.409259483 | 0.408952843 |
| 0.391246804 | 0.349977594 | 0.177452523 | 0.497270156 |
| 0.256731178 | 0.47744316  | 0.037743599 | 0.392473063 |
| 0.447326009 | 0.288894327 | 0.177681251 | 0.365097374 |
| 0.35600719  | 0.138227699 | 0.339223852 | 0.460474893 |
| 0.41732035  | 0.38731301  | 0.363325509 | 0.441206888 |
| 0.062922855 | 0.126071571 | 0.415149334 | 0.224946891 |
| 0.395774761 | 0.347852072 | 0.069949553 | 0.357826631 |
| 0.131781499 | 0.430659311 | 0.45623291  | 0.138921358 |
| 0.301304469 | 0.325216855 | 0.457642167 | 0.123380927 |
| 0.415307656 | 0.45843731  | 0.476658749 | 0.303409265 |
| 0.395179258 | 0.457684051 | 0.347900615 | 0.191003928 |
| 0.066553428 | 0.466043039 | 0.371983337 | 0.070792467 |
| 0.488279159 | 0.223309751 | 0.051056207 | 0.48181671  |
| 0.336121322 | 0.380890687 | 0.01177297  | 0.092598803 |
| 0.106419218 | 0.455929007 | 0.4304023   | 0.403285032 |
| 0.221478223 | 0.44584869  | 0.016158133 | 0.500453971 |
| 0.462895954 | 0.055187098 | 0.24175563  | 0.374702109 |
| 0.36152364  | 0.503121778 | 0.32873096  | 0.418988043 |
| 0.387640587 | 0.447692695 | 0.336935636 | 0.401021707 |
| 0.420780909 | 0.442035354 | 0.405944901 | 0.437094094 |
| 0.467929008 | 0.455890871 | 0.410325229 | 0.063569456 |
| 0.173057036 | 0.271388059 | 0.262753115 | 0.144043607 |
| 0.29845575  | 0.251402638 | 0.461297744 | 0.478183071 |
| 0.465498528 | 0.029905705 | 0.255637889 | 0.375438835 |
| 0.444970141 | 0.489743577 | 0.060139956 | 0.013489189 |

|             |             |             |             |
|-------------|-------------|-------------|-------------|
| 0.014023213 | 0.052235819 | 0.413342619 | 0.367380891 |
| 0.470799276 | 0.217495468 | 0.030461588 | 0.117934731 |
| 0.386116168 | 0.410765665 | 0.472345177 | 0.465641851 |
| 0.399231576 | 0.204339613 | 0.290891158 | 0.460841311 |
| 0.148321433 | 0.26608729  | 0.478514031 | 0.446443746 |
| 0.118557452 | 0.367532415 | 0.385893595 | 0.502648509 |
| 0.07927758  | 0.440192845 | 0.418682208 | 0.384703637 |
| 0.044959188 | 0.183996121 | 0.153827726 | 0.452052875 |
| 0.437642981 | 0.16929113  | 0.101499624 | 0.151668129 |
| 0.237449246 | 0.462976089 | 0.304228856 | 0.519599987 |
| 0.433084682 | 1           | 0.164260386 | 0.447582213 |
| 0.105828863 | 0.441400687 | 0.385976141 | 0.077383985 |
| 0.395019483 | 0.057192482 | 0.429471721 | 0.165619812 |
| 0.353525864 | 0.393182751 | 0.227586126 | 0.061041429 |
| 0.193422049 | 0.149111262 | 0.49012143  | 0.451130601 |
| 0.093756153 | 0.362249209 | 0.420579536 | 0.447448625 |
| 0.328680242 | 0.447031677 | 0.456304618 | 0.331701003 |
| 0.192714604 | 0.177368655 | 0.43395761  | 0.355829543 |
| 0.317928001 | 0.502380954 | 0.348386709 | 0.506250295 |
| 0.37010944  | 0.445184962 | 0.446805755 | 0.41388286  |
| 0.308595447 | 0.375251946 | 0.367226061 | 0.067182466 |
| 0.450002978 | 0.462531868 | 0.397613229 | 0.244007502 |
| 0.376992694 | 0.355427465 | 0.127296647 | 0.191872911 |
| 0.300905045 | 0.303970562 | 0.281493657 | 0.461294103 |
| 0.388214167 | 0.35454491  | 0.113187125 | 0.145746162 |
| 0.515776526 | 0.410557735 | 0.226908446 | 0.417671332 |
| 0.318444368 | 0.425663166 | 0.41404058  | 0.419231402 |
| 0.355386164 | 0.419759053 | 0.409897597 | 0.367119447 |
| 0.404953127 | 0.393130208 | 0.481276902 | 0.138523147 |
| 0.14845002  | 0.368747333 | 0.205832741 | 0.208615589 |
| 0.293881978 | 0.088971972 | 0.26968708  | 0.465399547 |
| 0.327561296 | 0.464301463 | 0.315693839 | 0.186513297 |
| 0.429451173 | 0.341898137 | 0.461361921 | 0.305598452 |
| 0.185923951 | 0.455263302 | 0.036779292 | 0.159141858 |
| 0.358611433 | 0.38728945  | 0.381331663 | 0.377294969 |
| 0.311915535 | 0.245154234 | 0.434506552 | 0.303779091 |
| 0.297910236 | 0.34972038  | 0.38766405  | 0.095415942 |
| 0.077996412 | 0.509196333 | 0.359038346 | 0.066799718 |
| 0.159262239 | 0.33379846  | 0.385127513 | 0.321088981 |
| 0.070853146 | 0.443316798 | 0.305938026 | 0.43501161  |
| 0.412286605 | 0.180361399 | 0.319142537 | 0.156967355 |
| 0.152245222 | 0.415610648 | 0.386647107 | 0.467016822 |
| 0.394995325 | 0.465297239 | 0.390457114 | 0.392568529 |
| 0.201373119 | 0.328252319 | 0.097081541 | 0.440632846 |
| 0.334885294 |             |             |             |
| SEC24D      | 0.086075421 | 0.08079827  | 0.079068001 |
| 0.10991303  | 0.126744016 | 0.031109335 | 0.065267017 |
| 0.014643932 | 0.026221238 | 0.006585204 | 0.045889389 |
| 0.104589682 | 0.028156432 | 0.024688549 | 0.011116034 |
| 0.183683814 | 0.159401416 | 0.049846211 | 0.143072524 |
| 0.122229436 | 0.019203445 | 0.205892311 | 0.06258962  |
| 0.107160683 | 0.150003664 | 0.1432563   | 0.103642654 |
| 0.121417494 | 0.153317192 | 0.019737185 | 0.067865482 |
| 0.188162084 | 0.092457413 | 0.06133798  | 0.145203193 |

|             |             |             |             |
|-------------|-------------|-------------|-------------|
| 0.061097172 | 0.057682953 | 0.036568511 | 0.016666758 |
| 0.069251675 | 0.10747578  | 0.113436624 | 0.132582826 |
| 0.051358649 | 0.046018681 | 0.100282021 | 0.170528502 |
| 0.006861982 | 0.08671847  | 0.008663924 | 0.044312086 |
| 0.047149755 | 0.061616996 | 0.024404367 | 0.053522252 |
| 0.017865774 | 0.011522872 | 0.035242575 | 0.028729726 |
| 0.110555684 | 0.007120433 | 0.058298394 | 0.015570429 |
| 0.014153305 | 0.043209055 | 0.207315453 | 0.049976568 |
| 0.085964243 | 0.044623193 | 0.038727095 | 0.07875497  |
| 0.001824944 | 0.126391408 | 0.206851911 | 0.047146255 |
| 0.227968468 | 0.036625567 | 0.242121837 | 0.089874144 |
| 0.121917003 | 0.066882381 | 0.142894992 | 0.12643342  |
| 0.060426967 | 0.214034064 | 0.131521273 | 0.114243826 |
| 0.07672696  | 0.060030543 | 0.023902622 | 0.212555746 |
| 0.134668046 | 0.074797448 | 0.087461027 | 0.269633985 |
| 0.061266919 | 0.071386314 | 0.04046435  | 0.074983516 |
| 0.026829813 | 0.153929571 | 0.052011771 | 0.109543644 |
| 0.048852429 | 0.132892947 | 0.24264388  | 0.075303456 |
| 0.198593184 | 0.010733975 | 0.157657736 | 0.056262055 |
| 0.121469181 | 0.026262298 | 0.286912128 | 0.073367929 |
| 0.055632547 | 0.080041904 | 0.078260452 | 0.113162486 |
| 0.133618635 | 0.049014109 | 0.029830481 | 0.186489205 |
| 0.01965465  | 0.072398546 | 0.041566613 | 0.100174712 |
| 0.015298488 | 0.03981314  | 0.068997031 | 0.074346894 |
| 0.161525863 | 0.083394946 | 0.08513364  | 0.081360677 |
| 0.11039596  | 0.053873275 | 0.07970166  | 0.043307492 |
| 0.084569427 | 0.147504052 | 0.000272883 | 0.06776892  |
| 0.062835028 | 0.101827512 | 0.231222394 | 0.084784169 |
| 0.150286013 | 0.044248857 | 0.14002677  | 0.109778723 |
| 0.046208551 | 0.140430009 | 0.027247452 | 0.186909464 |
| 0.019710723 | 0.203773933 | 0.125832588 | 0.065587415 |
| 0.04409154  | 0.059787541 | 0.237396657 | 0.037844703 |
| 0.010549172 | 0.105645762 | 0.043764748 | 0.032056462 |
| 0.010366483 | 0.063454497 | 0.043483182 | 0.182086635 |
| 0.085135552 | 0.17561776  | 0.026072847 | 0.059365507 |
| 0.018991069 | 0.067292725 | 0.013566331 | 0.098930236 |
| 0.01770232  | 0.119059452 | 0.07256359  | 0.110408635 |
| 0.241503164 | 0.129991253 | 0.00510884  | 0.050536277 |
| 0.075193379 | 0.011405697 | 0.10354594  | 0.149650172 |
| 0.057850548 | 0.104333693 | 0.002039547 | 0.185743419 |
| 0.036055284 | 0.157378377 | 0.140415708 | 0.228830852 |
| 0.062707412 | 0.163319993 | 0.030203523 | 0.106307869 |
| 0.0757451   | 0.023791154 | 0.014026484 | 0.08963715  |
| 0.19874093  | 0.011081703 | 0.097739451 | 0.108335424 |
| 0.082843719 | 0.142609722 | 0.155547181 | 0.050226248 |
| 0.095859647 | 0.069076426 | 0.071099339 | 0.220272267 |
| 0.111060919 | 0.014130308 | 0.04747338  | 0.036979289 |
| 0.021879142 | 0.066534534 | 0.063845835 | 0.006302951 |
| 0.095427075 | 0.050894342 | 0.008135468 | 0.108980095 |
| 0.056322713 | 0.036542216 | 0.048611727 | 0.103381074 |
| 0.225590164 | 0.097512672 | 0.160035313 | 0.099926617 |
| 0.102446133 | 0.05730994  | 0.106827832 | 0.021452915 |
| 0.025301909 | 0.102304835 | 0.058647454 | 0.048993109 |
| 0.022863553 | 0.155270806 | 0.101130602 | 0.029800257 |



|             |             |             |             |
|-------------|-------------|-------------|-------------|
| 0.021989569 | 0.027023927 | 0.020824875 | 0.052931481 |
| 0.024739872 | 0.033686934 | 0.097076245 | 0.064614931 |
| 0.13804377  | 0.190093267 | 0.080420348 | 0.160066928 |
| 0.026950375 | 0.066602795 | 0.208634777 | 0.007969139 |
| 0.099455196 | 0.01255222  | 0.007978623 | 0.07155656  |
| 0.045567109 | 0.138639171 | 0.035952987 | 0.221759882 |
| 0.080887245 | 0.141895543 | 0.127139606 | 0.005639036 |
| 0.05741581  | 0.060472022 | 0.197825972 | 0.133165375 |
| 0.039227194 | 0.09721634  | 0.034499573 | 0.051568903 |
| 0.048101024 | 0.167285964 | 0.090121763 | 0.162674744 |
| 0.226778754 | 0.150396746 | 0.080983942 | 0.266000659 |
| 0.198562425 | 0.054651635 | 0.010978887 | 0.262148006 |
| 0.090556045 | 0.195841634 | 0.065681601 | 0.15250703  |
| 0.086065581 | 0.031325498 | 0.250771851 | 0.093953131 |
| 0.05400345  | 0.096624058 | 0.240469082 | 0.102751864 |
| 0.181512885 | 0.046320008 | 0.004374971 | 0.10008715  |
| 0.052463855 | 0.071959989 | 0.117108067 | 0.123819034 |
| 0.055650408 | 0.017964483 | 0.16963188  | 0.044537003 |
| 0.042650451 | 0.083772206 | 0.083810259 | 0.060958081 |
| 0.074366054 | 0.063558634 | 0.036068006 | 0.138356644 |
| 0.01583291  | 0.027919567 | 0.1205584   | 0.097754981 |
| 0.037283536 | 0.106271655 | 0.048394491 | 0.019316425 |
| 0.043125296 | 0.057091616 | 0.15503126  | 0.060162806 |
| 0.022472505 | 0.016122608 | 0.244763356 | 0.133060217 |
| 0.101344105 | 0.080812334 | 0.062179628 | 0.07004299  |
| 0.102265083 | 0.080755837 | 0.08090653  | 0.258442404 |
| 0.230713238 | 0.06782162  | 0.056470557 | 0.017334855 |
| 0.139291062 | 0.00869434  | 0.023482347 | 0.072303715 |
| 0.131170392 | 0.038223944 | 0.000636748 | 0.021028508 |
| 0.163382307 | 0.168100764 | 0.049796923 | 0.074164111 |
| 0.004805884 | 0.137005785 | 0.05655531  | 0.104346143 |
| 0.063051823 | 0.142273841 | 0.136271949 | 0.076737339 |
| 0.087429204 | 0.075393363 | 0.091603396 | 0.100399092 |
| 0.085298619 | 0.060376866 | 0.018138151 | 0.228455628 |
| 0.073807585 | 0.076455473 | 0.075980394 | 0.059406803 |
| 0.117823461 | 0.192647082 | 0.148875485 | 0.040911905 |
| 0.03114892  | 0.018684126 | 0.008137831 | 0.027207116 |
| 0.025181161 | 0.101011719 | 0.080442054 | 0.148838605 |
| 0.104459674 | 0.143855472 | 0.017839368 | 0.069873751 |
| 0.077422595 | 0.111245396 | 0.064663487 | 0.006635331 |
| 0.00459566  | 0.054140855 | 0.071916782 | 0.224262633 |
| 0.089870638 | 0.002287789 | 0.079539617 | 0.01400612  |
| 0.022603569 | 0.162455669 | 0.070240527 | 0.180077767 |
| 0.121788571 | 0.205680589 | 0.010962626 | 0.15774788  |
| 0.081468677 | 0.026737331 | 0.10484005  | 0.055623633 |
| 0.155683261 | 0.19431531  | 0.052907854 | 0.113773288 |
| 0.043029548 | 0.255748662 | 0.111688134 | 0.025629504 |
| 0.074767513 | 0.188320883 | 0.134736204 | 0.17445884  |
| 0.05720409  | 0.050210368 | 0.058725113 | 0.002042204 |
| 0.052595458 | 0.124692371 | 0.058642601 | 0.124191478 |
| 0.086949837 | 0.164260386 | 1           | 0.057839493 |
| 0.060323351 | 0.055305975 | 0.154988142 | 0.001467439 |
| 0.116678674 | 0.088714636 | 0.076232743 | 0.013675741 |
| 0.022100533 | 0.07065023  | 0.026286155 | 0.205030771 |

|             |             |             |             |
|-------------|-------------|-------------|-------------|
| 0.039290834 | 0.200778473 | 0.131475381 | 0.151967912 |
| 0.154592851 | 0.055726513 | 0.196809265 | 0.137028347 |
| 0.029373815 | 0.119944874 | 0.054663678 | 0.023659558 |
| 0.041854887 | 0.077580464 | 0.100478565 | 0.048093549 |
| 0.022914856 | 0.149675342 | 0.041544436 | 0.099534355 |
| 0.061594019 | 0.083057607 | 0.084571521 | 0.07748655  |
| 0.091845174 | 0.04182917  | 0.047766316 | 0.010880549 |
| 0.121156642 | 0.129555079 | 0.059441661 | 0.048096038 |
| 0.155285523 | 0.100908735 | 0.065691642 | 0.007799937 |
| 0.090517336 | 0.023742374 | 0.047624209 | 0.172323775 |
| 0.066736333 | 0.049141581 | 0.043412607 | 0.110520293 |
| 0.084845802 | 0.058306588 | 0.010120024 | 0.074288223 |
| 0.237413808 | 0.135961835 | 0.122855737 | 0.151731837 |
| 0.02951755  | 0.082132539 | 0.084527141 | 0.047400516 |
| 0.04731306  | 0.115084469 | 0.064977391 | 0.003850917 |
| 0.046719406 | 0.077295824 | 0.053844685 | 0.309726907 |
| 0.162537597 | 0.103432638 | 0.039132101 | 0.189403857 |
| 0.04487473  | 0.160378518 | 0.009755036 | 0.060000244 |
| 0.246707649 | 0.043855086 | 0.188189117 | 0.036494135 |
| 0.041591168 | 0.056804513 | 0.037351303 | 0.228897786 |
| 0.064846833 | 0.082011385 | 0.094704863 | 0.145657595 |
| 0.053378278 | 0.157179876 | 0.185141117 | 0.018566367 |
| 0.014550496 | 0.016138807 | 0.073248449 | 0.016669751 |
| 0.033185563 | 0.144312453 | 0.03001902  | 0.110674629 |
| 0.124654512 | 0.046502717 | 0.064802115 | 0.030816045 |
| 0.221419851 | 0.082957174 | 0.016172667 | 0.114476225 |
| 0.066488381 | 0.158772105 | 0.033288652 | 0.022855558 |
| 0.054342558 | 0.050757288 | 0.11079039  | 0.071444477 |
| 0.136749714 | 0.167737957 | 0.039226365 | 0.07788767  |
| 0.036252811 | 0.061474946 | 0.033946121 | 0.110776688 |
| 0.026666049 |             |             |             |

|             |             |             |             |
|-------------|-------------|-------------|-------------|
| SELL        | 0.457888326 | 0.493454904 | 0.422988901 |
| 0.44931248  | 0.428185257 | 0.454051873 | 0.229862596 |
| 0.22146328  | 0.09819777  | 0.005027418 | 0.021746727 |
| 0.447340494 | 0.201806514 | 0.293446148 | 0.412954803 |
| 0.426086394 | 0.113840472 | 0.375709818 | 0.240981914 |
| 0.430993342 | 0.109595853 | 0.396327319 | 0.093154789 |
| 0.276435253 | 0.092507823 | 0.063811314 | 0.269201603 |
| 0.463027592 | 0.073789034 | 0.40396504  | 0.432388447 |
| 0.082046435 | 0.468976893 | 0.514727052 | 0.437631572 |
| 0.506103257 | 0.454763234 | 0.00808249  | 0.356338968 |
| 0.468723336 | 0.473892414 | 0.434415686 | 0.337355631 |
| 0.041776868 | 0.495539573 | 0.260485171 | 0.395645565 |
| 0.282321853 | 0.026145963 | 0.313656036 | 0.454924756 |
| 0.481452123 | 0.479721609 | 0.268712078 | 0.176073728 |
| 0.21359768  | 0.277865148 | 0.271250704 | 0.396770944 |
| 0.231737056 | 0.21187704  | 0.477504862 | 0.107435313 |
| 0.16875223  | 0.277217793 | 0.124909916 | 0.28554721  |
| 0.346724169 | 0.456944555 | 0.016895485 | 0.431418827 |
| 0.003004932 | 0.408344087 | 0.36186352  | 0.34164593  |
| 0.034079028 | 0.016804562 | 0.150015078 | 0.366309094 |
| 0.474046309 | 0.461033042 | 0.478263959 | 0.483045877 |
| 0.160214362 | 0.273655563 | 0.391320904 | 0.163758582 |
| 0.482995062 | 0.19381444  | 0.111863224 | 0.41898322  |

|             |             |             |             |
|-------------|-------------|-------------|-------------|
| 0.482351169 | 0.49791204  | 0.186847509 | 0.243266137 |
| 0.48380426  | 0.484608295 | 0.472090177 | 0.446319261 |
| 0.388911015 | 0.040590207 | 0.476772293 | 0.488300073 |
| 0.458420327 | 0.304949602 | 0.136153345 | 0.453963855 |
| 0.050266311 | 0.418794852 | 0.361279155 | 0.135732047 |
| 0.477031527 | 0.020108939 | 0.188186454 | 0.386780567 |
| 0.207886293 | 0.483097889 | 0.489112095 | 0.193012435 |
| 0.398498683 | 0.015425025 | 0.139564694 | 0.0255905   |
| 0.343202512 | 0.127875584 | 0.504019578 | 0.481450457 |
| 0.254626237 | 0.379169661 | 0.28438988  | 0.000383953 |
| 0.019638839 | 0.165480774 | 0.468661259 | 0.378331095 |
| 0.462278515 | 0.437627041 | 0.24238904  | 0.459042978 |
| 0.47063231  | 0.476403919 | 0.092866839 | 0.099543381 |
| 0.457711099 | 0.162828357 | 0.229361125 | 0.468381405 |
| 0.302425713 | 0.123996905 | 0.119439464 | 0.493048275 |
| 0.460313352 | 0.07966119  | 0.380384547 | 0.416196808 |
| 0.372933765 | 0.338311602 | 0.100013978 | 0.274612388 |
| 0.050449884 | 0.47539715  | 0.019900264 | 0.374204099 |
| 0.32298628  | 0.120762627 | 0.009307115 | 0.30472012  |
| 0.329718006 | 0.484813074 | 0.486812283 | 0.096983424 |
| 0.320477601 | 0.408752857 | 0.380495816 | 0.476327168 |
| 0.01132238  | 0.040948935 | 0.349809646 | 0.489187885 |
| 0.368580771 | 0.480783376 | 0.298900481 | 0.297593227 |
| 0.267162246 | 0.469898957 | 0.003117946 | 0.50161033  |
| 0.502046163 | 0.375064358 | 0.408504444 | 0.417309478 |
| 0.413925437 | 0.479644063 | 0.047914879 | 0.415532084 |
| 0.423058758 | 0.072202778 | 0.482781397 | 0.145229239 |
| 0.470644001 | 0.035830173 | 0.35712856  | 0.467019304 |
| 0.463775411 | 0.007546094 | 0.291775744 | 0.426686527 |
| 0.019127183 | 0.123739711 | 0.46363856  | 0.437029928 |
| 0.419503815 | 0.463380133 | 0.471909695 | 0.397905234 |
| 0.437221789 | 0.244995526 | 0.009334054 | 0.300308205 |
| 0.467731502 | 0.41468868  | 0.47171952  | 0.262445135 |
| 0.410426872 | 0.490142761 | 0.473005828 | 0.26442239  |
| 0.042316194 | 0.350754781 | 0.022138057 | 0.348732434 |
| 0.461769414 | 0.122858017 | 0.447376055 | 0.123412541 |
| 0.056834763 | 0.492980141 | 0.156655477 | 0.252781636 |
| 0.11298578  | 0.434872689 | 0.260107128 | 0.258844249 |
| 0.211556501 | 0.158129298 | 0.374789717 | 0.414364488 |
| 0.042369179 | 0.082316352 | 0.009710126 | 0.388275493 |
| 0.134180608 | 0.359698799 | 0.369276438 | 0.463925233 |
| 0.333858536 | 0.100426308 | 0.388427848 | 0.289518463 |
| 0.101732833 | 0.010888104 | 0.490679668 | 0.415223931 |
| 0.41720322  | 0.161508128 | 0.031998978 | 0.373168871 |
| 0.485343652 | 0.4150256   | 0.352719491 | 0.485450658 |
| 0.024592968 | 0.480329482 | 0.253818773 | 0.109050835 |
| 0.369276767 | 0.258946989 | 0.474585921 | 0.078914135 |
| 0.43555654  | 0.478712662 | 0.303336294 | 0.181924696 |
| 0.452483859 | 0.4449479   | 0.030139756 | 0.46856156  |
| 0.458980674 | 0.025175409 | 0.486126802 | 0.102760524 |
| 0.015213836 | 0.446172196 | 0.480520071 | 0.064720245 |
| 0.067139555 | 0.367316661 | 0.057936972 | 0.277197588 |
| 0.494191592 | 0.411341622 | 0.485377441 | 0.199254117 |
| 0.037689066 | 0.006987349 | 0.180326403 | 0.412570441 |

|             |             |             |             |
|-------------|-------------|-------------|-------------|
| 0.511340817 | 0.481195677 | 0.244819093 | 0.365488503 |
| 0.239351782 | 0.360036894 | 0.191059827 | 0.490622493 |
| 0.18245444  | 0.497966284 | 0.004537994 | 0.464731973 |
| 0.510035472 | 0.352661557 | 0.070583777 | 0.357954045 |
| 0.461982953 | 0.045687535 | 0.204478671 | 0.484484511 |
| 0.48899486  | 0.359427161 | 0.395669519 | 0.435110645 |
| 0.01809372  | 0.044981044 | 0.410435167 | 0.170974241 |
| 0.428991457 | 0.217526664 | 0.041982752 | 0.377857758 |
| 0.040082277 | 0.479001999 | 0.46112111  | 0.061448135 |
| 0.419069744 | 0.372668607 | 0.364584914 | 0.033006832 |
| 0.472253985 | 0.47009787  | 0.513275045 | 0.167644896 |
| 0.467318973 | 0.486839278 | 0.426359157 | 0.065451902 |
| 0.012052749 | 0.50089285  | 0.459827547 | 0.022322366 |
| 0.475479633 | 0.316540825 | 0.01065838  | 0.487687768 |
| 0.188006078 | 0.464348593 | 0.006498004 | 0.081929391 |
| 0.029968193 | 0.459969386 | 0.487386426 | 0.428145429 |
| 0.337716156 | 0.379754644 | 0.003689238 | 0.482734255 |
| 0.482369207 | 0.009954646 | 0.120500407 | 0.479754601 |
| 0.458626443 | 0.504951985 | 0.327846343 | 0.478194613 |
| 0.444866782 | 0.492470901 | 0.257097671 | 0.26099856  |
| 0.489393414 | 0.466143288 | 0.470597005 | 0.480051619 |
| 0.477153255 | 0.422544519 | 0.289351752 | 0.015476861 |
| 0.155600938 | 0.264598254 | 0.392580311 | 0.09272094  |
| 0.405896983 | 0.134443768 | 0.482844537 | 0.473503988 |
| 0.483077158 | 0.00288853  | 0.175337278 | 0.483734382 |
| 0.47665751  | 0.482568238 | 0.016644421 | 0.006670191 |
| 0.007416189 | 0.015898576 | 0.397911469 | 0.22681523  |
| 0.492215164 | 0.314861384 | 0.002969819 | 0.050444963 |
| 0.304163904 | 0.399617953 | 0.48388633  | 0.387757392 |
| 0.465797577 | 0.06927238  | 0.337816913 | 0.413383061 |
| 0.061151633 | 0.408237339 | 0.488341494 | 0.478294904 |
| 0.031413703 | 0.237569008 | 0.399093466 | 0.487385334 |
| 0.064836931 | 0.299256511 | 0.448832394 | 0.339820631 |
| 0.009328806 | 0.069197156 | 0.060603471 | 0.446551257 |
| 0.497088299 | 0.068613542 | 0.026664561 | 0.184130204 |
| 0.124333816 | 0.47910624  | 0.161394377 | 0.488850381 |
| 0.481461273 | 0.447582213 | 0.057839493 | 1           |
| 0.036967459 | 0.480549593 | 0.328379496 | 0.078488897 |
| 0.272325047 | 0.009165998 | 0.462889474 | 0.182986674 |
| 0.369436839 | 0.444836959 | 0.227740031 | 0.011044138 |
| 0.182739699 | 0.042075216 | 0.481537512 | 0.46865845  |
| 0.023638483 | 0.257415066 | 0.288239484 | 0.418626986 |
| 0.344530747 | 0.458481228 | 0.505087704 | 0.476875856 |
| 0.092439223 | 0.118169068 | 0.441171359 | 0.452893742 |
| 0.265945621 | 0.477273236 | 0.322410701 | 0.487755909 |
| 0.468423925 | 0.482280781 | 0.48453595  | 0.389607455 |
| 0.208847104 | 0.460377929 | 0.43586252  | 0.021654261 |
| 0.367334603 | 0.474023167 | 0.39495817  | 0.152111379 |
| 0.251516257 | 0.401084137 | 0.045662914 | 0.203563866 |
| 0.337351346 | 0.385645492 | 0.138295303 | 0.447402699 |
| 0.432533465 | 0.459669768 | 0.038409862 | 0.05810137  |
| 0.508831941 | 0.476314759 | 0.179189569 | 0.476088789 |
| 0.154230785 | 0.358781053 | 0.470379147 | 0.456878152 |
| 0.411448709 | 0.483355914 | 0.468254347 | 0.447259269 |

|             |             |             |             |
|-------------|-------------|-------------|-------------|
| 0.466115699 | 0.274938128 | 0.515015463 | 0.115359982 |
| 0.082432507 | 0.445420154 | 0.095117199 | 0.0765268   |
| 0.134906904 | 0.021515505 | 0.313178019 | 0.426557229 |
| 0.389672333 | 0.385162913 | 0.363286004 | 0.07766603  |
| 0.30600198  | 0.406725184 | 0.353633368 | 0.229006908 |
| 0.075615895 | 0.494647806 | 0.007217454 | 0.044628252 |
| 0.380721705 | 0.488959393 | 0.392467688 | 0.229199184 |
| 0.298640039 | 0.116107713 | 0.29358589  | 0.364733898 |
| 0.378315726 | 0.384265408 | 0.492396966 | 0.03750019  |
| 0.018394825 | 0.479189698 | 0.430195603 | 0.014446848 |
| 0.077110507 | 0.44674055  | 0.287111133 | 0.264253533 |
| 0.014909686 | 0.476187919 | 0.418239406 | 0.439729337 |
| 0.38532027  | 0.056765231 | 0.423951959 | 0.09392319  |
| 0.057566552 | 0.462930702 | 0.409622903 | 0.491565418 |
| 0.342289477 | 0.430280662 | 0.466587521 | 0.478020919 |
| 0.118183309 | 0.41655372  | 0.028362866 | 0.474480318 |
| 0.452815227 |             |             |             |

| SEPHS1      | 0.029404139 | 0.049107557 | 0.028211609 |
|-------------|-------------|-------------|-------------|
| 0.102921025 | 0.062554073 | 0.033357338 | 0.125634265 |
| 0.016578624 | 0.031426303 | 0.009802678 | 0.058262577 |
| 0.034492714 | 0.015095768 | 0.034100513 | 0.01544169  |
| 0.11553258  | 0.108198034 | 0.015264114 | 0.154215911 |
| 0.078276694 | 0.054685399 | 0.138139471 | 0.098613735 |
| 0.036083159 | 0.145985617 | 0.229677624 | 0.089945231 |
| 0.081488934 | 0.208027711 | 0.032208139 | 0.057314788 |
| 0.052218728 | 0.041209507 | 0.032387358 | 0.082973257 |
| 0.028168316 | 0.020207942 | 0.002975544 | 0.038530723 |
| 0.031824839 | 0.070150952 | 0.089009949 | 0.138594547 |
| 0.096565388 | 0.024752826 | 0.164335635 | 0.064086228 |
| 0.001856912 | 0.144992265 | 0.014802047 | 0.026212073 |
| 0.02834382  | 0.055837794 | 0.041965004 | 0.123123285 |
| 0.019542723 | 0.01502142  | 0.017978765 | 0.02480462  |
| 0.173229278 | 0.01897582  | 0.032259774 | 0.035095794 |
| 0.01215656  | 0.039104436 | 0.059353431 | 0.056235494 |
| 0.030588384 | 0.030013135 | 0.020657533 | 0.018778531 |
| 0.002371256 | 0.092005811 | 0.067317472 | 0.032875173 |
| 0.181168946 | 0.049903187 | 0.078736122 | 0.11993915  |
| 0.070926327 | 0.025361862 | 0.078277058 | 0.065763048 |
| 0.036506584 | 0.07673307  | 0.039671822 | 0.12831398  |
| 0.042353791 | 0.135014216 | 0.005857001 | 0.123206837 |
| 0.073417264 | 0.040121138 | 0.09475267  | 0.127916198 |
| 0.063403291 | 0.043170127 | 0.026148268 | 0.057914621 |
| 0.031505576 | 0.040547149 | 0.036280395 | 0.058321386 |
| 0.02488273  | 0.037967083 | 0.173219759 | 0.053206236 |
| 0.148137303 | 0.004517965 | 0.148252379 | 0.004185314 |
| 0.076443222 | 0.075653881 | 0.141550877 | 0.09428471  |
| 0.017957578 | 0.03831336  | 0.039028424 | 0.167587382 |
| 0.043466396 | 0.012681054 | 0.011430132 | 0.080006821 |
| 0.00510848  | 0.013407678 | 0.022089561 | 0.07677243  |
| 0.014847849 | 0.024312949 | 0.091076398 | 0.044152183 |
| 0.091423424 | 0.00968407  | 0.032887168 | 0.024784958 |
| 0.052971875 | 0.017700894 | 0.135648153 | 0.024741882 |
| 0.040544173 | 0.079510634 | 0.000587477 | 0.087872803 |
| 0.049566748 | 0.020632008 | 0.190042694 | 0.043653886 |

|              |             |             |             |
|--------------|-------------|-------------|-------------|
| 0.132497666  | 0.059593316 | 0.140806852 | 0.06451263  |
| 0.03193503   | 0.181240239 | 0.009734688 | 0.106545486 |
| 0.03323715   | 0.092255305 | 0.121282661 | 0.064175157 |
| 0.095288866  | 0.029798094 | 0.101353605 | 0.021800671 |
| 0.017414589  | 0.029707761 | 0.005506231 | 0.039232393 |
| 0.0111108911 | 0.051211364 | 0.019322501 | 0.12662834  |
| 0.078288287  | 0.11055999  | 0.018994864 | 0.055068765 |
| 0.038263497  | 0.023852538 | 0.007480458 | 0.057139181 |
| 0.020139845  | 0.050316171 | 0.042459727 | 0.051355187 |
| 0.141806728  | 0.075032381 | 8.14E-05    | 0.028414302 |
| 0.039371566  | 0.006274509 | 0.092096174 | 0.0498046   |
| 0.04902474   | 0.080757873 | 0.000177068 | 0.097255166 |
| 0.014277869  | 0.118366269 | 0.078048483 | 0.212189789 |
| 0.028217831  | 0.227166364 | 0.033280704 | 0.047088383 |
| 0.033204015  | 0.010160354 | 0.032949063 | 0.092143683 |
| 0.068502467  | 0.046449794 | 0.045965006 | 0.08681791  |
| 0.102800948  | 0.061598676 | 0.088065089 | 0.044089273 |
| 0.063465291  | 0.058397699 | 0.020854496 | 0.081399577 |
| 0.04124127   | 0.00638417  | 0.032094716 | 0.0575617   |
| 0.00978396   | 0.043925963 | 0.026057891 | 0.003815387 |
| 0.181158482  | 0.059057973 | 0.005969559 | 0.11191555  |
| 0.025754388  | 0.094703213 | 0.041100058 | 0.015759186 |
| 0.137413656  | 0.058052151 | 0.045107566 | 0.022774972 |
| 0.023082206  | 0.053808757 | 0.09433442  | 0.048930275 |
| 0.038054731  | 0.141160453 | 0.057950262 | 0.048150033 |
| 0.072779882  | 0.17196046  | 0.006350701 | 0.01320433  |
| 0.030654551  | 0.027207048 | 0.021058969 | 0.027509051 |
| 0.01910083   | 0.027373911 | 0.076816987 | 0.021222243 |
| 0.083283517  | 0.14879981  | 0.047060311 | 0.090103914 |
| 0.017256179  | 0.106110371 | 0.113436017 | 0.003263691 |
| 0.07446545   | 0.019561041 | 0.005837487 | 0.0578173   |
| 0.006879084  | 0.067907176 | 0.049808838 | 0.214924584 |
| 0.041993829  | 0.155741314 | 0.087127161 | 0.007155226 |
| 0.028385808  | 0.041052092 | 0.081644552 | 0.157415743 |
| 0.026133927  | 0.077560631 | 0.039863452 | 0.022415495 |
| 0.021916637  | 0.16513362  | 0.045792081 | 0.06547006  |
| 0.13573209   | 0.05589888  | 0.056231814 | 0.205746621 |
| 0.126073063  | 0.098136234 | 0.036657187 | 0.174441963 |
| 0.056544766  | 0.135197565 | 0.056505937 | 0.038555073 |
| 0.164437155  | 0.018908975 | 0.071161802 | 0.023223471 |
| 0.027015486  | 0.044489741 | 0.124132949 | 0.07697643  |
| 0.181179965  | 0.0633495   | 0.002402985 | 0.057700211 |
| 0.004166761  | 0.033218541 | 0.086305942 | 0.057725358 |
| 0.028460648  | 0.018341239 | 0.18015142  | 0.082252868 |
| 0.029335279  | 0.141317463 | 0.041961009 | 0.033894418 |
| 0.053019752  | 0.078931785 | 0.044965393 | 0.046049017 |
| 0.046227142  | 0.053136477 | 0.071397252 | 0.026287654 |
| 0.040226443  | 0.110565464 | 0.005011436 | 0.019740818 |
| 0.074627673  | 0.043831263 | 0.067915352 | 0.10846461  |
| 0.041887022  | 0.01434849  | 0.103493587 | 0.162475749 |
| 0.048597778  | 0.0328036   | 0.033211966 | 0.053762637 |
| 0.038556853  | 0.04672586  | 0.034926351 | 0.116771429 |
| 0.125460359  | 0.031596485 | 0.030699228 | 0.008539084 |
| 0.080506372  | 0.01298158  | 0.034574968 | 0.044736301 |

|             |             |             |             |
|-------------|-------------|-------------|-------------|
| 0.137616185 | 0.017721782 | 0.001429774 | 0.000427846 |
| 0.042571801 | 0.072252845 | 0.03176309  | 0.059199527 |
| 0.011429818 | 0.067633406 | 0.001700357 | 0.046323088 |
| 0.039732398 | 0.100908972 | 0.06101917  | 0.040109676 |
| 0.03886038  | 0.04038382  | 0.05439635  | 0.056254158 |
| 0.037474016 | 0.032052225 | 0.032096382 | 0.186180926 |
| 0.058251421 | 0.034124146 | 0.044916421 | 0.03429006  |
| 0.074560179 | 0.07646421  | 0.182835335 | 0.119558343 |
| 0.015195426 | 0.033580172 | 0.015090227 | 0.020488086 |
| 0.019992395 | 0.098435762 | 0.035756747 | 0.078276403 |
| 0.052492338 | 0.0972671   | 0.029056969 | 0.036798296 |
| 0.055292419 | 0.068904283 | 0.004912132 | 0.001554507 |
| 0.00015291  | 0.054087982 | 0.065989524 | 0.095420885 |
| 0.049995895 | 0.00411892  | 0.083648003 | 0.027099039 |
| 0.017437642 | 0.07462329  | 0.040773866 | 0.129445637 |
| 0.04411098  | 0.139000772 | 0.030738709 | 0.097756809 |
| 0.102979719 | 0.010859279 | 0.060885565 | 0.040331113 |
| 0.047893753 | 0.097717591 | 0.014893834 | 0.077182655 |
| 0.009667789 | 0.129510525 | 0.036701264 | 0.042674253 |
| 0.003345896 | 0.114546299 | 0.158386635 | 0.079924977 |
| 0.027068998 | 0.08225444  | 0.080967967 | 0.00112869  |
| 0.12987008  | 0.059973601 | 0.072341672 | 0.067451818 |
| 0.061308082 | 0.105828863 | 0.060323351 | 0.036967459 |
| 1           | 0.029799352 | 0.068556133 | 0.000959749 |
| 0.027730632 | 0.043168907 | 0.028527488 | 0.023677002 |
| 0.021637633 | 0.034568242 | 0.019621492 | 0.08906401  |
| 0.010636346 | 0.141402764 | 0.088374499 | 0.071811104 |
| 0.035718782 | 0.06122108  | 0.083044986 | 0.0540797   |
| 0.040753373 | 0.09794078  | 0.030700789 | 0.015376486 |
| 0.119617377 | 0.002811781 | 0.063296307 | 0.02035915  |
| 0.024754628 | 0.076025367 | 0.077194821 | 0.047757667 |
| 0.032091016 | 0.041598169 | 0.042818589 | 0.098662251 |
| 0.027076569 | 0.02610486  | 0.067369163 | 0.010800625 |
| 0.079387289 | 0.084765072 | 0.028381471 | 0.059918541 |
| 0.167348018 | 0.031210455 | 0.013184815 | 0.000363457 |
| 0.023321432 | 0.034745704 | 0.066639697 | 0.097455544 |
| 0.028922324 | 0.023756629 | 0.010119537 | 0.146323987 |
| 0.045159454 | 0.033991195 | 0.014796384 | 0.058097807 |
| 0.105441502 | 0.14320421  | 0.046592627 | 0.058579182 |
| 0.017222859 | 0.049629094 | 0.052469391 | 0.049539315 |
| 0.036937287 | 0.138577132 | 0.035979892 | 0.004268184 |
| 0.02366545  | 0.022063898 | 0.125518315 | 0.157935311 |
| 0.186365996 | 0.064722912 | 0.014232637 | 0.087046136 |
| 0.014731178 | 0.127436123 | 0.005016305 | 0.014548806 |
| 0.098300978 | 0.011390563 | 0.111639868 | 0.078484388 |
| 0.066163435 | 0.036362388 | 0.009329768 | 0.130340127 |
| 0.017601162 | 0.057460537 | 0.056936722 | 0.078036058 |
| 0.02970526  | 0.036480175 | 0.157057899 | 0.021600703 |
| 0.023640332 | 0.002624839 | 0.050181161 | 0.006884297 |
| 0.057181308 | 0.07421509  | 0.013181194 | 0.016946405 |
| 0.01520634  | 0.020886691 | 0.015242332 | 0.073450729 |
| 0.079002251 | 0.041805134 | 0.032742862 | 0.052967414 |
| 0.063695002 | 0.093080072 | 0.016898302 | 0.009129442 |
| 0.021963081 | 0.025328852 | 0.039358502 | 0.034914457 |

|             |             |             |             |
|-------------|-------------|-------------|-------------|
| 0.031124322 | 0.130282017 | 0.02069079  | 0.039865435 |
| 0.002363414 | 0.014664541 | 0.072153092 | 0.059510138 |
| 0.018697658 |             |             |             |
| SEPP1       | 0.456057714 | 0.496563668 | 0.40406162  |
| 0.433171722 | 0.427503981 | 0.427384833 | 0.200059456 |
| 0.192058638 | 0.069648355 | 0.004438741 | 0.019204597 |
| 0.462355384 | 0.215772434 | 0.294978228 | 0.357510843 |
| 0.407256977 | 0.11868153  | 0.344829829 | 0.217884401 |
| 0.412290319 | 0.091281906 | 0.389535948 | 0.074210968 |
| 0.263008526 | 0.087789088 | 0.053062768 | 0.247746587 |
| 0.452269914 | 0.061322611 | 0.394432311 | 0.41528133  |
| 0.076395825 | 0.473577412 | 0.512445834 | 0.454698859 |
| 0.514176041 | 0.449175761 | 0.009882821 | 0.323215535 |
| 0.461227999 | 0.461385538 | 0.413810564 | 0.318852051 |
| 0.031888231 | 0.495660137 | 0.233204475 | 0.38879985  |
| 0.246867548 | 0.023450703 | 0.281550321 | 0.457376477 |
| 0.487787064 | 0.475640746 | 0.227600517 | 0.148026714 |
| 0.234646393 | 0.272942341 | 0.298778148 | 0.384353749 |
| 0.21081544  | 0.191069098 | 0.488812023 | 0.077538714 |
| 0.14430752  | 0.243671781 | 0.126165819 | 0.258944584 |
| 0.342037214 | 0.440399763 | 0.011984637 | 0.445637178 |
| 0.003139201 | 0.381771585 | 0.357247866 | 0.320271604 |
| 0.029311385 | 0.018199088 | 0.149204989 | 0.343699239 |
| 0.467187911 | 0.467980342 | 0.484648436 | 0.490069874 |
| 0.173413486 | 0.258171276 | 0.399700582 | 0.153312133 |
| 0.477267687 | 0.173025358 | 0.100650861 | 0.410973518 |
| 0.489135917 | 0.500677079 | 0.175542888 | 0.226920894 |
| 0.479800962 | 0.486369185 | 0.455072876 | 0.438645573 |
| 0.3623768   | 0.035089048 | 0.483344138 | 0.501339413 |
| 0.459183425 | 0.315444609 | 0.127079642 | 0.449005653 |
| 0.042193148 | 0.39848832  | 0.342980696 | 0.156080091 |
| 0.470905279 | 0.012281837 | 0.182647391 | 0.375060369 |
| 0.179723725 | 0.478504966 | 0.49421316  | 0.168730557 |
| 0.405449238 | 0.015521744 | 0.129030949 | 0.021438904 |
| 0.342262831 | 0.137145958 | 0.5070185   | 0.485680197 |
| 0.250282541 | 0.379095733 | 0.250795713 | 0.000510886 |
| 0.018059906 | 0.153419658 | 0.493618231 | 0.364186479 |
| 0.445581831 | 0.443797768 | 0.220889904 | 0.46030973  |
| 0.48208994  | 0.482960141 | 0.082272089 | 0.076856771 |
| 0.445527016 | 0.150915222 | 0.210074243 | 0.478793727 |
| 0.292901674 | 0.100039167 | 0.107049542 | 0.494285187 |
| 0.45786302  | 0.068123565 | 0.360836741 | 0.405926411 |
| 0.35763473  | 0.344401123 | 0.087160826 | 0.283143862 |
| 0.041154381 | 0.478260681 | 0.018583479 | 0.347299856 |
| 0.289006137 | 0.139425971 | 0.006276359 | 0.276143794 |
| 0.315945147 | 0.497220915 | 0.492886891 | 0.082886413 |
| 0.324970888 | 0.399732024 | 0.364027657 | 0.487069725 |
| 0.008338118 | 0.033629855 | 0.332551408 | 0.504245529 |
| 0.361722683 | 0.489613668 | 0.281763877 | 0.271780621 |
| 0.253649602 | 0.455709448 | 0.002337347 | 0.500275376 |
| 0.502278384 | 0.365751723 | 0.42179119  | 0.418352919 |
| 0.392691023 | 0.473058415 | 0.052210501 | 0.414287688 |
| 0.43032741  | 0.058246046 | 0.484322348 | 0.137878007 |
| 0.483641041 | 0.029722497 | 0.346252166 | 0.472254118 |



|             |             |             |             |
|-------------|-------------|-------------|-------------|
| 0.496934657 | 0.006856159 | 0.259762531 | 0.401573564 |
| 0.016741826 | 0.097633743 | 0.447194338 | 0.413348348 |
| 0.389090746 | 0.453331177 | 0.469153795 | 0.375728283 |
| 0.435612158 | 0.219170781 | 0.007060773 | 0.292466597 |
| 0.465117172 | 0.416395958 | 0.470674671 | 0.229494212 |
| 0.413109809 | 0.491157655 | 0.482863405 | 0.22588956  |
| 0.032079221 | 0.320981033 | 0.020240064 | 0.318049958 |
| 0.454784347 | 0.117597844 | 0.417977225 | 0.121422331 |
| 0.053832459 | 0.500877295 | 0.156379855 | 0.257687987 |
| 0.114624273 | 0.456976985 | 0.22887784  | 0.278579622 |
| 0.244037731 | 0.135586797 | 0.349757942 | 0.378364073 |
| 0.0321763   | 0.078819424 | 0.007736528 | 0.453743807 |
| 0.168269844 | 0.411898436 | 0.423085689 | 0.474474825 |
| 0.359522183 | 0.114686042 | 0.394755165 | 0.261768805 |
| 0.090011423 | 0.008849348 | 0.497000018 | 0.396128427 |
| 0.414627247 | 0.131678545 | 0.0278864   | 0.421081679 |
| 0.492086072 | 0.404358888 | 0.323636129 | 0.490064182 |
| 0.019750421 | 0.481216278 | 0.257650304 | 0.101702435 |
| 0.407157496 | 0.250106908 | 0.460051621 | 0.061266678 |
| 0.423653353 | 0.488735961 | 0.27990814  | 0.161780073 |
| 0.470463527 | 0.429119514 | 0.023234825 | 0.467252342 |
| 0.47686652  | 0.02221325  | 0.501990531 | 0.106169785 |
| 0.012666379 | 0.450950695 | 0.486475552 | 0.055178691 |
| 0.057207185 | 0.358597699 | 0.041662746 | 0.26254659  |
| 0.500625079 | 0.405675606 | 0.489183991 | 0.186866423 |
| 0.031369002 | 0.011122275 | 0.176838306 | 0.412525299 |
| 0.516082712 | 0.49934986  | 0.231239076 | 0.382983446 |
| 0.215428339 | 0.334641801 | 0.159572686 | 0.503152858 |
| 0.165775537 | 0.497309062 | 0.003124058 | 0.4700787   |
| 0.515579082 | 0.348115409 | 0.064316322 | 0.326995827 |
| 0.469377726 | 0.033159204 | 0.178713666 | 0.492245471 |
| 0.475361571 | 0.318951606 | 0.359689687 | 0.439594927 |
| 0.012396087 | 0.033415488 | 0.382098912 | 0.164582006 |
| 0.401082753 | 0.183562313 | 0.046507933 | 0.34657791  |
| 0.034614483 | 0.48841044  | 0.465498866 | 0.044360673 |
| 0.41376037  | 0.328921067 | 0.360972468 | 0.025479573 |
| 0.483227886 | 0.484899812 | 0.514137105 | 0.143374155 |
| 0.487701351 | 0.499323301 | 0.449979734 | 0.057021505 |
| 0.010115101 | 0.504484887 | 0.438485022 | 0.018988485 |
| 0.477285897 | 0.299407145 | 0.012382448 | 0.491384627 |
| 0.160623615 | 0.470566448 | 0.003128566 | 0.075236277 |
| 0.025834748 | 0.463244791 | 0.479436269 | 0.405515101 |
| 0.322512825 | 0.355143555 | 0.003087678 | 0.495640946 |
| 0.497004286 | 0.008374255 | 0.114911699 | 0.502249233 |
| 0.480605687 | 0.498623421 | 0.321518867 | 0.491861576 |
| 0.473459694 | 0.497806028 | 0.251419431 | 0.24112077  |
| 0.489386948 | 0.484989385 | 0.455141137 | 0.475831985 |
| 0.48483515  | 0.421431746 | 0.262624026 | 0.010703252 |
| 0.110566288 | 0.232262374 | 0.373513109 | 0.071222927 |
| 0.382499859 | 0.119107124 | 0.49080134  | 0.474309988 |
| 0.501211707 | 0.001866264 | 0.147105393 | 0.497426826 |
| 0.472423042 | 0.473388755 | 0.012350535 | 0.004459338 |
| 0.006522943 | 0.014783681 | 0.372721069 | 0.20882826  |
| 0.494484715 | 0.321599427 | 0.00182514  | 0.039377168 |

|             |             |             |             |
|-------------|-------------|-------------|-------------|
| 0.270026758 | 0.404124289 | 0.498326419 | 0.368905582 |
| 0.467640439 | 0.060650402 | 0.341716466 | 0.392528684 |
| 0.052251526 | 0.404082899 | 0.500700888 | 0.483134047 |
| 0.026520788 | 0.211958529 | 0.396444525 | 0.483771817 |
| 0.068742054 | 0.292640624 | 0.47166032  | 0.335741717 |
| 0.007962419 | 0.060520234 | 0.047000885 | 0.438859591 |
| 0.506323732 | 0.076665847 | 0.028673456 | 0.186598813 |
| 0.115009548 | 0.481535139 | 0.155054704 | 0.493862596 |
| 0.47557309  | 0.441400687 | 0.055305975 | 0.480549593 |
| 0.029799352 | 1           | 0.066467637 | 0.261249267 |
| 0.006820114 | 0.486530024 | 0.164684114 | 0.370010796 |
| 0.429689018 | 0.176101492 | 0.009494291 | 0.169087155 |
| 0.038877809 | 0.48126156  | 0.472274407 | 0.020876107 |
| 0.214206951 | 0.267817813 | 0.402708985 | 0.318888338 |
| 0.456755327 | 0.504240498 | 0.47793264  | 0.073606479 |
| 0.130061629 | 0.425425761 | 0.457236218 | 0.256210272 |
| 0.482608191 | 0.30608588  | 0.495796482 | 0.455309907 |
| 0.476190078 | 0.498169067 | 0.350841039 | 0.221618485 |
| 0.444097806 | 0.426721948 | 0.01847048  | 0.342968751 |
| 0.481869215 | 0.364711401 | 0.143935338 | 0.243599041 |
| 0.408483879 | 0.032712432 | 0.20570556  | 0.35125495  |
| 0.364278085 | 0.131374626 | 0.435545521 | 0.422902808 |
| 0.463421354 | 0.031397327 | 0.044855999 | 0.50407374  |
| 0.467158814 | 0.138387117 | 0.459762725 | 0.139181818 |
| 0.331974614 | 0.474684128 | 0.467803264 | 0.375697767 |
| 0.503003859 | 0.468075737 | 0.45487142  | 0.471655456 |
| 0.238315956 | 0.512304641 | 0.096620264 | 0.070485809 |
| 0.464281417 | 0.09133755  | 0.068686955 | 0.123693317 |
| 0.016505072 | 0.317530304 | 0.422572347 | 0.414430223 |
| 0.385128284 | 0.364620083 | 0.061787439 | 0.297521366 |
| 0.392211079 | 0.336643788 | 0.206732637 | 0.06938409  |
| 0.494236074 | 0.005782761 | 0.040102502 | 0.425192228 |
| 0.484405066 | 0.406847474 | 0.210884339 | 0.298130431 |
| 0.110283836 | 0.281659356 | 0.349328824 | 0.408819676 |
| 0.385925743 | 0.487600947 | 0.026691725 | 0.014474214 |
| 0.483386914 | 0.41654045  | 0.011855551 | 0.064870893 |
| 0.42736082  | 0.280035935 | 0.230156263 | 0.01291868  |
| 0.496504066 | 0.397046976 | 0.431810302 | 0.352081577 |
| 0.047549014 | 0.425972069 | 0.075585973 | 0.042231359 |
| 0.475515784 | 0.404738173 | 0.497664573 | 0.332759766 |
| 0.423962318 | 0.461000596 | 0.49696373  | 0.103851802 |
| 0.411645839 | 0.019530912 | 0.466701049 | 0.465280855 |
| SERPINA3F   | 0.276837002 | 0.387996158 | 0.199926235 |
| 0.306182192 | 0.238671489 | 0.139348792 | 0.090917315 |
| 0.048268823 | 0.081594867 | 0.008112507 | 0.065324707 |
| 0.289306925 | 0.149269594 | 0.097190903 | 0.102758707 |
| 0.361940843 | 0.183853569 | 0.123070948 | 0.136124626 |
| 0.260063533 | 0.033625127 | 0.354096165 | 0.073064169 |
| 0.239618793 | 0.185008388 | 0.102610742 | 0.232765359 |
| 0.342788403 | 0.111596837 | 0.083181065 | 0.200370623 |
| 0.147759492 | 0.296837935 | 0.359208101 | 0.359446585 |
| 0.364178696 | 0.235659607 | 0.016666187 | 0.089031603 |
| 0.273954281 | 0.353561067 | 0.258060974 | 0.207357965 |
| 0.049254575 | 0.296668803 | 0.129419721 | 0.300786507 |

|             |             |             |             |
|-------------|-------------|-------------|-------------|
| 0.062952509 | 0.081331884 | 0.045995547 | 0.260202753 |
| 0.31923201  | 0.225958077 | 0.06376453  | 0.079914755 |
| 0.130901685 | 0.047721446 | 0.230191409 | 0.11902443  |
| 0.119805304 | 0.027943793 | 0.342634451 | 0.052909625 |
| 0.059225701 | 0.078363961 | 0.196575041 | 0.088944882 |
| 0.224435944 | 0.194207545 | 0.017793861 | 0.248262065 |
| 0.002190831 | 0.244964865 | 0.285974681 | 0.198634654 |
| 0.088326731 | 0.046938475 | 0.203580567 | 0.176662815 |
| 0.364417928 | 0.322379847 | 0.454968383 | 0.448844199 |
| 0.181859511 | 0.201607475 | 0.254342391 | 0.140584622 |
| 0.30429122  | 0.09079696  | 0.077249969 | 0.400401771 |
| 0.455402719 | 0.391342554 | 0.200294647 | 0.231552137 |
| 0.287676058 | 0.327119499 | 0.160371864 | 0.189024071 |
| 0.176627081 | 0.132656647 | 0.291554978 | 0.434432655 |
| 0.231839692 | 0.256406169 | 0.188727794 | 0.249001349 |
| 0.088011103 | 0.106774094 | 0.251765123 | 0.124824093 |
| 0.376593736 | 0.023996392 | 0.232242273 | 0.156004302 |
| 0.139262742 | 0.301987033 | 0.405603064 | 0.109339434 |
| 0.223656416 | 0.045816665 | 0.18040584  | 0.072956696 |
| 0.138647907 | 0.240957658 | 0.296494064 | 0.362549433 |
| 0.06932344  | 0.197101889 | 0.10901377  | 0.017671866 |
| 0.086638534 | 0.165879993 | 0.318583746 | 0.139179928 |
| 0.293773187 | 0.272769931 | 0.16939457  | 0.199004708 |
| 0.303464214 | 0.449641017 | 0.010295175 | 0.064300878 |
| 0.195416288 | 0.172056131 | 0.187855015 | 0.24113481  |
| 0.230350642 | 0.055410549 | 0.106552726 | 0.432131013 |
| 0.247759463 | 0.082754281 | 0.088444752 | 0.360283896 |
| 0.126215559 | 0.302409397 | 0.088559801 | 0.140345182 |
| 0.038380628 | 0.352496513 | 0.10144045  | 0.093253905 |
| 0.147767473 | 0.201835764 | 0.01589147  | 0.068257584 |
| 0.105902677 | 0.321607393 | 0.293235536 | 0.103044738 |
| 0.150133114 | 0.326924713 | 0.078624525 | 0.272938336 |
| 0.026432852 | 0.062743951 | 0.052736748 | 0.411951706 |
| 0.087777587 | 0.433955591 | 0.156536624 | 0.209009834 |
| 0.236231169 | 0.370942102 | 0.007264666 | 0.322775342 |
| 0.400529131 | 0.058669943 | 0.250450539 | 0.284166391 |
| 0.183472343 | 0.358469935 | 0.014797241 | 0.338455943 |
| 0.159652828 | 0.083301693 | 0.451958355 | 0.177659674 |
| 0.319827373 | 0.081947512 | 0.091339852 | 0.398786995 |
| 0.319873656 | 0.015263919 | 0.047917503 | 0.22133999  |
| 0.095348138 | 0.026818801 | 0.273580891 | 0.26623976  |
| 0.215692479 | 0.375276165 | 0.43649959  | 0.187466985 |
| 0.230106525 | 0.099396228 | 0.034232298 | 0.256768674 |
| 0.340497532 | 0.144297267 | 0.274780265 | 0.102469083 |
| 0.105931375 | 0.334448668 | 0.300386098 | 0.067671185 |
| 0.052134706 | 0.095883582 | 0.017348003 | 0.195931534 |
| 0.268020265 | 0.075176924 | 0.165713593 | 0.139292084 |
| 0.141213871 | 0.425479351 | 0.255060555 | 0.246051635 |
| 0.227671217 | 0.190362813 | 0.12016166  | 0.10551187  |
| 0.166785298 | 0.150536586 | 0.202792486 | 0.169405108 |
| 0.021037095 | 0.117824459 | 0.053535372 | 0.156059747 |
| 0.11427541  | 0.145169345 | 0.12116538  | 0.211256166 |
| 0.11956528  | 0.100711294 | 0.208265817 | 0.217632879 |
| 0.174311792 | 0.050208973 | 0.379439302 | 0.301478402 |

|             |             |             |             |
|-------------|-------------|-------------|-------------|
| 0.143490798 | 0.098804563 | 0.083016933 | 0.122711613 |
| 0.370224457 | 0.087396656 | 0.047371006 | 0.321857085 |
| 0.0376633   | 0.428020163 | 0.15171831  | 0.162912808 |
| 0.222557002 | 0.158824601 | 0.378890427 | 0.028069265 |
| 0.15246204  | 0.311117275 | 0.202431519 | 0.182238336 |
| 0.235531436 | 0.241378175 | 0.034021162 | 0.236337764 |
| 0.224673917 | 0.069066583 | 0.419324051 | 0.191789455 |
| 0.064356726 | 0.373301072 | 0.333232901 | 0.121084882 |
| 0.13512077  | 0.140687073 | 0.016448725 | 0.273885296 |
| 0.409818319 | 0.378135457 | 0.288916353 | 0.239057533 |
| 0.056453166 | 0.031163089 | 0.237128788 | 0.227121294 |
| 0.334825663 | 0.430852443 | 0.182354737 | 0.230273056 |
| 0.161708864 | 0.192728256 | 0.026407021 | 0.426162301 |
| 0.145240892 | 0.370741786 | 0.025007895 | 0.387805164 |
| 0.352839532 | 0.061828835 | 0.150133307 | 0.104575184 |
| 0.225298867 | 0.055201056 | 0.10290054  | 0.350794273 |
| 0.310233938 | 0.175810546 | 0.17109754  | 0.291718935 |
| 0.01372188  | 0.027117713 | 0.258630684 | 0.245418776 |
| 0.150028104 | 0.159096974 | 0.163334852 | 0.08896335  |
| 0.064469231 | 0.30293501  | 0.396138898 | 0.094531167 |
| 0.116519554 | 0.078189976 | 0.333684157 | 0.057438418 |
| 0.416742847 | 0.391936021 | 0.362288439 | 0.080374508 |
| 0.325932601 | 0.400365881 | 0.280586233 | 0.128558114 |
| 0.070386511 | 0.384300937 | 0.201140739 | 0.032658524 |
| 0.403656409 | 0.040861237 | 0.03024676  | 0.349602176 |
| 0.111202317 | 0.260123747 | 0.002741867 | 0.07488642  |
| 0.113241032 | 0.436929589 | 0.31825358  | 0.194667603 |
| 0.047896226 | 0.210818609 | 0.018038248 | 0.434987663 |
| 0.349116515 | 0.071155872 | 0.220269336 | 0.325955187 |
| 0.36405627  | 0.373421445 | 0.240252143 | 0.409526578 |
| 0.298146797 | 0.359921232 | 0.103353896 | 0.22710397  |
| 0.319452764 | 0.397246381 | 0.261139406 | 0.304085972 |
| 0.373684051 | 0.366337922 | 0.183273112 | 0.024474095 |
| 0.136522646 | 0.048879814 | 0.102408173 | 0.088571795 |
| 0.105987907 | 0.175680533 | 0.364181122 | 0.415057594 |
| 0.426496814 | 0.026453556 | 0.051666413 | 0.297657085 |
| 0.30151479  | 0.369611413 | 0.039300089 | 0.011512661 |
| 0.011360952 | 0.09133249  | 0.151162504 | 0.216087661 |
| 0.391730783 | 0.05446851  | 0.018431165 | 0.018830521 |
| 0.134272597 | 0.354770728 | 0.367947379 | 0.300076015 |
| 0.36514147  | 0.10625624  | 0.099845417 | 0.29608724  |
| 0.1430442   | 0.132896074 | 0.425428447 | 0.308365427 |
| 0.084922923 | 0.207944433 | 0.123727399 | 0.395037071 |
| 0.171924661 | 0.258768832 | 0.296853521 | 0.150033819 |
| 0.034306711 | 0.149043464 | 0.118807142 | 0.382634728 |
| 0.353753214 | 0.113396829 | 0.085596182 | 0.028360507 |
| 0.085245419 | 0.387693739 | 0.134156757 | 0.44440884  |
| 0.316357032 | 0.385976141 | 0.154988142 | 0.328379496 |
| 0.068556133 | 0.335157 1  | 0.019683653 | 0.179637782 |
| 0.035162115 | 0.362331138 | 0.131435542 | 0.085988848 |
| 0.206799436 | 0.155484285 | 0.070617365 | 0.206641342 |
| 0.109146666 | 0.423832616 | 0.441191013 | 0.099729502 |
| 0.102993157 | 0.204823602 | 0.263604101 | 0.080963731 |
| 0.341037879 | 0.334076891 | 0.142374525 | 0.049673853 |

|             |             |                      |             |
|-------------|-------------|----------------------|-------------|
| 0.180877722 | 0.254511857 | 0.195361139          | 0.068339646 |
| 0.457263983 | 0.178945198 | 0.427987447          | 0.230811133 |
| 0.334471874 | 0.37545746  | 0.170383119          | 0.240121356 |
| 0.160160818 | 0.186405788 | 0.020309421          | 0.194122026 |
| 0.396584252 | 0.120054612 | 0.196653935          | 0.204356493 |
| 0.259494148 | 0.040044588 | 0.053952968          | 0.225711694 |
| 0.097284041 | 0.105544022 | 0.387121859          | 0.182116556 |
| 0.206010963 | 0.024693581 | 0.113612524          | 0.405035786 |
| 0.284944449 | 0.053885239 | 0.255663561          | 0.164683263 |
| 0.223429182 | 0.377375446 | 0.404055111          | 0.149123641 |
| 0.342981496 | 0.27763527  | 0.200476067          | 0.259689004 |
| 0.130799914 | 0.370600678 | 0.016745999          | 0.12769413  |
| 0.228519731 | 0.098675584 | 0.148440522          | 0.125809474 |
| 0.078569158 | 0.217210366 | 0.354707537          | 0.195995462 |
| 0.281721682 | 0.078391449 | 0.09940747           | 0.243340952 |
| 0.115146549 | 0.248053799 | 0.077279486          | 0.090018828 |
| 0.343265067 | 0.028395844 | 0.101596507          | 0.201840703 |
| 0.331606513 | 0.25620878  | 0.203857579          | 0.242589386 |
| 0.190608794 | 0.197926275 | 0.066993612          | 0.095284902 |
| 0.15089065  | 0.324972203 | 0.02647007           | 0.019431871 |
| 0.442163329 | 0.108126478 | 0.066932128          | 0.103913421 |
| 0.164967746 | 0.139472961 | 0.136542273          | 0.087812994 |
| 0.396798635 | 0.083954637 | 0.250594908          | 0.140160316 |
| 0.083561899 | 0.18602245  | 0.053181718          | 0.054883376 |
| 0.284503085 | 0.261459447 | 0.386203824          | 0.209236719 |
| 0.365986601 | 0.257075331 | 0.3083925            | 0.091248224 |
| 0.177555954 | 0.031607619 | 0.330245874          | 0.159247523 |
| SERPINB1B   | 0.04289528  | 0.076753829          | 0.027556403 |
| 0.096854142 | 0.029385497 | 0.067734516          | 0.063987671 |
| 0.042470657 | 0.009345686 | 0.006761908          | 0.000879054 |
| 0.036666824 | 0.004899192 | 0.038434763          | 0.031102395 |
| 0.064296615 | 0.007762311 | 0.023059332          | 0.051930561 |
| 0.062754999 | 0.046653212 | 0.054639604          | 0.028535492 |
| 0.005879661 | 0.009250294 | 0.015098409          | 0.01948414  |
| 0.089436073 | 0.020950557 | 0.045035083          | 0.078889813 |
| 0.005318448 | 0.055083609 | 0.071812053          | 0.041296974 |
| 0.063004464 | 0.043153284 | 6.33E-05 0.035137202 |             |
| 0.073126182 | 0.06832887  | 0.066149469          | 0.07774912  |
| 0.026488985 | 0.076655831 | 0.068426308          | 0.030378158 |
| 0.006955131 | 0.006275352 | 0.045307547          | 0.072087125 |
| 0.06755378  | 0.034067302 | 0.0444441175         | 0.04112286  |
| 0.001486838 | 0.024662199 | 0.005179259          | 0.072648767 |
| 0.040885165 | 0.043384527 | 0.063786475          | 0.034153581 |
| 0.000486751 | 0.035447311 | 0.004829513          | 0.057387465 |
| 0.006785516 | 0.079059002 | 0.003838176          | 0.025157014 |
| 0.000591328 | 0.068316343 | 0.030287493          | 0.012606985 |
| 0.012479378 | 0.006367051 | 0.008309502          | 0.071331793 |
| 0.078533487 | 0.060242146 | 0.068315902          | 0.061693549 |
| 0.008807235 | 0.022647619 | 0.015033501          | 0.026738784 |
| 0.06394738  | 0.058830034 | 0.038363392          | 0.056362212 |
| 0.069221896 | 0.067775892 | 0.007384167          | 0.022712026 |
| 0.078939946 | 0.073597841 | 0.076063102          | 0.027328634 |
| 0.022146614 | 0.002240088 | 0.065757197          | 0.066430533 |
| 0.071786312 | 0.010455131 | 0.01960391           | 0.082496307 |

|             |             |             |             |
|-------------|-------------|-------------|-------------|
| 0.010013789 | 0.027031898 | 0.071846135 | 0.001176572 |
| 0.083252926 | 0.016708855 | 0.015444115 | 0.049097549 |
| 0.010048047 | 0.073434922 | 0.063942458 | 0.053586273 |
| 0.021649235 | 0.001584489 | 0.011004194 | 0.003750155 |
| 0.008990927 | 0.001891766 | 0.065747005 | 0.083759904 |
| 0.017960507 | 0.005783242 | 0.034809149 | 0.001457586 |
| 0.004448242 | 0.003369766 | 0.045941014 | 0.027907849 |
| 0.058767158 | 0.044862716 | 0.028618929 | 0.057102476 |
| 0.032900231 | 0.061065759 | 0.001896296 | 0.02555557  |
| 0.063068938 | 0.00340308  | 0.044064316 | 0.031830352 |
| 0.033074061 | 0.036996124 | 0.023624849 | 0.079628579 |
| 0.079530987 | 0.029527634 | 0.023317986 | 0.066871881 |
| 0.01472588  | 0.025023641 | 0.021225775 | 0.024525876 |
| 0.016029814 | 0.054206424 | 0.00328986  | 0.043599731 |
| 0.007669361 | 0.001408407 | 0.001476833 | 0.057948493 |
| 0.100821863 | 0.068006389 | 0.055254824 | 0.022316956 |
| 0.032675867 | 0.047394389 | 0.035339296 | 0.072667302 |
| 0.002798043 | 0.007797107 | 0.02755954  | 0.071764601 |
| 0.066650445 | 0.063571814 | 0.027092935 | 0.015544456 |
| 0.035482197 | 0.080512423 | 0.000473871 | 0.074527934 |
| 0.067433209 | 0.042755055 | 0.048759042 | 0.032852189 |
| 0.018723122 | 0.095685405 | 0.0003808   | 0.054776238 |
| 0.052243846 | 0.018658854 | 0.074254988 | 0.022228883 |
| 0.062123903 | 0.012071184 | 0.022504948 | 0.048186363 |
| 0.03630613  | 0.000316062 | 0.070885624 | 0.072262529 |
| 0.001888517 | 0.026315646 | 0.057686375 | 0.084098899 |
| 0.061793044 | 0.058917397 | 0.07779699  | 0.018345747 |
| 0.035879511 | 0.04603936  | 0.001795339 | 0.024753545 |
| 0.04767747  | 0.0028938   | 0.088547555 | 0.032492285 |
| 0.045753486 | 0.083290835 | 0.050315792 | 0.002340643 |
| 0.024155273 | 0.043075913 | 0.008501112 | 0.050126667 |
| 0.048400188 | 0.019241868 | 0.024860644 | 0.002891514 |
| 0.008908366 | 0.076663749 | 0.005327798 | 0.006935753 |
| 0.002540872 | 0.045273604 | 0.049469089 | 0.023322938 |
| 0.006406958 | 0.011910333 | 0.012926762 | 0.02202998  |
| 0.022955267 | 0.014701849 | 0.000362393 | 0.009201369 |
| 0.005024464 | 0.016693252 | 0.020715411 | 0.048086112 |
| 0.009876699 | 0.00930374  | 0.044116453 | 0.007822471 |
| 0.016202475 | 0.006267853 | 0.078966961 | 0.059806903 |
| 0.068477451 | 0.026182485 | 0.007517404 | 0.00383377  |
| 0.076052032 | 0.064950901 | 0.027874253 | 0.078318128 |
| 0.002468064 | 0.062297127 | 0.018943163 | 0.018473325 |
| 0.012271041 | 0.048208127 | 0.089151308 | 0.002437472 |
| 0.034799483 | 0.075317165 | 0.031514409 | 0.023133985 |
| 0.073275092 | 0.059705973 | 0.005699487 | 0.061910863 |
| 0.053753774 | 0.010159667 | 0.069647052 | 0.00629601  |
| 0.005329584 | 0.044862047 | 0.046625587 | 0.015704728 |
| 0.015557051 | 0.046152711 | 0.033331724 | 0.04022002  |
| 0.082359572 | 0.06259781  | 0.057331981 | 0.008259732 |
| 0.018014149 | 0.000765799 | 0.007957602 | 0.027305874 |
| 0.071061936 | 0.061836067 | 0.03071188  | 0.028727353 |
| 0.05070316  | 0.01407729  | 0.003805211 | 0.071951442 |
| 0.003338184 | 0.067954911 | 0.003268761 | 0.041252162 |
| 0.064176779 | 0.039211639 | 0.012932882 | 0.055997647 |

|             |             |                      |             |
|-------------|-------------|----------------------|-------------|
| 0.08507302  | 0.024264878 | 0.02048271           | 0.079217912 |
| 0.071148194 | 0.023612903 | 0.040785482          | 0.041106926 |
| 0.021303098 | 0.008651676 | 0.041214245          | 0.003571662 |
| 0.019668921 | 0.026798268 | 0.00033948           | 0.015876922 |
| 0.014367969 | 0.070721541 | 0.061420525          | 0.012312008 |
| 0.050922723 | 0.024146411 | 0.034711098          | 0.016035851 |
| 0.04975733  | 0.059617601 | 0.075230732          | 0.02247768  |
| 0.041767621 | 0.066732023 | 0.021415117          | 0.009325479 |
| 0.004194468 | 0.066832924 | 0.066318577          | 0.009700516 |
| 0.067305122 | 0.054093822 | 0.003347652          | 0.082796149 |
| 0.047164631 | 0.060114961 | 0.002735234          | 0.000660976 |
| 0.002147516 | 0.055932088 | 0.07551881           | 0.068385818 |
| 0.044249902 | 0.048844523 | 3.46E-05 0.063037187 |             |
| 0.077672098 | 0.002672228 | 0.003267879          | 0.043278181 |
| 0.041192987 | 0.08042311  | 0.015832114          | 0.055145454 |
| 0.030585612 | 0.06407119  | 0.006894689          | 0.039551461 |
| 0.080077152 | 0.053070629 | 0.082977621          | 0.085871226 |
| 0.074205693 | 0.04299516  | 0.063538009          | 0.01214479  |
| 0.004614685 | 0.045953021 | 0.030295227          | 0.002422869 |
| 0.062258114 | 0.015366118 | 0.074139588          | 0.063402971 |
| 0.062522596 | 0.002726728 | 0.040316212          | 0.048057331 |
| 0.093566933 | 0.08371174  | 0.001030175          | 0.000372886 |
| 0.007291249 | 0.002137999 | 0.050904067          | 0.021633517 |
| 0.069375898 | 0.020934231 | 0.005007609          | 0.022152502 |
| 0.025763107 | 0.030457685 | 0.069689224          | 0.068964684 |
| 0.045421405 | 0.009056392 | 0.019174745          | 0.070130413 |
| 0.005708721 | 0.048918906 | 0.069928642          | 0.078790463 |
| 0.002610379 | 0.020026543 | 0.029214134          | 0.083161321 |
| 0.000822113 | 0.028906584 | 0.034082013          | 0.017054343 |
| 0.000353203 | 0.008073748 | 0.008272771          | 0.05522908  |
| 0.058547925 | 0.006773233 | 0.005607858          | 0.000913951 |
| 0.027406706 | 0.056664848 | 0.02652126           | 0.074558453 |
| 0.084812251 | 0.077383985 | 0.001467439          | 0.078488897 |
| 0.000959749 | 0.066467637 | 0.019683653          | 1           |
| 0.018418739 | 0.002722079 | 0.051003955          | 0.005173499 |
| 0.029908581 | 0.062112225 | 0.00614578           | 0.001372194 |
| 0.003459396 | 0.008274744 | 0.072598718          | 0.054649059 |
| 0.001448833 | 0.022680667 | 0.036139086          | 0.053298841 |
| 0.080401264 | 0.074518881 | 0.075469709          | 0.044570442 |
| 0.02282066  | 0.00040485  | 0.079519546          | 0.058152021 |
| 0.021282229 | 0.06638607  | 0.01330255           | 0.071924741 |
| 0.063783984 | 0.068560305 | 0.056607086          | 0.071037709 |
| 0.001741987 | 0.056398041 | 0.083726387          | 0.02597208  |
| 0.070804711 | 0.06596435  | 0.039941513          | 0.014379907 |
| 0.02528547  | 0.018195024 | 0.001378476          | 0.003101988 |
| 0.011576059 | 0.083993286 | 0.010393731          | 0.07023844  |
| 0.049263853 | 0.058710335 | 0.002261224          | 0.008813302 |
| 0.075943045 | 0.07185314  | 0.036416161          | 0.078987142 |
| 0.019848316 | 0.0394275   | 0.061364974          | 0.04253236  |
| 0.008698689 | 0.056919148 | 0.069284501          | 0.076503408 |
| 0.079061464 | 0.047993575 | 0.076010343          | 0.023602805 |
| 0.000880366 | 0.026579143 | 0.013572655          | 0.010338939 |
| 0.027772946 | 0.005978896 | 0.006895189          | 0.049346594 |
| 0.00814298  | 0.052992748 | 0.007531875          | 0.006006866 |

|             |             |             |             |
|-------------|-------------|-------------|-------------|
| 0.020566962 | 0.019417788 | 0.036041319 | 0.059729345 |
| 0.019797626 | 0.073613283 | 0.002624388 | 0.006877442 |
| 0.007971858 | 0.060471414 | 0.023811323 | 0.026712961 |
| 0.004402362 | 0.002435829 | 0.032936094 | 0.052926658 |
| 0.036105865 | 0.002783712 | 0.068040104 | 0.01019026  |
| 0.009897157 | 0.071459433 | 0.049475981 | 0.001310694 |
| 0.000243655 | 0.039740033 | 0.011498405 | 0.011933705 |
| 0.002012547 | 0.052086646 | 0.030192649 | 0.030059218 |
| 0.067491397 | 0.011129093 | 0.064117006 | 0.000606128 |
| 0.006699388 | 0.07657142  | 0.027896092 | 0.062069255 |
| 0.016701002 | 0.069958181 | 0.066829656 | 0.047071634 |
| 0.011459565 | 0.018416358 | 0.016843802 | 0.06655011  |
| 0.016890735 |             |             |             |
| SERPINB6A   | 0.329186371 | 0.320919702 | 0.209354718 |
| 0.297903188 | 0.235001879 | 0.143877567 | 0.109124841 |
| 0.08650103  | 0.044695574 | 0.004500191 | 0.011785643 |
| 0.283613112 | 0.051905551 | 0.070055691 | 0.05556832  |
| 0.391322556 | 0.099359272 | 0.189500118 | 0.196021813 |
| 0.332642144 | 0.041053571 | 0.337247189 | 0.076524466 |
| 0.138230291 | 0.069156153 | 0.056151494 | 0.095011148 |
| 0.380346842 | 0.071332844 | 0.08132952  | 0.26777017  |
| 0.181369577 | 0.343740097 | 0.291171696 | 0.269211717 |
| 0.281964601 | 0.272000114 | 0.082411625 | 0.045812033 |
| 0.33349146  | 0.288331399 | 0.312152372 | 0.227217163 |
| 0.042193289 | 0.261742227 | 0.146593911 | 0.313305156 |
| 0.073908703 | 0.034614128 | 0.055206282 | 0.250889965 |
| 0.228673742 | 0.157725366 | 0.083373068 | 0.065691872 |
| 0.028688875 | 0.051335743 | 0.052946713 | 0.174381152 |
| 0.132826029 | 0.036529846 | 0.255497634 | 0.035056564 |
| 0.039089435 | 0.13181595  | 0.172659665 | 0.134474797 |
| 0.104164318 | 0.243869088 | 0.06135086  | 0.24208977  |
| 0.002025535 | 0.336838713 | 0.352139546 | 0.064822111 |
| 0.089169592 | 0.02050812  | 0.175168484 | 0.192216146 |
| 0.388207443 | 0.325053325 | 0.375304873 | 0.351726191 |
| 0.099856793 | 0.277355596 | 0.212739015 | 0.093295694 |
| 0.312885882 | 0.074033392 | 0.099259718 | 0.393165015 |
| 0.369630011 | 0.299431517 | 0.110245493 | 0.263106182 |
| 0.215226643 | 0.308012429 | 0.142974928 | 0.151323902 |
| 0.053016154 | 0.125829011 | 0.23203223  | 0.34917466  |
| 0.269826532 | 0.155510384 | 0.149352499 | 0.300251976 |
| 0.101087425 | 0.09559731  | 0.277331748 | 0.162767429 |
| 0.390009972 | 0.023164159 | 0.199703986 | 0.164625208 |
| 0.206438754 | 0.321087684 | 0.302565723 | 0.135500172 |
| 0.261114095 | 0.04823153  | 0.04041897  | 0.11477869  |
| 0.096843109 | 0.087165305 | 0.231737974 | 0.312313577 |
| 0.087832931 | 0.09483326  | 0.132923432 | 0.027168995 |
| 0.072568882 | 0.222183641 | 0.29686769  | 0.256878784 |
| 0.352271297 | 0.261514012 | 0.068808716 | 0.224732675 |
| 0.219489361 | 0.372130234 | 0.006768209 | 0.088682667 |
| 0.196037196 | 0.211776043 | 0.246325506 | 0.212780072 |
| 0.164984775 | 0.091928552 | 0.106509027 | 0.364330929 |
| 0.255289317 | 0.090266708 | 0.142794095 | 0.389358847 |
| 0.051664159 | 0.249313223 | 0.109481373 | 0.09458169  |
| 0.043273858 | 0.260415901 | 0.084707451 | 0.182492519 |



|             |             |             |             |
|-------------|-------------|-------------|-------------|
| 0.037749993 | 0.099974034 | 0.081680342 | 0.12115346  |
| 0.067179824 | 0.219543296 | 0.239094446 | 0.143824133 |
| 0.137079654 | 0.294837185 | 0.140151531 | 0.19224992  |
| 0.005182387 | 0.111717584 | 0.102984769 | 0.332170847 |
| 0.116830941 | 0.39044595  | 0.151769105 | 0.158202988 |
| 0.258256152 | 0.37738345  | 0.01953306  | 0.264428218 |
| 0.302946003 | 0.092531927 | 0.191002064 | 0.335908447 |
| 0.102048825 | 0.318655318 | 0.03048084  | 0.37973865  |
| 0.227384337 | 0.118204314 | 0.397984804 | 0.137817744 |
| 0.291202702 | 0.052199361 | 0.090301499 | 0.289376915 |
| 0.225556388 | 0.017152403 | 0.066000715 | 0.261195816 |
| 0.092266355 | 0.033108734 | 0.338929035 | 0.282302611 |
| 0.175032917 | 0.387617102 | 0.414903786 | 0.085457516 |
| 0.201200282 | 0.149398603 | 0.06773033  | 0.276938855 |
| 0.358018266 | 0.06244604  | 0.25230676  | 0.093564308 |
| 0.158486497 | 0.285216684 | 0.254537944 | 0.025395873 |
| 0.046565945 | 0.142949673 | 0.022938025 | 0.160952005 |
| 0.253026984 | 0.041061511 | 0.119505367 | 0.240425164 |
| 0.09978045  | 0.336723992 | 0.113107627 | 0.111768689 |
| 0.079702306 | 0.14796938  | 0.200034214 | 0.039114604 |
| 0.04142363  | 0.100721827 | 0.086830037 | 0.092005403 |
| 0.028948123 | 0.077516658 | 0.110570097 | 0.064973509 |
| 0.030483377 | 0.0549274   | 0.052694206 | 0.223396763 |
| 0.087976467 | 0.054816904 | 0.162919308 | 0.130516626 |
| 0.110957334 | 0.054848972 | 0.318084591 | 0.374050088 |
| 0.184269643 | 0.092137861 | 0.10448437  | 0.04506773  |
| 0.306790881 | 0.075963458 | 0.065051316 | 0.268790843 |
| 0.094530421 | 0.389619613 | 0.06156144  | 0.113046895 |
| 0.108676473 | 0.165520541 | 0.3785241   | 0.015775466 |
| 0.225111976 | 0.26799994  | 0.311723319 | 0.093149242 |
| 0.212195119 | 0.275424477 | 0.037123233 | 0.261946871 |
| 0.244664577 | 0.060157501 | 0.333784847 | 0.13091284  |
| 0.073979369 | 0.345251554 | 0.21828664  | 0.12623862  |
| 0.105591512 | 0.094989754 | 0.030893878 | 0.282165461 |
| 0.327326492 | 0.350104371 | 0.211052286 | 0.158388898 |
| 0.03984744  | 0.010241595 | 0.192218657 | 0.258188764 |
| 0.27606482  | 0.331466406 | 0.283608292 | 0.137200252 |
| 0.226594242 | 0.065270665 | 0.042723224 | 0.329186415 |
| 0.232659262 | 0.323469519 | 0.042511176 | 0.293416622 |
| 0.262687995 | 0.098111959 | 0.06510009  | 0.122964667 |
| 0.222208474 | 0.055602635 | 0.17400465  | 0.281820728 |
| 0.282935806 | 0.099197797 | 0.072113002 | 0.368824291 |
| 0.020807981 | 0.040690523 | 0.237251714 | 0.106038103 |
| 0.075553558 | 0.11253658  | 0.051453206 | 0.089579581 |
| 0.037189447 | 0.245697962 | 0.41749248  | 0.042995814 |
| 0.084748629 | 0.088597751 | 0.359225996 | 0.062839549 |
| 0.291667487 | 0.325020994 | 0.292332062 | 0.137889134 |
| 0.314637346 | 0.282975173 | 0.161362698 | 0.142366511 |
| 0.064993135 | 0.297089796 | 0.268975373 | 0.021586283 |
| 0.384861678 | 0.068539196 | 0.009405771 | 0.314199527 |
| 0.166596511 | 0.232100344 | 0.005299992 | 0.117468219 |
| 0.128809576 | 0.412082224 | 0.246201675 | 0.274412127 |
| 0.029218151 | 0.345243585 | 0.050929116 | 0.363651738 |
| 0.274268781 | 0.047013084 | 0.126160547 | 0.245870709 |

|             |             |             |             |
|-------------|-------------|-------------|-------------|
| 0.237718659 | 0.334726243 | 0.114221513 | 0.280963791 |
| 0.200725578 | 0.26119872  | 0.061725234 | 0.230901538 |
| 0.269408609 | 0.285349027 | 0.314823549 | 0.296986044 |
| 0.343734651 | 0.371192598 | 0.212090664 | 0.020447848 |
| 0.056412629 | 0.072752303 | 0.030843208 | 0.023633883 |
| 0.162985288 | 0.081102739 | 0.344284442 | 0.39032509  |
| 0.323873466 | 0.037100805 | 0.069799877 | 0.258817701 |
| 0.316629396 | 0.379421893 | 0.118205552 | 0.014500537 |
| 0.03232886  | 0.018104894 | 0.218578655 | 0.237246961 |
| 0.322307091 | 0.024772839 | 0.02536179  | 0.043539774 |
| 0.116564847 | 0.259440287 | 0.286551393 | 0.366047879 |
| 0.352693088 | 0.117989022 | 0.033075737 | 0.38769041  |
| 0.056522415 | 0.194004226 | 0.323676147 | 0.260567641 |
| 0.139264618 | 0.202351254 | 0.224173381 | 0.35941001  |
| 0.035023356 | 0.301418958 | 0.297748675 | 0.064426478 |
| 0.111995733 | 0.104075935 | 0.066950373 | 0.41799828  |
| 0.26023901  | 0.036620403 | 0.030914752 | 0.031222719 |
| 0.045744031 | 0.377247789 | 0.080536818 | 0.38116059  |
| 0.313415682 | 0.395019483 | 0.116678674 | 0.272325047 |
| 0.027730632 | 0.261249267 | 0.179637782 | 0.018418739 |
| 1           | 0.07301205  | 0.305762024 | 0.019069003 |
| 0.091342732 | 0.306607823 | 0.06253141  | 0.072138606 |
| 0.090458127 | 0.089552832 | 0.351460531 | 0.370541536 |
| 0.128177941 | 0.115136379 | 0.287641893 | 0.380607636 |
| 0.129333506 | 0.291912266 | 0.272141364 | 0.108404135 |
| 0.044934751 | 0.152094392 | 0.338711133 | 0.253939995 |
| 0.084477102 | 0.397801465 | 0.057204679 | 0.361402326 |
| 0.285519035 | 0.344747732 | 0.301495391 | 0.181710818 |
| 0.102652833 | 0.205226105 | 0.16726988  | 0.01618711  |
| 0.274204585 | 0.331450054 | 0.224782896 | 0.062269742 |
| 0.128856626 | 0.190713551 | 0.101719945 | 0.129672074 |
| 0.141711716 | 0.122917669 | 0.0715254   | 0.427944199 |
| 0.290791449 | 0.254086951 | 0.089950896 | 0.057473337 |
| 0.34201804  | 0.284884056 | 0.062124539 | 0.240315696 |
| 0.213389607 | 0.188658543 | 0.361921339 | 0.359222578 |
| 0.092901718 | 0.266434819 | 0.316559991 | 0.178077865 |
| 0.233991084 | 0.179391617 | 0.294026751 | 0.053072053 |
| 0.057611578 | 0.254797432 | 0.040004321 | 0.157179856 |
| 0.119995748 | 0.072635828 | 0.067380759 | 0.400363576 |
| 0.084538155 | 0.266601588 | 0.081362904 | 0.104510299 |
| 0.285183973 | 0.192759792 | 0.29169297  | 0.07052333  |
| 0.049399118 | 0.258020514 | 0.031215669 | 0.111191235 |
| 0.113613319 | 0.266827109 | 0.143681695 | 0.164034697 |
| 0.083400223 | 0.178805676 | 0.210549398 | 0.104511352 |
| 0.047750816 | 0.108155868 | 0.257691399 | 0.05521749  |
| 0.035448416 | 0.404751301 | 0.172986792 | 0.118289635 |
| 0.101155436 | 0.221323178 | 0.206948583 | 0.054086983 |
| 0.083118469 | 0.279323691 | 0.057157382 | 0.237376179 |
| 0.202913505 | 0.124323571 | 0.224775657 | 0.078121905 |
| 0.12772315  | 0.276948542 | 0.24089284  | 0.293154241 |
| 0.254259288 | 0.339423778 | 0.242002342 | 0.273814035 |
| 0.197056787 | 0.202293379 | 0.037817386 | 0.369932465 |
| 0.074591053 |             |             |             |
| SERPINI1    | 0.019018454 | 0.013201206 | 0.01942398  |

|             |             |             |             |
|-------------|-------------|-------------|-------------|
| 0.042986409 | 0.035503237 | 0.011089505 | 0.074639199 |
| 0.028075416 | 0.031945832 | 0.020989737 | 0.021316297 |
| 0.022637694 | 0.011091202 | 0.01930244  | 0.004330984 |
| 0.068182575 | 0.090535483 | 0.027820521 | 0.139640471 |
| 0.053884257 | 0.043880836 | 0.07661266  | 0.10793986  |
| 0.027379964 | 0.073551481 | 0.132222044 | 0.029359415 |
| 0.044321625 | 0.150545463 | 0.007420327 | 0.03304586  |
| 0.158141057 | 0.023390991 | 0.008005811 | 0.031018242 |
| 0.006742099 | 0.011774007 | 0.067804684 | 0.007957661 |
| 0.018864118 | 0.024305188 | 0.049269575 | 0.084127232 |
| 0.094383396 | 0.006519704 | 0.087199499 | 0.047660192 |
| 0.00789588  | 0.081292011 | 0.00897679  | 0.007611426 |
| 0.005140522 | 0.010753085 | 0.035760273 | 0.065441453 |
| 0.003408758 | 0.009893343 | 0.004037053 | 0.014144598 |
| 0.09965345  | 0.011673224 | 0.006850676 | 0.023456147 |
| 0.007515985 | 0.052812594 | 0.117062428 | 0.055970659 |
| 0.014009064 | 0.015150409 | 0.1566812   | 0.012421338 |
| 0.009664391 | 0.069222018 | 0.074221379 | 0.00572781  |
| 0.286627351 | 0.047862437 | 0.142850285 | 0.053765986 |
| 0.036522837 | 0.010982711 | 0.029177981 | 0.02113986  |
| 0.037485578 | 0.119084532 | 0.022079222 | 0.099079028 |
| 0.016944334 | 0.061898106 | 0.039955864 | 0.06987327  |
| 0.025926527 | 0.009631422 | 0.044780263 | 0.128133693 |
| 0.012843892 | 0.014000168 | 0.01144031  | 0.01933632  |
| 0.004914334 | 0.108085589 | 0.007624976 | 0.018217721 |
| 0.012105851 | 0.021803504 | 0.1618868   | 0.028189463 |
| 0.265237717 | 0.005032929 | 0.089667817 | 0.035503945 |
| 0.036220699 | 0.070163653 | 0.13353502  | 0.037397847 |
| 0.05689752  | 0.020774396 | 0.009565735 | 0.128683364 |
| 0.039027303 | 0.081472459 | 0.006861139 | 0.253511693 |
| 0.011179527 | 0.014230385 | 0.004247069 | 0.025351646 |
| 0.016751101 | 0.008756008 | 0.068500856 | 0.172886397 |
| 0.176756754 | 0.055121514 | 0.01416976  | 0.042511127 |
| 0.034733842 | 0.007413633 | 0.036387397 | 0.009936515 |
| 0.011853632 | 0.029204943 | 0.000511379 | 0.128481845 |
| 0.022577902 | 0.067199395 | 0.182758616 | 0.017573662 |
| 0.057698523 | 0.099146207 | 0.173515455 | 0.021202124 |
| 0.01037229  | 0.204474461 | 0.015101352 | 0.071757529 |
| 0.00564607  | 0.057440468 | 0.186797435 | 0.04340665  |
| 0.08820977  | 0.006279585 | 0.20845345  | 0.028422823 |
| 0.001852302 | 0.037178292 | 0.163326877 | 0.036237233 |
| 0.007940227 | 0.00951846  | 0.004193916 | 0.250818355 |
| 0.050187059 | 0.056023102 | 0.015199331 | 0.012087311 |
| 0.018500479 | 0.142480773 | 0.007631015 | 0.016961451 |
| 0.0080983   | 0.021134267 | 0.058501371 | 0.05084241  |
| 0.128477445 | 0.038751366 | 0.009754644 | 0.006680106 |
| 0.009435635 | 0.005664439 | 0.032456175 | 0.042594442 |
| 0.008146563 | 0.029733041 | 0.001983079 | 0.071002527 |
| 0.010182979 | 0.252051594 | 0.030635433 | 0.153412986 |
| 0.009519422 | 0.180810643 | 0.018543723 | 0.014658225 |
| 0.008955233 | 0.041387368 | 0.015425451 | 0.044033082 |
| 0.167318015 | 0.024310223 | 0.029916223 | 0.046161109 |
| 0.029442483 | 0.037029139 | 0.04156249  | 0.006876018 |
| 0.026932212 | 0.088395914 | 0.163044258 | 0.084425596 |

|             |             |             |             |
|-------------|-------------|-------------|-------------|
| 0.024071305 | 0.001725749 | 0.009166421 | 0.040711808 |
| 0.006787719 | 0.012419133 | 0.008945555 | 0.001522379 |
| 0.165173861 | 0.038065699 | 0.027202416 | 0.044023825 |
| 0.008757703 | 0.036076995 | 0.008020668 | 0.08845443  |
| 0.180351234 | 0.01618732  | 0.043100864 | 0.015557304 |
| 0.021119324 | 0.014718168 | 0.11499177  | 0.009652003 |
| 0.007163079 | 0.07631446  | 0.01261691  | 0.014068799 |
| 0.064930992 | 0.148327352 | 0.119302773 | 0.003437879 |
| 0.008874726 | 0.005567957 | 0.004079503 | 0.010862473 |
| 0.01142917  | 0.030108373 | 0.032575264 | 0.019340172 |
| 0.099466835 | 0.297936208 | 0.013422343 | 0.070533356 |
| 0.008212032 | 0.084517057 | 0.281249086 | 0.001060873 |
| 0.02194055  | 0.0039621   | 0.004866194 | 0.014698824 |
| 0.134226307 | 0.028245208 | 0.016851287 | 0.158839807 |
| 0.014776083 | 0.100825032 | 0.03932529  | 0.006214703 |
| 0.020779052 | 0.010656763 | 0.113899742 | 0.075950581 |
| 0.00699443  | 0.039222419 | 0.086128105 | 0.011689748 |
| 0.010194427 | 0.233001841 | 0.013166617 | 0.094177484 |
| 0.312942691 | 0.033961366 | 0.011789637 | 0.267825525 |
| 0.183842435 | 0.020719175 | 0.040457554 | 0.13450817  |
| 0.015740569 | 0.069188753 | 0.011350232 | 0.055491926 |
| 0.128802159 | 0.02715733  | 0.108106202 | 0.021903939 |
| 0.00670796  | 0.013184486 | 0.176719764 | 0.024659588 |
| 0.162108258 | 0.009413799 | 0.007649293 | 0.016217444 |
| 0.035482668 | 0.010243893 | 0.269773291 | 0.018578852 |
| 0.005871257 | 0.010967548 | 0.110882589 | 0.030077227 |
| 0.010105746 | 0.154096777 | 0.106837099 | 0.008831569 |
| 0.016053241 | 0.023382723 | 0.010280766 | 0.042089482 |
| 0.060901126 | 0.072500229 | 0.035089516 | 0.022948322 |
| 0.009575141 | 0.074690968 | 0.010393521 | 0.012376759 |
| 0.061385357 | 0.009670345 | 0.041940373 | 0.054349097 |
| 0.005656128 | 0.011859926 | 0.086012948 | 0.228430629 |
| 0.013037055 | 0.010589944 | 0.008318871 | 0.110815899 |
| 0.018390064 | 0.010783827 | 0.008274236 | 0.256709504 |
| 0.263908396 | 0.008109759 | 0.01969808  | 0.030090627 |
| 0.034889303 | 0.006993914 | 0.028915235 | 0.01379104  |
| 0.162923822 | 0.004416622 | 0.008554286 | 0.012441239 |
| 0.136891978 | 0.037946016 | 0.006577102 | 0.03730038  |
| 0.00214951  | 0.079627044 | 0.038769268 | 0.015778099 |
| 0.009557273 | 0.145841275 | 0.054727024 | 0.010667874 |
| 0.010666821 | 0.012850076 | 0.015113532 | 0.014162598 |
| 0.012110379 | 0.006617552 | 0.014373052 | 0.126594761 |
| 0.017122006 | 0.008133909 | 0.026889703 | 0.012246743 |
| 0.029958053 | 0.054076558 | 0.109966504 | 0.088589364 |
| 0.014030628 | 0.024496349 | 0.001492587 | 0.014571825 |
| 0.012772126 | 0.062635651 | 0.014842301 | 0.035417916 |
| 0.016085878 | 0.286796121 | 0.03232008  | 0.011563148 |
| 0.023242601 | 0.031330928 | 0.130841433 | 0.012495975 |
| 0.006915693 | 0.027338266 | 0.041858462 | 0.125906368 |
| 0.01505469  | 0.000850478 | 0.215445218 | 0.053862656 |
| 0.020961198 | 0.032488269 | 0.009854294 | 0.094242187 |
| 0.023723987 | 0.230587956 | 0.003456839 | 0.077203859 |
| 0.047884556 | 0.007281521 | 0.017781167 | 0.009508944 |
| 0.183626791 | 0.101101226 | 0.023862346 | 0.028263335 |

|             |             |             |             |
|-------------|-------------|-------------|-------------|
| 0.004282445 | 0.123125685 | 0.023558415 | 0.00997873  |
| 0.11252163  | 0.144837292 | 0.103496834 | 0.050959811 |
| 0.00566742  | 0.030036198 | 0.048974065 | 0.002119661 |
| 0.053249484 | 0.026869498 | 0.051543417 | 0.024387105 |
| 0.025668582 | 0.057192482 | 0.088714636 | 0.009165998 |
| 0.043168907 | 0.006820114 | 0.035162115 | 0.002722079 |
| 0.07301205  | 1           | 0.009676057 | 0.002481263 |
| 0.013071482 | 0.028313086 | 0.008647297 | 0.191205841 |
| 0.008055487 | 0.209941427 | 0.029688274 | 0.029537922 |
| 0.139227003 | 0.059614938 | 0.115204599 | 0.058043997 |
| 0.027403142 | 0.036249762 | 0.007348164 | 0.004291853 |
| 0.066342131 | 0.022726751 | 0.046048573 | 0.01369942  |
| 0.024561156 | 0.031263664 | 0.01053121  | 0.01610178  |
| 0.018511501 | 0.017593938 | 0.012407533 | 0.042884334 |
| 0.018266157 | 0.015345035 | 0.017494224 | 0.03057839  |
| 0.078458555 | 0.030051195 | 0.036045463 | 0.022208389 |
| 0.069504834 | 0.013956469 | 0.127721253 | 0.007769744 |
| 0.010771816 | 0.01398224  | 0.045271391 | 0.059818838 |
| 0.027402097 | 0.013633289 | 0.115326344 | 0.089228266 |
| 0.013451629 | 0.011772024 | 0.021755815 | 0.023088802 |
| 0.206489005 | 0.052600646 | 0.02607072  | 0.028548434 |
| 0.006667269 | 0.01342456  | 0.026565854 | 0.013981866 |
| 0.009511371 | 0.100787966 | 0.008761204 | 0.016012519 |
| 0.02958375  | 0.014299223 | 0.041738812 | 0.258050928 |
| 0.168742599 | 0.126824965 | 0.004125329 | 0.063122172 |
| 0.004609512 | 0.065597627 | 0.004217045 | 0.076409046 |
| 0.09846094  | 0.014609117 | 0.091654895 | 0.042850467 |
| 0.048553816 | 0.007394217 | 0.061570438 | 0.261027793 |
| 0.008166276 | 0.015254463 | 0.014809755 | 0.097746084 |
| 0.008222833 | 0.079047572 | 0.105910643 | 0.013195292 |
| 0.003465174 | 0.004423955 | 0.013840055 | 0.067548042 |
| 0.103210883 | 0.032579448 | 0.013418049 | 0.143354596 |
| 0.056328962 | 0.012761067 | 0.043806568 | 0.013668976 |
| 0.194177285 | 0.0094635   | 0.005019503 | 0.028634633 |
| 0.046507338 | 0.241497032 | 0.007508445 | 0.031266117 |
| 0.125636013 | 0.008803708 | 0.02275481  | 0.00848066  |
| 0.045213145 | 0.059078658 | 0.005671215 | 0.013580954 |
| 0.047960095 | 0.011563758 | 0.092364184 | 0.032217647 |
| 0.003165725 |             |             |             |
| SESN1       | 0.460230952 | 0.491197949 | 0.425629712 |
| 0.399417794 | 0.435255155 | 0.370584498 | 0.174896364 |
| 0.169373895 | 0.062372809 | 0.002324653 | 0.017081914 |
| 0.478019134 | 0.19681308  | 0.253208207 | 0.310961102 |
| 0.407168835 | 0.132081485 | 0.367025009 | 0.21221777  |
| 0.400502115 | 0.070246419 | 0.390157071 | 0.069770796 |
| 0.308820665 | 0.095869258 | 0.053045843 | 0.259440133 |
| 0.429023264 | 0.062127817 | 0.322711223 | 0.377454348 |
| 0.102288459 | 0.460622126 | 0.515075212 | 0.451881695 |
| 0.52276118  | 0.443482141 | 0.015470058 | 0.265762102 |
| 0.43849121  | 0.444788368 | 0.393770758 | 0.301887931 |
| 0.028224092 | 0.486776424 | 0.210764298 | 0.418962394 |
| 0.219839889 | 0.023161344 | 0.224384882 | 0.432678494 |
| 0.477943603 | 0.443592156 | 0.196797877 | 0.127253297 |
| 0.205624431 | 0.225859468 | 0.310280846 | 0.330706738 |

|             |             |             |             |
|-------------|-------------|-------------|-------------|
| 0.195326757 | 0.141596117 | 0.481356595 | 0.062450106 |
| 0.132894115 | 0.231296195 | 0.161428119 | 0.235286116 |
| 0.380838742 | 0.397089449 | 0.012682277 | 0.471136347 |
| 0.001694877 | 0.371218479 | 0.394012769 | 0.329204599 |
| 0.033688287 | 0.015148775 | 0.184104213 | 0.309896028 |
| 0.448151348 | 0.453301372 | 0.471972544 | 0.47715791  |
| 0.180190467 | 0.29285369  | 0.43789369  | 0.150708735 |
| 0.451510403 | 0.146856992 | 0.097760582 | 0.416223072 |
| 0.474246549 | 0.508194261 | 0.18825867  | 0.257338758 |
| 0.423982261 | 0.447409892 | 0.425323405 | 0.426646142 |
| 0.337615826 | 0.05261286  | 0.434846704 | 0.479036112 |
| 0.421982013 | 0.359443283 | 0.140318271 | 0.411470264 |
| 0.048700573 | 0.380413584 | 0.329416805 | 0.186844421 |
| 0.44822806  | 0.010016915 | 0.210907346 | 0.337844084 |
| 0.210971915 | 0.458761938 | 0.505477377 | 0.157311626 |
| 0.438550015 | 0.016295772 | 0.133512436 | 0.029848232 |
| 0.331101413 | 0.179671793 | 0.498933041 | 0.447429594 |
| 0.22411     | 0.387243355 | 0.235491465 | 0.00062186  |
| 0.022933202 | 0.1977919   | 0.482268735 | 0.388188057 |
| 0.441025704 | 0.435325704 | 0.205581826 | 0.419494032 |
| 0.475073651 | 0.473005348 | 0.055915811 | 0.074293656 |
| 0.416689306 | 0.195610614 | 0.216178545 | 0.471115826 |
| 0.296736508 | 0.092416795 | 0.108653012 | 0.468283441 |
| 0.405993924 | 0.066397482 | 0.361422654 | 0.408794835 |
| 0.314627564 | 0.371605801 | 0.089555679 | 0.267018988 |
| 0.035055081 | 0.487569374 | 0.026460617 | 0.333163748 |
| 0.26106788  | 0.164907963 | 0.009571107 | 0.241606089 |
| 0.270722008 | 0.44721115  | 0.496068126 | 0.091405634 |
| 0.309193371 | 0.402363446 | 0.330940807 | 0.433974582 |
| 0.005365241 | 0.039165093 | 0.301622771 | 0.473540403 |
| 0.294976429 | 0.481317999 | 0.286765728 | 0.300737154 |
| 0.272417845 | 0.443663257 | 0.00393923  | 0.493921333 |
| 0.512815809 | 0.323300357 | 0.397186415 | 0.445229739 |
| 0.38824209  | 0.438677941 | 0.055134571 | 0.418717425 |
| 0.402930044 | 0.064600156 | 0.469279933 | 0.144824971 |
| 0.454578264 | 0.030702609 | 0.310883647 | 0.469241982 |
| 0.482690071 | 0.007365776 | 0.202283678 | 0.368268027 |
| 0.025521323 | 0.072423845 | 0.440319269 | 0.391117166 |
| 0.358551147 | 0.45761678  | 0.457311655 | 0.370455317 |
| 0.427491753 | 0.213648272 | 0.009684145 | 0.329523485 |
| 0.470349238 | 0.408765013 | 0.417892407 | 0.208875713 |
| 0.376578632 | 0.447064311 | 0.46615355  | 0.195653722 |
| 0.029335588 | 0.291358536 | 0.015054678 | 0.310747393 |
| 0.43552236  | 0.096791917 | 0.403969652 | 0.164070252 |
| 0.064927052 | 0.482061756 | 0.196737686 | 0.305684638 |
| 0.15031268  | 0.410603754 | 0.22670576  | 0.22639039  |
| 0.220204304 | 0.140771458 | 0.351377541 | 0.364679161 |
| 0.024196658 | 0.080322083 | 0.015592459 | 0.442227557 |
| 0.14292567  | 0.367591919 | 0.367122709 | 0.441996166 |
| 0.336754682 | 0.102756136 | 0.381884109 | 0.30029818  |
| 0.103192302 | 0.010945846 | 0.472877447 | 0.39983533  |
| 0.362072593 | 0.12528985  | 0.035087986 | 0.391113743 |
| 0.454388286 | 0.322271615 | 0.280993303 | 0.4403137   |
| 0.023748697 | 0.472970657 | 0.235016464 | 0.108162094 |

|             |             |             |             |
|-------------|-------------|-------------|-------------|
| 0.414488156 | 0.239984633 | 0.437427282 | 0.049377237 |
| 0.410548331 | 0.440338883 | 0.309714109 | 0.163182817 |
| 0.412359326 | 0.406909436 | 0.020243669 | 0.441693419 |
| 0.443957986 | 0.024165921 | 0.499781844 | 0.128705465 |
| 0.016769324 | 0.466644793 | 0.460474342 | 0.063263229 |
| 0.067184079 | 0.312590365 | 0.030772396 | 0.277270536 |
| 0.474305598 | 0.401936653 | 0.444145882 | 0.233946541 |
| 0.02818815  | 0.009037702 | 0.221243887 | 0.44670045  |
| 0.515233245 | 0.487754066 | 0.252212086 | 0.377541756 |
| 0.214171722 | 0.323218171 | 0.13490328  | 0.474448964 |
| 0.225812998 | 0.510341997 | 0.004353125 | 0.471131432 |
| 0.51769119  | 0.295031194 | 0.068939122 | 0.280044518 |
| 0.413661939 | 0.031544485 | 0.194425592 | 0.483828983 |
| 0.439367807 | 0.309035427 | 0.333834771 | 0.457292674 |
| 0.009018387 | 0.028368693 | 0.390234604 | 0.207741656 |
| 0.375659555 | 0.188366802 | 0.070821961 | 0.321274808 |
| 0.030962446 | 0.434966853 | 0.466477869 | 0.042675769 |
| 0.336292551 | 0.302973264 | 0.388428273 | 0.02630615  |
| 0.472461068 | 0.495103647 | 0.51480086  | 0.146668657 |
| 0.485569702 | 0.467035861 | 0.454074236 | 0.072734809 |
| 0.014154569 | 0.516282343 | 0.412527051 | 0.016042369 |
| 0.461577792 | 0.235298311 | 0.00883999  | 0.46173975  |
| 0.158469053 | 0.466668093 | 0.002106727 | 0.110911932 |
| 0.040709272 | 0.469417559 | 0.47073082  | 0.375745209 |
| 0.241510079 | 0.364697187 | 0.007615163 | 0.49538168  |
| 0.46927035  | 0.011432198 | 0.145398574 | 0.477984303 |
| 0.472924238 | 0.504125251 | 0.339760108 | 0.472667079 |
| 0.472181678 | 0.500958788 | 0.216023158 | 0.250438027 |
| 0.444417916 | 0.491564814 | 0.427105406 | 0.434764017 |
| 0.458724093 | 0.441494842 | 0.250245492 | 0.008622424 |
| 0.115611068 | 0.191914324 | 0.307084292 | 0.064529504 |
| 0.334608101 | 0.123528809 | 0.467257659 | 0.466003705 |
| 0.481407616 | 0.003103691 | 0.126354465 | 0.469929159 |
| 0.430103217 | 0.448013228 | 0.020072701 | 0.005451679 |
| 0.009142403 | 0.015660442 | 0.34743673  | 0.23987776  |
| 0.467227178 | 0.24287195  | 0.002255138 | 0.031413167 |
| 0.260564259 | 0.42264275  | 0.485187438 | 0.364508781 |
| 0.475547231 | 0.070874514 | 0.27121499  | 0.389208518 |
| 0.057710733 | 0.373638405 | 0.474637911 | 0.448650053 |
| 0.039069687 | 0.240124316 | 0.411316763 | 0.454367888 |
| 0.092366889 | 0.316614253 | 0.485402525 | 0.297929914 |
| 0.015150594 | 0.072594854 | 0.052459794 | 0.446427134 |
| 0.513686661 | 0.070093575 | 0.027448953 | 0.152245884 |
| 0.096669179 | 0.472579068 | 0.145669891 | 0.474032008 |
| 0.439928548 | 0.429471721 | 0.076232743 | 0.462889474 |
| 0.028527488 | 0.486530024 | 0.362331138 | 0.051003955 |
| 0.305762024 | 0.009676057 | 1           | 0.143129981 |
| 0.325876841 | 0.414010842 | 0.17970989  | 0.015149335 |
| 0.207181469 | 0.045800565 | 0.45872619  | 0.47211315  |
| 0.034140697 | 0.209415001 | 0.29544067  | 0.415964792 |
| 0.269479292 | 0.428889828 | 0.499211254 | 0.431404606 |
| 0.061389224 | 0.193709086 | 0.406306498 | 0.433539774 |
| 0.228994612 | 0.474090978 | 0.283673968 | 0.493810774 |
| 0.431195285 | 0.453617722 | 0.474091777 | 0.321224939 |

|             |             |             |             |
|-------------|-------------|-------------|-------------|
| 0.259519507 | 0.412379026 | 0.362268042 | 0.012654939 |
| 0.340885599 | 0.459478527 | 0.363393917 | 0.142129436 |
| 0.242766877 | 0.438828239 | 0.03887568  | 0.22441709  |
| 0.390629665 | 0.29891567  | 0.123920667 | 0.431898171 |
| 0.413739317 | 0.434199388 | 0.03461904  | 0.047754895 |
| 0.514842528 | 0.430011487 | 0.116721241 | 0.42436283  |
| 0.162389853 | 0.325521416 | 0.477444042 | 0.478815229 |
| 0.386554257 | 0.46929501  | 0.438568909 | 0.392762187 |
| 0.413340118 | 0.229767091 | 0.513639726 | 0.078687417 |
| 0.075150007 | 0.477394667 | 0.079516762 | 0.085013161 |
| 0.123132497 | 0.02117214  | 0.346038686 | 0.433898853 |
| 0.441293232 | 0.374707044 | 0.344401586 | 0.068949047 |
| 0.333891684 | 0.41330825  | 0.349875563 | 0.171535666 |
| 0.06225672  | 0.486253007 | 0.006772199 | 0.049485823 |
| 0.458520645 | 0.455812729 | 0.409306894 | 0.230535763 |
| 0.325753545 | 0.150043609 | 0.284668713 | 0.29421051  |
| 0.330922132 | 0.408771265 | 0.454198214 | 0.02445474  |
| 0.012423914 | 0.471912327 | 0.396093549 | 0.02059886  |
| 0.085679381 | 0.412314293 | 0.320817512 | 0.207370508 |
| 0.020273677 | 0.472059835 | 0.327018657 | 0.444590073 |
| 0.325361257 | 0.056172253 | 0.382953351 | 0.081887363 |
| 0.049657564 | 0.440049008 | 0.430767138 | 0.509036569 |
| 0.384793765 | 0.409271782 | 0.452801024 | 0.472141623 |
| 0.129462091 | 0.442367837 | 0.016924354 | 0.450856141 |
| 0.440349299 |             |             |             |

|             |             |             |             |
|-------------|-------------|-------------|-------------|
| SF3B3       | 0.087753788 | 0.196229724 | 0.083766894 |
| 0.179088223 | 0.099645501 | 0.092815624 | 0.069839509 |
| 0.007520345 | 0.031212933 | 0.004313395 | 0.047101801 |
| 0.092936371 | 0.02490189  | 0.027240264 | 0.060544896 |
| 0.163401281 | 0.039820942 | 0.020535716 | 0.066082525 |
| 0.102927277 | 0.017813583 | 0.168303808 | 0.023905211 |
| 0.044625204 | 0.093725555 | 0.076148507 | 0.156552685 |
| 0.145740432 | 0.075109578 | 0.064821576 | 0.083536876 |
| 0.01040879  | 0.099708795 | 0.179775625 | 0.170090369 |
| 0.172590009 | 0.084155487 | 0.001311494 | 0.076977634 |
| 0.099597698 | 0.217638892 | 0.114176405 | 0.116971803 |
| 0.023902055 | 0.140410816 | 0.110117298 | 0.10605122  |
| 0.005931525 | 0.03874953  | 0.021398973 | 0.123416344 |
| 0.178969016 | 0.15809486  | 0.023716545 | 0.064201669 |
| 0.036870106 | 0.012628708 | 0.070348006 | 0.049862262 |
| 0.077158636 | 0.014572845 | 0.183115425 | 0.027081031 |
| 0.009611565 | 0.017423555 | 0.018147992 | 0.032283766 |
| 0.069264125 | 0.084471456 | 0.000682798 | 0.078934085 |
| 0.000730648 | 0.096832242 | 0.081344399 | 0.151808022 |
| 0.031960565 | 0.010932886 | 0.027078207 | 0.120265555 |
| 0.14977634  | 0.123006748 | 0.214889364 | 0.22146541  |
| 0.020187696 | 0.050239932 | 0.094908329 | 0.05245424  |
| 0.132347154 | 0.081015251 | 0.005509491 | 0.175427603 |
| 0.220101763 | 0.197262306 | 0.042404256 | 0.09604162  |
| 0.212860605 | 0.151184845 | 0.100073827 | 0.107932742 |
| 0.150935301 | 0.01212478  | 0.164321652 | 0.202783687 |
| 0.08993742  | 0.095541539 | 0.082342884 | 0.099861814 |
| 0.021309161 | 0.014284928 | 0.133955398 | 0.003164759 |
| 0.161710162 | 0.017491081 | 0.084631863 | 0.094239359 |



|             |             |             |             |
|-------------|-------------|-------------|-------------|
| 0.007318104 | 0.121297906 | 0.204649099 | 0.06754278  |
| 0.061139444 | 0.003114784 | 0.051157363 | 0.00662348  |
| 0.009116996 | 0.026260666 | 0.154835845 | 0.187848742 |
| 0.007728538 | 0.036466622 | 0.044030413 | 0.002588459 |
| 0.016692053 | 0.004883028 | 0.113286936 | 0.02788043  |
| 0.110411015 | 0.107352404 | 0.164865943 | 0.081516015 |
| 0.153556406 | 0.210223297 | 0.005111289 | 0.018958811 |
| 0.098852368 | 0.007470389 | 0.090205848 | 0.09766365  |
| 0.14917318  | 0.012077361 | 0.030434048 | 0.217544536 |
| 0.117873138 | 0.036886574 | 0.015217446 | 0.144941125 |
| 0.063456271 | 0.126563763 | 0.018971801 | 0.036366093 |
| 0.014602227 | 0.179921228 | 0.018724449 | 0.023798741 |
| 0.081979162 | 0.013348198 | 6.13E-05    | 0.026446361 |
| 0.018468674 | 0.212330234 | 0.13745012  | 0.022763948 |
| 0.051906947 | 0.168828882 | 0.024843094 | 0.181368494 |
| 0.033882731 | 0.002651373 | 0.01386683  | 0.196215844 |
| 0.045792061 | 0.175663541 | 0.028097652 | 0.049436161 |
| 0.105609405 | 0.170282787 | 0.000164815 | 0.164546672 |
| 0.20490596  | 0.017394592 | 0.139830276 | 0.082823611 |
| 0.175754722 | 0.196647826 | 0.000267364 | 0.118908773 |
| 0.048179739 | 0.018135205 | 0.20877865  | 0.096923975 |
| 0.133985629 | 0.053510399 | 0.027601737 | 0.20959226  |
| 0.142048929 | 0.001345325 | 0.040459649 | 0.118445251 |
| 0.012499927 | 0.018350109 | 0.100016116 | 0.145270842 |
| 0.206365818 | 0.15210702  | 0.19244971  | 0.180995236 |
| 0.1127454   | 0.021915616 | 0.001604711 | 0.088866372 |
| 0.121456761 | 0.018143057 | 0.147101328 | 0.028985708 |
| 0.033596532 | 0.179001338 | 0.131021693 | 0.031626275 |
| 0.037234815 | 0.045780768 | 0.002688174 | 0.174815538 |
| 0.12686808  | 0.038488518 | 0.14913237  | 0.003106737 |
| 0.035808924 | 0.221027545 | 0.058584078 | 0.070665981 |
| 0.045245667 | 0.106817934 | 0.040707109 | 0.054834332 |
| 0.04693897  | 0.049479005 | 0.117155675 | 0.113081483 |
| 0.011980902 | 0.042250429 | 0.000854057 | 0.044778505 |
| 0.023486099 | 0.055285371 | 0.051177872 | 0.082424592 |
| 0.015155888 | 0.010342816 | 0.118675984 | 0.046684564 |
| 0.05223947  | 0.016085294 | 0.191729882 | 0.112165237 |
| 0.059050902 | 0.037697708 | 0.01330347  | 0.012180098 |
| 0.19624794  | 0.079569068 | 0.012805929 | 0.178592597 |
| 0.001456998 | 0.188129719 | 0.049408283 | 0.086810669 |
| 0.079685094 | 0.087868216 | 0.187128687 | 0.011950167 |
| 0.047338522 | 0.157238381 | 0.06066217  | 0.128842657 |
| 0.112183418 | 0.111571224 | 0.005866427 | 0.091105707 |
| 0.079817857 | 0.022556168 | 0.197149913 | 0.024705477 |
| 0.01531707  | 0.13989665  | 0.212698978 | 0.053451467 |
| 0.045762779 | 0.148067909 | 0.008421892 | 0.137390507 |
| 0.21735891  | 0.183677692 | 0.187846008 | 0.044029223 |
| 0.035301075 | 0.006384052 | 0.04113502  | 0.067723694 |
| 0.158440044 | 0.199241054 | 0.053251633 | 0.144136464 |
| 0.081413713 | 0.146565005 | 0.002338722 | 0.215252905 |
| 0.00315532  | 0.162454466 | 0.004608356 | 0.195025374 |
| 0.181732744 | 0.024715029 | 0.089892178 | 0.086434521 |
| 0.106331194 | 0.029992042 | 0.011006267 | 0.17631398  |
| 0.175418559 | 0.121926407 | 0.143952269 | 0.080546065 |

|             |             |             |             |
|-------------|-------------|-------------|-------------|
| 0.007053943 | 0.006121572 | 0.159628162 | 0.045267564 |
| 0.090333631 | 0.072721608 | 0.008701216 | 0.016719801 |
| 0.021694552 | 0.166892893 | 0.137999355 | 0.067910797 |
| 0.126711293 | 0.017009871 | 0.114627586 | 0.023629401 |
| 0.221371804 | 0.170088213 | 0.178600009 | 0.010855109 |
| 0.11120564  | 0.226200744 | 0.160777146 | 0.02325175  |
| 0.020415975 | 0.186423099 | 0.079479674 | 0.0074992   |
| 0.172333705 | 0.021888867 | 0.010938027 | 0.171770171 |
| 0.048246823 | 0.114168891 | 0.001526229 | 0.001466565 |
| 0.007828373 | 0.170633671 | 0.184889789 | 0.079138136 |
| 0.04052815  | 0.06240805  | 0.000456926 | 0.188979809 |
| 0.181517819 | 0.019974343 | 0.027812543 | 0.152886366 |
| 0.184559434 | 0.171755659 | 0.154535369 | 0.226681508 |
| 0.134834742 | 0.19124258  | 0.01386254  | 0.137368803 |
| 0.17598696  | 0.195954213 | 0.108391646 | 0.146012722 |
| 0.166242278 | 0.133373346 | 0.122391757 | 0.018578961 |
| 0.045900856 | 0.022339532 | 0.105180198 | 0.064745854 |
| 0.043956666 | 0.085673881 | 0.149171425 | 0.177474249 |
| 0.202402333 | 0.006679603 | 0.01225053  | 0.12962533  |
| 0.138540777 | 0.166589547 | 0.000774359 | 0.001485284 |
| 0.000487756 | 0.036651039 | 0.06418975  | 0.065748097 |
| 0.200875777 | 0.017217235 | 0.005330909 | 0.003567929 |
| 0.018448277 | 0.177966127 | 0.189646072 | 0.126369875 |
| 0.138111028 | 0.020062387 | 0.069334518 | 0.111085479 |
| 0.050282444 | 0.043745499 | 0.218441706 | 0.168566843 |
| 0.004750554 | 0.074594903 | 0.024940653 | 0.196730971 |
| 0.031459564 | 0.090030862 | 0.089944819 | 0.057980546 |
| 0.000319833 | 0.044208585 | 0.062828901 | 0.141880623 |
| 0.175335108 | 0.035734504 | 0.025856507 | 0.00196955  |
| 0.058164718 | 0.155181895 | 0.035041013 | 0.208482778 |
| 0.149959568 | 0.165619812 | 0.013675741 | 0.182986674 |
| 0.023677002 | 0.164684114 | 0.131435542 | 0.005173499 |
| 0.019069003 | 0.002481263 | 0.143129981 | 1           |
| 0.023178167 | 0.065690753 | 0.048696331 | 0.010146878 |
| 0.033302291 | 0.026258858 | 0.222638159 | 0.198497128 |
| 0.005111459 | 0.029516684 | 0.065870027 | 0.077534497 |
| 0.042807035 | 0.186107636 | 0.170675318 | 0.087860734 |
| 0.032683002 | 0.003395873 | 0.09254978  | 0.062168975 |
| 0.011747337 | 0.201702343 | 0.135457917 | 0.195710846 |
| 0.088514574 | 0.142792113 | 0.172944367 | 0.137651318 |
| 0.020160719 | 0.061592761 | 0.139707192 | 0.005576685 |
| 0.074105195 | 0.194033961 | 0.03439012  | 0.071396835 |
| 0.143768587 | 0.112192953 | 0.001867105 | 0.001126715 |
| 0.098857773 | 0.063476589 | 0.022449508 | 0.155430211 |
| 0.050328298 | 0.069723425 | 0.000478659 | 0.069322148 |
| 0.191186102 | 0.138170111 | 0.011356185 | 0.146043424 |
| 0.034424614 | 0.186774886 | 0.14557575  | 0.154439985 |
| 0.036169526 | 0.167694398 | 0.10583171  | 0.117569486 |
| 0.136947128 | 0.081484064 | 0.191779445 | 0.001137926 |
| 0.022164864 | 0.064610656 | 0.055125736 | 0.040087998 |
| 0.053332995 | 0.015476494 | 0.065111333 | 0.121403348 |
| 0.053045508 | 0.135763517 | 0.006624829 | 0.009303742 |
| 0.078351361 | 0.02600284  | 0.097366471 | 0.048714986 |
| 0.027465411 | 0.193825466 | 0.003931346 | 0.017417321 |

|             |             |             |             |
|-------------|-------------|-------------|-------------|
| 0.046857969 | 0.193566988 | 0.174015739 | 0.052714783 |
| 0.062702261 | 0.01199749  | 0.097851418 | 0.02962118  |
| 0.068322898 | 0.007424537 | 0.191493449 | 0.002872838 |
| 0.003740152 | 0.187862517 | 0.033460155 | 0.001789837 |
| 0.006510903 | 0.060575767 | 0.009206944 | 0.086105766 |
| 0.014179965 | 0.202193043 | 0.081302026 | 0.10756068  |
| 0.068767978 | 0.011038185 | 0.071991422 | 0.002608051 |
| 0.002991304 | 0.120833864 | 0.107914342 | 0.187539353 |
| 0.045763997 | 0.186233138 | 0.119064749 | 0.123787569 |
| 0.002148462 | 0.054957012 | 0.012084755 | 0.127973213 |
| 0.083578676 |             |             |             |
| SFMBT1      | 0.270079552 | 0.405678289 | 0.113783773 |
| 0.329625981 | 0.173199847 | 0.226549849 | 0.136658398 |
| 0.138068385 | 0.033026607 | 0.013714722 | 0.009563805 |
| 0.195215754 | 0.070440791 | 0.141533897 | 0.079618666 |
| 0.29271853  | 0.047422398 | 0.112147558 | 0.151292056 |
| 0.309787872 | 0.100385054 | 0.252835406 | 0.066901662 |
| 0.053873559 | 0.026876452 | 0.034123853 | 0.048736965 |
| 0.387159178 | 0.038457456 | 0.187428863 | 0.356433321 |
| 0.039552614 | 0.346827159 | 0.381374178 | 0.224191662 |
| 0.361307066 | 0.238770449 | 0.02567646  | 0.103973758 |
| 0.354662066 | 0.249799966 | 0.324061331 | 0.207138124 |
| 0.039823728 | 0.397794542 | 0.156298288 | 0.162796465 |
| 0.100038637 | 0.017928598 | 0.13048074  | 0.384879271 |
| 0.348727284 | 0.18198721  | 0.132287969 | 0.092092272 |
| 0.055002255 | 0.157461691 | 0.039281608 | 0.320247111 |
| 0.138790166 | 0.133901875 | 0.349331898 | 0.050184489 |
| 0.068848621 | 0.146264435 | 0.047622452 | 0.166898208 |
| 0.056738837 | 0.331982606 | 0.034468108 | 0.158616498 |
| 0.010476827 | 0.295270223 | 0.164489668 | 0.040342766 |
| 0.026152889 | 0.024098259 | 0.055959237 | 0.242163137 |
| 0.386025362 | 0.341520416 | 0.340881437 | 0.327798255 |
| 0.067316394 | 0.109806492 | 0.109944434 | 0.078680453 |
| 0.341418837 | 0.100880706 | 0.059945136 | 0.279702545 |
| 0.344003467 | 0.376665659 | 0.058912394 | 0.093220677 |
| 0.313053817 | 0.400290384 | 0.138772618 | 0.138559202 |
| 0.055958548 | 0.013835823 | 0.346323989 | 0.368691265 |
| 0.357758503 | 0.060876468 | 0.053583145 | 0.395673978 |
| 0.03852489  | 0.100863559 | 0.246198965 | 0.07414702  |
| 0.394704592 | 0.019685243 | 0.064726768 | 0.228094506 |
| 0.08725688  | 0.314891873 | 0.349179418 | 0.12201673  |
| 0.144326897 | 0.023273329 | 0.019275277 | 0.022124813 |
| 0.103198522 | 0.020041135 | 0.356402588 | 0.376999541 |
| 0.178579009 | 0.092163536 | 0.136303289 | 0.003080515 |
| 0.015398236 | 0.056022831 | 0.307989235 | 0.160919011 |
| 0.301441806 | 0.246763332 | 0.064365784 | 0.31710306  |
| 0.18830673  | 0.334254465 | 0.025291417 | 0.075118675 |
| 0.189498047 | 0.058444245 | 0.145546942 | 0.205415727 |
| 0.095747424 | 0.100243604 | 0.079507816 | 0.380130104 |
| 0.404854682 | 0.062546319 | 0.128875563 | 0.275454202 |
| 0.094307585 | 0.121762968 | 0.079482894 | 0.127463915 |
| 0.063059074 | 0.320419863 | 0.011855392 | 0.180905265 |
| 0.039300904 | 0.043200403 | 0.018374895 | 0.186306077 |
| 0.106294231 | 0.309791339 | 0.336162523 | 0.065828272 |

|             |             |             |             |
|-------------|-------------|-------------|-------------|
| 0.148318876 | 0.20826013  | 0.206918146 | 0.266645278 |
| 0.008896986 | 0.038150686 | 0.155276796 | 0.38580107  |
| 0.288429183 | 0.352486973 | 0.117851033 | 0.074493751 |
| 0.11804419  | 0.326567229 | 0.001150427 | 0.379860479 |
| 0.363465414 | 0.145602891 | 0.198753365 | 0.196534781 |
| 0.076902438 | 0.353963833 | 0.017354522 | 0.289496369 |
| 0.28831819  | 0.054631473 | 0.371705553 | 0.065919973 |
| 0.3513954   | 0.025527599 | 0.152716905 | 0.239444132 |
| 0.230818024 | 0.009182416 | 0.158634641 | 0.314561381 |
| 0.010046492 | 0.098266586 | 0.300775186 | 0.271282308 |
| 0.17849064  | 0.285372153 | 0.369880642 | 0.06282102  |
| 0.167358541 | 0.132616119 | 0.012184636 | 0.104977305 |
| 0.279235051 | 0.075749856 | 0.384598698 | 0.116962675 |
| 0.223215129 | 0.37554931  | 0.259804847 | 0.051406669 |
| 0.038530539 | 0.193816265 | 0.036425247 | 0.109638873 |
| 0.260962655 | 0.082897442 | 0.103826243 | 0.061115277 |
| 0.027901503 | 0.384891113 | 0.028760425 | 0.035806431 |
| 0.01655652  | 0.221476178 | 0.150291088 | 0.097939767 |
| 0.059842107 | 0.063576486 | 0.064489525 | 0.083650656 |
| 0.05926927  | 0.054013139 | 0.005332883 | 0.080936474 |
| 0.062629106 | 0.094919635 | 0.100368785 | 0.298384091 |
| 0.156580714 | 0.076260777 | 0.132076561 | 0.051182402 |
| 0.032408546 | 0.012960698 | 0.391638484 | 0.268043957 |
| 0.32184539  | 0.081215025 | 0.027244185 | 0.079072245 |
| 0.377881789 | 0.175174447 | 0.10796677  | 0.38903042  |
| 0.024822364 | 0.347710706 | 0.086242135 | 0.048031266 |
| 0.084909941 | 0.144279467 | 0.370497982 | 0.022204024 |
| 0.238406858 | 0.402318063 | 0.135733767 | 0.052739364 |
| 0.371150306 | 0.281324812 | 0.035764324 | 0.292886854 |
| 0.312740594 | 0.025958778 | 0.377406619 | 0.040125711 |
| 0.014393621 | 0.226874685 | 0.231865826 | 0.036310267 |
| 0.029468199 | 0.134980304 | 0.070937502 | 0.140933936 |
| 0.387551551 | 0.273656739 | 0.290347344 | 0.041043206 |
| 0.036971092 | 0.014571977 | 0.04931059  | 0.132177395 |
| 0.389649214 | 0.344893592 | 0.137736532 | 0.104983547 |
| 0.161464796 | 0.061284244 | 0.111632746 | 0.365306389 |
| 0.051601008 | 0.386741506 | 0.008940186 | 0.236451307 |
| 0.355900668 | 0.208475718 | 0.02652384  | 0.201849884 |
| 0.359498027 | 0.03768543  | 0.114308182 | 0.377213715 |
| 0.33920631  | 0.076042615 | 0.071203449 | 0.255785144 |
| 0.032293437 | 0.058226095 | 0.143495514 | 0.02618478  |
| 0.09068102  | 0.071612043 | 0.00595598  | 0.131628709 |
| 0.035445213 | 0.38431517  | 0.339167034 | 0.022402204 |
| 0.192919983 | 0.122658814 | 0.190801008 | 0.032114025 |
| 0.264539781 | 0.338368307 | 0.393449852 | 0.119816957 |
| 0.289809898 | 0.325798565 | 0.127089647 | 0.034239548 |
| 0.00915083  | 0.354789385 | 0.291840085 | 0.020328332 |
| 0.373366389 | 0.182516634 | 0.017455292 | 0.413610172 |
| 0.117987368 | 0.357532537 | 0.004754138 | 0.015349916 |
| 0.013290072 | 0.306668941 | 0.356021034 | 0.332483731 |
| 0.097727562 | 0.238492985 | 0.002167486 | 0.363238036 |
| 0.385195115 | 0.006500729 | 0.032248648 | 0.274700988 |
| 0.209627502 | 0.422091559 | 0.056741808 | 0.275103155 |
| 0.166736961 | 0.349108882 | 0.119344855 | 0.122244977 |

|             |             |             |             |
|-------------|-------------|-------------|-------------|
| 0.342661906 | 0.311326198 | 0.332700847 | 0.382273418 |
| 0.374708171 | 0.231962933 | 0.183179172 | 0.020524454 |
| 0.02016918  | 0.145982918 | 0.060485872 | 0.024022429 |
| 0.260326327 | 0.040179927 | 0.364697981 | 0.349464795 |
| 0.326754758 | 0.005549629 | 0.121296979 | 0.297913237 |
| 0.414522469 | 0.397983351 | 0.013097022 | 0.002206561 |
| 0.002191792 | 0.004658525 | 0.260248145 | 0.075925949 |
| 0.34686944  | 0.089667422 | 0.008059704 | 0.08282277  |
| 0.102930067 | 0.150975162 | 0.377162654 | 0.287981578 |
| 0.262141438 | 0.047119444 | 0.084490086 | 0.309491005 |
| 0.018845642 | 0.256727128 | 0.341410605 | 0.400632757 |
| 0.021563685 | 0.07129376  | 0.159532881 | 0.393944774 |
| 0.00655566  | 0.151937904 | 0.224702992 | 0.09863629  |
| 0.008519915 | 0.026551172 | 0.022257704 | 0.30502797  |
| 0.342856764 | 0.039827524 | 0.021224746 | 0.087902586 |
| 0.074375857 | 0.349065861 | 0.079525995 | 0.37958983  |
| 0.369825356 | 0.353525864 | 0.022100533 | 0.369436839 |
| 0.021637633 | 0.370010796 | 0.085988848 | 0.029908581 |
| 0.091342732 | 0.013071482 | 0.325876841 | 0.023178167 |
| 1           | 0.308219846 | 0.031285366 | 0.00763949  |
| 0.022548119 | 0.028076016 | 0.354313905 | 0.29352964  |
| 0.011803249 | 0.115346347 | 0.119111907 | 0.255309349 |
| 0.223444969 | 0.30573263  | 0.387160735 | 0.136980203 |
| 0.073300152 | 0.025717331 | 0.338318137 | 0.283711673 |
| 0.172796442 | 0.35045952  | 0.065777337 | 0.373738961 |
| 0.299004465 | 0.363721903 | 0.334353019 | 0.186253268 |
| 0.048556355 | 0.231205298 | 0.297520674 | 0.032920658 |
| 0.194499967 | 0.344422478 | 0.186082031 | 0.03543331  |
| 0.08671506  | 0.107156962 | 0.04574717  | 0.075250243 |
| 0.064848711 | 0.258882929 | 0.091724523 | 0.345688428 |
| 0.279252272 | 0.295731947 | 0.068384688 | 0.02153429  |
| 0.408014478 | 0.358217143 | 0.084960321 | 0.270123002 |
| 0.067495174 | 0.139984611 | 0.279208973 | 0.261622996 |
| 0.078079057 | 0.330007204 | 0.368984047 | 0.313029876 |
| 0.397808486 | 0.147585148 | 0.388082248 | 0.119054211 |
| 0.020012013 | 0.210109791 | 0.052763709 | 0.0350712   |
| 0.080024132 | 0.013384678 | 0.038442434 | 0.280789688 |
| 0.058147045 | 0.240316369 | 0.133467534 | 0.037900773 |
| 0.122410424 | 0.129614316 | 0.17873996  | 0.119134208 |
| 0.049786095 | 0.375620602 | 0.007155288 | 0.032627284 |
| 0.073073303 | 0.276955699 | 0.102074922 | 0.07212131  |
| 0.043807415 | 0.0376162   | 0.147508457 | 0.201905872 |
| 0.111611858 | 0.079974826 | 0.280389981 | 0.03623363  |
| 0.040135887 | 0.371036255 | 0.168202688 | 0.009391002 |
| 0.028792522 | 0.228920374 | 0.11301977  | 0.069012132 |
| 0.008048336 | 0.315721899 | 0.118775998 | 0.155864867 |
| 0.22753549  | 0.045960205 | 0.350457601 | 0.047519752 |
| 0.046452529 | 0.38633933  | 0.127129068 | 0.356009971 |
| 0.09443694  | 0.307706446 | 0.370399957 | 0.323741796 |
| 0.04834135  | 0.116587909 | 0.03238024  | 0.362098219 |
| 0.073025847 |             |             |             |
| SGCB        | 0.358439099 | 0.474873611 | 0.283279467 |
| 0.345208678 | 0.302088004 | 0.286070444 | 0.215721241 |
| 0.277483431 | 0.081633899 | 0.006405061 | 0.013310242 |

|             |             |             |             |
|-------------|-------------|-------------|-------------|
| 0.297877595 | 0.131406905 | 0.239636259 | 0.241816743 |
| 0.348785984 | 0.105001432 | 0.373953084 | 0.243335096 |
| 0.342763029 | 0.132906753 | 0.28773897  | 0.121721785 |
| 0.209987795 | 0.071929567 | 0.064858482 | 0.165005601 |
| 0.42625986  | 0.077674776 | 0.253173487 | 0.349437469 |
| 0.124390445 | 0.401468768 | 0.466570033 | 0.267773353 |
| 0.446316072 | 0.329685478 | 0.03429929  | 0.221934511 |
| 0.429296963 | 0.317321843 | 0.342222345 | 0.272914692 |
| 0.055704135 | 0.459001402 | 0.221050884 | 0.291097101 |
| 0.250489425 | 0.027647724 | 0.258154182 | 0.4408152   |
| 0.405954971 | 0.25917136  | 0.279767088 | 0.165376243 |
| 0.101867258 | 0.254292149 | 0.126197916 | 0.296924682 |
| 0.215493337 | 0.199083248 | 0.416964449 | 0.094818788 |
| 0.140580078 | 0.331232571 | 0.144833557 | 0.293898219 |
| 0.215504208 | 0.367028655 | 0.053937515 | 0.266694591 |
| 0.00478246  | 0.343740603 | 0.300778918 | 0.160089455 |
| 0.051498999 | 0.018955467 | 0.167708533 | 0.279868501 |
| 0.441294163 | 0.444649027 | 0.412527557 | 0.41123446  |
| 0.13727878  | 0.275870057 | 0.248348196 | 0.155067702 |
| 0.413411959 | 0.164667865 | 0.140212786 | 0.33247143  |
| 0.419382487 | 0.451957648 | 0.162674839 | 0.216642211 |
| 0.336515766 | 0.461631082 | 0.285528791 | 0.279031326 |
| 0.183872918 | 0.05835567  | 0.395317261 | 0.441906404 |
| 0.401223975 | 0.186885888 | 0.129411745 | 0.395764127 |
| 0.080323643 | 0.319043372 | 0.287002063 | 0.166826178 |
| 0.450199809 | 0.029601001 | 0.166556225 | 0.28632839  |
| 0.282720887 | 0.384458771 | 0.438618422 | 0.198801295 |
| 0.311714277 | 0.026869282 | 0.06992047  | 0.055468884 |
| 0.275827093 | 0.087139476 | 0.428781645 | 0.403163795 |
| 0.282315638 | 0.253582634 | 0.285164845 | 0.005588538 |
| 0.031471372 | 0.214197046 | 0.364942405 | 0.373422329 |
| 0.371440231 | 0.348895041 | 0.154856387 | 0.349184567 |
| 0.257098334 | 0.405703842 | 0.053717196 | 0.145915398 |
| 0.310096465 | 0.209751167 | 0.225512995 | 0.295543586 |
| 0.209327488 | 0.186676549 | 0.148245582 | 0.461589198 |
| 0.438504834 | 0.104893518 | 0.3618647   | 0.324663644 |
| 0.215499927 | 0.236479364 | 0.146835859 | 0.23515454  |
| 0.074287195 | 0.41051599  | 0.031904087 | 0.367187729 |
| 0.138665276 | 0.103061406 | 0.042900355 | 0.305811847 |
| 0.235301378 | 0.342907013 | 0.420463221 | 0.145745816 |
| 0.264572892 | 0.283821381 | 0.328669728 | 0.280394545 |
| 0.007161106 | 0.086057462 | 0.308758194 | 0.443589614 |
| 0.25519242  | 0.449356148 | 0.296449063 | 0.258246482 |
| 0.229553861 | 0.395521027 | 0.007044157 | 0.451567672 |
| 0.451022599 | 0.294559064 | 0.25917047  | 0.320013176 |
| 0.209757253 | 0.392115626 | 0.05781113  | 0.323032651 |
| 0.320793505 | 0.120215136 | 0.448348886 | 0.131544778 |
| 0.430079181 | 0.043487858 | 0.303416668 | 0.328291224 |
| 0.285358373 | 0.014546073 | 0.235052191 | 0.321782102 |
| 0.032679266 | 0.137535704 | 0.369821059 | 0.313104904 |
| 0.26238585  | 0.372637612 | 0.437264212 | 0.190781804 |
| 0.294005805 | 0.296556751 | 0.025674354 | 0.2466399   |
| 0.371977817 | 0.228115162 | 0.429697389 | 0.258494193 |
| 0.295465383 | 0.436407753 | 0.340624952 | 0.131056256 |

|             |             |             |             |
|-------------|-------------|-------------|-------------|
| 0.05822842  | 0.31551289  | 0.033434795 | 0.237063988 |
| 0.357110379 | 0.105156281 | 0.241960637 | 0.198686556 |
| 0.068555874 | 0.458654217 | 0.117618069 | 0.153294511 |
| 0.076000511 | 0.260283667 | 0.292690753 | 0.151436328 |
| 0.110835962 | 0.155694172 | 0.219979123 | 0.253704388 |
| 0.065172189 | 0.090316466 | 0.027067464 | 0.205425675 |
| 0.077697891 | 0.195381572 | 0.19753128  | 0.323055315 |
| 0.276871585 | 0.090684574 | 0.254990329 | 0.210848705 |
| 0.100778846 | 0.022384699 | 0.460647476 | 0.334206475 |
| 0.323943782 | 0.179532879 | 0.059045407 | 0.193575905 |
| 0.407065417 | 0.225541807 | 0.28711417  | 0.413199248 |
| 0.056351725 | 0.432337447 | 0.166795558 | 0.103747208 |
| 0.218035608 | 0.220653405 | 0.430368345 | 0.057328766 |
| 0.347594434 | 0.437565847 | 0.297694259 | 0.138249893 |
| 0.378310073 | 0.330231971 | 0.048610689 | 0.35974537  |
| 0.346303713 | 0.039804411 | 0.458313339 | 0.107867436 |
| 0.030514927 | 0.302573322 | 0.2846041   | 0.082654977 |
| 0.081661351 | 0.219258725 | 0.09013968  | 0.230456844 |
| 0.456482685 | 0.305546143 | 0.318667282 | 0.174452284 |
| 0.047194524 | 0.007305512 | 0.176187701 | 0.290004809 |
| 0.462160755 | 0.432227107 | 0.259649061 | 0.213342468 |
| 0.240967173 | 0.193638966 | 0.211017843 | 0.435027482 |
| 0.241733316 | 0.476692    | 0.014914707 | 0.315777412 |
| 0.437689709 | 0.287627423 | 0.062430043 | 0.272606503 |
| 0.369434232 | 0.066277098 | 0.296681626 | 0.444685502 |
| 0.402177121 | 0.236844889 | 0.21948436  | 0.337277998 |
| 0.032649851 | 0.074653259 | 0.274051991 | 0.119640119 |
| 0.255658503 | 0.199775097 | 0.031469683 | 0.337034888 |
| 0.044543624 | 0.413382101 | 0.407068661 | 0.052393436 |
| 0.219658165 | 0.332921774 | 0.287364701 | 0.054694685 |
| 0.351714215 | 0.44026276  | 0.468567292 | 0.25350901  |
| 0.353250299 | 0.401608424 | 0.213136861 | 0.097868677 |
| 0.022213194 | 0.447178056 | 0.342991848 | 0.024682212 |
| 0.429768818 | 0.245563344 | 0.010005708 | 0.470885157 |
| 0.218694653 | 0.420490195 | 0.009168653 | 0.093366462 |
| 0.052826244 | 0.391210124 | 0.427665589 | 0.343591421 |
| 0.187795711 | 0.356595322 | 0.012166296 | 0.459998825 |
| 0.4371112   | 0.015872235 | 0.113509546 | 0.328066406 |
| 0.275443113 | 0.497716223 | 0.179508244 | 0.345244062 |
| 0.245548005 | 0.423733227 | 0.201789333 | 0.217207713 |
| 0.37944705  | 0.405613173 | 0.381329298 | 0.453965382 |
| 0.407842382 | 0.303369467 | 0.249850666 | 0.023255773 |
| 0.091616265 | 0.264278205 | 0.166731133 | 0.052153038 |
| 0.304338284 | 0.106666431 | 0.453094818 | 0.415191468 |
| 0.398978593 | 0.00993777  | 0.212187483 | 0.353945125 |
| 0.437366529 | 0.46023082  | 0.049011282 | 0.010037252 |
| 0.013040006 | 0.010772714 | 0.338144639 | 0.218525421 |
| 0.431764207 | 0.161945382 | 0.009894949 | 0.096374623 |
| 0.272238511 | 0.243478003 | 0.442593961 | 0.319080512 |
| 0.356455176 | 0.10347139  | 0.166490712 | 0.348520475 |
| 0.051526552 | 0.30087012  | 0.407531781 | 0.444060956 |
| 0.065859351 | 0.220139176 | 0.365845408 | 0.448529666 |
| 0.033385397 | 0.262736045 | 0.30150391  | 0.21640199  |
| 0.033139508 | 0.078384582 | 0.060897735 | 0.379329766 |

|             |             |             |             |
|-------------|-------------|-------------|-------------|
| 0.42468159  | 0.051790578 | 0.025150568 | 0.168018109 |
| 0.105841231 | 0.424874166 | 0.143620431 | 0.457832737 |
| 0.402752801 | 0.393182751 | 0.07065023  | 0.444836959 |
| 0.034568242 | 0.429689018 | 0.206799436 | 0.062112225 |
| 0.306607823 | 0.028313086 | 0.414010842 | 0.065690753 |
| 0.308219846 | 1           | 0.130516308 | 0.021811884 |
| 0.116126712 | 0.058594702 | 0.410837707 | 0.377658206 |
| 0.045936423 | 0.282457803 | 0.275002551 | 0.353589701 |
| 0.293924107 | 0.329198675 | 0.457379467 | 0.247492924 |
| 0.106789266 | 0.121983134 | 0.368195558 | 0.325596435 |
| 0.289463043 | 0.42847742  | 0.174170752 | 0.468914615 |
| 0.360741671 | 0.452222017 | 0.409733646 | 0.285337488 |
| 0.151177385 | 0.331251087 | 0.268869722 | 0.027659051 |
| 0.323946366 | 0.382077466 | 0.37265069  | 0.096110719 |
| 0.178936553 | 0.231228093 | 0.10562796  | 0.244674423 |
| 0.183885436 | 0.272011621 | 0.138200003 | 0.407103802 |
| 0.358394443 | 0.33816226  | 0.109515666 | 0.055101112 |
| 0.491306946 | 0.435544722 | 0.187098546 | 0.304466092 |
| 0.191212772 | 0.246698538 | 0.365339693 | 0.343005637 |
| 0.276168357 | 0.36626548  | 0.396332285 | 0.282457469 |
| 0.413107495 | 0.261835679 | 0.467374682 | 0.187536261 |
| 0.066482831 | 0.298891077 | 0.074976953 | 0.098384161 |
| 0.145841778 | 0.035114917 | 0.157458966 | 0.337671709 |
| 0.211494205 | 0.281621986 | 0.313702308 | 0.100961126 |
| 0.263735063 | 0.337355048 | 0.29555124  | 0.200679305 |
| 0.073145994 | 0.435724097 | 0.013203899 | 0.071263969 |
| 0.230280815 | 0.343509051 | 0.21042885  | 0.217953467 |
| 0.166291862 | 0.139272227 | 0.245700336 | 0.2957191   |
| 0.190221232 | 0.284057926 | 0.346817036 | 0.069420117 |
| 0.041545703 | 0.444192352 | 0.342227125 | 0.036594317 |
| 0.092780739 | 0.313724908 | 0.346290782 | 0.165551323 |
| 0.026617177 | 0.391859613 | 0.229282048 | 0.291747733 |
| 0.32679102  | 0.101899925 | 0.387127038 | 0.138998699 |
| 0.121357995 | 0.441868877 | 0.266307694 | 0.439565223 |
| 0.290107017 | 0.331818052 | 0.43732123  | 0.365467436 |
| 0.184287872 | 0.274938083 | 0.047119652 | 0.426933218 |
| 0.220325319 |             |             |             |
| SHMT2       | 0.173332457 | 0.234691478 | 0.186620461 |
| 0.218985027 | 0.139377248 | 0.115753104 | 0.082615608 |
| 0.020093963 | 0.05448139  | 0.000931374 | 0.011866287 |
| 0.142121048 | 0.012992978 | 0.022284447 | 0.094081482 |
| 0.273926183 | 0.034267108 | 0.072899151 | 0.107103915 |
| 0.171272967 | 0.015718015 | 0.214736092 | 0.040198205 |
| 0.10250357  | 0.085012522 | 0.07216746  | 0.205209245 |
| 0.215698333 | 0.083320908 | 0.055620102 | 0.128842138 |
| 0.031342097 | 0.161846434 | 0.220519589 | 0.175972499 |
| 0.198684933 | 0.165221701 | 0.000166306 | 0.060727606 |
| 0.175721737 | 0.298283648 | 0.182054737 | 0.142981706 |
| 0.023225382 | 0.168477014 | 0.121216345 | 0.206812072 |
| 0.011407342 | 0.025104711 | 0.031046691 | 0.166638749 |
| 0.176927744 | 0.173185992 | 0.051048841 | 0.062288324 |
| 0.012229712 | 0.014931774 | 0.040960896 | 0.073892647 |
| 0.086848178 | 0.014918323 | 0.196066553 | 0.031848912 |
| 0.013141685 | 0.045215687 | 0.036669165 | 0.05142063  |



|              |             |             |             |
|--------------|-------------|-------------|-------------|
| 0.117947812  | 0.141182379 | 0.003653246 | 0.133266274 |
| 0.000515974  | 0.186789969 | 0.170526412 | 0.200948651 |
| 0.044086349  | 0.00306694  | 0.054352763 | 0.130460995 |
| 0.219287806  | 0.194675235 | 0.265412079 | 0.276790659 |
| 0.015471041  | 0.12221922  | 0.158322246 | 0.050704393 |
| 0.212105121  | 0.061135463 | 0.010986201 | 0.258289544 |
| 0.27005685   | 0.221603351 | 0.06586624  | 0.195271252 |
| 0.208132111  | 0.198315252 | 0.130602253 | 0.127410815 |
| 0.154995796  | 0.0394847   | 0.186860975 | 0.240169049 |
| 0.134966881  | 0.138352699 | 0.104378861 | 0.140559347 |
| 0.041195286  | 0.026082515 | 0.173309178 | 0.004691265 |
| 0.235781235  | 0.028804528 | 0.129989328 | 0.098430233 |
| 0.032021788  | 0.185273948 | 0.236993986 | 0.091669186 |
| 0.115818624  | 0.002820136 | 0.049281621 | 0.022778649 |
| 0.0111114327 | 0.037586957 | 0.176239615 | 0.204791083 |
| 0.011890394  | 0.040666951 | 0.081541082 | 0.00578638  |
| 0.01929974   | 0.020936513 | 0.14187348  | 0.075896269 |
| 0.200685832  | 0.18195775  | 0.130423594 | 0.122058043 |
| 0.188363077  | 0.264200492 | 0.003117651 | 0.040641437 |
| 0.144399863  | 0.031616054 | 0.139796599 | 0.120563678 |
| 0.175093826  | 0.030406254 | 0.042191035 | 0.277997543 |
| 0.159790172  | 0.045782065 | 0.040997982 | 0.229553604 |
| 0.0424145    | 0.169193406 | 0.036792973 | 0.031843357 |
| 0.012745012  | 0.21645094  | 0.028337477 | 0.065095691 |
| 0.095152289  | 0.010281292 | 0.003028456 | 0.046597943 |
| 0.01732043   | 0.190862384 | 0.170073001 | 0.053160102 |
| 0.051767171  | 0.222399085 | 0.049430549 | 0.155464076 |
| 0.006528125  | 0.008520609 | 0.032903569 | 0.217722427 |
| 0.053449805  | 0.248496768 | 0.05316969  | 0.127214535 |
| 0.169172414  | 0.263958669 | 0.00180684  | 0.195302816 |
| 0.240302544  | 0.033165957 | 0.119024093 | 0.162881456 |
| 0.239488164  | 0.233090825 | 0.001275126 | 0.175255398 |
| 0.083429781  | 0.048771555 | 0.276013981 | 0.09840708  |
| 0.179010968  | 0.050409708 | 0.036057918 | 0.273018341 |
| 0.147560762  | 0.002506904 | 0.042024362 | 0.172037552 |
| 0.028474381  | 0.017644598 | 0.191421602 | 0.200588557 |
| 0.243529483  | 0.257290114 | 0.264534864 | 0.2317269   |
| 0.140424633  | 0.050322859 | 0.005906273 | 0.172172727 |
| 0.214338751  | 0.022601009 | 0.178265176 | 0.051299134 |
| 0.059133282  | 0.215723693 | 0.178218075 | 0.022167575 |
| 0.042426794  | 0.072608288 | 0.002338788 | 0.246010411 |
| 0.218608743  | 0.016847974 | 0.236846961 | 0.014538068 |
| 0.045556278  | 0.256492427 | 0.100784955 | 0.117020003 |
| 0.07126187   | 0.08005276  | 0.093597455 | 0.019692113 |
| 0.015750172  | 0.085513583 | 0.180499259 | 0.14783655  |
| 0.010396375  | 0.035361962 | 0.008707282 | 0.029942915 |
| 0.005243955  | 0.028202375 | 0.025452277 | 0.110723348 |
| 0.016005055  | 0.004715839 | 0.118310141 | 0.114213966 |
| 0.081782463  | 0.023213319 | 0.231990608 | 0.20865218  |
| 0.084258966  | 0.072595334 | 0.027860952 | 0.007225514 |
| 0.210222996  | 0.068277732 | 0.031682971 | 0.189086965 |
| 0.006801894  | 0.26617578  | 0.025303284 | 0.088555077 |
| 0.062733518  | 0.08746767  | 0.27044754  | 0.020733859 |
| 0.095217775  | 0.17478298  | 0.163198739 | 0.138283124 |

|             |             |             |             |
|-------------|-------------|-------------|-------------|
| 0.115593748 | 0.17454755  | 0.006708495 | 0.139290568 |
| 0.105647668 | 0.02352896  | 0.231374255 | 0.029888207 |
| 0.028275609 | 0.210186075 | 0.223546919 | 0.086927158 |
| 0.07743426  | 0.09969836  | 0.01048699  | 0.204321822 |
| 0.250326824 | 0.232329523 | 0.18760105  | 0.122686383 |
| 0.024913277 | 0.000602019 | 0.094092192 | 0.148475109 |
| 0.1830197   | 0.233571309 | 0.108496323 | 0.115322095 |
| 0.13124568  | 0.171175543 | 0.004701183 | 0.24218574  |
| 0.024479684 | 0.213372454 | 0.010915663 | 0.261270544 |
| 0.203491523 | 0.034775812 | 0.079867837 | 0.096708412 |
| 0.11978405  | 0.049866627 | 0.041963748 | 0.196434496 |
| 0.246510387 | 0.199497082 | 0.177467132 | 0.147099407 |
| 0.007169878 | 0.008199782 | 0.286822017 | 0.095923013 |
| 0.096292738 | 0.136827067 | 0.015164174 | 0.04091623  |
| 0.012515588 | 0.176012631 | 0.207556502 | 0.082991496 |
| 0.084798892 | 0.050400198 | 0.193538704 | 0.037698463 |
| 0.269915319 | 0.225435094 | 0.206234799 | 0.033298471 |
| 0.154161336 | 0.243106249 | 0.161620593 | 0.061219502 |
| 0.033013203 | 0.220132718 | 0.14883585  | 0.003571412 |
| 0.229906158 | 0.030899223 | 0.001500525 | 0.212607544 |
| 0.091502396 | 0.141112001 | 0.006946821 | 0.013716801 |
| 0.031839131 | 0.2571259   | 0.213643244 | 0.138575501 |
| 0.024366597 | 0.148654102 | 0.002409671 | 0.246277156 |
| 0.191061758 | 0.02638015  | 0.055059665 | 0.164830233 |
| 0.199074314 | 0.217820129 | 0.205922933 | 0.24873672  |
| 0.137529863 | 0.204257174 | 0.011754078 | 0.200324669 |
| 0.198419764 | 0.230468277 | 0.175807008 | 0.202176599 |
| 0.195219266 | 0.210747936 | 0.163848025 | 0.016724739 |
| 0.112980301 | 0.033810687 | 0.066453023 | 0.029881158 |
| 0.080598737 | 0.086166131 | 0.205645734 | 0.24588748  |
| 0.227530956 | 0.013518585 | 0.016951602 | 0.163010304 |
| 0.181678842 | 0.239182949 | 0.009636969 | 0.01005019  |
| 0.002342865 | 0.018381128 | 0.111334176 | 0.155885389 |
| 0.255527781 | 0.007129248 | 0.007227088 | 0.005875734 |
| 0.030776963 | 0.234511749 | 0.206783507 | 0.206506638 |
| 0.22671968  | 0.040453027 | 0.0298904   | 0.203784504 |
| 0.057234643 | 0.085582522 | 0.242218709 | 0.192319652 |
| 0.021641975 | 0.178085722 | 0.062638014 | 0.249506956 |
| 0.035630674 | 0.149199461 | 0.129709911 | 0.039724946 |
| 0.003996102 | 0.072261898 | 0.099692686 | 0.243517232 |
| 0.193903802 | 0.011727572 | 0.009392359 | 0.002508947 |
| 0.030625463 | 0.22970463  | 0.028235356 | 0.263450234 |
| 0.194132338 | 0.227586126 | 0.026286155 | 0.227740031 |
| 0.019621492 | 0.176101492 | 0.155484285 | 0.00614578  |
| 0.06253141  | 0.008647297 | 0.17970989  | 0.048696331 |
| 0.031285366 | 0.130516308 | 1           | 0.022915884 |
| 0.08505495  | 0.034140438 | 0.266585323 | 0.272380429 |
| 0.021499091 | 0.070997124 | 0.151578434 | 0.168656954 |
| 0.060853365 | 0.203973838 | 0.19578112  | 0.089790405 |
| 0.030158047 | 0.011423757 | 0.157604646 | 0.101738548 |
| 0.01924606  | 0.265482448 | 0.104275554 | 0.257069563 |
| 0.167437948 | 0.231571175 | 0.211079278 | 0.199701405 |
| 0.0226785   | 0.111255588 | 0.123337566 | 0.002433849 |
| 0.14477256  | 0.213439485 | 0.091013797 | 0.056755533 |

|             |             |             |             |
|-------------|-------------|-------------|-------------|
| 0.12422695  | 0.172344878 | 0.009747737 | 0.00495288  |
| 0.140086179 | 0.072227066 | 0.016112031 | 0.253234972 |
| 0.10624475  | 0.115455937 | 0.002875054 | 0.094674054 |
| 0.236939576 | 0.211961235 | 0.023433842 | 0.177619625 |
| 0.086531878 | 0.245107676 | 0.218983585 | 0.225931335 |
| 0.085361915 | 0.167474437 | 0.154915481 | 0.101197323 |
| 0.149927295 | 0.143430375 | 0.222981822 | 0.004175629 |
| 0.044602453 | 0.108321473 | 0.024214767 | 0.081254535 |
| 0.061295877 | 0.031679124 | 0.08810619  | 0.203235603 |
| 0.069218034 | 0.146626837 | 0.013162334 | 0.018253808 |
| 0.155678498 | 0.078620896 | 0.166068661 | 0.04161453  |
| 0.017113755 | 0.204646146 | 0.005013894 | 0.032439881 |
| 0.054322109 | 0.261474734 | 0.16464939  | 0.100123373 |
| 0.088331594 | 0.039131906 | 0.121273225 | 0.042770991 |
| 0.031412893 | 0.014108564 | 0.244081008 | 0.008478898 |
| 0.004784485 | 0.249512378 | 0.069616304 | 0.011190543 |
| 0.020464533 | 0.12922968  | 0.03219912  | 0.07728673  |
| 0.032419532 | 0.221119377 | 0.067128054 | 0.18094346  |
| 0.115027151 | 0.029626305 | 0.109639581 | 0.013226265 |
| 0.01740109  | 0.15465506  | 0.206985743 | 0.214979304 |
| 0.129684982 | 0.225769575 | 0.159894689 | 0.147115969 |
| 0.013335504 | 0.128128724 | 0.019569279 | 0.204185893 |
| 0.093982409 |             |             |             |
| SIDT1       | 0.023306729 | 0.016993604 | 0.028101242 |
| 0.03948265  | 0.047940033 | 0.007822149 | 0.043530635 |
| 0.009291176 | 0.040083581 | 0.015600952 | 0.067046631 |
| 0.032974114 | 0.023899512 | 0.012073152 | 0.003724603 |
| 0.075616424 | 0.123203855 | 0.021401378 | 0.101562127 |
| 0.04716912  | 0.016267906 | 0.091990522 | 0.065119759 |
| 0.052948089 | 0.126660826 | 0.142849272 | 0.056895458 |
| 0.040721322 | 0.156194049 | 0.004849541 | 0.022190223 |
| 0.186772498 | 0.025208443 | 0.011018496 | 0.049417317 |
| 0.010465361 | 0.013938625 | 0.059098547 | 0.005772024 |
| 0.017377423 | 0.033305567 | 0.04228393  | 0.071936069 |
| 0.070359264 | 0.007518379 | 0.063347274 | 0.07096664  |
| 0.004977353 | 0.115113761 | 0.00296752  | 0.007769918 |
| 0.007468961 | 0.015948159 | 0.013978301 | 0.039569799 |
| 0.011312705 | 0.004171455 | 0.015407508 | 0.007288472 |
| 0.074236347 | 0.003216261 | 0.010138362 | 0.021893767 |
| 0.01077925  | 0.025126003 | 0.155725344 | 0.028641094 |
| 0.032944817 | 0.010903707 | 0.095501254 | 0.021330367 |
| 0.0040124   | 0.054756965 | 0.098733539 | 0.016008734 |
| 0.269677089 | 0.066739715 | 0.180669092 | 0.04067743  |
| 0.037557621 | 0.013825395 | 0.041777925 | 0.033164975 |
| 0.068444434 | 0.133880358 | 0.046291055 | 0.089791002 |
| 0.018753923 | 0.041268579 | 0.034361473 | 0.088042162 |
| 0.03769603  | 0.014344181 | 0.078821978 | 0.174282295 |
| 0.014518591 | 0.015299188 | 0.012487321 | 0.026027181 |
| 0.009284847 | 0.20844214  | 0.009557884 | 0.026477985 |
| 0.010546263 | 0.054676324 | 0.202527564 | 0.021843218 |
| 0.220431261 | 0.004058628 | 0.080004308 | 0.057097339 |
| 0.037279181 | 0.052854359 | 0.197297049 | 0.029713222 |
| 0.06542246  | 0.02155379  | 0.015339601 | 0.087705048 |
| 0.054018067 | 0.100042263 | 0.027769794 | 0.227407623 |

|             |             |             |             |
|-------------|-------------|-------------|-------------|
| 0.013256575 | 0.052239922 | 0.006064986 | 0.027921917 |
| 0.010560085 | 0.019549807 | 0.041994945 | 0.150910241 |
| 0.203226231 | 0.096599121 | 0.019796029 | 0.035701393 |
| 0.035819625 | 0.010981701 | 0.048403715 | 0.009130925 |
| 0.021718587 | 0.043030194 | 9.55E-06    | 0.06886755  |
| 0.022002837 | 0.115705744 | 0.166469648 | 0.024173906 |
| 0.084215613 | 0.043197185 | 0.126407497 | 0.027896682 |
| 0.00903279  | 0.144978164 | 0.00936607  | 0.080648128 |
| 0.007285434 | 0.09712373  | 0.126205019 | 0.036968568 |
| 0.056084085 | 0.010437716 | 0.268904987 | 0.015344868 |
| 0.005872433 | 0.101988355 | 0.111692828 | 0.015277188 |
| 0.007360866 | 0.013257612 | 0.006451489 | 0.184236481 |
| 0.043734081 | 0.074716192 | 0.008036595 | 0.014727688 |
| 0.035842134 | 0.136353807 | 0.003457187 | 0.023099465 |
| 0.003883775 | 0.030553828 | 0.045914369 | 0.063812897 |
| 0.15451973  | 0.043393274 | 0.013796917 | 0.008537188 |
| 0.014554204 | 0.002591455 | 0.039987079 | 0.057385261 |
| 0.01763904  | 0.031515424 | 0.001685291 | 0.077773048 |
| 0.007882075 | 0.174163606 | 0.040670749 | 0.183632873 |
| 0.012105469 | 0.184912282 | 0.011535281 | 0.027164775 |
| 0.016585738 | 0.040380891 | 0.005555564 | 0.033197271 |
| 0.241318452 | 0.009104558 | 0.03018875  | 0.042375712 |
| 0.032442965 | 0.047280086 | 0.050248703 | 0.015834123 |
| 0.035782604 | 0.048118373 | 0.182529805 | 0.122758705 |
| 0.032027689 | 0.005580788 | 0.00906053  | 0.023599508 |
| 0.004560954 | 0.01404336  | 0.013354027 | 0.002684312 |
| 0.113435793 | 0.022370583 | 0.015981506 | 0.055962628 |
| 0.011878581 | 0.02989971  | 0.013781504 | 0.128763238 |
| 0.219142592 | 0.022396525 | 0.098596594 | 0.042999592 |
| 0.061302443 | 0.016259377 | 0.073673285 | 0.009272791 |
| 0.018598128 | 0.083196848 | 0.023455349 | 0.018162657 |
| 0.029215772 | 0.145087192 | 0.206898807 | 0.007104895 |
| 0.018768802 | 0.007999696 | 0.005293359 | 0.01159151  |
| 0.011757685 | 0.042014846 | 0.042655777 | 0.035984049 |
| 0.128592441 | 0.263875284 | 0.017245285 | 0.069648262 |
| 0.005323265 | 0.05572707  | 0.247616241 | 0.002525748 |
| 0.026050565 | 0.002509083 | 0.00198003  | 0.016135709 |
| 0.102591791 | 0.039278621 | 0.023470071 | 0.194169139 |
| 0.029034553 | 0.090265836 | 0.040992673 | 0.005266057 |
| 0.017200294 | 0.011831203 | 0.117821696 | 0.09980129  |
| 0.006864994 | 0.035540254 | 0.067084248 | 0.011466105 |
| 0.010185353 | 0.203056717 | 0.019312004 | 0.146913101 |
| 0.295071939 | 0.051533639 | 0.019914444 | 0.277637403 |
| 0.207499024 | 0.021944657 | 0.015268986 | 0.163933026 |
| 0.020660964 | 0.083686051 | 0.01482547  | 0.097005541 |
| 0.097814703 | 0.049889055 | 0.168646    | 0.03280532  |
| 0.008983854 | 0.021201439 | 0.165389362 | 0.043025863 |
| 0.128872322 | 0.018121835 | 0.003236779 | 0.023462885 |
| 0.056778398 | 0.013908399 | 0.190127431 | 0.034105291 |
| 0.009179151 | 0.005104348 | 0.161186598 | 0.018362611 |
| 0.008661556 | 0.103109819 | 0.065026238 | 0.011426847 |
| 0.01796171  | 0.030043042 | 0.014281843 | 0.049497045 |
| 0.033519322 | 0.050106093 | 0.049623351 | 0.056112182 |
| 0.01201887  | 0.075465497 | 0.050018692 | 0.007366194 |

|             |             |             |             |
|-------------|-------------|-------------|-------------|
| 0.074191727 | 0.011040723 | 0.051062294 | 0.08230069  |
| 0.004903895 | 0.006091005 | 0.116655648 | 0.168198593 |
| 0.02424212  | 0.016564796 | 0.011187776 | 0.060172309 |
| 0.026475074 | 0.017029345 | 0.020847221 | 0.264344425 |
| 0.300356789 | 0.01251608  | 0.015829759 | 0.031731495 |
| 0.042126878 | 0.002316859 | 0.041193439 | 0.015374422 |
| 0.106688948 | 0.005587364 | 0.002217206 | 0.023291322 |
| 0.227361139 | 0.054634829 | 0.008584353 | 0.025555877 |
| 0.001040696 | 0.065666215 | 0.088299798 | 0.023899837 |
| 0.01210537  | 0.190761004 | 0.129133773 | 0.01695257  |
| 0.021260491 | 0.015399508 | 0.037027664 | 0.02470783  |
| 0.023425292 | 0.01038495  | 0.015977419 | 0.147617309 |
| 0.018576596 | 0.014680493 | 0.022726454 | 0.012467841 |
| 0.034307992 | 0.075693582 | 0.09107957  | 0.066983737 |
| 0.037463462 | 0.008906938 | 0.002005306 | 0.0319089   |
| 0.006462573 | 0.08603054  | 0.018137556 | 0.045764916 |
| 0.025263549 | 0.236733087 | 0.016324715 | 0.015497807 |
| 0.020332326 | 0.032168411 | 0.148292498 | 0.014469333 |
| 0.007464353 | 0.089970222 | 0.028690648 | 0.155921137 |
| 0.020825165 | 0.000724227 | 0.137840553 | 0.026185428 |
| 0.02151548  | 0.061632174 | 0.013545824 | 0.086280621 |
| 0.03540128  | 0.204819958 | 0.003546512 | 0.068445108 |
| 0.116873576 | 0.005316986 | 0.026082815 | 0.010531429 |
| 0.230898692 | 0.12916218  | 0.019271629 | 0.031813294 |
| 0.029373729 | 0.148374022 | 0.0340518   | 0.013236433 |
| 0.14359718  | 0.187753888 | 0.13808458  | 0.063153695 |
| 0.009379609 | 0.060460532 | 0.093779432 | 0.001039776 |
| 0.041057314 | 0.034916894 | 0.051650294 | 0.032878791 |
| 0.024490352 | 0.061041429 | 0.205030771 | 0.011044138 |
| 0.08906401  | 0.009494291 | 0.070617365 | 0.001372194 |
| 0.072138606 | 0.191205841 | 0.015149335 | 0.010146878 |
| 0.00763949  | 0.021811884 | 0.022915884 | 1           |
| 0.029859237 | 0.217903044 | 0.038524743 | 0.045948964 |
| 0.245491818 | 0.036139051 | 0.123885441 | 0.056312276 |
| 0.011862537 | 0.040589338 | 0.009449975 | 0.005014813 |
| 0.038702256 | 0.070217554 | 0.036126797 | 0.011812511 |
| 0.011826757 | 0.044103722 | 0.018167055 | 0.022814674 |
| 0.016544501 | 0.020042682 | 0.018268465 | 0.03477023  |
| 0.06848966  | 0.01172465  | 0.013512062 | 0.021374567 |
| 0.063062687 | 0.03855392  | 0.024032009 | 0.055390765 |
| 0.094804579 | 0.032057919 | 0.114952069 | 0.005513881 |
| 0.030160949 | 0.006836925 | 0.055661645 | 0.064490434 |
| 0.021111456 | 0.011910582 | 0.079261369 | 0.117931505 |
| 0.017781419 | 0.01228546  | 0.011890864 | 0.022422906 |
| 0.200523    | 0.066193129 | 0.03647226  | 0.046397085 |
| 0.010216878 | 0.018659476 | 0.023986201 | 0.011932595 |
| 0.009028171 | 0.073506441 | 0.011968936 | 0.004774566 |
| 0.06567424  | 0.020311859 | 0.049605586 | 0.297383781 |
| 0.140750592 | 0.183326344 | 0.013221821 | 0.07502854  |
| 0.012494753 | 0.071975472 | 0.004304744 | 0.103988277 |
| 0.134209345 | 0.014021983 | 0.099085594 | 0.022325507 |
| 0.062974156 | 0.010012201 | 0.086110874 | 0.248312335 |
| 0.019333588 | 0.021141831 | 0.03285512  | 0.105286404 |
| 0.024740052 | 0.158866997 | 0.109061183 | 0.005740199 |

|             |             |             |             |
|-------------|-------------|-------------|-------------|
| 0.003458054 | 0.008801159 | 0.018162254 | 0.037320946 |
| 0.069101117 | 0.042453188 | 0.009188763 | 0.226020253 |
| 0.133435283 | 0.011828483 | 0.036747245 | 0.02132595  |
| 0.264990566 | 0.01670597  | 0.003937405 | 0.041432003 |
| 0.029092034 | 0.175365186 | 0.005939798 | 0.029958049 |
| 0.107142215 | 0.009402336 | 0.039744339 | 0.013315125 |
| 0.064532779 | 0.066303535 | 0.006221268 | 0.017759995 |
| 0.047718526 | 0.018070484 | 0.063595235 | 0.032888146 |
| 0.006240375 |             |             |             |
| SIT1        | 0.194156739 | 0.202373561 | 0.201426341 |
| 0.145124305 | 0.133609765 | 0.066561225 | 0.030933931 |
| 0.010154984 | 0.025595831 | 0.000159669 | 0.007826349 |
| 0.188003127 | 0.016040542 | 0.014165312 | 0.038951678 |
| 0.22114806  | 0.039112248 | 0.077696612 | 0.062941453 |
| 0.13333206  | 0.003839443 | 0.182462114 | 0.014061136 |
| 0.124407831 | 0.071495333 | 0.028720641 | 0.146714962 |
| 0.17337316  | 0.037645094 | 0.029623307 | 0.089115162 |
| 0.048796316 | 0.162698328 | 0.203490325 | 0.182638317 |
| 0.202782727 | 0.178317993 | 0.001963123 | 0.022483124 |
| 0.162927116 | 0.23557952  | 0.128173508 | 0.090662326 |
| 0.006626194 | 0.153020573 | 0.052823795 | 0.244684701 |
| 0.011043522 | 0.011906607 | 0.013518821 | 0.138405757 |
| 0.15912952  | 0.121109898 | 0.019751894 | 0.019531409 |
| 0.013341304 | 0.008499045 | 0.062518486 | 0.049825978 |
| 0.040854909 | 0.005169327 | 0.17960477  | 0.009622737 |
| 0.008642177 | 0.026451854 | 0.062645695 | 0.028341926 |
| 0.135308466 | 0.10401187  | 0.002703009 | 0.193264703 |
| 0.004201845 | 0.135906494 | 0.218913022 | 0.158431513 |
| 0.031723078 | 0.00207945  | 0.083401194 | 0.069310637 |
| 0.189631411 | 0.207525609 | 0.252959033 | 0.264334172 |
| 0.021534087 | 0.137537046 | 0.218298833 | 0.029810044 |
| 0.183986013 | 0.022007808 | 0.015544382 | 0.233659842 |
| 0.255944596 | 0.208404625 | 0.051074954 | 0.19989296  |
| 0.136321511 | 0.16714853  | 0.098003649 | 0.100372476 |
| 0.088602011 | 0.061514493 | 0.147644704 | 0.231800396 |
| 0.12026172  | 0.237905287 | 0.092237602 | 0.110047215 |
| 0.02848526  | 0.024592644 | 0.114677126 | 0.016765341 |
| 0.198860785 | 0.004862151 | 0.149774915 | 0.057868258 |
| 0.036799949 | 0.17296639  | 0.23236596  | 0.040520328 |
| 0.15426979  | 0.004642772 | 0.06251749  | 0.02547776  |
| 0.018176237 | 0.119282911 | 0.161501386 | 0.164365214 |
| 0.008226319 | 0.036130355 | 0.040089226 | 0.005229998 |
| 0.021460773 | 0.055709419 | 0.161687958 | 0.088088739 |
| 0.177657531 | 0.209612346 | 0.057802831 | 0.103548089 |
| 0.195645176 | 0.252492524 | 0.00146502  | 0.014705906 |
| 0.11125494  | 0.05248697  | 0.096771864 | 0.11770708  |
| 0.140301996 | 0.012047011 | 0.024729448 | 0.242918906 |
| 0.123304789 | 0.02095245  | 0.040049436 | 0.210720108 |
| 0.019849827 | 0.213344975 | 0.021677019 | 0.025508856 |
| 0.003521776 | 0.212697231 | 0.042344117 | 0.05258558  |
| 0.054022264 | 0.029513597 | 0.005886977 | 0.02424346  |
| 0.012079107 | 0.149326766 | 0.171376181 | 0.037948391 |
| 0.040822843 | 0.18984849  | 0.036354596 | 0.118250022 |
| 0.002169624 | 0.013039418 | 0.026227149 | 0.202813945 |

|             |             |             |             |
|-------------|-------------|-------------|-------------|
| 0.032634164 | 0.264644564 | 0.045969265 | 0.118111491 |
| 0.154961779 | 0.221635815 | 0.008336853 | 0.175352748 |
| 0.227987883 | 0.027037138 | 0.100624742 | 0.204017114 |
| 0.161015056 | 0.175537453 | 0.005043111 | 0.171503712 |
| 0.085108112 | 0.030157899 | 0.252730245 | 0.073249839 |
| 0.177711657 | 0.022418459 | 0.022929821 | 0.280211334 |
| 0.171028602 | 0.002481964 | 0.015543441 | 0.104596567 |
| 0.042262132 | 0.003256262 | 0.16991412  | 0.136400767 |
| 0.12643866  | 0.251615545 | 0.238047131 | 0.158011305 |
| 0.126983794 | 0.032487812 | 0.009841759 | 0.220036581 |
| 0.232541825 | 0.028870999 | 0.137956976 | 0.022986104 |
| 0.056095348 | 0.173096668 | 0.186711442 | 0.012255785 |
| 0.012087005 | 0.038896227 | 0.001792425 | 0.141152756 |
| 0.199446107 | 0.006087929 | 0.149528352 | 0.035342956 |
| 0.046698168 | 0.22614761  | 0.198297824 | 0.229051309 |
| 0.178618729 | 0.064264885 | 0.05729841  | 0.01136654  |
| 0.014218477 | 0.044754515 | 0.121698969 | 0.081386374 |
| 0.001744786 | 0.023466608 | 0.035392361 | 0.041577271 |
| 0.006076165 | 0.027924692 | 0.02384205  | 0.100822068 |
| 0.014859933 | 0.006290601 | 0.103813982 | 0.12447287  |
| 0.072167058 | 0.016489748 | 0.201465207 | 0.183174618 |
| 0.065864719 | 0.027069041 | 0.027149765 | 0.012232372 |
| 0.169428757 | 0.036827498 | 0.020324809 | 0.143555255 |
| 0.01115562  | 0.252521009 | 0.015731766 | 0.063684912 |
| 0.081912963 | 0.058132694 | 0.207434054 | 0.007249423 |
| 0.084884134 | 0.143599729 | 0.164141331 | 0.075016364 |
| 0.099221444 | 0.127810491 | 0.003102664 | 0.13296799  |
| 0.10856863  | 0.014749564 | 0.227390183 | 0.045712694 |
| 0.025441249 | 0.247943685 | 0.187888446 | 0.060449162 |
| 0.062271886 | 0.050266852 | 0.001533529 | 0.174482605 |
| 0.21424566  | 0.197069652 | 0.136164691 | 0.189263926 |
| 0.008145956 | 0.000687711 | 0.153271452 | 0.212317794 |
| 0.175556482 | 0.244159964 | 0.104654553 | 0.115876965 |
| 0.078882314 | 0.092832152 | 0.003024732 | 0.223841321 |
| 0.073916023 | 0.211608759 | 0.007615369 | 0.261404905 |
| 0.195975135 | 0.023076367 | 0.054204496 | 0.042014542 |
| 0.096574915 | 0.0150253   | 0.03529815  | 0.179652653 |
| 0.178819931 | 0.099842238 | 0.088436928 | 0.176863098 |
| 0.001018559 | 0.002197997 | 0.224662281 | 0.175282556 |
| 0.052587171 | 0.066680451 | 0.105269297 | 0.024396047 |
| 0.004903771 | 0.138511304 | 0.219466344 | 0.026552838 |
| 0.043738948 | 0.029201103 | 0.218297392 | 0.015558754 |
| 0.276310566 | 0.242378902 | 0.191837295 | 0.02112751  |
| 0.178616778 | 0.221434155 | 0.195711841 | 0.065087441 |
| 0.034127013 | 0.222145264 | 0.119408315 | 0.002500032 |
| 0.208033386 | 0.01592287  | 0.000839915 | 0.178240983 |
| 0.047329079 | 0.138633917 | 0.00097004  | 0.073603231 |
| 0.054497235 | 0.275865181 | 0.175339045 | 0.095175505 |
| 0.010728789 | 0.131666293 | 0.01142141  | 0.255922353 |
| 0.167720747 | 0.026701679 | 0.074209871 | 0.167110605 |
| 0.231021742 | 0.197063562 | 0.212571603 | 0.241395792 |
| 0.173860443 | 0.192373333 | 0.009712567 | 0.141176247 |
| 0.153855966 | 0.242205886 | 0.143467602 | 0.167636741 |
| 0.172467426 | 0.23336502  | 0.086667173 | 0.003201347 |

|             |             |             |             |
|-------------|-------------|-------------|-------------|
| 0.088346818 | 0.013367338 | 0.031214765 | 0.014395294 |
| 0.053603398 | 0.053860125 | 0.20794533  | 0.228885709 |
| 0.234180504 | 0.01090248  | 0.006276889 | 0.157452289 |
| 0.141369011 | 0.19587039  | 0.024890879 | 0.010253908 |
| 0.009447094 | 0.02047662  | 0.071096249 | 0.167635778 |
| 0.226763201 | 0.00450556  | 0.003510437 | 0.001567844 |
| 0.02170964  | 0.268924277 | 0.185965161 | 0.159576994 |
| 0.253756319 | 0.031324294 | 0.014754356 | 0.164777836 |
| 0.035118611 | 0.080896018 | 0.226768952 | 0.150292032 |
| 0.028655824 | 0.15600578  | 0.078591934 | 0.200148213 |
| 0.119070233 | 0.157770469 | 0.171331389 | 0.022358097 |
| 0.01415319  | 0.064029981 | 0.049299614 | 0.24009997  |
| 0.195699551 | 0.00788324  | 0.006627519 | 0.003110998 |
| 0.011026346 | 0.223315807 | 0.017671089 | 0.243112272 |
| 0.152675555 | 0.193422049 | 0.039290834 | 0.182739699 |
| 0.010636346 | 0.169087155 | 0.206641342 | 0.003459396 |
| 0.090458127 | 0.008055487 | 0.207181469 | 0.033302291 |
| 0.022548119 | 0.116126712 | 0.08505495  | 0.029859237 |
| 1           | 0.031070473 | 0.2217827   | 0.276946917 |
| 0.040376077 | 0.033159221 | 0.158115202 | 0.1720193   |
| 0.031595268 | 0.157880939 | 0.17525793  | 0.074540204 |
| 0.007110944 | 0.076267254 | 0.127628762 | 0.104081991 |
| 0.012201891 | 0.259445257 | 0.049683686 | 0.250195107 |
| 0.145041528 | 0.205976541 | 0.206064986 | 0.097419941 |
| 0.050095674 | 0.091207564 | 0.070425168 | 0.001096805 |
| 0.112766106 | 0.187501366 | 0.077205569 | 0.039177729 |
| 0.084882256 | 0.237059191 | 0.010010679 | 0.014542226 |
| 0.243695115 | 0.037166929 | 0.008880026 | 0.221981399 |
| 0.103226691 | 0.112437312 | 0.003314935 | 0.042547731 |
| 0.21808693  | 0.17054052  | 0.009665697 | 0.125428319 |
| 0.087814446 | 0.142231413 | 0.241544205 | 0.262048823 |
| 0.061480592 | 0.155896293 | 0.134021675 | 0.071257903 |
| 0.114166094 | 0.069438455 | 0.20059094  | 0.002239707 |
| 0.053725396 | 0.140401781 | 0.009466487 | 0.083331699 |
| 0.036332051 | 0.024091501 | 0.128017671 | 0.207036302 |
| 0.105677876 | 0.119942212 | 0.01153021  | 0.022777183 |
| 0.178049071 | 0.096287416 | 0.146469282 | 0.016131109 |
| 0.008240123 | 0.174492293 | 0.005814654 | 0.031807249 |
| 0.097691512 | 0.209187566 | 0.176085512 | 0.096115853 |
| 0.099771688 | 0.066324018 | 0.090408504 | 0.026050833 |
| 0.021741765 | 0.035884237 | 0.194008283 | 0.00543431  |
| 0.001233057 | 0.239682139 | 0.066835284 | 0.030157863 |
| 0.032052203 | 0.111312946 | 0.045214425 | 0.027523721 |
| 0.049105443 | 0.221545771 | 0.030812926 | 0.175801645 |
| 0.067389881 | 0.023082707 | 0.096402101 | 0.013576433 |
| 0.017483944 | 0.145772211 | 0.251400361 | 0.214773495 |
| 0.191060978 | 0.177183432 | 0.142722288 | 0.147062883 |
| 0.036161652 | 0.173814235 | 0.0043705   | 0.179372787 |
| 0.086599028 |             |             |             |
| SLAMF6      | 0.052466196 | 0.059125039 | 0.048052651 |
| 0.117205678 | 0.091632709 | 0.031658247 | 0.114693839 |
| 0.030659392 | 0.079896239 | 0.059196777 | 0.112366807 |
| 0.070385662 | 0.075033029 | 0.046591456 | 0.013170721 |
| 0.15424355  | 0.205221476 | 0.0364963   | 0.202888567 |



|             |             |             |             |
|-------------|-------------|-------------|-------------|
| 0.110370291 | 0.057734702 | 0.188820568 | 0.142549714 |
| 0.060123955 | 0.170067575 | 0.208680502 | 0.082703697 |
| 0.113221493 | 0.227458783 | 0.023199299 | 0.071493587 |
| 0.213268192 | 0.066207313 | 0.041167647 | 0.114809962 |
| 0.038632168 | 0.035585459 | 0.064370039 | 0.022229172 |
| 0.051993758 | 0.083874391 | 0.1063054   | 0.174339396 |
| 0.150885784 | 0.032792191 | 0.157850536 | 0.110084578 |
| 0.016570062 | 0.20604014  | 0.013867111 | 0.031857276 |
| 0.033225469 | 0.045874862 | 0.04059173  | 0.09854343  |
| 0.038058108 | 0.016295706 | 0.032086882 | 0.030965124 |
| 0.165832823 | 0.015642606 | 0.038964533 | 0.059103754 |
| 0.023754792 | 0.05604148  | 0.186143654 | 0.076602944 |
| 0.038021463 | 0.039339955 | 0.134507547 | 0.040134575 |
| 0.017853866 | 0.124385823 | 0.141623796 | 0.024094678 |
| 0.326791725 | 0.171680825 | 0.198192572 | 0.116831615 |
| 0.102000485 | 0.041738163 | 0.107707201 | 0.085811266 |
| 0.155168372 | 0.167909899 | 0.064429026 | 0.169901352 |
| 0.055618297 | 0.116346601 | 0.086019032 | 0.173980618 |
| 0.099689066 | 0.050385046 | 0.134629783 | 0.212119662 |
| 0.056322403 | 0.053772365 | 0.037226387 | 0.062195428 |
| 0.022818662 | 0.176677278 | 0.037303965 | 0.077813906 |
| 0.037979583 | 0.066463721 | 0.278908699 | 0.072350624 |
| 0.256041328 | 0.014538825 | 0.184787025 | 0.0992231   |
| 0.104319696 | 0.095560846 | 0.239784737 | 0.088585235 |
| 0.094033685 | 0.062972669 | 0.050761428 | 0.183628191 |
| 0.087433387 | 0.186273935 | 0.047889374 | 0.243440192 |
| 0.041799777 | 0.052122057 | 0.026837551 | 0.092929545 |
| 0.037038387 | 0.040752809 | 0.091671218 | 0.148521962 |
| 0.2671088   | 0.102841917 | 0.055202749 | 0.060936838 |
| 0.081316625 | 0.029885927 | 0.102931296 | 0.032746572 |
| 0.053196531 | 0.10637999  | 0.001907572 | 0.128252269 |
| 0.064262182 | 0.113845027 | 0.277736758 | 0.059370748 |
| 0.155951465 | 0.094323059 | 0.211272052 | 0.082775746 |
| 0.037442438 | 0.243822322 | 0.021426352 | 0.166911469 |
| 0.026558853 | 0.153388761 | 0.192904761 | 0.095342217 |
| 0.131676901 | 0.036795174 | 0.252974481 | 0.038968316 |
| 0.016481589 | 0.153639077 | 0.106839414 | 0.047738279 |
| 0.033859493 | 0.051642525 | 0.025700973 | 0.244767867 |
| 0.110747674 | 0.148921092 | 0.025819206 | 0.058879693 |
| 0.076867872 | 0.199102018 | 0.01195792  | 0.074796325 |
| 0.020564793 | 0.078808487 | 0.084701256 | 0.081584784 |
| 0.232524397 | 0.106554206 | 0.006639787 | 0.035647225 |
| 0.0495213   | 0.011087267 | 0.11477381  | 0.097302904 |
| 0.033446164 | 0.098241225 | 0.003656235 | 0.161129366 |
| 0.027029433 | 0.217937741 | 0.106282924 | 0.288708027 |
| 0.041316956 | 0.250211414 | 0.034413762 | 0.063522206 |
| 0.047894418 | 0.065383067 | 0.025811195 | 0.095345607 |
| 0.21954697  | 0.035511428 | 0.070598485 | 0.110556314 |
| 0.084907225 | 0.099652288 | 0.125652303 | 0.030527048 |
| 0.08457378  | 0.098397921 | 0.183060018 | 0.162301113 |
| 0.0696653   | 0.012767911 | 0.03826969  | 0.06540902  |
| 0.018022062 | 0.052045762 | 0.039854651 | 0.008267354 |
| 0.182185291 | 0.060582986 | 0.058617135 | 0.109682665 |
| 0.033121342 | 0.103293788 | 0.029604472 | 0.138881074 |

|             |             |             |             |
|-------------|-------------|-------------|-------------|
| 0.258467859 | 0.071770941 | 0.089210761 | 0.043831407 |
| 0.053313158 | 0.060634735 | 0.139269545 | 0.045443508 |
| 0.069188276 | 0.141846895 | 0.041259292 | 0.038781795 |
| 0.083110664 | 0.241722575 | 0.119853244 | 0.021020918 |
| 0.080180353 | 0.033093035 | 0.025578549 | 0.037745607 |
| 0.039077052 | 0.137795897 | 0.105018384 | 0.044996891 |
| 0.17741597  | 0.280389407 | 0.058987474 | 0.141569931 |
| 0.02381376  | 0.112441971 | 0.265212635 | 0.012276666 |
| 0.085612915 | 0.015462021 | 0.007648122 | 0.061193362 |
| 0.134062558 | 0.094767727 | 0.078611109 | 0.287379263 |
| 0.062224783 | 0.202763162 | 0.110821479 | 0.016904477 |
| 0.042562475 | 0.047371598 | 0.158593834 | 0.161350906 |
| 0.033285113 | 0.092380629 | 0.146745637 | 0.037472688 |
| 0.037205146 | 0.271567329 | 0.062487532 | 0.214721003 |
| 0.29018147  | 0.100450313 | 0.057949928 | 0.327106081 |
| 0.235414919 | 0.072475044 | 0.049070447 | 0.259460539 |
| 0.069255544 | 0.182213937 | 0.051784588 | 0.086516836 |
| 0.178984839 | 0.130287693 | 0.16281787  | 0.053691698 |
| 0.036381173 | 0.063307022 | 0.241226919 | 0.100116354 |
| 0.237154001 | 0.035398545 | 0.01138457  | 0.073739586 |
| 0.053155208 | 0.047169069 | 0.189239367 | 0.073267314 |
| 0.035659753 | 0.021542165 | 0.220125868 | 0.061216099 |
| 0.038444606 | 0.156099764 | 0.092160227 | 0.044690896 |
| 0.056215942 | 0.056832295 | 0.034318531 | 0.095099367 |
| 0.083967469 | 0.105807492 | 0.088004774 | 0.054873006 |
| 0.030153    | 0.112353349 | 0.038292341 | 0.02059397  |
| 0.171942442 | 0.045613445 | 0.116139496 | 0.132413091 |
| 0.025105353 | 0.016310928 | 0.181257966 | 0.221473535 |
| 0.062573871 | 0.049022683 | 0.043407942 | 0.100620454 |
| 0.064611846 | 0.056499554 | 0.044617958 | 0.261841632 |
| 0.27322999  | 0.043727769 | 0.046263769 | 0.082805437 |
| 0.109924891 | 0.012967449 | 0.123735727 | 0.056192849 |
| 0.189887689 | 0.024505381 | 0.007263655 | 0.015499857 |
| 0.191158591 | 0.115554331 | 0.035322043 | 0.073079042 |
| 0.00753613  | 0.120082401 | 0.03072246  | 0.067447889 |
| 0.048764881 | 0.21266811  | 0.144208398 | 0.052448602 |
| 0.055913561 | 0.054429218 | 0.056787614 | 0.070133235 |
| 0.058738479 | 0.039236599 | 0.061236116 | 0.237369234 |
| 0.067319381 | 0.045198496 | 0.068586029 | 0.045753272 |
| 0.101153303 | 0.134078327 | 0.195683871 | 0.125659846 |
| 0.04446317  | 0.030785672 | 0.00905794  | 0.065466691 |
| 0.025249151 | 0.149089171 | 0.057548972 | 0.10989579  |
| 0.074375448 | 0.206972907 | 0.052858049 | 0.048883856 |
| 0.071516577 | 0.092533935 | 0.109321323 | 0.017958647 |
| 0.011163059 | 0.132775769 | 0.074791938 | 0.186433123 |
| 0.063725373 | 0.007608108 | 0.162623853 | 0.07157081  |
| 0.058617622 | 0.108108169 | 0.049944076 | 0.183151588 |
| 0.07389983  | 0.237397911 | 0.020864511 | 0.147214083 |
| 0.167046138 | 0.019044541 | 0.079632972 | 0.04348239  |
| 0.218287952 | 0.149768394 | 0.03968958  | 0.09467653  |
| 0.023171971 | 0.222662293 | 0.073065815 | 0.048032253 |
| 0.10285765  | 0.209259649 | 0.170322233 | 0.125776853 |
| 0.035204065 | 0.163050724 | 0.202431549 | 0.006599951 |
| 0.114288184 | 0.085855289 | 0.141960255 | 0.091900643 |

|             |             |              |             |
|-------------|-------------|--------------|-------------|
| 0.079244016 | 0.149111262 | 0.200778473  | 0.042075216 |
| 0.141402764 | 0.038877809 | 0.109146666  | 0.008274744 |
| 0.089552832 | 0.209941427 | 0.045800565  | 0.026258858 |
| 0.028076016 | 0.058594702 | 0.034140438  | 0.217903044 |
| 0.031070473 | 1           | 0.106418797  | 0.103097993 |
| 0.204000894 | 0.06476872  | 0.174875628  | 0.106871527 |
| 0.045745349 | 0.117557036 | 0.03856536   | 0.020127294 |
| 0.098085548 | 0.053144312 | 0.096878054  | 0.038629292 |
| 0.034732619 | 0.108679432 | 0.046734011  | 0.067265235 |
| 0.047669556 | 0.057439613 | 0.056700995  | 0.090550345 |
| 0.085217682 | 0.038481054 | 0.05768508   | 0.079489522 |
| 0.131286382 | 0.108249249 | 0.051000693  | 0.117200534 |
| 0.179960809 | 0.048816104 | 0.123278825  | 0.012105548 |
| 0.040802217 | 0.03179378  | 0.138435384  | 0.142747331 |
| 0.05327944  | 0.039551142 | 0.111956478  | 0.166014245 |
| 0.05942585  | 0.04190758  | 0.04065511   | 0.07047267  |
| 0.238910093 | 0.128910263 | 0.082698948  | 0.094446341 |
| 0.018567335 | 0.062731895 | 0.074055965  | 0.052974545 |
| 0.04002955  | 0.14447283  | 0.044999302  | 0.018469049 |
| 0.100599146 | 0.042854739 | 0.141501671  | 0.308860343 |
| 0.251172295 | 0.207465718 | 0.018991845  | 0.143625421 |
| 0.021170607 | 0.168714151 | 0.012605984  | 0.145171288 |
| 0.171701394 | 0.025723373 | 0.169643883  | 0.075180031 |
| 0.163097187 | 0.041134302 | 0.113536616  | 0.273507548 |
| 0.032879908 | 0.061650963 | 0.068681862  | 0.153348586 |
| 0.039747725 | 0.144444783 | 0.204025542  | 0.025105467 |
| 0.02121211  | 0.01899118  | 0.056725757  | 0.071924777 |
| 0.13644646  | 0.108706183 | 0.027818809  | 0.175173943 |
| 0.092067953 | 0.03030149  | 0.055749835  | 0.05604032  |
| 0.214316462 | 0.051800665 | 0.017420166  | 0.075280267 |
| 0.07849119  | 0.225442062 | 0.02479821   | 0.049846227 |
| 0.132008532 | 0.037613616 | 0.064357906  | 0.046087211 |
| 0.076346579 | 0.162139537 | 0.026737453  | 0.054976546 |
| 0.067769035 | 0.030287827 | 0.126576812  | 0.085898249 |
| 0.018849616 |             |              |             |
| SLAMF7      | 0.415631152 | 0.529322854  | 0.424603877 |
| 0.472092038 | 0.490330142 | 0.387542186  | 0.295142796 |
| 0.218544617 | 0.150068236 | 0.015045337  | 0.059089374 |
| 0.462069071 | 0.292059001 | 0.335305228  | 0.360127747 |
| 0.480998957 | 0.22264335  | 0.368734225  | 0.338199381 |
| 0.459169174 | 0.143105469 | 0.484848647  | 0.163382963 |
| 0.364210251 | 0.183313775 | 0.1398175    | 0.363381497 |
| 0.470259944 | 0.15423017  | 0.346449131  | 0.410783237 |
| 0.162825631 | 0.44001949  | 0.5111110957 | 0.494895474 |
| 0.502299985 | 0.381642974 | 0.01853031   | 0.352252293 |
| 0.405838524 | 0.477341773 | 0.456062745  | 0.424461835 |
| 0.091226916 | 0.468762924 | 0.343801694  | 0.459309093 |
| 0.256520049 | 0.074913201 | 0.252342165  | 0.426760289 |
| 0.469514794 | 0.465261543 | 0.275068351  | 0.245513818 |
| 0.279508144 | 0.248561312 | 0.332086182  | 0.322146932 |
| 0.326434134 | 0.177985312 | 0.481567512  | 0.151654139 |
| 0.198763879 | 0.29956059  | 0.229754223  | 0.323925985 |
| 0.402989944 | 0.378605369 | 0.036944053  | 0.402228918 |
| 0.006956546 | 0.443559847 | 0.444236167  | 0.359674491 |

|             |             |             |             |
|-------------|-------------|-------------|-------------|
| 0.089873671 | 0.053740594 | 0.262780263 | 0.41828504  |
| 0.472248606 | 0.440086977 | 0.494964079 | 0.498496313 |
| 0.270673339 | 0.380125868 | 0.436393077 | 0.274518741 |
| 0.42899112  | 0.268071552 | 0.156943273 | 0.490579752 |
| 0.503844602 | 0.522826495 | 0.301875393 | 0.359420589 |
| 0.440992858 | 0.474969385 | 0.452864965 | 0.494323596 |
| 0.400808811 | 0.093197276 | 0.436918996 | 0.520262966 |
| 0.376819668 | 0.374724957 | 0.248469017 | 0.426359835 |
| 0.114839055 | 0.367059473 | 0.445959257 | 0.204515776 |
| 0.473193629 | 0.044725111 | 0.311015841 | 0.428875312 |
| 0.281669438 | 0.446052453 | 0.516628563 | 0.283241634 |
| 0.45876072  | 0.046064326 | 0.197833831 | 0.067383393 |
| 0.383397102 | 0.192190761 | 0.462380003 | 0.474227993 |
| 0.276512079 | 0.458793316 | 0.348100741 | 0.008160698 |
| 0.061489029 | 0.243504428 | 0.433141923 | 0.39859856  |
| 0.456252657 | 0.352408582 | 0.342931586 | 0.376737224 |
| 0.457703396 | 0.488464746 | 0.061712227 | 0.163410292 |
| 0.465203699 | 0.250974465 | 0.345027991 | 0.476958036 |
| 0.414723168 | 0.174631484 | 0.213464197 | 0.528488489 |
| 0.41312056  | 0.156871604 | 0.336407712 | 0.48283249  |
| 0.40499329  | 0.442997534 | 0.180450753 | 0.368550408 |
| 0.100539201 | 0.473203538 | 0.061274111 | 0.351728244 |
| 0.322301938 | 0.223992248 | 0.020866802 | 0.299480585 |
| 0.347984941 | 0.437615446 | 0.44473834  | 0.178705094 |
| 0.409627124 | 0.488551547 | 0.327881382 | 0.453719768 |
| 0.031919197 | 0.085124545 | 0.264696942 | 0.516784938 |
| 0.282425681 | 0.500025398 | 0.385853865 | 0.388842363 |
| 0.388045295 | 0.480185718 | 0.004640333 | 0.484570292 |
| 0.524189268 | 0.281581186 | 0.477136665 | 0.461445555 |
| 0.420991226 | 0.478189938 | 0.04035205  | 0.483359706 |
| 0.338406086 | 0.140105759 | 0.515174924 | 0.261733211 |
| 0.449164148 | 0.093316306 | 0.363547916 | 0.446407767 |
| 0.433708689 | 0.017515623 | 0.254716837 | 0.438310353 |
| 0.056843502 | 0.143404111 | 0.444092863 | 0.470153073 |
| 0.456812121 | 0.474993358 | 0.49092714  | 0.405552998 |
| 0.493644407 | 0.304033072 | 0.02855719  | 0.405446813 |
| 0.447960329 | 0.400525543 | 0.436185257 | 0.320679737 |
| 0.315776636 | 0.476232376 | 0.408382822 | 0.246567514 |
| 0.094077498 | 0.368512984 | 0.039674612 | 0.430083954 |
| 0.373637765 | 0.200671896 | 0.421098913 | 0.199294797 |
| 0.133238693 | 0.536499322 | 0.243610034 | 0.308168458 |
| 0.173927577 | 0.447838207 | 0.335344534 | 0.315043179 |
| 0.300240477 | 0.264015951 | 0.425591885 | 0.450530352 |
| 0.074986547 | 0.173886766 | 0.026633619 | 0.398627792 |
| 0.214519097 | 0.39493033  | 0.377247273 | 0.403945641 |
| 0.379618026 | 0.182645148 | 0.471641104 | 0.350754682 |
| 0.190146442 | 0.038796328 | 0.511854335 | 0.469024352 |
| 0.318576344 | 0.242248918 | 0.082891448 | 0.362365172 |
| 0.473846102 | 0.320298057 | 0.252392018 | 0.460759326 |
| 0.05034855  | 0.487100853 | 0.35236204  | 0.213399965 |
| 0.44959091  | 0.369764288 | 0.47825012  | 0.085729196 |
| 0.402328675 | 0.46858919  | 0.394621064 | 0.292491189 |
| 0.384104093 | 0.46623919  | 0.067407922 | 0.393225015 |
| 0.389853583 | 0.073068078 | 0.529173403 | 0.203327726 |

|             |             |             |             |
|-------------|-------------|-------------|-------------|
| 0.04910443  | 0.477874109 | 0.463081572 | 0.142097856 |
| 0.142916023 | 0.42006196  | 0.079796067 | 0.398747371 |
| 0.529174324 | 0.490438451 | 0.446909534 | 0.286395509 |
| 0.091389437 | 0.028391028 | 0.291357735 | 0.417175206 |
| 0.496399475 | 0.513478566 | 0.358212332 | 0.454789845 |
| 0.343619314 | 0.414066393 | 0.158622896 | 0.519448779 |
| 0.221869271 | 0.509118746 | 0.019005471 | 0.463760088 |
| 0.498266755 | 0.296508322 | 0.152861551 | 0.370544608 |
| 0.383286441 | 0.097011804 | 0.26825506  | 0.495006828 |
| 0.434768781 | 0.418447752 | 0.422531637 | 0.461609378 |
| 0.038573055 | 0.084694773 | 0.454587156 | 0.241529536 |
| 0.449671206 | 0.318797828 | 0.073887847 | 0.354703077 |
| 0.096632327 | 0.456039623 | 0.482800319 | 0.12219805  |
| 0.360924126 | 0.324744751 | 0.462529368 | 0.081379069 |
| 0.445976385 | 0.492041628 | 0.516071113 | 0.231154241 |
| 0.449573961 | 0.49433329  | 0.431863313 | 0.139689584 |
| 0.041888601 | 0.509658221 | 0.404345486 | 0.049538396 |
| 0.485271267 | 0.233669889 | 0.036640433 | 0.500046619 |
| 0.276533488 | 0.419985987 | 0.007596464 | 0.086739585 |
| 0.074389963 | 0.483818997 | 0.473841075 | 0.413886461 |
| 0.257814981 | 0.42728658  | 0.009719825 | 0.523775502 |
| 0.494185897 | 0.036452977 | 0.220000685 | 0.445942769 |
| 0.442501223 | 0.526961987 | 0.388570323 | 0.461879773 |
| 0.45872397  | 0.495797678 | 0.322597216 | 0.380826161 |
| 0.454834157 | 0.487389567 | 0.439516876 | 0.452966757 |
| 0.481236568 | 0.48418801  | 0.384778274 | 0.04171587  |
| 0.19737733  | 0.249243622 | 0.339657438 | 0.153227065 |
| 0.320535405 | 0.234351844 | 0.474991465 | 0.487928004 |
| 0.48595832  | 0.015139371 | 0.208440004 | 0.435651293 |
| 0.437592185 | 0.476798477 | 0.035224303 | 0.010053859 |
| 0.00990363  | 0.046926704 | 0.410846802 | 0.336228913 |
| 0.492701823 | 0.256987288 | 0.015304463 | 0.076104849 |
| 0.359880903 | 0.463531338 | 0.50679837  | 0.460000899 |
| 0.454791453 | 0.147283627 | 0.341429155 | 0.461047902 |
| 0.13252839  | 0.302637208 | 0.496572281 | 0.47436478  |
| 0.076366467 | 0.344126619 | 0.384068798 | 0.499080421 |
| 0.097062889 | 0.41889776  | 0.463108358 | 0.409395632 |
| 0.024223027 | 0.148048398 | 0.129248314 | 0.481604469 |
| 0.48866125  | 0.147926463 | 0.07796958  | 0.147867249 |
| 0.205630411 | 0.468597016 | 0.262927011 | 0.526233368 |
| 0.459616075 | 0.49012143  | 0.131475381 | 0.481537512 |
| 0.088374499 | 0.48126156  | 0.423832616 | 0.072598718 |
| 0.351460531 | 0.029688274 | 0.45872619  | 0.222638159 |
| 0.354313905 | 0.410837707 | 0.266585323 | 0.038524743 |
| 0.2217827   | 0.106418797 | 1           | 0.483380529 |
| 0.062503856 | 0.318647124 | 0.389973366 | 0.450863394 |
| 0.322056692 | 0.49019071  | 0.496284992 | 0.404533588 |
| 0.152206317 | 0.167842685 | 0.445459355 | 0.391388827 |
| 0.283114209 | 0.499979201 | 0.398674743 | 0.528987985 |
| 0.410521243 | 0.45217363  | 0.470881348 | 0.426867373 |
| 0.318568741 | 0.406863795 | 0.409582184 | 0.044917673 |
| 0.431568555 | 0.491710718 | 0.38756516  | 0.24763854  |
| 0.374891082 | 0.420371749 | 0.081554192 | 0.173106537 |
| 0.363691234 | 0.325345712 | 0.237080935 | 0.484140124 |

|             |             |             |                   |
|-------------|-------------|-------------|-------------------|
| 0.400528882 | 0.3944552   | 0.064858464 | 0.124118856       |
| 0.543226602 | 0.427010488 | 0.195819518 | 0.464489573       |
| 0.258075757 | 0.446668513 | 0.467270687 | 0.474109184       |
| 0.400391236 | 0.454746417 | 0.444834766 | 0.414078897       |
| 0.423168446 | 0.358351954 | 0.521755195 | 0.102297304       |
| 0.142285321 | 0.416082631 | 0.179876817 | 0.161422906       |
| 0.238857441 | 0.060125266 | 0.335895339 | 0.483034132       |
| 0.396385019 | 0.473877889 | 0.322141772 | 0.141415003       |
| 0.417262226 | 0.360740694 | 0.450987658 | 0.277793825       |
| 0.150144702 | 0.497868519 | 0.022751768 | 0.109245497       |
| 0.413732237 | 0.456939347 | 0.450554485 | 0.341203375       |
| 0.366207817 | 0.207054259 | 0.412094529 | 0.309849492       |
| 0.353336179 | 0.378510766 | 0.450317225 | 0.060734541       |
| 0.044571529 | 0.50183109  | 0.375886985 | 0.040149265       |
| 0.136507352 | 0.373108018 | 0.338486922 | 0.342312259       |
| 0.047023753 | 0.482347143 | 0.361025507 | 0.477869494       |
| 0.40565603  | 0.120329251 | 0.327935303 | 0.122773772       |
| 0.098972111 | 0.436069722 | 0.434349863 | 0.509077541       |
| 0.3995591   | 0.491970562 | 0.424236991 | 0.440479061       |
| 0.15370279  | 0.376790251 | 0.062740859 | 0.459582997       |
| 0.419891669 |             |             |                   |
| SLC11A2     | 0.407950582 | 0.518807535 | 0.438412982       |
| 0.415377509 | 0.470535152 | 0.328095985 | 0.22990618        |
| 0.174170262 | 0.124918983 | 0.007209085 | 0.046418506       |
| 0.462663003 | 0.253297135 | 0.264665099 | 0.314386445       |
| 0.452854056 | 0.216705691 | 0.365098402 | 0.291547268       |
| 0.416494024 | 0.094276696 | 0.45260689  | 0.128064612       |
| 0.404657266 | 0.183382285 | 0.117295286 | 0.366556096       |
| 0.426036317 | 0.13251224  | 0.276187423 | 0.35396899        |
| 0.180240729 | 0.412762973 | 0.507162907 | 0.472018091       |
| 0.50455103  | 0.373072825 | 0.020737922 | 0.276008001       |
| 0.386297052 | 0.451550027 | 0.406780131 | 0.369224832       |
| 0.065229338 | 0.454366088 | 0.279459044 | 0.47079905        |
| 0.215578523 | 0.062812661 | 0.193816646 | 0.410498 0.456214 |
| 0.424350039 | 0.2165791   | 0.184421835 | 0.234535548       |
| 0.189752121 | 0.345312317 | 0.26817685  | 0.266023717       |
| 0.122573979 | 0.474377969 | 0.10958812  | 0.161514751       |
| 0.252492957 | 0.253318765 | 0.262926658 | 0.433824287       |
| 0.334100374 | 0.028704713 | 0.41724577  | 0.002913879       |
| 0.401760795 | 0.457463209 | 0.375757394 | 0.082947129       |
| 0.036406825 | 0.281739074 | 0.347613936 | 0.44606141        |
| 0.450925911 | 0.501399951 | 0.509072951 | 0.254353998       |
| 0.386814697 | 0.462369055 | 0.232857956 | 0.410596245       |
| 0.202504444 | 0.141813157 | 0.468019374 | 0.51027191        |
| 0.51966835  | 0.29895133  | 0.372016313 | 0.38567637        |
| 0.461028699 | 0.416171264 | 0.456309805 | 0.377822054       |
| 0.116639347 | 0.419993512 | 0.522441947 | 0.350939154       |
| 0.417483351 | 0.242343992 | 0.374160704 | 0.105566511       |
| 0.339715444 | 0.393014283 | 0.211335302 | 0.460281717       |
| 0.030521162 | 0.32414483  | 0.358046918 | 0.285758883       |
| 0.415945912 | 0.521942139 | 0.230626113 | 0.468592918       |
| 0.038241817 | 0.20955305  | 0.071643547 | 0.351049849       |
| 0.245732999 | 0.45328296  | 0.441829004 | 0.223719778       |
| 0.43707113  | 0.291082298 | 0.008323906 | 0.06205602        |

|             |             |             |             |
|-------------|-------------|-------------|-------------|
| 0.276367217 | 0.411863237 | 0.390242557 | 0.429664297 |
| 0.37262678  | 0.295946875 | 0.338962201 | 0.448006246 |
| 0.49525044  | 0.043778887 | 0.128819828 | 0.424840266 |
| 0.283265418 | 0.312515799 | 0.448280836 | 0.398328487 |
| 0.13605836  | 0.179230987 | 0.526920434 | 0.389407747 |
| 0.125271395 | 0.312645804 | 0.458545358 | 0.335966897 |
| 0.453992239 | 0.152573506 | 0.312393198 | 0.067542902 |
| 0.479249949 | 0.069441157 | 0.316348787 | 0.307953221 |
| 0.236910756 | 0.021221205 | 0.24004138  | 0.285247738 |
| 0.40957913  | 0.445761539 | 0.16213239  | 0.35231623  |
| 0.464606189 | 0.281248306 | 0.400066096 | 0.018922044 |
| 0.080273619 | 0.230617002 | 0.510292394 | 0.225219581 |
| 0.515890963 | 0.353888266 | 0.400287485 | 0.37998867  |
| 0.449176307 | 0.00683622  | 0.474053671 | 0.526052046 |
| 0.245041978 | 0.427763471 | 0.467638222 | 0.416475845 |
| 0.429516149 | 0.044898    | 0.454965478 | 0.310107759 |
| 0.12534313  | 0.51852588  | 0.24208114  | 0.44894622  |
| 0.078239038 | 0.299697136 | 0.440170723 | 0.417934019 |
| 0.016213434 | 0.188036198 | 0.378872788 | 0.068114033 |
| 0.091872056 | 0.418420005 | 0.419959244 | 0.403629208 |
| 0.460863595 | 0.490656163 | 0.403176429 | 0.465511698 |
| 0.260929036 | 0.029177884 | 0.426430362 | 0.439063146 |
| 0.387094902 | 0.413386596 | 0.265469756 | 0.284157918 |
| 0.460061777 | 0.393085236 | 0.199877315 | 0.069289214 |
| 0.305055347 | 0.026851622 | 0.400173817 | 0.374049012 |
| 0.141631922 | 0.406711906 | 0.22725508  | 0.135468092 |
| 0.531439676 | 0.292618942 | 0.36252218  | 0.223617067 |
| 0.385577509 | 0.293142022 | 0.241047917 | 0.259255796 |
| 0.241080159 | 0.421058724 | 0.412476868 | 0.045286993 |
| 0.14824725  | 0.039697467 | 0.379044666 | 0.168875468 |
| 0.343514867 | 0.320260362 | 0.366814549 | 0.329130968 |
| 0.144279794 | 0.438314597 | 0.385093614 | 0.196258989 |
| 0.035778377 | 0.503328842 | 0.442601832 | 0.274414437 |
| 0.200694536 | 0.081939675 | 0.327028551 | 0.455348119 |
| 0.258908788 | 0.216267841 | 0.434903956 | 0.048426358 |
| 0.496772753 | 0.291496032 | 0.198164961 | 0.438484615 |
| 0.31772293  | 0.451552503 | 0.067867518 | 0.370694115 |
| 0.446059038 | 0.396610268 | 0.267467967 | 0.359233206 |
| 0.41977919  | 0.047095197 | 0.364525747 | 0.356949331 |
| 0.062232657 | 0.53115874  | 0.215540045 | 0.04915191  |
| 0.476137575 | 0.433892142 | 0.135661401 | 0.143124081 |
| 0.34693184  | 0.048421887 | 0.384999135 | 0.519902035 |
| 0.457106361 | 0.39842764  | 0.336721646 | 0.066013341 |
| 0.018648096 | 0.328510156 | 0.440663207 | 0.488579918 |
| 0.523846676 | 0.343883986 | 0.433679032 | 0.300705579 |
| 0.394280232 | 0.118417521 | 0.517415493 | 0.273664654 |
| 0.511291155 | 0.017529382 | 0.456251314 | 0.496476733 |
| 0.241093493 | 0.144799224 | 0.295234084 | 0.338569954 |
| 0.075143306 | 0.249809731 | 0.484619658 | 0.416918663 |
| 0.389650036 | 0.387399336 | 0.453799653 | 0.022504002 |
| 0.055257678 | 0.448081838 | 0.296552835 | 0.399047766 |
| 0.292441408 | 0.111784737 | 0.30929342  | 0.069994099 |
| 0.431518834 | 0.461795806 | 0.103954253 | 0.2900019   |
| 0.284980998 | 0.462156142 | 0.066153654 | 0.465191535 |

|             |             |             |             |
|-------------|-------------|-------------|-------------|
| 0.506532337 | 0.508292581 | 0.198331601 | 0.434089405 |
| 0.494408425 | 0.435742645 | 0.147116723 | 0.044864522 |
| 0.514657595 | 0.36821299  | 0.034217642 | 0.471843327 |
| 0.180362957 | 0.021698722 | 0.483978996 | 0.234513936 |
| 0.412255799 | 0.004552841 | 0.121811594 | 0.095138263 |
| 0.472810683 | 0.461142411 | 0.361529451 | 0.19187606  |
| 0.402350481 | 0.01607244  | 0.536160822 | 0.478061677 |
| 0.039405805 | 0.251631839 | 0.419593628 | 0.43499271  |
| 0.517889588 | 0.410071651 | 0.453878069 | 0.452047519 |
| 0.492120489 | 0.253744286 | 0.359066686 | 0.408765229 |
| 0.501385147 | 0.398990636 | 0.440178588 | 0.445686082 |
| 0.478926202 | 0.3306894   | 0.027224718 | 0.205899043 |
| 0.188261637 | 0.287872039 | 0.120278294 | 0.272969906 |
| 0.219942253 | 0.478441495 | 0.47088498  | 0.493497082 |
| 0.014916877 | 0.154643346 | 0.406828585 | 0.411981345 |
| 0.466223273 | 0.043858574 | 0.011503228 | 0.013508819 |
| 0.046289965 | 0.354748266 | 0.351672241 | 0.493376671 |
| 0.192330417 | 0.012041722 | 0.049461367 | 0.316859322 |
| 0.471464334 | 0.497074541 | 0.42088239  | 0.450721985 |
| 0.138482626 | 0.268052854 | 0.425139714 | 0.131391786 |
| 0.277478161 | 0.496692193 | 0.451034743 | 0.087493059 |
| 0.353599925 | 0.375659392 | 0.485717362 | 0.134967808 |
| 0.412255278 | 0.457981478 | 0.347660917 | 0.032830512 |
| 0.153386783 | 0.124272952 | 0.46553607  | 0.490499788 |
| 0.119318753 | 0.063153011 | 0.118318167 | 0.150308902 |
| 0.465358142 | 0.218227497 | 0.527902696 | 0.41123304  |
| 0.451130601 | 0.151967912 | 0.46865845  | 0.071811104 |
| 0.472274407 | 0.441191013 | 0.054649059 | 0.370541536 |
| 0.029537922 | 0.47211315  | 0.198497128 | 0.29352964  |
| 0.377658206 | 0.272380429 | 0.045948964 | 0.276946917 |
| 0.103097993 | 0.483380529 | 1           | 0.08108584  |
| 0.272037602 | 0.391392456 | 0.435446289 | 0.256467547 |
| 0.441358826 | 0.484567652 | 0.366351482 | 0.105206897 |
| 0.229500692 | 0.401826139 | 0.361805641 | 0.228107277 |
| 0.509302888 | 0.356298306 | 0.535960648 | 0.380307738 |
| 0.452728181 | 0.474134695 | 0.369073139 | 0.345365329 |
| 0.368363981 | 0.33693142  | 0.0261873   | 0.396762213 |
| 0.451606044 | 0.359721495 | 0.235597546 | 0.341523222 |
| 0.444768068 | 0.072964588 | 0.178602529 | 0.404452036 |
| 0.25770374  | 0.188597779 | 0.454548427 | 0.372198732 |
| 0.362863255 | 0.053213044 | 0.115268666 | 0.538968564 |
| 0.418191636 | 0.15137524  | 0.413402462 | 0.258875314 |
| 0.410339174 | 0.456974679 | 0.470656842 | 0.396600058 |
| 0.4257634   | 0.401893913 | 0.347297412 | 0.39348144  |
| 0.307282184 | 0.514308925 | 0.075081843 | 0.150986447 |
| 0.412801144 | 0.135645365 | 0.168322501 | 0.202616623 |
| 0.061897801 | 0.373364742 | 0.466077161 | 0.420615983 |
| 0.427733929 | 0.288341547 | 0.131879716 | 0.42766695  |
| 0.364126018 | 0.428878939 | 0.206724598 | 0.115604421 |
| 0.482871523 | 0.020729376 | 0.10724654  | 0.435227627 |
| 0.427619332 | 0.448689618 | 0.338170679 | 0.397179038 |
| 0.243627787 | 0.373695845 | 0.25106251  | 0.283035765 |
| 0.387940639 | 0.417407697 | 0.047339885 | 0.028961858 |
| 0.506318569 | 0.34732404  | 0.052755937 | 0.149886478 |



|             |             |             |             |
|-------------|-------------|-------------|-------------|
| 0.3496512   | 0.346072552 | 0.285700811 | 0.057537037 |
| 0.489529345 | 0.291454612 | 0.470802802 | 0.346159286 |
| 0.111957096 | 0.313131817 | 0.115806801 | 0.093155245 |
| 0.424694206 | 0.454663512 | 0.512144161 | 0.434872849 |
| 0.448506934 | 0.412659634 | 0.4080824   | 0.170603232 |
| 0.398202208 | 0.043955846 | 0.425794159 | 0.406066388 |
| SLC15A2     | 0.053508679 | 0.033516873 | 0.060649163 |
| 0.057394098 | 0.072458843 | 0.013832595 | 0.04264938  |
| 0.014609457 | 0.025650067 | 0.005021462 | 0.021511665 |
| 0.065383415 | 0.01335891  | 0.013234791 | 0.006209824 |
| 0.116830925 | 0.116783656 | 0.049319456 | 0.113006959 |
| 0.075738412 | 0.013566103 | 0.122679751 | 0.058007473 |
| 0.080348132 | 0.113716536 | 0.108041417 | 0.067858901 |
| 0.06897851  | 0.128957446 | 0.006871263 | 0.037497555 |
| 0.224663949 | 0.051334219 | 0.024957281 | 0.071281277 |
| 0.024068582 | 0.036011304 | 0.058513158 | 0.00626596  |
| 0.040202565 | 0.058001009 | 0.064854465 | 0.084333894 |
| 0.045136319 | 0.01812116  | 0.062818055 | 0.122485836 |
| 0.006647766 | 0.065291829 | 0.004951971 | 0.01820108  |
| 0.01626415  | 0.024360187 | 0.019010794 | 0.034440024 |
| 0.005062965 | 0.005816706 | 0.015890856 | 0.014574754 |
| 0.070271158 | 0.003991474 | 0.021541519 | 0.011630882 |
| 0.00668846  | 0.037030493 | 0.196288872 | 0.036742134 |
| 0.052005861 | 0.0238079   | 0.067390348 | 0.048739547 |
| 0.001239979 | 0.086294238 | 0.165002865 | 0.02512527  |
| 0.244556961 | 0.026588462 | 0.229053949 | 0.047223501 |
| 0.066649171 | 0.034635708 | 0.071481178 | 0.059863998 |
| 0.048973619 | 0.197065474 | 0.080685755 | 0.082403612 |
| 0.039410846 | 0.034364592 | 0.034180909 | 0.130289147 |
| 0.066011367 | 0.029467064 | 0.064758083 | 0.234554974 |
| 0.023231808 | 0.031124404 | 0.023147398 | 0.036717979 |
| 0.012812262 | 0.206708893 | 0.019197434 | 0.049158888 |
| 0.024662234 | 0.089381668 | 0.210581569 | 0.038908197 |
| 0.21721674  | 0.008627046 | 0.098148688 | 0.061376816 |
| 0.065975512 | 0.027640341 | 0.234502962 | 0.035138731 |
| 0.07445024  | 0.045434459 | 0.032210188 | 0.085659789 |
| 0.093785101 | 0.060951397 | 0.019806345 | 0.248001768 |
| 0.013789883 | 0.064258134 | 0.014934242 | 0.045029497 |
| 0.011077983 | 0.018631515 | 0.050017636 | 0.110275597 |
| 0.181951741 | 0.114327045 | 0.040013811 | 0.072378832 |
| 0.068119383 | 0.029520349 | 0.041993249 | 0.020294462 |
| 0.040104974 | 0.072919934 | 0.000174402 | 0.069775258 |
| 0.037350015 | 0.124404015 | 0.18672493  | 0.039691432 |
| 0.098160099 | 0.048257813 | 0.120675465 | 0.052152901 |
| 0.019697313 | 0.125792937 | 0.022496006 | 0.124475229 |
| 0.00652301  | 0.136772707 | 0.125287616 | 0.038972907 |
| 0.035434828 | 0.023680658 | 0.274865453 | 0.032168867 |
| 0.005473659 | 0.071662488 | 0.10453693  | 0.021995916 |
| 0.006776666 | 0.022385233 | 0.016635906 | 0.200991994 |
| 0.0488266   | 0.104814467 | 0.016090638 | 0.022783048 |
| 0.00943755  | 0.108885158 | 0.009017847 | 0.042167208 |
| 0.007421915 | 0.061944903 | 0.065183725 | 0.099340353 |
| 0.194718659 | 0.076778417 | 0.024284533 | 0.019851895 |
| 0.030709696 | 0.007073562 | 0.049092872 | 0.105620583 |

|             |             |             |             |
|-------------|-------------|-------------|-------------|
| 0.027588155 | 0.050995357 | 0.004042504 | 0.1171515   |
| 0.020950194 | 0.187234994 | 0.071572853 | 0.173398443 |
| 0.027951094 | 0.138899704 | 0.015606943 | 0.052568363 |
| 0.031497495 | 0.025121883 | 0.007261078 | 0.048488893 |
| 0.253023948 | 0.006925502 | 0.059957686 | 0.063519338 |
| 0.041944884 | 0.088928952 | 0.084853768 | 0.024318624 |
| 0.053140677 | 0.063697086 | 0.136444721 | 0.186840376 |
| 0.067186779 | 0.006101851 | 0.019438494 | 0.026976777 |
| 0.01256482  | 0.028090307 | 0.029949407 | 0.001945336 |
| 0.085247393 | 0.029846393 | 0.010367045 | 0.070439849 |
| 0.028702159 | 0.017827819 | 0.024067152 | 0.140664293 |
| 0.215385885 | 0.041926809 | 0.142087422 | 0.076012146 |
| 0.092065117 | 0.02137642  | 0.095483087 | 0.007269326 |
| 0.009953901 | 0.08013849  | 0.033398539 | 0.024891232 |
| 0.018465298 | 0.120321979 | 0.228352575 | 0.010845262 |
| 0.008522968 | 0.009255493 | 0.006481777 | 0.023437751 |
| 0.012832559 | 0.023637168 | 0.055020747 | 0.05912141  |
| 0.147010371 | 0.222024506 | 0.034189265 | 0.113001996 |
| 0.012651726 | 0.056478243 | 0.252202452 | 0.002671681 |
| 0.042281959 | 0.004473374 | 0.005190325 | 0.027852456 |
| 0.098605471 | 0.071498081 | 0.016258391 | 0.176017577 |
| 0.037439302 | 0.091077987 | 0.069420325 | 0.00339601  |
| 0.03453759  | 0.023268568 | 0.183905046 | 0.095343936 |
| 0.014551244 | 0.056205767 | 0.03573525  | 0.027346748 |
| 0.023403434 | 0.164073644 | 0.038923471 | 0.144555554 |
| 0.278216657 | 0.093557512 | 0.033119449 | 0.272149839 |
| 0.219948515 | 0.021471863 | 0.009883205 | 0.200537074 |
| 0.038840645 | 0.114618651 | 0.024054538 | 0.158472052 |
| 0.067720755 | 0.016070248 | 0.235237109 | 0.074146295 |
| 0.02095202  | 0.042662001 | 0.212604489 | 0.051797593 |
| 0.143199451 | 0.021711509 | 0.003314134 | 0.043242372 |
| 0.090948975 | 0.03158166  | 0.164512982 | 0.061044401 |
| 0.020913794 | 0.00909689  | 0.136131484 | 0.021637259 |
| 0.017680016 | 0.085306402 | 0.095166812 | 0.024526964 |
| 0.034030063 | 0.039060803 | 0.019295508 | 0.093496903 |
| 0.016402998 | 0.025917641 | 0.082674741 | 0.09074532  |
| 0.015578985 | 0.08411353  | 0.057804612 | 0.012436323 |
| 0.034982577 | 0.020860313 | 0.091114043 | 0.050778525 |
| 0.006616801 | 0.012200767 | 0.172203703 | 0.140949865 |
| 0.046960845 | 0.037411389 | 0.024694592 | 0.076033596 |
| 0.051809749 | 0.032757584 | 0.035552466 | 0.306950451 |
| 0.285575282 | 0.028203735 | 0.034430104 | 0.016436916 |
| 0.071072785 | 0.004422242 | 0.013104819 | 0.031130043 |
| 0.118329984 | 0.014750434 | 0.001946381 | 0.050666239 |
| 0.232163275 | 0.097929635 | 0.018857204 | 0.043599747 |
| 0.001562247 | 0.110825032 | 0.09486123  | 0.049109868 |
| 0.024252886 | 0.168908887 | 0.114903482 | 0.031656873 |
| 0.04032059  | 0.032799012 | 0.055979089 | 0.04430445  |
| 0.040937407 | 0.022254235 | 0.009877991 | 0.169730638 |
| 0.032465711 | 0.031626891 | 0.045254233 | 0.027640504 |
| 0.056361626 | 0.124090577 | 0.099237514 | 0.034967336 |
| 0.032799997 | 0.011615652 | 0.002715046 | 0.014317991 |
| 0.014304444 | 0.082923861 | 0.040375024 | 0.078206675 |
| 0.047345488 | 0.201247035 | 0.014319379 | 0.030909746 |

|             |             |             |             |
|-------------|-------------|-------------|-------------|
| 0.037424489 | 0.058541529 | 0.168255215 | 0.017100252 |
| 0.014437061 | 0.042668986 | 0.04318292  | 0.221276005 |
| 0.041090998 | 0.000706865 | 0.099748154 | 0.016576558 |
| 0.022013832 | 0.097440393 | 0.027239297 | 0.122321974 |
| 0.07198582  | 0.207235631 | 0.003363037 | 0.108251617 |
| 0.068109788 | 0.015466383 | 0.046855012 | 0.021172479 |
| 0.21645694  | 0.177653455 | 0.046064883 | 0.054651251 |
| 0.032995692 | 0.194619737 | 0.064892364 | 0.011054644 |
| 0.153308439 | 0.199405739 | 0.123384314 | 0.109366906 |
| 0.021352189 | 0.02710947  | 0.042496242 | 0.001370899 |
| 0.028896177 | 0.065452461 | 0.041750542 | 0.059882551 |
| 0.043194558 | 0.093756153 | 0.154592851 | 0.023638483 |
| 0.035718782 | 0.020876107 | 0.099729502 | 0.001448833 |
| 0.128177941 | 0.139227003 | 0.034140697 | 0.005111459 |
| 0.011803249 | 0.045936423 | 0.021499091 | 0.245491818 |
| 0.040376077 | 0.204000894 | 0.062503856 | 0.08108584  |
| 1           | 0.04579361  | 0.186535265 | 0.105076968 |
| 0.017694692 | 0.058721897 | 0.021181006 | 0.010296693 |
| 0.028116219 | 0.092592886 | 0.0631194   | 0.028227738 |
| 0.015721259 | 0.077279239 | 0.016920774 | 0.046817996 |
| 0.037206609 | 0.043359177 | 0.036522739 | 0.046068688 |
| 0.05144199  | 0.025340534 | 0.018603357 | 0.009884246 |
| 0.096075725 | 0.060131652 | 0.048252372 | 0.035493501 |
| 0.09135394  | 0.060513261 | 0.094284603 | 0.014495768 |
| 0.057356003 | 0.010831193 | 0.031391716 | 0.106429144 |
| 0.045764695 | 0.027898328 | 0.060078654 | 0.09979689  |
| 0.036646743 | 0.027490474 | 0.010613023 | 0.036994675 |
| 0.255457873 | 0.079529545 | 0.072229423 | 0.084609719 |
| 0.018062329 | 0.032494561 | 0.044452642 | 0.017941917 |
| 0.017781016 | 0.085323652 | 0.025837134 | 0.005432615 |
| 0.050833684 | 0.043619427 | 0.027687029 | 0.329025302 |
| 0.129421995 | 0.133137546 | 0.024050928 | 0.121388862 |
| 0.022983071 | 0.088654183 | 0.00600142  | 0.083644408 |
| 0.189963369 | 0.036672125 | 0.137413799 | 0.020953934 |
| 0.033520848 | 0.020755908 | 0.05249812  | 0.251052766 |
| 0.033262758 | 0.039249498 | 0.046570424 | 0.139556856 |
| 0.031216026 | 0.163082026 | 0.121656324 | 0.010065746 |
| 0.004130934 | 0.013698849 | 0.034335916 | 0.031379721 |
| 0.035971022 | 0.074753456 | 0.023038309 | 0.217828306 |
| 0.102530982 | 0.027640035 | 0.070282685 | 0.014278723 |
| 0.291452853 | 0.032734123 | 0.005278002 | 0.070788787 |
| 0.043263932 | 0.18969044  | 0.015579111 | 0.028624986 |
| 0.101424914 | 0.022243939 | 0.078713749 | 0.028701823 |
| 0.124669681 | 0.091052622 | 0.015995923 | 0.033698332 |
| 0.071937521 | 0.04480362  | 0.03672706  | 0.061543447 |
| 0.011614667 |             |             |             |
| SLC20A1     | 0.234823183 | 0.287910202 | 0.134720377 |
| 0.340753279 | 0.189372903 | 0.197544643 | 0.232793719 |
| 0.123612027 | 0.09595753  | 0.017881396 | 0.023247879 |
| 0.165533771 | 0.049552616 | 0.08305298  | 0.072751318 |
| 0.365242356 | 0.059041985 | 0.142666082 | 0.266987456 |
| 0.347345853 | 0.116335861 | 0.304519441 | 0.140641293 |
| 0.071691968 | 0.049675143 | 0.094059232 | 0.08356745  |
| 0.372504014 | 0.109522588 | 0.137958559 | 0.326350804 |

|             |             |             |             |
|-------------|-------------|-------------|-------------|
| 0.081556461 | 0.280785075 | 0.243646033 | 0.199315715 |
| 0.215504228 | 0.195388066 | 0.023991866 | 0.09808796  |
| 0.285926149 | 0.25180842  | 0.36178588  | 0.275766473 |
| 0.094032828 | 0.230384145 | 0.260206367 | 0.201020258 |
| 0.089649032 | 0.04310838  | 0.111413303 | 0.245713834 |
| 0.197135335 | 0.162620026 | 0.174895574 | 0.169886203 |
| 0.033646839 | 0.090865322 | 0.024597066 | 0.228672355 |
| 0.236039228 | 0.099417767 | 0.215616913 | 0.10533968  |
| 0.089208458 | 0.197777719 | 0.071728749 | 0.210422496 |
| 0.064772153 | 0.265146243 | 0.094420737 | 0.130753677 |
| 0.007702013 | 0.370756332 | 0.212744792 | 0.051724721 |
| 0.090373918 | 0.02879688  | 0.089809863 | 0.296010719 |
| 0.35472176  | 0.239559286 | 0.29585629  | 0.274645703 |
| 0.055853665 | 0.191311304 | 0.119385269 | 0.115618791 |
| 0.282238036 | 0.16454167  | 0.072669242 | 0.329814826 |
| 0.291487737 | 0.245654974 | 0.089611379 | 0.186040939 |
| 0.244466028 | 0.290133914 | 0.128366665 | 0.147967737 |
| 0.054124687 | 0.04898465  | 0.228323811 | 0.277879642 |
| 0.247037231 | 0.071965022 | 0.122437683 | 0.321055251 |
| 0.111200393 | 0.063111772 | 0.32644865  | 0.045295481 |
| 0.359582463 | 0.078021277 | 0.128475635 | 0.241467658 |
| 0.137566456 | 0.262115144 | 0.233232367 | 0.241147054 |
| 0.154075156 | 0.032487645 | 0.028066775 | 0.075123113 |
| 0.073548744 | 0.022183377 | 0.199301638 | 0.302282253 |
| 0.105636532 | 0.078571668 | 0.232583358 | 0.019992742 |
| 0.042854045 | 0.088920653 | 0.209503995 | 0.181948395 |
| 0.313078437 | 0.175105923 | 0.104281102 | 0.219810782 |
| 0.153417737 | 0.294955673 | 0.013874078 | 0.166660042 |
| 0.182708152 | 0.099927073 | 0.277082026 | 0.174627836 |
| 0.140955137 | 0.158465577 | 0.150039292 | 0.310567656 |
| 0.272490849 | 0.154372979 | 0.123125293 | 0.32015614  |
| 0.076965632 | 0.148817443 | 0.145585402 | 0.101706972 |
| 0.110410966 | 0.202660524 | 0.037408294 | 0.188890174 |
| 0.04135299  | 0.039558559 | 0.069232007 | 0.20530212  |
| 0.073775466 | 0.211089552 | 0.189613748 | 0.165325234 |
| 0.148452328 | 0.251803858 | 0.172672042 | 0.188965565 |
| 0.022402394 | 0.089995269 | 0.117964564 | 0.276382352 |
| 0.176885524 | 0.281474574 | 0.125672913 | 0.114106514 |
| 0.205472002 | 0.33432263  | 0.00360789  | 0.229185932 |
| 0.24225914  | 0.095708225 | 0.175881443 | 0.209250867 |
| 0.094866665 | 0.316901127 | 0.007654541 | 0.310358818 |
| 0.184536973 | 0.148970149 | 0.328312731 | 0.135531914 |
| 0.230440569 | 0.081222388 | 0.1401087   | 0.203924424 |
| 0.150079685 | 0.020424762 | 0.155577709 | 0.352856001 |
| 0.039954398 | 0.127977013 | 0.301588604 | 0.311620071 |
| 0.231016765 | 0.296350678 | 0.351077766 | 0.07764905  |
| 0.168934348 | 0.196459503 | 0.049196135 | 0.160985835 |
| 0.257078318 | 0.050524479 | 0.255277267 | 0.142792135 |
| 0.136565703 | 0.271581414 | 0.185686673 | 0.057849859 |
| 0.114085515 | 0.237490941 | 0.035069382 | 0.17792092  |
| 0.208364537 | 0.084951927 | 0.121291418 | 0.087944978 |
| 0.06268785  | 0.288204575 | 0.044901547 | 0.045233738 |
| 0.023429234 | 0.153133441 | 0.264071193 | 0.051341681 |
| 0.031968238 | 0.125792711 | 0.082664385 | 0.116902156 |

|             |             |             |             |
|-------------|-------------|-------------|-------------|
| 0.101033638 | 0.090159376 | 0.030770382 | 0.038483184 |
| 0.026748301 | 0.04500116  | 0.046404601 | 0.205980559 |
| 0.077660598 | 0.046696813 | 0.134051731 | 0.072234105 |
| 0.070792344 | 0.055516792 | 0.28112391  | 0.330679912 |
| 0.200402578 | 0.157086502 | 0.075793879 | 0.030470217 |
| 0.296750326 | 0.110631669 | 0.087289609 | 0.280403041 |
| 0.069607753 | 0.313226848 | 0.067989213 | 0.112780214 |
| 0.067486012 | 0.200896593 | 0.370065502 | 0.042605504 |
| 0.220460629 | 0.262017522 | 0.237398946 | 0.111774824 |
| 0.203053458 | 0.300452891 | 0.08444457  | 0.215652082 |
| 0.191732218 | 0.067790952 | 0.259851562 | 0.057168913 |
| 0.060686971 | 0.22072535  | 0.188260006 | 0.128365027 |
| 0.084994435 | 0.141567587 | 0.11433452  | 0.240651651 |
| 0.287344409 | 0.313156665 | 0.222327253 | 0.069449509 |
| 0.079748441 | 0.009791833 | 0.092772018 | 0.134439187 |
| 0.227442626 | 0.24172167  | 0.23907752  | 0.099414667 |
| 0.301182903 | 0.07066138  | 0.10067211  | 0.268546733 |
| 0.074919306 | 0.255647743 | 0.041050874 | 0.214339149 |
| 0.211020533 | 0.141496635 | 0.062740133 | 0.244048242 |
| 0.223051964 | 0.111170986 | 0.16007076  | 0.236305248 |
| 0.29487249  | 0.125068747 | 0.087406337 | 0.245490507 |
| 0.073099862 | 0.129509178 | 0.200790257 | 0.038686398 |
| 0.10199191  | 0.143830198 | 0.008549261 | 0.116500023 |
| 0.062814599 | 0.250706116 | 0.310650236 | 0.077681699 |
| 0.137939134 | 0.1121984   | 0.247425276 | 0.101164853 |
| 0.20860407  | 0.232290871 | 0.244230312 | 0.170655799 |
| 0.218326816 | 0.229097399 | 0.100436214 | 0.102472169 |
| 0.043664815 | 0.224656237 | 0.264949028 | 0.028836499 |
| 0.333725806 | 0.119330319 | 0.018903175 | 0.29395122  |
| 0.257255243 | 0.19273286  | 0.015482275 | 0.02349601  |
| 0.049401987 | 0.292597476 | 0.227691182 | 0.338792972 |
| 0.055793745 | 0.317810091 | 0.01393129  | 0.26858026  |
| 0.242246145 | 0.027660413 | 0.06158478  | 0.189174664 |
| 0.153012835 | 0.290287858 | 0.07374855  | 0.211493862 |
| 0.122708982 | 0.213405986 | 0.096167953 | 0.231420063 |
| 0.264748496 | 0.206122258 | 0.298713178 | 0.276909009 |
| 0.306012114 | 0.257916122 | 0.30882282  | 0.063718851 |
| 0.063473339 | 0.167494697 | 0.036612861 | 0.057803997 |
| 0.209765421 | 0.07511665  | 0.261724391 | 0.325128129 |
| 0.238269588 | 0.032700545 | 0.137874631 | 0.212532838 |
| 0.327107686 | 0.359977543 | 0.058259719 | 0.00896698  |
| 0.004092803 | 0.01398321  | 0.297208842 | 0.158226331 |
| 0.269741644 | 0.033175474 | 0.032839215 | 0.11230893  |
| 0.1108246   | 0.164333634 | 0.246438175 | 0.37258312  |
| 0.239699153 | 0.110941688 | 0.046211742 | 0.378758143 |
| 0.05288824  | 0.172008974 | 0.258687033 | 0.263765835 |
| 0.075532378 | 0.162216685 | 0.1433949   | 0.343282749 |
| 0.008386512 | 0.226776732 | 0.179332421 | 0.077788295 |
| 0.033641814 | 0.06877524  | 0.077227109 | 0.328833461 |
| 0.201058455 | 0.03628165  | 0.028476397 | 0.036801337 |
| 0.090790703 | 0.306245019 | 0.085246115 | 0.312999967 |
| 0.313130465 | 0.362249209 | 0.055726513 | 0.257415066 |
| 0.06122108  | 0.214206951 | 0.102993157 | 0.022680667 |
| 0.115136379 | 0.059614938 | 0.209415001 | 0.029516684 |

|             |             |             |             |
|-------------|-------------|-------------|-------------|
| 0.115346347 | 0.282457803 | 0.070997124 | 0.036139051 |
| 0.033159221 | 0.06476872  | 0.318647124 | 0.272037602 |
| 0.04579361  | 1           | 0.205318051 | 0.294396485 |
| 0.213513686 | 0.28703264  | 0.236685619 | 0.093195929 |
| 0.133584113 | 0.028654084 | 0.336391417 | 0.198175326 |
| 0.114946773 | 0.309374651 | 0.068247644 | 0.28167616  |
| 0.259236771 | 0.299886739 | 0.239841279 | 0.265911537 |
| 0.049034064 | 0.195267168 | 0.241766493 | 0.039331991 |
| 0.265227396 | 0.293386554 | 0.221597121 | 0.050971497 |
| 0.136244951 | 0.107343288 | 0.155443102 | 0.043633125 |
| 0.063965272 | 0.206732164 | 0.105423223 | 0.378403471 |
| 0.24883351  | 0.209467671 | 0.117170961 | 0.072771319 |
| 0.287017377 | 0.275536919 | 0.120647637 | 0.25408019  |
| 0.162140915 | 0.222203483 | 0.246440269 | 0.236688378 |
| 0.081384724 | 0.226729597 | 0.300055038 | 0.211250647 |
| 0.252393795 | 0.288751292 | 0.250929781 | 0.089714399 |
| 0.045861516 | 0.1617116   | 0.067477377 | 0.113771111 |
| 0.163359381 | 0.056137857 | 0.029760841 | 0.309832081 |
| 0.043452522 | 0.260752166 | 0.07713198  | 0.089416328 |
| 0.193521313 | 0.130404306 | 0.260666692 | 0.152953042 |
| 0.072267584 | 0.233149252 | 0.023776586 | 0.082755436 |
| 0.053190421 | 0.237668303 | 0.096377831 | 0.124142608 |
| 0.043773123 | 0.074527564 | 0.224031688 | 0.153307285 |
| 0.056704643 | 0.053627616 | 0.231822099 | 0.086164559 |
| 0.081205048 | 0.323976405 | 0.137106257 | 0.041665247 |
| 0.090442934 | 0.209453179 | 0.104947213 | 0.098430041 |
| 0.035043077 | 0.213292111 | 0.104045373 | 0.178105735 |
| 0.28315379  | 0.115059174 | 0.216042933 | 0.082914759 |
| 0.135153043 | 0.234002198 | 0.141733013 | 0.226182588 |
| 0.131077782 | 0.331512475 | 0.220074618 | 0.224678791 |
| 0.072517288 | 0.113833031 | 0.095925556 | 0.334359602 |
| 0.054300045 |             |             |             |
| SLC25A24    | 0.295293668 | 0.338615169 | 0.204987827 |
| 0.33975398  | 0.24444729  | 0.158670827 | 0.157596144 |
| 0.126309332 | 0.127346658 | 0.014894342 | 0.045790607 |
| 0.269466277 | 0.118823899 | 0.129555779 | 0.115694516 |
| 0.417957297 | 0.193787367 | 0.206029337 | 0.2255053   |
| 0.334785469 | 0.085620253 | 0.377561117 | 0.166597021 |
| 0.235677116 | 0.167764584 | 0.146520695 | 0.194529985 |
| 0.393142964 | 0.167950119 | 0.09157062  | 0.266560033 |
| 0.266711122 | 0.319657272 | 0.298050812 | 0.299217799 |
| 0.284753273 | 0.245222081 | 0.055471822 | 0.101673146 |
| 0.309077772 | 0.325152853 | 0.326024973 | 0.26884646  |
| 0.107951851 | 0.258926223 | 0.191169004 | 0.311309863 |
| 0.116501208 | 0.097346508 | 0.079654391 | 0.246660863 |
| 0.243484854 | 0.187109094 | 0.138056285 | 0.139571643 |
| 0.073362376 | 0.078007248 | 0.111328844 | 0.162418102 |
| 0.182849292 | 0.058177328 | 0.268737572 | 0.099468403 |
| 0.082770437 | 0.171603541 | 0.259669521 | 0.16551876  |
| 0.181038533 | 0.234584319 | 0.093694771 | 0.21800578  |
| 0.005088036 | 0.342160647 | 0.330784792 | 0.127115951 |
| 0.16190663  | 0.057202807 | 0.273223889 | 0.229199166 |
| 0.39592182  | 0.302316847 | 0.404056611 | 0.378078919 |
| 0.184688941 | 0.288377618 | 0.211552862 | 0.198258144 |

|             |             |             |             |
|-------------|-------------|-------------|-------------|
| 0.30999927  | 0.136248342 | 0.159372541 | 0.423840106 |
| 0.398032343 | 0.313834113 | 0.225426037 | 0.283563197 |
| 0.253544011 | 0.313078782 | 0.159555632 | 0.176725002 |
| 0.125419421 | 0.207147478 | 0.247552745 | 0.36861052  |
| 0.25109175  | 0.181475361 | 0.235899031 | 0.296003256 |
| 0.187682731 | 0.143104021 | 0.319631654 | 0.175208606 |
| 0.402653039 | 0.066951576 | 0.256863852 | 0.189460012 |
| 0.293950109 | 0.316321618 | 0.317407674 | 0.191333785 |
| 0.239474339 | 0.088319587 | 0.107277904 | 0.178409391 |
| 0.161849098 | 0.146398962 | 0.234996452 | 0.34386585  |
| 0.12760504  | 0.176795445 | 0.192066238 | 0.049757999 |
| 0.141340676 | 0.290821234 | 0.282596582 | 0.213856037 |
| 0.3432517   | 0.241129461 | 0.164209044 | 0.211669126 |
| 0.236579364 | 0.39871676  | 0.01335638  | 0.172562279 |
| 0.212326144 | 0.283763726 | 0.282560251 | 0.22085176  |
| 0.219693473 | 0.16166069  | 0.199523637 | 0.389840107 |
| 0.2533639   | 0.166561997 | 0.146533878 | 0.409317038 |
| 0.115149325 | 0.270984234 | 0.197641893 | 0.172472711 |
| 0.096541281 | 0.269618933 | 0.152128629 | 0.163604861 |
| 0.097936213 | 0.166210441 | 0.096638266 | 0.129648154 |
| 0.132107883 | 0.252953785 | 0.232884247 | 0.22832304  |
| 0.18264813  | 0.332358416 | 0.121713963 | 0.226335637 |
| 0.025655142 | 0.179425049 | 0.0871276   | 0.352272493 |
| 0.112748068 | 0.390305556 | 0.246416487 | 0.27137653  |
| 0.28947564  | 0.397397326 | 0.021496072 | 0.270057919 |
| 0.318180994 | 0.083549644 | 0.225710657 | 0.309844237 |
| 0.135457303 | 0.356021419 | 0.025334196 | 0.384509344 |
| 0.188892697 | 0.209223097 | 0.422291638 | 0.214117666 |
| 0.283279228 | 0.128511435 | 0.128487111 | 0.311583135 |
| 0.233691048 | 0.030028565 | 0.081409214 | 0.284259379 |
| 0.158079197 | 0.071868602 | 0.323480526 | 0.315723578 |
| 0.223617217 | 0.390304236 | 0.437988322 | 0.129190333 |
| 0.22357623  | 0.205884217 | 0.105964216 | 0.281984915 |
| 0.342318079 | 0.113284034 | 0.260997816 | 0.181644913 |
| 0.131364396 | 0.303350669 | 0.254000999 | 0.06196912  |
| 0.115280462 | 0.152700453 | 0.042770785 | 0.207597194 |
| 0.247564683 | 0.102281275 | 0.141564711 | 0.27125712  |
| 0.193450783 | 0.362723746 | 0.200617268 | 0.165848512 |
| 0.143188654 | 0.168366346 | 0.230464073 | 0.089803078 |
| 0.099199797 | 0.218982444 | 0.171563597 | 0.166921785 |
| 0.066430032 | 0.168194846 | 0.133575264 | 0.099451495 |
| 0.072505012 | 0.100189942 | 0.08596292  | 0.212571716 |
| 0.137361782 | 0.111438715 | 0.191665809 | 0.226212881 |
| 0.228901631 | 0.107350514 | 0.334335884 | 0.379388477 |
| 0.16854705  | 0.194456014 | 0.179259781 | 0.081556454 |
| 0.338073839 | 0.087332683 | 0.07695201  | 0.294193593 |
| 0.130426964 | 0.402459191 | 0.141570002 | 0.200996768 |
| 0.156197493 | 0.203066631 | 0.406994364 | 0.041456922 |
| 0.199161672 | 0.279433763 | 0.298215784 | 0.204994969 |
| 0.213265503 | 0.289060455 | 0.086791848 | 0.246126931 |
| 0.224143936 | 0.128054707 | 0.346735523 | 0.223321374 |
| 0.135999819 | 0.347821451 | 0.254575688 | 0.204038408 |
| 0.21533533  | 0.133281509 | 0.064929385 | 0.326274482 |
| 0.353967117 | 0.39342559  | 0.242639712 | 0.258209637 |

|             |             |             |             |
|-------------|-------------|-------------|-------------|
| 0.102666957 | 0.025174392 | 0.274017829 | 0.230346754 |
| 0.276420671 | 0.344092118 | 0.28102838  | 0.171587774 |
| 0.261358724 | 0.150125561 | 0.064890797 | 0.354639918 |
| 0.263474385 | 0.320084878 | 0.076208607 | 0.314564101 |
| 0.271368502 | 0.088856579 | 0.162975385 | 0.146576641 |
| 0.223642853 | 0.132366264 | 0.243347307 | 0.292998277 |
| 0.30389048  | 0.189094955 | 0.153496422 | 0.330858511 |
| 0.050500075 | 0.088100796 | 0.266137003 | 0.187971763 |
| 0.143181786 | 0.23622527  | 0.083482651 | 0.140736    |
| 0.101942733 | 0.264013772 | 0.409895348 | 0.130567528 |
| 0.105172207 | 0.135836436 | 0.364993432 | 0.136000437 |
| 0.31608292  | 0.32260564  | 0.300359673 | 0.209286619 |
| 0.298333956 | 0.310887879 | 0.180456648 | 0.238979365 |
| 0.125523567 | 0.30393582  | 0.253280123 | 0.057778818 |
| 0.400785074 | 0.064511554 | 0.03038056  | 0.325444734 |
| 0.22010809  | 0.220588982 | 0.015530857 | 0.11626346  |
| 0.199184337 | 0.417380792 | 0.262281015 | 0.269635649 |
| 0.052792142 | 0.319589896 | 0.045824412 | 0.368929989 |
| 0.291318916 | 0.102731732 | 0.230404017 | 0.258807171 |
| 0.258374387 | 0.338826445 | 0.165947031 | 0.312581745 |
| 0.215840903 | 0.275060651 | 0.13094461  | 0.280630515 |
| 0.297768126 | 0.296552288 | 0.310624413 | 0.299104113 |
| 0.362915081 | 0.374250197 | 0.260470327 | 0.058753301 |
| 0.144743169 | 0.099804724 | 0.073667684 | 0.082787562 |
| 0.15014757  | 0.196886697 | 0.338112888 | 0.405845386 |
| 0.343843506 | 0.069211734 | 0.125277512 | 0.262257215 |
| 0.325127719 | 0.392904407 | 0.142070348 | 0.026937125 |
| 0.030441751 | 0.061345097 | 0.220606583 | 0.289610508 |
| 0.342158157 | 0.050082488 | 0.053127858 | 0.077071747 |
| 0.214864492 | 0.287387057 | 0.302506881 | 0.389224828 |
| 0.343999757 | 0.20956249  | 0.078663187 | 0.392009124 |
| 0.146547802 | 0.161410398 | 0.352597633 | 0.27555303  |
| 0.19985914  | 0.278272953 | 0.178008238 | 0.387439324 |
| 0.068286664 | 0.313315119 | 0.276821025 | 0.141979779 |
| 0.111742366 | 0.213366872 | 0.166022249 | 0.416703463 |
| 0.266667965 | 0.095824978 | 0.083920464 | 0.044560194 |
| 0.116863347 | 0.378216532 | 0.178012291 | 0.402543162 |
| 0.331597215 | 0.420579536 | 0.196809265 | 0.288239484 |
| 0.083044986 | 0.267817813 | 0.204823602 | 0.036139086 |
| 0.287641893 | 0.115204599 | 0.29544067  | 0.065870027 |
| 0.119111907 | 0.275002551 | 0.151578434 | 0.123885441 |
| 0.158115202 | 0.174875628 | 0.389973366 | 0.391392456 |
| 0.186535265 | 0.205318051 | 1           | 0.348690403 |
| 0.132527411 | 0.332861551 | 0.279568887 | 0.120236869 |
| 0.107914468 | 0.173431441 | 0.33093348  | 0.224101588 |
| 0.126082233 | 0.418188637 | 0.141010747 | 0.371502438 |
| 0.268593    | 0.33861364  | 0.312858052 | 0.220311737 |
| 0.182975151 | 0.196377565 | 0.19631695  | 0.043465848 |
| 0.280756534 | 0.363332147 | 0.194532732 | 0.161720678 |
| 0.200823446 | 0.196324719 | 0.149244178 | 0.114099613 |
| 0.147133455 | 0.131029198 | 0.153470966 | 0.439840143 |
| 0.248003059 | 0.229788431 | 0.112449697 | 0.153104487 |
| 0.352687325 | 0.284735669 | 0.12565694  | 0.268221214 |
| 0.286817656 | 0.238816642 | 0.35771217  | 0.359468601 |



|             |             |             |             |
|-------------|-------------|-------------|-------------|
| 0.160041219 | 0.285792351 | 0.309709781 | 0.197616987 |
| 0.244091442 | 0.215133227 | 0.306684112 | 0.068054916 |
| 0.134702624 | 0.222273109 | 0.10980914  | 0.23582218  |
| 0.200327028 | 0.151208132 | 0.12769548  | 0.396662679 |
| 0.12951053  | 0.30195573  | 0.108594482 | 0.205998554 |
| 0.285515801 | 0.155239512 | 0.310506487 | 0.127231951 |
| 0.125215092 | 0.276241335 | 0.060859267 | 0.194457147 |
| 0.14320393  | 0.293478567 | 0.173429499 | 0.28163374  |
| 0.163498688 | 0.262490954 | 0.245519476 | 0.099869375 |
| 0.072541679 | 0.158753442 | 0.285625917 | 0.098983375 |
| 0.069842709 | 0.420569714 | 0.148923056 | 0.161575849 |
| 0.158997678 | 0.199566984 | 0.246257114 | 0.140488027 |
| 0.144187993 | 0.297672952 | 0.081596258 | 0.247339738 |
| 0.213665711 | 0.206356435 | 0.201655794 | 0.128852818 |
| 0.192227618 | 0.265933765 | 0.239979672 | 0.302273326 |
| 0.24602443  | 0.383466876 | 0.233483241 | 0.274538463 |
| 0.228545582 | 0.176431701 | 0.092861287 | 0.365151029 |
| 0.109230943 |             |             |             |
| SLC27A4     | 0.378868227 | 0.466764917 | 0.307011265 |
| 0.373200164 | 0.327142429 | 0.232763396 | 0.216144416 |
| 0.228891511 | 0.105910148 | 0.008086301 | 0.023519225 |
| 0.309994489 | 0.150084047 | 0.218408775 | 0.215830409 |
| 0.415718611 | 0.16295626  | 0.371694474 | 0.276268383 |
| 0.37047802  | 0.115735074 | 0.349986136 | 0.15199984  |
| 0.286679538 | 0.120188706 | 0.101098802 | 0.218903737 |
| 0.454723057 | 0.119837331 | 0.191256161 | 0.338803101 |
| 0.211499643 | 0.414515976 | 0.441854941 | 0.309928322 |
| 0.425919416 | 0.333271164 | 0.053700822 | 0.191209573 |
| 0.421214544 | 0.358752857 | 0.367467044 | 0.292475745 |
| 0.076893118 | 0.410187611 | 0.235698079 | 0.338824396 |
| 0.221145861 | 0.050087526 | 0.185004704 | 0.390164723 |
| 0.373377949 | 0.245492292 | 0.239870748 | 0.17251168  |
| 0.10832096  | 0.184601822 | 0.155238061 | 0.24662116  |
| 0.234669218 | 0.132458327 | 0.397403258 | 0.102448063 |
| 0.136763055 | 0.298308167 | 0.234199785 | 0.272441882 |
| 0.26389127  | 0.33595232  | 0.071225388 | 0.269600891 |
| 0.004319085 | 0.359908843 | 0.359404054 | 0.187393598 |
| 0.094094838 | 0.030823145 | 0.258203694 | 0.271549159 |
| 0.470519629 | 0.434491616 | 0.462125891 | 0.45228834  |
| 0.186832135 | 0.354319291 | 0.289515355 | 0.19952185  |
| 0.413636124 | 0.170787809 | 0.165147086 | 0.408964851 |
| 0.464550733 | 0.444000946 | 0.224424963 | 0.300077628 |
| 0.330716501 | 0.441106851 | 0.27634685  | 0.29321616  |
| 0.195830186 | 0.125017765 | 0.367683297 | 0.466544252 |
| 0.371456696 | 0.243072017 | 0.197661313 | 0.386472785 |
| 0.130907796 | 0.28272424  | 0.308203202 | 0.2170499   |
| 0.478139193 | 0.041153392 | 0.248285136 | 0.270371708 |
| 0.354373221 | 0.398610497 | 0.439261998 | 0.223858759 |
| 0.348807946 | 0.049531968 | 0.100437397 | 0.107584674 |
| 0.266366563 | 0.142672855 | 0.381700278 | 0.419038965 |
| 0.242557808 | 0.282330875 | 0.286669413 | 0.016454602 |
| 0.068695277 | 0.311377798 | 0.377438294 | 0.378147332 |
| 0.403538732 | 0.346373871 | 0.186776483 | 0.318650445 |
| 0.279299935 | 0.456559222 | 0.03179397  | 0.173208221 |

|             |             |             |             |
|-------------|-------------|-------------|-------------|
| 0.299285429 | 0.306421417 | 0.281139098 | 0.288616188 |
| 0.261233302 | 0.192817312 | 0.191560152 | 0.485274371 |
| 0.388859619 | 0.140527053 | 0.315468147 | 0.394366187 |
| 0.203704444 | 0.296223405 | 0.187977415 | 0.248431373 |
| 0.087326108 | 0.395767219 | 0.074705323 | 0.324965723 |
| 0.146496983 | 0.158839737 | 0.068332652 | 0.250506725 |
| 0.216483101 | 0.339458304 | 0.379245054 | 0.202330362 |
| 0.276377899 | 0.317226541 | 0.262005132 | 0.28357134  |
| 0.011541882 | 0.12879601  | 0.22612714  | 0.456566053 |
| 0.185441365 | 0.484446406 | 0.337459383 | 0.331693887 |
| 0.300384005 | 0.442234115 | 0.013354747 | 0.414033261 |
| 0.446304532 | 0.215122172 | 0.269106282 | 0.349789119 |
| 0.224341335 | 0.416374107 | 0.050213678 | 0.385961013 |
| 0.290169745 | 0.171897269 | 0.493193116 | 0.189877527 |
| 0.413172869 | 0.075083997 | 0.25927362  | 0.36875289  |
| 0.302623861 | 0.020196624 | 0.172813598 | 0.326272425 |
| 0.078683465 | 0.111672458 | 0.393571758 | 0.332055603 |
| 0.267338429 | 0.429748713 | 0.490172252 | 0.206789211 |
| 0.309976868 | 0.297917706 | 0.053227851 | 0.323474178 |
| 0.411152216 | 0.22604556  | 0.390760911 | 0.256563086 |
| 0.228080577 | 0.421124943 | 0.345597173 | 0.11911146  |
| 0.081836883 | 0.281840394 | 0.036497142 | 0.273830836 |
| 0.350818942 | 0.114567142 | 0.239837347 | 0.290988908 |
| 0.125140793 | 0.471174679 | 0.19035976  | 0.209294027 |
| 0.129879861 | 0.238816615 | 0.314059926 | 0.143444809 |
| 0.127198569 | 0.210583676 | 0.249283218 | 0.268201666 |
| 0.065801487 | 0.132971425 | 0.069476241 | 0.201101114 |
| 0.087897535 | 0.186199498 | 0.176030015 | 0.30711237  |
| 0.258800649 | 0.111720444 | 0.280490572 | 0.281025367 |
| 0.167891289 | 0.04856551  | 0.456570761 | 0.376664669 |
| 0.27248312  | 0.209334356 | 0.109275861 | 0.174007466 |
| 0.421548326 | 0.165880437 | 0.203006776 | 0.399757617 |
| 0.092761052 | 0.476737808 | 0.185336932 | 0.158974336 |
| 0.245599971 | 0.253030459 | 0.465722705 | 0.051415306 |
| 0.308283583 | 0.407965389 | 0.364525283 | 0.19126803  |
| 0.332824191 | 0.324832089 | 0.062015936 | 0.347145813 |
| 0.326849925 | 0.071626996 | 0.465449497 | 0.18035315  |
| 0.066263562 | 0.364667016 | 0.307523514 | 0.139536474 |
| 0.142539084 | 0.215522827 | 0.079190522 | 0.296646585 |
| 0.463537587 | 0.374051292 | 0.319423905 | 0.265045474 |
| 0.068968544 | 0.012716576 | 0.271303124 | 0.31547746  |
| 0.426241314 | 0.450911174 | 0.325795747 | 0.244995232 |
| 0.281603561 | 0.217566037 | 0.14768751  | 0.453195509 |
| 0.327767566 | 0.462122835 | 0.03287977  | 0.361263631 |
| 0.41150923  | 0.211066652 | 0.106482398 | 0.239897588 |
| 0.332416762 | 0.094293099 | 0.327302939 | 0.423947745 |
| 0.401436299 | 0.263278763 | 0.23336194  | 0.367048449 |
| 0.037832373 | 0.083957215 | 0.30697615  | 0.187693325 |
| 0.251758927 | 0.254096214 | 0.063186262 | 0.286320024 |
| 0.06631718  | 0.384535565 | 0.461175864 | 0.083424283 |
| 0.173157403 | 0.281583402 | 0.343706364 | 0.08671767  |
| 0.386373255 | 0.446012671 | 0.443311082 | 0.272518675 |
| 0.377947998 | 0.411022373 | 0.225262634 | 0.170704254 |
| 0.054291956 | 0.437069056 | 0.336530944 | 0.035926736 |

|             |             |             |             |
|-------------|-------------|-------------|-------------|
| 0.468531588 | 0.163088513 | 0.015646786 | 0.454919421 |
| 0.254039263 | 0.368011607 | 0.00939391  | 0.138385047 |
| 0.11623512  | 0.456284047 | 0.394793213 | 0.335041541 |
| 0.130538406 | 0.371679398 | 0.030551714 | 0.480994942 |
| 0.416469189 | 0.04039078  | 0.1928089   | 0.339286853 |
| 0.308264201 | 0.480820418 | 0.222396584 | 0.376971387 |
| 0.252939522 | 0.405940867 | 0.196032236 | 0.279160307 |
| 0.380134187 | 0.411318664 | 0.387531876 | 0.428182448 |
| 0.434785098 | 0.369496022 | 0.276887186 | 0.034010463 |
| 0.131616465 | 0.202201531 | 0.145258631 | 0.071041798 |
| 0.231961557 | 0.160328023 | 0.45535893  | 0.465026897 |
| 0.427737521 | 0.025728137 | 0.189329811 | 0.354699301 |
| 0.42825866  | 0.48045014  | 0.093496961 | 0.015279158 |
| 0.022229078 | 0.024264375 | 0.310116045 | 0.304957257 |
| 0.444041466 | 0.118065764 | 0.021373249 | 0.089920776 |
| 0.292975281 | 0.283540525 | 0.429303705 | 0.370897108 |
| 0.402545021 | 0.161805963 | 0.144973224 | 0.400971332 |
| 0.092188792 | 0.261527521 | 0.434649301 | 0.408253037 |
| 0.128966632 | 0.302708211 | 0.347921995 | 0.471621101 |
| 0.059750979 | 0.328759263 | 0.319855296 | 0.219040395 |
| 0.072896648 | 0.1405848   | 0.106000227 | 0.444252956 |
| 0.403245868 | 0.074437697 | 0.044911091 | 0.11007468  |
| 0.121394988 | 0.460216266 | 0.179327459 | 0.490956535 |
| 0.412751698 | 0.447448625 | 0.137028347 | 0.418626986 |
| 0.0540797   | 0.402708985 | 0.263604101 | 0.053298841 |
| 0.380607636 | 0.058043997 | 0.415964792 | 0.077534497 |
| 0.255309349 | 0.353589701 | 0.168656954 | 0.056312276 |
| 0.1720193   | 0.106871527 | 0.450863394 | 0.435446289 |
| 0.105076968 | 0.294396485 | 0.348690403 | 1           |
| 0.23686129  | 0.364087586 | 0.423198476 | 0.215473328 |
| 0.115392421 | 0.19182614  | 0.38516101  | 0.312261789 |
| 0.244127579 | 0.48049999  | 0.194927116 | 0.485612194 |
| 0.357482852 | 0.454437342 | 0.417914696 | 0.283965296 |
| 0.212097852 | 0.285940994 | 0.252938452 | 0.031514414 |
| 0.346219062 | 0.419805352 | 0.347691435 | 0.138484625 |
| 0.226385894 | 0.261298303 | 0.139191337 | 0.226485073 |
| 0.220189194 | 0.206125319 | 0.166713606 | 0.467844038 |
| 0.320978651 | 0.322234325 | 0.121035182 | 0.094812879 |
| 0.486521207 | 0.41091583  | 0.17111332  | 0.317022726 |
| 0.274667269 | 0.281492464 | 0.412815847 | 0.400569082 |
| 0.284155184 | 0.374372706 | 0.396992765 | 0.265516534 |
| 0.369047418 | 0.286576862 | 0.446434671 | 0.133739082 |
| 0.101849018 | 0.288513808 | 0.096580158 | 0.170834965 |
| 0.191047991 | 0.074941534 | 0.187809826 | 0.404844024 |
| 0.227609245 | 0.303585205 | 0.256235544 | 0.155488787 |
| 0.33684171  | 0.319212836 | 0.341698828 | 0.187407795 |
| 0.099244668 | 0.408798804 | 0.028860259 | 0.127500075 |
| 0.252082633 | 0.361460733 | 0.238965097 | 0.294798034 |
| 0.213073443 | 0.234679001 | 0.291935931 | 0.220675522 |
| 0.15643258  | 0.286575411 | 0.358729546 | 0.083431971 |
| 0.052025979 | 0.490262241 | 0.29853761  | 0.086018114 |
| 0.149870672 | 0.280023503 | 0.38456939  | 0.181551612 |
| 0.067301227 | 0.402330406 | 0.181056569 | 0.318043982 |
| 0.308228221 | 0.157119113 | 0.331164672 | 0.151087256 |

|             |             |             |             |
|-------------|-------------|-------------|-------------|
| 0.167135827 | 0.404872362 | 0.299676724 | 0.431875101 |
| 0.353407194 | 0.387386417 | 0.382027056 | 0.369711943 |
| 0.247764192 | 0.278326629 | 0.063444333 | 0.447406333 |
| 0.211120431 |             |             |             |
| SLC2A3      | 0.234648312 | 0.361755372 | 0.109438773 |
| 0.332165539 | 0.151456862 | 0.245035318 | 0.221961491 |
| 0.27288244  | 0.08972146  | 0.035191543 | 0.017978813 |
| 0.164164266 | 0.093613038 | 0.216675604 | 0.15298354  |
| 0.280483238 | 0.062824384 | 0.168708495 | 0.190521888 |
| 0.298498774 | 0.223413178 | 0.23337981  | 0.148247221 |
| 0.072546707 | 0.04259714  | 0.06770921  | 0.075404673 |
| 0.371186352 | 0.075561662 | 0.193934291 | 0.353383783 |
| 0.057179817 | 0.300033355 | 0.336825733 | 0.188449394 |
| 0.306576753 | 0.21639493  | 0.021279958 | 0.189598064 |
| 0.331327336 | 0.238132668 | 0.315098424 | 0.21755377  |
| 0.094194801 | 0.354921397 | 0.197386197 | 0.142224889 |
| 0.200181279 | 0.034558738 | 0.246560668 | 0.353178311 |
| 0.305761292 | 0.167111031 | 0.268562191 | 0.194948951 |
| 0.069341701 | 0.232477023 | 0.046827063 | 0.322908333 |
| 0.190812374 | 0.257140176 | 0.303705583 | 0.138558321 |
| 0.106170433 | 0.254436402 | 0.059964306 | 0.252776911 |
| 0.072937145 | 0.332210126 | 0.074440097 | 0.129558664 |
| 0.021923476 | 0.300307078 | 0.143079572 | 0.057834077 |
| 0.04788959  | 0.038384805 | 0.073640551 | 0.257249527 |
| 0.357434283 | 0.299860076 | 0.300306276 | 0.285551794 |
| 0.086278821 | 0.126456588 | 0.087980572 | 0.131932258 |
| 0.313102894 | 0.189467548 | 0.129520854 | 0.255747256 |
| 0.303137681 | 0.324478507 | 0.090739467 | 0.097893399 |
| 0.30330769  | 0.366886872 | 0.147397195 | 0.139562757 |
| 0.089949431 | 0.021840733 | 0.311844075 | 0.31824859  |
| 0.32849741  | 0.059901449 | 0.078051469 | 0.370807049 |
| 0.069960082 | 0.169466522 | 0.249856805 | 0.076945573 |
| 0.369364158 | 0.06419067  | 0.076374642 | 0.223491179 |
| 0.1403516   | 0.294024592 | 0.300838275 | 0.189589497 |
| 0.124802997 | 0.034210863 | 0.030799003 | 0.037457748 |
| 0.166005842 | 0.022734109 | 0.31235592  | 0.347707637 |
| 0.245891503 | 0.117374968 | 0.226928051 | 0.006328596 |
| 0.024726188 | 0.079987875 | 0.250839164 | 0.17180222  |
| 0.282124808 | 0.213195196 | 0.114185448 | 0.287336956 |
| 0.162037703 | 0.29120868  | 0.073000449 | 0.165184663 |
| 0.190615945 | 0.080065721 | 0.153451924 | 0.175291656 |
| 0.110920709 | 0.217400181 | 0.137858984 | 0.345882503 |
| 0.381686586 | 0.120909042 | 0.183704063 | 0.258528934 |
| 0.149386701 | 0.103889302 | 0.140609835 | 0.175040973 |
| 0.126877128 | 0.275870997 | 0.017793406 | 0.220535586 |
| 0.068796959 | 0.04495109  | 0.036397118 | 0.265546066 |
| 0.198355735 | 0.279023146 | 0.286321714 | 0.119009924 |
| 0.181883581 | 0.193017973 | 0.210765324 | 0.248438048 |
| 0.024380979 | 0.078517845 | 0.186784881 | 0.334866118 |
| 0.290288325 | 0.303827346 | 0.184690656 | 0.115714887 |
| 0.119822844 | 0.309077287 | 0.002320849 | 0.339848855 |
| 0.315255133 | 0.183424737 | 0.177619919 | 0.167941892 |
| 0.085930537 | 0.340652679 | 0.02644825  | 0.258365888 |
| 0.255872576 | 0.107413359 | 0.332670338 | 0.089957962 |

|             |             |             |             |
|-------------|-------------|-------------|-------------|
| 0.307266233 | 0.050026981 | 0.222966042 | 0.206744805 |
| 0.186665648 | 0.017450531 | 0.253299849 | 0.323809211 |
| 0.015546949 | 0.227612631 | 0.279209971 | 0.276070395 |
| 0.190399746 | 0.260467379 | 0.336964476 | 0.077421967 |
| 0.150465112 | 0.234598634 | 0.024624961 | 0.100653489 |
| 0.245314526 | 0.093232581 | 0.363101658 | 0.227231093 |
| 0.205334624 | 0.351886812 | 0.225361058 | 0.090825388 |
| 0.090236944 | 0.236060466 | 0.080213128 | 0.13337131  |
| 0.238411421 | 0.143602945 | 0.104675641 | 0.077938361 |
| 0.04350902  | 0.34256058  | 0.036533617 | 0.043883434 |
| 0.020128115 | 0.191640337 | 0.214500804 | 0.143226336 |
| 0.075217321 | 0.111680766 | 0.097159836 | 0.133946754 |
| 0.143420571 | 0.084894974 | 0.008196628 | 0.08695793  |
| 0.071526922 | 0.114554715 | 0.121692591 | 0.255834656 |
| 0.181566893 | 0.096931676 | 0.137344297 | 0.075198228 |
| 0.056963935 | 0.024487233 | 0.349698804 | 0.258151207 |
| 0.308499543 | 0.172579105 | 0.046525588 | 0.095433659 |
| 0.340391621 | 0.191764025 | 0.189825374 | 0.357084721 |
| 0.055438624 | 0.306327942 | 0.129006149 | 0.074578868 |
| 0.093983899 | 0.165494823 | 0.358545389 | 0.066468046 |
| 0.216611902 | 0.362648217 | 0.141191055 | 0.093664555 |
| 0.330899683 | 0.270413427 | 0.088721282 | 0.272201056 |
| 0.270850693 | 0.046315426 | 0.32587363  | 0.052101751 |
| 0.026007652 | 0.196433922 | 0.205420868 | 0.062333687 |
| 0.054055698 | 0.162154479 | 0.18774747  | 0.138245748 |
| 0.350141746 | 0.253276308 | 0.263113329 | 0.057163494 |
| 0.077836902 | 0.015320337 | 0.064673193 | 0.114529259 |
| 0.337927969 | 0.292733275 | 0.145873583 | 0.103692675 |
| 0.178213627 | 0.09537524  | 0.20912712  | 0.319976411 |
| 0.072519146 | 0.335353868 | 0.018245962 | 0.202110143 |
| 0.306312649 | 0.220346807 | 0.04566528  | 0.227629038 |
| 0.336899143 | 0.092378918 | 0.19284326  | 0.335896797 |
| 0.32219991  | 0.131305291 | 0.121268717 | 0.218002812 |
| 0.093269036 | 0.127750057 | 0.141519431 | 0.034331893 |
| 0.142262668 | 0.133006437 | 0.006144801 | 0.215504746 |
| 0.071606952 | 0.347538892 | 0.295733296 | 0.055342308 |
| 0.1979709   | 0.21257946  | 0.166475077 | 0.069106906 |
| 0.226536513 | 0.287854133 | 0.345334052 | 0.207923848 |
| 0.237380417 | 0.28709175  | 0.101551638 | 0.056931723 |
| 0.016239196 | 0.306004426 | 0.285584377 | 0.04633362  |
| 0.333219668 | 0.221285441 | 0.029068012 | 0.37706192  |
| 0.187884668 | 0.306956731 | 0.029491095 | 0.020704738 |
| 0.020375179 | 0.266313671 | 0.326096427 | 0.330139259 |
| 0.179062073 | 0.232625331 | 0.00222375  | 0.311347319 |
| 0.343317563 | 0.011846258 | 0.04427985  | 0.230924934 |
| 0.174220564 | 0.377374864 | 0.06716879  | 0.237587746 |
| 0.135673853 | 0.300354891 | 0.187115752 | 0.126583128 |
| 0.32530339  | 0.261516853 | 0.326284815 | 0.362361842 |
| 0.333623271 | 0.202061742 | 0.203634525 | 0.054395061 |
| 0.043722541 | 0.267250623 | 0.109193719 | 0.051984016 |
| 0.277134773 | 0.071293719 | 0.32615905  | 0.308095613 |
| 0.279125318 | 0.011042857 | 0.253616011 | 0.258781412 |
| 0.392613019 | 0.376077847 | 0.024661819 | 0.007818818 |
| 0.006540684 | 0.008713673 | 0.259052302 | 0.099792468 |

|             |             |             |             |
|-------------|-------------|-------------|-------------|
| 0.313344035 | 0.152018664 | 0.017639852 | 0.182536992 |
| 0.190110434 | 0.12971861  | 0.33222242  | 0.284268546 |
| 0.228088792 | 0.078427623 | 0.140900799 | 0.302760032 |
| 0.034389486 | 0.238068551 | 0.299760655 | 0.368618063 |
| 0.035336253 | 0.102990137 | 0.165711773 | 0.366434412 |
| 0.007235487 | 0.136577569 | 0.18137268  | 0.154972278 |
| 0.013040799 | 0.045652553 | 0.044698379 | 0.272989873 |
| 0.288794296 | 0.054819943 | 0.031732652 | 0.138691134 |
| 0.140970472 | 0.304780612 | 0.132962126 | 0.337731245 |
| 0.350529213 | 0.328680242 | 0.029373815 | 0.344530747 |
| 0.040753373 | 0.318888338 | 0.080963731 | 0.080401264 |
| 0.129333506 | 0.027403142 | 0.269479292 | 0.042807035 |
| 0.223444969 | 0.293924107 | 0.060853365 | 0.011862537 |
| 0.031595268 | 0.045745349 | 0.322056692 | 0.256467547 |
| 0.017694692 | 0.213513686 | 0.132527411 | 0.23686129  |
| 1           | 0.288907464 | 0.345602854 | 0.134132175 |
| 0.160146002 | 0.025701289 | 0.331316739 | 0.255949011 |
| 0.248841036 | 0.307085056 | 0.104947872 | 0.328580677 |
| 0.2861356   | 0.333054202 | 0.288552863 | 0.212743359 |
| 0.0548002   | 0.230554043 | 0.30429897  | 0.083614051 |
| 0.20412219  | 0.304402801 | 0.201415642 | 0.061582572 |
| 0.110607406 | 0.086541566 | 0.085996719 | 0.111563052 |
| 0.056048371 | 0.285825178 | 0.136983571 | 0.322882397 |
| 0.259052302 | 0.270879369 | 0.109973456 | 0.045376505 |
| 0.360819228 | 0.338776564 | 0.221795825 | 0.272177227 |
| 0.106368915 | 0.144379083 | 0.244642213 | 0.220159684 |
| 0.113642781 | 0.280902859 | 0.339247851 | 0.294013469 |
| 0.370005472 | 0.197514633 | 0.343933179 | 0.250183653 |
| 0.036730473 | 0.167134459 | 0.093969164 | 0.055922718 |
| 0.13118996  | 0.027343942 | 0.048832344 | 0.249670205 |
| 0.069564544 | 0.218388905 | 0.179079136 | 0.07703594  |
| 0.11321087  | 0.134517414 | 0.171339223 | 0.23042332  |
| 0.094402198 | 0.334918307 | 0.015240317 | 0.052375712 |
| 0.077913145 | 0.257097584 | 0.086983388 | 0.116917383 |
| 0.058586604 | 0.04900746  | 0.151592493 | 0.234325816 |
| 0.140690967 | 0.108361298 | 0.265405197 | 0.110915536 |
| 0.085375609 | 0.327752698 | 0.180029155 | 0.01545205  |
| 0.041253699 | 0.214222289 | 0.153522127 | 0.129263863 |
| 0.012651925 | 0.263807924 | 0.168204341 | 0.140916471 |
| 0.244796192 | 0.0847093   | 0.323312364 | 0.089763226 |
| 0.100645443 | 0.344234523 | 0.111782499 | 0.304013235 |
| 0.102512553 | 0.288784199 | 0.334855522 | 0.270929463 |
| 0.087609533 | 0.100992394 | 0.090537228 | 0.336505    |
| 0.09425313  |             |             |             |
| SLC30A4     | 0.318275751 | 0.510778813 | 0.321808561 |
| 0.401756188 | 0.395973031 | 0.317384487 | 0.290027663 |
| 0.205595296 | 0.149899635 | 0.027661491 | 0.069868877 |
| 0.361854615 | 0.280916729 | 0.323377697 | 0.287604651 |
| 0.395185774 | 0.22185503  | 0.290459179 | 0.322469224 |
| 0.380748125 | 0.163611681 | 0.410278535 | 0.179375253 |
| 0.279274922 | 0.177753021 | 0.152751298 | 0.297643482 |
| 0.444096409 | 0.164786921 | 0.294482835 | 0.343089177 |
| 0.15184014  | 0.377105267 | 0.479259219 | 0.403028084 |
| 0.46711957  | 0.285222059 | 0.019981556 | 0.310740216 |

|             |             |             |             |
|-------------|-------------|-------------|-------------|
| 0.376415199 | 0.377050095 | 0.378801415 | 0.386208399 |
| 0.112517471 | 0.442600402 | 0.32986291  | 0.361507045 |
| 0.217277204 | 0.09274106  | 0.221925352 | 0.403691172 |
| 0.4438826   | 0.365268543 | 0.255205434 | 0.25246549  |
| 0.254084608 | 0.222548616 | 0.260922469 | 0.265583113 |
| 0.317401131 | 0.172509183 | 0.45362331  | 0.159975407 |
| 0.165208666 | 0.26998436  | 0.205259082 | 0.30147576  |
| 0.298930969 | 0.314274989 | 0.046250556 | 0.295660966 |
| 0.012557651 | 0.373790454 | 0.35797453  | 0.261097014 |
| 0.102586313 | 0.079616528 | 0.235216366 | 0.374305807 |
| 0.456983194 | 0.409105021 | 0.490520233 | 0.482554452 |
| 0.26877527  | 0.320912311 | 0.327348647 | 0.278336379 |
| 0.398256996 | 0.276861335 | 0.162361644 | 0.403868284 |
| 0.496008136 | 0.495943911 | 0.27348379  | 0.304288604 |
| 0.403076253 | 0.461757194 | 0.361489736 | 0.400472234 |
| 0.31421044  | 0.083508725 | 0.41660944  | 0.505341411 |
| 0.351664205 | 0.282799539 | 0.238108516 | 0.376582533 |
| 0.124050904 | 0.298687054 | 0.395206047 | 0.188829645 |
| 0.47443034  | 0.057222438 | 0.273364532 | 0.376855286 |
| 0.242871201 | 0.381395714 | 0.486636922 | 0.282824092 |
| 0.366633768 | 0.061416609 | 0.16252247  | 0.071203236 |
| 0.345413424 | 0.144823555 | 0.426542133 | 0.47159691  |
| 0.257054279 | 0.369598369 | 0.319687461 | 0.011499124 |
| 0.071354945 | 0.200318944 | 0.37978246  | 0.321222957 |
| 0.360070132 | 0.317453561 | 0.317306416 | 0.306916655 |
| 0.349207785 | 0.480428109 | 0.062063735 | 0.17398317  |
| 0.385860422 | 0.205642349 | 0.321928325 | 0.379244236 |
| 0.361872498 | 0.18448645  | 0.224477241 | 0.516874086 |
| 0.401008512 | 0.175957868 | 0.266670013 | 0.401929624 |
| 0.348638273 | 0.364802545 | 0.190927249 | 0.352800846 |
| 0.123298041 | 0.437653017 | 0.065850202 | 0.291336473 |
| 0.247875834 | 0.207673089 | 0.023367408 | 0.272366718 |
| 0.32534405  | 0.421716183 | 0.403848561 | 0.183009321 |
| 0.376864137 | 0.404793296 | 0.268680481 | 0.371639704 |
| 0.044975412 | 0.094940781 | 0.210701753 | 0.507295656 |
| 0.234583104 | 0.479756417 | 0.345551328 | 0.317161547 |
| 0.340884566 | 0.425375816 | 0.003805645 | 0.456662394 |
| 0.493538615 | 0.226791463 | 0.413573701 | 0.363531006 |
| 0.314967818 | 0.456013011 | 0.032916276 | 0.403726953 |
| 0.26085966  | 0.147347311 | 0.509688602 | 0.257418982 |
| 0.424287019 | 0.108889303 | 0.315879883 | 0.387123031 |
| 0.343388942 | 0.022406471 | 0.235133972 | 0.37116643  |
| 0.056816321 | 0.154184776 | 0.34736072  | 0.394316683 |
| 0.382230508 | 0.392409925 | 0.493372521 | 0.303587238 |
| 0.406357272 | 0.286808703 | 0.033070169 | 0.333847702 |
| 0.366760008 | 0.291245863 | 0.421642033 | 0.30289171  |
| 0.245775953 | 0.464046055 | 0.352304146 | 0.192158146 |
| 0.113566807 | 0.322315753 | 0.054505194 | 0.365377988 |
| 0.332807574 | 0.226355516 | 0.314604762 | 0.171867508 |
| 0.138194366 | 0.521232443 | 0.191361934 | 0.224881021 |
| 0.130218145 | 0.38030628  | 0.309168752 | 0.313260487 |
| 0.292824916 | 0.248633572 | 0.333801783 | 0.362235879 |
| 0.097010864 | 0.191669867 | 0.023294478 | 0.317551122 |
| 0.235769474 | 0.348416922 | 0.329724439 | 0.313630776 |

|             |             |             |             |
|-------------|-------------|-------------|-------------|
| 0.335515537 | 0.212151149 | 0.408060168 | 0.263547392 |
| 0.180430234 | 0.048860979 | 0.493890271 | 0.38932177  |
| 0.261284517 | 0.241742894 | 0.091580151 | 0.299888145 |
| 0.47768012  | 0.26404561  | 0.200325007 | 0.459656749 |
| 0.05624075  | 0.474381145 | 0.340318035 | 0.215478606 |
| 0.372290029 | 0.354573627 | 0.468129597 | 0.086478659 |
| 0.317340332 | 0.457727217 | 0.330270976 | 0.273858618 |
| 0.377841112 | 0.386405323 | 0.089513492 | 0.327426698 |
| 0.321415291 | 0.090335565 | 0.507560663 | 0.193982547 |
| 0.057374462 | 0.374067621 | 0.363154948 | 0.146885482 |
| 0.143964193 | 0.375780748 | 0.096616858 | 0.350868719 |
| 0.516330831 | 0.412938544 | 0.381634978 | 0.223713243 |
| 0.115612792 | 0.046420942 | 0.242494772 | 0.314354494 |
| 0.465790732 | 0.488979476 | 0.322171109 | 0.386605998 |
| 0.323535735 | 0.329985429 | 0.142705472 | 0.505990188 |
| 0.168178932 | 0.479206818 | 0.025215223 | 0.374720613 |
| 0.462675939 | 0.252907596 | 0.15792735  | 0.329839359 |
| 0.362823156 | 0.112320926 | 0.24413676  | 0.473689132 |
| 0.415617377 | 0.345132856 | 0.342817552 | 0.366316265 |
| 0.055485254 | 0.101642675 | 0.359531565 | 0.180554338 |
| 0.364915353 | 0.288031601 | 0.054244671 | 0.294633867 |
| 0.122585946 | 0.446308471 | 0.43357062  | 0.127278639 |
| 0.30164832  | 0.262643743 | 0.380326471 | 0.09665447  |
| 0.420332203 | 0.457665658 | 0.488871984 | 0.222999909 |
| 0.36736186  | 0.473102859 | 0.3235219   | 0.136478811 |
| 0.048035294 | 0.476185923 | 0.317447962 | 0.065944664 |
| 0.476391988 | 0.200673713 | 0.059706766 | 0.486715713 |
| 0.269732329 | 0.387361216 | 0.010891289 | 0.058106993 |
| 0.068308047 | 0.436622868 | 0.446747015 | 0.342940293 |
| 0.224111869 | 0.355645076 | 0.006904972 | 0.498040944 |
| 0.479717904 | 0.042396712 | 0.187711799 | 0.381294238 |
| 0.346831509 | 0.505766109 | 0.298776133 | 0.429431256 |
| 0.358512407 | 0.464514252 | 0.314082452 | 0.339864025 |
| 0.430883503 | 0.4513924   | 0.359936579 | 0.436832219 |
| 0.464398822 | 0.387706801 | 0.355289521 | 0.056940843 |
| 0.152944213 | 0.230769817 | 0.276585507 | 0.148952403 |
| 0.259130979 | 0.223566489 | 0.457117755 | 0.463553022 |
| 0.47180201  | 0.020158983 | 0.212686584 | 0.375406856 |
| 0.440472002 | 0.477539686 | 0.032880166 | 0.010435534 |
| 0.009452123 | 0.054047016 | 0.347102256 | 0.287684541 |
| 0.473816715 | 0.23277404  | 0.02262419  | 0.093532339 |
| 0.325271183 | 0.364491767 | 0.486084524 | 0.394830693 |
| 0.371323132 | 0.152043023 | 0.312073453 | 0.386224725 |
| 0.131121685 | 0.227618977 | 0.487039387 | 0.459653292 |
| 0.074579228 | 0.288674273 | 0.305279404 | 0.499915865 |
| 0.067490895 | 0.361157417 | 0.362604762 | 0.370977455 |
| 0.022709235 | 0.144773823 | 0.127704599 | 0.399142552 |
| 0.452017552 | 0.174377872 | 0.101570974 | 0.132555614 |
| 0.230449543 | 0.446732132 | 0.275142339 | 0.516610846 |
| 0.42883337  | 0.447031677 | 0.119944874 | 0.458481228 |
| 0.09794078  | 0.456755327 | 0.341037879 | 0.074518881 |
| 0.291912266 | 0.036249762 | 0.428889828 | 0.186107636 |
| 0.30573263  | 0.329198675 | 0.203973838 | 0.040589338 |
| 0.157880939 | 0.117557036 | 0.49019071  | 0.441358826 |



|             |             |             |             |
|-------------|-------------|-------------|-------------|
| 0.058721897 | 0.28703264  | 0.332861551 | 0.364087586 |
| 0.288907464 | 1           | 0.469790525 | 0.316554582 |
| 0.170926684 | 0.122248798 | 0.370723965 | 0.307993341 |
| 0.259706427 | 0.493063766 | 0.339014394 | 0.505655965 |
| 0.319148584 | 0.431698011 | 0.451393483 | 0.368035917 |
| 0.25959206  | 0.327438899 | 0.3493097   | 0.068463988 |
| 0.374104881 | 0.463007665 | 0.316127113 | 0.234146758 |
| 0.344023031 | 0.309099647 | 0.081460487 | 0.13848029  |
| 0.264614957 | 0.279198789 | 0.247239813 | 0.435445428 |
| 0.319816775 | 0.309629963 | 0.07109354  | 0.126258113 |
| 0.520328384 | 0.406244406 | 0.19594814  | 0.380887468 |
| 0.238173772 | 0.378895792 | 0.391224603 | 0.388183033 |
| 0.295442825 | 0.428745691 | 0.387012508 | 0.348024295 |
| 0.416919342 | 0.32764273  | 0.493634928 | 0.104445031 |
| 0.130640922 | 0.313318413 | 0.205972153 | 0.156150276 |
| 0.248378463 | 0.065075367 | 0.242869541 | 0.392770801 |
| 0.293158042 | 0.412235303 | 0.256360998 | 0.140523541 |
| 0.345144554 | 0.269269327 | 0.384183187 | 0.280297561 |
| 0.176463315 | 0.474533061 | 0.027842331 | 0.116744765 |
| 0.314976939 | 0.388817195 | 0.356989544 | 0.305405229 |
| 0.281659473 | 0.17140202  | 0.372745877 | 0.269031429 |
| 0.310850288 | 0.291123512 | 0.394028365 | 0.07067728  |
| 0.06172532  | 0.49831128  | 0.301458421 | 0.038573867 |
| 0.109802418 | 0.280648624 | 0.278361887 | 0.309142857 |
| 0.047743865 | 0.45454093  | 0.301899483 | 0.374266822 |
| 0.34963568  | 0.128156122 | 0.312473869 | 0.114661189 |
| 0.099511437 | 0.417143939 | 0.329195246 | 0.478492274 |
| 0.307360738 | 0.414759877 | 0.394721423 | 0.390421462 |
| 0.135545094 | 0.272969458 | 0.080228998 | 0.42134623  |
| 0.324111681 |             |             |             |
| SLC6A19     | 0.47744524  | 0.515707212 | 0.424340115 |
| 0.453204228 | 0.439141832 | 0.460337682 | 0.215853172 |
| 0.215049797 | 0.078484181 | 0.004299055 | 0.018680901 |
| 0.469980355 | 0.208396358 | 0.303359645 | 0.394789752 |
| 0.425102831 | 0.113890556 | 0.37463961  | 0.229492296 |
| 0.434934628 | 0.101052676 | 0.399233255 | 0.080746424 |
| 0.270209955 | 0.086527725 | 0.055289058 | 0.255440423 |
| 0.472674584 | 0.064184177 | 0.419160342 | 0.44172672  |
| 0.078034162 | 0.492164996 | 0.509717632 | 0.456754046 |
| 0.507230009 | 0.475053957 | 0.009180809 | 0.348106559 |
| 0.487726997 | 0.480309375 | 0.436904892 | 0.331937242 |
| 0.034685303 | 0.495187104 | 0.247246836 | 0.399161883 |
| 0.275303881 | 0.02292586  | 0.312289024 | 0.483188892 |
| 0.496690106 | 0.493067113 | 0.254061194 | 0.160340974 |
| 0.224570669 | 0.292402443 | 0.289042434 | 0.413717271 |
| 0.221270842 | 0.212399479 | 0.505893344 | 0.088991673 |
| 0.156398764 | 0.26900143  | 0.12441381  | 0.279953746 |
| 0.350222144 | 0.472378473 | 0.013675122 | 0.458206135 |
| 0.003116466 | 0.404963184 | 0.36607637  | 0.334154376 |
| 0.029917884 | 0.0163949   | 0.14853569  | 0.362657341 |
| 0.487275868 | 0.489708105 | 0.496681253 | 0.503442837 |
| 0.165698614 | 0.268287191 | 0.404896815 | 0.156919671 |
| 0.501102177 | 0.183057396 | 0.106573459 | 0.422886759 |
| 0.501911904 | 0.512829279 | 0.177543584 | 0.233764728 |

|             |             |             |             |
|-------------|-------------|-------------|-------------|
| 0.500534411 | 0.509333677 | 0.478760077 | 0.451085479 |
| 0.379671965 | 0.036183976 | 0.505056244 | 0.514304456 |
| 0.484921254 | 0.314068482 | 0.128551209 | 0.471465847 |
| 0.044155089 | 0.429272571 | 0.357149922 | 0.149905377 |
| 0.49039242  | 0.014449937 | 0.183236354 | 0.391362205 |
| 0.195115415 | 0.501141799 | 0.50950747  | 0.17960425  |
| 0.412385296 | 0.014723146 | 0.131139665 | 0.022352639 |
| 0.351120773 | 0.131814703 | 0.50600964  | 0.500751764 |
| 0.263315629 | 0.385595901 | 0.269785582 | 0.000569226 |
| 0.017675809 | 0.161600621 | 0.504098948 | 0.385654444 |
| 0.470184252 | 0.465272147 | 0.228905333 | 0.485960873 |
| 0.493249566 | 0.49481964  | 0.092097535 | 0.08582039  |
| 0.464340088 | 0.156942075 | 0.218866817 | 0.489608033 |
| 0.296825865 | 0.111529628 | 0.111411765 | 0.512441213 |
| 0.484815276 | 0.071575518 | 0.391729784 | 0.419447745 |
| 0.373048234 | 0.344411498 | 0.091891252 | 0.284036547 |
| 0.044310459 | 0.494977478 | 0.018073644 | 0.376320114 |
| 0.306276726 | 0.128672483 | 0.00751747  | 0.302354438 |
| 0.331854691 | 0.511908779 | 0.491095023 | 0.0880809   |
| 0.329486881 | 0.411368636 | 0.392235741 | 0.499185953 |
| 0.008708368 | 0.036205962 | 0.365219457 | 0.517288154 |
| 0.389265928 | 0.504574806 | 0.29435975  | 0.285753126 |
| 0.259984311 | 0.476638615 | 0.002720693 | 0.498522214 |
| 0.509625798 | 0.395304338 | 0.423671868 | 0.429598284 |
| 0.410496437 | 0.491761664 | 0.053387253 | 0.425053766 |
| 0.454019072 | 0.063129919 | 0.499704918 | 0.13859003  |
| 0.502826784 | 0.030598738 | 0.365301034 | 0.48617065  |
| 0.500517423 | 0.006793696 | 0.287879028 | 0.426386152 |
| 0.016862215 | 0.111319334 | 0.473032777 | 0.435828072 |
| 0.410590629 | 0.472660542 | 0.484921546 | 0.392466054 |
| 0.446219454 | 0.236201695 | 0.007528612 | 0.298007701 |
| 0.484127083 | 0.429878557 | 0.497049474 | 0.247667589 |
| 0.439575938 | 0.513585285 | 0.500525512 | 0.250796179 |
| 0.034943781 | 0.346860982 | 0.020550633 | 0.333886078 |
| 0.481392207 | 0.119511471 | 0.443799302 | 0.123739572 |
| 0.05314862  | 0.517462761 | 0.154761089 | 0.25799356  |
| 0.112372671 | 0.46229644  | 0.246950238 | 0.273880342 |
| 0.228125579 | 0.142439694 | 0.364243698 | 0.401547108 |
| 0.036096145 | 0.078234193 | 0.00825051  | 0.438075507 |
| 0.150666389 | 0.397196809 | 0.411372363 | 0.494532245 |
| 0.359102616 | 0.106673349 | 0.397527711 | 0.276587828 |
| 0.092573318 | 0.009012865 | 0.516430404 | 0.414462189 |
| 0.443339923 | 0.143760728 | 0.028554956 | 0.412406154 |
| 0.506951526 | 0.431190438 | 0.360880725 | 0.509320503 |
| 0.021342319 | 0.497801377 | 0.257697239 | 0.102215888 |
| 0.395814813 | 0.25532141  | 0.482002834 | 0.068800064 |
| 0.449639782 | 0.508647883 | 0.294127507 | 0.167932335 |
| 0.488379692 | 0.449481075 | 0.02507849  | 0.49312846  |
| 0.49427065  | 0.02225355  | 0.516320564 | 0.102785238 |
| 0.012933526 | 0.461520613 | 0.499156825 | 0.057296613 |
| 0.059511031 | 0.369653932 | 0.049110699 | 0.269339399 |
| 0.518266313 | 0.415648525 | 0.506771271 | 0.19213708  |
| 0.032538615 | 0.008412147 | 0.177527254 | 0.426570733 |
| 0.512218661 | 0.511595235 | 0.239022229 | 0.37881466  |

|             |             |             |             |
|-------------|-------------|-------------|-------------|
| 0.226988839 | 0.347844051 | 0.182882685 | 0.516839502 |
| 0.177890262 | 0.504830377 | 0.003298333 | 0.482441123 |
| 0.510019306 | 0.370900263 | 0.064334458 | 0.351526615 |
| 0.491459935 | 0.036882935 | 0.194458817 | 0.510525379 |
| 0.502073123 | 0.339824341 | 0.380689292 | 0.452854562 |
| 0.014227205 | 0.03771509  | 0.401836321 | 0.166113951 |
| 0.42424451  | 0.197390784 | 0.043158609 | 0.375098799 |
| 0.035526474 | 0.507652995 | 0.478657688 | 0.048845513 |
| 0.435151973 | 0.363872326 | 0.367964695 | 0.027463497 |
| 0.495220357 | 0.501063868 | 0.509846416 | 0.156881331 |
| 0.497965235 | 0.514170078 | 0.451770498 | 0.059079493 |
| 0.010172459 | 0.50323287  | 0.470568722 | 0.020140931 |
| 0.492471582 | 0.327956928 | 0.010686447 | 0.512972736 |
| 0.173266945 | 0.469749032 | 0.004216281 | 0.081314092 |
| 0.026496566 | 0.475523126 | 0.498697226 | 0.433270777 |
| 0.349349077 | 0.37697742  | 0.003325325 | 0.510411314 |
| 0.513900512 | 0.008232908 | 0.11446888  | 0.512098817 |
| 0.486103603 | 0.511675358 | 0.326341401 | 0.501958928 |
| 0.47333938  | 0.502725471 | 0.256637333 | 0.249549891 |
| 0.508122498 | 0.498423247 | 0.481978306 | 0.502540991 |
| 0.498422705 | 0.431887976 | 0.276611289 | 0.011834106 |
| 0.126261039 | 0.258572235 | 0.395291674 | 0.07780864  |
| 0.416700578 | 0.122830822 | 0.50995012  | 0.4892259   |
| 0.511128024 | 0.001904075 | 0.165044691 | 0.512692212 |
| 0.495074839 | 0.495911811 | 0.014021639 | 0.00516734  |
| 0.007223414 | 0.013922084 | 0.39825273  | 0.216637262 |
| 0.514289316 | 0.336191479 | 0.00189408  | 0.044593488 |
| 0.290644548 | 0.408824304 | 0.515372808 | 0.385195022 |
| 0.483930736 | 0.062932842 | 0.34774982  | 0.412886624 |
| 0.053233579 | 0.433860755 | 0.512892428 | 0.5056383   |
| 0.027773475 | 0.222815742 | 0.417199307 | 0.503098686 |
| 0.065629202 | 0.297680283 | 0.476936143 | 0.342078933 |
| 0.00853986  | 0.062269386 | 0.05012454  | 0.455152398 |
| 0.499148942 | 0.070385297 | 0.026020428 | 0.19801797  |
| 0.117633607 | 0.49828823  | 0.156856319 | 0.509654266 |
| 0.496598671 | 0.456304618 | 0.054663678 | 0.505087704 |
| 0.030700789 | 0.504240498 | 0.334076891 | 0.075469709 |
| 0.272141364 | 0.007348164 | 0.499211254 | 0.170675318 |
| 0.387160735 | 0.457379467 | 0.19578112  | 0.009449975 |
| 0.17525793  | 0.03856536  | 0.496284992 | 0.484567652 |
| 0.021181006 | 0.236685619 | 0.279568887 | 0.423198476 |
| 0.345602854 | 0.469790525 | 1           | 0.499378076 |
| 0.08083787  | 0.126670204 | 0.44892438  | 0.479738256 |
| 0.27169583  | 0.495571005 | 0.314874855 | 0.512880917 |
| 0.482901097 | 0.501293376 | 0.512654111 | 0.376023256 |
| 0.215540096 | 0.472223736 | 0.44809765  | 0.019344357 |
| 0.361790297 | 0.493326708 | 0.394452104 | 0.143888124 |
| 0.245976758 | 0.415232527 | 0.037897522 | 0.21939387  |
| 0.352312997 | 0.394111268 | 0.133561785 | 0.453307891 |
| 0.448339438 | 0.485440041 | 0.035413894 | 0.047787585 |
| 0.515018139 | 0.495833949 | 0.158787143 | 0.484138896 |
| 0.145406965 | 0.346959191 | 0.489670829 | 0.477045107 |
| 0.402516995 | 0.514235751 | 0.487752629 | 0.471367557 |
| 0.494313365 | 0.256770064 | 0.509099675 | 0.110962923 |

|             |             |             |             |
|-------------|-------------|-------------|-------------|
| 0.07227896  | 0.476153158 | 0.090666555 | 0.070178672 |
| 0.126900843 | 0.017504098 | 0.320960303 | 0.435312612 |
| 0.4141607   | 0.392133853 | 0.384589031 | 0.067711601 |
| 0.303842493 | 0.418795062 | 0.348859831 | 0.220798567 |
| 0.07003825  | 0.507885566 | 0.006099495 | 0.040661609 |
| 0.416218373 | 0.503759529 | 0.406389608 | 0.218508006 |
| 0.299023215 | 0.111779543 | 0.28879364  | 0.375610588 |
| 0.410261549 | 0.400600397 | 0.508049569 | 0.030888612 |
| 0.015631891 | 0.497709853 | 0.445090676 | 0.012451818 |
| 0.068909975 | 0.459644629 | 0.293123064 | 0.244584346 |
| 0.01294483  | 0.507985777 | 0.423331002 | 0.4460019   |
| 0.379213659 | 0.050536551 | 0.453356945 | 0.083909238 |
| 0.048498983 | 0.496572929 | 0.416775912 | 0.507594163 |
| 0.344690973 | 0.436302043 | 0.47082375  | 0.50933348  |
| 0.113256098 | 0.431962946 | 0.02203109  | 0.488957241 |
| 0.473707711 |             |             |             |
| SLC9A7      | 0.289128412 | 0.489724984 | 0.168452175 |
| 0.308628866 | 0.17057267  | 0.221009237 | 0.093911623 |
| 0.084079596 | 0.045927399 | 0.004050611 | 0.011444334 |
| 0.232792755 | 0.090000376 | 0.128992096 | 0.170450982 |
| 0.275714276 | 0.053520467 | 0.137470198 | 0.099970268 |
| 0.243354737 | 0.045554588 | 0.236563243 | 0.040459974 |
| 0.106877836 | 0.045051522 | 0.029552286 | 0.114944325 |
| 0.35119676  | 0.034251824 | 0.151146276 | 0.255779383 |
| 0.035089721 | 0.32307326  | 0.505281398 | 0.261288653 |
| 0.499022011 | 0.288806838 | 0.002904303 | 0.13947902  |
| 0.356046443 | 0.322839337 | 0.252016843 | 0.153382217 |
| 0.020394932 | 0.482834848 | 0.110257304 | 0.178883034 |
| 0.11738117  | 0.014604182 | 0.116642346 | 0.428217491 |
| 0.483888409 | 0.233552487 | 0.09984444  | 0.073157811 |
| 0.095907768 | 0.098162756 | 0.125685461 | 0.215558712 |
| 0.093634811 | 0.0793002   | 0.474719304 | 0.047674928 |
| 0.057054095 | 0.098917763 | 0.052098299 | 0.113212533 |
| 0.131655526 | 0.301593182 | 0.00633743  | 0.219006847 |
| 0.003188456 | 0.221218795 | 0.156133567 | 0.13864711  |
| 0.016771905 | 0.012221702 | 0.062896113 | 0.169061473 |
| 0.37308057  | 0.423955754 | 0.409112217 | 0.423967613 |
| 0.077814014 | 0.107996458 | 0.152471783 | 0.074580645 |
| 0.363724193 | 0.085255022 | 0.055727248 | 0.276982747 |
| 0.423530929 | 0.494804996 | 0.076673604 | 0.099946303 |
| 0.369938417 | 0.440955776 | 0.200226756 | 0.181052847 |
| 0.170500392 | 0.018259579 | 0.423872294 | 0.455729867 |
| 0.349718025 | 0.126231233 | 0.062747355 | 0.312381759 |
| 0.021436024 | 0.188857897 | 0.187452131 | 0.061008186 |
| 0.38943111  | 0.009470409 | 0.08058878  | 0.154530024 |
| 0.0803316   | 0.350867287 | 0.490881498 | 0.080289305 |
| 0.155356056 | 0.010568626 | 0.065378627 | 0.010674135 |
| 0.146328324 | 0.057513548 | 0.488355599 | 0.395843202 |
| 0.092989568 | 0.144131857 | 0.106809751 | 0.000577293 |
| 0.010590188 | 0.064785205 | 0.345643906 | 0.142590104 |
| 0.292137802 | 0.348029852 | 0.108401489 | 0.295331706 |
| 0.274428266 | 0.395992388 | 0.048910746 | 0.039801688 |
| 0.196113623 | 0.06029291  | 0.09577636  | 0.22273652  |
| 0.133385527 | 0.049673261 | 0.051398748 | 0.466250221 |

|             |             |             |             |
|-------------|-------------|-------------|-------------|
| 0.403921093 | 0.035545718 | 0.138963559 | 0.260694664 |
| 0.147204533 | 0.143438769 | 0.040537432 | 0.118043644 |
| 0.021423837 | 0.467195817 | 0.010105228 | 0.136516835 |
| 0.138245807 | 0.053268009 | 0.003282516 | 0.113296    |
| 0.153820321 | 0.399434527 | 0.463447676 | 0.040289917 |
| 0.133674045 | 0.217546532 | 0.136211649 | 0.322796499 |
| 0.00686202  | 0.019510723 | 0.119297991 | 0.457910067 |
| 0.186975011 | 0.433443784 | 0.12270958  | 0.119502487 |
| 0.114113327 | 0.347817627 | 0.002651654 | 0.492789619 |
| 0.500747328 | 0.137586565 | 0.197072643 | 0.194823102 |
| 0.162259696 | 0.382608594 | 0.019760678 | 0.250598641 |
| 0.248663238 | 0.029834396 | 0.428190204 | 0.066157999 |
| 0.433700918 | 0.017563289 | 0.130284959 | 0.360361437 |
| 0.321130285 | 0.003086649 | 0.113627019 | 0.23825005  |
| 0.009037869 | 0.045505225 | 0.283809001 | 0.252383514 |
| 0.192717678 | 0.324105554 | 0.39455071  | 0.162628907 |
| 0.177506419 | 0.095884856 | 0.004263988 | 0.125360774 |
| 0.325238034 | 0.148401227 | 0.437847037 | 0.104338077 |
| 0.183702043 | 0.454968929 | 0.351704867 | 0.100808594 |
| 0.019272548 | 0.12786651  | 0.012931906 | 0.147173313 |
| 0.347860479 | 0.056773653 | 0.169292635 | 0.046666607 |
| 0.026999774 | 0.483495264 | 0.067498483 | 0.104857124 |
| 0.049686449 | 0.204876723 | 0.101702586 | 0.121084326 |
| 0.108106894 | 0.063500809 | 0.148049273 | 0.16466469  |
| 0.018133876 | 0.039038218 | 0.004168374 | 0.160223784 |
| 0.072510339 | 0.159394424 | 0.159982353 | 0.275335992 |
| 0.125844436 | 0.054616304 | 0.168808081 | 0.115452286 |
| 0.0481343   | 0.005718031 | 0.4709938   | 0.233741721 |
| 0.271794627 | 0.065267325 | 0.014413722 | 0.158358477 |
| 0.405596673 | 0.180689784 | 0.121183513 | 0.418680756 |
| 0.01181223  | 0.400417614 | 0.119065862 | 0.050760672 |
| 0.157231527 | 0.112887836 | 0.381796617 | 0.034219955 |
| 0.176384178 | 0.445217074 | 0.119175338 | 0.083403789 |
| 0.386454497 | 0.23036116  | 0.014447277 | 0.331561505 |
| 0.314755037 | 0.012960463 | 0.48654062  | 0.046660327 |
| 0.007508518 | 0.28163636  | 0.330466377 | 0.029180183 |
| 0.032000866 | 0.157128358 | 0.02331763  | 0.123578516 |
| 0.484103959 | 0.265704133 | 0.346287453 | 0.081838747 |
| 0.018750083 | 0.005840687 | 0.073997499 | 0.167893899 |
| 0.501794074 | 0.467723503 | 0.098932645 | 0.163458739 |
| 0.097794691 | 0.143472016 | 0.065504255 | 0.464654699 |
| 0.069265267 | 0.485842929 | 0.002231698 | 0.324608222 |
| 0.502839861 | 0.125605531 | 0.035345902 | 0.136771599 |
| 0.359418678 | 0.020554976 | 0.074860293 | 0.491156168 |
| 0.384987221 | 0.144599015 | 0.167690084 | 0.235509196 |
| 0.008992044 | 0.017055059 | 0.178858607 | 0.071916881 |
| 0.169894867 | 0.088100355 | 0.019364863 | 0.129027931 |
| 0.023569321 | 0.433553769 | 0.342957163 | 0.029325017 |
| 0.19133784  | 0.13028533  | 0.180784638 | 0.014984578 |
| 0.396550381 | 0.465017699 | 0.509293442 | 0.061252724 |
| 0.316442413 | 0.463886364 | 0.208577043 | 0.028062744 |
| 0.006399356 | 0.500919409 | 0.265754738 | 0.019348948 |
| 0.381376995 | 0.115982233 | 0.008469213 | 0.467317534 |
| 0.076601954 | 0.442126405 | 0.008630742 | 0.03094536  |

|             |             |             |             |
|-------------|-------------|-------------|-------------|
| 0.013042355 | 0.35028199  | 0.482517933 | 0.231575507 |
| 0.143660979 | 0.167034273 | 0.001032327 | 0.470089212 |
| 0.48004602  | 0.00577351  | 0.050350219 | 0.350975046 |
| 0.3264437   | 0.498682724 | 0.137711829 | 0.390502125 |
| 0.238561321 | 0.490117561 | 0.108083417 | 0.110821305 |
| 0.389513145 | 0.464289565 | 0.315237522 | 0.44183601  |
| 0.378576104 | 0.246483598 | 0.121817234 | 0.00728655  |
| 0.063861601 | 0.094489407 | 0.183497444 | 0.043300736 |
| 0.194107072 | 0.063894864 | 0.445900257 | 0.371742777 |
| 0.429475626 | 0.001658312 | 0.070417516 | 0.347183699 |
| 0.385700772 | 0.406312554 | 0.006434496 | 0.004395951 |
| 0.005278059 | 0.010329619 | 0.161603301 | 0.094964166 |
| 0.449408083 | 0.147477627 | 0.001911947 | 0.019708188 |
| 0.146043789 | 0.20869311  | 0.483800862 | 0.224973058 |
| 0.327472786 | 0.028430071 | 0.154953299 | 0.246944706 |
| 0.028383449 | 0.232537181 | 0.438090709 | 0.460401489 |
| 0.012671948 | 0.095235201 | 0.151557915 | 0.426641551 |
| 0.028910223 | 0.121509063 | 0.245334313 | 0.141865558 |
| 0.003727416 | 0.032136933 | 0.02660514  | 0.301762369 |
| 0.489501664 | 0.038616732 | 0.017445793 | 0.069787732 |
| 0.058757911 | 0.377458776 | 0.081143946 | 0.450579847 |
| 0.370985136 | 0.331701003 | 0.023659558 | 0.476875856 |
| 0.015376486 | 0.47793264  | 0.142374525 | 0.044570442 |
| 0.108404135 | 0.004291853 | 0.431404606 | 0.087860734 |
| 0.136980203 | 0.247492924 | 0.089790405 | 0.005014813 |
| 0.074540204 | 0.020127294 | 0.404533588 | 0.366351482 |
| 0.010296693 | 0.093195929 | 0.120236869 | 0.215473328 |
| 0.134132175 | 0.316554582 | 0.499378076 | 1           |
| 0.036480888 | 0.046262897 | 0.269944094 | 0.263418792 |
| 0.094094114 | 0.409437902 | 0.135450215 | 0.479874202 |
| 0.292931121 | 0.408182967 | 0.426468061 | 0.160918904 |
| 0.083186633 | 0.214187428 | 0.258618895 | 0.016558904 |
| 0.150641352 | 0.371495098 | 0.144581853 | 0.076892722 |
| 0.111740276 | 0.163913323 | 0.014348485 | 0.082227244 |
| 0.139151445 | 0.178965681 | 0.058716125 | 0.325455336 |
| 0.213883337 | 0.280085147 | 0.012196211 | 0.026692156 |
| 0.506800607 | 0.407854975 | 0.081410043 | 0.294007405 |
| 0.064428539 | 0.146653602 | 0.339944062 | 0.318411833 |
| 0.146159196 | 0.384667143 | 0.321255467 | 0.278733003 |
| 0.414097513 | 0.108500272 | 0.511665503 | 0.041682987 |
| 0.035340484 | 0.221487305 | 0.047704526 | 0.033164102 |
| 0.059670911 | 0.010865105 | 0.130200571 | 0.259500777 |
| 0.154569964 | 0.20002175  | 0.120643584 | 0.042246318 |
| 0.121292839 | 0.14517524  | 0.150331194 | 0.099438573 |
| 0.039892844 | 0.49372987  | 0.004407364 | 0.019967278 |
| 0.15008425  | 0.352402759 | 0.167343855 | 0.101524147 |
| 0.123574318 | 0.045027283 | 0.12254709  | 0.137584596 |
| 0.167586182 | 0.156726889 | 0.373371736 | 0.020680982 |
| 0.008075932 | 0.412520195 | 0.171278435 | 0.006673776 |
| 0.025164152 | 0.21839249  | 0.107051486 | 0.109712083 |
| 0.00718187  | 0.44266571  | 0.163011179 | 0.18551663  |
| 0.151232856 | 0.02401838  | 0.33559475  | 0.035132068 |
| 0.022320187 | 0.433215696 | 0.17194189  | 0.488897152 |
| 0.133463162 | 0.291503889 | 0.443433944 | 0.35209128  |

|             |             |             |             |
|-------------|-------------|-------------|-------------|
| 0.054862102 | 0.158606194 | 0.013763099 | 0.35167168  |
| 0.188849894 |             |             |             |
| SLC9A9      | 0.065979863 | 0.110388116 | 0.038897509 |
| 0.214027864 | 0.093532652 | 0.106679825 | 0.285870739 |
| 0.078124025 | 0.107019341 | 0.098766032 | 0.06989628  |
| 0.054163991 | 0.058233107 | 0.090099087 | 0.035181951 |
| 0.184812682 | 0.067163798 | 0.043509793 | 0.259290715 |
| 0.181219342 | 0.182676667 | 0.190631542 | 0.172816228 |
| 0.023265939 | 0.063127177 | 0.172808975 | 0.052863592 |
| 0.183982708 | 0.178358214 | 0.104226066 | 0.176008063 |
| 0.050331245 | 0.101402662 | 0.078331893 | 0.102672288 |
| 0.065502601 | 0.050302454 | 0.020452543 | 0.100836216 |
| 0.093737687 | 0.108340436 | 0.19984102  | 0.239818093 |
| 0.177746778 | 0.075052742 | 0.30213742  | 0.074725948 |
| 0.043553957 | 0.094471099 | 0.078177736 | 0.083119167 |
| 0.069524066 | 0.081498532 | 0.141508451 | 0.251823497 |
| 0.044660744 | 0.069953698 | 0.011449496 | 0.112574952 |
| 0.283919336 | 0.10344038  | 0.074787456 | 0.160103856 |
| 0.063306394 | 0.130522316 | 0.042649607 | 0.179218404 |
| 0.022478909 | 0.104397055 | 0.105989943 | 0.031990973 |
| 0.035778248 | 0.200592704 | 0.085037259 | 0.019460263 |
| 0.146936865 | 0.097745626 | 0.062278993 | 0.26319319  |
| 0.157825136 | 0.065174588 | 0.126189129 | 0.105446318 |
| 0.054909175 | 0.098620012 | 0.037980882 | 0.158196332 |
| 0.10009012  | 0.264729561 | 0.057455061 | 0.171820009 |
| 0.12074328  | 0.086168116 | 0.068911067 | 0.108271998 |
| 0.135382223 | 0.111377546 | 0.056031031 | 0.080608098 |
| 0.029995275 | 0.027666669 | 0.088254317 | 0.107513808 |
| 0.085444488 | 0.024255421 | 0.129487687 | 0.158286434 |
| 0.14792542  | 0.018836061 | 0.255243118 | 0.025962705 |
| 0.162475264 | 0.156879054 | 0.093944986 | 0.202801769 |
| 0.054848914 | 0.094055363 | 0.077070933 | 0.294657059 |
| 0.057306785 | 0.058560153 | 0.017168195 | 0.069104682 |
| 0.039760464 | 0.00646006  | 0.060902106 | 0.158563945 |
| 0.074719492 | 0.039162073 | 0.19243368  | 0.033494516 |
| 0.061535924 | 0.029407698 | 0.071262999 | 0.064161198 |
| 0.120467374 | 0.040719052 | 0.128460661 | 0.080405364 |
| 0.054921108 | 0.124990601 | 0.0127024   | 0.177532747 |
| 0.092985329 | 0.03622284  | 0.255591213 | 0.07501146  |
| 0.10718468  | 0.160032026 | 0.201019258 | 0.124069938 |
| 0.105134206 | 0.253690678 | 0.03983474  | 0.16515206  |
| 0.063851189 | 0.076055122 | 0.183725342 | 0.11061355  |
| 0.212262821 | 0.061194515 | 0.047945744 | 0.079023887 |
| 0.020287058 | 0.032987074 | 0.04554103  | 0.152270109 |
| 0.058295144 | 0.102276647 | 0.052072681 | 0.178643563 |
| 0.13846428  | 0.143008755 | 0.077093821 | 0.107530286 |
| 0.101534363 | 0.085424384 | 0.041759635 | 0.114005684 |
| 0.099726394 | 0.094155021 | 0.083725116 | 0.054498379 |
| 0.144546488 | 0.144567864 | 0.000502037 | 0.07523817  |
| 0.080748554 | 0.03421457  | 0.130514411 | 0.074099096 |
| 0.039946873 | 0.165680601 | 0.001762729 | 0.164063015 |
| 0.056264477 | 0.166661905 | 0.137821059 | 0.169648415 |
| 0.071268921 | 0.168147346 | 0.09927289  | 0.066943807 |
| 0.05226238  | 0.028513432 | 0.151100748 | 0.22224337  |

|             |             |             |             |
|-------------|-------------|-------------|-------------|
| 0.035871904 | 0.176021722 | 0.109892336 | 0.183861684 |
| 0.161490777 | 0.109282705 | 0.158781752 | 0.033039714 |
| 0.09070865  | 0.152623348 | 0.054435734 | 0.074342076 |
| 0.079725079 | 0.017044813 | 0.098981505 | 0.120520526 |
| 0.042955162 | 0.107974067 | 0.054925799 | 0.037581406 |
| 0.240077192 | 0.171338231 | 0.072055998 | 0.122630617 |
| 0.057119717 | 0.16527713  | 0.047170488 | 0.035675404 |
| 0.081153134 | 0.114794127 | 0.019180839 | 0.012778957 |
| 0.007586112 | 0.108366217 | 0.201556933 | 0.078298127 |
| 0.042385019 | 0.112565626 | 0.041920541 | 0.066807152 |
| 0.212592847 | 0.160251867 | 0.012437664 | 0.017880844 |
| 0.053886432 | 0.037214512 | 0.037235001 | 0.079234267 |
| 0.050850463 | 0.081214736 | 0.092320874 | 0.020323637 |
| 0.055884861 | 0.109089609 | 0.106978807 | 0.160389109 |
| 0.077757136 | 0.161923312 | 0.099766619 | 0.013724549 |
| 0.150202905 | 0.071315796 | 0.032703993 | 0.136646404 |
| 0.053185794 | 0.121283911 | 0.080696229 | 0.154703743 |
| 0.038561326 | 0.224088301 | 0.176816056 | 0.044474974 |
| 0.084690154 | 0.108832313 | 0.114595093 | 0.125253095 |
| 0.083206988 | 0.161672566 | 0.169639609 | 0.06803361  |
| 0.066027468 | 0.140349224 | 0.09228077  | 0.04699704  |
| 0.094624678 | 0.080268785 | 0.081430685 | 0.163435149 |
| 0.09435331  | 0.154554494 | 0.185933431 | 0.176215973 |
| 0.11661274  | 0.189974881 | 0.110726802 | 0.024916747 |
| 0.194636586 | 0.05317659  | 0.046967207 | 0.034851144 |
| 0.072451178 | 0.082106928 | 0.169693278 | 0.068017551 |
| 0.284025802 | 0.044881992 | 0.055132673 | 0.107187249 |
| 0.0134334   | 0.079642338 | 0.071053105 | 0.076844212 |
| 0.066043769 | 0.082105047 | 0.096478817 | 0.218401157 |
| 0.096657105 | 0.188872619 | 0.098516093 | 0.083541953 |
| 0.120464586 | 0.080701299 | 0.053242629 | 0.088985755 |
| 0.180195562 | 0.215881568 | 0.085941977 | 0.011153888 |
| 0.065203902 | 0.122302087 | 0.002092527 | 0.05243027  |
| 0.14154318  | 0.109903901 | 0.125846704 | 0.107926125 |
| 0.113378135 | 0.047628815 | 0.121218138 | 0.184199738 |
| 0.070159705 | 0.067884094 | 0.082200392 | 0.132543342 |
| 0.074785426 | 0.085730546 | 0.035597421 | 0.093770947 |
| 0.067006864 | 0.069298909 | 0.098281873 | 0.066844151 |
| 0.151737951 | 0.072617412 | 0.093799324 | 0.114867116 |
| 0.25941027  | 0.055379824 | 0.024222207 | 0.002367804 |
| 0.028666225 | 0.111706907 | 0.07947518  | 0.175077887 |
| 0.05221164  | 0.149563078 | 0.003219062 | 0.088861124 |
| 0.094951535 | 0.039823597 | 0.034622734 | 0.072863274 |
| 0.052003454 | 0.102770277 | 0.03116146  | 0.082258278 |
| 0.046654246 | 0.071390952 | 0.105625238 | 0.189114568 |
| 0.12754616  | 0.062442852 | 0.125539152 | 0.098782519 |
| 0.150219132 | 0.107928963 | 0.293287728 | 0.172225292 |
| 0.030562154 | 0.143557154 | 0.028528093 | 0.080979342 |
| 0.089527224 | 0.075260528 | 0.085299859 | 0.139239034 |
| 0.08995345  | 0.063838358 | 0.139835633 | 0.078598187 |
| 0.153322462 | 0.158136414 | 0.025873595 | 0.004954546 |
| 0.001034426 | 0.028064666 | 0.177935344 | 0.088849064 |
| 0.099599651 | 0.02911836  | 0.081656047 | 0.170596797 |
| 0.065560396 | 0.069036454 | 0.092443794 | 0.229694906 |



|             |             |             |             |
|-------------|-------------|-------------|-------------|
| 0.075732309 | 0.13385271  | 0.052580408 | 0.197347485 |
| 0.061786776 | 0.047416116 | 0.106564976 | 0.107381022 |
| 0.053512547 | 0.090799289 | 0.044020596 | 0.159539349 |
| 0.002276711 | 0.143403458 | 0.061460416 | 0.073580964 |
| 0.0164296   | 0.071306582 | 0.085361337 | 0.135215097 |
| 0.061171163 | 0.08295788  | 0.074523361 | 0.020190413 |
| 0.188967406 | 0.116111813 | 0.108517881 | 0.12675518  |
| 0.148461103 | 0.192714604 | 0.041854887 | 0.092439223 |
| 0.119617377 | 0.073606479 | 0.049673853 | 0.02282066  |
| 0.044934751 | 0.066342131 | 0.061389224 | 0.032683002 |
| 0.073300152 | 0.106789266 | 0.030158047 | 0.038702256 |
| 0.007110944 | 0.098085548 | 0.152206317 | 0.105206897 |
| 0.028116219 | 0.133584113 | 0.107914468 | 0.115392421 |
| 0.160146002 | 0.170926684 | 0.08083787  | 0.036480888 |
| 1           | 0.005191859 | 0.163405129 | 0.065475916 |
| 0.087404252 | 0.126548375 | 0.058814951 | 0.095896271 |
| 0.089179126 | 0.100370815 | 0.084389259 | 0.194537795 |
| 0.025641125 | 0.07486928  | 0.182612764 | 0.120869253 |
| 0.15575891  | 0.149250736 | 0.088831002 | 0.051420967 |
| 0.145261895 | 0.031089546 | 0.104910148 | 0.008231211 |
| 0.017339299 | 0.142519916 | 0.151261401 | 0.177882657 |
| 0.089777236 | 0.071150242 | 0.107557725 | 0.088836747 |
| 0.101825961 | 0.093970102 | 0.107459915 | 0.133438974 |
| 0.120890341 | 0.160391031 | 0.083722945 | 0.083735817 |
| 0.022782848 | 0.100259968 | 0.133748895 | 0.13767585  |
| 0.111402448 | 0.246883897 | 0.086006012 | 0.062244781 |
| 0.03745979  | 0.045836855 | 0.140101791 | 0.111874284 |
| 0.22928098  | 0.063141528 | 0.008426247 | 0.140648014 |
| 0.012575196 | 0.192755401 | 0.027813724 | 0.07538089  |
| 0.098319512 | 0.031234286 | 0.155481216 | 0.210091974 |
| 0.135278752 | 0.087197517 | 0.041206311 | 0.107744772 |
| 0.017351034 | 0.095566918 | 0.046974748 | 0.085139272 |
| 0.015573209 | 0.031921724 | 0.196880259 | 0.092097255 |
| 0.05343456  | 0.013072915 | 0.093269387 | 0.09005794  |
| 0.169161024 | 0.135031758 | 0.046333291 | 0.024995213 |
| 0.044720038 | 0.06366298  | 0.033526111 | 0.100115562 |
| 0.034580574 | 0.073625125 | 0.081820584 | 0.070747254 |
| 0.182551447 | 0.117646674 | 0.068923151 | 0.042951573 |
| 0.090377099 | 0.077763199 | 0.043406268 | 0.073454124 |
| 0.038538116 | 0.206416996 | 0.066745188 | 0.086693132 |
| 0.022861416 | 0.024986691 | 0.169150565 | 0.13694486  |
| 0.020184114 |             |             |             |
| SLFN1       | 0.192547696 | 0.149398167 | 0.147100812 |
| 0.102636945 | 0.137114    | 0.039945043 | 0.021244627 |
| 0.012419514 | 0.002606238 | 6.45E-05    | 0.001641426 |
| 0.198728368 | 0.005261095 | 0.015060256 | 0.011821399 |
| 0.186971497 | 0.064898099 | 0.093733307 | 0.062328967 |
| 0.131816015 | 0.003107113 | 0.172055706 | 0.011576586 |
| 0.111726219 | 0.052581418 | 0.022192561 | 0.076970994 |
| 0.149301436 | 0.028107601 | 0.020072085 | 0.081811979 |
| 0.125404407 | 0.169213395 | 0.145153579 | 0.17108498  |
| 0.157908383 | 0.154382024 | 0.023067411 | 0.009520851 |
| 0.1442392   | 0.144574161 | 0.11457441  | 0.075758819 |
| 0.005004357 | 0.116597296 | 0.036039308 | 0.232660482 |

|             |             |             |             |
|-------------|-------------|-------------|-------------|
| 0.0034979   | 0.009569871 | 0.008667069 | 0.102638992 |
| 0.11068085  | 0.077310426 | 0.014418141 | 0.011928651 |
| 0.003775185 | 0.011155155 | 0.049549075 | 0.04598166  |
| 0.037108885 | 0.004179006 | 0.129807905 | 0.001479779 |
| 0.002421615 | 0.03412204  | 0.14837299  | 0.03150487  |
| 0.118762653 | 0.080830874 | 0.004471314 | 0.204540304 |
| 0.000182237 | 0.124793635 | 0.262987438 | 0.067694149 |
| 0.049711922 | 0.002133016 | 0.173078931 | 0.053475005 |
| 0.16769559  | 0.178921123 | 0.206294675 | 0.204961126 |
| 0.030333881 | 0.191268321 | 0.217502764 | 0.034459648 |
| 0.142205215 | 0.014274084 | 0.005932037 | 0.214759377 |
| 0.203099573 | 0.156621914 | 0.041882815 | 0.202948492 |
| 0.078309939 | 0.132338825 | 0.057657852 | 0.075810741 |
| 0.028000208 | 0.098647828 | 0.101254967 | 0.189219799 |
| 0.107456961 | 0.223807977 | 0.098189553 | 0.10413855  |
| 0.051269957 | 0.023247273 | 0.101001681 | 0.03874134  |
| 0.166944167 | 0.001540104 | 0.180087729 | 0.05030126  |
| 0.048179883 | 0.145690262 | 0.172302609 | 0.034269379 |
| 0.195974393 | 0.005004337 | 0.009759555 | 0.068408381 |
| 0.008432058 | 0.138984699 | 0.11450603  | 0.12733535  |
| 0.012876682 | 0.035109455 | 0.035315769 | 0.012969366 |
| 0.041737975 | 0.068082139 | 0.177316024 | 0.1360703   |
| 0.164517603 | 0.170275291 | 0.026465928 | 0.089413569 |
| 0.149072402 | 0.210736744 | 3.02E-05    | 0.015429885 |
| 0.07672458  | 0.087027855 | 0.106677613 | 0.119852257 |
| 0.098088362 | 0.013659826 | 0.039087791 | 0.17763151  |
| 0.091984804 | 0.026645881 | 0.058677247 | 0.195630508 |
| 0.01146166  | 0.213867504 | 0.036079417 | 0.036959712 |
| 0.004682319 | 0.151635426 | 0.08798402  | 0.059594021 |
| 0.008564114 | 0.044532642 | 0.00859606  | 0.025482579 |
| 0.006131033 | 0.097033668 | 0.133032748 | 0.062627215 |
| 0.054071613 | 0.160810527 | 0.042407456 | 0.076391923 |
| 0.000133184 | 0.014398866 | 0.032136142 | 0.166224962 |
| 0.027188167 | 0.229796367 | 0.056493228 | 0.103735433 |
| 0.158154649 | 0.172885032 | 0.005115149 | 0.122750539 |
| 0.164689181 | 0.027852723 | 0.087715305 | 0.230283832 |
| 0.073930696 | 0.125358586 | 0.004469514 | 0.196542891 |
| 0.097401682 | 0.046603617 | 0.205256558 | 0.077302867 |
| 0.150338334 | 0.022628377 | 0.026362314 | 0.201621433 |
| 0.157272959 | 0.001638059 | 0.009307489 | 0.080721244 |
| 0.087868185 | 0.001651308 | 0.155160453 | 0.101208323 |
| 0.062180119 | 0.215750908 | 0.203244701 | 0.065834112 |
| 0.104031946 | 0.043341124 | 0.010668241 | 0.233777379 |
| 0.214694497 | 0.013986176 | 0.094100605 | 0.016712249 |
| 0.0598633   | 0.119069606 | 0.148457759 | 0.00163344  |
| 0.010106468 | 0.037155527 | 0.000431293 | 0.072969491 |
| 0.138176433 | 0.005708122 | 0.068694928 | 0.094140859 |
| 0.075355109 | 0.166110902 | 0.197501673 | 0.200016594 |
| 0.163439085 | 0.059841234 | 0.062645889 | 0.009071243 |
| 0.01201345  | 0.034472473 | 0.059874225 | 0.041112069 |
| 0.001519353 | 0.035049645 | 0.039985013 | 0.056339964 |
| 0.005590512 | 0.029178702 | 0.02492719  | 0.100146338 |
| 0.024246596 | 0.006721639 | 0.082278575 | 0.087359898 |
| 0.059501173 | 0.033059218 | 0.147133918 | 0.173885589 |

|             |             |             |             |
|-------------|-------------|-------------|-------------|
| 0.058854899 | 0.018617941 | 0.062727333 | 0.009063284 |
| 0.131506955 | 0.017706336 | 0.016992017 | 0.105300846 |
| 0.008359798 | 0.21448     | 0.01404234  | 0.06508369  |
| 0.09406518  | 0.060327879 | 0.156492339 | 0.000529759 |
| 0.095095491 | 0.110868737 | 0.186770937 | 0.04540653  |
| 0.082428077 | 0.104936206 | 0.001673027 | 0.118206878 |
| 0.112521776 | 0.02766389  | 0.180269422 | 0.088251734 |
| 0.055448489 | 0.239801418 | 0.121941683 | 0.074607551 |
| 0.06638879  | 0.029413915 | 0.000877438 | 0.164268911 |
| 0.153146559 | 0.174639635 | 0.091073704 | 0.187276783 |
| 0.008235461 | 0.001326467 | 0.230101426 | 0.209696568 |
| 0.137086378 | 0.198428269 | 0.15786425  | 0.092034314 |
| 0.079797028 | 0.035861884 | 0.001475421 | 0.170952154 |
| 0.076356097 | 0.169950593 | 0.019009426 | 0.204598501 |
| 0.141634348 | 0.024928615 | 0.042164363 | 0.02699951  |
| 0.078820236 | 0.010900499 | 0.063418579 | 0.133175413 |
| 0.115961114 | 0.044881856 | 0.029866846 | 0.223616337 |
| 0.000631748 | 0.002231412 | 0.139249842 | 0.149505221 |
| 0.030869561 | 0.044187641 | 0.080358593 | 0.022065453 |
| 0.004352056 | 0.099893724 | 0.229047045 | 0.008537087 |
| 0.022892141 | 0.022116906 | 0.249434633 | 0.019914282 |
| 0.196490804 | 0.198212714 | 0.142693822 | 0.036323329 |
| 0.197590189 | 0.151943761 | 0.149387505 | 0.113542627 |
| 0.060420461 | 0.166559317 | 0.100266353 | 0.001033788 |
| 0.187428812 | 0.012178939 | 0.000546419 | 0.13232444  |
| 0.048884046 | 0.115607476 | 0.000269365 | 0.044783794 |
| 0.100347929 | 0.255723982 | 0.110456528 | 0.087509691 |
| 0.005149199 | 0.153315563 | 0.04194704  | 0.213264449 |
| 0.123945655 | 0.033647685 | 0.084200967 | 0.144307718 |
| 0.17691093  | 0.154197213 | 0.123409183 | 0.171484318 |
| 0.15629814  | 0.139477147 | 0.004629237 | 0.119993643 |
| 0.106084779 | 0.184103709 | 0.11757368  | 0.120805743 |
| 0.155508134 | 0.244046033 | 0.067465448 | 0.001952087 |
| 0.008865788 | 0.011661496 | 0.008535578 | 0.00169434  |
| 0.044304072 | 0.032824669 | 0.174707956 | 0.204414899 |
| 0.188675158 | 0.024847534 | 0.006508621 | 0.134737103 |
| 0.113405816 | 0.158649094 | 0.021246427 | 0.00208184  |
| 0.004678859 | 0.006076805 | 0.068043778 | 0.17529676  |
| 0.163040233 | 0.002319227 | 0.007971399 | 0.001757577 |
| 0.016508419 | 0.218635064 | 0.139425416 | 0.15092836  |
| 0.230809202 | 0.065957231 | 0.006762567 | 0.161229645 |
| 0.01971327  | 0.078821962 | 0.170862189 | 0.104177447 |
| 0.073734394 | 0.141398251 | 0.118596229 | 0.154569964 |
| 0.094129694 | 0.197042774 | 0.20714961  | 0.013488355 |
| 0.026047261 | 0.069187621 | 0.032536888 | 0.232116683 |
| 0.149750475 | 0.008803757 | 0.007603257 | 0.002033312 |
| 0.008122303 | 0.203462173 | 0.017179275 | 0.195362023 |
| 0.119444307 | 0.177368655 | 0.077580464 | 0.118169068 |
| 0.002811781 | 0.130061629 | 0.180877722 | 0.00040485  |
| 0.152094392 | 0.022726751 | 0.193709086 | 0.003395873 |
| 0.025717331 | 0.121983134 | 0.011423757 | 0.070217554 |
| 0.076267254 | 0.053144312 | 0.167842685 | 0.229500692 |
| 0.092592886 | 0.028654084 | 0.173431441 | 0.19182614  |
| 0.025701289 | 0.122248798 | 0.126670204 | 0.046262897 |

|             |             |             |             |
|-------------|-------------|-------------|-------------|
| 0.005191859 | 1           | 0.126173031 | 0.110594401 |
| 0.01811767  | 0.222410157 | 0.021238366 | 0.195234769 |
| 0.119044664 | 0.162824946 | 0.166397904 | 0.052852615 |
| 0.049823219 | 0.074948587 | 0.045233747 | 0.000271875 |
| 0.107401511 | 0.160425207 | 0.086934722 | 0.017324582 |
| 0.067881332 | 0.201839765 | 0.009517354 | 0.014414743 |
| 0.208738031 | 0.025476123 | 0.011686284 | 0.203020476 |
| 0.124955069 | 0.109095729 | 0.007425694 | 0.02213575  |
| 0.169239601 | 0.11918469  | 0.002910751 | 0.087832495 |
| 0.138071329 | 0.08742055  | 0.219001959 | 0.251800177 |
| 0.041475538 | 0.133483764 | 0.127950834 | 0.056218168 |
| 0.084981429 | 0.053776903 | 0.142879624 | 0.002426059 |
| 0.009580236 | 0.17500331  | 0.007414992 | 0.129776493 |
| 0.043850985 | 0.025355979 | 0.088945223 | 0.224909943 |
| 0.101449134 | 0.120875094 | 0.016623893 | 0.010739446 |
| 0.222920584 | 0.113427395 | 0.154397203 | 0.011849572 |
| 0.006099441 | 0.118603862 | 0.003658358 | 0.074788891 |
| 0.134626198 | 0.130568093 | 0.121529667 | 0.092772072 |
| 0.064865797 | 0.134683845 | 0.098716239 | 0.023608747 |
| 0.01526113  | 0.023880397 | 0.119983409 | 0.00190249  |
| 0.002921466 | 0.212068293 | 0.066307658 | 0.050299791 |
| 0.027281045 | 0.098152969 | 0.102391356 | 0.010479989 |
| 0.094506274 | 0.170633314 | 0.01500985  | 0.152364015 |
| 0.055859956 | 0.052191761 | 0.087208801 | 0.006187264 |
| 0.017524663 | 0.121885079 | 0.199603218 | 0.164742183 |
| 0.225308916 | 0.150202153 | 0.107195762 | 0.143727516 |
| 0.025205403 | 0.166272579 | 0.00290578  | 0.167053702 |
| 0.048179665 |             |             |             |
| SMAD3       | 0.345730461 | 0.482160912 | 0.302582468 |
| 0.38601261  | 0.350223132 | 0.311100103 | 0.287691066 |
| 0.306575638 | 0.123182098 | 0.016656412 | 0.028689618 |
| 0.326174471 | 0.187373232 | 0.303925902 | 0.267806916 |
| 0.383952831 | 0.159349246 | 0.373664522 | 0.320626598 |
| 0.38569486  | 0.186126989 | 0.351917645 | 0.184906904 |
| 0.243162966 | 0.113061747 | 0.111379995 | 0.213185849 |
| 0.455244728 | 0.12793244  | 0.28220177  | 0.365492048 |
| 0.162502507 | 0.401072722 | 0.456431515 | 0.318932593 |
| 0.435263287 | 0.310683243 | 0.038264541 | 0.26939989  |
| 0.417427803 | 0.341629826 | 0.378516857 | 0.348956658 |
| 0.098944604 | 0.441114965 | 0.29856598  | 0.329266116 |
| 0.268920543 | 0.056071564 | 0.27501408  | 0.420517252 |
| 0.402766369 | 0.295557126 | 0.323050522 | 0.234354037 |
| 0.143292364 | 0.274337385 | 0.157881531 | 0.306096446 |
| 0.293146667 | 0.223802125 | 0.414730697 | 0.143111466 |
| 0.167507254 | 0.366200064 | 0.188664902 | 0.349858357 |
| 0.242443198 | 0.358527953 | 0.077517661 | 0.27308141  |
| 0.010030028 | 0.390544761 | 0.342668406 | 0.183316638 |
| 0.088092826 | 0.044212355 | 0.217666671 | 0.346355784 |
| 0.46359304  | 0.423063401 | 0.443474064 | 0.432897051 |
| 0.197940956 | 0.327015423 | 0.27513263  | 0.230331981 |
| 0.41102231  | 0.238007143 | 0.185618769 | 0.37291366  |
| 0.447653527 | 0.454463497 | 0.221992054 | 0.271888284 |
| 0.361066291 | 0.462236722 | 0.321084305 | 0.330993932 |
| 0.221040949 | 0.079943431 | 0.394332374 | 0.460643224 |

|             |             |             |             |
|-------------|-------------|-------------|-------------|
| 0.386778912 | 0.21612265  | 0.188884493 | 0.408546905 |
| 0.123886701 | 0.333030178 | 0.359279601 | 0.197364164 |
| 0.475464834 | 0.054664601 | 0.222540973 | 0.347182132 |
| 0.316996153 | 0.39061636  | 0.440746296 | 0.275257714 |
| 0.34745936  | 0.050378321 | 0.09550253  | 0.081953676 |
| 0.328015178 | 0.104507322 | 0.408175744 | 0.437010858 |
| 0.319837754 | 0.301144739 | 0.348558571 | 0.011578881 |
| 0.056065766 | 0.239053103 | 0.367415579 | 0.387819449 |
| 0.379216239 | 0.324255199 | 0.220970722 | 0.336204382 |
| 0.284438705 | 0.434933401 | 0.061373744 | 0.204503466 |
| 0.355719665 | 0.237785585 | 0.300481862 | 0.33125926  |
| 0.276153212 | 0.244546336 | 0.217347927 | 0.481816424 |
| 0.426327765 | 0.165694721 | 0.353056657 | 0.369310764 |
| 0.268992602 | 0.290510723 | 0.20905924  | 0.309211643 |
| 0.121698309 | 0.401361767 | 0.053082961 | 0.378055833 |
| 0.166095297 | 0.144145163 | 0.052503623 | 0.341961028 |
| 0.295593116 | 0.364058191 | 0.393009009 | 0.203093832 |
| 0.337283038 | 0.342584861 | 0.334004562 | 0.308567543 |
| 0.018724605 | 0.123076683 | 0.291582278 | 0.463823661 |
| 0.263288428 | 0.458036321 | 0.359329761 | 0.3057705   |
| 0.296682299 | 0.420629704 | 0.006971795 | 0.439580717 |
| 0.451414476 | 0.286509624 | 0.324205946 | 0.350982296 |
| 0.238454591 | 0.427178125 | 0.052377209 | 0.374269154 |
| 0.298125818 | 0.171101361 | 0.476206469 | 0.196519414 |
| 0.419342391 | 0.079911866 | 0.341207842 | 0.33963344  |
| 0.295855351 | 0.023308891 | 0.26826104  | 0.368624182 |
| 0.050791043 | 0.18174817  | 0.370911759 | 0.366758354 |
| 0.318868346 | 0.388815075 | 0.470653858 | 0.219954269 |
| 0.346758232 | 0.35422169  | 0.041131963 | 0.296715241 |
| 0.372663307 | 0.244640047 | 0.424222071 | 0.326294856 |
| 0.286948949 | 0.444028544 | 0.336052051 | 0.151679899 |
| 0.101633518 | 0.359837244 | 0.056225716 | 0.29914408  |
| 0.338802483 | 0.169769628 | 0.263659968 | 0.222620151 |
| 0.108636515 | 0.476317844 | 0.14591054  | 0.172765773 |
| 0.092509554 | 0.310009548 | 0.356169642 | 0.213718911 |
| 0.163752884 | 0.219220846 | 0.26052625  | 0.300229439 |
| 0.105542673 | 0.148512951 | 0.032807702 | 0.234979823 |
| 0.126043741 | 0.244809141 | 0.2406939   | 0.318301381 |
| 0.323538115 | 0.148161309 | 0.320680429 | 0.236692365 |
| 0.145775379 | 0.042574281 | 0.467814298 | 0.383122532 |
| 0.306756434 | 0.248590135 | 0.092597459 | 0.222675613 |
| 0.437701682 | 0.245263132 | 0.272311482 | 0.432372512 |
| 0.078614579 | 0.451034397 | 0.238256529 | 0.161229319 |
| 0.267950332 | 0.301883795 | 0.460971659 | 0.078027661 |
| 0.356625627 | 0.442008201 | 0.346115367 | 0.20161834  |
| 0.375689464 | 0.374982261 | 0.086231591 | 0.349225793 |
| 0.338785192 | 0.0737921   | 0.467034641 | 0.153737278 |
| 0.053209746 | 0.327356324 | 0.305486985 | 0.128367147 |
| 0.124001793 | 0.2858636   | 0.128708064 | 0.299366021 |
| 0.474353607 | 0.35270945  | 0.338377329 | 0.20416018  |
| 0.0889093   | 0.019394121 | 0.218337885 | 0.30377916  |
| 0.448148335 | 0.441533759 | 0.324848441 | 0.273122849 |
| 0.31682922  | 0.237913839 | 0.217920389 | 0.455309877 |
| 0.235912504 | 0.466195468 | 0.027762203 | 0.331037974 |

|             |             |             |             |
|-------------|-------------|-------------|-------------|
| 0.427030316 | 0.300524841 | 0.103863542 | 0.325372984 |
| 0.371229632 | 0.110267478 | 0.337178693 | 0.44498598  |
| 0.409115148 | 0.289867325 | 0.266206376 | 0.365138929 |
| 0.059589889 | 0.116000508 | 0.315217296 | 0.141109985 |
| 0.30164333  | 0.264961421 | 0.037710101 | 0.355731027 |
| 0.086472287 | 0.421136708 | 0.429611019 | 0.088538663 |
| 0.251878343 | 0.33851017  | 0.34105094  | 0.093398321 |
| 0.36425392  | 0.432675641 | 0.462810664 | 0.304118397 |
| 0.35828294  | 0.41538817  | 0.239428147 | 0.138259366 |
| 0.039744944 | 0.440936939 | 0.343706261 | 0.048226881 |
| 0.458050115 | 0.251891352 | 0.026728533 | 0.47552227  |
| 0.289859115 | 0.392111319 | 0.015152377 | 0.082224109 |
| 0.071911456 | 0.414153633 | 0.420871592 | 0.373259122 |
| 0.210494364 | 0.395516004 | 0.012195237 | 0.465576003 |
| 0.444663599 | 0.030274401 | 0.1518521   | 0.340046922 |
| 0.289828652 | 0.49544891  | 0.214473166 | 0.366491211 |
| 0.279219454 | 0.420608445 | 0.271013199 | 0.288228035 |
| 0.4029137   | 0.40341322  | 0.389608679 | 0.447209317 |
| 0.438949923 | 0.347136804 | 0.326598292 | 0.047092009 |
| 0.114980602 | 0.296251628 | 0.19797215  | 0.084528281 |
| 0.307214522 | 0.159466867 | 0.452080587 | 0.441668861 |
| 0.41846454  | 0.019612099 | 0.266043471 | 0.358523745 |
| 0.452564103 | 0.480497724 | 0.05712605  | 0.013161023 |
| 0.014346828 | 0.022690991 | 0.37749077  | 0.271730719 |
| 0.442183626 | 0.191183057 | 0.021246086 | 0.134645684 |
| 0.333969083 | 0.286435533 | 0.448065703 | 0.380356824 |
| 0.361800367 | 0.152283539 | 0.217146625 | 0.390080734 |
| 0.084638596 | 0.270229004 | 0.432140583 | 0.444842888 |
| 0.089842403 | 0.271858811 | 0.368866944 | 0.476659449 |
| 0.040040989 | 0.326373072 | 0.328900523 | 0.283160792 |
| 0.038772253 | 0.118248088 | 0.096749824 | 0.40157242  |
| 0.413936584 | 0.095287828 | 0.05327641  | 0.1717427   |
| 0.172174759 | 0.43788286  | 0.218364994 | 0.480798287 |
| 0.425026121 | 0.43395761  | 0.100478565 | 0.441171359 |
| 0.063296307 | 0.425425761 | 0.254511857 | 0.079519546 |
| 0.338711133 | 0.046048573 | 0.406306498 | 0.09254978  |
| 0.338318137 | 0.368195558 | 0.157604646 | 0.036126797 |
| 0.127628762 | 0.096878054 | 0.445459355 | 0.401826139 |
| 0.0631194   | 0.336391417 | 0.33093348  | 0.38516101  |
| 0.331316739 | 0.370723965 | 0.44892438  | 0.269944094 |
| 0.163405129 | 0.126173031 | 1           | 0.328119606 |
| 0.325176285 | 0.455965459 | 0.230766659 | 0.475738497 |
| 0.353177581 | 0.446094026 | 0.416912244 | 0.344125982 |
| 0.1915787   | 0.348202149 | 0.312252692 | 0.055354249 |
| 0.382959781 | 0.4182222   | 0.38746055  | 0.14563456  |
| 0.250403491 | 0.252200805 | 0.129643721 | 0.223504204 |
| 0.202324021 | 0.297941111 | 0.206543339 | 0.438940815 |
| 0.367774505 | 0.329449764 | 0.132087512 | 0.090457132 |
| 0.494605676 | 0.422949138 | 0.235880092 | 0.344348675 |
| 0.247700869 | 0.311035218 | 0.377385477 | 0.359846468 |
| 0.288983996 | 0.385560761 | 0.408432959 | 0.309906462 |
| 0.41459539  | 0.331666717 | 0.463709733 | 0.200477805 |
| 0.095225828 | 0.306100046 | 0.13142707  | 0.142119572 |
| 0.218266404 | 0.058545737 | 0.175729471 | 0.369397577 |

|             |             |             |             |
|-------------|-------------|-------------|-------------|
| 0.230173179 | 0.350651368 | 0.31324779  | 0.143544437 |
| 0.31659623  | 0.323968809 | 0.357978836 | 0.269932891 |
| 0.126515132 | 0.436517412 | 0.023984084 | 0.110933631 |
| 0.253841164 | 0.358331122 | 0.253770589 | 0.28203568  |
| 0.199471089 | 0.170440076 | 0.322290846 | 0.315902463 |
| 0.231675662 | 0.293860347 | 0.361712693 | 0.101006579 |
| 0.07142038  | 0.471147932 | 0.349010488 | 0.049210472 |
| 0.112945327 | 0.309701122 | 0.361815207 | 0.226360129 |
| 0.042182882 | 0.399224797 | 0.261835323 | 0.330380364 |
| 0.374578825 | 0.147351726 | 0.358686574 | 0.162517576 |
| 0.1530509   | 0.427828261 | 0.291162403 | 0.437630976 |
| 0.312364913 | 0.379161476 | 0.409517428 | 0.373172748 |
| 0.200658459 | 0.272571059 | 0.083592261 | 0.439298296 |
| 0.247180591 |             |             |             |
| SMARCC1     | 0.342358237 | 0.478216622 | 0.265087036 |
| 0.311803274 | 0.272714826 | 0.270873113 | 0.161444926 |
| 0.216348603 | 0.054368989 | 0.004421911 | 0.008997075 |
| 0.296462782 | 0.122424871 | 0.219522961 | 0.220250699 |
| 0.302313815 | 0.085410903 | 0.318131052 | 0.18585401  |
| 0.299023364 | 0.091753288 | 0.255147527 | 0.077123466 |
| 0.175733986 | 0.056526012 | 0.041320523 | 0.141722768 |
| 0.389205675 | 0.050726582 | 0.238797168 | 0.311578133 |
| 0.087336459 | 0.381529173 | 0.487072291 | 0.261341265 |
| 0.476500165 | 0.324203142 | 0.024056572 | 0.193693038 |
| 0.412157676 | 0.300242383 | 0.294673215 | 0.230790781 |
| 0.032555989 | 0.484258986 | 0.1729933   | 0.263409273 |
| 0.210451604 | 0.017928281 | 0.226809941 | 0.448349167 |
| 0.437588033 | 0.253436635 | 0.213027984 | 0.117389947 |
| 0.102581838 | 0.220488366 | 0.134014187 | 0.280300625 |
| 0.162735278 | 0.166824394 | 0.439334841 | 0.06176898  |
| 0.101739556 | 0.250425659 | 0.111771698 | 0.233489395 |
| 0.195209783 | 0.347424985 | 0.027127649 | 0.270671405 |
| 0.003886474 | 0.292468501 | 0.264400651 | 0.153110156 |
| 0.031386959 | 0.014291272 | 0.130924684 | 0.236677197 |
| 0.40911914  | 0.453008777 | 0.399168402 | 0.404172488 |
| 0.123076563 | 0.219263639 | 0.236094291 | 0.117650407 |
| 0.396970746 | 0.126447109 | 0.113827126 | 0.294044758 |
| 0.408971279 | 0.468978854 | 0.127443844 | 0.172297578 |
| 0.331117677 | 0.456282151 | 0.279004726 | 0.25958059  |
| 0.179276017 | 0.037720314 | 0.403974778 | 0.441907385 |
| 0.396810953 | 0.17982674  | 0.098546667 | 0.36713549  |
| 0.047867188 | 0.314768112 | 0.242956516 | 0.155746005 |
| 0.42031192  | 0.014250669 | 0.133314214 | 0.248773798 |
| 0.208437346 | 0.372698659 | 0.45734444  | 0.143811276 |
| 0.286849414 | 0.019529896 | 0.063529408 | 0.031331526 |
| 0.252897449 | 0.082912658 | 0.462399295 | 0.38982543  |
| 0.236027575 | 0.226121392 | 0.214646894 | 0.002092107 |
| 0.019632176 | 0.162675013 | 0.36946474  | 0.324261036 |
| 0.334463235 | 0.361856828 | 0.128263805 | 0.340961101 |
| 0.261392071 | 0.390003033 | 0.055488228 | 0.088264245 |
| 0.2938551   | 0.153321105 | 0.171551587 | 0.286772778 |
| 0.184072448 | 0.123579996 | 0.102144666 | 0.452557218 |
| 0.435102714 | 0.067550431 | 0.322323156 | 0.287280588 |
| 0.193127764 | 0.217208223 | 0.096075042 | 0.206786582 |

|             |             |             |             |
|-------------|-------------|-------------|-------------|
| 0.043734788 | 0.435335138 | 0.02018064  | 0.318095981 |
| 0.1334427   | 0.091128671 | 0.021279858 | 0.248095212 |
| 0.219815454 | 0.351128094 | 0.453922853 | 0.094722774 |
| 0.232299813 | 0.254287738 | 0.295264516 | 0.284065465 |
| 0.004053136 | 0.054160935 | 0.282342815 | 0.445822125 |
| 0.247259433 | 0.444399159 | 0.242950419 | 0.207943048 |
| 0.187278424 | 0.363687753 | 0.005519457 | 0.47619303  |
| 0.469106029 | 0.2878371   | 0.249190222 | 0.293986061 |
| 0.198602187 | 0.371776999 | 0.062488371 | 0.288294743 |
| 0.319577897 | 0.072797651 | 0.429313694 | 0.101268568 |
| 0.443361277 | 0.026104937 | 0.258950495 | 0.328195542 |
| 0.300082468 | 0.008530668 | 0.200386401 | 0.279804165 |
| 0.019404384 | 0.090972188 | 0.33458436  | 0.279112071 |
| 0.233098144 | 0.343982812 | 0.408466145 | 0.184256715 |
| 0.274418821 | 0.225563149 | 0.013060173 | 0.212933406 |
| 0.354189167 | 0.218621963 | 0.43534663  | 0.197286738 |
| 0.300151761 | 0.437710723 | 0.348957757 | 0.111674098 |
| 0.032658763 | 0.253695158 | 0.025834924 | 0.202217799 |
| 0.354896571 | 0.081033832 | 0.227136243 | 0.149917784 |
| 0.047744893 | 0.459216968 | 0.101848013 | 0.147380787 |
| 0.068453111 | 0.259393897 | 0.219636674 | 0.14946265  |
| 0.115912286 | 0.108549355 | 0.197421022 | 0.221903892 |
| 0.037487127 | 0.065064494 | 0.015319294 | 0.228661931 |
| 0.082653142 | 0.211570526 | 0.216723348 | 0.315115669 |
| 0.255058386 | 0.083470215 | 0.240764378 | 0.177357105 |
| 0.074077168 | 0.011726112 | 0.462461138 | 0.292756902 |
| 0.320640696 | 0.120780778 | 0.035349565 | 0.214188776 |
| 0.395732306 | 0.231992026 | 0.259553333 | 0.408109795 |
| 0.035176606 | 0.411031309 | 0.150552437 | 0.076963786 |
| 0.220494519 | 0.182357046 | 0.395271629 | 0.041721529 |
| 0.312864914 | 0.443221528 | 0.237919597 | 0.107024595 |
| 0.396353121 | 0.294958594 | 0.027594027 | 0.357757012 |
| 0.354806092 | 0.023852843 | 0.469756634 | 0.085419137 |
| 0.016683036 | 0.287727257 | 0.285168503 | 0.053027516 |
| 0.05457297  | 0.200882635 | 0.053121801 | 0.189077368 |
| 0.457866716 | 0.271953243 | 0.314975856 | 0.142808719 |
| 0.028476641 | 0.006816084 | 0.141164172 | 0.279569954 |
| 0.490734668 | 0.44472952  | 0.202454494 | 0.209731342 |
| 0.181511799 | 0.1737723   | 0.158799009 | 0.438674558 |
| 0.19370656  | 0.491459364 | 0.006638569 | 0.307075178 |
| 0.468352452 | 0.264529662 | 0.04551686  | 0.227373646 |
| 0.374238548 | 0.036719831 | 0.212334548 | 0.465518095 |
| 0.383724356 | 0.197897141 | 0.200445589 | 0.313504951 |
| 0.017156399 | 0.03954514  | 0.243768221 | 0.104439552 |
| 0.228277733 | 0.143414879 | 0.029991249 | 0.278099417 |
| 0.029628    | 0.419681279 | 0.38134051  | 0.032301496 |
| 0.218105773 | 0.278661446 | 0.251737592 | 0.030004266 |
| 0.357622588 | 0.456176848 | 0.491097058 | 0.173727601 |
| 0.34818341  | 0.414346644 | 0.222512567 | 0.063498839 |
| 0.012372383 | 0.472528556 | 0.315634826 | 0.018193645 |
| 0.403492846 | 0.231746197 | 0.00783591  | 0.470502427 |
| 0.153413678 | 0.452844441 | 0.006748614 | 0.080072757 |
| 0.033087804 | 0.368916001 | 0.446470524 | 0.301455455 |
| 0.19031109  | 0.297008678 | 0.006665411 | 0.464740498 |



|             |             |             |             |
|-------------|-------------|-------------|-------------|
| 0.454280169 | 0.009129518 | 0.086639133 | 0.335395249 |
| 0.287615854 | 0.50352813  | 0.17111621  | 0.350567184 |
| 0.257113033 | 0.449607983 | 0.174105285 | 0.172725826 |
| 0.373543148 | 0.427641823 | 0.355181595 | 0.452325833 |
| 0.390510972 | 0.277868326 | 0.19680213  | 0.011329438 |
| 0.066040587 | 0.206182527 | 0.174517286 | 0.036876983 |
| 0.283361523 | 0.081422947 | 0.458337249 | 0.388975984 |
| 0.405973171 | 0.004368086 | 0.150883589 | 0.354393567 |
| 0.417163459 | 0.430615226 | 0.027498259 | 0.007765226 |
| 0.011174587 | 0.008014173 | 0.284158181 | 0.171941285 |
| 0.43021576  | 0.176300021 | 0.004293267 | 0.058437007 |
| 0.230909236 | 0.232979758 | 0.456841241 | 0.272282843 |
| 0.342177165 | 0.064883286 | 0.169806409 | 0.297182223 |
| 0.035527145 | 0.29732959  | 0.409459826 | 0.450537609 |
| 0.038282527 | 0.167933615 | 0.340652022 | 0.426616502 |
| 0.032848569 | 0.21880549  | 0.299776796 | 0.195552517 |
| 0.01895106  | 0.053369884 | 0.037595691 | 0.341003296 |
| 0.456830111 | 0.045179169 | 0.019641199 | 0.163121845 |
| 0.08060805  | 0.403725214 | 0.117843708 | 0.445999894 |
| 0.382830858 | 0.355829543 | 0.048093549 | 0.452893742 |
| 0.02035915  | 0.457236218 | 0.195361139 | 0.058152021 |
| 0.253939995 | 0.01369942  | 0.433539774 | 0.062168975 |
| 0.283711673 | 0.325596435 | 0.101738548 | 0.011812511 |
| 0.104081991 | 0.038629292 | 0.391388827 | 0.361805641 |
| 0.028227738 | 0.198175326 | 0.224101588 | 0.312261789 |
| 0.255949011 | 0.307993341 | 0.479738256 | 0.263418792 |
| 0.065475916 | 0.110594401 | 0.328119606 | 1           |
| 0.23545942  | 0.411302187 | 0.155424836 | 0.471065743 |
| 0.340002167 | 0.436992982 | 0.415811953 | 0.240376281 |
| 0.133103195 | 0.318043587 | 0.25596081  | 0.020191667 |
| 0.274224946 | 0.36561292  | 0.315017804 | 0.082306834 |
| 0.151240749 | 0.22828903  | 0.054082266 | 0.242161229 |
| 0.187967076 | 0.251652939 | 0.102429269 | 0.362910554 |
| 0.330048661 | 0.333486948 | 0.061265325 | 0.034676782 |
| 0.497927769 | 0.426718608 | 0.140352579 | 0.286711822 |
| 0.138173181 | 0.207953308 | 0.353106249 | 0.32979557  |
| 0.239682914 | 0.370043789 | 0.372871108 | 0.277150725 |
| 0.417155188 | 0.195121431 | 0.485925552 | 0.143942761 |
| 0.050462151 | 0.297007623 | 0.057896033 | 0.066261719 |
| 0.105637846 | 0.019829111 | 0.160742799 | 0.299807286 |
| 0.22074774  | 0.252003334 | 0.277788467 | 0.068060027 |
| 0.219240859 | 0.310136799 | 0.248062583 | 0.161282801 |
| 0.05436387  | 0.456304019 | 0.007394093 | 0.044798556 |
| 0.239466247 | 0.335156784 | 0.210487139 | 0.174440861 |
| 0.157191026 | 0.10125138  | 0.201170469 | 0.272212363 |
| 0.206908877 | 0.280394583 | 0.342764041 | 0.042458074 |
| 0.021854008 | 0.424536935 | 0.331869873 | 0.021319559 |
| 0.05650166  | 0.292767914 | 0.288677197 | 0.132206101 |
| 0.015561634 | 0.407479462 | 0.217592145 | 0.268995765 |
| 0.273265739 | 0.061478024 | 0.390801893 | 0.099780008 |
| 0.070307487 | 0.457660266 | 0.252812509 | 0.461980065 |
| 0.254713018 | 0.297758132 | 0.457519064 | 0.365926118 |
| 0.147404361 | 0.268134593 | 0.024868358 | 0.394790933 |
| 0.234754338 |             |             |             |

|             |             |             |             |
|-------------|-------------|-------------|-------------|
| SMPD1       | 0.218609705 | 0.300045154 | 0.090466087 |
| 0.297223239 | 0.156758381 | 0.196069694 | 0.179816179 |
| 0.135227192 | 0.030935224 | 0.018470653 | 0.009870686 |
| 0.151580661 | 0.048259271 | 0.112048566 | 0.046723449 |
| 0.272244217 | 0.03992377  | 0.115396348 | 0.19229601  |
| 0.308504454 | 0.114191    | 0.236732657 | 0.07671788  |
| 0.034850156 | 0.022366799 | 0.043448902 | 0.038146978 |
| 0.348033157 | 0.051018408 | 0.176410156 | 0.349992711 |
| 0.041530915 | 0.295112377 | 0.265537861 | 0.178041612 |
| 0.243601476 | 0.183342441 | 0.045640197 | 0.082941248 |
| 0.29351947  | 0.193696436 | 0.319923317 | 0.219740989 |
| 0.051140174 | 0.283071089 | 0.187420039 | 0.140053402 |
| 0.080230045 | 0.02072096  | 0.138446384 | 0.290651348 |
| 0.232322689 | 0.137773101 | 0.151104311 | 0.117321716 |
| 0.031587448 | 0.160457186 | 0.018192545 | 0.310813935 |
| 0.180280441 | 0.15193705  | 0.239478093 | 0.050407691 |
| 0.058843867 | 0.19199455  | 0.042574312 | 0.212801183 |
| 0.038680152 | 0.285424145 | 0.060041744 | 0.117060192 |
| 0.014845231 | 0.304481882 | 0.154277067 | 0.025334279 |
| 0.044835902 | 0.026470132 | 0.056068182 | 0.258545916 |
| 0.33490583  | 0.250580111 | 0.264549859 | 0.243843861 |
| 0.051152598 | 0.122725244 | 0.086080781 | 0.081589139 |
| 0.2746175   | 0.130129315 | 0.057146895 | 0.253007649 |
| 0.26267072  | 0.263888579 | 0.047041892 | 0.098687879 |
| 0.239473408 | 0.312894105 | 0.106420867 | 0.115001537 |
| 0.031183694 | 0.014818347 | 0.249829962 | 0.273528748 |
| 0.29050861  | 0.046035241 | 0.06503989  | 0.36491276  |
| 0.0572808   | 0.060593432 | 0.255947134 | 0.061946128 |
| 0.337041803 | 0.02884931  | 0.070183479 | 0.238300297 |
| 0.07821794  | 0.250427302 | 0.239186857 | 0.168329757 |
| 0.129120156 | 0.025332148 | 0.010199781 | 0.032963984 |
| 0.074552577 | 0.011260612 | 0.23831996  | 0.306503141 |
| 0.170846256 | 0.059650289 | 0.17460318  | 0.006747408 |
| 0.020171223 | 0.047997526 | 0.235068676 | 0.167358566 |
| 0.26795986  | 0.170968338 | 0.058269627 | 0.263006046 |
| 0.134351325 | 0.261808808 | 0.0166703   | 0.092278958 |
| 0.161164756 | 0.053818613 | 0.180487254 | 0.16707292  |
| 0.087982059 | 0.117154606 | 0.105770115 | 0.288802067 |
| 0.323410146 | 0.100742847 | 0.131955058 | 0.252918471 |
| 0.061352041 | 0.104649685 | 0.10431483  | 0.120971056 |
| 0.085142754 | 0.213900515 | 0.015421549 | 0.194273686 |
| 0.018934428 | 0.033909301 | 0.035591976 | 0.234377012 |
| 0.071529876 | 0.221478217 | 0.225249608 | 0.100583256 |
| 0.161502385 | 0.186477048 | 0.216407961 | 0.197981788 |
| 0.010293445 | 0.051165845 | 0.161665908 | 0.288798932 |
| 0.274994823 | 0.265217053 | 0.100966171 | 0.061727228 |
| 0.125157583 | 0.274678113 | 0.001036113 | 0.263896245 |
| 0.250329636 | 0.137079224 | 0.170735773 | 0.17377237  |
| 0.056022902 | 0.290415222 | 0.013247255 | 0.273392697 |
| 0.243795367 | 0.080638251 | 0.294514479 | 0.080876014 |
| 0.254116883 | 0.038431597 | 0.172581709 | 0.167953793 |
| 0.158909231 | 0.01492346  | 0.181770874 | 0.317066389 |
| 0.013187106 | 0.108258357 | 0.265394291 | 0.251590833 |
| 0.158572842 | 0.236003234 | 0.308595213 | 0.04362292  |

|             |             |             |             |
|-------------|-------------|-------------|-------------|
| 0.143888209 | 0.17571649  | 0.020862958 | 0.098622797 |
| 0.22222528  | 0.040865461 | 0.288497021 | 0.104668608 |
| 0.189271552 | 0.280515139 | 0.183960911 | 0.031740656 |
| 0.060590333 | 0.229630473 | 0.044046004 | 0.101513339 |
| 0.190569752 | 0.078744743 | 0.078443258 | 0.062168113 |
| 0.031518831 | 0.283676604 | 0.020988236 | 0.025546425 |
| 0.009560417 | 0.186381219 | 0.195737728 | 0.063997567 |
| 0.034058356 | 0.058778103 | 0.046501573 | 0.069665275 |
| 0.082435436 | 0.064947638 | 0.008345213 | 0.052876166 |
| 0.040711845 | 0.065028411 | 0.075283737 | 0.248955243 |
| 0.126382881 | 0.06365595  | 0.114017278 | 0.031524237 |
| 0.027990119 | 0.025346295 | 0.290572788 | 0.256376939 |
| 0.275209753 | 0.083084956 | 0.039381169 | 0.040061777 |
| 0.301277678 | 0.137793263 | 0.107949766 | 0.304470453 |
| 0.034152564 | 0.277553591 | 0.059695703 | 0.062235703 |
| 0.066291766 | 0.165425119 | 0.31716068  | 0.019925113 |
| 0.233702921 | 0.305430754 | 0.148293287 | 0.053312461 |
| 0.279771572 | 0.267032391 | 0.051323484 | 0.228676964 |
| 0.245836338 | 0.039537475 | 0.270140099 | 0.034846566 |
| 0.026245125 | 0.179638655 | 0.16432311  | 0.057949476 |
| 0.03504895  | 0.123017432 | 0.094809966 | 0.14710457  |
| 0.285528732 | 0.248603961 | 0.218529876 | 0.031521522 |
| 0.04812403  | 0.015603856 | 0.049940431 | 0.104753523 |
| 0.269944406 | 0.24264535  | 0.168138339 | 0.082498667 |
| 0.205526082 | 0.038434711 | 0.109273945 | 0.266351449 |
| 0.04104907  | 0.277298764 | 0.017495203 | 0.175063954 |
| 0.237449233 | 0.227908987 | 0.028138877 | 0.221750234 |
| 0.284591935 | 0.050422592 | 0.123788409 | 0.264132613 |
| 0.268037115 | 0.067051194 | 0.050208003 | 0.22956507  |
| 0.050970106 | 0.084233951 | 0.121905988 | 0.015455093 |
| 0.072960222 | 0.068835902 | 0.003472599 | 0.103049869 |
| 0.039401846 | 0.288819355 | 0.287780113 | 0.022833274 |
| 0.157661282 | 0.097132931 | 0.179536409 | 0.050844904 |
| 0.182400276 | 0.235320365 | 0.274797781 | 0.132888688 |
| 0.229003578 | 0.224934289 | 0.085260929 | 0.046604006 |
| 0.016065564 | 0.240237888 | 0.258053992 | 0.020287685 |
| 0.314901591 | 0.185975139 | 0.019815967 | 0.315196353 |
| 0.169160515 | 0.247908782 | 0.005273086 | 0.010571525 |
| 0.015860252 | 0.248084709 | 0.24603291  | 0.33689673  |
| 0.074912672 | 0.255448653 | 0.004030839 | 0.26389556  |
| 0.274981493 | 0.008844408 | 0.02559859  | 0.199956383 |
| 0.13998645  | 0.314676097 | 0.041571537 | 0.19300419  |
| 0.116785572 | 0.234994547 | 0.092376914 | 0.132885488 |
| 0.267435269 | 0.207317577 | 0.290341153 | 0.292837002 |
| 0.310866143 | 0.201605826 | 0.213229036 | 0.032057406 |
| 0.01358648  | 0.192984298 | 0.029653623 | 0.019058473 |
| 0.248263877 | 0.032253472 | 0.271393032 | 0.288975807 |
| 0.23481804  | 0.012796884 | 0.131106205 | 0.228269905 |
| 0.353246252 | 0.336923891 | 0.019798307 | 0.001926215 |
| 0.001927124 | 0.004084135 | 0.282889358 | 0.083457508 |
| 0.255269004 | 0.048739446 | 0.015635673 | 0.118123578 |
| 0.076427274 | 0.116842465 | 0.269434363 | 0.294622385 |
| 0.204553097 | 0.061593439 | 0.047085564 | 0.308007695 |
| 0.016926344 | 0.213909134 | 0.249857261 | 0.299034354 |

|             |             |             |             |
|-------------|-------------|-------------|-------------|
| 0.030890986 | 0.07831134  | 0.152730059 | 0.320540178 |
| 0.003153905 | 0.160716745 | 0.179327059 | 0.06761236  |
| 0.014801121 | 0.02641723  | 0.023186744 | 0.269562266 |
| 0.226662812 | 0.033050621 | 0.020788793 | 0.068834542 |
| 0.071257243 | 0.284085815 | 0.06587775  | 0.293765448 |
| 0.308441101 | 0.317928001 | 0.022914856 | 0.265945621 |
| 0.024754628 | 0.256210272 | 0.068339646 | 0.021282229 |
| 0.084477102 | 0.024561156 | 0.228994612 | 0.011747337 |
| 0.172796442 | 0.289463043 | 0.01924606  | 0.011826757 |
| 0.012201891 | 0.034732619 | 0.283114209 | 0.228107277 |
| 0.015721259 | 0.114946773 | 0.126082233 | 0.244127579 |
| 0.248841036 | 0.259706427 | 0.27169583  | 0.094094114 |
| 0.087404252 | 0.01811767  | 0.325176285 | 0.23545942  |
| 1           | 0.276327269 | 0.039960911 | 0.2729978   |
| 0.251950747 | 0.286074487 | 0.242922988 | 0.187109648 |
| 0.031833336 | 0.198202819 | 0.264593303 | 0.037935205 |
| 0.202608682 | 0.280450878 | 0.200410054 | 0.023800906 |
| 0.088173862 | 0.077139951 | 0.071752815 | 0.053984033 |
| 0.044160409 | 0.252231073 | 0.092687803 | 0.313814767 |
| 0.266309622 | 0.243709298 | 0.112177103 | 0.022167083 |
| 0.298430272 | 0.277978377 | 0.079939526 | 0.22693974  |
| 0.091231978 | 0.134071388 | 0.217086746 | 0.204742713 |
| 0.04700333  | 0.248245091 | 0.32722443  | 0.265036986 |
| 0.30951918  | 0.183271796 | 0.27146685  | 0.134279248 |
| 0.016029498 | 0.168713765 | 0.04836275  | 0.052543325 |
| 0.113678708 | 0.017603784 | 0.017757563 | 0.259058461 |
| 0.036615107 | 0.232142469 | 0.104830917 | 0.038712076 |
| 0.124669258 | 0.117213481 | 0.183836364 | 0.144957203 |
| 0.048860771 | 0.261207975 | 0.009897017 | 0.044568131 |
| 0.05430622  | 0.207872624 | 0.073714784 | 0.070591269 |
| 0.023042118 | 0.033834773 | 0.162902358 | 0.211953193 |
| 0.083542426 | 0.045820385 | 0.207069221 | 0.049125415 |
| 0.06645865  | 0.298484246 | 0.14784731  | 0.013854384 |
| 0.031593137 | 0.197931286 | 0.092595513 | 0.051370204 |
| 0.010892155 | 0.216316812 | 0.102748511 | 0.129385235 |
| 0.244939652 | 0.06093184  | 0.28238232  | 0.044955505 |
| 0.062533999 | 0.287498773 | 0.09901502  | 0.244294905 |
| 0.086825466 | 0.27896405  | 0.26737555  | 0.251732424 |
| 0.042255703 | 0.090218382 | 0.046262268 | 0.315660136 |
| 0.047717349 |             |             |             |
| SMPDL3B     | 0.447827596 | 0.527704434 | 0.461472669 |
| 0.468454383 | 0.513964654 | 0.377337278 | 0.269298728 |
| 0.212081379 | 0.131576168 | 0.009856538 | 0.04811203  |
| 0.500929948 | 0.282527354 | 0.317654019 | 0.347128126 |
| 0.496631527 | 0.231191353 | 0.402967507 | 0.330242322 |
| 0.46924912  | 0.119263752 | 0.496935257 | 0.147289552 |
| 0.406700565 | 0.185510313 | 0.126619743 | 0.373432266 |
| 0.479462828 | 0.142709252 | 0.327068886 | 0.410376379 |
| 0.186693382 | 0.463012889 | 0.514414157 | 0.515154063 |
| 0.510130501 | 0.409527729 | 0.02437303  | 0.319737791 |
| 0.424065712 | 0.490891106 | 0.460223322 | 0.416499555 |
| 0.076051611 | 0.468500094 | 0.320362389 | 0.498975589 |
| 0.252151864 | 0.067001553 | 0.235246973 | 0.424333792 |
| 0.466274285 | 0.468269187 | 0.258391203 | 0.215647867 |

|             |             |                      |             |
|-------------|-------------|----------------------|-------------|
| 0.261821827 | 0.236279056 | 0.355186597          | 0.318484993 |
| 0.306247071 | 0.157069489 | 0.481937849          | 0.125041782 |
| 0.183750491 | 0.297612165 | 0.262109193          | 0.312110149 |
| 0.443606039 | 0.383670535 | 0.034537689          | 0.445819468 |
| 0.00472287  | 0.451745853 | 0.487737659          | 0.377397403 |
| 0.088531969 | 0.044340731 | 0.294382629          | 0.400502975 |
| 0.486103038 | 0.454392124 | 0.507651293          | 0.505758123 |
| 0.279800406 | 0.413634806 | 0.482527123          | 0.262777495 |
| 0.445177955 | 0.237611852 | 0.159677458          | 0.510262973 |
| 0.509209718 | 0.525764696 | 0.311484597          | 0.38671433  |
| 0.435170025 | 0.472689085 | 0.46043844           | 0.501018217 |
| 0.396738069 | 0.110952909 | 0.430979172          | 0.525415544 |
| 0.388914213 | 0.422023622 | 0.254673464          | 0.430867711 |
| 0.114225998 | 0.383770072 | 0.442010689          | 0.23654876  |
| 0.485839837 | 0.034738696 | 0.335182424          | 0.41466573  |
| 0.308838021 | 0.463899597 | 0.523488993          | 0.264850051 |
| 0.503773575 | 0.044573255 | 0.204569451          | 0.074326827 |
| 0.391878427 | 0.233613491 | 0.463397319          | 0.478245811 |
| 0.271941221 | 0.473195401 | 0.335512484          | 0.008414862 |
| 0.06384643  | 0.287309457 | 0.45873424           | 0.434770503 |
| 0.476603552 | 0.375659089 | 0.321041834          | 0.387584038 |
| 0.482581681 | 0.508728265 | 0.053099247          | 0.149514597 |
| 0.473291031 | 0.291642308 | 0.345258534          | 0.496217189 |
| 0.423261578 | 0.162453749 | 0.204487128          | 0.5298297   |
| 0.406142594 | 0.143957854 | 0.358835012          | 0.502713848 |
| 0.379814332 | 0.477366491 | 0.174791556          | 0.362525289 |
| 0.083352187 | 0.48043846  | 0.068594677          | 0.365360257 |
| 0.313957814 | 0.248311478 | 0.023649964          | 0.28810706  |
| 0.331850496 | 0.439197753 | 0.452761369          | 0.179739807 |
| 0.405999648 | 0.504272873 | 0.331852852          | 0.450779125 |
| 0.021522711 | 0.088533319 | 0.272755787          | 0.517547113 |
| 0.272291601 | 0.514345173 | 0.397538149          | 0.418871926 |
| 0.405697899 | 0.495864637 | 0.006341 0.484478403 |             |
| 0.52928643  | 0.288167904 | 0.478367606          | 0.50381322  |
| 0.433953839 | 0.481442856 | 0.049292706          | 0.504184466 |
| 0.356543771 | 0.138850607 | 0.519673513          | 0.260216062 |
| 0.456446462 | 0.084494007 | 0.354729059          | 0.472315704 |
| 0.458255993 | 0.017135219 | 0.229872335          | 0.432454846 |
| 0.065649975 | 0.11651184  | 0.464936065          | 0.470553177 |
| 0.44567485  | 0.50164473  | 0.507960618          | 0.416466432 |
| 0.509233603 | 0.303166071 | 0.030418352          | 0.444720014 |
| 0.478849935 | 0.41815487  | 0.428189305          | 0.305182431 |
| 0.329307892 | 0.470326177 | 0.430919392          | 0.222707033 |
| 0.079685268 | 0.357246975 | 0.033666553          | 0.428920167 |
| 0.393674337 | 0.171534052 | 0.432030183          | 0.240351998 |
| 0.140186806 | 0.536377287 | 0.283032568          | 0.356342968 |
| 0.208506965 | 0.442803504 | 0.334284888          | 0.286564626 |
| 0.289807327 | 0.258087451 | 0.437572822          | 0.446177767 |
| 0.058225287 | 0.165643334 | 0.036351156          | 0.421958329 |
| 0.198943072 | 0.393183321 | 0.372078167          | 0.417688468 |
| 0.384876567 | 0.172259123 | 0.48050425           | 0.387280803 |
| 0.199078503 | 0.037875638 | 0.511115722          | 0.48799715  |
| 0.321508755 | 0.225982132 | 0.087048702          | 0.369158004 |
| 0.47689953  | 0.303872846 | 0.254207554          | 0.44904476  |

|             |             |             |             |
|-------------|-------------|-------------|-------------|
| 0.053698688 | 0.49820509  | 0.332333765 | 0.210976023 |
| 0.474704183 | 0.359567455 | 0.487142022 | 0.074484733 |
| 0.420255781 | 0.461395613 | 0.425292652 | 0.283410893 |
| 0.37697411  | 0.472700946 | 0.055747124 | 0.409945583 |
| 0.40654021  | 0.068731813 | 0.535334056 | 0.223980633 |
| 0.050921803 | 0.512811258 | 0.473886449 | 0.142643253 |
| 0.147219705 | 0.395143373 | 0.062880931 | 0.412139936 |
| 0.526641902 | 0.502366416 | 0.447342631 | 0.331803985 |
| 0.076658876 | 0.023802865 | 0.333016634 | 0.466115001 |
| 0.499555438 | 0.523739431 | 0.376620709 | 0.467377105 |
| 0.337556255 | 0.412031886 | 0.146500094 | 0.521224204 |
| 0.27639493  | 0.517502277 | 0.018751703 | 0.490566344 |
| 0.502618116 | 0.290683725 | 0.149439036 | 0.346186932 |
| 0.385199845 | 0.084653727 | 0.282554053 | 0.494707876 |
| 0.441224812 | 0.415163906 | 0.41467623  | 0.498753033 |
| 0.028706232 | 0.069209783 | 0.474626692 | 0.282569434 |
| 0.440103043 | 0.313873993 | 0.098083431 | 0.357249283 |
| 0.081512477 | 0.446039946 | 0.509559272 | 0.107286578 |
| 0.338216136 | 0.327787895 | 0.495714664 | 0.074015431 |
| 0.467740769 | 0.506418131 | 0.517703466 | 0.231216876 |
| 0.479594473 | 0.495543515 | 0.461083905 | 0.152019461 |
| 0.044537247 | 0.517881918 | 0.416876564 | 0.041711791 |
| 0.501551779 | 0.221592704 | 0.027439952 | 0.496128348 |
| 0.266751262 | 0.424606761 | 0.005641677 | 0.117448715 |
| 0.090514372 | 0.513766031 | 0.469768481 | 0.416215265 |
| 0.233291073 | 0.448619143 | 0.014863301 | 0.536047204 |
| 0.489768851 | 0.038080726 | 0.246943753 | 0.464321687 |
| 0.468467038 | 0.528428575 | 0.415523353 | 0.48035206  |
| 0.48773777  | 0.498132036 | 0.299112631 | 0.385792002 |
| 0.457690311 | 0.498964328 | 0.450399912 | 0.451054903 |
| 0.49236711  | 0.517107515 | 0.371891748 | 0.031927187 |
| 0.194687127 | 0.230158012 | 0.319499246 | 0.127737238 |
| 0.319818191 | 0.229065963 | 0.483714536 | 0.50768454  |
| 0.49337661  | 0.015360381 | 0.188863425 | 0.453142825 |
| 0.441746335 | 0.476496613 | 0.043783175 | 0.01089985  |
| 0.013272469 | 0.044202693 | 0.40939461  | 0.365254131 |
| 0.495387894 | 0.233027063 | 0.013549175 | 0.063911278 |
| 0.357291586 | 0.496039862 | 0.505759735 | 0.468779994 |
| 0.487909149 | 0.150091157 | 0.310341544 | 0.474550732 |
| 0.130365137 | 0.317677219 | 0.49857219  | 0.465490497 |
| 0.088348462 | 0.367327094 | 0.421375059 | 0.494117461 |
| 0.120006372 | 0.443973281 | 0.501054189 | 0.390285363 |
| 0.032638462 | 0.154962169 | 0.124932537 | 0.50879914  |
| 0.495437164 | 0.135230898 | 0.07017035  | 0.146470143 |
| 0.177279569 | 0.491232907 | 0.248726268 | 0.530382927 |
| 0.46491581  | 0.502380954 | 0.149675342 | 0.477273236 |
| 0.076025367 | 0.482608191 | 0.457263983 | 0.06638607  |
| 0.397801465 | 0.031263664 | 0.474090978 | 0.201702343 |
| 0.35045952  | 0.42847742  | 0.265482448 | 0.044103722 |
| 0.259445257 | 0.108679432 | 0.499979201 | 0.509302888 |
| 0.077279239 | 0.309374651 | 0.418188637 | 0.48049999  |
| 0.307085056 | 0.493063766 | 0.495571005 | 0.409437902 |
| 0.126548375 | 0.222410157 | 0.455965459 | 0.411302187 |
| 0.276327269 | 1           | 0.382572401 | 0.537401736 |

|             |             |             |             |
|-------------|-------------|-------------|-------------|
| 0.427338141 | 0.458222049 | 0.476826509 | 0.413861931 |
| 0.353130969 | 0.417921371 | 0.391835465 | 0.034076678 |
| 0.442627338 | 0.502663343 | 0.406337127 | 0.243351528 |
| 0.369602295 | 0.462781203 | 0.081627339 | 0.202501982 |
| 0.40988917  | 0.308410413 | 0.218750684 | 0.502311728 |
| 0.422862786 | 0.412368526 | 0.065232708 | 0.116459387 |
| 0.54632616  | 0.426518428 | 0.176822811 | 0.464541446 |
| 0.276560405 | 0.444185644 | 0.497840925 | 0.508364804 |
| 0.422760702 | 0.46596249  | 0.456449078 | 0.404217711 |
| 0.411558681 | 0.346260169 | 0.522435883 | 0.096580177 |
| 0.145696897 | 0.453561449 | 0.156154623 | 0.173245596 |
| 0.228235313 | 0.061618482 | 0.373728972 | 0.510567959 |
| 0.439223655 | 0.478042531 | 0.336415281 | 0.142168804 |
| 0.452706688 | 0.399012437 | 0.468084888 | 0.248538343 |
| 0.132587527 | 0.493251825 | 0.022368719 | 0.114124373 |
| 0.462428004 | 0.469654244 | 0.473102608 | 0.358503876 |
| 0.397478984 | 0.243950534 | 0.413295204 | 0.301069575 |
| 0.333830698 | 0.418919588 | 0.460486464 | 0.055770174 |
| 0.036760492 | 0.508249753 | 0.395267346 | 0.050502961 |
| 0.150386541 | 0.391583993 | 0.382951249 | 0.312277424 |
| 0.054770207 | 0.489316067 | 0.337122351 | 0.50679173  |
| 0.398885617 | 0.123080953 | 0.328248575 | 0.127462999 |
| 0.102666805 | 0.4383387   | 0.476224362 | 0.516069483 |
| 0.453848748 | 0.498152713 | 0.42524264  | 0.457549454 |
| 0.182171557 | 0.420807451 | 0.051386006 | 0.47626334  |
| 0.435475536 |             |             |             |

| SND1        | 0.202279206 | 0.365422267 | 0.140680614 |
|-------------|-------------|-------------|-------------|
| 0.330959357 | 0.204667032 | 0.167936439 | 0.133378055 |
| 0.026613049 | 0.073849324 | 0.012381624 | 0.075659445 |
| 0.192081177 | 0.08463662  | 0.06197016  | 0.06676446  |
| 0.324700553 | 0.066857032 | 0.060127006 | 0.152736853 |
| 0.245652779 | 0.037806007 | 0.321746449 | 0.052163298 |
| 0.072304104 | 0.093950777 | 0.094691623 | 0.15413373  |
| 0.318545505 | 0.096850428 | 0.124272607 | 0.20987814  |
| 0.032848864 | 0.242208692 | 0.326582361 | 0.298546706 |
| 0.314520577 | 0.178450127 | 0.001745201 | 0.096782239 |
| 0.229202869 | 0.329247139 | 0.262357484 | 0.227921222 |
| 0.043473266 | 0.276521954 | 0.191300136 | 0.204438251 |
| 0.032399359 | 0.053882854 | 0.04642814  | 0.253754604 |
| 0.306318936 | 0.246873801 | 0.059893033 | 0.103035504 |
| 0.096031056 | 0.038143812 | 0.076121307 | 0.130405785 |
| 0.155981201 | 0.034437036 | 0.320610434 | 0.067106607 |
| 0.050268715 | 0.059330474 | 0.04619435  | 0.088890272 |
| 0.100267677 | 0.192783398 | 0.009514777 | 0.156828171 |
| 0.003222756 | 0.232974206 | 0.182913748 | 0.129744964 |
| 0.055856354 | 0.033695717 | 0.065740542 | 0.233143161 |
| 0.324735258 | 0.256175428 | 0.389254782 | 0.383996634 |
| 0.062670969 | 0.122278041 | 0.166633947 | 0.097449315 |
| 0.271739192 | 0.129059484 | 0.030165966 | 0.342091234 |
| 0.392480936 | 0.35424956  | 0.089139646 | 0.168853843 |
| 0.333906671 | 0.312213334 | 0.149177575 | 0.181411319 |
| 0.122534138 | 0.027808258 | 0.298512678 | 0.377023826 |
| 0.207555774 | 0.129702432 | 0.12636357  | 0.243634543 |
| 0.047532814 | 0.038057162 | 0.268971467 | 0.026581544 |

|             |             |             |             |
|-------------|-------------|-------------|-------------|
| 0.342190495 | 0.030939715 | 0.141230667 | 0.198968252 |
| 0.038578844 | 0.251167679 | 0.353909603 | 0.137160911 |
| 0.144928459 | 0.017417864 | 0.087296323 | 0.020031036 |
| 0.054942692 | 0.039047714 | 0.278987748 | 0.358603139 |
| 0.035069873 | 0.084361495 | 0.105330151 | 0.005272668 |
| 0.027838446 | 0.03569994  | 0.249534019 | 0.088199641 |
| 0.247236033 | 0.204068934 | 0.168166027 | 0.189973626 |
| 0.252278871 | 0.385756775 | 0.010580378 | 0.044244476 |
| 0.186006695 | 0.039279556 | 0.187800834 | 0.20373047  |
| 0.204267905 | 0.037113689 | 0.075409674 | 0.392351079 |
| 0.251840107 | 0.078262127 | 0.049284333 | 0.299289311 |
| 0.095132915 | 0.210305477 | 0.055132033 | 0.08735813  |
| 0.039072726 | 0.310045906 | 0.028676601 | 0.07369945  |
| 0.108396475 | 0.054749187 | 0.003416684 | 0.077650071 |
| 0.058807405 | 0.33710621  | 0.258590859 | 0.061707731 |
| 0.125870702 | 0.295384861 | 0.076378912 | 0.288871132 |
| 0.050683632 | 0.02101945  | 0.044776018 | 0.371404462 |
| 0.11074904  | 0.34262492  | 0.069622852 | 0.094173721 |
| 0.192863461 | 0.325992821 | 0.000525628 | 0.302017218 |
| 0.35649546  | 0.048458384 | 0.244957695 | 0.191402852 |
| 0.18861304  | 0.35707317  | 0.003125068 | 0.276668291 |
| 0.128978868 | 0.047773826 | 0.393948191 | 0.148295853 |
| 0.272901713 | 0.071496723 | 0.075706363 | 0.321045694 |
| 0.254268927 | 0.008070962 | 0.077804387 | 0.253762797 |
| 0.022238554 | 0.039737855 | 0.229651702 | 0.272669528 |
| 0.275591141 | 0.297881972 | 0.380074192 | 0.174552054 |
| 0.203246169 | 0.069048622 | 0.01088744  | 0.162408958 |
| 0.254714598 | 0.06775888  | 0.278793419 | 0.065573511 |
| 0.090186865 | 0.327714113 | 0.240264653 | 0.069237529 |
| 0.060253635 | 0.117990802 | 0.01321929  | 0.219790038 |
| 0.232165946 | 0.072457435 | 0.182580116 | 0.026006417 |
| 0.057438556 | 0.392839481 | 0.071650257 | 0.084121117 |
| 0.043351593 | 0.204399163 | 0.110150048 | 0.079012304 |
| 0.084961752 | 0.086392761 | 0.13788323  | 0.139925846 |
| 0.030043225 | 0.07808066  | 0.005771962 | 0.078906843 |
| 0.065236648 | 0.090720904 | 0.087397326 | 0.194192313 |
| 0.052843158 | 0.049688754 | 0.191291199 | 0.067986864 |
| 0.063386805 | 0.02829042  | 0.353820797 | 0.249880018 |
| 0.144081968 | 0.072079252 | 0.03117604  | 0.04830413  |
| 0.368970461 | 0.121884039 | 0.03573845  | 0.338885367 |
| 0.010595616 | 0.363957676 | 0.090784531 | 0.125230572 |
| 0.128697357 | 0.174751232 | 0.362293925 | 0.035568073 |
| 0.132854617 | 0.311965713 | 0.143203426 | 0.148188047 |
| 0.233803285 | 0.239115916 | 0.031683184 | 0.197577538 |
| 0.188584243 | 0.042563355 | 0.363707808 | 0.052494146 |
| 0.029045201 | 0.267879402 | 0.316514193 | 0.087082719 |
| 0.064365539 | 0.203923165 | 0.024173888 | 0.237094384 |
| 0.385513557 | 0.343931513 | 0.312675346 | 0.068846092 |
| 0.053968799 | 0.021168166 | 0.08324171  | 0.135983586 |
| 0.301864905 | 0.357169522 | 0.140172981 | 0.195924922 |
| 0.177965733 | 0.142267916 | 0.01805256  | 0.383241236 |
| 0.022991814 | 0.317308704 | 0.01064375  | 0.319623378 |
| 0.318353559 | 0.071457234 | 0.09570678  | 0.163166439 |
| 0.226493276 | 0.049662774 | 0.041984986 | 0.322130631 |



|             |             |             |             |
|-------------|-------------|-------------|-------------|
| 0.315052898 | 0.154195845 | 0.138780141 | 0.204555067 |
| 0.019574885 | 0.031663458 | 0.229201838 | 0.054222234 |
| 0.126195975 | 0.110180394 | 0.017346796 | 0.046539036 |
| 0.050558225 | 0.315312247 | 0.308500808 | 0.080150535 |
| 0.182096579 | 0.043797585 | 0.240850941 | 0.045457511 |
| 0.343868108 | 0.315926063 | 0.329554605 | 0.03998853  |
| 0.248645754 | 0.366094982 | 0.216352047 | 0.050222613 |
| 0.028738767 | 0.329767075 | 0.182643393 | 0.023471249 |
| 0.358588909 | 0.055250207 | 0.031835898 | 0.333455542 |
| 0.113193415 | 0.232575022 | 0.002827472 | 0.008098518 |
| 0.020461012 | 0.336462684 | 0.313615019 | 0.200814833 |
| 0.055624104 | 0.170180261 | 0.00174852  | 0.357001119 |
| 0.333269997 | 0.024202381 | 0.061711605 | 0.283690843 |
| 0.280345846 | 0.339079963 | 0.160545553 | 0.354001901 |
| 0.219220276 | 0.329081044 | 0.072451306 | 0.224484128 |
| 0.320390095 | 0.331109782 | 0.237459418 | 0.286465392 |
| 0.344785874 | 0.270012662 | 0.226636295 | 0.032017785 |
| 0.090773322 | 0.058369706 | 0.083176082 | 0.100525752 |
| 0.111908161 | 0.089757037 | 0.29946482  | 0.356200964 |
| 0.356541484 | 0.011900383 | 0.039549502 | 0.261845804 |
| 0.297311786 | 0.343664345 | 0.006517218 | 0.003117414 |
| 0.001407306 | 0.048322454 | 0.165907605 | 0.124342857 |
| 0.355729842 | 0.03886606  | 0.010626704 | 0.019310493 |
| 0.057770215 | 0.264973778 | 0.346149765 | 0.27988307  |
| 0.2733902   | 0.050645377 | 0.079566561 | 0.262795419 |
| 0.080320163 | 0.112109513 | 0.37772577  | 0.318312294 |
| 0.019379752 | 0.127094024 | 0.076986453 | 0.379963337 |
| 0.028097422 | 0.195332868 | 0.202620589 | 0.098627508 |
| 0.0043413   | 0.060570548 | 0.070431785 | 0.304828467 |
| 0.30943127  | 0.067991491 | 0.047215571 | 0.015176855 |
| 0.085628918 | 0.324625051 | 0.072137654 | 0.390936929 |
| 0.305094403 | 0.348386709 | 0.041544436 | 0.322410701 |
| 0.077194821 | 0.30608588  | 0.178945198 | 0.01330255  |
| 0.057204679 | 0.01053121  | 0.283673968 | 0.135457917 |
| 0.065777337 | 0.174170752 | 0.104275554 | 0.018167055 |
| 0.049683686 | 0.046734011 | 0.398674743 | 0.356298306 |
| 0.016920774 | 0.068247644 | 0.141010747 | 0.194927116 |
| 0.104947872 | 0.339014394 | 0.314874855 | 0.135450215 |
| 0.058814951 | 0.021238366 | 0.230766659 | 0.155424836 |
| 0.039960911 | 0.382572401 | 1           | 0.362511498 |
| 0.200917997 | 0.293953753 | 0.322370149 | 0.220483166 |
| 0.073674607 | 0.142633798 | 0.248132268 | 0.020561712 |
| 0.172071217 | 0.368547222 | 0.098738778 | 0.103972502 |
| 0.195014242 | 0.169303931 | 0.017884162 | 0.011162256 |
| 0.127466853 | 0.133771356 | 0.068581235 | 0.334203177 |
| 0.145282526 | 0.17163619  | 0.010727565 | 0.072661198 |
| 0.36353995  | 0.27173956  | 0.040744608 | 0.263428658 |
| 0.084117835 | 0.26256696  | 0.283471131 | 0.300074201 |
| 0.063377893 | 0.31781922  | 0.253257412 | 0.231701641 |
| 0.276388935 | 0.161757658 | 0.343092522 | 0.010113193 |
| 0.066714419 | 0.15735053  | 0.084792447 | 0.075808461 |
| 0.110074819 | 0.029016684 | 0.06826263  | 0.278338627 |
| 0.082056593 | 0.272843518 | 0.033264005 | 0.0397926   |
| 0.168843861 | 0.071817201 | 0.209428888 | 0.093625961 |

|             |             |             |             |
|-------------|-------------|-------------|-------------|
| 0.061252908 | 0.336866329 | 0.013076115 | 0.041511982 |
| 0.089822902 | 0.31778863  | 0.210296435 | 0.096365735 |
| 0.085940331 | 0.041066179 | 0.198453422 | 0.078510556 |
| 0.101431919 | 0.043240118 | 0.311910356 | 0.016446646 |
| 0.017942649 | 0.373417784 | 0.084697936 | 0.010187967 |
| 0.037365707 | 0.142530307 | 0.035723738 | 0.12338316  |
| 0.020792794 | 0.344351939 | 0.119233475 | 0.201550554 |
| 0.157175088 | 0.03271264  | 0.171876607 | 0.021160279 |
| 0.020947298 | 0.255524128 | 0.177584306 | 0.336475646 |
| 0.103500189 | 0.35599614  | 0.241182085 | 0.266156037 |
| 0.017162177 | 0.111041704 | 0.030772558 | 0.291029231 |
| 0.112248581 |             |             |             |
| SNX10       | 0.502079353 | 0.519569002 | 0.491413765 |
| 0.481890461 | 0.505843244 | 0.432481793 | 0.24061907  |
| 0.214482035 | 0.106652297 | 0.005028063 | 0.028701668 |
| 0.527987783 | 0.245853145 | 0.307496589 | 0.39225834  |
| 0.490893948 | 0.169263721 | 0.423496362 | 0.283624418 |
| 0.474879276 | 0.102182012 | 0.47149558  | 0.109435434 |
| 0.371525878 | 0.135065508 | 0.084182327 | 0.33794129  |
| 0.502336116 | 0.097692787 | 0.372058199 | 0.440635413 |
| 0.131993106 | 0.508488912 | 0.530129515 | 0.516663432 |
| 0.527844945 | 0.479345333 | 0.015218025 | 0.336902646 |
| 0.485807504 | 0.522600228 | 0.469739223 | 0.384868277 |
| 0.049249524 | 0.49435186  | 0.285229025 | 0.490011131 |
| 0.273492635 | 0.038515014 | 0.272214757 | 0.445718464 |
| 0.486814796 | 0.50824942  | 0.258944847 | 0.183559911 |
| 0.242739887 | 0.256246847 | 0.347237958 | 0.371274403 |
| 0.262219986 | 0.174084718 | 0.493607388 | 0.10378291  |
| 0.173769052 | 0.288917769 | 0.196834212 | 0.297994316 |
| 0.435605567 | 0.447198587 | 0.021335188 | 0.497490435 |
| 0.00263043  | 0.451197872 | 0.461402023 | 0.395337439 |
| 0.052795541 | 0.02368303  | 0.227112091 | 0.388636862 |
| 0.515880921 | 0.478437443 | 0.536930743 | 0.534941164 |
| 0.222427405 | 0.360962084 | 0.487661516 | 0.205273265 |
| 0.504667638 | 0.204567967 | 0.136129714 | 0.496298608 |
| 0.537071075 | 0.526444446 | 0.251332006 | 0.328261722 |
| 0.487765699 | 0.492397289 | 0.502571309 | 0.50625786  |
| 0.42010648  | 0.072743052 | 0.472411666 | 0.530090524 |
| 0.458340278 | 0.406617334 | 0.191734526 | 0.469349288 |
| 0.07338862  | 0.432005622 | 0.413606422 | 0.197667856 |
| 0.517284183 | 0.021497284 | 0.268691251 | 0.410099917 |
| 0.269589028 | 0.515958469 | 0.523093902 | 0.220156335 |
| 0.495456252 | 0.024733119 | 0.18125204  | 0.043877056 |
| 0.389506325 | 0.202065746 | 0.499362136 | 0.513453055 |
| 0.266411741 | 0.45391567  | 0.309385381 | 0.002790421 |
| 0.035021942 | 0.23900474  | 0.513135179 | 0.440649534 |
| 0.506856479 | 0.456418551 | 0.280178557 | 0.455978226 |
| 0.526604687 | 0.536763972 | 0.068704486 | 0.113981366 |
| 0.496593399 | 0.238934156 | 0.286871003 | 0.524661739 |
| 0.378230406 | 0.134173808 | 0.152171565 | 0.528584652 |
| 0.444393196 | 0.100428152 | 0.398211472 | 0.490206668 |
| 0.384244016 | 0.440199426 | 0.127968208 | 0.323003807 |
| 0.056054478 | 0.496188603 | 0.038359088 | 0.391074185 |
| 0.33721263  | 0.188819538 | 0.014540076 | 0.296527354 |

|             |             |             |             |
|-------------|-------------|-------------|-------------|
| 0.338912909 | 0.498094263 | 0.489212117 | 0.130411933 |
| 0.372363713 | 0.484967649 | 0.372563794 | 0.495609736 |
| 0.011710396 | 0.058669892 | 0.326691947 | 0.523481273 |
| 0.327516209 | 0.53086428  | 0.360769459 | 0.378911737 |
| 0.34770871  | 0.520156379 | 0.00503405  | 0.506513448 |
| 0.531805299 | 0.351390251 | 0.468881753 | 0.506096164 |
| 0.460416107 | 0.512815202 | 0.055500172 | 0.49095426  |
| 0.425314121 | 0.096955716 | 0.534808748 | 0.197377894 |
| 0.483851064 | 0.050693214 | 0.363736583 | 0.521138789 |
| 0.5134803   | 0.010900709 | 0.253031097 | 0.445919536 |
| 0.037129973 | 0.106190352 | 0.502825051 | 0.476486484 |
| 0.450085259 | 0.526586686 | 0.528854007 | 0.442778333 |
| 0.506010427 | 0.274943033 | 0.016280198 | 0.399858204 |
| 0.522789834 | 0.4551637   | 0.458917917 | 0.280470616 |
| 0.399929699 | 0.496478231 | 0.501950802 | 0.243807807 |
| 0.050881297 | 0.358185744 | 0.024401609 | 0.404007581 |
| 0.471965624 | 0.13406035  | 0.475568152 | 0.190589545 |
| 0.091293612 | 0.522145384 | 0.237812759 | 0.344951754 |
| 0.177477249 | 0.464116411 | 0.298220927 | 0.272339014 |
| 0.258432074 | 0.201349673 | 0.433701914 | 0.453089323 |
| 0.040822971 | 0.113597143 | 0.021375107 | 0.45172142  |
| 0.165302937 | 0.402498549 | 0.39570028  | 0.477380361 |
| 0.377192118 | 0.129805466 | 0.460538569 | 0.369694997 |
| 0.147610534 | 0.018836581 | 0.508564833 | 0.481024399 |
| 0.391212226 | 0.184126731 | 0.052186097 | 0.406897597 |
| 0.516430113 | 0.36930939  | 0.314508658 | 0.493674991 |
| 0.036399148 | 0.533825684 | 0.293611996 | 0.152357752 |
| 0.460175301 | 0.309690504 | 0.513880323 | 0.072827864 |
| 0.459492911 | 0.479133801 | 0.384854573 | 0.228988429 |
| 0.44086315  | 0.485332484 | 0.035010805 | 0.479766339 |
| 0.472955458 | 0.038629921 | 0.5229379   | 0.162347482 |
| 0.026929543 | 0.528002125 | 0.519900037 | 0.094930718 |
| 0.100143318 | 0.388006652 | 0.050574506 | 0.355599386 |
| 0.518580583 | 0.484032601 | 0.500109075 | 0.287433956 |
| 0.047188941 | 0.011564498 | 0.269929096 | 0.494711494 |
| 0.521336611 | 0.520047134 | 0.318384386 | 0.446268829 |
| 0.286553709 | 0.407951477 | 0.162578788 | 0.52636347  |
| 0.258282523 | 0.524571315 | 0.008428369 | 0.526829921 |
| 0.524259488 | 0.330694195 | 0.102237424 | 0.352254696 |
| 0.452947282 | 0.055422537 | 0.247379938 | 0.501646592 |
| 0.500101435 | 0.401230029 | 0.427454942 | 0.511722654 |
| 0.017894446 | 0.04721145  | 0.476634882 | 0.249521126 |
| 0.453559518 | 0.263447334 | 0.078855056 | 0.381569757 |
| 0.05053623  | 0.476819985 | 0.528598344 | 0.075091201 |
| 0.388329229 | 0.365336744 | 0.461402613 | 0.04466477  |
| 0.52130893  | 0.507478557 | 0.529900181 | 0.19543607  |
| 0.52351     | 0.513301404 | 0.496446036 | 0.102794451 |
| 0.022947479 | 0.528289074 | 0.469690492 | 0.026403172 |
| 0.527056798 | 0.269247178 | 0.013969958 | 0.497047549 |
| 0.22067433  | 0.46003268  | 0.004895145 | 0.118754767 |
| 0.056841491 | 0.533318677 | 0.489110242 | 0.442218804 |
| 0.281732768 | 0.438478654 | 0.008669909 | 0.522243474 |
| 0.490467129 | 0.019327669 | 0.18798976  | 0.517975547 |
| 0.51722196  | 0.527803062 | 0.407792124 | 0.52711512  |

|             |             |             |             |
|-------------|-------------|-------------|-------------|
| 0.517983018 | 0.511459447 | 0.275165663 | 0.329075499 |
| 0.507320593 | 0.502134258 | 0.493085528 | 0.479835792 |
| 0.521587108 | 0.510766716 | 0.331246281 | 0.01770668  |
| 0.177491487 | 0.240524957 | 0.369728553 | 0.101573994 |
| 0.378754537 | 0.177412101 | 0.50978557  | 0.532158381 |
| 0.530942783 | 0.006374664 | 0.171859346 | 0.511936146 |
| 0.490038592 | 0.514778996 | 0.028855233 | 0.0086379   |
| 0.011455588 | 0.025995893 | 0.417736099 | 0.308055926 |
| 0.519878558 | 0.27567658  | 0.005516293 | 0.049231411 |
| 0.338765441 | 0.490787419 | 0.505157521 | 0.448195737 |
| 0.527719222 | 0.100795552 | 0.327933845 | 0.469194915 |
| 0.089260685 | 0.394339149 | 0.531145187 | 0.472302155 |
| 0.054979123 | 0.313703467 | 0.451113166 | 0.521113282 |
| 0.104601567 | 0.388955252 | 0.527972405 | 0.372696433 |
| 0.019413325 | 0.105528919 | 0.084469775 | 0.517334577 |
| 0.515962907 | 0.093812564 | 0.04073569  | 0.165269201 |
| 0.138508594 | 0.529389707 | 0.198156344 | 0.533641401 |
| 0.50622615  | 0.506250295 | 0.099534355 | 0.487755909 |
| 0.047757667 | 0.495796482 | 0.427987447 | 0.071924741 |
| 0.361402326 | 0.01610178  | 0.493810774 | 0.195710846 |
| 0.373738961 | 0.468914615 | 0.257069563 | 0.022814674 |
| 0.250195107 | 0.067265235 | 0.528987985 | 0.535960648 |
| 0.046817996 | 0.28167616  | 0.371502438 | 0.485612194 |
| 0.328580677 | 0.505655965 | 0.512880917 | 0.479874202 |
| 0.095896271 | 0.195234769 | 0.475738497 | 0.471065743 |
| 0.2729978   | 0.537401736 | 0.362511498 | 1           |
| 0.48543258  | 0.503307711 | 0.516064167 | 0.411998913 |
| 0.298694363 | 0.470729555 | 0.427194006 | 0.022113197 |
| 0.423849775 | 0.525581506 | 0.426114161 | 0.198315826 |
| 0.314324712 | 0.485994761 | 0.057928995 | 0.230588295 |
| 0.426396265 | 0.351553504 | 0.16825124  | 0.508797783 |
| 0.461608645 | 0.474413666 | 0.046508295 | 0.078954366 |
| 0.539967993 | 0.474728271 | 0.169892778 | 0.498530315 |
| 0.215144626 | 0.415763129 | 0.534302981 | 0.533428238 |
| 0.45317446  | 0.515596595 | 0.495972366 | 0.446331917 |
| 0.45231118  | 0.309330028 | 0.532344871 | 0.101237622 |
| 0.111726689 | 0.503366859 | 0.114107604 | 0.118816133 |
| 0.17230255  | 0.035776865 | 0.387498601 | 0.504958028 |
| 0.469833192 | 0.451626389 | 0.373248156 | 0.103396352 |
| 0.403024157 | 0.448734471 | 0.430550252 | 0.22956624  |
| 0.093761813 | 0.504528218 | 0.01181812  | 0.071166129 |
| 0.476809934 | 0.520511969 | 0.473949753 | 0.302544103 |
| 0.384285093 | 0.18493333  | 0.360307207 | 0.340194911 |
| 0.370308712 | 0.44450939  | 0.516707772 | 0.041710406 |
| 0.021510557 | 0.535115294 | 0.446201614 | 0.029423126 |
| 0.112282754 | 0.455055476 | 0.362938504 | 0.282779932 |
| 0.030108168 | 0.507950089 | 0.385028097 | 0.515829759 |
| 0.403515026 | 0.081864027 | 0.404457853 | 0.110984853 |
| 0.075116444 | 0.462330263 | 0.49319052  | 0.521530989 |
| 0.44119651  | 0.490672439 | 0.457244838 | 0.511247766 |
| 0.161287179 | 0.474430871 | 0.032282107 | 0.512297686 |
| 0.491681412 |             |             |             |
| SNX18       | 0.352478954 | 0.489621976 | 0.323725596 |
| 0.330060819 | 0.318242423 | 0.309777253 | 0.201223322 |

|             |             |             |             |
|-------------|-------------|-------------|-------------|
| 0.242461892 | 0.087056439 | 0.00419787  | 0.012971203 |
| 0.325849011 | 0.13578257  | 0.225538056 | 0.285569518 |
| 0.332975497 | 0.096819477 | 0.364096139 | 0.225383238 |
| 0.34547831  | 0.107153867 | 0.298154479 | 0.103605944 |
| 0.228632931 | 0.073905056 | 0.057974211 | 0.190205866 |
| 0.403181412 | 0.069798214 | 0.265826057 | 0.338715727 |
| 0.101744643 | 0.387207218 | 0.497108202 | 0.294183075 |
| 0.477919365 | 0.334657386 | 0.019960806 | 0.2348429   |
| 0.419986739 | 0.327123944 | 0.341461642 | 0.269238551 |
| 0.044194948 | 0.481305301 | 0.213777246 | 0.314357586 |
| 0.26032549  | 0.023727587 | 0.256812579 | 0.455103858 |
| 0.436656675 | 0.299771837 | 0.262767918 | 0.151860777 |
| 0.113519993 | 0.227759193 | 0.152671725 | 0.302318698 |
| 0.199488227 | 0.17959982  | 0.445111453 | 0.090185464 |
| 0.139166179 | 0.286241149 | 0.128612665 | 0.264082735 |
| 0.246785893 | 0.356320372 | 0.034760409 | 0.301931229 |
| 0.002458767 | 0.344771548 | 0.3084454   | 0.206971477 |
| 0.040912225 | 0.013778295 | 0.151044451 | 0.278601711 |
| 0.421419909 | 0.459516114 | 0.414342561 | 0.422824538 |
| 0.1310353   | 0.262322285 | 0.281926359 | 0.141877755 |
| 0.415300658 | 0.15350125  | 0.130748174 | 0.317662508 |
| 0.425027135 | 0.476785874 | 0.163728136 | 0.217526101 |
| 0.34702331  | 0.463716502 | 0.326057467 | 0.306777697 |
| 0.230690228 | 0.052325737 | 0.415569506 | 0.453021913 |
| 0.395891732 | 0.215703974 | 0.122170821 | 0.368932406 |
| 0.063166828 | 0.330503059 | 0.287126022 | 0.139520054 |
| 0.435795401 | 0.0246691   | 0.164336312 | 0.288311904 |
| 0.245180589 | 0.378909463 | 0.466446117 | 0.180783616 |
| 0.322269381 | 0.02029972  | 0.088559302 | 0.040796645 |
| 0.266394303 | 0.098863636 | 0.46422716  | 0.398096658 |
| 0.243611317 | 0.266235022 | 0.26734041  | 0.003040443 |
| 0.024210029 | 0.192843279 | 0.362396866 | 0.355261864 |
| 0.355569717 | 0.372686405 | 0.165152307 | 0.345312529 |
| 0.300677558 | 0.407116196 | 0.059609904 | 0.119179521 |
| 0.340570355 | 0.188940817 | 0.210121563 | 0.319201592 |
| 0.225160406 | 0.152939802 | 0.122966547 | 0.471358485 |
| 0.44132578  | 0.085675275 | 0.343711541 | 0.327159696 |
| 0.23041481  | 0.253538378 | 0.118349873 | 0.217487167 |
| 0.055474128 | 0.445097709 | 0.025339747 | 0.356023631 |
| 0.188870478 | 0.096866325 | 0.025497565 | 0.276858012 |
| 0.242172267 | 0.358250476 | 0.455568724 | 0.117857979 |
| 0.251268444 | 0.300332518 | 0.321526998 | 0.294448764 |
| 0.006397217 | 0.064120588 | 0.297793181 | 0.450848077 |
| 0.263288697 | 0.456267673 | 0.283812156 | 0.269504003 |
| 0.229465615 | 0.385813895 | 0.005553897 | 0.480939519 |
| 0.480799663 | 0.299112076 | 0.276689924 | 0.336757038 |
| 0.259475519 | 0.387573271 | 0.056264503 | 0.325754626 |
| 0.31921378  | 0.095242003 | 0.447447497 | 0.12389875  |
| 0.445059129 | 0.036146189 | 0.288556075 | 0.347871245 |
| 0.299291003 | 0.010574986 | 0.228963348 | 0.32985793  |
| 0.026334981 | 0.119108357 | 0.358921361 | 0.328460205 |
| 0.29170598  | 0.365163539 | 0.425399188 | 0.239951847 |
| 0.314177237 | 0.256775445 | 0.018807359 | 0.254530703 |
| 0.370350918 | 0.26953097  | 0.441546626 | 0.243591872 |

|             |             |              |             |
|-------------|-------------|--------------|-------------|
| 0.311310285 | 0.450167319 | 0.354093421  | 0.150863707 |
| 0.04663554  | 0.29799604  | 0.028450781  | 0.259517739 |
| 0.379787245 | 0.091538336 | 0.292842749  | 0.164303636 |
| 0.059331582 | 0.473258276 | 0.128725333  | 0.181488277 |
| 0.087769061 | 0.277597944 | 0.263976556  | 0.154576553 |
| 0.119482288 | 0.149214207 | 0.25818401   | 0.284210757 |
| 0.048069318 | 0.076375793 | 0.0212221765 | 0.230538049 |
| 0.075515013 | 0.212840449 | 0.214602229  | 0.321940193 |
| 0.263746857 | 0.079243832 | 0.275392018  | 0.238673385 |
| 0.098492428 | 0.015715898 | 0.474497864  | 0.341330763 |
| 0.31233574  | 0.163920679 | 0.044679175  | 0.212599716 |
| 0.406014161 | 0.260060497 | 0.294448134  | 0.41532162  |
| 0.046774597 | 0.430980834 | 0.165341131  | 0.096104846 |
| 0.238089067 | 0.209232768 | 0.418200621  | 0.061945361 |
| 0.353571571 | 0.445391236 | 0.290823258  | 0.141986631 |
| 0.381763434 | 0.347110255 | 0.035669019  | 0.356363443 |
| 0.340123028 | 0.02972799  | 0.476425455  | 0.097620375 |
| 0.022301433 | 0.321623521 | 0.30072797   | 0.071000091 |
| 0.072411683 | 0.235188386 | 0.068972739  | 0.231328754 |
| 0.4713096   | 0.305498804 | 0.328502766  | 0.18470075  |
| 0.037286807 | 0.004622117 | 0.171368419  | 0.322875936 |
| 0.487967659 | 0.451981597 | 0.237682033  | 0.237282829 |
| 0.222408857 | 0.233579942 | 0.181372522  | 0.449063353 |
| 0.22802445  | 0.497094426 | 0.009391128  | 0.327946398 |
| 0.473520838 | 0.279973228 | 0.059929388  | 0.273917657 |
| 0.366068923 | 0.054463857 | 0.246909064  | 0.466608139 |
| 0.410410197 | 0.266470899 | 0.262808145  | 0.34786479  |
| 0.023488001 | 0.055398949 | 0.306784749  | 0.137680201 |
| 0.279046883 | 0.195877939 | 0.03619646   | 0.33709954  |
| 0.035539231 | 0.424727969 | 0.388309734  | 0.05290968  |
| 0.247582285 | 0.343223855 | 0.29477475   | 0.041907816 |
| 0.376503392 | 0.465590774 | 0.493311924  | 0.205094683 |
| 0.347558879 | 0.426671255 | 0.25757256   | 0.082005317 |
| 0.016938401 | 0.47838438  | 0.355014306  | 0.019889726 |
| 0.415997398 | 0.247868153 | 0.006982052  | 0.479642337 |
| 0.193230519 | 0.444613914 | 0.008677381  | 0.101255705 |
| 0.044123022 | 0.384986693 | 0.458755945  | 0.34688757  |
| 0.206260928 | 0.346618095 | 0.009124117  | 0.475968587 |
| 0.454162295 | 0.012867287 | 0.113177435  | 0.337802641 |
| 0.294706509 | 0.510261657 | 0.217251598  | 0.363311032 |
| 0.282914247 | 0.455148341 | 0.199147209  | 0.217923979 |
| 0.382972596 | 0.438062374 | 0.364832363  | 0.462351902 |
| 0.396222406 | 0.320709105 | 0.242794476  | 0.017521962 |
| 0.116439009 | 0.237332301 | 0.209969661  | 0.054903834 |
| 0.316942829 | 0.108229694 | 0.460261544  | 0.406109478 |
| 0.413039156 | 0.006263478 | 0.173621727  | 0.359953727 |
| 0.424578524 | 0.447334279 | 0.036968659  | 0.008885751 |
| 0.012595403 | 0.011265837 | 0.333175092  | 0.215388598 |
| 0.446224154 | 0.175211223 | 0.00590765   | 0.069306112 |
| 0.266219204 | 0.276878964 | 0.462335953  | 0.320187613 |
| 0.359441994 | 0.082463663 | 0.188322814  | 0.343063876 |
| 0.052601244 | 0.304785472 | 0.420210728  | 0.458778049 |
| 0.050521366 | 0.221168284 | 0.35957604   | 0.444737958 |
| 0.043284971 | 0.257554414 | 0.326339348  | 0.228171761 |

|             |             |             |             |
|-------------|-------------|-------------|-------------|
| 0.022748033 | 0.071051993 | 0.058397159 | 0.360264847 |
| 0.458383655 | 0.046879007 | 0.020756535 | 0.154224427 |
| 0.096015093 | 0.419869196 | 0.133382818 | 0.461110155 |
| 0.394960572 | 0.37010944  | 0.061594019 | 0.468423925 |
| 0.032091016 | 0.455309907 | 0.230811133 | 0.063783984 |
| 0.285519035 | 0.018511501 | 0.431195285 | 0.088514574 |
| 0.299004465 | 0.360741671 | 0.167437948 | 0.016544501 |
| 0.145041528 | 0.047669556 | 0.410521243 | 0.380307738 |
| 0.037206609 | 0.259236771 | 0.268593    | 0.357482852 |
| 0.2861356   | 0.319148584 | 0.482901097 | 0.292931121 |
| 0.089179126 | 0.119044664 | 0.353177581 | 0.340002167 |
| 0.251950747 | 0.427338141 | 0.200917997 | 0.48543258  |
| 1           | 0.457530395 | 0.423523493 | 0.301090419 |
| 0.15388007  | 0.353071731 | 0.289267653 | 0.020307737 |
| 0.322149891 | 0.375217059 | 0.361575065 | 0.109088205 |
| 0.182475324 | 0.273388638 | 0.074497821 | 0.227212733 |
| 0.22201151  | 0.280790423 | 0.11807381  | 0.383935073 |
| 0.360834683 | 0.342938187 | 0.066465081 | 0.053593845 |
| 0.507501039 | 0.446010651 | 0.175063363 | 0.327880934 |
| 0.168623863 | 0.265149554 | 0.364396518 | 0.343129998 |
| 0.315089458 | 0.36965501  | 0.375430812 | 0.291741611 |
| 0.417454631 | 0.249796659 | 0.493933317 | 0.150961246 |
| 0.073380521 | 0.324827389 | 0.068626254 | 0.085778472 |
| 0.127949274 | 0.028833662 | 0.19588738  | 0.335805234 |
| 0.249180815 | 0.286449238 | 0.310729248 | 0.087568565 |
| 0.264113805 | 0.352056308 | 0.295048072 | 0.186132252 |
| 0.063841032 | 0.463235613 | 0.010645197 | 0.055941674 |
| 0.256467628 | 0.359669868 | 0.247073824 | 0.21202446  |
| 0.200817384 | 0.12787388  | 0.23853228  | 0.290917062 |
| 0.212236272 | 0.299185143 | 0.364797544 | 0.060051569 |
| 0.027134239 | 0.43671565  | 0.356201374 | 0.028004183 |
| 0.08517029  | 0.340761721 | 0.311099449 | 0.17730847  |
| 0.0214089   | 0.417073826 | 0.25684817  | 0.325399446 |
| 0.323736443 | 0.077659122 | 0.382838302 | 0.114485579 |
| 0.09472862  | 0.451367836 | 0.306828844 | 0.468708846 |
| 0.30370217  | 0.313810635 | 0.45986647  | 0.364889438 |
| 0.164440046 | 0.311036788 | 0.037103673 | 0.407217255 |
| 0.271408089 |             |             |             |
| SOCS3       | 0.459048265 | 0.506147251 | 0.435827316 |
| 0.428790596 | 0.438289782 | 0.4038075   | 0.237023975 |
| 0.247662136 | 0.101882943 | 0.004135648 | 0.01985275  |
| 0.446347062 | 0.187637826 | 0.278819771 | 0.369623377 |
| 0.439902846 | 0.131374701 | 0.436081604 | 0.269648688 |
| 0.444135594 | 0.111316987 | 0.404405415 | 0.112119391 |
| 0.318420536 | 0.102550965 | 0.073382537 | 0.272880607 |
| 0.454626207 | 0.086445627 | 0.346927694 | 0.423836109 |
| 0.122123281 | 0.462868355 | 0.517103002 | 0.419208872 |
| 0.505470722 | 0.441000481 | 0.017640465 | 0.309549907 |
| 0.452234602 | 0.448195577 | 0.439581314 | 0.343889558 |
| 0.048333616 | 0.49172349  | 0.264844126 | 0.425047534 |
| 0.290695234 | 0.029770283 | 0.28998633  | 0.456491198 |
| 0.463662655 | 0.430818748 | 0.285661718 | 0.179471382 |
| 0.17655391  | 0.267509678 | 0.244367893 | 0.369687128 |
| 0.245989215 | 0.193854034 | 0.472417123 | 0.104185764 |

|             |             |             |             |
|-------------|-------------|-------------|-------------|
| 0.17895672  | 0.31830502  | 0.167154834 | 0.305036358 |
| 0.363291968 | 0.429304302 | 0.028765549 | 0.425346113 |
| 0.002386069 | 0.429913278 | 0.406714662 | 0.317119037 |
| 0.047397434 | 0.017010102 | 0.195116835 | 0.357994413 |
| 0.462470236 | 0.465336137 | 0.453319881 | 0.450559252 |
| 0.173162526 | 0.332909108 | 0.405565566 | 0.17987999  |
| 0.457703881 | 0.188233413 | 0.132978553 | 0.429832919 |
| 0.453475893 | 0.50293734  | 0.213347206 | 0.286926517 |
| 0.420915097 | 0.468426095 | 0.438469814 | 0.429906093 |
| 0.339321603 | 0.065123807 | 0.432236671 | 0.47311219  |
| 0.426288432 | 0.31856772  | 0.159971781 | 0.436743266 |
| 0.071482597 | 0.408259899 | 0.371353861 | 0.171088186 |
| 0.462178445 | 0.024013467 | 0.222333899 | 0.375133106 |
| 0.280524038 | 0.461532001 | 0.495765995 | 0.212834022 |
| 0.431004417 | 0.02171262  | 0.131897163 | 0.044280463 |
| 0.336716915 | 0.147473133 | 0.488354398 | 0.442781812 |
| 0.27501617  | 0.381731114 | 0.312994903 | 0.002766369 |
| 0.028991093 | 0.233533076 | 0.440359572 | 0.433887372 |
| 0.467469077 | 0.405694422 | 0.230398757 | 0.426165587 |
| 0.435201616 | 0.454141616 | 0.066109703 | 0.125763722 |
| 0.44114937  | 0.230369808 | 0.262642837 | 0.446200836 |
| 0.308253941 | 0.152778288 | 0.144562473 | 0.484745428 |
| 0.433290149 | 0.096951808 | 0.413341857 | 0.431269636 |
| 0.326823444 | 0.355243165 | 0.129980617 | 0.280131982 |
| 0.059407808 | 0.474071617 | 0.03133683  | 0.409318104 |
| 0.276066877 | 0.138900588 | 0.020931543 | 0.314042952 |
| 0.299607514 | 0.416537044 | 0.480024027 | 0.131360925 |
| 0.326723685 | 0.413357929 | 0.383901053 | 0.412539496 |
| 0.00873446  | 0.062641454 | 0.350481771 | 0.469061471 |
| 0.325088581 | 0.469904606 | 0.341462536 | 0.347851176 |
| 0.30056856  | 0.462697483 | 0.005381566 | 0.496808924 |
| 0.507874062 | 0.354720082 | 0.383294259 | 0.44742094  |
| 0.383637204 | 0.446367743 | 0.056239203 | 0.431742179 |
| 0.405901106 | 0.102183646 | 0.460207114 | 0.163503225 |
| 0.457363771 | 0.044137045 | 0.356764497 | 0.433125494 |
| 0.417273846 | 0.01022714  | 0.263887323 | 0.420010449 |
| 0.03251292  | 0.124419737 | 0.468980634 | 0.430447439 |
| 0.395311914 | 0.465335322 | 0.459670755 | 0.3603329   |
| 0.42990521  | 0.285086707 | 0.0177652   | 0.340438022 |
| 0.464727624 | 0.394504764 | 0.444261935 | 0.280181092 |
| 0.388820294 | 0.459654968 | 0.430232815 | 0.223596654 |
| 0.051111493 | 0.362362087 | 0.024349136 | 0.348961021 |
| 0.426289593 | 0.116832053 | 0.416592083 | 0.188164046 |
| 0.075142782 | 0.493595773 | 0.184968795 | 0.269460494 |
| 0.131755831 | 0.387653077 | 0.303846171 | 0.215189475 |
| 0.180395763 | 0.186194522 | 0.366661446 | 0.397336738 |
| 0.047059795 | 0.096035691 | 0.022529128 | 0.346498853 |
| 0.11198622  | 0.308052739 | 0.308693962 | 0.433250293 |
| 0.337955567 | 0.100656152 | 0.37624343  | 0.32783198  |
| 0.124691573 | 0.017255448 | 0.489253219 | 0.439216328 |
| 0.377780185 | 0.186798344 | 0.049645024 | 0.312856372 |
| 0.443779547 | 0.338090052 | 0.340830378 | 0.431093797 |
| 0.041619781 | 0.463033617 | 0.232981098 | 0.12577758  |
| 0.351820865 | 0.269058905 | 0.458581666 | 0.070556544 |



|             |             |             |             |
|-------------|-------------|-------------|-------------|
| 0.447680549 | 0.455610288 | 0.362268974 | 0.191986637 |
| 0.389855923 | 0.446802441 | 0.035880864 | 0.436444857 |
| 0.424910445 | 0.034118568 | 0.498520424 | 0.129571008 |
| 0.024928197 | 0.446589573 | 0.428208286 | 0.085960531 |
| 0.088392337 | 0.326301051 | 0.064000883 | 0.305934908 |
| 0.488915699 | 0.41399588  | 0.427122932 | 0.247398191 |
| 0.042999931 | 0.006466267 | 0.229144197 | 0.434297963 |
| 0.508328567 | 0.478506935 | 0.294413011 | 0.343684304 |
| 0.270852964 | 0.337772717 | 0.194062896 | 0.47065306  |
| 0.265370721 | 0.513428075 | 0.008893857 | 0.440515006 |
| 0.502338225 | 0.33334427  | 0.080274721 | 0.341440962 |
| 0.407623036 | 0.057896964 | 0.269432567 | 0.484692348 |
| 0.449860983 | 0.358560333 | 0.363535433 | 0.458765279 |
| 0.020974566 | 0.056435953 | 0.417259778 | 0.198741589 |
| 0.395287535 | 0.246904381 | 0.054135028 | 0.396287133 |
| 0.043146221 | 0.437274886 | 0.462230553 | 0.066987972 |
| 0.341660474 | 0.393521888 | 0.397485984 | 0.045229658 |
| 0.431266214 | 0.488526973 | 0.513768038 | 0.218326281 |
| 0.451210372 | 0.454970361 | 0.389421362 | 0.096478663 |
| 0.019832906 | 0.504920408 | 0.452279242 | 0.022838116 |
| 0.459756122 | 0.283872959 | 0.009102807 | 0.486628384 |
| 0.222218868 | 0.458795056 | 0.005854228 | 0.120918994 |
| 0.052282812 | 0.457906984 | 0.478101324 | 0.431665041 |
| 0.265092323 | 0.426413631 | 0.010282816 | 0.497007989 |
| 0.471818868 | 0.015435674 | 0.153848668 | 0.43314989  |
| 0.415397122 | 0.521136958 | 0.320873432 | 0.432661916 |
| 0.410863393 | 0.485885237 | 0.248320352 | 0.286703541 |
| 0.440171497 | 0.471631255 | 0.457962386 | 0.461537179 |
| 0.451353694 | 0.438611144 | 0.304990499 | 0.018202073 |
| 0.161055475 | 0.264559761 | 0.303313095 | 0.083031848 |
| 0.383894735 | 0.145471708 | 0.466790159 | 0.462289034 |
| 0.441743844 | 0.00622224  | 0.188598334 | 0.443465438 |
| 0.444788554 | 0.462189562 | 0.035334556 | 0.008802421 |
| 0.011526954 | 0.016395013 | 0.412009573 | 0.275147848 |
| 0.463949932 | 0.236612013 | 0.005565524 | 0.061735143 |
| 0.319865836 | 0.397512735 | 0.485132549 | 0.409259407 |
| 0.459088227 | 0.096724942 | 0.265092271 | 0.436480546 |
| 0.071183773 | 0.386538875 | 0.444917272 | 0.468860397 |
| 0.055726209 | 0.285867144 | 0.439002655 | 0.456891783 |
| 0.070830288 | 0.338551879 | 0.448350456 | 0.310155654 |
| 0.022094955 | 0.090704764 | 0.074874487 | 0.460143667 |
| 0.490594406 | 0.065828244 | 0.027944361 | 0.172030417 |
| 0.120222218 | 0.465704143 | 0.16794837  | 0.475421757 |
| 0.452123931 | 0.445184962 | 0.083057607 | 0.482280781 |
| 0.041598169 | 0.476190078 | 0.334471874 | 0.068560305 |
| 0.344747732 | 0.017593938 | 0.453617722 | 0.142792113 |
| 0.363721903 | 0.452222017 | 0.231571175 | 0.020042682 |
| 0.205976541 | 0.057439613 | 0.45217363  | 0.452728181 |
| 0.043359177 | 0.299886739 | 0.33861364  | 0.454437342 |
| 0.333054202 | 0.431698011 | 0.501293376 | 0.408182967 |
| 0.100370815 | 0.162824946 | 0.446094026 | 0.436992982 |
| 0.286074487 | 0.458222049 | 0.293953753 | 0.503307711 |
| 0.457530395 | 1           | 0.443427851 | 0.383808346 |
| 0.230170408 | 0.444692636 | 0.383196366 | 0.020084638 |

|             |             |             |             |
|-------------|-------------|-------------|-------------|
| 0.397085036 | 0.445946106 | 0.432839956 | 0.150399029 |
| 0.254448104 | 0.398417549 | 0.074725242 | 0.244121014 |
| 0.333304061 | 0.345425207 | 0.1498656   | 0.456076273 |
| 0.448731978 | 0.439991524 | 0.062175502 | 0.068694889 |
| 0.525317332 | 0.445079626 | 0.182951586 | 0.441299523 |
| 0.203105063 | 0.361448356 | 0.460110622 | 0.450757074 |
| 0.425584213 | 0.43449172  | 0.452182068 | 0.392356995 |
| 0.419954744 | 0.302868858 | 0.516103413 | 0.132170583 |
| 0.093445704 | 0.444438069 | 0.091334198 | 0.106133911 |
| 0.155674857 | 0.033008549 | 0.299026713 | 0.446742754 |
| 0.370473675 | 0.38615342  | 0.376703869 | 0.100813898 |
| 0.35215426  | 0.442835607 | 0.385068799 | 0.220761734 |
| 0.078310087 | 0.486305868 | 0.011410906 | 0.065576675 |
| 0.376444589 | 0.450460381 | 0.366614925 | 0.267362545 |
| 0.299236137 | 0.165906407 | 0.314730017 | 0.341895014 |
| 0.299615638 | 0.398494863 | 0.445536747 | 0.050141725 |
| 0.02490113  | 0.460759601 | 0.433558666 | 0.029791906 |
| 0.111644267 | 0.441991752 | 0.36470526  | 0.245841359 |
| 0.026123453 | 0.449386278 | 0.347853097 | 0.447164881 |
| 0.396549689 | 0.08406823  | 0.383490629 | 0.12149771  |
| 0.091797111 | 0.452965848 | 0.422043595 | 0.496008547 |
| 0.398078693 | 0.423760061 | 0.465564841 | 0.441604839 |
| 0.171063576 | 0.425756651 | 0.035507746 | 0.465446906 |
| 0.394414072 |             |             |             |

|             |             |             |             |
|-------------|-------------|-------------|-------------|
| SPRED1      | 0.440066525 | 0.518178833 | 0.420502321 |
| 0.425100388 | 0.44454784  | 0.385387316 | 0.2089577   |
| 0.180389381 | 0.087495169 | 0.004733128 | 0.026739875 |
| 0.466145616 | 0.226031599 | 0.276443482 | 0.334969527 |
| 0.427822015 | 0.150092808 | 0.355332001 | 0.243876044 |
| 0.415404531 | 0.090042111 | 0.415490457 | 0.091189377 |
| 0.315797273 | 0.116101827 | 0.072082616 | 0.291137437 |
| 0.442537654 | 0.08248351  | 0.339983326 | 0.3890102   |
| 0.108600764 | 0.45009942  | 0.528364948 | 0.463888353 |
| 0.52847645  | 0.418663875 | 0.012664855 | 0.303386862 |
| 0.426175936 | 0.457918883 | 0.412813462 | 0.33687036  |
| 0.041330952 | 0.494334253 | 0.248835049 | 0.423926901 |
| 0.226062903 | 0.033466755 | 0.239429182 | 0.443745377 |
| 0.49073483  | 0.457520908 | 0.222107354 | 0.161063215 |
| 0.234431969 | 0.233237362 | 0.312743161 | 0.330179196 |
| 0.231180732 | 0.156860949 | 0.494756134 | 0.086651222 |
| 0.153263676 | 0.247878157 | 0.168437436 | 0.258166626 |
| 0.381545922 | 0.392974897 | 0.017108914 | 0.437820438 |
| 0.002632659 | 0.391652452 | 0.397565141 | 0.342716519 |
| 0.043578254 | 0.022254795 | 0.194221781 | 0.344240453 |
| 0.455419914 | 0.45570545  | 0.477327793 | 0.476663265 |
| 0.198988762 | 0.305655105 | 0.428201985 | 0.178675537 |
| 0.446878708 | 0.181062785 | 0.108940117 | 0.435533704 |
| 0.477513482 | 0.526674083 | 0.217643751 | 0.278250485 |
| 0.438216961 | 0.464963576 | 0.435057673 | 0.450080877 |
| 0.366774833 | 0.057236361 | 0.440346252 | 0.494984909 |
| 0.406061201 | 0.355410365 | 0.163270775 | 0.416585409 |
| 0.061089283 | 0.369713112 | 0.361925916 | 0.17325762  |
| 0.45718486  | 0.017180139 | 0.230587309 | 0.36719688  |
| 0.21959918  | 0.453464753 | 0.522059547 | 0.189593303 |

|             |             |             |             |
|-------------|-------------|-------------|-------------|
| 0.434502128 | 0.020583076 | 0.153998346 | 0.035067007 |
| 0.349764106 | 0.174290669 | 0.501176742 | 0.459705571 |
| 0.235657287 | 0.409544268 | 0.269430745 | 0.001953991 |
| 0.028794475 | 0.194638703 | 0.461313719 | 0.377053445 |
| 0.442534312 | 0.40202359  | 0.246869208 | 0.405895436 |
| 0.468312973 | 0.477598218 | 0.063371508 | 0.095088296 |
| 0.434135891 | 0.196841105 | 0.246256113 | 0.473717683 |
| 0.329833559 | 0.111741768 | 0.131107352 | 0.494528386 |
| 0.414893927 | 0.085677758 | 0.34247035  | 0.426993345 |
| 0.351318873 | 0.386068693 | 0.108320221 | 0.291364986 |
| 0.049094191 | 0.497013726 | 0.031327538 | 0.333983101 |
| 0.29103041  | 0.173641319 | 0.01054408  | 0.25923761  |
| 0.296425083 | 0.450991751 | 0.490231587 | 0.108023185 |
| 0.333702316 | 0.424954383 | 0.329171834 | 0.447983019 |
| 0.010808564 | 0.046420804 | 0.287755886 | 0.491893217 |
| 0.295312642 | 0.479116607 | 0.308237592 | 0.315955034 |
| 0.297803537 | 0.454438782 | 0.003520728 | 0.506041068 |
| 0.530525456 | 0.309272948 | 0.42327019  | 0.439903336 |
| 0.404993466 | 0.454702522 | 0.04587666  | 0.432424231 |
| 0.375722691 | 0.079017902 | 0.474174525 | 0.171425811 |
| 0.461973713 | 0.043050406 | 0.328993366 | 0.461738796 |
| 0.466247775 | 0.009755763 | 0.223986216 | 0.393437755 |
| 0.029430147 | 0.093745969 | 0.437943966 | 0.415398482 |
| 0.394300365 | 0.458585268 | 0.466966133 | 0.389096787 |
| 0.447545177 | 0.23517302  | 0.012219906 | 0.342494126 |
| 0.458285126 | 0.404019274 | 0.435550218 | 0.240628661 |
| 0.352119621 | 0.464179071 | 0.447871288 | 0.217137813 |
| 0.042820006 | 0.314503322 | 0.020207437 | 0.348151405 |
| 0.415863556 | 0.123075762 | 0.417212072 | 0.157438044 |
| 0.077118955 | 0.512459276 | 0.201997171 | 0.297215309 |
| 0.150385386 | 0.425417157 | 0.252976963 | 0.256819413 |
| 0.244964879 | 0.172164924 | 0.380563626 | 0.397468025 |
| 0.035632204 | 0.099700146 | 0.015372615 | 0.421255699 |
| 0.163072978 | 0.378846853 | 0.373265916 | 0.428625199 |
| 0.344920035 | 0.120068832 | 0.408685577 | 0.307970501 |
| 0.121322171 | 0.01524557  | 0.49848648  | 0.417438768 |
| 0.347733813 | 0.15507198  | 0.042602389 | 0.38980928  |
| 0.463622937 | 0.331938727 | 0.272091923 | 0.445276322 |
| 0.027607955 | 0.472549614 | 0.268719996 | 0.131230827 |
| 0.421991757 | 0.27399539  | 0.4518496   | 0.063233132 |
| 0.40364683  | 0.463381824 | 0.324652144 | 0.19600965  |
| 0.400406364 | 0.427026781 | 0.030337589 | 0.423740691 |
| 0.422633071 | 0.03267773  | 0.521095262 | 0.139961089 |
| 0.021603968 | 0.463246721 | 0.467248902 | 0.078625377 |
| 0.081670375 | 0.350313325 | 0.042715591 | 0.306224202 |
| 0.505207618 | 0.426655059 | 0.452170282 | 0.237986124 |
| 0.041096674 | 0.012287122 | 0.229118639 | 0.425293958 |
| 0.522158491 | 0.506237635 | 0.272738601 | 0.40054339  |
| 0.246598018 | 0.359337282 | 0.145994184 | 0.494843697 |
| 0.204836643 | 0.521973381 | 0.0065917   | 0.468386588 |
| 0.525725722 | 0.29867596  | 0.087094684 | 0.313540791 |
| 0.406583072 | 0.045087553 | 0.206491666 | 0.500586278 |
| 0.442813145 | 0.345942438 | 0.368869422 | 0.447920463 |
| 0.014831594 | 0.040813777 | 0.41005855  | 0.211016713 |

|             |             |             |             |
|-------------|-------------|-------------|-------------|
| 0.405708725 | 0.22162298  | 0.066934238 | 0.336608586 |
| 0.043862702 | 0.449575706 | 0.466401895 | 0.061704672 |
| 0.356168944 | 0.310949271 | 0.401757231 | 0.036599231 |
| 0.464387612 | 0.503000107 | 0.529657806 | 0.164596078 |
| 0.469351537 | 0.483382366 | 0.445199284 | 0.083823045 |
| 0.018175743 | 0.526237595 | 0.407878449 | 0.02159325  |
| 0.468764326 | 0.239621874 | 0.014005678 | 0.487461338 |
| 0.186382951 | 0.461581728 | 0.003484483 | 0.091946021 |
| 0.044428117 | 0.469817457 | 0.488258613 | 0.388152333 |
| 0.255070991 | 0.375852425 | 0.006469404 | 0.513968858 |
| 0.492061175 | 0.015387112 | 0.158832421 | 0.469011901 |
| 0.462988489 | 0.52431565  | 0.355712996 | 0.471997914 |
| 0.466854344 | 0.513343751 | 0.250763671 | 0.282571648 |
| 0.454151527 | 0.50166207  | 0.430363024 | 0.448461434 |
| 0.465616057 | 0.447807707 | 0.28814124  | 0.01496468  |
| 0.142762872 | 0.212206134 | 0.328379093 | 0.089810945 |
| 0.332553931 | 0.150283627 | 0.4690628   | 0.471261955 |
| 0.475434005 | 0.004894733 | 0.147146929 | 0.461062769 |
| 0.435421872 | 0.454728756 | 0.020618221 | 0.006701097 |
| 0.007945066 | 0.022296524 | 0.366228042 | 0.257799292 |
| 0.473376699 | 0.255469905 | 0.004359382 | 0.041571669 |
| 0.286049863 | 0.431289794 | 0.505670537 | 0.390093968 |
| 0.463177206 | 0.085001961 | 0.304675991 | 0.407274701 |
| 0.074782945 | 0.345897763 | 0.474904062 | 0.472828317 |
| 0.043167875 | 0.262165894 | 0.388136824 | 0.463017316 |
| 0.090371523 | 0.338065395 | 0.469789499 | 0.336428386 |
| 0.013772659 | 0.086681927 | 0.069946553 | 0.452441061 |
| 0.518664798 | 0.087952759 | 0.037388351 | 0.155227461 |
| 0.124875125 | 0.469729244 | 0.172887242 | 0.487932543 |
| 0.448471153 | 0.446805755 | 0.084571521 | 0.48453595  |
| 0.042818589 | 0.498169067 | 0.37545746  | 0.056607086 |
| 0.301495391 | 0.012407533 | 0.474091777 | 0.172944367 |
| 0.334353019 | 0.409733646 | 0.211079278 | 0.018268465 |
| 0.206064986 | 0.056700995 | 0.470881348 | 0.474134695 |
| 0.036522739 | 0.239841279 | 0.312858052 | 0.417914696 |
| 0.288552863 | 0.451393483 | 0.512654111 | 0.426468061 |
| 0.084389259 | 0.166397904 | 0.416912244 | 0.415811953 |
| 0.242922988 | 0.476826509 | 0.322370149 | 0.516064167 |
| 0.423523493 | 0.443427851 | 1           | 0.356570456 |
| 0.268666964 | 0.413200127 | 0.385496154 | 0.019092844 |
| 0.362547561 | 0.470456271 | 0.36535688  | 0.169779796 |
| 0.278648816 | 0.427185302 | 0.047295036 | 0.189127085 |
| 0.374468412 | 0.313688756 | 0.150780493 | 0.445333138 |
| 0.403126706 | 0.41952134  | 0.038950278 | 0.06549555  |
| 0.537134667 | 0.425758219 | 0.141009457 | 0.440678107 |
| 0.178758325 | 0.362761101 | 0.468772807 | 0.472608193 |
| 0.392517007 | 0.466354051 | 0.441660503 | 0.40511126  |
| 0.419556263 | 0.265508885 | 0.531016869 | 0.084839806 |
| 0.095450862 | 0.44787597  | 0.104093233 | 0.098374428 |
| 0.149354277 | 0.027475547 | 0.341668706 | 0.442462875 |
| 0.424265259 | 0.401967052 | 0.331737646 | 0.082036262 |
| 0.348575876 | 0.384754286 | 0.374517544 | 0.203132783 |
| 0.08285526  | 0.50597083  | 0.008856775 | 0.059164721 |
| 0.432921672 | 0.461168561 | 0.422536305 | 0.253986634 |

|             |             |             |             |
|-------------|-------------|-------------|-------------|
| 0.338209017 | 0.154745999 | 0.316576158 | 0.304766763 |
| 0.346284551 | 0.392422026 | 0.458185337 | 0.031192025 |
| 0.018411306 | 0.47490683  | 0.383663359 | 0.02161103  |
| 0.095067923 | 0.396521935 | 0.306474656 | 0.253359227 |
| 0.023693107 | 0.482717556 | 0.352336609 | 0.449946263 |
| 0.34871276  | 0.066917308 | 0.360666962 | 0.094016574 |
| 0.058062769 | 0.448050023 | 0.425877451 | 0.521952806 |
| 0.373957533 | 0.434297332 | 0.455619188 | 0.461905169 |
| 0.124408062 | 0.41108555  | 0.026100722 | 0.452777171 |
| 0.441367274 |             |             |             |
| SRM         | 0.275810542 | 0.422743305 | 0.183959031 |
| 0.399961205 | 0.216926195 | 0.239603827 | 0.260035731 |
| 0.191053915 | 0.194831982 | 0.031681764 | 0.057514975 |
| 0.218678959 | 0.152071366 | 0.198099486 | 0.225086016 |
| 0.385442754 | 0.122006173 | 0.193878619 | 0.252875592 |
| 0.339398141 | 0.177604596 | 0.335065247 | 0.19810361  |
| 0.166127719 | 0.120066949 | 0.144083545 | 0.19745913  |
| 0.422510211 | 0.155859596 | 0.180166039 | 0.32768767  |
| 0.104944974 | 0.327576857 | 0.384390775 | 0.275027793 |
| 0.354730095 | 0.248759942 | 0.012161643 | 0.233623444 |
| 0.342273722 | 0.346799786 | 0.356412717 | 0.272000165 |
| 0.13374087  | 0.355527661 | 0.265222966 | 0.222714326 |
| 0.186491304 | 0.078021833 | 0.177448027 | 0.345418316 |
| 0.339658376 | 0.232855667 | 0.240670893 | 0.244581439 |
| 0.122279197 | 0.149388685 | 0.107235099 | 0.23603465  |
| 0.250916254 | 0.148788324 | 0.352881991 | 0.214404975 |
| 0.1436557   | 0.225458351 | 0.116549607 | 0.237053127 |
| 0.159577568 | 0.306772693 | 0.067649378 | 0.17757189  |
| 0.010159431 | 0.341060882 | 0.213081991 | 0.154744779 |
| 0.092317884 | 0.052230778 | 0.137672907 | 0.288949706 |
| 0.417988149 | 0.335451557 | 0.40927413  | 0.395251035 |
| 0.135663413 | 0.20766105  | 0.160902519 | 0.202190625 |
| 0.357005553 | 0.234834755 | 0.139751901 | 0.369047917 |
| 0.411905493 | 0.388624491 | 0.191328794 | 0.200230625 |
| 0.361586431 | 0.395108308 | 0.210712042 | 0.222033605 |
| 0.196347887 | 0.065782288 | 0.345157325 | 0.405802012 |
| 0.310246862 | 0.133849775 | 0.164878009 | 0.355160615 |
| 0.117874026 | 0.177296629 | 0.318548996 | 0.084439551 |
| 0.433716038 | 0.103451934 | 0.166574732 | 0.241055995 |
| 0.192202623 | 0.335593965 | 0.377837106 | 0.24933146  |
| 0.189229076 | 0.044134517 | 0.111448928 | 0.067342775 |
| 0.188938923 | 0.06340662  | 0.331825228 | 0.409279681 |
| 0.179037536 | 0.200920963 | 0.266140008 | 0.013796092 |
| 0.055739533 | 0.135216699 | 0.28955937  | 0.195299729 |
| 0.337127734 | 0.256521355 | 0.231204105 | 0.273624883 |
| 0.238950049 | 0.400807838 | 0.048371063 | 0.201363361 |
| 0.231569592 | 0.140045328 | 0.23720149  | 0.221695155 |
| 0.219698756 | 0.205049713 | 0.184983098 | 0.440789321 |
| 0.358316219 | 0.166984095 | 0.167212236 | 0.352269076 |
| 0.218943807 | 0.188079389 | 0.17637849  | 0.200559225 |
| 0.137588089 | 0.337285323 | 0.04756804  | 0.203820985 |
| 0.180779363 | 0.088837732 | 0.034622873 | 0.213267997 |
| 0.212387981 | 0.341589957 | 0.30930653  | 0.167560466 |
| 0.217448314 | 0.294431041 | 0.17301282  | 0.298448959 |

|             |             |             |             |
|-------------|-------------|-------------|-------------|
| 0.052434375 | 0.098676291 | 0.135767279 | 0.406594181 |
| 0.193611543 | 0.391191257 | 0.236737016 | 0.219719708 |
| 0.219930875 | 0.400444349 | 0.004028222 | 0.3665463   |
| 0.388605471 | 0.136699572 | 0.233765347 | 0.230027179 |
| 0.185568264 | 0.416328102 | 0.018655763 | 0.329234035 |
| 0.215336752 | 0.153588358 | 0.437493683 | 0.175517527 |
| 0.337611723 | 0.104583245 | 0.205081949 | 0.311936114 |
| 0.245758797 | 0.02083522  | 0.195960722 | 0.349771662 |
| 0.046105808 | 0.190005895 | 0.323477856 | 0.343785636 |
| 0.279231677 | 0.355012672 | 0.437648607 | 0.177374313 |
| 0.223405268 | 0.232830214 | 0.041177446 | 0.192314587 |
| 0.315814804 | 0.155681377 | 0.367991667 | 0.264694843 |
| 0.160126071 | 0.395937441 | 0.279050775 | 0.151210453 |
| 0.136877421 | 0.23963858  | 0.058110404 | 0.254973373 |
| 0.289838313 | 0.171196984 | 0.192514897 | 0.10828238  |
| 0.097024516 | 0.428939629 | 0.102267006 | 0.108378031 |
| 0.064989376 | 0.210153096 | 0.255531679 | 0.164030363 |
| 0.122319927 | 0.217747155 | 0.21150148  | 0.239694931 |
| 0.128770082 | 0.137942237 | 0.022012769 | 0.120132194 |
| 0.091343601 | 0.143405486 | 0.13652336  | 0.256369948 |
| 0.175472585 | 0.108273651 | 0.219487078 | 0.173455359 |
| 0.140831395 | 0.049076175 | 0.411912995 | 0.330064989 |
| 0.241107518 | 0.247758709 | 0.081217424 | 0.11736482  |
| 0.407455489 | 0.166045407 | 0.14200852  | 0.393718824 |
| 0.064772927 | 0.406569421 | 0.190751837 | 0.155248634 |
| 0.158572252 | 0.231709159 | 0.444805915 | 0.096983932 |
| 0.210419953 | 0.378595848 | 0.223973311 | 0.20958833  |
| 0.30329641  | 0.315107695 | 0.106093496 | 0.281193304 |
| 0.259470502 | 0.079299139 | 0.400026973 | 0.107761794 |
| 0.054489553 | 0.285738415 | 0.296054054 | 0.130131787 |
| 0.12398506  | 0.231813853 | 0.144354815 | 0.232176641 |
| 0.428864841 | 0.360167307 | 0.323741899 | 0.138987862 |
| 0.116571009 | 0.018384155 | 0.14051932  | 0.163889137 |
| 0.362504068 | 0.377390102 | 0.216340504 | 0.18721588  |
| 0.252417646 | 0.217265177 | 0.129842937 | 0.406907569 |
| 0.112379088 | 0.382258256 | 0.031157884 | 0.306270586 |
| 0.354914186 | 0.158233603 | 0.119399787 | 0.248719246 |
| 0.309589049 | 0.146764351 | 0.205159852 | 0.376498639 |
| 0.384886578 | 0.25677666  | 0.237045288 | 0.265298433 |
| 0.088125537 | 0.133996018 | 0.237124366 | 0.101179108 |
| 0.227362969 | 0.252348106 | 0.022380591 | 0.213452658 |
| 0.10883625  | 0.369947591 | 0.371241677 | 0.150933383 |
| 0.198010876 | 0.206195711 | 0.255462605 | 0.111747559 |
| 0.331620849 | 0.356999051 | 0.38690391  | 0.207164454 |
| 0.287102962 | 0.374590223 | 0.170367897 | 0.113280452 |
| 0.043648964 | 0.368130866 | 0.289684779 | 0.057960315 |
| 0.414954909 | 0.140593125 | 0.037717064 | 0.41428517  |
| 0.244102777 | 0.299994035 | 0.029779406 | 0.037446423 |
| 0.055160418 | 0.370368067 | 0.367566719 | 0.318627273 |
| 0.147545594 | 0.266092434 | 0.005807323 | 0.395845501 |
| 0.382244818 | 0.037628565 | 0.118524458 | 0.291870943 |
| 0.25768051  | 0.418627625 | 0.163052778 | 0.338568902 |
| 0.198999665 | 0.35600568  | 0.212051004 | 0.236578346 |
| 0.37630845  | 0.341137076 | 0.347527062 | 0.384624524 |

|             |             |             |             |
|-------------|-------------|-------------|-------------|
| 0.396236659 | 0.294617981 | 0.268550968 | 0.083232171 |
| 0.174998491 | 0.200942368 | 0.169089056 | 0.141150291 |
| 0.213099844 | 0.173695239 | 0.374522265 | 0.402658778 |
| 0.368026034 | 0.023403402 | 0.210035701 | 0.303273738 |
| 0.404147144 | 0.439084999 | 0.039879888 | 0.016342831 |
| 0.008174639 | 0.03964028  | 0.257080143 | 0.196094387 |
| 0.397416613 | 0.12651505  | 0.027950236 | 0.125152748 |
| 0.242254806 | 0.22689928  | 0.38599554  | 0.358399383 |
| 0.311881323 | 0.130203873 | 0.176649347 | 0.362897323 |
| 0.112009053 | 0.198394697 | 0.392928738 | 0.388517649 |
| 0.067846606 | 0.211089996 | 0.172881285 | 0.445166922 |
| 0.029591801 | 0.215806228 | 0.230431143 | 0.229841681 |
| 0.021673247 | 0.117123395 | 0.131025817 | 0.36572567  |
| 0.338602026 | 0.091945361 | 0.060137383 | 0.081794935 |
| 0.185672242 | 0.382772753 | 0.18778987  | 0.433939107 |
| 0.391806378 | 0.41388286  | 0.07748655  | 0.389607455 |
| 0.098662251 | 0.350841039 | 0.170383119 | 0.071037709 |
| 0.181710818 | 0.042884334 | 0.321224939 | 0.137651318 |
| 0.186253268 | 0.285337488 | 0.199701405 | 0.03477023  |
| 0.097419941 | 0.090550345 | 0.426867373 | 0.369073139 |
| 0.046068688 | 0.265911537 | 0.220311737 | 0.283965296 |
| 0.212743359 | 0.368035917 | 0.376023256 | 0.160918904 |
| 0.194537795 | 0.052852615 | 0.344125982 | 0.240376281 |
| 0.187109648 | 0.413861931 | 0.220483166 | 0.411998913 |
| 0.301090419 | 0.383808346 | 0.356570456 | 1           |
| 0.1234263   | 0.225200344 | 0.303978254 | 0.072228944 |
| 0.252221708 | 0.39083737  | 0.214145283 | 0.159261578 |
| 0.212903145 | 0.150734893 | 0.106082506 | 0.081127742 |
| 0.119307638 | 0.220812644 | 0.182129131 | 0.413753186 |
| 0.243591888 | 0.258714266 | 0.080185544 | 0.131654926 |
| 0.423661963 | 0.366295228 | 0.223084352 | 0.322985719 |
| 0.178721093 | 0.255760499 | 0.326948824 | 0.313431572 |
| 0.191232078 | 0.337189038 | 0.348861327 | 0.282656027 |
| 0.356012769 | 0.275665743 | 0.396296038 | 0.115772385 |
| 0.11452396  | 0.196297029 | 0.148843817 | 0.121033148 |
| 0.194175729 | 0.070607711 | 0.116374381 | 0.331268776 |
| 0.126659865 | 0.286874729 | 0.153665631 | 0.137237223 |
| 0.202976523 | 0.156644454 | 0.244412563 | 0.230650814 |
| 0.141401552 | 0.379076168 | 0.030400324 | 0.094760679 |
| 0.128612518 | 0.343712685 | 0.172384933 | 0.210648578 |
| 0.145817038 | 0.108609879 | 0.237652843 | 0.176691394 |
| 0.147121623 | 0.148800967 | 0.345209575 | 0.107790847 |
| 0.077480113 | 0.42239928  | 0.179904259 | 0.036135978 |
| 0.092108833 | 0.222300823 | 0.17206202  | 0.248853984 |
| 0.039530633 | 0.34532009  | 0.189489453 | 0.212379725 |
| 0.253403763 | 0.122483114 | 0.272790816 | 0.108744968 |
| 0.127155664 | 0.341097215 | 0.18270085  | 0.367010774 |
| 0.174066502 | 0.385528381 | 0.326417003 | 0.308140557 |
| 0.106761009 | 0.141109121 | 0.120079057 | 0.384018774 |
| 0.154178003 |             |             |             |
| SSR4        | 0.2052446   | 0.267463136 | 0.142207436 |
| 0.223599847 | 0.22033859  | 0.088027122 | 0.067417954 |
| 0.015627915 | 0.01127687  | 0.001995116 | 0.023400776 |
| 0.225659415 | 0.034136907 | 0.041102017 | 0.025979739 |

|             |             |             |             |
|-------------|-------------|-------------|-------------|
| 0.29638639  | 0.119644618 | 0.068178894 | 0.125204549 |
| 0.211961104 | 0.014408264 | 0.314800594 | 0.031544618 |
| 0.122464717 | 0.11105645  | 0.075905832 | 0.13359526  |
| 0.253291836 | 0.07975529  | 0.060460855 | 0.146792476 |
| 0.086358527 | 0.226613831 | 0.233315087 | 0.308289791 |
| 0.242288289 | 0.156531647 | 0.008658626 | 0.037976361 |
| 0.184127674 | 0.246700718 | 0.20778819  | 0.173150395 |
| 0.021160148 | 0.187867331 | 0.109468644 | 0.259433981 |
| 0.007501751 | 0.041921419 | 0.01909819  | 0.16796166  |
| 0.204138553 | 0.170654534 | 0.028724984 | 0.046365378 |
| 0.030811113 | 0.024329565 | 0.080170151 | 0.079491133 |
| 0.107507552 | 0.012355639 | 0.228213122 | 0.008435159 |
| 0.015527921 | 0.046592039 | 0.135430411 | 0.060095443 |
| 0.139987934 | 0.124446978 | 0.005537188 | 0.193205544 |
| 0.000641973 | 0.193838503 | 0.266466917 | 0.101927366 |
| 0.083714804 | 0.01388932  | 0.163773246 | 0.144931832 |
| 0.273130553 | 0.21491901  | 0.345989674 | 0.335792724 |
| 0.052747382 | 0.190128138 | 0.23760232  | 0.087485483 |
| 0.211816628 | 0.061762135 | 0.010979096 | 0.345165266 |
| 0.340626224 | 0.269304421 | 0.078385114 | 0.240311144 |
| 0.192756674 | 0.226414469 | 0.099299512 | 0.152040118 |
| 0.06411725  | 0.061398802 | 0.195382878 | 0.318107245 |
| 0.152590312 | 0.21871594  | 0.164406948 | 0.18265558  |
| 0.074355208 | 0.023474487 | 0.214238888 | 0.033675496 |
| 0.275923563 | 0.007927276 | 0.238505194 | 0.133187375 |
| 0.035078692 | 0.20286737  | 0.277413157 | 0.09068315  |
| 0.20881933  | 0.012276411 | 0.032429103 | 0.055713004 |
| 0.02290608  | 0.088714184 | 0.186658871 | 0.263006658 |
| 0.021364532 | 0.071314073 | 0.072388463 | 0.01327665  |
| 0.057120962 | 0.037741102 | 0.248142611 | 0.112631886 |
| 0.223123868 | 0.177573603 | 0.095725831 | 0.13858524  |
| 0.2296096   | 0.35214827  | 0.000737197 | 0.030758177 |
| 0.133159994 | 0.061522967 | 0.189675044 | 0.202557354 |
| 0.190642234 | 0.023768771 | 0.080046203 | 0.30393853  |
| 0.160621419 | 0.068076372 | 0.049131839 | 0.295108319 |
| 0.045230117 | 0.287713866 | 0.061398636 | 0.084472938 |
| 0.019741617 | 0.233787663 | 0.089173095 | 0.061709463 |
| 0.021901504 | 0.074015951 | 0.005068925 | 0.047456876 |
| 0.016021173 | 0.222234795 | 0.190290418 | 0.081669794 |
| 0.11905856  | 0.283924671 | 0.057259996 | 0.18557767  |
| 0.007496909 | 0.01457589  | 0.033796615 | 0.299926076 |
| 0.0575698   | 0.318036551 | 0.071497119 | 0.111704108 |
| 0.230675461 | 0.269593652 | 0.001100359 | 0.203555617 |
| 0.270407335 | 0.033355292 | 0.207439498 | 0.249115771 |
| 0.133458973 | 0.252372275 | 0.002520127 | 0.297492326 |
| 0.10854234  | 0.059351809 | 0.339221756 | 0.168555365 |
| 0.215763055 | 0.069953403 | 0.055772388 | 0.291079921 |
| 0.244613494 | 0.007328247 | 0.027867202 | 0.169789403 |
| 0.068272315 | 0.009578397 | 0.205627479 | 0.196919782 |
| 0.156754441 | 0.284757864 | 0.33487794  | 0.118926416 |
| 0.188429012 | 0.060707974 | 0.010765076 | 0.242880519 |
| 0.252941282 | 0.027870285 | 0.172246223 | 0.039813217 |
| 0.068792443 | 0.218731817 | 0.206794571 | 0.011664458 |
| 0.037490813 | 0.079238254 | 0.00279968  | 0.150953125 |



|             |             |             |             |
|-------------|-------------|-------------|-------------|
| 0.176478762 | 0.034609292 | 0.119315655 | 0.046253129 |
| 0.112893433 | 0.29935434  | 0.163815567 | 0.158212967 |
| 0.115170634 | 0.15498171  | 0.093722065 | 0.044847272 |
| 0.046583192 | 0.073496859 | 0.104111428 | 0.089938515 |
| 0.009999427 | 0.09178302  | 0.017123911 | 0.09637888  |
| 0.028023085 | 0.079481015 | 0.070252269 | 0.162052413 |
| 0.045986665 | 0.022529749 | 0.168766298 | 0.075738856 |
| 0.07832992  | 0.052721421 | 0.260949756 | 0.241736817 |
| 0.091461277 | 0.044478705 | 0.068996618 | 0.020588268 |
| 0.273714962 | 0.048724781 | 0.020804637 | 0.226964823 |
| 0.007615483 | 0.331662299 | 0.052857185 | 0.14497097  |
| 0.167842866 | 0.151269209 | 0.275348031 | 0.004218601 |
| 0.122473507 | 0.212899442 | 0.189141624 | 0.112294379 |
| 0.155168548 | 0.18586462  | 0.00880184  | 0.153874371 |
| 0.154841368 | 0.061319501 | 0.294269562 | 0.107301502 |
| 0.065726046 | 0.298647052 | 0.24096648  | 0.117744319 |
| 0.088505717 | 0.110140917 | 0.00531732  | 0.263137908 |
| 0.281509143 | 0.321162438 | 0.208279839 | 0.137009742 |
| 0.037806134 | 0.014980249 | 0.199397366 | 0.173498357 |
| 0.218547532 | 0.307641353 | 0.195586729 | 0.192787491 |
| 0.155322397 | 0.087023897 | 0.004329412 | 0.304215686 |
| 0.026476669 | 0.251142324 | 0.023951849 | 0.308146157 |
| 0.230510655 | 0.046011074 | 0.102962231 | 0.080175488 |
| 0.146998894 | 0.031193464 | 0.054786487 | 0.227737701 |
| 0.211656596 | 0.093151101 | 0.070907543 | 0.249711652 |
| 0.004694363 | 0.008613812 | 0.196113635 | 0.109291798 |
| 0.081199408 | 0.086900396 | 0.035986461 | 0.033689597 |
| 0.021088664 | 0.206339434 | 0.318516657 | 0.029603223 |
| 0.078905599 | 0.028226888 | 0.323166831 | 0.044055251 |
| 0.298711999 | 0.269907654 | 0.23755603  | 0.041413275 |
| 0.26596566  | 0.273141415 | 0.226839401 | 0.107097629 |
| 0.06893224  | 0.253961571 | 0.135253826 | 0.006057373 |
| 0.318700092 | 0.024615738 | 0.009963806 | 0.234316082 |
| 0.090334519 | 0.167266003 | 3.41E-05    | 0.011762845 |
| 0.05866799  | 0.350287419 | 0.199463149 | 0.146961889 |
| 0.01769047  | 0.177648277 | 0.012940657 | 0.312994094 |
| 0.232176077 | 0.04676636  | 0.10422021  | 0.245627655 |
| 0.262978102 | 0.252056582 | 0.165470342 | 0.296227539 |
| 0.233368312 | 0.24023804  | 0.018411306 | 0.219587239 |
| 0.215311486 | 0.275124796 | 0.176225026 | 0.194110053 |
| 0.287688705 | 0.321480985 | 0.162099516 | 0.013317042 |
| 0.019711301 | 0.028113747 | 0.028994431 | 0.017460382 |
| 0.066458827 | 0.073248762 | 0.244907122 | 0.329175001 |
| 0.308932493 | 0.029337221 | 0.015554627 | 0.217953074 |
| 0.20853455  | 0.266085967 | 0.009831068 | 0.001349368 |
| 0.00127888  | 0.022246518 | 0.123109413 | 0.180400691 |
| 0.270818548 | 0.008258943 | 0.016287835 | 0.005090362 |
| 0.024955343 | 0.299533911 | 0.251652791 | 0.251767505 |
| 0.279067574 | 0.090466913 | 0.031083208 | 0.23975801  |
| 0.049545366 | 0.085327973 | 0.304068169 | 0.20352297  |
| 0.049676993 | 0.16348284  | 0.091999919 | 0.286256177 |
| 0.06391261  | 0.27025828  | 0.24696208  | 0.048652306 |
| 0.013096534 | 0.090775318 | 0.065696006 | 0.317272086 |
| 0.236161501 | 0.043420131 | 0.03402827  | 0.004151172 |

|             |             |             |             |
|-------------|-------------|-------------|-------------|
| 0.045070847 | 0.299643187 | 0.049426786 | 0.327619231 |
| 0.219354616 | 0.308595447 | 0.091845174 | 0.208847104 |
| 0.027076569 | 0.221618485 | 0.240121356 | 0.001741987 |
| 0.102652833 | 0.018266157 | 0.259519507 | 0.020160719 |
| 0.048556355 | 0.151177385 | 0.0226785   | 0.06848966  |
| 0.050095674 | 0.085217682 | 0.318568741 | 0.345365329 |
| 0.05144199  | 0.049034064 | 0.182975151 | 0.212097852 |
| 0.0548002   | 0.25959206  | 0.215540096 | 0.083186633 |
| 0.025641125 | 0.049823219 | 0.1915787   | 0.133103195 |
| 0.031833336 | 0.353130969 | 0.073674607 | 0.298694363 |
| 0.15388007  | 0.230170408 | 0.268666964 | 0.1234263   |
| 1           | 0.1031946   | 0.130237784 | 0.003687769 |
| 0.15235761  | 0.311560718 | 0.092153754 | 0.046757328 |
| 0.175341454 | 0.21616409  | 0.013929263 | 0.007207862 |
| 0.191273361 | 0.062668453 | 0.039341834 | 0.30905426  |
| 0.137558577 | 0.138751163 | 0.009044474 | 0.053203322 |
| 0.278556736 | 0.185354691 | 0.006463671 | 0.176790013 |
| 0.13679998  | 0.191299701 | 0.282556184 | 0.332842388 |
| 0.05373375  | 0.257834468 | 0.20617381  | 0.142970497 |
| 0.172189037 | 0.111916354 | 0.243255886 | 0.002463397 |
| 0.025340346 | 0.18971161  | 0.043976784 | 0.148321984 |
| 0.106086614 | 0.032150971 | 0.091143969 | 0.31154371  |
| 0.118210525 | 0.254745972 | 0.021469121 | 0.018405777 |
| 0.26394365  | 0.082900178 | 0.22629299  | 0.043850033 |
| 0.025340698 | 0.223783578 | 0.007404804 | 0.088795386 |
| 0.15261613  | 0.227859677 | 0.210892758 | 0.117669584 |
| 0.085994936 | 0.09675061  | 0.200141505 | 0.04480212  |
| 0.054083679 | 0.023153308 | 0.214185862 | 0.003816034 |
| 0.009328787 | 0.340158478 | 0.067386001 | 0.02070457  |
| 0.052936581 | 0.116277334 | 0.062633909 | 0.041808625 |
| 0.072039658 | 0.286251944 | 0.049728141 | 0.205052028 |
| 0.104411019 | 0.056830803 | 0.119428299 | 0.011106303 |
| 0.011510357 | 0.185427397 | 0.204540098 | 0.263323336 |
| 0.16976718  | 0.301540452 | 0.160855897 | 0.234817215 |
| 0.013833821 | 0.132587838 | 0.01094437  | 0.249623022 |
| 0.083064122 |             |             |             |
| ST3GAL4     | 0.339972293 | 0.481368663 | 0.222456285 |
| 0.340946307 | 0.220622616 | 0.243668772 | 0.162103217 |
| 0.201630519 | 0.072257773 | 0.005536926 | 0.010420109 |
| 0.248990013 | 0.104961161 | 0.186631253 | 0.208906893 |
| 0.327769877 | 0.07361892  | 0.262641447 | 0.177920274 |
| 0.308911759 | 0.098039933 | 0.262668838 | 0.088740602 |
| 0.148412384 | 0.055215011 | 0.04628778  | 0.131347484 |
| 0.412684849 | 0.055866427 | 0.203897163 | 0.332176583 |
| 0.074355627 | 0.379600748 | 0.480698433 | 0.252223301 |
| 0.458399855 | 0.323232795 | 0.013775709 | 0.180432001 |
| 0.418097817 | 0.320481584 | 0.317851837 | 0.20888366  |
| 0.039666765 | 0.472869991 | 0.169166931 | 0.217765538 |
| 0.186054476 | 0.020704388 | 0.209032231 | 0.446815831 |
| 0.427318018 | 0.216696398 | 0.212799108 | 0.124659234 |
| 0.085265141 | 0.178578843 | 0.102644466 | 0.283226864 |
| 0.156837848 | 0.155818694 | 0.428784663 | 0.076425158 |
| 0.098554911 | 0.226047263 | 0.089838028 | 0.210299261 |
| 0.157976037 | 0.363483288 | 0.032361144 | 0.221712825 |

|             |             |             |             |
|-------------|-------------|-------------|-------------|
| 0.003257111 | 0.30098199  | 0.215680405 | 0.13321936  |
| 0.033429913 | 0.014072458 | 0.108140417 | 0.212449791 |
| 0.424269226 | 0.442186474 | 0.4074521   | 0.408772492 |
| 0.101844151 | 0.185795695 | 0.185228827 | 0.111051003 |
| 0.408303228 | 0.127454585 | 0.113731105 | 0.311889204 |
| 0.416261421 | 0.460804942 | 0.12167672  | 0.15303032  |
| 0.350063592 | 0.461899919 | 0.235742511 | 0.219132094 |
| 0.16245235  | 0.035047028 | 0.405498677 | 0.441681956 |
| 0.393758469 | 0.141683815 | 0.092527031 | 0.378969624 |
| 0.050122939 | 0.257930449 | 0.227379476 | 0.104256949 |
| 0.440559394 | 0.02311253  | 0.116404859 | 0.215547597 |
| 0.184579244 | 0.380730539 | 0.449664821 | 0.145055891 |
| 0.227964007 | 0.018672396 | 0.061130406 | 0.03105046  |
| 0.215300298 | 0.063630052 | 0.44665119  | 0.404549637 |
| 0.193796191 | 0.183840322 | 0.207435645 | 0.002794552 |
| 0.019360746 | 0.131851539 | 0.35141675  | 0.258046369 |
| 0.346768927 | 0.350135792 | 0.124418093 | 0.340182892 |
| 0.251436954 | 0.396746406 | 0.059899961 | 0.098503666 |
| 0.255011034 | 0.125685192 | 0.159312246 | 0.230333999 |
| 0.166086961 | 0.131779062 | 0.099941539 | 0.464311682 |
| 0.442942165 | 0.071896171 | 0.253570939 | 0.306933426 |
| 0.168732836 | 0.178975407 | 0.096460879 | 0.171549609 |
| 0.048366708 | 0.426388049 | 0.01903036  | 0.270874336 |
| 0.130652008 | 0.068567277 | 0.021489605 | 0.223293877 |
| 0.198350968 | 0.355683632 | 0.43115401  | 0.09379731  |
| 0.193248851 | 0.23321901  | 0.243377192 | 0.295147578 |
| 0.006102568 | 0.056625198 | 0.227207394 | 0.445133222 |
| 0.233718969 | 0.442288853 | 0.213479357 | 0.185782042 |
| 0.166460916 | 0.384520297 | 0.004560976 | 0.470589082 |
| 0.46331176  | 0.232181586 | 0.207047795 | 0.237074034 |
| 0.172047107 | 0.393959954 | 0.045190106 | 0.297139692 |
| 0.307417114 | 0.076785611 | 0.440601555 | 0.095196258 |
| 0.433087715 | 0.029860686 | 0.217803383 | 0.329148343 |
| 0.288214716 | 0.009674586 | 0.189208922 | 0.300364536 |
| 0.018341457 | 0.102031371 | 0.345617114 | 0.285486379 |
| 0.211946304 | 0.355051986 | 0.423676835 | 0.16124469  |
| 0.228626491 | 0.208264847 | 0.014908557 | 0.180044222 |
| 0.356000516 | 0.172109994 | 0.440716296 | 0.196448772 |
| 0.236481041 | 0.447700882 | 0.342745128 | 0.100994051 |
| 0.040469299 | 0.224946046 | 0.030517898 | 0.188924535 |
| 0.358401675 | 0.078032029 | 0.197454075 | 0.114191734 |
| 0.045249243 | 0.463818318 | 0.084598763 | 0.116249706 |
| 0.055689266 | 0.206427829 | 0.206624776 | 0.12587633  |
| 0.093816385 | 0.11273249  | 0.178335755 | 0.199514431 |
| 0.045323071 | 0.062580182 | 0.013231201 | 0.161255047 |
| 0.063657922 | 0.162053354 | 0.163035424 | 0.307467099 |
| 0.196425598 | 0.069212241 | 0.204832869 | 0.155126203 |
| 0.07317674  | 0.013355541 | 0.464907139 | 0.297039326 |
| 0.319294415 | 0.132199872 | 0.035341898 | 0.158135369 |
| 0.406025364 | 0.200086282 | 0.220705807 | 0.418111693 |
| 0.038148572 | 0.416832366 | 0.12912591  | 0.074602742 |
| 0.169330451 | 0.164889413 | 0.421575297 | 0.052930285 |
| 0.252160109 | 0.44378178  | 0.207935715 | 0.106056086 |
| 0.389258568 | 0.286312607 | 0.035640265 | 0.354902551 |

|             |             |             |             |
|-------------|-------------|-------------|-------------|
| 0.342605294 | 0.02572811  | 0.464456064 | 0.0708651   |
| 0.017861512 | 0.289401144 | 0.292580087 | 0.054933841 |
| 0.055636237 | 0.178404916 | 0.063946984 | 0.169288468 |
| 0.464991854 | 0.290723881 | 0.323517457 | 0.12198806  |
| 0.033246236 | 0.004949224 | 0.117085549 | 0.220593292 |
| 0.474459454 | 0.436239546 | 0.177036989 | 0.173096143 |
| 0.172323706 | 0.159968415 | 0.146981508 | 0.44062077  |
| 0.153948456 | 0.481634396 | 0.008250992 | 0.309224171 |
| 0.45420814  | 0.217999061 | 0.046351218 | 0.210287743 |
| 0.375210843 | 0.046618541 | 0.190568882 | 0.459715844 |
| 0.402086702 | 0.189455328 | 0.187126123 | 0.288192525 |
| 0.023899895 | 0.047075422 | 0.214234252 | 0.088734385 |
| 0.19854191  | 0.144015179 | 0.023192739 | 0.250741687 |
| 0.032509674 | 0.424102179 | 0.38470173  | 0.041327666 |
| 0.185626479 | 0.253971097 | 0.214023603 | 0.035620591 |
| 0.357721271 | 0.443267978 | 0.48257909  | 0.16356561  |
| 0.336459947 | 0.41438246  | 0.172506619 | 0.061280006 |
| 0.01311963  | 0.460114561 | 0.327892058 | 0.018724956 |
| 0.413785292 | 0.202096394 | 0.007726284 | 0.476054707 |
| 0.152349411 | 0.42995555  | 0.014626094 | 0.061064197 |
| 0.030784163 | 0.374493435 | 0.44793099  | 0.313961885 |
| 0.166142918 | 0.253087452 | 0.004604883 | 0.458605412 |
| 0.45261876  | 0.01038708  | 0.07712383  | 0.328714638 |
| 0.283253114 | 0.50122158  | 0.146867176 | 0.353370449 |
| 0.213704397 | 0.43704644  | 0.164360539 | 0.159657104 |
| 0.39113103  | 0.415063881 | 0.372618359 | 0.460015464 |
| 0.397576647 | 0.2737734   | 0.186687426 | 0.016415705 |
| 0.076902077 | 0.192467081 | 0.155623461 | 0.040806447 |
| 0.259703241 | 0.080736649 | 0.455566637 | 0.397494339 |
| 0.403226355 | 0.005378046 | 0.146070995 | 0.352229001 |
| 0.432745187 | 0.448986649 | 0.026384364 | 0.011927582 |
| 0.009600857 | 0.00927204  | 0.245979395 | 0.153949947 |
| 0.436235823 | 0.145135251 | 0.005692032 | 0.064625202 |
| 0.213351688 | 0.199739354 | 0.451735269 | 0.288500124 |
| 0.34155934  | 0.063715647 | 0.151702846 | 0.321885206 |
| 0.038933738 | 0.290462526 | 0.413498212 | 0.456309259 |
| 0.035685504 | 0.15392319  | 0.264451978 | 0.443724779 |
| 0.026035526 | 0.186035294 | 0.264600021 | 0.173506172 |
| 0.014122145 | 0.052931179 | 0.043380489 | 0.352599001 |
| 0.437930079 | 0.040203559 | 0.018946091 | 0.136724148 |
| 0.082424871 | 0.407899423 | 0.110934367 | 0.452505654 |
| 0.399891346 | 0.375251946 | 0.04182917  | 0.460377929 |
| 0.02610486  | 0.444097806 | 0.160160818 | 0.056398041 |
| 0.205226105 | 0.015345035 | 0.412379026 | 0.061592761 |
| 0.231205298 | 0.331251087 | 0.111255588 | 0.01172465  |
| 0.091207564 | 0.038481054 | 0.406863795 | 0.368363981 |
| 0.025340534 | 0.195267168 | 0.196377565 | 0.285940994 |
| 0.230554043 | 0.327438899 | 0.472223736 | 0.214187428 |
| 0.07486928  | 0.074948587 | 0.348202149 | 0.318043587 |
| 0.198202819 | 0.417921371 | 0.142633798 | 0.470729555 |
| 0.353071731 | 0.444692636 | 0.413200127 | 0.225200344 |
| 0.1031946   | 1           | 0.272532934 | 0.02332526  |
| 0.243513607 | 0.373590118 | 0.266039677 | 0.081416104 |
| 0.136489823 | 0.17916773  | 0.056795816 | 0.172951843 |

|             |             |             |             |
|-------------|-------------|-------------|-------------|
| 0.145114768 | 0.220807035 | 0.093723983 | 0.383772377 |
| 0.295382166 | 0.335365709 | 0.055346953 | 0.041097784 |
| 0.496064489 | 0.437121426 | 0.158130961 | 0.304077412 |
| 0.125579308 | 0.19043982  | 0.352688819 | 0.328526759 |
| 0.207798147 | 0.364843979 | 0.384179064 | 0.28500347  |
| 0.422032799 | 0.190459965 | 0.480687829 | 0.142046962 |
| 0.057337898 | 0.248717571 | 0.058347707 | 0.063076089 |
| 0.103582776 | 0.022489581 | 0.128839851 | 0.309518965 |
| 0.168076732 | 0.222842966 | 0.215709094 | 0.068480894 |
| 0.183960442 | 0.244141516 | 0.215255013 | 0.156967852 |
| 0.056356463 | 0.45304302  | 0.007951129 | 0.043444284 |
| 0.17316058  | 0.352097073 | 0.170965436 | 0.159677909 |
| 0.134179279 | 0.083816562 | 0.178347457 | 0.235804023 |
| 0.16583079  | 0.220674794 | 0.358967552 | 0.053353302 |
| 0.025707582 | 0.431447526 | 0.270909964 | 0.019390615 |
| 0.051856977 | 0.269936364 | 0.223927612 | 0.132641182 |
| 0.015099936 | 0.397997386 | 0.1942505   | 0.223001806 |
| 0.243220918 | 0.061748641 | 0.382625289 | 0.109127668 |
| 0.075498708 | 0.446940308 | 0.207342212 | 0.450194862 |
| 0.205008771 | 0.318838674 | 0.44829594  | 0.357832353 |
| 0.127735525 | 0.208744187 | 0.035244044 | 0.407502315 |
| 0.194279816 |             |             |             |

ST3GAL6 0.25993478

0.464662284

0.203180003

|             |             |             |             |
|-------------|-------------|-------------|-------------|
| 0.363198581 | 0.267510987 | 0.303041835 | 0.276494357 |
| 0.221806628 | 0.116951569 | 0.036143578 | 0.046186928 |
| 0.233817153 | 0.20106641  | 0.304737863 | 0.258267607 |
| 0.304409869 | 0.11410356  | 0.20907973  | 0.242803707 |
| 0.29541835  | 0.208093291 | 0.277654013 | 0.14797079  |
| 0.143917401 | 0.086147313 | 0.100572907 | 0.16903495  |
| 0.38967247  | 0.106217875 | 0.320715865 | 0.322357508 |
| 0.06808959  | 0.326987224 | 0.442046108 | 0.267864759 |
| 0.420857122 | 0.241770013 | 0.011523133 | 0.32930339  |
| 0.343057552 | 0.303203368 | 0.312061943 | 0.293463176 |
| 0.099334904 | 0.437630706 | 0.281804879 | 0.217197831 |
| 0.215112233 | 0.053565109 | 0.271612832 | 0.409683438 |
| 0.425003376 | 0.282015888 | 0.267913255 | 0.248580596 |
| 0.199626309 | 0.268972418 | 0.143623863 | 0.276313901 |
| 0.264788183 | 0.251382417 | 0.419167906 | 0.175122571 |
| 0.155820398 | 0.251965716 | 0.093544681 | 0.284356087 |
| 0.168161653 | 0.321442956 | 0.037814055 | 0.191469967 |
| 0.01805658  | 0.288185562 | 0.211012095 | 0.155928018 |
| 0.054502095 | 0.057895499 | 0.113388968 | 0.327329609 |
| 0.393920262 | 0.359209531 | 0.391206338 | 0.387191997 |
| 0.153122191 | 0.186802257 | 0.189838541 | 0.195660592 |
| 0.355580098 | 0.266464797 | 0.113988539 | 0.298340793 |
| 0.399001964 | 0.443112478 | 0.153801533 | 0.165190014 |
| 0.390374699 | 0.434862036 | 0.275733925 | 0.284668263 |
| 0.220523625 | 0.029118613 | 0.405069586 | 0.423379344 |
| 0.345305361 | 0.144860285 | 0.12749822  | 0.367515846 |
| 0.072454794 | 0.238961975 | 0.296459088 | 0.104866643 |
| 0.409848603 | 0.056980857 | 0.138417373 | 0.331534385 |
| 0.147952958 | 0.329210136 | 0.420193887 | 0.233780215 |
| 0.223923839 | 0.034824384 | 0.082922938 | 0.032474424 |
| 0.25323036  | 0.056439689 | 0.41769346  | 0.422355792 |

|             |             |             |             |
|-------------|-------------|-------------|-------------|
| 0.256773629 | 0.24806972  | 0.274313616 | 0.004266421 |
| 0.030350961 | 0.099838116 | 0.318793995 | 0.226389982 |
| 0.297760441 | 0.268117375 | 0.231583201 | 0.306570195 |
| 0.238932449 | 0.381515722 | 0.089039234 | 0.149865018 |
| 0.292397448 | 0.102652889 | 0.215930032 | 0.274070653 |
| 0.219271143 | 0.173854742 | 0.161107274 | 0.440002774 |
| 0.416374705 | 0.133139794 | 0.224360974 | 0.28150166  |
| 0.316330139 | 0.20473677  | 0.139474375 | 0.272862868 |
| 0.125311786 | 0.387582008 | 0.023332506 | 0.250621045 |
| 0.175123828 | 0.097251898 | 0.014073693 | 0.284266898 |
| 0.29308488  | 0.391104644 | 0.383122878 | 0.118630278 |
| 0.290906157 | 0.268570839 | 0.261453638 | 0.331867771 |
| 0.04815029  | 0.056480001 | 0.216893933 | 0.439990387 |
| 0.271652803 | 0.386723908 | 0.241375675 | 0.18489921  |
| 0.200507453 | 0.349939247 | 0.001355564 | 0.437317987 |
| 0.433916313 | 0.228128983 | 0.299906923 | 0.229873888 |
| 0.209227142 | 0.403264078 | 0.022834589 | 0.281140499 |
| 0.244990829 | 0.097072296 | 0.416379273 | 0.150616222 |
| 0.383897037 | 0.067199874 | 0.304722093 | 0.297114469 |
| 0.275070532 | 0.013840483 | 0.296759453 | 0.317950904 |
| 0.019410367 | 0.220512056 | 0.289694003 | 0.306115924 |
| 0.299849394 | 0.304562624 | 0.400917599 | 0.19778605  |
| 0.279982245 | 0.237763084 | 0.01606884  | 0.180936386 |
| 0.289248984 | 0.2128435   | 0.426170637 | 0.265377391 |
| 0.226953893 | 0.435586195 | 0.296711528 | 0.197671429 |
| 0.095763104 | 0.305439588 | 0.05513507  | 0.247761913 |
| 0.293030167 | 0.221595837 | 0.226762927 | 0.083100017 |
| 0.063699784 | 0.453245272 | 0.080706064 | 0.107635859 |
| 0.050057195 | 0.31789772  | 0.2414933   | 0.295744461 |
| 0.200148269 | 0.160450907 | 0.212700546 | 0.267415479 |
| 0.123591525 | 0.12187129  | 0.006070361 | 0.221040744 |
| 0.177294227 | 0.270216181 | 0.278578735 | 0.289962954 |
| 0.279316129 | 0.153461542 | 0.273718389 | 0.142264989 |
| 0.088020999 | 0.023941206 | 0.446348668 | 0.271052863 |
| 0.293475125 | 0.19488245  | 0.045374809 | 0.231399443 |
| 0.428390973 | 0.286581249 | 0.217443965 | 0.442594766 |
| 0.032223631 | 0.383842801 | 0.263782573 | 0.121758713 |
| 0.229198575 | 0.25942869  | 0.403136708 | 0.088027867 |
| 0.261945979 | 0.447587486 | 0.201118422 | 0.170351197 |
| 0.391454952 | 0.302518347 | 0.08044674  | 0.300770925 |
| 0.301097038 | 0.052262599 | 0.436600592 | 0.088529766 |
| 0.025627155 | 0.249477154 | 0.300194367 | 0.07918915  |
| 0.071628133 | 0.326187833 | 0.140100086 | 0.211122537 |
| 0.456747507 | 0.298153416 | 0.355320305 | 0.102468955 |
| 0.093900265 | 0.031024683 | 0.112086249 | 0.192397636 |
| 0.440959313 | 0.405184977 | 0.200350417 | 0.242678959 |
| 0.236187052 | 0.222383784 | 0.187891747 | 0.431107322 |
| 0.08058155  | 0.428742783 | 0.012656588 | 0.28518722  |
| 0.425377973 | 0.275776591 | 0.081638057 | 0.330335421 |
| 0.374365399 | 0.090038015 | 0.178720506 | 0.438843428 |
| 0.38405954  | 0.242925671 | 0.251106316 | 0.247580423 |
| 0.069434789 | 0.111821009 | 0.233101923 | 0.077182384 |
| 0.292148145 | 0.194341302 | 0.015410551 | 0.267660949 |
| 0.095800797 | 0.439817083 | 0.341573853 | 0.084955451 |

|             |             |             |             |
|-------------|-------------|-------------|-------------|
| 0.318028801 | 0.244218844 | 0.229480469 | 0.067043966 |
| 0.329622371 | 0.38629028  | 0.453302063 | 0.182985686 |
| 0.296660718 | 0.406664684 | 0.206000885 | 0.064986791 |
| 0.018252649 | 0.419276044 | 0.275160994 | 0.05536128  |
| 0.397129177 | 0.252625755 | 0.050554483 | 0.456629654 |
| 0.21034857  | 0.384337005 | 0.014049985 | 0.024369404 |
| 0.022787142 | 0.329992766 | 0.429702143 | 0.29979556  |
| 0.288137108 | 0.256564562 | 0.001027852 | 0.412610352 |
| 0.449480585 | 0.015065289 | 0.081048888 | 0.321392648 |
| 0.263446937 | 0.465630225 | 0.16641762  | 0.343400097 |
| 0.233848549 | 0.423103057 | 0.283679455 | 0.212388522 |
| 0.39591622  | 0.379062287 | 0.32841281  | 0.417085146 |
| 0.401034207 | 0.246753264 | 0.273556707 | 0.055391485 |
| 0.088165498 | 0.27632106  | 0.258129147 | 0.119603254 |
| 0.261696497 | 0.128791124 | 0.396121023 | 0.375177009 |
| 0.384332816 | 0.008472374 | 0.237498585 | 0.328436709 |
| 0.422148875 | 0.421222742 | 0.013777785 | 0.004950019 |
| 0.003904803 | 0.021652789 | 0.303237954 | 0.15424714  |
| 0.408135394 | 0.279580963 | 0.013498598 | 0.117458166 |
| 0.246997249 | 0.21722821  | 0.444669307 | 0.284633208 |
| 0.284759711 | 0.0878914   | 0.311860077 | 0.290735882 |
| 0.06374224  | 0.22346364  | 0.40582962  | 0.455926408 |
| 0.031467006 | 0.162078072 | 0.222703569 | 0.439109191 |
| 0.023657558 | 0.215824203 | 0.240616881 | 0.304355617 |
| 0.007766479 | 0.067767198 | 0.06833341  | 0.307805137 |
| 0.408726821 | 0.113436071 | 0.057758276 | 0.152538318 |
| 0.212067306 | 0.367653468 | 0.198163457 | 0.430670874 |
| 0.392160253 | 0.367226061 | 0.047766316 | 0.43586252  |
| 0.067369163 | 0.426721948 | 0.186405788 | 0.083726387 |
| 0.16726988  | 0.017494224 | 0.362268042 | 0.139707192 |
| 0.297520674 | 0.268869722 | 0.123337566 | 0.013512062 |
| 0.070425168 | 0.05768508  | 0.409582184 | 0.33693142  |
| 0.018603357 | 0.241766493 | 0.19631695  | 0.252938452 |
| 0.30429897  | 0.3493097   | 0.44809765  | 0.258618895 |
| 0.182612764 | 0.045233747 | 0.312252692 | 0.25596081  |
| 0.264593303 | 0.391835465 | 0.248132268 | 0.427194006 |
| 0.289267653 | 0.383196366 | 0.385496154 | 0.303978254 |
| 0.130237784 | 0.272532934 | 1           | 0.079668335 |
| 0.269009684 | 0.387728005 | 0.252510139 | 0.131125464 |
| 0.220549855 | 0.182955491 | 0.060818824 | 0.102582554 |
| 0.142721952 | 0.308530909 | 0.197895863 | 0.350381095 |
| 0.257002749 | 0.274945618 | 0.064482067 | 0.070410315 |
| 0.464077402 | 0.38733865  | 0.205377161 | 0.310924067 |
| 0.132524806 | 0.262995273 | 0.302509398 | 0.287521864 |
| 0.206352013 | 0.377737139 | 0.354384294 | 0.337120966 |
| 0.433832717 | 0.259895226 | 0.45538419  | 0.141516078 |
| 0.063871759 | 0.220151776 | 0.166014992 | 0.074510764 |
| 0.173106879 | 0.029179246 | 0.132066359 | 0.275860926 |
| 0.174423665 | 0.294787521 | 0.237472205 | 0.085038822 |
| 0.196667547 | 0.194436591 | 0.250928642 | 0.291946384 |
| 0.134696309 | 0.451053031 | 0.014617392 | 0.058712325 |
| 0.185945387 | 0.330423451 | 0.218555347 | 0.174456266 |
| 0.14815251  | 0.074002587 | 0.251920731 | 0.28714553  |
| 0.305554928 | 0.188663408 | 0.341948106 | 0.063708054 |

|             |             |             |             |
|-------------|-------------|-------------|-------------|
| 0.061194692 | 0.404582922 | 0.24642245  | 0.012273436 |
| 0.058276966 | 0.232099265 | 0.179088309 | 0.256076936 |
| 0.015320522 | 0.383494138 | 0.315387346 | 0.244281529 |
| 0.305581799 | 0.076529985 | 0.330589538 | 0.079335502 |
| 0.067283913 | 0.403301369 | 0.198816617 | 0.420748921 |
| 0.172071032 | 0.335944432 | 0.398387535 | 0.342330956 |
| 0.073522291 | 0.176343    | 0.074552371 | 0.365390694 |
| 0.226815808 |             |             |             |
| ST7L        | 0.011483441 | 0.026653608 | 0.008285833 |
| 0.084611487 | 0.024980088 | 0.037326691 | 0.154959156 |
| 0.045928221 | 0.021932145 | 0.105831614 | 0.015161281 |
| 0.016057974 | 0.011503967 | 0.092419132 | 0.012917802 |
| 0.052189135 | 0.059463745 | 0.009560674 | 0.133186445 |
| 0.052716302 | 0.150430514 | 0.07209837  | 0.110602426 |
| 0.004657424 | 0.046035389 | 0.107919721 | 0.017936331 |
| 0.060713457 | 0.121564556 | 0.038236682 | 0.05863848  |
| 0.024570449 | 0.022445738 | 0.016708225 | 0.038755657 |
| 0.013875154 | 0.008981636 | 0.002573236 | 0.04319501  |
| 0.022287495 | 0.030210486 | 0.056437006 | 0.131843942 |
| 0.147237818 | 0.017793894 | 0.166630455 | 0.018108358 |
| 0.005391014 | 0.078355351 | 0.038362936 | 0.017306535 |
| 0.018229274 | 0.019719413 | 0.060161764 | 0.143666183 |
| 0.006352083 | 0.029754495 | 0.00552376  | 0.039601926 |
| 0.136927681 | 0.06482217  | 0.017124344 | 0.049263362 |
| 0.003088521 | 0.047394808 | 0.021334086 | 0.095991868 |
| 0.003397583 | 0.028132572 | 0.027070331 | 0.005684728 |
| 0.031049655 | 0.061250299 | 0.023818197 | 0.003550638 |
| 0.117628891 | 0.104468837 | 0.031375122 | 0.116379086 |
| 0.046085981 | 0.012322888 | 0.036808572 | 0.025450745 |
| 0.048115509 | 0.031635058 | 0.006825629 | 0.116307214 |
| 0.020524302 | 0.185571616 | 0.026474352 | 0.053217763 |
| 0.033998753 | 0.019697082 | 0.02016869  | 0.037131268 |
| 0.044951175 | 0.026379743 | 0.024882509 | 0.025130578 |
| 0.010454789 | 0.009988358 | 0.019608468 | 0.027782067 |
| 0.021809847 | 0.00623233  | 0.086793026 | 0.051884745 |
| 0.082178402 | 0.010293392 | 0.115470407 | 0.009409185 |
| 0.047964948 | 0.092362722 | 0.043042403 | 0.078167291 |
| 0.011765737 | 0.027954388 | 0.017212743 | 0.161175764 |
| 0.014542881 | 0.033977115 | 0.002188208 | 0.034256691 |
| 0.006406708 | 0.002195685 | 0.012484129 | 0.057675718 |
| 0.032254707 | 0.006904185 | 0.068061888 | 0.030716058 |
| 0.06064212  | 0.003687315 | 0.017238134 | 0.016953583 |
| 0.027884377 | 0.006550838 | 0.070742095 | 0.017020878 |
| 0.0127621   | 0.033061178 | 0.005759219 | 0.096528015 |
| 0.037126712 | 0.005636209 | 0.123868425 | 0.019554368 |
| 0.053401267 | 0.099004444 | 0.128173625 | 0.032776038 |
| 0.025349596 | 0.180722801 | 0.009853809 | 0.059158852 |
| 0.019429561 | 0.030285065 | 0.104095566 | 0.088458423 |
| 0.128798425 | 0.011713322 | 0.041758694 | 0.025131449 |
| 0.003004151 | 0.011433356 | 0.006266961 | 0.069283025 |
| 0.039669208 | 0.032928723 | 0.008962218 | 0.098894961 |
| 0.088095739 | 0.048737924 | 0.021199547 | 0.048987273 |
| 0.03293861  | 0.027154609 | 0.009632603 | 0.032575549 |
| 0.038314712 | 0.02169268  | 0.042785807 | 0.014985362 |



|             |              |             |             |
|-------------|--------------|-------------|-------------|
| 0.065085151 | 0.042341453  | 0.000400444 | 0.017415004 |
| 0.017759981 | 0.012852212  | 0.075791849 | 0.017613016 |
| 0.006950166 | 0.0611110163 | 0.000626812 | 0.058545299 |
| 0.014147825 | 0.089532638  | 0.037633012 | 0.116288535 |
| 0.015100424 | 0.12480973   | 0.031090141 | 0.014266885 |
| 0.013662393 | 0.004878942  | 0.085425499 | 0.069555986 |
| 0.021098342 | 0.085030069  | 0.023525694 | 0.071256435 |
| 0.055780721 | 0.026460865  | 0.047801412 | 0.006684348 |
| 0.032469348 | 0.076768508  | 0.011913964 | 0.026686189 |
| 0.016012768 | 0.001010626  | 0.027605711 | 0.057163784 |
| 0.012323437 | 0.029205265  | 0.011640923 | 0.002232787 |
| 0.173397914 | 0.055321739  | 0.066818426 | 0.046436271 |
| 0.008828538 | 0.124978301  | 0.007649518 | 0.006592954 |
| 0.061973212 | 0.03000674   | 0.007277707 | 0.002997398 |
| 0.00285078  | 0.055629182  | 0.085929002 | 0.081464062 |
| 0.037389344 | 0.039752231  | 0.00880699  | 0.016531643 |
| 0.151009808 | 0.138116883  | 0.001732112 | 0.009460433 |
| 0.048059047 | 0.035234344  | 0.033306351 | 0.016916158 |
| 0.019266178 | 0.070932658  | 0.053003949 | 0.003950749 |
| 0.038932372 | 0.095189413  | 0.026351926 | 0.050451741 |
| 0.023542135 | 0.075075232  | 0.067739033 | 0.003773963 |
| 0.047924058 | 0.035798399  | 0.008922762 | 0.040909644 |
| 0.010984466 | 0.027523404  | 0.061801603 | 0.11088209  |
| 0.020271915 | 0.151099361  | 0.05311781  | 0.007596043 |
| 0.016227464 | 0.028725779  | 0.033717075 | 0.070563924 |
| 0.027838186 | 0.046508989  | 0.052250041 | 0.017806659 |
| 0.020133463 | 0.131514299  | 0.022953642 | 0.032740076 |
| 0.070232869 | 0.022653813  | 0.021686591 | 0.098122433 |
| 0.066955783 | 0.081580517  | 0.112629196 | 0.078799859 |
| 0.032353525 | 0.073164114  | 0.029799715 | 0.007318738 |
| 0.178710372 | 0.036743675  | 0.016796817 | 0.0076222   |
| 0.016487827 | 0.019776152  | 0.071870398 | 0.042189783 |
| 0.133612597 | 0.01066962   | 0.00445775  | 0.029673686 |
| 0.001470772 | 0.016453659  | 0.054624251 | 0.015407473 |
| 0.013966579 | 0.029297818  | 0.079363993 | 0.082527769 |
| 0.035013556 | 0.126478447  | 0.035910409 | 0.023147334 |
| 0.026555169 | 0.021329226  | 0.019019133 | 0.022584763 |
| 0.1438679   | 0.058173288  | 0.021654693 | 0.002993563 |
| 0.017137774 | 0.044753051  | 0.000496845 | 0.010685979 |
| 0.120353178 | 0.029201879  | 0.036245436 | 0.050745089 |
| 0.04495929  | 0.011924413  | 0.037915412 | 0.126564662 |
| 0.015430355 | 0.013486715  | 0.019754    | 0.057344466 |
| 0.016421674 | 0.022443739  | 0.008336856 | 0.04821454  |
| 0.055640648 | 0.01543908   | 0.024771032 | 0.063067519 |
| 0.042072816 | 0.034671037  | 0.070522348 | 0.029787423 |
| 0.129172433 | 0.010898348  | 0.018305662 | 0.000127857 |
| 0.010978117 | 0.028228125  | 0.018540366 | 0.04858818  |
| 0.037580095 | 0.041961366  | 5.51E-05    | 0.019567627 |
| 0.027883409 | 0.035706734  | 0.009586755 | 0.018612301 |
| 0.01451199  | 0.024629253  | 0.008438363 | 0.022471512 |
| 0.016539001 | 0.015992236  | 0.024908494 | 0.081503453 |
| 0.044171552 | 0.01232917   | 0.040334651 | 0.025330622 |
| 0.050500957 | 0.030036184  | 0.134056382 | 0.11726205  |
| 0.002581807 | 0.062637233  | 0.017139695 | 0.012630162 |

|             |             |             |             |
|-------------|-------------|-------------|-------------|
| 0.026975346 | 0.05323431  | 0.022309807 | 0.035758335 |
| 0.025706603 | 0.054884633 | 0.076493235 | 0.017915432 |
| 0.049399215 | 0.044384491 | 0.002691344 | 0.002285008 |
| 0.002973683 | 0.01576795  | 0.049873066 | 0.033820967 |
| 0.024007679 | 0.023055055 | 0.091933826 | 0.089191381 |
| 0.032911291 | 0.020382323 | 0.023138061 | 0.083404383 |
| 0.015466864 | 0.06590917  | 0.037705595 | 0.062683872 |
| 0.020179442 | 0.009725819 | 0.032072941 | 0.027057903 |
| 0.017648902 | 0.027299244 | 0.012558443 | 0.046528673 |
| 0.000483349 | 0.05498453  | 0.017008648 | 0.030340903 |
| 0.002147494 | 0.043576358 | 0.039270114 | 0.032954504 |
| 0.012533369 | 0.085877855 | 0.096212666 | 0.002719545 |
| 0.163991333 | 0.0253758   | 0.116020566 | 0.033777109 |
| 0.049682091 | 0.067182466 | 0.010880549 | 0.021654261 |
| 0.010800625 | 0.01847048  | 0.020309421 | 0.02597208  |
| 0.01618711  | 0.03057839  | 0.012654939 | 0.005576685 |
| 0.032920658 | 0.027659051 | 0.002433849 | 0.021374567 |
| 0.001096805 | 0.079489522 | 0.044917673 | 0.0261873   |
| 0.009884246 | 0.039331991 | 0.043465848 | 0.031514414 |
| 0.083614051 | 0.068463988 | 0.019344357 | 0.016558904 |
| 0.120869253 | 0.000271875 | 0.055354249 | 0.020191667 |
| 0.037935205 | 0.034076678 | 0.020561712 | 0.022113197 |
| 0.020307737 | 0.020084638 | 0.019092844 | 0.072228944 |
| 0.003687769 | 0.02332526  | 0.079668335 | 1           |
| 0.066281359 | 0.049543888 | 0.022784124 | 0.025290377 |
| 0.084248459 | 0.00567089  | 0.007206603 | 0.001335491 |
| 0.003636184 | 0.064279398 | 0.066600603 | 0.050696624 |
| 0.022231519 | 0.019539567 | 0.011327241 | 0.046590847 |
| 0.023908687 | 0.019141354 | 0.040632879 | 0.050633503 |
| 0.056564676 | 0.051430666 | 0.02190039  | 0.019018727 |
| 0.002721534 | 0.030570521 | 0.038877933 | 0.066024481 |
| 0.031936202 | 0.093173136 | 0.020091934 | 0.026770931 |
| 0.003956853 | 0.007894262 | 0.110268421 | 0.058117506 |
| 0.155054697 | 0.03413283  | 0.001781543 | 0.039033541 |
| 0.002482987 | 0.089610532 | 0.003532494 | 0.01702769  |
| 0.028007262 | 0.004861264 | 0.053775315 | 0.157935335 |
| 0.12693137  | 0.021913288 | 0.015208196 | 0.068130282 |
| 0.004469655 | 0.022737672 | 0.017323861 | 0.047132468 |
| 0.003188704 | 0.006705123 | 0.090290712 | 0.041222307 |
| 0.048015512 | 0.001269574 | 0.025087772 | 0.022501067 |
| 0.096294471 | 0.037940457 | 0.018297434 | 0.00686952  |
| 0.001507737 | 0.010230242 | 0.009992466 | 0.027921445 |
| 0.022925177 | 0.015892828 | 0.026966098 | 0.016373981 |
| 0.069178961 | 0.065792625 | 0.015479736 | 0.003890204 |
| 0.018622605 | 0.020084148 | 0.009263638 | 0.016023687 |
| 0.008283525 | 0.077949932 | 0.013328835 | 0.021496118 |
| 0.00477758  | 0.003723185 | 0.10312003  | 0.033715495 |
| 0.005855117 |             |             |             |
| ST8SIA4     | 0.315924012 | 0.413750031 | 0.204960182 |
| 0.395737664 | 0.238851998 | 0.216113854 | 0.232150538 |
| 0.212753921 | 0.141245866 | 0.022699057 | 0.038600102 |
| 0.264385767 | 0.146079033 | 0.20402647  | 0.172316515 |
| 0.419482853 | 0.165248162 | 0.246469707 | 0.275015993 |
| 0.369051166 | 0.152627368 | 0.367997221 | 0.202306463 |

|             |             |             |             |
|-------------|-------------|-------------|-------------|
| 0.199185695 | 0.131837045 | 0.13712277  | 0.183159801 |
| 0.450708648 | 0.155176677 | 0.149120422 | 0.340048725 |
| 0.18582742  | 0.364763549 | 0.373473269 | 0.299447699 |
| 0.351161252 | 0.274273817 | 0.040223461 | 0.166877725 |
| 0.370430677 | 0.34491141  | 0.37170178  | 0.28653155  |
| 0.123464468 | 0.346079617 | 0.243041097 | 0.269529921 |
| 0.183281685 | 0.082040902 | 0.15472959  | 0.332277949 |
| 0.318479453 | 0.214472485 | 0.228339889 | 0.201182002 |
| 0.094714172 | 0.145906401 | 0.109667902 | 0.237335362 |
| 0.241186512 | 0.126778519 | 0.337456807 | 0.141530866 |
| 0.114792063 | 0.25114156  | 0.190574951 | 0.247651158 |
| 0.171419202 | 0.310547478 | 0.100100002 | 0.210684756 |
| 0.009724848 | 0.375003978 | 0.277726414 | 0.128524724 |
| 0.125626278 | 0.059411805 | 0.213655213 | 0.274108466 |
| 0.446427196 | 0.356680014 | 0.43104005  | 0.406549602 |
| 0.182606347 | 0.27354524  | 0.185255189 | 0.221004757 |
| 0.366994484 | 0.198863043 | 0.19748847  | 0.410382652 |
| 0.429258754 | 0.381006609 | 0.2109884   | 0.244957321 |
| 0.323093853 | 0.392998416 | 0.204291216 | 0.2176725   |
| 0.151486758 | 0.113210438 | 0.321848675 | 0.417274242 |
| 0.323731314 | 0.159635525 | 0.201470429 | 0.372756416 |
| 0.157203168 | 0.203801838 | 0.336827394 | 0.160687447 |
| 0.459886093 | 0.079600157 | 0.213427345 | 0.231806433 |
| 0.277889334 | 0.362774916 | 0.374137836 | 0.246457593 |
| 0.237579111 | 0.07607301  | 0.093300465 | 0.118460326 |
| 0.219071234 | 0.093688289 | 0.312316599 | 0.410334105 |
| 0.202707935 | 0.19967888  | 0.264734702 | 0.026584669 |
| 0.089825086 | 0.224428123 | 0.319888469 | 0.255315949 |
| 0.370016679 | 0.272758391 | 0.188984833 | 0.27765536  |
| 0.246728499 | 0.421868749 | 0.034429538 | 0.210250695 |
| 0.243108677 | 0.219587363 | 0.268027503 | 0.238850499 |
| 0.22985723  | 0.226894865 | 0.218958144 | 0.445191748 |
| 0.345856745 | 0.184306648 | 0.203865111 | 0.402888146 |
| 0.167957374 | 0.223055619 | 0.217006458 | 0.226836783 |
| 0.128787714 | 0.327056228 | 0.085542807 | 0.23691726  |
| 0.119381923 | 0.131495389 | 0.072210498 | 0.216585183 |
| 0.208381032 | 0.314737419 | 0.300146267 | 0.221051555 |
| 0.240437854 | 0.317711426 | 0.184110467 | 0.281082114 |
| 0.027217889 | 0.159716371 | 0.147745704 | 0.413181765 |
| 0.180591704 | 0.422487008 | 0.287904623 | 0.260391822 |
| 0.2603128   | 0.425446145 | 0.009564796 | 0.352181564 |
| 0.380960082 | 0.146746386 | 0.244616566 | 0.286239568 |
| 0.156723363 | 0.415576527 | 0.0341108   | 0.385218846 |
| 0.243772205 | 0.199554179 | 0.459020005 | 0.200463846 |
| 0.347692563 | 0.11033068  | 0.201969259 | 0.319072252 |
| 0.259454139 | 0.02979871  | 0.159687541 | 0.344319372 |
| 0.082184436 | 0.138548858 | 0.354910648 | 0.349331881 |
| 0.247292486 | 0.393559817 | 0.469138539 | 0.146363641 |
| 0.231914254 | 0.275827784 | 0.071542514 | 0.244722467 |
| 0.354531491 | 0.142084173 | 0.34853832  | 0.26001415  |
| 0.178503865 | 0.382253314 | 0.289087044 | 0.09064508  |
| 0.12788083  | 0.231905831 | 0.071199399 | 0.237045799 |
| 0.289235615 | 0.147354942 | 0.164400387 | 0.210310505 |
| 0.140500701 | 0.424913734 | 0.13808606  | 0.132357251 |

|             |             |             |             |
|-------------|-------------|-------------|-------------|
| 0.088293636 | 0.207616232 | 0.288999165 | 0.141444752 |
| 0.121061858 | 0.219242052 | 0.187719505 | 0.205628639 |
| 0.107631035 | 0.16438982  | 0.055679932 | 0.130232212 |
| 0.095004623 | 0.144708065 | 0.133382737 | 0.266060973 |
| 0.197123841 | 0.13699683  | 0.231105251 | 0.194523532 |
| 0.174472395 | 0.073383224 | 0.40516666  | 0.38012107  |
| 0.242305036 | 0.240692499 | 0.130622477 | 0.117212503 |
| 0.403031681 | 0.137323156 | 0.14035118  | 0.374939237 |
| 0.11551398  | 0.430001248 | 0.180714069 | 0.178110891 |
| 0.176399805 | 0.247549867 | 0.457491884 | 0.069835493 |
| 0.234199536 | 0.365391138 | 0.282217977 | 0.200259715 |
| 0.296316166 | 0.328883758 | 0.106934443 | 0.29945416  |
| 0.282776712 | 0.106357474 | 0.40643081  | 0.166834869 |
| 0.088219986 | 0.331482208 | 0.281961745 | 0.162750669 |
| 0.160646579 | 0.193167872 | 0.118303768 | 0.271222652 |
| 0.422185951 | 0.391519652 | 0.297710438 | 0.190764872 |
| 0.111950269 | 0.025097588 | 0.206069702 | 0.206734557 |
| 0.355583167 | 0.388804342 | 0.27896703  | 0.195350497 |
| 0.273156285 | 0.172831064 | 0.121148254 | 0.409554774 |
| 0.203843644 | 0.388219972 | 0.051670209 | 0.317396295 |
| 0.341182974 | 0.157462788 | 0.130055154 | 0.210285777 |
| 0.306224021 | 0.142140879 | 0.277148113 | 0.369501929 |
| 0.366750959 | 0.223043505 | 0.192220758 | 0.328175953 |
| 0.075471507 | 0.122254706 | 0.24530115  | 0.128661857 |
| 0.190734083 | 0.247940975 | 0.040004622 | 0.217169943 |
| 0.108712748 | 0.34745391  | 0.426075258 | 0.1170318   |
| 0.154480251 | 0.209031133 | 0.314362706 | 0.127724688 |
| 0.33508203  | 0.369816548 | 0.378380353 | 0.257615051 |
| 0.323706721 | 0.36366553  | 0.174237354 | 0.172742646 |
| 0.071460455 | 0.366180192 | 0.305968323 | 0.065264489 |
| 0.441467058 | 0.128851426 | 0.035040218 | 0.407748595 |
| 0.264218794 | 0.295531676 | 0.023851006 | 0.075409249 |
| 0.105341279 | 0.41649482  | 0.340494833 | 0.332714299 |
| 0.108588737 | 0.321759693 | 0.017272898 | 0.413680201 |
| 0.370870231 | 0.057296561 | 0.161217892 | 0.297382433 |
| 0.268509838 | 0.419004509 | 0.16003389  | 0.339555704 |
| 0.217641049 | 0.341492787 | 0.198604319 | 0.254918222 |
| 0.366887346 | 0.340440512 | 0.369262024 | 0.379838642 |
| 0.416556011 | 0.346482934 | 0.271009888 | 0.0670964   |
| 0.120052926 | 0.182191505 | 0.116883173 | 0.085104233 |
| 0.214523642 | 0.172225206 | 0.396840047 | 0.431889329 |
| 0.382100031 | 0.040614073 | 0.202295104 | 0.31087971  |
| 0.409111709 | 0.454568772 | 0.084142432 | 0.019318137 |
| 0.026354934 | 0.039172989 | 0.266128162 | 0.252605638 |
| 0.395614469 | 0.098606881 | 0.040224689 | 0.127664818 |
| 0.266339924 | 0.25216669  | 0.375272619 | 0.399761485 |
| 0.348154608 | 0.177752613 | 0.131449869 | 0.410597843 |
| 0.111836972 | 0.214090584 | 0.398443161 | 0.364933272 |
| 0.125063498 | 0.248550466 | 0.227049572 | 0.449826172 |
| 0.036868963 | 0.263974802 | 0.278573487 | 0.197174857 |
| 0.05837107  | 0.15144372  | 0.127460132 | 0.414908959 |
| 0.329761014 | 0.099819834 | 0.072145304 | 0.08738104  |
| 0.159856416 | 0.411359618 | 0.207992113 | 0.448984754 |
| 0.398600435 | 0.450002978 | 0.121156642 | 0.367334603 |

|             |             |             |             |
|-------------|-------------|-------------|-------------|
| 0.079387289 | 0.342968751 | 0.194122026 | 0.070804711 |
| 0.274204585 | 0.078458555 | 0.340885599 | 0.074105195 |
| 0.194499967 | 0.323946366 | 0.14477256  | 0.063062687 |
| 0.112766106 | 0.131286382 | 0.431568555 | 0.396762213 |
| 0.096075725 | 0.265227396 | 0.280756534 | 0.346219062 |
| 0.20412219  | 0.374104881 | 0.361790297 | 0.150641352 |
| 0.15575891  | 0.107401511 | 0.382959781 | 0.274224946 |
| 0.202608682 | 0.442627338 | 0.172071217 | 0.423849775 |
| 0.322149891 | 0.397085036 | 0.362547561 | 0.252221708 |
| 0.15235761  | 0.243513607 | 0.269009684 | 0.066281359 |
| 1           | 0.40355839  | 0.246806724 | 0.152933869 |
| 0.213067416 | 0.169109192 | 0.137650537 | 0.14309428  |
| 0.135657247 | 0.199094907 | 0.183566489 | 0.457813279 |
| 0.288688149 | 0.287100978 | 0.124449803 | 0.120808081 |
| 0.424417295 | 0.358057884 | 0.197810082 | 0.317119872 |
| 0.25018971  | 0.238343917 | 0.367213612 | 0.354522496 |
| 0.186905661 | 0.33834959  | 0.375153806 | 0.267397973 |
| 0.33582918  | 0.270816369 | 0.382975372 | 0.135813564 |
| 0.109455505 | 0.233086355 | 0.132311334 | 0.172659068 |
| 0.218635533 | 0.096614473 | 0.11904329  | 0.388211744 |
| 0.139738715 | 0.311670421 | 0.169224979 | 0.172585246 |
| 0.253353878 | 0.192301833 | 0.285089774 | 0.204032979 |
| 0.139194609 | 0.35590084  | 0.044016779 | 0.145934492 |
| 0.154890501 | 0.335314504 | 0.171873363 | 0.264038894 |
| 0.151131453 | 0.174772717 | 0.260017203 | 0.174456968 |
| 0.12564557  | 0.181859816 | 0.333789877 | 0.131507971 |
| 0.08841288  | 0.45384185  | 0.207159779 | 0.081201589 |
| 0.111972242 | 0.235629878 | 0.261968781 | 0.177576135 |
| 0.072205519 | 0.342008588 | 0.142819003 | 0.236451883 |
| 0.254959025 | 0.179736229 | 0.278231178 | 0.141090764 |
| 0.179468107 | 0.346995741 | 0.211597282 | 0.364316325 |
| 0.232963083 | 0.405547833 | 0.315592451 | 0.323114359 |
| 0.205572187 | 0.166104938 | 0.11344929  | 0.414563687 |
| 0.14579581  |             |             |             |
| STARD10     | 0.381337233 | 0.527989523 | 0.378934889 |
| 0.442002198 | 0.464991392 | 0.35597295  | 0.281444105 |
| 0.206489326 | 0.126829198 | 0.017867123 | 0.059669154 |
| 0.432213751 | 0.293937543 | 0.337932248 | 0.31206865  |
| 0.446804449 | 0.228557608 | 0.336046956 | 0.324081808 |
| 0.43216789  | 0.142558929 | 0.460890678 | 0.156174649 |
| 0.33031331  | 0.174787329 | 0.136174833 | 0.325245465 |
| 0.440046908 | 0.148272406 | 0.329303846 | 0.386817379 |
| 0.160241365 | 0.411832329 | 0.505137329 | 0.471894396 |
| 0.499366245 | 0.345727008 | 0.022736764 | 0.326520602 |
| 0.38457636  | 0.435449789 | 0.427801803 | 0.405649032 |
| 0.090664389 | 0.466080753 | 0.327692254 | 0.423414508 |
| 0.23322349  | 0.076961438 | 0.23290345  | 0.422060502 |
| 0.468178852 | 0.430559795 | 0.253869912 | 0.23426048  |
| 0.281764932 | 0.247779078 | 0.316848158 | 0.303075584 |
| 0.317473264 | 0.172361153 | 0.479998767 | 0.136044219 |
| 0.182957489 | 0.284199808 | 0.228506618 | 0.312554216 |
| 0.367576942 | 0.348070109 | 0.036619029 | 0.370720061 |
| 0.009589601 | 0.413219962 | 0.416272931 | 0.311564359 |
| 0.090726935 | 0.064886152 | 0.25873074  | 0.399493115 |

|             |             |             |             |
|-------------|-------------|-------------|-------------|
| 0.455993966 | 0.433686215 | 0.497824293 | 0.497545454 |
| 0.279968551 | 0.359318747 | 0.403443149 | 0.274650311 |
| 0.407223919 | 0.261979662 | 0.147981531 | 0.460868335 |
| 0.505561879 | 0.521792246 | 0.28269979  | 0.334238549 |
| 0.409151246 | 0.474379267 | 0.412574981 | 0.461355607 |
| 0.352169625 | 0.086790961 | 0.434514518 | 0.522605981 |
| 0.362991571 | 0.345637263 | 0.240072499 | 0.402813146 |
| 0.113725167 | 0.337105589 | 0.424909659 | 0.219486375 |
| 0.470963965 | 0.040727015 | 0.297350792 | 0.413703888 |
| 0.259944342 | 0.412148347 | 0.513364571 | 0.272374962 |
| 0.433166534 | 0.052369914 | 0.171948968 | 0.066986669 |
| 0.368698743 | 0.178310665 | 0.456907599 | 0.468120255 |
| 0.277025411 | 0.436445191 | 0.326885888 | 0.008693458 |
| 0.063967717 | 0.229302617 | 0.409732179 | 0.374719598 |
| 0.421749514 | 0.34256798  | 0.321165399 | 0.350023666 |
| 0.423091901 | 0.490186624 | 0.055558125 | 0.154997797 |
| 0.429845116 | 0.236148884 | 0.331620548 | 0.451245875 |
| 0.388418928 | 0.166589627 | 0.214544675 | 0.526208722 |
| 0.410603938 | 0.157501123 | 0.314041983 | 0.453028065 |
| 0.384531561 | 0.418937887 | 0.179415853 | 0.376595001 |
| 0.104659107 | 0.466494559 | 0.062371913 | 0.325344084 |
| 0.270843739 | 0.235302485 | 0.020256677 | 0.285754953 |
| 0.331483333 | 0.430703106 | 0.43892943  | 0.174483646 |
| 0.410233108 | 0.459542662 | 0.308444585 | 0.427275506 |
| 0.032840332 | 0.08337707  | 0.246446835 | 0.52197264  |
| 0.267911838 | 0.498704965 | 0.36784864  | 0.354038677 |
| 0.367279186 | 0.443305031 | 0.00387151  | 0.479432188 |
| 0.519837965 | 0.261212971 | 0.462413807 | 0.431085036 |
| 0.372468775 | 0.447754384 | 0.037763144 | 0.461467704 |
| 0.31622     | 0.135114561 | 0.516538855 | 0.257232883 |
| 0.447148878 | 0.093473036 | 0.352970124 | 0.408308582 |
| 0.408345653 | 0.0177333   | 0.239301549 | 0.409915838 |
| 0.055866123 | 0.136960618 | 0.409109981 | 0.43800544  |
| 0.417826186 | 0.437745961 | 0.493152919 | 0.356362929 |
| 0.464460221 | 0.291330333 | 0.027984107 | 0.377917481 |
| 0.41172579  | 0.367893516 | 0.432785796 | 0.300189033 |
| 0.294018239 | 0.473202336 | 0.3747596   | 0.220483664 |
| 0.092715114 | 0.350344193 | 0.041395609 | 0.390560341 |
| 0.351690247 | 0.211829909 | 0.371142392 | 0.196129149 |
| 0.133660854 | 0.536239181 | 0.223798889 | 0.278375361 |
| 0.157255802 | 0.438087046 | 0.316558159 | 0.326439934 |
| 0.313329749 | 0.245325892 | 0.378549016 | 0.406327271 |
| 0.0766195   | 0.180687062 | 0.024627664 | 0.397026968 |
| 0.243205818 | 0.400437165 | 0.382847607 | 0.380822015 |
| 0.385028319 | 0.205653117 | 0.450407476 | 0.307856944 |
| 0.176468541 | 0.04041633  | 0.510081549 | 0.436837153 |
| 0.297279672 | 0.225279627 | 0.083960782 | 0.358221425 |
| 0.480573882 | 0.295333951 | 0.228933843 | 0.465044319 |
| 0.047967985 | 0.487296219 | 0.357036156 | 0.209771695 |
| 0.441243454 | 0.364601233 | 0.460795141 | 0.074235729 |
| 0.37587751  | 0.471581984 | 0.365807103 | 0.27332448  |
| 0.389629433 | 0.435194937 | 0.068483258 | 0.362840405 |
| 0.367209206 | 0.077279326 | 0.529561853 | 0.205825555 |
| 0.050117263 | 0.445298858 | 0.427746388 | 0.137478979 |

|             |             |             |             |
|-------------|-------------|-------------|-------------|
| 0.135715489 | 0.403476421 | 0.077349849 | 0.376904131 |
| 0.528522591 | 0.464401077 | 0.416949053 | 0.258203671 |
| 0.094878811 | 0.040143598 | 0.276449545 | 0.380420431 |
| 0.494531282 | 0.513598899 | 0.345635558 | 0.436859914 |
| 0.32864616  | 0.367989654 | 0.148564656 | 0.521217589 |
| 0.198574256 | 0.505437335 | 0.019748909 | 0.427482511 |
| 0.493749373 | 0.285018718 | 0.148158634 | 0.348745695 |
| 0.367768844 | 0.092062505 | 0.254727421 | 0.493919462 |
| 0.421910056 | 0.372698877 | 0.372902444 | 0.435809432 |
| 0.038948616 | 0.085340446 | 0.408440205 | 0.214422131 |
| 0.415119316 | 0.291489157 | 0.067116921 | 0.326591643 |
| 0.102644962 | 0.458217791 | 0.454518794 | 0.108404717 |
| 0.339870555 | 0.290611135 | 0.437470717 | 0.08084905  |
| 0.44063243  | 0.487402158 | 0.513498932 | 0.222528456 |
| 0.424093993 | 0.491951252 | 0.400650919 | 0.134516318 |
| 0.042141074 | 0.505230112 | 0.370872983 | 0.054289656 |
| 0.479961766 | 0.218946124 | 0.046688394 | 0.498914621 |
| 0.263404847 | 0.417408433 | 0.005897101 | 0.073797772 |
| 0.069819147 | 0.450867942 | 0.466475983 | 0.387191768 |
| 0.242639249 | 0.399326759 | 0.009405542 | 0.522273708 |
| 0.495786523 | 0.035969009 | 0.205723393 | 0.41906894  |
| 0.409901924 | 0.525242034 | 0.34824156  | 0.443310918 |
| 0.432024862 | 0.49345652  | 0.318096656 | 0.358451876 |
| 0.428314107 | 0.482821507 | 0.406478599 | 0.447501464 |
| 0.466507249 | 0.454611551 | 0.364561641 | 0.041858115 |
| 0.154159856 | 0.23684336  | 0.305263411 | 0.139698365 |
| 0.294877221 | 0.218970528 | 0.472901432 | 0.470436816 |
| 0.488476253 | 0.015840076 | 0.203016288 | 0.406458505 |
| 0.438162677 | 0.477154074 | 0.032034747 | 0.007930869 |
| 0.008716015 | 0.045321145 | 0.387230501 | 0.311559039 |
| 0.488791896 | 0.250865698 | 0.016705706 | 0.076485727 |
| 0.333690413 | 0.429761999 | 0.507458533 | 0.433614355 |
| 0.419116908 | 0.146876003 | 0.329032754 | 0.431734099 |
| 0.122182857 | 0.277263652 | 0.498606364 | 0.473013108 |
| 0.074217406 | 0.314213163 | 0.360600573 | 0.501074815 |
| 0.086018322 | 0.401154342 | 0.43873338  | 0.393751408 |
| 0.02427462  | 0.140775606 | 0.117139962 | 0.448837521 |
| 0.485629777 | 0.163735219 | 0.087813832 | 0.145251403 |
| 0.20974446  | 0.459717942 | 0.265541415 | 0.527747934 |
| 0.428798587 | 0.462531868 | 0.129555079 | 0.474023167 |
| 0.084765072 | 0.481869215 | 0.396584252 | 0.06596435  |
| 0.331450054 | 0.030051195 | 0.459478527 | 0.194033961 |
| 0.344422478 | 0.382077466 | 0.213439485 | 0.03855392  |
| 0.187501366 | 0.108249249 | 0.491710718 | 0.451606044 |
| 0.060131652 | 0.293386554 | 0.363332147 | 0.419805352 |
| 0.304402801 | 0.463007665 | 0.493326708 | 0.371495098 |
| 0.149250736 | 0.160425207 | 0.4182222   | 0.36561292  |
| 0.280450878 | 0.502663343 | 0.368547222 | 0.525581506 |
| 0.375217059 | 0.445946106 | 0.470456271 | 0.39083737  |
| 0.311560718 | 0.373590118 | 0.387728005 | 0.049543888 |
| 0.40355839  | 1           | 0.358009361 | 0.230327948 |
| 0.362028585 | 0.383169927 | 0.076680376 | 0.162387933 |
| 0.330902681 | 0.305632953 | 0.244649951 | 0.452160199 |
| 0.374698645 | 0.366574407 | 0.067747255 | 0.112353978 |

|                      |             |             |             |
|----------------------|-------------|-------------|-------------|
| 0.541499171          | 0.41867165  | 0.175029219 | 0.431820819 |
| 0.247147844          | 0.412096122 | 0.433292126 | 0.442294888 |
| 0.353188299          | 0.443343291 | 0.418538514 | 0.397238782 |
| 0.425668424          | 0.333897473 | 0.517747891 | 0.097150236 |
| 0.123095017          | 0.390263781 | 0.187497486 | 0.156176903 |
| 0.238234679          | 0.0566208   | 0.300138865 | 0.455437856 |
| 0.366758675          | 0.458568666 | 0.308234884 | 0.13279466  |
| 0.3941025            | 0.327591705 | 0.425547196 | 0.271263937 |
| 0.15419039           | 0.495783316 | 0.023404143 | 0.110975928 |
| 0.397628033          | 0.417469135 | 0.420300918 | 0.319143466 |
| 0.33027801           | 0.197145203 | 0.399178676 | 0.293173712 |
| 0.349555231          | 0.350241864 | 0.411550161 | 0.055749808 |
| 0.048035221          | 0.505881845 | 0.346098974 | 0.038190325 |
| 0.126711949          | 0.339068961 | 0.323881094 | 0.31408785  |
| 0.045959451          | 0.48185969  | 0.33402159  | 0.440747668 |
| 0.378932426          | 0.119453645 | 0.326551773 | 0.11043434  |
| 0.090702479          | 0.43599964  | 0.392994897 | 0.506992511 |
| 0.366510342          | 0.466057699 | 0.418233263 | 0.415586225 |
| 0.140231496          | 0.339149688 | 0.060131802 | 0.428550634 |
| 0.382397532          |             |             |             |
| STARD3NL 0.356576019 | 0.424568072 | 0.180749002 |             |
| 0.345881238          | 0.209657072 | 0.231114345 | 0.15515884  |
| 0.211220179          | 0.067119822 | 0.005434774 | 0.009411833 |
| 0.247075203          | 0.074054369 | 0.144479815 | 0.145494996 |
| 0.370443043          | 0.071365487 | 0.260951429 | 0.176449095 |
| 0.362928887          | 0.105484749 | 0.291103948 | 0.105834032 |
| 0.141727489          | 0.049894948 | 0.052966832 | 0.103036864 |
| 0.43108915           | 0.063550235 | 0.148993235 | 0.362671544 |
| 0.107929004          | 0.394149786 | 0.405710564 | 0.241055255 |
| 0.379398735          | 0.319994344 | 0.037172096 | 0.13178497  |
| 0.423098997          | 0.30493056  | 0.363606068 | 0.215820298 |
| 0.050873625          | 0.397488152 | 0.152743943 | 0.235775805 |
| 0.179091966          | 0.022689979 | 0.166158336 | 0.396425403 |
| 0.33660746           | 0.193031197 | 0.20623458  | 0.12346373  |
| 0.05002058           | 0.161033317 | 0.062770907 | 0.294111595 |
| 0.151810711          | 0.132300261 | 0.354628207 | 0.075593261 |
| 0.099697449          | 0.248222428 | 0.110633136 | 0.207323239 |
| 0.129325982          | 0.362004828 | 0.064209811 | 0.222979141 |
| 0.003823967          | 0.360988772 | 0.242330159 | 0.088806128 |
| 0.047955019          | 0.014007426 | 0.125215552 | 0.23075277  |
| 0.438913648          | 0.40926327  | 0.386151261 | 0.377629551 |
| 0.086830022          | 0.198797115 | 0.158127422 | 0.110117253 |
| 0.397302598          | 0.113251365 | 0.109600213 | 0.343834379 |
| 0.389099778          | 0.391467009 | 0.113472586 | 0.15320081  |
| 0.301461893          | 0.424283852 | 0.161815685 | 0.159677252 |
| 0.099270388          | 0.055228347 | 0.344377999 | 0.398966356 |
| 0.380002926          | 0.108333234 | 0.094424486 | 0.394218567 |
| 0.076472863          | 0.192239943 | 0.264143593 | 0.114658847 |
| 0.443256764          | 0.031830426 | 0.11611636  | 0.20345459  |
| 0.231390867          | 0.371103459 | 0.379113207 | 0.149241433 |
| 0.197773722          | 0.023402545 | 0.041252843 | 0.059432541 |
| 0.171206111          | 0.054247891 | 0.359267586 | 0.37501592  |
| 0.193504198          | 0.150103082 | 0.208078462 | 0.008135424 |
| 0.030005715          | 0.172231865 | 0.331561228 | 0.252906591 |



|             |             |             |             |
|-------------|-------------|-------------|-------------|
| 0.385657845 | 0.317621888 | 0.096528531 | 0.329747173 |
| 0.224863865 | 0.381328811 | 0.030692978 | 0.133715644 |
| 0.214846203 | 0.173982025 | 0.175483351 | 0.226614983 |
| 0.128869603 | 0.162597616 | 0.118923997 | 0.426750242 |
| 0.404487075 | 0.089099405 | 0.238843026 | 0.340709542 |
| 0.121729876 | 0.160516775 | 0.126402538 | 0.146065666 |
| 0.066430601 | 0.349416003 | 0.030376053 | 0.248032344 |
| 0.075600922 | 0.065393282 | 0.057115641 | 0.211348408 |
| 0.140693235 | 0.294198015 | 0.355243188 | 0.128970574 |
| 0.163253283 | 0.253418276 | 0.20963037  | 0.244955091 |
| 0.005618359 | 0.085104101 | 0.194369998 | 0.396955042 |
| 0.227351411 | 0.418634377 | 0.208112772 | 0.182083435 |
| 0.161419464 | 0.397125924 | 0.007728201 | 0.38873719  |
| 0.390880592 | 0.175757897 | 0.183986625 | 0.272346491 |
| 0.11643939  | 0.374163154 | 0.039333745 | 0.33649408  |
| 0.310118934 | 0.11400169  | 0.425647341 | 0.092643818 |
| 0.383262522 | 0.038350579 | 0.19297211  | 0.298002222 |
| 0.24411765  | 0.015004705 | 0.15118962  | 0.334497847 |
| 0.0332091   | 0.109470139 | 0.383395019 | 0.308917213 |
| 0.199733407 | 0.37604278  | 0.427999635 | 0.103759266 |
| 0.189935381 | 0.224644181 | 0.031544357 | 0.162642512 |
| 0.366957269 | 0.125010553 | 0.385716045 | 0.187619707 |
| 0.232554591 | 0.39335539  | 0.306242829 | 0.077380742 |
| 0.054409694 | 0.212635723 | 0.028647045 | 0.149703919 |
| 0.332965493 | 0.069872598 | 0.140085406 | 0.168646248 |
| 0.056183427 | 0.411730918 | 0.078496197 | 0.091056463 |
| 0.049434943 | 0.179197262 | 0.220325376 | 0.079062997 |
| 0.055050956 | 0.119769714 | 0.13062244  | 0.153740918 |
| 0.059814657 | 0.068042425 | 0.034506552 | 0.098299845 |
| 0.038408977 | 0.094798749 | 0.094499863 | 0.302303242 |
| 0.164922353 | 0.055801636 | 0.14588594  | 0.143750137 |
| 0.079204098 | 0.024357608 | 0.414569014 | 0.344982738 |
| 0.307028842 | 0.145159964 | 0.058451676 | 0.093600114 |
| 0.373659699 | 0.144191827 | 0.182799343 | 0.37220125  |
| 0.061302736 | 0.414552944 | 0.095773699 | 0.075930385 |
| 0.114891262 | 0.144371198 | 0.428227475 | 0.04264028  |
| 0.281901314 | 0.387488177 | 0.214935257 | 0.095212806 |
| 0.327470652 | 0.312086919 | 0.046459772 | 0.34046428  |
| 0.316523089 | 0.037022874 | 0.404564829 | 0.078699438 |
| 0.032616814 | 0.296176298 | 0.251284335 | 0.072084267 |
| 0.070215774 | 0.122607088 | 0.083391124 | 0.185135154 |
| 0.409315064 | 0.311427195 | 0.282684529 | 0.126044634 |
| 0.041094002 | 0.004512412 | 0.127499942 | 0.205032556 |
| 0.395556495 | 0.380619573 | 0.189036125 | 0.115376626 |
| 0.186393355 | 0.112285483 | 0.159340518 | 0.387521194 |
| 0.197990124 | 0.423326268 | 0.019296778 | 0.292983283 |
| 0.368794435 | 0.174171241 | 0.046411055 | 0.183989927 |
| 0.333627288 | 0.064082415 | 0.244611436 | 0.384718421 |
| 0.381254378 | 0.151322452 | 0.128257252 | 0.329320431 |
| 0.033943157 | 0.072417771 | 0.209254343 | 0.07977552  |
| 0.148956705 | 0.150633481 | 0.020973601 | 0.226873497 |
| 0.035542591 | 0.362399173 | 0.403728202 | 0.044470349 |
| 0.149423688 | 0.22831265  | 0.256488684 | 0.054055183 |
| 0.312258115 | 0.389856081 | 0.404961847 | 0.214038857 |

|             |             |             |             |
|-------------|-------------|-------------|-------------|
| 0.330310193 | 0.348186132 | 0.149376889 | 0.088832595 |
| 0.023610618 | 0.384697616 | 0.352111428 | 0.019510781 |
| 0.41636086  | 0.146603614 | 0.006927401 | 0.427887144 |
| 0.173448479 | 0.358236632 | 0.009906593 | 0.076452159 |
| 0.053133701 | 0.382846466 | 0.368501109 | 0.361376808 |
| 0.098269209 | 0.321892381 | 0.015930283 | 0.415630624 |
| 0.377720716 | 0.016176558 | 0.085051604 | 0.287524545 |
| 0.238561691 | 0.448817721 | 0.101951213 | 0.304328156 |
| 0.185384024 | 0.357929356 | 0.124279795 | 0.158691298 |
| 0.347739343 | 0.347351244 | 0.384454153 | 0.419713121 |
| 0.385392909 | 0.30504592  | 0.200190239 | 0.023593323 |
| 0.06954204  | 0.186382619 | 0.082656254 | 0.036012006 |
| 0.273665932 | 0.076202241 | 0.415604855 | 0.403734169 |
| 0.354553025 | 0.013006822 | 0.165930957 | 0.32105643  |
| 0.420575268 | 0.451374806 | 0.060228043 | 0.009241645 |
| 0.012392128 | 0.007941504 | 0.278119194 | 0.159838177 |
| 0.392165371 | 0.079465947 | 0.012445366 | 0.091975186 |
| 0.186495231 | 0.19822209  | 0.384622    | 0.342203234 |
| 0.346200722 | 0.092724589 | 0.08324958  | 0.382001943 |
| 0.039967031 | 0.293748815 | 0.364941661 | 0.392270662 |
| 0.070867538 | 0.162668268 | 0.234027325 | 0.426456604 |
| 0.019590672 | 0.198459872 | 0.267250073 | 0.124939594 |
| 0.042731241 | 0.065314006 | 0.052862877 | 0.391824708 |
| 0.355922581 | 0.031421862 | 0.017682075 | 0.098798184 |
| 0.07250625  | 0.409963637 | 0.096285885 | 0.426279057 |
| 0.387830083 | 0.397613229 | 0.059441661 | 0.39495817  |
| 0.028381471 | 0.364711401 | 0.120054612 | 0.039941513 |
| 0.224782896 | 0.036045463 | 0.363393917 | 0.03439012  |
| 0.186082031 | 0.37265069  | 0.091013797 | 0.024032009 |
| 0.077205569 | 0.051000693 | 0.38756516  | 0.359721495 |
| 0.048252372 | 0.221597121 | 0.194532732 | 0.347691435 |
| 0.201415642 | 0.316127113 | 0.394452104 | 0.144581853 |
| 0.088831002 | 0.086934722 | 0.38746055  | 0.315017804 |
| 0.200410054 | 0.406337127 | 0.098738778 | 0.426114161 |
| 0.361575065 | 0.432839956 | 0.36535688  | 0.214145283 |
| 0.092153754 | 0.266039677 | 0.252510139 | 0.022784124 |
| 0.246806724 | 0.358009361 | 1           | 0.060899879 |
| 0.111569642 | 0.152378069 | 0.118894103 | 0.171145228 |
| 0.100456198 | 0.219800898 | 0.098695251 | 0.422379364 |
| 0.339488793 | 0.325077835 | 0.114682818 | 0.046954504 |
| 0.439637165 | 0.408889874 | 0.145233714 | 0.295547962 |
| 0.153677798 | 0.171072261 | 0.352313962 | 0.328476089 |
| 0.175024383 | 0.323443954 | 0.389348645 | 0.25653743  |
| 0.367595552 | 0.191339159 | 0.405913428 | 0.154143003 |
| 0.049072785 | 0.259093531 | 0.049687041 | 0.083914428 |
| 0.110069639 | 0.036572842 | 0.08432498  | 0.353661289 |
| 0.110535487 | 0.242576093 | 0.19975357  | 0.088396619 |
| 0.180652577 | 0.216738631 | 0.232279429 | 0.135287873 |
| 0.053589689 | 0.371885738 | 0.013817318 | 0.065587121 |
| 0.122122416 | 0.31778208  | 0.117955316 | 0.156636302 |
| 0.095579401 | 0.113444325 | 0.16311554  | 0.180299452 |
| 0.090592832 | 0.167142337 | 0.317590516 | 0.072569042 |
| 0.043611664 | 0.424243041 | 0.207315114 | 0.042562969 |
| 0.085589993 | 0.295682973 | 0.253378491 | 0.105087402 |

|             |             |             |             |
|-------------|-------------|-------------|-------------|
| 0.027729246 | 0.336887489 | 0.124684696 | 0.209414202 |
| 0.249530605 | 0.098627003 | 0.35996549  | 0.112797521 |
| 0.127008558 | 0.394075295 | 0.191036982 | 0.377794657 |
| 0.194142194 | 0.333495945 | 0.38447839  | 0.331314919 |
| 0.155475739 | 0.187750155 | 0.04852917  | 0.426637773 |
| 0.110357165 |             |             |             |
| STARD7      | 0.110217048 | 0.182803021 | 0.105908096 |
| 0.222042145 | 0.140933746 | 0.082089625 | 0.109850354 |
| 0.019231291 | 0.064730771 | 0.01543562  | 0.071736644 |
| 0.138637374 | 0.062229749 | 0.049275054 | 0.041724463 |
| 0.238610637 | 0.127432562 | 0.040173062 | 0.159100281 |
| 0.15404095  | 0.03131755  | 0.263749834 | 0.065553741 |
| 0.068781848 | 0.200520227 | 0.157119588 | 0.174791926 |
| 0.203065699 | 0.169696122 | 0.05329342  | 0.114338023 |
| 0.058171918 | 0.130443866 | 0.15342284  | 0.225506787 |
| 0.147002789 | 0.092490975 | 0.002981157 | 0.050656479 |
| 0.120230404 | 0.225159481 | 0.158549152 | 0.206034366 |
| 0.058405185 | 0.12072097  | 0.170907377 | 0.169561782 |
| 0.013804302 | 0.108140551 | 0.022596478 | 0.107258843 |
| 0.138793941 | 0.133363339 | 0.039759182 | 0.088873575 |
| 0.04374681  | 0.016985446 | 0.068752712 | 0.058782894 |
| 0.13803251  | 0.016637335 | 0.148512063 | 0.039369136 |
| 0.013771826 | 0.039113764 | 0.075280982 | 0.064631953 |
| 0.072365964 | 0.093544441 | 0.01058518  | 0.093900844 |
| 0.003556834 | 0.16141107  | 0.164465916 | 0.098355133 |
| 0.138704919 | 0.050078377 | 0.103881173 | 0.156893691 |
| 0.195680267 | 0.125133182 | 0.252682487 | 0.230459121 |
| 0.068287228 | 0.127520304 | 0.121585809 | 0.128655701 |
| 0.142349925 | 0.116779079 | 0.040422767 | 0.265653311 |
| 0.248029026 | 0.174181672 | 0.089237495 | 0.205900969 |
| 0.177678929 | 0.149902686 | 0.105636723 | 0.121499812 |
| 0.09714447  | 0.0530354   | 0.132976178 | 0.213224316 |
| 0.097711458 | 0.12923685  | 0.224787336 | 0.131316666 |
| 0.090323789 | 0.021487792 | 0.22318397  | 0.024493118 |
| 0.210545243 | 0.037341191 | 0.209579954 | 0.1216829   |
| 0.026815814 | 0.146590978 | 0.180465741 | 0.142398266 |
| 0.113738957 | 0.033943035 | 0.088525208 | 0.046641741 |
| 0.029317869 | 0.05051411  | 0.116142418 | 0.215717352 |
| 0.016837678 | 0.039197852 | 0.079162937 | 0.020882339 |
| 0.085053016 | 0.027747939 | 0.131045738 | 0.060241128 |
| 0.145649202 | 0.100485471 | 0.176548711 | 0.085006838 |
| 0.154890381 | 0.244011581 | 0.004500279 | 0.052703433 |
| 0.139432109 | 0.0288051   | 0.214220899 | 0.118371521 |
| 0.247667618 | 0.040814932 | 0.100810594 | 0.226972546 |
| 0.110548071 | 0.117750783 | 0.025738904 | 0.245358646 |
| 0.044146495 | 0.225827283 | 0.076560127 | 0.081630331 |
| 0.037536779 | 0.146485698 | 0.100671027 | 0.04544324  |
| 0.050043235 | 0.055999616 | 0.005822907 | 0.046056297 |
| 0.033569196 | 0.176172402 | 0.106686317 | 0.096685414 |
| 0.105115542 | 0.238452868 | 0.036044307 | 0.174809811 |
| 0.04512388  | 0.031121183 | 0.0182722   | 0.205043909 |
| 0.044564605 | 0.200055906 | 0.070681204 | 0.095112698 |
| 0.237426798 | 0.215591624 | 0.001724259 | 0.13805358  |
| 0.178562099 | 0.022684476 | 0.200624765 | 0.14275728  |

|             |             |             |             |
|-------------|-------------|-------------|-------------|
| 0.122006129 | 0.226301717 | 0.002296448 | 0.208724479 |
| 0.059684877 | 0.078768432 | 0.244978336 | 0.237274701 |
| 0.12990774  | 0.145112068 | 0.038706533 | 0.196397825 |
| 0.14644461  | 0.011244785 | 0.03951477  | 0.15048422  |
| 0.063761599 | 0.020766743 | 0.130028198 | 0.190075707 |
| 0.194370567 | 0.19583853  | 0.24982288  | 0.121582342 |
| 0.154089238 | 0.063186909 | 0.020880555 | 0.186965852 |
| 0.150279601 | 0.019128615 | 0.127469723 | 0.056485333 |
| 0.040807142 | 0.16530433  | 0.126203973 | 0.016404839 |
| 0.092824108 | 0.065999204 | 0.019197556 | 0.210495899 |
| 0.111172718 | 0.061097573 | 0.104905812 | 0.022474668 |
| 0.141072914 | 0.214080414 | 0.114173648 | 0.09090092  |
| 0.075191612 | 0.121062293 | 0.101339515 | 0.063822218 |
| 0.066304765 | 0.097956515 | 0.105224255 | 0.091340855 |
| 0.0262886   | 0.135160805 | 0.014027195 | 0.050039266 |
| 0.051766713 | 0.069955269 | 0.057713796 | 0.088698819 |
| 0.027633001 | 0.053139921 | 0.188939451 | 0.057491924 |
| 0.140075154 | 0.086426242 | 0.181001212 | 0.190848276 |
| 0.060851494 | 0.077771053 | 0.07942426  | 0.017143381 |
| 0.209103829 | 0.057419091 | 0.015092455 | 0.169288282 |
| 0.019360503 | 0.214975856 | 0.069242159 | 0.225494756 |
| 0.112336394 | 0.18607726  | 0.228358932 | 0.022461814 |
| 0.065919325 | 0.144536501 | 0.142052785 | 0.205378158 |
| 0.104879678 | 0.153480986 | 0.031136416 | 0.098494475 |
| 0.09296956  | 0.103463471 | 0.194262321 | 0.093193386 |
| 0.088096658 | 0.195912533 | 0.186335673 | 0.175625062 |
| 0.150318399 | 0.142422725 | 0.015835255 | 0.278780084 |
| 0.209920743 | 0.28014301  | 0.157195428 | 0.093574576 |
| 0.089543873 | 0.033363105 | 0.117841988 | 0.102461029 |
| 0.1350648   | 0.196703671 | 0.156529604 | 0.202346325 |
| 0.183710802 | 0.108657017 | 0.004746652 | 0.216436621 |
| 0.017537385 | 0.153335547 | 0.035092135 | 0.196091129 |
| 0.145661948 | 0.03235193  | 0.211237985 | 0.090864297 |
| 0.107823517 | 0.081078506 | 0.041076643 | 0.158267495 |
| 0.159443341 | 0.12135617  | 0.114286691 | 0.136237346 |
| 0.018404037 | 0.019281578 | 0.183663109 | 0.072043805 |
| 0.069788449 | 0.119469962 | 0.028270945 | 0.024704657 |
| 0.055565767 | 0.145502355 | 0.203086564 | 0.102721535 |
| 0.080101032 | 0.024450874 | 0.215349561 | 0.085939051 |
| 0.205436187 | 0.161575924 | 0.155984119 | 0.038836362 |
| 0.1390016   | 0.198634408 | 0.145802553 | 0.106448586 |
| 0.103523629 | 0.16306137  | 0.095594242 | 0.033783397 |
| 0.218584374 | 0.024093263 | 0.039570736 | 0.165530256 |
| 0.122178658 | 0.093946086 | 0.006506092 | 0.00710391  |
| 0.045094562 | 0.228561893 | 0.143552169 | 0.109740923 |
| 0.024096754 | 0.124417859 | 0.001955905 | 0.19476031  |
| 0.164750337 | 0.090965629 | 0.074146702 | 0.153151611 |
| 0.183236637 | 0.16579782  | 0.156649205 | 0.219589935 |
| 0.15909165  | 0.153924613 | 0.034638518 | 0.259752285 |
| 0.183806064 | 0.167918577 | 0.139840991 | 0.140013355 |
| 0.208535185 | 0.205564365 | 0.207036417 | 0.042180687 |
| 0.058832317 | 0.030330943 | 0.051862697 | 0.062769971 |
| 0.051429463 | 0.150213631 | 0.162358251 | 0.220125136 |
| 0.214451437 | 0.046750985 | 0.023245311 | 0.136025931 |

|             |             |             |             |
|-------------|-------------|-------------|-------------|
| 0.160965776 | 0.198530813 | 0.011708904 | 0.008117084 |
| 0.007144461 | 0.102445512 | 0.09428955  | 0.166424698 |
| 0.192040366 | 0.011897265 | 0.033526975 | 0.012485607 |
| 0.036615311 | 0.228441486 | 0.16847771  | 0.223242384 |
| 0.167528966 | 0.08451538  | 0.049085707 | 0.189470808 |
| 0.099940017 | 0.047486817 | 0.227164271 | 0.144913192 |
| 0.033488319 | 0.146329175 | 0.049154242 | 0.220158307 |
| 0.037933245 | 0.204285143 | 0.133939879 | 0.06236539  |
| 0.009276256 | 0.133969971 | 0.127401045 | 0.206184684 |
| 0.140949086 | 0.081700153 | 0.077720572 | 0.004802742 |
| 0.094822872 | 0.184988753 | 0.091166619 | 0.230292622 |
| 0.176222401 | 0.244007502 | 0.048096038 | 0.152111379 |
| 0.059918541 | 0.143935338 | 0.196653935 | 0.014379907 |
| 0.062269742 | 0.022208389 | 0.142129436 | 0.071396835 |
| 0.03543331  | 0.096110719 | 0.056755533 | 0.055390765 |
| 0.039177729 | 0.117200534 | 0.24763854  | 0.235597546 |
| 0.035493501 | 0.050971497 | 0.161720678 | 0.138484625 |
| 0.061582572 | 0.234146758 | 0.143888124 | 0.076892722 |
| 0.051420967 | 0.017324582 | 0.14563456  | 0.082306834 |
| 0.023800906 | 0.243351528 | 0.103972502 | 0.198315826 |
| 0.109088205 | 0.150399029 | 0.169779796 | 0.159261578 |
| 0.046757328 | 0.081416104 | 0.131125464 | 0.025290377 |
| 0.152933869 | 0.230327948 | 0.060899879 | 1           |
| 0.22744375  | 0.122131141 | 0.013226658 | 0.005632433 |
| 0.109008069 | 0.063686216 | 0.046248422 | 0.229860565 |
| 0.080012366 | 0.091149102 | 0.00803047  | 0.131328335 |
| 0.183134101 | 0.127283891 | 0.02433564  | 0.159175669 |
| 0.125662886 | 0.218682988 | 0.184918794 | 0.198991221 |
| 0.033675165 | 0.169176561 | 0.142209854 | 0.120729334 |
| 0.122661211 | 0.138250774 | 0.163382136 | 0.004726212 |
| 0.069256232 | 0.083727952 | 0.093737813 | 0.152107963 |
| 0.152526632 | 0.061557532 | 0.060162993 | 0.201685191 |
| 0.058477498 | 0.220883184 | 0.009808142 | 0.048447682 |
| 0.164910193 | 0.039805744 | 0.185007383 | 0.073700336 |
| 0.064216704 | 0.15707889  | 0.025807958 | 0.091484502 |
| 0.064450181 | 0.188136404 | 0.186472454 | 0.139904081 |
| 0.06978264  | 0.042194943 | 0.192862559 | 0.039980584 |
| 0.058589019 | 0.01744124  | 0.182598334 | 0.021462462 |
| 0.018111479 | 0.232787482 | 0.052107899 | 0.023048651 |
| 0.020589532 | 0.066167662 | 0.029514712 | 0.06843008  |
| 0.073975935 | 0.177803198 | 0.052162795 | 0.143975385 |
| 0.101175655 | 0.061038335 | 0.07031998  | 0.014162432 |
| 0.02105113  | 0.118709312 | 0.141484383 | 0.16624721  |
| 0.091575686 | 0.264028518 | 0.099237383 | 0.135459668 |
| 0.020840543 | 0.066569839 | 0.036816559 | 0.164969299 |
| 0.07628453  |             |             |             |
| STT3B       | 0.191720288 | 0.305368879 | 0.133631429 |
| 0.331156592 | 0.218418266 | 0.142602276 | 0.159740597 |
| 0.065076955 | 0.142538141 | 0.051061035 | 0.163002032 |
| 0.204112908 | 0.187333257 | 0.13695831  | 0.089324768 |
| 0.348348244 | 0.234240732 | 0.083351447 | 0.218880795 |
| 0.267069897 | 0.097065117 | 0.373291283 | 0.159552898 |
| 0.14788752  | 0.224213125 | 0.2160108   | 0.192647032 |
| 0.32762691  | 0.214401686 | 0.101826162 | 0.212920213 |

|             |             |             |             |
|-------------|-------------|-------------|-------------|
| 0.148867143 | 0.235701118 | 0.255176808 | 0.314911548 |
| 0.247470571 | 0.156021227 | 0.01981477  | 0.116560839 |
| 0.211423132 | 0.293195971 | 0.273559226 | 0.283531382 |
| 0.148020693 | 0.215963087 | 0.231074043 | 0.227162174 |
| 0.062813246 | 0.186728944 | 0.053304189 | 0.197574146 |
| 0.233206063 | 0.201770622 | 0.090419333 | 0.165043902 |
| 0.164329296 | 0.060157735 | 0.139347421 | 0.121072681 |
| 0.204350592 | 0.047627345 | 0.249556359 | 0.124324877 |
| 0.080585782 | 0.095777818 | 0.175566033 | 0.121159329 |
| 0.13080755  | 0.169027417 | 0.050889205 | 0.149099433 |
| 0.018908154 | 0.26044223  | 0.228721446 | 0.115517483 |
| 0.167801048 | 0.15864377  | 0.18631202  | 0.25292946  |
| 0.325941032 | 0.21587639  | 0.372691401 | 0.345070962 |
| 0.216139515 | 0.177889367 | 0.166095274 | 0.233914978 |
| 0.237694204 | 0.179105374 | 0.094149148 | 0.378581956 |
| 0.36643554  | 0.287343575 | 0.212604965 | 0.228875039 |
| 0.271395141 | 0.26557327  | 0.136137793 | 0.18083978  |
| 0.133113876 | 0.114507756 | 0.229867644 | 0.337551661 |
| 0.182868811 | 0.137826093 | 0.234148561 | 0.242144935 |
| 0.159889634 | 0.0749263   | 0.323371405 | 0.110397187 |
| 0.336558269 | 0.084555498 | 0.214143241 | 0.21025966  |
| 0.12208212  | 0.239719141 | 0.286388848 | 0.190589002 |
| 0.171313235 | 0.103648422 | 0.133591511 | 0.107505847 |
| 0.12796839  | 0.099706334 | 0.204178838 | 0.339714259 |
| 0.088544925 | 0.165209801 | 0.145981595 | 0.040494704 |
| 0.147001672 | 0.115908816 | 0.235013963 | 0.111424171 |
| 0.249154593 | 0.164064889 | 0.23228519  | 0.160288021 |
| 0.218686675 | 0.367137422 | 0.013615876 | 0.136998318 |
| 0.182342346 | 0.126218983 | 0.278609605 | 0.203802312 |
| 0.239447476 | 0.10953017  | 0.197045121 | 0.347269488 |
| 0.204830766 | 0.18433016  | 0.06392202  | 0.342980109 |
| 0.150170229 | 0.255010884 | 0.164050385 | 0.187347284 |
| 0.132032607 | 0.237157764 | 0.133159657 | 0.083818724 |
| 0.11101381  | 0.189523366 | 0.026765082 | 0.089896841 |
| 0.123073595 | 0.27509435  | 0.190829514 | 0.164558171 |
| 0.182337371 | 0.321291445 | 0.078627794 | 0.255220313 |
| 0.109616828 | 0.103681997 | 0.042834726 | 0.332605993 |
| 0.094828647 | 0.315548366 | 0.161788039 | 0.163370068 |
| 0.26670618  | 0.323335619 | 0.00313662  | 0.232567483 |
| 0.285358648 | 0.04498594  | 0.274699083 | 0.214425314 |
| 0.133517618 | 0.339757294 | 0.006911497 | 0.329733618 |
| 0.119110114 | 0.145552058 | 0.373888169 | 0.248275645 |
| 0.227179932 | 0.188478386 | 0.10254293  | 0.274863229 |
| 0.224895789 | 0.029846423 | 0.071926207 | 0.25466583  |
| 0.11181307  | 0.078330062 | 0.225705758 | 0.285198662 |
| 0.24491559  | 0.297150364 | 0.382389921 | 0.122909635 |
| 0.214627777 | 0.128385427 | 0.060690458 | 0.213808931 |
| 0.244725642 | 0.093875247 | 0.223119456 | 0.144745593 |
| 0.081286091 | 0.271374134 | 0.204599767 | 0.081471847 |
| 0.151633568 | 0.128339821 | 0.048446324 | 0.217081362 |
| 0.17982963  | 0.193737846 | 0.12985305  | 0.107930194 |
| 0.195025498 | 0.337472878 | 0.139771911 | 0.108828615 |
| 0.099166118 | 0.207206343 | 0.154837942 | 0.165412917 |
| 0.206539265 | 0.210630079 | 0.151743384 | 0.151304946 |

|             |             |             |             |
|-------------|-------------|-------------|-------------|
| 0.090084595 | 0.226814454 | 0.03878376  | 0.103947331 |
| 0.194440172 | 0.135735976 | 0.113651389 | 0.172646616 |
| 0.123074805 | 0.192275693 | 0.215985713 | 0.128438344 |
| 0.195471447 | 0.112806456 | 0.297367793 | 0.288625056 |
| 0.123009918 | 0.170454565 | 0.138172155 | 0.093373054 |
| 0.338000007 | 0.090101311 | 0.037028846 | 0.290400439 |
| 0.055990632 | 0.340911345 | 0.222330125 | 0.241892737 |
| 0.165684801 | 0.25137734  | 0.350951019 | 0.046719764 |
| 0.132507834 | 0.258114912 | 0.193053457 | 0.244239592 |
| 0.194323159 | 0.243573777 | 0.116266052 | 0.177550559 |
| 0.172621351 | 0.161334789 | 0.310760218 | 0.200893571 |
| 0.11841413  | 0.279324801 | 0.266013191 | 0.191402014 |
| 0.185944666 | 0.194156003 | 0.063352649 | 0.317415445 |
| 0.329553229 | 0.387307462 | 0.257645912 | 0.137573877 |
| 0.171860717 | 0.112013318 | 0.170732633 | 0.140488321 |
| 0.237447437 | 0.308197624 | 0.222984675 | 0.217942978 |
| 0.254107216 | 0.162720931 | 0.037597535 | 0.335038381 |
| 0.070375081 | 0.261534051 | 0.061813361 | 0.28202981  |
| 0.242566184 | 0.069780386 | 0.226839317 | 0.157201319 |
| 0.195801674 | 0.141244744 | 0.115104658 | 0.26221678  |
| 0.260936048 | 0.167012878 | 0.146526238 | 0.230330666 |
| 0.067049057 | 0.100771831 | 0.217775676 | 0.116524208 |
| 0.142961498 | 0.199836248 | 0.049912489 | 0.082417696 |
| 0.188467305 | 0.255758016 | 0.327886167 | 0.185876899 |
| 0.136710614 | 0.067097275 | 0.298897201 | 0.143428494 |
| 0.288951141 | 0.262223656 | 0.263862947 | 0.117619588 |
| 0.240772849 | 0.299625142 | 0.185742788 | 0.157581548 |
| 0.114929629 | 0.263071691 | 0.17087258  | 0.100884502 |
| 0.354895607 | 0.048420817 | 0.131802644 | 0.282762697 |
| 0.172450758 | 0.176792276 | 0.008105995 | 0.022389667 |
| 0.098704015 | 0.34031175  | 0.23582858  | 0.20440935  |
| 0.054602533 | 0.20849459  | 0.010308933 | 0.31194605  |
| 0.274862901 | 0.113005897 | 0.175484846 | 0.248517062 |
| 0.246745739 | 0.28565991  | 0.14526061  | 0.306795855 |
| 0.213113674 | 0.255573855 | 0.160843906 | 0.290216508 |
| 0.285363122 | 0.264119842 | 0.231663211 | 0.238664023 |
| 0.340534811 | 0.3028828   | 0.279540074 | 0.100621845 |
| 0.119131682 | 0.072431344 | 0.088952701 | 0.183267098 |
| 0.100585353 | 0.234270607 | 0.266846057 | 0.351576111 |
| 0.320596195 | 0.060230579 | 0.10128182  | 0.229030316 |
| 0.277235596 | 0.327788928 | 0.0371958   | 0.010885122 |
| 0.006369441 | 0.140703852 | 0.176496981 | 0.182999089 |
| 0.301363526 | 0.063066405 | 0.061549887 | 0.064944637 |
| 0.146266774 | 0.267983932 | 0.28225032  | 0.332578389 |
| 0.258625164 | 0.172514619 | 0.123900919 | 0.302101635 |
| 0.199169128 | 0.09552917  | 0.337722831 | 0.252512184 |
| 0.100076134 | 0.180829822 | 0.090278555 | 0.352885104 |
| 0.055411532 | 0.272305843 | 0.216161388 | 0.179876084 |
| 0.031933676 | 0.190647179 | 0.18670796  | 0.322258024 |
| 0.238734929 | 0.230822327 | 0.198717555 | 0.029365915 |
| 0.203593693 | 0.3084537   | 0.226638663 | 0.359529794 |
| 0.29045997  | 0.376992694 | 0.155285523 | 0.251516257 |
| 0.167348018 | 0.243599041 | 0.204356493 | 0.02528547  |
| 0.128856626 | 0.069504834 | 0.242766877 | 0.143768587 |

|             |             |             |             |
|-------------|-------------|-------------|-------------|
| 0.08671506  | 0.178936553 | 0.12422695  | 0.094804579 |
| 0.084882256 | 0.179960809 | 0.374891082 | 0.341523222 |
| 0.09135394  | 0.136244951 | 0.200823446 | 0.226385894 |
| 0.110607406 | 0.344023031 | 0.245976758 | 0.111740276 |
| 0.145261895 | 0.067881332 | 0.250403491 | 0.151240749 |
| 0.088173862 | 0.369602295 | 0.195014242 | 0.314324712 |
| 0.182475324 | 0.254448104 | 0.278648816 | 0.212903145 |
| 0.175341454 | 0.136489823 | 0.220549855 | 0.084248459 |
| 0.213067416 | 0.362028585 | 0.111569642 | 0.22744375  |
| 1           | 0.157032575 | 0.071760997 | 0.02852613  |
| 0.120380122 | 0.119462287 | 0.210196918 | 0.356647684 |
| 0.153303611 | 0.159876228 | 0.054772047 | 0.191762169 |
| 0.3064551   | 0.219824332 | 0.08805504  | 0.250020177 |
| 0.180777931 | 0.261638275 | 0.27772675  | 0.295928365 |
| 0.0974854   | 0.285736139 | 0.249900353 | 0.215220455 |
| 0.225183844 | 0.197088595 | 0.272158424 | 0.027819721 |
| 0.131915089 | 0.154768376 | 0.233041266 | 0.181942052 |
| 0.220494794 | 0.124404829 | 0.100011649 | 0.315264227 |
| 0.098087259 | 0.327234663 | 0.061207417 | 0.145699822 |
| 0.222962239 | 0.073749485 | 0.265072928 | 0.14201115  |
| 0.207557324 | 0.261139203 | 0.059919959 | 0.162526869 |
| 0.109692382 | 0.263658199 | 0.198867055 | 0.199770214 |
| 0.143489016 | 0.139667615 | 0.268577084 | 0.078023667 |
| 0.098573932 | 0.086647407 | 0.259371196 | 0.0557733   |
| 0.080609229 | 0.366566159 | 0.086881477 | 0.063762478 |
| 0.098240914 | 0.125583901 | 0.101147943 | 0.199602697 |
| 0.101946435 | 0.282339665 | 0.088220318 | 0.200405717 |
| 0.172680086 | 0.141831617 | 0.141727664 | 0.059183983 |
| 0.081117525 | 0.211924356 | 0.17112654  | 0.270513997 |
| 0.125505008 | 0.384695358 | 0.182777305 | 0.244444489 |
| 0.063490878 | 0.103481187 | 0.102576248 | 0.285667958 |
| 0.096728828 |             |             |             |
| SUHW4       | 0.331309329 | 0.44671688  | 0.241270012 |
| 0.281593178 | 0.224588591 | 0.154452186 | 0.078097607 |
| 0.05561052  | 0.053961253 | 0.001122003 | 0.021153198 |
| 0.291847948 | 0.108189149 | 0.089767507 | 0.137657814 |
| 0.332679218 | 0.107518583 | 0.170936983 | 0.113099181 |
| 0.251809462 | 0.023977778 | 0.292303845 | 0.043603627 |
| 0.259969958 | 0.10392923  | 0.048618492 | 0.216271217 |
| 0.337952714 | 0.05625968  | 0.098144765 | 0.208261188 |
| 0.102806576 | 0.334670234 | 0.448914428 | 0.319307719 |
| 0.456835559 | 0.300559217 | 0.010732123 | 0.101638322 |
| 0.326557319 | 0.354426467 | 0.251730818 | 0.153714389 |
| 0.020248799 | 0.38252578  | 0.102813067 | 0.282129124 |
| 0.082529616 | 0.025567494 | 0.06304067  | 0.339974256 |
| 0.393549019 | 0.235909316 | 0.07226626  | 0.06097927  |
| 0.108625222 | 0.061003551 | 0.220585768 | 0.139801026 |
| 0.097653484 | 0.033673067 | 0.418158835 | 0.036293481 |
| 0.070589425 | 0.0896209   | 0.148138207 | 0.09135839  |
| 0.275803771 | 0.232970263 | 0.00874192  | 0.291348017 |
| 0.000384109 | 0.230152835 | 0.255274672 | 0.245238376 |
| 0.036990174 | 0.010715242 | 0.157238166 | 0.146702974 |
| 0.372452118 | 0.411347489 | 0.45309761  | 0.473228254 |
| 0.117134295 | 0.197819279 | 0.275488261 | 0.091753835 |



|             |             |             |             |
|-------------|-------------|-------------|-------------|
| 0.35561109  | 0.066645179 | 0.053406092 | 0.353684431 |
| 0.462457395 | 0.462000892 | 0.153038001 | 0.20569579  |
| 0.302950693 | 0.382407001 | 0.190445731 | 0.215652043 |
| 0.200951214 | 0.088399981 | 0.356026087 | 0.468503299 |
| 0.286470158 | 0.28350959  | 0.120995376 | 0.263338009 |
| 0.046403832 | 0.14360767  | 0.197991106 | 0.103938033 |
| 0.383654259 | 0.009197045 | 0.182473901 | 0.137544427 |
| 0.138287154 | 0.331327638 | 0.477912693 | 0.083354209 |
| 0.23975371  | 0.01452697  | 0.147910652 | 0.039023029 |
| 0.138837466 | 0.227483386 | 0.397216312 | 0.358913927 |
| 0.075389832 | 0.219895691 | 0.109820661 | 0.004236548 |
| 0.031766002 | 0.167042022 | 0.359162694 | 0.178844775 |
| 0.315349944 | 0.365835928 | 0.130631521 | 0.248459155 |
| 0.320276768 | 0.451567491 | 0.012485381 | 0.044246962 |
| 0.185201026 | 0.169190112 | 0.133816716 | 0.2449548   |
| 0.197740472 | 0.043158578 | 0.067004326 | 0.463343627 |
| 0.30884415  | 0.044019033 | 0.131763733 | 0.31560796  |
| 0.137042328 | 0.247920753 | 0.056826832 | 0.117669668 |
| 0.018561825 | 0.443391173 | 0.043901937 | 0.12657497  |
| 0.170931562 | 0.136504453 | 0.009764501 | 0.079748204 |
| 0.10219983  | 0.344949424 | 0.404654954 | 0.06694242  |
| 0.137482712 | 0.277542504 | 0.107749003 | 0.267317142 |
| 0.00595643  | 0.033357186 | 0.08765054  | 0.44139215  |
| 0.10537526  | 0.478387723 | 0.150830832 | 0.217030926 |
| 0.187876759 | 0.371758442 | 0.007071497 | 0.408027333 |
| 0.477614811 | 0.092461038 | 0.201045553 | 0.279286507 |
| 0.235632523 | 0.35124741  | 0.021338647 | 0.299636812 |
| 0.204675992 | 0.051306213 | 0.461300709 | 0.110975522 |
| 0.394544156 | 0.031979067 | 0.110882203 | 0.435087889 |
| 0.348149218 | 0.006066743 | 0.057998206 | 0.21331924  |
| 0.048431062 | 0.023774928 | 0.302929335 | 0.244308896 |
| 0.192759685 | 0.386457716 | 0.427510696 | 0.23359562  |
| 0.215868482 | 0.095275722 | 0.015078239 | 0.239686939 |
| 0.382731908 | 0.209534262 | 0.33510784  | 0.095123083 |
| 0.136537615 | 0.384467715 | 0.357997099 | 0.092957668 |
| 0.022473778 | 0.111951863 | 0.006561245 | 0.191189027 |
| 0.351636275 | 0.043366489 | 0.215267321 | 0.12802104  |
| 0.071022218 | 0.466255081 | 0.231165306 | 0.278383396 |
| 0.211168274 | 0.173930992 | 0.114259819 | 0.08419537  |
| 0.113723304 | 0.112184575 | 0.231616773 | 0.199418961 |
| 0.010206567 | 0.058556304 | 0.037761043 | 0.185568074 |
| 0.063588684 | 0.143454753 | 0.128392388 | 0.250508708 |
| 0.128196431 | 0.050282765 | 0.198316244 | 0.255162216 |
| 0.108787619 | 0.016033239 | 0.433942087 | 0.275705101 |
| 0.183147662 | 0.074584275 | 0.039393017 | 0.146306597 |
| 0.376718189 | 0.099902377 | 0.080202253 | 0.350060734 |
| 0.021723558 | 0.452410622 | 0.115134969 | 0.092268627 |
| 0.22392133  | 0.124687087 | 0.378123462 | 0.023389782 |
| 0.176295803 | 0.363184743 | 0.199202921 | 0.127053509 |
| 0.28079519  | 0.235110333 | 0.012832116 | 0.286274279 |
| 0.265502686 | 0.024428392 | 0.474497208 | 0.119534671 |
| 0.024865923 | 0.366862654 | 0.347400414 | 0.065112705 |
| 0.073998591 | 0.136611952 | 0.010887292 | 0.190592588 |
| 0.449150092 | 0.317878471 | 0.312371929 | 0.239109274 |

|             |             |             |             |
|-------------|-------------|-------------|-------------|
| 0.020821585 | 0.00543444  | 0.209172206 | 0.246452293 |
| 0.424626278 | 0.484217578 | 0.156822356 | 0.214009085 |
| 0.121046282 | 0.210457459 | 0.037140918 | 0.457930472 |
| 0.181275203 | 0.455581786 | 0.007699371 | 0.411927982 |
| 0.447189094 | 0.083773541 | 0.073308822 | 0.106506887 |
| 0.259661812 | 0.026247501 | 0.102477998 | 0.416752914 |
| 0.356084522 | 0.189407068 | 0.189791521 | 0.295736882 |
| 0.004708585 | 0.014806092 | 0.244354673 | 0.248902256 |
| 0.180248628 | 0.134218889 | 0.141460557 | 0.122991188 |
| 0.022492203 | 0.351423315 | 0.394143657 | 0.047627109 |
| 0.123111917 | 0.115099525 | 0.281238888 | 0.024354355 |
| 0.457365713 | 0.476665018 | 0.442016084 | 0.073250651 |
| 0.358524661 | 0.446925579 | 0.286795333 | 0.080430475 |
| 0.025942993 | 0.469618681 | 0.235539789 | 0.010598158 |
| 0.404598371 | 0.058278467 | 0.005327415 | 0.403830526 |
| 0.089060765 | 0.356858096 | 0.001355496 | 0.119047883 |
| 0.07254621  | 0.436998933 | 0.398390004 | 0.204447772 |
| 0.064491406 | 0.199718508 | 0.019780613 | 0.495017238 |
| 0.401836408 | 0.024002369 | 0.169079951 | 0.35756919  |
| 0.38167555  | 0.442961753 | 0.259497456 | 0.426104448 |
| 0.290418608 | 0.441138006 | 0.089898968 | 0.169952775 |
| 0.332969637 | 0.479227589 | 0.279949509 | 0.366656977 |
| 0.36992654  | 0.340380665 | 0.131938952 | 0.00747901  |
| 0.138761178 | 0.05848833  | 0.125292339 | 0.055222742 |
| 0.130386997 | 0.110153881 | 0.420385244 | 0.419074611 |
| 0.451007581 | 0.007373271 | 0.046085729 | 0.339588458 |
| 0.323864036 | 0.388493004 | 0.029974659 | 0.007151153 |
| 0.009507534 | 0.027780021 | 0.150157249 | 0.192487068 |
| 0.439390825 | 0.064512178 | 0.004103147 | 0.011632069 |
| 0.129162074 | 0.318364963 | 0.429069936 | 0.255009095 |
| 0.401779576 | 0.062979558 | 0.099175013 | 0.272598011 |
| 0.074423776 | 0.184828757 | 0.442707098 | 0.368847789 |
| 0.053083506 | 0.195658221 | 0.170144513 | 0.408246089 |
| 0.163744429 | 0.202044796 | 0.304177113 | 0.137878301 |
| 0.023068935 | 0.084379303 | 0.066802551 | 0.377478711 |
| 0.448151206 | 0.046144331 | 0.024802819 | 0.039581864 |
| 0.04819662  | 0.418872512 | 0.082147625 | 0.467005697 |
| 0.329084401 | 0.355427465 | 0.100908735 | 0.401084137 |
| 0.031210455 | 0.408483879 | 0.259494148 | 0.018195024 |
| 0.190713551 | 0.013956469 | 0.438828239 | 0.112192953 |
| 0.107156962 | 0.231228093 | 0.172344878 | 0.032057919 |
| 0.237059191 | 0.048816104 | 0.420371749 | 0.444768068 |
| 0.060513261 | 0.107343288 | 0.196324719 | 0.261298303 |
| 0.086541566 | 0.309099647 | 0.415232527 | 0.163913323 |
| 0.031089546 | 0.201839765 | 0.252200805 | 0.22828903  |
| 0.077139951 | 0.462781203 | 0.169303931 | 0.485994761 |
| 0.273388638 | 0.398417549 | 0.427185302 | 0.150734893 |
| 0.21616409  | 0.17916773  | 0.182955491 | 0.00567089  |
| 0.169109192 | 0.383169927 | 0.152378069 | 0.122131141 |
| 0.157032575 | 1           | 0.031701137 | 0.079828629 |
| 0.275163497 | 0.104806923 | 0.068255487 | 0.370580481 |
| 0.206048518 | 0.243375636 | 0.017749333 | 0.058767361 |
| 0.471778029 | 0.35531001  | 0.048719276 | 0.254054927 |
| 0.127473774 | 0.192473558 | 0.397055329 | 0.413875576 |

|             |             |             |             |          |
|-------------|-------------|-------------|-------------|----------|
| 0.217913185 | 0.364445799 | 0.293830636 | 0.200958106 |          |
| 0.307738366 | 0.122847493 | 0.450241737 | 0.019883815 |          |
| 0.088821469 | 0.268297111 | 0.046957108 | 0.092089319 |          |
| 0.078001271 | 0.033812316 | 0.266428689 | 0.330938742 |          |
| 0.255595783 | 0.224437776 | 0.117860663 | 0.062565313 |          |
| 0.22796139  | 0.18173312  | 0.202527067 | 0.065668526 |          |
| 0.040109324 | 0.41367937  | 0.009573912 | 0.052057371 |          |
| 0.248737467 | 0.35936021  | 0.247230797 | 0.166468249 |          |
| 0.257681896 | 0.167916753 | 0.161860632 | 0.086268672 |          |
| 0.106089907 | 0.207055729 | 0.355340256 | 0.015489686 |          |
| 0.006932528 | 0.447900111 | 0.146721999 | 0.039562412 |          |
| 0.104661987 | 0.213397588 | 0.16568279  | 0.12302762  |          |
| 0.042548609 | 0.456741189 | 0.111218816 | 0.247701377 |          |
| 0.13436282  | 0.048387075 | 0.249790916 | 0.049515123 |          |
| 0.041335722 | 0.352996052 | 0.26721047  | 0.464744351 |          |
| 0.254119532 | 0.31701268  | 0.349904666 | 0.344822311 |          |
| 0.090378399 | 0.224548607 | 0.012661959 | 0.352438443 |          |
| 0.2039989   |             |             |             |          |
| SUOX        | 0.071766413 | 0.056072042 | 0.045726307 | 0.107734 |
| 0.073372069 | 0.050925088 | 0.138264067 | 0.070843979 |          |
| 0.018978846 | 0.003887163 | 0.005568924 | 0.047997542 |          |
| 0.003553587 | 0.034299641 | 0.016083261 | 0.151293968 |          |
| 0.054818204 | 0.08422052  | 0.194194828 | 0.149018467 |          |
| 0.076487168 | 0.128459644 | 0.121434641 | 0.042529985 |          |
| 0.043280296 | 0.106893156 | 0.036373113 | 0.122837261 |          |
| 0.123588757 | 0.035186587 | 0.118006561 | 0.125825382 |          |
| 0.084501441 | 0.040197072 | 0.055495175 | 0.033175493 |          |
| 0.050562052 | 0.023198942 | 0.030677916 | 0.079135395 |          |
| 0.063544894 | 0.147013569 | 0.133107606 | 0.084280519 |          |
| 0.03761437  | 0.143292675 | 0.087581572 | 0.007273551 |          |
| 0.041089453 | 0.041022186 | 0.047133272 | 0.026846734 |          |
| 0.035695636 | 0.103149414 | 0.114214881 | 0.001790059 |          |
| 0.042945849 | 0.003958266 | 0.070839233 | 0.158500236 |          |
| 0.043897211 | 0.033344664 | 0.024139757 | 0.011709253 |          |
| 0.148551861 | 0.094694565 | 0.128652911 | 0.028493128 |          |
| 0.071851725 | 0.092574523 | 0.035887475 | 0.002184884 |          |
| 0.175037126 | 0.116680188 | 0.012726573 | 0.176452897 |          |
| 0.014709164 | 0.118669107 | 0.126223889 | 0.110143976 |          |
| 0.050767126 | 0.073737727 | 0.062109457 | 0.020524495 |          |
| 0.16196676  | 0.043945506 | 0.092620715 | 0.072029633 |          |
| 0.091524077 | 0.010858572 | 0.131945117 | 0.068991555 |          |
| 0.041672618 | 0.045399735 | 0.147081125 | 0.047521708 |          |
| 0.063108144 | 0.030210308 | 0.046705006 | 0.010761637 |          |
| 0.073536103 | 0.039804748 | 0.058527746 | 0.059677671 |          |
| 0.029201072 | 0.120430639 | 0.100927516 | 0.22272893  |          |
| 0.013764485 | 0.155990953 | 0.009046393 | 0.106046325 |          |
| 0.065797886 | 0.115163202 | 0.096312106 | 0.083101563 |          |
| 0.068260929 | 0.038760901 | 0.181166736 | 0.068883301 |          |
| 0.011804617 | 0.001757821 | 0.192943702 | 0.006412104 |          |
| 0.011057565 | 0.028190001 | 0.072561569 | 0.044597943 |          |
| 0.022787605 | 0.16020705  | 0.075845002 | 0.086666061 |          |
| 0.039539268 | 0.048203588 | 0.106340215 | 0.113091527 |          |
| 0.035093132 | 0.045347776 | 0.053072481 | 0.031515752 |          |
| 0.075959742 | 0.00036338  | 0.183731254 | 0.051751891 |          |

|             |             |             |             |
|-------------|-------------|-------------|-------------|
| 0.083200083 | 0.222774221 | 0.049176705 | 0.062934425 |
| 0.150522714 | 0.175601055 | 0.068729868 | 0.05857326  |
| 0.190352266 | 0.061447184 | 0.130645777 | 0.017190611 |
| 0.066164704 | 0.197683989 | 0.056041749 | 0.10416079  |
| 0.030941053 | 0.102831733 | 0.0961442   | 0.003381518 |
| 0.015633266 | 0.070223307 | 0.110246644 | 0.010253613 |
| 0.035053647 | 0.028425513 | 0.252556097 | 0.074590079 |
| 0.096819628 | 0.072371659 | 0.034032548 | 0.004949334 |
| 0.060689626 | 0.048245501 | 0.056253269 | 0.047027943 |
| 0.066487062 | 0.087035829 | 0.074128544 | 0.139338201 |
| 0.104665937 | 0.003460657 | 0.035720977 | 0.040412349 |
| 0.028770625 | 0.051882462 | 0.087724548 | 0.02282552  |
| 0.081336992 | 0.00079898  | 0.132900235 | 0.050263449 |
| 0.256230492 | 0.085063027 | 0.119999098 | 0.043616173 |
| 0.123073752 | 0.06817042  | 0.042994918 | 0.025974285 |
| 0.007643249 | 0.057223007 | 0.138237389 | 0.100050649 |
| 0.065166072 | 0.106613123 | 0.112574562 | 0.073249512 |
| 0.096640999 | 0.104452356 | 0.017033067 | 0.054861568 |
| 0.159149026 | 0.054045759 | 0.098709717 | 0.076519021 |
| 0.005368743 | 0.04795041  | 0.075139514 | 0.035929403 |
| 0.052302729 | 0.036183827 | 0.003357582 | 0.152451441 |
| 0.124696688 | 0.006103871 | 0.071951653 | 0.044608998 |
| 0.042477013 | 0.030379967 | 0.072932915 | 0.103977554 |
| 0.057217138 | 0.036579417 | 0.020330929 | 0.016774158 |
| 0.036787153 | 0.206558948 | 0.013424894 | 0.004876021 |
| 0.094728474 | 0.02733926  | 0.042622067 | 0.085380732 |
| 0.106288005 | 0.045585044 | 0.006971079 | 0.004072428 |
| 0.008686788 | 0.008161914 | 0.051899567 | 0.025298349 |
| 0.01143745  | 0.043160309 | 0.033231014 | 0.067944848 |
| 0.159850604 | 0.05540149  | 0.150478078 | 0.048362389 |
| 0.120852936 | 0.188301503 | 0.001939161 | 0.068492983 |
| 0.018339095 | 0.029632295 | 0.058500878 | 0.03110604  |
| 0.085072664 | 0.018487561 | 0.113690461 | 0.019488598 |
| 0.119765706 | 0.111644853 | 0.003022744 | 0.088739589 |
| 0.049864599 | 0.179240309 | 0.072054594 | 0.03513735  |
| 0.112223855 | 0.034876645 | 0.05129925  | 0.042429975 |
| 0.13568868  | 0.048056488 | 0.056300126 | 0.178570138 |
| 0.068602512 | 0.036076218 | 0.20153311  | 0.126175408 |
| 0.040812099 | 0.07230098  | 0.153061934 | 0.055960048 |
| 0.120092526 | 0.044658539 | 0.060597593 | 0.100193601 |
| 0.002931799 | 0.101964954 | 0.047327849 | 0.03607294  |
| 0.044851278 | 0.216465599 | 0.02797619  | 0.231405324 |
| 0.020874233 | 0.014201987 | 0.052393214 | 0.035070346 |
| 0.047500545 | 0.153202855 | 0.051963403 | 0.030824474 |
| 0.051223479 | 0.064973368 | 0.101431741 | 0.044542066 |
| 0.148197218 | 0.189453492 | 0.038637381 | 0.071066489 |
| 0.049429336 | 0.023186153 | 0.098498876 | 0.057369148 |
| 0.081137547 | 0.074901429 | 0.023602083 | 0.032338748 |
| 0.108315321 | 0.003837446 | 0.051303161 | 0.03692849  |
| 0.046109788 | 0.10139101  | 0.047879147 | 0.026509388 |
| 0.052071883 | 0.129146329 | 0.180289317 | 0.039774115 |
| 0.042985699 | 0.040070476 | 0.200425594 | 0.056855554 |
| 0.038354373 | 0.019475695 | 0.202505762 | 0.132847972 |
| 0.03578734  | 0.084791116 | 0.00522194  | 0.097158942 |

|             |             |             |             |
|-------------|-------------|-------------|-------------|
| 0.034901727 | 0.006238693 | 0.060304772 | 0.236199627 |
| 0.0305264   | 0.002294116 | 0.006437729 | 0.097338595 |
| 0.08928207  | 0.035356449 | 0.137449851 | 0.010047971 |
| 0.185485017 | 0.025199056 | 0.055351807 | 0.040392072 |
| 0.062495236 | 0.046831485 | 0.036193475 | 0.027147871 |
| 0.057499317 | 0.022345689 | 0.039722995 | 0.024959805 |
| 0.032030071 | 0.014927009 | 0.149724172 | 0.056445232 |
| 0.03333254  | 0.090551409 | 0.057690743 | 0.081037999 |
| 0.103149146 | 0.180567241 | 0.072783271 | 0.008920091 |
| 0.090287438 | 0.004505821 | 0.005450631 | 0.066224272 |
| 0.049150151 | 0.055022787 | 0.096632861 | 0.046564461 |
| 0.14036449  | 0.068986432 | 0.045105807 | 0.0857887   |
| 0.102761639 | 0.049322232 | 0.002857322 | 0.001267224 |
| 0.0056742   | 0.139797588 | 0.136555331 | 0.0549416   |
| 0.002401161 | 0.106662911 | 0.068144163 | 0.031444252 |
| 0.051678792 | 0.042285461 | 0.181698408 | 0.067525434 |
| 0.206193353 | 0.007327732 | 0.175993055 | 0.02829677  |
| 0.045863741 | 0.051742289 | 0.048062509 | 0.155881007 |
| 0.135729219 | 0.066131931 | 0.088202751 | 0.00340922  |
| 0.154862927 | 0.053304022 | 0.01790019  | 0.032799961 |
| 0.097147815 | 0.086653229 | 0.124190029 | 0.02948452  |
| 0.015043965 | 0.018581102 | 0.002502075 | 0.057282889 |
| 0.086540046 | 0.042325374 | 0.07390527  | 0.083273692 |
| 0.127296647 | 0.065691642 | 0.045662914 | 0.013184815 |
| 0.032712432 | 0.040044588 | 0.001378476 | 0.101719945 |
| 0.127721253 | 0.03887568  | 0.001867105 | 0.04574717  |
| 0.10562796  | 0.009747737 | 0.114952069 | 0.010010679 |
| 0.123278825 | 0.081554192 | 0.072964588 | 0.094284603 |
| 0.155443102 | 0.149244178 | 0.139191337 | 0.085996719 |
| 0.081460487 | 0.037897522 | 0.014348485 | 0.104910148 |
| 0.009517354 | 0.129643721 | 0.054082266 | 0.071752815 |
| 0.081627339 | 0.017884162 | 0.057928995 | 0.074497821 |
| 0.074725242 | 0.047295036 | 0.106082506 | 0.013929263 |
| 0.056795816 | 0.060818824 | 0.007206603 | 0.137650537 |
| 0.076680376 | 0.118894103 | 0.013226658 | 0.071760997 |
| 0.031701137 | 1           | 0.004981418 | 0.018326298 |
| 0.060719311 | 0.052843122 | 0.142931398 | 0.097873601 |
| 0.053580165 | 0.068048021 | 0.070917327 | 0.055674476 |
| 0.061503725 | 0.027944878 | 0.06820781  | 0.204819674 |
| 0.095496496 | 0.067291968 | 0.067464483 | 0.028286672 |
| 0.045596106 | 0.089570771 | 0.048002415 | 0.048556606 |
| 0.197294468 | 0.041776491 | 0.031297891 | 0.00703481  |
| 0.048699943 | 0.033539832 | 0.195093043 | 0.160412771 |
| 0.079352561 | 0.007198752 | 0.1303486   | 0.010084041 |
| 0.107628843 | 0.019162439 | 0.025291038 | 0.135400214 |
| 0.056852403 | 0.148413909 | 0.078168407 | 0.032799007 |
| 0.036121742 | 0.009870328 | 0.181316461 | 0.015080314 |
| 0.050834162 | 0.022985975 | 0.098591508 | 0.010967084 |
| 0.08432493  | 0.138238738 | 0.052881684 | 0.00866896  |
| 0.00573863  | 0.046594679 | 0.020807237 | 0.090220337 |
| 0.08790513  | 0.04456774  | 0.069669793 | 0.050818441 |
| 0.068705639 | 0.078597939 | 0.027486169 | 0.108998454 |
| 0.036306777 | 0.024009676 | 0.061721676 | 0.134083816 |
| 0.21163645  | 0.048693224 | 0.017139236 | 0.111226732 |

|             |             |             |             |
|-------------|-------------|-------------|-------------|
| 0.043568515 | 0.046790873 | 0.036593184 | 0.077558531 |
| 0.117057819 | 0.038083141 | 0.05108352  | 0.016400621 |
| 0.036663217 | 0.082649593 | 0.105649492 | 0.007989596 |
| SURF4       | 0.237685728 | 0.211974263 | 0.114741108 |
| 0.150395533 | 0.097867497 | 0.107914547 | 0.043355427 |
| 0.069181292 | 0.002656233 | 0.00015326  | 4.76E-05    |
| 0.168679394 | 0.001837112 | 0.038088249 | 0.025577114 |
| 0.171704818 | 0.01436715  | 0.1533676   | 0.071738636 |
| 0.179125446 | 0.017842618 | 0.124348696 | 0.015685388 |
| 0.032179337 | 0.008388661 | 0.006716979 | 0.021513297 |
| 0.223431096 | 0.010172145 | 0.061893544 | 0.191120041 |
| 0.03624069  | 0.239153313 | 0.223822032 | 0.109401401 |
| 0.219224979 | 0.221404915 | 0.007610654 | 0.0214168   |
| 0.277057067 | 0.139328768 | 0.165061416 | 0.089207708 |
| 0.00494102  | 0.241682442 | 0.050186454 | 0.134731963 |
| 0.008824822 | 0.00196493  | 0.061758956 | 0.228738735 |
| 0.180449545 | 0.073363485 | 0.058954587 | 0.020922568 |
| 0.001070756 | 0.048524166 | 0.009299056 | 0.184935688 |
| 0.04096914  | 0.04240436  | 0.186226991 | 0.003292731 |
| 0.001403552 | 0.092100295 | 0.035423661 | 0.081840166 |
| 0.032747908 | 0.220141958 | 0.006779935 | 0.156838691 |
| 0.000127023 | 0.183081847 | 0.154103085 | 0.020014982 |
| 0.012925583 | 0.000742757 | 0.048671075 | 0.083272896 |
| 0.228634202 | 0.271986337 | 0.187027796 | 0.181163292 |
| 0.012477778 | 0.104132182 | 0.085547047 | 0.021311151 |
| 0.215183461 | 0.024102987 | 0.012075934 | 0.157810227 |
| 0.188854778 | 0.203148575 | 0.01339573  | 0.072055832 |
| 0.123844351 | 0.226476242 | 0.084773188 | 0.060683453 |
| 0.018257018 | 0.012911766 | 0.168504836 | 0.200829285 |
| 0.246999532 | 0.04960942  | 0.028994806 | 0.218964426 |
| 0.017653568 | 0.063446912 | 0.108729934 | 0.014097608 |
| 0.229790515 | 0.002339709 | 0.044333993 | 0.075327985 |
| 0.049265445 | 0.229562432 | 0.199418005 | 0.043205709 |
| 0.130673881 | 0.001163245 | 0.000853107 | 0.016821714 |
| 0.013906667 | 0.012393336 | 0.207644923 | 0.176211052 |
| 0.039470109 | 0.016505986 | 0.058244651 | 0.001817483 |
| 0.006681389 | 0.027837209 | 0.205264657 | 0.19337196  |
| 0.21107151  | 0.216851188 | 0.015098332 | 0.194147615 |
| 0.111477747 | 0.180953995 | 0.001488    | 0.022060731 |
| 0.115029684 | 0.037098546 | 0.071946632 | 0.111751654 |
| 0.044886466 | 0.038664709 | 0.028194334 | 0.211164421 |
| 0.227549128 | 0.019736722 | 0.14806987  | 0.175043763 |
| 0.012508315 | 0.080471693 | 0.030235133 | 0.039551518 |
| 0.006204341 | 0.188026571 | 0.009572179 | 0.168157708 |
| 0.005386609 | 0.006502646 | 0.006471648 | 0.099643088 |
| 0.020056869 | 0.127568438 | 0.216587741 | 0.042165768 |
| 0.05841311  | 0.107428345 | 0.13659238  | 0.108788432 |
| 6.93E-05    | 0.011411355 | 0.131719564 | 0.199576227 |
| 0.13450918  | 0.236037009 | 0.065180381 | 0.055162563 |
| 0.075497187 | 0.200351721 | 0.001133849 | 0.221593806 |
| 0.20364076  | 0.13820951  | 0.077242313 | 0.176466008 |
| 0.036400299 | 0.173861008 | 0.011369514 | 0.177772929 |
| 0.262130139 | 0.031505828 | 0.208655784 | 0.025682673 |
| 0.23778138  | 0.00554068  | 0.056521113 | 0.146361308 |

|             |             |             |             |
|-------------|-------------|-------------|-------------|
| 0.132692757 | 0.000990253 | 0.059734829 | 0.142836349 |
| 0.00813856  | 0.012433161 | 0.219916544 | 0.137562321 |
| 0.068155522 | 0.206076019 | 0.212386274 | 0.029713089 |
| 0.083441262 | 0.088183411 | 0.003539686 | 0.094972907 |
| 0.22032127  | 0.008763347 | 0.210582071 | 0.035466371 |
| 0.209229552 | 0.20306996  | 0.178751772 | 0.001483036 |
| 0.007452855 | 0.083165113 | 0.003074406 | 0.050451131 |
| 0.190547067 | 0.006435344 | 0.052953873 | 0.052045581 |
| 0.014085486 | 0.200179733 | 0.024751644 | 0.035455555 |
| 0.013164746 | 0.077539062 | 0.092508227 | 0.011947233 |
| 0.005168605 | 0.014368623 | 0.027000762 | 0.034020349 |
| 0.006471061 | 0.012689936 | 0.006903111 | 0.035526026 |
| 0.002706397 | 0.026465387 | 0.030397621 | 0.169898956 |
| 0.031989035 | 0.004990466 | 0.062062009 | 0.030341725 |
| 0.017443793 | 0.005984159 | 0.210729572 | 0.184850614 |
| 0.210752303 | 0.022785484 | 0.017580751 | 0.008809133 |
| 0.169585363 | 0.072433388 | 0.093459894 | 0.171900129 |
| 0.005980012 | 0.205887168 | 0.010237087 | 0.018167639 |
| 0.038505245 | 0.052511547 | 0.205036961 | 0.001135846 |
| 0.172452868 | 0.200850341 | 0.13111807  | 0.017815292 |
| 0.19690936  | 0.144379176 | 0.002191908 | 0.228919982 |
| 0.229697203 | 0.007354203 | 0.215763652 | 0.0188152   |
| 0.009622414 | 0.169136752 | 0.104564359 | 0.020141282 |
| 0.018118839 | 0.03415818  | 0.010370572 | 0.079199226 |
| 0.201694532 | 0.134920012 | 0.115459293 | 0.046134846 |
| 0.004714152 | 0.000137085 | 0.05155881  | 0.157630435 |
| 0.233011736 | 0.203943547 | 0.103644477 | 0.044521995 |
| 0.073695516 | 0.017301139 | 0.008274045 | 0.191496322 |
| 0.055320732 | 0.246827007 | 0.004514557 | 0.135778408 |
| 0.202279819 | 0.10474708  | 0.007966626 | 0.063248412 |
| 0.203014173 | 0.008909444 | 0.090117913 | 0.214469085 |
| 0.177185485 | 0.032175027 | 0.027261704 | 0.22349948  |
| 0.003552622 | 0.003794609 | 0.094533561 | 0.019187522 |
| 0.029458819 | 0.027280362 | 0.00380219  | 0.051104323 |
| 0.002429808 | 0.174833872 | 0.232242817 | 0.003188388 |
| 0.053832651 | 0.070993701 | 0.134700512 | 0.009267777 |
| 0.152959891 | 0.22774706  | 0.225208797 | 0.058747127 |
| 0.196528708 | 0.169368393 | 0.067773274 | 0.030534935 |
| 0.007085227 | 0.217994769 | 0.212085234 | 0.00056591  |
| 0.203968468 | 0.098106396 | 0.000193861 | 0.226163867 |
| 0.058792436 | 0.235467082 | 0.000675907 | 0.008253453 |
| 0.015110046 | 0.205041764 | 0.189905722 | 0.184977318 |
| 0.029204227 | 0.193970635 | 0.001431717 | 0.227736942 |
| 0.19853583  | 0.003065166 | 0.013042629 | 0.141597878 |
| 0.1237429   | 0.248902228 | 0.033437407 | 0.142727614 |
| 0.096976569 | 0.18804211  | 0.007262714 | 0.060272322 |
| 0.166894331 | 0.18546313  | 0.226625296 | 0.238744875 |
| 0.192464625 | 0.161975263 | 0.070445713 | 0.001526346 |
| 0.002579796 | 0.060404615 | 0.014748813 | 0.000378574 |
| 0.178958142 | 0.010375066 | 0.25675027  | 0.198834482 |
| 0.183467578 | 0.003641776 | 0.025232117 | 0.167026334 |
| 0.223731736 | 0.228704318 | 0.007544396 | 0.000751429 |
| 0.006313622 | 0.000414304 | 0.127472527 | 0.073736598 |
| 0.196823323 | 0.011151302 | 0.002207255 | 0.012123745 |

|             |             |             |             |
|-------------|-------------|-------------|-------------|
| 0.028717841 | 0.093241768 | 0.198157307 | 0.162730966 |
| 0.199590048 | 0.020782268 | 0.011585405 | 0.200153255 |
| 0.002986593 | 0.240344907 | 0.1786139   | 0.198097631 |
| 0.019343426 | 0.057268649 | 0.216375419 | 0.202564621 |
| 0.003238345 | 0.098325262 | 0.179932619 | 0.013704922 |
| 0.005334258 | 0.013585084 | 0.005959501 | 0.206193725 |
| 0.19849822  | 0.002538528 | 0.001470658 | 0.003544619 |
| 0.009056972 | 0.212937788 | 0.014905944 | 0.212084268 |
| 0.197994374 | 0.191872911 | 0.007799937 | 0.203563866 |
| 0.000363457 | 0.20570556  | 0.053952968 | 0.003101988 |
| 0.129672074 | 0.007769744 | 0.22441709  | 0.001126715 |
| 0.075250243 | 0.244674423 | 0.00495288  | 0.005513881 |
| 0.014542226 | 0.012105548 | 0.173106537 | 0.178602529 |
| 0.014495768 | 0.043633125 | 0.114099613 | 0.226485073 |
| 0.111563052 | 0.13848029  | 0.21939387  | 0.082227244 |
| 0.008231211 | 0.014414743 | 0.223504204 | 0.242161229 |
| 0.053984033 | 0.202501982 | 0.011162256 | 0.230588295 |
| 0.227212733 | 0.244121014 | 0.189127085 | 0.081127742 |
| 0.007207862 | 0.172951843 | 0.102582554 | 0.001335491 |
| 0.14309428  | 0.162387933 | 0.171145228 | 0.005632433 |
| 0.02852613  | 0.079828629 | 0.004981418 | 1           |
| 0.05599747  | 0.10937152  | 0.00785673  | 0.214093732 |
| 0.24761142  | 0.234977615 | 0.007850232 | 0.004964966 |
| 0.234391031 | 0.22469401  | 0.014987653 | 0.138098342 |
| 0.066080047 | 0.056466495 | 0.208408302 | 0.179402289 |
| 0.03221108  | 0.155428051 | 0.220489083 | 0.120911921 |
| 0.192260094 | 0.064197166 | 0.216074294 | 0.034701956 |
| 0.000977923 | 0.182326445 | 0.004174569 | 0.028980273 |
| 0.028312844 | 0.005833201 | 0.018667384 | 0.191284249 |
| 0.037723582 | 0.101264628 | 0.038394846 | 0.004704947 |
| 0.094361933 | 0.171397055 | 0.108371758 | 0.03384272  |
| 0.004264262 | 0.188939201 | 0.000611041 | 0.018370075 |
| 0.053684815 | 0.147683557 | 0.047777477 | 0.055054205 |
| 0.015496397 | 0.024044319 | 0.06363657  | 0.108892764 |
| 0.030735531 | 0.017905968 | 0.150635339 | 0.004294587 |
| 0.004901503 | 0.216917223 | 0.18068507  | 0.011006433 |
| 0.001745294 | 0.181369892 | 0.121849343 | 0.007292946 |
| 0.008187482 | 0.166717087 | 0.036242593 | 0.106124279 |
| 0.118542844 | 0.026491456 | 0.254291487 | 0.003673601 |
| 0.016596949 | 0.256339388 | 0.112301772 | 0.205687519 |
| 0.127032351 | 0.142387771 | 0.238605913 | 0.178255165 |
| 0.024358869 | 0.13840406  | 0.004793386 | 0.231198363 |
| 0.041290755 |             |             |             |

|             |             |             |             |
|-------------|-------------|-------------|-------------|
| SWAP70      | 0.285460046 | 0.378968689 | 0.202111373 |
| 0.230879676 | 0.193396734 | 0.120118541 | 0.046867786 |
| 0.030421489 | 0.038451047 | 0.000643627 | 0.019690136 |
| 0.273189963 | 0.083827927 | 0.056826415 | 0.091584605 |
| 0.284075358 | 0.091679266 | 0.114930378 | 0.074062803 |
| 0.201621037 | 0.012609557 | 0.256039249 | 0.027274047 |
| 0.21822513  | 0.097520453 | 0.036092319 | 0.183257467 |
| 0.277550432 | 0.041826427 | 0.066252215 | 0.158528679 |
| 0.083909265 | 0.277242754 | 0.385081583 | 0.295382224 |
| 0.400263087 | 0.260070584 | 0.007601168 | 0.062817353 |
| 0.267634766 | 0.316077709 | 0.198838385 | 0.126687664 |



|             |             |             |             |
|-------------|-------------|-------------|-------------|
| 0.012877877 | 0.318759944 | 0.068572841 | 0.26569517  |
| 0.048333063 | 0.022136339 | 0.035124136 | 0.275251715 |
| 0.339522953 | 0.203696087 | 0.04023033  | 0.036520446 |
| 0.08527605  | 0.033967195 | 0.215320544 | 0.102382528 |
| 0.061801385 | 0.017447811 | 0.361392681 | 0.021963042 |
| 0.039002855 | 0.051609066 | 0.124506692 | 0.053752387 |
| 0.228025403 | 0.181748626 | 0.004803458 | 0.275788071 |
| 0.001199174 | 0.183439921 | 0.23764122  | 0.212532988 |
| 0.029313144 | 0.008587357 | 0.129221532 | 0.113343154 |
| 0.309804176 | 0.354336047 | 0.403820932 | 0.423992053 |
| 0.096581055 | 0.146214241 | 0.253413778 | 0.063828669 |
| 0.296077713 | 0.041709628 | 0.038936944 | 0.312199845 |
| 0.412119635 | 0.401416185 | 0.12267645  | 0.163817523 |
| 0.252175477 | 0.316456371 | 0.141000702 | 0.154129213 |
| 0.160608681 | 0.084582864 | 0.29596924  | 0.411336532 |
| 0.229382726 | 0.260896683 | 0.098740935 | 0.206402132 |
| 0.033433096 | 0.099065485 | 0.162453328 | 0.082573094 |
| 0.320590586 | 0.005662795 | 0.153063629 | 0.105213899 |
| 0.096065731 | 0.281605519 | 0.424940671 | 0.052592804 |
| 0.194969949 | 0.011688672 | 0.14762308  | 0.030473472 |
| 0.100068366 | 0.258130527 | 0.33777211  | 0.302199925 |
| 0.043931295 | 0.15968028  | 0.066327017 | 0.003894699 |
| 0.028764083 | 0.131537048 | 0.313206324 | 0.120642531 |
| 0.261148384 | 0.326377028 | 0.096968194 | 0.197164644 |
| 0.299577964 | 0.401460292 | 0.008275537 | 0.02596476  |
| 0.158165995 | 0.129468476 | 0.10303717  | 0.212708898 |
| 0.157679346 | 0.024423308 | 0.044282639 | 0.40221536  |
| 0.244618183 | 0.028818726 | 0.082981652 | 0.276383056 |
| 0.090967624 | 0.239810912 | 0.036568633 | 0.079690937 |
| 0.010299099 | 0.392825073 | 0.043079513 | 0.07780127  |
| 0.140013759 | 0.124508734 | 0.00623448  | 0.045741974 |
| 0.068491029 | 0.297457197 | 0.347584556 | 0.045532556 |
| 0.092217375 | 0.248990985 | 0.066911407 | 0.231007732 |
| 0.004729794 | 0.024411894 | 0.052046328 | 0.382529137 |
| 0.075766516 | 0.425174471 | 0.101844199 | 0.164988827 |
| 0.152788209 | 0.317375948 | 0.007056007 | 0.346333201 |
| 0.419360582 | 0.057429894 | 0.178249736 | 0.253660944 |
| 0.184060133 | 0.295658932 | 0.01681866  | 0.257391186 |
| 0.163255658 | 0.034366134 | 0.402740215 | 0.086932573 |
| 0.338006507 | 0.024450066 | 0.066056059 | 0.407148759 |
| 0.322369565 | 0.005042823 | 0.032423196 | 0.165282431 |
| 0.046408224 | 0.011425226 | 0.249268647 | 0.200091149 |
| 0.161737677 | 0.340351663 | 0.369576966 | 0.189267659 |
| 0.181998649 | 0.05841999  | 0.011710807 | 0.202611384 |
| 0.336011622 | 0.148477194 | 0.272501657 | 0.058726452 |
| 0.10770352  | 0.322657274 | 0.318983252 | 0.057853766 |
| 0.014336447 | 0.066294447 | 0.00438331  | 0.141488587 |
| 0.302474324 | 0.02738092  | 0.166581691 | 0.097593986 |
| 0.061776583 | 0.404498823 | 0.235864814 | 0.273936795 |
| 0.240679382 | 0.145520012 | 0.071682105 | 0.058374041 |
| 0.097274942 | 0.080068828 | 0.181018357 | 0.140308107 |
| 0.00501119  | 0.043494635 | 0.035744812 | 0.146662611 |
| 0.052495454 | 0.108606796 | 0.093552972 | 0.202668477 |
| 0.084350421 | 0.037851565 | 0.150728039 | 0.213145426 |

|             |             |             |             |
|-------------|-------------|-------------|-------------|
| 0.094698513 | 0.013177782 | 0.369113897 | 0.233838841 |
| 0.139550141 | 0.04743617  | 0.030852184 | 0.109796388 |
| 0.317494368 | 0.07730618  | 0.047374474 | 0.288292587 |
| 0.015727995 | 0.394670172 | 0.082862921 | 0.074100895 |
| 0.182979446 | 0.086053898 | 0.316601963 | 0.016372709 |
| 0.137929746 | 0.299453693 | 0.149740097 | 0.09849758  |
| 0.229039904 | 0.189727355 | 0.008103765 | 0.238912823 |
| 0.220781591 | 0.018857952 | 0.417171238 | 0.105874462 |
| 0.020774519 | 0.341232136 | 0.313011339 | 0.050777886 |
| 0.061363076 | 0.093132987 | 0.004859339 | 0.17616327  |
| 0.387186648 | 0.279182622 | 0.262421924 | 0.217434676 |
| 0.014067633 | 0.005215413 | 0.181775186 | 0.235760792 |
| 0.362107525 | 0.434992941 | 0.111549038 | 0.17474388  |
| 0.087715889 | 0.162261491 | 0.018553583 | 0.402676312 |
| 0.14833124  | 0.392477071 | 0.00597831  | 0.379728117 |
| 0.389507302 | 0.049747065 | 0.064818716 | 0.069697656 |
| 0.20909981  | 0.016881707 | 0.064507899 | 0.35758726  |
| 0.293502371 | 0.136136052 | 0.140893531 | 0.257742745 |
| 0.0023694   | 0.007298133 | 0.224227091 | 0.254012581 |
| 0.12257785  | 0.093748527 | 0.194764552 | 0.073690034 |
| 0.01591985  | 0.289736337 | 0.343137391 | 0.036386259 |
| 0.096347803 | 0.068141015 | 0.25895741  | 0.016639298 |
| 0.425424239 | 0.423854893 | 0.379048398 | 0.043192037 |
| 0.315184183 | 0.398491023 | 0.287095479 | 0.064468226 |
| 0.024252329 | 0.415062907 | 0.186372261 | 0.007532128 |
| 0.345230126 | 0.033528506 | 0.004432914 | 0.336116572 |
| 0.056068    | 0.298973893 | 0.000668872 | 0.10924682  |
| 0.069223514 | 0.393969032 | 0.3376772   | 0.155139747 |
| 0.039015406 | 0.161264797 | 0.015701806 | 0.438995234 |
| 0.342589153 | 0.024856207 | 0.155347042 | 0.317221891 |
| 0.367815891 | 0.373147277 | 0.231256511 | 0.393074213 |
| 0.282712614 | 0.385061933 | 0.057344256 | 0.138848843 |
| 0.28008903  | 0.434115028 | 0.22734269  | 0.30281139  |
| 0.313275441 | 0.309377794 | 0.105351062 | 0.004658276 |
| 0.11663005  | 0.031561247 | 0.092044285 | 0.040349314 |
| 0.096244921 | 0.090465442 | 0.364455938 | 0.362137716 |
| 0.407525149 | 0.006362176 | 0.02541038  | 0.29099385  |
| 0.260468991 | 0.322091841 | 0.023727181 | 0.007359242 |
| 0.009405424 | 0.034031795 | 0.112129289 | 0.15311045  |
| 0.382952636 | 0.042182187 | 0.003090612 | 0.005563874 |
| 0.086235298 | 0.316917746 | 0.368594368 | 0.211462352 |
| 0.361574821 | 0.045306636 | 0.069098021 | 0.223500776 |
| 0.067875351 | 0.145665662 | 0.393920897 | 0.303288556 |
| 0.042072594 | 0.150460602 | 0.116434999 | 0.342827137 |
| 0.215602796 | 0.176722923 | 0.277140843 | 0.096335305 |
| 0.017898452 | 0.073032942 | 0.05423149  | 0.327914022 |
| 0.394163144 | 0.039470139 | 0.022869819 | 0.023171149 |
| 0.031629917 | 0.359499519 | 0.058893622 | 0.407067057 |
| 0.269626381 | 0.300905045 | 0.090517336 | 0.337351346 |
| 0.023321432 | 0.35125495  | 0.225711694 | 0.011576059 |
| 0.141711716 | 0.010771816 | 0.390629665 | 0.098857773 |
| 0.064848711 | 0.183885436 | 0.140086179 | 0.030160949 |
| 0.243695115 | 0.040802217 | 0.363691234 | 0.404452036 |
| 0.057356003 | 0.063965272 | 0.147133455 | 0.220189194 |

|             |             |             |             |
|-------------|-------------|-------------|-------------|
| 0.056048371 | 0.264614957 | 0.352312997 | 0.139151445 |
| 0.017339299 | 0.208738031 | 0.202324021 | 0.187967076 |
| 0.044160409 | 0.40988917  | 0.127466853 | 0.426396265 |
| 0.22201151  | 0.333304061 | 0.374468412 | 0.119307638 |
| 0.191273361 | 0.145114768 | 0.142721952 | 0.003636184 |
| 0.135657247 | 0.330902681 | 0.100456198 | 0.109008069 |
| 0.120380122 | 0.275163497 | 0.018326298 | 0.05599747  |
| 1           | 0.075735793 | 0.044361765 | 0.314185735 |
| 0.164130086 | 0.19924354  | 0.009602912 | 0.048110192 |
| 0.404504417 | 0.291591401 | 0.028882992 | 0.210812966 |
| 0.09482656  | 0.157478952 | 0.357539883 | 0.38090763  |
| 0.152160824 | 0.314382111 | 0.238845617 | 0.160265923 |
| 0.247069475 | 0.077779473 | 0.386216984 | 0.00968526  |
| 0.080978722 | 0.23568548  | 0.03410524  | 0.0754659   |
| 0.053810734 | 0.029199596 | 0.251266078 | 0.287784793 |
| 0.218017357 | 0.192031825 | 0.071646425 | 0.045277676 |
| 0.183577035 | 0.125622785 | 0.175345955 | 0.039017752 |
| 0.02911836  | 0.352476118 | 0.007819272 | 0.040555691 |
| 0.207734453 | 0.313802639 | 0.226404056 | 0.128931033 |
| 0.235099413 | 0.142917012 | 0.118759581 | 0.052177422 |
| 0.073230457 | 0.158891528 | 0.308513954 | 0.009425251 |
| 0.003672573 | 0.390711397 | 0.099996563 | 0.036202089 |
| 0.073901974 | 0.170115254 | 0.113849827 | 0.084056642 |
| 0.042515378 | 0.409530105 | 0.070548898 | 0.22332665  |
| 0.098816712 | 0.033719776 | 0.197145302 | 0.033578748 |
| 0.02682406  | 0.293425939 | 0.260654261 | 0.409349656 |
| 0.200557553 | 0.271258701 | 0.287653478 | 0.292901754 |
| 0.070113103 | 0.205807289 | 0.007712568 | 0.29202252  |
| 0.163236402 |             |             |             |
| SYAP1       | 0.233318418 | 0.394593244 | 0.134323222 |
| 0.312152882 | 0.168146895 | 0.251535929 | 0.219192535 |
| 0.252884699 | 0.081178274 | 0.025219158 | 0.017370261 |
| 0.158830058 | 0.104548495 | 0.235570013 | 0.197763654 |
| 0.251872448 | 0.056318624 | 0.181077347 | 0.177925025 |
| 0.267712449 | 0.201247172 | 0.208302376 | 0.116664753 |
| 0.081354983 | 0.039464658 | 0.056451325 | 0.088427302 |
| 0.346839432 | 0.062339224 | 0.260477491 | 0.327910527 |
| 0.043427329 | 0.295647467 | 0.382108667 | 0.186110762 |
| 0.353885235 | 0.222779917 | 0.011705509 | 0.243201488 |
| 0.330445154 | 0.239061013 | 0.286844441 | 0.200094354 |
| 0.071917361 | 0.404601914 | 0.201428452 | 0.135266295 |
| 0.214619281 | 0.025705051 | 0.286405938 | 0.394317455 |
| 0.361000482 | 0.181355076 | 0.268034498 | 0.189243879 |
| 0.095308912 | 0.272592081 | 0.065364296 | 0.315802395 |
| 0.187697563 | 0.286490378 | 0.351359751 | 0.134961869 |
| 0.121021841 | 0.247749967 | 0.052150673 | 0.254285094 |
| 0.092938113 | 0.333767397 | 0.042016666 | 0.134485794 |
| 0.017076203 | 0.256985269 | 0.134611522 | 0.081927598 |
| 0.032368875 | 0.028869537 | 0.06528881  | 0.238168382 |
| 0.343683045 | 0.323011956 | 0.303700014 | 0.29994218  |
| 0.080946291 | 0.124456302 | 0.109087667 | 0.122004596 |
| 0.319873516 | 0.190619721 | 0.097545811 | 0.231984147 |
| 0.310684999 | 0.365480103 | 0.08597738  | 0.097952241 |
| 0.327636297 | 0.391279149 | 0.189985155 | 0.176496669 |

|             |             |             |             |
|-------------|-------------|-------------|-------------|
| 0.12461033  | 0.015973799 | 0.355955804 | 0.337908714 |
| 0.342281401 | 0.074892834 | 0.069762846 | 0.356126094 |
| 0.048869183 | 0.20107715  | 0.211143198 | 0.06817332  |
| 0.35607609  | 0.045998608 | 0.07444361  | 0.239956161 |
| 0.122647363 | 0.293483562 | 0.339164068 | 0.173750459 |
| 0.142901524 | 0.021106097 | 0.037520503 | 0.022656116 |
| 0.178570165 | 0.025866789 | 0.373199133 | 0.350929425 |
| 0.241651167 | 0.144904041 | 0.224674061 | 0.002589842 |
| 0.015498714 | 0.071309403 | 0.264963104 | 0.184314064 |
| 0.268515334 | 0.235711758 | 0.129215355 | 0.30142813  |
| 0.173102729 | 0.295082445 | 0.088848333 | 0.131020168 |
| 0.204392027 | 0.07081539  | 0.143547672 | 0.178237845 |
| 0.121656335 | 0.172727159 | 0.113464884 | 0.360271912 |
| 0.410983834 | 0.094177557 | 0.211868716 | 0.227855758 |
| 0.199471857 | 0.112187434 | 0.107739133 | 0.181138286 |
| 0.09967861  | 0.319590748 | 0.01127868  | 0.235831895 |
| 0.096259551 | 0.043975337 | 0.018078782 | 0.279500276 |
| 0.223082945 | 0.31289213  | 0.340788541 | 0.089576034 |
| 0.195871287 | 0.176487675 | 0.250722256 | 0.265017465 |
| 0.023964114 | 0.048538861 | 0.22773269  | 0.356583365 |
| 0.298717863 | 0.314210971 | 0.179073723 | 0.119772636 |
| 0.120576914 | 0.295900332 | 0.001566485 | 0.3881459   |
| 0.355866047 | 0.225978447 | 0.179729951 | 0.151500945 |
| 0.119442372 | 0.338034518 | 0.023153716 | 0.229410566 |
| 0.258687075 | 0.076873229 | 0.334521969 | 0.082277783 |
| 0.338698596 | 0.037352228 | 0.258293623 | 0.223264225 |
| 0.20669131  | 0.010403789 | 0.293534958 | 0.294873195 |
| 0.00990727  | 0.222620332 | 0.267129136 | 0.253251455 |
| 0.195880871 | 0.250960077 | 0.326274505 | 0.109471617 |
| 0.173352698 | 0.212533794 | 0.012605278 | 0.106818805 |
| 0.244552774 | 0.13186486  | 0.40061229  | 0.21765605  |
| 0.205898228 | 0.381709617 | 0.246136916 | 0.138682066 |
| 0.068073095 | 0.261824487 | 0.050604763 | 0.151774172 |
| 0.261163492 | 0.142677788 | 0.143905243 | 0.061743213 |
| 0.033106588 | 0.368543798 | 0.039085715 | 0.054957575 |
| 0.022562678 | 0.206937359 | 0.19945299  | 0.177853993 |
| 0.092572908 | 0.101049234 | 0.121557222 | 0.170146535 |
| 0.114057259 | 0.069093706 | 0.004277287 | 0.123453698 |
| 0.081710564 | 0.153041545 | 0.168172101 | 0.268955064 |
| 0.202006457 | 0.086230853 | 0.160343939 | 0.085991384 |
| 0.048697545 | 0.01409432  | 0.378571001 | 0.223658418 |
| 0.324077566 | 0.150500869 | 0.029506257 | 0.138138221 |
| 0.352252898 | 0.235189016 | 0.232426429 | 0.38307396  |
| 0.031468136 | 0.309953473 | 0.149426687 | 0.065059744 |
| 0.119913213 | 0.166240006 | 0.34571864  | 0.069228512 |
| 0.214334876 | 0.399396723 | 0.140663629 | 0.094283573 |
| 0.367405048 | 0.246500904 | 0.061938883 | 0.284371209 |
| 0.28190477  | 0.030554422 | 0.355215036 | 0.044793314 |
| 0.015253943 | 0.19091824  | 0.225126682 | 0.047368827 |
| 0.041826279 | 0.203923264 | 0.155099834 | 0.125897634 |
| 0.376612604 | 0.229054106 | 0.290364295 | 0.058408394 |
| 0.059327672 | 0.011565724 | 0.062340324 | 0.126776957 |
| 0.38852769  | 0.320149165 | 0.136391556 | 0.128116052 |
| 0.16796207  | 0.123091395 | 0.233231136 | 0.343573949 |

|             |             |             |             |
|-------------|-------------|-------------|-------------|
| 0.065249297 | 0.370349577 | 0.009035184 | 0.213188382 |
| 0.3587345   | 0.265526457 | 0.039407276 | 0.265297244 |
| 0.359773458 | 0.067850569 | 0.164227019 | 0.37722594  |
| 0.339352893 | 0.153295566 | 0.154703629 | 0.199384918 |
| 0.065075369 | 0.10093778  | 0.14705436  | 0.038635008 |
| 0.188408745 | 0.128964766 | 0.00616665  | 0.242234837 |
| 0.057740806 | 0.386622589 | 0.281374487 | 0.048715288 |
| 0.231707796 | 0.238051227 | 0.143731793 | 0.047258556 |
| 0.247629634 | 0.319289539 | 0.390640055 | 0.172541786 |
| 0.243045164 | 0.320513888 | 0.11251046  | 0.041535539 |
| 0.009486072 | 0.347865384 | 0.276915636 | 0.038446913 |
| 0.326600188 | 0.272502859 | 0.023183425 | 0.404310869 |
| 0.165581054 | 0.359961436 | 0.020050171 | 0.020082561 |
| 0.01340054  | 0.258894378 | 0.376292626 | 0.300935381 |
| 0.254336598 | 0.199153689 | 0.000903284 | 0.334078722 |
| 0.38292679  | 0.0069714   | 0.041073961 | 0.251710741 |
| 0.190639776 | 0.409526992 | 0.086112407 | 0.256482051 |
| 0.142588198 | 0.350131868 | 0.199110393 | 0.128278066 |
| 0.336741051 | 0.299778688 | 0.310923495 | 0.386974631 |
| 0.331719148 | 0.186703677 | 0.18929333  | 0.038698006 |
| 0.049791799 | 0.286527479 | 0.164786501 | 0.062654261 |
| 0.269007832 | 0.068533489 | 0.342856596 | 0.303608543 |
| 0.297419922 | 0.005233549 | 0.235778433 | 0.275295065 |
| 0.391262554 | 0.370137908 | 0.013601116 | 0.004980459 |
| 0.003872665 | 0.007176917 | 0.248306016 | 0.095537491 |
| 0.335932213 | 0.219899862 | 0.009137381 | 0.133084995 |
| 0.193138124 | 0.126279557 | 0.37224706  | 0.239667814 |
| 0.229941302 | 0.058418785 | 0.194114112 | 0.261366805 |
| 0.02995014  | 0.24670108  | 0.317304844 | 0.410339176 |
| 0.022085969 | 0.10195352  | 0.184619404 | 0.370423079 |
| 0.009235556 | 0.132150959 | 0.177235616 | 0.183440308 |
| 0.006836881 | 0.036394597 | 0.037166826 | 0.253528805 |
| 0.340045018 | 0.050871464 | 0.024729957 | 0.159688916 |
| 0.135168891 | 0.30606637  | 0.123092059 | 0.347795144 |
| 0.348406419 | 0.303970562 | 0.023742374 | 0.385645492 |
| 0.034745704 | 0.364278085 | 0.097284041 | 0.083993286 |
| 0.122917669 | 0.01398224  | 0.29891567  | 0.063476589 |
| 0.258882929 | 0.272011621 | 0.072227066 | 0.006836925 |
| 0.037166929 | 0.03179378  | 0.325345712 | 0.25770374  |
| 0.010831193 | 0.206732164 | 0.131029198 | 0.206125319 |
| 0.285825178 | 0.279198789 | 0.394111268 | 0.178965681 |
| 0.142519916 | 0.025476123 | 0.297941111 | 0.251652939 |
| 0.252231073 | 0.308410413 | 0.133771356 | 0.351553504 |
| 0.280790423 | 0.345425207 | 0.313688756 | 0.220812644 |
| 0.062668453 | 0.220807035 | 0.308530909 | 0.064279398 |
| 0.199094907 | 0.305632953 | 0.219800898 | 0.063686216 |
| 0.119462287 | 0.104806923 | 0.060719311 | 0.10937152  |
| 0.075735793 | 1           | 0.126420458 | 0.295682948 |
| 0.236953443 | 0.268727497 | 0.074679421 | 0.03779629  |
| 0.39354426  | 0.362546182 | 0.203918274 | 0.270296227 |
| 0.08977993  | 0.160950721 | 0.243949514 | 0.219667371 |
| 0.144997416 | 0.302982141 | 0.326939342 | 0.304907974 |
| 0.407612918 | 0.195923486 | 0.389329104 | 0.206324117 |
| 0.032453327 | 0.16953867  | 0.090088442 | 0.043361224 |

|             |             |             |             |
|-------------|-------------|-------------|-------------|
| 0.111971644 | 0.017445457 | 0.06800257  | 0.224859469 |
| 0.096849684 | 0.193833536 | 0.21471647  | 0.062304776 |
| 0.119683198 | 0.160013409 | 0.164071086 | 0.237555662 |
| 0.080767997 | 0.384585432 | 0.009316595 | 0.035966848 |
| 0.102764976 | 0.268631722 | 0.114822505 | 0.109954838 |
| 0.074408639 | 0.04342713  | 0.157241955 | 0.275946025 |
| 0.202018403 | 0.130806123 | 0.281392386 | 0.071823433 |
| 0.055229537 | 0.326382448 | 0.211368937 | 0.008442181 |
| 0.038432209 | 0.216413846 | 0.148221595 | 0.153114053 |
| 0.007668507 | 0.298601589 | 0.236395673 | 0.154462682 |
| 0.251223811 | 0.058289389 | 0.349460405 | 0.074069286 |
| 0.067550125 | 0.375735437 | 0.12227587  | 0.344912213 |
| 0.113172823 | 0.266140994 | 0.382871507 | 0.287501871 |
| 0.068511815 | 0.121079624 | 0.062216547 | 0.326578663 |
| 0.133971375 |             |             |             |
| SYT11       | 0.110460848 | 0.177021791 | 0.063294509 |
| 0.26151137  | 0.153217921 | 0.109537015 | 0.227029086 |
| 0.057885909 | 0.040888858 | 0.049364416 | 0.054870449 |
| 0.110575561 | 0.064450102 | 0.116979995 | 0.030269418 |
| 0.24926242  | 0.127040252 | 0.053937002 | 0.266085222 |
| 0.228085299 | 0.121220405 | 0.287399517 | 0.129677813 |
| 0.041458799 | 0.09796792  | 0.177465716 | 0.073916803 |
| 0.246292744 | 0.187337282 | 0.100917936 | 0.198926248 |
| 0.074148953 | 0.16021515  | 0.132706338 | 0.197004854 |
| 0.123958813 | 0.082167884 | 0.021900418 | 0.083078355 |
| 0.135379172 | 0.160963728 | 0.237821576 | 0.283123875 |
| 0.125630293 | 0.121455179 | 0.278184922 | 0.13008873  |
| 0.023678757 | 0.094621683 | 0.056275783 | 0.119431863 |
| 0.12180302  | 0.118482542 | 0.093797484 | 0.188013516 |
| 0.048624491 | 0.071586553 | 0.026246551 | 0.119596902 |
| 0.27702461  | 0.068500831 | 0.131566507 | 0.057765432 |
| 0.038606936 | 0.111990392 | 0.084093531 | 0.169084036 |
| 0.04297182  | 0.122585752 | 0.049723578 | 0.070723241 |
| 0.025412387 | 0.22668343  | 0.147751872 | 0.031220834 |
| 0.180844309 | 0.098615944 | 0.115258836 | 0.27393272  |
| 0.230332868 | 0.113474647 | 0.218410214 | 0.187236309 |
| 0.07403217  | 0.145245395 | 0.080807283 | 0.196620022 |
| 0.144282808 | 0.228523304 | 0.035723161 | 0.262980796 |
| 0.209597272 | 0.153616346 | 0.066072636 | 0.160329468 |
| 0.17630675  | 0.165054959 | 0.080540813 | 0.124023649 |
| 0.039547747 | 0.032448152 | 0.133015418 | 0.191287556 |
| 0.12358389  | 0.058650951 | 0.19221724  | 0.205874181 |
| 0.161491818 | 0.021627442 | 0.30912876  | 0.046339904 |
| 0.230575521 | 0.056288911 | 0.158856203 | 0.227688096 |
| 0.041429953 | 0.146403624 | 0.142902803 | 0.26351398  |
| 0.106521162 | 0.059472054 | 0.016187283 | 0.080630103 |
| 0.035950629 | 0.015071756 | 0.10427117  | 0.235712772 |
| 0.06528362  | 0.050848917 | 0.164318427 | 0.033327794 |
| 0.092036851 | 0.029851577 | 0.140684642 | 0.092036596 |
| 0.170883497 | 0.075943639 | 0.142786221 | 0.110819599 |
| 0.10620798  | 0.216460343 | 0.003874428 | 0.13097063  |
| 0.120632001 | 0.037327426 | 0.302955984 | 0.1323528   |
| 0.158750086 | 0.114443835 | 0.224484842 | 0.198791904 |
| 0.137836056 | 0.24916759  | 0.049817015 | 0.244950032 |

|             |             |             |             |
|-------------|-------------|-------------|-------------|
| 0.063491664 | 0.149168807 | 0.184032507 | 0.170024852 |
| 0.146894761 | 0.112457733 | 0.0842771   | 0.083073701 |
| 0.013421374 | 0.056407714 | 0.023980072 | 0.128055578 |
| 0.04026969  | 0.163162269 | 0.094510314 | 0.18792435  |
| 0.206349637 | 0.220065484 | 0.083567353 | 0.164131391 |
| 0.056022414 | 0.054693101 | 0.043023426 | 0.198173455 |
| 0.100517628 | 0.171665677 | 0.102951088 | 0.072087071 |
| 0.209036727 | 0.209400396 | 0.00069991  | 0.123259992 |
| 0.144789699 | 0.038241093 | 0.215550061 | 0.131742808 |
| 0.057150939 | 0.231686035 | 0.001629464 | 0.259042465 |
| 0.085016459 | 0.156085902 | 0.225392285 | 0.240740262 |
| 0.123327447 | 0.183735199 | 0.108288379 | 0.128956666 |
| 0.112668774 | 0.017527915 | 0.101617551 | 0.234128804 |
| 0.053568241 | 0.082380858 | 0.154352695 | 0.227491431 |
| 0.175510956 | 0.176321515 | 0.249044609 | 0.048892977 |
| 0.146220453 | 0.144796866 | 0.035174706 | 0.130254392 |
| 0.137527514 | 0.019279942 | 0.139122355 | 0.098656173 |
| 0.059923371 | 0.159369954 | 0.102884468 | 0.023492031 |
| 0.187964099 | 0.160223652 | 0.037092063 | 0.142182463 |
| 0.089266927 | 0.157486512 | 0.061340835 | 0.039213593 |
| 0.126773045 | 0.191361718 | 0.043402441 | 0.032103185 |
| 0.019764573 | 0.17747665  | 0.190693112 | 0.111334758 |
| 0.059131248 | 0.107192103 | 0.05477694  | 0.078330228 |
| 0.116619539 | 0.220081226 | 0.012840635 | 0.050433708 |
| 0.079118139 | 0.082021744 | 0.079504258 | 0.122407812 |
| 0.069496012 | 0.09893964  | 0.149227851 | 0.029225184 |
| 0.076635471 | 0.130472995 | 0.172677052 | 0.216902292 |
| 0.097598885 | 0.121446616 | 0.125631697 | 0.021906964 |
| 0.22881851  | 0.068767223 | 0.027944302 | 0.196183656 |
| 0.030038033 | 0.202179827 | 0.100690461 | 0.215033173 |
| 0.092805276 | 0.290478862 | 0.238924461 | 0.01288709  |
| 0.10966567  | 0.163780772 | 0.150595558 | 0.149344436 |
| 0.129537207 | 0.195852407 | 0.079836127 | 0.106813865 |
| 0.113005584 | 0.174697697 | 0.167135846 | 0.082525076 |
| 0.119295496 | 0.153611244 | 0.140586677 | 0.192687326 |
| 0.119711157 | 0.178041471 | 0.07280671  | 0.250361022 |
| 0.188789052 | 0.286402789 | 0.162967394 | 0.045713958 |
| 0.186528561 | 0.076335451 | 0.090282553 | 0.067891411 |
| 0.127425816 | 0.158450677 | 0.229324789 | 0.133647514 |
| 0.30012141  | 0.053654353 | 0.024277099 | 0.187432996 |
| 0.014848221 | 0.139627181 | 0.071370671 | 0.142132835 |
| 0.120411996 | 0.085781273 | 0.13535473  | 0.184128912 |
| 0.137669028 | 0.137779998 | 0.09656741  | 0.143013409 |
| 0.161652053 | 0.080966085 | 0.058966232 | 0.155797012 |
| 0.068082679 | 0.093521774 | 0.119134195 | 0.023182597 |
| 0.079966085 | 0.116303395 | 0.005093414 | 0.045418355 |
| 0.105847433 | 0.161785456 | 0.215516582 | 0.065116244 |
| 0.115204655 | 0.040158986 | 0.207133983 | 0.163898564 |
| 0.135643294 | 0.129461815 | 0.141934143 | 0.118478829 |
| 0.14290986  | 0.15348127  | 0.082018781 | 0.12181266  |
| 0.094597329 | 0.129718505 | 0.123735294 | 0.055183894 |
| 0.238645184 | 0.058485126 | 0.088377724 | 0.173713009 |
| 0.235680445 | 0.09593329  | 0.00430677  | 0.003184652 |
| 0.034308154 | 0.197754279 | 0.124263876 | 0.190706284 |

|             |             |             |             |
|-------------|-------------|-------------|-------------|
| 0.042733345 | 0.182826563 | 0.004137386 | 0.16440264  |
| 0.157745374 | 0.055333878 | 0.043972746 | 0.137524182 |
| 0.112842653 | 0.166439338 | 0.056610105 | 0.154596322 |
| 0.105819672 | 0.130326532 | 0.070249746 | 0.240508417 |
| 0.182810259 | 0.123779209 | 0.165394918 | 0.142669136 |
| 0.238864219 | 0.191092729 | 0.300020357 | 0.09678016  |
| 0.015979801 | 0.10254685  | 0.029544522 | 0.054968507 |
| 0.088250258 | 0.096851921 | 0.147461491 | 0.226259569 |
| 0.171382069 | 0.071005247 | 0.080687172 | 0.133001242 |
| 0.205324798 | 0.222556716 | 0.016328695 | 0.0019177   |
| 0.00093012  | 0.028105261 | 0.185448585 | 0.12774746  |
| 0.164230584 | 0.021542372 | 0.080605616 | 0.069186853 |
| 0.047286081 | 0.134135887 | 0.157338992 | 0.287767649 |
| 0.13768811  | 0.157348941 | 0.056764408 | 0.249547899 |
| 0.047415644 | 0.065056645 | 0.188486044 | 0.154670402 |
| 0.05115792  | 0.117263164 | 0.067824611 | 0.23251899  |
| 0.005403681 | 0.224684379 | 0.127800633 | 0.073216087 |
| 0.016147033 | 0.096691127 | 0.084535902 | 0.212291796 |
| 0.117430728 | 0.098029983 | 0.0872663   | 0.013012093 |
| 0.188066564 | 0.190107893 | 0.129116862 | 0.211972186 |
| 0.206417132 | 0.281493657 | 0.047624209 | 0.138295303 |
| 0.066639697 | 0.131374626 | 0.105544022 | 0.010393731 |
| 0.0715254   | 0.045271391 | 0.123920667 | 0.022449508 |
| 0.091724523 | 0.138200003 | 0.016112031 | 0.055661645 |
| 0.008880026 | 0.138435384 | 0.237080935 | 0.188597779 |
| 0.031391716 | 0.105423223 | 0.153470966 | 0.166713606 |
| 0.136983571 | 0.247239813 | 0.133561785 | 0.058716125 |
| 0.151261401 | 0.011686284 | 0.206543339 | 0.102429269 |
| 0.092687803 | 0.218750684 | 0.068581235 | 0.16825124  |
| 0.11807381  | 0.1498656   | 0.150780493 | 0.182129131 |
| 0.039341834 | 0.093723983 | 0.197895863 | 0.066600603 |
| 0.183566489 | 0.244649951 | 0.098695251 | 0.046248422 |
| 0.210196918 | 0.068255487 | 0.052843122 | 0.00785673  |
| 0.044361765 | 0.126420458 | 1           | 0.253852876 |
| 0.120491196 | 0.104798526 | 0.061031732 | 0.082866198 |
| 0.171375017 | 0.130258062 | 0.040038032 | 0.175508688 |
| 0.157378983 | 0.188381695 | 0.153400333 | 0.160461881 |
| 0.027629628 | 0.179330459 | 0.186480134 | 0.185334341 |
| 0.152898612 | 0.221057131 | 0.145466388 | 0.025311453 |
| 0.024004836 | 0.09124785  | 0.139804608 | 0.154865679 |
| 0.267401651 | 0.052508441 | 0.019197732 | 0.22345782  |
| 0.031124274 | 0.290143105 | 0.023015545 | 0.054739922 |
| 0.160112942 | 0.046960003 | 0.21545054  | 0.17983721  |
| 0.102333687 | 0.142720676 | 0.028364146 | 0.145173027 |
| 0.047989279 | 0.142024299 | 0.096260586 | 0.119609641 |
| 0.025049055 | 0.0417131   | 0.2658975   | 0.086785948 |
| 0.081748777 | 0.015733169 | 0.139645836 | 0.033410734 |
| 0.086552436 | 0.227657661 | 0.061615898 | 0.023919556 |
| 0.036109218 | 0.083989202 | 0.050233434 | 0.068055705 |
| 0.055588291 | 0.142700618 | 0.072413791 | 0.114215264 |
| 0.181150604 | 0.126759557 | 0.095890621 | 0.022079815 |
| 0.043191712 | 0.126160884 | 0.079080033 | 0.136719467 |
| 0.070130585 | 0.294991197 | 0.102532678 | 0.15469597  |
| 0.017487881 | 0.048094905 | 0.076196714 | 0.195592299 |



|             |             |             |             |
|-------------|-------------|-------------|-------------|
| 0.036628425 |             |             |             |
| SYTL2       | 0.389654348 | 0.499572932 | 0.406830986 |
| 0.432933672 | 0.464641843 | 0.339506314 | 0.315892543 |
| 0.269038244 | 0.164306084 | 0.015837617 | 0.051441138 |
| 0.424613681 | 0.253475619 | 0.319903104 | 0.318225211 |
| 0.470487975 | 0.23949622  | 0.420704685 | 0.380396166 |
| 0.45629297  | 0.166080058 | 0.46436834  | 0.209852748 |
| 0.379449771 | 0.18867088  | 0.160372764 | 0.336225646 |
| 0.459814938 | 0.180864514 | 0.294297782 | 0.396265709 |
| 0.233292628 | 0.408106936 | 0.470207585 | 0.432337109 |
| 0.454925625 | 0.347667454 | 0.040330817 | 0.304753303 |
| 0.406347106 | 0.419664476 | 0.445487927 | 0.424216072 |
| 0.11525726  | 0.43125544  | 0.352639235 | 0.454351105 |
| 0.274433062 | 0.08544399  | 0.24850507  | 0.40381537  |
| 0.412538014 | 0.384363641 | 0.312920471 | 0.262986531 |
| 0.205498413 | 0.248197959 | 0.255879626 | 0.301634517 |
| 0.347386297 | 0.18151219  | 0.433056115 | 0.161851843 |
| 0.200643183 | 0.360066183 | 0.285276448 | 0.357690985 |
| 0.374507322 | 0.34675611  | 0.073411999 | 0.361117779 |
| 0.007294094 | 0.45650323  | 0.464508081 | 0.29417183  |
| 0.125515632 | 0.056410731 | 0.319471779 | 0.40250478  |
| 0.475579144 | 0.43160859  | 0.490447383 | 0.482650787 |
| 0.274579651 | 0.439179132 | 0.403177324 | 0.297158273 |
| 0.417810789 | 0.269780866 | 0.199074008 | 0.470653316 |
| 0.494482495 | 0.479939178 | 0.326305972 | 0.397372682 |
| 0.372242317 | 0.460762212 | 0.398114191 | 0.439473233 |
| 0.319856962 | 0.138527925 | 0.399941648 | 0.498625015 |
| 0.366152983 | 0.343359362 | 0.279401978 | 0.396689628 |
| 0.165556821 | 0.357200652 | 0.443760971 | 0.243267084 |
| 0.488550492 | 0.062256685 | 0.340392961 | 0.403721231 |
| 0.378220977 | 0.403071211 | 0.473879013 | 0.320131135 |
| 0.459834708 | 0.064659569 | 0.167188069 | 0.115949237 |
| 0.373391853 | 0.189193706 | 0.410020705 | 0.452747496 |
| 0.307206432 | 0.419657074 | 0.388965205 | 0.017597248 |
| 0.088560636 | 0.328415834 | 0.386358544 | 0.443696697 |
| 0.438241745 | 0.341259015 | 0.311411575 | 0.333383184 |
| 0.38394033  | 0.484083822 | 0.049897825 | 0.222554314 |
| 0.430137851 | 0.33477782  | 0.386768989 | 0.420644033 |
| 0.395673633 | 0.237904    | 0.262348227 | 0.514723472 |
| 0.400750802 | 0.198523869 | 0.363863751 | 0.473573518 |
| 0.33704723  | 0.424056887 | 0.24200182  | 0.364808491 |
| 0.128861239 | 0.427044663 | 0.090639542 | 0.388237503 |
| 0.251921122 | 0.229523801 | 0.052488762 | 0.324950207 |
| 0.320183559 | 0.385043043 | 0.399332444 | 0.247598166 |
| 0.402345202 | 0.461132865 | 0.332518119 | 0.367653513 |
| 0.027606866 | 0.140332104 | 0.271821748 | 0.491677907 |
| 0.251080683 | 0.496380181 | 0.432865485 | 0.429013995 |
| 0.414322553 | 0.447149981 | 0.00881196  | 0.442072038 |
| 0.481124256 | 0.270933787 | 0.418107297 | 0.459663236 |
| 0.351053214 | 0.444883364 | 0.049527533 | 0.473406397 |
| 0.313198971 | 0.206219109 | 0.516772009 | 0.282503711 |
| 0.426570304 | 0.115703864 | 0.360822926 | 0.392126257 |
| 0.351952746 | 0.026586133 | 0.246349793 | 0.422436283 |
| 0.089482774 | 0.163636763 | 0.426978508 | 0.446097326 |

|             |             |             |             |
|-------------|-------------|-------------|-------------|
| 0.410283293 | 0.444808382 | 0.506330487 | 0.329633219 |
| 0.453469202 | 0.368238081 | 0.055539635 | 0.426762339 |
| 0.412888137 | 0.338088147 | 0.411101437 | 0.355356104 |
| 0.292766915 | 0.450272744 | 0.357130181 | 0.195018103 |
| 0.122356409 | 0.383012492 | 0.050778857 | 0.409707725 |
| 0.353909402 | 0.195248191 | 0.360435837 | 0.291129045 |
| 0.168699782 | 0.50809171  | 0.253508841 | 0.286299196 |
| 0.173794389 | 0.373993621 | 0.398599484 | 0.252301242 |
| 0.231292646 | 0.303329119 | 0.381951811 | 0.404391289 |
| 0.097515762 | 0.199970498 | 0.056221713 | 0.313377408 |
| 0.164954985 | 0.308728845 | 0.290208424 | 0.355204079 |
| 0.366728259 | 0.178764271 | 0.427232149 | 0.362700165 |
| 0.225289575 | 0.062119929 | 0.485740446 | 0.475086167 |
| 0.282607433 | 0.291606912 | 0.129030938 | 0.277609956 |
| 0.458485018 | 0.257191941 | 0.252318708 | 0.436232929 |
| 0.09151926  | 0.492423907 | 0.307950157 | 0.237054154 |
| 0.381508567 | 0.375927549 | 0.480310296 | 0.084670814 |
| 0.399231085 | 0.438716057 | 0.452141791 | 0.296342865 |
| 0.355197377 | 0.449007174 | 0.091865373 | 0.348038966 |
| 0.340638351 | 0.100794358 | 0.497426133 | 0.238100696 |
| 0.079872229 | 0.439332606 | 0.376253127 | 0.186259525 |
| 0.185520785 | 0.356846921 | 0.106852078 | 0.417178329 |
| 0.500348385 | 0.463074725 | 0.364273791 | 0.324970771 |
| 0.110511884 | 0.025825093 | 0.338927096 | 0.405084422 |
| 0.452370809 | 0.481618843 | 0.417054816 | 0.38855065  |
| 0.386957072 | 0.353885527 | 0.180700507 | 0.490603341 |
| 0.309696407 | 0.480982462 | 0.037346923 | 0.398405897 |
| 0.44541262  | 0.285245904 | 0.166255061 | 0.355300483 |
| 0.348122495 | 0.132642606 | 0.363529022 | 0.454908302 |
| 0.421027143 | 0.397417304 | 0.364646408 | 0.455737472 |
| 0.054910201 | 0.117533982 | 0.432276171 | 0.247547419 |
| 0.390067741 | 0.355731602 | 0.078162187 | 0.374282143 |
| 0.108962708 | 0.421127858 | 0.459913229 | 0.135050213 |
| 0.283501436 | 0.348273211 | 0.467772106 | 0.117449439 |
| 0.417315014 | 0.464007915 | 0.473643533 | 0.315414656 |
| 0.399478563 | 0.451926235 | 0.347599573 | 0.200726833 |
| 0.066282289 | 0.466178898 | 0.385524398 | 0.055435421 |
| 0.486433926 | 0.220207415 | 0.033623371 | 0.47931868  |
| 0.335318076 | 0.382219387 | 0.010791967 | 0.119826219 |
| 0.120623648 | 0.462523442 | 0.4282084   | 0.410155264 |
| 0.205085372 | 0.466814439 | 0.022386723 | 0.503426622 |
| 0.453362824 | 0.053535118 | 0.255153021 | 0.369105735 |
| 0.359842845 | 0.502900536 | 0.338194855 | 0.414241017 |
| 0.381579186 | 0.443143237 | 0.309358106 | 0.39982932  |
| 0.411814707 | 0.443125482 | 0.412857706 | 0.440128936 |
| 0.459043327 | 0.465179572 | 0.401101303 | 0.055557791 |
| 0.195659711 | 0.268736261 | 0.249028968 | 0.13137357  |
| 0.305619061 | 0.243533871 | 0.464734098 | 0.479650567 |
| 0.460344749 | 0.029493662 | 0.246619156 | 0.374622471 |
| 0.44105475  | 0.491335945 | 0.07515521  | 0.015572115 |
| 0.016877442 | 0.045526207 | 0.418871644 | 0.388163761 |
| 0.471536974 | 0.192356732 | 0.027354833 | 0.111426427 |
| 0.384423193 | 0.416093049 | 0.466038139 | 0.468487263 |
| 0.412576556 | 0.204469955 | 0.258363197 | 0.469933148 |

|             |             |             |             |
|-------------|-------------|-------------|-------------|
| 0.145033049 | 0.278705867 | 0.47144964  | 0.4406848   |
| 0.131803161 | 0.391605267 | 0.409844991 | 0.49821981  |
| 0.086029032 | 0.445708938 | 0.424187963 | 0.358565096 |
| 0.054942186 | 0.186935679 | 0.15573996  | 0.464273292 |
| 0.435609753 | 0.135155979 | 0.079667681 | 0.146714499 |
| 0.204666708 | 0.468868152 | 0.272762856 | 0.517874733 |
| 0.428785584 | 0.461294103 | 0.172323775 | 0.447402699 |
| 0.097455544 | 0.435545521 | 0.387121859 | 0.07023844  |
| 0.427944199 | 0.059818838 | 0.431898171 | 0.155430211 |
| 0.345688428 | 0.407103802 | 0.253234972 | 0.064490434 |
| 0.221981399 | 0.142747331 | 0.484140124 | 0.454548427 |
| 0.106429144 | 0.378403471 | 0.439840143 | 0.467844038 |
| 0.322882397 | 0.435445428 | 0.453307891 | 0.325455336 |
| 0.177882657 | 0.203020476 | 0.438940815 | 0.362910554 |
| 0.313814767 | 0.502311728 | 0.334203177 | 0.508797783 |
| 0.383935073 | 0.456076273 | 0.445333138 | 0.413753186 |
| 0.30905426  | 0.383772377 | 0.350381095 | 0.050696624 |
| 0.457813279 | 0.452160199 | 0.422379364 | 0.229860565 |
| 0.356647684 | 0.370580481 | 0.142931398 | 0.214093732 |
| 0.314185735 | 0.295682948 | 0.253852876 | 1           |
| 0.404215448 | 0.361624689 | 0.118619647 | 0.144564367 |
| 0.514692833 | 0.418779503 | 0.22599094  | 0.41245355  |
| 0.332121606 | 0.424824928 | 0.422528997 | 0.42715047  |
| 0.383984297 | 0.40863026  | 0.411126857 | 0.348559843 |
| 0.396381114 | 0.395694854 | 0.47893887  | 0.142369614 |
| 0.156131463 | 0.381868249 | 0.172436957 | 0.214707133 |
| 0.275766248 | 0.091157191 | 0.280272799 | 0.474407386 |
| 0.333459422 | 0.44852521  | 0.326688877 | 0.188543341 |
| 0.446183542 | 0.375794125 | 0.467737607 | 0.280815835 |
| 0.159824302 | 0.448406057 | 0.03531221  | 0.157820902 |
| 0.360959718 | 0.390690744 | 0.374994542 | 0.385527562 |
| 0.323551253 | 0.270729211 | 0.422843638 | 0.299498036 |
| 0.264524906 | 0.368010752 | 0.387037989 | 0.095988131 |
| 0.069382555 | 0.508358143 | 0.373332029 | 0.077874891 |
| 0.180314342 | 0.353396546 | 0.418133563 | 0.30813267  |
| 0.075818181 | 0.439737707 | 0.293101972 | 0.447549784 |
| 0.415619463 | 0.183310551 | 0.324155574 | 0.169274637 |
| 0.169826321 | 0.415646419 | 0.408552019 | 0.465148793 |
| 0.430674751 | 0.457194071 | 0.394480966 | 0.388548833 |
| 0.230186862 | 0.355617268 | 0.090211304 | 0.446283768 |
| 0.332490725 |             |             |             |
| SYTL3       | 0.363309218 | 0.464621006 | 0.25252422  |
| 0.333993317 | 0.269769359 | 0.246027302 | 0.184449955 |
| 0.252296842 | 0.064464575 | 0.004911091 | 0.010364395 |
| 0.269209268 | 0.11180611  | 0.21165955  | 0.200630609 |
| 0.343818683 | 0.095203243 | 0.346864554 | 0.214397184 |
| 0.336491479 | 0.113719116 | 0.276212649 | 0.104309146 |
| 0.189880947 | 0.061598141 | 0.054385043 | 0.13929244  |
| 0.420994025 | 0.065241817 | 0.219080252 | 0.347610861 |
| 0.119833414 | 0.40568852  | 0.457718687 | 0.254917918 |
| 0.439947229 | 0.331851112 | 0.043202264 | 0.182918567 |
| 0.429717248 | 0.306459514 | 0.338514467 | 0.23684158  |
| 0.045809622 | 0.452886325 | 0.188320095 | 0.262044868 |
| 0.220507176 | 0.023253117 | 0.22474743  | 0.435026495 |

|             |             |             |             |
|-------------|-------------|-------------|-------------|
| 0.395426107 | 0.223927716 | 0.246015445 | 0.138582    |
| 0.085806716 | 0.231947324 | 0.109156343 | 0.292481885 |
| 0.187019968 | 0.17555838  | 0.407682056 | 0.07400875  |
| 0.123115601 | 0.301455142 | 0.138552467 | 0.261744788 |
| 0.192618931 | 0.363989635 | 0.050679336 | 0.242197207 |
| 0.004159059 | 0.322495074 | 0.275051948 | 0.134463058 |
| 0.046162937 | 0.016324578 | 0.158075696 | 0.241816654 |
| 0.436611649 | 0.445181288 | 0.405012248 | 0.402914162 |
| 0.12436402  | 0.253042088 | 0.224809744 | 0.135494989 |
| 0.408932781 | 0.13811454  | 0.126313328 | 0.328557191 |
| 0.411278429 | 0.442930558 | 0.143025582 | 0.19396308  |
| 0.321818984 | 0.455117196 | 0.245310422 | 0.242506286 |
| 0.150622141 | 0.055406705 | 0.385712412 | 0.434971103 |
| 0.401398748 | 0.167911464 | 0.113768291 | 0.394272463 |
| 0.072889497 | 0.285849635 | 0.250752426 | 0.171818808 |
| 0.444909258 | 0.023549018 | 0.149880652 | 0.250804592 |
| 0.262103143 | 0.380970111 | 0.429730156 | 0.171881982 |
| 0.286479372 | 0.025429561 | 0.056517116 | 0.053501179 |
| 0.244656359 | 0.080680008 | 0.420568258 | 0.39349178  |
| 0.260062732 | 0.222208116 | 0.251170738 | 0.005360645 |
| 0.029050578 | 0.206164313 | 0.36779319  | 0.349454976 |
| 0.370441667 | 0.34914547  | 0.127391117 | 0.349127408 |
| 0.245711555 | 0.399232808 | 0.043700939 | 0.12710389  |
| 0.271794912 | 0.201189457 | 0.199167863 | 0.262821006 |
| 0.180547561 | 0.166272087 | 0.13223024  | 0.451269961 |
| 0.432596332 | 0.091631996 | 0.337463521 | 0.321863436 |
| 0.180041917 | 0.211067427 | 0.132766628 | 0.211266018 |
| 0.064206    | 0.402490936 | 0.030240144 | 0.336312163 |
| 0.111981451 | 0.097075474 | 0.042501186 | 0.273648981 |
| 0.199816959 | 0.329801799 | 0.416308509 | 0.132476547 |
| 0.236864798 | 0.248608456 | 0.30076883  | 0.269042552 |
| 0.005021581 | 0.080615795 | 0.284986087 | 0.435816627 |
| 0.234772295 | 0.446378649 | 0.267671464 | 0.232580976 |
| 0.203875437 | 0.3882724   | 0.006689285 | 0.442698597 |
| 0.441537239 | 0.267406698 | 0.225891304 | 0.292160947 |
| 0.178229073 | 0.380507511 | 0.060605694 | 0.324060774 |
| 0.32879413  | 0.108749765 | 0.440882409 | 0.114774482 |
| 0.427649617 | 0.037015517 | 0.27381191  | 0.320408197 |
| 0.28319263  | 0.013368776 | 0.202169414 | 0.308590049 |
| 0.031291607 | 0.117079349 | 0.369769404 | 0.287746872 |
| 0.221718796 | 0.369708804 | 0.430819793 | 0.160245791 |
| 0.257259681 | 0.268559868 | 0.024833167 | 0.222602172 |
| 0.37314731  | 0.200696776 | 0.41937478  | 0.225167553 |
| 0.270209901 | 0.425150711 | 0.335236597 | 0.106001635 |
| 0.048796396 | 0.279954467 | 0.029275353 | 0.200756696 |
| 0.352673528 | 0.089314134 | 0.206623741 | 0.202751155 |
| 0.062315819 | 0.447702301 | 0.106779627 | 0.137897206 |
| 0.068945916 | 0.227776713 | 0.261676916 | 0.128787761 |
| 0.095135563 | 0.134771886 | 0.188059835 | 0.214356414 |
| 0.055378366 | 0.079853903 | 0.028320118 | 0.185852449 |
| 0.067677443 | 0.171831187 | 0.173606327 | 0.32373454  |
| 0.255729996 | 0.081779506 | 0.222115253 | 0.187043239 |
| 0.087777812 | 0.020456268 | 0.450239361 | 0.316436312 |
| 0.324585134 | 0.154687756 | 0.055394831 | 0.169428004 |

|             |             |             |             |
|-------------|-------------|-------------|-------------|
| 0.397412402 | 0.192479316 | 0.259001975 | 0.402446092 |
| 0.054088244 | 0.427237266 | 0.141639868 | 0.090141832 |
| 0.19420663  | 0.192684913 | 0.420899007 | 0.046742495 |
| 0.317149226 | 0.429565991 | 0.270912802 | 0.116382274 |
| 0.373804518 | 0.295817906 | 0.041581493 | 0.358504824 |
| 0.350165903 | 0.035694271 | 0.451033732 | 0.100399469 |
| 0.028510698 | 0.302216312 | 0.274117386 | 0.073105166 |
| 0.071805856 | 0.184817309 | 0.076406736 | 0.202828203 |
| 0.444914094 | 0.299689376 | 0.30761468  | 0.159735573 |
| 0.039651192 | 0.006856412 | 0.164143051 | 0.264976172 |
| 0.455726697 | 0.425843794 | 0.237074184 | 0.184845549 |
| 0.211835881 | 0.161951938 | 0.190037125 | 0.425691695 |
| 0.238411619 | 0.471652853 | 0.014093373 | 0.310125518 |
| 0.429031546 | 0.260784388 | 0.053028819 | 0.234613717 |
| 0.364463782 | 0.055781765 | 0.277207721 | 0.435789844 |
| 0.391068539 | 0.201242017 | 0.181326462 | 0.325202032 |
| 0.026992212 | 0.064695374 | 0.237728435 | 0.108013712 |
| 0.216615594 | 0.171281361 | 0.030036234 | 0.30436377  |
| 0.037146314 | 0.4034712   | 0.408343921 | 0.041420607 |
| 0.185653753 | 0.297996412 | 0.25909738  | 0.047719727 |
| 0.343526136 | 0.43653341  | 0.459657577 | 0.233123453 |
| 0.356756964 | 0.390043976 | 0.186374376 | 0.090707733 |
| 0.020587226 | 0.439555582 | 0.341602812 | 0.020474004 |
| 0.425230582 | 0.218640543 | 0.008399761 | 0.461527838 |
| 0.192391291 | 0.418736735 | 0.006420797 | 0.093607106 |
| 0.050877529 | 0.389657509 | 0.414928243 | 0.336174582 |
| 0.158521711 | 0.324088339 | 0.014294775 | 0.455307749 |
| 0.427194634 | 0.014310287 | 0.103538684 | 0.323791524 |
| 0.269575887 | 0.490262148 | 0.1544617   | 0.335646311 |
| 0.216843177 | 0.414032703 | 0.17697583  | 0.189295865 |
| 0.368485852 | 0.398585797 | 0.37740959  | 0.445473256 |
| 0.402794408 | 0.296833464 | 0.215685302 | 0.018856275 |
| 0.072489666 | 0.233392267 | 0.135098271 | 0.039465084 |
| 0.271932084 | 0.089176644 | 0.449318783 | 0.410843927 |
| 0.39209089  | 0.009426881 | 0.185167964 | 0.350801559 |
| 0.430481636 | 0.453092471 | 0.048783824 | 0.00852677  |
| 0.012821288 | 0.008609474 | 0.301866897 | 0.197178557 |
| 0.422031903 | 0.135517935 | 0.008995719 | 0.085168269 |
| 0.236416347 | 0.214620536 | 0.433338131 | 0.307929478 |
| 0.356665947 | 0.095030841 | 0.138173472 | 0.347369366 |
| 0.04336363  | 0.305728583 | 0.398126585 | 0.433428208 |
| 0.064581051 | 0.195881753 | 0.344102539 | 0.439203426 |
| 0.029984381 | 0.237120718 | 0.284687103 | 0.182682276 |
| 0.035980276 | 0.069467084 | 0.051200899 | 0.379032552 |
| 0.417308033 | 0.044584595 | 0.021639148 | 0.156428969 |
| 0.088676477 | 0.423204169 | 0.124335393 | 0.449779404 |
| 0.395180076 | 0.388214167 | 0.066736333 | 0.432533465 |
| 0.028922324 | 0.422902808 | 0.182116556 | 0.049263853 |
| 0.290791449 | 0.027402097 | 0.413739317 | 0.050328298 |
| 0.279252272 | 0.358394443 | 0.10624475  | 0.021111456 |
| 0.103226691 | 0.05327944  | 0.400528882 | 0.372198732 |
| 0.045764695 | 0.24883351  | 0.248003059 | 0.320978651 |
| 0.259052302 | 0.319816775 | 0.448339438 | 0.213883337 |
| 0.089777236 | 0.124955069 | 0.367774505 | 0.330048661 |

|             |             |             |             |
|-------------|-------------|-------------|-------------|
| 0.266309622 | 0.422862786 | 0.145282526 | 0.461608645 |
| 0.360834683 | 0.448731978 | 0.403126706 | 0.243591888 |
| 0.137558577 | 0.295382166 | 0.257002749 | 0.022231519 |
| 0.288688149 | 0.374698645 | 0.339488793 | 0.080012366 |
| 0.153303611 | 0.206048518 | 0.097873601 | 0.24761142  |
| 0.164130086 | 0.236953443 | 0.120491196 | 0.404215448 |
| 1           | 0.342097535 | 0.107053083 | 0.04543221  |
| 0.483150875 | 0.427990129 | 0.156648184 | 0.294146081 |
| 0.175631742 | 0.211278557 | 0.363570024 | 0.343094517 |
| 0.244081078 | 0.359759675 | 0.396028345 | 0.274803892 |
| 0.404971326 | 0.227344454 | 0.456890629 | 0.172160728 |
| 0.056618562 | 0.276138485 | 0.06277412  | 0.090050428 |
| 0.128170567 | 0.030889884 | 0.137226863 | 0.339570417 |
| 0.189021145 | 0.247976961 | 0.29320526  | 0.088069474 |
| 0.239999043 | 0.314262621 | 0.26369066  | 0.171405698 |
| 0.060859796 | 0.424145487 | 0.012014091 | 0.06669774  |
| 0.211910066 | 0.333982082 | 0.181694523 | 0.193316353 |
| 0.145948859 | 0.133522626 | 0.216987217 | 0.264208401 |
| 0.162712467 | 0.261408514 | 0.336075539 | 0.061631139 |
| 0.037171284 | 0.438932871 | 0.311129729 | 0.03705405  |
| 0.086218759 | 0.289779128 | 0.336381284 | 0.135716689 |
| 0.025472989 | 0.384048663 | 0.19392043  | 0.260230636 |
| 0.287127348 | 0.094762459 | 0.388919795 | 0.125156303 |
| 0.112262962 | 0.439443837 | 0.238260108 | 0.43241582  |
| 0.269291957 | 0.324473413 | 0.433053345 | 0.364872791 |
| 0.17880951  | 0.250773959 | 0.03942906  | 0.425603274 |
| 0.190303333 |             |             |             |
| TAF9B       | 0.339405283 | 0.483610022 | 0.281476645 |
| 0.313610668 | 0.287192995 | 0.288181444 | 0.17298661  |
| 0.224479951 | 0.061190772 | 0.004204906 | 0.009926552 |
| 0.309273544 | 0.131159536 | 0.225446231 | 0.239727555 |
| 0.302143326 | 0.088383288 | 0.321779469 | 0.195790455 |
| 0.31274565  | 0.096740849 | 0.2685416   | 0.082346727 |
| 0.186559238 | 0.060668917 | 0.04435889  | 0.153753249 |
| 0.388782122 | 0.053629034 | 0.257963246 | 0.318209097 |
| 0.085213794 | 0.380444983 | 0.494337239 | 0.276806752 |
| 0.481351894 | 0.322351638 | 0.022132533 | 0.208090081 |
| 0.410147486 | 0.304355286 | 0.308570787 | 0.242312094 |
| 0.033929781 | 0.489192642 | 0.184572034 | 0.277295503 |
| 0.222293957 | 0.019395103 | 0.241710326 | 0.454633606 |
| 0.443737729 | 0.274854521 | 0.229958075 | 0.126367145 |
| 0.111178091 | 0.229129385 | 0.142260272 | 0.295178242 |
| 0.173461606 | 0.177193242 | 0.444976119 | 0.066914426 |
| 0.111220005 | 0.256881924 | 0.112604408 | 0.240663389 |
| 0.209414524 | 0.348552609 | 0.027755867 | 0.281527861 |
| 0.003129309 | 0.308340619 | 0.274741427 | 0.16801871  |
| 0.03230425  | 0.014106904 | 0.132289889 | 0.250823099 |
| 0.406923045 | 0.453484381 | 0.400905957 | 0.407551397 |
| 0.12704648  | 0.224198383 | 0.251060003 | 0.123334919 |
| 0.401221677 | 0.134889624 | 0.120059495 | 0.293231731 |
| 0.411392286 | 0.474728785 | 0.138057412 | 0.1801529   |
| 0.338110648 | 0.459749448 | 0.294922396 | 0.275752889 |
| 0.194919105 | 0.038207277 | 0.412174229 | 0.445688499 |
| 0.395590858 | 0.190473627 | 0.102121799 | 0.365715719 |

|             |             |             |             |
|-------------|-------------|-------------|-------------|
| 0.049306824 | 0.317725923 | 0.256008692 | 0.148441694 |
| 0.421895968 | 0.016308481 | 0.139249653 | 0.265784498 |
| 0.203594971 | 0.369159477 | 0.462338688 | 0.153144839 |
| 0.298691305 | 0.01912274  | 0.070511803 | 0.031248107 |
| 0.262439925 | 0.086566731 | 0.469184333 | 0.392872729 |
| 0.240174618 | 0.23699571  | 0.229862152 | 0.001922831 |
| 0.019547285 | 0.160911965 | 0.366635929 | 0.32720643  |
| 0.330927829 | 0.362820789 | 0.138097461 | 0.344080466 |
| 0.2793277   | 0.392295214 | 0.061189531 | 0.092861546 |
| 0.315900137 | 0.154315283 | 0.178814739 | 0.302515924 |
| 0.197231875 | 0.130036309 | 0.105256477 | 0.456670282 |
| 0.440844197 | 0.0707762   | 0.322592853 | 0.296013854 |
| 0.207538368 | 0.228917569 | 0.099871908 | 0.21277038  |
| 0.045683568 | 0.442666401 | 0.020108631 | 0.329206241 |
| 0.152216781 | 0.0939973   | 0.019373696 | 0.258943947 |
| 0.231185636 | 0.356198164 | 0.459688511 | 0.096451976 |
| 0.240653342 | 0.267708577 | 0.308439037 | 0.28758761  |
| 0.004525065 | 0.054300779 | 0.290713295 | 0.448861164 |
| 0.262534544 | 0.444728631 | 0.251860403 | 0.220746937 |
| 0.196715441 | 0.362802099 | 0.004370539 | 0.483652758 |
| 0.475748942 | 0.299592129 | 0.264275027 | 0.307346355 |
| 0.218785377 | 0.374328728 | 0.064825424 | 0.300851109 |
| 0.315290556 | 0.074657189 | 0.431195001 | 0.105948988 |
| 0.445715218 | 0.027632699 | 0.273694073 | 0.330362087 |
| 0.303274353 | 0.009504292 | 0.214260713 | 0.298402192 |
| 0.019310719 | 0.100486994 | 0.331470355 | 0.293426761 |
| 0.25204698  | 0.341386283 | 0.407939585 | 0.202093351 |
| 0.288803908 | 0.232001125 | 0.013693383 | 0.221469862 |
| 0.352431869 | 0.237274346 | 0.438596807 | 0.212180078 |
| 0.311299342 | 0.443297893 | 0.348427632 | 0.119754244 |
| 0.035040874 | 0.266992826 | 0.028127895 | 0.217676818 |
| 0.360804639 | 0.084873536 | 0.248828102 | 0.147158925 |
| 0.049242942 | 0.463863241 | 0.106965991 | 0.155789118 |
| 0.07203458  | 0.273943473 | 0.227848162 | 0.157906444 |
| 0.122570055 | 0.117636164 | 0.216676434 | 0.237664761 |
| 0.040026698 | 0.067162789 | 0.014510451 | 0.238953778 |
| 0.084683018 | 0.223463251 | 0.227888481 | 0.315121273 |
| 0.266629307 | 0.084224731 | 0.25690609  | 0.18722352  |
| 0.077466825 | 0.011874084 | 0.46656639  | 0.305871348 |
| 0.319159866 | 0.130952999 | 0.035628008 | 0.222314348 |
| 0.399638945 | 0.253188992 | 0.276392998 | 0.413110871 |
| 0.036844861 | 0.412065703 | 0.156163265 | 0.080510755 |
| 0.232091261 | 0.190508595 | 0.396526687 | 0.050293505 |
| 0.327989268 | 0.448530287 | 0.246649292 | 0.114288927 |
| 0.39855072  | 0.315386818 | 0.029568642 | 0.35276202  |
| 0.351414636 | 0.024447777 | 0.473858791 | 0.086811226 |
| 0.016845325 | 0.295346255 | 0.289902815 | 0.054959049 |
| 0.055881863 | 0.216403801 | 0.056714865 | 0.198395267 |
| 0.462853303 | 0.276824548 | 0.320697239 | 0.148784796 |
| 0.030035553 | 0.006423533 | 0.145074537 | 0.292432013 |
| 0.494688757 | 0.447693901 | 0.207836012 | 0.222916191 |
| 0.189986484 | 0.193386772 | 0.165613897 | 0.442954401 |
| 0.1898931   | 0.495171972 | 0.006787846 | 0.310597196 |
| 0.475589423 | 0.280732799 | 0.048220789 | 0.245155214 |

|             |             |             |             |
|-------------|-------------|-------------|-------------|
| 0.37493508  | 0.039601826 | 0.213798043 | 0.469517248 |
| 0.38923576  | 0.217979529 | 0.219210156 | 0.324777476 |
| 0.018369828 | 0.042508832 | 0.259955478 | 0.111041686 |
| 0.243120248 | 0.152980221 | 0.031181862 | 0.304553423 |
| 0.029970866 | 0.426999001 | 0.37739649  | 0.035608807 |
| 0.236909568 | 0.300065617 | 0.262701657 | 0.031492007 |
| 0.362358771 | 0.459461156 | 0.495609874 | 0.176312904 |
| 0.347075709 | 0.41954483  | 0.238337644 | 0.064403069 |
| 0.012442443 | 0.477161482 | 0.325575427 | 0.017411737 |
| 0.40381584  | 0.248075081 | 0.007684222 | 0.474177467 |
| 0.160149806 | 0.456164953 | 0.006745823 | 0.080399916 |
| 0.032640422 | 0.368075477 | 0.454566472 | 0.318355929 |
| 0.203319032 | 0.307281761 | 0.006374337 | 0.467575801 |
| 0.459094278 | 0.009478592 | 0.091265281 | 0.338636721 |
| 0.289757447 | 0.50662835  | 0.185547228 | 0.354459276 |
| 0.272430282 | 0.455482977 | 0.190335902 | 0.182859358 |
| 0.378289527 | 0.433008604 | 0.352250571 | 0.454527487 |
| 0.39089919  | 0.290107064 | 0.20886136  | 0.012547821 |
| 0.073797783 | 0.218146184 | 0.190239747 | 0.038993924 |
| 0.300493541 | 0.085560954 | 0.457311753 | 0.388950293 |
| 0.408722487 | 0.004381696 | 0.153303546 | 0.358880881 |
| 0.418628909 | 0.430711409 | 0.02609023  | 0.007326231 |
| 0.010945344 | 0.008826467 | 0.300576616 | 0.178457901 |
| 0.433305258 | 0.181503215 | 0.004324543 | 0.060542169 |
| 0.234284164 | 0.248222594 | 0.461983733 | 0.286224358 |
| 0.342038906 | 0.066491888 | 0.184956642 | 0.307958695 |
| 0.03907457  | 0.294032569 | 0.41300319  | 0.458123553 |
| 0.037975514 | 0.175947453 | 0.345254303 | 0.429816148 |
| 0.035587169 | 0.227740391 | 0.313299506 | 0.21077492  |
| 0.017331872 | 0.05489009  | 0.040774379 | 0.338558755 |
| 0.461854497 | 0.046683411 | 0.019885874 | 0.17398765  |
| 0.085831754 | 0.404846755 | 0.121836856 | 0.447955867 |
| 0.384304182 | 0.35454491  | 0.049141581 | 0.459669768 |
| 0.023756629 | 0.463421354 | 0.206010963 | 0.058710335 |
| 0.254086951 | 0.013633289 | 0.434199388 | 0.069723425 |
| 0.295731947 | 0.33816226  | 0.115455937 | 0.011910582 |
| 0.112437312 | 0.039551142 | 0.3944552   | 0.362863255 |
| 0.027898328 | 0.209467671 | 0.229788431 | 0.322234325 |
| 0.270879369 | 0.309629963 | 0.485440041 | 0.280085147 |
| 0.071150242 | 0.109095729 | 0.329449764 | 0.333486948 |
| 0.243709298 | 0.412368526 | 0.17163619  | 0.474413666 |
| 0.342938187 | 0.439991524 | 0.41952134  | 0.258714266 |
| 0.138751163 | 0.335365709 | 0.274945618 | 0.019539567 |
| 0.287100978 | 0.366574407 | 0.325077835 | 0.091149102 |
| 0.159876228 | 0.243375636 | 0.053580165 | 0.234977615 |
| 0.19924354  | 0.268727497 | 0.104798526 | 0.361624689 |
| 0.342097535 | 1           | 0.05833348  | 0.037548383 |
| 0.501969211 | 0.431288816 | 0.148278212 | 0.302173101 |
| 0.140003252 | 0.224111186 | 0.350571414 | 0.330485677 |
| 0.260539794 | 0.371176379 | 0.373346879 | 0.286580556 |
| 0.422933849 | 0.207245758 | 0.491265761 | 0.147983393 |
| 0.057763717 | 0.309973055 | 0.061692922 | 0.068016702 |
| 0.110323519 | 0.020011125 | 0.172719457 | 0.305884874 |
| 0.235294269 | 0.264781816 | 0.298219363 | 0.066859185 |



|             |             |             |             |
|-------------|-------------|-------------|-------------|
| 0.22900011  | 0.319583158 | 0.259379747 | 0.170120115 |
| 0.055983249 | 0.463787302 | 0.007625468 | 0.04541799  |
| 0.251381804 | 0.343409256 | 0.225531394 | 0.179370431 |
| 0.17235505  | 0.103207259 | 0.210933557 | 0.288808135 |
| 0.220267084 | 0.28571986  | 0.350365923 | 0.047100401 |
| 0.022770122 | 0.423713399 | 0.342080382 | 0.020400977 |
| 0.060038314 | 0.308475779 | 0.288084782 | 0.145173462 |
| 0.015520025 | 0.412786082 | 0.239484948 | 0.288441363 |
| 0.286411764 | 0.062193254 | 0.389464196 | 0.100789827 |
| 0.071119964 | 0.459070759 | 0.270663363 | 0.468467955 |
| 0.263997792 | 0.298187573 | 0.463282082 | 0.367207449 |
| 0.144013415 | 0.279824472 | 0.02745288  | 0.393537791 |
| 0.256295077 |             |             |             |
| TANK        | 0.059554772 | 0.048834429 | 0.027394718 |
| 0.094665841 | 0.060121353 | 0.047089907 | 0.138694052 |
| 0.100138429 | 0.009089132 | 0.007097438 | 0.003538446 |
| 0.0399753   | 0.004200301 | 0.053415918 | 0.010065426 |
| 0.115123907 | 0.053922223 | 0.072920965 | 0.18564202  |
| 0.139833187 | 0.109545597 | 0.105400931 | 0.111176818 |
| 0.020562559 | 0.027480097 | 0.081673123 | 0.01675365  |
| 0.113753979 | 0.091624978 | 0.043860514 | 0.130055944 |
| 0.10535245  | 0.08211706  | 0.034707222 | 0.045623592 |
| 0.029191422 | 0.041411622 | 0.072049265 | 0.025137382 |
| 0.074283985 | 0.042573215 | 0.13430329  | 0.126095219 |
| 0.081973638 | 0.037908776 | 0.130638052 | 0.058517719 |
| 0.008275636 | 0.035957754 | 0.050266324 | 0.046665304 |
| 0.024617897 | 0.025691165 | 0.10373017  | 0.103408356 |
| 0.001567425 | 0.078993986 | 0.00243237  | 0.095009229 |
| 0.155742279 | 0.073222209 | 0.029188395 | 0.017687283 |
| 0.007520486 | 0.171571633 | 0.07898115  | 0.158483699 |
| 0.014333966 | 0.072461503 | 0.10686237  | 0.027335021 |
| 0.006587735 | 0.155874552 | 0.089799192 | 0.00441713  |
| 0.157645508 | 0.021867144 | 0.100782592 | 0.124191906 |
| 0.099688291 | 0.044399086 | 0.058471291 | 0.046168605 |
| 0.023562455 | 0.126884522 | 0.02685949  | 0.095460471 |
| 0.06089215  | 0.096328511 | 0.013545449 | 0.102477583 |
| 0.05429184  | 0.035751353 | 0.031354304 | 0.094892819 |
| 0.040116135 | 0.059842649 | 0.023001189 | 0.032905043 |
| 0.004745851 | 0.042147515 | 0.035657008 | 0.048663208 |
| 0.063577746 | 0.015983286 | 0.091408854 | 0.112990441 |
| 0.192382814 | 0.015064709 | 0.140938219 | 0.016898485 |
| 0.094649107 | 0.046637373 | 0.081279537 | 0.101979181 |
| 0.065465005 | 0.059567616 | 0.031400308 | 0.175292128 |
| 0.058017136 | 0.01595024  | 0.000709669 | 0.160540318 |
| 0.007456224 | 0.005943804 | 0.026090338 | 0.067991378 |
| 0.078532999 | 0.015207929 | 0.141057496 | 0.069996036 |
| 0.075237596 | 0.030260077 | 0.047573742 | 0.10779167  |
| 0.093660964 | 0.027341133 | 0.029315851 | 0.057928384 |
| 0.022348658 | 0.059400842 | 0.000532319 | 0.163703322 |
| 0.045398267 | 0.054318911 | 0.193635687 | 0.04264358  |
| 0.043004127 | 0.167129979 | 0.186930311 | 0.055183873 |
| 0.060367856 | 0.199252849 | 0.068843091 | 0.108784898 |
| 0.013738523 | 0.046993741 | 0.214671719 | 0.077076266 |
| 0.131155328 | 0.024764604 | 0.080730909 | 0.104709631 |

|             |             |             |             |
|-------------|-------------|-------------|-------------|
| 0.001170156 | 0.015151799 | 0.06716146  | 0.145498186 |
| 0.012660357 | 0.030417269 | 0.026052018 | 0.23719967  |
| 0.094099133 | 0.073364276 | 0.08886847  | 0.031170483 |
| 0.003878772 | 0.061162259 | 0.065827317 | 0.050519869 |
| 0.071018249 | 0.053683774 | 0.083571059 | 0.046789558 |
| 0.105631226 | 0.081915876 | 0.001558726 | 0.032763729 |
| 0.032896054 | 0.041045171 | 0.050491804 | 0.071123945 |
| 0.010444197 | 0.07009504  | 0.001830685 | 0.123477969 |
| 0.06205499  | 0.226860217 | 0.06861809  | 0.100278113 |
| 0.039862437 | 0.102265503 | 0.083780552 | 0.027971122 |
| 0.022157621 | 0.010374596 | 0.074025585 | 0.126840441 |
| 0.065128123 | 0.073958694 | 0.088835236 | 0.094728825 |
| 0.048936627 | 0.071690984 | 0.08682391  | 0.007119169 |
| 0.044813299 | 0.183052439 | 0.04324891  | 0.067588173 |
| 0.058536802 | 0.003282003 | 0.046429192 | 0.073696083 |
| 0.046707139 | 0.045631815 | 0.028665246 | 0.001793259 |
| 0.140142209 | 0.132477378 | 0.011050552 | 0.043902468 |
| 0.032708484 | 0.056982257 | 0.01571505  | 0.070153762 |
| 0.088572998 | 0.047338153 | 0.018423675 | 0.009560545 |
| 0.007223716 | 0.04391483  | 0.199464416 | 0.019237248 |
| 0.005711566 | 0.064625933 | 0.013227898 | 0.022413147 |
| 0.11582807  | 0.113951979 | 0.021875798 | 0.008310097 |
| 0.007001481 | 0.012091221 | 0.012976467 | 0.057712413 |
| 0.042305619 | 0.019120938 | 0.037533874 | 0.014770546 |
| 0.042360595 | 0.148325346 | 0.047967211 | 0.123481781 |
| 0.062239806 | 0.097531711 | 0.172006314 | 0.002206124 |
| 0.062646763 | 0.020242255 | 0.036900907 | 0.056163121 |
| 0.0281288   | 0.06698327  | 0.020488487 | 0.092423212 |
| 0.0171755   | 0.124071123 | 0.092029288 | 0.002188865 |
| 0.090889479 | 0.050027336 | 0.133273815 | 0.045743107 |
| 0.042507276 | 0.09918794  | 0.038556697 | 0.048924423 |
| 0.049363203 | 0.143082408 | 0.041271452 | 0.050272935 |
| 0.154466591 | 0.051995528 | 0.02490547  | 0.154108768 |
| 0.088328203 | 0.037545447 | 0.09567452  | 0.113526542 |
| 0.047037515 | 0.098635624 | 0.036891016 | 0.031032818 |
| 0.105592715 | 0.007230112 | 0.068615356 | 0.034198221 |
| 0.034478083 | 0.0365322   | 0.196908109 | 0.022102536 |
| 0.207989389 | 0.009602936 | 0.015389706 | 0.043769509 |
| 0.022875991 | 0.04187263  | 0.14777716  | 0.034798006 |
| 0.026711497 | 0.082817316 | 0.045295838 | 0.096540789 |
| 0.052142095 | 0.120486483 | 0.189460081 | 0.035687541 |
| 0.054972198 | 0.027350155 | 0.011920054 | 0.091857149 |
| 0.072745157 | 0.094967054 | 0.04273991  | 0.009763259 |
| 0.02120818  | 0.070092876 | 0.001756936 | 0.048372129 |
| 0.04054858  | 0.0445867   | 0.090324993 | 0.023921996 |
| 0.026505208 | 0.044036069 | 0.099212177 | 0.166802049 |
| 0.02691277  | 0.034947828 | 0.036365528 | 0.213727119 |
| 0.053180814 | 0.029977177 | 0.01209264  | 0.15521067  |
| 0.100614419 | 0.030072862 | 0.079724928 | 0.007151975 |
| 0.08589513  | 0.054085039 | 0.010218944 | 0.055070158 |
| 0.216226416 | 0.031457067 | 0.001774861 | 0.003415174 |
| 0.059136376 | 0.069395431 | 0.030129131 | 0.139029381 |
| 0.01334594  | 0.166145188 | 0.012699569 | 0.045033703 |
| 0.038231534 | 0.044906792 | 0.026671664 | 0.031968192 |

|             |             |             |             |
|-------------|-------------|-------------|-------------|
| 0.019106732 | 0.052668313 | 0.010198563 | 0.029050262 |
| 0.019387799 | 0.027351934 | 0.016766552 | 0.108245376 |
| 0.05055075  | 0.025547129 | 0.085878623 | 0.053149962 |
| 0.078052941 | 0.078917701 | 0.154023113 | 0.069490215 |
| 0.002287227 | 0.116387029 | 0.002902664 | 0.002961779 |
| 0.075033533 | 0.029336796 | 0.049325787 | 0.078851484 |
| 0.038132646 | 0.124516109 | 0.093139244 | 0.041501885 |
| 0.086658663 | 0.090630001 | 0.029548922 | 0.00146509  |
| 0.000995892 | 0.002959725 | 0.140236312 | 0.091414975 |
| 0.043954569 | 0.003827501 | 0.119127186 | 0.104353924 |
| 0.02758856  | 0.032583286 | 0.03805126  | 0.159431614 |
| 0.050749444 | 0.187818173 | 0.007139577 | 0.15496509  |
| 0.016205941 | 0.051114465 | 0.04223089  | 0.045759382 |
| 0.113771108 | 0.080592428 | 0.074252135 | 0.075556785 |
| 0.000852131 | 0.126563889 | 0.048944565 | 0.016670953 |
| 0.028212634 | 0.063968727 | 0.046404996 | 0.098880769 |
| 0.025389507 | 0.018909116 | 0.021063074 | 0.005385133 |
| 0.064279105 | 0.071823492 | 0.046846175 | 0.061044524 |
| 0.076042119 | 0.113187125 | 0.043412607 | 0.038409862 |
| 0.010119537 | 0.031397327 | 0.024693581 | 0.002261224 |
| 0.089950896 | 0.115326344 | 0.03461904  | 0.000478659 |
| 0.068384688 | 0.109515666 | 0.002875054 | 0.079261369 |
| 0.003314935 | 0.111956478 | 0.064858464 | 0.053213044 |
| 0.060078654 | 0.117170961 | 0.112449697 | 0.121035182 |
| 0.109973456 | 0.07109354  | 0.035413894 | 0.012196211 |
| 0.107557725 | 0.007425694 | 0.132087512 | 0.061265325 |
| 0.112177103 | 0.065232708 | 0.010727565 | 0.046508295 |
| 0.066465081 | 0.062175502 | 0.038950278 | 0.080185544 |
| 0.009044474 | 0.055346953 | 0.064482067 | 0.011327241 |
| 0.124449803 | 0.067747255 | 0.114682818 | 0.00803047  |
| 0.054772047 | 0.017749333 | 0.068048021 | 0.007850232 |
| 0.009602912 | 0.074679421 | 0.061031732 | 0.118619647 |
| 0.107053083 | 0.05833348  | 1           | 0.037177109 |
| 0.048328284 | 0.052605409 | 0.025690792 | 0.059288388 |
| 0.169238428 | 0.061323774 | 0.053486746 | 0.051376438 |
| 0.014348697 | 0.04337125  | 0.093916585 | 0.058399443 |
| 0.052030318 | 0.155490795 | 0.03635515  | 0.057649847 |
| 0.003763789 | 0.044583267 | 0.036433561 | 0.145839393 |
| 0.161082627 | 0.051866904 | 0.003201884 | 0.110432696 |
| 0.006423318 | 0.103415908 | 0.027424373 | 0.018325655 |
| 0.097704761 | 0.048473017 | 0.117779443 | 0.092779465 |
| 0.033962342 | 0.032350255 | 0.009320197 | 0.166849642 |
| 0.01270912  | 0.037323407 | 0.014256723 | 0.072160734 |
| 0.005021809 | 0.052771529 | 0.122371153 | 0.075089947 |
| 0.0122585   | 0.00495626  | 0.034854904 | 0.021251505 |
| 0.133554928 | 0.074056671 | 0.048669689 | 0.044388228 |
| 0.021520274 | 0.058369176 | 0.085544031 | 0.016368233 |
| 0.069737572 | 0.028507405 | 0.02027895  | 0.042338352 |
| 0.125794352 | 0.20291874  | 0.056212693 | 0.015522917 |
| 0.084019234 | 0.046157799 | 0.028608336 | 0.031050531 |
| 0.053092637 | 0.100595324 | 0.037626473 | 0.049552008 |
| 0.015271589 | 0.025287613 | 0.074760976 | 0.096108876 |
| 0.005199185 |             |             |             |
| TBL1X       | 0.05325617  | 0.07216551  | 0.061937381 |

|             |             |             |             |
|-------------|-------------|-------------|-------------|
| 0.135646959 | 0.087941652 | 0.045378892 | 0.124929009 |
| 0.020791637 | 0.16908152  | 0.032808773 | 0.127828425 |
| 0.061938298 | 0.051593744 | 0.031462101 | 0.028787495 |
| 0.168291503 | 0.109626493 | 0.032047445 | 0.173220372 |
| 0.108190484 | 0.044272547 | 0.182638165 | 0.109494695 |
| 0.058815511 | 0.187924441 | 0.233228793 | 0.140172952 |
| 0.115760923 | 0.253257354 | 0.02856761  | 0.070820198 |
| 0.094770654 | 0.062310979 | 0.052292842 | 0.109289406 |
| 0.045901165 | 0.040623528 | 0.011167961 | 0.039958022 |
| 0.055422104 | 0.118054817 | 0.111548861 | 0.166974688 |
| 0.120523996 | 0.038799668 | 0.174535331 | 0.109893441 |
| 0.016568051 | 0.155063887 | 0.017209406 | 0.039421273 |
| 0.042111434 | 0.066989765 | 0.046024492 | 0.117467585 |
| 0.036842585 | 0.012288238 | 0.029757855 | 0.030793299 |
| 0.153699694 | 0.015455445 | 0.049119563 | 0.098695738 |
| 0.028103355 | 0.045407679 | 0.083646299 | 0.063516647 |
| 0.048182515 | 0.045688781 | 0.054027652 | 0.039237989 |
| 0.006099988 | 0.124818785 | 0.116999369 | 0.058130218 |
| 0.226448933 | 0.077590411 | 0.112544368 | 0.126699442 |
| 0.105450398 | 0.046641845 | 0.118141541 | 0.102132314 |
| 0.0689098   | 0.129441544 | 0.066329293 | 0.132626018 |
| 0.066377723 | 0.122544934 | 0.048440957 | 0.175437986 |
| 0.11240462  | 0.060914992 | 0.112673419 | 0.207147495 |
| 0.080362465 | 0.0623384   | 0.050964349 | 0.074395557 |
| 0.056909582 | 0.119555364 | 0.049503107 | 0.086682987 |
| 0.040047987 | 0.069577497 | 0.245713803 | 0.069190253 |
| 0.172761768 | 0.011870523 | 0.17933809  | 0.02560917  |
| 0.110256011 | 0.128548296 | 0.1997668   | 0.088021819 |
| 0.057255704 | 0.067715493 | 0.062770749 | 0.174234497 |
| 0.068318795 | 0.062917501 | 0.076244799 | 0.107834503 |
| 0.025708308 | 0.036883532 | 0.034874223 | 0.100125747 |
| 0.018499265 | 0.036787199 | 0.092521441 | 0.069403566 |
| 0.133577452 | 0.055888401 | 0.049961968 | 0.044445222 |
| 0.087294708 | 0.036229234 | 0.159905456 | 0.035569877 |
| 0.064282146 | 0.116778872 | 0.003615429 | 0.102025627 |
| 0.072434275 | 0.061077742 | 0.237681812 | 0.05757989  |
| 0.177910701 | 0.067449843 | 0.139288423 | 0.100223911 |
| 0.044923838 | 0.179782676 | 0.01708879  | 0.160357597 |
| 0.033762132 | 0.139242544 | 0.121039537 | 0.058012017 |
| 0.079699773 | 0.048181819 | 0.151450575 | 0.03360909  |
| 0.047478207 | 0.061097888 | 0.039170156 | 0.041987023 |
| 0.02772167  | 0.067217069 | 0.031875189 | 0.161700913 |
| 0.074491002 | 0.160310407 | 0.023121178 | 0.06988144  |
| 0.095031482 | 0.090487545 | 0.010584506 | 0.08115706  |
| 0.021533891 | 0.08490826  | 0.063630989 | 0.089777961 |
| 0.212350164 | 0.122726151 | 0.005162598 | 0.044975187 |
| 0.062502984 | 0.010045011 | 0.103447686 | 0.084302708 |
| 0.073034657 | 0.114745364 | 0.001297534 | 0.133815716 |
| 0.023823815 | 0.154082728 | 0.118381945 | 0.246699795 |
| 0.045943793 | 0.23505477  | 0.029931835 | 0.08404432  |
| 0.048489383 | 0.024540382 | 0.032600441 | 0.108607459 |
| 0.126341146 | 0.035941551 | 0.075811672 | 0.128883213 |
| 0.138918049 | 0.110214613 | 0.13266796  | 0.070789413 |
| 0.089025883 | 0.071284257 | 0.086191879 | 0.146121839 |

|             |             |             |             |
|-------------|-------------|-------------|-------------|
| 0.074541591 | 0.015228034 | 0.048923651 | 0.060932657 |
| 0.016184934 | 0.066203988 | 0.04698074  | 0.02228209  |
| 0.18052854  | 0.060598158 | 0.026848488 | 0.170379253 |
| 0.046719648 | 0.066140732 | 0.064333657 | 0.048989325 |
| 0.172476443 | 0.08700385  | 0.088603497 | 0.050659583 |
| 0.05244919  | 0.053955188 | 0.11918235  | 0.032498525 |
| 0.043316878 | 0.135426762 | 0.077026445 | 0.072435356 |
| 0.057034162 | 0.158589144 | 0.063145485 | 0.014526295 |
| 0.035123423 | 0.022825946 | 0.017721334 | 0.037379784 |
| 0.018691352 | 0.050977578 | 0.101055604 | 0.054658133 |
| 0.164258988 | 0.177583708 | 0.071785401 | 0.137540206 |
| 0.024843396 | 0.116356302 | 0.147384159 | 0.008201186 |
| 0.095172034 | 0.022952596 | 0.008669305 | 0.072359582 |
| 0.060111049 | 0.106034943 | 0.057093632 | 0.252717469 |
| 0.048655438 | 0.161248331 | 0.129661109 | 0.031628863 |
| 0.039671062 | 0.054808182 | 0.13921617  | 0.219216265 |
| 0.034598943 | 0.099140591 | 0.093882126 | 0.040539851 |
| 0.033779472 | 0.165549371 | 0.071088725 | 0.09838807  |
| 0.17788989  | 0.099396765 | 0.080302279 | 0.280156349 |
| 0.221833362 | 0.091096074 | 0.041173179 | 0.251309723 |
| 0.08464364  | 0.181293917 | 0.069766221 | 0.089080837 |
| 0.14279554  | 0.03687827  | 0.118688579 | 0.052564088 |
| 0.042751795 | 0.071669209 | 0.166332674 | 0.099099389 |
| 0.210864609 | 0.07628029  | 0.009680438 | 0.085376658 |
| 0.031086547 | 0.054511176 | 0.098533246 | 0.091681213 |
| 0.045274156 | 0.018342205 | 0.23498182  | 0.078229771 |
| 0.040460168 | 0.169032604 | 0.058975051 | 0.053217194 |
| 0.078922903 | 0.106465635 | 0.075611918 | 0.076424919 |
| 0.061678989 | 0.070103014 | 0.130668293 | 0.057010516 |
| 0.050606607 | 0.152026384 | 0.026526722 | 0.020472107 |
| 0.116119896 | 0.055650426 | 0.10560597  | 0.213787173 |
| 0.038907608 | 0.02001864  | 0.155230025 | 0.17831287  |
| 0.081536219 | 0.057094342 | 0.052368502 | 0.062900849 |
| 0.058265833 | 0.072811255 | 0.055682935 | 0.178297692 |
| 0.192996783 | 0.053268113 | 0.052338564 | 0.05430091  |
| 0.112279843 | 0.013594876 | 0.056994902 | 0.066945809 |
| 0.168211561 | 0.028061872 | 0.023840096 | 0.011411109 |
| 0.109142665 | 0.117348909 | 0.049729255 | 0.074953584 |
| 0.011273653 | 0.104229317 | 0.012956892 | 0.075831736 |
| 0.057190306 | 0.143007128 | 0.104528844 | 0.056905505 |
| 0.065551445 | 0.063243141 | 0.090476412 | 0.087072318 |
| 0.058623131 | 0.049678383 | 0.042885861 | 0.252942474 |
| 0.080365922 | 0.056496038 | 0.074155176 | 0.05675896  |
| 0.099146112 | 0.125540767 | 0.208171192 | 0.11300078  |
| 0.128056425 | 0.031745305 | 0.022536283 | 0.124250893 |
| 0.028203591 | 0.168622605 | 0.062423012 | 0.11522793  |
| 0.0817288   | 0.124256392 | 0.038219568 | 0.053484295 |
| 0.076962003 | 0.10374264  | 0.060688529 | 0.029549585 |
| 0.007254262 | 0.148658912 | 0.074954987 | 0.17421726  |
| 0.080305136 | 0.006991605 | 0.08747474  | 0.040795761 |
| 0.050730934 | 0.122771986 | 0.059930781 | 0.173400791 |
| 0.080077678 | 0.14853183  | 0.023344641 | 0.140312666 |
| 0.180501308 | 0.019379889 | 0.09162424  | 0.055078558 |
| 0.100023589 | 0.166365207 | 0.028298105 | 0.109042889 |

|             |             |             |             |
|-------------|-------------|-------------|-------------|
| 0.025304982 | 0.175402674 | 0.058880104 | 0.046382046 |
| 0.039791    | 0.194789077 | 0.214929838 | 0.125657988 |
| 0.04325087  | 0.086826298 | 0.108198437 | 0.003820086 |
| 0.098408062 | 0.091004117 | 0.08690709  | 0.10352687  |
| 0.087520861 | 0.145746162 | 0.110520293 | 0.05810137  |
| 0.146323987 | 0.044855999 | 0.113612524 | 0.008813302 |
| 0.057473337 | 0.089228266 | 0.047754895 | 0.069322148 |
| 0.02153429  | 0.055101112 | 0.094674054 | 0.117931505 |
| 0.042547731 | 0.166014245 | 0.124118856 | 0.115268666 |
| 0.09979689  | 0.072771319 | 0.153104487 | 0.094812879 |
| 0.045376505 | 0.126258113 | 0.047787585 | 0.026692156 |
| 0.088836747 | 0.02213575  | 0.090457132 | 0.034676782 |
| 0.022167083 | 0.116459387 | 0.072661198 | 0.078954366 |
| 0.053593845 | 0.068694889 | 0.06549555  | 0.131654926 |
| 0.053203322 | 0.041097784 | 0.070410315 | 0.046590847 |
| 0.120808081 | 0.112353978 | 0.046954504 | 0.131328335 |
| 0.191762169 | 0.058767361 | 0.070917327 | 0.004964966 |
| 0.048110192 | 0.03779629  | 0.082866198 | 0.144564367 |
| 0.04543221  | 0.037548383 | 0.037177109 | 1           |
| 0.070096213 | 0.055245386 | 0.051508075 | 0.086943849 |
| 0.167947425 | 0.184255492 | 0.085535111 | 0.094442856 |
| 0.025344184 | 0.066123248 | 0.070492559 | 0.053809653 |
| 0.047089789 | 0.164581288 | 0.056918771 | 0.010074371 |
| 0.127737019 | 0.036517672 | 0.101657607 | 0.227031152 |
| 0.1851946   | 0.163349713 | 0.02751905  | 0.128134029 |
| 0.022814643 | 0.146736944 | 0.008120159 | 0.123335555 |
| 0.142799767 | 0.023548195 | 0.156917634 | 0.071486697 |
| 0.112705022 | 0.053265314 | 0.070708449 | 0.154020773 |
| 0.024712298 | 0.085762076 | 0.085877888 | 0.140284907 |
| 0.046519495 | 0.077859126 | 0.174678853 | 0.023535764 |
| 0.019614243 | 0.014510425 | 0.079213136 | 0.057477604 |
| 0.060130451 | 0.112762839 | 0.025690028 | 0.084504639 |
| 0.066899524 | 0.035640989 | 0.026493198 | 0.090780434 |
| 0.140714971 | 0.062933816 | 0.030225741 | 0.084574804 |
| 0.084302719 | 0.116884717 | 0.026473927 | 0.03658897  |
| 0.084772394 | 0.040461814 | 0.076375187 | 0.055105091 |
| 0.066977721 | 0.165235697 | 0.032997251 | 0.054168955 |
| 0.034460518 | 0.033295166 | 0.110446735 | 0.088767238 |
| 0.027326768 |             |             |             |
| TBX21       | 0.513670179 | 0.532606843 | 0.479378587 |
| 0.49959966  | 0.506936895 | 0.469146921 | 0.252552259 |
| 0.233530324 | 0.100851892 | 0.005663874 | 0.026842076 |
| 0.525942085 | 0.246752867 | 0.332099324 | 0.410039466 |
| 0.491748092 | 0.156664885 | 0.425432463 | 0.283933625 |
| 0.489534409 | 0.114594408 | 0.470315445 | 0.108127955 |
| 0.342094703 | 0.120378093 | 0.079158458 | 0.31604965  |
| 0.519532875 | 0.091203554 | 0.417694088 | 0.471184853 |
| 0.115992567 | 0.528427503 | 0.527474057 | 0.518770128 |
| 0.524064599 | 0.495196495 | 0.014014764 | 0.366223619 |
| 0.509521943 | 0.52795578  | 0.487812164 | 0.39055286  |
| 0.04873818  | 0.500915289 | 0.293278367 | 0.473473048 |
| 0.290134119 | 0.034927377 | 0.308284084 | 0.476216081 |
| 0.490403209 | 0.52895493  | 0.279292535 | 0.192094617 |
| 0.252994855 | 0.295353828 | 0.332988925 | 0.412803798 |

|             |             |             |             |
|-------------|-------------|-------------|-------------|
| 0.269251561 | 0.20686049  | 0.508048094 | 0.107077651 |
| 0.184778313 | 0.306708478 | 0.176295287 | 0.317168203 |
| 0.415885949 | 0.481096088 | 0.020815795 | 0.497513356 |
| 0.003512929 | 0.461704991 | 0.443749327 | 0.378799656 |
| 0.046949279 | 0.023748567 | 0.206131623 | 0.408447801 |
| 0.533001207 | 0.500742185 | 0.546301108 | 0.545865694 |
| 0.212628584 | 0.34261404  | 0.471409204 | 0.202578249 |
| 0.526756894 | 0.215223592 | 0.130726772 | 0.493742888 |
| 0.547851654 | 0.524585613 | 0.23402055  | 0.30467259  |
| 0.518423332 | 0.523668047 | 0.514271598 | 0.512627966 |
| 0.416881018 | 0.058584398 | 0.507087134 | 0.548161499 |
| 0.491262085 | 0.379015737 | 0.17640763  | 0.499610995 |
| 0.067025482 | 0.450743286 | 0.419404646 | 0.190302998 |
| 0.534583205 | 0.020948515 | 0.246051209 | 0.434732752 |
| 0.25473407  | 0.534133974 | 0.523875017 | 0.223054421 |
| 0.484841586 | 0.02270271  | 0.162426295 | 0.037296906 |
| 0.397288877 | 0.174125565 | 0.505978882 | 0.536825914 |
| 0.289493474 | 0.453275065 | 0.319421645 | 0.001759081 |
| 0.02953273  | 0.216723171 | 0.533693734 | 0.444153026 |
| 0.519341714 | 0.473036228 | 0.277127002 | 0.491080553 |
| 0.533735536 | 0.545748764 | 0.080282045 | 0.11400255  |
| 0.508804359 | 0.215846436 | 0.279772099 | 0.539507704 |
| 0.363538793 | 0.138543459 | 0.149727331 | 0.54647812  |
| 0.482717613 | 0.098534355 | 0.420356743 | 0.48826982  |
| 0.407709962 | 0.419859722 | 0.125216007 | 0.334161688 |
| 0.059205865 | 0.498343772 | 0.031015012 | 0.410068186 |
| 0.331623258 | 0.173810612 | 0.012722102 | 0.324853721 |
| 0.356954401 | 0.527560681 | 0.492693373 | 0.123442437 |
| 0.384859817 | 0.481461413 | 0.407265364 | 0.5226272   |
| 0.011965015 | 0.053515652 | 0.363196006 | 0.546310218 |
| 0.374199935 | 0.542875938 | 0.356821369 | 0.357661277 |
| 0.330641165 | 0.529037606 | 0.003969424 | 0.508765464 |
| 0.523188235 | 0.387822695 | 0.478982249 | 0.49803925  |
| 0.456014697 | 0.532193807 | 0.055658534 | 0.493673984 |
| 0.457411326 | 0.090996004 | 0.546858499 | 0.186135145 |
| 0.511234981 | 0.046639254 | 0.395899078 | 0.52568649  |
| 0.528960396 | 0.009936121 | 0.288223399 | 0.468687043 |
| 0.029533809 | 0.122038034 | 0.51720445  | 0.488923778 |
| 0.459688178 | 0.529043    | 0.538736357 | 0.435997848 |
| 0.508868304 | 0.282311715 | 0.013450703 | 0.374441738 |
| 0.529801138 | 0.466485634 | 0.495343763 | 0.290121349 |
| 0.435301357 | 0.526252703 | 0.519853411 | 0.263507688 |
| 0.049959088 | 0.384117184 | 0.025097334 | 0.395740588 |
| 0.492097857 | 0.143944422 | 0.480669906 | 0.172305095 |
| 0.080099112 | 0.544160026 | 0.207348198 | 0.314032331 |
| 0.150698541 | 0.493913625 | 0.300965321 | 0.295804041 |
| 0.262405076 | 0.191312903 | 0.422913362 | 0.456218987 |
| 0.04533226  | 0.108973861 | 0.015585934 | 0.467900013 |
| 0.173451344 | 0.42477473  | 0.426510217 | 0.510164457 |
| 0.399430302 | 0.132335798 | 0.459068885 | 0.341072959 |
| 0.130083525 | 0.016061767 | 0.534728593 | 0.481483571 |
| 0.433050411 | 0.183203294 | 0.045623129 | 0.430677986 |
| 0.540946313 | 0.413085025 | 0.350618667 | 0.526978387 |
| 0.031820371 | 0.544883709 | 0.302494869 | 0.14149272  |

|             |             |             |             |
|-------------|-------------|-------------|-------------|
| 0.45678289  | 0.311656144 | 0.528992782 | 0.075815134 |
| 0.48355705  | 0.514959325 | 0.368061337 | 0.217346961 |
| 0.481733318 | 0.500333664 | 0.035343907 | 0.506536914 |
| 0.504382708 | 0.035258238 | 0.538073281 | 0.145220206 |
| 0.022595061 | 0.523782834 | 0.534609188 | 0.085300085 |
| 0.088135099 | 0.408398705 | 0.057391728 | 0.340158234 |
| 0.542336271 | 0.484243758 | 0.529219441 | 0.254291364 |
| 0.046567336 | 0.011987767 | 0.241998973 | 0.482231278 |
| 0.523629958 | 0.537642905 | 0.306976024 | 0.439965218 |
| 0.284589938 | 0.400390434 | 0.188631041 | 0.54649023  |
| 0.230718641 | 0.518202361 | 0.006981582 | 0.530431126 |
| 0.522933572 | 0.371711053 | 0.091859395 | 0.38076437  |
| 0.492090897 | 0.053231058 | 0.245095372 | 0.515685757 |
| 0.52538752  | 0.396867795 | 0.425397979 | 0.514092349 |
| 0.019115249 | 0.050647595 | 0.465868619 | 0.217775651 |
| 0.470165365 | 0.253343382 | 0.061891845 | 0.406386956 |
| 0.050068872 | 0.513246401 | 0.535789449 | 0.068626912 |
| 0.431436374 | 0.387545327 | 0.447154184 | 0.04186927  |
| 0.529668214 | 0.517622696 | 0.528493508 | 0.197992345 |
| 0.538105051 | 0.534472671 | 0.494488386 | 0.089838325 |
| 0.018405681 | 0.520602358 | 0.494832484 | 0.026612302 |
| 0.541829801 | 0.311500746 | 0.014799948 | 0.527041123 |
| 0.220036011 | 0.468335205 | 0.004893168 | 0.101673648 |
| 0.044873734 | 0.53453816  | 0.49513757  | 0.468615005 |
| 0.326620361 | 0.441034394 | 0.006483392 | 0.539097308 |
| 0.52149563  | 0.015152002 | 0.163530302 | 0.539348927 |
| 0.522588324 | 0.523985643 | 0.384971605 | 0.538358863 |
| 0.520279094 | 0.508671217 | 0.292443248 | 0.316187834 |
| 0.533850746 | 0.512482916 | 0.514849197 | 0.510400274 |
| 0.541508064 | 0.503810428 | 0.333989873 | 0.017698701 |
| 0.158953717 | 0.271048799 | 0.393552733 | 0.099614928 |
| 0.416583871 | 0.163818773 | 0.531299537 | 0.542426843 |
| 0.54558538  | 0.004944121 | 0.187444115 | 0.53622583  |
| 0.51955856  | 0.534967183 | 0.023221228 | 0.007235359 |
| 0.009226617 | 0.021393219 | 0.441137967 | 0.284122042 |
| 0.540339672 | 0.316509958 | 0.004731946 | 0.054148235 |
| 0.340607648 | 0.47618426  | 0.525763698 | 0.4511794   |
| 0.531737321 | 0.093116564 | 0.357723081 | 0.475493991 |
| 0.077702567 | 0.427285231 | 0.547751683 | 0.507568282 |
| 0.045901453 | 0.291093013 | 0.460767045 | 0.541798605 |
| 0.086783941 | 0.374118355 | 0.531360547 | 0.38539404  |
| 0.015126707 | 0.092300007 | 0.074602933 | 0.518920538 |
| 0.513360294 | 0.092250419 | 0.03808134  | 0.192028198 |
| 0.144339196 | 0.543182918 | 0.197192941 | 0.549432546 |
| 0.530346084 | 0.515776526 | 0.084845802 | 0.508831941 |
| 0.045159454 | 0.50407374  | 0.405035786 | 0.075943045 |
| 0.34201804  | 0.013451629 | 0.514842528 | 0.191186102 |
| 0.408014478 | 0.491306946 | 0.236939576 | 0.017781419 |
| 0.21808693  | 0.05942585  | 0.543226602 | 0.538968564 |
| 0.036646743 | 0.287017377 | 0.352687325 | 0.486521207 |
| 0.360819228 | 0.520328384 | 0.515018139 | 0.506800607 |
| 0.101825961 | 0.169239601 | 0.494605676 | 0.497927769 |
| 0.298430272 | 0.54632616  | 0.36353995  | 0.539967993 |
| 0.507501039 | 0.525317332 | 0.537134667 | 0.423661963 |



|             |             |             |             |
|-------------|-------------|-------------|-------------|
| 0.278556736 | 0.496064489 | 0.464077402 | 0.023908687 |
| 0.424417295 | 0.541499171 | 0.439637165 | 0.183134101 |
| 0.3064551   | 0.471778029 | 0.055674476 | 0.234391031 |
| 0.404504417 | 0.39354426  | 0.171375017 | 0.514692833 |
| 0.483150875 | 0.501969211 | 0.048328284 | 0.070096213 |
| 1           | 0.504148318 | 0.178461099 | 0.520767137 |
| 0.199174896 | 0.412010335 | 0.538766276 | 0.533562286 |
| 0.45312249  | 0.541464412 | 0.521328485 | 0.485027181 |
| 0.492828574 | 0.312160535 | 0.529673311 | 0.115134727 |
| 0.098338711 | 0.514771034 | 0.115811346 | 0.104697371 |
| 0.168493348 | 0.029490892 | 0.367261746 | 0.504495988 |
| 0.461541167 | 0.45740277  | 0.403282366 | 0.095172704 |
| 0.383246384 | 0.455830346 | 0.423671276 | 0.248104627 |
| 0.092481857 | 0.508558639 | 0.010068373 | 0.063305837 |
| 0.470354034 | 0.536299861 | 0.463735301 | 0.283203331 |
| 0.358845385 | 0.161686232 | 0.356873112 | 0.379253448 |
| 0.409642174 | 0.445731568 | 0.535459931 | 0.040521535 |
| 0.022450091 | 0.54689627  | 0.467383323 | 0.022540512 |
| 0.101140784 | 0.479028744 | 0.355925574 | 0.2881562   |
| 0.023375704 | 0.528244544 | 0.425659971 | 0.511154193 |
| 0.422714644 | 0.075426259 | 0.442743958 | 0.108534169 |
| 0.069619412 | 0.49590902  | 0.47733429  | 0.517264816 |
| 0.417588449 | 0.498250526 | 0.465426809 | 0.53677649  |
| 0.146169592 | 0.471157152 | 0.031813934 | 0.531173015 |
| 0.499891092 |             |             |             |
| TCF7        | 0.43384203  | 0.488046684 | 0.396717424 |
| 0.408621253 | 0.393494452 | 0.41560081  | 0.224852465 |
| 0.246065423 | 0.0940919   | 0.004013595 | 0.016627833 |
| 0.405047947 | 0.168293645 | 0.267715683 | 0.379346589 |
| 0.399985551 | 0.101774904 | 0.399410137 | 0.238239144 |
| 0.414111707 | 0.112825096 | 0.360841313 | 0.097581344 |
| 0.263781648 | 0.080525005 | 0.059806645 | 0.236016898 |
| 0.430622962 | 0.070509042 | 0.365771887 | 0.414947644 |
| 0.088382202 | 0.439581967 | 0.507183492 | 0.379518071 |
| 0.493083543 | 0.427212541 | 0.011542748 | 0.319864246 |
| 0.442419305 | 0.42238508  | 0.414670328 | 0.313516989 |
| 0.041817559 | 0.491773668 | 0.245234174 | 0.370885566 |
| 0.29028404  | 0.022945717 | 0.314286068 | 0.458739752 |
| 0.461065184 | 0.414892818 | 0.284601352 | 0.170518977 |
| 0.163682266 | 0.277819904 | 0.213164587 | 0.383261046 |
| 0.22284036  | 0.21468863  | 0.462460441 | 0.103427582 |
| 0.169450687 | 0.303225981 | 0.124299755 | 0.2901383   |
| 0.314491852 | 0.433416197 | 0.023339434 | 0.392673714 |
| 0.002449667 | 0.399474686 | 0.347392923 | 0.291310597 |
| 0.034780808 | 0.013328703 | 0.148510576 | 0.340458635 |
| 0.438296347 | 0.447027276 | 0.423126049 | 0.424955783 |
| 0.140772477 | 0.275656704 | 0.353947665 | 0.152164348 |
| 0.446726719 | 0.17850761  | 0.115708786 | 0.385049508 |
| 0.425655214 | 0.485351022 | 0.176359543 | 0.234836411 |
| 0.41996745  | 0.455147422 | 0.421463655 | 0.395553007 |
| 0.325226967 | 0.043686326 | 0.426950635 | 0.441505732 |
| 0.426253702 | 0.267946082 | 0.127184812 | 0.426291949 |
| 0.054468428 | 0.397056224 | 0.336996614 | 0.133560693 |
| 0.438655283 | 0.021641848 | 0.176137941 | 0.357261889 |

|             |             |             |             |
|-------------|-------------|-------------|-------------|
| 0.233212409 | 0.443004088 | 0.475183992 | 0.19099849  |
| 0.376510316 | 0.015223398 | 0.113439556 | 0.030332682 |
| 0.316950776 | 0.111758289 | 0.491753605 | 0.42621094  |
| 0.264534714 | 0.342001503 | 0.290312302 | 0.00106282  |
| 0.019661996 | 0.180438793 | 0.418643628 | 0.38971337  |
| 0.438967873 | 0.398115525 | 0.208598801 | 0.428432521 |
| 0.409002504 | 0.422792275 | 0.080585964 | 0.110711818 |
| 0.418492717 | 0.178831174 | 0.223726748 | 0.417235297 |
| 0.267263607 | 0.139866875 | 0.120633921 | 0.455363742 |
| 0.43421664  | 0.080917602 | 0.396164794 | 0.38741511  |
| 0.321617948 | 0.301871342 | 0.107754762 | 0.250921012 |
| 0.052936528 | 0.462329782 | 0.020263192 | 0.392676773 |
| 0.270771005 | 0.106044647 | 0.015131526 | 0.314438512 |
| 0.294148781 | 0.412832323 | 0.479328859 | 0.105716305 |
| 0.2942817   | 0.370311033 | 0.383977308 | 0.405165014 |
| 0.00828913  | 0.047830633 | 0.362928292 | 0.442121254 |
| 0.348525645 | 0.433784465 | 0.297946636 | 0.293396564 |
| 0.251617181 | 0.432689127 | 0.003847748 | 0.493596835 |
| 0.489374938 | 0.371089853 | 0.35240564  | 0.396750862 |
| 0.359797894 | 0.427789847 | 0.052149691 | 0.386884095 |
| 0.404840344 | 0.081604544 | 0.432432534 | 0.133072163 |
| 0.442527801 | 0.034311059 | 0.348220108 | 0.407646656 |
| 0.396060271 | 0.008512387 | 0.284296647 | 0.405432781 |
| 0.020657078 | 0.130918695 | 0.444153984 | 0.404569446 |
| 0.375670272 | 0.428737262 | 0.42795937  | 0.338619741 |
| 0.39363359  | 0.25985253  | 0.01183288  | 0.283003713 |
| 0.433369641 | 0.372036549 | 0.44332087  | 0.264234896 |
| 0.396019308 | 0.447912949 | 0.419983902 | 0.230832705 |
| 0.043430292 | 0.351636951 | 0.022489962 | 0.316062061 |
| 0.422773566 | 0.107833737 | 0.4013614   | 0.140524266 |
| 0.054850238 | 0.46808886  | 0.142587333 | 0.223942248 |
| 0.100160152 | 0.373279439 | 0.27191924  | 0.208608685 |
| 0.161059811 | 0.155852648 | 0.334624728 | 0.373358747 |
| 0.045541282 | 0.07679802  | 0.013189027 | 0.319890266 |
| 0.09969149  | 0.290804812 | 0.299785455 | 0.426938319 |
| 0.313631234 | 0.085042079 | 0.339319934 | 0.277979007 |
| 0.097442819 | 0.011689532 | 0.470893432 | 0.397415083 |
| 0.392651452 | 0.166654308 | 0.035248706 | 0.303929767 |
| 0.427772131 | 0.364386422 | 0.365326168 | 0.427908772 |
| 0.030641867 | 0.43431617  | 0.211660708 | 0.100419136 |
| 0.309957454 | 0.237736356 | 0.435021644 | 0.074307235 |
| 0.431185052 | 0.447336587 | 0.307349469 | 0.163182678 |
| 0.399283042 | 0.420475301 | 0.031484747 | 0.430914283 |
| 0.418406355 | 0.025139163 | 0.473116883 | 0.096703582 |
| 0.016666873 | 0.40216799  | 0.410353015 | 0.065605799 |
| 0.067087777 | 0.31326568  | 0.065844415 | 0.258877069 |
| 0.466081878 | 0.3723416   | 0.420113355 | 0.195008582 |
| 0.035978512 | 0.004602964 | 0.176118445 | 0.38834625  |
| 0.502069067 | 0.449354016 | 0.245539867 | 0.305731872 |
| 0.236891379 | 0.312870493 | 0.209621451 | 0.442887196 |
| 0.210454598 | 0.496429147 | 0.005753781 | 0.409449519 |
| 0.494399192 | 0.346452626 | 0.062775072 | 0.339630958 |
| 0.414335385 | 0.048764769 | 0.233551171 | 0.472917645 |
| 0.443856838 | 0.330469635 | 0.346239578 | 0.413976511 |

|             |             |             |             |
|-------------|-------------|-------------|-------------|
| 0.019832898 | 0.05103191  | 0.378828618 | 0.156705631 |
| 0.380193223 | 0.21403556  | 0.037362717 | 0.388648412 |
| 0.035792025 | 0.43102826  | 0.424330845 | 0.057154304 |
| 0.359145602 | 0.39229435  | 0.341300277 | 0.035589255 |
| 0.408920356 | 0.463942306 | 0.503258056 | 0.192010051 |
| 0.422639396 | 0.433952835 | 0.35904714  | 0.070499158 |
| 0.012745512 | 0.488488117 | 0.443601519 | 0.019201578 |
| 0.431573174 | 0.311635811 | 0.007530172 | 0.472255841 |
| 0.19519047  | 0.461391561 | 0.006530168 | 0.093341404 |
| 0.034088166 | 0.418073054 | 0.476516541 | 0.418792074 |
| 0.293583776 | 0.384191898 | 0.005710066 | 0.465521184 |
| 0.460450004 | 0.009893171 | 0.115798904 | 0.415951554 |
| 0.389806471 | 0.504926234 | 0.282151977 | 0.410849649 |
| 0.378172489 | 0.474922667 | 0.232955289 | 0.244237331 |
| 0.431853935 | 0.449842288 | 0.443258912 | 0.453033475 |
| 0.427193224 | 0.389244313 | 0.275634903 | 0.015828311 |
| 0.146133747 | 0.275990018 | 0.316413661 | 0.076775813 |
| 0.39851227  | 0.120968815 | 0.443649237 | 0.429674736 |
| 0.419685257 | 0.003632342 | 0.185735005 | 0.430915151 |
| 0.437270328 | 0.443209562 | 0.023883018 | 0.007316588 |
| 0.008594694 | 0.01219979  | 0.393697992 | 0.223921647 |
| 0.440269734 | 0.258236784 | 0.003569712 | 0.060123792 |
| 0.292222034 | 0.350645362 | 0.470430604 | 0.37016559  |
| 0.425288455 | 0.074034793 | 0.270749442 | 0.399168593 |
| 0.055312644 | 0.395999956 | 0.424710283 | 0.465129467 |
| 0.037921467 | 0.235882045 | 0.403818085 | 0.437700944 |
| 0.053555841 | 0.284972134 | 0.407103441 | 0.295269454 |
| 0.013560487 | 0.068082849 | 0.058953399 | 0.418577173 |
| 0.480313142 | 0.054112477 | 0.021243701 | 0.180937956 |
| 0.109975874 | 0.437530917 | 0.144601137 | 0.441536826 |
| 0.437133594 | 0.410557735 | 0.058306588 | 0.476314759 |
| 0.033991195 | 0.467158814 | 0.284944449 | 0.07185314  |
| 0.284884056 | 0.011772024 | 0.430011487 | 0.138170111 |
| 0.358217143 | 0.435544722 | 0.211961235 | 0.01228546  |
| 0.17054052  | 0.04190758  | 0.427010488 | 0.418191636 |
| 0.027490474 | 0.275536919 | 0.284735669 | 0.41091583  |
| 0.338776564 | 0.406244406 | 0.495833949 | 0.407854975 |
| 0.093970102 | 0.11918469  | 0.422949138 | 0.426718608 |
| 0.277978377 | 0.426518428 | 0.27173956  | 0.474728271 |
| 0.446010651 | 0.445079626 | 0.425758219 | 0.366295228 |
| 0.185354691 | 0.437121426 | 0.38733865  | 0.019141354 |
| 0.358057884 | 0.41867165  | 0.408889874 | 0.127283891 |
| 0.219824332 | 0.35531001  | 0.061503725 | 0.22469401  |
| 0.291591401 | 0.362546182 | 0.130258062 | 0.418779503 |
| 0.427990129 | 0.431288816 | 0.052605409 | 0.055245386 |
| 0.504148318 | 1           | 0.185059069 | 0.427919486 |
| 0.160689379 | 0.325874464 | 0.426374515 | 0.410959434 |
| 0.396062745 | 0.419791647 | 0.436217068 | 0.393274244 |
| 0.419860053 | 0.274540718 | 0.504739045 | 0.140124319 |
| 0.07730663  | 0.414046444 | 0.079976902 | 0.078517011 |
| 0.130456333 | 0.023172259 | 0.265313594 | 0.400678535 |
| 0.334967396 | 0.347870129 | 0.369589818 | 0.080186605 |
| 0.293694125 | 0.414426867 | 0.336278984 | 0.21550468  |
| 0.067275985 | 0.479658977 | 0.007714334 | 0.047238489 |

|             |             |             |             |
|-------------|-------------|-------------|-------------|
| 0.331874438 | 0.434744914 | 0.329678478 | 0.221951932 |
| 0.257811579 | 0.121295898 | 0.273072397 | 0.355184479 |
| 0.305411463 | 0.360810525 | 0.433733238 | 0.044044605 |
| 0.021336663 | 0.431041076 | 0.420688084 | 0.018281134 |
| 0.085093125 | 0.434953695 | 0.309866849 | 0.231866922 |
| 0.016212918 | 0.426145162 | 0.366140544 | 0.401902228 |
| 0.379080201 | 0.064194199 | 0.39624803  | 0.106639205 |
| 0.073642448 | 0.44619052  | 0.376596834 | 0.478179024 |
| 0.337284192 | 0.388916318 | 0.470320593 | 0.425176765 |
| 0.136017584 | 0.394222259 | 0.030975517 | 0.442502182 |
| 0.380569993 |             |             |             |

| TCTE3       | 0.127414464 | 0.182511676 | 0.080113834 |
|-------------|-------------|-------------|-------------|
| 0.254709496 | 0.095044183 | 0.174751556 | 0.227529046 |
| 0.124070939 | 0.063416836 | 0.020617821 | 0.006881204 |
| 0.093967032 | 0.014885024 | 0.081588916 | 0.074880732 |
| 0.218365121 | 0.028095436 | 0.084510677 | 0.210577087 |
| 0.212320687 | 0.137191239 | 0.177399291 | 0.119727945 |
| 0.025703781 | 0.033744798 | 0.073752528 | 0.052324851 |
| 0.253855464 | 0.091510138 | 0.1166437   | 0.237288193 |
| 0.029164288 | 0.157381282 | 0.156797291 | 0.109162011 |
| 0.131246196 | 0.11855185  | 0.002961917 | 0.095619268 |
| 0.191385188 | 0.167024442 | 0.226501211 | 0.218137218 |
| 0.081755376 | 0.158376876 | 0.233332752 | 0.102106272 |
| 0.038884885 | 0.027380966 | 0.136368187 | 0.167400734 |
| 0.133210957 | 0.096257373 | 0.176979179 | 0.169537846 |
| 0.007938953 | 0.069390951 | 0.008899469 | 0.192208083 |
| 0.176181545 | 0.127763794 | 0.134066762 | 0.068532077 |
| 0.018451161 | 0.148840731 | 0.024081956 | 0.182594011 |
| 0.024991624 | 0.201426385 | 0.032855688 | 0.064558353 |
| 0.006190946 | 0.249497547 | 0.105804394 | 0.029181628 |
| 0.063873515 | 0.012338442 | 0.039373365 | 0.22594861  |
| 0.225717543 | 0.145412077 | 0.174761533 | 0.156018065 |
| 0.018502153 | 0.095039414 | 0.049367187 | 0.084932074 |
| 0.176708774 | 0.176052058 | 0.048494531 | 0.186282188 |
| 0.172877817 | 0.148932606 | 0.035134123 | 0.097450088 |
| 0.183493228 | 0.189292328 | 0.107881701 | 0.084750833 |
| 0.046156663 | 0.013785498 | 0.146603139 | 0.162445844 |
| 0.168029503 | 0.030548663 | 0.079664163 | 0.221467239 |
| 0.068918856 | 0.049219741 | 0.226594217 | 0.00893209  |
| 0.234944657 | 0.081553544 | 0.063989517 | 0.162326605 |
| 0.042175026 | 0.177458564 | 0.140847433 | 0.209813071 |
| 0.075487407 | 0.011089573 | 0.009650578 | 0.03045997  |
| 0.026455543 | 0.005549046 | 0.130645761 | 0.206838496 |
| 0.053337348 | 0.021556526 | 0.16858585  | 0.009494643 |
| 0.021408824 | 0.0150874   | 0.111582762 | 0.101757676 |
| 0.183259514 | 0.102367763 | 0.085436737 | 0.140995178 |
| 0.085829437 | 0.165406004 | 0.026290079 | 0.128172824 |
| 0.149665471 | 0.019525318 | 0.182072386 | 0.093260078 |
| 0.097052301 | 0.154774849 | 0.107716395 | 0.197671318 |
| 0.19582611  | 0.129579394 | 0.075644089 | 0.200954617 |
| 0.040243509 | 0.077756694 | 0.106930778 | 0.071270053 |
| 0.073409687 | 0.12323603  | 0.018421229 | 0.145147771 |
| 0.019263851 | 0.005677689 | 0.0179689   | 0.187473837 |
| 0.046928098 | 0.143154589 | 0.114766644 | 0.115541775 |

|             |             |             |             |
|-------------|-------------|-------------|-------------|
| 0.097650599 | 0.146747694 | 0.121197206 | 0.145652298 |
| 0.014049045 | 0.033734771 | 0.086649135 | 0.168689113 |
| 0.158148047 | 0.160884965 | 0.085649287 | 0.063586956 |
| 0.123993823 | 0.215487026 | 0.002585191 | 0.156806936 |
| 0.148461702 | 0.092382621 | 0.118318395 | 0.106793788 |
| 0.053500603 | 0.22735436  | 0.00483502  | 0.175857243 |
| 0.1240786   | 0.109468561 | 0.196375209 | 0.088561863 |
| 0.141340972 | 0.063312331 | 0.087220922 | 0.113564477 |
| 0.081265107 | 0.006978331 | 0.195548266 | 0.250022429 |
| 0.013746553 | 0.115122678 | 0.176006638 | 0.227328843 |
| 0.176290032 | 0.169478495 | 0.214019009 | 0.048030243 |
| 0.105450525 | 0.165351824 | 0.014028221 | 0.085270409 |
| 0.140244512 | 0.008332934 | 0.189116963 | 0.12642004  |
| 0.105508643 | 0.189367375 | 0.112650429 | 0.015580329 |
| 0.115829191 | 0.163525355 | 0.036333561 | 0.135040362 |
| 0.125122458 | 0.060778393 | 0.073551734 | 0.015316539 |
| 0.035950404 | 0.179965045 | 0.019173567 | 0.019019618 |
| 0.008463494 | 0.10093021  | 0.20047876  | 0.044571281 |
| 0.012751147 | 0.067503899 | 0.049321392 | 0.072606087 |
| 0.097459349 | 0.062484426 | 0.004463525 | 0.018186829 |
| 0.008669136 | 0.030284972 | 0.032566168 | 0.117507266 |
| 0.030173142 | 0.016674171 | 0.094562014 | 0.027636782 |
| 0.046215533 | 0.037536215 | 0.179628715 | 0.206832541 |
| 0.156857223 | 0.129439221 | 0.04420078  | 0.007407878 |
| 0.188912059 | 0.129002089 | 0.080652878 | 0.189191235 |
| 0.027639075 | 0.173435756 | 0.036334692 | 0.076370317 |
| 0.032668349 | 0.150609292 | 0.247944669 | 0.030226258 |
| 0.123094314 | 0.173210296 | 0.131390945 | 0.084489163 |
| 0.149523323 | 0.193443651 | 0.041363467 | 0.146298413 |
| 0.126848887 | 0.049344651 | 0.157983168 | 0.020393876 |
| 0.035772169 | 0.120578706 | 0.114614771 | 0.084734448 |
| 0.061849003 | 0.116276188 | 0.111179571 | 0.14662065  |
| 0.187200676 | 0.190212413 | 0.13896218  | 0.032017254 |
| 0.075291553 | 0.002914912 | 0.038034216 | 0.072314489 |
| 0.146398461 | 0.140395253 | 0.135114328 | 0.062669571 |
| 0.2149631   | 0.044680007 | 0.032814038 | 0.165306804 |
| 0.013523054 | 0.156116303 | 0.026100899 | 0.110494499 |
| 0.132316747 | 0.115961543 | 0.046809255 | 0.200068421 |
| 0.172245381 | 0.117701683 | 0.103660346 | 0.160458739 |
| 0.191504512 | 0.089867952 | 0.076655527 | 0.128041553 |
| 0.071904577 | 0.04600038  | 0.125864422 | 0.014083257 |
| 0.063873749 | 0.102179466 | 0.001176762 | 0.069669137 |
| 0.036594073 | 0.167851328 | 0.175546799 | 0.056673093 |
| 0.120807887 | 0.090687573 | 0.123868579 | 0.085515012 |
| 0.117946505 | 0.13386798  | 0.159530194 | 0.11441132  |
| 0.112358346 | 0.144678844 | 0.049491426 | 0.055828915 |
| 0.02583321  | 0.139809883 | 0.183255668 | 0.019585563 |
| 0.19596893  | 0.142404735 | 0.0093692   | 0.19587088  |
| 0.204759438 | 0.122887385 | 0.070979412 | 0.003902062 |
| 0.014217448 | 0.159364177 | 0.159257809 | 0.227887    |
| 0.077190364 | 0.188769377 | 0.00057873  | 0.153830956 |
| 0.165473861 | 0.016134719 | 0.016698529 | 0.107309422 |
| 0.088022248 | 0.18703292  | 0.041273227 | 0.126659668 |
| 0.069826071 | 0.131356449 | 0.031091614 | 0.14782358  |

|             |             |             |             |
|-------------|-------------|-------------|-------------|
| 0.196500022 | 0.116989333 | 0.220100707 | 0.199334258 |
| 0.18933197  | 0.133300348 | 0.234112629 | 0.058479021 |
| 0.025262302 | 0.161396982 | 0.046237406 | 0.019544302 |
| 0.181129138 | 0.050623443 | 0.171292933 | 0.18059553  |
| 0.142002127 | 0.021053602 | 0.100766919 | 0.126366673 |
| 0.234037391 | 0.235527132 | 0.013337933 | 0.024837329 |
| 0.005261832 | 0.005442113 | 0.190117517 | 0.090879301 |
| 0.169817602 | 0.023999993 | 0.026354685 | 0.07287032  |
| 0.064549824 | 0.086296579 | 0.155867129 | 0.242021486 |
| 0.128178185 | 0.059836527 | 0.044128171 | 0.240119697 |
| 0.019502463 | 0.119516355 | 0.161049531 | 0.181991241 |
| 0.021073454 | 0.087356328 | 0.088759286 | 0.220331832 |
| 0.001875354 | 0.118545396 | 0.09248005  | 0.045270405 |
| 0.005051451 | 0.04200781  | 0.048168119 | 0.178769747 |
| 0.120347492 | 0.016297346 | 0.013531373 | 0.016472085 |
| 0.091375474 | 0.166952384 | 0.060943634 | 0.18845065  |
| 0.21827149  | 0.226908446 | 0.010120024 | 0.179189569 |
| 0.014796384 | 0.138387117 | 0.053885239 | 0.036416161 |
| 0.062124539 | 0.021755815 | 0.116721241 | 0.011356185 |
| 0.084960321 | 0.187098546 | 0.023433842 | 0.011890864 |
| 0.009665697 | 0.04065511  | 0.195819518 | 0.15137524  |
| 0.010613023 | 0.120647637 | 0.12565694  | 0.17111332  |
| 0.221795825 | 0.19594814  | 0.158787143 | 0.081410043 |
| 0.107459915 | 0.002910751 | 0.235880092 | 0.140352579 |
| 0.079939526 | 0.176822811 | 0.040744608 | 0.169892778 |
| 0.175063363 | 0.182951586 | 0.141009457 | 0.223084352 |
| 0.006463671 | 0.158130961 | 0.205377161 | 0.040632879 |
| 0.197810082 | 0.175029219 | 0.145233714 | 0.02433564  |
| 0.08805504  | 0.048719276 | 0.027944878 | 0.014987653 |
| 0.028882992 | 0.203918274 | 0.040038032 | 0.22599094  |
| 0.156648184 | 0.148278212 | 0.025690792 | 0.051508075 |
| 0.178461099 | 0.185059069 | 1           | 0.193310277 |
| 0.093125585 | 0.14152964  | 0.14241952  | 0.120776331 |
| 0.032154731 | 0.134836619 | 0.197625007 | 0.165553941 |
| 0.181715644 | 0.212143919 | 0.162929467 | 0.065474137 |
| 0.017531292 | 0.076268304 | 0.044610213 | 0.060250522 |
| 0.122889672 | 0.027109906 | 0.014132459 | 0.166782119 |
| 0.020078002 | 0.159860831 | 0.023745431 | 0.033299868 |
| 0.089148501 | 0.069115975 | 0.149678497 | 0.173214622 |
| 0.041747622 | 0.155615766 | 0.008057232 | 0.04449527  |
| 0.021812861 | 0.155554818 | 0.054351299 | 0.088730039 |
| 0.015139969 | 0.015282899 | 0.134425351 | 0.154202009 |
| 0.053942529 | 0.012586106 | 0.162103213 | 0.066719159 |
| 0.045357976 | 0.189983114 | 0.117668742 | 0.007919094 |
| 0.008938582 | 0.12076399  | 0.046069798 | 0.049843985 |
| 0.014612808 | 0.119005474 | 0.090495365 | 0.09348176  |
| 0.214929229 | 0.066150083 | 0.15158022  | 0.032739619 |
| 0.042202531 | 0.160579431 | 0.076106389 | 0.135664231 |
| 0.060923336 | 0.209748106 | 0.149926904 | 0.125204303 |
| 0.026553139 | 0.057714609 | 0.086078238 | 0.202778794 |
| 0.03780193  |             |             |             |
| TEX2        | 0.320320932 | 0.509897079 | 0.282274371 |
| 0.385972651 | 0.323871957 | 0.304289886 | 0.244199457 |
| 0.202257145 | 0.124200106 | 0.016565701 | 0.038392865 |

|             |             |             |             |
|-------------|-------------|-------------|-------------|
| 0.300667854 | 0.188001084 | 0.266006885 | 0.284680926 |
| 0.362639289 | 0.136785638 | 0.27490108  | 0.255751905 |
| 0.332490385 | 0.141938337 | 0.32722722  | 0.13783474  |
| 0.217179089 | 0.111939788 | 0.101839629 | 0.228039252 |
| 0.431126238 | 0.113365619 | 0.272047966 | 0.325058989 |
| 0.106096925 | 0.371465349 | 0.490433153 | 0.317868556 |
| 0.472746242 | 0.298631088 | 0.012251096 | 0.282875164 |
| 0.39148729  | 0.362954693 | 0.336417727 | 0.312148882 |
| 0.081429524 | 0.463924269 | 0.268854524 | 0.293544188 |
| 0.22548121  | 0.051790841 | 0.226644278 | 0.429209634 |
| 0.452962355 | 0.314554692 | 0.241216539 | 0.20730736  |
| 0.17391582  | 0.209454794 | 0.189017091 | 0.259251859 |
| 0.24798634  | 0.173959681 | 0.458949144 | 0.143050375 |
| 0.143889973 | 0.250945516 | 0.137525077 | 0.270062851 |
| 0.238610469 | 0.337077111 | 0.034619265 | 0.258664833 |
| 0.009533442 | 0.325634787 | 0.28662     | 0.21912748  |
| 0.06392287  | 0.041695339 | 0.162090716 | 0.317978398 |
| 0.445866222 | 0.423172263 | 0.459913427 | 0.45932276  |
| 0.172568629 | 0.25431749  | 0.262360424 | 0.2005485   |
| 0.401565214 | 0.220753195 | 0.129803671 | 0.359645328 |
| 0.468475857 | 0.492760425 | 0.189529901 | 0.23108482  |
| 0.399769275 | 0.4700358   | 0.326492741 | 0.33098432  |
| 0.269891375 | 0.056358622 | 0.426555935 | 0.484926296 |
| 0.371020079 | 0.214164254 | 0.16429427  | 0.377360979 |
| 0.083377257 | 0.296996699 | 0.321928209 | 0.131889666 |
| 0.459932245 | 0.044097119 | 0.191802893 | 0.315904304 |
| 0.210243633 | 0.384803261 | 0.482317508 | 0.22373045  |
| 0.293729757 | 0.034465493 | 0.116524977 | 0.04585594  |
| 0.282262393 | 0.098521868 | 0.449048433 | 0.450631943 |
| 0.221540195 | 0.291562486 | 0.271180739 | 0.006016208 |
| 0.040362913 | 0.161201953 | 0.366775803 | 0.288080832 |
| 0.354558975 | 0.331422194 | 0.242385159 | 0.320095893 |
| 0.2956384   | 0.449237223 | 0.068247917 | 0.142397674 |
| 0.330994326 | 0.159614096 | 0.247253438 | 0.318602531 |
| 0.270241466 | 0.158354568 | 0.162380451 | 0.504687196 |
| 0.424075804 | 0.124486173 | 0.263410953 | 0.338917267 |
| 0.294252064 | 0.273042365 | 0.139465097 | 0.264144607 |
| 0.089582468 | 0.441987033 | 0.036790209 | 0.275613309 |
| 0.212002709 | 0.122428458 | 0.019253464 | 0.256922056 |
| 0.284657457 | 0.411641339 | 0.424213441 | 0.135959414 |
| 0.291757819 | 0.326784921 | 0.258746334 | 0.343091847 |
| 0.027275079 | 0.069375085 | 0.216933463 | 0.488215009 |
| 0.231729297 | 0.46469502  | 0.281048885 | 0.257988101 |
| 0.258442944 | 0.414017748 | 0.00449206  | 0.472153896 |
| 0.492250612 | 0.228628746 | 0.321993015 | 0.299983296 |
| 0.267655861 | 0.441366015 | 0.029375358 | 0.329672381 |
| 0.264533989 | 0.110269378 | 0.485799157 | 0.175075032 |
| 0.432400723 | 0.068058943 | 0.277971347 | 0.372475193 |
| 0.320420925 | 0.01286937  | 0.233565695 | 0.327504257 |
| 0.03421545  | 0.142265926 | 0.341936524 | 0.344112595 |
| 0.327948093 | 0.38035904  | 0.467583358 | 0.258349684 |
| 0.330348938 | 0.246943145 | 0.020874121 | 0.25684828  |
| 0.361498595 | 0.249189559 | 0.445175244 | 0.257915141 |
| 0.239708286 | 0.47170792  | 0.353233896 | 0.193809014 |

|             |             |             |             |
|-------------|-------------|-------------|-------------|
| 0.080379522 | 0.291356354 | 0.037469297 | 0.298545829 |
| 0.348887163 | 0.160682817 | 0.280593051 | 0.127834595 |
| 0.084435139 | 0.509707023 | 0.133783367 | 0.172205705 |
| 0.089784971 | 0.312381144 | 0.262729617 | 0.231540581 |
| 0.189355765 | 0.182427091 | 0.271546888 | 0.31530203  |
| 0.076580604 | 0.121957114 | 0.016163049 | 0.243193344 |
| 0.139216577 | 0.258224075 | 0.254172073 | 0.305926722 |
| 0.260059075 | 0.129126644 | 0.313666416 | 0.221490344 |
| 0.126544008 | 0.027874266 | 0.493097356 | 0.329409219 |
| 0.287904688 | 0.194547376 | 0.057620995 | 0.239993993 |
| 0.457092345 | 0.255414151 | 0.212970958 | 0.455681757 |
| 0.041328668 | 0.455723957 | 0.252442788 | 0.142600585 |
| 0.271825963 | 0.26685274  | 0.456971405 | 0.076993634 |
| 0.29069454  | 0.46306133  | 0.270619034 | 0.202495146 |
| 0.387620398 | 0.331037228 | 0.061398078 | 0.345124958 |
| 0.326373129 | 0.053207125 | 0.496427295 | 0.12179111  |
| 0.033756722 | 0.320960547 | 0.346006113 | 0.099099043 |
| 0.099364291 | 0.305222615 | 0.089849202 | 0.266349765 |
| 0.508182267 | 0.346391467 | 0.37364133  | 0.171431218 |
| 0.074833188 | 0.018638902 | 0.17312605  | 0.27011438  |
| 0.479772335 | 0.473763813 | 0.247871483 | 0.287223686 |
| 0.255592266 | 0.265330896 | 0.154937309 | 0.487927031 |
| 0.14852991  | 0.484883791 | 0.01440105  | 0.353184672 |
| 0.471609581 | 0.23780247  | 0.099974922 | 0.294684478 |
| 0.375790956 | 0.083481541 | 0.210672118 | 0.480805859 |
| 0.424073216 | 0.290531168 | 0.295813447 | 0.309667817 |
| 0.042741117 | 0.079128193 | 0.306247735 | 0.133431011 |
| 0.321267049 | 0.231967388 | 0.03277565  | 0.270165905 |
| 0.080831716 | 0.449167789 | 0.408306424 | 0.093662707 |
| 0.274999216 | 0.25884758  | 0.298459131 | 0.065616775 |
| 0.402199882 | 0.457448469 | 0.497366544 | 0.189635208 |
| 0.348822194 | 0.463792651 | 0.262420256 | 0.093540224 |
| 0.027325917 | 0.479919563 | 0.30893606  | 0.050458202 |
| 0.45150231  | 0.205009501 | 0.029069031 | 0.49255911  |
| 0.219758951 | 0.410657646 | 0.015663894 | 0.053521555 |
| 0.044694378 | 0.407535923 | 0.464520224 | 0.312468776 |
| 0.226341044 | 0.309626266 | 0.004814835 | 0.486356329 |
| 0.480307963 | 0.022778714 | 0.12547543  | 0.363711861 |
| 0.323580476 | 0.51352768  | 0.232078885 | 0.404794831 |
| 0.28865575  | 0.468472581 | 0.238483134 | 0.259870732 |
| 0.423238476 | 0.445879535 | 0.367736708 | 0.457635689 |
| 0.439779301 | 0.317011407 | 0.286300329 | 0.037919124 |
| 0.135904028 | 0.224819936 | 0.258409601 | 0.119961666 |
| 0.259548768 | 0.160759347 | 0.459617154 | 0.438617214 |
| 0.447298637 | 0.010843435 | 0.1988625   | 0.366939336 |
| 0.44190674  | 0.473033821 | 0.02620214  | 0.009746663 |
| 0.008773651 | 0.027793037 | 0.309906631 | 0.22157881  |
| 0.470777152 | 0.221464224 | 0.012750311 | 0.080009824 |
| 0.294591325 | 0.287818199 | 0.485876322 | 0.326932928 |
| 0.360013489 | 0.103330457 | 0.256170077 | 0.33616548  |
| 0.082667863 | 0.242099688 | 0.464083132 | 0.471620087 |
| 0.050275094 | 0.227918828 | 0.277442922 | 0.48707234  |
| 0.044315025 | 0.273507693 | 0.299066734 | 0.288293922 |
| 0.016482277 | 0.097533309 | 0.0882591   | 0.376584334 |



|             |             |             |             |
|-------------|-------------|-------------|-------------|
| 0.457905528 | 0.097804465 | 0.05273725  | 0.12451181  |
| 0.163822969 | 0.430947446 | 0.197300666 | 0.497498196 |
| 0.424606459 | 0.417671332 | 0.074288223 | 0.476088789 |
| 0.058097807 | 0.459762725 | 0.255663561 | 0.078987142 |
| 0.240315696 | 0.023088802 | 0.42436283  | 0.146043424 |
| 0.270123002 | 0.304466092 | 0.177619625 | 0.022422906 |
| 0.125428319 | 0.07047267  | 0.464489573 | 0.413402462 |
| 0.036994675 | 0.25408019  | 0.268221214 | 0.317022726 |
| 0.272177227 | 0.380887468 | 0.484138896 | 0.294007405 |
| 0.133438974 | 0.087832495 | 0.344348675 | 0.286711822 |
| 0.22693974  | 0.464541446 | 0.263428658 | 0.498530315 |
| 0.327880934 | 0.441299523 | 0.440678107 | 0.322985719 |
| 0.176790013 | 0.304077412 | 0.310924067 | 0.050633503 |
| 0.317119872 | 0.431820819 | 0.295547962 | 0.159175669 |
| 0.250020177 | 0.254054927 | 0.06820781  | 0.138098342 |
| 0.210812966 | 0.270296227 | 0.175508688 | 0.41245355  |
| 0.294146081 | 0.302173101 | 0.059288388 | 0.086943849 |
| 0.520767137 | 0.427919486 | 0.193310277 | 1           |
| 0.179423091 | 0.306580591 | 0.376481746 | 0.359190953 |
| 0.266623198 | 0.410816627 | 0.379643278 | 0.31649489  |
| 0.430785113 | 0.275363942 | 0.502753967 | 0.109215443 |
| 0.086072019 | 0.271947764 | 0.133493876 | 0.104691489 |
| 0.175375205 | 0.042855193 | 0.194299671 | 0.335177849 |
| 0.234667003 | 0.324230514 | 0.234090808 | 0.116385352 |
| 0.265550825 | 0.254201752 | 0.309379765 | 0.238432815 |
| 0.118219592 | 0.481869639 | 0.017744608 | 0.073767872 |
| 0.24125411  | 0.378916246 | 0.27559347  | 0.235620772 |
| 0.210602557 | 0.121168415 | 0.284554365 | 0.256527178 |
| 0.25920053  | 0.255967626 | 0.390458041 | 0.063095848 |
| 0.042174848 | 0.473178215 | 0.287784409 | 0.02591736  |
| 0.082484703 | 0.270805187 | 0.238094319 | 0.250663101 |
| 0.02789419  | 0.440519314 | 0.279841969 | 0.312992773 |
| 0.317315019 | 0.091200467 | 0.342087966 | 0.09852619  |
| 0.084395714 | 0.432656892 | 0.2739504   | 0.475422968 |
| 0.255161713 | 0.375200375 | 0.423795469 | 0.378018628 |
| 0.121173293 | 0.247680832 | 0.059842968 | 0.416740027 |
| 0.27199372  |             |             |             |

|             |             |             |             |
|-------------|-------------|-------------|-------------|
| TEX9        | 0.186136673 | 0.192378787 | 0.138229332 |
| 0.249922403 | 0.192576486 | 0.098649172 | 0.151915436 |
| 0.093733792 | 0.109285993 | 0.025367257 | 0.05767079  |
| 0.180624433 | 0.084573767 | 0.088106503 | 0.052716008 |
| 0.330266985 | 0.202523891 | 0.119987791 | 0.256659533 |
| 0.264382757 | 0.085717013 | 0.319505491 | 0.184242782 |
| 0.153613894 | 0.160119363 | 0.174248709 | 0.123602083 |
| 0.280907142 | 0.190950045 | 0.060421053 | 0.194437462 |
| 0.308603496 | 0.209371735 | 0.155337246 | 0.215217329 |
| 0.145747876 | 0.142968816 | 0.092442803 | 0.055266085 |
| 0.189450299 | 0.210860929 | 0.25293155  | 0.252008701 |
| 0.141590817 | 0.132756716 | 0.200377147 | 0.242093686 |
| 0.067886831 | 0.133653233 | 0.042511504 | 0.131240494 |
| 0.121554102 | 0.116879644 | 0.098044705 | 0.123390303 |
| 0.044348148 | 0.048595174 | 0.056812474 | 0.106525438 |
| 0.192045715 | 0.03821171  | 0.140005683 | 0.087416914 |
| 0.056793162 | 0.127495061 | 0.267905332 | 0.137315127 |

|             |             |             |             |
|-------------|-------------|-------------|-------------|
| 0.102129857 | 0.144333414 | 0.157486022 | 0.133939287 |
| 0.009326783 | 0.281086715 | 0.28542008  | 0.058416944 |
| 0.230220303 | 0.089020456 | 0.2678122   | 0.200274892 |
| 0.271824    | 0.166909958 | 0.264701907 | 0.233718168 |
| 0.167428898 | 0.275899446 | 0.152415303 | 0.193308829 |
| 0.187773813 | 0.120067281 | 0.138137676 | 0.339003346 |
| 0.254638704 | 0.169988651 | 0.187974909 | 0.297933566 |
| 0.151068523 | 0.182542612 | 0.100257661 | 0.127449226 |
| 0.056484383 | 0.244114688 | 0.133443812 | 0.221840928 |
| 0.146963321 | 0.123350029 | 0.243652502 | 0.203358596 |
| 0.257756803 | 0.068467915 | 0.292007953 | 0.164686367 |
| 0.274091189 | 0.092233434 | 0.258999882 | 0.159556797 |
| 0.240318649 | 0.197933496 | 0.170952266 | 0.207814531 |
| 0.190600563 | 0.138872402 | 0.064659693 | 0.272485715 |
| 0.097357134 | 0.097134698 | 0.113921849 | 0.2246711   |
| 0.092963096 | 0.104152143 | 0.151737538 | 0.103835499 |
| 0.214624777 | 0.259030202 | 0.171720105 | 0.170381961 |
| 0.240346842 | 0.127616397 | 0.119168182 | 0.124881546 |
| 0.143030346 | 0.263253586 | 0.005518727 | 0.193867601 |
| 0.147672669 | 0.25434278  | 0.331391068 | 0.148400406 |
| 0.191128082 | 0.165816596 | 0.223796147 | 0.23762842  |
| 0.142484755 | 0.203915433 | 0.081104347 | 0.329535691 |
| 0.063800103 | 0.231753123 | 0.233691115 | 0.133338086 |
| 0.132466308 | 0.137213121 | 0.22219832  | 0.120063177 |
| 0.042101595 | 0.161952358 | 0.15780713  | 0.106206769 |
| 0.076891045 | 0.143126772 | 0.113418765 | 0.266495961 |
| 0.146839368 | 0.269269194 | 0.087455336 | 0.136533174 |
| 0.036780017 | 0.242987031 | 0.053876707 | 0.211000453 |
| 0.070863494 | 0.238736413 | 0.185571487 | 0.188529253 |
| 0.302887776 | 0.275526382 | 0.020212223 | 0.137860985 |
| 0.170326781 | 0.046614432 | 0.174804476 | 0.235888842 |
| 0.080645582 | 0.237448989 | 0.014538471 | 0.315781842 |
| 0.11261956  | 0.260251258 | 0.27655824  | 0.236085489 |
| 0.15477031  | 0.176210912 | 0.07946791  | 0.184049465 |
| 0.133745541 | 0.047382057 | 0.059070299 | 0.219351807 |
| 0.228004252 | 0.06598963  | 0.22118574  | 0.240906531 |
| 0.166440865 | 0.270111481 | 0.3045109   | 0.068841808 |
| 0.165960586 | 0.168155065 | 0.182488125 | 0.262423803 |
| 0.220418306 | 0.052049409 | 0.142452171 | 0.137849511 |
| 0.076838462 | 0.171599374 | 0.139770258 | 0.030264598 |
| 0.156065002 | 0.131648793 | 0.050404222 | 0.174282842 |
| 0.134952565 | 0.104062066 | 0.086241829 | 0.277588718 |
| 0.239764523 | 0.212656451 | 0.145088373 | 0.091029659 |
| 0.097005881 | 0.116749091 | 0.224331915 | 0.059220544 |
| 0.067296126 | 0.203013431 | 0.091728621 | 0.089706704 |
| 0.08908887  | 0.201618334 | 0.189698521 | 0.045858139 |
| 0.059678008 | 0.051393262 | 0.041680158 | 0.130039394 |
| 0.088361569 | 0.115490391 | 0.153592002 | 0.137919535 |
| 0.221605538 | 0.185622785 | 0.190881863 | 0.306941481 |
| 0.09771194  | 0.182540131 | 0.265972536 | 0.035253559 |
| 0.216300862 | 0.047923504 | 0.036104738 | 0.176574055 |
| 0.179038722 | 0.263021478 | 0.104256439 | 0.214847076 |
| 0.091223761 | 0.220626424 | 0.281523798 | 0.029985519 |
| 0.140392069 | 0.157859023 | 0.292349373 | 0.172424824 |

|             |             |             |             |
|-------------|-------------|-------------|-------------|
| 0.115784941 | 0.217307251 | 0.127067259 | 0.142959541 |
| 0.130862848 | 0.198872567 | 0.19651569  | 0.238810144 |
| 0.222130606 | 0.243697091 | 0.150081053 | 0.256141819 |
| 0.244539185 | 0.104147324 | 0.074572312 | 0.334939039 |
| 0.206361389 | 0.320071139 | 0.1443464   | 0.186616332 |
| 0.144239826 | 0.045856276 | 0.232508944 | 0.157928599 |
| 0.141885546 | 0.195575176 | 0.324168624 | 0.13154713  |
| 0.299910854 | 0.079428565 | 0.043734949 | 0.209395576 |
| 0.190547493 | 0.173675694 | 0.150243502 | 0.198027188 |
| 0.13630186  | 0.063505519 | 0.175319925 | 0.122087664 |
| 0.128594353 | 0.170259109 | 0.21659158  | 0.156466284 |
| 0.182518792 | 0.113091888 | 0.077027321 | 0.247180278 |
| 0.076537892 | 0.123847161 | 0.19717172  | 0.122770133 |
| 0.075191961 | 0.193647691 | 0.05891263  | 0.081915476 |
| 0.13439848  | 0.147710638 | 0.290571966 | 0.136830796 |
| 0.063206443 | 0.073665957 | 0.320999751 | 0.198457262 |
| 0.181599785 | 0.176241295 | 0.158051928 | 0.203630126 |
| 0.190235959 | 0.172002822 | 0.107132719 | 0.289997742 |
| 0.199028623 | 0.158738784 | 0.164626201 | 0.073715196 |
| 0.274877156 | 0.042694131 | 0.050514069 | 0.186861178 |
| 0.237379189 | 0.109111307 | 0.011918541 | 0.079729863 |
| 0.251622574 | 0.288823101 | 0.133890943 | 0.20202295  |
| 0.023205338 | 0.27807305  | 0.070410158 | 0.21454127  |
| 0.158918161 | 0.156288841 | 0.206386316 | 0.151526463 |
| 0.148006943 | 0.190355253 | 0.098825432 | 0.18405386  |
| 0.133292305 | 0.141504526 | 0.096724238 | 0.296234024 |
| 0.181747772 | 0.156620365 | 0.206613124 | 0.168396635 |
| 0.245533064 | 0.289696615 | 0.266571658 | 0.094282435 |
| 0.093875949 | 0.068530162 | 0.028897659 | 0.070910777 |
| 0.095937179 | 0.176412214 | 0.194976882 | 0.278624656 |
| 0.20415006  | 0.137237092 | 0.1096235   | 0.154250338 |
| 0.208337089 | 0.260479268 | 0.193835335 | 0.025630933 |
| 0.026643574 | 0.071497855 | 0.180653432 | 0.265384373 |
| 0.199550145 | 0.02167724  | 0.109445031 | 0.097547791 |
| 0.143997231 | 0.209418473 | 0.165901362 | 0.339083831 |
| 0.222166321 | 0.27212523  | 0.039672008 | 0.322325871 |
| 0.15308113  | 0.09136609  | 0.21247633  | 0.15130748  |
| 0.282870772 | 0.229136921 | 0.128305329 | 0.252714438 |
| 0.039105807 | 0.317181931 | 0.188057485 | 0.086576166 |
| 0.165350698 | 0.238698947 | 0.183977545 | 0.309019142 |
| 0.134051949 | 0.106280165 | 0.114409922 | 0.024564274 |
| 0.116237575 | 0.247642956 | 0.164304353 | 0.253256027 |
| 0.216452104 | 0.318444368 | 0.237413808 | 0.154230785 |
| 0.105441502 | 0.139181818 | 0.164683263 | 0.019848316 |
| 0.213389607 | 0.206489005 | 0.162389853 | 0.034424614 |
| 0.067495174 | 0.191212772 | 0.086531878 | 0.200523    |
| 0.087814446 | 0.238910093 | 0.258075757 | 0.258875314 |
| 0.255457873 | 0.162140915 | 0.286817656 | 0.274667269 |
| 0.106368915 | 0.238173772 | 0.145406965 | 0.064428539 |
| 0.120890341 | 0.138071329 | 0.247700869 | 0.138173181 |
| 0.091231978 | 0.276560405 | 0.084117835 | 0.215144626 |
| 0.168623863 | 0.203105063 | 0.178758325 | 0.178721093 |
| 0.13679998  | 0.125579308 | 0.132524806 | 0.056564676 |
| 0.25018971  | 0.247147844 | 0.153677798 | 0.125662886 |

|             |             |             |             |
|-------------|-------------|-------------|-------------|
| 0.180777931 | 0.127473774 | 0.204819674 | 0.066080047 |
| 0.09482656  | 0.08977993  | 0.157378983 | 0.332121606 |
| 0.175631742 | 0.140003252 | 0.169238428 | 0.167947425 |
| 0.199174896 | 0.160689379 | 0.093125585 | 0.179423091 |
| 1           | 0.206458814 | 0.233078115 | 0.241699587 |
| 0.081232129 | 0.171991078 | 0.208281637 | 0.127773471 |
| 0.137144221 | 0.221754988 | 0.162411843 | 0.055356226 |
| 0.114674597 | 0.141788105 | 0.11689956  | 0.274310094 |
| 0.213938156 | 0.204986978 | 0.05859386  | 0.313303096 |
| 0.058248796 | 0.261161678 | 0.058940208 | 0.218353985 |
| 0.278570502 | 0.102150955 | 0.287487066 | 0.09866911  |
| 0.140047463 | 0.144550572 | 0.098597747 | 0.272662751 |
| 0.072438727 | 0.176270577 | 0.117850629 | 0.224737378 |
| 0.089289959 | 0.261310623 | 0.256897459 | 0.071209058 |
| 0.036702187 | 0.080645247 | 0.167314761 | 0.114666559 |
| 0.120318928 | 0.279973129 | 0.097801964 | 0.230965994 |
| 0.171433899 | 0.124333722 | 0.178487419 | 0.096445269 |
| 0.212225677 | 0.163364891 | 0.044698988 | 0.1805246   |
| 0.177791598 | 0.278330988 | 0.110823459 | 0.108310322 |
| 0.233580165 | 0.144323288 | 0.165356255 | 0.160382132 |
| 0.184518419 | 0.301107182 | 0.118342876 | 0.16615361  |
| 0.189768581 | 0.110122759 | 0.127974404 | 0.24855662  |
| 0.047135811 |             |             |             |
| TFRC        | 0.269599502 | 0.408139088 | 0.190671765 |
| 0.384051931 | 0.243489712 | 0.196985591 | 0.209027006 |
| 0.11364305  | 0.19237568  | 0.02361761  | 0.101696456 |
| 0.240239481 | 0.174144276 | 0.159807906 | 0.181138166 |
| 0.407432352 | 0.178536257 | 0.16209815  | 0.2340951   |
| 0.324360412 | 0.113419435 | 0.379222809 | 0.172368945 |
| 0.222381971 | 0.188451276 | 0.184152715 | 0.262967729 |
| 0.400537385 | 0.190730063 | 0.135085434 | 0.275458445 |
| 0.14366883  | 0.312754071 | 0.362801892 | 0.323923226 |
| 0.344520444 | 0.233297291 | 0.013893552 | 0.187016412 |
| 0.302254249 | 0.36785399  | 0.335731552 | 0.273056958 |
| 0.124383747 | 0.313647889 | 0.2374125   | 0.26360561  |
| 0.121838672 | 0.115688072 | 0.104291577 | 0.296113649 |
| 0.32026538  | 0.25058274  | 0.160433818 | 0.203043679 |
| 0.156624133 | 0.098890397 | 0.157099491 | 0.172898647 |
| 0.232666642 | 0.080696382 | 0.34229758  | 0.166800797 |
| 0.129602819 | 0.162177525 | 0.16960267  | 0.177990841 |
| 0.212057361 | 0.249418727 | 0.051275214 | 0.196672229 |
| 0.006951736 | 0.318150274 | 0.25203807  | 0.203053093 |
| 0.123279706 | 0.068641855 | 0.188723031 | 0.268633012 |
| 0.404807289 | 0.314647643 | 0.441059363 | 0.427795959 |
| 0.17279095  | 0.233029308 | 0.197262854 | 0.22204379  |
| 0.333773632 | 0.200766497 | 0.111622633 | 0.414026454 |
| 0.441286949 | 0.384707405 | 0.242508513 | 0.24953869  |
| 0.343666667 | 0.363741375 | 0.190691456 | 0.232751    |
| 0.218774443 | 0.111541747 | 0.322180231 | 0.421622304 |
| 0.264204562 | 0.18629538  | 0.219190662 | 0.309739839 |
| 0.140427714 | 0.136891803 | 0.325947871 | 0.09992898  |
| 0.419996624 | 0.087245894 | 0.230120027 | 0.226209915 |
| 0.182645281 | 0.317038855 | 0.383539339 | 0.223121911 |
| 0.205922536 | 0.056145212 | 0.168531188 | 0.091046031 |

|             |             |             |             |
|-------------|-------------|-------------|-------------|
| 0.170859317 | 0.111882186 | 0.302007406 | 0.401230359 |
| 0.128254466 | 0.232927083 | 0.221052651 | 0.022161206 |
| 0.089672331 | 0.164110839 | 0.295817848 | 0.172891421 |
| 0.327787482 | 0.248326865 | 0.267855583 | 0.234422074 |
| 0.269512237 | 0.436768498 | 0.024445778 | 0.167101262 |
| 0.221110238 | 0.171871501 | 0.24978207  | 0.237885986 |
| 0.262785423 | 0.145303311 | 0.188048624 | 0.444730693 |
| 0.299796969 | 0.166341574 | 0.126304593 | 0.377493891 |
| 0.213488445 | 0.241147145 | 0.167609345 | 0.196606237 |
| 0.116401437 | 0.33434353  | 0.086174681 | 0.148357902 |
| 0.205925931 | 0.145040978 | 0.029210958 | 0.144563688 |
| 0.166970382 | 0.340518654 | 0.286557038 | 0.170805941 |
| 0.211820089 | 0.339551382 | 0.12316207  | 0.293743033 |
| 0.066045225 | 0.09667102  | 0.088298796 | 0.411578213 |
| 0.135705152 | 0.406309145 | 0.221833617 | 0.249280978 |
| 0.257803024 | 0.403029673 | 0.004230499 | 0.334186079 |
| 0.387695668 | 0.088932122 | 0.257568481 | 0.255272479 |
| 0.219083992 | 0.407373468 | 0.012759922 | 0.353380713 |
| 0.17596333  | 0.153165542 | 0.457188183 | 0.225683549 |
| 0.318788738 | 0.13950593  | 0.163121341 | 0.351484167 |
| 0.270960265 | 0.022600902 | 0.120006231 | 0.314172088 |
| 0.084006611 | 0.115713408 | 0.306704179 | 0.33328398  |
| 0.287880321 | 0.374676647 | 0.454555398 | 0.213951112 |
| 0.232860984 | 0.182876478 | 0.049648581 | 0.234798136 |
| 0.325695291 | 0.168557729 | 0.318727225 | 0.209596529 |
| 0.122887067 | 0.368443735 | 0.2786811   | 0.147029928 |
| 0.134309259 | 0.187671986 | 0.03774377  | 0.275143153 |
| 0.276096257 | 0.162231297 | 0.202377728 | 0.129940089 |
| 0.147450181 | 0.432588711 | 0.165262712 | 0.1583935   |
| 0.116692355 | 0.211535837 | 0.217302993 | 0.156435284 |
| 0.15928546  | 0.250461057 | 0.250963221 | 0.251243785 |
| 0.088138603 | 0.170201247 | 0.038730995 | 0.135346977 |
| 0.11557222  | 0.150099425 | 0.133317417 | 0.234738956 |
| 0.160007644 | 0.120714264 | 0.236036696 | 0.217012656 |
| 0.192634091 | 0.070998108 | 0.397068533 | 0.33658201  |
| 0.183747911 | 0.222074903 | 0.107111646 | 0.120057065 |
| 0.405931849 | 0.124935978 | 0.086551157 | 0.370119261 |
| 0.058935157 | 0.428807695 | 0.210685543 | 0.207497593 |
| 0.196453863 | 0.23601719  | 0.436498236 | 0.078014401 |
| 0.185217109 | 0.347044131 | 0.235450379 | 0.26264136  |
| 0.261438968 | 0.30037819  | 0.093272992 | 0.251448085 |
| 0.232040279 | 0.104058824 | 0.40359677  | 0.163588288 |
| 0.081253878 | 0.325900343 | 0.324332402 | 0.170409115 |
| 0.168012221 | 0.2243602   | 0.081388562 | 0.287243766 |
| 0.424659038 | 0.401390194 | 0.324575521 | 0.193329655 |
| 0.124886727 | 0.031563173 | 0.200455956 | 0.182612423 |
| 0.3358537   | 0.394737996 | 0.23147502  | 0.225197315 |
| 0.244123326 | 0.260878895 | 0.074035608 | 0.418703851 |
| 0.122650909 | 0.365551928 | 0.040730876 | 0.352228266 |
| 0.341871458 | 0.106927294 | 0.179415161 | 0.195365339 |
| 0.262812855 | 0.140101028 | 0.171712349 | 0.35544357  |
| 0.363035925 | 0.274807193 | 0.244380941 | 0.277761246 |
| 0.058877242 | 0.10535135  | 0.269976879 | 0.160437339 |
| 0.229541228 | 0.27227432  | 0.049852524 | 0.162307945 |

|             |             |             |             |
|-------------|-------------|-------------|-------------|
| 0.123509127 | 0.341352417 | 0.388488305 | 0.190130985 |
| 0.16971349  | 0.143678309 | 0.308587411 | 0.121034983 |
| 0.368491956 | 0.360836214 | 0.364876753 | 0.164549474 |
| 0.300865953 | 0.386108346 | 0.214313249 | 0.150992884 |
| 0.074677221 | 0.36245899  | 0.247215659 | 0.060662826 |
| 0.425624873 | 0.08112493  | 0.049292907 | 0.383376501 |
| 0.217959802 | 0.264790823 | 0.012068688 | 0.046359344 |
| 0.092081728 | 0.407599508 | 0.338773565 | 0.271389078 |
| 0.095580284 | 0.255170709 | 0.013276284 | 0.408361673 |
| 0.361813748 | 0.069041827 | 0.186212315 | 0.307496454 |
| 0.294704936 | 0.391762471 | 0.216193893 | 0.372408348 |
| 0.233585511 | 0.349789131 | 0.188397083 | 0.272231741 |
| 0.356762152 | 0.356708582 | 0.308740376 | 0.340856358 |
| 0.3987635   | 0.33938868  | 0.271748273 | 0.079303809 |
| 0.22088924  | 0.12637928  | 0.14972159  | 0.188021464 |
| 0.154334982 | 0.229710765 | 0.358790681 | 0.424818675 |
| 0.391151926 | 0.036088931 | 0.139931811 | 0.299920348 |
| 0.360126318 | 0.419939862 | 0.046046087 | 0.014409678 |
| 0.008172345 | 0.081625886 | 0.223607666 | 0.236788844 |
| 0.398788031 | 0.089086859 | 0.034841959 | 0.074424396 |
| 0.206420296 | 0.289777208 | 0.375251668 | 0.363641433 |
| 0.335644741 | 0.158159963 | 0.156180572 | 0.355703834 |
| 0.178470959 | 0.154100779 | 0.411287869 | 0.350559731 |
| 0.094264533 | 0.252646673 | 0.145862115 | 0.439714057 |
| 0.063220098 | 0.254375787 | 0.252508999 | 0.224869748 |
| 0.030472975 | 0.171666309 | 0.186848989 | 0.389686052 |
| 0.332519336 | 0.130542093 | 0.095653693 | 0.051119185 |
| 0.177408188 | 0.394031688 | 0.197673857 | 0.447447127 |
| 0.365800251 | 0.425663166 | 0.135961835 | 0.358781053 |
| 0.14320421  | 0.331974614 | 0.223429182 | 0.0394275   |
| 0.188658543 | 0.052600646 | 0.325521416 | 0.186774886 |
| 0.139984611 | 0.246698538 | 0.245107676 | 0.066193129 |
| 0.142231413 | 0.128910263 | 0.446668513 | 0.410339174 |
| 0.079529545 | 0.222203483 | 0.238816642 | 0.281492464 |
| 0.144379083 | 0.378895792 | 0.346959191 | 0.146653602 |
| 0.160391031 | 0.08742055  | 0.311035218 | 0.207953308 |
| 0.134071388 | 0.444185644 | 0.26256696  | 0.415763129 |
| 0.265149554 | 0.361448356 | 0.362761101 | 0.255760499 |
| 0.191299701 | 0.19043982  | 0.262995273 | 0.051430666 |
| 0.238343917 | 0.412096122 | 0.171072261 | 0.218682988 |
| 0.261638275 | 0.192473558 | 0.095496496 | 0.056466495 |
| 0.157478952 | 0.160950721 | 0.188381695 | 0.424824928 |
| 0.211278557 | 0.224111186 | 0.061323774 | 0.184255492 |
| 0.412010335 | 0.325874464 | 0.14152964  | 0.306580591 |
| 0.206458814 | 1           | 0.346941964 | 0.355579046 |
| 0.196185917 | 0.344135174 | 0.319052427 | 0.25052007  |
| 0.308808562 | 0.250078534 | 0.377287488 | 0.05136763  |
| 0.159384875 | 0.203362751 | 0.172646725 | 0.169324277 |
| 0.206537981 | 0.100347968 | 0.158318409 | 0.359044852 |
| 0.154082179 | 0.314127979 | 0.11807894  | 0.150718477 |
| 0.243262089 | 0.134502319 | 0.274048995 | 0.174662899 |
| 0.153462094 | 0.358172165 | 0.042007116 | 0.128237809 |
| 0.156627998 | 0.349107489 | 0.21191144  | 0.238305048 |
| 0.207172457 | 0.164009963 | 0.258696341 | 0.117551875 |

|             |             |             |             |
|-------------|-------------|-------------|-------------|
| 0.127405956 | 0.14897596  | 0.343250017 | 0.070287411 |
| 0.062687137 | 0.441477903 | 0.137570822 | 0.056641422 |
| 0.134091241 | 0.194302556 | 0.160389212 | 0.271263749 |
| 0.074351663 | 0.365302147 | 0.152693203 | 0.242812501 |
| 0.213205819 | 0.133627665 | 0.218028917 | 0.09104954  |
| 0.110167401 | 0.300638189 | 0.216074796 | 0.36614573  |
| 0.19685767  | 0.410538899 | 0.279846516 | 0.307901913 |
| 0.097511192 | 0.148574412 | 0.09734512  | 0.369555575 |
| 0.161205963 |             |             |             |
| TGTP        | 0.389039426 | 0.51502586  | 0.406952757 |
| 0.372828759 | 0.419360617 | 0.304388474 | 0.199735468 |
| 0.177767491 | 0.097638685 | 0.004923066 | 0.027701083 |
| 0.428539709 | 0.204084512 | 0.240354927 | 0.285201424 |
| 0.406693494 | 0.175276842 | 0.367613646 | 0.256373106 |
| 0.383996962 | 0.083168475 | 0.396505047 | 0.108156706 |
| 0.350647617 | 0.140222045 | 0.087591449 | 0.298975516 |
| 0.416030269 | 0.102646886 | 0.250525355 | 0.333215744 |
| 0.164586371 | 0.39524626  | 0.511335811 | 0.412876517 |
| 0.508983499 | 0.359684871 | 0.02447663  | 0.238511289 |
| 0.402256319 | 0.404382663 | 0.371498212 | 0.32429576  |
| 0.051321659 | 0.466491018 | 0.239245691 | 0.425468157 |
| 0.219188232 | 0.043865722 | 0.189162576 | 0.421895659 |
| 0.456214391 | 0.370430974 | 0.204829246 | 0.15350561  |
| 0.178357064 | 0.183505076 | 0.285535188 | 0.261980024 |
| 0.225045533 | 0.118811547 | 0.473553788 | 0.088816742 |
| 0.132963556 | 0.244851311 | 0.222432138 | 0.247360707 |
| 0.373119111 | 0.322074196 | 0.026687606 | 0.394228572 |
| 0.002442734 | 0.370743061 | 0.418819667 | 0.313104423 |
| 0.066422775 | 0.025804514 | 0.248077582 | 0.306370563 |
| 0.444611623 | 0.466489972 | 0.487236511 | 0.495545043 |
| 0.214783166 | 0.353312943 | 0.410911279 | 0.194154093 |
| 0.414544662 | 0.168680783 | 0.139083162 | 0.415074868 |
| 0.496799225 | 0.516332758 | 0.242135606 | 0.32291044  |
| 0.362642122 | 0.463443007 | 0.385626564 | 0.397728333 |
| 0.317189605 | 0.10138569  | 0.418520753 | 0.513121171 |
| 0.367383312 | 0.361918873 | 0.199588144 | 0.351713329 |
| 0.087413113 | 0.3421416   | 0.346643452 | 0.208020584 |
| 0.457223765 | 0.022819002 | 0.2731236   | 0.316141498 |
| 0.280867096 | 0.394363485 | 0.517663525 | 0.197752573 |
| 0.429565527 | 0.032370153 | 0.165220736 | 0.062657699 |
| 0.319724254 | 0.210274714 | 0.4619015   | 0.431041823 |
| 0.215987184 | 0.371391597 | 0.260215262 | 0.006599817 |
| 0.049357818 | 0.269667679 | 0.404657403 | 0.385472231 |
| 0.401910952 | 0.386956521 | 0.235215733 | 0.323803361 |
| 0.399687942 | 0.479999371 | 0.0419199   | 0.112989446 |
| 0.387362996 | 0.265511603 | 0.270709724 | 0.403573054 |
| 0.33357178  | 0.126757462 | 0.152155619 | 0.518679456 |
| 0.399374305 | 0.10317989  | 0.320882324 | 0.413413225 |
| 0.281453516 | 0.39282863  | 0.132723994 | 0.273370179 |
| 0.053974181 | 0.477766221 | 0.056348503 | 0.316925548 |
| 0.247094142 | 0.19286897  | 0.023654842 | 0.230833861 |
| 0.264472789 | 0.396431162 | 0.457115242 | 0.143480995 |
| 0.310872204 | 0.406513155 | 0.277021714 | 0.35595413  |
| 0.010848043 | 0.075084519 | 0.236778804 | 0.501745884 |

|             |             |             |             |
|-------------|-------------|-------------|-------------|
| 0.218775668 | 0.514659299 | 0.328498974 | 0.358397387 |
| 0.329819685 | 0.421020761 | 0.00834478  | 0.480474408 |
| 0.522808146 | 0.250433538 | 0.370433274 | 0.432496859 |
| 0.352308063 | 0.418690331 | 0.050346396 | 0.411671493 |
| 0.309589683 | 0.110557836 | 0.507767117 | 0.195851001 |
| 0.458095084 | 0.057758259 | 0.275105379 | 0.423164349 |
| 0.377661965 | 0.012642547 | 0.176998616 | 0.34362296  |
| 0.056384351 | 0.079665862 | 0.394515585 | 0.380451524 |
| 0.349230855 | 0.424073225 | 0.481065203 | 0.338392636 |
| 0.410120834 | 0.247341087 | 0.025626618 | 0.379186756 |
| 0.410119789 | 0.338584745 | 0.421299147 | 0.236650024 |
| 0.286040195 | 0.4598018   | 0.389405581 | 0.167781792 |
| 0.053458258 | 0.281021184 | 0.024044234 | 0.341179001 |
| 0.381158991 | 0.11177468  | 0.355100503 | 0.22540279  |
| 0.109778397 | 0.522402166 | 0.247270019 | 0.31639234  |
| 0.186849161 | 0.341274028 | 0.270828212 | 0.199466753 |
| 0.204625971 | 0.194468346 | 0.350113049 | 0.354830244 |
| 0.036768033 | 0.117472249 | 0.039303921 | 0.336394792 |
| 0.131136593 | 0.295397095 | 0.280609191 | 0.345548668 |
| 0.298154294 | 0.119158962 | 0.379310258 | 0.342776044 |
| 0.164277611 | 0.027749966 | 0.501109711 | 0.40534557  |
| 0.270041065 | 0.170599751 | 0.069713133 | 0.289912472 |
| 0.443156138 | 0.240608206 | 0.220716331 | 0.42756038  |
| 0.049087302 | 0.488688009 | 0.240459051 | 0.157476672 |
| 0.374216012 | 0.271148552 | 0.444878321 | 0.055331831 |
| 0.35455569  | 0.446358155 | 0.365420838 | 0.214365129 |
| 0.365970597 | 0.382087534 | 0.036269664 | 0.351822749 |
| 0.342341495 | 0.04811206  | 0.526968245 | 0.182096083 |
| 0.039782415 | 0.433446794 | 0.382138005 | 0.110471314 |
| 0.119220412 | 0.291969061 | 0.043350245 | 0.330783144 |
| 0.51254291  | 0.401651736 | 0.356331875 | 0.300236314 |
| 0.049168094 | 0.012542451 | 0.287663776 | 0.417886447 |
| 0.497011405 | 0.5180874   | 0.309009129 | 0.366253525 |
| 0.262379355 | 0.320088703 | 0.117652432 | 0.507085239 |
| 0.28662107  | 0.517766997 | 0.014031593 | 0.406925108 |
| 0.498757188 | 0.233416279 | 0.110219706 | 0.262339276 |
| 0.346790851 | 0.060081122 | 0.244043083 | 0.487812127 |
| 0.413681318 | 0.328174816 | 0.332323743 | 0.426219761 |
| 0.018063664 | 0.045062857 | 0.397415933 | 0.25216797  |
| 0.343003718 | 0.247523937 | 0.093748637 | 0.291880732 |
| 0.052949257 | 0.427256623 | 0.441571889 | 0.07635071  |
| 0.256412468 | 0.280112091 | 0.41141729  | 0.052782032 |
| 0.452092347 | 0.510806493 | 0.511965804 | 0.189156645 |
| 0.401622578 | 0.484151828 | 0.380624215 | 0.127846024 |
| 0.035613501 | 0.517275282 | 0.355193736 | 0.029422206 |
| 0.462340876 | 0.179208139 | 0.013963109 | 0.485931161 |
| 0.20824255  | 0.427787196 | 0.005347863 | 0.135106252 |
| 0.084232993 | 0.456146307 | 0.4627112   | 0.340189932 |
| 0.179279064 | 0.380046552 | 0.016216889 | 0.533530398 |
| 0.476041439 | 0.029563797 | 0.206647864 | 0.387724649 |
| 0.389513733 | 0.522846813 | 0.343679947 | 0.43758088  |
| 0.40162007  | 0.490841247 | 0.213447605 | 0.30484812  |
| 0.401263045 | 0.497181677 | 0.377527274 | 0.449647985 |
| 0.437533825 | 0.432353862 | 0.285298621 | 0.019010419 |



|             |             |             |             |
|-------------|-------------|-------------|-------------|
| 0.161454068 | 0.178909503 | 0.250067079 | 0.086174304 |
| 0.268896551 | 0.175670126 | 0.486454121 | 0.46164298  |
| 0.483380841 | 0.01167523  | 0.145430548 | 0.384912106 |
| 0.415120622 | 0.464684363 | 0.046442875 | 0.01075094  |
| 0.017536655 | 0.03038926  | 0.328811553 | 0.311941345 |
| 0.487750408 | 0.177453577 | 0.009065894 | 0.045738633 |
| 0.298187294 | 0.410513798 | 0.493757541 | 0.378995938 |
| 0.416339976 | 0.116229331 | 0.223103467 | 0.391247781 |
| 0.096863382 | 0.279422638 | 0.484325727 | 0.451172392 |
| 0.079180581 | 0.309686979 | 0.37804688  | 0.477474613 |
| 0.107685302 | 0.361656054 | 0.424096719 | 0.289559995 |
| 0.0363579   | 0.124741964 | 0.093699893 | 0.424979004 |
| 0.492682167 | 0.088221161 | 0.044801949 | 0.115582621 |
| 0.118202201 | 0.461474239 | 0.183203981 | 0.518932966 |
| 0.404429222 | 0.41404058  | 0.122855737 | 0.470379147 |
| 0.046592627 | 0.474684128 | 0.377375446 | 0.061364974 |
| 0.361921339 | 0.02607072  | 0.477444042 | 0.14557575  |
| 0.279208973 | 0.365339693 | 0.218983585 | 0.03647226  |
| 0.241544205 | 0.082698948 | 0.467270687 | 0.456974679 |
| 0.072229423 | 0.246440269 | 0.35771217  | 0.412815847 |
| 0.244642213 | 0.391224603 | 0.489670829 | 0.339944062 |
| 0.083722945 | 0.219001959 | 0.377385477 | 0.353106249 |
| 0.217086746 | 0.497840925 | 0.283471131 | 0.534302981 |
| 0.364396518 | 0.460110622 | 0.468772807 | 0.326948824 |
| 0.282556184 | 0.352688819 | 0.302509398 | 0.02190039  |
| 0.367213612 | 0.433292126 | 0.352313962 | 0.184918794 |
| 0.27772675  | 0.397055329 | 0.067291968 | 0.208408302 |
| 0.357539883 | 0.243949514 | 0.153400333 | 0.422528997 |
| 0.363570024 | 0.350571414 | 0.053486746 | 0.085535111 |
| 0.538766276 | 0.426374515 | 0.14241952  | 0.376481746 |
| 0.233078115 | 0.346941964 | 1           | 0.426256582 |
| 0.358572416 | 0.416158859 | 0.374648349 | 0.316184342 |
| 0.396405136 | 0.269762738 | 0.515838104 | 0.082605682 |
| 0.111853488 | 0.391258768 | 0.101486762 | 0.14147792  |
| 0.167861123 | 0.050684175 | 0.320645536 | 0.423575045 |
| 0.372840391 | 0.373661586 | 0.282620374 | 0.119784074 |
| 0.377861227 | 0.363688386 | 0.380410143 | 0.181594881 |
| 0.09078149  | 0.480823685 | 0.01778488  | 0.08956535  |
| 0.388588636 | 0.390444966 | 0.381352588 | 0.299574311 |
| 0.327853761 | 0.215362702 | 0.319727089 | 0.242507568 |
| 0.249101237 | 0.366313108 | 0.393863147 | 0.047066858 |
| 0.023698141 | 0.49797017  | 0.347690735 | 0.050360822 |
| 0.123771684 | 0.338835594 | 0.348975528 | 0.223136553 |
| 0.04738101  | 0.479495322 | 0.255779481 | 0.423595738 |
| 0.322665846 | 0.099249331 | 0.332718385 | 0.108166324 |
| 0.09095989  | 0.438630486 | 0.413509279 | 0.510800649 |
| 0.40916116  | 0.395564817 | 0.427316674 | 0.395024687 |
| 0.188991566 | 0.380795296 | 0.03487501  | 0.420611646 |
| 0.356702302 |             |             |             |
| THADA       | 0.377723434 | 0.510382657 | 0.402190443 |
| 0.360981807 | 0.428705121 | 0.280656272 | 0.190818061 |
| 0.152472767 | 0.095362995 | 0.004838156 | 0.035432997 |
| 0.42994818  | 0.218719492 | 0.227263536 | 0.258270417 |
| 0.40540081  | 0.200762166 | 0.342053527 | 0.253867221 |

|             |             |             |             |
|-------------|-------------|-------------|-------------|
| 0.372838416 | 0.075243153 | 0.404556572 | 0.105484221 |
| 0.382345005 | 0.160428763 | 0.096478174 | 0.319837727 |
| 0.411142122 | 0.109493656 | 0.236108088 | 0.312904323 |
| 0.17905715  | 0.39284659  | 0.501427383 | 0.426630782 |
| 0.503022092 | 0.341993508 | 0.026811179 | 0.225293274 |
| 0.386035789 | 0.398146218 | 0.360923019 | 0.319549681 |
| 0.050619177 | 0.44894335  | 0.233902472 | 0.436953976 |
| 0.1847535   | 0.051407528 | 0.162951534 | 0.404371655 |
| 0.44712321  | 0.372091562 | 0.184630586 | 0.149424371 |
| 0.199259754 | 0.167807156 | 0.312902836 | 0.236271716 |
| 0.227106892 | 0.102034201 | 0.467876739 | 0.081451688 |
| 0.134951439 | 0.225405021 | 0.251978529 | 0.22799117  |
| 0.407108688 | 0.296071004 | 0.02573626  | 0.392569409 |
| 0.002025654 | 0.358327234 | 0.430932799 | 0.328992824 |
| 0.07357813  | 0.029174329 | 0.274930319 | 0.297569191 |
| 0.441147365 | 0.455022782 | 0.49778267  | 0.50608865  |
| 0.233555102 | 0.363754111 | 0.436227219 | 0.201330369 |
| 0.408285224 | 0.164769354 | 0.125518768 | 0.42192877  |
| 0.506091926 | 0.514481074 | 0.268706359 | 0.343051131 |
| 0.357837174 | 0.454474262 | 0.361027439 | 0.401715445 |
| 0.315464386 | 0.116124391 | 0.410982872 | 0.519478731 |
| 0.34909633  | 0.395515172 | 0.215796732 | 0.339345917 |
| 0.095399743 | 0.301864362 | 0.343741721 | 0.217760222 |
| 0.454987408 | 0.022153494 | 0.301686253 | 0.311441026 |
| 0.267973502 | 0.383440328 | 0.518058473 | 0.195102351 |
| 0.44426817  | 0.034624289 | 0.178913243 | 0.070724854 |
| 0.315570317 | 0.244906303 | 0.447473454 | 0.430901203 |
| 0.201436334 | 0.393878633 | 0.253005105 | 0.007906123 |
| 0.057236932 | 0.27744265  | 0.408800823 | 0.36843373  |
| 0.388045439 | 0.378407593 | 0.244193519 | 0.305416393 |
| 0.404255226 | 0.493359391 | 0.034489611 | 0.108477969 |
| 0.374317694 | 0.281673308 | 0.276487137 | 0.407081245 |
| 0.350135037 | 0.11605085  | 0.156968957 | 0.518663391 |
| 0.381348183 | 0.106109441 | 0.290585518 | 0.412905217 |
| 0.282453656 | 0.419225438 | 0.135470008 | 0.277853884 |
| 0.054370015 | 0.47634284  | 0.067923783 | 0.287748146 |
| 0.252001462 | 0.234681216 | 0.021636752 | 0.209176886 |
| 0.240152214 | 0.396058673 | 0.445833596 | 0.146163384 |
| 0.313614441 | 0.414568658 | 0.253551118 | 0.347174905 |
| 0.012417493 | 0.073983072 | 0.210608728 | 0.505099118 |
| 0.195976843 | 0.518973972 | 0.320910872 | 0.368090179 |
| 0.343864108 | 0.418270041 | 0.006869984 | 0.466936769 |
| 0.520849753 | 0.220391419 | 0.377263951 | 0.438505998 |
| 0.365152994 | 0.414856526 | 0.046226847 | 0.414406722 |
| 0.285304756 | 0.111877274 | 0.514196769 | 0.212779735 |
| 0.4497443   | 0.064788957 | 0.265945088 | 0.432885655 |
| 0.382635243 | 0.015383371 | 0.15515729  | 0.330653576 |
| 0.06755455  | 0.07245421  | 0.378729223 | 0.365449482 |
| 0.342838439 | 0.417442531 | 0.486295018 | 0.349301236 |
| 0.413976243 | 0.232646279 | 0.027895768 | 0.39827196  |
| 0.408965101 | 0.348489631 | 0.401352174 | 0.225480872 |
| 0.258722299 | 0.449035063 | 0.386260645 | 0.159824157 |
| 0.05499931  | 0.266280671 | 0.021515648 | 0.343262685 |
| 0.373376889 | 0.115068918 | 0.355655072 | 0.238625347 |

|             |             |             |             |
|-------------|-------------|-------------|-------------|
| 0.126113441 | 0.52287493  | 0.282406268 | 0.346921936 |
| 0.218641828 | 0.339426527 | 0.259154296 | 0.202357451 |
| 0.225249571 | 0.208715692 | 0.369241526 | 0.353675236 |
| 0.034802034 | 0.129036406 | 0.04374929  | 0.353872526 |
| 0.146571884 | 0.306309725 | 0.28415765  | 0.333095716 |
| 0.303867613 | 0.126656654 | 0.388307384 | 0.354909558 |
| 0.174808188 | 0.03210036  | 0.494913691 | 0.399022681 |
| 0.243836367 | 0.168799461 | 0.077614835 | 0.295172669 |
| 0.445371533 | 0.217498175 | 0.192164256 | 0.422719343 |
| 0.046463173 | 0.496412747 | 0.247294053 | 0.172995732 |
| 0.404578497 | 0.276090601 | 0.441483033 | 0.053998175 |
| 0.339675636 | 0.437842108 | 0.368385938 | 0.225812181 |
| 0.35266217  | 0.373548971 | 0.037387881 | 0.335938023 |
| 0.324782302 | 0.054325386 | 0.528123388 | 0.208093769 |
| 0.046035253 | 0.437170542 | 0.382531479 | 0.1204687   |
| 0.127259933 | 0.291564839 | 0.037113693 | 0.344800368 |
| 0.509664671 | 0.407503196 | 0.357790812 | 0.324106397 |
| 0.052541447 | 0.016529492 | 0.320328347 | 0.416194903 |
| 0.484644712 | 0.52349269  | 0.317899207 | 0.385568476 |
| 0.262689808 | 0.337880692 | 0.101524765 | 0.510939941 |
| 0.28081233  | 0.510665578 | 0.016284396 | 0.416167646 |
| 0.491781593 | 0.214781776 | 0.12374434  | 0.249399355 |
| 0.330695276 | 0.06003355  | 0.233454784 | 0.476874242 |
| 0.405628956 | 0.333529242 | 0.324474924 | 0.424288034 |
| 0.016549619 | 0.044487906 | 0.397696816 | 0.285144592 |
| 0.34120145  | 0.251788845 | 0.117423005 | 0.279254676 |
| 0.054886745 | 0.421043555 | 0.448443938 | 0.080168045 |
| 0.243932135 | 0.252269181 | 0.427837336 | 0.055619592 |
| 0.463127256 | 0.509287972 | 0.501807364 | 0.179648602 |
| 0.402409681 | 0.485446081 | 0.396472603 | 0.13982128  |
| 0.041981878 | 0.511643389 | 0.328516115 | 0.0263553   |
| 0.469315062 | 0.155051627 | 0.016524911 | 0.47496736  |
| 0.202714706 | 0.411967835 | 0.002685715 | 0.131726678 |
| 0.096674694 | 0.469263924 | 0.449523964 | 0.321355857 |
| 0.156915979 | 0.368159266 | 0.020748776 | 0.537503645 |
| 0.468596119 | 0.035723656 | 0.240713535 | 0.396702956 |
| 0.393284658 | 0.511960747 | 0.368551538 | 0.448496907 |
| 0.412083719 | 0.486310059 | 0.216376111 | 0.316814752 |
| 0.396100917 | 0.501436885 | 0.354189477 | 0.431145164 |
| 0.440901848 | 0.440371943 | 0.283876194 | 0.020133115 |
| 0.166192277 | 0.160074114 | 0.233397148 | 0.089882912 |
| 0.240486597 | 0.185323819 | 0.4773159   | 0.470138344 |
| 0.491434804 | 0.013968496 | 0.128934957 | 0.387651014 |
| 0.402842903 | 0.458523163 | 0.045604222 | 0.00997025  |
| 0.014326013 | 0.03773302  | 0.314500093 | 0.325677508 |
| 0.485701535 | 0.157807053 | 0.010270762 | 0.040335712 |
| 0.270687238 | 0.430025465 | 0.48969448  | 0.375316164 |
| 0.420285602 | 0.128133256 | 0.219759156 | 0.381709079 |
| 0.112905704 | 0.252837307 | 0.489915528 | 0.439777931 |
| 0.088497416 | 0.323043496 | 0.356411982 | 0.476082198 |
| 0.133509417 | 0.380287507 | 0.428636205 | 0.294283654 |
| 0.037307786 | 0.138004675 | 0.105052078 | 0.424611671 |
| 0.488352894 | 0.101304669 | 0.052727946 | 0.106810967 |
| 0.12129547  | 0.467664933 | 0.184748285 | 0.523113261 |

|             |             |             |             |
|-------------|-------------|-------------|-------------|
| 0.395801353 | 0.419231402 | 0.151731837 | 0.456878152 |
| 0.058579182 | 0.467803264 | 0.404055111 | 0.04253236  |
| 0.359222578 | 0.028548434 | 0.478815229 | 0.154439985 |
| 0.261622996 | 0.343005637 | 0.225931335 | 0.046397085 |
| 0.262048823 | 0.094446341 | 0.474109184 | 0.470656842 |
| 0.084609719 | 0.236688378 | 0.359468601 | 0.400569082 |
| 0.220159684 | 0.388183033 | 0.477045107 | 0.318411833 |
| 0.083735817 | 0.251800177 | 0.359846468 | 0.32979557  |
| 0.204742713 | 0.508364804 | 0.300074201 | 0.533428238 |
| 0.343129998 | 0.450757074 | 0.472608193 | 0.313431572 |
| 0.332842388 | 0.328526759 | 0.287521864 | 0.019018727 |
| 0.354522496 | 0.442294888 | 0.328476089 | 0.198991221 |
| 0.295928365 | 0.413875576 | 0.067464483 | 0.179402289 |
| 0.38090763  | 0.219667371 | 0.160461881 | 0.42715047  |
| 0.343094517 | 0.330485677 | 0.051376438 | 0.094442856 |
| 0.533562286 | 0.410959434 | 0.120776331 | 0.359190953 |
| 0.241699587 | 0.355579046 | 0.426256582 | 1           |
| 0.359049112 | 0.420590916 | 0.366974218 | 0.301491589 |
| 0.383100791 | 0.264076797 | 0.506208026 | 0.065450171 |
| 0.130837968 | 0.389500872 | 0.11024106  | 0.157830235 |
| 0.175246711 | 0.054415669 | 0.344200483 | 0.427517697 |
| 0.395648281 | 0.380197368 | 0.270915644 | 0.113741627 |
| 0.401401054 | 0.344869417 | 0.387290629 | 0.169734579 |
| 0.093593941 | 0.472394384 | 0.018527291 | 0.101070472 |
| 0.419046307 | 0.392531813 | 0.401810187 | 0.303924624 |
| 0.366444013 | 0.246360837 | 0.331771198 | 0.219544334 |
| 0.240908948 | 0.363861903 | 0.390980122 | 0.039083074 |
| 0.023891012 | 0.504684371 | 0.314323345 | 0.055050705 |
| 0.147817455 | 0.317378204 | 0.340731008 | 0.232594939 |
| 0.057275277 | 0.487529596 | 0.244615654 | 0.430100225 |
| 0.300716821 | 0.103839397 | 0.311748316 | 0.104679257 |
| 0.085534568 | 0.421927051 | 0.421658686 | 0.51018675  |
| 0.418233455 | 0.397009225 | 0.408348589 | 0.398832765 |
| 0.169973737 | 0.375118741 | 0.033666766 | 0.417812105 |
| 0.360738959 |             |             |             |
| TIMM10      | 0.342952801 | 0.437153949 | 0.20783954  |
| 0.302174755 | 0.208754665 | 0.191686121 | 0.083624578 |
| 0.037984552 | 0.031973661 | 0.000527341 | 0.006485579 |
| 0.242720748 | 0.02991271  | 0.04131464  | 0.069087364 |
| 0.353845489 | 0.029214806 | 0.130968462 | 0.115865008 |
| 0.291040487 | 0.01832374  | 0.27861049  | 0.026272254 |
| 0.088272789 | 0.033393472 | 0.028398455 | 0.104543268 |
| 0.361461981 | 0.034639258 | 0.11169765  | 0.261103386 |
| 0.032918993 | 0.347657261 | 0.433304962 | 0.260189554 |
| 0.415267247 | 0.313178864 | 0.003547427 | 0.064703376 |
| 0.361010997 | 0.341245601 | 0.30247791  | 0.167639231 |
| 0.011808141 | 0.383753828 | 0.114437051 | 0.257798629 |
| 0.044401826 | 0.008276881 | 0.060355856 | 0.373920394 |
| 0.362996643 | 0.235482172 | 0.07052014  | 0.050855459 |
| 0.029570482 | 0.044699251 | 0.042529667 | 0.188013723 |
| 0.09446868  | 0.033606029 | 0.387512236 | 0.025311276 |
| 0.056888847 | 0.085901551 | 0.042110491 | 0.089565353 |
| 0.116487305 | 0.286933894 | 0.008367308 | 0.246458268 |
| 6.26E-05    | 0.282996174 | 0.233119316 | 0.11748281  |

|             |             |             |             |
|-------------|-------------|-------------|-------------|
| 0.021172481 | 0.002929302 | 0.061073048 | 0.178845896 |
| 0.386684928 | 0.407788436 | 0.406566837 | 0.426479549 |
| 0.028468336 | 0.147507742 | 0.209566997 | 0.045678449 |
| 0.381345855 | 0.054504679 | 0.021291804 | 0.340115147 |
| 0.415186669 | 0.425944935 | 0.052323558 | 0.161441351 |
| 0.308000106 | 0.398596593 | 0.160221835 | 0.171051239 |
| 0.086706838 | 0.026467243 | 0.365459302 | 0.424777178 |
| 0.315568592 | 0.138495447 | 0.067617734 | 0.299603478 |
| 0.027282931 | 0.054231151 | 0.217663438 | 0.025945529 |
| 0.396339331 | 0.008340404 | 0.105199662 | 0.161046694 |
| 0.065286411 | 0.333077277 | 0.428349151 | 0.083483919 |
| 0.185148812 | 0.004387882 | 0.039283598 | 0.015919127 |
| 0.046564924 | 0.039158618 | 0.387834847 | 0.34686349  |
| 0.036653535 | 0.072399549 | 0.105307799 | 0.001624636 |
| 0.008694074 | 0.057667031 | 0.321465821 | 0.160436114 |
| 0.350480334 | 0.353244653 | 0.070535552 | 0.281609406 |
| 0.270124248 | 0.408870708 | 0.00617218  | 0.03305296  |
| 0.188968613 | 0.063628445 | 0.138537299 | 0.229730405 |
| 0.130629425 | 0.032866964 | 0.042659762 | 0.442181345 |
| 0.353140621 | 0.033880164 | 0.107681477 | 0.308370352 |
| 0.054481959 | 0.182046055 | 0.036916964 | 0.054774327 |
| 0.012497627 | 0.40683407  | 0.013187473 | 0.136698672 |
| 0.062653508 | 0.028108797 | 0.007596003 | 0.093385139 |
| 0.038007051 | 0.316880721 | 0.390470187 | 0.047421407 |
| 0.0910378   | 0.259045064 | 0.133594336 | 0.241949616 |
| 0.002533779 | 0.015324158 | 0.099147686 | 0.402979415 |
| 0.143218929 | 0.437252006 | 0.072496819 | 0.109895056 |
| 0.155853805 | 0.382344407 | 0.002394305 | 0.399165472 |
| 0.439291312 | 0.089824959 | 0.171534131 | 0.258652589 |
| 0.177527504 | 0.350919969 | 0.006846466 | 0.289847146 |
| 0.229118826 | 0.036868902 | 0.435013873 | 0.067461735 |
| 0.382330148 | 0.018647404 | 0.08493811  | 0.375984584 |
| 0.279004015 | 0.003018704 | 0.070010752 | 0.266932819 |
| 0.013937658 | 0.022228971 | 0.345021801 | 0.269942966 |
| 0.216427941 | 0.37980787  | 0.411989083 | 0.154427237 |
| 0.185771711 | 0.078327564 | 0.007129525 | 0.17233913  |
| 0.376245362 | 0.076995397 | 0.35829897  | 0.054580927 |
| 0.159892909 | 0.38794227  | 0.329509156 | 0.053343839 |
| 0.018636    | 0.131671198 | 0.003192133 | 0.163098916 |
| 0.374928017 | 0.018398126 | 0.206826345 | 0.043709449 |
| 0.025602961 | 0.435913188 | 0.06925263  | 0.100336588 |
| 0.042945613 | 0.15829516  | 0.118129513 | 0.028539476 |
| 0.024446595 | 0.051930199 | 0.119186978 | 0.127973715 |
| 0.009121208 | 0.026738864 | 0.012649134 | 0.067194233 |
| 0.013406344 | 0.053483345 | 0.054995304 | 0.2657226   |
| 0.044981879 | 0.013402698 | 0.13304288  | 0.086746246 |
| 0.035683184 | 0.008650408 | 0.422866354 | 0.296403967 |
| 0.222850067 | 0.047441201 | 0.017864613 | 0.038528106 |
| 0.363437269 | 0.117143313 | 0.074787815 | 0.355908949 |
| 0.010735589 | 0.433047276 | 0.035534729 | 0.050954784 |
| 0.094827556 | 0.102113683 | 0.398830519 | 0.016327969 |
| 0.218280698 | 0.367491923 | 0.18840203  | 0.069012539 |
| 0.28160173  | 0.267032148 | 0.008230757 | 0.297412122 |
| 0.26030578  | 0.011882266 | 0.428551441 | 0.028971446 |

|             |             |             |             |
|-------------|-------------|-------------|-------------|
| 0.012493626 | 0.315480522 | 0.310396074 | 0.044042768 |
| 0.034716045 | 0.109295031 | 0.012187222 | 0.181591747 |
| 0.424952863 | 0.30002135  | 0.310138396 | 0.090383956 |
| 0.011649818 | 0.000771869 | 0.090609905 | 0.215973888 |
| 0.404879529 | 0.42117292  | 0.13777485  | 0.122253889 |
| 0.136839718 | 0.097678286 | 0.034575633 | 0.413567175 |
| 0.066577291 | 0.436400011 | 0.004282164 | 0.365800616 |
| 0.413306304 | 0.096245029 | 0.02951532  | 0.137613122 |
| 0.272155773 | 0.020253184 | 0.066359248 | 0.391425922 |
| 0.393308389 | 0.125365742 | 0.105119703 | 0.283583029 |
| 0.004446539 | 0.014629713 | 0.250639088 | 0.06124977  |
| 0.109638025 | 0.082808105 | 0.018267109 | 0.076692836 |
| 0.009030824 | 0.355736105 | 0.371304981 | 0.024093361 |
| 0.137949906 | 0.087663328 | 0.25514959  | 0.01733371  |
| 0.389975153 | 0.433359848 | 0.419201719 | 0.050954039 |
| 0.324207512 | 0.396904404 | 0.211417699 | 0.04134072  |
| 0.011038939 | 0.424347324 | 0.285884615 | 0.003967882 |
| 0.393641932 | 0.077338043 | 0.001293777 | 0.409011884 |
| 0.09053021  | 0.356669883 | 0.001264781 | 0.037720723 |
| 0.0222493   | 0.396269442 | 0.397227576 | 0.267069578 |
| 0.04356007  | 0.242969587 | 0.010038701 | 0.448778952 |
| 0.378567425 | 0.006674983 | 0.048730579 | 0.310585676 |
| 0.296019447 | 0.43885485  | 0.135359103 | 0.359097247 |
| 0.215286293 | 0.402500113 | 0.038020182 | 0.159446049 |
| 0.328844943 | 0.418263269 | 0.310265076 | 0.388799846 |
| 0.353195107 | 0.308244343 | 0.161474468 | 0.005447338 |
| 0.069989486 | 0.066460428 | 0.050735607 | 0.027079848 |
| 0.184578431 | 0.036702745 | 0.397930307 | 0.403798019 |
| 0.384332701 | 0.003935061 | 0.029575581 | 0.321747392 |
| 0.349924429 | 0.408101821 | 0.014535626 | 0.003076612 |
| 0.002634721 | 0.005603461 | 0.20444088  | 0.127498098 |
| 0.418321187 | 0.022675375 | 0.002275393 | 0.010831323 |
| 0.053672143 | 0.251279924 | 0.401612315 | 0.280141583 |
| 0.372823373 | 0.033284816 | 0.034062635 | 0.309916889 |
| 0.025531184 | 0.226137392 | 0.390104155 | 0.383075381 |
| 0.021296666 | 0.134921849 | 0.144619904 | 0.411866475 |
| 0.024236445 | 0.180921207 | 0.256891682 | 0.047149052 |
| 0.009198587 | 0.031718324 | 0.031282907 | 0.376869193 |
| 0.404724289 | 0.010723448 | 0.005471557 | 0.019145183 |
| 0.023636408 | 0.410606918 | 0.027797471 | 0.436010207 |
| 0.344614775 | 0.355386164 | 0.02951755  | 0.411448709 |
| 0.017222859 | 0.375697767 | 0.149123641 | 0.008698689 |
| 0.092901718 | 0.006667269 | 0.386554257 | 0.036169526 |
| 0.078079057 | 0.276168357 | 0.085361915 | 0.010216878 |
| 0.061480592 | 0.018567335 | 0.400391236 | 0.396600058 |
| 0.018062329 | 0.081384724 | 0.160041219 | 0.284155184 |
| 0.113642781 | 0.295442825 | 0.402516995 | 0.146159196 |
| 0.022782848 | 0.041475538 | 0.288983996 | 0.239682914 |
| 0.04700333  | 0.422760702 | 0.063377893 | 0.45317446  |
| 0.315089458 | 0.425584213 | 0.392517007 | 0.191232078 |
| 0.05373375  | 0.207798147 | 0.206352013 | 0.002721534 |
| 0.186905661 | 0.353188299 | 0.175024383 | 0.033675165 |
| 0.0974854   | 0.217913185 | 0.028286672 | 0.03221108  |
| 0.152160824 | 0.144997416 | 0.027629628 | 0.383984297 |

|             |             |             |             |
|-------------|-------------|-------------|-------------|
| 0.244081078 | 0.260539794 | 0.014348697 | 0.025344184 |
| 0.45312249  | 0.396062745 | 0.032154731 | 0.266623198 |
| 0.081232129 | 0.196185917 | 0.358572416 | 0.359049112 |
| 1           | 0.32775683  | 0.313941095 | 0.206818707 |
| 0.329118542 | 0.140812351 | 0.430584967 | 0.017537376 |
| 0.031249769 | 0.250960029 | 0.016498805 | 0.052079023 |
| 0.053657242 | 0.013526637 | 0.074043809 | 0.32395284  |
| 0.100419363 | 0.213056433 | 0.05634154  | 0.027366988 |
| 0.185512125 | 0.167699286 | 0.209870864 | 0.052953929 |
| 0.014433355 | 0.394866162 | 0.003546907 | 0.023552454 |
| 0.102068184 | 0.353030529 | 0.160178599 | 0.083180536 |
| 0.068298455 | 0.052783058 | 0.142045788 | 0.100663243 |
| 0.060580919 | 0.064443735 | 0.347219292 | 0.011476371 |
| 0.005571638 | 0.418603006 | 0.140827135 | 0.013421766 |
| 0.061144863 | 0.268633692 | 0.068420685 | 0.055708894 |
| 0.013197287 | 0.398584784 | 0.098494137 | 0.23913982  |
| 0.179397843 | 0.025061242 | 0.289438273 | 0.033774918 |
| 0.027918682 | 0.354199597 | 0.234266262 | 0.418440289 |
| 0.171246372 | 0.310438244 | 0.372433646 | 0.324774343 |
| 0.035854837 | 0.209359465 | 0.009836221 | 0.376175587 |
| 0.105666793 |             |             |             |
| TLE1        | 0.37664717  | 0.526390116 | 0.34902703  |
| 0.403965187 | 0.418411931 | 0.354068455 | 0.2198147   |
| 0.174766645 | 0.081876986 | 0.009856621 | 0.035788356 |
| 0.410889961 | 0.247001719 | 0.300859534 | 0.294972972 |
| 0.392924092 | 0.162112036 | 0.300704269 | 0.246453164 |
| 0.389526096 | 0.106151054 | 0.398442446 | 0.099242447 |
| 0.271094864 | 0.117978712 | 0.082838143 | 0.262311043 |
| 0.409250572 | 0.091413634 | 0.334204121 | 0.366489805 |
| 0.103941696 | 0.403957393 | 0.522915893 | 0.437802088 |
| 0.523390248 | 0.352050443 | 0.014594517 | 0.301407835 |
| 0.373504228 | 0.409490295 | 0.388116173 | 0.336205984 |
| 0.052263808 | 0.492948685 | 0.258195584 | 0.37186285  |
| 0.209599618 | 0.042681896 | 0.226115011 | 0.441186432 |
| 0.495688137 | 0.422061605 | 0.211820928 | 0.173826084 |
| 0.261025206 | 0.242886413 | 0.297372279 | 0.308501463 |
| 0.244921134 | 0.163534168 | 0.498656501 | 0.094139011 |
| 0.156057812 | 0.237887394 | 0.162463486 | 0.26229393  |
| 0.329288412 | 0.351079783 | 0.018707283 | 0.371014175 |
| 0.006552748 | 0.362116246 | 0.355308221 | 0.288209995 |
| 0.049980308 | 0.038761981 | 0.186697307 | 0.347209531 |
| 0.419144305 | 0.440879065 | 0.461984244 | 0.472522929 |
| 0.215007415 | 0.281921204 | 0.372022483 | 0.198520369 |
| 0.393953435 | 0.202303804 | 0.105188247 | 0.405363983 |
| 0.473667019 | 0.531228767 | 0.207557347 | 0.255455722 |
| 0.409250297 | 0.472381719 | 0.393318415 | 0.421866752 |
| 0.326078599 | 0.050730648 | 0.446934076 | 0.506168955 |
| 0.36506538  | 0.307618164 | 0.16643331  | 0.390356001 |
| 0.065909381 | 0.327134108 | 0.356771135 | 0.180387296 |
| 0.433042303 | 0.020471785 | 0.220581843 | 0.370973995 |
| 0.193862617 | 0.403486231 | 0.5211581   | 0.199914048 |
| 0.386924486 | 0.028961852 | 0.136578403 | 0.035466814 |
| 0.328077799 | 0.146763513 | 0.494041185 | 0.439709733 |
| 0.244409483 | 0.389748055 | 0.261176729 | 0.002831696 |

|             |             |             |             |
|-------------|-------------|-------------|-------------|
| 0.033666106 | 0.169929636 | 0.4171661   | 0.335217713 |
| 0.39604489  | 0.353245245 | 0.252783725 | 0.363856953 |
| 0.418068305 | 0.454601066 | 0.057284988 | 0.099634757 |
| 0.397156943 | 0.173418192 | 0.248067268 | 0.435588399 |
| 0.315508917 | 0.115323318 | 0.1456638   | 0.503241201 |
| 0.41946099  | 0.099499374 | 0.301826335 | 0.396496189 |
| 0.35528746  | 0.356705738 | 0.117672379 | 0.317155836 |
| 0.065099819 | 0.486420277 | 0.033074072 | 0.297307741 |
| 0.248469696 | 0.181359289 | 0.00976016  | 0.25452555  |
| 0.296153121 | 0.428994543 | 0.476279102 | 0.112182751 |
| 0.351418862 | 0.401568431 | 0.302430232 | 0.425187246 |
| 0.018080876 | 0.047722287 | 0.254094443 | 0.509116248 |
| 0.282894836 | 0.478774859 | 0.29393535  | 0.281761192 |
| 0.285143756 | 0.411642192 | 0.002509537 | 0.502298699 |
| 0.529081215 | 0.27326293  | 0.419712472 | 0.389730275 |
| 0.350033261 | 0.424026624 | 0.037122786 | 0.408627198 |
| 0.331547087 | 0.08181871  | 0.480219502 | 0.181408315 |
| 0.457317298 | 0.052267236 | 0.3269042   | 0.404044533 |
| 0.419412365 | 0.009812874 | 0.224610592 | 0.372462464 |
| 0.02937487  | 0.105293177 | 0.388646614 | 0.392581562 |
| 0.371416172 | 0.407756522 | 0.447559859 | 0.335306854 |
| 0.420653901 | 0.229805613 | 0.012850353 | 0.307206521 |
| 0.398576105 | 0.36674179  | 0.442775061 | 0.23864692  |
| 0.311380455 | 0.471017054 | 0.387700229 | 0.212533659 |
| 0.052622224 | 0.309680552 | 0.026133042 | 0.323570235 |
| 0.355601938 | 0.159705906 | 0.356305739 | 0.141291492 |
| 0.08171668  | 0.523994266 | 0.174236141 | 0.246476169 |
| 0.124642357 | 0.427658322 | 0.245386981 | 0.299309114 |
| 0.278306087 | 0.170230812 | 0.333194331 | 0.361456424 |
| 0.047750607 | 0.118853295 | 0.01218911  | 0.411472002 |
| 0.213215215 | 0.396780482 | 0.392590901 | 0.391682696 |
| 0.355989353 | 0.157260163 | 0.395328852 | 0.254955945 |
| 0.115697308 | 0.018963434 | 0.506268703 | 0.381186043 |
| 0.31671588  | 0.156608981 | 0.045964032 | 0.375394409 |
| 0.456671119 | 0.31250019  | 0.236779824 | 0.457182206 |
| 0.025410928 | 0.455358329 | 0.301269697 | 0.141113434 |
| 0.409235903 | 0.288669176 | 0.41808846  | 0.057924118 |
| 0.362817059 | 0.478258899 | 0.291227151 | 0.198274563 |
| 0.40695748  | 0.395482009 | 0.03830802  | 0.372583995 |
| 0.38248361  | 0.041738484 | 0.527145355 | 0.142815562 |
| 0.024512206 | 0.41461773  | 0.424341065 | 0.082616812 |
| 0.082376927 | 0.362890178 | 0.051562102 | 0.294605678 |
| 0.517357577 | 0.406571034 | 0.420494017 | 0.199360431 |
| 0.05481025  | 0.026067682 | 0.207175065 | 0.356372562 |
| 0.521093453 | 0.509422679 | 0.264080635 | 0.389643653 |
| 0.248301118 | 0.322397808 | 0.138419947 | 0.50792139  |
| 0.156254465 | 0.516001345 | 0.008108679 | 0.414877284 |
| 0.520802363 | 0.286640268 | 0.094109862 | 0.311531758 |
| 0.376295234 | 0.051693006 | 0.192073578 | 0.506532133 |
| 0.407964664 | 0.313761693 | 0.331085125 | 0.403261168 |
| 0.020804623 | 0.051641867 | 0.358918336 | 0.171899494 |
| 0.384181666 | 0.213086961 | 0.051271251 | 0.299563013 |
| 0.061699513 | 0.465217719 | 0.425599297 | 0.063900884 |
| 0.349719744 | 0.269241337 | 0.371368726 | 0.043648875 |



|             |             |             |             |
|-------------|-------------|-------------|-------------|
| 0.428558188 | 0.493800227 | 0.530846693 | 0.162304098 |
| 0.421121816 | 0.490334819 | 0.397174317 | 0.08146281  |
| 0.020120433 | 0.521140268 | 0.362702249 | 0.03307527  |
| 0.442101544 | 0.227225479 | 0.02843238  | 0.496155914 |
| 0.18980491  | 0.453876593 | 0.003350944 | 0.060862215 |
| 0.038852982 | 0.422018033 | 0.485940991 | 0.360698104 |
| 0.256679092 | 0.342749915 | 0.005000517 | 0.513712821 |
| 0.50467614  | 0.016935328 | 0.144514498 | 0.427234893 |
| 0.411204998 | 0.528506745 | 0.307952495 | 0.427455933 |
| 0.423557157 | 0.514409957 | 0.268013939 | 0.275343953 |
| 0.418798284 | 0.494242013 | 0.389621741 | 0.448812695 |
| 0.437825505 | 0.407191993 | 0.288489075 | 0.021186667 |
| 0.11279202  | 0.212174621 | 0.30939971  | 0.0985264   |
| 0.298391098 | 0.152134583 | 0.467462178 | 0.43123245  |
| 0.473637421 | 0.006158138 | 0.159352545 | 0.413955637 |
| 0.418127259 | 0.444368739 | 0.016663068 | 0.004646634 |
| 0.005692899 | 0.025208509 | 0.348682713 | 0.234155797 |
| 0.477817125 | 0.267683462 | 0.006769244 | 0.049642024 |
| 0.27265289  | 0.387940797 | 0.51558884  | 0.369464517 |
| 0.405277195 | 0.090578971 | 0.319652184 | 0.377781713 |
| 0.074872188 | 0.296925399 | 0.479523892 | 0.483030435 |
| 0.040908158 | 0.236659454 | 0.339509085 | 0.469389403 |
| 0.071952658 | 0.32217809  | 0.42161197  | 0.345684744 |
| 0.012490701 | 0.087168552 | 0.069412202 | 0.409129421 |
| 0.513355068 | 0.117138912 | 0.053536839 | 0.150870532 |
| 0.152508296 | 0.431698915 | 0.196236109 | 0.50041008  |
| 0.414565371 | 0.419759053 | 0.082132539 | 0.483355914 |
| 0.049629094 | 0.503003859 | 0.342981496 | 0.056919148 |
| 0.266434819 | 0.01342456  | 0.46929501  | 0.167694398 |
| 0.330007204 | 0.36626548  | 0.167474437 | 0.018659476 |
| 0.155896293 | 0.062731895 | 0.454746417 | 0.4257634   |
| 0.032494561 | 0.226729597 | 0.285792351 | 0.374372706 |
| 0.280902859 | 0.428745691 | 0.514235751 | 0.384667143 |
| 0.100259968 | 0.133483764 | 0.385560761 | 0.370043789 |
| 0.248245091 | 0.46596249  | 0.31781922  | 0.515596595 |
| 0.36965501  | 0.43449172  | 0.466354051 | 0.337189038 |
| 0.257834468 | 0.364843979 | 0.377737139 | 0.030570521 |
| 0.33834959  | 0.443343291 | 0.323443954 | 0.169176561 |
| 0.285736139 | 0.364445799 | 0.045596106 | 0.155428051 |
| 0.314382111 | 0.302982141 | 0.179330459 | 0.40863026  |
| 0.359759675 | 0.371176379 | 0.04337125  | 0.066123248 |
| 0.541464412 | 0.419791647 | 0.134836619 | 0.410816627 |
| 0.171991078 | 0.344135174 | 0.416158859 | 0.420590916 |
| 0.32775683  | 1           | 0.405436212 | 0.397831772 |
| 0.435610779 | 0.259297021 | 0.53215973  | 0.081653579 |
| 0.082772897 | 0.390899717 | 0.131937873 | 0.09775852  |
| 0.1648582   | 0.028620188 | 0.285274378 | 0.40686854  |
| 0.363174805 | 0.398825105 | 0.305219673 | 0.084096376 |
| 0.319915353 | 0.317186942 | 0.352854537 | 0.222023348 |
| 0.101778314 | 0.513095276 | 0.011145431 | 0.064439392 |
| 0.389341895 | 0.409973317 | 0.388830354 | 0.238874907 |
| 0.288398742 | 0.13822893  | 0.318981487 | 0.288354764 |
| 0.363115265 | 0.336070122 | 0.408580359 | 0.03231109  |
| 0.025979123 | 0.46929779  | 0.336861041 | 0.01920838  |

|             |             |             |             |
|-------------|-------------|-------------|-------------|
| 0.08675158  | 0.340867238 | 0.27319212  | 0.254345801 |
| 0.023210789 | 0.485925573 | 0.335802651 | 0.401091273 |
| 0.332904855 | 0.070670363 | 0.343193002 | 0.080371663 |
| 0.053595015 | 0.450714391 | 0.360713595 | 0.520434684 |
| 0.316100268 | 0.415814719 | 0.446928377 | 0.422159903 |
| 0.10127298  | 0.334494518 | 0.031900349 | 0.409984776 |
| 0.385027777 |             |             |             |
| TLR1        | 0.363010594 | 0.508016246 | 0.329655936 |
| 0.387457337 | 0.380295587 | 0.348193446 | 0.262683165 |
| 0.275584403 | 0.099452875 | 0.01162401  | 0.025182777 |
| 0.370445358 | 0.204692106 | 0.311733295 | 0.28668608  |
| 0.385775924 | 0.148540737 | 0.36803538  | 0.290467582 |
| 0.403153728 | 0.15633852  | 0.369842875 | 0.141250323 |
| 0.248513381 | 0.103033059 | 0.088177639 | 0.219757495 |
| 0.433486076 | 0.100902534 | 0.32711651  | 0.392694888 |
| 0.128954683 | 0.400206663 | 0.495447668 | 0.364477371 |
| 0.47994972  | 0.334475418 | 0.029751836 | 0.290107967 |
| 0.414017734 | 0.360912975 | 0.399448902 | 0.344994753 |
| 0.069909166 | 0.480573955 | 0.280258994 | 0.350853598 |
| 0.259089741 | 0.042981199 | 0.286949891 | 0.4494277   |
| 0.447558241 | 0.34809339  | 0.300957967 | 0.207873454 |
| 0.173406576 | 0.294294609 | 0.191178217 | 0.340848954 |
| 0.273357544 | 0.225996908 | 0.454550175 | 0.114743285 |
| 0.163489819 | 0.336950774 | 0.170071768 | 0.328046894 |
| 0.271268599 | 0.361426276 | 0.048162656 | 0.319684151 |
| 0.007183996 | 0.397231994 | 0.353082258 | 0.212558951 |
| 0.062899111 | 0.034418805 | 0.197203028 | 0.353667791 |
| 0.448546665 | 0.44406952  | 0.446092084 | 0.444863327 |
| 0.196170233 | 0.30758589  | 0.312862522 | 0.204920746 |
| 0.417171427 | 0.219142462 | 0.154187834 | 0.379189341 |
| 0.453879115 | 0.491439805 | 0.212099358 | 0.257148841 |
| 0.37339555  | 0.479240308 | 0.355188733 | 0.365501408 |
| 0.252221793 | 0.059608514 | 0.425122769 | 0.479632914 |
| 0.394846773 | 0.243317726 | 0.165717362 | 0.397186176 |
| 0.090805025 | 0.346879175 | 0.360518067 | 0.191491622 |
| 0.46358131  | 0.034808424 | 0.210294676 | 0.369058024 |
| 0.265161407 | 0.385633212 | 0.476308075 | 0.241621454 |
| 0.375468357 | 0.036161265 | 0.100617029 | 0.055369625 |
| 0.344436059 | 0.111819028 | 0.456365538 | 0.439603883 |
| 0.321097415 | 0.332637232 | 0.327461366 | 0.005657851 |
| 0.03929203  | 0.208170557 | 0.38463674  | 0.388527567 |
| 0.390936197 | 0.345092558 | 0.219363643 | 0.352986198 |
| 0.339141318 | 0.438231508 | 0.068218924 | 0.155081102 |
| 0.389402905 | 0.209269736 | 0.272486344 | 0.381258387 |
| 0.282692756 | 0.19280641  | 0.178923617 | 0.491819785 |
| 0.445037985 | 0.128999856 | 0.361452686 | 0.386805687 |
| 0.299821059 | 0.310563949 | 0.16626019  | 0.314164372 |
| 0.092460306 | 0.443164701 | 0.037964385 | 0.380689542 |
| 0.193710003 | 0.150551406 | 0.029389164 | 0.333738032 |
| 0.302476768 | 0.388647265 | 0.440968423 | 0.156962847 |
| 0.346017476 | 0.363588987 | 0.358089396 | 0.355580567 |
| 0.014240284 | 0.083868249 | 0.316214297 | 0.484634215 |
| 0.303485041 | 0.4689383   | 0.341805865 | 0.293362508 |
| 0.283853763 | 0.40134207  | 0.004101188 | 0.4801117   |

|             |             |             |             |
|-------------|-------------|-------------|-------------|
| 0.488033792 | 0.319479734 | 0.361910299 | 0.379384102 |
| 0.277603376 | 0.419657521 | 0.054955532 | 0.396358321 |
| 0.340638081 | 0.124941145 | 0.475789866 | 0.177138864 |
| 0.447220627 | 0.058932117 | 0.363447719 | 0.352717383 |
| 0.333529681 | 0.018123014 | 0.27359193  | 0.389651009 |
| 0.035173146 | 0.158779706 | 0.388843102 | 0.383417739 |
| 0.340571293 | 0.378798615 | 0.45794691  | 0.256167625 |
| 0.380034317 | 0.316343016 | 0.02484087  | 0.296740456 |
| 0.368683457 | 0.293605976 | 0.444890198 | 0.299306363 |
| 0.331020473 | 0.463579216 | 0.354911889 | 0.164534521 |
| 0.072611192 | 0.360054782 | 0.043486672 | 0.303446011 |
| 0.3554813   | 0.156566665 | 0.304461427 | 0.191735242 |
| 0.087582599 | 0.497104457 | 0.146874778 | 0.192872518 |
| 0.095974813 | 0.362319529 | 0.318041311 | 0.241000902 |
| 0.190728586 | 0.191768822 | 0.287553322 | 0.320839427 |
| 0.078182327 | 0.12482943  | 0.020381804 | 0.300508448 |
| 0.144941816 | 0.301573565 | 0.300887093 | 0.36527633  |
| 0.363447483 | 0.143470543 | 0.350043025 | 0.237414912 |
| 0.122118165 | 0.02667318  | 0.490450602 | 0.393866265 |
| 0.321481797 | 0.207378851 | 0.065207065 | 0.28188489  |
| 0.446430919 | 0.292547203 | 0.295949724 | 0.448943644 |
| 0.053223592 | 0.451489862 | 0.246401047 | 0.139811566 |
| 0.315620141 | 0.291088256 | 0.442833514 | 0.072674946 |
| 0.389918757 | 0.469438356 | 0.327429145 | 0.184412171 |
| 0.40480861  | 0.403957029 | 0.060435141 | 0.353197159 |
| 0.356970122 | 0.051989602 | 0.495881736 | 0.139325448 |
| 0.034422032 | 0.364996059 | 0.339058472 | 0.098373347 |
| 0.095001513 | 0.312033779 | 0.095372515 | 0.289030769 |
| 0.494302002 | 0.375306397 | 0.354595959 | 0.194842603 |
| 0.065971394 | 0.01765756  | 0.205887229 | 0.335592391 |
| 0.490997813 | 0.469512545 | 0.299066883 | 0.308140608 |
| 0.286596489 | 0.26607633  | 0.207070178 | 0.476439239 |
| 0.208382128 | 0.49919729  | 0.015629305 | 0.343025619 |
| 0.473731997 | 0.335816713 | 0.087646347 | 0.336728108 |
| 0.385890456 | 0.076556032 | 0.287305508 | 0.477852062 |
| 0.414401228 | 0.298057803 | 0.288214378 | 0.39695101  |
| 0.038634625 | 0.084718289 | 0.333109558 | 0.144292915 |
| 0.32993925  | 0.234415328 | 0.039375102 | 0.373276987 |
| 0.064198007 | 0.450306947 | 0.416946135 | 0.068030072 |
| 0.302439982 | 0.344077715 | 0.353274215 | 0.06373759  |
| 0.384996307 | 0.4631581   | 0.501100791 | 0.252996678 |
| 0.374352327 | 0.443525648 | 0.294250486 | 0.105294702 |
| 0.025618056 | 0.479731107 | 0.375721563 | 0.033216086 |
| 0.452311464 | 0.27856713  | 0.021833744 | 0.495402037 |
| 0.245303998 | 0.435764519 | 0.0076827   | 0.075522952 |
| 0.051250371 | 0.406901657 | 0.457263499 | 0.395770881 |
| 0.242858697 | 0.391100139 | 0.008239666 | 0.488419099 |
| 0.47688707  | 0.019845991 | 0.139272622 | 0.363076692 |
| 0.321252889 | 0.520833335 | 0.242021357 | 0.385426036 |
| 0.335301788 | 0.463411587 | 0.279936843 | 0.273007199 |
| 0.410645512 | 0.441291909 | 0.393117475 | 0.460978739 |
| 0.437961168 | 0.374295231 | 0.310250565 | 0.031193722 |
| 0.104378777 | 0.288265781 | 0.236229079 | 0.074829113 |
| 0.337959078 | 0.141395128 | 0.467091448 | 0.435218311 |

|             |             |             |             |
|-------------|-------------|-------------|-------------|
| 0.43899032  | 0.010754644 | 0.226346486 | 0.377686771 |
| 0.450268997 | 0.470013323 | 0.035482955 | 0.008467199 |
| 0.010025458 | 0.018767902 | 0.389763625 | 0.249471418 |
| 0.458026106 | 0.226127709 | 0.011649628 | 0.100371932 |
| 0.30579549  | 0.321251906 | 0.481369852 | 0.385287433 |
| 0.361660604 | 0.117563705 | 0.25590734  | 0.398818677 |
| 0.071076574 | 0.308972067 | 0.448823751 | 0.474143214 |
| 0.06220122  | 0.249635622 | 0.387284924 | 0.474715636 |
| 0.04569371  | 0.322796514 | 0.378330018 | 0.30858216  |
| 0.024001612 | 0.093766561 | 0.075260894 | 0.391715171 |
| 0.460842087 | 0.091242088 | 0.044133162 | 0.193781196 |
| 0.155397825 | 0.438764064 | 0.196443728 | 0.488303396 |
| 0.418971632 | 0.409897597 | 0.084527141 | 0.468254347 |
| 0.052469391 | 0.468075737 | 0.27763527  | 0.069284501 |
| 0.316559991 | 0.026565854 | 0.438568909 | 0.10583171  |
| 0.368984047 | 0.396332285 | 0.154915481 | 0.023986201 |
| 0.134021675 | 0.074055965 | 0.444834766 | 0.401893913 |
| 0.044452642 | 0.300055038 | 0.309709781 | 0.396992765 |
| 0.339247851 | 0.387012508 | 0.487752629 | 0.321255467 |
| 0.133748895 | 0.127950834 | 0.408432959 | 0.372871108 |
| 0.32722443  | 0.456449078 | 0.253257412 | 0.495972366 |
| 0.375430812 | 0.452182068 | 0.441660503 | 0.348861327 |
| 0.20617381  | 0.384179064 | 0.354384294 | 0.038877933 |
| 0.375153806 | 0.418538514 | 0.389348645 | 0.142209854 |
| 0.249900353 | 0.293830636 | 0.089570771 | 0.220489083 |
| 0.238845617 | 0.326939342 | 0.186480134 | 0.411126857 |
| 0.396028345 | 0.373346879 | 0.093916585 | 0.070492559 |
| 0.521328485 | 0.436217068 | 0.197625007 | 0.379643278 |
| 0.208281637 | 0.319052427 | 0.374648349 | 0.366974218 |
| 0.313941095 | 0.405436212 | 1           | 0.360553422 |
| 0.438900556 | 0.303823995 | 0.500012566 | 0.172539606 |
| 0.088888671 | 0.358037633 | 0.119311468 | 0.113527754 |
| 0.187052961 | 0.037804586 | 0.208851262 | 0.394487909 |
| 0.281081188 | 0.370835737 | 0.352049925 | 0.10432897  |
| 0.315993575 | 0.348385132 | 0.356719727 | 0.253601703 |
| 0.10556333  | 0.475788931 | 0.015188429 | 0.082422973 |
| 0.308754331 | 0.368077663 | 0.296830264 | 0.255303725 |
| 0.227338279 | 0.150230976 | 0.315004829 | 0.342404849 |
| 0.285401189 | 0.323550215 | 0.372096686 | 0.066490427 |
| 0.048051265 | 0.468569352 | 0.374190145 | 0.030894962 |
| 0.096546017 | 0.346681425 | 0.345244789 | 0.228646261 |
| 0.028568588 | 0.433656853 | 0.30617152  | 0.362634545 |
| 0.373873072 | 0.105922971 | 0.374915273 | 0.131574169 |
| 0.104696914 | 0.455050606 | 0.324644773 | 0.477865884 |
| 0.319894591 | 0.385825832 | 0.445632593 | 0.390952744 |
| 0.160481985 | 0.30913698  | 0.054542693 | 0.427086414 |
| 0.30533702  |             |             |             |
| TLR2        | 0.271919658 | 0.481023103 | 0.213125642 |
| 0.350462781 | 0.282557196 | 0.303193007 | 0.238156898 |
| 0.205913539 | 0.082138444 | 0.026936627 | 0.035238441 |
| 0.260531097 | 0.20569317  | 0.315563714 | 0.236821324 |
| 0.296348054 | 0.119660401 | 0.217617457 | 0.22470788  |
| 0.301435114 | 0.169502512 | 0.285722156 | 0.117673787 |
| 0.148138044 | 0.080162168 | 0.080676868 | 0.160990376 |

|             |             |             |             |
|-------------|-------------|-------------|-------------|
| 0.387406939 | 0.086636774 | 0.319993004 | 0.315917672 |
| 0.069344786 | 0.34020338  | 0.464382282 | 0.29142623  |
| 0.451577791 | 0.252339067 | 0.014668007 | 0.295368196 |
| 0.352496239 | 0.300464251 | 0.306544533 | 0.285605061 |
| 0.074464589 | 0.46301945  | 0.251486177 | 0.229886284 |
| 0.202666064 | 0.044361756 | 0.255959218 | 0.424513634 |
| 0.451497889 | 0.293641302 | 0.235136697 | 0.201443304 |
| 0.206965839 | 0.276564541 | 0.163463584 | 0.287271298 |
| 0.238752977 | 0.232878249 | 0.443509964 | 0.122641521 |
| 0.138198447 | 0.23838688  | 0.100206803 | 0.271104084 |
| 0.177527775 | 0.321354412 | 0.02885756  | 0.217115332 |
| 0.017969736 | 0.286768683 | 0.224470602 | 0.155800246 |
| 0.047029917 | 0.057030749 | 0.119728363 | 0.313532267 |
| 0.39780049  | 0.380697604 | 0.402961257 | 0.400895409 |
| 0.168603637 | 0.190198036 | 0.20812457  | 0.184142423 |
| 0.361020953 | 0.229095998 | 0.105343662 | 0.296546465 |
| 0.411589925 | 0.467594045 | 0.14389846  | 0.163489011 |
| 0.386399277 | 0.447579476 | 0.285535217 | 0.295091755 |
| 0.21371877  | 0.027586968 | 0.418687257 | 0.442772855 |
| 0.359156928 | 0.159789266 | 0.122051031 | 0.370541161 |
| 0.0615286   | 0.255860792 | 0.291539931 | 0.132937232 |
| 0.412196861 | 0.034493525 | 0.139816448 | 0.327693393 |
| 0.145773191 | 0.339105071 | 0.444503836 | 0.203338847 |
| 0.244348576 | 0.036547705 | 0.076696359 | 0.028542128 |
| 0.265133362 | 0.064563937 | 0.444803376 | 0.428214864 |
| 0.263210708 | 0.257924778 | 0.247513112 | 0.003240655 |
| 0.028153847 | 0.103936747 | 0.345410519 | 0.242868568 |
| 0.299394009 | 0.286034861 | 0.206879612 | 0.315712117 |
| 0.26065605  | 0.392905576 | 0.077834179 | 0.118451291 |
| 0.299039294 | 0.105276395 | 0.203984536 | 0.298701895 |
| 0.217474398 | 0.144581686 | 0.14684199  | 0.450155706 |
| 0.42485304  | 0.112521563 | 0.241735854 | 0.28110054  |
| 0.301269768 | 0.218843698 | 0.122841615 | 0.288598634 |
| 0.098744697 | 0.410822037 | 0.022301903 | 0.254750825 |
| 0.158098934 | 0.112470835 | 0.011537694 | 0.272105694 |
| 0.289380894 | 0.402495983 | 0.412282585 | 0.105376923 |
| 0.304965829 | 0.276315008 | 0.272080816 | 0.337951063 |
| 0.031228269 | 0.049259552 | 0.22878624  | 0.46034265  |
| 0.282232008 | 0.40573969  | 0.239553194 | 0.181781654 |
| 0.199016403 | 0.349110102 | 0.00146585  | 0.459484254 |
| 0.456870707 | 0.243715811 | 0.318165366 | 0.248192955 |
| 0.209365421 | 0.401882028 | 0.026464401 | 0.293743801 |
| 0.261357528 | 0.081473369 | 0.425912267 | 0.143321141 |
| 0.407801309 | 0.0539808   | 0.307121497 | 0.309656837 |
| 0.298801346 | 0.011327548 | 0.269915384 | 0.312526689 |
| 0.017933144 | 0.167837383 | 0.291972968 | 0.306629059 |
| 0.286307096 | 0.309456829 | 0.406459104 | 0.197903932 |
| 0.292509415 | 0.225165642 | 0.012564295 | 0.188818324 |
| 0.300531102 | 0.225753696 | 0.437032782 | 0.235733367 |
| 0.250331025 | 0.445799961 | 0.314171963 | 0.176393575 |
| 0.070357378 | 0.292797306 | 0.046975739 | 0.233777631 |
| 0.3013394   | 0.199647731 | 0.226012276 | 0.090336376 |
| 0.060670738 | 0.468792476 | 0.085653408 | 0.118546846 |
| 0.054219624 | 0.344528482 | 0.224144533 | 0.306791961 |

|             |             |             |             |
|-------------|-------------|-------------|-------------|
| 0.22523317  | 0.137600442 | 0.206654068 | 0.256936191 |
| 0.090377074 | 0.115008675 | 0.005832499 | 0.268376947 |
| 0.2093729   | 0.312973441 | 0.323498325 | 0.303797477 |
| 0.307232253 | 0.172731611 | 0.285287181 | 0.142059263 |
| 0.080185404 | 0.019719348 | 0.461673384 | 0.277305642 |
| 0.30301905  | 0.158881975 | 0.040374091 | 0.27337901  |
| 0.436697576 | 0.288605542 | 0.218879853 | 0.450781863 |
| 0.026781496 | 0.394145592 | 0.269148456 | 0.113009908 |
| 0.260995118 | 0.254291911 | 0.398567164 | 0.065486769 |
| 0.27592928  | 0.464352796 | 0.200850556 | 0.152550804 |
| 0.414096885 | 0.305660693 | 0.059978623 | 0.315034208 |
| 0.323035663 | 0.045613275 | 0.460386862 | 0.093930195 |
| 0.021824221 | 0.261404425 | 0.307688123 | 0.068481733 |
| 0.063256894 | 0.315992058 | 0.101296132 | 0.208221989 |
| 0.470947816 | 0.294980564 | 0.360103559 | 0.105404538 |
| 0.073909703 | 0.037285663 | 0.117823645 | 0.211307896 |
| 0.470636079 | 0.430321067 | 0.20005061  | 0.26114413  |
| 0.218264348 | 0.209553228 | 0.174922824 | 0.449455886 |
| 0.087362648 | 0.453440027 | 0.009599699 | 0.295176783 |
| 0.453125502 | 0.285798475 | 0.072855852 | 0.304998602 |
| 0.388719838 | 0.06514967  | 0.170273208 | 0.462793494 |
| 0.382607551 | 0.223093269 | 0.236260093 | 0.270618425 |
| 0.046713394 | 0.082729535 | 0.232976602 | 0.080550595 |
| 0.285790212 | 0.169511936 | 0.018121123 | 0.259021325 |
| 0.082068403 | 0.453129292 | 0.354391098 | 0.060310597 |
| 0.316465177 | 0.235041981 | 0.241846216 | 0.051733389 |
| 0.344975662 | 0.411826732 | 0.478808606 | 0.166494123 |
| 0.317456545 | 0.424910953 | 0.229244082 | 0.059577173 |
| 0.015678252 | 0.446430335 | 0.27769296  | 0.051148761 |
| 0.405004559 | 0.252953474 | 0.0480725   | 0.47015991  |
| 0.185026893 | 0.414730653 | 0.008603084 | 0.027326403 |
| 0.021621345 | 0.340889691 | 0.445184558 | 0.302528275 |
| 0.281838439 | 0.260023145 | 0.001456464 | 0.435256418 |
| 0.471283042 | 0.01270986  | 0.080845254 | 0.340839149 |
| 0.281537243 | 0.485758903 | 0.171314853 | 0.358194397 |
| 0.262827969 | 0.449790026 | 0.270883553 | 0.202585354 |
| 0.399686507 | 0.404968485 | 0.32828425  | 0.427191884 |
| 0.412253524 | 0.26392561  | 0.252197779 | 0.036269913 |
| 0.066978135 | 0.252390078 | 0.248449277 | 0.091505659 |
| 0.267561411 | 0.114600581 | 0.416550642 | 0.38360991  |
| 0.405440162 | 0.0065276   | 0.207068933 | 0.343328892 |
| 0.425442279 | 0.423148169 | 0.011984882 | 0.00377987  |
| 0.003966939 | 0.018290563 | 0.29965224  | 0.152115809 |
| 0.420657895 | 0.292567665 | 0.01030444  | 0.091933155 |
| 0.238739688 | 0.232340722 | 0.466724282 | 0.284782664 |
| 0.296871317 | 0.078740686 | 0.304363425 | 0.287561936 |
| 0.052940413 | 0.234293718 | 0.422017149 | 0.468321393 |
| 0.028604851 | 0.154979414 | 0.245704723 | 0.443049241 |
| 0.026196774 | 0.221469017 | 0.271116297 | 0.292942335 |
| 0.007759952 | 0.061043295 | 0.053263231 | 0.311203692 |
| 0.439632995 | 0.118232548 | 0.058061002 | 0.160430843 |
| 0.183471913 | 0.378925382 | 0.193145232 | 0.443828389 |
| 0.394655593 | 0.367119447 | 0.047400516 | 0.447259269 |
| 0.049539315 | 0.45487142  | 0.200476067 | 0.076503408 |

|             |             |             |             |
|-------------|-------------|-------------|-------------|
| 0.178077865 | 0.013981866 | 0.392762187 | 0.117569486 |
| 0.313029876 | 0.282457469 | 0.101197323 | 0.011932595 |
| 0.071257903 | 0.052974545 | 0.414078897 | 0.347297412 |
| 0.017941917 | 0.211250647 | 0.197616987 | 0.265516534 |
| 0.294013469 | 0.348024295 | 0.471367557 | 0.278733003 |
| 0.13767585  | 0.056218168 | 0.309906462 | 0.277150725 |
| 0.265036986 | 0.404217711 | 0.231701641 | 0.446331917 |
| 0.291741611 | 0.392356995 | 0.40511126  | 0.282656027 |
| 0.142970497 | 0.28500347  | 0.337120966 | 0.066024481 |
| 0.267397973 | 0.397238782 | 0.25653743  | 0.120729334 |
| 0.215220455 | 0.200958106 | 0.048002415 | 0.120911921 |
| 0.160265923 | 0.304907974 | 0.185334341 | 0.348559843 |
| 0.274803892 | 0.286580556 | 0.058399443 | 0.053809653 |
| 0.485027181 | 0.393274244 | 0.165553941 | 0.31649489  |
| 0.127773471 | 0.25052007  | 0.316184342 | 0.301491589 |
| 0.206818707 | 0.397831772 | 0.360553422 | 1           |
| 0.445753584 | 0.232001755 | 0.477625651 | 0.127573567 |
| 0.052694606 | 0.249307604 | 0.14778245  | 0.069231527 |
| 0.158363083 | 0.023536303 | 0.143543601 | 0.279684201 |
| 0.198047813 | 0.305204073 | 0.252977613 | 0.074893149 |
| 0.203684747 | 0.210973126 | 0.253113601 | 0.262039253 |
| 0.118727642 | 0.471482372 | 0.012008508 | 0.054136854 |
| 0.21868038  | 0.331780889 | 0.235018388 | 0.170971333 |
| 0.154502352 | 0.076290961 | 0.249284693 | 0.290223676 |
| 0.332282199 | 0.208839224 | 0.344653342 | 0.047386436 |
| 0.047325311 | 0.417129743 | 0.263190015 | 0.011463496 |
| 0.052670471 | 0.245212867 | 0.194641416 | 0.216616382 |
| 0.013926322 | 0.407444105 | 0.303091643 | 0.257088259 |
| 0.295796638 | 0.06726889  | 0.346836591 | 0.071626642 |
| 0.054182477 | 0.426816015 | 0.211605712 | 0.447617305 |
| 0.184895063 | 0.331184493 | 0.418906346 | 0.363192966 |
| 0.075225419 | 0.194529659 | 0.051157997 | 0.370225054 |
| 0.244594072 |             |             |             |

|             |             |             |             |
|-------------|-------------|-------------|-------------|
| TLR7        | 0.389886601 | 0.482515129 | 0.329246689 |
| 0.415091989 | 0.375473102 | 0.431334976 | 0.243360842 |
| 0.24995581  | 0.081090035 | 0.009336219 | 0.02105471  |
| 0.376673085 | 0.197126117 | 0.324918891 | 0.345201518 |
| 0.37281706  | 0.105780959 | 0.328403914 | 0.237438236 |
| 0.400626639 | 0.145050909 | 0.35336075  | 0.099552279 |
| 0.208287748 | 0.074955155 | 0.061972543 | 0.203640883 |
| 0.424624021 | 0.069577611 | 0.425928498 | 0.425983263 |
| 0.0709767   | 0.423564179 | 0.493420965 | 0.381417233 |
| 0.482415074 | 0.380191722 | 0.011535671 | 0.355153511 |
| 0.418588794 | 0.39557336  | 0.407695793 | 0.321691182 |
| 0.048327078 | 0.493354968 | 0.260766321 | 0.322321376 |
| 0.272927125 | 0.026734605 | 0.344061616 | 0.45427338  |
| 0.470883489 | 0.418059869 | 0.287835818 | 0.189680298 |
| 0.207515929 | 0.341255875 | 0.21083851  | 0.411919255 |
| 0.240211384 | 0.273848903 | 0.461505803 | 0.107911575 |
| 0.17009746  | 0.295390105 | 0.107528017 | 0.306596163 |
| 0.26322429  | 0.428553908 | 0.021900614 | 0.346616014 |
| 0.006974775 | 0.378832233 | 0.302781192 | 0.239880828 |
| 0.033490649 | 0.024018015 | 0.129862656 | 0.364539095 |
| 0.427382234 | 0.413528703 | 0.4124866   | 0.409617077 |

|             |             |             |             |
|-------------|-------------|-------------|-------------|
| 0.152798317 | 0.235541785 | 0.308267285 | 0.164908293 |
| 0.424298812 | 0.21027818  | 0.107589785 | 0.364661609 |
| 0.414537382 | 0.479400102 | 0.158554481 | 0.198355739 |
| 0.439774755 | 0.450829612 | 0.402286455 | 0.389710255 |
| 0.297903366 | 0.029327369 | 0.431198422 | 0.431775097 |
| 0.423529027 | 0.227994184 | 0.118313582 | 0.439388283 |
| 0.050063576 | 0.373056294 | 0.340554952 | 0.134869398 |
| 0.429781556 | 0.022581167 | 0.156091041 | 0.390960473 |
| 0.182483017 | 0.424717798 | 0.460506444 | 0.198546425 |
| 0.339581055 | 0.018518347 | 0.094843074 | 0.023865087 |
| 0.327888049 | 0.088081086 | 0.488812365 | 0.441393592 |
| 0.295890703 | 0.330134699 | 0.287478098 | 0.000695201 |
| 0.018434922 | 0.134662923 | 0.417051738 | 0.344099887 |
| 0.407105635 | 0.356968493 | 0.215243322 | 0.427269669 |
| 0.387822144 | 0.410501868 | 0.09842654  | 0.107867695 |
| 0.407611164 | 0.13455772  | 0.215161656 | 0.418369789 |
| 0.254323797 | 0.140532164 | 0.126912728 | 0.438525209 |
| 0.437658109 | 0.087406576 | 0.364180287 | 0.365393006 |
| 0.359657674 | 0.278116392 | 0.10792674  | 0.289147074 |
| 0.067041508 | 0.444020157 | 0.016775859 | 0.362497345 |
| 0.232795217 | 0.109265417 | 0.010141177 | 0.336734606 |
| 0.328584886 | 0.434103206 | 0.464442859 | 0.096871401 |
| 0.327711797 | 0.352899009 | 0.392352252 | 0.435083066 |
| 0.014237059 | 0.041521493 | 0.35915596  | 0.44291199  |
| 0.400368774 | 0.408981399 | 0.280216411 | 0.240311337 |
| 0.229768469 | 0.408152294 | 0.001893807 | 0.488711645 |
| 0.47511156  | 0.377108532 | 0.379156116 | 0.352759856 |
| 0.315900652 | 0.432504281 | 0.043489022 | 0.376912445 |
| 0.39927561  | 0.072721104 | 0.419222732 | 0.133018857 |
| 0.43011827  | 0.036321005 | 0.38491983  | 0.377073621 |
| 0.397992959 | 0.008875362 | 0.329978989 | 0.409242039 |
| 0.015055748 | 0.161373974 | 0.409123869 | 0.396384248 |
| 0.367945768 | 0.390822527 | 0.414754356 | 0.296999661 |
| 0.381057385 | 0.254874843 | 0.009071463 | 0.242542265 |
| 0.393372668 | 0.344183853 | 0.446055372 | 0.265499549 |
| 0.394375176 | 0.445979654 | 0.398261131 | 0.236037199 |
| 0.048131786 | 0.365189671 | 0.029460698 | 0.290538503 |
| 0.382873752 | 0.150158027 | 0.351441816 | 0.109790748 |
| 0.05076076  | 0.459864555 | 0.111371245 | 0.177357989 |
| 0.07436561  | 0.426825246 | 0.256171913 | 0.286903322 |
| 0.206836952 | 0.141861191 | 0.290977143 | 0.346656127 |
| 0.061342841 | 0.08628217  | 0.006357313 | 0.355238362 |
| 0.154103349 | 0.355889905 | 0.376470208 | 0.433825322 |
| 0.357380287 | 0.118184542 | 0.344360771 | 0.208070634 |
| 0.080937564 | 0.011389013 | 0.462101943 | 0.367750109 |
| 0.411119938 | 0.160269788 | 0.031130223 | 0.353648579 |
| 0.442830626 | 0.409753383 | 0.353629885 | 0.449822611 |
| 0.023923633 | 0.412994963 | 0.255335998 | 0.099408593 |
| 0.323281372 | 0.256169463 | 0.422271145 | 0.076836561 |
| 0.40919804  | 0.461427978 | 0.259107034 | 0.155334992 |
| 0.432323746 | 0.410126376 | 0.038413066 | 0.416710618 |
| 0.425416955 | 0.027760104 | 0.462904425 | 0.089798648 |
| 0.014634255 | 0.371229393 | 0.406318023 | 0.05869984  |
| 0.056929283 | 0.356768975 | 0.081379399 | 0.239109338 |



|             |             |             |             |
|-------------|-------------|-------------|-------------|
| 0.460984774 | 0.365208212 | 0.437551342 | 0.143881232 |
| 0.04501613  | 0.012627343 | 0.143426564 | 0.326775074 |
| 0.499915837 | 0.434256164 | 0.225870969 | 0.31400129  |
| 0.231480907 | 0.283721668 | 0.234391138 | 0.437213456 |
| 0.136099534 | 0.478123794 | 0.00521218  | 0.381544337 |
| 0.486153947 | 0.39126996  | 0.060715402 | 0.369010722 |
| 0.442601716 | 0.048544591 | 0.203224521 | 0.473377304 |
| 0.429967334 | 0.294993839 | 0.318123547 | 0.382831684 |
| 0.026556177 | 0.06102872  | 0.327626809 | 0.115115149 |
| 0.378760235 | 0.189764348 | 0.025287398 | 0.374080902 |
| 0.047325713 | 0.447898427 | 0.406378343 | 0.050999504 |
| 0.418750657 | 0.354340381 | 0.311342913 | 0.035894058 |
| 0.386102721 | 0.436976111 | 0.498689882 | 0.179413017 |
| 0.410838921 | 0.425514298 | 0.339269869 | 0.056931544 |
| 0.010485126 | 0.472131947 | 0.416588765 | 0.026821268 |
| 0.424801651 | 0.357156443 | 0.017597085 | 0.46913222  |
| 0.18863769  | 0.459590261 | 0.006283053 | 0.051680176 |
| 0.022094884 | 0.390185787 | 0.470710229 | 0.41551777  |
| 0.363332592 | 0.346906292 | 0.002326488 | 0.442540021 |
| 0.470212126 | 0.008196672 | 0.092889943 | 0.418916246 |
| 0.375332814 | 0.495706199 | 0.241881057 | 0.401331077 |
| 0.371648616 | 0.471562492 | 0.27713545  | 0.227538149 |
| 0.442908781 | 0.429232804 | 0.426859176 | 0.439419864 |
| 0.436277734 | 0.358705098 | 0.276796144 | 0.019915495 |
| 0.094817664 | 0.307990564 | 0.33616721  | 0.080264781 |
| 0.403519489 | 0.111381565 | 0.424118538 | 0.415027695 |
| 0.414474279 | 0.003112727 | 0.207013169 | 0.427537083 |
| 0.446195681 | 0.432991907 | 0.013201925 | 0.004492901 |
| 0.00504406  | 0.012088613 | 0.393049308 | 0.184577398 |
| 0.422237561 | 0.342467332 | 0.004255418 | 0.071945169 |
| 0.277961009 | 0.319906071 | 0.471773805 | 0.355487559 |
| 0.38654336  | 0.068562664 | 0.340173364 | 0.377195518 |
| 0.048090771 | 0.377405362 | 0.422825989 | 0.474061826 |
| 0.027167532 | 0.191741492 | 0.363747287 | 0.436855361 |
| 0.038850925 | 0.263077596 | 0.389176034 | 0.325958121 |
| 0.007782842 | 0.056826966 | 0.048777227 | 0.385900385 |
| 0.472251373 | 0.075872419 | 0.03006915  | 0.214877442 |
| 0.141906778 | 0.417860673 | 0.1641749   | 0.426200935 |
| 0.441049948 | 0.404953127 | 0.04731306  | 0.466115699 |
| 0.036937287 | 0.471655456 | 0.259689004 | 0.079061464 |
| 0.233991084 | 0.009511371 | 0.413340118 | 0.136947128 |
| 0.397808486 | 0.413107495 | 0.149927295 | 0.009028171 |
| 0.114166094 | 0.04002955  | 0.423168446 | 0.39348144  |
| 0.017781016 | 0.252393795 | 0.244091442 | 0.369047418 |
| 0.370005472 | 0.416919342 | 0.494313365 | 0.414097513 |
| 0.111402448 | 0.084981429 | 0.41459539  | 0.417155188 |
| 0.30951918  | 0.411558681 | 0.276388935 | 0.45231118  |
| 0.417454631 | 0.419954744 | 0.419556263 | 0.356012769 |
| 0.172189037 | 0.422032799 | 0.433832717 | 0.031936202 |
| 0.33582918  | 0.425668424 | 0.367595552 | 0.122661211 |
| 0.225183844 | 0.307738366 | 0.048556606 | 0.192260094 |
| 0.247069475 | 0.407612918 | 0.152898612 | 0.396381114 |
| 0.404971326 | 0.422933849 | 0.052030318 | 0.047089789 |
| 0.492828574 | 0.419860053 | 0.181715644 | 0.430785113 |

|             |             |             |             |
|-------------|-------------|-------------|-------------|
| 0.137144221 | 0.308808562 | 0.396405136 | 0.383100791 |
| 0.329118542 | 0.435610779 | 0.438900556 | 0.445753584 |
| 1           | 0.263077371 | 0.496836282 | 0.149389489 |
| 0.059534137 | 0.386177478 | 0.10588628  | 0.065947233 |
| 0.137912891 | 0.018007304 | 0.222358547 | 0.375617051 |
| 0.305129396 | 0.360014063 | 0.374086871 | 0.068543764 |
| 0.258445018 | 0.346021965 | 0.313074745 | 0.25722656  |
| 0.081933358 | 0.484394393 | 0.007123322 | 0.043215229 |
| 0.316021381 | 0.415813087 | 0.315368386 | 0.194125333 |
| 0.220565819 | 0.092146263 | 0.274504713 | 0.39325163  |
| 0.392132468 | 0.316008409 | 0.420777007 | 0.040761311 |
| 0.027786602 | 0.419388445 | 0.392646378 | 0.010867281 |
| 0.063985726 | 0.394726873 | 0.265016303 | 0.238512082 |
| 0.011401441 | 0.416022274 | 0.412540194 | 0.36629203  |
| 0.375474518 | 0.057669948 | 0.399552762 | 0.088638491 |
| 0.055678493 | 0.444460723 | 0.319090181 | 0.467670179 |
| 0.270941194 | 0.389933851 | 0.461910447 | 0.432119762 |
| 0.098493205 | 0.32500962  | 0.033867231 | 0.427552495 |
| 0.368967562 |             |             |             |
| TM6SF1      | 0.229509266 | 0.313583115 | 0.140531585 |
| 0.369611107 | 0.206874284 | 0.196275501 | 0.263812364 |
| 0.190068027 | 0.196700266 | 0.045049244 | 0.068847843 |
| 0.184447597 | 0.127156946 | 0.171447631 | 0.140604143 |
| 0.383320836 | 0.146335143 | 0.16155818  | 0.276712852 |
| 0.342322242 | 0.206009545 | 0.344107094 | 0.264364838 |
| 0.142256978 | 0.129649451 | 0.191780351 | 0.154894107 |
| 0.386685227 | 0.203469881 | 0.13748321  | 0.311695633 |
| 0.155476706 | 0.280445005 | 0.263828074 | 0.241399874 |
| 0.238461366 | 0.191498267 | 0.032079007 | 0.171632    |
| 0.277969186 | 0.283518671 | 0.356586901 | 0.305560963 |
| 0.193624731 | 0.241820536 | 0.280421626 | 0.216176068 |
| 0.147840277 | 0.113882488 | 0.134221571 | 0.245373545 |
| 0.222820135 | 0.185607056 | 0.231989934 | 0.262301684 |
| 0.090198837 | 0.127692344 | 0.066826647 | 0.205504922 |
| 0.26667424  | 0.128894503 | 0.240316218 | 0.213476811 |
| 0.145526158 | 0.230948648 | 0.147540424 | 0.231886891 |
| 0.116571722 | 0.250494623 | 0.139458899 | 0.139220216 |
| 0.016481625 | 0.359339306 | 0.224898744 | 0.092753618 |
| 0.15312069  | 0.082119806 | 0.166367991 | 0.309974933 |
| 0.369809448 | 0.244518453 | 0.337868171 | 0.31156205  |
| 0.140069636 | 0.209167704 | 0.133579436 | 0.232747469 |
| 0.284853913 | 0.236685847 | 0.144880909 | 0.364079004 |
| 0.332892046 | 0.274256042 | 0.196159621 | 0.205072183 |
| 0.276038209 | 0.301693241 | 0.144130835 | 0.166669603 |
| 0.116037869 | 0.098853285 | 0.24511644  | 0.313510457 |
| 0.241278431 | 0.095842294 | 0.190147746 | 0.317644664 |
| 0.194731936 | 0.117836059 | 0.353384322 | 0.093525769 |
| 0.37890488  | 0.151219748 | 0.174410348 | 0.2512351   |
| 0.22125511  | 0.273226016 | 0.263962289 | 0.278157214 |
| 0.163652274 | 0.077534463 | 0.076357972 | 0.133541436 |
| 0.147781211 | 0.052964934 | 0.213953946 | 0.339072063 |
| 0.173411602 | 0.159247492 | 0.273451364 | 0.038768132 |
| 0.100498153 | 0.154774186 | 0.226767797 | 0.166892376 |
| 0.308466238 | 0.17948963  | 0.200325565 | 0.212984418 |

|             |             |             |             |
|-------------|-------------|-------------|-------------|
| 0.180406116 | 0.333830361 | 0.026134939 | 0.279604258 |
| 0.201508111 | 0.167462758 | 0.297433161 | 0.191331661 |
| 0.183445764 | 0.26276646  | 0.249667335 | 0.344489938 |
| 0.268621747 | 0.236448951 | 0.132633515 | 0.35013994  |
| 0.160934606 | 0.181960015 | 0.251657127 | 0.191722451 |
| 0.206685064 | 0.225447293 | 0.085968837 | 0.168433908 |
| 0.098216893 | 0.097454001 | 0.08558477  | 0.193761321 |
| 0.157832319 | 0.247293987 | 0.200382619 | 0.241825916 |
| 0.199686259 | 0.288039939 | 0.146171543 | 0.226577746 |
| 0.06407565  | 0.16393187  | 0.098611063 | 0.312239203 |
| 0.160340649 | 0.307756765 | 0.23158868  | 0.199590158 |
| 0.235541173 | 0.355269309 | 0.005843996 | 0.247021707 |
| 0.271339987 | 0.088948619 | 0.21673006  | 0.218726855 |
| 0.114943992 | 0.352283009 | 0.012991263 | 0.334275108 |
| 0.171029339 | 0.236195635 | 0.364189255 | 0.200214061 |
| 0.242747722 | 0.159530033 | 0.17796686  | 0.234609814 |
| 0.178318824 | 0.036471715 | 0.15497564  | 0.346974554 |
| 0.084573573 | 0.209193737 | 0.291126321 | 0.330746794 |
| 0.257449594 | 0.312808494 | 0.384707608 | 0.10645304  |
| 0.194564381 | 0.252119534 | 0.088193436 | 0.181560484 |
| 0.264860608 | 0.09990952  | 0.265369502 | 0.262049122 |
| 0.124709412 | 0.292622845 | 0.201343896 | 0.105814746 |
| 0.203454255 | 0.215707222 | 0.073243828 | 0.205374752 |
| 0.209454231 | 0.192082357 | 0.131008036 | 0.145902398 |
| 0.140410987 | 0.32365888  | 0.092139564 | 0.07668967  |
| 0.054986303 | 0.180034974 | 0.272617675 | 0.127743356 |
| 0.093873305 | 0.251959458 | 0.148191509 | 0.176868924 |
| 0.182566272 | 0.188266555 | 0.047768536 | 0.072436932 |
| 0.080931154 | 0.092856671 | 0.08489409  | 0.205516731 |
| 0.147959868 | 0.122505517 | 0.167253562 | 0.139302893 |
| 0.161014088 | 0.10089386  | 0.306059595 | 0.338365959 |
| 0.186543933 | 0.288930222 | 0.147763199 | 0.07001193  |
| 0.332104582 | 0.117931274 | 0.095886998 | 0.30582806  |
| 0.112394593 | 0.339120922 | 0.167627118 | 0.187584402 |
| 0.111775162 | 0.233373693 | 0.392873081 | 0.0807046   |
| 0.197382379 | 0.279651506 | 0.233225983 | 0.208818123 |
| 0.215994673 | 0.303765093 | 0.166087712 | 0.216126355 |
| 0.197846631 | 0.139891044 | 0.292400972 | 0.133366574 |
| 0.109316275 | 0.248992434 | 0.223270576 | 0.187601651 |
| 0.16838385  | 0.174369946 | 0.18701465  | 0.277381227 |
| 0.322133413 | 0.357108289 | 0.249425491 | 0.129575507 |
| 0.174871167 | 0.032265508 | 0.149867265 | 0.140928351 |
| 0.24557746  | 0.275764209 | 0.245376953 | 0.133732306 |
| 0.310538143 | 0.148859406 | 0.130479641 | 0.307314981 |
| 0.115335234 | 0.272725558 | 0.075992571 | 0.243635682 |
| 0.23459984  | 0.123483551 | 0.14402507  | 0.236867326 |
| 0.232379927 | 0.21534672  | 0.247743087 | 0.262533425 |
| 0.30432022  | 0.199619559 | 0.156984993 | 0.250345288 |
| 0.136216156 | 0.213525185 | 0.218148856 | 0.084692671 |
| 0.164127087 | 0.261731639 | 0.020549353 | 0.180654611 |
| 0.153959053 | 0.271139219 | 0.333288672 | 0.175615956 |
| 0.151872234 | 0.165323706 | 0.272219299 | 0.185456363 |
| 0.243125861 | 0.254365713 | 0.267447919 | 0.266371389 |
| 0.234274334 | 0.266244502 | 0.125178774 | 0.172264853 |

|             |             |             |             |
|-------------|-------------|-------------|-------------|
| 0.085043869 | 0.250979025 | 0.249271534 | 0.076981087 |
| 0.361474752 | 0.102681453 | 0.056944109 | 0.311733197 |
| 0.286695642 | 0.198580968 | 0.030956466 | 0.035282676 |
| 0.093802003 | 0.322231334 | 0.247790228 | 0.313474808 |
| 0.088163641 | 0.296747212 | 0.015363082 | 0.297138919 |
| 0.271305987 | 0.068269271 | 0.133728724 | 0.217853056 |
| 0.186654211 | 0.308466503 | 0.108462318 | 0.252047816 |
| 0.152682377 | 0.239976688 | 0.199610059 | 0.264485203 |
| 0.295082904 | 0.234485313 | 0.299928677 | 0.285128565 |
| 0.338660348 | 0.282151148 | 0.327981171 | 0.133505269 |
| 0.132357252 | 0.185424103 | 0.087300878 | 0.134394578 |
| 0.18299302  | 0.180323455 | 0.280911422 | 0.351831846 |
| 0.277544467 | 0.058551179 | 0.229533923 | 0.230780803 |
| 0.336804476 | 0.375720955 | 0.079976863 | 0.017713492 |
| 0.007835291 | 0.04685452  | 0.2738271   | 0.198198568 |
| 0.298396041 | 0.072511979 | 0.066395547 | 0.180100558 |
| 0.217227534 | 0.198875745 | 0.274620674 | 0.387293095 |
| 0.256750891 | 0.205330733 | 0.112208968 | 0.378832099 |
| 0.130791986 | 0.151775432 | 0.300525347 | 0.280313164 |
| 0.128371176 | 0.211498948 | 0.132559213 | 0.372277303 |
| 0.021470663 | 0.249863448 | 0.197170421 | 0.17604582  |
| 0.048935873 | 0.154742215 | 0.16847395  | 0.343632641 |
| 0.224326854 | 0.107214736 | 0.086171108 | 0.061569375 |
| 0.206224807 | 0.323241557 | 0.203193554 | 0.348002484 |
| 0.331478958 | 0.393130208 | 0.115084469 | 0.274938128 |
| 0.138577132 | 0.238315956 | 0.130799914 | 0.047993575 |
| 0.179391617 | 0.100787966 | 0.229767091 | 0.081484064 |
| 0.147585148 | 0.261835679 | 0.143430375 | 0.073506441 |
| 0.069438455 | 0.14447283  | 0.358351954 | 0.307282184 |
| 0.085323652 | 0.288751292 | 0.215133227 | 0.286576862 |
| 0.197514633 | 0.32764273  | 0.256770064 | 0.108500272 |
| 0.246883897 | 0.053776903 | 0.331666717 | 0.195121431 |
| 0.183271796 | 0.346260169 | 0.161757658 | 0.309330028 |
| 0.249796659 | 0.302868858 | 0.265508885 | 0.275665743 |
| 0.111916354 | 0.190459965 | 0.259895226 | 0.093173136 |
| 0.270816369 | 0.333897473 | 0.191339159 | 0.138250774 |
| 0.197088595 | 0.122847493 | 0.197294468 | 0.064197166 |
| 0.077779473 | 0.195923486 | 0.221057131 | 0.395694854 |
| 0.227344454 | 0.207245758 | 0.155490795 | 0.164581288 |
| 0.312160535 | 0.274540718 | 0.212143919 | 0.275363942 |
| 0.221754988 | 0.250078534 | 0.269762738 | 0.264076797 |
| 0.140812351 | 0.259297021 | 0.303823995 | 0.232001755 |
| 0.263077371 | 1           | 0.275252562 | 0.123414834 |
| 0.109061969 | 0.163062907 | 0.170178193 | 0.171656671 |
| 0.242581859 | 0.118365115 | 0.069908582 | 0.326983781 |
| 0.077028158 | 0.298735866 | 0.119118258 | 0.181411942 |
| 0.206970429 | 0.113663599 | 0.276966035 | 0.223100498 |
| 0.173619068 | 0.259484846 | 0.053722631 | 0.161225913 |
| 0.084022948 | 0.264250236 | 0.12564848  | 0.213641139 |
| 0.10094458  | 0.138643932 | 0.251454419 | 0.13844945  |
| 0.087457849 | 0.103604882 | 0.259994871 | 0.14984796  |
| 0.143772047 | 0.357217691 | 0.130499946 | 0.073317209 |
| 0.132182877 | 0.187532802 | 0.170262088 | 0.211813246 |
| 0.07475052  | 0.245289543 | 0.121666355 | 0.193925773 |

|             |             |             |             |
|-------------|-------------|-------------|-------------|
| 0.267438798 | 0.204995533 | 0.201718881 | 0.13264136  |
| 0.20300186  | 0.243166252 | 0.156288279 | 0.253635133 |
| 0.143478846 | 0.372796078 | 0.221497173 | 0.243022301 |
| 0.119686703 | 0.112494444 | 0.183722348 | 0.338353707 |
| 0.083820945 |             |             |             |
| TMEM108     | 0.495504162 | 0.530193239 | 0.45374966  |
| 0.473682137 | 0.468610339 | 0.465406793 | 0.226080908 |
| 0.212031031 | 0.088818121 | 0.004562839 | 0.022435638 |
| 0.497117402 | 0.225871462 | 0.309115318 | 0.410289971 |
| 0.453386993 | 0.129153348 | 0.389220426 | 0.246110175 |
| 0.454345029 | 0.101204538 | 0.429256223 | 0.088304254 |
| 0.30312426  | 0.101150013 | 0.063798284 | 0.288580563 |
| 0.491638477 | 0.07397279  | 0.416103247 | 0.449139233 |
| 0.089472595 | 0.507640743 | 0.518843179 | 0.488007416 |
| 0.516759334 | 0.488418762 | 0.009533691 | 0.358281403 |
| 0.498044376 | 0.508862738 | 0.455520708 | 0.353359382 |
| 0.03883619  | 0.496790439 | 0.263018544 | 0.43293654  |
| 0.27749438  | 0.027004586 | 0.303998464 | 0.485024543 |
| 0.503795115 | 0.517198539 | 0.255957053 | 0.169799199 |
| 0.242402036 | 0.282962176 | 0.319696036 | 0.407152179 |
| 0.236101573 | 0.20110226  | 0.516568976 | 0.096333905 |
| 0.167433279 | 0.273297123 | 0.141685153 | 0.286622147 |
| 0.385679224 | 0.475090399 | 0.01469951  | 0.482056497 |
| 0.002931226 | 0.424068553 | 0.397060862 | 0.370253306 |
| 0.03502416  | 0.018409484 | 0.167941097 | 0.378728936 |
| 0.507501919 | 0.500502534 | 0.523864474 | 0.529914496 |
| 0.182514332 | 0.29442306  | 0.439656127 | 0.172030607 |
| 0.51602481  | 0.193016437 | 0.112131257 | 0.453716003 |
| 0.528303453 | 0.527105144 | 0.199751547 | 0.2620967   |
| 0.515443977 | 0.519430698 | 0.501899633 | 0.482880519 |
| 0.412287103 | 0.043820402 | 0.513686872 | 0.535985159 |
| 0.48864233  | 0.349391657 | 0.146558468 | 0.480321275 |
| 0.050646042 | 0.436010272 | 0.380377664 | 0.159737717 |
| 0.510129836 | 0.016347907 | 0.207903738 | 0.405900755 |
| 0.212860272 | 0.51811145  | 0.526015598 | 0.192551998 |
| 0.441109792 | 0.016674383 | 0.15253089  | 0.026347142 |
| 0.364697738 | 0.153194752 | 0.508530251 | 0.519361738 |
| 0.26339299  | 0.418636312 | 0.283410929 | 0.000128063 |
| 0.021293954 | 0.179101259 | 0.520533686 | 0.402001238 |
| 0.491431652 | 0.477683907 | 0.252548767 | 0.489009334 |
| 0.520552442 | 0.522447518 | 0.08596774  | 0.092715501 |
| 0.484394197 | 0.176067869 | 0.239597123 | 0.513825591 |
| 0.327537919 | 0.115857702 | 0.122037427 | 0.533818175 |
| 0.486267667 | 0.078997368 | 0.394991035 | 0.447891451 |
| 0.39219857  | 0.378783142 | 0.100232979 | 0.29860148  |
| 0.047418039 | 0.507470203 | 0.022162639 | 0.3815648   |
| 0.333551395 | 0.145299422 | 0.008384963 | 0.301147991 |
| 0.340410212 | 0.527963039 | 0.494332995 | 0.097693378 |
| 0.34686414  | 0.443262921 | 0.390013589 | 0.516170711 |
| 0.010192934 | 0.040127594 | 0.355466681 | 0.536014889 |
| 0.377300024 | 0.527352779 | 0.313880284 | 0.314602669 |
| 0.287463605 | 0.50207197  | 0.003171835 | 0.503768778 |
| 0.524992689 | 0.385529974 | 0.448912001 | 0.458118398 |
| 0.444543301 | 0.512636649 | 0.052040798 | 0.451415593 |

|             |             |             |             |
|-------------|-------------|-------------|-------------|
| 0.452756945 | 0.070488662 | 0.524917516 | 0.156258867 |
| 0.512491862 | 0.035870747 | 0.369822711 | 0.515011807 |
| 0.521438643 | 0.007336468 | 0.281521536 | 0.441197959 |
| 0.020895685 | 0.110406033 | 0.492129624 | 0.45891333  |
| 0.436874822 | 0.500365692 | 0.510653472 | 0.427468373 |
| 0.476155541 | 0.245505443 | 0.009011309 | 0.32994491  |
| 0.507924116 | 0.457009438 | 0.50181343  | 0.259010891 |
| 0.434085523 | 0.525381767 | 0.517941741 | 0.265355657 |
| 0.039204583 | 0.35475879  | 0.020972633 | 0.36442581  |
| 0.494689492 | 0.126387712 | 0.472603627 | 0.136253321 |
| 0.062111859 | 0.536826951 | 0.17957218  | 0.29012644  |
| 0.132275355 | 0.477158487 | 0.261544172 | 0.282652386 |
| 0.24562663  | 0.160478766 | 0.398476295 | 0.43268648  |
| 0.037123152 | 0.087896695 | 0.010382849 | 0.456694353 |
| 0.159765993 | 0.411685066 | 0.420173739 | 0.502219564 |
| 0.367980131 | 0.113825658 | 0.425724954 | 0.309635106 |
| 0.107294195 | 0.01095942  | 0.531678779 | 0.440381884 |
| 0.436734908 | 0.15540638  | 0.033254141 | 0.425690142 |
| 0.52587907  | 0.426256225 | 0.349457534 | 0.521442676 |
| 0.02358166  | 0.523120673 | 0.276708945 | 0.116711637 |
| 0.426408791 | 0.274729773 | 0.504193852 | 0.07058063  |
| 0.459127232 | 0.516020892 | 0.320408346 | 0.189434587 |
| 0.488379143 | 0.469451296 | 0.027222246 | 0.501715877 |
| 0.499166968 | 0.025888119 | 0.533732876 | 0.117570583 |
| 0.015644553 | 0.492549894 | 0.52588887  | 0.066535979 |
| 0.069525405 | 0.388715729 | 0.04898032  | 0.297673856 |
| 0.536187024 | 0.445506729 | 0.524364837 | 0.219128958 |
| 0.036571048 | 0.009222998 | 0.202037542 | 0.454023882 |
| 0.517729846 | 0.531901556 | 0.260735585 | 0.410791273 |
| 0.245597203 | 0.381222089 | 0.17654864  | 0.537474978 |
| 0.194688005 | 0.516533331 | 0.004201878 | 0.512563133 |
| 0.518722372 | 0.361815464 | 0.075319004 | 0.360086548 |
| 0.492930616 | 0.041648057 | 0.205204783 | 0.520742606 |
| 0.518388597 | 0.368804707 | 0.411320936 | 0.476494869 |
| 0.014959701 | 0.040039529 | 0.435282841 | 0.192348092 |
| 0.450451787 | 0.219017436 | 0.052394021 | 0.380006396 |
| 0.040010705 | 0.515725755 | 0.503658547 | 0.057535556 |
| 0.43778564  | 0.368163878 | 0.400381491 | 0.031405764 |
| 0.521961051 | 0.517404118 | 0.518653582 | 0.1648942   |
| 0.518027269 | 0.533725365 | 0.483927668 | 0.068640385 |
| 0.012683582 | 0.516369541 | 0.480426253 | 0.022016603 |
| 0.515571894 | 0.31306809  | 0.01174138  | 0.52444127  |
| 0.186620262 | 0.468938168 | 0.004456132 | 0.089884341 |
| 0.03240863  | 0.504586774 | 0.506874129 | 0.442985851 |
| 0.339860772 | 0.397345619 | 0.004167    | 0.530559874 |
| 0.524439242 | 0.010496552 | 0.133862795 | 0.531370158 |
| 0.513924929 | 0.523029386 | 0.36273811  | 0.528360002 |
| 0.502637615 | 0.514325394 | 0.267047025 | 0.276118518 |
| 0.523932633 | 0.516110131 | 0.495691348 | 0.510942748 |
| 0.518663078 | 0.463966709 | 0.297119917 | 0.013417564 |
| 0.147875159 | 0.254223522 | 0.40879623  | 0.090284795 |
| 0.41137642  | 0.140946275 | 0.524585335 | 0.515250069 |
| 0.534287333 | 0.002726805 | 0.16670419  | 0.528078512 |
| 0.506081868 | 0.514493416 | 0.016331777 | 0.00588037  |

|             |             |             |             |
|-------------|-------------|-------------|-------------|
| 0.007714549 | 0.017333439 | 0.410033305 | 0.242259212 |
| 0.533678249 | 0.329184171 | 0.002595296 | 0.044544198 |
| 0.308561367 | 0.444983312 | 0.527895378 | 0.409328289 |
| 0.509943456 | 0.071546391 | 0.356654441 | 0.435415131 |
| 0.063565548 | 0.430145086 | 0.535899438 | 0.512387215 |
| 0.032777642 | 0.250143138 | 0.427824705 | 0.523315459 |
| 0.078738352 | 0.32630295  | 0.501856772 | 0.362110754 |
| 0.010040686 | 0.07308379  | 0.059802591 | 0.483065634 |
| 0.50860267  | 0.078327436 | 0.030100978 | 0.187914521 |
| 0.126046845 | 0.521029185 | 0.170534137 | 0.53256816  |
| 0.512987106 | 0.481276902 | 0.064977391 | 0.515015463 |
| 0.035979892 | 0.512304641 | 0.370600678 | 0.076010343 |
| 0.294026751 | 0.008761204 | 0.513639726 | 0.191779445 |
| 0.388082248 | 0.467374682 | 0.222981822 | 0.011968936 |
| 0.20059094  | 0.044999302 | 0.521755195 | 0.514308925 |
| 0.025837134 | 0.250929781 | 0.306684112 | 0.446434671 |
| 0.343933179 | 0.493634928 | 0.509099675 | 0.511665503 |
| 0.086006012 | 0.142879624 | 0.463709733 | 0.485925552 |
| 0.27146685  | 0.522435883 | 0.343092522 | 0.532344871 |
| 0.493933317 | 0.516103413 | 0.531016869 | 0.396296038 |
| 0.243255886 | 0.480687829 | 0.45538419  | 0.020091934 |
| 0.382975372 | 0.517747891 | 0.405913428 | 0.163382136 |
| 0.272158424 | 0.450241737 | 0.041776491 | 0.216074294 |
| 0.386216984 | 0.389329104 | 0.145466388 | 0.47893887  |
| 0.456890629 | 0.491265761 | 0.03635515  | 0.056918771 |
| 0.529673311 | 0.504739045 | 0.162929467 | 0.502753967 |
| 0.162411843 | 0.377287488 | 0.515838104 | 0.506208026 |
| 0.430584967 | 0.53215973  | 0.500012566 | 0.477625651 |
| 0.496836282 | 0.275252562 | 1           | 0.104405966 |
| 0.08379897  | 0.494591729 | 0.099450757 | 0.081590353 |
| 0.139808246 | 0.02144727  | 0.354669138 | 0.463120942 |
| 0.445233308 | 0.418206678 | 0.383448444 | 0.077132428 |
| 0.334638578 | 0.431995611 | 0.377344155 | 0.226970965 |
| 0.077612544 | 0.517285834 | 0.007234765 | 0.047164046 |
| 0.444737956 | 0.525973541 | 0.442140051 | 0.242900636 |
| 0.332925303 | 0.129176584 | 0.313664551 | 0.368568207 |
| 0.413563266 | 0.420981632 | 0.52848302  | 0.032578627 |
| 0.01658076  | 0.522610339 | 0.450503843 | 0.015303731 |
| 0.080404244 | 0.468988273 | 0.308421563 | 0.266369736 |
| 0.01628048  | 0.527589456 | 0.427135255 | 0.477407588 |
| 0.392549757 | 0.056898994 | 0.449155412 | 0.089960523 |
| 0.053368261 | 0.500434743 | 0.449343539 | 0.521394144 |
| 0.374597147 | 0.463144245 | 0.471049538 | 0.525040733 |
| 0.121207107 | 0.454599306 | 0.024418302 | 0.506737455 |
| 0.497338308 |             |             |             |
| TMEM111     | 0.101775948 | 0.116788863 | 0.039896612 |
| 0.148790226 | 0.052549523 | 0.126440905 | 0.147955829 |
| 0.19580757  | 0.014895006 | 0.012807717 | 0.000992404 |
| 0.05734339  | 0.006654902 | 0.077137026 | 0.031927482 |
| 0.122018538 | 0.010994949 | 0.086982345 | 0.136416145 |
| 0.161711071 | 0.134399844 | 0.087777506 | 0.066755291 |
| 0.009545558 | 0.006954049 | 0.021330324 | 0.011186536 |
| 0.18176878  | 0.02837795  | 0.104093176 | 0.22794074  |
| 0.018322661 | 0.135986879 | 0.105176164 | 0.049699677 |

|             |             |             |             |
|-------------|-------------|-------------|-------------|
| 0.086687137 | 0.092107298 | 0.017210107 | 0.048390713 |
| 0.168348056 | 0.074502063 | 0.168044892 | 0.123058356 |
| 0.03700199  | 0.129472906 | 0.122485816 | 0.052298134 |
| 0.044864832 | 0.007105615 | 0.172524785 | 0.145927174 |
| 0.084538946 | 0.042682811 | 0.18278616  | 0.091989668 |
| 0.002472631 | 0.122672566 | 0.001951793 | 0.24671441  |
| 0.106102891 | 0.192538341 | 0.083106077 | 0.023607247 |
| 0.013006408 | 0.187951109 | 0.013526947 | 0.189975431 |
| 0.009126632 | 0.190797616 | 0.050227367 | 0.040013915 |
| 0.009035234 | 0.189979222 | 0.063092893 | 0.005826737 |
| 0.028203108 | 0.005405946 | 0.021674009 | 0.142105087 |
| 0.157924971 | 0.112676903 | 0.090372578 | 0.078233672 |
| 0.009629674 | 0.059170459 | 0.022184268 | 0.040481956 |
| 0.131996868 | 0.091802563 | 0.049797786 | 0.095802887 |
| 0.089116646 | 0.091322288 | 0.013271895 | 0.039574878 |
| 0.09760028  | 0.141159624 | 0.05313141  | 0.038271019 |
| 0.009793299 | 0.004569642 | 0.098019066 | 0.092802402 |
| 0.161908161 | 0.010044346 | 0.026900182 | 0.208654555 |
| 0.039678391 | 0.039432496 | 0.128565958 | 0.01218439  |
| 0.160525974 | 0.026726289 | 0.022988531 | 0.115627133 |
| 0.03494328  | 0.123679174 | 0.0797395   | 0.1273072   |
| 0.049675709 | 0.008495407 | 0.001221296 | 0.021568307 |
| 0.022148982 | 0.001411464 | 0.094721492 | 0.127132214 |
| 0.098409632 | 0.01051826  | 0.132295544 | 0.00473421  |
| 0.008529527 | 0.012093242 | 0.082482734 | 0.107922397 |
| 0.130380438 | 0.072634228 | 0.02128222  | 0.139076929 |
| 0.038551448 | 0.086062987 | 0.0175169   | 0.089964774 |
| 0.092910958 | 0.014925441 | 0.09817115  | 0.0561721   |
| 0.031315312 | 0.160624487 | 0.070164426 | 0.111147744 |
| 0.179377446 | 0.076742373 | 0.099216868 | 0.114315957 |
| 0.01647593  | 0.030004712 | 0.087637914 | 0.057626109 |
| 0.05579839  | 0.073724931 | 0.006633299 | 0.187014163 |
| 0.003203621 | 0.002815185 | 0.034524397 | 0.236076103 |
| 0.029466648 | 0.073682818 | 0.086776354 | 0.083692104 |
| 0.073755327 | 0.065499129 | 0.168523204 | 0.07511227  |
| 0.002270538 | 0.032099708 | 0.143718485 | 0.102020007 |
| 0.2139402   | 0.097844958 | 0.06830701  | 0.029402242 |
| 0.053414186 | 0.124897096 | 0.001383608 | 0.112665478 |
| 0.086949066 | 0.138533101 | 0.058368124 | 0.071592398 |
| 0.01504751  | 0.128732167 | 0.015445401 | 0.114602091 |
| 0.154983953 | 0.075924904 | 0.109589148 | 0.031726512 |
| 0.104782129 | 0.020089149 | 0.100733102 | 0.04945758  |
| 0.043442634 | 0.007415851 | 0.202414649 | 0.185676535 |
| 0.004876775 | 0.102541087 | 0.135086787 | 0.12963087  |
| 0.069789966 | 0.096253914 | 0.123617013 | 0.011257412 |
| 0.054001721 | 0.177981728 | 0.011518709 | 0.0373336   |
| 0.091052399 | 0.004706703 | 0.144208646 | 0.092932345 |
| 0.141951033 | 0.12237621  | 0.069705186 | 0.005258031 |
| 0.051371794 | 0.15583105  | 0.053926531 | 0.04440118  |
| 0.083563516 | 0.031915693 | 0.027547729 | 0.017719002 |
| 0.013499085 | 0.10151651  | 0.005003009 | 0.005656182 |
| 0.001630835 | 0.064975133 | 0.165850342 | 0.022650813 |
| 0.00386451  | 0.026739844 | 0.014750288 | 0.025938219 |
| 0.081590885 | 0.029652421 | 0.003253638 | 0.010803782 |



|             |             |                      |             |
|-------------|-------------|----------------------|-------------|
| 0.003907678 | 0.017286885 | 0.022125374          | 0.109389288 |
| 0.04242478  | 0.012722883 | 0.041719878          | 0.009654491 |
| 0.013055185 | 0.017083529 | 0.114724614          | 0.133484467 |
| 0.188044302 | 0.068411088 | 0.027989212          | 0.00474373  |
| 0.113535284 | 0.101191396 | 0.118212671          | 0.125457911 |
| 0.027759397 | 0.099860717 | 0.013902512          | 0.025330504 |
| 0.013748345 | 0.082328856 | 0.148184028          | 0.010738305 |
| 0.132689662 | 0.12901381  | 0.082517374          | 0.021471947 |
| 0.13601094  | 0.139905176 | 0.024951958          | 0.118020074 |
| 0.122776774 | 0.023886751 | 0.095185358          | 0.008792743 |
| 0.017140331 | 0.061250956 | 0.047791248          | 0.03304906  |
| 0.020627256 | 0.047050029 | 0.112714688          | 0.060376789 |
| 0.107356025 | 0.094175355 | 0.074155773          | 0.011626431 |
| 0.03275621  | 0.001683368 | 0.016704212          | 0.04425418  |
| 0.107756809 | 0.078479954 | 0.091253521          | 0.020842696 |
| 0.129976012 | 0.011233259 | 0.054488944          | 0.090967134 |
| 0.013516564 | 0.110677907 | 0.017057253          | 0.050123085 |
| 0.084516367 | 0.182971913 | 0.010607494          | 0.145689308 |
| 0.153419074 | 0.050933661 | 0.120095939          | 0.105166495 |
| 0.119353834 | 0.030075601 | 0.021325594          | 0.100554072 |
| 0.053530833 | 0.035988091 | 0.049631046          | 0.003449899 |
| 0.025597627 | 0.039165639 | 8.52E-05 0.075687622 |             |
| 0.013148336 | 0.118348225 | 0.116664486          | 0.009942266 |
| 0.07239968  | 0.100315558 | 0.064547569          | 0.042684383 |
| 0.05310755  | 0.083412286 | 0.108232419          | 0.136144385 |
| 0.080910686 | 0.072638986 | 0.017822987          | 0.029064833 |
| 0.008924959 | 0.08589548  | 0.162550534          | 0.008355558 |
| 0.123845652 | 0.218064175 | 0.003695859          | 0.139006498 |
| 0.139629328 | 0.108635884 | 0.020026644          | 0.003651025 |
| 0.006391744 | 0.088901231 | 0.101280658          | 0.216598037 |
| 0.059557244 | 0.159189544 | 0.001003722          | 0.091908321 |
| 0.108121157 | 0.004142415 | 0.005174759          | 0.061717267 |
| 0.037772625 | 0.13360697  | 0.010133036          | 0.057035244 |
| 0.031192653 | 0.078847229 | 0.02328116           | 0.057360183 |
| 0.120249007 | 0.063496458 | 0.174869484          | 0.149178581 |
| 0.122551318 | 0.071347156 | 0.123729021          | 0.022921304 |
| 0.003244172 | 0.203115593 | 0.012301975          | 0.003029544 |
| 0.217030728 | 0.01166169  | 0.119036908          | 0.106592361 |
| 0.075651124 | 0.010722785 | 0.108543288          | 0.086736423 |
| 0.18836626  | 0.158642147 | 0.013722323          | 0.003799861 |
| 0.003613087 | 0.000485634 | 0.175455279          | 0.040411994 |
| 0.095443297 | 0.016020273 | 0.014466025          | 0.107717822 |
| 0.036389263 | 0.031442468 | 0.097370734          | 0.155615307 |
| 0.074708685 | 0.03665373  | 0.017591577          | 0.169873139 |
| 0.003559005 | 0.14895688  | 0.084028046          | 0.131653765 |
| 0.014805358 | 0.036141618 | 0.105361448          | 0.132796929 |
| 0.000384563 | 0.06436913  | 0.063350152          | 0.020190886 |
| 0.006135204 | 0.012373525 | 0.01057717           | 0.11113859  |
| 0.07598588  | 0.005337188 | 0.003892376          | 0.03386547  |
| 0.041365938 | 0.108628414 | 0.028642682          | 0.107414002 |
| 0.150382086 | 0.138523147 | 0.003850917          | 0.115359982 |
| 0.004268184 | 0.096620264 | 0.016745999          | 0.023602805 |
| 0.053072053 | 0.016012519 | 0.078687417          | 0.001137926 |
| 0.119054211 | 0.187536261 | 0.004175629          | 0.004774566 |

|             |             |             |             |
|-------------|-------------|-------------|-------------|
| 0.002239707 | 0.018469049 | 0.102297304 | 0.075081843 |
| 0.005432615 | 0.089714399 | 0.068054916 | 0.133739082 |
| 0.250183653 | 0.104445031 | 0.110962923 | 0.041682987 |
| 0.062244781 | 0.002426059 | 0.200477805 | 0.143942761 |
| 0.134279248 | 0.096580177 | 0.010113193 | 0.101237622 |
| 0.150961246 | 0.132170583 | 0.084839806 | 0.115772385 |
| 0.002463397 | 0.142046962 | 0.141516078 | 0.026770931 |
| 0.135813564 | 0.097150236 | 0.154143003 | 0.004726212 |
| 0.027819721 | 0.019883815 | 0.031297891 | 0.034701956 |
| 0.00968526  | 0.206324117 | 0.025311453 | 0.142369614 |
| 0.172160728 | 0.147983393 | 0.057649847 | 0.010074371 |
| 0.115134727 | 0.140124319 | 0.065474137 | 0.109215443 |
| 0.055356226 | 0.05136763  | 0.082605682 | 0.065450171 |
| 0.017537376 | 0.081653579 | 0.172539606 | 0.127573567 |
| 0.149389489 | 0.123414834 | 0.104405966 | 1           |
| 0.003969933 | 0.063532246 | 0.014933647 | 0.026092599 |
| 0.066524331 | 0.00842078  | 0.003753295 | 0.106494575 |
| 0.008494904 | 0.089029861 | 0.037507989 | 0.014615664 |
| 0.045639746 | 0.072157319 | 0.082239814 | 0.124341055 |
| 0.01665269  | 0.098328196 | 0.00401718  | 0.025407139 |
| 0.012041302 | 0.081528086 | 0.016624274 | 0.038955994 |
| 0.003749385 | 0.008183404 | 0.067235785 | 0.204795344 |
| 0.032359037 | 0.009804673 | 0.083688059 | 0.060669645 |
| 0.049403632 | 0.111781844 | 0.124541416 | 0.005353417 |
| 0.005197005 | 0.11078455  | 0.057672281 | 0.013816989 |
| 0.005004941 | 0.063362959 | 0.053368148 | 0.045456637 |
| 0.174355559 | 0.048437335 | 0.170668836 | 0.025408284 |
| 0.041042204 | 0.139979015 | 0.035634533 | 0.083121421 |
| 0.037416741 | 0.111327138 | 0.131612888 | 0.090980278 |
| 0.025609353 | 0.037762516 | 0.041934937 | 0.149565173 |
| 0.014577226 |             |             |             |
| TMEM184C    | 0.078223378 | 0.099565857 | 0.092324929 |
| 0.128002782 | 0.086910685 | 0.045995047 | 0.07249267  |
| 0.015731031 | 0.045590733 | 0.001787128 | 0.018346345 |
| 0.090645404 | 0.011156578 | 0.020970159 | 0.035158925 |
| 0.172747618 | 0.073382169 | 0.036894302 | 0.117695688 |
| 0.101328378 | 0.017936658 | 0.162198322 | 0.052212242 |
| 0.067790983 | 0.140383806 | 0.113178602 | 0.136889263 |
| 0.126579624 | 0.127639293 | 0.026357857 | 0.069362888 |
| 0.058575734 | 0.081187756 | 0.082104299 | 0.123018785 |
| 0.073512689 | 0.065794955 | 0.000699996 | 0.02812027  |
| 0.07547436  | 0.146695756 | 0.104418202 | 0.126375291 |
| 0.037885487 | 0.059696566 | 0.106023801 | 0.138034875 |
| 0.00214211  | 0.078200668 | 0.014065147 | 0.057740823 |
| 0.06334614  | 0.077660869 | 0.0334508   | 0.059889418 |
| 0.007882619 | 0.00864335  | 0.028433788 | 0.032632698 |
| 0.092281202 | 0.009068365 | 0.07066034  | 0.023171046 |
| 0.002665651 | 0.033133091 | 0.062037029 | 0.039932673 |
| 0.064015042 | 0.055660186 | 0.010557107 | 0.061616872 |
| 8.43E-05    | 0.121182055 | 0.135247088 | 0.080598263 |
| 0.114732862 | 0.013672581 | 0.085622852 | 0.087508496 |
| 0.120768691 | 0.074558272 | 0.147798341 | 0.134024741 |
| 0.032981057 | 0.109925325 | 0.091987497 | 0.067403748 |
| 0.096205042 | 0.063887772 | 0.008539054 | 0.181243321 |

|             |             |             |             |
|-------------|-------------|-------------|-------------|
| 0.14359655  | 0.08866616  | 0.124271618 | 0.185429275 |
| 0.092661411 | 0.084450362 | 0.056180649 | 0.069580029 |
| 0.068311809 | 0.063317299 | 0.066425762 | 0.116112488 |
| 0.053143081 | 0.098937992 | 0.161204364 | 0.073550622 |
| 0.088299263 | 0.013634153 | 0.13282857  | 0.003426434 |
| 0.133036224 | 0.043919738 | 0.161627127 | 0.065380625 |
| 0.026245258 | 0.084517123 | 0.096318109 | 0.102490957 |
| 0.092792227 | 0.004173094 | 0.013597045 | 0.060787204 |
| 0.008200312 | 0.04219552  | 0.055249204 | 0.115188367 |
| 0.010778582 | 0.026936981 | 0.066643076 | 0.024265882 |
| 0.066795287 | 0.021393598 | 0.06754653  | 0.048268879 |
| 0.095925127 | 0.063601954 | 0.102938028 | 0.050076325 |
| 0.095970922 | 0.14495401  | 0.001488687 | 0.045498286 |
| 0.100055211 | 0.031026295 | 0.152826528 | 0.065282922 |
| 0.181011985 | 0.037796306 | 0.066575946 | 0.13318566  |
| 0.060810196 | 0.083087032 | 0.018228943 | 0.171489645 |
| 0.021070536 | 0.160857449 | 0.067032553 | 0.039273008 |
| 0.023776736 | 0.082759194 | 0.089281203 | 0.036917041 |
| 0.05333277  | 0.023219152 | 0.004945221 | 0.030712268 |
| 0.012719498 | 0.082976675 | 0.05376549  | 0.088772239 |
| 0.051657948 | 0.15573728  | 0.023850391 | 0.083832217 |
| 0.00831293  | 0.029358753 | 0.013616021 | 0.106925792 |
| 0.021786861 | 0.121519985 | 0.049774606 | 0.090926461 |
| 0.173726952 | 0.137044408 | 0.000835275 | 0.07182807  |
| 0.095599439 | 0.014561022 | 0.100451917 | 0.114240094 |
| 0.104681255 | 0.123712199 | 0.002349101 | 0.130364312 |
| 0.034717555 | 0.080459396 | 0.147441677 | 0.155191796 |
| 0.067965499 | 0.106445978 | 0.022941632 | 0.118990758 |
| 0.074870279 | 0.003905911 | 0.022177684 | 0.099784684 |
| 0.068694685 | 0.014276204 | 0.086664904 | 0.111917782 |
| 0.126696009 | 0.129390765 | 0.152016477 | 0.100388904 |
| 0.110818304 | 0.051213053 | 0.01973928  | 0.159366012 |
| 0.100134993 | 0.008808508 | 0.063695333 | 0.0499561   |
| 0.024718468 | 0.086305741 | 0.072009789 | 0.002005267 |
| 0.073509604 | 0.042251891 | 0.002759207 | 0.162313709 |
| 0.074719424 | 0.024580702 | 0.097318326 | 0.022167173 |
| 0.10674177  | 0.115744168 | 0.10435669  | 0.079042183 |
| 0.068614371 | 0.049539476 | 0.085162686 | 0.020144448 |
| 0.021801819 | 0.113730506 | 0.129387996 | 0.060715921 |
| 0.018224785 | 0.081860576 | 0.014284238 | 0.019234493 |
| 0.010466667 | 0.025568592 | 0.019171134 | 0.047935967 |
| 0.015463083 | 0.012602432 | 0.114590667 | 0.057881816 |
| 0.117397119 | 0.079353764 | 0.097637095 | 0.142196854 |
| 0.031340575 | 0.07578696  | 0.080381581 | 0.004361424 |
| 0.108201049 | 0.027949033 | 0.011320082 | 0.085564596 |
| 0.005851215 | 0.13282614  | 0.025101658 | 0.156236531 |
| 0.055914447 | 0.104171663 | 0.142491212 | 0.004629331 |
| 0.046621766 | 0.07124589  | 0.130050198 | 0.135152548 |
| 0.04853096  | 0.108874454 | 0.019105118 | 0.053397841 |
| 0.049283574 | 0.075875306 | 0.104765391 | 0.062760797 |
| 0.088124567 | 0.124624453 | 0.103672295 | 0.154451795 |
| 0.12953249  | 0.066403756 | 0.011092827 | 0.204775946 |
| 0.111169092 | 0.17421891  | 0.077261003 | 0.103506371 |
| 0.054757593 | 0.002575446 | 0.112501857 | 0.083561828 |

|             |             |             |             |
|-------------|-------------|-------------|-------------|
| 0.065886372 | 0.105455893 | 0.123433421 | 0.10471924  |
| 0.13830895  | 0.100306108 | 0.001300865 | 0.115175428 |
| 0.018281961 | 0.084604441 | 0.046559436 | 0.125589373 |
| 0.073009655 | 0.019299698 | 0.141405299 | 0.056462423 |
| 0.05031865  | 0.075836685 | 0.042112209 | 0.077339068 |
| 0.096021865 | 0.123366224 | 0.078535038 | 0.093607152 |
| 0.013721009 | 0.011269837 | 0.154170413 | 0.081430688 |
| 0.041570134 | 0.101677342 | 0.022831753 | 0.02354493  |
| 0.025476918 | 0.073116235 | 0.125979728 | 0.087892728 |
| 0.035222762 | 0.021152887 | 0.156514658 | 0.077516473 |
| 0.122246688 | 0.089384873 | 0.079290825 | 0.037489327 |
| 0.082515409 | 0.102587565 | 0.081488922 | 0.113263334 |
| 0.098695482 | 0.084734795 | 0.06212115  | 0.00208303  |
| 0.134363509 | 0.014222981 | 0.00606886  | 0.088116264 |
| 0.094184667 | 0.045197406 | 0.003119348 | 0.002585897 |
| 0.06327323  | 0.151894371 | 0.074538617 | 0.072521825 |
| 0.009011631 | 0.098366    | 0.001191079 | 0.111426372 |
| 0.081092124 | 0.090043306 | 0.074309464 | 0.084483802 |
| 0.100280782 | 0.08838749  | 0.135426971 | 0.125880784 |
| 0.090143075 | 0.073377789 | 0.016363728 | 0.187112849 |
| 0.103469675 | 0.089811393 | 0.088138447 | 0.078566571 |
| 0.11113545  | 0.137514224 | 0.14388585  | 0.039950294 |
| 0.040700068 | 0.020103209 | 0.02423077  | 0.006584229 |
| 0.03194894  | 0.097830067 | 0.092393045 | 0.131434797 |
| 0.116382484 | 0.057905652 | 0.014169317 | 0.082590819 |
| 0.089203185 | 0.12115146  | 0.010836681 | 0.02089398  |
| 0.001982736 | 0.045738861 | 0.064296916 | 0.16143049  |
| 0.111761107 | 0.003076758 | 0.030464263 | 0.009363202 |
| 0.023377599 | 0.158684069 | 0.08391855  | 0.158391988 |
| 0.111657248 | 0.079019937 | 0.021781146 | 0.133055962 |
| 0.078366403 | 0.028959972 | 0.122970305 | 0.074859639 |
| 0.044664194 | 0.138060671 | 0.038173124 | 0.123397555 |
| 0.033634047 | 0.160081632 | 0.080939868 | 0.040803869 |
| 0.002649068 | 0.12420982  | 0.130682155 | 0.146910432 |
| 0.068381472 | 0.031506739 | 0.033577191 | 0.001932627 |
| 0.045475862 | 0.116966801 | 0.043835609 | 0.132480482 |
| 0.095380251 | 0.14845002  | 0.046719406 | 0.082432507 |
| 0.02366545  | 0.070485809 | 0.12769413  | 0.000880366 |
| 0.057611578 | 0.02958375  | 0.075150007 | 0.022164864 |
| 0.020012013 | 0.066482831 | 0.044602453 | 0.06567424  |
| 0.053725396 | 0.100599146 | 0.142285321 | 0.150986447 |
| 0.050833684 | 0.045861516 | 0.134702624 | 0.101849018 |
| 0.036730473 | 0.130640922 | 0.07227896  | 0.035340484 |
| 0.03745979  | 0.009580236 | 0.095225828 | 0.050462151 |
| 0.016029498 | 0.145696897 | 0.066714419 | 0.111726689 |
| 0.073380521 | 0.093445704 | 0.095450862 | 0.11452396  |
| 0.025340346 | 0.057337898 | 0.063871759 | 0.003956853 |
| 0.109455505 | 0.123095017 | 0.049072785 | 0.069256232 |
| 0.131915089 | 0.088821469 | 0.00703481  | 0.000977923 |
| 0.080978722 | 0.032453327 | 0.024004836 | 0.156131463 |
| 0.056618562 | 0.057763717 | 0.003763789 | 0.127737019 |
| 0.098338711 | 0.07730663  | 0.017531292 | 0.086072019 |
| 0.114674597 | 0.159384875 | 0.111853488 | 0.130837968 |
| 0.031249769 | 0.082772897 | 0.088888671 | 0.052694606 |

|             |             |             |             |
|-------------|-------------|-------------|-------------|
| 0.059534137 | 0.109061969 | 0.08379897  | 0.003969933 |
| 1           | 0.051816368 | 0.041864586 | 0.145674986 |
| 0.102580127 | 0.057958342 | 0.053198034 | 0.139732409 |
| 0.043837165 | 0.122615027 | 0.00658592  | 0.014766572 |
| 0.13685034  | 0.033937612 | 0.139511271 | 0.036656444 |
| 0.032644701 | 0.077113323 | 0.003662962 | 0.082946003 |
| 0.042347931 | 0.130570106 | 0.11265727  | 0.111101401 |
| 0.063446835 | 0.047995198 | 0.120135651 | 0.025207891 |
| 0.018551604 | 0.011604355 | 0.112085093 | 0.004825943 |
| 0.014198999 | 0.137089384 | 0.036810779 | 0.027527136 |
| 0.005023452 | 0.044377795 | 0.026868644 | 0.058862389 |
| 0.083992437 | 0.09240572  | 0.028268353 | 0.096624589 |
| 0.062130577 | 0.057780804 | 0.037656002 | 0.007531011 |
| 0.024502678 | 0.061141958 | 0.122778579 | 0.086248832 |
| 0.086632747 | 0.158155447 | 0.0525556   | 0.071423989 |
| 0.005525417 | 0.056046186 | 0.03586705  | 0.105215707 |
| 0.053458547 |             |             |             |
| TMEM2       | 0.368727552 | 0.487760131 | 0.269441883 |
| 0.2982634   | 0.281720654 | 0.20518331  | 0.116395181 |
| 0.126127113 | 0.039865579 | 0.001462092 | 0.01032674  |
| 0.299019033 | 0.115367941 | 0.154962184 | 0.166513436 |
| 0.323368126 | 0.100770773 | 0.276700058 | 0.153461755 |
| 0.288068485 | 0.049431068 | 0.272770449 | 0.055932576 |
| 0.227823617 | 0.066441019 | 0.040396092 | 0.160159195 |
| 0.378402231 | 0.047669103 | 0.176779631 | 0.273905122 |
| 0.105279093 | 0.393974201 | 0.496932495 | 0.290195736 |
| 0.502786444 | 0.334210354 | 0.029339498 | 0.146182011 |
| 0.396011956 | 0.319933403 | 0.288438531 | 0.194786229 |
| 0.022465938 | 0.467144642 | 0.13628825  | 0.283395647 |
| 0.141240397 | 0.017405353 | 0.134487592 | 0.425609416 |
| 0.440998267 | 0.244228207 | 0.135870087 | 0.08499514  |
| 0.106111133 | 0.148592072 | 0.167847248 | 0.216608132 |
| 0.135178951 | 0.087630877 | 0.457307755 | 0.039194527 |
| 0.096631314 | 0.178922    | 0.147640528 | 0.164776766 |
| 0.249061128 | 0.305068666 | 0.017031323 | 0.290154541 |
| 0.001132088 | 0.261356315 | 0.28276599  | 0.181155391 |
| 0.032130014 | 0.010411557 | 0.161143125 | 0.192490599 |
| 0.411554967 | 0.46874972  | 0.437411478 | 0.451981568 |
| 0.12469419  | 0.232187583 | 0.283883516 | 0.10704049  |
| 0.398954963 | 0.092103451 | 0.072445827 | 0.329407898 |
| 0.447111611 | 0.495241572 | 0.137825519 | 0.194417208 |
| 0.319514259 | 0.448612785 | 0.238564092 | 0.256832601 |
| 0.172905438 | 0.055877656 | 0.404102242 | 0.478265408 |
| 0.368925674 | 0.232432658 | 0.106248553 | 0.337759499 |
| 0.048600953 | 0.228325945 | 0.214521093 | 0.164355936 |
| 0.419283696 | 0.00831844  | 0.161229527 | 0.209269502 |
| 0.19222367  | 0.368668999 | 0.491600009 | 0.112420514 |
| 0.304166158 | 0.015374566 | 0.073078489 | 0.03763843  |
| 0.211765366 | 0.128527859 | 0.464224915 | 0.387321615 |
| 0.164608753 | 0.250645773 | 0.169240007 | 0.002744661 |
| 0.023740157 | 0.182887577 | 0.406269682 | 0.291937787 |
| 0.345844748 | 0.390301976 | 0.120782639 | 0.321213781 |
| 0.290291819 | 0.43541629  | 0.023706226 | 0.064167227 |
| 0.245724276 | 0.189452232 | 0.160369032 | 0.285306691 |

|             |             |             |             |
|-------------|-------------|-------------|-------------|
| 0.186425538 | 0.076871656 | 0.0890617   | 0.471861622 |
| 0.397178427 | 0.054437357 | 0.259214119 | 0.305480211 |
| 0.175946717 | 0.244732568 | 0.079486912 | 0.177773336 |
| 0.029586618 | 0.465394098 | 0.029183387 | 0.236275829 |
| 0.127406302 | 0.128386244 | 0.017354906 | 0.165008267 |
| 0.15172217  | 0.357983483 | 0.471333739 | 0.084592543 |
| 0.204778541 | 0.254263601 | 0.21914412  | 0.277103336 |
| 0.002848925 | 0.040987587 | 0.199305489 | 0.468785509 |
| 0.172100426 | 0.486357711 | 0.209766523 | 0.221399596 |
| 0.194754292 | 0.374253827 | 0.004794086 | 0.469480764 |
| 0.497726378 | 0.197198671 | 0.232255691 | 0.303642257 |
| 0.215673184 | 0.366229963 | 0.042314546 | 0.31115657  |
| 0.292410706 | 0.062976964 | 0.46034857  | 0.105179664 |
| 0.456757196 | 0.025739957 | 0.205798919 | 0.382381847 |
| 0.346254964 | 0.007856653 | 0.118044627 | 0.25069447  |
| 0.030252921 | 0.050638452 | 0.343059856 | 0.253030877 |
| 0.206644971 | 0.377269523 | 0.432510915 | 0.199289633 |
| 0.261565444 | 0.165388167 | 0.013377428 | 0.236577784 |
| 0.391639003 | 0.242658563 | 0.403419619 | 0.143955144 |
| 0.227044697 | 0.429483099 | 0.376344713 | 0.104562834 |
| 0.024337386 | 0.197657758 | 0.010611475 | 0.190144302 |
| 0.374289617 | 0.061599255 | 0.226860929 | 0.175781392 |
| 0.057860453 | 0.48150934  | 0.145582123 | 0.200027053 |
| 0.108017411 | 0.230764771 | 0.172930022 | 0.119257383 |
| 0.115402    | 0.107509758 | 0.20860225  | 0.216303774 |
| 0.019646206 | 0.062663784 | 0.02508064  | 0.248897838 |
| 0.076109489 | 0.196324068 | 0.192810111 | 0.316038925 |
| 0.227299799 | 0.066528301 | 0.22743035  | 0.209971619 |
| 0.080164467 | 0.012722285 | 0.472016348 | 0.28324998  |
| 0.26952898  | 0.094057687 | 0.038578559 | 0.210144968 |
| 0.40374428  | 0.160133277 | 0.174773684 | 0.398779285 |
| 0.026837152 | 0.453090141 | 0.137281861 | 0.080709261 |
| 0.248085613 | 0.160393242 | 0.395499071 | 0.027461077 |
| 0.273360129 | 0.432505041 | 0.23897246  | 0.107279911 |
| 0.364320209 | 0.258970051 | 0.01719846  | 0.34610868  |
| 0.34023173  | 0.023062097 | 0.498457585 | 0.108405962 |
| 0.019821539 | 0.334617926 | 0.316108449 | 0.056260251 |
| 0.058016416 | 0.172316605 | 0.024646569 | 0.193973562 |
| 0.470353346 | 0.296488116 | 0.325715188 | 0.183336687 |
| 0.022223724 | 0.006092437 | 0.183970201 | 0.29223345  |
| 0.494755555 | 0.488904047 | 0.199957246 | 0.217489505 |
| 0.157294279 | 0.182949545 | 0.100028935 | 0.466387037 |
| 0.215256099 | 0.510439113 | 0.0068132   | 0.365144349 |
| 0.488542978 | 0.183919342 | 0.049742335 | 0.170710332 |
| 0.33700135  | 0.027058014 | 0.175708038 | 0.464871125 |
| 0.383819672 | 0.18778887  | 0.18288008  | 0.323204401 |
| 0.007766388 | 0.026098192 | 0.243861888 | 0.149334116 |
| 0.21685334  | 0.136820029 | 0.055705554 | 0.218651792 |
| 0.022424013 | 0.409699044 | 0.413955397 | 0.029393214 |
| 0.170226299 | 0.205779692 | 0.270640104 | 0.025016351 |
| 0.411149258 | 0.497359596 | 0.49651296  | 0.131336065 |
| 0.391038818 | 0.442835694 | 0.252276438 | 0.073061579 |
| 0.016445378 | 0.49878953  | 0.290487503 | 0.010446671 |
| 0.426918177 | 0.136276425 | 0.005299732 | 0.462284804 |

|             |             |             |             |
|-------------|-------------|-------------|-------------|
| 0.123173992 | 0.448599032 | 0.001070583 | 0.099718953 |
| 0.048439346 | 0.418149082 | 0.44124244  | 0.264414556 |
| 0.117098681 | 0.264615411 | 0.01547021  | 0.508293815 |
| 0.450917326 | 0.012111012 | 0.123157395 | 0.367127179 |
| 0.335160811 | 0.505241714 | 0.200126854 | 0.391057186 |
| 0.2678998   | 0.474607157 | 0.132982697 | 0.174286867 |
| 0.360208516 | 0.478132165 | 0.328390813 | 0.429145069 |
| 0.402464205 | 0.315193016 | 0.168269566 | 0.007397659 |
| 0.071241745 | 0.129357962 | 0.138967236 | 0.037367853 |
| 0.201509283 | 0.08360851  | 0.465223147 | 0.425496719 |
| 0.444227646 | 0.005178127 | 0.092089698 | 0.37138948  |
| 0.389275544 | 0.427220644 | 0.029380841 | 0.004668563 |
| 0.008416832 | 0.009755923 | 0.231977196 | 0.186387843 |
| 0.449494962 | 0.11366999  | 0.003652861 | 0.028286274 |
| 0.171190009 | 0.258168346 | 0.470517758 | 0.264824672 |
| 0.390033767 | 0.06927242  | 0.130817492 | 0.297426506 |
| 0.042877325 | 0.266993127 | 0.43752778  | 0.433700895 |
| 0.05040651  | 0.185372044 | 0.293208026 | 0.433440475 |
| 0.06069112  | 0.231534751 | 0.316629562 | 0.170475122 |
| 0.02746127  | 0.062089598 | 0.042534024 | 0.377219243 |
| 0.487838125 | 0.043253819 | 0.018840586 | 0.090331318 |
| 0.061225348 | 0.438489182 | 0.095931243 | 0.475514421 |
| 0.369671443 | 0.368747333 | 0.077295824 | 0.445420154 |
| 0.022063898 | 0.464281417 | 0.228519731 | 0.026579143 |
| 0.254797432 | 0.014299223 | 0.477394667 | 0.064610656 |
| 0.210109791 | 0.298891077 | 0.108321473 | 0.020311859 |
| 0.140401781 | 0.042854739 | 0.416082631 | 0.412801144 |
| 0.043619427 | 0.1617116   | 0.222273109 | 0.288513808 |
| 0.167134459 | 0.313318413 | 0.476153158 | 0.221487305 |
| 0.045836855 | 0.17500331  | 0.306100046 | 0.297007623 |
| 0.168713765 | 0.453561449 | 0.15735053  | 0.503366859 |
| 0.324827389 | 0.444438069 | 0.44787597  | 0.196297029 |
| 0.18971161  | 0.248717571 | 0.220151776 | 0.007894262 |
| 0.233086355 | 0.390263781 | 0.259093531 | 0.083727952 |
| 0.154768376 | 0.268297111 | 0.048699943 | 0.182326445 |
| 0.23568548  | 0.16953867  | 0.09124785  | 0.381868249 |
| 0.276138485 | 0.309973055 | 0.044583267 | 0.036517672 |
| 0.514771034 | 0.414046444 | 0.076268304 | 0.271947764 |
| 0.141788105 | 0.203362751 | 0.391258768 | 0.389500872 |
| 0.250960029 | 0.390899717 | 0.358037633 | 0.249307604 |
| 0.386177478 | 0.163062907 | 0.494591729 | 0.063532246 |
| 0.051816368 | 1           | 0.049825393 | 0.079368762 |
| 0.093726824 | 0.022313117 | 0.198273196 | 0.335166443 |
| 0.260693366 | 0.238467379 | 0.238628114 | 0.058175958 |
| 0.248902455 | 0.289493645 | 0.243337874 | 0.107271328 |
| 0.041730592 | 0.458254904 | 0.006949036 | 0.05107312  |
| 0.287699126 | 0.348981187 | 0.231564572 | 0.171814293 |
| 0.200012921 | 0.144987587 | 0.196803104 | 0.178118399 |
| 0.161804688 | 0.261313966 | 0.349676927 | 0.021019269 |
| 0.012920448 | 0.457287405 | 0.248930521 | 0.029712108 |
| 0.09026362  | 0.263385469 | 0.275083727 | 0.120299171 |
| 0.024577683 | 0.456186699 | 0.170103294 | 0.280913356 |
| 0.213760411 | 0.058781399 | 0.351982794 | 0.072627922 |
| 0.054959388 | 0.438018579 | 0.272599065 | 0.494223749 |

|             |             |             |             |
|-------------|-------------|-------------|-------------|
| 0.284972116 | 0.312950589 | 0.437622014 | 0.389617599 |
| 0.121252409 | 0.282285115 | 0.014765443 | 0.399695262 |
| 0.229721418 |             |             |             |
| TMEM50B     | 0.060396329 | 0.122053882 | 0.041809271 |
| 0.206810251 | 0.107808259 | 0.07937267  | 0.196211261 |
| 0.031764334 | 0.066934403 | 0.092254046 | 0.136608839 |
| 0.075197021 | 0.095298604 | 0.102521899 | 0.024342063 |
| 0.176765565 | 0.14759892  | 0.0251603   | 0.217901227 |
| 0.144201928 | 0.104934419 | 0.231386612 | 0.116602233 |
| 0.029468555 | 0.136877315 | 0.208224145 | 0.08177866  |
| 0.168687558 | 0.202407412 | 0.079848244 | 0.123991626 |
| 0.052553536 | 0.092148227 | 0.088374482 | 0.166901306 |
| 0.08278707  | 0.045803892 | 0.011493489 | 0.073822474 |
| 0.077018775 | 0.124991572 | 0.155109259 | 0.243460113 |
| 0.123966677 | 0.078014936 | 0.257469815 | 0.088096082 |
| 0.017145665 | 0.142939516 | 0.035194381 | 0.072708307 |
| 0.089166322 | 0.098265191 | 0.063034231 | 0.177884543 |
| 0.090629763 | 0.038329343 | 0.033245877 | 0.067555753 |
| 0.242027678 | 0.047507629 | 0.092236203 | 0.081008034 |
| 0.031254223 | 0.060320631 | 0.064190438 | 0.111535113 |
| 0.030666072 | 0.073033224 | 0.039546591 | 0.041352932 |
| 0.040614637 | 0.147572554 | 0.09625641  | 0.030533056 |
| 0.179583958 | 0.190343803 | 0.089910178 | 0.222543338 |
| 0.151100087 | 0.066496845 | 0.163337021 | 0.136156614 |
| 0.110380611 | 0.094761323 | 0.054794494 | 0.200629017 |
| 0.08854748  | 0.236203038 | 0.040936387 | 0.196985977 |
| 0.15601472  | 0.106875321 | 0.073130884 | 0.128594127 |
| 0.146537714 | 0.108208025 | 0.060713495 | 0.097838255 |
| 0.042892976 | 0.031297568 | 0.092738374 | 0.136958798 |
| 0.070204414 | 0.04734188  | 0.199440328 | 0.12842174  |
| 0.132771248 | 0.013514519 | 0.252916868 | 0.044282826 |
| 0.158359396 | 0.073821049 | 0.148038594 | 0.178174343 |
| 0.029459784 | 0.09472552  | 0.100893876 | 0.228728424 |
| 0.068850321 | 0.090599984 | 0.034073717 | 0.05704582  |
| 0.03906426  | 0.015332792 | 0.068812848 | 0.18271662  |
| 0.037628866 | 0.038556121 | 0.115129551 | 0.029428803 |
| 0.095084434 | 0.021317675 | 0.08908838  | 0.045508417 |
| 0.101631826 | 0.043975322 | 0.174112857 | 0.062883788 |
| 0.081006067 | 0.158717751 | 0.008325095 | 0.099447901 |
| 0.094788671 | 0.02518427  | 0.25101281  | 0.092658882 |
| 0.166790548 | 0.080905817 | 0.192854674 | 0.142969774 |
| 0.085167996 | 0.228861738 | 0.021786049 | 0.180508265 |
| 0.058005855 | 0.131419944 | 0.140453209 | 0.150629222 |
| 0.126125789 | 0.077231822 | 0.086892278 | 0.040577678 |
| 0.023405141 | 0.077845298 | 0.013561145 | 0.078519928 |
| 0.051755648 | 0.133851684 | 0.058604831 | 0.140037114 |
| 0.172045318 | 0.177313678 | 0.040738684 | 0.147828492 |
| 0.130754629 | 0.054647446 | 0.017902946 | 0.144190201 |
| 0.060868994 | 0.113097307 | 0.071588907 | 0.052897804 |
| 0.18121663  | 0.143953475 | 0.000119488 | 0.083155013 |
| 0.10100026  | 0.019171137 | 0.206890541 | 0.080952325 |
| 0.051122271 | 0.180081277 | 0.001042944 | 0.18316623  |
| 0.04277793  | 0.115834993 | 0.161165029 | 0.261229993 |
| 0.078551789 | 0.209182005 | 0.064511919 | 0.093162456 |



|             |             |             |             |
|-------------|-------------|-------------|-------------|
| 0.086077852 | 0.022727175 | 0.078867672 | 0.162914791 |
| 0.047444019 | 0.069606858 | 0.088404605 | 0.168022041 |
| 0.156212509 | 0.115322216 | 0.177816767 | 0.047566058 |
| 0.111619025 | 0.092709403 | 0.03297984  | 0.100915825 |
| 0.082737944 | 0.015466432 | 0.09215265  | 0.077733058 |
| 0.03055324  | 0.113459438 | 0.066338591 | 0.024982491 |
| 0.187678155 | 0.100589518 | 0.053490001 | 0.134504614 |
| 0.053833633 | 0.179163726 | 0.046951813 | 0.026068972 |
| 0.136879763 | 0.138808238 | 0.03968795  | 0.025038569 |
| 0.019001974 | 0.153961081 | 0.128273373 | 0.143886153 |
| 0.128562361 | 0.099127443 | 0.0495242   | 0.064315919 |
| 0.104405654 | 0.235329958 | 0.008522484 | 0.044656567 |
| 0.169154247 | 0.094860606 | 0.08508705  | 0.070795712 |
| 0.045492345 | 0.163485406 | 0.146319624 | 0.020441929 |
| 0.081058147 | 0.127049402 | 0.11782432  | 0.146373289 |
| 0.054022808 | 0.108276778 | 0.103700457 | 0.025745507 |
| 0.174111678 | 0.060204491 | 0.013394229 | 0.145165555 |
| 0.027360145 | 0.135508957 | 0.124465347 | 0.240642776 |
| 0.090841266 | 0.274960571 | 0.170603216 | 0.027904045 |
| 0.055291052 | 0.113645604 | 0.096975006 | 0.174677673 |
| 0.088894111 | 0.132100213 | 0.114034739 | 0.063516356 |
| 0.068622434 | 0.182044458 | 0.117679485 | 0.082458567 |
| 0.109473447 | 0.108468723 | 0.1142293   | 0.184493979 |
| 0.1186894   | 0.191385698 | 0.063306016 | 0.221164125 |
| 0.138795418 | 0.232452257 | 0.127024576 | 0.033233533 |
| 0.20641741  | 0.177737011 | 0.067811994 | 0.041140091 |
| 0.083500988 | 0.112135358 | 0.165275914 | 0.148541463 |
| 0.239569466 | 0.056619434 | 0.015031966 | 0.139534763 |
| 0.008177904 | 0.089077141 | 0.058632814 | 0.102077484 |
| 0.082314782 | 0.046541065 | 0.179669645 | 0.142697111 |
| 0.093848221 | 0.130651733 | 0.05154453  | 0.100634749 |
| 0.108201131 | 0.075314159 | 0.058605235 | 0.091715681 |
| 0.083033458 | 0.09440623  | 0.090712022 | 0.019791604 |
| 0.063880133 | 0.102819378 | 0.006640081 | 0.025146164 |
| 0.169954108 | 0.116701316 | 0.142178758 | 0.095279028 |
| 0.107494582 | 0.020775618 | 0.149695858 | 0.150908056 |
| 0.100727966 | 0.08398505  | 0.096212124 | 0.067189885 |
| 0.089709327 | 0.116617857 | 0.066584976 | 0.0969932   |
| 0.096162015 | 0.088457404 | 0.06852724  | 0.100877657 |
| 0.165489934 | 0.035925234 | 0.19847183  | 0.11663935  |
| 0.179453279 | 0.058077677 | 0.009118582 | 0.001455695 |
| 0.028110477 | 0.135524843 | 0.086899019 | 0.112686736 |
| 0.040917372 | 0.105794168 | 0.001288746 | 0.110453971 |
| 0.115342727 | 0.069955743 | 0.047436273 | 0.100227135 |
| 0.089723576 | 0.108493083 | 0.056065997 | 0.122439771 |
| 0.0874978   | 0.091530833 | 0.095984267 | 0.220617594 |
| 0.141226042 | 0.086076123 | 0.103724492 | 0.091261476 |
| 0.17461179  | 0.131532181 | 0.256008993 | 0.104370505 |
| 0.024303987 | 0.063629452 | 0.036404645 | 0.100126716 |
| 0.048796922 | 0.111457456 | 0.096048317 | 0.155076453 |
| 0.128258967 | 0.064206868 | 0.061197506 | 0.088635355 |
| 0.136725863 | 0.14886156  | 0.010252639 | 0.003205032 |
| 0.001158183 | 0.083949594 | 0.111693569 | 0.099269158 |
| 0.11538826  | 0.031160017 | 0.075839866 | 0.062265547 |

|             |             |             |             |
|-------------|-------------|-------------|-------------|
| 0.047763419 | 0.112926014 | 0.111933714 | 0.208450716 |
| 0.087236344 | 0.125733853 | 0.077885241 | 0.165279945 |
| 0.090585213 | 0.03120941  | 0.144530189 | 0.107705791 |
| 0.037102391 | 0.088927505 | 0.03326513  | 0.168058068 |
| 0.007063835 | 0.170853354 | 0.083429436 | 0.074501386 |
| 0.009525919 | 0.099700546 | 0.098192191 | 0.13660248  |
| 0.079547341 | 0.200101818 | 0.182353797 | 0.010416472 |
| 0.224516443 | 0.12178823  | 0.145908683 | 0.150343929 |
| 0.144287855 | 0.205832741 | 0.053844685 | 0.095117199 |
| 0.125518315 | 0.09133755  | 0.098675584 | 0.013572655 |
| 0.040004321 | 0.041738812 | 0.079516762 | 0.055125736 |
| 0.052763709 | 0.074976953 | 0.024214767 | 0.049605586 |
| 0.009466487 | 0.141501671 | 0.179876817 | 0.135645365 |
| 0.027687029 | 0.067477377 | 0.10980914  | 0.096580158 |
| 0.093969164 | 0.205972153 | 0.090666555 | 0.047704526 |
| 0.140101791 | 0.007414992 | 0.13142707  | 0.057896033 |
| 0.04836275  | 0.156154623 | 0.084792447 | 0.114107604 |
| 0.068626254 | 0.091334198 | 0.104093233 | 0.148843817 |
| 0.043976784 | 0.058347707 | 0.166014992 | 0.110268421 |
| 0.132311334 | 0.187497486 | 0.049687041 | 0.093737813 |
| 0.233041266 | 0.046957108 | 0.033539832 | 0.004174569 |
| 0.03410524  | 0.090088442 | 0.139804608 | 0.172436957 |
| 0.06277412  | 0.061692922 | 0.036433561 | 0.101657607 |
| 0.115811346 | 0.079976902 | 0.044610213 | 0.133493876 |
| 0.11689956  | 0.172646725 | 0.101486762 | 0.11024106  |
| 0.016498805 | 0.131937873 | 0.119311468 | 0.14778245  |
| 0.10588628  | 0.170178193 | 0.099450757 | 0.014933647 |
| 0.041864586 | 0.049825393 | 1           | 0.135722518 |
| 0.253517764 | 0.058315797 | 0.016494276 | 0.148792808 |
| 0.02298997  | 0.241547116 | 0.012564422 | 0.060408811 |
| 0.114231299 | 0.021205713 | 0.159265591 | 0.167111771 |
| 0.162776813 | 0.102861886 | 0.040309394 | 0.124404556 |
| 0.033754292 | 0.106101531 | 0.093737002 | 0.10065166  |
| 0.025994825 | 0.030611492 | 0.232301987 | 0.054380884 |
| 0.093384031 | 0.011921548 | 0.105740381 | 0.035778745 |
| 0.089637498 | 0.159180294 | 0.034283206 | 0.019781376 |
| 0.025582428 | 0.042412466 | 0.023705699 | 0.084609694 |
| 0.051090028 | 0.102436204 | 0.067863666 | 0.082375336 |
| 0.118139707 | 0.093941178 | 0.051776549 | 0.019554077 |
| 0.03320876  | 0.078661675 | 0.054711618 | 0.094762544 |
| 0.040556393 | 0.237715929 | 0.061892236 | 0.10153615  |
| 0.013016317 | 0.026370307 | 0.088639894 | 0.123774329 |
| 0.034720498 |             |             |             |
| TMEM51      | 0.100514623 | 0.101722476 | 0.090256861 |
| 0.157872042 | 0.13612758  | 0.049435324 | 0.115073732 |
| 0.049378853 | 0.117023265 | 0.032864054 | 0.107390647 |
| 0.114163099 | 0.084421286 | 0.057046042 | 0.030062838 |
| 0.227314358 | 0.242104572 | 0.066195862 | 0.211434964 |
| 0.162535044 | 0.062417589 | 0.242925743 | 0.173980886 |
| 0.138780575 | 0.214660199 | 0.221441604 | 0.122184582 |
| 0.166447242 | 0.232483078 | 0.031012889 | 0.103874933 |
| 0.331508803 | 0.113483773 | 0.076751635 | 0.155536368 |
| 0.072410023 | 0.071878127 | 0.086303673 | 0.03388431  |
| 0.09408885  | 0.135135672 | 0.154667224 | 0.192151575 |

|             |             |             |             |
|-------------|-------------|-------------|-------------|
| 0.159165407 | 0.060713511 | 0.160749924 | 0.178159501 |
| 0.034161809 | 0.202192968 | 0.019153624 | 0.059877473 |
| 0.059132768 | 0.073024857 | 0.056229568 | 0.101942636 |
| 0.044310215 | 0.023563662 | 0.054570831 | 0.047649229 |
| 0.161800931 | 0.018328421 | 0.07059674  | 0.079329305 |
| 0.042888165 | 0.074156228 | 0.288997952 | 0.086285459 |
| 0.083098908 | 0.068006376 | 0.155799678 | 0.079032258 |
| 0.009242768 | 0.177406231 | 0.215901849 | 0.048447235 |
| 0.296064276 | 0.126720616 | 0.27661103  | 0.136176138 |
| 0.158630602 | 0.082009858 | 0.167401701 | 0.143241573 |
| 0.1754529   | 0.230484798 | 0.114738631 | 0.190102319 |
| 0.099169928 | 0.101582562 | 0.109341426 | 0.246112954 |
| 0.158174087 | 0.089313172 | 0.200057904 | 0.281947355 |
| 0.08506282  | 0.092882316 | 0.05876136  | 0.088707729 |
| 0.043058366 | 0.307826234 | 0.066660677 | 0.128526221 |
| 0.068324795 | 0.109207819 | 0.278147164 | 0.107876468 |
| 0.299649077 | 0.032848525 | 0.217243103 | 0.13768937  |
| 0.160461977 | 0.108852397 | 0.277101317 | 0.105026832 |
| 0.180402773 | 0.106363851 | 0.091551405 | 0.17863717  |
| 0.1349907   | 0.172101457 | 0.078395311 | 0.332534254 |
| 0.064863435 | 0.108665259 | 0.052165856 | 0.132796023 |
| 0.053536335 | 0.079574166 | 0.10742319  | 0.160170282 |
| 0.304127598 | 0.21747316  | 0.094253919 | 0.100114115 |
| 0.139027569 | 0.06327773  | 0.117944103 | 0.059013321 |
| 0.090558699 | 0.167740657 | 0.00230721  | 0.170358215 |
| 0.091202182 | 0.233126903 | 0.298974249 | 0.092077573 |
| 0.179205951 | 0.12495855  | 0.218413984 | 0.13693448  |
| 0.066002358 | 0.213077997 | 0.038288864 | 0.23237658  |
| 0.044704488 | 0.20239633  | 0.225164194 | 0.104497539 |
| 0.133629602 | 0.06995073  | 0.317873965 | 0.061011249 |
| 0.034990812 | 0.195876019 | 0.154129458 | 0.05796175  |
| 0.047870516 | 0.080110232 | 0.052076667 | 0.26326388  |
| 0.111200028 | 0.20400138  | 0.040868177 | 0.080382462 |
| 0.064199071 | 0.250545411 | 0.021593417 | 0.11952268  |
| 0.03044781  | 0.137719503 | 0.135926338 | 0.153950803 |
| 0.27847635  | 0.169164161 | 0.0187128   | 0.065633927 |
| 0.089851614 | 0.018797726 | 0.128879133 | 0.159225368 |
| 0.06013158  | 0.142743399 | 0.007177998 | 0.219008184 |
| 0.049613104 | 0.263116917 | 0.169321188 | 0.267420142 |
| 0.076522141 | 0.238147972 | 0.045006474 | 0.114607024 |
| 0.079010743 | 0.061501482 | 0.030109948 | 0.132104464 |
| 0.320650097 | 0.044336625 | 0.123813453 | 0.154638528 |
| 0.117201731 | 0.168843014 | 0.191443759 | 0.053221002 |
| 0.116696743 | 0.114338376 | 0.235325097 | 0.228026971 |
| 0.127869389 | 0.033366679 | 0.067353554 | 0.098102499 |
| 0.032305428 | 0.0884965   | 0.074138067 | 0.019263413 |
| 0.178726918 | 0.07860739  | 0.045792787 | 0.144749985 |
| 0.068393399 | 0.099788452 | 0.056359767 | 0.248430004 |
| 0.308906816 | 0.119546953 | 0.158609934 | 0.082333626 |
| 0.113445924 | 0.072577758 | 0.164005725 | 0.046311984 |
| 0.068912287 | 0.210015203 | 0.073961889 | 0.063140081 |
| 0.080914665 | 0.235523701 | 0.238969777 | 0.029530771 |
| 0.06351426  | 0.035464918 | 0.026013352 | 0.065454207 |
| 0.057492772 | 0.118860287 | 0.120997959 | 0.114037561 |

|             |             |             |             |
|-------------|-------------|-------------|-------------|
| 0.259677053 | 0.26233132  | 0.101476338 | 0.205491628 |
| 0.041484788 | 0.158983279 | 0.327121934 | 0.020779649 |
| 0.126886656 | 0.022343322 | 0.014218614 | 0.095120414 |
| 0.175801009 | 0.159623558 | 0.092818687 | 0.259629908 |
| 0.074261464 | 0.192643157 | 0.170109102 | 0.024482008 |
| 0.073354613 | 0.079131816 | 0.228988476 | 0.185696311 |
| 0.053965474 | 0.133745295 | 0.141240705 | 0.068741497 |
| 0.062996557 | 0.26182333  | 0.107400481 | 0.281789486 |
| 0.303362374 | 0.163644431 | 0.093535676 | 0.31396153  |
| 0.295983493 | 0.077768498 | 0.05469306  | 0.307140724 |
| 0.114320229 | 0.237333652 | 0.082136717 | 0.177371946 |
| 0.176087795 | 0.076125264 | 0.234509561 | 0.100934148 |
| 0.067502489 | 0.110116344 | 0.280235159 | 0.112885769 |
| 0.254268155 | 0.067093263 | 0.020707875 | 0.120296611 |
| 0.138997197 | 0.087428256 | 0.208651107 | 0.12850575  |
| 0.067128452 | 0.029478033 | 0.23692671  | 0.074964482 |
| 0.061187557 | 0.188539267 | 0.155875381 | 0.078295351 |
| 0.098515622 | 0.0890535   | 0.056886142 | 0.15394596  |
| 0.077235778 | 0.117075047 | 0.143961626 | 0.12768906  |
| 0.049883883 | 0.176850641 | 0.079045129 | 0.043723343 |
| 0.164319641 | 0.075058689 | 0.180974162 | 0.17967925  |
| 0.033955327 | 0.0363594   | 0.254314047 | 0.236480574 |
| 0.110759209 | 0.093096721 | 0.07823238  | 0.151041592 |
| 0.109978176 | 0.096422531 | 0.075040475 | 0.332192705 |
| 0.292879129 | 0.08115595  | 0.082161853 | 0.078412367 |
| 0.168372889 | 0.017813356 | 0.077046089 | 0.095640363 |
| 0.199502909 | 0.048118059 | 0.008033131 | 0.054564617 |
| 0.318610047 | 0.18752095  | 0.065117428 | 0.110138734 |
| 0.010430611 | 0.178909879 | 0.084174288 | 0.119981165 |
| 0.081291661 | 0.249557232 | 0.244890612 | 0.086730842 |
| 0.093236919 | 0.09634292  | 0.088201881 | 0.113905833 |
| 0.089119014 | 0.071793556 | 0.074352354 | 0.276437731 |
| 0.101635297 | 0.084811426 | 0.110436458 | 0.082047618 |
| 0.147502109 | 0.205695991 | 0.215661421 | 0.122596841 |
| 0.10133304  | 0.036542638 | 0.017371734 | 0.087658081 |
| 0.042235282 | 0.207002615 | 0.101501586 | 0.173820876 |
| 0.12078658  | 0.205606183 | 0.071111744 | 0.083679462 |
| 0.110262922 | 0.147911874 | 0.201819261 | 0.027000006 |
| 0.01868686  | 0.137345462 | 0.10578584  | 0.247728152 |
| 0.110858905 | 0.01038931  | 0.156508367 | 0.075825131 |
| 0.097944985 | 0.164244156 | 0.086357257 | 0.239143314 |
| 0.134658157 | 0.305186781 | 0.027012181 | 0.209786654 |
| 0.218170177 | 0.037984256 | 0.126189067 | 0.074663261 |
| 0.335409158 | 0.211144121 | 0.067807316 | 0.147528174 |
| 0.053482074 | 0.275001254 | 0.117229626 | 0.067841656 |
| 0.183508674 | 0.297908305 | 0.244213365 | 0.201366777 |
| 0.066579563 | 0.140279554 | 0.172180196 | 0.010518282 |
| 0.115104944 | 0.145557403 | 0.158858136 | 0.149577906 |
| 0.120915566 | 0.208615589 | 0.309726907 | 0.0765268   |
| 0.157935311 | 0.068686955 | 0.148440522 | 0.010338939 |
| 0.157179856 | 0.258050928 | 0.085013161 | 0.040087998 |
| 0.0350712   | 0.098384161 | 0.081254535 | 0.297383781 |
| 0.083331699 | 0.308860343 | 0.161422906 | 0.168322501 |
| 0.329025302 | 0.113771111 | 0.23582218  | 0.170834965 |

|             |             |             |             |
|-------------|-------------|-------------|-------------|
| 0.055922718 | 0.156150276 | 0.070178672 | 0.033164102 |
| 0.111874284 | 0.129776493 | 0.142119572 | 0.066261719 |
| 0.052543325 | 0.173245596 | 0.075808461 | 0.118816133 |
| 0.085778472 | 0.106133911 | 0.098374428 | 0.121033148 |
| 0.148321984 | 0.063076089 | 0.074510764 | 0.058117506 |
| 0.172659068 | 0.156176903 | 0.083914428 | 0.152107963 |
| 0.181942052 | 0.092089319 | 0.195093043 | 0.028980273 |
| 0.0754659   | 0.043361224 | 0.154865679 | 0.214707133 |
| 0.090050428 | 0.068016702 | 0.145839393 | 0.227031152 |
| 0.104697371 | 0.078517011 | 0.060250522 | 0.104691489 |
| 0.274310094 | 0.169324277 | 0.14147792  | 0.157830235 |
| 0.052079023 | 0.09775852  | 0.113527754 | 0.069231527 |
| 0.065947233 | 0.171656671 | 0.081590353 | 0.026092599 |
| 0.145674986 | 0.079368762 | 0.135722518 | 1           |
| 0.219359993 | 0.278629391 | 0.048410702 | 0.213952645 |
| 0.041108697 | 0.196952639 | 0.028891269 | 0.222680265 |
| 0.239733134 | 0.052512252 | 0.22403752  | 0.069410622 |
| 0.160215719 | 0.072369673 | 0.130866874 | 0.330744995 |
| 0.052450827 | 0.103774316 | 0.095486942 | 0.204685597 |
| 0.083143058 | 0.27912974  | 0.2228927   | 0.033492207 |
| 0.021322845 | 0.047331245 | 0.095569364 | 0.094240644 |
| 0.128590585 | 0.171341209 | 0.046919214 | 0.289555992 |
| 0.197142096 | 0.060607117 | 0.115807252 | 0.087433654 |
| 0.306909892 | 0.091640929 | 0.024555723 | 0.12487119  |
| 0.106303892 | 0.295922448 | 0.046930857 | 0.0828692   |
| 0.20956615  | 0.067519339 | 0.116252779 | 0.08364364  |
| 0.135957205 | 0.211553283 | 0.052260311 | 0.090957665 |
| 0.131378159 | 0.064126017 | 0.137891176 | 0.140740713 |
| 0.029908616 |             |             |             |
| TMEM65      | 0.120976241 | 0.170833817 | 0.08132476  |
| 0.264434649 | 0.158498531 | 0.103567283 | 0.225158577 |
| 0.102653535 | 0.140268717 | 0.100686231 | 0.127648102 |
| 0.125815128 | 0.142518024 | 0.144442076 | 0.052501145 |
| 0.27699929  | 0.232310213 | 0.068297562 | 0.297926381 |
| 0.233117085 | 0.174140465 | 0.303604344 | 0.261998349 |
| 0.087837879 | 0.176667585 | 0.250160433 | 0.105270599 |
| 0.256543944 | 0.251397164 | 0.082134794 | 0.192796038 |
| 0.194559477 | 0.161966556 | 0.1294759   | 0.200513645 |
| 0.119385113 | 0.091361483 | 0.058245767 | 0.085209669 |
| 0.142365199 | 0.176498462 | 0.239191913 | 0.296143383 |
| 0.246343714 | 0.114468891 | 0.281546955 | 0.158384343 |
| 0.062783237 | 0.219196087 | 0.054632992 | 0.112535399 |
| 0.112393262 | 0.114717245 | 0.118788547 | 0.207297588 |
| 0.090897136 | 0.06632975  | 0.053345006 | 0.10768278  |
| 0.271856361 | 0.065366099 | 0.123043142 | 0.150565556 |
| 0.079267816 | 0.125183146 | 0.181460437 | 0.163556117 |
| 0.061379496 | 0.123853236 | 0.168038706 | 0.078503159 |
| 0.040305617 | 0.24973581  | 0.181900628 | 0.041348455 |
| 0.252288136 | 0.222887419 | 0.190062887 | 0.255978492 |
| 0.235616435 | 0.118212136 | 0.226879829 | 0.192482199 |
| 0.206887007 | 0.182407454 | 0.093262965 | 0.266579002 |
| 0.149262123 | 0.213449304 | 0.13392484  | 0.288209303 |
| 0.216886313 | 0.147029507 | 0.185394462 | 0.209783979 |
| 0.164278123 | 0.160284514 | 0.087006527 | 0.123868157 |

|             |             |             |             |
|-------------|-------------|-------------|-------------|
| 0.055603318 | 0.123087538 | 0.123318089 | 0.190767818 |
| 0.11971811  | 0.072679423 | 0.238800478 | 0.195850432 |
| 0.26220655  | 0.050187141 | 0.321389671 | 0.126643065 |
| 0.24138439  | 0.155702068 | 0.203315373 | 0.204240704 |
| 0.146306344 | 0.155953295 | 0.141317471 | 0.279941803 |
| 0.125715261 | 0.188595657 | 0.057536256 | 0.202190319 |
| 0.101230049 | 0.046991836 | 0.096989854 | 0.229118912 |
| 0.116340524 | 0.097504087 | 0.173213585 | 0.093637984 |
| 0.211851662 | 0.113925403 | 0.13619491  | 0.106141195 |
| 0.181541816 | 0.08187843  | 0.167729114 | 0.104879457 |
| 0.112803392 | 0.222964793 | 0.010210093 | 0.240203228 |
| 0.137564532 | 0.129462106 | 0.342817972 | 0.129585826 |
| 0.189886034 | 0.207938098 | 0.290469245 | 0.20413568  |
| 0.129686395 | 0.291199364 | 0.052347416 | 0.277560558 |
| 0.092877426 | 0.179211019 | 0.278159789 | 0.19162495  |
| 0.254169344 | 0.111086412 | 0.175568876 | 0.092032975 |
| 0.041818008 | 0.154718119 | 0.096224883 | 0.123164091 |
| 0.105316071 | 0.148537211 | 0.089330614 | 0.263799563 |
| 0.190012439 | 0.238320361 | 0.07822794  | 0.154478855 |
| 0.113388788 | 0.21031822  | 0.040799097 | 0.19205901  |
| 0.082481446 | 0.18083216  | 0.166232412 | 0.124601642 |
| 0.257538058 | 0.226723209 | 0.004006808 | 0.118972027 |
| 0.142426529 | 0.03831249  | 0.208588174 | 0.154012598 |
| 0.063152112 | 0.234237637 | 0.006879646 | 0.27453982  |
| 0.083341481 | 0.255356426 | 0.234191396 | 0.274673618 |
| 0.12268952  | 0.249428723 | 0.096262773 | 0.136839556 |
| 0.111848506 | 0.060590183 | 0.089325912 | 0.231019045 |
| 0.1462898   | 0.133801717 | 0.164035828 | 0.234731747 |
| 0.179856914 | 0.195976337 | 0.261475685 | 0.055057209 |
| 0.152326169 | 0.174603696 | 0.141985056 | 0.171213083 |
| 0.150871812 | 0.043052361 | 0.13073193  | 0.176218913 |
| 0.059201034 | 0.15610011  | 0.105276806 | 0.039002183 |
| 0.251179828 | 0.14823028  | 0.108613636 | 0.166278008 |
| 0.09467362  | 0.242046662 | 0.066670058 | 0.141330657 |
| 0.229458093 | 0.188510155 | 0.079477105 | 0.045967701 |
| 0.046449016 | 0.148932683 | 0.219823991 | 0.134280351 |
| 0.132623319 | 0.223149806 | 0.076414499 | 0.085448512 |
| 0.195942443 | 0.294111775 | 0.062735708 | 0.047769376 |
| 0.15674853  | 0.079110596 | 0.065712504 | 0.111278628 |
| 0.111016733 | 0.232888371 | 0.161957986 | 0.07169518  |
| 0.179872167 | 0.201674058 | 0.16745603  | 0.247983204 |
| 0.088367293 | 0.227933182 | 0.23917958  | 0.042762142 |
| 0.217279726 | 0.061654147 | 0.030024561 | 0.180567709 |
| 0.130710769 | 0.208862966 | 0.177870805 | 0.251344883 |
| 0.090153099 | 0.293186006 | 0.251444026 | 0.04475179  |
| 0.10823109  | 0.150801914 | 0.194699913 | 0.199342787 |
| 0.115517547 | 0.203090263 | 0.230160046 | 0.108771967 |
| 0.109100198 | 0.263986864 | 0.16605054  | 0.201498937 |
| 0.203642895 | 0.173703237 | 0.138487685 | 0.24802268  |
| 0.212700852 | 0.15800323  | 0.146870566 | 0.299775808 |
| 0.186401109 | 0.304861145 | 0.147854538 | 0.090241786 |
| 0.267996169 | 0.145810707 | 0.137418594 | 0.08586891  |
| 0.120241495 | 0.159209765 | 0.273034892 | 0.141143582 |
| 0.331674035 | 0.078745503 | 0.05252945  | 0.186062363 |

|             |             |             |             |
|-------------|-------------|-------------|-------------|
| 0.063050361 | 0.138357732 | 0.148557617 | 0.149601478 |
| 0.114856013 | 0.071762158 | 0.209812841 | 0.165534076 |
| 0.127001891 | 0.236446562 | 0.168882835 | 0.137999082 |
| 0.160018965 | 0.106552944 | 0.076852292 | 0.170794113 |
| 0.165884293 | 0.218297118 | 0.143586297 | 0.058464382 |
| 0.080608384 | 0.187951374 | 0.02219184  | 0.075235835 |
| 0.261582386 | 0.147200169 | 0.229034798 | 0.175723528 |
| 0.090875948 | 0.061934068 | 0.239882713 | 0.254104515 |
| 0.141981487 | 0.132061771 | 0.136153059 | 0.197442396 |
| 0.144310903 | 0.151307068 | 0.083540573 | 0.215042065 |
| 0.168919451 | 0.128387996 | 0.127795428 | 0.139791834 |
| 0.241577492 | 0.052387351 | 0.175665931 | 0.167493555 |
| 0.26592869  | 0.089068647 | 0.018132052 | 0.015325502 |
| 0.126862901 | 0.216746401 | 0.118747094 | 0.188427979 |
| 0.038063675 | 0.208979197 | 0.01564735  | 0.168028132 |
| 0.149281377 | 0.143820509 | 0.140930993 | 0.132520899 |
| 0.118523866 | 0.161865469 | 0.070858725 | 0.158291156 |
| 0.110851247 | 0.122520758 | 0.173419131 | 0.284570077 |
| 0.181129028 | 0.123241969 | 0.17385537  | 0.141977853 |
| 0.233927206 | 0.212529067 | 0.31773196  | 0.188054595 |
| 0.062133592 | 0.092053262 | 0.03840717  | 0.119814658 |
| 0.08693382  | 0.192548174 | 0.152945411 | 0.232355352 |
| 0.173812746 | 0.128487131 | 0.158728411 | 0.130636761 |
| 0.199203014 | 0.227216193 | 0.078735699 | 0.013191742 |
| 0.006712429 | 0.099464061 | 0.17956019  | 0.176739422 |
| 0.166558231 | 0.040510017 | 0.144639377 | 0.169252519 |
| 0.141089817 | 0.156069022 | 0.149064501 | 0.315700553 |
| 0.151713584 | 0.265791739 | 0.078683336 | 0.275405303 |
| 0.166262174 | 0.064597637 | 0.189785432 | 0.14394315  |
| 0.173860848 | 0.155449157 | 0.078147691 | 0.23306546  |
| 0.017604329 | 0.261072594 | 0.136463575 | 0.130649554 |
| 0.066961289 | 0.199255708 | 0.184047495 | 0.232596391 |
| 0.111155358 | 0.228479733 | 0.223169015 | 0.030056443 |
| 0.248664167 | 0.195369557 | 0.25593154  | 0.215473161 |
| 0.205399366 | 0.293881978 | 0.162537597 | 0.134906904 |
| 0.186365996 | 0.123693317 | 0.125809474 | 0.027772946 |
| 0.119995748 | 0.168742599 | 0.123132497 | 0.053332995 |
| 0.080024132 | 0.145841778 | 0.061295877 | 0.140750592 |
| 0.036332051 | 0.251172295 | 0.238857441 | 0.202616623 |
| 0.129421995 | 0.163359381 | 0.200327028 | 0.191047991 |
| 0.13118996  | 0.248378463 | 0.126900843 | 0.059670911 |
| 0.22928098  | 0.043850985 | 0.218266404 | 0.105637846 |
| 0.113678708 | 0.228235313 | 0.110074819 | 0.17230255  |
| 0.127949274 | 0.155674857 | 0.149354277 | 0.194175729 |
| 0.106086614 | 0.103582776 | 0.173106879 | 0.155054697 |
| 0.218635533 | 0.238234679 | 0.110069639 | 0.152526632 |
| 0.220494794 | 0.078001271 | 0.160412771 | 0.028312844 |
| 0.053810734 | 0.111971644 | 0.267401651 | 0.275766248 |
| 0.128170567 | 0.110323519 | 0.161082627 | 0.1851946   |
| 0.168493348 | 0.130456333 | 0.122889672 | 0.175375205 |
| 0.213938156 | 0.206537981 | 0.167861123 | 0.175246711 |
| 0.053657242 | 0.1648582   | 0.187052961 | 0.158363083 |
| 0.137912891 | 0.242581859 | 0.139808246 | 0.066524331 |
| 0.102580127 | 0.093726824 | 0.253517764 | 0.219359993 |

|             |             |             |             |
|-------------|-------------|-------------|-------------|
| 1           | 0.17415033  | 0.035421168 | 0.245169917 |
| 0.038843946 | 0.286231182 | 0.049318327 | 0.181896914 |
| 0.194500044 | 0.054899525 | 0.245248187 | 0.174466315 |
| 0.256729861 | 0.133357482 | 0.097377265 | 0.254809167 |
| 0.050044882 | 0.151081256 | 0.10353131  | 0.1842069   |
| 0.063012135 | 0.133283953 | 0.281531416 | 0.081293907 |
| 0.063194419 | 0.04799079  | 0.146535489 | 0.127720846 |
| 0.211937012 | 0.234875455 | 0.070467216 | 0.108990533 |
| 0.10004999  | 0.086099395 | 0.1019916   | 0.140250621 |
| 0.134809542 | 0.137836037 | 0.061402311 | 0.131580276 |
| 0.182178384 | 0.257870152 | 0.089901871 | 0.087176828 |
| 0.167981612 | 0.121520738 | 0.099546373 | 0.133449801 |
| 0.093245455 | 0.303458995 | 0.097477    | 0.145803494 |
| 0.08153155  | 0.057768051 | 0.209815316 | 0.203122879 |
| 0.041154404 |             |             |             |
| TNFAIP3     | 0.03154098  | 0.029130114 | 0.039373408 |
| 0.07193693  | 0.056679259 | 0.018521473 | 0.084483291 |
| 0.019492875 | 0.067879729 | 0.020935355 | 0.051442295 |
| 0.040371152 | 0.022721012 | 0.021703006 | 0.010794368 |
| 0.107173654 | 0.111173764 | 0.029755257 | 0.147144855 |
| 0.069656732 | 0.035085678 | 0.120052854 | 0.10484818  |
| 0.049521913 | 0.145817795 | 0.18490416  | 0.079780331 |
| 0.06671383  | 0.217002504 | 0.010902664 | 0.040493468 |
| 0.141950117 | 0.035172892 | 0.019523806 | 0.060873381 |
| 0.017276699 | 0.021426525 | 0.024303276 | 0.01481479  |
| 0.029999909 | 0.056398672 | 0.06665962  | 0.116109875 |
| 0.104657753 | 0.014472396 | 0.114059635 | 0.080778662 |
| 0.0094067   | 0.111974044 | 0.008968021 | 0.015191502 |
| 0.0141104   | 0.025530144 | 0.03109916  | 0.074821724 |
| 0.009642777 | 0.00757907  | 0.013682521 | 0.015902    |
| 0.108820702 | 0.008800915 | 0.017598841 | 0.045105261 |
| 0.011677712 | 0.039626937 | 0.116096419 | 0.05073122  |
| 0.029035592 | 0.022403594 | 0.074583459 | 0.024147779 |
| 0.005537692 | 0.085149052 | 0.101877512 | 0.023118796 |
| 0.283312374 | 0.057325962 | 0.145271398 | 0.072427381 |
| 0.059274758 | 0.02190692  | 0.060332684 | 0.04780865  |
| 0.05078267  | 0.134862635 | 0.043069367 | 0.115024197 |
| 0.030862202 | 0.078049474 | 0.043391195 | 0.113567066 |
| 0.055456291 | 0.023571446 | 0.066074156 | 0.187909654 |
| 0.029454503 | 0.026629584 | 0.026793425 | 0.038768737 |
| 0.01985049  | 0.131910629 | 0.017739474 | 0.039501396 |
| 0.019294445 | 0.049153511 | 0.234153564 | 0.038091505 |
| 0.220734423 | 0.007377127 | 0.121835203 | 0.030044425 |
| 0.059455783 | 0.079094226 | 0.190615924 | 0.048277531 |
| 0.059259968 | 0.036723741 | 0.024463592 | 0.138516431 |
| 0.053196884 | 0.071005642 | 0.030194029 | 0.185168894 |
| 0.01391594  | 0.029555091 | 0.011651584 | 0.047417766 |
| 0.012254425 | 0.015251461 | 0.065899575 | 0.121664303 |
| 0.186121273 | 0.058640842 | 0.025540399 | 0.042117125 |
| 0.053326826 | 0.016783639 | 0.08273733  | 0.016071991 |
| 0.029772405 | 0.059481251 | 0.000596165 | 0.104252416 |
| 0.039800759 | 0.067717284 | 0.210682095 | 0.030446706 |
| 0.115879049 | 0.071580655 | 0.149140468 | 0.045750987 |
| 0.018250227 | 0.18532536  | 0.014110206 | 0.111396996 |



|             |             |             |             |
|-------------|-------------|-------------|-------------|
| 0.011846273 | 0.103179595 | 0.143323276 | 0.046019408 |
| 0.067788886 | 0.016999389 | 0.225261461 | 0.026709291 |
| 0.009458716 | 0.048090115 | 0.080808088 | 0.030067987 |
| 0.013145799 | 0.024263484 | 0.011164063 | 0.206507024 |
| 0.056298483 | 0.100457364 | 0.01427837  | 0.028053925 |
| 0.040593192 | 0.106334749 | 0.006429228 | 0.036021055 |
| 0.009539324 | 0.043347683 | 0.059389959 | 0.076639145 |
| 0.183977486 | 0.070244221 | 0.014917221 | 0.016172768 |
| 0.023994554 | 0.005844808 | 0.057436276 | 0.063627858 |
| 0.026442626 | 0.056560293 | 0.001260183 | 0.095620322 |
| 0.013263108 | 0.200177141 | 0.060563403 | 0.212656052 |
| 0.019692356 | 0.220667176 | 0.017420574 | 0.038479913 |
| 0.021073152 | 0.024453187 | 0.016202911 | 0.059064716 |
| 0.185395428 | 0.020410629 | 0.04637686  | 0.076365686 |
| 0.063209286 | 0.067097386 | 0.074386176 | 0.025278689 |
| 0.051272292 | 0.07066886  | 0.12269052  | 0.130229823 |
| 0.043429633 | 0.004938427 | 0.019153263 | 0.045263879 |
| 0.008867124 | 0.026520241 | 0.02100964  | 0.004894623 |
| 0.16628162  | 0.038781119 | 0.022946866 | 0.095722345 |
| 0.019650381 | 0.04105837  | 0.022970211 | 0.065742082 |
| 0.205427106 | 0.036849428 | 0.084857592 | 0.038342271 |
| 0.049704433 | 0.025391307 | 0.108805497 | 0.015543083 |
| 0.016638615 | 0.102326606 | 0.032920204 | 0.031771948 |
| 0.046069586 | 0.158097526 | 0.114075653 | 0.007005995 |
| 0.015698842 | 0.010623442 | 0.007730291 | 0.017766191 |
| 0.011114521 | 0.035528963 | 0.0606913   | 0.040393505 |
| 0.16470002  | 0.256624047 | 0.029966734 | 0.09800877  |
| 0.011532247 | 0.090546495 | 0.225462198 | 0.002399059 |
| 0.042893316 | 0.007740954 | 0.004751694 | 0.029382412 |
| 0.079304204 | 0.054992577 | 0.028879937 | 0.224870252 |
| 0.02811319  | 0.124276209 | 0.069017404 | 0.010215154 |
| 0.024443158 | 0.021391939 | 0.134394395 | 0.148291914 |
| 0.013485726 | 0.055898085 | 0.066262294 | 0.020260426 |
| 0.016609032 | 0.208001246 | 0.030247769 | 0.109837972 |
| 0.268676404 | 0.063839737 | 0.031780305 | 0.307026046 |
| 0.248703903 | 0.040646407 | 0.02976218  | 0.202410632 |
| 0.035589186 | 0.114409346 | 0.026009301 | 0.093380288 |
| 0.131247962 | 0.028878128 | 0.135843231 | 0.038762771 |
| 0.016006044 | 0.031275509 | 0.174017019 | 0.056095574 |
| 0.178008866 | 0.028661644 | 0.00518445  | 0.037137699 |
| 0.038087576 | 0.022636299 | 0.172347663 | 0.043744867 |
| 0.015916768 | 0.009897044 | 0.195970572 | 0.038075819 |
| 0.017612507 | 0.162910376 | 0.074345551 | 0.02081707  |
| 0.033219626 | 0.050979186 | 0.03135131  | 0.056547281 |
| 0.047144158 | 0.051417041 | 0.075662467 | 0.049794396 |
| 0.020799461 | 0.113348965 | 0.023201062 | 0.011898161 |
| 0.080844904 | 0.020393701 | 0.066699345 | 0.112751761 |
| 0.011693874 | 0.013060639 | 0.124291025 | 0.204355355 |
| 0.034898925 | 0.024838284 | 0.019936729 | 0.074346625 |
| 0.03157431  | 0.028460558 | 0.024614131 | 0.246165865 |
| 0.27908282  | 0.020764024 | 0.029305494 | 0.044779646 |
| 0.06020772  | 0.006851332 | 0.034958288 | 0.027945914 |
| 0.157438559 | 0.010299928 | 0.009909887 | 0.015261967 |
| 0.144765554 | 0.069744709 | 0.01703779  | 0.044160081 |

|             |             |             |             |
|-------------|-------------|-------------|-------------|
| 0.003766924 | 0.086554664 | 0.027539602 | 0.034819477 |
| 0.021971578 | 0.180261918 | 0.082641233 | 0.02378373  |
| 0.02948635  | 0.026779052 | 0.046133904 | 0.037015506 |
| 0.029436883 | 0.017733391 | 0.017912181 | 0.193940884 |
| 0.034648276 | 0.021876108 | 0.041713452 | 0.024290114 |
| 0.051939383 | 0.087693626 | 0.144057248 | 0.087699588 |
| 0.052735047 | 0.020170751 | 0.00605063  | 0.045769998 |
| 0.014640567 | 0.130290108 | 0.029791822 | 0.063301627 |
| 0.037254203 | 0.211416798 | 0.026606586 | 0.023002308 |
| 0.037673375 | 0.053463268 | 0.101634264 | 0.017479829 |
| 0.00938197  | 0.077912622 | 0.046565401 | 0.173621915 |
| 0.034490853 | 0.001810155 | 0.14358266  | 0.033925383 |
| 0.031765975 | 0.072685149 | 0.023079751 | 0.122935277 |
| 0.045839948 | 0.188505258 | 0.00770103  | 0.099586562 |
| 0.100339636 | 0.010179341 | 0.040988401 | 0.020356047 |
| 0.140530189 | 0.150612796 | 0.02449021  | 0.052694882 |
| 0.015387133 | 0.154473958 | 0.037918482 | 0.019095131 |
| 0.091659984 | 0.205347289 | 0.174422992 | 0.081320312 |
| 0.015457485 | 0.04874864  | 0.074438233 | 0.001536281 |
| 0.06564705  | 0.047624482 | 0.067671745 | 0.05008539  |
| 0.04416887  | 0.088971972 | 0.103432638 | 0.021515505 |
| 0.064722912 | 0.016505072 | 0.078569158 | 0.005978896 |
| 0.072635828 | 0.126824965 | 0.02117214  | 0.015476494 |
| 0.013384678 | 0.035114917 | 0.031679124 | 0.183326344 |
| 0.024091501 | 0.207465718 | 0.060125266 | 0.061897801 |
| 0.133137546 | 0.056137857 | 0.151208132 | 0.074941534 |
| 0.027343942 | 0.065075367 | 0.017504098 | 0.010865105 |
| 0.063141528 | 0.025355979 | 0.058545737 | 0.019829111 |
| 0.017603784 | 0.061618482 | 0.029016684 | 0.035776865 |
| 0.028833662 | 0.033008549 | 0.027475547 | 0.070607711 |
| 0.032150971 | 0.022489581 | 0.029179246 | 0.03413283  |
| 0.096614473 | 0.0566208   | 0.036572842 | 0.061557532 |
| 0.124404829 | 0.033812316 | 0.079352561 | 0.005833201 |
| 0.029199596 | 0.017445457 | 0.052508441 | 0.091157191 |
| 0.030889884 | 0.020011125 | 0.051866904 | 0.163349713 |
| 0.029490892 | 0.023172259 | 0.027109906 | 0.042855193 |
| 0.204986978 | 0.100347968 | 0.050684175 | 0.054415669 |
| 0.013526637 | 0.028620188 | 0.037804586 | 0.023536303 |
| 0.018007304 | 0.118365115 | 0.02144727  | 0.00842078  |
| 0.057958342 | 0.022313117 | 0.058315797 | 0.278629391 |
| 0.17415033  | 1           | 0.013817476 | 0.090281745 |
| 0.0119372   | 0.095816556 | 0.004019468 | 0.115499593 |
| 0.127164332 | 0.018085285 | 0.120493442 | 0.047534037 |
| 0.069596966 | 0.018645328 | 0.07539274  | 0.218923025 |
| 0.015392555 | 0.03560795  | 0.042083293 | 0.139694834 |
| 0.021792886 | 0.081346001 | 0.13308328  | 0.012708717 |
| 0.007222629 | 0.00707168  | 0.032815598 | 0.055649298 |
| 0.059730573 | 0.060841413 | 0.017365756 | 0.137238083 |
| 0.058198508 | 0.019461675 | 0.03406492  | 0.029299629 |
| 0.216275428 | 0.024583169 | 0.009181399 | 0.051948816 |
| 0.055521244 | 0.174111447 | 0.011689661 | 0.029048692 |
| 0.095299488 | 0.017252002 | 0.048237073 | 0.021162602 |
| 0.063441055 | 0.097067432 | 0.012198744 | 0.025103306 |
| 0.043382529 | 0.021547449 | 0.082809849 | 0.049071419 |

|             |             |             |             |
|-------------|-------------|-------------|-------------|
| 0.009873282 |             |             |             |
| TNFRSF18    | 0.248601669 | 0.348304669 | 0.187775042 |
| 0.212451044 | 0.171563136 | 0.111779013 | 0.038103797 |
| 0.012353579 | 0.024941082 | 0.000350382 | 0.012466574 |
| 0.240358202 | 0.044032496 | 0.025237936 | 0.049140876 |
| 0.259553954 | 0.040180196 | 0.067163035 | 0.065135735 |
| 0.17695198  | 0.00554569  | 0.232605012 | 0.012468786 |
| 0.100661532 | 0.05518899  | 0.022078923 | 0.132067169 |
| 0.246996458 | 0.027202602 | 0.060767554 | 0.138670053 |
| 0.033543106 | 0.239409423 | 0.352862572 | 0.271469491 |
| 0.362215478 | 0.230546783 | 0.001589125 | 0.036495237 |
| 0.23374882  | 0.303082437 | 0.177602293 | 0.116160772 |
| 0.006344166 | 0.285510825 | 0.065217285 | 0.241344159 |
| 0.020821378 | 0.012011715 | 0.021336395 | 0.248020578 |
| 0.311474551 | 0.198109386 | 0.022512016 | 0.022734902 |
| 0.045830145 | 0.016294535 | 0.107645098 | 0.087877021 |
| 0.050592495 | 0.009461977 | 0.32916     | 0.013564304 |
| 0.018793067 | 0.029227041 | 0.050931912 | 0.037462961 |
| 0.132699342 | 0.159988326 | 0.001779683 | 0.243866934 |
| 0.001145284 | 0.162267832 | 0.209653397 | 0.157729445 |
| 0.017933089 | 0.004115659 | 0.062949741 | 0.104010527 |
| 0.276311308 | 0.313213342 | 0.371554636 | 0.39318208  |
| 0.042406124 | 0.111643127 | 0.233904941 | 0.032870396 |
| 0.268642496 | 0.030188638 | 0.016969434 | 0.284918592 |
| 0.380137801 | 0.366705985 | 0.061797212 | 0.154135848 |
| 0.240649778 | 0.285260904 | 0.134100678 | 0.141605261 |
| 0.103117077 | 0.03885047  | 0.273168136 | 0.374835382 |
| 0.19934251  | 0.225908254 | 0.072711489 | 0.178858875 |
| 0.016259185 | 0.042617263 | 0.146320524 | 0.029782418 |
| 0.287910215 | 0.003517234 | 0.12128244  | 0.094391903 |
| 0.037839955 | 0.247467344 | 0.392394443 | 0.04263012  |
| 0.168547188 | 0.004682254 | 0.107685297 | 0.012131628 |
| 0.042044945 | 0.130600275 | 0.307497187 | 0.274932889 |
| 0.017394858 | 0.072899089 | 0.044774674 | 0.001572799 |
| 0.012608327 | 0.054097752 | 0.269927387 | 0.091745245 |
| 0.230968416 | 0.293956116 | 0.066639851 | 0.174688254 |
| 0.28093003  | 0.368136513 | 0.004342378 | 0.011376371 |
| 0.148004499 | 0.051906306 | 0.092530522 | 0.190079788 |
| 0.148498066 | 0.010353401 | 0.022880088 | 0.371516457 |
| 0.219354724 | 0.017701432 | 0.04807726  | 0.250157579 |
| 0.044286323 | 0.226014863 | 0.017229579 | 0.039988126 |
| 0.004553498 | 0.364976898 | 0.019964498 | 0.059320904 |
| 0.087383759 | 0.053874613 | 0.001991598 | 0.034309701 |
| 0.030972152 | 0.279873789 | 0.313520766 | 0.024831845 |
| 0.063477902 | 0.232235896 | 0.055862665 | 0.217125201 |
| 0.003364106 | 0.010267483 | 0.038890364 | 0.346916803 |
| 0.065711612 | 0.383788654 | 0.045083262 | 0.087919857 |
| 0.141632765 | 0.290138197 | 0.004398144 | 0.316110919 |
| 0.388102957 | 0.043114449 | 0.163578554 | 0.222132987 |
| 0.185346225 | 0.27232498  | 0.007170162 | 0.223577268 |
| 0.135662691 | 0.016988978 | 0.369054315 | 0.067595975 |
| 0.297284164 | 0.015147118 | 0.038902911 | 0.387887551 |
| 0.292199482 | 0.002110161 | 0.026233181 | 0.149696705 |
| 0.020849764 | 0.00530355  | 0.21811375  | 0.183746947 |

|             |             |             |             |
|-------------|-------------|-------------|-------------|
| 0.163204126 | 0.305492799 | 0.334471271 | 0.180885037 |
| 0.172701773 | 0.033546524 | 0.005008045 | 0.18853305  |
| 0.298070841 | 0.070515729 | 0.247722709 | 0.026964181 |
| 0.089870863 | 0.294254199 | 0.289572401 | 0.031257615 |
| 0.008520535 | 0.054979003 | 0.002034183 | 0.144892113 |
| 0.278890062 | 0.012500761 | 0.177340764 | 0.035273314 |
| 0.030348147 | 0.373273582 | 0.13924769  | 0.189490983 |
| 0.124526965 | 0.129702588 | 0.054703192 | 0.026428939 |
| 0.045730119 | 0.040803147 | 0.123970859 | 0.095758827 |
| 0.002309845 | 0.022672702 | 0.015231794 | 0.082790444 |
| 0.023470216 | 0.061348272 | 0.056596434 | 0.177185224 |
| 0.033775712 | 0.016191665 | 0.14047154  | 0.102567106 |
| 0.04673224  | 0.007234532 | 0.337817372 | 0.207389742 |
| 0.120379717 | 0.02262952  | 0.01341798  | 0.047851674 |
| 0.289004819 | 0.073695771 | 0.028254119 | 0.263918914 |
| 0.005904166 | 0.358982394 | 0.03822657  | 0.053727742 |
| 0.126032018 | 0.075375817 | 0.289758313 | 0.009550687 |
| 0.116464051 | 0.269050375 | 0.130939326 | 0.066780787 |
| 0.202625247 | 0.171698621 | 0.003870732 | 0.207092432 |
| 0.188462611 | 0.009532844 | 0.380503359 | 0.044932488 |
| 0.010809735 | 0.309812027 | 0.303467168 | 0.035890467 |
| 0.034063942 | 0.08684647  | 0.002225242 | 0.165340377 |
| 0.356679681 | 0.256539333 | 0.246498119 | 0.119008941 |
| 0.00689934  | 0.002094229 | 0.109511761 | 0.210311796 |
| 0.32554475  | 0.397042634 | 0.093936152 | 0.162869028 |
| 0.079198339 | 0.099846439 | 0.007572813 | 0.370731327 |
| 0.058964909 | 0.352576887 | 0.002503392 | 0.360839465 |
| 0.358400112 | 0.042053847 | 0.040622765 | 0.065246105 |
| 0.183265487 | 0.008887819 | 0.026266847 | 0.325757564 |
| 0.273050555 | 0.098731827 | 0.097441248 | 0.218176234 |
| 0.001110404 | 0.003247548 | 0.222134779 | 0.132582743 |
| 0.079257517 | 0.052698646 | 0.099639116 | 0.03232896  |
| 0.007703674 | 0.264820468 | 0.300407745 | 0.022426352 |
| 0.092098831 | 0.032158145 | 0.230577032 | 0.00883372  |
| 0.402853266 | 0.384185232 | 0.345029223 | 0.017201184 |
| 0.275671263 | 0.372906728 | 0.276850896 | 0.033830673 |
| 0.013423098 | 0.379641639 | 0.16446154  | 0.003718545 |
| 0.310638537 | 0.02916785  | 0.002132166 | 0.302886601 |
| 0.041798605 | 0.26391062  | 0.000577631 | 0.048588827 |
| 0.031030455 | 0.356748743 | 0.315861296 | 0.13531273  |
| 0.0240807   | 0.136814661 | 0.005816612 | 0.398236082 |
| 0.313172367 | 0.012719049 | 0.073409093 | 0.292422626 |
| 0.347211068 | 0.335600649 | 0.205661375 | 0.373451344 |
| 0.267391672 | 0.352983738 | 0.026423446 | 0.132990591 |
| 0.26000881  | 0.401518633 | 0.201639829 | 0.274684346 |
| 0.278535114 | 0.277011353 | 0.099047054 | 0.002646359 |
| 0.078614741 | 0.020031041 | 0.051973508 | 0.02394798  |
| 0.083099201 | 0.046624131 | 0.325189229 | 0.324441119 |
| 0.373806099 | 0.003261056 | 0.010701861 | 0.266025321 |
| 0.231421877 | 0.290706631 | 0.009407954 | 0.004325745 |
| 0.004142183 | 0.021164878 | 0.098165073 | 0.118368052 |
| 0.355549539 | 0.018739446 | 0.001329146 | 0.002279096 |
| 0.03855699  | 0.306229165 | 0.33579575  | 0.188273899 |
| 0.326630007 | 0.020367395 | 0.033906317 | 0.195664933 |

|                      |             |             |             |
|----------------------|-------------|-------------|-------------|
| 0.0383397            | 0.123029909 | 0.364090607 | 0.277687854 |
| 0.016434213          | 0.109770232 | 0.088407643 | 0.311956029 |
| 0.122952147          | 0.15727204  | 0.237653963 | 0.046891175 |
| 0.005943047          | 0.035602746 | 0.030549749 | 0.293287158 |
| 0.359151386          | 0.018634358 | 0.011117247 | 0.012086318 |
| 0.015246988          | 0.322089885 | 0.02667787  | 0.371680966 |
| 0.241123862          | 0.26968708  | 0.039132101 | 0.313178019 |
| 0.014232637          | 0.317530304 | 0.217210366 | 0.006895189 |
| 0.067380759          | 0.004125329 | 0.346038686 | 0.065111333 |
| 0.038442434          | 0.157458966 | 0.08810619  | 0.013221821 |
| 0.128017671          | 0.018991845 | 0.335895339 | 0.373364742 |
| 0.024050928          | 0.029760841 | 0.12769548  | 0.187809826 |
| 0.048832344          | 0.242869541 | 0.320960303 | 0.130200571 |
| 0.008426247          | 0.088945223 | 0.175729471 | 0.160742799 |
| 0.017757563          | 0.373728972 | 0.06826263  | 0.387498601 |
| 0.19588738           | 0.299026713 | 0.341668706 | 0.116374381 |
| 0.091143969          | 0.128839851 | 0.132066359 | 0.001781543 |
| 0.11904329           | 0.300138865 | 0.08432498  | 0.060162993 |
| 0.100011649          | 0.266428689 | 0.007198752 | 0.018667384 |
| 0.251266078          | 0.06800257  | 0.019197732 | 0.280272799 |
| 0.137226863          | 0.172719457 | 0.003201884 | 0.02751905  |
| 0.367261746          | 0.265313594 | 0.014132459 | 0.194299671 |
| 0.05859386           | 0.158318409 | 0.320645536 | 0.344200483 |
| 0.074043809          | 0.285274378 | 0.208851262 | 0.143543601 |
| 0.222358547          | 0.069908582 | 0.354669138 | 0.003753295 |
| 0.053198034          | 0.198273196 | 0.016494276 | 0.048410702 |
| 0.035421168          | 0.013817476 | 1           | 0.251916525 |
| 0.145147978          | 0.172099324 | 0.028858786 | 0.021308864 |
| 0.163665597          | 0.098327361 | 0.157923944 | 0.024663427 |
| 0.014102318          | 0.325238452 | 0.003580805 | 0.018352777 |
| 0.138219873          | 0.30107166  | 0.227770636 | 0.073537473 |
| 0.116866493          | 0.061819403 | 0.105817228 | 0.045501685 |
| 0.054002723          | 0.075218661 | 0.295077141 | 0.004391401 |
| 0.001464909          | 0.352211951 | 0.085641629 | 0.015153214 |
| 0.032135266          | 0.148564578 | 0.042581592 | 0.048073433 |
| 0.019499354          | 0.378257968 | 0.059025564 | 0.204181581 |
| 0.086508514          | 0.013375032 | 0.169465355 | 0.016412144 |
| 0.011127884          | 0.258457564 | 0.248901136 | 0.373068156 |
| 0.155864393          | 0.247581144 | 0.258135429 | 0.258863616 |
| 0.026889999          | 0.183685434 | 0.003920848 | 0.258014846 |
| 0.123234392          |             |             |             |
| TNFRSF26 0.363643826 | 0.486677603 | 0.350213652 |             |
| 0.385550776          | 0.409611999 | 0.263200053 | 0.251057576 |
| 0.210410305          | 0.124622132 | 0.01211399  | 0.045967591 |
| 0.373535619          | 0.222789643 | 0.260922127 | 0.238885156 |
| 0.424750556          | 0.237248763 | 0.360949584 | 0.323383413 |
| 0.383966034          | 0.126120614 | 0.404668889 | 0.173974043 |
| 0.359750025          | 0.17804334  | 0.142810685 | 0.293851241 |
| 0.454757369          | 0.160008786 | 0.228371543 | 0.321930495 |
| 0.242318885          | 0.408468028 | 0.454409437 | 0.378668199 |
| 0.444898413          | 0.313869401 | 0.051804046 | 0.231525871 |
| 0.397078099          | 0.37667898  | 0.370475241 | 0.356261873 |
| 0.095521832          | 0.411681406 | 0.286605013 | 0.406540036 |
| 0.210589532          | 0.080365933 | 0.183170613 | 0.383515285 |

|             |             |             |             |
|-------------|-------------|-------------|-------------|
| 0.395483862 | 0.317115734 | 0.239704669 | 0.207140817 |
| 0.175964389 | 0.197198946 | 0.234333207 | 0.236259772 |
| 0.290498981 | 0.132048415 | 0.419967649 | 0.119314666 |
| 0.164340056 | 0.295204215 | 0.297907081 | 0.289566663 |
| 0.343713798 | 0.311423679 | 0.065851962 | 0.318557895 |
| 0.005852324 | 0.381690082 | 0.424461554 | 0.24975593  |
| 0.12276042  | 0.052754746 | 0.322848642 | 0.327558169 |
| 0.473889797 | 0.425305571 | 0.496463773 | 0.486458007 |
| 0.260090268 | 0.406763631 | 0.368224117 | 0.262750194 |
| 0.408768516 | 0.215738699 | 0.168011605 | 0.434348    |
| 0.49850376  | 0.470490535 | 0.299694803 | 0.36881313  |
| 0.353766406 | 0.447137511 | 0.32183438  | 0.37224096  |
| 0.255608752 | 0.148704996 | 0.382838234 | 0.498709001 |
| 0.352390445 | 0.322847509 | 0.262088573 | 0.376972976 |
| 0.158927014 | 0.28832441  | 0.374893849 | 0.252069373 |
| 0.484277782 | 0.047824125 | 0.327807881 | 0.33193982  |
| 0.343078504 | 0.390642535 | 0.466800819 | 0.265672939 |
| 0.418743111 | 0.063464681 | 0.14529329  | 0.122703901 |
| 0.322715653 | 0.195270892 | 0.391057321 | 0.445026986 |
| 0.254885169 | 0.371750455 | 0.317562777 | 0.020115997 |
| 0.093961443 | 0.322301294 | 0.394065577 | 0.390545112 |
| 0.391711438 | 0.337366205 | 0.258756582 | 0.307741134 |
| 0.328517183 | 0.49230262  | 0.032605818 | 0.183831425 |
| 0.35352153  | 0.336217417 | 0.341381624 | 0.362325184 |
| 0.347998304 | 0.19220974  | 0.234878773 | 0.508266649 |
| 0.378672278 | 0.17397986  | 0.304905875 | 0.409726529 |
| 0.273556131 | 0.389858273 | 0.216112247 | 0.319581614 |
| 0.107048618 | 0.41671828  | 0.101039679 | 0.317388483 |
| 0.195472492 | 0.243072348 | 0.05257274  | 0.257285227 |
| 0.25226906  | 0.372710931 | 0.385736363 | 0.227069871 |
| 0.349671698 | 0.401425616 | 0.267681957 | 0.31158829  |
| 0.021620791 | 0.131739362 | 0.216682582 | 0.488461373 |
| 0.192211852 | 0.501528872 | 0.374210309 | 0.386355642 |
| 0.37594597  | 0.445362544 | 0.008919217 | 0.422806836 |
| 0.471151858 | 0.213882174 | 0.357516383 | 0.411614192 |
| 0.293445604 | 0.434816501 | 0.045891686 | 0.414411664 |
| 0.263965495 | 0.187438875 | 0.519452824 | 0.260319151 |
| 0.418192266 | 0.106976262 | 0.295642164 | 0.396778922 |
| 0.336923232 | 0.027101059 | 0.181193649 | 0.343279635 |
| 0.100176594 | 0.118676562 | 0.376732364 | 0.367633562 |
| 0.331357255 | 0.433246287 | 0.511088262 | 0.273919738 |
| 0.389534178 | 0.309403562 | 0.057383401 | 0.395197077 |
| 0.409012267 | 0.289787827 | 0.387731136 | 0.287662262 |
| 0.236061372 | 0.432527739 | 0.354926223 | 0.147887166 |
| 0.103077658 | 0.310456801 | 0.039955427 | 0.34242422  |
| 0.344398854 | 0.162560125 | 0.294342992 | 0.304635701 |
| 0.171554423 | 0.500308278 | 0.253101153 | 0.272383954 |
| 0.17700709  | 0.312407255 | 0.3353146   | 0.207455924 |
| 0.20535521  | 0.266519939 | 0.323712333 | 0.331040656 |
| 0.075265737 | 0.186755996 | 0.066830545 | 0.279939213 |
| 0.149242014 | 0.265220451 | 0.24506336  | 0.307917127 |
| 0.321485428 | 0.16288914  | 0.368772647 | 0.325407974 |
| 0.210915843 | 0.064211737 | 0.473894296 | 0.406873783 |
| 0.250484405 | 0.239960832 | 0.13176643  | 0.238241431 |

|             |             |             |             |
|-------------|-------------|-------------|-------------|
| 0.451585803 | 0.192286508 | 0.194447523 | 0.421222441 |
| 0.083735112 | 0.498554142 | 0.264409515 | 0.220578386 |
| 0.34730983  | 0.325386005 | 0.473500848 | 0.062916333 |
| 0.335133865 | 0.422460735 | 0.407036528 | 0.257896094 |
| 0.338798428 | 0.372312105 | 0.077580824 | 0.332220161 |
| 0.32123283  | 0.098826188 | 0.49285327  | 0.245377611 |
| 0.08426767  | 0.385839856 | 0.342006476 | 0.177028652 |
| 0.176734798 | 0.289718667 | 0.077843269 | 0.374356319 |
| 0.489344092 | 0.404526572 | 0.346964245 | 0.314717009 |
| 0.096119714 | 0.027460529 | 0.339204244 | 0.359769279 |
| 0.437209832 | 0.482134089 | 0.381710137 | 0.342441821 |
| 0.332268521 | 0.293686499 | 0.137811524 | 0.486714322 |
| 0.302158015 | 0.471689308 | 0.039418469 | 0.393340586 |
| 0.431660029 | 0.226047457 | 0.15546278  | 0.277645593 |
| 0.331288071 | 0.111072994 | 0.321617603 | 0.439827266 |
| 0.405235453 | 0.327321834 | 0.29035406  | 0.402891191 |
| 0.042044929 | 0.09473387  | 0.367625485 | 0.241803291 |
| 0.319642399 | 0.305020753 | 0.087335877 | 0.302451248 |
| 0.095129016 | 0.403636844 | 0.47372294  | 0.111110382 |
| 0.217913748 | 0.273916343 | 0.424987846 | 0.106054126 |
| 0.419849934 | 0.461365616 | 0.458506937 | 0.270236207 |
| 0.395026128 | 0.444088289 | 0.304046615 | 0.200606586 |
| 0.071692309 | 0.456571026 | 0.312341105 | 0.046395676 |
| 0.491317653 | 0.163553671 | 0.030744823 | 0.462931956 |
| 0.283381697 | 0.366922706 | 0.005739601 | 0.117647582 |
| 0.132716494 | 0.478145926 | 0.406907515 | 0.33388368  |
| 0.148024581 | 0.40176078  | 0.030112517 | 0.504551841 |
| 0.438357974 | 0.057394841 | 0.26024874  | 0.37065335  |
| 0.342225838 | 0.489337342 | 0.298754163 | 0.415448188 |
| 0.332914353 | 0.43118335  | 0.251830364 | 0.354048129 |
| 0.397992405 | 0.440060522 | 0.369505302 | 0.420888893 |
| 0.45987408  | 0.413052914 | 0.335478252 | 0.04581734  |
| 0.157097949 | 0.205926461 | 0.187233863 | 0.104047624 |
| 0.23777896  | 0.215634329 | 0.458424655 | 0.48716681  |
| 0.462700957 | 0.032354864 | 0.193148318 | 0.372195559 |
| 0.426114643 | 0.48353195  | 0.077237104 | 0.013050062 |
| 0.016143086 | 0.043869583 | 0.343428629 | 0.360619773 |
| 0.463518474 | 0.142754592 | 0.027640758 | 0.086573698 |
| 0.312787435 | 0.370172842 | 0.454361111 | 0.399804194 |
| 0.412383618 | 0.198748152 | 0.200903934 | 0.399007481 |
| 0.135699236 | 0.230634764 | 0.469467319 | 0.419866998 |
| 0.142396632 | 0.35704658  | 0.356061827 | 0.490597166 |
| 0.089667674 | 0.408930915 | 0.37565306  | 0.297548625 |
| 0.066687904 | 0.181925625 | 0.141851042 | 0.451937119 |
| 0.425431101 | 0.126088637 | 0.077325602 | 0.114064009 |
| 0.168828301 | 0.473913648 | 0.236394988 | 0.517936861 |
| 0.41724862  | 0.465399547 | 0.189403857 | 0.426557229 |
| 0.087046136 | 0.422572347 | 0.354707537 | 0.049346594 |
| 0.400363576 | 0.063122172 | 0.433898853 | 0.121403348 |
| 0.280789688 | 0.337671709 | 0.203235603 | 0.07502854  |
| 0.207036302 | 0.143625421 | 0.483034132 | 0.466077161 |
| 0.121388862 | 0.309832081 | 0.396662679 | 0.404844024 |
| 0.249670205 | 0.392770801 | 0.435312612 | 0.259500777 |
| 0.140648014 | 0.224909943 | 0.369397577 | 0.299807286 |

|             |             |             |             |
|-------------|-------------|-------------|-------------|
| 0.259058461 | 0.510567959 | 0.278338627 | 0.504958028 |
| 0.335805234 | 0.446742754 | 0.442462875 | 0.331268776 |
| 0.31154371  | 0.309518965 | 0.275860926 | 0.039033541 |
| 0.388211744 | 0.455437856 | 0.353661289 | 0.201685191 |
| 0.315264227 | 0.330938742 | 0.1303486   | 0.191284249 |
| 0.287784793 | 0.224859469 | 0.22345782  | 0.474407386 |
| 0.339570417 | 0.305884874 | 0.110432696 | 0.128134029 |
| 0.504495988 | 0.400678535 | 0.166782119 | 0.335177849 |
| 0.313303096 | 0.359044852 | 0.423575045 | 0.427517697 |
| 0.32395284  | 0.40686854  | 0.394487909 | 0.279684201 |
| 0.375617051 | 0.326983781 | 0.463120942 | 0.106494575 |
| 0.139732409 | 0.335166443 | 0.148792808 | 0.213952645 |
| 0.245169917 | 0.090281745 | 0.251916525 | 1           |
| 0.301324227 | 0.38856245  | 0.277100391 | 0.167427323 |
| 0.415507497 | 0.323203718 | 0.412010967 | 0.219645655 |
| 0.136668146 | 0.430347693 | 0.034159848 | 0.160615486 |
| 0.336650967 | 0.379693658 | 0.329013888 | 0.348708336 |
| 0.295459434 | 0.283696275 | 0.373941521 | 0.232629787 |
| 0.210026355 | 0.320246558 | 0.375725598 | 0.075521506 |
| 0.060090698 | 0.514822853 | 0.303552809 | 0.088325873 |
| 0.185405    | 0.289705489 | 0.388731788 | 0.246728003 |
| 0.085529905 | 0.43824233  | 0.224179214 | 0.389826076 |
| 0.335196747 | 0.176182444 | 0.307742238 | 0.144987342 |
| 0.150700308 | 0.40109868  | 0.36029448  | 0.457593882 |
| 0.398386468 | 0.41657017  | 0.374288172 | 0.389580083 |
| 0.212424861 | 0.310834963 | 0.072981691 | 0.445174811 |
| 0.276535194 |             |             |             |
| TNFSF10     | 0.308451166 | 0.437396036 | 0.18789333  |
| 0.256105307 | 0.199422575 | 0.143983704 | 0.045308538 |
| 0.024013835 | 0.020264656 | 0.000509577 | 0.009877421 |
| 0.283924413 | 0.063102623 | 0.04558865  | 0.062267471 |
| 0.293479895 | 0.053928216 | 0.082809263 | 0.075609555 |
| 0.22237847  | 0.010451601 | 0.264415007 | 0.017212115 |
| 0.117117974 | 0.048659374 | 0.02011317  | 0.100232044 |
| 0.310857355 | 0.022842595 | 0.087239823 | 0.189858853 |
| 0.042588517 | 0.31488963  | 0.444400107 | 0.312506941 |
| 0.460998633 | 0.279151373 | 0.004341071 | 0.048857593 |
| 0.304123653 | 0.32291461  | 0.224131263 | 0.136175953 |
| 0.007627481 | 0.383409146 | 0.073893444 | 0.25059837  |
| 0.033653355 | 0.011879384 | 0.031051381 | 0.333769311 |
| 0.401565464 | 0.225846712 | 0.031210931 | 0.026164849 |
| 0.064411981 | 0.030735043 | 0.12000284  | 0.131277138 |
| 0.060482632 | 0.016108015 | 0.416328165 | 0.014266793 |
| 0.029635347 | 0.041020778 | 0.068383564 | 0.050925615 |
| 0.131593254 | 0.214855111 | 0.002875268 | 0.280832486 |
| 0.00027049  | 0.200228484 | 0.225755937 | 0.11670462  |
| 0.0149816   | 0.005456132 | 0.07222033  | 0.129415482 |
| 0.345937178 | 0.396998287 | 0.432800137 | 0.453906942 |
| 0.061443923 | 0.117856233 | 0.23558875  | 0.041420217 |
| 0.335456148 | 0.035258814 | 0.023718494 | 0.319910705 |
| 0.44218245  | 0.459515722 | 0.073461993 | 0.139475562 |
| 0.2912818   | 0.372603523 | 0.146324396 | 0.159329891 |
| 0.095965824 | 0.034054762 | 0.350974196 | 0.456810411 |
| 0.271534379 | 0.191267389 | 0.06379111  | 0.246353005 |



|             |             |             |             |
|-------------|-------------|-------------|-------------|
| 0.018008551 | 0.070514285 | 0.172796069 | 0.054838784 |
| 0.358117215 | 0.003003812 | 0.109153168 | 0.123767677 |
| 0.055410302 | 0.308302996 | 0.475686875 | 0.047961414 |
| 0.197511443 | 0.005948172 | 0.081520483 | 0.014360313 |
| 0.07630691  | 0.116358132 | 0.401938454 | 0.345895487 |
| 0.035941101 | 0.107627491 | 0.055422381 | 0.001287841 |
| 0.012923668 | 0.067839357 | 0.357678803 | 0.119797806 |
| 0.282018193 | 0.351667032 | 0.060356627 | 0.238741826 |
| 0.311718993 | 0.429642808 | 0.007150597 | 0.016493797 |
| 0.172870118 | 0.069589381 | 0.09996632  | 0.241864779 |
| 0.137595437 | 0.017148796 | 0.028815478 | 0.441997431 |
| 0.299390289 | 0.018745222 | 0.069101013 | 0.284840795 |
| 0.069601289 | 0.222844518 | 0.023561751 | 0.060237367 |
| 0.00722594  | 0.446641315 | 0.018388239 | 0.081576226 |
| 0.080737665 | 0.076599494 | 0.002668811 | 0.050446088 |
| 0.051383351 | 0.34329158  | 0.40931864  | 0.026592482 |
| 0.085030225 | 0.250263844 | 0.083913671 | 0.266763701 |
| 0.002406186 | 0.012826241 | 0.060426879 | 0.435686252 |
| 0.101497069 | 0.459278966 | 0.066661908 | 0.093006456 |
| 0.139976063 | 0.335357658 | 0.00288216  | 0.407997975 |
| 0.473444767 | 0.065934078 | 0.197220779 | 0.256259071 |
| 0.161013157 | 0.328871892 | 0.01293197  | 0.274726285 |
| 0.197237112 | 0.019150957 | 0.436020708 | 0.063775745 |
| 0.389430299 | 0.01291827  | 0.057218395 | 0.415208272 |
| 0.360210462 | 0.003560825 | 0.03716854  | 0.190286068 |
| 0.018421386 | 0.009700005 | 0.271025377 | 0.214517911 |
| 0.167897247 | 0.346767855 | 0.398034103 | 0.148913433 |
| 0.192812359 | 0.044354743 | 0.00499183  | 0.178379866 |
| 0.352215616 | 0.102317557 | 0.322916082 | 0.043171994 |
| 0.132674505 | 0.371980246 | 0.353942624 | 0.039552155 |
| 0.008412186 | 0.075119744 | 0.003046829 | 0.131082173 |
| 0.330468383 | 0.021047435 | 0.166787956 | 0.054774207 |
| 0.031726608 | 0.452948171 | 0.109586035 | 0.142861835 |
| 0.101075897 | 0.175376554 | 0.065467859 | 0.047331447 |
| 0.067377518 | 0.048188762 | 0.111249542 | 0.093638861 |
| 0.003923648 | 0.02691241  | 0.012015351 | 0.110061083 |
| 0.040357081 | 0.086008843 | 0.080514257 | 0.24543319  |
| 0.06842522  | 0.027524946 | 0.154043764 | 0.106331678 |
| 0.045720492 | 0.005982684 | 0.421474361 | 0.242547284 |
| 0.175252014 | 0.030546412 | 0.0153297   | 0.090401458 |
| 0.363291914 | 0.097881085 | 0.041324159 | 0.342809266 |
| 0.007055281 | 0.423983123 | 0.059875013 | 0.047252802 |
| 0.143739691 | 0.089502628 | 0.345309352 | 0.011525252 |
| 0.160110197 | 0.360045251 | 0.1380029   | 0.055502184 |
| 0.287366087 | 0.21127913  | 0.005338493 | 0.271022415 |
| 0.262552925 | 0.010139091 | 0.470236888 | 0.056816584 |
| 0.009313521 | 0.343692365 | 0.338867772 | 0.029657198 |
| 0.029653513 | 0.100507396 | 0.003970019 | 0.162765688 |
| 0.435726775 | 0.29041132  | 0.302783703 | 0.105371806 |
| 0.008482078 | 0.003691717 | 0.096397423 | 0.224471037 |
| 0.427707951 | 0.479469321 | 0.107705632 | 0.167779656 |
| 0.089084853 | 0.099546352 | 0.017036906 | 0.449276612 |
| 0.0736081   | 0.450385539 | 0.002615744 | 0.392839718 |
| 0.451886363 | 0.067206644 | 0.032861841 | 0.083644273 |

|             |             |             |             |
|-------------|-------------|-------------|-------------|
| 0.256240923 | 0.009412497 | 0.042405037 | 0.415032787 |
| 0.329224245 | 0.086801568 | 0.087653938 | 0.273957525 |
| 0.00158635  | 0.00524244  | 0.210326977 | 0.11776832  |
| 0.087200792 | 0.055784978 | 0.071477952 | 0.059148197 |
| 0.009373766 | 0.350160065 | 0.370198635 | 0.017433782 |
| 0.120565399 | 0.05136051  | 0.251293079 | 0.008925607 |
| 0.442580754 | 0.467873658 | 0.441739641 | 0.029528645 |
| 0.355198498 | 0.440239024 | 0.28236729  | 0.031904455 |
| 0.009792412 | 0.468219262 | 0.209662221 | 0.004044645 |
| 0.38369064  | 0.046070482 | 0.002918485 | 0.389598344 |
| 0.046956843 | 0.362857601 | 0.000293505 | 0.046075901 |
| 0.028026592 | 0.409344407 | 0.394302627 | 0.181649841 |
| 0.033248366 | 0.168107958 | 0.005982693 | 0.482752236 |
| 0.403959537 | 0.009985469 | 0.077950568 | 0.360930973 |
| 0.381095894 | 0.431865036 | 0.161398041 | 0.419534631 |
| 0.298867509 | 0.443196239 | 0.045701044 | 0.128788174 |
| 0.323291958 | 0.478736199 | 0.253936802 | 0.350260826 |
| 0.35454313  | 0.311382868 | 0.110419739 | 0.002716147 |
| 0.052839462 | 0.029931612 | 0.063459154 | 0.021305124 |
| 0.118946851 | 0.046830332 | 0.408823613 | 0.389975153 |
| 0.444960216 | 0.002459954 | 0.019404949 | 0.337958606 |
| 0.305497465 | 0.359935127 | 0.008682818 | 0.002947351 |
| 0.003576027 | 0.013615596 | 0.130180731 | 0.106858073 |
| 0.421479779 | 0.035489278 | 0.001327738 | 0.004344268 |
| 0.05633125  | 0.296968266 | 0.426314362 | 0.222998163 |
| 0.373996001 | 0.025722135 | 0.054943303 | 0.238168585 |
| 0.03288554  | 0.175051713 | 0.431633787 | 0.363835108 |
| 0.019057392 | 0.096381141 | 0.120224758 | 0.382973625 |
| 0.085796975 | 0.170476588 | 0.298037213 | 0.071561397 |
| 0.006863763 | 0.03446064  | 0.026355735 | 0.341864971 |
| 0.455372921 | 0.025419985 | 0.012615247 | 0.023804634 |
| 0.022695943 | 0.393077922 | 0.038735517 | 0.446214852 |
| 0.305856571 | 0.327561296 | 0.04487473  | 0.389672333 |
| 0.014731178 | 0.414430223 | 0.195995462 | 0.00814298  |
| 0.084538155 | 0.004609512 | 0.441293232 | 0.053045508 |
| 0.058147045 | 0.211494205 | 0.069218034 | 0.012494753 |
| 0.105677876 | 0.021170607 | 0.396385019 | 0.420615983 |
| 0.022983071 | 0.043452522 | 0.12951053  | 0.227609245 |
| 0.069564544 | 0.293158042 | 0.4141607   | 0.154569964 |
| 0.012575196 | 0.101449134 | 0.230173179 | 0.22074774  |
| 0.036615107 | 0.439223655 | 0.082056593 | 0.469833192 |
| 0.249180815 | 0.370473675 | 0.424265259 | 0.126659865 |
| 0.118210525 | 0.168076732 | 0.174423665 | 0.002482987 |
| 0.139738715 | 0.366758675 | 0.110535487 | 0.058477498 |
| 0.098087259 | 0.255595783 | 0.010084041 | 0.037723582 |
| 0.218017357 | 0.096849684 | 0.031124274 | 0.333459422 |
| 0.189021145 | 0.235294269 | 0.006423318 | 0.022814643 |
| 0.461541167 | 0.334967396 | 0.020078002 | 0.234667003 |
| 0.058248796 | 0.154082179 | 0.372840391 | 0.395648281 |
| 0.100419363 | 0.363174805 | 0.281081188 | 0.198047813 |
| 0.305129396 | 0.077028158 | 0.445233308 | 0.008494904 |
| 0.043837165 | 0.260693366 | 0.02298997  | 0.041108697 |
| 0.038843946 | 0.0119372   | 0.145147978 | 0.301324227 |
| 1           | 0.208128474 | 0.059869489 | 0.022517607 |

|             |             |             |             |
|-------------|-------------|-------------|-------------|
| 0.170828461 | 0.124702727 | 0.175373466 | 0.032284192 |
| 0.018192604 | 0.412691551 | 0.002948753 | 0.021063708 |
| 0.158507054 | 0.340653946 | 0.214932749 | 0.073300141 |
| 0.128252682 | 0.071192161 | 0.121077276 | 0.069082166 |
| 0.074432419 | 0.108307716 | 0.338114859 | 0.00517835  |
| 0.002547309 | 0.425584329 | 0.112085851 | 0.013545642 |
| 0.039044993 | 0.190692402 | 0.075214337 | 0.056381404 |
| 0.016216535 | 0.456289613 | 0.075733253 | 0.221700915 |
| 0.109835355 | 0.018455836 | 0.243032811 | 0.02470158  |
| 0.013389545 | 0.349587616 | 0.243110967 | 0.465897361 |
| 0.15799614  | 0.291818007 | 0.346891486 | 0.342110974 |
| 0.035603169 | 0.202361996 | 0.004495044 | 0.327839836 |
| 0.132524027 |             |             |             |
| TNFSF14     | 0.294226205 | 0.450592084 | 0.227868516 |
| 0.404328462 | 0.320220322 | 0.210906366 | 0.268974178 |
| 0.173821654 | 0.135502102 | 0.042427089 | 0.091790408 |
| 0.270598998 | 0.26808005  | 0.286103112 | 0.186323424 |
| 0.407800887 | 0.264988034 | 0.222774576 | 0.313544912 |
| 0.351026802 | 0.167637127 | 0.397531452 | 0.206078134 |
| 0.241152614 | 0.196451733 | 0.191366376 | 0.246829004 |
| 0.440322074 | 0.200667724 | 0.204090726 | 0.31585657  |
| 0.193100502 | 0.359746182 | 0.400980822 | 0.35864678  |
| 0.390816027 | 0.248247653 | 0.039082194 | 0.229177461 |
| 0.338362055 | 0.354606281 | 0.358536976 | 0.337601889 |
| 0.148664174 | 0.36449165  | 0.302717456 | 0.28695797  |
| 0.161624225 | 0.1330914   | 0.153421709 | 0.335863825 |
| 0.365478217 | 0.25537994  | 0.208395244 | 0.244609366 |
| 0.222485135 | 0.179780928 | 0.204686576 | 0.212244234 |
| 0.312010343 | 0.132226536 | 0.382913272 | 0.150383638 |
| 0.150195003 | 0.236246907 | 0.241391411 | 0.267533485 |
| 0.235230651 | 0.277716812 | 0.071430883 | 0.213596997 |
| 0.020503162 | 0.332531205 | 0.301571801 | 0.179962886 |
| 0.151575276 | 0.130186112 | 0.264404628 | 0.311991371 |
| 0.44685907  | 0.35030332  | 0.473548615 | 0.450666491 |
| 0.292686904 | 0.303141066 | 0.251775123 | 0.307693749 |
| 0.358250774 | 0.267447559 | 0.154240541 | 0.426197719 |
| 0.472072695 | 0.429315394 | 0.271130039 | 0.28797489  |
| 0.361946014 | 0.408256017 | 0.249842486 | 0.30847562  |
| 0.212567264 | 0.109192048 | 0.354543545 | 0.465724694 |
| 0.309050023 | 0.22572894  | 0.263889705 | 0.365204029 |
| 0.172748347 | 0.201824434 | 0.341563508 | 0.216461046 |
| 0.458917918 | 0.072151246 | 0.280383176 | 0.310892256 |
| 0.23518509  | 0.349820562 | 0.419379194 | 0.285611863 |
| 0.295321124 | 0.102641848 | 0.131516068 | 0.112896134 |
| 0.271408674 | 0.131269061 | 0.341957563 | 0.451224437 |
| 0.234192873 | 0.309537154 | 0.285578995 | 0.026302603 |
| 0.116754947 | 0.204376615 | 0.353667522 | 0.259426387 |
| 0.347065094 | 0.264686152 | 0.284283205 | 0.271226079 |
| 0.278728724 | 0.466596409 | 0.031966483 | 0.19695932  |
| 0.279748856 | 0.216856908 | 0.323561323 | 0.280441813 |
| 0.314965327 | 0.194340899 | 0.268931096 | 0.473590325 |
| 0.342521656 | 0.22211252  | 0.197072955 | 0.396101294 |
| 0.272184033 | 0.310142517 | 0.234023559 | 0.343477148 |
| 0.166038124 | 0.363085883 | 0.10604794  | 0.220678212 |

|             |             |             |             |
|-------------|-------------|-------------|-------------|
| 0.15732046  | 0.241345019 | 0.039166151 | 0.22089967  |
| 0.249302303 | 0.375034449 | 0.324942742 | 0.223605681 |
| 0.349970622 | 0.340628878 | 0.195661049 | 0.330054171 |
| 0.061814242 | 0.128654613 | 0.143063163 | 0.466462013 |
| 0.171574175 | 0.44336298  | 0.313687521 | 0.27737649  |
| 0.321514622 | 0.416271268 | 0.004021766 | 0.375977941 |
| 0.423093566 | 0.14668518  | 0.333713598 | 0.285613174 |
| 0.217777468 | 0.43734493  | 0.023555797 | 0.396826831 |
| 0.219471009 | 0.186803472 | 0.48913115  | 0.285461818 |
| 0.363462757 | 0.154244392 | 0.257982135 | 0.351937395 |
| 0.311240577 | 0.031465223 | 0.172116226 | 0.330761024 |
| 0.09026689  | 0.144855736 | 0.326908216 | 0.342134383 |
| 0.288532238 | 0.384481577 | 0.488690735 | 0.206583143 |
| 0.317889748 | 0.268241817 | 0.057324148 | 0.293512078 |
| 0.34540789  | 0.211578306 | 0.357258233 | 0.269946804 |
| 0.159832755 | 0.40312209  | 0.305563943 | 0.13791087  |
| 0.150753827 | 0.267062146 | 0.066009857 | 0.295286278 |
| 0.27959164  | 0.256560218 | 0.211192495 | 0.197610518 |
| 0.18559183  | 0.470315197 | 0.178879615 | 0.176994319 |
| 0.118107683 | 0.29010591  | 0.289222836 | 0.276849355 |
| 0.271536948 | 0.260393234 | 0.248671921 | 0.271021537 |
| 0.121834159 | 0.248757346 | 0.037759859 | 0.238401728 |
| 0.251483895 | 0.274815305 | 0.251809243 | 0.279388088 |
| 0.296136431 | 0.259251122 | 0.331070081 | 0.211436662 |
| 0.196068157 | 0.087279578 | 0.437394788 | 0.350316475 |
| 0.224928326 | 0.243754917 | 0.140145198 | 0.214418571 |
| 0.45378139  | 0.163200106 | 0.128180123 | 0.417456581 |
| 0.073708599 | 0.454893738 | 0.323852826 | 0.251618259 |
| 0.304642865 | 0.345190819 | 0.455318359 | 0.062654319 |
| 0.233762022 | 0.400260452 | 0.294998433 | 0.270305661 |
| 0.32331163  | 0.317727661 | 0.121226848 | 0.286191434 |
| 0.286796463 | 0.14376567  | 0.450651637 | 0.234660854 |
| 0.097960484 | 0.344425363 | 0.331552716 | 0.189013982 |
| 0.177294079 | 0.302475927 | 0.105492706 | 0.327132071 |
| 0.462708553 | 0.421067258 | 0.347403866 | 0.203823659 |
| 0.161910626 | 0.086860346 | 0.24772079  | 0.228286373 |
| 0.387752153 | 0.436773254 | 0.32109966  | 0.314419198 |
| 0.317729494 | 0.245167329 | 0.111289604 | 0.460513131 |
| 0.150283247 | 0.410995172 | 0.050144656 | 0.353652461 |
| 0.382133054 | 0.182575133 | 0.189558683 | 0.260528499 |
| 0.317340674 | 0.143651975 | 0.241722858 | 0.403450668 |
| 0.37224531  | 0.268100108 | 0.243502319 | 0.317247619 |
| 0.075287025 | 0.135174584 | 0.270821855 | 0.155812992 |
| 0.273492826 | 0.27444947  | 0.052589837 | 0.22084168  |
| 0.171525446 | 0.38866778  | 0.436307513 | 0.1392151   |
| 0.201664461 | 0.188103789 | 0.326800449 | 0.139749119 |
| 0.377308451 | 0.396140687 | 0.413105878 | 0.233491991 |
| 0.35014476  | 0.414680192 | 0.22743528  | 0.17689593  |
| 0.082117161 | 0.402202313 | 0.268183228 | 0.092778533 |
| 0.469833139 | 0.132447509 | 0.098831983 | 0.428803575 |
| 0.276236191 | 0.313253271 | 0.008127591 | 0.047707806 |
| 0.096233761 | 0.433173622 | 0.36733715  | 0.300253803 |
| 0.143128243 | 0.294649997 | 0.012953168 | 0.448001633 |
| 0.414451916 | 0.070193085 | 0.203208694 | 0.347824311 |

|             |             |             |             |
|-------------|-------------|-------------|-------------|
| 0.314365451 | 0.441386711 | 0.224474427 | 0.392328468 |
| 0.261226457 | 0.390500467 | 0.285202928 | 0.320960028 |
| 0.392605827 | 0.386176028 | 0.338786289 | 0.375407298 |
| 0.455950563 | 0.357509358 | 0.324149093 | 0.084183525 |
| 0.115777159 | 0.185942008 | 0.170391848 | 0.146299273 |
| 0.177086489 | 0.231104251 | 0.403989164 | 0.458263351 |
| 0.433155517 | 0.0419676   | 0.203380843 | 0.338604233 |
| 0.410321424 | 0.454485425 | 0.046680258 | 0.009020341 |
| 0.008452596 | 0.069554199 | 0.277244268 | 0.274334308 |
| 0.423126145 | 0.153132983 | 0.04622042  | 0.112144151 |
| 0.272613102 | 0.281234259 | 0.421895653 | 0.380915833 |
| 0.351586354 | 0.204132394 | 0.225679926 | 0.376700814 |
| 0.151774569 | 0.183097638 | 0.449094521 | 0.393250666 |
| 0.112012664 | 0.270845779 | 0.229936738 | 0.474639194 |
| 0.057656382 | 0.336595884 | 0.296606199 | 0.306993914 |
| 0.039757474 | 0.177151302 | 0.150623938 | 0.409798552 |
| 0.37532492  | 0.220687195 | 0.151523106 | 0.095096054 |
| 0.252719134 | 0.427906502 | 0.297768188 | 0.485062111 |
| 0.405557551 | 0.464301463 | 0.160378518 | 0.385162913 |
| 0.127436123 | 0.385128284 | 0.281721682 | 0.052992748 |
| 0.266601588 | 0.065597627 | 0.374707044 | 0.135763517 |
| 0.240316369 | 0.281621986 | 0.146626837 | 0.071975472 |
| 0.119942212 | 0.168714151 | 0.473877889 | 0.427733929 |
| 0.088654183 | 0.260752166 | 0.30195573  | 0.303585205 |
| 0.218388905 | 0.412235303 | 0.392133853 | 0.20002175  |
| 0.192755401 | 0.120875094 | 0.350651368 | 0.252003334 |
| 0.232142469 | 0.478042531 | 0.272843518 | 0.451626389 |
| 0.286449238 | 0.38615342  | 0.401967052 | 0.286874729 |
| 0.254745972 | 0.222842966 | 0.294787521 | 0.089610532 |
| 0.311670421 | 0.458568666 | 0.242576093 | 0.220883184 |
| 0.327234663 | 0.224437776 | 0.107628843 | 0.101264628 |
| 0.192031825 | 0.193833536 | 0.290143105 | 0.44852521  |
| 0.247976961 | 0.264781816 | 0.103415908 | 0.146736944 |
| 0.45740277  | 0.347870129 | 0.159860831 | 0.324230514 |
| 0.261161678 | 0.314127979 | 0.373661586 | 0.380197368 |
| 0.213056433 | 0.398825105 | 0.370835737 | 0.305204073 |
| 0.360014063 | 0.298735866 | 0.418206678 | 0.089029861 |
| 0.122615027 | 0.238467379 | 0.241547116 | 0.196952639 |
| 0.286231182 | 0.095816556 | 0.172099324 | 0.38856245  |
| 0.208128474 | 1           | 0.194171192 | 0.163931589 |
| 0.314007777 | 0.190819682 | 0.335082107 | 0.255366611 |
| 0.213258903 | 0.399643581 | 0.046145288 | 0.171115895 |
| 0.241268    | 0.350362259 | 0.269248802 | 0.292773556 |
| 0.216205623 | 0.195332744 | 0.353562124 | 0.189946585 |
| 0.221322231 | 0.210262156 | 0.349519455 | 0.079441226 |
| 0.097626427 | 0.484203899 | 0.207462138 | 0.061923955 |
| 0.130357561 | 0.206663702 | 0.250224534 | 0.261170333 |
| 0.077636205 | 0.400127026 | 0.200238782 | 0.284190234 |
| 0.279167062 | 0.176138235 | 0.261716357 | 0.107815389 |
| 0.12001539  | 0.355018882 | 0.241235247 | 0.408956915 |
| 0.250990829 | 0.437774735 | 0.319564787 | 0.362117733 |
| 0.126558063 | 0.186592039 | 0.105848147 | 0.406006515 |
| 0.208710857 |             |             |             |
| TNFSF8      | 0.297597127 | 0.392777122 | 0.122348266 |

|             |             |             |             |
|-------------|-------------|-------------|-------------|
| 0.274477995 | 0.171792941 | 0.199342819 | 0.095084106 |
| 0.074024153 | 0.008111828 | 0.00095075  | 0.001634565 |
| 0.193513736 | 0.019197803 | 0.063994844 | 0.044377911 |
| 0.273231768 | 0.020738339 | 0.125772174 | 0.111890063 |
| 0.293335477 | 0.038651719 | 0.217959721 | 0.023650624 |
| 0.040534144 | 0.013222876 | 0.015596979 | 0.038806195 |
| 0.351244367 | 0.01912148  | 0.163713062 | 0.324312937 |
| 0.021664945 | 0.358128946 | 0.387435618 | 0.198946325 |
| 0.370846811 | 0.262367324 | 0.01412117  | 0.062820474 |
| 0.365767042 | 0.23132376  | 0.302890091 | 0.153593992 |
| 0.009529924 | 0.400951855 | 0.106407302 | 0.165405548 |
| 0.041073065 | 0.003976871 | 0.102806662 | 0.400257919 |
| 0.335926052 | 0.168858067 | 0.097201927 | 0.052787207 |
| 0.014214062 | 0.117921227 | 0.018185395 | 0.300026743 |
| 0.098798968 | 0.088258174 | 0.346423175 | 0.011991282 |
| 0.027568361 | 0.132862653 | 0.030027996 | 0.131877198 |
| 0.055816888 | 0.326240827 | 0.009763458 | 0.183205036 |
| 0.001251596 | 0.2752577   | 0.169642885 | 0.038698031 |
| 0.014338342 | 0.002637041 | 0.043013575 | 0.188407969 |
| 0.36340106  | 0.369476022 | 0.318400524 | 0.319039341 |
| 0.017584561 | 0.109240751 | 0.123259963 | 0.040146454 |
| 0.349428906 | 0.059870006 | 0.017029097 | 0.257327979 |
| 0.323905994 | 0.373362733 | 0.022844259 | 0.087986854 |
| 0.270636864 | 0.396226599 | 0.120247549 | 0.118954487 |
| 0.036304908 | 0.007115378 | 0.341854265 | 0.354976538 |
| 0.360794777 | 0.065349393 | 0.038067034 | 0.366229313 |
| 0.021341676 | 0.048659089 | 0.194469689 | 0.027432084 |
| 0.367483134 | 0.004109873 | 0.057622965 | 0.18720801  |
| 0.036152984 | 0.298948302 | 0.348684657 | 0.084105291 |
| 0.151199083 | 0.003265709 | 0.006876331 | 0.011411468 |
| 0.039016382 | 0.010977981 | 0.368643803 | 0.328343057 |
| 0.066613844 | 0.039473969 | 0.113899284 | 0.000905145 |
| 0.00533774  | 0.027542311 | 0.315728338 | 0.174480572 |
| 0.307227612 | 0.278625476 | 0.038092297 | 0.334399451 |
| 0.18788962  | 0.319146985 | 0.006712178 | 0.034119385 |
| 0.165346027 | 0.031851986 | 0.112203643 | 0.200499338 |
| 0.074724092 | 0.047699973 | 0.045015784 | 0.361508657 |
| 0.401839552 | 0.034743033 | 0.140397156 | 0.247606016 |
| 0.042308387 | 0.112182579 | 0.043558443 | 0.072801701 |
| 0.017858562 | 0.331318546 | 0.006463469 | 0.177174384 |
| 0.014276    | 0.015559514 | 0.007257465 | 0.163535701 |
| 0.030498699 | 0.27511801  | 0.366289385 | 0.045230135 |
| 0.110301385 | 0.185722173 | 0.205353195 | 0.216689825 |
| 0.000888205 | 0.011228076 | 0.16996858  | 0.362556905 |
| 0.259344322 | 0.354934336 | 0.071287568 | 0.061962707 |
| 0.101421304 | 0.303166122 | 0.000583243 | 0.379485168 |
| 0.363434816 | 0.150101875 | 0.1518861   | 0.209885199 |
| 0.07895031  | 0.306644154 | 0.010993589 | 0.264476693 |
| 0.306097596 | 0.032849539 | 0.352234568 | 0.043475799 |
| 0.363335723 | 0.011067335 | 0.135781616 | 0.242185598 |
| 0.230869018 | 0.003969028 | 0.120132193 | 0.280929284 |
| 0.005444582 | 0.03744571  | 0.312544397 | 0.230720248 |
| 0.146555633 | 0.284076968 | 0.343426285 | 0.061318154 |
| 0.145826077 | 0.10802134  | 0.003809505 | 0.10094752  |

|             |                      |             |             |
|-------------|----------------------|-------------|-------------|
| 0.294259644 | 0.03598325           | 0.365395384 | 0.060485635 |
| 0.226717327 | 0.357094171          | 0.269095508 | 0.019838998 |
| 0.016103413 | 0.177347439          | 0.005075702 | 0.090027776 |
| 0.29306031  | 0.022859656          | 0.108244367 | 0.032592417 |
| 0.014950536 | 0.366206593          | 0.025218443 | 0.039559712 |
| 0.012487976 | 0.17661461           | 0.125080471 | 0.035583163 |
| 0.013540154 | 0.029039594          | 0.054137179 | 0.071396883 |
| 0.016677061 | 0.023842726          | 0.003834711 | 0.066640855 |
| 0.011062505 | 0.058644234          | 0.069187346 | 0.313411958 |
| 0.069241711 | 0.013281605          | 0.104326436 | 0.032031792 |
| 0.015637943 | 0.005988534          | 0.379877065 | 0.245559054 |
| 0.317617398 | 0.039191568          | 0.01410765  | 0.027872372 |
| 0.337771166 | 0.14209333           | 0.121575754 | 0.353601232 |
| 0.007076098 | 0.348112535          | 0.026126412 | 0.030315723 |
| 0.072595011 | 0.097571289          | 0.339374167 | 0.009021904 |
| 0.26160167  | 0.384360924          | 0.136197118 | 0.033010812 |
| 0.343927515 | 0.257528034          | 0.007174644 | 0.29511609  |
| 0.305196489 | 0.010174972          | 0.369681029 | 0.017743478 |
| 0.007843881 | 0.225883132          | 0.214221787 | 0.024891214 |
| 0.016943615 | 0.095123663          | 0.020235287 | 0.116096306 |
| 0.363474978 | 0.234619656          | 0.264414629 | 0.037148616 |
| 0.011271597 | 0.001502663          | 0.048818845 | 0.148268642 |
| 0.393807461 | 0.341808167          | 0.120807133 | 0.08171068  |
| 0.122593186 | 0.042779594          | 0.048863043 | 0.344778807 |
| 0.030066628 | 0.398359927          | 0.003710511 | 0.244420901 |
| 0.363567906 | 0.198910141          | 0.013012254 | 0.161825691 |
| 0.330789856 | 0.014979205          | 0.083060352 | 0.362881973 |
| 0.331275584 | 0.064497374          | 0.052157473 | 0.26805072  |
| 0.00534761  | 0.015318877          | 0.138663776 | 0.018743956 |
| 0.074876106 | 0.047320737          | 0.00313845  | 0.098406675 |
| 0.005524794 | 0.360455567          | 0.329759559 | 0.005962007 |
| 0.153697851 | 0.097255287          | 0.184054933 | 0.014135498 |
| 0.263231711 | 0.355042475          | 0.387807141 | 0.07122926  |
| 0.305402159 | 0.310743757          | 0.128177825 | 0.024401794 |
| 0.005133692 | 0.359695811          | 0.293043017 | 0.00281023  |
| 0.354636067 | 0.15581236           | 0.001509219 | 0.394143838 |
| 0.088875767 | 0.378640358          | 0.00059946  | 0.010490142 |
| 0.006944343 | 0.303978919          | 0.351707803 | 0.317318319 |
| 0.062107401 | 0.235953512          | 0.00312465  | 0.368619378 |
| 0.360282427 | 0.00235026           | 0.015102252 | 0.268938947 |
| 0.200788434 | 0.418023739          | 0.054361431 | 0.258055298 |
| 0.155541478 | 0.349424959          | 0.031021559 | 0.099049614 |
| 0.30175707  | 0.321746919          | 0.309771461 | 0.376881716 |
| 0.340085697 | 0.229448 0.138019697 | 0.004464596 |             |
| 0.008304957 | 0.128401833          | 0.03239682  | 0.005752927 |
| 0.257933349 | 0.01640636           | 0.360896115 | 0.336006629 |
| 0.309799919 | 0.002611482          | 0.043424732 | 0.302644216 |
| 0.378857488 | 0.375319955          | 0.006183745 | 0.000492217 |
| 0.001181726 | 0.000864883          | 0.24489073  | 0.07220726  |
| 0.33699453  | 0.022628488          | 0.002386349 | 0.020333677 |
| 0.031161757 | 0.14477134           | 0.367073353 | 0.250662825 |
| 0.280360543 | 0.027153793          | 0.032080246 | 0.284666813 |
| 0.005424883 | 0.286006416          | 0.314962504 | 0.384756529 |
| 0.010904535 | 0.069220886          | 0.171180891 | 0.363163929 |

|             |             |             |             |
|-------------|-------------|-------------|-------------|
| 0.003873445 | 0.137007907 | 0.228705565 | 0.037604627 |
| 0.007351146 | 0.014123864 | 0.010117739 | 0.304991205 |
| 0.352095303 | 0.006621441 | 0.002902928 | 0.03285665  |
| 0.025390895 | 0.351439894 | 0.022622586 | 0.363493349 |
| 0.330757105 | 0.315693839 | 0.009755036 | 0.363286004 |
| 0.005016305 | 0.364620083 | 0.078391449 | 0.007531875 |
| 0.081362904 | 0.004217045 | 0.344401586 | 0.006624829 |
| 0.133467534 | 0.313702308 | 0.013162334 | 0.004304744 |
| 0.01153021  | 0.012605984 | 0.322141772 | 0.288341547 |
| 0.00600142  | 0.07713198  | 0.108594482 | 0.256235544 |
| 0.179079136 | 0.256360998 | 0.384589031 | 0.120643584 |
| 0.027813724 | 0.016623893 | 0.31324779  | 0.277788467 |
| 0.104830917 | 0.336415281 | 0.033264005 | 0.373248156 |
| 0.310729248 | 0.376703869 | 0.331737646 | 0.153665631 |
| 0.021469121 | 0.215709094 | 0.237472205 | 0.003532494 |
| 0.169224979 | 0.308234884 | 0.19975357  | 0.009808142 |
| 0.061207417 | 0.117860663 | 0.019162439 | 0.038394846 |
| 0.071646425 | 0.21471647  | 0.023015545 | 0.326688877 |
| 0.29320526  | 0.298219363 | 0.027424373 | 0.008120159 |
| 0.403282366 | 0.369589818 | 0.023745431 | 0.234090808 |
| 0.058940208 | 0.11807894  | 0.282620374 | 0.270915644 |
| 0.05634154  | 0.305219673 | 0.352049925 | 0.252977613 |
| 0.374086871 | 0.119118258 | 0.383448444 | 0.037507989 |
| 0.00658592  | 0.238628114 | 0.012564422 | 0.028891269 |
| 0.049318327 | 0.004019468 | 0.028858786 | 0.277100391 |
| 0.059869489 | 0.194171192 | 1           | 0.011126655 |
| 0.124263617 | 0.156530792 | 0.160186509 | 0.071079718 |
| 0.008687763 | 0.362086302 | 0.001556601 | 0.017684309 |
| 0.079822776 | 0.266758858 | 0.091038534 | 0.051781147 |
| 0.024036778 | 0.020846027 | 0.116034784 | 0.176033652 |
| 0.073700958 | 0.034118536 | 0.266382509 | 0.010176753 |
| 0.008749302 | 0.353050123 | 0.159265674 | 0.004842088 |
| 0.018351863 | 0.259863051 | 0.082289013 | 0.023876133 |
| 0.004930817 | 0.315640846 | 0.101011371 | 0.160402038 |
| 0.194839641 | 0.023717448 | 0.367926553 | 0.017478381 |
| 0.016861633 | 0.387686957 | 0.137727453 | 0.361306087 |
| 0.110577434 | 0.261829644 | 0.390119509 | 0.318999605 |
| 0.020924744 | 0.141333151 | 0.006990293 | 0.359841921 |
| 0.068179827 |             |             |             |
| TNFSF9      | 0.085452436 | 0.09381075  | 0.075568011 |
| 0.162347332 | 0.104496146 | 0.063535938 | 0.13845917  |
| 0.04868768  | 0.031519656 | 0.007332193 | 0.013321587 |
| 0.085068118 | 0.009332452 | 0.051564747 | 0.030837549 |
| 0.198979291 | 0.092586866 | 0.065659747 | 0.203572767 |
| 0.158135911 | 0.056536341 | 0.198971772 | 0.10955837  |
| 0.054397259 | 0.111041293 | 0.15393382  | 0.088258165 |
| 0.161680086 | 0.190938997 | 0.035148429 | 0.116312524 |
| 0.126334307 | 0.099419479 | 0.071322121 | 0.112981902 |
| 0.063387736 | 0.067661149 | 0.006608501 | 0.036376101 |
| 0.096520971 | 0.12403936  | 0.152195254 | 0.190274384 |
| 0.101144341 | 0.060622735 | 0.178326401 | 0.129861884 |
| 0.014260158 | 0.07649891  | 0.030950325 | 0.061548716 |
| 0.055861466 | 0.063793354 | 0.067950346 | 0.106672576 |
| 0.004670426 | 0.024923794 | 0.017300406 | 0.061443298 |



|             |             |              |             |
|-------------|-------------|--------------|-------------|
| 0.152365072 | 0.028103834 | 0.06415852   | 0.035139132 |
| 0.006249947 | 0.082189108 | 0.100915723  | 0.113213067 |
| 0.04261941  | 0.078358838 | 0.032207139  | 0.059346587 |
| 0.004074342 | 0.174732538 | 0.156841119  | 0.034217192 |
| 0.213010002 | 0.033503541 | 0.135450858  | 0.148728854 |
| 0.14972613  | 0.075227166 | 0.138136388  | 0.116776894 |
| 0.04570208  | 0.177214576 | 0.0712221813 | 0.140753036 |
| 0.091437701 | 0.116909887 | 0.018890987  | 0.197943463 |
| 0.131700827 | 0.077884849 | 0.060040674  | 0.209195688 |
| 0.087428586 | 0.088336641 | 0.07381228   | 0.076763337 |
| 0.03520743  | 0.09997766  | 0.064303106  | 0.107627206 |
| 0.074837367 | 0.063187628 | 0.218241658  | 0.112089682 |
| 0.173634287 | 0.031413119 | 0.207904736  | 0.014299116 |
| 0.14863291  | 0.066371311 | 0.181231689  | 0.104612559 |
| 0.063407137 | 0.107025521 | 0.078143141  | 0.186228098 |
| 0.089347449 | 0.02140244  | 0.009069245  | 0.128863834 |
| 0.008277541 | 0.026539993 | 0.050439769  | 0.123444585 |
| 0.027352018 | 0.025638136 | 0.111223323  | 0.061723054 |
| 0.126881775 | 0.044022587 | 0.074823422  | 0.092325001 |
| 0.134867774 | 0.056662204 | 0.101159171  | 0.059171282 |
| 0.067837235 | 0.134116622 | 0.000979922  | 0.120888967 |
| 0.088927357 | 0.056354347 | 0.262964371  | 0.072045429 |
| 0.141252245 | 0.101607869 | 0.157792754  | 0.123117262 |
| 0.07052205  | 0.184879282 | 0.0433057    | 0.199407342 |
| 0.024519152 | 0.133263215 | 0.146082544  | 0.0746823   |
| 0.072612216 | 0.059551498 | 0.141752788  | 0.070928597 |
| 0.010926402 | 0.022704253 | 0.022696882  | 0.07436114  |
| 0.022968145 | 0.074560588 | 0.047587433  | 0.2018646   |
| 0.097919744 | 0.166417157 | 0.048710882  | 0.077213351 |
| 0.012696651 | 0.052884324 | 0.026338662  | 0.102302268 |
| 0.041005597 | 0.114029261 | 0.096693607  | 0.102166617 |
| 0.224473897 | 0.164039133 | 0.016138695  | 0.062998593 |
| 0.078831462 | 0.023936738 | 0.106156273  | 0.115606782 |
| 0.047953602 | 0.143227862 | 0.001001337  | 0.178456065 |
| 0.051735658 | 0.187716138 | 0.145479798  | 0.201934619 |
| 0.068355617 | 0.168937952 | 0.045568607  | 0.092394773 |
| 0.056501078 | 0.004347375 | 0.050081839  | 0.137130964 |
| 0.126515284 | 0.036762943 | 0.117706931  | 0.171452275 |
| 0.123996651 | 0.148015459 | 0.167557602  | 0.043870709 |
| 0.096572385 | 0.11934187  | 0.038166235  | 0.16436426  |
| 0.109746902 | 0.006843816 | 0.075508266  | 0.071492095 |
| 0.035236095 | 0.087807288 | 0.063854496  | 0.005065083 |
| 0.150153548 | 0.08788556  | 0.008214292  | 0.139239622 |
| 0.063097312 | 0.055613888 | 0.050445616  | 0.048132772 |
| 0.14912708  | 0.106522007 | 0.075606788  | 0.046006257 |
| 0.040449032 | 0.065458022 | 0.174297478  | 0.030681237 |
| 0.019675048 | 0.101245531 | 0.049473538  | 0.060123347 |
| 0.055133804 | 0.141917892 | 0.036954331  | 0.016573655 |
| 0.013951532 | 0.023187718 | 0.020260126  | 0.05961587  |
| 0.021839389 | 0.02591281  | 0.096654426  | 0.055041353 |
| 0.141601058 | 0.164363752 | 0.093984649  | 0.185304566 |
| 0.052124214 | 0.106362918 | 0.162366233  | 0.004435652 |
| 0.114570351 | 0.031881045 | 0.018550658  | 0.091978805 |
| 0.025085651 | 0.133136599 | 0.047580339  | 0.197994816 |

|             |             |             |             |
|-------------|-------------|-------------|-------------|
| 0.043954702 | 0.17136237  | 0.165243557 | 0.004262002 |
| 0.067843967 | 0.07560786  | 0.189581145 | 0.157432018 |
| 0.054484942 | 0.12580824  | 0.02697591  | 0.073740114 |
| 0.059998576 | 0.151534132 | 0.091382255 | 0.087575778 |
| 0.175477486 | 0.129339078 | 0.080028674 | 0.249223306 |
| 0.209726912 | 0.079145723 | 0.044703801 | 0.247178905 |
| 0.105265217 | 0.198501719 | 0.077270392 | 0.098643293 |
| 0.114737024 | 0.007104341 | 0.132572277 | 0.077529262 |
| 0.06345591  | 0.090200322 | 0.215669144 | 0.08125603  |
| 0.238522416 | 0.041101623 | 0.005153736 | 0.103260892 |
| 0.030624301 | 0.077290202 | 0.098867348 | 0.097465745 |
| 0.060592802 | 0.033775444 | 0.155766895 | 0.090441537 |
| 0.066490849 | 0.15010723  | 0.10436293  | 0.076104868 |
| 0.099048827 | 0.078253946 | 0.054816104 | 0.120046953 |
| 0.043220241 | 0.040905062 | 0.128776902 | 0.048506283 |
| 0.047057484 | 0.132005706 | 0.008747482 | 0.029472928 |
| 0.075759226 | 0.071626543 | 0.148692222 | 0.095165813 |
| 0.039623191 | 0.034350782 | 0.182287686 | 0.166216044 |
| 0.087532722 | 0.079424172 | 0.073126313 | 0.104776458 |
| 0.082432072 | 0.084784352 | 0.049990614 | 0.199784387 |
| 0.175868329 | 0.072055031 | 0.094896303 | 0.0433625   |
| 0.142054055 | 0.026904658 | 0.013907368 | 0.093027254 |
| 0.209638665 | 0.046186323 | 0.015421778 | 0.009933895 |
| 0.101096255 | 0.146461474 | 0.065551004 | 0.118157836 |
| 0.019194465 | 0.168321469 | 0.008270895 | 0.099400893 |
| 0.076829439 | 0.103816366 | 0.061650452 | 0.069297633 |
| 0.070283036 | 0.091549372 | 0.059637049 | 0.090762869 |
| 0.063508183 | 0.064292951 | 0.016787224 | 0.234803849 |
| 0.100571575 | 0.069214102 | 0.121385299 | 0.087757055 |
| 0.129231566 | 0.15744428  | 0.213393153 | 0.067542185 |
| 0.020771426 | 0.051945861 | 0.018074273 | 0.01748339  |
| 0.055040455 | 0.127480238 | 0.094410372 | 0.144653865 |
| 0.097924611 | 0.11698988  | 0.05155903  | 0.070809413 |
| 0.114128147 | 0.144920129 | 0.031124234 | 0.005682588 |
| 0.004449298 | 0.025379393 | 0.111940812 | 0.195221432 |
| 0.100785552 | 0.007170274 | 0.088346669 | 0.03493773  |
| 0.074705717 | 0.115116284 | 0.078114382 | 0.216919349 |
| 0.109771571 | 0.156096293 | 0.017892279 | 0.196997149 |
| 0.056840264 | 0.042100045 | 0.107444409 | 0.073903962 |
| 0.100870402 | 0.172859175 | 0.062706533 | 0.139371828 |
| 0.01068299  | 0.196694198 | 0.083579468 | 0.030825169 |
| 0.024082127 | 0.162486697 | 0.131622447 | 0.16527683  |
| 0.058032993 | 0.04087074  | 0.052541082 | 0.002571073 |
| 0.080054215 | 0.121917522 | 0.09284806  | 0.129320763 |
| 0.125720591 | 0.186513297 | 0.060000244 | 0.07766603  |
| 0.014548806 | 0.061787439 | 0.09940747  | 0.006006866 |
| 0.104510299 | 0.076409046 | 0.068949047 | 0.009303742 |
| 0.037900773 | 0.100961126 | 0.018253808 | 0.103988277 |
| 0.022777183 | 0.145171288 | 0.141415003 | 0.131879716 |
| 0.083644408 | 0.089416328 | 0.205998554 | 0.155488787 |
| 0.07703594  | 0.140523541 | 0.067711601 | 0.042246318 |
| 0.07538089  | 0.010739446 | 0.143544437 | 0.068060027 |
| 0.038712076 | 0.142168804 | 0.0397926   | 0.103396352 |
| 0.087568565 | 0.100813898 | 0.082036262 | 0.137237223 |

|             |             |             |             |
|-------------|-------------|-------------|-------------|
| 0.018405777 | 0.068480894 | 0.085038822 | 0.01702769  |
| 0.172585246 | 0.13279466  | 0.088396619 | 0.048447682 |
| 0.145699822 | 0.062565313 | 0.025291038 | 0.004704947 |
| 0.045277676 | 0.062304776 | 0.054739922 | 0.188543341 |
| 0.088069474 | 0.066859185 | 0.018325655 | 0.123335555 |
| 0.095172704 | 0.080186605 | 0.033299868 | 0.116385352 |
| 0.218353985 | 0.150718477 | 0.119784074 | 0.113741627 |
| 0.027366988 | 0.084096376 | 0.10432897  | 0.074893149 |
| 0.068543764 | 0.181411942 | 0.077132428 | 0.014615664 |
| 0.014766572 | 0.058175958 | 0.060408811 | 0.222680265 |
| 0.181896914 | 0.115499593 | 0.021308864 | 0.167427323 |
| 0.022517607 | 0.163931589 | 0.011126655 | 1           |
| 0.161843773 | 0.046986621 | 0.18922775  | 0.092105585 |
| 0.063827288 | 0.068746676 | 0.025884797 | 0.165727663 |
| 0.027839806 | 0.091524024 | 0.066078819 | 0.16012718  |
| 0.024436423 | 0.074197706 | 0.178830678 | 0.043291134 |
| 0.023826908 | 0.009879004 | 0.092425756 | 0.034108742 |
| 0.047822999 | 0.14465801  | 0.058317394 | 0.065198562 |
| 0.016844886 | 0.062626414 | 0.058051957 | 0.041811112 |
| 0.137693482 | 0.073298841 | 0.028326123 | 0.099405261 |
| 0.129184433 | 0.151707253 | 0.051595741 | 0.011513655 |
| 0.065212321 | 0.066600537 | 0.085769503 | 0.070859186 |
| 0.09922793  | 0.182980611 | 0.05344639  | 0.076195987 |
| 0.023245558 | 0.050391916 | 0.075265035 | 0.129399463 |
| 0.021842153 |             |             |             |

| TPCN1       | 0.308086972 | 0.367609281 | 0.205750509 |
|-------------|-------------|-------------|-------------|
| 0.333533781 | 0.267611966 | 0.15206854  | 0.144441056 |
| 0.10019291  | 0.101233465 | 0.010166112 | 0.054047112 |
| 0.28684636  | 0.138176692 | 0.125584707 | 0.109447109 |
| 0.421055958 | 0.221894684 | 0.197325046 | 0.212567605 |
| 0.330771003 | 0.068940349 | 0.392933169 | 0.137365837 |
| 0.28654728  | 0.179007171 | 0.143493314 | 0.219479424 |
| 0.389563625 | 0.156009428 | 0.093891424 | 0.25496225  |
| 0.269974142 | 0.336139831 | 0.325776473 | 0.33634902  |
| 0.319553316 | 0.249584319 | 0.061639654 | 0.105307888 |
| 0.306623961 | 0.335603635 | 0.324134469 | 0.250262435 |
| 0.086393039 | 0.277700152 | 0.171495499 | 0.32709296  |
| 0.096782181 | 0.095111687 | 0.070323556 | 0.261047965 |
| 0.271261431 | 0.210798681 | 0.118872437 | 0.128136302 |
| 0.100524924 | 0.0800851   | 0.150073215 | 0.152153971 |
| 0.1837594   | 0.050314929 | 0.301169918 | 0.078740268 |
| 0.096688667 | 0.156148328 | 0.301707608 | 0.151049994 |
| 0.236719862 | 0.225110161 | 0.069644551 | 0.2419643   |
| 0.003605361 | 0.323871978 | 0.341445686 | 0.157813318 |
| 0.149245094 | 0.053584831 | 0.305510384 | 0.220127348 |
| 0.403175953 | 0.320436882 | 0.437195204 | 0.418451484 |
| 0.199782108 | 0.303752764 | 0.248565894 | 0.198577553 |
| 0.322340787 | 0.127884879 | 0.113681045 | 0.442857972 |
| 0.43192756  | 0.350945258 | 0.249249378 | 0.298097417 |
| 0.267318618 | 0.33249695  | 0.153246875 | 0.202080508 |
| 0.138384181 | 0.209698267 | 0.272617187 | 0.407328275 |
| 0.252851003 | 0.230633146 | 0.239364061 | 0.294216846 |
| 0.177755451 | 0.128981001 | 0.307711621 | 0.191938119 |
| 0.409651078 | 0.047504702 | 0.289293502 | 0.192319209 |

|             |             |             |             |
|-------------|-------------|-------------|-------------|
| 0.258544825 | 0.315284533 | 0.355195955 | 0.176947525 |
| 0.257419714 | 0.073527647 | 0.120002835 | 0.171584716 |
| 0.169455783 | 0.188884145 | 0.260834791 | 0.360424118 |
| 0.122093753 | 0.224659481 | 0.185389104 | 0.041892878 |
| 0.133707964 | 0.290293632 | 0.317324015 | 0.217216583 |
| 0.346053778 | 0.258041705 | 0.174048641 | 0.220363116 |
| 0.267850066 | 0.43807866  | 0.010028841 | 0.143374704 |
| 0.203916671 | 0.310799476 | 0.262289036 | 0.248114148 |
| 0.238015231 | 0.126359388 | 0.190598007 | 0.414727584 |
| 0.260663626 | 0.150087254 | 0.142831559 | 0.407724341 |
| 0.137445925 | 0.295307925 | 0.180432993 | 0.185182137 |
| 0.084913015 | 0.304577757 | 0.155026888 | 0.15168382  |
| 0.109189264 | 0.229097555 | 0.068277498 | 0.11916103  |
| 0.118279744 | 0.279786098 | 0.26227786  | 0.205895024 |
| 0.198401392 | 0.347552195 | 0.114739448 | 0.239498685 |
| 0.023999558 | 0.138866086 | 0.085489164 | 0.387214186 |
| 0.107602185 | 0.422290369 | 0.236328473 | 0.283965505 |
| 0.283439785 | 0.397637969 | 0.011959848 | 0.291941959 |
| 0.354090596 | 0.080607356 | 0.239989579 | 0.32647287  |
| 0.166978961 | 0.361405347 | 0.022675647 | 0.397298319 |
| 0.187234044 | 0.180980781 | 0.45049431  | 0.223297361 |
| 0.307544533 | 0.122161171 | 0.139683021 | 0.348129849 |
| 0.274933413 | 0.031778103 | 0.072648353 | 0.27672994  |
| 0.161880306 | 0.060906868 | 0.324943994 | 0.302641195 |
| 0.221339111 | 0.401967134 | 0.456579741 | 0.156885001 |
| 0.233219622 | 0.183563497 | 0.087621321 | 0.291515507 |
| 0.360936402 | 0.14985005  | 0.268052401 | 0.164806455 |
| 0.125089283 | 0.319551148 | 0.276615528 | 0.073316676 |
| 0.097921143 | 0.154795227 | 0.026496021 | 0.215213611 |
| 0.264217982 | 0.103889293 | 0.154185656 | 0.286625998 |
| 0.200587739 | 0.395160048 | 0.241832219 | 0.208601976 |
| 0.180145463 | 0.185245034 | 0.210377543 | 0.101290232 |
| 0.122877743 | 0.224410453 | 0.201515822 | 0.186335609 |
| 0.052458431 | 0.170480714 | 0.123330974 | 0.1351576   |
| 0.089252533 | 0.124811547 | 0.1065955   | 0.231096255 |
| 0.161579048 | 0.111960528 | 0.210604783 | 0.246472918 |
| 0.212928645 | 0.097264638 | 0.359918156 | 0.367597475 |
| 0.164288122 | 0.173056582 | 0.168322959 | 0.106414871 |
| 0.363891746 | 0.083289205 | 0.073170254 | 0.315568511 |
| 0.091827182 | 0.436568309 | 0.157787408 | 0.205308359 |
| 0.203186961 | 0.208492847 | 0.409253529 | 0.036900327 |
| 0.202431485 | 0.302515164 | 0.286413825 | 0.207338189 |
| 0.22651735  | 0.287551818 | 0.071163674 | 0.24763288  |
| 0.233149814 | 0.119968501 | 0.38275219  | 0.250855643 |
| 0.12710535  | 0.372893222 | 0.286137994 | 0.194156367 |
| 0.196095346 | 0.148097313 | 0.045932676 | 0.320440998 |
| 0.380762221 | 0.407069303 | 0.269445194 | 0.282947203 |
| 0.09243083  | 0.029861913 | 0.315670308 | 0.237546836 |
| 0.303729212 | 0.385119605 | 0.281406708 | 0.203253089 |
| 0.23573097  | 0.179717871 | 0.0596229   | 0.389576065 |
| 0.246574751 | 0.349491576 | 0.066345866 | 0.358859191 |
| 0.304971544 | 0.089094068 | 0.162961489 | 0.138322925 |
| 0.228298278 | 0.106598768 | 0.220130236 | 0.31597319  |
| 0.316811475 | 0.202544376 | 0.15981046  | 0.345915785 |

|             |             |             |             |
|-------------|-------------|-------------|-------------|
| 0.034539763 | 0.075989691 | 0.267071486 | 0.225853984 |
| 0.166675701 | 0.232482171 | 0.108542314 | 0.145624409 |
| 0.088817337 | 0.288226747 | 0.431315376 | 0.113710328 |
| 0.111265882 | 0.126781303 | 0.386196265 | 0.116754752 |
| 0.356562137 | 0.357734041 | 0.327581851 | 0.183178399 |
| 0.335464724 | 0.344833548 | 0.218462327 | 0.231948315 |
| 0.117490425 | 0.336485764 | 0.241209062 | 0.040647672 |
| 0.427569496 | 0.057284663 | 0.029882592 | 0.343001293 |
| 0.198479721 | 0.242497104 | 0.003614941 | 0.105810451 |
| 0.197779228 | 0.44854172  | 0.283477695 | 0.258704409 |
| 0.051181372 | 0.300312037 | 0.063100286 | 0.407789116 |
| 0.316223553 | 0.096239338 | 0.276045566 | 0.296178911 |
| 0.293725347 | 0.362099526 | 0.20049966  | 0.349468458 |
| 0.246585426 | 0.310723874 | 0.136116836 | 0.272524693 |
| 0.308010521 | 0.339568184 | 0.296675455 | 0.3049      |
| 0.385847434 | 0.399448201 | 0.240555639 | 0.048207621 |
| 0.138234998 | 0.091201591 | 0.077925288 | 0.085827257 |
| 0.137242509 | 0.189874018 | 0.353881595 | 0.435599172 |
| 0.380849426 | 0.060704286 | 0.103332123 | 0.290626238 |
| 0.326603912 | 0.399987989 | 0.10794182  | 0.015016076 |
| 0.016073776 | 0.061264286 | 0.212540328 | 0.295724676 |
| 0.367651188 | 0.049799882 | 0.043816062 | 0.0553112   |
| 0.181095169 | 0.319667131 | 0.33485887  | 0.376152747 |
| 0.371925235 | 0.211490946 | 0.087381885 | 0.37735698  |
| 0.154752198 | 0.157118277 | 0.384677912 | 0.295596493 |
| 0.197629922 | 0.290004353 | 0.180007026 | 0.405465517 |
| 0.097967197 | 0.322122344 | 0.305423612 | 0.158226525 |
| 0.102827312 | 0.206090472 | 0.162558805 | 0.434618417 |
| 0.303749989 | 0.105935454 | 0.084314296 | 0.042519306 |
| 0.113197438 | 0.408735703 | 0.166501606 | 0.433561883 |
| 0.334325334 | 0.429451173 | 0.246707649 | 0.30600198  |
| 0.098300978 | 0.297521366 | 0.243340952 | 0.020566962 |
| 0.285183973 | 0.09846094  | 0.333891684 | 0.078351361 |
| 0.122410424 | 0.263735063 | 0.155678498 | 0.134209345 |
| 0.178049071 | 0.171701394 | 0.417262226 | 0.42766695  |
| 0.189963369 | 0.193521313 | 0.285515801 | 0.33684171  |
| 0.11321087  | 0.345144554 | 0.303842493 | 0.121292839 |
| 0.098319512 | 0.222920584 | 0.31659623  | 0.219240859 |
| 0.124669258 | 0.452706688 | 0.168843861 | 0.403024157 |
| 0.264113805 | 0.35215426  | 0.348575876 | 0.202976523 |
| 0.26394365  | 0.183960442 | 0.196667547 | 0.028007262 |
| 0.253353878 | 0.3941025   | 0.180652577 | 0.164910193 |
| 0.222962239 | 0.22796139  | 0.135400214 | 0.094361933 |
| 0.183577035 | 0.119683198 | 0.160112942 | 0.446183542 |
| 0.239999043 | 0.22900011  | 0.097704761 | 0.142799767 |
| 0.383246384 | 0.293694125 | 0.089148501 | 0.265550825 |
| 0.278570502 | 0.243262089 | 0.377861227 | 0.401401054 |
| 0.185512125 | 0.319915353 | 0.315993575 | 0.203684747 |
| 0.258445018 | 0.206970429 | 0.334638578 | 0.045639746 |
| 0.13685034  | 0.248902455 | 0.114231299 | 0.239733134 |
| 0.194500044 | 0.127164332 | 0.163665597 | 0.415507497 |
| 0.170828461 | 0.314007777 | 0.124263617 | 0.161843773 |
| 1           | 0.162858848 | 0.309737653 | 0.114862615 |
| 0.111455669 | 0.304101132 | 0.047847591 | 0.193426345 |

|             |             |             |             |
|-------------|-------------|-------------|-------------|
| 0.193063255 | 0.312042799 | 0.19901002  | 0.26981167  |
| 0.211675017 | 0.310822316 | 0.249894617 | 0.092744961 |
| 0.083417037 | 0.17281827  | 0.300299434 | 0.059491111 |
| 0.056918899 | 0.449255137 | 0.134782205 | 0.144582324 |
| 0.224531632 | 0.200462523 | 0.249097759 | 0.155367669 |
| 0.145065617 | 0.34369875  | 0.092016126 | 0.266178782 |
| 0.192220743 | 0.18782498  | 0.204268599 | 0.105986162 |
| 0.145800833 | 0.27925134  | 0.255250377 | 0.340655704 |
| 0.271197744 | 0.395838802 | 0.248736143 | 0.307303007 |
| 0.168892267 | 0.18669261  | 0.06762373  | 0.375920431 |
| 0.131191507 |             |             |             |
| TPPP3       | 0.387240779 | 0.42839981  | 0.200021767 |
| 0.278188134 | 0.190852499 | 0.191799522 | 0.076361996 |
| 0.115593937 | 0.031276768 | 0.000580052 | 0.003534196 |
| 0.263278613 | 0.046920724 | 0.085115315 | 0.112607408 |
| 0.320816253 | 0.046426561 | 0.232206425 | 0.103958764 |
| 0.299109428 | 0.036637622 | 0.242058956 | 0.042798546 |
| 0.138759273 | 0.032325873 | 0.022534088 | 0.084150794 |
| 0.371306936 | 0.028606664 | 0.111619937 | 0.289889767 |
| 0.077243422 | 0.387644517 | 0.441885416 | 0.228255521 |
| 0.42990548  | 0.360824576 | 0.026479125 | 0.08147289  |
| 0.419098503 | 0.293251995 | 0.294721506 | 0.149461984 |
| 0.01549093  | 0.423420554 | 0.089612949 | 0.239393934 |
| 0.11641558  | 0.008272154 | 0.102349156 | 0.407543309 |
| 0.364322289 | 0.184618468 | 0.113302705 | 0.054864127 |
| 0.036324489 | 0.095564292 | 0.063753096 | 0.238373647 |
| 0.079944473 | 0.065373836 | 0.383824951 | 0.028489505 |
| 0.064009005 | 0.1493362   | 0.086774192 | 0.117677562 |
| 0.134049763 | 0.330339172 | 0.021679017 | 0.269053488 |
| 0.000315384 | 0.288238798 | 0.234611283 | 0.093757224 |
| 0.021041076 | 0.003674165 | 0.096350803 | 0.156831459 |
| 0.39722948  | 0.459824347 | 0.376440563 | 0.386786042 |
| 0.058223461 | 0.155780207 | 0.181116435 | 0.057653081 |
| 0.395021193 | 0.052063079 | 0.060172176 | 0.303737692 |
| 0.384307186 | 0.418116676 | 0.077919665 | 0.12699964  |
| 0.27125139  | 0.416187336 | 0.149324956 | 0.137870216 |
| 0.087589633 | 0.043556944 | 0.351599087 | 0.406447978 |
| 0.373381177 | 0.117440456 | 0.059566839 | 0.334875872 |
| 0.035558245 | 0.162516294 | 0.192165324 | 0.097954847 |
| 0.401439538 | 0.007937712 | 0.088500101 | 0.145103422 |
| 0.174506263 | 0.364271876 | 0.416311107 | 0.073482157 |
| 0.19943211  | 0.009724707 | 0.034071074 | 0.031821074 |
| 0.120429473 | 0.064447944 | 0.405956191 | 0.334265906 |
| 0.112708134 | 0.123961538 | 0.120412716 | 0.002622427 |
| 0.014458604 | 0.149710481 | 0.350958738 | 0.216366133 |
| 0.361754389 | 0.389123794 | 0.058754944 | 0.319956032 |
| 0.243672754 | 0.374158688 | 0.017149188 | 0.05581894  |
| 0.186451135 | 0.147167592 | 0.1160257   | 0.218980604 |
| 0.095891336 | 0.070348985 | 0.056895794 | 0.42117327  |
| 0.388369061 | 0.035856176 | 0.204702912 | 0.295620333 |
| 0.08236316  | 0.153518006 | 0.05820622  | 0.090412611 |
| 0.020234609 | 0.401034092 | 0.018028426 | 0.189303788 |
| 0.068496455 | 0.052259687 | 0.027839459 | 0.123434156 |
| 0.085961929 | 0.284605456 | 0.419480256 | 0.065684207 |

|             |             |             |             |
|-------------|-------------|-------------|-------------|
| 0.106299408 | 0.219534699 | 0.173259376 | 0.221342329 |
| 0.000960986 | 0.039533392 | 0.15690709  | 0.393689808 |
| 0.179012234 | 0.441805726 | 0.14181819  | 0.151642186 |
| 0.12715654  | 0.36584081  | 0.008808445 | 0.418565095 |
| 0.426082266 | 0.142031759 | 0.151815581 | 0.27498983  |
| 0.112903677 | 0.328652383 | 0.040566305 | 0.291210311 |
| 0.313541916 | 0.053874398 | 0.410866928 | 0.054700506 |
| 0.415995464 | 0.014709702 | 0.126608491 | 0.32941144  |
| 0.269825306 | 0.005459238 | 0.083267526 | 0.256780951 |
| 0.021518125 | 0.040855287 | 0.36628295  | 0.248961916 |
| 0.158909993 | 0.372093049 | 0.395776278 | 0.101958108 |
| 0.168271772 | 0.128700033 | 0.014022354 | 0.15382134  |
| 0.390009259 | 0.124097843 | 0.378042405 | 0.102294091 |
| 0.229549672 | 0.386451016 | 0.339491164 | 0.056916826 |
| 0.017231134 | 0.134058808 | 0.00838741  | 0.111465265 |
| 0.37741599  | 0.028405563 | 0.145183841 | 0.141690712 |
| 0.032516171 | 0.413049075 | 0.079996928 | 0.107386414 |
| 0.057491096 | 0.150060778 | 0.131221873 | 0.047162332 |
| 0.039365371 | 0.068647534 | 0.115399111 | 0.122102125 |
| 0.015604182 | 0.032105592 | 0.03114143  | 0.098168663 |
| 0.023062341 | 0.076558244 | 0.07589994  | 0.292713298 |
| 0.116658675 | 0.028027805 | 0.116015443 | 0.144216058 |
| 0.051595195 | 0.008908156 | 0.417439059 | 0.297575051 |
| 0.28304388  | 0.070367278 | 0.028635173 | 0.084728162 |
| 0.34157856  | 0.119889627 | 0.142658173 | 0.343159373 |
| 0.031234829 | 0.411558818 | 0.057998274 | 0.042547378 |
| 0.103658332 | 0.087530626 | 0.380096875 | 0.019734317 |
| 0.258992283 | 0.377669781 | 0.184645661 | 0.058010723 |
| 0.318424205 | 0.259359034 | 0.012986455 | 0.348400864 |
| 0.321629101 | 0.013738358 | 0.425697651 | 0.056457953 |
| 0.014466256 | 0.304492612 | 0.254820078 | 0.037296664 |
| 0.039562359 | 0.080487217 | 0.023966544 | 0.144244564 |
| 0.406130564 | 0.262379067 | 0.267442602 | 0.12444627  |
| 0.012674161 | 0.001007911 | 0.111557016 | 0.236542625 |
| 0.432863163 | 0.411613689 | 0.137077052 | 0.096786143 |
| 0.117544128 | 0.093313965 | 0.088768822 | 0.391623723 |
| 0.216011437 | 0.461055447 | 0.006265652 | 0.312366833 |
| 0.415546221 | 0.126759393 | 0.02526982  | 0.121395442 |
| 0.309070459 | 0.021928453 | 0.156029305 | 0.402547538 |
| 0.367138238 | 0.11346708  | 0.101260803 | 0.323765719 |
| 0.00713526  | 0.021656344 | 0.198756516 | 0.089110012 |
| 0.114225585 | 0.091446755 | 0.029622543 | 0.161528449 |
| 0.011497249 | 0.351203992 | 0.387020378 | 0.019420547 |
| 0.120213877 | 0.172650562 | 0.234476609 | 0.018985507 |
| 0.345849122 | 0.442433941 | 0.433082942 | 0.1158443   |
| 0.345604124 | 0.366545658 | 0.171565161 | 0.054503703 |
| 0.011450531 | 0.430944968 | 0.326775169 | 0.005925757 |
| 0.385403815 | 0.104532106 | 0.001299721 | 0.420947735 |
| 0.090623883 | 0.406726087 | 0.002121749 | 0.112349992 |
| 0.040700314 | 0.38306539  | 0.39040143  | 0.29079937  |
| 0.066014582 | 0.269211104 | 0.016970703 | 0.446996451 |
| 0.382146584 | 0.007802693 | 0.070899932 | 0.299045307 |
| 0.267588511 | 0.459212874 | 0.101362357 | 0.318403542 |
| 0.199102905 | 0.394411709 | 0.070948702 | 0.116396866 |

|             |             |             |             |
|-------------|-------------|-------------|-------------|
| 0.318610491 | 0.400755905 | 0.345675982 | 0.416932599 |
| 0.350239859 | 0.292542585 | 0.129325699 | 0.005271377 |
| 0.0561158   | 0.09944747  | 0.067001841 | 0.017744048 |
| 0.231620051 | 0.04583308  | 0.433999994 | 0.384700785 |
| 0.368658457 | 0.004433556 | 0.073248801 | 0.326650812 |
| 0.372512516 | 0.412110199 | 0.043651177 | 0.006510745 |
| 0.011273993 | 0.003912319 | 0.210844021 | 0.12510657  |
| 0.401751483 | 0.054679632 | 0.002956723 | 0.027664247 |
| 0.121255112 | 0.204052145 | 0.398297092 | 0.26922357  |
| 0.371474285 | 0.047534413 | 0.056682416 | 0.315704315 |
| 0.023104541 | 0.305380752 | 0.365652797 | 0.385887683 |
| 0.044836636 | 0.125733055 | 0.212609378 | 0.392114539 |
| 0.027777226 | 0.163837611 | 0.282040493 | 0.080830718 |
| 0.031857244 | 0.039904154 | 0.027904832 | 0.370034113 |
| 0.408518097 | 0.01506325  | 0.006917345 | 0.063710579 |
| 0.030242093 | 0.407489566 | 0.050322376 | 0.418722545 |
| 0.347372918 | 0.341898137 | 0.043855086 | 0.406725184 |
| 0.011390563 | 0.392211079 | 0.115146549 | 0.019417788 |
| 0.192759792 | 0.014609117 | 0.41330825  | 0.02600284  |
| 0.129614316 | 0.337355048 | 0.078620896 | 0.014021983 |
| 0.096287416 | 0.025723373 | 0.360740694 | 0.364126018 |
| 0.036672125 | 0.130404306 | 0.155239512 | 0.319212836 |
| 0.134517414 | 0.269269327 | 0.418795062 | 0.14517524  |
| 0.031234286 | 0.113427395 | 0.323968809 | 0.310136799 |
| 0.117213481 | 0.399012437 | 0.071817201 | 0.448734471 |
| 0.352056308 | 0.442835607 | 0.384754286 | 0.156644454 |
| 0.082900178 | 0.244141516 | 0.194436591 | 0.004861264 |
| 0.192301833 | 0.327591705 | 0.216738631 | 0.039805744 |
| 0.073749485 | 0.18173312  | 0.056852403 | 0.171397055 |
| 0.125622785 | 0.160013409 | 0.046960003 | 0.375794125 |
| 0.314262621 | 0.319583158 | 0.048473017 | 0.023548195 |
| 0.455830346 | 0.414426867 | 0.069115975 | 0.254201752 |
| 0.102150955 | 0.134502319 | 0.363688386 | 0.344869417 |
| 0.167699286 | 0.317186942 | 0.348385132 | 0.210973126 |
| 0.346021965 | 0.113663599 | 0.431995611 | 0.072157319 |
| 0.033937612 | 0.289493645 | 0.021205713 | 0.052512252 |
| 0.054899525 | 0.018085285 | 0.098327361 | 0.323203718 |
| 0.124702727 | 0.190819682 | 0.156530792 | 0.046986621 |
| 0.162858848 | 1           | 0.189816317 | 0.06563829  |
| 0.021519553 | 0.388426933 | 0.005548462 | 0.034283941 |
| 0.132741332 | 0.316411761 | 0.119945858 | 0.112082332 |
| 0.099461871 | 0.097598449 | 0.117705844 | 0.12916264  |
| 0.067922627 | 0.17055088  | 0.314558092 | 0.02492464  |
| 0.01076371  | 0.408430428 | 0.193152658 | 0.03143036  |
| 0.064291608 | 0.301044835 | 0.215436038 | 0.062748164 |
| 0.017883542 | 0.370762375 | 0.090409598 | 0.208234593 |
| 0.182469839 | 0.047929454 | 0.364309912 | 0.071491553 |
| 0.066210068 | 0.408049472 | 0.212591188 | 0.417502189 |
| 0.193968117 | 0.276788972 | 0.417914006 | 0.335212735 |
| 0.13061663  | 0.232339415 | 0.01321265  | 0.39570219  |
| 0.111698129 |             |             |             |
| TRAF1       | 0.313783811 | 0.412532253 | 0.221603877 |
| 0.386176604 | 0.271372156 | 0.19367802  | 0.219712657 |
| 0.159429761 | 0.141517764 | 0.020570289 | 0.063817306 |



|             |             |             |             |
|-------------|-------------|-------------|-------------|
| 0.27803493  | 0.172701191 | 0.19336423  | 0.160830186 |
| 0.435736349 | 0.221888798 | 0.23390728  | 0.280081789 |
| 0.363973914 | 0.124307274 | 0.402156226 | 0.192742259 |
| 0.259081519 | 0.179968341 | 0.171919593 | 0.231539255 |
| 0.436463487 | 0.187486584 | 0.139269367 | 0.30760478  |
| 0.236329004 | 0.358985472 | 0.365308749 | 0.336928825 |
| 0.350670671 | 0.263301931 | 0.047330013 | 0.165296931 |
| 0.342710295 | 0.355296889 | 0.364583456 | 0.284931122 |
| 0.125725654 | 0.323645004 | 0.246214909 | 0.29761078  |
| 0.148311952 | 0.109173921 | 0.120312214 | 0.306754765 |
| 0.312821876 | 0.231027233 | 0.187793287 | 0.198534244 |
| 0.131218786 | 0.127625908 | 0.151104631 | 0.196914389 |
| 0.254931168 | 0.094607635 | 0.337511745 | 0.127252848 |
| 0.131411946 | 0.222094293 | 0.258928731 | 0.224954    |
| 0.226679442 | 0.270847034 | 0.087989695 | 0.226600864 |
| 0.008739356 | 0.358580485 | 0.305353659 | 0.164286527 |
| 0.156244928 | 0.07484213  | 0.277890339 | 0.267496723 |
| 0.443130535 | 0.344845408 | 0.456112081 | 0.433546117 |
| 0.221880285 | 0.315163525 | 0.231558594 | 0.25102189  |
| 0.354796251 | 0.197683901 | 0.147771417 | 0.444604336 |
| 0.452445238 | 0.385836351 | 0.26154047  | 0.299963963 |
| 0.318120987 | 0.379614947 | 0.203126339 | 0.250545527 |
| 0.173514043 | 0.160321497 | 0.314400679 | 0.434562646 |
| 0.294537659 | 0.212749981 | 0.253442821 | 0.345358488 |
| 0.18855493  | 0.18018706  | 0.341955376 | 0.186129894 |
| 0.451977306 | 0.072676632 | 0.278533963 | 0.234946586 |
| 0.279392701 | 0.34795316  | 0.383472803 | 0.247141693 |
| 0.270723559 | 0.084286992 | 0.116167094 | 0.150608815 |
| 0.21739851  | 0.141783262 | 0.299720932 | 0.409872672 |
| 0.179550643 | 0.255467483 | 0.259172207 | 0.035781757 |
| 0.124035028 | 0.260023717 | 0.330624988 | 0.255304135 |
| 0.368639775 | 0.267978986 | 0.225250391 | 0.254796137 |
| 0.269141793 | 0.451885709 | 0.021441051 | 0.199528146 |
| 0.229936334 | 0.270768605 | 0.29859111  | 0.258035782 |
| 0.272358015 | 0.189566033 | 0.239341279 | 0.451419459 |
| 0.313535501 | 0.196832532 | 0.186310283 | 0.417348197 |
| 0.191126601 | 0.275810711 | 0.224729757 | 0.246528138 |
| 0.130927517 | 0.331801754 | 0.125254893 | 0.20628009  |
| 0.135065154 | 0.197044516 | 0.066825017 | 0.183507906 |
| 0.179454146 | 0.321097389 | 0.292154939 | 0.236702946 |
| 0.260935927 | 0.349342739 | 0.165397002 | 0.280755459 |
| 0.037011808 | 0.154992099 | 0.124053197 | 0.423356317 |
| 0.146408793 | 0.436516631 | 0.291382498 | 0.296117417 |
| 0.305780259 | 0.426855647 | 0.009718812 | 0.335737161 |
| 0.386586384 | 0.118682281 | 0.262498812 | 0.304565179 |
| 0.189622803 | 0.411178324 | 0.024889892 | 0.406148003 |
| 0.213975841 | 0.209326557 | 0.47660017  | 0.25046465  |
| 0.337909352 | 0.141535605 | 0.201930116 | 0.347818872 |
| 0.28035987  | 0.030363264 | 0.127668962 | 0.327250498 |
| 0.124352274 | 0.113633271 | 0.346352539 | 0.343916969 |
| 0.252649694 | 0.407666989 | 0.483865677 | 0.178935233 |
| 0.260350389 | 0.251136021 | 0.081034257 | 0.293709639 |
| 0.365399544 | 0.171181723 | 0.321735512 | 0.238069969 |
| 0.148481384 | 0.368417383 | 0.292501019 | 0.105915018 |

|             |             |             |             |
|-------------|-------------|-------------|-------------|
| 0.135782918 | 0.222258898 | 0.045885378 | 0.263035094 |
| 0.282662621 | 0.16146408  | 0.185327015 | 0.246717324 |
| 0.187426269 | 0.43360673  | 0.196812955 | 0.180052582 |
| 0.134307063 | 0.215302202 | 0.277902131 | 0.154429851 |
| 0.155707582 | 0.260027905 | 0.228526803 | 0.234512078 |
| 0.093614711 | 0.202346716 | 0.080124655 | 0.156903213 |
| 0.12155975  | 0.164802343 | 0.146239898 | 0.257631113 |
| 0.209154258 | 0.153274409 | 0.257739051 | 0.23789707  |
| 0.213040668 | 0.095745127 | 0.401724942 | 0.38283223  |
| 0.205946515 | 0.235061738 | 0.161407704 | 0.137526798 |
| 0.409195328 | 0.11474777  | 0.110080975 | 0.368680455 |
| 0.100211961 | 0.451908443 | 0.21418565  | 0.226378967 |
| 0.22419707  | 0.272198568 | 0.453150766 | 0.054209305 |
| 0.221825775 | 0.352346701 | 0.309890014 | 0.244279405 |
| 0.273431954 | 0.320717649 | 0.104811064 | 0.280177304 |
| 0.264605238 | 0.132412483 | 0.413928932 | 0.224732886 |
| 0.116680334 | 0.360247478 | 0.306311301 | 0.202116908 |
| 0.198065904 | 0.210321009 | 0.08780452  | 0.305468061 |
| 0.423993372 | 0.421623941 | 0.307245978 | 0.244418028 |
| 0.127669144 | 0.036497864 | 0.275105118 | 0.218997419 |
| 0.344391813 | 0.405612687 | 0.313228443 | 0.236311024 |
| 0.289293975 | 0.210048543 | 0.10078982  | 0.422205183 |
| 0.215674695 | 0.382518071 | 0.063351237 | 0.352825527 |
| 0.339800038 | 0.135879828 | 0.173409141 | 0.202741823 |
| 0.277168945 | 0.143947125 | 0.264408303 | 0.360031581 |
| 0.359279245 | 0.248724889 | 0.204962279 | 0.338919832 |
| 0.06103989  | 0.118417127 | 0.262607428 | 0.182948661 |
| 0.219817764 | 0.274437338 | 0.066661855 | 0.200362948 |
| 0.12551712  | 0.338685041 | 0.441629409 | 0.140755722 |
| 0.146532259 | 0.178716854 | 0.35506299  | 0.14127416  |
| 0.36245761  | 0.376785249 | 0.37019032  | 0.240452069 |
| 0.339650052 | 0.375917294 | 0.205612421 | 0.215330765 |
| 0.101104042 | 0.367131243 | 0.27781187  | 0.064157043 |
| 0.456382066 | 0.097314954 | 0.046115379 | 0.393216103 |
| 0.26331164  | 0.277818681 | 0.011850092 | 0.080606189 |
| 0.147451023 | 0.44479676  | 0.32865881  | 0.304411954 |
| 0.091172517 | 0.312391941 | 0.03240152  | 0.427872301 |
| 0.363710065 | 0.082915009 | 0.227967745 | 0.31605507  |
| 0.294411789 | 0.407873115 | 0.203951877 | 0.364412472 |
| 0.243613877 | 0.344767466 | 0.204153195 | 0.297892237 |
| 0.358283415 | 0.356733674 | 0.341014224 | 0.354560588 |
| 0.423128725 | 0.38188145  | 0.27847134  | 0.071239846 |
| 0.145423505 | 0.150516184 | 0.117415805 | 0.115042908 |
| 0.175156526 | 0.215834631 | 0.387215407 | 0.453208516 |
| 0.400891371 | 0.054258728 | 0.168526746 | 0.316589301 |
| 0.383051503 | 0.447016122 | 0.089174198 | 0.016503822 |
| 0.013502234 | 0.059154667 | 0.249469134 | 0.298232421 |
| 0.401350232 | 0.087129396 | 0.048119551 | 0.096074096 |
| 0.25384231  | 0.293270263 | 0.375857591 | 0.402755297 |
| 0.368208575 | 0.217952593 | 0.137130089 | 0.404562231 |
| 0.150111276 | 0.182605157 | 0.41395459  | 0.348234395 |
| 0.161757585 | 0.295714324 | 0.216311962 | 0.451661255 |
| 0.064675015 | 0.313804896 | 0.296722332 | 0.21690736  |
| 0.071088971 | 0.198975721 | 0.168358411 | 0.435940161 |

|             |             |             |             |
|-------------|-------------|-------------|-------------|
| 0.333267931 | 0.1323351   | 0.099931625 | 0.073089849 |
| 0.172183405 | 0.427077742 | 0.225221119 | 0.463370521 |
| 0.384998731 | 0.461361921 | 0.188189117 | 0.353633368 |
| 0.111639868 | 0.336643788 | 0.248053799 | 0.036041319 |
| 0.29169297  | 0.091654895 | 0.349875563 | 0.097366471 |
| 0.17873996  | 0.29555124  | 0.166068661 | 0.099085594 |
| 0.146469282 | 0.169643883 | 0.450987658 | 0.428878939 |
| 0.137413799 | 0.260666692 | 0.310506487 | 0.341698828 |
| 0.171339223 | 0.384183187 | 0.348859831 | 0.150331194 |
| 0.155481216 | 0.154397203 | 0.357978836 | 0.248062583 |
| 0.183836364 | 0.468084888 | 0.209428888 | 0.430550252 |
| 0.295048072 | 0.385068799 | 0.374517544 | 0.244412563 |
| 0.22629299  | 0.215255013 | 0.250928642 | 0.053775315 |
| 0.285089774 | 0.425547196 | 0.232279429 | 0.185007383 |
| 0.265072928 | 0.202527067 | 0.148413909 | 0.108371758 |
| 0.175345955 | 0.164071086 | 0.21545054  | 0.467737607 |
| 0.26369066  | 0.259379747 | 0.117779443 | 0.156917634 |
| 0.423671276 | 0.336278984 | 0.149678497 | 0.309379765 |
| 0.287487066 | 0.274048995 | 0.380410143 | 0.387290629 |
| 0.209870864 | 0.352854537 | 0.356719727 | 0.253113601 |
| 0.313074745 | 0.276966035 | 0.377344155 | 0.082239814 |
| 0.139511271 | 0.243337874 | 0.159265591 | 0.22403752  |
| 0.245248187 | 0.120493442 | 0.157923944 | 0.412010967 |
| 0.175373466 | 0.335082107 | 0.160186509 | 0.18922775  |
| 0.309737653 | 0.189816317 | 1           | 0.187401456 |
| 0.155776631 | 0.349753521 | 0.049266361 | 0.186791508 |
| 0.195567463 | 0.338743343 | 0.2128912   | 0.296574646 |
| 0.200696854 | 0.247213458 | 0.301577288 | 0.146072395 |
| 0.127544094 | 0.202001779 | 0.333807524 | 0.090773159 |
| 0.083240101 | 0.472055412 | 0.182918426 | 0.106936888 |
| 0.172147491 | 0.220277201 | 0.266555286 | 0.214052797 |
| 0.109443621 | 0.363141701 | 0.141623094 | 0.257078336 |
| 0.239246911 | 0.199910187 | 0.244152885 | 0.128203717 |
| 0.166429748 | 0.321602194 | 0.230626306 | 0.369806392 |
| 0.267730271 | 0.425720529 | 0.291060569 | 0.333686111 |
| 0.170483113 | 0.179787334 | 0.102116047 | 0.409437117 |
| 0.159662911 |             |             |             |
| TRAPPC2     | 0.147889326 | 0.2560896   | 0.076538663 |
| 0.323395402 | 0.1405945   | 0.193467755 | 0.256476768 |
| 0.151249276 | 0.108940855 | 0.093505999 | 0.050097534 |
| 0.122399262 | 0.101350132 | 0.176254193 | 0.083792057 |
| 0.261817357 | 0.086321511 | 0.071429014 | 0.240752983 |
| 0.262276369 | 0.231540755 | 0.255565253 | 0.184929417 |
| 0.043700502 | 0.060666775 | 0.115859191 | 0.06000805  |
| 0.311902435 | 0.118777866 | 0.166622449 | 0.285289824 |
| 0.056635209 | 0.207541589 | 0.212918491 | 0.182633671 |
| 0.191532408 | 0.126840576 | 0.016974716 | 0.142938445 |
| 0.21178762  | 0.1984887   | 0.282160659 | 0.277981106 |
| 0.162856468 | 0.214610162 | 0.284180115 | 0.121139562 |
| 0.103143474 | 0.079087026 | 0.122713732 | 0.212850626 |
| 0.200860174 | 0.145547929 | 0.168164613 | 0.213539624 |
| 0.080024062 | 0.120989267 | 0.033229792 | 0.220228601 |
| 0.241891892 | 0.152127083 | 0.201412321 | 0.177002229 |
| 0.084669159 | 0.145663244 | 0.056242705 | 0.205519908 |

|             |             |             |             |
|-------------|-------------|-------------|-------------|
| 0.039122917 | 0.217933011 | 0.084105011 | 0.082413797 |
| 0.042558998 | 0.270694762 | 0.126531752 | 0.032272497 |
| 0.082539341 | 0.107213762 | 0.066901687 | 0.307013383 |
| 0.286760918 | 0.177507947 | 0.248901664 | 0.222442594 |
| 0.100943207 | 0.10765794  | 0.070005858 | 0.16367323  |
| 0.210483132 | 0.232881146 | 0.100057194 | 0.249507191 |
| 0.245484267 | 0.221210752 | 0.086248193 | 0.108259815 |
| 0.257658602 | 0.251262485 | 0.114791085 | 0.125136445 |
| 0.057637992 | 0.024495639 | 0.211938461 | 0.240653985 |
| 0.205856663 | 0.042556476 | 0.104140605 | 0.287172625 |
| 0.097742127 | 0.073343843 | 0.300737148 | 0.063084824 |
| 0.295992379 | 0.113478834 | 0.086441291 | 0.24909894  |
| 0.088059039 | 0.20975735  | 0.203498106 | 0.240828373 |
| 0.097581954 | 0.071024331 | 0.027074106 | 0.050258753 |
| 0.099179926 | 0.014918228 | 0.1848775   | 0.299389493 |
| 0.14571915  | 0.07751933  | 0.180188274 | 0.01669555  |
| 0.049942696 | 0.046828533 | 0.173957341 | 0.10553502  |
| 0.213868895 | 0.119496142 | 0.126970495 | 0.179099453 |
| 0.123419201 | 0.240596468 | 0.03997066  | 0.177322084 |
| 0.162939114 | 0.051137386 | 0.227449821 | 0.144646538 |
| 0.124284744 | 0.189653779 | 0.167659288 | 0.263082626 |
| 0.243822592 | 0.168071163 | 0.075556589 | 0.247240572 |
| 0.118017681 | 0.110876057 | 0.156855043 | 0.158738172 |
| 0.189609395 | 0.173358325 | 0.032649792 | 0.127580676 |
| 0.04286994  | 0.050247795 | 0.032847026 | 0.19269591  |
| 0.144608492 | 0.225351306 | 0.161785652 | 0.129302081 |
| 0.173631759 | 0.200417752 | 0.135037856 | 0.222008112 |
| 0.075777127 | 0.085928506 | 0.083912126 | 0.255616054 |
| 0.20022582  | 0.216091104 | 0.127850377 | 0.074488531 |
| 0.151692535 | 0.2561894   | 0.001689224 | 0.211149656 |
| 0.211646414 | 0.083029399 | 0.203915105 | 0.130336398 |
| 0.062060722 | 0.299424719 | 0.007430161 | 0.247507368 |
| 0.145280941 | 0.12215471  | 0.268270582 | 0.134484525 |
| 0.192121058 | 0.098129754 | 0.128919289 | 0.153334546 |
| 0.135844763 | 0.022576812 | 0.200059264 | 0.300211396 |
| 0.025375372 | 0.215321231 | 0.200956723 | 0.270444859 |
| 0.207463462 | 0.203746146 | 0.28544772  | 0.053347983 |
| 0.144335241 | 0.161916851 | 0.035589776 | 0.097549691 |
| 0.171017766 | 0.045858151 | 0.24194118  | 0.178286536 |
| 0.113595348 | 0.249502393 | 0.14611321  | 0.069047068 |
| 0.150361508 | 0.198391837 | 0.100943688 | 0.139868236 |
| 0.141805126 | 0.212888182 | 0.077852326 | 0.049340576 |
| 0.065813997 | 0.256785054 | 0.026543763 | 0.02328373  |
| 0.01391632  | 0.194193434 | 0.197091626 | 0.155452148 |
| 0.094205769 | 0.12025022  | 0.059524686 | 0.086947037 |
| 0.199865044 | 0.135766891 | 0.008046248 | 0.048120849 |
| 0.11341692  | 0.084626965 | 0.083059898 | 0.170799803 |
| 0.112275273 | 0.149392079 | 0.138282837 | 0.042066392 |
| 0.064461159 | 0.052653755 | 0.247453168 | 0.234122059 |
| 0.188114085 | 0.173491636 | 0.06850897  | 0.054466974 |
| 0.287119911 | 0.150707666 | 0.065262561 | 0.280104225 |
| 0.052953701 | 0.236636625 | 0.148654474 | 0.11156504  |
| 0.069137094 | 0.23008523  | 0.30275315  | 0.057759012 |
| 0.146005204 | 0.253837642 | 0.13123075  | 0.109566045 |

|             |             |             |             |
|-------------|-------------|-------------|-------------|
| 0.220383737 | 0.236501923 | 0.145730043 | 0.172662024 |
| 0.173289389 | 0.092003103 | 0.229045923 | 0.060849721 |
| 0.048570065 | 0.159642769 | 0.170491838 | 0.094482872 |
| 0.072353732 | 0.191939353 | 0.20473859  | 0.183618243 |
| 0.262547758 | 0.268483335 | 0.217216518 | 0.035848813 |
| 0.150290701 | 0.056735267 | 0.049046193 | 0.076898374 |
| 0.209139679 | 0.20704536  | 0.166455549 | 0.108407988 |
| 0.253048919 | 0.065918839 | 0.107271499 | 0.243622472 |
| 0.029740986 | 0.21184468  | 0.036116399 | 0.156547984 |
| 0.192075713 | 0.142267372 | 0.075131089 | 0.249153613 |
| 0.233576591 | 0.139356474 | 0.122493801 | 0.22569079  |
| 0.236376238 | 0.091142266 | 0.080299554 | 0.164739891 |
| 0.153914802 | 0.175118638 | 0.127003673 | 0.021741558 |
| 0.093519659 | 0.121663144 | 0.004115304 | 0.100226288 |
| 0.150715221 | 0.250195249 | 0.23774037  | 0.090268854 |
| 0.188840391 | 0.091938596 | 0.166922282 | 0.113248386 |
| 0.166607017 | 0.184334368 | 0.224228403 | 0.153849548 |
| 0.167408993 | 0.210705927 | 0.081101726 | 0.065872406 |
| 0.0334      | 0.196427237 | 0.19292297  | 0.102743366 |
| 0.274869836 | 0.139308747 | 0.094629555 | 0.263563394 |
| 0.210972682 | 0.17256291  | 0.034553743 | 0.006600935 |
| 0.023114546 | 0.212969825 | 0.211360157 | 0.263339441 |
| 0.10692829  | 0.200290021 | 0.001252464 | 0.216051288 |
| 0.241876319 | 0.027073219 | 0.042512468 | 0.171325214 |
| 0.132397796 | 0.252495446 | 0.048069911 | 0.186495958 |
| 0.111184548 | 0.197850951 | 0.177725857 | 0.180062172 |
| 0.26162471  | 0.172356534 | 0.242330979 | 0.237551027 |
| 0.28258113  | 0.178362545 | 0.281887136 | 0.113545352 |
| 0.035083391 | 0.165854853 | 0.07159637  | 0.088109233 |
| 0.177179726 | 0.090298905 | 0.217065533 | 0.253321995 |
| 0.211852648 | 0.025402101 | 0.207034486 | 0.180292731 |
| 0.299402619 | 0.294822354 | 0.019587634 | 0.006788721 |
| 0.002791379 | 0.023502514 | 0.230082296 | 0.089595207 |
| 0.226391776 | 0.102781928 | 0.043917324 | 0.183999444 |
| 0.140683994 | 0.1193498   | 0.231229603 | 0.292480719 |
| 0.162657101 | 0.100447081 | 0.123643413 | 0.277192062 |
| 0.053597555 | 0.124770852 | 0.236222765 | 0.252726803 |
| 0.040747547 | 0.0854343   | 0.089959611 | 0.299720395 |
| 0.004822634 | 0.160883336 | 0.135571611 | 0.132297272 |
| 0.011883483 | 0.060921406 | 0.066147353 | 0.224984888 |
| 0.181086547 | 0.113338144 | 0.085150475 | 0.060912812 |
| 0.209007928 | 0.228345885 | 0.173557973 | 0.26237934  |
| 0.283593807 | 0.305598452 | 0.036494135 | 0.229006908 |
| 0.078484388 | 0.206732637 | 0.077279486 | 0.059729345 |
| 0.07052333  | 0.042850467 | 0.171535666 | 0.048714986 |
| 0.119134208 | 0.200679305 | 0.04161453  | 0.022325507 |
| 0.016131109 | 0.075180031 | 0.277793825 | 0.206724598 |
| 0.020953934 | 0.152953042 | 0.127231951 | 0.187407795 |
| 0.23042332  | 0.280297561 | 0.220798567 | 0.099438573 |
| 0.210091974 | 0.011849572 | 0.269932891 | 0.161282801 |
| 0.144957203 | 0.248538343 | 0.093625961 | 0.22956624  |
| 0.186132252 | 0.220761734 | 0.203132783 | 0.230650814 |
| 0.043850033 | 0.156967852 | 0.291946384 | 0.157935335 |
| 0.204032979 | 0.271263937 | 0.135287873 | 0.073700336 |

|             |             |             |             |
|-------------|-------------|-------------|-------------|
| 0.14201115  | 0.065668526 | 0.078168407 | 0.03384272  |
| 0.039017752 | 0.237555662 | 0.17983721  | 0.280815835 |
| 0.171405698 | 0.170120115 | 0.092779465 | 0.071486697 |
| 0.248104627 | 0.21550468  | 0.173214622 | 0.238432815 |
| 0.09866911  | 0.174662899 | 0.181594881 | 0.169734579 |
| 0.052953929 | 0.222023348 | 0.253601703 | 0.262039253 |
| 0.25722656  | 0.223100498 | 0.226970965 | 0.124341055 |
| 0.036656444 | 0.107271328 | 0.167111771 | 0.069410622 |
| 0.174466315 | 0.047534037 | 0.024663427 | 0.219645655 |
| 0.032284192 | 0.255366611 | 0.071079718 | 0.092105585 |
| 0.114862615 | 0.06563829  | 0.187401456 | 1           |
| 0.161895917 | 0.226942511 | 0.030199908 | 0.077423645 |
| 0.039769486 | 0.193930681 | 0.084079593 | 0.098313897 |
| 0.0356048   | 0.03852551  | 0.20136899  | 0.161632235 |
| 0.112706451 | 0.045914342 | 0.200526646 | 0.107544185 |
| 0.132463926 | 0.264211453 | 0.10614571  | 0.018288238 |
| 0.035781958 | 0.129983896 | 0.073574409 | 0.132091578 |
| 0.021467781 | 0.18643426  | 0.123577166 | 0.119255528 |
| 0.235828265 | 0.102731977 | 0.182275094 | 0.060373871 |
| 0.086682943 | 0.211963749 | 0.083710848 | 0.199862511 |
| 0.062766545 | 0.298363097 | 0.190899963 | 0.196876989 |
| 0.045458759 | 0.060393341 | 0.144602065 | 0.253508715 |
| 0.049933035 |             |             |             |

| TRDMT1      | 0.054564051 | 0.097065275 | 0.041141493 |
|-------------|-------------|-------------|-------------|
| 0.186128686 | 0.092138438 | 0.069450859 | 0.193254891 |
| 0.039377312 | 0.058047783 | 0.112384848 | 0.072040149 |
| 0.068387883 | 0.05903996  | 0.09924674  | 0.024183788 |
| 0.165876392 | 0.139605931 | 0.028976923 | 0.224373997 |
| 0.135350336 | 0.112091946 | 0.208768356 | 0.13195783  |
| 0.027646495 | 0.134169878 | 0.205032106 | 0.07673206  |
| 0.155772243 | 0.220480369 | 0.059744789 | 0.114681053 |
| 0.067921863 | 0.08106182  | 0.069148567 | 0.136873799 |
| 0.062976157 | 0.041489208 | 0.01043961  | 0.063116971 |
| 0.071079737 | 0.111140869 | 0.141098859 | 0.237033201 |
| 0.149178995 | 0.06105105  | 0.247611431 | 0.084763427 |
| 0.015590316 | 0.135264052 | 0.036804122 | 0.05768294  |
| 0.065654981 | 0.072379722 | 0.06793855  | 0.174332636 |
| 0.040913912 | 0.034457407 | 0.024892909 | 0.062113755 |
| 0.224803508 | 0.047433463 | 0.069002194 | 0.064288476 |
| 0.017032393 | 0.066514736 | 0.070881491 | 0.118669332 |
| 0.025422394 | 0.066263793 | 0.040546805 | 0.035804137 |
| 0.034656241 | 0.145321888 | 0.097729868 | 0.024988414 |
| 0.213915106 | 0.143008494 | 0.098771677 | 0.199635448 |
| 0.136166156 | 0.055984607 | 0.137706758 | 0.111171705 |
| 0.083195685 | 0.104563453 | 0.046192505 | 0.193406954 |
| 0.077399772 | 0.220557967 | 0.045424059 | 0.179339667 |
| 0.130344553 | 0.081949214 | 0.063231333 | 0.136404305 |
| 0.114624356 | 0.087183499 | 0.05945534  | 0.082044713 |
| 0.037882477 | 0.037413706 | 0.069183726 | 0.109912857 |
| 0.061975095 | 0.042205086 | 0.212654476 | 0.115152196 |
| 0.157539396 | 0.015564886 | 0.238231789 | 0.0373677   |
| 0.141459019 | 0.077935834 | 0.149884145 | 0.148859547 |
| 0.028476971 | 0.086947636 | 0.077992362 | 0.234447233 |
| 0.064668738 | 0.086346386 | 0.022898676 | 0.07757125  |

|             |             |             |             |
|-------------|-------------|-------------|-------------|
| 0.027126045 | 0.014010457 | 0.050892496 | 0.152087348 |
| 0.036454293 | 0.028413502 | 0.116980797 | 0.044607436 |
| 0.12026165  | 0.021056726 | 0.071111502 | 0.048903799 |
| 0.094438716 | 0.037022798 | 0.153234191 | 0.052534585 |
| 0.063505721 | 0.131725402 | 0.006490483 | 0.118594177 |
| 0.088925282 | 0.022458627 | 0.260033043 | 0.074325366 |
| 0.156943235 | 0.098599397 | 0.200571704 | 0.11932889  |
| 0.069895405 | 0.248642278 | 0.02304584  | 0.173571186 |
| 0.042949862 | 0.121583562 | 0.158375311 | 0.136315397 |
| 0.131994238 | 0.058439945 | 0.109517008 | 0.046275806 |
| 0.013508952 | 0.049659357 | 0.018682253 | 0.080332133 |
| 0.04043507  | 0.100538741 | 0.043552383 | 0.169516088 |
| 0.152629042 | 0.159628052 | 0.039460578 | 0.117012463 |
| 0.08350641  | 0.05718403  | 0.017882004 | 0.114744309 |
| 0.052069431 | 0.095939097 | 0.082707082 | 0.054555313 |
| 0.185718478 | 0.133873293 | 0.001238045 | 0.064765301 |
| 0.078278059 | 0.019382563 | 0.173312124 | 0.077058189 |
| 0.040093149 | 0.156677219 | 0.001073703 | 0.168689926 |
| 0.039032931 | 0.145321246 | 0.137472379 | 0.25899897  |
| 0.062486723 | 0.219943966 | 0.056323312 | 0.076503745 |
| 0.064622328 | 0.017615221 | 0.075494466 | 0.14754135  |
| 0.063640584 | 0.066790484 | 0.081818713 | 0.160212526 |
| 0.137782246 | 0.105974112 | 0.15709937  | 0.03796203  |
| 0.101684187 | 0.106460582 | 0.036236771 | 0.106225336 |
| 0.07385171  | 0.007932635 | 0.075405732 | 0.078825706 |
| 0.02831146  | 0.091764936 | 0.05486916  | 0.012852614 |
| 0.207211354 | 0.092871429 | 0.064074532 | 0.130455592 |
| 0.044552629 | 0.151933997 | 0.038801716 | 0.024701443 |
| 0.151804438 | 0.111207803 | 0.041605777 | 0.023661967 |
| 0.019764711 | 0.118242658 | 0.143608819 | 0.109248249 |
| 0.071146301 | 0.098238542 | 0.042749481 | 0.056432147 |
| 0.112025074 | 0.233138    | 0.012296844 | 0.031238603 |
| 0.091157744 | 0.069312838 | 0.061383822 | 0.056901985 |
| 0.037706487 | 0.118706703 | 0.13235758  | 0.022271713 |
| 0.10261879  | 0.159434792 | 0.095266974 | 0.145568821 |
| 0.047129145 | 0.11267322  | 0.133970693 | 0.014102121 |
| 0.139864205 | 0.048048294 | 0.013094974 | 0.113241916 |
| 0.03489862  | 0.114517845 | 0.09917752  | 0.244857642 |
| 0.070844394 | 0.260300588 | 0.153070253 | 0.0160575   |
| 0.049981123 | 0.087630819 | 0.107761967 | 0.169888032 |
| 0.069217011 | 0.123063965 | 0.08823231  | 0.056399097 |
| 0.057958045 | 0.203622727 | 0.0933065   | 0.089649979 |
| 0.14035457  | 0.096915601 | 0.088503745 | 0.215401656 |
| 0.151062219 | 0.148476127 | 0.069004022 | 0.223144841 |
| 0.1117066   | 0.210101209 | 0.095357721 | 0.038741214 |
| 0.214946955 | 0.108564798 | 0.073652187 | 0.040360187 |
| 0.064090006 | 0.088714891 | 0.176351807 | 0.124070553 |
| 0.249026818 | 0.045370874 | 0.011419192 | 0.110974586 |
| 0.008920853 | 0.071338819 | 0.08090126  | 0.082471117 |
| 0.061719578 | 0.042007794 | 0.184881707 | 0.125980152 |
| 0.077011063 | 0.154913615 | 0.063990974 | 0.079182104 |
| 0.090091524 | 0.066952149 | 0.054541091 | 0.085697813 |
| 0.084554616 | 0.071223424 | 0.088308675 | 0.020656527 |
| 0.051079784 | 0.105701236 | 0.005386414 | 0.023986155 |

|             |             |             |             |
|-------------|-------------|-------------|-------------|
| 0.130734008 | 0.088411332 | 0.127332404 | 0.094153654 |
| 0.076488638 | 0.022208046 | 0.142273431 | 0.177401855 |
| 0.080449588 | 0.067032469 | 0.075143832 | 0.082384213 |
| 0.073574831 | 0.090405996 | 0.050983026 | 0.124236359 |
| 0.126970377 | 0.06891406  | 0.066034341 | 0.09436727  |
| 0.141152842 | 0.034052159 | 0.131119003 | 0.095779613 |
| 0.199391858 | 0.043847648 | 0.01640639  | 0.002086879 |
| 0.037983108 | 0.11979199  | 0.067095791 | 0.10607913  |
| 0.034115797 | 0.111169334 | 0.001475992 | 0.089385398 |
| 0.089427634 | 0.085429661 | 0.041268397 | 0.076961642 |
| 0.071404622 | 0.088102412 | 0.049813751 | 0.09770426  |
| 0.071139763 | 0.068299658 | 0.056021088 | 0.217578399 |
| 0.11771448  | 0.065467248 | 0.099747441 | 0.077784805 |
| 0.14565631  | 0.121390083 | 0.250555133 | 0.113238874 |
| 0.020677279 | 0.063411584 | 0.028095292 | 0.063701711 |
| 0.046381523 | 0.124265442 | 0.082256404 | 0.132886648 |
| 0.10361379  | 0.090245849 | 0.064507132 | 0.071140643 |
| 0.120219941 | 0.13195411  | 0.015238458 | 0.006330571 |
| 0.003233632 | 0.055963341 | 0.104317629 | 0.113546594 |
| 0.094060266 | 0.020060482 | 0.099384842 | 0.058920968 |
| 0.044006289 | 0.098797576 | 0.085432917 | 0.203603852 |
| 0.075837853 | 0.140067083 | 0.054435055 | 0.16192914  |
| 0.062257764 | 0.028433005 | 0.117195367 | 0.083131904 |
| 0.046271056 | 0.097428476 | 0.035427919 | 0.141447254 |
| 0.005559841 | 0.170479639 | 0.072217531 | 0.059807255 |
| 0.012943654 | 0.118708985 | 0.106181048 | 0.125759795 |
| 0.059090992 | 0.131744958 | 0.133021169 | 0.007362488 |
| 0.20064978  | 0.103698581 | 0.148375108 | 0.125508502 |
| 0.126902369 | 0.185923951 | 0.041591168 | 0.075615895 |
| 0.066163435 | 0.06938409  | 0.090018828 | 0.019797626 |
| 0.049399118 | 0.048553816 | 0.06225672  | 0.027465411 |
| 0.049786095 | 0.073145994 | 0.017113755 | 0.062974156 |
| 0.008240123 | 0.163097187 | 0.150144702 | 0.115604421 |
| 0.033520848 | 0.072267584 | 0.125215092 | 0.099244668 |
| 0.094402198 | 0.176463315 | 0.07003825  | 0.039892844 |
| 0.135278752 | 0.006099441 | 0.126515132 | 0.05436387  |
| 0.048860771 | 0.132587527 | 0.061252908 | 0.093761813 |
| 0.063841032 | 0.078310087 | 0.08285526  | 0.141401552 |
| 0.025340698 | 0.056356463 | 0.134696309 | 0.12693137  |
| 0.139194609 | 0.15419039  | 0.053589689 | 0.064216704 |
| 0.207557324 | 0.040109324 | 0.032799007 | 0.004264262 |
| 0.02911836  | 0.080767997 | 0.102333687 | 0.159824302 |
| 0.060859796 | 0.055983249 | 0.033962342 | 0.112705022 |
| 0.092481857 | 0.067275985 | 0.041747622 | 0.118219592 |
| 0.140047463 | 0.153462094 | 0.09078149  | 0.093593941 |
| 0.014433355 | 0.101778314 | 0.10556333  | 0.118727642 |
| 0.081933358 | 0.173619068 | 0.077612544 | 0.01665269  |
| 0.032644701 | 0.041730592 | 0.162776813 | 0.160215719 |
| 0.256729861 | 0.069596966 | 0.014102318 | 0.136668146 |
| 0.018192604 | 0.213258903 | 0.008687763 | 0.063827288 |
| 0.111455669 | 0.021519553 | 0.155776631 | 0.161895917 |
| 1           | 0.077702581 | 0.040971798 | 0.145384167 |
| 0.026585166 | 0.08821278  | 0.078013632 | 0.116675824 |
| 0.021130274 | 0.030521224 | 0.212126879 | 0.05220615  |



|             |             |             |             |
|-------------|-------------|-------------|-------------|
| 0.067950512 | 0.008743308 | 0.088099727 | 0.039698543 |
| 0.081541158 | 0.136562863 | 0.037262067 | 0.024638032 |
| 0.017722298 | 0.038266804 | 0.027499094 | 0.062529046 |
| 0.070577748 | 0.077037423 | 0.048069731 | 0.07144682  |
| 0.119291573 | 0.115971387 | 0.043632349 | 0.017025899 |
| 0.037103447 | 0.064213752 | 0.051561996 | 0.072449609 |
| 0.042733833 | 0.208944697 | 0.048503483 | 0.079769252 |
| 0.017207394 | 0.02417124  | 0.091186446 | 0.109262011 |
| 0.026510418 |             |             |             |
| TRIB2       | 0.457299742 | 0.508517001 | 0.413076887 |
| 0.454952055 | 0.439483382 | 0.451991255 | 0.221120274 |
| 0.199348432 | 0.085214376 | 0.005694921 | 0.024128487 |
| 0.460572619 | 0.224286011 | 0.306382543 | 0.392443538 |
| 0.423550304 | 0.121449417 | 0.346858015 | 0.232233673 |
| 0.427067035 | 0.103303927 | 0.405033092 | 0.084203267 |
| 0.270917853 | 0.094948738 | 0.061899219 | 0.268975827 |
| 0.465890048 | 0.070417046 | 0.416981937 | 0.429428106 |
| 0.076645604 | 0.476688623 | 0.515479896 | 0.464327844 |
| 0.513125216 | 0.452008896 | 0.007873201 | 0.358337135 |
| 0.467015689 | 0.480954764 | 0.431261361 | 0.337710817 |
| 0.038538152 | 0.496363256 | 0.255866417 | 0.395201813 |
| 0.260539741 | 0.026891229 | 0.298170154 | 0.465764735 |
| 0.491623451 | 0.499633104 | 0.245117332 | 0.168544418 |
| 0.24959976  | 0.280810795 | 0.305483985 | 0.39400679  |
| 0.229212552 | 0.204457189 | 0.497955512 | 0.0962543   |
| 0.161224894 | 0.25434357  | 0.125023864 | 0.273592722 |
| 0.352963874 | 0.45261139  | 0.013114267 | 0.441938408 |
| 0.003631866 | 0.396679837 | 0.359880193 | 0.345123613 |
| 0.032169231 | 0.0200831   | 0.149273599 | 0.368270511 |
| 0.479383084 | 0.469762645 | 0.496560598 | 0.502112396 |
| 0.173903628 | 0.264119099 | 0.403157469 | 0.165708673 |
| 0.487178333 | 0.193682026 | 0.10300088  | 0.424755832 |
| 0.501235647 | 0.505714635 | 0.185009832 | 0.236653157 |
| 0.503506892 | 0.497542682 | 0.475288986 | 0.4594521   |
| 0.395497402 | 0.036337469 | 0.497179569 | 0.510887007 |
| 0.464416701 | 0.317875993 | 0.135174239 | 0.459550795 |
| 0.04596156  | 0.404324266 | 0.362255203 | 0.143856752 |
| 0.483448018 | 0.016419893 | 0.189120411 | 0.396374428 |
| 0.183830858 | 0.487703772 | 0.502380225 | 0.184980037 |
| 0.403688383 | 0.015955464 | 0.142619196 | 0.022363558 |
| 0.346310525 | 0.134240443 | 0.508747572 | 0.500896062 |
| 0.252778659 | 0.394754208 | 0.268670469 | 0.000157583 |
| 0.019155147 | 0.152731937 | 0.492853418 | 0.362382732 |
| 0.457548589 | 0.444338896 | 0.247191432 | 0.466733153 |
| 0.492348335 | 0.494771225 | 0.090131196 | 0.087002036 |
| 0.460084889 | 0.150452235 | 0.223519491 | 0.487592488 |
| 0.308816802 | 0.108748186 | 0.11539307  | 0.508027253 |
| 0.468523343 | 0.075812771 | 0.360643469 | 0.417905319 |
| 0.390235595 | 0.350573776 | 0.093275234 | 0.290435386 |
| 0.048018912 | 0.484798298 | 0.019184839 | 0.351244726 |
| 0.321962927 | 0.135508151 | 0.006380441 | 0.289600601 |
| 0.333906026 | 0.514914183 | 0.49047512  | 0.088434688 |
| 0.335036687 | 0.416789891 | 0.369522804 | 0.505191985 |
| 0.012286104 | 0.035043783 | 0.333944371 | 0.514056962 |

|             |             |             |             |
|-------------|-------------|-------------|-------------|
| 0.373174135 | 0.495557456 | 0.290150733 | 0.283706817 |
| 0.26492505  | 0.471401636 | 0.002245302 | 0.503001873 |
| 0.506115664 | 0.365531577 | 0.435367724 | 0.419017258 |
| 0.419575965 | 0.49180721  | 0.045392638 | 0.422846701 |
| 0.425995885 | 0.063445669 | 0.49693522  | 0.14748309  |
| 0.487716581 | 0.034613462 | 0.35890678  | 0.483961108 |
| 0.498183764 | 0.006907543 | 0.281767066 | 0.422599366 |
| 0.017522667 | 0.113611193 | 0.457700894 | 0.435391113 |
| 0.420392071 | 0.464880909 | 0.482206947 | 0.403900636 |
| 0.449463784 | 0.227829509 | 0.007588516 | 0.298150711 |
| 0.470830279 | 0.431922564 | 0.484195558 | 0.247076732 |
| 0.409979178 | 0.505566723 | 0.488147183 | 0.262739921 |
| 0.038681373 | 0.340315085 | 0.021419445 | 0.343877299 |
| 0.463979061 | 0.131865528 | 0.444899793 | 0.115137974 |
| 0.056457557 | 0.513897356 | 0.158518575 | 0.259325953 |
| 0.115557142 | 0.470329266 | 0.241981506 | 0.294451496 |
| 0.250690749 | 0.149638398 | 0.373691892 | 0.410765464 |
| 0.038764564 | 0.084713176 | 0.007498748 | 0.444016768 |
| 0.169443154 | 0.412885384 | 0.424239883 | 0.479620893 |
| 0.356971797 | 0.115687301 | 0.407408513 | 0.275312667 |
| 0.096740539 | 0.009974899 | 0.50886628  | 0.408387321 |
| 0.420682827 | 0.147345673 | 0.029403935 | 0.418935773 |
| 0.507636055 | 0.42610072  | 0.331057966 | 0.506477622 |
| 0.020197582 | 0.492626035 | 0.276017885 | 0.1098703   |
| 0.408143866 | 0.264543773 | 0.477950619 | 0.071408393 |
| 0.428847232 | 0.500140857 | 0.287794645 | 0.179973968 |
| 0.476298602 | 0.444720864 | 0.027335748 | 0.473261523 |
| 0.475495012 | 0.024580497 | 0.509546885 | 0.106600198 |
| 0.013795524 | 0.457227176 | 0.504535745 | 0.060572521 |
| 0.062354593 | 0.387834304 | 0.049833975 | 0.275934666 |
| 0.514412212 | 0.42117814  | 0.509801513 | 0.190464487 |
| 0.037062808 | 0.010922619 | 0.178013198 | 0.410626434 |
| 0.516137583 | 0.505816035 | 0.23791731  | 0.394510771 |
| 0.230545481 | 0.3642824   | 0.170474214 | 0.514519494 |
| 0.15909234  | 0.497247895 | 0.003658951 | 0.481845001 |
| 0.517053009 | 0.353599415 | 0.071185213 | 0.353967288 |
| 0.478667325 | 0.039829984 | 0.1826859   | 0.500914065 |
| 0.494535319 | 0.34855434  | 0.392884474 | 0.439139768 |
| 0.015703027 | 0.040163019 | 0.402469293 | 0.168431324 |
| 0.434025496 | 0.203417228 | 0.043752267 | 0.358457519 |
| 0.040737209 | 0.5019351   | 0.471208141 | 0.055492009 |
| 0.442370309 | 0.341948294 | 0.368258146 | 0.029627657 |
| 0.493747779 | 0.488919926 | 0.516797703 | 0.150046329 |
| 0.487236945 | 0.512024194 | 0.457659751 | 0.059750698 |
| 0.011026296 | 0.50532048  | 0.450177679 | 0.022552508 |
| 0.488748588 | 0.309583095 | 0.014068623 | 0.503268797 |
| 0.174423739 | 0.466972318 | 0.004185049 | 0.070804124 |
| 0.026170333 | 0.470892095 | 0.488673953 | 0.420105269 |
| 0.348406511 | 0.364040973 | 0.002795365 | 0.501967179 |
| 0.507223915 | 0.009234555 | 0.118335895 | 0.5090189   |
| 0.486972305 | 0.502445602 | 0.336577263 | 0.503792754 |
| 0.476074124 | 0.501116466 | 0.267003421 | 0.257598392 |
| 0.505670196 | 0.490951961 | 0.467454661 | 0.487446131 |
| 0.496357531 | 0.429360049 | 0.283440574 | 0.014032027 |

|             |             |             |             |
|-------------|-------------|-------------|-------------|
| 0.134078314 | 0.249006539 | 0.409711426 | 0.090960493 |
| 0.393446587 | 0.132423444 | 0.49608378  | 0.486071546 |
| 0.508969396 | 0.002292569 | 0.161901417 | 0.503694324 |
| 0.485470644 | 0.487944626 | 0.012378187 | 0.004809788 |
| 0.006064437 | 0.017011568 | 0.38920223  | 0.216530502 |
| 0.507888105 | 0.341650454 | 0.002467008 | 0.043966155 |
| 0.287061901 | 0.414569856 | 0.508574053 | 0.383795124 |
| 0.473578032 | 0.064831108 | 0.369073359 | 0.406026142 |
| 0.059529317 | 0.403470908 | 0.512427243 | 0.496605884 |
| 0.027123773 | 0.224418697 | 0.388219891 | 0.500069827 |
| 0.068959467 | 0.30011489  | 0.467491819 | 0.357872213 |
| 0.007428568 | 0.065563807 | 0.055148582 | 0.448577538 |
| 0.506175846 | 0.080930468 | 0.030930264 | 0.184664662 |
| 0.129506439 | 0.490369038 | 0.16610114  | 0.505780052 |
| 0.490716433 | 0.455263302 | 0.056804513 | 0.494647806 |
| 0.036362388 | 0.494236074 | 0.343265067 | 0.073613283 |
| 0.258020514 | 0.007394217 | 0.486253007 | 0.193825466 |
| 0.375620602 | 0.435724097 | 0.204646146 | 0.010012201 |
| 0.174492293 | 0.041134302 | 0.497868519 | 0.482871523 |
| 0.020755908 | 0.233149252 | 0.276241335 | 0.408798804 |
| 0.334918307 | 0.474533061 | 0.507885566 | 0.49372987  |
| 0.087197517 | 0.118603862 | 0.436517412 | 0.456304019 |
| 0.261207975 | 0.493251825 | 0.336866329 | 0.504528218 |
| 0.463235613 | 0.486305868 | 0.50597083  | 0.379076168 |
| 0.223783578 | 0.45304302  | 0.451053031 | 0.021913288 |
| 0.35590084  | 0.495783316 | 0.371885738 | 0.15707889  |
| 0.261139203 | 0.41367937  | 0.036121742 | 0.188939201 |
| 0.352476118 | 0.384585432 | 0.142720676 | 0.448406057 |
| 0.424145487 | 0.463787302 | 0.032350255 | 0.053265314 |
| 0.508558639 | 0.479658977 | 0.155615766 | 0.481869639 |
| 0.144550572 | 0.358172165 | 0.480823685 | 0.472394384 |
| 0.394866162 | 0.513095276 | 0.475788931 | 0.471482372 |
| 0.484394393 | 0.259484846 | 0.517285834 | 0.098328196 |
| 0.077113323 | 0.458254904 | 0.102861886 | 0.072369673 |
| 0.133357482 | 0.018645328 | 0.325238452 | 0.430347693 |
| 0.412691551 | 0.399643581 | 0.362086302 | 0.068746676 |
| 0.304101132 | 0.388426933 | 0.349753521 | 0.226942511 |
| 0.077702581 | 1           | 0.006648838 | 0.042238297 |
| 0.413618871 | 0.500718225 | 0.419366951 | 0.22030482  |
| 0.308497244 | 0.110755426 | 0.296799877 | 0.359160271 |
| 0.424164258 | 0.382991541 | 0.504715494 | 0.029985117 |
| 0.016668058 | 0.493807035 | 0.417703412 | 0.011780794 |
| 0.070194463 | 0.436054    | 0.271880453 | 0.263176227 |
| 0.013506133 | 0.504571661 | 0.428719357 | 0.444141215 |
| 0.372300325 | 0.050706783 | 0.428948018 | 0.078926546 |
| 0.045584735 | 0.479067088 | 0.41055989  | 0.498938494 |
| 0.332158247 | 0.441252491 | 0.461749451 | 0.501638388 |
| 0.101144927 | 0.410796266 | 0.024011542 | 0.477571433 |
| 0.476977332 |             |             |             |
| TRIM17      | 0.009700417 | 0.010110414 | 0.011656223 |
| 0.031834266 | 0.024003467 | 0.007332015 | 0.04718498  |
| 0.011642516 | 0.013025359 | 0.007190513 | 0.012836661 |
| 0.013445491 | 0.003292904 | 0.017337861 | 0.003898091 |
| 0.040449819 | 0.062469485 | 0.011214232 | 0.074033255 |

|             |             |             |             |
|-------------|-------------|-------------|-------------|
| 0.030163865 | 0.024473746 | 0.05163402  | 0.054706321 |
| 0.014002544 | 0.067832486 | 0.097924552 | 0.028981862 |
| 0.027095903 | 0.110738926 | 0.005359779 | 0.018124067 |
| 0.065196529 | 0.013280331 | 0.00636029  | 0.024526533 |
| 0.005467782 | 0.006889342 | 0.001222688 | 0.006993172 |
| 0.010359783 | 0.020271654 | 0.027307854 | 0.056538891 |
| 0.063800064 | 0.004954145 | 0.060969565 | 0.026379605 |
| 0.002002925 | 0.062057067 | 0.00442271  | 0.005095122 |
| 0.00479499  | 0.009531302 | 0.015904474 | 0.041746415 |
| 0.001747046 | 0.004802703 | 0.006234929 | 0.007253823 |
| 0.058656961 | 0.006018937 | 0.006195285 | 0.014285594 |
| 0.000366973 | 0.019031443 | 0.052489499 | 0.029427235 |
| 0.009725296 | 0.008986008 | 0.022195504 | 0.007292378 |
| 0.002111295 | 0.034047094 | 0.038865165 | 0.006761347 |
| 0.158577758 | 0.033168919 | 0.066637166 | 0.037803753 |
| 0.022153653 | 0.006890337 | 0.022209681 | 0.016276342 |
| 0.029453439 | 0.059427172 | 0.013581472 | 0.075219181 |
| 0.010384716 | 0.047730639 | 0.011056361 | 0.044356341 |
| 0.020312597 | 0.007961721 | 0.025919025 | 0.072791049 |
| 0.01218518  | 0.009377044 | 0.010880962 | 0.014171928 |
| 0.007152643 | 0.053806706 | 0.006354928 | 0.014017508 |
| 0.007775136 | 0.015514646 | 0.109846647 | 0.01657705  |
| 0.112610012 | 0.003382238 | 0.05937319  | 0.00511631  |
| 0.023094493 | 0.045373038 | 0.08084278  | 0.025769556 |
| 0.017248631 | 0.013672514 | 0.007985441 | 0.07553774  |
| 0.019537217 | 0.037165778 | 0.002538759 | 0.091359835 |
| 0.001978713 | 0.009497088 | 0.003673219 | 0.019855281 |
| 0.00822613  | 0.005682642 | 0.029971211 | 0.069799025 |
| 0.105662664 | 0.021251997 | 0.009223198 | 0.016535861 |
| 0.018942675 | 0.004878477 | 0.040213368 | 0.00636538  |
| 0.009777896 | 0.021636309 | 6.50E-05    | 0.054292663 |
| 0.01640439  | 0.019395329 | 0.104195294 | 0.010348435 |
| 0.047984955 | 0.040485042 | 0.083545726 | 0.016302608 |
| 0.006647369 | 0.111938281 | 0.005519389 | 0.044577457 |
| 0.005322492 | 0.039906322 | 0.081345299 | 0.030361649 |
| 0.04970902  | 0.005055859 | 0.113780097 | 0.011285834 |
| 0.002425789 | 0.015910669 | 0.012756721 | 0.01568     |
| 0.007518971 | 0.009592331 | 0.003341024 | 0.10614293  |
| 0.033495994 | 0.041457332 | 0.005808859 | 0.012070741 |
| 0.015109875 | 0.033137364 | 0.002482585 | 0.013348575 |
| 0.004953912 | 0.014415179 | 0.035841572 | 0.029906701 |
| 0.080814637 | 0.026071449 | 0.000414059 | 0.005389085 |
| 0.007802285 | 0.002183121 | 0.028475952 | 0.022101594 |
| 0.00830619  | 0.023475831 | 0.000104867 | 0.041088828 |
| 0.005106431 | 0.102845155 | 0.022192367 | 0.109598064 |
| 0.006560061 | 0.122516255 | 0.008607984 | 0.011936937 |
| 0.007256405 | 0.001082882 | 0.009733596 | 0.025049793 |
| 0.089361768 | 0.01335221  | 0.015726217 | 0.032867098 |
| 0.026518802 | 0.023765693 | 0.028404582 | 0.007681276 |
| 0.019580651 | 0.034757762 | 0.036401944 | 0.048936443 |
| 0.013823498 | 0.000978367 | 0.007268937 | 0.02026642  |
| 0.003274077 | 0.009718336 | 0.005964813 | 0.000628183 |
| 0.102545159 | 0.01850646  | 0.005180052 | 0.037849536 |
| 0.005809101 | 0.032536143 | 0.006887184 | 0.021189132 |

|             |             |             |             |
|-------------|-------------|-------------|-------------|
| 0.105579284 | 0.013218451 | 0.02879808  | 0.010896195 |
| 0.015519175 | 0.013388885 | 0.052701398 | 0.012813106 |
| 0.010864805 | 0.043231224 | 0.010262749 | 0.011578511 |
| 0.03612418  | 0.096994579 | 0.018601505 | 0.003542899 |
| 0.009814905 | 0.006981961 | 0.005172043 | 0.006855633 |
| 0.006456711 | 0.02304605  | 0.029539481 | 0.014067476 |
| 0.072229345 | 0.150093973 | 0.010442839 | 0.037312716 |
| 0.004922707 | 0.045053805 | 0.124643586 | 0.000592365 |
| 0.017754837 | 0.003776307 | 0.001890111 | 0.011666208 |
| 0.011693988 | 0.01949369  | 0.019947971 | 0.115369425 |
| 0.012965851 | 0.067446601 | 0.026736163 | 0.000511689 |
| 0.008848602 | 0.008230141 | 0.052005845 | 0.070581808 |
| 0.005285944 | 0.023791229 | 0.019374292 | 0.00729527  |
| 0.006552521 | 0.128093582 | 0.010421986 | 0.061168923 |
| 0.148448628 | 0.022617149 | 0.010656834 | 0.152100944 |
| 0.11535361  | 0.022645588 | 0.020635145 | 0.088285599 |
| 0.013058852 | 0.048833057 | 0.010215269 | 0.030930292 |
| 0.087356714 | 0.010564331 | 0.052822832 | 0.012764685 |
| 0.005317171 | 0.010492084 | 0.080966262 | 0.025992769 |
| 0.086720973 | 0.009939693 | 0.000646792 | 0.013428476 |
| 0.007698145 | 0.007235404 | 0.099724842 | 0.014144981 |
| 0.005045441 | 0.004891071 | 0.098868384 | 0.019216616 |
| 0.007446157 | 0.090688427 | 0.032831602 | 0.007450052 |
| 0.011528781 | 0.018976066 | 0.011597968 | 0.021533175 |
| 0.036744323 | 0.025637145 | 0.024857745 | 0.014098152 |
| 0.007979378 | 0.047642505 | 0.004010149 | 0.004470038 |
| 0.05751251  | 0.007667661 | 0.025007874 | 0.053768851 |
| 0.005945899 | 0.004463051 | 0.048008049 | 0.125753629 |
| 0.011023085 | 0.00788648  | 0.006648058 | 0.038030418 |
| 0.01109493  | 0.009843656 | 0.00804517  | 0.113367501 |
| 0.14616978  | 0.006690786 | 0.011393265 | 0.043566994 |
| 0.022810942 | 0.003522751 | 0.018105055 | 0.010306886 |
| 0.080407488 | 0.003174425 | 0.000798205 | 0.001260404 |
| 0.055901466 | 0.024725195 | 0.005626972 | 0.018942843 |
| 0.003147698 | 0.035794749 | 0.001199388 | 0.011484274 |
| 0.007974582 | 0.084398079 | 0.027302778 | 0.008652336 |
| 0.009365459 | 0.009295382 | 0.014551592 | 0.012600577 |
| 0.009970837 | 0.005895623 | 0.006340116 | 0.085424055 |
| 0.013337261 | 0.006712843 | 0.016913061 | 0.008607036 |
| 0.021927376 | 0.032392513 | 0.068413133 | 0.060353419 |
| 0.00682235  | 0.010596238 | 0.003223937 | 0.005759729 |
| 0.005934308 | 0.061260607 | 0.010172257 | 0.023759483 |
| 0.013332906 | 0.125852367 | 0.018516409 | 0.007990377 |
| 0.015580837 | 0.020603891 | 0.015851656 | 0.000566868 |
| 0.002078358 | 0.022055312 | 0.021101531 | 0.067513819 |
| 0.012004136 | 0.001690456 | 0.098925732 | 0.020950461 |
| 0.014217954 | 0.026027235 | 0.00829655  | 0.053296196 |
| 0.015196582 | 0.095943825 | 0.004581104 | 0.040650932 |
| 0.038328395 | 0.003368837 | 0.01520929  | 0.007446525 |
| 0.06228939  | 0.056588079 | 0.010115802 | 0.020867135 |
| 0.00413547  | 0.065704157 | 0.013551568 | 0.009003285 |
| 0.008221838 | 0.095777995 | 0.073354253 | 0.029336944 |
| 0.004776122 | 0.034297989 | 0.048526628 | 0.000112286 |
| 0.044847508 | 0.017215593 | 0.052510886 | 0.018343959 |

|             |             |             |             |
|-------------|-------------|-------------|-------------|
| 0.01805442  | 0.036779292 | 0.037351303 | 0.007217454 |
| 0.009329768 | 0.005782761 | 0.028395844 | 0.002624388 |
| 0.031215669 | 0.061570438 | 0.006772199 | 0.003931346 |
| 0.007155288 | 0.013203899 | 0.005013894 | 0.086110874 |
| 0.005814654 | 0.113536616 | 0.022751768 | 0.020729376 |
| 0.05249812  | 0.023776586 | 0.060859267 | 0.028860259 |
| 0.015240317 | 0.027842331 | 0.006099495 | 0.004407364 |
| 0.041206311 | 0.003658358 | 0.023984084 | 0.007394093 |
| 0.009897017 | 0.022368719 | 0.013076115 | 0.01181812  |
| 0.010645197 | 0.011410906 | 0.008856775 | 0.030400324 |
| 0.007404804 | 0.007951129 | 0.014617392 | 0.015208196 |
| 0.044016779 | 0.023404143 | 0.013817318 | 0.025807958 |
| 0.059919959 | 0.009573912 | 0.009870328 | 0.000611041 |
| 0.007819272 | 0.009316595 | 0.028364146 | 0.03531221  |
| 0.012014091 | 0.007625468 | 0.009320197 | 0.070708449 |
| 0.010068373 | 0.007714334 | 0.008057232 | 0.017744608 |
| 0.098597747 | 0.042007116 | 0.01778488  | 0.018527291 |
| 0.003546907 | 0.011145431 | 0.015188429 | 0.012008508 |
| 0.007123322 | 0.053722631 | 0.007234765 | 0.00401718  |
| 0.003662962 | 0.006949036 | 0.040309394 | 0.130866874 |
| 0.097377265 | 0.07539274  | 0.003580805 | 0.034159848 |
| 0.002948753 | 0.046145288 | 0.001556601 | 0.025884797 |
| 0.047847591 | 0.005548462 | 0.049266361 | 0.030199908 |
| 0.040971798 | 0.006648838 | 1           | 0.119832499 |
| 0.005066343 | 0.012289308 | 0.016009275 | 0.056143803 |
| 0.006496785 | 0.031926082 | 0.063562128 | 0.006089983 |
| 0.005433056 | 0.001437964 | 0.011487232 | 0.009551772 |
| 0.043272763 | 0.022324864 | 0.007608936 | 0.038058595 |
| 0.003503272 | 0.006409876 | 0.01450019  | 0.013302644 |
| 0.102837444 | 0.007950097 | 0.0040059   | 0.018769085 |
| 0.026117516 | 0.09049223  | 0.004165514 | 0.000731273 |
| 0.030500283 | 0.006290044 | 0.014912859 | 0.006955951 |
| 0.021281975 | 0.041830537 | 0.003913651 | 0.008885168 |
| 0.006240827 | 0.005834129 | 0.046550591 | 0.018564902 |
| 0.003060694 |             |             |             |
| TRIM36      | 0.062529991 | 0.062300532 | 0.052888402 |
| 0.120965483 | 0.100589938 | 0.034405259 | 0.121954357 |
| 0.040948933 | 0.071651442 | 0.044734507 | 0.083694051 |
| 0.074547286 | 0.061440608 | 0.048735723 | 0.013908854 |
| 0.168444141 | 0.196364912 | 0.048629884 | 0.219091387 |
| 0.128230102 | 0.064651114 | 0.195006542 | 0.157636325 |
| 0.069843746 | 0.143851527 | 0.193644976 | 0.07280639  |
| 0.123607086 | 0.213806558 | 0.02474871  | 0.083586799 |
| 0.260949339 | 0.077332816 | 0.043523492 | 0.111753224 |
| 0.040512618 | 0.042014527 | 0.104041608 | 0.021838764 |
| 0.060777709 | 0.08418151  | 0.122037333 | 0.17653143  |
| 0.153799473 | 0.035460916 | 0.160382447 | 0.121023228 |
| 0.021671094 | 0.17717785  | 0.01634453  | 0.035869756 |
| 0.033617073 | 0.046800715 | 0.049138786 | 0.100539862 |
| 0.02989756  | 0.020602241 | 0.026105371 | 0.037525062 |
| 0.174332159 | 0.018511305 | 0.040485391 | 0.057451059 |
| 0.029993655 | 0.072628191 | 0.216449729 | 0.090546364 |
| 0.042183249 | 0.046167329 | 0.181816441 | 0.045934249 |
| 0.017257691 | 0.143626466 | 0.161092119 | 0.021909444 |

|             |             |             |             |
|-------------|-------------|-------------|-------------|
| 0.330410218 | 0.14486594  | 0.219511175 | 0.123939746 |
| 0.112372171 | 0.047493652 | 0.110103223 | 0.088506856 |
| 0.143627331 | 0.197342452 | 0.07121853  | 0.169053317 |
| 0.061991657 | 0.112744425 | 0.085662207 | 0.184187814 |
| 0.101902696 | 0.052262829 | 0.132706259 | 0.226879753 |
| 0.055756167 | 0.058962512 | 0.037459392 | 0.06387959  |
| 0.018765856 | 0.207355986 | 0.039902338 | 0.08082217  |
| 0.04451284  | 0.066572054 | 0.266844784 | 0.082482835 |
| 0.284288617 | 0.017303763 | 0.1937902   | 0.119439388 |
| 0.112970098 | 0.097391835 | 0.241315016 | 0.095784356 |
| 0.124637396 | 0.069398273 | 0.052126812 | 0.1941995   |
| 0.098169676 | 0.188318534 | 0.034112725 | 0.302013881 |
| 0.042119938 | 0.052809257 | 0.028615575 | 0.094366035 |
| 0.04611812  | 0.044845487 | 0.106384491 | 0.167161241 |
| 0.271542571 | 0.139619977 | 0.061047349 | 0.079804886 |
| 0.095896925 | 0.034049739 | 0.087711856 | 0.038341731 |
| 0.053474615 | 0.110299232 | 0.001316791 | 0.155024765 |
| 0.064738046 | 0.156637023 | 0.296261823 | 0.064079482 |
| 0.140118341 | 0.116853794 | 0.22924089  | 0.085963016 |
| 0.042261829 | 0.25510818  | 0.029725795 | 0.177018717 |
| 0.026511251 | 0.149448452 | 0.218425759 | 0.096536039 |
| 0.147856381 | 0.038035444 | 0.263064426 | 0.050089568 |
| 0.012878686 | 0.149455006 | 0.161394793 | 0.058336044 |
| 0.032214263 | 0.050156505 | 0.028149335 | 0.280343104 |
| 0.115634787 | 0.151870229 | 0.033731538 | 0.054742544 |
| 0.058854924 | 0.235750745 | 0.016564202 | 0.076854098 |
| 0.024361531 | 0.084756583 | 0.09752284  | 0.09266133  |
| 0.238844231 | 0.115462994 | 0.010974543 | 0.037391771 |
| 0.051227221 | 0.013610798 | 0.106509914 | 0.110698581 |
| 0.032228795 | 0.100496372 | 0.004717374 | 0.176555432 |
| 0.033357899 | 0.253767776 | 0.111623726 | 0.270483623 |
| 0.045310395 | 0.235865941 | 0.041666203 | 0.064974879 |
| 0.047549965 | 0.062893199 | 0.028959685 | 0.106489264 |
| 0.249564269 | 0.042329166 | 0.083935882 | 0.118226264 |
| 0.083582843 | 0.110843995 | 0.133201875 | 0.027759547 |
| 0.084159231 | 0.117974763 | 0.228189577 | 0.171540316 |
| 0.080159015 | 0.014970673 | 0.041608373 | 0.074251436 |
| 0.021853303 | 0.054650037 | 0.042129914 | 0.009353916 |
| 0.184705188 | 0.073256915 | 0.052331532 | 0.103681711 |
| 0.037634981 | 0.100545828 | 0.030553065 | 0.193480335 |
| 0.251624119 | 0.073874553 | 0.088266925 | 0.044330064 |
| 0.052753213 | 0.059458628 | 0.16393742  | 0.039148621 |
| 0.052095331 | 0.151233293 | 0.039106589 | 0.039759553 |
| 0.093576589 | 0.232083914 | 0.1724807   | 0.019566848 |
| 0.060836789 | 0.027526341 | 0.021907893 | 0.043691318 |
| 0.044212931 | 0.123025601 | 0.094890934 | 0.052781481 |
| 0.170779109 | 0.289217422 | 0.061981629 | 0.158116218 |
| 0.02869332  | 0.125851269 | 0.302293015 | 0.011268125 |
| 0.087901972 | 0.015399337 | 0.010091659 | 0.063896878 |
| 0.166430354 | 0.102937401 | 0.071986572 | 0.265814802 |
| 0.056486747 | 0.200261143 | 0.11894861  | 0.01445877  |
| 0.053744339 | 0.05053612  | 0.187116536 | 0.145650226 |
| 0.035179547 | 0.101946857 | 0.151439195 | 0.043078015 |
| 0.041821436 | 0.270234273 | 0.064554809 | 0.217302326 |

|             |             |             |             |
|-------------|-------------|-------------|-------------|
| 0.309583765 | 0.107646984 | 0.056506033 | 0.334619425 |
| 0.232319441 | 0.066742144 | 0.059034999 | 0.261703179 |
| 0.071054918 | 0.185587845 | 0.053128566 | 0.096152915 |
| 0.177402659 | 0.100393773 | 0.182201381 | 0.061215155 |
| 0.038812565 | 0.065176186 | 0.274208152 | 0.085057011 |
| 0.256935565 | 0.031193652 | 0.016723445 | 0.07490693  |
| 0.078030746 | 0.050859909 | 0.221207586 | 0.076561457 |
| 0.037069253 | 0.026051687 | 0.187471409 | 0.067491686 |
| 0.041515378 | 0.169102665 | 0.125516524 | 0.046447794 |
| 0.061641755 | 0.056646329 | 0.030531836 | 0.111396043 |
| 0.090444187 | 0.131426926 | 0.091292645 | 0.058635218 |
| 0.031411316 | 0.117786212 | 0.036235451 | 0.02703433  |
| 0.163031874 | 0.04774762  | 0.128005728 | 0.118477899 |
| 0.024620666 | 0.021194013 | 0.197366928 | 0.23496914  |
| 0.062821573 | 0.052835008 | 0.04545181  | 0.133175188 |
| 0.071729989 | 0.056329689 | 0.042259765 | 0.293613323 |
| 0.276419286 | 0.045482877 | 0.055765572 | 0.080964275 |
| 0.117849278 | 0.015436727 | 0.095866232 | 0.060105376 |
| 0.214492729 | 0.027304267 | 0.00653079  | 0.025149586 |
| 0.230519872 | 0.124122661 | 0.036739749 | 0.087550739 |
| 0.007683861 | 0.146929822 | 0.060427068 | 0.071730014 |
| 0.049814027 | 0.20378306  | 0.152726561 | 0.053691557 |
| 0.053543061 | 0.058833288 | 0.050213505 | 0.067861547 |
| 0.055342048 | 0.040459439 | 0.062580228 | 0.239011395 |
| 0.067960919 | 0.046695736 | 0.077188193 | 0.050257448 |
| 0.106380558 | 0.146455621 | 0.203270266 | 0.127125677 |
| 0.041286983 | 0.03793824  | 0.007608771 | 0.055431447 |
| 0.0311633   | 0.134878102 | 0.061898639 | 0.119007024 |
| 0.074441139 | 0.222736734 | 0.064226625 | 0.052125761 |
| 0.077974274 | 0.101621633 | 0.158873031 | 0.015786835 |
| 0.009283006 | 0.08990767  | 0.090253556 | 0.202095509 |
| 0.066811941 | 0.006783689 | 0.179485474 | 0.086893076 |
| 0.06516894  | 0.105681323 | 0.051880258 | 0.200132204 |
| 0.082937063 | 0.273341381 | 0.017539565 | 0.167821859 |
| 0.144073548 | 0.024028859 | 0.079411962 | 0.046172924 |
| 0.283909169 | 0.166214464 | 0.051024355 | 0.100797137 |
| 0.020300022 | 0.239436908 | 0.079949025 | 0.043800524 |
| 0.152808728 | 0.213504385 | 0.166625013 | 0.141223964 |
| 0.036703299 | 0.13131114  | 0.165227147 | 0.008054618 |
| 0.107831746 | 0.095692066 | 0.136937742 | 0.096245125 |
| 0.085524344 | 0.159141858 | 0.228897786 | 0.044628252 |
| 0.130340127 | 0.040102502 | 0.101596507 | 0.006877442 |
| 0.111191235 | 0.261027793 | 0.049485823 | 0.017417321 |
| 0.032627284 | 0.071263969 | 0.032439881 | 0.248312335 |
| 0.031807249 | 0.273507548 | 0.109245497 | 0.10724654  |
| 0.251052766 | 0.082755436 | 0.194457147 | 0.127500075 |
| 0.052375712 | 0.116744765 | 0.040661609 | 0.019967278 |
| 0.107744772 | 0.074788891 | 0.110933631 | 0.044798556 |
| 0.044568131 | 0.114124373 | 0.041511982 | 0.071166129 |
| 0.055941674 | 0.065576675 | 0.059164721 | 0.094760679 |
| 0.088795386 | 0.043444284 | 0.058712325 | 0.068130282 |
| 0.145934492 | 0.110975928 | 0.065587121 | 0.091484502 |
| 0.162526869 | 0.052057371 | 0.181316461 | 0.018370075 |
| 0.040555691 | 0.035966848 | 0.145173027 | 0.157820902 |



|             |             |             |             |
|-------------|-------------|-------------|-------------|
| 0.06669774  | 0.04541799  | 0.166849642 | 0.154020773 |
| 0.063305837 | 0.047238489 | 0.04449527  | 0.073767872 |
| 0.272662751 | 0.128237809 | 0.08956535  | 0.101070472 |
| 0.023552454 | 0.064439392 | 0.082422973 | 0.054136854 |
| 0.043215229 | 0.161225913 | 0.047164046 | 0.025407139 |
| 0.082946003 | 0.05107312  | 0.124404556 | 0.330744995 |
| 0.254809167 | 0.218923025 | 0.018352777 | 0.160615486 |
| 0.021063708 | 0.171115895 | 0.017684309 | 0.165727663 |
| 0.193426345 | 0.034283941 | 0.186791508 | 0.077423645 |
| 0.145384167 | 0.042238297 | 0.119832499 | 1           |
| 0.033931801 | 0.062637128 | 0.059644854 | 0.157038516 |
| 0.037130522 | 0.187876669 | 0.211962907 | 0.029179664 |
| 0.018232498 | 0.02323409  | 0.057652975 | 0.087618227 |
| 0.161171256 | 0.115349329 | 0.032987056 | 0.228657371 |
| 0.135105452 | 0.038532873 | 0.079361759 | 0.05315677  |
| 0.238552767 | 0.052849505 | 0.017750066 | 0.083212066 |
| 0.091510867 | 0.276477083 | 0.029746024 | 0.061510255 |
| 0.179470156 | 0.041277807 | 0.068646026 | 0.047686402 |
| 0.092918104 | 0.165866343 | 0.030055117 | 0.060069868 |
| 0.08708103  | 0.036294812 | 0.137145259 | 0.097999226 |
| 0.016361249 |             |             |             |
| TRIM56      | 0.321258061 | 0.444679487 | 0.180310018 |
| 0.272004726 | 0.224214996 | 0.14230119  | 0.051582118 |
| 0.032156256 | 0.018091733 | 0.001416389 | 0.013437492 |
| 0.304643763 | 0.082404259 | 0.064662475 | 0.059703565 |
| 0.312141617 | 0.080541403 | 0.092466687 | 0.089064238 |
| 0.247805015 | 0.014904059 | 0.294223237 | 0.022641327 |
| 0.132680258 | 0.05782914  | 0.026078853 | 0.101372357 |
| 0.335355452 | 0.029078609 | 0.093508116 | 0.209462091 |
| 0.064054484 | 0.344606358 | 0.441306793 | 0.341885825 |
| 0.4641662   | 0.279027372 | 0.015686389 | 0.05441962  |
| 0.315567121 | 0.318083853 | 0.244897991 | 0.153629497 |
| 0.010729672 | 0.387321313 | 0.082625143 | 0.263284465 |
| 0.039740792 | 0.016840796 | 0.034895245 | 0.334681521 |
| 0.400700928 | 0.223575637 | 0.037877695 | 0.033098111 |
| 0.081955791 | 0.043651093 | 0.137325572 | 0.143806071 |
| 0.072277262 | 0.021028256 | 0.420114122 | 0.014668306 |
| 0.034186863 | 0.052806062 | 0.101476971 | 0.061132093 |
| 0.146071446 | 0.221502626 | 0.005084439 | 0.288916563 |
| 0.000594784 | 0.218952562 | 0.251061234 | 0.107467629 |
| 0.022486161 | 0.011523529 | 0.103827757 | 0.144770878 |
| 0.370787252 | 0.401601994 | 0.453263476 | 0.463144311 |
| 0.092958706 | 0.138092322 | 0.244959431 | 0.058044814 |
| 0.341752261 | 0.041222837 | 0.031250254 | 0.347416675 |
| 0.459713058 | 0.466734069 | 0.088762397 | 0.15071122  |
| 0.292588936 | 0.384202133 | 0.142754708 | 0.16557026  |
| 0.091387308 | 0.04251752  | 0.350190361 | 0.475171685 |
| 0.285877006 | 0.19083111  | 0.073840563 | 0.273187326 |
| 0.027403576 | 0.08063979  | 0.19496103  | 0.101972076 |
| 0.38092593  | 0.003333852 | 0.124313918 | 0.142345585 |
| 0.071778485 | 0.319981799 | 0.476501892 | 0.056405741 |
| 0.223957578 | 0.012422983 | 0.065144288 | 0.023312806 |
| 0.097055707 | 0.125021678 | 0.394861643 | 0.369813344 |
| 0.055057112 | 0.133642018 | 0.062480189 | 0.002584649 |

|             |             |             |             |
|-------------|-------------|-------------|-------------|
| 0.021511993 | 0.091174445 | 0.392997352 | 0.140162564 |
| 0.296666185 | 0.34178191  | 0.068401419 | 0.252617913 |
| 0.316195618 | 0.45215552  | 0.006988595 | 0.022018993 |
| 0.179038555 | 0.095045893 | 0.118381198 | 0.259646481 |
| 0.142980917 | 0.023495854 | 0.04303481  | 0.450771759 |
| 0.305672491 | 0.026970645 | 0.078986326 | 0.310700547 |
| 0.07999277  | 0.241533594 | 0.035756669 | 0.089940164 |
| 0.012139691 | 0.437779652 | 0.028362844 | 0.09181068  |
| 0.070041992 | 0.122685748 | 0.005001022 | 0.058981953 |
| 0.061638173 | 0.349770904 | 0.405138832 | 0.039044005 |
| 0.107887036 | 0.27039984  | 0.094623177 | 0.276896695 |
| 0.003160248 | 0.01935509  | 0.06694329  | 0.458823564 |
| 0.111362473 | 0.475738764 | 0.089134867 | 0.108662771 |
| 0.156212937 | 0.346456992 | 0.002288181 | 0.405506954 |
| 0.471829339 | 0.070547314 | 0.223836742 | 0.282809748 |
| 0.142356836 | 0.342438473 | 0.018143329 | 0.314991515 |
| 0.216740162 | 0.027578664 | 0.455441873 | 0.076845516 |
| 0.399041983 | 0.018322122 | 0.072486662 | 0.405370437 |
| 0.379648394 | 0.00552436  | 0.039975179 | 0.205464013 |
| 0.026692977 | 0.012640529 | 0.285396286 | 0.22659683  |
| 0.165290261 | 0.360398439 | 0.423592055 | 0.126395268 |
| 0.207319109 | 0.057639382 | 0.007992364 | 0.191076946 |
| 0.363481218 | 0.116162338 | 0.324596049 | 0.053314922 |
| 0.144913394 | 0.374115158 | 0.3518236   | 0.038112355 |
| 0.011817275 | 0.086209718 | 0.005287362 | 0.126836493 |
| 0.315788877 | 0.032581961 | 0.147886534 | 0.088750385 |
| 0.046388191 | 0.462779122 | 0.119972218 | 0.143799611 |
| 0.104079218 | 0.202376163 | 0.076272044 | 0.067845814 |
| 0.095923636 | 0.057291316 | 0.113356621 | 0.095723353 |
| 0.006332649 | 0.042025681 | 0.016612488 | 0.151018693 |
| 0.069937465 | 0.119781547 | 0.10775741  | 0.267692774 |
| 0.104923799 | 0.050697909 | 0.170365024 | 0.110712312 |
| 0.05398127  | 0.01018181  | 0.429557998 | 0.263327286 |
| 0.186890281 | 0.037553971 | 0.025214037 | 0.113942095 |
| 0.38716142  | 0.096281148 | 0.045082738 | 0.357453221 |
| 0.010784164 | 0.443351996 | 0.079832825 | 0.056616034 |
| 0.168272406 | 0.108492335 | 0.359286572 | 0.010326542 |
| 0.179268691 | 0.37467248  | 0.153424665 | 0.06399127  |
| 0.305018081 | 0.228862543 | 0.008123753 | 0.279327297 |
| 0.288861248 | 0.01718329  | 0.483585325 | 0.085809351 |
| 0.015250462 | 0.360857509 | 0.33316091  | 0.036139231 |
| 0.037687184 | 0.108377648 | 0.005523945 | 0.180327734 |
| 0.443897247 | 0.318609296 | 0.30729504  | 0.115962563 |
| 0.013335687 | 0.011607117 | 0.121434453 | 0.229551054 |
| 0.433127235 | 0.491584925 | 0.132795219 | 0.182805413 |
| 0.104411545 | 0.100182965 | 0.020259151 | 0.462975163 |
| 0.0899617   | 0.457203331 | 0.004779101 | 0.393328114 |
| 0.447591594 | 0.07872851  | 0.040886787 | 0.090340276 |
| 0.271943774 | 0.012092768 | 0.06009336  | 0.419738386 |
| 0.326498598 | 0.088502024 | 0.086097571 | 0.311358005 |
| 0.002589675 | 0.008185955 | 0.20145935  | 0.117245342 |
| 0.095236178 | 0.06368352  | 0.074042744 | 0.070177398 |
| 0.01450792  | 0.360104511 | 0.406861134 | 0.017418464 |
| 0.123433091 | 0.057966848 | 0.281948889 | 0.01326932  |

|             |             |             |             |
|-------------|-------------|-------------|-------------|
| 0.4369133   | 0.470618205 | 0.445165817 | 0.042807038 |
| 0.388890521 | 0.439822184 | 0.284041221 | 0.044615886 |
| 0.014971539 | 0.467676062 | 0.21833918  | 0.006411973 |
| 0.414821364 | 0.049816464 | 0.00722459  | 0.400587714 |
| 0.055732546 | 0.367006331 | 6.87E-05    | 0.046583082 |
| 0.036493195 | 0.433992369 | 0.382271841 | 0.199789997 |
| 0.037542669 | 0.190744318 | 0.011067802 | 0.495576286 |
| 0.413176638 | 0.013288196 | 0.093565171 | 0.380057396 |
| 0.381844514 | 0.442508839 | 0.147199636 | 0.422614698 |
| 0.31127533  | 0.442858644 | 0.061120477 | 0.140390498 |
| 0.33211627  | 0.474729775 | 0.26822577  | 0.351695846 |
| 0.389050256 | 0.338188625 | 0.123017635 | 0.003982391 |
| 0.038624151 | 0.034319907 | 0.062806152 | 0.021282615 |
| 0.124219031 | 0.054704575 | 0.42047897  | 0.41749934  |
| 0.462503065 | 0.004484637 | 0.026639372 | 0.353385539 |
| 0.325838092 | 0.378267821 | 0.01218852  | 0.002405391 |
| 0.003977361 | 0.015290167 | 0.146756327 | 0.11579764  |
| 0.424565169 | 0.043185413 | 0.002752926 | 0.007156228 |
| 0.066305955 | 0.303143373 | 0.436469693 | 0.249840846 |
| 0.385468089 | 0.039432286 | 0.064983335 | 0.263372779 |
| 0.036246622 | 0.182599041 | 0.446538536 | 0.368350602 |
| 0.029820568 | 0.100674912 | 0.140089499 | 0.400597525 |
| 0.078792026 | 0.199427428 | 0.333531233 | 0.088779786 |
| 0.01363602  | 0.044042461 | 0.028657573 | 0.368540773 |
| 0.454317982 | 0.04223713  | 0.021816447 | 0.031844207 |
| 0.032617974 | 0.416855954 | 0.05417934  | 0.465364204 |
| 0.322576586 | 0.358611433 | 0.064846833 | 0.380721705 |
| 0.017601162 | 0.425192228 | 0.201840703 | 0.007971858 |
| 0.113613319 | 0.008166276 | 0.458520645 | 0.046857969 |
| 0.073073303 | 0.230280815 | 0.054322109 | 0.019333588 |
| 0.097691512 | 0.032879908 | 0.413732237 | 0.435227627 |
| 0.033262758 | 0.053190421 | 0.14320393  | 0.252082633 |
| 0.077913145 | 0.314976939 | 0.416218373 | 0.15008425  |
| 0.017351034 | 0.134626198 | 0.253841164 | 0.239466247 |
| 0.05430622  | 0.462428004 | 0.089822902 | 0.476809934 |
| 0.256467628 | 0.376444589 | 0.432921672 | 0.128612518 |
| 0.15261613  | 0.17316058  | 0.185945387 | 0.004469655 |
| 0.154890501 | 0.397628033 | 0.122122416 | 0.064450181 |
| 0.109692382 | 0.248737467 | 0.015080314 | 0.053684815 |
| 0.207734453 | 0.102764976 | 0.047989279 | 0.360959718 |
| 0.211910066 | 0.251381804 | 0.01270912  | 0.024712298 |
| 0.470354034 | 0.331874438 | 0.021812861 | 0.24125411  |
| 0.072438727 | 0.156627998 | 0.388588636 | 0.419046307 |
| 0.102068184 | 0.389341895 | 0.308754331 | 0.21868038  |
| 0.316021381 | 0.084022948 | 0.444737956 | 0.012041302 |
| 0.042347931 | 0.287699126 | 0.033754292 | 0.052450827 |
| 0.050044882 | 0.015392555 | 0.138219873 | 0.336650967 |
| 0.158507054 | 0.241268    | 0.079822776 | 0.027839806 |
| 0.193063255 | 0.132741332 | 0.195567463 | 0.039769486 |
| 0.026585166 | 0.413618871 | 0.005066343 | 0.033931801 |
| 1           | 0.336242557 | 0.217384733 | 0.090207634 |
| 0.135674592 | 0.095241654 | 0.142697924 | 0.076496639 |
| 0.084900041 | 0.124433047 | 0.330169478 | 0.006356874 |
| 0.005176437 | 0.452609077 | 0.119886495 | 0.019640152 |

|             |             |             |             |
|-------------|-------------|-------------|-------------|
| 0.051170182 | 0.194117524 | 0.107569236 | 0.060180247 |
| 0.022945198 | 0.462357971 | 0.073756612 | 0.228515552 |
| 0.120792831 | 0.028881072 | 0.253231378 | 0.02618339  |
| 0.017940621 | 0.364126285 | 0.238619905 | 0.471190656 |
| 0.168011336 | 0.32036112  | 0.345006531 | 0.369534518 |
| 0.045637395 | 0.199306132 | 0.005972336 | 0.350473975 |
| 0.126100457 |             |             |             |
| TRMT1       | 0.360295272 | 0.521276549 | 0.373354561 |
| 0.376822309 | 0.381827992 | 0.32908071  | 0.211539088 |
| 0.17113178  | 0.122985346 | 0.006339746 | 0.034545418 |
| 0.381554814 | 0.206986584 | 0.23742191  | 0.332295322 |
| 0.38266011  | 0.138709514 | 0.309167477 | 0.239777743 |
| 0.361707864 | 0.092655152 | 0.366910818 | 0.105494795 |
| 0.292763359 | 0.127073115 | 0.085364752 | 0.296894361 |
| 0.399191189 | 0.09683376  | 0.283832664 | 0.332812599 |
| 0.103285009 | 0.36922666  | 0.522587859 | 0.38756879  |
| 0.510944212 | 0.344219704 | 0.008860788 | 0.27936349  |
| 0.385009259 | 0.404975855 | 0.36164731  | 0.312841734 |
| 0.051189795 | 0.47942641  | 0.246583829 | 0.372580011 |
| 0.213320249 | 0.041809066 | 0.212210561 | 0.437741614 |
| 0.475224832 | 0.389210109 | 0.218826969 | 0.168898674 |
| 0.199791759 | 0.186551787 | 0.262170198 | 0.270815803 |
| 0.225152597 | 0.136806015 | 0.483634524 | 0.111259223 |
| 0.145891055 | 0.226911339 | 0.150069001 | 0.23624107  |
| 0.337109376 | 0.329860097 | 0.021177722 | 0.347013687 |
| 0.002105123 | 0.352235537 | 0.348399544 | 0.328859453 |
| 0.050574991 | 0.023033051 | 0.175439031 | 0.312874794 |
| 0.422515668 | 0.44973153  | 0.464798151 | 0.478043582 |
| 0.177959398 | 0.280181703 | 0.361101487 | 0.17556292  |
| 0.410802944 | 0.182362967 | 0.121821598 | 0.383567493 |
| 0.477322342 | 0.51982137  | 0.227279445 | 0.268725531 |
| 0.387086868 | 0.467312232 | 0.384584859 | 0.388666763 |
| 0.35580646  | 0.062670197 | 0.438004462 | 0.499558881 |
| 0.360427172 | 0.307331523 | 0.165719803 | 0.347402159 |
| 0.067546188 | 0.313697319 | 0.331043949 | 0.132851861 |
| 0.441862447 | 0.028187814 | 0.219636141 | 0.322753461 |
| 0.206506626 | 0.376946743 | 0.517526204 | 0.195675806 |
| 0.365728083 | 0.022834619 | 0.176597346 | 0.038868668 |
| 0.293561062 | 0.15246942  | 0.481124796 | 0.429721389 |
| 0.201551622 | 0.347326955 | 0.259826077 | 0.003207922 |
| 0.032432002 | 0.181376066 | 0.37448874  | 0.316476435 |
| 0.375772019 | 0.371610011 | 0.251898759 | 0.330636356 |
| 0.39098866  | 0.456712934 | 0.058600646 | 0.106233333 |
| 0.391225885 | 0.180353534 | 0.239467547 | 0.380984798 |
| 0.317976392 | 0.120971576 | 0.130749813 | 0.512322259 |
| 0.415799664 | 0.093842067 | 0.276328546 | 0.379661306 |
| 0.306785774 | 0.34172678  | 0.1137556   | 0.249715378 |
| 0.055160498 | 0.488039853 | 0.03421866  | 0.29370429  |
| 0.320339578 | 0.143039383 | 0.011951737 | 0.230922617 |
| 0.26961687  | 0.41245684  | 0.466530402 | 0.11348491  |
| 0.285781913 | 0.379424792 | 0.270772974 | 0.374789166 |
| 0.016404263 | 0.053992579 | 0.231075252 | 0.493689266 |
| 0.23820323  | 0.485657125 | 0.285855548 | 0.309770236 |
| 0.283847417 | 0.399177508 | 0.003771088 | 0.498140111 |

|             |             |             |             |
|-------------|-------------|-------------|-------------|
| 0.527466104 | 0.248936921 | 0.361641181 | 0.375361224 |
| 0.376662528 | 0.416085607 | 0.040937381 | 0.369796755 |
| 0.294960736 | 0.088177243 | 0.48679383  | 0.171575532 |
| 0.450213505 | 0.052205144 | 0.274938659 | 0.405461    |
| 0.366802613 | 0.01091556  | 0.204247858 | 0.349900182 |
| 0.033137875 | 0.100162879 | 0.371114579 | 0.371594296 |
| 0.371707276 | 0.393129738 | 0.453841806 | 0.364612961 |
| 0.393394762 | 0.221317294 | 0.016696608 | 0.313027373 |
| 0.380363567 | 0.343490327 | 0.437756    | 0.242942972 |
| 0.279555709 | 0.470391684 | 0.37574848  | 0.196723022 |
| 0.054299078 | 0.280509881 | 0.025936698 | 0.346391836 |
| 0.381786238 | 0.118772496 | 0.383049021 | 0.137304303 |
| 0.080769849 | 0.521084325 | 0.190755346 | 0.261787431 |
| 0.141375807 | 0.343033733 | 0.246340417 | 0.215703017 |
| 0.203981256 | 0.189511076 | 0.371409265 | 0.366947593 |
| 0.042741142 | 0.100823322 | 0.017381555 | 0.311117653 |
| 0.128028918 | 0.295712833 | 0.284662421 | 0.341212774 |
| 0.277329254 | 0.106278766 | 0.366389426 | 0.297863357 |
| 0.13473316  | 0.019123929 | 0.503735603 | 0.370867349 |
| 0.277733899 | 0.173677069 | 0.047108426 | 0.279174895 |
| 0.442925856 | 0.283312902 | 0.231516333 | 0.44051049  |
| 0.033477747 | 0.462709846 | 0.233437169 | 0.137143976 |
| 0.339608888 | 0.253473856 | 0.433120495 | 0.075991059 |
| 0.33487687  | 0.458528711 | 0.302800961 | 0.208586503 |
| 0.377764693 | 0.378258921 | 0.037548911 | 0.339957544 |
| 0.333224413 | 0.037483113 | 0.520082391 | 0.129782901 |
| 0.025912541 | 0.389794463 | 0.391009044 | 0.088562948 |
| 0.092358166 | 0.316692702 | 0.050580158 | 0.292234982 |
| 0.514932421 | 0.377455221 | 0.373572493 | 0.229925099 |
| 0.048541513 | 0.009812524 | 0.210795692 | 0.360453528 |
| 0.504135242 | 0.503120263 | 0.251819896 | 0.348768351 |
| 0.241692331 | 0.357913924 | 0.11934961  | 0.501365069 |
| 0.18469133  | 0.513469831 | 0.009061388 | 0.392502507 |
| 0.511050121 | 0.242954351 | 0.098717502 | 0.287992902 |
| 0.352931584 | 0.059779357 | 0.193873274 | 0.494275264 |
| 0.423241669 | 0.353871931 | 0.36590028  | 0.370558053 |
| 0.020777002 | 0.047853354 | 0.382235781 | 0.202735689 |
| 0.35720297  | 0.236594964 | 0.061083708 | 0.300543825 |
| 0.049451826 | 0.447233691 | 0.39883208  | 0.08624395  |
| 0.299047441 | 0.284884269 | 0.352305782 | 0.046057522 |
| 0.441268682 | 0.495906336 | 0.520156224 | 0.160394512 |
| 0.373641145 | 0.487665261 | 0.365910327 | 0.089327919 |
| 0.022414556 | 0.517194959 | 0.347347288 | 0.024824767 |
| 0.439942495 | 0.201967669 | 0.014210604 | 0.491583973 |
| 0.190772837 | 0.43526014  | 0.00636519  | 0.083698076 |
| 0.048563605 | 0.416428619 | 0.486788537 | 0.336292771 |
| 0.217045858 | 0.33464441  | 0.006275737 | 0.514443318 |
| 0.487236121 | 0.020441785 | 0.157297908 | 0.380910463 |
| 0.378067327 | 0.522326011 | 0.334860533 | 0.431144099 |
| 0.379426191 | 0.499503302 | 0.234411724 | 0.277377705 |
| 0.410830461 | 0.492253297 | 0.369572536 | 0.455275992 |
| 0.420561201 | 0.381520599 | 0.280080977 | 0.022273286 |
| 0.195109573 | 0.19168087  | 0.302795284 | 0.100039777 |
| 0.27884512  | 0.163466109 | 0.469494067 | 0.433113515 |

|             |             |             |             |
|-------------|-------------|-------------|-------------|
| 0.468135069 | 0.006954395 | 0.142871473 | 0.380721717 |
| 0.41428527  | 0.451740823 | 0.024393125 | 0.009540737 |
| 0.009174173 | 0.030168402 | 0.323643992 | 0.25255554  |
| 0.485438586 | 0.202307943 | 0.00631209  | 0.04701845  |
| 0.271507326 | 0.37821288  | 0.500421458 | 0.353344152 |
| 0.386172352 | 0.088268517 | 0.268034018 | 0.361540882 |
| 0.093656196 | 0.27434864  | 0.476304578 | 0.473139515 |
| 0.046287368 | 0.261393612 | 0.31838499  | 0.47040575  |
| 0.084702788 | 0.305966378 | 0.376105858 | 0.310608059 |
| 0.013945635 | 0.097186129 | 0.089598865 | 0.38942485  |
| 0.49775101  | 0.082283574 | 0.038445345 | 0.129018017 |
| 0.127205775 | 0.436205611 | 0.16939957  | 0.501770416 |
| 0.398897561 | 0.38728945  | 0.082011385 | 0.488959393 |
| 0.057460537 | 0.484405066 | 0.331606513 | 0.060471414 |
| 0.266827109 | 0.015254463 | 0.455812729 | 0.193566988 |
| 0.276955699 | 0.343509051 | 0.261474734 | 0.021141831 |
| 0.209187566 | 0.061650963 | 0.456939347 | 0.427619332 |
| 0.039249498 | 0.237668303 | 0.293478567 | 0.361460733 |
| 0.257097584 | 0.388817195 | 0.503759529 | 0.352402759 |
| 0.095566918 | 0.130568093 | 0.358331122 | 0.335156784 |
| 0.207872624 | 0.469654244 | 0.31778863  | 0.520511969 |
| 0.359669868 | 0.450460381 | 0.461168561 | 0.343712685 |
| 0.227859677 | 0.352097073 | 0.330423451 | 0.022737672 |
| 0.335314504 | 0.417469135 | 0.31778208  | 0.188136404 |
| 0.263658199 | 0.35936021  | 0.050834162 | 0.147683557 |
| 0.313802639 | 0.268631722 | 0.142024299 | 0.390690744 |
| 0.333982082 | 0.343409256 | 0.037323407 | 0.085762076 |
| 0.536299861 | 0.434744914 | 0.155554818 | 0.378916246 |
| 0.176270577 | 0.349107489 | 0.390444966 | 0.392531813 |
| 0.353030529 | 0.409973317 | 0.368077663 | 0.331780889 |
| 0.415813087 | 0.264250236 | 0.525973541 | 0.081528086 |
| 0.130570106 | 0.348981187 | 0.106101531 | 0.103774316 |
| 0.151081256 | 0.03560795  | 0.30107166  | 0.379693658 |
| 0.340653946 | 0.350362259 | 0.266758858 | 0.091524024 |
| 0.312042799 | 0.316411761 | 0.338743343 | 0.193930681 |
| 0.08821278  | 0.500718225 | 0.012289308 | 0.062637128 |
| 0.336242557 | 1           | 0.368657983 | 0.248382658 |
| 0.312225887 | 0.144037368 | 0.28985701  | 0.256987915 |
| 0.275479065 | 0.326611823 | 0.402553793 | 0.043149602 |
| 0.022287532 | 0.468860295 | 0.326677395 | 0.024860547 |
| 0.092840167 | 0.328508878 | 0.257813132 | 0.263202301 |
| 0.0275537   | 0.475796001 | 0.302655635 | 0.391728946 |
| 0.316154518 | 0.071555219 | 0.333709566 | 0.095849894 |
| 0.068453147 | 0.43898109  | 0.376639087 | 0.511778229 |
| 0.326985639 | 0.381459304 | 0.442887984 | 0.381244891 |
| 0.122834882 | 0.337276729 | 0.037083686 | 0.398702197 |
| 0.375062652 |             |             |             |
| TRP53       | 0.281715576 | 0.448820076 | 0.188709251 |
| 0.320208314 | 0.228016913 | 0.162347137 | 0.0943055   |
| 0.048900637 | 0.077285828 | 0.007296352 | 0.060289035 |
| 0.280860771 | 0.167511569 | 0.110407919 | 0.131743099 |
| 0.341691261 | 0.144390095 | 0.117636929 | 0.124339147 |
| 0.254111232 | 0.034376435 | 0.329946017 | 0.057463411 |
| 0.205694341 | 0.149466769 | 0.07980384  | 0.230744723 |

|             |             |             |             |
|-------------|-------------|-------------|-------------|
| 0.351729209 | 0.08573769  | 0.1026259   | 0.212138908 |
| 0.087293572 | 0.310753182 | 0.430066881 | 0.360777237 |
| 0.435908303 | 0.251529809 | 0.006671859 | 0.116775973 |
| 0.295167309 | 0.371782977 | 0.258008284 | 0.192502709 |
| 0.037192238 | 0.363988777 | 0.125219188 | 0.264039834 |
| 0.069990999 | 0.058848471 | 0.058995017 | 0.316131345 |
| 0.397298986 | 0.253080549 | 0.068750007 | 0.08156989  |
| 0.166836767 | 0.058703921 | 0.25340069  | 0.136620669 |
| 0.117811553 | 0.035619163 | 0.414761883 | 0.055367872 |
| 0.061079989 | 0.077022009 | 0.134161023 | 0.091608974 |
| 0.224392969 | 0.219246974 | 0.009030301 | 0.247667771 |
| 0.001942283 | 0.231558083 | 0.23793299  | 0.225924739 |
| 0.053710309 | 0.036158229 | 0.145050841 | 0.178945944 |
| 0.376876537 | 0.361574587 | 0.475886635 | 0.480595859 |
| 0.161368994 | 0.167247167 | 0.232252364 | 0.122312292 |
| 0.335171595 | 0.095571936 | 0.064265458 | 0.375025775 |
| 0.482728303 | 0.459815048 | 0.173667383 | 0.18841117  |
| 0.340554076 | 0.375907575 | 0.18076716  | 0.209690019 |
| 0.218544201 | 0.070759282 | 0.353385405 | 0.47766523  |
| 0.264287003 | 0.243013841 | 0.146386829 | 0.268459451 |
| 0.054529305 | 0.119758195 | 0.234338279 | 0.096595593 |
| 0.393351378 | 0.01762636  | 0.18523738  | 0.162102063 |
| 0.101300496 | 0.319933089 | 0.471461296 | 0.101567152 |
| 0.202197329 | 0.027463868 | 0.189531709 | 0.035920559 |
| 0.147471441 | 0.185320457 | 0.372849869 | 0.398683533 |
| 0.074715444 | 0.212652312 | 0.108709455 | 0.006434187 |
| 0.047950991 | 0.114719979 | 0.344954104 | 0.133018091 |
| 0.292211265 | 0.305077667 | 0.179406419 | 0.231446152 |
| 0.325437992 | 0.468539495 | 0.016694942 | 0.049831722 |
| 0.203022383 | 0.117185225 | 0.147508    | 0.24896157  |
| 0.226159748 | 0.046032093 | 0.082830024 | 0.47436746  |
| 0.296471094 | 0.062997694 | 0.09307857  | 0.334257726 |
| 0.158465646 | 0.261139297 | 0.065793287 | 0.143999361 |
| 0.03107911  | 0.421930781 | 0.053388701 | 0.098600112 |
| 0.194767345 | 0.164601923 | 0.005750388 | 0.075554564 |
| 0.124337381 | 0.383787947 | 0.363205075 | 0.070791502 |
| 0.155498661 | 0.308773032 | 0.086216414 | 0.317595615 |
| 0.025402044 | 0.035690286 | 0.063918761 | 0.461626697 |
| 0.108115516 | 0.459950398 | 0.144634326 | 0.181188885 |
| 0.19085825  | 0.374467801 | 0.003177064 | 0.394766459 |
| 0.468843229 | 0.073721764 | 0.256928584 | 0.257310984 |
| 0.21805143  | 0.386085575 | 0.014444991 | 0.314978975 |
| 0.177258513 | 0.05388086  | 0.474262625 | 0.14704081  |
| 0.368642064 | 0.056737706 | 0.105109771 | 0.42534102  |
| 0.356638658 | 0.009561982 | 0.061632174 | 0.229492974 |
| 0.047188022 | 0.030059627 | 0.275144416 | 0.266522266 |
| 0.22710285  | 0.368473165 | 0.444493338 | 0.22285625  |
| 0.228905787 | 0.090788803 | 0.015532054 | 0.213185791 |
| 0.342474277 | 0.174731379 | 0.331356874 | 0.102720564 |
| 0.12023464  | 0.390066442 | 0.335834553 | 0.090572224 |
| 0.038712193 | 0.105715396 | 0.015138402 | 0.205565957 |
| 0.304176472 | 0.077080616 | 0.188171749 | 0.087666275 |
| 0.092289469 | 0.480696687 | 0.198253286 | 0.222406281 |
| 0.17429029  | 0.213646006 | 0.108883315 | 0.133245788 |

|             |             |             |             |
|-------------|-------------|-------------|-------------|
| 0.193058959 | 0.12653202  | 0.224132589 | 0.192774219 |
| 0.018327391 | 0.090997426 | 0.020121513 | 0.193178453 |
| 0.132891599 | 0.185014453 | 0.161244739 | 0.239281155 |
| 0.134383145 | 0.096224567 | 0.226804148 | 0.194260981 |
| 0.127632622 | 0.025657986 | 0.436538528 | 0.276368427 |
| 0.17091269  | 0.086678673 | 0.045852888 | 0.158440851 |
| 0.411857751 | 0.113964326 | 0.060235996 | 0.374691366 |
| 0.020039098 | 0.446305674 | 0.164483454 | 0.128410601 |
| 0.244538032 | 0.154078626 | 0.39345993  | 0.032469078 |
| 0.155787555 | 0.370621237 | 0.164211327 | 0.164513509 |
| 0.288882991 | 0.245559264 | 0.024515498 | 0.261972862 |
| 0.254103879 | 0.042184577 | 0.47655086  | 0.13740665  |
| 0.03236199  | 0.357950605 | 0.371935607 | 0.080631284 |
| 0.089033326 | 0.170638426 | 0.01530172  | 0.222413639 |
| 0.466248159 | 0.359880323 | 0.336360983 | 0.182217986 |
| 0.042789919 | 0.025576114 | 0.175247464 | 0.207690762 |
| 0.406235709 | 0.482004902 | 0.148498626 | 0.25166537  |
| 0.131605834 | 0.225226232 | 0.028876219 | 0.477346387 |
| 0.097697109 | 0.429310029 | 0.010795338 | 0.404750638 |
| 0.43025511  | 0.076442196 | 0.115565658 | 0.113069043 |
| 0.267483169 | 0.039252608 | 0.081040399 | 0.417048631 |
| 0.350021073 | 0.191092644 | 0.203430311 | 0.273329541 |
| 0.010283332 | 0.021214778 | 0.244263868 | 0.194091396 |
| 0.178596527 | 0.14110439  | 0.107166636 | 0.10022209  |
| 0.048979775 | 0.365096551 | 0.390514914 | 0.078291622 |
| 0.149635062 | 0.087000706 | 0.284713248 | 0.036611567 |
| 0.455851635 | 0.442660867 | 0.433168164 | 0.064900626 |
| 0.341465786 | 0.462623489 | 0.298666367 | 0.077047129 |
| 0.03508726  | 0.452460382 | 0.214341567 | 0.024337749 |
| 0.419337556 | 0.053262538 | 0.026278947 | 0.404731928 |
| 0.09512456  | 0.322273641 | 0.001996812 | 0.049716963 |
| 0.055636419 | 0.431062922 | 0.390992565 | 0.201182389 |
| 0.071146027 | 0.184842893 | 0.006463825 | 0.478706557 |
| 0.415923014 | 0.03717848  | 0.155501515 | 0.368587706 |
| 0.394364077 | 0.43154586  | 0.250475073 | 0.451730482 |
| 0.31213868  | 0.434789378 | 0.115569026 | 0.185103384 |
| 0.361964038 | 0.459309625 | 0.27584619  | 0.352935172 |
| 0.397765654 | 0.337177389 | 0.163976289 | 0.017785541 |
| 0.134678696 | 0.056790015 | 0.148123056 | 0.092486369 |
| 0.119884828 | 0.149761087 | 0.403834911 | 0.42416027  |
| 0.468943272 | 0.011101233 | 0.051524328 | 0.33625011  |
| 0.335006434 | 0.392850614 | 0.016682544 | 0.006582264 |
| 0.006747662 | 0.068508587 | 0.151191261 | 0.171782479 |
| 0.43971333  | 0.08094015  | 0.008523811 | 0.015752653 |
| 0.128603391 | 0.334652231 | 0.434972526 | 0.275758392 |
| 0.368228371 | 0.06831784  | 0.137789028 | 0.275366627 |
| 0.110609503 | 0.151832597 | 0.4702767   | 0.373072342 |
| 0.041302481 | 0.170445056 | 0.126164139 | 0.42662748  |
| 0.135351242 | 0.208993504 | 0.291869398 | 0.179244559 |
| 0.012881975 | 0.099499365 | 0.086496012 | 0.365915219 |
| 0.428030519 | 0.104164453 | 0.065539518 | 0.037785432 |
| 0.084692968 | 0.40435336  | 0.121173044 | 0.478810853 |
| 0.342508816 | 0.381331663 | 0.094704863 | 0.392467688 |
| 0.056936722 | 0.406847474 | 0.25620878  | 0.023811323 |



|             |             |             |             |
|-------------|-------------|-------------|-------------|
| 0.143681695 | 0.014809755 | 0.409306894 | 0.174015739 |
| 0.102074922 | 0.21042885  | 0.16464939  | 0.03285512  |
| 0.176085512 | 0.068681862 | 0.450554485 | 0.448689618 |
| 0.046570424 | 0.096377831 | 0.173429499 | 0.238965097 |
| 0.086983388 | 0.356989544 | 0.406389608 | 0.167343855 |
| 0.046974748 | 0.121529667 | 0.253770589 | 0.210487139 |
| 0.073714784 | 0.473102608 | 0.210296435 | 0.473949753 |
| 0.247073824 | 0.366614925 | 0.422536305 | 0.172384933 |
| 0.210892758 | 0.170965436 | 0.218555347 | 0.017323861 |
| 0.171873363 | 0.420300918 | 0.117955316 | 0.186472454 |
| 0.198867055 | 0.247230797 | 0.022985975 | 0.047777477 |
| 0.226404056 | 0.114822505 | 0.096260586 | 0.374994542 |
| 0.181694523 | 0.225531394 | 0.014256723 | 0.085877888 |
| 0.463735301 | 0.329678478 | 0.054351299 | 0.27559347  |
| 0.117850629 | 0.21191144  | 0.381352588 | 0.401810187 |
| 0.160178599 | 0.388830354 | 0.296830264 | 0.235018388 |
| 0.315368386 | 0.12564848  | 0.442140051 | 0.016624274 |
| 0.11265727  | 0.231564572 | 0.093737002 | 0.095486942 |
| 0.10353131  | 0.042083293 | 0.227770636 | 0.329013888 |
| 0.214932749 | 0.269248802 | 0.091038534 | 0.066078819 |
| 0.19901002  | 0.119945858 | 0.2128912   | 0.084079593 |
| 0.078013632 | 0.419366951 | 0.016009275 | 0.059644854 |
| 0.217384733 | 0.368657983 | 1           | 0.166439746 |
| 0.243173184 | 0.123193384 | 0.176401019 | 0.081090373 |
| 0.134548475 | 0.158866026 | 0.365460837 | 0.018116021 |
| 0.012681549 | 0.458287514 | 0.118310847 | 0.027477732 |
| 0.069063467 | 0.176007341 | 0.116327999 | 0.156550428 |
| 0.042392479 | 0.456319126 | 0.115817687 | 0.23768028  |
| 0.137623148 | 0.049688541 | 0.221668483 | 0.039645604 |
| 0.031919562 | 0.337235405 | 0.243104303 | 0.45431753  |
| 0.184586589 | 0.361745096 | 0.317092585 | 0.341648603 |
| 0.059256727 | 0.170996185 | 0.02176339  | 0.342179402 |
| 0.200305071 |             |             |             |
| TRPC4AP     | 0.229270542 | 0.27413995  | 0.174223758 |
| 0.310680726 | 0.21660963  | 0.132582262 | 0.14889564  |
| 0.072238785 | 0.11058616  | 0.01982807  | 0.052926704 |
| 0.228755435 | 0.090220861 | 0.083990478 | 0.067226456 |
| 0.377234122 | 0.155531934 | 0.118812746 | 0.240418923 |
| 0.288112761 | 0.064151204 | 0.360518884 | 0.13488662  |
| 0.141567963 | 0.147546132 | 0.133003168 | 0.13740426  |
| 0.340393125 | 0.149302166 | 0.077417128 | 0.222134889 |
| 0.185318056 | 0.253548919 | 0.232997231 | 0.274896355 |
| 0.221427434 | 0.186821264 | 0.032878085 | 0.061914147 |
| 0.242060763 | 0.287623271 | 0.282391084 | 0.274864218 |
| 0.101929408 | 0.198045967 | 0.207476546 | 0.27660147  |
| 0.064744614 | 0.103680347 | 0.046916716 | 0.18731375  |
| 0.192443871 | 0.161568335 | 0.08145783  | 0.104751036 |
| 0.052970349 | 0.040712415 | 0.073036205 | 0.126960124 |
| 0.180646634 | 0.033344873 | 0.212188744 | 0.081423735 |
| 0.050675573 | 0.103679599 | 0.175864387 | 0.129213789 |
| 0.10077792  | 0.183747999 | 0.073209879 | 0.171629105 |
| 0.006002046 | 0.302673092 | 0.295463715 | 0.07858276  |
| 0.153902232 | 0.065418396 | 0.184222076 | 0.220150196 |
| 0.335914927 | 0.230660282 | 0.35094429  | 0.32004295  |

|             |             |             |             |
|-------------|-------------|-------------|-------------|
| 0.141979412 | 0.246597281 | 0.180714156 | 0.152303066 |
| 0.247240133 | 0.122633281 | 0.120683017 | 0.389556125 |
| 0.342739376 | 0.251314512 | 0.164384082 | 0.289520544 |
| 0.21885606  | 0.249664006 | 0.141706273 | 0.162008578 |
| 0.079518388 | 0.154096981 | 0.195354558 | 0.307080601 |
| 0.19231154  | 0.150349981 | 0.228988342 | 0.244328073 |
| 0.152308136 | 0.076520231 | 0.314636531 | 0.106350581 |
| 0.343154493 | 0.067147922 | 0.243607    | 0.175365931 |
| 0.176550512 | 0.259860761 | 0.254970521 | 0.190304702 |
| 0.206601212 | 0.083049104 | 0.08169475  | 0.138189851 |
| 0.100902178 | 0.093946278 | 0.178055146 | 0.30029307  |
| 0.072176314 | 0.10292767  | 0.141852463 | 0.050111225 |
| 0.133651779 | 0.164506199 | 0.224899685 | 0.165556411 |
| 0.282561962 | 0.181198429 | 0.126353183 | 0.160893494 |
| 0.201653179 | 0.344004404 | 0.008734174 | 0.127665256 |
| 0.192143528 | 0.169033948 | 0.304113144 | 0.187214613 |
| 0.227901971 | 0.11285855  | 0.152422527 | 0.327912837 |
| 0.196170848 | 0.148104959 | 0.081839222 | 0.377666751 |
| 0.070896114 | 0.266403226 | 0.147474968 | 0.11521658  |
| 0.082047226 | 0.211010562 | 0.134225373 | 0.123024088 |
| 0.0641108   | 0.120684756 | 0.066252653 | 0.102662223 |
| 0.08699993  | 0.21461881  | 0.173071317 | 0.174202248 |
| 0.149651607 | 0.314392756 | 0.09339063  | 0.202111453 |
| 0.032895423 | 0.139739539 | 0.056835848 | 0.293953757 |
| 0.087678681 | 0.31988961  | 0.151905598 | 0.165885986 |
| 0.304087963 | 0.344527517 | 0.014137628 | 0.210122569 |
| 0.254537651 | 0.057095194 | 0.220859077 | 0.263811156 |
| 0.114308344 | 0.314812988 | 0.012881104 | 0.346705644 |
| 0.139449768 | 0.158450997 | 0.361493656 | 0.222666583 |
| 0.219699189 | 0.123426474 | 0.076902637 | 0.261565989 |
| 0.192924273 | 0.027923948 | 0.066549869 | 0.250754125 |
| 0.13050974  | 0.049672066 | 0.262003029 | 0.288702999 |
| 0.213830822 | 0.331369353 | 0.381726659 | 0.103475271 |
| 0.206833804 | 0.138398086 | 0.089344836 | 0.273951588 |
| 0.276842754 | 0.059182047 | 0.205999048 | 0.12076778  |
| 0.097091259 | 0.247040981 | 0.202497172 | 0.035398975 |
| 0.104947745 | 0.1305291   | 0.043282992 | 0.212496052 |
| 0.189492087 | 0.084708591 | 0.120357839 | 0.158289477 |
| 0.1634346   | 0.301565642 | 0.132977377 | 0.105869913 |
| 0.094872682 | 0.151860284 | 0.200640157 | 0.064557853 |
| 0.078108527 | 0.1617497   | 0.104576306 | 0.106746101 |
| 0.056880139 | 0.144857076 | 0.092275334 | 0.057012306 |
| 0.061745581 | 0.062294714 | 0.05604853  | 0.16430783  |
| 0.078657172 | 0.095662602 | 0.192855709 | 0.132362396 |
| 0.186556773 | 0.10307236  | 0.271798613 | 0.340316589 |
| 0.126866158 | 0.141676537 | 0.147819983 | 0.045850141 |
| 0.290375098 | 0.073930314 | 0.039820465 | 0.24490444  |
| 0.098454975 | 0.336692148 | 0.104076231 | 0.198480254 |
| 0.114857965 | 0.223111581 | 0.353821926 | 0.031622945 |
| 0.154445552 | 0.223253925 | 0.277210063 | 0.166383134 |
| 0.168176042 | 0.251559332 | 0.082182753 | 0.191521213 |
| 0.174435424 | 0.120906871 | 0.282382845 | 0.169692528 |
| 0.121538116 | 0.301778519 | 0.220911398 | 0.201264499 |
| 0.180282174 | 0.132219853 | 0.050319857 | 0.344523087 |

|             |             |             |             |
|-------------|-------------|-------------|-------------|
| 0.294794377 | 0.373469899 | 0.204191012 | 0.1606601   |
| 0.099472522 | 0.030639671 | 0.185730792 | 0.189550053 |
| 0.213128406 | 0.281241339 | 0.2816025   | 0.174486859 |
| 0.276910222 | 0.095260261 | 0.033934479 | 0.297345913 |
| 0.13979644  | 0.249917319 | 0.070943817 | 0.265323204 |
| 0.21109503  | 0.070269296 | 0.149830504 | 0.13493495  |
| 0.179393227 | 0.117033799 | 0.14361525  | 0.234023192 |
| 0.248292801 | 0.126036339 | 0.097270452 | 0.273982258 |
| 0.049435854 | 0.070032911 | 0.24416032  | 0.11855598  |
| 0.08562235  | 0.163905647 | 0.057079109 | 0.072553833 |
| 0.102183149 | 0.21309565  | 0.348981648 | 0.12362927  |
| 0.091388464 | 0.069756579 | 0.339337269 | 0.1205138   |
| 0.264822868 | 0.253420867 | 0.236783758 | 0.129984839 |
| 0.23972246  | 0.258274943 | 0.156736752 | 0.179663295 |
| 0.117369911 | 0.239919773 | 0.19987412  | 0.057663752 |
| 0.343111642 | 0.051336845 | 0.038526942 | 0.262326473 |
| 0.203882105 | 0.163162806 | 0.0166351   | 0.054406622 |
| 0.148292588 | 0.357734304 | 0.206789244 | 0.222818119 |
| 0.030320152 | 0.275658009 | 0.023744989 | 0.298774245 |
| 0.236370237 | 0.103445763 | 0.165851466 | 0.212796152 |
| 0.221331202 | 0.269134262 | 0.136102258 | 0.268669732 |
| 0.190152423 | 0.217159858 | 0.08994288  | 0.302700123 |
| 0.255730013 | 0.235737362 | 0.257881331 | 0.236796646 |
| 0.312891179 | 0.331225032 | 0.272433787 | 0.060883473 |
| 0.104040273 | 0.065273098 | 0.04514551  | 0.074049391 |
| 0.115984018 | 0.166166474 | 0.271335098 | 0.346247235 |
| 0.289962809 | 0.067136209 | 0.081584979 | 0.211166504 |
| 0.270036645 | 0.33009652  | 0.092936511 | 0.023978444 |
| 0.020445501 | 0.07361099  | 0.187563089 | 0.253146401 |
| 0.281510393 | 0.02975261  | 0.055101631 | 0.058991886 |
| 0.14016925  | 0.266162042 | 0.243493966 | 0.363660829 |
| 0.281788915 | 0.159875594 | 0.052401662 | 0.348787798 |
| 0.132162396 | 0.116081406 | 0.301059266 | 0.219502997 |
| 0.146397583 | 0.219789045 | 0.133961023 | 0.330208223 |
| 0.045447785 | 0.309489325 | 0.230331936 | 0.096053527 |
| 0.075538191 | 0.177006455 | 0.14376063  | 0.357757783 |
| 0.206826765 | 0.093754708 | 0.092219093 | 0.022465148 |
| 0.099446075 | 0.3106845   | 0.14395437  | 0.339491875 |
| 0.281928258 | 0.377294969 | 0.145657595 | 0.229199184 |
| 0.078036058 | 0.210884339 | 0.203857579 | 0.026712961 |
| 0.164034697 | 0.097746084 | 0.230535763 | 0.052714783 |
| 0.07212131  | 0.217953467 | 0.100123373 | 0.105286404 |
| 0.096115853 | 0.153348586 | 0.341203375 | 0.338170679 |
| 0.139556856 | 0.124142608 | 0.28163374  | 0.294798034 |
| 0.116917383 | 0.305405229 | 0.218508006 | 0.101524147 |
| 0.085139272 | 0.092772072 | 0.28203568  | 0.174440861 |
| 0.070591269 | 0.358503876 | 0.096365735 | 0.302544103 |
| 0.21202446  | 0.267362545 | 0.253986634 | 0.210648578 |
| 0.117669584 | 0.159677909 | 0.174456266 | 0.047132468 |
| 0.264038894 | 0.319143466 | 0.156636302 | 0.139904081 |
| 0.199770214 | 0.166468249 | 0.098591508 | 0.055054205 |
| 0.128931033 | 0.109954838 | 0.119609641 | 0.385527562 |
| 0.193316353 | 0.179370431 | 0.072160734 | 0.140284907 |
| 0.283203331 | 0.221951932 | 0.088730039 | 0.235620772 |

|             |             |             |             |
|-------------|-------------|-------------|-------------|
| 0.224737378 | 0.238305048 | 0.299574311 | 0.303924624 |
| 0.083180536 | 0.238874907 | 0.255303725 | 0.170971333 |
| 0.194125333 | 0.213641139 | 0.242900636 | 0.038955994 |
| 0.111101401 | 0.171814293 | 0.10065166  | 0.204685597 |
| 0.1842069   | 0.139694834 | 0.073537473 | 0.348708336 |
| 0.073300141 | 0.292773556 | 0.051781147 | 0.16012718  |
| 0.26981167  | 0.112082332 | 0.296574646 | 0.098313897 |
| 0.116675824 | 0.22030482  | 0.056143803 | 0.157038516 |
| 0.090207634 | 0.248382658 | 0.166439746 | 1           |
| 0.102425083 | 0.16405156  | 0.255854931 | 0.082198915 |
| 0.055370977 | 0.081411414 | 0.241798534 | 0.07968974  |
| 0.062212393 | 0.359125991 | 0.118430522 | 0.121268465 |
| 0.096455954 | 0.149539983 | 0.129201593 | 0.099023185 |
| 0.121689904 | 0.241655489 | 0.062388646 | 0.215592649 |
| 0.190479143 | 0.156865378 | 0.148274114 | 0.082036603 |
| 0.131001434 | 0.205326528 | 0.206922057 | 0.239839443 |
| 0.189326309 | 0.358519252 | 0.174251281 | 0.221665246 |
| 0.134112072 | 0.136815015 | 0.088235834 | 0.300484102 |

0.07643405

TRPM7

0.247373071

0.342502338

0.20055478

|             |             |             |             |
|-------------|-------------|-------------|-------------|
| 0.248435717 | 0.202790906 | 0.117371914 | 0.056891816 |
| 0.014250632 | 0.033478954 | 0.001132815 | 0.023798229 |
| 0.251583999 | 0.042930546 | 0.032089161 | 0.046110939 |
| 0.309255754 | 0.063248932 | 0.0748127   | 0.097923195 |
| 0.206082585 | 0.009111378 | 0.288282395 | 0.021148637 |
| 0.117493503 | 0.088578811 | 0.047238951 | 0.162847305 |
| 0.278026933 | 0.052969591 | 0.067430363 | 0.154609552 |
| 0.042575863 | 0.248678055 | 0.328415382 | 0.305503662 |
| 0.332155237 | 0.217481787 | 0.002816401 | 0.04359591  |
| 0.232521234 | 0.327682998 | 0.207296906 | 0.154144712 |
| 0.011169215 | 0.26225535  | 0.095725393 | 0.275606488 |
| 0.017475286 | 0.023193054 | 0.023801155 | 0.231350958 |
| 0.287669034 | 0.211888823 | 0.030485437 | 0.037992303 |
| 0.042334667 | 0.019078116 | 0.082355387 | 0.091282028 |
| 0.078867764 | 0.011936461 | 0.310871806 | 0.016732129 |
| 0.019788095 | 0.038282183 | 0.06783085  | 0.048740967 |
| 0.147958121 | 0.16323464  | 0.003668062 | 0.228719862 |
| 0.000167048 | 0.196804117 | 0.24480173  | 0.161578882 |
| 0.038911329 | 0.008483088 | 0.091836176 | 0.133137331 |
| 0.298780216 | 0.291962293 | 0.395995488 | 0.406021662 |
| 0.046861896 | 0.146674376 | 0.25212889  | 0.054954941 |
| 0.272238144 | 0.047812572 | 0.020004332 | 0.339341432 |
| 0.399898727 | 0.352256543 | 0.073214581 | 0.205601147 |
| 0.251859721 | 0.285068755 | 0.134889039 | 0.162643751 |
| 0.109474619 | 0.044307277 | 0.263350325 | 0.381684728 |
| 0.192332161 | 0.231660275 | 0.113928905 | 0.194476768 |
| 0.034328696 | 0.031375795 | 0.192683077 | 0.029005297 |
| 0.315768663 | 0.007210757 | 0.171447607 | 0.118970784 |
| 0.039462693 | 0.255346226 | 0.372706444 | 0.068165673 |
| 0.195960312 | 0.008531046 | 0.077236031 | 0.021716901 |
| 0.042647372 | 0.091977458 | 0.27343659  | 0.299517214 |
| 0.016980566 | 0.06591734  | 0.063939164 | 0.003939638 |
| 0.022937053 | 0.051252265 | 0.270407534 | 0.102846907 |
| 0.247179068 | 0.260432976 | 0.097784082 | 0.169750277 |

|             |             |             |             |
|-------------|-------------|-------------|-------------|
| 0.288060935 | 0.395685927 | 0.003909533 | 0.020118051 |
| 0.166605414 | 0.055469314 | 0.138939152 | 0.205054022 |
| 0.192649535 | 0.0167825   | 0.042256907 | 0.382692879 |
| 0.213382502 | 0.035632982 | 0.050555064 | 0.295132937 |
| 0.042532389 | 0.268747359 | 0.031796864 | 0.055284184 |
| 0.008105343 | 0.335875165 | 0.037887233 | 0.066269131 |
| 0.078294723 | 0.060077446 | 0.0031998   | 0.04319653  |
| 0.028860063 | 0.281272553 | 0.27437427  | 0.044660172 |
| 0.084174487 | 0.27817238  | 0.05982165  | 0.229372493 |
| 0.007823344 | 0.0145016   | 0.038325127 | 0.354338031 |
| 0.067378069 | 0.38474876  | 0.060815294 | 0.113664862 |
| 0.192450359 | 0.314659787 | 0.002073356 | 0.29304032  |
| 0.36722154  | 0.041931058 | 0.196854792 | 0.247174724 |
| 0.200322419 | 0.298231095 | 0.004833915 | 0.267515242 |
| 0.129656903 | 0.032526548 | 0.391960899 | 0.111735038 |
| 0.287394803 | 0.035614331 | 0.047105394 | 0.379213936 |
| 0.291210126 | 0.006868615 | 0.031377097 | 0.179062905 |
| 0.030161362 | 0.007470209 | 0.232595065 | 0.211806808 |
| 0.195558445 | 0.329828399 | 0.368042081 | 0.188655753 |
| 0.191094786 | 0.046675814 | 0.00847222  | 0.226375863 |
| 0.303708468 | 0.053876736 | 0.236003858 | 0.036077854 |
| 0.085643088 | 0.295793729 | 0.273620116 | 0.026322388 |
| 0.020349197 | 0.06953851  | 0.003490053 | 0.181803317 |
| 0.262839073 | 0.018211879 | 0.184530083 | 0.039237726 |
| 0.057034499 | 0.37609932  | 0.15156656  | 0.181625527 |
| 0.117410661 | 0.145600932 | 0.076373604 | 0.034256781 |
| 0.04778289  | 0.058350461 | 0.145498948 | 0.114451788 |
| 0.004525875 | 0.044185699 | 0.016371301 | 0.085225825 |
| 0.027307403 | 0.070156327 | 0.062545807 | 0.176249519 |
| 0.032674518 | 0.020991613 | 0.171771371 | 0.095311969 |
| 0.066026825 | 0.018968124 | 0.333148361 | 0.247124938 |
| 0.11490402  | 0.038092072 | 0.028377001 | 0.037130192 |
| 0.311188182 | 0.073113761 | 0.028190888 | 0.272633655 |
| 0.009239149 | 0.377707954 | 0.039907397 | 0.092503865 |
| 0.144528528 | 0.110293081 | 0.321218909 | 0.016949762 |
| 0.126133569 | 0.268586641 | 0.169452515 | 0.103402643 |
| 0.195355032 | 0.200364405 | 0.008135484 | 0.200628841 |
| 0.184413297 | 0.023521336 | 0.372972989 | 0.055584745 |
| 0.02530673  | 0.32651038  | 0.306861551 | 0.068085201 |
| 0.058804506 | 0.109171427 | 0.003498647 | 0.225225465 |
| 0.360546967 | 0.309865136 | 0.254905778 | 0.135238033 |
| 0.017488436 | 0.005356409 | 0.140688944 | 0.212341192 |
| 0.298392495 | 0.387515324 | 0.135791016 | 0.192630043 |
| 0.118204376 | 0.125836033 | 0.007270672 | 0.375312439 |
| 0.050496515 | 0.334370243 | 0.007416177 | 0.368338849 |
| 0.325088104 | 0.046475673 | 0.072000048 | 0.082060226 |
| 0.183661259 | 0.019585594 | 0.038337409 | 0.307458981 |
| 0.279618526 | 0.125701999 | 0.112046253 | 0.240335787 |
| 0.002683121 | 0.006127216 | 0.252255572 | 0.12063309  |
| 0.089297245 | 0.080106143 | 0.070488384 | 0.03696701  |
| 0.013668405 | 0.264128288 | 0.328110855 | 0.034522362 |
| 0.098681884 | 0.035872741 | 0.281756933 | 0.020913626 |
| 0.396679218 | 0.359404865 | 0.322704613 | 0.026529924 |
| 0.281971608 | 0.364043378 | 0.273227159 | 0.058228478 |

|             |             |             |             |
|-------------|-------------|-------------|-------------|
| 0.029373233 | 0.350945827 | 0.166083845 | 0.005728664 |
| 0.339848988 | 0.030871332 | 0.005466201 | 0.302783878 |
| 0.066316412 | 0.233990256 | 0.000693022 | 0.029590291 |
| 0.036101302 | 0.383628904 | 0.291893721 | 0.154080014 |
| 0.024031705 | 0.166145617 | 0.006191728 | 0.391555366 |
| 0.303433    | 0.023755038 | 0.083303163 | 0.288464573 |
| 0.337770548 | 0.32587165  | 0.222411806 | 0.376157767 |
| 0.264024655 | 0.328393252 | 0.02911075  | 0.189065734 |
| 0.271725582 | 0.374051814 | 0.212451348 | 0.264479448 |
| 0.305834182 | 0.312704439 | 0.141032663 | 0.006151645 |
| 0.074624534 | 0.025589973 | 0.050928438 | 0.032465133 |
| 0.08604361  | 0.064641242 | 0.316917076 | 0.35574487  |
| 0.376993723 | 0.009471393 | 0.012121656 | 0.262620927 |
| 0.245333659 | 0.310136064 | 0.011197307 | 0.004901229 |
| 0.003589786 | 0.034243736 | 0.117388701 | 0.157463462 |
| 0.352509248 | 0.014913774 | 0.004567418 | 0.003758481 |
| 0.035742974 | 0.336470778 | 0.326737798 | 0.237662736 |
| 0.331008103 | 0.040223331 | 0.03698945  | 0.236314543 |
| 0.056589856 | 0.113020801 | 0.373479247 | 0.271799039 |
| 0.024162471 | 0.148157366 | 0.093819171 | 0.335992541 |
| 0.079413666 | 0.208116449 | 0.252156968 | 0.046494099 |
| 0.008153188 | 0.060468662 | 0.052084511 | 0.327241469 |
| 0.325797158 | 0.027924087 | 0.019778852 | 0.007730422 |
| 0.028520053 | 0.338543082 | 0.033496756 | 0.386747787 |
| 0.259038557 | 0.311915535 | 0.053378278 | 0.298640039 |
| 0.02970526  | 0.298130431 | 0.242589386 | 0.004402362 |
| 0.083400223 | 0.008222833 | 0.325753545 | 0.062702261 |
| 0.043807415 | 0.166291862 | 0.088331594 | 0.024740052 |
| 0.099771688 | 0.039747725 | 0.366207817 | 0.397179038 |
| 0.031216026 | 0.043773123 | 0.163498688 | 0.213073443 |
| 0.058586604 | 0.281659473 | 0.299023215 | 0.123574318 |
| 0.015573209 | 0.064865797 | 0.199471089 | 0.157191026 |
| 0.023042118 | 0.397478984 | 0.085940331 | 0.384285093 |
| 0.200817384 | 0.299236137 | 0.338209017 | 0.145817038 |
| 0.085994936 | 0.134179279 | 0.14815251  | 0.003188704 |
| 0.151131453 | 0.33027801  | 0.095579401 | 0.06978264  |
| 0.143489016 | 0.257681896 | 0.010967084 | 0.015496397 |
| 0.235099413 | 0.074408639 | 0.025049055 | 0.323551253 |
| 0.145948859 | 0.17235505  | 0.005021809 | 0.046519495 |
| 0.358845385 | 0.257811579 | 0.015139969 | 0.210602557 |
| 0.089289959 | 0.207172457 | 0.327853761 | 0.366444013 |
| 0.068298455 | 0.288398742 | 0.227338279 | 0.154502352 |
| 0.220565819 | 0.10094458  | 0.332925303 | 0.003749385 |
| 0.063446835 | 0.200012921 | 0.025994825 | 0.083143058 |
| 0.063012135 | 0.021792886 | 0.116866493 | 0.295459434 |
| 0.128252682 | 0.216205623 | 0.024036778 | 0.024436423 |
| 0.211675017 | 0.099461871 | 0.200696854 | 0.0356048   |
| 0.021130274 | 0.308497244 | 0.006496785 | 0.037130522 |
| 0.135674592 | 0.312225887 | 0.243173184 | 0.102425083 |
| 1           | 0.0640767   | 0.152089076 | 0.050317456 |
| 0.05776117  | 0.050316777 | 0.29780905  | 0.006178004 |
| 0.003597941 | 0.375989258 | 0.085456687 | 0.01848085  |
| 0.042185351 | 0.14646419  | 0.046981575 | 0.05253137  |
| 0.033285569 | 0.365399968 | 0.066554928 | 0.232197766 |

|             |             |             |             |
|-------------|-------------|-------------|-------------|
| 0.105665239 | 0.025642193 | 0.158013877 | 0.017091331 |
| 0.014630914 | 0.243894207 | 0.258595057 | 0.353979919 |
| 0.172174291 | 0.298468601 | 0.232494985 | 0.261437889 |
| 0.0260558   | 0.174832381 | 0.00758466  | 0.278906121 |
| 0.133585588 |             |             |             |
| TRPS1       | 0.173596768 | 0.151308428 | 0.142845559 |
| 0.163173583 | 0.179962038 | 0.057507311 | 0.070388155 |
| 0.025090542 | 0.025613747 | 0.002721504 | 0.019806106 |
| 0.176056327 | 0.025898    | 0.029419834 | 0.019879903 |
| 0.27253707  | 0.120982913 | 0.101666665 | 0.155206259 |
| 0.195558477 | 0.017379958 | 0.263629378 | 0.052028383 |
| 0.136849914 | 0.107160855 | 0.092632444 | 0.114396313 |
| 0.200552861 | 0.108671393 | 0.032239426 | 0.120344176 |
| 0.198259112 | 0.175204955 | 0.125897301 | 0.196535466 |
| 0.124489102 | 0.127424345 | 0.053638895 | 0.022519949 |
| 0.144766419 | 0.174762873 | 0.17971099  | 0.15521286  |
| 0.032776015 | 0.099262364 | 0.10484111  | 0.260302755 |
| 0.016106289 | 0.043376873 | 0.017020208 | 0.096267616 |
| 0.093945443 | 0.096518455 | 0.037947816 | 0.049384192 |
| 0.015945734 | 0.019373279 | 0.038125608 | 0.059634746 |
| 0.108752894 | 0.011463341 | 0.113977715 | 0.015131648 |
| 0.020150739 | 0.067898468 | 0.210279422 | 0.070052107 |
| 0.122262945 | 0.093741013 | 0.039898869 | 0.150814633 |
| 0.000714519 | 0.198383186 | 0.305701165 | 0.068018709 |
| 0.163452554 | 0.018498833 | 0.252309199 | 0.11532667  |
| 0.20754239  | 0.144582219 | 0.228379841 | 0.211579564 |
| 0.060270461 | 0.282577022 | 0.201071031 | 0.096218949 |
| 0.149860946 | 0.052731918 | 0.030580854 | 0.297212674 |
| 0.219825504 | 0.141745136 | 0.081433703 | 0.318436891 |
| 0.101913916 | 0.137000745 | 0.070851323 | 0.106477437 |
| 0.036714511 | 0.156522736 | 0.101727336 | 0.190146816 |
| 0.1059715   | 0.18439314  | 0.210300475 | 0.134898952 |
| 0.161790136 | 0.022839448 | 0.194821446 | 0.081971771 |
| 0.206277447 | 0.016486422 | 0.286679617 | 0.097423646 |
| 0.093822899 | 0.152005807 | 0.148445144 | 0.11079895  |
| 0.201652848 | 0.038665595 | 0.031660121 | 0.167145614 |
| 0.029256686 | 0.090824287 | 0.090386839 | 0.160059413 |
| 0.022539389 | 0.050022457 | 0.088870192 | 0.047630014 |
| 0.111894649 | 0.14542294  | 0.154823379 | 0.149727732 |
| 0.199150529 | 0.121835206 | 0.068433    | 0.091363782 |
| 0.138249186 | 0.234327059 | 0.00060822  | 0.064411176 |
| 0.101199099 | 0.15541801  | 0.242404172 | 0.132279196 |
| 0.160022266 | 0.048607865 | 0.118943621 | 0.192024926 |
| 0.097193018 | 0.107213782 | 0.060394613 | 0.26971225  |
| 0.022813484 | 0.249934887 | 0.112912429 | 0.067892325 |
| 0.030234479 | 0.120544943 | 0.179528979 | 0.077428821 |
| 0.016009797 | 0.097811077 | 0.059760827 | 0.051136938 |
| 0.015604968 | 0.106364443 | 0.096960161 | 0.172657258 |
| 0.09595206  | 0.231964631 | 0.054740579 | 0.092215295 |
| 0.007206565 | 0.074077275 | 0.033511219 | 0.17044779  |
| 0.036542491 | 0.216420694 | 0.097193557 | 0.153671826 |
| 0.271883579 | 0.218631183 | 0.014260802 | 0.105750072 |
| 0.145149119 | 0.027187061 | 0.126019307 | 0.241544055 |
| 0.086908019 | 0.167103236 | 0.006064093 | 0.264478586 |

|             |             |             |             |
|-------------|-------------|-------------|-------------|
| 0.083166384 | 0.14652402  | 0.232544436 | 0.184545729 |
| 0.127587559 | 0.099874869 | 0.046742008 | 0.184417372 |
| 0.128388075 | 0.015411821 | 0.022780684 | 0.139244037 |
| 0.171028133 | 0.011816304 | 0.181745388 | 0.163935715 |
| 0.11354285  | 0.243492613 | 0.248265715 | 0.073547966 |
| 0.136270161 | 0.091279656 | 0.074138944 | 0.288880225 |
| 0.208761078 | 0.02656543  | 0.09765992  | 0.044663403 |
| 0.051289034 | 0.125733831 | 0.124088206 | 0.010340149 |
| 0.062785901 | 0.076308826 | 0.006285814 | 0.13324579  |
| 0.120531368 | 0.024483963 | 0.082886078 | 0.158038005 |
| 0.169859655 | 0.172250575 | 0.187332063 | 0.145786835 |
| 0.121958348 | 0.079139599 | 0.139265903 | 0.01884088  |
| 0.020598405 | 0.095158547 | 0.080297041 | 0.069373182 |
| 0.015842799 | 0.107992491 | 0.147689751 | 0.041498619 |
| 0.015327667 | 0.031478361 | 0.026278494 | 0.101987321 |
| 0.032143004 | 0.027092724 | 0.116625374 | 0.101119203 |
| 0.123771861 | 0.124534774 | 0.149810525 | 0.245201067 |
| 0.061015612 | 0.065025936 | 0.16944261  | 0.013197976 |
| 0.160801028 | 0.024096556 | 0.01959017  | 0.124592458 |
| 0.055580998 | 0.235020353 | 0.030744732 | 0.168173628 |
| 0.094806538 | 0.137532331 | 0.209044243 | 0.005431357 |
| 0.110413088 | 0.114591485 | 0.279565912 | 0.114529853 |
| 0.078188475 | 0.156150837 | 0.02439855  | 0.108915997 |
| 0.098335032 | 0.10612861  | 0.165736452 | 0.139176607 |
| 0.167194851 | 0.242434909 | 0.13071434  | 0.214458961 |
| 0.167690331 | 0.060544421 | 0.010054902 | 0.290631819 |
| 0.161168555 | 0.258806693 | 0.109884798 | 0.206878285 |
| 0.049400031 | 0.011703239 | 0.290247717 | 0.175030368 |
| 0.112769614 | 0.175256617 | 0.279216535 | 0.113991073 |
| 0.196302137 | 0.056244944 | 0.009329935 | 0.172912355 |
| 0.114398041 | 0.145484001 | 0.081043805 | 0.203525219 |
| 0.11420185  | 0.034430663 | 0.113891408 | 0.063518029 |
| 0.083178035 | 0.061832227 | 0.115424532 | 0.120389384 |
| 0.138602543 | 0.083276608 | 0.049296649 | 0.233107977 |
| 0.01042116  | 0.024464761 | 0.184121833 | 0.130034925 |
| 0.052257136 | 0.112800301 | 0.066673619 | 0.035425281 |
| 0.028196849 | 0.106457345 | 0.253906903 | 0.040313354 |
| 0.035565581 | 0.033990313 | 0.326193564 | 0.094330812 |
| 0.17676908  | 0.161470464 | 0.124873242 | 0.087071768 |
| 0.179838502 | 0.144045702 | 0.123861853 | 0.245109695 |
| 0.165548985 | 0.135784238 | 0.11723262  | 0.012897091 |
| 0.224301384 | 0.018473037 | 0.008985106 | 0.138403628 |
| 0.140857438 | 0.08662386  | 0.000883599 | 0.065419945 |
| 0.165325721 | 0.273094583 | 0.101877122 | 0.131708966 |
| 0.008704675 | 0.221803785 | 0.107020743 | 0.193098867 |
| 0.118905386 | 0.091969389 | 0.128338766 | 0.133658563 |
| 0.146526123 | 0.148291558 | 0.122009949 | 0.16535042  |
| 0.132556675 | 0.118368506 | 0.021692739 | 0.242630383 |
| 0.126711356 | 0.147105519 | 0.143155508 | 0.121987436 |
| 0.187568936 | 0.286500692 | 0.165239527 | 0.021247502 |
| 0.043585638 | 0.029513503 | 0.01198482  | 0.019658718 |
| 0.055522634 | 0.082143508 | 0.157908836 | 0.24069206  |
| 0.17852455  | 0.096052141 | 0.021165475 | 0.129665344 |
| 0.140429335 | 0.195189158 | 0.10348518  | 0.008751134 |



|             |             |             |             |
|-------------|-------------|-------------|-------------|
| 0.009995939 | 0.026620195 | 0.117355946 | 0.273383239 |
| 0.164202936 | 0.004055764 | 0.045479377 | 0.014553514 |
| 0.037379417 | 0.228693269 | 0.131709841 | 0.249333725 |
| 0.220169688 | 0.176077539 | 0.012275408 | 0.241993169 |
| 0.062265995 | 0.066274117 | 0.175978164 | 0.108299666 |
| 0.154886023 | 0.240221927 | 0.108389975 | 0.191246642 |
| 0.050112721 | 0.303847612 | 0.18584869  | 0.026890386 |
| 0.108504329 | 0.158338358 | 0.102115545 | 0.280635977 |
| 0.116257358 | 0.028466197 | 0.031401409 | 0.00532289  |
| 0.035489328 | 0.219200804 | 0.047724932 | 0.211315806 |
| 0.151735779 | 0.245154234 | 0.157179876 | 0.116107713 |
| 0.036480175 | 0.110283836 | 0.190608794 | 0.002435829 |
| 0.178805676 | 0.079047572 | 0.150043609 | 0.01199749  |
| 0.0376162   | 0.139272227 | 0.039131906 | 0.158866997 |
| 0.066324018 | 0.144444783 | 0.207054259 | 0.243627787 |
| 0.163082026 | 0.074527564 | 0.262490954 | 0.234679001 |
| 0.04900746  | 0.17140202  | 0.111779543 | 0.045027283 |
| 0.031921724 | 0.134683845 | 0.170440076 | 0.10125138  |
| 0.033834773 | 0.243950534 | 0.041066179 | 0.18493333  |
| 0.12787388  | 0.165906407 | 0.154745999 | 0.108609879 |
| 0.09675061  | 0.083816562 | 0.074002587 | 0.006705123 |
| 0.174772717 | 0.197145203 | 0.113444325 | 0.042194943 |
| 0.139667615 | 0.167916753 | 0.08432493  | 0.024044319 |
| 0.142917012 | 0.04342713  | 0.0417131   | 0.270729211 |
| 0.133522626 | 0.103207259 | 0.052771529 | 0.077859126 |
| 0.161686232 | 0.121295898 | 0.015282899 | 0.121168415 |
| 0.261310623 | 0.164009963 | 0.215362702 | 0.246360837 |
| 0.052783058 | 0.13822893  | 0.150230976 | 0.076290961 |
| 0.092146263 | 0.138643932 | 0.129176584 | 0.008183404 |
| 0.047995198 | 0.144987587 | 0.030611492 | 0.27912974  |
| 0.133283953 | 0.081346001 | 0.061819403 | 0.283696275 |
| 0.071192161 | 0.195332744 | 0.020846027 | 0.074197706 |
| 0.310822316 | 0.097598449 | 0.247213458 | 0.03852551  |
| 0.030521224 | 0.110755426 | 0.031926082 | 0.187876669 |
| 0.095241654 | 0.144037368 | 0.123193384 | 0.16405156  |
| 0.0640767   | 1           | 0.19637226  | 0.035308889 |
| 0.019829649 | 0.037706073 | 0.131753862 | 0.020758666 |
| 0.023466792 | 0.237015729 | 0.06587106  | 0.141366314 |
| 0.161342428 | 0.101762424 | 0.109865404 | 0.029739194 |
| 0.18578953  | 0.149646215 | 0.025521926 | 0.17984979  |
| 0.105351603 | 0.143489317 | 0.077559268 | 0.033760946 |
| 0.076932274 | 0.107047183 | 0.18787007  | 0.138509667 |
| 0.225566397 | 0.227155434 | 0.089347133 | 0.140259857 |
| 0.072629135 | 0.125210521 | 0.023283145 | 0.196252407 |
| 0.041896234 |             |             |             |
| TSEN15      | 0.246351453 | 0.352645296 | 0.152184884 |
| 0.374127231 | 0.247176077 | 0.173658841 | 0.224427897 |
| 0.130791715 | 0.140956132 | 0.045495132 | 0.106393287 |
| 0.233825938 | 0.188787911 | 0.195821916 | 0.116359618 |
| 0.401348166 | 0.252726465 | 0.152449022 | 0.270573798 |
| 0.335815879 | 0.150942402 | 0.402117645 | 0.222745852 |
| 0.190278092 | 0.196459615 | 0.219296124 | 0.192968752 |
| 0.396222054 | 0.224467398 | 0.124430226 | 0.282280647 |
| 0.212954184 | 0.3016606   | 0.297808521 | 0.323512136 |

|             |             |             |             |
|-------------|-------------|-------------|-------------|
| 0.285697911 | 0.199360635 | 0.046071815 | 0.149974955 |
| 0.27595074  | 0.311367401 | 0.341270716 | 0.310465514 |
| 0.174311571 | 0.263774056 | 0.248874067 | 0.255423177 |
| 0.108544051 | 0.162796037 | 0.094868349 | 0.249474402 |
| 0.263363961 | 0.212805201 | 0.160253289 | 0.219074787 |
| 0.14697837  | 0.112205311 | 0.127912636 | 0.173082198 |
| 0.266624477 | 0.087812456 | 0.283634534 | 0.142639039 |
| 0.123544528 | 0.181687543 | 0.234533766 | 0.202126969 |
| 0.162645172 | 0.225873248 | 0.100927715 | 0.175781197 |
| 0.020731799 | 0.331207992 | 0.26727293  | 0.116673857 |
| 0.192630215 | 0.142094831 | 0.249744648 | 0.28966845  |
| 0.392901781 | 0.268925364 | 0.407513688 | 0.376704108 |
| 0.239370973 | 0.249744631 | 0.178405184 | 0.286290401 |
| 0.292192093 | 0.22659325  | 0.134543633 | 0.418762311 |
| 0.40063688  | 0.325869181 | 0.2430375   | 0.246521496 |
| 0.294303078 | 0.322918015 | 0.149497598 | 0.202901349 |
| 0.133978545 | 0.136468653 | 0.268481774 | 0.378283641 |
| 0.240382731 | 0.153437063 | 0.259031925 | 0.31252928  |
| 0.214159325 | 0.120421435 | 0.36217038  | 0.168025691 |
| 0.401602845 | 0.097335416 | 0.251762269 | 0.246956959 |
| 0.209985901 | 0.291731346 | 0.319360318 | 0.258153625 |
| 0.203339095 | 0.120947655 | 0.099498513 | 0.15730307  |
| 0.181936345 | 0.100980301 | 0.241631531 | 0.382167412 |
| 0.160577298 | 0.21078312  | 0.231351359 | 0.048606941 |
| 0.154803968 | 0.184516934 | 0.281807162 | 0.17733872  |
| 0.312886691 | 0.200212657 | 0.233461832 | 0.210639444 |
| 0.231285966 | 0.403683248 | 0.017472219 | 0.21302015  |
| 0.207201421 | 0.201905286 | 0.305218783 | 0.233821012 |
| 0.242401879 | 0.190398775 | 0.274512731 | 0.391067785 |
| 0.262171378 | 0.242443077 | 0.124100616 | 0.389145027 |
| 0.179658806 | 0.250221986 | 0.247351945 | 0.2557447   |
| 0.18436749  | 0.267940696 | 0.141594248 | 0.14450402  |
| 0.100739761 | 0.205522876 | 0.060658225 | 0.155546437 |
| 0.16326553  | 0.292922386 | 0.229567267 | 0.244055594 |
| 0.25537454  | 0.338240972 | 0.119989265 | 0.266928227 |
| 0.074107596 | 0.158359232 | 0.08222464  | 0.374581434 |
| 0.133668544 | 0.364529871 | 0.244995141 | 0.225569965 |
| 0.273940692 | 0.375207378 | 0.004539213 | 0.274292807 |
| 0.321082761 | 0.079782651 | 0.27711856  | 0.257799716 |
| 0.138128095 | 0.380484313 | 0.013841725 | 0.386582291 |
| 0.168908021 | 0.218909638 | 0.420992405 | 0.273365278 |
| 0.275998372 | 0.191997716 | 0.171905699 | 0.290041825 |
| 0.242474364 | 0.040469339 | 0.113085832 | 0.314102206 |
| 0.126033405 | 0.12837285  | 0.289802983 | 0.327170361 |
| 0.248771445 | 0.346996509 | 0.435895291 | 0.130687835 |
| 0.228522865 | 0.220307659 | 0.088151459 | 0.226761696 |
| 0.296632593 | 0.125965709 | 0.270994866 | 0.22080817  |
| 0.11738753  | 0.316074536 | 0.236440604 | 0.092659094 |
| 0.182847064 | 0.190147354 | 0.064319281 | 0.220616096 |
| 0.218177341 | 0.227936282 | 0.131581702 | 0.190113525 |
| 0.211967895 | 0.377072624 | 0.149053536 | 0.121793451 |
| 0.096208531 | 0.223926368 | 0.242458141 | 0.183311992 |
| 0.186260592 | 0.256870225 | 0.172309928 | 0.186950854 |
| 0.133502724 | 0.260262758 | 0.058258617 | 0.129226388 |

|             |             |             |             |
|-------------|-------------|-------------|-------------|
| 0.176553323 | 0.157009446 | 0.137615317 | 0.220844287 |
| 0.190118304 | 0.211826585 | 0.223006081 | 0.161894386 |
| 0.201595308 | 0.128920987 | 0.343211403 | 0.34756248  |
| 0.170924202 | 0.239143265 | 0.183018644 | 0.113952783 |
| 0.379564982 | 0.105235996 | 0.073316384 | 0.335095734 |
| 0.094254505 | 0.391190997 | 0.242469789 | 0.255777496 |
| 0.192420862 | 0.280815365 | 0.408019079 | 0.055239015 |
| 0.186221687 | 0.307473642 | 0.236936895 | 0.250292279 |
| 0.237556518 | 0.295351789 | 0.151141449 | 0.226007695 |
| 0.220584264 | 0.184898927 | 0.351459094 | 0.229336375 |
| 0.141987383 | 0.310459639 | 0.272928871 | 0.221567582 |
| 0.203540039 | 0.205701485 | 0.107634391 | 0.320208097 |
| 0.369708977 | 0.415450915 | 0.281853791 | 0.172443218 |
| 0.191394576 | 0.087938199 | 0.221040116 | 0.166672231 |
| 0.28198858  | 0.342642198 | 0.276305744 | 0.209025289 |
| 0.290922697 | 0.170034554 | 0.081235444 | 0.369982772 |
| 0.125876929 | 0.311369458 | 0.083380041 | 0.301260508 |
| 0.277160609 | 0.106444427 | 0.20435916  | 0.19037864  |
| 0.243264788 | 0.176569988 | 0.215085067 | 0.302574543 |
| 0.307372772 | 0.200832437 | 0.162195266 | 0.289457314 |
| 0.093596955 | 0.158429126 | 0.227866446 | 0.125980805 |
| 0.181072595 | 0.251476752 | 0.044605307 | 0.148005511 |
| 0.193649416 | 0.298263543 | 0.389231952 | 0.16307794  |
| 0.147919861 | 0.124248259 | 0.332876397 | 0.181029297 |
| 0.304366974 | 0.303694845 | 0.306996466 | 0.216174341 |
| 0.288312868 | 0.323114686 | 0.178288765 | 0.208330808 |
| 0.120512595 | 0.299548427 | 0.227599227 | 0.100742297 |
| 0.411727294 | 0.074863603 | 0.106265747 | 0.336186119 |
| 0.257432629 | 0.220833008 | 0.00925671  | 0.037840314 |
| 0.126256743 | 0.385703576 | 0.271144039 | 0.275234802 |
| 0.077872561 | 0.27806442  | 0.020227188 | 0.356892243 |
| 0.314021165 | 0.102275887 | 0.199763313 | 0.274684851 |
| 0.251310935 | 0.341318568 | 0.151621094 | 0.318310002 |
| 0.215007165 | 0.287708948 | 0.216643296 | 0.288953172 |
| 0.321957498 | 0.291826978 | 0.291599447 | 0.292065385 |
| 0.392269814 | 0.34158803  | 0.305832532 | 0.112571198 |
| 0.106306667 | 0.13258686  | 0.094994621 | 0.144079571 |
| 0.14607998  | 0.223171931 | 0.31822649  | 0.404774695 |
| 0.348442447 | 0.071834288 | 0.170749926 | 0.267822772 |
| 0.34083714  | 0.392539082 | 0.065962275 | 0.011261864 |
| 0.007674814 | 0.08378274  | 0.236559248 | 0.240033626 |
| 0.34042932  | 0.080351127 | 0.075057398 | 0.116596764 |
| 0.208644707 | 0.263209233 | 0.321980087 | 0.39247633  |
| 0.30180198  | 0.238819552 | 0.137146413 | 0.374483104 |
| 0.170594168 | 0.138659771 | 0.36593495  | 0.299362163 |
| 0.151849499 | 0.237320693 | 0.144219531 | 0.406669767 |
| 0.043571046 | 0.299362071 | 0.254420908 | 0.209578101 |
| 0.057471797 | 0.202054734 | 0.180326764 | 0.381851616 |
| 0.272103092 | 0.204206747 | 0.165447663 | 0.053595002 |
| 0.232316144 | 0.365959803 | 0.264468644 | 0.405749315 |
| 0.34589158  | 0.434506552 | 0.185141117 | 0.29358589  |
| 0.157057899 | 0.281659356 | 0.197926275 | 0.032936094 |
| 0.210549398 | 0.105910643 | 0.284668713 | 0.097851418 |
| 0.147508457 | 0.245700336 | 0.121273225 | 0.109061183 |

|             |             |             |             |
|-------------|-------------|-------------|-------------|
| 0.090408504 | 0.204025542 | 0.412094529 | 0.373695845 |
| 0.121656324 | 0.224031688 | 0.245519476 | 0.291935931 |
| 0.151592493 | 0.372745877 | 0.28879364  | 0.12254709  |
| 0.196880259 | 0.098716239 | 0.322290846 | 0.201170469 |
| 0.162902358 | 0.413295204 | 0.198453422 | 0.360307207 |
| 0.23853228  | 0.314730017 | 0.316576158 | 0.237652843 |
| 0.200141505 | 0.178347457 | 0.251920731 | 0.090290712 |
| 0.260017203 | 0.399178676 | 0.16311554  | 0.192862559 |
| 0.268577084 | 0.161860632 | 0.138238738 | 0.06363657  |
| 0.118759581 | 0.157241955 | 0.2658975   | 0.422843638 |
| 0.216987217 | 0.210933557 | 0.122371153 | 0.174678853 |
| 0.356873112 | 0.273072397 | 0.134425351 | 0.284554365 |
| 0.256897459 | 0.258696341 | 0.319727089 | 0.331771198 |
| 0.142045788 | 0.318981487 | 0.315004829 | 0.249284693 |
| 0.274504713 | 0.251454419 | 0.313664551 | 0.067235785 |
| 0.120135651 | 0.196803104 | 0.232301987 | 0.2228927   |
| 0.281531416 | 0.13308328  | 0.105817228 | 0.373941521 |
| 0.121077276 | 0.353562124 | 0.116034784 | 0.178830678 |
| 0.249894617 | 0.117705844 | 0.301577288 | 0.20136899  |
| 0.212126879 | 0.296799877 | 0.063562128 | 0.211962907 |
| 0.142697924 | 0.28985701  | 0.176401019 | 0.255854931 |
| 0.152089076 | 0.19637226  | 1           | 0.113679912 |
| 0.119854564 | 0.129138409 | 0.285272092 | 0.091076141 |
| 0.125017895 | 0.41844816  | 0.122250855 | 0.091196118 |
| 0.144306923 | 0.17246999  | 0.187754279 | 0.210790515 |
| 0.111528903 | 0.308342408 | 0.118717624 | 0.224879292 |
| 0.223613786 | 0.215182361 | 0.194536571 | 0.102687296 |
| 0.145171205 | 0.264082836 | 0.185396836 | 0.306622044 |
| 0.180458973 | 0.420917803 | 0.230600051 | 0.290282925 |
| 0.113513186 | 0.127747669 | 0.135960845 | 0.354732456 |
| 0.116276375 |             |             |             |
| TSPAN13     | 0.244358215 | 0.377954638 | 0.103373249 |
| 0.299711443 | 0.138416771 | 0.241060205 | 0.150412958 |
| 0.21688194  | 0.049820565 | 0.014404549 | 0.008656235 |
| 0.166014718 | 0.071346607 | 0.171796658 | 0.12568513  |
| 0.251508997 | 0.041707509 | 0.14890838  | 0.132597355 |
| 0.273423942 | 0.146422521 | 0.203363847 | 0.084170331 |
| 0.058277477 | 0.026245619 | 0.035325552 | 0.05585577  |
| 0.352591077 | 0.040212565 | 0.192034602 | 0.340088203 |
| 0.037549974 | 0.307001468 | 0.36558504  | 0.179456903 |
| 0.337909283 | 0.229409438 | 0.016530485 | 0.148275014 |
| 0.343201169 | 0.224819412 | 0.289165911 | 0.176823682 |
| 0.04569356  | 0.393268595 | 0.138202062 | 0.131505946 |
| 0.15263603  | 0.016984502 | 0.217106421 | 0.387057738 |
| 0.335948658 | 0.16390233  | 0.207815319 | 0.123518689 |
| 0.056368407 | 0.212972675 | 0.040941916 | 0.333679748 |
| 0.130869899 | 0.218911795 | 0.327033544 | 0.075742136 |
| 0.079437445 | 0.205458031 | 0.042878024 | 0.193410245 |
| 0.063322529 | 0.339747879 | 0.042224811 | 0.136835186 |
| 0.011415144 | 0.270325513 | 0.130049425 | 0.049275526 |
| 0.024501073 | 0.01900745  | 0.052799344 | 0.214739357 |
| 0.346790927 | 0.324874469 | 0.293523077 | 0.285688386 |
| 0.062099182 | 0.095976534 | 0.085700553 | 0.08314822  |
| 0.322796141 | 0.122745558 | 0.086404818 | 0.230186893 |

|             |             |             |             |
|-------------|-------------|-------------|-------------|
| 0.298488481 | 0.345911909 | 0.064136867 | 0.071505697 |
| 0.29799765  | 0.385168583 | 0.129379624 | 0.117376587 |
| 0.073610599 | 0.012814932 | 0.332421535 | 0.324977865 |
| 0.347523628 | 0.052390479 | 0.049599008 | 0.366307326 |
| 0.038580655 | 0.155714471 | 0.205892495 | 0.063938013 |
| 0.359198632 | 0.028329278 | 0.054151956 | 0.195735401 |
| 0.103918286 | 0.294414127 | 0.320945823 | 0.12336907  |
| 0.117046266 | 0.017073175 | 0.022177392 | 0.020363148 |
| 0.149834929 | 0.019262781 | 0.351280429 | 0.339162432 |
| 0.205575177 | 0.09825217  | 0.169515425 | 0.002300623 |
| 0.012272551 | 0.060157517 | 0.265669882 | 0.152835067 |
| 0.272338102 | 0.233940534 | 0.076061331 | 0.306323379 |
| 0.164268952 | 0.284769812 | 0.067527509 | 0.098092007 |
| 0.17997643  | 0.060085776 | 0.113420458 | 0.176765657 |
| 0.083473802 | 0.143160067 | 0.085293032 | 0.346390109 |
| 0.408552433 | 0.068400945 | 0.172411018 | 0.232342671 |
| 0.120135861 | 0.092766003 | 0.087135909 | 0.135581498 |
| 0.069040593 | 0.303940899 | 0.009249422 | 0.196310722 |
| 0.055953644 | 0.034811528 | 0.020749991 | 0.221400777 |
| 0.155642261 | 0.284428391 | 0.326053976 | 0.072610952 |
| 0.14328697  | 0.16967255  | 0.205809054 | 0.245581923 |
| 0.009542566 | 0.046733898 | 0.189443541 | 0.34339264  |
| 0.304698574 | 0.31101392  | 0.138328023 | 0.087178592 |
| 0.091123072 | 0.290652316 | 0.001645356 | 0.372820831 |
| 0.336754953 | 0.186253938 | 0.161504081 | 0.16196125  |
| 0.074843525 | 0.323311506 | 0.030008235 | 0.23631081  |
| 0.280678318 | 0.06215123  | 0.325606659 | 0.057125546 |
| 0.332747714 | 0.024475154 | 0.196292615 | 0.208949901 |
| 0.199749237 | 0.011647674 | 0.207781448 | 0.294537518 |
| 0.008004631 | 0.151946602 | 0.272782759 | 0.242911831 |
| 0.161865938 | 0.248328054 | 0.321618447 | 0.067284487 |
| 0.139167221 | 0.178578467 | 0.011854891 | 0.081290742 |
| 0.247132125 | 0.085009785 | 0.381690124 | 0.165193016 |
| 0.226695246 | 0.363800595 | 0.241142292 | 0.068425599 |
| 0.044502212 | 0.191584193 | 0.045212331 | 0.099620825 |
| 0.254422139 | 0.088862837 | 0.096721677 | 0.060319338 |
| 0.025186332 | 0.349444351 | 0.028396141 | 0.038477661 |
| 0.016080275 | 0.185778998 | 0.156369379 | 0.111540823 |
| 0.059407334 | 0.071084531 | 0.080930314 | 0.106434057 |
| 0.079224475 | 0.049632215 | 0.004476675 | 0.085608623 |
| 0.054398076 | 0.105365624 | 0.114623718 | 0.271091303 |
| 0.162433029 | 0.065213119 | 0.112551913 | 0.058712883 |
| 0.034711551 | 0.011045276 | 0.36210904  | 0.23321815  |
| 0.33202896  | 0.108179636 | 0.024995498 | 0.097269076 |
| 0.334895356 | 0.195127589 | 0.185474697 | 0.363262218 |
| 0.029958096 | 0.302199224 | 0.09337823  | 0.045005091 |
| 0.083875274 | 0.117944308 | 0.338324758 | 0.047444108 |
| 0.219533011 | 0.383618064 | 0.111378635 | 0.058885314 |
| 0.362509991 | 0.250414975 | 0.047479592 | 0.285764746 |
| 0.292254108 | 0.023051637 | 0.342311249 | 0.034915411 |
| 0.012421179 | 0.190195187 | 0.205715006 | 0.0344766   |
| 0.030441251 | 0.12526654  | 0.11130739  | 0.108643291 |
| 0.356605475 | 0.223776837 | 0.263615817 | 0.043973473 |
| 0.038227898 | 0.008208028 | 0.048639328 | 0.114400227 |

|             |             |             |             |
|-------------|-------------|-------------|-------------|
| 0.373223138 | 0.306914118 | 0.106979584 | 0.086174219 |
| 0.132418889 | 0.076087725 | 0.189810524 | 0.326728493 |
| 0.060780982 | 0.362804927 | 0.008080047 | 0.202028254 |
| 0.338402064 | 0.21263444  | 0.025715521 | 0.19391419  |
| 0.354774926 | 0.045945091 | 0.145879623 | 0.359358985 |
| 0.321504807 | 0.100228245 | 0.094745557 | 0.213909972 |
| 0.044235894 | 0.069717676 | 0.12620514  | 0.027775448 |
| 0.117645747 | 0.087012036 | 0.005217543 | 0.196323439 |
| 0.035080821 | 0.367552353 | 0.288184303 | 0.027043751 |
| 0.192679976 | 0.187636809 | 0.147433141 | 0.034030901 |
| 0.232002794 | 0.308909385 | 0.374100186 | 0.148380683 |
| 0.248789026 | 0.297488684 | 0.103123414 | 0.033881082 |
| 0.007460588 | 0.331440974 | 0.283320208 | 0.021391274 |
| 0.325125977 | 0.211478187 | 0.013659853 | 0.390843233 |
| 0.122914726 | 0.351233311 | 0.016795349 | 0.017956044 |
| 0.011864938 | 0.259048207 | 0.352238643 | 0.313587295 |
| 0.158001718 | 0.208323268 | 0.00146549  | 0.325063997 |
| 0.365241318 | 0.005424361 | 0.030893958 | 0.242984579 |
| 0.179738711 | 0.398582547 | 0.056690499 | 0.240734941 |
| 0.139229907 | 0.326065745 | 0.143551618 | 0.095809604 |
| 0.325445619 | 0.282474374 | 0.317604128 | 0.37909781  |
| 0.325340364 | 0.188390595 | 0.156244943 | 0.023640003 |
| 0.02785612  | 0.219956129 | 0.092102538 | 0.027675102 |
| 0.285720992 | 0.042927106 | 0.342556872 | 0.297366773 |
| 0.285690494 | 0.004518017 | 0.174767678 | 0.274428614 |
| 0.390643955 | 0.366963193 | 0.014002126 | 0.005286627 |
| 0.003891291 | 0.00427234  | 0.23575563  | 0.072548704 |
| 0.319919115 | 0.134010208 | 0.00710379  | 0.111770146 |
| 0.140013242 | 0.121082    | 0.351922419 | 0.246001764 |
| 0.229198341 | 0.046331681 | 0.116418951 | 0.271508519 |
| 0.018923655 | 0.263444315 | 0.30157433  | 0.391159673 |
| 0.02002966  | 0.073122887 | 0.156118373 | 0.356690941 |
| 0.006232598 | 0.114199852 | 0.185212833 | 0.120931173 |
| 0.00739237  | 0.026248943 | 0.023921286 | 0.25804141  |
| 0.320352341 | 0.033390966 | 0.016547901 | 0.154841638 |
| 0.084545073 | 0.304747275 | 0.084705947 | 0.336452682 |
| 0.34072732  | 0.303779091 | 0.018566367 | 0.364733898 |
| 0.021600703 | 0.349328824 | 0.066993612 | 0.052926658 |
| 0.104511352 | 0.013195292 | 0.29421051  | 0.02962118  |
| 0.201905872 | 0.2957191   | 0.042770991 | 0.005740199 |
| 0.026050833 | 0.025105467 | 0.309849492 | 0.25106251  |
| 0.010065746 | 0.153307285 | 0.099869375 | 0.220675522 |
| 0.234325816 | 0.269031429 | 0.375610588 | 0.137584596 |
| 0.092097255 | 0.023608747 | 0.315902463 | 0.272212363 |
| 0.211953193 | 0.301069575 | 0.078510556 | 0.340194911 |
| 0.290917062 | 0.341895014 | 0.304766763 | 0.176691394 |
| 0.04480212  | 0.235804023 | 0.28714553  | 0.041222307 |
| 0.174456968 | 0.293173712 | 0.180299452 | 0.039980584 |
| 0.078023667 | 0.086268672 | 0.052881684 | 0.108892764 |
| 0.052177422 | 0.275946025 | 0.086785948 | 0.299498036 |
| 0.264208401 | 0.288808135 | 0.075089947 | 0.023535764 |
| 0.379253448 | 0.355184479 | 0.154202009 | 0.256527178 |
| 0.071209058 | 0.117551875 | 0.242507568 | 0.219544334 |
| 0.100663243 | 0.288354764 | 0.342404849 | 0.290223676 |

|             |             |             |             |
|-------------|-------------|-------------|-------------|
| 0.39325163  | 0.13844945  | 0.368568207 | 0.204795344 |
| 0.025207891 | 0.178118399 | 0.054380884 | 0.033492207 |
| 0.081293907 | 0.012708717 | 0.045501685 | 0.232629787 |
| 0.069082166 | 0.189946585 | 0.176033652 | 0.043291134 |
| 0.092744961 | 0.12916264  | 0.146072395 | 0.161632235 |
| 0.05220615  | 0.359160271 | 0.006089983 | 0.029179664 |
| 0.076496639 | 0.256987915 | 0.081090373 | 0.082198915 |
| 0.050317456 | 0.035308889 | 0.113679912 | 1           |
| 0.128336678 | 0.105681515 | 0.266484432 | 0.061156394 |
| 0.044507004 | 0.321692886 | 0.169691071 | 0.008280333 |
| 0.02772062  | 0.220978231 | 0.133008041 | 0.089269628 |
| 0.006321499 | 0.279901416 | 0.150665971 | 0.132041477 |
| 0.210833868 | 0.048888234 | 0.358722031 | 0.07310194  |
| 0.060141575 | 0.374439209 | 0.108262506 | 0.328856151 |
| 0.088368455 | 0.258616573 | 0.375457125 | 0.285326326 |
| 0.065105597 | 0.106052735 | 0.043855321 | 0.333228135 |
| 0.090727654 |             |             |             |

| TSPAN3      | 0.194213983 | 0.411119905 | 0.090020815 |
|-------------|-------------|-------------|-------------|
| 0.296338167 | 0.144847743 | 0.202089099 | 0.093948443 |
| 0.0567928   | 0.029836475 | 0.025217228 | 0.027400351 |
| 0.173796213 | 0.116417834 | 0.148388806 | 0.082711721 |
| 0.222254672 | 0.058308483 | 0.05524487  | 0.093872313 |
| 0.210115432 | 0.068618533 | 0.222625488 | 0.040328356 |
| 0.044023012 | 0.036622816 | 0.034257813 | 0.059266292 |
| 0.305672447 | 0.034183157 | 0.176787072 | 0.241844663 |
| 0.019278338 | 0.257115761 | 0.395208426 | 0.249444855 |
| 0.393726141 | 0.18252434  | 0.004075943 | 0.121129176 |
| 0.260864195 | 0.246580774 | 0.225947072 | 0.170741523 |
| 0.031991072 | 0.396498481 | 0.126238476 | 0.123661595 |
| 0.059693477 | 0.026199886 | 0.085413173 | 0.344595595 |
| 0.419307082 | 0.206972297 | 0.069290613 | 0.078027404 |
| 0.142450799 | 0.096938383 | 0.0843646   | 0.210580117 |
| 0.099651934 | 0.085871483 | 0.395252845 | 0.048641173 |
| 0.043411593 | 0.063517208 | 0.032143371 | 0.090741335 |
| 0.057713286 | 0.242472381 | 0.006567795 | 0.139002166 |
| 0.015829083 | 0.184973463 | 0.111488674 | 0.057255579 |
| 0.018064296 | 0.052520964 | 0.038643705 | 0.19982355  |
| 0.312309628 | 0.29498618  | 0.342345808 | 0.33836021  |
| 0.091855581 | 0.060650677 | 0.098771865 | 0.078787842 |
| 0.27636859  | 0.102354589 | 0.036724909 | 0.233801033 |
| 0.350301082 | 0.409881864 | 0.049868916 | 0.063188009 |
| 0.357035247 | 0.367627374 | 0.135893379 | 0.136588507 |
| 0.088428363 | 0.007091967 | 0.364322362 | 0.381675883 |
| 0.279816553 | 0.063063023 | 0.046246597 | 0.294245474 |
| 0.018940895 | 0.084527537 | 0.196209975 | 0.058457614 |
| 0.328463804 | 0.012801527 | 0.051270094 | 0.188540438 |
| 0.034510864 | 0.267513184 | 0.387776597 | 0.078261318 |
| 0.105105442 | 0.025558341 | 0.034105897 | 0.007165576 |
| 0.100253922 | 0.024164542 | 0.388745701 | 0.381598771 |
| 0.087063992 | 0.092302463 | 0.075660123 | 0.001002183 |
| 0.012226948 | 0.024959215 | 0.289511745 | 0.078692906 |
| 0.216422077 | 0.21852359  | 0.091969799 | 0.243834818 |
| 0.209253919 | 0.329654858 | 0.043747804 | 0.034246472 |
| 0.165404908 | 0.024794068 | 0.095627877 | 0.196675902 |

|             |             |             |             |
|-------------|-------------|-------------|-------------|
| 0.099569952 | 0.041472536 | 0.053961235 | 0.377098508 |
| 0.344247927 | 0.043296304 | 0.065950678 | 0.217219754 |
| 0.128942568 | 0.118416109 | 0.039073852 | 0.131744074 |
| 0.040518554 | 0.355179465 | 0.008429623 | 0.080669946 |
| 0.065714739 | 0.056494537 | 0.001409021 | 0.094004613 |
| 0.12831411  | 0.385264993 | 0.348089066 | 0.030735527 |
| 0.128375806 | 0.189047929 | 0.107892319 | 0.337732801 |
| 0.027138951 | 0.014069134 | 0.072844123 | 0.406551482 |
| 0.211290447 | 0.32750364  | 0.076193717 | 0.052726698 |
| 0.090129415 | 0.271492946 | 0.000192712 | 0.397450077 |
| 0.396319598 | 0.085587012 | 0.23532765  | 0.139053692 |
| 0.087456119 | 0.346927977 | 0.007226235 | 0.225804242 |
| 0.193665772 | 0.022263206 | 0.35125019  | 0.061140766 |
| 0.33677869  | 0.023736182 | 0.104471047 | 0.258544153 |
| 0.276002582 | 0.00366207  | 0.111361091 | 0.227661532 |
| 0.005267956 | 0.060756775 | 0.207522254 | 0.223510759 |
| 0.176189049 | 0.232995265 | 0.329627156 | 0.079678206 |
| 0.154746504 | 0.065910172 | 0.003050212 | 0.078784841 |
| 0.224072331 | 0.078226498 | 0.370231454 | 0.076346466 |
| 0.146027842 | 0.381766974 | 0.257353232 | 0.068959201 |
| 0.027668603 | 0.110239808 | 0.027588937 | 0.101626561 |
| 0.22764555  | 0.11468162  | 0.101446456 | 0.021412494 |
| 0.024036917 | 0.405977906 | 0.029006863 | 0.040746509 |
| 0.019105243 | 0.265597871 | 0.071142624 | 0.199641243 |
| 0.171232967 | 0.04434899  | 0.071968481 | 0.089887575 |
| 0.037590421 | 0.05520306  | 0.000703969 | 0.135616575 |
| 0.191152877 | 0.18696559  | 0.190338967 | 0.242179135 |
| 0.122871332 | 0.127181021 | 0.14763715  | 0.041373611 |
| 0.027640786 | 0.007678568 | 0.391172409 | 0.185195793 |
| 0.239141395 | 0.049828368 | 0.012790601 | 0.145513526 |
| 0.388596702 | 0.195017401 | 0.06183877  | 0.401731448 |
| 0.006640347 | 0.313541995 | 0.147420226 | 0.047472103 |
| 0.122026264 | 0.129392299 | 0.317180464 | 0.026718033 |
| 0.138437992 | 0.406955417 | 0.073185067 | 0.060571983 |
| 0.378004762 | 0.204006141 | 0.025847021 | 0.245870406 |
| 0.267555864 | 0.020930641 | 0.399108063 | 0.038037768 |
| 0.007407461 | 0.207637606 | 0.279601816 | 0.022927314 |
| 0.021115665 | 0.175235897 | 0.034984342 | 0.111819626 |
| 0.410445359 | 0.24743692  | 0.32783359  | 0.030091598 |
| 0.037092408 | 0.048651291 | 0.035585718 | 0.100184478 |
| 0.408632468 | 0.373511697 | 0.07779116  | 0.146205665 |
| 0.099011798 | 0.079115009 | 0.047803137 | 0.396197503 |
| 0.018281224 | 0.375398981 | 0.002843928 | 0.242264373 |
| 0.399576625 | 0.122910923 | 0.033524093 | 0.152031614 |
| 0.34080251  | 0.022055693 | 0.04067697  | 0.409755429 |
| 0.305484569 | 0.075360813 | 0.089404964 | 0.178779386 |
| 0.020309172 | 0.027994284 | 0.120949791 | 0.025768632 |
| 0.10574195  | 0.052318327 | 0.006764194 | 0.073176931 |
| 0.049055955 | 0.4061468   | 0.278498773 | 0.02384269  |
| 0.243159473 | 0.0634522   | 0.145475163 | 0.01800893  |
| 0.296809246 | 0.340982163 | 0.416858079 | 0.042294706 |
| 0.256240163 | 0.381415879 | 0.1634753   | 0.016671526 |
| 0.005624588 | 0.386348634 | 0.196344496 | 0.03706555  |
| 0.329711855 | 0.112610098 | 0.053892275 | 0.395891748 |



|             |             |             |             |
|-------------|-------------|-------------|-------------|
| 0.05990777  | 0.350741353 | 0.003959556 | 0.005524177 |
| 0.00506889  | 0.268698198 | 0.387921929 | 0.206325777 |
| 0.133305999 | 0.127482636 | 0.000793391 | 0.361795558 |
| 0.427188875 | 0.00528721  | 0.025558898 | 0.304734479 |
| 0.25711883  | 0.405049187 | 0.06630361  | 0.321749232 |
| 0.204521339 | 0.402469423 | 0.128145238 | 0.096917618 |
| 0.354367714 | 0.351926645 | 0.249773791 | 0.345077833 |
| 0.354855266 | 0.190910949 | 0.134770215 | 0.016157465 |
| 0.020084435 | 0.079123171 | 0.123833058 | 0.046108725 |
| 0.162290539 | 0.045811771 | 0.34067319  | 0.307962855 |
| 0.359424559 | 0.002140408 | 0.068197763 | 0.28771967  |
| 0.349286519 | 0.335307403 | 0.001526729 | 0.000988348 |
| 0.001178343 | 0.01340999  | 0.152916935 | 0.047020306 |
| 0.352114594 | 0.170580007 | 0.004407951 | 0.029002144 |
| 0.08223652  | 0.158575545 | 0.413037676 | 0.202191563 |
| 0.226683616 | 0.024160852 | 0.179494501 | 0.205500646 |
| 0.021650252 | 0.16569273  | 0.375326308 | 0.406806395 |
| 0.006343827 | 0.044510606 | 0.083729161 | 0.369767961 |
| 0.010706136 | 0.107461547 | 0.196128248 | 0.131512828 |
| 0.001058019 | 0.020450926 | 0.017850955 | 0.230880664 |
| 0.389407454 | 0.096553117 | 0.050022767 | 0.060848712 |
| 0.100766976 | 0.297198308 | 0.097638935 | 0.370992529 |
| 0.327842228 | 0.297910236 | 0.014550496 | 0.378315726 |
| 0.023640332 | 0.408819676 | 0.095284902 | 0.036105865 |
| 0.047750816 | 0.003465174 | 0.330922132 | 0.068322898 |
| 0.111611858 | 0.190221232 | 0.031412893 | 0.003458054 |
| 0.021741765 | 0.02121211  | 0.353336179 | 0.283035765 |
| 0.004130934 | 0.056704643 | 0.072541679 | 0.15643258  |
| 0.140690967 | 0.310850288 | 0.410261549 | 0.167586182 |
| 0.05343456  | 0.01526113  | 0.231675662 | 0.206908877 |
| 0.083542426 | 0.333830698 | 0.101431919 | 0.370308712 |
| 0.212236272 | 0.299615638 | 0.346284551 | 0.147121623 |
| 0.054083679 | 0.16583079  | 0.305554928 | 0.048015512 |
| 0.12564557  | 0.349555231 | 0.090592832 | 0.058589019 |
| 0.098573932 | 0.106089907 | 0.00866896  | 0.030735531 |
| 0.073230457 | 0.202018403 | 0.081748777 | 0.264524906 |
| 0.162712467 | 0.220267084 | 0.0122585   | 0.019614243 |
| 0.409642174 | 0.305411463 | 0.053942529 | 0.25920053  |
| 0.036702187 | 0.127405956 | 0.249101237 | 0.240908948 |
| 0.060580919 | 0.363115265 | 0.285401189 | 0.332282199 |
| 0.392132468 | 0.087457849 | 0.413563266 | 0.032359037 |
| 0.018551604 | 0.161804688 | 0.093384031 | 0.021322845 |
| 0.063194419 | 0.007222629 | 0.054002723 | 0.210026355 |
| 0.074432419 | 0.221322231 | 0.073700958 | 0.023826908 |
| 0.083417037 | 0.067922627 | 0.127544094 | 0.112706451 |
| 0.067950512 | 0.424164258 | 0.005433056 | 0.018232498 |
| 0.084900041 | 0.275479065 | 0.134548475 | 0.055370977 |
| 0.05776117  | 0.019829649 | 0.119854564 | 0.128336678 |
| 1           | 0.067153614 | 0.292790416 | 0.013552758 |
| 0.018292076 | 0.342473545 | 0.105087572 | 0.002264719 |
| 0.012101671 | 0.147851061 | 0.049755761 | 0.089819895 |
| 0.004103704 | 0.362007728 | 0.135691354 | 0.134330715 |
| 0.141392201 | 0.019011476 | 0.268346616 | 0.016863927 |
| 0.010728179 | 0.35575077  | 0.107583482 | 0.391603852 |

|             |             |             |             |
|-------------|-------------|-------------|-------------|
| 0.058044758 | 0.281261801 | 0.342864266 | 0.31008122  |
| 0.017494372 | 0.087685888 | 0.018829811 | 0.282116877 |
| 0.10132454  |             |             |             |
| TSPAN31     | 0.343941669 | 0.422087515 | 0.19494919  |
| 0.278451877 | 0.195390004 | 0.171177333 | 0.063607845 |
| 0.037786131 | 0.005989522 | 0.000247132 | 0.001336771 |
| 0.278414598 | 0.010903835 | 0.048032436 | 0.050244543 |
| 0.317724833 | 0.031948552 | 0.133072    | 0.102303362 |
| 0.274369528 | 0.013785826 | 0.264506422 | 0.01710871  |
| 0.06838125  | 0.028739436 | 0.01783968  | 0.074498146 |
| 0.355707631 | 0.0238492   | 0.096432811 | 0.249890747 |
| 0.036204919 | 0.351025131 | 0.422384932 | 0.267769318 |
| 0.418309676 | 0.325385648 | 0.003025726 | 0.046469532 |
| 0.361318839 | 0.307311616 | 0.266303573 | 0.158028711 |
| 0.00655256  | 0.384435174 | 0.091610076 | 0.247336633 |
| 0.01397243  | 0.005598105 | 0.051636107 | 0.349184802 |
| 0.361319663 | 0.199355139 | 0.053979805 | 0.035359399 |
| 0.009933955 | 0.042198397 | 0.038850421 | 0.184561708 |
| 0.075196042 | 0.029681261 | 0.376280214 | 0.005655005 |
| 0.007335603 | 0.077932589 | 0.047042241 | 0.085228256 |
| 0.095778418 | 0.270283616 | 0.002592508 | 0.267709815 |
| 0.000135228 | 0.257502022 | 0.242590892 | 0.078802879 |
| 0.019260381 | 0.001718807 | 0.068023708 | 0.153299514 |
| 0.382555349 | 0.416403419 | 0.404548515 | 0.40804253  |
| 0.023223289 | 0.144331057 | 0.198828246 | 0.040474987 |
| 0.360442439 | 0.043677956 | 0.009879963 | 0.323047515 |
| 0.411069625 | 0.415334953 | 0.034831774 | 0.142261366 |
| 0.278902338 | 0.388052039 | 0.151422187 | 0.147217624 |
| 0.065345798 | 0.019425539 | 0.330263707 | 0.421959873 |
| 0.320952746 | 0.140560756 | 0.063709918 | 0.294979191 |
| 0.022343244 | 0.064870202 | 0.19582221  | 0.018401344 |
| 0.392191233 | 0.002535666 | 0.09824506  | 0.139629179 |
| 0.037269523 | 0.345115459 | 0.427268605 | 0.065942661 |
| 0.205543165 | 0.002597206 | 0.009919067 | 0.01500182  |
| 0.019923043 | 0.038179976 | 0.372974253 | 0.346190477 |
| 0.031040734 | 0.047643793 | 0.08061121  | 0.001409975 |
| 0.00960688  | 0.029552735 | 0.342679159 | 0.178859879 |
| 0.326685401 | 0.356320492 | 0.050737717 | 0.272177113 |
| 0.269612622 | 0.397306641 | 0.003399492 | 0.021338781 |
| 0.192684168 | 0.034749892 | 0.122286109 | 0.224137153 |
| 0.121844518 | 0.027052315 | 0.036927738 | 0.42984854  |
| 0.33185707  | 0.027199896 | 0.115125186 | 0.309357879 |
| 0.035068891 | 0.191352772 | 0.03169574  | 0.06307517  |
| 0.00748595  | 0.402785018 | 0.014902514 | 0.138286306 |
| 0.022274097 | 0.015743561 | 0.002688406 | 0.085610136 |
| 0.021752127 | 0.303218506 | 0.381794523 | 0.042327841 |
| 0.095750106 | 0.243765201 | 0.129914534 | 0.245964248 |
| 0.000387275 | 0.007960516 | 0.104010983 | 0.406785411 |
| 0.136571002 | 0.446573731 | 0.075693118 | 0.091135331 |
| 0.145315321 | 0.360986756 | 0.002261933 | 0.394744324 |
| 0.429428498 | 0.097873007 | 0.181888598 | 0.270874073 |
| 0.125458111 | 0.337156719 | 0.006607894 | 0.298368274 |
| 0.251818965 | 0.029775257 | 0.426057595 | 0.062126849 |
| 0.381988858 | 0.012847307 | 0.077340679 | 0.356096587 |

|             |             |             |             |
|-------------|-------------|-------------|-------------|
| 0.297073221 | 0.000703339 | 0.059558997 | 0.22999067  |
| 0.0134074   | 0.011277927 | 0.31346099  | 0.245204021 |
| 0.16721643  | 0.363720698 | 0.405718889 | 0.111297645 |
| 0.193613115 | 0.07732586  | 0.002354417 | 0.177935328 |
| 0.37157682  | 0.024319761 | 0.342433834 | 0.043452018 |
| 0.17983389  | 0.369082571 | 0.328437642 | 0.007823247 |
| 0.011256343 | 0.104763768 | 0.001495079 | 0.126733181 |
| 0.332765389 | 0.014141423 | 0.14926816  | 0.029803733 |
| 0.025269339 | 0.423483988 | 0.070093516 | 0.101649865 |
| 0.044918616 | 0.163760688 | 0.105089451 | 0.030611484 |
| 0.019882887 | 0.034639686 | 0.092709664 | 0.08778374  |
| 0.005239793 | 0.025859601 | 0.005300708 | 0.081767477 |
| 0.009050257 | 0.066573533 | 0.066278122 | 0.257725545 |
| 0.042548317 | 0.008200632 | 0.143468083 | 0.064326532 |
| 0.031741371 | 0.00781031  | 0.404657178 | 0.289544981 |
| 0.225178852 | 0.03161007  | 0.018183655 | 0.020426775 |
| 0.35002301  | 0.110069639 | 0.065895898 | 0.337378968 |
| 0.004585669 | 0.41331804  | 0.028418816 | 0.045715874 |
| 0.109736484 | 0.099663486 | 0.372871261 | 0.002654604 |
| 0.204864078 | 0.356404233 | 0.1732198   | 0.051035767 |
| 0.296093695 | 0.244722707 | 0.002262282 | 0.31165794  |
| 0.297706004 | 0.010987277 | 0.43589844  | 0.030557595 |
| 0.011896876 | 0.330343232 | 0.285602295 | 0.035718717 |
| 0.030483302 | 0.09326677  | 0.005449081 | 0.167051954 |
| 0.412670227 | 0.289658994 | 0.273580242 | 0.0852313   |
| 0.008313945 | 0.000585167 | 0.0932277   | 0.235254037 |
| 0.408403885 | 0.430371713 | 0.136820275 | 0.13124639  |
| 0.117256274 | 0.063973737 | 0.007806736 | 0.411010486 |
| 0.034864392 | 0.435702712 | 0.003646834 | 0.337365129 |
| 0.407452671 | 0.09586106  | 0.02454468  | 0.106831957 |
| 0.278023067 | 0.011645844 | 0.063687705 | 0.399153592 |
| 0.336767163 | 0.08623249  | 0.072914985 | 0.306962913 |
| 0.00182993  | 0.003751724 | 0.207748678 | 0.059137505 |
| 0.080638702 | 0.052585387 | 0.011861097 | 0.059977642 |
| 0.004820023 | 0.339610591 | 0.387330164 | 0.008974327 |
| 0.117861156 | 0.064688586 | 0.250666326 | 0.012111549 |
| 0.377173086 | 0.436503927 | 0.420526278 | 0.045889335 |
| 0.343502227 | 0.388116796 | 0.206293933 | 0.038644998 |
| 0.01068073  | 0.42962988  | 0.274665606 | 0.001780471 |
| 0.390828038 | 0.073770415 | 0.00060744  | 0.396793544 |
| 0.072214038 | 0.35604695  | 0.001098172 | 0.018397887 |
| 0.017653164 | 0.400319333 | 0.373649709 | 0.240581083 |
| 0.04221044  | 0.232823225 | 0.003345509 | 0.452698307 |
| 0.385020037 | 0.00618187  | 0.029510504 | 0.330585471 |
| 0.309587002 | 0.43338883  | 0.117416905 | 0.358789051 |
| 0.24651685  | 0.390669338 | 0.015094457 | 0.131821384 |
| 0.329918635 | 0.413459264 | 0.317238982 | 0.381085923 |
| 0.355630626 | 0.307776918 | 0.131824569 | 0.002359899 |
| 0.01074106  | 0.051809029 | 0.043913071 | 0.003621358 |
| 0.171480636 | 0.028843873 | 0.424266612 | 0.385225175 |
| 0.399478706 | 0.003755596 | 0.020113488 | 0.334096701 |
| 0.342803233 | 0.398570195 | 0.00588032  | 0.00422296  |
| 0.002231514 | 0.002047103 | 0.175083519 | 0.120561792 |
| 0.410005912 | 0.01559595  | 0.001938204 | 0.004801594 |

|             |             |             |             |
|-------------|-------------|-------------|-------------|
| 0.038483821 | 0.248484025 | 0.396955468 | 0.265335179 |
| 0.37274106  | 0.028160872 | 0.034175631 | 0.293081648 |
| 0.009553243 | 0.226118014 | 0.394755115 | 0.360987498 |
| 0.014601779 | 0.103974049 | 0.178872718 | 0.390898054 |
| 0.0202746   | 0.181034283 | 0.288515142 | 0.037046084 |
| 0.003925122 | 0.028481666 | 0.017469203 | 0.364164841 |
| 0.401394302 | 0.00838126  | 0.004296443 | 0.030641122 |
| 0.019511248 | 0.402733883 | 0.026867874 | 0.430908768 |
| 0.333032433 | 0.34972038  | 0.016138807 | 0.384265408 |
| 0.002624839 | 0.385925743 | 0.15089065  | 0.002783712 |
| 0.108155868 | 0.004423955 | 0.408771265 | 0.007424537 |
| 0.079974826 | 0.284057926 | 0.014108564 | 0.008801159 |
| 0.035884237 | 0.01899118  | 0.378510766 | 0.387940639 |
| 0.013698849 | 0.053627616 | 0.158753442 | 0.286575411 |
| 0.108361298 | 0.291123512 | 0.400600397 | 0.156726889 |
| 0.013072915 | 0.023880397 | 0.293860347 | 0.280394583 |
| 0.045820385 | 0.418919588 | 0.043240118 | 0.44450939  |
| 0.299185143 | 0.398494863 | 0.392422026 | 0.148800967 |
| 0.023153308 | 0.220674794 | 0.188663408 | 0.001269574 |
| 0.181859816 | 0.350241864 | 0.167142337 | 0.01744124  |
| 0.086647407 | 0.207055729 | 0.00573863  | 0.017905968 |
| 0.158891528 | 0.130806123 | 0.015733169 | 0.368010752 |
| 0.261408514 | 0.28571986  | 0.00495626  | 0.014510425 |
| 0.445731568 | 0.360810525 | 0.012586106 | 0.255967626 |
| 0.080645247 | 0.14897596  | 0.366313108 | 0.363861903 |
| 0.064443735 | 0.336070122 | 0.323550215 | 0.208839224 |
| 0.316008409 | 0.103604882 | 0.420981632 | 0.009804673 |
| 0.011604355 | 0.261313966 | 0.011921548 | 0.047331245 |
| 0.04799079  | 0.00707168  | 0.075218661 | 0.320246558 |
| 0.108307716 | 0.210262156 | 0.034118536 | 0.009879004 |
| 0.17281827  | 0.17055088  | 0.202001779 | 0.045914342 |
| 0.008743308 | 0.382991541 | 0.001437964 | 0.02323409  |
| 0.124433047 | 0.326611823 | 0.158866026 | 0.081411414 |
| 0.050316777 | 0.037706073 | 0.129138409 | 0.105681515 |
| 0.067153614 | 1           | 0.326070882 | 0.00359175  |
| 0.00274207  | 0.419484871 | 0.172664297 | 0.007121418 |
| 0.008937706 | 0.232702511 | 0.081256905 | 0.028594554 |
| 0.013496508 | 0.38752085  | 0.076244697 | 0.211977266 |
| 0.151627505 | 0.022341192 | 0.289716335 | 0.01027133  |
| 0.010536848 | 0.367749154 | 0.226776715 | 0.417824169 |
| 0.175496537 | 0.295535804 | 0.361400599 | 0.333399113 |
| 0.01836642  | 0.216675278 | 0.004149498 | 0.371136676 |
| 0.10577177  |             |             |             |
| TSR1        | 0.361094082 | 0.520049731 | 0.370494373 |
| 0.382358248 | 0.377697248 | 0.343119529 | 0.212067898 |
| 0.17455277  | 0.118465017 | 0.006703687 | 0.031959238 |
| 0.381910155 | 0.203785827 | 0.246011687 | 0.343671691 |
| 0.379400336 | 0.132432709 | 0.305010088 | 0.235626323 |
| 0.362027324 | 0.095418608 | 0.364313591 | 0.102502196 |
| 0.276757209 | 0.119105892 | 0.081036294 | 0.285395847 |
| 0.392926601 | 0.092290847 | 0.294079038 | 0.338614679 |
| 0.096014371 | 0.370847353 | 0.524180456 | 0.38825967  |
| 0.513001244 | 0.348830344 | 0.00799511  | 0.287510277 |
| 0.382725199 | 0.408065078 | 0.36231969  | 0.312958347 |

|             |             |             |             |
|-------------|-------------|-------------|-------------|
| 0.050584601 | 0.485300211 | 0.247090802 | 0.363788701 |
| 0.226526669 | 0.039371435 | 0.222718706 | 0.44090084  |
| 0.482239858 | 0.39533585  | 0.22009174  | 0.16910204  |
| 0.200941688 | 0.1928073   | 0.262079969 | 0.281552046 |
| 0.2217013   | 0.145366773 | 0.486629625 | 0.112022496 |
| 0.142473763 | 0.224791776 | 0.140154197 | 0.239950474 |
| 0.32300371  | 0.339056449 | 0.019482528 | 0.349251796 |
| 0.0027361   | 0.35086467  | 0.338485881 | 0.321414558 |
| 0.047240687 | 0.023544372 | 0.16483298  | 0.316392256 |
| 0.416211691 | 0.447867916 | 0.456603497 | 0.470628927 |
| 0.174573688 | 0.268690006 | 0.352223232 | 0.17367077  |
| 0.4041907   | 0.184852242 | 0.120054644 | 0.379715869 |
| 0.46969897  | 0.519510243 | 0.210156842 | 0.255931146 |
| 0.388560091 | 0.466513271 | 0.396789558 | 0.390954304 |
| 0.35837346  | 0.056531685 | 0.440232484 | 0.49479238  |
| 0.362233655 | 0.296915278 | 0.158718164 | 0.35407938  |
| 0.06267005  | 0.332701663 | 0.330402573 | 0.130231227 |
| 0.434616395 | 0.027070363 | 0.208199855 | 0.325289006 |
| 0.198389188 | 0.385534765 | 0.516225346 | 0.19247565  |
| 0.356187934 | 0.021870041 | 0.167020978 | 0.034615991 |
| 0.298836795 | 0.143905131 | 0.487828489 | 0.427079608 |
| 0.200546099 | 0.339394428 | 0.255404299 | 0.002739388 |
| 0.029993913 | 0.169631892 | 0.37107207  | 0.314063745 |
| 0.379031323 | 0.369033253 | 0.249356788 | 0.337027452 |
| 0.393461667 | 0.447175117 | 0.066911392 | 0.103268389 |
| 0.394642465 | 0.168173137 | 0.233144579 | 0.385992528 |
| 0.31085043  | 0.119149706 | 0.127104647 | 0.507309563 |
| 0.418312418 | 0.090773417 | 0.281007446 | 0.376717242 |
| 0.313355159 | 0.332884592 | 0.108044117 | 0.250593437 |
| 0.054005728 | 0.487585041 | 0.03078881  | 0.293651231 |
| 0.311324316 | 0.134637092 | 0.010720287 | 0.235249643 |
| 0.284189092 | 0.414442938 | 0.470186783 | 0.107700467 |
| 0.286847171 | 0.375544909 | 0.27685262  | 0.387031748 |
| 0.016372589 | 0.050754474 | 0.236059958 | 0.490608225 |
| 0.250103136 | 0.477902142 | 0.281252425 | 0.297362022 |
| 0.275916275 | 0.398736816 | 0.004007957 | 0.501982663 |
| 0.526799473 | 0.258993966 | 0.365466576 | 0.36764478  |
| 0.370727028 | 0.414094747 | 0.039843836 | 0.367961757 |
| 0.303093291 | 0.083037365 | 0.478432264 | 0.164963164 |
| 0.450612624 | 0.049243244 | 0.278575477 | 0.399050791 |
| 0.373167791 | 0.009501707 | 0.215014542 | 0.352346735 |
| 0.029427207 | 0.101745498 | 0.372936616 | 0.377145794 |
| 0.374215195 | 0.394055444 | 0.445056919 | 0.361705514 |
| 0.390647475 | 0.219309027 | 0.014672711 | 0.301957567 |
| 0.382910447 | 0.338058318 | 0.443273284 | 0.241107933 |
| 0.287266781 | 0.472821561 | 0.374041095 | 0.206394475 |
| 0.052232082 | 0.281417432 | 0.025802242 | 0.34127012  |
| 0.378012765 | 0.120371004 | 0.379881413 | 0.126993419 |
| 0.075026846 | 0.518278065 | 0.177750982 | 0.251044048 |
| 0.130828468 | 0.352835593 | 0.241399792 | 0.225043415 |
| 0.208028673 | 0.177266636 | 0.35817246  | 0.367454101 |
| 0.042829137 | 0.097001707 | 0.015026312 | 0.315225501 |
| 0.131869298 | 0.303573324 | 0.295449481 | 0.34671825  |
| 0.274291387 | 0.107214627 | 0.365113597 | 0.285679917 |

|             |             |             |             |
|-------------|-------------|-------------|-------------|
| 0.127491029 | 0.017455352 | 0.501863194 | 0.368012418 |
| 0.290376658 | 0.167304677 | 0.04296624  | 0.293612514 |
| 0.439563753 | 0.301542951 | 0.238334166 | 0.441128492 |
| 0.031231844 | 0.453096687 | 0.240514244 | 0.130667048 |
| 0.337425678 | 0.252368257 | 0.42669035  | 0.075710282 |
| 0.334647714 | 0.460710854 | 0.292536671 | 0.203109908 |
| 0.383568536 | 0.376773425 | 0.036459294 | 0.351935202 |
| 0.342737811 | 0.035260203 | 0.517268872 | 0.121528412 |
| 0.023432307 | 0.390642568 | 0.398860636 | 0.082654743 |
| 0.087174934 | 0.323435117 | 0.051988522 | 0.283829065 |
| 0.513739163 | 0.375701077 | 0.383405977 | 0.215629565 |
| 0.047293766 | 0.00995478  | 0.196992102 | 0.356734162 |
| 0.5086164   | 0.49963788  | 0.243005875 | 0.348369889 |
| 0.236123653 | 0.346347251 | 0.127974269 | 0.498122353 |
| 0.174230149 | 0.511961783 | 0.007989281 | 0.393138377 |
| 0.514504104 | 0.249518371 | 0.093393575 | 0.292355617 |
| 0.358584313 | 0.057169475 | 0.186775161 | 0.499016937 |
| 0.42017744  | 0.345482134 | 0.367031688 | 0.367783859 |
| 0.020916853 | 0.046352468 | 0.377628675 | 0.189420287 |
| 0.363943949 | 0.227759343 | 0.054175363 | 0.297349451 |
| 0.050221205 | 0.4495834   | 0.390017134 | 0.081809651 |
| 0.313194572 | 0.286197874 | 0.343804362 | 0.043148657 |
| 0.434892454 | 0.493517244 | 0.522996952 | 0.154496338 |
| 0.375678367 | 0.487422916 | 0.366569572 | 0.082063894 |
| 0.020210906 | 0.518388984 | 0.353924651 | 0.027842627 |
| 0.430934979 | 0.212453936 | 0.014790358 | 0.491531079 |
| 0.186834979 | 0.440835228 | 0.008668154 | 0.078456013 |
| 0.042781826 | 0.404401025 | 0.491901182 | 0.338668933 |
| 0.23690929  | 0.330061923 | 0.005042268 | 0.509105473 |
| 0.49093642  | 0.018330384 | 0.144132894 | 0.383732348 |
| 0.383644268 | 0.522810282 | 0.323785635 | 0.425430844 |
| 0.383247389 | 0.502843778 | 0.233701765 | 0.269830347 |
| 0.411190202 | 0.49044466  | 0.376614221 | 0.457824652 |
| 0.415352842 | 0.378144226 | 0.276897347 | 0.021107901 |
| 0.181505175 | 0.196625833 | 0.323213647 | 0.101115191 |
| 0.289403989 | 0.15849201  | 0.468538491 | 0.423351353 |
| 0.463330919 | 0.00608039  | 0.146633689 | 0.380434079 |
| 0.412935093 | 0.446917902 | 0.021330224 | 0.008963009 |
| 0.009070462 | 0.027781417 | 0.323369744 | 0.241037009 |
| 0.482034081 | 0.224082282 | 0.005837371 | 0.046686942 |
| 0.283159941 | 0.372627947 | 0.502018431 | 0.349950033 |
| 0.387930791 | 0.08191002  | 0.282003456 | 0.35978691  |
| 0.084886764 | 0.282245937 | 0.472141687 | 0.475885865 |
| 0.041324365 | 0.248678217 | 0.318011012 | 0.466351302 |
| 0.077566986 | 0.295622312 | 0.376391494 | 0.310715555 |
| 0.01239108  | 0.090124664 | 0.082114596 | 0.386201781 |
| 0.500753908 | 0.081615648 | 0.037862286 | 0.133347065 |
| 0.128027989 | 0.426997598 | 0.170970021 | 0.495287964 |
| 0.398088243 | 0.38766405  | 0.073248449 | 0.492396966 |
| 0.050181161 | 0.487600947 | 0.324972203 | 0.068040104 |
| 0.257691399 | 0.013840055 | 0.454198214 | 0.191493449 |
| 0.280389981 | 0.346817036 | 0.244081008 | 0.018162254 |
| 0.194008283 | 0.056725757 | 0.450317225 | 0.417407697 |
| 0.034335916 | 0.231822099 | 0.285625917 | 0.358729546 |

|             |             |             |             |
|-------------|-------------|-------------|-------------|
| 0.265405197 | 0.394028365 | 0.508049569 | 0.373371736 |
| 0.093269387 | 0.119983409 | 0.361712693 | 0.342764041 |
| 0.207069221 | 0.460486464 | 0.311910356 | 0.516707772 |
| 0.364797544 | 0.445536747 | 0.458185337 | 0.345209575 |
| 0.214185862 | 0.358967552 | 0.341948106 | 0.025087772 |
| 0.333789877 | 0.411550161 | 0.317590516 | 0.182598334 |
| 0.259371196 | 0.355340256 | 0.046594679 | 0.150635339 |
| 0.308513954 | 0.281392386 | 0.139645836 | 0.387037989 |
| 0.336075539 | 0.350365923 | 0.034854904 | 0.079213136 |
| 0.535459931 | 0.433733238 | 0.162103213 | 0.390458041 |
| 0.167314761 | 0.343250017 | 0.393863147 | 0.390980122 |
| 0.347219292 | 0.408580359 | 0.372096686 | 0.344653342 |
| 0.420777007 | 0.259994871 | 0.52848302  | 0.083688059 |
| 0.112085093 | 0.349676927 | 0.105740381 | 0.095569364 |
| 0.146535489 | 0.032815598 | 0.295077141 | 0.375725598 |
| 0.338114859 | 0.349519455 | 0.266382509 | 0.092425756 |
| 0.300299434 | 0.314558092 | 0.333807524 | 0.200526646 |
| 0.088099727 | 0.504715494 | 0.011487232 | 0.057652975 |
| 0.330169478 | 0.402553793 | 0.365460837 | 0.241798534 |
| 0.29780905  | 0.131753862 | 0.285272092 | 0.266484432 |
| 0.292790416 | 0.326070882 | 1           | 0.044372489 |
| 0.021445836 | 0.460689288 | 0.334283108 | 0.021963852 |
| 0.083713416 | 0.332785226 | 0.250734189 | 0.259828391 |
| 0.024151215 | 0.47289058  | 0.316257119 | 0.390273912 |
| 0.319926683 | 0.067280741 | 0.337533351 | 0.090084015 |
| 0.063827118 | 0.441691281 | 0.369595326 | 0.511529593 |
| 0.317035646 | 0.381814796 | 0.447781177 | 0.378872074 |
| 0.119379572 | 0.336592233 | 0.036185675 | 0.39233688  |
| 0.379199698 |             |             |             |
| TUBB3       | 0.037460058 | 0.041341529 | 0.031001135 |
| 0.101861167 | 0.040615576 | 0.047897195 | 0.159943843 |
| 0.11145811  | 0.036694976 | 0.007999644 | 0.004140597 |
| 0.031933279 | 0.003576413 | 0.045485944 | 0.025321085 |
| 0.099765156 | 0.033412076 | 0.04366301  | 0.17841949  |
| 0.094941719 | 0.106416478 | 0.086872152 | 0.135383104 |
| 0.015282236 | 0.035964887 | 0.083799408 | 0.027649321 |
| 0.099390009 | 0.104848287 | 0.031552242 | 0.095218764 |
| 0.050044773 | 0.050461027 | 0.031063889 | 0.038375211 |
| 0.024155806 | 0.031499452 | 0.003028311 | 0.028925494 |
| 0.058278765 | 0.054364878 | 0.097393054 | 0.129433332 |
| 0.09573588  | 0.030745305 | 0.154072099 | 0.047152498 |
| 0.023874723 | 0.039976693 | 0.055440892 | 0.035006821 |
| 0.022936137 | 0.024840087 | 0.119429199 | 0.117341098 |
| 0.001253195 | 0.03060222  | 0.003370119 | 0.065083675 |
| 0.125895933 | 0.061868247 | 0.025022714 | 0.043862399 |
| 0.002919816 | 0.101762152 | 0.032983031 | 0.126682341 |
| 0.009802367 | 0.061990869 | 0.060162152 | 0.017791543 |
| 0.002208834 | 0.128534828 | 0.060832058 | 0.008547657 |
| 0.118706185 | 0.017529318 | 0.047685982 | 0.109429446 |
| 0.078617576 | 0.033816949 | 0.054091426 | 0.041978548 |
| 0.020164103 | 0.077041353 | 0.018361211 | 0.084028796 |
| 0.048389223 | 0.115579054 | 0.030112426 | 0.084678085 |
| 0.051209313 | 0.030308152 | 0.028958176 | 0.078110904 |
| 0.04607509  | 0.045190863 | 0.039491276 | 0.029877444 |

|             |             |                      |             |
|-------------|-------------|----------------------|-------------|
| 0.012648175 | 0.029242573 | 0.029804339          | 0.0418308   |
| 0.046519484 | 0.013623502 | 0.086403668          | 0.079452725 |
| 0.115062734 | 0.023859124 | 0.129454078          | 0.003755341 |
| 0.082833501 | 0.110558357 | 0.060018146          | 0.073972213 |
| 0.039846792 | 0.054667022 | 0.028450708          | 0.18152664  |
| 0.034010441 | 0.009018395 | 0.001793275          | 0.077979153 |
| 0.00675277  | 0.004655326 | 0.021626132          | 0.064210966 |
| 0.035495034 | 0.007551967 | 0.113567782          | 0.038015685 |
| 0.0507728   | 0.017202264 | 0.027842615          | 0.05535242  |
| 0.067428674 | 0.022400158 | 0.045667008          | 0.037584605 |
| 0.021945775 | 0.050752928 | 0.00258253           | 0.147327828 |
| 0.064966795 | 0.022922971 | 0.158054022          | 0.026907229 |
| 0.058972197 | 0.181801488 | 0.121647972          | 0.054061419 |
| 0.0465587   | 0.160595562 | 0.031132029          | 0.099613709 |
| 0.012161333 | 0.042117148 | 0.141248234          | 0.047132786 |
| 0.082405411 | 0.021948948 | 0.047838108          | 0.078664727 |
| 0.005264492 | 0.005898626 | 0.028704027          | 0.106321747 |
| 0.028254377 | 0.030745685 | 0.019012039          | 0.162361669 |
| 0.059258299 | 0.066156188 | 0.047743 0.037918427 |             |
| 0.007877581 | 0.062600655 | 0.027898678          | 0.042243459 |
| 0.04665722  | 0.044082729 | 0.07321789           | 0.04799099  |
| 0.100583214 | 0.080229358 | 0.002387288          | 0.030138034 |
| 0.030277265 | 0.031014741 | 0.048512297          | 0.04726697  |
| 0.014990694 | 0.076997604 | 0.001937359          | 0.08475215  |
| 0.036119401 | 0.169083034 | 0.061371333          | 0.087084235 |
| 0.030321898 | 0.090679275 | 0.03808199           | 0.028323092 |
| 0.018029157 | 0.003448377 | 0.085295811          | 0.104436075 |
| 0.03848251  | 0.078074576 | 0.061791736          | 0.100118999 |
| 0.068798498 | 0.061167612 | 0.075874454          | 0.012911837 |
| 0.040458372 | 0.142613949 | 0.044132103          | 0.057100982 |
| 0.043883078 | 0.00211796  | 0.042658379          | 0.094950424 |
| 0.029539808 | 0.044663273 | 0.023838891          | 0.001530653 |
| 0.145430348 | 0.081607758 | 0.021061 0.06887738  |             |
| 0.02829025  | 0.042513172 | 0.019424802          | 0.024402917 |
| 0.060076194 | 0.043891953 | 0.016099405          | 0.009087074 |
| 0.006994497 | 0.030588044 | 0.168148672          | 0.018215337 |
| 0.006355102 | 0.061858694 | 0.017792232          | 0.024861436 |
| 0.101384789 | 0.076222591 | 0.014657133          | 0.004170275 |
| 0.00514586  | 0.009220292 | 0.008658727          | 0.030001659 |
| 0.01459657  | 0.015873008 | 0.046431507          | 0.01588931  |
| 0.05818605  | 0.092995128 | 0.041907471          | 0.101538638 |
| 0.043767418 | 0.11971139  | 0.097719763          | 0.001334977 |
| 0.054155673 | 0.033450057 | 0.029327797          | 0.046899281 |
| 0.033909046 | 0.052345965 | 0.019914964          | 0.084218598 |
| 0.01156263  | 0.106812474 | 0.089125735          | 0.005849875 |
| 0.043541832 | 0.038197755 | 0.099375979          | 0.067031227 |
| 0.031644225 | 0.082326019 | 0.038345694          | 0.037870373 |
| 0.033002526 | 0.091219699 | 0.036155772          | 0.029187747 |
| 0.092961217 | 0.045260284 | 0.027383365          | 0.124956227 |
| 0.091941443 | 0.04528061  | 0.110313427          | 0.107348624 |
| 0.046183898 | 0.089551097 | 0.032606219          | 0.02733267  |
| 0.090830221 | 0.0022414   | 0.037703829          | 0.029450311 |
| 0.027306185 | 0.031997071 | 0.121177836          | 0.026999711 |
| 0.17566456  | 0.015567208 | 0.008186923          | 0.041141711 |



|             |             |             |             |
|-------------|-------------|-------------|-------------|
| 0.014022136 | 0.032764826 | 0.084216804 | 0.030389399 |
| 0.023566383 | 0.043262844 | 0.056480254 | 0.086890902 |
| 0.043883993 | 0.161295688 | 0.10530487  | 0.033948165 |
| 0.050238535 | 0.042721911 | 0.02773185  | 0.052818556 |
| 0.093048271 | 0.055416574 | 0.052678389 | 0.00990582  |
| 0.019232    | 0.080335791 | 0.001435073 | 0.032704205 |
| 0.043707334 | 0.035744265 | 0.064887471 | 0.056658874 |
| 0.026716461 | 0.043950111 | 0.068399637 | 0.138376762 |
| 0.027930474 | 0.029295763 | 0.031426349 | 0.121048675 |
| 0.031030189 | 0.031408845 | 0.011880269 | 0.097702651 |
| 0.071034945 | 0.027674713 | 0.063341016 | 0.011621243 |
| 0.064676058 | 0.052606162 | 0.007667515 | 0.046671136 |
| 0.198663232 | 0.021247978 | 0.044392962 | 0.002454002 |
| 0.034793829 | 0.055773329 | 0.030233287 | 0.094611235 |
| 0.020365653 | 0.110759885 | 0.001369363 | 0.037228557 |
| 0.034983878 | 0.041983153 | 0.01820468  | 0.024423351 |
| 0.021026022 | 0.042811969 | 0.015745752 | 0.030775527 |
| 0.018971707 | 0.023886468 | 0.015984471 | 0.111849422 |
| 0.054969598 | 0.022618302 | 0.08038231  | 0.048916106 |
| 0.062309647 | 0.056833308 | 0.154715567 | 0.077965085 |
| 0.008358405 | 0.084637556 | 0.009957202 | 0.003625823 |
| 0.062159392 | 0.0465479   | 0.043293288 | 0.060030205 |
| 0.036038475 | 0.076509994 | 0.075954539 | 0.030733914 |
| 0.073758057 | 0.077013932 | 0.025775845 | 0.00512126  |
| 0.009456217 | 0.007566057 | 0.090831885 | 0.082390811 |
| 0.041266865 | 0.005609528 | 0.072359063 | 0.086826061 |
| 0.051302879 | 0.034088307 | 0.03240192  | 0.133899958 |
| 0.040574201 | 0.092375774 | 0.012091787 | 0.121482908 |
| 0.021771874 | 0.030826842 | 0.042320907 | 0.038810752 |
| 0.054557949 | 0.071188712 | 0.041880604 | 0.068741906 |
| 0.001313831 | 0.083620329 | 0.030789662 | 0.019103589 |
| 0.00744185  | 0.059854703 | 0.057895581 | 0.071544071 |
| 0.020631081 | 0.015948373 | 0.01914926  | 0.00261287  |
| 0.067275716 | 0.050777662 | 0.057612391 | 0.05353567  |
| 0.072481382 | 0.095415942 | 0.016669751 | 0.03750019  |
| 0.006884297 | 0.026691725 | 0.02647007  | 0.01019026  |
| 0.05521749  | 0.067548042 | 0.02445474  | 0.002872838 |
| 0.03623363  | 0.069420117 | 0.008478898 | 0.037320946 |
| 0.00543431  | 0.071924777 | 0.060734541 | 0.047339885 |
| 0.031379721 | 0.086164559 | 0.098983375 | 0.083431971 |
| 0.110915536 | 0.07067728  | 0.030888612 | 0.020680982 |
| 0.09005794  | 0.00190249  | 0.101006579 | 0.042458074 |
| 0.049125415 | 0.055770174 | 0.016446646 | 0.041710406 |
| 0.060051569 | 0.050141725 | 0.031192025 | 0.107790847 |
| 0.003816034 | 0.053353302 | 0.063708054 | 0.022501067 |
| 0.131507971 | 0.055749808 | 0.072569042 | 0.021462462 |
| 0.0557733   | 0.015489686 | 0.020807237 | 0.004294587 |
| 0.009425251 | 0.071823433 | 0.033410734 | 0.095988131 |
| 0.061631139 | 0.047100401 | 0.021251505 | 0.057477604 |
| 0.040521535 | 0.044044605 | 0.066719159 | 0.063095848 |
| 0.114666559 | 0.070287411 | 0.047066858 | 0.039083074 |
| 0.011476371 | 0.03231109  | 0.066490427 | 0.047386436 |
| 0.040761311 | 0.14984796  | 0.032578627 | 0.060669645 |
| 0.004825943 | 0.021019269 | 0.035778745 | 0.094240644 |

|             |             |             |             |
|-------------|-------------|-------------|-------------|
| 0.127720846 | 0.055649298 | 0.004391401 | 0.075521506 |
| 0.00517835  | 0.079441226 | 0.010176753 | 0.034108742 |
| 0.059491111 | 0.02492464  | 0.090773159 | 0.107544185 |
| 0.039698543 | 0.029985117 | 0.009551772 | 0.087618227 |
| 0.006356874 | 0.043149602 | 0.018116021 | 0.07968974  |
| 0.006178004 | 0.020758666 | 0.091076141 | 0.061156394 |
| 0.013552758 | 0.00359175  | 0.044372489 | 1           |
| 0.07386757  | 0.06019754  | 0.050557841 | 0.031525648 |
| 0.003097834 | 0.035288855 | 0.037486142 | 0.022151626 |
| 0.043567336 | 0.023965642 | 0.021865597 | 0.039552972 |
| 0.111705351 | 0.117878006 | 0.034444475 | 0.007245102 |
| 0.083176907 | 0.03643504  | 0.030416274 | 0.026904348 |
| 0.035573183 | 0.090646256 | 0.028618572 | 0.03092417  |
| 0.019019985 | 0.017117183 | 0.126416628 | 0.067898476 |
| 0.008665208 |             |             |             |
| TUSC4       | 0.017962147 | 0.024683372 | 0.010766464 |
| 0.080900493 | 0.036170587 | 0.030842429 | 0.175861651 |
| 0.064610959 | 0.036681518 | 0.088639031 | 0.030434895 |
| 0.017316167 | 0.022218984 | 0.06101472  | 0.008670947 |
| 0.074092821 | 0.070382339 | 0.021079894 | 0.190068485 |
| 0.077948917 | 0.154055039 | 0.087472967 | 0.152273671 |
| 0.00954716  | 0.045626392 | 0.143569856 | 0.017968529 |
| 0.070167207 | 0.149508693 | 0.033984818 | 0.073451021 |
| 0.064206046 | 0.032467696 | 0.014628392 | 0.036234715 |
| 0.011576532 | 0.01169409  | 0.053508831 | 0.031625531 |
| 0.027630079 | 0.028454704 | 0.081955195 | 0.135087843 |
| 0.152357556 | 0.01512512  | 0.174706716 | 0.028513178 |
| 0.015804651 | 0.081266751 | 0.036743057 | 0.018003547 |
| 0.012229496 | 0.019025966 | 0.083911236 | 0.157482842 |
| 0.010683453 | 0.043053329 | 0.002859944 | 0.045281237 |
| 0.188565214 | 0.064050748 | 0.013658171 | 0.055500749 |
| 0.017633632 | 0.091375126 | 0.050079627 | 0.122244496 |
| 0.005966556 | 0.032211289 | 0.148584229 | 0.007204562 |
| 0.044966362 | 0.094700229 | 0.042105837 | 0.003011539 |
| 0.2010336   | 0.090353653 | 0.067293811 | 0.124962745 |
| 0.054176452 | 0.013881332 | 0.03616518  | 0.025459093 |
| 0.036654277 | 0.068157928 | 0.010810527 | 0.131997514 |
| 0.025921895 | 0.164445153 | 0.042788288 | 0.070478323 |
| 0.032693571 | 0.017039495 | 0.033707839 | 0.066512237 |
| 0.032949759 | 0.02751554  | 0.016022222 | 0.026814554 |
| 0.005629297 | 0.026245838 | 0.017727004 | 0.026472592 |
| 0.024136112 | 0.007627077 | 0.109219442 | 0.061191816 |
| 0.193201551 | 0.006422765 | 0.135590326 | 0.023437946 |
| 0.054946407 | 0.103339133 | 0.070144398 | 0.093969454 |
| 0.032072001 | 0.027599987 | 0.0144106   | 0.214238385 |
| 0.025063777 | 0.074096341 | 0.003297092 | 0.121087003 |
| 0.015559414 | 0.002623016 | 0.009941418 | 0.0503252   |
| 0.047952253 | 0.010214737 | 0.116586307 | 0.084700813 |
| 0.095598073 | 0.017576226 | 0.019085723 | 0.03504273  |
| 0.040544174 | 0.007215162 | 0.055693226 | 0.02194765  |
| 0.011946061 | 0.035476232 | 0.003014412 | 0.16937714  |
| 0.034350979 | 0.022974393 | 0.189064605 | 0.023359796 |
| 0.051698493 | 0.157995242 | 0.209705905 | 0.031087022 |
| 0.026622354 | 0.267859147 | 0.018822574 | 0.073594611 |

|             |             |             |             |
|-------------|-------------|-------------|-------------|
| 0.016814415 | 0.035326049 | 0.210395437 | 0.084252508 |
| 0.195358391 | 0.010015151 | 0.08274451  | 0.043059691 |
| 0.002069933 | 0.022965049 | 0.088296065 | 0.094758935 |
| 0.020828018 | 0.022383372 | 0.008266865 | 0.209338568 |
| 0.093333863 | 0.057004701 | 0.034962022 | 0.029443168 |
| 0.047305659 | 0.093313316 | 0.017976077 | 0.029020671 |
| 0.037734395 | 0.02343447  | 0.060778432 | 0.02797161  |
| 0.092755994 | 0.047333893 | 0.000627445 | 0.014175298 |
| 0.01517462  | 0.014661388 | 0.057536444 | 0.029241837 |
| 0.007134002 | 0.053017492 | 0.001287916 | 0.078800365 |
| 0.018560572 | 0.203040249 | 0.03967201  | 0.138581302 |
| 0.015158393 | 0.175573976 | 0.050687506 | 0.013351652 |
| 0.011402396 | 0.037500372 | 0.07150569  | 0.090302617 |
| 0.053411926 | 0.102304155 | 0.035922482 | 0.072513671 |
| 0.051405004 | 0.033796733 | 0.052791927 | 0.005515103 |
| 0.033158272 | 0.126902637 | 0.077930005 | 0.040276743 |
| 0.021748832 | 0.002320133 | 0.022581759 | 0.075429537 |
| 0.014601349 | 0.024884723 | 0.010871013 | 0.004757931 |
| 0.239530129 | 0.087582469 | 0.071937604 | 0.04650885  |
| 0.010779787 | 0.111744646 | 0.008793685 | 0.033720831 |
| 0.10209934  | 0.026592701 | 0.010476205 | 0.003644593 |
| 0.003562701 | 0.041093125 | 0.146387347 | 0.041110695 |
| 0.016292696 | 0.072234417 | 0.010524192 | 0.018415028 |
| 0.19303208  | 0.172359955 | 0.01867449  | 0.006005618 |
| 0.028036456 | 0.016674086 | 0.015572598 | 0.022406117 |
| 0.027858065 | 0.06066804  | 0.041383836 | 0.006303642 |
| 0.046901086 | 0.194123614 | 0.024224269 | 0.072796761 |
| 0.024535156 | 0.115930761 | 0.164775606 | 0.002701419 |
| 0.043908308 | 0.018868216 | 0.01291925  | 0.035846    |
| 0.068603049 | 0.033164406 | 0.037238788 | 0.13406359  |
| 0.015808329 | 0.156830818 | 0.058252931 | 0.012717892 |
| 0.031867866 | 0.025933095 | 0.071010446 | 0.070610016 |
| 0.021306213 | 0.06387402  | 0.134874715 | 0.017711178 |
| 0.019431666 | 0.207967546 | 0.020235983 | 0.048211445 |
| 0.168552239 | 0.025551717 | 0.017460012 | 0.175159899 |
| 0.097568618 | 0.058763701 | 0.133905971 | 0.105997181 |
| 0.027388191 | 0.082495292 | 0.025727374 | 0.013662925 |
| 0.206504854 | 0.066849444 | 0.037524246 | 0.010452916 |
| 0.013743104 | 0.01741585  | 0.139920108 | 0.027899812 |
| 0.20257901  | 0.010725182 | 0.022341098 | 0.025477517 |
| 0.00722336  | 0.016255886 | 0.165835651 | 0.01730276  |
| 0.011116364 | 0.040756751 | 0.079378328 | 0.092807585 |
| 0.027862026 | 0.184466721 | 0.095342001 | 0.017330456 |
| 0.028881874 | 0.026365965 | 0.013586404 | 0.036149927 |
| 0.146928685 | 0.155435712 | 0.026419722 | 0.004404501 |
| 0.017419676 | 0.070108688 | 0.000985367 | 0.023035851 |
| 0.098087864 | 0.025263239 | 0.045417903 | 0.049859284 |
| 0.0280225   | 0.020536668 | 0.06038063  | 0.227626082 |
| 0.013736928 | 0.01308728  | 0.016130593 | 0.13288747  |
| 0.021095854 | 0.017043139 | 0.00687985  | 0.121665474 |
| 0.115649966 | 0.012554943 | 0.031750427 | 0.051805217 |
| 0.049547415 | 0.033203233 | 0.081572189 | 0.027747882 |
| 0.208201796 | 0.010169195 | 0.014353633 | 0.001017055 |
| 0.034984073 | 0.034860073 | 0.014296712 | 0.073026014 |

|             |             |             |             |
|-------------|-------------|-------------|-------------|
| 0.015387277 | 0.080106152 | 0.004775982 | 0.019723841 |
| 0.020870738 | 0.060837464 | 0.019876292 | 0.016670033 |
| 0.010710216 | 0.023455617 | 0.007644767 | 0.01795701  |
| 0.012054188 | 0.012498882 | 0.04074284  | 0.111770445 |
| 0.035484226 | 0.010663672 | 0.043448029 | 0.023474241 |
| 0.050777244 | 0.04159335  | 0.169117272 | 0.156842565 |
| 0.005355789 | 0.083849797 | 0.005015674 | 0.02269314  |
| 0.033247699 | 0.046538909 | 0.020636665 | 0.04378712  |
| 0.021511214 | 0.151591629 | 0.087839352 | 0.01898824  |
| 0.049905699 | 0.049456966 | 0.034398667 | 0.003500579 |
| 0.001160192 | 0.014620242 | 0.082095891 | 0.060577661 |
| 0.022104007 | 0.006541601 | 0.181972228 | 0.141547685 |
| 0.025917045 | 0.021321586 | 0.019255219 | 0.117014349 |
| 0.01974998  | 0.169273431 | 0.016608326 | 0.093200067 |
| 0.0288722   | 0.013583027 | 0.026428027 | 0.023752244 |
| 0.070454976 | 0.053093353 | 0.02158438  | 0.047349108 |
| 0.000343724 | 0.092182885 | 0.02078041  | 0.024902687 |
| 0.029426691 | 0.069254132 | 0.062532772 | 0.048904944 |
| 0.010116642 | 0.05213899  | 0.060047842 | 0.007903516 |
| 0.137775631 | 0.03312948  | 0.079699414 | 0.033753431 |
| 0.048078322 | 0.077996412 | 0.033185563 | 0.018394825 |
| 0.057181308 | 0.014474214 | 0.019431871 | 0.009897157 |
| 0.035448416 | 0.103210883 | 0.012423914 | 0.003740152 |
| 0.040135887 | 0.041545703 | 0.004784485 | 0.069101117 |
| 0.001233057 | 0.13644646  | 0.044571529 | 0.028961858 |
| 0.035971022 | 0.081205048 | 0.069842709 | 0.052025979 |
| 0.085375609 | 0.06172532  | 0.015631891 | 0.008075932 |
| 0.169161024 | 0.002921466 | 0.07142038  | 0.021854008 |
| 0.06645865  | 0.036760492 | 0.017942649 | 0.021510557 |
| 0.027134239 | 0.02490113  | 0.018411306 | 0.077480113 |
| 0.009328787 | 0.025707582 | 0.061194692 | 0.096294471 |
| 0.08841288  | 0.048035221 | 0.043611664 | 0.018111479 |
| 0.080609229 | 0.006932528 | 0.090220337 | 0.004901503 |
| 0.003672573 | 0.055229537 | 0.086552436 | 0.069382555 |
| 0.037171284 | 0.022770122 | 0.133554928 | 0.060130451 |
| 0.022450091 | 0.021336663 | 0.045357976 | 0.042174848 |
| 0.120318928 | 0.062687137 | 0.023698141 | 0.023891012 |
| 0.005571638 | 0.025979123 | 0.048051265 | 0.047325311 |
| 0.027786602 | 0.143772047 | 0.01658076  | 0.049403632 |
| 0.014198999 | 0.012920448 | 0.089637498 | 0.128590585 |
| 0.211937012 | 0.059730573 | 0.001464909 | 0.060090698 |
| 0.002547309 | 0.097626427 | 0.008749302 | 0.047822999 |
| 0.056918899 | 0.01076371  | 0.083240101 | 0.132463926 |
| 0.081541158 | 0.016668058 | 0.043272763 | 0.161171256 |
| 0.005176437 | 0.022287532 | 0.012681549 | 0.062212393 |
| 0.003597941 | 0.023466792 | 0.125017895 | 0.044507004 |
| 0.018292076 | 0.00274207  | 0.021445836 | 0.07386757  |
| 1           | 0.04111172  | 0.018827196 | 0.036168042 |
| 0.024233224 | 0.017491865 | 0.027270833 | 0.027249352 |
| 0.05910533  | 0.013967026 | 0.020602695 | 0.023197992 |
| 0.088589381 | 0.171132403 | 0.018105413 | 0.025093165 |
| 0.077827729 | 0.018345255 | 0.011994044 | 0.013743303 |
| 0.017191919 | 0.085443313 | 0.013057011 | 0.023345678 |
| 0.017881171 | 0.005782527 | 0.132430123 | 0.045079235 |

0.003761836

TXNDC5 0.452613713

0.52887343

0.455849031

|             |             |             |             |
|-------------|-------------|-------------|-------------|
| 0.477501188 | 0.514744526 | 0.390746714 | 0.282993859 |
| 0.232966933 | 0.130537937 | 0.011044865 | 0.045482411 |
| 0.500423122 | 0.281988408 | 0.335785346 | 0.350600373 |
| 0.500742705 | 0.228324196 | 0.417775225 | 0.341756282 |
| 0.481808685 | 0.132389468 | 0.499249013 | 0.155288375 |
| 0.392142607 | 0.177037575 | 0.126584369 | 0.357108634 |
| 0.489884312 | 0.143154572 | 0.34256885  | 0.427777088 |
| 0.187261124 | 0.471466011 | 0.514267695 | 0.511763275 |
| 0.508414182 | 0.413557759 | 0.026754164 | 0.330887405 |
| 0.434251309 | 0.48845823  | 0.472650341 | 0.426967753 |
| 0.080477209 | 0.473505156 | 0.331123832 | 0.493646342 |
| 0.26591212  | 0.066118258 | 0.25438237  | 0.430830719 |
| 0.466523079 | 0.466553051 | 0.277225811 | 0.226413278 |
| 0.25645803  | 0.257470172 | 0.335715179 | 0.337453185 |
| 0.317559309 | 0.175003979 | 0.480887263 | 0.130353004 |
| 0.18907262  | 0.320387415 | 0.258896314 | 0.332853008 |
| 0.425880087 | 0.39742473  | 0.038829441 | 0.442243343 |
| 0.005750755 | 0.464896011 | 0.486097023 | 0.355775376 |
| 0.089344207 | 0.046180988 | 0.292200317 | 0.413986991 |
| 0.494803673 | 0.45578983  | 0.507202128 | 0.500110157 |
| 0.279369814 | 0.416058783 | 0.469256937 | 0.268328231 |
| 0.451309826 | 0.248509364 | 0.166773226 | 0.511225788 |
| 0.505095978 | 0.524043543 | 0.305677611 | 0.380672114 |
| 0.439951887 | 0.477994864 | 0.463498305 | 0.500519566 |
| 0.383750561 | 0.10583449  | 0.43287952  | 0.522645763 |
| 0.400091413 | 0.402151638 | 0.251831801 | 0.446033094 |
| 0.117012173 | 0.398280025 | 0.451409158 | 0.243290292 |
| 0.493595533 | 0.036618814 | 0.327588549 | 0.428032874 |
| 0.320512687 | 0.471427624 | 0.519292554 | 0.275731287 |
| 0.503949658 | 0.046201398 | 0.187949623 | 0.075307956 |
| 0.405419495 | 0.215055184 | 0.464725851 | 0.484868656 |
| 0.294150409 | 0.47007354  | 0.350898934 | 0.008588112 |
| 0.063241022 | 0.287233689 | 0.462864459 | 0.450131098 |
| 0.484750002 | 0.375617992 | 0.317775729 | 0.398225109 |
| 0.476440587 | 0.50776529  | 0.057273396 | 0.159477278 |
| 0.479498068 | 0.291496469 | 0.351747176 | 0.49985142  |
| 0.416066166 | 0.176491675 | 0.213312867 | 0.528462874 |
| 0.41501686  | 0.150548467 | 0.379231168 | 0.506792689 |
| 0.385322527 | 0.467311207 | 0.183798161 | 0.375755328 |
| 0.090515475 | 0.476410562 | 0.066450946 | 0.385813638 |
| 0.297584779 | 0.241386251 | 0.026417358 | 0.310815581 |
| 0.345545292 | 0.441356455 | 0.452781241 | 0.186947202 |
| 0.419152888 | 0.503396682 | 0.352069581 | 0.454933642 |
| 0.021358687 | 0.093191247 | 0.292593486 | 0.517368544 |
| 0.289991408 | 0.511443959 | 0.4088123   | 0.413925892 |
| 0.403686485 | 0.50041793  | 0.006353882 | 0.486477316 |
| 0.525855609 | 0.306939082 | 0.481514408 | 0.504453818 |
| 0.418362055 | 0.487591592 | 0.051568188 | 0.510934104 |
| 0.370394452 | 0.144998335 | 0.517892612 | 0.259156021 |
| 0.458571045 | 0.084900053 | 0.373759733 | 0.465251978 |
| 0.454886474 | 0.018044556 | 0.248293952 | 0.446361557 |
| 0.06308668  | 0.128717967 | 0.473971131 | 0.47965872  |

|             |             |             |             |
|-------------|-------------|-------------|-------------|
| 0.447112434 | 0.503003276 | 0.511714772 | 0.399372889 |
| 0.510354095 | 0.322627506 | 0.030989092 | 0.437552921 |
| 0.480327486 | 0.410679366 | 0.434607351 | 0.319995246 |
| 0.345081065 | 0.473385714 | 0.432091857 | 0.223358187 |
| 0.083521964 | 0.376691178 | 0.036796899 | 0.424868895 |
| 0.394708802 | 0.180457237 | 0.423446154 | 0.244802456 |
| 0.137925964 | 0.534786232 | 0.265056631 | 0.334962162 |
| 0.190395301 | 0.451653798 | 0.350119203 | 0.295127817 |
| 0.285803082 | 0.257848031 | 0.42379061  | 0.443512314 |
| 0.065098787 | 0.168858918 | 0.034913    | 0.419322002 |
| 0.201176127 | 0.396345617 | 0.378679075 | 0.427777982 |
| 0.400344162 | 0.178298282 | 0.479288107 | 0.372641419 |
| 0.193928741 | 0.038388193 | 0.512288216 | 0.495886651 |
| 0.336418261 | 0.23445614  | 0.088467348 | 0.372928376 |
| 0.482177691 | 0.315018953 | 0.27176291  | 0.453663687 |
| 0.056165912 | 0.499176134 | 0.337355666 | 0.209283438 |
| 0.466773818 | 0.368473621 | 0.493756279 | 0.076445241 |
| 0.434964244 | 0.466728578 | 0.428911127 | 0.278809222 |
| 0.384801226 | 0.4824561   | 0.060252022 | 0.419122557 |
| 0.416833155 | 0.07043027  | 0.53318641  | 0.21984529  |
| 0.051067112 | 0.509306996 | 0.469551547 | 0.142571716 |
| 0.145663779 | 0.400576573 | 0.071620091 | 0.410353814 |
| 0.526195406 | 0.504302908 | 0.450143617 | 0.317854836 |
| 0.080085291 | 0.02467755  | 0.323950721 | 0.461683844 |
| 0.501714415 | 0.518991549 | 0.383890248 | 0.458993268 |
| 0.347640176 | 0.397646099 | 0.163881879 | 0.51861634  |
| 0.277130052 | 0.518158842 | 0.019458521 | 0.483678228 |
| 0.500607199 | 0.311045787 | 0.144901643 | 0.36160922  |
| 0.397247677 | 0.088344605 | 0.299681685 | 0.496057803 |
| 0.44631445  | 0.409413451 | 0.407603432 | 0.505145699 |
| 0.032299416 | 0.076040333 | 0.468761534 | 0.262444352 |
| 0.441998465 | 0.315156142 | 0.086685506 | 0.373785558 |
| 0.084792131 | 0.450266212 | 0.514328922 | 0.104562838 |
| 0.34771262  | 0.34456235  | 0.493901176 | 0.076976284 |
| 0.461116192 | 0.50254842  | 0.518866123 | 0.248224532 |
| 0.482449203 | 0.490859456 | 0.447320307 | 0.151814049 |
| 0.04350986  | 0.514983988 | 0.429697904 | 0.043868445 |
| 0.506636618 | 0.240097009 | 0.028788992 | 0.50050262  |
| 0.278664286 | 0.428865737 | 0.006360448 | 0.112481273 |
| 0.087275594 | 0.512770969 | 0.47053884  | 0.433067417 |
| 0.246286019 | 0.461838074 | 0.013964228 | 0.532446588 |
| 0.491954737 | 0.036400191 | 0.236131137 | 0.463993156 |
| 0.460578044 | 0.53181223  | 0.395079772 | 0.47566986  |
| 0.480550483 | 0.495870046 | 0.309846429 | 0.384640779 |
| 0.463919445 | 0.492152915 | 0.462290795 | 0.45657728  |
| 0.498952565 | 0.516116661 | 0.381088362 | 0.033851682 |
| 0.180864357 | 0.251117697 | 0.317698624 | 0.124809427 |
| 0.337545159 | 0.223891451 | 0.485614395 | 0.510387859 |
| 0.488671771 | 0.015539302 | 0.207156536 | 0.456401688 |
| 0.453393922 | 0.484452541 | 0.044603889 | 0.01094153  |
| 0.013209516 | 0.040321614 | 0.426345174 | 0.361400729 |
| 0.493511675 | 0.245545617 | 0.014334384 | 0.073046404 |
| 0.369750151 | 0.483447934 | 0.505991415 | 0.47813221  |
| 0.486081563 | 0.1533391   | 0.31568967  | 0.485674887 |

|             |             |             |             |
|-------------|-------------|-------------|-------------|
| 0.123512874 | 0.330536148 | 0.494986776 | 0.470334407 |
| 0.088554223 | 0.362600845 | 0.436911282 | 0.496473821 |
| 0.104854922 | 0.444542229 | 0.5023213   | 0.395019894 |
| 0.033293172 | 0.151397053 | 0.120770802 | 0.51191422  |
| 0.492824241 | 0.135385384 | 0.069912946 | 0.158056209 |
| 0.184558693 | 0.494152384 | 0.255071237 | 0.528917599 |
| 0.473947727 | 0.509196333 | 0.144312453 | 0.479189698 |
| 0.07421509  | 0.483386914 | 0.442163329 | 0.071459433 |
| 0.404751301 | 0.032579448 | 0.471912327 | 0.187862517 |
| 0.371036255 | 0.444192352 | 0.249512378 | 0.042453188 |
| 0.239682139 | 0.108706183 | 0.50183109  | 0.506318569 |
| 0.074753456 | 0.323976405 | 0.420569714 | 0.490262241 |
| 0.327752698 | 0.49831128  | 0.497709853 | 0.412520195 |
| 0.135031758 | 0.212068293 | 0.471147932 | 0.424536935 |
| 0.298484246 | 0.508249753 | 0.373417784 | 0.535115294 |
| 0.43671565  | 0.460759601 | 0.47490683  | 0.42239928  |
| 0.340158478 | 0.431447526 | 0.404582922 | 0.037940457 |
| 0.45384185  | 0.505881845 | 0.424243041 | 0.232787482 |
| 0.366566159 | 0.447900111 | 0.08790513  | 0.216917223 |
| 0.390711397 | 0.326382448 | 0.227657661 | 0.508358143 |
| 0.438932871 | 0.423713399 | 0.074056671 | 0.112762839 |
| 0.54689627  | 0.431041076 | 0.189983114 | 0.473178215 |
| 0.279973129 | 0.441477903 | 0.49797017  | 0.504684371 |
| 0.418603006 | 0.46929779  | 0.468569352 | 0.417129743 |
| 0.419388445 | 0.357217691 | 0.522610339 | 0.111781844 |
| 0.137089384 | 0.457287405 | 0.159180294 | 0.171341209 |
| 0.234875455 | 0.060841413 | 0.352211951 | 0.514822853 |
| 0.425584329 | 0.484203899 | 0.353050123 | 0.14465801  |
| 0.449255137 | 0.408430428 | 0.472055412 | 0.264211453 |
| 0.136562863 | 0.493807035 | 0.022324864 | 0.115349329 |
| 0.452609077 | 0.468860295 | 0.458287514 | 0.359125991 |
| 0.375989258 | 0.237015729 | 0.41844816  | 0.321692886 |
| 0.342473545 | 0.419484871 | 0.460689288 | 0.06019754  |
| 0.04111172  | 1           | 0.410791543 | 0.049578352 |
| 0.146271204 | 0.401420711 | 0.397198179 | 0.310521782 |
| 0.05230902  | 0.48342679  | 0.346748811 | 0.502112108 |
| 0.415979345 | 0.127995725 | 0.33844969  | 0.135193291 |
| 0.10877825  | 0.444522379 | 0.465894358 | 0.512988584 |
| 0.448991471 | 0.502931958 | 0.430584489 | 0.462459503 |
| 0.18843911  | 0.417904618 | 0.055177911 | 0.485201583 |
| 0.427683701 |             |             |             |
| UAP1        | 0.344337144 | 0.448021626 | 0.17101448  |
| 0.319576998 | 0.178557026 | 0.22755791  | 0.109349541 |
| 0.165571065 | 0.045646747 | 0.003809895 | 0.005143132 |
| 0.248099831 | 0.065356102 | 0.133683083 | 0.143693267 |
| 0.314422918 | 0.049832742 | 0.214295365 | 0.125382096 |
| 0.304925572 | 0.067815833 | 0.246284607 | 0.060804879 |
| 0.104146014 | 0.035498962 | 0.028406954 | 0.083798359 |
| 0.400831125 | 0.036158349 | 0.140490409 | 0.327487854 |
| 0.062924793 | 0.377600518 | 0.453008377 | 0.230819554 |
| 0.43187209  | 0.331197581 | 0.017886586 | 0.112155289 |
| 0.423613015 | 0.299971055 | 0.305346138 | 0.17802052  |
| 0.026180402 | 0.452455658 | 0.114524565 | 0.204987723 |
| 0.157709848 | 0.012553802 | 0.150721851 | 0.426908586 |

|             |             |             |             |
|-------------|-------------|-------------|-------------|
| 0.392945768 | 0.189772904 | 0.153817992 | 0.07993214  |
| 0.047423237 | 0.128420158 | 0.065294413 | 0.284563735 |
| 0.102773984 | 0.110495691 | 0.397236141 | 0.048238918 |
| 0.059483567 | 0.172778126 | 0.069554184 | 0.157058426 |
| 0.10622676  | 0.362107162 | 0.027255864 | 0.224272951 |
| 0.002880338 | 0.297797474 | 0.201130268 | 0.083908217 |
| 0.02432103  | 0.009254104 | 0.08258447  | 0.187857579 |
| 0.411961263 | 0.43985287  | 0.381728564 | 0.379140836 |
| 0.073328393 | 0.141577204 | 0.141969941 | 0.075211121 |
| 0.393847986 | 0.081918216 | 0.102530327 | 0.296310012 |
| 0.389725533 | 0.427387587 | 0.079997234 | 0.109439171 |
| 0.314184834 | 0.436890942 | 0.169777528 | 0.143207884 |
| 0.102169865 | 0.029371625 | 0.371126721 | 0.412064005 |
| 0.396757982 | 0.097754266 | 0.064294631 | 0.371989591 |
| 0.036409552 | 0.21226315  | 0.214880437 | 0.098060193 |
| 0.42428646  | 0.014430262 | 0.081322357 | 0.168306837 |
| 0.153867283 | 0.378760676 | 0.418546963 | 0.099071258 |
| 0.173473714 | 0.016758949 | 0.038054553 | 0.025855847 |
| 0.151351855 | 0.046530086 | 0.418501967 | 0.376008673 |
| 0.150941483 | 0.119366056 | 0.142619618 | 0.002369945 |
| 0.015067528 | 0.117145569 | 0.340052096 | 0.208099106 |
| 0.344681088 | 0.350393735 | 0.075800468 | 0.334633608 |
| 0.233062068 | 0.369972179 | 0.042085147 | 0.070179342 |
| 0.2153169   | 0.104106315 | 0.121684027 | 0.212260523 |
| 0.109858274 | 0.101626341 | 0.070038285 | 0.436384232 |
| 0.424054049 | 0.049647702 | 0.20532707  | 0.300500672 |
| 0.101085252 | 0.140789355 | 0.071001149 | 0.119928805 |
| 0.03242665  | 0.395505653 | 0.015089213 | 0.214553336 |
| 0.079391507 | 0.046844684 | 0.022726347 | 0.164176046 |
| 0.141982776 | 0.318418092 | 0.410018925 | 0.071844    |
| 0.133687247 | 0.219098868 | 0.185563818 | 0.266016086 |
| 0.002791714 | 0.050521891 | 0.175651824 | 0.413940931 |
| 0.227978657 | 0.426822877 | 0.163690845 | 0.136771595 |
| 0.122711137 | 0.373316562 | 0.006533432 | 0.44390641  |
| 0.43110361  | 0.179078292 | 0.176514492 | 0.240985969 |
| 0.108460899 | 0.369302299 | 0.051574318 | 0.290583202 |
| 0.324832849 | 0.058832633 | 0.416292615 | 0.063387382 |
| 0.415685532 | 0.018893611 | 0.150072846 | 0.306873886 |
| 0.265009136 | 0.006381328 | 0.131697675 | 0.283127442 |
| 0.015155187 | 0.066324231 | 0.345013354 | 0.275104092 |
| 0.177915122 | 0.349311191 | 0.404572952 | 0.100626698 |
| 0.176215966 | 0.159846307 | 0.013643672 | 0.132652879 |
| 0.353154914 | 0.112509996 | 0.421096459 | 0.137094406 |
| 0.251642904 | 0.418292617 | 0.32679488  | 0.060678384 |
| 0.026105526 | 0.156831042 | 0.028000531 | 0.12500985  |
| 0.345887562 | 0.047861266 | 0.132282246 | 0.106216609 |
| 0.032489338 | 0.430526152 | 0.060682556 | 0.082270563 |
| 0.039882153 | 0.177889895 | 0.154109819 | 0.077171463 |
| 0.056547967 | 0.072827982 | 0.113762323 | 0.127931582 |
| 0.030557639 | 0.041827129 | 0.015167029 | 0.106854163 |
| 0.038537014 | 0.103530217 | 0.104874123 | 0.296652029 |
| 0.138314673 | 0.049753222 | 0.13791784  | 0.113447794 |
| 0.053608599 | 0.009930977 | 0.435934841 | 0.295155746 |
| 0.323950555 | 0.089231964 | 0.028178587 | 0.100666327 |



|             |             |             |             |
|-------------|-------------|-------------|-------------|
| 0.373311303 | 0.166110831 | 0.167942333 | 0.382510765 |
| 0.038685935 | 0.396113874 | 0.081439172 | 0.049620756 |
| 0.110239501 | 0.111077046 | 0.402039799 | 0.030814909 |
| 0.24314109  | 0.411973807 | 0.159466703 | 0.068390367 |
| 0.36913415  | 0.274766811 | 0.023057409 | 0.357616998 |
| 0.345749725 | 0.017954738 | 0.436033193 | 0.052810754 |
| 0.013930795 | 0.283287943 | 0.260866428 | 0.038953174 |
| 0.041268905 | 0.110578877 | 0.04630459  | 0.14206132  |
| 0.432264315 | 0.272853008 | 0.287620047 | 0.093329109 |
| 0.020826832 | 0.003250021 | 0.087807855 | 0.19849996  |
| 0.450072543 | 0.409339425 | 0.131424382 | 0.112322525 |
| 0.129104189 | 0.097367005 | 0.103319244 | 0.408482329 |
| 0.146132484 | 0.459722003 | 0.006553536 | 0.285606464 |
| 0.423336167 | 0.15622702  | 0.030134003 | 0.148238123 |
| 0.361601041 | 0.031476654 | 0.155333544 | 0.434386271 |
| 0.375591355 | 0.122649936 | 0.120608227 | 0.295768018 |
| 0.016876096 | 0.030804163 | 0.183854237 | 0.063304678 |
| 0.125462656 | 0.096763865 | 0.017745726 | 0.174977509 |
| 0.021323958 | 0.38678759  | 0.378059036 | 0.025016394 |
| 0.153683046 | 0.188743777 | 0.209447633 | 0.024876198 |
| 0.330723509 | 0.424917359 | 0.454406832 | 0.129310454 |
| 0.325170713 | 0.380884597 | 0.156002559 | 0.047928695 |
| 0.010343304 | 0.435209046 | 0.336367553 | 0.016042681 |
| 0.392128453 | 0.146781553 | 0.004587797 | 0.450323523 |
| 0.110076421 | 0.413710781 | 0.013360921 | 0.063983987 |
| 0.026751439 | 0.361815848 | 0.415465625 | 0.309967155 |
| 0.111753137 | 0.255072268 | 0.005867149 | 0.435678026 |
| 0.420436488 | 0.007662651 | 0.053720548 | 0.304241915 |
| 0.261902307 | 0.477899556 | 0.095543064 | 0.323301913 |
| 0.198561386 | 0.403412786 | 0.104566644 | 0.116941844 |
| 0.363656204 | 0.38555314  | 0.376475771 | 0.446766953 |
| 0.375449004 | 0.26690811  | 0.14828178  | 0.009773744 |
| 0.0491023   | 0.136120325 | 0.098423295 | 0.022164264 |
| 0.263385003 | 0.05385494  | 0.446427763 | 0.377158741 |
| 0.377200655 | 0.004387615 | 0.109815284 | 0.33210505  |
| 0.417357157 | 0.433113393 | 0.029145938 | 0.00954723  |
| 0.01593482  | 0.005420888 | 0.222249901 | 0.114961815 |
| 0.410874508 | 0.097307427 | 0.004232575 | 0.051699397 |
| 0.167023507 | 0.186671209 | 0.419168027 | 0.281413329 |
| 0.33576229  | 0.046096662 | 0.090507298 | 0.319886959 |
| 0.023978512 | 0.305540027 | 0.384243475 | 0.422110635 |
| 0.031304503 | 0.110890514 | 0.216683982 | 0.416634494 |
| 0.017463559 | 0.15103201  | 0.261965942 | 0.108947439 |
| 0.017936832 | 0.03843597  | 0.027418874 | 0.345591728 |
| 0.407313004 | 0.024606793 | 0.012083198 | 0.10498089  |
| 0.050642296 | 0.391514429 | 0.077426068 | 0.426836456 |
| 0.383116662 | 0.359038346 | 0.03001902  | 0.430195603 |
| 0.013181194 | 0.41654045  | 0.108126478 | 0.049475981 |
| 0.172986792 | 0.013418049 | 0.396093549 | 0.033460155 |
| 0.168202688 | 0.342227125 | 0.069616304 | 0.009188763 |
| 0.066835284 | 0.027818809 | 0.375886985 | 0.34732404  |
| 0.023038309 | 0.137106257 | 0.148923056 | 0.29853761  |
| 0.180029155 | 0.301458421 | 0.445090676 | 0.171278435 |
| 0.046333291 | 0.066307658 | 0.349010488 | 0.331869873 |

|             |             |             |             |
|-------------|-------------|-------------|-------------|
| 0.14784731  | 0.395267346 | 0.084697936 | 0.446201614 |
| 0.356201374 | 0.433558666 | 0.383663359 | 0.179904259 |
| 0.067386001 | 0.270909964 | 0.24642245  | 0.018297434 |
| 0.207159779 | 0.346098974 | 0.207315114 | 0.052107899 |
| 0.086881477 | 0.146721999 | 0.04456774  | 0.18068507  |
| 0.099996563 | 0.211368937 | 0.061615898 | 0.373332029 |
| 0.311129729 | 0.342080382 | 0.048669689 | 0.025690028 |
| 0.467383323 | 0.420688084 | 0.117668742 | 0.287784409 |
| 0.097801964 | 0.137570822 | 0.347690735 | 0.314323345 |
| 0.140827135 | 0.336861041 | 0.374190145 | 0.263190015 |
| 0.392646378 | 0.130499946 | 0.450503843 | 0.124541416 |
| 0.036810779 | 0.248930521 | 0.034283206 | 0.046919214 |
| 0.070467216 | 0.017365756 | 0.085641629 | 0.303552809 |
| 0.112085851 | 0.207462138 | 0.159265674 | 0.058317394 |
| 0.134782205 | 0.193152658 | 0.182918426 | 0.10614571  |
| 0.037262067 | 0.417703412 | 0.007608936 | 0.032987056 |
| 0.119886495 | 0.326677395 | 0.118310847 | 0.118430522 |
| 0.085456687 | 0.06587106  | 0.122250855 | 0.169691071 |
| 0.105087572 | 0.172664297 | 0.334283108 | 0.050557841 |
| 0.018827196 | 0.410791543 | 1           | 0.020106691 |
| 0.03567431  | 0.273131017 | 0.192975855 | 0.077762222 |
| 0.012564733 | 0.363949791 | 0.118596392 | 0.187740018 |
| 0.204046542 | 0.048699949 | 0.384297978 | 0.076773236 |
| 0.065829937 | 0.438468026 | 0.180959179 | 0.419928242 |
| 0.158970804 | 0.296710027 | 0.432697581 | 0.33716266  |
| 0.131741351 | 0.181728573 | 0.023896934 | 0.397033075 |
| 0.12488872  |             |             |             |
| UAP1L1      | 0.038888834 | 0.020362788 | 0.045852513 |
| 0.0409303   | 0.050067412 | 0.009684402 | 0.037679534 |
| 0.016569193 | 0.015614583 | 0.003205939 | 0.008929433 |
| 0.044918084 | 0.005627854 | 0.010700955 | 0.00491298  |
| 0.08648789  | 0.085687754 | 0.046474042 | 0.097985185 |
| 0.058098729 | 0.013486589 | 0.086814349 | 0.056857552 |
| 0.059731113 | 0.084416693 | 0.088512236 | 0.047573407 |
| 0.050146207 | 0.112374015 | 0.00441615  | 0.029164494 |
| 0.206659058 | 0.036260563 | 0.014793463 | 0.04403968  |
| 0.013793696 | 0.026231734 | 0.03960223  | 0.004306761 |
| 0.029836734 | 0.038872285 | 0.048860467 | 0.065974082 |
| 0.04454561  | 0.01090102  | 0.051540689 | 0.090390174 |
| 0.005043446 | 0.052185422 | 0.004513408 | 0.011477545 |
| 0.008835643 | 0.014389065 | 0.018841408 | 0.029054214 |
| 0.00169401  | 0.00490875  | 0.00868873  | 0.011530241 |
| 0.056284984 | 0.003836201 | 0.012111208 | 0.00780329  |
| 0.003558796 | 0.035640832 | 0.160338902 | 0.034128613 |
| 0.034010148 | 0.017790138 | 0.054861785 | 0.033711189 |
| 0.000959005 | 0.069423642 | 0.128379419 | 0.015660019 |
| 0.224116638 | 0.014799243 | 0.187390165 | 0.035699939 |
| 0.047348839 | 0.023226956 | 0.045900687 | 0.037099904 |
| 0.031653514 | 0.166512317 | 0.053174863 | 0.06728345  |
| 0.026477722 | 0.02812623  | 0.024385099 | 0.092498971 |
| 0.042012218 | 0.017031198 | 0.048764746 | 0.189635319 |
| 0.014043451 | 0.019754268 | 0.0173959   | 0.024212444 |
| 0.007924626 | 0.193291594 | 0.01122108  | 0.03013203  |
| 0.01763765  | 0.05895952  | 0.172730409 | 0.028478506 |

|             |             |             |             |
|-------------|-------------|-------------|-------------|
| 0.200702595 | 0.007892862 | 0.075193817 | 0.035921485 |
| 0.046047154 | 0.030524619 | 0.180010268 | 0.025109593 |
| 0.067751476 | 0.032475372 | 0.018695285 | 0.075501188 |
| 0.067138411 | 0.039116562 | 0.008850238 | 0.247093434 |
| 0.006559774 | 0.046335631 | 0.008353007 | 0.028918237 |
| 0.009942961 | 0.011631734 | 0.042914608 | 0.116765843 |
| 0.16549401  | 0.073038726 | 0.025202968 | 0.064308956 |
| 0.051414431 | 0.019863835 | 0.028979905 | 0.013906178 |
| 0.024206582 | 0.046361019 | 6.62E-05    | 0.069416743 |
| 0.027377317 | 0.102036741 | 0.155819204 | 0.024749311 |
| 0.070261857 | 0.052525885 | 0.105534157 | 0.033379783 |
| 0.012926988 | 0.11431248  | 0.020732982 | 0.093309863 |
| 0.003902894 | 0.094408019 | 0.118499284 | 0.02928574  |
| 0.033485911 | 0.013276529 | 0.243276477 | 0.030372133 |
| 0.002541639 | 0.031347084 | 0.101302118 | 0.020148339 |
| 0.004284717 | 0.012575427 | 0.009497053 | 0.192318263 |
| 0.036456755 | 0.073561445 | 0.013645168 | 0.013503746 |
| 0.004888472 | 0.080443454 | 0.007836169 | 0.025507648 |
| 0.005521132 | 0.040483782 | 0.05635668  | 0.084376405 |
| 0.155281291 | 0.055979555 | 0.039073625 | 0.011631806 |
| 0.017950091 | 0.006014288 | 0.031308528 | 0.078522265 |
| 0.016813286 | 0.034530611 | 0.003415459 | 0.085484108 |
| 0.016205752 | 0.187140595 | 0.047112148 | 0.134648116 |
| 0.01728617  | 0.11981202  | 0.011784616 | 0.032626909 |
| 0.017463675 | 0.013431021 | 0.006478634 | 0.036084797 |
| 0.239742228 | 0.00697044  | 0.04549891  | 0.048636461 |
| 0.029391164 | 0.064364659 | 0.058220548 | 0.014734893 |
| 0.036379433 | 0.060825046 | 0.113941503 | 0.145590957 |
| 0.047779166 | 0.002541252 | 0.012513777 | 0.024861849 |
| 0.009848574 | 0.017409361 | 0.018617735 | 0.000871655 |
| 0.080389542 | 0.024562484 | 0.008202107 | 0.052467541 |
| 0.01887943  | 0.013746404 | 0.01548287  | 0.100969478 |
| 0.177045824 | 0.025569368 | 0.1068718   | 0.05230498  |
| 0.06689622  | 0.012789552 | 0.089595587 | 0.004469273 |
| 0.005227639 | 0.067039337 | 0.021742365 | 0.016845421 |
| 0.019067122 | 0.098260968 | 0.189477442 | 0.005600971 |
| 0.003466541 | 0.004928954 | 0.003400262 | 0.01535279  |
| 0.008841573 | 0.012251738 | 0.03679029  | 0.049375987 |
| 0.127045195 | 0.212172413 | 0.021120351 | 0.088136366 |
| 0.009404648 | 0.051435193 | 0.238311744 | 0.000881959 |
| 0.02627759  | 0.002921128 | 0.004519057 | 0.017002761 |
| 0.076638789 | 0.047158491 | 0.011115836 | 0.140644843 |
| 0.021220431 | 0.070092518 | 0.049136969 | 0.001647007 |
| 0.026366792 | 0.013893517 | 0.15891632  | 0.074231099 |
| 0.008756979 | 0.041045852 | 0.022266468 | 0.019389139 |
| 0.015905597 | 0.147492054 | 0.023381596 | 0.11195137  |
| 0.265194097 | 0.065356581 | 0.019303431 | 0.24249778  |
| 0.199577495 | 0.013927292 | 0.011825057 | 0.156238465 |
| 0.023866919 | 0.080685103 | 0.013992073 | 0.13411363  |
| 0.05907589  | 0.007460513 | 0.189566695 | 0.056799939 |
| 0.012269135 | 0.025486107 | 0.178471633 | 0.031828581 |
| 0.121973116 | 0.013144915 | 0.002211903 | 0.026159818 |
| 0.066520093 | 0.019295622 | 0.172954669 | 0.037813228 |
| 0.011761418 | 0.007138228 | 0.108052263 | 0.016598359 |

|             |             |             |             |
|-------------|-------------|-------------|-------------|
| 0.011584009 | 0.087418192 | 0.0943577   | 0.0147622   |
| 0.022410366 | 0.028746958 | 0.013370764 | 0.069864042 |
| 0.018055725 | 0.019302004 | 0.061145832 | 0.069505502 |
| 0.010065393 | 0.071102268 | 0.027984732 | 0.010071055 |
| 0.028438857 | 0.012091135 | 0.064118888 | 0.04404782  |
| 0.003717694 | 0.011454997 | 0.127069762 | 0.136893973 |
| 0.028016662 | 0.023134727 | 0.014573929 | 0.076798813 |
| 0.033104897 | 0.019086747 | 0.019790758 | 0.285981603 |
| 0.268849302 | 0.016631428 | 0.027264806 | 0.012340684 |
| 0.047213711 | 0.003860823 | 0.00673843  | 0.019577322 |
| 0.110124743 | 0.008708256 | 0.002959779 | 0.044983683 |
| 0.229076576 | 0.066686479 | 0.01099523  | 0.034210943 |
| 0.001098534 | 0.094433192 | 0.078815376 | 0.03052355  |
| 0.014231428 | 0.15521912  | 0.089405219 | 0.018319046 |
| 0.023540761 | 0.020606966 | 0.035559113 | 0.026031138 |
| 0.024258601 | 0.012405017 | 0.004961717 | 0.133608325 |
| 0.020704933 | 0.018059691 | 0.03449016  | 0.018467695 |
| 0.036952962 | 0.088401454 | 0.079724789 | 0.034485298 |
| 0.019535867 | 0.010805568 | 0.001538941 | 0.007031362 |
| 0.011571194 | 0.067870274 | 0.026627529 | 0.052255051 |
| 0.028571472 | 0.20749239  | 0.014309396 | 0.0188836   |
| 0.02590135  | 0.040859245 | 0.161649599 | 0.013753809 |
| 0.012716104 | 0.019765746 | 0.034579722 | 0.189412794 |
| 0.025858959 | 0.000344555 | 0.104138993 | 0.015883198 |
| 0.019784748 | 0.063911046 | 0.015839454 | 0.095014847 |
| 0.04985803  | 0.183769489 | 0.00190149  | 0.085524737 |
| 0.046029481 | 0.012052055 | 0.028595748 | 0.012657899 |
| 0.220863443 | 0.151703642 | 0.04038909  | 0.0362264   |
| 0.021152575 | 0.149653409 | 0.043543647 | 0.007131691 |
| 0.138293827 | 0.173040363 | 0.105787256 | 0.079282649 |
| 0.011836137 | 0.017809188 | 0.030297634 | 0.001023581 |
| 0.02238736  | 0.043594212 | 0.035049001 | 0.038411849 |
| 0.030010611 | 0.066799718 | 0.110674629 | 0.014446848 |
| 0.016946405 | 0.011855551 | 0.066932128 | 0.001310694 |
| 0.118289635 | 0.143354596 | 0.02059886  | 0.001789837 |
| 0.009391002 | 0.036594317 | 0.011190543 | 0.226020253 |
| 0.030157863 | 0.175173943 | 0.040149265 | 0.052755937 |
| 0.217828306 | 0.041665247 | 0.161575849 | 0.086018114 |
| 0.01545205  | 0.038573867 | 0.012451818 | 0.006673776 |
| 0.024995213 | 0.050299791 | 0.049210472 | 0.021319559 |
| 0.013854384 | 0.050502961 | 0.010187967 | 0.029423126 |
| 0.028004183 | 0.029791906 | 0.02161103  | 0.036135978 |
| 0.02070457  | 0.019390615 | 0.012273436 | 0.00686952  |
| 0.081201589 | 0.038190325 | 0.042562969 | 0.023048651 |
| 0.063762478 | 0.039562412 | 0.069669793 | 0.011006433 |
| 0.036202089 | 0.008442181 | 0.023919556 | 0.077874891 |
| 0.03705405  | 0.020400977 | 0.044388228 | 0.084504639 |
| 0.022540512 | 0.018281134 | 0.007919094 | 0.02591736  |
| 0.230965994 | 0.056641422 | 0.050360822 | 0.055050705 |
| 0.013421766 | 0.01920838  | 0.030894962 | 0.011463496 |
| 0.010867281 | 0.073317209 | 0.015303731 | 0.005353417 |
| 0.027527136 | 0.029712108 | 0.019781376 | 0.289555992 |
| 0.108990533 | 0.137238083 | 0.015153214 | 0.088325873 |
| 0.013545642 | 0.061923955 | 0.004842088 | 0.065198562 |

|             |             |             |             |
|-------------|-------------|-------------|-------------|
| 0.144582324 | 0.03143036  | 0.106936888 | 0.018288238 |
| 0.024638032 | 0.011780794 | 0.038058595 | 0.228657371 |
| 0.019640152 | 0.024860547 | 0.027477732 | 0.121268465 |
| 0.01848085  | 0.141366314 | 0.091196118 | 0.008280333 |
| 0.002264719 | 0.007121418 | 0.021963852 | 0.031525648 |
| 0.036168042 | 0.049578352 | 0.020106691 | 1           |
| 0.056978878 | 0.021181169 | 0.065972029 | 0.009559853 |
| 0.276527536 | 0.018368384 | 0.003112112 | 0.049865057 |
| 0.036702614 | 0.18337319  | 0.010853008 | 0.020940706 |
| 0.085873182 | 0.01432508  | 0.056483226 | 0.016432801 |
| 0.103155214 | 0.062971722 | 0.009877488 | 0.020687111 |
| 0.055496869 | 0.033488929 | 0.04015191  | 0.043431037 |
| 0.006253052 |             |             |             |
| UBA6        | 0.109364562 | 0.09808206  | 0.084653819 |
| 0.11452713  | 0.128142964 | 0.046778613 | 0.069126955 |
| 0.021521994 | 0.011407314 | 0.000548842 | 0.008769227 |
| 0.088869252 | 0.004408828 | 0.019798935 | 0.017594427 |
| 0.192573583 | 0.071114858 | 0.067157874 | 0.118183746 |
| 0.145167161 | 0.021132308 | 0.177427719 | 0.04895171  |
| 0.114060223 | 0.064607496 | 0.085774328 | 0.082303869 |
| 0.13186452  | 0.090586099 | 0.029622212 | 0.091824688 |
| 0.124553542 | 0.113552945 | 0.077859766 | 0.116399989 |
| 0.073407895 | 0.076081964 | 0.006006403 | 0.026184394 |
| 0.092032735 | 0.11231745  | 0.143635792 | 0.107674508 |
| 0.032423044 | 0.061172193 | 0.091225267 | 0.161992733 |
| 0.003140943 | 0.031792023 | 0.017519142 | 0.066718802 |
| 0.056810621 | 0.075220498 | 0.041287662 | 0.05503446  |
| 0.004594213 | 0.020636228 | 0.01919838  | 0.047175181 |
| 0.10091779  | 0.01414128  | 0.071799295 | 0.011579786 |
| 0.012647637 | 0.06379224  | 0.141568973 | 0.059688412 |
| 0.102422245 | 0.067079544 | 0.021631605 | 0.083896872 |
| 0.000215832 | 0.148031996 | 0.184600541 | 0.052924515 |
| 0.112855835 | 0.007705539 | 0.158605896 | 0.099090498 |
| 0.136254999 | 0.085911027 | 0.138280835 | 0.133183483 |
| 0.022824989 | 0.192602179 | 0.135190558 | 0.070134551 |
| 0.100261129 | 0.04888788  | 0.002965324 | 0.197052082 |
| 0.133259975 | 0.088036325 | 0.059043006 | 0.218722293 |
| 0.072541683 | 0.091101328 | 0.042499078 | 0.079803088 |
| 0.026333354 | 0.102097374 | 0.072089558 | 0.116542802 |
| 0.068847935 | 0.103762138 | 0.130991731 | 0.094489978 |
| 0.137564642 | 0.011502206 | 0.141792633 | 0.007007578 |
| 0.132260887 | 0.020516983 | 0.18799275  | 0.084434381 |
| 0.054268196 | 0.089812299 | 0.088462811 | 0.097090742 |
| 0.115516766 | 0.003335138 | 0.003861182 | 0.133012674 |
| 0.005539735 | 0.040896182 | 0.05718017  | 0.101495845 |
| 0.018095559 | 0.050789776 | 0.090129486 | 0.035335917 |
| 0.066918761 | 0.048909664 | 0.091382161 | 0.094889386 |
| 0.142117443 | 0.070983061 | 0.057395499 | 0.063921593 |
| 0.08213559  | 0.148053913 | 3.54E-05    | 0.071171934 |
| 0.059329013 | 0.118060893 | 0.179248954 | 0.089298892 |
| 0.096207346 | 0.045248274 | 0.096536934 | 0.119759562 |
| 0.069092145 | 0.090414821 | 0.042082526 | 0.164818567 |
| 0.026532326 | 0.139036005 | 0.093256209 | 0.04349078  |
| 0.037774639 | 0.072782083 | 0.107319997 | 0.055044435 |

|             |             |             |             |
|-------------|-------------|-------------|-------------|
| 0.009576639 | 0.036885842 | 0.018871779 | 0.04725565  |
| 0.006802718 | 0.069391857 | 0.060732678 | 0.133201688 |
| 0.06477585  | 0.153350388 | 0.046033153 | 0.055378963 |
| 0.003951148 | 0.02254808  | 0.026680717 | 0.103827514 |
| 0.031207392 | 0.127210393 | 0.061130044 | 0.107543091 |
| 0.174406951 | 0.142392339 | 0.001077169 | 0.064343448 |
| 0.08866865  | 0.017759296 | 0.074558231 | 0.144415873 |
| 0.07291151  | 0.108383524 | 0.000356733 | 0.167177213 |
| 0.050329205 | 0.121500589 | 0.145626248 | 0.122719004 |
| 0.077233973 | 0.086710993 | 0.04640289  | 0.112974043 |
| 0.070983511 | 0.002470179 | 0.024252846 | 0.116361097 |
| 0.120421183 | 0.021510862 | 0.130851242 | 0.117629481 |
| 0.09359733  | 0.155124243 | 0.156326573 | 0.057064589 |
| 0.083190677 | 0.069961017 | 0.02527596  | 0.164061391 |
| 0.131769856 | 0.020023444 | 0.065614096 | 0.039520458 |
| 0.030654954 | 0.081755617 | 0.072790555 | 0.008225798 |
| 0.065173843 | 0.078624993 | 0.000555879 | 0.097394731 |
| 0.083136642 | 0.024244127 | 0.07181253  | 0.073930812 |
| 0.106275125 | 0.108297586 | 0.103897093 | 0.077733449 |
| 0.061319079 | 0.052505888 | 0.110816806 | 0.013211586 |
| 0.009505606 | 0.08939988  | 0.061815539 | 0.068359485 |
| 0.022141655 | 0.076411178 | 0.044406573 | 0.021697171 |
| 0.005492865 | 0.016192857 | 0.014272444 | 0.071662426 |
| 0.022352945 | 0.007633758 | 0.063370137 | 0.073355569 |
| 0.07186992  | 0.09200787  | 0.096154656 | 0.160168362 |
| 0.043271637 | 0.062318519 | 0.11779592  | 0.004592328 |
| 0.106548088 | 0.017354791 | 0.016923079 | 0.086189437 |
| 0.005790476 | 0.154757601 | 0.022046483 | 0.112641963 |
| 0.052492966 | 0.094691922 | 0.141274613 | 0.001263165 |
| 0.085994475 | 0.076308513 | 0.194086079 | 0.084955485 |
| 0.047930916 | 0.113717639 | 0.010903261 | 0.066131563 |
| 0.05558793  | 0.076900243 | 0.097581604 | 0.076595611 |
| 0.119237264 | 0.137480022 | 0.086418725 | 0.159121757 |
| 0.107484528 | 0.049036757 | 0.016240888 | 0.189493532 |
| 0.100719473 | 0.16751991  | 0.082477716 | 0.126201189 |
| 0.046790066 | 0.002098646 | 0.190008222 | 0.09144279  |
| 0.068154341 | 0.10158912  | 0.189671975 | 0.060138489 |
| 0.155549628 | 0.050245514 | 0.005858585 | 0.104552814 |
| 0.039063226 | 0.088058328 | 0.067457647 | 0.135149524 |
| 0.069334484 | 0.029143215 | 0.073335771 | 0.067367845 |
| 0.052763079 | 0.061950898 | 0.093340077 | 0.071258381 |
| 0.105139554 | 0.07216846  | 0.039005811 | 0.139325175 |
| 0.011472878 | 0.029861476 | 0.127944499 | 0.074368332 |
| 0.054652682 | 0.104552603 | 0.014437297 | 0.036120783 |
| 0.018779378 | 0.072758309 | 0.152462835 | 0.038763537 |
| 0.03165108  | 0.034302498 | 0.210648567 | 0.083041862 |
| 0.105747248 | 0.095121473 | 0.075362725 | 0.080168681 |
| 0.107839283 | 0.087083765 | 0.074334853 | 0.172229491 |
| 0.109324252 | 0.078799094 | 0.082716443 | 0.001409853 |
| 0.145454585 | 0.016372252 | 0.003207534 | 0.089790411 |
| 0.122083979 | 0.05387523  | 8.81E-05    | 0.005684815 |
| 0.110396591 | 0.16433422  | 0.066134208 | 0.107171663 |
| 0.007341904 | 0.158914058 | 0.046475596 | 0.115290444 |
| 0.071773661 | 0.055880029 | 0.099432245 | 0.080059118 |

|             |             |             |             |
|-------------|-------------|-------------|-------------|
| 0.077569913 | 0.093412361 | 0.0721812   | 0.09606468  |
| 0.066240468 | 0.073474108 | 0.01009972  | 0.175568965 |
| 0.079404514 | 0.087841101 | 0.091141989 | 0.078464789 |
| 0.118176504 | 0.180583664 | 0.136263236 | 0.026828312 |
| 0.016179285 | 0.036234448 | 0.008615771 | 0.006531995 |
| 0.044667341 | 0.055700949 | 0.089108298 | 0.159185084 |
| 0.100842533 | 0.072418111 | 0.022200441 | 0.080248468 |
| 0.094017965 | 0.129999635 | 0.022129748 | 0.000626226 |
| 0.000508556 | 0.008779414 | 0.10514305  | 0.171783746 |
| 0.102633591 | 0.00212152  | 0.037863302 | 0.013595207 |
| 0.019921135 | 0.132003799 | 0.082427264 | 0.172197583 |
| 0.135350304 | 0.152589857 | 0.008801769 | 0.168139283 |
| 0.040556076 | 0.044121045 | 0.103340789 | 0.073752207 |
| 0.131983829 | 0.18730946  | 0.058542201 | 0.128182528 |
| 0.022478973 | 0.201028183 | 0.100790857 | 0.020537944 |
| 0.016982032 | 0.101356613 | 0.093321605 | 0.185750182 |
| 0.07019215  | 0.015309936 | 0.015364775 | 0.000640885 |
| 0.031787868 | 0.144437216 | 0.028800564 | 0.13133769  |
| 0.101003324 | 0.159262239 | 0.124654512 | 0.077110507 |
| 0.01520634  | 0.064870893 | 0.103913421 | 0.000243655 |
| 0.101155436 | 0.056328962 | 0.085679381 | 0.006510903 |
| 0.028792522 | 0.092780739 | 0.020464533 | 0.133435283 |
| 0.032052203 | 0.092067953 | 0.136507352 | 0.149886478 |
| 0.102530982 | 0.090442934 | 0.158997678 | 0.149870672 |
| 0.041253699 | 0.109802418 | 0.068909975 | 0.025164152 |
| 0.044720038 | 0.027281045 | 0.112945327 | 0.05650166  |
| 0.031593137 | 0.150386541 | 0.037365707 | 0.112282754 |
| 0.08517029  | 0.111644267 | 0.095067923 | 0.092108833 |
| 0.052936581 | 0.051856977 | 0.058276966 | 0.001507737 |
| 0.111972242 | 0.126711949 | 0.085589993 | 0.020589532 |
| 0.098240914 | 0.104661987 | 0.050818441 | 0.001745294 |
| 0.073901974 | 0.038432209 | 0.036109218 | 0.180314342 |
| 0.086218759 | 0.060038314 | 0.021520274 | 0.066899524 |
| 0.101140784 | 0.085093125 | 0.008938582 | 0.082484703 |
| 0.171433899 | 0.134091241 | 0.123771684 | 0.147817455 |
| 0.061144863 | 0.08675158  | 0.096546017 | 0.052670471 |
| 0.063985726 | 0.132182877 | 0.080404244 | 0.005197005 |
| 0.005023452 | 0.09026362  | 0.025582428 | 0.197142096 |
| 0.10004999  | 0.058198508 | 0.032135266 | 0.185405    |
| 0.039044993 | 0.130357561 | 0.018351863 | 0.016844886 |
| 0.224531632 | 0.064291608 | 0.172147491 | 0.035781958 |
| 0.017722298 | 0.070194463 | 0.003503272 | 0.135105452 |
| 0.051170182 | 0.092840167 | 0.069063467 | 0.096455954 |
| 0.042185351 | 0.161342428 | 0.144306923 | 0.02772062  |
| 0.012101671 | 0.008937706 | 0.083713416 | 0.003097834 |
| 0.024233224 | 0.146271204 | 0.03567431  | 0.056978878 |
| 1           | 0.081565019 | 0.068698375 | 0.033558031 |
| 0.124220038 | 0.093025729 | 0.026004862 | 0.123202321 |
| 0.090417956 | 0.113417574 | 0.052415006 | 0.004840338 |
| 0.040258853 | 0.063730561 | 0.10815695  | 0.082538758 |
| 0.139224566 | 0.152035113 | 0.058405264 | 0.089583245 |
| 0.005724972 | 0.074116897 | 0.024015012 | 0.13157937  |
| 0.022396025 |             |             |             |
| UBASH3B     | 0.346932353 | 0.459942282 | 0.251906055 |

|             |             |             |             |
|-------------|-------------|-------------|-------------|
| 0.293887927 | 0.244099221 | 0.24134992  | 0.143511299 |
| 0.185026614 | 0.055699586 | 0.001677504 | 0.007720743 |
| 0.243965579 | 0.086548478 | 0.156782641 | 0.217697705 |
| 0.30139599  | 0.063245981 | 0.306808814 | 0.15950153  |
| 0.288850444 | 0.074791744 | 0.232301335 | 0.069751901 |
| 0.181180357 | 0.046546401 | 0.038083469 | 0.135660532 |
| 0.367365679 | 0.045895478 | 0.205702809 | 0.299516372 |
| 0.076351108 | 0.369813885 | 0.474306593 | 0.224903154 |
| 0.457184288 | 0.330893339 | 0.016171215 | 0.17724396  |
| 0.405024581 | 0.295904478 | 0.295550762 | 0.190199183 |
| 0.028217088 | 0.462912025 | 0.150042704 | 0.238978831 |
| 0.20239635  | 0.013171106 | 0.200129191 | 0.445932367 |
| 0.412357749 | 0.22950577  | 0.199585012 | 0.106786454 |
| 0.077673438 | 0.187303466 | 0.10794263  | 0.259191116 |
| 0.142745116 | 0.138778657 | 0.423576012 | 0.061687437 |
| 0.127616679 | 0.233294497 | 0.094647646 | 0.201107265 |
| 0.198021907 | 0.343993575 | 0.024724385 | 0.243521051 |
| 0.00137461  | 0.270938843 | 0.233774316 | 0.161257499 |
| 0.026101912 | 0.006951235 | 0.110083615 | 0.20628049  |
| 0.391440448 | 0.448456865 | 0.375420329 | 0.390705316 |
| 0.082777841 | 0.201923782 | 0.220417944 | 0.096122963 |
| 0.395146138 | 0.103948418 | 0.077065523 | 0.283787569 |
| 0.386541399 | 0.449462155 | 0.110754931 | 0.160826216 |
| 0.314742744 | 0.441531916 | 0.240765092 | 0.23121994  |
| 0.16680344  | 0.03890269  | 0.397989599 | 0.417833189 |
| 0.383391212 | 0.161570025 | 0.082564378 | 0.345311707 |
| 0.044387662 | 0.250213418 | 0.208353881 | 0.100872064 |
| 0.398202379 | 0.015025198 | 0.116739513 | 0.215658595 |
| 0.201576723 | 0.353927825 | 0.439008038 | 0.126265956 |
| 0.244338279 | 0.011065739 | 0.057250729 | 0.029767294 |
| 0.187003751 | 0.071380916 | 0.453760252 | 0.356222759 |
| 0.185313983 | 0.208503168 | 0.201608779 | 0.001748248 |
| 0.015075761 | 0.1548345   | 0.343868459 | 0.290292275 |
| 0.341080399 | 0.370370714 | 0.112851322 | 0.336046214 |
| 0.242194178 | 0.372380163 | 0.037170269 | 0.087904328 |
| 0.242346913 | 0.15611976  | 0.151123677 | 0.246127925 |
| 0.152677513 | 0.10868485  | 0.086442603 | 0.433908118 |
| 0.425966562 | 0.057022095 | 0.297863724 | 0.270168846 |
| 0.175324772 | 0.180609338 | 0.083091113 | 0.151901045 |
| 0.038494492 | 0.425937343 | 0.016535364 | 0.283203204 |
| 0.133379948 | 0.066117955 | 0.021654968 | 0.217055437 |
| 0.161089432 | 0.326789697 | 0.451977595 | 0.08502917  |
| 0.180566964 | 0.221895466 | 0.26528414  | 0.250780533 |
| 0.003356876 | 0.041770926 | 0.257675261 | 0.413724743 |
| 0.212584688 | 0.426684928 | 0.204295105 | 0.205240335 |
| 0.163240948 | 0.355747966 | 0.0047023   | 0.457151357 |
| 0.453385104 | 0.239442002 | 0.192539193 | 0.258653113 |
| 0.201202916 | 0.347140631 | 0.037939417 | 0.267046998 |
| 0.30110672  | 0.068901263 | 0.409938947 | 0.082614001 |
| 0.427570449 | 0.022915942 | 0.230048644 | 0.326456154 |
| 0.273837878 | 0.006427646 | 0.17401711  | 0.269269001 |
| 0.018877779 | 0.090257286 | 0.344423659 | 0.254099637 |
| 0.214040993 | 0.343947455 | 0.387868708 | 0.183561525 |
| 0.229361882 | 0.191465415 | 0.012201082 | 0.18602754  |



|             |             |             |             |
|-------------|-------------|-------------|-------------|
| 0.356483624 | 0.225521541 | 0.421766934 | 0.174943915 |
| 0.25102273  | 0.420467037 | 0.338854663 | 0.140040846 |
| 0.030378958 | 0.240135642 | 0.013200251 | 0.184780955 |
| 0.377526364 | 0.060831545 | 0.232724072 | 0.130261315 |
| 0.038621601 | 0.437788789 | 0.09352721  | 0.138441848 |
| 0.06444611  | 0.202854461 | 0.198395232 | 0.101735913 |
| 0.075343997 | 0.106164466 | 0.192168732 | 0.221632517 |
| 0.032282902 | 0.049281422 | 0.017684705 | 0.170017111 |
| 0.045783248 | 0.144844146 | 0.149544861 | 0.30556287  |
| 0.195064115 | 0.046655994 | 0.187121096 | 0.191386651 |
| 0.06500332  | 0.009785915 | 0.445349142 | 0.266588446 |
| 0.307352323 | 0.115887975 | 0.030164036 | 0.156725358 |
| 0.368810293 | 0.192356004 | 0.249244379 | 0.384662665 |
| 0.028716736 | 0.404569771 | 0.113285193 | 0.063000604 |
| 0.168922852 | 0.143862448 | 0.383607862 | 0.040646094 |
| 0.292343644 | 0.419696963 | 0.223524962 | 0.096830947 |
| 0.357137733 | 0.26062514  | 0.021650643 | 0.34595118  |
| 0.320830438 | 0.018257325 | 0.442398533 | 0.06599551  |
| 0.014596408 | 0.274253341 | 0.275142999 | 0.048419905 |
| 0.048728325 | 0.16567611  | 0.049492129 | 0.164529838 |
| 0.434189834 | 0.254130448 | 0.30577127  | 0.140903435 |
| 0.022962287 | 0.00198839  | 0.12810721  | 0.251238802 |
| 0.46874913  | 0.420442707 | 0.17601804  | 0.161758666 |
| 0.160819151 | 0.170870357 | 0.168346579 | 0.411479909 |
| 0.195578252 | 0.475550484 | 0.005925743 | 0.307619615 |
| 0.45314119  | 0.220682527 | 0.037520911 | 0.208158882 |
| 0.341890622 | 0.036019569 | 0.198395355 | 0.436678887 |
| 0.392957223 | 0.19700606  | 0.188792426 | 0.277590956 |
| 0.013941997 | 0.042011707 | 0.232703888 | 0.103971901 |
| 0.221101867 | 0.145584177 | 0.025155729 | 0.269911168 |
| 0.021519777 | 0.397910515 | 0.35832965  | 0.034618063 |
| 0.186973127 | 0.28202842  | 0.220706873 | 0.0277083   |
| 0.349189299 | 0.445151918 | 0.467417148 | 0.160897744 |
| 0.32784586  | 0.394314311 | 0.194836774 | 0.058757579 |
| 0.010870839 | 0.453344942 | 0.320567863 | 0.01141539  |
| 0.382679906 | 0.193365805 | 0.00320913  | 0.450789486 |
| 0.141584261 | 0.440083149 | 0.003668795 | 0.089688547 |
| 0.032904972 | 0.354409473 | 0.43753117  | 0.292962213 |
| 0.154540978 | 0.272933201 | 0.009943193 | 0.447273771 |
| 0.420674193 | 0.007580083 | 0.082359225 | 0.311868621 |
| 0.26679624  | 0.484244947 | 0.157413366 | 0.329155701 |
| 0.206060974 | 0.433386471 | 0.13363092  | 0.155380605 |
| 0.3440291   | 0.416690177 | 0.340019122 | 0.440941325 |
| 0.359594022 | 0.259715706 | 0.174191163 | 0.010518032 |
| 0.090154353 | 0.191271895 | 0.149011346 | 0.042695768 |
| 0.256872975 | 0.072291098 | 0.431007505 | 0.376844382 |
| 0.3751936   | 0.003795394 | 0.133858382 | 0.335930762 |
| 0.392212814 | 0.416349518 | 0.030428482 | 0.005391996 |
| 0.007563179 | 0.005761318 | 0.264207394 | 0.158031991 |
| 0.417889496 | 0.126036045 | 0.003351524 | 0.047594534 |
| 0.18997817  | 0.202914305 | 0.434226359 | 0.25145066  |
| 0.341822576 | 0.059994891 | 0.126346997 | 0.291075513 |
| 0.033688372 | 0.299009364 | 0.38017259  | 0.434140017 |
| 0.039135768 | 0.168928231 | 0.286916491 | 0.408956261 |

|             |             |             |             |
|-------------|-------------|-------------|-------------|
| 0.03177244  | 0.188398838 | 0.249935028 | 0.156563754 |
| 0.019560029 | 0.048570905 | 0.040481353 | 0.337409939 |
| 0.441297009 | 0.027159922 | 0.011166966 | 0.112633817 |
| 0.061130305 | 0.395963225 | 0.084807138 | 0.42490919  |
| 0.362192028 | 0.33379846  | 0.046502717 | 0.44674055  |
| 0.020886691 | 0.42736082  | 0.164967746 | 0.039740033 |
| 0.221323178 | 0.012761067 | 0.412314293 | 0.060575767 |
| 0.228920374 | 0.313724908 | 0.12922968  | 0.011828483 |
| 0.111312946 | 0.03030149  | 0.373108018 | 0.3496512   |
| 0.027640035 | 0.209453179 | 0.199566984 | 0.280023503 |
| 0.214222289 | 0.280648624 | 0.459644629 | 0.21839249  |
| 0.06366298  | 0.098152969 | 0.309701122 | 0.292767914 |
| 0.197931286 | 0.391583993 | 0.142530307 | 0.455055476 |
| 0.340761721 | 0.441991752 | 0.396521935 | 0.222300823 |
| 0.116277334 | 0.269936364 | 0.232099265 | 0.010230242 |
| 0.235629878 | 0.339068961 | 0.295682973 | 0.066167662 |
| 0.125583901 | 0.213397588 | 0.068705639 | 0.181369892 |
| 0.170115254 | 0.216413846 | 0.083989202 | 0.353396546 |
| 0.289779128 | 0.308475779 | 0.058369176 | 0.035640989 |
| 0.479028744 | 0.434953695 | 0.12076399  | 0.270805187 |
| 0.124333722 | 0.194302556 | 0.338835594 | 0.317378204 |
| 0.268633692 | 0.340867238 | 0.346681425 | 0.245212867 |
| 0.394726873 | 0.187532802 | 0.468988273 | 0.11078455  |
| 0.044377795 | 0.263385469 | 0.042412466 | 0.060607117 |
| 0.086099395 | 0.019461675 | 0.148564578 | 0.289705489 |
| 0.190692402 | 0.206663702 | 0.259863051 | 0.062626414 |
| 0.200462523 | 0.301044835 | 0.220277201 | 0.129983896 |
| 0.038266804 | 0.436054    | 0.006409876 | 0.038532873 |
| 0.194117524 | 0.328508878 | 0.176007341 | 0.149539983 |
| 0.14646419  | 0.101762424 | 0.17246999  | 0.220978231 |
| 0.147851061 | 0.232702511 | 0.332785226 | 0.035288855 |
| 0.017491865 | 0.401420711 | 0.273131017 | 0.021181169 |
| 0.081565019 | 1           | 0.252519723 | 0.128221116 |
| 0.014940194 | 0.392144315 | 0.197075119 | 0.248674224 |
| 0.251248547 | 0.05626582  | 0.383029376 | 0.087939115 |
| 0.073389767 | 0.429910398 | 0.232816259 | 0.44198316  |
| 0.240677076 | 0.277945557 | 0.453637852 | 0.343726249 |
| 0.119854171 | 0.258954614 | 0.022539285 | 0.38528895  |
| 0.196200544 |             |             |             |
| UNC84A      | 0.348591207 | 0.334203915 | 0.18657859  |
| 0.290838621 | 0.223462739 | 0.157140754 | 0.109291184 |
| 0.082438241 | 0.023136802 | 0.002561728 | 0.004951198 |
| 0.270699093 | 0.032814391 | 0.066565217 | 0.040275441 |
| 0.368309576 | 0.058503199 | 0.205056615 | 0.182964325 |
| 0.347024292 | 0.037128259 | 0.306073903 | 0.050266029 |
| 0.085249402 | 0.038092855 | 0.038678542 | 0.067558089 |
| 0.388829342 | 0.049994687 | 0.096947568 | 0.305406512 |
| 0.112078171 | 0.374780604 | 0.308402006 | 0.245064771 |
| 0.298039263 | 0.288374238 | 0.094351026 | 0.045642536 |
| 0.366989339 | 0.26185406  | 0.32839665  | 0.20974068  |
| 0.025099784 | 0.293666608 | 0.135877882 | 0.27809423  |
| 0.062551258 | 0.016176061 | 0.070586817 | 0.288159221 |
| 0.242625098 | 0.152664231 | 0.09697018  | 0.062766322 |
| 0.018715661 | 0.072764818 | 0.029635553 | 0.221744228 |

|             |             |             |             |
|-------------|-------------|-------------|-------------|
| 0.12786022  | 0.052056398 | 0.267907398 | 0.022134871 |
| 0.033979273 | 0.158582066 | 0.108504603 | 0.152237847 |
| 0.087369209 | 0.279155253 | 0.047960741 | 0.238243728 |
| 0.001957815 | 0.346264236 | 0.319734297 | 0.048615277 |
| 0.063228802 | 0.011164124 | 0.142184823 | 0.194577051 |
| 0.398429836 | 0.350481936 | 0.356449214 | 0.336248471 |
| 0.061100654 | 0.247325827 | 0.188310965 | 0.075650394 |
| 0.330809287 | 0.069348922 | 0.062036904 | 0.360613969 |
| 0.352371898 | 0.309598241 | 0.063720299 | 0.208244785 |
| 0.215917262 | 0.334467716 | 0.132594636 | 0.139896757 |
| 0.039215721 | 0.06323444  | 0.250554361 | 0.347695467 |
| 0.310527056 | 0.121681072 | 0.107408206 | 0.337859457 |
| 0.077171175 | 0.076188567 | 0.260006718 | 0.137818592 |
| 0.396441173 | 0.013212308 | 0.151404585 | 0.174442955 |
| 0.145640412 | 0.328683854 | 0.305106714 | 0.126201613 |
| 0.248456987 | 0.026598221 | 0.018072151 | 0.069002669 |
| 0.072675535 | 0.045030095 | 0.255768698 | 0.313879556 |
| 0.084688372 | 0.066163819 | 0.139319979 | 0.013376054 |
| 0.035964401 | 0.145511739 | 0.316087521 | 0.283125814 |
| 0.364796763 | 0.273829746 | 0.052372072 | 0.262489018 |
| 0.203891682 | 0.355439147 | 0.005476441 | 0.065275399 |
| 0.18848329  | 0.14627617  | 0.214451812 | 0.215235548 |
| 0.12740227  | 0.07807525  | 0.096129837 | 0.358994561 |
| 0.29523734  | 0.077552172 | 0.175410587 | 0.360494604 |
| 0.037858924 | 0.203487993 | 0.096020138 | 0.095587463 |
| 0.03243397  | 0.268783618 | 0.047970022 | 0.214404591 |
| 0.020974303 | 0.061238213 | 0.059697528 | 0.150091483 |
| 0.048001718 | 0.21897686  | 0.265885203 | 0.126711161 |
| 0.139043514 | 0.260736082 | 0.181233849 | 0.187015777 |
| 0.002146666 | 0.070858753 | 0.140975287 | 0.336536807 |
| 0.154516083 | 0.387749517 | 0.128377417 | 0.129080513 |
| 0.210602256 | 0.364420552 | 0.010273251 | 0.285512053 |
| 0.308935669 | 0.119902001 | 0.17575375  | 0.323348203 |
| 0.085561251 | 0.311955792 | 0.031937981 | 0.369778319 |
| 0.277800729 | 0.100056566 | 0.386560128 | 0.102973921 |
| 0.314155529 | 0.035820243 | 0.111803599 | 0.266059304 |
| 0.222411159 | 0.011334769 | 0.081559335 | 0.276776863 |
| 0.046108686 | 0.031087792 | 0.357220433 | 0.272627563 |
| 0.157454064 | 0.370457669 | 0.401911396 | 0.068413015 |
| 0.184572552 | 0.162228962 | 0.03936242  | 0.225149768 |
| 0.359634787 | 0.047055431 | 0.277612379 | 0.074533906 |
| 0.197139302 | 0.297414046 | 0.257795405 | 0.01915169  |
| 0.036911631 | 0.16585932  | 0.014218995 | 0.130030192 |
| 0.26490489  | 0.02958193  | 0.108339519 | 0.182112797 |
| 0.062894873 | 0.336496592 | 0.07612733  | 0.082969041 |
| 0.040170368 | 0.153085198 | 0.201206666 | 0.030435123 |
| 0.024983253 | 0.060892712 | 0.070851105 | 0.081513597 |
| 0.023728669 | 0.059726449 | 0.061375002 | 0.065372289 |
| 0.02000005  | 0.053693641 | 0.054648058 | 0.256537226 |
| 0.077740858 | 0.036912999 | 0.140187163 | 0.076171883 |
| 0.054561872 | 0.037664705 | 0.32860994  | 0.359333736 |
| 0.230426656 | 0.065683537 | 0.071111806 | 0.03483267  |
| 0.310193955 | 0.085499226 | 0.086830773 | 0.28454352  |
| 0.056985889 | 0.383231492 | 0.040419146 | 0.080639594 |

|             |             |             |             |
|-------------|-------------|-------------|-------------|
| 0.09585046  | 0.148847641 | 0.37311294  | 0.010517144 |
| 0.263833073 | 0.293326263 | 0.282035388 | 0.066381954 |
| 0.243987676 | 0.281181198 | 0.02443996  | 0.286547841 |
| 0.279042034 | 0.041968676 | 0.338483816 | 0.074230566 |
| 0.051852477 | 0.318503471 | 0.204210705 | 0.090320408 |
| 0.068276312 | 0.088075596 | 0.027802805 | 0.228718288 |
| 0.328448211 | 0.318072319 | 0.214257725 | 0.112366195 |
| 0.026310063 | 0.005825377 | 0.151744559 | 0.240546109 |
| 0.301402769 | 0.329027261 | 0.259161253 | 0.11168858  |
| 0.207403765 | 0.048426771 | 0.048929854 | 0.325604092 |
| 0.162971386 | 0.343643612 | 0.02634382  | 0.27292884  |
| 0.27764     | 0.132376403 | 0.040081868 | 0.135130352 |
| 0.252236925 | 0.037617653 | 0.164384977 | 0.296475595 |
| 0.292766126 | 0.083575904 | 0.058461672 | 0.378034123 |
| 0.014680298 | 0.032760278 | 0.20215939  | 0.054403026 |
| 0.072071957 | 0.086020877 | 0.023148555 | 0.086423508 |
| 0.020625415 | 0.2665629   | 0.415836534 | 0.019697096 |
| 0.091778103 | 0.094926747 | 0.320490813 | 0.046217632 |
| 0.271893817 | 0.333055593 | 0.310282249 | 0.126204228 |
| 0.328098351 | 0.276757007 | 0.141410143 | 0.108106708 |
| 0.040796254 | 0.306047881 | 0.298173951 | 0.01156216  |
| 0.385830854 | 0.093861787 | 0.005085695 | 0.333473842 |
| 0.156756694 | 0.268649843 | 0.002643624 | 0.072908419 |
| 0.067184754 | 0.390854434 | 0.260479971 | 0.310572008 |
| 0.034319435 | 0.356170221 | 0.03708574  | 0.365727103 |
| 0.288459317 | 0.019998343 | 0.067961725 | 0.248457555 |
| 0.216685729 | 0.357326258 | 0.084626606 | 0.261389814 |
| 0.18243312  | 0.271882161 | 0.047856256 | 0.186484323 |
| 0.272718091 | 0.285489086 | 0.332160843 | 0.320573651 |
| 0.34841431  | 0.342727849 | 0.193850482 | 0.011922102 |
| 0.025964273 | 0.095410041 | 0.023483402 | 0.011769471 |
| 0.202489692 | 0.040074353 | 0.357101655 | 0.383202973 |
| 0.31361791  | 0.024489412 | 0.060925927 | 0.272295374 |
| 0.341658156 | 0.389648315 | 0.070523636 | 0.006106358 |
| 0.014246046 | 0.005836607 | 0.246366952 | 0.188317147 |
| 0.321113    | 0.020266637 | 0.015066157 | 0.039297204 |
| 0.079797685 | 0.216029746 | 0.299080814 | 0.351233333 |
| 0.344120509 | 0.088632899 | 0.02347989  | 0.386566721 |
| 0.025448356 | 0.240011885 | 0.312669964 | 0.284155912 |
| 0.085748995 | 0.161538646 | 0.254864858 | 0.361673642 |
| 0.015113303 | 0.264406374 | 0.2980443   | 0.044148954 |
| 0.0773048   | 0.057426453 | 0.032653645 | 0.405941447 |
| 0.274372405 | 0.019992792 | 0.014653234 | 0.034235539 |
| 0.034092323 | 0.383188511 | 0.049794564 | 0.375532708 |
| 0.324466003 | 0.385127513 | 0.064802115 | 0.287111133 |
| 0.015242332 | 0.280035935 | 0.139472961 | 0.011498405 |
| 0.206948583 | 0.043806568 | 0.320817512 | 0.009206944 |
| 0.11301977  | 0.346290782 | 0.03219912  | 0.036747245 |
| 0.045214425 | 0.055749835 | 0.338486922 | 0.346072552 |
| 0.070282685 | 0.104947213 | 0.246257114 | 0.38456939  |
| 0.153522127 | 0.278361887 | 0.293123064 | 0.107051486 |
| 0.033526111 | 0.102391356 | 0.361815207 | 0.288677197 |
| 0.092595513 | 0.382951249 | 0.035723738 | 0.362938504 |
| 0.311099449 | 0.36470526  | 0.306474656 | 0.17206202  |

|             |             |             |             |
|-------------|-------------|-------------|-------------|
| 0.062633909 | 0.223927612 | 0.179088309 | 0.009992466 |
| 0.261968781 | 0.323881094 | 0.253378491 | 0.029514712 |
| 0.101147943 | 0.16568279  | 0.078597939 | 0.121849343 |
| 0.113849827 | 0.148221595 | 0.050233434 | 0.418133563 |
| 0.336381284 | 0.288084782 | 0.085544031 | 0.026493198 |
| 0.355925574 | 0.309866849 | 0.046069798 | 0.238094319 |
| 0.178487419 | 0.160389212 | 0.348975528 | 0.340731008 |
| 0.068420685 | 0.27319212  | 0.345244789 | 0.194641416 |
| 0.265016303 | 0.170262088 | 0.308421563 | 0.057672281 |
| 0.026868644 | 0.275083727 | 0.023705699 | 0.115807252 |
| 0.1019916   | 0.03406492  | 0.042581592 | 0.388731788 |
| 0.075214337 | 0.250224534 | 0.082289013 | 0.058051957 |
| 0.249097759 | 0.215436038 | 0.266555286 | 0.073574409 |
| 0.027499094 | 0.271880453 | 0.01450019  | 0.079361759 |
| 0.107569236 | 0.257813132 | 0.116327999 | 0.129201593 |
| 0.046981575 | 0.109865404 | 0.187754279 | 0.133008041 |
| 0.049755761 | 0.081256905 | 0.250734189 | 0.037486142 |
| 0.027270833 | 0.397198179 | 0.192975855 | 0.065972029 |
| 0.068698375 | 0.252519723 | 1           | 0.034352702 |
| 0.043074551 | 0.278545297 | 0.062352938 | 0.218609841 |
| 0.216004877 | 0.085667412 | 0.275304705 | 0.056449517 |
| 0.086502425 | 0.310939562 | 0.210031788 | 0.302598209 |
| 0.23102978  | 0.318852644 | 0.278912338 | 0.293909386 |
| 0.128304958 | 0.199159516 | 0.023723471 | 0.388896528 |
| 0.06612898  |             |             |             |
| URB2        | 0.165197465 | 0.297103365 | 0.115356218 |
| 0.325763784 | 0.176805573 | 0.176126825 | 0.18882923  |
| 0.038069059 | 0.083968599 | 0.018429953 | 0.064598296 |
| 0.146427842 | 0.0560495   | 0.069803117 | 0.072584259 |
| 0.310196892 | 0.062438529 | 0.059694871 | 0.189395313 |
| 0.248130334 | 0.068366874 | 0.302393863 | 0.07505322  |
| 0.058684147 | 0.090124588 | 0.127069087 | 0.140168759 |
| 0.299158526 | 0.130943534 | 0.132595015 | 0.217122229 |
| 0.031904887 | 0.205308789 | 0.250756207 | 0.239012555 |
| 0.229869472 | 0.144315474 | 0.002051961 | 0.124068814 |
| 0.198302417 | 0.280638174 | 0.268743117 | 0.249322891 |
| 0.061242831 | 0.215709795 | 0.246643802 | 0.170140182 |
| 0.03016918  | 0.053040053 | 0.062583291 | 0.209280982 |
| 0.230641848 | 0.214286788 | 0.088995531 | 0.160027024 |
| 0.069042466 | 0.047260434 | 0.038926291 | 0.1348889   |
| 0.204606085 | 0.054598361 | 0.242293888 | 0.081194646 |
| 0.044613205 | 0.081247467 | 0.041531473 | 0.118163297 |
| 0.079482357 | 0.17947824  | 0.015426536 | 0.113696486 |
| 0.004874223 | 0.245727698 | 0.157613602 | 0.10224269  |
| 0.0750695   | 0.032406115 | 0.062449519 | 0.271556756 |
| 0.293507245 | 0.197675339 | 0.316386048 | 0.304138926 |
| 0.04197283  | 0.121422659 | 0.123448311 | 0.115518933 |
| 0.233232081 | 0.178800626 | 0.025178235 | 0.310572409 |
| 0.315772091 | 0.269537926 | 0.067953322 | 0.164242129 |
| 0.298836624 | 0.263356797 | 0.128826756 | 0.164460893 |
| 0.108082601 | 0.022434692 | 0.241385149 | 0.296589588 |
| 0.178093628 | 0.09018618  | 0.134378188 | 0.230847631 |
| 0.06975464  | 0.029289366 | 0.286641572 | 0.017134316 |
| 0.306486244 | 0.046789765 | 0.130931297 | 0.217821249 |

|             |             |             |             |
|-------------|-------------|-------------|-------------|
| 0.033557863 | 0.213107685 | 0.264657986 | 0.188708426 |
| 0.118507608 | 0.016062848 | 0.047441561 | 0.026643427 |
| 0.038935096 | 0.018123188 | 0.20846671  | 0.313118959 |
| 0.032376591 | 0.060658811 | 0.14408279  | 0.007446041 |
| 0.031137966 | 0.026488337 | 0.190181235 | 0.085245899 |
| 0.227998754 | 0.150512603 | 0.186318541 | 0.162952834 |
| 0.187550457 | 0.313624379 | 0.012183453 | 0.076830582 |
| 0.167419978 | 0.029139268 | 0.219978682 | 0.171485608 |
| 0.187892779 | 0.062649433 | 0.102325697 | 0.322398718 |
| 0.220219073 | 0.116356034 | 0.049670387 | 0.273884603 |
| 0.088606297 | 0.168663211 | 0.080063229 | 0.09149257  |
| 0.059424694 | 0.229871637 | 0.0314426   | 0.080053299 |
| 0.070185223 | 0.032200339 | 0.005753116 | 0.10178196  |
| 0.04612646  | 0.274252475 | 0.188809765 | 0.086605296 |
| 0.129014945 | 0.26747673  | 0.08280175  | 0.243647134 |
| 0.052094535 | 0.023688326 | 0.047482877 | 0.295429073 |
| 0.115743849 | 0.267544586 | 0.076739784 | 0.089374406 |
| 0.189843074 | 0.292259562 | 0.000572544 | 0.233048171 |
| 0.269746763 | 0.046367067 | 0.216572296 | 0.157227158 |
| 0.160261562 | 0.321590687 | 0.001844788 | 0.252838104 |
| 0.108560607 | 0.073150437 | 0.328436639 | 0.161409669 |
| 0.209184388 | 0.100000674 | 0.090296537 | 0.242840046 |
| 0.18071345  | 0.006993511 | 0.110726134 | 0.275243519 |
| 0.023568368 | 0.066574    | 0.206992034 | 0.275797645 |
| 0.284368018 | 0.253234745 | 0.329269564 | 0.146557076 |
| 0.180662933 | 0.091431321 | 0.012888957 | 0.14142157  |
| 0.208302002 | 0.038562508 | 0.23600604  | 0.085181439 |
| 0.077042362 | 0.273203992 | 0.182577726 | 0.063052841 |
| 0.102512495 | 0.145146691 | 0.014852664 | 0.22245297  |
| 0.184535778 | 0.084299822 | 0.16377087  | 0.019796359 |
| 0.061254634 | 0.315253835 | 0.053339601 | 0.05651403  |
| 0.028708048 | 0.181074534 | 0.142424073 | 0.081533185 |
| 0.051572302 | 0.102290277 | 0.129882589 | 0.145542164 |
| 0.053670452 | 0.094935416 | 0.005598997 | 0.052472537 |
| 0.042310002 | 0.070133106 | 0.068309656 | 0.162623338 |
| 0.04032576  | 0.037983001 | 0.164862317 | 0.053711672 |
| 0.066790187 | 0.042041147 | 0.285160339 | 0.24291143  |
| 0.131032583 | 0.103439184 | 0.042616128 | 0.02860355  |
| 0.315827004 | 0.119809649 | 0.037780552 | 0.293515873 |
| 0.013019865 | 0.301023984 | 0.073986636 | 0.139800868 |
| 0.095670877 | 0.195278609 | 0.333481229 | 0.032903693 |
| 0.125970062 | 0.258390753 | 0.145555086 | 0.164842417 |
| 0.190518299 | 0.236741342 | 0.043425472 | 0.165427357 |
| 0.151102031 | 0.058936562 | 0.278164339 | 0.039727345 |
| 0.040685805 | 0.211853298 | 0.254795012 | 0.112575019 |
| 0.07873735  | 0.212278596 | 0.04010696  | 0.2370209   |
| 0.311469722 | 0.317183689 | 0.268900793 | 0.058060618 |
| 0.084323317 | 0.015967658 | 0.073089786 | 0.103410533 |
| 0.228325218 | 0.266881741 | 0.151641964 | 0.154337703 |
| 0.222020686 | 0.131836352 | 0.023324707 | 0.300513769 |
| 0.015604414 | 0.24343115  | 0.018713637 | 0.249325298 |
| 0.235308022 | 0.077646881 | 0.103914808 | 0.208783568 |
| 0.193137438 | 0.084622032 | 0.056033115 | 0.249451933 |
| 0.279056501 | 0.162129386 | 0.13128843  | 0.171895024 |

|             |             |             |             |
|-------------|-------------|-------------|-------------|
| 0.032520982 | 0.048291573 | 0.210925379 | 0.04040804  |
| 0.134862589 | 0.132388866 | 0.006939989 | 0.054381756 |
| 0.053828996 | 0.264627167 | 0.25919446  | 0.083495238 |
| 0.187581688 | 0.050203564 | 0.211591405 | 0.073828982 |
| 0.255900112 | 0.233846627 | 0.25346666  | 0.061224012 |
| 0.193432394 | 0.279534642 | 0.149280424 | 0.061849743 |
| 0.037266896 | 0.243239296 | 0.172255333 | 0.024565111 |
| 0.310342608 | 0.063871278 | 0.030194757 | 0.27777694  |
| 0.158305059 | 0.174085099 | 0.00780766  | 0.00481683  |
| 0.017298881 | 0.273597813 | 0.248775288 | 0.212058708 |
| 0.064807396 | 0.177259637 | 0.001476627 | 0.273102366 |
| 0.263831107 | 0.027055931 | 0.040156638 | 0.219453514 |
| 0.198353701 | 0.27308832  | 0.12447688  | 0.268935216 |
| 0.158029319 | 0.24511485  | 0.065136063 | 0.236558059 |
| 0.279874473 | 0.239670477 | 0.22064114  | 0.242537343 |
| 0.293818494 | 0.229623298 | 0.273812859 | 0.050339156 |
| 0.076645013 | 0.086802798 | 0.077210904 | 0.093917051 |
| 0.116180741 | 0.096900535 | 0.237029548 | 0.302105677 |
| 0.27027597  | 0.01964845  | 0.049064492 | 0.211968688 |
| 0.270445992 | 0.311242419 | 0.007661668 | 0.005597586 |
| 0.001058346 | 0.032940431 | 0.186242975 | 0.123877531 |
| 0.28644461  | 0.030914861 | 0.019394657 | 0.030824546 |
| 0.051995034 | 0.205417107 | 0.270094071 | 0.287163485 |
| 0.216451796 | 0.068663865 | 0.079582087 | 0.263506859 |
| 0.06064769  | 0.095467186 | 0.296524777 | 0.265381815 |
| 0.019061226 | 0.131267941 | 0.06881809  | 0.333485975 |
| 0.011602391 | 0.188305223 | 0.154377101 | 0.080596486 |
| 0.004152594 | 0.070120995 | 0.0911783   | 0.268069572 |
| 0.224896582 | 0.050775837 | 0.038284071 | 0.014327226 |
| 0.115824424 | 0.272538547 | 0.069778998 | 0.319688784 |
| 0.275809961 | 0.321088981 | 0.030816045 | 0.264253533 |
| 0.073450729 | 0.230156263 | 0.136542273 | 0.011933705 |
| 0.054086983 | 0.013668976 | 0.207370508 | 0.086105766 |
| 0.069012132 | 0.165551323 | 0.07728673  | 0.02132595  |
| 0.027523721 | 0.05604032  | 0.342312259 | 0.285700811 |
| 0.014278723 | 0.098430041 | 0.140488027 | 0.181551612 |
| 0.129263863 | 0.309142857 | 0.244584346 | 0.109712083 |
| 0.100115562 | 0.010479989 | 0.226360129 | 0.132206101 |
| 0.051370204 | 0.312277424 | 0.12338316  | 0.282779932 |
| 0.17730847  | 0.245841359 | 0.253359227 | 0.248853984 |
| 0.041808625 | 0.132641182 | 0.256076936 | 0.027921445 |
| 0.177576135 | 0.31408785  | 0.105087402 | 0.06843008  |
| 0.199602697 | 0.12302762  | 0.027486169 | 0.007292946 |
| 0.084056642 | 0.153114053 | 0.068055705 | 0.30813267  |
| 0.135716689 | 0.145173462 | 0.016368233 | 0.090780434 |
| 0.2881562   | 0.231866922 | 0.049843985 | 0.250663101 |
| 0.096445269 | 0.271263749 | 0.223136553 | 0.232594939 |
| 0.055708894 | 0.254345801 | 0.228646261 | 0.216616382 |
| 0.238512082 | 0.211813246 | 0.266369736 | 0.013816989 |
| 0.058862389 | 0.120299171 | 0.084609694 | 0.087433654 |
| 0.140250621 | 0.029299629 | 0.048073433 | 0.246728003 |
| 0.056381404 | 0.261170333 | 0.023876133 | 0.041811112 |
| 0.155367669 | 0.062748164 | 0.214052797 | 0.132091578 |
| 0.062529046 | 0.263176227 | 0.013302644 | 0.05315677  |

|             |             |             |             |
|-------------|-------------|-------------|-------------|
| 0.060180247 | 0.263202301 | 0.156550428 | 0.099023185 |
| 0.05253137  | 0.029739194 | 0.210790515 | 0.089269628 |
| 0.089819895 | 0.028594554 | 0.259828391 | 0.022151626 |
| 0.027249352 | 0.310521782 | 0.077762222 | 0.009559853 |
| 0.033558031 | 0.128221116 | 0.034352702 | 1           |
| 0.024562906 | 0.254882377 | 0.132354767 | 0.168376778 |
| 0.182561738 | 0.047629338 | 0.145946909 | 0.021981975 |
| 0.027219345 | 0.201050801 | 0.137785507 | 0.249355683 |
| 0.085857874 | 0.332704632 | 0.191057583 | 0.214299073 |
| 0.013809044 | 0.085497017 | 0.043719681 | 0.262388946 |
| 0.080673105 |             |             |             |
| USP18       | 0.030077984 | 0.022051783 | 0.038387848 |
| 0.046179254 | 0.054176347 | 0.009559823 | 0.042080334 |
| 0.010165031 | 0.05127157  | 0.014590248 | 0.068735034 |
| 0.042392654 | 0.02663222  | 0.012494182 | 0.005265368 |
| 0.087495765 | 0.12934915  | 0.026584844 | 0.101878006 |
| 0.053407757 | 0.014280355 | 0.102737841 | 0.067001671 |
| 0.062595624 | 0.141820658 | 0.138022208 | 0.069479824 |
| 0.048446588 | 0.158165906 | 0.005206842 | 0.025198578 |
| 0.217925665 | 0.030858865 | 0.01514236  | 0.057989649 |
| 0.014472131 | 0.019442056 | 0.054517718 | 0.006109936 |
| 0.022696027 | 0.043398226 | 0.046850147 | 0.07753048  |
| 0.072032222 | 0.010387274 | 0.064177209 | 0.085932555 |
| 0.00693565  | 0.123000346 | 0.003190675 | 0.010331131 |
| 0.010347588 | 0.019204663 | 0.01391565  | 0.03700006  |
| 0.012181696 | 0.003913342 | 0.02247733  | 0.008515866 |
| 0.069629367 | 0.00294775  | 0.013718554 | 0.024460256 |
| 0.00941725  | 0.024730299 | 0.174367073 | 0.028881026 |
| 0.038672042 | 0.013873609 | 0.086150658 | 0.028584425 |
| 0.003406578 | 0.061126233 | 0.115728092 | 0.021961752 |
| 0.26455155  | 0.068623047 | 0.188695852 | 0.042440844 |
| 0.045455429 | 0.019030775 | 0.05221902  | 0.04220785  |
| 0.081995322 | 0.147627974 | 0.056139249 | 0.08918384  |
| 0.024021968 | 0.039614465 | 0.045097911 | 0.101340729 |
| 0.04771456  | 0.019033597 | 0.089458328 | 0.196488639 |
| 0.018148551 | 0.019471144 | 0.017210175 | 0.030147014 |
| 0.013000299 | 0.26502622  | 0.012424189 | 0.03374934  |
| 0.013867095 | 0.070558508 | 0.220021752 | 0.025503089 |
| 0.206400718 | 0.006520209 | 0.085984547 | 0.06893488  |
| 0.045403218 | 0.054066907 | 0.214350431 | 0.030255317 |
| 0.079924159 | 0.028415395 | 0.020836434 | 0.084936926 |
| 0.062691978 | 0.111095939 | 0.039766326 | 0.240600162 |
| 0.016222407 | 0.078511958 | 0.008617547 | 0.033865327 |
| 0.011262117 | 0.022399674 | 0.040463743 | 0.150911779 |
| 0.230597774 | 0.126910458 | 0.024652592 | 0.04161797  |
| 0.043607814 | 0.015902918 | 0.053335543 | 0.011622585 |
| 0.028328011 | 0.052857338 | 0.000166701 | 0.065955214 |
| 0.027636965 | 0.132860438 | 0.171302193 | 0.027700797 |
| 0.098148885 | 0.040669227 | 0.116417966 | 0.036022703 |
| 0.011598805 | 0.133458777 | 0.011273584 | 0.09498504  |
| 0.00815312  | 0.114669563 | 0.114826725 | 0.036713277 |
| 0.050678468 | 0.0145117   | 0.28061719  | 0.017948341 |
| 0.008953823 | 0.110551472 | 0.113650603 | 0.015183075 |
| 0.009777598 | 0.016995    | 0.009174447 | 0.177357312 |



|             |             |             |             |
|-------------|-------------|-------------|-------------|
| 0.043893584 | 0.087179962 | 0.00895275  | 0.018598851 |
| 0.035874058 | 0.151441659 | 0.004120262 | 0.029195767 |
| 0.004484145 | 0.039863416 | 0.050354632 | 0.075431073 |
| 0.172428063 | 0.054333472 | 0.024653836 | 0.011850977 |
| 0.019745519 | 0.003321568 | 0.045280869 | 0.068659317 |
| 0.022574599 | 0.038852247 | 0.002661952 | 0.087252334 |
| 0.010326156 | 0.165799405 | 0.050777526 | 0.190443522 |
| 0.016171241 | 0.176320744 | 0.011191215 | 0.036623329 |
| 0.021298181 | 0.033949755 | 0.005665987 | 0.036281843 |
| 0.285014122 | 0.008144964 | 0.036819315 | 0.050337091 |
| 0.038337534 | 0.05979328  | 0.061254768 | 0.02114007  |
| 0.042989998 | 0.047754473 | 0.194297256 | 0.146544147 |
| 0.041234888 | 0.00691518  | 0.012113447 | 0.02430059  |
| 0.006070423 | 0.018370737 | 0.018095357 | 0.003112991 |
| 0.102374966 | 0.022113583 | 0.017470804 | 0.067046106 |
| 0.016261018 | 0.028933644 | 0.017836726 | 0.146427652 |
| 0.223983206 | 0.028972861 | 0.1238332   | 0.059367704 |
| 0.085147856 | 0.018152636 | 0.075529616 | 0.00948109  |
| 0.022425248 | 0.090807556 | 0.02867254  | 0.021388604 |
| 0.025438319 | 0.138108287 | 0.264849265 | 0.008294093 |
| 0.020572612 | 0.009027189 | 0.005996933 | 0.014075851 |
| 0.012614428 | 0.046854821 | 0.05057289  | 0.052576958 |
| 0.161505093 | 0.246785093 | 0.022451737 | 0.081191741 |
| 0.006867857 | 0.055034427 | 0.238175172 | 0.003293776 |
| 0.031485937 | 0.003252083 | 0.002417986 | 0.019798796 |
| 0.116529412 | 0.048711864 | 0.027173626 | 0.201376823 |
| 0.032796086 | 0.091457068 | 0.050089462 | 0.005554163 |
| 0.019606366 | 0.015025711 | 0.132431999 | 0.111927628 |
| 0.008945318 | 0.040640962 | 0.062978279 | 0.015469829 |
| 0.013312326 | 0.187891249 | 0.025508599 | 0.172342324 |
| 0.2842902   | 0.065419783 | 0.02557572  | 0.281994554 |
| 0.227805378 | 0.023635256 | 0.013716051 | 0.182590336 |
| 0.026857598 | 0.095642041 | 0.018154317 | 0.121405457 |
| 0.087336388 | 0.0458546   | 0.187412932 | 0.044608157 |
| 0.01237383  | 0.028162918 | 0.17032564  | 0.051637525 |
| 0.129780758 | 0.021194226 | 0.003048118 | 0.030287007 |
| 0.08019012  | 0.018722056 | 0.166253779 | 0.043144968 |
| 0.012793023 | 0.005400048 | 0.175035134 | 0.018539662 |
| 0.01106807  | 0.09728649  | 0.063932683 | 0.01559711  |
| 0.022699822 | 0.035221764 | 0.018429553 | 0.058653365 |
| 0.030499827 | 0.042516905 | 0.063191983 | 0.081060589 |
| 0.013531608 | 0.080120616 | 0.080314596 | 0.007755989 |
| 0.079311281 | 0.013950231 | 0.061539558 | 0.1005451   |
| 0.005647863 | 0.006939166 | 0.131217025 | 0.154553158 |
| 0.032726864 | 0.022692798 | 0.015257276 | 0.05621737  |
| 0.032302332 | 0.022855102 | 0.027467623 | 0.271144392 |
| 0.306693738 | 0.017414681 | 0.020324856 | 0.039610158 |
| 0.050217184 | 0.002591783 | 0.039789526 | 0.019945053 |
| 0.10505231  | 0.00787676  | 0.003461427 | 0.041122847 |
| 0.276682404 | 0.06769721  | 0.011852695 | 0.028635207 |
| 0.00130072  | 0.073660702 | 0.098238234 | 0.031454001 |
| 0.016037981 | 0.219897641 | 0.151053152 | 0.021732258 |
| 0.029121515 | 0.020287834 | 0.049526396 | 0.032633981 |
| 0.030780962 | 0.014157871 | 0.016556319 | 0.161048807 |

|             |             |             |             |
|-------------|-------------|-------------|-------------|
| 0.023532234 | 0.020156776 | 0.028989433 | 0.016736545 |
| 0.040910497 | 0.08948334  | 0.093801688 | 0.061825172 |
| 0.056041485 | 0.008301204 | 0.002855613 | 0.037745027 |
| 0.007827974 | 0.110135322 | 0.024517839 | 0.054987306 |
| 0.033072034 | 0.216046048 | 0.016925412 | 0.019773815 |
| 0.024930526 | 0.039823463 | 0.184509742 | 0.023006554 |
| 0.014304822 | 0.113193617 | 0.030364644 | 0.180249374 |
| 0.027594583 | 0.001057092 | 0.117363594 | 0.023691795 |
| 0.029693397 | 0.077970304 | 0.017827025 | 0.095538676 |
| 0.045808642 | 0.190092239 | 0.004294873 | 0.077658656 |
| 0.136450758 | 0.007175321 | 0.033811765 | 0.013625053 |
| 0.253111207 | 0.146008492 | 0.023994087 | 0.039085379 |
| 0.048503133 | 0.159253372 | 0.041457049 | 0.015477258 |
| 0.166665816 | 0.207302739 | 0.154352601 | 0.075153832 |
| 0.01300103  | 0.065716151 | 0.104208864 | 0.00139614  |
| 0.037816556 | 0.043025236 | 0.060273033 | 0.041618602 |
| 0.030167736 | 0.070853146 | 0.221419851 | 0.014909686 |
| 0.079002251 | 0.01291868  | 0.087812994 | 0.002012547 |
| 0.083118469 | 0.194177285 | 0.020273677 | 0.014179965 |
| 0.008048336 | 0.026617177 | 0.032419532 | 0.264990566 |
| 0.049105443 | 0.214316462 | 0.047023753 | 0.057537037 |
| 0.291452853 | 0.035043077 | 0.144187993 | 0.067301227 |
| 0.012651925 | 0.047743865 | 0.01294483  | 0.00718187  |
| 0.034580574 | 0.094506274 | 0.042182882 | 0.015561634 |
| 0.010892155 | 0.054770207 | 0.020792794 | 0.030108168 |
| 0.0214089   | 0.026123453 | 0.023693107 | 0.039530633 |
| 0.072039658 | 0.015099936 | 0.015320522 | 0.022925177 |
| 0.072205519 | 0.045959451 | 0.027729246 | 0.073975935 |
| 0.101946435 | 0.042548609 | 0.108998454 | 0.008187482 |
| 0.042515378 | 0.007668507 | 0.055588291 | 0.075818181 |
| 0.025472989 | 0.015520025 | 0.069737572 | 0.140714971 |
| 0.023375704 | 0.016212918 | 0.014612808 | 0.02789419  |
| 0.212225677 | 0.074351663 | 0.04738101  | 0.057275277 |
| 0.013197287 | 0.023210789 | 0.028568588 | 0.013926322 |
| 0.011401441 | 0.07475052  | 0.01628048  | 0.005004941 |
| 0.083992437 | 0.024577683 | 0.051090028 | 0.306909892 |
| 0.134809542 | 0.216275428 | 0.019499354 | 0.085529905 |
| 0.016216535 | 0.077636205 | 0.004930817 | 0.137693482 |
| 0.145065617 | 0.017883542 | 0.109443621 | 0.021467781 |
| 0.070577748 | 0.013506133 | 0.102837444 | 0.238552767 |
| 0.022945198 | 0.0275537   | 0.042392479 | 0.121689904 |
| 0.033285569 | 0.18578953  | 0.111528903 | 0.006321499 |
| 0.004103704 | 0.013496508 | 0.024151215 | 0.043567336 |
| 0.05910533  | 0.05230902  | 0.012564733 | 0.276527536 |
| 0.124220038 | 0.014940194 | 0.043074551 | 0.024562906 |
| 1           | 0.021967561 | 0.004350854 | 0.050133731 |
| 0.031932168 | 0.167635787 | 0.007920142 | 0.032868959 |
| 0.121596649 | 0.012713001 | 0.052978166 | 0.018012143 |
| 0.079526834 | 0.075199847 | 0.008666822 | 0.021781545 |
| 0.069111889 | 0.024717439 | 0.063075727 | 0.039817007 |
| 0.008483625 |             |             |             |
| USP28       | 0.441270066 | 0.508774355 | 0.424936998 |
| 0.420561932 | 0.452114953 | 0.377621486 | 0.190943887 |
| 0.150947892 | 0.080370501 | 0.003909843 | 0.029261561 |

|             |             |             |             |
|-------------|-------------|-------------|-------------|
| 0.473287652 | 0.232726488 | 0.262141218 | 0.334272479 |
| 0.42192768  | 0.149291808 | 0.327809592 | 0.22390335  |
| 0.401943063 | 0.075241836 | 0.415287706 | 0.078309088 |
| 0.325638    | 0.119527636 | 0.06845214  | 0.306640362 |
| 0.434037393 | 0.077291899 | 0.334736116 | 0.372089758 |
| 0.098225917 | 0.449025407 | 0.524682826 | 0.481796514 |
| 0.530674434 | 0.422730991 | 0.009639185 | 0.297953273 |
| 0.421339656 | 0.470498182 | 0.40064198  | 0.323356045 |
| 0.035588059 | 0.48578488  | 0.234328042 | 0.42676818  |
| 0.20748708  | 0.032015458 | 0.215806584 | 0.430571216 |
| 0.49350056  | 0.479909436 | 0.19282145  | 0.145737546 |
| 0.259625758 | 0.213457732 | 0.360572491 | 0.313286236 |
| 0.215749839 | 0.135827169 | 0.497117218 | 0.078648546 |
| 0.152008431 | 0.214790796 | 0.162214063 | 0.231981749 |
| 0.408081732 | 0.384017907 | 0.011622104 | 0.455687407 |
| 0.002049332 | 0.371416518 | 0.392105105 | 0.38205356  |
| 0.038922668 | 0.021162993 | 0.186123682 | 0.332282591 |
| 0.452197463 | 0.444243794 | 0.49172147  | 0.496697253 |
| 0.197005599 | 0.291464729 | 0.451794187 | 0.170498914 |
| 0.449228107 | 0.169194736 | 0.094053904 | 0.435947737 |
| 0.493783648 | 0.525937155 | 0.212499449 | 0.273384958 |
| 0.451856957 | 0.448815236 | 0.442427818 | 0.461991974 |
| 0.395566936 | 0.054069324 | 0.444258221 | 0.493210137 |
| 0.405034084 | 0.383357407 | 0.158857398 | 0.406437754 |
| 0.05303583  | 0.351418347 | 0.350805545 | 0.164584135 |
| 0.454362772 | 0.013830201 | 0.230027882 | 0.35883435  |
| 0.192704659 | 0.453561711 | 0.523653096 | 0.172390912 |
| 0.431258224 | 0.018002455 | 0.172777638 | 0.029552779 |
| 0.328858745 | 0.192003014 | 0.503109809 | 0.466082759 |
| 0.210232187 | 0.422858493 | 0.242983541 | 0.001141291 |
| 0.026341617 | 0.180195985 | 0.476081776 | 0.351967969 |
| 0.436596909 | 0.419203322 | 0.251793832 | 0.406725474 |
| 0.496554449 | 0.492997108 | 0.05595297  | 0.078828929 |
| 0.428483881 | 0.183188017 | 0.231727    | 0.482792086 |
| 0.33454776  | 0.090675089 | 0.117569084 | 0.482966722 |
| 0.399446849 | 0.075368399 | 0.316400738 | 0.421017319 |
| 0.360610114 | 0.396816401 | 0.09340542  | 0.280879985 |
| 0.041394132 | 0.500380503 | 0.029239213 | 0.302518843 |
| 0.318848679 | 0.179396616 | 0.006764638 | 0.230391641 |
| 0.283737177 | 0.47450093  | 0.493275768 | 0.093479651 |
| 0.324162302 | 0.430306972 | 0.305180471 | 0.463635815 |
| 0.011184742 | 0.036928968 | 0.263760226 | 0.487362423 |
| 0.283325022 | 0.48477284  | 0.285424229 | 0.310266257 |
| 0.29150308  | 0.454518569 | 0.002848898 | 0.500760356 |
| 0.530803073 | 0.288918666 | 0.430849123 | 0.438028361 |
| 0.43706293  | 0.45848126  | 0.040816143 | 0.426101939 |
| 0.368466817 | 0.066441567 | 0.484651536 | 0.167311164 |
| 0.453218293 | 0.039828488 | 0.309059984 | 0.489591954 |
| 0.495304863 | 0.007595302 | 0.203658497 | 0.378861503 |
| 0.027462142 | 0.078823336 | 0.431972235 | 0.408478035 |
| 0.398086308 | 0.462835909 | 0.470995815 | 0.423814717 |
| 0.452455364 | 0.204330715 | 0.009726754 | 0.340394036 |
| 0.464544265 | 0.440439807 | 0.422607602 | 0.217715854 |
| 0.341843132 | 0.455303351 | 0.465426919 | 0.23414946  |

|             |             |             |             |
|-------------|-------------|-------------|-------------|
| 0.036823431 | 0.292823877 | 0.016398059 | 0.349286207 |
| 0.430050418 | 0.117901105 | 0.438421044 | 0.139996043 |
| 0.073240627 | 0.50561589  | 0.21467634  | 0.324298181 |
| 0.166757645 | 0.436158923 | 0.225653292 | 0.26302091  |
| 0.266161014 | 0.162476751 | 0.396296067 | 0.406162509 |
| 0.02834734  | 0.093924551 | 0.013061578 | 0.458966429 |
| 0.174637215 | 0.400527731 | 0.394041783 | 0.433543111 |
| 0.335334871 | 0.116776959 | 0.414476618 | 0.316708904 |
| 0.11674514  | 0.013054792 | 0.489418563 | 0.40329909  |
| 0.341517084 | 0.137845592 | 0.036741827 | 0.407331422 |
| 0.474923407 | 0.332587053 | 0.251552114 | 0.455760828 |
| 0.020940672 | 0.484335554 | 0.273732185 | 0.127613694 |
| 0.44842386  | 0.262834622 | 0.450579162 | 0.057603242 |
| 0.389568379 | 0.452010331 | 0.306580155 | 0.196247908 |
| 0.408746008 | 0.416119354 | 0.024252615 | 0.425288247 |
| 0.425858058 | 0.028963696 | 0.516504835 | 0.137726567 |
| 0.018704779 | 0.475015704 | 0.494598638 | 0.072116392 |
| 0.075634155 | 0.35769721  | 0.032862689 | 0.300913411 |
| 0.497055399 | 0.427598524 | 0.471779422 | 0.239931585 |
| 0.036577163 | 0.012837242 | 0.226902223 | 0.430674258 |
| 0.518963187 | 0.505374295 | 0.254458194 | 0.422434713 |
| 0.227942403 | 0.381186873 | 0.121259302 | 0.491598953 |
| 0.185379815 | 0.514239193 | 0.004976876 | 0.493267641 |
| 0.529464346 | 0.277694933 | 0.086982923 | 0.297778558 |
| 0.40923234  | 0.038229379 | 0.17542916  | 0.495460557 |
| 0.451207567 | 0.348407925 | 0.382166266 | 0.44263073  |
| 0.011177798 | 0.032849852 | 0.414753932 | 0.225161025 |
| 0.416149881 | 0.211073748 | 0.075319622 | 0.308538309 |
| 0.040567457 | 0.445799247 | 0.467569118 | 0.059407241 |
| 0.3649295   | 0.284528687 | 0.400601347 | 0.031116558 |
| 0.493821701 | 0.50149125  | 0.525139355 | 0.137256087 |
| 0.480549393 | 0.486635211 | 0.488341533 | 0.075121759 |
| 0.01635288  | 0.527386102 | 0.397755389 | 0.020004064 |
| 0.473013709 | 0.220061279 | 0.013887953 | 0.473116447 |
| 0.165867459 | 0.457753812 | 0.002189815 | 0.088199135 |
| 0.040226891 | 0.478786439 | 0.48519301  | 0.369436914 |
| 0.252281778 | 0.352457189 | 0.005861847 | 0.508300268 |
| 0.485510019 | 0.014278673 | 0.159975827 | 0.491953107 |
| 0.495736019 | 0.511800178 | 0.384260695 | 0.499081472 |
| 0.494468188 | 0.517669266 | 0.239026953 | 0.276984549 |
| 0.460766999 | 0.508249894 | 0.420923238 | 0.43170603  |
| 0.471825566 | 0.451379904 | 0.272994544 | 0.012506576 |
| 0.149026392 | 0.186250502 | 0.352438311 | 0.094800235 |
| 0.313931411 | 0.150218692 | 0.462237017 | 0.478920706 |
| 0.497659298 | 0.003792456 | 0.125834865 | 0.473806544 |
| 0.432101774 | 0.453825392 | 0.015946958 | 0.005090388 |
| 0.006660054 | 0.024221828 | 0.346462512 | 0.247851093 |
| 0.479551459 | 0.257654084 | 0.003208325 | 0.031134434 |
| 0.263776115 | 0.453525508 | 0.502422567 | 0.37524715  |
| 0.47574782  | 0.075534059 | 0.315478417 | 0.391029708 |
| 0.076031424 | 0.33985403  | 0.494978334 | 0.462104398 |
| 0.037106603 | 0.254669894 | 0.365526809 | 0.469267357 |
| 0.108521901 | 0.32972934  | 0.478324157 | 0.338906166 |
| 0.0111024   | 0.082830674 | 0.067137136 | 0.451387832 |

|             |             |             |             |
|-------------|-------------|-------------|-------------|
| 0.524413558 | 0.090428038 | 0.037334924 | 0.136571807 |
| 0.118187552 | 0.47733447  | 0.165337869 | 0.487896257 |
| 0.44833624  | 0.443316798 | 0.082957174 | 0.476187919 |
| 0.041805134 | 0.496504066 | 0.396798635 | 0.052086646 |
| 0.279323691 | 0.0094635   | 0.472059835 | 0.202193043 |
| 0.315721899 | 0.391859613 | 0.221119377 | 0.01670597  |
| 0.221545771 | 0.051800665 | 0.482347143 | 0.489529345 |
| 0.032734123 | 0.213292111 | 0.297672952 | 0.402330406 |
| 0.263807924 | 0.45454093  | 0.507985777 | 0.44266571  |
| 0.073625125 | 0.170633314 | 0.399224797 | 0.407479462 |
| 0.216316812 | 0.489316067 | 0.344351939 | 0.507950089 |
| 0.417073826 | 0.449386278 | 0.482717556 | 0.34532009  |
| 0.286251944 | 0.397997386 | 0.383494138 | 0.015892828 |
| 0.342008588 | 0.48185969  | 0.336887489 | 0.177803198 |
| 0.282339665 | 0.456741189 | 0.036306777 | 0.166717087 |
| 0.409530105 | 0.298601589 | 0.142700618 | 0.439737707 |
| 0.384048663 | 0.412786082 | 0.028507405 | 0.062933816 |
| 0.528244544 | 0.426145162 | 0.119005474 | 0.440519314 |
| 0.163364891 | 0.365302147 | 0.479495322 | 0.487529596 |
| 0.398584784 | 0.485925573 | 0.433656853 | 0.407444105 |
| 0.416022274 | 0.245289543 | 0.527589456 | 0.063362959 |
| 0.09240572  | 0.456186699 | 0.102436204 | 0.091640929 |
| 0.137836037 | 0.024583169 | 0.378257968 | 0.43824233  |
| 0.456289613 | 0.400127026 | 0.315640846 | 0.073298841 |
| 0.34369875  | 0.370762375 | 0.363141701 | 0.18643426  |
| 0.077037423 | 0.504571661 | 0.007950097 | 0.052849505 |
| 0.462357971 | 0.475796001 | 0.456319126 | 0.241655489 |
| 0.365399968 | 0.149646215 | 0.308342408 | 0.279901416 |
| 0.362007728 | 0.38752085  | 0.47289058  | 0.023965642 |
| 0.013967026 | 0.48342679  | 0.363949791 | 0.018368384 |
| 0.093025729 | 0.392144315 | 0.278545297 | 0.254882377 |
| 0.021967561 | 1           | 0.353928017 | 0.459642065 |
| 0.327949842 | 0.056547176 | 0.359742374 | 0.076192623 |
| 0.045165541 | 0.435097823 | 0.438794697 | 0.523113027 |
| 0.369410792 | 0.434370772 | 0.446106241 | 0.474927116 |
| 0.104499052 | 0.419692494 | 0.020772175 | 0.448426023 |
| 0.47040965  |             |             |             |
| UTP15       | 0.226771729 | 0.428987879 | 0.109761222 |
| 0.316339007 | 0.150829942 | 0.2473339   | 0.117851279 |
| 0.086142767 | 0.057464941 | 0.012960096 | 0.023233672 |
| 0.165765187 | 0.074611536 | 0.114617884 | 0.127518324 |
| 0.256317727 | 0.036726088 | 0.082672023 | 0.105665442 |
| 0.245188108 | 0.088278201 | 0.221823884 | 0.056561181 |
| 0.059382717 | 0.031828364 | 0.040407977 | 0.074459365 |
| 0.331791724 | 0.040343362 | 0.199650351 | 0.280370929 |
| 0.02051507  | 0.279547874 | 0.416796549 | 0.216341809 |
| 0.393629523 | 0.21777395  | 0.00200218  | 0.165514596 |
| 0.303355603 | 0.270230622 | 0.269120863 | 0.171485526 |
| 0.037566656 | 0.414303175 | 0.143842937 | 0.135928835 |
| 0.088647243 | 0.019153034 | 0.126342687 | 0.393523365 |
| 0.407887596 | 0.224167058 | 0.117140856 | 0.112166096 |
| 0.091587448 | 0.115030884 | 0.058693116 | 0.248888352 |
| 0.11245713  | 0.115849692 | 0.396087784 | 0.084832449 |
| 0.079335314 | 0.100814056 | 0.029689451 | 0.111320386 |

|             |             |             |             |
|-------------|-------------|-------------|-------------|
| 0.074003742 | 0.294724014 | 0.012189477 | 0.145600622 |
| 0.005814799 | 0.229017715 | 0.119102403 | 0.077237334 |
| 0.016874254 | 0.016979059 | 0.036753645 | 0.221126323 |
| 0.337752801 | 0.327244176 | 0.337689317 | 0.34469065  |
| 0.047485949 | 0.069747681 | 0.104396554 | 0.071033169 |
| 0.321822154 | 0.115055463 | 0.035719247 | 0.246077731 |
| 0.347403175 | 0.410542485 | 0.059108876 | 0.072757584 |
| 0.37073684  | 0.403286794 | 0.141663025 | 0.14145391  |
| 0.106760646 | 0.009516854 | 0.390619742 | 0.376397432 |
| 0.309395606 | 0.059786207 | 0.044434251 | 0.316917057 |
| 0.024322935 | 0.097781845 | 0.205309709 | 0.028807621 |
| 0.353829415 | 0.025669534 | 0.049767958 | 0.199334882 |
| 0.051541028 | 0.2864625   | 0.388919318 | 0.093157431 |
| 0.107886074 | 0.007958591 | 0.036045031 | 0.009585885 |
| 0.102657963 | 0.020571131 | 0.407734409 | 0.370744622 |
| 0.092645863 | 0.104614799 | 0.115178471 | 0.00094496  |
| 0.008211843 | 0.033039596 | 0.27600994  | 0.09431794  |
| 0.257703417 | 0.24801263  | 0.104676457 | 0.278985341 |
| 0.209377665 | 0.330882101 | 0.051998189 | 0.059215845 |
| 0.174711189 | 0.035295468 | 0.103884293 | 0.19735053  |
| 0.094126263 | 0.064968869 | 0.05642399  | 0.394171409 |
| 0.394555349 | 0.047100182 | 0.091877235 | 0.226245764 |
| 0.157090558 | 0.106794225 | 0.047194792 | 0.097444818 |
| 0.047944911 | 0.370323124 | 0.006373877 | 0.106767243 |
| 0.093606655 | 0.030903998 | 0.003719378 | 0.123716112 |
| 0.11843501  | 0.365752071 | 0.370841013 | 0.039492189 |
| 0.10800625  | 0.19437972  | 0.137921225 | 0.30085158  |
| 0.025658753 | 0.016297784 | 0.102001467 | 0.391327451 |
| 0.239007151 | 0.337371534 | 0.086713486 | 0.072863128 |
| 0.092634033 | 0.299772731 | 0.000168083 | 0.415614441 |
| 0.403971511 | 0.104226335 | 0.186290323 | 0.149538535 |
| 0.11041302  | 0.354881069 | 0.007637531 | 0.22393274  |
| 0.213278722 | 0.033058721 | 0.361754504 | 0.053811508 |
| 0.354512027 | 0.024455543 | 0.1315327   | 0.268577601 |
| 0.245182649 | 0.005189966 | 0.144884027 | 0.279125794 |
| 0.005627898 | 0.107866263 | 0.251437139 | 0.248666034 |
| 0.209608135 | 0.259647906 | 0.341145749 | 0.098031548 |
| 0.151444165 | 0.088142301 | 0.004435296 | 0.081417439 |
| 0.251644671 | 0.097412808 | 0.401521618 | 0.109323314 |
| 0.163514265 | 0.407680977 | 0.271166077 | 0.119079807 |
| 0.037668312 | 0.146608582 | 0.016961198 | 0.120918701 |
| 0.280659169 | 0.090549102 | 0.136436018 | 0.025263043 |
| 0.019858633 | 0.411098872 | 0.030077552 | 0.043844167 |
| 0.019186471 | 0.211667463 | 0.092927135 | 0.123682411 |
| 0.07626551  | 0.06533011  | 0.099668105 | 0.12702138  |
| 0.051488088 | 0.040087114 | 0.001446868 | 0.088075149 |
| 0.060472799 | 0.106566924 | 0.112458836 | 0.258846126 |
| 0.103978289 | 0.044531229 | 0.122904342 | 0.060278463 |
| 0.030851036 | 0.006877275 | 0.407645296 | 0.211030639 |
| 0.270424811 | 0.081000536 | 0.013222829 | 0.09994229  |
| 0.380894887 | 0.207378203 | 0.10265451  | 0.409812218 |
| 0.009441494 | 0.335539542 | 0.105607277 | 0.042753934 |
| 0.08931772  | 0.110673316 | 0.352832132 | 0.057352584 |
| 0.175726754 | 0.418597941 | 0.091692541 | 0.070290121 |

|             |             |             |             |
|-------------|-------------|-------------|-------------|
| 0.36228518  | 0.234955315 | 0.031536756 | 0.270884144 |
| 0.262122472 | 0.015755727 | 0.39374828  | 0.027030928 |
| 0.007370142 | 0.207561406 | 0.279233946 | 0.027182443 |
| 0.024103119 | 0.163672412 | 0.060666509 | 0.115184712 |
| 0.415626938 | 0.244034775 | 0.336632899 | 0.038608564 |
| 0.035313923 | 0.007531644 | 0.039233158 | 0.109951971 |
| 0.414376576 | 0.363544998 | 0.08310535  | 0.107928623 |
| 0.115069099 | 0.108256617 | 0.09812014  | 0.386549082 |
| 0.0277679   | 0.39485628  | 0.003560388 | 0.256045676 |
| 0.404994489 | 0.142612478 | 0.029385319 | 0.194452492 |
| 0.342360385 | 0.034897582 | 0.064116803 | 0.40603355  |
| 0.360813001 | 0.113565218 | 0.11715535  | 0.187382961 |
| 0.027435902 | 0.04643142  | 0.149611789 | 0.031672456 |
| 0.142075903 | 0.081540183 | 0.005254888 | 0.121633829 |
| 0.033697197 | 0.417562968 | 0.282098224 | 0.039654172 |
| 0.254152502 | 0.108980215 | 0.149026151 | 0.023177696 |
| 0.299243693 | 0.352277433 | 0.422923694 | 0.06559908  |
| 0.254534237 | 0.375303099 | 0.148578909 | 0.020842911 |
| 0.005155973 | 0.388704772 | 0.24203658  | 0.016950583 |
| 0.341242695 | 0.138703895 | 0.016930394 | 0.418673619 |
| 0.079918339 | 0.368651764 | 0.006584993 | 0.00868788  |
| 0.006774953 | 0.277311498 | 0.41650918  | 0.257384566 |
| 0.143143813 | 0.159234917 | 0.000419698 | 0.369258161 |
| 0.416593023 | 0.004400162 | 0.029626566 | 0.288252101 |
| 0.233084754 | 0.426861437 | 0.072846206 | 0.307411048 |
| 0.171223577 | 0.400573828 | 0.118147783 | 0.106701011 |
| 0.359307067 | 0.353256123 | 0.282508205 | 0.386283372 |
| 0.343037686 | 0.19721835  | 0.157014124 | 0.022795255 |
| 0.049365611 | 0.125432131 | 0.134059102 | 0.06751611  |
| 0.214591071 | 0.05013575  | 0.351944506 | 0.321616651 |
| 0.337280801 | 0.002232309 | 0.095808434 | 0.29663581  |
| 0.372933782 | 0.370178045 | 0.003859226 | 0.002201614 |
| 0.000941649 | 0.008215366 | 0.194573146 | 0.056567999 |
| 0.372020331 | 0.131261873 | 0.00375956  | 0.04297707  |
| 0.094714411 | 0.154077053 | 0.413520758 | 0.225200413 |
| 0.247061189 | 0.029501851 | 0.153322149 | 0.238274632 |
| 0.025869788 | 0.2045175   | 0.358733373 | 0.434729514 |
| 0.009433683 | 0.063178244 | 0.094013737 | 0.3903626   |
| 0.009968228 | 0.108192544 | 0.182889123 | 0.131469712 |
| 0.0017086   | 0.023336018 | 0.029255122 | 0.256126147 |
| 0.387723324 | 0.037536192 | 0.017276135 | 0.064258723 |
| 0.088228733 | 0.320374337 | 0.068380337 | 0.378539687 |
| 0.345014561 | 0.305938026 | 0.016172667 | 0.418239406 |
| 0.032742862 | 0.397046976 | 0.083954637 | 0.030192649 |
| 0.057157382 | 0.005019503 | 0.327018657 | 0.081302026 |
| 0.118775998 | 0.229282048 | 0.067128054 | 0.003937405 |
| 0.030812926 | 0.017420166 | 0.361025507 | 0.291454612 |
| 0.005278002 | 0.104045373 | 0.081596258 | 0.181056569 |
| 0.168204341 | 0.301899483 | 0.423331002 | 0.163011179 |
| 0.081820584 | 0.01500985  | 0.261835323 | 0.217592145 |
| 0.102748511 | 0.337122351 | 0.119233475 | 0.385028097 |
| 0.25684817  | 0.347853097 | 0.352336609 | 0.189489453 |
| 0.049728141 | 0.1942505   | 0.315387346 | 0.026966098 |
| 0.142819003 | 0.33402159  | 0.124684696 | 0.052162795 |

|             |             |             |             |
|-------------|-------------|-------------|-------------|
| 0.088220318 | 0.111218816 | 0.024009676 | 0.036242593 |
| 0.070548898 | 0.236395673 | 0.072413791 | 0.293101972 |
| 0.19392043  | 0.239484948 | 0.02027895  | 0.030225741 |
| 0.425659971 | 0.366140544 | 0.090495365 | 0.279841969 |
| 0.044698988 | 0.152693203 | 0.255779481 | 0.244615654 |
| 0.098494137 | 0.335802651 | 0.30617152  | 0.303091643 |
| 0.412540194 | 0.121666355 | 0.427135255 | 0.053368148 |
| 0.028268353 | 0.170103294 | 0.067863666 | 0.024555723 |
| 0.061402311 | 0.009181399 | 0.059025564 | 0.224179214 |
| 0.075733253 | 0.200238782 | 0.101011371 | 0.028326123 |
| 0.092016126 | 0.090409598 | 0.141623094 | 0.123577166 |
| 0.048069731 | 0.428719357 | 0.0040059   | 0.017750066 |
| 0.073756612 | 0.302655635 | 0.115817687 | 0.062388646 |
| 0.066554928 | 0.025521926 | 0.118717624 | 0.150665971 |
| 0.135691354 | 0.076244697 | 0.316257119 | 0.021865597 |
| 0.020602695 | 0.346748811 | 0.118596392 | 0.003112112 |
| 0.026004862 | 0.197075119 | 0.062352938 | 0.132354767 |
| 0.004350854 | 0.353928017 | 1           | 0.150310088 |
| 0.177143722 | 0.024459923 | 0.310229026 | 0.031539997 |
| 0.02324269  | 0.367456417 | 0.120480209 | 0.390513473 |
| 0.068312535 | 0.281375072 | 0.385311023 | 0.30454809  |
| 0.022693369 | 0.106730031 | 0.029303203 | 0.319638076 |
| 0.105163691 |             |             |             |
| UVRAG       | 0.357293194 | 0.490277759 | 0.252807319 |
| 0.361927763 | 0.266051152 | 0.200869825 | 0.139653396 |
| 0.106132414 | 0.086161269 | 0.004201169 | 0.0297766   |
| 0.303206614 | 0.13190122  | 0.141261485 | 0.171751139 |
| 0.404084595 | 0.137175875 | 0.219656514 | 0.182475535 |
| 0.327933858 | 0.058304904 | 0.35501896  | 0.090883906 |
| 0.259505236 | 0.118873846 | 0.083570612 | 0.22195861  |
| 0.422463023 | 0.092758073 | 0.139809866 | 0.284957691 |
| 0.134429072 | 0.386449391 | 0.470941116 | 0.345022893 |
| 0.463848921 | 0.318249119 | 0.01859451  | 0.145095164 |
| 0.381032802 | 0.388959236 | 0.330923833 | 0.216348578 |
| 0.046965365 | 0.416373797 | 0.167332612 | 0.297854566 |
| 0.128404323 | 0.044482922 | 0.103452368 | 0.382742013 |
| 0.412514097 | 0.262403    | 0.132492761 | 0.114159866 |
| 0.117212066 | 0.101974171 | 0.180062838 | 0.194991722 |
| 0.162342273 | 0.066896899 | 0.437526178 | 0.070848476 |
| 0.103325085 | 0.15421194  | 0.173366041 | 0.155434456 |
| 0.258315858 | 0.29464998  | 0.025546307 | 0.277808801 |
| 0.001721135 | 0.310114372 | 0.282107129 | 0.213070571 |
| 0.064050193 | 0.023551288 | 0.189022023 | 0.212936893 |
| 0.446144439 | 0.43240581  | 0.495002353 | 0.498715783 |
| 0.148128365 | 0.24834282  | 0.265216739 | 0.149380865 |
| 0.401690981 | 0.119322411 | 0.091897649 | 0.414542188 |
| 0.501212279 | 0.48444924  | 0.18804343  | 0.24102595  |
| 0.35544364  | 0.439132359 | 0.222311864 | 0.251547188 |
| 0.201771735 | 0.097380523 | 0.393470633 | 0.503673807 |
| 0.337423148 | 0.241083445 | 0.159438045 | 0.340191502 |
| 0.081477391 | 0.183758098 | 0.272226827 | 0.128938138 |
| 0.460854027 | 0.025221816 | 0.210087395 | 0.198880986 |
| 0.194508427 | 0.38143925  | 0.488051474 | 0.146641693 |
| 0.267299725 | 0.028978568 | 0.122817346 | 0.061914496 |



|             |             |             |             |
|-------------|-------------|-------------|-------------|
| 0.187039809 | 0.151857244 | 0.410842821 | 0.427267386 |
| 0.124545073 | 0.24081006  | 0.179684362 | 0.008694178 |
| 0.048215299 | 0.197398806 | 0.385304814 | 0.23071627  |
| 0.374649282 | 0.358081293 | 0.173286966 | 0.293293116 |
| 0.322571576 | 0.491600064 | 0.020551075 | 0.094097478 |
| 0.230502283 | 0.201931016 | 0.198806631 | 0.27423539  |
| 0.232102339 | 0.093924742 | 0.121303794 | 0.511964035 |
| 0.367185935 | 0.087839281 | 0.178276936 | 0.380177987 |
| 0.178170191 | 0.261513452 | 0.107158906 | 0.174089214 |
| 0.047586355 | 0.442387697 | 0.055808648 | 0.181983286 |
| 0.167481717 | 0.141765093 | 0.020948947 | 0.137511288 |
| 0.152577085 | 0.379535711 | 0.406365996 | 0.11725264  |
| 0.197917503 | 0.323375521 | 0.154909618 | 0.308093343 |
| 0.012748548 | 0.063361627 | 0.123524509 | 0.485271386 |
| 0.149410068 | 0.504957919 | 0.216760711 | 0.262674615 |
| 0.238011088 | 0.434454658 | 0.005745871 | 0.435151711 |
| 0.49224244  | 0.125850192 | 0.24139244  | 0.305248203 |
| 0.232575745 | 0.422417858 | 0.024640249 | 0.366296452 |
| 0.24290688  | 0.096049436 | 0.514384994 | 0.154332386 |
| 0.424257933 | 0.058244439 | 0.166579825 | 0.425317606 |
| 0.348344051 | 0.011842484 | 0.101582826 | 0.291528612 |
| 0.058608975 | 0.058742715 | 0.359095012 | 0.313734331 |
| 0.239342172 | 0.430127529 | 0.494087659 | 0.222632286 |
| 0.250022153 | 0.162143348 | 0.027846682 | 0.261218158 |
| 0.410660954 | 0.210312986 | 0.386269521 | 0.161549284 |
| 0.167043495 | 0.436418676 | 0.364163803 | 0.114158414 |
| 0.051938598 | 0.176561691 | 0.017101228 | 0.235146939 |
| 0.364655786 | 0.083204342 | 0.224427032 | 0.164194127 |
| 0.097776873 | 0.507245041 | 0.18768064  | 0.213749675 |
| 0.142223899 | 0.212927445 | 0.185874092 | 0.120442848 |
| 0.130201101 | 0.163646718 | 0.24109731  | 0.235920293 |
| 0.031910009 | 0.09756832  | 0.040250304 | 0.185701861 |
| 0.081977994 | 0.165958204 | 0.151911787 | 0.290733936 |
| 0.174983686 | 0.08061533  | 0.237573417 | 0.247928008 |
| 0.135728066 | 0.030706228 | 0.475837361 | 0.34264906  |
| 0.231571464 | 0.137004824 | 0.065732413 | 0.154738533 |
| 0.439576682 | 0.129600348 | 0.116163115 | 0.411798206 |
| 0.042336872 | 0.496167043 | 0.159034191 | 0.130078705 |
| 0.229524991 | 0.185958694 | 0.457071123 | 0.044495653 |
| 0.221223295 | 0.417135848 | 0.253927955 | 0.171335375 |
| 0.326449361 | 0.299244132 | 0.034495796 | 0.325821683 |
| 0.304530416 | 0.047679223 | 0.501612383 | 0.142251248 |
| 0.042457037 | 0.386058682 | 0.360599544 | 0.100810049 |
| 0.105448578 | 0.185895228 | 0.03406327  | 0.236699218 |
| 0.495552907 | 0.381858466 | 0.35290669  | 0.226030394 |
| 0.046776433 | 0.010835135 | 0.219485517 | 0.250579803 |
| 0.447728987 | 0.497153382 | 0.219469596 | 0.231032844 |
| 0.189156012 | 0.224398818 | 0.072361621 | 0.493806799 |
| 0.194401633 | 0.479759119 | 0.016996249 | 0.414045014 |
| 0.454503585 | 0.125838598 | 0.097707515 | 0.165228898 |
| 0.315877201 | 0.058461739 | 0.1677161   | 0.449647363 |
| 0.408642497 | 0.234869648 | 0.216545724 | 0.337793975 |
| 0.017317125 | 0.042963196 | 0.266329401 | 0.191954608 |
| 0.219644287 | 0.195972619 | 0.07217107  | 0.180890265 |

|             |             |             |             |
|-------------|-------------|-------------|-------------|
| 0.048490404 | 0.401441969 | 0.449882428 | 0.076297499 |
| 0.157168408 | 0.167699073 | 0.318898774 | 0.052726885 |
| 0.449382494 | 0.482021702 | 0.468929671 | 0.133789382 |
| 0.384179662 | 0.464850634 | 0.257989187 | 0.113541113 |
| 0.038679134 | 0.477853287 | 0.290236353 | 0.025566772 |
| 0.469386203 | 0.093138999 | 0.01300078  | 0.458259879 |
| 0.155466843 | 0.375097464 | 0.003601942 | 0.091792418 |
| 0.080574419 | 0.472258948 | 0.425007016 | 0.279013615 |
| 0.094368274 | 0.264356334 | 0.01900668  | 0.515908935 |
| 0.441904129 | 0.033022511 | 0.174801344 | 0.374784669 |
| 0.364958198 | 0.488969157 | 0.232087182 | 0.433042958 |
| 0.281751633 | 0.452695    | 0.142840716 | 0.22539783  |
| 0.390280786 | 0.469987612 | 0.346182032 | 0.418160625 |
| 0.437591496 | 0.375078196 | 0.199280663 | 0.021162077 |
| 0.141652954 | 0.107990514 | 0.142338735 | 0.077561994 |
| 0.179408295 | 0.141126976 | 0.45707004  | 0.474744463 |
| 0.470995043 | 0.014616631 | 0.09510255  | 0.36912002  |
| 0.399914356 | 0.463949928 | 0.042191097 | 0.00844139  |
| 0.010908971 | 0.031255451 | 0.212848425 | 0.231992273 |
| 0.473818472 | 0.089212609 | 0.011337185 | 0.034629152 |
| 0.18973524  | 0.313304565 | 0.463300207 | 0.336139246 |
| 0.420356091 | 0.104037338 | 0.130973469 | 0.354736753 |
| 0.094184562 | 0.216656155 | 0.475728885 | 0.420161423 |
| 0.076285308 | 0.236981918 | 0.212152405 | 0.480500191 |
| 0.082536164 | 0.250073445 | 0.322385872 | 0.181773264 |
| 0.032460413 | 0.111708638 | 0.094333066 | 0.432265796 |
| 0.448597418 | 0.068232177 | 0.040069276 | 0.05954722  |
| 0.089765161 | 0.465650454 | 0.132422834 | 0.515482997 |
| 0.400284422 | 0.43501161  | 0.114476225 | 0.439729337 |
| 0.052967414 | 0.431810302 | 0.250594908 | 0.030059218 |
| 0.237376179 | 0.028634633 | 0.444590073 | 0.10756068  |
| 0.155864867 | 0.291747733 | 0.18094346  | 0.041432003 |
| 0.175801645 | 0.075280267 | 0.477869494 | 0.470802802 |
| 0.070788787 | 0.178105735 | 0.247339738 | 0.318043982 |
| 0.140916471 | 0.374266822 | 0.4460019   | 0.18551663  |
| 0.070747254 | 0.152364015 | 0.330380364 | 0.268995765 |
| 0.129385235 | 0.50679173  | 0.201550554 | 0.515829759 |
| 0.325399446 | 0.447164881 | 0.449946263 | 0.212379725 |
| 0.205052028 | 0.223001806 | 0.244281529 | 0.016373981 |
| 0.236451883 | 0.440747668 | 0.209414202 | 0.143975385 |
| 0.200405717 | 0.247701377 | 0.061721676 | 0.106124279 |
| 0.22332665  | 0.154462682 | 0.114215264 | 0.447549784 |
| 0.260230636 | 0.288441363 | 0.042338352 | 0.084574804 |
| 0.511154193 | 0.401902228 | 0.09348176  | 0.312992773 |
| 0.1805246   | 0.242812501 | 0.423595738 | 0.430100225 |
| 0.23913982  | 0.401091273 | 0.362634545 | 0.257088259 |
| 0.36629203  | 0.193925773 | 0.477407588 | 0.045456637 |
| 0.096624589 | 0.280913356 | 0.082375336 | 0.12487119  |
| 0.131580276 | 0.051948816 | 0.204181581 | 0.389826076 |
| 0.221700915 | 0.284190234 | 0.160402038 | 0.099405261 |
| 0.266178782 | 0.208234593 | 0.257078336 | 0.119255528 |
| 0.07144682  | 0.444141215 | 0.018769085 | 0.083212066 |
| 0.228515552 | 0.391728946 | 0.23768028  | 0.215592649 |
| 0.232197766 | 0.17984979  | 0.224879292 | 0.132041477 |

|             |             |             |             |
|-------------|-------------|-------------|-------------|
| 0.134330715 | 0.211977266 | 0.390273912 | 0.039552972 |
| 0.023197992 | 0.502112108 | 0.187740018 | 0.049865057 |
| 0.123202321 | 0.248674224 | 0.218609841 | 0.168376778 |
| 0.050133731 | 0.459642065 | 0.150310088 | 1           |
| 0.199845557 | 0.088591092 | 0.29391539  | 0.078144594 |
| 0.078094705 | 0.394550854 | 0.260601047 | 0.476543309 |
| 0.269128627 | 0.390598102 | 0.380289063 | 0.380766208 |
| 0.125795012 | 0.221769008 | 0.035004772 | 0.422578532 |
| 0.206017021 |             |             |             |
| VAMP8       | 0.295234705 | 0.418756539 | 0.168595236 |
| 0.389320388 | 0.209876411 | 0.247530683 | 0.253536796 |
| 0.247609507 | 0.125000207 | 0.026782394 | 0.029527041 |
| 0.217130867 | 0.122574275 | 0.220081821 | 0.188754078 |
| 0.374435172 | 0.105290867 | 0.229239872 | 0.249585117 |
| 0.362844325 | 0.196443657 | 0.317710613 | 0.186373885 |
| 0.140992406 | 0.079556905 | 0.10767089  | 0.136803467 |
| 0.43502778  | 0.120699779 | 0.189437043 | 0.369313304 |
| 0.109540497 | 0.356274768 | 0.382499894 | 0.254022881 |
| 0.353572642 | 0.262395494 | 0.02613448  | 0.212138675 |
| 0.373687004 | 0.312279702 | 0.375795577 | 0.262664367 |
| 0.117974984 | 0.373251886 | 0.245655132 | 0.21194273  |
| 0.218926543 | 0.053119437 | 0.212168032 | 0.368756591 |
| 0.334573457 | 0.210318035 | 0.270210146 | 0.22546329  |
| 0.091842427 | 0.204672239 | 0.080374241 | 0.289168469 |
| 0.242095578 | 0.193279153 | 0.347881574 | 0.161714234 |
| 0.148250448 | 0.27956834  | 0.114960576 | 0.275930175 |
| 0.133210655 | 0.341418465 | 0.085841944 | 0.178965332 |
| 0.014638005 | 0.359757    | 0.212300236 | 0.1048366   |
| 0.080184217 | 0.045190259 | 0.135005018 | 0.290082946 |
| 0.430317904 | 0.35142361  | 0.387857923 | 0.371796127 |
| 0.124437883 | 0.210113186 | 0.145611694 | 0.186214442 |
| 0.365724772 | 0.213561803 | 0.137340374 | 0.351398588 |
| 0.389581355 | 0.38094737  | 0.148821201 | 0.175089762 |
| 0.339060703 | 0.407480737 | 0.195960692 | 0.204699564 |
| 0.137817373 | 0.054217338 | 0.345436764 | 0.393756359 |
| 0.348616777 | 0.110599185 | 0.135715243 | 0.395177342 |
| 0.1133256   | 0.193957949 | 0.31240752  | 0.106571258 |
| 0.438917097 | 0.077206262 | 0.140943447 | 0.248832542 |
| 0.221694367 | 0.348328888 | 0.362728297 | 0.23848952  |
| 0.18850662  | 0.045453305 | 0.05855265  | 0.069794709 |
| 0.188521055 | 0.049631956 | 0.337663046 | 0.401560736 |
| 0.238449331 | 0.186434671 | 0.278896897 | 0.013054305 |
| 0.047169989 | 0.147333884 | 0.303952037 | 0.232478818 |
| 0.356217592 | 0.261693866 | 0.169921389 | 0.30296381  |
| 0.21598585  | 0.380804568 | 0.043139046 | 0.208937966 |
| 0.220172635 | 0.151569355 | 0.225875098 | 0.222078238 |
| 0.174419688 | 0.230896853 | 0.188166227 | 0.423427937 |
| 0.388156485 | 0.159967144 | 0.217788114 | 0.342540897 |
| 0.190757585 | 0.1622825   | 0.185905438 | 0.21134192  |
| 0.142511387 | 0.324482804 | 0.03936656  | 0.247970403 |
| 0.10444318  | 0.079329581 | 0.052582119 | 0.259279975 |
| 0.205784095 | 0.320597888 | 0.318136754 | 0.173807677 |
| 0.228071118 | 0.269885033 | 0.218832771 | 0.277864684 |
| 0.029156083 | 0.10473912  | 0.181074373 | 0.398992712 |

|             |             |             |             |
|-------------|-------------|-------------|-------------|
| 0.239611777 | 0.386240843 | 0.251483433 | 0.196862051 |
| 0.195424205 | 0.394609979 | 0.004826884 | 0.369185561 |
| 0.375354507 | 0.170145928 | 0.217312299 | 0.233015573 |
| 0.138780667 | 0.403030447 | 0.022556459 | 0.336876899 |
| 0.260262832 | 0.157674495 | 0.422636256 | 0.145648615 |
| 0.350055923 | 0.080770393 | 0.242750593 | 0.283137488 |
| 0.233440676 | 0.0198816   | 0.220119387 | 0.36305233  |
| 0.038372962 | 0.203894396 | 0.346840697 | 0.339696475 |
| 0.242014988 | 0.350762731 | 0.428739972 | 0.126736062 |
| 0.204846594 | 0.268998194 | 0.040775785 | 0.172968071 |
| 0.322392606 | 0.143933375 | 0.383551625 | 0.260717015 |
| 0.19533964  | 0.393876648 | 0.275617946 | 0.131536338 |
| 0.117965838 | 0.271207358 | 0.05973052  | 0.203258994 |
| 0.288817099 | 0.159120305 | 0.156818122 | 0.133803646 |
| 0.080431827 | 0.413154262 | 0.078579729 | 0.086393505 |
| 0.046747551 | 0.211528529 | 0.27473914  | 0.150168235 |
| 0.09722189  | 0.178634217 | 0.157000042 | 0.203926739 |
| 0.133962385 | 0.124080697 | 0.023345054 | 0.116765888 |
| 0.080280124 | 0.134399634 | 0.134162817 | 0.282702008 |
| 0.203902574 | 0.108254345 | 0.190761807 | 0.145287896 |
| 0.106109314 | 0.043176675 | 0.408046515 | 0.335518605 |
| 0.288467709 | 0.224535355 | 0.079850871 | 0.11481636  |
| 0.399590412 | 0.167224475 | 0.176321796 | 0.394247623 |
| 0.074183407 | 0.397809482 | 0.169164293 | 0.124041155 |
| 0.141267963 | 0.219741684 | 0.437929529 | 0.064778898 |
| 0.245637822 | 0.390120738 | 0.22451407  | 0.155632853 |
| 0.326484571 | 0.32171103  | 0.096166917 | 0.305800367 |
| 0.288096852 | 0.071226935 | 0.390252851 | 0.096279687 |
| 0.048996468 | 0.274018661 | 0.264477676 | 0.109435212 |
| 0.099826009 | 0.200450117 | 0.162274153 | 0.206705857 |
| 0.414517868 | 0.338783374 | 0.309337291 | 0.11720127  |
| 0.100010362 | 0.017072944 | 0.127756976 | 0.162157547 |
| 0.372007949 | 0.363573456 | 0.222055519 | 0.154512254 |
| 0.246655232 | 0.152413556 | 0.186554914 | 0.389508322 |
| 0.13172113  | 0.38809568  | 0.030624933 | 0.279740804 |
| 0.349192429 | 0.198963961 | 0.082175983 | 0.253204858 |
| 0.336029342 | 0.125360284 | 0.250920813 | 0.376140126 |
| 0.380971511 | 0.198877178 | 0.178530049 | 0.284804823 |
| 0.086370939 | 0.146392299 | 0.206144457 | 0.074897636 |
| 0.201612951 | 0.211420998 | 0.015886676 | 0.240550843 |
| 0.092908595 | 0.373306739 | 0.379603711 | 0.093164623 |
| 0.190787422 | 0.237830038 | 0.24680979  | 0.100688204 |
| 0.300971373 | 0.353409857 | 0.387997331 | 0.253869483 |
| 0.296360814 | 0.349937965 | 0.146396141 | 0.106211485 |
| 0.034922287 | 0.360444508 | 0.321565162 | 0.054577967 |
| 0.413287502 | 0.176720212 | 0.030299296 | 0.422549519 |
| 0.248192541 | 0.322914408 | 0.021178332 | 0.042422492 |
| 0.049595961 | 0.359071557 | 0.360316927 | 0.35907524  |
| 0.153905911 | 0.295330114 | 0.007977499 | 0.387835829 |
| 0.379472144 | 0.025711031 | 0.093592835 | 0.281087861 |
| 0.232031396 | 0.428273153 | 0.118021017 | 0.306319168 |
| 0.180453972 | 0.348022696 | 0.20413397  | 0.202962784 |
| 0.365052012 | 0.324847701 | 0.369033774 | 0.397875712 |
| 0.398449912 | 0.287486378 | 0.253803024 | 0.065428565 |

|             |             |             |             |
|-------------|-------------|-------------|-------------|
| 0.090940034 | 0.245516075 | 0.127579297 | 0.09040856  |
| 0.255418233 | 0.125392682 | 0.381355864 | 0.398863056 |
| 0.349283685 | 0.021063855 | 0.249354835 | 0.302556745 |
| 0.426492994 | 0.446639208 | 0.047776236 | 0.009420035 |
| 0.007577964 | 0.017949413 | 0.289208944 | 0.175084177 |
| 0.382243751 | 0.130985676 | 0.026762268 | 0.156283142 |
| 0.245463503 | 0.194884965 | 0.380675824 | 0.360605521 |
| 0.306813984 | 0.128878709 | 0.145710784 | 0.379359589 |
| 0.067531455 | 0.239604918 | 0.370818333 | 0.394234117 |
| 0.07150477  | 0.185774164 | 0.207409478 | 0.439893595 |
| 0.018156458 | 0.205376461 | 0.236741324 | 0.192993926 |
| 0.029271143 | 0.08979762  | 0.086770876 | 0.366828924 |
| 0.334720355 | 0.072723776 | 0.045676138 | 0.103324042 |
| 0.161487566 | 0.386492086 | 0.171880533 | 0.421108595 |
| 0.401837173 | 0.412286605 | 0.066488381 | 0.38532027  |
| 0.063695002 | 0.352081577 | 0.140160316 | 0.067491397 |
| 0.202913505 | 0.046507338 | 0.325361257 | 0.068767978 |
| 0.22753549  | 0.32679102  | 0.115027151 | 0.029092034 |
| 0.067389881 | 0.07849119  | 0.40565603  | 0.346159286 |
| 0.043263932 | 0.28315379  | 0.213665711 | 0.308228221 |
| 0.244796192 | 0.34963568  | 0.379213659 | 0.151232856 |
| 0.182551447 | 0.055859956 | 0.374578825 | 0.273265739 |
| 0.244939652 | 0.398885617 | 0.157175088 | 0.403515026 |
| 0.323736443 | 0.396549689 | 0.34871276  | 0.253403763 |
| 0.104411019 | 0.243220918 | 0.305581799 | 0.069178961 |
| 0.254959025 | 0.378932426 | 0.249530605 | 0.101175655 |
| 0.172680086 | 0.13436282  | 0.134083816 | 0.118542844 |
| 0.098816712 | 0.251223811 | 0.181150604 | 0.415619463 |
| 0.287127348 | 0.286411764 | 0.125794352 | 0.084302719 |
| 0.422714644 | 0.379080201 | 0.214929229 | 0.317315019 |
| 0.177791598 | 0.213205819 | 0.322665846 | 0.300716821 |
| 0.179397843 | 0.332904855 | 0.373873072 | 0.295796638 |
| 0.375474518 | 0.267438798 | 0.392549757 | 0.174355559 |
| 0.062130577 | 0.213760411 | 0.118139707 | 0.106303892 |
| 0.182178384 | 0.055521244 | 0.086508514 | 0.335196747 |
| 0.109835355 | 0.279167062 | 0.194839641 | 0.129184433 |
| 0.192220743 | 0.182469839 | 0.239246911 | 0.235828265 |
| 0.119291573 | 0.372300325 | 0.026117516 | 0.091510867 |
| 0.120792831 | 0.316154518 | 0.137623148 | 0.190479143 |
| 0.105665239 | 0.105351603 | 0.223613786 | 0.210833868 |
| 0.141392201 | 0.151627505 | 0.319926683 | 0.111705351 |
| 0.088589381 | 0.415979345 | 0.204046542 | 0.036702614 |
| 0.090417956 | 0.251248547 | 0.216004877 | 0.182561738 |
| 0.031932168 | 0.327949842 | 0.177143722 | 0.199845557 |
| 1           | 0.130628122 | 0.318593703 | 0.113628905 |
| 0.143419489 | 0.364826447 | 0.164520474 | 0.358375363 |
| 0.173367571 | 0.368167261 | 0.348659251 | 0.319021258 |
| 0.125308125 | 0.141143807 | 0.104979323 | 0.402073705 |
| 0.126688524 |             |             |             |
| VAV3        | 0.077929004 | 0.074568377 | 0.059190186 |
| 0.146265763 | 0.105122763 | 0.050876417 | 0.16222525  |
| 0.064558152 | 0.072644749 | 0.037398507 | 0.045353511 |
| 0.077855785 | 0.043316338 | 0.055021938 | 0.017262621 |
| 0.192100116 | 0.132893347 | 0.070038816 | 0.258104924 |

|             |             |             |             |
|-------------|-------------|-------------|-------------|
| 0.16271466  | 0.085142523 | 0.200227768 | 0.169653944 |
| 0.055385563 | 0.102121298 | 0.175710677 | 0.062608694 |
| 0.153807692 | 0.199065581 | 0.035955394 | 0.119479388 |
| 0.210786003 | 0.096619382 | 0.053138964 | 0.1054379   |
| 0.047418474 | 0.054552363 | 0.103822276 | 0.029990054 |
| 0.083693311 | 0.093126186 | 0.157196534 | 0.199725233 |
| 0.149406436 | 0.04646126  | 0.192315288 | 0.123156836 |
| 0.033414469 | 0.119815883 | 0.031166213 | 0.0497721   |
| 0.039904684 | 0.051012995 | 0.083920236 | 0.128711392 |
| 0.018512274 | 0.033913068 | 0.01534025  | 0.06201453  |
| 0.201988767 | 0.035276773 | 0.047507543 | 0.067882698 |
| 0.033304048 | 0.115505304 | 0.161101614 | 0.131442659 |
| 0.037633511 | 0.069628037 | 0.214699766 | 0.049565407 |
| 0.017345638 | 0.18781444  | 0.164584482 | 0.019296562 |
| 0.29894624  | 0.096678126 | 0.193696129 | 0.154423116 |
| 0.137041133 | 0.060238918 | 0.11692256  | 0.094534306 |
| 0.098621472 | 0.205637514 | 0.0658546   | 0.16721828  |
| 0.079554617 | 0.133394175 | 0.091710115 | 0.193368115 |
| 0.108906435 | 0.060112201 | 0.101777208 | 0.21442162  |
| 0.066718383 | 0.075417859 | 0.045335474 | 0.066900713 |
| 0.017880801 | 0.151490591 | 0.049880565 | 0.088881069 |
| 0.062823232 | 0.053605668 | 0.230098798 | 0.111854653 |
| 0.286436306 | 0.021996717 | 0.220254911 | 0.092585271 |
| 0.137103174 | 0.10728729  | 0.205129118 | 0.117211979 |
| 0.136388348 | 0.087081019 | 0.058453095 | 0.233490438 |
| 0.100317932 | 0.133902082 | 0.02161087  | 0.255857647 |
| 0.043333099 | 0.031412378 | 0.036152189 | 0.108623564 |
| 0.058249632 | 0.037301536 | 0.145935707 | 0.135097769 |
| 0.189962347 | 0.123793262 | 0.068834884 | 0.105231166 |
| 0.121647691 | 0.041978917 | 0.080953198 | 0.053783275 |
| 0.05380064  | 0.116641283 | 0.002382011 | 0.180777274 |
| 0.077765505 | 0.140342459 | 0.314919494 | 0.069727735 |
| 0.124940051 | 0.149851418 | 0.248192343 | 0.098575479 |
| 0.060186223 | 0.274808112 | 0.047382773 | 0.193199636 |
| 0.025972448 | 0.1297657   | 0.24786168  | 0.098955369 |
| 0.152383868 | 0.043752789 | 0.194555724 | 0.080120446 |
| 0.010411556 | 0.090699488 | 0.19284111  | 0.096415072 |
| 0.036720942 | 0.055905141 | 0.035211261 | 0.31096217  |
| 0.123040274 | 0.15360215  | 0.055316363 | 0.060110366 |
| 0.038422819 | 0.226440016 | 0.031081045 | 0.085882323 |
| 0.040994452 | 0.094865344 | 0.111210544 | 0.097317397 |
| 0.230533381 | 0.136662267 | 0.011095797 | 0.046975782 |
| 0.05866899  | 0.024729633 | 0.103271817 | 0.118894207 |
| 0.031666066 | 0.118312498 | 0.005878942 | 0.191981278 |
| 0.049503817 | 0.290298343 | 0.123989839 | 0.234206075 |
| 0.056174911 | 0.20887247  | 0.058446963 | 0.067084802 |
| 0.047737258 | 0.057689798 | 0.051254172 | 0.142930125 |
| 0.173688159 | 0.061831142 | 0.109394207 | 0.144544816 |
| 0.096405476 | 0.126292493 | 0.149527354 | 0.026112862 |
| 0.086303039 | 0.164776843 | 0.197993521 | 0.160458403 |
| 0.093745113 | 0.013544629 | 0.056224675 | 0.088904618 |
| 0.034190822 | 0.068459198 | 0.049155024 | 0.011008492 |
| 0.202563663 | 0.107449818 | 0.054640763 | 0.108172473 |
| 0.048163273 | 0.088698164 | 0.034327129 | 0.173685622 |

|             |             |             |             |
|-------------|-------------|-------------|-------------|
| 0.205115996 | 0.083934083 | 0.066326295 | 0.035030506 |
| 0.031638909 | 0.063353028 | 0.21675973  | 0.031849492 |
| 0.031092644 | 0.132134425 | 0.037356351 | 0.045238633 |
| 0.111067891 | 0.206248795 | 0.137852134 | 0.016639906 |
| 0.036054744 | 0.023509666 | 0.020084501 | 0.056808747 |
| 0.042530718 | 0.08702937  | 0.08955261  | 0.044968508 |
| 0.129266696 | 0.258922961 | 0.074221477 | 0.186173617 |
| 0.045357082 | 0.13781308  | 0.275397018 | 0.009330091 |
| 0.100239211 | 0.022835628 | 0.020190967 | 0.077887662 |
| 0.174396843 | 0.11519303  | 0.056940052 | 0.224713495 |
| 0.045526427 | 0.205662962 | 0.143959165 | 0.019573329 |
| 0.075904374 | 0.063560462 | 0.209447014 | 0.131051762 |
| 0.045890986 | 0.127499007 | 0.151784939 | 0.058115906 |
| 0.053727032 | 0.243460843 | 0.072695189 | 0.148410213 |
| 0.277094917 | 0.110630412 | 0.058515924 | 0.309524075 |
| 0.209478249 | 0.07052476  | 0.088190045 | 0.251374988 |
| 0.08217528  | 0.191741092 | 0.061220195 | 0.08559504  |
| 0.162786174 | 0.054118475 | 0.156731901 | 0.066426261 |
| 0.047993059 | 0.070768872 | 0.291277616 | 0.070311961 |
| 0.294547264 | 0.029449827 | 0.031120391 | 0.082511204 |
| 0.078529145 | 0.061693567 | 0.197432836 | 0.078274598 |
| 0.043736181 | 0.043024843 | 0.144772556 | 0.09586183  |
| 0.05626713  | 0.182562855 | 0.164136944 | 0.056013937 |
| 0.078795321 | 0.062364046 | 0.033365509 | 0.126850852 |
| 0.107484385 | 0.153652868 | 0.09853281  | 0.039721013 |
| 0.03617695  | 0.131116023 | 0.019127863 | 0.037685542 |
| 0.131571074 | 0.059181023 | 0.143074067 | 0.097097036 |
| 0.031882367 | 0.036464978 | 0.194922448 | 0.245444794 |
| 0.064539003 | 0.060666641 | 0.05502717  | 0.169522862 |
| 0.079501078 | 0.061690625 | 0.037329147 | 0.277619999 |
| 0.226966819 | 0.052619045 | 0.080698275 | 0.068400292 |
| 0.133560434 | 0.029262028 | 0.060147656 | 0.075475356 |
| 0.267670585 | 0.035955798 | 0.012697141 | 0.024648248 |
| 0.173698509 | 0.131974071 | 0.046022959 | 0.126318132 |
| 0.011978931 | 0.188939873 | 0.047594034 | 0.080300129 |
| 0.059304299 | 0.13520304  | 0.107062532 | 0.057281398 |
| 0.051731606 | 0.073166507 | 0.041444954 | 0.068938605 |
| 0.051112198 | 0.046801878 | 0.059551665 | 0.235864266 |
| 0.081289439 | 0.050969109 | 0.103654952 | 0.067226769 |
| 0.120606956 | 0.150929393 | 0.235435433 | 0.118061425 |
| 0.035223955 | 0.06802234  | 0.008135933 | 0.042922163 |
| 0.053723938 | 0.099738996 | 0.075083168 | 0.132531932 |
| 0.07844484  | 0.202326281 | 0.088642993 | 0.060742877 |
| 0.102408494 | 0.126069814 | 0.157711019 | 0.014997572 |
| 0.01057477  | 0.045887407 | 0.126942362 | 0.197289788 |
| 0.077169598 | 0.007671404 | 0.158038203 | 0.118640995 |
| 0.072273236 | 0.095387171 | 0.060757448 | 0.233478885 |
| 0.091986765 | 0.267526747 | 0.015546849 | 0.206693041 |
| 0.09669985  | 0.038456223 | 0.085225589 | 0.059232513 |
| 0.242449199 | 0.167990093 | 0.069498141 | 0.119379683 |
| 0.00981774  | 0.233392138 | 0.083672912 | 0.038773094 |
| 0.144640101 | 0.166742704 | 0.127705561 | 0.158762247 |
| 0.042474287 | 0.080236523 | 0.099186247 | 0.011671234 |
| 0.102213866 | 0.110083294 | 0.113066296 | 0.107854053 |

|             |             |             |             |
|-------------|-------------|-------------|-------------|
| 0.10693428  | 0.180361399 | 0.158772105 | 0.056765231 |
| 0.093080072 | 0.047549014 | 0.083561899 | 0.011129093 |
| 0.124323571 | 0.241497032 | 0.056172253 | 0.011038185 |
| 0.045960205 | 0.101899925 | 0.029626305 | 0.175365186 |
| 0.023082707 | 0.225442062 | 0.120329251 | 0.111957096 |
| 0.18969044  | 0.115059174 | 0.206356435 | 0.157119113 |
| 0.0847093   | 0.128156122 | 0.050536551 | 0.02401838  |
| 0.117646674 | 0.052191761 | 0.147351726 | 0.061478024 |
| 0.06093184  | 0.123080953 | 0.03271264  | 0.081864027 |
| 0.077659122 | 0.08406823  | 0.066917308 | 0.122483114 |
| 0.056830803 | 0.061748641 | 0.076529985 | 0.065792625 |
| 0.179736229 | 0.119453645 | 0.098627003 | 0.061038335 |
| 0.141831617 | 0.048387075 | 0.21163645  | 0.026491456 |
| 0.033719776 | 0.058289389 | 0.126759557 | 0.183310551 |
| 0.094762459 | 0.062193254 | 0.20291874  | 0.116884717 |
| 0.075426259 | 0.064194199 | 0.066150083 | 0.091200467 |
| 0.278330988 | 0.133627665 | 0.099249331 | 0.103839397 |
| 0.025061242 | 0.070670363 | 0.105922971 | 0.06726889  |
| 0.057669948 | 0.204995533 | 0.056898994 | 0.048437335 |
| 0.057780804 | 0.058781399 | 0.093941178 | 0.295922448 |
| 0.257870152 | 0.174111447 | 0.013375032 | 0.176182444 |
| 0.018455836 | 0.176138235 | 0.023717448 | 0.151707253 |
| 0.18782498  | 0.047929454 | 0.199910187 | 0.102731977 |
| 0.115971387 | 0.050706783 | 0.09049223  | 0.276477083 |
| 0.028881072 | 0.071555219 | 0.049688541 | 0.156865378 |
| 0.025642193 | 0.143489317 | 0.215182361 | 0.048888234 |
| 0.019011476 | 0.022341192 | 0.067280741 | 0.117878006 |
| 0.171132403 | 0.127995725 | 0.048699949 | 0.18337319  |
| 0.113417574 | 0.05626582  | 0.085667412 | 0.047629338 |
| 0.167635787 | 0.056547176 | 0.024459923 | 0.088591092 |
| 0.130628122 | 1           | 0.045210775 | 0.07308277  |
| 0.206910175 | 0.054212635 | 0.069549902 | 0.054287525 |
| 0.097307342 | 0.178871895 | 0.041329423 | 0.069028637 |
| 0.097873632 | 0.041957736 | 0.150481959 | 0.12280203  |
| 0.01600685  |             |             |             |
| VIM         | 0.361948268 | 0.427156336 | 0.288717851 |
| 0.319740766 | 0.294593573 | 0.361720644 | 0.175345457 |
| 0.251944019 | 0.049851871 | 0.002829671 | 0.007025565 |
| 0.317041677 | 0.116817587 | 0.242713398 | 0.282095103 |
| 0.297990023 | 0.064977265 | 0.346203455 | 0.177809129 |
| 0.337277754 | 0.106293657 | 0.262519055 | 0.067799672 |
| 0.167867702 | 0.042738671 | 0.033042832 | 0.136554476 |
| 0.350062991 | 0.039880278 | 0.339879498 | 0.370416457 |
| 0.060381061 | 0.375109108 | 0.454304856 | 0.280164952 |
| 0.44367534  | 0.360590411 | 0.015602454 | 0.254462653 |
| 0.386024161 | 0.310097879 | 0.337435652 | 0.23485565  |
| 0.026594147 | 0.46846378  | 0.180243532 | 0.265735496 |
| 0.265012003 | 0.011706016 | 0.321591485 | 0.438820063 |
| 0.41931579  | 0.313637671 | 0.257391703 | 0.125704224 |
| 0.112392956 | 0.313090178 | 0.137420533 | 0.386016261 |
| 0.166289374 | 0.24740919  | 0.412226561 | 0.065493825 |
| 0.132159188 | 0.284286739 | 0.083587309 | 0.261312203 |
| 0.206670091 | 0.393641598 | 0.020239937 | 0.312578495 |
| 0.003612927 | 0.321424623 | 0.254410598 | 0.175136492 |



|             |             |             |             |
|-------------|-------------|-------------|-------------|
| 0.020240209 | 0.008759236 | 0.100709483 | 0.270317784 |
| 0.35583661  | 0.406793151 | 0.32314967  | 0.332071697 |
| 0.098375345 | 0.198343472 | 0.25000284  | 0.104897782 |
| 0.37049955  | 0.133327063 | 0.091118009 | 0.281764714 |
| 0.329028253 | 0.42481255  | 0.107748406 | 0.151167637 |
| 0.336686719 | 0.412415709 | 0.324697312 | 0.28992575  |
| 0.206896936 | 0.023395863 | 0.385387516 | 0.371705198 |
| 0.390273662 | 0.174539167 | 0.077354617 | 0.378244703 |
| 0.034675475 | 0.355474163 | 0.253174326 | 0.121573546 |
| 0.354039649 | 0.011843498 | 0.10990242  | 0.293120858 |
| 0.183313823 | 0.367962642 | 0.407902765 | 0.139883155 |
| 0.287670129 | 0.010635158 | 0.057059795 | 0.019216038 |
| 0.262309255 | 0.066589125 | 0.46089928  | 0.343390686 |
| 0.269865398 | 0.243758644 | 0.231987882 | 0.000603209 |
| 0.010838512 | 0.131914485 | 0.355372249 | 0.341271444 |
| 0.356190458 | 0.334964221 | 0.128845598 | 0.389250976 |
| 0.306071451 | 0.322177293 | 0.079904482 | 0.082555844 |
| 0.326500009 | 0.128118936 | 0.156721127 | 0.333010916 |
| 0.171922144 | 0.119913306 | 0.087886502 | 0.379993669 |
| 0.418047825 | 0.055794595 | 0.390170065 | 0.289565772 |
| 0.241527976 | 0.204012937 | 0.080606916 | 0.205924621 |
| 0.041092057 | 0.403979306 | 0.010725864 | 0.36594472  |
| 0.158778051 | 0.070651415 | 0.013622336 | 0.307209223 |
| 0.244716052 | 0.332104269 | 0.449743717 | 0.075567539 |
| 0.239597188 | 0.263689198 | 0.385479469 | 0.323085729 |
| 0.003399019 | 0.035488598 | 0.389828304 | 0.379562148 |
| 0.367227533 | 0.365081281 | 0.231891707 | 0.197084848 |
| 0.168084667 | 0.334681313 | 0.003045778 | 0.452827987 |
| 0.423025063 | 0.388569047 | 0.265385536 | 0.304262799 |
| 0.235072179 | 0.337425478 | 0.057444311 | 0.300524124 |
| 0.39561132  | 0.056936606 | 0.345312122 | 0.082920231 |
| 0.405055436 | 0.018632573 | 0.326430952 | 0.303159783 |
| 0.315875189 | 0.006423316 | 0.280185357 | 0.332786789 |
| 0.010588321 | 0.122627877 | 0.366519721 | 0.312728522 |
| 0.26698873  | 0.328267465 | 0.33154467  | 0.215583544 |
| 0.2897922   | 0.225939877 | 0.007041287 | 0.191011544 |
| 0.345050819 | 0.27666976  | 0.413675438 | 0.209279411 |
| 0.397514617 | 0.396638638 | 0.343439001 | 0.171642783 |
| 0.02688174  | 0.311410796 | 0.019730377 | 0.206482914 |
| 0.3480247   | 0.082095018 | 0.280294983 | 0.113873658 |
| 0.031883982 | 0.396067367 | 0.082536073 | 0.14078034  |
| 0.055207532 | 0.311269172 | 0.217033257 | 0.169303767 |
| 0.112812227 | 0.09550693  | 0.212496458 | 0.257804252 |
| 0.03885433  | 0.050101887 | 0.007621075 | 0.264129877 |
| 0.076417697 | 0.237452865 | 0.259444037 | 0.381578436 |
| 0.286522163 | 0.066697406 | 0.242741928 | 0.174889284 |
| 0.054831479 | 0.006293876 | 0.410548488 | 0.30549197  |
| 0.391293248 | 0.115981354 | 0.022175276 | 0.25989164  |
| 0.344476381 | 0.333922202 | 0.378410537 | 0.366165515 |
| 0.022569601 | 0.337792691 | 0.153437699 | 0.059906585 |
| 0.225199219 | 0.174349475 | 0.341425656 | 0.051669354 |
| 0.386048569 | 0.411947423 | 0.223204055 | 0.095930198 |
| 0.377318015 | 0.335193019 | 0.022164763 | 0.380602693 |
| 0.383064141 | 0.015126093 | 0.407538436 | 0.061484963 |

|             |             |             |             |
|-------------|-------------|-------------|-------------|
| 0.00921658  | 0.301244902 | 0.30739741  | 0.038207037 |
| 0.038154955 | 0.232554914 | 0.06244818  | 0.172055386 |
| 0.397463772 | 0.271969084 | 0.336919513 | 0.120100459 |
| 0.022369709 | 0.003587511 | 0.11323062  | 0.296321493 |
| 0.46594781  | 0.380374652 | 0.18085105  | 0.21019049  |
| 0.172245517 | 0.193919892 | 0.243496413 | 0.372575294 |
| 0.164897719 | 0.445503767 | 0.003043802 | 0.302655603 |
| 0.44360862  | 0.364083265 | 0.033362387 | 0.2851811   |
| 0.380409235 | 0.029639093 | 0.201128529 | 0.425490287 |
| 0.359894557 | 0.214714528 | 0.227388711 | 0.336681584 |
| 0.015365362 | 0.040839875 | 0.259673198 | 0.089430596 |
| 0.277962445 | 0.136647574 | 0.019980185 | 0.34735411  |
| 0.022464402 | 0.392034353 | 0.337249441 | 0.026947515 |
| 0.309843137 | 0.354858094 | 0.24476143  | 0.021840828 |
| 0.307913985 | 0.403465615 | 0.454256318 | 0.166994245 |
| 0.348465938 | 0.362981281 | 0.256414885 | 0.043609506 |
| 0.006246235 | 0.429655079 | 0.387161846 | 0.013463577 |
| 0.341683443 | 0.343384665 | 0.004954249 | 0.423420664 |
| 0.145727015 | 0.451974584 | 0.004725581 | 0.07035085  |
| 0.018908602 | 0.317633518 | 0.427144363 | 0.36698065  |
| 0.287683338 | 0.31197277  | 0.00387693  | 0.395933802 |
| 0.41273988  | 0.004238565 | 0.066426192 | 0.333974174 |
| 0.292858801 | 0.454562869 | 0.173549081 | 0.310335352 |
| 0.283380383 | 0.420818957 | 0.186844297 | 0.159675697 |
| 0.350904647 | 0.38301896  | 0.374036036 | 0.413125596 |
| 0.345572923 | 0.288515225 | 0.198993336 | 0.008934288 |
| 0.066642475 | 0.278948909 | 0.231537953 | 0.039435189 |
| 0.390893706 | 0.068106015 | 0.393189526 | 0.334506205 |
| 0.335510874 | 0.001345203 | 0.174158863 | 0.356021761 |
| 0.375278723 | 0.360139169 | 0.016821133 | 0.00443371  |
| 0.006608564 | 0.004607632 | 0.338870313 | 0.146464407 |
| 0.370991528 | 0.251787404 | 0.001594955 | 0.060246842 |
| 0.226479837 | 0.239522469 | 0.4157154   | 0.282478776 |
| 0.329863988 | 0.049047247 | 0.211473396 | 0.315552813 |
| 0.026300635 | 0.388761011 | 0.339638512 | 0.425675922 |
| 0.02420261  | 0.151078817 | 0.370003773 | 0.35622001  |
| 0.027239429 | 0.200733302 | 0.327998469 | 0.214117938 |
| 0.010383428 | 0.037484764 | 0.028634811 | 0.321048192 |
| 0.431140401 | 0.034878378 | 0.012336677 | 0.204273474 |
| 0.077824474 | 0.349010953 | 0.101908315 | 0.367823691 |
| 0.361437304 | 0.319142537 | 0.033288652 | 0.423951959 |
| 0.016898302 | 0.425972069 | 0.18602245  | 0.064117006 |
| 0.224775657 | 0.007508445 | 0.382953351 | 0.071991422 |
| 0.350457601 | 0.387127038 | 0.109639581 | 0.005939798 |
| 0.096402101 | 0.02479821  | 0.327935303 | 0.313131817 |
| 0.015579111 | 0.216042933 | 0.201655794 | 0.331164672 |
| 0.323312364 | 0.312473869 | 0.453356945 | 0.33559475  |
| 0.068923151 | 0.087208801 | 0.358686574 | 0.390801893 |
| 0.28238232  | 0.328248575 | 0.171876607 | 0.404457853 |
| 0.382838302 | 0.383490629 | 0.360666962 | 0.272790816 |
| 0.119428299 | 0.382625289 | 0.330589538 | 0.015479736 |
| 0.278231178 | 0.326551773 | 0.35996549  | 0.07031998  |
| 0.141727664 | 0.249790916 | 0.048693224 | 0.254291487 |
| 0.197145302 | 0.349460405 | 0.095890621 | 0.324155574 |

|             |             |             |             |
|-------------|-------------|-------------|-------------|
| 0.388919795 | 0.389464196 | 0.056212693 | 0.026473927 |
| 0.442743958 | 0.39624803  | 0.15158022  | 0.342087966 |
| 0.110823459 | 0.218028917 | 0.332718385 | 0.311748316 |
| 0.289438273 | 0.343193002 | 0.374915273 | 0.346836591 |
| 0.399552762 | 0.201718881 | 0.449155412 | 0.170668836 |
| 0.037656002 | 0.351982794 | 0.051776549 | 0.046930857 |
| 0.089901871 | 0.011689661 | 0.169465355 | 0.307742238 |
| 0.243032811 | 0.261716357 | 0.367926553 | 0.051595741 |
| 0.204268599 | 0.364309912 | 0.244152885 | 0.182275094 |
| 0.043632349 | 0.428948018 | 0.004165514 | 0.029746024 |
| 0.253231378 | 0.333709566 | 0.221668483 | 0.148274114 |
| 0.158013877 | 0.077559268 | 0.194536571 | 0.358722031 |
| 0.268346616 | 0.289716335 | 0.337533351 | 0.034444475 |
| 0.018105413 | 0.33844969  | 0.384297978 | 0.010853008 |
| 0.052415006 | 0.383029376 | 0.275304705 | 0.145946909 |
| 0.007920142 | 0.359742374 | 0.310229026 | 0.29391539  |
| 0.318593703 | 0.045210775 | 1           | 0.085699137 |
| 0.055493482 | 0.425415114 | 0.267085884 | 0.419008435 |
| 0.247258986 | 0.292112288 | 0.454880207 | 0.358663203 |
| 0.112411344 | 0.310883381 | 0.019863646 | 0.365374698 |
| 0.280359806 |             |             |             |
| VPREB1      | 0.113044343 | 0.106893419 | 0.07154159  |
| 0.134322218 | 0.07454437  | 0.076214581 | 0.095811475 |
| 0.056172746 | 0.017255892 | 0.000888323 | 0.002321593 |
| 0.086827078 | 0.003829659 | 0.033544937 | 0.025343646 |
| 0.167396351 | 0.032239948 | 0.085831292 | 0.140999392 |
| 0.14517461  | 0.042136214 | 0.131345587 | 0.069969321 |
| 0.03646015  | 0.03220366  | 0.048090727 | 0.041269498 |
| 0.162239314 | 0.059191519 | 0.044514412 | 0.137300814 |
| 0.05396571  | 0.118637607 | 0.088873674 | 0.082945401 |
| 0.077903175 | 0.091189381 | 0.001240467 | 0.028101373 |
| 0.12751366  | 0.101415136 | 0.150737227 | 0.128630706 |
| 0.033068263 | 0.08411959  | 0.107798086 | 0.108072168 |
| 0.004127446 | 0.020637243 | 0.045885849 | 0.090555096 |
| 0.066929587 | 0.057713981 | 0.081801218 | 0.063968126 |
| 0.002270224 | 0.030560038 | 0.0070413   | 0.092064368 |
| 0.099823151 | 0.035931201 | 0.071311685 | 0.018783689 |
| 0.002727217 | 0.100612074 | 0.042888542 | 0.0906677   |
| 0.029196995 | 0.11064513  | 0.034652862 | 0.060723483 |
| 7.15E-05    | 0.179163948 | 0.118041949 | 0.021202324 |
| 0.063516338 | 0.005263609 | 0.063020209 | 0.107213727 |
| 0.151045386 | 0.100382534 | 0.120718483 | 0.10761705  |
| 0.015416527 | 0.109031934 | 0.055863871 | 0.051737594 |
| 0.11854241  | 0.06327632  | 0.007656972 | 0.149071793 |
| 0.116412177 | 0.087162409 | 0.04393944  | 0.11111667  |
| 0.081296045 | 0.112887153 | 0.052461308 | 0.059479128 |
| 0.019663345 | 0.028714278 | 0.077635358 | 0.106596432 |
| 0.096474773 | 0.039207794 | 0.075721568 | 0.1291897   |
| 0.072797208 | 0.025564284 | 0.139626598 | 0.003936422 |
| 0.155618562 | 0.028680293 | 0.078973377 | 0.082945278 |
| 0.067726168 | 0.115451769 | 0.086505475 | 0.113560722 |
| 0.085704023 | 0.002381018 | 0.002286066 | 0.055856438 |
| 0.009611707 | 0.011739407 | 0.068099238 | 0.115421887 |
| 0.028327239 | 0.017819138 | 0.10792778  | 0.015880983 |

|             |             |             |             |
|-------------|-------------|-------------|-------------|
| 0.026988412 | 0.020966917 | 0.083255629 | 0.102732052 |
| 0.13650779  | 0.075533632 | 0.038467497 | 0.08326105  |
| 0.062032937 | 0.117843866 | 0.000541864 | 0.075908684 |
| 0.090937153 | 0.033874078 | 0.139100815 | 0.074004375 |
| 0.074919667 | 0.085865191 | 0.08087857  | 0.122151154 |
| 0.103254917 | 0.081337516 | 0.064432693 | 0.158297995 |
| 0.015798686 | 0.079987581 | 0.088112036 | 0.043654534 |
| 0.031243284 | 0.075700928 | 0.035506649 | 0.10473607  |
| 0.008099981 | 0.008734587 | 0.018681598 | 0.092403156 |
| 0.015010781 | 0.068965561 | 0.066437467 | 0.107226826 |
| 0.062791784 | 0.108721504 | 0.078547367 | 0.068765161 |
| 0.00136815  | 0.033890402 | 0.059353984 | 0.104319182 |
| 0.061836387 | 0.119484861 | 0.061125702 | 0.064543863 |
| 0.110515183 | 0.146215418 | 0.001066705 | 0.084113453 |
| 0.088882809 | 0.051571368 | 0.070458268 | 0.108918495 |
| 0.035844438 | 0.123693039 | 0.00048316  | 0.14209334  |
| 0.082978804 | 0.100829747 | 0.134257126 | 0.073433596 |
| 0.090129814 | 0.045423708 | 0.04968552  | 0.081234965 |
| 0.058483806 | 0.001204011 | 0.055684187 | 0.140451654 |
| 0.028844653 | 0.033013016 | 0.13464525  | 0.125717958 |
| 0.083394836 | 0.130757418 | 0.148289723 | 0.030908924 |
| 0.07657811  | 0.115257324 | 0.014479108 | 0.099843955 |
| 0.115494448 | 0.006279457 | 0.090817303 | 0.074070487 |
| 0.068025035 | 0.09951464  | 0.077926332 | 0.001702522 |
| 0.056193896 | 0.091132885 | 0.001723368 | 0.081661341 |
| 0.083625348 | 0.021644455 | 0.047124653 | 0.029379217 |
| 0.046293406 | 0.106527329 | 0.033094486 | 0.027436798 |
| 0.016505059 | 0.050937015 | 0.147350681 | 0.013909216 |
| 0.006412784 | 0.066902203 | 0.039554949 | 0.040496452 |
| 0.031551533 | 0.04925075  | 0.010126754 | 0.013648986 |
| 0.003892934 | 0.016222706 | 0.015113268 | 0.076689354 |
| 0.020689566 | 0.007732137 | 0.06036889  | 0.029714394 |
| 0.041389286 | 0.043866495 | 0.103559922 | 0.170876751 |
| 0.076040896 | 0.080533285 | 0.059867067 | 0.004094071 |
| 0.106809619 | 0.038687001 | 0.03996247  | 0.099334996 |
| 0.006367746 | 0.124941063 | 0.015594473 | 0.065959414 |
| 0.028321813 | 0.093188308 | 0.15452464  | 0.001447603 |
| 0.094879076 | 0.092293317 | 0.139629533 | 0.052665464 |
| 0.075730281 | 0.126430996 | 0.021731574 | 0.08953081  |
| 0.080482785 | 0.04605402  | 0.099619975 | 0.028496106 |
| 0.051101964 | 0.103069753 | 0.068981036 | 0.084261321 |
| 0.060447967 | 0.04538788  | 0.031219887 | 0.126467229 |
| 0.106421998 | 0.13630354  | 0.07211941  | 0.050794122 |
| 0.035153123 | 0.000723057 | 0.065580132 | 0.073973478 |
| 0.082032051 | 0.092930646 | 0.136439178 | 0.043076987 |
| 0.152203008 | 0.027690407 | 0.009028313 | 0.101715885 |
| 0.026096095 | 0.099520899 | 0.037169201 | 0.085287846 |
| 0.074043348 | 0.057106331 | 0.038044714 | 0.082800942 |
| 0.083171162 | 0.062724871 | 0.101947784 | 0.086753148 |
| 0.108551561 | 0.056774072 | 0.033967397 | 0.119252992 |
| 0.020798885 | 0.021689428 | 0.094738909 | 0.025170387 |
| 0.032349849 | 0.074337693 | 0.004202058 | 0.053048956 |
| 0.014904418 | 0.0869004   | 0.140617294 | 0.025493388 |
| 0.036447954 | 0.060719629 | 0.126287031 | 0.061747756 |

|             |             |             |             |
|-------------|-------------|-------------|-------------|
| 0.080852339 | 0.090559929 | 0.090070411 | 0.093919616 |
| 0.093031406 | 0.082099365 | 0.037166611 | 0.083142823 |
| 0.038748959 | 0.083244377 | 0.11224356  | 0.000813302 |
| 0.137258069 | 0.052652166 | 0.001791292 | 0.108672467 |
| 0.129708297 | 0.070565397 | 0.001327763 | 0.001583658 |
| 0.039247597 | 0.131779355 | 0.080014174 | 0.141059425 |
| 0.015959995 | 0.161397378 | 0.000501421 | 0.10644348  |
| 0.089150288 | 0.025959026 | 0.031803076 | 0.070262324 |
| 0.062776768 | 0.10923636  | 0.037524466 | 0.082679101 |
| 0.05501835  | 0.07217134  | 0.01630987  | 0.116016217 |
| 0.104800439 | 0.076158095 | 0.129802042 | 0.10754424  |
| 0.119303754 | 0.120295813 | 0.138975571 | 0.023141461 |
| 0.008755385 | 0.06586393  | 0.010012944 | 0.001917317 |
| 0.089973514 | 0.030296941 | 0.111098795 | 0.131528828 |
| 0.093406078 | 0.031874756 | 0.03687476  | 0.082641484 |
| 0.127702732 | 0.145775539 | 0.012468227 | 0.019556123 |
| 0.000295342 | 0.004346846 | 0.118708006 | 0.103106329 |
| 0.10348512  | 0.00449032  | 0.023161335 | 0.026667335 |
| 0.031497786 | 0.076300998 | 0.085922567 | 0.175118587 |
| 0.103347604 | 0.07274743  | 0.012684947 | 0.182482143 |
| 0.019834581 | 0.076663829 | 0.099091158 | 0.093252274 |
| 0.041302563 | 0.095730287 | 0.083215642 | 0.131424149 |
| 0.004987682 | 0.121105336 | 0.084784261 | 0.020349177 |
| 0.002146398 | 0.046525584 | 0.043765191 | 0.150404049 |
| 0.070773074 | 0.009330288 | 0.008603565 | 0.001657197 |
| 0.033956071 | 0.124463013 | 0.03181692  | 0.122467929 |
| 0.121924604 | 0.156967355 | 0.022855558 | 0.09392319  |
| 0.009129442 | 0.075585973 | 0.053181718 | 0.000606128 |
| 0.078121905 | 0.031266117 | 0.081887363 | 0.002608051 |
| 0.047519752 | 0.138998699 | 0.013226265 | 0.029958049 |
| 0.013576433 | 0.049846227 | 0.122773772 | 0.115806801 |
| 0.028624986 | 0.082914759 | 0.128852818 | 0.151087256 |
| 0.089763226 | 0.114661189 | 0.083909238 | 0.035132068 |
| 0.042951573 | 0.006187264 | 0.162517576 | 0.099780008 |
| 0.044955505 | 0.127462999 | 0.021160279 | 0.110984853 |
| 0.114485579 | 0.12149771  | 0.094016574 | 0.108744968 |
| 0.011106303 | 0.109127668 | 0.079335502 | 0.003890204 |
| 0.141090764 | 0.11043434  | 0.112797521 | 0.014162432 |
| 0.059183983 | 0.049515123 | 0.017139236 | 0.003673601 |
| 0.033578748 | 0.074069286 | 0.022079815 | 0.169274637 |
| 0.125156303 | 0.100789827 | 0.015522917 | 0.03658897  |
| 0.108534169 | 0.106639205 | 0.032739619 | 0.09852619  |
| 0.108310322 | 0.09104954  | 0.108166324 | 0.104679257 |
| 0.033774918 | 0.080371663 | 0.131574169 | 0.071626642 |
| 0.088638491 | 0.13264136  | 0.089960523 | 0.025408284 |
| 0.007531011 | 0.072627922 | 0.019554077 | 0.0828692   |
| 0.087176828 | 0.029048692 | 0.016412144 | 0.144987342 |
| 0.02470158  | 0.107815389 | 0.017478381 | 0.011513655 |
| 0.105986162 | 0.071491553 | 0.128203717 | 0.060373871 |
| 0.017025899 | 0.078926546 | 0.000731273 | 0.061510255 |
| 0.02618339  | 0.095849894 | 0.039645604 | 0.082036603 |
| 0.017091331 | 0.033760946 | 0.102687296 | 0.07310194  |
| 0.016863927 | 0.01027133  | 0.090084015 | 0.007245102 |
| 0.025093165 | 0.135193291 | 0.076773236 | 0.020940706 |

|             |             |             |             |
|-------------|-------------|-------------|-------------|
| 0.004840338 | 0.087939115 | 0.056449517 | 0.021981975 |
| 0.032868959 | 0.076192623 | 0.031539997 | 0.078144594 |
| 0.113628905 | 0.07308277  | 0.085699137 | 1           |
| 0.041167718 | 0.090315789 | 0.073424687 | 0.081743954 |
| 0.078553064 | 0.137758987 | 0.081522493 | 0.085916441 |
| 0.00906881  | 0.059883751 | 0.039324914 | 0.143628528 |
| 0.025199918 |             |             |             |
| VPS54       | 0.087600943 | 0.068413954 | 0.067401284 |
| 0.130759321 | 0.081616826 | 0.057264026 | 0.151403861 |
| 0.089067383 | 0.040160752 | 0.008396423 | 0.007289368 |
| 0.067199631 | 0.008512865 | 0.040069204 | 0.023501321 |
| 0.17732186  | 0.058875368 | 0.098829957 | 0.221602978 |
| 0.160438435 | 0.077489593 | 0.147835033 | 0.136600564 |
| 0.046154854 | 0.056096833 | 0.10934526  | 0.049416628 |
| 0.148361862 | 0.13686975  | 0.033897255 | 0.129383918 |
| 0.13455296  | 0.097774915 | 0.05191735  | 0.068162995 |
| 0.043052445 | 0.06729205  | 0.029823951 | 0.028850473 |
| 0.098379796 | 0.086734577 | 0.154939227 | 0.15935574  |
| 0.08833035  | 0.047564565 | 0.160471575 | 0.111809899 |
| 0.022601121 | 0.045266559 | 0.04559909  | 0.05516611  |
| 0.034646915 | 0.040670708 | 0.114348639 | 0.112624174 |
| 0.002985476 | 0.034489915 | 0.005551775 | 0.076182498 |
| 0.154289197 | 0.044117576 | 0.041671169 | 0.031742629 |
| 0.01375899  | 0.14256318  | 0.093172006 | 0.136925097 |
| 0.030973625 | 0.086690026 | 0.100850099 | 0.047547715 |
| 0.00291101  | 0.19750977  | 0.145541224 | 0.018169142 |
| 0.19110945  | 0.01417477  | 0.125347402 | 0.131111858 |
| 0.130245346 | 0.06623436  | 0.09468358  | 0.078408051 |
| 0.026320985 | 0.183206441 | 0.052878742 | 0.101416217 |
| 0.086707442 | 0.099439462 | 0.045860405 | 0.156650173 |
| 0.089345219 | 0.052187645 | 0.051970919 | 0.175714187 |
| 0.057954593 | 0.074294415 | 0.046240037 | 0.051652559 |
| 0.016412021 | 0.088083241 | 0.046850172 | 0.073555251 |
| 0.072164128 | 0.03910954  | 0.145856551 | 0.113013404 |
| 0.209025506 | 0.022923069 | 0.177397999 | 0.022681783 |
| 0.130866358 | 0.082036462 | 0.132416615 | 0.094195864 |
| 0.091099287 | 0.090401397 | 0.050962805 | 0.199000613 |
| 0.084647016 | 0.033555542 | 0.00655488  | 0.185805476 |
| 0.014279025 | 0.015190683 | 0.035514802 | 0.089355636 |
| 0.042122075 | 0.018117992 | 0.15308257  | 0.074108668 |
| 0.095198982 | 0.058299975 | 0.057255725 | 0.120344594 |
| 0.128505535 | 0.048688427 | 0.053248378 | 0.060812244 |
| 0.04276554  | 0.093730301 | 0.002033351 | 0.176938121 |
| 0.077063413 | 0.074094969 | 0.243443732 | 0.053140484 |
| 0.086323744 | 0.173235723 | 0.170143201 | 0.088953282 |
| 0.067586892 | 0.194013705 | 0.064103784 | 0.167548366 |
| 0.014800361 | 0.08733044  | 0.198510031 | 0.058662821 |
| 0.085874707 | 0.04042076  | 0.11340525  | 0.112743155 |
| 0.006177523 | 0.0146247   | 0.127562622 | 0.11375207  |
| 0.016238054 | 0.043135645 | 0.035418205 | 0.26075824  |
| 0.078184025 | 0.118373968 | 0.070855354 | 0.045137512 |
| 0.007483427 | 0.097397759 | 0.047006028 | 0.069866336 |
| 0.048541106 | 0.086779605 | 0.105785161 | 0.098108968 |
| 0.173124341 | 0.133414274 | 0.015190087 | 0.046822114 |

|             |             |             |             |
|-------------|-------------|-------------|-------------|
| 0.052603032 | 0.03553047  | 0.063511816 | 0.10975449  |
| 0.029278545 | 0.103724721 | 0.004074805 | 0.153451518 |
| 0.060710481 | 0.26408342  | 0.107252542 | 0.135159324 |
| 0.05513941  | 0.12343421  | 0.055428112 | 0.057802191 |
| 0.033944481 | 0.01479622  | 0.063788487 | 0.144452178 |
| 0.107328625 | 0.058985756 | 0.121073667 | 0.135923569 |
| 0.088042208 | 0.122788085 | 0.129764347 | 0.023647107 |
| 0.068650471 | 0.175830125 | 0.091177047 | 0.131826454 |
| 0.095450981 | 0.0048762   | 0.059459664 | 0.09186066  |
| 0.044996709 | 0.065745076 | 0.046882709 | 0.004604674 |
| 0.154002704 | 0.112712998 | 0.023747265 | 0.096560038 |
| 0.056445986 | 0.03745219  | 0.037310861 | 0.07355976  |
| 0.115131257 | 0.072270486 | 0.04877637  | 0.029208308 |
| 0.023527647 | 0.039494342 | 0.23002289  | 0.01395792  |
| 0.005852287 | 0.098799507 | 0.034629727 | 0.043036902 |
| 0.07870387  | 0.106828272 | 0.084936193 | 0.008046182 |
| 0.004067165 | 0.010449215 | 0.009351384 | 0.055280473 |
| 0.022529064 | 0.015067148 | 0.060322797 | 0.044927897 |
| 0.095141516 | 0.161268684 | 0.068657464 | 0.180966609 |
| 0.055531209 | 0.137465826 | 0.19361311  | 0.002032616 |
| 0.080995255 | 0.025423608 | 0.033442025 | 0.067458614 |
| 0.105683927 | 0.102402748 | 0.019747106 | 0.129782962 |
| 0.022532846 | 0.132747996 | 0.137639337 | 0.010511622 |
| 0.087379601 | 0.058161139 | 0.209326274 | 0.09094794  |
| 0.042722977 | 0.127240913 | 0.047282124 | 0.064544629 |
| 0.053706038 | 0.135673654 | 0.062662547 | 0.06395367  |
| 0.184112409 | 0.092977861 | 0.045073052 | 0.219500847 |
| 0.157168417 | 0.045851554 | 0.074179723 | 0.186962762 |
| 0.071947987 | 0.14498602  | 0.049666575 | 0.083117454 |
| 0.09489166  | 0.004653787 | 0.114722611 | 0.071229194 |
| 0.045717474 | 0.059018986 | 0.232312825 | 0.038535519 |
| 0.248263044 | 0.025101588 | 0.017846424 | 0.067781657 |
| 0.050108706 | 0.060191182 | 0.148461928 | 0.064588955 |
| 0.039937815 | 0.049669503 | 0.081352089 | 0.097108515 |
| 0.055002232 | 0.166753332 | 0.18630716  | 0.051355802 |
| 0.082084923 | 0.063146633 | 0.033213594 | 0.117571694 |
| 0.062678043 | 0.06029137  | 0.099281139 | 0.033036857 |
| 0.030410816 | 0.121880655 | 0.005642339 | 0.049652028 |
| 0.039307238 | 0.052968511 | 0.124527231 | 0.062008637 |
| 0.026824113 | 0.057478919 | 0.150938615 | 0.185986239 |
| 0.053923114 | 0.057069355 | 0.051537203 | 0.187693561 |
| 0.067334777 | 0.050981972 | 0.02523682  | 0.218424467 |
| 0.1471945   | 0.048208154 | 0.100902112 | 0.016314947 |
| 0.113983953 | 0.041988036 | 0.007107028 | 0.073512659 |
| 0.251612425 | 0.037286611 | 0.018786976 | 0.02897621  |
| 0.110670018 | 0.114131261 | 0.045405928 | 0.142926539 |
| 0.012816928 | 0.205238282 | 0.030251511 | 0.071411021 |
| 0.051792725 | 0.076067094 | 0.048694702 | 0.04450513  |
| 0.038961585 | 0.071047255 | 0.033242045 | 0.053818037 |
| 0.034990439 | 0.040456812 | 0.017950019 | 0.178042179 |
| 0.07278246  | 0.043823542 | 0.115726911 | 0.073306486 |
| 0.097502202 | 0.123993822 | 0.197784711 | 0.070946263 |
| 0.022266363 | 0.083610316 | 0.007263874 | 0.01113743  |
| 0.074400362 | 0.064177594 | 0.074183654 | 0.113740518 |

|             |             |             |             |
|-------------|-------------|-------------|-------------|
| 0.062523541 | 0.143615675 | 0.069408786 | 0.054320051 |
| 0.102372338 | 0.123370074 | 0.14295938  | 0.018118975 |
| 0.012100782 | 0.008583522 | 0.136612887 | 0.174674436 |
| 0.071251018 | 0.003141216 | 0.100106488 | 0.069858968 |
| 0.046102582 | 0.071368099 | 0.0525009   | 0.210226388 |
| 0.087349535 | 0.185536308 | 0.008933931 | 0.20315901  |
| 0.034871911 | 0.053779421 | 0.068690181 | 0.057161444 |
| 0.147238689 | 0.157559211 | 0.083757801 | 0.106722863 |
| 0.004721086 | 0.171813273 | 0.067547606 | 0.019858656 |
| 0.067724279 | 0.119603655 | 0.09727637  | 0.147005807 |
| 0.037489047 | 0.015781632 | 0.020324604 | 0.006730517 |
| 0.05779298  | 0.101510864 | 0.054885034 | 0.093012507 |
| 0.10163994  | 0.152245222 | 0.054342558 | 0.057566552 |
| 0.021963081 | 0.042231359 | 0.054883376 | 0.006699388 |
| 0.12772315  | 0.125636013 | 0.049657564 | 0.002991304 |
| 0.046452529 | 0.121357995 | 0.01740109  | 0.107142215 |
| 0.017483944 | 0.132008532 | 0.098972111 | 0.093155245 |
| 0.101424914 | 0.135153043 | 0.192227618 | 0.167135827 |
| 0.100645443 | 0.099511437 | 0.048498983 | 0.022320187 |
| 0.090377099 | 0.017524663 | 0.1530509   | 0.070307487 |
| 0.062533999 | 0.102666805 | 0.020947298 | 0.075116444 |
| 0.09472862  | 0.091797111 | 0.058062769 | 0.127155664 |
| 0.011510357 | 0.075498708 | 0.067283913 | 0.018622605 |
| 0.179468107 | 0.090702479 | 0.127008558 | 0.02105113  |
| 0.081117525 | 0.041335722 | 0.111226732 | 0.016596949 |
| 0.02682406  | 0.067550125 | 0.043191712 | 0.169826321 |
| 0.112262962 | 0.071119964 | 0.084019234 | 0.084772394 |
| 0.069619412 | 0.073642448 | 0.042202531 | 0.084395714 |
| 0.233580165 | 0.110167401 | 0.09095989  | 0.085534568 |
| 0.027918682 | 0.053595015 | 0.104696914 | 0.054182477 |
| 0.055678493 | 0.20300186  | 0.053368261 | 0.041042204 |
| 0.024502678 | 0.054959388 | 0.03320876  | 0.20956615  |
| 0.167981612 | 0.095299488 | 0.011127884 | 0.150700308 |
| 0.013389545 | 0.12001539  | 0.016861633 | 0.065212321 |
| 0.145800833 | 0.066210068 | 0.166429748 | 0.086682943 |
| 0.037103447 | 0.045584735 | 0.030500283 | 0.179470156 |
| 0.017940621 | 0.068453147 | 0.031919562 | 0.131001434 |
| 0.014630914 | 0.076932274 | 0.145171205 | 0.060141575 |
| 0.010728179 | 0.010536848 | 0.063827118 | 0.083176907 |
| 0.077827729 | 0.10877825  | 0.065829937 | 0.085873182 |
| 0.040258853 | 0.073389767 | 0.086502425 | 0.027219345 |
| 0.121596649 | 0.045165541 | 0.02324269  | 0.078094705 |
| 0.143419489 | 0.206910175 | 0.055493482 | 0.041167718 |
| 1           | 0.056121041 | 0.068959591 | 0.047420893 |
| 0.100782236 | 0.138170924 | 0.046496246 | 0.057418296 |
| 0.065672248 | 0.049308863 | 0.098864915 | 0.122078129 |
| 0.012815546 |             |             |             |
| WBP5        | 0.440473477 | 0.478276631 | 0.378329756 |
| 0.40964802  | 0.394349611 | 0.417585518 | 0.206685212 |
| 0.239865354 | 0.067266264 | 0.004287005 | 0.013404469 |
| 0.425508985 | 0.181397807 | 0.294037485 | 0.343946836 |
| 0.386828182 | 0.103474782 | 0.37903683  | 0.222361741 |
| 0.408569912 | 0.106073034 | 0.358211587 | 0.081315889 |
| 0.237407952 | 0.072835184 | 0.048801541 | 0.209360078 |



|             |             |             |             |
|-------------|-------------|-------------|-------------|
| 0.436744372 | 0.05800148  | 0.384065794 | 0.422680208 |
| 0.080397465 | 0.457351734 | 0.502347646 | 0.397552037 |
| 0.497330811 | 0.43364976  | 0.014484685 | 0.305769569 |
| 0.455248756 | 0.417571981 | 0.407539099 | 0.307379383 |
| 0.033804477 | 0.497441071 | 0.228638445 | 0.360483641 |
| 0.27766241  | 0.020123335 | 0.314554864 | 0.452845174 |
| 0.468635242 | 0.417948876 | 0.260512464 | 0.149925969 |
| 0.177453915 | 0.301791409 | 0.228532667 | 0.405332598 |
| 0.208072971 | 0.223072911 | 0.463340793 | 0.079797077 |
| 0.143781595 | 0.284726308 | 0.12046554  | 0.283870626 |
| 0.294331078 | 0.444420557 | 0.018040634 | 0.407850356 |
| 0.00358985  | 0.385584741 | 0.340625199 | 0.2613729   |
| 0.029504617 | 0.01528401  | 0.143280988 | 0.33371418  |
| 0.446316038 | 0.441587207 | 0.43636844  | 0.437011584 |
| 0.152912524 | 0.257634213 | 0.350937417 | 0.145598518 |
| 0.454065119 | 0.168820847 | 0.115538633 | 0.380112215 |
| 0.439562929 | 0.483072966 | 0.159563778 | 0.21292778  |
| 0.433958208 | 0.457332546 | 0.424940426 | 0.392565488 |
| 0.303093204 | 0.03476632  | 0.441423111 | 0.450705243 |
| 0.45174503  | 0.265293185 | 0.116729527 | 0.44521657  |
| 0.044790443 | 0.414258863 | 0.329132062 | 0.159593156 |
| 0.447416111 | 0.013999151 | 0.16496879  | 0.360464466 |
| 0.206044235 | 0.457430036 | 0.470376604 | 0.172965614 |
| 0.382476925 | 0.016113738 | 0.100500377 | 0.024398682 |
| 0.33364631  | 0.111000416 | 0.496415071 | 0.446579027 |
| 0.281867801 | 0.334287764 | 0.263671741 | 4.70E-05    |
| 0.017429228 | 0.164257859 | 0.453817094 | 0.388577726 |
| 0.434076663 | 0.413052987 | 0.190650361 | 0.450784281 |
| 0.421999907 | 0.434235923 | 0.084110213 | 0.089103966 |
| 0.42396164  | 0.15912219  | 0.206797533 | 0.434798711 |
| 0.257539167 | 0.122749054 | 0.110753903 | 0.450959355 |
| 0.443541635 | 0.071136156 | 0.401254156 | 0.384630829 |
| 0.316603222 | 0.302556493 | 0.096143481 | 0.270269145 |
| 0.045595382 | 0.457386331 | 0.017639901 | 0.388618097 |
| 0.237126431 | 0.115444348 | 0.011311804 | 0.311558106 |
| 0.310565263 | 0.438863584 | 0.483359429 | 0.091737364 |
| 0.310753354 | 0.364241514 | 0.394778123 | 0.432937574 |
| 0.006117538 | 0.041859398 | 0.375199219 | 0.455351956 |
| 0.377947429 | 0.448262555 | 0.289234537 | 0.263231377 |
| 0.237477112 | 0.430486571 | 0.003282602 | 0.493783035 |
| 0.483287264 | 0.399818668 | 0.373509223 | 0.398554782 |
| 0.332431586 | 0.438282755 | 0.063738514 | 0.39319919  |
| 0.439940975 | 0.066834706 | 0.442833928 | 0.124826368 |
| 0.448804101 | 0.027917674 | 0.355085074 | 0.414179819 |
| 0.431297075 | 0.007733272 | 0.283106049 | 0.396818933 |
| 0.016514333 | 0.11398066  | 0.440140633 | 0.396933208 |
| 0.355537789 | 0.425503926 | 0.435249092 | 0.312354271 |
| 0.397255438 | 0.247604497 | 0.008907818 | 0.270953014 |
| 0.437241562 | 0.365615233 | 0.445537995 | 0.243483928 |
| 0.432131384 | 0.453842004 | 0.439870128 | 0.201021738 |
| 0.033854256 | 0.338599032 | 0.024074959 | 0.289228229 |
| 0.424794759 | 0.109119465 | 0.370692407 | 0.136504228 |
| 0.050026158 | 0.456968779 | 0.132412269 | 0.21576137  |
| 0.092564309 | 0.410304799 | 0.24926843  | 0.238413714 |

|             |             |             |             |
|-------------|-------------|-------------|-------------|
| 0.187592348 | 0.129873842 | 0.302463659 | 0.34078771  |
| 0.038575667 | 0.073732933 | 0.009622346 | 0.378726417 |
| 0.12837317  | 0.344579987 | 0.360632541 | 0.454860842 |
| 0.350111014 | 0.101867989 | 0.35075688  | 0.240086572 |
| 0.084022042 | 0.009294111 | 0.460829075 | 0.387081206 |
| 0.423407174 | 0.139317229 | 0.030035278 | 0.354407965 |
| 0.448398869 | 0.388100896 | 0.366065612 | 0.451134928 |
| 0.025831138 | 0.441498876 | 0.222805307 | 0.092018568 |
| 0.338962871 | 0.236521259 | 0.434912968 | 0.061191323 |
| 0.433748014 | 0.452780306 | 0.282759002 | 0.143677825 |
| 0.442866907 | 0.416324136 | 0.025942337 | 0.452341552 |
| 0.459774933 | 0.022177807 | 0.469495834 | 0.09633158  |
| 0.013364396 | 0.410106074 | 0.421455376 | 0.054511979 |
| 0.056073271 | 0.317952736 | 0.055006101 | 0.24369184  |
| 0.455830691 | 0.37202589  | 0.436506125 | 0.173287853 |
| 0.030762051 | 0.007843055 | 0.164411526 | 0.389226941 |
| 0.508243856 | 0.445361128 | 0.23307964  | 0.321547413 |
| 0.217499844 | 0.28215699  | 0.19608247  | 0.450594184 |
| 0.18851762  | 0.491974703 | 0.004008855 | 0.413459802 |
| 0.496489977 | 0.373023973 | 0.055395681 | 0.326865823 |
| 0.450982324 | 0.036505538 | 0.211856312 | 0.475009619 |
| 0.444755258 | 0.290832883 | 0.318078005 | 0.425816392 |
| 0.015735036 | 0.03987378  | 0.351003937 | 0.139220659 |
| 0.360351938 | 0.17950537  | 0.036263506 | 0.369037672 |
| 0.032839987 | 0.447525607 | 0.437748565 | 0.040203344 |
| 0.377266586 | 0.365181761 | 0.335603644 | 0.027844622 |
| 0.421444808 | 0.457801387 | 0.503860775 | 0.171971955 |
| 0.449263854 | 0.440772507 | 0.374126169 | 0.059352446 |
| 0.010065677 | 0.487545158 | 0.444167708 | 0.01929039  |
| 0.443219524 | 0.333283452 | 0.00936741  | 0.463332805 |
| 0.172390215 | 0.472109144 | 0.004606416 | 0.082039996 |
| 0.027074399 | 0.424864024 | 0.469107931 | 0.415869225 |
| 0.31662218  | 0.368349271 | 0.004101442 | 0.456018882 |
| 0.463124194 | 0.007737144 | 0.102668088 | 0.444454868 |
| 0.412484215 | 0.498199927 | 0.266369714 | 0.428551222 |
| 0.406049497 | 0.476372007 | 0.238041449 | 0.224416463 |
| 0.45053747  | 0.445256667 | 0.450177785 | 0.452940334 |
| 0.448778207 | 0.38915081  | 0.256102426 | 0.011368319 |
| 0.096491759 | 0.2665184   | 0.318584032 | 0.057946122 |
| 0.407177079 | 0.105293522 | 0.457987224 | 0.437675727 |
| 0.444899798 | 0.002346551 | 0.173531371 | 0.454691174 |
| 0.455608354 | 0.450027426 | 0.017556803 | 0.005360456 |
| 0.008647151 | 0.01044175  | 0.383761221 | 0.202254746 |
| 0.449545928 | 0.298540244 | 0.002435818 | 0.053863812 |
| 0.278585054 | 0.349712134 | 0.469059115 | 0.360224912 |
| 0.430837779 | 0.063344373 | 0.291264433 | 0.389720255 |
| 0.044248438 | 0.418288031 | 0.446325514 | 0.459703792 |
| 0.03035991  | 0.204390946 | 0.421772124 | 0.448618108 |
| 0.049820327 | 0.276089961 | 0.434566588 | 0.298933017 |
| 0.011476965 | 0.057150093 | 0.042953876 | 0.41542869  |
| 0.484813964 | 0.060745633 | 0.022813662 | 0.203804466 |
| 0.106567226 | 0.447134092 | 0.145820164 | 0.450077058 |
| 0.451003709 | 0.415610648 | 0.050757288 | 0.462930702 |
| 0.025328852 | 0.475515784 | 0.284503085 | 0.07657142  |

|             |             |             |             |
|-------------|-------------|-------------|-------------|
| 0.276948542 | 0.008803708 | 0.440049008 | 0.120833864 |
| 0.38633933  | 0.441868877 | 0.15465506  | 0.009402336 |
| 0.145772211 | 0.037613616 | 0.436069722 | 0.424694206 |
| 0.022243939 | 0.234002198 | 0.265933765 | 0.404872362 |
| 0.344234523 | 0.417143939 | 0.496572929 | 0.433215696 |
| 0.077763199 | 0.121885079 | 0.427828261 | 0.457660266 |
| 0.287498773 | 0.4383387   | 0.255524128 | 0.462330263 |
| 0.451367836 | 0.452965848 | 0.448050023 | 0.341097215 |
| 0.185427397 | 0.446940308 | 0.403301369 | 0.020084148 |
| 0.346995741 | 0.43599964  | 0.394075295 | 0.118709312 |
| 0.211924356 | 0.352996052 | 0.043568515 | 0.256339388 |
| 0.293425939 | 0.375735437 | 0.126160884 | 0.415646419 |
| 0.439443837 | 0.459070759 | 0.046157799 | 0.040461814 |
| 0.49590902  | 0.44619052  | 0.160579431 | 0.432656892 |
| 0.144323288 | 0.300638189 | 0.438630486 | 0.421927051 |
| 0.354199597 | 0.450714391 | 0.455050606 | 0.426816015 |
| 0.444460723 | 0.243166252 | 0.500434743 | 0.139979015 |
| 0.061141958 | 0.438018579 | 0.078661675 | 0.067519339 |
| 0.121520738 | 0.017252002 | 0.258457564 | 0.40109868  |
| 0.349587616 | 0.355018882 | 0.387686957 | 0.066600537 |
| 0.27925134  | 0.408049472 | 0.321602194 | 0.211963749 |
| 0.064213752 | 0.479067088 | 0.006290044 | 0.041277807 |
| 0.364126285 | 0.43898109  | 0.337235405 | 0.205326528 |
| 0.243894207 | 0.107047183 | 0.264082836 | 0.374439209 |
| 0.35575077  | 0.367749154 | 0.441691281 | 0.03643504  |
| 0.018345255 | 0.444522379 | 0.438468026 | 0.01432508  |
| 0.063730561 | 0.429910398 | 0.310939562 | 0.201050801 |
| 0.012713001 | 0.435097823 | 0.367456417 | 0.394550854 |
| 0.364826447 | 0.054212635 | 0.425415114 | 0.090315789 |
| 0.056121041 | 1           | 0.367254714 | 0.478115698 |
| 0.322445652 | 0.391388199 | 0.469392629 | 0.455272431 |
| 0.128696632 | 0.388964135 | 0.023038869 | 0.449145649 |
| 0.396176728 |             |             |             |
| WDR74       | 0.353395394 | 0.453088664 | 0.271304306 |
| 0.312522272 | 0.241088221 | 0.171122861 | 0.103005263 |
| 0.083958129 | 0.079530671 | 0.001923126 | 0.021909462 |
| 0.304941563 | 0.116491026 | 0.106979328 | 0.164142493 |
| 0.369197061 | 0.119221676 | 0.217343803 | 0.146754316 |
| 0.284380302 | 0.035566097 | 0.313837171 | 0.064783635 |
| 0.278418323 | 0.117011717 | 0.061963097 | 0.230837636 |
| 0.376707204 | 0.073121772 | 0.110252717 | 0.239640084 |
| 0.130149264 | 0.357933294 | 0.449749751 | 0.318640393 |
| 0.446118176 | 0.321632359 | 0.01512749  | 0.115382041 |
| 0.359069678 | 0.374320985 | 0.282859568 | 0.179800498 |
| 0.029797703 | 0.387727083 | 0.128517253 | 0.302420118 |
| 0.10924706  | 0.033617126 | 0.082624676 | 0.352376907 |
| 0.383109925 | 0.23348979  | 0.103097101 | 0.080403021 |
| 0.096862239 | 0.073618095 | 0.190940702 | 0.16183936  |
| 0.120938861 | 0.045741931 | 0.408229084 | 0.053096782 |
| 0.072945312 | 0.122891412 | 0.167981807 | 0.118850709 |
| 0.272207325 | 0.263218381 | 0.016910874 | 0.290546823 |
| 0.000204121 | 0.271899746 | 0.2819433   | 0.238268051 |
| 0.051089827 | 0.013119195 | 0.181896501 | 0.167160083 |
| 0.403782126 | 0.424963065 | 0.46446069  | 0.474293743 |

|             |             |             |             |
|-------------|-------------|-------------|-------------|
| 0.132142062 | 0.236854648 | 0.276531397 | 0.11156244  |
| 0.381386497 | 0.084530437 | 0.089520405 | 0.380736248 |
| 0.471972809 | 0.455547452 | 0.185084781 | 0.238810063 |
| 0.312955878 | 0.398989716 | 0.211354407 | 0.2236086   |
| 0.207742161 | 0.10927858  | 0.355916539 | 0.470372749 |
| 0.307795441 | 0.274226673 | 0.14432719  | 0.292671818 |
| 0.064037252 | 0.175303255 | 0.226042961 | 0.119876938 |
| 0.419077228 | 0.016395894 | 0.204361444 | 0.156018694 |
| 0.187516882 | 0.357100373 | 0.4695627   | 0.110876032 |
| 0.266907102 | 0.021298429 | 0.154189555 | 0.054874094 |
| 0.167375705 | 0.205024688 | 0.388321437 | 0.37792457  |
| 0.097965532 | 0.217982082 | 0.142304589 | 0.006822928 |
| 0.041766995 | 0.211681184 | 0.35830726  | 0.217436086 |
| 0.343900196 | 0.370860033 | 0.145815725 | 0.267223443 |
| 0.317031114 | 0.459918389 | 0.017854104 | 0.066274214 |
| 0.216362791 | 0.206094583 | 0.165288882 | 0.245789605 |
| 0.222204542 | 0.068571402 | 0.087540645 | 0.479723396 |
| 0.329313623 | 0.061180613 | 0.160518823 | 0.35248422  |
| 0.140860227 | 0.263271823 | 0.080342266 | 0.135197841 |
| 0.026649657 | 0.432942679 | 0.054376041 | 0.165584759 |
| 0.188748945 | 0.13434749  | 0.018531494 | 0.105897308 |
| 0.127343342 | 0.340749511 | 0.393270486 | 0.094421846 |
| 0.155731783 | 0.296111512 | 0.130054469 | 0.273616557 |
| 0.007056208 | 0.055569827 | 0.108859325 | 0.445400626 |
| 0.119601936 | 0.489783397 | 0.191307921 | 0.261527136 |
| 0.220464654 | 0.403444    | 0.010293808 | 0.411929387 |
| 0.47146837  | 0.114017426 | 0.209246076 | 0.304878727 |
| 0.238229735 | 0.375708709 | 0.032946771 | 0.326783659 |
| 0.225335255 | 0.076014802 | 0.4795955   | 0.130795256 |
| 0.400184247 | 0.042047972 | 0.128192311 | 0.425884652 |
| 0.334353929 | 0.009898993 | 0.075725982 | 0.244526108 |
| 0.059547908 | 0.035126309 | 0.332879324 | 0.272676125 |
| 0.21083889  | 0.412300619 | 0.454250375 | 0.233161389 |
| 0.235841221 | 0.131674417 | 0.025049118 | 0.270630196 |
| 0.40060523  | 0.199300604 | 0.349217376 | 0.129574377 |
| 0.155151086 | 0.397898086 | 0.359081837 | 0.086883711 |
| 0.033303946 | 0.136699091 | 0.013252382 | 0.221645693 |
| 0.363223679 | 0.051040744 | 0.226351514 | 0.165682091 |
| 0.087880042 | 0.471243312 | 0.230690896 | 0.265940389 |
| 0.195077838 | 0.174916259 | 0.1538398   | 0.088086766 |
| 0.108461726 | 0.141265056 | 0.249787343 | 0.212436962 |
| 0.016615792 | 0.072039742 | 0.051596001 | 0.170908736 |
| 0.06035581  | 0.141684855 | 0.126405903 | 0.260137889 |
| 0.143380839 | 0.05908842  | 0.220462859 | 0.279111274 |
| 0.138482301 | 0.023195501 | 0.442675599 | 0.315101375 |
| 0.201540026 | 0.10641598  | 0.055487959 | 0.136060131 |
| 0.388104348 | 0.110314068 | 0.103495868 | 0.36001013  |
| 0.039664056 | 0.466345593 | 0.119836868 | 0.110849783 |
| 0.216385096 | 0.147486368 | 0.412746932 | 0.036539695 |
| 0.198183459 | 0.370818026 | 0.244775378 | 0.148784536 |
| 0.288769498 | 0.266125209 | 0.02083339  | 0.303462192 |
| 0.279953854 | 0.033613292 | 0.475496359 | 0.136044793 |
| 0.035101686 | 0.378557681 | 0.338216847 | 0.086056738 |
| 0.09822938  | 0.147673478 | 0.018857569 | 0.217730738 |

|             |             |             |             |
|-------------|-------------|-------------|-------------|
| 0.457497843 | 0.342031847 | 0.309433686 | 0.26770453  |
| 0.028590907 | 0.005400604 | 0.23212553  | 0.272548746 |
| 0.421086095 | 0.477833605 | 0.193138118 | 0.218664161 |
| 0.153550983 | 0.222907357 | 0.048354546 | 0.460216665 |
| 0.240948004 | 0.460020172 | 0.012537134 | 0.40555056  |
| 0.43540438  | 0.101751534 | 0.087463133 | 0.127630676 |
| 0.275362244 | 0.040763523 | 0.144686239 | 0.418611706 |
| 0.373469457 | 0.221118409 | 0.211809881 | 0.321764065 |
| 0.008877147 | 0.022585057 | 0.266593797 | 0.248530346 |
| 0.186077695 | 0.169588791 | 0.122763787 | 0.155437221 |
| 0.029165467 | 0.356099569 | 0.419256557 | 0.064160002 |
| 0.126645159 | 0.149947422 | 0.302801246 | 0.036681508 |
| 0.446554864 | 0.472454482 | 0.441737586 | 0.105661704 |
| 0.363963947 | 0.44019837  | 0.263664014 | 0.106653101 |
| 0.035181276 | 0.463093111 | 0.266274412 | 0.014576742 |
| 0.426815876 | 0.074704288 | 0.006080827 | 0.418871928 |
| 0.120965294 | 0.353182254 | 0.0032249   | 0.145427559 |
| 0.092536263 | 0.456284581 | 0.399294766 | 0.237402838 |
| 0.073067032 | 0.238486506 | 0.021132502 | 0.496776058 |
| 0.404426931 | 0.032072553 | 0.186148188 | 0.351192881 |
| 0.366672289 | 0.454102793 | 0.261389967 | 0.420055353 |
| 0.281064298 | 0.426873314 | 0.108150617 | 0.20006183  |
| 0.351783901 | 0.460946057 | 0.316535282 | 0.388478484 |
| 0.387950322 | 0.357954523 | 0.16189781  | 0.012016443 |
| 0.170628451 | 0.078384688 | 0.131077729 | 0.055664179 |
| 0.154341043 | 0.129416378 | 0.437799295 | 0.436247535 |
| 0.45006282  | 0.011551952 | 0.065340056 | 0.346385847 |
| 0.353309828 | 0.419695851 | 0.049715468 | 0.013017825 |
| 0.018519668 | 0.03194058  | 0.17530957  | 0.23447785  |
| 0.448166803 | 0.068785852 | 0.006817917 | 0.020786727 |
| 0.164593827 | 0.319038947 | 0.427022082 | 0.295089747 |
| 0.414643531 | 0.082468674 | 0.105132513 | 0.314717843 |
| 0.090324381 | 0.205014289 | 0.446567692 | 0.378164361 |
| 0.072811832 | 0.233340158 | 0.206987561 | 0.429739228 |
| 0.131104489 | 0.231466517 | 0.312349788 | 0.154590841 |
| 0.034466087 | 0.107138619 | 0.085541541 | 0.407658919 |
| 0.430185076 | 0.049551161 | 0.028454479 | 0.051690349 |
| 0.059438884 | 0.435023688 | 0.101215081 | 0.48053376  |
| 0.353759346 | 0.386647107 | 0.11079039  | 0.409622903 |
| 0.039358502 | 0.404738173 | 0.261459447 | 0.027896092 |
| 0.24089284  | 0.02275481  | 0.430767138 | 0.107914342 |
| 0.127129068 | 0.266307694 | 0.206985743 | 0.039744339 |
| 0.251400361 | 0.064357906 | 0.434349863 | 0.454663512 |
| 0.078713749 | 0.141733013 | 0.239979672 | 0.299676724 |
| 0.111782499 | 0.329195246 | 0.416775912 | 0.17194189  |
| 0.043406268 | 0.199603218 | 0.291162403 | 0.252812509 |
| 0.09901502  | 0.476224362 | 0.177584306 | 0.49319052  |
| 0.306828844 | 0.422043595 | 0.425877451 | 0.18270085  |
| 0.204540098 | 0.207342212 | 0.198816617 | 0.009263638 |
| 0.211597282 | 0.392994897 | 0.191036982 | 0.141484383 |
| 0.17112654  | 0.26721047  | 0.046790873 | 0.112301772 |
| 0.260654261 | 0.12227587  | 0.079080033 | 0.408552019 |
| 0.238260108 | 0.270663363 | 0.028608336 | 0.076375187 |
| 0.47733429  | 0.376596834 | 0.076106389 | 0.2739504   |

|             |             |             |             |
|-------------|-------------|-------------|-------------|
| 0.165356255 | 0.216074796 | 0.413509279 | 0.421658686 |
| 0.234266262 | 0.360713595 | 0.324644773 | 0.211605712 |
| 0.319090181 | 0.156288279 | 0.449343539 | 0.035634533 |
| 0.122778579 | 0.272599065 | 0.054711618 | 0.116252779 |
| 0.099546373 | 0.048237073 | 0.248901136 | 0.36029448  |
| 0.243110967 | 0.241235247 | 0.137727453 | 0.085769503 |
| 0.255250377 | 0.212591188 | 0.230626306 | 0.083710848 |
| 0.051561996 | 0.41055989  | 0.014912859 | 0.068646026 |
| 0.238619905 | 0.376639087 | 0.243104303 | 0.206922057 |
| 0.258595057 | 0.18787007  | 0.185396836 | 0.108262506 |
| 0.107583482 | 0.226776715 | 0.369595326 | 0.030416274 |
| 0.011994044 | 0.465894358 | 0.180959179 | 0.056483226 |
| 0.10815695  | 0.232816259 | 0.210031788 | 0.137785507 |
| 0.052978166 | 0.438794697 | 0.120480209 | 0.260601047 |
| 0.164520474 | 0.069549902 | 0.267085884 | 0.073424687 |
| 0.068959591 | 0.367254714 | 1           | 0.456246048 |
| 0.289389174 | 0.342236872 | 0.357454664 | 0.345077042 |
| 0.144304701 | 0.241217588 | 0.021930999 | 0.382785327 |
| 0.21076013  |             |             |             |
| XKRX        | 0.484450142 | 0.512167936 | 0.451389904 |
| 0.448893834 | 0.465092795 | 0.424638531 | 0.201460586 |
| 0.180685211 | 0.078609002 | 0.003475686 | 0.022539582 |
| 0.501150185 | 0.226363363 | 0.283667488 | 0.369676887 |
| 0.440353623 | 0.136306359 | 0.367574396 | 0.230457704 |
| 0.431179462 | 0.083039312 | 0.422620688 | 0.078305932 |
| 0.31613357  | 0.105942733 | 0.060787905 | 0.292122698 |
| 0.46950975  | 0.070116116 | 0.377215161 | 0.414917108 |
| 0.092643495 | 0.49216131  | 0.521601615 | 0.491799511 |
| 0.525205771 | 0.472849029 | 0.010205118 | 0.320416393 |
| 0.473505873 | 0.496592981 | 0.430058686 | 0.334681052 |
| 0.0333119   | 0.492834539 | 0.241351305 | 0.437404166 |
| 0.242616029 | 0.026929896 | 0.25908181  | 0.45815672  |
| 0.490201088 | 0.503412404 | 0.221250253 | 0.149915547 |
| 0.244926176 | 0.248435425 | 0.342541086 | 0.366531873 |
| 0.219096759 | 0.165299131 | 0.50202017  | 0.079652804 |
| 0.15106274  | 0.242370353 | 0.151544075 | 0.255576307 |
| 0.401476548 | 0.439466134 | 0.012220803 | 0.488000668 |
| 0.002045888 | 0.400158656 | 0.401605843 | 0.375770167 |
| 0.034517514 | 0.01776546  | 0.176477685 | 0.350696058 |
| 0.487772428 | 0.486121853 | 0.517475489 | 0.524550021 |
| 0.189337119 | 0.293427598 | 0.456431476 | 0.165175562 |
| 0.495785826 | 0.173404213 | 0.1041873   | 0.448007443 |
| 0.521384135 | 0.514747946 | 0.202987231 | 0.265582711 |
| 0.489542986 | 0.496422805 | 0.477897769 | 0.472702411 |
| 0.401013114 | 0.047605021 | 0.491626226 | 0.527568246 |
| 0.460719819 | 0.372997156 | 0.147881679 | 0.451095818 |
| 0.048935595 | 0.403813817 | 0.362618476 | 0.167906502 |
| 0.491114115 | 0.013039898 | 0.216253127 | 0.380172739 |
| 0.201934783 | 0.498152845 | 0.516848602 | 0.176123014 |
| 0.448245132 | 0.01636779  | 0.158095242 | 0.026697318 |
| 0.354438976 | 0.174836137 | 0.508026304 | 0.500592272 |
| 0.237737615 | 0.418479124 | 0.258899534 | 0.00019729  |
| 0.022254118 | 0.182106155 | 0.515391064 | 0.386291716 |
| 0.471726692 | 0.468250858 | 0.24262731  | 0.461585804 |

|             |             |             |             |
|-------------|-------------|-------------|-------------|
| 0.521529475 | 0.517314475 | 0.071677231 | 0.080774461 |
| 0.464364727 | 0.180728823 | 0.23048949  | 0.507975053 |
| 0.328511702 | 0.099530847 | 0.114805365 | 0.519453854 |
| 0.454992859 | 0.072615357 | 0.36484683  | 0.438515507 |
| 0.369242199 | 0.391664781 | 0.093117083 | 0.288285488 |
| 0.0403128   | 0.49757741  | 0.024354834 | 0.348680207 |
| 0.323941354 | 0.162456359 | 0.007247615 | 0.26467495  |
| 0.312139177 | 0.510699744 | 0.498101938 | 0.092095975 |
| 0.334082239 | 0.437591242 | 0.353816349 | 0.497483174 |
| 0.008572771 | 0.037349129 | 0.318193355 | 0.524330256 |
| 0.335242499 | 0.520698872 | 0.300510137 | 0.31293765  |
| 0.287241857 | 0.484589642 | 0.002984155 | 0.502963207 |
| 0.518267703 | 0.348732792 | 0.442684953 | 0.459822779 |
| 0.44293213  | 0.491456414 | 0.051615116 | 0.443745911 |
| 0.4273166   | 0.065209812 | 0.514370383 | 0.156359515 |
| 0.497709094 | 0.034347891 | 0.339952847 | 0.514380624 |
| 0.526507139 | 0.007493232 | 0.238734824 | 0.410799009 |
| 0.022819625 | 0.088477844 | 0.471030985 | 0.433553056 |
| 0.413866879 | 0.490515522 | 0.498499762 | 0.426254279 |
| 0.467940624 | 0.223275803 | 0.008822255 | 0.337881762 |
| 0.499812992 | 0.453034329 | 0.471552298 | 0.2340118   |
| 0.403089228 | 0.50257236  | 0.508437046 | 0.237392669 |
| 0.034254375 | 0.320753234 | 0.018109567 | 0.352283166 |
| 0.478423729 | 0.114871152 | 0.459554953 | 0.142018365 |
| 0.065097501 | 0.523054318 | 0.197072077 | 0.313241203 |
| 0.149579388 | 0.461370305 | 0.240035643 | 0.269092421 |
| 0.254247716 | 0.154744654 | 0.396971228 | 0.414543818 |
| 0.029356788 | 0.086369824 | 0.011571469 | 0.473971465 |
| 0.164958241 | 0.414151911 | 0.415859484 | 0.481184535 |
| 0.358289035 | 0.113290918 | 0.423704099 | 0.313764125 |
| 0.108707498 | 0.010819222 | 0.513517842 | 0.425663869 |
| 0.399985027 | 0.140724611 | 0.033338298 | 0.428350779 |
| 0.508589454 | 0.38448854  | 0.308300354 | 0.49747429  |
| 0.022223627 | 0.514097798 | 0.267826934 | 0.11692137  |
| 0.444920871 | 0.263886718 | 0.483153408 | 0.062989269 |
| 0.434424205 | 0.492998145 | 0.315043084 | 0.184941715 |
| 0.462614281 | 0.44747948  | 0.023439154 | 0.478102426 |
| 0.479599817 | 0.025210375 | 0.523716314 | 0.12626052  |
| 0.015886335 | 0.494563164 | 0.518533364 | 0.065545475 |
| 0.069110842 | 0.367568086 | 0.037006647 | 0.295961223 |
| 0.520027637 | 0.438087566 | 0.50512645  | 0.231076392 |
| 0.032995354 | 0.010129161 | 0.214666898 | 0.459110756 |
| 0.519536505 | 0.526733745 | 0.256279918 | 0.419165932 |
| 0.231254238 | 0.37762092  | 0.145501356 | 0.527082883 |
| 0.198687135 | 0.509253877 | 0.004015173 | 0.513770208 |
| 0.524946937 | 0.325978217 | 0.076565136 | 0.324042994 |
| 0.463046873 | 0.036212775 | 0.190030523 | 0.502788449 |
| 0.493124527 | 0.354156024 | 0.39328764  | 0.472075479 |
| 0.011347188 | 0.032671902 | 0.427164994 | 0.209478096 |
| 0.427961296 | 0.207600047 | 0.064910112 | 0.349655286 |
| 0.036142894 | 0.492501853 | 0.496218423 | 0.052866172 |
| 0.402215636 | 0.330046757 | 0.403915369 | 0.028484693 |
| 0.521462877 | 0.509955108 | 0.521016218 | 0.148112286 |
| 0.515910403 | 0.523461647 | 0.498005655 | 0.069558724 |

|             |             |             |             |
|-------------|-------------|-------------|-------------|
| 0.013366808 | 0.51899509  | 0.447793994 | 0.018795495 |
| 0.503057415 | 0.269638831 | 0.01125626  | 0.50177326  |
| 0.170544403 | 0.467535188 | 0.002772022 | 0.095383234 |
| 0.035305133 | 0.502344185 | 0.485130561 | 0.41019565  |
| 0.294190294 | 0.378517389 | 0.004966815 | 0.523546992 |
| 0.505800897 | 0.011314681 | 0.144416774 | 0.526394909 |
| 0.51945403  | 0.506622048 | 0.375689451 | 0.525673882 |
| 0.51236797  | 0.508585082 | 0.249506203 | 0.271343234 |
| 0.501518644 | 0.51192515  | 0.466943073 | 0.483945875 |
| 0.50407923  | 0.464503098 | 0.278889003 | 0.01105923  |
| 0.14018295  | 0.216577519 | 0.379747272 | 0.082105752 |
| 0.370037019 | 0.138844567 | 0.509522119 | 0.505666946 |
| 0.530053443 | 0.002757445 | 0.140283172 | 0.516383108 |
| 0.478070803 | 0.492397614 | 0.016034166 | 0.005376814 |
| 0.007840733 | 0.019016862 | 0.378891407 | 0.244056617 |
| 0.518764324 | 0.293283977 | 0.002274884 | 0.035266508 |
| 0.282456527 | 0.455643747 | 0.512278725 | 0.39307356  |
| 0.506761894 | 0.070189729 | 0.333431514 | 0.416100759 |
| 0.065499718 | 0.400292044 | 0.527262438 | 0.486961441 |
| 0.033900524 | 0.248920449 | 0.411987272 | 0.504251785 |
| 0.093320662 | 0.327969447 | 0.506655971 | 0.347105298 |
| 0.010657197 | 0.074411142 | 0.058628156 | 0.474771629 |
| 0.517648278 | 0.080428739 | 0.031130055 | 0.166753305 |
| 0.11539643  | 0.510798208 | 0.16256723  | 0.521250076 |
| 0.488417711 | 0.467016822 | 0.071444477 | 0.491565418 |
| 0.034914457 | 0.497664573 | 0.386203824 | 0.062069255 |
| 0.293154241 | 0.00848066  | 0.509036569 | 0.187539353 |
| 0.356009971 | 0.439565223 | 0.214979304 | 0.013315125 |
| 0.214773495 | 0.046087211 | 0.509077541 | 0.512144161 |
| 0.028701823 | 0.226182588 | 0.302273326 | 0.431875101 |
| 0.304013235 | 0.478492274 | 0.507594163 | 0.488897152 |
| 0.073454124 | 0.164742183 | 0.437630976 | 0.461980065 |
| 0.244294905 | 0.516069483 | 0.336475646 | 0.521530989 |
| 0.468708846 | 0.496008547 | 0.521952806 | 0.367010774 |
| 0.263323336 | 0.450194862 | 0.420748921 | 0.016023687 |
| 0.364316325 | 0.506992511 | 0.377794657 | 0.16624721  |
| 0.270513997 | 0.464744351 | 0.036593184 | 0.205687519 |
| 0.409349656 | 0.344912213 | 0.136719467 | 0.465148793 |
| 0.43241582  | 0.468467955 | 0.031050531 | 0.055105091 |
| 0.517264816 | 0.478179024 | 0.135664231 | 0.475422968 |
| 0.160382132 | 0.36614573  | 0.510800649 | 0.51018675  |
| 0.418440289 | 0.520434684 | 0.477865884 | 0.447617305 |
| 0.467670179 | 0.253635133 | 0.521394144 | 0.083121421 |
| 0.086248832 | 0.494223749 | 0.094762544 | 0.08364364  |
| 0.133449801 | 0.021162602 | 0.373068156 | 0.457593882 |
| 0.465897361 | 0.408956915 | 0.361306087 | 0.070859186 |
| 0.340655704 | 0.417502189 | 0.369806392 | 0.199862511 |
| 0.072449609 | 0.498938494 | 0.006955951 | 0.047686402 |
| 0.471190656 | 0.511778229 | 0.45431753  | 0.239839443 |
| 0.353979919 | 0.138509667 | 0.306622044 | 0.328856151 |
| 0.391603852 | 0.417824169 | 0.511529593 | 0.026904348 |
| 0.013743303 | 0.512988584 | 0.419928242 | 0.016432801 |
| 0.082538758 | 0.44198316  | 0.302598209 | 0.249355683 |
| 0.018012143 | 0.523113027 | 0.390513473 | 0.476543309 |



|             |             |             |             |
|-------------|-------------|-------------|-------------|
| 0.358375363 | 0.054287525 | 0.419008435 | 0.081743954 |
| 0.047420893 | 0.478115698 | 0.456246048 | 1           |
| 0.38218986  | 0.450655741 | 0.457450092 | 0.514172221 |
| 0.117076096 | 0.45522273  | 0.020153932 | 0.487381539 |
| 0.499175066 |             |             |             |
| ZBTB2       | 0.36630393  | 0.390699008 | 0.245107994 |
| 0.298145707 | 0.245774477 | 0.152543834 | 0.080795152 |
| 0.079237877 | 0.054871885 | 0.001665317 | 0.013950223 |
| 0.311726224 | 0.07245368  | 0.078137269 | 0.096198975 |
| 0.393232001 | 0.111026172 | 0.203487227 | 0.143033145 |
| 0.311397817 | 0.031211725 | 0.331938763 | 0.064080529 |
| 0.237422672 | 0.092315672 | 0.056305505 | 0.155727062 |
| 0.377976103 | 0.067445316 | 0.083348332 | 0.246708997 |
| 0.176644334 | 0.3630211   | 0.374925719 | 0.302880025 |
| 0.370717402 | 0.317274294 | 0.045143804 | 0.069311722 |
| 0.355288192 | 0.33977853  | 0.298713231 | 0.192450625 |
| 0.030169751 | 0.324184063 | 0.115330481 | 0.336538523 |
| 0.087351412 | 0.029998907 | 0.057942292 | 0.302964808 |
| 0.302810901 | 0.199380924 | 0.08485044  | 0.063230984 |
| 0.051901396 | 0.057752322 | 0.11262126  | 0.160392865 |
| 0.099499193 | 0.034321811 | 0.334238409 | 0.037398503 |
| 0.057685091 | 0.117802646 | 0.194476793 | 0.102598057 |
| 0.201472013 | 0.251916518 | 0.031087699 | 0.295055628 |
| 0.000296383 | 0.304241231 | 0.34221055  | 0.138559618 |
| 0.063274839 | 0.012388796 | 0.2002102   | 0.170149758 |
| 0.402227521 | 0.392866099 | 0.432342346 | 0.429441963 |
| 0.111044652 | 0.233603844 | 0.262979233 | 0.098115352 |
| 0.356352941 | 0.062442303 | 0.083408948 | 0.402154707 |
| 0.433138467 | 0.382795377 | 0.150644661 | 0.245065104 |
| 0.25658837  | 0.357219402 | 0.15800338  | 0.169116487 |
| 0.110455341 | 0.144891556 | 0.29418265  | 0.420532    |
| 0.290800528 | 0.201200527 | 0.133704021 | 0.291235403 |
| 0.082861399 | 0.131860038 | 0.244313773 | 0.146580882 |
| 0.408537946 | 0.016135634 | 0.187128835 | 0.15117978  |
| 0.218444822 | 0.346268513 | 0.394679971 | 0.095052307 |
| 0.262961421 | 0.028602285 | 0.083683354 | 0.090198142 |
| 0.126295037 | 0.168812846 | 0.310930298 | 0.340840283 |
| 0.086130705 | 0.1573218   | 0.120070341 | 0.015195139 |
| 0.056722024 | 0.257729151 | 0.34130731  | 0.217110435 |
| 0.364477923 | 0.338261131 | 0.094288576 | 0.247550095 |
| 0.28196696  | 0.431725848 | 0.008840003 | 0.072695199 |
| 0.201005912 | 0.250818476 | 0.188585224 | 0.239279307 |
| 0.16704998  | 0.072501893 | 0.091565742 | 0.430151369 |
| 0.289878977 | 0.063795433 | 0.145212391 | 0.379118534 |
| 0.085848024 | 0.265519987 | 0.090306737 | 0.107854089 |
| 0.028766093 | 0.354388665 | 0.075706899 | 0.148037381 |
| 0.089218026 | 0.12550293  | 0.046265842 | 0.088231545 |
| 0.083406144 | 0.275097652 | 0.323370861 | 0.113100026 |
| 0.1224665   | 0.305342778 | 0.121894343 | 0.224101998 |
| 0.004328815 | 0.079000645 | 0.089697414 | 0.393103618 |
| 0.110231394 | 0.460804114 | 0.172310346 | 0.231072212 |
| 0.229294936 | 0.400770851 | 0.019048558 | 0.337675442 |
| 0.394451653 | 0.083536075 | 0.194761661 | 0.34480052  |
| 0.147559987 | 0.344076749 | 0.031579528 | 0.360754768 |

|             |             |             |             |
|-------------|-------------|-------------|-------------|
| 0.228719208 | 0.096294157 | 0.451684785 | 0.114289212 |
| 0.35512549  | 0.043639385 | 0.09895065  | 0.378963587 |
| 0.289821534 | 0.011751495 | 0.052202838 | 0.247655853 |
| 0.089252438 | 0.029081551 | 0.351524954 | 0.275412909 |
| 0.190194901 | 0.423856578 | 0.445511373 | 0.132597251 |
| 0.212382475 | 0.127164236 | 0.044799495 | 0.271698969 |
| 0.407256739 | 0.12672145  | 0.297076133 | 0.104626785 |
| 0.155074821 | 0.341271079 | 0.319231795 | 0.050424377 |
| 0.034731156 | 0.118352864 | 0.011043629 | 0.168039164 |
| 0.3259677   | 0.039054891 | 0.163605195 | 0.233556393 |
| 0.097984426 | 0.409554389 | 0.197024388 | 0.197800665 |
| 0.158809874 | 0.15603623  | 0.144014907 | 0.052471482 |
| 0.063118711 | 0.123448675 | 0.158730437 | 0.139826935 |
| 0.017288567 | 0.070347624 | 0.104077255 | 0.106130565 |
| 0.037073537 | 0.083311831 | 0.073253886 | 0.245842549 |
| 0.110252715 | 0.047366763 | 0.165147104 | 0.229286337 |
| 0.13119538  | 0.0354764   | 0.383856266 | 0.352592251 |
| 0.188728062 | 0.095133594 | 0.080388423 | 0.081007551 |
| 0.346091277 | 0.084989167 | 0.07638992  | 0.310416319 |
| 0.061205926 | 0.448251049 | 0.081828897 | 0.099736976 |
| 0.144628262 | 0.129516308 | 0.400164485 | 0.021652023 |
| 0.218707841 | 0.317236835 | 0.270784822 | 0.114170358 |
| 0.243606364 | 0.269941746 | 0.023121688 | 0.290155745 |
| 0.26361508  | 0.04241513  | 0.412611923 | 0.143200759 |
| 0.054345477 | 0.3876995   | 0.28356906  | 0.09617303  |
| 0.107349359 | 0.097306636 | 0.019371616 | 0.254106075 |
| 0.394977564 | 0.351209345 | 0.259735271 | 0.249690161 |
| 0.028706627 | 0.005400435 | 0.234182985 | 0.290153198 |
| 0.351229637 | 0.41757805  | 0.215942073 | 0.153084983 |
| 0.169245899 | 0.129909835 | 0.045219093 | 0.400569812 |
| 0.293018668 | 0.401689572 | 0.024172845 | 0.373292197 |
| 0.352726414 | 0.083863279 | 0.074657284 | 0.109843317 |
| 0.242168098 | 0.04350801  | 0.16749326  | 0.350468996 |
| 0.333838466 | 0.148379076 | 0.123129029 | 0.36425574  |
| 0.010272733 | 0.026555778 | 0.269130742 | 0.204702539 |
| 0.120061337 | 0.144905739 | 0.105619052 | 0.121361349 |
| 0.027955326 | 0.297105565 | 0.434911955 | 0.050111742 |
| 0.098427095 | 0.118954065 | 0.352642809 | 0.045308925 |
| 0.386010089 | 0.416414216 | 0.369091222 | 0.120742015 |
| 0.357141961 | 0.366007984 | 0.225773632 | 0.136336926 |
| 0.052107663 | 0.387919841 | 0.272021496 | 0.014466797 |
| 0.415526294 | 0.057935202 | 0.005156383 | 0.367030361 |
| 0.116631439 | 0.296230114 | 0.002673561 | 0.174001073 |
| 0.134397534 | 0.45905781  | 0.321548118 | 0.252553534 |
| 0.040365472 | 0.296842414 | 0.053934894 | 0.447883899 |
| 0.336646568 | 0.04113622  | 0.182181371 | 0.305934901 |
| 0.314082919 | 0.399540956 | 0.166859913 | 0.358549244 |
| 0.250333686 | 0.347558131 | 0.074688111 | 0.206386979 |
| 0.305652187 | 0.386833749 | 0.315432822 | 0.344616749 |
| 0.367721023 | 0.388974401 | 0.174784773 | 0.012644887 |
| 0.112761128 | 0.06342091  | 0.062482167 | 0.035211403 |
| 0.154693229 | 0.103124507 | 0.400616603 | 0.429047938 |
| 0.395964148 | 0.022237618 | 0.060972958 | 0.309752427 |
| 0.329994181 | 0.405090903 | 0.09646193  | 0.014024444 |

|             |             |             |             |
|-------------|-------------|-------------|-------------|
| 0.025041256 | 0.022010692 | 0.193497373 | 0.222115615 |
| 0.394300006 | 0.03726393  | 0.012530144 | 0.024256058 |
| 0.136140178 | 0.311942389 | 0.359227686 | 0.329258448 |
| 0.413779275 | 0.104192406 | 0.054778209 | 0.35451035  |
| 0.07350901  | 0.203926186 | 0.390290999 | 0.316100441 |
| 0.12046311  | 0.215442608 | 0.195515448 | 0.398777009 |
| 0.09274727  | 0.267847444 | 0.322871425 | 0.095781477 |
| 0.082343365 | 0.11453078  | 0.080235922 | 0.435366472 |
| 0.351387332 | 0.036526223 | 0.024929545 | 0.036703744 |
| 0.044638473 | 0.42507636  | 0.082351024 | 0.442069605 |
| 0.332194926 | 0.394995325 | 0.136749714 | 0.342289477 |
| 0.031124322 | 0.332759766 | 0.209236719 | 0.016701002 |
| 0.254259288 | 0.045213145 | 0.384793765 | 0.045763997 |
| 0.09443694  | 0.290107017 | 0.129684982 | 0.064532779 |
| 0.191060978 | 0.076346579 | 0.3995591   | 0.434872849 |
| 0.124669681 | 0.131077782 | 0.24602443  | 0.353407194 |
| 0.102512553 | 0.307360738 | 0.344690973 | 0.133463162 |
| 0.038538116 | 0.225308916 | 0.312364913 | 0.254713018 |
| 0.086825466 | 0.453848748 | 0.103500189 | 0.44119651  |
| 0.30370217  | 0.398078693 | 0.373957533 | 0.174066502 |
| 0.16976718  | 0.205008771 | 0.172071032 | 0.008283525 |
| 0.232963083 | 0.366510342 | 0.194142194 | 0.091575686 |
| 0.125505008 | 0.254119532 | 0.077558531 | 0.127032351 |
| 0.200557553 | 0.113172823 | 0.070130585 | 0.430674751 |
| 0.269291957 | 0.263997792 | 0.053092637 | 0.066977721 |
| 0.417588449 | 0.337284192 | 0.060923336 | 0.255161713 |
| 0.184518419 | 0.19685767  | 0.40916116  | 0.418233455 |
| 0.171246372 | 0.316100268 | 0.319894591 | 0.184895063 |
| 0.270941194 | 0.143478846 | 0.374597147 | 0.037416741 |
| 0.086632747 | 0.284972116 | 0.040556393 | 0.135957205 |
| 0.093245455 | 0.063441055 | 0.155864393 | 0.398386468 |
| 0.15799614  | 0.250990829 | 0.110577434 | 0.09922793  |
| 0.271197744 | 0.193968117 | 0.267730271 | 0.062766545 |
| 0.042733833 | 0.332158247 | 0.021281975 | 0.092918104 |
| 0.168011336 | 0.326985639 | 0.184586589 | 0.189326309 |
| 0.172174291 | 0.225566397 | 0.180458973 | 0.088368455 |
| 0.058044758 | 0.175496537 | 0.317035646 | 0.035573183 |
| 0.017191919 | 0.448991471 | 0.158970804 | 0.103155214 |
| 0.139224566 | 0.240677076 | 0.23102978  | 0.085857874 |
| 0.079526834 | 0.369410792 | 0.068312535 | 0.269128627 |
| 0.173367571 | 0.097307342 | 0.247258986 | 0.078553064 |
| 0.100782236 | 0.322445652 | 0.289389174 | 0.38218986  |
| 1           | 0.341531487 | 0.302266833 | 0.317996182 |
| 0.185768847 | 0.245080589 | 0.024232716 | 0.387218083 |
| 0.117319608 |             |             |             |
| ZEB2        | 0.320295222 | 0.488935561 | 0.330894406 |
| 0.409845533 | 0.420431702 | 0.300986134 | 0.322485968 |
| 0.222204789 | 0.175055456 | 0.031864859 | 0.086648826 |
| 0.364615121 | 0.297704493 | 0.330718186 | 0.279942565 |
| 0.418760305 | 0.270858889 | 0.312443544 | 0.371618266 |
| 0.399493082 | 0.182855423 | 0.438914401 | 0.225142627 |
| 0.322600658 | 0.21778848  | 0.197688024 | 0.328644703 |
| 0.452737825 | 0.212136121 | 0.277634992 | 0.34496099  |
| 0.20689782  | 0.379172371 | 0.44829957  | 0.410157894 |

|             |             |             |             |
|-------------|-------------|-------------|-------------|
| 0.435128646 | 0.279251552 | 0.031074166 | 0.305596204 |
| 0.369595719 | 0.379264798 | 0.394669748 | 0.417105374 |
| 0.145686354 | 0.407829488 | 0.36431263  | 0.388460473 |
| 0.223920547 | 0.122918018 | 0.213072425 | 0.376617572 |
| 0.40613145  | 0.357185951 | 0.273325977 | 0.284661408 |
| 0.253325886 | 0.222911481 | 0.263689105 | 0.253998562 |
| 0.361215026 | 0.167803103 | 0.423052056 | 0.18317499  |
| 0.190031656 | 0.300005912 | 0.263544773 | 0.327877225 |
| 0.324128064 | 0.304291507 | 0.068749656 | 0.294133093 |
| 0.013978188 | 0.396632057 | 0.395296243 | 0.266970148 |
| 0.144749451 | 0.099207671 | 0.295482549 | 0.393325492 |
| 0.463638068 | 0.391872891 | 0.492881432 | 0.478704756 |
| 0.305137631 | 0.377851566 | 0.345737215 | 0.33069841  |
| 0.3909598   | 0.304643773 | 0.185506159 | 0.428778026 |
| 0.49519158  | 0.469410261 | 0.326019445 | 0.360199707 |
| 0.385827619 | 0.443290093 | 0.3544383   | 0.411535579 |
| 0.308600424 | 0.121335281 | 0.390912948 | 0.494456666 |
| 0.337336632 | 0.304165043 | 0.294050823 | 0.376123481 |
| 0.173210532 | 0.289516399 | 0.427014134 | 0.221487093 |
| 0.478508716 | 0.076704808 | 0.329956165 | 0.391826252 |
| 0.296212733 | 0.375783198 | 0.461373773 | 0.329898769 |
| 0.391504505 | 0.084171835 | 0.177413214 | 0.10940017  |
| 0.347787729 | 0.167160483 | 0.388540761 | 0.465101302 |
| 0.275768075 | 0.395418029 | 0.357096118 | 0.020703916 |
| 0.104778406 | 0.252775419 | 0.371956718 | 0.34718091  |
| 0.368410568 | 0.302960491 | 0.346847033 | 0.295793177 |
| 0.342733958 | 0.485102719 | 0.048195663 | 0.219832603 |
| 0.386304792 | 0.263752532 | 0.379385682 | 0.378649881 |
| 0.396412988 | 0.223218926 | 0.280633244 | 0.507389453 |
| 0.377900537 | 0.225298817 | 0.274192495 | 0.426404079 |
| 0.350072354 | 0.396711843 | 0.245953589 | 0.382402814 |
| 0.15810735  | 0.408232139 | 0.098520336 | 0.30363057  |
| 0.243075473 | 0.247006303 | 0.038392911 | 0.28420509  |
| 0.319287818 | 0.399382824 | 0.370515551 | 0.240271888 |
| 0.406396647 | 0.430876788 | 0.268487493 | 0.35185506  |
| 0.054553403 | 0.132304498 | 0.205071305 | 0.492539668 |
| 0.217830681 | 0.475246258 | 0.387412942 | 0.36735788  |
| 0.393755802 | 0.435806733 | 0.005226843 | 0.422004819 |
| 0.466979411 | 0.212802619 | 0.419607126 | 0.386043794 |
| 0.318134665 | 0.453863078 | 0.033536944 | 0.428200498 |
| 0.249146616 | 0.1995184   | 0.512371787 | 0.311538    |
| 0.40150316  | 0.148307936 | 0.326505695 | 0.382433714 |
| 0.330062276 | 0.02991396  | 0.229099788 | 0.381189291 |
| 0.088252749 | 0.170562272 | 0.353819499 | 0.407437777 |
| 0.392018073 | 0.40523391  | 0.503808903 | 0.303604341 |
| 0.420730343 | 0.325787734 | 0.053880393 | 0.37742399  |
| 0.371434031 | 0.297642524 | 0.395025092 | 0.33754322  |
| 0.232000211 | 0.440561653 | 0.337346589 | 0.192227519 |
| 0.150240799 | 0.343347755 | 0.063452367 | 0.393219294 |
| 0.319740969 | 0.255187461 | 0.313613277 | 0.224608436 |
| 0.185897461 | 0.50476372  | 0.227209731 | 0.24448267  |
| 0.153659005 | 0.370506961 | 0.356394315 | 0.306329703 |
| 0.292180307 | 0.307119724 | 0.350563836 | 0.374769461 |
| 0.119849293 | 0.242110899 | 0.039696993 | 0.304358477 |

|             |             |             |             |
|-------------|-------------|-------------|-------------|
| 0.236129299 | 0.330927907 | 0.307068123 | 0.303654284 |
| 0.34991874  | 0.235890122 | 0.422046614 | 0.297125089 |
| 0.227056402 | 0.075701893 | 0.47447014  | 0.414243879 |
| 0.245814284 | 0.290809484 | 0.133719845 | 0.274581697 |
| 0.469987475 | 0.236673939 | 0.191484316 | 0.44161049  |
| 0.078148518 | 0.479441023 | 0.359128443 | 0.268375995 |
| 0.379511973 | 0.395473676 | 0.475313068 | 0.088153701 |
| 0.323880366 | 0.432115851 | 0.380846115 | 0.320869388 |
| 0.348813148 | 0.398233243 | 0.116151162 | 0.314412516 |
| 0.307354642 | 0.127768092 | 0.487266064 | 0.245275704 |
| 0.088779977 | 0.383991415 | 0.353819103 | 0.198486605 |
| 0.192121669 | 0.379896229 | 0.11477523  | 0.401688766 |
| 0.497705901 | 0.436333279 | 0.368041408 | 0.268307441 |
| 0.150215246 | 0.05593362  | 0.298475594 | 0.32470072  |
| 0.431565073 | 0.471627402 | 0.381099827 | 0.39675795  |
| 0.376628037 | 0.343109689 | 0.146106209 | 0.490903732 |
| 0.204912466 | 0.454479041 | 0.04225439  | 0.377144478 |
| 0.428141913 | 0.244636726 | 0.200137947 | 0.338869464 |
| 0.340551726 | 0.15080841  | 0.294302718 | 0.443350422 |
| 0.406358321 | 0.370734452 | 0.346597503 | 0.382647781 |
| 0.071450268 | 0.133645631 | 0.378736307 | 0.210468669 |
| 0.370748179 | 0.342614937 | 0.066301121 | 0.305185114 |
| 0.155441636 | 0.419752193 | 0.446721229 | 0.16098329  |
| 0.27811141  | 0.270520201 | 0.41929475  | 0.135982357 |
| 0.410445296 | 0.438029975 | 0.456925288 | 0.271912874 |
| 0.366534581 | 0.451152935 | 0.318156118 | 0.18919533  |
| 0.074929918 | 0.447170402 | 0.314938271 | 0.081101322 |
| 0.483659093 | 0.186329168 | 0.070893673 | 0.465346096 |
| 0.322931183 | 0.354153951 | 0.010663977 | 0.070199657 |
| 0.103057455 | 0.449867672 | 0.413337271 | 0.350700605 |
| 0.198973341 | 0.388801473 | 0.013246247 | 0.484869684 |
| 0.44987359  | 0.064848377 | 0.239719176 | 0.368764027 |
| 0.337030186 | 0.482291326 | 0.313068649 | 0.418897827 |
| 0.350995035 | 0.432441289 | 0.332283235 | 0.39246336  |
| 0.416377642 | 0.427636709 | 0.360021799 | 0.415539423 |
| 0.465466462 | 0.410166278 | 0.3967518   | 0.07824203  |
| 0.176547486 | 0.239137197 | 0.249528356 | 0.169439127 |
| 0.247947168 | 0.267687415 | 0.440377164 | 0.473575265 |
| 0.459800837 | 0.034589834 | 0.237786271 | 0.363430795 |
| 0.431915223 | 0.478418977 | 0.052026473 | 0.012434313 |
| 0.011269275 | 0.069081797 | 0.365570413 | 0.343705768 |
| 0.46000475  | 0.200610644 | 0.036576635 | 0.115253693 |
| 0.34958444  | 0.380217261 | 0.459276916 | 0.425711579 |
| 0.376753675 | 0.208210385 | 0.288792991 | 0.411240034 |
| 0.169575158 | 0.21502355  | 0.475505723 | 0.431216481 |
| 0.114167531 | 0.345540655 | 0.316233377 | 0.497435367 |
| 0.077608238 | 0.412499553 | 0.366166228 | 0.38130218  |
| 0.038781892 | 0.193721058 | 0.170491679 | 0.420848673 |
| 0.418800993 | 0.199689597 | 0.126655371 | 0.1247316   |
| 0.260871    | 0.450807079 | 0.315332302 | 0.512387047 |
| 0.424643879 | 0.465297239 | 0.167737957 | 0.430280662 |
| 0.130282017 | 0.423962318 | 0.365986601 | 0.069958181 |
| 0.339423778 | 0.059078658 | 0.409271782 | 0.186233138 |
| 0.307706446 | 0.331818052 | 0.225769575 | 0.066303535 |

|             |             |             |             |
|-------------|-------------|-------------|-------------|
| 0.177183432 | 0.162139537 | 0.491970562 | 0.448506934 |
| 0.091052622 | 0.331512475 | 0.383466876 | 0.387386417 |
| 0.288784199 | 0.414759877 | 0.436302043 | 0.291503889 |
| 0.206416996 | 0.150202153 | 0.379161476 | 0.297758132 |
| 0.27896405  | 0.498152713 | 0.35599614  | 0.490672439 |
| 0.313810635 | 0.423760061 | 0.434297332 | 0.385528381 |
| 0.301540452 | 0.318838674 | 0.335944432 | 0.077949932 |
| 0.405547833 | 0.466057699 | 0.333495945 | 0.264028518 |
| 0.384695358 | 0.31701268  | 0.117057819 | 0.142387771 |
| 0.271258701 | 0.266140994 | 0.294991197 | 0.457194071 |
| 0.324473413 | 0.298187573 | 0.100595324 | 0.165235697 |
| 0.498250526 | 0.388916318 | 0.209748106 | 0.375200375 |
| 0.301107182 | 0.410538899 | 0.395564817 | 0.397009225 |
| 0.310438244 | 0.415814719 | 0.385825832 | 0.331184493 |
| 0.389933851 | 0.372796078 | 0.463144245 | 0.111327138 |
| 0.158155447 | 0.312950589 | 0.237715929 | 0.211553283 |
| 0.303458995 | 0.097067432 | 0.247581144 | 0.41657017  |
| 0.291818007 | 0.437774735 | 0.261829644 | 0.182980611 |
| 0.395838802 | 0.276788972 | 0.425720529 | 0.298363097 |
| 0.208944697 | 0.441252491 | 0.041830537 | 0.165866343 |
| 0.32036112  | 0.381459304 | 0.361745096 | 0.358519252 |
| 0.298468601 | 0.227155434 | 0.420917803 | 0.258616573 |
| 0.281261801 | 0.295535804 | 0.381814796 | 0.090646256 |
| 0.085443313 | 0.502931958 | 0.296710027 | 0.062971722 |
| 0.152035113 | 0.277945557 | 0.318852644 | 0.332704632 |
| 0.075199847 | 0.434370772 | 0.281375072 | 0.390598102 |
| 0.368167261 | 0.178871895 | 0.292112288 | 0.137758987 |
| 0.138170924 | 0.391388199 | 0.342236872 | 0.450655741 |
| 0.341531487 | 1           | 0.363444872 | 0.380656097 |
| 0.163920988 | 0.275051382 | 0.107699273 | 0.426113975 |
| 0.304398395 |             |             |             |
| ZFP238      | 0.447154077 | 0.464801659 | 0.375782653 |
| 0.390510399 | 0.368947695 | 0.430988204 | 0.186019361 |
| 0.225834072 | 0.060726108 | 0.002181666 | 0.010171418 |
| 0.405311377 | 0.152384973 | 0.261230213 | 0.362335926 |
| 0.364729083 | 0.079469375 | 0.370204489 | 0.192555465 |
| 0.389291678 | 0.093015698 | 0.326339785 | 0.066251753 |
| 0.22146671  | 0.057911095 | 0.038246842 | 0.193000343 |
| 0.419756087 | 0.045605107 | 0.392899653 | 0.414847186 |
| 0.061956196 | 0.453659809 | 0.477136063 | 0.370328083 |
| 0.471544927 | 0.453150605 | 0.009529493 | 0.305435171 |
| 0.463810064 | 0.410108041 | 0.392464681 | 0.273982838 |
| 0.02550536  | 0.476253839 | 0.203823289 | 0.338079169 |
| 0.275362409 | 0.013876405 | 0.325579503 | 0.466934733 |
| 0.453394804 | 0.42180949  | 0.2525686   | 0.133458447 |
| 0.161799283 | 0.298114001 | 0.210245577 | 0.416203479 |
| 0.182452687 | 0.225273056 | 0.458891862 | 0.071909469 |
| 0.147277296 | 0.268312104 | 0.0953167   | 0.260254335 |
| 0.288192074 | 0.458892826 | 0.01359464  | 0.410961749 |
| 0.002088068 | 0.365394538 | 0.309765714 | 0.26912693  |
| 0.020872561 | 0.009034187 | 0.115018396 | 0.311060252 |
| 0.433670309 | 0.462614589 | 0.422437271 | 0.433009084 |
| 0.119667551 | 0.225505882 | 0.339200108 | 0.118761123 |
| 0.463894933 | 0.147221075 | 0.091273701 | 0.352720757 |

|             |             |             |             |
|-------------|-------------|-------------|-------------|
| 0.428780691 | 0.460648799 | 0.135422885 | 0.185813472 |
| 0.438330935 | 0.469894747 | 0.416686177 | 0.375947513 |
| 0.303849179 | 0.026791489 | 0.464941019 | 0.448594151 |
| 0.466713526 | 0.247929549 | 0.093741353 | 0.436741256 |
| 0.033955491 | 0.405763075 | 0.297480772 | 0.124465439 |
| 0.435035719 | 0.010989441 | 0.137628238 | 0.339169561 |
| 0.180763994 | 0.45409384  | 0.454522169 | 0.148751492 |
| 0.353333804 | 0.00978624  | 0.090394455 | 0.017544339 |
| 0.300595339 | 0.0971699   | 0.485523332 | 0.433636959 |
| 0.254577844 | 0.315085506 | 0.2439744   | 0.001988315 |
| 0.011443651 | 0.140608884 | 0.451032875 | 0.366198525 |
| 0.427913729 | 0.442495282 | 0.170021836 | 0.468679214 |
| 0.419916357 | 0.4214786   | 0.089120828 | 0.07540246  |
| 0.405377969 | 0.136908605 | 0.176305272 | 0.422968632 |
| 0.227093997 | 0.105374364 | 0.08870287  | 0.449788114 |
| 0.467203343 | 0.055306929 | 0.401266043 | 0.354223936 |
| 0.307957972 | 0.269657483 | 0.076575006 | 0.230280999 |
| 0.035808775 | 0.452196275 | 0.011823909 | 0.378572939 |
| 0.246954767 | 0.090047427 | 0.00815341  | 0.299479982 |
| 0.281817334 | 0.443434542 | 0.475268459 | 0.072829865 |
| 0.271988339 | 0.335779336 | 0.401494253 | 0.424163393 |
| 0.004383988 | 0.030624767 | 0.396659295 | 0.45237257  |
| 0.395454747 | 0.446297854 | 0.253178587 | 0.240471017 |
| 0.204946968 | 0.417166293 | 0.002657968 | 0.471380124 |
| 0.458200844 | 0.413990201 | 0.339680788 | 0.374660384 |
| 0.341624683 | 0.425246512 | 0.058243623 | 0.360609196 |
| 0.452850258 | 0.052834017 | 0.431986214 | 0.100373788 |
| 0.466651218 | 0.020443327 | 0.345048144 | 0.417502229 |
| 0.429797623 | 0.005525139 | 0.285502956 | 0.384811749 |
| 0.011557534 | 0.109630382 | 0.437916602 | 0.376879478 |
| 0.343395075 | 0.413799682 | 0.417604905 | 0.320861527 |
| 0.37071576  | 0.219180132 | 0.005824044 | 0.239812918 |
| 0.436881429 | 0.379969196 | 0.467116553 | 0.221928077 |
| 0.446754037 | 0.466044293 | 0.453600821 | 0.222192108 |
| 0.026011845 | 0.326805158 | 0.016820563 | 0.26810164  |
| 0.456358586 | 0.089288928 | 0.389405247 | 0.110412181 |
| 0.036679011 | 0.454714973 | 0.115212824 | 0.204760674 |
| 0.082101932 | 0.388541236 | 0.222013067 | 0.209824173 |
| 0.157496767 | 0.111810112 | 0.298024004 | 0.337122798 |
| 0.031382886 | 0.055390847 | 0.006865922 | 0.356668031 |
| 0.099586083 | 0.312478091 | 0.333773192 | 0.462755231 |
| 0.315479017 | 0.07454579  | 0.314738986 | 0.232065525 |
| 0.067134477 | 0.005802247 | 0.464824519 | 0.361296409 |
| 0.445472677 | 0.121463884 | 0.021246335 | 0.342293454 |
| 0.439647764 | 0.40851131  | 0.395559331 | 0.455160406 |
| 0.018788876 | 0.434854717 | 0.191799538 | 0.072310895 |
| 0.306080203 | 0.201582009 | 0.423028209 | 0.059987844 |
| 0.435501209 | 0.466064737 | 0.254242371 | 0.123165571 |
| 0.457504295 | 0.399362698 | 0.019434454 | 0.464982595 |
| 0.464156727 | 0.014961792 | 0.457915983 | 0.073267385 |
| 0.008838408 | 0.390879067 | 0.4229008   | 0.041816343 |
| 0.043077416 | 0.296709161 | 0.048491772 | 0.211499019 |
| 0.456999661 | 0.341118353 | 0.442676115 | 0.154715919 |
| 0.022465026 | 0.003612759 | 0.138644096 | 0.379186754 |

|             |             |             |             |
|-------------|-------------|-------------|-------------|
| 0.483594833 | 0.449033388 | 0.198624943 | 0.288242817 |
| 0.188419151 | 0.277459097 | 0.210506865 | 0.449586129 |
| 0.173124316 | 0.465684412 | 0.001939743 | 0.411688347 |
| 0.475077041 | 0.375948392 | 0.04263533  | 0.318949561 |
| 0.459819183 | 0.028569154 | 0.186651146 | 0.464041172 |
| 0.458213629 | 0.282050183 | 0.311930996 | 0.402452018 |
| 0.011662678 | 0.033289937 | 0.339390772 | 0.128509929 |
| 0.35945586  | 0.159687215 | 0.030438522 | 0.37395258  |
| 0.023452307 | 0.462419861 | 0.416852442 | 0.033746951 |
| 0.389049421 | 0.377974051 | 0.302758566 | 0.020464765 |
| 0.425938488 | 0.454714779 | 0.473824575 | 0.14961571  |
| 0.442322878 | 0.448810627 | 0.370386282 | 0.045589454 |
| 0.00647071  | 0.458245543 | 0.451568355 | 0.013248456 |
| 0.428308585 | 0.349589979 | 0.005182833 | 0.468494009 |
| 0.148447723 | 0.461228731 | 0.003899217 | 0.082090296 |
| 0.020045199 | 0.407984196 | 0.461561658 | 0.409103318 |
| 0.332733142 | 0.344079018 | 0.00325065  | 0.45346171  |
| 0.462738387 | 0.004827431 | 0.084998925 | 0.445426175 |
| 0.409195616 | 0.469794995 | 0.254882804 | 0.425292139 |
| 0.390150794 | 0.455089476 | 0.214111989 | 0.195512028 |
| 0.447973778 | 0.444849849 | 0.444027175 | 0.470502868 |
| 0.431747393 | 0.363121374 | 0.228389207 | 0.00817872  |
| 0.099632872 | 0.264470445 | 0.329556263 | 0.053157251 |
| 0.426175408 | 0.087471648 | 0.463687731 | 0.423394367 |
| 0.439634031 | 0.000525781 | 0.156362966 | 0.460714709 |
| 0.452257047 | 0.44357817  | 0.013432371 | 0.004568696 |
| 0.006463437 | 0.007221116 | 0.371764149 | 0.174847766 |
| 0.456322575 | 0.298205575 | 0.000405576 | 0.044134005 |
| 0.251362184 | 0.32860301  | 0.46299428  | 0.330062308 |
| 0.427824396 | 0.049050351 | 0.280262188 | 0.364717788 |
| 0.035165938 | 0.447717015 | 0.440379982 | 0.467420851 |
| 0.022547236 | 0.181845484 | 0.403327395 | 0.44154804  |
| 0.046281647 | 0.240419412 | 0.414076312 | 0.272494213 |
| 0.007696341 | 0.044324125 | 0.035275078 | 0.396465088 |
| 0.463114943 | 0.043793627 | 0.014746555 | 0.206804017 |
| 0.087244053 | 0.441947065 | 0.117053799 | 0.443663151 |
| 0.443848659 | 0.390457114 | 0.039226365 | 0.466587521 |
| 0.02069079  | 0.461000596 | 0.257075331 | 0.066829656 |
| 0.242002342 | 0.005671215 | 0.452801024 | 0.119064749 |
| 0.370399957 | 0.43732123  | 0.159894689 | 0.006221268 |
| 0.142722288 | 0.026737453 | 0.424236991 | 0.412659634 |
| 0.015995923 | 0.220074618 | 0.233483241 | 0.382027056 |
| 0.334855522 | 0.394721423 | 0.47082375  | 0.443433944 |
| 0.066745188 | 0.107195762 | 0.409517428 | 0.457519064 |
| 0.26737555  | 0.42524264  | 0.241182085 | 0.457244838 |
| 0.45986647  | 0.465564841 | 0.455619188 | 0.326417003 |
| 0.160855897 | 0.44829594  | 0.398387535 | 0.013328835 |
| 0.315592451 | 0.418233263 | 0.38447839  | 0.099237383 |
| 0.182777305 | 0.349904666 | 0.038083141 | 0.238605913 |
| 0.287653478 | 0.382871507 | 0.102532678 | 0.394480966 |
| 0.433053345 | 0.463282082 | 0.037626473 | 0.032997251 |
| 0.465426809 | 0.470320593 | 0.149926904 | 0.423795469 |
| 0.118342876 | 0.279846516 | 0.427316674 | 0.408348589 |
| 0.372433646 | 0.446928377 | 0.445632593 | 0.418906346 |



|             |             |             |             |
|-------------|-------------|-------------|-------------|
| 0.461910447 | 0.221497173 | 0.471049538 | 0.131612888 |
| 0.0525556   | 0.437622014 | 0.061892236 | 0.052260311 |
| 0.097477    | 0.012198744 | 0.258135429 | 0.374288172 |
| 0.346891486 | 0.319564787 | 0.390119509 | 0.05344639  |
| 0.248736143 | 0.417914006 | 0.291060569 | 0.190899963 |
| 0.048503483 | 0.461749451 | 0.003913651 | 0.030055117 |
| 0.345006531 | 0.442887984 | 0.317092585 | 0.174251281 |
| 0.232494985 | 0.089347133 | 0.230600051 | 0.375457125 |
| 0.342864266 | 0.361400599 | 0.447781177 | 0.028618572 |
| 0.013057011 | 0.430584489 | 0.432697581 | 0.009877488 |
| 0.058405264 | 0.453637852 | 0.278912338 | 0.191057583 |
| 0.008666822 | 0.446106241 | 0.385311023 | 0.380289063 |
| 0.348659251 | 0.041329423 | 0.454880207 | 0.081522493 |
| 0.046496246 | 0.469392629 | 0.357454664 | 0.457450092 |
| 0.302266833 | 0.363444872 | 1           | 0.45622961  |
| 0.107002412 | 0.402187673 | 0.017479607 | 0.442323322 |
| 0.399462029 |             |             |             |
| ZFP281      | 0.375514903 | 0.518946227 | 0.338474893 |
| 0.370476777 | 0.390563888 | 0.332072834 | 0.198017187 |
| 0.181196025 | 0.068135861 | 0.005953694 | 0.02323798  |
| 0.394058797 | 0.202717118 | 0.270117358 | 0.267996804 |
| 0.370847556 | 0.140402222 | 0.316239358 | 0.228984347 |
| 0.373795708 | 0.095457613 | 0.365383763 | 0.089317776 |
| 0.260592278 | 0.096562916 | 0.067134986 | 0.227731546 |
| 0.39077779  | 0.075802632 | 0.308587387 | 0.355165267 |
| 0.103991666 | 0.396172923 | 0.520519574 | 0.397901622 |
| 0.520504593 | 0.349432138 | 0.019438448 | 0.264344496 |
| 0.386466486 | 0.376363492 | 0.371128766 | 0.303755525 |
| 0.042125427 | 0.495643738 | 0.228829627 | 0.35779796  |
| 0.206662931 | 0.031826856 | 0.223367791 | 0.448460644 |
| 0.48436762  | 0.384400527 | 0.210564012 | 0.152245509 |
| 0.208580958 | 0.242679863 | 0.248879397 | 0.305786012 |
| 0.220913242 | 0.161132189 | 0.489138026 | 0.075616071 |
| 0.152442913 | 0.244418463 | 0.157802685 | 0.252792832 |
| 0.309740683 | 0.343407105 | 0.020478955 | 0.362510808 |
| 0.004436961 | 0.350994054 | 0.345529409 | 0.253804647 |
| 0.043290487 | 0.026400708 | 0.18001019  | 0.31525119  |
| 0.418579256 | 0.453005298 | 0.449399787 | 0.461425437 |
| 0.185904222 | 0.275156265 | 0.355418815 | 0.17178763  |
| 0.400067276 | 0.171545314 | 0.097773623 | 0.377798062 |
| 0.460628421 | 0.522359698 | 0.18738892  | 0.239679775 |
| 0.370505056 | 0.472475129 | 0.360074964 | 0.387095554 |
| 0.278353564 | 0.049608916 | 0.440938517 | 0.49653255  |
| 0.375755117 | 0.285264966 | 0.145947966 | 0.376026646 |
| 0.061521254 | 0.318585048 | 0.326497179 | 0.180156582 |
| 0.431291725 | 0.016443697 | 0.201576672 | 0.340950083 |
| 0.202942828 | 0.386406925 | 0.511521371 | 0.180493696 |
| 0.377671013 | 0.02380473  | 0.107931412 | 0.035855657 |
| 0.307765292 | 0.136574329 | 0.493265873 | 0.425226642 |
| 0.244155568 | 0.357991336 | 0.253399888 | 0.0024682   |
| 0.028707715 | 0.17573043  | 0.400271942 | 0.34713755  |
| 0.385299276 | 0.364536105 | 0.208187322 | 0.355725885 |
| 0.385254655 | 0.443696934 | 0.050166837 | 0.094895103 |
| 0.36981936  | 0.182130047 | 0.227988817 | 0.411691957 |

|             |             |             |             |
|-------------|-------------|-------------|-------------|
| 0.27708116  | 0.113825543 | 0.132807878 | 0.492641269 |
| 0.425985939 | 0.087399104 | 0.319268176 | 0.371789209 |
| 0.307211278 | 0.326315987 | 0.111542703 | 0.2850388   |
| 0.056305029 | 0.482381388 | 0.029697815 | 0.308800157 |
| 0.208713072 | 0.162258462 | 0.012293024 | 0.252412205 |
| 0.260281729 | 0.407079282 | 0.481937949 | 0.107476652 |
| 0.320440884 | 0.365630242 | 0.31268789  | 0.380073601 |
| 0.01018312  | 0.047039687 | 0.26981111  | 0.497160151 |
| 0.276176583 | 0.478108219 | 0.283186393 | 0.270406965 |
| 0.261810166 | 0.387984771 | 0.002854972 | 0.500059487 |
| 0.520889722 | 0.279975012 | 0.372346062 | 0.380499966 |
| 0.314753156 | 0.399076082 | 0.042169667 | 0.38671901  |
| 0.336000792 | 0.0790944   | 0.471132715 | 0.156121475 |
| 0.462064544 | 0.042075121 | 0.321300971 | 0.379562836 |
| 0.390308428 | 0.009533538 | 0.211292599 | 0.352429925 |
| 0.027610424 | 0.098372402 | 0.381089102 | 0.362962741 |
| 0.331251642 | 0.388499895 | 0.43983462  | 0.296499542 |
| 0.384489993 | 0.2286228   | 0.012835905 | 0.290405441 |
| 0.388308262 | 0.344186084 | 0.439710397 | 0.224253208 |
| 0.315091754 | 0.463554454 | 0.372341628 | 0.183467982 |
| 0.043620721 | 0.300201397 | 0.021731852 | 0.286700523 |
| 0.363519125 | 0.128096797 | 0.329214694 | 0.155728474 |
| 0.071734877 | 0.510764233 | 0.160870145 | 0.230217441 |
| 0.113908168 | 0.383355054 | 0.239233532 | 0.242848458 |
| 0.218708621 | 0.154727992 | 0.301392301 | 0.32723958  |
| 0.041290894 | 0.100281055 | 0.014250761 | 0.371897345 |
| 0.161040586 | 0.340882453 | 0.339716399 | 0.37937203  |
| 0.340481578 | 0.126385824 | 0.350086507 | 0.243840291 |
| 0.10139287  | 0.016211009 | 0.498340123 | 0.365991339 |
| 0.312813974 | 0.143810935 | 0.04323256  | 0.339105497 |
| 0.441794763 | 0.2861472   | 0.246124942 | 0.44509237  |
| 0.026963468 | 0.451114304 | 0.248241253 | 0.119676423 |
| 0.364765601 | 0.255792293 | 0.41136613  | 0.050034539 |
| 0.366678795 | 0.472651834 | 0.287461429 | 0.167136179 |
| 0.404739836 | 0.376554769 | 0.032460773 | 0.362339759 |
| 0.37191984  | 0.034865453 | 0.518426813 | 0.128743476 |
| 0.022128628 | 0.391218544 | 0.385524575 | 0.073372957 |
| 0.072697489 | 0.309552978 | 0.047636043 | 0.267861474 |
| 0.503790095 | 0.372305268 | 0.384624204 | 0.193088219 |
| 0.043204131 | 0.016593433 | 0.200175252 | 0.351052717 |
| 0.520244876 | 0.500380211 | 0.254449958 | 0.337129293 |
| 0.230244874 | 0.281903787 | 0.153485429 | 0.493715926 |
| 0.177137759 | 0.51860154  | 0.007554839 | 0.386569684 |
| 0.515440026 | 0.287638842 | 0.075630455 | 0.288570774 |
| 0.371342556 | 0.044443645 | 0.203168036 | 0.498518396 |
| 0.404610068 | 0.282680567 | 0.28923875  | 0.396091097 |
| 0.016986038 | 0.047657303 | 0.333628251 | 0.161911808 |
| 0.345238704 | 0.192978391 | 0.048737061 | 0.308539318 |
| 0.046254514 | 0.456733242 | 0.406527941 | 0.049824384 |
| 0.310588758 | 0.280091178 | 0.351638139 | 0.037832481 |
| 0.416725211 | 0.494643789 | 0.525752079 | 0.168058255 |
| 0.406023168 | 0.473377076 | 0.359412214 | 0.078617776 |
| 0.017562153 | 0.515581079 | 0.356498754 | 0.023233151 |
| 0.436571154 | 0.227214839 | 0.017403532 | 0.491988635 |

|             |             |             |             |
|-------------|-------------|-------------|-------------|
| 0.17860872  | 0.463115338 | 0.002807477 | 0.071378855 |
| 0.039552259 | 0.402448139 | 0.478651834 | 0.353297756 |
| 0.228815042 | 0.341502755 | 0.006977404 | 0.510458776 |
| 0.493477784 | 0.014027642 | 0.135536484 | 0.397229394 |
| 0.376993098 | 0.527339796 | 0.27387761  | 0.410111835 |
| 0.387363311 | 0.504799152 | 0.240674395 | 0.247961404 |
| 0.399227288 | 0.487442402 | 0.374289384 | 0.449866776 |
| 0.425064125 | 0.385542782 | 0.261592207 | 0.016121286 |
| 0.095558728 | 0.210373633 | 0.257640628 | 0.072722628 |
| 0.299875466 | 0.126205123 | 0.468719369 | 0.426524339 |
| 0.460536816 | 0.00545788  | 0.149660548 | 0.392950024 |
| 0.416609582 | 0.441938405 | 0.019555805 | 0.004702714 |
| 0.005869164 | 0.016867284 | 0.3405248   | 0.222596235 |
| 0.468247906 | 0.227939197 | 0.005521599 | 0.048155241 |
| 0.2544268   | 0.354181989 | 0.505017909 | 0.348503616 |
| 0.389266592 | 0.085705556 | 0.264299342 | 0.363314225 |
| 0.060514298 | 0.303325792 | 0.463353988 | 0.477057029 |
| 0.042929358 | 0.224814914 | 0.352523586 | 0.460083369 |
| 0.0639025   | 0.303184694 | 0.407103637 | 0.295393831 |
| 0.015013536 | 0.076354539 | 0.058803803 | 0.391884525 |
| 0.508732407 | 0.086913727 | 0.038050934 | 0.154410597 |
| 0.122961332 | 0.433618635 | 0.165056963 | 0.490351225 |
| 0.395084619 | 0.392568529 | 0.07788767  | 0.478020919 |
| 0.039865435 | 0.49696373  | 0.3083925   | 0.047071634 |
| 0.273814035 | 0.013580954 | 0.472141623 | 0.123787569 |
| 0.323741796 | 0.365467436 | 0.147115969 | 0.017759995 |
| 0.147062883 | 0.054976546 | 0.440479061 | 0.4080824   |
| 0.033698332 | 0.224678791 | 0.274538463 | 0.369711943 |
| 0.270929463 | 0.390421462 | 0.50933348  | 0.35209128  |
| 0.086693132 | 0.143727516 | 0.373172748 | 0.365926118 |
| 0.251732424 | 0.457549454 | 0.266156037 | 0.511247766 |
| 0.364889438 | 0.441604839 | 0.461905169 | 0.308140557 |
| 0.234817215 | 0.357832353 | 0.342330956 | 0.021496118 |
| 0.323114359 | 0.415586225 | 0.331314919 | 0.135459668 |
| 0.244444489 | 0.344822311 | 0.05108352  | 0.178255165 |
| 0.292901754 | 0.287501871 | 0.15469597  | 0.388548833 |
| 0.364872791 | 0.367207449 | 0.049552008 | 0.054168955 |
| 0.53677649  | 0.425176765 | 0.125204303 | 0.378018628 |
| 0.16615361  | 0.307901913 | 0.395024687 | 0.398832765 |
| 0.324774343 | 0.422159903 | 0.390952744 | 0.363192966 |
| 0.432119762 | 0.243022301 | 0.525040733 | 0.090980278 |
| 0.071423989 | 0.389617599 | 0.10153615  | 0.090957665 |
| 0.145803494 | 0.025103306 | 0.258863616 | 0.389580083 |
| 0.342110974 | 0.362117733 | 0.318999605 | 0.076195987 |
| 0.307303007 | 0.335212735 | 0.333686111 | 0.196876989 |
| 0.079769252 | 0.501638388 | 0.008885168 | 0.060069868 |
| 0.369534518 | 0.381244891 | 0.341648603 | 0.221665246 |
| 0.261437889 | 0.140259857 | 0.290282925 | 0.285326326 |
| 0.31008122  | 0.333399113 | 0.378872074 | 0.03092417  |
| 0.023345678 | 0.462459503 | 0.33716266  | 0.020687111 |
| 0.089583245 | 0.343726249 | 0.293909386 | 0.214299073 |
| 0.021781545 | 0.474927116 | 0.30454809  | 0.380766208 |
| 0.319021258 | 0.069028637 | 0.358663203 | 0.085916441 |
| 0.057418296 | 0.455272431 | 0.345077042 | 0.514172221 |

|             |             |             |             |
|-------------|-------------|-------------|-------------|
| 0.317996182 | 0.380656097 | 0.45622961  | 1           |
| 0.109960227 | 0.33572037  | 0.027213334 | 0.398695831 |
| 0.348194817 |             |             |             |
| ZFP455      | 0.178413655 | 0.133347726 | 0.139984713 |
| 0.152969071 | 0.110309036 | 0.073755085 | 0.072624998 |
| 0.06463758  | 0.012158802 | 0.000679831 | 0.001166498 |
| 0.155361188 | 0.003076689 | 0.035566431 | 0.02625431  |
| 0.214474755 | 0.046247621 | 0.155647201 | 0.13987399  |
| 0.181687102 | 0.026618857 | 0.168670645 | 0.051148253 |
| 0.061667044 | 0.041444325 | 0.037957878 | 0.054031539 |
| 0.203431973 | 0.053611785 | 0.034186611 | 0.146971651 |
| 0.114819267 | 0.171009342 | 0.122084084 | 0.112874281 |
| 0.112922784 | 0.154911046 | 0.006896453 | 0.019560081 |
| 0.184404835 | 0.144958305 | 0.161503251 | 0.13560683  |
| 0.024116235 | 0.113082254 | 0.090470352 | 0.18347167  |
| 0.008419301 | 0.016061358 | 0.037260097 | 0.110557444 |
| 0.087196575 | 0.060185412 | 0.068136819 | 0.042491147 |
| 0.001194776 | 0.026444075 | 0.012112103 | 0.097046173 |
| 0.075855145 | 0.025842821 | 0.098488012 | 0.01009475  |
| 0.001608955 | 0.098563117 | 0.090105878 | 0.094229176 |
| 0.049943733 | 0.137598313 | 0.025106896 | 0.126168525 |
| 0.000188771 | 0.205587081 | 0.226080592 | 0.029904347 |
| 0.082140468 | 0.004559905 | 0.123737236 | 0.097995355 |
| 0.19390512  | 0.160593216 | 0.169029166 | 0.150713629 |
| 0.028598956 | 0.203747538 | 0.102477572 | 0.058739495 |
| 0.153061147 | 0.044825164 | 0.034219422 | 0.201678742 |
| 0.164755768 | 0.117790375 | 0.037757232 | 0.179858543 |
| 0.087805255 | 0.136473374 | 0.084751611 | 0.064723815 |
| 0.024005867 | 0.074606119 | 0.091690981 | 0.146247299 |
| 0.13834833  | 0.079750912 | 0.106442473 | 0.152887613 |
| 0.083405429 | 0.054170776 | 0.156676992 | 0.014247405 |
| 0.199312906 | 0.016519614 | 0.127879341 | 0.075004613 |
| 0.092982035 | 0.177004107 | 0.122718193 | 0.096556071 |
| 0.150360811 | 0.007556688 | 0.003305338 | 0.084935108 |
| 0.011671166 | 0.031873693 | 0.09192784  | 0.138289137 |
| 0.031976128 | 0.019559744 | 0.086692121 | 0.022436536 |
| 0.046909022 | 0.075503837 | 0.127486667 | 0.184107534 |
| 0.190671394 | 0.133401332 | 0.034600854 | 0.106808051 |
| 0.092277978 | 0.162611371 | 0.001331661 | 0.065490452 |
| 0.118724735 | 0.073262779 | 0.166068112 | 0.0882726   |
| 0.093804607 | 0.079119745 | 0.078496353 | 0.165047749 |
| 0.117871491 | 0.073113388 | 0.100033086 | 0.2248594   |
| 0.011753857 | 0.134139139 | 0.086205732 | 0.048846575 |
| 0.020398601 | 0.103669256 | 0.069082024 | 0.137739993 |
| 0.00771338  | 0.014931105 | 0.026663326 | 0.084104851 |
| 0.026216295 | 0.081306706 | 0.095905877 | 0.131340643 |
| 0.068863701 | 0.147957144 | 0.081607037 | 0.079168696 |
| 0.000609128 | 0.051691786 | 0.065458869 | 0.136633463 |
| 0.059740956 | 0.18337566  | 0.109331902 | 0.113405384 |
| 0.171486457 | 0.203125679 | 0.005207971 | 0.112302218 |
| 0.1228676   | 0.06242508  | 0.083070325 | 0.194103191 |
| 0.044056351 | 0.154249479 | 0.004155882 | 0.201801122 |
| 0.128620625 | 0.116927493 | 0.184229259 | 0.087020927 |
| 0.131100815 | 0.039394097 | 0.04257457  | 0.126972186 |

|             |             |             |             |
|-------------|-------------|-------------|-------------|
| 0.087268933 | 0.001977673 | 0.043324829 | 0.135085679 |
| 0.061206511 | 0.016438893 | 0.184627317 | 0.154805701 |
| 0.086226417 | 0.2102416   | 0.20338494  | 0.037517686 |
| 0.094634816 | 0.124498881 | 0.025123285 | 0.190270396 |
| 0.186600512 | 0.006807393 | 0.114423813 | 0.053088503 |
| 0.094962789 | 0.12709732  | 0.113871418 | 0.001258149 |
| 0.039900917 | 0.078667595 | 0.00984882  | 0.096120456 |
| 0.123117088 | 0.013267485 | 0.054991495 | 0.084576792 |
| 0.074146936 | 0.140813704 | 0.073730233 | 0.06465193  |
| 0.041671491 | 0.055058174 | 0.159035445 | 0.011611527 |
| 0.006935679 | 0.047445381 | 0.041689521 | 0.043469442 |
| 0.017009168 | 0.048493914 | 0.037365972 | 0.020918547 |
| 0.003621941 | 0.018757747 | 0.017478743 | 0.096395723 |
| 0.023601978 | 0.010445782 | 0.085514069 | 0.065031168 |
| 0.08235012  | 0.054407492 | 0.134528123 | 0.228642816 |
| 0.096039311 | 0.0614837   | 0.091632311 | 0.004681062 |
| 0.127296843 | 0.037765645 | 0.044267711 | 0.109091056 |
| 0.031955315 | 0.177629433 | 0.015960129 | 0.075384396 |
| 0.04067519  | 0.094556597 | 0.195040447 | 0.002457107 |
| 0.118148654 | 0.110084734 | 0.23579734  | 0.059583489 |
| 0.090162364 | 0.14606461  | 0.009816056 | 0.139299145 |
| 0.120552857 | 0.048629963 | 0.140029893 | 0.062088069 |
| 0.075090651 | 0.181930724 | 0.083352594 | 0.108248735 |
| 0.099863601 | 0.038639432 | 0.019273025 | 0.177418349 |
| 0.140132137 | 0.175753881 | 0.078784956 | 0.122570425 |
| 0.025223604 | 0.000769654 | 0.135028495 | 0.174888159 |
| 0.113575414 | 0.138003936 | 0.20116658  | 0.060459729 |
| 0.153711703 | 0.026159143 | 0.005067638 | 0.137118223 |
| 0.093930845 | 0.140528087 | 0.041582791 | 0.124966449 |
| 0.102728068 | 0.052919013 | 0.046979916 | 0.062166495 |
| 0.104519062 | 0.047895721 | 0.138066069 | 0.120404508 |
| 0.12774111  | 0.056046725 | 0.040254959 | 0.207897295 |
| 0.013284148 | 0.012932438 | 0.139665673 | 0.054351807 |
| 0.029927094 | 0.075577491 | 0.01400177  | 0.043602089 |
| 0.012971007 | 0.096284696 | 0.212873222 | 0.021632352 |
| 0.030701088 | 0.056797856 | 0.200678079 | 0.057483548 |
| 0.122095294 | 0.142790844 | 0.12126028  | 0.102404145 |
| 0.140406915 | 0.113330372 | 0.059242923 | 0.136626604 |
| 0.06722928  | 0.124055641 | 0.155750079 | 0.003632375 |
| 0.175861889 | 0.044917341 | 0.001212799 | 0.138822495 |
| 0.132778711 | 0.097142993 | 0.006351147 | 0.033249647 |
| 0.082036631 | 0.205551485 | 0.101471056 | 0.152652446 |
| 0.015417442 | 0.233209844 | 0.006275153 | 0.158530952 |
| 0.112344492 | 0.03688087  | 0.044359739 | 0.094904504 |
| 0.098932657 | 0.146712006 | 0.057851667 | 0.114956723 |
| 0.084063611 | 0.099592637 | 0.009365004 | 0.14445214  |
| 0.122038555 | 0.113159412 | 0.181973726 | 0.144044409 |
| 0.154532233 | 0.195558619 | 0.128315436 | 0.01144515  |
| 0.010264127 | 0.047717998 | 0.012108863 | 0.00146183  |
| 0.098831102 | 0.043066935 | 0.16927692  | 0.180974237 |
| 0.137212298 | 0.043307266 | 0.033801509 | 0.10840159  |
| 0.155280365 | 0.188409366 | 0.040340971 | 0.008176526 |
| 0.070289472 | 0.005461302 | 0.119158357 | 0.187686906 |
| 0.142206257 | 0.005484826 | 0.02327879  | 0.021357142 |

|             |             |             |             |
|-------------|-------------|-------------|-------------|
| 0.049071789 | 0.127402889 | 0.11369822  | 0.216186503 |
| 0.177962678 | 0.083912271 | 0.009166591 | 0.234138165 |
| 0.019616758 | 0.110514519 | 0.137507283 | 0.107568231 |
| 0.078839251 | 0.147552726 | 0.165742656 | 0.165665411 |
| 0.0104613   | 0.177462498 | 0.147523437 | 0.016155321 |
| 0.016403438 | 0.076744241 | 0.041438919 | 0.219855164 |
| 0.099668335 | 0.008721182 | 0.009476693 | 0.002370117 |
| 0.021669857 | 0.174837075 | 0.037755055 | 0.170142405 |
| 0.153509069 | 0.201373119 | 0.036252811 | 0.118183309 |
| 0.002363414 | 0.103851802 | 0.091248224 | 0.011459565 |
| 0.197056787 | 0.047960095 | 0.129462091 | 0.002148462 |
| 0.04834135  | 0.184287872 | 0.013335504 | 0.047718526 |
| 0.036161652 | 0.067769035 | 0.15370279  | 0.170603232 |
| 0.071937521 | 0.072517288 | 0.228545582 | 0.247764192 |
| 0.087609533 | 0.135545094 | 0.113256098 | 0.054862102 |
| 0.022861416 | 0.025205403 | 0.200658459 | 0.147404361 |
| 0.042255703 | 0.182171557 | 0.017162177 | 0.161287179 |
| 0.164440046 | 0.171063576 | 0.124408062 | 0.106761009 |
| 0.013833821 | 0.127735525 | 0.073522291 | 0.00477758  |
| 0.205572187 | 0.140231496 | 0.155475739 | 0.020840543 |
| 0.063490878 | 0.090378399 | 0.016400621 | 0.024358869 |
| 0.070113103 | 0.068511815 | 0.017487881 | 0.230186862 |
| 0.17880951  | 0.144013415 | 0.015271589 | 0.034460518 |
| 0.146169592 | 0.136017584 | 0.026553139 | 0.121173293 |
| 0.189768581 | 0.097511192 | 0.188991566 | 0.169973737 |
| 0.035854837 | 0.10127298  | 0.160481985 | 0.075225419 |
| 0.098493205 | 0.119686703 | 0.121207107 | 0.025609353 |
| 0.005525417 | 0.121252409 | 0.013016317 | 0.131378159 |
| 0.08153155  | 0.043382529 | 0.026889999 | 0.212424861 |
| 0.035603169 | 0.126558063 | 0.020924744 | 0.023245558 |
| 0.168892267 | 0.13061663  | 0.170483113 | 0.045458759 |
| 0.017207394 | 0.101144927 | 0.006240827 | 0.08708103  |
| 0.045637395 | 0.122834882 | 0.059256727 | 0.134112072 |
| 0.0260558   | 0.072629135 | 0.113513186 | 0.065105597 |
| 0.017494372 | 0.01836642  | 0.119379572 | 0.019019985 |
| 0.017881171 | 0.18843911  | 0.131741351 | 0.055496869 |
| 0.005724972 | 0.119854171 | 0.128304958 | 0.013809044 |
| 0.069111889 | 0.104499052 | 0.022693369 | 0.125795012 |
| 0.125308125 | 0.097873632 | 0.112411344 | 0.00906881  |
| 0.065672248 | 0.128696632 | 0.144304701 | 0.117076096 |
| 0.185768847 | 0.163920988 | 0.107002412 | 0.109960227 |
| 1           | 0.122594751 | 0.024347761 | 0.189313311 |
| 0.033152247 |             |             |             |
| ZFP52       | 0.366835285 | 0.440293199 | 0.236656864 |
| 0.262285326 | 0.194331112 | 0.169521149 | 0.071237055 |
| 0.080060306 | 0.038306171 | 0.000186272 | 0.006523363 |
| 0.277541343 | 0.065540582 | 0.083553942 | 0.137444809 |
| 0.30821278  | 0.064028641 | 0.224182039 | 0.100623451 |
| 0.257473551 | 0.024926877 | 0.2447377   | 0.036790373 |
| 0.202387718 | 0.053312137 | 0.027695453 | 0.13831099  |
| 0.337852227 | 0.034181804 | 0.1014801   | 0.230710701 |
| 0.084665789 | 0.353163539 | 0.46264303  | 0.256393038 |
| 0.463385342 | 0.349124972 | 0.014209335 | 0.09110026  |
| 0.37431473  | 0.318264495 | 0.253342429 | 0.134617231 |

|             |             |             |             |
|-------------|-------------|-------------|-------------|
| 0.013505375 | 0.417797833 | 0.086123959 | 0.251603096 |
| 0.10160304  | 0.011305793 | 0.082306469 | 0.383544393 |
| 0.393293407 | 0.204800096 | 0.088493077 | 0.051605003 |
| 0.058845464 | 0.073812468 | 0.124564235 | 0.175525937 |
| 0.080749226 | 0.044732657 | 0.413536772 | 0.028559552 |
| 0.059252955 | 0.115474679 | 0.108124713 | 0.099973272 |
| 0.209842845 | 0.276793244 | 0.01078435  | 0.29566085  |
| 0.000378704 | 0.240343483 | 0.233391595 | 0.170599005 |
| 0.023197731 | 0.004098006 | 0.118488402 | 0.134599045 |
| 0.371948947 | 0.456952356 | 0.40383982  | 0.425779112 |
| 0.076356023 | 0.177659559 | 0.224606338 | 0.065597003 |
| 0.376360484 | 0.053362661 | 0.05585278  | 0.308040516 |
| 0.414830374 | 0.448733387 | 0.104921142 | 0.158748565 |
| 0.280479553 | 0.402258614 | 0.175857876 | 0.174921176 |
| 0.144790295 | 0.061271525 | 0.359022422 | 0.433713595 |
| 0.328942238 | 0.197171942 | 0.079701162 | 0.281920569 |
| 0.034427581 | 0.176273737 | 0.174134561 | 0.098110994 |
| 0.379591029 | 0.006275104 | 0.124187161 | 0.124694659 |
| 0.15938557  | 0.348552428 | 0.460823336 | 0.071075229 |
| 0.222077054 | 0.009073167 | 0.072013219 | 0.030355858 |
| 0.13810557  | 0.126511831 | 0.42533784  | 0.332932627 |
| 0.08724485  | 0.166304659 | 0.109183226 | 0.002250523 |
| 0.017728597 | 0.165735988 | 0.355505258 | 0.212293845 |
| 0.330886667 | 0.408077158 | 0.083978005 | 0.28202231  |
| 0.285284886 | 0.401309405 | 0.017017318 | 0.042949741 |
| 0.179423896 | 0.159189359 | 0.109236274 | 0.225255448 |
| 0.138264276 | 0.049547203 | 0.053919672 | 0.440589477 |
| 0.348453871 | 0.032983967 | 0.182615136 | 0.287664179 |
| 0.106906683 | 0.182784763 | 0.049488749 | 0.097716686 |
| 0.014308899 | 0.444822532 | 0.024434429 | 0.164526826 |
| 0.121032906 | 0.078083152 | 0.015148363 | 0.099015966 |
| 0.095446568 | 0.311303507 | 0.440917279 | 0.05944487  |
| 0.116162675 | 0.231962194 | 0.136976018 | 0.236605944 |
| 0.001444201 | 0.03283346  | 0.131124892 | 0.412633575 |
| 0.130804266 | 0.463320051 | 0.143836111 | 0.190479916 |
| 0.145220928 | 0.357598095 | 0.009076859 | 0.430008888 |
| 0.464628939 | 0.128726804 | 0.160382544 | 0.271129126 |
| 0.181603021 | 0.326948139 | 0.035346757 | 0.275248157 |
| 0.25725742  | 0.046271142 | 0.426308505 | 0.0714241   |
| 0.41928867  | 0.017234934 | 0.11590129  | 0.387210339 |
| 0.31082034  | 0.004700336 | 0.069359756 | 0.21683816  |
| 0.029026433 | 0.02625613  | 0.328138728 | 0.231213964 |
| 0.163414338 | 0.37525439  | 0.397474009 | 0.173432915 |
| 0.181167913 | 0.107361131 | 0.011921634 | 0.191850179 |
| 0.390469583 | 0.171697326 | 0.36099732  | 0.094811497 |
| 0.181118436 | 0.389478672 | 0.363914397 | 0.074333326 |
| 0.015170352 | 0.120557797 | 0.00556051  | 0.147615244 |
| 0.386924197 | 0.029215765 | 0.188675825 | 0.134562577 |
| 0.04275936  | 0.439067599 | 0.14032887  | 0.190787465 |
| 0.115739241 | 0.150232774 | 0.118395449 | 0.059448815 |
| 0.063599095 | 0.080306208 | 0.175909259 | 0.16382884  |
| 0.00917166  | 0.036686141 | 0.033878707 | 0.143870118 |
| 0.033709119 | 0.106559672 | 0.1011214   | 0.267002621 |
| 0.11824226  | 0.031801016 | 0.152737083 | 0.209459842 |

|             |             |             |             |
|-------------|-------------|-------------|-------------|
| 0.072330374 | 0.009134006 | 0.42806171  | 0.270613588 |
| 0.227554249 | 0.066622013 | 0.028450377 | 0.120416301 |
| 0.345683138 | 0.107754551 | 0.121611119 | 0.339222563 |
| 0.023720635 | 0.426100335 | 0.077613897 | 0.056356429 |
| 0.157253007 | 0.097476929 | 0.366473505 | 0.02222412  |
| 0.208382577 | 0.370373996 | 0.189155317 | 0.081804378 |
| 0.299657467 | 0.230284346 | 0.009850095 | 0.325670369 |
| 0.294165849 | 0.014204239 | 0.455735301 | 0.076501585 |
| 0.015509103 | 0.330952369 | 0.296140937 | 0.043650378 |
| 0.049955871 | 0.104192808 | 0.012781048 | 0.148422938 |
| 0.427181319 | 0.267367181 | 0.282623368 | 0.183784627 |
| 0.012115889 | 0.00122667  | 0.153541605 | 0.250185131 |
| 0.446026347 | 0.454568646 | 0.139000924 | 0.146755384 |
| 0.104700992 | 0.146713279 | 0.057657966 | 0.422543673 |
| 0.231610357 | 0.47369161  | 0.004956594 | 0.359717402 |
| 0.451713909 | 0.102748201 | 0.038166386 | 0.103608425 |
| 0.281410374 | 0.019320954 | 0.125760898 | 0.419943507 |
| 0.360259713 | 0.153384327 | 0.146566699 | 0.301714631 |
| 0.003905988 | 0.01301073  | 0.216007191 | 0.160128852 |
| 0.151022282 | 0.107228866 | 0.06767485  | 0.145855752 |
| 0.012374267 | 0.350223877 | 0.378624642 | 0.026749566 |
| 0.116201159 | 0.150145483 | 0.239419595 | 0.016970356 |
| 0.405814214 | 0.477637834 | 0.451267835 | 0.086132766 |
| 0.350640613 | 0.412460062 | 0.223309776 | 0.060953566 |
| 0.014449106 | 0.469514988 | 0.276240199 | 0.006292826 |
| 0.381563286 | 0.078965509 | 0.00146669  | 0.41308793  |
| 0.083079711 | 0.402330819 | 0.001496823 | 0.142028247 |
| 0.051972345 | 0.401296155 | 0.410185404 | 0.228857325 |
| 0.068732698 | 0.217528977 | 0.017182783 | 0.478751974 |
| 0.396680435 | 0.011550731 | 0.107191635 | 0.328585084 |
| 0.324698976 | 0.458112666 | 0.17549861  | 0.369525531 |
| 0.239402276 | 0.43255247  | 0.073498145 | 0.127817868 |
| 0.319900257 | 0.457305819 | 0.305478012 | 0.399813968 |
| 0.345223675 | 0.303294331 | 0.112737704 | 0.004165976 |
| 0.097634255 | 0.074345042 | 0.102359389 | 0.027678942 |
| 0.172115462 | 0.06645148  | 0.437630528 | 0.388138962 |
| 0.407715692 | 0.004138217 | 0.054040392 | 0.335143494 |
| 0.336080643 | 0.390918889 | 0.036682336 | 0.007864289 |
| 0.013231069 | 0.008917427 | 0.16212196  | 0.158535688 |
| 0.426651886 | 0.063082721 | 0.002129206 | 0.014110706 |
| 0.127520577 | 0.24794028  | 0.421005474 | 0.240221643 |
| 0.392005292 | 0.047481616 | 0.076579485 | 0.274356773 |
| 0.037465617 | 0.248557457 | 0.399151573 | 0.38070015  |
| 0.0442072   | 0.158218105 | 0.211180475 | 0.388923034 |
| 0.071927122 | 0.163298113 | 0.288856144 | 0.104307121 |
| 0.025587545 | 0.054638713 | 0.039126236 | 0.360644551 |
| 0.449051473 | 0.021650782 | 0.009916157 | 0.052438122 |
| 0.032385259 | 0.406542077 | 0.058452188 | 0.437589542 |
| 0.326007375 | 0.328252319 | 0.061474946 | 0.41655372  |
| 0.014664541 | 0.411645839 | 0.177555954 | 0.018416358 |
| 0.202293379 | 0.011563758 | 0.442367837 | 0.054957012 |
| 0.116587909 | 0.274938083 | 0.128128724 | 0.018070484 |
| 0.173814235 | 0.030287827 | 0.376790251 | 0.398202208 |
| 0.04480362  | 0.113833031 | 0.176431701 | 0.278326629 |



|             |             |             |             |
|-------------|-------------|-------------|-------------|
| 0.100992394 | 0.272969458 | 0.431962946 | 0.158606194 |
| 0.024986691 | 0.166272579 | 0.272571059 | 0.268134593 |
| 0.090218382 | 0.420807451 | 0.111041704 | 0.474430871 |
| 0.311036788 | 0.425756651 | 0.41108555  | 0.141109121 |
| 0.132587838 | 0.208744187 | 0.176343    | 0.003723185 |
| 0.166104938 | 0.339149688 | 0.187750155 | 0.066569839 |
| 0.103481187 | 0.224548607 | 0.036663217 | 0.13840406  |
| 0.205807289 | 0.121079624 | 0.048094905 | 0.355617268 |
| 0.250773959 | 0.279824472 | 0.025287613 | 0.033295166 |
| 0.471157152 | 0.394222259 | 0.057714609 | 0.247680832 |
| 0.110122759 | 0.148574412 | 0.380795296 | 0.375118741 |
| 0.209359465 | 0.334494518 | 0.30913698  | 0.194529659 |
| 0.32500962  | 0.112494444 | 0.454599306 | 0.037762516 |
| 0.056046186 | 0.282285115 | 0.026370307 | 0.064126017 |
| 0.057768051 | 0.021547449 | 0.183685434 | 0.310834963 |
| 0.202361996 | 0.186592039 | 0.141333151 | 0.050391916 |
| 0.18669261  | 0.232339415 | 0.179787334 | 0.060393341 |
| 0.02417124  | 0.410796266 | 0.005834129 | 0.036294812 |
| 0.199306132 | 0.337276729 | 0.170996185 | 0.136815015 |
| 0.174832381 | 0.125210521 | 0.127747669 | 0.106052735 |
| 0.087685888 | 0.216675278 | 0.336592233 | 0.017117183 |
| 0.005782527 | 0.417904618 | 0.181728573 | 0.033488929 |
| 0.074116897 | 0.258954614 | 0.199159516 | 0.085497017 |
| 0.024717439 | 0.419692494 | 0.106730031 | 0.221769008 |
| 0.141143807 | 0.041957736 | 0.310883381 | 0.059883751 |
| 0.049308863 | 0.388964135 | 0.241217588 | 0.45522273  |
| 0.245080589 | 0.275051382 | 0.402187673 | 0.33572037  |
| 0.122594751 | 1           | 0.009766892 | 0.366268113 |
| 0.173910559 |             |             |             |
| ZFP715      | 0.02436364  | 0.034684631 | 0.020729414 |
| 0.108403036 | 0.04374879  | 0.04314156  | 0.209010164 |
| 0.062836158 | 0.106236337 | 0.080983359 | 0.041405443 |
| 0.023994257 | 0.025299622 | 0.053296258 | 0.020310908 |
| 0.102019312 | 0.063347799 | 0.025186783 | 0.216658807 |
| 0.089102474 | 0.144250445 | 0.107659252 | 0.188426905 |
| 0.016201556 | 0.069430244 | 0.179224646 | 0.039085658 |
| 0.088469079 | 0.198136645 | 0.037155781 | 0.080527363 |
| 0.058046504 | 0.037157377 | 0.021794934 | 0.045786238 |
| 0.016838444 | 0.017578368 | 0.017260622 | 0.044748829 |
| 0.036263339 | 0.049342396 | 0.097613295 | 0.163243972 |
| 0.173553402 | 0.019996352 | 0.217158798 | 0.042346565 |
| 0.022392415 | 0.094675506 | 0.041561946 | 0.023551145 |
| 0.017701358 | 0.029002941 | 0.100270467 | 0.187096212 |
| 0.012083284 | 0.027762366 | 0.0046983   | 0.044472872 |
| 0.196033726 | 0.055776634 | 0.01951352  | 0.113890619 |
| 0.025307118 | 0.085059259 | 0.043553994 | 0.117238305 |
| 0.010126721 | 0.040801431 | 0.123261341 | 0.010988678 |
| 0.023835882 | 0.117918372 | 0.052752828 | 0.00935366  |
| 0.199322871 | 0.071336848 | 0.06176859  | 0.14222314  |
| 0.069320508 | 0.019955777 | 0.05157646  | 0.038519639 |
| 0.034002442 | 0.076322266 | 0.016498187 | 0.131632147 |
| 0.035926834 | 0.189308632 | 0.058740379 | 0.093059592 |
| 0.047548828 | 0.024399999 | 0.046548995 | 0.09295159  |
| 0.04877856  | 0.036234364 | 0.028186346 | 0.037955606 |

|             |             |             |             |
|-------------|-------------|-------------|-------------|
| 0.015258321 | 0.033015909 | 0.024717816 | 0.036957234 |
| 0.028144471 | 0.01332147  | 0.137251026 | 0.06593509  |
| 0.180792821 | 0.009536467 | 0.16060124  | 0.015129782 |
| 0.072110933 | 0.173646224 | 0.085872569 | 0.096631036 |
| 0.040738609 | 0.038542267 | 0.02215688  | 0.244269002 |
| 0.029642473 | 0.058099678 | 0.010699058 | 0.10193922  |
| 0.018768286 | 0.004380927 | 0.014381917 | 0.064630148 |
| 0.030634624 | 0.011578734 | 0.13025329  | 0.068604736 |
| 0.089211678 | 0.020066918 | 0.021841557 | 0.035919504 |
| 0.053483942 | 0.011947999 | 0.087949198 | 0.024877837 |
| 0.019988581 | 0.049723612 | 0.006600192 | 0.185453531 |
| 0.052610323 | 0.025223618 | 0.211490752 | 0.028226688 |
| 0.081065415 | 0.166517337 | 0.188614616 | 0.046626955 |
| 0.03329549  | 0.256307164 | 0.017748852 | 0.09785822  |
| 0.021710212 | 0.049108793 | 0.18573188  | 0.067677742 |
| 0.154785622 | 0.015976889 | 0.078979744 | 0.046084211 |
| 0.008299711 | 0.018769366 | 0.068424271 | 0.089852366 |
| 0.02888683  | 0.031886745 | 0.011762521 | 0.203416154 |
| 0.080884862 | 0.07873013  | 0.03249331  | 0.041020424 |
| 0.067825444 | 0.099930462 | 0.014999195 | 0.038425416 |
| 0.034765982 | 0.034011385 | 0.062922899 | 0.044294973 |
| 0.120270983 | 0.069395987 | 0.002231506 | 0.020592536 |
| 0.023288743 | 0.014642327 | 0.065530366 | 0.03778443  |
| 0.016594115 | 0.074150683 | 0.001818816 | 0.087731827 |
| 0.018550421 | 0.207906063 | 0.056168799 | 0.156805643 |
| 0.020607789 | 0.195768762 | 0.041868631 | 0.023746878 |
| 0.015491658 | 0.02822861  | 0.081514144 | 0.11015771  |
| 0.056216772 | 0.108824864 | 0.047636623 | 0.099794153 |
| 0.085246501 | 0.050139205 | 0.071533241 | 0.014735286 |
| 0.045554008 | 0.125089067 | 0.080424945 | 0.05678917  |
| 0.031678567 | 0.0037056   | 0.03104319  | 0.101712859 |
| 0.015006913 | 0.035947405 | 0.017069393 | 0.009218095 |
| 0.267840791 | 0.088236997 | 0.076002718 | 0.084869709 |
| 0.017913872 | 0.094882496 | 0.018724679 | 0.027636178 |
| 0.101675105 | 0.038679889 | 0.018040491 | 0.007716322 |
| 0.007389293 | 0.040401654 | 0.163784932 | 0.03709648  |
| 0.016430624 | 0.099981044 | 0.022528291 | 0.032019774 |
| 0.169928485 | 0.151844003 | 0.021907475 | 0.0049603   |
| 0.020920547 | 0.014139919 | 0.012505974 | 0.023380369 |
| 0.017797213 | 0.046159286 | 0.053949129 | 0.013126068 |
| 0.073670865 | 0.172666161 | 0.034529885 | 0.094981507 |
| 0.025578403 | 0.158671959 | 0.141178461 | 0.002737107 |
| 0.055890555 | 0.028048875 | 0.014266616 | 0.046025993 |
| 0.076636643 | 0.046516969 | 0.037177151 | 0.156974148 |
| 0.016703226 | 0.16206412  | 0.082334428 | 0.03243792  |
| 0.03293503  | 0.032291649 | 0.089607753 | 0.11373628  |
| 0.024028428 | 0.078417913 | 0.147156593 | 0.023283018 |
| 0.021205542 | 0.177722931 | 0.028976115 | 0.043757966 |
| 0.152008378 | 0.037575751 | 0.028797405 | 0.202458901 |
| 0.130571658 | 0.07505715  | 0.135090873 | 0.140121446 |
| 0.040026937 | 0.105558708 | 0.035430231 | 0.023611757 |
| 0.197342322 | 0.030777267 | 0.043450603 | 0.016943516 |
| 0.018724645 | 0.025684686 | 0.140473091 | 0.037650338 |
| 0.228410766 | 0.022902471 | 0.021653214 | 0.03669079  |

|             |             |             |             |
|-------------|-------------|-------------|-------------|
| 0.010000213 | 0.022927892 | 0.133863684 | 0.027925326 |
| 0.016706144 | 0.032331622 | 0.111469588 | 0.10877133  |
| 0.032584652 | 0.245793236 | 0.088459961 | 0.02473721  |
| 0.043574466 | 0.052329883 | 0.031168937 | 0.040907587 |
| 0.158903556 | 0.13391849  | 0.050140352 | 0.009746683 |
| 0.026355719 | 0.10927458  | 0.001957243 | 0.025764037 |
| 0.107224994 | 0.032477677 | 0.056249883 | 0.104723418 |
| 0.036741924 | 0.02830523  | 0.074333563 | 0.234113138 |
| 0.023696879 | 0.019905904 | 0.022998962 | 0.115461494 |
| 0.024834233 | 0.027023692 | 0.011873143 | 0.125427815 |
| 0.11880924  | 0.019309931 | 0.040937088 | 0.059859345 |
| 0.062724279 | 0.03370108  | 0.058087012 | 0.037366738 |
| 0.234425724 | 0.012930739 | 0.053704991 | 0.001884702 |
| 0.038738728 | 0.0489212   | 0.022335296 | 0.080739613 |
| 0.020356718 | 0.09119387  | 0.003543614 | 0.028851795 |
| 0.028657145 | 0.074570679 | 0.027256516 | 0.021964796 |
| 0.018096795 | 0.031987322 | 0.017947076 | 0.028924027 |
| 0.017833037 | 0.01841927  | 0.044918743 | 0.15341352  |
| 0.050411359 | 0.017040475 | 0.057314267 | 0.033452603 |
| 0.061066032 | 0.054545289 | 0.209949319 | 0.174097092 |
| 0.025620771 | 0.080111367 | 0.011393886 | 0.043658901 |
| 0.038100692 | 0.077489881 | 0.029352111 | 0.057351084 |
| 0.031138566 | 0.128928504 | 0.080379181 | 0.024725349 |
| 0.061104857 | 0.065889598 | 0.041720252 | 0.014534727 |
| 0.002889272 | 0.030690787 | 0.087011906 | 0.085569531 |
| 0.034034086 | 0.007978186 | 0.143531296 | 0.12154615  |
| 0.041202666 | 0.035367541 | 0.026742935 | 0.141908845 |
| 0.029818978 | 0.146611444 | 0.022553496 | 0.114376998 |
| 0.052339092 | 0.015135482 | 0.038576262 | 0.032076799 |
| 0.06256281  | 0.08015157  | 0.022030187 | 0.064213182 |
| 0.001496734 | 0.102823798 | 0.024546942 | 0.03202274  |
| 0.025328768 | 0.094333191 | 0.108247272 | 0.064677971 |
| 0.014906161 | 0.046992786 | 0.056967139 | 0.006807357 |
| 0.140014788 | 0.043283328 | 0.084277192 | 0.047586185 |
| 0.063032489 | 0.097081541 | 0.033946121 | 0.028362866 |
| 0.072153092 | 0.019530912 | 0.031607619 | 0.016843802 |
| 0.037817386 | 0.092364184 | 0.016924354 | 0.012084755 |
| 0.03238024  | 0.047119652 | 0.019569279 | 0.063595235 |
| 0.0043705   | 0.126576812 | 0.062740859 | 0.043955846 |
| 0.03672706  | 0.095925556 | 0.092861287 | 0.063444333 |
| 0.090537228 | 0.080228998 | 0.02203109  | 0.013763099 |
| 0.169150565 | 0.00290578  | 0.083592261 | 0.024868358 |
| 0.046262268 | 0.051386006 | 0.030772558 | 0.032282107 |
| 0.037103673 | 0.035507746 | 0.026100722 | 0.120079057 |
| 0.01094437  | 0.035244044 | 0.074552371 | 0.10312003  |
| 0.11344929  | 0.060131802 | 0.04852917  | 0.036816559 |
| 0.102576248 | 0.012661959 | 0.082649593 | 0.004793386 |
| 0.007712568 | 0.062216547 | 0.076196714 | 0.090211304 |
| 0.03942906  | 0.02745288  | 0.074760976 | 0.110446735 |
| 0.031813934 | 0.030975517 | 0.086078238 | 0.059842968 |
| 0.127974404 | 0.09734512  | 0.03487501  | 0.033666766 |
| 0.009836221 | 0.031900349 | 0.054542693 | 0.051157997 |
| 0.033867231 | 0.183722348 | 0.024418302 | 0.041934937 |
| 0.03586705  | 0.014765443 | 0.088639894 | 0.137891176 |

|             |             |             |             |
|-------------|-------------|-------------|-------------|
| 0.209815316 | 0.082809849 | 0.003920848 | 0.072981691 |
| 0.004495044 | 0.105848147 | 0.006990293 | 0.075265035 |
| 0.06762373  | 0.01321265  | 0.102116047 | 0.144602065 |
| 0.091186446 | 0.024011542 | 0.046550591 | 0.137145259 |
| 0.005972336 | 0.037083686 | 0.02176339  | 0.088235834 |
| 0.00758466  | 0.023283145 | 0.135960845 | 0.043855321 |
| 0.018829811 | 0.004149498 | 0.036185675 | 0.126416628 |
| 0.132430123 | 0.055177911 | 0.023896934 | 0.04015191  |
| 0.024015012 | 0.022539285 | 0.023723471 | 0.043719681 |
| 0.063075727 | 0.020772175 | 0.029303203 | 0.035004772 |
| 0.104979323 | 0.150481959 | 0.019863646 | 0.039324914 |
| 0.098864915 | 0.023038869 | 0.021930999 | 0.020153932 |
| 0.024232716 | 0.107699273 | 0.017479607 | 0.027213334 |
| 0.024347761 | 0.009766892 | 1           | 0.056290984 |
| 0.007664827 |             |             |             |
| ZHX2        | 0.407198712 | 0.514451843 | 0.390383265 |
| 0.419560445 | 0.434461371 | 0.368814847 | 0.273651694 |
| 0.270011859 | 0.115946442 | 0.008818065 | 0.029212008 |
| 0.416301946 | 0.208690826 | 0.305427381 | 0.320538239 |
| 0.436748187 | 0.16881312  | 0.419322516 | 0.314912306 |
| 0.443913887 | 0.145558411 | 0.417294409 | 0.150751748 |
| 0.314548356 | 0.124124353 | 0.102584785 | 0.27040651  |
| 0.4388481   | 0.117119472 | 0.327305502 | 0.411471002 |
| 0.161057663 | 0.424888159 | 0.501581679 | 0.407695669 |
| 0.4872983   | 0.375559283 | 0.029441602 | 0.303590131 |
| 0.418643005 | 0.408615992 | 0.43592621  | 0.373498429 |
| 0.073765577 | 0.475385293 | 0.300350747 | 0.411252696 |
| 0.276863407 | 0.047537401 | 0.276718842 | 0.444813017 |
| 0.447678867 | 0.390567042 | 0.304890113 | 0.217562192 |
| 0.183083027 | 0.278254601 | 0.226558329 | 0.342535697 |
| 0.291099534 | 0.20409375  | 0.461025393 | 0.124386531 |
| 0.183337644 | 0.351759983 | 0.207418795 | 0.338704035 |
| 0.337739866 | 0.38226196  | 0.048507482 | 0.371534886 |
| 0.005429278 | 0.435281895 | 0.412337664 | 0.267816524 |
| 0.073540366 | 0.032157499 | 0.237349812 | 0.377301251 |
| 0.457781076 | 0.456153068 | 0.464032683 | 0.466317838 |
| 0.209858924 | 0.365265392 | 0.375036847 | 0.226105873 |
| 0.423900334 | 0.225654493 | 0.156361867 | 0.430849781 |
| 0.472164325 | 0.499745382 | 0.244316571 | 0.313147774 |
| 0.378197462 | 0.481241299 | 0.394911603 | 0.413759845 |
| 0.296330236 | 0.084469732 | 0.427059913 | 0.493261536 |
| 0.390981312 | 0.298850383 | 0.19702183  | 0.415014801 |
| 0.105779227 | 0.378951614 | 0.395861403 | 0.206042662 |
| 0.470474284 | 0.037344773 | 0.255252515 | 0.388789758 |
| 0.314504635 | 0.418322352 | 0.490129749 | 0.258192533 |
| 0.428050141 | 0.036645051 | 0.124898285 | 0.068702551 |
| 0.359832275 | 0.145401657 | 0.457724498 | 0.440033734 |
| 0.304655003 | 0.382727477 | 0.348665175 | 0.00725934  |
| 0.047498274 | 0.262388141 | 0.395981731 | 0.435520464 |
| 0.439736696 | 0.362214792 | 0.250761325 | 0.372451664 |
| 0.386384288 | 0.457694922 | 0.06139543  | 0.168344406 |
| 0.419384554 | 0.261999567 | 0.308688304 | 0.42349463  |
| 0.324542251 | 0.195671364 | 0.194650804 | 0.506641318 |
| 0.435100802 | 0.138110934 | 0.394119184 | 0.434111469 |

|             |             |             |             |
|-------------|-------------|-------------|-------------|
| 0.32655619  | 0.362760516 | 0.177649183 | 0.323172757 |
| 0.091648195 | 0.454557622 | 0.048931418 | 0.399103519 |
| 0.229198199 | 0.171105283 | 0.033998167 | 0.334238601 |
| 0.307198733 | 0.391436306 | 0.446277546 | 0.177455021 |
| 0.3635793   | 0.416315569 | 0.366847591 | 0.378213552 |
| 0.014770185 | 0.092789747 | 0.321846089 | 0.491417988 |
| 0.296033382 | 0.488151563 | 0.37455567  | 0.357150121 |
| 0.332816024 | 0.435556977 | 0.006010975 | 0.47941327  |
| 0.500030497 | 0.318424827 | 0.389043461 | 0.433177395 |
| 0.334009551 | 0.425890313 | 0.052688874 | 0.440826431 |
| 0.356083428 | 0.142525991 | 0.493609528 | 0.203394887 |
| 0.453182358 | 0.0680179   | 0.370917761 | 0.379124209 |
| 0.368128508 | 0.017120082 | 0.265269176 | 0.417207391 |
| 0.048785649 | 0.150994501 | 0.434163733 | 0.424745195 |
| 0.382147034 | 0.433619013 | 0.474679357 | 0.310960521 |
| 0.422639778 | 0.330921314 | 0.029473199 | 0.354909054 |
| 0.418618598 | 0.339066846 | 0.44149924  | 0.313359941 |
| 0.339051943 | 0.467130741 | 0.367889818 | 0.198295718 |
| 0.078320961 | 0.379230341 | 0.034901732 | 0.351460585 |
| 0.372350124 | 0.154946638 | 0.357864939 | 0.228865436 |
| 0.105269811 | 0.509132502 | 0.190196055 | 0.245125633 |
| 0.128894874 | 0.378839322 | 0.345989501 | 0.235118913 |
| 0.197253984 | 0.223131769 | 0.342125878 | 0.376712298 |
| 0.072919075 | 0.135644978 | 0.031272759 | 0.321051811 |
| 0.13681193  | 0.305256825 | 0.29945034  | 0.388691728 |
| 0.35920221  | 0.135405693 | 0.38288415  | 0.306269765 |
| 0.15079537  | 0.031627904 | 0.497219843 | 0.441856952 |
| 0.329552113 | 0.227940998 | 0.077092494 | 0.294955398 |
| 0.449426094 | 0.2929995   | 0.300628832 | 0.446290053 |
| 0.058639274 | 0.47332815  | 0.264655136 | 0.162037711 |
| 0.3509438   | 0.313004313 | 0.455912306 | 0.076522922 |
| 0.421280111 | 0.464558153 | 0.38537937  | 0.220004076 |
| 0.388463484 | 0.436709817 | 0.059982609 | 0.382046293 |
| 0.376319508 | 0.057630203 | 0.506268198 | 0.165171899 |
| 0.042480059 | 0.420614841 | 0.380962835 | 0.118752337 |
| 0.117807904 | 0.333303162 | 0.089004704 | 0.336904487 |
| 0.50366831  | 0.420621473 | 0.382425155 | 0.252760781 |
| 0.068916194 | 0.014432266 | 0.257612037 | 0.392813604 |
| 0.491962903 | 0.485299436 | 0.341245162 | 0.344366173 |
| 0.316973675 | 0.313866201 | 0.206567587 | 0.488003603 |
| 0.266397072 | 0.506820838 | 0.018183676 | 0.395190954 |
| 0.480392634 | 0.323457369 | 0.10491197  | 0.349722095 |
| 0.373253001 | 0.084989731 | 0.317105855 | 0.480776111 |
| 0.425489884 | 0.350276654 | 0.332006564 | 0.444878002 |
| 0.035749345 | 0.086136619 | 0.394043764 | 0.192133028 |
| 0.379545711 | 0.278993637 | 0.053607803 | 0.389871555 |
| 0.068238436 | 0.444965598 | 0.442660521 | 0.084524445 |
| 0.310317173 | 0.364605402 | 0.410366603 | 0.071498775 |
| 0.408045041 | 0.480352986 | 0.504294397 | 0.26897249  |
| 0.412913302 | 0.457498038 | 0.341228699 | 0.130643216 |
| 0.033322027 | 0.490948802 | 0.409248323 | 0.035539207 |
| 0.464073591 | 0.261403392 | 0.018907154 | 0.496595763 |
| 0.269801081 | 0.432267129 | 0.007563255 | 0.10445562  |
| 0.071032233 | 0.430424191 | 0.461200894 | 0.420369729 |

|                     |             |                      |             |
|---------------------|-------------|----------------------|-------------|
| 0.237702131         | 0.437760463 | 0.013876775          | 0.50623551  |
| 0.475799142         | 0.025677948 | 0.177858639          | 0.386229455 |
| 0.363130078         | 0.525482162 | 0.293901 0.401861003 |             |
| 0.37554401          | 0.471643597 | 0.277395491          | 0.319289025 |
| 0.410425539         | 0.4592201   | 0.425274242          | 0.463854491 |
| 0.442530596         | 0.431615838 | 0.340891189          | 0.031924244 |
| 0.146102319         | 0.282582907 | 0.258297498          | 0.095360228 |
| 0.347299096         | 0.170574746 | 0.476179655          | 0.45319233  |
| 0.452178641         | 0.013252767 | 0.228123217          | 0.394534054 |
| 0.444330292         | 0.480080069 | 0.047423931          | 0.010392164 |
| 0.012549986         | 0.023030522 | 0.415784152          | 0.303716822 |
| 0.4739863           | 0.21895112  | 0.012862726          | 0.089848169 |
| 0.340663271         | 0.377328535 | 0.487000496          | 0.426254615 |
| 0.413981544         | 0.137622616 | 0.257907287          | 0.442356386 |
| 0.089108235         | 0.325838243 | 0.461052814          | 0.470000303 |
| 0.080694732         | 0.308479586 | 0.421536668          | 0.485158132 |
| 0.063438827         | 0.371939734 | 0.421057816          | 0.323964315 |
| 0.03306569          | 0.118796193 | 0.096817866          | 0.444079021 |
| 0.469410462         | 0.092238943 | 0.04576525           | 0.17513539  |
| 0.156822678         | 0.455743266 | 0.208515692          | 0.504409382 |
| 0.421349306         | 0.440632846 | 0.110776688          | 0.474480318 |
| 0.059510138         | 0.466701049 | 0.330245874          | 0.06655011  |
| 0.369932465         | 0.032217647 | 0.450856141          | 0.127973213 |
| 0.362098219         | 0.426933218 | 0.204185893          | 0.032888146 |
| 0.179372787         | 0.085898249 | 0.459582997          | 0.425794159 |
| 0.061543447         | 0.334359602 | 0.365151029          | 0.447406333 |
| 0.336505 0.42134623 | 0.488957241 | 0.35167168           |             |
| 0.13694486          | 0.167053702 | 0.439298296          | 0.394790933 |
| 0.315660136         | 0.47626334  | 0.291029231          | 0.512297686 |
| 0.407217255         | 0.465446906 | 0.452777171          | 0.384018774 |
| 0.249623022         | 0.407502315 | 0.365390694          | 0.033715495 |
| 0.414563687         | 0.428550634 | 0.426637773          | 0.164969299 |
| 0.285667958         | 0.352438443 | 0.105649492          | 0.231198363 |
| 0.29202252          | 0.326578663 | 0.195592299          | 0.446283768 |
| 0.425603274         | 0.393537791 | 0.096108876          | 0.088767238 |
| 0.531173015         | 0.442502182 | 0.202778794          | 0.416740027 |
| 0.24855662          | 0.369555575 | 0.420611646          | 0.417812105 |
| 0.376175587         | 0.409984776 | 0.427086414          | 0.370225054 |
| 0.427552495         | 0.338353707 | 0.506737455          | 0.149565173 |
| 0.105215707         | 0.399695262 | 0.123774329          | 0.140740713 |
| 0.203122879         | 0.049071419 | 0.258014846          | 0.445174811 |
| 0.327839836         | 0.406006515 | 0.359841921          | 0.129399463 |
| 0.375920431         | 0.39570219  | 0.409437117          | 0.253508715 |
| 0.109262011         | 0.477571433 | 0.018564902          | 0.097999226 |
| 0.350473975         | 0.398702197 | 0.342179402          | 0.300484102 |
| 0.278906121         | 0.196252407 | 0.354732456          | 0.333228135 |
| 0.282116877         | 0.371136676 | 0.39233688           | 0.067898476 |
| 0.045079235         | 0.485201583 | 0.397033075          | 0.043431037 |
| 0.13157937          | 0.38528895  | 0.388896528          | 0.262388946 |
| 0.039817007         | 0.448426023 | 0.319638076          | 0.422578532 |
| 0.402073705         | 0.12280203  | 0.365374698          | 0.143628528 |
| 0.122078129         | 0.449145649 | 0.382785327          | 0.487381539 |
| 0.387218083         | 0.426113975 | 0.442323322          | 0.398695831 |
| 0.189313311         | 0.366268113 | 0.056290984          | 1           |

|             |             |             |             |
|-------------|-------------|-------------|-------------|
| 0.33969893  |             |             |             |
| ZMYM2       | 0.29151007  | 0.481754772 | 0.176760181 |
| 0.296662283 | 0.184190451 | 0.186419945 | 0.058459722 |
| 0.035886168 | 0.037149651 | 0.001666122 | 0.014128702 |
| 0.259557949 | 0.074060691 | 0.067410868 | 0.099636198 |
| 0.290004234 | 0.049133718 | 0.08178934  | 0.080833984 |
| 0.227510693 | 0.019335035 | 0.255619957 | 0.024515686 |
| 0.099865445 | 0.049904244 | 0.024630259 | 0.108292028 |
| 0.337052108 | 0.027268936 | 0.118105933 | 0.217809202 |
| 0.028184604 | 0.312416836 | 0.493999774 | 0.298155712 |
| 0.496827457 | 0.281294872 | 0.001462804 | 0.079311747 |
| 0.325396603 | 0.347572669 | 0.236474105 | 0.150816625 |
| 0.011486743 | 0.442113145 | 0.09043562  | 0.212772112 |
| 0.04966694  | 0.015130586 | 0.051981052 | 0.385893158 |
| 0.466237137 | 0.246372129 | 0.049627061 | 0.041653234 |
| 0.078137735 | 0.043921111 | 0.116856737 | 0.163667146 |
| 0.068022548 | 0.030497881 | 0.465701298 | 0.026821842 |
| 0.034827262 | 0.050179532 | 0.046272802 | 0.058843785 |
| 0.117867666 | 0.257034072 | 0.003159514 | 0.238951926 |
| 0.000309159 | 0.209996862 | 0.180705538 | 0.12768738  |
| 0.013809518 | 0.007824974 | 0.053891366 | 0.152159363 |
| 0.361513939 | 0.411016694 | 0.438141694 | 0.457217107 |
| 0.063103395 | 0.090723816 | 0.185605281 | 0.049575303 |
| 0.35879561  | 0.049136883 | 0.036174242 | 0.303526153 |
| 0.451749344 | 0.498329689 | 0.076116082 | 0.108524859 |
| 0.356422819 | 0.417849707 | 0.16728475  | 0.161300123 |
| 0.133929579 | 0.0195011   | 0.403623362 | 0.47313033  |
| 0.302059932 | 0.135619552 | 0.053094478 | 0.275790966 |
| 0.016234649 | 0.094938035 | 0.184850855 | 0.040421231 |
| 0.384315047 | 0.005992201 | 0.080027339 | 0.141569706 |
| 0.050681192 | 0.333010745 | 0.507073305 | 0.055242511 |
| 0.164987363 | 0.006403806 | 0.077101917 | 0.009064378 |
| 0.102083846 | 0.066745896 | 0.459551068 | 0.390121161 |
| 0.046742213 | 0.108741246 | 0.063596238 | 0.000688577 |
| 0.009928618 | 0.048275026 | 0.347631344 | 0.103506008 |
| 0.278728208 | 0.350244128 | 0.083551773 | 0.264859049 |
| 0.312544437 | 0.427779515 | 0.022254805 | 0.021662323 |
| 0.199684822 | 0.04755915  | 0.094383632 | 0.232596447 |
| 0.134282107 | 0.024560527 | 0.03251526  | 0.476621473 |
| 0.355750012 | 0.022447492 | 0.071019009 | 0.277259373 |
| 0.095344602 | 0.184899879 | 0.025745742 | 0.073727758 |
| 0.01060441  | 0.481725643 | 0.011292286 | 0.087376327 |
| 0.128894729 | 0.054623786 | 0.001498117 | 0.063010412 |
| 0.084530524 | 0.398432931 | 0.444342328 | 0.026474458 |
| 0.086667972 | 0.241941627 | 0.093177644 | 0.321807752 |
| 0.005515181 | 0.012524359 | 0.067981219 | 0.465438424 |
| 0.136339943 | 0.454275892 | 0.07707466  | 0.093334242 |
| 0.121291624 | 0.347707501 | 0.001028845 | 0.470692354 |
| 0.51004722  | 0.07994362  | 0.211551916 | 0.219088036 |
| 0.16161006  | 0.372964218 | 0.013630619 | 0.258906271 |
| 0.210110407 | 0.01934523  | 0.446401643 | 0.057916736 |
| 0.421591596 | 0.014678098 | 0.070372038 | 0.402723125 |
| 0.356477764 | 0.004805036 | 0.05787211  | 0.219087845 |
| 0.009738827 | 0.019165665 | 0.271644692 | 0.236224362 |

|             |             |             |             |
|-------------|-------------|-------------|-------------|
| 0.197876619 | 0.336958054 | 0.406276489 | 0.15105059  |
| 0.190150974 | 0.052521481 | 0.00361575  | 0.139138262 |
| 0.333856935 | 0.108657327 | 0.387583246 | 0.062181277 |
| 0.151925693 | 0.433789393 | 0.362786029 | 0.056382362 |
| 0.012129644 | 0.085537225 | 0.007428527 | 0.140899874 |
| 0.349154789 | 0.032493875 | 0.174746628 | 0.035398839 |
| 0.026372183 | 0.490980485 | 0.07509485  | 0.105038776 |
| 0.062048753 | 0.196809204 | 0.067251024 | 0.074747367 |
| 0.089181709 | 0.052992061 | 0.129919442 | 0.115468712 |
| 0.007553932 | 0.029451724 | 0.004290936 | 0.119633366 |
| 0.055149726 | 0.113465477 | 0.105577998 | 0.255783746 |
| 0.079898268 | 0.036421677 | 0.162680386 | 0.097926147 |
| 0.044803837 | 0.004921973 | 0.464316465 | 0.238228796 |
| 0.211948692 | 0.043220854 | 0.011854036 | 0.106797653 |
| 0.403058171 | 0.145393008 | 0.059342852 | 0.397468338 |
| 0.007357529 | 0.419065886 | 0.077052042 | 0.043848145 |
| 0.129396907 | 0.094624202 | 0.376061763 | 0.032204062 |
| 0.160779127 | 0.416869314 | 0.114631083 | 0.067696062 |
| 0.343786481 | 0.227000961 | 0.008979034 | 0.295816207 |
| 0.28565222  | 0.010098552 | 0.499045026 | 0.044453325 |
| 0.00676249  | 0.310390427 | 0.357263038 | 0.024513779 |
| 0.027297982 | 0.125092607 | 0.008065221 | 0.146157096 |
| 0.484357368 | 0.287031045 | 0.341832915 | 0.078443762 |
| 0.012240318 | 0.004581303 | 0.068767195 | 0.191027064 |
| 0.476498395 | 0.491823768 | 0.090075628 | 0.166180002 |
| 0.090088749 | 0.12742016  | 0.024420465 | 0.480585767 |
| 0.05230859  | 0.481298429 | 0.001899124 | 0.36854002  |
| 0.497033179 | 0.083093343 | 0.035075031 | 0.107371704 |
| 0.311532603 | 0.013090717 | 0.043155603 | 0.469336227 |
| 0.37112624  | 0.111950767 | 0.124637686 | 0.243155652 |
| 0.003655896 | 0.007733564 | 0.205508963 | 0.080558602 |
| 0.11046634  | 0.065391967 | 0.032996281 | 0.076476617 |
| 0.013498562 | 0.41015728  | 0.35392414  | 0.026346477 |
| 0.166621041 | 0.070370136 | 0.209682286 | 0.010276551 |
| 0.443384033 | 0.475821082 | 0.493331287 | 0.032784835 |
| 0.332082256 | 0.480832338 | 0.25704125  | 0.023986932 |
| 0.006673367 | 0.503848374 | 0.230055704 | 0.006634223 |
| 0.390902914 | 0.068443776 | 0.005592433 | 0.443521555 |
| 0.049247109 | 0.404512897 | 0.001703464 | 0.025710544 |
| 0.014442675 | 0.383823896 | 0.459907536 | 0.201995757 |
| 0.063568363 | 0.158225292 | 0.001186071 | 0.489412827 |
| 0.46305208  | 0.007436259 | 0.056211221 | 0.367960745 |
| 0.374671694 | 0.476505386 | 0.141071091 | 0.434051972 |
| 0.279145263 | 0.48716637  | 0.069107131 | 0.120493554 |
| 0.377928836 | 0.491199813 | 0.284570007 | 0.403288185 |
| 0.377007097 | 0.272848942 | 0.121184512 | 0.004718082 |
| 0.067149194 | 0.042859831 | 0.111631113 | 0.032016387 |
| 0.149864374 | 0.053983383 | 0.436069842 | 0.38694912  |
| 0.459072733 | 0.001643043 | 0.030002781 | 0.350874891 |
| 0.351865211 | 0.389182979 | 0.004907958 | 0.004137066 |
| 0.00318784  | 0.016934993 | 0.141261208 | 0.083294163 |
| 0.455225736 | 0.068024942 | 0.001283364 | 0.007625049 |
| 0.074716869 | 0.262651394 | 0.475547434 | 0.22682359  |
| 0.348174563 | 0.021601903 | 0.097805208 | 0.240421553 |



|             |             |             |             |
|-------------|-------------|-------------|-------------|
| 0.036053237 | 0.193460216 | 0.460276315 | 0.430235305 |
| 0.010981381 | 0.076874904 | 0.110366558 | 0.418774252 |
| 0.044055093 | 0.14071537  | 0.267068566 | 0.100742114 |
| 0.002640741 | 0.030458882 | 0.02742178  | 0.318947342 |
| 0.489346099 | 0.032909438 | 0.015590341 | 0.032669209 |
| 0.036615534 | 0.387243598 | 0.051804648 | 0.464201753 |
| 0.345175393 | 0.334885294 | 0.026666049 | 0.452815227 |
| 0.018697658 | 0.465280855 | 0.159247523 | 0.016890735 |
| 0.074591053 | 0.003165725 | 0.440349299 | 0.083578676 |
| 0.073025847 | 0.220325319 | 0.093982409 | 0.006240375 |
| 0.086599028 | 0.018849616 | 0.419891669 | 0.406066388 |
| 0.011614667 | 0.054300045 | 0.109230943 | 0.211120431 |
| 0.09425313  | 0.324111681 | 0.473707711 | 0.188849894 |
| 0.020184114 | 0.048179665 | 0.247180591 | 0.234754338 |
| 0.047717349 | 0.435475536 | 0.112248581 | 0.491681412 |
| 0.271408089 | 0.394414072 | 0.441367274 | 0.154178003 |
| 0.083064122 | 0.194279816 | 0.226815808 | 0.005855117 |
| 0.14579581  | 0.382397532 | 0.110357165 | 0.07628453  |
| 0.096728828 | 0.2039989   | 0.007989596 | 0.041290755 |
| 0.163236402 | 0.133971375 | 0.036628425 | 0.332490725 |
| 0.190303333 | 0.256295077 | 0.005199185 | 0.027326768 |
| 0.499891092 | 0.380569993 | 0.03780193  | 0.27199372  |
| 0.047135811 | 0.161205963 | 0.356702302 | 0.360738959 |
| 0.105666793 | 0.385027777 | 0.30533702  | 0.244594072 |
| 0.368967562 | 0.083820945 | 0.497338308 | 0.014577226 |
| 0.053458547 | 0.229721418 | 0.034720498 | 0.029908616 |
| 0.041154404 | 0.009873282 | 0.123234392 | 0.276535194 |
| 0.132524027 | 0.208710857 | 0.068179827 | 0.021842153 |
| 0.131191507 | 0.111698129 | 0.159662911 | 0.049933035 |
| 0.026510418 | 0.476977332 | 0.003060694 | 0.016361249 |
| 0.126100457 | 0.375062652 | 0.200305071 | 0.07643405  |
| 0.133585588 | 0.041896234 | 0.116276375 | 0.090727654 |
| 0.10132454  | 0.10577177  | 0.379199698 | 0.008665208 |
| 0.003761836 | 0.427683701 | 0.12488872  | 0.006253052 |
| 0.022396025 | 0.196200544 | 0.06612898  | 0.080673105 |
| 0.008483625 | 0.47040965  | 0.105163691 | 0.206017021 |
| 0.126688524 | 0.01600685  | 0.280359806 | 0.025199918 |
| 0.012815546 | 0.396176728 | 0.21076013  | 0.499175066 |
| 0.117319608 | 0.304398395 | 0.399462029 | 0.348194817 |
| 0.033152247 | 0.173910559 | 0.007664827 | 0.33969893  |

Table S2B

| NAMES         | 1700020L24RIK | 1700025G04RIK | 2610524H06RIK |           |               |          |
|---------------|---------------|---------------|---------------|-----------|---------------|----------|
| 4930486L24RIK | 4930503L19RIK | 6330403K07RIK | ACTN1         | ADAM17    |               |          |
| ADAM9         | ADSL          | AHNAK         | AIF1          | ALCAM     | ALOX5AP       | AMICA1   |
| AMPD1         | ANXA1         | ANXA2         | ANXA4         | AP1S2     | APAF1         | APEX1    |
| AP0L7C        | ARHGAP26      | ARL5A         | ARL6          | ART4      | ASAH1         | ATG5     |
| ATP1B1        | ATP2A2        | ATPAF2        | AVEN          | B3GALNT1  | B630005N14RIK | BACE1    |
| BACH2         | BAZ1A         | BBS9          | BC028528      | BCL2L1    | BEX2          | BLVRA    |
| BTBD10        | BTLA          | BZW2          | CAPN2         | CAPRIN1   | CAR5B         | CARHSP1  |
| CASP1         | CASP3         | CASP4         | CASP7         | CCDC109B  | CCDC125       | CCDC58   |
| CCL3          | CCL4          | CCL5          | CCL6          | CCL9      | CCNC          | CCR2     |
| CCR7          | CCR9          | CCRL2         | CD24A         | CD3EAP    | CD69          | CD74     |
| CD86          | CDC42EP3      | CDK9          | CDKN2C        | CEP57     | CERCAM        | CHCHD7   |
| CHST11        | CHST12        | CHSY1         | CLDN10        | CLEC4N    | CLIC4         | CLYBL    |
| CNGA1         | CNR2          | COMMD10       | COQ10B        | CREM      | CRMP1         | CST3     |
| CTSD          | CTSE          | CX3CR1        | CXCL10        | CXCR3     | CYBB          | CYSLTR2  |
| DAPL1         | DDX58         | DEK           | DENND5A       | DERL2     | DGAT1         | DGKA     |
| DNAJB6        | DPAGT1        | DPH5          | DPYSL2        | DUSP10    | DUSP16        | DUSP19   |
| DYNC1LI2      | E2F2          | ECE1          | ECE2          | ECH1      | EGR1          | EGR2     |
| ELL2          | ELOVL1        | EMB           | EMP1          | ENDOD1    | ENPP1         | ENTPD1   |
| EPHX1         | ERRFI1        | ESM1          | ETAA1         | ETS2      | EVL           | EXOSC2   |
| F2RL1         | F2RL3         | FAM105A       | FAM129B       | FASL      | FBXL20        | FCER1G   |
| FGF13         | FGFR10P       | FGL2          | FOXO1         | FOXP1     | FRYL          | FYN      |
| GABARAPL1     |               | GABARAPL2     |               | GADD45B   | GALK1         | GALNT3   |
| GBA           | GBP3          | GCNT1         | GEM           | GEMIN6    | GGT1          | GINS4    |
| GNA15         | GNPTAB        | GPATCH4       | GPR174        | GPX1      | GPX8          | GRWD1    |
| GZMK          | H2-AA         | H2-AB1        | H2-DMA        | H2-EB1    | H2-Q10        | HAVCR2   |
| HDGFRP3       | HEG1          | HERC2         | HIP1          | HIST2H2BE |               | HMGN3    |
| HPSE          | HSPA4L        | HVCN1         | ICA1          | ID2       | IDH3A         | IFI30    |
| IFNG          | IFNGR1        | IFT57         | IFT80         | IGF2R     | IGFBP4        | IL10RA   |
| IL18RAP       | IL2RA         | IL2RB         | IL4RA         | IL6ST     | INPP4B        | INSL6    |
| IRF4          | ITGAV         | ITGB1         | ITGB2         | JAZF1     | KCNAB2        | KCNK5    |
| KLF7          | KLHDC10       | KLHL6         | KLRG1         | KLRK1     | LAT2          | LEF1     |
| LGALS3        | LITAF         | LRIG1         | LSM8          | LTB       | LXN           | LY96     |
| LYSMD2        | MAP3K8        | MAPKAPK2      | MAPRE2        | MDM1      | METTTL1       | METTTL2  |
| MGST2         | MLF1          | MLKL          | MPP5          | MRPL23    | MRPS18B       | MRPS27   |
| MS4A4C        | MS4A6D        | MSC           | MTCH2         | MTX1      | MX1           | MX2      |
| MYC           | MYCBP         | MYL4          | MYO1F         | MYO5A     | N4BP2         | NCALD    |
| NEDD4L        | NME4          | NQO2          | NR4A2         | NRARP     | NRM           | NRP1     |
| NSMAF         | NUCKS1        | NUP155        | NUP93         | OASL2     | OGFRL1        | OSBPL3   |
| PCYT1A        | PDE2A         | PDE4D         | PDIA3         | PDIA6     | PDK1          | PDLIM1   |
| PELI1         | PELO          | PFKP          | PGM2L1        | PGRMC1    | PHF21A        | PHTF2    |
| PIH1D1        | PIK3AP1       | PLEK          | PLEKHF1       | PLSCR1    | PLXDC1        | PN01     |
| POLK          | PON3          | PPP4C         | PQLC3         | PRDM1     | PRDX4         | PRKD3    |
| PRR13         | PRUNE         | PUS7L         | PVR           | RAB19     | RAB27A        | RABGAP1L |
| RAMP1         | RANGRF        | RAP2A         | RAPGEF6       | RCN3      | REEP5         | RFC2     |
| RGS10         | RHOQ          | ROM1          | RORA          | RPL12     | RRAS2         | RREB1    |
| S1PR1         | SAE1          | SAMSN1        | SATB1         | SDCBP2    | SELL          | SEPHS2   |
| SERPINB6A     |               | SESN1         | SFMBT1        | SGCB      | SH2D2A        | SH3BGRL  |
| SHMT2         | SIT1          | SLAMF7        | SLC11A2       | SLC25A24  | SLC27A4       | SLC2A3   |
| SLC6A19       | SLC9A7        | SMAD3         | SMARCC1       | SMPDL3B   | SND1          | SNX10    |
| SOCS3         | SPINT2        | SPRED1        | SPRED2        | SQRDL     | SRM           | SSBP2    |
| ST6GAL1       | ST8SIA4       | STARD10       | STARD3NL      | SURF1     | SURF4         | SWAP70   |
| SYTL2         | TAF12         | TAF9B         | TBRG4         | TBX21     | TCF4          | TCF7     |
|               |               |               |               |           |               | TCP11L2  |

|       |          |          |         |         |         |         |       |
|-------|----------|----------|---------|---------|---------|---------|-------|
| TEX2  | TFDP2    | TFRC     | TGFBI   | THA1    | THADA   | THRA    | TIMM9 |
| TJP2  | TLE1     | TLR1     | TLR2    | TLR7    | TMED9   | TMEM108 | TMEM2 |
| TMIE  | TNFRSF18 | TNFRSF26 | TNFSF10 | TNFSF14 | TNFSF8  | TPCN1   | TPPP3 |
| TRIB2 | TRIM56   | TRP53    | TRPC1   | TRPC4AP | TSPAN13 | TSPAN2  | TSP0  |
| TSR1  | TTC27    | TXK      | TXNDC5  | TYROBP  | UBASH3B | UMPS    | URB2  |
| UTP15 | VAMP8    | VIM      | WBP5    | XKRX    | YIPF1   | YPEL1   | ZBTB2 |
| ZDHC2 | ZEB1     | ZEB2     | ZFP280C | ZFP281  | ZFP35   | ZFP455  | ZFP52 |
| ZHX2  | ZMYM2    |          |         |         |         |         |       |

|               |             |             |             |
|---------------|-------------|-------------|-------------|
| 1700020L24RIK | 1           | 0.375632201 | 0.054224787 |
| 0.008077512   | 0.032177895 | 0.139266709 | 0.089921495 |
| 0.219640482   | 0.098379902 | 0.069113421 | 0.205741267 |
| 0.013823589   | 0.263416876 | 0.04679142  | 0.054035866 |
| 0.423696936   | 0.40468289  | 0.116058509 | 0.408974785 |
| 0.235840898   | 0.060468078 | 0.280538948 | 0.188974143 |
| 0.130132153   | 0.01385926  | 0.050368246 | 0.021443609 |
| 0.189307335   | 0.403847519 | 0.132974281 | 0.147882222 |
| 0.40621966    | 0.315102027 | 0.144771417 | 0.082529397 |
| 0.067363252   | 0.357682647 | 0.027140273 | 0.230828504 |
| 0.329395089   | 0.083668901 | 0.318950052 | 0.024719977 |
| 0.000612769   | 0.052725315 | 0.191205173 | 0.265272689 |
| 0.198706267   | 0.122222324 | 0.112445869 | 0.06718221  |
| 0.069369388   | 0.235503402 | 0.357555703 | 0.063504608 |
| 0.27885387    | 0.001701027 | 0.332236593 | 0.243092745 |
| 0.05395407    | 0.176240751 | 0.209223375 | 0.272024904 |
| 0.138843569   | 0.302222019 | 0.387053547 | 0.020039688 |
| 0.051675725   | 0.200392708 | 0.299696391 | 0.17555862  |
| 0.355954168   | 0.160431955 | 0.119024046 | 0.116591931 |
| 0.25516631    | 0.313097826 | 0.171355176 | 0.107797478 |
| 0.005192515   | 0.06347936  | 0.086531971 | 0.304843134 |
| 0.182671295   | 0.238471005 | 0.24721772  | 0.077724181 |
| 0.189076876   | 0.02894817  | 0.206433519 | 0.40316476  |
| 0.011570661   | 0.281055202 | 0.004898524 | 0.093013784 |
| 0.337013025   | 0.387756494 | 0.300462995 | 0.043833708 |
| 0.023071154   | 0.113562978 | 0.213084172 | 0.335743568 |
| 0.20691646    | 0.182397754 | 0.27177658  | 0.064567503 |
| 0.262017172   | 0.188033205 | 0.140395343 | 0.346550273 |
| 0.406352006   | 0.014789593 | 0.150409365 | 0.113120324 |
| 0.121916842   | 0.045929814 | 0.096875068 | 0.030631768 |
| 0.007226095   | 0.055024968 | 0.381263305 | 0.138638959 |
| 0.045007356   | 0.097022757 | 0.032334463 | 0.178089963 |
| 0.198746063   | 0.393377771 | 0.035435551 | 0.109073978 |
| 0.228999272   | 0.100907892 | 0.124433195 | 0.267542499 |
| 0.091333885   | 0.203712798 | 0.125025761 | 0.298751909 |
| 0.346094325   | 0.0436102   | 0.075489304 | 0.206962262 |
| 0.240640554   | 0.400230303 | 0.417882666 | 0.192397041 |
| 0.073776208   | 0.152722977 | 0.169845682 | 0.184796686 |
| 0.106569908   | 0.199184049 | 0.049653937 | 0.221121688 |
| 0.300186035   | 0.02268128  | 0.059069778 | 0.317087003 |
| 0.008409722   | 0.091089549 | 0.361351735 | 0.269668115 |
| 0.168692258   | 0.019575893 | 0.098835575 | 0.123712398 |
| 0.192371495   | 0.120050289 | 0.258056121 | 0.095494867 |
| 0.217170951   | 0.16156089  | 0.03253488  | 0.25726516  |
| 0.080626831   | 0.221486633 | 0.171322303 | 0.043527904 |
| 0.248902105   | 0.2037456   | 0.324037336 | 0.225345732 |

|             |             |             |             |
|-------------|-------------|-------------|-------------|
| 0.306682586 | 0.001083953 | 0.070072544 | 0.276337976 |
| 0.19613453  | 0.324997786 | 0.358532049 | 0.077004636 |
| 0.170497712 | 0.114719776 | 0.100445169 | 0.089294208 |
| 0.376411495 | 0.12531678  | 0.112597778 | 0.005639244 |
| 0.062434212 | 0.173695356 | 0.181907815 | 0.10305403  |
| 0.07499753  | 0.131537356 | 0.132798988 | 0.340620821 |
| 0.116338391 | 0.248030289 | 0.069362647 | 0.106523556 |
| 0.142540109 | 0.219686115 | 0.143703407 | 0.251055616 |
| 0.245947223 | 0.15986681  | 0.361155346 | 0.289268316 |
| 0.079701252 | 0.233287896 | 0.080518812 | 0.181565388 |
| 0.177889552 | 0.317335288 | 0.302537464 | 0.265138231 |
| 0.130431696 | 0.270720533 | 0.133204019 | 0.179718422 |
| 0.215001902 | 0.178023498 | 0.090119513 | 0.371638215 |
| 0.005300938 | 0.185078145 | 0.163790709 | 0.104986635 |
| 0.345844398 | 0.105572514 | 0.076687136 | 0.196317624 |
| 0.413552543 | 0.374855145 | 0.380396533 | 0.347367183 |
| 0.149185014 | 0.036691158 | 0.40748558  | 0.266614928 |
| 0.399797085 | 0.149702696 | 0.078656133 | 0.05174574  |
| 0.354618118 | 0.195820483 | 0.253783625 | 0.20634503  |
| 0.149171501 | 0.112385797 | 0.143616504 | 0.275430797 |
| 0.031814812 | 0.158585548 | 0.255114565 | 0.083436383 |
| 0.141086919 | 0.128469798 | 0.286715242 | 0.200336999 |
| 0.106169969 | 0.218601673 | 0.107943889 | 0.043143216 |
| 0.094207387 | 0.391303569 | 0.010227674 | 0.397310645 |
| 0.410785192 | 0.166711545 | 0.33078373  | 0.419521692 |
| 0.208370166 | 0.24310585  | 0.349910757 | 0.375156967 |
| 0.005658525 | 0.323038313 | 0.222047773 | 0.251622978 |
| 0.359318778 | 0.171516647 | 0.160160441 | 0.131263877 |
| 0.002045216 | 0.111495182 | 0.091523541 | 0.39163514  |
| 0.30832259  | 0.020916238 | 0.009586734 | 0.268216113 |
| 0.199914942 | 0.0208306   | 0.42039869  | 0.153167986 |
| 0.301637249 | 0.145061145 | 0.084068251 | 0.27255582  |
| 0.085647607 | 0.163441912 | 0.009305892 | 0.188028701 |
| 0.144710753 | 0.097472215 | 0.028757854 | 0.415438882 |
| 0.36341345  | 0.197511367 | 0.130950389 | 0.015465893 |
| 0.354927268 | 0.079420464 | 0.254901561 | 0.068825473 |
| 0.320895303 | 0.232236924 | 0.304334238 | 0.280274908 |
| 0.197088368 | 0.275027059 | 0.27139518  | 0.329243241 |
| 0.030638266 | 0.319977363 | 0.366899054 | 0.036231272 |
| 0.215383139 | 0.339997333 | 0.151987751 | 0.088298557 |
| 0.259622875 | 0.018476235 | 0.118392339 | 0.233927045 |
| 0.294401357 | 0.347660129 | 0.051384683 | 0.138283128 |
| 0.269524821 | 0.153403307 | 0.056179866 | 0.154102429 |
| 0.183286129 | 0.106431425 | 0.102669182 | 0.243479627 |
| 0.334094637 | 0.160480373 | 0.368614737 | 0.064913438 |
| 0.328690551 | 0.055543704 | 0.32347142  | 0.105216287 |
| 0.177859124 | 0.219796709 | 0.333113193 | 0.130448991 |
| 0.034768321 | 0.175637728 | 0.242789013 | 0.296141423 |
| 0.058932265 | 0.13526595  | 0.110948177 | 0.118647888 |
| 0.389024076 | 0.161347901 | 0.154700908 | 0.182848017 |
| 0.288081239 | 0.03230223  | 0.392913838 | 0.211911574 |
| 0.342658349 | 0.133012536 | 0.289620845 | 0.009248777 |
| 0.229993661 | 0.088086413 | 0.188415874 | 0.118250672 |
| 0.380887462 | 0.079184793 | 0.186407189 | 0.145192814 |

|               |             |             |             |
|---------------|-------------|-------------|-------------|
| 0.073071786   | 0.006151184 | 0.259018782 | 0.103989779 |
| 0.18648141    | 0.13974933  | 0.188872233 | 0.053502469 |
| 0.412113359   | 0.218371192 | 0.355087911 | 0.103735362 |
| 0.151983482   | 0.003047715 | 0.070326346 | 0.045841067 |
| 0.32793458    | 0.258862252 | 0.258338222 | 0.231835512 |
| 0.22562212    | 0.180398649 | 0.213840477 | 0.118185979 |
| 0.320799378   | 0.082511621 | 0.406866723 | 0.178038169 |
| 0.287939428   | 0.186928801 | 0.139115142 | 0.154217662 |
| 0.070940182   | 0.084310993 | 0.073981995 | 0.196378968 |
| 0.345401486   | 0.123458527 | 0.12842611  | 0.251659359 |
| 0.030919733   | 0.145358369 | 0.283825803 | 0.260144082 |
| 0.204714981   | 0.276753956 | 0.169159497 | 0.269702763 |
| 0.218006439   | 0.241193291 | 0.015099678 | 0.013513523 |
| 0.090391921   | 0.108052916 | 0.385525124 | 0.342365695 |
| 0.38791738    | 0.174167329 | 0.071805559 | 0.137805132 |
| 0.046847816   | 0.327452508 | 0.114503204 | 0.034454526 |
| 0.180673735   | 0.181876409 | 0.001567866 | 0.223158074 |
| 0.257475863   | 0.142700177 |             |             |
| 1700025G04RIK | 0.375632201 | 1           | 0.121982546 |
| 0.044518083   | 0.182005494 | 0.345260946 | 0.334664832 |
| 0.377618339   | 0.184132584 | 0.226223973 | 0.428882697 |
| 0.00280325    | 0.369569186 | 0.028015598 | 0.117239978 |
| 0.494342756   | 0.507030841 | 0.444639852 | 0.492416407 |
| 0.371813322   | 0.21967205  | 0.430054954 | 0.464115204 |
| 0.372780868   | 0.00355889  | 0.208738938 | 0.088765615 |
| 0.367219398   | 0.473375985 | 0.303328781 | 0.374731273 |
| 0.4366969     | 0.44110761  | 0.468604724 | 0.383260346 |
| 0.261845699   | 0.496983136 | 0.129147574 | 0.43317781  |
| 0.361748351   | 0.333965438 | 0.453409105 | 0.031036201 |
| 0.005463975   | 0.180505824 | 0.334872734 | 0.456493748 |
| 0.364619471   | 0.325665086 | 0.265231123 | 0.274658536 |
| 0.157340844   | 0.451447802 | 0.423335833 | 0.155525353 |
| 0.489154446   | 0.008351758 | 0.50126654  | 0.279979899 |
| 0.124258595   | 0.407794486 | 0.382035548 | 0.471527227 |
| 0.361208451   | 0.496803761 | 0.513469764 | 0.076776276 |
| 0.139265963   | 0.46220272  | 0.409571264 | 0.489510787 |
| 0.497914759   | 0.40268152  | 0.405356721 | 0.374781511 |
| 0.459258492   | 0.389273034 | 0.387739436 | 0.265874588 |
| 0.002238888   | 0.245280901 | 0.40457045  | 0.346478695 |
| 0.389153938   | 0.454272495 | 0.414246535 | 0.329873638 |
| 0.455347022   | 0.041220372 | 0.454844595 | 0.516951881 |
| 0.03925826    | 0.409479323 | 0.018178344 | 0.237467361 |
| 0.447372322   | 0.433451722 | 0.448366999 | 0.142380925 |
| 0.029758678   | 0.19737711  | 0.172743195 | 0.362842518 |
| 0.465214699   | 0.503990076 | 0.486881373 | 0.131448782 |
| 0.323142058   | 0.245693368 | 0.453638571 | 0.502326822 |
| 0.478446711   | 0.015040994 | 0.228284847 | 0.331262762 |
| 0.387230202   | 0.205508408 | 0.341970949 | 0.045396563 |
| 0.022128928   | 0.024424429 | 0.441888054 | 0.244236637 |
| 0.179657866   | 0.311832861 | 0.131454395 | 0.488483751 |
| 0.364143449   | 0.404274569 | 0.199765348 | 0.368515555 |
| 0.439425669   | 0.368605533 | 0.477964761 | 0.47694263  |
| 0.420853393   | 0.329651853 | 0.233606858 | 0.511742593 |
| 0.476107865   | 0.127407869 | 0.146639769 | 0.424403728 |

|             |             |                      |             |
|-------------|-------------|----------------------|-------------|
| 0.348663778 | 0.476873018 | 0.528411105          | 0.370746616 |
| 0.365135596 | 0.342312141 | 0.390551596          | 0.480046665 |
| 0.355141621 | 0.395069915 | 0.086501685          | 0.444734639 |
| 0.484367996 | 0.044941375 | 0.124977034          | 0.450467437 |
| 0.082180707 | 0.355171041 | 0.4903883            | 0.507438568 |
| 0.482299079 | 0.0750946   | 0.330572722          | 0.377328781 |
| 0.390338008 | 0.359595305 | 0.470357473          | 0.306698755 |
| 0.409308648 | 0.392794591 | 0.097067013          | 0.33998284  |
| 0.208471669 | 0.414418459 | 0.314260934          | 0.090640226 |
| 0.41663089  | 0.391892194 | 0.502798205          | 0.463695045 |
| 0.420615774 | 0.006961508 | 0.222615905          | 0.404514902 |
| 0.368779737 | 0.365305965 | 0.511698736          | 0.195174559 |
| 0.347462529 | 0.333491879 | 0.231234443          | 0.420662836 |
| 0.406609201 | 0.324228962 | 0.289653 0.001739323 |             |
| 0.226834951 | 0.391300406 | 0.47124094           | 0.085460712 |
| 0.335872923 | 0.180152427 | 0.142361753          | 0.497992328 |
| 0.306297125 | 0.482869959 | 0.040559943          | 0.159337992 |
| 0.357250123 | 0.504345688 | 0.436528739          | 0.311481976 |
| 0.511856341 | 0.401989387 | 0.389506856          | 0.471754737 |
| 0.373782506 | 0.447039113 | 0.169944008          | 0.367743942 |
| 0.452797204 | 0.498679528 | 0.453350708          | 0.485589406 |
| 0.37563742  | 0.391821099 | 0.316867776          | 0.379790581 |
| 0.443079012 | 0.457149694 | 0.146419281          | 0.506268595 |
| 0.001688757 | 0.436818286 | 0.496943399          | 0.177584465 |
| 0.511898116 | 0.352209009 | 0.124322735          | 0.317961404 |
| 0.501132273 | 0.506079032 | 0.432547591          | 0.410773089 |
| 0.248500815 | 0.019086356 | 0.472276373          | 0.484647499 |
| 0.48169689  | 0.484349561 | 0.36059074           | 0.085352008 |
| 0.487853229 | 0.342783703 | 0.475803431          | 0.424174864 |
| 0.478460453 | 0.406424713 | 0.340942934          | 0.357376896 |
| 0.021221015 | 0.346752325 | 0.441948378          | 0.261377187 |
| 0.398124711 | 0.266439736 | 0.50394689           | 0.421996175 |
| 0.444757386 | 0.333929094 | 0.413339887          | 0.148682861 |
| 0.278352036 | 0.508090715 | 0.0517131            | 0.463843672 |
| 0.517938363 | 0.446230891 | 0.49895083           | 0.505589374 |
| 0.399626356 | 0.479801443 | 0.500401029          | 0.403337183 |
| 0.001669412 | 0.390249004 | 0.368757216          | 0.437771073 |
| 0.446396206 | 0.39557236  | 0.239737532          | 0.413886339 |
| 0.002687736 | 0.243946696 | 0.265151431          | 0.492432581 |
| 0.490944494 | 0.061941313 | 0.050407723          | 0.501548012 |
| 0.383500243 | 0.050656766 | 0.523936876          | 0.434161794 |
| 0.514244081 | 0.491132903 | 0.274577982          | 0.391681698 |
| 0.22006173  | 0.401185181 | 0.055615336          | 0.501445496 |
| 0.449312466 | 0.100286948 | 0.140829888          | 0.508611199 |
| 0.478092376 | 0.481107157 | 0.359755816          | 0.019166726 |
| 0.343657835 | 0.25440521  | 0.497687069          | 0.177803674 |
| 0.475262429 | 0.458997797 | 0.507750824          | 0.432921018 |
| 0.491820276 | 0.490798159 | 0.464497837          | 0.499132634 |
| 0.144509591 | 0.40181526  | 0.420679299          | 0.098524966 |
| 0.380618041 | 0.49067094  | 0.466101013          | 0.278919919 |
| 0.445627877 | 0.128146466 | 0.306723427          | 0.361649711 |
| 0.511402294 | 0.48688142  | 0.112327057          | 0.232737997 |
| 0.490384364 | 0.401377807 | 0.193476419          | 0.42580168  |
| 0.380975494 | 0.16727783  | 0.147547119          | 0.459671078 |

|               |             |             |             |
|---------------|-------------|-------------|-------------|
| 0.505821115   | 0.399760196 | 0.467162379 | 0.230191077 |
| 0.456183218   | 0.092812026 | 0.448403159 | 0.368667066 |
| 0.375288871   | 0.399791327 | 0.346274293 | 0.12390413  |
| 0.043843233   | 0.183894392 | 0.486158925 | 0.483943534 |
| 0.137791992   | 0.284437729 | 0.360795596 | 0.44882333  |
| 0.480128496   | 0.443127973 | 0.379080198 | 0.411070184 |
| 0.479709549   | 0.160393108 | 0.493609792 | 0.413775493 |
| 0.461934197   | 0.435735925 | 0.495912418 | 0.015116743 |
| 0.462791471   | 0.25783629  | 0.218302363 | 0.45523851  |
| 0.414017249   | 0.217201818 | 0.478868502 | 0.248352526 |
| 0.213530111   | 0.005549071 | 0.433115282 | 0.372254512 |
| 0.38506376    | 0.290649595 | 0.431179364 | 0.159364    |
| 0.530800412   | 0.455774862 | 0.452782402 | 0.285755486 |
| 0.45970636    | 0.024382708 | 0.244460656 | 0.06458602  |
| 0.450397826   | 0.467178584 | 0.438587454 | 0.40413     |
| 0.230680037   | 0.502365544 | 0.477710247 | 0.477517679 |
| 0.493735556   | 0.184784918 | 0.50621648  | 0.374801435 |
| 0.342581843   | 0.444979045 | 0.366180222 | 0.408063579 |
| 0.305853474   | 0.180335597 | 0.209140488 | 0.218419036 |
| 0.468139924   | 0.377982887 | 0.478334218 | 0.352105206 |
| 0.092189253   | 0.473258427 | 0.425341552 | 0.435501519 |
| 0.485940781   | 0.386909451 | 0.388228286 | 0.471760907 |
| 0.340140348   | 0.362553148 | 0.084696476 | 0.063562716 |
| 0.314749753   | 0.291970478 | 0.430795343 | 0.469975977 |
| 0.495300611   | 0.296156139 | 0.170988284 | 0.208917362 |
| 0.125731481   | 0.361380316 | 0.382118294 | 0.186972931 |
| 0.487835324   | 0.327394016 | 0.001236284 | 0.287201894 |
| 0.465131328   | 0.424217505 |             |             |
| 2610524H06RIK | 0.054224787 | 0.121982546 | 1           |
| 0.002891889   | 0.025501247 | 0.29499502  | 0.212234154 |
| 0.037597271   | 0.051827543 | 0.061980204 | 0.274751405 |
| 0.005850027   | 0.025437407 | 0.04530976  | 0.031806106 |
| 0.07247626    | 0.068371961 | 0.13083719  | 0.072789535 |
| 0.086432355   | 0.010377462 | 0.170814149 | 0.12718468  |
| 0.21962761    | 0.013677278 | 0.163738173 | 0.009778719 |
| 0.020557701   | 0.05741443  | 0.229051814 | 0.038865919 |
| 0.061443927   | 0.041559441 | 0.01894233  | 0.007982696 |
| 0.001424185   | 0.176242123 | 0.000454133 | 0.029965567 |
| 0.028499351   | 0.103113443 | 0.046989012 | 0.028070767 |
| 3.05E-05      | 0.181097425 | 0.020129117 | 0.149829544 |
| 0.083935171   | 0.290985982 | 0.273713775 | 0.125039393 |
| 0.000480746   | 0.2389709   | 0.107586828 | 0.000481429 |
| 0.212344937   | 0.000481505 | 0.176867458 | 0.038003142 |
| 0.176549822   | 0.108697524 | 0.023174476 | 0.105678706 |
| 0.295397367   | 0.202249378 | 0.09350702  | 0.045495781 |
| 0.269472917   | 0.040134774 | 0.0312734   | 0.06838474  |
| 0.109799868   | 0.023615171 | 0.039906322 | 0.008357513 |
| 0.039388434   | 0.033824241 | 0.244147045 | 0.098051295 |
| 0.004349083   | 0.205014045 | 0.017403649 | 0.042689618 |
| 0.017288154   | 0.248434518 | 0.050041207 | 0.073780263 |
| 0.035052034   | 0.067661699 | 0.145406785 | 0.084447853 |
| 0.008478208   | 0.037099877 | 0.002336139 | 0.061852308 |
| 0.061898154   | 0.039398699 | 0.079538211 | 0.080414387 |
| 0.053780935   | 0.13694625  | 0.012947537 | 0.024163669 |

|             |             |             |             |
|-------------|-------------|-------------|-------------|
| 0.077550795 | 0.052906343 | 0.203453728 | 0.001157563 |
| 0.017299743 | 0.031475528 | 0.053012347 | 0.178667179 |
| 0.095535676 | 0.033375973 | 0.07190882  | 0.311999462 |
| 0.005575756 | 0.007998281 | 0.235193494 | 0.00135893  |
| 0.013562457 | 0.006284301 | 0.054911828 | 0.143115602 |
| 0.117910307 | 0.23315684  | 0.029869742 | 0.043083707 |
| 0.029707313 | 0.049078943 | 0.032338791 | 0.166500165 |
| 0.030203536 | 0.205505776 | 0.041168647 | 0.050135038 |
| 0.013483632 | 0.055432628 | 0.199672304 | 0.13089945  |
| 0.194034201 | 0.074158899 | 0.088305391 | 0.244264989 |
| 0.017941047 | 0.074000224 | 0.098208636 | 0.03547699  |
| 0.053546938 | 0.190880405 | 0.023450676 | 0.140684816 |
| 0.237654505 | 0.096093126 | 0.000884659 | 0.219630471 |
| 0.228370045 | 0.001526728 | 0.17493996  | 0.061495658 |
| 0.003580016 | 0.021359213 | 0.153104957 | 0.083460126 |
| 0.047797654 | 0.00824858  | 0.079443001 | 0.191096328 |
| 0.180259516 | 0.189882664 | 0.096055204 | 0.053288784 |
| 0.236882029 | 0.023868662 | 0.17539073  | 0.018294258 |
| 0.284896507 | 0.165023905 | 0.002671799 | 0.001949711 |
| 0.052446894 | 0.050933478 | 0.106615535 | 0.072247191 |
| 0.047756046 | 0.000531038 | 0.063722077 | 0.068762682 |
| 0.020354614 | 0.035445999 | 0.138778275 | 0.300482473 |
| 0.240436554 | 0.004822113 | 0.274419478 | 0.03331231  |
| 0.077753772 | 0.021584991 | 0.021717408 | 0.011904672 |
| 0.048381964 | 0.014566696 | 0.045791262 | 0.057749258 |
| 0.050766523 | 0.05631814  | 0.012887564 | 0.089619246 |
| 0.278643453 | 0.052028295 | 0.024932851 | 0.003541912 |
| 0.133043999 | 0.129199735 | 0.020554605 | 0.013899861 |
| 0.084009333 | 0.059989719 | 0.028626014 | 0.208297553 |
| 0.025451547 | 0.243768576 | 0.000955011 | 0.095544372 |
| 0.027414396 | 0.075526733 | 0.045261285 | 0.064207743 |
| 0.154222042 | 0.062752408 | 0.004655181 | 0.306485241 |
| 0.095286619 | 0.07915684  | 0.157873112 | 0.125565599 |
| 0.008061885 | 0.190533298 | 0.050514101 | 0.00111723  |
| 0.131249351 | 0.249749707 | 0.186720898 | 0.124280201 |
| 0.075681398 | 0.127194803 | 0.089569439 | 0.039823299 |
| 0.003995525 | 0.039596076 | 0.108726194 | 0.147757655 |
| 0.055451452 | 0.065957125 | 0.005181357 | 0.001996551 |
| 0.087957222 | 0.028317776 | 0.083995703 | 0.03675511  |
| 0.034262863 | 0.011539595 | 0.18805212  | 0.045975069 |
| 0.000954797 | 0.122947263 | 0.049415728 | 0.008544336 |
| 0.043683838 | 0.024163392 | 0.075977766 | 0.24676395  |
| 0.013071634 | 0.008510527 | 0.014353275 | 0.199423824 |
| 0.270045277 | 0.122696826 | 0.000180627 | 0.113644912 |
| 0.089049768 | 0.106955689 | 0.081949693 | 0.089698049 |
| 0.158387908 | 0.20047391  | 0.098750602 | 0.051070629 |
| 0.003502066 | 0.03006763  | 0.018910858 | 0.268873902 |
| 0.053506755 | 0.237429698 | 0.01387507  | 0.011521865 |
| 0.00294677  | 0.288913434 | 0.00181945  | 0.151072737 |
| 0.068823848 | 0.051984147 | 5.34E-05    | 0.084955608 |
| 0.019191734 | 0.00131054  | 0.111283684 | 0.134083963 |
| 0.112891482 | 0.063217218 | 0.188351206 | 0.025126302 |
| 0.001124312 | 0.022554484 | 0.009365877 | 0.082008691 |
| 0.024494645 | 0.001476234 | 0.023597092 | 0.088803694 |



|               |             |             |             |
|---------------|-------------|-------------|-------------|
| 0.119026718   | 0.170799059 | 0.244908619 | 0.00614411  |
| 0.029889368   | 0.005299571 | 0.065158396 | 0.062864902 |
| 0.139550971   | 0.214970509 | 0.141691257 | 0.035419017 |
| 0.060895654   | 0.190926562 | 0.233664225 | 0.104874971 |
| 0.00196179    | 0.034370274 | 0.047961568 | 0.059711911 |
| 0.027219705   | 0.074551572 | 0.039553795 | 0.311897759 |
| 0.157684889   | 0.002087274 | 0.332820086 | 0.069340418 |
| 0.146820991   | 0.07111847  | 0.153589735 | 0.092540235 |
| 0.190464792   | 0.080287513 | 0.215960139 | 0.094062135 |
| 0.279746293   | 0.000736036 | 0.001835429 | 0.184535138 |
| 0.172841705   | 0.279272133 | 0.071639803 | 0.019947488 |
| 0.054352519   | 0.105196416 | 0.075562192 | 0.03168624  |
| 0.206656996   | 0.027065978 | 0.025986383 | 0.003108815 |
| 0.007754982   | 0.053686908 | 0.185236414 | 0.208301339 |
| 0.243590625   | 0.269642761 | 0.187839068 | 0.125352519 |
| 0.063582025   | 0.016281996 | 0.280865787 | 0.104940003 |
| 0.229282285   | 0.008167138 | 0.156222321 | 0.137513291 |
| 0.129221109   | 0.082393316 | 0.082320196 | 0.001495714 |
| 0.038204365   | 0.07387145  | 0.020455991 | 0.076131986 |
| 0.035633486   | 0.23056502  | 0.158971286 | 0.150921565 |
| 0.00659766    | 0.005908955 | 0.181298067 | 0.008112085 |
| 0.317684308   | 0.006498158 | 0.099833035 | 0.000284065 |
| 0.12927482    | 0.096440686 | 0.087572627 | 0.004775053 |
| 0.069127696   | 3.47E-05    | 0.079398585 | 0.077691868 |
| 0.141498077   | 0.187846881 | 0.054844287 | 0.040974449 |
| 0.027405644   | 0.060418096 | 0.166491012 | 0.043097984 |
| 0.07045475    | 0.00448184  | 0.076200239 | 0.06291436  |
| 0.019840989   | 0.019638894 | 0.262029486 | 0.020890411 |
| 0.14233085    | 0.009337492 | 0.187170172 | 0.052795483 |
| 0.05693404    | 0.01844604  | 0.081038372 | 0.021319903 |
| 0.082724763   | 0.06236409  | 0.045639884 | 0.032239352 |
| 0.075933467   | 0.028417541 | 0.020376911 | 0.233228671 |
| 0.007571825   | 0.073626678 | 0.003344375 | 0.006229714 |
| 0.003633304   | 0.17275697  | 0.094792041 | 0.095706949 |
| 0.076044394   | 0.005648804 | 0.187712798 | 0.151265063 |
| 0.000489229   | 0.036367172 | 0.218016776 | 0.001297919 |
| 0.060673781   | 0.008143518 | 0.007671583 | 0.058293861 |
| 0.193865729   | 0.006046771 |             |             |
| 4930486L24RIK | 0.008077512 | 0.044518083 | 0.002891889 |
| 1             | 0.008303668 | 0.02818134  | 0.03677235  |
| 0.007933882   | 0.000783031 | 0.042607755 | 0.039809304 |
| 1.57E-07      | 0.01874573  | 1.47E-05    | 6.87E-05    |
| 0.035778511   | 0.030931434 | 0.02781784  | 0.005515495 |
| 0.023234568   | 0.015257082 | 0.056169674 | 0.022670082 |
| 4.53E-07      | 0.043443297 | 0.081428535 | 0.006140573 |
| 0.030250975   | 0.006942736 | 0.013613421 | 0.026831496 |
| 0.0394095     | 0.019605352 | 0.010269907 | 0.022708552 |
| 0.041611395   | 0.000378757 | 0.032870997 | 0.016506487 |
| 0.042506012   | 0.033045094 | 1.29E-05    | 0.052840119 |
| 0.015522812   | 0.005374325 | 0.022254314 | 0.003519013 |
| 0.025237262   | 0.006215747 | 0.055204502 | 0.00091348  |
| 0.032776102   | 0.013605224 | 0.006303734 | 0.047891485 |
| 0.074362175   | 0.042675621 | 0.00194815  | 0.002321402 |
| 0.005745377   | 0.007210615 | 0.020805628 | 0.030782403 |

|             |             |             |             |
|-------------|-------------|-------------|-------------|
| 0.049355012 | 0.038341925 | 0.001674012 | 0.008797274 |
| 0.011388292 | 0.03098254  | 0.08497806  | 0.036506691 |
| 0.016264546 | 0.00977546  | 0.009064368 | 0.029843022 |
| 0.020953818 | 0.012590211 | 0.002653364 | 2.17E-06    |
| 0.039212324 | 0.056574462 | 0.007316564 | 0.025042845 |
| 0.036993924 | 0.01149189  | 0.023893065 | 0.033267523 |
| 0.000106651 | 0.020461442 | 0.03949568  | 0.003863327 |
| 0.016318432 | 0.000727126 | 0.00117084  | 0.025098017 |
| 0.025772256 | 0.019833835 | 0.007565227 | 2.79E-05    |
| 0.001137715 | 0.000222064 | 0.018166613 | 0.011315115 |
| 0.023102734 | 0.040385934 | 0.000626634 | 0.018400664 |
| 0.001030468 | 0.007986732 | 0.053386775 | 0.036230866 |
| 6.34E-06    | 0.000791999 | 0.025749978 | 0.002578284 |
| 0.006192011 | 0.024661679 | 0.000572361 | 0.001588643 |
| 2.21E-06    | 0.027926656 | 0.002545332 | 0.03501229  |
| 0.032376049 | 0.022012991 | 0.063243555 | 0.005634375 |
| 0.016600613 | 0.008172505 | 0.035111424 | 0.034917088 |
| 0.040500946 | 0.071220587 | 0.032746498 | 0.021171666 |
| 0.001589958 | 0.005272827 | 0.044655048 | 0.026170252 |
| 0.002064878 | 0.001702976 | 0.033808744 | 0.01955654  |
| 0.034492547 | 0.039477821 | 0.00253348  | 0.039092281 |
| 0.00600226  | 0.022114995 | 0.072798002 | 0.019592562 |
| 0.005687004 | 5.31E-05    | 0.020780356 | 0.04506549  |
| 0.000568652 | 0.002759164 | 0.018845519 | 0.022420322 |
| 0.003601894 | 0.03653958  | 0.036927303 | 0.018566236 |
| 0.065855335 | 0.093816095 | 0.037869447 | 0.010387136 |
| 0.043613137 | 0.015168524 | 0.081377792 | 0.019612957 |
| 0.035231326 | 0.004927281 | 0.019786421 | 0.007822165 |
| 0.010545746 | 0.002570928 | 0.000146506 | 0.009968366 |
| 0.003920267 | 0.048129554 | 0.014298109 | 0.017397672 |
| 0.189692334 | 0.061391086 | 0.010908199 | 0.012872844 |
| 0.015199224 | 0.054036076 | 0.006224687 | 0.007913427 |
| 0.002392961 | 0.005500382 | 0.024091842 | 0.012667889 |
| 0.011966799 | 0.01170039  | 2.34E-05    | 0.002459245 |
| 0.041762419 | 0.009566493 | 0.000117862 | 0.036056915 |
| 0.001259803 | 5.76E-05    | 0.04316552  | 0.015768086 |
| 0.041737225 | 6.02E-06    | 0.000283971 | 0.014927422 |
| 0.053401728 | 0.057217401 | 0.001524188 | 0.055598324 |
| 0.024277489 | 0.022269421 | 0.028947738 | 0.007780806 |
| 0.05156522  | 0.000159552 | 0.003503302 | 0.024364127 |
| 0.042022868 | 0.043430718 | 0.034304013 | 0.017565677 |
| 0.007999159 | 0.001429452 | 0.024613449 | 0.013399288 |
| 0.010915585 | 0.002270001 | 0.039563128 | 7.53E-07    |
| 0.019010596 | 0.045858456 | 0.000230567 | 0.057814381 |
| 0.042750354 | 0.001580224 | 0.003428208 | 0.029634547 |
| 0.036556812 | 0.015834337 | 0.031027076 | 0.000561226 |
| 5.68E-06    | 0.0253489   | 0.026448008 | 0.032059416 |
| 0.014813658 | 0.020104173 | 1.58E-05    | 0.041636399 |
| 0.005421353 | 0.0350289   | 0.023468    | 0.025150611 |
| 0.011350064 | 0.00566831  | 0.006569787 | 9.79E-06    |
| 0.026830437 | 0.03934802  | 0.00860379  | 0.060479456 |
| 0.000691955 | 0.044697448 | 0.019399434 | 0.022199882 |
| 0.007427012 | 0.061217862 | 0.014308741 | 0.011007104 |
| 0.044778222 | 0.000164793 | 0.022696974 | 0.037681941 |

|               |             |             |             |
|---------------|-------------|-------------|-------------|
| 0.009192139   | 0.055902398 | 0.033210069 | 0.012597491 |
| 0.037930155   | 0.043391722 | 0.01624011  | 1.71E-07    |
| 0.028243204   | 0.022910593 | 0.024321387 | 0.04328641  |
| 0.021288669   | 0.001455849 | 0.018113175 | 1.84E-07    |
| 0.007410411   | 0.035157215 | 0.030846512 | 0.0493443   |
| 0.000531145   | 0.000152005 | 0.038338071 | 0.023766206 |
| 6.96E-05      | 0.03913121  | 0.045681876 | 0.056723762 |
| 0.023888429   | 0.032410598 | 0.026105934 | 0.01571063  |
| 0.003343208   | 0.001804507 | 0.065217452 | 0.010517419 |
| 1.43E-05      | 0.06991679  | 0.030338746 | 0.037445165 |
| 0.038139666   | 0.014001038 | 0.002397572 | 0.014086768 |
| 0.141181213   | 0.062892036 | 0.000659176 | 0.026274945 |
| 0.028242875   | 0.042365231 | 0.027313553 | 0.020371159 |
| 0.045560224   | 0.040408153 | 0.044489876 | 0.013491796 |
| 0.033104831   | 0.030886851 | 0.001891049 | 0.012227574 |
| 0.043287883   | 0.066463015 | 0.027660375 | 0.015464719 |
| 0.035271355   | 0.019690868 | 0.004601167 | 0.053797032 |
| 0.047694505   | 0.004452383 | 0.000969925 | 0.051537594 |
| 0.004809321   | 0.01040495  | 0.007293203 | 0.016665269 |
| 0.002790015   | 0.000117272 | 0.019242898 | 0.04994209  |
| 0.037402004   | 0.044947503 | 0.089802688 | 0.033127667 |
| 0.000465085   | 0.017352883 | 0.003370712 | 0.009469624 |
| 0.031080688   | 0.017958125 | 0.000248117 | 0.002293717 |
| 0.000890738   | 0.055595124 | 0.038277343 | 0.005453564 |
| 0.006884804   | 0.045759148 | 0.064413005 | 0.038248623 |
| 0.021427283   | 0.021899618 | 0.007557613 | 0.038588812 |
| 0.029314626   | 0.035544875 | 0.010934239 | 0.02154763  |
| 0.038037385   | 0.029290323 | 5.62E-05    | 0.027449797 |
| 0.061848598   | 0.001171132 | 0.087418647 | 0.021742934 |
| 0.012592335   | 0.044867676 | 0.002996594 | 0.001929876 |
| 3.88E-06      | 0.013590345 | 0.02721704  | 0.02780087  |
| 0.001781246   | 0.009021546 | 0.006782837 | 0.039869535 |
| 0.020619085   | 0.026200778 | 0.002267918 | 0.053889001 |
| 0.000732647   | 0.046838605 | 0.000269142 | 0.017903324 |
| 0.020853226   | 0.012139094 | 0.012468778 | 0.000761093 |
| 0.033982616   | 0.026396114 | 0.051872541 | 0.048853103 |
| 0.007052381   | 0.041570975 | 0.002498248 | 0.020969367 |
| 0.005341905   | 0.015550952 | 0.001885305 | 0.028594079 |
| 9.28E-05      | 0.005072806 | 0.000485932 | 0.047136722 |
| 0.001637246   | 0.057873668 | 0.004448062 | 0.004810923 |
| 0.023889341   | 0.015549807 | 0.027714674 | 0.050931851 |
| 0.024230346   | 0.007930391 | 0.035593083 | 0.001350558 |
| 0.003940903   | 0.20273503  | 0.01608988  | 0.023347841 |
| 0.02117753    | 0.015554317 | 0.024006928 | 0.033245569 |
| 0.000875572   | 0.004352724 | 0.001412981 | 0.000167663 |
| 0.013471278   | 0.048939043 | 0.007473614 | 0.017170763 |
| 0.001793932   | 2.78E-05    | 0.001434952 | 0.025912078 |
| 0.00849231    |             |             |             |
| 4930503L19RIK | 0.032177895 | 0.182005494 | 0.025501247 |
| 0.008303668   | 1           | 0.193046665 | 0.274766315 |
| 0.028742509   | 0.012594435 | 0.056630923 | 0.24947301  |
| 3.06E-05      | 0.067406607 | 0.001190168 | 0.009935306 |
| 0.112236717   | 0.124943415 | 0.260118399 | 0.120140145 |
| 0.039879509   | 0.013820893 | 0.104649526 | 0.128459039 |

|             |             |             |             |
|-------------|-------------|-------------|-------------|
| 0.169289429 | 0.000100494 | 0.210031575 | 0.012833018 |
| 0.025745265 | 0.100529943 | 0.09858095  | 0.029666598 |
| 0.085114737 | 0.105649593 | 0.040542202 | 0.043777943 |
| 0.01427331  | 0.207020084 | 0.005606825 | 0.101057082 |
| 0.0582042   | 0.170493222 | 0.100855181 | 0.002331658 |
| 0.00053677  | 0.138144475 | 0.01847912  | 0.104515928 |
| 0.045109878 | 0.164046893 | 0.113719361 | 0.190449147 |
| 0.001205233 | 0.222029952 | 0.084938884 | 0.002250646 |
| 0.277068913 | 0.001050393 | 0.225514934 | 0.012519183 |
| 0.054013351 | 0.074920068 | 0.024782333 | 0.09299456  |
| 0.258858019 | 0.264710608 | 0.160446933 | 0.020259423 |
| 0.10325193  | 0.053685557 | 0.063689757 | 0.142516921 |
| 0.150149637 | 0.022227565 | 0.058239386 | 0.038078075 |
| 0.079162619 | 0.063389708 | 0.171454995 | 0.057034514 |
| 5.76E-05    | 0.237193232 | 0.088569851 | 0.03519351  |
| 0.052311116 | 0.230811329 | 0.047570377 | 0.138877247 |
| 0.049979749 | 0.006143801 | 0.119053762 | 0.144935205 |
| 0.004794643 | 0.075751297 | 0.002533634 | 0.034861073 |
| 0.087568775 | 0.074838912 | 0.071352452 | 0.04532559  |
| 0.004280099 | 0.036751406 | 0.001676143 | 0.052985444 |
| 0.069627908 | 0.082851149 | 0.258144942 | 0.003718882 |
| 0.050945011 | 0.007080873 | 0.076641548 | 0.218074915 |
| 0.125827923 | 0.002659064 | 0.019847305 | 0.220694822 |
| 0.011660746 | 0.016598312 | 0.251098468 | 0.000643584 |
| 0.003208002 | 0.000360284 | 0.092267284 | 0.035406315 |
| 0.132294277 | 0.18707714  | 0.028787184 | 0.132636137 |
| 0.023973273 | 0.069694859 | 0.136472349 | 0.185601371 |
| 0.083373133 | 0.273429482 | 0.14017836  | 0.099402251 |
| 0.095981567 | 0.021864102 | 0.05509773  | 0.232409546 |
| 0.186522712 | 0.02648929  | 0.01661695  | 0.181648259 |
| 0.057860912 | 0.114825738 | 0.152097831 | 0.01932283  |
| 0.207927662 | 0.092878213 | 0.023160223 | 0.215874438 |
| 0.247341797 | 0.065234426 | 0.001106344 | 0.210326455 |
| 0.258196217 | 0.001076356 | 0.045268348 | 0.087781351 |
| 0.055683195 | 0.036176248 | 0.16570161  | 0.154067761 |
| 0.109420426 | 0.009464052 | 0.094576841 | 0.170157928 |
| 0.092317428 | 0.165787887 | 0.093376856 | 0.064615245 |
| 0.145362168 | 0.026617326 | 0.068169945 | 0.055175656 |
| 0.115435775 | 0.097843356 | 0.00413603  | 0.001688273 |
| 0.056924369 | 0.036314195 | 0.152809919 | 0.076434369 |
| 0.05715314  | 0.0020811   | 0.054683113 | 0.044577874 |
| 0.01431896  | 0.064536603 | 0.215197776 | 0.118972338 |
| 0.107643255 | 0.016122337 | 0.105207855 | 0.160217526 |
| 0.075265028 | 0.01638351  | 0.018786465 | 0.000136455 |
| 0.031402931 | 0.024251542 | 0.064683694 | 0.003631572 |
| 0.116021917 | 0.008699724 | 0.002824874 | 0.145734441 |
| 0.149983166 | 0.145402984 | 0.001037349 | 0.003639885 |
| 0.077231789 | 0.245898739 | 0.039440869 | 0.004265348 |
| 0.18196513  | 0.040317546 | 0.058740329 | 0.197911791 |
| 0.099969766 | 0.222796886 | 0.001527498 | 0.049271457 |
| 0.070345326 | 0.153868186 | 0.096354697 | 0.148975874 |
| 0.11591386  | 0.0635875   | 0.005425582 | 0.185524491 |
| 0.077769406 | 0.095824335 | 0.025194373 | 0.191543336 |
| 0.000101882 | 0.160222844 | 0.111279142 | 0.001359041 |

|             |             |             |             |
|-------------|-------------|-------------|-------------|
| 0.208096251 | 0.302528323 | 0.030257262 | 0.040073136 |
| 0.12458711  | 0.19140256  | 0.095983656 | 0.077312822 |
| 0.0021169   | 0.001008902 | 0.132461922 | 0.154495693 |
| 0.103945292 | 0.107574274 | 0.055232025 | 0.001485322 |
| 0.149798985 | 0.034824452 | 0.092370583 | 0.04193337  |
| 0.107132611 | 0.05515085  | 0.106287314 | 0.044474572 |
| 0.000126939 | 0.062739459 | 0.061364769 | 0.010270373 |
| 0.05135438  | 0.007079333 | 0.156708486 | 0.216168777 |
| 0.06631166  | 0.005875774 | 0.053973924 | 0.129938308 |
| 0.177691289 | 0.174738188 | 0.002265904 | 0.126842067 |
| 0.14575351  | 0.1110067   | 0.159617025 | 0.133759231 |
| 0.076511158 | 0.250218927 | 0.154391603 | 0.077090105 |
| 5.77E-05    | 0.071093622 | 0.065550337 | 0.220173149 |
| 0.093166748 | 0.158969825 | 0.011494248 | 0.048384504 |
| 0.000273425 | 0.101562116 | 0.00819033  | 0.180797663 |
| 0.15502083  | 0.014198453 | 0.001506188 | 0.163353993 |
| 0.062700083 | 0.002148341 | 0.159518511 | 0.128193597 |
| 0.206074172 | 0.140647148 | 0.149338568 | 0.07017728  |
| 0.005557329 | 0.032278996 | 0.024384569 | 0.157100582 |
| 0.066687466 | 0.000513333 | 0.053538456 | 0.135256869 |
| 0.124475909 | 0.264501673 | 0.17270708  | 0.00064792  |
| 0.046743904 | 0.008997583 | 0.13503357  | 0.022343872 |
| 0.144622839 | 0.223531655 | 0.226240328 | 0.090168422 |
| 0.094972418 | 0.227859644 | 0.215010683 | 0.142814209 |
| 0.020177591 | 0.064503904 | 0.077010967 | 0.02297696  |
| 0.033570599 | 0.147836349 | 0.083731499 | 0.222544124 |
| 0.112327239 | 0.019344326 | 0.188967392 | 0.036634408 |
| 0.240704061 | 0.133538733 | 0.039745883 | 0.027767073 |
| 0.23947308  | 0.058658862 | 0.163607116 | 0.102175131 |
| 0.174744701 | 0.001026902 | 0.001768973 | 0.163629178 |
| 0.234603354 | 0.29128817  | 0.105579472 | 0.028831326 |
| 0.117815653 | 0.019497095 | 0.108469234 | 0.051232928 |
| 0.101095858 | 0.040987947 | 0.049275088 | 0.00069367  |
| 0.001049078 | 0.004639389 | 0.260540976 | 0.225664155 |
| 0.075004769 | 0.101491559 | 0.177283932 | 0.243209851 |
| 0.114806152 | 0.027047689 | 0.191332024 | 0.076762585 |
| 0.260271275 | 0.015554912 | 0.181135444 | 0.068707731 |
| 0.104873436 | 0.108392477 | 0.135077387 | 0.000449285 |
| 0.074372617 | 0.058040324 | 0.009837541 | 0.182693594 |
| 0.066520933 | 0.098384353 | 0.276709617 | 0.037957219 |
| 0.007339782 | 0.000423584 | 0.132827212 | 0.053988807 |
| 0.228253617 | 0.009728061 | 0.072885252 | 0.003097568 |
| 0.179829995 | 0.07162731  | 0.082636476 | 0.016941658 |
| 0.097012159 | 0.002582349 | 0.083159075 | 0.007371591 |
| 0.102632201 | 0.182792931 | 0.058916602 | 0.034031576 |
| 0.007851132 | 0.15922921  | 0.186974579 | 0.169275335 |
| 0.150180025 | 0.002475146 | 0.130698311 | 0.044176004 |
| 0.054606044 | 0.018396939 | 0.192966959 | 0.020168564 |
| 0.265690265 | 0.00402006  | 0.094774455 | 0.01029642  |
| 0.123433942 | 0.030242287 | 0.192356877 | 0.009964524 |
| 0.037069318 | 0.093166833 | 0.077549616 | 0.07374059  |
| 0.097954854 | 0.043868255 | 0.028021125 | 0.258352717 |
| 0.004979509 | 0.030170197 | 0.01107249  | 0.009445542 |
| 0.007866604 | 0.108570159 | 0.091752563 | 0.121756707 |

|               |             |             |             |
|---------------|-------------|-------------|-------------|
| 0.133270228   | 0.005407362 | 0.056716792 | 0.031199734 |
| 0.001766736   | 0.048449235 | 0.297125644 | 0.015672441 |
| 0.117289657   | 0.009271054 | 0.000288362 | 0.017076588 |
| 0.17064116    | 0.012022365 |             |             |
| 6330403K07RIK | 0.139266709 | 0.345260946 | 0.29499502  |
| 0.02818134    | 0.193046665 | 1           | 0.367568791 |
| 0.12051134    | 0.345525701 | 0.308294864 | 0.429744868 |
| 0.008896087   | 0.1121937   | 0.100583448 | 0.181644651 |
| 0.243370842   | 0.245293598 | 0.300197477 | 0.24333293  |
| 0.1925889     | 0.16890163  | 0.287725994 | 0.261781215 |
| 0.383532547   | 0.01876306  | 0.32698832  | 0.110716029 |
| 0.092035216   | 0.207035493 | 0.37939501  | 0.293830182 |
| 0.21156051    | 0.172714013 | 0.178986008 | 0.152000028 |
| 0.042862686   | 0.398346474 | 0.017443416 | 0.133390069 |
| 0.127187785   | 0.323744862 | 0.183884512 | 0.118912327 |
| 0.001087946   | 0.342101147 | 0.085880489 | 0.278314538 |
| 0.217356381   | 0.394869616 | 0.37137986  | 0.327653807 |
| 0.018312712   | 0.414670958 | 0.239130123 | 0.016006607 |
| 0.439592581   | 0.007172987 | 0.418017012 | 0.124881919 |
| 0.324487841   | 0.304279854 | 0.112559924 | 0.24379326  |
| 0.41761092    | 0.435517387 | 0.29717421  | 0.227893876 |
| 0.35443513    | 0.148647857 | 0.134936789 | 0.199948164 |
| 0.309352936   | 0.212144106 | 0.319459015 | 0.073114568 |
| 0.155847162   | 0.135248367 | 0.355309557 | 0.320794644 |
| 0.009348564   | 0.356996674 | 0.158690324 | 0.126618518 |
| 0.080467342   | 0.425538826 | 0.131942893 | 0.326566735 |
| 0.13093445    | 0.191941426 | 0.26143243  | 0.276843549 |
| 0.056200293   | 0.143287454 | 0.015654967 | 0.294987123 |
| 0.197676601   | 0.164914414 | 0.205525077 | 0.344176318 |
| 0.128123202   | 0.30171611  | 0.089067054 | 0.113822523 |
| 0.204141958   | 0.184815122 | 0.432806461 | 0.014703959 |
| 0.089229785   | 0.274574814 | 0.279248117 | 0.408542151 |
| 0.285472466   | 0.047182766 | 0.268863942 | 0.385654703 |
| 0.137392782   | 0.148150188 | 0.369147402 | 0.012538947 |
| 0.032893993   | 0.015007253 | 0.201267733 | 0.336411026 |
| 0.31996989    | 0.387676004 | 0.139082679 | 0.158590498 |
| 0.110843572   | 0.175759385 | 0.241389538 | 0.365659331 |
| 0.126769916   | 0.360589716 | 0.171824668 | 0.178300351 |
| 0.127029517   | 0.236966399 | 0.356312203 | 0.346927282 |
| 0.396488525   | 0.286662803 | 0.337507657 | 0.375614976 |
| 0.093934648   | 0.240277252 | 0.303324754 | 0.208233721 |
| 0.247722757   | 0.336147503 | 0.196304592 | 0.294447879 |
| 0.369126931   | 0.192743432 | 0.012865043 | 0.372522149 |
| 0.459294674   | 0.014451377 | 0.34430274  | 0.194528127 |
| 0.044687583   | 0.297386787 | 0.364830494 | 0.251703397 |
| 0.155448842   | 0.101995527 | 0.280193903 | 0.368582244 |
| 0.318048083   | 0.355139182 | 0.239077694 | 0.254586105 |
| 0.354164721   | 0.184950289 | 0.285523296 | 0.095112506 |
| 0.377391634   | 0.274539751 | 0.071762939 | 0.039702406 |
| 0.142901306   | 0.175450646 | 0.293621184 | 0.182498263 |
| 0.158341993   | 0.004965791 | 0.288540534 | 0.163074096 |
| 0.187531687   | 0.134451276 | 0.372815086 | 0.37328043  |
| 0.326706587   | 0.071582252 | 0.369637528 | 0.212123833 |
| 0.208324246   | 0.276870394 | 0.28433849  | 0.015495222 |

|             |             |             |             |
|-------------|-------------|-------------|-------------|
| 0.318005454 | 0.096787549 | 0.180134839 | 0.178594814 |
| 0.268735005 | 0.311233708 | 0.093726061 | 0.272252421 |
| 0.396163691 | 0.188586115 | 0.060407906 | 0.034859042 |
| 0.337152106 | 0.325025199 | 0.139309951 | 0.146002249 |
| 0.261133324 | 0.267912875 | 0.130187335 | 0.417456706 |
| 0.243134549 | 0.421717234 | 0.028254177 | 0.309259925 |
| 0.107404225 | 0.256408381 | 0.170926086 | 0.209319502 |
| 0.373274749 | 0.158924093 | 0.078726582 | 0.39311333  |
| 0.206095876 | 0.194749411 | 0.319116323 | 0.341336158 |
| 0.015483034 | 0.302439064 | 0.176371876 | 0.031593565 |
| 0.352985095 | 0.366684643 | 0.314777582 | 0.249072206 |
| 0.250531909 | 0.344307979 | 0.239755981 | 0.159559752 |
| 0.059510486 | 0.068175497 | 0.298491583 | 0.337172239 |
| 0.209022284 | 0.245229241 | 0.077882769 | 0.023129503 |
| 0.264532279 | 0.084380386 | 0.226317554 | 0.124058655 |
| 0.138247941 | 0.093004004 | 0.327471108 | 0.126059539 |
| 0.010400926 | 0.334172171 | 0.148522325 | 0.16297242  |
| 0.230175323 | 0.258106178 | 0.253534085 | 0.387313735 |
| 0.132987471 | 0.11120351  | 0.137960236 | 0.319759515 |
| 0.393502327 | 0.342545409 | 0.006456897 | 0.293734152 |
| 0.281043615 | 0.250177672 | 0.263678566 | 0.27315725  |
| 0.287428117 | 0.41165898  | 0.290304368 | 0.178937318 |
| 0.005185792 | 0.136765336 | 0.094873881 | 0.442411568 |
| 0.19616854  | 0.365631664 | 0.056793909 | 0.082687044 |
| 0.007484645 | 0.385000923 | 0.043179644 | 0.371882513 |
| 0.233612025 | 0.229989017 | 0.003752659 | 0.243265896 |
| 0.090545537 | 0.014722404 | 0.322052324 | 0.309462478 |
| 0.314971266 | 0.201174774 | 0.389198373 | 0.120482298 |
| 0.028365786 | 0.140260585 | 0.078725393 | 0.214223724 |
| 0.130015685 | 0.02775159  | 0.18234729  | 0.28185221  |
| 0.289132986 | 0.352295827 | 0.369559659 | 0.042370215 |
| 0.124622686 | 0.088785777 | 0.210830201 | 0.235335909 |
| 0.300687473 | 0.411619422 | 0.348549273 | 0.150921182 |
| 0.175860274 | 0.390798744 | 0.426912793 | 0.285219959 |
| 0.041637049 | 0.138248434 | 0.176443524 | 0.19353231  |
| 0.091083794 | 0.252742745 | 0.166564727 | 0.396014183 |
| 0.287533002 | 0.043243346 | 0.399990835 | 0.157322063 |
| 0.35938571  | 0.247598941 | 0.336659474 | 0.254768043 |
| 0.407677301 | 0.3169865   | 0.362648208 | 0.253449755 |
| 0.394722555 | 0.020692911 | 0.032386541 | 0.357383622 |
| 0.407706483 | 0.421960009 | 0.233568182 | 0.188879495 |
| 0.198040187 | 0.248816204 | 0.221024869 | 0.307087705 |
| 0.316142586 | 0.098761455 | 0.115598661 | 0.028684737 |
| 0.07267468  | 0.228730874 | 0.403205792 | 0.427489232 |
| 0.338987101 | 0.362573764 | 0.348787655 | 0.286122694 |
| 0.224871149 | 0.147446046 | 0.3649068   | 0.234567199 |
| 0.455325193 | 0.130992188 | 0.378666264 | 0.263699562 |
| 0.290264862 | 0.290885325 | 0.249355701 | 0.018109953 |
| 0.141566216 | 0.29836575  | 0.063428762 | 0.234821509 |
| 0.152622518 | 0.373350856 | 0.346753608 | 0.339268178 |
| 0.078970952 | 0.008176027 | 0.31730598  | 0.066834405 |
| 0.447510403 | 0.063334733 | 0.228788835 | 0.015751044 |
| 0.357206915 | 0.219097008 | 0.23523906  | 0.051749585 |
| 0.249360791 | 0.002184994 | 0.317286469 | 0.214666325 |

|             |             |             |             |
|-------------|-------------|-------------|-------------|
| 0.292584435 | 0.368585087 | 0.158236453 | 0.13852143  |
| 0.10072796  | 0.191067344 | 0.327019223 | 0.181710842 |
| 0.246808886 | 0.040540899 | 0.257499995 | 0.226407692 |
| 0.104116966 | 0.195336262 | 0.374259115 | 0.220508174 |
| 0.340031527 | 0.115168114 | 0.383044018 | 0.210794654 |
| 0.214905769 | 0.184395646 | 0.240431601 | 0.156166725 |
| 0.260828678 | 0.251767447 | 0.159086769 | 0.139577292 |
| 0.18958739  | 0.114134398 | 0.104783473 | 0.446746843 |
| 0.139811206 | 0.227026325 | 0.048423435 | 0.091202234 |
| 0.104704307 | 0.385491701 | 0.244114427 | 0.249247034 |
| 0.254955484 | 0.085670161 | 0.366780638 | 0.299588786 |
| 0.016983334 | 0.129591986 | 0.353688008 | 0.032520056 |
| 0.180792673 | 0.088478601 | 0.007140866 | 0.200890601 |
| 0.372156507 | 0.124170935 |             |             |
| ACTN1       | 0.089921495 | 0.334664832 | 0.212234154 |
| 0.03677235  | 0.274766315 | 0.367568791 | 1           |
| 0.077700668 | 0.223544341 | 0.269509261 | 0.418197956 |
| 0.001800397 | 0.110912467 | 0.038153882 | 0.137663193 |
| 0.222534947 | 0.235187659 | 0.312025438 | 0.228246503 |
| 0.117780541 | 0.164843808 | 0.234040139 | 0.236735029 |
| 0.322977389 | 0.004672228 | 0.340748343 | 0.116348988 |
| 0.066400442 | 0.191859849 | 0.266165507 | 0.217119022 |
| 0.186080286 | 0.174636678 | 0.163417687 | 0.198591683 |
| 0.050215331 | 0.379011195 | 0.023780449 | 0.144805057 |
| 0.117409128 | 0.323193865 | 0.182065431 | 0.06593868  |
| 0.002003578 | 0.325970326 | 0.056041541 | 0.232976676 |
| 0.147187149 | 0.31683083  | 0.269060418 | 0.345226775 |
| 0.014429206 | 0.397985545 | 0.194274025 | 0.013775145 |
| 0.449180607 | 0.0092051   | 0.410689199 | 0.065838433 |
| 0.237352335 | 0.226259746 | 0.076870644 | 0.206583418 |
| 0.425737517 | 0.440521047 | 0.291238596 | 0.202721824 |
| 0.275380885 | 0.114346665 | 0.125800249 | 0.216038004 |
| 0.293163233 | 0.167602395 | 0.292680273 | 0.072171453 |
| 0.152033423 | 0.124112136 | 0.327514078 | 0.248479619 |
| 0.0028841   | 0.356780056 | 0.191186015 | 0.095922654 |
| 0.082246039 | 0.406185638 | 0.107847503 | 0.353149305 |
| 0.100573804 | 0.105876872 | 0.226159996 | 0.266496905 |
| 0.048529676 | 0.137284934 | 0.016000089 | 0.229183368 |
| 0.177526771 | 0.151292066 | 0.169064355 | 0.281902392 |
| 0.07383418  | 0.192262499 | 0.03763003  | 0.10458026  |
| 0.153728865 | 0.155852963 | 0.440308709 | 0.011909814 |
| 0.08733998  | 0.153582657 | 0.249200612 | 0.394476812 |
| 0.258348337 | 0.02411179  | 0.163718369 | 0.346018583 |
| 0.137906124 | 0.174960347 | 0.340368073 | 0.007369018 |
| 0.023013311 | 0.00518135  | 0.18405381  | 0.203955853 |
| 0.323405123 | 0.340104288 | 0.148505684 | 0.180759148 |
| 0.073303781 | 0.153363571 | 0.33789626  | 0.340298932 |
| 0.129644719 | 0.371745099 | 0.175832728 | 0.176064034 |
| 0.153954709 | 0.146654963 | 0.229557849 | 0.363433413 |
| 0.361524969 | 0.239835798 | 0.219490675 | 0.343075239 |
| 0.094929397 | 0.220949484 | 0.287328488 | 0.139690349 |
| 0.300332486 | 0.240934312 | 0.145175764 | 0.313236732 |
| 0.349786138 | 0.135359156 | 0.009181858 | 0.359816357 |
| 0.452183964 | 0.010183008 | 0.232524292 | 0.177232887 |



|             |             |             |             |
|-------------|-------------|-------------|-------------|
| 0.091537877 | 0.303333009 | 0.335752872 | 0.258032217 |
| 0.16261844  | 0.103970531 | 0.252433004 | 0.309188363 |
| 0.223070392 | 0.305498477 | 0.211412552 | 0.226480544 |
| 0.308207694 | 0.140308919 | 0.235854981 | 0.093925211 |
| 0.282820254 | 0.22357381  | 0.051015182 | 0.031030876 |
| 0.123717906 | 0.120916484 | 0.282290414 | 0.158630913 |
| 0.133951884 | 0.0071737   | 0.247786655 | 0.122341198 |
| 0.122026622 | 0.122316779 | 0.373337121 | 0.2805171   |
| 0.240102188 | 0.066268196 | 0.267251959 | 0.259250622 |
| 0.17229159  | 0.201535825 | 0.22698721  | 0.004912831 |
| 0.284787575 | 0.074362878 | 0.147292438 | 0.079394471 |
| 0.294053937 | 0.175194136 | 0.050419251 | 0.26489364  |
| 0.299127235 | 0.20449017  | 0.023121186 | 0.023437844 |
| 0.264722467 | 0.358507948 | 0.120736366 | 0.081380032 |
| 0.281690896 | 0.198771381 | 0.117944108 | 0.393735117 |
| 0.290337717 | 0.404587257 | 0.023081677 | 0.214581082 |
| 0.109240119 | 0.262242061 | 0.168140137 | 0.218990152 |
| 0.295256906 | 0.134549784 | 0.06009054  | 0.35443407  |
| 0.163821236 | 0.15913181  | 0.186556928 | 0.334737842 |
| 0.004801739 | 0.285554334 | 0.175114908 | 0.022930941 |
| 0.354183339 | 0.400627105 | 0.187288766 | 0.152998111 |
| 0.235458215 | 0.337119647 | 0.206348962 | 0.147726229 |
| 0.036407107 | 0.024572375 | 0.268689011 | 0.318022691 |
| 0.197198191 | 0.21808523  | 0.098153784 | 0.016736498 |
| 0.258212352 | 0.071824857 | 0.202625734 | 0.092580998 |
| 0.147175005 | 0.094752897 | 0.245101537 | 0.102203623 |
| 0.004198711 | 0.234029023 | 0.129111622 | 0.155156242 |
| 0.193572628 | 0.162102531 | 0.2617359   | 0.37337482  |
| 0.145328651 | 0.06815134  | 0.145311851 | 0.302418612 |
| 0.326342297 | 0.326967643 | 0.008787561 | 0.261353369 |
| 0.267230575 | 0.207336915 | 0.267696518 | 0.254123585 |
| 0.19259209  | 0.420757846 | 0.280012062 | 0.159496616 |
| 0.001482573 | 0.13120534  | 0.098547827 | 0.412959585 |
| 0.182008985 | 0.33012845  | 0.036430088 | 0.079253579 |
| 0.004506388 | 0.268302021 | 0.040305637 | 0.347716332 |
| 0.241140738 | 0.182537492 | 0.005804884 | 0.248870226 |
| 0.093599867 | 0.013668772 | 0.303320257 | 0.245833765 |
| 0.325087412 | 0.18654734  | 0.336543906 | 0.120173278 |
| 0.024937122 | 0.11478819  | 0.100424479 | 0.224825996 |
| 0.120421281 | 0.015147896 | 0.219886757 | 0.263960326 |
| 0.255768808 | 0.383698082 | 0.314753715 | 0.021179532 |
| 0.106047444 | 0.084504131 | 0.218147838 | 0.187444226 |
| 0.271867635 | 0.40539258  | 0.355959669 | 0.153440898 |
| 0.169741914 | 0.384535613 | 0.403104101 | 0.27089036  |
| 0.057887918 | 0.126204732 | 0.157265636 | 0.162902703 |
| 0.075633214 | 0.255627995 | 0.147793079 | 0.344171305 |
| 0.247390827 | 0.065999124 | 0.34583201  | 0.09759505  |
| 0.372699785 | 0.243272767 | 0.232787903 | 0.16036881  |
| 0.411434524 | 0.244773785 | 0.331064813 | 0.20866398  |
| 0.35531764  | 0.013633624 | 0.021182012 | 0.329564319 |
| 0.407227629 | 0.440861778 | 0.213454892 | 0.182322104 |
| 0.197119259 | 0.155974244 | 0.206464011 | 0.285444728 |
| 0.223696124 | 0.085924707 | 0.102586718 | 0.013667046 |
| 0.037040886 | 0.110132501 | 0.42117967  | 0.414547279 |

|             |             |             |             |
|-------------|-------------|-------------|-------------|
| 0.24559532  | 0.249458124 | 0.303135103 | 0.296189739 |
| 0.213991734 | 0.124053681 | 0.339589398 | 0.169772835 |
| 0.451733463 | 0.156485101 | 0.351444711 | 0.174827427 |
| 0.243059901 | 0.254179911 | 0.242843327 | 0.011793566 |
| 0.138968155 | 0.246560565 | 0.035132812 | 0.236958302 |
| 0.138204086 | 0.291684616 | 0.3888153   | 0.210339054 |
| 0.074241307 | 0.004071058 | 0.275537375 | 0.070723714 |
| 0.421880628 | 0.04735113  | 0.164714254 | 0.016884559 |
| 0.339890753 | 0.160674995 | 0.195559581 | 0.047341517 |
| 0.219988328 | 0.005050017 | 0.29445736  | 0.122700476 |
| 0.242085356 | 0.349038171 | 0.134922596 | 0.091311167 |
| 0.051233151 | 0.216629324 | 0.318027852 | 0.197418613 |
| 0.25275401  | 0.028748158 | 0.244832338 | 0.163543028 |
| 0.100822205 | 0.143237991 | 0.348615024 | 0.170496453 |
| 0.370782787 | 0.083063619 | 0.306038543 | 0.109567833 |
| 0.21437335  | 0.164611761 | 0.240071247 | 0.090527195 |
| 0.227469464 | 0.215770763 | 0.147845244 | 0.137532911 |
| 0.178414642 | 0.097387703 | 0.078501883 | 0.443676141 |
| 0.091580226 | 0.137146953 | 0.065513706 | 0.105473934 |
| 0.099474194 | 0.310546665 | 0.205952835 | 0.229317447 |
| 0.245436884 | 0.057291568 | 0.261720709 | 0.176448679 |
| 0.016072986 | 0.109230344 | 0.397153482 | 0.046764657 |
| 0.187784947 | 0.06195466  | 0.00324909  | 0.113352896 |
| 0.343854238 | 0.105018814 |             |             |
| ADAM17      | 0.219640482 | 0.377618339 | 0.037597271 |
| 0.007933882 | 0.028742509 | 0.12051134  | 0.077700668 |
| 1           | 0.05145148  | 0.044348225 | 0.199589591 |
| 0.007193438 | 0.297746219 | 0.023536944 | 0.037046303 |
| 0.437679174 | 0.419236786 | 0.115385253 | 0.42961475  |
| 0.186839696 | 0.039192961 | 0.270993144 | 0.183092039 |
| 0.107535237 | 0.005932447 | 0.036708335 | 0.014213628 |
| 0.159645027 | 0.430225044 | 0.090728549 | 0.109672726 |
| 0.400961978 | 0.343561353 | 0.107908965 | 0.070105488 |
| 0.056804856 | 0.359769539 | 0.027449915 | 0.255773712 |
| 0.342370229 | 0.06577655  | 0.333043141 | 0.010136836 |
| 0.000623511 | 0.035345622 | 0.171079434 | 0.252704244 |
| 0.14781831  | 0.105303163 | 0.076839961 | 0.046596262 |
| 0.069185038 | 0.225065761 | 0.35803113  | 0.066133634 |
| 0.278783341 | 0.001101056 | 0.325245561 | 0.178483709 |
| 0.031495701 | 0.120557048 | 0.147811262 | 0.257781837 |
| 0.124914862 | 0.302649371 | 0.396267832 | 0.012729446 |
| 0.030676675 | 0.177252782 | 0.303349135 | 0.178666201 |
| 0.356360617 | 0.128505672 | 0.085610732 | 0.097628855 |
| 0.253882954 | 0.340616735 | 0.157976214 | 0.082053535 |
| 0.002407498 | 0.044374622 | 0.07129536  | 0.280945483 |
| 0.204959874 | 0.233862229 | 0.245201013 | 0.05452569  |
| 0.173883867 | 0.015475704 | 0.211720826 | 0.420219957 |
| 0.007624318 | 0.296950729 | 0.004443136 | 0.072380129 |
| 0.351223358 | 0.40304011  | 0.290501816 | 0.02653079  |
| 0.012966786 | 0.076452601 | 0.148301727 | 0.357443144 |
| 0.187719025 | 0.170079045 | 0.264241777 | 0.059447999 |
| 0.293067567 | 0.099715714 | 0.105030768 | 0.347280057 |
| 0.404256247 | 0.012412389 | 0.101479667 | 0.10560972  |
| 0.084548069 | 0.029114147 | 0.08534787  | 0.033112697 |

|             |             |             |             |
|-------------|-------------|-------------|-------------|
| 0.008523682 | 0.046843662 | 0.397329139 | 0.096509625 |
| 0.029788987 | 0.069889155 | 0.028975134 | 0.187626839 |
| 0.175342511 | 0.398520016 | 0.027361529 | 0.07691681  |
| 0.253120539 | 0.093123367 | 0.110354564 | 0.271779635 |
| 0.084561198 | 0.141793193 | 0.083210708 | 0.30961976  |
| 0.345033491 | 0.031210815 | 0.045036923 | 0.193579262 |
| 0.267659413 | 0.421060674 | 0.429376505 | 0.153557955 |
| 0.063213113 | 0.108198853 | 0.107088435 | 0.189652195 |
| 0.099287162 | 0.194407899 | 0.065711362 | 0.221791494 |
| 0.293946872 | 0.027336455 | 0.033673383 | 0.330461026 |
| 0.008789858 | 0.063993535 | 0.349292317 | 0.283510645 |
| 0.184706528 | 0.011627174 | 0.074570153 | 0.102637928 |
| 0.156728422 | 0.089250175 | 0.234805491 | 0.066362958 |
| 0.198253575 | 0.109265167 | 0.021190912 | 0.285942305 |
| 0.055413166 | 0.207456161 | 0.105965249 | 0.023082227 |
| 0.254752781 | 0.169241299 | 0.331196192 | 0.223692855 |
| 0.298208333 | 0.001256141 | 0.047449386 | 0.248913271 |
| 0.119085765 | 0.359099291 | 0.363249926 | 0.05004054  |
| 0.152630411 | 0.090265862 | 0.067246042 | 0.07430793  |
| 0.376859302 | 0.08225196  | 0.067309297 | 0.002501749 |
| 0.050370191 | 0.13415814  | 0.138135855 | 0.060927031 |
| 0.064884394 | 0.074044688 | 0.093629992 | 0.341786929 |
| 0.090925588 | 0.274601699 | 0.048408034 | 0.087532103 |
| 0.106811988 | 0.221987092 | 0.1262343   | 0.161998956 |
| 0.251153661 | 0.127141774 | 0.383938351 | 0.268634912 |
| 0.066284969 | 0.221314536 | 0.0667076   | 0.117890558 |
| 0.196543401 | 0.328733375 | 0.322728383 | 0.294397442 |
| 0.091230842 | 0.281969768 | 0.145914488 | 0.166295524 |
| 0.219803809 | 0.189849001 | 0.05930002  | 0.386964123 |
| 0.002044214 | 0.183972181 | 0.167311387 | 0.078443336 |
| 0.355122912 | 0.099173676 | 0.045405336 | 0.149612757 |
| 0.434918252 | 0.390117649 | 0.386752944 | 0.371402849 |
| 0.131617434 | 0.022247223 | 0.41331459  | 0.245983649 |
| 0.42017163  | 0.118178234 | 0.073832514 | 0.050210595 |
| 0.380931581 | 0.210937632 | 0.232000424 | 0.203664486 |
| 0.16065614  | 0.105687972 | 0.106263998 | 0.280227086 |
| 0.01699641  | 0.105353787 | 0.256896475 | 0.051197831 |
| 0.102626847 | 0.077282497 | 0.295629426 | 0.194535376 |
| 0.09526403  | 0.163823409 | 0.085198606 | 0.029777881 |
| 0.06935656  | 0.396989968 | 0.011302234 | 0.40382314  |
| 0.43103973  | 0.158887585 | 0.347224377 | 0.441100063 |
| 0.165344635 | 0.235718759 | 0.357366153 | 0.390818994 |
| 0.003433224 | 0.344186011 | 0.252034046 | 0.239707017 |
| 0.369711578 | 0.148246886 | 0.136402912 | 0.117083334 |
| 0.00121513  | 0.071210293 | 0.081670364 | 0.396183933 |
| 0.335449512 | 0.011167714 | 0.009679796 | 0.293715655 |
| 0.22894522  | 0.022898573 | 0.429651852 | 0.129169214 |
| 0.315008257 | 0.142987421 | 0.055321559 | 0.291514994 |
| 0.072276873 | 0.136506976 | 0.007947566 | 0.203728398 |
| 0.118145479 | 0.055167929 | 0.020023757 | 0.426894813 |
| 0.365427126 | 0.198973987 | 0.116784541 | 0.006417229 |
| 0.36379833  | 0.068535881 | 0.26507735  | 0.060220304 |
| 0.338372639 | 0.216691133 | 0.321278714 | 0.294882985 |
| 0.203633037 | 0.2749239   | 0.261109909 | 0.332338239 |

|             |             |             |             |
|-------------|-------------|-------------|-------------|
| 0.031658057 | 0.338227869 | 0.377466011 | 0.028298795 |
| 0.218610171 | 0.355712888 | 0.131929404 | 0.07554334  |
| 0.247147178 | 0.019215443 | 0.103507276 | 0.200801668 |
| 0.307846811 | 0.354986513 | 0.027360458 | 0.108881111 |
| 0.264971279 | 0.110317212 | 0.036879953 | 0.12678997  |
| 0.161168944 | 0.093605676 | 0.08202681  | 0.22899646  |
| 0.334125497 | 0.152973021 | 0.372439599 | 0.046182235 |
| 0.358351311 | 0.037321142 | 0.341216609 | 0.081269806 |
| 0.15756683  | 0.226173889 | 0.353953213 | 0.124253803 |
| 0.015795414 | 0.112659014 | 0.237933687 | 0.28715967  |
| 0.038326763 | 0.095443137 | 0.08628282  | 0.122187452 |
| 0.410235568 | 0.149596482 | 0.146417703 | 0.153157973 |
| 0.281696149 | 0.021864312 | 0.394332762 | 0.173777067 |
| 0.322818699 | 0.105258271 | 0.298955501 | 0.003482105 |
| 0.234596126 | 0.059238843 | 0.144550275 | 0.10848426  |
| 0.395241039 | 0.056674954 | 0.18600059  | 0.09116214  |
| 0.056343348 | 0.005877518 | 0.253565563 | 0.092969381 |
| 0.169856566 | 0.139662404 | 0.160875722 | 0.046556809 |
| 0.418820748 | 0.208510872 | 0.334046393 | 0.091435513 |
| 0.119933322 | 0.003676547 | 0.045272958 | 0.026674565 |
| 0.305992118 | 0.250944308 | 0.249647331 | 0.195967119 |
| 0.164092852 | 0.189923084 | 0.215811926 | 0.103243454 |
| 0.33573684  | 0.076677355 | 0.421278069 | 0.130169538 |
| 0.308444524 | 0.141665708 | 0.124774674 | 0.117775601 |
| 0.052045246 | 0.048732864 | 0.045189213 | 0.130664293 |
| 0.363766775 | 0.101284376 | 0.119678621 | 0.176156502 |
| 0.021573329 | 0.125273962 | 0.303779559 | 0.267486706 |
| 0.211369893 | 0.276013818 | 0.165857265 | 0.263434746 |
| 0.130013693 | 0.151443614 | 0.013147198 | 0.007413261 |
| 0.067310628 | 0.070495692 | 0.385470205 | 0.360774958 |
| 0.407185554 | 0.13003555  | 0.045015481 | 0.090838626 |
| 0.044935419 | 0.341044255 | 0.108938174 | 0.037881751 |
| 0.188792534 | 0.122805911 | 0.001297153 | 0.155925719 |
| 0.245131409 | 0.129468602 |             |             |
| ADAM9       | 0.098379902 | 0.184132584 | 0.051827543 |
| 0.000783031 | 0.012594435 | 0.345525701 | 0.223544341 |
| 0.05145148  | 1           | 0.0585672   | 0.301238795 |
| 0.010249881 | 0.044566388 | 0.047034473 | 0.036926168 |
| 0.117266004 | 0.115086804 | 0.160388139 | 0.12250904  |
| 0.125440643 | 0.009995271 | 0.230342991 | 0.141202512 |
| 0.289515487 | 0.019709835 | 0.113256126 | 0.0050398   |
| 0.031456452 | 0.094064066 | 0.282893222 | 0.038494426 |
| 0.110335165 | 0.067339871 | 0.030475342 | 0.007924854 |
| 0.002282359 | 0.23845041  | 0.000720091 | 0.049302404 |
| 0.057740506 | 0.090358928 | 0.079703145 | 0.072107171 |
| 1.44E-05    | 0.123420276 | 0.025722323 | 0.194797153 |
| 0.130246851 | 0.315794395 | 0.288487483 | 0.116891079 |
| 0.000604859 | 0.300544533 | 0.171291876 | 0.000546572 |
| 0.268407559 | 0.000242022 | 0.256075334 | 0.061197178 |
| 0.170269472 | 0.198810672 | 0.058597415 | 0.157574928 |
| 0.341050014 | 0.25992576  | 0.151047463 | 0.03388919  |
| 0.250811011 | 0.072898743 | 0.05472597  | 0.084621132 |
| 0.17287014  | 0.018201286 | 0.056312853 | 0.016579102 |
| 0.069013133 | 0.05880123  | 0.329261462 | 0.085265121 |

|             |                      |             |             |
|-------------|----------------------|-------------|-------------|
| 0.005401221 | 0.174686107          | 0.020563927 | 0.093979532 |
| 0.027423724 | 0.291250505          | 0.082151166 | 0.085337624 |
| 0.043154781 | 0.055992288          | 0.171499511 | 0.133164649 |
| 0.004107486 | 0.068364987          | 0.001367222 | 0.057937158 |
| 0.099099713 | 0.072761689          | 0.129314684 | 0.082128842 |
| 0.034660748 | 0.153543427          | 0.016478241 | 0.046891319 |
| 0.121547851 | 0.080225315          | 0.280800661 | 0.002987642 |
| 0.032176531 | 0.070554744          | 0.087630325 | 0.234512952 |
| 0.152499221 | 0.014085009          | 0.100360664 | 0.290139703 |
| 0.009904941 | 0.010536721          | 0.227153306 | 0.000601874 |
| 0.002409028 | 0.005022691          | 0.094752601 | 0.131381697 |
| 0.103432377 | 0.219504074          | 0.00870016  | 0.060289342 |
| 0.036282209 | 0.09478748           | 0.02652817  | 0.177662862 |
| 0.046536723 | 0.225073076          | 0.043983158 | 0.079346367 |
| 0.017206092 | 0.088390741          | 0.17739997  | 0.184814949 |
| 0.27289043  | 0.03734433           | 0.076937105 | 0.274516565 |
| 0.033900726 | 0.114491286          | 0.153739692 | 0.04151471  |
| 0.047872474 | 0.242923678          | 0.037838523 | 0.149438608 |
| 0.265152141 | 0.136902681          | 0.000796976 | 0.279301241 |
| 0.294007094 | 0.000765872          | 0.185546844 | 0.1052689   |
| 0.001498351 | 0.031126513          | 0.227174932 | 0.126018885 |
| 0.074957688 | 0.005075026          | 0.064450231 | 0.236627339 |
| 0.279119176 | 0.179453272          | 0.173794537 | 0.051366058 |
| 0.304421618 | 0.033740866          | 0.106469305 | 0.034211918 |
| 0.240793105 | 0.24676504           | 0.007407434 | 0.005414547 |
| 0.089729484 | 0.068750101          | 0.149829737 | 0.116525294 |
| 0.089531775 | 9.20E-05 0.048894751 | 0.125566291 |             |
| 0.033678522 | 0.062350679          | 0.196471256 | 0.291805525 |
| 0.310522039 | 0.01159138           | 0.289016461 | 0.040640265 |
| 0.140349508 | 0.027723189          | 0.033146886 | 0.007785948 |
| 0.036615856 | 0.01956715           | 0.083585908 | 0.056726918 |
| 0.033514624 | 0.061736239          | 0.017298751 | 0.135795339 |
| 0.286448889 | 0.075845807          | 0.024246374 | 0.00890627  |
| 0.108193321 | 0.171026037          | 0.018197644 | 0.020524325 |
| 0.121578548 | 0.047163594          | 0.053854583 | 0.30707144  |
| 0.031726363 | 0.280645484          | 0.002661743 | 0.18670821  |
| 0.041810318 | 0.119405778          | 0.067804409 | 0.09328774  |
| 0.17436091  | 0.11083472           | 0.004285265 | 0.324562703 |
| 0.13268087  | 0.107819631          | 0.10692761  | 0.182656124 |
| 0.013790535 | 0.22588099           | 0.073214193 | 0.002855645 |
| 0.178649734 | 0.249711471          | 0.169299009 | 0.133401714 |
| 0.124738409 | 0.189155175          | 0.153883195 | 0.065715361 |
| 0.00465214  | 0.031453261          | 0.176368005 | 0.233708315 |
| 0.094046329 | 0.094479462          | 0.007052005 | 0.003365513 |
| 0.12455646  | 0.049940068          | 0.133747524 | 0.053959794 |
| 0.056337467 | 0.017244643          | 0.24567269  | 0.088553889 |
| 0.002248778 | 0.136945412          | 0.070093853 | 0.011783496 |
| 0.047960117 | 0.033746386          | 0.118412895 | 0.31184597  |
| 0.016023606 | 0.012839344          | 0.0189332   | 0.123857376 |
| 0.316807077 | 0.182852672          | 0.000293219 | 0.179908598 |
| 0.137885201 | 0.170367018          | 0.118423856 | 0.138953702 |
| 0.197279857 | 0.271979454          | 0.145134181 | 0.095860532 |
| 0.002855452 | 0.053386755          | 0.032697263 | 0.346424549 |
| 0.084769244 | 0.313130907          | 0.025568467 | 0.018083102 |

|             |             |             |             |
|-------------|-------------|-------------|-------------|
| 0.004426807 | 0.312911972 | 0.002188229 | 0.229426635 |
| 0.098752352 | 0.081425205 | 0.000128158 | 0.115564428 |
| 0.031430352 | 0.001237428 | 0.171452935 | 0.151112674 |
| 0.15167365  | 0.077163198 | 0.200571503 | 0.045241625 |
| 0.001845865 | 0.036354427 | 0.005766485 | 0.094101124 |
| 0.043959464 | 0.006473883 | 0.017111069 | 0.148996037 |
| 0.164352038 | 0.214973146 | 0.305201292 | 0.00497558  |
| 0.060894592 | 0.003021171 | 0.088193162 | 0.03175538  |
| 0.183398283 | 0.303624877 | 0.187691633 | 0.063192291 |
| 0.092378173 | 0.234669047 | 0.290607724 | 0.148970836 |
| 0.001263514 | 0.055701772 | 0.079054657 | 0.019446106 |
| 0.046885401 | 0.117143936 | 0.053415916 | 0.294738854 |
| 0.229753377 | 0.00119689  | 0.355104727 | 0.11942541  |
| 0.187324411 | 0.112227457 | 0.16144249  | 0.092858013 |
| 0.244388067 | 0.115730865 | 0.206693419 | 0.131590666 |
| 0.369748608 | 0.00086121  | 0.005056773 | 0.275030522 |
| 0.234238968 | 0.30560194  | 0.111085613 | 0.01603362  |
| 0.085166283 | 0.077709908 | 0.127886306 | 0.037423924 |
| 0.257064617 | 0.040782576 | 0.048750326 | 0.002673258 |
| 0.008752491 | 0.043012887 | 0.239829831 | 0.288328858 |
| 0.174268463 | 0.295323796 | 0.150279174 | 0.131572672 |
| 0.10048802  | 0.016488215 | 0.297994433 | 0.121026157 |
| 0.303138793 | 0.007636237 | 0.230002304 | 0.171749061 |
| 0.201809665 | 0.07854769  | 0.130691581 | 0.014715605 |
| 0.065179161 | 0.064148407 | 0.040502655 | 0.083710957 |
| 0.068612347 | 0.156398342 | 0.203343446 | 0.180636786 |
| 0.004569059 | 0.002336175 | 0.261801908 | 0.012387213 |
| 0.37549571  | 0.008819524 | 0.116181981 | 0.00053504  |
| 0.197808162 | 0.127243452 | 0.145287399 | 0.010563093 |
| 0.073552484 | 3.87E-05    | 0.082440908 | 0.048767294 |
| 0.221266584 | 0.274504118 | 0.098805331 | 0.076852725 |
| 0.048380924 | 0.08956174  | 0.212613717 | 0.05084044  |
| 0.109030845 | 0.001555109 | 0.120073826 | 0.12332453  |
| 0.039027401 | 0.025223498 | 0.340223694 | 0.032298667 |
| 0.139999887 | 0.021523443 | 0.241219254 | 0.089458478 |
| 0.089225148 | 0.03118469  | 0.089578549 | 0.030767767 |
| 0.037210292 | 0.063286048 | 0.081867753 | 0.058220213 |
| 0.09079421  | 0.049930257 | 0.022828075 | 0.305465993 |
| 0.021280508 | 0.146655832 | 0.001557923 | 0.005124979 |
| 0.004841323 | 0.176710797 | 0.163818397 | 0.139886555 |
| 0.123972503 | 0.014226847 | 0.182184033 | 0.173058276 |
| 0.00110893  | 0.06852839  | 0.23131291  | 0.00089825  |
| 0.101854661 | 0.024682357 | 0.001596363 | 0.09722374  |
| 0.269153588 | 0.006799586 |             |             |
| ADSL        | 0.069113421 | 0.226223973 | 0.061980204 |
| 0.042607755 | 0.056630923 | 0.308294864 | 0.269509261 |
| 0.044348225 | 0.0585672   | 1           | 0.303958021 |
| 0.000490809 | 0.062036081 | 0.009601256 | 0.017431548 |
| 0.15086124  | 0.150977107 | 0.182751317 | 0.136186837 |
| 0.066161869 | 0.146652999 | 0.151757488 | 0.239478591 |
| 0.253533234 | 0.001299389 | 0.199530459 | 0.169029472 |
| 0.03017344  | 0.122618595 | 0.139663392 | 0.096094422 |
| 0.129999574 | 0.113981386 | 0.067048848 | 0.039048717 |
| 0.016448938 | 0.249454276 | 0.00265988  | 0.086563826 |

|             |             |             |             |
|-------------|-------------|-------------|-------------|
| 0.070076314 | 0.181664593 | 0.119098088 | 0.013156824 |
| 0.003826499 | 0.131989027 | 0.024719806 | 0.177843225 |
| 0.051889246 | 0.27646772  | 0.130940729 | 0.246154079 |
| 0.004707653 | 0.266266363 | 0.116259915 | 0.004308267 |
| 0.295494412 | 0.023715099 | 0.274315672 | 0.024915174 |
| 0.066506513 | 0.09679517  | 0.054104837 | 0.156937173 |
| 0.30838208  | 0.292313401 | 0.183288003 | 0.081434561 |
| 0.158779182 | 0.072999779 | 0.097340851 | 0.203453066 |
| 0.19473706  | 0.066882584 | 0.082841095 | 0.025982747 |
| 0.112717955 | 0.078175588 | 0.186437189 | 0.044357142 |
| 0.001782178 | 0.259324822 | 0.071266667 | 0.062201966 |
| 0.054736577 | 0.285682546 | 0.070773767 | 0.14079788  |
| 0.084671033 | 0.028013909 | 0.151832325 | 0.171763102 |
| 0.053918433 | 0.076805687 | 0.003504628 | 0.036427143 |
| 0.119029091 | 0.09958439  | 0.128256201 | 0.128654    |
| 0.013830548 | 0.039574167 | 0.009716962 | 0.064889087 |
| 0.096336693 | 0.096778876 | 0.284912194 | 0.002544272 |
| 0.052071735 | 0.052630439 | 0.06998916  | 0.282435264 |
| 0.184727422 | 0.003069004 | 0.02888612  | 0.24858629  |
| 0.030625136 | 0.088307595 | 0.206648459 | 0.005076018 |
| 0.014318932 | 0.000604312 | 0.12179574  | 0.055726319 |
| 0.207941939 | 0.246053997 | 0.057818691 | 0.135746276 |
| 0.029944302 | 0.092535399 | 0.063539134 | 0.223176468 |
| 0.089463969 | 0.274493138 | 0.113385391 | 0.123788452 |
| 0.036447733 | 0.032863205 | 0.090641328 | 0.221305061 |
| 0.217873541 | 0.064031516 | 0.070184984 | 0.272004166 |
| 0.056151277 | 0.147986062 | 0.188256525 | 0.028700294 |
| 0.099331014 | 0.107478013 | 0.096329691 | 0.260780533 |
| 0.20727787  | 0.067561571 | 0.001156998 | 0.200042387 |
| 0.306274468 | 0.003505527 | 0.079717959 | 0.107243523 |
| 0.027873906 | 0.066671029 | 0.233355512 | 0.159793328 |
| 0.085714987 | 0.170218356 | 0.201539345 | 0.291340885 |
| 0.153328384 | 0.248302289 | 0.136395429 | 0.202527877 |
| 0.214791936 | 0.104661855 | 0.069509377 | 0.057033474 |
| 0.135132528 | 0.136939702 | 0.020192633 | 0.008382108 |
| 0.068669406 | 0.038146934 | 0.208570773 | 0.098676148 |
| 0.096095362 | 0.018684706 | 0.182137667 | 0.095031337 |
| 0.075972906 | 0.068425113 | 0.254345404 | 0.13626942  |
| 0.141754089 | 0.011409682 | 0.121778405 | 0.070615358 |
| 0.099784585 | 0.118227889 | 0.139999146 | 0.00471032  |
| 0.062299879 | 0.061118848 | 0.071283434 | 0.017742042 |
| 0.082464669 | 0.064406736 | 0.007778979 | 0.185753583 |
| 0.208256281 | 0.123757841 | 0.003493967 | 0.003080201 |
| 0.102378125 | 0.243810148 | 0.059343968 | 0.026338683 |
| 0.199549217 | 0.078276341 | 0.078270363 | 0.256321196 |
| 0.047804027 | 0.333736054 | 0.003087956 | 0.071414789 |
| 0.071286274 | 0.171017893 | 0.120599463 | 0.125580835 |
| 0.176218341 | 0.068676833 | 0.013151594 | 0.256465518 |
| 0.100272217 | 0.079568336 | 0.054160688 | 0.204871009 |
| 0.002090464 | 0.168975148 | 0.139899133 | 0.003906978 |
| 0.248377912 | 0.300274346 | 0.053261013 | 0.054829804 |
| 0.141875632 | 0.200851225 | 0.118282331 | 0.103704477 |
| 0.008434886 | 0.004860249 | 0.164440532 | 0.213976133 |
| 0.126543365 | 0.092837956 | 0.022111552 | 0.00140719  |

|             |             |             |             |
|-------------|-------------|-------------|-------------|
| 0.16493649  | 0.036847983 | 0.187211309 | 0.08040574  |
| 0.085089505 | 0.02737481  | 0.10374531  | 0.054470051 |
| 0.00125814  | 0.18097205  | 0.118783863 | 0.093930736 |
| 0.13733139  | 0.06878955  | 0.177750854 | 0.211127163 |
| 0.039610619 | 0.030721564 | 0.076352638 | 0.118377403 |
| 0.18398273  | 0.224833079 | 0.000894771 | 0.156030087 |
| 0.169801267 | 0.103333959 | 0.186067866 | 0.158134791 |
| 0.133109357 | 0.269035472 | 0.197322099 | 0.091580187 |
| 0.00031197  | 0.087063447 | 0.058756347 | 0.255028212 |
| 0.140432409 | 0.254245047 | 0.012243187 | 0.038320263 |
| 0.000370548 | 0.154607682 | 0.017348391 | 0.208991714 |
| 0.156891135 | 0.050875888 | 0.00062521  | 0.153374753 |
| 0.05757464  | 0.001471399 | 0.196880525 | 0.247714885 |
| 0.223345093 | 0.094203383 | 0.259643027 | 0.078300944 |
| 0.010520282 | 0.024466529 | 0.032998307 | 0.176944347 |
| 0.048714165 | 0.002481444 | 0.155603111 | 0.162557724 |
| 0.186459955 | 0.233064756 | 0.190468025 | 0.056002986 |
| 0.06847846  | 0.064454629 | 0.169438018 | 0.030064754 |
| 0.165918231 | 0.262455265 | 0.215840276 | 0.094255028 |
| 0.103137895 | 0.268627532 | 0.2893599   | 0.195423194 |
| 0.01646824  | 0.095220561 | 0.116299185 | 0.059933319 |
| 0.054112404 | 0.164015971 | 0.149616198 | 0.279060231 |
| 0.150994642 | 0.029821794 | 0.260319034 | 0.055163208 |
| 0.244327605 | 0.176102507 | 0.094455671 | 0.025920393 |
| 0.298920592 | 0.065596596 | 0.146840152 | 0.076758745 |
| 0.232007894 | 0.005424612 | 0.002819589 | 0.203845278 |
| 0.271824607 | 0.30282979  | 0.168466689 | 0.152501695 |
| 0.119730927 | 0.028128571 | 0.11006313  | 0.054992719 |
| 0.139304501 | 0.079574846 | 0.067341159 | 0.003819896 |
| 0.087341891 | 0.042484483 | 0.30764236  | 0.273639565 |
| 0.095181915 | 0.135723335 | 0.224628533 | 0.231251378 |
| 0.141927056 | 0.034508076 | 0.229056856 | 0.074304011 |
| 0.287837837 | 0.116131883 | 0.226660906 | 0.11673892  |
| 0.174147105 | 0.14292271  | 0.153364629 | 0.00507164  |
| 0.093757714 | 0.197474594 | 0.014145897 | 0.208224583 |
| 0.089238923 | 0.127735513 | 0.248043129 | 0.068617227 |
| 0.021950161 | 0.000494459 | 0.155000216 | 0.035957983 |
| 0.301209485 | 0.007956325 | 0.080198082 | 0.004579866 |
| 0.217846488 | 0.132124476 | 0.156641549 | 0.00993154  |
| 0.141203911 | 0.000746334 | 0.216048353 | 0.032657672 |
| 0.165061894 | 0.201789314 | 0.087368346 | 0.076036181 |
| 0.01360996  | 0.126142753 | 0.198390273 | 0.111186347 |
| 0.17198164  | 0.015247291 | 0.166066748 | 0.044439242 |
| 0.064105823 | 0.038915314 | 0.211561041 | 0.031339996 |
| 0.181016425 | 0.014107631 | 0.1170978   | 0.021326377 |
| 0.149197166 | 0.022453352 | 0.173834446 | 0.03235982  |
| 0.075134451 | 0.093021045 | 0.083680568 | 0.095892505 |
| 0.158919724 | 0.083512285 | 0.026943817 | 0.276946795 |
| 0.026293906 | 0.065005826 | 0.061916783 | 0.128963378 |
| 0.061753541 | 0.193792353 | 0.121229438 | 0.134591054 |
| 0.151426294 | 0.011119843 | 0.091595447 | 0.046808273 |
| 0.001883956 | 0.068682393 | 0.301901786 | 0.009613398 |
| 0.100326231 | 0.015580724 | 0.000944167 | 0.028716829 |
| 0.227634565 | 0.030348075 |             |             |



| AHNAK       | 0.205741267 | 0.428882697 | 0.274751405 |
|-------------|-------------|-------------|-------------|
| 0.039809304 | 0.24947301  | 0.429744868 | 0.418197956 |
| 0.199589591 | 0.301238795 | 0.303958021 | 1           |
| 0.005989672 | 0.178431324 | 0.072121813 | 0.187293208 |
| 0.334863678 | 0.340087545 | 0.407183536 | 0.337569351 |
| 0.265826552 | 0.192790452 | 0.334089494 | 0.358978591 |
| 0.42803383  | 0.011081804 | 0.341893268 | 0.107657111 |
| 0.166449497 | 0.298658018 | 0.40763114  | 0.36687765  |
| 0.286518301 | 0.257087942 | 0.266269234 | 0.246034886 |
| 0.088569057 | 0.466142744 | 0.042662406 | 0.204163834 |
| 0.192825065 | 0.392549843 | 0.26196003  | 0.078357233 |
| 0.001890134 | 0.333530319 | 0.155466298 | 0.340773672 |
| 0.294715429 | 0.424838718 | 0.393013831 | 0.354669296 |
| 0.042175177 | 0.425673399 | 0.291746759 | 0.039995282 |
| 0.486419585 | 0.00711795  | 0.476062053 | 0.175921323 |
| 0.278754781 | 0.373061205 | 0.173817219 | 0.309102104 |
| 0.43836723  | 0.490603734 | 0.39112457  | 0.188960713 |
| 0.30375157  | 0.240400222 | 0.196547637 | 0.297297853 |
| 0.382626241 | 0.303951474 | 0.387225871 | 0.143589362 |
| 0.213116942 | 0.202631415 | 0.415883684 | 0.36888562  |
| 0.005809711 | 0.372874097 | 0.251674386 | 0.161506251 |
| 0.143766956 | 0.441683141 | 0.210830739 | 0.375498039 |
| 0.223523882 | 0.13651465  | 0.365078609 | 0.373616419 |
| 0.056462166 | 0.209532573 | 0.022662286 | 0.339643759 |
| 0.26852335  | 0.244227399 | 0.256782055 | 0.291575044 |
| 0.095707477 | 0.309350176 | 0.11821364  | 0.180406508 |
| 0.299834741 | 0.292386411 | 0.470349942 | 0.034574965 |
| 0.148317421 | 0.268763225 | 0.377177969 | 0.473685348 |
| 0.365791977 | 0.045221765 | 0.289920313 | 0.435926195 |
| 0.207160004 | 0.173149645 | 0.43543362  | 0.023002544 |
| 0.041011168 | 0.022110296 | 0.283130852 | 0.355717362 |
| 0.30526385  | 0.422270048 | 0.182613987 | 0.249561396 |
| 0.191512603 | 0.247529953 | 0.283861058 | 0.422615844 |
| 0.190839217 | 0.423906272 | 0.289586314 | 0.244529523 |
| 0.231587359 | 0.294787523 | 0.359534156 | 0.426424025 |
| 0.450305453 | 0.277477544 | 0.288826882 | 0.412644587 |
| 0.153625253 | 0.331178025 | 0.399057164 | 0.300202236 |
| 0.350442192 | 0.395218407 | 0.250172227 | 0.373816372 |
| 0.434032837 | 0.284341171 | 0.03141514  | 0.401914467 |
| 0.498842806 | 0.027545021 | 0.282751825 | 0.26231134  |
| 0.073575652 | 0.358439197 | 0.421442126 | 0.325194161 |
| 0.266026589 | 0.091732274 | 0.338779176 | 0.419587003 |
| 0.376713875 | 0.410014542 | 0.305430136 | 0.293839158 |
| 0.398506321 | 0.244725309 | 0.249009642 | 0.155787183 |
| 0.374036599 | 0.354626729 | 0.116906618 | 0.050371668 |
| 0.213522266 | 0.267674543 | 0.366256368 | 0.282795655 |
| 0.206991427 | 0.006323974 | 0.295115302 | 0.231440183 |
| 0.233571123 | 0.204968378 | 0.456018299 | 0.35861846  |
| 0.382436356 | 0.134512281 | 0.37428223  | 0.320620384 |
| 0.269094289 | 0.309000789 | 0.295517012 | 0.007914906 |
| 0.365232458 | 0.166667718 | 0.276513877 | 0.156062254 |
| 0.368270901 | 0.277363941 | 0.121612808 | 0.35079499  |
| 0.426344664 | 0.269996478 | 0.062239363 | 0.064495575 |
| 0.406693883 | 0.378328167 | 0.238739386 | 0.197513029 |

|             |             |             |             |
|-------------|-------------|-------------|-------------|
| 0.328633951 | 0.354103773 | 0.201651069 | 0.439667892 |
| 0.347311319 | 0.425775031 | 0.056205588 | 0.361177045 |
| 0.199225825 | 0.340953529 | 0.246801908 | 0.29296765  |
| 0.433090119 | 0.210663965 | 0.152726834 | 0.427025443 |
| 0.303884459 | 0.306568525 | 0.295418497 | 0.433083784 |
| 0.007318919 | 0.397735148 | 0.281292003 | 0.058345381 |
| 0.436682468 | 0.427429363 | 0.270040311 | 0.314525819 |
| 0.346249598 | 0.435227844 | 0.308455591 | 0.235754214 |
| 0.11093612  | 0.053727125 | 0.380695139 | 0.366648221 |
| 0.300572727 | 0.364366599 | 0.157655821 | 0.043844194 |
| 0.356433114 | 0.153015816 | 0.290694096 | 0.20535575  |
| 0.2424376   | 0.18439649  | 0.390862073 | 0.171493955 |
| 0.011782342 | 0.372463955 | 0.218241267 | 0.190952167 |
| 0.299993162 | 0.276312837 | 0.330863451 | 0.416827119 |
| 0.239953067 | 0.169403137 | 0.222649794 | 0.306685525 |
| 0.412896231 | 0.427349457 | 0.016530567 | 0.369665283 |
| 0.379439596 | 0.351869426 | 0.351218703 | 0.368850241 |
| 0.357155459 | 0.441689046 | 0.371361562 | 0.253569467 |
| 0.004227608 | 0.210606136 | 0.15535207  | 0.449269653 |
| 0.274112544 | 0.423326429 | 0.104357118 | 0.164332076 |
| 0.006479403 | 0.381781949 | 0.089463002 | 0.450062172 |
| 0.324404995 | 0.171295188 | 0.010815983 | 0.321825523 |
| 0.146706463 | 0.0276691   | 0.415067208 | 0.39220417  |
| 0.396474037 | 0.327374531 | 0.395677594 | 0.187083433 |
| 0.061114159 | 0.232129464 | 0.08656074  | 0.318366842 |
| 0.226358647 | 0.040405374 | 0.185790162 | 0.373803118 |
| 0.354327998 | 0.398950277 | 0.426782574 | 0.029774369 |
| 0.184511987 | 0.142706561 | 0.280693494 | 0.281775798 |
| 0.365856474 | 0.421469964 | 0.428959716 | 0.222214132 |
| 0.284814808 | 0.438754757 | 0.44675996  | 0.352747729 |
| 0.081073532 | 0.204990812 | 0.250188752 | 0.193972482 |
| 0.16065168  | 0.341570911 | 0.260645324 | 0.416589847 |
| 0.343478902 | 0.078124707 | 0.42617574  | 0.229120647 |
| 0.435278    | 0.331794118 | 0.262124618 | 0.300810109 |
| 0.446858215 | 0.392340658 | 0.353609521 | 0.360610559 |
| 0.422894096 | 0.044635605 | 0.058665141 | 0.385137973 |
| 0.475019769 | 0.438436376 | 0.308445926 | 0.216250453 |
| 0.287283309 | 0.225112745 | 0.294736592 | 0.394638293 |
| 0.384632781 | 0.167215674 | 0.178537008 | 0.052903969 |
| 0.055182409 | 0.233808611 | 0.43831381  | 0.464901126 |
| 0.304766492 | 0.389331613 | 0.423171298 | 0.394489452 |
| 0.316719743 | 0.251065498 | 0.434534149 | 0.336564102 |
| 0.492106882 | 0.143232647 | 0.454513097 | 0.346125767 |
| 0.330313468 | 0.394477143 | 0.320381756 | 0.01543101  |
| 0.215130263 | 0.313040965 | 0.104157095 | 0.339359744 |
| 0.227380969 | 0.378719348 | 0.395316686 | 0.347352697 |
| 0.125544117 | 0.010149863 | 0.354706773 | 0.138727177 |
| 0.435382503 | 0.125488342 | 0.334361041 | 0.037790676 |
| 0.446934541 | 0.308922826 | 0.283984266 | 0.105428855 |
| 0.34958912  | 0.006421067 | 0.317284908 | 0.171372232 |
| 0.325966381 | 0.400065045 | 0.2283548   | 0.209796127 |
| 0.143778368 | 0.289817854 | 0.39286035  | 0.297972516 |
| 0.333762144 | 0.076877054 | 0.351607211 | 0.303976114 |
| 0.166948096 | 0.286562517 | 0.432528851 | 0.313534805 |

|             |             |             |             |
|-------------|-------------|-------------|-------------|
| 0.394080749 | 0.145350199 | 0.362342501 | 0.233736087 |
| 0.303763015 | 0.280300912 | 0.35728247  | 0.215088925 |
| 0.233247085 | 0.37694126  | 0.224408016 | 0.201876607 |
| 0.294961398 | 0.162156327 | 0.195687501 | 0.477404626 |
| 0.189883594 | 0.278208029 | 0.06654304  | 0.077371193 |
| 0.157952419 | 0.399472844 | 0.307383759 | 0.326444015 |
| 0.350128315 | 0.139884052 | 0.332480509 | 0.30538555  |
| 0.038863265 | 0.185963438 | 0.426043424 | 0.07694932  |
| 0.289134898 | 0.139437046 | 0.006090368 | 0.248572776 |
| 0.391692508 | 0.220596352 |             |             |
| AIF1        | 0.013823589 | 0.00280325  | 0.005850027 |
|             |             |             | 1.57E-07    |
| 3.06E-05    | 0.008896087 | 0.001800397 | 0.007193438 |
| 0.010249881 | 0.000490809 | 0.005989672 | 1           |
| 0.000739862 | 0.192998141 | 0.001249103 | 0.002905931 |
| 0.001960088 | 0.000961963 | 0.002890074 | 0.025770927 |
| 2.06E-05    | 0.019731365 | 0.002708833 | 0.005615908 |
| 0.220930448 | 0.000732641 | 1.08E-05    | 0.001759904 |
| 0.002271088 | 0.020721178 | 0.001240328 | 0.003441455 |
| 0.000726461 | 0.000163116 | 1.32E-05    | 2.59E-06    |
| 6.23E-07    | 0.000330153 | 0.001460626 | 0.000527579 |
| 0.001043487 | 0.010321383 | 6.77E-08    | 0.002145677 |
| 0.003509259 | 0.010758156 | 0.016512894 | 0.010204409 |
| 0.021563644 | 0.000546761 | 4.83E-06    | 0.006639408 |
| 0.015143387 | 4.49E-06    | 0.00348153  | 2.60E-08    |
| 0.030585993 | 0.015784219 | 0.009699396 | 0.002646683 |
| 0.006825862 | 0.00548199  | 0.003527443 | 0.002254677 |
| 0.000164712 | 0.011145302 | 0.001792003 | 0.00089891  |
| 0.000450708 | 0.003311084 | 0.000392113 | 0.000520013 |
| 8.00E-05    | 0.000823887 | 0.001625984 | 0.012530203 |
| 0.00502585  | 0.034776007 | 0.001385021 | 2.47E-05    |
| 0.010712343 | 0.000275581 | 0.006233582 | 0.005423399 |
| 0.00033659  | 0.000882982 | 0.01382282  | 0.007426298 |
| 0.002264725 | 6.17E-06    | 0.001379736 | 2.62E-06    |
| 0.003108268 | 0.001726665 | 0.00724333  | 0.001382769 |
| 0.00882745  | 0.039598235 | 0.038317149 | 0.00119982  |
| 0.004762834 | 0.001121684 | 0.003739077 | 0.000125508 |
| 0.000519605 | 0.015966681 | 0.001058983 | 0.004013561 |
| 0.00383305  | 0.010354253 | 0.032363324 | 0.006749899 |
| 5.14E-05    | 6.93E-06    | 0.00283861  | 5.39E-05    |
| 0.002351301 | 0.028981518 | 0.000731474 | 3.98E-05    |
| 1.51E-05    | 0.00024416  | 0.004796257 | 0.012392661 |
| 0.001732024 | 0.000438416 | 0.001721874 | 0.003362715 |
| 0.000960989 | 3.10E-05    | 0.017031362 | 0.003940341 |
| 0.001853958 | 0.009088708 | 0.001296313 | 7.30E-05    |
| 0.008153636 | 0.000393452 | 0.00281518  | 0.000131725 |
| 0.00444338  | 0.000108133 | 0.018072305 | 0.029889047 |
| 0.001270928 | 0.003978519 | 0.01364212  | 0.012247934 |
| 0.007413969 | 0.004855134 | 1.94E-05    | 0.002941601 |
| 0.003291016 | 1.17E-07    | 0.000207619 | 0.000602696 |
| 0.00138754  | 0.000738978 | 9.56E-06    | 4.89E-05    |
| 0.003269787 | 0.020978987 | 0.002939809 | 0.007413969 |
| 0.000363566 | 0.016089297 | 0.000414098 | 0.003291016 |
| 0.000473319 | 0.013480324 | 0.02074869  | 0.00138754  |
| 1.69E-05    | 0.004859771 | 0.006622341 | 0.003269787 |
|             |             | 0.002463085 | 0.000363566 |

|             |             |             |             |
|-------------|-------------|-------------|-------------|
| 0.004515179 | 0.003854892 | 8.21E-09    | 0.000487675 |
| 0.013889941 | 0.001181693 | 0.002227327 | 0.002454766 |
| 0.017502603 | 0.03125842  | 9.55E-05    | 0.024553882 |
| 0.010372219 | 0.000458786 | 0.00078058  | 0.016771601 |
| 0.000462229 | 0.000276222 | 0.001401758 | 0.174458196 |
| 0.000137063 | 0.021547505 | 0.003275868 | 0.001900593 |
| 0.011276666 | 0.000534812 | 0.053369644 | 0.001356862 |
| 0.004753536 | 0.001135985 | 0.000133435 | 0.004956106 |
| 0.000768309 | 0.001403491 | 0.001422874 | 0.007330726 |
| 0.000107814 | 0.005323555 | 6.49E-05    | 0.014515222 |
| 0.00042711  | 0.001198679 | 0.00086482  | 0.000950184 |
| 0.003809966 | 0.0082265   | 0.000108174 | 0.012906743 |
| 0.008315538 | 0.003667    | 0.036959141 | 0.002995099 |
| 0.078374011 | 0.007452455 | 0.000469449 | 0.000191931 |
| 0.002164216 | 0.00226564  | 0.065203258 | 0.035971176 |
| 0.002861872 | 0.00333714  | 0.008326115 | 0.001403666 |
| 0.001323302 | 0.158458516 | 0.005861264 | 0.004905835 |
| 0.001851627 | 0.000976073 | 8.75E-06    | 0.000160224 |
| 0.002058624 | 0.003590107 | 0.002999377 | 0.002039951 |
| 0.000301998 | 7.82E-05    | 0.015296325 | 0.008514486 |
| 0.000325462 | 0.006828086 | 0.002014164 | 4.33E-05    |
| 0.000502322 | 0.000927682 | 0.001038259 | 0.008431093 |
| 3.57E-05    | 0.00115999  | 3.78E-05    | 0.002399965 |
| 0.00333775  | 1.86E-07    | 0.007068104 | 0.002675937 |
| 0.004708459 | 0.001250628 | 0.003458085 | 0.018915344 |
| 0.003517867 | 0.002315745 | 0.003685194 | 0.031680746 |
| 0.000834223 | 0.000309527 | 0.010188679 | 0.00153439  |
| 0.009685568 | 0.005615175 | 9.67E-05    | 0.000700954 |
| 0.029095891 | 7.59E-06    | 0.005953842 | 0.000946096 |
| 0.000986832 | 3.87E-08    | 0.001410398 | 0.000305231 |
| 0.003629198 | 0.002348615 | 0.001439175 | 0.000684263 |
| 0.002503254 | 0.000518088 | 8.04E-06    | 0.001059113 |
| 0.000745358 | 0.000349614 | 0.00046533  | 3.13E-05    |
| 0.003415264 | 0.005592863 | 0.001995628 | 0.009542526 |
| 0.000700215 | 0.002888504 | 7.83E-06    | 0.000707167 |
| 0.001214315 | 0.006874119 | 0.005495678 | 0.002450868 |
| 0.000696003 | 0.001508699 | 0.003838597 | 0.006875013 |
| 0.002697764 | 3.09E-07    | 0.001213147 | 0.00211333  |
| 0.000249048 | 0.002871056 | 0.001359637 | 0.000295678 |
| 0.005656476 | 0.013561479 | 1.55E-07    | 0.012010095 |
| 0.021868827 | 0.002012375 | 0.001336936 | 0.014830494 |
| 0.026469939 | 0.003233611 | 0.004098213 | 0.003396464 |
| 0.003994499 | 0.014498708 | 4.33E-05    | 0.00104905  |
| 0.008247128 | 0.003325042 | 0.004192787 | 0.002325506 |
| 6.45E-05    | 0.00119412  | 0.030584025 | 0.00385865  |
| 0.000439198 | 0.021563927 | 0.00110933  | 0.001611983 |
| 0.003418107 | 0.000306876 | 0.027518569 | 0.002411765 |
| 0.005549656 | 0.014756203 | 0.030843459 | 0.002197297 |
| 0.00067507  | 0.001825714 | 0.000253056 | 0.009237377 |
| 0.007923271 | 0.005134519 | 4.86E-06    | 0.005943061 |
| 0.018796668 | 0.010636056 | 0.000805304 | 0.002126976 |
| 4.44E-05    | 0.000889494 | 0.000875852 | 0.019012201 |
| 0.000271951 | 0.001872748 | 0.006910703 | 0.00149147  |
| 0.04090793  | 7.25E-06    | 0.001996209 | 0.015264181 |
|             |             |             | 3.01E-05    |

|             |             |             |             |
|-------------|-------------|-------------|-------------|
| 0.010272778 | 0.000652709 | 0.008000819 | 1.13E-06    |
| 0.003932294 | 0.006457303 | 0.006705585 | 0.000137194 |
| 0.000726176 | 6.99E-08    | 0.000618042 | 0.015226215 |
| 0.014376598 | 0.007320878 | 0.004961479 | 0.00534137  |
| 0.035452164 | 0.0005283   | 0.003990003 | 0.000132752 |
| 0.001029818 | 5.25E-06    | 0.002113156 | 0.009273357 |
| 0.000585293 | 0.000764829 | 0.009133837 | 0.00095573  |
| 0.000690914 | 0.000165479 | 0.008032558 | 0.068729563 |
| 0.001008427 | 0.000507631 | 0.000385791 | 0.00482247  |
| 0.001195179 | 0.000761676 | 0.002309704 | 0.000687873 |
| 0.001572167 | 0.001494422 | 0.001169755 | 0.005314359 |
| 0.001543653 | 0.025669372 | 4.41E-07    | 2.45E-06    |
| 0.005053234 | 0.01026464  | 0.004312781 | 1.09E-05    |
| 0.001496951 | 0.014305571 | 0.073252754 | 1.46E-05    |
| 0.003932523 | 0.001696355 | 3.75E-07    | 0.001273561 |
| 0.001216258 | 0.001703212 | 0.040188753 | 0.00787243  |
| 6.69E-05    |             |             |             |
| ALCAM       | 0.263416876 | 0.369569186 | 0.025437407 |
| 0.01874573  | 0.067406607 | 0.1121937   | 0.110912467 |
| 0.297746219 | 0.044566388 | 0.062036081 | 0.178431324 |
| 0.000739862 | 1           | 0.005211888 | 0.04048251  |
| 0.450782555 | 0.46832315  | 0.206661036 | 0.464210982 |
| 0.223539139 | 0.080961758 | 0.235907661 | 0.230511276 |
| 0.12848737  | 0.00064153  | 0.054596604 | 0.023069111 |
| 0.350403901 | 0.47533626  | 0.099035074 | 0.149828211 |
| 0.402548037 | 0.43349394  | 0.279883706 | 0.255865199 |
| 0.269393923 | 0.309790843 | 0.214871214 | 0.411844374 |
| 0.43021284  | 0.117464248 | 0.399029939 | 0.004601154 |
| 0.004666014 | 0.041825621 | 0.304595061 | 0.245530968 |
| 0.214758109 | 0.10169599  | 0.081191791 | 0.083576447 |
| 0.21141401  | 0.203932804 | 0.300361229 | 0.238574682 |
| 0.24930427  | 0.002680776 | 0.290738255 | 0.197157234 |
| 0.023909436 | 0.188528382 | 0.299425333 | 0.277771831 |
| 0.122906479 | 0.265816646 | 0.424486425 | 0.011735264 |
| 0.025766605 | 0.343136488 | 0.371620762 | 0.291178846 |
| 0.337508324 | 0.218718921 | 0.167274614 | 0.398799665 |
| 0.369402891 | 0.390892319 | 0.158836975 | 0.09588574  |
| 0.000303998 | 0.067102608 | 0.236626549 | 0.298285904 |
| 0.407405932 | 0.204942477 | 0.31711142  | 0.113977628 |
| 0.338587367 | 0.005823056 | 0.245337303 | 0.448109111 |
| 0.011080289 | 0.386011385 | 0.007735058 | 0.086830095 |
| 0.363711474 | 0.473265675 | 0.297987896 | 0.025783238 |
| 0.004723766 | 0.06302778  | 0.115760098 | 0.46006691  |
| 0.285577548 | 0.33379282  | 0.244585816 | 0.259413262 |
| 0.420876325 | 0.086045383 | 0.22950786  | 0.298953286 |
| 0.381747019 | 0.004218871 | 0.090719468 | 0.108732133 |
| 0.269502191 | 0.08277834  | 0.118562209 | 0.040553415 |
| 0.00542086  | 0.023408018 | 0.423738589 | 0.077204155 |
| 0.041743133 | 0.095790317 | 0.047953805 | 0.353023443 |
| 0.299350341 | 0.421515843 | 0.066406651 | 0.129869462 |
| 0.397954958 | 0.131635911 | 0.307991983 | 0.373067418 |
| 0.329506068 | 0.164299874 | 0.067147126 | 0.319509511 |
| 0.273065678 | 0.0270241   | 0.03064882  | 0.179396881 |
| 0.400009231 | 0.428940034 | 0.437556542 | 0.213106043 |

|             |             |             |             |
|-------------|-------------|-------------|-------------|
| 0.166022176 | 0.133930505 | 0.193630242 | 0.244662738 |
| 0.127265225 | 0.260206798 | 0.15053358  | 0.216993364 |
| 0.242447748 | 0.038133038 | 0.023023633 | 0.368838961 |
| 0.045307588 | 0.139882727 | 0.295133639 | 0.349040147 |
| 0.370452109 | 0.018225203 | 0.122078155 | 0.131366058 |
| 0.16753514  | 0.12790232  | 0.285918197 | 0.113827038 |
| 0.176865535 | 0.200780546 | 0.017020418 | 0.411687237 |
| 0.052466342 | 0.208906753 | 0.273067694 | 0.054288953 |
| 0.341166731 | 0.266476878 | 0.326984809 | 0.313350641 |
| 0.331445292 | 0.002559264 | 0.062368923 | 0.268165682 |
| 0.181065    | 0.417208548 | 0.355467039 | 0.047122265 |
| 0.141577507 | 0.347837936 | 0.065299998 | 0.234900156 |
| 0.327832726 | 0.113702776 | 0.099461804 | 0.000114182 |
| 0.067150331 | 0.300541016 | 0.320659684 | 0.023372617 |
| 0.13439946  | 0.046082453 | 0.099932515 | 0.349685635 |
| 0.094477574 | 0.391302542 | 0.017652805 | 0.225568442 |
| 0.139392691 | 0.277667847 | 0.290835157 | 0.18256467  |
| 0.328738024 | 0.178205229 | 0.465407198 | 0.233648509 |
| 0.183970235 | 0.195010641 | 0.250814889 | 0.156662767 |
| 0.402176472 | 0.374540226 | 0.387783516 | 0.383529494 |
| 0.130489464 | 0.327971292 | 0.294625282 | 0.14306045  |
| 0.281605338 | 0.309069824 | 0.033219317 | 0.383910912 |
| 0.000159766 | 0.211211461 | 0.322035855 | 0.245667042 |
| 0.349098885 | 0.120953478 | 0.025547775 | 0.155204483 |
| 0.467512271 | 0.386902722 | 0.347848986 | 0.421569091 |
| 0.236905921 | 0.004339772 | 0.381979606 | 0.257615492 |
| 0.480088834 | 0.267127314 | 0.341631399 | 0.127895955 |
| 0.399012704 | 0.348039173 | 0.280384058 | 0.330172044 |
| 0.373038807 | 0.39528668  | 0.139036684 | 0.322056111 |
| 0.013511802 | 0.123226781 | 0.323275819 | 0.112078951 |
| 0.185000743 | 0.092797872 | 0.350926596 | 0.1883008   |
| 0.326756088 | 0.237257314 | 0.258785183 | 0.032184661 |
| 0.081079255 | 0.378494347 | 0.089718067 | 0.363210681 |
| 0.448526619 | 0.25028245  | 0.378315483 | 0.445627743 |
| 0.18359029  | 0.232821755 | 0.35355129  | 0.422911619 |
| 0.000486985 | 0.439415284 | 0.409105831 | 0.197440012 |
| 0.393312338 | 0.14785577  | 0.275905717 | 0.412025892 |
| 0.000740664 | 0.06663052  | 0.269323397 | 0.355391731 |
| 0.388595661 | 0.009082551 | 0.123554001 | 0.357792538 |
| 0.409399556 | 0.06126102  | 0.419720131 | 0.183516489 |
| 0.327793953 | 0.31869988  | 0.074932247 | 0.398012908 |
| 0.262245913 | 0.331917585 | 0.016001598 | 0.304935112 |
| 0.365237546 | 0.107107807 | 0.038556781 | 0.441999626 |
| 0.311363379 | 0.241606532 | 0.131222138 | 0.002425688 |
| 0.399388789 | 0.154690167 | 0.351662725 | 0.065121007 |
| 0.303454309 | 0.211558156 | 0.314925761 | 0.400178543 |
| 0.334670593 | 0.255522716 | 0.218327508 | 0.324587687 |
| 0.113470797 | 0.372972095 | 0.393368816 | 0.024380019 |
| 0.338583459 | 0.400860882 | 0.28651896  | 0.077788875 |
| 0.242920384 | 0.077224219 | 0.093311886 | 0.250875133 |
| 0.30386435  | 0.388161381 | 0.018300477 | 0.098828817 |
| 0.2490629   | 0.17562205  | 0.044886646 | 0.240192378 |
| 0.14363997  | 0.210455118 | 0.198026029 | 0.225868553 |
| 0.304058531 | 0.153396229 | 0.362916072 | 0.082095024 |

|             |             |             |             |          |
|-------------|-------------|-------------|-------------|----------|
| 0.426155189 | 0.021018606 | 0.361802786 | 0.153927506 |          |
| 0.160454329 | 0.337095403 | 0.415631259 | 0.142966257 |          |
| 0.008148112 | 0.060258709 | 0.239490061 | 0.246800551 |          |
| 0.028291912 | 0.093844709 | 0.129364667 | 0.207139889 |          |
| 0.450412281 | 0.319340942 | 0.143336952 | 0.23557154  |          |
| 0.239203212 | 0.057335845 | 0.345589712 | 0.205917797 |          |
| 0.279989211 | 0.190206415 | 0.346098523 | 0.004844354 |          |
| 0.369560521 | 0.077621708 | 0.222335332 | 0.229965962 |          |
| 0.467377553 | 0.056075259 | 0.236237453 | 0.077242563 |          |
| 0.136008051 | 0.002963795 | 0.234166457 | 0.388084679 |          |
| 0.141879316 | 0.337447005 | 0.249785274 | 0.254883936 |          |
| 0.402062486 | 0.258124529 | 0.302770044 | 0.360762331 |          |
| 0.235042251 | 0.052862426 | 0.068658492 | 0.012007374 |          |
| 0.266602946 | 0.243073195 | 0.331789785 | 0.289836942 |          |
| 0.178785139 | 0.345617654 | 0.242954128 | 0.304366402 |          |
| 0.387011461 | 0.151441731 | 0.448913155 | 0.220439032 |          |
| 0.432253621 | 0.260831047 | 0.132830975 | 0.229753527 |          |
| 0.101103485 | 0.090226368 | 0.05030127  | 0.098659988 |          |
| 0.425152528 | 0.246875    | 0.252434496 | 0.21795347  |          |
| 0.016999175 | 0.24639162  | 0.382400335 | 0.383895792 |          |
| 0.29923907  | 0.33973209  | 0.34819738  | 0.230203899 |          |
| 0.226062294 | 0.188227886 | 0.036664239 | 0.013455521 |          |
| 0.186930767 | 0.086046419 | 0.327561677 | 0.34817312  |          |
| 0.446039531 | 0.284507277 | 0.037449435 | 0.068416555 |          |
| 0.2460133   | 0.356706075 | 0.14091729  | 0.223165699 |          |
| 0.34053178  | 0.289309809 | 0.000219522 | 0.152669457 |          |
| 0.228985702 | 0.312772384 |             |             |          |
| ALOX5AP     | 0.04679142  | 0.028015598 | 0.04530976  | 1.47E-05 |
| 0.001190168 | 0.100583448 | 0.038153882 | 0.023536944 |          |
| 0.047034473 | 0.009601256 | 0.072121813 | 0.192998141 |          |
| 0.005211888 | 1           | 0.015199163 | 0.01916321  |          |
| 0.015834976 | 0.020172483 | 0.020051671 | 0.087864746 |          |
| 0.000503742 | 0.100582663 | 0.027604406 | 0.071006831 |          |
| 0.319187367 | 0.019947288 | 0.000295058 | 0.009147804 |          |
| 0.014646344 | 0.134788223 | 0.010287019 | 0.019913604 |          |
| 0.006729302 | 0.002561696 | 0.000430051 | 5.92E-05    |          |
| 0.048908917 | 1.56E-05    | 0.003826232 | 0.008489781 |          |
| 0.012053185 | 0.009222821 | 0.055846354 | 3.83E-08    |          |
| 0.041295272 | 0.010020465 | 0.065474987 | 0.07863265  |          |
| 0.10581027  | 0.162862726 | 0.014982612 | 2.43E-05    |          |
| 0.073256712 | 0.065334508 | 2.74E-05    | 0.046098487 | 3.67E-06 |
| 0.044049343 | 0.070213398 | 0.12266553  | 0.062256554 |          |
| 0.01332031  | 0.041065492 | 0.079659913 | 0.04436888  |          |
| 0.020944101 | 0.003504188 | 0.122180981 | 0.013148967 |          |
| 0.006714714 | 0.00747818  | 0.029184443 | 0.004395722 |          |
| 0.008294245 | 0.001037515 | 0.007596326 | 0.009489752 |          |
| 0.110248411 | 0.05044604  | 0.053923118 | 0.032527866 |          |
| 0.00089663  | 0.034531082 | 0.002433626 | 0.067666002 |          |
| 0.02342142  | 0.009120201 | 0.006969687 | 0.049403643 |          |
| 0.056367531 | 0.019500485 | 0.000358751 | 0.009710043 |          |
| 0.000115433 | 0.034405765 | 0.018902946 | 0.010470136 |          |
| 0.037999008 | 0.022353917 | 0.053921756 | 0.164229372 |          |
| 0.037607065 | 0.006352682 | 0.031560188 | 0.011332968 |          |
| 0.047632382 | 0.000429636 | 0.003295587 | 0.046886002 |          |

|             |             |             |             |
|-------------|-------------|-------------|-------------|
| 0.014081873 | 0.041874171 | 0.026700607 | 0.040393994 |
| 0.11461782  | 0.089544273 | 0.000780707 | 0.000277624 |
| 0.049353718 | 0.00016278  | 0.000783174 | 0.025945897 |
| 0.014875089 | 0.123224555 | 0.016904092 | 0.054066714 |
| 0.000736062 | 0.004304409 | 0.014808488 | 0.019440153 |
| 0.002895995 | 0.032762947 | 0.004211999 | 0.03579901  |
| 0.002993549 | 0.009409054 | 0.000846242 | 0.067494424 |
| 0.16426792  | 0.02440491  | 0.071445513 | 0.016661624 |
| 0.060978364 | 0.082301701 | 0.002960033 | 0.018686542 |
| 0.02402099  | 0.022559046 | 0.003669916 | 0.114755879 |
| 0.005578571 | 0.020311193 | 0.063253834 | 0.064000462 |
| 0.000184667 | 0.07484502  | 0.057234194 | 0.000151306 |
| 0.132267347 | 0.020154169 | 1.75E-05    | 0.003919902 |
| 0.049837271 | 0.015451786 | 0.008506671 | 0.000263637 |
| 0.008877873 | 0.045495318 | 0.12012355  | 0.043907908 |
| 0.040377327 | 0.006203323 | 0.11702237  | 0.00445435  |
| 0.056374274 | 0.003197206 | 0.133326285 | 0.10808563  |
| 0.001106715 | 0.000413478 | 0.025420846 | 0.030981967 |
| 0.02291572  | 0.030013383 | 0.019686217 | 1.07E-06    |
| 0.008812628 | 0.050096156 | 0.007685617 | 0.011179083 |
| 0.028191308 | 0.158991677 | 0.176426001 | 0.001023953 |
| 0.176456467 | 0.002711268 | 0.044185927 | 0.004805022 |
| 0.006668447 | 0.047877139 | 0.006952307 | 0.002310982 |
| 0.014265659 | 0.265446796 | 0.003614678 | 0.067746319 |
| 0.013689346 | 0.019153183 | 0.11395243  | 0.006886796 |
| 0.099633992 | 0.004311061 | 0.044236112 | 0.019209192 |
| 0.001609611 | 0.015053061 | 0.011844727 | 0.013025704 |
| 0.007547737 | 0.071023538 | 0.003081404 | 0.062572432 |
| 0.000298077 | 0.073741596 | 0.00423388  | 0.013358269 |
| 0.007840871 | 0.010696131 | 0.044559425 | 0.036931948 |
| 0.000616728 | 0.121656678 | 0.050199484 | 0.027619616 |
| 0.149511852 | 0.029130575 | 0.12482857  | 0.071040794 |
| 0.00684295  | 0.000827437 | 0.02489009  | 0.044825085 |
| 0.231474878 | 0.129291292 | 0.020613803 | 0.031618851 |
| 0.041758978 | 0.009117244 | 0.001412146 | 0.204647251 |
| 0.037804416 | 0.047471857 | 0.013082619 | 0.013178875 |
| 0.000241629 | 0.000830359 | 0.018746023 | 0.014791236 |
| 0.024361808 | 0.011900971 | 0.00432272  | 0.001178861 |
| 0.11124908  | 0.030480632 | 0.002060244 | 0.052749903 |
| 0.013206287 | 0.000618592 | 0.006930515 | 0.005471468 |
| 0.012390307 | 0.087720074 | 0.000846342 | 0.004706103 |
| 0.000913067 | 0.041654264 | 0.104098404 | 0.029813075 |
| 6.19E-06    | 0.043710296 | 0.021708433 | 0.041937691 |
| 0.013948814 | 0.024803603 | 0.104493299 | 0.047229413 |
| 0.02175745  | 0.019054376 | 0.039564548 | 0.00573629  |
| 0.002629087 | 0.097935382 | 0.011517428 | 0.092939303 |
| 0.014494013 | 0.001184886 | 0.004881194 | 0.193784287 |
| 8.92E-05    | 0.047716112 | 0.010741226 | 0.013694018 |
| 0.015660133 | 0.002555565 | 0.000248659 | 1.26E-06    |
| 0.028383856 | 0.018891306 | 0.010278589 | 0.029717489 |
| 0.0041816   | 7.63E-05    | 0.009112915 | 0.042319974 |
| 0.010491138 | 0.004477025 | 0.000253065 | 0.001206689 |
| 0.025175253 | 0.004477025 | 0.001475717 | 0.001206689 |
| 0.003977611 | 0.039512478 | 0.0318014   | 0.102454099 |
|             | 0.012298331 | 0.000156615 | 0.009007577 |



|                      |                      |                      |             |
|----------------------|----------------------|----------------------|-------------|
| 0.010595473          | 0.049628417          | 0.063651743          | 0.028819229 |
| 0.006563933          | 0.014288591          | 0.043823537          | 0.070786289 |
| 0.025687904          | 2.86E-05 0.007798478 | 0.012523855          |             |
| 0.006486917          | 0.009432356          | 0.013989994          | 0.004484551 |
| 0.08379052           | 0.083769921          | 1.36E-05 0.129398198 |             |
| 0.070800755          | 0.02629682           | 0.013087942          | 0.104174744 |
| 0.100829181          | 0.04074723           | 0.033928589          | 0.061504771 |
| 0.035315665          | 0.127655319          | 0.000138266          | 0.002328982 |
| 0.070624583          | 0.039073375          | 0.064497792          | 0.017508276 |
| 0.001449295          | 0.010150487          | 0.115032253          | 0.02618295  |
| 0.00738991           | 0.134720966          | 0.006460976          | 0.007860377 |
| 0.002301009          | 0.002560005          | 0.063608795          | 0.034979046 |
| 0.058444307          | 0.12811751           | 0.189957056          | 0.032948071 |
| 0.014521405          | 0.014239305          | 0.002550667          | 0.100089001 |
| 0.053355123          | 0.060268234          | 0.00018896           | 0.047548412 |
| 0.08203923           | 0.059868037          | 0.011673313          | 0.019549504 |
| 0.00081216           | 0.008143328          | 0.01214413           | 0.036530568 |
| 0.006587932          | 0.010415912          | 0.074618996          | 0.026609465 |
| 0.168018226          | 0.0003094            | 0.007112935          | 0.097530296 |
| 0.000520783          | 0.109082129          | 0.002967564          | 0.043871249 |
| 1.52E-05 0.034257059 | 0.039902152          | 0.0369212            |             |
| 0.001072087          | 0.011321437          | 1.70E-07 0.012146866 |             |
| 0.058821901          | 0.076474 0.06571828  | 0.022546287          |             |
| 0.025019939          | 0.06721109           | 0.008760305          | 0.043394744 |
| 0.00344545           | 0.0114344            | 8.59E-05 0.017505401 |             |
| 0.046851433          | 0.003879401          | 0.006782326          | 0.098028839 |
| 0.008379165          | 0.019225554          | 0.002663863          | 0.09003988  |
| 0.140457501          | 0.009688423          | 0.006015795          | 0.008445704 |
| 0.017560766          | 0.017915587          | 0.010257316          | 0.014091432 |
| 0.005717774          | 0.014123333          | 0.007869364          | 0.006004588 |
| 0.063669652          | 0.0065607            | 0.08799144           | 2.55E-05    |
| 0.000130168          | 0.000187659          | 0.057822497          | 0.050283996 |
| 0.029884117          | 0.017658532          | 0.005738039          | 0.106016585 |
| 0.23034499           | 9.49E-05 0.016725519 | 0.034854914          | 1.14E-05    |
| 0.013712688          | 0.005466116          | 0.006342325          | 0.110643867 |
| 0.070878656          | 0.000638554          |                      |             |
| AMICA1 0.054035866   | 0.117239978          | 0.031806106          | 6.87E-05    |
| 0.009935306          | 0.181644651          | 0.137663193          | 0.037046303 |
| 0.036926168          | 0.017431548          | 0.187293208          | 0.001249103 |
| 0.04048251           | 0.015199163          | 1                    | 0.076856214 |
| 0.079592197          | 0.121379969          | 0.093535931          | 0.098066444 |
| 0.001762289          | 0.16686502           | 0.067789839          | 0.155440186 |
| 0.00273767           | 0.056685854          | 0.000821298          | 0.0292617   |
| 0.068635508          | 0.188310905          | 0.014500881          | 0.067078427 |
| 0.047240203          | 0.015210716          | 0.006613269          | 0.001202454 |
| 0.165440268          | 0.00057384           | 0.037379613          | 0.045255026 |
| 0.046656989          | 0.055220227          | 0.015108681          | 1.36E-06    |
| 0.087427616          | 0.018433239          | 0.118153353          | 0.146940637 |
| 0.160350266          | 0.253261494          | 0.054469468          | 0.000149903 |
| 0.196576853          | 0.136093751          | 0.000314014          | 0.179454537 |
| 8.48E-06 0.167016635 | 0.048411975          | 0.155208113          |             |
| 0.148861527          | 0.03021818           | 0.088969763          | 0.207323497 |
| 0.172377696          | 0.103550646          | 0.005323985          | 0.14215897  |
| 0.046618952          | 0.031340481          | 0.041248679          | 0.111000402 |

|             |             |             |             |
|-------------|-------------|-------------|-------------|
| 0.009836159 | 0.029646678 | 0.01490743  | 0.040757499 |
| 0.047768711 | 0.272205334 | 0.116734008 | 0.000376863 |
| 0.09313486  | 0.010980728 | 0.062849887 | 0.020064818 |
| 0.183539864 | 0.0501494   | 0.045898195 | 0.023472266 |
| 0.018157476 | 0.134108977 | 0.092786931 | 0.000397696 |
| 0.055862404 | 0.000289799 | 0.110140604 | 0.073246197 |
| 0.050335745 | 0.07808115  | 0.031615056 | 0.024468899 |
| 0.196386618 | 0.009889906 | 0.035559668 | 0.081674544 |
| 0.049808297 | 0.184229426 | 0.006474421 | 0.026520526 |
| 0.024352653 | 0.071873341 | 0.143150019 | 0.090811322 |
| 0.012333578 | 0.140899017 | 0.185016302 | 0.006619618 |
| 0.001413384 | 0.164166111 | 9.19E-05    | 0.000218378 |
| 0.002534787 | 0.063322053 | 0.091129031 | 0.041716285 |
| 0.118466566 | 0.001567849 | 0.035407426 | 0.027857736 |
| 0.071691006 | 0.025468793 | 0.09814558  | 0.030598806 |
| 0.134885704 | 0.02571824  | 0.049897286 | 0.015268702 |
| 0.079142161 | 0.136897823 | 0.131587302 | 0.205887534 |
| 0.028727093 | 0.033616366 | 0.164527812 | 0.027482533 |
| 0.07604216  | 0.103308706 | 0.034069301 | 0.033347603 |
| 0.187832218 | 0.012358023 | 0.085233196 | 0.217366527 |
| 0.146091977 | 0.000627593 | 0.240198825 | 0.19050544  |
| 0.000167117 | 0.113852562 | 0.083304223 | 0.000348232 |
| 0.024017808 | 0.148803814 | 0.087936684 | 0.068402707 |
| 0.000581266 | 0.02316697  | 0.105761739 | 0.170589625 |
| 0.095697042 | 0.112374137 | 0.015948842 | 0.207124212 |
| 0.010985702 | 0.076440171 | 0.02683219  | 0.190195094 |
| 0.192740447 | 0.002965746 | 0.0006135   | 0.080752657 |
| 0.062230344 | 0.092398567 | 0.084346613 | 0.053664663 |
| 3.87E-06    | 0.014087753 | 0.068229204 | 0.010352077 |
| 0.055436751 | 0.125366468 | 0.235377015 | 0.261686585 |
| 0.011982375 | 0.257942379 | 0.033465586 | 0.112241774 |
| 0.007947753 | 0.010858672 | 0.000399039 | 0.020716134 |
| 0.007928019 | 0.063837485 | 0.04651585  | 0.01946594  |
| 0.02924699  | 0.01633798  | 0.081705671 | 0.180225851 |
| 0.056240852 | 0.008051982 | 0.019673372 | 0.074937803 |
| 0.106799779 | 0.008162746 | 0.008126104 | 0.072786452 |
| 0.019952488 | 0.037740273 | 0.2017143   | 0.033499092 |
| 0.155196952 | 0.003265207 | 0.11724464  | 0.029169466 |
| 0.080619134 | 0.044329074 | 0.074033294 | 0.092238172 |
| 0.112592883 | 0.002295335 | 0.216603252 | 0.121760683 |
| 0.109495092 | 0.066789962 | 0.131841597 | 0.00106174  |
| 0.199693497 | 0.041143037 | 0.006203985 | 0.112548884 |
| 0.151451237 | 0.120852909 | 0.125209775 | 0.095560913 |
| 0.144477956 | 0.125462389 | 0.044590346 | 0.002410568 |
| 0.01393931  | 0.127869113 | 0.14998063  | 0.066235568 |
| 0.068389048 | 0.005873161 | 0.005250397 | 0.092154514 |
| 0.05572324  | 0.062598214 | 0.032242014 | 0.042321623 |
| 0.017217724 | 0.243437869 | 0.077756812 | 0.00043429  |
| 0.055560956 | 0.03601298  | 0.002450122 | 0.019540869 |
| 0.005244632 | 0.074625104 | 0.258370286 | 0.011025756 |
| 0.005774255 | 0.008439482 | 0.081547101 | 0.239381116 |
| 0.11739929  | 0.000209218 | 0.14180233  | 0.097336629 |
| 0.160786198 | 0.075785814 | 0.102466754 | 0.128406617 |
| 0.177527956 | 0.091146717 | 0.078953652 | 0.001438959 |

|             |             |             |             |
|-------------|-------------|-------------|-------------|
| 0.035773655 | 0.025847686 | 0.252442107 | 0.049457769 |
| 0.177416837 | 0.032818135 | 0.013607863 | 0.004375279 |
| 0.221327064 | 0.000909088 | 0.170941799 | 0.068617615 |
| 0.018219749 | 0.000103457 | 0.087391856 | 0.024087904 |
| 0.002921925 | 0.117551955 | 0.065081082 | 0.095913334 |
| 0.068524632 | 0.0820869   | 0.031056217 | 0.000787185 |
| 0.049066464 | 0.000891182 | 0.054227796 | 0.038343422 |
| 0.001541701 | 0.00514085  | 0.110223616 | 0.10426998  |
| 0.152627143 | 0.248006696 | 0.000144778 | 0.043785865 |
| 0.000866723 | 0.051282731 | 0.024687343 | 0.147342069 |
| 0.203561643 | 0.139131738 | 0.046173489 | 0.067515544 |
| 0.147259097 | 0.184338406 | 0.091957987 | 0.000337194 |
| 0.034229143 | 0.047131279 | 0.005480098 | 0.027589432 |
| 0.080519808 | 0.023708582 | 0.167180407 | 0.178305397 |
| 0.000188816 | 0.219144407 | 0.091699241 | 0.125778283 |
| 0.06618168  | 0.071682621 | 0.126969914 | 0.150854361 |
| 0.089027725 | 0.152958812 | 0.146979383 | 0.245479741 |
| 0.000315552 | 0.008983671 | 0.197690045 | 0.154438464 |
| 0.201751271 | 0.063593966 | 0.004629757 | 0.063752003 |
| 0.104239157 | 0.119904036 | 0.029682003 | 0.200081058 |
| 0.021326278 | 0.035042874 | 0.001190426 | 0.000222324 |
| 0.012731298 | 0.14087357  | 0.185788731 | 0.128993355 |
| 0.240254832 | 0.078192903 | 0.07668557  | 0.06908889  |
| 0.012745817 | 0.207617179 | 0.123046954 | 0.209521658 |
| 0.001119919 | 0.158786582 | 0.106685085 | 0.124589827 |
| 0.036730913 | 0.094606479 | 0.000297952 | 0.041011298 |
| 0.018111641 | 0.040518131 | 0.04118971  | 0.049689242 |
| 0.095017476 | 0.138356252 | 0.121725263 | 0.000812582 |
| 0.001918311 | 0.229047971 | 0.008670898 | 0.233438712 |
| 0.014325555 | 0.099190542 | 0.000377623 | 0.136969802 |
| 0.068672443 | 0.077428444 | 0.014516946 | 0.042458211 |
| 2.59E-05    | 0.027570659 | 0.033528825 | 0.148623588 |
| 0.211915494 | 0.067023381 | 0.042210772 | 0.042846661 |
| 0.066961955 | 0.149072014 | 0.034304101 | 0.070545637 |
| 0.00014755  | 0.07941759  | 0.128464469 | 0.028837018 |
| 0.016241285 | 0.240911363 | 0.028622405 | 0.094795904 |
| 0.004787398 | 0.176275767 | 0.076266149 | 0.056950142 |
| 0.0388439   | 0.052182569 | 0.014855313 | 0.020231865 |
| 0.040200879 | 0.071884249 | 0.036586054 | 0.048615587 |
| 0.025098837 | 0.021741965 | 0.21643517  | 0.009793752 |
| 0.086645562 | 0.00024665  | 0.00035307  | 0.001351878 |
| 0.086993794 | 0.13126952  | 0.109061232 | 0.090376079 |
| 0.016031451 | 0.10885692  | 0.164691543 | 0.002971022 |
| 0.055245857 | 0.131551398 | 0.000352803 | 0.086703223 |
| 0.016799032 | 0.000863636 | 0.08574225  | 0.189303312 |
| 0.00347456  |             |             |             |
| AMIG02      | 0.423696936 | 0.494342756 | 0.07247626  |
| 0.034478033 | 0.112236717 | 0.243370842 | 0.222534947 |
| 0.437679174 | 0.117266004 | 0.15086124  | 0.334863678 |
| 0.002905931 | 0.450782555 | 0.01916321  | 0.076856214 |
| 1           | 0.51021414  | 0.339312303 | 0.498656412 |
| 0.37828513  | 0.167765029 | 0.403610091 | 0.415066701 |
| 0.266940818 | 0.002737645 | 0.123621563 | 0.059484461 |
| 0.442175877 | 0.50046529  | 0.216003185 | 0.311130718 |

|             |             |             |             |
|-------------|-------------|-------------|-------------|
| 0.491426179 | 0.500862664 | 0.433600234 | 0.327448433 |
| 0.293884759 | 0.462243048 | 0.145712781 | 0.486131858 |
| 0.442472602 | 0.232240381 | 0.506828344 | 0.016491753 |
| 0.005272857 | 0.102701708 | 0.411652239 | 0.428026989 |
| 0.341678121 | 0.227769582 | 0.179270819 | 0.17664514  |
| 0.232435553 | 0.366816208 | 0.448086799 | 0.234312045 |
| 0.414553603 | 0.005899338 | 0.450639351 | 0.321087405 |
| 0.067775889 | 0.337645142 | 0.437357955 | 0.462416006 |
| 0.251110531 | 0.431701081 | 0.506718098 | 0.037176424 |
| 0.074938298 | 0.492005636 | 0.487446303 | 0.457334166 |
| 0.492746171 | 0.379950147 | 0.30510621  | 0.423891916 |
| 0.502985846 | 0.470883645 | 0.296593445 | 0.186771593 |
| 0.001610377 | 0.149881586 | 0.342091081 | 0.415616549 |
| 0.471809646 | 0.37042871  | 0.465397311 | 0.220200481 |
| 0.500000337 | 0.02086738  | 0.411210383 | 0.510213501 |
| 0.026502807 | 0.471479717 | 0.012881539 | 0.163681914 |
| 0.497907169 | 0.480688759 | 0.469834688 | 0.076729804 |
| 0.015848581 | 0.137532197 | 0.210846896 | 0.42926685  |
| 0.455483737 | 0.492921368 | 0.410017672 | 0.197711008 |
| 0.418902697 | 0.205347577 | 0.365410707 | 0.460580334 |
| 0.502591089 | 0.009813101 | 0.179652481 | 0.228043411 |
| 0.365972632 | 0.148167235 | 0.231399564 | 0.062462193 |
| 0.015383592 | 0.033934216 | 0.495471792 | 0.180773816 |
| 0.103378488 | 0.207636141 | 0.09272661  | 0.486248201 |
| 0.420514738 | 0.461686837 | 0.115324481 | 0.259075695 |
| 0.499900299 | 0.255009831 | 0.439540705 | 0.513257993 |
| 0.386302944 | 0.296056266 | 0.163485207 | 0.47252688  |
| 0.436793993 | 0.072596329 | 0.089861904 | 0.343111405 |
| 0.435242973 | 0.507076499 | 0.507391788 | 0.350177737 |
| 0.264503809 | 0.262270585 | 0.367814823 | 0.411148998 |
| 0.244472097 | 0.389564229 | 0.127122216 | 0.36590115  |
| 0.412499975 | 0.054123193 | 0.069173033 | 0.493912244 |
| 0.054807877 | 0.248643195 | 0.466114981 | 0.496148141 |
| 0.479258734 | 0.049214332 | 0.252213354 | 0.274042268 |
| 0.325287675 | 0.263196208 | 0.454387907 | 0.238576272 |
| 0.336378636 | 0.372084126 | 0.049141555 | 0.430312468 |
| 0.127645269 | 0.36781031  | 0.385762234 | 0.089275965 |
| 0.462393852 | 0.396901421 | 0.496956438 | 0.46788064  |
| 0.477073211 | 0.005480011 | 0.152945556 | 0.438725848 |
| 0.362555525 | 0.446565219 | 0.486180508 | 0.116638279 |
| 0.276138517 | 0.371669007 | 0.15001899  | 0.331441712 |
| 0.453844262 | 0.256895778 | 0.220735085 | 0.001029702 |
| 0.141567851 | 0.455005307 | 0.46180508  | 0.065802954 |
| 0.240790433 | 0.131199349 | 0.147208252 | 0.507443154 |
| 0.209697896 | 0.502590303 | 0.038807278 | 0.21313917  |
| 0.278093115 | 0.437604543 | 0.444662947 | 0.340533353 |
| 0.484187695 | 0.348537004 | 0.453115813 | 0.404119811 |
| 0.27157878  | 0.363836843 | 0.224089917 | 0.300095485 |
| 0.504275991 | 0.508183069 | 0.510794041 | 0.499450669 |
| 0.27496817  | 0.432031414 | 0.364592785 | 0.288070497 |
| 0.435821432 | 0.440224403 | 0.095215153 | 0.493398975 |
| 0.000995561 | 0.362337806 | 0.47741237  | 0.241084125 |
| 0.490093757 | 0.240536432 | 0.07527487  | 0.286092506 |
| 0.504897913 | 0.490275556 | 0.467492886 | 0.4889595   |

|             |             |             |             |
|-------------|-------------|-------------|-------------|
| 0.318731588 | 0.013910069 | 0.488982623 | 0.430857898 |
| 0.50563089  | 0.417030896 | 0.36340713  | 0.108129844 |
| 0.508932032 | 0.414516687 | 0.467894084 | 0.483679694 |
| 0.479223778 | 0.428331651 | 0.258731096 | 0.420093116 |
| 0.025853819 | 0.27615643  | 0.491099278 | 0.210534442 |
| 0.347586779 | 0.212978174 | 0.50054013  | 0.332588637 |
| 0.418626186 | 0.395186615 | 0.384678842 | 0.081816443 |
| 0.177168205 | 0.49831532  | 0.058919966 | 0.481258611 |
| 0.507924096 | 0.389051201 | 0.510713223 | 0.503769238 |
| 0.352721871 | 0.395979176 | 0.506293384 | 0.465122056 |
| 0.001604907 | 0.471208329 | 0.450560452 | 0.354564949 |
| 0.50474272  | 0.301351967 | 0.31250579  | 0.472513877 |
| 0.001539346 | 0.1615469   | 0.330582017 | 0.475058541 |
| 0.510267495 | 0.028360103 | 0.065133505 | 0.497699002 |
| 0.462617001 | 0.055774892 | 0.503281502 | 0.356045869 |
| 0.489206141 | 0.446107948 | 0.175240173 | 0.471709247 |
| 0.299900992 | 0.413139674 | 0.031887254 | 0.468699545 |
| 0.456225425 | 0.134187535 | 0.087420505 | 0.500698507 |
| 0.48585446  | 0.394740148 | 0.258704903 | 0.013195964 |
| 0.432128025 | 0.253961549 | 0.505784826 | 0.120987758 |
| 0.462567796 | 0.37295666  | 0.471258883 | 0.492593788 |
| 0.48623303  | 0.428770539 | 0.390577477 | 0.495757304 |
| 0.135274315 | 0.48562243  | 0.491618227 | 0.061482095 |
| 0.46149175  | 0.510936077 | 0.451543435 | 0.17804357  |
| 0.408816939 | 0.103277753 | 0.207431811 | 0.388905052 |
| 0.467051493 | 0.511822657 | 0.060214887 | 0.185436488 |
| 0.420835693 | 0.31733673  | 0.108368992 | 0.36499661  |
| 0.286804604 | 0.263828351 | 0.198829631 | 0.391354103 |
| 0.459470604 | 0.291725411 | 0.506141565 | 0.175999654 |
| 0.505118137 | 0.055054276 | 0.477163586 | 0.269244516 |
| 0.306255327 | 0.478137464 | 0.438905917 | 0.191993698 |
| 0.033702966 | 0.160922143 | 0.406988865 | 0.417148697 |
| 0.078495526 | 0.204422561 | 0.263578221 | 0.35373195  |
| 0.508961204 | 0.456971899 | 0.281638907 | 0.37457788  |
| 0.404194408 | 0.112521144 | 0.477034619 | 0.38042349  |
| 0.458440927 | 0.353071994 | 0.495420867 | 0.011450179 |
| 0.503486862 | 0.185901628 | 0.28491183  | 0.379355622 |
| 0.466557596 | 0.136982343 | 0.388508991 | 0.181903666 |
| 0.208472601 | 0.005011063 | 0.386469786 | 0.421266104 |
| 0.285038156 | 0.36106733  | 0.402296126 | 0.223683491 |
| 0.49488915  | 0.444283843 | 0.480050216 | 0.343287994 |
| 0.400043381 | 0.027912044 | 0.160840993 | 0.037258622 |
| 0.440027574 | 0.402608341 | 0.479824869 | 0.451619181 |
| 0.27403537  | 0.475313125 | 0.406380144 | 0.425213837 |
| 0.510062265 | 0.226281001 | 0.511297312 | 0.338903789 |
| 0.435028343 | 0.426721836 | 0.262244821 | 0.355292987 |
| 0.195138813 | 0.155588681 | 0.122518881 | 0.19864163  |
| 0.512435199 | 0.328606653 | 0.403846278 | 0.387538343 |
| 0.04902731  | 0.405571908 | 0.478904006 | 0.496514847 |
| 0.479861228 | 0.469240882 | 0.442785737 | 0.391574013 |
| 0.364574057 | 0.349784218 | 0.0647166   | 0.037553464 |
| 0.297608351 | 0.199529676 | 0.463643744 | 0.490711247 |
| 0.50736698  | 0.35043985  | 0.101508907 | 0.15592191  |
| 0.16722025  | 0.445863809 | 0.270078621 | 0.19692155  |

|             |             |             |             |
|-------------|-------------|-------------|-------------|
| 0.468261586 | 0.387378431 | 0.000789543 | 0.276674194 |
| 0.398021507 | 0.439621563 |             |             |
| AMPD1       | 0.40468289  | 0.507030841 | 0.068371961 |
| 0.035778511 | 0.124943415 | 0.245293598 | 0.235187659 |
| 0.419236786 | 0.115086804 | 0.150977107 | 0.340087545 |
| 0.001960088 | 0.46832315  | 0.015834976 | 0.079592197 |
| 0.51021414  | 1           | 0.36371788  | 0.509523008 |
| 0.361853149 | 0.172621451 | 0.395075277 | 0.413713206 |
| 0.273070874 | 0.002028872 | 0.12924764  | 0.059402276 |
| 0.43989101  | 0.504558553 | 0.212673831 | 0.298448339 |
| 0.493155623 | 0.519182886 | 0.45939351  | 0.370227851 |
| 0.324863919 | 0.470573796 | 0.176421544 | 0.513890006 |
| 0.455038329 | 0.241284664 | 0.524341579 | 0.015841009 |
| 0.006228874 | 0.105892282 | 0.39279877  | 0.422120372 |
| 0.339407746 | 0.22689026  | 0.178261427 | 0.187574436 |
| 0.22856753  | 0.37367871  | 0.442270506 | 0.232682786 |
| 0.428883071 | 0.006352127 | 0.463722417 | 0.296985399 |
| 0.067346353 | 0.342926204 | 0.43699816  | 0.456699469 |
| 0.259177821 | 0.445664794 | 0.522349386 | 0.037015927 |
| 0.074630333 | 0.500087855 | 0.494194136 | 0.47449365  |
| 0.505041354 | 0.371059784 | 0.319449004 | 0.463044466 |
| 0.518843447 | 0.47955962  | 0.302083203 | 0.18815918  |
| 0.001180012 | 0.156926165 | 0.378558024 | 0.40668571  |
| 0.4894921   | 0.376068375 | 0.455900654 | 0.238202136 |
| 0.497554671 | 0.019003397 | 0.410758232 | 0.523990176 |
| 0.026204272 | 0.486054412 | 0.013470503 | 0.165907191 |
| 0.501327643 | 0.485611926 | 0.464340999 | 0.075952584 |
| 0.014634722 | 0.133676813 | 0.180427899 | 0.435199924 |
| 0.457351742 | 0.512119318 | 0.425175293 | 0.210969942 |
| 0.433339481 | 0.191504435 | 0.388503771 | 0.469639749 |
| 0.505980092 | 0.008595452 | 0.173961918 | 0.231612067 |
| 0.404105238 | 0.164498533 | 0.241956613 | 0.053224543 |
| 0.012912259 | 0.027270471 | 0.502700411 | 0.168708531 |
| 0.107074494 | 0.21358367  | 0.094278569 | 0.514498557 |
| 0.40408365  | 0.466673029 | 0.13190719  | 0.27132119  |
| 0.514974938 | 0.269748005 | 0.466182748 | 0.526292662 |
| 0.431828427 | 0.288322135 | 0.156026294 | 0.493800282 |
| 0.442293106 | 0.071118907 | 0.085522108 | 0.34316475  |
| 0.454962779 | 0.512572357 | 0.517939634 | 0.339752841 |
| 0.289829945 | 0.260838103 | 0.364967766 | 0.423648644 |
| 0.256101204 | 0.386543932 | 0.126693771 | 0.375968017 |
| 0.423338224 | 0.049766044 | 0.066895225 | 0.503593799 |
| 0.066343828 | 0.269395397 | 0.472572283 | 0.518352475 |
| 0.508101708 | 0.049189215 | 0.254207771 | 0.279386602 |
| 0.320553491 | 0.266916794 | 0.458492023 | 0.2400649   |
| 0.335168469 | 0.369589617 | 0.048991836 | 0.446390146 |
| 0.126840347 | 0.363598712 | 0.389614144 | 0.091816689 |
| 0.466969462 | 0.391338724 | 0.506582797 | 0.470506325 |
| 0.475487059 | 0.00541364  | 0.150457091 | 0.423452457 |
| 0.347993236 | 0.454948718 | 0.501454015 | 0.116601902 |
| 0.272188651 | 0.405706674 | 0.149208197 | 0.370702572 |
| 0.452185185 | 0.250880744 | 0.220651344 | 0.000683824 |
| 0.145448615 | 0.446249338 | 0.48097115  | 0.056896264 |
| 0.254255146 | 0.119691252 | 0.139814092 | 0.518995402 |

|             |             |             |             |
|-------------|-------------|-------------|-------------|
| 0.208876075 | 0.529441768 | 0.032029311 | 0.218455533 |
| 0.276201447 | 0.460419036 | 0.445869796 | 0.314710248 |
| 0.508593014 | 0.337709295 | 0.455140327 | 0.412932304 |
| 0.303522234 | 0.368643425 | 0.245590785 | 0.299384085 |
| 0.522708242 | 0.529806804 | 0.523579422 | 0.522456424 |
| 0.27552891  | 0.435002346 | 0.365439692 | 0.288453412 |
| 0.435317289 | 0.451237356 | 0.086742941 | 0.508260371 |
| 0.000725759 | 0.369767195 | 0.497333589 | 0.257927475 |
| 0.504777164 | 0.251757034 | 0.07035497  | 0.271860213 |
| 0.512787491 | 0.505640579 | 0.469868301 | 0.494708403 |
| 0.297194619 | 0.011123562 | 0.494533843 | 0.44150551  |
| 0.512529018 | 0.435962984 | 0.407714142 | 0.111165421 |
| 0.522410832 | 0.418487868 | 0.467955021 | 0.476418991 |
| 0.511618075 | 0.467096343 | 0.261897164 | 0.417751412 |
| 0.023199304 | 0.265868619 | 0.482878785 | 0.222629957 |
| 0.349091567 | 0.203567054 | 0.521533123 | 0.341339744 |
| 0.456215914 | 0.369621524 | 0.412063462 | 0.083888617 |
| 0.182532362 | 0.508234464 | 0.071362175 | 0.486198878 |
| 0.519020219 | 0.403227812 | 0.52799319  | 0.51250121  |
| 0.342188359 | 0.411351047 | 0.516600665 | 0.47290787  |
| 0.001112649 | 0.482589322 | 0.471272809 | 0.360777924 |
| 0.50944364  | 0.302912469 | 0.308465442 | 0.500073175 |
| 0.001551081 | 0.158277338 | 0.335549458 | 0.484868801 |
| 0.530209482 | 0.028972104 | 0.08309411  | 0.515480301 |
| 0.480499395 | 0.061417311 | 0.512616292 | 0.356359687 |
| 0.507158926 | 0.470049524 | 0.179082627 | 0.487634224 |
| 0.304134792 | 0.433285091 | 0.034672625 | 0.482313743 |
| 0.48757819  | 0.130507755 | 0.092482312 | 0.51248893  |
| 0.484673275 | 0.415269524 | 0.265077544 | 0.010748279 |
| 0.434582947 | 0.254377991 | 0.522506482 | 0.121665131 |
| 0.466075669 | 0.38432742  | 0.488353061 | 0.513995716 |
| 0.500387075 | 0.437190642 | 0.396034314 | 0.505447541 |
| 0.14936484  | 0.487349797 | 0.491839499 | 0.058751587 |
| 0.452265219 | 0.530791928 | 0.464368566 | 0.181117178 |
| 0.408651751 | 0.116912629 | 0.208672078 | 0.374692756 |
| 0.484333046 | 0.52621371  | 0.057952639 | 0.178233902 |
| 0.433682027 | 0.322604458 | 0.112773179 | 0.377552528 |
| 0.289296006 | 0.243963122 | 0.200384393 | 0.398397273 |
| 0.473474788 | 0.30220393  | 0.50955957  | 0.177960784 |
| 0.521437753 | 0.052033142 | 0.490600792 | 0.282056906 |
| 0.302318855 | 0.469411316 | 0.443653224 | 0.164106057 |
| 0.028489768 | 0.138707879 | 0.422107379 | 0.427389751 |
| 0.076237177 | 0.200241652 | 0.265982343 | 0.372449424 |
| 0.520083531 | 0.462197844 | 0.285052893 | 0.373207851 |
| 0.416439545 | 0.123946548 | 0.484120944 | 0.366403372 |
| 0.454269116 | 0.357654126 | 0.510067585 | 0.011418071 |
| 0.519209069 | 0.182152748 | 0.270044004 | 0.40118728  |
| 0.471162634 | 0.135082762 | 0.410827047 | 0.173387374 |
| 0.21425803  | 0.004388201 | 0.388634984 | 0.456136448 |
| 0.288751707 | 0.36839951  | 0.39800374  | 0.246465793 |
| 0.506520472 | 0.435845982 | 0.473238063 | 0.374216942 |
| 0.411082667 | 0.036436584 | 0.165184746 | 0.034452147 |
| 0.435104598 | 0.412957155 | 0.477541777 | 0.441363763 |
| 0.252619669 | 0.507351751 | 0.416569699 | 0.460218577 |

|             |             |             |             |
|-------------|-------------|-------------|-------------|
| 0.530285091 | 0.213657942 | 0.521739276 | 0.344091521 |
| 0.449924954 | 0.42620971  | 0.269383848 | 0.366407227 |
| 0.2109967   | 0.158602821 | 0.125889204 | 0.182404153 |
| 0.528109575 | 0.353466687 | 0.426064156 | 0.361906631 |
| 0.047900331 | 0.413833044 | 0.491650621 | 0.512308697 |
| 0.480008212 | 0.464238121 | 0.440289957 | 0.403912562 |
| 0.363249289 | 0.33544833  | 0.070163186 | 0.039759394 |
| 0.313188241 | 0.198737514 | 0.463896595 | 0.497672083 |
| 0.521026455 | 0.352470469 | 0.09918323  | 0.147090056 |
| 0.18846877  | 0.446846926 | 0.283995809 | 0.225497488 |
| 0.492820544 | 0.394717373 | 0.000604202 | 0.261216879 |
| 0.40532386  | 0.450287243 |             |             |
| ANXA1       | 0.116058509 | 0.444639852 | 0.13083719  |
| 0.030931434 | 0.260118399 | 0.300197477 | 0.312025438 |
| 0.115385253 | 0.160388139 | 0.182751317 | 0.407183536 |
| 0.000961963 | 0.206661036 | 0.020172483 | 0.121379969 |
| 0.339312303 | 0.36371788  | 1           | 0.355645795 |
| 0.143228259 | 0.133538598 | 0.265896929 | 0.248925119 |
| 0.278066974 | 0.002039861 | 0.245060226 | 0.065147755 |
| 0.110530919 | 0.311319564 | 0.230544558 | 0.202881672 |
| 0.282994676 | 0.290968886 | 0.21183806  | 0.2729808   |
| 0.094569841 | 0.461203851 | 0.068744219 | 0.251098711 |
| 0.210277578 | 0.287306512 | 0.288633797 | 0.035320602 |
| 0.002541162 | 0.219296967 | 0.093558162 | 0.260863201 |
| 0.178089173 | 0.251496777 | 0.226362139 | 0.269404454 |
| 0.032018152 | 0.407872501 | 0.260887165 | 0.032431791 |
| 0.503715382 | 0.005032892 | 0.486742763 | 0.084504543 |
| 0.149515987 | 0.243328273 | 0.113379689 | 0.2524233   |
| 0.364527163 | 0.505898035 | 0.41944381  | 0.11342524  |
| 0.167386149 | 0.169252286 | 0.205127576 | 0.267603716 |
| 0.390488784 | 0.181855376 | 0.286723312 | 0.140094831 |
| 0.231841564 | 0.212524721 | 0.317904393 | 0.225380276 |
| 0.001235764 | 0.266608089 | 0.248590902 | 0.142728362 |
| 0.148828525 | 0.419921031 | 0.156478976 | 0.312418555 |
| 0.149528878 | 0.051699393 | 0.25322262  | 0.394937494 |
| 0.032741181 | 0.232611835 | 0.017521634 | 0.216496685 |
| 0.266774205 | 0.257545374 | 0.21910108  | 0.166216959 |
| 0.03731405  | 0.16067433  | 0.045739847 | 0.195805799 |
| 0.197734886 | 0.216156609 | 0.489263896 | 0.032136655 |
| 0.172071251 | 0.125343469 | 0.296598328 | 0.469807554 |
| 0.360437729 | 0.01667524  | 0.149257951 | 0.288332622 |
| 0.188434887 | 0.159362127 | 0.312232808 | 0.010106937 |
| 0.017091737 | 0.007091803 | 0.292162644 | 0.169303044 |
| 0.211102109 | 0.275554226 | 0.126851732 | 0.259546219 |
| 0.115973394 | 0.250327634 | 0.305490186 | 0.299607119 |
| 0.21570692  | 0.324850228 | 0.245343576 | 0.262731547 |
| 0.252040506 | 0.161940271 | 0.174414746 | 0.472061968 |
| 0.432810921 | 0.156174145 | 0.137144097 | 0.326725353 |
| 0.184453201 | 0.336353492 | 0.413242429 | 0.174462674 |
| 0.331561595 | 0.236766304 | 0.154323193 | 0.343463084 |
| 0.315211683 | 0.179197381 | 0.023213321 | 0.392176922 |
| 0.498071267 | 0.014973806 | 0.138726083 | 0.268269661 |
| 0.113113126 | 0.306103679 | 0.406526393 | 0.360328855 |
| 0.246512821 | 0.053427445 | 0.216504842 | 0.273072936 |



|             |             |             |             |
|-------------|-------------|-------------|-------------|
| 0.218385696 | 0.262552325 | 0.262910156 | 0.186782692 |
| 0.296302942 | 0.152192279 | 0.139163794 | 0.182895998 |
| 0.209324355 | 0.23915787  | 0.078999969 | 0.037349758 |
| 0.182478694 | 0.16573366  | 0.369927603 | 0.211131687 |
| 0.196607051 | 0.004487847 | 0.168354189 | 0.155373232 |
| 0.127888614 | 0.218514036 | 0.47920203  | 0.204411072 |
| 0.225382663 | 0.129512647 | 0.211343405 | 0.330498449 |
| 0.252755561 | 0.173482479 | 0.177085426 | 0.001288831 |
| 0.250098985 | 0.109581863 | 0.20785638  | 0.054182657 |
| 0.296023278 | 0.115922018 | 0.058881814 | 0.364850712 |
| 0.248100398 | 0.321217419 | 0.020413061 | 0.047008344 |
| 0.240063281 | 0.426134782 | 0.168994364 | 0.096614441 |
| 0.37352759  | 0.202563403 | 0.212646178 | 0.427188848 |
| 0.357076517 | 0.396791504 | 0.052162802 | 0.218921328 |
| 0.178201045 | 0.380050036 | 0.265386633 | 0.337457114 |
| 0.269711191 | 0.201443782 | 0.106748937 | 0.318481089 |
| 0.201256017 | 0.219199161 | 0.123423506 | 0.456772794 |
| 0.001498105 | 0.301713135 | 0.231636792 | 0.044829254 |
| 0.457822835 | 0.343126421 | 0.117930267 | 0.162826597 |
| 0.36407091  | 0.459477755 | 0.298958239 | 0.245288455 |
| 0.066074738 | 0.014008656 | 0.377182712 | 0.363317462 |
| 0.320033842 | 0.282595396 | 0.182524755 | 0.035720405 |
| 0.37657959  | 0.121279276 | 0.241144779 | 0.12990086  |
| 0.227857799 | 0.180584814 | 0.247367364 | 0.159879539 |
| 0.004457915 | 0.196763207 | 0.17803294  | 0.141581467 |
| 0.193184286 | 0.147500997 | 0.369673153 | 0.383944084 |
| 0.231508913 | 0.088095414 | 0.19439943  | 0.196100367 |
| 0.269636794 | 0.434210456 | 0.029153538 | 0.361784427 |
| 0.395976669 | 0.254439905 | 0.380483699 | 0.37782503  |
| 0.197293223 | 0.45921562  | 0.38090045  | 0.26228856  |
| 0.000858172 | 0.232798639 | 0.188813011 | 0.425571477 |
| 0.279147224 | 0.297250055 | 0.067334647 | 0.145434652 |
| 0.003518619 | 0.20532806  | 0.07240822  | 0.452552088 |
| 0.363422533 | 0.10061031  | 0.022661155 | 0.351725308 |
| 0.175170122 | 0.024369917 | 0.422537005 | 0.24552509  |
| 0.428298197 | 0.26459318  | 0.251342039 | 0.215149313 |
| 0.049771808 | 0.177672748 | 0.078769608 | 0.287697488 |
| 0.198215012 | 0.025459677 | 0.142972092 | 0.389193968 |
| 0.329511021 | 0.428553446 | 0.283674956 | 0.00756597  |
| 0.185181714 | 0.098351159 | 0.305517232 | 0.175846725 |
| 0.349610371 | 0.42155432  | 0.460235037 | 0.255458438 |
| 0.237388133 | 0.436011114 | 0.421015827 | 0.35274139  |
| 0.086829259 | 0.207863688 | 0.249456033 | 0.09884083  |
| 0.121973897 | 0.376412068 | 0.193824065 | 0.263646132 |
| 0.280004828 | 0.090380511 | 0.273017998 | 0.129967503 |
| 0.466273366 | 0.354891571 | 0.126713508 | 0.159250233 |
| 0.45432009  | 0.260967513 | 0.239547288 | 0.262596297 |
| 0.324422161 | 0.027074919 | 0.042773912 | 0.359154268 |
| 0.48961326  | 0.408625799 | 0.30445555  | 0.140468275 |
| 0.319443804 | 0.103821602 | 0.310286283 | 0.304281662 |
| 0.222256469 | 0.131415571 | 0.185263575 | 0.023179249 |
| 0.016845925 | 0.085453384 | 0.458115253 | 0.460823215 |
| 0.154179426 | 0.213273958 | 0.271969205 | 0.310010367 |
| 0.333393303 | 0.17486487  | 0.310460747 | 0.211125312 |

|             |             |             |             |
|-------------|-------------|-------------|-------------|
| 0.498032627 | 0.124021152 | 0.448030572 | 0.194190828 |
| 0.294823175 | 0.266306714 | 0.339917808 | 0.009138656 |
| 0.209771447 | 0.176651027 | 0.057399484 | 0.272356392 |
| 0.239447506 | 0.211048977 | 0.428504904 | 0.171694588 |
| 0.095340851 | 0.004095203 | 0.312982683 | 0.136831604 |
| 0.37794472  | 0.090490191 | 0.210284261 | 0.039303075 |
| 0.457939563 | 0.186133939 | 0.254068643 | 0.101925567 |
| 0.242548125 | 0.014862353 | 0.208026524 | 0.066822314 |
| 0.286842785 | 0.397983247 | 0.19316855  | 0.124129498 |
| 0.069423142 | 0.30115813  | 0.364421476 | 0.271605129 |
| 0.372009535 | 0.046105017 | 0.366366745 | 0.204175267 |
| 0.191081664 | 0.18353498  | 0.315271623 | 0.224992117 |
| 0.327637032 | 0.102763596 | 0.226516266 | 0.106547214 |
| 0.332606206 | 0.240036057 | 0.288107939 | 0.10682742  |
| 0.125660537 | 0.265633822 | 0.240238983 | 0.224634613 |
| 0.224606641 | 0.156194896 | 0.132847457 | 0.482238498 |
| 0.11421658  | 0.148967776 | 0.057907482 | 0.054896751 |
| 0.126897712 | 0.236074139 | 0.288971687 | 0.328106439 |
| 0.374511943 | 0.092498499 | 0.17544553  | 0.146171014 |
| 0.043536905 | 0.181422636 | 0.355393457 | 0.101526796 |
| 0.263224678 | 0.09721763  | 0.001471649 | 0.124011695 |
| 0.371502445 | 0.16401057  |             |             |
| ANXA2       | 0.408974785 | 0.492416407 | 0.072789535 |
| 0.02781784  | 0.120140145 | 0.24333293  | 0.228246503 |
| 0.42961475  | 0.12250904  | 0.136186837 | 0.337569351 |
| 0.002890074 | 0.464210982 | 0.020051671 | 0.093535931 |
| 0.498656412 | 0.509523008 | 0.355645795 | 1           |
| 0.380643811 | 0.145634629 | 0.40794944  | 0.394379225 |
| 0.269004717 | 0.002877012 | 0.123439823 | 0.046147864 |
| 0.450941918 | 0.499488751 | 0.224736563 | 0.286143331 |
| 0.481697163 | 0.499250735 | 0.417061762 | 0.34269013  |
| 0.28228027  | 0.464784227 | 0.175983362 | 0.494120406 |
| 0.448878676 | 0.22791592  | 0.505514945 | 0.018871338 |
| 0.003881161 | 0.105392133 | 0.405564834 | 0.42114923  |
| 0.368221697 | 0.22613046  | 0.191572047 | 0.173700797 |
| 0.211761212 | 0.372311924 | 0.456545192 | 0.216757352 |
| 0.420686367 | 0.004232965 | 0.454044228 | 0.320485404 |
| 0.073074432 | 0.354968806 | 0.423250776 | 0.452181993 |
| 0.2570539   | 0.436332895 | 0.510121813 | 0.036419545 |
| 0.076782231 | 0.494747351 | 0.469357977 | 0.437389925 |
| 0.492057769 | 0.353826049 | 0.305450874 | 0.447056463 |
| 0.491760419 | 0.471894662 | 0.313926262 | 0.205498968 |
| 0.001375203 | 0.150961223 | 0.335728045 | 0.414671109 |
| 0.46865312  | 0.373498477 | 0.459602922 | 0.223507138 |
| 0.471253088 | 0.02248605  | 0.416221201 | 0.510665729 |
| 0.023511204 | 0.4841355   | 0.013743386 | 0.186338774 |
| 0.494159902 | 0.476512338 | 0.456625811 | 0.073854884 |
| 0.017780131 | 0.153664394 | 0.205687497 | 0.430016752 |
| 0.459852423 | 0.494503673 | 0.417517451 | 0.226666759 |
| 0.424229915 | 0.197990033 | 0.387130411 | 0.457152044 |
| 0.492980156 | 0.012724293 | 0.198294974 | 0.233656109 |
| 0.3763106   | 0.141508201 | 0.243081104 | 0.051839204 |
| 0.012388917 | 0.040169457 | 0.490885422 | 0.185084396 |
| 0.100372732 | 0.208966987 | 0.089283712 | 0.478016028 |

|             |             |             |             |
|-------------|-------------|-------------|-------------|
| 0.421519222 | 0.466420521 | 0.127450585 | 0.260817909 |
| 0.492708766 | 0.260688798 | 0.43277258  | 0.506069868 |
| 0.407904254 | 0.31066655  | 0.165456864 | 0.482147727 |
| 0.447711269 | 0.074644082 | 0.089543766 | 0.340038354 |
| 0.443004459 | 0.502269742 | 0.506109459 | 0.364366265 |
| 0.27269324  | 0.279233215 | 0.328241035 | 0.402790427 |
| 0.259437538 | 0.417739386 | 0.14557324  | 0.385044407 |
| 0.416240349 | 0.050955278 | 0.071597424 | 0.503390378 |
| 0.055793395 | 0.26138319  | 0.4642053   | 0.503234419 |
| 0.503660461 | 0.037186998 | 0.230723064 | 0.268662332 |
| 0.329419907 | 0.257276847 | 0.458463413 | 0.212928148 |
| 0.34017875  | 0.328703119 | 0.051673724 | 0.434234774 |
| 0.134278886 | 0.377929733 | 0.358595397 | 0.086998635 |
| 0.476641452 | 0.420161705 | 0.48934743  | 0.474694307 |
| 0.464251493 | 0.003642558 | 0.134730855 | 0.424045592 |
| 0.316024332 | 0.45905699  | 0.485184308 | 0.124747667 |
| 0.289733197 | 0.405142289 | 0.161186978 | 0.349693893 |
| 0.464942022 | 0.22735616  | 0.201243584 | 0.000748148 |
| 0.151611631 | 0.405473729 | 0.478510921 | 0.069175845 |
| 0.240543223 | 0.125144712 | 0.167086934 | 0.501169264 |
| 0.213467964 | 0.510345304 | 0.044567286 | 0.251437222 |
| 0.278645524 | 0.440961387 | 0.409109272 | 0.318908768 |
| 0.481003663 | 0.323419463 | 0.447555312 | 0.410335826 |
| 0.298643573 | 0.358473868 | 0.260870488 | 0.31419276  |
| 0.503935815 | 0.50988901  | 0.500353126 | 0.512658825 |
| 0.273036286 | 0.457686297 | 0.371415362 | 0.291601799 |
| 0.44555405  | 0.468612973 | 0.095309044 | 0.500734258 |
| 0.000963316 | 0.376859004 | 0.464937744 | 0.266610186 |
| 0.486953617 | 0.245332057 | 0.078408398 | 0.299322067 |
| 0.511000129 | 0.500610806 | 0.480093915 | 0.478589839 |
| 0.311614335 | 0.015632429 | 0.495444391 | 0.434031853 |
| 0.503643203 | 0.433578796 | 0.37621289  | 0.142738508 |
| 0.510680434 | 0.440092528 | 0.444849934 | 0.458609287 |
| 0.49187899  | 0.458381911 | 0.282516857 | 0.43799386  |
| 0.024021533 | 0.256064639 | 0.459163063 | 0.191544183 |
| 0.315652003 | 0.200582964 | 0.498639284 | 0.350555233 |
| 0.424555474 | 0.350826926 | 0.363080434 | 0.084745215 |
| 0.18912582  | 0.494832492 | 0.073196258 | 0.490327047 |
| 0.509279648 | 0.417793426 | 0.505447822 | 0.506868844 |
| 0.348720607 | 0.404264585 | 0.500787693 | 0.47650715  |
| 0.001651384 | 0.465745603 | 0.457235833 | 0.366168413 |
| 0.486584352 | 0.302115425 | 0.341078018 | 0.476832686 |
| 0.002292368 | 0.166877348 | 0.296727451 | 0.484482124 |
| 0.510505717 | 0.030851186 | 0.081627219 | 0.505367207 |
| 0.465817878 | 0.068897171 | 0.50347337  | 0.338609731 |
| 0.487735965 | 0.465346023 | 0.172005855 | 0.469156295 |
| 0.268935456 | 0.456055717 | 0.031925842 | 0.457106843 |
| 0.481304358 | 0.1485157   | 0.077740134 | 0.505875772 |
| 0.475823741 | 0.407433455 | 0.272566449 | 0.007878847 |
| 0.430628182 | 0.216603823 | 0.492607386 | 0.139966198 |
| 0.471217757 | 0.382021382 | 0.481304924 | 0.496990823 |
| 0.49157025  | 0.429570027 | 0.390476596 | 0.487597977 |
| 0.13382139  | 0.467974729 | 0.475453348 | 0.05856446  |
| 0.446587843 | 0.512280747 | 0.422328444 | 0.180589872 |

|             |             |             |             |
|-------------|-------------|-------------|-------------|
| 0.417433525 | 0.095191764 | 0.211903755 | 0.400024217 |
| 0.470770818 | 0.502085402 | 0.059588338 | 0.209362538 |
| 0.420169965 | 0.333105999 | 0.115559166 | 0.400210191 |
| 0.29556121  | 0.228569703 | 0.231800786 | 0.401463323 |
| 0.461817005 | 0.299139024 | 0.487873008 | 0.150479956 |
| 0.510051278 | 0.062997542 | 0.498374042 | 0.287758485 |
| 0.316669075 | 0.443322346 | 0.434917898 | 0.180594028 |
| 0.022783101 | 0.148704642 | 0.40682157  | 0.422206083 |
| 0.081353926 | 0.214330632 | 0.258075821 | 0.353015212 |
| 0.50494693  | 0.442671365 | 0.28966478  | 0.396338317 |
| 0.412648372 | 0.100450419 | 0.480802202 | 0.377174003 |
| 0.452600757 | 0.340314213 | 0.500423936 | 0.011116482 |
| 0.497230201 | 0.164493661 | 0.302470064 | 0.368272635 |
| 0.464423487 | 0.138473187 | 0.39781525  | 0.186854292 |
| 0.200801862 | 0.006428843 | 0.40434473  | 0.42383285  |
| 0.290041304 | 0.3914864   | 0.416907723 | 0.219690029 |
| 0.497594585 | 0.427941558 | 0.461972427 | 0.384924863 |
| 0.385922654 | 0.031541214 | 0.149321551 | 0.039107161 |
| 0.439867652 | 0.418725518 | 0.479270354 | 0.43103243  |
| 0.286575812 | 0.487532038 | 0.416794839 | 0.429561082 |
| 0.506893446 | 0.192414615 | 0.505766446 | 0.374991974 |
| 0.435199597 | 0.413639223 | 0.275930619 | 0.378387644 |
| 0.20438962  | 0.169295334 | 0.131468533 | 0.210794447 |
| 0.504832351 | 0.376513134 | 0.401205756 | 0.357472539 |
| 0.048818972 | 0.403014947 | 0.494353626 | 0.489204435 |
| 0.45617114  | 0.44164659  | 0.450600005 | 0.401997211 |
| 0.35587857  | 0.346974471 | 0.054775143 | 0.028697281 |
| 0.265290828 | 0.195202869 | 0.47388903  | 0.50093137  |
| 0.511835402 | 0.369695377 | 0.104515445 | 0.166484637 |
| 0.206035498 | 0.448663212 | 0.273889081 | 0.206300375 |
| 0.488969999 | 0.391356687 | 0.000839459 | 0.287721871 |
| 0.403795214 | 0.426001043 |             |             |
| ANXA4       | 0.235840898 | 0.371813322 | 0.086432355 |
| 0.005515495 | 0.039879509 | 0.1925889   | 0.117780541 |
| 0.186839696 | 0.125440643 | 0.066161869 | 0.265826552 |
| 0.025770927 | 0.223539139 | 0.087864746 | 0.098066444 |
| 0.37828513  | 0.361853149 | 0.143228259 | 0.380643811 |
| 1           | 0.042626527 | 0.338257189 | 0.197062732 |
| 0.168225156 | 0.029956821 | 0.062093319 | 0.015091499 |
| 0.14491268  | 0.355323995 | 0.171447057 | 0.133667615 |
| 0.351024783 | 0.26639762  | 0.107748714 | 0.067388339 |
| 0.036874255 | 0.390447087 | 0.019987486 | 0.194583903 |
| 0.269560524 | 0.089050576 | 0.273953648 | 0.042330565 |
| 0.000241903 | 0.073590484 | 0.151509283 | 0.298812901 |
| 0.220423789 | 0.171528734 | 0.158812602 | 0.071085373 |
| 0.038404638 | 0.293666936 | 0.389700202 | 0.032137818 |
| 0.324582226 | 0.000866097 | 0.362062046 | 0.237261142 |
| 0.091029494 | 0.189202507 | 0.144062244 | 0.279611273 |
| 0.195035589 | 0.342704524 | 0.366898545 | 0.029483386 |
| 0.078564154 | 0.170601265 | 0.232013073 | 0.161286975 |
| 0.35553764  | 0.131807522 | 0.117055417 | 0.078668353 |
| 0.213268925 | 0.269797394 | 0.246213643 | 0.158418197 |
| 0.007951781 | 0.076429132 | 0.065398593 | 0.279146835 |
| 0.143904497 | 0.298284637 | 0.233411855 | 0.080904262 |

|             |             |             |             |
|-------------|-------------|-------------|-------------|
| 0.14359958  | 0.058248733 | 0.253388902 | 0.376169313 |
| 0.010977677 | 0.249111042 | 0.005571715 | 0.146730107 |
| 0.312262789 | 0.317326316 | 0.299768798 | 0.0586479   |
| 0.05293931  | 0.181301884 | 0.213837526 | 0.26169571  |
| 0.211771473 | 0.164567118 | 0.315780193 | 0.043784521 |
| 0.202515286 | 0.188131216 | 0.142532238 | 0.371050707 |
| 0.378509584 | 0.041002865 | 0.217193425 | 0.169260552 |
| 0.089788117 | 0.034832707 | 0.131558397 | 0.02081824  |
| 0.009346482 | 0.078522824 | 0.336371116 | 0.189411029 |
| 0.052689783 | 0.113650199 | 0.034891854 | 0.15508279  |
| 0.17075807  | 0.348608438 | 0.044667982 | 0.116643983 |
| 0.189336855 | 0.133892907 | 0.097527354 | 0.230777085 |
| 0.073963757 | 0.238131184 | 0.173231498 | 0.315844756 |
| 0.405106107 | 0.070118137 | 0.107852078 | 0.259320672 |
| 0.189399507 | 0.365514968 | 0.396234391 | 0.202131975 |
| 0.073938391 | 0.188525703 | 0.117623997 | 0.200092414 |
| 0.157663087 | 0.240607009 | 0.04968589  | 0.294737892 |
| 0.350138352 | 0.019407066 | 0.094146909 | 0.305799742 |
| 0.007354778 | 0.0978552   | 0.380487124 | 0.269870721 |
| 0.173696909 | 0.013020999 | 0.08864025  | 0.145904506 |
| 0.234831793 | 0.125901831 | 0.266529509 | 0.077645823 |
| 0.282557842 | 0.111371534 | 0.0565903   | 0.200966632 |
| 0.122867979 | 0.285517449 | 0.092493104 | 0.028377834 |
| 0.254224122 | 0.205203622 | 0.318252284 | 0.234474169 |
| 0.274077311 | 0.000609363 | 0.065853113 | 0.27132144  |
| 0.135439163 | 0.29015935  | 0.362769848 | 0.118481465 |
| 0.250805087 | 0.081441536 | 0.148729359 | 0.081786572 |
| 0.380305457 | 0.106888064 | 0.0955975   | 0.008069605 |
| 0.089741446 | 0.103125723 | 0.149392847 | 0.16710163  |
| 0.078252007 | 0.163106318 | 0.167873458 | 0.314933064 |
| 0.156833319 | 0.228650366 | 0.117725626 | 0.094486955 |
| 0.160308026 | 0.234024009 | 0.10136103  | 0.201962204 |
| 0.235328055 | 0.147343117 | 0.283893214 | 0.339254854 |
| 0.086670629 | 0.278416912 | 0.061536312 | 0.199397361 |
| 0.153535129 | 0.29649654  | 0.255063076 | 0.258093493 |
| 0.142479175 | 0.29356377  | 0.117704096 | 0.25154375  |
| 0.252166002 | 0.208595141 | 0.140588725 | 0.382148401 |
| 0.010392723 | 0.246323327 | 0.150537609 | 0.076030017 |
| 0.346778078 | 0.14565355  | 0.126735129 | 0.238486061 |
| 0.386519057 | 0.390503619 | 0.390925962 | 0.28776621  |
| 0.117199049 | 0.081385091 | 0.410827112 | 0.294085412 |
| 0.346103644 | 0.140335196 | 0.054873913 | 0.059364427 |
| 0.343122834 | 0.193963867 | 0.235687022 | 0.176035212 |
| 0.139133137 | 0.087794605 | 0.184457467 | 0.277292082 |
| 0.028119392 | 0.154187035 | 0.218209075 | 0.059611929 |
| 0.110791446 | 0.12410074  | 0.269739665 | 0.275684225 |
| 0.082121754 | 0.152752674 | 0.072926    | 0.06349289  |
| 0.132607764 | 0.386982285 | 0.007731833 | 0.413420576 |
| 0.387948949 | 0.205117094 | 0.305864136 | 0.401226291 |
| 0.228778508 | 0.288305355 | 0.334477835 | 0.343800194 |
| 0.010643109 | 0.255514505 | 0.176915925 | 0.329527008 |
| 0.300294435 | 0.22330616  | 0.140225574 | 0.087795707 |
| 0.004795613 | 0.152888197 | 0.047909245 | 0.422535154 |
| 0.285923468 | 0.035010789 | 0.005493475 | 0.271679945 |

|             |             |             |             |
|-------------|-------------|-------------|-------------|
| 0.161157177 | 0.024823417 | 0.408673439 | 0.153576894 |
| 0.301417144 | 0.143090231 | 0.095766637 | 0.213382412 |
| 0.040887273 | 0.152879275 | 0.011685771 | 0.187610684 |
| 0.114259424 | 0.07023633  | 0.025636216 | 0.398116596 |
| 0.365040841 | 0.235390619 | 0.192988326 | 0.010513213 |
| 0.292716568 | 0.048943775 | 0.227273934 | 0.115355543 |
| 0.363121529 | 0.284431094 | 0.330851003 | 0.234752401 |
| 0.200312112 | 0.31031368  | 0.326080932 | 0.323767727 |
| 0.022767614 | 0.254878537 | 0.305519207 | 0.052517389 |
| 0.181089728 | 0.314825185 | 0.113816488 | 0.130723265 |
| 0.313487616 | 0.013230529 | 0.180614602 | 0.240382292 |
| 0.314826966 | 0.308501802 | 0.075825499 | 0.211041201 |
| 0.3035004   | 0.171466929 | 0.081925236 | 0.173400974 |
| 0.25491373  | 0.051042275 | 0.089636223 | 0.29962806  |
| 0.359833324 | 0.217706208 | 0.325232134 | 0.049376397 |
| 0.295719544 | 0.110853779 | 0.33315164  | 0.12068427  |
| 0.242264196 | 0.172827287 | 0.266328978 | 0.102917152 |
| 0.023067609 | 0.202006942 | 0.2725769   | 0.342660861 |
| 0.096569595 | 0.179696641 | 0.120479466 | 0.136598688 |
| 0.344646751 | 0.132300434 | 0.222337489 | 0.203486778 |
| 0.344065911 | 0.023830622 | 0.416703632 | 0.224912374 |
| 0.36064514  | 0.123237439 | 0.28882782  | 0.006886369 |
| 0.199411816 | 0.080005635 | 0.167935341 | 0.107305547 |
| 0.311600567 | 0.110788015 | 0.217618928 | 0.190402214 |
| 0.052789921 | 0.013039443 | 0.333559471 | 0.065334738 |
| 0.256974352 | 0.125464047 | 0.198674224 | 0.025556093 |
| 0.416261864 | 0.229846448 | 0.332488672 | 0.077916244 |
| 0.132420286 | 0.001792966 | 0.069156316 | 0.08916523  |
| 0.359723821 | 0.317765902 | 0.24471028  | 0.195282617 |
| 0.229139983 | 0.17900365  | 0.259647607 | 0.095485704 |
| 0.292072291 | 0.047895502 | 0.365263512 | 0.195170425 |
| 0.219749817 | 0.161605572 | 0.202228217 | 0.159354414 |
| 0.082727009 | 0.079200962 | 0.106602419 | 0.254326396 |
| 0.297335495 | 0.134067364 | 0.120859716 | 0.20251101  |
| 0.048546625 | 0.139938713 | 0.269457205 | 0.212318752 |
| 0.196484873 | 0.215334065 | 0.146034504 | 0.329591227 |
| 0.158331663 | 0.226373104 | 0.010213678 | 0.009689046 |
| 0.056070805 | 0.122081143 | 0.399663425 | 0.350352665 |
| 0.361107423 | 0.14189497  | 0.107335788 | 0.201172248 |
| 0.036706924 | 0.289410265 | 0.149439337 | 0.023409806 |
| 0.191390874 | 0.13018215  | 0.00410464  | 0.259598403 |
| 0.313153888 | 0.107676202 |             |             |
| AP1S2       | 0.060468078 | 0.21967205  | 0.010377462 |
| 0.023234568 | 0.013820893 | 0.16890163  | 0.164843808 |
| 0.039192961 | 0.009995271 | 0.146652999 | 0.192790452 |
| 2.06E-05    | 0.080961758 | 0.000503742 | 0.001762289 |
| 0.167765029 | 0.172621451 | 0.133538598 | 0.145634629 |
| 0.042626527 | 1           | 0.100197973 | 0.203503778 |
| 0.147847879 | 4.40E-05    | 0.114405714 | 0.099483719 |
| 0.031961773 | 0.141763241 | 0.060768389 | 0.058516131 |
| 0.145706136 | 0.148479708 | 0.079749721 | 0.020956994 |
| 0.038758239 | 0.204476772 | 0.001535095 | 0.119698836 |
| 0.090541906 | 0.133140469 | 0.146872379 | 0.00084891  |
| 0.008906838 | 0.061176782 | 0.024748174 | 0.125079758 |

|             |             |             |             |
|-------------|-------------|-------------|-------------|
| 0.030511794 | 0.144935408 | 0.051719848 | 0.186015596 |
| 0.002815494 | 0.178526661 | 0.091956012 | 0.005440553 |
| 0.224937288 | 0.022606867 | 0.224763706 | 0.016313608 |
| 0.020210744 | 0.055399049 | 0.060448505 | 0.132872542 |
| 0.1728262   | 0.230218769 | 0.19088525  | 0.010761634 |
| 0.057529807 | 0.074387386 | 0.135541399 | 0.242346569 |
| 0.183783546 | 0.033283682 | 0.053598006 | 0.037948587 |
| 0.138139422 | 0.095322149 | 0.097851879 | 0.017125393 |
| 0.000176127 | 0.14547146  | 0.115139396 | 0.060348027 |
| 0.076952954 | 0.188637912 | 0.06945983  | 0.102972887 |
| 0.095323384 | 0.001651863 | 0.102407094 | 0.184054722 |
| 0.010017653 | 0.092436914 | 0.000696149 | 0.008481491 |
| 0.124134564 | 0.126182359 | 0.114617378 | 0.048157562 |
| 0.000699482 | 0.012824666 | 0.002467911 | 0.090277589 |
| 0.077025479 | 0.094086604 | 0.214506695 | 0.00365716  |
| 0.07728032  | 0.01305397  | 0.050038608 | 0.238325937 |
| 0.18757736  | 0.000127951 | 0.009252118 | 0.12560523  |
| 0.015233581 | 0.066136926 | 0.109565806 | 0.001260165 |
| 0.00256371  | 5.45E-05    | 0.141603381 | 0.022034067 |
| 0.128995982 | 0.135001628 | 0.011018389 | 0.185315878 |
| 0.026158407 | 0.102604052 | 0.023313319 | 0.146695149 |
| 0.123735491 | 0.177314894 | 0.140057086 | 0.149399247 |
| 0.048440161 | 0.017625713 | 0.035874338 | 0.202261552 |
| 0.158520042 | 0.009021618 | 0.011445466 | 0.172430602 |
| 0.082599976 | 0.160373261 | 0.193214936 | 0.014617993 |
| 0.087701356 | 0.051289326 | 0.108033492 | 0.226641332 |
| 0.110342433 | 0.044260996 | 0.000398863 | 0.123862838 |
| 0.226746597 | 0.000987876 | 0.024676402 | 0.104874871 |
| 0.012796463 | 0.024190356 | 0.195763588 | 0.158272132 |
| 0.084153083 | 0.08984551  | 0.186649575 | 0.196391571 |
| 0.086655585 | 0.165562838 | 0.112792846 | 0.21271279  |
| 0.125027858 | 0.124214677 | 0.021812702 | 0.084046737 |
| 0.049384059 | 0.081790268 | 0.019834304 | 0.002873928 |
| 0.062711085 | 0.02663318  | 0.200135633 | 0.085834565 |
| 0.105100575 | 0.014783294 | 0.149920723 | 0.079899813 |
| 0.078726143 | 0.080119791 | 0.240692349 | 0.047886603 |
| 0.068425643 | 0.015244914 | 0.044979687 | 0.073120194 |
| 0.089104711 | 0.059166536 | 0.07009183  | 0.000433826 |
| 0.009798964 | 0.094293133 | 0.06512865  | 0.001882043 |
| 0.057712894 | 0.011674607 | 0.001236676 | 0.198055193 |
| 0.098171313 | 0.148941288 | 0.000236701 | 0.002800006 |
| 0.056457647 | 0.222818016 | 0.074411047 | 0.008939746 |
| 0.218068841 | 0.05871301  | 0.106449107 | 0.181700846 |
| 0.029513439 | 0.232554022 | 0.001251102 | 0.038920312 |
| 0.087444978 | 0.187247562 | 0.15135714  | 0.135867798 |
| 0.106047524 | 0.058018058 | 0.004088066 | 0.137928763 |
| 0.07321008  | 0.060712197 | 0.014748274 | 0.189672391 |
| 7.31E-05    | 0.101686306 | 0.167179242 | 0.001972313 |
| 0.237221163 | 0.18265392  | 0.01481771  | 0.02579487  |
| 0.150993547 | 0.182507226 | 0.104454437 | 0.132028261 |
| 0.00256486  | 0.000192721 | 0.150891663 | 0.165679703 |
| 0.151089452 | 0.077477039 | 0.041733139 | 0.000308307 |
| 0.168294668 | 0.036139156 | 0.184085896 | 0.083981665 |
| 0.104451876 | 0.035282113 | 0.049153545 | 0.050194791 |

|             |             |              |             |
|-------------|-------------|--------------|-------------|
| 0.000339277 | 0.12446153  | 0.135908064  | 0.051929243 |
| 0.150148225 | 0.012869278 | 0.197453316  | 0.122558788 |
| 0.055544761 | 0.019883373 | 0.13576976   | 0.048334657 |
| 0.080723273 | 0.215670594 | 0.000480931  | 0.135009453 |
| 0.17859943  | 0.069128771 | 0.206542614  | 0.160858462 |
| 0.081264939 | 0.200052758 | 0.201780552  | 0.098180717 |
| 1.04E-05    | 0.12070079  | 0.086579838  | 0.154704173 |
| 0.173307139 | 0.149230986 | 0.0111016482 | 0.057698169 |
| 1.89E-05    | 0.061494391 | 0.030939915  | 0.17447223  |
| 0.179240143 | 0.004716684 | 0.000623764  | 0.151072673 |
| 0.082813104 | 0.00040805  | 0.194124192  | 0.196047758 |
| 0.223908699 | 0.085353026 | 0.149835541  | 0.112801009 |
| 0.026159286 | 0.020735488 | 0.006239238  | 0.184590536 |
| 0.056241697 | 0.000725679 | 0.145382317  | 0.16405786  |
| 0.168809709 | 0.174643771 | 0.097977749  | 0.014879922 |
| 0.084450834 | 0.040000887 | 0.198608026  | 0.003321533 |
| 0.131231257 | 0.176414401 | 0.188267561  | 0.124622904 |
| 0.101382845 | 0.211578094 | 0.204503238  | 0.189975992 |
| 0.009062042 | 0.127624522 | 0.142590648  | 0.008942544 |
| 0.061094866 | 0.182859445 | 0.207605078  | 0.139222956 |
| 0.10065591  | 0.022623981 | 0.123171263  | 0.039606641 |
| 0.218244686 | 0.204126195 | 0.033334987  | 0.00924994  |
| 0.234920269 | 0.036482374 | 0.061816241  | 0.048274532 |
| 0.124526351 | 0.004978452 | 0.001457695  | 0.136166706 |
| 0.23195687  | 0.182138597 | 0.188283072  | 0.134718847 |
| 0.141291721 | 0.004040891 | 0.102703993  | 0.019586414 |
| 0.073148876 | 0.106226655 | 0.089465587  | 0.001090198 |
| 0.020184316 | 0.006781648 | 0.250345849  | 0.203585451 |
| 0.030622898 | 0.0567711   | 0.143495186  | 0.196187067 |
| 0.164450225 | 0.031653533 | 0.121329886  | 0.046323815 |
| 0.206258728 | 0.051759497 | 0.190312104  | 0.071530484 |
| 0.137479866 | 0.123626151 | 0.151855352  | 0.002441592 |
| 0.118765361 | 0.164612651 | 0.011296014  | 0.232113071 |
| 0.113251079 | 0.051457202 | 0.19914693   | 0.028218575 |
| 0.008223368 | 2.82E-05    | 0.0966437    | 0.066188995 |
| 0.167772601 | 0.007325942 | 0.05148454   | 0.007415727 |
| 0.202247108 | 0.103375736 | 0.149466065  | 0.012694069 |
| 0.129875526 | 0.00114797  | 0.169087742  | 0.002393607 |
| 0.121004785 | 0.135792498 | 0.08283646   | 0.073451254 |
| 0.008345454 | 0.138106243 | 0.141736435  | 0.134982384 |
| 0.197430295 | 0.00679063  | 0.186880539  | 0.026566818 |
| 0.095087476 | 0.024954446 | 0.109324887  | 0.013524004 |
| 0.112741074 | 0.002783718 | 0.045435936  | 0.007222148 |
| 0.185726451 | 0.011834229 | 0.181247144  | 0.021579477 |
| 0.013707234 | 0.076727026 | 0.087251828  | 0.128066319 |
| 0.157686629 | 0.111086151 | 0.025425676  | 0.192535718 |
| 0.011533021 | 0.041041511 | 0.038613488  | 0.070124157 |
| 0.043222677 | 0.10931714  | 0.10478194   | 0.12301339  |
| 0.162843784 | 0.007309948 | 0.032377373  | 0.015649851 |
| 0.000883755 | 0.074951498 | 0.199745152  | 0.006352942 |
| 0.094405675 | 0.016655426 | 2.22E-05     | 0.014690709 |
| 0.154595714 | 0.016549474 |              |             |
| APAF1       | 0.280538948 | 0.430054954  | 0.170814149 |
| 0.015257082 | 0.104649526 | 0.287725994  | 0.234040139 |



|             |             |             |             |
|-------------|-------------|-------------|-------------|
| 0.270993144 | 0.230342991 | 0.151757488 | 0.334089494 |
| 0.019731365 | 0.235907661 | 0.100582663 | 0.16686502  |
| 0.403610091 | 0.395075277 | 0.265896929 | 0.40794944  |
| 0.338257189 | 0.100197973 | 1           | 0.289265723 |
| 0.290243764 | 0.025392222 | 0.15361484  | 0.039027795 |
| 0.226329832 | 0.375473358 | 0.318237179 | 0.268680814 |
| 0.363539894 | 0.2973207   | 0.212092964 | 0.156434633 |
| 0.075251906 | 0.453174019 | 0.039690261 | 0.225891804 |
| 0.269887943 | 0.208148787 | 0.30256264  | 0.065866728 |
| 0.000679791 | 0.167614774 | 0.223976165 | 0.334102215 |
| 0.346137104 | 0.285687412 | 0.298978692 | 0.171167556 |
| 0.058468383 | 0.357900831 | 0.379110904 | 0.054124134 |
| 0.405117658 | 0.002320038 | 0.43408612  | 0.289132705 |
| 0.177200138 | 0.336638192 | 0.220827725 | 0.311765545 |
| 0.280664371 | 0.421540721 | 0.41806957  | 0.074103395 |
| 0.166123713 | 0.263012405 | 0.245856056 | 0.23191561  |
| 0.397793196 | 0.256049902 | 0.251840606 | 0.149255967 |
| 0.237901951 | 0.272998925 | 0.334307859 | 0.295298303 |
| 0.008350034 | 0.181684588 | 0.152378861 | 0.250261195 |
| 0.16634842  | 0.364132889 | 0.264345518 | 0.192924724 |
| 0.235760534 | 0.100525442 | 0.34009927  | 0.416381634 |
| 0.026400266 | 0.264934426 | 0.014438054 | 0.277177569 |
| 0.329780837 | 0.325571704 | 0.296863085 | 0.135131863 |
| 0.080115597 | 0.294823235 | 0.236339511 | 0.261547027 |
| 0.310674014 | 0.27323121  | 0.392723684 | 0.062534445 |
| 0.208073459 | 0.286527151 | 0.29234001  | 0.437946536 |
| 0.412027562 | 0.05626954  | 0.321735659 | 0.282962259 |
| 0.175531631 | 0.087581394 | 0.263743171 | 0.031969185 |
| 0.02075455  | 0.068867341 | 0.350665087 | 0.319845867 |
| 0.131189891 | 0.247459052 | 0.08793062  | 0.211094897 |
| 0.259615948 | 0.343015336 | 0.11877956  | 0.254241354 |
| 0.215735286 | 0.247546479 | 0.210995835 | 0.266378995 |
| 0.165474049 | 0.344697214 | 0.295781295 | 0.387519211 |
| 0.45431897  | 0.149391923 | 0.196971437 | 0.323723147 |
| 0.201898821 | 0.392348137 | 0.440126141 | 0.341258046 |
| 0.182987115 | 0.342195499 | 0.212658065 | 0.273356939 |
| 0.280048827 | 0.334370293 | 0.059155549 | 0.350328331 |
| 0.426932674 | 0.031901401 | 0.180986676 | 0.321120589 |
| 0.023174058 | 0.218126577 | 0.42777853  | 0.31824806  |
| 0.250129228 | 0.033389996 | 0.19509439  | 0.267648424 |
| 0.349464352 | 0.264637701 | 0.309753599 | 0.170271963 |
| 0.343757003 | 0.204227913 | 0.125634909 | 0.209736331 |
| 0.243480031 | 0.355988802 | 0.148270065 | 0.05007084  |
| 0.265728098 | 0.3226421   | 0.366748732 | 0.304804351 |
| 0.268389674 | 0.001855981 | 0.149403346 | 0.291609171 |
| 0.224023662 | 0.288151724 | 0.43185797  | 0.23563338  |
| 0.353177916 | 0.148349013 | 0.278566886 | 0.19301642  |
| 0.367984612 | 0.206329931 | 0.192223807 | 0.008847193 |
| 0.202011418 | 0.179450938 | 0.274466699 | 0.208580174 |
| 0.189972521 | 0.250662156 | 0.207231307 | 0.364207678 |
| 0.292683299 | 0.272710754 | 0.123581724 | 0.122478543 |
| 0.307693378 | 0.303110318 | 0.201400293 | 0.278560905 |
| 0.292519852 | 0.278390621 | 0.285105262 | 0.398278054 |
| 0.203395108 | 0.341344572 | 0.087538502 | 0.340688684 |

|             |             |             |             |
|-------------|-------------|-------------|-------------|
| 0.208879792 | 0.346152099 | 0.283229885 | 0.303245365 |
| 0.292142131 | 0.284574099 | 0.183503393 | 0.325068202 |
| 0.330207055 | 0.311605927 | 0.237886788 | 0.440507875 |
| 0.010046717 | 0.337753628 | 0.237653849 | 0.09953631  |
| 0.413239526 | 0.247934547 | 0.215022801 | 0.361585224 |
| 0.414821717 | 0.447674421 | 0.394399009 | 0.301224568 |
| 0.173312244 | 0.087572426 | 0.440440751 | 0.343236183 |
| 0.370085353 | 0.288929042 | 0.120350087 | 0.080579069 |
| 0.386363943 | 0.216852658 | 0.276716377 | 0.241953125 |
| 0.21659126  | 0.172057522 | 0.337255333 | 0.254290301 |
| 0.024945998 | 0.284888274 | 0.241830887 | 0.125507906 |
| 0.220886061 | 0.225218915 | 0.321144749 | 0.333573526 |
| 0.176418719 | 0.222825034 | 0.156823946 | 0.147846244 |
| 0.265077283 | 0.439644649 | 0.015578409 | 0.435402229 |
| 0.42811431  | 0.322037771 | 0.356846199 | 0.432200772 |
| 0.352309566 | 0.361251575 | 0.382966952 | 0.344378029 |
| 0.009766358 | 0.271143685 | 0.194261465 | 0.390650528 |
| 0.324717309 | 0.317911423 | 0.183327224 | 0.167135326 |
| 0.007201167 | 0.283318968 | 0.089991652 | 0.471979371 |
| 0.334393692 | 0.082381858 | 0.010958508 | 0.321008109 |
| 0.179889426 | 0.036461121 | 0.454607463 | 0.281158223 |
| 0.365619904 | 0.272773804 | 0.214554074 | 0.233110436 |
| 0.071852076 | 0.261858229 | 0.031093468 | 0.25866952  |
| 0.217811441 | 0.083817992 | 0.068855129 | 0.43131361  |
| 0.392314407 | 0.304600731 | 0.314992876 | 0.017834044 |
| 0.275730351 | 0.101672895 | 0.273259783 | 0.221615122 |
| 0.395194371 | 0.349781322 | 0.398642349 | 0.261063532 |
| 0.274787829 | 0.380542186 | 0.386846948 | 0.361949196 |
| 0.051175667 | 0.265393983 | 0.317797698 | 0.10916454  |
| 0.211013104 | 0.360465927 | 0.212529459 | 0.241519321 |
| 0.344771619 | 0.034852667 | 0.284899468 | 0.314172444 |
| 0.386335532 | 0.351240872 | 0.151660933 | 0.32738538  |
| 0.374042415 | 0.328694871 | 0.18610036  | 0.325890841 |
| 0.329923808 | 0.073308779 | 0.111575312 | 0.34480235  |
| 0.432389876 | 0.29032753  | 0.35158808  | 0.113668028 |
| 0.329845852 | 0.18865339  | 0.354283904 | 0.261829676 |
| 0.355578689 | 0.199946699 | 0.258731718 | 0.117949102 |
| 0.036473368 | 0.273340041 | 0.347886039 | 0.41183428  |
| 0.189589716 | 0.322314147 | 0.259399603 | 0.250755833 |
| 0.373168895 | 0.241056796 | 0.320544328 | 0.345702093 |
| 0.421010144 | 0.060190209 | 0.470273194 | 0.353085353 |
| 0.373304964 | 0.261826217 | 0.332249285 | 0.013619944 |
| 0.227424845 | 0.173333628 | 0.200559546 | 0.218643531 |
| 0.313276003 | 0.228603232 | 0.286907398 | 0.317676711 |
| 0.105488855 | 0.016815345 | 0.358679749 | 0.13081274  |
| 0.317540892 | 0.18275521  | 0.341006451 | 0.045448235 |
| 0.469057436 | 0.314897935 | 0.339297953 | 0.130987774 |
| 0.265045715 | 0.004223973 | 0.157609631 | 0.141123626 |
| 0.372155376 | 0.371973167 | 0.269413473 | 0.263108351 |
| 0.265056387 | 0.244832519 | 0.319719968 | 0.210212383 |
| 0.34120445  | 0.082755637 | 0.401499786 | 0.328304412 |
| 0.227487497 | 0.28351102  | 0.310808581 | 0.296465948 |
| 0.200477639 | 0.149330384 | 0.222654877 | 0.325975387 |
| 0.335541094 | 0.255759792 | 0.242740419 | 0.282027559 |

|             |             |             |             |
|-------------|-------------|-------------|-------------|
| 0.110427003 | 0.285927593 | 0.283389583 | 0.235070111 |
| 0.269880546 | 0.215562031 | 0.238795757 | 0.404723681 |
| 0.239333099 | 0.33553124  | 0.027097315 | 0.024583266 |
| 0.114972605 | 0.251704627 | 0.396513743 | 0.377690546 |
| 0.399351194 | 0.209130991 | 0.213085882 | 0.311602283 |
| 0.058251681 | 0.274769855 | 0.250617547 | 0.053619008 |
| 0.268189661 | 0.189641221 | 0.005837639 | 0.341920697 |
| 0.359089494 | 0.201485395 |             |             |
| APEX1       | 0.188974143 | 0.464115204 | 0.12718468  |
| 0.056169674 | 0.128459039 | 0.261781215 | 0.236735029 |
| 0.183092039 | 0.141202512 | 0.239478591 | 0.358978591 |
| 0.002708833 | 0.230511276 | 0.027604406 | 0.067789839 |
| 0.415066701 | 0.413713206 | 0.248925119 | 0.394379225 |
| 0.197062732 | 0.203503778 | 0.289265723 | 1           |
| 0.252964993 | 0.004110014 | 0.18814342  | 0.141977856 |
| 0.157829143 | 0.377387857 | 0.210520491 | 0.301631866 |
| 0.363243018 | 0.335680491 | 0.244884794 | 0.188643534 |
| 0.10985698  | 0.463792971 | 0.03232312  | 0.258948274 |
| 0.256053285 | 0.257280733 | 0.334143441 | 0.025543088 |
| 0.004565235 | 0.162450936 | 0.146696194 | 0.304975822 |
| 0.180712801 | 0.248263825 | 0.184635118 | 0.223198038 |
| 0.06128989  | 0.361283233 | 0.301537016 | 0.059959557 |
| 0.441990557 | 0.014981154 | 0.462083953 | 0.142658077 |
| 0.10947011  | 0.221884337 | 0.17176136  | 0.297026151 |
| 0.277643035 | 0.460266078 | 0.439907481 | 0.083586223 |
| 0.134892719 | 0.210766733 | 0.28307163  | 0.2955384   |
| 0.414593998 | 0.286451189 | 0.258075737 | 0.134072139 |
| 0.276514788 | 0.268363308 | 0.244418528 | 0.172084375 |
| 0.002965409 | 0.206764378 | 0.220441724 | 0.195007984 |
| 0.183466361 | 0.380267138 | 0.199472162 | 0.225084235 |
| 0.231575253 | 0.047142665 | 0.263948074 | 0.438422248 |
| 0.045451909 | 0.24942164  | 0.011987311 | 0.143948343 |
| 0.326563212 | 0.331055006 | 0.284735515 | 0.151150759 |
| 0.029716571 | 0.130225326 | 0.092077095 | 0.25436853  |
| 0.226585434 | 0.245046863 | 0.420502446 | 0.033802763 |
| 0.211898276 | 0.183475652 | 0.23133884  | 0.482345986 |
| 0.429408703 | 0.011880093 | 0.140259575 | 0.238470757 |
| 0.171028662 | 0.141723261 | 0.229970845 | 0.034325122 |
| 0.030840435 | 0.010500729 | 0.355418422 | 0.181889084 |
| 0.179368523 | 0.242062347 | 0.127652273 | 0.266813197 |
| 0.162480508 | 0.306124509 | 0.13109531  | 0.259440898 |
| 0.255517363 | 0.249381803 | 0.254286551 | 0.303970818 |
| 0.181984681 | 0.174321199 | 0.188938427 | 0.422902933 |
| 0.41372886  | 0.1272018   | 0.14037108  | 0.325753703 |
| 0.211165188 | 0.402718448 | 0.457940251 | 0.194693329 |
| 0.223917264 | 0.20608751  | 0.258367952 | 0.339385844 |
| 0.227461247 | 0.185724741 | 0.025252519 | 0.313492757 |
| 0.454785007 | 0.028452372 | 0.121126596 | 0.30182817  |
| 0.052266472 | 0.202530649 | 0.436360763 | 0.347249794 |
| 0.209292618 | 0.127859591 | 0.286570353 | 0.271575636 |
| 0.238852828 | 0.273936607 | 0.271190882 | 0.274769923 |
| 0.289999435 | 0.266185032 | 0.097281971 | 0.217908415 |
| 0.169273589 | 0.23667984  | 0.147203401 | 0.042051867 |
| 0.204865848 | 0.18501411  | 0.41431771  | 0.228346401 |

|             |             |             |             |
|-------------|-------------|-------------|-------------|
| 0.260395465 | 0.014410254 | 0.250803603 | 0.218765254 |
| 0.248272017 | 0.254754923 | 0.484019213 | 0.154368627 |
| 0.212741144 | 0.110711286 | 0.169635597 | 0.213786252 |
| 0.293702896 | 0.264615774 | 0.253146475 | 0.005341881 |
| 0.169313646 | 0.210938914 | 0.209701073 | 0.069236447 |
| 0.241061456 | 0.169651958 | 0.068473216 | 0.406952038 |
| 0.230092653 | 0.314333844 | 0.024546743 | 0.047459884 |
| 0.26282143  | 0.369726296 | 0.253520888 | 0.181710768 |
| 0.363698615 | 0.288484912 | 0.287089182 | 0.391091863 |
| 0.191509488 | 0.39162415  | 0.047153917 | 0.205689375 |
| 0.20117233  | 0.391193021 | 0.329549653 | 0.321940182 |
| 0.263563068 | 0.208920498 | 0.138568959 | 0.28702274  |
| 0.230032698 | 0.210967031 | 0.139855325 | 0.452009759 |
| 0.003133154 | 0.259358158 | 0.253659512 | 0.055704098 |
| 0.473886295 | 0.248344114 | 0.11375542  | 0.188059567 |
| 0.404827031 | 0.448898551 | 0.328227992 | 0.323373042 |
| 0.099087897 | 0.018092149 | 0.408421036 | 0.345145379 |
| 0.380755203 | 0.24242994  | 0.146515825 | 0.023058196 |
| 0.409114158 | 0.136520245 | 0.306775463 | 0.217572568 |
| 0.204175461 | 0.153175289 | 0.19639604  | 0.184641366 |
| 0.010509219 | 0.284206246 | 0.267227164 | 0.189228956 |
| 0.288635224 | 0.183030754 | 0.374213988 | 0.297455973 |
| 0.20503759  | 0.207541947 | 0.228216665 | 0.142498851 |
| 0.195381869 | 0.473268307 | 0.011990375 | 0.389796146 |
| 0.439351155 | 0.214291636 | 0.417429189 | 0.426051907 |
| 0.247942584 | 0.384270051 | 0.425356382 | 0.302699613 |
| 0.001599633 | 0.291600342 | 0.211615357 | 0.361136574 |
| 0.368614237 | 0.269376197 | 0.085609604 | 0.168864251 |
| 0.001356276 | 0.188814248 | 0.129323625 | 0.448512797 |
| 0.382679066 | 0.060512518 | 0.009592836 | 0.347620662 |
| 0.198655801 | 0.017643929 | 0.465520131 | 0.300137684 |
| 0.427962359 | 0.234294226 | 0.232598127 | 0.258444176 |
| 0.094096086 | 0.164567524 | 0.045705137 | 0.301999848 |
| 0.178420871 | 0.030606404 | 0.157509509 | 0.423933709 |
| 0.399798546 | 0.336143422 | 0.22851506  | 0.048504406 |
| 0.252167752 | 0.197555336 | 0.34594078  | 0.112831335 |
| 0.36241969  | 0.355648484 | 0.421726865 | 0.284361232 |
| 0.231904015 | 0.416688527 | 0.404545739 | 0.399845249 |
| 0.082505083 | 0.294691074 | 0.336696367 | 0.114383305 |
| 0.170035882 | 0.399916917 | 0.260689822 | 0.222124607 |
| 0.281412413 | 0.082756172 | 0.228913004 | 0.17321809  |
| 0.437687042 | 0.406981027 | 0.123034961 | 0.136236318 |
| 0.427545935 | 0.22252393  | 0.154012317 | 0.208903815 |
| 0.270293244 | 0.074262594 | 0.042211002 | 0.318416865 |
| 0.471578136 | 0.313951743 | 0.395730874 | 0.233353984 |
| 0.347552567 | 0.07833414  | 0.308746292 | 0.213707892 |
| 0.225348107 | 0.209773353 | 0.253160494 | 0.05779409  |
| 0.081403513 | 0.161330189 | 0.412713515 | 0.424539498 |
| 0.133664717 | 0.198900411 | 0.277918214 | 0.279443623 |
| 0.39736381  | 0.241734475 | 0.257617276 | 0.211278127 |
| 0.432895665 | 0.140196241 | 0.464547252 | 0.243991061 |
| 0.349958459 | 0.296727418 | 0.343641845 | 0.010294211 |
| 0.244019024 | 0.269429942 | 0.08449033  | 0.276885621 |
| 0.308313424 | 0.193930081 | 0.335165811 | 0.180314572 |

|             |             |             |             |
|-------------|-------------|-------------|-------------|
| 0.117835471 | 0.003574547 | 0.286867835 | 0.147441375 |
| 0.318733238 | 0.107863062 | 0.221699653 | 0.055151234 |
| 0.479417183 | 0.258136846 | 0.341859402 | 0.088884331 |
| 0.291928608 | 0.00655305  | 0.23243203  | 0.068302515 |
| 0.32907511  | 0.338676158 | 0.229006647 | 0.208618554 |
| 0.106376045 | 0.258558345 | 0.31445392  | 0.242897994 |
| 0.39714112  | 0.108130617 | 0.431837319 | 0.173901357 |
| 0.239192219 | 0.230782855 | 0.231173347 | 0.188696703 |
| 0.209875379 | 0.080070031 | 0.157880817 | 0.127655235 |
| 0.388083494 | 0.153510523 | 0.274851256 | 0.218543445 |
| 0.110938125 | 0.272423153 | 0.257692567 | 0.267553993 |
| 0.279577267 | 0.23766367  | 0.171524291 | 0.409002906 |
| 0.177503217 | 0.203048526 | 0.086338384 | 0.089762805 |
| 0.190838917 | 0.247484551 | 0.32882841  | 0.349146168 |
| 0.407533729 | 0.118072599 | 0.151060651 | 0.144614175 |
| 0.031064292 | 0.242517421 | 0.264570834 | 0.074367684 |
| 0.222802296 | 0.127900083 | 0.002209209 | 0.156840954 |
| 0.347398613 | 0.212978003 |             |             |
| APLP2       | 0.130132153 | 0.372780868 | 0.21962761  |
| 0.022670082 | 0.169289429 | 0.383532547 | 0.322977389 |
| 0.107535237 | 0.289515487 | 0.253533234 | 0.42803383  |
| 0.005615908 | 0.12848737  | 0.071006831 | 0.155440186 |
| 0.266940818 | 0.273070874 | 0.278066974 | 0.269004717 |
| 0.168225156 | 0.147847879 | 0.290243764 | 0.252964993 |
| 1           | 0.012026699 | 0.270311352 | 0.090724987 |
| 0.086123542 | 0.229280837 | 0.316829019 | 0.240744445 |
| 0.233582364 | 0.194554733 | 0.174400128 | 0.151009617 |
| 0.045881421 | 0.41805025  | 0.019915968 | 0.153254411 |
| 0.146244956 | 0.275745282 | 0.20641836  | 0.097843876 |
| 0.001137186 | 0.28162986  | 0.078735079 | 0.281275394 |
| 0.193483682 | 0.335653807 | 0.308553226 | 0.287153872 |
| 0.018327377 | 0.422497204 | 0.25078615  | 0.016296583 |
| 0.457857374 | 0.006175553 | 0.441853255 | 0.107735711 |
| 0.257672787 | 0.277201912 | 0.109663052 | 0.253341597 |
| 0.416347754 | 0.455639464 | 0.326702758 | 0.180519456 |
| 0.281063541 | 0.142568651 | 0.151834093 | 0.213917569 |
| 0.333520255 | 0.180154427 | 0.289356098 | 0.077041946 |
| 0.175738092 | 0.150697382 | 0.359058063 | 0.268782645 |
| 0.006342537 | 0.302103959 | 0.155591876 | 0.138368543 |
| 0.092228735 | 0.429203241 | 0.142165495 | 0.299741981 |
| 0.121974656 | 0.135822113 | 0.253835228 | 0.303888569 |
| 0.044818579 | 0.162850595 | 0.012396269 | 0.249524667 |
| 0.214337845 | 0.186380427 | 0.215565354 | 0.275149058 |
| 0.093892443 | 0.246341899 | 0.073763879 | 0.131223396 |
| 0.191205418 | 0.174759592 | 0.454613243 | 0.015618439 |
| 0.103930039 | 0.228384976 | 0.260600597 | 0.426921601 |
| 0.308469291 | 0.032426392 | 0.223075662 | 0.340953553 |
| 0.142781324 | 0.143057184 | 0.318180699 | 0.009956199 |
| 0.021504944 | 0.01102315  | 0.22295931  | 0.267540571 |
| 0.265396265 | 0.326829481 | 0.106758259 | 0.176970295 |
| 0.100977473 | 0.196940387 | 0.222110524 | 0.321425008 |
| 0.1418572   | 0.329452788 | 0.160643462 | 0.197314809 |
| 0.127108212 | 0.207021849 | 0.282369514 | 0.374280424 |
| 0.412975088 | 0.220186094 | 0.264063086 | 0.372122892 |

|             |             |             |             |
|-------------|-------------|-------------|-------------|
| 0.109565693 | 0.261761119 | 0.331021528 | 0.178660372 |
| 0.225464912 | 0.289712626 | 0.179728054 | 0.302068925 |
| 0.328866181 | 0.173642065 | 0.012242834 | 0.382265733 |
| 0.476353083 | 0.011067775 | 0.267427468 | 0.211282947 |
| 0.041684993 | 0.283137931 | 0.384070903 | 0.27433129  |
| 0.168705248 | 0.083432121 | 0.2352808   | 0.320278258 |
| 0.278020895 | 0.303394917 | 0.256242634 | 0.217610438 |
| 0.352050725 | 0.167265079 | 0.21783743  | 0.110928241 |
| 0.300873592 | 0.275074654 | 0.071253031 | 0.042482725 |
| 0.156116956 | 0.156568025 | 0.310890948 | 0.189334116 |
| 0.173791313 | 0.003885934 | 0.232317909 | 0.170530374 |
| 0.16870611  | 0.15116965  | 0.399773911 | 0.302607161 |
| 0.289604455 | 0.07593495  | 0.302665947 | 0.205821415 |
| 0.224587344 | 0.236724916 | 0.243360934 | 0.009385802 |
| 0.256708276 | 0.091609569 | 0.175712126 | 0.13326139  |
| 0.230125221 | 0.244267585 | 0.078671426 | 0.295717312 |
| 0.32690728  | 0.210758854 | 0.044979363 | 0.034123879 |
| 0.279137361 | 0.348094841 | 0.126820916 | 0.126531392 |
| 0.286283898 | 0.22545687  | 0.147787839 | 0.436167304 |
| 0.23034252  | 0.423140315 | 0.030246125 | 0.278101318 |
| 0.119321346 | 0.283357059 | 0.189646649 | 0.231163461 |
| 0.320845488 | 0.171448708 | 0.071494949 | 0.383736121 |
| 0.195290323 | 0.179619538 | 0.236676383 | 0.368156937 |
| 0.010095341 | 0.306953824 | 0.179576691 | 0.032591106 |
| 0.376873476 | 0.356827382 | 0.239477864 | 0.20688672  |
| 0.276535039 | 0.371414167 | 0.258988722 | 0.177694129 |
| 0.055465169 | 0.045402999 | 0.320915304 | 0.358017264 |
| 0.23412891  | 0.228342624 | 0.08048102  | 0.022434594 |
| 0.287400516 | 0.092528681 | 0.238993524 | 0.114857328 |
| 0.147927331 | 0.093389262 | 0.285430457 | 0.137882322 |
| 0.009709504 | 0.276029148 | 0.15737463  | 0.154966714 |
| 0.204413941 | 0.223096118 | 0.279488367 | 0.394091936 |
| 0.130169451 | 0.095996322 | 0.134369277 | 0.254379668 |
| 0.335843407 | 0.367161224 | 0.007484262 | 0.315458009 |
| 0.3069468   | 0.232170209 | 0.288017407 | 0.297613252 |
| 0.248761541 | 0.431180586 | 0.311532216 | 0.199689504 |
| 0.003339734 | 0.156703961 | 0.110207072 | 0.450015578 |
| 0.216025028 | 0.365576411 | 0.053293172 | 0.083149353 |
| 0.006273111 | 0.315161527 | 0.042623674 | 0.396913631 |
| 0.25733504  | 0.182967892 | 0.0047542   | 0.261892084 |
| 0.104002924 | 0.014100739 | 0.347942696 | 0.267064407 |
| 0.337783852 | 0.187951959 | 0.326545894 | 0.139115338 |
| 0.029103547 | 0.133520133 | 0.067936084 | 0.225149685 |
| 0.131136315 | 0.029830006 | 0.156405578 | 0.309455919 |
| 0.302891946 | 0.371037034 | 0.329397813 | 0.029896803 |
| 0.140258212 | 0.078041152 | 0.229956729 | 0.190241575 |
| 0.311758577 | 0.42701678  | 0.371056938 | 0.172288137 |
| 0.190129461 | 0.403261573 | 0.43525072  | 0.304836539 |
| 0.038170664 | 0.153133342 | 0.195077187 | 0.143805397 |
| 0.100778963 | 0.279694884 | 0.156730861 | 0.330384493 |
| 0.297406904 | 0.040732487 | 0.359355637 | 0.141425908 |
| 0.381129979 | 0.272999642 | 0.261223864 | 0.208354454 |
| 0.424675582 | 0.287366315 | 0.303947216 | 0.229872966 |
| 0.394963162 | 0.020280949 | 0.032676847 | 0.372317251 |

|             |             |             |             |             |
|-------------|-------------|-------------|-------------|-------------|
| 0.431183847 | 0.424301629 | 0.252501901 | 0.162307284 |             |
| 0.221086044 | 0.186719945 | 0.242079009 | 0.277099662 |             |
| 0.271457697 | 0.107545289 | 0.130955618 | 0.024556569 |             |
| 0.05380869  | 0.171825447 | 0.420956173 | 0.444231958 |             |
| 0.2586693   | 0.300022776 | 0.290492535 | 0.261208981 |             |
| 0.248709921 | 0.133175906 | 0.35667746  | 0.205626147 |             |
| 0.473841057 | 0.122669182 | 0.399836214 | 0.22850694  |             |
| 0.303123668 | 0.252371537 | 0.269940029 | 0.017109679 |             |
| 0.158279725 | 0.24375547  | 0.05821846  | 0.215940137 |             |
| 0.173192094 | 0.293109151 | 0.367432495 | 0.275953052 |             |
| 0.076356083 | 0.005591055 | 0.324735237 | 0.06924495  |             |
| 0.443437458 | 0.059672    | 0.202209144 | 0.017300546 |             |
| 0.384697043 | 0.198814905 | 0.248424427 | 0.054337309 |             |
| 0.221723431 | 0.002582007 | 0.270370017 | 0.153952483 |             |
| 0.302944113 | 0.384777467 | 0.172367568 | 0.126704978 |             |
| 0.0874948   | 0.21359137  | 0.337205577 | 0.174487922 |             |
| 0.273363344 | 0.037180875 | 0.28309286  | 0.20839911  |             |
| 0.121249063 | 0.180823674 | 0.362473321 | 0.206232473 |             |
| 0.303415987 | 0.114596285 | 0.322189158 | 0.174739866 |             |
| 0.239523693 | 0.178702027 | 0.221886753 | 0.134479984 |             |
| 0.191415511 | 0.221224398 | 0.176083829 | 0.158350441 |             |
| 0.197857773 | 0.126339484 | 0.095311585 | 0.462693613 |             |
| 0.130110178 | 0.20277158  | 0.041989933 | 0.080353627 |             |
| 0.101415709 | 0.321276749 | 0.260819468 | 0.267847983 |             |
| 0.281346969 | 0.080789165 | 0.29022241  | 0.241615044 |             |
| 0.018100551 | 0.142354873 | 0.35355588  | 0.032950731 |             |
| 0.200170905 | 0.089947717 | 0.003950734 | 0.171075387 |             |
| 0.383097017 | 0.113258984 |             |             |             |
| APOL7C      | 0.01385926  | 0.00355889  | 0.013677278 | 4.53E-07    |
| 0.000100494 | 0.01876306  | 0.004672228 | 0.005932447 |             |
| 0.019709835 | 0.001299389 | 0.011081804 | 0.220930448 |             |
| 0.00064153  | 0.319187367 | 0.00273767  | 0.002737645 |             |
| 0.002028872 | 0.002039861 | 0.002877012 | 0.029956821 |             |
| 4.40E-05    | 0.025392222 | 0.004110014 | 0.012026699 | 1           |
| 0.002370413 | 2.53E-05    | 0.001704107 | 0.002059513 |             |
| 0.036319197 | 0.001813522 | 0.003169474 | 0.000723981 |             |
| 0.000238488 | 2.79E-05    | 2.45E-06    | 0.007300703 | 5.61E-07    |
| 0.000341507 | 0.00123694  | 0.001228134 | 0.001085584 |             |
| 0.024327439 | 4.84E-07    | 0.006613745 | 0.002208059 |             |
| 0.014485285 | 0.023925385 | 0.021446367 | 0.043759816 |             |
| 0.001577463 | 1.94E-06    | 0.011731861 | 0.015676665 | 1.95E-06    |
| 0.005933539 | 1.47E-07    | 0.006069066 | 0.032551157 |             |
| 0.03877399  | 0.014396178 | 0.002696843 | 0.00748248  |             |
| 0.012230091 | 0.005758091 | 0.002625762 | 0.000494141 |             |
| 0.030262073 | 0.002000836 | 0.000832085 | 0.00065533  |             |
| 0.004158382 | 0.000646969 | 0.001055936 | 8.18E-05    |             |
| 0.000867626 | 0.001427158 | 0.022216995 | 0.011129062 |             |
| 0.041921773 | 0.004110132 | 4.52E-05    | 0.008798174 |             |
| 0.000250162 | 0.010427507 | 0.004681996 | 0.000855013 |             |
| 0.000907262 | 0.031663599 | 0.010930751 | 0.002518265 |             |
| 2.61E-05    | 0.001267182 | 8.86E-06    | 0.008117435 | 0.002989687 |
| 0.001484315 | 0.007796288 | 0.003712692 | 0.019596998 |             |
| 0.073713353 | 0.028197441 | 0.00089164  | 0.005801744 |             |
| 0.001498545 | 0.006284043 | 6.97E-05    | 0.000390992 |             |

|                      |                      |                      |                   |
|----------------------|----------------------|----------------------|-------------------|
| 0.024116085          | 0.001915146          | 0.005810431          | 0.003961234       |
| 0.025427927          | 0.055146869          | 0.015333843          | 8.16E-05 1.68E-05 |
| 0.006737703          | 2.61E-05 8.81E-05    | 0.017413298          | 0.002121881       |
| 0.048786292          | 0.00216909           | 0.008597361          | 4.89E-05          |
| 0.000335977          | 0.003409191          | 0.003354007          | 0.000248576       |
| 0.00431943           | 0.000419507          | 0.004304959          | 0.000207782       |
| 0.001062805          | 4.76E-05 0.024453774 | 0.060987483          |                   |
| 0.002733535          | 0.012475358          | 0.003155709          | 0.02638348        |
| 0.014790005          | 0.000315281          | 0.002648032          | 0.003223717       |
| 0.005875877          | 0.000258991          | 0.030881986          | 0.000833528       |
| 0.00225581           | 0.009174625          | 0.016312213          | 2.72E-05          |
| 0.012559301          | 0.008068427          | 2.03E-05 0.047561304 |                   |
| 0.003338678          | 3.46E-07 0.000414888 | 0.008125061          |                   |
| 0.001793128          | 0.000925573          | 2.58E-05 0.001035387 |                   |
| 0.006728947          | 0.0340538            | 0.006797838          | 0.007356155       |
| 0.000719394          | 0.027320668          | 0.000598898          | 0.012209714       |
| 0.000354047          | 0.031987146          | 0.02828595           | 0.000209608       |
| 3.58E-05 0.005040488 | 0.007576995          | 0.003100499          |                   |
| 0.005484746          | 0.003485236          | 2.38E-08 0.001226905 |                   |
| 0.013880118          | 0.001472812          | 0.001757068          | 0.003427018       |
| 0.040894662          | 0.052999449          | 9.70E-05 0.051277663 |                   |
| 0.000182786          | 0.009694926          | 0.000719884          | 0.001332956       |
| 0.036950368          | 0.000989198          | 0.000273625          | 0.001925466       |
| 0.289363591          | 0.000316832          | 0.037070533          | 0.004957838       |
| 0.002363864          | 0.023516937          | 0.000627907          | 0.069109315       |
| 0.00111279           | 0.009553131          | 0.001897021          | 0.000144582       |
| 0.006421023          | 0.001115061          | 0.002219488          | 0.001085933       |
| 0.011897857          | 0.000247763          | 0.009724162          | 4.72E-05          |
| 0.021621737          | 0.000447913          | 0.001448697          | 0.000890347       |
| 0.001130121          | 0.007004687          | 0.008046593          | 9.53E-05          |
| 0.025188766          | 0.011192739          | 0.004610338          | 0.073396114       |
| 0.003788409          | 0.137699034          | 0.013433358          | 0.000663025       |
| 0.000183441          | 0.002976699          | 0.005556793          | 0.133206319       |
| 0.053718778          | 0.002927964          | 0.004285746          | 0.008191548       |
| 0.001209438          | 0.000413459          | 0.235736994          | 0.00624857        |
| 0.007549593          | 0.001719122          | 0.001476249          | 1.08E-05          |
| 0.000139878          | 0.002395863          | 0.003031114          | 0.00383781        |
| 0.002118991          | 0.000361569          | 8.67E-05 0.027140369 |                   |
| 0.007118237          | 0.000721403          | 0.012290763          | 0.002061061       |
| 8.20E-05 0.00088323  | 0.001111335          | 0.001263062          |                   |
| 0.015171779          | 4.62E-05 0.001223746 | 5.43E-05 0.007173631 |                   |
| 0.019490773          | 0.004073514          | 1.26E-07 0.007789654 |                   |
| 0.002904151          | 0.006987479          | 0.001562209          | 0.003642754       |
| 0.029945436          | 0.006174161          | 0.002782322          | 0.003221555       |
| 0.039553269          | 0.000671241          | 0.000252082          | 0.017420629       |
| 0.001489215          | 0.017866247          | 0.004173216          | 9.60E-05          |
| 0.001671958          | 0.060012263          | 5.75E-06 0.007533694 |                   |
| 0.001115586          | 0.003364061          | 1.44E-08 0.001820203 |                   |
| 0.000246739          | 2.58E-05 0.004245804 | 0.003934199          |                   |
| 0.00202055           | 0.001079638          | 0.006540167          | 0.000440263       |
| 5.24E-06 0.001501298 | 9.70E-06 0.001041158 | 0.000423451          |                   |
| 0.000305315          | 9.54E-05 0.003654736 | 0.006777771          |                   |
| 0.003690016          | 0.019745523          | 0.00180033           | 0.002178886       |
| 1.18E-05 0.000900851 | 0.002526489          | 0.00873976           |                   |



|             |             |             |             |             |
|-------------|-------------|-------------|-------------|-------------|
| 0.009615715 | 0.003492111 | 0.000726566 | 0.001809257 |             |
| 0.005955242 | 0.011519835 | 0.003516911 | 8.94E-07    |             |
| 0.001051063 | 0.001773805 | 0.000802125 | 0.001706457 |             |
| 0.001614379 | 0.000398745 | 0.013734005 | 0.019545314 |             |
| 2.86E-07    | 0.026426651 | 0.023828356 | 0.003002073 |             |
| 0.001486665 | 0.036692686 | 0.042724998 | 0.005364175 |             |
| 0.006699092 | 0.00955049  | 0.00600191  | 0.027019854 |             |
| 2.24E-05    | 0.00062148  | 0.01233926  | 0.005114487 |             |
| 0.00904583  | 0.002476525 | 0.000140983 | 0.001167577 |             |
| 0.060482373 | 0.004243035 | 0.000837608 | 0.036298359 |             |
| 0.000917886 | 0.00120254  | 0.001045516 | 0.000639498 |             |
| 0.041936654 | 0.00419254  | 0.008928026 | 0.03739415  |             |
| 0.059060936 | 0.00460786  | 0.001376863 | 0.001841233 |             |
| 0.000331535 | 0.018667866 | 0.011071562 | 0.008652625 |             |
| 1.27E-05    | 0.00758574  | 0.023252333 | 0.012605649 |             |
| 0.001325105 | 0.002540261 | 0.000153063 | 0.000997223 |             |
| 0.001873524 | 0.014241796 | 0.000505392 | 0.001546152 |             |
| 0.016666026 | 0.002843786 | 0.075700277 | 1.71E-05    |             |
| 0.004578678 | 0.021822142 | 2.97E-05    | 0.019864648 |             |
| 0.000586969 | 0.009286171 | 8.91E-07    | 0.004869422 |             |
| 0.00814389  | 0.007207575 | 0.000117424 | 0.001394949 |             |
| 1.96E-07    | 0.001567335 | 0.03365065  | 0.018099627 |             |
| 0.011213917 | 0.004217292 | 0.00591485  | 0.035719272 |             |
| 0.000806655 | 0.006072257 | 0.000237219 | 0.001203485 |             |
| 5.67E-06    | 0.002268209 | 0.011654004 | 0.000457208 |             |
| 0.001061082 | 0.018229422 | 0.00138123  | 0.001952589 |             |
| 0.000362199 | 0.019443832 | 0.094595341 | 0.001054892 |             |
| 0.000777267 | 0.000709824 | 0.005812251 | 0.003911652 |             |
| 0.001182506 | 0.002181988 | 0.000629224 | 0.001855835 |             |
| 0.001171511 | 0.001025628 | 0.009297116 | 0.002023687 |             |
| 0.035128041 | 1.11E-06    | 6.60E-06    | 1.40E-05    | 0.011102206 |
| 0.010681136 | 0.004782819 | 0.002315176 | 0.001488614 |             |
| 0.031527934 | 0.128307049 | 1.19E-05    | 0.003305091 |             |
| 0.004007777 | 3.67E-07    | 0.001652574 | 0.001100664 |             |
| 0.004185488 | 0.05511067  | 0.012662007 | 6.88E-05    |             |
| ARHGAP26    | 0.050368246 | 0.208738938 | 0.163738173 |             |
| 0.043443297 | 0.210031575 | 0.32698832  | 0.340748343 |             |
| 0.036708335 | 0.113256126 | 0.199530459 | 0.341893268 |             |
| 0.000732641 | 0.054596604 | 0.019947288 | 0.056685854 |             |
| 0.123621563 | 0.12924764  | 0.245060226 | 0.123439823 |             |
| 0.062093319 | 0.114405714 | 0.15361484  | 0.18814342  |             |
| 0.270311352 | 0.002370413 | 1           | 0.115344292 |             |
| 0.026458685 | 0.102274669 | 0.172116983 | 0.123811882 |             |
| 0.100175109 | 0.095229613 | 0.066905828 | 0.090338632 |             |
| 0.018773131 | 0.250874824 | 0.006980987 | 0.078449841 |             |
| 0.055810505 | 0.205817339 | 0.098921862 | 0.031654335 |             |
| 0.001876724 | 0.233521271 | 0.02073139  | 0.159624078 |             |
| 0.061998241 | 0.291467713 | 0.185161247 | 0.253459696 |             |
| 0.00450352  | 0.299054538 | 0.110052781 | 0.004626902 |             |
| 0.326549501 | 0.011089182 | 0.276174187 | 0.022348244 |             |
| 0.146848969 | 0.109796227 | 0.034937116 | 0.133029924 |             |
| 0.372829543 | 0.31299266  | 0.169746905 | 0.183948623 |             |
| 0.206138803 | 0.063340287 | 0.067063374 | 0.158536311 |             |
| 0.179376881 | 0.087591864 | 0.146381896 | 0.024939385 |             |

|             |             |             |             |
|-------------|-------------|-------------|-------------|
| 0.084660213 | 0.062574083 | 0.239170663 | 0.12587882  |
| 0.001772731 | 0.318217431 | 0.09407251  | 0.047141852 |
| 0.0428342   | 0.313018077 | 0.059978386 | 0.201990466 |
| 0.059701794 | 0.076150428 | 0.159128017 | 0.152893312 |
| 0.048052751 | 0.069774269 | 0.011529861 | 0.110859743 |
| 0.098231996 | 0.076012079 | 0.101132642 | 0.211689729 |
| 0.045286572 | 0.089849937 | 0.012900012 | 0.049060358 |
| 0.092224208 | 0.093534519 | 0.313173693 | 0.002658649 |
| 0.040981304 | 0.067427479 | 0.103288549 | 0.272228774 |
| 0.152597694 | 0.014009035 | 0.067605928 | 0.321904749 |
| 0.048736256 | 0.100917314 | 0.300154085 | 0.00424226  |
| 0.025087103 | 0.001768859 | 0.09887408  | 0.106314138 |
| 0.248435437 | 0.289167368 | 0.135019575 | 0.11728614  |
| 0.02780555  | 0.075952853 | 0.22433606  | 0.255744964 |
| 0.07303906  | 0.338188403 | 0.111815897 | 0.102222178 |
| 0.064164401 | 0.056343293 | 0.126572648 | 0.237401395 |
| 0.23487792  | 0.172629303 | 0.140529933 | 0.274325388 |
| 0.045732258 | 0.125141675 | 0.167527886 | 0.058319368 |
| 0.17548542  | 0.143111524 | 0.067442275 | 0.250369946 |
| 0.296387197 | 0.079194836 | 0.002509745 | 0.254547716 |
| 0.326456825 | 0.005540841 | 0.149947306 | 0.096385863 |
| 0.084267815 | 0.140150135 | 0.216247517 | 0.159112821 |
| 0.094752835 | 0.102939816 | 0.166373573 | 0.276361753 |
| 0.157465648 | 0.247560389 | 0.126595401 | 0.14711195  |
| 0.228521995 | 0.067971    | 0.191964906 | 0.04492363  |
| 0.197861977 | 0.146140844 | 0.015841232 | 0.010658193 |
| 0.064393527 | 0.045109666 | 0.182146933 | 0.095400879 |
| 0.071698139 | 0.013098158 | 0.193264441 | 0.070194364 |
| 0.055612106 | 0.059905726 | 0.243147672 | 0.20431879  |
| 0.172643345 | 0.019050421 | 0.177786751 | 0.12297378  |
| 0.090921488 | 0.11583715  | 0.128049594 | 0.00437743  |
| 0.180707814 | 0.031034107 | 0.072233594 | 0.037781334 |
| 0.193872337 | 0.091983551 | 0.016789961 | 0.16263515  |
| 0.251265733 | 0.121101611 | 0.009488661 | 0.005784664 |
| 0.143442264 | 0.256636788 | 0.057190064 | 0.031536088 |
| 0.185000518 | 0.110484801 | 0.057340184 | 0.270249644 |
| 0.13865282  | 0.325603308 | 0.005375611 | 0.085992114 |
| 0.061476338 | 0.155789305 | 0.095185573 | 0.129553033 |
| 0.182074917 | 0.070030647 | 0.022505154 | 0.29283143  |
| 0.101057685 | 0.096679562 | 0.120301656 | 0.206221358 |
| 0.003003006 | 0.205566881 | 0.116051086 | 0.005457887 |
| 0.233225645 | 0.376735604 | 0.113078745 | 0.06515051  |
| 0.128406155 | 0.205123749 | 0.112013377 | 0.078074296 |
| 0.011788826 | 0.013161089 | 0.154969887 | 0.209107354 |
| 0.104652169 | 0.110912053 | 0.038674281 | 0.004040846 |
| 0.15338458  | 0.034628568 | 0.133692549 | 0.054250136 |
| 0.086128262 | 0.033000398 | 0.148076776 | 0.050421913 |
| 0.001299895 | 0.13003137  | 0.07953204  | 0.078461983 |
| 0.101718466 | 0.078696038 | 0.160547412 | 0.274027354 |
| 0.061677057 | 0.026561388 | 0.066857374 | 0.232928352 |
| 0.262563338 | 0.203111779 | 0.002445967 | 0.149242965 |
| 0.153845505 | 0.128961001 | 0.164494168 | 0.143692981 |
| 0.127836378 | 0.304882071 | 0.174020531 | 0.079887599 |
| 0.000713921 | 0.06639413  | 0.049441042 | 0.301037323 |

|             |             |             |             |
|-------------|-------------|-------------|-------------|
| 0.103147033 | 0.260971803 | 0.011858302 | 0.033777507 |
| 0.001888876 | 0.191293348 | 0.01598859  | 0.212702159 |
| 0.14487489  | 0.13635459  | 0.00144546  | 0.156211159 |
| 0.048417458 | 0.004269246 | 0.179969102 | 0.200780999 |
| 0.216024713 | 0.116286267 | 0.260565303 | 0.061036308 |
| 0.008514853 | 0.038335269 | 0.088147444 | 0.163091242 |
| 0.053012209 | 0.003366939 | 0.191110716 | 0.147173984 |
| 0.161092008 | 0.282793558 | 0.248346715 | 0.021397403 |
| 0.050309631 | 0.051826064 | 0.140112109 | 0.10990864  |
| 0.172739248 | 0.29308654  | 0.234758601 | 0.080737647 |
| 0.101629082 | 0.279318001 | 0.298493642 | 0.171636101 |
| 0.032142881 | 0.067625465 | 0.08549741  | 0.138992494 |
| 0.039311383 | 0.149033901 | 0.09842933  | 0.346571173 |
| 0.157771674 | 0.047103475 | 0.314852614 | 0.052745758 |
| 0.255817351 | 0.144195022 | 0.163493631 | 0.070803472 |
| 0.299977186 | 0.104736674 | 0.229756983 | 0.106501526 |
| 0.273422428 | 0.004389996 | 0.005067153 | 0.221674197 |
| 0.276212148 | 0.374555028 | 0.126414907 | 0.131433873 |
| 0.108663094 | 0.092701564 | 0.11163961  | 0.139712551 |
| 0.162784101 | 0.048952676 | 0.049276933 | 0.004361412 |
| 0.033499964 | 0.058978097 | 0.315828654 | 0.291898986 |
| 0.171347249 | 0.174472196 | 0.243622713 | 0.254641085 |
| 0.118662256 | 0.051811382 | 0.283813731 | 0.092513662 |
| 0.322015844 | 0.111618197 | 0.221409066 | 0.111468382 |
| 0.150285823 | 0.138109233 | 0.145755434 | 0.005282558 |
| 0.077850099 | 0.176185733 | 0.01256511  | 0.189163098 |
| 0.06756717  | 0.197255579 | 0.2910132   | 0.103570305 |
| 0.033287823 | 0.002099473 | 0.178407834 | 0.031457567 |
| 0.347395948 | 0.014229163 | 0.092078617 | 0.005061567 |
| 0.206330104 | 0.109134302 | 0.117431934 | 0.012993743 |
| 0.12244783  | 0.001954524 | 0.202022744 | 0.08231784  |
| 0.149790383 | 0.232823155 | 0.073014134 | 0.051061742 |
| 0.016180225 | 0.135833028 | 0.227047942 | 0.122768606 |
| 0.150405006 | 0.015052916 | 0.139514568 | 0.057181098 |
| 0.047877112 | 0.058046205 | 0.277362219 | 0.065978725 |
| 0.264331931 | 0.027599143 | 0.171935815 | 0.041808249 |
| 0.122208247 | 0.059114348 | 0.182144937 | 0.035675375 |
| 0.211015653 | 0.104929107 | 0.076960565 | 0.073391968 |
| 0.123752102 | 0.052490909 | 0.028472978 | 0.320090373 |
| 0.030504247 | 0.054993846 | 0.05918985  | 0.094965717 |
| 0.046192747 | 0.188917527 | 0.112871155 | 0.133522807 |
| 0.137004966 | 0.016583884 | 0.163871862 | 0.082050194 |
| 0.003875053 | 0.053486916 | 0.363394911 | 0.022763138 |
| 0.109973237 | 0.017175997 | 0.003496875 | 0.042164709 |
| 0.239143714 | 0.044485223 |             |             |
| ARL5A       | 0.021443609 | 0.088765615 | 0.009778719 |
| 0.081428535 | 0.012833018 | 0.110716029 | 0.116348988 |
| 0.014213628 | 0.0050398   | 0.169029472 | 0.107657111 |
| 1.08E-05    | 0.023069111 | 0.000295058 | 0.000821298 |
| 0.059484461 | 0.059402276 | 0.065147755 | 0.046147864 |
| 0.015091499 | 0.099483719 | 0.039027795 | 0.141977856 |
| 0.090724987 | 2.53E-05    | 0.115344292 | 1           |
| 0.046440384 | 0.029229783 | 0.043262946 | 0.050071627 |
| 0.05243326  | 0.046590354 | 0.010876319 | 0.019207103 |

|             |             |             |             |
|-------------|-------------|-------------|-------------|
| 0.087697554 | 0.00052779  | 0.040220843 | 0.025006251 |
| 0.113052553 | 0.052171796 | 0.000496102 | 0.032505535 |
| 0.056704355 | 0.007980813 | 0.059325722 | 0.009154655 |
| 0.098686636 | 0.025118868 | 0.182383882 | 0.001546975 |
| 0.087170198 | 0.029574525 | 0.002840117 | 0.107521861 |
| 0.065676394 | 0.098470832 | 0.005173114 | 0.013106147 |
| 0.02078618  | 0.019754896 | 0.054562165 | 0.105619    |
| 0.108831829 | 0.068742677 | 0.01327397  | 0.046638182 |
| 0.024259493 | 0.050477422 | 0.154971008 | 0.071894963 |
| 0.027879957 | 0.033146385 | 0.011196807 | 0.054105819 |
| 0.029804846 | 0.041289231 | 0.008131106 | 0.000116099 |
| 0.133228325 | 0.078453751 | 0.01686471  | 0.027272627 |
| 0.096385923 | 0.022716156 | 0.081662681 | 0.048516132 |
| 0.001368288 | 0.04600442  | 0.066375146 | 0.015141912 |
| 0.025920134 | 0.000500844 | 0.003628722 | 0.043453547 |
| 0.039764439 | 0.045536667 | 0.045012523 | 0.000543072 |
| 0.005101494 | 0.000739733 | 0.025406422 | 0.027835431 |
| 0.039510328 | 0.099347945 | 0.000696959 | 0.022037134 |
| 0.006208412 | 0.018787031 | 0.114338048 | 0.072621665 |
| 7.74E-05    | 0.003309404 | 0.079117071 | 0.006348374 |
| 0.042059868 | 0.064047335 | 0.001382784 | 0.004117443 |
| 1.61E-05    | 0.047042503 | 0.010777642 | 0.13849367  |
| 0.102523354 | 0.016535116 | 0.089653598 | 0.008551774 |
| 0.029566116 | 0.017172037 | 0.106784401 | 0.046089703 |
| 0.119601426 | 0.080163912 | 0.057270903 | 0.020344503 |
| 0.005445313 | 0.021905249 | 0.081670144 | 0.060291826 |
| 0.008134162 | 0.009428945 | 0.102252065 | 0.023653942 |
| 0.057159034 | 0.071250148 | 0.004906774 | 0.058327171 |
| 0.020341026 | 0.081883399 | 0.145735955 | 0.058409285 |
| 0.013179017 | 0.000119238 | 0.05014541  | 0.109526198 |
| 0.000689409 | 0.017416249 | 0.033203483 | 0.026141963 |
| 0.012934027 | 0.083769978 | 0.060823573 | 0.027601415 |
| 0.194451879 | 0.213902202 | 0.140473245 | 0.038121771 |
| 0.137271958 | 0.039390198 | 0.252787533 | 0.062502128 |
| 0.100606598 | 0.018336476 | 0.024431007 | 0.030371331 |
| 0.031549705 | 0.007285451 | 0.001695786 | 0.019119569 |
| 0.008211687 | 0.090356766 | 0.028354586 | 0.037214751 |
| 0.07805888  | 0.192996907 | 0.029859957 | 0.053950332 |
| 0.021989588 | 0.105601555 | 0.028006088 | 0.02797741  |
| 0.003652206 | 0.023004581 | 0.036149646 | 0.025726403 |
| 0.049018435 | 0.057715202 | 0.000882011 | 0.006571764 |
| 0.061848834 | 0.020620922 | 0.000805291 | 0.047728779 |
| 0.008299993 | 0.000391732 | 0.080724087 | 0.058770959 |
| 0.055094353 | 9.01E-05    | 0.000510745 | 0.038555706 |
| 0.110772572 | 0.056765476 | 0.004105473 | 0.100768743 |
| 0.049650247 | 0.03210358  | 0.08050619  | 0.013199075 |
| 0.144209404 | 0.00029745  | 0.013882225 | 0.032088364 |
| 0.071998334 | 0.060514338 | 0.047084789 | 0.06596058  |
| 0.015604557 | 0.001904491 | 0.078075381 | 0.027406615 |
| 0.020019867 | 0.009892642 | 0.071133596 | 6.64E-05    |
| 0.045142752 | 0.084435789 | 0.000409541 | 0.107784462 |
| 0.126986239 | 0.008902174 | 0.009901658 | 0.048809788 |
| 0.066517985 | 0.03133324  | 0.046296716 | 0.000911772 |
| 0.000106576 | 0.049944531 | 0.071365528 | 0.050114426 |

|             |             |             |             |
|-------------|-------------|-------------|-------------|
| 0.029542114 | 0.017521982 | 7.43E-05    | 0.064268045 |
| 0.009246966 | 0.097806062 | 0.039947448 | 0.037627495 |
| 0.011304616 | 0.018432096 | 0.013118923 | 0.000136383 |
| 0.102178579 | 0.068879149 | 0.046434456 | 0.145932314 |
| 0.0087211   | 0.080237088 | 0.05171393  | 0.025848328 |
| 0.011993395 | 0.094453368 | 0.045011897 | 0.043915865 |
| 0.089203681 | 0.000159562 | 0.045190041 | 0.063037808 |
| 0.022136075 | 0.088286512 | 0.055652744 | 0.040536498 |
| 0.092888598 | 0.083410907 | 0.027596497 | 6.63E-06    |
| 0.039229648 | 0.026378171 | 0.068126695 | 0.069835063 |
| 0.083134391 | 0.002483577 | 0.021042674 | 5.64E-06    |
| 0.035558435 | 0.02117715  | 0.063542137 | 0.069837273 |
| 0.004357405 | 0.000185859 | 0.058218454 | 0.026716015 |
| 0.0001497   | 0.072414835 | 0.140219131 | 0.099353178 |
| 0.032783725 | 0.127667838 | 0.036128873 | 0.012550589 |
| 0.005691888 | 0.009642281 | 0.100476015 | 0.01711355  |
| 0.000141461 | 0.195050391 | 0.055071717 | 0.073681134 |
| 0.082242282 | 0.046765961 | 0.030230108 | 0.023766445 |
| 0.066247178 | 0.096629415 | 0.00200356  | 0.04938345  |
| 0.082200215 | 0.076241163 | 0.040396398 | 0.037214105 |
| 0.103378364 | 0.106637971 | 0.085662378 | 0.010166491 |
| 0.047833861 | 0.051522746 | 0.013182092 | 0.020632475 |
| 0.069741306 | 0.133051303 | 0.10200507  | 0.039948908 |
| 0.037854075 | 0.076521123 | 0.011639472 | 0.099241922 |
| 0.08323783  | 0.029423349 | 0.003270685 | 0.124795719 |
| 0.014695671 | 0.04251056  | 0.015942995 | 0.059688687 |
| 0.002511964 | 0.00025561  | 0.056165854 | 0.10537037  |
| 0.105475422 | 0.080780825 | 0.185330064 | 0.047843965 |
| 0.002154318 | 0.030410685 | 0.00887852  | 0.029824038 |
| 0.049773029 | 0.026481901 | 0.000498855 | 0.034390463 |
| 0.004944005 | 0.135214112 | 0.092433163 | 0.023331587 |
| 0.027574681 | 0.116400938 | 0.125977204 | 0.059349703 |
| 0.01882622  | 0.063305293 | 0.016061966 | 0.094010147 |
| 0.09714883  | 0.074116488 | 0.032129701 | 0.056456357 |
| 0.090550453 | 0.054252664 | 0.000795161 | 0.045159308 |
| 0.208413555 | 0.002589835 | 0.166946331 | 0.034121884 |
| 0.041216875 | 0.100413828 | 0.013395729 | 0.00879647  |
| 1.61E-05    | 0.034467815 | 0.025685679 | 0.093851499 |
| 0.002024847 | 0.018803908 | 0.002977238 | 0.076922353 |
| 0.050747341 | 0.062561711 | 0.00294959  | 0.093510733 |
| 0.000520718 | 0.191648078 | 0.002154455 | 0.047450042 |
| 0.052096285 | 0.026875679 | 0.029719925 | 0.002171341 |
| 0.054754834 | 0.05976504  | 0.069708936 | 0.079162592 |
| 0.008406374 | 0.069575936 | 0.007290705 | 0.02797521  |
| 0.011231392 | 0.052396397 | 0.004095399 | 0.078438546 |
| 0.00090287  | 0.026241286 | 0.002265637 | 0.072356426 |
| 0.003270607 | 0.107775671 | 0.011503364 | 0.014931604 |
| 0.039358875 | 0.025096095 | 0.045874127 | 0.09172561  |
| 0.042221428 | 0.008802169 | 0.086300376 | 0.004132597 |
| 0.015295549 | 0.101114655 | 0.125313088 | 0.035178813 |
| 0.092569774 | 0.032260034 | 0.041702867 | 0.055316235 |
| 0.001717852 | 0.022142549 | 0.006592713 | 0.000188194 |
| 0.022007403 | 0.136310259 | 0.00431797  | 0.031643907 |
| 0.004717189 | 3.43E-05    | 0.004666902 | 0.069206669 |

|             |             |             |             |
|-------------|-------------|-------------|-------------|
| 0.007991006 |             |             |             |
| ARL6        | 0.189307335 | 0.367219398 | 0.020557701 |
| 0.006140573 | 0.025745265 | 0.092035216 | 0.066400442 |
| 0.159645027 | 0.031456452 | 0.03017344  | 0.166449497 |
| 0.001759904 | 0.350403901 | 0.009147804 | 0.0292617   |
| 0.442175877 | 0.43989101  | 0.110530919 | 0.450941918 |
| 0.14491268  | 0.031961773 | 0.226329832 | 0.157829143 |
| 0.086123542 | 0.001704107 | 0.026458685 | 0.009551992 |
| 1           | 0.455547103 | 0.063012845 | 0.077240277 |
| 0.400150541 | 0.380530774 | 0.096793027 | 0.080160166 |
| 0.067129534 | 0.337047751 | 0.03952772  | 0.299963562 |
| 0.389764967 | 0.050117756 | 0.365423739 | 0.005219871 |
| 0.000610915 | 0.024644477 | 0.144250314 | 0.210512987 |
| 0.120610242 | 0.07699615  | 0.056370201 | 0.036204571 |
| 0.063043732 | 0.194950061 | 0.323807394 | 0.068186758 |
| 0.257261008 | 0.000861441 | 0.305334357 | 0.123390972 |
| 0.01947199  | 0.093627042 | 0.144232504 | 0.224286195 |
| 0.10132078  | 0.281431813 | 0.40806603  | 0.006547476 |
| 0.018273053 | 0.187003125 | 0.328062945 | 0.173809097 |
| 0.34097963  | 0.111709096 | 0.070812757 | 0.115708544 |
| 0.267515985 | 0.367890675 | 0.132030823 | 0.063131601 |
| 0.000566253 | 0.034145868 | 0.071606177 | 0.265612026 |
| 0.241193551 | 0.196579076 | 0.224864687 | 0.044706624 |
| 0.167948487 | 0.00824439  | 0.186085361 | 0.432713865 |
| 0.005407883 | 0.329609397 | 0.003478313 | 0.054386332 |
| 0.352851647 | 0.439034496 | 0.252118614 | 0.014974736 |
| 0.006724267 | 0.050478775 | 0.08558834  | 0.410369257 |
| 0.170045477 | 0.166220069 | 0.243326733 | 0.079624038 |
| 0.35294394  | 0.062536696 | 0.092475461 | 0.318288309 |
| 0.386373999 | 0.007031131 | 0.070186931 | 0.082243485 |
| 0.092093205 | 0.027548092 | 0.070904583 | 0.025778683 |
| 0.003010508 | 0.027997695 | 0.402064013 | 0.058129294 |
| 0.02047329  | 0.055121557 | 0.023444864 | 0.205082752 |
| 0.141676867 | 0.415145433 | 0.024673557 | 0.065436831 |
| 0.279698802 | 0.081326964 | 0.115225363 | 0.292782571 |
| 0.092612786 | 0.099066471 | 0.051377554 | 0.30980696  |
| 0.313442227 | 0.019181416 | 0.024109896 | 0.159561158 |
| 0.320962989 | 0.420559999 | 0.429012045 | 0.119808117 |
| 0.057339109 | 0.082449994 | 0.080728306 | 0.175706326 |
| 0.084927872 | 0.178198822 | 0.061025297 | 0.197670936 |
| 0.264473122 | 0.020046577 | 0.019474894 | 0.341160981 |
| 0.009286415 | 0.052926317 | 0.326436909 | 0.284830269 |
| 0.197952453 | 0.007882397 | 0.054541435 | 0.081191296 |
| 0.125917213 | 0.073556099 | 0.21992702  | 0.049639878 |
| 0.162004194 | 0.082990859 | 0.012363385 | 0.3339601   |
| 0.035448892 | 0.169956593 | 0.10952954  | 0.021445378 |
| 0.252761913 | 0.143029269 | 0.317517386 | 0.21632727  |
| 0.278237389 | 0.000721244 | 0.03136891  | 0.206650948 |
| 0.083198256 | 0.392656376 | 0.354760006 | 0.032315614 |
| 0.120033539 | 0.104364973 | 0.045124063 | 0.075557974 |
| 0.36414219  | 0.051303247 | 0.049218959 | 0.000404208 |
| 0.034185146 | 0.11788797  | 0.145437074 | 0.02920887  |
| 0.052366716 | 0.040870545 | 0.086158023 | 0.348292858 |
| 0.066765244 | 0.301840884 | 0.023982855 | 0.101867569 |

|             |             |             |             |
|-------------|-------------|-------------|-------------|
| 0.080519828 | 0.217957851 | 0.1064448   | 0.107718794 |
| 0.256304707 | 0.086610235 | 0.424428379 | 0.239260596 |
| 0.06262807  | 0.186037687 | 0.078741353 | 0.0857984   |
| 0.220000093 | 0.343199716 | 0.348200038 | 0.315498034 |
| 0.064225144 | 0.282670715 | 0.124300308 | 0.129761663 |
| 0.201295771 | 0.183022394 | 0.0308543   | 0.383057356 |
| 0.000482636 | 0.161780117 | 0.168276755 | 0.096388211 |
| 0.347271011 | 0.083356848 | 0.024552613 | 0.102743101 |
| 0.455602105 | 0.389689412 | 0.376022476 | 0.39398795  |
| 0.095027927 | 0.00861733  | 0.402181193 | 0.223251438 |
| 0.446104943 | 0.1036609   | 0.087375763 | 0.05731709  |
| 0.388856712 | 0.233101211 | 0.210184929 | 0.195996909 |
| 0.175864972 | 0.116052351 | 0.088296009 | 0.276277545 |
| 0.010080144 | 0.070065761 | 0.239344767 | 0.043788179 |
| 0.079777146 | 0.045179257 | 0.299246133 | 0.170008582 |
| 0.096183827 | 0.120947239 | 0.082559736 | 0.019968164 |
| 0.054302852 | 0.385030845 | 0.015212823 | 0.390012802 |
| 0.440311223 | 0.149223408 | 0.358193202 | 0.447387163 |
| 0.129202613 | 0.214741933 | 0.356492665 | 0.415054925 |
| 0.001172861 | 0.379815591 | 0.301196714 | 0.204817925 |
| 0.374970636 | 0.117275425 | 0.129372347 | 0.133741892 |
| 0.000744351 | 0.048523522 | 0.081340328 | 0.377350731 |
| 0.35303219  | 0.006352195 | 0.01744994  | 0.30323551  |
| 0.265281258 | 0.029455818 | 0.428197791 | 0.104017336 |
| 0.313191812 | 0.144967067 | 0.03793473  | 0.335734769 |
| 0.075576092 | 0.146654289 | 0.005316913 | 0.192955762 |
| 0.129460171 | 0.053022822 | 0.015108333 | 0.4337887   |
| 0.335586103 | 0.189231741 | 0.097077607 | 0.002351442 |
| 0.385348566 | 0.057963253 | 0.273262619 | 0.044977418 |
| 0.313241721 | 0.194290446 | 0.315248749 | 0.340063554 |
| 0.195864246 | 0.250562784 | 0.223092272 | 0.317942957 |
| 0.037124923 | 0.357170411 | 0.379253814 | 0.018733761 |
| 0.206325455 | 0.372867408 | 0.127306184 | 0.056296759 |
| 0.212118625 | 0.017987919 | 0.077597148 | 0.176319816 |
| 0.298723992 | 0.360470479 | 0.015178574 | 0.074844669 |
| 0.240507147 | 0.083952669 | 0.025289696 | 0.115178483 |
| 0.129059344 | 0.085226768 | 0.086328187 | 0.198116714 |
| 0.318257807 | 0.129756239 | 0.362411374 | 0.033802611 |
| 0.385780292 | 0.02231136  | 0.355076205 | 0.06921277  |
| 0.124251024 | 0.217336901 | 0.385679478 | 0.091565099 |
| 0.006647272 | 0.056069966 | 0.218538367 | 0.259468933 |
| 0.023156544 | 0.071098335 | 0.066711135 | 0.112851459 |
| 0.428764424 | 0.130728545 | 0.117321314 | 0.13271958  |
| 0.25567794  | 0.018172753 | 0.372416674 | 0.13265766  |
| 0.282597678 | 0.081420121 | 0.297916322 | 0.002804449 |
| 0.245527307 | 0.039141494 | 0.123485736 | 0.104654706 |
| 0.430641371 | 0.035718288 | 0.177837579 | 0.056923145 |
| 0.055032587 | 0.003635269 | 0.222252316 | 0.111896019 |
| 0.135450153 | 0.142052608 | 0.133795395 | 0.064069481 |
| 0.409015607 | 0.172461696 | 0.300321328 | 0.109925344 |
| 0.101907885 | 0.006818702 | 0.031582403 | 0.014483213 |
| 0.268106403 | 0.226240466 | 0.239409258 | 0.177730363 |
| 0.116792599 | 0.20565823  | 0.191522879 | 0.11378664  |
| 0.348855105 | 0.057837698 | 0.435435448 | 0.111652671 |

|             |             |             |             |
|-------------|-------------|-------------|-------------|
| 0.360772124 | 0.113566655 | 0.102363803 | 0.097918321 |
| 0.042716553 | 0.040814706 | 0.030267759 | 0.07859553  |
| 0.385972578 | 0.096934117 | 0.119202472 | 0.127562431 |
| 0.013193799 | 0.099816326 | 0.324913934 | 0.288498324 |
| 0.188529959 | 0.267519037 | 0.148060658 | 0.239135011 |
| 0.112222416 | 0.108495099 | 0.011188174 | 0.004542296 |
| 0.057951607 | 0.049701013 | 0.369884338 | 0.358276881 |
| 0.422779232 | 0.128391066 | 0.02619454  | 0.055029077 |
| 0.067102028 | 0.358229587 | 0.094079036 | 0.046869436 |
| 0.194940886 | 0.111441403 | 0.000511667 | 0.102640552 |
| 0.211383673 | 0.110550217 |             |             |
| ART4        | 0.403847519 | 0.473375985 | 0.05741443  |
| 0.030250975 | 0.100529943 | 0.207035493 | 0.191859849 |
| 0.430225044 | 0.094064066 | 0.122618595 | 0.298658018 |
| 0.002271088 | 0.47533626  | 0.014646344 | 0.068635508 |
| 0.50046529  | 0.504558553 | 0.311319564 | 0.499488751 |
| 0.355323995 | 0.141763241 | 0.375473358 | 0.377387857 |
| 0.229280837 | 0.002059513 | 0.102274669 | 0.046440384 |
| 0.455547103 | 1           | 0.184677927 | 0.26966715  |
| 0.48562836  | 0.509006113 | 0.406314836 | 0.322263826 |
| 0.302819481 | 0.436496409 | 0.169430602 | 0.499737594 |
| 0.460333998 | 0.201078545 | 0.509750071 | 0.012013256 |
| 0.004990555 | 0.083416061 | 0.414704955 | 0.395439424 |
| 0.325881539 | 0.192152745 | 0.152788304 | 0.148957328 |
| 0.247270589 | 0.331611914 | 0.435402098 | 0.255585698 |
| 0.383347398 | 0.004741074 | 0.421769115 | 0.308061086 |
| 0.053317603 | 0.306054965 | 0.424450273 | 0.431482757 |
| 0.216673693 | 0.401472732 | 0.496432428 | 0.027334813 |
| 0.058008626 | 0.481238363 | 0.489937282 | 0.429479927 |
| 0.472794913 | 0.352947697 | 0.270554789 | 0.44570361  |
| 0.497014305 | 0.485240101 | 0.265261166 | 0.165715848 |
| 0.001092937 | 0.124827042 | 0.322722197 | 0.412340818 |
| 0.491983917 | 0.334525298 | 0.45293774  | 0.190251338 |
| 0.486278107 | 0.01557118  | 0.384519897 | 0.50381295  |
| 0.021985484 | 0.481711562 | 0.011877802 | 0.146299409 |
| 0.495047568 | 0.487433827 | 0.447252275 | 0.058149009 |
| 0.012206854 | 0.118823764 | 0.196919819 | 0.448090151 |
| 0.430174826 | 0.47452261  | 0.37778654  | 0.233494652 |
| 0.446483003 | 0.173058647 | 0.339632412 | 0.430847863 |
| 0.485539315 | 0.008603703 | 0.160764339 | 0.195995341 |
| 0.355955968 | 0.129688568 | 0.202068801 | 0.06290007  |
| 0.012090277 | 0.035329884 | 0.494729159 | 0.153034414 |
| 0.082909111 | 0.176209502 | 0.082275296 | 0.47518131  |
| 0.417613629 | 0.468303133 | 0.101277576 | 0.224910244 |
| 0.506282312 | 0.222535288 | 0.422978452 | 0.506514066 |
| 0.388870181 | 0.271025098 | 0.136727445 | 0.452261813 |
| 0.411174083 | 0.058048494 | 0.070380057 | 0.305661883 |
| 0.460659662 | 0.501898672 | 0.496110659 | 0.331568405 |
| 0.242161318 | 0.232335964 | 0.325966162 | 0.37906845  |
| 0.214768207 | 0.378181059 | 0.147817816 | 0.337882181 |
| 0.379374846 | 0.054687299 | 0.053494851 | 0.494362333 |
| 0.052155459 | 0.219088064 | 0.439830975 | 0.482308313 |
| 0.478399474 | 0.037713633 | 0.216877167 | 0.234794458 |
| 0.289565685 | 0.227809838 | 0.428878016 | 0.203714482 |



|             |             |             |             |
|-------------|-------------|-------------|-------------|
| 0.301410183 | 0.332518164 | 0.038141995 | 0.454319427 |
| 0.105333286 | 0.337910827 | 0.379629982 | 0.081397321 |
| 0.461823466 | 0.386771179 | 0.476049108 | 0.452329943 |
| 0.465675606 | 0.004521611 | 0.124489287 | 0.414368926 |
| 0.317474277 | 0.464902414 | 0.463184205 | 0.095437456 |
| 0.245945461 | 0.387831859 | 0.12636583  | 0.314888083 |
| 0.45061538  | 0.213470033 | 0.185754797 | 0.000602495 |
| 0.120624174 | 0.437116008 | 0.447444441 | 0.054190811 |
| 0.214671054 | 0.105157957 | 0.146267491 | 0.491008132 |
| 0.177723187 | 0.503270703 | 0.034948242 | 0.238360886 |
| 0.246479217 | 0.409578124 | 0.422760477 | 0.311494319 |
| 0.463585253 | 0.308567503 | 0.465990564 | 0.370356665 |
| 0.253690507 | 0.325691001 | 0.250128062 | 0.266641657 |
| 0.51150198  | 0.498314026 | 0.512473274 | 0.498668743 |
| 0.235721268 | 0.435344165 | 0.376155388 | 0.252580992 |
| 0.419311928 | 0.430275797 | 0.076185705 | 0.47772893  |
| 0.00064703  | 0.334108711 | 0.455841065 | 0.266094957 |
| 0.468022231 | 0.208374273 | 0.059434641 | 0.26291661  |
| 0.501290328 | 0.476127727 | 0.462201801 | 0.495951119 |
| 0.319220669 | 0.011297455 | 0.476850271 | 0.398714215 |
| 0.505601467 | 0.390834318 | 0.376213149 | 0.124104579 |
| 0.502122204 | 0.432813845 | 0.434990816 | 0.474367165 |
| 0.475806682 | 0.446583617 | 0.232532891 | 0.425133401 |
| 0.023069984 | 0.235056149 | 0.47341131  | 0.183885076 |
| 0.309490421 | 0.178022868 | 0.484921041 | 0.302428615 |
| 0.412589476 | 0.376325699 | 0.363142084 | 0.065932994 |
| 0.14975142  | 0.478666098 | 0.068839941 | 0.470054264 |
| 0.501405204 | 0.367815773 | 0.499152342 | 0.49904674  |
| 0.316566702 | 0.362747527 | 0.489054864 | 0.474497948 |
| 0.001341243 | 0.483736922 | 0.474411363 | 0.321291751 |
| 0.499228675 | 0.262056959 | 0.333696158 | 0.489457868 |
| 0.001301229 | 0.133900172 | 0.334689836 | 0.455779959 |
| 0.505288845 | 0.021082839 | 0.080979708 | 0.488184415 |
| 0.483368979 | 0.062790762 | 0.490024004 | 0.314032684 |
| 0.468402004 | 0.433296653 | 0.144296414 | 0.48640612  |
| 0.311200476 | 0.422251307 | 0.026530995 | 0.443870833 |
| 0.456563173 | 0.135778859 | 0.070913448 | 0.494647332 |
| 0.463851795 | 0.365618135 | 0.227186593 | 0.008480351 |
| 0.445303528 | 0.23601122  | 0.491149877 | 0.109234602 |
| 0.444449529 | 0.338758228 | 0.451171359 | 0.50219264  |
| 0.469253978 | 0.396604564 | 0.354508435 | 0.474044019 |
| 0.137023664 | 0.490709788 | 0.489274752 | 0.050611449 |
| 0.458873703 | 0.503937314 | 0.423273489 | 0.14827871  |
| 0.380740138 | 0.097054962 | 0.175449042 | 0.375472848 |
| 0.443008763 | 0.499773326 | 0.045112774 | 0.169120388 |
| 0.387606466 | 0.285359426 | 0.088013438 | 0.348207295 |
| 0.25121991  | 0.271754928 | 0.216809975 | 0.358221474 |
| 0.432110793 | 0.257644949 | 0.492567451 | 0.148104424 |
| 0.509459209 | 0.04529423  | 0.478167765 | 0.242038763 |
| 0.274491222 | 0.470524763 | 0.455458322 | 0.199523131 |
| 0.023664752 | 0.133362544 | 0.372877902 | 0.384797906 |
| 0.062491789 | 0.175900132 | 0.228731086 | 0.321930772 |
| 0.508426641 | 0.448666822 | 0.248150985 | 0.355904485 |
| 0.372300839 | 0.095121278 | 0.455147218 | 0.345709443 |

|             |             |             |             |
|-------------|-------------|-------------|-------------|
| 0.431135122 | 0.314389082 | 0.481516513 | 0.009432015 |
| 0.497513267 | 0.152675945 | 0.293645422 | 0.348198153 |
| 0.475700017 | 0.113101567 | 0.358109734 | 0.153650194 |
| 0.198168602 | 0.004944321 | 0.361815036 | 0.4399443   |
| 0.24881771  | 0.391313019 | 0.380081264 | 0.250461957 |
| 0.47782077  | 0.411510825 | 0.456285459 | 0.374019429 |
| 0.368893104 | 0.034446572 | 0.131664645 | 0.029330017 |
| 0.413570434 | 0.374150121 | 0.468234969 | 0.434130282 |
| 0.268540777 | 0.463482966 | 0.375521368 | 0.410317602 |
| 0.500925844 | 0.217506705 | 0.505515984 | 0.323302323 |
| 0.45671074  | 0.399010101 | 0.229555487 | 0.335206629 |
| 0.168935413 | 0.141838396 | 0.099878646 | 0.17790129  |
| 0.509710763 | 0.321207361 | 0.375174432 | 0.360976769 |
| 0.038296002 | 0.375588768 | 0.487734754 | 0.498475049 |
| 0.451844807 | 0.464531466 | 0.453256756 | 0.359913514 |
| 0.345840782 | 0.317477656 | 0.056924431 | 0.027693426 |
| 0.273827524 | 0.166631055 | 0.455921339 | 0.482679458 |
| 0.504465272 | 0.361197927 | 0.08093733  | 0.133779433 |
| 0.200426909 | 0.458633585 | 0.236595233 | 0.213752131 |
| 0.457375089 | 0.384028413 | 0.000650138 | 0.255307175 |
| 0.364923142 | 0.429511932 |             |             |
| ASAH1       | 0.132974281 | 0.303328781 | 0.229051814 |
| 0.006942736 | 0.09858095  | 0.37939501  | 0.266165507 |
| 0.090728549 | 0.282893222 | 0.139663392 | 0.40763114  |
| 0.020721178 | 0.099035074 | 0.134788223 | 0.188310905 |
| 0.216003185 | 0.212673831 | 0.230544558 | 0.224736563 |
| 0.171447057 | 0.060768389 | 0.318237179 | 0.210520491 |
| 0.316829019 | 0.036319197 | 0.172116983 | 0.029229783 |
| 0.063012845 | 0.184677927 | 1           | 0.166686222 |
| 0.189843184 | 0.140161952 | 0.085926389 | 0.07034913  |
| 0.016032078 | 0.371323481 | 0.009764775 | 0.106242842 |
| 0.113865796 | 0.168027925 | 0.152963598 | 0.130224493 |
| 0.000153808 | 0.210465267 | 0.062045026 | 0.2779254   |
| 0.184698886 | 0.344247113 | 0.315827914 | 0.158653708 |
| 0.008744105 | 0.40064366  | 0.262079507 | 0.007105573 |
| 0.397793852 | 0.001128422 | 0.379244994 | 0.112133723 |
| 0.273485699 | 0.227994982 | 0.078092604 | 0.235291761 |
| 0.39514589  | 0.392076244 | 0.261862351 | 0.133119762 |
| 0.253207477 | 0.116096909 | 0.107905861 | 0.144981504 |
| 0.276285234 | 0.114902903 | 0.181732801 | 0.039163836 |
| 0.125414807 | 0.120105706 | 0.395015571 | 0.269962961 |
| 0.011726203 | 0.197427738 | 0.06602728  | 0.135644495 |
| 0.063133824 | 0.407093143 | 0.132786713 | 0.166251186 |
| 0.083469482 | 0.2013872   | 0.260205696 | 0.242327751 |
| 0.023786117 | 0.132003479 | 0.009571208 | 0.264986612 |
| 0.181140756 | 0.142952182 | 0.196825191 | 0.203673694 |
| 0.144017063 | 0.299900097 | 0.097567648 | 0.099633204 |
| 0.177489645 | 0.128450371 | 0.395355599 | 0.010900873 |
| 0.075089664 | 0.220729349 | 0.177897432 | 0.363322701 |
| 0.255318504 | 0.081757344 | 0.269122256 | 0.351671611 |
| 0.071116816 | 0.057019876 | 0.285628986 | 0.007319698 |
| 0.019472875 | 0.031032756 | 0.178014329 | 0.301843262 |
| 0.159121188 | 0.249234662 | 0.067993422 | 0.115135122 |
| 0.082957426 | 0.16844101  | 0.127163547 | 0.213274774 |

|             |             |             |             |
|-------------|-------------|-------------|-------------|
| 0.100454799 | 0.274498294 | 0.086633196 | 0.147700809 |
| 0.062568147 | 0.205974545 | 0.292347072 | 0.304951796 |
| 0.403915619 | 0.212884962 | 0.263332903 | 0.362562053 |
| 0.077786785 | 0.214533111 | 0.269923891 | 0.167342612 |
| 0.122553044 | 0.275275531 | 0.093830701 | 0.237154132 |
| 0.325150766 | 0.203869174 | 0.012706038 | 0.389498175 |
| 0.423375327 | 0.009309099 | 0.28173631  | 0.18586595  |
| 0.014806268 | 0.172678708 | 0.33858581  | 0.216672319 |
| 0.137645168 | 0.025703341 | 0.128919046 | 0.2692055   |
| 0.303367064 | 0.222302174 | 0.236199878 | 0.108710957 |
| 0.372345224 | 0.084001761 | 0.209861897 | 0.078924144 |
| 0.293199025 | 0.309446747 | 0.037006189 | 0.023822205 |
| 0.147919669 | 0.142670829 | 0.251899548 | 0.179458396 |
| 0.145533796 | 0.000769273 | 0.127300458 | 0.168718306 |
| 0.096457819 | 0.12919727  | 0.321327189 | 0.298134988 |
| 0.359055416 | 0.043719228 | 0.306248548 | 0.106694267 |
| 0.222977617 | 0.138066926 | 0.13967194  | 0.015807339 |
| 0.224942636 | 0.044703283 | 0.124910626 | 0.216937266 |
| 0.135778654 | 0.255142322 | 0.105564019 | 0.232069908 |
| 0.326860034 | 0.153914284 | 0.102288845 | 0.034109518 |
| 0.223079054 | 0.268473239 | 0.064759376 | 0.106632666 |
| 0.206837554 | 0.153921863 | 0.112490717 | 0.40362398  |
| 0.140626412 | 0.378481725 | 0.021460047 | 0.244168161 |
| 0.087314093 | 0.214308667 | 0.137454256 | 0.182546504 |
| 0.238019703 | 0.180842284 | 0.052387622 | 0.40449861  |
| 0.202528977 | 0.180673462 | 0.286922879 | 0.310834158 |
| 0.021580378 | 0.313505266 | 0.125201786 | 0.023022488 |
| 0.300356175 | 0.310969966 | 0.291401554 | 0.224021398 |
| 0.229872527 | 0.318558139 | 0.250198546 | 0.134788586 |
| 0.045863871 | 0.111307419 | 0.290687921 | 0.315481639 |
| 0.181991383 | 0.152016498 | 0.034668588 | 0.029757862 |
| 0.232584714 | 0.093827335 | 0.19199285  | 0.093806668 |
| 0.105561828 | 0.052123665 | 0.28753722  | 0.142607805 |
| 0.009803453 | 0.200674661 | 0.122665135 | 0.06579509  |
| 0.107216781 | 0.170499316 | 0.208358922 | 0.409269782 |
| 0.064205551 | 0.06330597  | 0.056421394 | 0.202193962 |
| 0.327348327 | 0.303494513 | 0.003945336 | 0.293758602 |
| 0.251451105 | 0.235895006 | 0.215616583 | 0.251348689 |
| 0.247464482 | 0.376794499 | 0.251400141 | 0.174793339 |
| 0.010068166 | 0.112789852 | 0.077227737 | 0.456133257 |
| 0.160747493 | 0.363430591 | 0.050050355 | 0.042131122 |
| 0.012284385 | 0.311770365 | 0.016745671 | 0.359928881 |
| 0.192742908 | 0.17528352  | 0.001927076 | 0.214258257 |
| 0.073409668 | 0.012465609 | 0.291621614 | 0.207978709 |
| 0.263665731 | 0.141276203 | 0.219866782 | 0.097627382 |
| 0.011284328 | 0.103483445 | 0.038183011 | 0.169709914 |
| 0.078617695 | 0.02787316  | 0.063510999 | 0.259334595 |
| 0.266638598 | 0.315351057 | 0.352403591 | 0.014722046 |
| 0.115950289 | 0.029824961 | 0.163320248 | 0.213466055 |
| 0.301764539 | 0.395621905 | 0.316013288 | 0.125102808 |
| 0.157026263 | 0.355671141 | 0.401290918 | 0.246607045 |
| 0.01609763  | 0.113681646 | 0.151464516 | 0.123665397 |
| 0.085005411 | 0.212132912 | 0.091137019 | 0.326527386 |
| 0.306534326 | 0.01353759  | 0.389189482 | 0.158493527 |

|             |             |             |             |
|-------------|-------------|-------------|-------------|
| 0.311901852 | 0.202557659 | 0.24658441  | 0.264765459 |
| 0.357262936 | 0.230832132 | 0.246541842 | 0.192929427 |
| 0.421072355 | 0.010341687 | 0.032343878 | 0.363500127 |
| 0.362270718 | 0.39286431  | 0.195862709 | 0.067571485 |
| 0.171130941 | 0.268019117 | 0.221167778 | 0.209288991 |
| 0.317840022 | 0.078796928 | 0.101848262 | 0.026866467 |
| 0.02753274  | 0.207519792 | 0.3448797   | 0.400222853 |
| 0.269925575 | 0.324620102 | 0.20610127  | 0.200696918 |
| 0.192857831 | 0.079597991 | 0.37686528  | 0.19044268  |
| 0.429249456 | 0.042016482 | 0.359460256 | 0.22777453  |
| 0.28892623  | 0.157341342 | 0.224082644 | 0.012395203 |
| 0.116130096 | 0.137402732 | 0.060478694 | 0.133855477 |
| 0.134514176 | 0.260096617 | 0.297036174 | 0.289230761 |
| 0.039124832 | 0.01514942  | 0.35551071  | 0.030734075 |
| 0.447212386 | 0.047904934 | 0.184317126 | 0.006218181 |
| 0.325541597 | 0.187171644 | 0.217805249 | 0.034249811 |
| 0.129315136 | 0.000745864 | 0.146705465 | 0.208326421 |
| 0.304236316 | 0.375689863 | 0.156712602 | 0.108477216 |
| 0.10260621  | 0.156809221 | 0.316978417 | 0.09477464  |
| 0.200982111 | 0.017526165 | 0.221359878 | 0.192834107 |
| 0.085619633 | 0.120332561 | 0.37980259  | 0.159261608 |
| 0.18859603  | 0.09253894  | 0.285811652 | 0.225949453 |
| 0.173910762 | 0.141520245 | 0.14829785  | 0.106277336 |
| 0.17228171  | 0.147202087 | 0.153148336 | 0.112789844 |
| 0.155347798 | 0.094149762 | 0.071257217 | 0.426778239 |
| 0.091542661 | 0.178633048 | 0.012504544 | 0.023410292 |
| 0.038277282 | 0.237946388 | 0.256328078 | 0.243313363 |
| 0.2275104   | 0.065545565 | 0.281989797 | 0.292677412 |
| 0.013128298 | 0.126016931 | 0.294519944 | 0.013412383 |
| 0.167137117 | 0.059583941 | 0.009177132 | 0.188596345 |
| 0.364605307 | 0.064481532 |             |             |
| ATG5        | 0.147882222 | 0.374731273 | 0.038865919 |
| 0.013613421 | 0.029666598 | 0.293830182 | 0.217119022 |
| 0.109672726 | 0.038494426 | 0.096094422 | 0.36687765  |
| 0.001240328 | 0.149828211 | 0.010287019 | 0.014500881 |
| 0.311130718 | 0.298448339 | 0.202881672 | 0.286143331 |
| 0.133667615 | 0.058516131 | 0.268680814 | 0.301631866 |
| 0.240744445 | 0.001813522 | 0.123811882 | 0.043262946 |
| 0.077240277 | 0.26966715  | 0.166686222 | 1           |
| 0.270627912 | 0.23294551  | 0.072621812 | 0.029565949 |
| 0.017578375 | 0.397071825 | 0.003897136 | 0.17363354  |
| 0.166556933 | 0.151616812 | 0.233335359 | 0.008055223 |
| 0.000920298 | 0.087414279 | 0.069148916 | 0.275040955 |
| 0.097620052 | 0.265554887 | 0.149181361 | 0.147540803 |
| 0.008710729 | 0.350599966 | 0.243888192 | 0.009221484 |
| 0.395201742 | 0.004133693 | 0.395953366 | 0.061115704 |
| 0.053126702 | 0.132243808 | 0.100021598 | 0.269810046 |
| 0.293716775 | 0.403787159 | 0.33306363  | 0.02976253  |
| 0.105923924 | 0.13871544  | 0.201280299 | 0.254222944 |
| 0.327375465 | 0.062909162 | 0.070040177 | 0.050085374 |
| 0.196367412 | 0.18277466  | 0.237707222 | 0.051823244 |
| 0.001642494 | 0.16797071  | 0.068148393 | 0.146610487 |
| 0.118452271 | 0.371063552 | 0.161300743 | 0.095780464 |
| 0.150149431 | 0.017896104 | 0.241979073 | 0.325100795 |

|             |             |             |             |
|-------------|-------------|-------------|-------------|
| 0.012459162 | 0.175332795 | 0.003026679 | 0.032654677 |
| 0.245968575 | 0.225041764 | 0.234700789 | 0.055800705 |
| 0.008998021 | 0.053726427 | 0.020369505 | 0.165302826 |
| 0.16579549  | 0.157500847 | 0.373123676 | 0.008341447 |
| 0.132899956 | 0.047405893 | 0.088976388 | 0.420105653 |
| 0.342157129 | 0.004210819 | 0.038708457 | 0.250390961 |
| 0.025829564 | 0.031203487 | 0.200953633 | 0.007806313 |
| 0.014893169 | 0.002471249 | 0.259463846 | 0.079834875 |
| 0.106752774 | 0.200279943 | 0.031195541 | 0.200942963 |
| 0.076572834 | 0.213194447 | 0.027935476 | 0.189575347 |
| 0.186295413 | 0.233829282 | 0.15527937  | 0.229910931 |
| 0.052176074 | 0.057469442 | 0.104665336 | 0.341236933 |
| 0.358315003 | 0.037657235 | 0.039732532 | 0.333327305 |
| 0.133637828 | 0.304414312 | 0.350611228 | 0.046893948 |
| 0.093187026 | 0.148983994 | 0.086293076 | 0.316432466 |
| 0.209481884 | 0.13805713  | 0.003508903 | 0.283920549 |
| 0.411538047 | 0.007167941 | 0.061985641 | 0.219048428 |
| 0.010920704 | 0.042601896 | 0.367921919 | 0.264142112 |
| 0.150931052 | 0.039515347 | 0.158884153 | 0.263641449 |
| 0.211956987 | 0.227479566 | 0.228591753 | 0.134072124 |
| 0.284819181 | 0.097060295 | 0.045980459 | 0.138548293 |
| 0.127329512 | 0.220837045 | 0.022597805 | 0.007456487 |
| 0.148116374 | 0.08175696  | 0.338203337 | 0.191640713 |
| 0.198003842 | 0.003629475 | 0.101733882 | 0.183437109 |
| 0.073495301 | 0.171793854 | 0.39497212  | 0.125730302 |
| 0.202115162 | 0.023833415 | 0.131282353 | 0.074785198 |
| 0.222946468 | 0.072536955 | 0.064964014 | 0.003608917 |
| 0.04433329  | 0.101492037 | 0.118831837 | 0.020421945 |
| 0.070451075 | 0.048772557 | 0.014033203 | 0.323296153 |
| 0.217103433 | 0.225710821 | 0.00741945  | 0.009308969 |
| 0.119936276 | 0.313849551 | 0.090854675 | 0.036002657 |
| 0.286610498 | 0.099684596 | 0.193357108 | 0.34950993  |
| 0.039653814 | 0.387676978 | 0.005603365 | 0.101469062 |
| 0.141719488 | 0.289553392 | 0.234982673 | 0.237662694 |
| 0.186762985 | 0.15616848  | 0.022116832 | 0.298236857 |
| 0.184284442 | 0.150518936 | 0.05263125  | 0.355550548 |
| 0.001673979 | 0.233748692 | 0.199711612 | 0.006800296 |
| 0.386317213 | 0.262423947 | 0.053825261 | 0.098632937 |
| 0.293567514 | 0.350751963 | 0.250141776 | 0.229590648 |
| 0.017399191 | 0.006919012 | 0.32194808  | 0.295684624 |
| 0.269852728 | 0.139677437 | 0.034086334 | 0.003320095 |
| 0.307526076 | 0.093363802 | 0.269914565 | 0.152894991 |
| 0.145020872 | 0.053276316 | 0.142274177 | 0.134779409 |
| 0.002142698 | 0.181369855 | 0.222393338 | 0.040195635 |
| 0.125071703 | 0.045712538 | 0.288622635 | 0.280696942 |
| 0.057233938 | 0.038536976 | 0.078124453 | 0.079135033 |
| 0.171719333 | 0.382436175 | 0.001452878 | 0.301915316 |
| 0.332315674 | 0.161549762 | 0.317795666 | 0.31869762  |
| 0.200667735 | 0.346803869 | 0.343176098 | 0.210552335 |
| 0.00060627  | 0.196562347 | 0.136523372 | 0.34144076  |
| 0.276117797 | 0.281122727 | 0.037031832 | 0.077681224 |
| 0.000418502 | 0.159743412 | 0.023375423 | 0.362322614 |
| 0.284700133 | 0.019855701 | 0.001019114 | 0.272824407 |
| 0.133262115 | 0.002347691 | 0.364698422 | 0.270479709 |

|             |             |             |             |
|-------------|-------------|-------------|-------------|
| 0.349645776 | 0.155228125 | 0.181290645 | 0.173280134 |
| 0.019524969 | 0.048579036 | 0.013226681 | 0.265525815 |
| 0.090062272 | 0.004828503 | 0.04569099  | 0.314542207 |
| 0.334897906 | 0.292584998 | 0.214285192 | 0.019598907 |
| 0.169710494 | 0.041744981 | 0.267912903 | 0.026568865 |
| 0.304158702 | 0.328018076 | 0.346501611 | 0.19392126  |
| 0.184001675 | 0.385558409 | 0.382945722 | 0.320767233 |
| 0.014177218 | 0.213751152 | 0.251009683 | 0.037247839 |
| 0.127401813 | 0.292885892 | 0.185490485 | 0.235778492 |
| 0.244921792 | 0.017315142 | 0.252411206 | 0.124734318 |
| 0.366927521 | 0.307427317 | 0.058842827 | 0.04333237  |
| 0.381034152 | 0.087375096 | 0.10851493  | 0.124422888 |
| 0.277444138 | 0.012672546 | 0.006181924 | 0.287952309 |
| 0.399417334 | 0.317083323 | 0.308626705 | 0.060575939 |
| 0.248295737 | 0.023051779 | 0.225768525 | 0.047493878 |
| 0.202547807 | 0.164982901 | 0.167588053 | 0.010920606 |
| 0.028327792 | 0.051122895 | 0.377926829 | 0.38270225  |
| 0.08033427  | 0.168264169 | 0.224852457 | 0.247131703 |
| 0.286696513 | 0.05485469  | 0.267223677 | 0.136762852 |
| 0.388347056 | 0.031998746 | 0.386121245 | 0.191284818 |
| 0.296647265 | 0.172457246 | 0.273131316 | 0.002596585 |
| 0.179208913 | 0.12766063  | 0.043702552 | 0.213250118 |
| 0.207062137 | 0.11024989  | 0.294866894 | 0.087975521 |
| 0.021342544 | 0.000875288 | 0.254863795 | 0.065566579 |
| 0.33405644  | 0.02043217  | 0.146537049 | 0.00647276  |
| 0.378595625 | 0.213258836 | 0.28571495  | 0.02351586  |
| 0.161955895 | 0.000766659 | 0.114291642 | 0.021244964 |
| 0.28269334  | 0.295408286 | 0.178865313 | 0.143755282 |
| 0.037187127 | 0.19417356  | 0.288230069 | 0.142793589 |
| 0.294467546 | 0.022427859 | 0.321812754 | 0.078494129 |
| 0.152079032 | 0.045787263 | 0.234840305 | 0.035524248 |
| 0.137460797 | 0.014772541 | 0.094345095 | 0.035534771 |
| 0.281518714 | 0.027150659 | 0.208823565 | 0.051000982 |
| 0.037824611 | 0.137291764 | 0.182562356 | 0.187159814 |
| 0.245649731 | 0.178077455 | 0.065203763 | 0.370712294 |
| 0.029940786 | 0.10905517  | 0.01985528  | 0.027170467 |
| 0.035990707 | 0.163393085 | 0.254332112 | 0.268883933 |
| 0.299188116 | 0.01925898  | 0.076653473 | 0.066142923 |
| 0.003767119 | 0.166509703 | 0.270938178 | 0.011146552 |
| 0.170843394 | 0.031339721 | 0.000757638 | 0.057129703 |
| 0.311074577 | 0.037616756 |             |             |
| ATN1        | 0.40621966  | 0.4366969   | 0.061443927 |
| 0.026831496 | 0.085114737 | 0.21156051  | 0.186080286 |
| 0.400961978 | 0.110335165 | 0.129999574 | 0.286518301 |
| 0.003441455 | 0.402548037 | 0.019913604 | 0.067078427 |
| 0.491426179 | 0.493155623 | 0.282994676 | 0.481697163 |
| 0.351024783 | 0.145706136 | 0.363539894 | 0.363243018 |
| 0.233582364 | 0.003169474 | 0.100175109 | 0.050071627 |
| 0.400150541 | 0.48562836  | 0.189843184 | 0.270627912 |
| 1           | 0.443857691 | 0.385644593 | 0.267900054 |
| 0.254519426 | 0.405061669 | 0.117619616 | 0.424961594 |
| 0.408408945 | 0.189623603 | 0.452119745 | 0.016591847 |
| 0.004097483 | 0.085158356 | 0.377295124 | 0.384599367 |
| 0.310899846 | 0.198195294 | 0.155638453 | 0.146941562 |

|             |             |             |             |
|-------------|-------------|-------------|-------------|
| 0.208286612 | 0.318255556 | 0.409218175 | 0.207919273 |
| 0.356041277 | 0.005141298 | 0.394223568 | 0.311882351 |
| 0.05898851  | 0.303450953 | 0.42463945  | 0.418331709 |
| 0.214465749 | 0.372347753 | 0.463409011 | 0.030584066 |
| 0.064655128 | 0.446154932 | 0.445463706 | 0.395667053 |
| 0.438874305 | 0.32928334  | 0.261614032 | 0.372866568 |
| 0.454586652 | 0.426945745 | 0.258246423 | 0.158204708 |
| 0.001819212 | 0.123696412 | 0.28302687  | 0.399984648 |
| 0.419244047 | 0.31928221  | 0.430854272 | 0.183550581 |
| 0.448335288 | 0.018944602 | 0.358597024 | 0.482279784 |
| 0.022654121 | 0.424351822 | 0.010505107 | 0.138672139 |
| 0.44907995  | 0.47465894  | 0.43270807  | 0.065115533 |
| 0.014162593 | 0.123153028 | 0.215296962 | 0.426530433 |
| 0.412205407 | 0.434523368 | 0.354426454 | 0.183870811 |
| 0.379079049 | 0.203554682 | 0.317206059 | 0.402559937 |
| 0.453554954 | 0.0084087   | 0.164936067 | 0.193177101 |
| 0.328662828 | 0.128725525 | 0.192197329 | 0.055897938 |
| 0.011768494 | 0.034255894 | 0.450402    | 0.16087404  |
| 0.085473519 | 0.17618202  | 0.072772756 | 0.419661407 |
| 0.383001102 | 0.438691965 | 0.090463026 | 0.220165667 |
| 0.439841215 | 0.21447305  | 0.366453743 | 0.455820138 |
| 0.314643008 | 0.275443502 | 0.145076273 | 0.407460551 |
| 0.384577885 | 0.058786519 | 0.080933236 | 0.299284868 |
| 0.3909211   | 0.465762935 | 0.4865856   | 0.314274238 |
| 0.210511241 | 0.231392089 | 0.345713332 | 0.349781241 |
| 0.205625057 | 0.34872233  | 0.11090346  | 0.314967123 |
| 0.357459196 | 0.04598238  | 0.06130803  | 0.44350558  |
| 0.039179048 | 0.210926001 | 0.415227734 | 0.432879392 |
| 0.413440285 | 0.043156689 | 0.213355863 | 0.237298721 |
| 0.296437817 | 0.225404126 | 0.41354989  | 0.206746302 |
| 0.298011212 | 0.3447793   | 0.040869128 | 0.388815046 |
| 0.108545436 | 0.331114259 | 0.377833631 | 0.088738433 |
| 0.420780544 | 0.354718121 | 0.437849874 | 0.420911731 |
| 0.443973545 | 0.004150521 | 0.130749437 | 0.417003691 |
| 0.351300226 | 0.404638087 | 0.424873293 | 0.100389653 |
| 0.246611178 | 0.334320157 | 0.130495843 | 0.270257294 |
| 0.417976289 | 0.232508278 | 0.200273455 | 0.001100209 |
| 0.113985967 | 0.419155348 | 0.414796697 | 0.065115211 |
| 0.191274133 | 0.123636824 | 0.14079688  | 0.449773095 |
| 0.180283577 | 0.433598116 | 0.039064451 | 0.203179566 |
| 0.238602923 | 0.373543188 | 0.384460169 | 0.336609355 |
| 0.420114507 | 0.304797046 | 0.449792295 | 0.356618    |
| 0.218983881 | 0.315847022 | 0.20925738  | 0.275401537 |
| 0.442477625 | 0.446420258 | 0.453991287 | 0.431852921 |
| 0.236445354 | 0.393104192 | 0.312909652 | 0.250284338 |
| 0.388542373 | 0.380966542 | 0.084441562 | 0.431986177 |
| 0.001130523 | 0.313981334 | 0.41712789  | 0.233616103 |
| 0.42722585  | 0.200923348 | 0.068157401 | 0.258468288 |
| 0.48710077  | 0.430467396 | 0.42493201  | 0.442380843 |
| 0.30345773  | 0.013859392 | 0.438422124 | 0.38379705  |
| 0.491591633 | 0.356597105 | 0.297258183 | 0.097584891 |
| 0.447194278 | 0.37767621  | 0.425739177 | 0.44325255  |
| 0.413348511 | 0.359679932 | 0.226061552 | 0.390385074 |
| 0.029135876 | 0.248589122 | 0.44825652  | 0.193453423 |

|             |             |             |             |
|-------------|-------------|-------------|-------------|
| 0.308230826 | 0.201126673 | 0.438693682 | 0.286377243 |
| 0.345718547 | 0.378583397 | 0.330115036 | 0.067144873 |
| 0.151670909 | 0.441819997 | 0.047084041 | 0.431968967 |
| 0.483633728 | 0.340968886 | 0.448026166 | 0.480507065 |
| 0.320273264 | 0.341578919 | 0.446350212 | 0.426556231 |
| 0.001685622 | 0.427411406 | 0.398940655 | 0.308409768 |
| 0.45689038  | 0.265623157 | 0.293734412 | 0.407524475 |
| 0.001447715 | 0.142533207 | 0.29241178  | 0.420064887 |
| 0.444707479 | 0.024943238 | 0.053872614 | 0.429428399 |
| 0.408355077 | 0.047208741 | 0.474322952 | 0.309611208 |
| 0.423215185 | 0.375350257 | 0.149943071 | 0.424290513 |
| 0.275885333 | 0.362903326 | 0.02415906  | 0.401177754 |
| 0.39790606  | 0.143143962 | 0.071388862 | 0.479267191 |
| 0.435445823 | 0.335091206 | 0.22411608  | 0.01413835  |
| 0.404152543 | 0.218466653 | 0.442716906 | 0.099783348 |
| 0.406546952 | 0.32408796  | 0.405455259 | 0.439271453 |
| 0.428334818 | 0.370078363 | 0.340668513 | 0.439572952 |
| 0.106021474 | 0.441742714 | 0.449553336 | 0.050219027 |
| 0.431389227 | 0.450367661 | 0.397482283 | 0.150119874 |
| 0.367008269 | 0.079011628 | 0.178902858 | 0.36538132  |
| 0.401041704 | 0.455626951 | 0.053883501 | 0.163103805 |
| 0.36421374  | 0.280407405 | 0.090444597 | 0.312694023 |
| 0.252256581 | 0.251656238 | 0.191548486 | 0.344842179 |
| 0.399712604 | 0.24712642  | 0.457449906 | 0.152054735 |
| 0.445451301 | 0.047819895 | 0.425139619 | 0.223235952 |
| 0.273196297 | 0.440433012 | 0.405117836 | 0.184729377 |
| 0.035935285 | 0.155355088 | 0.349904904 | 0.364123114 |
| 0.066972173 | 0.18036794  | 0.219636801 | 0.294510182 |
| 0.472997107 | 0.394142176 | 0.242240617 | 0.32639455  |
| 0.349734584 | 0.095369365 | 0.42201372  | 0.344507327 |
| 0.417473643 | 0.297190505 | 0.436521189 | 0.012154201 |
| 0.452124837 | 0.161372732 | 0.278861425 | 0.318766636 |
| 0.463595607 | 0.115338897 | 0.329242441 | 0.166784278 |
| 0.18117437  | 0.00441543  | 0.342916066 | 0.36034401  |
| 0.246555513 | 0.319549907 | 0.352879204 | 0.201989166 |
| 0.462429423 | 0.403544676 | 0.443117183 | 0.304258614 |
| 0.344775575 | 0.02080823  | 0.138367062 | 0.033492864 |
| 0.400938849 | 0.352361549 | 0.440694613 | 0.427304623 |
| 0.26971303  | 0.407983969 | 0.349711737 | 0.353217403 |
| 0.448743387 | 0.206568779 | 0.485860265 | 0.30618478  |
| 0.39733578  | 0.385963927 | 0.226777114 | 0.316568685 |
| 0.159595617 | 0.148196518 | 0.106530292 | 0.191875133 |
| 0.454763049 | 0.282099601 | 0.337974458 | 0.371117915 |
| 0.040119769 | 0.341391202 | 0.43017782  | 0.446946343 |
| 0.423798469 | 0.43833927  | 0.386788754 | 0.338191947 |
| 0.358407872 | 0.3373942   | 0.051848405 | 0.033211014 |
| 0.266937965 | 0.172627261 | 0.423002433 | 0.435179563 |
| 0.46909973  | 0.335227242 | 0.088539521 | 0.14297829  |
| 0.148483527 | 0.41326614  | 0.226023406 | 0.152624421 |
| 0.407788861 | 0.378199543 | 0.000657733 | 0.264151962 |
| 0.35059862  | 0.381215858 |             |             |
| ATP1B1      | 0.315102027 | 0.44110761  | 0.041559441 |
| 0.0394095   | 0.105649593 | 0.172714013 | 0.174636678 |
| 0.343561353 | 0.067339871 | 0.113981386 | 0.257087942 |



|             |             |             |             |
|-------------|-------------|-------------|-------------|
| 0.000726461 | 0.43349394  | 0.006729302 | 0.047240203 |
| 0.500862664 | 0.519182886 | 0.290968886 | 0.499250735 |
| 0.26639762  | 0.148479708 | 0.2973207   | 0.335680491 |
| 0.194554733 | 0.000723981 | 0.095229613 | 0.05243326  |
| 0.380530774 | 0.509006113 | 0.140161952 | 0.23294551  |
| 0.443857691 | 1           | 0.399986455 | 0.349242224 |
| 0.348187908 | 0.381261138 | 0.18793749  | 0.479792842 |
| 0.429813702 | 0.191430318 | 0.468306795 | 0.006722146 |
| 0.010073512 | 0.070926645 | 0.332120594 | 0.326135767 |
| 0.244693536 | 0.157797299 | 0.113914591 | 0.143537752 |
| 0.235540803 | 0.284056314 | 0.348909548 | 0.255006462 |
| 0.342450856 | 0.007040182 | 0.373743328 | 0.216267487 |
| 0.037753558 | 0.244016808 | 0.358114443 | 0.360171784 |
| 0.186294385 | 0.358549033 | 0.485169011 | 0.022466551 |
| 0.0443745   | 0.415042336 | 0.447027614 | 0.416406967 |
| 0.419268778 | 0.315710735 | 0.252434125 | 0.438311472 |
| 0.459699049 | 0.429917895 | 0.213707377 | 0.126428413 |
| 0.000479558 | 0.113783822 | 0.355153063 | 0.326910544 |
| 0.46736488  | 0.287423782 | 0.370349538 | 0.183679093 |
| 0.437718705 | 0.009154797 | 0.32118604  | 0.50678244  |
| 0.019886721 | 0.426806377 | 0.010944056 | 0.109065115 |
| 0.431379371 | 0.497259011 | 0.375202125 | 0.047901059 |
| 0.00667094  | 0.079450874 | 0.119954717 | 0.45471245  |
| 0.354811615 | 0.432849465 | 0.33553577  | 0.201569808 |
| 0.411879618 | 0.122983913 | 0.303081745 | 0.382441043 |
| 0.442919295 | 0.004087958 | 0.108588214 | 0.164033197 |
| 0.346248963 | 0.141254373 | 0.176535903 | 0.050126908 |
| 0.010375493 | 0.015440992 | 0.461699273 | 0.105850176 |
| 0.076844249 | 0.15322138  | 0.079707428 | 0.469544244 |
| 0.330801347 | 0.431869858 | 0.10392253  | 0.203551756 |
| 0.478318078 | 0.203758835 | 0.42871865  | 0.463352224 |
| 0.41573159  | 0.195725503 | 0.098746138 | 0.413456155 |
| 0.345777584 | 0.044827715 | 0.050231422 | 0.258343011 |
| 0.430435063 | 0.477697296 | 0.499930094 | 0.25326596  |
| 0.250266701 | 0.175992678 | 0.295519006 | 0.353768772 |
| 0.184572598 | 0.290811309 | 0.115969935 | 0.284317343 |
| 0.333437994 | 0.045431779 | 0.037862301 | 0.428628815 |
| 0.074800715 | 0.203374724 | 0.381292031 | 0.442605047 |
| 0.440151925 | 0.043127913 | 0.207541026 | 0.206329422 |
| 0.226569016 | 0.201412091 | 0.358907769 | 0.197371208 |
| 0.244480415 | 0.310744843 | 0.028945272 | 0.420727956 |
| 0.079933388 | 0.265843529 | 0.341348648 | 0.07053765  |
| 0.382555396 | 0.300723504 | 0.428082068 | 0.380911496 |
| 0.397454973 | 0.007277983 | 0.116173012 | 0.329397077 |
| 0.27252163  | 0.409830964 | 0.433752627 | 0.071282608 |
| 0.185494469 | 0.358468359 | 0.093452393 | 0.326969318 |
| 0.366315114 | 0.190198523 | 0.167626181 | 0.000276074 |
| 0.100730936 | 0.406555325 | 0.387943194 | 0.028959599 |
| 0.211441602 | 0.071909087 | 0.09351506  | 0.443581001 |
| 0.1426016   | 0.478246238 | 0.015930404 | 0.176172444 |
| 0.203402011 | 0.384280688 | 0.410770501 | 0.23209753  |
| 0.440877653 | 0.267817088 | 0.47478382  | 0.315839746 |
| 0.249434049 | 0.284819201 | 0.212185757 | 0.203301545 |
| 0.482569883 | 0.460811625 | 0.473863121 | 0.461443698 |

|             |             |             |             |
|-------------|-------------|-------------|-------------|
| 0.197020148 | 0.351007616 | 0.330206653 | 0.206441529 |
| 0.344224083 | 0.362609721 | 0.050429506 | 0.445953014 |
| 0.000251561 | 0.280132989 | 0.438110945 | 0.219595958 |
| 0.427365897 | 0.187971743 | 0.038536372 | 0.187002289 |
| 0.505957695 | 0.445256504 | 0.383014122 | 0.455924653 |
| 0.243768563 | 0.004703061 | 0.424942747 | 0.344280458 |
| 0.518262238 | 0.348310867 | 0.42031397  | 0.085449114 |
| 0.454489514 | 0.353055723 | 0.384247158 | 0.413925911 |
| 0.458488383 | 0.441791887 | 0.177951175 | 0.337775557 |
| 0.014794136 | 0.194456699 | 0.418618429 | 0.186835188 |
| 0.292153464 | 0.136516764 | 0.451736183 | 0.252111026 |
| 0.42954334  | 0.313933649 | 0.384454811 | 0.05522709  |
| 0.12079157  | 0.450217035 | 0.077403531 | 0.400570762 |
| 0.50354055  | 0.305113895 | 0.463074075 | 0.492857898 |
| 0.247651199 | 0.321733161 | 0.439656544 | 0.429284472 |
| 0.000447512 | 0.463202114 | 0.449463933 | 0.267605674 |
| 0.451469588 | 0.21590128  | 0.250465994 | 0.485292528 |
| 0.000617748 | 0.099370388 | 0.352702037 | 0.410501192 |
| 0.471820084 | 0.015796036 | 0.098970841 | 0.447563493 |
| 0.457346589 | 0.053028603 | 0.482247541 | 0.279166006 |
| 0.433211171 | 0.402005902 | 0.126488097 | 0.453574793 |
| 0.321937713 | 0.355695586 | 0.028181266 | 0.419250864 |
| 0.42265334  | 0.088336459 | 0.078116494 | 0.489489768 |
| 0.398827079 | 0.332502502 | 0.185091805 | 0.007204761 |
| 0.40050444  | 0.249873979 | 0.463315981 | 0.080507877 |
| 0.376268624 | 0.29256441  | 0.406085473 | 0.466055258 |
| 0.415816355 | 0.349629936 | 0.305025284 | 0.424137027 |
| 0.160581985 | 0.4414837   | 0.434641164 | 0.042365098 |
| 0.388547857 | 0.463539182 | 0.41140115  | 0.124784465 |
| 0.308672218 | 0.13214556  | 0.142186965 | 0.280698163 |
| 0.404891843 | 0.459655541 | 0.03279325  | 0.112923072 |
| 0.348308428 | 0.232003711 | 0.072455006 | 0.287890199 |
| 0.202519071 | 0.238716643 | 0.154166252 | 0.299507728 |
| 0.386437275 | 0.225938604 | 0.440881663 | 0.15313015  |
| 0.464575691 | 0.027791984 | 0.410471596 | 0.211738439 |
| 0.211480317 | 0.420175762 | 0.42025345  | 0.135803009 |
| 0.019129021 | 0.086113046 | 0.340205867 | 0.335364708 |
| 0.045759335 | 0.130359065 | 0.203177229 | 0.308535257 |
| 0.500481187 | 0.417492312 | 0.204956881 | 0.282297942 |
| 0.325373229 | 0.110996467 | 0.407112819 | 0.2687018   |
| 0.357447768 | 0.288059975 | 0.430334687 | 0.0073375   |
| 0.454826634 | 0.140258538 | 0.204675928 | 0.347377116 |
| 0.48137085  | 0.089831971 | 0.331911795 | 0.107715589 |
| 0.187359468 | 0.002477012 | 0.291318444 | 0.461213126 |
| 0.207363764 | 0.325566972 | 0.303688247 | 0.279359901 |
| 0.468559887 | 0.344494953 | 0.385778922 | 0.342470537 |
| 0.345264456 | 0.053427794 | 0.124220233 | 0.01821925  |
| 0.336343959 | 0.315243717 | 0.390486292 | 0.360951474 |
| 0.177191966 | 0.442607826 | 0.324310676 | 0.418841858 |
| 0.467335468 | 0.206676282 | 0.508609236 | 0.247427339 |
| 0.43649872  | 0.34189374  | 0.188803568 | 0.277204432 |
| 0.159239963 | 0.104452434 | 0.077686681 | 0.112092914 |
| 0.485378807 | 0.272359074 | 0.364046685 | 0.2847099   |
| 0.030896718 | 0.341076114 | 0.426159257 | 0.461072844 |

|             |             |             |             |
|-------------|-------------|-------------|-------------|
| 0.408426344 | 0.410020813 | 0.387491888 | 0.313273738 |
| 0.282387309 | 0.236340492 | 0.073555122 | 0.034186147 |
| 0.294471893 | 0.139622007 | 0.374461151 | 0.414217564 |
| 0.493235924 | 0.288472315 | 0.059693337 | 0.088119204 |
| 0.182469707 | 0.388157887 | 0.217642707 | 0.262116956 |
| 0.414287355 | 0.318488167 | 0.000284854 | 0.176168957 |
| 0.309286125 | 0.410820315 |             |             |
| ATP2A2      | 0.144771417 | 0.468604724 | 0.01894233  |
| 0.019605352 | 0.040542202 | 0.178986008 | 0.163417687 |
| 0.107908965 | 0.030475342 | 0.067048848 | 0.266269234 |
| 0.000163116 | 0.279883706 | 0.002561696 | 0.015210716 |
| 0.433600234 | 0.45939351  | 0.21183806  | 0.417061762 |
| 0.107748714 | 0.079749721 | 0.212092964 | 0.244884794 |
| 0.174400128 | 0.000238488 | 0.066905828 | 0.046590354 |
| 0.096793027 | 0.406314836 | 0.085926389 | 0.072621812 |
| 0.385644593 | 0.399986455 | 1           | 0.093365264 |
| 0.079650955 | 0.413517085 | 0.023557755 | 0.327320208 |
| 0.312053811 | 0.102389419 | 0.384770468 | 0.004090073 |
| 0.005832364 | 0.042404328 | 0.073881921 | 0.240300171 |
| 0.081190297 | 0.146847813 | 0.07446902  | 0.111859612 |
| 0.032297213 | 0.283749405 | 0.25579634  | 0.029959687 |
| 0.390024931 | 0.008457225 | 0.429430409 | 0.048658371 |
| 0.019470887 | 0.117570046 | 0.150773406 | 0.252111521 |
| 0.203760235 | 0.412583209 | 0.464550113 | 0.016909504 |
| 0.039575956 | 0.180747359 | 0.330717818 | 0.323043587 |
| 0.419860856 | 0.07823716  | 0.094508499 | 0.119765114 |
| 0.338245309 | 0.301314756 | 0.176327104 | 0.037567151 |
| 0.000349264 | 0.102000295 | 0.116296972 | 0.18976793  |
| 0.231478417 | 0.296562295 | 0.182436419 | 0.092370136 |
| 0.189341857 | 0.005190437 | 0.198884756 | 0.467278579 |
| 0.01042874  | 0.28343858  | 0.003062687 | 0.032455232 |
| 0.331189977 | 0.385446594 | 0.263849655 | 0.03330697  |
| 0.003192927 | 0.024485712 | 0.019257583 | 0.308671433 |
| 0.180489393 | 0.21581252  | 0.377455431 | 0.022908059 |
| 0.271274314 | 0.041345622 | 0.101398903 | 0.436695964 |
| 0.431004687 | 0.000925072 | 0.028810766 | 0.146841563 |
| 0.095138853 | 0.078252383 | 0.13837133  | 0.00741214  |
| 0.003993241 | 0.001130576 | 0.391211637 | 0.032505284 |
| 0.05625165  | 0.122898767 | 0.027347306 | 0.324236794 |
| 0.078597897 | 0.332836308 | 0.047312113 | 0.147265459 |
| 0.29886576  | 0.190727822 | 0.20582702  | 0.327362901 |
| 0.098541831 | 0.045182744 | 0.042407769 | 0.424786387 |
| 0.348346917 | 0.021150453 | 0.025476536 | 0.23745675  |
| 0.278666295 | 0.41449917  | 0.474592357 | 0.049502582 |
| 0.095847081 | 0.091111932 | 0.108445705 | 0.304649926 |
| 0.154862482 | 0.124316907 | 0.009735821 | 0.248391319 |
| 0.392152618 | 0.006436548 | 0.020879857 | 0.308131353 |
| 0.030499195 | 0.07897743  | 0.396884005 | 0.372323184 |
| 0.232821332 | 0.046255038 | 0.103851462 | 0.183345864 |
| 0.149373214 | 0.148402296 | 0.247463176 | 0.099012655 |
| 0.204830167 | 0.11352741  | 0.016510429 | 0.286405304 |
| 0.053149585 | 0.175011343 | 0.070434594 | 0.021672135 |
| 0.198279697 | 0.073761077 | 0.403859628 | 0.201891637 |
| 0.274043521 | 0.005942812 | 0.06424539  | 0.189645296 |

|             |             |             |             |
|-------------|-------------|-------------|-------------|
| 0.095648197 | 0.283956054 | 0.480165075 | 0.053615708 |
| 0.125804892 | 0.058372509 | 0.060696502 | 0.11018663  |
| 0.274464842 | 0.087016468 | 0.084373311 | 0.000296125 |
| 0.037017192 | 0.131622651 | 0.163333343 | 0.008750189 |
| 0.071130741 | 0.029740091 | 0.014216776 | 0.414153474 |
| 0.111360633 | 0.364394221 | 0.002618696 | 0.018558511 |
| 0.070358199 | 0.372492106 | 0.101448565 | 0.049080239 |
| 0.410456528 | 0.078437896 | 0.339398397 | 0.332466641 |
| 0.075301061 | 0.309879625 | 0.025950197 | 0.076012296 |
| 0.237476172 | 0.438217229 | 0.369861392 | 0.352228061 |
| 0.11342581  | 0.194500771 | 0.051064459 | 0.193342635 |
| 0.177382734 | 0.165687452 | 0.019968321 | 0.447095544 |
| 0.000186395 | 0.201408975 | 0.283865821 | 0.028969813 |
| 0.470032574 | 0.190706561 | 0.017142913 | 0.057808583 |
| 0.428042945 | 0.441947122 | 0.312331491 | 0.364413294 |
| 0.034881619 | 0.001247216 | 0.38854883  | 0.318895485 |
| 0.427578239 | 0.145463242 | 0.086805425 | 0.007974521 |
| 0.422485323 | 0.134870761 | 0.298249571 | 0.190187249 |
| 0.246283128 | 0.103561735 | 0.095801036 | 0.175953239 |
| 0.003274269 | 0.099651591 | 0.260155421 | 0.104928326 |
| 0.119249434 | 0.053261865 | 0.422812201 | 0.225697481 |
| 0.101201586 | 0.065864406 | 0.130651248 | 0.03290635  |
| 0.100798274 | 0.466519634 | 0.009490027 | 0.367332982 |
| 0.454471552 | 0.168055895 | 0.450606558 | 0.431579354 |
| 0.138578896 | 0.339441661 | 0.420912389 | 0.328318145 |
| 8.61E-05    | 0.356812925 | 0.274433654 | 0.276451652 |
| 0.405059887 | 0.195750501 | 0.049710791 | 0.148436337 |
| 0.00016149  | 0.072324947 | 0.068337359 | 0.418019475 |
| 0.425915906 | 0.011763642 | 0.010336157 | 0.353024295 |
| 0.248972094 | 0.006937773 | 0.459939854 | 0.198239713 |
| 0.434523106 | 0.187308132 | 0.102962278 | 0.326562442 |
| 0.056510093 | 0.065778784 | 0.016485495 | 0.299955106 |
| 0.150060516 | 0.011861003 | 0.055437614 | 0.445115576 |
| 0.356882399 | 0.306973944 | 0.147278124 | 0.010958465 |
| 0.288129103 | 0.077425312 | 0.378526639 | 0.022291898 |
| 0.307869168 | 0.297440617 | 0.40041059  | 0.342061225 |
| 0.235562224 | 0.350600431 | 0.325759768 | 0.394860882 |
| 0.037219382 | 0.323337981 | 0.365834612 | 0.01937716  |
| 0.180037509 | 0.442595617 | 0.244703113 | 0.124783781 |
| 0.225028285 | 0.053530902 | 0.139115167 | 0.110135725 |
| 0.419160308 | 0.455864096 | 0.021940414 | 0.026113613 |
| 0.387630787 | 0.07300826  | 0.054595742 | 0.116417903 |
| 0.189183124 | 0.030440324 | 0.016705812 | 0.264564671 |
| 0.43748859  | 0.241094362 | 0.413365862 | 0.084504692 |
| 0.386414341 | 0.010284831 | 0.31092095  | 0.063449848 |
| 0.133323955 | 0.223021794 | 0.296330078 | 0.01410421  |
| 0.021968811 | 0.025266336 | 0.377984604 | 0.364843406 |
| 0.025546316 | 0.083147822 | 0.13187318  | 0.234210484 |
| 0.431785533 | 0.087470582 | 0.175677955 | 0.109833501 |
| 0.371834175 | 0.081197124 | 0.422284614 | 0.137142695 |
| 0.303158699 | 0.121663157 | 0.351242871 | 0.003673644 |
| 0.274768911 | 0.071459598 | 0.046479085 | 0.241455104 |
| 0.363972661 | 0.045968135 | 0.317380417 | 0.037867864 |
| 0.043829979 | 0.000326893 | 0.222829696 | 0.149408908 |

|             |             |             |             |
|-------------|-------------|-------------|-------------|
| 0.224809394 | 0.041635695 | 0.123936575 | 0.04052759  |
| 0.474334467 | 0.199509039 | 0.315395154 | 0.054204653 |
| 0.160630833 | 0.008102658 | 0.078678593 | 0.00848972  |
| 0.270248192 | 0.284610823 | 0.220768895 | 0.165113657 |
| 0.02899073  | 0.296561915 | 0.261517569 | 0.209438044 |
| 0.455109924 | 0.041433002 | 0.460723879 | 0.07257815  |
| 0.312456167 | 0.082902749 | 0.164673125 | 0.065737781 |
| 0.110809856 | 0.02594758  | 0.049237689 | 0.025308662 |
| 0.443857243 | 0.056593647 | 0.224171596 | 0.06203781  |
| 0.017473474 | 0.11796783  | 0.281060279 | 0.325270487 |
| 0.265802646 | 0.268095236 | 0.078059752 | 0.344207009 |
| 0.063865715 | 0.088549135 | 0.041303848 | 0.048841745 |
| 0.129242707 | 0.085187462 | 0.300500741 | 0.328280919 |
| 0.434978643 | 0.044865888 | 0.028640143 | 0.027980428 |
| 0.018378216 | 0.255780124 | 0.216071022 | 0.04508542  |
| 0.242775944 | 0.061122864 | 9.00E-05    | 0.037763035 |
| 0.289410402 | 0.087010115 |             |             |
| ATPAF2      | 0.082529397 | 0.383260346 | 0.007982696 |
| 0.010269907 | 0.043777943 | 0.152000028 | 0.198591683 |
| 0.070105488 | 0.007924854 | 0.039048717 | 0.246034886 |
| 1.32E-05    | 0.255865199 | 0.000430051 | 0.006613269 |
| 0.327448433 | 0.370227851 | 0.2729808   | 0.34269013  |
| 0.067388339 | 0.020956994 | 0.156434633 | 0.188643534 |
| 0.151009617 | 2.79E-05    | 0.090338632 | 0.010876319 |
| 0.080160166 | 0.322263826 | 0.07034913  | 0.029565949 |
| 0.267900054 | 0.349242224 | 0.093365264 | 1           |
| 0.059084618 | 0.353973212 | 0.020621098 | 0.333429063 |
| 0.241373874 | 0.116101527 | 0.328370379 | 0.000894656 |
| 0.001961113 | 0.056035635 | 0.049824302 | 0.169844963 |
| 0.065704775 | 0.119733014 | 0.069971035 | 0.131277255 |
| 0.007571979 | 0.256005818 | 0.182856798 | 0.012303196 |
| 0.373984098 | 0.002675242 | 0.37156159  | 0.025807385 |
| 0.01970874  | 0.09450636  | 0.084225743 | 0.173458092 |
| 0.203621909 | 0.385659    | 0.396160093 | 0.005773483 |
| 0.037625284 | 0.144759794 | 0.242556792 | 0.280524247 |
| 0.328978845 | 0.033669775 | 0.059908817 | 0.145448693 |
| 0.255854426 | 0.232305276 | 0.164356336 | 0.032559703 |
| 1.76E-05    | 0.125928926 | 0.156627793 | 0.112712973 |
| 0.214258531 | 0.260122838 | 0.123523165 | 0.115265656 |
| 0.138239953 | 0.001465544 | 0.166064847 | 0.384439018 |
| 0.003255751 | 0.241308807 | 0.00168601  | 0.019183387 |
| 0.247356247 | 0.289360946 | 0.165032613 | 0.016811855 |
| 0.001060972 | 0.020809225 | 0.002987356 | 0.239438925 |
| 0.137084747 | 0.18442557  | 0.35482614  | 0.024347663 |
| 0.236958434 | 0.007664943 | 0.100913918 | 0.365665469 |
| 0.312609374 | 0.000436375 | 0.015944693 | 0.148440843 |
| 0.04111663  | 0.030710073 | 0.168366634 | 0.001794395 |
| 0.00099417  | 0.000275639 | 0.285519631 | 0.021631952 |
| 0.061075297 | 0.126638646 | 0.017849878 | 0.330485444 |
| 0.055179126 | 0.240841172 | 0.066651611 | 0.159922412 |
| 0.264654065 | 0.224771009 | 0.240454085 | 0.281048528 |
| 0.176308219 | 0.027517271 | 0.032848181 | 0.415821852 |
| 0.292348568 | 0.009352081 | 0.007417494 | 0.196611024 |
| 0.248458899 | 0.318073044 | 0.379146001 | 0.025840127 |

|             |             |             |             |
|-------------|-------------|-------------|-------------|
| 0.170185927 | 0.080445899 | 0.04876494  | 0.293647754 |
| 0.185013564 | 0.103932825 | 0.003528489 | 0.242491623 |
| 0.351945776 | 0.001921042 | 0.016448568 | 0.243540705 |
| 0.038541286 | 0.0353731   | 0.312274178 | 0.333853688 |
| 0.240609911 | 0.008963799 | 0.087329903 | 0.153816277 |
| 0.10907423  | 0.140732656 | 0.1846767   | 0.070415313 |
| 0.165208904 | 0.05647661  | 0.017181374 | 0.24098852  |
| 0.052473292 | 0.130290169 | 0.020302214 | 0.005288136 |
| 0.153909494 | 0.060305199 | 0.324280705 | 0.157315128 |
| 0.17262072  | 0.002772379 | 0.037010407 | 0.107369866 |
| 0.030086272 | 0.22816447  | 0.420187494 | 0.053858325 |
| 0.102455967 | 0.055477336 | 0.058197089 | 0.206076088 |
| 0.196429432 | 0.018066938 | 0.020848056 | 2.49E-05    |
| 0.016957713 | 0.081741747 | 0.146818885 | 0.001807532 |
| 0.077049317 | 0.006027631 | 0.003949853 | 0.346916947 |
| 0.097480417 | 0.371043988 | 0.000578187 | 0.012580337 |
| 0.068177025 | 0.382123193 | 0.082438845 | 0.009249276 |
| 0.380554918 | 0.046033005 | 0.249521948 | 0.28207432  |
| 0.092566496 | 0.260257413 | 0.009463763 | 0.056772171 |
| 0.218433132 | 0.384714868 | 0.311535238 | 0.3486441   |
| 0.096550693 | 0.152580614 | 0.015523726 | 0.165985732 |
| 0.14052049  | 0.158499991 | 0.009909305 | 0.393995864 |
| 1.64E-05    | 0.189064699 | 0.242373988 | 0.008365572 |
| 0.411201426 | 0.220850979 | 0.011600721 | 0.04314967  |
| 0.351884894 | 0.393851066 | 0.234524678 | 0.274390503 |
| 0.007165201 | 0.000276004 | 0.303120681 | 0.255170331 |
| 0.338660617 | 0.150582357 | 0.137367478 | 0.003467051 |
| 0.366416123 | 0.110919604 | 0.198185072 | 0.128738733 |
| 0.259561574 | 0.136655031 | 0.0927971   | 0.12670535  |
| 0.000312847 | 0.062646669 | 0.171168822 | 0.023556302 |
| 0.081091991 | 0.009137464 | 0.362293498 | 0.223107548 |
| 0.1259219   | 0.017557346 | 0.124629849 | 0.045274941 |
| 0.108694112 | 0.376770761 | 0.008875503 | 0.287356936 |
| 0.373744702 | 0.158379159 | 0.395677215 | 0.350587693 |
| 0.097590371 | 0.325106694 | 0.347992707 | 0.251323082 |
| 1.48E-05    | 0.281567286 | 0.260856463 | 0.247977524 |
| 0.29474915  | 0.157089455 | 0.036826524 | 0.16710269  |
| 7.21E-05    | 0.060390748 | 0.033617231 | 0.348475429 |
| 0.389037825 | 0.004351234 | 0.009767054 | 0.337219746 |
| 0.234218835 | 0.006867725 | 0.375244025 | 0.148183963 |
| 0.397897641 | 0.214105676 | 0.093027678 | 0.277302437 |
| 0.030712917 | 0.070962884 | 0.008767074 | 0.271136368 |
| 0.163639031 | 0.002397841 | 0.0326994   | 0.354394519 |
| 0.265479191 | 0.336244191 | 0.14585766  | 0.000645113 |
| 0.19319783  | 0.02347235  | 0.333847756 | 0.011193645 |
| 0.256426228 | 0.274820346 | 0.387245319 | 0.311196565 |
| 0.19934582  | 0.318700382 | 0.274634046 | 0.313423287 |
| 0.035490203 | 0.237869381 | 0.254049231 | 0.007939126 |
| 0.11437762  | 0.390155868 | 0.187092283 | 0.127091595 |
| 0.174736444 | 0.028846428 | 0.126714382 | 0.074148019 |
| 0.402592202 | 0.360528727 | 0.014254084 | 0.01877756  |
| 0.344541371 | 0.062858849 | 0.06916779  | 0.123392805 |
| 0.163111909 | 0.006041452 | 0.005627395 | 0.219873192 |
| 0.39565138  | 0.252426582 | 0.29375709  | 0.032050788 |

|             |             |             |             |
|-------------|-------------|-------------|-------------|
| 0.344268754 | 0.005705953 | 0.268161518 | 0.037483997 |
| 0.104523244 | 0.141192724 | 0.211877053 | 0.002771912 |
| 0.001126947 | 0.00428683  | 0.353423977 | 0.320634109 |
| 0.025497128 | 0.071321878 | 0.13091387  | 0.263276103 |
| 0.348131793 | 0.058820484 | 0.162054341 | 0.096332395 |
| 0.34572453  | 0.023692778 | 0.344757057 | 0.093887136 |
| 0.208235867 | 0.1131241   | 0.292373915 | 0.000856418 |
| 0.224020517 | 0.045870924 | 0.028107158 | 0.25623299  |
| 0.26613359  | 0.045650605 | 0.35307643  | 0.027299163 |
| 0.021205928 | 0.000159524 | 0.183550215 | 0.191954818 |
| 0.201497788 | 0.029351164 | 0.100729328 | 0.024349634 |
| 0.388775737 | 0.130337967 | 0.202222348 | 0.063520937 |
| 0.146161508 | 0.011834288 | 0.06132963  | 0.002619919 |
| 0.190867621 | 0.253982912 | 0.156107799 | 0.096750861 |
| 0.016110696 | 0.333248539 | 0.239288432 | 0.291002035 |
| 0.390890839 | 0.009217242 | 0.36887621  | 0.062331737 |
| 0.251157678 | 0.034101325 | 0.162368092 | 0.028665651 |
| 0.171080469 | 0.008117226 | 0.049474468 | 0.010131452 |
| 0.371301416 | 0.041472261 | 0.263969078 | 0.022952929 |
| 0.008658687 | 0.109520319 | 0.227211734 | 0.2576091   |
| 0.196440528 | 0.161765182 | 0.065704264 | 0.327024425 |
| 0.014266197 | 0.050390185 | 0.01755302  | 0.008880188 |
| 0.024953916 | 0.075421128 | 0.221347846 | 0.277829336 |
| 0.363343965 | 0.016529371 | 0.024668278 | 0.020726864 |
| 0.009424399 | 0.180196369 | 0.24533966  | 0.039393187 |
| 0.235845844 | 0.034396604 | 4.52E-05    | 0.02297053  |
| 0.235836058 | 0.026650677 |             |             |
| AVEN        | 0.067363252 | 0.261845699 | 0.001424185 |
| 0.022708552 | 0.01427331  | 0.042862686 | 0.050215331 |
| 0.056804856 | 0.002282359 | 0.016448938 | 0.088569057 |
| 2.59E-06    | 0.269393923 | 5.92E-05    | 0.001202454 |
| 0.324863919 | 0.094569841 | 0.28228027  | 0.293884759 |
| 0.038758239 | 0.075251906 | 0.10985698  | 0.036874255 |
| 2.45E-06    | 0.018773131 | 0.019207103 | 0.045881421 |
| 0.302819481 | 0.016032078 | 0.067129534 |             |
| 0.348187908 | 0.017578375 | 0.017578375 | 0.254519426 |
| 0.193218142 | 0.079650955 | 0.059084618 | 1           |
| 0.040973977 | 0.044217348 | 0.32918303  | 0.27012254  |
| 0.007643098 | 0.30438681  | 9.65E-05    | 0.048455767 |
| 0.032736526 | 0.047586778 | 0.091066386 | 0.025767915 |
| 0.099421311 | 0.012408941 | 0.041413662 | 0.036931078 |
| 0.011627637 | 0.117215834 | 0.057437003 | 0.169296544 |
| 0.033397552 | 0.197133313 | 0.017104975 | 0.001738824 |
| 0.186121499 | 0.086968429 | 0.114472864 | 0.054279582 |
| 0.110835893 | 0.294807537 | 0.001382505 | 0.004192872 |
| 0.024613765 | 0.284699588 | 0.222402755 | 0.225015504 |
| 0.240332555 | 0.024300977 | 0.141044717 | 0.249512982 |
| 0.026501275 | 0.046056892 | 0.005751542 | 1.05E-05    |
| 0.105213278 | 0.128904135 | 0.104787283 | 0.243617978 |
| 0.000137431 | 0.10356454  | 0.037659404 | 0.129833971 |
| 0.225287224 | 0.075337995 | 0.306727358 | 0.002178592 |
| 0.315801369 | 0.000852479 | 0.003733468 | 0.209511446 |
| 0.003014125 | 0.124920018 | 0.002991802 | 8.73E-05    |
| 0.122526519 | 0.003556936 | 0.30029255  | 0.081520723 |
|             | 0.158679067 | 0.031736569 | 0.307894554 |

|             |             |             |             |
|-------------|-------------|-------------|-------------|
| 0.00473336  | 0.039120575 | 0.207419158 | 0.2511192   |
| 2.61E-05    | 0.003212664 | 0.035696068 | 0.043631274 |
| 0.040433371 | 0.038728001 | 0.003468801 | 0.000789846 |
| 0.000136101 | 0.276771612 | 0.004803317 | 0.013735455 |
| 0.031090029 | 0.008188209 | 0.282531979 | 0.0437654   |
| 0.230944157 | 0.012722549 | 0.048570684 | 0.278781938 |
| 0.064354087 | 0.175194425 | 0.245290452 | 0.113270328 |
| 0.01080001  | 0.006427359 | 0.236541085 | 0.143474518 |
| 0.001903417 | 0.001685124 | 0.075650016 | 0.312629501 |
| 0.277398795 | 0.291999941 | 0.011586615 | 0.06284418  |
| 0.020820041 | 0.047549325 | 0.153179882 | 0.041873515 |
| 0.048137293 | 0.006930885 | 0.085673118 | 0.160524309 |
| 0.003057949 | 0.001689214 | 0.189173689 | 0.038240253 |
| 0.018996907 | 0.183014106 | 0.225292637 | 0.155293662 |
| 0.016410174 | 0.047609782 | 0.056976778 | 0.039778034 |
| 0.045921252 | 0.110674572 | 0.046670362 | 0.058791302 |
| 0.057156748 | 0.001449187 | 0.317005178 | 0.007545585 |
| 0.053356066 | 0.037313696 | 0.008026055 | 0.110973926 |
| 0.031071028 | 0.225309324 | 0.100157797 | 0.165130121 |
| 0.016012949 | 0.016786166 | 0.083167812 | 0.030991283 |
| 0.229326735 | 0.264825563 | 0.006864111 | 0.02878829  |
| 0.051045599 | 0.00882124  | 0.084643607 | 0.146756405 |
| 0.020229012 | 0.017356774 | 6.70E-06    | 0.00537363  |
| 0.111587134 | 0.089309266 | 0.00041693  | 0.028169044 |
| 0.002374054 | 0.002440441 | 0.26103854  | 0.022646667 |
| 0.300740806 | 0.000141926 | 0.009884737 | 0.019841675 |
| 0.204304514 | 0.082085327 | 0.011521529 | 0.267245239 |
| 0.025285763 | 0.308614792 | 0.124696774 | 0.02743011  |
| 0.11122794  | 0.016465792 | 0.018989185 | 0.199730029 |
| 0.296233928 | 0.300404935 | 0.255911972 | 0.031976072 |
| 0.102104762 | 0.024206369 | 0.050163734 | 0.073687687 |
| 0.079287009 | 0.001452326 | 0.251220672 | 1.23E-06    |
| 0.066487119 | 0.188978298 | 0.015290108 | 0.265389234 |
| 0.059945081 | 0.001264523 | 0.014355817 | 0.286960536 |
| 0.243928306 | 0.166005519 | 0.295817909 | 0.013746185 |
| 2.50E-05    | 0.211691925 | 0.130730682 | 0.324785684 |
| 0.072747598 | 0.13792927  | 0.00298586  | 0.270236328 |
| 0.089994614 | 0.149816016 | 0.116060239 | 0.202810117 |
| 0.116494682 | 0.022177846 | 0.100762526 | 0.000627011 |
| 0.027019026 | 0.164210597 | 0.033781783 | 0.057338221 |
| 0.007695335 | 0.280692918 | 0.070093446 | 0.108696772 |
| 0.020938653 | 0.142273301 | 0.005245608 | 0.018669703 |
| 0.259254197 | 0.017671905 | 0.189730695 | 0.29348644  |
| 0.064261554 | 0.305041892 | 0.271372155 | 0.041271313 |
| 0.139285107 | 0.254625239 | 0.22609325  | 1.63E-06    |
| 0.336549091 | 0.316788366 | 0.088538825 | 0.298288672 |
| 0.053030962 | 0.030572795 | 0.172644629 | 4.77E-06    |
| 0.010752756 | 0.092080916 | 0.20351103  | 0.311645796 |
| 0.000525855 | 0.044413769 | 0.221825682 | 0.275408156 |
| 0.003202692 | 0.269014543 | 0.078030248 | 0.261892508 |
| 0.112239794 | 0.024697677 | 0.328674393 | 0.100583258 |
| 0.037411861 | 0.005685456 | 0.186674473 | 0.117806093 |
| 0.004029498 | 0.021051929 | 0.272503198 | 0.181776474 |
| 0.136994036 | 0.035477073 | 0.001156023 | 0.226826367 |



|             |             |             |             |
|-------------|-------------|-------------|-------------|
| 0.056463077 | 0.272297318 | 0.002745137 | 0.143499961 |
| 0.106555937 | 0.214231167 | 0.300935062 | 0.136308564 |
| 0.156285371 | 0.120079867 | 0.217824987 | 0.041810024 |
| 0.272526902 | 0.270372039 | 0.002176447 | 0.124225134 |
| 0.305222008 | 0.181972117 | 0.026763013 | 0.080027935 |
| 0.088995007 | 0.02828992  | 0.044296844 | 0.225939683 |
| 0.314696608 | 0.001591998 | 0.003714407 | 0.168650245 |
| 0.02046974  | 0.00881973  | 0.043615634 | 0.047533309 |
| 0.029254541 | 0.007042276 | 0.093004629 | 0.214061707 |
| 0.075688025 | 0.263601666 | 0.030375038 | 0.304514642 |
| 0.000499085 | 0.183421151 | 0.014671507 | 0.034356901 |
| 0.169582319 | 0.26291097  | 0.005865753 | 0.002243595 |
| 0.002669492 | 0.170286095 | 0.147785943 | 0.002713237 |
| 0.014957201 | 0.043932941 | 0.119074803 | 0.313696684 |
| 0.040421773 | 0.046431179 | 0.040017669 | 0.148015825 |
| 0.047106207 | 0.204495605 | 0.043689139 | 0.130056261 |
| 0.058166566 | 0.20516496  | 0.000672457 | 0.204480564 |
| 0.02262615  | 0.022907281 | 0.162814313 | 0.298574924 |
| 0.00770956  | 0.149492617 | 0.005913937 | 0.021906454 |
| 2.16E-05    | 0.075635385 | 0.244001665 | 0.059900488 |
| 0.023471254 | 0.047015694 | 0.097976921 | 0.257758341 |
| 0.082616992 | 0.161605201 | 0.059890801 | 0.078912904 |
| 0.060633053 | 0.025290692 | 0.00034348  | 0.10742073  |
| 0.106135931 | 0.123305945 | 0.083626575 | 0.009962874 |
| 0.207468286 | 0.106397567 | 0.177766939 | 0.321011776 |
| 0.031511776 | 0.315369178 | 0.023543641 | 0.331508729 |
| 0.023689438 | 0.040494947 | 0.015583417 | 0.038635296 |
| 0.005159707 | 0.006650116 | 0.00300361  | 0.347447968 |
| 0.017436971 | 0.144633641 | 0.017234761 | 0.001403418 |
| 0.057831224 | 0.189824304 | 0.277199302 | 0.14691563  |
| 0.206696729 | 0.051934721 | 0.13239189  | 0.018117032 |
| 0.025869216 | 0.043533176 | 0.01927119  | 0.078502473 |
| 0.019147572 | 0.152931629 | 0.186716637 | 0.294434826 |
| 0.01539889  | 0.003302299 | 0.00372409  | 0.016675801 |
| 0.178161881 | 0.077342641 | 0.103629793 | 0.140891741 |
| 0.034320677 | 1.62E-06    | 0.009243912 | 0.103085839 |
| 0.042714142 |             |             |             |
| B3GALNT1    | 0.357682647 | 0.496983136 | 0.176242123 |
| 0.041611395 | 0.207020084 | 0.398346474 | 0.379011195 |
| 0.359769539 | 0.23845041  | 0.249454276 | 0.466142744 |
| 0.005093318 | 0.309790843 | 0.048908917 | 0.165440268 |
| 0.462243048 | 0.470573796 | 0.461203851 | 0.464784227 |
| 0.390447087 | 0.204476772 | 0.453174019 | 0.463792971 |
| 0.41805025  | 0.007300703 | 0.250874824 | 0.087697554 |
| 0.337047751 | 0.436496409 | 0.371323481 | 0.397071825 |
| 0.405061669 | 0.381261138 | 0.413517085 | 0.353973212 |
| 0.193218142 | 1           | 0.095447528 | 0.363652553 |
| 0.318272291 | 0.362489197 | 0.391470686 | 0.04808818  |
| 0.003158255 | 0.235391493 | 0.305489057 | 0.465427215 |
| 0.402508773 | 0.38220273  | 0.338890512 | 0.303801739 |
| 0.114994133 | 0.482263336 | 0.414446173 | 0.1134206   |
| 0.496712683 | 0.007126495 | 0.493580769 | 0.291349046 |
| 0.180644491 | 0.443044351 | 0.332982975 | 0.455481045 |
| 0.412273616 | 0.498108679 | 0.492449505 | 0.099082731 |

|             |             |             |             |
|-------------|-------------|-------------|-------------|
| 0.192150083 | 0.419631149 | 0.341814289 | 0.44477793  |
| 0.464629083 | 0.413602424 | 0.423709356 | 0.30456101  |
| 0.392974139 | 0.33345316  | 0.442215201 | 0.343532801 |
| 0.003451239 | 0.290924579 | 0.354906063 | 0.313193655 |
| 0.321276635 | 0.481068969 | 0.379080222 | 0.350787427 |
| 0.404456563 | 0.07262413  | 0.480245571 | 0.490572501 |
| 0.043349833 | 0.352860901 | 0.020497577 | 0.312704852 |
| 0.403582079 | 0.386229513 | 0.422847271 | 0.179667421 |
| 0.053669027 | 0.273181192 | 0.186938569 | 0.313339781 |
| 0.450762363 | 0.468553206 | 0.494187124 | 0.102972577 |
| 0.265119182 | 0.289440591 | 0.465998283 | 0.491736752 |
| 0.46009271  | 0.029872524 | 0.299828827 | 0.391951111 |
| 0.341809647 | 0.190736075 | 0.396336603 | 0.044078217 |
| 0.026669041 | 0.033492321 | 0.405293693 | 0.3148483   |
| 0.214310027 | 0.365436657 | 0.152987781 | 0.426164058 |
| 0.344125628 | 0.372183479 | 0.229542437 | 0.408502799 |
| 0.371869017 | 0.407297735 | 0.433663735 | 0.419338775 |
| 0.369478739 | 0.368231684 | 0.307924563 | 0.487864568 |
| 0.483625451 | 0.176946454 | 0.201452762 | 0.463041804 |
| 0.280876162 | 0.448554436 | 0.507290441 | 0.402064451 |
| 0.370582825 | 0.404449793 | 0.354286139 | 0.47758008  |
| 0.411381944 | 0.4158324   | 0.0772364   | 0.480213188 |
| 0.494895946 | 0.043891671 | 0.181106166 | 0.409923835 |
| 0.07405118  | 0.372147506 | 0.47965128  | 0.467028065 |
| 0.440804156 | 0.074562755 | 0.343341206 | 0.410251388 |
| 0.435109948 | 0.404834235 | 0.456295712 | 0.308097384 |
| 0.455733109 | 0.355791753 | 0.141390559 | 0.272614979 |
| 0.278425141 | 0.45073526  | 0.254774866 | 0.079977667 |
| 0.389247801 | 0.404503226 | 0.47038713  | 0.448540426 |
| 0.371346485 | 0.006133294 | 0.246066657 | 0.38486528  |
| 0.336525761 | 0.323941801 | 0.507442584 | 0.263985866 |
| 0.410574328 | 0.273476951 | 0.306584559 | 0.403315192 |
| 0.380392895 | 0.320948014 | 0.302688392 | 0.003427001 |
| 0.277481776 | 0.328834096 | 0.440530907 | 0.130755868 |
| 0.354615187 | 0.238619737 | 0.175841862 | 0.454234481 |
| 0.372367565 | 0.423709197 | 0.062301426 | 0.147266707 |
| 0.417001308 | 0.486470298 | 0.38790707  | 0.311061613 |
| 0.466627154 | 0.41663125  | 0.339669417 | 0.486698843 |
| 0.382099993 | 0.471708386 | 0.138439799 | 0.410379978 |
| 0.390756027 | 0.446030754 | 0.391329956 | 0.437258094 |
| 0.416199811 | 0.374396824 | 0.287264724 | 0.435122898 |
| 0.454904362 | 0.458855005 | 0.210035474 | 0.503438742 |
| 0.003527456 | 0.47788287  | 0.448604464 | 0.14843377  |
| 0.490337211 | 0.396200551 | 0.184845395 | 0.375232777 |
| 0.474116184 | 0.506421506 | 0.406397068 | 0.36248762  |
| 0.2187696   | 0.037019265 | 0.467310568 | 0.482764907 |
| 0.439933775 | 0.475815748 | 0.293458128 | 0.087881544 |
| 0.454831333 | 0.312328805 | 0.445350215 | 0.38550049  |
| 0.41805346  | 0.345276876 | 0.405732324 | 0.329697991 |
| 0.021085492 | 0.384792304 | 0.396496801 | 0.244374524 |
| 0.388436089 | 0.279103307 | 0.451490067 | 0.467315799 |
| 0.382440515 | 0.312911068 | 0.349734645 | 0.200302881 |
| 0.345034843 | 0.502169977 | 0.03759873  | 0.451629736 |
| 0.495019297 | 0.461525158 | 0.449901365 | 0.48639966  |

|               |             |             |             |
|---------------|-------------|-------------|-------------|
| 0.438663801   | 0.491582686 | 0.461047558 | 0.37528261  |
| 0.003256926   | 0.339516844 | 0.299124469 | 0.474923201 |
| 0.390531823   | 0.438451372 | 0.222839396 | 0.34354164  |
| 0.004407842   | 0.315534751 | 0.202371264 | 0.504167317 |
| 0.436933609   | 0.090237489 | 0.031586662 | 0.46735491  |
| 0.314765874   | 0.052660315 | 0.512903469 | 0.444150926 |
| 0.479795108   | 0.474889128 | 0.319785433 | 0.320804543 |
| 0.158986111   | 0.390462364 | 0.060153188 | 0.469492473 |
| 0.3961316     | 0.08753055  | 0.147003695 | 0.487758085 |
| 0.456775638   | 0.490612107 | 0.421039772 | 0.021290104 |
| 0.30438819    | 0.223404861 | 0.444341671 | 0.240635089 |
| 0.47231092    | 0.483050318 | 0.490787644 | 0.367695569 |
| 0.455475559   | 0.495011975 | 0.486093795 | 0.466822124 |
| 0.128859201   | 0.339916726 | 0.368567196 | 0.139201572 |
| 0.327280759   | 0.443245368 | 0.411129118 | 0.337227524 |
| 0.46682434    | 0.104089514 | 0.371307076 | 0.368128017 |
| 0.493450437   | 0.432656854 | 0.159513467 | 0.305548698 |
| 0.492712388   | 0.444193243 | 0.249758302 | 0.457017906 |
| 0.434916074   | 0.125689875 | 0.131627406 | 0.479901244 |
| 0.495149756   | 0.443835726 | 0.416537752 | 0.22682259  |
| 0.40367066    | 0.149875595 | 0.41704378  | 0.403765593 |
| 0.428702159   | 0.340937767 | 0.301948603 | 0.117745206 |
| 0.04473308    | 0.229407639 | 0.488147774 | 0.494507715 |
| 0.199498678   | 0.358659867 | 0.402359831 | 0.454100209 |
| 0.445129562   | 0.421573152 | 0.435526295 | 0.444207957 |
| 0.494569805   | 0.143669266 | 0.50350025  | 0.441363432 |
| 0.452488119   | 0.442116702 | 0.458350312 | 0.01642037  |
| 0.403646533   | 0.279921913 | 0.210526447 | 0.431391545 |
| 0.366986594   | 0.282429054 | 0.483731812 | 0.317798592 |
| 0.197702058   | 0.009391454 | 0.463487186 | 0.296245383 |
| 0.436523499   | 0.267722524 | 0.450816441 | 0.112466057 |
| 0.527068158   | 0.44991768  | 0.421156831 | 0.235276329 |
| 0.460022868   | 0.01599067  | 0.266636518 | 0.107815414 |
| 0.453381526   | 0.484964224 | 0.402395434 | 0.37548789  |
| 0.243021152   | 0.460123302 | 0.489266284 | 0.437356336 |
| 0.436904383   | 0.151225228 | 0.475440055 | 0.404327265 |
| 0.290140657   | 0.42956679  | 0.423845187 | 0.41650207  |
| 0.345129208   | 0.186305364 | 0.27114854  | 0.271541537 |
| 0.422897231   | 0.3820915   | 0.460703304 | 0.35124166  |
| 0.134438596   | 0.472797581 | 0.378734943 | 0.36519687  |
| 0.454948044   | 0.32218058  | 0.361764985 | 0.492359138 |
| 0.323460158   | 0.384073157 | 0.075012294 | 0.05859226  |
| 0.255235157   | 0.348434762 | 0.409864081 | 0.442209839 |
| 0.467540696   | 0.27681655  | 0.23208714  | 0.281140161 |
| 0.101248503   | 0.316734512 | 0.416412384 | 0.145507513 |
| 0.456767657   | 0.281765706 | 0.002826353 | 0.329444691 |
| 0.484872561   | 0.370855057 |             |             |
| B630005N14RIK | 0.027140273 | 0.129147574 | 0.000454133 |
| 0.000378757   | 0.005606825 | 0.017443416 | 0.023780449 |
| 0.027449915   | 0.000720091 | 0.00265988  | 0.042662406 |
| 6.23E-07      | 0.214871214 | 1.56E-05    | 0.00057384  |
| 0.176421544   | 0.068744219 | 0.175983362 | 0.145712781 |
| 0.001535095   | 0.039690261 | 0.03232312  | 0.019987486 |
| 5.61E-07      | 0.006980987 | 0.00052779  | 0.019915968 |
|               |             | 0.03952772  |             |

|             |             |             |             |
|-------------|-------------|-------------|-------------|
| 0.169430602 | 0.009764775 | 0.003897136 | 0.117619616 |
| 0.18793749  | 0.023557755 | 0.020621098 | 0.044217348 |
| 0.095447528 | 1           | 0.224002269 | 0.177210165 |
| 0.015232958 | 0.155583762 | 2.61E-05    | 0.00054595  |
| 0.003461544 | 0.026821669 | 0.037768024 | 0.022194145 |
| 0.012974827 | 0.009663657 | 0.012112448 | 0.004363814 |
| 0.050057916 | 0.069686251 | 0.020840972 | 0.088300499 |
| 3.73E-05    | 0.097414548 | 0.009304785 | 0.001264266 |
| 0.023573349 | 0.033966751 | 0.051128591 | 0.027030387 |
| 0.094383789 | 0.163619712 | 0.000218009 | 0.001934719 |
| 0.058856567 | 0.111594537 | 0.069404431 | 0.110918459 |
| 0.004895121 | 0.00885975  | 0.142939013 | 0.105481815 |
| 0.140138917 | 0.033206789 | 0.005225216 | 3.96E-07    |
| 0.010184598 | 0.046284173 | 0.056710378 | 0.129413472 |
| 0.053402198 | 0.056417231 | 0.016542086 | 0.045085755 |
| 2.42E-05    | 0.036471828 | 0.162844614 | 0.000103672 |
| 0.177809191 | 0.000183163 | 0.003870611 | 0.105380692 |
| 0.165087393 | 0.050653485 | 0.000997459 | 2.47E-05    |
| 0.003261629 | 0.001213472 | 0.1896929   | 0.050392955 |
| 0.058570818 | 0.085180546 | 0.074002032 | 0.218104697 |
| 0.000902212 | 0.029981045 | 0.091890897 | 0.113034626 |
| 2.36E-05    | 0.002835375 | 0.018427903 | 0.011395753 |
| 0.001575484 | 0.026284924 | 0.000155873 | 4.13E-05    |
| 0.000121798 | 0.147835398 | 0.002974778 | 0.003764726 |
| 0.012329295 | 0.000647413 | 0.116804434 | 0.02819194  |
| 0.144009101 | 0.010084737 | 0.018490033 | 0.138425291 |
| 0.029819428 | 0.077706762 | 0.114316193 | 0.111923277 |
| 0.008835693 | 0.003061994 | 0.143196872 | 0.08535246  |
| 0.000571606 | 0.00042879  | 0.029568281 | 0.234409527 |
| 0.144347228 | 0.151592439 | 0.008283999 | 0.041764859 |
| 0.017320358 | 0.008689464 | 0.056339934 | 0.029889823 |
| 0.043458438 | 0.004732639 | 0.061608936 | 0.079159728 |
| 0.000292459 | 0.000829839 | 0.112296811 | 0.00476759  |
| 0.009424864 | 0.08047025  | 0.134353977 | 0.146623814 |
| 0.000275626 | 0.0090975   | 0.019771883 | 0.018793091 |
| 0.0142671   | 0.060920798 | 0.006885382 | 0.026565317 |
| 0.009303088 | 0.000971494 | 0.22958846  | 0.004896224 |
| 0.030006148 | 0.007267906 | 0.000773474 | 0.076457064 |
| 0.024639843 | 0.095636626 | 0.055219216 | 0.073882738 |
| 5.09E-05    | 0.002449017 | 0.033873368 | 0.005599924 |
| 0.181737721 | 0.125955559 | 0.004935757 | 0.018735188 |
| 0.094781939 | 0.006353832 | 0.067407388 | 0.094997671 |
| 0.002561537 | 0.001896969 | 2.41E-07    | 0.002716539 |
| 0.024254449 | 0.068652668 | 0.00019764  | 0.015550322 |
| 0.00040056  | 0.00067324  | 0.116274618 | 0.010996255 |
| 0.201861673 | 7.04E-05    | 0.025323653 | 0.008077753 |
| 0.102531533 | 0.023679235 | 0.002339076 | 0.121125038 |
| 0.007295838 | 0.165337621 | 0.064583758 | 0.041118643 |
| 0.041621164 | 0.023719438 | 0.014184431 | 0.102328699 |
| 0.158497147 | 0.134218027 | 0.188613475 | 0.015323967 |
| 0.087118211 | 0.007271376 | 0.024034879 | 0.039511502 |
| 0.072703005 | 0.000751857 | 0.149400657 | 1.07E-07    |
| 0.039022207 | 0.069921507 | 0.010031881 | 0.120690916 |
| 0.028898263 | 0.000780477 | 0.009898603 | 0.174738712 |

|                      |             |                      |             |
|----------------------|-------------|----------------------|-------------|
| 0.148881968          | 0.10962244  | 0.140371286          | 0.004601751 |
| 1.03E-05 0.125447433 | 0.065829961 | 0.18042715           |             |
| 0.066688887          | 0.112731138 | 0.004544163          | 0.146222236 |
| 0.081688001          | 0.045252033 | 0.037775035          | 0.155220808 |
| 0.179557627          | 0.022076507 | 0.081304068          | 5.44E-05    |
| 0.006570129          | 0.050298553 | 0.001475151          | 0.010846461 |
| 0.000801588          | 0.145091921 | 0.049463761          | 0.087779386 |
| 0.004000721          | 0.035067644 | 0.002552986          | 0.01323098  |
| 0.119419911          | 0.036538389 | 0.113635659          | 0.161163649 |
| 0.068524317          | 0.137640958 | 0.152515855          | 0.017529821 |
| 0.078071588          | 0.114671854 | 0.154665538          | 8.90E-07    |
| 0.188331579          | 0.236423722 | 0.053449588          | 0.119582342 |
| 0.024063086          | 0.037555015 | 0.101453749          | 0.000105809 |
| 0.005863086          | 0.018685651 | 0.120656532          | 0.170203761 |
| 0.000143181          | 0.055101075 | 0.127857324          | 0.19145673  |
| 0.002021861          | 0.136613106 | 0.023483405          | 0.127205371 |
| 0.094141967          | 0.007866587 | 0.186373387          | 0.02296152  |
| 0.044882121          | 0.000937509 | 0.07776858           | 0.136396713 |
| 0.002291778          | 0.002281279 | 0.157356544          | 0.076487478 |
| 0.083808505          | 0.023203351 | 2.69E-06 0.128024708 |             |
| 0.00339532           | 0.108287984 | 0.001421322          | 0.083331961 |
| 0.057073443          | 0.13203837  | 0.175686095          | 0.094689993 |
| 0.075389732          | 0.05408737  | 0.09056632           | 0.003429031 |
| 0.113318555          | 0.119092644 | 0.000130378          | 0.059259337 |
| 0.161025792          | 0.047419889 | 0.012362148          | 0.044268811 |
| 0.004288368          | 0.013549431 | 0.027630563          | 0.118604457 |
| 0.139269466          | 0.000551243 | 0.004875479          | 0.073371759 |
| 0.015261136          | 0.006675773 | 0.049440473          | 0.027015752 |
| 0.004342077          | 0.016587016 | 0.056453476          | 0.104242654 |
| 0.039834274          | 0.099290362 | 0.00275349           | 0.196986644 |
| 0.000519179          | 0.14448534  | 0.010558829          | 0.02121525  |
| 0.053764699          | 0.148427444 | 0.001082203          | 1.48E-05    |
| 0.00037525           | 0.074055786 | 0.073474224          | 0.00138613  |
| 0.009209252          | 0.016294495 | 0.051960352          | 0.161015039 |
| 0.015784728          | 0.025540171 | 0.032158072          | 0.081035671 |
| 0.001575354          | 0.105691737 | 0.021069714          | 0.056281954 |
| 0.021336772          | 0.119766539 | 3.34E-05 0.09730723  |             |
| 0.00336645           | 0.021962266 | 0.054211573          | 0.165344037 |
| 0.003537996          | 0.083455229 | 0.003455227          | 0.001676324 |
| 1.78E-05 0.04984976  | 0.151688131 | 0.029516683          |             |
| 0.027902512          | 0.035735281 | 0.025051276          | 0.134731986 |
| 0.029729441          | 0.059725481 | 0.133200749          | 0.023349234 |
| 0.02136798           | 0.00452581  | 6.46E-05 0.050178285 |             |
| 0.072794539          | 0.067872716 | 0.027963393          | 0.008084456 |
| 0.133242408          | 0.071281899 | 0.093095747          | 0.158903902 |
| 0.001358737          | 0.151206868 | 0.029226866          | 0.203687685 |
| 0.010021124          | 0.026888531 | 0.014264793          | 0.024224895 |
| 0.002185993          | 0.004877711 | 0.002454272          | 0.165069515 |
| 0.048899657          | 0.064116353 | 0.004774633          | 0.000307265 |
| 0.032798311          | 0.136175431 | 0.13713364           | 0.050692916 |
| 0.07534721           | 0.037681226 | 0.074886684          | 0.003927024 |
| 0.011740259          | 0.001121751 | 0.000190834          | 0.005074249 |
| 0.005929623          | 0.092867742 | 0.118469068          | 0.175931459 |
| 0.009973968          | 0.001852952 | 0.00290844           | 0.032987426 |

|             |             |             |             |
|-------------|-------------|-------------|-------------|
| 0.098866935 | 0.035193703 | 0.034280226 | 0.113203107 |
| 0.021422235 | 4.65E-07    | 0.006190357 | 0.052962644 |
| 0.011964817 |             |             |             |
| BACE1       | 0.230828504 | 0.43317781  | 0.029965567 |
| 0.032870997 | 0.101057082 | 0.133390069 | 0.144805057 |
| 0.255773712 | 0.049302404 | 0.086563826 | 0.204163834 |
| 0.000330153 | 0.411844374 | 0.003826232 | 0.037379613 |
| 0.486131858 | 0.513890006 | 0.251098711 | 0.494120406 |
| 0.194583903 | 0.119698836 | 0.225891804 | 0.258948274 |
| 0.153254411 | 0.000341507 | 0.078449841 | 0.040220843 |
| 0.299963562 | 0.499737594 | 0.106242842 | 0.17363354  |
| 0.424961594 | 0.479792842 | 0.327320208 | 0.333429063 |
| 0.32918303  | 0.363652553 | 0.224002269 | 1           |
| 0.427661545 | 0.157829554 | 0.443050322 | 0.004678979 |
| 0.010730258 | 0.056379793 | 0.253045036 | 0.247572552 |
| 0.188254461 | 0.120005755 | 0.087513688 | 0.119437335 |
| 0.190295183 | 0.225729294 | 0.272971783 | 0.220709279 |
| 0.304246738 | 0.005650409 | 0.352830795 | 0.150889711 |
| 0.028221326 | 0.19245321  | 0.274256732 | 0.278417233 |
| 0.149294434 | 0.330962555 | 0.483223442 | 0.017812487 |
| 0.033158277 | 0.335856474 | 0.381345269 | 0.341181442 |
| 0.388024273 | 0.239008025 | 0.205595484 | 0.402598023 |
| 0.374152791 | 0.394620921 | 0.169825305 | 0.099279584 |
| 0.000237832 | 0.093118742 | 0.324693663 | 0.248355818 |
| 0.391570079 | 0.228423656 | 0.287386812 | 0.158879607 |
| 0.340880904 | 0.005936024 | 0.248197044 | 0.499993479 |
| 0.015440951 | 0.37445008  | 0.009304769 | 0.086784747 |
| 0.370286453 | 0.487092469 | 0.283494685 | 0.036318885 |
| 0.004473552 | 0.058480924 | 0.0792888   | 0.452301742 |
| 0.281731328 | 0.351167521 | 0.288657081 | 0.183622925 |
| 0.421451821 | 0.083267316 | 0.253414564 | 0.36214643  |
| 0.425416923 | 0.00281111  | 0.078388886 | 0.129462106 |
| 0.304130304 | 0.125202377 | 0.145909205 | 0.033063494 |
| 0.00700157  | 0.009977091 | 0.449556972 | 0.076335412 |
| 0.061785918 | 0.121084261 | 0.065647455 | 0.399265744 |
| 0.254196369 | 0.419182362 | 0.100959407 | 0.16511213  |
| 0.398327475 | 0.169108211 | 0.369516663 | 0.38039028  |
| 0.399676982 | 0.145466121 | 0.070050664 | 0.389419032 |
| 0.310528409 | 0.034539241 | 0.035248233 | 0.199015189 |
| 0.411687147 | 0.464967326 | 0.490174999 | 0.193635311 |
| 0.2289364   | 0.13711631  | 0.221131122 | 0.286587518 |
| 0.152233687 | 0.229051284 | 0.098791611 | 0.229965943 |
| 0.299676922 | 0.03370731  | 0.026998271 | 0.353785509 |
| 0.085136127 | 0.177924364 | 0.341270077 | 0.366857776 |
| 0.37902201  | 0.031647207 | 0.16143184  | 0.162523928 |
| 0.17061328  | 0.156578994 | 0.28425254  | 0.152211763 |
| 0.186248399 | 0.230752251 | 0.022111879 | 0.42090162  |
| 0.060595118 | 0.202275716 | 0.264156044 | 0.058138745 |
| 0.303919737 | 0.235171032 | 0.368126767 | 0.300093732 |
| 0.307649077 | 0.00563748  | 0.086659503 | 0.243376836 |
| 0.194565566 | 0.407880678 | 0.428452902 | 0.054444102 |
| 0.140613021 | 0.333069214 | 0.070702201 | 0.306518384 |
| 0.321444038 | 0.140199332 | 0.124419086 | 0.000118889 |
| 0.083919527 | 0.309225266 | 0.323297354 | 0.018095475 |

|             |             |             |             |
|-------------|-------------|-------------|-------------|
| 0.184030795 | 0.047184434 | 0.067011302 | 0.407457433 |
| 0.10864865  | 0.410926174 | 0.010128517 | 0.146409926 |
| 0.15516236  | 0.322585607 | 0.327803308 | 0.161808325 |
| 0.367948092 | 0.200245282 | 0.464496502 | 0.252962894 |
| 0.23655249  | 0.222725015 | 0.195372602 | 0.156802536 |
| 0.40245486  | 0.439390178 | 0.419480431 | 0.400123968 |
| 0.155425237 | 0.279977102 | 0.265283724 | 0.158735552 |
| 0.264437239 | 0.297605325 | 0.034367782 | 0.44298288  |
| 0.000115226 | 0.221597991 | 0.360012769 | 0.181427868 |
| 0.421374917 | 0.154821166 | 0.026509389 | 0.137030498 |
| 0.499783559 | 0.442229029 | 0.353370616 | 0.443522036 |
| 0.185691129 | 0.002636602 | 0.412309555 | 0.274674626 |
| 0.512023373 | 0.297136758 | 0.413590093 | 0.076925242 |
| 0.448974529 | 0.285414971 | 0.296200167 | 0.312699653 |
| 0.402152144 | 0.412104275 | 0.141042811 | 0.266665059 |
| 0.009244814 | 0.139636629 | 0.317885536 | 0.146607173 |
| 0.221663767 | 0.10054596  | 0.398560263 | 0.20324004  |
| 0.394903752 | 0.214617191 | 0.331804158 | 0.043696596 |
| 0.096523089 | 0.438207765 | 0.09573985  | 0.386555349 |
| 0.495688567 | 0.25221785  | 0.445391325 | 0.482063479 |
| 0.183196689 | 0.263320565 | 0.410841954 | 0.421091115 |
| 0.000227776 | 0.463535857 | 0.400329169 | 0.212794191 |
| 0.432963725 | 0.167550916 | 0.196990344 | 0.425390955 |
| 0.000559842 | 0.073634186 | 0.295039579 | 0.400679293 |
| 0.451741122 | 0.012265715 | 0.128639736 | 0.370504383 |
| 0.391480564 | 0.047393401 | 0.470449081 | 0.216311573 |
| 0.39561932  | 0.343982195 | 0.098969362 | 0.427904479 |
| 0.267288649 | 0.30010643  | 0.026508266 | 0.342246492 |
| 0.375259267 | 0.07188408  | 0.065354816 | 0.480750706 |
| 0.336023141 | 0.27846615  | 0.146797847 | 0.003520446 |
| 0.384552274 | 0.19524654  | 0.379534024 | 0.065025957 |
| 0.303248973 | 0.2361646   | 0.375801556 | 0.422291887 |
| 0.341953842 | 0.284133091 | 0.23975716  | 0.357565162 |
| 0.150056795 | 0.392975666 | 0.416590536 | 0.029595969 |
| 0.30270506  | 0.46185285  | 0.332325543 | 0.098328294 |
| 0.238531091 | 0.130894146 | 0.109477533 | 0.210653551 |
| 0.369020113 | 0.450434228 | 0.023094326 | 0.084673197 |
| 0.287347265 | 0.185030244 | 0.059098081 | 0.23926955  |
| 0.15792162  | 0.178454598 | 0.12937996  | 0.238399235 |
| 0.370772336 | 0.183312929 | 0.405535188 | 0.117513659 |
| 0.469368459 | 0.019995908 | 0.367126567 | 0.182575755 |
| 0.160603717 | 0.321143812 | 0.408991122 | 0.09297455  |
| 0.010305856 | 0.054598859 | 0.277276045 | 0.284832064 |
| 0.033202218 | 0.09761021  | 0.160624829 | 0.25834578  |
| 0.492103548 | 0.326125406 | 0.160360063 | 0.221959654 |
| 0.287485992 | 0.096877461 | 0.393802802 | 0.200957065 |
| 0.273860467 | 0.232656319 | 0.351282452 | 0.005514089 |
| 0.370330465 | 0.103887195 | 0.152297097 | 0.293738728 |
| 0.470696955 | 0.067723042 | 0.27934314  | 0.077217118 |
| 0.157281851 | 0.001740855 | 0.227662158 | 0.423788607 |
| 0.162513287 | 0.264611949 | 0.238689453 | 0.260846456 |
| 0.458045129 | 0.258558866 | 0.293373019 | 0.31925888  |
| 0.271948157 | 0.071296338 | 0.0968842   | 0.01182408  |
| 0.256926028 | 0.254449684 | 0.308387271 | 0.266165334 |

|             |             |             |             |
|-------------|-------------|-------------|-------------|
| 0.125900658 | 0.381451947 | 0.264035706 | 0.371687149 |
| 0.454434333 | 0.156063117 | 0.498045174 | 0.199040418 |
| 0.441657012 | 0.26306423  | 0.151014499 | 0.226846164 |
| 0.13880654  | 0.089094148 | 0.061011772 | 0.077582311 |
| 0.483801973 | 0.246766246 | 0.310712368 | 0.196751174 |
| 0.022728703 | 0.277347775 | 0.34890663  | 0.380919841 |
| 0.318658331 | 0.316919881 | 0.308084985 | 0.26416123  |
| 0.209544746 | 0.171002084 | 0.063950244 | 0.026902629 |
| 0.239437294 | 0.105967797 | 0.332231509 | 0.365376498 |
| 0.490732857 | 0.221869261 | 0.044052535 | 0.062527132 |
| 0.182308042 | 0.333912611 | 0.180356882 | 0.285975691 |
| 0.351074081 | 0.251566576 | 0.000155764 | 0.124750637 |
| 0.243096283 | 0.333334499 |             |             |
| BACH2       | 0.329395089 | 0.361748351 | 0.028499351 |
| 0.016506487 | 0.0582042   | 0.127187785 | 0.117409128 |
| 0.342370229 | 0.057740506 | 0.070076314 | 0.192825065 |
| 0.001460626 | 0.43021284  | 0.008489781 | 0.045255026 |
| 0.442472602 | 0.455038329 | 0.210277578 | 0.448878676 |
| 0.269560524 | 0.090541906 | 0.269887943 | 0.256053285 |
| 0.146244956 | 0.00123694  | 0.055810505 | 0.025006251 |
| 0.389764967 | 0.460333998 | 0.113865796 | 0.166556933 |
| 0.408408945 | 0.429813702 | 0.312053811 | 0.241373874 |
| 0.27012254  | 0.318272291 | 0.177210165 | 0.427661545 |
| 1           | 0.119537068 | 0.428934728 | 0.007320531 |
| 0.00385926  | 0.044804438 | 0.342148125 | 0.283150718 |
| 0.248084062 | 0.115609011 | 0.091922612 | 0.088754905 |
| 0.225789681 | 0.223225323 | 0.34628122  | 0.235134348 |
| 0.266579729 | 0.002865066 | 0.306260611 | 0.25137433  |
| 0.028537216 | 0.219767257 | 0.378458911 | 0.321064231 |
| 0.13461698  | 0.283009241 | 0.407721757 | 0.012921989 |
| 0.030210308 | 0.394078535 | 0.422226592 | 0.311491153 |
| 0.366316298 | 0.233717216 | 0.179496841 | 0.411129834 |
| 0.414597054 | 0.427798257 | 0.176543984 | 0.101798331 |
| 0.000597913 | 0.070908426 | 0.233084404 | 0.368515347 |
| 0.430256314 | 0.222974347 | 0.370359333 | 0.120189679 |
| 0.375924423 | 0.007540639 | 0.26862963  | 0.431962762 |
| 0.012213536 | 0.423453379 | 0.00709078  | 0.090299864 |
| 0.404875482 | 0.469276067 | 0.35094141  | 0.029667549 |
| 0.006161074 | 0.073863402 | 0.158086983 | 0.453767265 |
| 0.330461707 | 0.366260785 | 0.26506264  | 0.273359754 |
| 0.420035387 | 0.118645463 | 0.245284447 | 0.309847093 |
| 0.383370121 | 0.004563947 | 0.109556635 | 0.117542566 |
| 0.308837047 | 0.090106237 | 0.123031757 | 0.042639363 |
| 0.004761935 | 0.030419505 | 0.418509296 | 0.09089463  |
| 0.044763253 | 0.104875879 | 0.044765718 | 0.369175839 |
| 0.334009874 | 0.427235455 | 0.061036091 | 0.141563929 |
| 0.419809627 | 0.139805542 | 0.304063791 | 0.408199801 |
| 0.300311598 | 0.201922175 | 0.079767312 | 0.336519542 |
| 0.30014478  | 0.028909399 | 0.03838192  | 0.199787157 |
| 0.427799358 | 0.416934447 | 0.423859511 | 0.236316939 |
| 0.155205102 | 0.152219327 | 0.239863659 | 0.256963959 |
| 0.134648665 | 0.290970965 | 0.147599478 | 0.233028949 |
| 0.263769848 | 0.037990341 | 0.02814771  | 0.410190339 |
| 0.032368966 | 0.147747713 | 0.327670266 | 0.373711608 |



|             |             |             |             |
|-------------|-------------|-------------|-------------|
| 0.382928752 | 0.020630527 | 0.131447661 | 0.147599658 |
| 0.199439185 | 0.139890565 | 0.33093618  | 0.126816268 |
| 0.202357864 | 0.240242836 | 0.018564857 | 0.422866709 |
| 0.058363832 | 0.240689752 | 0.353394613 | 0.072143643 |
| 0.389588604 | 0.297594451 | 0.358309405 | 0.35150358  |
| 0.39305462  | 0.00209049  | 0.069432183 | 0.33152113  |
| 0.235860194 | 0.418491351 | 0.345800261 | 0.053387326 |
| 0.163753764 | 0.376022019 | 0.074323417 | 0.224309225 |
| 0.379443763 | 0.136858276 | 0.120236867 | 0.000221898 |
| 0.067629559 | 0.346376418 | 0.362822876 | 0.033286973 |
| 0.129017283 | 0.062086589 | 0.122886371 | 0.381525597 |
| 0.105515472 | 0.404242036 | 0.02442421  | 0.261060674 |
| 0.153223723 | 0.292549631 | 0.30171695  | 0.238442328 |
| 0.350562213 | 0.196556021 | 0.460491168 | 0.262770957 |
| 0.174430857 | 0.215564816 | 0.287119465 | 0.189477693 |
| 0.421703668 | 0.396303635 | 0.421511477 | 0.397012574 |
| 0.145984302 | 0.370297221 | 0.299675523 | 0.16016149  |
| 0.315287435 | 0.327171475 | 0.040157025 | 0.366238668 |
| 0.000323515 | 0.22894594  | 0.343760772 | 0.308339883 |
| 0.348291233 | 0.127411205 | 0.03205057  | 0.180317183 |
| 0.451854969 | 0.366975651 | 0.381067332 | 0.423998885 |
| 0.271253751 | 0.006326351 | 0.379101767 | 0.291959217 |
| 0.466263017 | 0.280565418 | 0.308489362 | 0.130336804 |
| 0.395159463 | 0.389968407 | 0.326637224 | 0.378067709 |
| 0.383581784 | 0.377439533 | 0.154936326 | 0.375874266 |
| 0.022925912 | 0.146578069 | 0.369228785 | 0.132600666 |
| 0.207824027 | 0.118186408 | 0.378421338 | 0.203480527 |
| 0.314351711 | 0.288976711 | 0.272377596 | 0.034155009 |
| 0.089758564 | 0.365990228 | 0.071351783 | 0.373548342 |
| 0.430873208 | 0.273836716 | 0.389254662 | 0.430570996 |
| 0.217555589 | 0.252013864 | 0.375928207 | 0.419125197 |
| 0.000783396 | 0.428780186 | 0.427346767 | 0.217962129 |
| 0.40973392  | 0.170398832 | 0.320138193 | 0.415402311 |
| 0.000925426 | 0.078578803 | 0.279287512 | 0.347322993 |
| 0.399769158 | 0.010678453 | 0.102548171 | 0.372861541 |
| 0.423952831 | 0.058850591 | 0.406703016 | 0.204923088 |
| 0.348696947 | 0.317318809 | 0.08389238  | 0.431650734 |
| 0.28547969  | 0.356018656 | 0.014502989 | 0.317072011 |
| 0.383561789 | 0.154860194 | 0.039569399 | 0.430820247 |
| 0.350384195 | 0.253639019 | 0.145592245 | 0.004168607 |
| 0.412618874 | 0.16063296  | 0.377122033 | 0.064458344 |
| 0.330844479 | 0.233367126 | 0.332168014 | 0.434797214 |
| 0.363661072 | 0.275422961 | 0.241660725 | 0.360826642 |
| 0.098766396 | 0.41778471  | 0.411154768 | 0.024580917 |
| 0.391838593 | 0.40437842  | 0.313883408 | 0.085152945 |
| 0.277537789 | 0.064256647 | 0.104962341 | 0.302465458 |
| 0.320932104 | 0.39920802  | 0.023095466 | 0.110687133 |
| 0.270344018 | 0.194754889 | 0.048542701 | 0.251561051 |
| 0.163679655 | 0.247527748 | 0.239190639 | 0.253735511 |
| 0.313482966 | 0.163570926 | 0.392259371 | 0.089585599 |
| 0.422076681 | 0.024113346 | 0.396193121 | 0.157603894 |
| 0.184858872 | 0.385838955 | 0.418730456 | 0.169443668 |
| 0.01365167  | 0.082001231 | 0.257393355 | 0.270856234 |
| 0.032159433 | 0.108418015 | 0.136539045 | 0.211967147 |

|             |             |             |             |
|-------------|-------------|-------------|-------------|
| 0.435793918 | 0.328045053 | 0.157056488 | 0.254482768 |
| 0.259392616 | 0.06186238  | 0.34169115  | 0.240077511 |
| 0.326609484 | 0.201575766 | 0.375942399 | 0.007144303 |
| 0.412392262 | 0.088422321 | 0.278121619 | 0.237728025 |
| 0.467073671 | 0.061462448 | 0.247749635 | 0.094859849 |
| 0.144796889 | 0.003160944 | 0.262002546 | 0.379696064 |
| 0.157907333 | 0.353071281 | 0.271798135 | 0.263225259 |
| 0.38884863  | 0.300470074 | 0.357799043 | 0.373993722 |
| 0.252207869 | 0.036080408 | 0.077706369 | 0.014972786 |
| 0.310721626 | 0.267790481 | 0.382918874 | 0.354396086 |
| 0.231200798 | 0.35889993  | 0.261216955 | 0.299611158 |
| 0.398524598 | 0.165206252 | 0.435434573 | 0.251372894 |
| 0.42722967  | 0.295697025 | 0.146996582 | 0.251343745 |
| 0.102597825 | 0.111348809 | 0.057922316 | 0.128564703 |
| 0.416923619 | 0.254683409 | 0.258391866 | 0.27304895  |
| 0.018065137 | 0.251734081 | 0.418690608 | 0.425801834 |
| 0.327054588 | 0.398676599 | 0.359934412 | 0.249107827 |
| 0.29571734  | 0.242543185 | 0.034614527 | 0.015587677 |
| 0.207740277 | 0.097986415 | 0.373163285 | 0.381063483 |
| 0.427890326 | 0.338344227 | 0.043750073 | 0.083670948 |
| 0.234794388 | 0.410451385 | 0.148339977 | 0.175153449 |
| 0.360306332 | 0.369835315 | 0.000245503 | 0.192205241 |
| 0.256989892 | 0.326667066 |             |             |
| BAZ1A       | 0.083668901 | 0.333965438 | 0.103113443 |
| 0.042506012 | 0.170493222 | 0.323744862 | 0.323193865 |
| 0.06577655  | 0.090358928 | 0.181664593 | 0.392549843 |
| 0.000527579 | 0.117464248 | 0.012053185 | 0.046656989 |
| 0.232240381 | 0.241284664 | 0.287306512 | 0.22791592  |
| 0.089050576 | 0.133140469 | 0.208148787 | 0.257280733 |
| 0.275745282 | 0.001228134 | 0.205817339 | 0.113052553 |
| 0.050117756 | 0.201078545 | 0.168027925 | 0.151616812 |
| 0.189623603 | 0.191430318 | 0.102389419 | 0.116101527 |
| 0.040973977 | 0.362489197 | 0.015232958 | 0.157829554 |
| 0.119537068 | 1           | 0.191306486 | 0.018939661 |
| 0.003372075 | 0.162593033 | 0.039227945 | 0.220567159 |
| 0.079571589 | 0.281666094 | 0.165676148 | 0.231385024 |
| 0.01267856  | 0.357175201 | 0.176328039 | 0.012421572 |
| 0.42518284  | 0.011111735 | 0.389079797 | 0.033001113 |
| 0.095532571 | 0.133291698 | 0.064666972 | 0.204362424 |
| 0.368520222 | 0.420403215 | 0.291006651 | 0.114693859 |
| 0.142817352 | 0.108339593 | 0.139918094 | 0.248166649 |
| 0.285696076 | 0.112580946 | 0.165240686 | 0.0510675   |
| 0.161064281 | 0.131288816 | 0.261147351 | 0.108414313 |
| 0.001340743 | 0.267323748 | 0.132935793 | 0.087918731 |
| 0.093143836 | 0.382149601 | 0.105143851 | 0.193121658 |
| 0.10748222  | 0.039584345 | 0.21341347  | 0.271784634 |
| 0.03366363  | 0.137918269 | 0.010510758 | 0.095710512 |
| 0.182974446 | 0.159387717 | 0.166047471 | 0.162912515 |
| 0.023425041 | 0.07334591  | 0.018516351 | 0.111514832 |
| 0.137943156 | 0.14571047  | 0.405030604 | 0.006821096 |
| 0.096151133 | 0.07117191  | 0.124720522 | 0.390270493 |
| 0.263938498 | 0.00749967  | 0.063528682 | 0.301566478 |
| 0.071904584 | 0.10862517  | 0.284906214 | 0.006689536 |
| 0.024559765 | 0.001810085 | 0.193023819 | 0.09653693  |

|             |             |             |             |
|-------------|-------------|-------------|-------------|
| 0.195558946 | 0.258349968 | 0.108841412 | 0.203066594 |
| 0.048128046 | 0.150083472 | 0.173578628 | 0.24931479  |
| 0.14972823  | 0.334167681 | 0.17679066  | 0.187742385 |
| 0.100331703 | 0.065332555 | 0.106205033 | 0.354609026 |
| 0.326543139 | 0.127706    | 0.098441897 | 0.31823891  |
| 0.104589218 | 0.232312703 | 0.290797458 | 0.071839515 |
| 0.190720454 | 0.147732048 | 0.096063439 | 0.333816339 |
| 0.290400609 | 0.111858445 | 0.005496396 | 0.307423665 |
| 0.422733721 | 0.009275274 | 0.100621708 | 0.174299133 |
| 0.082412135 | 0.155669615 | 0.317424191 | 0.257999382 |
| 0.159054527 | 0.100214789 | 0.177918561 | 0.293268231 |
| 0.181075165 | 0.25090618  | 0.189395666 | 0.16376328  |
| 0.263791922 | 0.098545743 | 0.109916911 | 0.104382574 |
| 0.155553425 | 0.186983756 | 0.032084794 | 0.015063297 |
| 0.112582935 | 0.062400477 | 0.293987681 | 0.149050198 |
| 0.134783506 | 0.012024716 | 0.176149095 | 0.115009297 |
| 0.080508263 | 0.124791235 | 0.373023663 | 0.157216056 |
| 0.185409594 | 0.036362804 | 0.148746537 | 0.150642718 |
| 0.158121175 | 0.138785833 | 0.144930687 | 0.002199792 |
| 0.156998743 | 0.061832947 | 0.11117078  | 0.028198559 |
| 0.199866275 | 0.082581121 | 0.01947799  | 0.271830056 |
| 0.236664415 | 0.21944242  | 0.00732927  | 0.01072628  |
| 0.141084874 | 0.357359524 | 0.095430909 | 0.043680688 |
| 0.292886982 | 0.130025746 | 0.12850041  | 0.345328628 |
| 0.157386569 | 0.388703726 | 0.011432374 | 0.094246297 |
| 0.120091277 | 0.269762165 | 0.185322594 | 0.226394723 |
| 0.199465014 | 0.118793287 | 0.040613543 | 0.307637628 |
| 0.148467001 | 0.143126417 | 0.08692765  | 0.327861298 |
| 0.001516465 | 0.243701168 | 0.190999738 | 0.011355288 |
| 0.362170463 | 0.367707375 | 0.076253499 | 0.074652451 |
| 0.235345856 | 0.324979855 | 0.190700823 | 0.162871734 |
| 0.023190374 | 0.007569872 | 0.258409302 | 0.284767095 |
| 0.206035318 | 0.154863488 | 0.071294555 | 0.006816376 |
| 0.265228864 | 0.066627086 | 0.208272394 | 0.099927814 |
| 0.153532669 | 0.061057043 | 0.153354552 | 0.091889605 |
| 0.001790608 | 0.143263319 | 0.144834569 | 0.097752845 |
| 0.129870689 | 0.091204246 | 0.273803286 | 0.311717931 |
| 0.102588645 | 0.045852513 | 0.107683284 | 0.151396347 |
| 0.229186842 | 0.329608354 | 0.005767442 | 0.244609675 |
| 0.27229283  | 0.170385268 | 0.282501223 | 0.254642783 |
| 0.155437202 | 0.382574173 | 0.29101756  | 0.155453984 |
| 0.000467891 | 0.144245788 | 0.110871743 | 0.354857389 |
| 0.200236932 | 0.286831627 | 0.022970595 | 0.070926551 |
| 0.001008901 | 0.166696073 | 0.036881731 | 0.324295586 |
| 0.258470351 | 0.075998714 | 0.004011144 | 0.257059456 |
| 0.107133683 | 0.006150365 | 0.30179355  | 0.250664707 |
| 0.338383001 | 0.172902101 | 0.229949914 | 0.133135884 |
| 0.022042509 | 0.057019224 | 0.075374717 | 0.255161861 |
| 0.092744465 | 0.005820554 | 0.167909744 | 0.259792249 |
| 0.255818637 | 0.353784749 | 0.250274631 | 0.019346611 |
| 0.109291634 | 0.080021502 | 0.240101974 | 0.080935805 |
| 0.25896634  | 0.356535977 | 0.349346787 | 0.160550058 |
| 0.167426485 | 0.377676525 | 0.374257015 | 0.272619552 |
| 0.051043298 | 0.142276798 | 0.171165787 | 0.098803922 |

|             |             |             |             |
|-------------|-------------|-------------|-------------|
| 0.080031156 | 0.261758102 | 0.164628552 | 0.304882782 |
| 0.211080179 | 0.069555623 | 0.290243976 | 0.079122964 |
| 0.374577958 | 0.258978704 | 0.107555646 | 0.065669772 |
| 0.3976638   | 0.115152516 | 0.173852877 | 0.136295175 |
| 0.28908451  | 0.011295201 | 0.009740467 | 0.285891681 |
| 0.392255337 | 0.394865574 | 0.229035706 | 0.1441024   |
| 0.208248965 | 0.057728066 | 0.192211476 | 0.148283861 |
| 0.181195726 | 0.100998606 | 0.110310779 | 0.008651979 |
| 0.03244471  | 0.058173447 | 0.410741735 | 0.3803063   |
| 0.112377659 | 0.164115291 | 0.255994621 | 0.313708797 |
| 0.224775308 | 0.083780161 | 0.292203423 | 0.120159499 |
| 0.410911442 | 0.116202638 | 0.336324158 | 0.146771517 |
| 0.227493955 | 0.17371694  | 0.244197056 | 0.004822329 |
| 0.143783375 | 0.171311699 | 0.022610238 | 0.255468612 |
| 0.144451547 | 0.149752278 | 0.36577493  | 0.09215256  |
| 0.045736545 | 0.001417377 | 0.230828345 | 0.067184123 |
| 0.366253697 | 0.02712482  | 0.127004673 | 0.012801331 |
| 0.331546716 | 0.157461282 | 0.195715044 | 0.02631287  |
| 0.161175831 | 0.004549479 | 0.184882355 | 0.047551458 |
| 0.218312212 | 0.301928248 | 0.12991801  | 0.088215301 |
| 0.023746253 | 0.213843865 | 0.298939454 | 0.18354501  |
| 0.267405519 | 0.026478673 | 0.254962616 | 0.072855748 |
| 0.110630282 | 0.08133337  | 0.279251607 | 0.083450622 |
| 0.241565061 | 0.033306641 | 0.132102493 | 0.044537693 |
| 0.232654393 | 0.076288858 | 0.248289195 | 0.052803922 |
| 0.122061034 | 0.140992849 | 0.146385512 | 0.149794163 |
| 0.199087804 | 0.110350631 | 0.050250153 | 0.397626839 |
| 0.046106526 | 0.073244756 | 0.066797289 | 0.094208726 |
| 0.081900676 | 0.177779454 | 0.18871415  | 0.220915575 |
| 0.24952854  | 0.029409337 | 0.120318778 | 0.071204487 |
| 0.008812117 | 0.109473655 | 0.373013304 | 0.041837985 |
| 0.175804654 | 0.031962304 | 0.001452913 | 0.049953035 |
| 0.305266651 | 0.077945541 |             |             |
| BBS9        | 0.318950052 | 0.453409105 | 0.046989012 |
| 0.033045094 | 0.100855181 | 0.183884512 | 0.182065431 |
| 0.333043141 | 0.079703145 | 0.119098088 | 0.26196003  |
| 0.001043487 | 0.399029939 | 0.009222821 | 0.055220227 |
| 0.506828344 | 0.524341579 | 0.288633797 | 0.505514945 |
| 0.273953648 | 0.146872379 | 0.30256264  | 0.334143441 |
| 0.20641836  | 0.001085584 | 0.098921862 | 0.052171796 |
| 0.365423739 | 0.509750071 | 0.152963598 | 0.233335359 |
| 0.452119745 | 0.468306795 | 0.384770468 | 0.328370379 |
| 0.30438681  | 0.391470686 | 0.155583762 | 0.443050322 |
| 0.428934728 | 0.191306486 | 1           | 0.009870062 |
| 0.007187367 | 0.078016528 | 0.310752867 | 0.330968039 |
| 0.254961145 | 0.168156127 | 0.126323566 | 0.148918583 |
| 0.203914505 | 0.288671187 | 0.347635154 | 0.210341319 |
| 0.34062566  | 0.006307958 | 0.378039353 | 0.222700432 |
| 0.045633336 | 0.260182822 | 0.357412936 | 0.359881991 |
| 0.196136898 | 0.355829459 | 0.495219604 | 0.025233862 |
| 0.051763281 | 0.412415068 | 0.422936676 | 0.398191089 |
| 0.411596338 | 0.306932882 | 0.253723131 | 0.405400827 |
| 0.438741917 | 0.404197088 | 0.22601135  | 0.135298607 |
| 0.000659085 | 0.120671058 | 0.33048801  | 0.324824763 |

|             |             |             |             |
|-------------|-------------|-------------|-------------|
| 0.427753175 | 0.290828598 | 0.36157922  | 0.18998596  |
| 0.414100492 | 0.01168246  | 0.322573081 | 0.513734877 |
| 0.020034    | 0.403721659 | 0.009915558 | 0.116688031 |
| 0.413216793 | 0.496740212 | 0.369981807 | 0.054125825 |
| 0.00892085  | 0.090648392 | 0.12703951  | 0.44802718  |
| 0.35952226  | 0.420102396 | 0.336870048 | 0.181494081 |
| 0.398750707 | 0.140749604 | 0.302088556 | 0.389632775 |
| 0.454136296 | 0.004975669 | 0.122333314 | 0.172272789 |
| 0.349362917 | 0.140549975 | 0.182582654 | 0.043818956 |
| 0.008851781 | 0.01661415  | 0.463982869 | 0.116867851 |
| 0.082523471 | 0.161851203 | 0.076494904 | 0.441511119 |
| 0.313703791 | 0.440401475 | 0.104964996 | 0.211802579 |
| 0.441852688 | 0.210346122 | 0.395700755 | 0.444242513 |
| 0.373145503 | 0.208106891 | 0.110322998 | 0.401519957 |
| 0.34625678  | 0.050972559 | 0.059145468 | 0.265140526 |
| 0.393372953 | 0.482055508 | 0.509242504 | 0.251948036 |
| 0.238073489 | 0.188872627 | 0.297783057 | 0.345006928 |
| 0.193500444 | 0.295104279 | 0.101175868 | 0.288841003 |
| 0.334110433 | 0.041028736 | 0.045322544 | 0.414743007 |
| 0.060736716 | 0.209795951 | 0.379094293 | 0.425333729 |
| 0.418465682 | 0.043081108 | 0.20591042  | 0.214964326 |
| 0.240968831 | 0.208131525 | 0.36237769  | 0.197759784 |
| 0.256351428 | 0.303550391 | 0.032915336 | 0.39612057  |
| 0.088674317 | 0.275709211 | 0.344467093 | 0.07484691  |
| 0.378002132 | 0.299395704 | 0.415696605 | 0.373791703 |
| 0.387251464 | 0.005503421 | 0.119213511 | 0.332819572 |
| 0.277076569 | 0.406515761 | 0.446978759 | 0.080871388 |
| 0.199432561 | 0.34013731  | 0.104837366 | 0.310946244 |
| 0.360637875 | 0.192976736 | 0.177432554 | 0.00041628  |
| 0.105357268 | 0.382228504 | 0.388631564 | 0.036269045 |
| 0.20469558  | 0.085728883 | 0.10034384  | 0.429212138 |
| 0.152517941 | 0.447214043 | 0.01895354  | 0.172042286 |
| 0.213575868 | 0.376237736 | 0.375391771 | 0.240052787 |
| 0.422881355 | 0.261431599 | 0.467907886 | 0.322958358 |
| 0.243220299 | 0.288906361 | 0.208856416 | 0.22021851  |
| 0.447276455 | 0.442707536 | 0.446747415 | 0.433114713 |
| 0.207758332 | 0.344524392 | 0.297071219 | 0.216669621 |
| 0.344620501 | 0.355614335 | 0.057879549 | 0.457306648 |
| 0.000415477 | 0.285162284 | 0.415127176 | 0.220594647 |
| 0.438246025 | 0.194176992 | 0.04623682  | 0.198072452 |
| 0.512269261 | 0.457817111 | 0.380535879 | 0.45189795  |
| 0.224935204 | 0.0062256   | 0.439250348 | 0.348573539 |
| 0.518709062 | 0.343977116 | 0.367389729 | 0.084698981 |
| 0.458161853 | 0.342047591 | 0.381269342 | 0.399066904 |
| 0.430312536 | 0.397482502 | 0.190968502 | 0.332485055 |
| 0.016340922 | 0.203752202 | 0.400316017 | 0.186965309 |
| 0.286696167 | 0.146795411 | 0.432193264 | 0.259528659 |
| 0.391346974 | 0.304434607 | 0.361466881 | 0.06118458  |
| 0.13255419  | 0.46334866  | 0.063176843 | 0.416171893 |
| 0.509660077 | 0.31002085  | 0.452362178 | 0.500879463 |
| 0.259722586 | 0.323527961 | 0.43040069  | 0.434841967 |
| 0.000606951 | 0.455672851 | 0.408691568 | 0.275681115 |
| 0.449660312 | 0.229116345 | 0.243433044 | 0.443534109 |
| 0.000843056 | 0.112288793 | 0.307516073 | 0.428069289 |

|             |             |             |             |             |
|-------------|-------------|-------------|-------------|-------------|
| 0.444957697 | 0.018979225 | 0.078130391 | 0.424765386 |             |
| 0.414559539 | 0.051071103 | 0.494641921 | 0.280515134 |             |
| 0.416587582 | 0.378278803 | 0.13479595  | 0.420168098 |             |
| 0.278670443 | 0.350417172 | 0.02709615  | 0.396088781 |             |
| 0.403525304 | 0.097658202 | 0.077909197 | 0.500033699 |             |
| 0.390722858 | 0.331199005 | 0.197376455 | 0.008220345 |             |
| 0.403141468 | 0.226359693 | 0.440208927 | 0.083690134 |             |
| 0.369391393 | 0.300302949 | 0.394831713 | 0.440077003 |             |
| 0.402468289 | 0.3477398   | 0.30909909  | 0.413372558 |             |
| 0.139642054 | 0.414482516 | 0.434518066 | 0.043787018 |             |
| 0.368755695 | 0.466816495 | 0.391849682 | 0.134132309 |             |
| 0.316243554 | 0.108032785 | 0.153498133 | 0.286902442 |             |
| 0.393567122 | 0.460977205 | 0.039724528 | 0.122847099 |             |
| 0.347079011 | 0.240035056 | 0.080740842 | 0.28950795  |             |
| 0.215522918 | 0.214186746 | 0.153968933 | 0.307703208 |             |
| 0.393597108 | 0.232064115 | 0.431822875 | 0.149687731 |             |
| 0.461853647 | 0.03343141  | 0.398290631 | 0.216067498 |             |
| 0.222555462 | 0.394941638 | 0.417128348 | 0.127680219 |             |
| 0.02164927  | 0.096719235 | 0.338168642 | 0.336693199 |             |
| 0.052469514 | 0.143649281 | 0.206693783 | 0.301440465 |             |
| 0.503525724 | 0.386930911 | 0.213007042 | 0.281789729 |             |
| 0.327393235 | 0.109084769 | 0.424365617 | 0.277805881 |             |
| 0.360209351 | 0.285428801 | 0.41498181  | 0.008596246 |             |
| 0.435813467 | 0.14467963  | 0.205621519 | 0.334626156 |             |
| 0.480796107 | 0.097734703 | 0.329865415 | 0.121190492 |             |
| 0.182712527 | 0.002784421 | 0.297136145 | 0.410513636 |             |
| 0.217993075 | 0.30220572  | 0.302140144 | 0.24074625  |             |
| 0.482770934 | 0.342764745 | 0.381792869 | 0.318019497 |             |
| 0.337234847 | 0.037602787 | 0.130790271 | 0.022392762 |             |
| 0.342173639 | 0.320673355 | 0.385676532 | 0.359562319 |             |
| 0.185534796 | 0.423060806 | 0.324140788 | 0.392391912 |             |
| 0.454948744 | 0.177943    | 0.514106871 | 0.258273441 |             |
| 0.42697978  | 0.330763428 | 0.200713356 | 0.272991679 |             |
| 0.164365382 | 0.116894552 | 0.088792929 | 0.125975618 |             |
| 0.485418084 | 0.270188681 | 0.352864347 | 0.288925085 |             |
| 0.034266591 | 0.324572738 | 0.404570168 | 0.4372866   |             |
| 0.391549464 | 0.38680176  | 0.355591532 | 0.31591822  |             |
| 0.298384349 | 0.253473928 | 0.065355136 | 0.034465439 |             |
| 0.272819534 | 0.151422743 | 0.370564077 | 0.402594788 |             |
| 0.49954954  | 0.280738678 | 0.068577229 | 0.100998887 |             |
| 0.160645244 | 0.371492613 | 0.222182147 | 0.209841313 |             |
| 0.399907406 | 0.323746738 | 0.000366129 | 0.188390177 |             |
| 0.31514309  | 0.373763081 |             |             |             |
| BC028528    | 0.024719977 | 0.031036201 | 0.028070767 | 1.29E-05    |
| 0.002331658 | 0.118912327 | 0.06593868  | 0.010136836 |             |
| 0.072107171 | 0.013156824 | 0.078357233 | 0.010321383 |             |
| 0.004601154 | 0.055846354 | 0.015108681 | 0.016491753 |             |
| 0.015841009 | 0.035320602 | 0.018871338 | 0.042330565 |             |
| 0.00084891  | 0.065866728 | 0.025543088 | 0.097843876 |             |
| 0.024327439 | 0.031654335 | 0.000496102 | 0.005219871 |             |
| 0.012013256 | 0.130224493 | 0.008055223 | 0.016591847 |             |
| 0.006722146 | 0.004090073 | 0.000894656 | 9.65E-05    |             |
| 0.04808818  | 2.61E-05    | 0.004678979 | 0.007320531 |             |
| 0.018939661 | 0.009870062 | 1           | 1.10E-07    | 0.058909083 |

|                      |                      |                      |             |
|----------------------|----------------------|----------------------|-------------|
| 0.004102535          | 0.048026804          | 0.049094256          | 0.110637549 |
| 0.158316884          | 0.028286182          | 1.09E-05 0.078939644 |             |
| 0.042298366          | 1.61E-05 0.056942762 | 2.69E-06 0.052740981 |             |
| 0.022553798          | 0.173295197          | 0.08054221           | 0.012082836 |
| 0.034209033          | 0.112139523          | 0.053310504          | 0.023821278 |
| 0.007901522          | 0.171480934          | 0.013985976          | 0.005724013 |
| 0.009927886          | 0.030308424          | 0.003015875          | 0.013768487 |
| 0.001841481          | 0.008592539          | 0.006801442          | 0.12672664  |
| 0.043988575          | 0.00458241           | 0.05573157           | 0.001984375 |
| 0.021886066          | 0.002154655          | 0.072604835          | 0.016211321 |
| 0.021423932          | 0.004790623          | 0.029052051          | 0.043166369 |
| 0.019220511          | 0.00017509           | 0.010065111          | 5.14E-05    |
| 0.032155758          | 0.014580854          | 0.008616727          | 0.025858883 |
| 0.040391265          | 0.025422772          | 0.110977361          | 0.008382985 |
| 0.004912743          | 0.030279008          | 0.013162419          | 0.064251259 |
| 0.000410107          | 0.002762423          | 0.034981381          | 0.022109807 |
| 0.043934031          | 0.02478711           | 0.004804357          | 0.067021306 |
| 0.098676293          | 0.001586206          | 0.000520741          | 0.071069449 |
| 1.54E-05 0.000111362 | 0.001265294          | 0.012870841          |             |
| 0.068936561          | 0.032071178          | 0.068269312          | 0.000308368 |
| 0.006002926          | 0.006695359          | 0.015788051          | 0.007969519 |
| 0.048295961          | 0.004262894          | 0.06003746           | 0.004176517 |
| 0.010177823          | 0.001669883          | 0.039636708          | 0.100113957 |
| 0.032016006          | 0.067587322          | 0.021410477          | 0.049032553 |
| 0.076081991          | 0.002922843          | 0.015856729          | 0.023928964 |
| 0.011369268          | 0.007464892          | 0.103584999          | 0.006297313 |
| 0.024028098          | 0.094602409          | 0.043398669          | 3.80E-05    |
| 0.081169008          | 0.066232883          | 1.70E-05 0.148330318 |             |
| 0.017764275          | 3.80E-05 0.009971031 | 0.047000742          |             |
| 0.018970855          | 0.011573803          | 0.000423308          | 0.010288643 |
| 0.064053843          | 0.103327042          | 0.04806311           | 0.041921234 |
| 0.008251204          | 0.101827449          | 0.00445884           | 0.070724737 |
| 0.002933964          | 0.133494142          | 0.084208353          | 0.001046963 |
| 0.000581774          | 0.019607828          | 0.019412245          | 0.022804448 |
| 0.023621015          | 0.016002829          | 8.12E-07 0.009678204 |             |
| 0.030734445          | 0.006447332          | 0.008378864          | 0.03273003  |
| 0.185513139          | 0.135389315          | 0.002100913          | 0.170536734 |
| 0.006096611          | 0.03137322           | 0.005595955          | 0.008552404 |
| 0.003957432          | 0.01049137           | 0.001691448          | 0.018653652 |
| 0.069773733          | 0.005452081          | 0.042921502          | 0.003954152 |
| 0.020364988          | 0.114290843          | 0.008542523          | 0.009414916 |
| 0.002784903          | 0.034534873          | 0.02951243           | 0.001484084 |
| 0.005626587          | 0.016704131          | 0.008774635          | 0.005534987 |
| 0.081931987          | 0.007296916          | 0.065708799          | 0.000584603 |
| 0.086141748          | 0.004377008          | 0.016678141          | 0.007062043 |
| 0.012227264          | 0.055136188          | 0.0270534            | 0.00029522  |
| 0.109448816          | 0.033262077          | 0.025869696          | 0.068374557 |
| 0.03155939           | 0.013134189          | 0.065421477          | 0.008989251 |
| 0.000679047          | 0.02793876           | 0.06969273           | 0.141416737 |
| 0.057126279          | 0.018946774          | 0.034090181          | 0.033092303 |
| 0.007090222          | 0.00048623           | 0.026083284          | 0.034129104 |
| 0.055902127          | 0.011911082          | 0.019892004          | 0.000466821 |
| 0.00036743           | 0.01747303           | 0.009986149          | 0.024671977 |
| 0.007442211          | 0.007248204          | 0.001779418          | 0.110690112 |

|             |             |             |             |
|-------------|-------------|-------------|-------------|
| 0.021420889 | 0.000370719 | 0.03923259  | 0.008933314 |
| 0.000979558 | 0.007226722 | 0.004391238 | 0.01653956  |
| 0.098745804 | 0.001524326 | 0.001845015 | 0.001662408 |
| 0.05807839  | 0.154740293 | 0.031035962 | 8.21E-06    |
| 0.037192016 | 0.020431366 | 0.050798389 | 0.015109758 |
| 0.021677366 | 0.067941742 | 0.063539757 | 0.022600795 |
| 0.015971535 | 0.002095597 | 0.005219238 | 0.002703707 |
| 0.104696342 | 0.0095781   | 0.107051829 | 0.006122393 |
| 0.001523833 | 0.015474348 | 0.180272996 | 7.80E-05    |
| 0.048251998 | 0.011602232 | 0.037308113 | 2.39E-06    |
| 0.016762615 | 0.002530046 | 8.61E-05    | 0.028539427 |
| 0.030473839 | 0.022305507 | 0.012137148 | 0.062485833 |
| 0.004317787 | 5.98E-05    | 0.008834102 | 0.000344897 |
| 0.011713143 | 0.007581686 | 0.00247988  | 0.002616282 |
| 0.024826459 | 0.029419896 | 0.04659114  | 0.120551096 |
| 0.000454631 | 0.008352276 | 0.000137166 | 0.009938869 |
| 0.008063601 | 0.038243566 | 0.084330792 | 0.033695327 |
| 0.007428975 | 0.015766478 | 0.048506218 | 0.071544203 |
| 0.024412103 | 1.73E-05    | 0.005573431 | 0.009558049 |
| 0.002333887 | 0.006570879 | 0.015969245 | 0.005768429 |
| 0.111669366 | 0.067073653 | 2.17E-05    | 0.144617272 |
| 0.037731792 | 0.031782035 | 0.014447605 | 0.124800523 |
| 0.054024597 | 0.050068935 | 0.038732254 | 0.117074393 |
| 0.040064899 | 0.138757305 | 4.71E-05    | 0.002022536 |
| 0.081478812 | 0.044897014 | 0.085593608 | 0.014646286 |
| 0.001981676 | 0.010488106 | 0.075410411 | 0.024703318 |
| 0.011876968 | 0.09690988  | 0.004225445 | 0.005304693 |
| 0.000341032 | 0.000564162 | 0.017831228 | 0.047842349 |
| 0.066593539 | 0.112967432 | 0.150250752 | 0.035556243 |
| 0.021828212 | 0.012703137 | 0.001800264 | 0.096962917 |
| 0.036115259 | 0.072413206 | 0.000518854 | 0.046026542 |
| 0.052252195 | 0.048557243 | 0.01427661  | 0.021361035 |
| 0.001065288 | 0.008598311 | 0.013371049 | 0.013013134 |
| 0.010865372 | 0.008353071 | 0.065997187 | 0.041922015 |
| 0.098442053 | 0.000158775 | 0.000596748 | 0.080924112 |
| 0.000758284 | 0.124367449 | 0.001404259 | 0.030643813 |
| 1.53E-05    | 0.035091684 | 0.027507837 | 0.027766886 |
| 0.001865679 | 0.01136775  | 2.12E-07    | 0.019925117 |
| 0.028078393 | 0.058099846 | 0.074978303 | 0.02005202  |
| 0.015256011 | 0.020895862 | 0.013167844 | 0.049831308 |
| 0.005748991 | 0.01365438  | 1.86E-05    | 0.016260812 |
| 0.049344056 | 0.003521646 | 0.004791161 | 0.128045996 |
| 0.008294795 | 0.039955934 | 0.002283496 | 0.159687094 |
| 0.057537841 | 0.010146111 | 0.009598004 | 0.013090912 |
| 0.007644164 | 0.017343343 | 0.010233966 | 0.012823098 |
| 0.00666389  | 0.012414591 | 0.005371194 | 0.002995162 |
| 0.075499425 | 0.005810795 | 0.057903687 | 4.85E-05    |
| 0.000250069 | 0.000292907 | 0.066554443 | 0.037117657 |
| 0.025557786 | 0.018190491 | 0.003423885 | 0.10938672  |
| 0.116003873 | 0.000145384 | 0.010304069 | 0.056626787 |
| 1.81E-05    | 0.019721742 | 0.007308906 | 0.000506572 |
| 0.045875625 | 0.0713736   | 0.000572723 |             |
| BCL2L1      | 0.000612769 | 0.005463975 | 3.05E-05    |
| 0.00053677  | 0.001087946 | 0.002003578 | 0.000623511 |



1.44E-05 0.003826499 0.001890134 6.77E-08 0.004666014  
3.83E-08 1.36E-06 0.005272857 0.006228874 0.002541162  
0.003881161 0.000241903 0.008906838 0.000679791  
0.004565235 0.001137186 4.84E-07 0.001876724  
0.032505535 0.000610915 0.004990555 0.000153808  
0.000920298 0.004097483 0.010073512 0.005832364  
0.001961113 0.048455767 0.003158255 0.00054595  
0.010730258 0.00385926 0.003372075 0.007187367  
1.10E-07 1 0.000367891 0.000499315 0.00120777  
0.000123842 0.00083489 0.000104484 0.004889835  
0.001464821 0.001754031 0.000877237 0.00678463  
0.003580278 0.057117127 0.003774664 8.75E-05 2.04E-05  
0.000275443 0.001199742 0.001735435 0.001330654  
0.003904051 0.005492245 5.49E-05 0.000129017  
0.00142786 0.008847166 0.017741428 0.004171078  
0.000927203 0.000951695 0.0041647 0.00711944  
0.003890255 0.000438116 4.75E-05 8.19E-08 0.001751193  
0.027690812 0.000750639 0.00771809 0.001988888  
0.001120062 0.002795652 0.00424655 4.01E-07  
0.000943473 0.005759446 0.000200698 0.003207764  
3.65E-05 1.85E-05 0.003115655 0.00563371 0.001786738  
0.000265446 1.22E-07 1.24E-05 9.07E-06 0.00512582  
0.000862598 0.002893837 0.003215073 0.000247289  
0.007024567 3.51E-05 0.000628611 0.004609775  
0.004662832 1.18E-08 1.22E-05 0.000751002 0.000783393  
0.003812065 0.000866446 6.68E-05 9.38E-05 7.50E-10  
0.005127291 3.95E-05 0.002077155 0.001193145  
0.000926261 0.018110912 0.00038941 0.002429729  
0.000484091 0.002120782 0.011100792 0.002520457  
0.015713203 0.006338899 0.006427438 5.23E-05 8.25E-05  
0.005033025 0.001590281 2.57E-05 2.47E-05 0.001507998  
0.008099261 0.005019958 0.005212032 8.49E-05  
0.004863994 0.000150178 0.004032162 0.006641571  
0.000719152 0.000255249 1.65E-05 0.000955392  
0.003143928 6.48E-05 2.89E-05 0.002159104 0.015591935  
0.000423116 0.002942864 0.005085367 0.002555627  
0.027304823 0.009975712 0.002559169 0.000391386  
0.002126064 0.001284428 0.012892811 0.000747035  
0.006788457 4.14E-05 0.008195808 0.000103093  
0.000438837 0.000939328 7.90E-05 0.000884075  
0.000187576 0.005558789 0.001105044 0.0026066  
0.128027659 0.0053328 0.000860228 0.001693109  
0.002607039 0.006229471 7.77E-05 0.000206551  
0.000900781 7.63E-05 0.004365643 0.001070095  
0.001449347 0.001356085 3.82E-07 4.88E-05 0.011117183  
0.001087822 7.94E-07 0.002579744 2.84E-05 2.16E-06  
0.006102947 0.000395725 0.009047719 6.18E-08 2.86E-05  
0.00042662 0.006811715 0.011159411 7.76E-05  
0.010343958 0.001345656 0.006031073 0.001907397  
0.000823027 0.003030006 4.06E-05 0.000138422  
0.005464754 0.007501922 0.008826153 0.005349496  
0.000826921 0.000605336 0.000178047 0.000804822  
0.000674389 0.000706505 2.13E-05 0.004177177 2.69E-07  
0.000763637 0.009612824 4.13E-05 0.00668992

|             |             |             |             |             |          |
|-------------|-------------|-------------|-------------|-------------|----------|
| 0.002199499 | 1.22E-05    | 7.91E-05    | 0.004035871 | 0.00366118  |          |
| 0.001352431 | 0.006855251 | 5.17E-05    | 4.82E-08    | 0.002454472 |          |
| 0.002174554 | 0.005996048 | 0.001399801 | 0.013864323 |             |          |
| 2.47E-06    | 0.005027751 | 0.000556415 | 0.004412086 |             |          |
| 0.002573432 | 0.006768042 | 0.003629329 | 0.000142722 |             |          |
| 0.000593704 | 1.52E-06    | 0.001231771 | 0.005510702 |             |          |
| 0.001878262 | 0.007138117 | 5.80E-05    | 0.008803827 |             |          |
| 0.000789039 | 0.008974654 | 0.000669738 | 0.036630177 |             |          |
| 0.000236639 | 0.000253193 | 0.005198031 | 0.00020276  |             |          |
| 0.001891512 | 0.00504951  | 0.000527074 | 0.008877733 |             |          |
| 0.003929167 | 0.000488023 | 0.002932612 | 0.005800682 |             |          |
| 0.00222943  | 7.90E-08    | 0.008697129 | 0.009594532 |             |          |
| 0.001104084 | 0.008471327 | 0.000985591 | 0.000121753 |             |          |
| 0.007755469 | 1.57E-07    | 0.000130306 | 0.039849273 |             |          |
| 0.002550444 | 0.008674307 | 4.06E-06    | 0.000967802 |             |          |
| 0.00453035  | 0.008815501 | 8.12E-06    | 0.004453639 |             |          |
| 0.003647989 | 0.007565808 | 0.002339051 | 0.001565976 |             |          |
| 0.009569988 | 0.035451863 | 0.000263304 | 0.000824439 |             |          |
| 0.009054727 | 0.002362368 | 3.32E-06    | 0.015965268 |             |          |
| 0.003858639 | 0.003116818 | 0.003015135 | 0.00043978  |             |          |
| 0.000459451 | 0.002793811 | 0.03036314  | 0.011023935 |             |          |
| 7.25E-06    | 0.001665592 | 0.001778407 | 0.003974777 |             |          |
| 0.007232409 | 0.002488053 | 0.003324966 | 0.002402326 |             |          |
| 0.004950474 | 0.004165188 | 0.007785862 | 0.005973176 |             |          |
| 6.63E-05    | 0.001913265 | 0.007300418 | 0.019171765 |             |          |
| 0.000835405 | 0.00076298  | 0.064513034 | 0.000519609 |             |          |
| 0.000236173 | 0.005482853 | 0.009359242 | 7.08E-05    | 1.40E-05    |          |
| 0.004275276 | 0.000203629 | 0.000210134 | 0.000336795 |             |          |
| 0.000602887 | 0.001958438 | 1.34E-05    | 0.001170803 |             |          |
| 0.004504773 | 0.001768781 | 0.006907659 | 0.016825434 |             |          |
| 0.006345374 | 1.88E-06    | 0.001722632 | 0.000182078 |             |          |
| 0.000284679 | 0.006711947 | 0.00445082  | 1.78E-05    |             |          |
| 0.000476771 | 1.56E-05    | 0.005212472 | 0.002648745 | 5.21E-05    |          |
| 0.000126449 | 0.002096686 | 0.006618279 | 0.006431122 |             |          |
| 0.00185074  | 0.000696996 | 0.000296028 | 0.00255242  |             |          |
| 0.021543888 | 0.002901182 | 0.000450865 | 0.001557772 |             |          |
| 0.003465905 | 0.003809423 | 1.11E-05    | 0.005818066 |             |          |
| 0.005754684 | 7.97E-05    | 0.01711883  | 0.004782249 |             |          |
| 0.000198536 | 0.00433843  | 5.12E-05    | 0.000433788 | 1.33E-08    |          |
| 0.000591223 | 0.020194581 | 0.001086525 | 0.000167278 |             |          |
| 0.000399503 | 0.01122586  | 0.004196163 | 0.001339138 |             |          |
| 0.00271041  | 0.000725029 | 0.00469374  | 0.003364865 |             |          |
| 0.005024767 | 1.56E-06    | 0.001065318 | 0.001193904 |             |          |
| 0.001310728 | 0.001198659 | 3.37E-05    | 0.006135917 |             |          |
| 0.00168666  | 0.011440502 | 0.009523078 | 0.002754616 |             |          |
| 0.006520326 | 0.000107462 | 0.008319456 | 0.000383631 |             |          |
| 0.000530663 | 0.000105592 | 0.001697986 | 8.25E-06    | 9.07E-05    |          |
| 1.01E-05    | 0.010473062 | 0.000123148 | 0.008320861 |             |          |
| 0.000250018 | 6.36E-05    | 0.001850014 | 0.002114857 |             |          |
| 0.008597216 | 0.005613571 | 0.006197891 | 0.00067173  |             |          |
| 0.002171556 | 0.000130143 | 0.000191691 | 0.064444128 |             |          |
| 0.010265632 | 0.017548865 | 0.000801768 | 0.001227813 |             |          |
| 0.002141937 | 0.004994604 | 8.04E-05    | 5.95E-05    | 1.78E-05    | 6.36E-05 |
| 0.00177552  | 0.003239267 | 0.005941508 | 0.002208483 |             |          |

|             |             |             |             |             |
|-------------|-------------|-------------|-------------|-------------|
| 0.000319075 | 4.67E-09    | 4.12E-05    | 0.001508848 | 0.001965975 |
| BEX2        | 0.052725315 | 0.180505824 | 0.181097425 |             |
| 0.015522812 | 0.138144475 | 0.342101147 | 0.325970326 |             |
| 0.035345622 | 0.123420276 | 0.131989027 | 0.333530319 |             |
| 0.002145677 | 0.041825621 | 0.041295272 | 0.087427616 |             |
| 0.102701708 | 0.105892282 | 0.219296967 | 0.105392133 |             |
| 0.073590484 | 0.061176782 | 0.167614774 | 0.162450936 |             |
| 0.28162986  | 0.006613745 | 0.233521271 | 0.056704355 |             |
| 0.024644477 | 0.083416061 | 0.210465267 | 0.087414279 |             |
| 0.085158356 | 0.070926645 | 0.042404328 | 0.056035635 |             |
| 0.007643098 | 0.235391493 | 0.003461544 | 0.056379793 |             |
| 0.044804438 | 0.162593033 | 0.078016528 | 0.058909083 |             |
| 0.000367891 | 1           | 0.018501358 | 0.159421862 |             |
| 0.079045059 | 0.30914662  | 0.244163468 | 0.219796792 |             |
| 0.002107497 | 0.300735782 | 0.114324279 | 0.001977569 |             |
| 0.30092826  | 0.003703888 | 0.253896689 | 0.026425874 |             |
| 0.181413846 | 0.127550877 | 0.032257672 | 0.124297487 |             |
| 0.381966946 | 0.286449163 | 0.143408458 | 0.140279818 |             |
| 0.258414344 | 0.05622864  | 0.050475057 | 0.117847183 |             |
| 0.157725906 | 0.065085232 | 0.109496279 | 0.018099612 |             |
| 0.066106918 | 0.050621251 | 0.275631883 | 0.142503375 |             |
| 0.00304326  | 0.299026755 | 0.050836987 | 0.047659637 |             |
| 0.030407484 | 0.302372146 | 0.055492992 | 0.145183864 |             |
| 0.046529649 | 0.113570389 | 0.161956245 | 0.127395307 |             |
| 0.027126325 | 0.057706424 | 0.006832899 | 0.132064442 |             |
| 0.085378862 | 0.060323274 | 0.09509501  | 0.175460372 |             |
| 0.091216577 | 0.12087622  | 0.015453269 | 0.03773031  |             |
| 0.092039692 | 0.0795932   | 0.293641457 | 0.001847362 |             |
| 0.029659623 | 0.072551132 | 0.082955674 | 0.24356083  |             |
| 0.131124049 | 0.029703738 | 0.09067353  | 0.340365009 |             |
| 0.035126495 | 0.059279967 | 0.300070445 | 0.002718506 |             |
| 0.014964125 | 0.003555413 | 0.080344008 | 0.118547133 |             |
| 0.183735024 | 0.286060126 | 0.081285709 | 0.084146473 |             |
| 0.026189088 | 0.067016915 | 0.161472876 | 0.24401043  |             |
| 0.052203996 | 0.318481002 | 0.076584303 | 0.080997876 |             |
| 0.035537945 | 0.060000346 | 0.149559337 | 0.204703485 |             |
| 0.235598429 | 0.181694627 | 0.1572098   | 0.281272045 |             |
| 0.032413039 | 0.102864507 | 0.142748995 | 0.051392773 |             |
| 0.108116055 | 0.174683008 | 0.044245934 | 0.210057834 |             |
| 0.314268612 | 0.092103188 | 0.00189547  | 0.267458288 |             |
| 0.308971826 | 0.002997623 | 0.176486119 | 0.084786113 |             |
| 0.033399658 | 0.111780263 | 0.205251243 | 0.131503685 |             |
| 0.078525511 | 0.050910241 | 0.113542686 | 0.258619585 |             |
| 0.183770724 | 0.244941173 | 0.124819804 | 0.092098171 |             |
| 0.254677658 | 0.042532291 | 0.197857163 | 0.031973364 |             |
| 0.250354161 | 0.169873535 | 0.010252794 | 0.008845479 |             |
| 0.064443946 | 0.047125217 | 0.153073306 | 0.090068266 |             |
| 0.063639154 | 0.003237777 | 0.124865593 | 0.070904584 |             |
| 0.038436908 | 0.049600399 | 0.209272702 | 0.271863654 |             |
| 0.220369532 | 0.012522577 | 0.241827845 | 0.07817515  |             |
| 0.089863244 | 0.076805316 | 0.092440255 | 0.007485904 |             |
| 0.144181717 | 0.022014363 | 0.068500549 | 0.065238037 |             |
| 0.120098072 | 0.113843049 | 0.025723903 | 0.135601319 |             |
| 0.282113295 | 0.090971819 | 0.018443486 | 0.005539907 |             |

|             |             |             |             |
|-------------|-------------|-------------|-------------|
| 0.127600411 | 0.215900185 | 0.031075829 | 0.027341595 |
| 0.146972499 | 0.078781897 | 0.04391052  | 0.272498377 |
| 0.09589914  | 0.30861644  | 0.004081438 | 0.099003904 |
| 0.046164691 | 0.12526175  | 0.072677677 | 0.103127019 |
| 0.180968284 | 0.072279856 | 0.013815976 | 0.319694409 |
| 0.107158583 | 0.096407611 | 0.143044252 | 0.180525416 |
| 0.006555203 | 0.222291633 | 0.090374262 | 0.004558148 |
| 0.196836057 | 0.359124052 | 0.148517094 | 0.085741228 |
| 0.109815485 | 0.183323827 | 0.108917333 | 0.060776893 |
| 0.008543444 | 0.029746157 | 0.141767698 | 0.203862529 |
| 0.084511697 | 0.097764303 | 0.018536379 | 0.004838244 |
| 0.129042026 | 0.033526601 | 0.117540227 | 0.047227484 |
| 0.06559168  | 0.022317944 | 0.186535255 | 0.050964698 |
| 0.00183803  | 0.128086266 | 0.065332504 | 0.05293601  |
| 0.069295924 | 0.065569302 | 0.127477458 | 0.295043264 |
| 0.032614837 | 0.019244209 | 0.034985568 | 0.211290223 |
| 0.308653026 | 0.17687801  | 0.001187304 | 0.143353681 |
| 0.129635276 | 0.136088837 | 0.131729965 | 0.124630387 |
| 0.149424605 | 0.28758287  | 0.145878658 | 0.070389146 |
| 0.002177164 | 0.049109328 | 0.034382494 | 0.317059371 |
| 0.080602728 | 0.277402519 | 0.012537231 | 0.023240067 |
| 0.004307819 | 0.253484845 | 0.006752686 | 0.201026843 |
| 0.112606172 | 0.141600827 | 0.000579067 | 0.129694375 |
| 0.033804874 | 0.004569695 | 0.157868291 | 0.172541013 |
| 0.176524742 | 0.098152529 | 0.245828833 | 0.04423758  |
| 0.003581944 | 0.031790084 | 0.050875748 | 0.125852359 |
| 0.044195795 | 0.003720444 | 0.108866388 | 0.128846695 |
| 0.147647751 | 0.258630252 | 0.28476377  | 0.013415571 |
| 0.041616855 | 0.02474873  | 0.107272054 | 0.11714153  |
| 0.166078873 | 0.293004713 | 0.20601686  | 0.062364103 |
| 0.088930489 | 0.254591512 | 0.293754635 | 0.149590951 |
| 0.014504425 | 0.051541439 | 0.068074184 | 0.148905549 |
| 0.03306327  | 0.121116113 | 0.070738155 | 0.362060322 |
| 0.174058754 | 0.016802177 | 0.352891862 | 0.061092405 |
| 0.219341249 | 0.113443867 | 0.178756653 | 0.089360993 |
| 0.273653705 | 0.097584614 | 0.262784698 | 0.114037208 |
| 0.309078333 | 0.002239153 | 0.004860461 | 0.231606659 |
| 0.249557346 | 0.370527668 | 0.103361649 | 0.077402033 |
| 0.085523731 | 0.137094107 | 0.104096942 | 0.113058142 |
| 0.193370067 | 0.037840423 | 0.038295722 | 0.003971305 |
| 0.018751264 | 0.064964717 | 0.281114654 | 0.279523519 |
| 0.190921854 | 0.230978668 | 0.220478436 | 0.206449413 |
| 0.09587047  | 0.034852427 | 0.303164017 | 0.102746343 |
| 0.311197464 | 0.057799329 | 0.20552734  | 0.12183721  |
| 0.149817233 | 0.110247535 | 0.124575768 | 0.004876463 |
| 0.062589615 | 0.117499605 | 0.015298568 | 0.141066654 |
| 0.054295363 | 0.193068386 | 0.260281054 | 0.117896462 |
| 0.023773695 | 0.003736582 | 0.198584067 | 0.019092542 |
| 0.367866625 | 0.011045331 | 0.09568154  | 0.002156381 |
| 0.183901943 | 0.104664883 | 0.10726247  | 0.008582823 |
| 0.105335323 | 0.000627465 | 0.138732912 | 0.130149485 |
| 0.156770744 | 0.236809053 | 0.068676458 | 0.048704139 |
| 0.018083993 | 0.111539099 | 0.213062175 | 0.089750371 |
| 0.117916781 | 0.006657825 | 0.11482232  | 0.068390641 |

|             |             |             |             |
|-------------|-------------|-------------|-------------|
| 0.034679427 | 0.045643879 | 0.307724991 | 0.055621675 |
| 0.243140294 | 0.027970205 | 0.204883391 | 0.055008415 |
| 0.093737504 | 0.050248285 | 0.142603028 | 0.0306331   |
| 0.194947906 | 0.082150258 | 0.066260015 | 0.055078314 |
| 0.101577106 | 0.03982981  | 0.02220156  | 0.313008779 |
| 0.026010397 | 0.068414912 | 0.023722421 | 0.048529963 |
| 0.022661582 | 0.20196897  | 0.112194761 | 0.121553788 |
| 0.114094682 | 0.014230972 | 0.176089115 | 0.10747759  |
| 0.002534683 | 0.047288796 | 0.330997154 | 0.008440376 |
| 0.098854071 | 0.014116746 | 0.005525029 | 0.048153943 |
| 0.242526955 | 0.023748392 |             |             |
| BLVRA       | 0.191205173 | 0.334872734 | 0.020129117 |
| 0.005374325 | 0.01847912  | 0.085880489 | 0.056041541 |
| 0.171079434 | 0.025722323 | 0.024719806 | 0.155466298 |
| 0.003509259 | 0.304595061 | 0.010020465 | 0.018433239 |
| 0.411652239 | 0.39279877  | 0.093558162 | 0.405564834 |
| 0.151509283 | 0.024748174 | 0.223976165 | 0.146696194 |
| 0.078735079 | 0.002208059 | 0.02073139  | 0.007980813 |
| 0.144250314 | 0.414704955 | 0.062045026 | 0.069148916 |
| 0.377295124 | 0.332120594 | 0.073881921 | 0.049824302 |
| 0.047586778 | 0.305489057 | 0.026821669 | 0.253045036 |
| 0.342148125 | 0.039227945 | 0.310752867 | 0.004102535 |
| 0.000499315 | 0.018501358 | 1           | 0.204193132 |
| 0.101920165 | 0.074863448 | 0.053810228 | 0.027369484 |
| 0.06134295  | 0.178651537 | 0.314099065 | 0.068812639 |
| 0.229434791 | 0.000613321 | 0.27104248  | 0.118511289 |
| 0.01513024  | 0.082957696 | 0.131342388 | 0.223099622 |
| 0.090758478 | 0.251116175 | 0.361654333 | 0.006808915 |
| 0.014942691 | 0.163262011 | 0.293253762 | 0.155353132 |
| 0.311280856 | 0.087745131 | 0.052744455 | 0.083504336 |
| 0.237212577 | 0.325912394 | 0.119079308 | 0.049577527 |
| 0.001227703 | 0.029408019 | 0.050665782 | 0.257754079 |
| 0.207067395 | 0.186772584 | 0.238055944 | 0.032592591 |
| 0.165348804 | 0.007071711 | 0.168936307 | 0.386501738 |
| 0.005729589 | 0.295977701 | 0.003448468 | 0.043222448 |
| 0.321594307 | 0.393742422 | 0.24635319  | 0.013368662 |
| 0.005607162 | 0.041646844 | 0.106024333 | 0.369212521 |
| 0.16523387  | 0.147485752 | 0.215148191 | 0.055537415 |
| 0.30749625  | 0.051177598 | 0.068130396 | 0.292449385 |
| 0.367137431 | 0.006913232 | 0.054344149 | 0.078250836 |
| 0.058514468 | 0.018673652 | 0.063834512 | 0.036214893 |
| 0.006574806 | 0.039007795 | 0.377619668 | 0.058374608 |
| 0.015620314 | 0.049320253 | 0.018508423 | 0.172348547 |
| 0.152201643 | 0.381508479 | 0.016580069 | 0.055849155 |
| 0.247473176 | 0.068974601 | 0.10043368  | 0.254549681 |
| 0.065079969 | 0.08854593  | 0.044176897 | 0.271647785 |
| 0.291579198 | 0.015604947 | 0.022049001 | 0.148646279 |
| 0.278513591 | 0.397137184 | 0.393033711 | 0.115740105 |
| 0.042030418 | 0.081756505 | 0.068667937 | 0.155840879 |
| 0.073120779 | 0.171161608 | 0.066929166 | 0.178481126 |
| 0.23982988  | 0.021980433 | 0.015910944 | 0.299859322 |
| 0.006709585 | 0.038575207 | 0.291614614 | 0.251801378 |
| 0.169511277 | 0.006228668 | 0.045117406 | 0.075574631 |
| 0.118074585 | 0.064805483 | 0.200917598 | 0.039865967 |

|             |             |             |             |
|-------------|-------------|-------------|-------------|
| 0.146652261 | 0.070680172 | 0.010932023 | 0.299259575 |
| 0.031589102 | 0.160475305 | 0.07645771  | 0.017259156 |
| 0.227103029 | 0.129347861 | 0.284849182 | 0.198726091 |
| 0.269306814 | 0.000821762 | 0.02704717  | 0.210098571 |
| 0.076638545 | 0.363830902 | 0.31551458  | 0.030227931 |
| 0.113436767 | 0.075022686 | 0.04136194  | 0.051525037 |
| 0.345673482 | 0.049851954 | 0.036815218 | 0.000792436 |
| 0.029526925 | 0.099632313 | 0.125059405 | 0.029437226 |
| 0.042046802 | 0.034686504 | 0.060007064 | 0.31088458  |
| 0.064264128 | 0.261260675 | 0.030641101 | 0.072311339 |
| 0.061596077 | 0.1881299   | 0.095200674 | 0.10540742  |
| 0.223052463 | 0.089095866 | 0.38765214  | 0.21438772  |
| 0.044047441 | 0.171284231 | 0.053312864 | 0.071290789 |
| 0.191727796 | 0.297458051 | 0.304888135 | 0.280839934 |
| 0.059710706 | 0.261228194 | 0.131337834 | 0.123032662 |
| 0.177230289 | 0.16917699  | 0.031827303 | 0.346671768 |
| 0.000618705 | 0.143563171 | 0.148026525 | 0.059422963 |
| 0.309358808 | 0.073366545 | 0.022235177 | 0.09478805  |
| 0.408774613 | 0.345754346 | 0.354061509 | 0.359484318 |
| 0.125377186 | 0.009789892 | 0.374111754 | 0.20042206  |
| 0.405291817 | 0.093197017 | 0.059919419 | 0.041819534 |
| 0.349558394 | 0.205798715 | 0.19460688  | 0.177563832 |
| 0.150590107 | 0.086471749 | 0.080737665 | 0.266226854 |
| 0.010707512 | 0.059854258 | 0.230685634 | 0.030891655 |
| 0.063691232 | 0.047433485 | 0.267057269 | 0.153029564 |
| 0.072745309 | 0.10328582  | 0.060499059 | 0.015102674 |
| 0.048047147 | 0.347337426 | 0.011606993 | 0.359631427 |
| 0.400894928 | 0.133629601 | 0.31334857  | 0.40844991  |
| 0.127006133 | 0.191622767 | 0.317632841 | 0.377186564 |
| 0.002030419 | 0.347859417 | 0.263521564 | 0.189032642 |
| 0.34843355  | 0.11016558  | 0.118425339 | 0.108591914 |
| 0.000669913 | 0.046035197 | 0.06674269  | 0.343633036 |
| 0.314019754 | 0.00529133  | 0.011154039 | 0.268106776 |
| 0.237333636 | 0.015693117 | 0.385601539 | 0.10204813  |
| 0.27976672  | 0.131055651 | 0.034033714 | 0.296351503 |
| 0.063095364 | 0.101032641 | 0.004948756 | 0.180069231 |
| 0.110721646 | 0.046048493 | 0.011426261 | 0.389262432 |
| 0.317067681 | 0.163519349 | 0.084624057 | 0.002723451 |
| 0.35681376  | 0.047210006 | 0.241388425 | 0.042978044 |
| 0.293705307 | 0.170176467 | 0.281621186 | 0.284483795 |
| 0.183771255 | 0.229540782 | 0.205340446 | 0.288166199 |
| 0.022816067 | 0.327637654 | 0.367432376 | 0.014453912 |
| 0.21938211  | 0.322951165 | 0.11557295  | 0.052426002 |
| 0.196348716 | 0.01434799  | 0.07229579  | 0.176889942 |
| 0.266241181 | 0.326417968 | 0.012632285 | 0.068425997 |
| 0.213749362 | 0.070721472 | 0.019683321 | 0.101841851 |
| 0.120102103 | 0.090530622 | 0.070219114 | 0.181700246 |
| 0.281337731 | 0.116077466 | 0.335764925 | 0.027380261 |
| 0.34539311  | 0.019173819 | 0.311277628 | 0.054894727 |
| 0.12253555  | 0.21349074  | 0.355388084 | 0.121103062 |
| 0.007596856 | 0.063124068 | 0.192873587 | 0.233148938 |
| 0.019178578 | 0.067428442 | 0.063418774 | 0.098154875 |
| 0.385465825 | 0.102789323 | 0.111195295 | 0.134684607 |
| 0.228787331 | 0.013566417 | 0.339337662 | 0.140376806 |

|             |             |             |             |
|-------------|-------------|-------------|-------------|
| 0.26896553  | 0.069005997 | 0.266636667 | 0.002018842 |
| 0.215104113 | 0.033677075 | 0.13080918  | 0.091006627 |
| 0.387010578 | 0.03075112  | 0.151309543 | 0.049621044 |
| 0.043000725 | 0.003606183 | 0.204989512 | 0.091545911 |
| 0.125125691 | 0.112445528 | 0.144696865 | 0.041584896 |
| 0.368863488 | 0.17666297  | 0.288741145 | 0.077385308 |
| 0.079134005 | 0.004128501 | 0.024820329 | 0.011404791 |
| 0.249972922 | 0.203790945 | 0.227141108 | 0.16268003  |
| 0.113200606 | 0.17119398  | 0.181003329 | 0.092734267 |
| 0.307427352 | 0.077816456 | 0.391182559 | 0.086215706 |
| 0.315441228 | 0.105974783 | 0.091819371 | 0.087391704 |
| 0.033950913 | 0.033492926 | 0.02324277  | 0.074325769 |
| 0.341920055 | 0.07497371  | 0.102138956 | 0.111849327 |
| 0.010550404 | 0.088132397 | 0.289291454 | 0.254201835 |
| 0.184442676 | 0.269126639 | 0.139878934 | 0.213039323 |
| 0.07920211  | 0.092629263 | 0.008265316 | 0.003809582 |
| 0.046150712 | 0.038213843 | 0.341340865 | 0.333403452 |
| 0.378420115 | 0.093224382 | 0.022435721 | 0.048547864 |
| 0.041921226 | 0.321590399 | 0.082239704 | 0.034703305 |
| 0.16870402  | 0.086334669 | 0.000592861 | 0.092798291 |
| 0.191381051 | 0.097487095 |             |             |
| BSCl2       | 0.265272689 | 0.456493748 | 0.149829544 |
| 0.022254314 | 0.104515928 | 0.278314538 | 0.232976676 |
| 0.252704244 | 0.194797153 | 0.177843225 | 0.340773672 |
| 0.010758156 | 0.245530968 | 0.065474987 | 0.118153353 |
| 0.428026989 | 0.422120372 | 0.260863201 | 0.42114923  |
| 0.298812901 | 0.125079758 | 0.334102215 | 0.304975822 |
| 0.281275394 | 0.014485285 | 0.159624078 | 0.059325722 |
| 0.210512987 | 0.395439424 | 0.2779254   | 0.275040955 |
| 0.384599367 | 0.326135767 | 0.240300171 | 0.169844963 |
| 0.091066386 | 0.465427215 | 0.037768024 | 0.247572552 |
| 0.283150718 | 0.220567159 | 0.330968039 | 0.048026804 |
| 0.00120777  | 0.159421862 | 0.204193132 | 1           |
| 0.281525991 | 0.274770181 | 0.251530085 | 0.185359337 |
| 0.066524235 | 0.35753984  | 0.364247418 | 0.058492787 |
| 0.421056878 | 0.004143312 | 0.453391515 | 0.246493178 |
| 0.14693866  | 0.303180057 | 0.223296891 | 0.311293633 |
| 0.269672769 | 0.440677245 | 0.442278994 | 0.074268254 |
| 0.151619744 | 0.260838257 | 0.275748536 | 0.256614401 |
| 0.420652526 | 0.271832367 | 0.256549593 | 0.15343396  |
| 0.268085076 | 0.287373967 | 0.296835614 | 0.236695943 |
| 0.005840089 | 0.187073846 | 0.175962802 | 0.245295444 |
| 0.177319373 | 0.371943756 | 0.248507222 | 0.204009708 |
| 0.25121261  | 0.075093875 | 0.321086155 | 0.443961417 |
| 0.032139837 | 0.269440825 | 0.011706767 | 0.212003014 |
| 0.343692081 | 0.349479088 | 0.31046428  | 0.137439831 |
| 0.056823599 | 0.21860066  | 0.18613213  | 0.275773803 |
| 0.295323112 | 0.279742252 | 0.406884851 | 0.054101067 |
| 0.222439181 | 0.257435523 | 0.272688536 | 0.464071567 |
| 0.437715193 | 0.03058035  | 0.243528063 | 0.265784086 |
| 0.184959934 | 0.101454024 | 0.248624762 | 0.034753844 |
| 0.02257084  | 0.039083783 | 0.372347724 | 0.263927537 |
| 0.141699511 | 0.245764276 | 0.096307473 | 0.230553608 |
| 0.231863616 | 0.350244004 | 0.116859607 | 0.257931455 |

|             |             |             |             |
|-------------|-------------|-------------|-------------|
| 0.237826776 | 0.247811196 | 0.230235168 | 0.29026103  |
| 0.173734927 | 0.282560898 | 0.255067175 | 0.40718855  |
| 0.447846319 | 0.136098017 | 0.179550487 | 0.316721066 |
| 0.217580156 | 0.415152502 | 0.465490199 | 0.279321147 |
| 0.191445378 | 0.287871826 | 0.24634432  | 0.286239802 |
| 0.258504664 | 0.280363672 | 0.047547875 | 0.33622552  |
| 0.441958051 | 0.030939063 | 0.155395844 | 0.331575876 |
| 0.028113513 | 0.20987436  | 0.444488032 | 0.3400956   |
| 0.245039527 | 0.051963427 | 0.223110821 | 0.272666857 |
| 0.316618713 | 0.26774069  | 0.295470779 | 0.203065988 |
| 0.320501394 | 0.239931256 | 0.109854549 | 0.226228233 |
| 0.211841305 | 0.316945309 | 0.167718918 | 0.05079213  |
| 0.246801579 | 0.275564469 | 0.397542909 | 0.283444933 |
| 0.283271323 | 0.003333672 | 0.177717395 | 0.281530173 |
| 0.254445975 | 0.290922403 | 0.462360034 | 0.199567783 |
| 0.300461133 | 0.140076206 | 0.231266773 | 0.199902263 |
| 0.356481665 | 0.232355642 | 0.217100794 | 0.007649788 |
| 0.184371717 | 0.201778738 | 0.263934398 | 0.146176577 |
| 0.201102023 | 0.22720868  | 0.139389537 | 0.392056893 |
| 0.269758966 | 0.296893809 | 0.072996214 | 0.091619084 |
| 0.295086958 | 0.329814531 | 0.225285689 | 0.263897798 |
| 0.325829834 | 0.29007745  | 0.304589248 | 0.402900925 |
| 0.195621047 | 0.362350859 | 0.076968977 | 0.293764006 |
| 0.218185692 | 0.378063968 | 0.315108948 | 0.318124781 |
| 0.285994705 | 0.264518881 | 0.181360654 | 0.304588603 |
| 0.303674604 | 0.279855872 | 0.196534118 | 0.458076142 |
| 0.00697003  | 0.309912997 | 0.252948358 | 0.091090012 |
| 0.447017457 | 0.245882148 | 0.170670131 | 0.297207093 |
| 0.430064046 | 0.461102994 | 0.385733321 | 0.32673686  |
| 0.150627773 | 0.051391307 | 0.445067002 | 0.353647213 |
| 0.39333389  | 0.274896731 | 0.131608533 | 0.052437922 |
| 0.409304004 | 0.194872586 | 0.290913837 | 0.252937449 |
| 0.220867092 | 0.172615075 | 0.278980853 | 0.238856573 |
| 0.020954793 | 0.292616584 | 0.25370567  | 0.146102186 |
| 0.247945829 | 0.223611874 | 0.351821923 | 0.317728417 |
| 0.19316751  | 0.240352789 | 0.185390434 | 0.140036784 |
| 0.235748674 | 0.467695084 | 0.014329792 | 0.435912077 |
| 0.449389221 | 0.286231716 | 0.391789831 | 0.448421824 |
| 0.324845708 | 0.371018726 | 0.412016923 | 0.34781845  |
| 0.005660119 | 0.295393409 | 0.210991616 | 0.381878269 |
| 0.357970945 | 0.304921686 | 0.150375083 | 0.177015375 |
| 0.003803932 | 0.246658526 | 0.106914678 | 0.477133767 |
| 0.363357843 | 0.070497043 | 0.01085222  | 0.337527758 |
| 0.194200777 | 0.028675974 | 0.474791657 | 0.296910977 |
| 0.396318965 | 0.261051718 | 0.220409783 | 0.255602309 |
| 0.085528029 | 0.23151369  | 0.033980378 | 0.270767165 |
| 0.210375835 | 0.064562292 | 0.086104969 | 0.448735831 |
| 0.409090936 | 0.316714249 | 0.281510112 | 0.026079931 |
| 0.28861875  | 0.129097139 | 0.308258224 | 0.165993176 |
| 0.391152321 | 0.355322888 | 0.41340596  | 0.28245684  |
| 0.267048755 | 0.395785261 | 0.396934084 | 0.391039993 |
| 0.059218289 | 0.290926741 | 0.342916333 | 0.103144298 |
| 0.20800664  | 0.390241704 | 0.238325919 | 0.232616521 |
| 0.320906588 | 0.044845586 | 0.265396598 | 0.269412326 |



|             |             |             |             |
|-------------|-------------|-------------|-------------|
| 0.410843869 | 0.388842278 | 0.139266634 | 0.240054416 |
| 0.399284217 | 0.289261224 | 0.168272038 | 0.280490631 |
| 0.299927007 | 0.079829663 | 0.083805468 | 0.341150461 |
| 0.454759714 | 0.292216486 | 0.38620373  | 0.142070797 |
| 0.349914221 | 0.133765655 | 0.349085105 | 0.24005529  |
| 0.309383665 | 0.211863505 | 0.276469372 | 0.097857658 |
| 0.054890402 | 0.239466921 | 0.372364181 | 0.420577838 |
| 0.164214181 | 0.273078647 | 0.265974564 | 0.262251961 |
| 0.401471455 | 0.251116907 | 0.296020148 | 0.295497851 |
| 0.428874964 | 0.081816594 | 0.481561944 | 0.325996982 |
| 0.384082064 | 0.275000823 | 0.34552435  | 0.012352539 |
| 0.237796816 | 0.202845337 | 0.159961374 | 0.241620017 |
| 0.333028373 | 0.21532133  | 0.30317951  | 0.260875739 |
| 0.112839984 | 0.009765164 | 0.335598459 | 0.144224227 |
| 0.316660333 | 0.162812556 | 0.302837995 | 0.05335388  |
| 0.489703378 | 0.315402614 | 0.359911449 | 0.121554871 |
| 0.281532804 | 0.004752774 | 0.181734698 | 0.107047327 |
| 0.37185318  | 0.364834977 | 0.258048082 | 0.266314225 |
| 0.209255662 | 0.248979846 | 0.317205971 | 0.22578639  |
| 0.376120372 | 0.096447547 | 0.431394425 | 0.268106906 |
| 0.247838305 | 0.276264508 | 0.280915354 | 0.256256564 |
| 0.199121199 | 0.123434768 | 0.194993326 | 0.24457833  |
| 0.370970675 | 0.213478976 | 0.256008119 | 0.292205843 |
| 0.10448865  | 0.282388177 | 0.287010608 | 0.261114952 |
| 0.282663523 | 0.239711176 | 0.222819983 | 0.407883814 |
| 0.239490812 | 0.302924283 | 0.038470233 | 0.037869621 |
| 0.144333629 | 0.250823013 | 0.38784635  | 0.379915478 |
| 0.419848416 | 0.179142799 | 0.185866127 | 0.241164079 |
| 0.048638935 | 0.281407873 | 0.253613565 | 0.060324985 |
| 0.257013253 | 0.183357496 | 0.004333196 | 0.273056223 |
| 0.362724655 | 0.220157397 |             |             |
| BTBD10      | 0.198706267 | 0.364619471 | 0.083935171 |
| 0.003519013 | 0.045109878 | 0.217356381 | 0.147187149 |
| 0.14781831  | 0.130246851 | 0.051889246 | 0.294715429 |
| 0.016512894 | 0.214758109 | 0.07863265  | 0.146940637 |
| 0.341678121 | 0.339407746 | 0.178089173 | 0.368221697 |
| 0.220423789 | 0.030511794 | 0.346137104 | 0.180712801 |
| 0.193483682 | 0.023925385 | 0.061998241 | 0.009154655 |
| 0.120610242 | 0.325881539 | 0.184698886 | 0.097620052 |
| 0.310899846 | 0.244693536 | 0.081190297 | 0.065704775 |
| 0.025767915 | 0.402508773 | 0.022194145 | 0.188254461 |
| 0.248084062 | 0.079571589 | 0.254961145 | 0.049094256 |
| 0.000123842 | 0.079045059 | 0.101920165 | 0.281525991 |
| 1           | 0.189906715 | 0.195354695 | 0.06762826  |
| 0.020163368 | 0.328878758 | 0.379821899 | 0.018119061 |
| 0.355184582 | 0.000487603 | 0.381256401 | 0.165855087 |
| 0.10581983  | 0.192068656 | 0.124749289 | 0.260421789 |
| 0.23542189  | 0.367125549 | 0.361476721 | 0.029230524 |
| 0.082679258 | 0.166470104 | 0.193948522 | 0.148207624 |
| 0.34681168  | 0.095663198 | 0.104904472 | 0.06814335  |
| 0.190575727 | 0.244734418 | 0.30550463  | 0.180720399 |
| 0.004660716 | 0.085420859 | 0.054835788 | 0.247866062 |
| 0.128022661 | 0.32182998  | 0.20818214  | 0.080352623 |
| 0.119069955 | 0.063764855 | 0.262873757 | 0.358046541 |

|             |             |             |             |
|-------------|-------------|-------------|-------------|
| 0.00896351  | 0.24347657  | 0.007584111 | 0.181942919 |
| 0.289676397 | 0.280640606 | 0.262212658 | 0.054114537 |
| 0.063737561 | 0.20524833  | 0.134059934 | 0.231655348 |
| 0.212590076 | 0.161104494 | 0.349804755 | 0.041032921 |
| 0.182169837 | 0.15003686  | 0.148129548 | 0.370284578 |
| 0.344974655 | 0.055466041 | 0.228464882 | 0.202809069 |
| 0.081658812 | 0.033185139 | 0.169805105 | 0.009527484 |
| 0.005221384 | 0.06342167  | 0.299820854 | 0.17017954  |
| 0.050508895 | 0.132674638 | 0.03255512  | 0.148159947 |
| 0.123430234 | 0.32141288  | 0.056200011 | 0.128867785 |
| 0.169265716 | 0.164439336 | 0.091571899 | 0.216373424 |
| 0.068447522 | 0.213275471 | 0.160063612 | 0.337320527 |
| 0.43279673  | 0.073113457 | 0.098357186 | 0.270978397 |
| 0.174939976 | 0.332078197 | 0.376923006 | 0.188309128 |
| 0.073344741 | 0.216140849 | 0.076357362 | 0.202564523 |
| 0.208067342 | 0.272828307 | 0.037707873 | 0.352221941 |
| 0.37623242  | 0.012529304 | 0.09751343  | 0.298029158 |
| 0.007254548 | 0.102858218 | 0.380816384 | 0.275321456 |
| 0.192181306 | 0.007748652 | 0.06668455  | 0.157575875 |
| 0.254324808 | 0.135409977 | 0.277454668 | 0.055609625 |
| 0.306004039 | 0.070202258 | 0.064663109 | 0.179670496 |
| 0.130026102 | 0.306738679 | 0.059968279 | 0.022310312 |
| 0.251809232 | 0.177112173 | 0.303144584 | 0.242442184 |
| 0.232802887 | 0.000279035 | 0.048700575 | 0.231210911 |
| 0.080916079 | 0.272724652 | 0.363482989 | 0.140103261 |
| 0.297632546 | 0.077136651 | 0.174361246 | 0.083347853 |
| 0.369051493 | 0.071760769 | 0.072379235 | 0.003734436 |
| 0.098476332 | 0.061267635 | 0.16324784  | 0.151612637 |
| 0.072662462 | 0.125918679 | 0.18790264  | 0.300538638 |
| 0.182160844 | 0.226547912 | 0.104931801 | 0.099216167 |
| 0.144916989 | 0.249707408 | 0.067002749 | 0.1334201   |
| 0.233645102 | 0.103752925 | 0.244045464 | 0.371395469 |
| 0.0994624   | 0.287835013 | 0.06080499  | 0.190792015 |
| 0.141503925 | 0.290126354 | 0.227428685 | 0.263538829 |
| 0.126709837 | 0.30881227  | 0.080649116 | 0.281932309 |
| 0.2620745   | 0.232898221 | 0.126853134 | 0.389158134 |
| 0.007138051 | 0.287318957 | 0.143571733 | 0.069417125 |
| 0.341589336 | 0.176539367 | 0.12910389  | 0.210493541 |
| 0.373196256 | 0.404870835 | 0.387720087 | 0.248169098 |
| 0.078725845 | 0.078173188 | 0.405528454 | 0.313548656 |
| 0.317225405 | 0.140705835 | 0.046420052 | 0.075791337 |
| 0.332158768 | 0.198194124 | 0.206944201 | 0.145889876 |
| 0.145029116 | 0.077828115 | 0.238806213 | 0.269788571 |
| 0.015369854 | 0.116198899 | 0.176658683 | 0.047269986 |
| 0.079626463 | 0.09566749  | 0.261884026 | 0.338395429 |
| 0.067576123 | 0.088820215 | 0.053977248 | 0.070554939 |
| 0.180213308 | 0.371998407 | 0.008625162 | 0.412337561 |
| 0.370911616 | 0.25413156  | 0.290679536 | 0.38400315  |
| 0.226475542 | 0.325152975 | 0.317135614 | 0.328628916 |
| 0.007984151 | 0.223600813 | 0.162850868 | 0.379185154 |
| 0.257773238 | 0.244838443 | 0.119108361 | 0.07360778  |
| 0.007948726 | 0.172571482 | 0.027772883 | 0.437573531 |
| 0.274785614 | 0.044127198 | 0.006275291 | 0.27508513  |
| 0.14778892  | 0.032563966 | 0.396988749 | 0.144163047 |

|             |             |             |             |
|-------------|-------------|-------------|-------------|
| 0.298930882 | 0.161276399 | 0.091871956 | 0.190550147 |
| 0.022822674 | 0.15484286  | 0.010863941 | 0.178795323 |
| 0.116445934 | 0.059750703 | 0.021192743 | 0.387058844 |
| 0.339211944 | 0.272145692 | 0.248579171 | 0.004047825 |
| 0.251453101 | 0.029124009 | 0.21132463  | 0.14664755  |
| 0.37316465  | 0.32363864  | 0.350798646 | 0.223678011 |
| 0.204058731 | 0.325286248 | 0.344805398 | 0.303204164 |
| 0.018092756 | 0.212478875 | 0.257624549 | 0.047588184 |
| 0.149740673 | 0.305585553 | 0.09898864  | 0.157399755 |
| 0.333647433 | 0.009638193 | 0.214606852 | 0.236755762 |
| 0.32576995  | 0.281649674 | 0.073722058 | 0.226067156 |
| 0.31704397  | 0.169983012 | 0.094948488 | 0.202294375 |
| 0.300988131 | 0.023870648 | 0.085210937 | 0.330993459 |
| 0.375190952 | 0.25988197  | 0.282638602 | 0.034747937 |
| 0.282146428 | 0.135772982 | 0.352328511 | 0.125588144 |
| 0.276235068 | 0.132916547 | 0.226228519 | 0.05684744  |
| 0.008725304 | 0.132469591 | 0.290367569 | 0.371998893 |
| 0.100574406 | 0.217390324 | 0.118493423 | 0.149368149 |
| 0.315632826 | 0.098514457 | 0.261763035 | 0.215033804 |
| 0.383149371 | 0.018468443 | 0.422782786 | 0.216859204 |
| 0.335661824 | 0.098291417 | 0.291895159 | 0.00684474  |
| 0.184602606 | 0.057484469 | 0.140395362 | 0.108109208 |
| 0.276194293 | 0.106915463 | 0.24943102  | 0.184094862 |
| 0.040697427 | 0.016010753 | 0.377214918 | 0.055054693 |
| 0.295741573 | 0.106170697 | 0.202711825 | 0.017552682 |
| 0.413440766 | 0.200346446 | 0.287709273 | 0.07341039  |
| 0.106854855 | 0.00171023  | 0.057140136 | 0.096343926 |
| 0.352376253 | 0.366005447 | 0.230669198 | 0.162604335 |
| 0.170951414 | 0.191719721 | 0.287477624 | 0.098429673 |
| 0.278003086 | 0.02333979  | 0.337049283 | 0.204640926 |
| 0.194572497 | 0.124970092 | 0.257802816 | 0.160950359 |
| 0.09199043  | 0.092067299 | 0.122724258 | 0.21927682  |
| 0.270405188 | 0.156300201 | 0.127945774 | 0.121512856 |
| 0.049001973 | 0.117725612 | 0.268433765 | 0.190411224 |
| 0.173934167 | 0.16668502  | 0.111008587 | 0.375292291 |
| 0.120672745 | 0.176193368 | 0.00708625  | 0.00629676  |
| 0.036588073 | 0.108553526 | 0.393943812 | 0.350728605 |
| 0.349367708 | 0.127305365 | 0.111560404 | 0.200215181 |
| 0.043811275 | 0.261142028 | 0.176542426 | 0.019344302 |
| 0.210736412 | 0.096786544 | 0.00401968  | 0.21791629  |
| 0.338961915 | 0.075300858 |             |             |
| BTLA        | 0.122222324 | 0.325665086 | 0.290985982 |
| 0.025237262 | 0.164046893 | 0.394869616 | 0.31683083  |
| 0.105303163 | 0.315794395 | 0.27646772  | 0.424838718 |
| 0.010204409 | 0.10169599  | 0.10581027  | 0.160350266 |
| 0.227769582 | 0.22689026  | 0.251496777 | 0.22613046  |
| 0.171528734 | 0.144935408 | 0.285687412 | 0.248263825 |
| 0.335653807 | 0.021446367 | 0.291467713 | 0.098686636 |
| 0.07699615  | 0.192152745 | 0.344247113 | 0.265554887 |
| 0.198195294 | 0.157797299 | 0.146847813 | 0.119733014 |
| 0.032736526 | 0.38220273  | 0.012974827 | 0.120005755 |
| 0.115609011 | 0.281666094 | 0.168156127 | 0.110637549 |
| 0.00083489  | 0.30914662  | 0.074863448 | 0.274770181 |
| 0.189906715 | 1           | 0.337965106 | 0.281835899 |

|             |             |             |             |
|-------------|-------------|-------------|-------------|
| 0.014870433 | 0.405684202 | 0.231872089 | 0.013040712 |
| 0.421931883 | 0.006238019 | 0.398364436 | 0.113145511 |
| 0.302752957 | 0.261384932 | 0.093322638 | 0.23696953  |
| 0.412833923 | 0.41703659  | 0.276469602 | 0.21408317  |
| 0.330665669 | 0.122682999 | 0.123966474 | 0.188110074 |
| 0.292330648 | 0.187534689 | 0.271780575 | 0.056714477 |
| 0.143251243 | 0.124740304 | 0.350371314 | 0.28984737  |
| 0.010327958 | 0.314187186 | 0.126837006 | 0.120632396 |
| 0.072815797 | 0.418395694 | 0.126797812 | 0.273819057 |
| 0.110923678 | 0.193904645 | 0.250720322 | 0.257939226 |
| 0.052542437 | 0.131184056 | 0.014043465 | 0.266805202 |
| 0.186041576 | 0.151413979 | 0.199008366 | 0.317545303 |
| 0.126321873 | 0.279905646 | 0.085144262 | 0.103335644 |
| 0.1734092   | 0.153736202 | 0.413758591 | 0.011385171 |
| 0.080052086 | 0.24973084  | 0.233968173 | 0.392400269 |
| 0.270245111 | 0.048783854 | 0.245583016 | 0.356822131 |
| 0.107946997 | 0.11995867  | 0.323385896 | 0.011862852 |
| 0.034799651 | 0.015650146 | 0.187376696 | 0.318226639 |
| 0.283869073 | 0.3444249   | 0.127099748 | 0.144867542 |
| 0.097289305 | 0.163141566 | 0.200212999 | 0.315856354 |
| 0.116027387 | 0.313349105 | 0.14179812  | 0.164575095 |
| 0.100482093 | 0.211613136 | 0.334770523 | 0.325462633 |
| 0.38356624  | 0.26759166  | 0.323709222 | 0.374010033 |
| 0.084025695 | 0.225578719 | 0.28448922  | 0.186717324 |
| 0.20585224  | 0.30009152  | 0.168686829 | 0.283513705 |
| 0.320187896 | 0.167344352 | 0.011033828 | 0.362556965 |
| 0.443430612 | 0.013127593 | 0.326866345 | 0.181854083 |
| 0.036027831 | 0.246152967 | 0.349639668 | 0.234676143 |
| 0.140003359 | 0.090868178 | 0.247876448 | 0.322800165 |
| 0.281104172 | 0.31309155  | 0.227864379 | 0.223064971 |
| 0.352327879 | 0.159885402 | 0.273202675 | 0.085458656 |
| 0.350803735 | 0.269020926 | 0.057635355 | 0.032359341 |
| 0.134799548 | 0.153355846 | 0.278509815 | 0.172413413 |
| 0.149504122 | 0.004571644 | 0.262298827 | 0.159346365 |
| 0.164394078 | 0.124029798 | 0.351768641 | 0.344322609 |
| 0.29761723  | 0.055741755 | 0.338712978 | 0.170163084 |
| 0.198449534 | 0.248097127 | 0.247676117 | 0.017776218 |
| 0.286931888 | 0.08146083  | 0.148014468 | 0.178970516 |
| 0.232318613 | 0.293200531 | 0.085187864 | 0.255130926 |
| 0.359659728 | 0.172553675 | 0.062306335 | 0.028634624 |
| 0.302018858 | 0.305200186 | 0.119546345 | 0.131848647 |
| 0.242493098 | 0.243411319 | 0.119210582 | 0.402619377 |
| 0.197712255 | 0.415135818 | 0.021865687 | 0.269880282 |
| 0.09774775  | 0.236807292 | 0.157686351 | 0.193653424 |
| 0.330333916 | 0.151137025 | 0.06760851  | 0.395935306 |
| 0.186027309 | 0.165125924 | 0.315392655 | 0.321590298 |
| 0.016761197 | 0.296573972 | 0.15298388  | 0.024950581 |
| 0.33348484  | 0.349436041 | 0.306093138 | 0.228525449 |
| 0.233082701 | 0.32401921  | 0.227838415 | 0.147645732 |
| 0.05297334  | 0.073922216 | 0.282846029 | 0.322399807 |
| 0.193059686 | 0.205270474 | 0.060263006 | 0.019211615 |
| 0.248079691 | 0.078720553 | 0.217060034 | 0.10513123  |
| 0.117861369 | 0.0738519   | 0.288797513 | 0.119527329 |
| 0.009544628 | 0.302933498 | 0.142462165 | 0.135246136 |

|             |             |             |             |
|-------------|-------------|-------------|-------------|
| 0.199290021 | 0.234197949 | 0.235086469 | 0.379112844 |
| 0.106700266 | 0.098306974 | 0.111286689 | 0.293396234 |
| 0.349498533 | 0.323885307 | 0.004822378 | 0.279315185 |
| 0.263040034 | 0.211642521 | 0.245526912 | 0.256402251 |
| 0.256275899 | 0.394574112 | 0.273244946 | 0.16603838  |
| 0.005837934 | 0.124583405 | 0.085024082 | 0.433965073 |
| 0.183203373 | 0.3626224   | 0.04813034  | 0.065464423 |
| 0.00694944  | 0.353793416 | 0.03500184  | 0.353786253 |
| 0.216565872 | 0.216180327 | 0.002616816 | 0.228239002 |
| 0.081855279 | 0.012083933 | 0.303338385 | 0.271974224 |
| 0.296405697 | 0.168174807 | 0.347424798 | 0.108778675 |
| 0.022591028 | 0.115750779 | 0.068989468 | 0.204132296 |
| 0.104188481 | 0.022595177 | 0.157367067 | 0.263242755 |
| 0.278699317 | 0.334760209 | 0.326694822 | 0.04291483  |
| 0.115091964 | 0.076803242 | 0.196456163 | 0.219246194 |
| 0.290792272 | 0.397036592 | 0.329782953 | 0.13658265  |
| 0.163522741 | 0.377412773 | 0.417265527 | 0.27068146  |
| 0.033309648 | 0.12825253  | 0.165189007 | 0.187005582 |
| 0.086332723 | 0.233568028 | 0.138655075 | 0.355247539 |
| 0.280890152 | 0.03512725  | 0.380853562 | 0.137647076 |
| 0.340501921 | 0.230148497 | 0.319974653 | 0.236187218 |
| 0.391388251 | 0.276539214 | 0.324711619 | 0.216204007 |
| 0.392763295 | 0.017404003 | 0.026543928 | 0.34608738  |
| 0.387874596 | 0.414051853 | 0.22041722  | 0.165589481 |
| 0.182311104 | 0.242188123 | 0.206494009 | 0.262764544 |
| 0.282699587 | 0.093545028 | 0.106047587 | 0.026814358 |
| 0.071242056 | 0.225909625 | 0.385805134 | 0.412187618 |
| 0.323857492 | 0.330951979 | 0.310617515 | 0.243867522 |
| 0.208688907 | 0.125694399 | 0.366589705 | 0.206739293 |
| 0.438540191 | 0.108619924 | 0.361855385 | 0.235187421 |
| 0.281591962 | 0.253129103 | 0.233829409 | 0.01575006  |
| 0.130479474 | 0.269578855 | 0.055480556 | 0.196073967 |
| 0.139965684 | 0.348873953 | 0.3276799   | 0.315370314 |
| 0.065870403 | 0.008374258 | 0.310989324 | 0.052065161 |
| 0.445557262 | 0.052981192 | 0.201401862 | 0.01183996  |
| 0.337323465 | 0.192719719 | 0.22645286  | 0.040335827 |
| 0.213239498 | 0.001543367 | 0.278858633 | 0.215607459 |
| 0.285055912 | 0.355117643 | 0.149682794 | 0.118418828 |
| 0.091283674 | 0.175120718 | 0.316779193 | 0.147297607 |
| 0.228125916 | 0.038317138 | 0.239977013 | 0.193358846 |
| 0.093502224 | 0.169869421 | 0.356749022 | 0.189799046 |
| 0.289278523 | 0.096688291 | 0.344462952 | 0.195813452 |
| 0.197991521 | 0.152595606 | 0.200219513 | 0.139817438 |
| 0.251244798 | 0.218521643 | 0.14749676  | 0.127080659 |
| 0.183054489 | 0.107200134 | 0.08997905  | 0.431331947 |
| 0.117235881 | 0.200008582 | 0.040974703 | 0.07864127  |
| 0.0860249   | 0.345300154 | 0.232914172 | 0.236211875 |
| 0.236642462 | 0.071611427 | 0.34430134  | 0.281296798 |
| 0.013022497 | 0.121057319 | 0.339427946 | 0.02534131  |
| 0.167021365 | 0.071944825 | 0.008315992 | 0.182574581 |
| 0.361939796 | 0.104778785 |             |             |
| BZW2        | 0.112445869 | 0.265231123 | 0.273713775 |
| 0.006215747 | 0.113719361 | 0.37137986  | 0.269060418 |
| 0.076839961 | 0.288487483 | 0.130940729 | 0.393013831 |

|             |             |             |             |
|-------------|-------------|-------------|-------------|
| 0.021563644 | 0.081191791 | 0.162862726 | 0.253261494 |
| 0.179270819 | 0.178261427 | 0.226362139 | 0.191572047 |
| 0.158812602 | 0.051719848 | 0.298978692 | 0.184635118 |
| 0.308553226 | 0.043759816 | 0.185161247 | 0.025118868 |
| 0.056370201 | 0.152788304 | 0.315827914 | 0.149181361 |
| 0.155638453 | 0.113914591 | 0.07446902  | 0.069971035 |
| 0.012408941 | 0.338890512 | 0.009663657 | 0.087513688 |
| 0.091922612 | 0.165676148 | 0.126323566 | 0.158316884 |
| 0.000104484 | 0.244163468 | 0.053810228 | 0.251530085 |
| 0.195354695 | 0.337965106 | 1           | 0.162231871 |
| 0.006273511 | 0.385154895 | 0.235824117 | 0.005167409 |
| 0.37320071  | 0.00090867  | 0.34560781  | 0.104773457 |
| 0.334604394 | 0.22947983  | 0.062682319 | 0.205673517 |
| 0.395294151 | 0.3641463   | 0.226021343 | 0.140354461 |
| 0.287124698 | 0.099795854 | 0.084312309 | 0.122579104 |
| 0.241924034 | 0.106480356 | 0.171512821 | 0.034156483 |
| 0.101795588 | 0.097928688 | 0.401281506 | 0.323987502 |
| 0.011620853 | 0.207686697 | 0.060230413 | 0.112981298 |
| 0.050005365 | 0.386473574 | 0.113204114 | 0.169115154 |
| 0.068502516 | 0.240511525 | 0.244957021 | 0.206513612 |
| 0.024355726 | 0.111084838 | 0.010310941 | 0.324965331 |
| 0.15247803  | 0.114431474 | 0.167513331 | 0.207525225 |
| 0.217363924 | 0.359940182 | 0.088615793 | 0.078570485 |
| 0.162468703 | 0.11259877  | 0.370983711 | 0.009363804 |
| 0.058896943 | 0.204698224 | 0.178249067 | 0.326789585 |
| 0.215151153 | 0.126466625 | 0.307603101 | 0.360214173 |
| 0.066702167 | 0.05356656  | 0.296256378 | 0.005850946 |
| 0.018522753 | 0.037203436 | 0.145730676 | 0.325633136 |
| 0.162743465 | 0.252640407 | 0.075047922 | 0.096788426 |
| 0.075497897 | 0.140297679 | 0.147841751 | 0.211930127 |
| 0.080110826 | 0.274082037 | 0.074772747 | 0.123067352 |
| 0.058614401 | 0.215132166 | 0.32637273  | 0.276939873 |
| 0.378081248 | 0.256783264 | 0.287689048 | 0.344753071 |
| 0.06134249  | 0.179094804 | 0.231106689 | 0.171326188 |
| 0.12458593  | 0.293121891 | 0.078471927 | 0.215050429 |
| 0.339113968 | 0.200247431 | 0.012101489 | 0.387005919 |
| 0.396250332 | 0.007984247 | 0.319661535 | 0.15900574  |
| 0.015346728 | 0.175545027 | 0.304216999 | 0.190910213 |
| 0.124168485 | 0.021454992 | 0.119923949 | 0.252929647 |
| 0.291084473 | 0.216461232 | 0.212332048 | 0.096889189 |
| 0.361333497 | 0.06907385  | 0.256535209 | 0.061746283 |
| 0.335764689 | 0.296062272 | 0.028495079 | 0.02072411  |
| 0.132323718 | 0.141752981 | 0.217304842 | 0.160634507 |
| 0.119069314 | 0.000596692 | 0.119700299 | 0.142496703 |
| 0.079308634 | 0.10740866  | 0.284770211 | 0.344701172 |
| 0.368506752 | 0.039801425 | 0.351408966 | 0.107391146 |
| 0.195282782 | 0.119575803 | 0.124218799 | 0.016234708 |
| 0.245391408 | 0.034916348 | 0.114962588 | 0.254576403 |
| 0.138798383 | 0.26314728  | 0.122848367 | 0.198459017 |
| 0.331945903 | 0.131596616 | 0.120777656 | 0.033515556 |
| 0.235608488 | 0.244481366 | 0.05388503  | 0.094886339 |
| 0.179591116 | 0.142942457 | 0.087737797 | 0.381191473 |
| 0.149510723 | 0.353614051 | 0.019918567 | 0.247819026 |
| 0.07112346  | 0.183489649 | 0.112282317 | 0.159442521 |

|             |             |             |             |
|-------------|-------------|-------------|-------------|
| 0.236681549 | 0.164505566 | 0.045718165 | 0.404109075 |
| 0.189489708 | 0.17294786  | 0.32769413  | 0.277406915 |
| 0.021926077 | 0.312544746 | 0.10564096  | 0.020956523 |
| 0.264060419 | 0.311758872 | 0.343208835 | 0.238830301 |
| 0.19652898  | 0.286213943 | 0.221137993 | 0.107491981 |
| 0.039399928 | 0.14355404  | 0.25527889  | 0.291155514 |
| 0.150052702 | 0.148619056 | 0.03026132  | 0.032605819 |
| 0.201653257 | 0.082807523 | 0.160713051 | 0.076347734 |
| 0.091033339 | 0.047336297 | 0.306476705 | 0.124972896 |
| 0.00867049  | 0.19010051  | 0.098638275 | 0.058818647 |
| 0.095989932 | 0.156797063 | 0.177841876 | 0.411820378 |
| 0.057360695 | 0.051165403 | 0.047790757 | 0.237074885 |
| 0.34908629  | 0.263169888 | 0.00380054  | 0.262001886 |
| 0.215151225 | 0.23286992  | 0.183521708 | 0.216412785 |
| 0.236866784 | 0.357776407 | 0.21522766  | 0.147181878 |
| 0.013199301 | 0.089156284 | 0.06128026  | 0.447102904 |
| 0.129383591 | 0.350301265 | 0.046925679 | 0.035106846 |
| 0.019513385 | 0.335172137 | 0.012110231 | 0.326690368 |
| 0.163803275 | 0.197095712 | 0.001685908 | 0.188411091 |
| 0.058382409 | 0.015216476 | 0.253235436 | 0.184805289 |
| 0.231522574 | 0.132256698 | 0.221976444 | 0.076932567 |
| 0.007814916 | 0.104827397 | 0.038322291 | 0.146944245 |
| 0.071752183 | 0.024966046 | 0.06099411  | 0.223252918 |
| 0.233382832 | 0.302258641 | 0.365762119 | 0.011462761 |
| 0.091795732 | 0.024073745 | 0.137706672 | 0.274107352 |
| 0.277986823 | 0.378149883 | 0.288881069 | 0.102990948 |
| 0.140438626 | 0.327787674 | 0.378465574 | 0.214525924 |
| 0.014424058 | 0.089360652 | 0.121070695 | 0.145850767 |
| 0.067541696 | 0.181510703 | 0.074185138 | 0.334208284 |
| 0.291731537 | 0.01136913  | 0.39706127  | 0.145526986 |
| 0.282444979 | 0.168122087 | 0.27137585  | 0.313744897 |
| 0.328541288 | 0.23706583  | 0.282609521 | 0.202134668 |
| 0.420961777 | 0.007106456 | 0.030915732 | 0.345958472 |
| 0.33088748  | 0.390357782 | 0.16058577  | 0.060547529 |
| 0.143871148 | 0.351649634 | 0.198695486 | 0.217726512 |
| 0.320684134 | 0.060842384 | 0.079937388 | 0.023048212 |
| 0.019891756 | 0.203837516 | 0.317133399 | 0.373805753 |
| 0.31761199  | 0.343999105 | 0.201428539 | 0.187209562 |
| 0.160719055 | 0.071661627 | 0.380764917 | 0.191242523 |
| 0.407336724 | 0.037579711 | 0.322449715 | 0.211492006 |
| 0.254642953 | 0.147272919 | 0.195603755 | 0.010188008 |
| 0.096932921 | 0.126341935 | 0.056093909 | 0.119039011 |
| 0.107518192 | 0.288465333 | 0.282370427 | 0.31649431  |
| 0.037040727 | 0.022584237 | 0.345477935 | 0.025382119 |
| 0.441514445 | 0.04529398  | 0.17661005  | 0.004634579 |
| 0.286906968 | 0.163593671 | 0.182375319 | 0.031160095 |
| 0.121840211 | 0.000658071 | 0.140241117 | 0.272513155 |
| 0.27489007  | 0.361459227 | 0.133638945 | 0.089039521 |
| 0.098447989 | 0.141016731 | 0.300188316 | 0.08511348  |
| 0.169406795 | 0.012671761 | 0.185519978 | 0.199439885 |
| 0.066609261 | 0.113471882 | 0.388219638 | 0.162013589 |
| 0.203004681 | 0.097090963 | 0.321908466 | 0.235157775 |
| 0.143011747 | 0.151702852 | 0.135264723 | 0.090858752 |
| 0.199536831 | 0.139824101 | 0.130227474 | 0.090365494 |

|             |             |             |             |
|-------------|-------------|-------------|-------------|
| 0.131816264 | 0.07186463  | 0.064742069 | 0.409665667 |
| 0.079734312 | 0.168458664 | 0.010926624 | 0.020052908 |
| 0.029702535 | 0.242270838 | 0.227366847 | 0.21717478  |
| 0.193886036 | 0.0587162   | 0.316348952 | 0.333151484 |
| 0.012203189 | 0.103171461 | 0.288736178 | 0.011789835 |
| 0.151375975 | 0.050921376 | 0.013867852 | 0.192663575 |
| 0.346176293 | 0.053294369 |             |             |
| CAPN2       | 0.06718221  | 0.274658536 | 0.125039393 |
| 0.055204502 | 0.190449147 | 0.327653807 | 0.345226775 |
| 0.046596262 | 0.116891079 | 0.246154079 | 0.354669296 |
| 0.000546761 | 0.083576447 | 0.014982612 | 0.054469468 |
| 0.17664514  | 0.187574436 | 0.269404454 | 0.173700797 |
| 0.071085373 | 0.186015596 | 0.171167556 | 0.223198038 |
| 0.287153872 | 0.001577463 | 0.253459696 | 0.182383882 |
| 0.036204571 | 0.148957328 | 0.158653708 | 0.147540803 |
| 0.146941562 | 0.143537752 | 0.111859612 | 0.131277255 |
| 0.041413662 | 0.303801739 | 0.012112448 | 0.119437335 |
| 0.088754905 | 0.231385024 | 0.148918583 | 0.028286182 |
| 0.004889835 | 0.219796792 | 0.027369484 | 0.185359337 |
| 0.06762826  | 0.281835899 | 0.162231871 | 1           |
| 0.009055413 | 0.32543779  | 0.137473994 | 0.008934823 |
| 0.375355223 | 0.021864203 | 0.337543576 | 0.02916952  |
| 0.126324929 | 0.125381415 | 0.054295906 | 0.165318887 |
| 0.375339904 | 0.367520728 | 0.233041251 | 0.157954237 |
| 0.171738792 | 0.088213324 | 0.107032183 | 0.215887851 |
| 0.23624298  | 0.110395992 | 0.187210401 | 0.040531944 |
| 0.130158125 | 0.09489673  | 0.245245148 | 0.120174284 |
| 0.00156058  | 0.299226968 | 0.147758773 | 0.068163587 |
| 0.068270932 | 0.336258064 | 0.080630875 | 0.254094683 |
| 0.083315555 | 0.049792984 | 0.174342966 | 0.213042397 |
| 0.047921797 | 0.102970154 | 0.009123785 | 0.102985049 |
| 0.13749233  | 0.118725964 | 0.133115662 | 0.215157343 |
| 0.031719607 | 0.082008311 | 0.015640958 | 0.079963906 |
| 0.117306377 | 0.123536141 | 0.36630592  | 0.0049864   |
| 0.067659434 | 0.081438008 | 0.132247603 | 0.330582447 |
| 0.208824362 | 0.007290781 | 0.068003994 | 0.296626235 |
| 0.086608806 | 0.16580209  | 0.280011506 | 0.004907445 |
| 0.017920925 | 0.001271495 | 0.144792036 | 0.09915604  |
| 0.266513834 | 0.274691155 | 0.110080046 | 0.169908754 |
| 0.035066288 | 0.113491284 | 0.228483012 | 0.268573169 |
| 0.109516566 | 0.352642609 | 0.142367929 | 0.147841049 |
| 0.093991696 | 0.065826102 | 0.119929683 | 0.297420963 |
| 0.273394015 | 0.144887368 | 0.127809104 | 0.29190757  |
| 0.074372658 | 0.174669667 | 0.229372599 | 0.064482462 |
| 0.202940196 | 0.136920783 | 0.113340386 | 0.292133995 |
| 0.290523214 | 0.088546401 | 0.003452656 | 0.271594024 |
| 0.375674438 | 0.005702186 | 0.130184063 | 0.132388499 |
| 0.087036918 | 0.188840185 | 0.270710399 | 0.209541601 |
| 0.12461318  | 0.170133944 | 0.208214823 | 0.298875403 |
| 0.169727075 | 0.257296305 | 0.161893145 | 0.207666228 |
| 0.243206535 | 0.112532126 | 0.143758418 | 0.073754559 |
| 0.157202792 | 0.161426838 | 0.032149877 | 0.019604266 |
| 0.088432711 | 0.055033065 | 0.236924307 | 0.117959724 |
| 0.105696121 | 0.018521035 | 0.232765778 | 0.093131187 |



|             |             |             |             |
|-------------|-------------|-------------|-------------|
| 0.09154534  | 0.088619869 | 0.312800115 | 0.165801844 |
| 0.170544083 | 0.033181154 | 0.150052642 | 0.16422468  |
| 0.121288885 | 0.160817343 | 0.186971096 | 0.003394415 |
| 0.158389684 | 0.052893453 | 0.097444614 | 0.031597878 |
| 0.204175537 | 0.098908466 | 0.018109637 | 0.221113365 |
| 0.228552434 | 0.169604499 | 0.007051104 | 0.008611674 |
| 0.152505342 | 0.317627429 | 0.084644433 | 0.042669995 |
| 0.250345253 | 0.129047883 | 0.091852259 | 0.316653428 |
| 0.168177439 | 0.358734531 | 0.009857269 | 0.104544062 |
| 0.08999702  | 0.217822101 | 0.141970599 | 0.173142229 |
| 0.188485738 | 0.090090987 | 0.030457304 | 0.289869427 |
| 0.119217302 | 0.112693785 | 0.096263    | 0.264539783 |
| 0.002164898 | 0.21832737  | 0.161582867 | 0.010336486 |
| 0.299633592 | 0.376998179 | 0.092827254 | 0.068497107 |
| 0.180221504 | 0.26276502  | 0.147527781 | 0.119259893 |
| 0.016993205 | 0.008043303 | 0.202307358 | 0.258150459 |
| 0.15555795  | 0.130109019 | 0.064747028 | 0.004962239 |
| 0.206258135 | 0.048044862 | 0.181246353 | 0.077634747 |
| 0.122785699 | 0.05081386  | 0.143150386 | 0.069013504 |
| 0.001983456 | 0.155970199 | 0.113153289 | 0.143325538 |
| 0.151635159 | 0.099601137 | 0.222633549 | 0.284287853 |
| 0.093597595 | 0.04178439  | 0.117190434 | 0.199621286 |
| 0.241086677 | 0.267361934 | 0.004209395 | 0.193805894 |
| 0.210585177 | 0.147747774 | 0.227292545 | 0.196222647 |
| 0.139902881 | 0.350348835 | 0.232259002 | 0.116000703 |
| 0.000455247 | 0.106045189 | 0.0788056   | 0.321536756 |
| 0.153558671 | 0.279545764 | 0.015733964 | 0.052724328 |
| 0.001302319 | 0.170215188 | 0.032020748 | 0.266161322 |
| 0.200244766 | 0.10923709  | 0.003039351 | 0.199806606 |
| 0.075328347 | 0.005609299 | 0.240281567 | 0.227002467 |
| 0.277212502 | 0.136212229 | 0.254813438 | 0.098199402 |
| 0.018772281 | 0.052917428 | 0.08532326  | 0.203550852 |
| 0.075568719 | 0.006012742 | 0.250510594 | 0.203691029 |
| 0.205692092 | 0.322540275 | 0.246865971 | 0.032138215 |
| 0.079380752 | 0.087768175 | 0.1956399   | 0.085152271 |
| 0.204013766 | 0.332301048 | 0.286019728 | 0.124070097 |
| 0.134111427 | 0.322054914 | 0.336167786 | 0.226837687 |
| 0.044408693 | 0.10454224  | 0.127888978 | 0.113271973 |
| 0.058565269 | 0.21014176  | 0.14415173  | 0.317453259 |
| 0.183617788 | 0.069622348 | 0.293181922 | 0.062916731 |
| 0.312752755 | 0.206923645 | 0.150173347 | 0.064776203 |
| 0.356019728 | 0.124171382 | 0.201070269 | 0.113510709 |
| 0.280479423 | 0.008719331 | 0.007917671 | 0.256176023 |
| 0.338570716 | 0.382209284 | 0.180106751 | 0.20059136  |
| 0.156118588 | 0.066397413 | 0.148762854 | 0.157613457 |
| 0.162610403 | 0.075867076 | 0.079046173 | 0.00614201  |
| 0.049785154 | 0.057850571 | 0.372764621 | 0.337725322 |
| 0.138534844 | 0.15741096  | 0.236124326 | 0.283448106 |
| 0.172166525 | 0.073172732 | 0.273237103 | 0.095439086 |
| 0.367565411 | 0.187144824 | 0.274733701 | 0.121854576 |
| 0.189560983 | 0.169279176 | 0.192155802 | 0.007896873 |
| 0.115909071 | 0.220743291 | 0.0162445   | 0.236386473 |
| 0.106718917 | 0.174628757 | 0.339964776 | 0.103329833 |
| 0.050957358 | 0.001146624 | 0.196360086 | 0.051661458 |

|             |             |             |             |
|-------------|-------------|-------------|-------------|
| 0.35261053  | 0.02086273  | 0.098554541 | 0.011824518 |
| 0.269456659 | 0.131461786 | 0.158649306 | 0.022251025 |
| 0.147489348 | 0.003804175 | 0.256857707 | 0.060189206 |
| 0.182864898 | 0.264910714 | 0.101325889 | 0.071605641 |
| 0.020682834 | 0.183340498 | 0.252202121 | 0.158667334 |
| 0.213651079 | 0.022100163 | 0.198691012 | 0.071094727 |
| 0.080063479 | 0.079570693 | 0.276461265 | 0.081284446 |
| 0.261281252 | 0.038110018 | 0.169809822 | 0.044215424 |
| 0.180774183 | 0.075135226 | 0.22042023  | 0.049946701 |
| 0.154066885 | 0.125508891 | 0.107932435 | 0.115246953 |
| 0.160281595 | 0.082485279 | 0.038544967 | 0.357934297 |
| 0.04886211  | 0.067384453 | 0.091680464 | 0.169606769 |
| 0.092648083 | 0.204848133 | 0.147517653 | 0.171788371 |
| 0.192103897 | 0.025219742 | 0.14780586  | 0.077536857 |
| 0.006478056 | 0.079633974 | 0.377600478 | 0.032964428 |
| 0.144892402 | 0.031171548 | 0.001341491 | 0.048735797 |
| 0.273316909 | 0.06317654  |             |             |
| CAPRIN1     | 0.069369388 | 0.157340844 | 0.000480746 |
| 0.00091348  | 0.001205233 | 0.018312712 | 0.014429206 |
| 0.069185038 | 0.000604859 | 0.004707653 | 0.042175177 |
| 4.83E-06    | 0.21141401  | 2.43E-05    | 0.000149903 |
| 0.22856753  | 0.032018152 | 0.211761212 | 0.038404638 |
| 0.002815494 | 0.058468383 | 0.06128989  | 0.018327377 |
| 1.94E-06    | 0.00450352  | 0.001546975 | 0.063043732 |
| 0.247270589 | 0.008744105 | 0.008710729 | 0.208286612 |
| 0.235540803 | 0.032297213 | 0.007571979 | 0.036931078 |
| 0.114994133 | 0.004363814 | 0.190295183 | 0.225789681 |
| 0.01267856  | 0.203914505 | 1.09E-05    | 0.001464821 |
| 0.002107497 | 0.06134295  | 0.066524235 | 0.020163368 |
| 0.014870433 | 0.006273511 | 0.009055413 | 1           |
| 0.048765689 | 0.106065313 | 0.040581712 | 0.080447836 |
| 0.000174299 | 0.104653035 | 0.024989791 | 0.00065585  |
| 0.019479233 | 0.070524313 | 0.086066564 | 0.020395681 |
| 0.09231666  | 0.184716264 | 0.000115434 | 0.001418537 |
| 0.074841029 | 0.217785343 | 0.096593871 | 0.140873836 |
| 0.011830475 | 0.008307085 | 0.068827817 | 0.161123595 |
| 0.216542298 | 0.023434539 | 0.002759445 | 3.85E-06    |
| 0.006925337 | 0.027525966 | 0.111753635 | 0.172554255 |
| 0.054663825 | 0.095999003 | 0.008642683 | 0.10255958  |
| 1.75E-05    | 0.050828152 | 0.208618411 | 0.000199397 |
| 0.169449806 | 7.19E-05    | 0.001519771 | 0.177332398 |
| 0.264347753 | 0.106810476 | 0.00094326  | 1.36E-05    |
| 0.001913258 | 0.004662266 | 0.271473107 | 0.058323976 |
| 0.067933573 | 0.074159167 | 0.032869951 | 0.256887961 |
| 0.001991315 | 0.016508086 | 0.116987607 | 0.184095925 |
| 8.59E-06    | 0.002445292 | 0.01472982  | 0.007021609 |
| 0.001161596 | 0.013621553 | 0.003030465 | 0.000203798 |
| 0.000177967 | 0.227015134 | 0.00349419  | 0.003117309 |
| 0.010699168 | 0.000620476 | 0.120399909 | 0.050936948 |
| 0.207763389 | 0.001503665 | 0.015149995 | 0.188549164 |
| 0.019180984 | 0.066842054 | 0.154803622 | 0.03489294  |
| 0.009199678 | 0.003968001 | 0.119139234 | 0.090929678 |
| 0.00037337  | 0.000538734 | 0.040043672 | 0.234747877 |
| 0.219632738 | 0.201045931 | 0.009445745 | 0.015000572 |

|             |             |             |             |
|-------------|-------------|-------------|-------------|
| 0.011797641 | 0.024431686 | 0.068044704 | 0.015178945 |
| 0.039894727 | 0.003507756 | 0.044887781 | 0.080809922 |
| 0.001402101 | 0.00070385  | 0.148770683 | 0.001007008 |
| 0.003287183 | 0.113271698 | 0.126203532 | 0.087929644 |
| 0.000987298 | 0.016129952 | 0.021524791 | 0.024260672 |
| 0.017747196 | 0.072596073 | 0.014630573 | 0.03404354  |
| 0.028818496 | 0.000485479 | 0.258873072 | 0.003352571 |
| 0.038187236 | 0.02013535  | 0.00079105  | 0.096452491 |
| 0.025832173 | 0.141371474 | 0.071114987 | 0.146949824 |
| 0.000401825 | 0.005289745 | 0.081181102 | 0.021190054 |
| 0.213633281 | 0.145110137 | 0.002843458 | 0.018046537 |
| 0.027355345 | 0.004210235 | 0.020331201 | 0.134378291 |
| 0.006040046 | 0.004038816 | 1.08E-06    | 0.000927336 |
| 0.082251792 | 0.050724753 | 0.000289592 | 0.008228389 |
| 0.00091584  | 0.000684066 | 0.156629127 | 0.010608527 |
| 0.16702669  | 7.62E-05    | 0.01182244  | 0.010329277 |
| 0.085092363 | 0.049136386 | 0.007034751 | 0.123145131 |
| 0.015948655 | 0.284850414 | 0.065815356 | 0.007348276 |
| 0.05415686  | 0.005997013 | 0.01143245  | 0.130348631 |
| 0.171394619 | 0.209480268 | 0.15168008  | 0.014810467 |
| 0.091494998 | 0.010475213 | 0.026119395 | 0.057782123 |
| 0.053654074 | 0.001020621 | 0.153675019 | 5.52E-07    |
| 0.036513528 | 0.08883809  | 0.007729086 | 0.147684298 |
| 0.019155625 | 0.00074797  | 0.013107783 | 0.213752374 |
| 0.150059022 | 0.140180797 | 0.254473634 | 0.010292719 |
| 1.38E-05    | 0.157498704 | 0.071662598 | 0.250393096 |
| 0.034419398 | 0.041628757 | 0.000892854 | 0.182233165 |
| 0.089678854 | 0.093092994 | 0.104661936 | 0.098133582 |
| 0.059494017 | 0.011971744 | 0.1020914   | 0.000230043 |
| 0.015185466 | 0.135435959 | 0.002379881 | 0.024946248 |
| 0.001335421 | 0.154980177 | 0.034520286 | 0.043359329 |
| 0.020960647 | 0.039919207 | 0.001487851 | 0.006901071 |
| 0.164815316 | 0.00178478  | 0.145874069 | 0.205972455 |
| 0.036700926 | 0.177516335 | 0.202307895 | 0.029486607 |
| 0.062497716 | 0.160918252 | 0.196533561 | 6.15E-06    |
| 0.267191293 | 0.226366275 | 0.04660614  | 0.227238572 |
| 0.026008778 | 0.041168201 | 0.096299159 | 6.13E-07    |
| 0.00543665  | 0.048700235 | 0.132068626 | 0.187258057 |
| 4.52E-05    | 0.002962641 | 0.131006807 | 0.198986141 |
| 0.000515092 | 0.1813432   | 0.037821204 | 0.137904675 |
| 0.055402973 | 0.00773022  | 0.236999659 | 0.06552302  |
| 0.024203551 | 0.0004403   | 0.097190613 | 0.06076076  |
| 0.001215115 | 0.002478306 | 0.196400618 | 0.134402647 |
| 0.056894428 | 0.015705691 | 0.000102084 | 0.230785512 |
| 0.011228994 | 0.148358125 | 0.000425774 | 0.102675801 |
| 0.050007895 | 0.116857953 | 0.191489441 | 0.087668083 |
| 0.081797303 | 0.063920691 | 0.13606368  | 0.002981656 |
| 0.234887804 | 0.234601136 | 0.000250577 | 0.129789851 |
| 0.183480256 | 0.081427781 | 0.009642677 | 0.05537525  |
| 0.003710582 | 0.01223219  | 0.043371672 | 0.115579776 |
| 0.19714269  | 0.000592789 | 0.003010743 | 0.082063642 |
| 0.010991197 | 0.002508452 | 0.024510488 | 0.023494232 |
| 0.026875463 | 0.006832787 | 0.053074564 | 0.112160484 |
| 0.029682393 | 0.194780996 | 0.006471639 | 0.213310205 |

|             |             |             |             |
|-------------|-------------|-------------|-------------|
| 0.000245943 | 0.135810971 | 0.003880755 | 0.022029666 |
| 0.15926988  | 0.259179101 | 0.007215059 | 0.000272078 |
| 0.001253945 | 0.07394126  | 0.075878969 | 0.001162436 |
| 0.008385753 | 0.018183642 | 0.041345225 | 0.231525756 |
| 0.029940952 | 0.022431057 | 0.029229104 | 0.07326558  |
| 0.001769054 | 0.132359683 | 0.036008738 | 0.099440161 |
| 0.025145684 | 0.130747134 | 4.01E-05    | 0.128715919 |
| 0.007843359 | 0.036081584 | 0.051041591 | 0.263130637 |
| 0.003444823 | 0.056970765 | 0.00385207  | 0.002231041 |
| 1.06E-05    | 0.050302301 | 0.102365528 | 0.027725102 |
| 0.028038672 | 0.037571183 | 0.024582096 | 0.165298399 |
| 0.062746788 | 0.130003755 | 0.039621649 | 0.035407976 |
| 0.002086751 | 0.00636761  | 6.91E-05    | 0.082271509 |
| 0.05934219  | 0.106386276 | 0.075753466 | 0.015672081 |
| 0.090219044 | 0.057315327 | 0.057339866 | 0.188004568 |
| 0.006121339 | 0.221776759 | 0.015961106 | 0.266763186 |
| 0.016488857 | 0.01740292  | 0.007840534 | 0.009062269 |
| 0.000705929 | 0.002339199 | 0.003370789 | 0.227291371 |
| 0.007733243 | 0.050145144 | 0.018818394 | 0.000288846 |
| 0.031757151 | 0.152650442 | 0.191459098 | 0.098454607 |
| 0.194278832 | 0.054851683 | 0.063968409 | 0.007869693 |
| 0.022172415 | 0.001857872 | 0.000438252 | 0.011023311 |
| 0.007563744 | 0.130091558 | 0.136816247 | 0.207436245 |
| 0.013621849 | 0.001520794 | 0.002894247 | 0.005512227 |
| 0.180666843 | 0.024432239 | 0.008204123 | 0.076937673 |
| 0.030228361 | 1.36E-06    | 0.009631048 | 0.058560566 |
| 0.017491907 |             |             |             |
| CAR5B       | 0.235503402 | 0.451447802 | 0.2389709   |
| 0.032776102 | 0.222029952 | 0.414670958 | 0.397985545 |
| 0.225065761 | 0.300544533 | 0.266266363 | 0.425673399 |
| 0.006639408 | 0.203932804 | 0.073256712 | 0.196576853 |
| 0.366816208 | 0.37367871  | 0.407872501 | 0.372311924 |
| 0.293666936 | 0.178526661 | 0.357900831 | 0.361283233 |
| 0.422497204 | 0.011731861 | 0.299054538 | 0.087170198 |
| 0.194950061 | 0.331611914 | 0.40064366  | 0.350599966 |
| 0.318255556 | 0.284056314 | 0.283749405 | 0.256005818 |
| 0.099421311 | 0.482263336 | 0.050057916 | 0.225729294 |
| 0.223225323 | 0.357175201 | 0.288671187 | 0.078939644 |
| 0.001754031 | 0.300735782 | 0.178651537 | 0.35753984  |
| 0.328878758 | 0.405684202 | 0.385154895 | 0.32543779  |
| 0.048765689 | 1           | 0.317745825 | 0.047421296 |
| 0.485778265 | 0.0061324   | 0.487409687 | 0.202977689 |
| 0.258515811 | 0.395268622 | 0.202868053 | 0.330538331 |
| 0.425395044 | 0.49374763  | 0.420263355 | 0.152853301 |
| 0.271329252 | 0.269356213 | 0.220052656 | 0.308411615 |
| 0.406364341 | 0.306081915 | 0.386532241 | 0.167134005 |
| 0.232513802 | 0.229620774 | 0.425200778 | 0.372746294 |
| 0.005355141 | 0.33587281  | 0.255057913 | 0.189129504 |
| 0.16647088  | 0.430789595 | 0.240367663 | 0.355643304 |
| 0.244599099 | 0.123320176 | 0.380702457 | 0.404678582 |
| 0.046558793 | 0.236696499 | 0.020525207 | 0.343896811 |
| 0.293947508 | 0.277138895 | 0.284524313 | 0.247025562 |
| 0.088793778 | 0.31884133  | 0.134208061 | 0.209948066 |
| 0.327186945 | 0.320081055 | 0.472068862 | 0.044796433 |

|             |             |             |             |
|-------------|-------------|-------------|-------------|
| 0.172575267 | 0.284159125 | 0.397104571 | 0.482878646 |
| 0.392351798 | 0.044768761 | 0.311808009 | 0.416022716 |
| 0.233771247 | 0.170375279 | 0.415523929 | 0.023033696 |
| 0.029461044 | 0.026240624 | 0.313672274 | 0.346892316 |
| 0.263308577 | 0.396238281 | 0.150965271 | 0.269877999 |
| 0.215798343 | 0.281533386 | 0.261394745 | 0.40952017  |
| 0.209355163 | 0.409417096 | 0.296885413 | 0.263907791 |
| 0.2450306   | 0.323462874 | 0.349793416 | 0.440640327 |
| 0.466568186 | 0.236673499 | 0.26456242  | 0.414305509 |
| 0.176308065 | 0.359808599 | 0.429271488 | 0.323386245 |
| 0.331040796 | 0.404685992 | 0.2586983   | 0.375840626 |
| 0.425230483 | 0.314638626 | 0.038050624 | 0.416825543 |
| 0.499594576 | 0.026712907 | 0.25852912  | 0.286807261 |
| 0.062627644 | 0.361417965 | 0.441125082 | 0.342376637 |
| 0.29085768  | 0.075418535 | 0.311932768 | 0.404326642 |
| 0.39530033  | 0.395925339 | 0.334771113 | 0.272567342 |
| 0.409910075 | 0.253162348 | 0.21332371  | 0.179293094 |
| 0.347050946 | 0.378850012 | 0.137420027 | 0.058215805 |
| 0.246045925 | 0.296602814 | 0.380823613 | 0.313439    |
| 0.230585877 | 0.004761212 | 0.256336983 | 0.259294937 |
| 0.24454545  | 0.234013467 | 0.473522072 | 0.338052802 |
| 0.39708433  | 0.159602014 | 0.365137793 | 0.324834929 |
| 0.299973485 | 0.292921663 | 0.283540029 | 0.006596352 |
| 0.32364135  | 0.186364694 | 0.307986534 | 0.161435983 |
| 0.331805502 | 0.272037043 | 0.147552008 | 0.373303231 |
| 0.406794044 | 0.288951756 | 0.069160217 | 0.082732674 |
| 0.396319485 | 0.379214708 | 0.246058115 | 0.220973341 |
| 0.340878162 | 0.34567812  | 0.231904238 | 0.448021104 |
| 0.344227938 | 0.413462702 | 0.07101377  | 0.386254133 |
| 0.224210778 | 0.362943043 | 0.269811038 | 0.313654954 |
| 0.413509406 | 0.242894585 | 0.166866214 | 0.422662047 |
| 0.332600578 | 0.334409824 | 0.271118669 | 0.456541445 |
| 0.006824159 | 0.413312686 | 0.302245511 | 0.074805617 |
| 0.451741496 | 0.406593543 | 0.254424719 | 0.331094512 |
| 0.381190396 | 0.460583194 | 0.339680501 | 0.26347792  |
| 0.124987138 | 0.054584372 | 0.410296863 | 0.379977919 |
| 0.33448234  | 0.378127959 | 0.171425931 | 0.054646236 |
| 0.381957127 | 0.180293067 | 0.312238671 | 0.230009464 |
| 0.266842592 | 0.204645178 | 0.404535544 | 0.201699958 |
| 0.015531138 | 0.361600572 | 0.242673275 | 0.199399194 |
| 0.303073826 | 0.26573993  | 0.348703579 | 0.427483263 |
| 0.249002278 | 0.188548688 | 0.230936034 | 0.268375289 |
| 0.399017289 | 0.450362945 | 0.019328201 | 0.399469059 |
| 0.410999009 | 0.377102074 | 0.37360806  | 0.401727276 |
| 0.376128978 | 0.441990592 | 0.391375876 | 0.286865461 |
| 0.004232524 | 0.238146423 | 0.175989095 | 0.447228767 |
| 0.300460082 | 0.422004342 | 0.126662693 | 0.186901484 |
| 0.007007719 | 0.369539027 | 0.099626919 | 0.475392095 |
| 0.346771979 | 0.15043393  | 0.013498758 | 0.338505242 |
| 0.165477834 | 0.033634899 | 0.445294051 | 0.381741397 |
| 0.409384438 | 0.346711606 | 0.362855785 | 0.211297485 |
| 0.071088221 | 0.263881368 | 0.070306669 | 0.330579876 |
| 0.255666818 | 0.053417916 | 0.158558136 | 0.407147651 |
| 0.375343915 | 0.408117385 | 0.428946393 | 0.024574646 |

|             |             |             |             |
|-------------|-------------|-------------|-------------|
| 0.213232053 | 0.141382721 | 0.294689439 | 0.274636871 |
| 0.383659534 | 0.420094219 | 0.441515891 | 0.248618995 |
| 0.311744179 | 0.437993488 | 0.445295691 | 0.372517695 |
| 0.081236393 | 0.229667201 | 0.277743541 | 0.170141196 |
| 0.185203695 | 0.368177693 | 0.274272972 | 0.385687563 |
| 0.37089862  | 0.071962366 | 0.408017962 | 0.261862789 |
| 0.443302754 | 0.355656315 | 0.233348326 | 0.314212408 |
| 0.445964992 | 0.409908595 | 0.324391038 | 0.381841723 |
| 0.428053171 | 0.054286248 | 0.074676562 | 0.403583214 |
| 0.486945083 | 0.429843302 | 0.333062739 | 0.199496179 |
| 0.314515796 | 0.213729178 | 0.323899553 | 0.389516571 |
| 0.398955095 | 0.190481645 | 0.205693836 | 0.061934647 |
| 0.045667857 | 0.230768999 | 0.434267704 | 0.471105792 |
| 0.274034774 | 0.388391391 | 0.391847474 | 0.385359276 |
| 0.347691827 | 0.269251062 | 0.429003762 | 0.359296784 |
| 0.494250222 | 0.129161907 | 0.476067211 | 0.360047946 |
| 0.348271462 | 0.377597095 | 0.33991649  | 0.017158997 |
| 0.245010644 | 0.279903843 | 0.127518075 | 0.336316231 |
| 0.260112579 | 0.339284574 | 0.40330546  | 0.350815371 |
| 0.134547238 | 0.010267383 | 0.380292838 | 0.156935086 |
| 0.429784605 | 0.147442005 | 0.351813906 | 0.046551556 |
| 0.474487932 | 0.329745251 | 0.305419801 | 0.126743925 |
| 0.357186906 | 0.007245359 | 0.284906849 | 0.159674917 |
| 0.343711018 | 0.408112442 | 0.256961976 | 0.238461183 |
| 0.169086533 | 0.315473031 | 0.402801475 | 0.309142271 |
| 0.356413822 | 0.082109456 | 0.383122676 | 0.337026713 |
| 0.192776047 | 0.312153873 | 0.432501622 | 0.339729187 |
| 0.370414382 | 0.161537683 | 0.344799079 | 0.258270712 |
| 0.33032082  | 0.308015422 | 0.359028543 | 0.236813732 |
| 0.194659307 | 0.37524814  | 0.249466292 | 0.222425534 |
| 0.310963763 | 0.181327294 | 0.216942194 | 0.478593718 |
| 0.219551961 | 0.309073439 | 0.05847677  | 0.064238104 |
| 0.163721366 | 0.376711748 | 0.338288451 | 0.351702347 |
| 0.380699757 | 0.169833495 | 0.30483307  | 0.312678919 |
| 0.048865259 | 0.212601326 | 0.408644558 | 0.079319332 |
| 0.318556639 | 0.167669457 | 0.004552414 | 0.279074137 |
| 0.40297581  | 0.230619745 |             |             |
| CARHSP1     | 0.357555703 | 0.423335833 | 0.107586828 |
| 0.013605224 | 0.084938884 | 0.239130123 | 0.194274025 |
| 0.35803113  | 0.171291876 | 0.116259915 | 0.291746759 |
| 0.015143387 | 0.300361229 | 0.065334508 | 0.136093751 |
| 0.448086799 | 0.442270506 | 0.260887165 | 0.456545192 |
| 0.389700202 | 0.091956012 | 0.379110904 | 0.301537016 |
| 0.25078615  | 0.015676665 | 0.110052781 | 0.029574525 |
| 0.323807394 | 0.435402098 | 0.262079507 | 0.243888192 |
| 0.409218175 | 0.348909548 | 0.25579634  | 0.182856798 |
| 0.117215834 | 0.414446173 | 0.069686251 | 0.272971783 |
| 0.34628122  | 0.176328039 | 0.347635154 | 0.042298366 |
| 0.000877237 | 0.114324279 | 0.314099065 | 0.364247418 |
| 0.379821899 | 0.231872089 | 0.235824117 | 0.137473994 |
| 0.106065313 | 0.317745825 | 1           | 0.098320375 |
| 0.343306868 | 0.001958072 | 0.389650737 | 0.360929274 |
| 0.112897307 | 0.340182632 | 0.305170512 | 0.359634524 |
| 0.237420508 | 0.365968107 | 0.438252362 | 0.042904888 |

|             |             |             |             |
|-------------|-------------|-------------|-------------|
| 0.104272379 | 0.34360785  | 0.293958382 | 0.270879424 |
| 0.396087251 | 0.266431572 | 0.235671272 | 0.230626435 |
| 0.299319008 | 0.334333011 | 0.309054622 | 0.243328693 |
| 0.005065291 | 0.135962886 | 0.175368025 | 0.329327453 |
| 0.25721922  | 0.315049483 | 0.351236799 | 0.167362682 |
| 0.307591646 | 0.053594648 | 0.360174668 | 0.448521489 |
| 0.019672493 | 0.315134932 | 0.011675464 | 0.228499483 |
| 0.361555196 | 0.39973744  | 0.360073305 | 0.085263242 |
| 0.045931565 | 0.234792984 | 0.28619988  | 0.345747358 |
| 0.368097814 | 0.337349134 | 0.332595813 | 0.128274591 |
| 0.281912169 | 0.257364497 | 0.301310649 | 0.396270156 |
| 0.427737856 | 0.037157173 | 0.287188517 | 0.230856965 |
| 0.2243625   | 0.083954039 | 0.220299625 | 0.04048506  |
| 0.013434761 | 0.088106897 | 0.402791942 | 0.254968738 |
| 0.091357042 | 0.197026276 | 0.069238966 | 0.271322441 |
| 0.344279133 | 0.41052473  | 0.094503191 | 0.219740847 |
| 0.281650708 | 0.214055184 | 0.248753763 | 0.313885546 |
| 0.209701517 | 0.358719869 | 0.22684601  | 0.366654257 |
| 0.408285365 | 0.096251145 | 0.13347769  | 0.304953788 |
| 0.266755112 | 0.431200976 | 0.462652643 | 0.360950856 |
| 0.173901934 | 0.307799655 | 0.237722642 | 0.284789005 |
| 0.239575435 | 0.38996895  | 0.109063708 | 0.33573178  |
| 0.359849812 | 0.039380177 | 0.113062764 | 0.353713988 |
| 0.022240688 | 0.202085202 | 0.397764685 | 0.332142158 |
| 0.32302986  | 0.024542564 | 0.173288326 | 0.233081287 |
| 0.336247912 | 0.226770963 | 0.361087596 | 0.154410004 |
| 0.32924463  | 0.229069264 | 0.07337662  | 0.279370537 |
| 0.172473608 | 0.36918788  | 0.220109606 | 0.061847332 |
| 0.361659076 | 0.384539058 | 0.359541511 | 0.367581135 |
| 0.329812737 | 0.001510599 | 0.114444063 | 0.363887392 |
| 0.251348637 | 0.359988215 | 0.413206865 | 0.165372208 |
| 0.324206393 | 0.227516172 | 0.21069782  | 0.207026328 |
| 0.401666195 | 0.189635885 | 0.170375999 | 0.003673861 |
| 0.153542154 | 0.245139489 | 0.340105821 | 0.159726598 |
| 0.169108457 | 0.191528799 | 0.232220786 | 0.371005212 |
| 0.23248539  | 0.301223337 | 0.112890153 | 0.207845872 |
| 0.272246946 | 0.298108574 | 0.245673739 | 0.327010124 |
| 0.302278363 | 0.271359854 | 0.36595441  | 0.339654562 |
| 0.201879379 | 0.29794838  | 0.16289785  | 0.332013179 |
| 0.294830789 | 0.364482678 | 0.322920555 | 0.323678522 |
| 0.25263511  | 0.365248008 | 0.258001636 | 0.288327698 |
| 0.382117825 | 0.372090156 | 0.159796443 | 0.437349063 |
| 0.005225421 | 0.336910225 | 0.287916881 | 0.181063373 |
| 0.39746344  | 0.208806224 | 0.140419087 | 0.359644999 |
| 0.46173751  | 0.444700979 | 0.421039932 | 0.359531007 |
| 0.249390649 | 0.058874878 | 0.453624071 | 0.341675522 |
| 0.430281179 | 0.314166654 | 0.169538216 | 0.131666278 |
| 0.406343277 | 0.323479341 | 0.324040194 | 0.321411344 |
| 0.28595463  | 0.246506882 | 0.307247735 | 0.345499973 |
| 0.033083501 | 0.250753576 | 0.314560093 | 0.127586035 |
| 0.226783634 | 0.205184095 | 0.329697495 | 0.318365362 |
| 0.224370234 | 0.284364876 | 0.192417023 | 0.096443188 |
| 0.205874762 | 0.435848972 | 0.028138229 | 0.446458582 |
| 0.458268292 | 0.351188612 | 0.371304975 | 0.466265109 |

|             |             |             |             |
|-------------|-------------|-------------|-------------|
| 0.351574985 | 0.314712994 | 0.386275236 | 0.408690092 |
| 0.007227888 | 0.338545081 | 0.250670396 | 0.328132191 |
| 0.364835688 | 0.286808385 | 0.288074918 | 0.24871301  |
| 0.005271958 | 0.214542178 | 0.138763706 | 0.455794554 |
| 0.357348792 | 0.04617221  | 0.024172762 | 0.333928361 |
| 0.254521097 | 0.054473691 | 0.46656981  | 0.270607751 |
| 0.353069855 | 0.314855988 | 0.163131845 | 0.291336323 |
| 0.122033014 | 0.342846444 | 0.023143992 | 0.298393213 |
| 0.293382844 | 0.13896929  | 0.052225798 | 0.464263204 |
| 0.383717618 | 0.302867493 | 0.273450824 | 0.010596483 |
| 0.352535792 | 0.11944371  | 0.303086678 | 0.177499297 |
| 0.37440957  | 0.316668541 | 0.374579525 | 0.309451522 |
| 0.340207764 | 0.32849473  | 0.326304744 | 0.357683812 |
| 0.063426415 | 0.31722205  | 0.36707692  | 0.071103052 |
| 0.305316524 | 0.386025735 | 0.255882435 | 0.1834861   |
| 0.374877252 | 0.038993926 | 0.226337632 | 0.385783051 |
| 0.356713604 | 0.3756859   | 0.091031787 | 0.294567408 |
| 0.31962086  | 0.314929223 | 0.129025101 | 0.347081132 |
| 0.295277191 | 0.128725445 | 0.193971156 | 0.345044489 |
| 0.392588099 | 0.258752619 | 0.375285328 | 0.101574832 |
| 0.37520082  | 0.122881202 | 0.382781683 | 0.239688161 |
| 0.335569275 | 0.282619498 | 0.335574086 | 0.177058291 |
| 0.02735227  | 0.232803988 | 0.300328635 | 0.350647416 |
| 0.120300998 | 0.263792114 | 0.221822598 | 0.247066541 |
| 0.420452884 | 0.297423357 | 0.281944783 | 0.371104297 |
| 0.352987462 | 0.056083694 | 0.447574791 | 0.367562259 |
| 0.371294782 | 0.253465675 | 0.341672114 | 0.011718084 |
| 0.311554894 | 0.13990693  | 0.298970555 | 0.230876255 |
| 0.391874885 | 0.163039983 | 0.287428542 | 0.256446123 |
| 0.125944436 | 0.014482047 | 0.371858712 | 0.198931706 |
| 0.276016088 | 0.283840943 | 0.374879313 | 0.08668844  |
| 0.467703552 | 0.356483952 | 0.351539242 | 0.218309072 |
| 0.277784575 | 0.007872345 | 0.12462725  | 0.084172869 |
| 0.378143871 | 0.350128891 | 0.354173633 | 0.339926664 |
| 0.344622928 | 0.301899615 | 0.333113627 | 0.246008004 |
| 0.363346383 | 0.113200254 | 0.438393861 | 0.363191519 |
| 0.301848723 | 0.32261888  | 0.270773121 | 0.320267905 |
| 0.164606026 | 0.159023837 | 0.159884647 | 0.321471324 |
| 0.375581834 | 0.294952886 | 0.258547752 | 0.335821071 |
| 0.064223921 | 0.296904385 | 0.330188941 | 0.288046604 |
| 0.317368719 | 0.281099557 | 0.323677891 | 0.333986029 |
| 0.299837569 | 0.366094152 | 0.026183614 | 0.018099391 |
| 0.142145884 | 0.197634193 | 0.416961057 | 0.391677427 |
| 0.437513729 | 0.296892062 | 0.143891296 | 0.25558389  |
| 0.111409979 | 0.335154873 | 0.220008704 | 0.079266768 |
| 0.331469768 | 0.284426845 | 0.003101326 | 0.366138906 |
| 0.343387407 | 0.260695096 |             |             |
| CASD1       | 0.063504608 | 0.155525353 | 0.000481429 |
| 0.006303734 | 0.002250646 | 0.016006607 | 0.013775145 |
| 0.066133634 | 0.000546572 | 0.004308267 | 0.039995282 |
| 4.49E-06    | 0.238574682 | 2.74E-05    | 0.000314014 |
| 0.232682786 | 0.032431791 | 0.216757352 | 0.032137818 |
| 0.005440553 | 0.054124134 | 0.059959557 | 0.016296583 |
| 1.95E-06    | 0.004626902 | 0.002840117 | 0.068186758 |



|             |             |             |             |
|-------------|-------------|-------------|-------------|
| 0.255585698 | 0.007105573 | 0.009221484 | 0.207919273 |
| 0.255006462 | 0.029959687 | 0.012303196 | 0.057437003 |
| 0.1134206   | 0.020840972 | 0.220709279 | 0.235134348 |
| 0.012421572 | 0.210341319 | 1.61E-05    | 0.00678463  |
| 0.001977569 | 0.068812639 | 0.058492787 | 0.018119061 |
| 0.013040712 | 0.005167409 | 0.008934823 | 0.040581712 |
| 0.047421296 | 0.098320375 | 1           | 0.078905987 |
| 0.001076166 | 0.100217199 | 0.020193149 | 0.000469486 |
| 0.015942873 | 0.061936917 | 0.079024842 | 0.018577446 |
| 0.090565835 | 0.187881593 | 0.000240442 | 0.001079882 |
| 0.07345648  | 0.224961818 | 0.102800881 | 0.13665739  |
| 0.01303547  | 0.007818522 | 0.083560335 | 0.158937595 |
| 0.218224733 | 0.020520747 | 0.002597678 | 3.73E-06    |
| 0.006451588 | 0.034359297 | 0.101276882 | 0.197066776 |
| 0.051055655 | 0.099596032 | 0.008189736 | 0.106592189 |
| 2.81E-05    | 0.046122852 | 0.209900322 | 0.000652504 |
| 0.181775717 | 0.000270815 | 0.001348611 | 0.171087827 |
| 0.271709699 | 0.094473749 | 0.000704149 | 2.08E-05    |
| 0.001497414 | 0.00452142  | 0.296220129 | 0.054507054 |
| 0.069609988 | 0.071197188 | 0.039059388 | 0.294256712 |
| 0.0017597   | 0.015536555 | 0.11485365  | 0.17989443  |
| 1.78E-05    | 0.001798564 | 0.013806317 | 0.010258999 |
| 0.003917936 | 0.01308842  | 0.006780474 | 0.000865145 |
| 0.00063198  | 0.223733332 | 0.002906666 | 0.002831313 |
| 0.009922055 | 0.00242802  | 0.136481446 | 0.056000863 |
| 0.204222319 | 0.001719364 | 0.014660133 | 0.20882537  |
| 0.018672786 | 0.079704749 | 0.162949016 | 0.046128578 |
| 0.00737204  | 0.003146301 | 0.121761122 | 0.086168175 |
| 0.000418717 | 0.00044172  | 0.03711226  | 0.264889807 |
| 0.221259864 | 0.200692657 | 0.00979191  | 0.017332517 |
| 0.01064502  | 0.021614661 | 0.07045411  | 0.014107593 |
| 0.037649504 | 0.011979038 | 0.042421193 | 0.077650189 |
| 0.004592359 | 0.000484203 | 0.140743568 | 0.00617278  |
| 0.003551755 | 0.107588914 | 0.127385511 | 0.090650125 |
| 0.002007783 | 0.018102445 | 0.019738639 | 0.021074768 |
| 0.017524646 | 0.06754531  | 0.015430151 | 0.029899582 |
| 0.02731784  | 0.000408768 | 0.285619172 | 0.002717892 |
| 0.032993216 | 0.01821476  | 0.002341519 | 0.09229703  |
| 0.025984224 | 0.137536457 | 0.070833785 | 0.135990149 |
| 0.003010275 | 0.005499402 | 0.069913327 | 0.017882615 |
| 0.223701732 | 0.14562755  | 0.002295792 | 0.015431101 |
| 0.031313124 | 0.003418527 | 0.023946624 | 0.127270321 |
| 0.005691333 | 0.00350331  | 1.63E-06    | 0.001276496 |
| 0.092828382 | 0.050002465 | 0.000209108 | 0.009622628 |
| 0.000807369 | 0.001789241 | 0.163226539 | 0.009030822 |
| 0.184065809 | 0.000193124 | 0.011879147 | 0.009654833 |
| 0.086120138 | 0.062519459 | 0.007858737 | 0.127553988 |
| 0.018563811 | 0.29897789  | 0.061108106 | 0.007669604 |
| 0.050876835 | 0.009939692 | 0.009734349 | 0.141427027 |
| 0.171295665 | 0.222045947 | 0.165955486 | 0.012995969 |
| 0.087421317 | 0.018271166 | 0.023163165 | 0.052323247 |
| 0.053493659 | 0.000787692 | 0.154652035 | 4.00E-07    |
| 0.03400143  | 0.094002978 | 0.008719941 | 0.148640473 |
| 0.018540005 | 0.000519222 | 0.011096981 | 0.217730445 |

|             |             |             |             |
|-------------|-------------|-------------|-------------|
| 0.149689568 | 0.133640964 | 0.258294333 | 0.017139027 |
| 1.92E-05    | 0.152896536 | 0.065721247 | 0.260606219 |
| 0.035261459 | 0.060175321 | 0.002761785 | 0.18754878  |
| 0.088191422 | 0.08784153  | 0.100160078 | 0.10835946  |
| 0.072498783 | 0.010604408 | 0.098404727 | 0.000529301 |
| 0.013612117 | 0.139660289 | 0.005412804 | 0.026546152 |
| 0.002771009 | 0.155111199 | 0.032364602 | 0.046625014 |
| 0.018652913 | 0.046443937 | 0.001376221 | 0.005949982 |
| 0.161331902 | 0.009111249 | 0.138874857 | 0.210542358 |
| 0.034050044 | 0.186624134 | 0.205686659 | 0.026650391 |
| 0.06092531  | 0.159764439 | 0.194725877 | 5.98E-06    |
| 0.289816668 | 0.262217864 | 0.042679049 | 0.234325877 |
| 0.022392506 | 0.039967521 | 0.114028035 | 1.52E-06    |
| 0.004271158 | 0.067812646 | 0.127475698 | 0.19987426  |
| 6.61E-05    | 0.016935638 | 0.137377752 | 0.2355337   |
| 0.001784924 | 0.182670281 | 0.035368069 | 0.141594238 |
| 0.061331877 | 0.006956895 | 0.260719006 | 0.078163028 |
| 0.024643073 | 0.000785476 | 0.104769305 | 0.067448926 |
| 0.003174753 | 0.002949057 | 0.191521938 | 0.133187613 |
| 0.056758097 | 0.013961791 | 0.00028724  | 0.221210236 |
| 0.024457491 | 0.159936897 | 0.000999572 | 0.1003648   |
| 0.045875649 | 0.118689523 | 0.208670408 | 0.088622536 |
| 0.081324437 | 0.060273073 | 0.134230201 | 0.010908499 |
| 0.249052293 | 0.23848613  | 0.000761178 | 0.130213622 |
| 0.190264067 | 0.08618205  | 0.00860487  | 0.050552861 |
| 0.017679191 | 0.010429995 | 0.040662136 | 0.117743703 |
| 0.199515233 | 0.000405793 | 0.002513336 | 0.078222637 |
| 0.010191458 | 0.002217643 | 0.023535556 | 0.020864147 |
| 0.044320273 | 0.006233886 | 0.047157928 | 0.111296768 |
| 0.028273867 | 0.193118015 | 0.00817786  | 0.229187851 |
| 0.000175229 | 0.134513761 | 0.003891797 | 0.019334428 |
| 0.162966809 | 0.260948254 | 0.016886131 | 0.000523799 |
| 0.001625432 | 0.072707516 | 0.073535436 | 0.00090725  |
| 0.006966115 | 0.018014731 | 0.042598205 | 0.238794469 |
| 0.031507689 | 0.020426374 | 0.028411577 | 0.070244778 |
| 0.004140469 | 0.128103294 | 0.031524971 | 0.088657826 |
| 0.026389394 | 0.127270767 | 0.0001137   | 0.138240149 |
| 0.008207745 | 0.03289663  | 0.05565165  | 0.265267012 |
| 0.00295456  | 0.057140551 | 0.003101866 | 0.00980678  |
| 2.35E-05    | 0.045448342 | 0.140913725 | 0.024802352 |
| 0.027089588 | 0.035329938 | 0.041318573 | 0.162044681 |
| 0.057975387 | 0.121829153 | 0.045563311 | 0.036209914 |
| 0.015858361 | 0.005668038 | 9.37E-05    | 0.072995167 |
| 0.054570975 | 0.099496044 | 0.067253151 | 0.012591542 |
| 0.098748493 | 0.054238465 | 0.067559079 | 0.192853397 |
| 0.037396418 | 0.22729879  | 0.014084599 | 0.28832136  |
| 0.015897118 | 0.015714619 | 0.00752384  | 0.00918744  |
| 0.001928426 | 0.001832448 | 0.002438839 | 0.238325416 |
| 0.008305745 | 0.055425078 | 0.016216779 | 0.000300893 |
| 0.032440743 | 0.149537358 | 0.194168461 | 0.101191857 |
| 0.190883771 | 0.058529965 | 0.061556495 | 0.007761015 |
| 0.017856742 | 0.007547821 | 0.001272387 | 0.016995225 |
| 0.006664612 | 0.121971015 | 0.140588997 | 0.210688624 |
| 0.012250806 | 0.001159342 | 0.002123168 | 0.010634333 |

|             |             |             |             |
|-------------|-------------|-------------|-------------|
| 0.172935368 | 0.023908373 | 0.052561626 | 0.077843688 |
| 0.025076302 | 1.83E-06    | 0.007627085 | 0.052004338 |
| 0.020525151 |             |             |             |
| CASP1       | 0.27885387  | 0.489154446 | 0.212344937 |
| 0.047891485 | 0.277068913 | 0.439592581 | 0.449180607 |
| 0.278783341 | 0.268407559 | 0.295494412 | 0.486419585 |
| 0.00348153  | 0.24930427  | 0.046098487 | 0.179454537 |
| 0.414553603 | 0.428883071 | 0.503715382 | 0.420686367 |
| 0.324582226 | 0.224937288 | 0.405117658 | 0.441990557 |
| 0.457857374 | 0.005933539 | 0.326549501 | 0.107521861 |
| 0.257261008 | 0.383347398 | 0.397793852 | 0.395201742 |
| 0.356041277 | 0.342450856 | 0.390024931 | 0.373984098 |
| 0.169296544 | 0.496712683 | 0.088300499 | 0.304246738 |
| 0.266579729 | 0.42518284  | 0.34062566  | 0.056942762 |
| 0.003580278 | 0.30092826  | 0.229434791 | 0.421056878 |
| 0.355184582 | 0.421931883 | 0.37320071  | 0.375355223 |
| 0.080447836 | 0.485778265 | 0.343306868 | 0.078905987 |
| 1           | 0.008387009 | 0.503799755 | 0.218447513 |
| 0.2232843   | 0.43620152  | 0.262020223 | 0.402622675 |
| 0.464575197 | 0.507481378 | 0.469903549 | 0.145215616 |
| 0.245932913 | 0.35494306  | 0.26824692  | 0.420170803 |
| 0.437160881 | 0.375632797 | 0.456950007 | 0.25730818  |
| 0.328495074 | 0.269828756 | 0.459198405 | 0.366982263 |
| 0.00322859  | 0.367249322 | 0.374276039 | 0.237110806 |
| 0.252333005 | 0.487412893 | 0.304114447 | 0.426523453 |
| 0.333345541 | 0.087066595 | 0.445621904 | 0.45701549  |
| 0.052386374 | 0.284775593 | 0.023794125 | 0.337082267 |
| 0.328220818 | 0.328190259 | 0.352801973 | 0.238876321 |
| 0.062416505 | 0.281837255 | 0.132442481 | 0.255769857 |
| 0.400309762 | 0.421796849 | 0.493811999 | 0.070157786 |
| 0.217896979 | 0.26707714  | 0.476756222 | 0.502157008 |
| 0.428338435 | 0.030287426 | 0.284800101 | 0.441854251 |
| 0.320469766 | 0.22154847  | 0.460741298 | 0.030299262 |
| 0.031608611 | 0.02153136  | 0.359042409 | 0.321765572 |
| 0.283501661 | 0.426022221 | 0.183426929 | 0.387642692 |
| 0.269947768 | 0.318057694 | 0.316377043 | 0.463722909 |
| 0.305187511 | 0.47045389  | 0.42146494  | 0.355257171 |
| 0.369834648 | 0.330728324 | 0.322527188 | 0.477810441 |
| 0.464539356 | 0.2257022   | 0.234202212 | 0.464949503 |
| 0.223225951 | 0.406322007 | 0.476685055 | 0.355390927 |
| 0.436561947 | 0.415065547 | 0.323795749 | 0.475601475 |
| 0.468003033 | 0.361388079 | 0.05389229  | 0.480336051 |
| 0.500507471 | 0.035179071 | 0.219872461 | 0.338805184 |
| 0.102949844 | 0.426212097 | 0.452639635 | 0.423999739 |
| 0.399910725 | 0.090036962 | 0.373488717 | 0.452283278 |
| 0.418703182 | 0.43933452  | 0.407220412 | 0.329953274 |
| 0.447223368 | 0.321872957 | 0.190076244 | 0.226324073 |
| 0.327940891 | 0.416530013 | 0.192748427 | 0.071761074 |
| 0.315383689 | 0.345914192 | 0.419468318 | 0.386738642 |
| 0.296501342 | 0.007292952 | 0.28531315  | 0.31089068  |
| 0.292972308 | 0.273954075 | 0.512014605 | 0.313543993 |
| 0.405109569 | 0.231954334 | 0.343042413 | 0.446516145 |
| 0.314634768 | 0.332393367 | 0.31871285  | 0.003491985 |
| 0.346166959 | 0.259694471 | 0.395629054 | 0.120165146 |

|             |             |             |             |
|-------------|-------------|-------------|-------------|
| 0.419213405 | 0.238634546 | 0.13575452  | 0.413560353 |
| 0.413488715 | 0.372724457 | 0.050197484 | 0.104286528 |
| 0.430109329 | 0.484340697 | 0.344807078 | 0.244522024 |
| 0.435657775 | 0.403317146 | 0.279377258 | 0.473671354 |
| 0.44644991  | 0.477465533 | 0.104140426 | 0.402571711 |
| 0.324848869 | 0.415872184 | 0.320599949 | 0.3850396   |
| 0.455170818 | 0.304032435 | 0.233108094 | 0.453833991 |
| 0.394534751 | 0.414482372 | 0.229513286 | 0.496028147 |
| 0.00355276  | 0.470663062 | 0.411256983 | 0.104487927 |
| 0.492707684 | 0.460506852 | 0.207297273 | 0.337754409 |
| 0.430257847 | 0.49787335  | 0.358699746 | 0.3112046   |
| 0.161479487 | 0.033140873 | 0.438050077 | 0.458816374 |
| 0.389130622 | 0.475627356 | 0.278169729 | 0.066480531 |
| 0.428942348 | 0.239801489 | 0.393826118 | 0.30467024  |
| 0.380149845 | 0.309731359 | 0.418728094 | 0.256298301 |
| 0.014085003 | 0.385649518 | 0.320470403 | 0.246570946 |
| 0.373824308 | 0.283092824 | 0.406580703 | 0.479947134 |
| 0.374642105 | 0.233520635 | 0.33930076  | 0.264030879 |
| 0.404240251 | 0.487758089 | 0.035507136 | 0.421864958 |
| 0.459912681 | 0.445781221 | 0.42539422  | 0.446289611 |
| 0.40442008  | 0.497505805 | 0.431200661 | 0.324700815 |
| 0.002518268 | 0.290587969 | 0.235911115 | 0.478690134 |
| 0.346870401 | 0.458863844 | 0.160866598 | 0.285845184 |
| 0.005007918 | 0.348740529 | 0.159828701 | 0.496503198 |
| 0.402298591 | 0.127944509 | 0.027850436 | 0.418541066 |
| 0.249913931 | 0.043392345 | 0.485301589 | 0.451546154 |
| 0.451882295 | 0.45481215  | 0.384597694 | 0.261477261 |
| 0.11712183  | 0.337825125 | 0.086211043 | 0.440342369 |
| 0.354804509 | 0.061518973 | 0.191596272 | 0.451865473 |
| 0.393030262 | 0.504681532 | 0.454329936 | 0.021602774 |
| 0.248576203 | 0.202641557 | 0.392983944 | 0.267838224 |
| 0.419605047 | 0.490896364 | 0.473311613 | 0.300937349 |
| 0.407090661 | 0.481625413 | 0.478599002 | 0.412395785 |
| 0.128572599 | 0.270916814 | 0.319207209 | 0.16062817  |
| 0.251167382 | 0.421405986 | 0.376698673 | 0.401517081 |
| 0.425575535 | 0.119382465 | 0.417556768 | 0.29658129  |
| 0.476553753 | 0.408033549 | 0.199876952 | 0.295328261 |
| 0.48534016  | 0.449180443 | 0.321929827 | 0.447094312 |
| 0.454644979 | 0.080992787 | 0.094156927 | 0.467859625 |
| 0.509261509 | 0.487145901 | 0.372488182 | 0.245334414 |
| 0.369053476 | 0.169944473 | 0.352935525 | 0.451205782 |
| 0.417873952 | 0.262944846 | 0.246921467 | 0.073833614 |
| 0.044800886 | 0.20527674  | 0.491806526 | 0.481413898 |
| 0.241751832 | 0.376138226 | 0.447155427 | 0.486659316 |
| 0.401114711 | 0.361630031 | 0.462648898 | 0.407243135 |
| 0.491973955 | 0.176016593 | 0.49620807  | 0.401479693 |
| 0.393600199 | 0.463006009 | 0.406191239 | 0.016459096 |
| 0.337407371 | 0.312538319 | 0.148120868 | 0.448470365 |
| 0.307954592 | 0.334755247 | 0.502759776 | 0.322515538 |
| 0.181432371 | 0.008230832 | 0.430985715 | 0.252716895 |
| 0.466975434 | 0.202058693 | 0.411556408 | 0.08300461  |
| 0.511144137 | 0.394566021 | 0.350280001 | 0.190252129 |
| 0.446321094 | 0.015805263 | 0.320590104 | 0.119422499 |
| 0.396547263 | 0.471667135 | 0.330812515 | 0.296337351 |

|             |             |             |                      |
|-------------|-------------|-------------|----------------------|
| 0.178639933 | 0.431141406 | 0.485016043 | 0.436973828          |
| 0.412482077 | 0.117385651 | 0.435078021 | 0.373640845          |
| 0.241415309 | 0.378326587 | 0.462548956 | 0.396296259          |
| 0.429019522 | 0.179020885 | 0.330336667 | 0.234103158          |
| 0.38874152  | 0.376760351 | 0.473592003 | 0.274218129          |
| 0.177857414 | 0.469429884 | 0.308229802 | 0.299078305          |
| 0.404524973 | 0.247312296 | 0.290401608 | 0.492996195          |
| 0.261377981 | 0.328846352 | 0.086467221 | 0.077896964          |
| 0.239642837 | 0.39164468  | 0.351501379 | 0.379254965          |
| 0.432588961 | 0.208445013 | 0.277300944 | 0.278172812          |
| 0.076482538 | 0.240775103 | 0.476176953 | 0.142107038          |
| 0.418758473 | 0.219008242 | 0.00310445  | 0.276473577          |
| 0.469842988 | 0.328660888 |             |                      |
| CASP3       | 0.001701027 | 0.008351758 | 0.000481505          |
| 0.074362175 | 0.001050393 | 0.007172987 | 0.0092051            |
| 0.001101056 | 0.000242022 | 0.023715099 | 0.00711795           |
| 2.60E-08    | 0.002680776 | 3.67E-06    | 8.48E-06 0.005899338 |
| 0.006352127 | 0.005032892 | 0.004232965 | 0.000866097          |
| 0.022606867 | 0.002320038 | 0.014981154 | 0.006175553          |
| 1.47E-07    | 0.011089182 | 0.065676394 | 0.000861441          |
| 0.004741074 | 0.001128422 | 0.004133693 | 0.005141298          |
| 0.007040182 | 0.008457225 | 0.002675242 | 0.011627637          |
| 0.007126495 | 3.73E-05    | 0.005650409 | 0.002865066          |
| 0.011111735 | 0.006307958 | 2.69E-06    | 0.057117127          |
| 0.003703888 | 0.000613321 | 0.004143312 | 0.000487603          |
| 0.006238019 | 0.00090867  | 0.021864203 | 0.000174299          |
| 0.0061324   | 0.001958072 | 0.001076166 | 0.008387009          |
| 1           | 0.008154109 | 0.00032293  | 0.000470745          |
| 0.0009929   | 0.00227854  | 0.003945006 | 0.006735819          |
| 0.008766992 | 0.006598856 | 0.000393662 | 0.002268646          |
| 0.002023344 | 0.006936204 | 0.026209681 | 0.007031013          |
| 0.003757113 | 0.003054745 | 0.001677471 | 0.006828153          |
| 0.003486825 | 0.001884204 | 0.000328087 | 9.90E-07             |
| 0.010815515 | 0.022878399 | 0.001367006 | 0.00426237           |
| 0.006255409 | 0.001793578 | 0.008003044 | 0.006601316          |
| 2.30E-05    | 0.003125586 | 0.006772077 | 0.000375992          |
| 0.002476516 | 5.61E-05    | 0.000113856 | 0.004195533          |
| 0.004627849 | 0.004248567 | 0.002534954 | 3.66E-06             |
| 0.000152736 | 3.28E-05    | 0.003045762 | 0.001836372          |
| 0.004675343 | 0.00752158  | 7.52E-05    | 0.002975667          |
| 0.000408354 | 0.001544968 | 0.010184524 | 0.006798764          |
| 2.29E-07    | 0.000121143 | 0.004547472 | 0.001197948          |
| 0.009154066 | 0.003723427 | 2.53E-05    | 8.39E-05 7.42E-08    |
| 0.004899514 | 0.000364918 | 0.013643742 | 0.008294604          |
| 0.002126774 | 0.016604133 | 0.000585841 | 0.002714996          |
| 0.001299101 | 0.010163269 | 0.006310697 | 0.010269231          |
| 0.016778345 | 0.00638053  | 0.003297898 | 0.000246981          |
| 0.001091462 | 0.007249546 | 0.003853048 | 0.000283081          |
| 0.000478367 | 0.007282027 | 0.003265384 | 0.005497891          |
| 0.006723968 | 0.000281747 | 0.00722474  | 0.000822303          |
| 0.012444437 | 0.016930724 | 0.003133938 | 0.000633797          |
| 3.23E-06    | 0.002814349 | 0.008294501 | 2.04E-05 0.00069244  |
| 0.002859705 | 0.004785963 | 0.00103429  | 0.007436347          |
| 0.006428767 | 0.002468404 | 0.077217416 | 0.038031232          |

|             |             |             |             |             |
|-------------|-------------|-------------|-------------|-------------|
| 0.011888626 | 0.00218717  | 0.013609303 | 0.002969606 |             |
| 0.047430839 | 0.003920007 | 0.020509702 | 0.000811323 |             |
| 0.003277498 | 0.00126165  | 0.00171838  | 0.00125865  |             |
| 4.55E-05    | 0.00148779  | 0.000456029 | 0.009533988 |             |
| 0.0023318   | 0.003739019 | 0.071338997 | 0.030826813 |             |
| 0.002367568 | 0.006910282 | 0.002042626 | 0.010327557 |             |
| 0.001049101 | 0.001229957 | 0.000427955 | 0.000888453 |             |
| 0.004736681 | 0.001850028 | 0.005643354 | 0.008936532 |             |
| 2.74E-05    | 0.000233571 | 0.013568996 | 0.001659201 | 2.10E-05    |
| 0.006519183 | 0.000440362 | 8.33E-06    | 0.008419555 |             |
| 0.003011965 | 0.006622755 | 4.83E-07    | 3.33E-05    | 0.002799661 |
| 0.010876533 | 0.013844212 | 0.000377077 | 0.012603463 |             |
| 0.005166282 | 0.003925119 | 0.005758327 | 0.00099408  |             |
| 0.012144235 | 2.34E-05    | 0.000651835 | 0.003862127 |             |
| 0.007925519 | 0.008264677 | 0.004696156 | 0.00373366  |             |
| 0.001014469 | 0.000141502 | 0.004688091 | 0.002133689 |             |
| 0.001221188 | 0.00042069  | 0.00606584  | 3.32E-07    |             |
| 0.002937227 | 0.012867984 | 4.76E-05    | 0.010925357 |             |
| 0.009373432 | 0.000333267 | 0.000417504 | 0.00456324  |             |
| 0.005558783 | 0.002245224 | 0.005557128 | 5.16E-05    | 6.10E-07    |
| 0.003843631 | 0.005802329 | 0.005403711 | 0.002073143 |             |
| 0.004368868 | 9.36E-07    | 0.006492549 | 0.000663545 |             |
| 0.010673562 | 0.005158729 | 0.004586111 | 0.001347232 |             |
| 0.000735613 | 0.00089456  | 2.29E-06    | 0.00988976  |             |
| 0.009360583 | 0.010383425 | 0.028923023 | 0.000238405 |             |
| 0.009050212 | 0.002747304 | 0.004141869 | 0.002192217 |             |
| 0.030660046 | 0.002834368 | 0.001951327 | 0.008287954 |             |
| 3.87E-06    | 0.003348501 | 0.00604157  | 0.00118069  |             |
| 0.011037435 | 0.005108742 | 0.00263704  | 0.007127588 |             |
| 0.008072194 | 0.002409773 | 5.70E-09    | 0.00501639  |             |
| 0.003567232 | 0.003852315 | 0.00899883  | 0.004976356 |             |
| 0.000169251 | 0.003267387 | 5.49E-09    | 0.001515805 |             |
| 0.013570342 | 0.004772187 | 0.008289006 | 0.000132212 |             |
| 2.47E-05    | 0.005500801 | 0.003603061 | 4.34E-06    | 0.006701074 |
| 0.013091295 | 0.01037569  | 0.002854727 | 0.010931156 |             |
| 0.004727213 | 0.006630841 | 0.000416455 | 0.000141318 |             |
| 0.013078708 | 0.001663708 | 2.17E-06    | 0.044286552 |             |
| 0.00497926  | 0.007024252 | 0.006303025 | 0.002505435 |             |
| 0.001407287 | 0.002481476 | 0.058937477 | 0.014111358 |             |
| 4.59E-05    | 0.003640726 | 0.005350435 | 0.006157315 |             |
| 0.005111665 | 0.003347315 | 0.007847011 | 0.008266967 |             |
| 0.009171788 | 0.001952308 | 0.006498416 | 0.005753286 |             |
| 0.000389    | 0.001947132 | 0.008109092 | 0.025614769 |             |
| 0.00603656  | 0.00265975  | 0.01496273  | 0.004102339 |             |
| 0.000680187 | 0.00896005  | 0.009920069 | 0.001611615 |             |
| 9.45E-05    | 0.010913798 | 0.00073874  | 0.001936444 |             |
| 0.000758623 | 0.003180319 | 0.000572154 | 1.26E-05    |             |
| 0.003324866 | 0.009382045 | 0.007024504 | 0.009831769 |             |
| 0.054883528 | 0.004995137 | 5.06E-05    | 0.002372381 |             |
| 0.000400221 | 0.001507532 | 0.007258462 | 0.003081456 |             |
| 2.51E-05    | 0.00121674  | 0.000222217 | 0.012380275 |             |
| 0.007228947 | 0.001023941 | 0.001128514 | 0.009566846 |             |
| 0.015050141 | 0.006651007 | 0.004174584 | 0.003669384 |             |
| 0.000823644 | 0.006676115 | 0.027965037 | 0.005809458 |             |

|             |             |             |             |
|-------------|-------------|-------------|-------------|
| 0.001735833 | 0.004131612 | 0.008478161 | 0.004989714 |
| 0.000133405 | 0.006240396 | 0.031560251 | 0.000152883 |
| 0.028324431 | 0.003904286 | 0.002226704 | 0.008791867 |
| 0.000621976 | 0.000238867 | 6.99E-08    | 0.00193734  |
| 0.005953202 | 0.005514653 | 0.000173585 | 0.000931181 |
| 0.003123376 | 0.006850404 | 0.004255212 | 0.005898525 |
| 0.000288691 | 0.017168516 | 0.000111634 | 0.025730148 |
| 6.09E-05    | 0.003246097 | 0.00313335  | 0.001992003 |
| 0.003315634 | 0.000105318 | 0.006329755 | 0.003700727 |
| 0.011410603 | 0.00961802  | 0.001228592 | 0.007553509 |
| 0.000313809 | 0.003934633 | 0.001120975 | 0.002701251 |
| 0.000242369 | 0.006013497 | 1.16E-05    | 0.001085684 |
| 0.009165331 | 0.000171349 | 0.013436898 | 7.15E-05    |
| 0.000981716 | 0.003399004 | 0.002204385 | 0.001113876 |
| 0.0111566   | 0.005479829 | 0.000768889 | 0.005925615 |
| 0.000553482 | 0.000955398 | 0.114930235 | 0.006023306 |
| 0.017250505 | 0.006945839 | 0.002366561 | 0.01484131  |
| 0.005288531 | 0.00017674  | 0.000941762 | 0.003249332 |
| 1.67E-05    | 0.002194504 | 0.000941762 | 0.000210921 |
| 0.002635477 | 0.000456789 | 0.011413645 | 0.001221688 |
| 0.005002667 | 0.001678533 | 1.77E-07    | 0.00024157  |
| CASP4       | 0.332236593 | 0.50126654  | 0.176867458 |
| 0.042675621 | 0.225514934 | 0.418017012 | 0.410689199 |
| 0.325245561 | 0.256075334 | 0.274315672 | 0.476062053 |
| 0.004027812 | 0.290738255 | 0.044049343 | 0.167016635 |
| 0.450639351 | 0.463722417 | 0.486742763 | 0.454044228 |
| 0.362062046 | 0.224763706 | 0.43408612  | 0.462083953 |
| 0.441853255 | 0.006069066 | 0.276174187 | 0.098470832 |
| 0.305334357 | 0.421769115 | 0.379244994 | 0.395953366 |
| 0.394223568 | 0.373743328 | 0.429430409 | 0.37156159  |
| 0.197133313 | 0.493580769 | 0.097414548 | 0.352830795 |
| 0.306260611 | 0.389079797 | 0.378039353 | 0.052740981 |
| 0.003774664 | 0.253896689 | 0.27104248  | 0.453391515 |
| 0.381256401 | 0.398364436 | 0.34560781  | 0.337543576 |
| 0.104653035 | 0.487409687 | 0.389650737 | 0.100217199 |
| 0.503799755 | 0.008154109 | 1           | 0.258689342 |
| 0.191475761 | 0.452001376 | 0.323413062 | 0.444955546 |
| 0.436515128 | 0.502429677 | 0.492454503 | 0.116286012 |
| 0.209513478 | 0.409053682 | 0.325005198 | 0.449896796 |
| 0.456781458 | 0.391545105 | 0.450598367 | 0.302257293 |
| 0.384959018 | 0.311873976 | 0.451051031 | 0.336427712 |
| 0.003289763 | 0.320838023 | 0.378824157 | 0.291841656 |
| 0.30296506  | 0.487704216 | 0.35465143  | 0.392748824 |
| 0.38295078  | 0.072417665 | 0.465709398 | 0.48505115  |
| 0.046509422 | 0.336388547 | 0.021133562 | 0.308260644 |
| 0.383086721 | 0.372297173 | 0.404495759 | 0.205524272 |
| 0.051641766 | 0.26496018  | 0.160449342 | 0.297763807 |
| 0.441057448 | 0.46186928  | 0.505017714 | 0.093383143 |
| 0.252292484 | 0.289233024 | 0.486693908 | 0.495928835 |
| 0.455251706 | 0.024728838 | 0.285763399 | 0.406968339 |
| 0.35729954  | 0.219417198 | 0.419377769 | 0.035168266 |
| 0.025466166 | 0.023863566 | 0.395130206 | 0.305807922 |
| 0.243872377 | 0.38891161  | 0.155670891 | 0.426645905 |
| 0.309606745 | 0.3581571   | 0.261966728 | 0.434906384 |

|             |             |             |             |
|-------------|-------------|-------------|-------------|
| 0.356276763 | 0.437938674 | 0.437596393 | 0.407974152 |
| 0.380463941 | 0.35282565  | 0.302551302 | 0.48911232  |
| 0.474763833 | 0.18668598  | 0.209560101 | 0.465186139 |
| 0.266315613 | 0.437732056 | 0.502789658 | 0.375150565 |
| 0.39942219  | 0.404727299 | 0.364466171 | 0.483417018 |
| 0.434210045 | 0.391140808 | 0.06345724  | 0.48155285  |
| 0.500058546 | 0.03867318  | 0.191614289 | 0.392771653 |
| 0.084091248 | 0.411157019 | 0.471484847 | 0.464060854 |
| 0.438493357 | 0.084763532 | 0.357562296 | 0.43602194  |
| 0.433187695 | 0.418146979 | 0.452029075 | 0.326002351 |
| 0.453866725 | 0.360371143 | 0.152099068 | 0.260177139 |
| 0.288533347 | 0.439140736 | 0.249622467 | 0.083341946 |
| 0.365877509 | 0.374959847 | 0.462280446 | 0.431508226 |
| 0.353451757 | 0.006293822 | 0.263320528 | 0.365243527 |
| 0.338333308 | 0.307953063 | 0.515224529 | 0.27633069  |
| 0.404856063 | 0.274024859 | 0.313051543 | 0.432109754 |
| 0.357431453 | 0.339083497 | 0.326021493 | 0.003175429 |
| 0.298233411 | 0.310251794 | 0.439636519 | 0.118648756 |
| 0.375352995 | 0.235790465 | 0.151402177 | 0.444264923 |
| 0.384389625 | 0.415619509 | 0.050881624 | 0.131466802 |
| 0.414015095 | 0.499531253 | 0.374650033 | 0.287337322 |
| 0.470881118 | 0.40592166  | 0.323359887 | 0.49179882  |
| 0.41611016  | 0.479557963 | 0.132606346 | 0.415392723 |
| 0.375043401 | 0.441490514 | 0.374036689 | 0.426187322 |
| 0.436880789 | 0.350402636 | 0.261197688 | 0.440737524 |
| 0.431753707 | 0.440596538 | 0.204646084 | 0.504773202 |
| 0.003423746 | 0.474177828 | 0.449890683 | 0.138264797 |
| 0.496406476 | 0.423832116 | 0.1846436   | 0.348960635 |
| 0.463192788 | 0.507203048 | 0.3856209   | 0.348534148 |
| 0.196296024 | 0.030743874 | 0.460451697 | 0.488169554 |
| 0.42817254  | 0.487976345 | 0.298965825 | 0.077208196 |
| 0.447907414 | 0.287174263 | 0.44043164  | 0.360277071 |
| 0.420494155 | 0.341377387 | 0.407226728 | 0.305119223 |
| 0.018244738 | 0.388028458 | 0.373630483 | 0.263882365 |
| 0.391984093 | 0.296026272 | 0.450608708 | 0.473291398 |
| 0.393373667 | 0.284380919 | 0.365468707 | 0.217043072 |
| 0.367469186 | 0.502628682 | 0.038876029 | 0.442655523 |
| 0.486978543 | 0.464175317 | 0.442399909 | 0.4748912   |
| 0.423604966 | 0.503636848 | 0.450943932 | 0.361540218 |
| 0.002464794 | 0.328853752 | 0.28411319  | 0.479964849 |
| 0.380677866 | 0.453841409 | 0.197842365 | 0.332077918 |
| 0.004375375 | 0.323793679 | 0.19270371  | 0.504215987 |
| 0.425680274 | 0.104687663 | 0.033446769 | 0.455915597 |
| 0.298466535 | 0.046581745 | 0.50751869  | 0.455456459 |
| 0.476951512 | 0.470394575 | 0.349360676 | 0.306134793 |
| 0.150501605 | 0.373463818 | 0.07010927  | 0.465719145 |
| 0.39483656  | 0.082321227 | 0.168184103 | 0.481821019 |
| 0.4375749   | 0.504900362 | 0.435373801 | 0.022457386 |
| 0.289732083 | 0.216560906 | 0.437021226 | 0.231699691 |
| 0.453454296 | 0.496218025 | 0.487145309 | 0.354452362 |
| 0.447912941 | 0.496443771 | 0.488507025 | 0.455487723 |
| 0.127796272 | 0.317910641 | 0.35560853  | 0.134931287 |
| 0.305642699 | 0.442926509 | 0.414595222 | 0.360507759 |
| 0.454163165 | 0.112773223 | 0.387667921 | 0.339648394 |



|             |             |             |             |
|-------------|-------------|-------------|-------------|
| 0.49297647  | 0.433111641 | 0.173297665 | 0.284479802 |
| 0.5002445   | 0.450347718 | 0.27495712  | 0.453698664 |
| 0.445449283 | 0.108319915 | 0.119266223 | 0.484461185 |
| 0.500918141 | 0.463470615 | 0.401565185 | 0.240049132 |
| 0.396158171 | 0.144834588 | 0.399944959 | 0.423028931 |
| 0.421470555 | 0.317719772 | 0.286787959 | 0.093319809 |
| 0.048651094 | 0.211976212 | 0.500772967 | 0.497786448 |
| 0.205223318 | 0.358315569 | 0.416586338 | 0.474360577 |
| 0.434744118 | 0.395286557 | 0.443542442 | 0.420791993 |
| 0.501059614 | 0.168742526 | 0.503698135 | 0.426363873 |
| 0.438414962 | 0.453767478 | 0.451307777 | 0.018177368 |
| 0.390455513 | 0.296492762 | 0.184143403 | 0.450889131 |
| 0.352815688 | 0.292884335 | 0.502091332 | 0.314194795 |
| 0.192112372 | 0.007506769 | 0.452092356 | 0.291265491 |
| 0.450870064 | 0.238400097 | 0.431339487 | 0.106711795 |
| 0.526861953 | 0.432808699 | 0.403916524 | 0.227360736 |
| 0.459845168 | 0.016477787 | 0.297376921 | 0.103138409 |
| 0.438596113 | 0.488267211 | 0.38624181  | 0.354074344 |
| 0.213675539 | 0.462462382 | 0.494213422 | 0.448483215 |
| 0.432947262 | 0.135077171 | 0.46695758  | 0.39820052  |
| 0.280020981 | 0.413272152 | 0.44163514  | 0.416094228 |
| 0.380837178 | 0.195045753 | 0.29563088  | 0.251002501 |
| 0.418391583 | 0.385618946 | 0.475591621 | 0.321853126 |
| 0.141369932 | 0.472311145 | 0.361362518 | 0.355391811 |
| 0.442810574 | 0.303620715 | 0.328469764 | 0.499223349 |
| 0.316663934 | 0.370491101 | 0.081392389 | 0.072659686 |
| 0.271251815 | 0.365710243 | 0.38808136  | 0.422428868 |
| 0.46186952  | 0.257884599 | 0.245303888 | 0.270563101 |
| 0.095874417 | 0.293121996 | 0.445190879 | 0.145739816 |
| 0.455353792 | 0.273886796 | 0.002286616 | 0.304016871 |
| 0.487224104 | 0.364356498 |             |             |
| CASP7       | 0.243092745 | 0.279979899 | 0.038003142 |
| 0.00194815  | 0.012519183 | 0.124881919 | 0.065838433 |
| 0.178483709 | 0.061197178 | 0.024915174 | 0.175921323 |
| 0.030585993 | 0.197157234 | 0.070213398 | 0.048411975 |
| 0.321087405 | 0.296985399 | 0.084504543 | 0.320485404 |
| 0.237261142 | 0.016313608 | 0.289132705 | 0.142658077 |
| 0.107735711 | 0.032551157 | 0.022348244 | 0.005173114 |
| 0.123390972 | 0.308061086 | 0.112133723 | 0.061115704 |
| 0.311882351 | 0.216267487 | 0.048658371 | 0.025807385 |
| 0.017104975 | 0.291349046 | 0.009304785 | 0.150889711 |
| 0.25137433  | 0.033001113 | 0.222700432 | 0.022553798 |
| 8.75E-05    | 0.026425874 | 0.118511289 | 0.246493178 |
| 0.165855087 | 0.113145511 | 0.104773457 | 0.02916952  |
| 0.024989791 | 0.202977689 | 0.360929274 | 0.020193149 |
| 0.218447513 | 0.00032293  | 0.258689342 | 1           |
| 0.038373977 | 0.12434352  | 0.138487235 | 0.229150384 |
| 0.11927375  | 0.235274545 | 0.284684397 | 0.009101889 |
| 0.035475894 | 0.142585815 | 0.202330138 | 0.10931826  |
| 0.277199075 | 0.065110635 | 0.046577126 | 0.048240437 |
| 0.171927398 | 0.24635192  | 0.172494144 | 0.072290894 |
| 0.007575061 | 0.037064173 | 0.024398952 | 0.292818826 |
| 0.122134674 | 0.204239997 | 0.21777904  | 0.027574689 |
| 0.119743277 | 0.029184982 | 0.198163849 | 0.301499073 |

|             |             |             |             |
|-------------|-------------|-------------|-------------|
| 0.004222128 | 0.213425552 | 0.002579537 | 0.066835614 |
| 0.270059368 | 0.287336545 | 0.268711036 | 0.020246072 |
| 0.028569215 | 0.098005607 | 0.194397503 | 0.249076011 |
| 0.17296298  | 0.124345053 | 0.212577579 | 0.032534287 |
| 0.186241267 | 0.116381022 | 0.061748722 | 0.269961087 |
| 0.310976384 | 0.025490569 | 0.130512655 | 0.106191141 |
| 0.040976566 | 0.012443759 | 0.076755243 | 0.016510675 |
| 0.003929724 | 0.090041916 | 0.290823167 | 0.100284866 |
| 0.017333024 | 0.066661281 | 0.013003238 | 0.10757075  |
| 0.127317558 | 0.326065152 | 0.013618405 | 0.065337067 |
| 0.151087005 | 0.076491592 | 0.059616956 | 0.180819664 |
| 0.029320969 | 0.149625186 | 0.088152199 | 0.219973521 |
| 0.311717155 | 0.026585346 | 0.050864131 | 0.183705669 |
| 0.166128122 | 0.306849198 | 0.316277572 | 0.11963212  |
| 0.025190829 | 0.130841407 | 0.059820513 | 0.131225202 |
| 0.09488973  | 0.215705795 | 0.037154213 | 0.20767341  |
| 0.241899932 | 0.012236483 | 0.041051921 | 0.263550337 |
| 0.002058984 | 0.035668767 | 0.296032324 | 0.198159857 |
| 0.12701761  | 0.004702053 | 0.035126847 | 0.090714482 |
| 0.189038107 | 0.079215016 | 0.215449627 | 0.031392971 |
| 0.21496637  | 0.056475894 | 0.021155524 | 0.179685353 |
| 0.064301856 | 0.236844255 | 0.05820339  | 0.014984699 |
| 0.231754529 | 0.129485837 | 0.243000307 | 0.197984449 |
| 0.250004101 | 0.000201657 | 0.025442944 | 0.265237677 |
| 0.075800462 | 0.270362804 | 0.263184046 | 0.066687896 |
| 0.199769782 | 0.042474194 | 0.091667483 | 0.029700547 |
| 0.360071927 | 0.047529303 | 0.042598939 | 0.006384641 |
| 0.032823519 | 0.066083081 | 0.114093998 | 0.122187217 |
| 0.0272083   | 0.091198712 | 0.130603367 | 0.242292876 |
| 0.104409804 | 0.167704052 | 0.106168898 | 0.075639847 |
| 0.074166404 | 0.151262365 | 0.04805008  | 0.146125441 |
| 0.162522129 | 0.07083993  | 0.267709987 | 0.245038305 |
| 0.030655699 | 0.190903711 | 0.040530833 | 0.106865633 |
| 0.121959583 | 0.221919729 | 0.208110376 | 0.193087782 |
| 0.07434018  | 0.276028338 | 0.06904646  | 0.176706547 |
| 0.216999127 | 0.164254788 | 0.073841474 | 0.288282886 |
| 0.009699344 | 0.178890952 | 0.106001446 | 0.056459509 |
| 0.252088725 | 0.082970176 | 0.065655069 | 0.157515195 |
| 0.323992752 | 0.29659075  | 0.3499982   | 0.253396321 |
| 0.08415478  | 0.06811335  | 0.342197232 | 0.216046937 |
| 0.29477492  | 0.079555922 | 0.022814575 | 0.042855134 |
| 0.2696457   | 0.192352164 | 0.187377016 | 0.160713784 |
| 0.097468244 | 0.042832264 | 0.132504728 | 0.278640976 |
| 0.024576031 | 0.081105082 | 0.190131832 | 0.025964063 |
| 0.050534966 | 0.062221968 | 0.196204008 | 0.190060958 |
| 0.033403072 | 0.105079482 | 0.030324008 | 0.022568927 |
| 0.081366119 | 0.297740364 | 0.003616615 | 0.348740692 |
| 0.313465209 | 0.151707933 | 0.230899213 | 0.333346771 |
| 0.192575567 | 0.191647851 | 0.256879437 | 0.315694646 |
| 0.012009033 | 0.223089478 | 0.148955634 | 0.232947751 |
| 0.253927657 | 0.153682727 | 0.138634219 | 0.059684427 |
| 0.002640284 | 0.101034291 | 0.025332609 | 0.329118472 |
| 0.215569076 | 0.01236262  | 0.002749252 | 0.20115441  |
| 0.134231682 | 0.015036264 | 0.326096515 | 0.103829624 |

|                      |             |             |             |
|----------------------|-------------|-------------|-------------|
| 0.213900239          | 0.097368616 | 0.046413254 | 0.180929085 |
| 0.024042015          | 0.083591288 | 0.00332763  | 0.129480136 |
| 0.07698106           | 0.059936998 | 0.008043648 | 0.327120454 |
| 0.301984245          | 0.150553326 | 0.129321735 | 0.006233128 |
| 0.290665302          | 0.022877028 | 0.167556396 | 0.053196918 |
| 0.292715966          | 0.192756162 | 0.23472226  | 0.191372182 |
| 0.151073237          | 0.215607724 | 0.231445107 | 0.251413841 |
| 0.009434262          | 0.227938138 | 0.270390134 | 0.021637664 |
| 0.17193208           | 0.241676478 | 0.080138614 | 0.076910435 |
| 0.256152935          | 0.004430124 | 0.117403391 | 0.247943873 |
| 0.218089206          | 0.239876157 | 0.031900025 | 0.122659569 |
| 0.207034837          | 0.079126161 | 0.03381479  | 0.114197069 |
| 0.178933685          | 0.03728009  | 0.071310012 | 0.218216076 |
| 0.25598809           | 0.134272787 | 0.271366231 | 0.019242812 |
| 0.237190439          | 0.056328685 | 0.279990199 | 0.04648873  |
| 0.194675271          | 0.156260184 | 0.256409542 | 0.098688167 |
| 0.014639924          | 0.138934079 | 0.178757243 | 0.243109298 |
| 0.04122716           | 0.133556342 | 0.068561351 | 0.081409221 |
| 0.286219114          | 0.068047575 | 0.151532564 | 0.157221742 |
| 0.236402078          | 0.007998017 | 0.324221389 | 0.19191606  |
| 0.306775519          | 0.053376973 | 0.220823437 | 0.003746481 |
| 0.160711691          | 0.032582428 | 0.194357849 | 0.064452761 |
| 0.288935088          | 0.0458055   | 0.135716366 | 0.104191424 |
| 0.024141581          | 0.009747555 | 0.268826144 | 0.042714419 |
| 0.17105188           | 0.082651101 | 0.157877053 | 0.014887434 |
| 0.323632687          | 0.195535788 | 0.293963836 | 0.043794795 |
| 0.072974603          | 0.000765788 | 0.025364979 | 0.048159875 |
| 0.308983268          | 0.231064692 | 0.21539434  | 0.189942343 |
| 0.19157373           | 0.122059926 | 0.179890208 | 0.057207883 |
| 0.219943548          | 0.02814479  | 0.298176645 | 0.113440366 |
| 0.199433472          | 0.084971831 | 0.132468138 | 0.079643464 |
| 0.035830334          | 0.040256125 | 0.043102094 | 0.182409456 |
| 0.235285553          | 0.061765716 | 0.073691155 | 0.137289019 |
| 0.018052281          | 0.06306044  | 0.234318431 | 0.173463587 |
| 0.149703225          | 0.199727035 | 0.086570088 | 0.225685365 |
| 0.102759928          | 0.168145195 | 0.003555262 | 0.003044914 |
| 0.025421764          | 0.056110545 | 0.364043781 | 0.289732092 |
| 0.291728148          | 0.098811529 | 0.046402051 | 0.117153479 |
| 0.023911042          | 0.287030098 | 0.085551682 | 0.009528704 |
| 0.138899804          | 0.082468477 | 0.002786155 | 0.181818571 |
| 0.231069386          | 0.053587223 |             |             |
| CCDC109B 0.05395407  | 0.124258595 | 0.176549822 |             |
| 0.002321402          | 0.054013351 | 0.324487841 | 0.237352335 |
| 0.031495701          | 0.170269472 | 0.066506513 | 0.278754781 |
| 0.015784219          | 0.023909436 | 0.12266553  | 0.155208113 |
| 0.067775889          | 0.067346353 | 0.149515987 | 0.073074432 |
| 0.091029494          | 0.020210744 | 0.177200138 | 0.10947011  |
| 0.257672787          | 0.03877399  | 0.146848969 | 0.013106147 |
| 0.01947199           | 0.053317603 | 0.273485699 | 0.053126702 |
| 0.05898851           | 0.037753558 | 0.019470887 | 0.01970874  |
| 0.001738824          | 0.180644491 | 0.001264266 | 0.028221326 |
| 0.028537216          | 0.095532571 | 0.045633336 | 0.173295197 |
| 2.04E-05 0.181413846 | 0.01513024  | 0.14693866  |             |
| 0.10581983           | 0.302752957 | 0.334604394 | 0.126324929 |

|             |             |             |             |
|-------------|-------------|-------------|-------------|
| 0.00065585  | 0.258515811 | 0.112897307 | 0.000469486 |
| 0.2232843   | 0.000470745 | 0.191475761 | 0.038373977 |
| 1           | 0.149188906 | 0.026762033 | 0.10617519  |
| 0.336045021 | 0.210235456 | 0.095720201 | 0.104562294 |
| 0.318042117 | 0.043586656 | 0.027713491 | 0.059135609 |
| 0.113346179 | 0.032861866 | 0.065664838 | 0.009170372 |
| 0.038329803 | 0.031566242 | 0.308118457 | 0.153113758 |
| 0.009984367 | 0.208477185 | 0.01638649  | 0.046359237 |
| 0.014426827 | 0.254581963 | 0.046499703 | 0.084669372 |
| 0.02669832  | 0.212072736 | 0.147691217 | 0.083138306 |
| 0.012167074 | 0.038325753 | 0.003848989 | 0.153896707 |
| 0.059485564 | 0.036892075 | 0.079393318 | 0.142098609 |
| 0.224541087 | 0.187784506 | 0.02547086  | 0.022101137 |
| 0.084003053 | 0.052531074 | 0.225949054 | 0.001332563 |
| 0.01537166  | 0.09637219  | 0.069295348 | 0.17552019  |
| 0.092225987 | 0.079563097 | 0.144652082 | 0.315792237 |
| 0.017778262 | 0.021375338 | 0.251664997 | 0.001079067 |
| 0.008497473 | 0.011162732 | 0.052265454 | 0.154540405 |
| 0.117305676 | 0.23336437  | 0.034074036 | 0.039538359 |
| 0.023328763 | 0.050180213 | 0.075948774 | 0.176819972 |
| 0.025916917 | 0.22592682  | 0.033542887 | 0.04786083  |
| 0.013374995 | 0.076597217 | 0.212640314 | 0.137585138 |
| 0.211982709 | 0.177536973 | 0.190798947 | 0.24793439  |
| 0.016608479 | 0.067917215 | 0.096834476 | 0.050401713 |
| 0.051014188 | 0.224613352 | 0.023540036 | 0.125804687 |
| 0.28721971  | 0.1092643   | 0.001427744 | 0.252785518 |
| 0.241278818 | 0.001530357 | 0.234026106 | 0.063825948 |
| 0.00567181  | 0.070675016 | 0.16226502  | 0.084986472 |
| 0.051904365 | 0.011989638 | 0.05895002  | 0.202648974 |
| 0.215019248 | 0.180264817 | 0.112223414 | 0.04247726  |
| 0.264774029 | 0.019928024 | 0.195632414 | 0.016437549 |
| 0.319081646 | 0.194010448 | 0.005570746 | 0.006194397 |
| 0.056375277 | 0.052474653 | 0.101122418 | 0.076934131 |
| 0.047416683 | 0.000248016 | 0.0586424   | 0.069489731 |
| 0.023799266 | 0.033842187 | 0.13956983  | 0.369489615 |
| 0.291450913 | 0.007122138 | 0.34256191  | 0.037813696 |
| 0.083386226 | 0.045265697 | 0.054930051 | 0.018281706 |
| 0.120599694 | 0.009837122 | 0.056084846 | 0.150400276 |
| 0.052206702 | 0.156965009 | 0.044467283 | 0.087096134 |
| 0.307244138 | 0.049241356 | 0.05532608  | 0.00639429  |
| 0.116617744 | 0.134377097 | 0.011798144 | 0.026922461 |
| 0.083899812 | 0.047235042 | 0.025542745 | 0.23976805  |
| 0.051291681 | 0.241365351 | 0.003290634 | 0.129309824 |
| 0.024478885 | 0.076597866 | 0.039441717 | 0.062396522 |
| 0.163595074 | 0.071434106 | 0.007746309 | 0.321712047 |
| 0.102729119 | 0.085771648 | 0.194799431 | 0.12789437  |
| 0.025293808 | 0.209842245 | 0.047991951 | 0.003908107 |
| 0.127111389 | 0.263473165 | 0.22808101  | 0.125515928 |
| 0.075686526 | 0.133417369 | 0.096241403 | 0.03505018  |
| 0.006278188 | 0.096303796 | 0.113570392 | 0.170371606 |
| 0.052378376 | 0.07312885  | 0.005241467 | 0.006468832 |
| 0.08293315  | 0.030253268 | 0.082811937 | 0.030957267 |
| 0.035841376 | 0.011311166 | 0.243244185 | 0.049866822 |
| 0.002824249 | 0.113564138 | 0.039813182 | 0.021338458 |

|             |             |             |             |
|-------------|-------------|-------------|-------------|
| 0.035918932 | 0.062239224 | 0.076289374 | 0.29017814  |
| 0.011904607 | 0.011659258 | 0.012478462 | 0.183027786 |
| 0.348818019 | 0.122415236 | 0.000455654 | 0.120029415 |
| 0.086720984 | 0.137104172 | 0.07666483  | 0.087185486 |
| 0.165452728 | 0.223350421 | 0.096079593 | 0.052956026 |
| 0.009753434 | 0.026605291 | 0.016808246 | 0.306627687 |
| 0.046636105 | 0.274450867 | 0.014464136 | 0.010271659 |
| 0.018412248 | 0.347092565 | 0.0015626   | 0.162466169 |
| 0.063763403 | 0.174023325 | 0.00015816  | 0.082067724 |
| 0.016345474 | 0.00362814  | 0.111332228 | 0.122709498 |
| 0.10904262  | 0.063106731 | 0.194316703 | 0.022886763 |
| 0.000860318 | 0.028091371 | 0.02093231  | 0.069180261 |
| 0.028359435 | 0.005876908 | 0.032962157 | 0.092230806 |
| 0.111330204 | 0.185699971 | 0.306808112 | 0.008270443 |
| 0.028913642 | 0.00559739  | 0.057402038 | 0.125100857 |
| 0.139710769 | 0.25384603  | 0.1441603   | 0.035187361 |
| 0.062480531 | 0.189723786 | 0.244059843 | 0.101434088 |
| 0.003101173 | 0.028612757 | 0.041936243 | 0.093581007 |
| 0.022904483 | 0.073637988 | 0.033819996 | 0.330119176 |
| 0.175812678 | 0.002764451 | 0.374105467 | 0.075628023 |
| 0.144618166 | 0.067234614 | 0.211502019 | 0.134361793 |
| 0.196432602 | 0.09539223  | 0.271855577 | 0.116768814 |
| 0.334720455 | 0.000783555 | 0.005818394 | 0.220510282 |
| 0.178765158 | 0.301346272 | 0.064652627 | 0.024794626 |
| 0.050896238 | 0.233409102 | 0.083670792 | 0.08232772  |
| 0.236736228 | 0.020739363 | 0.023388867 | 0.003959485 |
| 0.011642898 | 0.094040866 | 0.193087028 | 0.225416659 |
| 0.253487729 | 0.318504411 | 0.15711944  | 0.119211351 |
| 0.059039149 | 0.015977543 | 0.300678981 | 0.111566296 |
| 0.251684267 | 0.016751267 | 0.162024818 | 0.13255744  |
| 0.134991969 | 0.068229479 | 0.086717625 | 0.005225934 |
| 0.037100846 | 0.058656001 | 0.021751047 | 0.068469293 |
| 0.034080346 | 0.19908743  | 0.175046093 | 0.170633167 |
| 0.009777365 | 0.010834885 | 0.213605016 | 0.00690019  |
| 0.352885237 | 0.007741446 | 0.096724936 | 0.000462959 |
| 0.1333553   | 0.089147054 | 0.084844174 | 0.005828602 |
| 0.061774685 | 6.95E-05    | 0.077064824 | 0.216612299 |
| 0.152971484 | 0.220227143 | 0.057139513 | 0.040978477 |
| 0.029183282 | 0.064642216 | 0.177462309 | 0.041146582 |
| 0.067972349 | 0.001826773 | 0.072322762 | 0.090341494 |
| 0.018276229 | 0.030538977 | 0.319956861 | 0.046852207 |
| 0.160899371 | 0.031983229 | 0.266688792 | 0.095943595 |
| 0.052178609 | 0.042324205 | 0.075760685 | 0.025527884 |
| 0.147407481 | 0.054138162 | 0.048053958 | 0.030698528 |
| 0.061592092 | 0.023529441 | 0.015800886 | 0.259544402 |
| 0.022534356 | 0.090201745 | 0.00399247  | 0.012184437 |
| 0.006909147 | 0.179915848 | 0.102985541 | 0.09427184  |
| 0.075457953 | 0.012876972 | 0.204721084 | 0.179569191 |
| 0.001628239 | 0.035461698 | 0.228142073 | 0.001685214 |
| 0.070352127 | 0.011198998 | 0.011301411 | 0.069617633 |
| 0.219454547 | 0.010333539 |             |             |
| CCDC125     | 0.176240751 | 0.407794486 | 0.108697524 |
| 0.005745377 | 0.074920068 | 0.304279854 | 0.226259746 |
| 0.120557048 | 0.198810672 | 0.09679517  | 0.373061205 |

|             |             |             |             |
|-------------|-------------|-------------|-------------|
| 0.009699396 | 0.188528382 | 0.062256554 | 0.148861527 |
| 0.337645142 | 0.342926204 | 0.243328273 | 0.354968806 |
| 0.189202507 | 0.055399049 | 0.336638192 | 0.221884337 |
| 0.277201912 | 0.014396178 | 0.109796227 | 0.02078618  |
| 0.093627042 | 0.306054965 | 0.227994982 | 0.132243808 |
| 0.303450953 | 0.244016808 | 0.117570046 | 0.09450636  |
| 0.033397552 | 0.443044351 | 0.023573349 | 0.19245321  |
| 0.219767257 | 0.133291698 | 0.260182822 | 0.08054221  |
| 0.000275443 | 0.127550877 | 0.082957696 | 0.303180057 |
| 0.192068656 | 0.261384932 | 0.22947983  | 0.125381415 |
| 0.019479233 | 0.395268622 | 0.340182632 | 0.015942873 |
| 0.43620152  | 0.0009929   | 0.452001376 | 0.12434352  |
| 0.149188906 | 1           | 0.127249527 | 0.281582939 |
| 0.333498266 | 0.443773806 | 0.386325522 | 0.063497822 |
| 0.135794953 | 0.17243048  | 0.192384288 | 0.190258797 |
| 0.375260575 | 0.11111279  | 0.170416727 | 0.07633293  |
| 0.20932665  | 0.214713251 | 0.365690978 | 0.192529966 |
| 0.004436109 | 0.143897252 | 0.087123067 | 0.213584882 |
| 0.121662923 | 0.3970569   | 0.189463849 | 0.150579358 |
| 0.120877812 | 0.076562289 | 0.270454454 | 0.3672177   |
| 0.014864521 | 0.228444356 | 0.006791905 | 0.193305745 |
| 0.276111082 | 0.260304576 | 0.259195863 | 0.111050437 |
| 0.06416831  | 0.203029815 | 0.093965224 | 0.200318381 |
| 0.226998947 | 0.177490426 | 0.439700038 | 0.027727812 |
| 0.158116419 | 0.182784997 | 0.192980203 | 0.428702288 |
| 0.363365567 | 0.033648326 | 0.20934344  | 0.268789932 |
| 0.113424909 | 0.062244391 | 0.233578942 | 0.007525576 |
| 0.007446438 | 0.022943643 | 0.291521749 | 0.190168779 |
| 0.102096149 | 0.190347513 | 0.044347297 | 0.176788063 |
| 0.103545342 | 0.289893675 | 0.103704504 | 0.18790626  |
| 0.172281744 | 0.24591556  | 0.114425898 | 0.231027541 |
| 0.091843371 | 0.19499074  | 0.182172228 | 0.392839021 |
| 0.462160546 | 0.111094193 | 0.146526551 | 0.331574558 |
| 0.159992789 | 0.327940919 | 0.394266705 | 0.156664724 |
| 0.118743992 | 0.235982537 | 0.110677345 | 0.258035372 |
| 0.280648793 | 0.235277215 | 0.021898567 | 0.397341135 |
| 0.458209992 | 0.00956421  | 0.145475387 | 0.283820902 |
| 0.014796535 | 0.177749346 | 0.415114969 | 0.305300502 |
| 0.205224157 | 0.017856348 | 0.105737975 | 0.234686722 |
| 0.287353868 | 0.185991291 | 0.301147    | 0.094571264 |
| 0.349422304 | 0.097458248 | 0.097474322 | 0.163390126 |
| 0.173149913 | 0.318855061 | 0.067931773 | 0.036366483 |
| 0.225155666 | 0.154986023 | 0.334209966 | 0.228440974 |
| 0.229306659 | 0.000552726 | 0.085266152 | 0.222225228 |
| 0.109525233 | 0.23150107  | 0.417931653 | 0.181295081 |
| 0.312686835 | 0.08333283  | 0.203455402 | 0.127002044 |
| 0.324388755 | 0.116744191 | 0.121046449 | 0.004336521 |
| 0.146109671 | 0.068633242 | 0.178349903 | 0.123184222 |
| 0.113567989 | 0.162990232 | 0.100267984 | 0.327500342 |
| 0.23637893  | 0.243805991 | 0.061040051 | 0.060139829 |
| 0.17571858  | 0.32535408  | 0.082653343 | 0.118132821 |
| 0.285876015 | 0.131708275 | 0.215795295 | 0.443978532 |
| 0.150135657 | 0.365828645 | 0.051701422 | 0.234205862 |
| 0.145557026 | 0.32324413  | 0.229129461 | 0.273571572 |

|             |             |             |             |
|-------------|-------------|-------------|-------------|
| 0.191635749 | 0.259686745 | 0.070199628 | 0.340898169 |
| 0.239404632 | 0.224053027 | 0.140811769 | 0.418697073 |
| 0.007686031 | 0.313990118 | 0.174473089 | 0.051235961 |
| 0.391370589 | 0.263223934 | 0.149741057 | 0.187485755 |
| 0.360422389 | 0.429895002 | 0.357192981 | 0.234557983 |
| 0.064245042 | 0.048548854 | 0.402252098 | 0.373790015 |
| 0.307573149 | 0.172211447 | 0.060356978 | 0.048161588 |
| 0.338571864 | 0.154883956 | 0.244586021 | 0.139067919 |
| 0.168670395 | 0.086281548 | 0.255884977 | 0.222028613 |
| 0.012150913 | 0.156193916 | 0.176367991 | 0.075890482 |
| 0.111379835 | 0.143894622 | 0.304446237 | 0.394530397 |
| 0.092619182 | 0.081440049 | 0.080312877 | 0.112990652 |
| 0.248605045 | 0.408672922 | 0.009973995 | 0.403548309 |
| 0.37352036  | 0.274828727 | 0.316717213 | 0.374853094 |
| 0.237268122 | 0.408440373 | 0.346428124 | 0.294195461 |
| 0.004312969 | 0.213881215 | 0.153913119 | 0.447531677 |
| 0.259414923 | 0.326463655 | 0.078560763 | 0.077385213 |
| 0.007743515 | 0.215137732 | 0.031777913 | 0.462840518 |
| 0.292227095 | 0.087249455 | 0.007207733 | 0.292596259 |
| 0.140732691 | 0.019060596 | 0.409886025 | 0.195812141 |
| 0.345386231 | 0.175810501 | 0.153174066 | 0.187188294 |
| 0.02461705  | 0.140305717 | 0.0252118   | 0.21123605  |
| 0.12792757  | 0.054771375 | 0.046542573 | 0.390929288 |
| 0.341607106 | 0.348027436 | 0.305239562 | 0.006770305 |
| 0.216712027 | 0.037290914 | 0.238858834 | 0.13677973  |
| 0.363086747 | 0.412471807 | 0.395196162 | 0.223214642 |
| 0.219471256 | 0.389097857 | 0.411978257 | 0.329672584 |
| 0.021786835 | 0.198231808 | 0.249394922 | 0.05976065  |
| 0.140911898 | 0.326326659 | 0.125662797 | 0.233695119 |
| 0.344161733 | 0.016754684 | 0.289511642 | 0.19214842  |
| 0.383198993 | 0.3096842   | 0.123422613 | 0.193919879 |
| 0.398721581 | 0.217504107 | 0.156757715 | 0.209712474 |
| 0.37258267  | 0.020733377 | 0.059707141 | 0.394474564 |
| 0.43706345  | 0.351293535 | 0.291713316 | 0.059383354 |
| 0.281536282 | 0.134350516 | 0.329694701 | 0.18363715  |
| 0.282708176 | 0.129164105 | 0.19650481  | 0.033481787 |
| 0.01599899  | 0.126689488 | 0.378877114 | 0.439406361 |
| 0.135127815 | 0.241458546 | 0.164961258 | 0.206726528 |
| 0.311745955 | 0.101629859 | 0.314106916 | 0.193062404 |
| 0.464429954 | 0.042249627 | 0.451174118 | 0.227858482 |
| 0.35553455  | 0.14426028  | 0.312091743 | 0.011766209 |
| 0.189261576 | 0.098889987 | 0.087604214 | 0.154654947 |
| 0.250716064 | 0.151497902 | 0.331319815 | 0.199349771 |
| 0.051410113 | 0.007785888 | 0.379452563 | 0.060728922 |
| 0.386280972 | 0.07622095  | 0.196225255 | 0.016987351 |
| 0.441540921 | 0.211961999 | 0.293472637 | 0.068989093 |
| 0.135793082 | 0.001913617 | 0.110381372 | 0.092836496 |
| 0.361138126 | 0.416979091 | 0.231332823 | 0.152349024 |
| 0.116422651 | 0.225431753 | 0.338891908 | 0.127740116 |
| 0.308392843 | 0.024516801 | 0.342202719 | 0.212415694 |
| 0.177726087 | 0.135979418 | 0.332070844 | 0.172912241 |
| 0.154318648 | 0.11520565  | 0.191178234 | 0.187771561 |
| 0.284386071 | 0.172711398 | 0.17237007  | 0.119055196 |
| 0.075563914 | 0.145735635 | 0.247701067 | 0.201006912 |

|             |             |             |             |
|-------------|-------------|-------------|-------------|
| 0.196376014 | 0.161461922 | 0.094167829 | 0.450338462 |
| 0.127593394 | 0.18881476  | 0.012573487 | 0.017723154 |
| 0.055902545 | 0.169740314 | 0.357480407 | 0.337397872 |
| 0.354099202 | 0.097510001 | 0.161359126 | 0.199800982 |
| 0.030413566 | 0.217507077 | 0.263972726 | 0.023772032 |
| 0.236060896 | 0.107558415 | 0.002439574 | 0.177750274 |
| 0.390760048 | 0.086952239 |             |             |
| CCDC58      | 0.209223375 | 0.382035548 | 0.023174476 |
| 0.007210615 | 0.024782333 | 0.112559924 | 0.076870644 |
| 0.147811262 | 0.058597415 | 0.054104837 | 0.173817219 |
| 0.002646683 | 0.299425333 | 0.01332031  | 0.03021818  |
| 0.437357955 | 0.43699816  | 0.113379689 | 0.423250776 |
| 0.144062244 | 0.060448505 | 0.220827725 | 0.17176136  |
| 0.109663052 | 0.002696843 | 0.034937116 | 0.019754896 |
| 0.144232504 | 0.424450273 | 0.078092604 | 0.100021598 |
| 0.42463945  | 0.358114443 | 0.150773406 | 0.084225743 |
| 0.086968429 | 0.332982975 | 0.033966751 | 0.274256732 |
| 0.378458911 | 0.064666972 | 0.357412936 | 0.012082836 |
| 0.001199742 | 0.032257672 | 0.131342388 | 0.223296891 |
| 0.124749289 | 0.093322638 | 0.062682319 | 0.054295906 |
| 0.070524313 | 0.202868053 | 0.305170512 | 0.061936917 |
| 0.262020223 | 0.00227854  | 0.323413062 | 0.138487235 |
| 0.026762033 | 0.127249527 | 1           | 0.2471854   |
| 0.117453498 | 0.286024318 | 0.406310343 | 0.012040679 |
| 0.028374089 | 0.191343773 | 0.34133991  | 0.19153288  |
| 0.357658049 | 0.113142138 | 0.100774797 | 0.130771993 |
| 0.297712524 | 0.338784323 | 0.137511649 | 0.058117478 |
| 0.001477684 | 0.045614882 | 0.091752853 | 0.29297176  |
| 0.214712788 | 0.205632296 | 0.222759916 | 0.067438911 |
| 0.167010053 | 0.010311018 | 0.170036704 | 0.421923113 |
| 0.008194686 | 0.307408302 | 0.003159359 | 0.051553148 |
| 0.343492468 | 0.432681966 | 0.279070299 | 0.028286586 |
| 0.007106858 | 0.053613983 | 0.101557598 | 0.384813953 |
| 0.181393549 | 0.166911634 | 0.258770536 | 0.06824936  |
| 0.311078326 | 0.119299468 | 0.120679695 | 0.327335957 |
| 0.409493016 | 0.003409967 | 0.076486601 | 0.086380103 |
| 0.140692093 | 0.055167914 | 0.072675756 | 0.017735939 |
| 0.00292328  | 0.01368238  | 0.405654627 | 0.06571432  |
| 0.033356282 | 0.066253858 | 0.021298492 | 0.207712726 |
| 0.132718931 | 0.411690624 | 0.02963878  | 0.081525587 |
| 0.259249081 | 0.09339741  | 0.114997294 | 0.292055997 |
| 0.094342887 | 0.119789128 | 0.061890596 | 0.304112722 |
| 0.304640987 | 0.021944769 | 0.037381168 | 0.170562913 |
| 0.294881925 | 0.406736213 | 0.429112604 | 0.114041317 |
| 0.064804001 | 0.090213507 | 0.159748204 | 0.179024944 |
| 0.088827906 | 0.146974876 | 0.033164707 | 0.187286514 |
| 0.27623814  | 0.013683065 | 0.029542187 | 0.322062266 |
| 0.009675324 | 0.081572016 | 0.342294683 | 0.284054902 |
| 0.183502947 | 0.020117358 | 0.075302907 | 0.104274963 |
| 0.145294111 | 0.084329548 | 0.249415037 | 0.080488302 |
| 0.17171069  | 0.150072539 | 0.016034197 | 0.311995534 |
| 0.042934197 | 0.175610454 | 0.193136585 | 0.047471017 |
| 0.233676504 | 0.127506748 | 0.324895895 | 0.207974059 |
| 0.31356159  | 0.001043466 | 0.050967002 | 0.245560272 |



|             |             |             |             |
|-------------|-------------|-------------|-------------|
| 0.172693332 | 0.34076744  | 0.361851057 | 0.041481939 |
| 0.121268538 | 0.125921528 | 0.054052161 | 0.086623862 |
| 0.34676993  | 0.10074663  | 0.098200574 | 0.000921071 |
| 0.038533838 | 0.158385932 | 0.159229435 | 0.036137873 |
| 0.057695715 | 0.066543401 | 0.066302197 | 0.351239602 |
| 0.0731521   | 0.276008721 | 0.018479857 | 0.084435798 |
| 0.087508131 | 0.227899206 | 0.123013258 | 0.151676979 |
| 0.271387503 | 0.105670797 | 0.407691285 | 0.262510545 |
| 0.071052768 | 0.205044969 | 0.08475912  | 0.119975817 |
| 0.199334166 | 0.348780191 | 0.330877395 | 0.281136132 |
| 0.089972244 | 0.245465231 | 0.097628058 | 0.13823221  |
| 0.181379116 | 0.14915396  | 0.035838022 | 0.36862912  |
| 0.00137033  | 0.1538488   | 0.184313327 | 0.110882572 |
| 0.349133095 | 0.093311487 | 0.032298735 | 0.101797848 |
| 0.42749836  | 0.371384515 | 0.357279627 | 0.379412253 |
| 0.109286452 | 0.007933214 | 0.391774765 | 0.25777739  |
| 0.433611115 | 0.122696325 | 0.088927774 | 0.035189404 |
| 0.36070034  | 0.185633118 | 0.255126488 | 0.198154619 |
| 0.175863435 | 0.111053826 | 0.087695306 | 0.250420619 |
| 0.019483101 | 0.10531223  | 0.250958994 | 0.094793013 |
| 0.118694849 | 0.097194392 | 0.316563885 | 0.166289997 |
| 0.10700101  | 0.161810684 | 0.1155591   | 0.024891271 |
| 0.061995598 | 0.391057    | 0.012580001 | 0.374926775 |
| 0.419817717 | 0.147097118 | 0.351425015 | 0.418776475 |
| 0.137466892 | 0.2281202   | 0.354606125 | 0.390546609 |
| 0.001021577 | 0.373759988 | 0.267069708 | 0.210802916 |
| 0.386935557 | 0.142677956 | 0.112354299 | 0.133666499 |
| 0.000752904 | 0.061496409 | 0.097286451 | 0.370875283 |
| 0.332734654 | 0.011987541 | 0.016977088 | 0.272273773 |
| 0.23501513  | 0.015442453 | 0.418717106 | 0.124033269 |
| 0.309339307 | 0.125416913 | 0.059455784 | 0.325967554 |
| 0.101658875 | 0.129955236 | 0.007645221 | 0.190277873 |
| 0.138258077 | 0.079440004 | 0.026251216 | 0.429953125 |
| 0.333117609 | 0.190062583 | 0.104614393 | 0.010477126 |
| 0.385990987 | 0.07048914  | 0.276386107 | 0.032389949 |
| 0.281037584 | 0.212048034 | 0.296224994 | 0.324585489 |
| 0.19913028  | 0.251695713 | 0.237092336 | 0.324179695 |
| 0.029793191 | 0.344229556 | 0.388744267 | 0.017909811 |
| 0.220137016 | 0.366799059 | 0.151517894 | 0.065515971 |
| 0.216728276 | 0.021583766 | 0.088658967 | 0.16310295  |
| 0.289749895 | 0.379702994 | 0.026917172 | 0.062675276 |
| 0.258154899 | 0.108886489 | 0.035293144 | 0.110300114 |
| 0.144990142 | 0.090529317 | 0.080753648 | 0.215975468 |
| 0.322581464 | 0.139348127 | 0.382240416 | 0.057783424 |
| 0.353632704 | 0.020318015 | 0.321408124 | 0.076938545 |
| 0.12532445  | 0.230701316 | 0.369133379 | 0.065880868 |
| 0.026152311 | 0.074121442 | 0.236588321 | 0.271311714 |
| 0.027796201 | 0.074574046 | 0.075598944 | 0.117263298 |
| 0.411798239 | 0.128848622 | 0.120317878 | 0.115039767 |
| 0.26438711  | 0.037447495 | 0.370454704 | 0.140676902 |
| 0.307285889 | 0.100052211 | 0.300662794 | 0.009069881 |
| 0.25081175  | 0.064272497 | 0.11809726  | 0.114958712 |
| 0.429408146 | 0.043381072 | 0.18542896  | 0.075281627 |
| 0.059115097 | 0.001558081 | 0.212106154 | 0.115209105 |

|             |             |             |             |
|-------------|-------------|-------------|-------------|
| 0.151103727 | 0.108237061 | 0.123937898 | 0.07196077  |
| 0.409988251 | 0.186185734 | 0.336211172 | 0.107171166 |
| 0.122514337 | 0.005087903 | 0.057515601 | 0.016473626 |
| 0.285230996 | 0.23189166  | 0.255051119 | 0.203592327 |
| 0.12089125  | 0.199469979 | 0.191962294 | 0.112540171 |
| 0.356082187 | 0.065558491 | 0.427631488 | 0.124203057 |
| 0.352377408 | 0.145634329 | 0.112687545 | 0.119795009 |
| 0.055765664 | 0.068331261 | 0.046539234 | 0.093467447 |
| 0.382823486 | 0.097897242 | 0.119888885 | 0.164561963 |
| 0.015174561 | 0.111742459 | 0.301271893 | 0.306048602 |
| 0.199471968 | 0.302244013 | 0.124971561 | 0.243976079 |
| 0.190904769 | 0.162093181 | 0.016081784 | 0.017361224 |
| 0.108507753 | 0.07055306  | 0.352714094 | 0.320010599 |
| 0.408126405 | 0.150314701 | 0.03815476  | 0.064900804 |
| 0.053549105 | 0.33478371  | 0.105590617 | 0.037658913 |
| 0.192115507 | 0.180699474 | 0.000234889 | 0.120151073 |
| 0.228622052 | 0.125981456 |             |             |
| CCDC86      | 0.272024904 | 0.471527227 | 0.105678706 |
| 0.020805628 | 0.09299456  | 0.24379326  | 0.206583418 |
| 0.257781837 | 0.157574928 | 0.156937173 | 0.309102104 |
| 0.006825862 | 0.277771831 | 0.041065492 | 0.088969763 |
| 0.462416006 | 0.456699469 | 0.2524233   | 0.452181993 |
| 0.279611273 | 0.132872542 | 0.311765545 | 0.297026151 |
| 0.253341597 | 0.00748248  | 0.133029924 | 0.054562165 |
| 0.224286195 | 0.431482757 | 0.235291761 | 0.269810046 |
| 0.418331709 | 0.360171784 | 0.252111521 | 0.173458092 |
| 0.114472864 | 0.455481045 | 0.051128591 | 0.278417233 |
| 0.321064231 | 0.204362424 | 0.359881991 | 0.034209033 |
| 0.001735435 | 0.124297487 | 0.223099622 | 0.311293633 |
| 0.260421789 | 0.23696953  | 0.205673517 | 0.165318887 |
| 0.086066564 | 0.330538331 | 0.359634524 | 0.079024842 |
| 0.402622675 | 0.003945006 | 0.444955546 | 0.229150384 |
| 0.10617519  | 0.281582939 | 0.2471854   | 1           |
| 0.239370469 | 0.424857228 | 0.467563758 | 0.063888557 |
| 0.113511161 | 0.283807757 | 0.309878859 | 0.271218644 |
| 0.428874211 | 0.252545205 | 0.242967841 | 0.182433325 |
| 0.291363496 | 0.315302803 | 0.266176595 | 0.191537489 |
| 0.004487725 | 0.157374356 | 0.191089088 | 0.260709708 |
| 0.201351706 | 0.344531646 | 0.27293587  | 0.190975494 |
| 0.270183426 | 0.046159419 | 0.299110933 | 0.469093326 |
| 0.027576418 | 0.305237001 | 0.011464715 | 0.170749716 |
| 0.363308974 | 0.389831588 | 0.309732922 | 0.115999357 |
| 0.033643068 | 0.167712733 | 0.173917611 | 0.320656872 |
| 0.304997622 | 0.286754735 | 0.390210479 | 0.067747546 |
| 0.260435463 | 0.218779104 | 0.268499414 | 0.454658715 |
| 0.461451703 | 0.018089975 | 0.191062455 | 0.228064644 |
| 0.200117673 | 0.106823169 | 0.218183192 | 0.032809609 |
| 0.019450343 | 0.03068268  | 0.409074067 | 0.216393861 |
| 0.119952345 | 0.208517383 | 0.078499493 | 0.253259367 |
| 0.245602604 | 0.383876527 | 0.102368607 | 0.229405445 |
| 0.267644653 | 0.223954908 | 0.245296473 | 0.317032223 |
| 0.191933217 | 0.259522103 | 0.196777899 | 0.412357654 |
| 0.430721787 | 0.103011145 | 0.129113134 | 0.286334459 |
| 0.255145662 | 0.446054948 | 0.490176029 | 0.269999071 |

|             |             |             |             |
|-------------|-------------|-------------|-------------|
| 0.188785914 | 0.254699456 | 0.257226433 | 0.280474591 |
| 0.227504819 | 0.271552665 | 0.05105104  | 0.307207509 |
| 0.419828065 | 0.031139007 | 0.111458286 | 0.344232413 |
| 0.029924893 | 0.20850217  | 0.434770567 | 0.350743086 |
| 0.263223322 | 0.046654498 | 0.207532204 | 0.252615799 |
| 0.286101575 | 0.234817117 | 0.30552689  | 0.193199659 |
| 0.285679033 | 0.246976666 | 0.079061315 | 0.266790941 |
| 0.163983385 | 0.292713454 | 0.192261857 | 0.057587147 |
| 0.258003348 | 0.268343921 | 0.40214702  | 0.294882531 |
| 0.304585135 | 0.00306193  | 0.15510146  | 0.287344963 |
| 0.265974073 | 0.3242726   | 0.468241239 | 0.154480789 |
| 0.260935386 | 0.175316382 | 0.181533262 | 0.205509611 |
| 0.36813026  | 0.236198622 | 0.200739175 | 0.004354072 |
| 0.159693743 | 0.229989963 | 0.282334852 | 0.100996461 |
| 0.191517569 | 0.171387903 | 0.121318647 | 0.412300756 |
| 0.226611957 | 0.3209821   | 0.052805044 | 0.101563662 |
| 0.247373601 | 0.328607215 | 0.24294693  | 0.252053037 |
| 0.338116162 | 0.271733805 | 0.349089531 | 0.380903258 |
| 0.196080031 | 0.330063159 | 0.091477469 | 0.272391112 |
| 0.241217167 | 0.399527164 | 0.340591251 | 0.339150844 |
| 0.267207266 | 0.269354714 | 0.184992678 | 0.26646813  |
| 0.289148099 | 0.278560207 | 0.143268031 | 0.468423832 |
| 0.003653877 | 0.280837254 | 0.271603064 | 0.101106606 |
| 0.451431507 | 0.220350879 | 0.120684894 | 0.254357355 |
| 0.45902708  | 0.468481063 | 0.39686623  | 0.362072249 |
| 0.177896783 | 0.02983487  | 0.461321714 | 0.344263586 |
| 0.433358594 | 0.29063571  | 0.156181499 | 0.054778145 |
| 0.423929611 | 0.209831115 | 0.300101031 | 0.260459583 |
| 0.250028181 | 0.198676958 | 0.244175743 | 0.251527463 |
| 0.020249284 | 0.259205824 | 0.271444477 | 0.147276705 |
| 0.241245795 | 0.224791407 | 0.374695117 | 0.285273038 |
| 0.217270922 | 0.231165297 | 0.207709553 | 0.105060983 |
| 0.19689492  | 0.477569951 | 0.019842956 | 0.440879037 |
| 0.475933967 | 0.283295411 | 0.408845909 | 0.470307743 |
| 0.293952093 | 0.354887045 | 0.427712181 | 0.377264606 |
| 0.003389252 | 0.340129834 | 0.246294654 | 0.347447473 |
| 0.39040195  | 0.27838872  | 0.159754106 | 0.205278174 |
| 0.002939435 | 0.196874973 | 0.132907675 | 0.476390573 |
| 0.38659326  | 0.051629567 | 0.017382784 | 0.346384374 |
| 0.225756206 | 0.025952279 | 0.492032163 | 0.28702662  |
| 0.406137118 | 0.271140468 | 0.190294569 | 0.296073587 |
| 0.1117183   | 0.234890988 | 0.032780099 | 0.283326013 |
| 0.241769149 | 0.080690959 | 0.080513236 | 0.472287845 |
| 0.408620687 | 0.301109644 | 0.246796035 | 0.02149264  |
| 0.324059449 | 0.133841316 | 0.324105206 | 0.129368408 |
| 0.381021394 | 0.330549358 | 0.413804177 | 0.314961706 |
| 0.290074973 | 0.384061631 | 0.368663384 | 0.393357121 |
| 0.061981472 | 0.324442792 | 0.380847008 | 0.073398337 |
| 0.238671903 | 0.412209683 | 0.260934171 | 0.196693788 |
| 0.29903095  | 0.051528858 | 0.222455983 | 0.265764133 |
| 0.408917254 | 0.416832801 | 0.100809935 | 0.193084448 |
| 0.38022047  | 0.26940421  | 0.137345489 | 0.268597153 |
| 0.268671986 | 0.103908957 | 0.099805685 | 0.321778926 |
| 0.44702452  | 0.259287614 | 0.406865918 | 0.136022527 |

|              |             |             |             |
|--------------|-------------|-------------|-------------|
| 0.383778569  | 0.089792718 | 0.3625305   | 0.232070349 |
| 0.276765943  | 0.239376323 | 0.314662832 | 0.102661659 |
| 0.046146419  | 0.192775504 | 0.358418115 | 0.400869217 |
| 0.116356385  | 0.223844007 | 0.238022303 | 0.256016544 |
| 0.4324442    | 0.24626307  | 0.260525211 | 0.278711823 |
| 0.40584818   | 0.082049232 | 0.479131956 | 0.305756739 |
| 0.372999844  | 0.274609879 | 0.363191335 | 0.011912127 |
| 0.260327008  | 0.18024588  | 0.16577555  | 0.24811063  |
| 0.374064196  | 0.165376332 | 0.2912045   | 0.213822612 |
| 0.118229416  | 0.006033328 | 0.308086457 | 0.172938164 |
| 0.276199226  | 0.167099609 | 0.293270347 | 0.067638501 |
| 0.499075037  | 0.306287657 | 0.367034557 | 0.145613191 |
| 0.267578103  | 0.006697249 | 0.161201488 | 0.066461007 |
| 0.35458376   | 0.345798336 | 0.28091319  | 0.269938569 |
| 0.197028473  | 0.265903569 | 0.306869426 | 0.238741672 |
| 0.400664967  | 0.108342022 | 0.460710691 | 0.258523527 |
| 0.290143639  | 0.282645592 | 0.249031627 | 0.26159335  |
| 0.179065102  | 0.132139342 | 0.157148956 | 0.204484132 |
| 0.40412374   | 0.222176601 | 0.264540993 | 0.262426617 |
| 0.072352885  | 0.287509766 | 0.308381625 | 0.294329829 |
| 0.292793886  | 0.27144988  | 0.232809882 | 0.382540155 |
| 0.234892187  | 0.282292611 | 0.038469183 | 0.038292986 |
| 0.163255641  | 0.210023977 | 0.392324371 | 0.389196621 |
| 0.450164629  | 0.191824844 | 0.143018277 | 0.186576207 |
| 0.060201233  | 0.299846393 | 0.232633041 | 0.073186836 |
| 0.273987112  | 0.205772705 | 0.001845517 | 0.23952229  |
| 0.336346274  | 0.237446265 |             |             |
| CCL3         | 0.138843569 | 0.361208451 | 0.295397367 |
| 0.030782403  | 0.258858019 | 0.41761092  | 0.425737517 |
| 0.124914862  | 0.341050014 | 0.30838208  | 0.43836723  |
| 0.00548199   | 0.122906479 | 0.079659913 | 0.207323497 |
| 0.2511110531 | 0.259177821 | 0.364527163 | 0.2570539   |
| 0.195035589  | 0.1728262   | 0.280664371 | 0.277643035 |
| 0.416347754  | 0.012230091 | 0.372829543 | 0.105619    |
| 0.10132078   | 0.216673693 | 0.39514589  | 0.293716775 |
| 0.214465749  | 0.186294385 | 0.203760235 | 0.203621909 |
| 0.054279582  | 0.412273616 | 0.027030387 | 0.149294434 |
| 0.13461698   | 0.368520222 | 0.196136898 | 0.112139523 |
| 0.001330654  | 0.381966946 | 0.090758478 | 0.269672769 |
| 0.23542189   | 0.412833923 | 0.395294151 | 0.375339904 |
| 0.020395681  | 0.425395044 | 0.237420508 | 0.018577446 |
| 0.464575197  | 0.006735819 | 0.436515128 | 0.11927375  |
| 0.336045021  | 0.333498266 | 0.117453498 | 0.239370469 |
| 1            | 0.458967496 | 0.315664358 | 0.239653234 |
| 0.363796667  | 0.165597815 | 0.138616915 | 0.217996411 |
| 0.321708087  | 0.22046935  | 0.359139078 | 0.0925753   |
| 0.163123206  | 0.141649698 | 0.38252631  | 0.356335014 |
| 0.006248873  | 0.404214463 | 0.20049787  | 0.121969594 |
| 0.087244615  | 0.434505145 | 0.137865771 | 0.389768945 |
| 0.141750635  | 0.171182873 | 0.28300309  | 0.291958334 |
| 0.055347173  | 0.154502069 | 0.019119479 | 0.333964268 |
| 0.202441546  | 0.171755643 | 0.19970786  | 0.346430735 |
| 0.122801004  | 0.312008362 | 0.077459106 | 0.120137266 |
| 0.224438716  | 0.21234178  | 0.457289756 | 0.01827375  |

|             |             |             |             |
|-------------|-------------|-------------|-------------|
| 0.097011197 | 0.249856483 | 0.329306373 | 0.421511189 |
| 0.290489873 | 0.04632356  | 0.273383363 | 0.422957151 |
| 0.167478662 | 0.174113024 | 0.427310892 | 0.011216605 |
| 0.030727961 | 0.013606676 | 0.208849831 | 0.329865213 |
| 0.349173452 | 0.425928469 | 0.159580146 | 0.17462192  |
| 0.11857805  | 0.181221855 | 0.325824811 | 0.414382025 |
| 0.136321235 | 0.418535627 | 0.207441051 | 0.187987599 |
| 0.170080129 | 0.244686534 | 0.35112008  | 0.376271681 |
| 0.407656487 | 0.306497909 | 0.323384382 | 0.37007381  |
| 0.103361408 | 0.248907469 | 0.317078684 | 0.222210493 |
| 0.31664083  | 0.363268384 | 0.195105531 | 0.307971759 |
| 0.427474103 | 0.212433347 | 0.015762513 | 0.391881599 |
| 0.477299182 | 0.014876088 | 0.335953062 | 0.202281407 |
| 0.067267317 | 0.359622324 | 0.370707316 | 0.272056634 |
| 0.188692687 | 0.093395458 | 0.296023973 | 0.397669678 |
| 0.330320712 | 0.383958282 | 0.242148356 | 0.260378479 |
| 0.3470287   | 0.184168011 | 0.302824069 | 0.103643453 |
| 0.397033767 | 0.291274994 | 0.073315991 | 0.043056816 |
| 0.147418702 | 0.191693331 | 0.30308193  | 0.201097764 |
| 0.157652757 | 0.00491966  | 0.284979301 | 0.16078758  |
| 0.176766249 | 0.142858622 | 0.393267482 | 0.395100731 |
| 0.344305001 | 0.090444627 | 0.390338599 | 0.279276043 |
| 0.210051591 | 0.270006331 | 0.279373648 | 0.009459659 |
| 0.36520821  | 0.101304802 | 0.208299929 | 0.154749822 |
| 0.325043145 | 0.277849279 | 0.093974672 | 0.284334425 |
| 0.416813033 | 0.209700567 | 0.053127371 | 0.040303076 |
| 0.35987643  | 0.353025277 | 0.154192386 | 0.137700272 |
| 0.28233747  | 0.27552912  | 0.135261756 | 0.428615224 |
| 0.322067956 | 0.423059609 | 0.035378351 | 0.32990112  |
| 0.125451511 | 0.275749898 | 0.180240329 | 0.230916555 |
| 0.400166109 | 0.164209854 | 0.089184262 | 0.388326167 |
| 0.22346591  | 0.226314306 | 0.298678603 | 0.362838732 |
| 0.010044232 | 0.336996055 | 0.203115168 | 0.036073814 |
| 0.371572764 | 0.420906674 | 0.298845524 | 0.253558705 |
| 0.264458634 | 0.366481652 | 0.245496168 | 0.165356153 |
| 0.062562346 | 0.054710278 | 0.308079009 | 0.346672856 |
| 0.220224069 | 0.291014618 | 0.105188707 | 0.029249355 |
| 0.280379586 | 0.095245958 | 0.221431954 | 0.130321902 |
| 0.169659863 | 0.120261164 | 0.363620391 | 0.128050296 |
| 0.008739259 | 0.327019466 | 0.144941951 | 0.173614019 |
| 0.240679651 | 0.248980392 | 0.272329726 | 0.404821232 |
| 0.168843637 | 0.104960275 | 0.163056017 | 0.355832324 |
| 0.436809097 | 0.355149951 | 0.010261721 | 0.302238448 |
| 0.295531713 | 0.289903999 | 0.280439012 | 0.285670003 |
| 0.293836807 | 0.435977932 | 0.301720959 | 0.186846555 |
| 0.003795199 | 0.145357831 | 0.105232476 | 0.45354045  |
| 0.200960844 | 0.389917871 | 0.062538447 | 0.100932068 |
| 0.008337097 | 0.39363864  | 0.04894716  | 0.388011825 |
| 0.252663853 | 0.238741481 | 0.006249993 | 0.262150029 |
| 0.099836192 | 0.019328513 | 0.335299716 | 0.326493853 |
| 0.336022429 | 0.243568761 | 0.415195341 | 0.129840722 |
| 0.031679842 | 0.166945737 | 0.096570976 | 0.229060024 |
| 0.160521796 | 0.028963596 | 0.201685346 | 0.295587051 |
| 0.28969237  | 0.383542005 | 0.410471421 | 0.027745584 |

|             |             |             |             |
|-------------|-------------|-------------|-------------|
| 0.126702948 | 0.093509749 | 0.223491172 | 0.270464477 |
| 0.309238086 | 0.427691355 | 0.37477991  | 0.163930107 |
| 0.203380184 | 0.405576335 | 0.433342821 | 0.293638523 |
| 0.054563106 | 0.141427011 | 0.179250221 | 0.197144857 |
| 0.097324686 | 0.271409252 | 0.185411091 | 0.430805158 |
| 0.287967723 | 0.056811004 | 0.42581741  | 0.162552216 |
| 0.384559512 | 0.260005119 | 0.321312387 | 0.268594106 |
| 0.4244463   | 0.352437564 | 0.409578369 | 0.297348547 |
| 0.394107503 | 0.020907083 | 0.037357013 | 0.366142223 |
| 0.428733805 | 0.441955664 | 0.236274525 | 0.193113149 |
| 0.214073857 | 0.250813027 | 0.235640696 | 0.36449297  |
| 0.333669871 | 0.099941093 | 0.119519797 | 0.026487357 |
| 0.050262111 | 0.195177243 | 0.424226262 | 0.443090009 |
| 0.342515123 | 0.375849935 | 0.381145032 | 0.33544234  |
| 0.236300425 | 0.165570303 | 0.397924763 | 0.259004885 |
| 0.477286743 | 0.146929068 | 0.390383685 | 0.271212428 |
| 0.284040796 | 0.321984256 | 0.263885235 | 0.017006994 |
| 0.150031612 | 0.294178208 | 0.064682726 | 0.275218177 |
| 0.158744385 | 0.390150304 | 0.379101143 | 0.335159914 |
| 0.091726883 | 0.008224093 | 0.32147528  | 0.08451941  |
| 0.44953456  | 0.073662368 | 0.251160988 | 0.019742626 |
| 0.37320045  | 0.227172236 | 0.22812738  | 0.066195143 |
| 0.276879415 | 0.003836878 | 0.332151457 | 0.197077709 |
| 0.285937584 | 0.385193073 | 0.159286906 | 0.140496551 |
| 0.097238947 | 0.215277932 | 0.342912322 | 0.226722648 |
| 0.264728445 | 0.040785541 | 0.268971648 | 0.254285135 |
| 0.111787017 | 0.210140099 | 0.417691684 | 0.25247068  |
| 0.413552837 | 0.130076947 | 0.414633069 | 0.201221598 |
| 0.228473716 | 0.230930916 | 0.286300583 | 0.146190896 |
| 0.27111429  | 0.286266533 | 0.168693712 | 0.148237927 |
| 0.206583381 | 0.112628222 | 0.117905321 | 0.468890571 |
| 0.140889878 | 0.224570587 | 0.055029902 | 0.0907882   |
| 0.113595517 | 0.400443101 | 0.246680869 | 0.260902735 |
| 0.270768825 | 0.092047184 | 0.371394262 | 0.295471026 |
| 0.022792132 | 0.130971589 | 0.40838962  | 0.04657483  |
| 0.215582853 | 0.096288854 | 0.005931762 | 0.19843539  |
| 0.378758819 | 0.140715371 |             |             |
| CCL4        | 0.302222019 | 0.496803761 | 0.202249378 |
| 0.049355012 | 0.264710608 | 0.435517387 | 0.440521047 |
| 0.302649371 | 0.25992576  | 0.292313401 | 0.490603734 |
| 0.003527443 | 0.265816646 | 0.04436888  | 0.172377696 |
| 0.431701081 | 0.445664794 | 0.505898035 | 0.436332895 |
| 0.342704524 | 0.230218769 | 0.421540721 | 0.460266078 |
| 0.455639464 | 0.005758091 | 0.31299266  | 0.108831829 |
| 0.281431813 | 0.401472732 | 0.392076244 | 0.403787159 |
| 0.372347753 | 0.358549033 | 0.412583209 | 0.385659    |
| 0.186121499 | 0.498108679 | 0.094383789 | 0.330962555 |
| 0.283009241 | 0.420403215 | 0.355829459 | 0.053310504 |
| 0.003904051 | 0.286449163 | 0.251116175 | 0.440677245 |
| 0.367125549 | 0.41703659  | 0.3641463   | 0.367520728 |
| 0.09231666  | 0.49374763  | 0.365968107 | 0.090565835 |
| 0.507481378 | 0.008766992 | 0.502429677 | 0.235274545 |
| 0.210235456 | 0.443773806 | 0.286024318 | 0.424857228 |
| 0.458967496 | 1           | 0.481870296 | 0.134151996 |

|             |             |             |             |
|-------------|-------------|-------------|-------------|
| 0.231821271 | 0.381626329 | 0.296109474 | 0.44357748  |
| 0.444979721 | 0.394699198 | 0.459101745 | 0.279906188 |
| 0.356965774 | 0.285071359 | 0.459594917 | 0.359272085 |
| 0.003125469 | 0.354693503 | 0.388684161 | 0.259372879 |
| 0.279137316 | 0.495858648 | 0.329040938 | 0.420208075 |
| 0.362270053 | 0.080037266 | 0.461384375 | 0.471709176 |
| 0.051642778 | 0.309673772 | 0.023079225 | 0.327414316 |
| 0.355220696 | 0.347501383 | 0.377875557 | 0.225801565 |
| 0.057967361 | 0.274649766 | 0.143094548 | 0.273671071 |
| 0.422504354 | 0.44756379  | 0.506466785 | 0.079156802 |
| 0.233398476 | 0.272030496 | 0.482649063 | 0.50326058  |
| 0.441102682 | 0.028268473 | 0.28374718  | 0.434566096 |
| 0.338842351 | 0.223376779 | 0.451351996 | 0.033852413 |
| 0.030856994 | 0.022828743 | 0.375240842 | 0.317791182 |
| 0.271358514 | 0.417845491 | 0.180575463 | 0.414040751 |
| 0.291642337 | 0.334443918 | 0.300239413 | 0.460638802 |
| 0.332856858 | 0.465097989 | 0.442014559 | 0.383610452 |
| 0.385521238 | 0.339464677 | 0.317255046 | 0.481707424 |
| 0.465469745 | 0.213664955 | 0.225601368 | 0.472560581 |
| 0.240730248 | 0.421980173 | 0.490191379 | 0.367231918 |
| 0.434010934 | 0.414046784 | 0.343911119 | 0.490800339 |
| 0.460083796 | 0.377285276 | 0.059844166 | 0.487737671 |
| 0.501353931 | 0.037928331 | 0.207546681 | 0.365312139 |
| 0.100491151 | 0.421898145 | 0.45643816  | 0.448636679 |
| 0.422562298 | 0.091030368 | 0.378840846 | 0.451918232 |
| 0.426546389 | 0.439372199 | 0.427989936 | 0.337171389 |
| 0.45514011  | 0.34254915  | 0.176009087 | 0.241346102 |
| 0.314533199 | 0.428630533 | 0.215431309 | 0.076212038 |
| 0.340343738 | 0.363468455 | 0.445069261 | 0.408956553 |
| 0.32294875  | 0.007644904 | 0.284097972 | 0.33466483  |
| 0.313206015 | 0.28892148  | 0.517246753 | 0.29958623  |
| 0.407331395 | 0.24991496  | 0.332158253 | 0.451891509 |
| 0.329597751 | 0.339798658 | 0.323438573 | 0.003330922 |
| 0.331691731 | 0.286815505 | 0.417953215 | 0.118447066 |
| 0.416207521 | 0.237580024 | 0.140631933 | 0.424293983 |
| 0.405842857 | 0.399451264 | 0.05033189  | 0.113804186 |
| 0.43325116  | 0.501058437 | 0.369783223 | 0.263779062 |
| 0.459579695 | 0.416659727 | 0.298158393 | 0.487117595 |
| 0.441877641 | 0.487009283 | 0.115363077 | 0.407680481 |
| 0.352912321 | 0.426422449 | 0.349892748 | 0.410439284 |
| 0.454128654 | 0.325428333 | 0.252692493 | 0.454877523 |
| 0.414902938 | 0.433098852 | 0.221544164 | 0.503113409 |
| 0.003310314 | 0.479147314 | 0.435345362 | 0.117025418 |
| 0.498689796 | 0.45359881  | 0.197885506 | 0.346008915 |
| 0.446029245 | 0.504613555 | 0.36884058  | 0.32855063  |
| 0.1768421   | 0.03177373  | 0.448173411 | 0.475874715 |
| 0.407393315 | 0.4882734   | 0.296062492 | 0.070398821 |
| 0.440820793 | 0.261687814 | 0.418482828 | 0.33292007  |
| 0.403831049 | 0.330826259 | 0.416674379 | 0.278267602 |
| 0.015461288 | 0.392005694 | 0.34862839  | 0.255246606 |
| 0.390236528 | 0.286744567 | 0.432281027 | 0.483243331 |
| 0.39449844  | 0.257286288 | 0.360109971 | 0.249173082 |
| 0.391630972 | 0.496860398 | 0.03785553  | 0.431341112 |
| 0.474127395 | 0.456947482 | 0.436906849 | 0.460988014 |

|             |             |             |             |
|-------------|-------------|-------------|-------------|
| 0.417315722 | 0.508188159 | 0.440945476 | 0.339851966 |
| 0.002491572 | 0.308179639 | 0.260410825 | 0.485442726 |
| 0.363305808 | 0.461354769 | 0.17648926  | 0.312132548 |
| 0.004637386 | 0.340089395 | 0.178727795 | 0.501335019 |
| 0.413776075 | 0.1167105   | 0.030504104 | 0.443071893 |
| 0.274983611 | 0.04605025  | 0.497180276 | 0.462148191 |
| 0.467291887 | 0.471500107 | 0.375060605 | 0.279247471 |
| 0.133112313 | 0.356991226 | 0.081719345 | 0.462426564 |
| 0.376790062 | 0.067900148 | 0.187770573 | 0.465623263 |
| 0.418501951 | 0.514771695 | 0.450087925 | 0.022306747 |
| 0.26499395  | 0.218773238 | 0.420802994 | 0.258185618 |
| 0.44090373  | 0.499405599 | 0.481210399 | 0.328311051 |
| 0.430665417 | 0.497228289 | 0.490600094 | 0.438584506 |
| 0.134844495 | 0.29038561  | 0.335823541 | 0.154527046 |
| 0.276356588 | 0.433918771 | 0.401090915 | 0.39021368  |
| 0.442116469 | 0.123154261 | 0.40958296  | 0.315713462 |
| 0.489608046 | 0.421529383 | 0.188622477 | 0.293254022 |
| 0.500541127 | 0.452224395 | 0.304998533 | 0.45473306  |
| 0.454785033 | 0.094351633 | 0.102896616 | 0.479655373 |
| 0.509332096 | 0.485257629 | 0.386835373 | 0.251506654 |
| 0.383589351 | 0.16009005  | 0.376135527 | 0.447036511 |
| 0.422738144 | 0.290349115 | 0.264046516 | 0.083453477 |
| 0.046548713 | 0.209596382 | 0.504774326 | 0.495589702 |
| 0.228854053 | 0.371160784 | 0.44599218  | 0.493573846 |
| 0.418286323 | 0.386836972 | 0.461179476 | 0.419310806 |
| 0.503063486 | 0.1785688   | 0.501074422 | 0.416573568 |
| 0.416706405 | 0.472467113 | 0.430357143 | 0.016557221 |
| 0.365567245 | 0.314098104 | 0.162358012 | 0.462315946 |
| 0.326748503 | 0.323330474 | 0.512399323 | 0.319111864 |
| 0.193518588 | 0.008090035 | 0.443663166 | 0.276137538 |
| 0.466199775 | 0.22096061  | 0.426589804 | 0.094995506 |
| 0.520089574 | 0.416960354 | 0.376561251 | 0.207321918 |
| 0.463149852 | 0.016931271 | 0.31668539  | 0.112825692 |
| 0.417573252 | 0.484025461 | 0.356231369 | 0.322048006 |
| 0.19230668  | 0.453625434 | 0.496864769 | 0.455107631 |
| 0.424391947 | 0.130942566 | 0.451375217 | 0.382828631 |
| 0.258035494 | 0.398374991 | 0.458057563 | 0.405052383 |
| 0.416877042 | 0.18328327  | 0.315601251 | 0.238749792 |
| 0.404708257 | 0.383807971 | 0.487689839 | 0.29732502  |
| 0.166130909 | 0.481636798 | 0.333195494 | 0.326964921 |
| 0.429702128 | 0.273654947 | 0.313298663 | 0.503258597 |
| 0.281961219 | 0.344666265 | 0.089261373 | 0.077402632 |
| 0.256621756 | 0.386457148 | 0.361765746 | 0.403332149 |
| 0.447086923 | 0.225082687 | 0.264832508 | 0.274808377 |
| 0.083567139 | 0.263175373 | 0.472541912 | 0.151645982 |
| 0.439453706 | 0.239982469 | 0.002905303 | 0.286854405 |
| 0.482829458 | 0.352093913 |             |             |
| CCL5        | 0.387053547 | 0.513469764 | 0.09350702  |
| 0.038341925 | 0.160446933 | 0.29717421  | 0.291238596 |
| 0.396267832 | 0.151047463 | 0.183288003 | 0.39112457  |
| 0.002254677 | 0.424486425 | 0.020944101 | 0.103550646 |
| 0.506718098 | 0.522349386 | 0.41944381  | 0.510121813 |
| 0.366898545 | 0.19088525  | 0.41806957  | 0.439907481 |
| 0.326702758 | 0.002625762 | 0.169746905 | 0.068742677 |



|             |             |             |             |
|-------------|-------------|-------------|-------------|
| 0.40806603  | 0.496432428 | 0.261862351 | 0.33306363  |
| 0.463409011 | 0.485169011 | 0.464550113 | 0.396160093 |
| 0.294807537 | 0.492449505 | 0.163619712 | 0.483223442 |
| 0.407721757 | 0.291006651 | 0.495219604 | 0.023821278 |
| 0.005492245 | 0.143408458 | 0.361654333 | 0.442278994 |
| 0.361476721 | 0.276469602 | 0.226021343 | 0.233041251 |
| 0.184716264 | 0.420263355 | 0.438252362 | 0.187881593 |
| 0.469903549 | 0.006598856 | 0.492454503 | 0.284684397 |
| 0.095720201 | 0.386325522 | 0.406310343 | 0.467563758 |
| 0.315664358 | 0.481870296 | 1           | 0.055033818 |
| 0.105303708 | 0.491984518 | 0.45032667  | 0.485593584 |
| 0.507610532 | 0.385908077 | 0.36867826  | 0.433292406 |
| 0.492063535 | 0.43511163  | 0.354977385 | 0.233206328 |
| 0.001507368 | 0.203353399 | 0.401053765 | 0.375674304 |
| 0.442315209 | 0.422474516 | 0.436776084 | 0.291612783 |
| 0.472749158 | 0.028851749 | 0.439641958 | 0.524245417 |
| 0.031414441 | 0.455423547 | 0.016284341 | 0.209264358 |
| 0.477368885 | 0.463933218 | 0.453776007 | 0.10594023  |
| 0.021506248 | 0.168843593 | 0.173920821 | 0.402222461 |
| 0.46978641  | 0.515782738 | 0.467513778 | 0.173901895 |
| 0.379772128 | 0.216636862 | 0.43468539  | 0.4931073   |
| 0.49544127  | 0.012282962 | 0.205080726 | 0.285278408 |
| 0.406430841 | 0.186868591 | 0.299963145 | 0.0462774   |
| 0.016020767 | 0.026236175 | 0.470927755 | 0.20704346  |
| 0.142561788 | 0.264812161 | 0.11426357  | 0.509958578 |
| 0.385150994 | 0.430305995 | 0.174970434 | 0.324769592 |
| 0.48212834  | 0.326496021 | 0.481627429 | 0.509434598 |
| 0.4466283   | 0.311299006 | 0.192706868 | 0.516401446 |
| 0.469365056 | 0.099553726 | 0.113823987 | 0.387249738 |
| 0.405439296 | 0.490497609 | 0.529925671 | 0.362153392 |
| 0.340386143 | 0.309998753 | 0.367740609 | 0.458411254 |
| 0.315141501 | 0.40332916  | 0.107399585 | 0.42271861  |
| 0.46297451  | 0.047261436 | 0.09422929  | 0.485109459 |
| 0.078046574 | 0.322891089 | 0.487516802 | 0.523815083 |
| 0.512393967 | 0.056341553 | 0.288364028 | 0.330255696 |
| 0.360051026 | 0.314394569 | 0.473351441 | 0.267788714 |
| 0.377155088 | 0.368354266 | 0.071758713 | 0.394683611 |
| 0.168026503 | 0.395296339 | 0.347058971 | 0.09277394  |
| 0.448325618 | 0.401736297 | 0.510730211 | 0.474641972 |
| 0.445472437 | 0.005549573 | 0.17972679  | 0.411537203 |
| 0.34367763  | 0.414246378 | 0.515701089 | 0.157224207 |
| 0.315956473 | 0.385039259 | 0.193015824 | 0.41503393  |
| 0.434941295 | 0.276107011 | 0.249756731 | 0.000999946 |
| 0.191888476 | 0.407195712 | 0.490631554 | 0.070297397 |
| 0.302825327 | 0.145981516 | 0.143261706 | 0.515999227 |
| 0.258786321 | 0.518128178 | 0.037065904 | 0.194183848 |
| 0.321005442 | 0.495266419 | 0.437777019 | 0.307610878 |
| 0.519678662 | 0.364337326 | 0.424528108 | 0.451422291 |
| 0.358971866 | 0.4116387   | 0.215143654 | 0.341239995 |
| 0.495473621 | 0.523970251 | 0.491667443 | 0.516820324 |
| 0.329416057 | 0.42260494  | 0.343070086 | 0.337548098 |
| 0.4452882   | 0.46922856  | 0.113622386 | 0.516305389 |
| 0.001101933 | 0.412565441 | 0.501801637 | 0.217558953 |
| 0.516937881 | 0.308219294 | 0.095495942 | 0.299637998 |

|             |             |             |             |
|-------------|-------------|-------------|-------------|
| 0.517365225 | 0.513990994 | 0.458512328 | 0.452411338 |
| 0.269709379 | 0.014668175 | 0.490834101 | 0.471284381 |
| 0.504434345 | 0.47742786  | 0.399607633 | 0.106637472 |
| 0.512743225 | 0.388722582 | 0.471438049 | 0.446019898 |
| 0.510091194 | 0.454714401 | 0.312155804 | 0.393185741 |
| 0.020322086 | 0.300173798 | 0.456490273 | 0.235431564 |
| 0.366136287 | 0.23145051  | 0.521447887 | 0.393194036 |
| 0.464888927 | 0.336932212 | 0.415655142 | 0.116715124 |
| 0.235904556 | 0.511654962 | 0.067778038 | 0.483205449 |
| 0.524546491 | 0.440901963 | 0.52047525  | 0.514393071 |
| 0.371755416 | 0.456522446 | 0.516004703 | 0.440332534 |
| 0.001328579 | 0.436411314 | 0.425533542 | 0.408704942 |
| 0.477006969 | 0.353396478 | 0.278114576 | 0.467865057 |
| 0.00237918  | 0.201837969 | 0.294157611 | 0.497845379 |
| 0.518731186 | 0.0450638   | 0.072078236 | 0.520159953 |
| 0.437462568 | 0.05897557  | 0.521577446 | 0.394716697 |
| 0.520117315 | 0.495464667 | 0.226095931 | 0.443248168 |
| 0.253223596 | 0.435212243 | 0.045652095 | 0.497051126 |
| 0.48575253  | 0.119168779 | 0.113704192 | 0.516389627 |
| 0.48367034  | 0.462627181 | 0.320089292 | 0.011841807 |
| 0.385536809 | 0.245737916 | 0.515666461 | 0.155881217 |
| 0.47895381  | 0.432535408 | 0.511319408 | 0.480895777 |
| 0.504832531 | 0.473806276 | 0.43592492  | 0.50626003  |
| 0.150736237 | 0.442166088 | 0.454535907 | 0.075688474 |
| 0.414663498 | 0.519238639 | 0.464029779 | 0.231803674 |
| 0.434124816 | 0.123144604 | 0.259894312 | 0.373169159 |
| 0.509362617 | 0.511236539 | 0.082284146 | 0.212098435 |
| 0.470239663 | 0.37124317  | 0.155558478 | 0.420303578 |
| 0.341197848 | 0.194630364 | 0.179045199 | 0.438524831 |
| 0.499602703 | 0.35867929  | 0.48777684  | 0.19592244  |
| 0.497382557 | 0.073343938 | 0.480863256 | 0.340148534 |
| 0.343410459 | 0.426175685 | 0.391285681 | 0.138895774 |
| 0.030586153 | 0.155863275 | 0.463170914 | 0.464918391 |
| 0.105423741 | 0.245766109 | 0.316019147 | 0.419576178 |
| 0.495731895 | 0.451904825 | 0.337075936 | 0.401530318 |
| 0.458891585 | 0.140355355 | 0.497936197 | 0.393729015 |
| 0.461574032 | 0.401047253 | 0.512124364 | 0.013455601 |
| 0.494432736 | 0.213091343 | 0.244934182 | 0.435234555 |
| 0.446119491 | 0.175794279 | 0.458098733 | 0.211167386 |
| 0.218128947 | 0.00536608  | 0.42049164  | 0.423707394 |
| 0.342214956 | 0.333987575 | 0.423742794 | 0.200018393 |
| 0.521305179 | 0.443698264 | 0.46185391  | 0.343776402 |
| 0.436373276 | 0.031573091 | 0.201196677 | 0.047414063 |
| 0.448003053 | 0.45278644  | 0.4645395   | 0.417267453 |
| 0.24227586  | 0.519616994 | 0.458653469 | 0.483656132 |
| 0.519513858 | 0.18954338  | 0.515594997 | 0.375315029 |
| 0.396641106 | 0.43061585  | 0.326221356 | 0.396378655 |
| 0.267033877 | 0.180201657 | 0.170104141 | 0.202413202 |
| 0.503003507 | 0.388281798 | 0.464116061 | 0.347971546 |
| 0.06832288  | 0.448701519 | 0.466451987 | 0.478349946 |
| 0.48245843  | 0.418207518 | 0.417578872 | 0.448788328 |
| 0.351149109 | 0.349520441 | 0.075262848 | 0.0465117   |
| 0.3062385   | 0.245553001 | 0.453625121 | 0.493882865 |
| 0.508031488 | 0.325789455 | 0.1342882   | 0.179903229 |

|             |             |             |             |
|-------------|-------------|-------------|-------------|
| 0.164530547 | 0.404232724 | 0.340383701 | 0.215935632 |
| 0.505449619 | 0.361048509 | 0.000878816 | 0.274815414 |
| 0.442038678 | 0.439322911 |             |             |
| CCL6        | 0.020039688 | 0.076776276 | 0.045495781 |
| 0.001674012 | 0.020259423 | 0.227893876 | 0.202721824 |
| 0.012729446 | 0.03388919  | 0.081434561 | 0.188960713 |
| 0.000164712 | 0.011735264 | 0.003504188 | 0.005323985 |
| 0.037176424 | 0.037015927 | 0.11342524  | 0.036419545 |
| 0.029483386 | 0.010761634 | 0.074103395 | 0.083586223 |
| 0.180519456 | 0.000494141 | 0.183948623 | 0.01327397  |
| 0.006547476 | 0.027334813 | 0.133119762 | 0.02976253  |
| 0.030584066 | 0.022466551 | 0.016909504 | 0.005773483 |
| 0.001382505 | 0.099082731 | 0.000218009 | 0.017812487 |
| 0.012921989 | 0.114693859 | 0.025233862 | 0.007901522 |
| 5.49E-05    | 0.140279818 | 0.006808915 | 0.074268254 |
| 0.029230524 | 0.21408317  | 0.140354461 | 0.157954237 |
| 0.000115434 | 0.152853301 | 0.042904888 | 0.000240442 |
| 0.145215616 | 0.000393662 | 0.116286012 | 0.009101889 |
| 0.104562294 | 0.063497822 | 0.012040679 | 0.063888557 |
| 0.239653234 | 0.134151996 | 0.055033818 | 1           |
| 0.216140289 | 0.021978314 | 0.016077901 | 0.055888441 |
| 0.065567399 | 0.009767836 | 0.03846204  | 0.005513342 |
| 0.023502221 | 0.014646079 | 0.141420653 | 0.039037229 |
| 0.000795986 | 0.216343023 | 0.021145248 | 0.016232407 |
| 0.008039541 | 0.167797313 | 0.022944724 | 0.100591607 |
| 0.017605891 | 0.011558686 | 0.068063874 | 0.046111953 |
| 0.004486238 | 0.019411679 | 0.001017127 | 0.025422096 |
| 0.028820065 | 0.01821545  | 0.039120398 | 0.131309598 |
| 0.006928956 | 0.046826152 | 0.002211848 | 0.010526682 |
| 0.042014125 | 0.031631306 | 0.144951251 | 0.000425178 |
| 0.00778943  | 0.013311861 | 0.040320788 | 0.112269159 |
| 0.054196471 | 0.001648973 | 0.021669525 | 0.212198976 |
| 0.003102194 | 0.006454969 | 0.185465163 | 0.000127786 |
| 0.004858    | 0.000166497 | 0.029054217 | 0.056689031 |
| 0.169325838 | 0.186436545 | 0.007266111 | 0.031668651 |
| 0.010456859 | 0.021655154 | 0.043085291 | 0.141224284 |
| 0.017319974 | 0.19010751  | 0.033656507 | 0.029552941 |
| 0.012051001 | 0.021936303 | 0.077757683 | 0.08787458  |
| 0.103756066 | 0.033671298 | 0.039944254 | 0.143897545 |
| 0.00930922  | 0.038866059 | 0.054791437 | 0.01375549  |
| 0.061499519 | 0.096598746 | 0.02294067  | 0.100567941 |
| 0.174691666 | 0.035512857 | 7.87E-05    | 0.124263386 |
| 0.150866269 | 0.000285026 | 0.107480943 | 0.02927964  |
| 0.00382527  | 0.024175158 | 0.08431396  | 0.054008396 |
| 0.030330959 | 0.009485661 | 0.076384928 | 0.189459492 |
| 0.091937615 | 0.131387111 | 0.056225767 | 0.059695277 |
| 0.120370001 | 0.021430486 | 0.135940627 | 0.009268797 |
| 0.166001121 | 0.0754957   | 0.001409306 | 0.000700843 |
| 0.020557041 | 0.019207136 | 0.063932833 | 0.036321461 |
| 0.023985376 | 0.00045531  | 0.070586918 | 0.030235147 |
| 0.01786044  | 0.015253315 | 0.088839839 | 0.181743177 |
| 0.105439457 | 0.00361252  | 0.137501822 | 0.034395759 |
| 0.031951525 | 0.032683797 | 0.023604421 | 0.001128622 |
| 0.034662063 | 0.008274778 | 0.02740288  | 0.009492401 |

|             |             |             |             |
|-------------|-------------|-------------|-------------|
| 0.049170265 | 0.017755692 | 0.000943672 | 0.05362681  |
| 0.182986582 | 0.032996675 | 0.001316573 | 0.000985925 |
| 0.057840103 | 0.102937489 | 0.013317014 | 0.004103052 |
| 0.062541638 | 0.034999023 | 0.012675494 | 0.130555169 |
| 0.027339925 | 0.165972052 | 0.000296809 | 0.054828907 |
| 0.014399607 | 0.0482999   | 0.023127638 | 0.03832339  |
| 0.137409024 | 0.024384058 | 0.00108878  | 0.174389124 |
| 0.037413485 | 0.037372364 | 0.055512297 | 0.073465994 |
| 0.000791256 | 0.094430527 | 0.037158472 | 0.00029453  |
| 0.082688585 | 0.226464371 | 0.073222994 | 0.037072718 |
| 0.037584436 | 0.071779389 | 0.039603127 | 0.018782097 |
| 0.001056684 | 0.001929679 | 0.056726218 | 0.096350747 |
| 0.027957466 | 0.054449915 | 0.004787104 | 0.000194448 |
| 0.045647588 | 0.009753627 | 0.054229345 | 0.014353276 |
| 0.025885081 | 0.008367753 | 0.091715945 | 0.017259066 |
| 8.69E-05    | 0.080133363 | 0.023952746 | 0.004411524 |
| 0.03327848  | 0.014451031 | 0.054087176 | 0.144695975 |
| 0.012740961 | 0.00294026  | 0.015877556 | 0.147289874 |
| 0.196445216 | 0.071688182 | 9.26E-05    | 0.053236522 |
| 0.047627822 | 0.062381624 | 0.048294126 | 0.044091537 |
| 0.066613054 | 0.146485353 | 0.059008554 | 0.022542965 |
| 0.000102267 | 0.015497204 | 0.010168787 | 0.161314838 |
| 0.028210218 | 0.169757219 | 0.003746094 | 0.006742266 |
| 0.000606731 | 0.152899435 | 0.0012578   | 0.082398598 |
| 0.040953288 | 0.045993838 | 3.57E-05    | 0.048824373 |
| 0.010348689 | 0.000118984 | 0.059793216 | 0.116845578 |
| 0.076053472 | 0.040778076 | 0.20840002  | 0.013502728 |
| 0.000737162 | 0.009506942 | 0.022834059 | 0.058296606 |
| 0.017115864 | 0.000269682 | 0.046614898 | 0.046707693 |
| 0.058289292 | 0.124274661 | 0.150420251 | 0.001975296 |
| 0.01257259  | 0.002663353 | 0.041144659 | 0.010294872 |
| 0.066624065 | 0.148185827 | 0.088312443 | 0.019217943 |
| 0.038584257 | 0.126047875 | 0.145923872 | 0.058965987 |
| 0.000654133 | 0.01598977  | 0.024091877 | 0.010107365 |
| 0.012271583 | 0.043525101 | 0.034388636 | 0.263255169 |
| 0.071722526 | 0.001664049 | 0.224413166 | 0.023166278 |
| 0.096764426 | 0.044598091 | 0.112110897 | 0.02692337  |
| 0.131435694 | 0.048242572 | 0.210714578 | 0.050121755 |
| 0.173133178 | 0.000256426 | 0.000658427 | 0.114918586 |
| 0.109263545 | 0.211154137 | 0.038490962 | 0.023690926 |
| 0.029800611 | 0.033523511 | 0.035865681 | 0.028097698 |
| 0.096682478 | 0.012849219 | 0.011230831 | 0.000235942 |
| 0.003895753 | 0.00941022  | 0.143034189 | 0.134048723 |
| 0.124737004 | 0.120968612 | 0.141558168 | 0.11369939  |
| 0.032493173 | 0.006951021 | 0.170746195 | 0.043373498 |
| 0.149763343 | 0.010895256 | 0.086334554 | 0.062652133 |
| 0.063738968 | 0.074768902 | 0.051527389 | 0.000744222 |
| 0.021847699 | 0.076559791 | 0.004797253 | 0.077124441 |
| 0.016097547 | 0.129412161 | 0.126573587 | 0.062472305 |
| 0.001290302 | 0.000194181 | 0.084792355 | 0.005716463 |
| 0.216120435 | 0.001824402 | 0.04593656  | 0.000151761 |
| 0.073016328 | 0.048064439 | 0.044717142 | 0.002708601 |
| 0.043778428 | 2.09E-05    | 0.110396651 | 0.011417393 |
| 0.06490346  | 0.11277061  | 0.027187427 | 0.016804388 |

|             |             |             |             |
|-------------|-------------|-------------|-------------|
| 0.006085413 | 0.041669125 | 0.115089439 | 0.036210511 |
| 0.044546604 | 0.000722137 | 0.04025695  | 0.029567952 |
| 0.00976328  | 0.010349588 | 0.17692437  | 0.012895476 |
| 0.158878488 | 0.00257424  | 0.15168625  | 0.014833427 |
| 0.032798143 | 0.011607519 | 0.071457459 | 0.006515426 |
| 0.047084033 | 0.047398006 | 0.022032029 | 0.019543898 |
| 0.045526647 | 0.015006765 | 0.007745558 | 0.15107389  |
| 0.003081864 | 0.029818289 | 0.002547392 | 0.009855682 |
| 0.003449189 | 0.122132697 | 0.040240224 | 0.045667002 |
| 0.041655508 | 0.001985414 | 0.120475619 | 0.048017785 |
| 0.000171994 | 0.013366587 | 0.20704471  | 0.000552783 |
| 0.038342889 | 0.0039339   | 0.000402869 | 0.017214789 |
| 0.115691759 | 0.004228644 |             |             |
| CCL9        | 0.051675725 | 0.139265963 | 0.269472917 |
| 0.008797274 | 0.10325193  | 0.35443513  | 0.275380885 |
| 0.030676675 | 0.250811011 | 0.158779182 | 0.30375157  |
| 0.011145302 | 0.025766605 | 0.122180981 | 0.14215897  |
| 0.074938298 | 0.074630333 | 0.167386149 | 0.076782231 |
| 0.078564154 | 0.057529807 | 0.166123713 | 0.134892719 |
| 0.281063541 | 0.030262073 | 0.206138803 | 0.046638182 |
| 0.018273053 | 0.058008626 | 0.253207477 | 0.105923924 |
| 0.064655128 | 0.0443745   | 0.039575956 | 0.037625284 |
| 0.004192872 | 0.192150083 | 0.001934719 | 0.033158277 |
| 0.030210308 | 0.142817352 | 0.051763281 | 0.171480934 |
| 0.000129017 | 0.258414344 | 0.014942691 | 0.151619744 |
| 0.082679258 | 0.330665669 | 0.287124698 | 0.171738792 |
| 0.001418537 | 0.271329252 | 0.104272379 | 0.001079882 |
| 0.245932913 | 0.002268646 | 0.209513478 | 0.035475894 |
| 0.318042117 | 0.135794953 | 0.028374089 | 0.113511161 |
| 0.363796667 | 0.231821271 | 0.105303708 | 0.216140289 |
| 1           | 0.04511453  | 0.033146441 | 0.080099543 |
| 0.12480468  | 0.061205316 | 0.122878528 | 0.010285575 |
| 0.04559569  | 0.033997706 | 0.282819668 | 0.187019793 |
| 0.011958346 | 0.257718113 | 0.036570178 | 0.043454648 |
| 0.017261909 | 0.275051609 | 0.046980615 | 0.147361225 |
| 0.032578655 | 0.264728135 | 0.146306238 | 0.09179876  |
| 0.03054089  | 0.039951048 | 0.007160633 | 0.180578349 |
| 0.063604244 | 0.040837936 | 0.08406547  | 0.276516519 |
| 0.191797265 | 0.208914851 | 0.029469343 | 0.024094063 |
| 0.082469471 | 0.059518394 | 0.246085099 | 0.001417586 |
| 0.017270492 | 0.141069037 | 0.092771598 | 0.197579816 |
| 0.10306772  | 0.058139714 | 0.156958758 | 0.33216993  |
| 0.03042075  | 0.053029837 | 0.26863783  | 0.002137365 |
| 0.019957492 | 0.007576965 | 0.058013    | 0.20320272  |
| 0.210342382 | 0.267532539 | 0.071515219 | 0.051069076 |
| 0.022324379 | 0.050662737 | 0.13698648  | 0.206474996 |
| 0.031728363 | 0.264092882 | 0.045543161 | 0.055379699 |
| 0.024116955 | 0.093656742 | 0.232696507 | 0.152618088 |
| 0.20940614  | 0.251793807 | 0.290101411 | 0.264798119 |
| 0.01900051  | 0.075280073 | 0.106627476 | 0.068564944 |
| 0.088388912 | 0.195636826 | 0.051487265 | 0.156142153 |
| 0.287646568 | 0.089243654 | 0.001598289 | 0.242381095 |
| 0.262456176 | 0.002742729 | 0.331570149 | 0.065414907 |
| 0.016554501 | 0.121243089 | 0.172397896 | 0.095944233 |

|             |             |              |             |
|-------------|-------------|--------------|-------------|
| 0.054980666 | 0.044197353 | 0.107551086  | 0.246389851 |
| 0.203088055 | 0.211491154 | 0.113382641  | 0.094428974 |
| 0.257150359 | 0.045881468 | 0.301452981  | 0.018883955 |
| 0.293969952 | 0.176640857 | 0.010281337  | 0.010573626 |
| 0.052177107 | 0.049656384 | 0.116881012  | 0.077265261 |
| 0.05103672  | 0.001496965 | 0.141795648  | 0.06959671  |
| 0.049323424 | 0.034312815 | 0.158507209  | 0.32960724  |
| 0.249118998 | 0.010880647 | 0.291901075  | 0.060935505 |
| 0.07789182  | 0.102760454 | 0.118023956  | 0.026391982 |
| 0.191604461 | 0.014145176 | 0.055488582  | 0.156064508 |
| 0.106622204 | 0.215553402 | 0.039668664  | 0.099636965 |
| 0.309871768 | 0.057355322 | 0.046323287  | 0.00652568  |
| 0.154448444 | 0.159092953 | 0.025309299  | 0.040495774 |
| 0.102334866 | 0.09119475  | 0.028644311  | 0.246641414 |
| 0.084933034 | 0.275253799 | 0.003998988  | 0.130583493 |
| 0.028906852 | 0.087914182 | 0.046575524  | 0.069255719 |
| 0.181447903 | 0.06247625  | 0.012806376  | 0.322970682 |
| 0.095130849 | 0.079084659 | 0.262336677  | 0.137665985 |
| 0.028938612 | 0.201216894 | 0.061425347  | 0.004686438 |
| 0.14676367  | 0.30575712  | 0.291247411  | 0.107854728 |
| 0.079744849 | 0.14058221  | 0.091934602  | 0.040210131 |
| 0.009629914 | 0.083144487 | 0.1159247    | 0.180111744 |
| 0.057994158 | 0.07849721  | 0.010780551  | 0.005540299 |
| 0.091399459 | 0.026400782 | 0.098762224  | 0.035071341 |
| 0.041929764 | 0.014027578 | 0.201956176  | 0.044120696 |
| 0.003185529 | 0.144582046 | 0.048126991  | 0.049392158 |
| 0.06788494  | 0.112874944 | 0.09037919   | 0.277304859 |
| 0.023953441 | 0.021338249 | 0.026622326  | 0.264496063 |
| 0.331684891 | 0.136477997 | 0.000699317  | 0.118444647 |
| 0.09460147  | 0.124763054 | 0.090245114  | 0.092386316 |
| 0.155067049 | 0.242570384 | 0.10906595   | 0.052872075 |
| 0.00629293  | 0.030918334 | 0.019610672  | 0.302172272 |
| 0.0555156   | 0.286036371 | 0.0111106626 | 0.012605948 |
| 0.011542075 | 0.312364535 | 0.004084377  | 0.165970783 |
| 0.07458581  | 0.276982892 | 0.0002646    | 0.091522094 |
| 0.019392463 | 0.003494193 | 0.120231888  | 0.155891805 |
| 0.127869054 | 0.068602358 | 0.243650624  | 0.026905505 |
| 0.002190864 | 0.032976375 | 0.050784701  | 0.087691107 |
| 0.029772503 | 0.006273429 | 0.093748789  | 0.097473174 |
| 0.119872967 | 0.203701509 | 0.288780905  | 0.023701182 |
| 0.030260771 | 0.016303929 | 0.071272216  | 0.152611632 |
| 0.139140382 | 0.264393454 | 0.156399231  | 0.039688168 |
| 0.067360961 | 0.210363975 | 0.261390474  | 0.114325661 |
| 0.007183993 | 0.033697411 | 0.048242724  | 0.156504462 |
| 0.02522588  | 0.083583361 | 0.04784655   | 0.362372193 |
| 0.164938382 | 0.008705301 | 0.379986306  | 0.063644056 |
| 0.164181906 | 0.080018357 | 0.331483537  | 0.144005296 |
| 0.223566969 | 0.128405461 | 0.273338831  | 0.102866353 |
| 0.323668945 | 0.001685772 | 0.006106288  | 0.218106806 |
| 0.197124242 | 0.328765047 | 0.075978763  | 0.068127984 |
| 0.056715758 | 0.252887473 | 0.080644645  | 0.127468479 |
| 0.21140908  | 0.025727906 | 0.025585262  | 0.005021648 |
| 0.035642847 | 0.129486293 | 0.225926341  | 0.241610979 |
| 0.306955649 | 0.273898819 | 0.190463949  | 0.151374726 |

|             |             |             |             |
|-------------|-------------|-------------|-------------|
| 0.066100352 | 0.02920098  | 0.302232019 | 0.097031122 |
| 0.266382995 | 0.050874739 | 0.17039198  | 0.128363866 |
| 0.137599836 | 0.095933939 | 0.094926788 | 0.010150647 |
| 0.042663624 | 0.137091972 | 0.016114973 | 0.094996046 |
| 0.037082018 | 0.259004817 | 0.198816898 | 0.205685502 |
| 0.018241861 | 0.007163749 | 0.193623449 | 0.009111682 |
| 0.366095654 | 0.010133706 | 0.09034706  | 0.00103681  |
| 0.143658153 | 0.09645782  | 0.092575236 | 0.007077539 |
| 0.076737213 | 0.000160529 | 0.161914982 | 0.250235856 |
| 0.149040745 | 0.21606596  | 0.05779742  | 0.043064036 |
| 0.029506051 | 0.073597645 | 0.186584744 | 0.052625897 |
| 0.080415749 | 0.005170441 | 0.081289077 | 0.079562847 |
| 0.020986227 | 0.050427163 | 0.311818072 | 0.068296927 |
| 0.18943875  | 0.041402108 | 0.282970111 | 0.106480072 |
| 0.061738804 | 0.055117749 | 0.096199726 | 0.039973544 |
| 0.25849779  | 0.072409611 | 0.04897715  | 0.036314918 |
| 0.076345179 | 0.028556295 | 0.01857061  | 0.271080268 |
| 0.034126417 | 0.080307453 | 0.014096247 | 0.044987038 |
| 0.018988448 | 0.211588197 | 0.097178098 | 0.09502428  |
| 0.081991899 | 0.016984621 | 0.299434207 | 0.197176329 |
| 0.002014572 | 0.035559463 | 0.273535627 | 0.003782674 |
| 0.07343962  | 0.016300191 | 0.010998519 | 0.080212028 |
| 0.223819077 | 0.021455984 |             |             |
| CCNC        | 0.200392708 | 0.46220272  | 0.040134774 |
| 0.011388292 | 0.053685557 | 0.148647857 | 0.114346665 |
| 0.177252782 | 0.072898743 | 0.072999779 | 0.240400222 |
| 0.001792003 | 0.343136488 | 0.013148967 | 0.046618952 |
| 0.492005636 | 0.500087855 | 0.169252286 | 0.494747351 |
| 0.170601265 | 0.074387386 | 0.263012405 | 0.210766733 |
| 0.142568651 | 0.002000836 | 0.063340287 | 0.024259493 |
| 0.187003125 | 0.481238363 | 0.116096909 | 0.13871544  |
| 0.446154932 | 0.415042336 | 0.180747359 | 0.144759794 |
| 0.110835893 | 0.419631149 | 0.058856567 | 0.335856474 |
| 0.394078535 | 0.108339593 | 0.412415068 | 0.013985976 |
| 0.00142786  | 0.05622864  | 0.163262011 | 0.260838257 |
| 0.166470104 | 0.122682999 | 0.099795854 | 0.088213324 |
| 0.074841029 | 0.269356213 | 0.34360785  | 0.07345648  |
| 0.35494306  | 0.002023344 | 0.409053682 | 0.142585815 |
| 0.043586656 | 0.17243048  | 0.191343773 | 0.283807757 |
| 0.165597815 | 0.381626329 | 0.491984518 | 0.021978314 |
| 0.04511453  | 1           | 0.357001755 | 0.237329951 |
| 0.419927318 | 0.160063592 | 0.144209869 | 0.177064709 |
| 0.323173246 | 0.362521033 | 0.187317204 | 0.09881073  |
| 0.001015451 | 0.078486438 | 0.143374007 | 0.272851131 |
| 0.244880565 | 0.277127104 | 0.243781701 | 0.11140282  |
| 0.198279932 | 0.014942757 | 0.216703524 | 0.498173084 |
| 0.01308372  | 0.353551775 | 0.00583364  | 0.08690049  |
| 0.379039402 | 0.45625277  | 0.286364125 | 0.043561334 |
| 0.011323145 | 0.078867374 | 0.097186757 | 0.399584974 |
| 0.217964767 | 0.210040675 | 0.345385321 | 0.077986778 |
| 0.337682221 | 0.112548182 | 0.17307278  | 0.412925466 |
| 0.460744929 | 0.006773663 | 0.098796709 | 0.126908487 |
| 0.172527078 | 0.070881372 | 0.117153677 | 0.020720235 |
| 0.005371269 | 0.017450823 | 0.441328907 | 0.097677035 |

|             |             |             |             |
|-------------|-------------|-------------|-------------|
| 0.054569418 | 0.106215481 | 0.041668869 | 0.262271867 |
| 0.17175115  | 0.433052755 | 0.060778751 | 0.129182268 |
| 0.305137501 | 0.13667274  | 0.178893965 | 0.348522082 |
| 0.157858039 | 0.147624335 | 0.087095477 | 0.404078324 |
| 0.387650413 | 0.041778308 | 0.052162142 | 0.218984445 |
| 0.326361209 | 0.469164957 | 0.504998203 | 0.163029478 |
| 0.119804828 | 0.139059533 | 0.158273839 | 0.240544813 |
| 0.133522069 | 0.187232289 | 0.04668295  | 0.259380825 |
| 0.363917806 | 0.020290613 | 0.043132753 | 0.371712072 |
| 0.021055637 | 0.122878428 | 0.404774653 | 0.356485935 |
| 0.241158453 | 0.019880078 | 0.110005996 | 0.136372643 |
| 0.168717992 | 0.126113974 | 0.285347963 | 0.104714024 |
| 0.213089233 | 0.150288898 | 0.02929819  | 0.336354962 |
| 0.071157295 | 0.206287536 | 0.175186907 | 0.046895561 |
| 0.262809206 | 0.18465858  | 0.390574093 | 0.244516105 |
| 0.310356525 | 0.001360921 | 0.070427531 | 0.236098589 |
| 0.155480185 | 0.381317698 | 0.454977173 | 0.067875715 |
| 0.153922294 | 0.167127472 | 0.084647066 | 0.150392431 |
| 0.379776947 | 0.112057433 | 0.106784507 | 0.000739772 |
| 0.075414995 | 0.169500282 | 0.219281834 | 0.040257458 |
| 0.10965864  | 0.073495609 | 0.075767786 | 0.424852619 |
| 0.108445233 | 0.356916639 | 0.023524045 | 0.097230552 |
| 0.136174398 | 0.310699243 | 0.165980945 | 0.153611802 |
| 0.341806875 | 0.146382149 | 0.41794717  | 0.331263837 |
| 0.131213092 | 0.264293573 | 0.09969087  | 0.15769785  |
| 0.23984956  | 0.425535839 | 0.382597323 | 0.3652956   |
| 0.139204843 | 0.282362698 | 0.141596073 | 0.184095534 |
| 0.213811295 | 0.202172095 | 0.053631777 | 0.467252385 |
| 0.000842774 | 0.204430506 | 0.217902872 | 0.107450315 |
| 0.440052598 | 0.139410249 | 0.045919027 | 0.14074654  |
| 0.499757599 | 0.469266266 | 0.405488079 | 0.407499346 |
| 0.118771231 | 0.009093197 | 0.463740044 | 0.309762031 |
| 0.485045233 | 0.194421524 | 0.14131414  | 0.051938027 |
| 0.440695931 | 0.214048979 | 0.272722254 | 0.202195342 |
| 0.224759872 | 0.174327347 | 0.137656256 | 0.271360815 |
| 0.011571665 | 0.129651042 | 0.259620581 | 0.091282712 |
| 0.142569278 | 0.106676731 | 0.384607454 | 0.23252816  |
| 0.171097951 | 0.148716124 | 0.156786958 | 0.045951816 |
| 0.098828775 | 0.469514989 | 0.023570468 | 0.440412614 |
| 0.4997516   | 0.196512879 | 0.427273717 | 0.494661253 |
| 0.167788581 | 0.308189369 | 0.431793486 | 0.427661122 |
| 0.0009645   | 0.404113488 | 0.311284092 | 0.283277202 |
| 0.416778802 | 0.182338289 | 0.134229257 | 0.185809568 |
| 0.001456854 | 0.090367815 | 0.113217576 | 0.458036637 |
| 0.411854529 | 0.019284347 | 0.027420579 | 0.353409323 |
| 0.274782626 | 0.024924841 | 0.499669446 | 0.161596589 |
| 0.399039043 | 0.189853039 | 0.090875884 | 0.361309544 |
| 0.102454475 | 0.195033503 | 0.015115768 | 0.245421784 |
| 0.199388695 | 0.077841445 | 0.039533259 | 0.497173163 |
| 0.384515546 | 0.271160912 | 0.144195927 | 0.005478142 |
| 0.380031567 | 0.088826039 | 0.337227645 | 0.065238545 |
| 0.353265896 | 0.281895551 | 0.398452883 | 0.376294555 |
| 0.243968703 | 0.337874785 | 0.303508801 | 0.383448094 |
| 0.051404185 | 0.364854289 | 0.409380503 | 0.028543633 |



|             |             |             |             |
|-------------|-------------|-------------|-------------|
| 0.220241947 | 0.442817564 | 0.183122792 | 0.096922756 |
| 0.257269446 | 0.03576806  | 0.122466737 | 0.181501569 |
| 0.388072713 | 0.438855779 | 0.037658801 | 0.099544359 |
| 0.334188167 | 0.155095946 | 0.062662736 | 0.176651794 |
| 0.190750488 | 0.089797888 | 0.092494462 | 0.273204071 |
| 0.417018042 | 0.199781479 | 0.413847931 | 0.070759536 |
| 0.429404566 | 0.035515791 | 0.386555771 | 0.139480517 |
| 0.158089164 | 0.226358625 | 0.377208733 | 0.07118972  |
| 0.015384908 | 0.082929547 | 0.313686826 | 0.350079501 |
| 0.045659681 | 0.110963082 | 0.124493213 | 0.169093906 |
| 0.473414101 | 0.172177127 | 0.1669227   | 0.173164684 |
| 0.353032427 | 0.049632372 | 0.454679294 | 0.177421907 |
| 0.341586663 | 0.158787176 | 0.362570342 | 0.007501177 |
| 0.282052348 | 0.085312309 | 0.126211446 | 0.164565084 |
| 0.440259825 | 0.072739843 | 0.261321222 | 0.099732559 |
| 0.091705775 | 0.003042565 | 0.264763157 | 0.16318761  |
| 0.204719031 | 0.143359427 | 0.181294411 | 0.080348395 |
| 0.494135575 | 0.205353481 | 0.350189037 | 0.147269846 |
| 0.169972899 | 0.008972973 | 0.078862718 | 0.022524726 |
| 0.320487427 | 0.304547914 | 0.278666751 | 0.191561646 |
| 0.129022464 | 0.264276338 | 0.263595964 | 0.180826252 |
| 0.425777857 | 0.074420871 | 0.492641718 | 0.173037259 |
| 0.367202508 | 0.178127881 | 0.157740618 | 0.165386365 |
| 0.100608616 | 0.095119497 | 0.072735839 | 0.105561766 |
| 0.445615005 | 0.162432239 | 0.179736344 | 0.166200187 |
| 0.027248482 | 0.171393694 | 0.342790895 | 0.338116192 |
| 0.231817146 | 0.289533726 | 0.172793703 | 0.329426503 |
| 0.175612352 | 0.17181554  | 0.023416651 | 0.015120144 |
| 0.112044016 | 0.104117911 | 0.395372443 | 0.398735663 |
| 0.485133475 | 0.150493637 | 0.058250783 | 0.086870797 |
| 0.069915607 | 0.340870293 | 0.155870854 | 0.070703994 |
| 0.24255856  | 0.168089005 | 0.000506927 | 0.134119121 |
| 0.283638531 | 0.171194117 |             |             |
| CCR2        | 0.299696391 | 0.409571264 | 0.0312734   |
| 0.03098254  | 0.063689757 | 0.134936789 | 0.125800249 |
| 0.303349135 | 0.05472597  | 0.097340851 | 0.196547637 |
| 0.00089891  | 0.371620762 | 0.006714714 | 0.031340481 |
| 0.487446303 | 0.494194136 | 0.205127576 | 0.469357977 |
| 0.232013073 | 0.135541399 | 0.245856056 | 0.28307163  |
| 0.151834093 | 0.000832085 | 0.067063374 | 0.050477422 |
| 0.328062945 | 0.489937282 | 0.107905861 | 0.201280299 |
| 0.445463706 | 0.447027614 | 0.330717818 | 0.242556792 |
| 0.284699588 | 0.341814289 | 0.111594537 | 0.381345269 |
| 0.422226592 | 0.139918094 | 0.422936676 | 0.005724013 |
| 0.008847166 | 0.050475057 | 0.293253762 | 0.275748536 |
| 0.193948522 | 0.123966474 | 0.084312309 | 0.107032183 |
| 0.217785343 | 0.220052656 | 0.293958382 | 0.224961818 |
| 0.26824692  | 0.006936204 | 0.325005198 | 0.202330138 |
| 0.027713491 | 0.192384288 | 0.34133991  | 0.309878859 |
| 0.138616915 | 0.296109474 | 0.45032667  | 0.016077901 |
| 0.033146441 | 0.357001755 | 1           | 0.340626555 |
| 0.372367989 | 0.272204162 | 0.192851308 | 0.337658414 |
| 0.394397467 | 0.391949418 | 0.160241565 | 0.089358837 |
| 0.000648725 | 0.082007575 | 0.264007406 | 0.301552971 |

|             |             |             |             |
|-------------|-------------|-------------|-------------|
| 0.38971861  | 0.221934737 | 0.326716815 | 0.13296008  |
| 0.386413378 | 0.007243099 | 0.255662566 | 0.476050615 |
| 0.017192021 | 0.351905229 | 0.006659283 | 0.072994157 |
| 0.372536935 | 0.493523986 | 0.330257658 | 0.037230143 |
| 0.005147879 | 0.058898318 | 0.121519568 | 0.452808678 |
| 0.29702319  | 0.347060744 | 0.258206954 | 0.157401222 |
| 0.39675664  | 0.11954034  | 0.220397958 | 0.342352469 |
| 0.430654254 | 0.002671975 | 0.085170403 | 0.120931251 |
| 0.283925816 | 0.113697992 | 0.122929713 | 0.052408563 |
| 0.007610323 | 0.013513654 | 0.449429072 | 0.085625126 |
| 0.057338674 | 0.114541537 | 0.056311376 | 0.375786571 |
| 0.280968585 | 0.426420827 | 0.062605813 | 0.15356051  |
| 0.396158708 | 0.148394803 | 0.323298551 | 0.390770862 |
| 0.280631605 | 0.162863444 | 0.080011861 | 0.336973667 |
| 0.290109761 | 0.031980905 | 0.041072492 | 0.207260815 |
| 0.373864769 | 0.45854824  | 0.471010571 | 0.200545647 |
| 0.167101766 | 0.133772513 | 0.286251481 | 0.276302324 |
| 0.130359828 | 0.228967301 | 0.085307291 | 0.211364484 |
| 0.272725418 | 0.038217408 | 0.029411255 | 0.353841815 |
| 0.041630066 | 0.144488423 | 0.336396276 | 0.346192837 |
| 0.328363395 | 0.043777916 | 0.170885241 | 0.163219159 |
| 0.188744292 | 0.158733376 | 0.300814357 | 0.172443    |
| 0.197158199 | 0.295181467 | 0.019771248 | 0.392241573 |
| 0.057749509 | 0.215259075 | 0.357122795 | 0.069359304 |
| 0.319673408 | 0.240530912 | 0.355584398 | 0.313930218 |
| 0.356865458 | 0.006263332 | 0.100666045 | 0.304268257 |
| 0.283146927 | 0.388836439 | 0.39621939  | 0.051336204 |
| 0.146018652 | 0.277522687 | 0.068549886 | 0.22190502  |
| 0.32736111  | 0.174691703 | 0.153759037 | 0.000426173 |
| 0.066142016 | 0.393019253 | 0.315218121 | 0.026572486 |
| 0.146524407 | 0.068269952 | 0.079054646 | 0.393413501 |
| 0.108328996 | 0.372359596 | 0.013847388 | 0.141758163 |
| 0.15997536  | 0.294227058 | 0.343819414 | 0.227927714 |
| 0.349503226 | 0.225069559 | 0.476939508 | 0.251331795 |
| 0.159863016 | 0.226957869 | 0.165491169 | 0.164632072 |
| 0.391806848 | 0.400872465 | 0.409656788 | 0.355725152 |
| 0.15462524  | 0.285186077 | 0.257562862 | 0.160496929 |
| 0.280198055 | 0.272826738 | 0.041190601 | 0.402860321 |
| 0.00031502  | 0.211969729 | 0.354699093 | 0.193604541 |
| 0.390802673 | 0.136107097 | 0.030807535 | 0.151362335 |
| 0.475605162 | 0.400694859 | 0.347337282 | 0.450790138 |
| 0.213009343 | 0.004126138 | 0.399320386 | 0.27824784  |
| 0.499006576 | 0.258684609 | 0.29416158  | 0.057963504 |
| 0.418174    | 0.292472964 | 0.340932989 | 0.375058811 |
| 0.348774707 | 0.312623524 | 0.130691766 | 0.287728999 |
| 0.018493326 | 0.172680762 | 0.380653498 | 0.168892743 |
| 0.256374246 | 0.122552348 | 0.362753325 | 0.186784724 |
| 0.310825539 | 0.313426724 | 0.314932492 | 0.038259727 |
| 0.08647208  | 0.421443499 | 0.043156687 | 0.374862927 |
| 0.472057597 | 0.228179914 | 0.416492393 | 0.463754968 |
| 0.212298049 | 0.245635384 | 0.3958758   | 0.411777121 |
| 0.000477583 | 0.453775941 | 0.36580752  | 0.205280531 |
| 0.447690433 | 0.173172086 | 0.209048161 | 0.384139705 |
| 0.000370649 | 0.077537308 | 0.318526003 | 0.373911204 |

|             |             |             |             |
|-------------|-------------|-------------|-------------|
| 0.407139594 | 0.010732434 | 0.059383923 | 0.348147146 |
| 0.370800307 | 0.034811936 | 0.453272918 | 0.230885803 |
| 0.357315222 | 0.290227852 | 0.097352078 | 0.406215725 |
| 0.306895986 | 0.269729819 | 0.017623809 | 0.330246063 |
| 0.322485896 | 0.089454175 | 0.062994625 | 0.459606817 |
| 0.345505127 | 0.2463345   | 0.137465143 | 0.011594823 |
| 0.409071418 | 0.224130668 | 0.381498213 | 0.051332456 |
| 0.299800255 | 0.22629032  | 0.328008332 | 0.391804034 |
| 0.330789555 | 0.274841336 | 0.241891531 | 0.352901186 |
| 0.112966505 | 0.414409663 | 0.438784573 | 0.031930924 |
| 0.349420769 | 0.426406314 | 0.351944606 | 0.092172806 |
| 0.250425774 | 0.090557379 | 0.107911586 | 0.245233952 |
| 0.325729399 | 0.435468908 | 0.026905786 | 0.082577277 |
| 0.273296348 | 0.174716523 | 0.049688426 | 0.206185731 |
| 0.157278333 | 0.258658922 | 0.128753787 | 0.235626807 |
| 0.339803569 | 0.166351811 | 0.422380748 | 0.136312739 |
| 0.42852367  | 0.019601757 | 0.335120165 | 0.149695313 |
| 0.167990337 | 0.390751086 | 0.424978472 | 0.138230603 |
| 0.02821891  | 0.086335069 | 0.263929748 | 0.262954876 |
| 0.033908528 | 0.10111768  | 0.154367243 | 0.228166799 |
| 0.479775085 | 0.333507897 | 0.154125747 | 0.215662639 |
| 0.256467758 | 0.091824656 | 0.375249067 | 0.226641445 |
| 0.307544505 | 0.22700515  | 0.344838515 | 0.007434468 |
| 0.385182091 | 0.12379491  | 0.18500947  | 0.268131314 |
| 0.479420241 | 0.066529354 | 0.246785954 | 0.088508569 |
| 0.157415587 | 0.001645492 | 0.227821741 | 0.357583442 |
| 0.159014786 | 0.252155117 | 0.235437799 | 0.240399384 |
| 0.433432488 | 0.300278935 | 0.346539891 | 0.255407967 |
| 0.277824137 | 0.030430714 | 0.102516138 | 0.014456716 |
| 0.286142251 | 0.242192791 | 0.337177519 | 0.338966698 |
| 0.162597433 | 0.337078799 | 0.246785252 | 0.308380668 |
| 0.418761539 | 0.196620714 | 0.488015485 | 0.189303854 |
| 0.428708097 | 0.289887535 | 0.139393947 | 0.207030957 |
| 0.108741634 | 0.085024042 | 0.055739026 | 0.097488151 |
| 0.462374977 | 0.186825797 | 0.276582243 | 0.281150527 |
| 0.022331871 | 0.255716337 | 0.345888633 | 0.3931805   |
| 0.343824152 | 0.381934057 | 0.307429214 | 0.239045867 |
| 0.272324169 | 0.217409698 | 0.058777908 | 0.033378443 |
| 0.259859515 | 0.112589898 | 0.33516058  | 0.344237901 |
| 0.460011642 | 0.248002785 | 0.044875599 | 0.070373933 |
| 0.124054443 | 0.350526383 | 0.158977255 | 0.166559714 |
| 0.314981184 | 0.293555217 | 0.000216192 | 0.152081406 |
| 0.244608962 | 0.325923141 |             |             |
| CCR5        | 0.17555862  | 0.489510787 | 0.06838474  |
| 0.08497806  | 0.142516921 | 0.199948164 | 0.216038004 |
| 0.178666201 | 0.084621132 | 0.203453066 | 0.297297853 |
| 0.000450708 | 0.291178846 | 0.00747818  | 0.041248679 |
| 0.457334166 | 0.47449365  | 0.267603716 | 0.437389925 |
| 0.161286975 | 0.242346569 | 0.23191561  | 0.2955384   |
| 0.213917569 | 0.00065533  | 0.158536311 | 0.154971008 |
| 0.173809097 | 0.429479927 | 0.144981504 | 0.254222944 |
| 0.395667053 | 0.416406967 | 0.323043587 | 0.280524247 |
| 0.222402755 | 0.44477793  | 0.069404431 | 0.341181442 |
| 0.311491153 | 0.248166649 | 0.398191089 | 0.009927886 |

|             |             |             |             |
|-------------|-------------|-------------|-------------|
| 0.017741428 | 0.117847183 | 0.155353132 | 0.256614401 |
| 0.148207624 | 0.188110074 | 0.122579104 | 0.215887851 |
| 0.096593871 | 0.308411615 | 0.270879424 | 0.102800881 |
| 0.420170803 | 0.026209681 | 0.449896796 | 0.10931826  |
| 0.059135609 | 0.190258797 | 0.19153288  | 0.271218644 |
| 0.217996411 | 0.44357748  | 0.485593584 | 0.055888441 |
| 0.080099543 | 0.237329951 | 0.340626555 | 1           |
| 0.431725051 | 0.269675399 | 0.259043005 | 0.208176869 |
| 0.330827085 | 0.312413147 | 0.188479215 | 0.120698564 |
| 0.000859579 | 0.174228712 | 0.342932791 | 0.187291299 |
| 0.240498827 | 0.325487    | 0.199577777 | 0.236768508 |
| 0.27295416  | 0.016119965 | 0.236302657 | 0.488100926 |
| 0.037088055 | 0.294603439 | 0.011412989 | 0.099603657 |
| 0.347234466 | 0.392899885 | 0.268292371 | 0.101463768 |
| 0.009957889 | 0.073660625 | 0.058129766 | 0.316810282 |
| 0.22920316  | 0.286456543 | 0.398332163 | 0.050791368 |
| 0.280495622 | 0.113383224 | 0.240135675 | 0.469467164 |
| 0.449827173 | 0.003328302 | 0.083180236 | 0.188445514 |
| 0.233657261 | 0.198539441 | 0.199132932 | 0.028916576 |
| 0.021274555 | 0.004178233 | 0.40312674  | 0.10735958  |
| 0.147400157 | 0.196853164 | 0.11284692  | 0.338694132 |
| 0.165682062 | 0.337832778 | 0.143179843 | 0.238274713 |
| 0.319696847 | 0.236132721 | 0.34032911  | 0.349565783 |
| 0.284490639 | 0.131375774 | 0.111806657 | 0.450641176 |
| 0.373310112 | 0.076101575 | 0.076905036 | 0.259612859 |
| 0.283709037 | 0.441560912 | 0.496332892 | 0.162620815 |
| 0.272434869 | 0.154234619 | 0.279650202 | 0.336881183 |
| 0.196317171 | 0.165566709 | 0.030825932 | 0.267757729 |
| 0.419707438 | 0.025941124 | 0.062413223 | 0.318818251 |
| 0.104343089 | 0.213562407 | 0.415148424 | 0.38605559  |
| 0.257053425 | 0.137405986 | 0.279660509 | 0.240435174 |
| 0.188187839 | 0.235436436 | 0.253701652 | 0.277135817 |
| 0.219382192 | 0.297046474 | 0.055338234 | 0.291018514 |
| 0.105924288 | 0.192726471 | 0.181815697 | 0.049448067 |
| 0.205619822 | 0.169265465 | 0.429039181 | 0.229493667 |
| 0.274563627 | 0.028046103 | 0.2118929   | 0.194545588 |
| 0.246844955 | 0.29645983  | 0.50804756  | 0.095265231 |
| 0.155736586 | 0.16063986  | 0.106730402 | 0.289433293 |
| 0.284480628 | 0.24762967  | 0.22350219  | 0.001038033 |
| 0.129362646 | 0.266964936 | 0.23709724  | 0.026205745 |
| 0.257300638 | 0.088599649 | 0.043003034 | 0.441589552 |
| 0.165755831 | 0.387607816 | 0.008531573 | 0.05064398  |
| 0.203703278 | 0.393922065 | 0.320933117 | 0.147276844 |
| 0.420082265 | 0.263954917 | 0.348817808 | 0.347411086 |
| 0.229636401 | 0.335396849 | 0.065784953 | 0.163339944 |
| 0.260077585 | 0.450631192 | 0.392129287 | 0.376685411 |
| 0.219010361 | 0.20123886  | 0.163028398 | 0.211787596 |
| 0.214282944 | 0.218195078 | 0.06835325  | 0.475356164 |
| 0.000467181 | 0.223722463 | 0.320227018 | 0.069492818 |
| 0.500281978 | 0.224076196 | 0.053363273 | 0.13056555  |
| 0.448424406 | 0.467767801 | 0.323744688 | 0.380560602 |
| 0.106200603 | 0.00408026  | 0.411240233 | 0.323038469 |
| 0.443968606 | 0.264198876 | 0.26248086  | 0.022373645 |
| 0.44961376  | 0.147728762 | 0.301981328 | 0.238341071 |

|             |             |             |             |
|-------------|-------------|-------------|-------------|
| 0.279315508 | 0.228974135 | 0.150305541 | 0.181626161 |
| 0.007458614 | 0.220623194 | 0.279179738 | 0.232438051 |
| 0.30760431  | 0.142655654 | 0.43236913  | 0.243425604 |
| 0.309413644 | 0.195506038 | 0.34475557  | 0.096783488 |
| 0.144860895 | 0.491265374 | 0.02744401  | 0.384306656 |
| 0.481412612 | 0.209141643 | 0.47487957  | 0.457987083 |
| 0.197849367 | 0.360741749 | 0.451265408 | 0.334368756 |
| 0.000297256 | 0.367410142 | 0.286293447 | 0.297159837 |
| 0.422615546 | 0.215606898 | 0.088067946 | 0.250008593 |
| 0.000477399 | 0.118821033 | 0.214748539 | 0.440393712 |
| 0.450417676 | 0.033668603 | 0.028021667 | 0.380663312 |
| 0.26381627  | 0.020402317 | 0.488335537 | 0.28293528  |
| 0.465730978 | 0.27569143  | 0.186576894 | 0.334873269 |
| 0.162266413 | 0.180169635 | 0.049830413 | 0.330318565 |
| 0.236658586 | 0.02897905  | 0.175751327 | 0.458228447 |
| 0.386455649 | 0.328811889 | 0.183039996 | 0.031038689 |
| 0.288491739 | 0.267677786 | 0.401795381 | 0.076062825 |
| 0.337837092 | 0.312273592 | 0.43458595  | 0.353092595 |
| 0.262798208 | 0.389600197 | 0.35163207  | 0.414781742 |
| 0.132695334 | 0.345153506 | 0.382022746 | 0.070999005 |
| 0.192130264 | 0.460508552 | 0.333192403 | 0.169320214 |
| 0.236046737 | 0.170967975 | 0.168355964 | 0.150013563 |
| 0.454291846 | 0.468661505 | 0.065286843 | 0.083520986 |
| 0.408423576 | 0.193970295 | 0.11128679  | 0.197003608 |
| 0.200945601 | 0.101055393 | 0.045266779 | 0.275189414 |
| 0.468293672 | 0.262158907 | 0.429441772 | 0.25889965  |
| 0.4118793   | 0.033845447 | 0.323994361 | 0.202365615 |
| 0.17383535  | 0.236296347 | 0.303726319 | 0.049370594 |
| 0.053921251 | 0.084230665 | 0.401099214 | 0.38907214  |
| 0.072283955 | 0.130912329 | 0.241099185 | 0.304949734 |
| 0.454773031 | 0.276586708 | 0.201935299 | 0.186138258 |
| 0.396647847 | 0.204564785 | 0.450040787 | 0.200737389 |
| 0.314065344 | 0.298041565 | 0.367081026 | 0.008226431 |
| 0.285696407 | 0.230412702 | 0.075423782 | 0.339089508 |
| 0.36622472  | 0.126767628 | 0.336786622 | 0.108919716 |
| 0.145831485 | 0.001241019 | 0.235219126 | 0.246673181 |
| 0.243370575 | 0.124926189 | 0.201781136 | 0.112796395 |
| 0.495990676 | 0.245724884 | 0.328028393 | 0.130394385 |
| 0.308750905 | 0.024474191 | 0.210354299 | 0.026893328 |
| 0.282198458 | 0.300334738 | 0.228898305 | 0.208538725 |
| 0.078401544 | 0.307292531 | 0.287026089 | 0.331411191 |
| 0.466732059 | 0.146770496 | 0.484030131 | 0.151057096 |
| 0.313872649 | 0.240586579 | 0.189266723 | 0.186652787 |
| 0.20433255  | 0.071375891 | 0.10646885  | 0.073562669 |
| 0.463623309 | 0.166702106 | 0.326850883 | 0.182195046 |
| 0.063379873 | 0.286849923 | 0.286364456 | 0.329884913 |
| 0.300171196 | 0.272723118 | 0.192055195 | 0.368741704 |
| 0.16702392  | 0.159372134 | 0.139134771 | 0.116867833 |
| 0.297844267 | 0.184677364 | 0.313649268 | 0.35611047  |
| 0.456724701 | 0.120651464 | 0.088613105 | 0.080007988 |
| 0.048474317 | 0.260534074 | 0.248026079 | 0.15651754  |
| 0.257037003 | 0.149148525 | 0.000437029 | 0.108512564 |
| 0.301231516 | 0.270055471 |             |             |
| CCR7        | 0.355954168 | 0.497914759 | 0.109799868 |

|             |             |             |             |
|-------------|-------------|-------------|-------------|
| 0.036506691 | 0.150149637 | 0.309352936 | 0.293163233 |
| 0.356360617 | 0.17287014  | 0.19473706  | 0.382626241 |
| 0.003311084 | 0.337508324 | 0.029184443 | 0.111000402 |
| 0.492746171 | 0.505041354 | 0.390488784 | 0.492057769 |
| 0.35553764  | 0.183783546 | 0.397793196 | 0.414593998 |
| 0.333520255 | 0.004158382 | 0.179376881 | 0.071894963 |
| 0.34097963  | 0.472794913 | 0.276285234 | 0.327375465 |
| 0.438874305 | 0.419268778 | 0.419860856 | 0.328978845 |
| 0.225015504 | 0.464629083 | 0.110918459 | 0.388024273 |
| 0.366316298 | 0.285696076 | 0.411596338 | 0.030308424 |
| 0.004171078 | 0.157725906 | 0.311280856 | 0.420652526 |
| 0.34681168  | 0.292330648 | 0.241924034 | 0.23624298  |
| 0.140873836 | 0.406364341 | 0.396087251 | 0.13665739  |
| 0.437160881 | 0.007031013 | 0.456781458 | 0.277199075 |
| 0.113346179 | 0.375260575 | 0.357658049 | 0.428874211 |
| 0.321708087 | 0.444979721 | 0.507610532 | 0.065567399 |
| 0.12480468  | 0.419927318 | 0.372367989 | 0.431725051 |
| 1           | 0.355493997 | 0.353967428 | 0.333801914 |
| 0.415656987 | 0.360311283 | 0.352341695 | 0.242540866 |
| 0.002226861 | 0.212182385 | 0.344474716 | 0.328408352 |
| 0.351353089 | 0.407414716 | 0.383854757 | 0.283355657 |
| 0.411789957 | 0.038721615 | 0.416352586 | 0.514323323 |
| 0.033303242 | 0.372510245 | 0.016624649 | 0.216684138 |
| 0.409438966 | 0.43580948  | 0.419230328 | 0.122246653 |
| 0.028607985 | 0.187531141 | 0.171117197 | 0.36504279  |
| 0.42560447  | 0.463898459 | 0.435944564 | 0.124016196 |
| 0.311192265 | 0.235757899 | 0.409055546 | 0.465591954 |
| 0.476124541 | 0.014911224 | 0.221479342 | 0.295781881 |
| 0.346315643 | 0.174430785 | 0.302759245 | 0.040205053 |
| 0.018515417 | 0.027016612 | 0.443391562 | 0.224122994 |
| 0.152860178 | 0.278343652 | 0.111812734 | 0.431495755 |
| 0.338810082 | 0.410698006 | 0.167443278 | 0.327687026 |
| 0.392390926 | 0.324341639 | 0.415242599 | 0.426194115 |
| 0.361360476 | 0.317140867 | 0.216938569 | 0.457697548 |
| 0.434009869 | 0.110336492 | 0.135620759 | 0.381941698 |
| 0.316907893 | 0.475263621 | 0.524370048 | 0.347097048 |
| 0.308643209 | 0.314950563 | 0.353689594 | 0.423477001 |
| 0.315895928 | 0.368332114 | 0.084193384 | 0.403233525 |
| 0.434876252 | 0.041171293 | 0.113718479 | 0.415647098 |
| 0.063112247 | 0.306868948 | 0.447371896 | 0.459993518 |
| 0.434835539 | 0.06175535  | 0.287556656 | 0.334563298 |
| 0.360852082 | 0.318552534 | 0.429208726 | 0.264848828 |
| 0.375851409 | 0.355616598 | 0.086507404 | 0.317219247 |
| 0.18897799  | 0.384274412 | 0.290163856 | 0.080555691 |
| 0.389718436 | 0.368013406 | 0.455367926 | 0.427132777 |
| 0.391426356 | 0.005602954 | 0.191840143 | 0.381848392 |
| 0.338814983 | 0.360993723 | 0.499394959 | 0.177015758 |
| 0.321998162 | 0.298810801 | 0.212689078 | 0.360589653 |
| 0.380543    | 0.288697588 | 0.257097943 | 0.001744696 |
| 0.199551586 | 0.35233517  | 0.426853188 | 0.086417911 |
| 0.285198156 | 0.168510333 | 0.143627278 | 0.448074652 |
| 0.275939072 | 0.431493003 | 0.043251323 | 0.156044909 |
| 0.324073577 | 0.445443747 | 0.383646469 | 0.305765848 |
| 0.455591987 | 0.361070627 | 0.391751842 | 0.428118551 |

|             |             |             |             |
|-------------|-------------|-------------|-------------|
| 0.321484495 | 0.401570077 | 0.164061839 | 0.342902236 |
| 0.405746021 | 0.449439555 | 0.410102594 | 0.436029394 |
| 0.330454776 | 0.367127584 | 0.296041627 | 0.3448057   |
| 0.413871225 | 0.419060828 | 0.135783052 | 0.500751524 |
| 0.001788984 | 0.399075332 | 0.440848926 | 0.17542901  |
| 0.483925932 | 0.308474862 | 0.11668945  | 0.302128795 |
| 0.500966463 | 0.501555267 | 0.404323352 | 0.401859857 |
| 0.231040992 | 0.020516623 | 0.473023201 | 0.440110878 |
| 0.480072124 | 0.428794222 | 0.305823581 | 0.082055123 |
| 0.466540011 | 0.321034833 | 0.431557416 | 0.39207479  |
| 0.423532888 | 0.3603271   | 0.314320436 | 0.337225311 |
| 0.022508118 | 0.31474818  | 0.404351787 | 0.23257016  |
| 0.354932148 | 0.240466511 | 0.451481135 | 0.381736542 |
| 0.384019752 | 0.321526891 | 0.357376997 | 0.131094275 |
| 0.249921451 | 0.502590343 | 0.043989787 | 0.452151907 |
| 0.51468077  | 0.407132216 | 0.457713055 | 0.505335445 |
| 0.370582745 | 0.429906649 | 0.452211311 | 0.408486252 |
| 0.00177646  | 0.387884946 | 0.331636591 | 0.396664988 |
| 0.424692582 | 0.356046141 | 0.233828992 | 0.364701556 |
| 0.002718582 | 0.222820402 | 0.230975979 | 0.490996995 |
| 0.44109462  | 0.055977655 | 0.042744657 | 0.449759735 |
| 0.343542862 | 0.049714833 | 0.52080099  | 0.385108863 |
| 0.459616581 | 0.436097674 | 0.242448335 | 0.352636757 |
| 0.193621049 | 0.372043658 | 0.044738524 | 0.44409779  |
| 0.39953518  | 0.095975582 | 0.115094135 | 0.50827463  |
| 0.438582281 | 0.427870971 | 0.326066335 | 0.017464995 |
| 0.351807045 | 0.22142716  | 0.444525361 | 0.16410562  |
| 0.436022885 | 0.411997792 | 0.455127591 | 0.391738828 |
| 0.444291543 | 0.437696255 | 0.419921086 | 0.455123349 |
| 0.121727894 | 0.366899335 | 0.405481759 | 0.086084999 |
| 0.349535264 | 0.464787062 | 0.411154668 | 0.246595123 |
| 0.412830824 | 0.103059991 | 0.276148474 | 0.344751208 |
| 0.456708242 | 0.45883084  | 0.101173644 | 0.222008173 |
| 0.439176617 | 0.362936973 | 0.170151128 | 0.386798904 |
| 0.346119717 | 0.15208175  | 0.141841513 | 0.41711628  |
| 0.466368683 | 0.354918915 | 0.433283876 | 0.197316056 |
| 0.432188483 | 0.087444073 | 0.412796977 | 0.317998272 |
| 0.348012338 | 0.364549177 | 0.351261406 | 0.118212846 |
| 0.040669575 | 0.177636083 | 0.432020135 | 0.437429739 |
| 0.124952429 | 0.261697114 | 0.316137982 | 0.391998809 |
| 0.478672509 | 0.404097367 | 0.343442342 | 0.379496886 |
| 0.431020773 | 0.134578912 | 0.488071506 | 0.380974718 |
| 0.426289412 | 0.378543336 | 0.448077352 | 0.013873089 |
| 0.42296778  | 0.224592276 | 0.215618671 | 0.394306408 |
| 0.418068359 | 0.194835006 | 0.42343125  | 0.233475665 |
| 0.186513282 | 0.005791297 | 0.40068774  | 0.323639068 |
| 0.346334595 | 0.276768104 | 0.395190293 | 0.142637965 |
| 0.527779731 | 0.421901696 | 0.418918718 | 0.261071387 |
| 0.413191441 | 0.019201695 | 0.212142976 | 0.061949465 |
| 0.416920521 | 0.424886141 | 0.400607879 | 0.382812981 |
| 0.230901543 | 0.446591684 | 0.428635616 | 0.4135463   |
| 0.452352659 | 0.166756981 | 0.502830193 | 0.349618578 |
| 0.342013303 | 0.405754303 | 0.330869079 | 0.373504966 |
| 0.263593342 | 0.162619448 | 0.188786438 | 0.216057252 |

|             |             |             |             |
|-------------|-------------|-------------|-------------|
| 0.45594658  | 0.340791654 | 0.414249168 | 0.338853117 |
| 0.081146633 | 0.417914094 | 0.390993526 | 0.393521658 |
| 0.436402253 | 0.356192852 | 0.357613533 | 0.424526715 |
| 0.330034012 | 0.345226765 | 0.070018972 | 0.052457937 |
| 0.277086689 | 0.258193717 | 0.402174996 | 0.43033028  |
| 0.491956195 | 0.284917851 | 0.155018914 | 0.199299756 |
| 0.116171721 | 0.339683398 | 0.334950917 | 0.154910781 |
| 0.437821947 | 0.310439206 | 0.001254942 | 0.283911332 |
| 0.425473289 | 0.387195665 |             |             |
| CCR9        | 0.160431955 | 0.40268152  | 0.023615171 |
| 0.016264546 | 0.022227565 | 0.212144106 | 0.167602395 |
| 0.128505672 | 0.018201286 | 0.066882584 | 0.303951474 |
| 0.000392113 | 0.218718921 | 0.004395722 | 0.009836159 |
| 0.379950147 | 0.371059784 | 0.181855376 | 0.353826049 |
| 0.131807522 | 0.033283682 | 0.256049902 | 0.286451189 |
| 0.180154427 | 0.000646969 | 0.087591864 | 0.027879957 |
| 0.111709096 | 0.352947697 | 0.114902903 | 0.062909162 |
| 0.32928334  | 0.315710735 | 0.07823716  | 0.033669775 |
| 0.024613765 | 0.413602424 | 0.004895121 | 0.239008025 |
| 0.233717216 | 0.112580946 | 0.306932882 | 0.003015875 |
| 0.000927203 | 0.065085232 | 0.087745131 | 0.271832367 |
| 0.095663198 | 0.187534689 | 0.106480356 | 0.110395992 |
| 0.011830475 | 0.306081915 | 0.266431572 | 0.01303547  |
| 0.375632797 | 0.003757113 | 0.391545105 | 0.065110635 |
| 0.032861866 | 0.11111279  | 0.113142138 | 0.252545205 |
| 0.22046935  | 0.394699198 | 0.385908077 | 0.009767836 |
| 0.061205316 | 0.160063592 | 0.272204162 | 0.269675399 |
| 0.355493997 | 1           | 0.057284409 | 0.071657663 |
| 0.25025949  | 0.253792866 | 0.193890552 | 0.044859657 |
| 0.000392436 | 0.120782329 | 0.072009081 | 0.170376968 |
| 0.188659877 | 0.316674454 | 0.177314767 | 0.072338286 |
| 0.196656636 | 0.008334441 | 0.244493096 | 0.394273091 |
| 0.010892629 | 0.22045546  | 0.002046169 | 0.023741297 |
| 0.305942906 | 0.310203053 | 0.25135208  | 0.025807805 |
| 0.005024287 | 0.039693226 | 0.015472433 | 0.241545063 |
| 0.167537487 | 0.178978655 | 0.345837117 | 0.014465909 |
| 0.204906653 | 0.027653927 | 0.079736891 | 0.423275051 |
| 0.380926109 | 0.002490579 | 0.031952213 | 0.189625425 |
| 0.025980823 | 0.020395009 | 0.154441449 | 0.034817497 |
| 0.006298117 | 0.002222737 | 0.316074149 | 0.05391217  |
| 0.065961315 | 0.151605571 | 0.039416386 | 0.24611951  |
| 0.091373453 | 0.272084151 | 0.019813992 | 0.155651614 |
| 0.24485366  | 0.188321285 | 0.175409755 | 0.28244051  |
| 0.064512002 | 0.047615133 | 0.079175414 | 0.361493334 |
| 0.352940413 | 0.020991002 | 0.021735029 | 0.295112479 |
| 0.196379986 | 0.366044698 | 0.407872513 | 0.043847917 |
| 0.082941756 | 0.11396554  | 0.075556692 | 0.318339437 |
| 0.166153664 | 0.142211378 | 0.004912755 | 0.259903211 |
| 0.386054707 | 0.006794107 | 0.036159572 | 0.269675453 |
| 0.009600814 | 0.026582625 | 0.387699914 | 0.295775078 |
| 0.176116412 | 0.025692431 | 0.128733357 | 0.1881386   |
| 0.178237049 | 0.197739755 | 0.223646335 | 0.108481026 |
| 0.253007823 | 0.091327848 | 0.026789767 | 0.202630996 |
| 0.085022437 | 0.200359838 | 0.025902524 | 0.00622519  |



|             |             |             |             |
|-------------|-------------|-------------|-------------|
| 0.181334712 | 0.087013243 | 0.37364859  | 0.201780399 |
| 0.226574149 | 0.005164568 | 0.075134077 | 0.189784499 |
| 0.061555542 | 0.233598076 | 0.424834138 | 0.081398228 |
| 0.166093078 | 0.028772818 | 0.092582482 | 0.077402714 |
| 0.257129    | 0.037062413 | 0.039599602 | 0.000861533 |
| 0.022857059 | 0.125739551 | 0.130226302 | 0.01127349  |
| 0.058332267 | 0.028819627 | 0.012565301 | 0.370439223 |
| 0.152445372 | 0.283309705 | 0.004142628 | 0.012515178 |
| 0.115753406 | 0.312557779 | 0.104955837 | 0.030270241 |
| 0.317291393 | 0.089866903 | 0.274774125 | 0.321412139 |
| 0.034672702 | 0.342923144 | 0.006734085 | 0.077234071 |
| 0.197904155 | 0.341098727 | 0.321810003 | 0.288216588 |
| 0.127868791 | 0.182687981 | 0.025962254 | 0.244581388 |
| 0.204878917 | 0.162628893 | 0.033261465 | 0.393559154 |
| 0.00043668  | 0.228655667 | 0.222091388 | 0.008992126 |
| 0.424536621 | 0.203520899 | 0.033024453 | 0.090374736 |
| 0.36548117  | 0.391529786 | 0.286472739 | 0.312555103 |
| 0.01652703  | 0.003250054 | 0.353685303 | 0.281864801 |
| 0.350130828 | 0.123262723 | 0.046127886 | 0.003687363 |
| 0.380909044 | 0.12685243  | 0.275438399 | 0.209903039 |
| 0.167293412 | 0.069093266 | 0.114697243 | 0.160087549 |
| 0.001734558 | 0.140575569 | 0.269531877 | 0.030925394 |
| 0.123242663 | 0.022631638 | 0.319433904 | 0.243811712 |
| 0.064412062 | 0.047347744 | 0.082130308 | 0.05552406  |
| 0.11936375  | 0.421153006 | 0.001761428 | 0.343620504 |
| 0.39731436  | 0.149866318 | 0.386110521 | 0.388427239 |
| 0.184055224 | 0.312129943 | 0.383453393 | 0.270785955 |
| 0.000334836 | 0.27192837  | 0.20007292  | 0.295195419 |
| 0.351136469 | 0.214425481 | 0.048480376 | 0.112073574 |
| 0.000161445 | 0.110139934 | 0.031788365 | 0.384339474 |
| 0.352060437 | 0.007350986 | 0.001442906 | 0.320474543 |
| 0.190085837 | 0.003443151 | 0.418589573 | 0.21417611  |
| 0.379380752 | 0.167064407 | 0.117764046 | 0.243259934 |
| 0.029087876 | 0.060694648 | 0.005932429 | 0.279144555 |
| 0.103123122 | 0.004063476 | 0.031331569 | 0.372813181 |
| 0.372393702 | 0.27912158  | 0.169676739 | 0.009173851 |
| 0.22931027  | 0.0452636   | 0.328046743 | 0.0192829   |
| 0.325817265 | 0.289112882 | 0.366372231 | 0.26146863  |
| 0.193969866 | 0.36268838  | 0.346200254 | 0.362440664 |
| 0.019519253 | 0.291970371 | 0.316950592 | 0.035529768 |
| 0.15714221  | 0.357153591 | 0.192328035 | 0.159473435 |
| 0.242184431 | 0.014661155 | 0.181512509 | 0.130115197 |
| 0.384235634 | 0.363300478 | 0.032874225 | 0.03546874  |
| 0.36807213  | 0.073003645 | 0.066553231 | 0.117470825 |
| 0.215566735 | 0.016681929 | 0.006133186 | 0.253888164 |
| 0.410298402 | 0.259166142 | 0.370965673 | 0.049048367 |
| 0.31590869  | 0.014307681 | 0.268520839 | 0.031041561 |
| 0.167636405 | 0.213324854 | 0.2378634   | 0.01537356  |
| 0.01386742  | 0.027592099 | 0.349717458 | 0.35798037  |
| 0.054262531 | 0.127487863 | 0.176912754 | 0.22187783  |
| 0.36813815  | 0.078343794 | 0.214550583 | 0.134037172 |
| 0.362163527 | 0.020363584 | 0.406625047 | 0.170591473 |
| 0.307045309 | 0.134507192 | 0.293789127 | 0.001487699 |
| 0.218143867 | 0.093586591 | 0.051185102 | 0.202378402 |

|             |             |             |             |
|-------------|-------------|-------------|-------------|
| 0.285659005 | 0.080623924 | 0.277116785 | 0.060641117 |
| 0.027547133 | 0.000783667 | 0.24253694  | 0.098148463 |
| 0.259444336 | 0.032313151 | 0.140249524 | 0.011372369 |
| 0.420159591 | 0.219042038 | 0.307874379 | 0.032901781 |
| 0.176620007 | 0.001348167 | 0.078285603 | 0.012919538 |
| 0.289692091 | 0.272409962 | 0.198748663 | 0.169671145 |
| 0.037984761 | 0.225019127 | 0.253650955 | 0.164261615 |
| 0.354342374 | 0.025808908 | 0.399485165 | 0.070709218 |
| 0.22340595  | 0.049772773 | 0.179763457 | 0.029499664 |
| 0.105058758 | 0.010103995 | 0.05749814  | 0.026719284 |
| 0.358256638 | 0.025930156 | 0.202609525 | 0.063917811 |
| 0.022019987 | 0.12142799  | 0.229405072 | 0.237885259 |
| 0.268317072 | 0.222250406 | 0.088287659 | 0.341426877 |
| 0.027953739 | 0.099022092 | 0.018466729 | 0.0131348   |
| 0.029409508 | 0.125193218 | 0.288453625 | 0.314146804 |
| 0.361287877 | 0.022525736 | 0.045275733 | 0.048741377 |
| 0.005076448 | 0.230670209 | 0.21532791  | 0.014140406 |
| 0.185478977 | 0.036289132 | 0.00067332  | 0.050319232 |
| 0.286491285 | 0.035129399 |             |             |
| CCRL2       | 0.119024046 | 0.405356721 | 0.039906322 |
| 0.00977546  | 0.058239386 | 0.319459015 | 0.292680273 |
| 0.085610732 | 0.056312853 | 0.082841095 | 0.387225871 |
| 0.000520013 | 0.167274614 | 0.008294245 | 0.029646678 |
| 0.30510621  | 0.319449004 | 0.286723312 | 0.305450874 |
| 0.117055417 | 0.053598006 | 0.251840606 | 0.258075737 |
| 0.289356098 | 0.001055936 | 0.146381896 | 0.033146385 |
| 0.070812757 | 0.270554789 | 0.181732801 | 0.070040177 |
| 0.261614032 | 0.252434125 | 0.094508499 | 0.059908817 |
| 0.024300977 | 0.423709356 | 0.00885975  | 0.205595484 |
| 0.179496841 | 0.165240686 | 0.253723131 | 0.013768487 |
| 0.000951695 | 0.109496279 | 0.052744455 | 0.256549593 |
| 0.104904472 | 0.271780575 | 0.171512821 | 0.187210401 |
| 0.008307085 | 0.386532241 | 0.235671272 | 0.007818522 |
| 0.456950007 | 0.003054745 | 0.450598367 | 0.046577126 |
| 0.065664838 | 0.170416727 | 0.100774797 | 0.242967841 |
| 0.359139078 | 0.459101745 | 0.36867826  | 0.03846204  |
| 0.122878528 | 0.144209869 | 0.192851308 | 0.259043005 |
| 0.353967428 | 0.057284409 | 1           | 0.071640324 |
| 0.217431919 | 0.183217259 | 0.295231917 | 0.061887656 |
| 0.000802837 | 0.214006198 | 0.09085579  | 0.136196915 |
| 0.128387922 | 0.392909319 | 0.140446046 | 0.143699039 |
| 0.126380174 | 0.021963972 | 0.238985826 | 0.347861657 |
| 0.01047777  | 0.19396361  | 0.003307953 | 0.053375082 |
| 0.242261453 | 0.228541193 | 0.216355626 | 0.064854001 |
| 0.011124405 | 0.061370497 | 0.014645008 | 0.166583314 |
| 0.172045471 | 0.177663308 | 0.447888902 | 0.01099204  |
| 0.141893807 | 0.051055947 | 0.129054597 | 0.436605755 |
| 0.336435441 | 0.004174154 | 0.043900316 | 0.278473951 |
| 0.051206636 | 0.051839426 | 0.256231593 | 0.003401311 |
| 0.005296645 | 0.001397718 | 0.260293575 | 0.068027013 |
| 0.126008043 | 0.225790608 | 0.030650771 | 0.231102333 |
| 0.062172763 | 0.218144787 | 0.070551703 | 0.23181693  |
| 0.192435579 | 0.310592838 | 0.170199504 | 0.236253973 |
| 0.080085641 | 0.057197179 | 0.096455028 | 0.407396956 |

|             |             |             |             |
|-------------|-------------|-------------|-------------|
| 0.389893219 | 0.046770163 | 0.049090495 | 0.336510378 |
| 0.150530568 | 0.2969366   | 0.369989834 | 0.042407646 |
| 0.128987016 | 0.165031662 | 0.072973151 | 0.328559682 |
| 0.285651065 | 0.144985937 | 0.004074149 | 0.342778256 |
| 0.462578915 | 0.003631512 | 0.069814864 | 0.233958365 |
| 0.022477975 | 0.089307959 | 0.387138775 | 0.306765641 |
| 0.192682543 | 0.032131632 | 0.125299267 | 0.279649135 |
| 0.223834117 | 0.235029806 | 0.245158545 | 0.1085273   |
| 0.299252136 | 0.079912715 | 0.051414624 | 0.151008034 |
| 0.140459974 | 0.235670221 | 0.026024003 | 0.014207326 |
| 0.156370306 | 0.079622547 | 0.341526631 | 0.189082871 |
| 0.188349482 | 0.002092955 | 0.073535615 | 0.157910253 |
| 0.054018636 | 0.178554584 | 0.43421165  | 0.150671141 |
| 0.218709131 | 0.03380976  | 0.153451209 | 0.122252333 |
| 0.223077052 | 0.064354163 | 0.076731797 | 0.001129018 |
| 0.060454962 | 0.074412745 | 0.145881316 | 0.019052092 |
| 0.072974835 | 0.050077683 | 0.015376399 | 0.334088144 |
| 0.229335002 | 0.263262399 | 0.005665471 | 0.011118195 |
| 0.113004891 | 0.382863653 | 0.07078405  | 0.029499671 |
| 0.340004983 | 0.072331388 | 0.188357111 | 0.401048838 |
| 0.075077963 | 0.3968973   | 0.009926416 | 0.119347548 |
| 0.160214758 | 0.33254793  | 0.236537804 | 0.275497316 |
| 0.187504545 | 0.16959445  | 0.024632842 | 0.312496997 |
| 0.184317822 | 0.174197191 | 0.040896112 | 0.394618252 |
| 0.001405234 | 0.273658404 | 0.228007111 | 0.010635642 |
| 0.416331041 | 0.330189051 | 0.05094478  | 0.087865434 |
| 0.313484528 | 0.397133038 | 0.262286389 | 0.223035002 |
| 0.015493247 | 0.004912138 | 0.332163389 | 0.341290184 |
| 0.279976264 | 0.163490133 | 0.049967742 | 0.006300421 |
| 0.328075994 | 0.098341794 | 0.257630128 | 0.130458993 |
| 0.188088885 | 0.071470291 | 0.17494085  | 0.136034568 |
| 0.001980873 | 0.140098468 | 0.180796102 | 0.058608394 |
| 0.107547933 | 0.048712923 | 0.330442103 | 0.342501614 |
| 0.072365431 | 0.029623945 | 0.086415145 | 0.09357573  |
| 0.228798773 | 0.403323042 | 0.003645858 | 0.320469136 |
| 0.34773804  | 0.205993128 | 0.34232862  | 0.32965043  |
| 0.184393738 | 0.415180882 | 0.350609635 | 0.225323369 |
| 0.000296471 | 0.200964987 | 0.153527761 | 0.390907361 |
| 0.260894345 | 0.306555768 | 0.035437028 | 0.093376593 |
| 0.000690494 | 0.173058773 | 0.021350477 | 0.400709542 |
| 0.314302473 | 0.034423704 | 0.002744252 | 0.306523237 |
| 0.144149318 | 0.004284481 | 0.379872657 | 0.238153209 |
| 0.382394705 | 0.187822184 | 0.19694638  | 0.187814174 |
| 0.016603037 | 0.061250776 | 0.024843022 | 0.264096068 |
| 0.120418719 | 0.006519446 | 0.055321401 | 0.343510791 |
| 0.309055933 | 0.373172835 | 0.265950491 | 0.006807045 |
| 0.164647012 | 0.032039556 | 0.277367567 | 0.037597261 |
| 0.305801608 | 0.399136518 | 0.394521445 | 0.219787725 |
| 0.199824128 | 0.400736563 | 0.403194942 | 0.329322515 |
| 0.019932167 | 0.191470814 | 0.231532965 | 0.036009704 |
| 0.113312722 | 0.327804168 | 0.178091444 | 0.265714008 |
| 0.261678757 | 0.02363965  | 0.283443969 | 0.112006085 |
| 0.411932874 | 0.324346981 | 0.062274851 | 0.044490484 |
| 0.431816581 | 0.111871356 | 0.149007152 | 0.159878287 |

|             |             |             |             |
|-------------|-------------|-------------|-------------|
| 0.317950593 | 0.008278981 | 0.008993786 | 0.335738452 |
| 0.443579146 | 0.384876396 | 0.291832871 | 0.055060812 |
| 0.267147318 | 0.028913578 | 0.256922453 | 0.079065162 |
| 0.206447539 | 0.132463364 | 0.161068204 | 0.006317051 |
| 0.013034883 | 0.032390956 | 0.436700337 | 0.428155763 |
| 0.083009274 | 0.178662621 | 0.209402237 | 0.28346642  |
| 0.292119665 | 0.050845375 | 0.292176271 | 0.139492414 |
| 0.454359789 | 0.045311925 | 0.406998891 | 0.170105362 |
| 0.290799897 | 0.148474724 | 0.300120416 | 0.003997282 |
| 0.186602074 | 0.092821881 | 0.03685917  | 0.234897977 |
| 0.211685785 | 0.109680631 | 0.38186928  | 0.081082451 |
| 0.024985561 | 0.000783015 | 0.284499444 | 0.082709471 |
| 0.374073641 | 0.021759429 | 0.144284537 | 0.009483797 |
| 0.411841576 | 0.190583953 | 0.253676018 | 0.033919865 |
| 0.162099932 | 0.002125469 | 0.11806508  | 0.022871258 |
| 0.279315538 | 0.348914374 | 0.1774072   | 0.123353947 |
| 0.029236566 | 0.255038258 | 0.315706744 | 0.185213201 |
| 0.331146623 | 0.013787228 | 0.330002317 | 0.100664878 |
| 0.1626491   | 0.051294189 | 0.295359456 | 0.053637055 |
| 0.206792414 | 0.023892873 | 0.129908038 | 0.033461329 |
| 0.296097081 | 0.048827282 | 0.233764576 | 0.037329156 |
| 0.042897521 | 0.129755969 | 0.204796832 | 0.199515604 |
| 0.218963514 | 0.151629227 | 0.058456485 | 0.436941207 |
| 0.035954223 | 0.105876374 | 0.019201458 | 0.029631165 |
| 0.046285271 | 0.169058183 | 0.257463248 | 0.27772889  |
| 0.321732175 | 0.025306421 | 0.081340844 | 0.066293625 |
| 0.007674712 | 0.161783223 | 0.339519444 | 0.017255869 |
| 0.227231317 | 0.037600681 | 0.000387624 | 0.051611969 |
| 0.347425004 | 0.041595141 |             |             |
| CD24A       | 0.116591931 | 0.374781511 | 0.008357513 |
| 0.009064368 | 0.038078075 | 0.073114568 | 0.072171453 |
| 0.097628855 | 0.016579102 | 0.025982747 | 0.143589362 |
| 8.00E-05    | 0.398799665 | 0.001037515 | 0.01490743  |
| 0.423891916 | 0.463044466 | 0.140094831 | 0.447056463 |
| 0.078668353 | 0.037948587 | 0.149255967 | 0.134072139 |
| 0.077041946 | 8.18E-05    | 0.024939385 | 0.011196807 |
| 0.115708544 | 0.44570361  | 0.039163836 | 0.050085374 |
| 0.372866568 | 0.438311472 | 0.119765114 | 0.145448693 |
| 0.141044717 | 0.30456101  | 0.142939013 | 0.402598023 |
| 0.411129834 | 0.0510675   | 0.405400827 | 0.001841481 |
| 0.0041647   | 0.018099612 | 0.083504336 | 0.15343396  |
| 0.06814335  | 0.056714477 | 0.034156483 | 0.040531944 |
| 0.068827817 | 0.167134005 | 0.230626435 | 0.083560335 |
| 0.25730818  | 0.001677471 | 0.302257293 | 0.048240437 |
| 0.009170372 | 0.07633293  | 0.130771993 | 0.182433325 |
| 0.0925753   | 0.279906188 | 0.433292406 | 0.005513342 |
| 0.010285575 | 0.177064709 | 0.337658414 | 0.208176869 |
| 0.333801914 | 0.071657663 | 0.071640324 | 1           |
| 0.308465766 | 0.356258725 | 0.103871735 | 0.032657964 |
| 5.72E-05    | 0.035345251 | 0.125845594 | 0.196918517 |
| 0.286486845 | 0.172638324 | 0.174705739 | 0.05931994  |
| 0.1517772   | 0.001619065 | 0.133017686 | 0.441223265 |
| 0.004688369 | 0.359310816 | 0.003002257 | 0.030470644 |
| 0.32103549  | 0.445266495 | 0.193884184 | 0.011197315 |

|             |             |             |             |
|-------------|-------------|-------------|-------------|
| 0.001361547 | 0.019278072 | 0.02508921  | 0.43055975  |
| 0.148841234 | 0.170440242 | 0.248665445 | 0.096902061 |
| 0.411596962 | 0.025851455 | 0.096813906 | 0.29909779  |
| 0.363326145 | 0.000818605 | 0.026010361 | 0.064824925 |
| 0.138272864 | 0.050633583 | 0.068667486 | 0.008440333 |
| 0.001279914 | 0.003131625 | 0.397816141 | 0.022892759 |
| 0.019819479 | 0.047623778 | 0.01936608  | 0.274915381 |
| 0.085027249 | 0.386157433 | 0.043272821 | 0.065243003 |
| 0.32428961  | 0.089960862 | 0.15709527  | 0.317731935 |
| 0.171790682 | 0.049444599 | 0.020466415 | 0.346354257 |
| 0.262194132 | 0.010414109 | 0.010468406 | 0.121913261 |
| 0.409060141 | 0.402667983 | 0.429103486 | 0.062764645 |
| 0.085978008 | 0.053477701 | 0.07265521  | 0.181583    |
| 0.080841658 | 0.118602258 | 0.039956069 | 0.169446933 |
| 0.250354106 | 0.009600513 | 0.008219696 | 0.315892514 |
| 0.038172444 | 0.073683742 | 0.285117207 | 0.321802002 |
| 0.249569155 | 0.008662303 | 0.047877663 | 0.076465134 |
| 0.082533373 | 0.061035723 | 0.197533951 | 0.046431317 |
| 0.111585799 | 0.07261115  | 0.006706534 | 0.412087623 |
| 0.018943764 | 0.114310791 | 0.100537869 | 0.027085413 |
| 0.211077    | 0.080037304 | 0.308691771 | 0.174441377 |
| 0.245423695 | 0.001239929 | 0.024431238 | 0.142676644 |
| 0.060984661 | 0.381382077 | 0.368268562 | 0.0192107   |
| 0.071577432 | 0.169125742 | 0.025047717 | 0.127424801 |
| 0.284078183 | 0.04187773  | 0.039126416 | 1.92E-05    |
| 0.028009526 | 0.100200266 | 0.158721936 | 0.005247232 |
| 0.061429946 | 0.013365465 | 0.023210065 | 0.352239281 |
| 0.044787033 | 0.381099644 | 0.003033361 | 0.069466324 |
| 0.047703486 | 0.261856331 | 0.105297839 | 0.049719086 |
| 0.314790264 | 0.058434309 | 0.425624817 | 0.214959669 |
| 0.101819715 | 0.160610015 | 0.11324472  | 0.055568482 |
| 0.251794224 | 0.397527559 | 0.368968669 | 0.366856051 |
| 0.05255916  | 0.221191339 | 0.088235507 | 0.093687337 |
| 0.139617667 | 0.15769606  | 0.009319981 | 0.388105567 |
| 2.67E-05    | 0.128268296 | 0.202956292 | 0.08745375  |
| 0.358745215 | 0.087091474 | 0.007774751 | 0.043397403 |
| 0.449487067 | 0.38998214  | 0.313497182 | 0.390819281 |
| 0.066241565 | 0.000662881 | 0.359466072 | 0.21506422  |
| 0.463638009 | 0.120830409 | 0.183177472 | 0.044337375 |
| 0.3906934   | 0.187072495 | 0.189292354 | 0.154375858 |
| 0.259960938 | 0.177043384 | 0.060364824 | 0.21181922  |
| 0.003085476 | 0.040544585 | 0.196986856 | 0.052170147 |
| 0.068628354 | 0.034246012 | 0.35806945  | 0.142770937 |
| 0.15631768  | 0.062736444 | 0.121977925 | 0.013612489 |
| 0.043602968 | 0.373580676 | 0.066389039 | 0.337648533 |
| 0.434456916 | 0.142657321 | 0.387156359 | 0.421816113 |
| 0.077779269 | 0.218848319 | 0.350431666 | 0.39046859  |
| 5.63E-05    | 0.431880961 | 0.393067444 | 0.169798924 |
| 0.371338135 | 0.094726132 | 0.079381469 | 0.188685522 |
| 0.000361828 | 0.027101046 | 0.105178788 | 0.347688227 |
| 0.400982351 | 0.004246489 | 0.098737054 | 0.317721756 |
| 0.338862452 | 0.021461343 | 0.40654663  | 0.092785928 |
| 0.339397    | 0.167299142 | 0.033173887 | 0.407481923 |
| 0.100341816 | 0.120061665 | 0.009773913 | 0.210238685 |

|             |             |             |             |
|-------------|-------------|-------------|-------------|
| 0.185970528 | 0.039131456 | 0.02075731  | 0.430267492 |
| 0.272334325 | 0.209437438 | 0.076683407 | 0.000593687 |
| 0.351857672 | 0.058315232 | 0.308647459 | 0.021429996 |
| 0.250902647 | 0.183124003 | 0.326986354 | 0.400830292 |
| 0.211392371 | 0.234921204 | 0.190348395 | 0.298059083 |
| 0.054909138 | 0.338517573 | 0.359508021 | 0.007400996 |
| 0.186091454 | 0.414582656 | 0.151855239 | 0.046180687 |
| 0.158049636 | 0.048704778 | 0.05585909  | 0.100188049 |
| 0.315765688 | 0.395383876 | 0.006869079 | 0.02770935  |
| 0.240184756 | 0.066613808 | 0.020310352 | 0.100996145 |
| 0.097848296 | 0.058111725 | 0.064179183 | 0.174616504 |
| 0.314979671 | 0.123690573 | 0.339523009 | 0.034785697 |
| 0.429892398 | 0.00616519  | 0.339063159 | 0.067778705 |
| 0.077214838 | 0.191950677 | 0.373439636 | 0.028236313 |
| 0.002211933 | 0.014133042 | 0.23040549  | 0.238172419 |
| 0.009653164 | 0.038594583 | 0.057681777 | 0.133871999 |
| 0.434365576 | 0.104875667 | 0.088520168 | 0.087232373 |
| 0.244126741 | 0.034957659 | 0.334170721 | 0.086154109 |
| 0.219196712 | 0.07426274  | 0.310399899 | 0.002409101 |
| 0.262972348 | 0.029658524 | 0.06293682  | 0.139879312 |
| 0.435665187 | 0.020208657 | 0.208573618 | 0.023944427 |
| 0.056794676 | 0.0005422   | 0.161782029 | 0.200051574 |
| 0.109184753 | 0.09990797  | 0.097998452 | 0.118642538 |
| 0.396775604 | 0.124572222 | 0.23739703  | 0.158971448 |
| 0.087068924 | 0.042765616 | 0.03072206  | 0.003210623 |
| 0.197245044 | 0.20506301  | 0.21405341  | 0.1242035   |
| 0.043024144 | 0.269842189 | 0.182069546 | 0.170982011 |
| 0.407343575 | 0.046926607 | 0.435314153 | 0.077315225 |
| 0.429149225 | 0.087397398 | 0.085711687 | 0.086150475 |
| 0.053322889 | 0.045151026 | 0.021339516 | 0.025153623 |
| 0.431498665 | 0.113127777 | 0.151223259 | 0.058830114 |
| 0.006166799 | 0.090810523 | 0.323898657 | 0.345208159 |
| 0.177419654 | 0.248762787 | 0.104328853 | 0.223676791 |
| 0.075403884 | 0.057747102 | 0.020298639 | 0.008412451 |
| 0.084391325 | 0.032855051 | 0.288878134 | 0.317989183 |
| 0.442978276 | 0.085254923 | 0.01369694  | 0.01987171  |
| 0.112918052 | 0.298330961 | 0.103770931 | 0.130915871 |
| 0.232477068 | 0.105131833 | 2.75E-05    | 0.040346879 |
| 0.180132075 | 0.111414605 |             |             |
| CD3EAP      | 0.25516631  | 0.459258492 | 0.039388434 |
| 0.029843022 | 0.079162619 | 0.155847162 | 0.152033423 |
| 0.253882954 | 0.069013133 | 0.112717955 | 0.213116942 |
| 0.000823887 | 0.369402891 | 0.007596326 | 0.040757499 |
| 0.502985846 | 0.518843447 | 0.231841564 | 0.491760419 |
| 0.213268925 | 0.138139422 | 0.237901951 | 0.276514788 |
| 0.175738092 | 0.000867626 | 0.084660213 | 0.054105819 |
| 0.267515985 | 0.497014305 | 0.125414807 | 0.196367412 |
| 0.454586652 | 0.459699049 | 0.338245309 | 0.255854426 |
| 0.249512982 | 0.392974139 | 0.105481815 | 0.374152791 |
| 0.414597054 | 0.161064281 | 0.438741917 | 0.008592539 |
| 0.00711944  | 0.066106918 | 0.237212577 | 0.268085076 |
| 0.190575727 | 0.143251243 | 0.101795588 | 0.130158125 |
| 0.161123595 | 0.232513802 | 0.299319008 | 0.158937595 |
| 0.328495074 | 0.006828153 | 0.384959018 | 0.171927398 |

|             |             |             |             |
|-------------|-------------|-------------|-------------|
| 0.038329803 | 0.20932665  | 0.297712524 | 0.291363496 |
| 0.163123206 | 0.356965774 | 0.492063535 | 0.023502221 |
| 0.04559569  | 0.323173246 | 0.394397467 | 0.330827085 |
| 0.415656987 | 0.25025949  | 0.217431919 | 0.308465766 |
| 1           | 0.386233374 | 0.180311817 | 0.103229844 |
| 0.000730714 | 0.103571467 | 0.276073512 | 0.255207177 |
| 0.32961328  | 0.242616022 | 0.282835234 | 0.163537182 |
| 0.336147043 | 0.009978547 | 0.251978603 | 0.508931723 |
| 0.019710978 | 0.354838586 | 0.007495168 | 0.089136705 |
| 0.385825817 | 0.487965677 | 0.298812866 | 0.050717629 |
| 0.007104088 | 0.069823962 | 0.101660133 | 0.430828605 |
| 0.286035951 | 0.331877047 | 0.315444964 | 0.123702479 |
| 0.377952645 | 0.122015531 | 0.244335479 | 0.39663895  |
| 0.460820276 | 0.003172897 | 0.092991784 | 0.141800241 |
| 0.283605528 | 0.12960411  | 0.148022539 | 0.037092071 |
| 0.008134124 | 0.009988497 | 0.460039609 | 0.09487368  |
| 0.074168286 | 0.136207917 | 0.061974968 | 0.354299817 |
| 0.240757301 | 0.428577462 | 0.085068592 | 0.176678014 |
| 0.342593783 | 0.17509417  | 0.317818307 | 0.360013551 |
| 0.287616666 | 0.162825315 | 0.090540224 | 0.3947564   |
| 0.338759638 | 0.041723453 | 0.052355928 | 0.218109637 |
| 0.367692801 | 0.476994316 | 0.508770335 | 0.191503637 |
| 0.1917049   | 0.148920029 | 0.27539644  | 0.282048072 |
| 0.156165657 | 0.21986734  | 0.065025695 | 0.226173443 |
| 0.332436743 | 0.029713182 | 0.039703587 | 0.361284811 |
| 0.050205577 | 0.174665623 | 0.38085176  | 0.363251619 |
| 0.321130431 | 0.047735709 | 0.17946374  | 0.184234304 |
| 0.197074477 | 0.174899429 | 0.290995739 | 0.180306792 |
| 0.206521121 | 0.279885837 | 0.028227399 | 0.381853189 |
| 0.073177903 | 0.218386051 | 0.289942265 | 0.068197263 |
| 0.284891228 | 0.223168633 | 0.394772388 | 0.289991227 |
| 0.315709583 | 0.005420638 | 0.111514328 | 0.271235979 |
| 0.260340762 | 0.384794791 | 0.451981161 | 0.066910896 |
| 0.15792057  | 0.254961133 | 0.084310877 | 0.246553719 |
| 0.340988592 | 0.181261325 | 0.164469791 | 0.000427455 |
| 0.083696635 | 0.319183642 | 0.306209126 | 0.028833526 |
| 0.165330764 | 0.074546591 | 0.068307542 | 0.426258887 |
| 0.126697819 | 0.382996147 | 0.013090129 | 0.115975534 |
| 0.169806668 | 0.308822672 | 0.311565883 | 0.197091787 |
| 0.364166846 | 0.22244763  | 0.456075862 | 0.288930855 |
| 0.188931726 | 0.240684889 | 0.143486965 | 0.177324183 |
| 0.349034356 | 0.443635092 | 0.419093937 | 0.375751948 |
| 0.174719941 | 0.257255668 | 0.222525616 | 0.1772883   |
| 0.263083632 | 0.265937878 | 0.048421757 | 0.4535152   |
| 0.000382523 | 0.224757626 | 0.34200089  | 0.157866718 |
| 0.443506834 | 0.161520602 | 0.038910495 | 0.151379733 |
| 0.49936027  | 0.451502599 | 0.370587237 | 0.44594773  |
| 0.180643121 | 0.004459249 | 0.432519373 | 0.284173302 |
| 0.510370515 | 0.269788097 | 0.281313892 | 0.052123752 |
| 0.452156389 | 0.249294596 | 0.318811739 | 0.318922437 |
| 0.336201347 | 0.295106141 | 0.147832204 | 0.248644686 |
| 0.014146202 | 0.177325985 | 0.324037398 | 0.177896421 |
| 0.25148588  | 0.137670101 | 0.40654815  | 0.204931272 |
| 0.31035037  | 0.252107639 | 0.306749855 | 0.0509979   |

|             |             |             |             |
|-------------|-------------|-------------|-------------|
| 0.109125499 | 0.466485503 | 0.04258441  | 0.409040959 |
| 0.502697368 | 0.240288738 | 0.453210041 | 0.490534223 |
| 0.209812194 | 0.278216715 | 0.430924832 | 0.419942902 |
| 0.000448549 | 0.448697165 | 0.352343456 | 0.232866462 |
| 0.454741295 | 0.191855763 | 0.171427185 | 0.336233916 |
| 0.000551116 | 0.093479001 | 0.250581624 | 0.424484757 |
| 0.441778935 | 0.017256644 | 0.052911319 | 0.358002074 |
| 0.315110856 | 0.031750756 | 0.490454501 | 0.239019843 |
| 0.406287117 | 0.291793695 | 0.118633686 | 0.404727849 |
| 0.233342825 | 0.25448244  | 0.024218596 | 0.320000992 |
| 0.307353304 | 0.074737028 | 0.07357612  | 0.494239226 |
| 0.370999363 | 0.264485483 | 0.159009061 | 0.011490814 |
| 0.392971035 | 0.194111682 | 0.367838506 | 0.061847641 |
| 0.320221881 | 0.243112167 | 0.381412901 | 0.402227909 |
| 0.315795636 | 0.309396219 | 0.271472165 | 0.386519473 |
| 0.103897901 | 0.40016957  | 0.437340547 | 0.036548401 |
| 0.295874978 | 0.462608221 | 0.330999491 | 0.112996211 |
| 0.249112569 | 0.093497621 | 0.12826712  | 0.218464745 |
| 0.380918904 | 0.468459491 | 0.036640171 | 0.089792056 |
| 0.319718881 | 0.19604087  | 0.067698178 | 0.218426241 |
| 0.175926944 | 0.170355315 | 0.105936601 | 0.247059741 |
| 0.397195819 | 0.190056715 | 0.439604794 | 0.140545536 |
| 0.448429396 | 0.025479043 | 0.362581353 | 0.171215609 |
| 0.17729084  | 0.319537433 | 0.404491027 | 0.093882496 |
| 0.028854921 | 0.081893265 | 0.300742177 | 0.315950478 |
| 0.044031125 | 0.115375024 | 0.171112805 | 0.246500511 |
| 0.495898922 | 0.302800988 | 0.172805992 | 0.213258525 |
| 0.316027162 | 0.108366561 | 0.423880525 | 0.224775461 |
| 0.310401074 | 0.234822846 | 0.359306739 | 0.008414976 |
| 0.339942679 | 0.133586773 | 0.149292053 | 0.27917999  |
| 0.471071644 | 0.082012009 | 0.265638035 | 0.09867378  |
| 0.146098441 | 0.001645608 | 0.231197225 | 0.3172577   |
| 0.17920586  | 0.213075728 | 0.234353613 | 0.184574104 |
| 0.482612357 | 0.281976245 | 0.338051916 | 0.227036162 |
| 0.276149052 | 0.026545178 | 0.122340264 | 0.018223743 |
| 0.27906623  | 0.258522537 | 0.30433279  | 0.290228573 |
| 0.138272715 | 0.331489215 | 0.257611981 | 0.311953611 |
| 0.45876631  | 0.155280955 | 0.511052202 | 0.195501957 |
| 0.414836696 | 0.277019158 | 0.162640425 | 0.219249496 |
| 0.135904301 | 0.096100618 | 0.075304418 | 0.097129019 |
| 0.484101128 | 0.200032054 | 0.284350957 | 0.23941689  |
| 0.029074978 | 0.261003037 | 0.341500555 | 0.370837395 |
| 0.321776917 | 0.32153993  | 0.2662458   | 0.289967418 |
| 0.242482079 | 0.208949394 | 0.059639103 | 0.040709686 |
| 0.25621005  | 0.129692199 | 0.355107137 | 0.371580189 |
| 0.490396878 | 0.211928099 | 0.058548579 | 0.079958285 |
| 0.107533074 | 0.342629072 | 0.184745542 | 0.15443065  |
| 0.311279327 | 0.260586186 | 0.000256983 | 0.145112316 |
| 0.253971321 | 0.301072513 |             |             |
| CD69        | 0.313097826 | 0.389273034 | 0.033824241 |
| 0.020953818 | 0.063389708 | 0.135248367 | 0.124112136 |
| 0.340616735 | 0.05880123  | 0.078175588 | 0.202631415 |
| 0.001625984 | 0.390892319 | 0.009489752 | 0.047768711 |
| 0.470883645 | 0.47955962  | 0.212524721 | 0.471894662 |



|             |             |             |             |
|-------------|-------------|-------------|-------------|
| 0.269797394 | 0.095322149 | 0.272998925 | 0.268363308 |
| 0.150697382 | 0.001427158 | 0.062574083 | 0.029804846 |
| 0.367890675 | 0.485240101 | 0.120105706 | 0.18277466  |
| 0.426945745 | 0.429917895 | 0.301314756 | 0.232305276 |
| 0.240332555 | 0.33345316  | 0.140138917 | 0.394620921 |
| 0.427798257 | 0.131288816 | 0.404197088 | 0.006801442 |
| 0.003890255 | 0.050621251 | 0.325912394 | 0.287373967 |
| 0.244734418 | 0.124740304 | 0.097928688 | 0.09489673  |
| 0.216542298 | 0.229620774 | 0.334333011 | 0.218224733 |
| 0.269828756 | 0.003486825 | 0.311873976 | 0.24635192  |
| 0.031566242 | 0.214713251 | 0.338784323 | 0.315302803 |
| 0.141649698 | 0.285071359 | 0.43511163  | 0.014646079 |
| 0.033997706 | 0.362521033 | 0.391949418 | 0.312413147 |
| 0.360311283 | 0.253792866 | 0.183217259 | 0.356258725 |
| 0.386233374 | 1           | 0.180006864 | 0.109734033 |
| 0.00066023  | 0.077425536 | 0.229035017 | 0.33317039  |
| 0.39954653  | 0.230677805 | 0.346338328 | 0.122333822 |
| 0.373073574 | 0.008859979 | 0.280472693 | 0.462625817 |
| 0.013295931 | 0.38264385  | 0.008276791 | 0.097105838 |
| 0.390578317 | 0.482553569 | 0.345399233 | 0.033574255 |
| 0.007290408 | 0.079170959 | 0.1501204   | 0.453779921 |
| 0.313620948 | 0.356805399 | 0.265332059 | 0.217302013 |
| 0.399913322 | 0.121811465 | 0.24260827  | 0.324411746 |
| 0.408368966 | 0.005290198 | 0.115307553 | 0.126493921 |
| 0.272268594 | 0.08789396  | 0.130899021 | 0.050213771 |
| 0.007181448 | 0.028307524 | 0.439846687 | 0.097922503 |
| 0.05024587  | 0.113712447 | 0.053386895 | 0.356543993 |
| 0.320266037 | 0.435659414 | 0.062875348 | 0.148525443 |
| 0.398319213 | 0.146040295 | 0.307109956 | 0.386635019 |
| 0.286731234 | 0.199001656 | 0.090126356 | 0.329382605 |
| 0.297807449 | 0.034099917 | 0.042722928 | 0.21023036  |
| 0.381603711 | 0.44655765  | 0.455622784 | 0.240490377 |
| 0.16162619  | 0.154665658 | 0.23770605  | 0.267592669 |
| 0.140835523 | 0.281103226 | 0.132164103 | 0.236670599 |
| 0.26712847  | 0.043432136 | 0.031717021 | 0.388641818 |
| 0.034176473 | 0.147002031 | 0.325385616 | 0.362460053 |
| 0.363725833 | 0.024939784 | 0.145880332 | 0.154869055 |
| 0.201298191 | 0.152027919 | 0.315650955 | 0.137750725 |
| 0.210923988 | 0.246424172 | 0.021743667 | 0.391652682 |
| 0.065554842 | 0.24393422  | 0.309725202 | 0.057430488 |
| 0.365776444 | 0.286422591 | 0.356823961 | 0.342431474 |
| 0.368502787 | 0.003188029 | 0.079852163 | 0.318545068 |
| 0.233357494 | 0.411526116 | 0.374224126 | 0.058558433 |
| 0.169046627 | 0.30937714  | 0.081089442 | 0.219449058 |
| 0.353885327 | 0.145623183 | 0.128076914 | 0.000326206 |
| 0.074682034 | 0.343053276 | 0.331282599 | 0.036445893 |
| 0.139927563 | 0.069375079 | 0.120817912 | 0.367471573 |
| 0.115269619 | 0.384565872 | 0.024121755 | 0.213742985 |
| 0.168114312 | 0.290187328 | 0.312911611 | 0.236022827 |
| 0.340899347 | 0.2122582   | 0.470191563 | 0.262008902 |
| 0.172384371 | 0.225604614 | 0.223898079 | 0.184330834 |
| 0.398564349 | 0.381305995 | 0.403045914 | 0.379188499 |
| 0.152514086 | 0.343527149 | 0.297787465 | 0.170529603 |
| 0.321257414 | 0.31961677  | 0.046907648 | 0.396634193 |

|             |             |             |             |
|-------------|-------------|-------------|-------------|
| 0.000388606 | 0.237180752 | 0.339145653 | 0.249530622 |
| 0.367488512 | 0.135089765 | 0.036441998 | 0.188133237 |
| 0.477127496 | 0.399788158 | 0.365837475 | 0.434501101 |
| 0.252034607 | 0.007671591 | 0.402389511 | 0.287150509 |
| 0.48769386  | 0.274275274 | 0.287307827 | 0.106185253 |
| 0.410640837 | 0.353278073 | 0.321419785 | 0.378039831 |
| 0.359963043 | 0.345963316 | 0.157553574 | 0.340049226 |
| 0.019512137 | 0.161371217 | 0.368604505 | 0.134423689 |
| 0.223495252 | 0.118340005 | 0.363659668 | 0.207852051 |
| 0.302669605 | 0.312533446 | 0.26629134  | 0.039375527 |
| 0.094595162 | 0.402099687 | 0.054757976 | 0.38476267  |
| 0.462363391 | 0.264190928 | 0.390693508 | 0.461984805 |
| 0.224517542 | 0.253143543 | 0.372627983 | 0.429019486 |
| 0.00092605  | 0.435727341 | 0.385967039 | 0.22195249  |
| 0.415405931 | 0.175112769 | 0.284826276 | 0.386848091 |
| 0.000740285 | 0.085340615 | 0.269825606 | 0.376331854 |
| 0.390055014 | 0.011474907 | 0.07052104  | 0.366045764 |
| 0.390255671 | 0.056517479 | 0.441334458 | 0.215197478 |
| 0.344090108 | 0.316431898 | 0.090834045 | 0.3912883   |
| 0.260845202 | 0.328025753 | 0.015881463 | 0.324134657 |
| 0.346024563 | 0.108343268 | 0.044758386 | 0.458030282 |
| 0.349981982 | 0.254395183 | 0.152062941 | 0.00568746  |
| 0.414793116 | 0.178226305 | 0.369371203 | 0.069846092 |
| 0.331784039 | 0.234478774 | 0.328454475 | 0.398940555 |
| 0.351670535 | 0.279395088 | 0.249603563 | 0.355989423 |
| 0.105313892 | 0.396084676 | 0.413748393 | 0.033357073 |
| 0.362046878 | 0.409326602 | 0.313003736 | 0.092911637 |
| 0.278535852 | 0.068473157 | 0.113063604 | 0.286512063 |
| 0.320218519 | 0.402910353 | 0.026091394 | 0.116329661 |
| 0.27489538  | 0.194859962 | 0.05260152  | 0.248395377 |
| 0.16831946  | 0.227264359 | 0.187104879 | 0.253014289 |
| 0.32436787  | 0.171668203 | 0.392791903 | 0.101886788 |
| 0.421829219 | 0.027594372 | 0.373002475 | 0.156325561 |
| 0.190647057 | 0.376478533 | 0.423991117 | 0.166361037 |
| 0.015792411 | 0.090324949 | 0.261341117 | 0.273349951 |
| 0.037729362 | 0.115750615 | 0.150103589 | 0.221709957 |
| 0.464261952 | 0.352733287 | 0.166677339 | 0.257367987 |
| 0.261659488 | 0.062836352 | 0.370640148 | 0.24481692  |
| 0.320528466 | 0.212005278 | 0.364393212 | 0.00615633  |
| 0.389611753 | 0.099475737 | 0.245931458 | 0.242748366 |
| 0.476637236 | 0.070272068 | 0.249223636 | 0.102298864 |
| 0.140179025 | 0.00353529  | 0.262799204 | 0.346136111 |
| 0.165944268 | 0.335964332 | 0.273315876 | 0.22290518  |
| 0.424089191 | 0.302718108 | 0.347969608 | 0.310072204 |
| 0.268833243 | 0.030079836 | 0.084560789 | 0.018966036 |
| 0.306985633 | 0.266100419 | 0.358556741 | 0.345922751 |
| 0.214992379 | 0.343563554 | 0.26315998  | 0.295628319 |
| 0.394012562 | 0.164258797 | 0.466359371 | 0.23626006  |
| 0.420862837 | 0.294973372 | 0.151841754 | 0.241620246 |
| 0.107112054 | 0.094984907 | 0.061483462 | 0.129061447 |
| 0.43291712  | 0.230476602 | 0.261321718 | 0.28068138  |
| 0.022490912 | 0.265827876 | 0.389173815 | 0.393477542 |
| 0.335050734 | 0.372668093 | 0.359689433 | 0.252071996 |
| 0.277181402 | 0.234327662 | 0.040064179 | 0.018241807 |

|             |             |             |             |
|-------------|-------------|-------------|-------------|
| 0.207141454 | 0.106813326 | 0.354726061 | 0.365916563 |
| 0.454321403 | 0.310572458 | 0.049405543 | 0.090012913 |
| 0.183813121 | 0.38105952  | 0.155463309 | 0.163070631 |
| 0.342298649 | 0.316679888 | 0.000387282 | 0.194145273 |
| 0.261457528 | 0.327821513 |             |             |
| CD74        | 0.171355176 | 0.387739436 | 0.244147045 |
| 0.012590211 | 0.171454995 | 0.355309557 | 0.327514078 |
| 0.157976214 | 0.329261462 | 0.186437189 | 0.415883684 |
| 0.012530203 | 0.158836975 | 0.110248411 | 0.272205334 |
| 0.296593445 | 0.302083203 | 0.317904393 | 0.313926262 |
| 0.246213643 | 0.097851879 | 0.334307859 | 0.244418528 |
| 0.359058063 | 0.022216995 | 0.239170663 | 0.041289231 |
| 0.132030823 | 0.265261166 | 0.395015571 | 0.237707222 |
| 0.258246423 | 0.213707377 | 0.176327104 | 0.164356336 |
| 0.046056892 | 0.442215201 | 0.033206789 | 0.169825305 |
| 0.176543984 | 0.261147351 | 0.22601135  | 0.12672664  |
| 0.000438116 | 0.275631883 | 0.119079308 | 0.296835614 |
| 0.30550463  | 0.350371314 | 0.401281506 | 0.245245148 |
| 0.023434539 | 0.425200778 | 0.309054622 | 0.020520747 |
| 0.459198405 | 0.001884204 | 0.451051031 | 0.172494144 |
| 0.308118457 | 0.365690978 | 0.137511649 | 0.266176595 |
| 0.38252631  | 0.459594917 | 0.354977385 | 0.141420653 |
| 0.282819668 | 0.187317204 | 0.160241565 | 0.188479215 |
| 0.352341695 | 0.193890552 | 0.295231917 | 0.103871735 |
| 0.180311817 | 0.180006864 | 1           | 0.384236795 |
| 0.007103811 | 0.278138765 | 0.147171436 | 0.170054138 |
| 0.103076159 | 0.428359431 | 0.165894685 | 0.277804602 |
| 0.144514596 | 0.170014486 | 0.29729775  | 0.333416176 |
| 0.031548707 | 0.195697666 | 0.015063037 | 0.382701132 |
| 0.244423291 | 0.214233537 | 0.232843968 | 0.226213467 |
| 0.141780434 | 0.380003002 | 0.125629387 | 0.158863868 |
| 0.251100648 | 0.214068227 | 0.455175928 | 0.031800089 |
| 0.126553069 | 0.269375605 | 0.323499284 | 0.430359474 |
| 0.328359043 | 0.080283752 | 0.358250471 | 0.363499897 |
| 0.160394557 | 0.107362225 | 0.360184675 | 0.011961696 |
| 0.018919685 | 0.036458208 | 0.250692868 | 0.357480839 |
| 0.210740668 | 0.330034499 | 0.10248257  | 0.168385727 |
| 0.15401845  | 0.238432647 | 0.222483638 | 0.323426414 |
| 0.152480683 | 0.328392921 | 0.174859228 | 0.207856567 |
| 0.152516012 | 0.308797102 | 0.351137503 | 0.39176161  |
| 0.461475089 | 0.246838366 | 0.28056685  | 0.360168514 |
| 0.130406904 | 0.292479162 | 0.36034213  | 0.268150853 |
| 0.231916142 | 0.394134854 | 0.161303726 | 0.277110013 |
| 0.380792053 | 0.276981774 | 0.030180377 | 0.425179621 |
| 0.477666077 | 0.01604751  | 0.29462736  | 0.250853786 |
| 0.033751094 | 0.30194223  | 0.40173536  | 0.291744645 |
| 0.205011829 | 0.034800035 | 0.198958556 | 0.317144603 |
| 0.348518449 | 0.304903919 | 0.278971823 | 0.168433086 |
| 0.367118037 | 0.146880635 | 0.228429392 | 0.131645112 |
| 0.357613081 | 0.329127752 | 0.080412907 | 0.044269391 |
| 0.195331177 | 0.246537856 | 0.319343103 | 0.227338144 |
| 0.191307513 | 0.001263194 | 0.169261458 | 0.190309026 |
| 0.155041646 | 0.193364805 | 0.407843918 | 0.364374589 |
| 0.381567192 | 0.111051351 | 0.390510381 | 0.227130842 |

|             |             |             |             |
|-------------|-------------|-------------|-------------|
| 0.281657906 | 0.195945451 | 0.200937583 | 0.00798153  |
| 0.305898663 | 0.095501578 | 0.231216107 | 0.214998621 |
| 0.231069375 | 0.277481254 | 0.160029477 | 0.306224227 |
| 0.37199061  | 0.227978485 | 0.102322907 | 0.075937345 |
| 0.328444558 | 0.33454445  | 0.132014696 | 0.163950937 |
| 0.277658747 | 0.234394385 | 0.173606286 | 0.448271438 |
| 0.277758272 | 0.394397004 | 0.057505879 | 0.368443599 |
| 0.135241241 | 0.29815524  | 0.202424833 | 0.259826186 |
| 0.344870457 | 0.230467975 | 0.108002331 | 0.38287445  |
| 0.258858532 | 0.266065489 | 0.293096675 | 0.402351162 |
| 0.011875357 | 0.345959207 | 0.18616875  | 0.057438151 |
| 0.382724134 | 0.330937878 | 0.301587772 | 0.318510442 |
| 0.320492779 | 0.41225273  | 0.317960858 | 0.198733901 |
| 0.087207298 | 0.091930383 | 0.369318592 | 0.365247774 |
| 0.264930434 | 0.286805296 | 0.093992948 | 0.065199173 |
| 0.31680122  | 0.134770912 | 0.22593186  | 0.142784841 |
| 0.171805161 | 0.130689301 | 0.40516428  | 0.185472437 |
| 0.013488473 | 0.273845386 | 0.157736129 | 0.119893087 |
| 0.185365143 | 0.227686222 | 0.284724678 | 0.429782633 |
| 0.14914245  | 0.112087394 | 0.12511122  | 0.252803499 |
| 0.393414935 | 0.3857624   | 0.013514881 | 0.369859945 |
| 0.341646612 | 0.325963509 | 0.297020696 | 0.339777091 |
| 0.313326763 | 0.429435177 | 0.325807717 | 0.247369644 |
| 0.0076663   | 0.176465888 | 0.128844603 | 0.476743864 |
| 0.226396154 | 0.359578189 | 0.103238474 | 0.106693656 |
| 0.013956998 | 0.378177306 | 0.043303646 | 0.443410319 |
| 0.273908974 | 0.178580444 | 0.008316261 | 0.285922999 |
| 0.11995485  | 0.030493239 | 0.380623198 | 0.270010376 |
| 0.3414791   | 0.244668452 | 0.297382158 | 0.155494761 |
| 0.030792196 | 0.214783104 | 0.054462916 | 0.215974723 |
| 0.176616749 | 0.053941773 | 0.096068912 | 0.350400589 |
| 0.323769269 | 0.371852221 | 0.395525747 | 0.011914213 |
| 0.170389283 | 0.061663079 | 0.225948302 | 0.299131187 |
| 0.359664279 | 0.430042074 | 0.397815352 | 0.192253775 |
| 0.215992553 | 0.405687542 | 0.432825236 | 0.312772273 |
| 0.039605266 | 0.167316247 | 0.212473967 | 0.143245267 |
| 0.117838272 | 0.298867564 | 0.157405637 | 0.341373932 |
| 0.336604596 | 0.031363691 | 0.373640022 | 0.217657288 |
| 0.389324886 | 0.280078016 | 0.249359624 | 0.35901746  |
| 0.411662242 | 0.367780245 | 0.323327564 | 0.341099828 |
| 0.403784772 | 0.024538165 | 0.070750959 | 0.396299387 |
| 0.439508345 | 0.40191354  | 0.260776017 | 0.109002671 |
| 0.251200854 | 0.290153759 | 0.298779165 | 0.339837141 |
| 0.361567403 | 0.109313942 | 0.156349424 | 0.044179326 |
| 0.025170538 | 0.215500833 | 0.39755956  | 0.452747076 |
| 0.294672034 | 0.391709133 | 0.298020156 | 0.268850829 |
| 0.275195924 | 0.163459029 | 0.371707525 | 0.306577214 |
| 0.485119578 | 0.073944244 | 0.435642885 | 0.298230463 |
| 0.328105685 | 0.258964413 | 0.294030186 | 0.015375699 |
| 0.167177156 | 0.186295995 | 0.10910226  | 0.212504933 |
| 0.20294979  | 0.317897861 | 0.354081387 | 0.358680598 |
| 0.081933261 | 0.0166843   | 0.38341594  | 0.083654371 |
| 0.430147847 | 0.10841879  | 0.290587271 | 0.020711727 |
| 0.41648614  | 0.235642223 | 0.260870778 | 0.090401554 |

|             |             |             |             |
|-------------|-------------|-------------|-------------|
| 0.233980755 | 0.003124658 | 0.206927949 | 0.203043558 |
| 0.337913479 | 0.423674055 | 0.19916736  | 0.160569876 |
| 0.157766557 | 0.220210872 | 0.356285813 | 0.19265351  |
| 0.283327724 | 0.035623748 | 0.306863922 | 0.327875699 |
| 0.141251929 | 0.216877795 | 0.395371161 | 0.285246678 |
| 0.305761494 | 0.162978577 | 0.36611838  | 0.287682339 |
| 0.252923842 | 0.280776177 | 0.236907209 | 0.167349386 |
| 0.182945337 | 0.259702343 | 0.216138347 | 0.16946697  |
| 0.196605258 | 0.131994131 | 0.145474693 | 0.47676909  |
| 0.163506107 | 0.27020509  | 0.02457024  | 0.032770365 |
| 0.08148894  | 0.318556779 | 0.318660199 | 0.315160187 |
| 0.317453501 | 0.130267977 | 0.32195566  | 0.357117921 |
| 0.038376109 | 0.17768987  | 0.320182132 | 0.039287519 |
| 0.231482354 | 0.124898286 | 0.0069487   | 0.27045437  |
| 0.399046137 | 0.133830508 |             |             |
| CD81        | 0.107797478 | 0.265874588 | 0.098051295 |
| 0.002653364 | 0.057034514 | 0.320794644 | 0.248479619 |
| 0.082053535 | 0.085265121 | 0.044357142 | 0.36888562  |
| 0.00502585  | 0.09588574  | 0.05044604  | 0.116734008 |
| 0.186771593 | 0.18815918  | 0.225380276 | 0.205498968 |
| 0.158418197 | 0.017125393 | 0.295298303 | 0.172084375 |
| 0.268782645 | 0.011129062 | 0.12587882  | 0.008131106 |
| 0.063131601 | 0.165715848 | 0.269962961 | 0.051823244 |
| 0.158204708 | 0.126428413 | 0.037567151 | 0.032559703 |
| 0.005751542 | 0.343532801 | 0.005225216 | 0.099279584 |
| 0.101798331 | 0.108414313 | 0.135298607 | 0.043988575 |
| 4.75E-05    | 0.142503375 | 0.049577527 | 0.236695943 |
| 0.180720399 | 0.28984737  | 0.323987502 | 0.120174284 |
| 0.002759445 | 0.372746294 | 0.243328693 | 0.002597678 |
| 0.366982263 | 0.000328087 | 0.336427712 | 0.072290894 |
| 0.153113758 | 0.192529966 | 0.058117478 | 0.191537489 |
| 0.356335014 | 0.359272085 | 0.233206328 | 0.039037229 |
| 0.187019793 | 0.09881073  | 0.089358837 | 0.120698564 |
| 0.242540866 | 0.044859657 | 0.061887656 | 0.032657964 |
| 0.103229844 | 0.109734033 | 0.384236795 | 1           |
| 0.002532084 | 0.179350565 | 0.033329018 | 0.111866927 |
| 0.058317919 | 0.363313485 | 0.114654141 | 0.089307029 |
| 0.070803536 | 0.082771045 | 0.250547264 | 0.217586423 |
| 0.007745313 | 0.12260568  | 0.004069204 | 0.151821425 |
| 0.160795223 | 0.123773819 | 0.163659671 | 0.058503019 |
| 0.080304701 | 0.188100742 | 0.030604856 | 0.088369186 |
| 0.155290898 | 0.116342314 | 0.356823874 | 0.007892566 |
| 0.069506147 | 0.06376378  | 0.107465449 | 0.321126549 |
| 0.213645271 | 0.072011595 | 0.125684413 | 0.334586649 |
| 0.026629874 | 0.018633223 | 0.282526926 | 0.002808283 |
| 0.005650173 | 0.019167851 | 0.152940075 | 0.141827069 |
| 0.083275412 | 0.225622476 | 0.030411836 | 0.102992819 |
| 0.06676642  | 0.148313585 | 0.06361243  | 0.19619332  |
| 0.089207068 | 0.254958084 | 0.080627824 | 0.127583357 |
| 0.038412143 | 0.10169758  | 0.194695599 | 0.283755361 |
| 0.38041066  | 0.092772175 | 0.088855063 | 0.325297286 |
| 0.070619238 | 0.18690772  | 0.238194513 | 0.070401281 |
| 0.079294954 | 0.272788449 | 0.031461412 | 0.212694814 |
| 0.327994175 | 0.217722551 | 0.008073521 | 0.393821165 |

|             |             |             |             |
|-------------|-------------|-------------|-------------|
| 0.383846703 | 0.003428702 | 0.131619467 | 0.167260575 |
| 0.008184264 | 0.062901979 | 0.301860193 | 0.196187865 |
| 0.132566887 | 0.006799393 | 0.070367361 | 0.214420729 |
| 0.266142719 | 0.204334121 | 0.200445925 | 0.047932922 |
| 0.342874571 | 0.031824331 | 0.102990475 | 0.070659485 |
| 0.260767852 | 0.288593774 | 0.010486316 | 0.006829507 |
| 0.142669448 | 0.114647003 | 0.216811254 | 0.165459906 |
| 0.118653414 | 0.000237934 | 0.041644855 | 0.131483164 |
| 0.026335998 | 0.122495947 | 0.286549538 | 0.287889443 |
| 0.357766766 | 0.019568115 | 0.308200665 | 0.070513741 |
| 0.203739812 | 0.036044467 | 0.03928212  | 0.003552065 |
| 0.085844309 | 0.028465163 | 0.114024474 | 0.088250078 |
| 0.054168205 | 0.085648968 | 0.065755503 | 0.202803907 |
| 0.297316441 | 0.144875667 | 0.049379099 | 0.017730253 |
| 0.141710137 | 0.240766166 | 0.030605043 | 0.032835465 |
| 0.181782329 | 0.057655622 | 0.097049383 | 0.361639798 |
| 0.062101344 | 0.328362833 | 0.008968405 | 0.156133936 |
| 0.079892145 | 0.188562854 | 0.122121821 | 0.176417543 |
| 0.175340028 | 0.181422895 | 0.022426194 | 0.376633108 |
| 0.202117377 | 0.194159914 | 0.112103606 | 0.287032112 |
| 0.004951977 | 0.322656302 | 0.108037119 | 0.00995242  |
| 0.267111281 | 0.28922491  | 0.139958449 | 0.18016081  |
| 0.211471546 | 0.298691106 | 0.231712808 | 0.117336203 |
| 0.015184392 | 0.053884147 | 0.261065414 | 0.273223646 |
| 0.161303566 | 0.131354084 | 0.017673998 | 0.018534756 |
| 0.217442055 | 0.09580946  | 0.149581343 | 0.079286018 |
| 0.096556919 | 0.040682683 | 0.307445798 | 0.134284304 |
| 0.003428066 | 0.120370936 | 0.100925382 | 0.021196992 |
| 0.05430839  | 0.043291473 | 0.17939301  | 0.409802511 |
| 0.03174834  | 0.019677867 | 0.027551197 | 0.132131489 |
| 0.316678495 | 0.265999046 | 0.002093213 | 0.271658317 |
| 0.228195953 | 0.233419784 | 0.193625649 | 0.230926787 |
| 0.227154222 | 0.34473185  | 0.218920124 | 0.159421244 |
| 0.004556283 | 0.097152624 | 0.071290059 | 0.429366472 |
| 0.135141773 | 0.306356173 | 0.048305282 | 0.039031493 |
| 0.007412526 | 0.294284019 | 0.005420605 | 0.332414794 |
| 0.177581104 | 0.055489469 | 0.000955303 | 0.205109784 |
| 0.067363797 | 0.012481877 | 0.262544652 | 0.161293999 |
| 0.23741883  | 0.148250373 | 0.162643375 | 0.085187861 |
| 0.003602708 | 0.071853551 | 0.013137048 | 0.15094133  |
| 0.076027187 | 0.008616491 | 0.021319889 | 0.232453864 |
| 0.237301358 | 0.300348436 | 0.347534897 | 0.002740972 |
| 0.098106451 | 0.010228169 | 0.142783129 | 0.13838364  |
| 0.293641384 | 0.355926205 | 0.299523561 | 0.113827189 |
| 0.142847076 | 0.319545464 | 0.362497599 | 0.218923006 |
| 0.00823153  | 0.097258601 | 0.126489395 | 0.069623226 |
| 0.067818988 | 0.191576269 | 0.072173862 | 0.292275414 |
| 0.289894947 | 0.00530791  | 0.352431855 | 0.148453066 |
| 0.288312489 | 0.171160829 | 0.093091162 | 0.145696048 |
| 0.316087856 | 0.130045219 | 0.20163124  | 0.208351379 |
| 0.386193529 | 0.003151087 | 0.01391456  | 0.327193566 |
| 0.330480061 | 0.368830275 | 0.163722654 | 0.021533217 |
| 0.157194605 | 0.141509691 | 0.215827413 | 0.086157463 |
| 0.309860247 | 0.063502339 | 0.087964881 | 0.009842632 |

|             |             |             |             |             |
|-------------|-------------|-------------|-------------|-------------|
| 0.004336694 | 0.065084245 | 0.303698542 | 0.362694727 |             |
| 0.176599709 | 0.326791994 | 0.182040431 | 0.181975311 |             |
| 0.172080622 | 0.033062414 | 0.360431608 | 0.211247522 |             |
| 0.397173607 | 0.012185242 | 0.323503487 | 0.193912543 |             |
| 0.243352895 | 0.099081751 | 0.199592175 | 0.002706181 |             |
| 0.102847179 | 0.052043324 | 0.057536582 | 0.115519525 |             |
| 0.116374965 | 0.164642744 | 0.278830064 | 0.15944875  |             |
| 0.016287111 | 0.013458734 | 0.351721605 | 0.028896287 |             |
| 0.401137423 | 0.025137724 | 0.181103173 | 0.002462778 |             |
| 0.292863952 | 0.156936845 | 0.175328898 | 0.023066497 |             |
| 0.105286977 | 0.000512921 | 0.063565279 | 0.101692019 |             |
| 0.264588782 | 0.350479764 | 0.130257158 | 0.087168059 |             |
| 0.056513137 | 0.152197995 | 0.289507185 | 0.093234679 |             |
| 0.175972199 | 0.005374859 | 0.196027632 | 0.147320292 |             |
| 0.074590503 | 0.045455794 | 0.359001027 | 0.063857712 |             |
| 0.171670272 | 0.03210125  | 0.191146531 | 0.087021693 |             |
| 0.151880267 | 0.066050715 | 0.135893315 | 0.034081522 |             |
| 0.073737843 | 0.09957919  | 0.141807502 | 0.093056851 |             |
| 0.129921459 | 0.072545469 | 0.054034987 | 0.401991291 |             |
| 0.028551328 | 0.123253736 | 0.004438949 | 0.0056544   |             |
| 0.01085831  | 0.162175276 | 0.236538175 | 0.231770798 |             |
| 0.203679218 | 0.025425709 | 0.137420174 | 0.175786894 |             |
| 0.006621828 | 0.112586187 | 0.266930806 | 0.006348399 |             |
| 0.159899216 | 0.024003798 | 0.005597219 | 0.100930848 |             |
| 0.330397953 | 0.021309053 |             |             |             |
| CD86        | 0.005192515 | 0.002238888 | 0.004349083 | 2.17E-06    |
| 5.76E-05    | 0.009348564 | 0.0028841   | 0.002407498 |             |
| 0.005401221 | 0.001782178 | 0.005809711 | 0.034776007 |             |
| 0.000303998 | 0.053923118 | 0.000376863 | 0.001610377 |             |
| 0.001180012 | 0.001235764 | 0.001375203 | 0.007951781 |             |
| 0.000176127 | 0.008350034 | 0.002965409 | 0.006342537 |             |
| 0.041921773 | 0.001772731 | 0.000116099 | 0.000566253 |             |
| 0.001092937 | 0.011726203 | 0.001642494 | 0.001819212 |             |
| 0.000479558 | 0.000349264 | 1.76E-05    | 1.05E-05    | 0.003451239 |
| 3.96E-07    | 0.000237832 | 0.000597913 | 0.001340743 |             |
| 0.000659085 | 0.00458241  | 8.19E-08    | 0.00304326  |             |
| 0.001227703 | 0.005840089 | 0.004660716 | 0.010327958 |             |
| 0.011620853 | 0.00156058  | 3.85E-06    | 0.005355141 |             |
| 0.005065291 | 3.73E-06    | 0.00322859  | 9.90E-07    | 0.003289763 |
| 0.007575061 | 0.009984367 | 0.004436109 | 0.001477684 |             |
| 0.004487725 | 0.006248873 | 0.003125469 | 0.001507368 |             |
| 0.000795986 | 0.011958346 | 0.001015451 | 0.000648725 |             |
| 0.000859579 | 0.002226861 | 0.000392436 | 0.000802837 |             |
| 5.72E-05    | 0.000730714 | 0.00066023  | 0.007103811 |             |
| 0.002532084 | 1           | 0.002889379 | 9.62E-05    | 0.003362441 |
| 0.000163925 | 0.005517375 | 0.002282403 | 0.000908267 |             |
| 0.000722538 | 0.005448254 | 0.003936378 | 0.00140004  |             |
| 1.68E-05    | 0.000653472 | 1.57E-06    | 0.001601775 | 0.001510349 |
| 0.000829263 | 0.003540662 | 0.004338433 | 0.003074976 |             |
| 0.011699599 | 0.010923564 | 0.000482008 | 0.002565498 |             |
| 0.000764176 | 0.00340138  | 1.80E-05    | 0.000218706 |             |
| 0.006726925 | 0.000910765 | 0.003304071 | 0.002483716 |             |
| 0.000766265 | 0.008012907 | 0.006851595 | 5.26E-05    | 3.44E-05    |
| 0.003231805 | 1.31E-05    | 8.55E-05    | 0.00086146  | 0.00126765  |

|             |             |             |             |          |
|-------------|-------------|-------------|-------------|----------|
| 0.013791667 | 0.002370993 | 0.004386851 | 2.33E-05    |          |
| 0.000348839 | 0.001622801 | 0.001485839 | 0.000146117 |          |
| 0.002440657 | 0.000334749 | 0.002650859 | 0.000239899 |          |
| 0.000767912 | 4.20E-05    | 0.005754415 | 0.014777086 |          |
| 0.001595314 | 0.004928117 | 0.001316988 | 0.006763473 |          |
| 0.006824098 | 0.000203277 | 0.001558658 | 0.001862126 |          |
| 0.001772835 | 0.000254064 | 0.008350969 | 0.00157707  |          |
| 0.001670804 | 0.003791818 | 0.004059023 | 5.28E-06    |          |
| 0.004373078 | 0.004213909 | 5.81E-06    | 0.013802477 |          |
| 0.001380423 | 1.04E-06    | 0.000369228 | 0.003720686 |          |
| 0.001056022 | 0.000478476 | 0.000116529 | 0.00124236  |          |
| 0.005083368 | 0.010206082 | 0.003718054 | 0.003425418 |          |
| 0.001160583 | 0.008827131 | 0.001141877 | 0.004889929 |          |
| 0.000241467 | 0.010181079 | 0.00817428  | 0.000161328 |          |
| 1.03E-05    | 0.001595262 | 0.002114403 | 0.001894331 |          |
| 0.002186439 | 0.001908076 | 3.97E-07    | 0.001485253 |          |
| 0.005588377 | 0.002171932 | 0.000746361 | 0.002098881 |          |
| 0.012111146 | 0.012817443 | 5.99E-05    | 0.012428968 |          |
| 0.000142264 | 0.003355781 | 0.00192766  | 0.001138924 |          |
| 0.020816574 | 0.000541829 | 0.000405201 | 0.00091432  |          |
| 0.040606345 | 0.000277725 | 0.010103694 | 0.000665646 |          |
| 0.001513815 | 0.009736739 | 0.000434444 | 0.007196541 |          |
| 0.000213979 | 0.003153891 | 0.001436538 | 0.000220019 |          |
| 0.001959937 | 0.000960646 | 0.001615533 | 0.000628468 |          |
| 0.005131382 | 0.000149357 | 0.005368579 | 1.31E-05    |          |
| 0.006069701 | 0.000291917 | 0.000990848 | 0.000596844 |          |
| 0.00064278  | 0.005016108 | 0.002346506 | 4.20E-05    |          |
| 0.00932817  | 0.003131545 | 0.001459621 | 0.018202645 |          |
| 0.001967197 | 0.029413479 | 0.004059407 | 0.000647041 |          |
| 4.26E-05    | 0.001879275 | 0.003489952 | 0.026469956 |          |
| 0.01016772  | 0.001396091 | 0.002016968 | 0.003025988 |          |
| 0.000764205 | 0.000608247 | 0.024874259 | 0.002837456 |          |
| 0.003782311 | 0.001001015 | 0.000983345 | 1.39E-05    | 1.80E-05 |
| 0.001246496 | 0.000889834 | 0.002719368 | 0.001076563 |          |
| 0.000303306 | 5.70E-05    | 0.006444497 | 0.002259472 |          |
| 0.000400473 | 0.006667943 | 0.001421635 | 0.000111718 |          |
| 0.000965389 | 0.005415265 | 0.001076408 | 0.00531492  |          |
| 7.50E-05    | 0.000606853 | 0.000169745 | 0.00308649  |          |
| 0.007208977 | 0.00233246  | 8.22E-08    | 0.003059544 |          |
| 0.001564863 | 0.00241342  | 0.00101445  | 0.001727975 |          |
| 0.009187361 | 0.003315926 | 0.001743999 | 0.001340135 |          |
| 0.00187166  | 0.000490977 | 0.000177907 | 0.006750789 |          |
| 0.001095019 | 0.008408531 | 0.000934487 | 7.24E-05    | 9.20E-05 |
| 0.016679356 | 1.99E-05    | 0.003240925 | 0.00074794  |          |
| 0.00151571  | 2.64E-08    | 0.00099071  | 0.000182377 | 8.89E-07 |
| 0.002158646 | 0.003722749 | 0.001420808 | 0.00056092  |          |
| 0.004797312 | 0.000336749 | 2.20E-05    | 0.000350699 | 2.51E-05 |
| 0.00094811  | 0.000259758 | 9.12E-05    | 0.00027778  |          |
| 0.001804972 | 0.003214832 | 0.001967229 | 0.006587    |          |
| 0.002603311 | 0.001034062 | 3.36E-05    | 0.000759094 |          |
| 0.000469963 | 0.003300586 | 0.004532933 | 0.001852422 |          |
| 0.000431553 | 0.001110683 | 0.003438469 | 0.005454653 |          |
| 0.001972465 | 4.33E-07    | 0.000699331 | 0.001249349 |          |
| 0.000293161 | 0.001263622 | 0.000957754 | 0.000748306 |          |



|             |             |             |             |
|-------------|-------------|-------------|-------------|
| 0.007302684 | 0.005748278 | 3.12E-06    | 0.010594646 |
| 0.006124979 | 0.001819005 | 0.0011735   | 0.013062823 |
| 0.006336596 | 0.00315677  | 0.002509269 | 0.004695652 |
| 0.001778402 | 0.009705394 | 2.50E-05    | 0.000177558 |
| 0.00519411  | 0.002731914 | 0.004664001 | 0.001642142 |
| 0.000353585 | 0.00069443  | 0.008329382 | 0.001516696 |
| 0.000552287 | 0.010290713 | 0.000780917 | 0.000644531 |
| 0.000868002 | 0.001121662 | 0.014310383 | 0.002808821 |
| 0.004218534 | 0.010795666 | 0.014638502 | 0.003058445 |
| 0.001191335 | 0.001057987 | 0.000161039 | 0.007233808 |
| 0.003358404 | 0.004145594 | 5.89E-05    | 0.003492111 |
| 0.008462221 | 0.005272278 | 0.001377695 | 0.001493346 |
| 2.39E-05    | 0.000623462 | 0.002061763 | 0.003588679 |
| 0.000708493 | 0.000831074 | 0.006254645 | 0.001749841 |
| 0.01681198  | 7.00E-06    | 6.31E-05    | 0.006244883 |
| 0.008661963 | 0.000132849 | 0.003483978 | 3.58E-05    |
| 0.00246053  | 0.003897064 | 0.003765089 | 1.25E-06    |
| 0.000887706 | 9.18E-08    | 0.001988284 | 0.005516574 |
| 0.006302243 | 0.004314753 | 0.002233941 | 0.002441997 |
| 0.007332601 | 0.000505904 | 0.003294277 | 0.000215747 |
| 0.000903335 | 1.06E-05    | 0.001339214 | 0.002826252 |
| 0.000304384 | 0.00063753  | 0.006699012 | 0.00068163  |
| 0.001326834 | 9.90E-05    | 0.007261569 | 0.016267792 |
| 0.00077777  | 0.000252093 | 0.000672753 | 0.002053163 |
| 0.001585316 | 0.00097757  | 0.000944781 | 0.000537992 |
| 0.001509091 | 0.001046253 | 0.000413135 | 0.004210233 |
| 0.000667623 | 0.008953234 | 6.10E-06    | 0.000125191 |
| 0.005641683 | 0.003595947 | 0.001955069 | 9.74E-05    |
| 0.000399258 | 0.010260222 | 0.00126705  | 0.00126705  |
| 0.001243309 | 0.010260222 | 0.020328749 | 2.78E-06    |
| 0.000490711 | 0.002787665 | 5.56E-07    | 0.000826759 |
| CDC42EP3    | 0.000490711 | 9.77E-05    | 0.009992334 |
| 0.06347936  | 0.245280901 | 0.005094541 | 7.51E-05    |
| 0.039212324 | 0.237193232 | 0.205014045 |             |
| 0.044374622 | 0.174686107 | 0.356996674 | 0.356780056 |
| 0.001385021 | 0.067102608 | 0.259324822 | 0.372874097 |
| 0.149881586 | 0.156926165 | 0.032527866 | 0.09313486  |
| 0.076429132 | 0.14547146  | 0.266608089 | 0.150961223 |
| 0.302103959 | 0.004110132 | 0.181684588 | 0.206764378 |
| 0.034145868 | 0.124827042 | 0.318217431 | 0.133228325 |
| 0.123696412 | 0.113783822 | 0.197427738 | 0.16797071  |
| 0.026501275 | 0.290924579 | 0.102000295 | 0.125928926 |
| 0.070908426 | 0.267323748 | 0.010184598 | 0.093118742 |
| 0.001751193 | 0.299026755 | 0.120671058 | 0.05573157  |
| 0.085420859 | 0.314187186 | 0.029408019 | 0.187073846 |
| 0.006925337 | 0.33587281  | 0.207686697 | 0.299226968 |
| 0.367249322 | 0.010815515 | 0.135962886 | 0.006451588 |
| 0.208477185 | 0.143897252 | 0.320838023 | 0.037064173 |
| 0.404214463 | 0.354693503 | 0.045614882 | 0.157374356 |
| 0.257718113 | 0.078486438 | 0.203353399 | 0.216343023 |
| 0.212182385 | 0.120782329 | 0.082007575 | 0.174228712 |
| 0.103571467 | 0.077425536 | 0.214006198 | 0.035345251 |
| 0.002889379 | 1           | 0.278138765 | 0.179350565 |
| 0.0517303   | 0.127410622 | 0.061831066 |             |
| 0.068110295 | 0.347898847 | 0.072906029 | 0.280323476 |
|             | 0.10624944  | 0.182507143 | 0.183094186 |

|             |             |             |             |
|-------------|-------------|-------------|-------------|
| 0.051703627 | 0.08619255  | 0.012257815 | 0.161544082 |
| 0.119813373 | 0.095007443 | 0.122227947 | 0.281580376 |
| 0.068635717 | 0.137340168 | 0.022013765 | 0.062083618 |
| 0.112510784 | 0.108983457 | 0.358131317 | 0.004723404 |
| 0.051171286 | 0.11081481  | 0.155765211 | 0.310542448 |
| 0.183078322 | 0.019688722 | 0.10907064  | 0.337799259 |
| 0.078839651 | 0.13732068  | 0.311952509 | 0.005394826 |
| 0.02537458  | 0.002771941 | 0.120551213 | 0.15524886  |
| 0.316245632 | 0.296725611 | 0.141257441 | 0.132068166 |
| 0.039567413 | 0.096686813 | 0.279583698 | 0.269983877 |
| 0.085707472 | 0.357422374 | 0.11651582  | 0.121994449 |
| 0.089091282 | 0.089148456 | 0.181864917 | 0.273201743 |
| 0.276319198 | 0.227383628 | 0.199412874 | 0.305912922 |
| 0.056471636 | 0.14996898  | 0.200621351 | 0.084468696 |
| 0.223590137 | 0.164399137 | 0.101679306 | 0.269788975 |
| 0.322130226 | 0.096935629 | 0.003924591 | 0.291301275 |
| 0.370437977 | 0.006825126 | 0.213353519 | 0.119162987 |
| 0.08207332  | 0.210812532 | 0.255332927 | 0.185317527 |
| 0.111977578 | 0.121012371 | 0.213243802 | 0.29895782  |
| 0.187705168 | 0.261360049 | 0.15500313  | 0.195854058 |
| 0.264570197 | 0.098440336 | 0.233659042 | 0.055645018 |
| 0.236035204 | 0.17680745  | 0.02722705  | 0.018751082 |
| 0.081565608 | 0.069348027 | 0.211275802 | 0.112942974 |
| 0.089545791 | 0.009976851 | 0.241368343 | 0.088052282 |
| 0.084503055 | 0.074734431 | 0.281434491 | 0.231325545 |
| 0.203429939 | 0.03129129  | 0.206523965 | 0.170129308 |
| 0.114477723 | 0.160725928 | 0.189470236 | 0.00636806  |
| 0.231710385 | 0.043065748 | 0.089135814 | 0.060972604 |
| 0.235261532 | 0.14630458  | 0.027633591 | 0.191121738 |
| 0.270530138 | 0.140101994 | 0.01527575  | 0.010239545 |
| 0.200024105 | 0.28861845  | 0.076822348 | 0.049192726 |
| 0.211960265 | 0.147173348 | 0.071799412 | 0.316492016 |
| 0.192450594 | 0.358726481 | 0.009772451 | 0.137427125 |
| 0.073197906 | 0.184831358 | 0.113222035 | 0.150307124 |
| 0.222662074 | 0.08827826  | 0.03250181  | 0.323124559 |
| 0.121164219 | 0.114224211 | 0.163579152 | 0.24202092  |
| 0.005432966 | 0.234671752 | 0.132201214 | 0.010076383 |
| 0.268150148 | 0.39312804  | 0.162201598 | 0.099577584 |
| 0.156485849 | 0.242586253 | 0.13930849  | 0.095270109 |
| 0.018235732 | 0.020315201 | 0.187492978 | 0.248195768 |
| 0.127989194 | 0.133724785 | 0.053364126 | 0.00732423  |
| 0.180626336 | 0.044642128 | 0.158484319 | 0.065695559 |
| 0.101019552 | 0.048752921 | 0.172695073 | 0.064962339 |
| 0.002305021 | 0.183997294 | 0.092937436 | 0.113953898 |
| 0.142238238 | 0.120356432 | 0.188096935 | 0.311656779 |
| 0.085895243 | 0.040681847 | 0.093704188 | 0.287866342 |
| 0.287538667 | 0.240007302 | 0.00365297  | 0.18272932  |
| 0.183535435 | 0.154576699 | 0.191450844 | 0.173157039 |
| 0.150403836 | 0.344900498 | 0.204428487 | 0.100984579 |
| 0.001196351 | 0.081616307 | 0.059919085 | 0.344400364 |
| 0.123157795 | 0.297823824 | 0.017117816 | 0.040948269 |
| 0.003197222 | 0.215108698 | 0.022097946 | 0.253750419 |
| 0.167823051 | 0.179508051 | 0.002186974 | 0.179806951 |
| 0.057824001 | 0.006656852 | 0.214627114 | 0.216110169 |

|             |             |             |             |
|-------------|-------------|-------------|-------------|
| 0.245193012 | 0.128059383 | 0.289959528 | 0.074981382 |
| 0.012563676 | 0.061200428 | 0.102089059 | 0.176980169 |
| 0.064045299 | 0.006881294 | 0.226232691 | 0.179757397 |
| 0.188747418 | 0.316098071 | 0.28015064  | 0.026300146 |
| 0.064611894 | 0.062767828 | 0.159902828 | 0.140910793 |
| 0.201006747 | 0.33852026  | 0.268807278 | 0.098649705 |
| 0.119552461 | 0.313782344 | 0.33751278  | 0.200505771 |
| 0.037703559 | 0.081706289 | 0.103670961 | 0.16350127  |
| 0.04904025  | 0.1771147   | 0.10909429  | 0.359116929 |
| 0.189943361 | 0.05038468  | 0.340854877 | 0.066180516 |
| 0.289202895 | 0.170747767 | 0.228017897 | 0.106915491 |
| 0.339970824 | 0.160032304 | 0.284368204 | 0.126452019 |
| 0.312572632 | 0.006691176 | 0.009267616 | 0.263174029 |
| 0.317186826 | 0.404399189 | 0.150213941 | 0.165227409 |
| 0.130072001 | 0.131424106 | 0.137528043 | 0.199553339 |
| 0.187259601 | 0.058248384 | 0.06213931  | 0.007100755 |
| 0.043817225 | 0.086332052 | 0.353284773 | 0.333920614 |
| 0.226430594 | 0.198580683 | 0.246730335 | 0.265988674 |
| 0.142898642 | 0.074104454 | 0.308139818 | 0.105890961 |
| 0.367618529 | 0.145656024 | 0.261441599 | 0.131717942 |
| 0.183220244 | 0.186611952 | 0.172282361 | 0.008586491 |
| 0.09307377  | 0.228254066 | 0.0171645   | 0.198743411 |
| 0.085361276 | 0.257270764 | 0.324114598 | 0.154713029 |
| 0.047525422 | 0.002925186 | 0.212377403 | 0.036306906 |
| 0.385649166 | 0.022844846 | 0.106305352 | 0.007639252 |
| 0.245217758 | 0.126803332 | 0.142179129 | 0.02160338  |
| 0.151117218 | 0.002343231 | 0.270537156 | 0.113831801 |
| 0.183149734 | 0.273314958 | 0.092234339 | 0.063591478 |
| 0.027673524 | 0.157016755 | 0.255937837 | 0.131532122 |
| 0.177264924 | 0.017657714 | 0.167273947 | 0.094227965 |
| 0.060072001 | 0.085978212 | 0.311478315 | 0.09936133  |
| 0.29532895  | 0.047293768 | 0.247854685 | 0.069780734 |
| 0.145405068 | 0.091651257 | 0.193925773 | 0.056818729 |
| 0.242690104 | 0.142670385 | 0.095403532 | 0.0900978   |
| 0.139082405 | 0.063759998 | 0.042079154 | 0.363212378 |
| 0.051885354 | 0.084417674 | 0.062262827 | 0.116691475 |
| 0.065838603 | 0.259245255 | 0.140528418 | 0.159632833 |
| 0.16570297  | 0.028059963 | 0.228306987 | 0.127441943 |
| 0.006509007 | 0.068369068 | 0.381122058 | 0.026332396 |
| 0.132221981 | 0.030979352 | 0.004011372 | 0.068197155 |
| 0.277712364 | 0.061774605 |             |             |
| CDK9        | 0.086531971 | 0.40457045  | 0.017403649 |
| 0.056574462 | 0.088569851 | 0.158690324 | 0.191186015 |
| 0.07129536  | 0.020563927 | 0.071266667 | 0.251674386 |
| 2.47E-05    | 0.236626549 | 0.00089663  | 0.010980728 |
| 0.342091081 | 0.378558024 | 0.248590902 | 0.335728045 |
| 0.065398593 | 0.115139396 | 0.152378861 | 0.220441724 |
| 0.155591876 | 4.52E-05    | 0.09407251  | 0.078453751 |
| 0.071606177 | 0.322722197 | 0.06602728  | 0.068148393 |
| 0.28302687  | 0.355153063 | 0.116296972 | 0.156627793 |
| 0.128904135 | 0.354906063 | 0.046284173 | 0.324693663 |
| 0.233084404 | 0.132935793 | 0.33048801  | 0.001984375 |
| 0.027690812 | 0.050836987 | 0.050665782 | 0.175962802 |
| 0.054835788 | 0.126837006 | 0.060230413 | 0.147758773 |

|             |             |             |             |
|-------------|-------------|-------------|-------------|
| 0.027525966 | 0.255057913 | 0.175368025 | 0.034359297 |
| 0.374276039 | 0.022878399 | 0.378824157 | 0.024398952 |
| 0.01638649  | 0.087123067 | 0.091752853 | 0.191089088 |
| 0.20049787  | 0.388684161 | 0.401053765 | 0.021145248 |
| 0.036570178 | 0.143374007 | 0.264007406 | 0.342932791 |
| 0.344474716 | 0.072009081 | 0.09085579  | 0.125845594 |
| 0.276073512 | 0.229035017 | 0.147171436 | 0.033329018 |
| 9.62E-05    | 0.127410622 | 1           | 0.205671876 |
| 0.268327348 | 0.129825839 | 0.112524733 | 0.155914176 |
| 0.003124091 | 0.159928111 | 0.120088353 | 0.012516741 |
| 0.234441574 | 0.0045403   | 0.391688144 | 0.25054517  |
| 0.291891115 | 0.179268491 | 0.027335346 | 0.001895297 |
| 0.016085211 | 0.007932809 | 0.033952795 | 0.137926491 |
| 0.189098767 | 0.007932809 | 0.234176212 | 0.225382585 |
| 0.021626937 | 0.354536276 | 0.017125125 | 0.337419462 |
| 0.000487152 | 0.092640607 | 0.386266526 | 0.094616943 |
| 0.118414433 | 0.016819111 | 0.143348077 | 0.005312885 |
| 0.000394907 | 0.153757047 | 0.004881589 | 0.073062907 |
| 0.127751364 | 0.30272381  | 0.022529105 | 0.054776674 |
| 0.236636534 | 0.045935905 | 0.359868252 | 0.279184675 |
| 0.218317945 | 0.089950188 | 0.161121416 | 0.153639701 |
| 0.027615249 | 0.265520255 | 0.292964937 | 0.283256178 |
| 0.023897423 | 0.030062341 | 0.411779082 | 0.241218427 |
| 0.332870384 | 0.018345995 | 0.201744128 | 0.159688725 |
| 0.071855889 | 0.39165161  | 0.036558602 | 0.16196528  |
| 0.089416165 | 0.08026816  | 0.318034705 | 0.356922596 |
| 0.005788156 | 0.007477117 | 0.220244669 | 0.112683361 |
| 0.089716401 | 0.015693369 | 0.234225002 | 0.222645546 |
| 0.067950626 | 0.318274916 | 0.340063853 | 0.105324177 |
| 0.148285544 | 0.122891998 | 0.17742758  | 0.158957394 |
| 0.087216002 | 0.186476094 | 0.109625338 | 0.046768122 |
| 0.122914904 | 0.017638066 | 0.240029804 | 0.142541459 |
| 0.053954553 | 0.045930125 | 0.015684719 | 0.189528855 |
| 0.026880489 | 0.346378321 | 0.155582097 | 0.059468488 |
| 0.216305294 | 0.071843468 | 0.115199435 | 0.090972076 |
| 0.056753293 | 0.437348671 | 0.046245363 | 0.187547092 |
| 0.072699601 | 0.048649702 | 0.171373763 | 0.044594868 |
| 0.110680016 | 0.069430439 | 0.000122523 | 0.114311345 |
| 0.017041239 | 0.137098289 | 0.003723055 | 0.096270277 |
| 0.370068492 | 0.007337701 | 0.364554693 | 0.063677734 |
| 0.394339802 | 0.000981493 | 0.011007866 | 0.40898358  |
| 0.069395446 | 0.107692481 | 0.027309905 | 0.116584652 |
| 0.278637411 | 0.253261286 | 0.280006914 | 0.21392372  |
| 0.397374844 | 0.019182771 | 0.053666177 | 0.10713186  |
| 0.135882614 | 0.322131121 | 0.338918452 | 0.129800172 |
| 0.141646287 | 0.042906801 | 0.16275382  | 4.00E-05    |
| 0.169771849 | 0.013798764 | 0.393287316 | 0.4304007   |
| 0.217932558 | 0.274958896 | 0.016791132 |             |
| 0.384140038 | 0.011148    | 0.037276389 | 0.345172785 |
| 0.000413697 | 0.224178014 | 0.285998806 | 0.021411846 |
| 0.150999657 | 0.302981219 | 0.260431747 | 0.344115506 |
| 0.094737443 | 0.147167875 | 0.005260822 | 0.364645384 |
| 0.125712869 | 0.230900747 | 0.134798942 | 0.260625891 |
| 0.076586993 | 0.077291782 | 0.117029777 | 0.001044119 |
|             | 0.197780909 | 0.095065842 | 0.110360678 |

|             |             |             |             |
|-------------|-------------|-------------|-------------|
| 0.032801762 | 0.393271624 | 0.201389916 | 0.143667556 |
| 0.038210482 | 0.175360809 | 0.040460215 | 0.095104179 |
| 0.3937649   | 0.019220118 | 0.27760413  | 0.379331262 |
| 0.141353918 | 0.412014159 | 0.348183886 | 0.09740557  |
| 0.325288534 | 0.367372434 | 0.239429808 | 2.00E-05    |
| 0.292442302 | 0.25442195  | 0.236886008 | 0.324430387 |
| 0.163021024 | 0.030119121 | 0.159105233 | 9.48E-05    |
| 0.055449717 | 0.083874722 | 0.342095964 | 0.399514587 |
| 0.011183004 | 0.022960584 | 0.330648414 | 0.232303958 |
| 0.006944496 | 0.380818431 | 0.184101677 | 0.420596994 |
| 0.200965919 | 0.106270412 | 0.281987249 | 0.058844084 |
| 0.055212448 | 0.031653699 | 0.308200873 | 0.153211145 |
| 0.0055807   | 0.097716296 | 0.353648349 | 0.278872709 |
| 0.319066143 | 0.130183467 | 0.006800053 | 0.194995574 |
| 0.106416853 | 0.363209185 | 0.02172507  | 0.249162895 |
| 0.267751211 | 0.38122632  | 0.30417583  | 0.208013705 |
| 0.33029445  | 0.283860967 | 0.332255074 | 0.079551436 |
| 0.255153287 | 0.277647264 | 0.020470829 | 0.123401883 |
| 0.39613809  | 0.250781711 | 0.128683368 | 0.165779041 |
| 0.146713946 | 0.122753828 | 0.068444091 | 0.409977871 |
| 0.394705168 | 0.017330954 | 0.017603296 | 0.358631912 |
| 0.058125964 | 0.061822575 | 0.10350903  | 0.15619885  |
| 0.021882048 | 0.009911981 | 0.21661221  | 0.401690954 |
| 0.244746043 | 0.324763534 | 0.10609551  | 0.343657452 |
| 0.007263478 | 0.246656018 | 0.073182204 | 0.09797144  |
| 0.166833379 | 0.215297377 | 0.007337317 | 0.010528549 |
| 0.013429829 | 0.372765514 | 0.322513132 | 0.022166382 |
| 0.062629777 | 0.145326126 | 0.282432815 | 0.357110872 |
| 0.077797698 | 0.155265505 | 0.086634682 | 0.339637218 |
| 0.133896894 | 0.345848294 | 0.095594015 | 0.215026875 |
| 0.13937158  | 0.302044299 | 0.002807374 | 0.238601283 |
| 0.074134027 | 0.024222755 | 0.306577536 | 0.267094178 |
| 0.043488695 | 0.344139058 | 0.025151456 | 0.052139202 |
| 0.000171635 | 0.167582596 | 0.192576209 | 0.199859817 |
| 0.030099808 | 0.096224287 | 0.054289959 | 0.394067023 |
| 0.142407723 | 0.222534327 | 0.051176135 | 0.158384507 |
| 0.03174239  | 0.086631817 | 0.005267325 | 0.188829723 |
| 0.240353509 | 0.158106842 | 0.103197393 | 0.014028897 |
| 0.316963199 | 0.241703229 | 0.284208399 | 0.413014811 |
| 0.039840448 | 0.381805439 | 0.051881588 | 0.251371587 |
| 0.061433008 | 0.148335019 | 0.051234386 | 0.153001792 |
| 0.018871043 | 0.043719576 | 0.012520843 | 0.393285648 |
| 0.056692001 | 0.284467395 | 0.034388527 | 0.020473071 |
| 0.122794355 | 0.215565289 | 0.277174168 | 0.228885101 |
| 0.190917004 | 0.06226875  | 0.316278973 | 0.037057958 |
| 0.049800888 | 0.096053144 | 0.072797066 | 0.133216689 |
| 0.079275666 | 0.211717106 | 0.267265717 | 0.364646366 |
| 0.026011854 | 0.023433042 | 0.016729089 | 0.016926087 |
| 0.171682641 | 0.248780133 | 0.111262303 | 0.222988778 |
| 0.036056087 | 4.70E-05    | 0.020387674 | 0.23505732  |
| 0.083158984 |             |             |             |
| CDKN2C      | 0.304843134 | 0.346478695 | 0.042689618 |
| 0.007316564 | 0.03519351  | 0.126618518 | 0.095922654 |
| 0.280945483 | 0.093979532 | 0.062201966 | 0.161506251 |

|             |             |             |             |
|-------------|-------------|-------------|-------------|
| 0.010712343 | 0.298285904 | 0.034531082 | 0.062849887 |
| 0.415616549 | 0.40668571  | 0.142728362 | 0.414671109 |
| 0.279146835 | 0.060348027 | 0.250261195 | 0.195007984 |
| 0.138368543 | 0.008798174 | 0.047141852 | 0.01686471  |
| 0.265612026 | 0.412340818 | 0.135644495 | 0.146610487 |
| 0.399984648 | 0.326910544 | 0.18976793  | 0.112712973 |
| 0.104787283 | 0.313193655 | 0.056710378 | 0.248355818 |
| 0.368515347 | 0.087918731 | 0.324824763 | 0.021886066 |
| 0.000750639 | 0.047659637 | 0.257754079 | 0.245295444 |
| 0.247866062 | 0.120632396 | 0.112981298 | 0.068163587 |
| 0.111753635 | 0.189129504 | 0.329327453 | 0.101276882 |
| 0.237110806 | 0.001367006 | 0.291841656 | 0.292818826 |
| 0.046359237 | 0.213584882 | 0.29297176  | 0.260709708 |
| 0.121969594 | 0.259372879 | 0.375674304 | 0.016232407 |
| 0.043454648 | 0.272851131 | 0.301552971 | 0.187291299 |
| 0.328408352 | 0.170376968 | 0.136196915 | 0.196918517 |
| 0.255207177 | 0.33317039  | 0.170054138 | 0.111866927 |
| 0.003362441 | 0.061831066 | 0.112524733 | 1           |
| 0.222783833 | 0.191489846 | 0.287637975 | 0.08708008  |
| 0.241782159 | 0.020396422 | 0.221934586 | 0.393168287 |
| 0.010072797 | 0.304426559 | 0.005271477 | 0.103335314 |
| 0.331579308 | 0.410445907 | 0.280089106 | 0.037155411 |
| 0.016857415 | 0.113916517 | 0.247331755 | 0.379099736 |
| 0.265692673 | 0.23801968  | 0.232689103 | 0.140487303 |
| 0.304085709 | 0.184136073 | 0.182398677 | 0.297645098 |
| 0.379758666 | 0.012270661 | 0.160233533 | 0.112238229 |
| 0.178819832 | 0.054343557 | 0.104560767 | 0.032257128 |
| 0.005035096 | 0.065661268 | 0.385872181 | 0.129841955 |
| 0.041150392 | 0.096151567 | 0.030692994 | 0.198264857 |
| 0.264146465 | 0.414759933 | 0.040220288 | 0.114793865 |
| 0.23425393  | 0.109811507 | 0.160563028 | 0.260526966 |
| 0.135035523 | 0.235926937 | 0.112435169 | 0.276239302 |
| 0.302561629 | 0.03701626  | 0.062926038 | 0.177086395 |
| 0.279473108 | 0.390280931 | 0.401295695 | 0.225389704 |
| 0.088649066 | 0.166669333 | 0.192091475 | 0.172983058 |
| 0.118046471 | 0.259926312 | 0.089837562 | 0.191950402 |
| 0.251749337 | 0.026406129 | 0.048783731 | 0.317042883 |
| 0.010546199 | 0.113057863 | 0.315391645 | 0.25819489  |
| 0.226506224 | 0.014940627 | 0.096984059 | 0.129541522 |
| 0.211225441 | 0.121175356 | 0.265068514 | 0.094333679 |
| 0.195282302 | 0.179928622 | 0.02646797  | 0.298142493 |
| 0.074129198 | 0.235572441 | 0.237064971 | 0.06057732  |
| 0.28652161  | 0.256931247 | 0.292251659 | 0.266210488 |
| 0.297497041 | 0.000806979 | 0.060367949 | 0.301117335 |
| 0.214736871 | 0.358330714 | 0.324224489 | 0.071779563 |
| 0.18390066  | 0.201408297 | 0.097647651 | 0.118714272 |
| 0.370552692 | 0.124517357 | 0.11135801  | 0.00168607  |
| 0.063938797 | 0.21808674  | 0.252547329 | 0.088696234 |
| 0.082099395 | 0.110801671 | 0.164911399 | 0.315514871 |
| 0.114254083 | 0.250535112 | 0.067063288 | 0.19919918  |
| 0.143999692 | 0.19469804  | 0.175979329 | 0.270034147 |
| 0.228490034 | 0.163646063 | 0.393748717 | 0.243085888 |
| 0.104887907 | 0.180768702 | 0.163725043 | 0.209232169 |
| 0.233163903 | 0.309957073 | 0.298958019 | 0.265943331 |

|             |             |             |             |
|-------------|-------------|-------------|-------------|
| 0.136982183 | 0.283527534 | 0.180949661 | 0.155816022 |
| 0.258557696 | 0.239167678 | 0.071291284 | 0.348612195 |
| 0.002854698 | 0.193749403 | 0.207016754 | 0.196753933 |
| 0.31179754  | 0.103810124 | 0.062692026 | 0.214222331 |
| 0.416582409 | 0.35406539  | 0.37373804  | 0.35630723  |
| 0.225250476 | 0.027763654 | 0.387626316 | 0.232336376 |
| 0.411682295 | 0.194469769 | 0.1226198   | 0.104630386 |
| 0.340897633 | 0.27147794  | 0.245456463 | 0.265071194 |
| 0.210254078 | 0.178715004 | 0.163151864 | 0.292582979 |
| 0.037330959 | 0.152001026 | 0.256188978 | 0.094019034 |
| 0.151906353 | 0.140060218 | 0.276299251 | 0.176344773 |
| 0.150391705 | 0.247252458 | 0.13994276  | 0.03777504  |
| 0.096973462 | 0.358542469 | 0.022490862 | 0.378064356 |
| 0.399069996 | 0.219502508 | 0.312468146 | 0.408589193 |
| 0.224584934 | 0.205662517 | 0.322082965 | 0.39906271  |
| 0.004555521 | 0.348660046 | 0.251945463 | 0.204423682 |
| 0.348340792 | 0.165055617 | 0.25603139  | 0.201611524 |
| 0.002227543 | 0.105253583 | 0.128554015 | 0.360667548 |
| 0.301745568 | 0.017856272 | 0.024886609 | 0.254667285 |
| 0.222362798 | 0.035103029 | 0.395288941 | 0.164402032 |
| 0.2743093   | 0.194599842 | 0.080382236 | 0.297682097 |
| 0.131107573 | 0.240230295 | 0.009622602 | 0.196725746 |
| 0.220970359 | 0.167409966 | 0.026290507 | 0.41096511  |
| 0.318127408 | 0.176776569 | 0.143165133 | 0.008004041 |
| 0.385014789 | 0.086504214 | 0.236831302 | 0.071031074 |
| 0.285763013 | 0.192704208 | 0.277780054 | 0.2961652   |
| 0.243967036 | 0.231131749 | 0.21868899  | 0.293772167 |
| 0.039777017 | 0.319733732 | 0.363473663 | 0.028553207 |
| 0.276859434 | 0.332621318 | 0.190104096 | 0.085606136 |
| 0.246684979 | 0.023082277 | 0.112036429 | 0.29576847  |
| 0.262442549 | 0.334028101 | 0.040163605 | 0.148382758 |
| 0.227134366 | 0.183674984 | 0.054033839 | 0.201241206 |
| 0.164132989 | 0.146964834 | 0.195552676 | 0.215388341 |
| 0.292505496 | 0.135632739 | 0.342841366 | 0.061933335 |
| 0.337601198 | 0.047188178 | 0.329816831 | 0.123255488 |
| 0.19462163  | 0.251313088 | 0.36290209  | 0.168261656 |
| 0.022460535 | 0.146355792 | 0.203802966 | 0.249716303 |
| 0.048254006 | 0.134859886 | 0.112471196 | 0.13874492  |
| 0.386339814 | 0.203209778 | 0.147515895 | 0.221711467 |
| 0.244009021 | 0.034413391 | 0.35360713  | 0.240372854 |
| 0.296297543 | 0.145912815 | 0.278549846 | 0.010058791 |
| 0.252050667 | 0.078305684 | 0.276821875 | 0.141578812 |
| 0.412284353 | 0.070924339 | 0.168619882 | 0.139250028 |
| 0.087891643 | 0.00609047  | 0.233182627 | 0.163448094 |
| 0.148794896 | 0.22383785  | 0.233648823 | 0.094675419 |
| 0.383946238 | 0.252381474 | 0.312508281 | 0.191470284 |
| 0.172852282 | 0.006472421 | 0.066540187 | 0.034206989 |
| 0.281759638 | 0.225591327 | 0.288627057 | 0.289686709 |
| 0.287421434 | 0.206853173 | 0.199885308 | 0.156156678 |
| 0.313659904 | 0.097328425 | 0.395315624 | 0.237655346 |
| 0.329068002 | 0.229037021 | 0.141877253 | 0.205304586 |
| 0.077524146 | 0.115700196 | 0.073198364 | 0.211433577 |
| 0.342677235 | 0.181016398 | 0.156692199 | 0.270748845 |
| 0.023461487 | 0.174216926 | 0.301474346 | 0.270926222 |

|             |             |             |             |
|-------------|-------------|-------------|-------------|
| 0.225273508 | 0.272397602 | 0.234509696 | 0.226547664 |
| 0.270324496 | 0.278596313 | 0.015358513 | 0.01106138  |
| 0.11519767  | 0.101955572 | 0.368497672 | 0.325450531 |
| 0.388361327 | 0.269262717 | 0.063946981 | 0.135266052 |
| 0.106685681 | 0.34347372  | 0.113561634 | 0.054488768 |
| 0.231455108 | 0.286949103 | 0.000891784 | 0.252745827 |
| 0.21447198  | 0.18877651  |             |             |
| CEP57       | 0.182671295 | 0.389153938 | 0.017288154 |
| 0.025042845 | 0.052311116 | 0.080467342 | 0.082246039 |
| 0.204959874 | 0.027423724 | 0.054736577 | 0.143766956 |
| 0.000275581 | 0.407405932 | 0.002433626 | 0.020064818 |
| 0.471809646 | 0.4894921   | 0.148828525 | 0.46865312  |
| 0.143904497 | 0.076952954 | 0.16634842  | 0.183466361 |
| 0.092228735 | 0.000250162 | 0.0428342   | 0.027272627 |
| 0.241193551 | 0.491983917 | 0.063133824 | 0.118452271 |
| 0.419244047 | 0.46736488  | 0.231478417 | 0.214258531 |
| 0.243617978 | 0.321276635 | 0.129413472 | 0.391570079 |
| 0.430256314 | 0.093143836 | 0.427753175 | 0.002154655 |
| 0.00771809  | 0.030407484 | 0.207067395 | 0.177319373 |
| 0.128022661 | 0.072815797 | 0.050005365 | 0.068270932 |
| 0.172554255 | 0.16647088  | 0.25721922  | 0.197066776 |
| 0.252333005 | 0.00426237  | 0.30296506  | 0.122134674 |
| 0.014426827 | 0.121662923 | 0.214712788 | 0.201351706 |
| 0.087244615 | 0.279137316 | 0.442315209 | 0.008039541 |
| 0.017261909 | 0.244880565 | 0.38971861  | 0.240498827 |
| 0.351353089 | 0.188659877 | 0.128387922 | 0.286486845 |
| 0.32961328  | 0.39954653  | 0.103076159 | 0.058317919 |
| 0.000163925 | 0.0517303   | 0.205671876 | 0.222783833 |
| 1           | 0.173872052 | 0.216947158 | 0.088877956 |
| 0.271568821 | 0.003162334 | 0.172727212 | 0.469903835 |
| 0.010656784 | 0.353100783 | 0.00494963  | 0.049341873 |
| 0.363114511 | 0.494215041 | 0.23023471  | 0.018734922 |
| 0.00234944  | 0.034148468 | 0.066419665 | 0.467504136 |
| 0.196080501 | 0.248415796 | 0.236894078 | 0.146026437 |
| 0.432878305 | 0.057787057 | 0.154516676 | 0.318334123 |
| 0.401625035 | 0.001556611 | 0.050116429 | 0.076195839 |
| 0.204140716 | 0.073434466 | 0.082302402 | 0.03866101  |
| 0.004848847 | 0.008503176 | 0.436291875 | 0.047308121 |
| 0.033563215 | 0.071014189 | 0.042520736 | 0.284828103 |
| 0.198808135 | 0.414151887 | 0.049161849 | 0.098751254 |
| 0.351153049 | 0.098316385 | 0.252395586 | 0.336601404 |
| 0.252723396 | 0.096189657 | 0.044025396 | 0.333434585 |
| 0.268290769 | 0.018195987 | 0.020903349 | 0.132172941 |
| 0.409500038 | 0.446874643 | 0.457211738 | 0.132845781 |
| 0.130323937 | 0.082412418 | 0.164129818 | 0.193992124 |
| 0.08655347  | 0.158519942 | 0.081734289 | 0.160140467 |
| 0.250840747 | 0.028507234 | 0.014634159 | 0.33767063  |
| 0.044300748 | 0.095972848 | 0.308071954 | 0.318966667 |
| 0.257367049 | 0.022227399 | 0.107167654 | 0.098689889 |
| 0.112853293 | 0.100030733 | 0.197174796 | 0.103877804 |
| 0.123212225 | 0.176105111 | 0.01084277  | 0.423795116 |
| 0.033436498 | 0.137000297 | 0.220538563 | 0.040416135 |
| 0.227570717 | 0.166307758 | 0.33891806  | 0.214076381 |
| 0.27949672  | 0.005117634 | 0.057188331 | 0.18741499  |



|             |             |             |             |
|-------------|-------------|-------------|-------------|
| 0.150308279 | 0.403929919 | 0.380279969 | 0.029193986 |
| 0.089121147 | 0.21901224  | 0.039922314 | 0.179992625 |
| 0.307676706 | 0.092644765 | 0.083367472 | 8.87E-05    |
| 0.042628593 | 0.258548316 | 0.220468699 | 0.012046248 |
| 0.107065465 | 0.031981461 | 0.049159751 | 0.37695305  |
| 0.064359379 | 0.373548732 | 0.006970768 | 0.111070352 |
| 0.102390574 | 0.247591855 | 0.251666963 | 0.12855827  |
| 0.312556021 | 0.143700655 | 0.482962683 | 0.211237209 |
| 0.125660147 | 0.170986999 | 0.137508451 | 0.097127983 |
| 0.308873718 | 0.400451323 | 0.41586007  | 0.360366641 |
| 0.092952478 | 0.226811765 | 0.207789795 | 0.100053282 |
| 0.192003375 | 0.201694251 | 0.020819448 | 0.394968923 |
| 7.63E-05    | 0.145282076 | 0.25568939  | 0.144957196 |
| 0.378392916 | 0.089448605 | 0.015142669 | 0.094616591 |
| 0.47480085  | 0.394298946 | 0.331981044 | 0.45142325  |
| 0.150185935 | 0.001725628 | 0.378497649 | 0.211362811 |
| 0.500277038 | 0.182158504 | 0.274052463 | 0.052894337 |
| 0.421825652 | 0.220871993 | 0.218420053 | 0.259618403 |
| 0.272277189 | 0.275739637 | 0.083727113 | 0.223298702 |
| 0.007923947 | 0.096585227 | 0.255368108 | 0.099990194 |
| 0.161659554 | 0.063822491 | 0.356536556 | 0.132327531 |
| 0.256489122 | 0.196004565 | 0.227652155 | 0.022885286 |
| 0.052679837 | 0.401199498 | 0.05316047  | 0.358672588 |
| 0.465073452 | 0.158463751 | 0.415534727 | 0.457197701 |
| 0.127823204 | 0.205534124 | 0.378547791 | 0.411288626 |
| 0.000191686 | 0.465836104 | 0.394079907 | 0.164110852 |
| 0.432401479 | 0.104240281 | 0.156274519 | 0.320118585 |
| 0.000181353 | 0.043040411 | 0.247349123 | 0.355531931 |
| 0.419251464 | 0.005404222 | 0.074859459 | 0.329668993 |
| 0.347167801 | 0.034339669 | 0.436167438 | 0.143622934 |
| 0.35013553  | 0.225219935 | 0.056808165 | 0.42598268  |
| 0.235493232 | 0.208649312 | 0.012722725 | 0.238981763 |
| 0.248054221 | 0.051031003 | 0.037879118 | 0.449712676 |
| 0.317558671 | 0.19167074  | 0.086530253 | 0.003337749 |
| 0.397360233 | 0.159832898 | 0.335629531 | 0.036335364 |
| 0.273063065 | 0.172807608 | 0.323941871 | 0.405689844 |
| 0.234903843 | 0.240544615 | 0.198095689 | 0.331153119 |
| 0.104950194 | 0.40661602  | 0.419991868 | 0.020466602 |
| 0.243451695 | 0.427738214 | 0.239731869 | 0.055297983 |
| 0.166844881 | 0.079984676 | 0.064413563 | 0.156689459 |
| 0.318763945 | 0.423812978 | 0.012579756 | 0.05227418  |
| 0.244143085 | 0.114566691 | 0.02938734  | 0.14938288  |
| 0.096306948 | 0.176222596 | 0.093110879 | 0.167359531 |
| 0.321029404 | 0.11441361  | 0.398085901 | 0.081488791 |
| 0.443229902 | 0.01072335  | 0.336727508 | 0.103013774 |
| 0.103103285 | 0.267285448 | 0.425357182 | 0.094729956 |
| 0.009248341 | 0.040216182 | 0.226891931 | 0.239025381 |
| 0.018472953 | 0.059178647 | 0.09973779  | 0.161510768 |
| 0.477450522 | 0.258322514 | 0.098166105 | 0.14900562  |
| 0.237205257 | 0.058540787 | 0.352866528 | 0.140769603 |
| 0.24719047  | 0.148783758 | 0.313197593 | 0.003483839 |
| 0.278870967 | 0.069656973 | 0.123385717 | 0.190732185 |
| 0.479569801 | 0.039635742 | 0.188432943 | 0.047369701 |
| 0.116657116 | 0.001154811 | 0.164272577 | 0.3126939   |

|             |             |             |             |
|-------------|-------------|-------------|-------------|
| 0.105742282 | 0.212729837 | 0.162346395 | 0.225203218 |
| 0.416015293 | 0.191839989 | 0.282047501 | 0.22129459  |
| 0.191489111 | 0.044591395 | 0.059014953 | 0.007085387 |
| 0.219457151 | 0.193402594 | 0.229664408 | 0.214461672 |
| 0.099102884 | 0.25703213  | 0.174125743 | 0.244663556 |
| 0.420884611 | 0.142153498 | 0.478373414 | 0.126892553 |
| 0.450689962 | 0.192070041 | 0.088153674 | 0.143161196 |
| 0.0745224   | 0.052004358 | 0.031583151 | 0.052803577 |
| 0.46451683  | 0.142136888 | 0.199564754 | 0.169681777 |
| 0.012599241 | 0.180364905 | 0.332684397 | 0.358836184 |
| 0.236874148 | 0.305290418 | 0.241458143 | 0.215653782 |
| 0.161725301 | 0.124049283 | 0.043466437 | 0.015817098 |
| 0.172687244 | 0.065401109 | 0.31351531  | 0.337680493 |
| 0.459047557 | 0.172833002 | 0.024029155 | 0.039073721 |
| 0.127097769 | 0.34645828  | 0.106072335 | 0.188313223 |
| 0.235059403 | 0.191714364 | 0.000124824 | 0.088762588 |
| 0.182507159 | 0.244009322 |             |             |
| CERCAM      | 0.238471005 | 0.454272495 | 0.248434518 |
| 0.036993924 | 0.230811329 | 0.425538826 | 0.406185638 |
| 0.233862229 | 0.291250505 | 0.285682546 | 0.441683141 |
| 0.006233582 | 0.204942477 | 0.067666002 | 0.183539864 |
| 0.37042871  | 0.376068375 | 0.419921031 | 0.373498477 |
| 0.298284637 | 0.188637912 | 0.364132889 | 0.380267138 |
| 0.429203241 | 0.010427507 | 0.313018077 | 0.096385923 |
| 0.196579076 | 0.334525298 | 0.407093143 | 0.371063552 |
| 0.31928221  | 0.287423782 | 0.296562295 | 0.260122838 |
| 0.105213278 | 0.481068969 | 0.053402198 | 0.228423656 |
| 0.222974347 | 0.382149601 | 0.290828598 | 0.072604835 |
| 0.001988888 | 0.302372146 | 0.186772584 | 0.371943756 |
| 0.32182998  | 0.418395694 | 0.386473574 | 0.336258064 |
| 0.054663825 | 0.430789595 | 0.315049483 | 0.051055655 |
| 0.487412893 | 0.006255409 | 0.487704216 | 0.204239997 |
| 0.254581963 | 0.3970569   | 0.205632296 | 0.344531646 |
| 0.434505145 | 0.495858648 | 0.422474516 | 0.167797313 |
| 0.275051609 | 0.277127104 | 0.221934737 | 0.325487    |
| 0.407414716 | 0.316674454 | 0.392909319 | 0.172638324 |
| 0.242616022 | 0.230677805 | 0.428359431 | 0.363313485 |
| 0.005517375 | 0.347898847 | 0.268327348 | 0.191489846 |
| 0.173872052 | 1           | 0.247378896 | 0.367901057 |
| 0.257958325 | 0.118294792 | 0.391299095 | 0.407632536 |
| 0.052208307 | 0.236192247 | 0.022011255 | 0.3364327   |
| 0.295450528 | 0.278811453 | 0.293340645 | 0.264967448 |
| 0.084993841 | 0.305457192 | 0.138712215 | 0.210748569 |
| 0.337836935 | 0.329181224 | 0.471727667 | 0.045611135 |
| 0.17387344  | 0.274999236 | 0.39957181  | 0.486789459 |
| 0.396299698 | 0.041690605 | 0.295983793 | 0.428035279 |
| 0.23153634  | 0.17132737  | 0.427874091 | 0.025868362 |
| 0.038727712 | 0.026239643 | 0.317169128 | 0.35508394  |
| 0.276659953 | 0.407225308 | 0.167890241 | 0.281588279 |
| 0.226472721 | 0.281286886 | 0.263521367 | 0.416344798 |
| 0.21866699  | 0.417773846 | 0.315356825 | 0.266216058 |
| 0.256992345 | 0.320431406 | 0.349611629 | 0.443260798 |
| 0.46421607  | 0.250716493 | 0.270117562 | 0.425188209 |
| 0.178668805 | 0.365343487 | 0.432736301 | 0.326832193 |

|             |             |             |             |
|-------------|-------------|-------------|-------------|
| 0.350022796 | 0.406192688 | 0.273251706 | 0.393393961 |
| 0.430556078 | 0.31771034  | 0.041366318 | 0.42394199  |
| 0.500359401 | 0.030630499 | 0.257413569 | 0.288782935 |
| 0.069594594 | 0.363693569 | 0.437744437 | 0.346403542 |
| 0.303832799 | 0.080729865 | 0.333992473 | 0.419865896 |
| 0.3940884   | 0.403232691 | 0.340386875 | 0.290468917 |
| 0.413885255 | 0.26610045  | 0.219401956 | 0.182203177 |
| 0.353718706 | 0.380784484 | 0.139935133 | 0.056900347 |
| 0.250245408 | 0.301712375 | 0.386407744 | 0.317713228 |
| 0.232834162 | 0.005584609 | 0.276940678 | 0.266762941 |
| 0.258058832 | 0.23566906  | 0.476591504 | 0.338213521 |
| 0.394788146 | 0.162145349 | 0.36132606  | 0.334357513 |
| 0.297382049 | 0.317925384 | 0.292278879 | 0.006599335 |
| 0.350959101 | 0.193872293 | 0.313059595 | 0.153500464 |
| 0.36198367  | 0.268838789 | 0.132312977 | 0.374686847 |
| 0.417747634 | 0.293975079 | 0.0657206   | 0.08002115  |
| 0.405683367 | 0.388236064 | 0.26621138  | 0.224956412 |
| 0.344721649 | 0.370482909 | 0.233575445 | 0.442762087 |
| 0.356058847 | 0.424735044 | 0.072035024 | 0.381479547 |
| 0.233872628 | 0.367949603 | 0.273347122 | 0.317441741 |
| 0.437711798 | 0.246086553 | 0.182852653 | 0.433135041 |
| 0.335858055 | 0.342838452 | 0.278267664 | 0.459792847 |
| 0.006346162 | 0.417507941 | 0.312780113 | 0.073684883 |
| 0.456819942 | 0.419039707 | 0.251248053 | 0.335489126 |
| 0.382353079 | 0.461676742 | 0.337882819 | 0.266369843 |
| 0.138050101 | 0.050687763 | 0.41117822  | 0.388121899 |
| 0.336946294 | 0.394779896 | 0.180353189 | 0.053668045 |
| 0.385292127 | 0.18433944  | 0.322662907 | 0.237653527 |
| 0.277920151 | 0.216980484 | 0.401627881 | 0.205215996 |
| 0.014097994 | 0.374611207 | 0.251199171 | 0.195378304 |
| 0.312446784 | 0.292032611 | 0.3543552   | 0.432827232 |
| 0.269484363 | 0.194275135 | 0.244662613 | 0.273728731 |
| 0.399908912 | 0.45321562  | 0.021152342 | 0.398802711 |
| 0.413481027 | 0.383256394 | 0.376731774 | 0.4034347   |
| 0.378610886 | 0.440305678 | 0.395388834 | 0.286769148 |
| 0.004190429 | 0.241767428 | 0.179128149 | 0.443694534 |
| 0.303879929 | 0.432955902 | 0.128761544 | 0.194448787 |
| 0.00630327  | 0.370081828 | 0.106691891 | 0.474587681 |
| 0.35153007  | 0.14995281  | 0.014467046 | 0.341400583 |
| 0.173477357 | 0.031974704 | 0.445681566 | 0.406486633 |
| 0.414834606 | 0.359277545 | 0.376983235 | 0.213890095 |
| 0.075932331 | 0.265015128 | 0.080573074 | 0.348743125 |
| 0.26171587  | 0.051172428 | 0.16740087  | 0.408568916 |
| 0.375513015 | 0.420673425 | 0.428803111 | 0.026200626 |
| 0.214463556 | 0.151544546 | 0.29956722  | 0.275100055 |
| 0.383536603 | 0.428895963 | 0.445488147 | 0.24861537  |
| 0.323341631 | 0.442245529 | 0.444188277 | 0.373610736 |
| 0.084911129 | 0.231550569 | 0.281137996 | 0.170442018 |
| 0.194263992 | 0.370532856 | 0.288642211 | 0.398819578 |
| 0.373888177 | 0.080906345 | 0.416396144 | 0.261386083 |
| 0.44837916  | 0.3610769   | 0.23491813  | 0.310136927 |
| 0.448736868 | 0.411157844 | 0.327831412 | 0.387701923 |
| 0.431426949 | 0.057195829 | 0.074279495 | 0.412299631 |
| 0.487449138 | 0.441212811 | 0.336164411 | 0.209479302 |

|             |             |             |             |
|-------------|-------------|-------------|-------------|
| 0.318762712 | 0.207585518 | 0.322042161 | 0.401910907 |
| 0.401507767 | 0.198339011 | 0.2080383   | 0.066021534 |
| 0.052253572 | 0.238464306 | 0.436342635 | 0.467888988 |
| 0.276662721 | 0.386814028 | 0.417971616 | 0.405479086 |
| 0.350939529 | 0.279959806 | 0.439248542 | 0.365877174 |
| 0.492715244 | 0.139793374 | 0.476540723 | 0.374942751 |
| 0.348501891 | 0.406936507 | 0.342231891 | 0.015403912 |
| 0.250752942 | 0.299882292 | 0.127439755 | 0.355722017 |
| 0.261347906 | 0.355536043 | 0.414926978 | 0.345420474 |
| 0.137379051 | 0.010229055 | 0.38304598  | 0.164892386 |
| 0.439852954 | 0.152899521 | 0.368653963 | 0.04769102  |
| 0.475566253 | 0.342024877 | 0.305862142 | 0.130330221 |
| 0.366468149 | 0.007602189 | 0.301175215 | 0.152800999 |
| 0.342759563 | 0.408843133 | 0.265785799 | 0.242147881 |
| 0.169360766 | 0.32333866  | 0.420611942 | 0.322228967 |
| 0.361625543 | 0.091580491 | 0.38529491  | 0.332764032 |
| 0.194831978 | 0.319405481 | 0.435363081 | 0.344593196 |
| 0.378793424 | 0.160326962 | 0.343285685 | 0.249930829 |
| 0.334843267 | 0.310131564 | 0.376587207 | 0.243371589 |
| 0.199671548 | 0.402120364 | 0.250428645 | 0.226637211 |
| 0.327658062 | 0.186158361 | 0.229872003 | 0.475269339 |
| 0.215729714 | 0.305948498 | 0.063748092 | 0.069652506 |
| 0.175650424 | 0.38372202  | 0.334752322 | 0.352845082 |
| 0.384429023 | 0.164838974 | 0.310217898 | 0.305819627 |
| 0.049599277 | 0.212218741 | 0.422747762 | 0.088392572 |
| 0.325402054 | 0.169208821 | 0.005164481 | 0.27226168  |
| 0.41210726  | 0.253401725 |             |             |
| CHCHD7      | 0.24721772  | 0.414246535 | 0.050041207 |
| 0.01149189  | 0.047570377 | 0.131942893 | 0.107847503 |
| 0.245201013 | 0.082151166 | 0.070773767 | 0.210830739 |
| 0.005423399 | 0.31711142  | 0.02342142  | 0.0501494   |
| 0.465397311 | 0.455900654 | 0.156478976 | 0.459602922 |
| 0.233411855 | 0.06945983  | 0.264345518 | 0.199472162 |
| 0.142165495 | 0.004681996 | 0.059978386 | 0.022716156 |
| 0.224864687 | 0.45293774  | 0.132786713 | 0.161300743 |
| 0.430854272 | 0.370349538 | 0.182436419 | 0.123523165 |
| 0.10356454  | 0.379080222 | 0.056417231 | 0.287386812 |
| 0.370359333 | 0.105143851 | 0.36157922  | 0.016211321 |
| 0.001120062 | 0.055492992 | 0.238055944 | 0.248507222 |
| 0.20818214  | 0.126797812 | 0.113204114 | 0.080630875 |
| 0.095999003 | 0.240367663 | 0.351236799 | 0.099596032 |
| 0.304114447 | 0.001793578 | 0.35465143  | 0.21777904  |
| 0.046499703 | 0.189463849 | 0.222759916 | 0.27293587  |
| 0.137865771 | 0.329040938 | 0.436776084 | 0.022944724 |
| 0.046980615 | 0.243781701 | 0.326716815 | 0.199577777 |
| 0.383854757 | 0.177314767 | 0.140446046 | 0.174705739 |
| 0.282835234 | 0.346338328 | 0.165894685 | 0.114654141 |
| 0.002282403 | 0.072906029 | 0.129825839 | 0.287637975 |
| 0.216947158 | 0.247378896 | 1           | 0.099828745 |
| 0.233553598 | 0.01833141  | 0.212057989 | 0.450934269 |
| 0.013365687 | 0.330612257 | 0.007182332 | 0.101380597 |
| 0.359155204 | 0.429022217 | 0.287254049 | 0.043599523 |
| 0.014844158 | 0.10063293  | 0.176590999 | 0.384208152 |
| 0.247509268 | 0.232201841 | 0.293541313 | 0.092944256 |

|             |             |             |             |
|-------------|-------------|-------------|-------------|
| 0.31436589  | 0.135752584 | 0.17623843  | 0.369708124 |
| 0.434127508 | 0.01146758  | 0.125739781 | 0.124628878 |
| 0.155160623 | 0.058785744 | 0.119090142 | 0.032411874 |
| 0.009617408 | 0.044720418 | 0.423481941 | 0.1285775   |
| 0.049534971 | 0.107616546 | 0.04077438  | 0.214096945 |
| 0.248623332 | 0.423494305 | 0.050339147 | 0.127301536 |
| 0.272350324 | 0.122662898 | 0.179297716 | 0.302052762 |
| 0.148819284 | 0.197612411 | 0.107349463 | 0.345217517 |
| 0.359315955 | 0.04321165  | 0.061704486 | 0.196257684 |
| 0.29465786  | 0.445128095 | 0.463236749 | 0.219581429 |
| 0.10973289  | 0.164841496 | 0.176139999 | 0.202294167 |
| 0.12684734  | 0.229376729 | 0.075386534 | 0.231965452 |
| 0.31778439  | 0.027873925 | 0.047030294 | 0.339527784 |
| 0.016408051 | 0.117909342 | 0.365645329 | 0.311866598 |
| 0.216091897 | 0.018303312 | 0.115120057 | 0.139715101 |
| 0.190188583 | 0.130855319 | 0.259964443 | 0.105353599 |
| 0.195067344 | 0.170372191 | 0.031884055 | 0.31298332  |
| 0.079410847 | 0.209593474 | 0.173593728 | 0.048875572 |
| 0.259161242 | 0.239042644 | 0.347557416 | 0.24232081  |
| 0.312946062 | 0.001619422 | 0.072333007 | 0.247561834 |
| 0.188874169 | 0.374454386 | 0.397294333 | 0.074668782 |
| 0.16948082  | 0.173204449 | 0.095950439 | 0.134707433 |
| 0.382987753 | 0.133618173 | 0.104157767 | 0.001681831 |
| 0.078678158 | 0.205413076 | 0.230669876 | 0.064714552 |
| 0.107171967 | 0.0901473   | 0.110415395 | 0.375836048 |
| 0.119865892 | 0.305898361 | 0.049517983 | 0.126416695 |
| 0.148666901 | 0.253375621 | 0.19385154  | 0.226487773 |
| 0.285617973 | 0.185606409 | 0.403582802 | 0.292419673 |
| 0.11983652  | 0.231401023 | 0.112297896 | 0.18674777  |
| 0.217271941 | 0.36470931  | 0.342002558 | 0.322903645 |
| 0.148964418 | 0.282640821 | 0.183142104 | 0.167475269 |
| 0.2276298   | 0.229459793 | 0.072843406 | 0.419261037 |
| 0.00149519  | 0.18916825  | 0.206086343 | 0.117954378 |
| 0.383598974 | 0.118087836 | 0.058516344 | 0.190629678 |
| 0.463229225 | 0.418927857 | 0.398479911 | 0.385535155 |
| 0.199804647 | 0.018691589 | 0.437356506 | 0.272558064 |
| 0.453388919 | 0.206060066 | 0.131138529 | 0.06964543  |
| 0.400701095 | 0.215931234 | 0.247256456 | 0.228004616 |
| 0.206540873 | 0.180031377 | 0.157229722 | 0.284725191 |
| 0.022299686 | 0.149697152 | 0.256888593 | 0.088313846 |
| 0.1567932   | 0.129582054 | 0.333224791 | 0.205549993 |
| 0.166515233 | 0.199398577 | 0.149797388 | 0.045395963 |
| 0.101454048 | 0.422470006 | 0.023368456 | 0.418236872 |
| 0.460467673 | 0.207676399 | 0.374758254 | 0.463572756 |
| 0.206970759 | 0.264210944 | 0.382309532 | 0.411270182 |
| 0.002577289 | 0.378370943 | 0.278202757 | 0.253508853 |
| 0.392224332 | 0.164877775 | 0.186442033 | 0.189708481 |
| 0.002026788 | 0.102350204 | 0.127274164 | 0.420544461 |
| 0.363941232 | 0.019583409 | 0.02248587  | 0.31069922  |
| 0.250387326 | 0.027640484 | 0.457344303 | 0.175815491 |
| 0.345284919 | 0.205473468 | 0.091123907 | 0.324246231 |
| 0.115454572 | 0.208452605 | 0.013980923 | 0.21814131  |
| 0.211319259 | 0.105429688 | 0.034825627 | 0.456534587 |
| 0.370601114 | 0.223466139 | 0.143125373 | 0.00786566  |

|             |             |             |             |
|-------------|-------------|-------------|-------------|
| 0.376930924 | 0.099094941 | 0.291093874 | 0.083171874 |
| 0.337624071 | 0.237888636 | 0.348275743 | 0.327233572 |
| 0.237444588 | 0.296420538 | 0.27358283  | 0.349668969 |
| 0.04565092  | 0.349514945 | 0.400685572 | 0.032675253 |
| 0.237919658 | 0.389195452 | 0.193938772 | 0.096779185 |
| 0.248297404 | 0.032520384 | 0.117008539 | 0.242403315 |
| 0.334983963 | 0.391250346 | 0.040016638 | 0.136656972 |
| 0.285837397 | 0.177739049 | 0.062017707 | 0.194209945 |
| 0.171519942 | 0.133237991 | 0.128170672 | 0.245997144 |
| 0.362908447 | 0.167220126 | 0.388287346 | 0.073393698 |
| 0.390249508 | 0.045680507 | 0.358767642 | 0.139267152 |
| 0.184819333 | 0.228837649 | 0.368405773 | 0.135956023 |
| 0.019590393 | 0.128858071 | 0.263407477 | 0.309200071 |
| 0.051217901 | 0.129364528 | 0.130864766 | 0.156818904 |
| 0.43672115  | 0.199874148 | 0.154603884 | 0.216193476 |
| 0.306233862 | 0.041773091 | 0.414733033 | 0.222900831 |
| 0.327194949 | 0.169951271 | 0.324353755 | 0.007126629 |
| 0.258410463 | 0.089849135 | 0.193210548 | 0.160362487 |
| 0.419417362 | 0.079618231 | 0.211964843 | 0.126300336 |
| 0.098691862 | 0.005316198 | 0.251916313 | 0.16063855  |
| 0.179214486 | 0.179715618 | 0.22901004  | 0.078037058 |
| 0.447836271 | 0.236735737 | 0.342587144 | 0.157334743 |
| 0.1788733   | 0.007167733 | 0.074850265 | 0.029520991 |
| 0.306163471 | 0.270473535 | 0.268328279 | 0.233163584 |
| 0.203379381 | 0.218739421 | 0.234937877 | 0.17206865  |
| 0.370828993 | 0.115999465 | 0.450588785 | 0.200557169 |
| 0.337283574 | 0.222704193 | 0.145257139 | 0.19688018  |
| 0.091957244 | 0.100436059 | 0.073852004 | 0.157655219 |
| 0.396969712 | 0.178159154 | 0.17641059  | 0.218398035 |
| 0.02857924  | 0.19476256  | 0.317899881 | 0.299066998 |
| 0.22546851  | 0.292366325 | 0.223187866 | 0.285510792 |
| 0.193109534 | 0.217106954 | 0.021016616 | 0.013982285 |
| 0.114145606 | 0.106013179 | 0.388612347 | 0.377490348 |
| 0.44107068  | 0.184939081 | 0.065616593 | 0.11492082  |
| 0.07298574  | 0.335950222 | 0.129022082 | 0.066942539 |
| 0.21884171  | 0.202254842 | 0.000899659 | 0.19472218  |
| 0.255338248 | 0.194588912 |             |             |
| CHPT1       | 0.077724181 | 0.329873638 | 0.073780263 |
| 0.023893065 | 0.138877247 | 0.326566735 | 0.353149305 |
| 0.05452569  | 0.085337624 | 0.14079788  | 0.375498039 |
| 0.00033659  | 0.113977628 | 0.009120201 | 0.045898195 |
| 0.220200481 | 0.238202136 | 0.312418555 | 0.223507138 |
| 0.080904262 | 0.102972887 | 0.192924724 | 0.225084235 |
| 0.299741981 | 0.000855013 | 0.201990466 | 0.081662681 |
| 0.044706624 | 0.190251338 | 0.166251186 | 0.095780464 |
| 0.183550581 | 0.183679093 | 0.092370136 | 0.115265656 |
| 0.037659404 | 0.350787427 | 0.016542086 | 0.158879607 |
| 0.120189679 | 0.193121658 | 0.18998596  | 0.021423932 |
| 0.002795652 | 0.145183864 | 0.032592591 | 0.204009708 |
| 0.080352623 | 0.273819057 | 0.169115154 | 0.254094683 |
| 0.008642683 | 0.355643304 | 0.167362682 | 0.008189736 |
| 0.426523453 | 0.008003044 | 0.392748824 | 0.027574689 |
| 0.084669372 | 0.150579358 | 0.067438911 | 0.190975494 |
| 0.389768945 | 0.420208075 | 0.291612783 | 0.100591607 |

|             |             |             |             |
|-------------|-------------|-------------|-------------|
| 0.147361225 | 0.11140282  | 0.13296008  | 0.236768508 |
| 0.283355657 | 0.072338286 | 0.143699039 | 0.05931994  |
| 0.163537182 | 0.122333822 | 0.277804602 | 0.089307029 |
| 0.000908267 | 0.280323476 | 0.120088353 | 0.08708008  |
| 0.088877956 | 0.367901057 | 0.099828745 | 1           |
| 0.093789881 | 0.028139756 | 0.190406107 | 0.264873912 |
| 0.02414248  | 0.139190058 | 0.00634124  | 0.081105552 |
| 0.169335037 | 0.154513384 | 0.153200867 | 0.134713702 |
| 0.019386116 | 0.061643603 | 0.012908625 | 0.108578923 |
| 0.14456542  | 0.147111179 | 0.422409708 | 0.006528258 |
| 0.093402881 | 0.057135818 | 0.119037084 | 0.374620477 |
| 0.252470741 | 0.004768166 | 0.052532311 | 0.296472977 |
| 0.080333974 | 0.114516751 | 0.293509715 | 0.002914255 |
| 0.00919813  | 0.001073448 | 0.184096683 | 0.070874008 |
| 0.174534814 | 0.261153377 | 0.064188182 | 0.203130116 |
| 0.041576209 | 0.149800651 | 0.179597369 | 0.269381449 |
| 0.138040698 | 0.36635945  | 0.16108186  | 0.182850266 |
| 0.089283605 | 0.054244799 | 0.085235772 | 0.36090268  |
| 0.321986256 | 0.093350098 | 0.081308108 | 0.300146253 |
| 0.103343218 | 0.217351985 | 0.28338343  | 0.051877696 |
| 0.163468333 | 0.15267771  | 0.07898866  | 0.30894528  |
| 0.315476884 | 0.109710834 | 0.003837963 | 0.313879325 |
| 0.423312649 | 0.004074574 | 0.082586974 | 0.168224295 |
| 0.063980601 | 0.164071053 | 0.310207115 | 0.258612364 |
| 0.16469473  | 0.07164779  | 0.140234819 | 0.299472554 |
| 0.183957315 | 0.24242049  | 0.196447181 | 0.123971905 |
| 0.257830004 | 0.074689002 | 0.087096786 | 0.102229318 |
| 0.149100754 | 0.183665668 | 0.027323708 | 0.019453733 |
| 0.113572387 | 0.058296696 | 0.274516204 | 0.140023371 |
| 0.130751253 | 0.00622359  | 0.125589374 | 0.108815278 |
| 0.062517523 | 0.119920837 | 0.368871612 | 0.161892039 |
| 0.186072991 | 0.03696253  | 0.150835444 | 0.146821885 |
| 0.154369626 | 0.104533    | 0.115972087 | 0.001355778 |
| 0.116706063 | 0.052836253 | 0.126043448 | 0.021238703 |
| 0.146388577 | 0.062327577 | 0.01424466  | 0.264639924 |
| 0.224622656 | 0.217176106 | 0.005460503 | 0.009266373 |
| 0.108240208 | 0.371038782 | 0.063284791 | 0.032432665 |
| 0.299063508 | 0.087120024 | 0.120837998 | 0.362314418 |
| 0.151860958 | 0.371632037 | 0.012116501 | 0.104566582 |
| 0.114375757 | 0.272096513 | 0.174550876 | 0.221504763 |
| 0.197336939 | 0.11743647  | 0.026987721 | 0.297732249 |
| 0.135938849 | 0.141193528 | 0.059378909 | 0.324245946 |
| 0.001096268 | 0.242632486 | 0.18659672  | 0.010897732 |
| 0.350381553 | 0.386353029 | 0.059299611 | 0.066845497 |
| 0.230164426 | 0.323250568 | 0.187522802 | 0.150141457 |
| 0.016313489 | 0.004719534 | 0.251178216 | 0.301345663 |
| 0.200178348 | 0.160933402 | 0.062737321 | 0.006163176 |
| 0.252477963 | 0.064984556 | 0.199817859 | 0.086909949 |
| 0.162720407 | 0.063363106 | 0.163672193 | 0.091822198 |
| 0.001504115 | 0.124070468 | 0.124757339 | 0.090402123 |
| 0.098824676 | 0.076049064 | 0.275198487 | 0.322532357 |
| 0.085644296 | 0.028600366 | 0.092120785 | 0.126640901 |
| 0.251949958 | 0.318119928 | 0.006529256 | 0.24053124  |
| 0.261515286 | 0.185887275 | 0.272617802 | 0.244566255 |

|             |             |             |             |
|-------------|-------------|-------------|-------------|
| 0.147119469 | 0.400781441 | 0.276431306 | 0.153956938 |
| 0.000259693 | 0.140417798 | 0.10847839  | 0.361614313 |
| 0.185462412 | 0.297013522 | 0.021756871 | 0.069831397 |
| 0.001216399 | 0.167382939 | 0.025683177 | 0.323594186 |
| 0.247542024 | 0.071828046 | 0.004935498 | 0.24285827  |
| 0.10174509  | 0.00547753  | 0.291786038 | 0.225793102 |
| 0.326661558 | 0.166366012 | 0.234929453 | 0.131196898 |
| 0.016059021 | 0.049943524 | 0.065032669 | 0.227290224 |
| 0.10490152  | 0.007448386 | 0.137191647 | 0.257477801 |
| 0.234216113 | 0.374268335 | 0.266214059 | 0.0109315   |
| 0.105059469 | 0.049440654 | 0.229080672 | 0.063060587 |
| 0.238944124 | 0.37761734  | 0.343810234 | 0.162575096 |
| 0.168036988 | 0.361980668 | 0.365362037 | 0.262487275 |
| 0.03238428  | 0.128296765 | 0.158448093 | 0.058034732 |
| 0.075108645 | 0.261596389 | 0.155068736 | 0.306586344 |
| 0.21184024  | 0.049875021 | 0.290578025 | 0.075536395 |
| 0.366219768 | 0.253082115 | 0.089843467 | 0.051217018 |
| 0.397484225 | 0.103780449 | 0.193466789 | 0.141071612 |
| 0.303206978 | 0.007342783 | 0.009285497 | 0.299886724 |
| 0.391324453 | 0.405535091 | 0.211276173 | 0.10723556  |
| 0.202487316 | 0.044375516 | 0.193303125 | 0.133805653 |
| 0.176116221 | 0.087215398 | 0.104485455 | 0.005189125 |
| 0.020150012 | 0.036459448 | 0.414640356 | 0.381819115 |
| 0.087924903 | 0.160900951 | 0.225865889 | 0.301533486 |
| 0.215450435 | 0.055853246 | 0.283748763 | 0.110511971 |
| 0.420163667 | 0.124712768 | 0.3255519   | 0.135211315 |
| 0.21996882  | 0.153971584 | 0.23704411  | 0.00574436  |
| 0.143174069 | 0.12439546  | 0.021445383 | 0.252005178 |
| 0.140663125 | 0.121358888 | 0.39113709  | 0.073426749 |
| 0.040679144 | 0.000839168 | 0.228622934 | 0.069352813 |
| 0.370078674 | 0.019934262 | 0.117053977 | 0.011311313 |
| 0.326299693 | 0.142649608 | 0.182342078 | 0.02628967  |
| 0.146383424 | 0.004326624 | 0.15941299  | 0.033661524 |
| 0.211376765 | 0.314358451 | 0.129149052 | 0.08016307  |
| 0.018099466 | 0.229784525 | 0.293491564 | 0.187966816 |
| 0.264690467 | 0.015760698 | 0.244634846 | 0.080919406 |
| 0.109280876 | 0.063461143 | 0.301478274 | 0.072445919 |
| 0.275162392 | 0.038898428 | 0.14753564  | 0.035496179 |
| 0.225346795 | 0.075255421 | 0.245675403 | 0.036086875 |
| 0.083054834 | 0.118753351 | 0.142251484 | 0.149676515 |
| 0.175181823 | 0.100313484 | 0.039331463 | 0.406459431 |
| 0.040010851 | 0.07516818  | 0.046369393 | 0.084062744 |
| 0.066890915 | 0.174393052 | 0.183387399 | 0.213571381 |
| 0.245169181 | 0.02297079  | 0.098050896 | 0.057278412 |
| 0.008212147 | 0.102298319 | 0.392272023 | 0.032273878 |
| 0.188170164 | 0.031126806 | 0.000578827 | 0.038918308 |
| 0.30754967  | 0.052353361 |             |             |
| CHST11      | 0.189076876 | 0.455347022 | 0.035052034 |
| 0.033267523 | 0.049979749 | 0.13093445  | 0.100573804 |
| 0.173883867 | 0.043154781 | 0.084671033 | 0.223523882 |
| 0.000882982 | 0.338587367 | 0.006969687 | 0.023472266 |
| 0.500000337 | 0.497554671 | 0.149528878 | 0.471253088 |
| 0.14359958  | 0.095323384 | 0.235760534 | 0.231575253 |
| 0.121974656 | 0.000907262 | 0.059701794 | 0.048516132 |



|             |             |             |             |
|-------------|-------------|-------------|-------------|
| 0.167948487 | 0.486278107 | 0.083469482 | 0.150149431 |
| 0.448335288 | 0.437718705 | 0.189341857 | 0.138239953 |
| 0.129833971 | 0.404456563 | 0.045085755 | 0.340880904 |
| 0.375924423 | 0.10748222  | 0.414100492 | 0.004790623 |
| 0.00424655  | 0.046529649 | 0.165348804 | 0.25121261  |
| 0.119069955 | 0.110923678 | 0.068502516 | 0.083315555 |
| 0.10255958  | 0.244599099 | 0.307591646 | 0.106592189 |
| 0.333345541 | 0.006601316 | 0.38295078  | 0.119743277 |
| 0.02669832  | 0.120877812 | 0.167010053 | 0.270183426 |
| 0.141750635 | 0.362270053 | 0.472749158 | 0.017605891 |
| 0.032578655 | 0.198279932 | 0.386413378 | 0.27295416  |
| 0.411789957 | 0.196656636 | 0.126380174 | 0.1517772   |
| 0.336147043 | 0.373073574 | 0.144514596 | 0.070803536 |
| 0.000722538 | 0.068110295 | 0.155914176 | 0.241782159 |
| 0.271568821 | 0.257958325 | 0.233553598 | 0.093789881 |
| 1           | 0.008520539 | 0.204928129 | 0.496842906 |
| 0.021744247 | 0.325421689 | 0.005786837 | 0.058063005 |
| 0.386597202 | 0.463523023 | 0.291582699 | 0.035998721 |
| 0.006247913 | 0.048224809 | 0.076393563 | 0.399434178 |
| 0.190717247 | 0.203876369 | 0.312671435 | 0.056675101 |
| 0.343580208 | 0.08110548  | 0.13597804  | 0.411862207 |
| 0.463772508 | 0.003064073 | 0.061551346 | 0.11195104  |
| 0.139048384 | 0.070940165 | 0.096656969 | 0.046667443 |
| 0.012335606 | 0.01019644  | 0.44669403  | 0.072495655 |
| 0.050439505 | 0.092518543 | 0.055615517 | 0.287085815 |
| 0.166250392 | 0.403839526 | 0.046493909 | 0.113096931 |
| 0.330327723 | 0.122531047 | 0.196294867 | 0.350788469 |
| 0.152747204 | 0.105820479 | 0.069654731 | 0.382849379 |
| 0.345489356 | 0.032011301 | 0.039864691 | 0.209663487 |
| 0.327075558 | 0.47759199  | 0.5009809   | 0.135815004 |
| 0.114862069 | 0.097302408 | 0.177571011 | 0.260133279 |
| 0.107278523 | 0.147072372 | 0.04073879  | 0.219047968 |
| 0.341228847 | 0.025968237 | 0.028690272 | 0.345741451 |
| 0.02942241  | 0.092466929 | 0.389730333 | 0.349021446 |
| 0.21990841  | 0.041944274 | 0.135228603 | 0.128325829 |
| 0.137797463 | 0.121639998 | 0.245587948 | 0.130528332 |
| 0.186496576 | 0.188874511 | 0.022044546 | 0.344308492 |
| 0.052874829 | 0.173276927 | 0.158971067 | 0.033224004 |
| 0.235086954 | 0.14513446  | 0.403063862 | 0.223945534 |
| 0.311900282 | 0.008793765 | 0.092636938 | 0.224326531 |
| 0.176523029 | 0.361994719 | 0.451336382 | 0.045968249 |
| 0.118445857 | 0.119902851 | 0.057465478 | 0.133350391 |
| 0.334150414 | 0.130017959 | 0.108064765 | 0.000732233 |
| 0.05673719  | 0.218798154 | 0.171019155 | 0.023903815 |
| 0.113480777 | 0.0569134   | 0.046825837 | 0.425796261 |
| 0.087847705 | 0.362172921 | 0.011972945 | 0.057952096 |
| 0.122636211 | 0.300602418 | 0.221254698 | 0.144032894 |
| 0.35123218  | 0.176341508 | 0.434200623 | 0.290947907 |
| 0.100850466 | 0.261731656 | 0.06182688  | 0.106882414 |
| 0.253745037 | 0.420556719 | 0.41755861  | 0.359192749 |
| 0.115763623 | 0.234508992 | 0.151256141 | 0.164938107 |
| 0.198121474 | 0.174709574 | 0.042686243 | 0.447067197 |
| 0.000351564 | 0.181594593 | 0.240325678 | 0.073270994 |
| 0.447326874 | 0.126212439 | 0.030868001 | 0.108201415 |

|             |             |             |             |
|-------------|-------------|-------------|-------------|
| 0.481742242 | 0.44131789  | 0.361406407 | 0.440657967 |
| 0.121214016 | 0.004764216 | 0.427175327 | 0.278791519 |
| 0.491185556 | 0.157917279 | 0.145684593 | 0.024712659 |
| 0.452518056 | 0.179537846 | 0.284527253 | 0.234183666 |
| 0.216325935 | 0.156436542 | 0.092595764 | 0.226892374 |
| 0.009560844 | 0.133316632 | 0.309526597 | 0.106368005 |
| 0.178129156 | 0.089778666 | 0.38713842  | 0.19096344  |
| 0.172906874 | 0.194289101 | 0.178347979 | 0.037163117 |
| 0.068415609 | 0.466828899 | 0.016815682 | 0.404923948 |
| 0.496096949 | 0.152212172 | 0.449975444 | 0.486604375 |
| 0.14511325  | 0.278020783 | 0.431829071 | 0.392220921 |
| 0.000590392 | 0.423219971 | 0.318753258 | 0.240901975 |
| 0.462033198 | 0.155601735 | 0.09924112  | 0.183944644 |
| 0.000321417 | 0.064867848 | 0.159556228 | 0.420389592 |
| 0.432566509 | 0.011045732 | 0.018172343 | 0.353784487 |
| 0.290966348 | 0.01750077  | 0.48901877  | 0.165676107 |
| 0.406763077 | 0.175524654 | 0.08060087  | 0.372015724 |
| 0.139323856 | 0.142150999 | 0.014823101 | 0.278634615 |
| 0.162459726 | 0.034461304 | 0.05314864  | 0.47453281  |
| 0.398292039 | 0.24528198  | 0.112944609 | 0.01426404  |
| 0.369727637 | 0.15882846  | 0.37309008  | 0.04600753  |
| 0.336105678 | 0.24130163  | 0.379016991 | 0.36898582  |
| 0.235735479 | 0.323078353 | 0.288892966 | 0.397375643 |
| 0.066713731 | 0.407612528 | 0.442153183 | 0.035575292 |
| 0.230233434 | 0.444614839 | 0.207136356 | 0.083879886 |
| 0.226794657 | 0.058209614 | 0.102467517 | 0.144581927 |
| 0.383254709 | 0.457801478 | 0.027398655 | 0.064091364 |
| 0.326169745 | 0.118727752 | 0.043395942 | 0.128155378 |
| 0.154128004 | 0.123972565 | 0.051348574 | 0.231839122 |
| 0.401627873 | 0.178494949 | 0.452550378 | 0.110009477 |
| 0.428770586 | 0.020242041 | 0.342009075 | 0.101689543 |
| 0.130122744 | 0.27959887  | 0.38607199  | 0.082734728 |
| 0.028450908 | 0.072799894 | 0.303921394 | 0.322413924 |
| 0.03466971  | 0.079542276 | 0.12229205  | 0.17443486  |
| 0.488797945 | 0.210608226 | 0.146340983 | 0.141463231 |
| 0.319382183 | 0.063392571 | 0.428288231 | 0.152360245 |
| 0.321408913 | 0.160589604 | 0.347533623 | 0.004414255 |
| 0.289595687 | 0.106515301 | 0.09118339  | 0.176346077 |
| 0.441668588 | 0.062624402 | 0.241442851 | 0.071323118 |
| 0.099565708 | 0.001597172 | 0.221007625 | 0.170721505 |
| 0.176704347 | 0.128162438 | 0.153980053 | 0.094526791 |
| 0.477528977 | 0.214662492 | 0.35481182  | 0.10718843  |
| 0.186104613 | 0.011456371 | 0.083338454 | 0.01642789  |
| 0.28943692  | 0.25576995  | 0.253037267 | 0.195551306 |
| 0.091418055 | 0.255429048 | 0.235902163 | 0.181148894 |
| 0.440404573 | 0.137950317 | 0.506162148 | 0.110028621 |
| 0.374331756 | 0.190079908 | 0.123253879 | 0.131097007 |
| 0.081113415 | 0.050288288 | 0.046581154 | 0.066354157 |
| 0.470503689 | 0.106436919 | 0.178885124 | 0.176238838 |
| 0.025102854 | 0.17542419  | 0.316893501 | 0.343439628 |
| 0.272302303 | 0.329006699 | 0.17910255  | 0.293952914 |
| 0.140205366 | 0.131424983 | 0.047753664 | 0.028505931 |
| 0.148485483 | 0.090396654 | 0.351828653 | 0.373452858 |
| 0.470345026 | 0.117508053 | 0.042092378 | 0.056991742 |

|             |             |             |             |             |
|-------------|-------------|-------------|-------------|-------------|
| 0.045678987 | 0.332330115 | 0.14434067  | 0.085865302 |             |
| 0.216720654 | 0.130411197 | 0.000466621 | 0.09837027  |             |
| 0.256506124 | 0.191357341 |             |             |             |
| CHST12      | 0.02894817  | 0.041220372 | 0.067661699 |             |
| 0.000106651 | 0.006143801 | 0.191941426 | 0.105876872 |             |
| 0.015475704 | 0.055992288 | 0.028013909 | 0.13651465  |             |
| 0.01382282  | 0.005823056 | 0.049403643 | 0.018157476 |             |
| 0.02086738  | 0.019003397 | 0.051699393 | 0.02248605  |             |
| 0.058248733 | 0.001651863 | 0.100525442 | 0.047142665 |             |
| 0.135822113 | 0.031663599 | 0.076150428 | 0.001368288 |             |
| 0.00824439  | 0.01557118  | 0.2013872   | 0.017896104 |             |
| 0.018944602 | 0.009154797 | 0.005190437 | 0.001465544 |             |
| 0.000137431 | 0.07262413  | 2.42E-05    | 0.005936024 |             |
| 0.007540639 | 0.039584345 | 0.01168246  | 0.029052051 |             |
| 4.01E-07    | 0.113570389 | 0.007071711 | 0.075093875 |             |
| 0.063764855 | 0.193904645 | 0.240511525 | 0.049792984 |             |
| 1.75E-05    | 0.123320176 | 0.053594648 | 2.81E-05    | 0.087066595 |
| 2.30E-05    | 0.072417665 | 0.029184982 | 0.212072736 |             |
| 0.076562289 | 0.010311018 | 0.046159419 | 0.171182873 |             |
| 0.080037266 | 0.028851749 | 0.011558686 | 0.264728135 |             |
| 0.014942757 | 0.007243099 | 0.016119965 | 0.038721615 |             |
| 0.008334441 | 0.021963972 | 0.001619065 | 0.009978547 |             |
| 0.008859979 | 0.170014486 | 0.082771045 | 0.005448254 |             |
| 0.10624944  | 0.003124091 | 0.020396422 | 0.003162334 |             |
| 0.118294792 | 0.01833141  | 0.028139756 | 0.008520539 |             |
| 1           | 0.079314125 | 0.025160762 | 0.001030867 |             |
| 0.01054098  | 0.000320501 | 0.05389178  | 0.020118181 |             |
| 0.009982555 | 0.03477622  | 0.062393236 | 0.034464253 |             |
| 0.162014139 | 0.009985813 | 0.005406372 | 0.032713763 |             |
| 0.016595692 | 0.086847603 | 0.000306856 | 0.00328395  |             |
| 0.036373779 | 0.027093017 | 0.066820465 | 0.031422008 |             |
| 0.030436383 | 0.095972288 | 0.185861461 | 0.001278299 |             |
| 0.000901349 | 0.123312059 | 0.000125017 | 0.00138935  |             |
| 0.00378278  | 0.015298622 | 0.131078236 | 0.060579101 |             |
| 0.127407814 | 0.002965702 | 0.008998513 | 0.011013473 |             |
| 0.015720243 | 0.013095547 | 0.078686171 | 0.006219777 |             |
| 0.094644665 | 0.008338278 | 0.01319644  | 0.002488666 |             |
| 0.047673986 | 0.196838664 | 0.04375447  | 0.095138864 |             |
| 0.03872133  | 0.072143118 | 0.139611718 | 0.003417113 |             |
| 0.020997134 | 0.030739909 | 0.020468334 | 0.014336294 |             |
| 0.140102469 | 0.007791586 | 0.046064515 | 0.142267585 |             |
| 0.058402801 | 8.82E-05    | 0.119799649 | 0.099664488 |             |
| 0.000120816 | 0.252255546 | 0.021935109 | 0.000178507 |             |
| 0.009279976 | 0.067274868 | 0.024717719 | 0.013874407 |             |
| 0.001249703 | 0.023944543 | 0.095466153 | 0.140867056 |             |
| 0.097005673 | 0.046169557 | 0.016557303 | 0.158855301 |             |
| 0.007351507 | 0.143352028 | 0.00337423  | 0.252782202 |             |
| 0.115691431 | 0.000900572 | 0.0003665   | 0.020910216 |             |
| 0.028898815 | 0.034208143 | 0.033509469 | 0.016032668 |             |
| 9.97E-06    | 0.024330553 | 0.034268611 | 0.008165194 |             |
| 0.009771783 | 0.045964498 | 0.288854493 | 0.200578245 |             |
| 0.001262888 | 0.270112228 | 0.00878203  | 0.034949295 |             |
| 0.008427898 | 0.012941066 | 0.009195091 | 0.018824148 |             |
| 0.002692425 | 0.018200141 | 0.083925721 | 0.012743734 |             |

|             |             |             |             |
|-------------|-------------|-------------|-------------|
| 0.057390751 | 0.007475403 | 0.027775584 | 0.217166479 |
| 0.01176435  | 0.018080837 | 0.002478589 | 0.071729798 |
| 0.041410052 | 0.003170512 | 0.006624452 | 0.0231629   |
| 0.020361084 | 0.006672302 | 0.104071605 | 0.009220295 |
| 0.114656678 | 0.000197178 | 0.073875982 | 0.006487366 |
| 0.02080101  | 0.010237116 | 0.01717457  | 0.082373116 |
| 0.031088567 | 0.000680842 | 0.19188357  | 0.052482681 |
| 0.035039416 | 0.15179647  | 0.042430758 | 0.026430458 |
| 0.108456627 | 0.013605942 | 0.000526943 | 0.041726236 |
| 0.118664713 | 0.234795303 | 0.096615918 | 0.023441766 |
| 0.045347427 | 0.03857536  | 0.009640268 | 0.000652733 |
| 0.044104586 | 0.042149275 | 0.067379326 | 0.014385845 |
| 0.023284672 | 0.0006942   | 0.000526148 | 0.025881729 |
| 0.011574385 | 0.032722178 | 0.011687723 | 0.007889061 |
| 0.002200279 | 0.1452678   | 0.020355015 | 0.000450964 |
| 0.075647047 | 0.014179453 | 0.001376623 | 0.013546571 |
| 0.005830227 | 0.020581059 | 0.145745012 | 0.002192963 |
| 0.003145776 | 0.002447761 | 0.123799981 | 0.21408467  |
| 0.04233534  | 9.21E-06    | 0.046679441 | 0.027453961 |
| 0.056458639 | 0.021978068 | 0.028552761 | 0.105794807 |
| 0.0863969   | 0.031740596 | 0.017166207 | 0.004504948 |
| 0.00603727  | 0.003368906 | 0.152347483 | 0.013331739 |
| 0.14954592  | 0.006656642 | 0.002041072 | 0.00226321  |
| 0.278884535 | 0.000153666 | 0.061794315 | 0.017284203 |
| 0.037815928 | 2.17E-06    | 0.026706791 | 0.003365856 |
| 0.000275935 | 0.037983803 | 0.055594893 | 0.034174838 |
| 0.02040335  | 0.107596409 | 0.005057723 | 0.000103284 |
| 0.011033913 | 0.001278917 | 0.021461341 | 0.006686062 |
| 0.000436576 | 0.006159767 | 0.029656808 | 0.044845537 |
| 0.066707821 | 0.173428338 | 0.001710343 | 0.008669364 |
| 0.000423908 | 0.015464843 | 0.018248032 | 0.060655008 |
| 0.112400702 | 0.04916264  | 0.008535838 | 0.018591822 |
| 0.076123568 | 0.111478311 | 0.035343664 | 0.000114463 |
| 0.00784494  | 0.01246498  | 0.016942243 | 0.007289919 |
| 0.020087932 | 0.008924263 | 0.194526983 | 0.087982091 |
| 7.87E-05    | 0.24871456  | 0.045412288 | 0.048509972 |
| 0.018623997 | 0.192487243 | 0.088595967 | 0.075694442 |
| 0.049206125 | 0.16176751  | 0.053505913 | 0.191852255 |
| 7.06E-05    | 0.001078198 | 0.099383306 | 0.064690011 |
| 0.142147651 | 0.020866786 | 0.004522402 | 0.013093311 |
| 0.132851639 | 0.028680153 | 0.016974759 | 0.153393572 |
| 0.006187669 | 0.006148293 | 0.000614777 | 0.002087237 |
| 0.032241259 | 0.071817406 | 0.094829157 | 0.258036203 |
| 0.250744081 | 0.078616586 | 0.040502013 | 0.016614762 |
| 0.004180821 | 0.175647278 | 0.063079763 | 0.104291327 |
| 0.000838411 | 0.063770525 | 0.078260456 | 0.06239302  |
| 0.025398603 | 0.028083696 | 0.000853557 | 0.0097762   |
| 0.028926171 | 0.013241305 | 0.018720788 | 0.009230557 |
| 0.152630747 | 0.059276278 | 0.147367535 | 0.000452537 |
| 0.004593995 | 0.115246848 | 0.001062336 | 0.193301807 |
| 0.002315729 | 0.048706917 | 2.40E-05    | 0.046388335 |
| 0.045109004 | 0.035160514 | 0.001222583 | 0.02407872  |
| 8.70E-07    | 0.034938119 | 0.060050781 | 0.076708045 |
| 0.094580227 | 0.020790047 | 0.019388455 | 0.023011756 |

|             |             |             |             |
|-------------|-------------|-------------|-------------|
| 0.016817991 | 0.072477311 | 0.009702839 | 0.017955209 |
| 8.74E-05    | 0.021744433 | 0.047237728 | 0.003894024 |
| 0.008200296 | 0.171486839 | 0.010837826 | 0.062843565 |
| 0.002202532 | 0.180846593 | 0.065312947 | 0.013283247 |
| 0.008677438 | 0.021513935 | 0.012018955 | 0.066389508 |
| 0.020865754 | 0.015510193 | 0.00700594  | 0.021161109 |
| 0.00678815  | 0.006208767 | 0.11162518  | 0.004554578 |
| 0.061432704 | 0.000170976 | 0.000577286 | 0.000460328 |
| 0.120798255 | 0.043788391 | 0.034029115 | 0.021828641 |
| 0.003952345 | 0.166210897 | 0.17107733  | 0.000111665 |
| 0.012437353 | 0.094120435 | 3.47E-05    | 0.021493331 |
| 0.003422537 | 0.004570825 | 0.056865063 | 0.100957606 |
| 0.001151744 |             |             |             |
| CHSY1       | 0.206433519 | 0.454844595 | 0.145406785 |
| 0.020461442 | 0.119053762 | 0.26143243  | 0.226159996 |
| 0.211720826 | 0.171499511 | 0.151832325 | 0.365078609 |
| 0.007426298 | 0.245337303 | 0.056367531 | 0.134108977 |
| 0.411210383 | 0.410758232 | 0.25322262  | 0.416221201 |
| 0.253388902 | 0.102407094 | 0.34009927  | 0.263948074 |
| 0.253835228 | 0.010930751 | 0.159128017 | 0.04600442  |
| 0.186085361 | 0.384519897 | 0.260205696 | 0.241979073 |
| 0.358597024 | 0.32118604  | 0.198884756 | 0.166064847 |
| 0.075337995 | 0.480245571 | 0.036471828 | 0.248197044 |
| 0.26862963  | 0.21341347  | 0.322573081 | 0.043166369 |
| 0.000943473 | 0.161956245 | 0.168936307 | 0.321086155 |
| 0.262873757 | 0.250720322 | 0.244957021 | 0.174342966 |
| 0.050828152 | 0.380702457 | 0.360174668 | 0.046122852 |
| 0.445621904 | 0.003125586 | 0.465709398 | 0.198163849 |
| 0.147691217 | 0.270454454 | 0.170036704 | 0.299110933 |
| 0.28300309  | 0.461384375 | 0.439641958 | 0.068063874 |
| 0.146306238 | 0.216703524 | 0.255662566 | 0.236302657 |
| 0.416352586 | 0.244493096 | 0.238985826 | 0.133017686 |
| 0.251978603 | 0.280472693 | 0.29729775  | 0.250547264 |
| 0.003936378 | 0.182507143 | 0.159928111 | 0.221934586 |
| 0.172727212 | 0.391299095 | 0.212057989 | 0.190406107 |
| 0.204928129 | 0.079314125 | 1           | 0.438777377 |
| 0.025815815 | 0.265594707 | 0.013080137 | 0.229369345 |
| 0.337525607 | 0.329639608 | 0.294114145 | 0.124569667 |
| 0.059442713 | 0.221246079 | 0.135236485 | 0.259103934 |
| 0.245647338 | 0.242843115 | 0.426282394 | 0.048016852 |
| 0.214445168 | 0.209089785 | 0.259408833 | 0.471831915 |
| 0.419207179 | 0.038331565 | 0.240435743 | 0.255180191 |
| 0.158823777 | 0.088413808 | 0.246780599 | 0.028520862 |
| 0.020312924 | 0.03367443  | 0.355635569 | 0.242875828 |
| 0.134983821 | 0.233129059 | 0.100681628 | 0.225888024 |
| 0.194435083 | 0.330718773 | 0.128185012 | 0.241751456 |
| 0.235595164 | 0.237180899 | 0.212112916 | 0.283293409 |
| 0.168146583 | 0.249306631 | 0.241630566 | 0.424560578 |
| 0.464855165 | 0.141370104 | 0.159141849 | 0.331371012 |
| 0.211477794 | 0.402271568 | 0.457711446 | 0.258397996 |
| 0.194503338 | 0.269663631 | 0.182593153 | 0.301252239 |
| 0.255917993 | 0.257667049 | 0.046281413 | 0.368694868 |
| 0.461224832 | 0.029541616 | 0.15102203  | 0.329806127 |
| 0.032014282 | 0.199576629 | 0.447583489 | 0.345915736 |

|             |             |             |             |
|-------------|-------------|-------------|-------------|
| 0.224574206 | 0.039532345 | 0.196740408 | 0.242931161 |
| 0.278752268 | 0.249776988 | 0.28941106  | 0.170287919 |
| 0.325824782 | 0.183616676 | 0.113378955 | 0.216510355 |
| 0.211370506 | 0.289975362 | 0.12259751  | 0.036719822 |
| 0.240260806 | 0.250120981 | 0.397268293 | 0.254243711 |
| 0.260032198 | 0.002739632 | 0.15145446  | 0.232268874 |
| 0.180625249 | 0.284743168 | 0.468376648 | 0.198843359 |
| 0.28026565  | 0.121157675 | 0.230475421 | 0.197368227 |
| 0.346828411 | 0.180541584 | 0.181009763 | 0.005103753 |
| 0.190573696 | 0.155810383 | 0.225872494 | 0.129649282 |
| 0.199471521 | 0.195657882 | 0.142137757 | 0.386608839 |
| 0.256903038 | 0.303134646 | 0.064616561 | 0.085258256 |
| 0.281147764 | 0.343996193 | 0.189294514 | 0.192146695 |
| 0.328532479 | 0.244639055 | 0.285987508 | 0.41341246  |
| 0.201706333 | 0.375386897 | 0.065570483 | 0.257567329 |
| 0.192890114 | 0.376347671 | 0.306035806 | 0.329555353 |
| 0.255214268 | 0.269714418 | 0.163458938 | 0.314269338 |
| 0.277982299 | 0.262920062 | 0.184009645 | 0.466477282 |
| 0.005420358 | 0.303836521 | 0.220709204 | 0.077269192 |
| 0.452942455 | 0.236885283 | 0.163272588 | 0.271348927 |
| 0.42570281  | 0.473876647 | 0.381516977 | 0.312516175 |
| 0.114789466 | 0.049034719 | 0.442089117 | 0.354494904 |
| 0.379269021 | 0.252350592 | 0.123888893 | 0.055373935 |
| 0.413312151 | 0.174707348 | 0.273501065 | 0.207527658 |
| 0.196671538 | 0.159724481 | 0.271516033 | 0.230581949 |
| 0.01396281  | 0.249211997 | 0.237349143 | 0.121014449 |
| 0.20903237  | 0.168584327 | 0.34968896  | 0.350221966 |
| 0.175581079 | 0.18587722  | 0.15720021  | 0.144965453 |
| 0.23137492  | 0.466781385 | 0.013903551 | 0.435030688 |
| 0.446573741 | 0.265356465 | 0.391788659 | 0.444652386 |
| 0.281579774 | 0.391218949 | 0.410546337 | 0.337712784 |
| 0.004629122 | 0.277688871 | 0.207207084 | 0.406490374 |
| 0.338223991 | 0.277796919 | 0.130236167 | 0.156680693 |
| 0.004143912 | 0.233087659 | 0.085421202 | 0.486065602 |
| 0.367396855 | 0.06882585  | 0.010204811 | 0.353856507 |
| 0.191804038 | 0.033373475 | 0.473575165 | 0.256518861 |
| 0.405431098 | 0.251012822 | 0.201299256 | 0.244349064 |
| 0.06496445  | 0.220287952 | 0.034313889 | 0.266811274 |
| 0.187213545 | 0.04468474  | 0.07852801  | 0.443329806 |
| 0.40314767  | 0.341197266 | 0.271562105 | 0.015286596 |
| 0.266257395 | 0.107617208 | 0.304173708 | 0.183264408 |
| 0.408343602 | 0.374101272 | 0.434144022 | 0.277830796 |
| 0.236339412 | 0.412506024 | 0.412988659 | 0.386465656 |
| 0.06408432  | 0.274291921 | 0.319286877 | 0.113723422 |
| 0.167771182 | 0.38859267  | 0.198646523 | 0.222460103 |
| 0.328187457 | 0.043740149 | 0.250953402 | 0.227284263 |
| 0.428529854 | 0.375319802 | 0.128213858 | 0.242312843 |
| 0.413450402 | 0.266220182 | 0.169738701 | 0.276209042 |
| 0.307014239 | 0.056043853 | 0.072022448 | 0.352255821 |
| 0.468929238 | 0.321046429 | 0.368016954 | 0.118634978 |
| 0.347682793 | 0.143601713 | 0.357999965 | 0.236164989 |
| 0.284185355 | 0.181102419 | 0.257046798 | 0.074620278 |
| 0.031165061 | 0.189020924 | 0.389346782 | 0.439069141 |
| 0.166674575 | 0.261199312 | 0.250023188 | 0.248150891 |

|             |             |             |             |
|-------------|-------------|-------------|-------------|
| 0.39023657  | 0.231652859 | 0.288757151 | 0.281551794 |
| 0.452641621 | 0.065888969 | 0.488935763 | 0.276796624 |
| 0.369647504 | 0.246645382 | 0.351548398 | 0.009163425 |
| 0.230433151 | 0.170001144 | 0.129694464 | 0.217930208 |
| 0.313244567 | 0.209249748 | 0.326294121 | 0.238771052 |
| 0.094560074 | 0.011118618 | 0.357424516 | 0.125826913 |
| 0.338476849 | 0.153566093 | 0.273814055 | 0.043627197 |
| 0.491797949 | 0.261040587 | 0.335059893 | 0.108756061 |
| 0.257619861 | 0.005216214 | 0.157044512 | 0.111008093 |
| 0.365126738 | 0.38356725  | 0.24271568  | 0.212191519 |
| 0.168333979 | 0.250600924 | 0.334504753 | 0.211582252 |
| 0.372103092 | 0.067734721 | 0.4210424   | 0.250518318 |
| 0.233865881 | 0.232682476 | 0.26729899  | 0.234706762 |
| 0.199488267 | 0.09979865  | 0.189693857 | 0.21434212  |
| 0.360533546 | 0.208368993 | 0.23639541  | 0.223720721 |
| 0.111353193 | 0.263677934 | 0.28861482  | 0.246982148 |
| 0.245896716 | 0.212694199 | 0.202764657 | 0.435501734 |
| 0.186869169 | 0.24393332  | 0.034996268 | 0.027866843 |
| 0.113348584 | 0.231510413 | 0.383637542 | 0.382938006 |
| 0.415181152 | 0.160217663 | 0.177163296 | 0.227009847 |
| 0.048233718 | 0.269454807 | 0.244788614 | 0.058422376 |
| 0.239762739 | 0.140123447 | 0.004544539 | 0.237797115 |
| 0.376009815 | 0.188577585 |             |             |
| CLDN10      | 0.40316476  | 0.516951881 | 0.084447853 |
| 0.03949568  | 0.144935205 | 0.276843549 | 0.266496905 |
| 0.420219957 | 0.133164649 | 0.171763102 | 0.373616419 |
| 0.002264725 | 0.448109111 | 0.019500485 | 0.092786931 |
| 0.510213501 | 0.523990176 | 0.394937494 | 0.510665729 |
| 0.376169313 | 0.184054722 | 0.416381634 | 0.438422248 |
| 0.303888569 | 0.002518265 | 0.152893312 | 0.066375146 |
| 0.432713865 | 0.50381295  | 0.242327751 | 0.325100795 |
| 0.482279784 | 0.50678244  | 0.467278579 | 0.384439018 |
| 0.306727358 | 0.490572501 | 0.162844614 | 0.499993479 |
| 0.431962762 | 0.271784634 | 0.513734877 | 0.019220511 |
| 0.005759446 | 0.127395307 | 0.386501738 | 0.443961417 |
| 0.358046541 | 0.257939226 | 0.206513612 | 0.213042397 |
| 0.208618411 | 0.404678582 | 0.448521489 | 0.209900322 |
| 0.45701549  | 0.006772077 | 0.48505115  | 0.301499073 |
| 0.083138306 | 0.3672177   | 0.421923113 | 0.469093326 |
| 0.291958334 | 0.471709176 | 0.524245417 | 0.046111953 |
| 0.09179876  | 0.498173084 | 0.476050615 | 0.488100926 |
| 0.514323323 | 0.394273091 | 0.347861657 | 0.441223265 |
| 0.508931723 | 0.462625817 | 0.333416176 | 0.217586423 |
| 0.00140004  | 0.183094186 | 0.391688144 | 0.393168287 |
| 0.469903835 | 0.407632536 | 0.450934269 | 0.264873912 |
| 0.496842906 | 0.025160762 | 0.438777377 | 1           |
| 0.030052969 | 0.470691784 | 0.015374975 | 0.192038009 |
| 0.496323119 | 0.47620429  | 0.469991226 | 0.091905388 |
| 0.019101331 | 0.15599815  | 0.181417346 | 0.416979406 |
| 0.467483225 | 0.523681794 | 0.452233465 | 0.187672651 |
| 0.406351123 | 0.208727058 | 0.414030577 | 0.490945997 |
| 0.506980676 | 0.011246819 | 0.196502112 | 0.264824724 |
| 0.400790516 | 0.173595446 | 0.275632022 | 0.053875641 |
| 0.015903168 | 0.028679279 | 0.491632335 | 0.194416776 |

|             |             |             |             |
|-------------|-------------|-------------|-------------|
| 0.126423648 | 0.245067862 | 0.109375622 | 0.517588585 |
| 0.404087824 | 0.450621691 | 0.152605253 | 0.303754904 |
| 0.50260522  | 0.301975382 | 0.482600797 | 0.521286908 |
| 0.438987216 | 0.30774024  | 0.182543745 | 0.511133936 |
| 0.464073162 | 0.087727781 | 0.102937488 | 0.37516659  |
| 0.429390435 | 0.507964491 | 0.525637093 | 0.361274224 |
| 0.318249386 | 0.290270039 | 0.371901507 | 0.451254243 |
| 0.289428976 | 0.402021534 | 0.120743894 | 0.406770501 |
| 0.451095216 | 0.051194193 | 0.082696012 | 0.500943625 |
| 0.072425202 | 0.291903579 | 0.489282962 | 0.527872413 |
| 0.513210745 | 0.054904032 | 0.280481667 | 0.309742237 |
| 0.347152713 | 0.29884271  | 0.468642378 | 0.260701575 |
| 0.365785176 | 0.37848926  | 0.062061527 | 0.419955471 |
| 0.152161592 | 0.387874065 | 0.367011882 | 0.088767028 |
| 0.463155891 | 0.407376003 | 0.518224417 | 0.480602075 |
| 0.465389961 | 0.005982354 | 0.171586213 | 0.424699031 |
| 0.352654089 | 0.43729832  | 0.516227317 | 0.139811972 |
| 0.301089984 | 0.383373284 | 0.175545161 | 0.392847106 |
| 0.448763655 | 0.269811328 | 0.240300964 | 0.000932065 |
| 0.171463013 | 0.434377031 | 0.485329707 | 0.066961444 |
| 0.284444879 | 0.13860647  | 0.147719612 | 0.523846496 |
| 0.240667099 | 0.528596404 | 0.036470528 | 0.205066021 |
| 0.30970612  | 0.483192382 | 0.45313193  | 0.320078837 |
| 0.520065582 | 0.365054906 | 0.440528124 | 0.438407086 |
| 0.329442269 | 0.399976305 | 0.223148342 | 0.322531783 |
| 0.514865955 | 0.532060752 | 0.514525093 | 0.525273008 |
| 0.30662755  | 0.433917365 | 0.370465752 | 0.321821126 |
| 0.453454608 | 0.468783367 | 0.105545972 | 0.51941134  |
| 0.000958687 | 0.401166271 | 0.506001353 | 0.236533543 |
| 0.519551238 | 0.284234841 | 0.08623741  | 0.296745775 |
| 0.518465645 | 0.516867954 | 0.469727927 | 0.478823129 |
| 0.283791278 | 0.014083671 | 0.498816945 | 0.461641414 |
| 0.510481175 | 0.457210876 | 0.400919024 | 0.106866846 |
| 0.526249158 | 0.40734261  | 0.477633237 | 0.473165569 |
| 0.509691075 | 0.460587498 | 0.291633634 | 0.408241117 |
| 0.022370975 | 0.29361233  | 0.480542784 | 0.231714976 |
| 0.368374344 | 0.217962087 | 0.526058304 | 0.373609591 |
| 0.462946966 | 0.369608176 | 0.416436909 | 0.102764714 |
| 0.211617341 | 0.517894174 | 0.065433814 | 0.491654486 |
| 0.522876778 | 0.424721027 | 0.532298013 | 0.514329154 |
| 0.367723112 | 0.439769326 | 0.523974981 | 0.45949271  |
| 0.001353523 | 0.460526785 | 0.448217938 | 0.391773286 |
| 0.499775978 | 0.333536042 | 0.296637147 | 0.484351631 |
| 0.00186038  | 0.184692578 | 0.316647583 | 0.498540616 |
| 0.531737049 | 0.036600285 | 0.071497258 | 0.526585796 |
| 0.459397836 | 0.062429219 | 0.517544537 | 0.385047443 |
| 0.521991801 | 0.490537711 | 0.206462084 | 0.465374165 |
| 0.277834512 | 0.43979041  | 0.040358266 | 0.50015435  |
| 0.482020603 | 0.117158925 | 0.104766547 | 0.513564516 |
| 0.495289408 | 0.444675475 | 0.297369872 | 0.012294676 |
| 0.412321133 | 0.260291887 | 0.527013987 | 0.144247162 |
| 0.483803681 | 0.413757105 | 0.507458862 | 0.49907583  |
| 0.506455151 | 0.46347716  | 0.425249659 | 0.516378282 |
| 0.155181475 | 0.47049706  | 0.47818717  | 0.072256594 |



|             |             |             |             |
|-------------|-------------|-------------|-------------|
| 0.434911053 | 0.530932783 | 0.470797318 | 0.210653467 |
| 0.42993255  | 0.122021445 | 0.239963467 | 0.381135353 |
| 0.505222    | 0.524574022 | 0.071755189 | 0.202834363 |
| 0.460287063 | 0.349603352 | 0.135015667 | 0.40399499  |
| 0.320576119 | 0.220764831 | 0.185077832 | 0.423887005 |
| 0.494659751 | 0.336295299 | 0.507390681 | 0.192769618 |
| 0.513212594 | 0.065227161 | 0.49044729  | 0.311924051 |
| 0.331650936 | 0.455262946 | 0.42011055  | 0.156739251 |
| 0.031674894 | 0.155920885 | 0.449582171 | 0.453920347 |
| 0.094654929 | 0.229292973 | 0.299650148 | 0.403414302 |
| 0.512561797 | 0.475503435 | 0.319432953 | 0.399090135 |
| 0.444638713 | 0.13241212  | 0.499165168 | 0.388923853 |
| 0.466792629 | 0.387052839 | 0.516731038 | 0.011918547 |
| 0.511518021 | 0.204646166 | 0.260418197 | 0.424412936 |
| 0.459347987 | 0.161307152 | 0.439427566 | 0.197858349 |
| 0.218493207 | 0.005264302 | 0.413359932 | 0.438158548 |
| 0.321808233 | 0.361407315 | 0.42044927  | 0.220405122 |
| 0.515856309 | 0.453319812 | 0.476124784 | 0.352268202 |
| 0.437832505 | 0.033013231 | 0.186894326 | 0.043862862 |
| 0.450152274 | 0.438509402 | 0.472426967 | 0.439990881 |
| 0.253851988 | 0.51715653  | 0.444357748 | 0.477206186 |
| 0.530514773 | 0.208445329 | 0.517812747 | 0.361093368 |
| 0.422715873 | 0.439694665 | 0.301662829 | 0.384494679 |
| 0.240224162 | 0.161647379 | 0.14878363  | 0.198431306 |
| 0.520790756 | 0.367130243 | 0.450495299 | 0.371292503 |
| 0.060828187 | 0.442228075 | 0.483089354 | 0.496049285 |
| 0.492258976 | 0.445828335 | 0.442966891 | 0.433534646 |
| 0.361697239 | 0.348416762 | 0.075263473 | 0.043663184 |
| 0.312210387 | 0.227694775 | 0.465705122 | 0.503281341 |
| 0.517194934 | 0.34246524  | 0.119232759 | 0.168984382 |
| 0.171583861 | 0.430978279 | 0.316794091 | 0.219879356 |
| 0.500827958 | 0.372731536 | 0.000871608 | 0.277545427 |
| 0.432532043 | 0.456502833 |             |             |
| CLEC4N      | 0.011570661 | 0.03925826  | 0.008478208 |
| 0.003863327 | 0.004794643 | 0.056200293 | 0.048529676 |
| 0.007624318 | 0.004107486 | 0.053918433 | 0.056462166 |
| 6.17E-06    | 0.011080289 | 0.000358751 | 0.000397696 |
| 0.026502807 | 0.026204272 | 0.032741181 | 0.023511204 |
| 0.010977677 | 0.010017653 | 0.026400266 | 0.045451909 |
| 0.044818579 | 2.61E-05    | 0.048052751 | 0.015141912 |
| 0.005407883 | 0.021985484 | 0.023786117 | 0.012459162 |
| 0.022654121 | 0.019886721 | 0.01042874  | 0.003255751 |
| 0.002178592 | 0.043349833 | 0.000103672 | 0.015440951 |
| 0.012213536 | 0.03366363  | 0.020034    | 0.00017509  |
| 0.000200698 | 0.027126325 | 0.005729589 | 0.032139837 |
| 0.00896351  | 0.052542437 | 0.024355726 | 0.047921797 |
| 0.000199397 | 0.046558793 | 0.019672493 | 0.000652504 |
| 0.052386374 | 0.000375992 | 0.046509422 | 0.004222128 |
| 0.012167074 | 0.014864521 | 0.008194686 | 0.027576418 |
| 0.055347173 | 0.051642778 | 0.031414441 | 0.004486238 |
| 0.03054089  | 0.01308372  | 0.017192021 | 0.037088055 |
| 0.033303242 | 0.010892629 | 0.01047777  | 0.004688369 |
| 0.019710978 | 0.013295931 | 0.031548707 | 0.007745313 |
| 1.68E-05    | 0.051703627 | 0.012516741 | 0.010072797 |

|             |             |             |             |
|-------------|-------------|-------------|-------------|
| 0.010656784 | 0.052208307 | 0.013365687 | 0.02414248  |
| 0.021744247 | 0.001030867 | 0.025815815 | 0.030052969 |
| 1           | 0.01329007  | 0.000128995 | 0.004363741 |
| 0.020440055 | 0.017436805 | 0.021035882 | 0.018210376 |
| 0.00036118  | 0.007081754 | 0.000821674 | 0.011745406 |
| 0.01842186  | 0.016345448 | 0.048671789 | 0.000436022 |
| 0.009312332 | 0.003030551 | 0.011681812 | 0.049852655 |
| 0.03195528  | 6.06E-05    | 0.003914438 | 0.050453378 |
| 0.001738185 | 0.002797175 | 0.04107535  | 0.000374947 |
| 0.00031684  | 1.92E-05    | 0.020739574 | 0.010638216 |
| 0.040262587 | 0.052951336 | 0.012609716 | 0.024335855 |
| 0.007289217 | 0.015911615 | 0.007695937 | 0.042405221 |
| 0.015053164 | 0.050638185 | 0.022328459 | 0.022143381 |
| 0.006789207 | 0.005946663 | 0.016904931 | 0.038806825 |
| 0.037701153 | 0.004755426 | 0.006542193 | 0.049598179 |
| 0.009966395 | 0.026558697 | 0.032852842 | 0.005582935 |
| 0.019882605 | 0.020020217 | 0.017200436 | 0.049611592 |
| 0.037165602 | 0.012190429 | 3.96E-05    | 0.035226207 |
| 0.054096185 | 0.00011243  | 0.01359582  | 0.0178211   |
| 0.001454822 | 0.004524636 | 0.039455418 | 0.02783156  |
| 0.015239243 | 0.012654253 | 0.044298713 | 0.052406393 |
| 0.024983327 | 0.047656742 | 0.022970965 | 0.043212212 |
| 0.035415512 | 0.01945477  | 0.018587939 | 0.010242071 |
| 0.027994026 | 0.021474474 | 0.001762802 | 7.18E-05    |
| 0.011548596 | 0.007374098 | 0.035984308 | 0.017149137 |
| 0.01511868  | 0.00135437  | 0.057145889 | 0.015469404 |
| 0.01319409  | 0.012298744 | 0.044289581 | 0.025913003 |
| 0.024200025 | 0.002118355 | 0.021908925 | 0.012695992 |
| 0.016906935 | 0.010644757 | 0.011976425 | 4.82E-05    |
| 0.004583909 | 0.010601338 | 0.013618403 | 0.001355564 |
| 0.019611685 | 0.0036286   | 0.000229104 | 0.032900798 |
| 0.038255629 | 0.022555361 | 0.000105919 | 0.000525302 |
| 0.020665813 | 0.042490287 | 0.013232021 | 0.002345393 |
| 0.034835351 | 0.020255586 | 0.013632883 | 0.043252434 |
| 0.006637147 | 0.061825354 | 0.000181707 | 0.011274596 |
| 0.012467682 | 0.029397041 | 0.022438622 | 0.022924946 |
| 0.032965328 | 0.011689744 | 0.000870616 | 0.048631841 |
| 0.016149148 | 0.013944724 | 0.010160088 | 0.03638695  |
| 1.35E-05    | 0.030029834 | 0.022844561 | 0.000257919 |
| 0.043900957 | 0.05659511  | 0.010305058 | 0.010546063 |
| 0.024825696 | 0.034717433 | 0.020236558 | 0.018114973 |
| 0.000802458 | 0.000182748 | 0.028270284 | 0.036611084 |
| 0.022423933 | 0.01697989  | 0.004027036 | 2.96E-05    |
| 0.030020689 | 0.006508205 | 0.030302927 | 0.014091335 |
| 0.014148357 | 0.005278204 | 0.018592051 | 0.009261559 |
| 1.46E-05    | 0.036514735 | 0.020760302 | 0.003111516 |
| 0.024586203 | 0.003346218 | 0.029991165 | 0.037276036 |
| 0.007565769 | 0.003293937 | 0.012305886 | 0.026006822 |
| 0.03286113  | 0.037355109 | 1.26E-05    | 0.026898013 |
| 0.029950797 | 0.018511265 | 0.032399435 | 0.027929007 |
| 0.022798328 | 0.046911941 | 0.033316989 | 0.015644798 |
| 3.20E-06    | 0.015981824 | 0.010716201 | 0.045154192 |
| 0.025393914 | 0.044411553 | 0.002261288 | 0.006272379 |
| 4.01E-06    | 0.026813867 | 0.002159406 | 0.035584101 |

|             |             |             |             |
|-------------|-------------|-------------|-------------|
| 0.028377674 | 0.002875053 | 1.63E-05    | 0.026715391 |
| 0.010421364 | 1.35E-05    | 0.033618393 | 0.049277264 |
| 0.039994646 | 0.017892957 | 0.054093085 | 0.013794354 |
| 0.001733544 | 0.004504825 | 0.000408048 | 0.032609987 |
| 0.008547351 | 7.85E-05    | 0.021439312 | 0.027493362 |
| 0.033243106 | 0.041648522 | 0.033423658 | 0.000993746 |
| 0.011562896 | 0.005369642 | 0.032656114 | 0.002229453 |
| 0.029542237 | 0.043823165 | 0.03836397  | 0.015893639 |
| 0.018545632 | 0.048128774 | 0.050174389 | 0.033915387 |
| 0.000241498 | 0.016950005 | 0.021358921 | 0.001772167 |
| 0.009967    | 0.028016904 | 0.025479244 | 0.053538603 |
| 0.024997741 | 0.000971538 | 0.048182284 | 0.009450691 |
| 0.043406588 | 0.030695439 | 0.017976183 | 0.005053144 |
| 0.051409745 | 0.011585584 | 0.027541997 | 0.013427269 |
| 0.040205596 | 0.000576609 | 0.000290549 | 0.033427734 |
| 0.047403819 | 0.05591027  | 0.029049732 | 0.020729878 |
| 0.021299629 | 0.003940841 | 0.018684586 | 0.005630242 |
| 0.025945596 | 0.013904459 | 0.01217638  | 0.000319781 |
| 0.001848266 | 0.002564736 | 0.052396579 | 0.046630124 |
| 0.019950226 | 0.024076441 | 0.047273098 | 0.0431842   |
| 0.025506326 | 0.005803205 | 0.045065782 | 0.014525409 |
| 0.05015614  | 0.005664187 | 0.038638085 | 0.020887518 |
| 0.028737617 | 0.027361258 | 0.025553903 | 5.78E-05    |
| 0.015374094 | 0.047374965 | 0.002564267 | 0.039294966 |
| 0.015351456 | 0.030225873 | 0.042625922 | 0.012248777 |
| 0.000494045 | 8.91E-06    | 0.026118435 | 0.006850669 |
| 0.052978615 | 0.001471361 | 0.015931556 | 0.000499323 |
| 0.037171935 | 0.024643471 | 0.02588136  | 0.001785612 |
| 0.025900399 | 1.13E-05    | 0.043896895 | 0.001723467 |
| 0.027215711 | 0.03495352  | 0.014566714 | 0.011573595 |
| 0.002401624 | 0.021607179 | 0.036460044 | 0.020421569 |
| 0.029693566 | 0.001001691 | 0.02921822  | 0.007263185 |
| 0.011255286 | 0.009243348 | 0.037110122 | 0.005207701 |
| 0.034225521 | 0.000304884 | 0.020063808 | 0.002727549 |
| 0.026181307 | 0.003189567 | 0.032800762 | 0.004765159 |
| 0.008397539 | 0.019275915 | 0.014028901 | 0.015924692 |
| 0.030056064 | 0.015260604 | 0.00619285  | 0.048762744 |
| 0.001630755 | 0.009653547 | 0.003741712 | 0.003274365 |
| 0.003149015 | 0.034341072 | 0.020049926 | 0.024704693 |
| 0.026129651 | 0.001127728 | 0.017057016 | 0.008159455 |
| 0.000122199 | 0.011380167 | 0.05614878  | 0.000666984 |
| 0.016124013 | 0.002215602 | 3.65E-05    | 0.00469801  |
| 0.038861099 | 0.00283156  |             |             |
| CLIC4       | 0.281055202 | 0.409479323 | 0.037099877 |
| 0.016318432 | 0.075751297 | 0.143287454 | 0.137284934 |
| 0.296950729 | 0.068364987 | 0.076805687 | 0.209532573 |
| 0.001379736 | 0.386011385 | 0.009710043 | 0.055862404 |
| 0.471479717 | 0.486054412 | 0.232611835 | 0.4841355   |
| 0.249111042 | 0.092436914 | 0.264934426 | 0.24942164  |
| 0.162850595 | 0.001267182 | 0.069774269 | 0.025920134 |
| 0.329609397 | 0.481711562 | 0.132003479 | 0.175332795 |
| 0.424351822 | 0.426806377 | 0.28343858  | 0.241308807 |
| 0.225287224 | 0.352860901 | 0.177809191 | 0.37445008  |
| 0.423453379 | 0.137918269 | 0.403721659 | 0.010065111 |

|             |             |             |             |
|-------------|-------------|-------------|-------------|
| 0.003207764 | 0.057706424 | 0.295977701 | 0.269440825 |
| 0.24347657  | 0.131184056 | 0.111084838 | 0.102970154 |
| 0.169449806 | 0.236696499 | 0.315134932 | 0.181775717 |
| 0.284775593 | 0.002476516 | 0.336388547 | 0.213425552 |
| 0.038325753 | 0.228444356 | 0.307408302 | 0.305237001 |
| 0.154502069 | 0.309673772 | 0.455423547 | 0.019411679 |
| 0.039951048 | 0.353551775 | 0.351905229 | 0.294603439 |
| 0.372510245 | 0.22045546  | 0.19396361  | 0.359310816 |
| 0.354838586 | 0.38264385  | 0.195697666 | 0.12260568  |
| 0.000653472 | 0.08619255  | 0.234441574 | 0.304426559 |
| 0.353100783 | 0.236192247 | 0.330612257 | 0.139190058 |
| 0.325421689 | 0.01054098  | 0.265594707 | 0.470691784 |
| 0.01329007  | 1           | 0.008551176 | 0.112145367 |
| 0.364349132 | 0.469353053 | 0.309635741 | 0.039589073 |
| 0.008550396 | 0.088344642 | 0.136315803 | 0.442548043 |
| 0.315889353 | 0.337420478 | 0.274058203 | 0.208921949 |
| 0.390782788 | 0.114345886 | 0.258829872 | 0.341409249 |
| 0.416012231 | 0.006635342 | 0.117459555 | 0.137473357 |
| 0.27824439  | 0.094153202 | 0.146559917 | 0.033064636 |
| 0.006242186 | 0.027038912 | 0.439133942 | 0.106231497 |
| 0.055795181 | 0.120623363 | 0.050770044 | 0.338810095 |
| 0.300589854 | 0.43668754  | 0.080288642 | 0.157038525 |
| 0.365855084 | 0.159161482 | 0.297805221 | 0.36463191  |
| 0.305225476 | 0.201649117 | 0.090961155 | 0.355948118 |
| 0.320530685 | 0.039470246 | 0.045902826 | 0.208882308 |
| 0.374023073 | 0.449100786 | 0.468708774 | 0.238436363 |
| 0.17920501  | 0.1722428   | 0.212664    | 0.259134196 |
| 0.158338508 | 0.285460172 | 0.122332903 | 0.248291086 |
| 0.287266951 | 0.033534874 | 0.036621668 | 0.359186329 |
| 0.040031862 | 0.176612376 | 0.335477491 | 0.350510977 |
| 0.363414497 | 0.020452496 | 0.137456289 | 0.162707612 |
| 0.204222646 | 0.152311233 | 0.314752103 | 0.128074305 |
| 0.208616771 | 0.211164507 | 0.026520033 | 0.387817051 |
| 0.073786573 | 0.241924586 | 0.263856748 | 0.066373325 |
| 0.342241091 | 0.287092912 | 0.339911506 | 0.327851427 |
| 0.334356701 | 0.001982158 | 0.075062138 | 0.287553973 |
| 0.204463272 | 0.413800786 | 0.394251191 | 0.068807091 |
| 0.177177337 | 0.346942863 | 0.09090972  | 0.244105825 |
| 0.356350186 | 0.139692082 | 0.119498328 | 0.0002577   |
| 0.089070764 | 0.285056059 | 0.34307039  | 0.036104016 |
| 0.149962848 | 0.066024096 | 0.114222081 | 0.378358606 |
| 0.123234644 | 0.371505808 | 0.025868519 | 0.214869563 |
| 0.16314349  | 0.295642702 | 0.276406876 | 0.203655945 |
| 0.332674937 | 0.197805025 | 0.450710585 | 0.266546842 |
| 0.207169549 | 0.222448092 | 0.231317917 | 0.200761591 |
| 0.36799024  | 0.395509657 | 0.373518175 | 0.371000316 |
| 0.166525099 | 0.332613449 | 0.263085193 | 0.174636334 |
| 0.293890891 | 0.324010022 | 0.049289898 | 0.42098957  |
| 0.000382809 | 0.237773848 | 0.321786756 | 0.22206624  |
| 0.382336173 | 0.148266186 | 0.0402549   | 0.183753859 |
| 0.487014806 | 0.423699634 | 0.379963689 | 0.417281704 |
| 0.234899381 | 0.007410883 | 0.420989177 | 0.287288549 |
| 0.488438892 | 0.299750127 | 0.29681132  | 0.125332893 |
| 0.416416502 | 0.331598901 | 0.29700187  | 0.31278747  |

|             |             |             |             |
|-------------|-------------|-------------|-------------|
| 0.364962006 | 0.358003456 | 0.175806998 | 0.325730412 |
| 0.017441931 | 0.148851997 | 0.31598397  | 0.123587299 |
| 0.196980322 | 0.124062927 | 0.356758036 | 0.2223185   |
| 0.310584624 | 0.224160949 | 0.253829047 | 0.045053249 |
| 0.110353963 | 0.414774536 | 0.074518293 | 0.399012007 |
| 0.473810523 | 0.284458942 | 0.395488742 | 0.469540506 |
| 0.216520421 | 0.263909039 | 0.383146062 | 0.434984131 |
| 0.000790371 | 0.430144712 | 0.359225241 | 0.232208449 |
| 0.401971048 | 0.184779443 | 0.262285132 | 0.363685229 |
| 0.001630711 | 0.093453657 | 0.224521045 | 0.400659991 |
| 0.399600685 | 0.015850989 | 0.094840193 | 0.352971041 |
| 0.36138583  | 0.05181921  | 0.453999334 | 0.210683598 |
| 0.353297916 | 0.324434418 | 0.098255225 | 0.386694581 |
| 0.213298372 | 0.330746465 | 0.019919724 | 0.308412154 |
| 0.371228608 | 0.13689912  | 0.045869357 | 0.470339951 |
| 0.332366516 | 0.266702374 | 0.16559365  | 0.003406785 |
| 0.398655352 | 0.139562985 | 0.34214244  | 0.082818735 |
| 0.317234032 | 0.245082908 | 0.349624676 | 0.383699964 |
| 0.348959013 | 0.281137244 | 0.248173944 | 0.334929319 |
| 0.094988952 | 0.368108103 | 0.403970258 | 0.02972738  |
| 0.32990595  | 0.418893889 | 0.289011136 | 0.10336812  |
| 0.27164852  | 0.067890405 | 0.122181676 | 0.274461225 |
| 0.33396256  | 0.40859431  | 0.029797518 | 0.126775123 |
| 0.271974262 | 0.213923445 | 0.065348015 | 0.269002524 |
| 0.181059468 | 0.179595853 | 0.208513112 | 0.261927955 |
| 0.347036994 | 0.18393369  | 0.380710966 | 0.089807719 |
| 0.433603705 | 0.032861289 | 0.374656871 | 0.189928396 |
| 0.196339681 | 0.317641359 | 0.404473224 | 0.131248057 |
| 0.010854398 | 0.081591554 | 0.264330556 | 0.277721023 |
| 0.041786369 | 0.124536808 | 0.153001446 | 0.226074624 |
| 0.461160146 | 0.292633809 | 0.174964773 | 0.26163004  |
| 0.278793849 | 0.063010302 | 0.389090751 | 0.23851276  |
| 0.301430405 | 0.216129167 | 0.352751418 | 0.006992448 |
| 0.360611078 | 0.093108923 | 0.22780419  | 0.242403265 |
| 0.46230979  | 0.074668911 | 0.261321019 | 0.10681421  |
| 0.137529153 | 0.003578811 | 0.263784775 | 0.332265067 |
| 0.175490783 | 0.292718321 | 0.275938978 | 0.186442269 |
| 0.441293896 | 0.27773888  | 0.315248612 | 0.328760817 |
| 0.243962852 | 0.033112332 | 0.085508213 | 0.018691245 |
| 0.290193862 | 0.275022881 | 0.343028522 | 0.292450646 |
| 0.197686665 | 0.347090792 | 0.274078619 | 0.299274228 |
| 0.403305779 | 0.13460951  | 0.467642076 | 0.257781085 |
| 0.410074967 | 0.279169381 | 0.168279191 | 0.262103943 |
| 0.125363216 | 0.121653521 | 0.074095095 | 0.129396497 |
| 0.433475544 | 0.284071901 | 0.268244847 | 0.22433154  |
| 0.024190741 | 0.265128581 | 0.365625514 | 0.363125372 |
| 0.303777411 | 0.32438275  | 0.320064642 | 0.260130088 |
| 0.238444854 | 0.223195262 | 0.03405208  | 0.016608717 |
| 0.181860912 | 0.110877845 | 0.360026909 | 0.366330957 |
| 0.467390674 | 0.277166827 | 0.055821375 | 0.094330212 |
| 0.197867332 | 0.346583233 | 0.168074242 | 0.170832818 |
| 0.35158547  | 0.298588361 | 0.000302771 | 0.181757971 |
| 0.258878389 | 0.293518581 |             |             |
| CLYBL       | 0.004898524 | 0.018178344 | 0.002336139 |

|                      |                      |                      |                   |
|----------------------|----------------------|----------------------|-------------------|
| 0.000727126          | 0.002533634          | 0.015654967          | 0.016000089       |
| 0.004443136          | 0.001367222          | 0.003504628          | 0.022662286       |
| 2.62E-06 0.007735058 | 0.000115433          | 0.000289799          |                   |
| 0.012881539          | 0.013470503          | 0.017521634          | 0.013743386       |
| 0.005571715          | 0.000696149          | 0.014438054          | 0.011987311       |
| 0.012396269          | 8.86E-06 0.011529861 | 0.000500844          |                   |
| 0.003478313          | 0.011877802          | 0.009571208          | 0.003026679       |
| 0.010505107          | 0.010944056          | 0.003062687          | 0.00168601        |
| 0.000852479          | 0.020497577          | 0.000183163          | 0.009304769       |
| 0.00709078           | 0.010510758          | 0.009915558          | 5.14E-05 3.65E-05 |
| 0.006832899          | 0.003448468          | 0.011706767          | 0.007584111       |
| 0.014043465          | 0.010310941          | 0.009123785          | 7.19E-05          |
| 0.020525207          | 0.011675464          | 0.000270815          | 0.023794125       |
| 5.61E-05 0.021133562 | 0.002579537          | 0.003848989          |                   |
| 0.006791905          | 0.003159359          | 0.011464715          | 0.019119479       |
| 0.023079225          | 0.016284341          | 0.001017127          | 0.007160633       |
| 0.00583364           | 0.006659283          | 0.011412989          | 0.016624649       |
| 0.002046169          | 0.003307953          | 0.003002257          | 0.007495168       |
| 0.008276791          | 0.015063037          | 0.004069204          | 1.57E-06          |
| 0.012257815          | 0.0045403            | 0.005271477          | 0.00494963        |
| 0.022011255          | 0.007182332          | 0.00634124           | 0.005786837       |
| 0.000320501          | 0.013080137          | 0.015374975          | 0.000128995       |
| 0.008551176          | 1                    | 0.002731105          | 0.010763516       |
| 0.008783491          | 0.009336163          | 0.002728072          | 0.000110821       |
| 0.003821662          | 0.000529831          | 0.00650721           | 0.007529765       |
| 0.00851201           | 0.021767608          | 0.000546121          | 0.005668498       |
| 0.000912889          | 0.007715358          | 0.021298522          | 0.014193323       |
| 7.74E-05 0.002260623 | 0.017970124          | 0.000666374          |                   |
| 0.000433447          | 0.01932156           | 2.35E-05 0.000149314 | 5.86E-05          |
| 0.011265148          | 0.004069564          | 0.006550354          | 0.014976251       |
| 0.006288382          | 0.010263425          | 0.004968176          | 0.008719308       |
| 0.003544514          | 0.012327332          | 0.008210276          | 0.017017372       |
| 0.01082041           | 0.00955637           | 0.005227999          | 0.003635834       |
| 0.005200304          | 0.020714442          | 0.019727568          | 0.001790923       |
| 0.001347293          | 0.015559324          | 0.006563281          | 0.013764781       |
| 0.016082359          | 0.011850259          | 0.010778146          | 0.011070939       |
| 0.002116303          | 0.017252886          | 0.016986363          | 0.009183169       |
| 6.07E-05 0.019688299 | 0.022793138          | 0.001251387          |                   |
| 0.003299078          | 0.0108687            | 0.000544872          | 0.001976907       |
| 0.01722372           | 0.016494791          | 0.011472602          | 0.000351339       |
| 0.006785428          | 0.013334446          | 0.009751393          | 0.011233849       |
| 0.011410657          | 0.003968576          | 0.013861802          | 0.002588378       |
| 0.006059701          | 0.006290541          | 0.010489591          | 0.0105377         |
| 0.000454582          | 1.37E-05 0.006573858 | 0.00591822           |                   |
| 0.016664997          | 0.01352921           | 0.006812656          | 0.000187386       |
| 0.003731643          | 0.006337633          | 0.001463612          | 0.00835879        |
| 0.020085673          | 0.009567311          | 0.011553193          | 0.001754476       |
| 0.009545295          | 0.007590019          | 0.010612219          | 0.001510109       |
| 0.001328167          | 3.48E-06 0.009365857 | 0.002447633          |                   |
| 0.006315623          | 0.000578397          | 0.00928416           | 0.000695949       |
| 0.000316155          | 0.014434266          | 0.013218869          | 0.013232334       |
| 0.000125783          | 0.000775387          | 0.007519369          | 0.018313208       |
| 0.003969408          | 0.001323366          | 0.014921842          | 0.004259104       |
| 0.007437383          | 0.018349092          | 0.005588166          | 0.019652494       |

|             |             |             |             |             |
|-------------|-------------|-------------|-------------|-------------|
| 0.000193871 | 0.00538049  | 0.006212793 | 0.014724175 |             |
| 0.009596643 | 0.015026271 | 0.009527207 | 0.008681037 |             |
| 0.000856468 | 0.017259298 | 0.01002276  | 0.009903794 |             |
| 0.003165507 | 0.019587385 | 1.90E-06    | 0.014982013 |             |
| 0.009381818 | 0.000183937 | 0.019480016 | 0.018908532 |             |
| 0.003180932 | 0.006793782 | 0.014060679 | 0.019469026 |             |
| 0.012223306 | 0.008678539 | 0.000792907 | 9.61E-05    |             |
| 0.016366493 | 0.015127382 | 0.011586348 | 0.012090763 |             |
| 0.002851414 | 5.95E-05    | 0.015448894 | 0.004545556 |             |
| 0.008756078 | 0.004936143 | 0.009246771 | 0.004970346 |             |
| 0.011221904 | 0.00613924  | 2.03E-06    | 0.006225549 |             |
| 0.007295626 | 0.000463556 | 0.004046805 | 0.000468351 |             |
| 0.014797165 | 0.019774945 | 0.004576558 | 0.001189265 |             |
| 0.003521826 | 0.009030912 | 0.013114189 | 0.017192205 |             |
| 2.92E-05    | 0.014389361 | 0.016072078 | 0.01240472  |             |
| 0.015211851 | 0.015122214 | 0.007811017 | 0.021629973 |             |
| 0.015234995 | 0.009516819 | 9.37E-07    | 0.007974365 |             |
| 0.006599647 | 0.020891197 | 0.010630156 | 0.013281387 |             |
| 0.002850069 | 0.003551162 | 4.47E-06    | 0.008442258 |             |
| 0.000827592 | 0.01918464  | 0.015205778 | 0.00097145  |             |
| 3.59E-05    | 0.015588685 | 0.006661518 | 2.55E-05    | 0.017225693 |
| 0.011574555 | 0.018944643 | 0.013490932 | 0.010879868 |             |
| 0.006905566 | 0.000638118 | 0.003617901 | 0.000131692 |             |
| 0.015040109 | 0.005684081 | 2.56E-05    | 0.001954259 |             |
| 0.014843597 | 0.014976903 | 0.020072318 | 0.015254031 |             |
| 1.07E-05    | 0.006358228 | 0.000915049 | 0.012513985 |             |
| 0.002874826 | 0.018300164 | 0.018273382 | 0.021042136 |             |
| 0.008681279 | 0.010910852 | 0.021157617 | 0.020030994 |             |
| 0.014046663 | 0.000193116 | 0.007672938 | 0.009170432 |             |
| 0.00043886  | 0.004365023 | 0.01452404  | 0.007096215 |             |
| 0.016132905 | 0.012187058 | 0.000397261 | 0.015307319 |             |
| 0.006837838 | 0.020965044 | 0.013460889 | 0.002764788 |             |
| 0.003991039 | 0.019855912 | 0.005301365 | 0.009851195 |             |
| 0.010878591 | 0.015779664 | 0.00012167  | 0.000275979 |             |
| 0.015002543 | 0.021437744 | 0.021901466 | 0.012066441 |             |
| 0.001737065 | 0.012314521 | 0.002094003 | 0.012984401 |             |
| 0.002743616 | 0.013150918 | 0.004746215 | 0.006371064 |             |
| 0.000147224 | 2.13E-05    | 0.000762664 | 0.020724863 |             |
| 0.022015982 | 0.005996631 | 0.00985323  | 0.014545981 |             |
| 0.018360199 | 0.012583973 | 0.003007128 | 0.01932171  |             |
| 0.010534894 | 0.022906924 | 0.000476275 | 0.020022596 |             |
| 0.008252301 | 0.011141769 | 0.008844486 | 0.015506613 |             |
| 6.22E-06    | 0.00804107  | 0.003925053 | 0.002476808 |             |
| 0.012314295 | 0.00810717  | 0.008914517 | 0.019469744 |             |
| 0.005696032 | 8.08E-05    | 6.68E-05    | 0.01550156  | 0.003532625 |
| 0.019406484 | 0.00137484  | 0.010044079 | 0.000259763 |             |
| 0.018846954 | 0.007979655 | 0.010196959 | 0.001698569 |             |
| 0.008523091 | 1.77E-05    | 0.004549839 | 0.000524649 |             |
| 0.011920458 | 0.019228568 | 0.00694333  | 0.004753894 |             |
| 0.002057714 | 0.011585978 | 0.020209421 | 0.00998979  |             |
| 0.014435723 | 0.000123778 | 0.013799777 | 0.005587449 |             |
| 0.00631235  | 0.002334844 | 0.016815942 | 0.003670634 |             |
| 0.012853712 | 0.000140401 | 0.007081205 | 0.001686273 |             |
| 0.012114921 | 0.002934886 | 0.01320699  | 0.001253579 |             |

|             |             |             |             |
|-------------|-------------|-------------|-------------|
| 0.002944464 | 0.012264632 | 0.009832205 | 0.007664003 |
| 0.01028825  | 0.005854632 | 0.005204772 | 0.023355465 |
| 0.000747852 | 0.003640653 | 0.000812104 | 0.000158335 |
| 0.00078948  | 0.006891187 | 0.012261324 | 0.014455844 |
| 0.014712167 | 0.001364787 | 0.005357452 | 0.003786286 |
| 0.000219356 | 0.006911482 | 0.019297001 | 0.000582859 |
| 0.010224673 | 0.001012855 | 9.45E-06    | 0.00358033  |
| 0.017423201 | 0.004055239 |             |             |
| CMAH        | 0.093013784 | 0.237467361 | 0.061852308 |
| 0.00117084  | 0.034861073 | 0.294987123 | 0.229183368 |
| 0.072380129 | 0.057937158 | 0.036427143 | 0.339643759 |
| 0.003934954 | 0.086830095 | 0.034405765 | 0.110140604 |
| 0.163681914 | 0.165907191 | 0.216496685 | 0.186338774 |
| 0.146730107 | 0.008481491 | 0.277177569 | 0.143948343 |
| 0.249524667 | 0.008117435 | 0.110859743 | 0.003628722 |
| 0.054386332 | 0.146299409 | 0.264986612 | 0.032654677 |
| 0.138672139 | 0.109065115 | 0.032455232 | 0.019183387 |
| 0.003733468 | 0.312704852 | 0.003870611 | 0.086784747 |
| 0.090299864 | 0.095710512 | 0.116688031 | 0.032155758 |
| 1.85E-05    | 0.132064442 | 0.043222448 | 0.212003014 |
| 0.181942919 | 0.266805202 | 0.324965331 | 0.102985049 |
| 0.001519771 | 0.343896811 | 0.228499483 | 0.001348611 |
| 0.337082267 | 0.000113856 | 0.308260644 | 0.066835614 |
| 0.153896707 | 0.193305745 | 0.051553148 | 0.170749716 |
| 0.333964268 | 0.327414316 | 0.209264358 | 0.025422096 |
| 0.180578349 | 0.08690049  | 0.072994157 | 0.099603657 |
| 0.216684138 | 0.023741297 | 0.053375082 | 0.030470644 |
| 0.089136705 | 0.097105838 | 0.382701132 | 0.151821425 |
| 0.001601775 | 0.161544082 | 0.027335346 | 0.103335314 |
| 0.049341873 | 0.3364327   | 0.101380597 | 0.081105552 |
| 0.058063005 | 0.05389178  | 0.229369345 | 0.192038009 |
| 0.004363741 | 0.112145367 | 0.002731105 | 1           |
| 0.145589394 | 0.10742036  | 0.144018269 | 0.047948659 |
| 0.05460672  | 0.198862525 | 0.020320754 | 0.07705829  |
| 0.143475409 | 0.101131131 | 0.330642442 | 0.008777666 |
| 0.060263499 | 0.039443868 | 0.110114015 | 0.285186579 |
| 0.188604723 | 0.054219283 | 0.123130174 | 0.312992375 |
| 0.015883116 | 0.010489103 | 0.272843606 | 0.001385911 |
| 0.003410718 | 0.013955407 | 0.134428774 | 0.135252487 |
| 0.07387034  | 0.202808303 | 0.017202887 | 0.085643499 |
| 0.061695232 | 0.134593079 | 0.041854137 | 0.171701953 |
| 0.075663606 | 0.233226587 | 0.067834056 | 0.109459574 |
| 0.03586714  | 0.09786875  | 0.179868136 | 0.260453279 |
| 0.35792324  | 0.059814248 | 0.057036479 | 0.291913227 |
| 0.062545025 | 0.164517467 | 0.212809479 | 0.059505061 |
| 0.072247345 | 0.269568838 | 0.025550704 | 0.184482594 |
| 0.322737244 | 0.218860503 | 0.005323921 | 0.385287038 |
| 0.351510722 | 0.001959272 | 0.129299386 | 0.154026509 |
| 0.00479803  | 0.042476502 | 0.270322032 | 0.178471167 |
| 0.129566971 | 0.002981854 | 0.05531387  | 0.190461167 |
| 0.24920449  | 0.176211286 | 0.188373033 | 0.037212923 |
| 0.315420957 | 0.025218989 | 0.103869933 | 0.062243873 |
| 0.256004823 | 0.280624059 | 0.005549163 | 0.004274987 |
| 0.133480941 | 0.106988703 | 0.190593825 | 0.151462818 |



|             |             |             |             |
|-------------|-------------|-------------|-------------|
| 0.103624064 | 9.40E-05    | 0.032694104 | 0.117786141 |
| 0.021049218 | 0.112106667 | 0.254342258 | 0.290232739 |
| 0.350225174 | 0.019791767 | 0.309592309 | 0.065772799 |
| 0.191473073 | 0.019997297 | 0.021721848 | 0.001902543 |
| 0.05820121  | 0.021437507 | 0.107085299 | 0.060630295 |
| 0.045907598 | 0.050086487 | 0.042440964 | 0.174598102 |
| 0.279025827 | 0.1279558   | 0.036071701 | 0.019551427 |
| 0.124989132 | 0.215868787 | 0.024625174 | 0.018897846 |
| 0.158749496 | 0.04842562  | 0.083843576 | 0.334885627 |
| 0.053547016 | 0.290814904 | 0.006513683 | 0.153129017 |
| 0.069292354 | 0.167388667 | 0.10240538  | 0.161111441 |
| 0.161137806 | 0.178431957 | 0.012927845 | 0.349589686 |
| 0.188047661 | 0.189657861 | 0.09568482  | 0.26186944  |
| 0.003380784 | 0.313092991 | 0.093750036 | 0.006446171 |
| 0.235299676 | 0.266824645 | 0.137713992 | 0.17670645  |
| 0.190840616 | 0.275649644 | 0.219787926 | 0.100637282 |
| 0.011260068 | 0.039195577 | 0.239831479 | 0.254475502 |
| 0.142343771 | 0.126462954 | 0.015487652 | 0.018726146 |
| 0.194369921 | 0.091899663 | 0.126328759 | 0.066586126 |
| 0.089786858 | 0.038606323 | 0.314221344 | 0.12818094  |
| 0.001767294 | 0.101028816 | 0.082484697 | 0.011438919 |
| 0.043422663 | 0.029349082 | 0.159623857 | 0.402068089 |
| 0.027801221 | 0.011337691 | 0.021716932 | 0.123425404 |
| 0.316284056 | 0.236019691 | 0.001727588 | 0.254341901 |
| 0.202816987 | 0.23835491  | 0.166868382 | 0.207065727 |
| 0.202791189 | 0.318421729 | 0.190026195 | 0.147801263 |
| 0.003598756 | 0.083700004 | 0.062324194 | 0.408897458 |
| 0.114065211 | 0.282177863 | 0.048448998 | 0.033354809 |
| 0.007655137 | 0.283240601 | 0.0032261   | 0.30995875  |
| 0.156018948 | 0.041816759 | 0.000718667 | 0.185723381 |
| 0.059626964 | 0.008014607 | 0.23402591  | 0.13738204  |
| 0.207853515 | 0.141741661 | 0.144945876 | 0.073351845 |
| 0.002707971 | 0.070660112 | 0.008308193 | 0.13048702  |
| 0.072466479 | 0.006147339 | 0.012365543 | 0.212403712 |
| 0.206819378 | 0.280350037 | 0.340467175 | 0.001145282 |
| 0.08618853  | 0.0047033   | 0.120506742 | 0.099855725 |
| 0.271140363 | 0.333569185 | 0.275506702 | 0.098489132 |
| 0.132981504 | 0.287910652 | 0.328172051 | 0.187811585 |
| 0.004029615 | 0.080249918 | 0.107950507 | 0.041582755 |
| 0.06174743  | 0.168290926 | 0.058432952 | 0.270730866 |
| 0.276887062 | 0.002754294 | 0.331419272 | 0.138893751 |
| 0.258735294 | 0.147234973 | 0.087894004 | 0.152679222 |
| 0.285664112 | 0.139069696 | 0.2007301   | 0.217769303 |
| 0.367018725 | 0.001443968 | 0.010620964 | 0.312790258 |
| 0.296350147 | 0.346866515 | 0.139016975 | 0.011699965 |
| 0.139900328 | 0.10572641  | 0.207292488 | 0.055810006 |
| 0.294299474 | 0.051750674 | 0.075345577 | 0.005974154 |
| 0.00202784  | 0.037064327 | 0.272628932 | 0.332935407 |
| 0.169077912 | 0.316387143 | 0.159290645 | 0.161103732 |
| 0.148988734 | 0.028750511 | 0.339506257 | 0.204411234 |
| 0.370789675 | 0.006243402 | 0.296710176 | 0.183338525 |
| 0.219287955 | 0.083706194 | 0.184064378 | 0.00182269  |
| 0.086886615 | 0.040728787 | 0.05651343  | 0.09668555  |
| 0.10260269  | 0.154762307 | 0.256379991 | 0.15369327  |

|             |             |             |             |
|-------------|-------------|-------------|-------------|
| 0.00832061  | 0.0105511   | 0.343951109 | 0.024044387 |
| 0.375537805 | 0.024463497 | 0.179502507 | 0.001217186 |
| 0.265467471 | 0.135080527 | 0.150318852 | 0.02359336  |
| 0.087750759 | 0.00031765  | 0.052941532 | 0.067780104 |
| 0.244448493 | 0.34039655  | 0.122504022 | 0.073496612 |
| 0.055233207 | 0.137110541 | 0.27313569  | 0.080287353 |
| 0.154747464 | 0.0025153   | 0.1698854   | 0.156850668 |
| 0.064640754 | 0.03369839  | 0.351993743 | 0.048681047 |
| 0.161084728 | 0.02523463  | 0.198002314 | 0.080654401 |
| 0.129645582 | 0.057160946 | 0.116411096 | 0.02619338  |
| 0.043668108 | 0.091420616 | 0.135037491 | 0.080652193 |
| 0.112388823 | 0.059897132 | 0.050002961 | 0.376223957 |
| 0.016825215 | 0.115164223 | 0.002036781 | 0.002800832 |
| 0.005851298 | 0.1414731   | 0.220204586 | 0.211925477 |
| 0.184146535 | 0.019435344 | 0.139086679 | 0.180773908 |
| 0.005588216 | 0.101684273 | 0.242415895 | 0.003597913 |
| 0.156412836 | 0.023005987 | 0.003832895 | 0.09911482  |
| 0.308271227 | 0.012170546 |             |             |
| CNGA1       | 0.337013025 | 0.447372322 | 0.061898154 |
| 0.025098017 | 0.087568775 | 0.197676601 | 0.177526771 |
| 0.351223358 | 0.099099713 | 0.119029091 | 0.26852335  |
| 0.003108268 | 0.363711474 | 0.018902946 | 0.073246197 |
| 0.497907169 | 0.501327643 | 0.266774205 | 0.494159902 |
| 0.312262789 | 0.124134564 | 0.329780837 | 0.326563212 |
| 0.214337845 | 0.002989687 | 0.098231996 | 0.043453547 |
| 0.352851647 | 0.495047568 | 0.181140756 | 0.245968575 |
| 0.44907995  | 0.431379371 | 0.331189977 | 0.247356247 |
| 0.209511446 | 0.403582079 | 0.105380692 | 0.370286453 |
| 0.404875482 | 0.182974446 | 0.413216793 | 0.014580854 |
| 0.003115655 | 0.085378862 | 0.321594307 | 0.343692081 |
| 0.289676397 | 0.186041576 | 0.15247803  | 0.13749233  |
| 0.177332398 | 0.293947508 | 0.361555196 | 0.171087827 |
| 0.328220818 | 0.004195533 | 0.383086721 | 0.270059368 |
| 0.059485564 | 0.276111082 | 0.343492468 | 0.363308974 |
| 0.202441546 | 0.355220696 | 0.477368885 | 0.028820065 |
| 0.063604244 | 0.379039402 | 0.372536935 | 0.347234466 |
| 0.409438966 | 0.305942906 | 0.242261453 | 0.32103549  |
| 0.385825817 | 0.390578317 | 0.244423291 | 0.160795223 |
| 0.001510349 | 0.119813373 | 0.25054517  | 0.331579308 |
| 0.363114511 | 0.295450528 | 0.359155204 | 0.169335037 |
| 0.386597202 | 0.020118181 | 0.337525607 | 0.496323119 |
| 0.020440055 | 0.364349132 | 0.010763516 | 0.145589394 |
| 1           | 0.473072855 | 0.374081524 | 0.062395505 |
| 0.015556825 | 0.124127246 | 0.1777199   | 0.420784394 |
| 0.355182423 | 0.379292089 | 0.32290183  | 0.160683031 |
| 0.361385477 | 0.176437447 | 0.297579718 | 0.394978591 |
| 0.455336951 | 0.009924087 | 0.163642119 | 0.185419114 |
| 0.280217414 | 0.110959713 | 0.186727426 | 0.053728809 |
| 0.012088009 | 0.030782408 | 0.452903888 | 0.1534822   |
| 0.082575076 | 0.167482071 | 0.074903931 | 0.367354147 |
| 0.330885163 | 0.437284503 | 0.090426574 | 0.204139313 |
| 0.382842688 | 0.201860197 | 0.33294741  | 0.394329785 |
| 0.290791249 | 0.248385765 | 0.142430161 | 0.382361734 |
| 0.363714288 | 0.061627262 | 0.076394967 | 0.277753658 |

|             |             |             |             |
|-------------|-------------|-------------|-------------|
| 0.344489642 | 0.474724226 | 0.500317445 | 0.289598989 |
| 0.202403789 | 0.215961068 | 0.281333624 | 0.322130006 |
| 0.199287647 | 0.320625945 | 0.101146338 | 0.296736971 |
| 0.336123083 | 0.044384044 | 0.061195677 | 0.392090224 |
| 0.038908969 | 0.197769468 | 0.388746085 | 0.385049374 |
| 0.375681881 | 0.037334085 | 0.194277241 | 0.216062955 |
| 0.267682898 | 0.212423989 | 0.361171276 | 0.183369804 |
| 0.276754294 | 0.287479137 | 0.042346632 | 0.359518327 |
| 0.109555802 | 0.305284904 | 0.295476366 | 0.065268998 |
| 0.368693086 | 0.31796762  | 0.389951885 | 0.374807325 |
| 0.37084785  | 0.003693322 | 0.119878096 | 0.350055378 |
| 0.278497589 | 0.397064353 | 0.436874507 | 0.100228934 |
| 0.232785301 | 0.281586222 | 0.130140468 | 0.252096249 |
| 0.374284868 | 0.195842985 | 0.1776274   | 0.000963363 |
| 0.114953564 | 0.344748457 | 0.35855146  | 0.062039306 |
| 0.183833512 | 0.114855506 | 0.138291451 | 0.408675214 |
| 0.174536479 | 0.384027512 | 0.035518418 | 0.181845609 |
| 0.229698267 | 0.337352133 | 0.336814462 | 0.270697157 |
| 0.370613592 | 0.27108777  | 0.446255528 | 0.321667014 |
| 0.211467377 | 0.289932688 | 0.176100981 | 0.244193678 |
| 0.388661819 | 0.415226059 | 0.394552522 | 0.386069016 |
| 0.217890702 | 0.350056493 | 0.283042217 | 0.236318976 |
| 0.361451212 | 0.351829871 | 0.083612562 | 0.451419941 |
| 0.001069865 | 0.298448851 | 0.368645096 | 0.199249467 |
| 0.427052569 | 0.191391155 | 0.06786745  | 0.244192337 |
| 0.500909183 | 0.454660609 | 0.399959599 | 0.434507475 |
| 0.253045979 | 0.014762596 | 0.449620101 | 0.341944127 |
| 0.497148243 | 0.323480635 | 0.268596389 | 0.095139744 |
| 0.447180612 | 0.33348964  | 0.364101881 | 0.387577449 |
| 0.36601085  | 0.323461844 | 0.216688656 | 0.334005534 |
| 0.020667113 | 0.225190834 | 0.383536126 | 0.165379819 |
| 0.273034131 | 0.171580446 | 0.384425442 | 0.270949406 |
| 0.30973124  | 0.330092708 | 0.282627745 | 0.068131922 |
| 0.14725898  | 0.459949232 | 0.041425092 | 0.432108497 |
| 0.498879367 | 0.31411836  | 0.427520915 | 0.496232484 |
| 0.288155005 | 0.311333812 | 0.419908676 | 0.432659415 |
| 0.001798685 | 0.421564648 | 0.343165684 | 0.286265043 |
| 0.434317976 | 0.242496632 | 0.25756548  | 0.358954206 |
| 0.001352551 | 0.137973777 | 0.242029398 | 0.439445462 |
| 0.418150236 | 0.024160444 | 0.044590265 | 0.389624186 |
| 0.354294018 | 0.048342193 | 0.491580856 | 0.277908804 |
| 0.386251696 | 0.351033528 | 0.139680741 | 0.372891401 |
| 0.221627717 | 0.333740941 | 0.023828116 | 0.362465607 |
| 0.347621906 | 0.102745349 | 0.06563303  | 0.49441912  |
| 0.384802215 | 0.309129079 | 0.214998379 | 0.010643718 |
| 0.396213741 | 0.191259572 | 0.387924168 | 0.103678748 |
| 0.371209431 | 0.297476304 | 0.380132041 | 0.377837158 |
| 0.378372234 | 0.337034725 | 0.312163043 | 0.385683254 |
| 0.103432665 | 0.388270927 | 0.426272012 | 0.056138066 |
| 0.357243109 | 0.438941536 | 0.341979046 | 0.144495115 |
| 0.333499249 | 0.07202601  | 0.171447088 | 0.316422859 |
| 0.370360878 | 0.435754706 | 0.05192647  | 0.163208145 |
| 0.331919509 | 0.260713537 | 0.089395624 | 0.299510483 |
| 0.234007422 | 0.190408165 | 0.162152231 | 0.314124504 |

|             |             |             |             |
|-------------|-------------|-------------|-------------|
| 0.392795817 | 0.234359156 | 0.426119088 | 0.134756544 |
| 0.434365368 | 0.051472483 | 0.382816835 | 0.210650004 |
| 0.25432174  | 0.370707071 | 0.398815659 | 0.157425614 |
| 0.026281907 | 0.135000435 | 0.318647787 | 0.331183636 |
| 0.069222948 | 0.174534326 | 0.209202103 | 0.275364682 |
| 0.481980764 | 0.37178395  | 0.230806352 | 0.307328406 |
| 0.323030326 | 0.079689256 | 0.437510335 | 0.309402721 |
| 0.365148964 | 0.269537401 | 0.389918658 | 0.009372041 |
| 0.385248401 | 0.144710083 | 0.23531792  | 0.286844112 |
| 0.461584129 | 0.115052249 | 0.303178699 | 0.157659958 |
| 0.153220748 | 0.004951575 | 0.318592554 | 0.312423206 |
| 0.231391375 | 0.300157141 | 0.325624041 | 0.164419871 |
| 0.48258836  | 0.351152457 | 0.376605567 | 0.264097394 |
| 0.318606432 | 0.019452588 | 0.125525664 | 0.036946182 |
| 0.356219239 | 0.323492904 | 0.378799003 | 0.362966961 |
| 0.23108404  | 0.364501518 | 0.32123583  | 0.321536097 |
| 0.42581526  | 0.16093146  | 0.496219117 | 0.282375291 |
| 0.38805755  | 0.339573308 | 0.214363606 | 0.289945898 |
| 0.153448105 | 0.124687046 | 0.103964187 | 0.174990314 |
| 0.451429158 | 0.259882093 | 0.307186067 | 0.316856147 |
| 0.042287214 | 0.320425519 | 0.380899303 | 0.379080387 |
| 0.375361872 | 0.358987763 | 0.35656298  | 0.312220196 |
| 0.297051146 | 0.288837297 | 0.046765843 | 0.02745193  |
| 0.222683502 | 0.163271547 | 0.388310967 | 0.38771331  |
| 0.483018912 | 0.301595546 | 0.087697629 | 0.13962542  |
| 0.139667144 | 0.361593026 | 0.212285902 | 0.138743685 |
| 0.368259112 | 0.30432045  | 0.000854166 | 0.239175065 |
| 0.321344561 | 0.334451321 |             |             |
| CNR2        | 0.387756494 | 0.433451722 | 0.039398699 |
| 0.025772256 | 0.074838912 | 0.164914414 | 0.151292066 |
| 0.40304011  | 0.072761689 | 0.09958439  | 0.244227399 |
| 0.001726665 | 0.473265675 | 0.010470136 | 0.050335745 |
| 0.480688759 | 0.485611926 | 0.257545374 | 0.476512338 |
| 0.317326316 | 0.126182359 | 0.325571704 | 0.331055006 |
| 0.186380427 | 0.001484315 | 0.076012079 | 0.039764439 |
| 0.439034496 | 0.487433827 | 0.142952182 | 0.225041764 |
| 0.47465894  | 0.497259011 | 0.385446594 | 0.289360946 |
| 0.315801369 | 0.386229513 | 0.165087393 | 0.487092469 |
| 0.469276067 | 0.159387717 | 0.496740212 | 0.008616727 |
| 0.00563371  | 0.060323274 | 0.393742422 | 0.349479088 |
| 0.280640606 | 0.151413979 | 0.114431474 | 0.118725964 |
| 0.264347753 | 0.277138895 | 0.39973744  | 0.271709699 |
| 0.328190259 | 0.004627849 | 0.372297173 | 0.287336545 |
| 0.036892075 | 0.260304576 | 0.432681966 | 0.389831588 |
| 0.171755643 | 0.347501383 | 0.463933218 | 0.01821545  |
| 0.040837936 | 0.45625277  | 0.493523986 | 0.392899885 |
| 0.43580948  | 0.310203053 | 0.228541193 | 0.445266495 |
| 0.487965677 | 0.482553569 | 0.214233537 | 0.123773819 |
| 0.000829263 | 0.095007443 | 0.291891115 | 0.410445907 |
| 0.494215041 | 0.278811453 | 0.429022217 | 0.154513384 |
| 0.463523023 | 0.009982555 | 0.329639608 | 0.47620429  |
| 0.017436805 | 0.469353053 | 0.008783491 | 0.10742036  |
| 0.473072855 | 1           | 0.420169561 | 0.041690483 |
| 0.007737269 | 0.087844639 | 0.181429493 | 0.461255041 |

|             |             |             |             |
|-------------|-------------|-------------|-------------|
| 0.388776426 | 0.437300554 | 0.324501386 | 0.252559775 |
| 0.459842135 | 0.150682169 | 0.289880128 | 0.381261137 |
| 0.45684707  | 0.005102725 | 0.12720674  | 0.151353292 |
| 0.34789142  | 0.116306847 | 0.155725269 | 0.058942708 |
| 0.007940543 | 0.028990937 | 0.481661313 | 0.115369759 |
| 0.062373437 | 0.137548872 | 0.062478291 | 0.446985307 |
| 0.385082726 | 0.463737539 | 0.076258649 | 0.182414171 |
| 0.492449712 | 0.178774787 | 0.378879114 | 0.483341747 |
| 0.350273093 | 0.231434662 | 0.10369619  | 0.402649253 |
| 0.358523134 | 0.039468961 | 0.05198516  | 0.254840862 |
| 0.469512625 | 0.477549471 | 0.464941394 | 0.278489058 |
| 0.196423116 | 0.183643957 | 0.311849459 | 0.327634342 |
| 0.167707234 | 0.328839601 | 0.14279239  | 0.280416525 |
| 0.325464673 | 0.048202231 | 0.037651542 | 0.46970972  |
| 0.042304063 | 0.179939746 | 0.396682732 | 0.44186476  |
| 0.437546072 | 0.033329063 | 0.181389214 | 0.192197417 |
| 0.24506878  | 0.185072425 | 0.390087311 | 0.1764386   |
| 0.252173039 | 0.317193187 | 0.025115249 | 0.465288611 |
| 0.07560643  | 0.289118775 | 0.411317379 | 0.082595237 |
| 0.437838023 | 0.338399709 | 0.436142222 | 0.411577618 |
| 0.456587053 | 0.00394726  | 0.100751947 | 0.393932001 |
| 0.307607149 | 0.459195758 | 0.418716528 | 0.068349343 |
| 0.198700386 | 0.384842024 | 0.093224883 | 0.269825016 |
| 0.427011063 | 0.185860338 | 0.162850026 | 0.000399579 |
| 0.086148428 | 0.437947753 | 0.413391008 | 0.040711925 |
| 0.169149997 | 0.083743673 | 0.126667325 | 0.457284666 |
| 0.136457104 | 0.471737505 | 0.026161206 | 0.239862792 |
| 0.198252917 | 0.359349668 | 0.390566958 | 0.29255886  |
| 0.425047076 | 0.261757163 | 0.473714805 | 0.319947375 |
| 0.205699058 | 0.275101104 | 0.264150038 | 0.224200267 |
| 0.493942682 | 0.467383949 | 0.498151122 | 0.46067242  |
| 0.188252586 | 0.406577544 | 0.34618962  | 0.203366987 |
| 0.373454046 | 0.375825164 | 0.053901108 | 0.43349909  |
| 0.000448546 | 0.278942023 | 0.422552104 | 0.291557632 |
| 0.423832304 | 0.164380562 | 0.041866376 | 0.215350359 |
| 0.476934355 | 0.431946372 | 0.432580365 | 0.491690861 |
| 0.306420882 | 0.007484271 | 0.440833421 | 0.353023019 |
| 0.49087827  | 0.333828271 | 0.356068018 | 0.113812629 |
| 0.467152923 | 0.419036904 | 0.405903977 | 0.461102646 |
| 0.443971467 | 0.417307356 | 0.183467189 | 0.409182409 |
| 0.024704086 | 0.197588675 | 0.455831034 | 0.17343095  |
| 0.278440987 | 0.151510149 | 0.450971246 | 0.246862719 |
| 0.375508844 | 0.371243729 | 0.343178668 | 0.046315452 |
| 0.112871235 | 0.439638689 | 0.066346903 | 0.433561518 |
| 0.471164836 | 0.314671611 | 0.46694167  | 0.469691938 |
| 0.270817538 | 0.308714282 | 0.452001103 | 0.464348278 |
| 0.00092721  | 0.487202954 | 0.476203068 | 0.26661296  |
| 0.48734124  | 0.21547344  | 0.326836892 | 0.479755725 |
| 0.000815034 | 0.101006098 | 0.347230487 | 0.410083825 |
| 0.473128855 | 0.0140406   | 0.087606312 | 0.443388996 |
| 0.479724661 | 0.057068216 | 0.454707649 | 0.26748665  |
| 0.423057232 | 0.376007199 | 0.112433182 | 0.489717086 |
| 0.341652013 | 0.384680309 | 0.019510157 | 0.396052355 |
| 0.426371069 | 0.143156371 | 0.057582887 | 0.467223623 |

|             |             |             |             |
|-------------|-------------|-------------|-------------|
| 0.425146791 | 0.310126014 | 0.179880502 | 0.007879826 |
| 0.4559261   | 0.222692704 | 0.459976941 | 0.076573537 |
| 0.393680152 | 0.286437013 | 0.398341051 | 0.494208787 |
| 0.427348509 | 0.341135902 | 0.301554099 | 0.436995644 |
| 0.123907596 | 0.489596422 | 0.481726679 | 0.036025459 |
| 0.454536556 | 0.475354758 | 0.397001176 | 0.112109659 |
| 0.332434434 | 0.086335562 | 0.135531929 | 0.343334081 |
| 0.39101737  | 0.475743355 | 0.032086751 | 0.127544278 |
| 0.33639171  | 0.235169098 | 0.062848059 | 0.289471206 |
| 0.203185273 | 0.297383677 | 0.218078206 | 0.306384122 |
| 0.381956237 | 0.20702566  | 0.472233863 | 0.129393051 |
| 0.486554899 | 0.029763517 | 0.445826089 | 0.191432327 |
| 0.224735998 | 0.468857164 | 0.466521568 | 0.195044509 |
| 0.022713823 | 0.108907718 | 0.321295834 | 0.331879126 |
| 0.043284178 | 0.135444073 | 0.181383552 | 0.270096959 |
| 0.489875165 | 0.41036852  | 0.197476565 | 0.298069231 |
| 0.317537578 | 0.085667241 | 0.409060713 | 0.296681699 |
| 0.393556583 | 0.262465786 | 0.442381899 | 0.008765063 |
| 0.481374244 | 0.126390334 | 0.287793251 | 0.304399481 |
| 0.479495987 | 0.082669761 | 0.304910383 | 0.119144584 |
| 0.181372651 | 0.003334957 | 0.309511897 | 0.436500954 |
| 0.200114875 | 0.374916822 | 0.322672223 | 0.286075041 |
| 0.438194871 | 0.372412687 | 0.431677867 | 0.373407186 |
| 0.324132875 | 0.03585288  | 0.107767755 | 0.019855869 |
| 0.372719963 | 0.319838203 | 0.443874984 | 0.423828378 |
| 0.24993605  | 0.422802807 | 0.317402079 | 0.366326105 |
| 0.472930239 | 0.215601935 | 0.482779674 | 0.277833514 |
| 0.47218977  | 0.36095868  | 0.181939612 | 0.287490649 |
| 0.130985328 | 0.122769435 | 0.073376561 | 0.147726641 |
| 0.491465801 | 0.272683282 | 0.324417771 | 0.344053904 |
| 0.025878508 | 0.315614606 | 0.468594154 | 0.493269769 |
| 0.412224241 | 0.470028019 | 0.416832441 | 0.304542915 |
| 0.344410155 | 0.288740194 | 0.050706682 | 0.024745699 |
| 0.269810021 | 0.131450655 | 0.426066628 | 0.443064535 |
| 0.477679618 | 0.358416148 | 0.058003535 | 0.102173101 |
| 0.206446669 | 0.458658097 | 0.190523076 | 0.200497814 |
| 0.415089814 | 0.399278741 | 0.000355397 | 0.221373445 |
| 0.313791657 | 0.399657207 |             |             |
| COMMD10     | 0.300462995 | 0.448366999 | 0.079538211 |
| 0.019833835 | 0.071352452 | 0.205525077 | 0.169064355 |
| 0.290501816 | 0.129314684 | 0.128256201 | 0.256782055 |
| 0.00724333  | 0.297987896 | 0.037999008 | 0.07808115  |
| 0.469834688 | 0.464340999 | 0.21910108  | 0.456625811 |
| 0.299768798 | 0.114617378 | 0.296863085 | 0.284735515 |
| 0.215565354 | 0.007796288 | 0.101132642 | 0.045536667 |
| 0.252118614 | 0.447252275 | 0.196825191 | 0.234700789 |
| 0.43270807  | 0.375202125 | 0.263849655 | 0.165032613 |
| 0.124920018 | 0.422847271 | 0.050653485 | 0.283494685 |
| 0.35094141  | 0.166047471 | 0.369981807 | 0.025858883 |
| 0.001786738 | 0.09509501  | 0.24635319  | 0.31046428  |
| 0.262212658 | 0.199008366 | 0.167513331 | 0.133115662 |
| 0.106810476 | 0.284524313 | 0.360073305 | 0.094473749 |
| 0.352801973 | 0.004248567 | 0.404495759 | 0.268711036 |
| 0.079393318 | 0.259195863 | 0.279070299 | 0.309732922 |

|             |             |             |             |
|-------------|-------------|-------------|-------------|
| 0.19970786  | 0.377875557 | 0.453776007 | 0.039120398 |
| 0.08406547  | 0.286364125 | 0.330257658 | 0.268292371 |
| 0.419230328 | 0.25135208  | 0.216355626 | 0.193884184 |
| 0.298812866 | 0.345399233 | 0.232843968 | 0.163659671 |
| 0.003540662 | 0.122227947 | 0.179268491 | 0.280089106 |
| 0.23023471  | 0.293340645 | 0.287254049 | 0.153200867 |
| 0.291582699 | 0.03477622  | 0.294114145 | 0.469991226 |
| 0.021035882 | 0.309635741 | 0.009336163 | 0.144018269 |
| 0.374081524 | 0.420169561 | 1           | 0.079704073 |
| 0.026179725 | 0.147121939 | 0.191537728 | 0.352432724 |
| 0.296087216 | 0.300611137 | 0.34018918  | 0.085226172 |
| 0.287942917 | 0.217907329 | 0.247822658 | 0.419893897 |
| 0.455091433 | 0.014340451 | 0.186974839 | 0.188307155 |
| 0.2044864   | 0.092821017 | 0.177716964 | 0.038609096 |
| 0.013884405 | 0.036096079 | 0.42537307  | 0.17937114  |
| 0.088997471 | 0.172942082 | 0.063734614 | 0.258694404 |
| 0.261146701 | 0.406463834 | 0.077474092 | 0.196838354 |
| 0.274054491 | 0.187624108 | 0.238078225 | 0.309081545 |
| 0.184616609 | 0.259922989 | 0.173035733 | 0.376940785 |
| 0.393973711 | 0.072097936 | 0.105206401 | 0.26189726  |
| 0.275692616 | 0.44955345  | 0.482772878 | 0.258220945 |
| 0.156662275 | 0.218222575 | 0.265156107 | 0.263237059 |
| 0.18859348  | 0.267943476 | 0.064518346 | 0.266075831 |
| 0.370006183 | 0.032678618 | 0.085433651 | 0.351701578 |
| 0.023916    | 0.171860454 | 0.415196204 | 0.337624795 |
| 0.263540391 | 0.04201502  | 0.183857628 | 0.213935865 |
| 0.268120005 | 0.206419273 | 0.298503366 | 0.174028708 |
| 0.26834576  | 0.265126688 | 0.055710632 | 0.290820463 |
| 0.129251781 | 0.285208389 | 0.225232748 | 0.055484121 |
| 0.281301133 | 0.271076728 | 0.389433202 | 0.300789023 |
| 0.322131496 | 0.003097957 | 0.129263378 | 0.312734027 |
| 0.281347795 | 0.346056574 | 0.43928058  | 0.11980727  |
| 0.236728112 | 0.177294615 | 0.149647605 | 0.182165385 |
| 0.376655711 | 0.212875432 | 0.185985828 | 0.003310112 |
| 0.116441099 | 0.26189527  | 0.273895369 | 0.096632399 |
| 0.153097504 | 0.157082828 | 0.137372187 | 0.396967184 |
| 0.188810466 | 0.313431643 | 0.052952722 | 0.121780416 |
| 0.223203326 | 0.289711711 | 0.250729601 | 0.281996994 |
| 0.318597608 | 0.257707943 | 0.384520264 | 0.337986007 |
| 0.161704587 | 0.288157951 | 0.10843565  | 0.248313601 |
| 0.261196778 | 0.389591443 | 0.353439752 | 0.328221731 |
| 0.21500691  | 0.274004092 | 0.209226367 | 0.236045874 |
| 0.304500141 | 0.275907005 | 0.115032311 | 0.443980854 |
| 0.003249749 | 0.265598288 | 0.27696072  | 0.133315499 |
| 0.426398577 | 0.180637245 | 0.097211132 | 0.247371759 |
| 0.464894663 | 0.446072364 | 0.398324952 | 0.387479779 |
| 0.188862825 | 0.028779313 | 0.448576828 | 0.312650188 |
| 0.448479958 | 0.254783405 | 0.156610343 | 0.059328686 |
| 0.421635211 | 0.233437032 | 0.308491199 | 0.299481469 |
| 0.249410503 | 0.201606932 | 0.212040631 | 0.262215202 |
| 0.028754952 | 0.241075796 | 0.301710852 | 0.153523904 |
| 0.244652531 | 0.186281163 | 0.359181733 | 0.244835022 |
| 0.207892353 | 0.296401969 | 0.20612563  | 0.078396147 |
| 0.156592845 | 0.460934274 | 0.018969758 | 0.433653837 |

|             |             |             |             |
|-------------|-------------|-------------|-------------|
| 0.473107948 | 0.260917838 | 0.404751806 | 0.472344989 |
| 0.286478789 | 0.306292317 | 0.411817132 | 0.396108958 |
| 0.003198869 | 0.36107748  | 0.259897023 | 0.296655298 |
| 0.407190854 | 0.241384181 | 0.188241749 | 0.22117964  |
| 0.001992454 | 0.16237925  | 0.152777608 | 0.450791181 |
| 0.382687593 | 0.034886385 | 0.017773899 | 0.332433105 |
| 0.235928235 | 0.031947524 | 0.481631802 | 0.258925428 |
| 0.380269666 | 0.25932657  | 0.15191536  | 0.3107742   |
| 0.135231523 | 0.241750393 | 0.022193455 | 0.278823436 |
| 0.237279522 | 0.082870893 | 0.063420311 | 0.472529074 |
| 0.403917432 | 0.258233804 | 0.21149648  | 0.021334924 |
| 0.360993177 | 0.146431575 | 0.316840546 | 0.104812785 |
| 0.364265788 | 0.28237518  | 0.378006825 | 0.324620775 |
| 0.287874642 | 0.335850619 | 0.32675919  | 0.388202792 |
| 0.064493682 | 0.349588687 | 0.399051788 | 0.062635216 |
| 0.262727288 | 0.41014066  | 0.264912394 | 0.1547069   |
| 0.296422781 | 0.047944375 | 0.184489391 | 0.281107016 |
| 0.372935527 | 0.414968349 | 0.075492668 | 0.174790437 |
| 0.340309265 | 0.239538199 | 0.100361165 | 0.245037142 |
| 0.233729111 | 0.128569183 | 0.111897372 | 0.282359158 |
| 0.409249067 | 0.217092003 | 0.419719926 | 0.127773749 |
| 0.384531638 | 0.069239265 | 0.360755836 | 0.1822923   |
| 0.254749866 | 0.274651458 | 0.349869417 | 0.122297435 |
| 0.047183293 | 0.18554447  | 0.313596994 | 0.357965424 |
| 0.090302753 | 0.191851564 | 0.198864046 | 0.227510478 |
| 0.444531687 | 0.277245484 | 0.227174893 | 0.267969542 |
| 0.354751245 | 0.071629571 | 0.452208667 | 0.291758915 |
| 0.362943525 | 0.234972377 | 0.34787381  | 0.010507831 |
| 0.282061596 | 0.155090735 | 0.195532561 | 0.226825407 |
| 0.408238177 | 0.131484152 | 0.249394637 | 0.187647751 |
| 0.113346602 | 0.00563106  | 0.283564403 | 0.184359443 |
| 0.227647581 | 0.201409137 | 0.278551245 | 0.086580546 |
| 0.482570538 | 0.31902312  | 0.372134203 | 0.158279591 |
| 0.26910025  | 0.007301868 | 0.13344928  | 0.05697341  |
| 0.341351692 | 0.30400513  | 0.289371864 | 0.312382888 |
| 0.226673896 | 0.26327182  | 0.272478069 | 0.227412983 |
| 0.39618323  | 0.124702912 | 0.466601887 | 0.244674588 |
| 0.319285236 | 0.290941531 | 0.21049983  | 0.244249145 |
| 0.140487218 | 0.105224643 | 0.12094787  | 0.209503488 |
| 0.410119507 | 0.197848356 | 0.237249679 | 0.313215412 |
| 0.053835455 | 0.262081088 | 0.317929113 | 0.30145382  |
| 0.299358727 | 0.294354872 | 0.255190181 | 0.332562776 |
| 0.273413745 | 0.293742855 | 0.036918917 | 0.033455847 |
| 0.177034138 | 0.174802361 | 0.397269948 | 0.37857522  |
| 0.447219426 | 0.228328911 | 0.109866889 | 0.168388141 |
| 0.070843971 | 0.333882855 | 0.19460096  | 0.071736805 |
| 0.271269788 | 0.238059105 | 0.001468985 | 0.259358178 |
| 0.304614862 | 0.252179773 |             |             |
| COQ10B      | 0.043833708 | 0.142380925 | 0.080414387 |
| 0.007565227 | 0.04532559  | 0.344176318 | 0.281902392 |
| 0.02653079  | 0.082128842 | 0.128654    | 0.291575044 |
| 0.001382769 | 0.025783238 | 0.022353917 | 0.031615056 |
| 0.076729804 | 0.075952584 | 0.166216959 | 0.073854884 |
| 0.0586479   | 0.048157562 | 0.135131863 | 0.151150759 |



|             |             |             |             |
|-------------|-------------|-------------|-------------|
| 0.275149058 | 0.003712692 | 0.211689729 | 0.045012523 |
| 0.014974736 | 0.058149009 | 0.203673694 | 0.055800705 |
| 0.065115533 | 0.047901059 | 0.03330697  | 0.016811855 |
| 0.002991802 | 0.179667421 | 0.000997459 | 0.036318885 |
| 0.029667549 | 0.162912515 | 0.054125825 | 0.040391265 |
| 0.000265446 | 0.175460372 | 0.013368662 | 0.137439831 |
| 0.054114537 | 0.317545303 | 0.207525225 | 0.215157343 |
| 0.00094326  | 0.247025562 | 0.085263242 | 0.000704149 |
| 0.238876321 | 0.002534954 | 0.205524272 | 0.020246072 |
| 0.142098609 | 0.111050437 | 0.028286586 | 0.115999357 |
| 0.346430735 | 0.225801565 | 0.10594023  | 0.131309598 |
| 0.276516519 | 0.043561334 | 0.037230143 | 0.101463768 |
| 0.122246653 | 0.025807805 | 0.064854001 | 0.011197315 |
| 0.050717629 | 0.033574255 | 0.226213467 | 0.058503019 |
| 0.004338433 | 0.281580376 | 0.033952795 | 0.037155411 |
| 0.018734922 | 0.264967448 | 0.043599523 | 0.134713702 |
| 0.035998721 | 0.062393236 | 0.124569667 | 0.091905388 |
| 0.018210376 | 0.039589073 | 0.002728072 | 0.047948659 |
| 0.062395505 | 0.041690483 | 0.079704073 | 1           |
| 0.036663842 | 0.075430535 | 0.008084966 | 0.024760969 |
| 0.075301963 | 0.057186204 | 0.239150192 | 0.001023958 |
| 0.018326981 | 0.047663329 | 0.066028504 | 0.197042829 |
| 0.106419003 | 0.00839232  | 0.040711035 | 0.292616931 |
| 0.013605428 | 0.036687752 | 0.242391844 | 0.001050508 |
| 0.011024624 | 0.000958592 | 0.060267715 | 0.087381699 |
| 0.222549664 | 0.255932478 | 0.02955063  | 0.060543011 |
| 0.018960536 | 0.047404704 | 0.058549555 | 0.204143039 |
| 0.036811914 | 0.268419628 | 0.056490256 | 0.060489742 |
| 0.019408046 | 0.039084051 | 0.128278293 | 0.151907101 |
| 0.1827494   | 0.088725242 | 0.091326751 | 0.244623103 |
| 0.020862668 | 0.0773657   | 0.107268955 | 0.021753066 |
| 0.080006976 | 0.144651248 | 0.046031896 | 0.171188328 |
| 0.248439343 | 0.064093521 | 0.000480409 | 0.200366221 |
| 0.252062533 | 0.00137422  | 0.157715063 | 0.060873818 |
| 0.012329789 | 0.059975843 | 0.160862943 | 0.096841032 |
| 0.053909868 | 0.043195253 | 0.117967939 | 0.278830338 |
| 0.163495164 | 0.210625341 | 0.105357734 | 0.105726657 |
| 0.212014096 | 0.044295835 | 0.138206978 | 0.020931451 |
| 0.222797738 | 0.139669954 | 0.005347209 | 0.004783302 |
| 0.043209445 | 0.032951846 | 0.12186765  | 0.06830904  |
| 0.051314853 | 0.001991175 | 0.108799741 | 0.063196037 |
| 0.036062972 | 0.032528773 | 0.161383957 | 0.244881759 |
| 0.17922603  | 0.006475582 | 0.203533425 | 0.05067697  |
| 0.065571614 | 0.070229667 | 0.072675785 | 0.006974997 |
| 0.075159992 | 0.019057372 | 0.050584851 | 0.031337087 |
| 0.058859067 | 0.068261686 | 0.00759048  | 0.103147221 |
| 0.269945184 | 0.061599948 | 0.007314703 | 0.002153512 |
| 0.09388967  | 0.171428031 | 0.023463402 | 0.013712369 |
| 0.113435192 | 0.052652803 | 0.030079138 | 0.224311765 |
| 0.036655921 | 0.27430978  | 0.001401562 | 0.089947009 |
| 0.030865658 | 0.093091521 | 0.050020467 | 0.069874803 |
| 0.196371763 | 0.049109865 | 0.005159451 | 0.275387296 |
| 0.075012979 | 0.064582217 | 0.078989825 | 0.133112765 |
| 0.005955145 | 0.160257746 | 0.072102586 | 0.001511247 |

|             |             |             |             |
|-------------|-------------|-------------|-------------|
| 0.151428425 | 0.311994476 | 0.109841891 | 0.064787955 |
| 0.076459601 | 0.132549722 | 0.079267507 | 0.042881393 |
| 0.004328535 | 0.012461802 | 0.108182974 | 0.171571919 |
| 0.059327018 | 0.080372788 | 0.008599258 | 0.001277404 |
| 0.089565178 | 0.021275345 | 0.108786408 | 0.034601946 |
| 0.047087484 | 0.013816034 | 0.141700148 | 0.035677304 |
| 0.000798545 | 0.141803871 | 0.052213042 | 0.031192179 |
| 0.065142732 | 0.071493953 | 0.100599339 | 0.227601072 |
| 0.020262262 | 0.009182755 | 0.029762567 | 0.169961503 |
| 0.27135328  | 0.137841765 | 0.000365308 | 0.104881282 |
| 0.093685414 | 0.102677702 | 0.09457823  | 0.088032632 |
| 0.123511641 | 0.23319877  | 0.114035259 | 0.048569364 |
| 0.000787335 | 0.034100373 | 0.02199287  | 0.260085897 |
| 0.060781735 | 0.272054253 | 0.007788818 | 0.014711801 |
| 0.002017579 | 0.237832971 | 0.003043965 | 0.151379643 |
| 0.078918236 | 0.100773001 | 0.00016742  | 0.09098844  |
| 0.022048329 | 0.000799725 | 0.116696868 | 0.187268371 |
| 0.135301446 | 0.066171561 | 0.276353265 | 0.03025807  |
| 0.002005117 | 0.017739243 | 0.04063029  | 0.101054456 |
| 0.03039113  | 0.001872247 | 0.07315114  | 0.094137552 |
| 0.113297452 | 0.195216805 | 0.232781742 | 0.015790696 |
| 0.029681434 | 0.011689819 | 0.079882824 | 0.037709114 |
| 0.121016008 | 0.246137612 | 0.151953335 | 0.041367892 |
| 0.068244317 | 0.20988668  | 0.24606066  | 0.113223323 |
| 0.004358801 | 0.03670494  | 0.051968746 | 0.052342557 |
| 0.026264015 | 0.08544651  | 0.066460131 | 0.349875656 |
| 0.132882958 | 0.007966769 | 0.330751111 | 0.045810297 |
| 0.166105169 | 0.088059319 | 0.161883834 | 0.042246162 |
| 0.226366401 | 0.076769676 | 0.243987459 | 0.080383088 |
| 0.27233781  | 0.000992749 | 0.001868782 | 0.196860975 |
| 0.191991263 | 0.311170822 | 0.08090294  | 0.049142564 |
| 0.058956397 | 0.05637224  | 0.070628194 | 0.051711942 |
| 0.159948071 | 0.02990221  | 0.026323488 | 0.001565339 |
| 0.026301379 | 0.039087367 | 0.237246311 | 0.225900481 |
| 0.168617489 | 0.194613766 | 0.201635803 | 0.173266503 |
| 0.067445813 | 0.014263495 | 0.255099084 | 0.072401526 |
| 0.248291369 | 0.044729038 | 0.159558508 | 0.110890831 |
| 0.125719802 | 0.108709676 | 0.097090112 | 0.00369843  |
| 0.044336471 | 0.121592442 | 0.010496436 | 0.12330748  |
| 0.037533538 | 0.170557257 | 0.201084661 | 0.102302677 |
| 0.007879006 | 0.000915816 | 0.150840737 | 0.011726247 |
| 0.332627931 | 0.003932343 | 0.075409572 | 0.00060833  |
| 0.138563706 | 0.090301052 | 0.09159993  | 0.005149202 |
| 0.08031951  | 0.00011898  | 0.167358635 | 0.056880702 |
| 0.128078931 | 0.188301103 | 0.055911853 | 0.039577981 |
| 0.012837059 | 0.074964993 | 0.179408833 | 0.060766227 |
| 0.087347154 | 0.00306885  | 0.082958229 | 0.051842359 |
| 0.023022342 | 0.019990325 | 0.261205373 | 0.0243358   |
| 0.197425496 | 0.014102675 | 0.204911998 | 0.028234254 |
| 0.067593612 | 0.018362093 | 0.112777638 | 0.015435207 |
| 0.087888532 | 0.071426741 | 0.046191885 | 0.041702415 |
| 0.085741351 | 0.033290596 | 0.014481953 | 0.246474139 |
| 0.012268595 | 0.061735129 | 0.012748419 | 0.053383736 |
| 0.015698765 | 0.198850602 | 0.08181145  | 0.085285986 |

|             |             |             |             |             |
|-------------|-------------|-------------|-------------|-------------|
| 0.082436491 | 0.005533905 | 0.163843958 | 0.082468563 |             |
| 0.000778406 | 0.031980595 | 0.289217346 | 0.002410665 |             |
| 0.0708428   | 0.009381682 | 0.001705182 | 0.033385529 |             |
| 0.200601958 | 0.011365135 |             |             |             |
| CREM        | 0.023071154 | 0.029758678 | 0.053780935 | 2.79E-05    |
| 0.004280099 | 0.128123202 | 0.07383418  | 0.012966786 |             |
| 0.034660748 | 0.013830548 | 0.095707477 | 0.00882745  |             |
| 0.004723766 | 0.053921756 | 0.024468899 | 0.015848581 |             |
| 0.014634722 | 0.03731405  | 0.017780131 | 0.05293931  |             |
| 0.000699482 | 0.080115597 | 0.029716571 | 0.093892443 |             |
| 0.019596998 | 0.045286572 | 0.000543072 | 0.006724267 |             |
| 0.012206854 | 0.144017063 | 0.008998021 | 0.014162593 |             |
| 0.00667094  | 0.003192927 | 0.001060972 | 8.73E-05    |             |
| 0.053669027 | 2.47E-05    | 0.004473552 | 0.006161074 |             |
| 0.023425041 | 0.00892085  | 0.025422772 | 1.22E-07    |             |
| 0.091216577 | 0.005607162 | 0.056823599 | 0.063737561 |             |
| 0.126321873 | 0.217363924 | 0.031719607 | 1.36E-05    |             |
| 0.088793778 | 0.045931565 | 2.08E-05    | 0.062416505 | 3.66E-06    |
| 0.051641766 | 0.028569215 | 0.224541087 | 0.06416831  |             |
| 0.007106858 | 0.033643068 | 0.122801004 | 0.057967361 |             |
| 0.021506248 | 0.006928956 | 0.191797265 | 0.011323145 |             |
| 0.005147879 | 0.009957889 | 0.028607985 | 0.005024287 |             |
| 0.011124405 | 0.001361547 | 0.007104088 | 0.007290408 |             |
| 0.141780434 | 0.080304701 | 0.003074976 | 0.068635717 |             |
| 0.001895297 | 0.016857415 | 0.00234944  | 0.084993841 |             |
| 0.014844158 | 0.019386116 | 0.006247913 | 0.034464253 |             |
| 0.059442713 | 0.019101331 | 0.00036118  | 0.008550396 |             |
| 0.000110821 | 0.05460672  | 0.015556825 | 0.007737269 |             |
| 0.026179725 | 0.036663842 | 1           | 0.165226915 |             |
| 0.009434265 | 0.004425518 | 0.029316    | 0.011911005 |             |
| 0.063043459 | 0.000318619 | 0.002667972 | 0.020971517 |             |
| 0.019459505 | 0.047217291 | 0.022575031 | 0.01503748  |             |
| 0.09388684  | 0.133107715 | 0.001071257 | 0.000347527 |             |
| 0.091011895 | 4.28E-05    | 0.000414956 | 0.002529638 |             |
| 0.011758484 | 0.100363761 | 0.03325754  | 0.087517367 |             |
| 0.001064706 | 0.005957689 | 0.009447706 | 0.013426751 |             |
| 0.010074977 | 0.056409907 | 0.00417681  | 0.065706756 |             |
| 0.005008134 | 0.009476023 | 0.001779108 | 0.047860243 |             |
| 0.169981854 | 0.032042878 | 0.074599334 | 0.040421693 |             |
| 0.054162686 | 0.095127532 | 0.002685454 | 0.015992721 |             |
| 0.023023367 | 0.017004248 | 0.009147069 | 0.121402122 |             |
| 0.004620215 | 0.029165622 | 0.114434179 | 0.056006454 |             |
| 9.32E-05    | 0.098016228 | 0.0721846   | 5.74E-05    | 0.159535255 |
| 0.017055185 | 5.28E-05    | 0.007289142 | 0.049197091 |             |
| 0.018330455 | 0.011373525 | 0.000393526 | 0.013179976 |             |
| 0.059928632 | 0.100914857 | 0.062449414 | 0.034750059 |             |
| 0.00826158  | 0.120539446 | 0.003849037 | 0.107334863 |             |
| 0.002731283 | 0.20272435  | 0.09154317  | 0.000540223 |             |
| 0.000143694 | 0.020100546 | 0.02501481  | 0.023844093 |             |
| 0.024496837 | 0.01272181  | 1.58E-06    | 0.012426692 |             |
| 0.026689233 | 0.005039611 | 0.008475156 | 0.032892419 |             |
| 0.238161613 | 0.172188868 | 0.001172617 | 0.230622504 |             |
| 0.006280025 | 0.029597448 | 0.004706654 | 0.00635093  |             |
| 0.004899857 | 0.013957694 | 0.001671281 | 0.015782488 |             |

|             |             |             |             |
|-------------|-------------|-------------|-------------|
| 0.089778889 | 0.00853857  | 0.045808399 | 0.006867357 |
| 0.019259821 | 0.147698732 | 0.008855441 | 0.011710453 |
| 0.002710292 | 0.057305897 | 0.028533892 | 0.001855493 |
| 0.005470021 | 0.015530131 | 0.012747974 | 0.005086857 |
| 0.080598294 | 0.007649347 | 0.077018125 | 0.000254041 |
| 0.061543349 | 0.004315649 | 0.015373781 | 0.007625126 |
| 0.012959764 | 0.060155419 | 0.027861695 | 0.000531569 |
| 0.149415025 | 0.044472043 | 0.031427573 | 0.118227057 |
| 0.032466237 | 0.007211626 | 0.088580683 | 0.008244295 |
| 0.000601586 | 0.029213795 | 0.082234648 | 0.196641754 |
| 0.092960601 | 0.018663626 | 0.035146321 | 0.032078514 |
| 0.007206845 | 0.000627968 | 0.036588621 | 0.03287703  |
| 0.051645628 | 0.011216175 | 0.018217827 | 0.000482093 |
| 0.000478794 | 0.019846984 | 0.010962102 | 0.020285939 |
| 0.008431959 | 0.005879555 | 0.001835159 | 0.138268084 |
| 0.018728847 | 0.000290461 | 0.046693623 | 0.009514367 |
| 0.000717856 | 0.007942861 | 0.003509552 | 0.014556422 |
| 0.116995253 | 0.001564964 | 0.002172021 | 0.001441142 |
| 0.08942186  | 0.171053186 | 0.030082442 | 6.57E-06    |
| 0.038527812 | 0.020700244 | 0.051385487 | 0.015442739 |
| 0.022519458 | 0.08764116  | 0.063763391 | 0.022270395 |
| 0.014120816 | 0.011217943 | 0.004736129 | 0.002616073 |
| 0.120444322 | 0.009466992 | 0.110962346 | 0.007443934 |
| 0.00142551  | 0.004595058 | 0.228717538 | 8.24E-05    |
| 0.048578428 | 0.012419057 | 0.020642573 | 1.45E-06    |
| 0.018636331 | 0.002537065 | 0.000263549 | 0.028344809 |
| 0.033223061 | 0.023520915 | 0.01536125  | 0.062885956 |
| 0.003732242 | 5.59E-05    | 0.010739589 | 0.000457799 |
| 0.013616067 | 0.005766621 | 0.000289755 | 0.002842621 |
| 0.023180817 | 0.03406857  | 0.049446853 | 0.144718827 |
| 0.000504414 | 0.00718647  | 0.000214866 | 0.010598287 |
| 0.01754558  | 0.048806712 | 0.083149343 | 0.036959047 |
| 0.006433883 | 0.015616773 | 0.053810114 | 0.083216281 |
| 0.025986673 | 3.96E-05    | 0.005735337 | 0.00917783  |
| 0.007018222 | 0.005586677 | 0.015170353 | 0.005269273 |
| 0.137045209 | 0.075481966 | 2.55E-05    | 0.176528887 |
| 0.039219558 | 0.034659564 | 0.013090791 | 0.121370378 |
| 0.095659051 | 0.052879538 | 0.038073116 | 0.13206626  |
| 0.046727575 | 0.150643284 | 4.86E-05    | 0.001282126 |
| 0.080665466 | 0.047624776 | 0.101512399 | 0.014490256 |
| 0.002233572 | 0.010343724 | 0.138104764 | 0.024865062 |
| 0.012629169 | 0.129815241 | 0.004345965 | 0.005140289 |
| 0.00064404  | 0.000421445 | 0.02343249  | 0.047484832 |
| 0.067567145 | 0.182997486 | 0.207705183 | 0.050914005 |
| 0.025448283 | 0.01299502  | 0.002978283 | 0.131413382 |
| 0.055919979 | 0.077761084 | 0.000380709 | 0.047082773 |
| 0.061860186 | 0.04730801  | 0.016278395 | 0.020593544 |
| 0.000150066 | 0.007462152 | 0.014568017 | 0.01404113  |
| 0.01128705  | 0.007374886 | 0.107760372 | 0.042941256 |
| 0.126999233 | 0.000239286 | 0.002200669 | 0.094599546 |
| 0.000754679 | 0.141216772 | 0.00254232  | 0.042086917 |
| 1.64E-05    | 0.034679294 | 0.031518079 | 0.025084602 |
| 0.001214404 | 0.015481654 | 3.37E-07    | 0.019310394 |
| 0.074477748 | 0.059851052 | 0.077231932 | 0.016565556 |

|             |             |             |             |
|-------------|-------------|-------------|-------------|
| 0.013906987 | 0.024318179 | 0.012623482 | 0.055450041 |
| 0.006402351 | 0.012823655 | 2.74E-05    | 0.016149848 |
| 0.042796895 | 0.003090915 | 0.0065242   | 0.134298171 |
| 0.009003694 | 0.045400234 | 0.001395207 | 0.148278094 |
| 0.060074637 | 0.009748294 | 0.008833889 | 0.014376009 |
| 0.008626866 | 0.030142002 | 0.013990085 | 0.012034956 |
| 0.005298877 | 0.014247791 | 0.004846075 | 0.00522952  |
| 0.083240223 | 0.003067553 | 0.048772863 | 6.97E-05    |
| 0.000196544 | 0.00022246  | 0.075676871 | 0.036796319 |
| 0.028100966 | 0.017066827 | 0.003035595 | 0.126739491 |
| 0.164979699 | 0.000118106 | 0.010188046 | 0.062222254 |
| 2.50E-05    | 0.016669153 | 0.003032763 | 0.005301265 |
| 0.054363437 | 0.079988035 | 0.000671878 |             |
| CRMP1       | 0.113562978 | 0.19737711  | 0.13694625  |
| 0.001137715 | 0.036751406 | 0.30171611  | 0.192262499 |
| 0.076452601 | 0.153543427 | 0.039574167 | 0.309350176 |
| 0.039598235 | 0.06302778  | 0.164229372 | 0.196386618 |
| 0.137532197 | 0.133676813 | 0.16067433  | 0.153664394 |
| 0.181301884 | 0.012824666 | 0.294823235 | 0.130225326 |
| 0.246341899 | 0.073713353 | 0.089849937 | 0.005101494 |
| 0.050478775 | 0.118823764 | 0.299900097 | 0.053726427 |
| 0.123153028 | 0.079450874 | 0.024485712 | 0.020809225 |
| 0.003014125 | 0.273181192 | 0.003261629 | 0.058480924 |
| 0.073863402 | 0.07334591  | 0.090648392 | 0.110977361 |
| 1.24E-05    | 0.12087622  | 0.041646844 | 0.21860066  |
| 0.20524833  | 0.279905646 | 0.359940182 | 0.082008311 |
| 0.001913258 | 0.31884133  | 0.234792984 | 0.001497414 |
| 0.281837255 | 0.000152736 | 0.26496018  | 0.098005607 |
| 0.187784506 | 0.203029815 | 0.053613983 | 0.167712733 |
| 0.312008362 | 0.274649766 | 0.168843593 | 0.046826152 |
| 0.208914851 | 0.078867374 | 0.058898318 | 0.073660625 |
| 0.187531141 | 0.039693226 | 0.061370497 | 0.019278072 |
| 0.069823962 | 0.079170959 | 0.380003002 | 0.188100742 |
| 0.011699599 | 0.137340168 | 0.016085211 | 0.113916517 |
| 0.034148468 | 0.305457192 | 0.10063293  | 0.061643603 |
| 0.048224809 | 0.162014139 | 0.221246079 | 0.15599815  |
| 0.007081754 | 0.088344642 | 0.003821662 | 0.198862525 |
| 0.124127246 | 0.087844639 | 0.147121939 | 0.075430535 |
| 0.165226915 | 1           | 0.066831741 | 0.061062525 |
| 0.139439836 | 0.08431408  | 0.282283157 | 0.006173897 |
| 0.043522207 | 0.11946869  | 0.089964414 | 0.246332708 |
| 0.164687674 | 0.13612093  | 0.223504979 | 0.299446803 |
| 0.023502855 | 0.014078664 | 0.232553012 | 0.002254523 |
| 0.005819562 | 0.049943595 | 0.112109669 | 0.182583899 |
| 0.063432762 | 0.191689311 | 0.022784615 | 0.058580542 |
| 0.059026279 | 0.120661222 | 0.048589535 | 0.152893814 |
| 0.053369974 | 0.194030408 | 0.043061756 | 0.085456265 |
| 0.019005172 | 0.134105563 | 0.230615668 | 0.20224056  |
| 0.331796251 | 0.115773182 | 0.148348319 | 0.28663464  |
| 0.04344669  | 0.136669001 | 0.175979994 | 0.093515628 |
| 0.043673753 | 0.295157579 | 0.025836409 | 0.144387528 |
| 0.283459793 | 0.220794139 | 0.007591417 | 0.346746893 |
| 0.307447803 | 0.003131456 | 0.169071266 | 0.132762498 |
| 0.002853542 | 0.063571596 | 0.24957005  | 0.138302292 |

|             |             |             |             |
|-------------|-------------|-------------|-------------|
| 0.092842901 | 0.004455817 | 0.046196518 | 0.18047381  |
| 0.28711453  | 0.163243359 | 0.181639658 | 0.031478555 |
| 0.337451142 | 0.023035471 | 0.118258054 | 0.044001997 |
| 0.280774555 | 0.302494564 | 0.010364612 | 0.008234618 |
| 0.126558446 | 0.110380497 | 0.15877835  | 0.143555721 |
| 0.099083014 | 7.64E-05    | 0.035968286 | 0.135473354 |
| 0.028863752 | 0.09125466  | 0.207381604 | 0.322210115 |
| 0.399474729 | 0.015294782 | 0.352938357 | 0.039342158 |
| 0.189299536 | 0.038645311 | 0.04282001  | 0.013383491 |
| 0.097966886 | 0.017655982 | 0.093528651 | 0.222584891 |
| 0.040998614 | 0.152446964 | 0.11837336  | 0.143768242 |
| 0.296391921 | 0.088826838 | 0.136674919 | 0.024211381 |
| 0.127157694 | 0.164096055 | 0.017160943 | 0.052302043 |
| 0.11798667  | 0.052872763 | 0.067337937 | 0.317348789 |
| 0.051729544 | 0.269540632 | 0.0103614   | 0.180102019 |
| 0.049372719 | 0.12829666  | 0.078304236 | 0.116236277 |
| 0.156834322 | 0.169824352 | 0.019539799 | 0.358741719 |
| 0.189014932 | 0.161512437 | 0.190034782 | 0.213757595 |
| 0.026206956 | 0.289158042 | 0.068721043 | 0.012578687 |
| 0.189216599 | 0.223738678 | 0.211260209 | 0.216698868 |
| 0.157420421 | 0.226592986 | 0.205301533 | 0.079973623 |
| 0.018820043 | 0.167091898 | 0.214799637 | 0.234644203 |
| 0.113587119 | 0.099688052 | 0.008148829 | 0.024929218 |
| 0.153640013 | 0.083470867 | 0.1186136   | 0.06145592  |
| 0.060072513 | 0.02296925  | 0.327840133 | 0.128470758 |
| 0.00763066  | 0.114797087 | 0.074186303 | 0.018422786 |
| 0.037445422 | 0.06289445  | 0.120650055 | 0.371272093 |
| 0.016197027 | 0.023182787 | 0.014113635 | 0.116001893 |
| 0.316984371 | 0.199281879 | 0.001364136 | 0.230771441 |
| 0.165961538 | 0.214389953 | 0.12871941  | 0.174054998 |
| 0.23596034  | 0.273973439 | 0.157431492 | 0.127795867 |
| 0.018276921 | 0.062998564 | 0.041826853 | 0.391177724 |
| 0.092800991 | 0.292782952 | 0.051499286 | 0.021158227 |
| 0.019400581 | 0.340275497 | 0.003095835 | 0.272943503 |
| 0.114319976 | 0.09056883  | 0.00049659  | 0.140283413 |
| 0.039696815 | 0.011166979 | 0.199058521 | 0.126259847 |
| 0.161131663 | 0.100017374 | 0.140040035 | 0.052721371 |
| 0.002065471 | 0.060685503 | 0.009743377 | 0.096252198 |
| 0.051729879 | 0.016234633 | 0.01439358  | 0.178416692 |
| 0.192600416 | 0.2231138   | 0.339433119 | 0.004432691 |
| 0.07756054  | 0.006021946 | 0.090142483 | 0.16613939  |
| 0.246292647 | 0.304814977 | 0.218260582 | 0.073742077 |
| 0.107492523 | 0.247192986 | 0.30685799  | 0.162860715 |
| 0.003780776 | 0.065299251 | 0.090685245 | 0.069135371 |
| 0.054333023 | 0.13081542  | 0.043812169 | 0.263757182 |
| 0.282484393 | 0.00218229  | 0.347911135 | 0.167102775 |
| 0.203488147 | 0.116053094 | 0.131859876 | 0.216507474 |
| 0.242072194 | 0.126500766 | 0.191199469 | 0.186764344 |
| 0.384654709 | 0.002432236 | 0.020499512 | 0.298973087 |
| 0.250200629 | 0.302646221 | 0.118761315 | 0.016031957 |
| 0.10498476  | 0.244029056 | 0.176090598 | 0.086445072 |
| 0.331718046 | 0.044072467 | 0.062965501 | 0.014578906 |
| 0.006574774 | 0.124772944 | 0.225061474 | 0.299175705 |
| 0.198989086 | 0.371239918 | 0.139462793 | 0.119057862 |

|             |             |             |             |
|-------------|-------------|-------------|-------------|
| 0.120046268 | 0.027578686 | 0.334884443 | 0.198199775 |
| 0.323813731 | 0.008142405 | 0.263286652 | 0.201110956 |
| 0.223069165 | 0.068564542 | 0.148903065 | 0.004894859 |
| 0.070667082 | 0.039167106 | 0.073656744 | 0.067972682 |
| 0.084762975 | 0.161896452 | 0.199854031 | 0.208563066 |
| 0.012307931 | 0.026313525 | 0.345179361 | 0.013574834 |
| 0.371296894 | 0.024786275 | 0.168179803 | 0.001290606 |
| 0.225544559 | 0.13933465  | 0.151251273 | 0.016077785 |
| 0.072467252 | 0.000144261 | 0.047676212 | 0.196380476 |
| 0.255394513 | 0.312564243 | 0.113304054 | 0.081502914 |
| 0.083486838 | 0.097775594 | 0.237155597 | 0.050490169 |
| 0.116131899 | 0.003730105 | 0.138647851 | 0.161536943 |
| 0.047735218 | 0.048887098 | 0.344972381 | 0.07674712  |
| 0.121739526 | 0.048353159 | 0.212915799 | 0.178735542 |
| 0.09849604  | 0.072881736 | 0.082855943 | 0.045949736 |
| 0.085733141 | 0.070359606 | 0.10950987  | 0.061114189 |
| 0.092445512 | 0.052283597 | 0.040020462 | 0.33180064  |
| 0.040132218 | 0.152423464 | 0.00209952  | 0.003998967 |
| 0.007620404 | 0.148406252 | 0.217146054 | 0.184003305 |
| 0.147391371 | 0.035645779 | 0.164720809 | 0.244928388 |
| 0.00639897  | 0.093650046 | 0.198492617 | 0.002773916 |
| 0.11907038  | 0.024073005 | 0.01177787  | 0.143851318 |
| 0.29610472  | 0.016797541 |             |             |
| CST3        | 0.213084172 | 0.172743195 | 0.012947537 |
| 0.000222064 | 0.001676143 | 0.089067054 | 0.03763003  |
| 0.148301727 | 0.016478241 | 0.009716962 | 0.11821364  |
| 0.038317149 | 0.115760098 | 0.037607065 | 0.009889906 |
| 0.210846896 | 0.180427899 | 0.045739847 | 0.205687497 |
| 0.213837526 | 0.002467911 | 0.236339511 | 0.092077095 |
| 0.073763879 | 0.028197441 | 0.012900012 | 0.000739733 |
| 0.08558834  | 0.196919819 | 0.097567648 | 0.020369505 |
| 0.215296962 | 0.119954717 | 0.019257583 | 0.002987356 |
| 0.003556936 | 0.186938569 | 0.001213472 | 0.0792888   |
| 0.158086983 | 0.018516351 | 0.12703951  | 0.008382985 |
| 9.07E-06    | 0.015453269 | 0.106024333 | 0.18613213  |
| 0.134059934 | 0.085144262 | 0.088615793 | 0.015640958 |
| 0.004662266 | 0.134208061 | 0.28619988  | 0.00452142  |
| 0.132442481 | 3.28E-05    | 0.160449342 | 0.194397503 |
| 0.02547086  | 0.093965224 | 0.101557598 | 0.173917611 |
| 0.077459106 | 0.143094548 | 0.173920821 | 0.002211848 |
| 0.029469343 | 0.097186757 | 0.121519568 | 0.058129766 |
| 0.171117197 | 0.015472433 | 0.014645008 | 0.02508921  |
| 0.101660133 | 0.1501204   | 0.125629387 | 0.030604856 |
| 0.010923564 | 0.022013765 | 0.007932809 | 0.247331755 |
| 0.066419665 | 0.138712215 | 0.176590999 | 0.012908625 |
| 0.076393563 | 0.009985813 | 0.135236485 | 0.181417346 |
| 0.000821674 | 0.136315803 | 0.000529831 | 0.020320754 |
| 0.1777199   | 0.181429493 | 0.191537728 | 0.008084966 |
| 0.009434265 | 0.066831741 | 1           | 0.16077423  |
| 0.131504479 | 0.070714435 | 0.130611342 | 0.020456249 |
| 0.109584282 | 0.031919569 | 0.03212361  | 0.168978442 |
| 0.210087099 | 0.011798399 | 0.063209526 | 0.07465568  |
| 0.005743298 | 0.001688542 | 0.047888526 | 0.006944993 |
| 0.001396451 | 0.057010488 | 0.1869346   | 0.076943316 |

|             |             |             |             |
|-------------|-------------|-------------|-------------|
| 0.009649285 | 0.041878004 | 0.002073064 | 0.052823225 |
| 0.117057798 | 0.228406409 | 0.002511079 | 0.037198249 |
| 0.084517306 | 0.043143704 | 0.028492712 | 0.108593338 |
| 0.010382764 | 0.091841809 | 0.072364376 | 0.127018167 |
| 0.216759435 | 0.006551212 | 0.01550971  | 0.128061551 |
| 0.094505092 | 0.201472785 | 0.20024396  | 0.052924263 |
| 0.010487655 | 0.110517269 | 0.028004277 | 0.073986055 |
| 0.059425058 | 0.179339118 | 0.008499345 | 0.138334786 |
| 0.152975695 | 0.003029288 | 0.028309573 | 0.170775615 |
| 0.000211915 | 0.006142413 | 0.190555494 | 0.112425326 |
| 0.071809206 | 0.000651613 | 0.018751851 | 0.05939694  |
| 0.152621595 | 0.049399914 | 0.156531136 | 0.015080112 |
| 0.156603712 | 0.025670803 | 0.012245554 | 0.106075159 |
| 0.052303824 | 0.187583044 | 0.013972194 | 0.003391665 |
| 0.164392058 | 0.106580179 | 0.147092233 | 0.136729059 |
| 0.175394003 | 2.34E-05    | 0.009730514 | 0.225393207 |
| 0.033398017 | 0.18147484  | 0.15592322  | 0.055881444 |
| 0.16631108  | 0.016744872 | 0.075695766 | 0.011700524 |
| 0.27785591  | 0.010650793 | 0.008749989 | 0.004752191 |
| 0.006637615 | 0.03977551  | 0.074179218 | 0.050080914 |
| 0.008032329 | 0.026125133 | 0.033128339 | 0.147852946 |
| 0.078894665 | 0.089361633 | 0.061278737 | 0.037162475 |
| 0.046262759 | 0.083792945 | 0.022547618 | 0.040230147 |
| 0.087336845 | 0.0336083   | 0.171905032 | 0.163096459 |
| 0.007299264 | 0.122798167 | 0.007455321 | 0.088005743 |
| 0.06848157  | 0.125129939 | 0.117944374 | 0.109994682 |
| 0.056794451 | 0.208859352 | 0.012972525 | 0.128442104 |
| 0.149191384 | 0.110221726 | 0.045597174 | 0.178124921 |
| 0.008949758 | 0.118419136 | 0.056768803 | 0.01012892  |
| 0.147992358 | 0.04949419  | 0.049752191 | 0.155042616 |
| 0.205019608 | 0.182186446 | 0.257781377 | 0.156173475 |
| 0.031163102 | 0.03850634  | 0.235851791 | 0.141961913 |
| 0.184980122 | 0.050350134 | 0.006551165 | 0.010730554 |
| 0.161367239 | 0.143359365 | 0.123606463 | 0.104801509 |
| 0.052524632 | 0.021736237 | 0.102736108 | 0.225813328 |
| 0.006450131 | 0.06098004  | 0.124008204 | 0.003667748 |
| 0.024648896 | 0.019126057 | 0.111704371 | 0.129314516 |
| 0.011721904 | 0.03023221  | 0.011644829 | 0.013625765 |
| 0.058384917 | 0.185122016 | 0.000640562 | 0.24405329  |
| 0.195264953 | 0.103837031 | 0.128954495 | 0.214565464 |
| 0.156767303 | 0.116722072 | 0.15623558  | 0.216509459 |
| 0.015972797 | 0.137747464 | 0.083834711 | 0.162289118 |
| 0.156982327 | 0.112876847 | 0.124393515 | 0.030142566 |
| 0.001128083 | 0.087301963 | 0.006018987 | 0.217182846 |
| 0.119673143 | 0.003169566 | 0.000352238 | 0.115642272 |
| 0.07769281  | 0.001912579 | 0.206358046 | 0.068428012 |
| 0.121007192 | 0.054419058 | 0.030309709 | 0.106595343 |
| 0.007727266 | 0.043513716 | 0.000575219 | 0.072469858 |
| 0.044473318 | 0.020082398 | 0.001716441 | 0.208065921 |
| 0.203883126 | 0.086937487 | 0.089013016 | 0.001835856 |
| 0.201101257 | 0.002953211 | 0.092515931 | 0.012424415 |
| 0.198799601 | 0.124584189 | 0.140676186 | 0.106599083 |
| 0.095864827 | 0.139241939 | 0.151447198 | 0.150919569 |
| 0.00094555  | 0.140854718 | 0.181119782 | 0.004272834 |



|             |             |             |             |
|-------------|-------------|-------------|-------------|
| 0.140379696 | 0.136580307 | 0.043164442 | 0.053662994 |
| 0.190146575 | 0.000463727 | 0.086476898 | 0.227374106 |
| 0.12681718  | 0.141479088 | 0.019847372 | 0.07217279  |
| 0.12490139  | 0.050914159 | 0.023797234 | 0.078173464 |
| 0.132690407 | 0.008417373 | 0.023121738 | 0.151796109 |
| 0.154008147 | 0.084118482 | 0.168977152 | 0.004134128 |
| 0.142280809 | 0.025035689 | 0.182104234 | 0.011142706 |
| 0.156530649 | 0.102371614 | 0.166854486 | 0.050306845 |
| 0.004017717 | 0.051791841 | 0.104799484 | 0.154853189 |
| 0.032331451 | 0.114763349 | 0.04479353  | 0.042544693 |
| 0.173323396 | 0.020843867 | 0.105949382 | 0.120532807 |
| 0.149773073 | 0.001037044 | 0.215012006 | 0.174966874 |
| 0.229006331 | 0.033963284 | 0.134109341 | 0.000976937 |
| 0.091726298 | 0.015443712 | 0.209014877 | 0.032387869 |
| 0.185312788 | 0.034738093 | 0.074781609 | 0.082754834 |
| 0.004159028 | 0.004080898 | 0.197501371 | 0.02002022  |
| 0.120454805 | 0.032463041 | 0.13226046  | 0.002110145 |
| 0.202950555 | 0.143826812 | 0.2123373   | 0.022953821 |
| 0.037716504 | 6.76E-05    | 0.012268936 | 0.013866345 |
| 0.237611649 | 0.157091387 | 0.167979597 | 0.136210057 |
| 0.187804962 | 0.062872419 | 0.119623918 | 0.026271127 |
| 0.123594385 | 0.005918805 | 0.181575138 | 0.089742036 |
| 0.117249472 | 0.027294506 | 0.092927173 | 0.023225621 |
| 0.019474398 | 0.010922995 | 0.03291543  | 0.109236771 |
| 0.134700222 | 0.018142454 | 0.038556515 | 0.060796467 |
| 0.004316742 | 0.03932267  | 0.150734624 | 0.103266457 |
| 0.096456195 | 0.136592277 | 0.062528473 | 0.142097711 |
| 0.021469182 | 0.152941823 | 0.00037378  | 0.000414953 |
| 0.003511119 | 0.040205916 | 0.267753888 | 0.197575503 |
| 0.181766954 | 0.030722945 | 0.033414326 | 0.099562279 |
| 0.003860222 | 0.1991786   | 0.04899244  | 0.001118455 |
| 0.08199567  | 0.044406769 | 0.0013282   | 0.138600071 |
| 0.152091937 | 0.00921274  |             |             |
| CTLA2A      | 0.335743568 | 0.362842518 | 0.024163669 |
| 0.018166613 | 0.052985444 | 0.113822523 | 0.10458026  |
| 0.357443144 | 0.046891319 | 0.064889087 | 0.180406508 |
| 0.00119982  | 0.46006691  | 0.006352682 | 0.035559668 |
| 0.42926685  | 0.435199924 | 0.195805799 | 0.430016752 |
| 0.26169571  | 0.090277589 | 0.261547027 | 0.25436853  |
| 0.131223396 | 0.00089164  | 0.049060358 | 0.025406422 |
| 0.410369257 | 0.448090151 | 0.099633204 | 0.165302826 |
| 0.426530433 | 0.45471245  | 0.308671433 | 0.239438925 |
| 0.30029255  | 0.313339781 | 0.1896929   | 0.452301742 |
| 0.453767265 | 0.111514832 | 0.44802718  | 0.004912743 |
| 0.00512582  | 0.03773031  | 0.369212521 | 0.275773803 |
| 0.231655348 | 0.103335644 | 0.078570485 | 0.079963906 |
| 0.271473107 | 0.209948066 | 0.345747358 | 0.296220129 |
| 0.255769857 | 0.003045762 | 0.297763807 | 0.249076011 |
| 0.022101137 | 0.200318381 | 0.384813953 | 0.320656872 |
| 0.120137266 | 0.273671071 | 0.402222461 | 0.010526682 |
| 0.024094063 | 0.399584974 | 0.452808678 | 0.316810282 |
| 0.36504279  | 0.241545063 | 0.166583314 | 0.43055975  |
| 0.430828605 | 0.453779921 | 0.158863868 | 0.088369186 |
| 0.000482008 | 0.062083618 | 0.234176212 | 0.379099736 |

|             |             |             |             |
|-------------|-------------|-------------|-------------|
| 0.467504136 | 0.210748569 | 0.384208152 | 0.108578923 |
| 0.399434178 | 0.005406372 | 0.259103934 | 0.416979406 |
| 0.011745406 | 0.442548043 | 0.00650721  | 0.07705829  |
| 0.420784394 | 0.461255041 | 0.352432724 | 0.024760969 |
| 0.004425518 | 0.061062525 | 0.16077423  | 1           |
| 0.325822797 | 0.363767846 | 0.25261481  | 0.296786294 |
| 0.459992345 | 0.105351647 | 0.226081548 | 0.305050783 |
| 0.392811825 | 0.003461231 | 0.093000128 | 0.104772978 |
| 0.297812272 | 0.085247328 | 0.109299477 | 0.05249386  |
| 0.005054548 | 0.029491472 | 0.436772311 | 0.080651565 |
| 0.039062695 | 0.092867138 | 0.043522724 | 0.381052993 |
| 0.351023184 | 0.433837273 | 0.052730727 | 0.127977133 |
| 0.450393496 | 0.126131056 | 0.311375716 | 0.426236566 |
| 0.306684479 | 0.184029047 | 0.068859921 | 0.332007461 |
| 0.290374685 | 0.02428064  | 0.031545787 | 0.188111191 |
| 0.462681574 | 0.424467279 | 0.403079433 | 0.228654226 |
| 0.147668494 | 0.136122234 | 0.240412226 | 0.252769394 |
| 0.119059108 | 0.280941108 | 0.162722708 | 0.217115421 |
| 0.252667432 | 0.043227953 | 0.022066381 | 0.417586289 |
| 0.033064808 | 0.133383871 | 0.322406563 | 0.373322504 |
| 0.38302061  | 0.020539413 | 0.127832839 | 0.135417318 |
| 0.18359706  | 0.129614892 | 0.324327824 | 0.124575148 |
| 0.18747559  | 0.243531216 | 0.014651251 | 0.459994725 |
| 0.048627732 | 0.226272201 | 0.370957643 | 0.070768304 |
| 0.394427533 | 0.290171088 | 0.361525708 | 0.349755707 |
| 0.40633717  | 0.002628261 | 0.065908543 | 0.333702088 |
| 0.237911399 | 0.443156097 | 0.344681084 | 0.043673032 |
| 0.147371468 | 0.381794499 | 0.062064901 | 0.215455408 |
| 0.384236019 | 0.131871409 | 0.112210406 | 0.000174584 |
| 0.058521349 | 0.38164985  | 0.355947106 | 0.027191365 |
| 0.123269667 | 0.053413112 | 0.111878723 | 0.38967313  |
| 0.092696866 | 0.417941242 | 0.020904811 | 0.260168313 |
| 0.142333487 | 0.285631764 | 0.324821204 | 0.238917192 |
| 0.351512732 | 0.195617053 | 0.461201436 | 0.249056577 |
| 0.16067198  | 0.204317003 | 0.287598241 | 0.170802132 |
| 0.445584012 | 0.402521024 | 0.446421207 | 0.406403858 |
| 0.134385323 | 0.370104572 | 0.314687472 | 0.145912746 |
| 0.307960885 | 0.319490873 | 0.033946314 | 0.366375202 |
| 0.000214772 | 0.213536924 | 0.349364988 | 0.303581623 |
| 0.348973082 | 0.114926159 | 0.025567447 | 0.16755859  |
| 0.430254598 | 0.365672983 | 0.384056761 | 0.454152648 |
| 0.29863026  | 0.004776292 | 0.381968772 | 0.280086632 |
| 0.453183917 | 0.27158597  | 0.32999496  | 0.127500679 |
| 0.405020007 | 0.402183042 | 0.328604341 | 0.398924149 |
| 0.392167501 | 0.392722313 | 0.136923874 | 0.383687959 |
| 0.021647524 | 0.138291657 | 0.391284044 | 0.126869317 |
| 0.208020181 | 0.110012299 | 0.383542226 | 0.186805168 |
| 0.323553048 | 0.307735291 | 0.281213889 | 0.028362305 |
| 0.076008673 | 0.368492645 | 0.077222238 | 0.37461837  |
| 0.413611147 | 0.256661588 | 0.399106835 | 0.414521793 |
| 0.206451853 | 0.238562332 | 0.382493985 | 0.433626174 |
| 0.00067595  | 0.462752806 | 0.464250405 | 0.202368691 |
| 0.433780403 | 0.155633674 | 0.32946975  | 0.448474187 |
| 0.000609702 | 0.066734246 | 0.326804042 | 0.342740435 |

|             |             |             |             |
|-------------|-------------|-------------|-------------|
| 0.412521169 | 0.007824369 | 0.112107217 | 0.377713984 |
| 0.462465446 | 0.055817047 | 0.390364452 | 0.197682209 |
| 0.349787708 | 0.313851046 | 0.07380028  | 0.465714655 |
| 0.336990403 | 0.34576983  | 0.01306685  | 0.321952962 |
| 0.387800839 | 0.153501926 | 0.037537415 | 0.410935331 |
| 0.354871029 | 0.240760218 | 0.128796125 | 0.00406694  |
| 0.438590762 | 0.177641385 | 0.389925281 | 0.055151312 |
| 0.32732215  | 0.218166914 | 0.328247107 | 0.4564475   |
| 0.366204727 | 0.268443778 | 0.230046627 | 0.36284643  |
| 0.105407744 | 0.452204135 | 0.438176471 | 0.022076023 |
| 0.421597191 | 0.413575763 | 0.324207338 | 0.07429678  |
| 0.26576192  | 0.069175166 | 0.091733277 | 0.298196535 |
| 0.317254341 | 0.411614585 | 0.018218044 | 0.096532631 |
| 0.260715584 | 0.178709602 | 0.039852251 | 0.234864812 |
| 0.14742269  | 0.305796716 | 0.240441359 | 0.239018794 |
| 0.30715258  | 0.149314156 | 0.407697559 | 0.089930368 |
| 0.442232355 | 0.0187763   | 0.398568444 | 0.144586296 |
| 0.168887501 | 0.420874726 | 0.45175867  | 0.200514388 |
| 0.012898239 | 0.075719592 | 0.247501739 | 0.259201408 |
| 0.026048743 | 0.094499115 | 0.127832422 | 0.203224719 |
| 0.438925486 | 0.341673223 | 0.14197376  | 0.24277551  |
| 0.246718887 | 0.059617031 | 0.338539975 | 0.23230513  |
| 0.322969764 | 0.197407771 | 0.37792159  | 0.006261448 |
| 0.427310146 | 0.084370905 | 0.284480299 | 0.23490206  |
| 0.459105047 | 0.053100579 | 0.235515594 | 0.082317795 |
| 0.151480334 | 0.002684872 | 0.246804376 | 0.414949953 |
| 0.143209826 | 0.366241768 | 0.264244065 | 0.304602496 |
| 0.369741089 | 0.297622349 | 0.364259212 | 0.385385205 |
| 0.2475733   | 0.04289448  | 0.070579944 | 0.011479417 |
| 0.30409631  | 0.252881176 | 0.393194618 | 0.361064158 |
| 0.226771462 | 0.358372778 | 0.249516212 | 0.301063726 |
| 0.408985882 | 0.192908851 | 0.425660574 | 0.231593474 |
| 0.462972035 | 0.294689522 | 0.130338475 | 0.235928601 |
| 0.090887516 | 0.10287291  | 0.046875439 | 0.11433664  |
| 0.436829261 | 0.237414749 | 0.25544641  | 0.277062779 |
| 0.014958348 | 0.247936368 | 0.429995623 | 0.449930784 |
| 0.336666492 | 0.429788682 | 0.379481397 | 0.235209504 |
| 0.286537891 | 0.229215841 | 0.036444147 | 0.014785442 |
| 0.215916478 | 0.087776095 | 0.374247932 | 0.386142556 |
| 0.424578974 | 0.336787091 | 0.036070231 | 0.071327562 |
| 0.241219862 | 0.431561391 | 0.135566479 | 0.200455329 |
| 0.35623296  | 0.371690274 | 0.000199143 | 0.176973578 |
| 0.242310543 | 0.339736983 |             |             |
| CTSD        | 0.20691646  | 0.465214699 | 0.077550795 |
| 0.011315115 | 0.069627908 | 0.204141958 | 0.153728865 |
| 0.187719025 | 0.121547851 | 0.096336693 | 0.299834741 |
| 0.004762834 | 0.285577548 | 0.031560188 | 0.081674544 |
| 0.455483737 | 0.457351742 | 0.197734886 | 0.459852423 |
| 0.211771473 | 0.077025479 | 0.310674014 | 0.226585434 |
| 0.191205418 | 0.005801744 | 0.092224208 | 0.027835431 |
| 0.170045477 | 0.430174826 | 0.177489645 | 0.16579549  |
| 0.412205407 | 0.354811615 | 0.180489393 | 0.137084747 |
| 0.081520723 | 0.450762363 | 0.050392955 | 0.281731328 |
| 0.330461707 | 0.137943156 | 0.35952226  | 0.030279008 |

|             |             |             |             |
|-------------|-------------|-------------|-------------|
| 0.000862598 | 0.092039692 | 0.16523387  | 0.295323112 |
| 0.212590076 | 0.1734092   | 0.162468703 | 0.117306377 |
| 0.058323976 | 0.327186945 | 0.368097814 | 0.054507054 |
| 0.400309762 | 0.001836372 | 0.441057448 | 0.17296298  |
| 0.084003053 | 0.226998947 | 0.181393549 | 0.304997622 |
| 0.224438716 | 0.422504354 | 0.46978641  | 0.042014125 |
| 0.082469471 | 0.217964767 | 0.29702319  | 0.22920316  |
| 0.42560447  | 0.167537487 | 0.172045471 | 0.148841234 |
| 0.286035951 | 0.313620948 | 0.251100648 | 0.155290898 |
| 0.002565498 | 0.112510784 | 0.137926491 | 0.265692673 |
| 0.196080501 | 0.337836935 | 0.247509268 | 0.14456542  |
| 0.190717247 | 0.032713763 | 0.245647338 | 0.467483225 |
| 0.01842186  | 0.315889353 | 0.007529765 | 0.143475409 |
| 0.355182423 | 0.388776426 | 0.296087216 | 0.075301963 |
| 0.029316    | 0.139439836 | 0.131504479 | 0.325822797 |
| 0.216582654 | 0.392758999 | 0.060112632 | 1           |
| 0.150730238 | 0.20725714  | 0.442938962 | 0.265378296 |
| 0.016667693 | 0.154941827 | 0.179406585 | 0.449661779 |
| 0.074464602 | 0.166017231 | 0.179406585 | 0.164166227 |
| 0.029395245 | 0.403284261 | 0.019382793 | 0.009626251 |
| 0.15105255  | 0.05166902  | 0.160979569 | 0.079576605 |
| 0.396526089 | 0.082983026 | 0.233469212 | 0.187733532 |
| 0.174345026 | 0.173114141 | 0.170097413 | 0.25621889  |
| 0.206563234 | 0.144364849 | 0.310372854 | 0.149085283 |
| 0.074288009 | 0.096033242 | 0.416148875 | 0.437929466 |
| 0.439196105 | 0.487352406 | 0.269139879 | 0.258854866 |
| 0.204567063 | 0.169160793 | 0.203381945 | 0.1383137   |
| 0.221562538 | 0.046422971 | 0.257165201 | 0.181977116 |
| 0.01914012  | 0.080710543 | 0.319557635 | 0.416813577 |
| 0.163150031 | 0.426462544 | 0.346805099 | 0.020691868 |
| 0.022346038 | 0.131971777 | 0.352426067 | 0.234783095 |
| 0.164746368 | 0.303741778 | 0.178798629 | 0.215229091 |
| 0.155824062 | 0.05786458  | 0.119879955 | 0.26757348  |
| 0.25575944  | 0.13418538  | 0.269878196 | 0.122853029 |
| 0.213633676 | 0.385740247 | 0.049677299 | 0.266126157 |
| 0.001352343 | 0.092428263 | 0.248582582 | 0.299394703 |
| 0.336616017 | 0.461788914 | 0.249760691 | 0.170857479 |
| 0.150528072 | 0.141994031 | 0.119747814 | 0.213080698 |
| 0.146044854 | 0.125249093 | 0.160496025 | 0.38110093  |
| 0.150938407 | 0.230560411 | 0.001909955 | 0.117587906 |
| 0.118871507 | 0.099572802 | 0.079444368 | 0.135387133 |
| 0.323338877 | 0.046323503 | 0.403052657 | 0.16342216  |
| 0.326035941 | 0.161992706 | 0.092439355 | 0.180243959 |
| 0.183597074 | 0.343907804 | 0.181738702 | 0.331392411 |
| 0.31412923  | 0.089905763 | 0.387224228 | 0.158309939 |
| 0.398516004 | 0.332107899 | 0.219879488 | 0.204663123 |
| 0.287882332 | 0.137120881 | 0.343949281 | 0.193733046 |
| 0.223929387 | 0.102072883 | 0.248618216 | 0.232660208 |
| 0.252036889 | 0.207215828 | 0.47357182  | 0.002172068 |
| 0.183409421 | 0.091024991 | 0.090221775 | 0.440963064 |
| 0.475668262 | 0.410660968 | 0.19920532  | 0.466028365 |
| 0.023739559 | 0.465277835 | 0.350506753 | 0.135299671 |
| 0.225535704 | 0.118002104 | 0.348548082 | 0.433808047 |
| 0.197762373 | 0.273027991 | 0.057677647 | 0.422523701 |
|             |             | 0.185131327 | 0.208654011 |

|             |             |             |             |
|-------------|-------------|-------------|-------------|
| 0.159195602 | 0.201400254 | 0.270815265 | 0.015876975 |
| 0.16918146  | 0.242281043 | 0.096387565 | 0.157742563 |
| 0.157362903 | 0.368661057 | 0.296306098 | 0.162304653 |
| 0.145903491 | 0.142975406 | 0.07688894  | 0.15431333  |
| 0.466967719 | 0.020023355 | 0.452264961 | 0.473629444 |
| 0.234107667 | 0.399320702 | 0.473405419 | 0.218493668 |
| 0.358523948 | 0.414409755 | 0.390483635 | 0.002662327 |
| 0.338935458 | 0.248937042 | 0.355070534 | 0.372287318 |
| 0.23955282  | 0.134974267 | 0.152841284 | 0.003457263 |
| 0.148817779 | 0.085391432 | 0.485209337 | 0.380736196 |
| 0.038784023 | 0.017408682 | 0.341508121 | 0.224692783 |
| 0.025940606 | 0.488099516 | 0.194102539 | 0.395906956 |
| 0.206136598 | 0.13181896  | 0.294126686 | 0.072065655 |
| 0.198681015 | 0.022270475 | 0.24717595  | 0.197237721 |
| 0.083726897 | 0.048451444 | 0.47705507  | 0.395388772 |
| 0.307853208 | 0.198514598 | 0.008253824 | 0.325593536 |
| 0.080954133 | 0.311854581 | 0.111297755 | 0.380850054 |
| 0.334516527 | 0.416874603 | 0.318072625 | 0.255614054 |
| 0.375109597 | 0.361367743 | 0.384072197 | 0.041422982 |
| 0.308900479 | 0.366997049 | 0.046533038 | 0.206564437 |
| 0.413047187 | 0.176817299 | 0.142555862 | 0.306641385 |
| 0.031830262 | 0.177941998 | 0.207669883 | 0.404840189 |
| 0.405692262 | 0.070253728 | 0.163107406 | 0.37222611  |
| 0.214860166 | 0.105687459 | 0.218155442 | 0.259034049 |
| 0.068328475 | 0.094593287 | 0.330807152 | 0.444318522 |
| 0.257633479 | 0.385262729 | 0.080925194 | 0.387873469 |
| 0.074704171 | 0.380705164 | 0.181694011 | 0.212527913 |
| 0.200161866 | 0.314253795 | 0.075835332 | 0.020255638 |
| 0.127850826 | 0.348355311 | 0.397863596 | 0.084227615 |
| 0.171906883 | 0.164081789 | 0.187891455 | 0.429683443 |
| 0.172273835 | 0.225537054 | 0.217894256 | 0.409117701 |
| 0.053520449 | 0.475710858 | 0.227520066 | 0.368128713 |
| 0.188881675 | 0.357351964 | 0.009093083 | 0.257078165 |
| 0.109458853 | 0.137828622 | 0.174346677 | 0.37512002  |
| 0.118646166 | 0.293801296 | 0.161219052 | 0.095725099 |
| 0.005732084 | 0.317787563 | 0.1298563   | 0.273426452 |
| 0.137272678 | 0.228280995 | 0.050519197 | 0.497997531 |
| 0.22539541  | 0.349674328 | 0.127943927 | 0.184910086 |
| 0.005425331 | 0.105527479 | 0.049544207 | 0.353029342 |
| 0.359265913 | 0.276731463 | 0.189511728 | 0.158914662 |
| 0.256737147 | 0.308962466 | 0.176693013 | 0.394358548 |
| 0.070655272 | 0.453319072 | 0.217255532 | 0.291601474 |
| 0.208289801 | 0.217456412 | 0.210319625 | 0.136779519 |
| 0.131497329 | 0.123507393 | 0.16138979  | 0.396236372 |
| 0.201417448 | 0.191674955 | 0.17861117  | 0.047577453 |
| 0.201819155 | 0.313324096 | 0.290342    | 0.236812646 |
| 0.253781973 | 0.172937336 | 0.386169505 | 0.172004771 |
| 0.213599422 | 0.02204588  | 0.019542878 | 0.10206223  |
| 0.146301227 | 0.402284064 | 0.400527836 | 0.453951979 |
| 0.143050655 | 0.105289126 | 0.148698043 | 0.054481925 |
| 0.300954873 | 0.195712307 | 0.056459548 | 0.247673503 |
| 0.168262    | 0.001456997 | 0.18591449  | 0.337293952 |
| 0.161886263 |             |             |             |
| CTSE        | 0.182397754 | 0.503990076 | 0.052906343 |

|             |             |             |             |
|-------------|-------------|-------------|-------------|
| 0.023102734 | 0.082851149 | 0.184815122 | 0.155852963 |
| 0.170079045 | 0.080225315 | 0.096778876 | 0.292386411 |
| 0.001121684 | 0.33379282  | 0.011332968 | 0.049808297 |
| 0.492921368 | 0.512119318 | 0.216156609 | 0.494503673 |
| 0.164567118 | 0.094086604 | 0.27323121  | 0.245046863 |
| 0.174759592 | 0.001498545 | 0.093534519 | 0.039510328 |
| 0.166220069 | 0.47452261  | 0.128450371 | 0.157500847 |
| 0.434523368 | 0.432849465 | 0.21581252  | 0.18442557  |
| 0.122526519 | 0.468553206 | 0.058570818 | 0.351167521 |
| 0.366260785 | 0.14571047  | 0.420102396 | 0.013162419 |
| 0.002893837 | 0.0795932   | 0.147485752 | 0.279742252 |
| 0.161104494 | 0.153736202 | 0.11259877  | 0.123536141 |
| 0.067933573 | 0.320081055 | 0.337349134 | 0.069609988 |
| 0.421796849 | 0.004675343 | 0.46186928  | 0.124345053 |
| 0.052531074 | 0.177490426 | 0.166911634 | 0.286754735 |
| 0.21234178  | 0.44756379  | 0.515782738 | 0.031631306 |
| 0.059518394 | 0.210040675 | 0.347060744 | 0.286456543 |
| 0.463898459 | 0.178978655 | 0.177663308 | 0.170440242 |
| 0.331877047 | 0.356805399 | 0.214068227 | 0.116342314 |
| 0.000764176 | 0.108983457 | 0.189098767 | 0.23801968  |
| 0.248415796 | 0.329181224 | 0.232201841 | 0.147111179 |
| 0.203876369 | 0.016595692 | 0.242843115 | 0.523681794 |
| 0.016345448 | 0.337420478 | 0.00851201  | 0.101131131 |
| 0.379292089 | 0.437300554 | 0.300611137 | 0.057186204 |
| 0.011911005 | 0.08431408  | 0.070714435 | 0.363767846 |
| 0.216582654 | 1           | 0.405032575 | 0.058604334 |
| 0.316207091 | 0.10482956  | 0.199666463 | 0.475017822 |
| 0.474281027 | 0.006424147 | 0.099173228 | 0.164595128 |
| 0.177568447 | 0.092065177 | 0.152253165 | 0.018423387 |
| 0.009228173 | 0.011084473 | 0.443466768 | 0.100229622 |
| 0.077713394 | 0.140538362 | 0.060010182 | 0.303461086 |
| 0.160334002 | 0.404275952 | 0.091418185 | 0.168971407 |
| 0.316381958 | 0.183937889 | 0.219857648 | 0.348587257 |
| 0.195069056 | 0.142380644 | 0.099801154 | 0.461122733 |
| 0.421164367 | 0.052777768 | 0.064318191 | 0.25873688  |
| 0.312120911 | 0.476963642 | 0.528915659 | 0.161103002 |
| 0.165094679 | 0.148326046 | 0.171095527 | 0.298583031 |
| 0.171333015 | 0.181336827 | 0.042516463 | 0.302471267 |
| 0.42672132  | 0.020226296 | 0.05193511  | 0.368755916 |
| 0.038804178 | 0.150709286 | 0.441767207 | 0.405481428 |
| 0.263030457 | 0.033279035 | 0.149810287 | 0.172484683 |
| 0.179626402 | 0.160277517 | 0.282116526 | 0.135571628 |
| 0.242950524 | 0.175923018 | 0.041398149 | 0.32057367  |
| 0.089080501 | 0.220176042 | 0.138824164 | 0.038409327 |
| 0.257851859 | 0.177321853 | 0.432652273 | 0.249259449 |
| 0.308756415 | 0.004235664 | 0.097255118 | 0.225103827 |
| 0.158010858 | 0.359093831 | 0.512574852 | 0.083220019 |
| 0.166637521 | 0.144972305 | 0.099656027 | 0.193442499 |
| 0.357914535 | 0.138296295 | 0.124260927 | 0.000690663 |
| 0.097886974 | 0.176269056 | 0.207138448 | 0.035693144 |
| 0.151152785 | 0.075144903 | 0.061324377 | 0.448281386 |
| 0.13165732  | 0.392969906 | 0.017929025 | 0.069901916 |
| 0.161234758 | 0.370582707 | 0.199059061 | 0.144209353 |
| 0.397297613 | 0.18101361  | 0.389894957 | 0.37287422  |

|             |             |             |             |
|-------------|-------------|-------------|-------------|
| 0.16652873  | 0.32208468  | 0.080134554 | 0.160319097 |
| 0.252460785 | 0.460446476 | 0.398017566 | 0.399449588 |
| 0.157470549 | 0.266337303 | 0.153279352 | 0.222744947 |
| 0.228349525 | 0.220282908 | 0.060631232 | 0.510150969 |
| 0.000673204 | 0.242558303 | 0.257103262 | 0.082848987 |
| 0.49853335  | 0.187357457 | 0.051738178 | 0.138548184 |
| 0.504512013 | 0.509580522 | 0.395130779 | 0.403524905 |
| 0.101371167 | 0.007826649 | 0.468192333 | 0.341462687 |
| 0.483571539 | 0.210536891 | 0.166032339 | 0.037162227 |
| 0.477633837 | 0.188360613 | 0.291876883 | 0.207740583 |
| 0.249212189 | 0.18728264  | 0.148673037 | 0.24430009  |
| 0.009703374 | 0.150471769 | 0.275518739 | 0.118990832 |
| 0.180915743 | 0.103182375 | 0.426749721 | 0.272767669 |
| 0.203326234 | 0.1549533   | 0.190570544 | 0.067131457 |
| 0.120946069 | 0.509505451 | 0.024089298 | 0.447047721 |
| 0.520792121 | 0.20895538  | 0.476320958 | 0.510063459 |
| 0.175438206 | 0.368067961 | 0.459234685 | 0.403417422 |
| 0.00060451  | 0.39190555  | 0.304517938 | 0.326113006 |
| 0.429015374 | 0.209499202 | 0.108299058 | 0.189154648 |
| 0.001160661 | 0.103327456 | 0.121419813 | 0.492251586 |
| 0.456320608 | 0.026804715 | 0.023083811 | 0.394733974 |
| 0.274581825 | 0.027420736 | 0.525829564 | 0.189416254 |
| 0.457366977 | 0.220558782 | 0.120960118 | 0.348692444 |
| 0.097173148 | 0.183223896 | 0.02340255  | 0.299084092 |
| 0.199114447 | 0.039635471 | 0.062402364 | 0.509358505 |
| 0.41413514  | 0.329829812 | 0.172724761 | 0.007933979 |
| 0.345000428 | 0.122442774 | 0.377677218 | 0.080657234 |
| 0.384596126 | 0.324403218 | 0.45245859  | 0.376622926 |
| 0.265390683 | 0.386840032 | 0.359737638 | 0.430507546 |
| 0.070628706 | 0.359764404 | 0.402824895 | 0.042711436 |
| 0.205568754 | 0.48165041  | 0.209180477 | 0.129189881 |
| 0.278867723 | 0.061946311 | 0.153943821 | 0.160633987 |
| 0.453026357 | 0.470186407 | 0.046809255 | 0.100981743 |
| 0.399019649 | 0.171833508 | 0.08349384  | 0.186926144 |
| 0.221266984 | 0.074632843 | 0.061521525 | 0.302905753 |
| 0.477916077 | 0.255165023 | 0.437995932 | 0.104731232 |
| 0.441621857 | 0.038973484 | 0.388568363 | 0.156933414 |
| 0.17333697  | 0.230505279 | 0.349432525 | 0.05235839  |
| 0.01815698  | 0.078355895 | 0.380333808 | 0.407149555 |
| 0.058919055 | 0.121486654 | 0.159252433 | 0.222316583 |
| 0.487575373 | 0.210057675 | 0.205857055 | 0.18104272  |
| 0.412181899 | 0.075953324 | 0.488563515 | 0.177395613 |
| 0.350752808 | 0.191192477 | 0.386769923 | 0.006243709 |
| 0.301505902 | 0.113874836 | 0.096099523 | 0.20676812  |
| 0.415825518 | 0.095039176 | 0.323529617 | 0.104748269 |
| 0.099868504 | 0.002598555 | 0.286160702 | 0.170881971 |
| 0.249181943 | 0.135795801 | 0.187317014 | 0.077662727 |
| 0.533674214 | 0.225257762 | 0.354314748 | 0.129767824 |
| 0.213565129 | 0.011615659 | 0.10795171  | 0.026780188 |
| 0.324425364 | 0.337574631 | 0.258739932 | 0.187253861 |
| 0.101152443 | 0.306820075 | 0.30132082  | 0.220497462 |
| 0.467163419 | 0.090276104 | 0.510527132 | 0.161625739 |
| 0.344934528 | 0.192923476 | 0.191405256 | 0.17297351  |
| 0.136959821 | 0.070608432 | 0.089260702 | 0.093234236 |

|             |             |             |             |
|-------------|-------------|-------------|-------------|
| 0.46925278  | 0.165507309 | 0.214781211 | 0.162412501 |
| 0.041060509 | 0.206034225 | 0.335213485 | 0.336436787 |
| 0.267267678 | 0.281462785 | 0.175081119 | 0.387458741 |
| 0.157863771 | 0.156762898 | 0.042433421 | 0.027731358 |
| 0.143974305 | 0.126416331 | 0.386020436 | 0.410295237 |
| 0.496998647 | 0.1286227   | 0.071741277 | 0.088281566 |
| 0.054879812 | 0.317689619 | 0.208739756 | 0.089496175 |
| 0.266764072 | 0.145618667 | 0.00054928  | 0.127217762 |
| 0.327087556 | 0.202016465 |             |             |
| CX3CR1      | 0.27177658  | 0.486881373 | 0.203453728 |
| 0.040385934 | 0.258144942 | 0.432806461 | 0.440308709 |
| 0.264241777 | 0.280800661 | 0.284912194 | 0.470349942 |
| 0.003739077 | 0.244585816 | 0.047632382 | 0.184229426 |
| 0.410017672 | 0.425175293 | 0.489263896 | 0.417517451 |
| 0.315780193 | 0.214506695 | 0.392723684 | 0.420502446 |
| 0.454613243 | 0.006284043 | 0.313173693 | 0.099347945 |
| 0.243326733 | 0.37778654  | 0.395355599 | 0.373123676 |
| 0.354426454 | 0.33553577  | 0.377455431 | 0.35482614  |
| 0.158679067 | 0.494187124 | 0.085180546 | 0.288657081 |
| 0.26506264  | 0.405030604 | 0.336870048 | 0.064251259 |
| 0.003215073 | 0.293641457 | 0.215148191 | 0.406884851 |
| 0.349804755 | 0.413758591 | 0.370983711 | 0.36630592  |
| 0.074159167 | 0.472068862 | 0.332595813 | 0.071197188 |
| 0.493811999 | 0.00752158  | 0.505017714 | 0.212577579 |
| 0.225949054 | 0.439700038 | 0.258770536 | 0.390210479 |
| 0.457289756 | 0.506466785 | 0.467513778 | 0.144951251 |
| 0.246085099 | 0.345385321 | 0.258206954 | 0.398332163 |
| 0.435944564 | 0.345837117 | 0.447888902 | 0.248665445 |
| 0.315444964 | 0.265332059 | 0.455175928 | 0.356823874 |
| 0.00340138  | 0.358131317 | 0.354536276 | 0.232689103 |
| 0.236894078 | 0.471727667 | 0.293541313 | 0.422409708 |
| 0.312671435 | 0.086847603 | 0.426282394 | 0.452233465 |
| 0.048671789 | 0.274058203 | 0.021767608 | 0.330642442 |
| 0.32290183  | 0.324501386 | 0.34018918  | 0.239150192 |
| 0.063043459 | 0.282283157 | 0.130611342 | 0.25261481  |
| 0.392758999 | 0.405032575 | 1           | 0.068071636 |
| 0.21364568  | 0.272502035 | 0.469983661 | 0.498831302 |
| 0.425926487 | 0.029117534 | 0.285545963 | 0.429710677 |
| 0.319231023 | 0.219162743 | 0.448462347 | 0.025633577 |
| 0.02658595  | 0.02033492  | 0.355571224 | 0.315568737 |
| 0.277494672 | 0.414925333 | 0.163172739 | 0.367100459 |
| 0.254827846 | 0.318210418 | 0.308565615 | 0.453023553 |
| 0.287542423 | 0.46036713  | 0.392470507 | 0.339552414 |
| 0.348415014 | 0.329055945 | 0.315074548 | 0.475501344 |
| 0.465957518 | 0.218771233 | 0.234670833 | 0.449510547 |
| 0.219443018 | 0.400950754 | 0.472960106 | 0.339331881 |
| 0.413079422 | 0.411996304 | 0.316187966 | 0.451162145 |
| 0.460457418 | 0.352031247 | 0.049503162 | 0.46789386  |
| 0.501362807 | 0.031076248 | 0.221523061 | 0.325736682 |
| 0.091209323 | 0.430651377 | 0.452334597 | 0.406933403 |
| 0.384811148 | 0.083694374 | 0.35115183  | 0.44396444  |
| 0.415179385 | 0.42331545  | 0.400443704 | 0.313825255 |
| 0.437343484 | 0.30810494  | 0.185471453 | 0.222451673 |
| 0.321683166 | 0.409170246 | 0.18920908  | 0.074609329 |



|             |             |             |             |
|-------------|-------------|-------------|-------------|
| 0.306097959 | 0.332347008 | 0.409986704 | 0.372444089 |
| 0.287103842 | 0.005844934 | 0.26944875  | 0.303929819 |
| 0.286685537 | 0.270662592 | 0.50856056  | 0.312628489 |
| 0.400869927 | 0.230242539 | 0.341322612 | 0.429157552 |
| 0.315927382 | 0.323899539 | 0.31379542  | 0.003511666 |
| 0.335058013 | 0.243246191 | 0.389807088 | 0.121815442 |
| 0.391162907 | 0.239444466 | 0.132732265 | 0.409592141 |
| 0.404331299 | 0.35364513  | 0.050370789 | 0.103277833 |
| 0.411614416 | 0.466759272 | 0.316919349 | 0.238717062 |
| 0.41732745  | 0.377809797 | 0.275005672 | 0.464525904 |
| 0.435250976 | 0.460845625 | 0.105489988 | 0.408757113 |
| 0.306428856 | 0.412744144 | 0.313014919 | 0.365964274 |
| 0.447170638 | 0.295155822 | 0.213619735 | 0.442097268 |
| 0.379002444 | 0.398796006 | 0.222744796 | 0.49276015  |
| 0.003880485 | 0.456236767 | 0.391730988 | 0.104198933 |
| 0.487257642 | 0.44871592  | 0.207092049 | 0.327869583 |
| 0.426500767 | 0.495337355 | 0.359460227 | 0.305064675 |
| 0.153767147 | 0.033039364 | 0.437376647 | 0.450216878 |
| 0.384596454 | 0.463274703 | 0.259706608 | 0.066540458 |
| 0.421825464 | 0.231206427 | 0.380557951 | 0.288098356 |
| 0.365562999 | 0.293323989 | 0.416559323 | 0.249891879 |
| 0.014487326 | 0.372120092 | 0.302679152 | 0.241723984 |
| 0.354505482 | 0.286429401 | 0.393969485 | 0.469818471 |
| 0.352907183 | 0.218799804 | 0.321798413 | 0.256308014 |
| 0.40389832  | 0.484221752 | 0.034562549 | 0.421735041 |
| 0.454561331 | 0.440362055 | 0.418461091 | 0.4415208   |
| 0.394528859 | 0.484654001 | 0.426585293 | 0.323835265 |
| 0.002466739 | 0.286233844 | 0.223107358 | 0.4684462   |
| 0.340685408 | 0.45406569  | 0.155844626 | 0.269263289 |
| 0.005546646 | 0.34773951  | 0.146422206 | 0.496905676 |
| 0.394325419 | 0.132724573 | 0.027529086 | 0.397036456 |
| 0.235587257 | 0.041032461 | 0.48154727  | 0.433345838 |
| 0.445680812 | 0.430941594 | 0.377987197 | 0.257348547 |
| 0.108364716 | 0.327373362 | 0.082711657 | 0.414259587 |
| 0.345661245 | 0.066993623 | 0.182165356 | 0.450148965 |
| 0.387768517 | 0.489161851 | 0.4498127   | 0.020221068 |
| 0.247404436 | 0.181202729 | 0.37224992  | 0.25550132  |
| 0.401378028 | 0.481884567 | 0.469352146 | 0.294864013 |
| 0.393019272 | 0.463268152 | 0.463708966 | 0.397857372 |
| 0.113170922 | 0.264784944 | 0.314391529 | 0.146368041 |
| 0.241209771 | 0.417150631 | 0.357437267 | 0.393647958 |
| 0.416158891 | 0.106055613 | 0.41105439  | 0.290054593 |
| 0.47156787  | 0.403567694 | 0.201940383 | 0.289415107 |
| 0.468797898 | 0.445926314 | 0.321381131 | 0.436618203 |
| 0.450531296 | 0.074779247 | 0.095562072 | 0.460768145 |
| 0.507598801 | 0.474449017 | 0.366944096 | 0.229841768 |
| 0.363591894 | 0.168466004 | 0.352717316 | 0.442269625 |
| 0.409734915 | 0.247785726 | 0.243632752 | 0.068301732 |
| 0.043157956 | 0.19949232  | 0.475279373 | 0.470774565 |
| 0.23580367  | 0.371965149 | 0.425234743 | 0.463702791 |
| 0.395329476 | 0.332687727 | 0.449850025 | 0.390290389 |
| 0.494597744 | 0.172024296 | 0.494882094 | 0.390961607 |
| 0.382646191 | 0.439951038 | 0.390650775 | 0.017771461 |
| 0.323393829 | 0.297663598 | 0.145432321 | 0.426061487 |

|             |             |             |             |
|-------------|-------------|-------------|-------------|
| 0.305254799 | 0.32264023  | 0.487517521 | 0.321584739 |
| 0.171871942 | 0.007731959 | 0.420783588 | 0.236780236 |
| 0.458309308 | 0.189337226 | 0.395775787 | 0.07704588  |
| 0.508850457 | 0.378609999 | 0.33806883  | 0.185822888 |
| 0.421200922 | 0.01391338  | 0.313970769 | 0.116736297 |
| 0.386607773 | 0.462304827 | 0.322482517 | 0.286000382 |
| 0.176279179 | 0.414009945 | 0.469853406 | 0.41251481  |
| 0.407497117 | 0.104524965 | 0.429431567 | 0.37534484  |
| 0.238167593 | 0.361309577 | 0.458988365 | 0.388538639 |
| 0.420155382 | 0.189167384 | 0.335935956 | 0.236672624 |
| 0.382573256 | 0.374481545 | 0.45071127  | 0.262099446 |
| 0.168182412 | 0.441101289 | 0.295982853 | 0.28700161  |
| 0.382393546 | 0.235668212 | 0.26867867  | 0.479220094 |
| 0.261281444 | 0.329852996 | 0.077098629 | 0.076265874 |
| 0.228282838 | 0.383539688 | 0.352498675 | 0.376172804 |
| 0.429201492 | 0.203548034 | 0.277087032 | 0.278485414 |
| 0.074439302 | 0.23861426  | 0.463045648 | 0.127219426 |
| 0.406668266 | 0.221197611 | 0.002694618 | 0.273878329 |
| 0.458580811 | 0.305887932 |             |             |
| CXCL10      | 0.064567503 | 0.131448782 | 0.001157563 |
| 0.000626634 | 0.003718882 | 0.014703959 | 0.011909814 |
| 0.059447999 | 0.002987642 | 0.002544272 | 0.034574965 |
| 0.000125508 | 0.259413262 | 0.000429636 | 0.006474421 |
| 0.197711008 | 0.210969942 | 0.032136655 | 0.226666759 |
| 0.043784521 | 0.00365716  | 0.062534445 | 0.033802763 |
| 0.015618439 | 6.97E-05    | 0.002658649 | 0.000696959 |
| 0.079624038 | 0.233494652 | 0.010900873 | 0.008341447 |
| 0.183870811 | 0.201569808 | 0.022908059 | 0.024347663 |
| 0.031736569 | 0.102972577 | 0.074002032 | 0.183622925 |
| 0.273359754 | 0.006821096 | 0.181494081 | 0.000410107 |
| 0.000247289 | 0.001847362 | 0.055537415 | 0.054101067 |
| 0.041032921 | 0.011385171 | 0.009363804 | 0.0049864   |
| 0.032869951 | 0.044796433 | 0.128274591 | 0.039059388 |
| 0.070157786 | 7.52E-05    | 0.093383143 | 0.032534287 |
| 0.001332563 | 0.027727812 | 0.06824936  | 0.067747546 |
| 0.01827375  | 0.079156802 | 0.173901895 | 0.000425178 |
| 0.001417586 | 0.077986778 | 0.157401222 | 0.050791368 |
| 0.124016196 | 0.014465909 | 0.01099204  | 0.096902061 |
| 0.123702479 | 0.217302013 | 0.031800089 | 0.007892566 |
| 1.80E-05    | 0.004723404 | 0.017125125 | 0.140487303 |
| 0.146026437 | 0.045611135 | 0.092944256 | 0.006528258 |
| 0.056675101 | 0.000306856 | 0.048016852 | 0.187672651 |
| 0.000436022 | 0.208921949 | 0.000546121 | 0.008777666 |
| 0.160683031 | 0.252559775 | 0.085226172 | 0.001023958 |
| 0.000318619 | 0.006173897 | 0.020456249 | 0.296786294 |
| 0.060112632 | 0.058604334 | 0.068071636 | 1           |
| 0.280366974 | 0.006759511 | 0.023004136 | 0.090489057 |
| 0.147391721 | 0.000619265 | 0.011115132 | 0.01315422  |
| 0.03329037  | 0.005053738 | 0.013678813 | 0.00374344  |
| 0.000166545 | 0.010132186 | 0.199277639 | 0.00565614  |
| 0.001685195 | 0.008075966 | 0.002319037 | 0.080783238 |
| 0.052032072 | 0.242896533 | 0.004109341 | 0.011205997 |
| 0.140673223 | 0.01564045  | 0.03861978  | 0.124944231 |
| 0.037722364 | 0.020186834 | 0.004119348 | 0.111479257 |

|             |             |             |             |
|-------------|-------------|-------------|-------------|
| 0.098156158 | 0.00132885  | 0.00149501  | 0.031015017 |
| 0.255944691 | 0.18492745  | 0.177061104 | 0.023698472 |
| 0.010928384 | 0.017881111 | 0.013203033 | 0.042718461 |
| 0.017747919 | 0.072231776 | 0.058507166 | 0.055128901 |
| 0.069449898 | 0.004082299 | 0.001152046 | 0.165801697 |
| 0.002767128 | 0.011119502 | 0.100029867 | 0.115991384 |
| 0.108035114 | 0.00052209  | 0.005710829 | 0.014068648 |
| 0.02728519  | 0.011281761 | 0.07915387  | 0.005342853 |
| 0.033629045 | 0.012918089 | 0.000742841 | 0.261590837 |
| 0.004012394 | 0.046576687 | 0.034248436 | 0.006543345 |
| 0.127091266 | 0.039955093 | 0.106358018 | 0.079689087 |
| 0.123098821 | 5.60E-05    | 0.002382701 | 0.071220817 |
| 0.012601606 | 0.267614069 | 0.118092704 | 0.004088699 |
| 0.025877365 | 0.081162518 | 0.006608071 | 0.020591834 |
| 0.17768914  | 0.005743855 | 0.005317362 | 2.67E-06    |
| 0.004416217 | 0.032783408 | 0.066251942 | 0.002295248 |
| 0.007476325 | 0.002646766 | 0.027027064 | 0.126320539 |
| 0.009838024 | 0.147622991 | 0.003362198 | 0.108950134 |
| 0.009014344 | 0.066942439 | 0.021685791 | 0.018451492 |
| 0.091597871 | 0.010294756 | 0.270139206 | 0.064553613 |
| 0.017905719 | 0.038227831 | 0.11127018  | 0.016967844 |
| 0.109017093 | 0.147548803 | 0.156734845 | 0.152123136 |
| 0.010930246 | 0.157511043 | 0.0380882   | 0.023467047 |
| 0.065884713 | 0.074738395 | 0.00179095  | 0.146539185 |
| 9.74E-06    | 0.041744089 | 0.058633992 | 0.086175836 |
| 0.114381827 | 0.015114912 | 0.001482903 | 0.019643569 |
| 0.223636502 | 0.153020853 | 0.178223068 | 0.202261916 |
| 0.043575671 | 0.000485484 | 0.1662665   | 0.067760097 |
| 0.233147575 | 0.036645112 | 0.043162339 | 0.109091484 |
| 0.160828955 | 0.159197318 | 0.059191991 | 0.069514999 |
| 0.09538558  | 0.070964153 | 0.022000584 | 0.163460582 |
| 0.002393792 | 0.007799044 | 0.077879958 | 0.006784805 |
| 0.010682608 | 0.006864146 | 0.121964212 | 0.043161184 |
| 0.032301705 | 0.022402088 | 0.019390555 | 0.001396757 |
| 0.00919105  | 0.135302339 | 0.032740371 | 0.162676911 |
| 0.189657741 | 0.059010758 | 0.137489721 | 0.196507215 |
| 0.02645158  | 0.057690141 | 0.126611592 | 0.249593352 |
| 0.000102687 | 0.232014822 | 0.222099309 | 0.050264517 |
| 0.160068455 | 0.022535958 | 0.103836157 | 0.081041199 |
| 0.000285539 | 0.006413621 | 0.027750337 | 0.138298464 |
| 0.153111373 | 0.000456424 | 0.058792384 | 0.119378149 |
| 0.182243747 | 0.020753822 | 0.165779026 | 0.019942069 |
| 0.10551358  | 0.05681082  | 0.004873577 | 0.211146538 |
| 0.033287877 | 0.060603572 | 0.000759712 | 0.058218414 |
| 0.081839638 | 0.043046373 | 0.001344262 | 0.199466183 |
| 0.105286515 | 0.054231593 | 0.019877836 | 4.40E-05    |
| 0.246305929 | 0.008841063 | 0.098949484 | 0.005824379 |
| 0.104662626 | 0.04985856  | 0.109328328 | 0.192908662 |
| 0.081461528 | 0.066252002 | 0.05195941  | 0.102875665 |
| 0.009299803 | 0.170276374 | 0.175804854 | 0.000953137 |
| 0.106794904 | 0.161919941 | 0.038329834 | 0.007783079 |
| 0.06261626  | 0.00453056  | 0.011611785 | 0.066095621 |
| 0.094542599 | 0.146627283 | 0.000749042 | 0.012064439 |
| 0.063513747 | 0.016032299 | 0.002982784 | 0.044429657 |

|             |             |             |             |
|-------------|-------------|-------------|-------------|
| 0.025785779 | 0.029880737 | 0.094960251 | 0.056301906 |
| 0.095633121 | 0.026423524 | 0.13585417  | 0.003412473 |
| 0.200208872 | 0.001706302 | 0.18729498  | 0.012557075 |
| 0.027069949 | 0.086829911 | 0.247271766 | 0.03011442  |
| 0.000244347 | 0.003976463 | 0.056401708 | 0.069828807 |
| 0.001371134 | 0.01150744  | 0.010700317 | 0.027126852 |
| 0.198312536 | 0.028926221 | 0.022154019 | 0.040404713 |
| 0.069635081 | 0.002555072 | 0.126220672 | 0.032753825 |
| 0.087847634 | 0.013053671 | 0.123603948 | 0.000386215 |
| 0.109169708 | 0.003187881 | 0.084361733 | 0.026918458 |
| 0.267433927 | 0.002840985 | 0.049928247 | 0.005704384 |
| 0.010684425 | 0.000868482 | 0.068253495 | 0.077443724 |
| 0.025466917 | 0.076557967 | 0.043269686 | 0.048366544 |
| 0.153285368 | 0.043872561 | 0.098147512 | 0.10320448  |
| 0.020686898 | 0.014470568 | 0.002935372 | 0.000671034 |
| 0.082998122 | 0.070348056 | 0.109401687 | 0.060340961 |
| 0.036540941 | 0.08693677  | 0.054992207 | 0.041176529 |
| 0.149634931 | 0.012363268 | 0.186361749 | 0.039823951 |
| 0.267325175 | 0.023338769 | 0.021195873 | 0.027790244 |
| 0.008029286 | 0.014669171 | 0.003456944 | 0.013517348 |
| 0.174756108 | 0.043012203 | 0.032740501 | 0.0205817   |
| 0.000621812 | 0.020646336 | 0.192912666 | 0.153453284 |
| 0.054863476 | 0.123158516 | 0.051795113 | 0.063598977 |
| 0.027480503 | 0.026217867 | 0.001482295 | 0.000377715 |
| 0.013570083 | 0.005237187 | 0.161963449 | 0.148298179 |
| 0.201391738 | 0.063339033 | 0.002012332 | 0.006343439 |
| 0.17893675  | 0.208910624 | 0.018341631 | 0.031131156 |
| 0.093137931 | 0.052279493 | 1.42E-05    | 0.020314307 |
| 0.056156855 | 0.029164725 |             |             |
| CXCR3       | 0.262017172 | 0.323142058 | 0.017299743 |
| 0.018400664 | 0.050945011 | 0.089229785 | 0.08733998  |
| 0.293067567 | 0.032176531 | 0.052071735 | 0.148317421 |
| 0.000519605 | 0.420876325 | 0.003295587 | 0.026520526 |
| 0.418902697 | 0.433339481 | 0.172071251 | 0.424229915 |
| 0.202515286 | 0.07728032  | 0.208073459 | 0.211898276 |
| 0.103930039 | 0.000390992 | 0.040981304 | 0.022037134 |
| 0.35294394  | 0.446483003 | 0.075089664 | 0.132899956 |
| 0.379079049 | 0.411879618 | 0.271274314 | 0.236958434 |
| 0.307894554 | 0.265119182 | 0.218104697 | 0.421451821 |
| 0.420035387 | 0.096151133 | 0.398750707 | 0.002762423 |
| 0.007024567 | 0.029659623 | 0.30749625  | 0.222439181 |
| 0.182169837 | 0.080052086 | 0.058896943 | 0.067659434 |
| 0.256887961 | 0.172575267 | 0.281912169 | 0.294256712 |
| 0.217896979 | 0.002975667 | 0.252292484 | 0.186241267 |
| 0.01537166  | 0.158116419 | 0.311078326 | 0.260435463 |
| 0.097011197 | 0.233398476 | 0.379772128 | 0.00778943  |
| 0.017270492 | 0.337682221 | 0.39675664  | 0.280495622 |
| 0.311192265 | 0.204906653 | 0.141893807 | 0.411596962 |
| 0.377952645 | 0.399913322 | 0.126553069 | 0.069506147 |
| 0.000218706 | 0.051171286 | 0.225382585 | 0.304085709 |
| 0.432878305 | 0.17387344  | 0.31436589  | 0.093402881 |
| 0.343580208 | 0.00328395  | 0.214445168 | 0.406351123 |
| 0.009312332 | 0.390782788 | 0.005668498 | 0.060263499 |
| 0.361385477 | 0.459842135 | 0.287942917 | 0.018326981 |

|             |             |             |             |
|-------------|-------------|-------------|-------------|
| 0.002667972 | 0.043522207 | 0.109584282 | 0.459992345 |
| 0.265378296 | 0.316207091 | 0.21364568  | 0.280366974 |
| 1           | 0.072418862 | 0.192223202 | 0.258597994 |
| 0.345470892 | 0.002231319 | 0.067358432 | 0.083792973 |
| 0.265491534 | 0.075749121 | 0.090718023 | 0.043523826 |
| 0.004089823 | 0.01888471  | 0.397785583 | 0.057783014 |
| 0.031683116 | 0.074685558 | 0.038650525 | 0.349372984 |
| 0.289454952 | 0.399139387 | 0.048874503 | 0.106118134 |
| 0.411123095 | 0.105997067 | 0.291191277 | 0.375013856 |
| 0.308912604 | 0.137729477 | 0.049846479 | 0.2912074   |
| 0.241071914 | 0.018340841 | 0.02174767  | 0.152108884 |
| 0.427981564 | 0.394888411 | 0.393267864 | 0.180827007 |
| 0.138723588 | 0.104306694 | 0.192751199 | 0.21962165  |
| 0.097970182 | 0.227424689 | 0.15276393  | 0.180345506 |
| 0.212162432 | 0.037749548 | 0.015110751 | 0.360263386 |
| 0.039518828 | 0.113833814 | 0.269497879 | 0.328899408 |
| 0.346200531 | 0.017413971 | 0.107952008 | 0.10908817  |
| 0.140960207 | 0.105832984 | 0.264674921 | 0.10427327  |
| 0.148577964 | 0.199644205 | 0.010618163 | 0.422067758 |
| 0.036324903 | 0.178612263 | 0.308931782 | 0.055443674 |
| 0.331873769 | 0.23659003  | 0.311114306 | 0.291522688 |
| 0.337998569 | 0.002905042 | 0.05317541  | 0.262090356 |
| 0.182917256 | 0.396040554 | 0.306931533 | 0.032092433 |
| 0.112546723 | 0.350141353 | 0.045992794 | 0.205379707 |
| 0.317797132 | 0.103204878 | 0.088653411 | 7.67E-05    |
| 0.047626694 | 0.327221237 | 0.301405273 | 0.016263956 |
| 0.111102944 | 0.035942559 | 0.082388506 | 0.3372403   |
| 0.071778328 | 0.383626602 | 0.012350689 | 0.219146834 |
| 0.114308971 | 0.251077715 | 0.290938993 | 0.176708466 |
| 0.312281485 | 0.159050526 | 0.462501123 | 0.204367825 |
| 0.149279942 | 0.168208329 | 0.261354349 | 0.12943194  |
| 0.40734859  | 0.356425432 | 0.398188447 | 0.367756226 |
| 0.106473805 | 0.309625805 | 0.285626137 | 0.115441625 |
| 0.254518536 | 0.274428988 | 0.02301307  | 0.331811566 |
| 9.16E-05    | 0.176261193 | 0.310188108 | 0.261997192 |
| 0.303270208 | 0.095927268 | 0.016852687 | 0.126589947 |
| 0.426507467 | 0.333156786 | 0.321387082 | 0.407126259 |
| 0.239826767 | 0.002532104 | 0.336036997 | 0.231140398 |
| 0.452582628 | 0.233945652 | 0.344955887 | 0.110899718 |
| 0.356309269 | 0.344867879 | 0.271934259 | 0.337262564 |
| 0.361227562 | 0.385317164 | 0.106858746 | 0.317061259 |
| 0.014185112 | 0.106194694 | 0.330199098 | 0.106590461 |
| 0.174196666 | 0.079208628 | 0.338810631 | 0.153113791 |
| 0.31470078  | 0.246116271 | 0.260826269 | 0.022117731 |
| 0.059012522 | 0.332821139 | 0.090237975 | 0.317246973 |
| 0.404757271 | 0.213105015 | 0.353239423 | 0.402317256 |
| 0.159655936 | 0.201102264 | 0.330988912 | 0.393659336 |
| 0.000321749 | 0.431932628 | 0.434409552 | 0.164543847 |
| 0.376689771 | 0.122197993 | 0.272655232 | 0.429787292 |
| 0.00037114  | 0.048761611 | 0.314975846 | 0.302149202 |
| 0.370651108 | 0.005390318 | 0.137429929 | 0.336643539 |
| 0.431068216 | 0.053423706 | 0.372983832 | 0.162305609 |
| 0.307514307 | 0.283534279 | 0.058402538 | 0.422910631 |
| 0.320032705 | 0.30217216  | 0.012298588 | 0.285210302 |

|             |             |             |             |
|-------------|-------------|-------------|-------------|
| 0.351295175 | 0.111103868 | 0.033241295 | 0.397690194 |
| 0.296813357 | 0.20827299  | 0.101956938 | 0.002461391 |
| 0.393416005 | 0.16263171  | 0.346242754 | 0.043700487 |
| 0.275812957 | 0.180454522 | 0.286422672 | 0.411793092 |
| 0.31536615  | 0.226855993 | 0.189349489 | 0.310440531 |
| 0.111782396 | 0.396077546 | 0.377526264 | 0.017465803 |
| 0.353405557 | 0.366078017 | 0.284585211 | 0.058607248 |
| 0.214125399 | 0.077225827 | 0.071125526 | 0.232550899 |
| 0.277188567 | 0.360335013 | 0.012306577 | 0.071697007 |
| 0.221260341 | 0.142540166 | 0.030841004 | 0.198242354 |
| 0.115339839 | 0.266317438 | 0.196154896 | 0.194816091 |
| 0.262635383 | 0.12369369  | 0.349277931 | 0.076698018 |
| 0.396116007 | 0.012666732 | 0.344427429 | 0.122936535 |
| 0.130435858 | 0.359822595 | 0.413985213 | 0.155997165 |
| 0.008124226 | 0.050070953 | 0.211431478 | 0.216479038 |
| 0.018726327 | 0.070553477 | 0.10608603  | 0.179099227 |
| 0.419893863 | 0.305610172 | 0.113617648 | 0.198893512 |
| 0.207099852 | 0.054390176 | 0.294621493 | 0.180689457 |
| 0.262370259 | 0.167810536 | 0.327562306 | 0.004236197 |
| 0.374158937 | 0.06760501  | 0.220130725 | 0.210605882 |
| 0.456193385 | 0.040654096 | 0.204927769 | 0.058091336 |
| 0.134015948 | 0.001854521 | 0.199943781 | 0.412634926 |
| 0.114239247 | 0.328315256 | 0.215907443 | 0.316853202 |
| 0.350686201 | 0.24085018  | 0.297944429 | 0.365495257 |
| 0.213526553 | 0.060892963 | 0.057380923 | 0.007394027 |
| 0.244816354 | 0.209051784 | 0.326045652 | 0.291898418 |
| 0.166410051 | 0.325001528 | 0.20932221  | 0.28381101  |
| 0.363661179 | 0.169526866 | 0.413805261 | 0.184647179 |
| 0.433884887 | 0.241789276 | 0.103616457 | 0.193587845 |
| 0.078187251 | 0.076548187 | 0.034758968 | 0.07878671  |
| 0.398157832 | 0.206732206 | 0.228701793 | 0.215208185 |
| 0.011303994 | 0.21467493  | 0.376320272 | 0.400012063 |
| 0.287158479 | 0.364717796 | 0.334704062 | 0.196994589 |
| 0.224886841 | 0.170410913 | 0.036478062 | 0.012714158 |
| 0.194277442 | 0.06847274  | 0.310310607 | 0.33072398  |
| 0.405582478 | 0.276725759 | 0.025741651 | 0.049734971 |
| 0.242756256 | 0.368657963 | 0.114711089 | 0.234570872 |
| 0.314429875 | 0.302785964 | 0.000116293 | 0.129239772 |
| 0.198447876 | 0.306652447 |             |             |
| CYBB        | 0.188033205 | 0.245693368 | 0.031475528 |
| 0.001030468 | 0.007080873 | 0.274574814 | 0.153582657 |
| 0.099715714 | 0.070554744 | 0.052630439 | 0.268763225 |
| 0.015966681 | 0.086045383 | 0.046886002 | 0.024352653 |
| 0.205347577 | 0.191504435 | 0.125343469 | 0.197990033 |
| 0.188131216 | 0.01305397  | 0.286527151 | 0.183475652 |
| 0.228384976 | 0.024116085 | 0.067427479 | 0.006208412 |
| 0.062536696 | 0.173058647 | 0.220729349 | 0.047405893 |
| 0.203554682 | 0.122983913 | 0.041345622 | 0.007664943 |
| 0.00473336  | 0.289440591 | 0.000902212 | 0.083267316 |
| 0.118645463 | 0.07117191  | 0.140749604 | 0.034981381 |
| 3.51E-05    | 0.072551132 | 0.051177598 | 0.257435523 |
| 0.15003686  | 0.24973084  | 0.204698224 | 0.081438008 |
| 0.001991315 | 0.284159125 | 0.257364497 | 0.0017597   |
| 0.26707714  | 0.000408354 | 0.289233024 | 0.116381022 |

|             |             |             |             |
|-------------|-------------|-------------|-------------|
| 0.09637219  | 0.182784997 | 0.119299468 | 0.218779104 |
| 0.249856483 | 0.272030496 | 0.216636862 | 0.013311861 |
| 0.141069037 | 0.112548182 | 0.11954034  | 0.113383224 |
| 0.235757899 | 0.027653927 | 0.051055947 | 0.025851455 |
| 0.122015531 | 0.121811465 | 0.269375605 | 0.06376378  |
| 0.006726925 | 0.11081481  | 0.021626937 | 0.184136073 |
| 0.057787057 | 0.274999236 | 0.135752584 | 0.057135818 |
| 0.08110548  | 0.036373779 | 0.209089785 | 0.208727058 |
| 0.003030551 | 0.114345886 | 0.000912889 | 0.039443868 |
| 0.176437447 | 0.150682169 | 0.217907329 | 0.047663329 |
| 0.020971517 | 0.11946869  | 0.031919569 | 0.105351647 |
| 0.150730238 | 0.10482956  | 0.272502035 | 0.006759511 |
| 0.072418862 | 1           | 0.076505171 | 0.280820919 |
| 0.240419835 | 0.009834357 | 0.100100799 | 0.209448724 |
| 0.01283459  | 0.00966614  | 0.149649488 | 0.001845795 |
| 0.002026635 | 0.007307612 | 0.171757984 | 0.114482968 |
| 0.065671299 | 0.156066888 | 0.006620147 | 0.087463961 |
| 0.060969936 | 0.176587751 | 0.013062181 | 0.135948604 |
| 0.087437952 | 0.161556443 | 0.054592152 | 0.131762138 |
| 0.018528091 | 0.10086812  | 0.157463244 | 0.208784777 |
| 0.308967882 | 0.022345607 | 0.048917575 | 0.279618596 |
| 0.070642621 | 0.194284988 | 0.232069825 | 0.048797036 |
| 0.03520875  | 0.192512025 | 0.062299077 | 0.165036039 |
| 0.182567095 | 0.161950796 | 0.001592019 | 0.252232453 |
| 0.299272324 | 0.001708806 | 0.117362461 | 0.173344467 |
| 0.00095072  | 0.022074976 | 0.300419065 | 0.161080827 |
| 0.09164474  | 0.007319212 | 0.065958417 | 0.194940385 |
| 0.29338524  | 0.161959577 | 0.222366324 | 0.06018324  |
| 0.316539226 | 0.059469865 | 0.05114843  | 0.07358433  |
| 0.154079821 | 0.278858408 | 0.022891776 | 0.006133163 |
| 0.141376415 | 0.085884929 | 0.215979307 | 0.164964819 |
| 0.166241415 | 0.000161617 | 0.046635955 | 0.221756371 |
| 0.062174812 | 0.118312592 | 0.247932353 | 0.176891867 |
| 0.289392149 | 0.015719776 | 0.200279021 | 0.033237602 |
| 0.22665813  | 0.030565578 | 0.04620548  | 0.011358624 |
| 0.02034517  | 0.047335613 | 0.100750936 | 0.059010211 |
| 0.024649315 | 0.075861975 | 0.026049266 | 0.200285536 |
| 0.219993888 | 0.109702978 | 0.026634636 | 0.015029275 |
| 0.104156464 | 0.176635824 | 0.029858758 | 0.036870895 |
| 0.153029933 | 0.053653689 | 0.123197447 | 0.3143922   |
| 0.021616357 | 0.283544361 | 0.00395095  | 0.164659052 |
| 0.073281425 | 0.171404515 | 0.127191325 | 0.127929321 |
| 0.141670867 | 0.163701662 | 0.007623665 | 0.285339428 |
| 0.187608908 | 0.1213462   | 0.084424255 | 0.234030775 |
| 0.017708228 | 0.219451732 | 0.101728013 | 0.00659943  |
| 0.232404629 | 0.176353881 | 0.120235824 | 0.15059292  |
| 0.20175295  | 0.2423791   | 0.23214839  | 0.136885792 |
| 0.009006038 | 0.033595225 | 0.254039213 | 0.258675645 |
| 0.169591071 | 0.087203784 | 0.009885019 | 0.003784823 |
| 0.187479287 | 0.088066461 | 0.206448454 | 0.116760229 |
| 0.072553093 | 0.02280438  | 0.190736207 | 0.14590773  |
| 0.005055894 | 0.159869863 | 0.141283574 | 0.018176037 |
| 0.066585376 | 0.031909245 | 0.161756979 | 0.263849592 |
| 0.019268573 | 0.036009775 | 0.026842056 | 0.066508988 |

|             |             |             |             |
|-------------|-------------|-------------|-------------|
| 0.198978409 | 0.257466085 | 0.000330365 | 0.257978568 |
| 0.214008765 | 0.157892944 | 0.178084297 | 0.219290748 |
| 0.238796553 | 0.251947303 | 0.214278267 | 0.169882969 |
| 0.003851544 | 0.109425693 | 0.06515127  | 0.315142812 |
| 0.163726623 | 0.277181007 | 0.047805262 | 0.032761691 |
| 0.001518693 | 0.236567337 | 0.006076636 | 0.286384819 |
| 0.148423752 | 0.027410437 | 0.000205166 | 0.15565163  |
| 0.061540464 | 0.00156969  | 0.252677084 | 0.161831974 |
| 0.192621292 | 0.082555528 | 0.137920043 | 0.091345205 |
| 0.006202596 | 0.044560285 | 0.002823817 | 0.12059789  |
| 0.053278188 | 0.008955396 | 0.013754477 | 0.22866903  |
| 0.250152574 | 0.1925526   | 0.236057675 | 0.010704121 |
| 0.137260443 | 0.006335362 | 0.134313503 | 0.018690503 |
| 0.238245559 | 0.282208151 | 0.214657328 | 0.112165013 |
| 0.11741247  | 0.251600917 | 0.301049179 | 0.215215757 |
| 0.002086378 | 0.123840085 | 0.158091421 | 0.01585301  |
| 0.094199629 | 0.175017456 | 0.082330274 | 0.196399142 |
| 0.268829698 | 0.001419148 | 0.262628438 | 0.18055355  |
| 0.214037185 | 0.178722631 | 0.101601511 | 0.079586531 |
| 0.259439972 | 0.095564546 | 0.107608191 | 0.117286408 |
| 0.307930845 | 0.003346143 | 0.007701792 | 0.273365324 |
| 0.269395308 | 0.237766936 | 0.200534397 | 0.01953291  |
| 0.13864495  | 0.048925478 | 0.18196854  | 0.026735206 |
| 0.250273051 | 0.094764042 | 0.112656095 | 0.00748748  |
| 0.017665236 | 0.059831539 | 0.24075802  | 0.298971373 |
| 0.110553626 | 0.244407626 | 0.125994837 | 0.119767025 |
| 0.175939559 | 0.027859673 | 0.244106014 | 0.131287564 |
| 0.296388972 | 0.00654759  | 0.296925456 | 0.206776577 |
| 0.291092209 | 0.077000141 | 0.179900923 | 0.008784717 |
| 0.109028382 | 0.064901396 | 0.079051779 | 0.086593571 |
| 0.145249047 | 0.103740528 | 0.183320057 | 0.162161402 |
| 0.005874013 | 0.001986674 | 0.283635707 | 0.022248961 |
| 0.308749574 | 0.016568667 | 0.128665268 | 0.001706164 |
| 0.269777374 | 0.186028464 | 0.250512077 | 0.015515877 |
| 0.092427869 | 7.16E-05    | 0.067942325 | 0.037318287 |
| 0.3076006   | 0.268071843 | 0.158618843 | 0.162498686 |
| 0.08602551  | 0.105266754 | 0.204736484 | 0.056317743 |
| 0.163880509 | 0.003603394 | 0.202034495 | 0.118802724 |
| 0.087488638 | 0.034068473 | 0.248696324 | 0.030518085 |
| 0.08505443  | 0.01593524  | 0.13648185  | 0.107790496 |
| 0.153319598 | 0.024307239 | 0.090921045 | 0.067377811 |
| 0.021597218 | 0.066449989 | 0.13597734  | 0.107769173 |
| 0.134763467 | 0.115159833 | 0.039569475 | 0.290139519 |
| 0.045027303 | 0.208303757 | 0.002017782 | 0.005357498 |
| 0.009074236 | 0.151845914 | 0.253483852 | 0.197637094 |
| 0.193130982 | 0.028302132 | 0.112665936 | 0.153924899 |
| 0.001861538 | 0.147298236 | 0.170685095 | 0.001298877 |
| 0.117733829 | 0.043411728 | 0.00123372  | 0.130387706 |
| 0.283551301 | 0.011001258 |             |             |
| CYSLTR2     | 0.140395343 | 0.453638571 | 0.053012347 |
| 0.007986732 | 0.076641548 | 0.279248117 | 0.249200612 |
| 0.105030768 | 0.087630325 | 0.06998916  | 0.377177969 |
| 0.001058983 | 0.22950786  | 0.014081873 | 0.071873341 |
| 0.365410707 | 0.388503771 | 0.296598328 | 0.387130411 |



|             |             |             |             |
|-------------|-------------|-------------|-------------|
| 0.142532238 | 0.050038608 | 0.29234001  | 0.23133884  |
| 0.260600597 | 0.001915146 | 0.103288549 | 0.018787031 |
| 0.092475461 | 0.339632412 | 0.177897432 | 0.088976388 |
| 0.317206059 | 0.303081745 | 0.101398903 | 0.100913918 |
| 0.039120575 | 0.465998283 | 0.029981045 | 0.253414564 |
| 0.245284447 | 0.124720522 | 0.302088556 | 0.022109807 |
| 0.000628611 | 0.082955674 | 0.068130396 | 0.272688536 |
| 0.148129548 | 0.233968173 | 0.178249067 | 0.132247603 |
| 0.016508086 | 0.397104571 | 0.301310649 | 0.015536555 |
| 0.476756222 | 0.001544968 | 0.486693908 | 0.061748722 |
| 0.069295348 | 0.192980203 | 0.120679695 | 0.268499414 |
| 0.329306373 | 0.482649063 | 0.43468539  | 0.040320788 |
| 0.092771598 | 0.17307278  | 0.220397958 | 0.240135675 |
| 0.409055546 | 0.079736891 | 0.129054597 | 0.096813906 |
| 0.244335479 | 0.24260827  | 0.323499284 | 0.107465449 |
| 0.000910765 | 0.155765211 | 0.092640607 | 0.182398677 |
| 0.154516676 | 0.39957181  | 0.17623843  | 0.119037084 |
| 0.13597804  | 0.027093017 | 0.259408833 | 0.414030577 |
| 0.011681812 | 0.258829872 | 0.007715358 | 0.110114015 |
| 0.297579718 | 0.289880128 | 0.247822658 | 0.066028504 |
| 0.019459505 | 0.089964414 | 0.03212361  | 0.226081548 |
| 0.20725714  | 0.199666463 | 0.469983661 | 0.023004136 |
| 0.192223202 | 0.076505171 | 1           | 0.459888818 |
| 0.383885524 | 0.009345077 | 0.091271201 | 0.256281672 |
| 0.093161902 | 0.066042177 | 0.247502341 | 0.004910542 |
| 0.005337402 | 0.005491262 | 0.322195685 | 0.085598555 |
| 0.076459911 | 0.192984943 | 0.039995475 | 0.238401145 |
| 0.082877439 | 0.292260908 | 0.100023298 | 0.200215844 |
| 0.218903787 | 0.274598586 | 0.164533206 | 0.267548373 |
| 0.101541117 | 0.098341134 | 0.089214511 | 0.458234538 |
| 0.45099051  | 0.059165948 | 0.063756903 | 0.31389293  |
| 0.204141899 | 0.358079944 | 0.433712579 | 0.09830397  |
| 0.118003686 | 0.189567794 | 0.076287504 | 0.304546873 |
| 0.284767565 | 0.199607772 | 0.01305084  | 0.391645425 |
| 0.480390998 | 0.007026038 | 0.066021362 | 0.299644779 |
| 0.026536802 | 0.138746012 | 0.425661761 | 0.363431833 |
| 0.253571191 | 0.016952471 | 0.086791046 | 0.235530004 |
| 0.232601286 | 0.189255969 | 0.293579979 | 0.072870529 |
| 0.303035276 | 0.07444327  | 0.055519184 | 0.203718606 |
| 0.130152775 | 0.266556736 | 0.045976628 | 0.020010788 |
| 0.208892344 | 0.105837729 | 0.373790502 | 0.237699287 |
| 0.224656906 | 0.000934735 | 0.062221752 | 0.184770537 |
| 0.067242843 | 0.250875822 | 0.471916618 | 0.14107327  |
| 0.244667038 | 0.072173233 | 0.155405334 | 0.128340218 |
| 0.299372907 | 0.07781302  | 0.081403611 | 0.00073708  |
| 0.099778394 | 0.069123647 | 0.185096425 | 0.035322585 |
| 0.101353006 | 0.061053181 | 0.045887488 | 0.368475895 |
| 0.206229016 | 0.312033902 | 0.014773776 | 0.036279201 |
| 0.106890777 | 0.387360292 | 0.072647732 | 0.057491661 |
| 0.355601868 | 0.089131595 | 0.244508234 | 0.432734043 |
| 0.142019217 | 0.37213073  | 0.033945919 | 0.137351406 |
| 0.18035618  | 0.383900978 | 0.271383678 | 0.337780559 |
| 0.167067967 | 0.242050208 | 0.052805347 | 0.307272432 |
| 0.224844106 | 0.223561934 | 0.0594612   | 0.463614644 |

|             |             |             |             |
|-------------|-------------|-------------|-------------|
| 0.001172164 | 0.30526788  | 0.225405637 | 0.032295088 |
| 0.446694853 | 0.286442624 | 0.060520331 | 0.108721019 |
| 0.394744004 | 0.472602735 | 0.344068679 | 0.268212892 |
| 0.041319184 | 0.010197031 | 0.411383195 | 0.378794169 |
| 0.347630399 | 0.195055024 | 0.072249893 | 0.025726569 |
| 0.386324606 | 0.14602471  | 0.249016746 | 0.14208456  |
| 0.224501695 | 0.097888742 | 0.212181156 | 0.19449431  |
| 0.003711412 | 0.111164905 | 0.18855344  | 0.069290002 |
| 0.086318856 | 0.080381356 | 0.368774361 | 0.38081051  |
| 0.093315887 | 0.051079333 | 0.079182616 | 0.072816125 |
| 0.220621923 | 0.443714351 | 0.012497597 | 0.39823689  |
| 0.416886547 | 0.272235776 | 0.377775137 | 0.403422749 |
| 0.188829814 | 0.438585302 | 0.383846058 | 0.304953564 |
| 0.000653666 | 0.25322745  | 0.199084368 | 0.423843587 |
| 0.297147711 | 0.289590204 | 0.063107954 | 0.105010578 |
| 0.002299792 | 0.158990121 | 0.032157043 | 0.475943103 |
| 0.362114303 | 0.046519088 | 0.010899101 | 0.348573434 |
| 0.183688467 | 0.013223476 | 0.443161694 | 0.203188117 |
| 0.410508712 | 0.224061126 | 0.149176194 | 0.230102638 |
| 0.024779407 | 0.09713279  | 0.022923464 | 0.264733124 |
| 0.156748701 | 0.019898509 | 0.044013571 | 0.42290571  |
| 0.346665613 | 0.391953564 | 0.281325017 | 0.003287943 |
| 0.222770797 | 0.037279232 | 0.294059613 | 0.080008119 |
| 0.36784477  | 0.410868534 | 0.446223688 | 0.269430099 |
| 0.246402416 | 0.413087936 | 0.410886804 | 0.356669871 |
| 0.028214242 | 0.225214224 | 0.273476228 | 0.037251986 |
| 0.140173198 | 0.383104915 | 0.160868052 | 0.220331152 |
| 0.305018156 | 0.025768833 | 0.253969989 | 0.148624582 |
| 0.439923472 | 0.362142865 | 0.057076084 | 0.088415897 |
| 0.431367637 | 0.136249319 | 0.1272199   | 0.208275553 |
| 0.325043155 | 0.014396237 | 0.031428797 | 0.370075487 |
| 0.477144712 | 0.367688679 | 0.323055753 | 0.051856368 |
| 0.33056604  | 0.052628367 | 0.347340981 | 0.127400064 |
| 0.23617483  | 0.142200901 | 0.214186146 | 0.014461756 |
| 0.007808686 | 0.047022276 | 0.424799657 | 0.45720063  |
| 0.06751227  | 0.182060122 | 0.172835731 | 0.260142156 |
| 0.352108359 | 0.083509555 | 0.298030171 | 0.177346063 |
| 0.484353956 | 0.040718687 | 0.467545915 | 0.184024563 |
| 0.320468769 | 0.12710034  | 0.359869609 | 0.00602824  |
| 0.21980579  | 0.068280649 | 0.061210986 | 0.203984532 |
| 0.276842758 | 0.091145662 | 0.38600538  | 0.093563734 |
| 0.038717805 | 0.002455778 | 0.34425665  | 0.093389925 |
| 0.358196345 | 0.052789485 | 0.179876942 | 0.018923691 |
| 0.477832247 | 0.195954626 | 0.280160609 | 0.056826739 |
| 0.148306677 | 0.004576209 | 0.079679808 | 0.035339608 |
| 0.318877344 | 0.411062312 | 0.219561289 | 0.138898259 |
| 0.048068273 | 0.285808971 | 0.354516857 | 0.183149964 |
| 0.375121091 | 0.020682316 | 0.385114143 | 0.142147746 |
| 0.21595321  | 0.098987026 | 0.306331148 | 0.134278123 |
| 0.177409291 | 0.062791377 | 0.121521205 | 0.07041542  |
| 0.339289228 | 0.12546947  | 0.219820101 | 0.060626626 |
| 0.045187206 | 0.137660562 | 0.276523338 | 0.237687234 |
| 0.220148866 | 0.175582683 | 0.078239886 | 0.469957521 |
| 0.071287172 | 0.118107109 | 0.01674537  | 0.017486911 |

|             |             |             |             |
|-------------|-------------|-------------|-------------|
| 0.058734693 | 0.124453314 | 0.334409644 | 0.346566525 |
| 0.396996791 | 0.06955649  | 0.081730978 | 0.083367242 |
| 0.030416843 | 0.219322665 | 0.296921297 | 0.032854744 |
| 0.274757408 | 0.061023694 | 0.000614618 | 0.080252035 |
| 0.38264728  | 0.077327104 |             |             |
| DAPK2       | 0.346550273 | 0.502326822 | 0.178667179 |
| 0.053386775 | 0.218074915 | 0.408542151 | 0.394476812 |
| 0.347280057 | 0.234512952 | 0.282435264 | 0.473685348 |
| 0.004013561 | 0.298953286 | 0.041874171 | 0.143150019 |
| 0.460580334 | 0.469639749 | 0.469807554 | 0.457152044 |
| 0.371050707 | 0.238325937 | 0.437946536 | 0.482345986 |
| 0.426921601 | 0.005810431 | 0.272228774 | 0.114338048 |
| 0.318288309 | 0.430847863 | 0.363322701 | 0.420105653 |
| 0.402559937 | 0.382441043 | 0.436695964 | 0.365665469 |
| 0.207419158 | 0.491736752 | 0.091890897 | 0.36214643  |
| 0.309847093 | 0.390270493 | 0.389632775 | 0.043934031 |
| 0.004609775 | 0.24356083  | 0.292449385 | 0.464071567 |
| 0.370284578 | 0.392400269 | 0.326789585 | 0.330582447 |
| 0.116987607 | 0.482878646 | 0.396270156 | 0.11485365  |
| 0.502157008 | 0.010184524 | 0.495928835 | 0.269961087 |
| 0.17552019  | 0.428702288 | 0.327335957 | 0.454658715 |
| 0.421511189 | 0.50326058  | 0.4931073   | 0.112269159 |
| 0.197579816 | 0.412925466 | 0.342352469 | 0.469467164 |
| 0.465591954 | 0.423275051 | 0.436605755 | 0.29909779  |
| 0.39663895  | 0.324411746 | 0.430359474 | 0.321126549 |
| 0.003304071 | 0.310542448 | 0.386266526 | 0.297645098 |
| 0.318334123 | 0.486789459 | 0.369708124 | 0.374620477 |
| 0.411862207 | 0.066820465 | 0.471831915 | 0.490945997 |
| 0.049852655 | 0.341409249 | 0.021298522 | 0.285186579 |
| 0.394978591 | 0.381261137 | 0.419893897 | 0.197042829 |
| 0.047217291 | 0.246332708 | 0.168978442 | 0.305050783 |
| 0.442938962 | 0.475017822 | 0.498831302 | 0.090489057 |
| 0.258597994 | 0.280820919 | 0.459888818 | 1           |
| 0.462500967 | 0.023116208 | 0.267786498 | 0.398616177 |
| 0.343176398 | 0.212362006 | 0.403963432 | 0.043360207 |
| 0.032448663 | 0.025720863 | 0.40364105  | 0.301705775 |
| 0.237037127 | 0.381974738 | 0.167602547 | 0.441004977 |
| 0.328840235 | 0.361609586 | 0.238769025 | 0.427068945 |
| 0.372430459 | 0.423507735 | 0.45598864  | 0.419725648 |
| 0.378268191 | 0.344329208 | 0.298450651 | 0.490270353 |
| 0.474009927 | 0.181018514 | 0.204108621 | 0.467274731 |
| 0.274219255 | 0.447824438 | 0.507698919 | 0.379736302 |
| 0.393405432 | 0.388651374 | 0.382822237 | 0.49570121  |
| 0.411917919 | 0.386097765 | 0.068296062 | 0.470006946 |
| 0.499219717 | 0.044284876 | 0.178697351 | 0.399153659 |
| 0.08562069  | 0.377990626 | 0.477416913 | 0.470295214 |
| 0.434900846 | 0.097122852 | 0.381957303 | 0.431515568 |
| 0.42386293  | 0.420305698 | 0.447006194 | 0.346299241 |
| 0.449643448 | 0.386564057 | 0.144729381 | 0.266474953 |
| 0.276052618 | 0.432544045 | 0.257030058 | 0.079712588 |
| 0.371611399 | 0.380936537 | 0.47575224  | 0.436014937 |
| 0.367602634 | 0.009269283 | 0.281996404 | 0.377374978 |
| 0.360514807 | 0.312405822 | 0.516015165 | 0.258546996 |
| 0.39100938  | 0.261758003 | 0.294451115 | 0.41726655  |

|             |             |             |             |
|-------------|-------------|-------------|-------------|
| 0.36253107  | 0.358630641 | 0.328025096 | 0.003619279 |
| 0.286935261 | 0.343892225 | 0.430645113 | 0.114404768 |
| 0.384434221 | 0.233226091 | 0.1454729   | 0.456576053 |
| 0.375075055 | 0.425832157 | 0.050517791 | 0.124217156 |
| 0.419490746 | 0.499595169 | 0.413760575 | 0.308322499 |
| 0.478873831 | 0.440552762 | 0.333410374 | 0.48515028  |
| 0.38776235  | 0.484085686 | 0.125500222 | 0.395158709 |
| 0.389130828 | 0.449265458 | 0.392481693 | 0.434005464 |
| 0.430549251 | 0.349800659 | 0.284153159 | 0.435918585 |
| 0.437004101 | 0.440204674 | 0.204928064 | 0.50406186  |
| 0.003138258 | 0.466946169 | 0.461952057 | 0.133474246 |
| 0.500138644 | 0.411800699 | 0.175880298 | 0.349668583 |
| 0.467097579 | 0.503996851 | 0.389610391 | 0.360506706 |
| 0.208258336 | 0.029620653 | 0.46016981  | 0.482430953 |
| 0.436287039 | 0.477880271 | 0.302543804 | 0.069467228 |
| 0.454696442 | 0.289688057 | 0.455235485 | 0.384009846 |
| 0.420431543 | 0.342932593 | 0.384453139 | 0.309000457 |
| 0.019402507 | 0.40219617  | 0.401650057 | 0.266476166 |
| 0.417233572 | 0.28960315  | 0.458479338 | 0.457972331 |
| 0.4016019   | 0.317279911 | 0.38184212  | 0.209363622 |
| 0.342833691 | 0.506351124 | 0.036212526 | 0.441254695 |
| 0.49310769  | 0.444393934 | 0.454814442 | 0.481260099 |
| 0.429245143 | 0.496790117 | 0.463356036 | 0.36264858  |
| 0.002506078 | 0.338140907 | 0.293956781 | 0.469964572 |
| 0.394895053 | 0.443418024 | 0.199640177 | 0.342780103 |
| 0.00353372  | 0.309032996 | 0.216417071 | 0.499256514 |
| 0.439235624 | 0.09284164  | 0.030275823 | 0.465299456 |
| 0.310114803 | 0.045690984 | 0.511580092 | 0.469590483 |
| 0.487840218 | 0.471724428 | 0.342814874 | 0.317152291 |
| 0.166318912 | 0.36460495  | 0.068424624 | 0.485563143 |
| 0.388265146 | 0.075555836 | 0.174783815 | 0.482560817 |
| 0.45483228  | 0.496958073 | 0.413824208 | 0.028682628 |
| 0.296481108 | 0.254082718 | 0.455212625 | 0.223319087 |
| 0.46175845  | 0.484010442 | 0.49082639  | 0.363333978 |
| 0.452955353 | 0.500754196 | 0.490107105 | 0.47121665  |
| 0.137227122 | 0.338075052 | 0.368851238 | 0.141106969 |
| 0.320981035 | 0.447261172 | 0.436329345 | 0.350023746 |
| 0.452358396 | 0.124364465 | 0.375263815 | 0.343873189 |
| 0.499786269 | 0.441224939 | 0.164142434 | 0.273286839 |
| 0.502161843 | 0.42974803  | 0.254777595 | 0.434299029 |
| 0.430334167 | 0.127714616 | 0.112236416 | 0.473920287 |
| 0.499031978 | 0.451956284 | 0.419733899 | 0.264135306 |
| 0.401896116 | 0.134322319 | 0.400463615 | 0.402733927 |
| 0.413782996 | 0.344359813 | 0.296367679 | 0.107126262 |
| 0.058174692 | 0.226022136 | 0.500701491 | 0.495986391 |
| 0.197834762 | 0.344286463 | 0.425426404 | 0.477249919 |
| 0.44512543  | 0.425571693 | 0.435478097 | 0.421290985 |
| 0.495591205 | 0.17473576  | 0.501687102 | 0.432607884 |
| 0.446775401 | 0.471188052 | 0.455121116 | 0.016211818 |
| 0.405091926 | 0.316982682 | 0.187324784 | 0.462314943 |
| 0.360024477 | 0.290323717 | 0.494039183 | 0.303433549 |
| 0.20426663  | 0.007417948 | 0.444269273 | 0.301406913 |
| 0.440375541 | 0.245697596 | 0.435050797 | 0.113639999 |
| 0.527147011 | 0.45260426  | 0.420511737 | 0.220573623 |

|             |             |             |             |
|-------------|-------------|-------------|-------------|
| 0.478050266 | 0.016422105 | 0.299220073 | 0.098751217 |
| 0.442163476 | 0.47700472  | 0.390573365 | 0.371072262 |
| 0.217740031 | 0.463449961 | 0.490521361 | 0.454734736 |
| 0.441690728 | 0.167299297 | 0.476377708 | 0.372730753 |
| 0.285973422 | 0.427263347 | 0.42040878  | 0.398567098 |
| 0.360746088 | 0.173558743 | 0.269423537 | 0.24277596  |
| 0.428307712 | 0.359076854 | 0.48246814  | 0.349105184 |
| 0.141457991 | 0.485863999 | 0.364680967 | 0.366368262 |
| 0.467539291 | 0.32449183  | 0.348070821 | 0.492113071 |
| 0.316792343 | 0.366966955 | 0.093792852 | 0.078410978 |
| 0.288119453 | 0.360820574 | 0.393179914 | 0.431713992 |
| 0.464843308 | 0.251495761 | 0.232567135 | 0.257626897 |
| 0.088008171 | 0.303336605 | 0.435452945 | 0.154288259 |
| 0.447973128 | 0.270283062 | 0.002563863 | 0.301999797 |
| 0.482869174 | 0.390489714 |             |             |
| DAPL1       | 0.406352006 | 0.478446711 | 0.095535676 |
| 0.036230866 | 0.125827923 | 0.285472466 | 0.258348337 |
| 0.404256247 | 0.152499221 | 0.184727422 | 0.365791977 |
| 0.003833305 | 0.381747019 | 0.026700607 | 0.090811322 |
| 0.502591089 | 0.505980092 | 0.360437729 | 0.492980156 |
| 0.378509584 | 0.18757736  | 0.412027562 | 0.429408703 |
| 0.308469291 | 0.003961234 | 0.152597694 | 0.072621665 |
| 0.386373999 | 0.485539315 | 0.255318504 | 0.342157129 |
| 0.453554954 | 0.442919295 | 0.431004687 | 0.312609374 |
| 0.2511192   | 0.46009271  | 0.113034626 | 0.425416923 |
| 0.383370121 | 0.263938498 | 0.454136296 | 0.02478711  |
| 0.004662832 | 0.131124049 | 0.367137431 | 0.437715193 |
| 0.344974655 | 0.270245111 | 0.215151153 | 0.208824362 |
| 0.184095925 | 0.392351798 | 0.427737856 | 0.17989443  |
| 0.428338435 | 0.006798764 | 0.455251706 | 0.310976384 |
| 0.092225987 | 0.363365567 | 0.409493016 | 0.461451703 |
| 0.290489873 | 0.441102682 | 0.49544127  | 0.054196471 |
| 0.10306772  | 0.460744929 | 0.430654254 | 0.449827173 |
| 0.476124541 | 0.380926109 | 0.336435441 | 0.363326145 |
| 0.460820276 | 0.408368966 | 0.328359043 | 0.213645271 |
| 0.002483716 | 0.183078322 | 0.337419462 | 0.379758666 |
| 0.401625035 | 0.396299698 | 0.434127508 | 0.252470741 |
| 0.463772508 | 0.031422008 | 0.419207179 | 0.506980676 |
| 0.03195528  | 0.416012231 | 0.014193323 | 0.188604723 |
| 0.455336951 | 0.45684707  | 0.455091433 | 0.106419003 |
| 0.022575031 | 0.164687674 | 0.210087099 | 0.392811825 |
| 0.449661779 | 0.474281027 | 0.425926487 | 0.147391721 |
| 0.345470892 | 0.240419835 | 0.383885524 | 0.462500967 |
| 1           | 0.012383911 | 0.203472602 | 0.266321896 |
| 0.348290235 | 0.163100387 | 0.266351575 | 0.054613884 |
| 0.019430644 | 0.031141701 | 0.45327569  | 0.215379712 |
| 0.132213702 | 0.246131458 | 0.102884601 | 0.45439795  |
| 0.386445227 | 0.425485449 | 0.134464589 | 0.294768047 |
| 0.441803132 | 0.289935094 | 0.423219514 | 0.471272691 |
| 0.357073053 | 0.313699964 | 0.198339205 | 0.463032527 |
| 0.439930133 | 0.094694984 | 0.11959984  | 0.373398685 |
| 0.364321316 | 0.481204347 | 0.517178819 | 0.354956298 |
| 0.280644689 | 0.294523393 | 0.385114416 | 0.422305654 |
| 0.279325999 | 0.380773895 | 0.096942078 | 0.384800464 |

|             |             |             |             |
|-------------|-------------|-------------|-------------|
| 0.428574799 | 0.048355839 | 0.095886547 | 0.452175102 |
| 0.055331887 | 0.27801623  | 0.462855313 | 0.473746631 |
| 0.446708575 | 0.06194866  | 0.281186839 | 0.314405728 |
| 0.356182754 | 0.298490733 | 0.451836181 | 0.266639713 |
| 0.365051551 | 0.385266227 | 0.06859015  | 0.359863792 |
| 0.161284184 | 0.385576304 | 0.347125977 | 0.090152167 |
| 0.423014109 | 0.383764455 | 0.480242024 | 0.451338178 |
| 0.441197882 | 0.005870774 | 0.185031115 | 0.427931945 |
| 0.382180632 | 0.384249831 | 0.475187244 | 0.149531979 |
| 0.306750495 | 0.323211308 | 0.18421443  | 0.334000676 |
| 0.419548529 | 0.295775309 | 0.255381155 | 0.001838114 |
| 0.170909088 | 0.416943534 | 0.444304691 | 0.082398886 |
| 0.262509352 | 0.164418204 | 0.143965368 | 0.481155926 |
| 0.250123369 | 0.458036131 | 0.043790354 | 0.174376727 |
| 0.307129499 | 0.441751382 | 0.423775547 | 0.344376137 |
| 0.469222191 | 0.372919307 | 0.420819541 | 0.422156014 |
| 0.285195162 | 0.391732014 | 0.179311963 | 0.330770198 |
| 0.449317226 | 0.475953073 | 0.457150105 | 0.459825206 |
| 0.315849457 | 0.396597889 | 0.322269208 | 0.324049938 |
| 0.426098888 | 0.423998923 | 0.123545437 | 0.47613499  |
| 0.001720157 | 0.381558185 | 0.461914436 | 0.19477283  |
| 0.477066873 | 0.276476599 | 0.100970201 | 0.303113784 |
| 0.500169649 | 0.475458535 | 0.435889505 | 0.429978071 |
| 0.287463342 | 0.018520772 | 0.463861635 | 0.442270357 |
| 0.49177818  | 0.423270113 | 0.318265005 | 0.088454734 |
| 0.472980268 | 0.360270753 | 0.465436666 | 0.44519597  |
| 0.44342201  | 0.375612472 | 0.287684918 | 0.378013318 |
| 0.026095113 | 0.314904974 | 0.458759863 | 0.228900566 |
| 0.365332694 | 0.250153754 | 0.475845836 | 0.358641539 |
| 0.39132332  | 0.374377339 | 0.372186389 | 0.106484472 |
| 0.215346514 | 0.485852236 | 0.045549376 | 0.456099285 |
| 0.509082307 | 0.396514871 | 0.478446728 | 0.501560595 |
| 0.376253835 | 0.415067527 | 0.482025332 | 0.418330472 |
| 0.001995967 | 0.409410563 | 0.379524187 | 0.380616449 |
| 0.458615289 | 0.34033936  | 0.265834238 | 0.406947913 |
| 0.002054983 | 0.19959552  | 0.281412062 | 0.46430639  |
| 0.471010686 | 0.042785445 | 0.046122592 | 0.470028237 |
| 0.393476607 | 0.046451059 | 0.509070327 | 0.386382065 |
| 0.474689417 | 0.433256954 | 0.215511669 | 0.406307821 |
| 0.246941555 | 0.379008689 | 0.038788821 | 0.459591543 |
| 0.418505304 | 0.119286656 | 0.105513941 | 0.501542142 |
| 0.46950409  | 0.409534516 | 0.294833544 | 0.019788468 |
| 0.375453952 | 0.24406398  | 0.47596579  | 0.138963552 |
| 0.450942011 | 0.397420389 | 0.461833217 | 0.433988686 |
| 0.465607729 | 0.439753507 | 0.412402718 | 0.478445204 |
| 0.121494877 | 0.426041283 | 0.442089543 | 0.076536675 |
| 0.415168195 | 0.473462305 | 0.440554942 | 0.217225719 |
| 0.417469582 | 0.101004882 | 0.248140546 | 0.375968029 |
| 0.462002208 | 0.477510228 | 0.085946443 | 0.205160417 |
| 0.434869345 | 0.347011406 | 0.139782641 | 0.371740426 |
| 0.323869339 | 0.212357627 | 0.164770016 | 0.410850067 |
| 0.459653165 | 0.326110404 | 0.472065137 | 0.197581922 |
| 0.452891539 | 0.07229218  | 0.439164298 | 0.295524634 |
| 0.33511223  | 0.430238612 | 0.376247296 | 0.160897516 |

|             |             |             |             |          |
|-------------|-------------|-------------|-------------|----------|
| 0.046818463 | 0.189239943 | 0.423854395 | 0.431737198 |          |
| 0.104657255 | 0.240179459 | 0.297886628 | 0.373498833 |          |
| 0.483021673 | 0.427014716 | 0.31710724  | 0.378205892 |          |
| 0.42092716  | 0.127199468 | 0.467539952 | 0.399002447 |          |
| 0.454788943 | 0.377234822 | 0.472193033 | 0.013960155 |          |
| 0.459805961 | 0.220596455 | 0.251836781 | 0.389339824 |          |
| 0.440414608 | 0.170786292 | 0.404419979 | 0.217575296 |          |
| 0.199125192 | 0.005326926 | 0.39722216  | 0.359060117 |          |
| 0.322821789 | 0.30274112  | 0.405421293 | 0.170182418 |          |
| 0.506445722 | 0.448063937 | 0.462810165 | 0.284316009 |          |
| 0.409343842 | 0.019792291 | 0.195482291 | 0.05101864  |          |
| 0.440151861 | 0.416419974 | 0.449829103 | 0.428773312 |          |
| 0.26100121  | 0.452497662 | 0.421461161 | 0.410869026 |          |
| 0.475065496 | 0.206091522 | 0.504073178 | 0.344990352 |          |
| 0.365450348 | 0.426652478 | 0.29950155  | 0.365199552 |          |
| 0.226684235 | 0.165783606 | 0.157767415 | 0.218568765 |          |
| 0.465112447 | 0.324019947 | 0.409518963 | 0.383575241 |          |
| 0.066767935 | 0.416463746 | 0.429476683 | 0.44330415  |          |
| 0.469494954 | 0.420656348 | 0.395157761 | 0.410410597 |          |
| 0.356501037 | 0.366737721 | 0.068009538 | 0.049395033 |          |
| 0.296261922 | 0.239209307 | 0.435052674 | 0.459752592 |          |
| 0.488702307 | 0.314590193 | 0.13352139  | 0.185102594 |          |
| 0.127427639 | 0.389183777 | 0.304202313 | 0.162377946 |          |
| 0.447918084 | 0.352374573 | 0.001077041 | 0.289417613 |          |
| 0.416856328 | 0.412957285 |             |             |          |
| DDX58       | 0.014789593 | 0.015040994 | 0.033375973 | 6.34E-06 |
| 0.002659064 | 0.047182766 | 0.02411179  | 0.012412389 |          |
| 0.014085009 | 0.003069004 | 0.045221765 | 0.010354253 |          |
| 0.004218871 | 0.040393994 | 0.012333578 | 0.009813101 |          |
| 0.008595452 | 0.01667524  | 0.012724293 | 0.041002865 |          |
| 0.000127951 | 0.05626954  | 0.011880093 | 0.032426392 |          |
| 0.025427927 | 0.014009035 | 7.74E-05    | 0.007031131 |          |
| 0.008603703 | 0.081757344 | 0.004210819 | 0.0084087   |          |
| 0.004087958 | 0.000925072 | 0.000436375 | 2.61E-05    |          |
| 0.029872524 | 2.36E-05    | 0.00281111  | 0.004563947 |          |
| 0.00749967  | 0.004975669 | 0.004804357 | 1.18E-08    |          |
| 0.029703738 | 0.006913232 | 0.03058035  | 0.055466041 |          |
| 0.048783854 | 0.126466625 | 0.007290781 | 8.59E-06    |          |
| 0.044768761 | 0.037157173 | 1.78E-05    | 0.030287426 | 2.29E-07 |
| 0.024728838 | 0.025490569 | 0.079563097 | 0.033648326 |          |
| 0.003409967 | 0.018089975 | 0.04632356  | 0.028268473 |          |
| 0.012282962 | 0.001648973 | 0.058139714 | 0.006773663 |          |
| 0.002671975 | 0.003328302 | 0.014911224 | 0.002490579 |          |
| 0.004174154 | 0.000818605 | 0.003172897 | 0.005290198 |          |
| 0.080283752 | 0.072011595 | 0.000766265 | 0.019688722 |          |
| 0.000487152 | 0.012270661 | 0.001556611 | 0.041690605 |          |
| 0.01146758  | 0.004768166 | 0.003064073 | 0.030436383 |          |
| 0.038331565 | 0.011246819 | 6.06E-05    | 0.006635342 | 7.74E-05 |
| 0.054219283 | 0.009924087 | 0.005102725 | 0.014340451 |          |
| 0.00839232  | 0.01503748  | 0.13612093  | 0.011798399 |          |
| 0.003461231 | 0.016667693 | 0.006424147 | 0.029117534 |          |
| 0.000619265 | 0.002231319 | 0.009834357 | 0.009345077 |          |
| 0.023116208 | 0.012383911 | 1           | 0.074060905 |          |
| 0.062431077 | 0.000342071 | 6.00E-05    | 0.042991654 | 2.77E-05 |

|                      |                      |                      |             |
|----------------------|----------------------|----------------------|-------------|
| 0.000233829          | 0.026411608          | 0.00741601           | 0.077414864 |
| 0.007725833          | 0.03000471           | 0.00049593           | 0.002338413 |
| 0.011409057          | 0.009753451          | 0.003941229          | 0.018005931 |
| 0.002587482          | 0.021974468          | 0.00212145           | 0.004905564 |
| 0.000978987          | 0.032254933          | 0.081876364          | 0.017143384 |
| 0.04806098           | 0.019180383          | 0.020265987          | 0.043670641 |
| 0.002043193          | 0.010405063          | 0.013329754          | 0.017333482 |
| 0.003522933          | 0.088537528          | 0.001134186          | 0.011876098 |
| 0.053126505          | 0.059969129          | 0.000389094          | 0.063936804 |
| 0.034416637          | 8.83E-05 0.06140864  | 0.012343846          | 1.38E-05    |
| 0.002247066          | 0.024821732          | 0.009843722          | 0.007640527 |
| 5.69E-05 0.003707889 | 0.019022252          | 0.053596286          |             |
| 0.022428169          | 0.018457406          | 0.001908919          | 0.061969662 |
| 0.001010612          | 0.043192842          | 0.002037659          | 0.098411699 |
| 0.059594485          | 0.000193159          | 2.91E-05 0.015660922 |             |
| 0.031377947          | 0.011798876          | 0.01692452           | 0.007067015 |
| 2.78E-07 0.003040903 | 0.015795183          | 0.00139505           |             |
| 0.008175593          | 0.016000734          | 0.115347885          | 0.111825533 |
| 0.000812589          | 0.134030442          | 0.002544621          | 0.024681629 |
| 0.001227684          | 0.001502822          | 0.000945714          | 0.008751483 |
| 0.000616923          | 0.008418192          | 0.079719918          | 0.003434433 |
| 0.0162177            | 0.00732755           | 0.010036679          | 0.067323367 |
| 0.005309375          | 0.056976129          | 0.004005884          | 0.0316709   |
| 0.01186113           | 0.000784321          | 0.003426533          | 0.006422513 |
| 0.006006373          | 0.003734769          | 0.037962592          | 0.003674263 |
| 0.03134511           | 0.000285709          | 0.034793921          | 0.00286966  |
| 0.007649945          | 0.00417095           | 0.009194643          | 0.022950395 |
| 0.027826156          | 0.000850257          | 0.069822434          | 0.031445182 |
| 0.031972023          | 0.073887222          | 0.019654557          | 0.004534865 |
| 0.054664973          | 0.00327968           | 0.000446067          | 0.014303811 |
| 0.029353024          | 0.10178353           | 0.090565423          | 0.012987299 |
| 0.021879784          | 0.025571423          | 0.004556418          | 0.000728046 |
| 0.089459717          | 0.022502507          | 0.022494336          | 0.007188383 |
| 0.010002322          | 0.000231079          | 0.001980434          | 0.012420051 |
| 0.012522432          | 0.008161401          | 0.004466766          | 0.003059238 |
| 0.001595618          | 0.103165929          | 0.018992052          | 0.000106471 |
| 0.016138562          | 0.004747772          | 0.000146849          | 0.002171076 |
| 0.001190709          | 0.00669906           | 0.071756497          | 0.000669776 |
| 0.001074107          | 0.000352799          | 0.036916636          | 0.074323991 |
| 0.015989692          | 9.11E-06 0.026861905 | 0.013227923          |             |
| 0.034442132          | 0.007858052          | 0.015385875          | 0.046390684 |
| 0.02932776           | 0.011824145          | 0.011525299          | 0.004405914 |
| 0.002984237          | 0.002007562          | 0.065555708          | 0.004964535 |
| 0.043121662          | 0.011708462          | 0.000908229          | 0.005274371 |
| 0.102495956          | 3.36E-05 0.030314435 | 0.00712563           |             |
| 0.006379409          | 1.47E-06 0.012375039 | 0.001903467          |             |
| 0.000301798          | 0.016907195          | 0.011925894          | 0.011670432 |
| 0.011215785          | 0.01790815           | 0.002353282          | 2.32E-05    |
| 0.011074905          | 7.64E-05 0.006282589 | 0.003623976          |             |
| 0.000268643          | 0.000472766          | 0.014432222          | 0.019259497 |
| 0.024032574          | 0.069273803          | 6.22E-05 0.00536269  | 5.80E-05    |
| 0.004612624          | 0.035811733          | 0.035891978          | 0.037860956 |
| 0.022117217          | 0.00393128           | 0.00857673           | 0.02749881  |
| 0.03826732           | 0.012792698          | 1.46E-05 0.003497345 |             |



|             |             |             |             |             |
|-------------|-------------|-------------|-------------|-------------|
| 0.005484054 | 0.003102542 | 0.003962643 | 0.008129611 |             |
| 0.001616392 | 0.049823941 | 0.046283454 | 6.45E-06    |             |
| 0.073455513 | 0.036947172 | 0.018066166 | 0.006282223 |             |
| 0.033771485 | 0.133160137 | 0.022465806 | 0.022294265 |             |
| 0.046166846 | 0.043023384 | 0.071895164 | 4.12E-05    |             |
| 0.001924386 | 0.040739362 | 0.023314945 | 0.043404676 |             |
| 0.007291127 | 0.000432047 | 0.007062709 | 0.167864831 |             |
| 0.019801031 | 0.007729685 | 0.079215719 | 0.002194834 |             |
| 0.003797467 | 0.001214834 | 6.96E-05    | 0.015822945 |             |
| 0.019529635 | 0.033924836 | 0.090139093 | 0.126151408 |             |
| 0.020957218 | 0.009451652 | 0.007824269 | 0.001778122 |             |
| 0.066766443 | 0.055617815 | 0.038812687 | 5.16E-05    |             |
| 0.027974324 | 0.039890914 | 0.026100237 | 0.006469484 |             |
| 0.011566201 | 2.94E-05    | 0.003791371 | 0.003773837 |             |
| 0.019179675 | 0.003407928 | 0.004962127 | 0.051343996 |             |
| 0.018162331 | 0.068904448 | 6.73E-05    | 0.09144101  |             |
| 0.067733847 | 0.000376281 | 0.062302192 | 0.003951577 |             |
| 0.038466505 | 7.85E-06    | 0.019687474 | 0.016688594 |             |
| 0.013189916 | 0.001409309 | 0.005748039 | 1.51E-07    |             |
| 0.003885661 | 0.024275789 | 0.035130932 | 0.04438873  |             |
| 0.010636789 | 0.007323452 | 0.029015677 | 0.006422416 |             |
| 0.030980475 | 0.002679891 | 0.006275143 | 1.62E-05    |             |
| 0.009261017 | 0.036673098 | 0.002067273 | 0.003065715 |             |
| 0.065753739 | 0.005959139 | 0.015106429 | 0.000502996 |             |
| 0.050564188 | 0.061465649 | 0.005095567 | 0.008573077 |             |
| 0.005448988 | 0.00472854  | 0.017454007 | 0.007265068 |             |
| 0.009697662 | 0.002634569 | 0.006371    | 0.002588857 |             |
| 0.006475484 | 0.042796417 | 0.001438029 | 0.027032027 |             |
| 1.23E-05    | 1.86E-05    | 4.81E-05    | 0.025846157 | 0.028190017 |
| 0.02220191  | 0.010823635 | 0.002592564 | 0.051785017 |             |
| 0.124010162 | 0.000234357 | 0.008220691 | 0.021772542 |             |
| 1.76E-05    | 0.010421121 | 0.001588899 | 0.004172552 |             |
| 0.045950541 | 0.037930809 | 0.000398711 |             |             |
| DEK         | 0.150409365 | 0.228284847 | 0.07190882  |             |
| 0.000791999 | 0.019847305 | 0.268863942 | 0.163718369 |             |
| 0.101479667 | 0.100360664 | 0.02888612  | 0.289920313 |             |
| 0.032363324 | 0.090719468 | 0.11461782  | 0.140899017 |             |
| 0.179652481 | 0.173961918 | 0.149257951 | 0.198294974 |             |
| 0.217193425 | 0.009252118 | 0.321735659 | 0.140259575 |             |
| 0.223075662 | 0.055146869 | 0.067605928 | 0.003309404 |             |
| 0.070186931 | 0.160764339 | 0.269122256 | 0.038708457 |             |
| 0.164936067 | 0.108588214 | 0.028810766 | 0.015944693 |             |
| 0.003212664 | 0.299828827 | 0.002835375 | 0.078388886 |             |
| 0.109556635 | 0.063528682 | 0.122333314 | 0.067021306 |             |
| 1.22E-05    | 0.09067353  | 0.054344149 | 0.243528063 |             |
| 0.228464882 | 0.245583016 | 0.307603101 | 0.068003994 |             |
| 0.002445292 | 0.311808009 | 0.287188517 | 0.001798564 |             |
| 0.284800101 | 0.000121143 | 0.285763399 | 0.130512655 |             |
| 0.144652082 | 0.20934344  | 0.076486601 | 0.191062455 |             |
| 0.273383363 | 0.28374718  | 0.205080726 | 0.021669525 |             |
| 0.156958758 | 0.098796709 | 0.085170403 | 0.083180236 |             |
| 0.221479342 | 0.031952213 | 0.043900316 | 0.026010361 |             |
| 0.092991784 | 0.115307553 | 0.358250471 | 0.125684413 |             |
| 0.008012907 | 0.10907064  | 0.016819111 | 0.160233533 |             |

|             |             |             |             |
|-------------|-------------|-------------|-------------|
| 0.050116429 | 0.295983793 | 0.125739781 | 0.052532311 |
| 0.061551346 | 0.095972288 | 0.240435743 | 0.196502112 |
| 0.003914438 | 0.117459555 | 0.002260623 | 0.123130174 |
| 0.163642119 | 0.12720674  | 0.186974839 | 0.040711035 |
| 0.09388684  | 0.223504979 | 0.063209526 | 0.093000128 |
| 0.154941827 | 0.099173228 | 0.285545963 | 0.011115132 |
| 0.067358432 | 0.100100799 | 0.091271201 | 0.267786498 |
| 0.203472602 | 0.074060905 | 1           | 0.253345914 |
| 0.020826967 | 0.009837721 | 0.19417139  | 0.002282518 |
| 0.002814741 | 0.036884128 | 0.150905331 | 0.151433911 |
| 0.048883553 | 0.161721871 | 0.013159877 | 0.070845526 |
| 0.071548164 | 0.167559545 | 0.02649615  | 0.13574823  |
| 0.072756284 | 0.16931635  | 0.047432023 | 0.108897691 |
| 0.020631093 | 0.141798715 | 0.2066404   | 0.220046231 |
| 0.356489559 | 0.061539836 | 0.087528782 | 0.28124633  |
| 0.06529118  | 0.175718424 | 0.216112612 | 0.071630821 |
| 0.03817623  | 0.27021889  | 0.029315372 | 0.148502905 |
| 0.245474717 | 0.243110275 | 0.007729984 | 0.339959461 |
| 0.312395787 | 0.002949394 | 0.133611829 | 0.174445011 |
| 0.001638096 | 0.042336509 | 0.285622795 | 0.160935422 |
| 0.108194601 | 0.003039636 | 0.042984169 | 0.163528456 |
| 0.295970586 | 0.149329174 | 0.207889947 | 0.03076228  |
| 0.342719129 | 0.027812723 | 0.073139958 | 0.066437171 |
| 0.224290139 | 0.326185635 | 0.01274575  | 0.00706053  |
| 0.162275474 | 0.123157041 | 0.189027157 | 0.171023972 |
| 0.134000009 | 5.42E-05    | 0.025728439 | 0.175262401 |
| 0.028599927 | 0.128616681 | 0.233926064 | 0.257181368 |
| 0.389594296 | 0.017796506 | 0.301791904 | 0.037789371 |
| 0.244131042 | 0.027499308 | 0.033179392 | 0.008353445 |
| 0.055038415 | 0.024730642 | 0.106666432 | 0.158538946 |
| 0.025658824 | 0.11056101  | 0.1146637   | 0.172861763 |
| 0.257858799 | 0.108982709 | 0.098494039 | 0.030401353 |
| 0.119338111 | 0.170289478 | 0.020187486 | 0.048543041 |
| 0.134145179 | 0.044021451 | 0.102144752 | 0.327849779 |
| 0.034025544 | 0.266662549 | 0.011664708 | 0.182755638 |
| 0.066011796 | 0.156874619 | 0.105985423 | 0.138728369 |
| 0.138462436 | 0.214188465 | 0.018447814 | 0.332583284 |
| 0.224189814 | 0.176273771 | 0.112730056 | 0.244829201 |
| 0.019428227 | 0.289727806 | 0.080489419 | 0.016555437 |
| 0.215522546 | 0.190496226 | 0.162991051 | 0.222299927 |
| 0.202614115 | 0.261346475 | 0.256362729 | 0.113852771 |
| 0.017303374 | 0.116586696 | 0.259659401 | 0.251641482 |
| 0.152815269 | 0.098835778 | 0.009268698 | 0.023022113 |
| 0.18812701  | 0.114762225 | 0.142695386 | 0.085753403 |
| 0.071046489 | 0.027782608 | 0.30435207  | 0.170690356 |
| 0.008570988 | 0.113759084 | 0.09855505  | 0.015003937 |
| 0.040577395 | 0.043567202 | 0.143075221 | 0.352955667 |
| 0.018088069 | 0.025642173 | 0.016499129 | 0.083992064 |
| 0.263652239 | 0.236174051 | 0.001087637 | 0.27844015  |
| 0.206818237 | 0.220015202 | 0.15787272  | 0.218774169 |
| 0.248521631 | 0.271064862 | 0.189843313 | 0.174982709 |
| 0.013430472 | 0.090348782 | 0.060695518 | 0.380100775 |
| 0.125195662 | 0.275791088 | 0.073888976 | 0.029211385 |
| 0.00876031  | 0.294534855 | 0.003514172 | 0.310098293 |

|             |             |             |             |
|-------------|-------------|-------------|-------------|
| 0.140731444 | 0.044769462 | 0.000532348 | 0.16419877  |
| 0.056166463 | 0.010505137 | 0.241512576 | 0.124622864 |
| 0.181690593 | 0.104716776 | 0.115485437 | 0.075789335 |
| 0.002871925 | 0.072388928 | 0.004958629 | 0.1061688   |
| 0.060206603 | 0.017466982 | 0.008476112 | 0.224498526 |
| 0.230082145 | 0.218438798 | 0.30927074  | 0.003267121 |
| 0.118053748 | 0.005572641 | 0.109332061 | 0.091852063 |
| 0.278933431 | 0.302587312 | 0.236457042 | 0.100947045 |
| 0.122032685 | 0.253483215 | 0.310916699 | 0.193684437 |
| 0.003595891 | 0.094410788 | 0.124170388 | 0.039305946 |
| 0.07415142  | 0.162623569 | 0.051920912 | 0.214635795 |
| 0.308610956 | 0.0016582   | 0.300509336 | 0.204862294 |
| 0.218933499 | 0.145921414 | 0.090977228 | 0.166945461 |
| 0.251210019 | 0.119625846 | 0.142875261 | 0.187009784 |
| 0.358531186 | 0.00309019  | 0.022069854 | 0.306700852 |
| 0.270169085 | 0.271361101 | 0.155107212 | 0.011257687 |
| 0.135251285 | 0.140737092 | 0.218176659 | 0.054727777 |
| 0.326967875 | 0.062608961 | 0.09626321  | 0.015246546 |
| 0.005477161 | 0.091481649 | 0.228115389 | 0.309712242 |
| 0.154129326 | 0.3355346   | 0.122236362 | 0.11420511  |
| 0.158260537 | 0.027074967 | 0.304158347 | 0.204067029 |
| 0.326169745 | 0.005420689 | 0.300239244 | 0.212101648 |
| 0.263911819 | 0.064694218 | 0.177315911 | 0.003875047 |
| 0.091887022 | 0.035082204 | 0.105185543 | 0.068465892 |
| 0.124848618 | 0.127306223 | 0.196192527 | 0.193870888 |
| 0.009593096 | 0.015033078 | 0.36865755  | 0.018603025 |
| 0.340102379 | 0.028264435 | 0.173498508 | 0.001777807 |
| 0.265666615 | 0.161339864 | 0.192099709 | 0.022323623 |
| 0.078890789 | 0.000149881 | 0.041282337 | 0.121283189 |
| 0.297392762 | 0.320407597 | 0.14280607  | 0.114217085 |
| 0.110771528 | 0.10985861  | 0.235481035 | 0.054112974 |
| 0.143840753 | 0.003587309 | 0.178528787 | 0.174821766 |
| 0.073477161 | 0.03943396  | 0.309179822 | 0.056868765 |
| 0.098507769 | 0.034498331 | 0.171003786 | 0.146753003 |
| 0.128812393 | 0.052620493 | 0.082933779 | 0.046031252 |
| 0.044717995 | 0.069622215 | 0.14621463  | 0.083931033 |
| 0.106859405 | 0.075710654 | 0.050196015 | 0.330498033 |
| 0.042280675 | 0.181226379 | 0.001563366 | 0.002430741 |
| 0.007110497 | 0.132007332 | 0.273720777 | 0.218975424 |
| 0.186335081 | 0.039555935 | 0.129557448 | 0.23214891  |
| 0.007873532 | 0.138768788 | 0.173866355 | 0.002439076 |
| 0.135051064 | 0.034166131 | 0.006287762 | 0.169937307 |
| 0.309233458 | 0.015406177 |             |             |
| DENND5A     | 0.113120324 | 0.331262762 | 0.311999462 |
| 0.025749978 | 0.220694822 | 0.385654703 | 0.346018583 |
| 0.10560972  | 0.290139703 | 0.24858629  | 0.435926195 |
| 0.006749899 | 0.108732133 | 0.089544273 | 0.185016302 |
| 0.228043411 | 0.231612067 | 0.288332622 | 0.233656109 |
| 0.169260552 | 0.12560523  | 0.282962259 | 0.238470757 |
| 0.340953553 | 0.015333843 | 0.321904749 | 0.079117071 |
| 0.082243485 | 0.195995341 | 0.351671611 | 0.250390961 |
| 0.193177101 | 0.164033197 | 0.146841563 | 0.148440843 |
| 0.035696068 | 0.391951111 | 0.018427903 | 0.129462106 |
| 0.117542566 | 0.301566478 | 0.172272789 | 0.098676293 |

|             |             |             |             |
|-------------|-------------|-------------|-------------|
| 0.000751002 | 0.340365009 | 0.078250836 | 0.265784086 |
| 0.202809069 | 0.356822131 | 0.360214173 | 0.296626235 |
| 0.01472982  | 0.416022716 | 0.230856965 | 0.013806317 |
| 0.441854251 | 0.004547472 | 0.406968339 | 0.106191141 |
| 0.315792237 | 0.268789932 | 0.086380103 | 0.228064644 |
| 0.422957151 | 0.434566096 | 0.285278408 | 0.212198976 |
| 0.33216993  | 0.126908487 | 0.120931251 | 0.188445514 |
| 0.295781881 | 0.189625425 | 0.278473951 | 0.064824925 |
| 0.141800241 | 0.126493921 | 0.363499897 | 0.334586649 |
| 0.006851595 | 0.337799259 | 0.143348077 | 0.112238229 |
| 0.076195839 | 0.428035279 | 0.124628878 | 0.296472977 |
| 0.11195104  | 0.185861461 | 0.255180191 | 0.264824724 |
| 0.050453378 | 0.137473357 | 0.017970124 | 0.312992375 |
| 0.185419114 | 0.151353292 | 0.188307155 | 0.292616931 |
| 0.133107715 | 0.299446803 | 0.074655568 | 0.104772978 |
| 0.179406585 | 0.164595128 | 0.429710677 | 0.01315422  |
| 0.083792973 | 0.209448724 | 0.256281672 | 0.398616177 |
| 0.266321896 | 0.062431077 | 0.253345914 | 1           |
| 0.115306708 | 0.118454332 | 0.364749997 | 0.011383343 |
| 0.036028542 | 0.018393092 | 0.187571031 | 0.32076676  |
| 0.284303309 | 0.364383027 | 0.15536551  | 0.152306238 |
| 0.103590562 | 0.162851607 | 0.259227854 | 0.337671887 |
| 0.120088484 | 0.337683519 | 0.159728804 | 0.167117594 |
| 0.124919083 | 0.214609869 | 0.335652006 | 0.346722655 |
| 0.395269881 | 0.29475875  | 0.307598175 | 0.36998345  |
| 0.088530714 | 0.228158188 | 0.289484339 | 0.20234482  |
| 0.249356389 | 0.321312979 | 0.144409828 | 0.292003305 |
| 0.358117505 | 0.183069159 | 0.015015875 | 0.387415087 |
| 0.456233088 | 0.01416238  | 0.316393884 | 0.185361995 |
| 0.051963513 | 0.26498324  | 0.348335182 | 0.247225937 |
| 0.154052326 | 0.067988853 | 0.243226213 | 0.322654597 |
| 0.278772824 | 0.322153097 | 0.223915402 | 0.202921966 |
| 0.347888501 | 0.138380855 | 0.299165352 | 0.089012164 |
| 0.374334854 | 0.265362097 | 0.050767983 | 0.029992441 |
| 0.137442283 | 0.169087667 | 0.27995133  | 0.174536071 |
| 0.142067895 | 0.003987953 | 0.238605892 | 0.144701994 |
| 0.134620359 | 0.12982232  | 0.362037445 | 0.365126213 |
| 0.303622264 | 0.063338777 | 0.359396091 | 0.207726049 |
| 0.198359804 | 0.212956807 | 0.211064909 | 0.01134509  |
| 0.331971196 | 0.075777841 | 0.158812344 | 0.164257789 |
| 0.275057321 | 0.253898524 | 0.089824697 | 0.25883942  |
| 0.371115149 | 0.187183782 | 0.063465534 | 0.032427634 |
| 0.321298775 | 0.322411662 | 0.122818791 | 0.117892097 |
| 0.25194292  | 0.24284617  | 0.118695249 | 0.40685046  |
| 0.246659228 | 0.412818037 | 0.024958746 | 0.272272095 |
| 0.102528942 | 0.245566143 | 0.160637219 | 0.210862609 |
| 0.335151419 | 0.15736364  | 0.077548605 | 0.39885746  |
| 0.18829209  | 0.187737677 | 0.312774481 | 0.337029129 |
| 0.010913247 | 0.31202899  | 0.154541714 | 0.025911366 |
| 0.343103936 | 0.368846021 | 0.300045081 | 0.238200894 |
| 0.240830176 | 0.340225656 | 0.231268907 | 0.14723968  |
| 0.05381729  | 0.068988675 | 0.287769696 | 0.321781187 |
| 0.196575654 | 0.229534635 | 0.073914408 | 0.025540114 |
| 0.258708806 | 0.082842229 | 0.202226353 | 0.10206063  |

|             |             |             |             |
|-------------|-------------|-------------|-------------|
| 0.12768307  | 0.089941766 | 0.31809456  | 0.121035297 |
| 0.007514335 | 0.27893105  | 0.133882495 | 0.120145332 |
| 0.187260006 | 0.201760169 | 0.24219741  | 0.402677184 |
| 0.124990521 | 0.084664727 | 0.115020837 | 0.328732988 |
| 0.376561817 | 0.327190876 | 0.007046231 | 0.284412515 |
| 0.270850087 | 0.234629276 | 0.253255867 | 0.263664137 |
| 0.253426906 | 0.412083661 | 0.276609302 | 0.16941993  |
| 0.005138803 | 0.126530399 | 0.090917054 | 0.448280726 |
| 0.179864929 | 0.35290341  | 0.052392716 | 0.073151041 |
| 0.008569587 | 0.357126448 | 0.034727898 | 0.364877107 |
| 0.228346551 | 0.21300075  | 0.003792089 | 0.243604792 |
| 0.087019503 | 0.016841136 | 0.309096564 | 0.267561837 |
| 0.309424108 | 0.195528782 | 0.346933648 | 0.111801821 |
| 0.021632303 | 0.134788916 | 0.07830143  | 0.211582861 |
| 0.118477764 | 0.021190714 | 0.152032177 | 0.268649961 |
| 0.275558032 | 0.361406406 | 0.348002181 | 0.023497743 |
| 0.112301256 | 0.072379827 | 0.200896734 | 0.281788377 |
| 0.302154812 | 0.406773108 | 0.352161192 | 0.142450268 |
| 0.170228835 | 0.389053629 | 0.420652754 | 0.271943318 |
| 0.041487304 | 0.126028604 | 0.161443062 | 0.202552267 |
| 0.082695101 | 0.242709719 | 0.13754497  | 0.373457586 |
| 0.281227875 | 0.041368304 | 0.381079736 | 0.13862672  |
| 0.359742025 | 0.23178444  | 0.294569411 | 0.265623947 |
| 0.399264852 | 0.293044548 | 0.356465741 | 0.248941588 |
| 0.394460744 | 0.016020817 | 0.0293243   | 0.350214257 |
| 0.401149812 | 0.434680461 | 0.214388274 | 0.147377501 |
| 0.192178731 | 0.267627558 | 0.217876515 | 0.302509014 |
| 0.293937454 | 0.087250918 | 0.105443389 | 0.025722161 |
| 0.041144091 | 0.197017429 | 0.396260081 | 0.422333434 |
| 0.338752928 | 0.343224078 | 0.329433478 | 0.267127303 |
| 0.212848107 | 0.134333523 | 0.378828853 | 0.229963804 |
| 0.456068838 | 0.100296937 | 0.368329139 | 0.233887674 |
| 0.2704896   | 0.26481418  | 0.240584336 | 0.012290976 |
| 0.132297827 | 0.243057849 | 0.055710277 | 0.210521364 |
| 0.139298756 | 0.370709332 | 0.351303763 | 0.309213236 |
| 0.072299878 | 0.011460548 | 0.319921145 | 0.059688174 |
| 0.449297579 | 0.061700285 | 0.218669315 | 0.013003209 |
| 0.344914669 | 0.188665514 | 0.212456979 | 0.047994758 |
| 0.221515176 | 0.002464852 | 0.25990337  | 0.212311515 |
| 0.275556431 | 0.369915234 | 0.145797333 | 0.110277185 |
| 0.088012612 | 0.190853989 | 0.332716463 | 0.170628166 |
| 0.235212603 | 0.03742903  | 0.243114176 | 0.209452364 |
| 0.095270457 | 0.172929602 | 0.370470175 | 0.208413391 |
| 0.332853796 | 0.1000737   | 0.35743557  | 0.187170557 |
| 0.202312494 | 0.185544095 | 0.222317933 | 0.124391013 |
| 0.275197994 | 0.239003226 | 0.15305522  | 0.127523119 |
| 0.179233463 | 0.100069358 | 0.100818232 | 0.451331929 |
| 0.105469054 | 0.185217742 | 0.040412164 | 0.059374273 |
| 0.076733452 | 0.34085246  | 0.233361109 | 0.24727474  |
| 0.244512721 | 0.071277641 | 0.342996624 | 0.283017831 |
| 0.016347664 | 0.11915476  | 0.357540564 | 0.034993488 |
| 0.178882014 | 0.068659093 | 0.009499801 | 0.178018652 |
| 0.364990568 | 0.110986929 |             |             |
| DERL2       | 0.121916842 | 0.387230202 | 0.005575756 |

|             |             |             |             |
|-------------|-------------|-------------|-------------|
| 0.002578284 | 0.011660746 | 0.137392782 | 0.137906124 |
| 0.084548069 | 0.009904941 | 0.030625136 | 0.207160004 |
| 5.14E-05    | 0.269502191 | 0.000780707 | 0.006619618 |
| 0.365972632 | 0.404105238 | 0.188434887 | 0.3763106   |
| 0.089788117 | 0.015233581 | 0.175531631 | 0.171028662 |
| 0.142781324 | 8.16E-05    | 0.048736256 | 0.006348374 |
| 0.092093205 | 0.355955968 | 0.071116816 | 0.025829564 |
| 0.328662828 | 0.346248963 | 0.095138853 | 0.04111663  |
| 0.043631274 | 0.341809647 | 0.011395753 | 0.304130304 |
| 0.308837047 | 0.071904584 | 0.349362917 | 0.001586206 |
| 0.000783393 | 0.035126495 | 0.058514468 | 0.184959934 |
| 0.081658812 | 0.107946997 | 0.066702167 | 0.086608806 |
| 0.007021609 | 0.233771247 | 0.2243625   | 0.010258999 |
| 0.320469766 | 0.001197948 | 0.35729954  | 0.040976566 |
| 0.017778262 | 0.113424909 | 0.140692093 | 0.200117673 |
| 0.167478662 | 0.338842351 | 0.406430841 | 0.003102194 |
| 0.03042075  | 0.172527078 | 0.283925816 | 0.233657261 |
| 0.346315643 | 0.025980823 | 0.051206636 | 0.138272864 |
| 0.283605528 | 0.272268594 | 0.160394557 | 0.026629874 |
| 5.26E-05    | 0.078839651 | 0.094616943 | 0.178819832 |
| 0.204140716 | 0.23153634  | 0.155160623 | 0.080333974 |
| 0.139048384 | 0.001278299 | 0.158823777 | 0.400790516 |
| 0.001738185 | 0.27824439  | 0.000666374 | 0.015883116 |
| 0.280217414 | 0.34789142  | 0.2044864   | 0.013605428 |
| 0.001071257 | 0.023502855 | 0.005743298 | 0.297812272 |
| 0.164166227 | 0.177568447 | 0.319231023 | 0.03329037  |
| 0.265491534 | 0.01283459  | 0.093161902 | 0.343176398 |
| 0.348290235 | 0.000342071 | 0.020826967 | 0.115306708 |
| 1           | 0.026390558 | 0.115220666 | 0.001201907 |
| 0.000336311 | 0.000416412 | 0.331761198 | 0.023325961 |
| 0.038815027 | 0.094275672 | 0.005388724 | 0.268894539 |
| 0.062814323 | 0.315507399 | 0.025875789 | 0.121379339 |
| 0.250555067 | 0.160788055 | 0.154596045 | 0.287677395 |
| 0.09450771  | 0.038975422 | 0.033578159 | 0.364493592 |
| 0.298065245 | 0.005140553 | 0.007335437 | 0.181403301 |
| 0.268492297 | 0.343174393 | 0.399493388 | 0.027112459 |
| 0.081228278 | 0.082644985 | 0.062578586 | 0.225119185 |
| 0.139219329 | 0.11939474  | 0.0030793   | 0.21882178  |
| 0.319554373 | 0.00126591  | 0.015725744 | 0.273548086 |
| 0.007438132 | 0.034162425 | 0.329938169 | 0.311255201 |
| 0.214000537 | 0.006024643 | 0.061991166 | 0.135368513 |
| 0.127722271 | 0.110713808 | 0.224419817 | 0.057205018 |
| 0.169198783 | 0.065348178 | 0.010826761 | 0.269154526 |
| 0.042719163 | 0.150854255 | 0.039602448 | 0.010843387 |
| 0.193675345 | 0.065539876 | 0.315972027 | 0.174392771 |
| 0.23085996  | 0.000422069 | 0.026705836 | 0.152547613 |
| 0.044406801 | 0.267905561 | 0.394956062 | 0.046321718 |
| 0.113149578 | 0.069855714 | 0.054194364 | 0.111816184 |
| 0.25249858  | 0.019591228 | 0.024950491 | 3.87E-05    |
| 0.008763458 | 0.090876619 | 0.173304581 | 0.003055605 |
| 0.037989293 | 0.007803441 | 0.00557996  | 0.347937389 |
| 0.08518798  | 0.318275254 | 0.000869396 | 0.022100495 |
| 0.055334614 | 0.309430292 | 0.063567117 | 0.013471155 |
| 0.333989739 | 0.039267901 | 0.305661222 | 0.289027295 |

|             |             |             |             |
|-------------|-------------|-------------|-------------|
| 0.050815746 | 0.231716343 | 0.014155911 | 0.073108082 |
| 0.198899252 | 0.375584305 | 0.311908571 | 0.307083166 |
| 0.087272968 | 0.189536801 | 0.011441915 | 0.152944691 |
| 0.153470674 | 0.15132183  | 0.009681564 | 0.38084308  |
| 4.53E-05    | 0.172473032 | 0.217503216 | 0.023291386 |
| 0.376726217 | 0.154716233 | 0.012581394 | 0.049536503 |
| 0.383834475 | 0.384835049 | 0.283092928 | 0.308182087 |
| 0.008043753 | 0.000409174 | 0.338399129 | 0.276036863 |
| 0.37701314  | 0.131019121 | 0.075194214 | 0.004037728 |
| 0.353350922 | 0.139475629 | 0.224789261 | 0.14659308  |
| 0.22630929  | 0.100064922 | 0.093012073 | 0.173634208 |
| 0.001021633 | 0.063821346 | 0.1902487   | 0.035017298 |
| 0.075727148 | 0.010917877 | 0.347704095 | 0.199940109 |
| 0.080306773 | 0.022354586 | 0.096637223 | 0.026036344 |
| 0.090601542 | 0.381405737 | 0.004297031 | 0.324511104 |
| 0.388161686 | 0.165278601 | 0.369748538 | 0.373200678 |
| 0.112723883 | 0.289019355 | 0.346790342 | 0.3096444   |
| 2.97E-05    | 0.316612809 | 0.25653585  | 0.236268373 |
| 0.323589955 | 0.159512761 | 0.053105171 | 0.138507151 |
| 0.000104873 | 0.060945267 | 0.028130168 | 0.362093783 |
| 0.352092979 | 0.002805396 | 0.006269621 | 0.292707306 |
| 0.222421481 | 0.003732695 | 0.392177201 | 0.132371502 |
| 0.349399077 | 0.160669977 | 0.072565563 | 0.297847264 |
| 0.03123168  | 0.074407315 | 0.003297837 | 0.217316654 |
| 0.164190418 | 0.007314053 | 0.019446387 | 0.392436834 |
| 0.283450868 | 0.265222964 | 0.133659514 | 0.000842898 |
| 0.267491769 | 0.013021167 | 0.298854378 | 0.006159464 |
| 0.256182331 | 0.258218045 | 0.338280073 | 0.329822613 |
| 0.205777582 | 0.281303947 | 0.259949018 | 0.317680914 |
| 0.010148916 | 0.269935141 | 0.297541395 | 0.003680358 |
| 0.144973392 | 0.384893281 | 0.171785527 | 0.096239814 |
| 0.197092838 | 0.009638781 | 0.11025068  | 0.101527869 |
| 0.341547666 | 0.369134615 | 0.013429899 | 0.020113991 |
| 0.306991468 | 0.064765659 | 0.048344503 | 0.111324456 |
| 0.163536122 | 0.008047421 | 0.011545769 | 0.232938865 |
| 0.365013862 | 0.197126009 | 0.321872065 | 0.024890903 |
| 0.342440322 | 0.0052631   | 0.297280593 | 0.027308857 |
| 0.114155302 | 0.165838201 | 0.270644322 | 0.003398429 |
| 0.001734812 | 0.004945461 | 0.300797251 | 0.301827278 |
| 0.019564938 | 0.07249685  | 0.091429086 | 0.177993089 |
| 0.371417837 | 0.04676859  | 0.140729526 | 0.095380549 |
| 0.313632269 | 0.014227694 | 0.352195177 | 0.107070639 |
| 0.247454152 | 0.085412536 | 0.298844096 | 0.001689447 |
| 0.246041405 | 0.036560045 | 0.048369948 | 0.17864303  |
| 0.335350019 | 0.032809755 | 0.275381369 | 0.032597522 |
| 0.01244546  | 0.000116273 | 0.196975874 | 0.139497423 |
| 0.18179846  | 0.031636105 | 0.10162216  | 0.02088247  |
| 0.400123646 | 0.144694742 | 0.249036897 | 0.071612496 |
| 0.117707701 | 0.003258591 | 0.049557581 | 0.002221864 |
| 0.22830455  | 0.252869705 | 0.197867542 | 0.134245796 |
| 0.027690142 | 0.278937481 | 0.215961251 | 0.181817955 |
| 0.376004592 | 0.006663063 | 0.39131295  | 0.077838254 |
| 0.298915778 | 0.038021506 | 0.145885474 | 0.031190841 |
| 0.100271029 | 0.011368048 | 0.044917199 | 0.016462688 |

|             |             |             |             |
|-------------|-------------|-------------|-------------|
| 0.374224533 | 0.04022585  | 0.182862703 | 0.030401202 |
| 0.004564745 | 0.084158237 | 0.25640771  | 0.286014675 |
| 0.185701361 | 0.205999101 | 0.061497791 | 0.2927738   |
| 0.026841597 | 0.079684054 | 0.006473752 | 0.007508474 |
| 0.021008267 | 0.063838107 | 0.273233983 | 0.288237037 |
| 0.382642738 | 0.026639036 | 0.022376234 | 0.025841769 |
| 0.009181463 | 0.234176857 | 0.17293023  | 0.012110598 |
| 0.229876119 | 0.069980861 | 1.68E-05    | 0.034046991 |
| 0.2410823   | 0.022154221 |             |             |
| DGAT1       | 0.045929814 | 0.205508408 | 0.007998281 |
| 0.006192011 | 0.016598312 | 0.148150188 | 0.174960347 |
| 0.029114147 | 0.010536721 | 0.088307595 | 0.173149645 |
| 6.93E-06    | 0.08277834  | 0.000277624 | 0.001413384 |
| 0.148167235 | 0.164498533 | 0.159362127 | 0.141508201 |
| 0.034832707 | 0.066136926 | 0.087581394 | 0.141723261 |
| 0.143057184 | 1.68E-05    | 0.100917314 | 0.042059868 |
| 0.027548092 | 0.129688568 | 0.057019876 | 0.031203487 |
| 0.128725525 | 0.141254373 | 0.078252383 | 0.030710073 |
| 0.040433371 | 0.190736075 | 0.001575484 | 0.125202377 |
| 0.090106237 | 0.10862517  | 0.140549975 | 0.000520741 |
| 0.003812065 | 0.059279967 | 0.018673652 | 0.101454024 |
| 0.033185139 | 0.11995867  | 0.05356656  | 0.16580209  |
| 0.001161596 | 0.170375279 | 0.083954039 | 0.003917936 |
| 0.22154847  | 0.009154066 | 0.219417198 | 0.012443759 |
| 0.021375338 | 0.062244391 | 0.055167914 | 0.106823169 |
| 0.174113024 | 0.223376779 | 0.186868591 | 0.006454969 |
| 0.053029837 | 0.070881372 | 0.113697992 | 0.198539441 |
| 0.174430785 | 0.020395009 | 0.051839426 | 0.050633583 |
| 0.12960411  | 0.08789396  | 0.107362225 | 0.018633223 |
| 3.44E-05    | 0.13732068  | 0.118414433 | 0.054343557 |
| 0.073434466 | 0.17132737  | 0.058785744 | 0.114516751 |
| 0.070940165 | 0.000901349 | 0.088413808 | 0.173595446 |
| 0.002797175 | 0.094153202 | 0.000433447 | 0.010489103 |
| 0.110959713 | 0.116306847 | 0.092821017 | 0.036687752 |
| 0.000347527 | 0.014078664 | 0.001688542 | 0.085247328 |
| 0.074464602 | 0.092065177 | 0.219162743 | 0.005053738 |
| 0.075749121 | 0.00966614  | 0.066042177 | 0.212362006 |
| 0.163100387 | 6.00E-05    | 0.009837721 | 0.118454332 |
| 0.026390558 | 1           | 0.120182958 | 0.000251201 |
| 0.000428562 | 2.15E-05    | 0.127322353 | 0.016943638 |
| 0.105835869 | 0.124054155 | 0.004087356 | 0.177842238 |
| 0.02151165  | 0.098266861 | 0.036247211 | 0.143114075 |
| 0.110589999 | 0.188864354 | 0.12663207  | 0.135697988 |
| 0.062944634 | 0.017292281 | 0.028276645 | 0.209094495 |
| 0.154235972 | 0.00771714  | 0.009451811 | 0.142627232 |
| 0.084654489 | 0.141555922 | 0.179938184 | 0.013478009 |
| 0.096823972 | 0.053736167 | 0.072746964 | 0.190666285 |
| 0.128638888 | 0.04536078  | 0.000201229 | 0.133511682 |
| 0.216959878 | 0.000268208 | 0.021902984 | 0.101557966 |
| 0.007185737 | 0.032366286 | 0.17928046  | 0.162025673 |
| 0.097927237 | 0.040437808 | 0.110838445 | 0.164662104 |
| 0.080255028 | 0.131743038 | 0.112450284 | 0.122914846 |
| 0.112657229 | 0.08215363  | 0.021046017 | 0.083288144 |
| 0.047354094 | 0.077635198 | 0.016749803 | 0.001990202 |



|             |             |             |             |
|-------------|-------------|-------------|-------------|
| 0.062140451 | 0.025064331 | 0.175471041 | 0.080702677 |
| 0.088665934 | 0.003063114 | 0.078521194 | 0.063383941 |
| 0.045878467 | 0.077826534 | 0.22701909  | 0.05006164  |
| 0.067784582 | 0.02248011  | 0.047135537 | 0.098228436 |
| 0.084861258 | 0.033041466 | 0.049650357 | 6.65E-05    |
| 0.010013432 | 0.060650585 | 0.07513369  | 0.001534378 |
| 0.050947691 | 0.007217123 | 0.000671188 | 0.178730883 |
| 0.08575226  | 0.151456538 | 0.000108923 | 0.003555106 |
| 0.046311976 | 0.22463227  | 0.050910039 | 0.006246854 |
| 0.213979539 | 0.035737469 | 0.095212849 | 0.181807065 |
| 0.043539008 | 0.194828327 | 0.002007964 | 0.041864407 |
| 0.083134916 | 0.185412383 | 0.133799907 | 0.139699004 |
| 0.087778131 | 0.059720008 | 0.003070423 | 0.123723679 |
| 0.067217542 | 0.063831316 | 0.010159632 | 0.186511265 |
| 2.43E-05    | 0.105599981 | 0.155225201 | 0.002810605 |
| 0.218053334 | 0.18383435  | 0.012739364 | 0.022823358 |
| 0.145990347 | 0.183361397 | 0.10193661  | 0.113784102 |
| 0.00222324  | 8.30E-05    | 0.142673645 | 0.167604291 |
| 0.141529668 | 0.084651205 | 0.050538834 | 0.000237453 |
| 0.158517843 | 0.036187216 | 0.142770509 | 0.063558784 |
| 0.118147132 | 0.042839276 | 0.056877642 | 0.049115636 |
| 0.000108059 | 0.075424328 | 0.097074048 | 0.063986396 |
| 0.102405235 | 0.005409056 | 0.191895079 | 0.13336846  |
| 0.058389336 | 0.011921957 | 0.121164844 | 0.047938887 |
| 0.092278723 | 0.195190522 | 0.000564934 | 0.130502375 |
| 0.166537242 | 0.083339135 | 0.191256037 | 0.150424973 |
| 0.065175733 | 0.206187641 | 0.177401343 | 0.096992815 |
| 2.76E-06    | 0.112321601 | 0.087197896 | 0.156169523 |
| 0.144836021 | 0.134206028 | 0.011155212 | 0.058561016 |
| 1.77E-05    | 0.056450985 | 0.022379546 | 0.172606655 |
| 0.171368836 | 0.005061098 | 0.000749072 | 0.146144366 |
| 0.081407964 | 0.000331785 | 0.179953685 | 0.13593688  |
| 0.20772442  | 0.091888218 | 0.125239153 | 0.108072464 |
| 0.019935486 | 0.024827552 | 0.003162669 | 0.154596717 |
| 0.068762416 | 0.000520678 | 0.091542681 | 0.159952895 |
| 0.139801178 | 0.190094021 | 0.108130256 | 0.002430331 |
| 0.07587348  | 0.0216377   | 0.176077727 | 0.003000231 |
| 0.120885845 | 0.181483345 | 0.187445559 | 0.125410074 |
| 0.101208642 | 0.190105775 | 0.183586139 | 0.166483458 |
| 0.004075374 | 0.103419645 | 0.117925889 | 0.002781588 |
| 0.051569237 | 0.179393868 | 0.161971018 | 0.127119784 |
| 0.098166391 | 0.009541563 | 0.11432547  | 0.035663758 |
| 0.209003085 | 0.184938036 | 0.026509575 | 0.009562905 |
| 0.219822233 | 0.04167927  | 0.070196049 | 0.057336354 |
| 0.124449333 | 0.002611045 | 0.001860095 | 0.138004114 |
| 0.222060461 | 0.184752095 | 0.155062318 | 0.078232435 |
| 0.136921085 | 0.004158033 | 0.108713481 | 0.021786148 |
| 0.069193656 | 0.075461934 | 0.079251167 | 0.000553011 |
| 0.003580082 | 0.003271002 | 0.236965866 | 0.198260572 |
| 0.026577406 | 0.053766841 | 0.108362154 | 0.182010943 |
| 0.149982569 | 0.025572673 | 0.116201269 | 0.044521599 |
| 0.208168393 | 0.041315372 | 0.178837888 | 0.057981592 |
| 0.117337826 | 0.088699068 | 0.148101329 | 0.011540584 |
| 0.111069951 | 0.087035294 | 0.010410809 | 0.200777428 |

|             |             |             |             |
|-------------|-------------|-------------|-------------|
| 0.10585632  | 0.043188234 | 0.214641525 | 0.024802614 |
| 0.003528057 | 1.46E-05    | 0.098700089 | 0.071504501 |
| 0.158377208 | 0.007308909 | 0.048238259 | 0.008427121 |
| 0.193548885 | 0.078178921 | 0.117437561 | 0.017932351 |
| 0.105544213 | 0.000928776 | 0.119112514 | 0.001563669 |
| 0.107682763 | 0.145593188 | 0.076922581 | 0.056284209 |
| 0.007196451 | 0.154603135 | 0.138730078 | 0.14219022  |
| 0.190329314 | 0.001918723 | 0.169000949 | 0.032802175 |
| 0.092756846 | 0.021238822 | 0.121244893 | 0.016810259 |
| 0.133811649 | 0.002678728 | 0.052833248 | 0.006541145 |
| 0.169889901 | 0.017472259 | 0.167203738 | 0.013417061 |
| 0.01062954  | 0.064209581 | 0.089019488 | 0.12075907  |
| 0.120411327 | 0.08447913  | 0.021770415 | 0.197378674 |
| 0.011658645 | 0.035943627 | 0.019435692 | 0.023699105 |
| 0.040165593 | 0.083981407 | 0.099368187 | 0.117705195 |
| 0.15810134  | 0.008109036 | 0.029549619 | 0.015085056 |
| 0.001576427 | 0.068214406 | 0.199837544 | 0.005012202 |
| 0.109054167 | 0.018427678 | 6.20E-06    | 0.013469448 |
| 0.150665113 | 0.01348395  |             |             |
| DGKA        | 0.096875068 | 0.341970949 | 0.235193494 |
| 0.024661679 | 0.251098468 | 0.369147402 | 0.340368073 |
| 0.08534787  | 0.227153306 | 0.206648459 | 0.43543362  |
| 0.00283861  | 0.118562209 | 0.049353718 | 0.164166111 |
| 0.231399564 | 0.241956613 | 0.312232808 | 0.243081104 |
| 0.131558397 | 0.109565806 | 0.263743171 | 0.229970845 |
| 0.318180699 | 0.006737703 | 0.300154085 | 0.064047335 |
| 0.070904583 | 0.202068801 | 0.285628986 | 0.200953633 |
| 0.192197329 | 0.176535903 | 0.13837133  | 0.168366634 |
| 0.038728001 | 0.396336603 | 0.026284924 | 0.145909205 |
| 0.123031757 | 0.284906214 | 0.182582654 | 0.071069449 |
| 0.000866446 | 0.300070445 | 0.063834512 | 0.248624762 |
| 0.169805105 | 0.323385896 | 0.296256378 | 0.280011506 |
| 0.013621553 | 0.415523929 | 0.220299625 | 0.01308842  |
| 0.460741298 | 0.003723427 | 0.419377769 | 0.076755243 |
| 0.251664997 | 0.233578942 | 0.072675756 | 0.218183192 |
| 0.427310892 | 0.451351996 | 0.299963145 | 0.185465163 |
| 0.26863783  | 0.117153677 | 0.122929713 | 0.199132932 |
| 0.302759245 | 0.154441449 | 0.256231593 | 0.068667486 |
| 0.148022539 | 0.130899021 | 0.360184675 | 0.282526926 |
| 0.003231805 | 0.311952509 | 0.153757047 | 0.104560767 |
| 0.082302402 | 0.427874091 | 0.119090142 | 0.293509715 |
| 0.096656969 | 0.123312059 | 0.246780599 | 0.275632022 |
| 0.04107535  | 0.146559917 | 0.01932156  | 0.272843606 |
| 0.186727426 | 0.155725269 | 0.177716964 | 0.242391844 |
| 0.091011895 | 0.232553012 | 0.047888526 | 0.109299477 |
| 0.166017231 | 0.152253165 | 0.448462347 | 0.013678813 |
| 0.090718023 | 0.149649488 | 0.247502341 | 0.403963432 |
| 0.266351575 | 0.042991654 | 0.19417139  | 0.364749997 |
| 0.115220666 | 0.120182958 | 1           | 0.007566116 |
| 0.027248132 | 0.011603671 | 0.192221174 | 0.236949001 |
| 0.258952712 | 0.320145677 | 0.14781501  | 0.169196798 |
| 0.085645506 | 0.164431459 | 0.295600512 | 0.307406214 |
| 0.129278187 | 0.35338592  | 0.160396733 | 0.17495251  |
| 0.143283399 | 0.1693758   | 0.249354024 | 0.373807403 |

|             |             |             |             |
|-------------|-------------|-------------|-------------|
| 0.394660557 | 0.247143495 | 0.226081678 | 0.352525521 |
| 0.098121425 | 0.232763678 | 0.298105161 | 0.167375149 |
| 0.269840934 | 0.269487415 | 0.118092538 | 0.303849409 |
| 0.363688145 | 0.165274112 | 0.014181586 | 0.396532044 |
| 0.465233104 | 0.012157585 | 0.238861302 | 0.190497135 |
| 0.073323542 | 0.265236457 | 0.345408414 | 0.266531923 |
| 0.174371993 | 0.053306318 | 0.209966368 | 0.294134478 |
| 0.239450226 | 0.276987582 | 0.222142404 | 0.17152157  |
| 0.327228987 | 0.113326109 | 0.24847895  | 0.097294095 |
| 0.30555019  | 0.248843194 | 0.042862592 | 0.025754459 |
| 0.136924392 | 0.142871586 | 0.286373077 | 0.173375099 |
| 0.138180041 | 0.003537977 | 0.193751551 | 0.130585822 |
| 0.102689448 | 0.135665975 | 0.377501569 | 0.300173048 |
| 0.275254657 | 0.067058123 | 0.292856231 | 0.231912461 |
| 0.193757126 | 0.170132085 | 0.172565512 | 0.004796869 |
| 0.316198062 | 0.063901524 | 0.147299921 | 0.101932794 |
| 0.276629371 | 0.170796952 | 0.065875945 | 0.266538586 |
| 0.306755227 | 0.208800997 | 0.039167155 | 0.029899522 |
| 0.26751319  | 0.35068113  | 0.110464257 | 0.086064239 |
| 0.27285722  | 0.196136626 | 0.122080206 | 0.407437304 |
| 0.278391911 | 0.405398845 | 0.025994731 | 0.227164187 |
| 0.11021471  | 0.263854901 | 0.167647371 | 0.231874533 |
| 0.287350651 | 0.157436055 | 0.06984811  | 0.378977435 |
| 0.181617886 | 0.184207706 | 0.217967059 | 0.353082999 |
| 0.005130343 | 0.311427047 | 0.165045051 | 0.023823208 |
| 0.357456244 | 0.388418737 | 0.213349188 | 0.183977409 |
| 0.250057646 | 0.356808936 | 0.230191726 | 0.150721977 |
| 0.044928756 | 0.038160976 | 0.290848339 | 0.32470866  |
| 0.204451996 | 0.222681287 | 0.086664062 | 0.02617872  |
| 0.269964297 | 0.083929358 | 0.194511889 | 0.092499194 |
| 0.147288839 | 0.097888843 | 0.27505679  | 0.118573361 |
| 0.004393156 | 0.215569494 | 0.127593238 | 0.10706186  |
| 0.158365116 | 0.158313124 | 0.260666765 | 0.409107347 |
| 0.134689739 | 0.063869367 | 0.114691827 | 0.290333442 |
| 0.331214665 | 0.334121023 | 0.01052299  | 0.284876227 |
| 0.280334114 | 0.233964739 | 0.26709888  | 0.270208344 |
| 0.198949655 | 0.430319786 | 0.284028762 | 0.173746637 |
| 0.002497155 | 0.133737149 | 0.10145152  | 0.446084093 |
| 0.181959348 | 0.337123905 | 0.045293408 | 0.073720474 |
| 0.007190109 | 0.281457405 | 0.03290975  | 0.372501523 |
| 0.245884462 | 0.181758792 | 0.006172781 | 0.260322238 |
| 0.096573305 | 0.017167495 | 0.315920347 | 0.22791397  |
| 0.327948037 | 0.192519044 | 0.299968351 | 0.120411994 |
| 0.020346915 | 0.127910231 | 0.084108694 | 0.223547202 |
| 0.119795872 | 0.017185396 | 0.143591247 | 0.277678073 |
| 0.267894457 | 0.39068303  | 0.337147878 | 0.011843222 |
| 0.112426473 | 0.062771985 | 0.212083896 | 0.246775626 |
| 0.301565032 | 0.415258934 | 0.374391342 | 0.154053405 |
| 0.179630155 | 0.397082591 | 0.41579015  | 0.273951435 |
| 0.047446569 | 0.127004517 | 0.161148775 | 0.155860304 |
| 0.080463752 | 0.258683399 | 0.12623566  | 0.345934673 |
| 0.270373648 | 0.049085171 | 0.362107188 | 0.111460077 |
| 0.381249291 | 0.242006425 | 0.219780527 | 0.209889117 |
| 0.410501941 | 0.257096575 | 0.322116067 | 0.233411969 |

|             |             |             |             |
|-------------|-------------|-------------|-------------|
| 0.37947738  | 0.012640205 | 0.027016298 | 0.349549359 |
| 0.415136142 | 0.448258185 | 0.213697665 | 0.125144153 |
| 0.206222168 | 0.199950128 | 0.228324395 | 0.289689093 |
| 0.256402613 | 0.084098159 | 0.107513789 | 0.017442662 |
| 0.023016975 | 0.12412218  | 0.414015819 | 0.429161367 |
| 0.262588347 | 0.272994513 | 0.289772526 | 0.284155859 |
| 0.220457132 | 0.120855993 | 0.368856229 | 0.197007521 |
| 0.469302892 | 0.097548789 | 0.372102168 | 0.187413259 |
| 0.256042677 | 0.238046478 | 0.253417526 | 0.009535768 |
| 0.138366767 | 0.195262385 | 0.043536642 | 0.204643358 |
| 0.143253595 | 0.302969652 | 0.383434751 | 0.23265937  |
| 0.065258797 | 0.008481127 | 0.312019808 | 0.06333338  |
| 0.438963637 | 0.056695551 | 0.188384317 | 0.01366609  |
| 0.354361382 | 0.168772404 | 0.200522282 | 0.05119164  |
| 0.198073427 | 0.004118937 | 0.225514587 | 0.142435355 |
| 0.259886531 | 0.378588315 | 0.143751136 | 0.090873827 |
| 0.064271353 | 0.214393778 | 0.343672766 | 0.17721107  |
| 0.252058331 | 0.027757073 | 0.250092631 | 0.186381251 |
| 0.102384018 | 0.145208423 | 0.371644268 | 0.19058159  |
| 0.332932956 | 0.090637603 | 0.307621961 | 0.133985349 |
| 0.213775902 | 0.188295501 | 0.21777968  | 0.089809488 |
| 0.224493641 | 0.221238685 | 0.161167204 | 0.135967898 |
| 0.177726166 | 0.097527258 | 0.089881848 | 0.46445661  |
| 0.085892562 | 0.141487481 | 0.040535996 | 0.052438648 |
| 0.072538912 | 0.2805864   | 0.228560996 | 0.252146565 |
| 0.257231165 | 0.061738778 | 0.272121407 | 0.209505092 |
| 0.019184304 | 0.118043504 | 0.38069432  | 0.044890714 |
| 0.19636342  | 0.060062477 | 0.005591233 | 0.133519358 |
| 0.361999789 | 0.10485081  |             |             |
| DIRC2       | 0.030631768 | 0.045396563 | 0.00135893  |
| 0.000572361 | 0.000643584 | 0.012538947 | 0.007369018 |
| 0.033112697 | 0.000601874 | 0.005076018 | 0.023002544 |
| 5.39E-05    | 0.040553415 | 0.00016278  | 9.19E-05    |
| 0.053224543 | 0.010106937 | 0.051839204 | 0.02081824  |
| 0.001260165 | 0.031969185 | 0.034325122 | 0.009956199 |
| 2.61E-05    | 0.00424226  | 0.001382784 | 0.025778683 |
| 0.06290007  | 0.007319698 | 0.007806313 | 0.055897938 |
| 0.050126908 | 0.00741214  | 0.001794395 | 0.003468801 |
| 0.044078217 | 0.000155873 | 0.033063494 | 0.042639363 |
| 0.006689536 | 0.043818956 | 1.54E-05    | 6.68E-05    |
| 0.036214893 | 0.034753844 | 0.009527484 | 0.011862852 |
| 0.005850946 | 0.004907445 | 0.003030465 | 0.023033696 |
| 0.04048506  | 0.006780474 | 0.030299262 | 2.53E-05    |
| 0.035168266 | 0.016510675 | 0.001079067 | 0.007525576 |
| 0.017735939 | 0.032809609 | 0.011216605 | 0.033852413 |
| 0.0462774   | 0.000127786 | 0.002137365 | 0.020720235 |
| 0.052408563 | 0.028916576 | 0.040205053 | 0.034817497 |
| 0.003401311 | 0.008440333 | 0.037092071 | 0.050213771 |
| 0.011961696 | 0.002808283 | 1.31E-05    | 0.005394826 |
| 0.004881589 | 0.032257128 | 0.03866101  | 0.025868362 |
| 0.032411874 | 0.002914255 | 0.046667443 | 0.000125017 |
| 0.028520862 | 0.053875641 | 0.000374947 | 0.033064636 |
| 2.35E-05    | 0.001385911 | 0.053728809 | 0.058942708 |
| 0.038609096 | 0.001050508 | 4.28E-05    | 0.002254523 |

|             |             |             |             |          |
|-------------|-------------|-------------|-------------|----------|
| 0.006944993 | 0.05249386  | 0.019382793 | 0.018423387 |          |
| 0.025633577 | 0.00374344  | 0.043523826 | 0.001845795 |          |
| 0.004910542 | 0.043360207 | 0.054613884 | 2.77E-05    |          |
| 0.002282518 | 0.011383343 | 0.001201907 | 0.000251201 |          |
| 0.007566116 | 1           | 0.00121016  | 0.000542879 |          |
| 0.052697637 | 0.005381752 | 0.002707176 | 0.008027606 |          |
| 0.002216759 | 0.027303979 | 0.031291953 | 0.047028783 |          |
| 0.0005367   | 0.007958887 | 0.040520133 | 0.008947637 |          |
| 0.018577137 | 0.040358755 | 0.005128614 | 0.004805042 |          |
| 0.005833847 | 0.033173039 | 0.035591627 | 0.000637926 |          |
| 0.000979105 | 0.027648082 | 0.036996864 | 0.06025983  |          |
| 0.054976921 | 0.007494053 | 0.004427072 | 0.007870582 |          |
| 0.008777952 | 0.032135303 | 0.007783911 | 0.018520594 |          |
| 0.000931926 | 0.019341319 | 0.032213744 | 0.002452875 |          |
| 0.001459581 | 0.040092006 | 0.000121559 | 0.000867857 |          |
| 0.042538461 | 0.030948973 | 0.018447477 | 0.001053522 |          |
| 0.011061375 | 0.011089031 | 0.014863947 | 0.016264037 |          |
| 0.023300372 | 0.009702815 | 0.020797353 | 0.01174023  |          |
| 0.000945486 | 0.041549662 | 0.004179001 | 0.019065011 |          |
| 0.004896301 | 4.88E-05    | 0.025867224 | 0.01446645  |          |
| 0.046078583 | 0.025894413 | 0.036883448 | 0.000136815 |          |
| 0.007289265 | 0.031776541 | 0.008781704 | 0.046763461 |          |
| 0.044178576 | 0.003366038 | 0.012634072 | 0.003114362 |          |
| 0.0044382   | 0.00411782  | 0.040968493 | 0.002695506 |          |
| 0.002419739 | 1.33E-05    | 0.000651005 | 0.027092659 |          |
| 0.012621254 | 0.000909831 | 0.003974451 | 0.001561636 |          |
| 0.000534896 | 0.046850051 | 0.009225698 | 0.034629041 |          |
| 0.000243018 | 0.002479646 | 0.011666303 | 0.024588396 |          |
| 0.018923252 | 0.004401126 | 0.031130128 | 0.013721746 |          |
| 0.061748847 | 0.025073479 | 0.001517616 | 0.029016713 |          |
| 0.000523762 | 0.005131324 | 0.032620152 | 0.039316093 |          |
| 0.055198873 | 0.035985659 | 0.008532849 | 0.027658913 |          |
| 0.005525349 | 0.018175266 | 0.026132869 | 0.017990863 |          |
| 0.002719729 | 0.044358939 | 5.38E-06    | 0.019054405 |          |
| 0.02383488  | 0.001132474 | 0.04699862  | 0.010242046 |          |
| 0.001781924 | 0.012491204 | 0.053831171 | 0.043083568 |          |
| 0.042223106 | 0.063670351 | 0.004537463 | 0.000134835 |          |
| 0.046638719 | 0.024136532 | 0.058123848 | 0.009244363 |          |
| 0.004426828 | 0.000132181 | 0.054211487 | 0.024573319 |          |
| 0.034089368 | 0.047492089 | 0.01644299  | 0.00807802  |          |
| 0.006937481 | 0.027499499 | 2.97E-05    | 0.014035375 |          |
| 0.052917685 | 0.00077161  | 0.013038563 | 0.000696825 |          |
| 0.03483537  | 0.016377066 | 0.006031712 | 0.013897424 |          |
| 0.007376798 | 0.002055137 | 0.004848685 | 0.050086001 |          |
| 2.46E-05    | 0.046228352 | 0.05620527  | 0.011537492 |          |
| 0.048622109 | 0.057365865 | 0.020151619 | 0.02177268  |          |
| 0.047787824 | 0.045805753 | 7.52E-05    | 0.052349367 |          |
| 0.036850861 | 0.021854661 | 0.063401911 | 0.014405275 |          |
| 0.01254433  | 0.015955575 | 6.15E-07    | 0.005969023 |          |
| 0.007930005 | 0.041481542 | 0.047006463 | 7.57E-05    | 4.40E-05 |
| 0.03955839  | 0.035902837 | 3.52E-05    | 0.053768496 |          |
| 0.019812606 | 0.040618395 | 0.016877019 | 0.005729344 |          |
| 0.043699892 | 0.011211844 | 0.006765876 | 2.69E-05    |          |
| 0.032297899 | 0.009763424 | 0.000151767 | 0.001493929 |          |

|                      |                      |                      |             |
|----------------------|----------------------|----------------------|-------------|
| 0.049978056          | 0.053656362          | 0.019224631          | 0.009057985 |
| 9.60E-05 0.049937889 | 0.005004317          | 0.04453746           |             |
| 0.000639825          | 0.041704794          | 0.01988921           | 0.036231669 |
| 0.036648898          | 0.021666046          | 0.033761544          | 0.0287476   |
| 0.044232079          | 0.000279727          | 0.062712235          | 0.064035362 |
| 0.00133421           | 0.036827288          | 0.043048087          | 0.022182839 |
| 0.007622646          | 0.023882109          | 0.000306751          | 0.010065296 |
| 0.021089317          | 0.037083252          | 0.04871126           | 0.001308863 |
| 0.00340183           | 0.03107733           | 0.005104921          | 0.002022562 |
| 0.009404781          | 0.013350741          | 0.00860543           | 0.001152514 |
| 0.019567002          | 0.038261274          | 0.015299331          | 0.060052954 |
| 0.003810953          | 0.046522437          | 0.000722986          | 0.034169586 |
| 0.001666824          | 0.01444684           | 0.050871606          | 0.054893146 |
| 0.023527876          | 0.000316447          | 0.002574158          | 0.026641108 |
| 0.029199109          | 0.00274217           | 0.008488174          | 0.013875913 |
| 0.015346049          | 0.058316215          | 0.01464088           | 0.014844892 |
| 0.017814342          | 0.028251949          | 0.000436737          | 0.045982226 |
| 0.022224935          | 0.039639326          | 0.011310739          | 0.033812691 |
| 7.32E-06 0.02801213  | 0.00807781           | 0.014547308          |             |
| 0.015754788          | 0.055942962          | 0.005265063          | 0.017889688 |
| 0.004224814          | 0.000590289          | 1.49E-05 0.022860832 |             |
| 0.0138148            | 0.016187415          | 0.010162589          | 0.0205328   |
| 0.002459042          | 0.04901143           | 0.033026376          | 0.046913298 |
| 0.004274639          | 0.018440644          | 1.78E-05 0.004113337 |             |
| 0.000274261          | 0.036051418          | 0.021567564          | 0.030161704 |
| 0.030758222          | 0.009654716          | 0.019604595          | 0.021407339 |
| 0.013746083          | 0.043981155          | 0.001906083          | 0.059778587 |
| 0.00570952           | 0.044742963          | 0.008218948          | 0.00928083  |
| 0.002984404          | 0.003954172          | 0.000100235          | 0.001929279 |
| 0.003185806          | 0.05252895           | 0.001803659          | 0.016113459 |
| 0.016970936          | 0.001073518          | 0.013567017          | 0.036412715 |
| 0.03592362           | 0.039800898          | 0.051867055          | 0.031628231 |
| 0.025639878          | 0.002778811          | 0.011463473          | 0.000551383 |
| 0.000130344          | 0.001993363          | 0.008789838          | 0.041216091 |
| 0.043945952          | 0.049426099          | 0.003988458          | 0.002037687 |
| 0.003750298          | 0.00057891           | 0.049841246          | 0.011224791 |
| 0.00065777           | 0.016838488          | 0.00496515           | 0.000262185 |
| 0.006418116          | 0.023648567          | 0.00495844           |             |
| DNAJB6 0.007226095   | 0.022128928          | 0.013562457          |             |
| 0.001588643          | 0.003208002          | 0.032893993          | 0.023013311 |
| 0.008523682          | 0.002409028          | 0.014318932          | 0.041011168 |
| 3.98E-05 0.00542086  | 0.000783174          | 0.000218378          |             |
| 0.015383592          | 0.012912259          | 0.017091737          | 0.012388917 |
| 0.009346482          | 0.00256371           | 0.02075455           | 0.030840435 |
| 0.021504944          | 8.81E-05 0.025087103 | 0.004117443          |             |
| 0.003010508          | 0.012090277          | 0.019472875          | 0.014893169 |
| 0.011768494          | 0.010375493          | 0.003993241          | 0.00099417  |
| 0.000789846          | 0.026669041          | 4.13E-05 0.00700157  |             |
| 0.004761935          | 0.024559765          | 0.008851781          | 0.000111362 |
| 9.38E-05 0.014964125 | 0.006574806          | 0.02257084           |             |
| 0.005221384          | 0.034799651          | 0.018522753          | 0.017920925 |
| 0.000203798          | 0.029461044          | 0.013434761          | 0.000865145 |
| 0.031608611          | 8.39E-05 0.025466166 | 0.003929724          |             |
| 0.008497473          | 0.007446438          | 0.00292328           | 0.019450343 |

|             |             |             |             |
|-------------|-------------|-------------|-------------|
| 0.030727961 | 0.030856994 | 0.016020767 | 0.004858    |
| 0.019957492 | 0.005371269 | 0.007610323 | 0.021274555 |
| 0.018515417 | 0.006298117 | 0.005296645 | 0.001279914 |
| 0.008134124 | 0.007181448 | 0.018919685 | 0.005650173 |
| 8.55E-05    | 0.02537458  | 0.005312885 | 0.005035096 |
| 0.004848847 | 0.038727712 | 0.009617408 | 0.00919813  |
| 0.012335606 | 0.00138935  | 0.020312924 | 0.015903168 |
| 0.00031684  | 0.006242186 | 0.000149314 | 0.003410718 |
| 0.012088009 | 0.007940543 | 0.013884405 | 0.011024624 |
| 0.000414956 | 0.005819562 | 0.001396451 | 0.005054548 |
| 0.009626251 | 0.009228173 | 0.02658595  | 0.000166545 |
| 0.004089823 | 0.002026635 | 0.005337402 | 0.032448663 |
| 0.019430644 | 0.000233829 | 0.002814741 | 0.036028542 |
| 0.000336311 | 0.000428562 | 0.027248132 | 0.00121016  |
| 1           | 5.88E-05    | 0.012266125 | 0.013491715 |
| 0.027515948 | 0.003601533 | 0.011312119 | 0.008460843 |
| 0.007388995 | 0.003010667 | 0.018786194 | 0.009457196 |
| 0.023045199 | 0.016360368 | 0.010370507 | 0.003629579 |
| 0.003846629 | 0.014995096 | 0.021518656 | 0.0242137   |
| 0.00598798  | 0.006456351 | 0.032524917 | 0.004448045 |
| 0.017209287 | 0.018558352 | 0.005322793 | 0.013059991 |
| 0.014688265 | 0.006183521 | 0.031850351 | 0.020715938 |
| 0.008702926 | 0.00013655  | 0.022429388 | 0.032553873 |
| 0.00303828  | 0.010453177 | 0.009673833 | 0.00088007  |
| 0.001958525 | 0.021009145 | 0.016014051 | 0.008302912 |
| 0.002597864 | 0.026127443 | 0.028479581 | 0.014754716 |
| 0.025270936 | 0.011001391 | 0.016591968 | 0.022644114 |
| 0.008031334 | 0.016427363 | 0.004908196 | 0.023607761 |
| 0.014827257 | 0.000467188 | 1.56E-05    | 0.005817622 |
| 0.006093269 | 0.022737668 | 0.010645873 | 0.008616506 |
| 0.000810017 | 0.018701918 | 0.009971963 | 0.005540029 |
| 0.006961732 | 0.024798724 | 0.019660086 | 0.016754534 |
| 0.000576023 | 0.016703553 | 0.005154019 | 0.009764686 |
| 0.007567285 | 0.003861487 | 0.000138905 | 0.007664656 |
| 0.00710342  | 0.004415717 | 0.002240633 | 0.016770761 |
| 0.003027119 | 0.000153558 | 0.017217006 | 0.029561069 |
| 0.012461583 | 0.000275771 | 0.000237874 | 0.015802749 |
| 0.022477205 | 0.016493511 | 0.002030034 | 0.017194133 |
| 0.026122305 | 0.006803191 | 0.022273555 | 0.003542682 |
| 0.038354777 | 4.67E-05    | 0.006077623 | 0.006785991 |
| 0.01443521  | 0.011215299 | 0.014028056 | 0.023295723 |
| 0.00676838  | 0.002158992 | 0.03365525  | 0.010686973 |
| 0.009902282 | 0.015508295 | 0.021466494 | 3.96E-05    |
| 0.018492809 | 0.012404847 | 6.33E-05    | 0.025917454 |
| 0.03124487  | 0.01128368  | 0.010969645 | 0.012940712 |
| 0.019542006 | 0.011724986 | 0.01005963  | 0.001645499 |
| 0.000577579 | 0.016958944 | 0.017110093 | 0.011469168 |
| 0.011424563 | 0.001988304 | 2.64E-05    | 0.017850014 |
| 0.003413049 | 0.016102094 | 0.008060535 | 0.007182942 |
| 0.003228048 | 0.011748144 | 0.005305896 | 4.90E-06    |
| 0.021407392 | 0.014862631 | 0.000661    | 0.011562328 |
| 0.001620906 | 0.016581397 | 0.023019744 | 0.005274668 |
| 0.002549763 | 0.005378607 | 0.01911752  | 0.018763228 |
| 0.02223954  | 6.66E-06    | 0.015387896 | 0.017266521 |

|             |             |             |             |
|-------------|-------------|-------------|-------------|
| 0.009626741 | 0.017787455 | 0.016142492 | 0.01616207  |
| 0.025857119 | 0.019765488 | 0.007662561 | 1.23E-05    |
| 0.007846215 | 0.005211857 | 0.028357676 | 0.014389472 |
| 0.025204562 | 0.001764296 | 0.003034419 | 3.85E-06    |
| 0.01971109  | 0.002296185 | 0.020770884 | 0.016954055 |
| 0.001978296 | 4.44E-06    | 0.01749191  | 0.006258033 |
| 0.019032144 | 0.033286413 | 0.02452882  | 6.70E-06    |
| 0.025500625 | 0.006103174 | 0.001132295 | 0.013901659 |
| 0.000947757 | 0.028239567 | 0.003353553 | 0.001823855 |
| 0.006791675 | 0.014259698 | 0.022341465 | 1.62E-05    |
| 0.018306583 | 0.000298162 | 0.005537634 | 0.022535354 |
| 0.017240239 | 0.00240518  | 0.022178956 | 0.003519327 |
| 0.024537517 | 0.006295211 | 0.012003021 | 0.02284902  |
| 0.032409251 | 0.01934175  | 0.000155474 | 0.033345221 |
| 0.012685935 | 0.002972763 | 0.007334187 | 0.009631449 |
| 0.013892774 | 0.035371715 | 0.015183679 | 0.013938412 |
| 0.031534759 | 0.006531363 | 0.02779324  | 0.000927055 |
| 0.01052953  | 0.005411709 | 0.029710975 | 0.0165182   |
| 0.016235793 | 0.008821615 | 0.023813542 | 0.006903927 |
| 0.000144451 | 0.019270434 | 0.026588139 | 0.000623155 |
| 0.017233105 | 0.007538531 | 0.012127691 | 0.033432733 |
| 0.009653801 | 0.003594822 | 0.018229809 | 0.005407391 |
| 0.005898577 | 0.000551767 | 0.000650565 | 0.009738485 |
| 0.029990859 | 0.02749256  | 0.019262973 | 0.00505983  |
| 0.040144606 | 0.028256316 | 0.013528641 | 0.018582066 |
| 0.031384279 | 0.012537077 | 0.029025347 | 0.005569845 |
| 0.023846244 | 0.019094857 | 0.017578793 | 0.00150752  |
| 0.015774409 | 7.26E-06    | 0.00736419  | 0.026051137 |
| 0.002041505 | 0.021535432 | 0.006877019 | 0.021048521 |
| 0.021769612 | 0.010171049 | 0.000256851 | 0.02800779  |
| 0.016781836 | 0.002884277 | 0.034286019 | 3.45E-05    |
| 0.016495724 | 0.000121651 | 0.020907122 | 0.001417052 |
| 0.015855236 | 0.000568502 | 0.013764886 | 0.018768275 |
| 0.014612205 | 0.001840281 | 0.016329002 | 4.27E-06    |
| 0.008094648 | 0.00615736  | 0.002314676 | 0.020133152 |
| 0.02715207  | 0.010209109 | 0.0156597   | 0.009228294 |
| 0.015389137 | 0.003704801 | 0.004607264 | 0.002085308 |
| 0.021256649 | 0.00277831  | 0.015672556 | 0.004145661 |
| 0.010990288 | 0.002889063 | 0.013640529 | 7.67E-05    |
| 0.019368367 | 0.003710562 | 0.010550827 | 0.001434391 |
| 0.007668729 | 0.007439431 | 0.024587957 | 0.024290317 |
| 0.007932947 | 0.028001248 | 0.000589014 | 0.00934727  |
| 0.001604137 | 0.000824476 | 0.00148692  | 0.005445478 |
| 0.01147394  | 0.015384486 | 0.014244436 | 0.018798701 |
| 0.014795838 | 0.008024304 | 4.80E-05    | 0.000535755 |
| 0.030368259 | 0.000602488 | 0.007887564 | 0.0059441   |
| 0.000435934 | 0.003858277 | 0.022417884 | 0.000708575 |
| DPAGT1      | 0.055024968 | 0.024424429 | 0.006284301 |
| 0.000360284 | 0.015007253 | 0.00518135  | 2.21E-06    |
| 0.005022691 | 0.000604312 | 0.022110296 | 0.046843662 |
| 0.023408018 | 0.025945897 | 0.002534787 | 0.012392661 |
| 0.027270471 | 0.007091803 | 0.040169457 | 0.033934216 |
| 5.45E-05    | 0.068867341 | 0.010500729 | 0.078522824 |
| 0.017413298 | 0.001768859 | 1.61E-05    | 0.01102315  |
|             |             | 0.027997695 |             |



|             |             |             |             |
|-------------|-------------|-------------|-------------|
| 0.035329884 | 0.031032756 | 0.002471249 | 0.034255894 |
| 0.015440992 | 0.001130576 | 0.000275639 | 0.000136101 |
| 0.033492321 | 0.000121798 | 0.009977091 | 0.030419505 |
| 0.001810085 | 0.01661415  | 0.001265294 | 7.50E-10    |
| 0.003555413 | 0.039007795 | 0.039083783 | 0.06342167  |
| 0.015650146 | 0.037203436 | 0.001271495 | 0.000177967 |
| 0.026240624 | 0.088106897 | 0.00063198  | 0.02153136  |
| 7.42E-08    | 0.023863566 | 0.090041916 | 0.011162732 |
| 0.022943643 | 0.01368238  | 0.03068268  | 0.013606676 |
| 0.022828743 | 0.026236175 | 0.000166497 | 0.007576965 |
| 0.017450823 | 0.013513654 | 0.004178233 | 0.027016612 |
| 0.002222737 | 0.001397718 | 0.003131625 | 0.009988497 |
| 0.028307524 | 0.036458208 | 0.019167851 | 0.00086146  |
| 0.002771941 | 0.000394907 | 0.065661268 | 0.008503176 |
| 0.026239643 | 0.044720418 | 0.001073448 | 0.01019644  |
| 0.00378278  | 0.03367443  | 0.028679279 | 1.92E-05    |
| 0.027038912 | 5.86E-05    | 0.013955407 | 0.030782408 |
| 0.028990937 | 0.036096079 | 0.000958592 | 0.002529638 |
| 0.049943595 | 0.057010488 | 0.029491472 | 0.029395245 |
| 0.011084473 | 0.02033492  | 0.010132186 | 0.01888471  |
| 0.007307612 | 0.005491262 | 0.025720863 | 0.031141701 |
| 0.026411608 | 0.036884128 | 0.018393092 | 0.000416412 |
| 2.15E-05    | 0.011603671 | 0.000542879 | 5.88E-05    |
| 0.030300215 | 0.036291276 | 0.000815481 | 0.007199999 |
| 0.000113912 | 0.004151436 | 0.047035864 | 0.050389166 |
| 0.000480814 | 0.005112702 | 0.009569105 | 0.005767402 |
| 0.002526382 | 0.01275987  | 0.001109849 | 0.040358575 |
| 0.02687897  | 0.019511746 | 0.05183486  | 0.00211995  |
| 0.00561022  | 0.022962953 | 0.014198713 | 0.034464245 |
| 0.031401042 | 0.025139539 | 0.001147063 | 0.047720892 |
| 0.001551433 | 0.008234297 | 0.014472062 | 0.083330664 |
| 0.004561551 | 0.039129311 | 0.025366603 | 0.000236101 |
| 0.009406152 | 0.035981253 | 3.25E-06    | 0.000673083 |
| 0.031526046 | 0.016670615 | 0.013247942 | 9.73E-06    |
| 0.001414723 | 0.00677316  | 0.037295283 | 0.006662558 |
| 0.028083246 | 0.000764662 | 0.036619192 | 0.001365756 |
| 0.004673131 | 0.016039206 | 0.020474906 | 0.052821233 |
| 0.001031865 | 5.63E-05    | 0.047159514 | 0.05441669  |
| 0.019492566 | 0.032503501 | 0.028730459 | 9.21E-08    |
| 0.000684388 | 0.049834262 | 0.00247212  | 0.047401732 |
| 0.021277863 | 0.022510367 | 0.061211485 | 0.003082436 |
| 0.033877483 | 0.001237597 | 0.082709569 | 0.000787862 |
| 0.000525035 | 0.000434071 | 0.001901231 | 0.00281938  |
| 0.01401886  | 0.052191406 | 0.001142216 | 0.006420862 |
| 0.010092008 | 0.019766366 | 0.019747102 | 0.012233023 |
| 0.148917877 | 0.027424247 | 0.012270076 | 0.009494872 |
| 0.002046792 | 0.011971311 | 0.008552669 | 0.005690529 |
| 0.028126189 | 0.029520324 | 0.001319163 | 0.018066661 |
| 0.002573763 | 0.026779676 | 0.008977465 | 0.015427151 |
| 0.014638958 | 0.019447511 | 0.008935626 | 0.077404349 |
| 0.003289308 | 0.031085393 | 0.042680167 | 0.039359842 |
| 0.022903897 | 0.032055344 | 0.002127457 | 0.032290724 |
| 0.004560191 | 0.003594619 | 0.019678172 | 0.007375106 |
| 0.027561151 | 0.084763703 | 0.039671219 | 0.034181109 |

|             |             |              |             |
|-------------|-------------|--------------|-------------|
| 0.069913431 | 0.022238222 | 0.007171098  | 0.04840788  |
| 0.050771981 | 0.021770119 | 0.02930265   | 0.008945347 |
| 0.000472322 | 0.005759709 | 0.027361131  | 0.056870771 |
| 0.012571713 | 0.014876824 | 0.005799496  | 0.004038954 |
| 0.047463793 | 0.083043343 | 0.000417911  | 0.008364256 |
| 0.015461558 | 8.62E-05    | 0.001655686  | 0.001019003 |
| 0.012151874 | 0.036359199 | 0.001034559  | 0.004515481 |
| 0.000482528 | 0.003950462 | 0.016438211  | 0.026839743 |
| 5.13E-05    | 0.056868213 | 0.033734754  | 0.031032496 |
| 0.01584841  | 0.041840024 | 0.040024588  | 0.01928631  |
| 0.02152982  | 0.051547748 | 0.004424441  | 0.018677678 |
| 0.012058999 | 0.039305309 | 0.018990634  | 0.019631842 |
| 0.08245594  | 0.003149838 | 0.00184004   | 0.028049237 |
| 0.000280429 | 0.044696243 | 0.016189565  | 0.000552143 |
| 1.77E-05    | 0.019510478 | 0.010615384  | 0.000580039 |
| 0.034879601 | 0.007407218 | 0.015915326  | 0.011485227 |
| 0.003607463 | 0.013001954 | 0.000333633  | 0.01837727  |
| 1.15E-05    | 0.0082181   | 0.007434438  | 0.002639303 |
| 0.036759218 | 0.037513179 | 0.014544706  | 6.55E-05    |
| 0.041964556 | 0.000104612 | 0.009178608  | 2.72E-05    |
| 0.052036429 | 0.021372533 | 0.025423376  | 0.009916806 |
| 0.01601601  | 0.022810223 | 0.026671533  | 0.01446238  |
| 1.65E-05    | 0.019126014 | 0.026225193  | 0.022105288 |
| 0.024528848 | 0.018574027 | 0.000345594  | 0.010452651 |
| 0.049272933 | 5.55E-06    | 0.020084006  | 0.002513823 |
| 0.019180744 | 0.015951019 | 0.0095939386 | 0.072454937 |
| 0.016633043 | 0.012564374 | 0.004753578  | 0.030047668 |
| 0.032318611 | 0.001247483 | 0.006236006  | 0.030963813 |
| 0.023703751 | 0.015182167 | 0.016186964  | 0.000170315 |
| 0.023123226 | 0.031555719 | 0.021140977  | 0.002816536 |
| 0.054070294 | 0.011415556 | 0.047004098  | 0.020916322 |
| 4.83E-05    | 0.014472921 | 0.031249818  | 0.027040246 |
| 0.013280163 | 0.01275916  | 0.00708632   | 0.004505438 |
| 0.026912152 | 0.044485559 | 0.00708632   | 0.004505438 |
| 0.026960171 | 0.003255066 | 0.028272628  | 0.053707003 |
| 0.044344283 | 1.64E-05    | 0.040283096  | 0.047032493 |
| 0.011854229 | 0.003991282 | 0.020375023  | 1.50E-05    |
| 0.031175791 | 0.001091556 | 0.132970128  | 0.002245311 |
| 0.000100843 | 0.010576654 | 0.010129908  | 0.032426171 |
| 0.024575882 | 0.012957114 | 0.061887568  | 0.001539501 |
| 0.034013151 | 0.017899735 | 0.047923643  | 0.000135971 |
| 0.004005156 | 0.027513687 | 0.034423952  | 0.007145379 |
| 0.05302349  | 1.08E-06    | 0.000758467  | 0.004774602 |
| 0.119557997 | 0.036671942 | 0.031695475  | 0.023965936 |
| 0.013947479 | 0.008102627 | 0.025219041  | 0.002402766 |
| 0.01632544  | 0.0002424   | 0.026602168  | 0.037108345 |
| 0.002808758 | 0.00500137  | 0.023710965  | 0.006798244 |
| 0.015846189 | 0.000566695 | 0.008892574  | 0.071176287 |
| 0.001353989 | 0.00770478  | 0.003751947  | 0.012947062 |
| 0.011085632 | 0.006787659 | 0.032722578  | 0.01073112  |
| 0.003626142 | 0.016686259 | 0.022387735  | 0.027703993 |
| 0.005799275 | 0.04042143  | 4.84E-06     | 3.02E-06    |
| 0.009977308 | 0.074348319 | 8.19E-05     | 0.030152926 |
| 0.048428672 | 0.010457734 | 0.049641224  | 0.001830815 |
|             | 0.006356035 | 0.06063112   | 0.001830815 |
|             |             | 5.88E-05     | 0.013967496 |

|             |             |             |             |
|-------------|-------------|-------------|-------------|
| 0.007653795 | 0.000582672 | 0.070074707 | 0.030201805 |
| 0.001143132 |             |             |             |
| DPH5        | 0.381263305 | 0.441888054 | 0.054911828 |
| 0.027926656 | 0.092267284 | 0.201267733 | 0.18405381  |
| 0.397329139 | 0.094752601 | 0.12179574  | 0.283130852 |
| 0.002351301 | 0.423738589 | 0.014875089 | 0.063322053 |
| 0.495471792 | 0.502700411 | 0.292162644 | 0.490885422 |
| 0.336371116 | 0.141603381 | 0.350665087 | 0.355418422 |
| 0.22295931  | 0.002121881 | 0.09887408  | 0.047042503 |
| 0.402064013 | 0.494729159 | 0.178014329 | 0.259463846 |
| 0.450402    | 0.461699273 | 0.391211637 | 0.285519631 |
| 0.276771612 | 0.405293693 | 0.147835398 | 0.449556972 |
| 0.418509296 | 0.193023819 | 0.463982869 | 0.012870841 |
| 0.005127291 | 0.080344008 | 0.377619668 | 0.372347724 |
| 0.299820854 | 0.187376696 | 0.145730676 | 0.144792036 |
| 0.227015134 | 0.313672274 | 0.402791942 | 0.223733332 |
| 0.359042409 | 0.004899514 | 0.395130206 | 0.290823167 |
| 0.052265454 | 0.291521749 | 0.405654627 | 0.409074067 |
| 0.208849831 | 0.375240842 | 0.470927755 | 0.029054217 |
| 0.058013    | 0.441328907 | 0.449429072 | 0.40312674  |
| 0.443391562 | 0.316074149 | 0.260293575 | 0.397816141 |
| 0.460039609 | 0.439846687 | 0.250692868 | 0.152940075 |
| 0.00126765  | 0.120551213 | 0.30272381  | 0.385872181 |
| 0.436291875 | 0.317169128 | 0.423481941 | 0.184096683 |
| 0.44669403  | 0.015298622 | 0.355635569 | 0.491632335 |
| 0.020739574 | 0.439133942 | 0.011265148 | 0.134428774 |
| 0.452903888 | 0.481661313 | 0.42537307  | 0.060267715 |
| 0.011758484 | 0.112109669 | 0.1869346   | 0.436772311 |
| 0.403284261 | 0.443466768 | 0.355571224 | 0.199277639 |
| 0.397785583 | 0.171757984 | 0.322195685 | 0.40364105  |
| 0.45327569  | 0.00741601  | 0.150905331 | 0.187571031 |
| 0.331761198 | 0.127322353 | 0.192221174 | 0.052697637 |
| 0.012266125 | 0.030300215 | 1           | 0.146396843 |
| 0.081942017 | 0.170107207 | 0.073418998 | 0.436321713 |
| 0.381847837 | 0.441210466 | 0.094807016 | 0.215898934 |
| 0.458669899 | 0.21286314  | 0.388503312 | 0.461775453 |
| 0.350117164 | 0.262263715 | 0.131681189 | 0.418766636 |
| 0.38303189  | 0.055500002 | 0.070005564 | 0.28925618  |
| 0.413494265 | 0.47237838  | 0.492286123 | 0.304960268 |
| 0.225907903 | 0.219929046 | 0.325004813 | 0.353243126 |
| 0.20361178  | 0.343920535 | 0.127336343 | 0.315206273 |
| 0.35683419  | 0.047747034 | 0.053143543 | 0.45109429  |
| 0.047512356 | 0.214455274 | 0.410769646 | 0.447627854 |
| 0.436161906 | 0.039131494 | 0.209727877 | 0.229828247 |
| 0.276174366 | 0.216605557 | 0.402792503 | 0.198616649 |
| 0.284945912 | 0.32908844  | 0.037602239 | 0.409932651 |
| 0.101943798 | 0.318482855 | 0.355588553 | 0.079715184 |
| 0.422119442 | 0.353362091 | 0.441932062 | 0.418825966 |
| 0.44122094  | 0.004337633 | 0.122674298 | 0.39564004  |
| 0.322382164 | 0.419852033 | 0.430672706 | 0.092584573 |
| 0.232059874 | 0.356064844 | 0.120994999 | 0.290367417 |
| 0.415261896 | 0.222985405 | 0.185063071 | 0.000677484 |
| 0.116506382 | 0.409631457 | 0.413184003 | 0.052320056 |
| 0.201120666 | 0.104073294 | 0.130733269 | 0.453045099 |

|             |             |             |             |
|-------------|-------------|-------------|-------------|
| 0.172188905 | 0.457439482 | 0.032296566 | 0.209200582 |
| 0.228106139 | 0.382482857 | 0.391495848 | 0.301139157 |
| 0.431974446 | 0.295478195 | 0.458574336 | 0.349998311 |
| 0.23724329  | 0.309732048 | 0.224873959 | 0.258533794 |
| 0.459438006 | 0.459825272 | 0.464509621 | 0.453673177 |
| 0.228839398 | 0.396386356 | 0.340292118 | 0.240892623 |
| 0.384887901 | 0.39257681  | 0.074056539 | 0.441127871 |
| 0.000718696 | 0.310337835 | 0.426450215 | 0.240339774 |
| 0.433814193 | 0.199424465 | 0.058255414 | 0.243159135 |
| 0.496487675 | 0.438357089 | 0.42563481  | 0.451783377 |
| 0.298961166 | 0.01078146  | 0.441302553 | 0.377613914 |
| 0.501064043 | 0.366931412 | 0.335251345 | 0.103390981 |
| 0.458319655 | 0.384659775 | 0.413475707 | 0.432735771 |
| 0.437996332 | 0.400418042 | 0.217927843 | 0.389868675 |
| 0.025422491 | 0.229612456 | 0.440516932 | 0.183824605 |
| 0.297654172 | 0.183004447 | 0.452487401 | 0.283463226 |
| 0.38070213  | 0.35240463  | 0.343809274 | 0.063422657 |
| 0.144340519 | 0.444522896 | 0.059866904 | 0.432749493 |
| 0.492379475 | 0.34295915  | 0.45860262  | 0.487071392 |
| 0.300423758 | 0.343055221 | 0.451984371 | 0.433088058 |
| 0.001208211 | 0.440368672 | 0.423993829 | 0.303273576 |
| 0.460608391 | 0.253212773 | 0.297657481 | 0.433880122 |
| 0.001273461 | 0.129867724 | 0.30541474  | 0.422890199 |
| 0.462299108 | 0.021692526 | 0.070314958 | 0.44513375  |
| 0.432033154 | 0.052157149 | 0.477554575 | 0.303982033 |
| 0.434687186 | 0.397238182 | 0.142967394 | 0.439906352 |
| 0.285142211 | 0.374325611 | 0.026894964 | 0.413861151 |
| 0.419434685 | 0.129157921 | 0.070671161 | 0.485930857 |
| 0.431228874 | 0.341075262 | 0.21591235  | 0.010164111 |
| 0.409660105 | 0.218231656 | 0.451145443 | 0.098809042 |
| 0.409720277 | 0.319799426 | 0.416243461 | 0.454554465 |
| 0.438963426 | 0.370465444 | 0.335981745 | 0.442297226 |
| 0.119351737 | 0.447122225 | 0.452454018 | 0.046738522 |
| 0.425913042 | 0.462939063 | 0.401784447 | 0.144301078 |
| 0.356194982 | 0.093070379 | 0.16969004  | 0.347460038 |
| 0.4106339   | 0.464239633 | 0.045698781 | 0.155272328 |
| 0.364631701 | 0.270932573 | 0.086260675 | 0.318765074 |
| 0.240873408 | 0.247509132 | 0.197415204 | 0.339794141 |
| 0.402579456 | 0.244931404 | 0.458018492 | 0.145911222 |
| 0.462631828 | 0.042070411 | 0.43536651  | 0.227006256 |
| 0.260867818 | 0.436409654 | 0.41523103  | 0.17296235  |
| 0.027520187 | 0.132144337 | 0.351978336 | 0.362193284 |
| 0.060396515 | 0.16699697  | 0.21755215  | 0.3034794   |
| 0.481984347 | 0.403955444 | 0.236432294 | 0.327537704 |
| 0.349439783 | 0.096251754 | 0.422252375 | 0.326447866 |
| 0.405437822 | 0.299771543 | 0.44753975  | 0.009356229 |
| 0.461271128 | 0.150867361 | 0.268472706 | 0.328538009 |
| 0.470933924 | 0.108365911 | 0.335997564 | 0.148664418 |
| 0.177217551 | 0.004015332 | 0.337238861 | 0.390085318 |
| 0.238467264 | 0.340658301 | 0.352358299 | 0.21676174  |
| 0.466239139 | 0.391512371 | 0.430757879 | 0.332643849 |
| 0.344752634 | 0.02870437  | 0.131732761 | 0.028108085 |
| 0.386310579 | 0.350555774 | 0.433073851 | 0.408688367 |
| 0.250320969 | 0.426059885 | 0.353775567 | 0.374987288 |

|             |             |             |             |
|-------------|-------------|-------------|-------------|
| 0.462278786 | 0.203698465 | 0.492094253 | 0.299613861 |
| 0.413068584 | 0.379885283 | 0.219264714 | 0.318251858 |
| 0.161205746 | 0.132226316 | 0.098413063 | 0.171127942 |
| 0.467143452 | 0.296431579 | 0.348775597 | 0.339757774 |
| 0.036793356 | 0.35489285  | 0.443753552 | 0.458504223 |
| 0.422505788 | 0.436856054 | 0.404093197 | 0.337883544 |
| 0.328585387 | 0.305874249 | 0.054614591 | 0.031760531 |
| 0.271884702 | 0.160265342 | 0.420532938 | 0.44055425  |
| 0.479271851 | 0.331302853 | 0.07974382  | 0.126970482 |
| 0.16977203  | 0.415741622 | 0.226259609 | 0.183713434 |
| 0.423115807 | 0.368572954 | 0.000519552 | 0.244328192 |
| 0.346136945 | 0.4044046   |             |             |
| DPYSL2      | 0.138638959 | 0.244236637 | 0.143115602 |
| 0.002545332 | 0.035406315 | 0.336411026 | 0.203955853 |
| 0.096509625 | 0.131381697 | 0.055726319 | 0.355717362 |
| 0.028981518 | 0.077204155 | 0.123224555 | 0.091129031 |
| 0.180773816 | 0.168708531 | 0.169303044 | 0.185084396 |
| 0.189411029 | 0.022034067 | 0.319845867 | 0.181889084 |
| 0.267540571 | 0.048786292 | 0.106314138 | 0.010777642 |
| 0.058129294 | 0.153034414 | 0.301843262 | 0.079834875 |
| 0.16087404  | 0.105850176 | 0.032505284 | 0.021631952 |
| 0.004803317 | 0.3148483   | 0.002974778 | 0.076335412 |
| 0.09089463  | 0.09653693  | 0.116867851 | 0.068936561 |
| 3.95E-05    | 0.118547133 | 0.058374608 | 0.263927537 |
| 0.17017954  | 0.318226639 | 0.325633136 | 0.09915604  |
| 0.00349419  | 0.346892316 | 0.254968738 | 0.002906666 |
| 0.321765572 | 0.000364918 | 0.305807922 | 0.100284866 |
| 0.154540405 | 0.190168779 | 0.06571432  | 0.216393861 |
| 0.329865213 | 0.317791182 | 0.20704346  | 0.056689031 |
| 0.20320272  | 0.097677035 | 0.085625126 | 0.10735958  |
| 0.224122994 | 0.05391217  | 0.068027013 | 0.022892759 |
| 0.09487368  | 0.097922503 | 0.357480839 | 0.141827069 |
| 0.013791667 | 0.15524886  | 0.022529105 | 0.129841955 |
| 0.047308121 | 0.35508394  | 0.1285775   | 0.070874008 |
| 0.072495655 | 0.131078236 | 0.242875828 | 0.194416776 |
| 0.010638216 | 0.106231497 | 0.004069564 | 0.135252487 |
| 0.1534822   | 0.115369759 | 0.17937114  | 0.087381699 |
| 0.100363761 | 0.182583899 | 0.076943316 | 0.080651565 |
| 0.160979569 | 0.100229622 | 0.315568737 | 0.00565614  |
| 0.057783014 | 0.114482968 | 0.085598555 | 0.301705775 |
| 0.215379712 | 0.077414864 | 0.151433911 | 0.32076676  |
| 0.023325961 | 0.016943638 | 0.236949001 | 0.005381752 |
| 0.013491715 | 0.036291276 | 0.146396843 | 1           |
| 0.078541743 | 0.210913825 | 0.029851742 | 0.080790676 |
| 0.076865225 | 0.144155498 | 0.041632513 | 0.168329381 |
| 0.076091915 | 0.208690338 | 0.061698968 | 0.115806142 |
| 0.022801598 | 0.113204751 | 0.224686343 | 0.235797918 |
| 0.359761257 | 0.11152658  | 0.143441002 | 0.331387029 |
| 0.057580345 | 0.180707455 | 0.220513603 | 0.092517562 |
| 0.052574703 | 0.278533541 | 0.038122284 | 0.187158553 |
| 0.268933357 | 0.208443718 | 0.007602172 | 0.340721269 |
| 0.351640184 | 0.00541432  | 0.155408373 | 0.155053261 |
| 0.003948707 | 0.059725836 | 0.287319376 | 0.165099851 |
| 0.102530602 | 0.009184754 | 0.071092845 | 0.220690808 |

|             |             |             |             |
|-------------|-------------|-------------|-------------|
| 0.293545779 | 0.190818151 | 0.202644306 | 0.050933675 |
| 0.349929027 | 0.036500733 | 0.10656538  | 0.05962455  |
| 0.266502362 | 0.29948185  | 0.014420942 | 0.009117661 |
| 0.132730934 | 0.114638759 | 0.203503615 | 0.160302986 |
| 0.125964225 | 0.000286299 | 0.053679278 | 0.165905792 |
| 0.042950535 | 0.110183268 | 0.254388582 | 0.287862699 |
| 0.369319494 | 0.015177561 | 0.304199647 | 0.042791134 |
| 0.207929629 | 0.058645337 | 0.05507873  | 0.019774405 |
| 0.098015291 | 0.030381439 | 0.10026641  | 0.169769926 |
| 0.051907393 | 0.15150338  | 0.067167275 | 0.186654157 |
| 0.315331421 | 0.113860155 | 0.098768276 | 0.016346706 |
| 0.137766516 | 0.199989816 | 0.029989357 | 0.062000185 |
| 0.151452161 | 0.074895146 | 0.091554995 | 0.340885353 |
| 0.047000596 | 0.323832293 | 0.007985065 | 0.167223611 |
| 0.066418188 | 0.161442826 | 0.107534317 | 0.141292697 |
| 0.193636644 | 0.168750182 | 0.026251697 | 0.382152789 |
| 0.189717234 | 0.16173465  | 0.193801692 | 0.252988571 |
| 0.021199891 | 0.279862434 | 0.091166976 | 0.009340919 |
| 0.238028844 | 0.246647888 | 0.180716572 | 0.207374502 |
| 0.189305821 | 0.258814425 | 0.225908928 | 0.109449195 |
| 0.026652879 | 0.112697155 | 0.252039206 | 0.258573397 |
| 0.14662112  | 0.113398469 | 0.010536435 | 0.014577673 |
| 0.188841479 | 0.087237885 | 0.160407034 | 0.082566906 |
| 0.07363006  | 0.027606299 | 0.279246654 | 0.136582986 |
| 0.006517832 | 0.149396693 | 0.107230285 | 0.022148946 |
| 0.053086795 | 0.080469424 | 0.155892589 | 0.360386328 |
| 0.023090634 | 0.030999839 | 0.022071399 | 0.11450544  |
| 0.290060177 | 0.247677839 | 0.001220634 | 0.258580511 |
| 0.206582556 | 0.200690496 | 0.165984649 | 0.211435579 |
| 0.256426502 | 0.302047961 | 0.203994888 | 0.148433613 |
| 0.013287583 | 0.088051706 | 0.057237558 | 0.405955746 |
| 0.130363007 | 0.326077743 | 0.048872154 | 0.028927233 |
| 0.008049058 | 0.324642902 | 0.005936282 | 0.304657527 |
| 0.147646179 | 0.073539313 | 0.000491699 | 0.170101901 |
| 0.055002438 | 0.005635653 | 0.241638749 | 0.17876971  |
| 0.205696786 | 0.111115393 | 0.167746639 | 0.073607712 |
| 0.003949618 | 0.053434988 | 0.013600005 | 0.132807985 |
| 0.057550063 | 0.013832917 | 0.021373206 | 0.211640487 |
| 0.238052715 | 0.244133005 | 0.313436099 | 0.00990104  |
| 0.099080256 | 0.011417519 | 0.124250332 | 0.121539783 |
| 0.273959782 | 0.326283189 | 0.254511703 | 0.093591645 |
| 0.126999152 | 0.299544603 | 0.347267362 | 0.203187754 |
| 0.005243875 | 0.093780507 | 0.128172517 | 0.069389296 |
| 0.077241967 | 0.162045916 | 0.067300452 | 0.288202742 |
| 0.2844324   | 0.004014328 | 0.361993557 | 0.171809592 |
| 0.247017596 | 0.156906681 | 0.125309706 | 0.161866895 |
| 0.286057045 | 0.121506938 | 0.177066982 | 0.168694957 |
| 0.387042135 | 0.00524662  | 0.015717445 | 0.314266261 |
| 0.292520073 | 0.324640557 | 0.16128963  | 0.025169881 |
| 0.134754319 | 0.174113238 | 0.185164654 | 0.088709525 |
| 0.32588191  | 0.067469656 | 0.084830807 | 0.022597357 |
| 0.015923842 | 0.16376279  | 0.269155195 | 0.332576632 |
| 0.189581944 | 0.346379799 | 0.180235236 | 0.149270696 |
| 0.155685188 | 0.032598536 | 0.34882243  | 0.195961828 |

|             |             |                      |             |
|-------------|-------------|----------------------|-------------|
| 0.354808798 | 0.012608518 | 0.306004588          | 0.23714397  |
| 0.265214463 | 0.100790288 | 0.178085561          | 0.004574526 |
| 0.089718325 | 0.061314179 | 0.071481292          | 0.095426554 |
| 0.108808046 | 0.175915394 | 0.222546194          | 0.195333016 |
| 0.016366185 | 0.015191257 | 0.333036005          | 0.019975275 |
| 0.397429709 | 0.022941263 | 0.186156094          | 0.001928389 |
| 0.266804149 | 0.178560181 | 0.196509016          | 0.015897351 |
| 0.0899023   | 0.000181404 | 0.065446217          | 0.141300104 |
| 0.284869574 | 0.320132203 | 0.138763828          | 0.10029132  |
| 0.079664581 | 0.112711976 | 0.27074865           | 0.064543796 |
| 0.15085487  | 0.009623439 | 0.179038901          | 0.134433895 |
| 0.064609291 | 0.055144218 | 0.330623813          | 0.069734311 |
| 0.126253031 | 0.039677899 | 0.184918 0.142060314 |             |
| 0.133560795 | 0.057344342 | 0.109277984          | 0.057470223 |
| 0.088283294 | 0.092563314 | 0.125180879          | 0.084620553 |
| 0.130506022 | 0.080155486 | 0.050793032          | 0.355079084 |
| 0.039274496 | 0.154611139 | 0.00392813           | 0.007196854 |
| 0.01227362  | 0.170930203 | 0.235025079          | 0.214144762 |
| 0.18224768  | 0.029189992 | 0.158833259          | 0.205037825 |
| 0.004595083 | 0.110649397 | 0.226558332          | 0.004219772 |
| 0.12649252  | 0.024906859 | 0.009996051          | 0.123134454 |
| 0.314029905 | 0.025161542 |                      |             |
| DUSP10      | 0.045007356 | 0.179657866          | 0.117910307 |
| 0.03501229  | 0.132294277 | 0.31996989           | 0.323405123 |
| 0.029788987 | 0.103432377 | 0.207941939          | 0.30526385  |
| 0.000731474 | 0.041743133 | 0.016904092          | 0.041716285 |
| 0.103378488 | 0.107074494 | 0.211102109          | 0.100372732 |
| 0.052689783 | 0.128995982 | 0.131189891          | 0.179368523 |
| 0.265396265 | 0.00216909  | 0.248435437          | 0.13849367  |
| 0.02047329  | 0.082909111 | 0.159121188          | 0.106752774 |
| 0.085473519 | 0.076844249 | 0.05625165           | 0.061075297 |
| 0.013735455 | 0.214310027 | 0.003764726          | 0.061785918 |
| 0.044763253 | 0.195558946 | 0.082523471          | 0.032071178 |
| 0.002077155 | 0.183735024 | 0.015620314          | 0.141699511 |
| 0.050508895 | 0.283869073 | 0.162743465          | 0.266513834 |
| 0.003117309 | 0.263308577 | 0.091357042          | 0.002831313 |
| 0.283501661 | 0.013643742 | 0.243872377          | 0.017333024 |
| 0.117305676 | 0.102096149 | 0.033356282          | 0.119952345 |
| 0.349173452 | 0.271358514 | 0.142561788          | 0.169325838 |
| 0.210342382 | 0.054569418 | 0.057338674          | 0.147400157 |
| 0.152860178 | 0.065961315 | 0.126008043          | 0.019819479 |
| 0.074168286 | 0.05024587  | 0.210740668          | 0.083275412 |
| 0.002370993 | 0.316245632 | 0.073062907          | 0.041150392 |
| 0.033563215 | 0.276659953 | 0.049534971          | 0.174534814 |
| 0.050439505 | 0.060579101 | 0.134983821          | 0.126423648 |
| 0.040262587 | 0.055795181 | 0.006550354          | 0.07387034  |
| 0.082575076 | 0.062373437 | 0.088997471          | 0.222549664 |
| 0.03325754  | 0.063432762 | 0.009649285          | 0.039062695 |
| 0.079576605 | 0.077713394 | 0.277494672          | 0.001685195 |
| 0.031683116 | 0.065671299 | 0.076459911          | 0.237037127 |
| 0.132213702 | 0.007725833 | 0.048883553          | 0.284303309 |
| 0.038815027 | 0.105835869 | 0.258952712          | 0.002707176 |
| 0.017540763 | 0.000815481 | 0.081942017          | 0.078541743 |
| 1           | 0.26963934  | 0.085000497          | 0.100306715 |

|             |             |             |             |
|-------------|-------------|-------------|-------------|
| 0.020822037 | 0.062585294 | 0.156646997 | 0.239332129 |
| 0.059783876 | 0.315956634 | 0.092931685 | 0.087478862 |
| 0.040934329 | 0.039968057 | 0.096750688 | 0.199029628 |
| 0.198121355 | 0.136703923 | 0.119616529 | 0.251424287 |
| 0.035686375 | 0.103272647 | 0.140722536 | 0.037344411 |
| 0.125216898 | 0.121664318 | 0.068078524 | 0.225390074 |
| 0.260606386 | 0.062878411 | 0.001186165 | 0.21227115  |
| 0.287026929 | 0.003433958 | 0.130420387 | 0.07969703  |
| 0.054412025 | 0.122072877 | 0.18975202  | 0.131850435 |
| 0.075685922 | 0.132206816 | 0.15202458  | 0.281654478 |
| 0.14601481  | 0.239015114 | 0.113769334 | 0.148456409 |
| 0.206562617 | 0.066044329 | 0.143972132 | 0.035173458 |
| 0.174505589 | 0.129403991 | 0.014447925 | 0.00987538  |
| 0.052613229 | 0.033327078 | 0.158560685 | 0.079212114 |
| 0.062816241 | 0.011810395 | 0.190268363 | 0.064166321 |
| 0.055933388 | 0.046335425 | 0.209346712 | 0.185758834 |
| 0.150681954 | 0.013003691 | 0.157425526 | 0.085934567 |
| 0.074941686 | 0.117352079 | 0.147051423 | 0.00562284  |
| 0.127888514 | 0.029915696 | 0.061486725 | 0.029337946 |
| 0.135439322 | 0.088349383 | 0.010668173 | 0.139077942 |
| 0.232011874 | 0.096165865 | 0.005963635 | 0.003647485 |
| 0.104306408 | 0.226853123 | 0.04160102  | 0.02396301  |
| 0.161308678 | 0.082233773 | 0.046525876 | 0.241912722 |
| 0.095549079 | 0.300519652 | 0.003594101 | 0.075462839 |
| 0.049574967 | 0.131883687 | 0.078521693 | 0.101561949 |
| 0.178720121 | 0.055740039 | 0.013079122 | 0.260880401 |
| 0.084008385 | 0.075161129 | 0.08893857  | 0.170309456 |
| 0.003849664 | 0.172064445 | 0.105004228 | 0.003808753 |
| 0.200209822 | 0.350234216 | 0.089056934 | 0.05236037  |
| 0.104212794 | 0.169535934 | 0.092044512 | 0.064480875 |
| 0.007677139 | 0.009088635 | 0.129201275 | 0.189800773 |
| 0.085637678 | 0.093666748 | 0.024654757 | 0.002333662 |
| 0.124544234 | 0.026971672 | 0.129582119 | 0.047976783 |
| 0.071632609 | 0.023328073 | 0.124130729 | 0.040696925 |
| 0.00102271  | 0.136142275 | 0.07074247  | 0.086169114 |
| 0.091940079 | 0.0799113   | 0.138650861 | 0.232529311 |
| 0.041703142 | 0.021577914 | 0.056318368 | 0.177361671 |
| 0.24068842  | 0.17562908  | 0.001325292 | 0.12407543  |
| 0.126156645 | 0.107458833 | 0.138124849 | 0.117115869 |
| 0.114669823 | 0.267614047 | 0.150036094 | 0.064610484 |
| 0.000485566 | 0.05384693  | 0.038187977 | 0.261481489 |
| 0.087825758 | 0.25181046  | 0.008852291 | 0.027104901 |
| 0.00138219  | 0.181300746 | 0.012133647 | 0.178773172 |
| 0.117443633 | 0.122901358 | 0.000786793 | 0.126507041 |
| 0.037722523 | 0.002225173 | 0.151200562 | 0.19890461  |
| 0.182646923 | 0.090039494 | 0.271573307 | 0.049664881 |
| 0.006593229 | 0.024463121 | 0.075496181 | 0.139605719 |
| 0.043028456 | 0.002753463 | 0.200086142 | 0.122871232 |
| 0.137214273 | 0.242213244 | 0.221462077 | 0.029413722 |
| 0.041388962 | 0.044316407 | 0.120006688 | 0.062292047 |
| 0.140089578 | 0.265842465 | 0.193935986 | 0.065804148 |
| 0.084809575 | 0.243921159 | 0.266650263 | 0.146959033 |
| 0.020020857 | 0.056276432 | 0.071835059 | 0.102119695 |
| 0.033335585 | 0.123919253 | 0.09675161  | 0.330433664 |



|             |             |             |             |
|-------------|-------------|-------------|-------------|
| 0.136454983 | 0.035147677 | 0.294237734 | 0.043813801 |
| 0.215935807 | 0.123808329 | 0.15650971  | 0.045472088 |
| 0.270815269 | 0.078116359 | 0.216039322 | 0.085333691 |
| 0.248671831 | 0.003088948 | 0.003393868 | 0.198992076 |
| 0.23843312  | 0.336258036 | 0.10995051  | 0.137387382 |
| 0.087087021 | 0.063442391 | 0.089882001 | 0.100114149 |
| 0.13859911  | 0.043349398 | 0.039642899 | 0.002814169 |
| 0.046692338 | 0.047551008 | 0.287608929 | 0.255976647 |
| 0.129904463 | 0.154455308 | 0.223932006 | 0.229671494 |
| 0.097261873 | 0.035050125 | 0.24484674  | 0.071081187 |
| 0.280901671 | 0.126956403 | 0.188876181 | 0.09960523  |
| 0.13453319  | 0.126179809 | 0.12376532  | 0.006197336 |
| 0.065305399 | 0.173810433 | 0.009942035 | 0.178446202 |
| 0.055528393 | 0.151493243 | 0.256430793 | 0.080643039 |
| 0.023693176 | 0.001045643 | 0.149735091 | 0.024414901 |
| 0.320195277 | 0.008324613 | 0.073393789 | 0.003242989 |
| 0.174518419 | 0.09599803  | 0.10579844  | 0.008201657 |
| 0.111613106 | 0.000932673 | 0.207436505 | 0.062189076 |
| 0.133265896 | 0.20015336  | 0.064326169 | 0.046809576 |
| 0.011187109 | 0.112118776 | 0.193056696 | 0.102077726 |
| 0.127261074 | 0.009043434 | 0.116341994 | 0.047714958 |
| 0.038517785 | 0.040878325 | 0.248541644 | 0.044684568 |
| 0.241730295 | 0.022118783 | 0.160296872 | 0.031635516 |
| 0.102124618 | 0.038278607 | 0.160834093 | 0.027722086 |
| 0.157319133 | 0.083628809 | 0.062152176 | 0.063205033 |
| 0.110506121 | 0.04564911  | 0.019041913 | 0.276500454 |
| 0.025759299 | 0.052882114 | 0.056415813 | 0.134743417 |
| 0.047263876 | 0.196200282 | 0.093800179 | 0.106905447 |
| 0.113079241 | 0.011876284 | 0.138257687 | 0.061203644 |
| 0.002313776 | 0.043745431 | 0.338377642 | 0.0115964   |
| 0.092233064 | 0.013623531 | 0.00175783  | 0.03026582  |
| 0.211715727 | 0.03023179  |             |             |
| DUSP16      | 0.097022757 | 0.311832861 | 0.23315684  |
| 0.032376049 | 0.18707714  | 0.387676004 | 0.340104288 |
| 0.069889155 | 0.219504074 | 0.246053997 | 0.422270048 |
| 0.003362715 | 0.095790317 | 0.054066714 | 0.118466566 |
| 0.207636141 | 0.21358367  | 0.275554226 | 0.208966987 |
| 0.113650199 | 0.135001628 | 0.247459052 | 0.242062347 |
| 0.326829481 | 0.008597361 | 0.289167368 | 0.102523354 |
| 0.055121557 | 0.176209502 | 0.249234662 | 0.200279943 |
| 0.17618202  | 0.15322138  | 0.122898767 | 0.126638646 |
| 0.031090029 | 0.365436657 | 0.012329295 | 0.121084261 |
| 0.104875879 | 0.258349968 | 0.161851203 | 0.068269312 |
| 0.001193145 | 0.286060126 | 0.049320253 | 0.245764276 |
| 0.132674638 | 0.3444249   | 0.252640407 | 0.274691155 |
| 0.010699168 | 0.396238281 | 0.197026276 | 0.009922055 |
| 0.426022221 | 0.008294604 | 0.38891161  | 0.066661281 |
| 0.23336437  | 0.190347513 | 0.066253858 | 0.208517383 |
| 0.425928469 | 0.417845491 | 0.264812161 | 0.186436545 |
| 0.267532539 | 0.106215481 | 0.114541537 | 0.196853164 |
| 0.278343652 | 0.151605571 | 0.225790608 | 0.047623778 |
| 0.136207917 | 0.113712447 | 0.330034499 | 0.225622476 |
| 0.004386851 | 0.296725611 | 0.127751364 | 0.096151567 |
| 0.071014189 | 0.407225308 | 0.107616546 | 0.261153377 |

|             |             |             |             |
|-------------|-------------|-------------|-------------|
| 0.092518543 | 0.127407814 | 0.233129059 | 0.245067862 |
| 0.052951336 | 0.120623363 | 0.014976251 | 0.202808303 |
| 0.167482071 | 0.137548872 | 0.172942082 | 0.255932478 |
| 0.087517367 | 0.191689311 | 0.041878004 | 0.092867138 |
| 0.15105255  | 0.140538362 | 0.414925333 | 0.008075966 |
| 0.074685558 | 0.156066888 | 0.192984943 | 0.381974738 |
| 0.246131458 | 0.03000471  | 0.161721871 | 0.364383027 |
| 0.094275672 | 0.124054155 | 0.320145677 | 0.008027606 |
| 0.027515948 | 0.007199999 | 0.170107207 | 0.210913825 |
| 0.26963934  | 1           | 0.142411854 | 0.154687473 |
| 0.065085796 | 0.142865129 | 0.22411254  | 0.285197638 |
| 0.112393053 | 0.351374623 | 0.128960002 | 0.158018911 |
| 0.097016095 | 0.140582885 | 0.238430047 | 0.328562916 |
| 0.355407718 | 0.224803983 | 0.235257538 | 0.357228524 |
| 0.079944107 | 0.206995931 | 0.266487624 | 0.132966811 |
| 0.210016178 | 0.220510836 | 0.127509987 | 0.297566218 |
| 0.337385752 | 0.13780966  | 0.007248403 | 0.352124574 |
| 0.437500883 | 0.010149304 | 0.238200752 | 0.16626168  |
| 0.050993966 | 0.212249584 | 0.3285932   | 0.234472478 |
| 0.140824759 | 0.093290138 | 0.223224379 | 0.313495168 |
| 0.238911011 | 0.270812095 | 0.20506017  | 0.196767076 |
| 0.325649905 | 0.124048422 | 0.236759738 | 0.07987628  |
| 0.276140207 | 0.232543223 | 0.041177519 | 0.022812395 |
| 0.118537158 | 0.107977274 | 0.268947669 | 0.156790742 |
| 0.12907581  | 0.006680502 | 0.236482454 | 0.129511004 |
| 0.114204404 | 0.110915575 | 0.347047923 | 0.267524041 |
| 0.261005127 | 0.04422214  | 0.25548387  | 0.170688966 |
| 0.169030808 | 0.186395064 | 0.19846796  | 0.008696378 |
| 0.250683927 | 0.061376654 | 0.11579143  | 0.099301063 |
| 0.23183972  | 0.186255961 | 0.05184373  | 0.245584997 |
| 0.301081754 | 0.175873176 | 0.030436037 | 0.018678674 |
| 0.248540724 | 0.320809215 | 0.098017588 | 0.084555343 |
| 0.249781746 | 0.188866621 | 0.106525961 | 0.385757472 |
| 0.192661684 | 0.411978984 | 0.01604359  | 0.190118634 |
| 0.095202371 | 0.234050599 | 0.152315492 | 0.192557514 |
| 0.257470156 | 0.129748492 | 0.050879442 | 0.379664642 |
| 0.167715497 | 0.150574652 | 0.215933073 | 0.310528713 |
| 0.007324171 | 0.287221699 | 0.155306317 | 0.017527172 |
| 0.330165339 | 0.384784009 | 0.208883389 | 0.152866639 |
| 0.216274765 | 0.312105585 | 0.198879572 | 0.134732879 |
| 0.03197221  | 0.036799061 | 0.256593808 | 0.307006905 |
| 0.178519649 | 0.168108113 | 0.058580154 | 0.012176704 |
| 0.238373578 | 0.067684981 | 0.199586329 | 0.092979653 |
| 0.121003785 | 0.063929096 | 0.217034828 | 0.099197486 |
| 0.004596079 | 0.22824903  | 0.128421742 | 0.1212556   |
| 0.166734375 | 0.153532809 | 0.232536749 | 0.369325393 |
| 0.097882585 | 0.06716331  | 0.102866668 | 0.278071798 |
| 0.304344586 | 0.307174778 | 0.004404387 | 0.251077674 |
| 0.247152399 | 0.196441543 | 0.243577706 | 0.237705455 |
| 0.197850497 | 0.398978932 | 0.261156779 | 0.147051617 |
| 0.002456792 | 0.115654906 | 0.082235899 | 0.414865313 |
| 0.169680392 | 0.341501379 | 0.031279855 | 0.054397957 |
| 0.004452893 | 0.259709945 | 0.029065919 | 0.33104454  |
| 0.214894036 | 0.1747246   | 0.00257196  | 0.225336662 |

|             |             |             |             |
|-------------|-------------|-------------|-------------|
| 0.078776579 | 0.010202758 | 0.28481337  | 0.241250212 |
| 0.297961463 | 0.152481896 | 0.301287854 | 0.10276581  |
| 0.017691118 | 0.090158496 | 0.06883555  | 0.208036519 |
| 0.084368662 | 0.012448995 | 0.169534973 | 0.243767473 |
| 0.25549524  | 0.352248692 | 0.320705324 | 0.031132734 |
| 0.099129768 | 0.072559812 | 0.198318192 | 0.182526186 |
| 0.26942543  | 0.390369389 | 0.32803442  | 0.132619635 |
| 0.1555684   | 0.371253404 | 0.40415997  | 0.25990764  |
| 0.037877112 | 0.117066872 | 0.147409674 | 0.162174671 |
| 0.072181428 | 0.229858052 | 0.125180212 | 0.36025234  |
| 0.251894249 | 0.04059919  | 0.372433275 | 0.101550663 |
| 0.344198153 | 0.221719262 | 0.240279839 | 0.159940022 |
| 0.392719058 | 0.205740203 | 0.283817035 | 0.167993415 |
| 0.369326564 | 0.011419283 | 0.016320097 | 0.322043972 |
| 0.385027449 | 0.431733558 | 0.203965637 | 0.157150758 |
| 0.174545279 | 0.170796104 | 0.190365765 | 0.217650914 |
| 0.245225031 | 0.082644117 | 0.09410231  | 0.014178165 |
| 0.051219034 | 0.133081035 | 0.395431846 | 0.403455814 |
| 0.254597901 | 0.241920806 | 0.267756479 | 0.27151795  |
| 0.196530771 | 0.10269463  | 0.35948132  | 0.150716221 |
| 0.433672482 | 0.115500939 | 0.338906208 | 0.174938218 |
| 0.246382196 | 0.212058548 | 0.222553588 | 0.010895075 |
| 0.126088833 | 0.233393164 | 0.032593264 | 0.200566075 |
| 0.125441275 | 0.289667885 | 0.350492414 | 0.215938759 |
| 0.057505001 | 0.005375589 | 0.28017597  | 0.046094616 |
| 0.434848574 | 0.038294345 | 0.14455946  | 0.010782072 |
| 0.319514157 | 0.170372071 | 0.197948559 | 0.031748618 |
| 0.184392938 | 0.00203767  | 0.252881502 | 0.148666687 |
| 0.248342838 | 0.339032096 | 0.128370071 | 0.093923664 |
| 0.051861967 | 0.184257414 | 0.308214836 | 0.13816497  |
| 0.225167644 | 0.027484758 | 0.225834227 | 0.136417453 |
| 0.086952911 | 0.124700409 | 0.352132677 | 0.141887998 |
| 0.281422512 | 0.067583786 | 0.273938628 | 0.113327288 |
| 0.191656009 | 0.121797791 | 0.202266648 | 0.090623636 |
| 0.232590061 | 0.178183441 | 0.134128585 | 0.120583385 |
| 0.174334422 | 0.09335969  | 0.065867749 | 0.428731355 |
| 0.081883916 | 0.128109946 | 0.050281733 | 0.081144765 |
| 0.07412168  | 0.280901233 | 0.202691905 | 0.21862392  |
| 0.222952003 | 0.04778337  | 0.260557185 | 0.183281801 |
| 0.009983671 | 0.104552526 | 0.376521892 | 0.02754669  |
| 0.162762686 | 0.048140876 | 0.005972702 | 0.11394478  |
| 0.344564271 | 0.085364038 |             |             |
| DUSP19      | 0.032334463 | 0.131454395 | 0.029869742 |
| 0.022012991 | 0.028787184 | 0.139082679 | 0.148505684 |
| 0.028975134 | 0.00870016  | 0.057818691 | 0.182613987 |
| 1.51E-05    | 0.047953805 | 0.000736062 | 0.001567849 |
| 0.09272661  | 0.094278569 | 0.126851732 | 0.089283712 |
| 0.034891854 | 0.011018389 | 0.08793062  | 0.127652273 |
| 0.106758259 | 4.89E-05    | 0.135019575 | 0.016535116 |
| 0.023444864 | 0.082275296 | 0.067993422 | 0.031195541 |
| 0.072772756 | 0.079707428 | 0.027347306 | 0.017849878 |
| 0.008188209 | 0.152987781 | 0.000647413 | 0.065647455 |
| 0.044765718 | 0.108841412 | 0.076494904 | 0.000308368 |
| 0.000926261 | 0.081285709 | 0.018508423 | 0.096307473 |

|             |             |             |             |
|-------------|-------------|-------------|-------------|
| 0.03255512  | 0.127099748 | 0.075047922 | 0.110080046 |
| 0.000620476 | 0.150965271 | 0.069238966 | 0.00242802  |
| 0.183426929 | 0.002126774 | 0.155670891 | 0.013003238 |
| 0.034074036 | 0.044347297 | 0.021298492 | 0.078499493 |
| 0.159580146 | 0.180575463 | 0.11426357  | 0.007266111 |
| 0.071515219 | 0.041668869 | 0.056311376 | 0.11284692  |
| 0.111812734 | 0.039416386 | 0.030650771 | 0.01936608  |
| 0.061974968 | 0.053386895 | 0.10248257  | 0.030411836 |
| 2.33E-05    | 0.141257441 | 0.045935905 | 0.030692994 |
| 0.042520736 | 0.167890241 | 0.04077438  | 0.064188182 |
| 0.055615517 | 0.002965702 | 0.100681628 | 0.109375622 |
| 0.012609716 | 0.050770044 | 0.006288382 | 0.017202887 |
| 0.074903931 | 0.062478291 | 0.063734614 | 0.02955063  |
| 0.001064706 | 0.022784615 | 0.002073064 | 0.043522724 |
| 0.05166902  | 0.060010182 | 0.163172739 | 0.002319037 |
| 0.038650525 | 0.006620147 | 0.039995475 | 0.167602547 |
| 0.102884601 | 0.00049593  | 0.013159877 | 0.15536551  |
| 0.005388724 | 0.004087356 | 0.14781501  | 0.002216759 |
| 0.003601533 | 0.000113912 | 0.073418998 | 0.029851742 |
| 0.085000497 | 0.142411854 | 1           | 0.090618858 |
| 0.022908551 | 0.055278332 | 0.033903947 | 0.11928107  |
| 0.063171221 | 0.153858395 | 0.097551029 | 0.077951455 |
| 0.038337603 | 0.015989738 | 0.048474776 | 0.146860555 |
| 0.130938117 | 0.020440584 | 0.015950729 | 0.144855843 |
| 0.041270338 | 0.094972099 | 0.115160998 | 0.020595286 |
| 0.097398755 | 0.06268192  | 0.024198205 | 0.170080467 |
| 0.129744034 | 0.045879429 | 0.000278609 | 0.129681728 |
| 0.177752291 | 0.006121033 | 0.03240816  | 0.069387575 |
| 0.00890403  | 0.013860665 | 0.128787373 | 0.106285382 |
| 0.065190614 | 0.011488003 | 0.095371913 | 0.120809693 |
| 0.069393437 | 0.129651316 | 0.068367452 | 0.06530277  |
| 0.113831131 | 0.029929989 | 0.052942988 | 0.040696625 |
| 0.084637761 | 0.070471257 | 0.004310863 | 0.000250829 |
| 0.042809235 | 0.027514185 | 0.127957173 | 0.06167198  |
| 0.047550182 | 0.009372263 | 0.067246711 | 0.042735648 |
| 0.016656869 | 0.048977964 | 0.154922018 | 0.076219139 |
| 0.075954123 | 0.007631253 | 0.070257171 | 0.059646893 |
| 0.059397736 | 0.015445991 | 0.016776678 | 0.000111582 |
| 0.020426845 | 0.028241495 | 0.040174807 | 0.003750997 |
| 0.100013414 | 0.008406532 | 0.000891494 | 0.11242205  |
| 0.10820061  | 0.094841859 | 0.000342795 | 0.002312817 |
| 0.085933843 | 0.151050651 | 0.043777506 | 0.005808314 |
| 0.120057072 | 0.046069251 | 0.050679635 | 0.133841493 |
| 0.032858669 | 0.177799997 | 0.000749939 | 0.030468069 |
| 0.05182782  | 0.107741182 | 0.082228825 | 0.096606785 |
| 0.082343761 | 0.044710832 | 0.004064199 | 0.14460943  |
| 0.065790325 | 0.059259679 | 0.028885478 | 0.134388138 |
| 3.16E-05    | 0.11058649  | 0.078123897 | 0.000972193 |
| 0.156320603 | 0.175939049 | 0.027210177 | 0.03793784  |
| 0.093198512 | 0.131830937 | 0.071819387 | 0.066699122 |
| 0.002160026 | 0.000557405 | 0.100139294 | 0.106616285 |
| 0.081367338 | 0.064265901 | 0.022616783 | 0.000184752 |
| 0.114874942 | 0.026532489 | 0.080342886 | 0.048602183 |
| 0.059101726 | 0.027209843 | 0.063693862 | 0.033321307 |

|             |             |             |             |
|-------------|-------------|-------------|-------------|
| 2.90E-05    | 0.06892154  | 0.064964495 | 0.005115345 |
| 0.051697793 | 0.003149697 | 0.106547569 | 0.131678245 |
| 0.035656598 | 0.009960915 | 0.036796518 | 0.095717146 |
| 0.098747586 | 0.132284555 | 0.000165136 | 0.095412108 |
| 0.110316903 | 0.063472023 | 0.121620148 | 0.104026228 |
| 0.065804701 | 0.155358194 | 0.119901297 | 0.058163269 |
| 2.19E-05    | 0.057233976 | 0.045349709 | 0.146532336 |
| 0.083597498 | 0.110894463 | 0.009699263 | 0.030031114 |
| 2.56E-05    | 0.073123329 | 0.008527701 | 0.127284889 |
| 0.111477795 | 0.006217305 | 0.000107787 | 0.112664822 |
| 0.045298868 | 0.000230153 | 0.122066977 | 0.112326755 |
| 0.14596915  | 0.080646933 | 0.108786198 | 0.052168749 |
| 0.005587131 | 0.019040099 | 0.002200131 | 0.122639404 |
| 0.032993056 | 0.000112179 | 0.035716848 | 0.099498988 |
| 0.111440273 | 0.15489734  | 0.106341525 | 0.000836901 |
| 0.040493881 | 0.018377132 | 0.110937481 | 0.011651646 |
| 0.114113119 | 0.139337169 | 0.150664388 | 0.062822888 |
| 0.065144188 | 0.168096153 | 0.159209657 | 0.113447579 |
| 0.003427196 | 0.060625067 | 0.068377254 | 0.007775933 |
| 0.030954864 | 0.106510414 | 0.069342094 | 0.149901141 |
| 0.084084325 | 0.004837103 | 0.133192941 | 0.031549125 |
| 0.164888152 | 0.103514134 | 0.031990419 | 0.019062256 |
| 0.168609333 | 0.034069208 | 0.080828073 | 0.055732742 |
| 0.114647163 | 0.001493975 | 0.000990308 | 0.104283977 |
| 0.166047384 | 0.180897313 | 0.095057248 | 0.032059551 |
| 0.085379363 | 0.015339071 | 0.074185494 | 0.020074079 |
| 0.076383971 | 0.043331264 | 0.043174688 | 0.001064782 |
| 0.001217335 | 0.006021297 | 0.172198478 | 0.156940482 |
| 0.062658368 | 0.074586478 | 0.156663971 | 0.160198826 |
| 0.092816228 | 0.028582555 | 0.139816615 | 0.054085347 |
| 0.170168959 | 0.008246191 | 0.137514484 | 0.062372338 |
| 0.087593841 | 0.089259394 | 0.094918179 | 0.000103429 |
| 0.05598072  | 0.066914707 | 0.008834277 | 0.124935169 |
| 0.055127088 | 0.096733453 | 0.154794665 | 0.033022423 |
| 0.001825331 | 0.00022324  | 0.091689891 | 0.030607276 |
| 0.157428325 | 0.007730414 | 0.056382108 | 0.002222444 |
| 0.131906484 | 0.066564726 | 0.076622716 | 0.007996432 |
| 0.085765299 | 0.000180615 | 0.064356489 | 0.005278552 |
| 0.086625269 | 0.119681525 | 0.047411904 | 0.035599005 |
| 0.007653684 | 0.086153926 | 0.126989076 | 0.090634884 |
| 0.108651328 | 0.001504065 | 0.103975203 | 0.02488428  |
| 0.042752267 | 0.015489411 | 0.116496272 | 0.01260915  |
| 0.116800883 | 0.00068931  | 0.052164305 | 0.007931842 |
| 0.09570762  | 0.012066941 | 0.12437227  | 0.013804093 |
| 0.034551914 | 0.07357919  | 0.056110622 | 0.057105599 |
| 0.093436215 | 0.043277603 | 0.027143322 | 0.166921771 |
| 0.004874643 | 0.024828997 | 0.017199872 | 0.003379443 |
| 0.007061295 | 0.085173707 | 0.072227449 | 0.093362345 |
| 0.098996842 | 0.004448289 | 0.045738338 | 0.025006203 |
| 0.000712669 | 0.04391233  | 0.175649032 | 0.005860001 |
| 0.063386445 | 0.006481583 | 0.000917485 | 0.014629732 |
| 0.122486254 | 0.012061235 |             |             |
| DUSP6       | 0.178089963 | 0.488483751 | 0.043083707 |
| 0.063243555 | 0.132636137 | 0.158590498 | 0.180759148 |

|             |             |             |             |
|-------------|-------------|-------------|-------------|
| 0.187626839 | 0.060289342 | 0.135746276 | 0.249561396 |
| 0.00024416  | 0.353023443 | 0.004304409 | 0.035407426 |
| 0.486248201 | 0.514498557 | 0.259546219 | 0.478016028 |
| 0.15508279  | 0.185315878 | 0.211094897 | 0.266813197 |
| 0.176970295 | 0.000335977 | 0.11728614  | 0.089653598 |
| 0.205082752 | 0.47518131  | 0.115135122 | 0.200942963 |
| 0.419661407 | 0.469544244 | 0.324236794 | 0.330485444 |
| 0.282531979 | 0.426164058 | 0.116804434 | 0.399265744 |
| 0.369175839 | 0.203066594 | 0.441511119 | 0.006002926 |
| 0.018110912 | 0.084146473 | 0.172348547 | 0.230553608 |
| 0.148159947 | 0.144867542 | 0.096788426 | 0.169908754 |
| 0.120399909 | 0.269877999 | 0.271322441 | 0.136481446 |
| 0.387642692 | 0.016604133 | 0.426645905 | 0.10757075  |
| 0.039538359 | 0.176788063 | 0.207712726 | 0.253259367 |
| 0.17462192  | 0.414040751 | 0.509958578 | 0.031668651 |
| 0.051069076 | 0.262271867 | 0.375786571 | 0.338694132 |
| 0.431495755 | 0.24611951  | 0.231102333 | 0.274915381 |
| 0.354299817 | 0.356543993 | 0.168385727 | 0.102992819 |
| 0.000348839 | 0.132068166 | 0.359868252 | 0.198264857 |
| 0.284828103 | 0.281588279 | 0.214096945 | 0.203130116 |
| 0.287085815 | 0.008998513 | 0.225888024 | 0.517588585 |
| 0.024335855 | 0.338810095 | 0.010263425 | 0.085643499 |
| 0.367354147 | 0.446985307 | 0.258694404 | 0.060543011 |
| 0.005957689 | 0.058580542 | 0.052823225 | 0.381052993 |
| 0.233469212 | 0.303461086 | 0.367100459 | 0.080783238 |
| 0.349372984 | 0.087463961 | 0.238401145 | 0.441004977 |
| 0.45439795  | 0.002338413 | 0.070845526 | 0.152306238 |
| 0.268894539 | 0.177842238 | 0.169196798 | 0.027303979 |
| 0.011312119 | 0.004151436 | 0.436321713 | 0.080790676 |
| 0.100306715 | 0.154687473 | 0.090618858 | 1           |
| 0.17884375  | 0.377555907 | 0.133095452 | 0.201329764 |
| 0.357769072 | 0.203432037 | 0.358513458 | 0.373399102 |
| 0.343870234 | 0.121434261 | 0.082149747 | 0.45136235  |
| 0.354641571 | 0.050290384 | 0.048999842 | 0.215959037 |
| 0.350362834 | 0.467249021 | 0.515408481 | 0.158606253 |
| 0.264638819 | 0.13373488  | 0.239535687 | 0.30398265  |
| 0.170552285 | 0.171917951 | 0.043834819 | 0.244091731 |
| 0.381885622 | 0.025871931 | 0.039321578 | 0.34348396  |
| 0.113168854 | 0.196056952 | 0.397521123 | 0.39766711  |
| 0.293697797 | 0.076060541 | 0.216752141 | 0.195084876 |
| 0.165938784 | 0.191558051 | 0.246512144 | 0.210189626 |
| 0.186312828 | 0.25551889  | 0.034802855 | 0.356493329 |
| 0.076665252 | 0.179773893 | 0.206089548 | 0.050985918 |
| 0.220481814 | 0.176995792 | 0.421966972 | 0.241479667 |
| 0.283556402 | 0.017286754 | 0.138578621 | 0.193715186 |
| 0.204587092 | 0.347089455 | 0.500851646 | 0.068971299 |
| 0.135513083 | 0.212395861 | 0.081790918 | 0.312949615 |
| 0.300420669 | 0.179971671 | 0.166059415 | 0.000327847 |
| 0.100951283 | 0.272525803 | 0.259809347 | 0.017902469 |
| 0.226368158 | 0.058875606 | 0.044266666 | 0.451268958 |
| 0.128443064 | 0.427380213 | 0.006654336 | 0.069542168 |
| 0.170958044 | 0.377861187 | 0.315157597 | 0.135521745 |
| 0.422976544 | 0.218313077 | 0.406791084 | 0.315708439 |
| 0.239061111 | 0.283345045 | 0.096177812 | 0.146189666 |

|             |             |             |             |
|-------------|-------------|-------------|-------------|
| 0.30553598  | 0.474668031 | 0.428059941 | 0.410476225 |
| 0.177289854 | 0.217643594 | 0.186684243 | 0.171340915 |
| 0.21778905  | 0.233534145 | 0.043913921 | 0.484010491 |
| 0.000177946 | 0.210786682 | 0.332904973 | 0.097188974 |
| 0.493356947 | 0.188181545 | 0.03444127  | 0.11702337  |
| 0.488094741 | 0.478628782 | 0.339837307 | 0.422525145 |
| 0.115945332 | 0.002455893 | 0.422718448 | 0.300599445 |
| 0.491645461 | 0.26784449  | 0.338454283 | 0.03137727  |
| 0.472242078 | 0.179593305 | 0.280669362 | 0.252028158 |
| 0.322279939 | 0.291180443 | 0.134401593 | 0.199299033 |
| 0.006666843 | 0.167306659 | 0.274342625 | 0.195442402 |
| 0.260324458 | 0.107702244 | 0.445140733 | 0.215119041 |
| 0.351693803 | 0.185217833 | 0.3534093   | 0.066856355 |
| 0.115329228 | 0.490103493 | 0.047217851 | 0.394081426 |
| 0.50913882  | 0.212541195 | 0.49290487  | 0.485756874 |
| 0.175232447 | 0.329367461 | 0.456237712 | 0.376834064 |
| 0.000171188 | 0.424322658 | 0.350425669 | 0.260639881 |
| 0.446311357 | 0.18152424  | 0.108961945 | 0.312563916 |
| 0.000378153 | 0.088060917 | 0.245412665 | 0.437997462 |
| 0.480795392 | 0.020238049 | 0.057191521 | 0.396003409 |
| 0.315877434 | 0.027879736 | 0.501571291 | 0.24030152  |
| 0.464100764 | 0.296347479 | 0.136674953 | 0.39312222  |
| 0.199185923 | 0.211814765 | 0.038431363 | 0.323301195 |
| 0.281299308 | 0.035766618 | 0.121653247 | 0.4856932   |
| 0.375330841 | 0.307383501 | 0.157560004 | 0.011782623 |
| 0.331253626 | 0.236505732 | 0.41083012  | 0.064697311 |
| 0.331064752 | 0.27851391  | 0.431753781 | 0.405820124 |
| 0.28043655  | 0.357368134 | 0.308442861 | 0.409554657 |
| 0.157035287 | 0.379668298 | 0.409002238 | 0.046545712 |
| 0.214358451 | 0.489957822 | 0.330050497 | 0.127791818 |
| 0.217878901 | 0.174830748 | 0.131219304 | 0.154724132 |
| 0.4426761   | 0.48772886  | 0.038019122 | 0.072527113 |
| 0.372060886 | 0.176990822 | 0.081750904 | 0.200324711 |
| 0.16589708  | 0.117340258 | 0.06031019  | 0.248675706 |
| 0.448449422 | 0.21819992  | 0.436885902 | 0.185601711 |
| 0.457852969 | 0.023208694 | 0.351653971 | 0.187836342 |
| 0.15356947  | 0.252583125 | 0.354086027 | 0.053646443 |
| 0.023222866 | 0.058223083 | 0.363728239 | 0.356697719 |
| 0.04737463  | 0.104807115 | 0.194546367 | 0.283961465 |
| 0.492659629 | 0.286352131 | 0.172244334 | 0.184198094 |
| 0.363045669 | 0.161598411 | 0.440601301 | 0.181117127 |
| 0.296841478 | 0.259550749 | 0.376563336 | 0.006740869 |
| 0.306536178 | 0.155713397 | 0.08662365  | 0.32443838  |
| 0.420715434 | 0.089800864 | 0.313366272 | 0.083436955 |
| 0.151557205 | 0.001081986 | 0.21837867  | 0.318276181 |
| 0.195808044 | 0.157703097 | 0.197550631 | 0.17252635  |
| 0.500819512 | 0.233407791 | 0.317820392 | 0.182476041 |
| 0.28848329  | 0.04820766  | 0.147755212 | 0.016548688 |
| 0.265130431 | 0.279404926 | 0.2363598   | 0.214226245 |
| 0.080212991 | 0.329716886 | 0.26335908  | 0.359533612 |
| 0.491857564 | 0.139326564 | 0.514023867 | 0.153948254 |
| 0.380477027 | 0.235538247 | 0.162632416 | 0.189029805 |
| 0.176087369 | 0.071454101 | 0.078597491 | 0.062710105 |
| 0.501042603 | 0.186252651 | 0.322874051 | 0.169570028 |

|             |             |             |             |
|-------------|-------------|-------------|-------------|
| 0.0387567   | 0.271357933 | 0.320550368 | 0.366086178 |
| 0.29393486  | 0.28823515  | 0.217717814 | 0.335897275 |
| 0.171499539 | 0.146537136 | 0.112162667 | 0.068272203 |
| 0.276815654 | 0.137896258 | 0.324673444 | 0.371298119 |
| 0.491812658 | 0.14189103  | 0.05945048  | 0.062185581 |
| 0.079569865 | 0.293606924 | 0.214168498 | 0.219117705 |
| 0.28360945  | 0.171406434 | 0.000210546 | 0.09961131  |
| 0.270595649 | 0.284165796 |             |             |
| DYNC1LI2    | 0.198746063 | 0.364143449 | 0.029707313 |
| 0.005634375 | 0.023973273 | 0.110843572 | 0.073303781 |
| 0.175342511 | 0.036282209 | 0.029944302 | 0.191512603 |
| 0.004796257 | 0.299350341 | 0.014808488 | 0.027857736 |
| 0.420514738 | 0.40408365  | 0.115973394 | 0.421519222 |
| 0.17075807  | 0.026158407 | 0.259615948 | 0.162480508 |
| 0.100977473 | 0.003409191 | 0.02780555  | 0.008551774 |
| 0.141676867 | 0.417613629 | 0.082957426 | 0.076572834 |
| 0.383001102 | 0.330801347 | 0.078597897 | 0.055179126 |
| 0.0437654   | 0.344125628 | 0.02819194  | 0.254196369 |
| 0.334009874 | 0.048128046 | 0.313703791 | 0.006695359 |
| 0.00038941  | 0.026189088 | 0.152201643 | 0.231863616 |
| 0.123430234 | 0.097289305 | 0.075497897 | 0.035066288 |
| 0.050936948 | 0.215798343 | 0.344279133 | 0.056000863 |
| 0.269947768 | 0.000585841 | 0.309606745 | 0.127317558 |
| 0.023328763 | 0.103545342 | 0.132718931 | 0.245602604 |
| 0.11857805  | 0.291642337 | 0.385150994 | 0.010456859 |
| 0.022324379 | 0.17175115  | 0.280968585 | 0.165682062 |
| 0.338810082 | 0.091373453 | 0.062172763 | 0.085027249 |
| 0.240757301 | 0.320266037 | 0.15401845  | 0.06676642  |
| 0.001622801 | 0.039567413 | 0.054776674 | 0.264146465 |
| 0.198808135 | 0.226472721 | 0.248623332 | 0.041576209 |
| 0.166250392 | 0.011013473 | 0.194435083 | 0.404087824 |
| 0.007289217 | 0.300589854 | 0.004968176 | 0.061695232 |
| 0.330885163 | 0.385082726 | 0.261146701 | 0.018960536 |
| 0.009447706 | 0.059026279 | 0.117057798 | 0.351023184 |
| 0.187733532 | 0.160334002 | 0.254827846 | 0.052032072 |
| 0.289454952 | 0.060969936 | 0.082877439 | 0.328840235 |
| 0.386445227 | 0.011409057 | 0.071548164 | 0.103590562 |
| 0.062814323 | 0.02151165  | 0.085645506 | 0.031291953 |
| 0.008460843 | 0.047035864 | 0.381847837 | 0.076865225 |
| 0.020822037 | 0.065085796 | 0.022908551 | 0.17884375  |
| 1           | 0.386545013 | 0.022871868 | 0.07064287  |
| 0.242477932 | 0.088611761 | 0.107673575 | 0.259925926 |
| 0.070881131 | 0.107497233 | 0.058454994 | 0.305826029 |
| 0.337638153 | 0.022778687 | 0.031537302 | 0.178286354 |
| 0.267375464 | 0.409053274 | 0.415849455 | 0.136531044 |
| 0.050875287 | 0.107622423 | 0.0719527   | 0.176878817 |
| 0.097632387 | 0.200786648 | 0.065802153 | 0.220435524 |
| 0.282246777 | 0.021187414 | 0.023533221 | 0.31477146  |
| 0.007746171 | 0.049125741 | 0.323368777 | 0.276217373 |
| 0.188348044 | 0.006546828 | 0.051430951 | 0.094071387 |
| 0.14360315  | 0.079443685 | 0.225956566 | 0.044116591 |
| 0.177915429 | 0.072276748 | 0.017296431 | 0.285549635 |
| 0.045684691 | 0.191873315 | 0.06995985  | 0.018587289 |
| 0.243146751 | 0.144571171 | 0.306804977 | 0.21699134  |



|             |             |             |             |
|-------------|-------------|-------------|-------------|
| 0.274102228 | 0.000817903 | 0.032073856 | 0.224121704 |
| 0.07880963  | 0.363040762 | 0.347245161 | 0.044672646 |
| 0.145321704 | 0.077734109 | 0.058848083 | 0.060356281 |
| 0.368174964 | 0.056390642 | 0.041592975 | 0.000947682 |
| 0.041928547 | 0.092001908 | 0.140181952 | 0.041124274 |
| 0.051852181 | 0.043619592 | 0.068972949 | 0.327466498 |
| 0.085086934 | 0.273724078 | 0.041683597 | 0.074566907 |
| 0.075510916 | 0.21508138  | 0.096080275 | 0.113899619 |
| 0.24197003  | 0.100355324 | 0.368409082 | 0.254397749 |
| 0.055713518 | 0.203366907 | 0.055072685 | 0.089060285 |
| 0.191956497 | 0.315966533 | 0.303405078 | 0.299709383 |
| 0.076192959 | 0.283999479 | 0.132019942 | 0.156258531 |
| 0.198281739 | 0.194802519 | 0.044582769 | 0.381563411 |
| 0.000905171 | 0.176025194 | 0.156725808 | 0.05756947  |
| 0.338050607 | 0.095285357 | 0.032868626 | 0.1164935   |
| 0.425188232 | 0.381538965 | 0.381851729 | 0.349976093 |
| 0.135673507 | 0.01507579  | 0.404139874 | 0.233258369 |
| 0.408865354 | 0.111136777 | 0.060529393 | 0.048225749 |
| 0.370013923 | 0.212446834 | 0.20615111  | 0.17597294  |
| 0.161464755 | 0.090864476 | 0.107816377 | 0.280588622 |
| 0.010782266 | 0.069566783 | 0.228637906 | 0.033291888 |
| 0.068270828 | 0.060538258 | 0.285792133 | 0.193077108 |
| 0.077635958 | 0.098464388 | 0.061814977 | 0.022023274 |
| 0.067691397 | 0.37394085  | 0.012456188 | 0.392660708 |
| 0.419976368 | 0.164020692 | 0.328481846 | 0.428799451 |
| 0.149180887 | 0.229404128 | 0.336007918 | 0.385769423 |
| 0.002754055 | 0.337907689 | 0.254288639 | 0.233806317 |
| 0.346564267 | 0.138135641 | 0.123769515 | 0.10593191  |
| 0.001248977 | 0.063663139 | 0.057611199 | 0.385156011 |
| 0.328253842 | 0.008917485 | 0.010585943 | 0.288846033 |
| 0.230734631 | 0.017860511 | 0.410848393 | 0.117997669 |
| 0.304779651 | 0.149617078 | 0.044972321 | 0.286392524 |
| 0.052441269 | 0.112055104 | 0.006687715 | 0.195450983 |
| 0.120120839 | 0.048085209 | 0.013445832 | 0.412015304 |
| 0.33965612  | 0.196371473 | 0.111785452 | 0.002846378 |
| 0.344708565 | 0.04484923  | 0.251825634 | 0.061797283 |
| 0.3289166   | 0.206178544 | 0.318019751 | 0.283862622 |
| 0.203423381 | 0.265240796 | 0.24317814  | 0.308407604 |
| 0.022115466 | 0.313081201 | 0.362737672 | 0.018648338 |
| 0.220009371 | 0.339714126 | 0.119199807 | 0.071219687 |
| 0.230810685 | 0.014684902 | 0.096613331 | 0.195581562 |
| 0.29941035  | 0.338187724 | 0.018568335 | 0.092002126 |
| 0.248104348 | 0.090078515 | 0.029155753 | 0.126136723 |
| 0.154095844 | 0.070700028 | 0.072288635 | 0.218895757 |
| 0.318481494 | 0.14800148  | 0.341709683 | 0.029829092 |
| 0.354803819 | 0.030262006 | 0.337400103 | 0.06923773  |
| 0.153497613 | 0.203312457 | 0.338163144 | 0.110495071 |
| 0.007860057 | 0.074781255 | 0.224536742 | 0.273084137 |
| 0.02804537  | 0.090288962 | 0.078835986 | 0.11600714  |
| 0.392182516 | 0.105632313 | 0.142897918 | 0.160076388 |
| 0.272647422 | 0.015328321 | 0.377563485 | 0.16604826  |
| 0.296512219 | 0.079396238 | 0.288593285 | 0.002497872 |
| 0.218935557 | 0.039144578 | 0.137326399 | 0.102319374 |
| 0.377490434 | 0.042759022 | 0.180339731 | 0.066229042 |

|             |             |             |             |
|-------------|-------------|-------------|-------------|
| 0.04542005  | 0.005567433 | 0.24512667  | 0.088893477 |
| 0.159750613 | 0.115110515 | 0.17153573  | 0.034995387 |
| 0.401790967 | 0.192957295 | 0.301752694 | 0.078928161 |
| 0.087713361 | 0.003771609 | 0.030600977 | 0.017496596 |
| 0.28101871  | 0.246349461 | 0.241881834 | 0.164550281 |
| 0.124900974 | 0.187698314 | 0.21701926  | 0.101578956 |
| 0.322433096 | 0.071871772 | 0.401381446 | 0.104988042 |
| 0.299330135 | 0.116784624 | 0.121640596 | 0.107519574 |
| 0.045357541 | 0.044455998 | 0.034232307 | 0.092481726 |
| 0.346508576 | 0.092969902 | 0.115730886 | 0.112877429 |
| 0.015113899 | 0.101743238 | 0.300575332 | 0.253855941 |
| 0.197089778 | 0.258330191 | 0.14348499  | 0.255977799 |
| 0.082674065 | 0.106367848 | 0.008577099 | 0.004347381 |
| 0.045924648 | 0.04816561  | 0.36768753  | 0.360982583 |
| 0.396768069 | 0.095186952 | 0.032989714 | 0.066607771 |
| 0.041866263 | 0.31815414  | 0.104211781 | 0.034457256 |
| 0.188605623 | 0.088342617 | 0.001034395 | 0.110418998 |
| 0.228114519 | 0.099895219 |             |             |
| E2F2        | 0.393377771 | 0.404274569 | 0.049078943 |
| 0.016600613 | 0.069694859 | 0.175759385 | 0.153363571 |
| 0.398520016 | 0.09478748  | 0.092535399 | 0.247529953 |
| 0.003940341 | 0.421515843 | 0.019440153 | 0.071691006 |
| 0.461686837 | 0.466673029 | 0.250327634 | 0.466420521 |
| 0.348608438 | 0.102604052 | 0.343015336 | 0.306124509 |
| 0.196940387 | 0.003354007 | 0.075952853 | 0.029566116 |
| 0.415145433 | 0.468303133 | 0.16844101  | 0.213194447 |
| 0.438691965 | 0.431869858 | 0.332836308 | 0.240841172 |
| 0.230944157 | 0.372183479 | 0.144009101 | 0.419182362 |
| 0.427235455 | 0.150083472 | 0.440401475 | 0.015788051 |
| 0.002429729 | 0.067016915 | 0.381508479 | 0.350244004 |
| 0.32141288  | 0.163141566 | 0.140297679 | 0.113491284 |
| 0.207763389 | 0.281533386 | 0.41052473  | 0.204222319 |
| 0.318057694 | 0.002714996 | 0.3581571   | 0.326065152 |
| 0.050180213 | 0.289893675 | 0.411690624 | 0.383876527 |
| 0.181221855 | 0.334443918 | 0.430305995 | 0.021655154 |
| 0.050662737 | 0.433052755 | 0.426420827 | 0.337832778 |
| 0.410698006 | 0.272084151 | 0.218144787 | 0.386157433 |
| 0.428577462 | 0.435659414 | 0.238432647 | 0.148313585 |
| 0.001485839 | 0.096686813 | 0.236636534 | 0.414759933 |
| 0.414151887 | 0.281286886 | 0.423494305 | 0.149800651 |
| 0.403839526 | 0.015720243 | 0.330718773 | 0.450621691 |
| 0.015911615 | 0.43668754  | 0.008719308 | 0.134593079 |
| 0.437284503 | 0.463737539 | 0.406463834 | 0.047404704 |
| 0.013426751 | 0.120661222 | 0.228406409 | 0.433837273 |
| 0.396526089 | 0.404275952 | 0.318210418 | 0.242896533 |
| 0.399139387 | 0.176587751 | 0.292260908 | 0.361609586 |
| 0.425485449 | 0.009753451 | 0.167559545 | 0.162851607 |
| 0.315507399 | 0.098266861 | 0.164431459 | 0.047028783 |
| 0.007388995 | 0.050389166 | 0.441210466 | 0.144155498 |
| 0.062585294 | 0.142865129 | 0.055278332 | 0.377555907 |
| 0.386545013 | 1           | 0.07552946  | 0.181780265 |
| 0.420230917 | 0.178445281 | 0.317420774 | 0.429098212 |
| 0.294276657 | 0.277336886 | 0.125699665 | 0.377216053 |
| 0.362869771 | 0.047573148 | 0.06590362  | 0.257589999 |

|             |             |             |             |
|-------------|-------------|-------------|-------------|
| 0.406518604 | 0.438565859 | 0.450600882 | 0.303223974 |
| 0.176076021 | 0.216524885 | 0.27927156  | 0.29768112  |
| 0.180302783 | 0.363033239 | 0.14947639  | 0.293897621 |
| 0.31911105  | 0.042549121 | 0.049642539 | 0.44365059  |
| 0.029581587 | 0.185247467 | 0.381614443 | 0.407492836 |
| 0.408402765 | 0.024284011 | 0.160968538 | 0.193531122 |
| 0.26866868  | 0.182285316 | 0.391016728 | 0.152693692 |
| 0.26721375  | 0.272568398 | 0.031938137 | 0.404167058 |
| 0.09203167  | 0.314277178 | 0.352952599 | 0.082389423 |
| 0.437620926 | 0.364028486 | 0.399863902 | 0.40372521  |
| 0.432302277 | 0.001999889 | 0.091226244 | 0.397968008 |
| 0.283714234 | 0.429176529 | 0.388174828 | 0.086149827 |
| 0.23090933  | 0.365982459 | 0.116415414 | 0.240347582 |
| 0.430389982 | 0.176646282 | 0.15263389  | 0.000653447 |
| 0.097390567 | 0.360117028 | 0.406963318 | 0.064605145 |
| 0.155164073 | 0.103714592 | 0.16623478  | 0.415933745 |
| 0.152029753 | 0.415471279 | 0.046938058 | 0.274085764 |
| 0.205554671 | 0.331603576 | 0.321383514 | 0.309308262 |
| 0.378162759 | 0.247380428 | 0.445807872 | 0.324293105 |
| 0.200983476 | 0.269527608 | 0.277223407 | 0.2617732   |
| 0.424866809 | 0.421577491 | 0.431893594 | 0.418201544 |
| 0.198809798 | 0.420225652 | 0.316213169 | 0.217825285 |
| 0.377471444 | 0.384026372 | 0.070905088 | 0.40927668  |
| 0.000969448 | 0.28987847  | 0.367423564 | 0.296550629 |
| 0.388523602 | 0.166299686 | 0.058649243 | 0.255379153 |
| 0.46970985  | 0.410387689 | 0.431375165 | 0.432994522 |
| 0.313244193 | 0.015140114 | 0.427527396 | 0.350438427 |
| 0.471564473 | 0.330405077 | 0.280664553 | 0.148200263 |
| 0.426558077 | 0.419068907 | 0.374196906 | 0.410591176 |
| 0.395722386 | 0.366803198 | 0.217399713 | 0.423160018 |
| 0.031397958 | 0.198003445 | 0.403310515 | 0.147867166 |
| 0.242822985 | 0.168325146 | 0.406400513 | 0.263360346 |
| 0.315557696 | 0.330052626 | 0.275845794 | 0.052484871 |
| 0.131314913 | 0.408860904 | 0.05852458  | 0.425565051 |
| 0.452931566 | 0.335927949 | 0.414921051 | 0.455819639 |
| 0.290223591 | 0.30537341  | 0.413726589 | 0.442036398 |
| 0.001987736 | 0.426157846 | 0.407583578 | 0.280596861 |
| 0.428941461 | 0.229480361 | 0.35435079  | 0.397612767 |
| 0.001890896 | 0.123065404 | 0.254904255 | 0.401336273 |
| 0.419129873 | 0.019264556 | 0.070333918 | 0.404340959 |
| 0.409884619 | 0.061332157 | 0.438028027 | 0.254086136 |
| 0.384425199 | 0.35193507  | 0.116323991 | 0.422079051 |
| 0.249671268 | 0.391785646 | 0.01839383  | 0.350628389 |
| 0.40111153  | 0.185211139 | 0.047608055 | 0.455953282 |
| 0.402806301 | 0.300930067 | 0.19989322  | 0.006698638 |
| 0.422360819 | 0.164812877 | 0.399339716 | 0.096705547 |
| 0.388375909 | 0.290642517 | 0.377334377 | 0.435603515 |
| 0.408540564 | 0.329555615 | 0.301146461 | 0.403581043 |
| 0.09143804  | 0.426013004 | 0.431812441 | 0.037286418 |
| 0.423670637 | 0.428762503 | 0.33583097  | 0.12196093  |
| 0.348886751 | 0.058540922 | 0.150656821 | 0.375858497 |
| 0.364146591 | 0.423880824 | 0.040893815 | 0.170017717 |
| 0.321198638 | 0.258617299 | 0.074319739 | 0.311269803 |
| 0.224171633 | 0.238059811 | 0.262293799 | 0.319303654 |

|             |             |             |             |
|-------------|-------------|-------------|-------------|
| 0.362876692 | 0.211793892 | 0.423154638 | 0.105308768 |
| 0.438230581 | 0.045424519 | 0.435087356 | 0.200830655 |
| 0.252967049 | 0.404907084 | 0.418914431 | 0.20082422  |
| 0.020364178 | 0.133715106 | 0.30471687  | 0.327678588 |
| 0.054408179 | 0.162452121 | 0.178058295 | 0.247811355 |
| 0.445746934 | 0.354830339 | 0.211737896 | 0.321189348 |
| 0.315618088 | 0.067149136 | 0.395452443 | 0.31751809  |
| 0.390968785 | 0.245566594 | 0.414283255 | 0.009807546 |
| 0.43200912  | 0.115658686 | 0.331138088 | 0.264259795 |
| 0.460196196 | 0.09347009  | 0.291276848 | 0.149125811 |
| 0.158723182 | 0.005598357 | 0.330690979 | 0.346226476 |
| 0.213058664 | 0.367432082 | 0.342444866 | 0.204982768 |
| 0.424472892 | 0.362529565 | 0.4104818   | 0.355629826 |
| 0.290213542 | 0.022240766 | 0.101780169 | 0.029051653 |
| 0.378995598 | 0.330711656 | 0.434048479 | 0.401734518 |
| 0.30559581  | 0.381957291 | 0.319337359 | 0.312237419 |
| 0.419935416 | 0.168498323 | 0.450916146 | 0.321034634 |
| 0.409889629 | 0.34684482  | 0.201329132 | 0.306572046 |
| 0.131856667 | 0.150303785 | 0.090821386 | 0.199975681 |
| 0.431378992 | 0.29996994  | 0.289858095 | 0.334192814 |
| 0.029431472 | 0.297489322 | 0.441117542 | 0.432740289 |
| 0.370350292 | 0.414965573 | 0.389216596 | 0.305244671 |
| 0.341904726 | 0.321960839 | 0.034355187 | 0.018524525 |
| 0.210261402 | 0.137874937 | 0.427172352 | 0.427561828 |
| 0.445433413 | 0.365309331 | 0.07291056  | 0.137072663 |
| 0.201076878 | 0.430160821 | 0.187584424 | 0.14585916  |
| 0.397066464 | 0.403609012 | 0.000629406 | 0.270597861 |
| 0.319360095 | 0.342145572 |             |             |
| ECE1        | 0.035435551 | 0.199765348 | 0.032338791 |
| 0.008172505 | 0.136472349 | 0.241389538 | 0.33789626  |
| 0.027361529 | 0.02652817  | 0.063539134 | 0.283861058 |
| 7.30E-05    | 0.066406651 | 0.002895995 | 0.025468793 |
| 0.115324481 | 0.13190719  | 0.305490186 | 0.127450585 |
| 0.044667982 | 0.023313319 | 0.11877956  | 0.13109531  |
| 0.222110524 | 0.000248576 | 0.22433606  | 0.017172037 |
| 0.024673557 | 0.101277576 | 0.127163547 | 0.027935476 |
| 0.090463026 | 0.10392253  | 0.047312113 | 0.066651611 |
| 0.012722549 | 0.229542437 | 0.010084737 | 0.100959407 |
| 0.061036091 | 0.173578628 | 0.104964996 | 0.007969519 |
| 0.000484091 | 0.161472876 | 0.016580069 | 0.116859607 |
| 0.056200011 | 0.200212999 | 0.147841751 | 0.228483012 |
| 0.001503665 | 0.261394745 | 0.094503191 | 0.001719364 |
| 0.316377043 | 0.001299101 | 0.261966728 | 0.013618405 |
| 0.075948774 | 0.103704504 | 0.02963878  | 0.102368607 |
| 0.325824811 | 0.300239413 | 0.174970434 | 0.043085291 |
| 0.13698648  | 0.060778751 | 0.062605813 | 0.143179843 |
| 0.167443278 | 0.019813992 | 0.070551703 | 0.043272821 |
| 0.085068592 | 0.062875348 | 0.222483638 | 0.06361243  |
| 0.000146117 | 0.279583698 | 0.089950188 | 0.040220288 |
| 0.049161849 | 0.263521367 | 0.050339147 | 0.179597369 |
| 0.046493909 | 0.013095547 | 0.128185012 | 0.152605253 |
| 0.007695937 | 0.080288642 | 0.003544514 | 0.041854137 |
| 0.090426574 | 0.076258649 | 0.077474092 | 0.058549555 |
| 0.010074977 | 0.048589535 | 0.002511079 | 0.052730727 |

|             |             |             |             |
|-------------|-------------|-------------|-------------|
| 0.082983026 | 0.091418185 | 0.308565615 | 0.004109341 |
| 0.048874503 | 0.013062181 | 0.100023298 | 0.238769025 |
| 0.134464589 | 0.003941229 | 0.02649615  | 0.259227854 |
| 0.025875789 | 0.036247211 | 0.295600512 | 0.0005367   |
| 0.003010667 | 0.000480814 | 0.094807016 | 0.041632513 |
| 0.156646997 | 0.22411254  | 0.033903947 | 0.133095452 |
| 0.022871868 | 0.07552946  | 1           | 0.227257369 |
| 0.077805892 | 0.336303179 | 0.125699375 | 0.10234018  |
| 0.094169503 | 0.027962163 | 0.065044638 | 0.258688229 |
| 0.2150841   | 0.044856115 | 0.027315015 | 0.207377016 |
| 0.056858476 | 0.116368911 | 0.162389562 | 0.020738235 |
| 0.201717277 | 0.119357068 | 0.026787862 | 0.221974791 |
| 0.309325655 | 0.075617885 | 0.001345226 | 0.251953358 |
| 0.298820407 | 0.000995072 | 0.061729723 | 0.09492931  |
| 0.065533957 | 0.064302389 | 0.188290644 | 0.168728944 |
| 0.12222546  | 0.014270524 | 0.091300171 | 0.208955903 |
| 0.118243974 | 0.187605148 | 0.114439943 | 0.067088159 |
| 0.176004699 | 0.02804304  | 0.081725467 | 0.053681176 |
| 0.142269685 | 0.119639533 | 0.004549857 | 0.004317769 |
| 0.063810001 | 0.039009905 | 0.160764961 | 0.084158225 |
| 0.061858763 | 0.001609319 | 0.055213558 | 0.050667382 |
| 0.016104471 | 0.065001953 | 0.235690935 | 0.156898309 |
| 0.136740089 | 0.020355727 | 0.137800852 | 0.175556251 |
| 0.084046653 | 0.02126432  | 0.026602653 | 0.000266268 |
| 0.057265584 | 0.021609669 | 0.080743746 | 0.0066727   |
| 0.101278864 | 0.015841098 | 0.004911423 | 0.154224443 |
| 0.180432512 | 0.145980402 | 0.002050929 | 0.004436807 |
| 0.083743281 | 0.276929562 | 0.032030699 | 0.006349836 |
| 0.197652033 | 0.03830994  | 0.057412121 | 0.244606194 |
| 0.114763396 | 0.253411494 | 0.003408265 | 0.069037795 |
| 0.068334664 | 0.166398341 | 0.093861668 | 0.152040335 |
| 0.138805912 | 0.071753459 | 0.007279263 | 0.221208122 |
| 0.085636919 | 0.105144422 | 0.028522924 | 0.208835219 |
| 0.000285208 | 0.18968122  | 0.116816809 | 0.0024893   |
| 0.22215154  | 0.358763621 | 0.039743813 | 0.045939893 |
| 0.131707987 | 0.211491037 | 0.107406163 | 0.07488982  |
| 0.003422791 | 0.002017205 | 0.145678759 | 0.191935223 |
| 0.106834257 | 0.1242461   | 0.051352    | 0.003053654 |
| 0.153882968 | 0.037152479 | 0.102515246 | 0.041107479 |
| 0.116907479 | 0.054673949 | 0.139517055 | 0.049657334 |
| 0.000250504 | 0.069523579 | 0.058809677 | 0.021533926 |
| 0.053614525 | 0.015844319 | 0.169122487 | 0.265507248 |
| 0.061834826 | 0.005370892 | 0.053568676 | 0.149039656 |
| 0.238388283 | 0.188582873 | 0.004003813 | 0.141758954 |
| 0.151801765 | 0.142159025 | 0.164443281 | 0.140169519 |
| 0.088901731 | 0.299765517 | 0.161374024 | 0.083045089 |
| 0.000102383 | 0.070385926 | 0.062513936 | 0.26866577  |
| 0.092168173 | 0.202342298 | 0.012297257 | 0.045995649 |
| 0.001009385 | 0.132766212 | 0.006073976 | 0.205747813 |
| 0.155255456 | 0.035951832 | 0.002708199 | 0.166305201 |
| 0.05885514  | 0.003402039 | 0.171108867 | 0.136591684 |
| 0.215050583 | 0.143106358 | 0.184083685 | 0.069385623 |
| 0.00436463  | 0.037677322 | 0.038458258 | 0.149945519 |
| 0.077321613 | 0.001415082 | 0.054727512 | 0.148022707 |

|             |             |             |             |
|-------------|-------------|-------------|-------------|
| 0.130362533 | 0.309623665 | 0.225057165 | 0.00096041  |
| 0.048135556 | 0.010242211 | 0.135462752 | 0.037637263 |
| 0.154042856 | 0.278525561 | 0.245024586 | 0.093769357 |
| 0.1046498   | 0.249751059 | 0.248398234 | 0.152471551 |
| 0.01871026  | 0.060786198 | 0.076188652 | 0.02942611  |
| 0.03445161  | 0.157563813 | 0.083042593 | 0.269754561 |
| 0.135422592 | 0.021700567 | 0.236278079 | 0.042066481 |
| 0.25787365  | 0.139505758 | 0.054115721 | 0.032947688 |
| 0.274740502 | 0.077133654 | 0.214178972 | 0.123422899 |
| 0.22537266  | 0.001050099 | 0.002578238 | 0.204204768 |
| 0.263704181 | 0.347978801 | 0.107286162 | 0.028235146 |
| 0.119079481 | 0.02436405  | 0.121631491 | 0.062049029 |
| 0.12359769  | 0.038035866 | 0.048403982 | 0.000916005 |
| 0.001787067 | 0.008232069 | 0.298723884 | 0.265067681 |
| 0.088396577 | 0.128043368 | 0.180565631 | 0.254102292 |
| 0.116698093 | 0.023688547 | 0.227462108 | 0.082790995 |
| 0.308054246 | 0.031363505 | 0.202056068 | 0.078643724 |
| 0.119852357 | 0.105489233 | 0.147094332 | 0.001272754 |
| 0.078269231 | 0.060494579 | 0.01092007  | 0.186873138 |
| 0.06850276  | 0.111158908 | 0.324592871 | 0.049496554 |
| 0.012240029 | 0.000612578 | 0.160067895 | 0.049978684 |
| 0.28165136  | 0.009014261 | 0.079590411 | 0.003079635 |
| 0.198517335 | 0.076911998 | 0.08926111  | 0.019776391 |
| 0.099742713 | 0.003377939 | 0.101558432 | 0.014777812 |
| 0.11991641  | 0.225576659 | 0.066764302 | 0.036565418 |
| 0.009060494 | 0.176456576 | 0.212933642 | 0.168893436 |
| 0.157918029 | 0.002779925 | 0.134723787 | 0.06015344  |
| 0.054349926 | 0.01986004  | 0.252938214 | 0.025387487 |
| 0.3164099   | 0.011025182 | 0.138039422 | 0.013611302 |
| 0.124520322 | 0.038804374 | 0.196576264 | 0.010064006 |
| 0.045103794 | 0.087919368 | 0.083187765 | 0.076839095 |
| 0.096652564 | 0.042684663 | 0.02430135  | 0.306984953 |
| 0.008216173 | 0.039118162 | 0.013943618 | 0.017718315 |
| 0.012692836 | 0.130581374 | 0.102882689 | 0.129825328 |
| 0.141577025 | 0.006418723 | 0.075096107 | 0.04142363  |
| 0.003496719 | 0.049995444 | 0.350393245 | 0.017790656 |
| 0.13712062  | 0.012078007 | 0.000356658 | 0.021203758 |
| 0.206613648 | 0.013059498 |             |             |

|             |             |             |             |
|-------------|-------------|-------------|-------------|
| ECE2        | 0.109073978 | 0.368515555 | 0.166500165 |
| 0.035111424 | 0.185601371 | 0.365659331 | 0.340298932 |
| 0.07691681  | 0.177662862 | 0.223176468 | 0.422615844 |
| 0.001732024 | 0.129869462 | 0.032762947 | 0.09814558  |
| 0.259075695 | 0.27132119  | 0.299607119 | 0.260817909 |
| 0.116643983 | 0.146695149 | 0.254241354 | 0.259440898 |
| 0.321425008 | 0.00431943  | 0.255744964 | 0.106784401 |
| 0.065436831 | 0.224910244 | 0.213274774 | 0.189575347 |
| 0.220165667 | 0.203551756 | 0.147265459 | 0.159922412 |
| 0.048570684 | 0.408502799 | 0.018490033 | 0.16511213  |
| 0.141563929 | 0.24931479  | 0.211802579 | 0.048295961 |
| 0.002120782 | 0.24401043  | 0.055849155 | 0.257931455 |
| 0.128867785 | 0.315856354 | 0.211930127 | 0.268573169 |
| 0.015149995 | 0.40952017  | 0.219740847 | 0.014660133 |
| 0.463722909 | 0.010163269 | 0.434906384 | 0.065337067 |
| 0.176819972 | 0.18790626  | 0.081525587 | 0.229405445 |

|             |             |             |             |
|-------------|-------------|-------------|-------------|
| 0.414382025 | 0.460638802 | 0.324769592 | 0.141224284 |
| 0.206474996 | 0.129182268 | 0.15356051  | 0.238274713 |
| 0.327687026 | 0.155651614 | 0.23181693  | 0.065243003 |
| 0.176678014 | 0.148525443 | 0.323426414 | 0.19619332  |
| 0.002440657 | 0.269983877 | 0.161121416 | 0.114793865 |
| 0.098751254 | 0.416344798 | 0.127301536 | 0.269381449 |
| 0.113096931 | 0.078686171 | 0.241751456 | 0.303754904 |
| 0.042405221 | 0.157038525 | 0.012327332 | 0.171701953 |
| 0.204139313 | 0.182414171 | 0.196838354 | 0.204143039 |
| 0.056409907 | 0.152893814 | 0.037198249 | 0.127977133 |
| 0.170097413 | 0.168971407 | 0.453023553 | 0.011205997 |
| 0.106118134 | 0.135948604 | 0.200215844 | 0.427068945 |
| 0.294768047 | 0.018005931 | 0.13574823  | 0.337671887 |
| 0.121379339 | 0.143114075 | 0.307406214 | 0.007958887 |
| 0.018786194 | 0.005112702 | 0.215898934 | 0.168329381 |
| 0.239332129 | 0.285197638 | 0.11928107  | 0.201329764 |
| 0.07064287  | 0.181780265 | 0.227257369 | 1           |
| 0.149895223 | 0.358608284 | 0.155313858 | 0.200799954 |
| 0.12397976  | 0.130055985 | 0.191913183 | 0.384015936 |
| 0.384621093 | 0.173685359 | 0.176810856 | 0.357147292 |
| 0.112400868 | 0.255642602 | 0.324253533 | 0.124358533 |
| 0.22473498  | 0.197939397 | 0.139244059 | 0.328293596 |
| 0.330734037 | 0.144525686 | 0.008946062 | 0.363426108 |
| 0.471252977 | 0.009655651 | 0.175552907 | 0.201539087 |
| 0.059905215 | 0.224649321 | 0.369524006 | 0.282021038 |
| 0.171478083 | 0.095913711 | 0.220209424 | 0.311171841 |
| 0.234776561 | 0.268097913 | 0.229714257 | 0.199835024 |
| 0.323008156 | 0.136457677 | 0.16949104  | 0.112402548 |
| 0.218257121 | 0.235371393 | 0.053524828 | 0.0279326   |
| 0.142469021 | 0.11001098  | 0.314193844 | 0.176363807 |
| 0.15964384  | 0.007621911 | 0.213831477 | 0.144208845 |
| 0.120898084 | 0.144323275 | 0.406698804 | 0.213079826 |
| 0.245060542 | 0.058104245 | 0.209005403 | 0.199741579 |
| 0.197758804 | 0.180548526 | 0.19477679  | 0.004500624 |
| 0.208086407 | 0.077359689 | 0.138054754 | 0.068415103 |
| 0.228988458 | 0.150880419 | 0.046254603 | 0.29867742  |
| 0.268922385 | 0.226692213 | 0.020576426 | 0.021414402 |
| 0.226727461 | 0.370720181 | 0.1146049   | 0.083869193 |
| 0.305444973 | 0.181286586 | 0.144128825 | 0.413467294 |
| 0.210087669 | 0.423581747 | 0.021432541 | 0.181195579 |
| 0.125157036 | 0.291443661 | 0.198792615 | 0.239873607 |
| 0.239524203 | 0.150051227 | 0.058560303 | 0.361371484 |
| 0.181198851 | 0.168437553 | 0.153149201 | 0.365694946 |
| 0.00380322  | 0.293475218 | 0.1914308   | 0.023028489 |
| 0.387528059 | 0.382297306 | 0.148560015 | 0.134434859 |
| 0.269497591 | 0.366656322 | 0.232466997 | 0.176745274 |
| 0.034568232 | 0.020727877 | 0.300256425 | 0.338081101 |
| 0.230705289 | 0.18032675  | 0.082569578 | 0.013025606 |
| 0.290874571 | 0.08312357  | 0.230218855 | 0.112453823 |
| 0.156221762 | 0.082216319 | 0.203412284 | 0.118610139 |
| 0.004805147 | 0.208279471 | 0.15618923  | 0.140875828 |
| 0.179239701 | 0.135744501 | 0.287176168 | 0.372169822 |
| 0.123461766 | 0.072848581 | 0.131909082 | 0.224578133 |
| 0.277666321 | 0.36267432  | 0.006553515 | 0.291452816 |

|             |             |             |             |
|-------------|-------------|-------------|-------------|
| 0.303419752 | 0.210181726 | 0.302475681 | 0.290357058 |
| 0.197416003 | 0.431698678 | 0.313049876 | 0.185464817 |
| 0.001336076 | 0.157506758 | 0.115543671 | 0.421109379 |
| 0.216656201 | 0.335626114 | 0.035246551 | 0.073564766 |
| 0.003058396 | 0.214548    | 0.041447693 | 0.377589237 |
| 0.270428348 | 0.12401191  | 0.004504266 | 0.270091284 |
| 0.108610497 | 0.012210979 | 0.34093121  | 0.247264218 |
| 0.353472178 | 0.176198401 | 0.268425821 | 0.142024305 |
| 0.026180122 | 0.101431317 | 0.06422732  | 0.243229937 |
| 0.104871434 | 0.014683525 | 0.172694162 | 0.297702323 |
| 0.292459437 | 0.386782312 | 0.308258224 | 0.024585835 |
| 0.130375167 | 0.088007414 | 0.247237212 | 0.144458216 |
| 0.297556215 | 0.412008428 | 0.376945804 | 0.178235771 |
| 0.184994541 | 0.403232977 | 0.423777686 | 0.307573109 |
| 0.049710618 | 0.154553278 | 0.188592887 | 0.12687291  |
| 0.090411755 | 0.288969628 | 0.155260392 | 0.327713691 |
| 0.26649435  | 0.054050859 | 0.337908161 | 0.10823049  |
| 0.395786054 | 0.278370704 | 0.178136654 | 0.131242999 |
| 0.430637078 | 0.198202196 | 0.240564458 | 0.168621042 |
| 0.357814763 | 0.016081842 | 0.01899888  | 0.34032627  |
| 0.436113827 | 0.431484944 | 0.250828971 | 0.166645457 |
| 0.224752549 | 0.117552427 | 0.228226016 | 0.216901286 |
| 0.233215187 | 0.106336418 | 0.127062337 | 0.014890794 |
| 0.040482474 | 0.103102874 | 0.434870607 | 0.435176461 |
| 0.188221699 | 0.213480168 | 0.24789215  | 0.295330821 |
| 0.250401773 | 0.116900514 | 0.340948362 | 0.146890575 |
| 0.465604515 | 0.13243349  | 0.383145979 | 0.174106116 |
| 0.272820483 | 0.215538648 | 0.264115143 | 0.010192443 |
| 0.163192073 | 0.216296762 | 0.034753839 | 0.233585027 |
| 0.166738195 | 0.230099476 | 0.390482205 | 0.17640672  |
| 0.070566395 | 0.003318258 | 0.288862605 | 0.065623347 |
| 0.42136193  | 0.045276027 | 0.146439442 | 0.01798851  |
| 0.375821423 | 0.18402256  | 0.229352186 | 0.042367752 |
| 0.197027066 | 0.003833894 | 0.239755731 | 0.097407489 |
| 0.268224733 | 0.359736661 | 0.152242599 | 0.109358296 |
| 0.049889311 | 0.230397529 | 0.326361169 | 0.171822239 |
| 0.283572619 | 0.032838175 | 0.283217421 | 0.135480171 |
| 0.122276555 | 0.132666706 | 0.340114474 | 0.142103043 |
| 0.275637945 | 0.068226371 | 0.228418343 | 0.095487257 |
| 0.248422069 | 0.130747113 | 0.235013808 | 0.093323394 |
| 0.16913826  | 0.181682409 | 0.166321991 | 0.160205755 |
| 0.200963694 | 0.121019496 | 0.073897889 | 0.455168898 |
| 0.09055703  | 0.125960002 | 0.059943209 | 0.08837972  |
| 0.093871693 | 0.252621723 | 0.234198335 | 0.257592019 |
| 0.277476251 | 0.053121783 | 0.199143116 | 0.14509371  |
| 0.013278134 | 0.131975106 | 0.384208661 | 0.039225334 |
| 0.195877118 | 0.059276468 | 0.002700279 | 0.103331118 |
| 0.361993991 | 0.098456746 |             |             |
| ECH1        | 0.228999272 | 0.439425669 | 0.030203536 |
| 0.034917088 | 0.083373133 | 0.126769916 | 0.129644719 |
| 0.253120539 | 0.046536723 | 0.089463969 | 0.190839217 |
| 0.000438416 | 0.397954958 | 0.004211999 | 0.030598806 |
| 0.499900299 | 0.514974938 | 0.21570692  | 0.492708766 |
| 0.189336855 | 0.123735491 | 0.215735286 | 0.255517363 |



|              |             |             |             |
|--------------|-------------|-------------|-------------|
| 0.1418572    | 0.000419507 | 0.07303906  | 0.046089703 |
| 0.279698802  | 0.506282312 | 0.100454799 | 0.186295413 |
| 0.439841215  | 0.478318078 | 0.29886576  | 0.264654065 |
| 0.278781938  | 0.371869017 | 0.138425291 | 0.398327475 |
| 0.419809627  | 0.14972823  | 0.441852688 | 0.004262894 |
| 0.0111100792 | 0.052203996 | 0.247473176 | 0.237826776 |
| 0.169265716  | 0.116027387 | 0.080110826 | 0.109516566 |
| 0.188549164  | 0.209355163 | 0.281650708 | 0.20882537  |
| 0.305187511  | 0.006310697 | 0.356276763 | 0.151087005 |
| 0.025916917  | 0.172281744 | 0.259249081 | 0.267644653 |
| 0.136321235  | 0.332856858 | 0.48212834  | 0.017319974 |
| 0.031728363  | 0.305137501 | 0.396158708 | 0.319696847 |
| 0.392390926  | 0.24485366  | 0.192435579 | 0.32428961  |
| 0.342593783  | 0.398319213 | 0.152480683 | 0.089207068 |
| 0.000334749  | 0.085707472 | 0.279184675 | 0.23425393  |
| 0.351153049  | 0.21866699  | 0.272350324 | 0.138040698 |
| 0.330327723  | 0.006219777 | 0.235595164 | 0.50260522  |
| 0.015053164  | 0.365855084 | 0.008210276 | 0.075663606 |
| 0.382842688  | 0.492449712 | 0.274054491 | 0.036811914 |
| 0.00417681   | 0.053369974 | 0.084517306 | 0.450393496 |
| 0.25621889   | 0.316381958 | 0.287542423 | 0.140673223 |
| 0.411123095  | 0.087437952 | 0.218903787 | 0.372430459 |
| 0.441803132  | 0.002587482 | 0.072756284 | 0.120088484 |
| 0.250555067  | 0.110589999 | 0.129278187 | 0.040520133 |
| 0.009457196  | 0.009569105 | 0.458669899 | 0.076091915 |
| 0.059783876  | 0.112393053 | 0.063171221 | 0.357769072 |
| 0.242477932  | 0.420230917 | 0.077805892 | 0.149895223 |
| 1            | 0.150806583 | 0.33337767  | 0.360726834 |
| 0.320460247  | 0.134796026 | 0.069952896 | 0.382548894 |
| 0.31422991   | 0.033766187 | 0.035117587 | 0.19133734  |
| 0.396367345  | 0.476666592 | 0.496960095 | 0.181780088 |
| 0.19495399   | 0.124216805 | 0.224092849 | 0.269043094 |
| 0.133748039  | 0.205813264 | 0.081593414 | 0.2052655   |
| 0.303753034  | 0.036240595 | 0.026692474 | 0.354094499 |
| 0.064646974  | 0.152306577 | 0.352097863 | 0.353603126 |
| 0.321957236  | 0.037595086 | 0.163849891 | 0.154407795 |
| 0.162384107  | 0.151481032 | 0.261472267 | 0.157017017 |
| 0.176725103  | 0.238768612 | 0.02074127  | 0.409955252 |
| 0.056810854  | 0.19066046  | 0.253431546 | 0.052078426 |
| 0.273441284  | 0.214451884 | 0.379843469 | 0.278697473 |
| 0.298610337  | 0.007452832 | 0.09251259  | 0.238576023 |
| 0.20668075   | 0.401483721 | 0.4327397   | 0.05009045  |
| 0.131004258  | 0.260333521 | 0.065280954 | 0.248190771 |
| 0.325844761  | 0.148386568 | 0.129020402 | 0.000219073 |
| 0.074746049  | 0.319029428 | 0.279276954 | 0.018804217 |
| 0.165648345  | 0.051620018 | 0.062429252 | 0.416286103 |
| 0.104129251  | 0.398083944 | 0.009952087 | 0.11767753  |
| 0.149178917  | 0.293229146 | 0.325370454 | 0.16590875  |
| 0.352145534  | 0.204895774 | 0.47344629  | 0.255158392 |
| 0.185902711  | 0.213439369 | 0.141882351 | 0.142650757 |
| 0.364922747  | 0.434477886 | 0.427355555 | 0.388619657 |
| 0.147406816  | 0.249573976 | 0.243638037 | 0.149564786 |
| 0.247883912  | 0.261911589 | 0.035916202 | 0.440961612 |
| 0.000168405  | 0.201318664 | 0.334108319 | 0.145063145 |

|             |             |             |             |
|-------------|-------------|-------------|-------------|
| 0.427803177 | 0.140128896 | 0.026362714 | 0.130692146 |
| 0.498850491 | 0.43884007  | 0.35561228  | 0.458580457 |
| 0.179386296 | 0.00287501  | 0.41742783  | 0.250203382 |
| 0.515731841 | 0.258572826 | 0.332866945 | 0.056301521 |
| 0.451917362 | 0.251728047 | 0.288505558 | 0.308489406 |
| 0.345358901 | 0.330528606 | 0.124233391 | 0.240526392 |
| 0.010061922 | 0.146586908 | 0.317825956 | 0.14335246  |
| 0.225870804 | 0.099474344 | 0.397262622 | 0.181834919 |
| 0.332148233 | 0.234223394 | 0.30317341  | 0.040586776 |
| 0.085996616 | 0.44947547  | 0.058197904 | 0.390125305 |
| 0.500751099 | 0.216672616 | 0.450394824 | 0.486999361 |
| 0.179296989 | 0.253049933 | 0.422177822 | 0.417755106 |
| 0.000271838 | 0.464601721 | 0.386422367 | 0.204883867 |
| 0.453070668 | 0.157509906 | 0.17225951  | 0.375186368 |
| 0.00035217  | 0.07044314  | 0.293493403 | 0.401912566 |
| 0.450350244 | 0.010986921 | 0.074465636 | 0.364101979 |
| 0.347035162 | 0.034853135 | 0.478883506 | 0.212786156 |
| 0.398586269 | 0.300282582 | 0.094452305 | 0.425177491 |
| 0.262062006 | 0.249933519 | 0.023124584 | 0.321091577 |
| 0.312923298 | 0.059511076 | 0.065597947 | 0.481595666 |
| 0.354621302 | 0.245065613 | 0.132255867 | 0.006125895 |
| 0.3910546   | 0.206141679 | 0.364179427 | 0.055526075 |
| 0.30991759  | 0.214168369 | 0.372452543 | 0.414029463 |
| 0.306965208 | 0.291334342 | 0.244139151 | 0.368352208 |
| 0.133146083 | 0.413339923 | 0.437220153 | 0.032979713 |
| 0.289790542 | 0.458428736 | 0.319497961 | 0.09222787  |
| 0.221117879 | 0.118315306 | 0.103013721 | 0.199017514 |
| 0.36953509  | 0.457995085 | 0.023512629 | 0.076604927 |
| 0.292560876 | 0.166387005 | 0.052437891 | 0.206262353 |
| 0.145558534 | 0.193785693 | 0.104687263 | 0.217103878 |
| 0.373968781 | 0.166502367 | 0.427555985 | 0.125132044 |
| 0.464365881 | 0.018530383 | 0.357894089 | 0.159028205 |
| 0.150234521 | 0.3215323   | 0.414908225 | 0.102395436 |
| 0.015230187 | 0.062653582 | 0.277630423 | 0.288959284 |
| 0.03262895  | 0.092281369 | 0.155192571 | 0.235303927 |
| 0.498081078 | 0.314775223 | 0.14836044  | 0.202747705 |
| 0.287969907 | 0.089598959 | 0.401635342 | 0.195597219 |
| 0.279573658 | 0.224077994 | 0.352174662 | 0.005236465 |
| 0.337861075 | 0.11104254  | 0.140624257 | 0.268971786 |
| 0.474292917 | 0.065483334 | 0.246726902 | 0.075435234 |
| 0.143074457 | 0.001542587 | 0.208068314 | 0.358120453 |
| 0.151339439 | 0.22860725  | 0.219591766 | 0.213127647 |
| 0.462707104 | 0.253409894 | 0.312656678 | 0.245348683 |
| 0.260214523 | 0.044547334 | 0.095576879 | 0.012112065 |
| 0.249518031 | 0.232236624 | 0.287321335 | 0.26324434  |
| 0.120697355 | 0.329971306 | 0.238543109 | 0.321936832 |
| 0.453910739 | 0.167012359 | 0.507907193 | 0.172171772 |
| 0.434442882 | 0.250700888 | 0.135257871 | 0.196534863 |
| 0.119023316 | 0.071628417 | 0.054363962 | 0.076058618 |
| 0.488793783 | 0.192418735 | 0.280155924 | 0.208061574 |
| 0.023510056 | 0.259903776 | 0.343995673 | 0.371896505 |
| 0.310370484 | 0.315346341 | 0.286136342 | 0.263818365 |
| 0.198388628 | 0.166796963 | 0.063874714 | 0.029682505 |
| 0.235738372 | 0.104663677 | 0.337620163 | 0.365892021 |

|             |             |             |             |
|-------------|-------------|-------------|-------------|
| 0.489313052 | 0.202533603 | 0.042514067 | 0.059862913 |
| 0.126463973 | 0.340968746 | 0.162755488 | 0.214204859 |
| 0.305402511 | 0.224511603 | 0.000177701 | 0.120394229 |
| 0.223496429 | 0.313001596 |             |             |
| EGR1        | 0.100907892 | 0.368605533 | 0.205505776 |
| 0.040500946 | 0.273429482 | 0.360589716 | 0.371745099 |
| 0.093123367 | 0.225073076 | 0.274493138 | 0.423906272 |
| 0.001721874 | 0.131635911 | 0.03579901  | 0.134885704 |
| 0.255009831 | 0.269748005 | 0.324850228 | 0.260688798 |
| 0.133892907 | 0.177314894 | 0.247546479 | 0.249381803 |
| 0.329452788 | 0.004304959 | 0.338188403 | 0.119601426 |
| 0.081326964 | 0.222535288 | 0.274498294 | 0.233829282 |
| 0.21447305  | 0.203758835 | 0.190727822 | 0.224771009 |
| 0.064354087 | 0.407297735 | 0.029819428 | 0.169108211 |
| 0.139805542 | 0.334167681 | 0.210346122 | 0.06003746  |
| 0.002520457 | 0.318481002 | 0.068974601 | 0.247811196 |
| 0.164439336 | 0.313349105 | 0.274082037 | 0.352642609 |
| 0.019180984 | 0.409417096 | 0.214055184 | 0.018672786 |
| 0.47045389  | 0.010269231 | 0.437938674 | 0.076491592 |
| 0.22592682  | 0.24591556  | 0.09339741  | 0.223954908 |
| 0.418535627 | 0.465097989 | 0.326496021 | 0.19010751  |
| 0.264092882 | 0.13667274  | 0.148394803 | 0.236132721 |
| 0.324341639 | 0.188321285 | 0.310592838 | 0.089960862 |
| 0.17509417  | 0.146040295 | 0.328392921 | 0.254958084 |
| 0.002650859 | 0.357422374 | 0.218317945 | 0.109811507 |
| 0.098316385 | 0.417773846 | 0.122662898 | 0.36635945  |
| 0.122531047 | 0.094644665 | 0.237180899 | 0.301975382 |
| 0.050638185 | 0.159161482 | 0.017017372 | 0.233226587 |
| 0.201860197 | 0.178774787 | 0.187624108 | 0.268419628 |
| 0.065706756 | 0.194030408 | 0.043143704 | 0.126131056 |
| 0.174345026 | 0.183937889 | 0.46036713  | 0.01564045  |
| 0.105997067 | 0.161556443 | 0.274598586 | 0.423507735 |
| 0.289935094 | 0.021974468 | 0.16931635  | 0.337683519 |
| 0.160788055 | 0.188864354 | 0.35338592  | 0.008947637 |
| 0.023045199 | 0.005767402 | 0.21286314  | 0.208690338 |
| 0.315956634 | 0.351374623 | 0.153858395 | 0.203432037 |
| 0.088611761 | 0.178445281 | 0.336303179 | 0.358608284 |
| 0.150806583 | 1           | 0.204093169 | 0.200251391 |
| 0.179369604 | 0.161641382 | 0.232871581 | 0.393590534 |
| 0.384829507 | 0.22680392  | 0.215371859 | 0.349016026 |
| 0.114230259 | 0.25249028  | 0.322999494 | 0.158182434 |
| 0.319251863 | 0.255934145 | 0.166656762 | 0.328564894 |
| 0.347894987 | 0.152520848 | 0.01170811  | 0.370798951 |
| 0.473370339 | 0.011924652 | 0.220736113 | 0.200663206 |
| 0.094940167 | 0.317560228 | 0.362921611 | 0.286127081 |
| 0.18067718  | 0.106203928 | 0.269920533 | 0.326468237 |
| 0.237814666 | 0.321388515 | 0.229055813 | 0.242156077 |
| 0.31389718  | 0.162264262 | 0.221608042 | 0.113442115 |
| 0.280510864 | 0.23170732  | 0.063848101 | 0.035791918 |
| 0.139612607 | 0.13932317  | 0.310933159 | 0.174445029 |
| 0.153418915 | 0.007953771 | 0.25527785  | 0.135687643 |
| 0.140643886 | 0.144027317 | 0.407424605 | 0.27644807  |
| 0.240479277 | 0.08161337  | 0.268676406 | 0.285452355 |
| 0.193979713 | 0.218001726 | 0.237944055 | 0.004297156 |

|             |             |             |             |
|-------------|-------------|-------------|-------------|
| 0.285979808 | 0.092358635 | 0.172429069 | 0.078284209 |
| 0.310690725 | 0.174391859 | 0.055278336 | 0.295801166 |
| 0.307252772 | 0.232448477 | 0.023747307 | 0.028608252 |
| 0.280933998 | 0.3805448   | 0.144387435 | 0.095881019 |
| 0.309675329 | 0.220778991 | 0.141260095 | 0.412027118 |
| 0.310261499 | 0.415641537 | 0.029257197 | 0.232285949 |
| 0.126204441 | 0.294424706 | 0.195147563 | 0.246736008 |
| 0.310840096 | 0.150177817 | 0.073965882 | 0.354402954 |
| 0.176259359 | 0.179066458 | 0.183368689 | 0.368822846 |
| 0.004031312 | 0.294080755 | 0.193154265 | 0.028966514 |
| 0.387419476 | 0.391879766 | 0.180871396 | 0.166278721 |
| 0.268703579 | 0.370620552 | 0.230796786 | 0.173302907 |
| 0.045302958 | 0.022810792 | 0.298882164 | 0.337708478 |
| 0.229032599 | 0.245560094 | 0.11869852  | 0.019274549 |
| 0.290540587 | 0.082650598 | 0.2211182   | 0.108230228 |
| 0.165089289 | 0.115463613 | 0.259646957 | 0.116426519 |
| 0.004895129 | 0.249685604 | 0.14715742  | 0.172056436 |
| 0.216800773 | 0.173210778 | 0.291740366 | 0.379565045 |
| 0.171360571 | 0.082500362 | 0.171076938 | 0.292577041 |
| 0.331427254 | 0.360372807 | 0.011209765 | 0.289544825 |
| 0.302194942 | 0.225158728 | 0.300931362 | 0.287787092 |
| 0.21165137  | 0.438211865 | 0.3105933   | 0.184489239 |
| 0.00137562  | 0.156349906 | 0.117920856 | 0.423221595 |
| 0.21082202  | 0.331109162 | 0.044901778 | 0.098311395 |
| 0.004138812 | 0.270632233 | 0.051914715 | 0.378693922 |
| 0.273123856 | 0.168607411 | 0.007712352 | 0.27510874  |
| 0.111304958 | 0.016104768 | 0.33827566  | 0.268544707 |
| 0.35612319  | 0.213897977 | 0.34312948  | 0.142731502 |
| 0.033000745 | 0.134480361 | 0.095791914 | 0.244808062 |
| 0.143598712 | 0.018475192 | 0.219595985 | 0.297617183 |
| 0.282392058 | 0.398934044 | 0.313025861 | 0.022284114 |
| 0.126146977 | 0.100755168 | 0.245362738 | 0.191933998 |
| 0.295033296 | 0.41693647  | 0.384673088 | 0.178730439 |
| 0.188047918 | 0.405029304 | 0.418762208 | 0.299702869 |
| 0.066858342 | 0.148967886 | 0.18335407  | 0.156015258 |
| 0.08840078  | 0.289121856 | 0.173836367 | 0.341911347 |
| 0.261628143 | 0.075168164 | 0.334342064 | 0.113320901 |
| 0.401299289 | 0.276149918 | 0.220525438 | 0.167198469 |
| 0.432004059 | 0.264694291 | 0.324166765 | 0.230055725 |
| 0.355474805 | 0.018391141 | 0.025747762 | 0.342711803 |
| 0.436651146 | 0.439669146 | 0.242837042 | 0.195811379 |
| 0.226923701 | 0.147572108 | 0.231326815 | 0.300936101 |
| 0.236233176 | 0.1006155   | 0.12319747  | 0.017113159 |
| 0.039213566 | 0.115264212 | 0.439684675 | 0.435596771 |
| 0.235774745 | 0.257143071 | 0.318534596 | 0.30626995  |
| 0.24666775  | 0.147018062 | 0.339052888 | 0.189735618 |
| 0.471269518 | 0.166681222 | 0.38196316  | 0.194140289 |
| 0.263596202 | 0.277692461 | 0.268589262 | 0.01279202  |
| 0.159831764 | 0.257102407 | 0.04257762  | 0.264552771 |
| 0.163771515 | 0.291369109 | 0.403399785 | 0.217265054 |
| 0.087271725 | 0.00407153  | 0.288333744 | 0.088982469 |
| 0.420091361 | 0.058496435 | 0.185774323 | 0.022980706 |
| 0.375127508 | 0.175373518 | 0.218026557 | 0.059168551 |
| 0.246839486 | 0.006366973 | 0.300745082 | 0.114315217 |

|             |             |             |             |
|-------------|-------------|-------------|-------------|
| 0.260174848 | 0.365595974 | 0.151308252 | 0.109247036 |
| 0.05955388  | 0.238223031 | 0.332979767 | 0.226624167 |
| 0.285669268 | 0.037530283 | 0.27930835  | 0.181042254 |
| 0.121807069 | 0.166736581 | 0.345229463 | 0.192963934 |
| 0.379764108 | 0.093402303 | 0.302867826 | 0.116195352 |
| 0.24677782  | 0.185247968 | 0.268638752 | 0.105689918 |
| 0.213231469 | 0.241485259 | 0.169011943 | 0.160243426 |
| 0.196242679 | 0.115195237 | 0.095260251 | 0.460818029 |
| 0.107804721 | 0.153280225 | 0.071906915 | 0.105344521 |
| 0.11848259  | 0.317140234 | 0.229451815 | 0.256109574 |
| 0.278852035 | 0.068710695 | 0.255599529 | 0.179926007 |
| 0.020218952 | 0.127826009 | 0.393329319 | 0.057664866 |
| 0.205130459 | 0.075289392 | 0.002905633 | 0.125289443 |
| 0.359245722 | 0.126970856 |             |             |
| EGR2        | 0.124433195 | 0.477964761 | 0.041168647 |
| 0.071220587 | 0.14017836  | 0.171824668 | 0.175832728 |
| 0.110354564 | 0.043983158 | 0.113385391 | 0.289586314 |
| 0.000131725 | 0.307991983 | 0.002993549 | 0.02571824  |
| 0.439540705 | 0.466182748 | 0.245343576 | 0.43277258  |
| 0.097527354 | 0.140057086 | 0.210995835 | 0.254286551 |
| 0.160643462 | 0.000207782 | 0.111815897 | 0.080163912 |
| 0.115225363 | 0.422978452 | 0.086633196 | 0.15527937  |
| 0.366453743 | 0.42871865  | 0.20582702  | 0.240454085 |
| 0.175194425 | 0.433663735 | 0.077706762 | 0.369516663 |
| 0.304063791 | 0.17679066  | 0.395700755 | 0.004176517 |
| 0.015713203 | 0.076584303 | 0.10043368  | 0.230235168 |
| 0.091571899 | 0.14179812  | 0.074772747 | 0.142367929 |
| 0.066842054 | 0.296885413 | 0.248753763 | 0.079704749 |
| 0.42146494  | 0.016778345 | 0.437596393 | 0.059616956 |
| 0.033542887 | 0.114425898 | 0.114997294 | 0.245296473 |
| 0.207441051 | 0.442014559 | 0.481627429 | 0.033656507 |
| 0.045543161 | 0.178893965 | 0.323298551 | 0.34032911  |
| 0.415242599 | 0.175409755 | 0.170199504 | 0.15709527  |
| 0.317818307 | 0.307109956 | 0.174859228 | 0.080627824 |
| 0.000239899 | 0.11651582  | 0.265520255 | 0.160563028 |
| 0.252395586 | 0.315356825 | 0.179297716 | 0.16108186  |
| 0.196294867 | 0.008338278 | 0.212112916 | 0.482600797 |
| 0.022328459 | 0.297805221 | 0.01082041  | 0.067834056 |
| 0.33294741  | 0.378879114 | 0.238078225 | 0.056490256 |
| 0.005008134 | 0.043061756 | 0.028492712 | 0.311375716 |
| 0.173114141 | 0.219857648 | 0.392470507 | 0.03861978  |
| 0.291191277 | 0.054592152 | 0.164533206 | 0.45598864  |
| 0.423219514 | 0.00212145  | 0.047432023 | 0.159728804 |
| 0.154596045 | 0.12663207  | 0.160396733 | 0.018577137 |
| 0.016360368 | 0.002526382 | 0.388503312 | 0.061698968 |
| 0.092931685 | 0.128960002 | 0.097551029 | 0.358513458 |
| 0.107673575 | 0.317420774 | 0.125699375 | 0.155313858 |
| 0.33337767  | 0.204093169 | 1           | 0.345670283 |
| 0.251144034 | 0.075531464 | 0.063127806 | 0.465375357 |
| 0.35948074  | 0.049971569 | 0.040146551 | 0.240397479 |
| 0.299368542 | 0.430056908 | 0.484568367 | 0.106519706 |
| 0.229117953 | 0.095528343 | 0.147232396 | 0.342843722 |
| 0.168214093 | 0.129289899 | 0.025935269 | 0.266313041 |
| 0.409421703 | 0.019551358 | 0.033632001 | 0.31054285  |

|             |             |             |             |
|-------------|-------------|-------------|-------------|
| 0.128600055 | 0.144257239 | 0.390004361 | 0.394037053 |
| 0.259897101 | 0.065474566 | 0.176266924 | 0.177288186 |
| 0.133393768 | 0.153734074 | 0.231438217 | 0.161267362 |
| 0.197445873 | 0.162801671 | 0.035429036 | 0.302061657 |
| 0.065781068 | 0.163976682 | 0.100009923 | 0.02680783  |
| 0.193114766 | 0.111380169 | 0.417289026 | 0.207913349 |
| 0.245076681 | 0.025556597 | 0.119488049 | 0.159521109 |
| 0.121081967 | 0.29825397  | 0.503622207 | 0.057661538 |
| 0.119664499 | 0.116535165 | 0.064529921 | 0.240319584 |
| 0.263851506 | 0.131096611 | 0.117045948 | 0.000296133 |
| 0.096241884 | 0.15986341  | 0.159157798 | 0.012132508 |
| 0.208005807 | 0.041870528 | 0.025408524 | 0.432297762 |
| 0.113042193 | 0.418973867 | 0.004341817 | 0.033962187 |
| 0.129461143 | 0.40690876  | 0.221737771 | 0.077057934 |
| 0.429482861 | 0.165190386 | 0.338553536 | 0.324730707 |
| 0.193998084 | 0.315615879 | 0.045329357 | 0.094444904 |
| 0.259964332 | 0.454311775 | 0.391101188 | 0.4052187   |
| 0.135757064 | 0.194180099 | 0.123721093 | 0.194855106 |
| 0.179644442 | 0.186217879 | 0.037545881 | 0.477352662 |
| 0.000138075 | 0.209561187 | 0.287460766 | 0.042878294 |
| 0.498911518 | 0.210833695 | 0.028140387 | 0.078199949 |
| 0.443610233 | 0.469611528 | 0.306941559 | 0.370874473 |
| 0.066331385 | 0.00185262  | 0.395324429 | 0.299602733 |
| 0.436469316 | 0.186184605 | 0.236154583 | 0.01691239  |
| 0.454253119 | 0.138818048 | 0.268195177 | 0.181119303 |
| 0.273294602 | 0.190271414 | 0.096859715 | 0.168801028 |
| 0.002996276 | 0.121764766 | 0.253613526 | 0.12606916  |
| 0.181188608 | 0.072337186 | 0.436077051 | 0.239247264 |
| 0.251947414 | 0.106421239 | 0.239941173 | 0.064676648 |
| 0.100147127 | 0.476813756 | 0.03292655  | 0.366772481 |
| 0.477523771 | 0.171873779 | 0.478622822 | 0.449917535 |
| 0.128579456 | 0.356726238 | 0.442193282 | 0.324021536 |
| 0.00011675  | 0.365062698 | 0.309339265 | 0.283366271 |
| 0.403216987 | 0.182982919 | 0.057052272 | 0.188436393 |
| 0.000270285 | 0.067936124 | 0.152339023 | 0.427894924 |
| 0.46968299  | 0.019353255 | 0.034054844 | 0.401089102 |
| 0.284884511 | 0.016983456 | 0.475646821 | 0.200703631 |
| 0.47675121  | 0.232178544 | 0.113254797 | 0.341417775 |
| 0.110905328 | 0.127194207 | 0.042913966 | 0.344004375 |
| 0.171234724 | 0.014444616 | 0.110113238 | 0.446193137 |
| 0.361358412 | 0.340552407 | 0.147472926 | 0.009239382 |
| 0.26825529  | 0.178254525 | 0.404963436 | 0.056778387 |
| 0.331886477 | 0.299050109 | 0.448735119 | 0.35998438  |
| 0.247463924 | 0.385284111 | 0.332294067 | 0.397782753 |
| 0.133727161 | 0.330642497 | 0.360334244 | 0.047144704 |
| 0.169437797 | 0.463061523 | 0.241185368 | 0.131778658 |
| 0.214907769 | 0.165388786 | 0.13729064  | 0.102947704 |
| 0.466829905 | 0.458882248 | 0.032996522 | 0.052572117 |
| 0.398301361 | 0.122586676 | 0.072609467 | 0.138634634 |
| 0.182045553 | 0.05984238  | 0.028749445 | 0.256701081 |
| 0.462135355 | 0.260505067 | 0.403493378 | 0.146680312 |
| 0.423845797 | 0.020022424 | 0.323048936 | 0.146804042 |
| 0.129710754 | 0.214640692 | 0.290915825 | 0.028614409 |
| 0.016843444 | 0.040810616 | 0.39785728  | 0.376167921 |

|             |             |             |             |
|-------------|-------------|-------------|-------------|
| 0.043077359 | 0.080339281 | 0.16206932  | 0.278394691 |
| 0.447270569 | 0.194063629 | 0.185014343 | 0.12533031  |
| 0.389345499 | 0.123768615 | 0.434421739 | 0.131260624 |
| 0.280014323 | 0.201653208 | 0.366187579 | 0.003782306 |
| 0.27789157  | 0.12748893  | 0.043975154 | 0.275029564 |
| 0.350901723 | 0.079709581 | 0.349449012 | 0.059935043 |
| 0.099133311 | 0.000875184 | 0.222050115 | 0.196967319 |
| 0.226218648 | 0.090901934 | 0.13451978  | 0.090242118 |
| 0.483654503 | 0.186488912 | 0.289283512 | 0.10015012  |
| 0.204582888 | 0.035164699 | 0.11955833  | 0.014039698 |
| 0.251398821 | 0.289828219 | 0.209127096 | 0.140197084 |
| 0.042988594 | 0.329773075 | 0.286920472 | 0.262226864 |
| 0.471489561 | 0.098400271 | 0.473105092 | 0.095686634 |
| 0.314978041 | 0.149845133 | 0.165291994 | 0.125413994 |
| 0.149877732 | 0.040709336 | 0.06339171  | 0.038767864 |
| 0.463373701 | 0.123835402 | 0.27276724  | 0.098027826 |
| 0.041610202 | 0.207358063 | 0.287509876 | 0.323219667 |
| 0.274649694 | 0.24623119  | 0.138194274 | 0.363736511 |
| 0.089968449 | 0.084806749 | 0.103691513 | 0.055497015 |
| 0.180894199 | 0.108898448 | 0.291958601 | 0.351809775 |
| 0.454276722 | 0.074973725 | 0.05047392  | 0.044019315 |
| 0.042139543 | 0.244537603 | 0.238578787 | 0.175979061 |
| 0.254632817 | 0.084693476 | 0.000271546 | 0.060117931 |
| 0.281383602 | 0.19621034  |             |             |
| EI24        | 0.267542499 | 0.47694263  | 0.050135038 |
| 0.032746498 | 0.099402251 | 0.178300351 | 0.176064034 |
| 0.271779635 | 0.079346367 | 0.123788452 | 0.244529523 |
| 0.000960989 | 0.373067418 | 0.009409054 | 0.049897286 |
| 0.513257993 | 0.526292662 | 0.262731547 | 0.506069868 |
| 0.230777085 | 0.149399247 | 0.266378995 | 0.303970818 |
| 0.197314809 | 0.001062805 | 0.102222178 | 0.057270903 |
| 0.292782571 | 0.506514066 | 0.147700809 | 0.229910931 |
| 0.455820138 | 0.463352224 | 0.327362901 | 0.281048528 |
| 0.245290452 | 0.419338775 | 0.114316193 | 0.38039028  |
| 0.408199801 | 0.187742385 | 0.444242513 | 0.010177823 |
| 0.006338899 | 0.080997876 | 0.254549681 | 0.29026103  |
| 0.216373424 | 0.164575095 | 0.123067352 | 0.147841049 |
| 0.154803622 | 0.263907791 | 0.313885546 | 0.162949016 |
| 0.355257171 | 0.00638053  | 0.407974152 | 0.180819664 |
| 0.04786083  | 0.231027541 | 0.292055997 | 0.317032223 |
| 0.187987599 | 0.383610452 | 0.509434598 | 0.029552941 |
| 0.055379699 | 0.348522082 | 0.390770862 | 0.349565783 |
| 0.426194115 | 0.28244051  | 0.236253973 | 0.317731935 |
| 0.360013551 | 0.386635019 | 0.207856567 | 0.127583357 |
| 0.000767912 | 0.121994449 | 0.292964937 | 0.260526966 |
| 0.336601404 | 0.266216058 | 0.302052762 | 0.182850266 |
| 0.350788469 | 0.01319644  | 0.283293409 | 0.521286908 |
| 0.022143381 | 0.36463191  | 0.00955637  | 0.109459574 |
| 0.394329785 | 0.483341747 | 0.309081545 | 0.060489742 |
| 0.009476023 | 0.085456265 | 0.108593338 | 0.426236566 |
| 0.310372854 | 0.348587257 | 0.339552414 | 0.124944231 |
| 0.375013856 | 0.131762138 | 0.267548373 | 0.419725648 |
| 0.471272691 | 0.004905564 | 0.108897691 | 0.167117594 |
| 0.287677395 | 0.135697988 | 0.17495251  | 0.040358755 |

|             |             |             |             |
|-------------|-------------|-------------|-------------|
| 0.010370507 | 0.01275987  | 0.461775453 | 0.115806142 |
| 0.087478862 | 0.158018911 | 0.077951455 | 0.373399102 |
| 0.259925926 | 0.429098212 | 0.10234018  | 0.200799954 |
| 0.360726834 | 0.200251391 | 0.345670283 | 1           |
| 0.312849846 | 0.181211522 | 0.107725351 | 0.418705327 |
| 0.364927264 | 0.055055756 | 0.060232282 | 0.245870966 |
| 0.364117905 | 0.48908172  | 0.523164314 | 0.224018195 |
| 0.223074745 | 0.176366584 | 0.267764022 | 0.311725479 |
| 0.183283828 | 0.249676412 | 0.069143861 | 0.257612324 |
| 0.358047548 | 0.035345201 | 0.048298983 | 0.369813655 |
| 0.057661475 | 0.196543229 | 0.399243499 | 0.374502874 |
| 0.344709666 | 0.047585442 | 0.199957933 | 0.207038219 |
| 0.220319359 | 0.200095465 | 0.315519805 | 0.193057665 |
| 0.232733103 | 0.271329501 | 0.03626168  | 0.37551548  |
| 0.0896659   | 0.242856144 | 0.280461094 | 0.066118877 |
| 0.302339776 | 0.251740158 | 0.409488866 | 0.318589139 |
| 0.314670205 | 0.0055291   | 0.124360946 | 0.27972202  |
| 0.25050092  | 0.389652336 | 0.473587669 | 0.082077224 |
| 0.183390869 | 0.269548276 | 0.10250363  | 0.276051206 |
| 0.35153682  | 0.186880981 | 0.172173661 | 0.000561459 |
| 0.105938517 | 0.323509112 | 0.330737455 | 0.034706814 |
| 0.198457513 | 0.08476345  | 0.082488858 | 0.444349842 |
| 0.14923591  | 0.396403099 | 0.016823739 | 0.123743352 |
| 0.199953625 | 0.332915483 | 0.328371583 | 0.204722107 |
| 0.37406319  | 0.243395798 | 0.450124454 | 0.310169265 |
| 0.220500111 | 0.2652685   | 0.142930506 | 0.199011178 |
| 0.363578443 | 0.45358751  | 0.424489409 | 0.392888425 |
| 0.203427364 | 0.276765915 | 0.234026941 | 0.202959816 |
| 0.289722482 | 0.2972778   | 0.060444014 | 0.476331958 |
| 0.000464975 | 0.252916254 | 0.357375075 | 0.151267207 |
| 0.463635517 | 0.187492773 | 0.047986946 | 0.175265775 |
| 0.513048412 | 0.475080492 | 0.383426389 | 0.446217303 |
| 0.184660704 | 0.006099421 | 0.452597422 | 0.306796802 |
| 0.515464893 | 0.308185055 | 0.301634015 | 0.060237745 |
| 0.467566547 | 0.266482948 | 0.33264481  | 0.328775172 |
| 0.357727225 | 0.317292153 | 0.175105548 | 0.263286548 |
| 0.012696104 | 0.195980671 | 0.337082807 | 0.171117412 |
| 0.261954217 | 0.144236751 | 0.415506287 | 0.236018477 |
| 0.33183993  | 0.251082259 | 0.31589746  | 0.064153376 |
| 0.130025514 | 0.484858797 | 0.045782794 | 0.425843882 |
| 0.519705566 | 0.269863705 | 0.465746176 | 0.507013164 |
| 0.234065018 | 0.301541904 | 0.450773051 | 0.423810922 |
| 0.000601588 | 0.444690989 | 0.353786552 | 0.25674471  |
| 0.455444671 | 0.216629305 | 0.18150675  | 0.355326393 |
| 0.000835054 | 0.111242048 | 0.251673531 | 0.447641898 |
| 0.454251169 | 0.021171344 | 0.054242579 | 0.377421267 |
| 0.328399875 | 0.035509226 | 0.511261995 | 0.263309647 |
| 0.426584201 | 0.32588168  | 0.135837379 | 0.403264517 |
| 0.22234468  | 0.2820838   | 0.027793258 | 0.346741205 |
| 0.333600614 | 0.078326379 | 0.082812488 | 0.505808256 |
| 0.387810693 | 0.295965543 | 0.18593103  | 0.010017154 |
| 0.383845924 | 0.202345388 | 0.377024959 | 0.079217385 |
| 0.343758981 | 0.27246254  | 0.408614084 | 0.408199824 |
| 0.341053234 | 0.337893744 | 0.293752394 | 0.397945748 |



|             |             |             |             |
|-------------|-------------|-------------|-------------|
| 0.119202461 | 0.402171307 | 0.437211319 | 0.046254323 |
| 0.300974492 | 0.473762154 | 0.343582232 | 0.134514158 |
| 0.273829406 | 0.098304332 | 0.149854381 | 0.240069592 |
| 0.405955493 | 0.473106522 | 0.043732881 | 0.110719505 |
| 0.339201328 | 0.2194571   | 0.083555107 | 0.252555032 |
| 0.202120018 | 0.170136901 | 0.11329755  | 0.274292011 |
| 0.422942251 | 0.218493329 | 0.442388817 | 0.147737982 |
| 0.46238078  | 0.034208048 | 0.378525936 | 0.20656776  |
| 0.203584828 | 0.325523064 | 0.39736874  | 0.102926464 |
| 0.023928525 | 0.093644871 | 0.322098654 | 0.340450838 |
| 0.055200657 | 0.137992911 | 0.200671081 | 0.277274977 |
| 0.504374636 | 0.320677846 | 0.199923253 | 0.245404132 |
| 0.342405078 | 0.105126718 | 0.448352964 | 0.249573653 |
| 0.320972395 | 0.270187244 | 0.375038525 | 0.008813898 |
| 0.355738444 | 0.146917338 | 0.157552851 | 0.304650254 |
| 0.463363442 | 0.099046766 | 0.296273621 | 0.1177254   |
| 0.162249113 | 0.002399287 | 0.258672154 | 0.329447462 |
| 0.205837546 | 0.224250933 | 0.263549915 | 0.17489058  |
| 0.501496871 | 0.297256793 | 0.343665405 | 0.237860453 |
| 0.299568897 | 0.027718125 | 0.13161007  | 0.023216665 |
| 0.295073371 | 0.283111327 | 0.323318582 | 0.295973422 |
| 0.148339319 | 0.35730972  | 0.290931918 | 0.341583838 |
| 0.465345472 | 0.151796817 | 0.522207415 | 0.221647265 |
| 0.405238272 | 0.289555726 | 0.189059929 | 0.240137778 |
| 0.160387023 | 0.110764269 | 0.089564823 | 0.110685591 |
| 0.490420867 | 0.230159436 | 0.320594133 | 0.242837089 |
| 0.037788973 | 0.29476722  | 0.34733387  | 0.369492285 |
| 0.341064639 | 0.314529899 | 0.287775127 | 0.316310162 |
| 0.243395709 | 0.220605192 | 0.062672299 | 0.037211248 |
| 0.237508871 | 0.151135447 | 0.369066225 | 0.392497877 |
| 0.505020388 | 0.21914523  | 0.071200352 | 0.095049167 |
| 0.112180031 | 0.340582442 | 0.211365532 | 0.16943538  |
| 0.335655537 | 0.249386347 | 0.000394583 | 0.15949241  |
| 0.27866457  | 0.31073552  |             |             |
| ELL2        | 0.091333885 | 0.420853393 | 0.013483632 |
| 0.021171666 | 0.095981567 | 0.127029517 | 0.153954709 |
| 0.084561198 | 0.017206092 | 0.036447733 | 0.231587359 |
| 3.10E-05    | 0.329506068 | 0.000846242 | 0.015268702 |
| 0.386302944 | 0.431828427 | 0.252040506 | 0.407904254 |
| 0.073963757 | 0.048440161 | 0.165474049 | 0.181984681 |
| 0.127108212 | 4.76E-05    | 0.064164401 | 0.020344503 |
| 0.092612786 | 0.388870181 | 0.062568147 | 0.052176074 |
| 0.314643008 | 0.41573159  | 0.098541831 | 0.176308219 |
| 0.113270328 | 0.369478739 | 0.111923277 | 0.399676982 |
| 0.300311598 | 0.100331703 | 0.373145503 | 0.001669883 |
| 0.006427438 | 0.035537945 | 0.065079969 | 0.173734927 |
| 0.068447522 | 0.100482093 | 0.058614401 | 0.093991696 |
| 0.03489294  | 0.2450306   | 0.209701517 | 0.046128578 |
| 0.369834648 | 0.003297898 | 0.380463941 | 0.029320969 |
| 0.013374995 | 0.091843371 | 0.094342887 | 0.191933217 |
| 0.170080129 | 0.385521238 | 0.4466283   | 0.012051001 |
| 0.024116955 | 0.157858039 | 0.280631605 | 0.284490639 |
| 0.361360476 | 0.064512002 | 0.080085641 | 0.171790682 |
| 0.287616666 | 0.286731234 | 0.152516012 | 0.038412143 |

|             |             |             |             |
|-------------|-------------|-------------|-------------|
| 4.20E-05    | 0.089091282 | 0.153639701 | 0.135035523 |
| 0.252723396 | 0.256992345 | 0.148819284 | 0.089283605 |
| 0.152747204 | 0.002488666 | 0.168146583 | 0.438987216 |
| 0.006789207 | 0.305225476 | 0.005227999 | 0.03586714  |
| 0.290791249 | 0.350273093 | 0.184616609 | 0.019408046 |
| 0.001779108 | 0.019005172 | 0.010382764 | 0.306684479 |
| 0.149085283 | 0.195069056 | 0.348415014 | 0.037722364 |
| 0.308912604 | 0.018528091 | 0.101541117 | 0.378268191 |
| 0.357073053 | 0.000978987 | 0.020631093 | 0.124919083 |
| 0.09450771  | 0.062944634 | 0.143283399 | 0.005128614 |
| 0.003629579 | 0.001109849 | 0.350117164 | 0.022801598 |
| 0.040934329 | 0.097016095 | 0.038337603 | 0.343870234 |
| 0.070881131 | 0.294276657 | 0.094169503 | 0.12397976  |
| 0.320460247 | 0.179369604 | 0.251144034 | 0.312849846 |
| 1           | 0.033064993 | 0.025740857 | 0.442739603 |
| 0.310792515 | 0.019067658 | 0.013432453 | 0.180195005 |
| 0.327210509 | 0.379552301 | 0.433519027 | 0.046676679 |
| 0.151286822 | 0.076066463 | 0.053545576 | 0.281033628 |
| 0.155111389 | 0.117642934 | 0.018928569 | 0.241015705 |
| 0.347597698 | 0.007045289 | 0.011818588 | 0.284343393 |
| 0.113114123 | 0.0868174   | 0.321374972 | 0.373417364 |
| 0.28416846  | 0.015186201 | 0.073133721 | 0.132407345 |
| 0.101461434 | 0.111376838 | 0.198804206 | 0.0572651   |
| 0.150702428 | 0.057803231 | 0.013428346 | 0.322492257 |
| 0.040476717 | 0.132830957 | 0.042683257 | 0.014124716 |
| 0.177497559 | 0.069307085 | 0.349601027 | 0.176766225 |
| 0.204318195 | 0.004695839 | 0.035365988 | 0.119874906 |
| 0.040517204 | 0.29830078  | 0.44320384  | 0.040195592 |
| 0.094979364 | 0.089122078 | 0.045793952 | 0.180033851 |
| 0.234024665 | 0.043059723 | 0.039839719 | 2.96E-05    |
| 0.045894909 | 0.089239896 | 0.155487675 | 0.004028535 |
| 0.102142154 | 0.01263977  | 0.011388003 | 0.37580458  |
| 0.082615079 | 0.431656683 | 0.001724396 | 0.022902087 |
| 0.055739311 | 0.37864958  | 0.092870529 | 0.027421349 |
| 0.398570517 | 0.058419997 | 0.316150032 | 0.27457247  |
| 0.144184081 | 0.240968116 | 0.03869941  | 0.055041177 |
| 0.252897112 | 0.428741841 | 0.351558372 | 0.413411781 |
| 0.088344888 | 0.185414461 | 0.061503833 | 0.147697343 |
| 0.147398929 | 0.182058493 | 0.011657753 | 0.438654566 |
| 2.54E-05    | 0.179870356 | 0.256539025 | 0.026431994 |
| 0.434425997 | 0.180356161 | 0.009561953 | 0.043514553 |
| 0.414957532 | 0.435694426 | 0.277950678 | 0.332362884 |
| 0.031886881 | 0.000558301 | 0.350863588 | 0.256663596 |
| 0.407508998 | 0.167016476 | 0.183839896 | 0.015999671 |
| 0.41414686  | 0.137376758 | 0.203642562 | 0.137606441 |
| 0.306202778 | 0.182481313 | 0.086619404 | 0.157645151 |
| 0.00101553  | 0.053295924 | 0.189252305 | 0.05018122  |
| 0.071403937 | 0.027459639 | 0.409295091 | 0.213160143 |
| 0.161559094 | 0.035397187 | 0.123691169 | 0.028586299 |
| 0.085393624 | 0.411107718 | 0.054061852 | 0.326541572 |
| 0.433197748 | 0.171221439 | 0.429565523 | 0.406190586 |
| 0.092634974 | 0.317088053 | 0.380889336 | 0.3102107   |
| 3.30E-05    | 0.353354039 | 0.341043619 | 0.239937848 |
| 0.341568592 | 0.140554995 | 0.049355336 | 0.19545802  |

|             |             |             |             |
|-------------|-------------|-------------|-------------|
| 0.000262324 | 0.04719262  | 0.072534603 | 0.382702142 |
| 0.446116636 | 0.007917085 | 0.05935172  | 0.37819279  |
| 0.306813253 | 0.013752657 | 0.418414612 | 0.142443769 |
| 0.42729116  | 0.24133141  | 0.070417495 | 0.344058058 |
| 0.05502588  | 0.077480498 | 0.02586272  | 0.294545676 |
| 0.196461029 | 0.009106305 | 0.040729366 | 0.410682328 |
| 0.286939569 | 0.321363021 | 0.12513306  | 0.000803356 |
| 0.243701818 | 0.061446161 | 0.35499803  | 0.029251422 |
| 0.283799191 | 0.258969738 | 0.417489326 | 0.360501505 |
| 0.234206137 | 0.322641705 | 0.265700011 | 0.331291545 |
| 0.079700679 | 0.28302941  | 0.307461743 | 0.014450249 |
| 0.145144225 | 0.433722009 | 0.194193903 | 0.099186921 |
| 0.177898355 | 0.098152657 | 0.102801131 | 0.083114107 |
| 0.421089985 | 0.40731943  | 0.010443015 | 0.024356108 |
| 0.335796002 | 0.062665388 | 0.049301557 | 0.133379201 |
| 0.146274197 | 0.023395133 | 0.020359696 | 0.222149403 |
| 0.401447886 | 0.221878461 | 0.329614903 | 0.046710851 |
| 0.416855177 | 0.00808614  | 0.317064493 | 0.081126727 |
| 0.101192043 | 0.165865803 | 0.268932328 | 0.010590709 |
| 0.002106091 | 0.011172877 | 0.341142005 | 0.318613129 |
| 0.016883843 | 0.060240866 | 0.114639962 | 0.246039852 |
| 0.404579994 | 0.085592736 | 0.146723392 | 0.106934351 |
| 0.340278859 | 0.052413373 | 0.373211705 | 0.097946942 |
| 0.221449864 | 0.110876493 | 0.337853129 | 0.001512371 |
| 0.251797771 | 0.038315695 | 0.036249195 | 0.241322107 |
| 0.328472292 | 0.034206154 | 0.331094015 | 0.023059039 |
| 0.047552695 | 0.000435939 | 0.190990722 | 0.226835948 |
| 0.178299921 | 0.052056403 | 0.11630638  | 0.061873885 |
| 0.428595195 | 0.137008556 | 0.221487343 | 0.089526835 |
| 0.130819509 | 0.051568655 | 0.04392722  | 0.004385387 |
| 0.199642851 | 0.260367852 | 0.183340151 | 0.102981469 |
| 0.019136677 | 0.34539906  | 0.253752609 | 0.280074083 |
| 0.440350519 | 0.033673562 | 0.420089377 | 0.06817886  |
| 0.320976062 | 0.064663806 | 0.141735403 | 0.067808862 |
| 0.130442556 | 0.02448932  | 0.036379034 | 0.015725339 |
| 0.426089462 | 0.089396296 | 0.251682104 | 0.034054272 |
| 0.013479548 | 0.12384121  | 0.28273722  | 0.3070308   |
| 0.212634009 | 0.198345927 | 0.085201926 | 0.318617676 |
| 0.03745122  | 0.050334518 | 0.037897573 | 0.016228593 |
| 0.076335809 | 0.055771386 | 0.254643608 | 0.318607377 |
| 0.427590087 | 0.037750228 | 0.018803948 | 0.017738637 |
| 0.044599092 | 0.21815844  | 0.205916868 | 0.163477438 |
| 0.268727041 | 0.044266792 | 5.15E-05    | 0.02470726  |
| 0.232977144 | 0.09001351  |             |             |
| ELOVL1      | 0.203712798 | 0.329651853 | 0.055432628 |
| 0.001589958 | 0.021864102 | 0.236966399 | 0.146654963 |
| 0.141793193 | 0.088390741 | 0.032863205 | 0.294787523 |
| 0.017031362 | 0.164299874 | 0.067494424 | 0.079142161 |
| 0.296056266 | 0.288322135 | 0.161940271 | 0.31066655  |
| 0.238131184 | 0.017625713 | 0.344697214 | 0.174321199 |
| 0.207021849 | 0.024453774 | 0.056343293 | 0.005445313 |
| 0.099066471 | 0.271025098 | 0.205974545 | 0.057469442 |
| 0.275443502 | 0.195725503 | 0.045182744 | 0.027517271 |
| 0.01080001  | 0.368231684 | 0.008835693 | 0.145466121 |

|             |             |             |             |
|-------------|-------------|-------------|-------------|
| 0.201922175 | 0.065332555 | 0.208106891 | 0.039636708 |
| 5.23E-05    | 0.060000346 | 0.08854593  | 0.282560898 |
| 0.213275471 | 0.211613136 | 0.215132166 | 0.065826102 |
| 0.009199678 | 0.323462874 | 0.358719869 | 0.00737204  |
| 0.330728324 | 0.000246981 | 0.35282565  | 0.149625186 |
| 0.076597217 | 0.19499074  | 0.119789128 | 0.259522103 |
| 0.244686534 | 0.339464677 | 0.311299006 | 0.021936303 |
| 0.093656742 | 0.147624335 | 0.162863444 | 0.131375774 |
| 0.317140867 | 0.047615133 | 0.057197179 | 0.049444599 |
| 0.162825315 | 0.199001656 | 0.308797102 | 0.10169758  |
| 0.005754415 | 0.089148456 | 0.027615249 | 0.235926937 |
| 0.096189657 | 0.320431406 | 0.197612411 | 0.054244799 |
| 0.105820479 | 0.047673986 | 0.249306631 | 0.30774024  |
| 0.005946663 | 0.201649117 | 0.003635834 | 0.09786875  |
| 0.248385765 | 0.231434662 | 0.259922989 | 0.039084051 |
| 0.047860243 | 0.134105563 | 0.091841809 | 0.184029047 |
| 0.206563234 | 0.142380644 | 0.329055945 | 0.020186834 |
| 0.137729477 | 0.10086812  | 0.098341134 | 0.344329208 |
| 0.313699964 | 0.032254933 | 0.141798715 | 0.214609869 |
| 0.038975422 | 0.017292281 | 0.1693758   | 0.004805042 |
| 0.003846629 | 0.040358575 | 0.262263715 | 0.113204751 |
| 0.039968057 | 0.140582885 | 0.015989738 | 0.121434261 |
| 0.107497233 | 0.277336886 | 0.027962163 | 0.130055985 |
| 0.134796026 | 0.161641382 | 0.075531464 | 0.181211522 |
| 0.033064993 | 1           | 0.1399316   | 0.296003468 |
| 0.409307723 | 0.046438967 | 0.068403427 | 0.275342379 |
| 0.133718265 | 0.288779957 | 0.330359012 | 0.104242033 |
| 0.044709772 | 0.229321667 | 0.045505445 | 0.18347108  |
| 0.205514575 | 0.254824494 | 0.01687643  | 0.334912299 |
| 0.358367573 | 0.005724738 | 0.070708475 | 0.253590086 |
| 0.003014201 | 0.056446103 | 0.35505896  | 0.238526777 |
| 0.157882353 | 0.004688693 | 0.050811294 | 0.168475243 |
| 0.269755393 | 0.136635881 | 0.264145075 | 0.037688015 |
| 0.312799743 | 0.043674697 | 0.043933318 | 0.139890181 |
| 0.147186649 | 0.310293694 | 0.030093461 | 0.012871175 |
| 0.221080328 | 0.142166336 | 0.26935625  | 0.222661335 |
| 0.219382586 | 0.00012734  | 0.030638981 | 0.237247458 |
| 0.052105951 | 0.222937796 | 0.324396017 | 0.159876633 |
| 0.316293594 | 0.034979668 | 0.193472294 | 0.047991167 |
| 0.33625726  | 0.049030029 | 0.044027288 | 0.004660986 |
| 0.058383697 | 0.049517432 | 0.147267379 | 0.113015323 |
| 0.037699489 | 0.090074476 | 0.110475222 | 0.262930363 |
| 0.203830966 | 0.18327208  | 0.075570669 | 0.044356126 |
| 0.100516226 | 0.223352351 | 0.036406135 | 0.083155897 |
| 0.203382412 | 0.060689566 | 0.197921427 | 0.362208989 |
| 0.048477998 | 0.287431083 | 0.025556176 | 0.169535391 |
| 0.111649171 | 0.247248453 | 0.185193668 | 0.216947256 |
| 0.139166618 | 0.273185062 | 0.039809031 | 0.298398332 |
| 0.242241585 | 0.20501965  | 0.091657829 | 0.342842271 |
| 0.007819295 | 0.272169465 | 0.124048577 | 0.03082995  |
| 0.302038483 | 0.176831898 | 0.091824919 | 0.192243684 |
| 0.315808986 | 0.353637706 | 0.348903603 | 0.205145918 |
| 0.042528311 | 0.061084009 | 0.365919639 | 0.302722591 |
| 0.264722378 | 0.129764639 | 0.018828993 | 0.029962525 |

|             |             |             |             |
|-------------|-------------|-------------|-------------|
| 0.28089941  | 0.16251961  | 0.19908975  | 0.126846199 |
| 0.118399662 | 0.049822843 | 0.243605002 | 0.242789475 |
| 0.014621814 | 0.111392404 | 0.159548826 | 0.025636526 |
| 0.05281363  | 0.067972881 | 0.228552756 | 0.328668848 |
| 0.032730985 | 0.048231251 | 0.030401884 | 0.052977874 |
| 0.192233932 | 0.33212549  | 0.003254909 | 0.36972838  |
| 0.319825521 | 0.23967643  | 0.245476177 | 0.33004163  |
| 0.241993248 | 0.310549151 | 0.279492315 | 0.277624876 |
| 0.006581473 | 0.181210444 | 0.123724383 | 0.37824268  |
| 0.221604742 | 0.264215224 | 0.103535808 | 0.054260295 |
| 0.005451256 | 0.199506459 | 0.011913503 | 0.397184236 |
| 0.228505674 | 0.030531826 | 0.00224594  | 0.230948966 |
| 0.112294972 | 0.011425373 | 0.348223614 | 0.151133567 |
| 0.263659704 | 0.137687302 | 0.103031709 | 0.15055441  |
| 0.009921736 | 0.084108943 | 0.006644483 | 0.15773741  |
| 0.096946413 | 0.034455893 | 0.012050284 | 0.3359446   |
| 0.313849639 | 0.247776734 | 0.25512534  | 0.003949388 |
| 0.216336261 | 0.013379533 | 0.178592278 | 0.079021731 |
| 0.341503931 | 0.314323407 | 0.30900884  | 0.178065953 |
| 0.183991855 | 0.304481264 | 0.340087351 | 0.27576125  |
| 0.006992449 | 0.17636408  | 0.225480602 | 0.028647178 |
| 0.133357716 | 0.256781313 | 0.089045504 | 0.173039732 |
| 0.323653225 | 0.004253675 | 0.23628232  | 0.236854915 |
| 0.2892009   | 0.244919137 | 0.053696834 | 0.134798391 |
| 0.296871395 | 0.111167982 | 0.097240927 | 0.181692979 |
| 0.319437169 | 0.011515715 | 0.042350775 | 0.328578854 |
| 0.341721392 | 0.257729661 | 0.250922357 | 0.019133773 |
| 0.230379318 | 0.086404805 | 0.298820791 | 0.068447913 |
| 0.300288648 | 0.116693455 | 0.188027813 | 0.03092747  |
| 0.008018779 | 0.10122133  | 0.271719175 | 0.352829244 |
| 0.085069382 | 0.240263237 | 0.120696942 | 0.137104669 |
| 0.265804292 | 0.044566068 | 0.274618648 | 0.210517903 |
| 0.362539821 | 0.010100302 | 0.384520798 | 0.225035553 |
| 0.32768482  | 0.08233932  | 0.257915997 | 0.004192644 |
| 0.157600728 | 0.037024524 | 0.139430207 | 0.097136565 |
| 0.228286762 | 0.088839472 | 0.227524301 | 0.143188757 |
| 0.019254904 | 0.008234313 | 0.366831776 | 0.040049349 |
| 0.30864722  | 0.046107376 | 0.19667929  | 0.006406596 |
| 0.368697354 | 0.204919904 | 0.277539708 | 0.038855381 |
| 0.094398787 | 0.000540617 | 0.04138031  | 0.06922696  |
| 0.342029012 | 0.348870451 | 0.207779553 | 0.157859247 |
| 0.125609479 | 0.159948335 | 0.278087949 | 0.080064055 |
| 0.235067047 | 0.012280192 | 0.288177933 | 0.165002426 |
| 0.152407587 | 0.072434141 | 0.264276444 | 0.091290979 |
| 0.089053643 | 0.049861899 | 0.112339882 | 0.149524524 |
| 0.225128084 | 0.077928359 | 0.112973643 | 0.071994229 |
| 0.031487532 | 0.092784057 | 0.222884835 | 0.157683136 |
| 0.158192801 | 0.152010785 | 0.074766534 | 0.35703299  |
| 0.065774221 | 0.181699109 | 0.003217818 | 0.004457551 |
| 0.018584462 | 0.103556838 | 0.360055959 | 0.305986085 |
| 0.295251686 | 0.062109791 | 0.081208688 | 0.148493014 |
| 0.015740228 | 0.219311996 | 0.173722383 | 0.007273934 |
| 0.18040341  | 0.052240053 | 0.002671089 | 0.155912204 |
| 0.336098996 | 0.036965403 |             |             |

| EMB         | 0.125025761 | 0.233606858 | 0.199672304 |
|-------------|-------------|-------------|-------------|
| 0.005272827 | 0.05509773  | 0.356312203 | 0.229557849 |
| 0.083210708 | 0.17739997  | 0.090641328 | 0.359534156 |
| 0.029889047 | 0.067147126 | 0.16426792  | 0.136897823 |
| 0.163485207 | 0.156026294 | 0.174414746 | 0.165456864 |
| 0.173231498 | 0.035874338 | 0.295781295 | 0.188938427 |
| 0.282369514 | 0.060987483 | 0.126572648 | 0.021905249 |
| 0.051377554 | 0.136727445 | 0.292347072 | 0.104665336 |
| 0.145076273 | 0.098746138 | 0.042407769 | 0.032848181 |
| 0.006427359 | 0.307924563 | 0.003061994 | 0.070050664 |
| 0.079767312 | 0.106205033 | 0.110322998 | 0.100113957 |
| 8.25E-05    | 0.149559337 | 0.044176897 | 0.255067175 |
| 0.160063612 | 0.334770523 | 0.32637273  | 0.119929683 |
| 0.003968001 | 0.349793416 | 0.22684601  | 0.003146301 |
| 0.322527188 | 0.001091462 | 0.302551302 | 0.088152199 |
| 0.212640314 | 0.182172228 | 0.061890596 | 0.196777899 |
| 0.35112008  | 0.317255046 | 0.192706868 | 0.077757683 |
| 0.232696507 | 0.087095477 | 0.080011861 | 0.111806657 |
| 0.216938569 | 0.079175414 | 0.096455028 | 0.020466415 |
| 0.090540224 | 0.090126356 | 0.351137503 | 0.194695599 |
| 0.014777086 | 0.181864917 | 0.030062341 | 0.112435169 |
| 0.044025396 | 0.349611629 | 0.107349463 | 0.085235772 |
| 0.069654731 | 0.196838664 | 0.241630566 | 0.182543745 |
| 0.016904931 | 0.090961155 | 0.005200304 | 0.179868136 |
| 0.142430161 | 0.10369619  | 0.173035733 | 0.128278293 |
| 0.169981854 | 0.230615668 | 0.072364376 | 0.068859921 |
| 0.144364849 | 0.099801154 | 0.315074548 | 0.004119348 |
| 0.049846479 | 0.157463244 | 0.089214511 | 0.298450651 |
| 0.198339205 | 0.081876364 | 0.2066404   | 0.335652006 |
| 0.033578159 | 0.028276645 | 0.249354024 | 0.005833847 |
| 0.014995096 | 0.02687897  | 0.131681189 | 0.224686343 |
| 0.096750688 | 0.238430047 | 0.048474776 | 0.082149747 |
| 0.058454994 | 0.125699665 | 0.065044638 | 0.191913183 |
| 0.069952896 | 0.232871581 | 0.063127806 | 0.107725351 |
| 0.025740857 | 0.1399316   | 1           | 0.227700305 |
| 0.338394557 | 0.161005707 | 0.208322753 | 0.34296513  |
| 0.049933609 | 0.161810374 | 0.204620412 | 0.10492896  |
| 0.059414053 | 0.258066585 | 0.054214914 | 0.198188492 |
| 0.283393834 | 0.178543003 | 0.006097896 | 0.331764816 |
| 0.351866699 | 0.00577719  | 0.22105992  | 0.141279558 |
| 0.006357311 | 0.08326567  | 0.28688463  | 0.158971592 |
| 0.093916216 | 0.020435373 | 0.08299233  | 0.23460515  |
| 0.289398845 | 0.218317179 | 0.188233281 | 0.067902321 |
| 0.359712977 | 0.050554215 | 0.161854518 | 0.051287409 |
| 0.284228282 | 0.287351921 | 0.019359845 | 0.011128703 |
| 0.120738038 | 0.094644076 | 0.200333393 | 0.1479783   |
| 0.116187267 | 0.000710508 | 0.088085051 | 0.151116745 |
| 0.059881633 | 0.09194704  | 0.249899825 | 0.305664413 |
| 0.360107325 | 0.016625171 | 0.318103074 | 0.048015494 |
| 0.180108408 | 0.081640866 | 0.088997151 | 0.026504083 |
| 0.126064102 | 0.031002826 | 0.092340285 | 0.219180119 |
| 0.073444575 | 0.226652987 | 0.091372909 | 0.177589627 |
| 0.327853705 | 0.106197082 | 0.094443843 | 0.016809463 |
| 0.15636476  | 0.201396123 | 0.03412655  | 0.074167353 |

|             |             |             |             |
|-------------|-------------|-------------|-------------|
| 0.151714572 | 0.098467756 | 0.080154897 | 0.340087278 |
| 0.063021073 | 0.340026235 | 0.008248759 | 0.156496149 |
| 0.061669651 | 0.154690423 | 0.103037517 | 0.128649712 |
| 0.188593908 | 0.144279823 | 0.027476589 | 0.395636543 |
| 0.18868847  | 0.143839614 | 0.256713819 | 0.236923332 |
| 0.029060747 | 0.286490803 | 0.093766958 | 0.01178942  |
| 0.234586947 | 0.269322548 | 0.25551176  | 0.187093293 |
| 0.171451939 | 0.24427398  | 0.198299182 | 0.100492869 |
| 0.022550787 | 0.138474379 | 0.226317796 | 0.257496299 |
| 0.132174419 | 0.102689836 | 0.013610532 | 0.012616178 |
| 0.179067128 | 0.071779306 | 0.161197962 | 0.083470576 |
| 0.068437187 | 0.023752575 | 0.267028406 | 0.112119244 |
| 0.009013039 | 0.163084277 | 0.105479289 | 0.039381283 |
| 0.06745278  | 0.095862476 | 0.149077962 | 0.354389771 |
| 0.027014516 | 0.044839005 | 0.026526594 | 0.143977105 |
| 0.304903783 | 0.238335362 | 0.001077694 | 0.235937591 |
| 0.190201688 | 0.184265398 | 0.163395678 | 0.193463951 |
| 0.255335284 | 0.302974689 | 0.194778573 | 0.128290291 |
| 0.015410812 | 0.077327132 | 0.049472864 | 0.39812114  |
| 0.123003931 | 0.330172581 | 0.037037819 | 0.026999397 |
| 0.008130783 | 0.340537021 | 0.007795482 | 0.285929467 |
| 0.140488762 | 0.10809748  | 0.000464118 | 0.161365988 |
| 0.047754297 | 0.007741182 | 0.227568513 | 0.182899947 |
| 0.200989445 | 0.10528603  | 0.188811393 | 0.065046171 |
| 0.005008915 | 0.052941252 | 0.018152792 | 0.132264738 |
| 0.050957824 | 0.012234611 | 0.039070702 | 0.195387823 |
| 0.230272644 | 0.246059656 | 0.327021606 | 0.018926294 |
| 0.086087113 | 0.019644257 | 0.123770071 | 0.149091835 |
| 0.257055142 | 0.327686202 | 0.242439026 | 0.086667852 |
| 0.117289722 | 0.291731415 | 0.35487654  | 0.202930877 |
| 0.008863065 | 0.086739511 | 0.114856967 | 0.126166899 |
| 0.06323063  | 0.156089385 | 0.070304533 | 0.311463375 |
| 0.277350137 | 0.006071332 | 0.383371521 | 0.147047228 |
| 0.242146536 | 0.149284725 | 0.195041271 | 0.193419102 |
| 0.294120673 | 0.128343749 | 0.194542871 | 0.15213644  |
| 0.388513185 | 0.005442607 | 0.014455403 | 0.304525139 |
| 0.291912905 | 0.341301655 | 0.156397439 | 0.045368571 |
| 0.120435494 | 0.234601945 | 0.166716603 | 0.105902908 |
| 0.316149879 | 0.064269114 | 0.073998598 | 0.018643215 |
| 0.026182848 | 0.188607293 | 0.276889987 | 0.332236137 |
| 0.22102327  | 0.348444776 | 0.191430237 | 0.159800939 |
| 0.144734967 | 0.047214039 | 0.357560481 | 0.175877859 |
| 0.353319679 | 0.022162645 | 0.290040473 | 0.213735333 |
| 0.251507694 | 0.09900577  | 0.167396653 | 0.006249721 |
| 0.086807345 | 0.092695849 | 0.054786325 | 0.10255118  |
| 0.097217151 | 0.191291871 | 0.230304156 | 0.220334851 |
| 0.022346968 | 0.013798968 | 0.317117836 | 0.018706387 |
| 0.408496771 | 0.025888038 | 0.158885771 | 0.002637834 |
| 0.254401954 | 0.17328921  | 0.186388526 | 0.012977193 |
| 0.104472033 | 0.000238526 | 0.089916993 | 0.246467151 |
| 0.270771968 | 0.306257908 | 0.119878806 | 0.100669831 |
| 0.071377206 | 0.111911973 | 0.254148026 | 0.067392341 |
| 0.145228786 | 0.01039559  | 0.168373858 | 0.118270054 |
| 0.057030718 | 0.072640051 | 0.335416335 | 0.083413924 |

|             |             |             |             |
|-------------|-------------|-------------|-------------|
| 0.141141906 | 0.043155648 | 0.200323594 | 0.168131601 |
| 0.126192394 | 0.064004104 | 0.112472144 | 0.077009081 |
| 0.143592308 | 0.088428511 | 0.11033728  | 0.07730717  |
| 0.128911975 | 0.072183587 | 0.041870845 | 0.355264884 |
| 0.05512582  | 0.148166823 | 0.008123421 | 0.01506625  |
| 0.018987338 | 0.1927554   | 0.211989421 | 0.190585802 |
| 0.165538492 | 0.036327222 | 0.204636789 | 0.230357001 |
| 0.00452708  | 0.099444663 | 0.24612985  | 0.005048469 |
| 0.11846862  | 0.028869564 | 0.014301553 | 0.137496845 |
| 0.318972925 | 0.030959938 |             |             |
| EMP1        | 0.298751909 | 0.511742593 | 0.13089945  |
| 0.044655048 | 0.232409546 | 0.346927282 | 0.363433413 |
| 0.30961976  | 0.184814949 | 0.221305061 | 0.426424025 |
| 0.001853958 | 0.319509511 | 0.02440491  | 0.131587302 |
| 0.47252688  | 0.493800282 | 0.472061968 | 0.482147727 |
| 0.315844756 | 0.202261552 | 0.387519211 | 0.422902933 |
| 0.374280424 | 0.002733535 | 0.237401395 | 0.081670144 |
| 0.30980696  | 0.452261813 | 0.304951796 | 0.341236933 |
| 0.407460551 | 0.413456155 | 0.424786387 | 0.415821852 |
| 0.236541085 | 0.487864568 | 0.143196872 | 0.389419032 |
| 0.336519542 | 0.354609026 | 0.401519957 | 0.032016006 |
| 0.005033025 | 0.204703485 | 0.271647785 | 0.40718855  |
| 0.337320527 | 0.325462633 | 0.276939873 | 0.297420963 |
| 0.119139234 | 0.440640327 | 0.366654257 | 0.121761122 |
| 0.477810441 | 0.007249546 | 0.48911232  | 0.219973521 |
| 0.137585138 | 0.392839021 | 0.304112722 | 0.412357654 |
| 0.376271681 | 0.481707424 | 0.516401446 | 0.08787458  |
| 0.152618088 | 0.404078324 | 0.336973667 | 0.450641176 |
| 0.457697548 | 0.361493334 | 0.407396956 | 0.346354257 |
| 0.3947564   | 0.329382605 | 0.39176161  | 0.283755361 |
| 0.001595314 | 0.273201743 | 0.411779082 | 0.276239302 |
| 0.333434585 | 0.443260798 | 0.345217517 | 0.36090268  |
| 0.382849379 | 0.04375447  | 0.424560578 | 0.511133936 |
| 0.038806825 | 0.355948118 | 0.020714442 | 0.260453279 |
| 0.382361734 | 0.402649253 | 0.376940785 | 0.151907101 |
| 0.032042878 | 0.20224056  | 0.127018167 | 0.332007461 |
| 0.416148875 | 0.461122733 | 0.475501344 | 0.111479257 |
| 0.2912074   | 0.208784777 | 0.458234538 | 0.490270353 |
| 0.463032527 | 0.017143384 | 0.220046231 | 0.346722655 |
| 0.364493592 | 0.209094495 | 0.373807403 | 0.033173039 |
| 0.021518656 | 0.019511746 | 0.418766636 | 0.235797918 |
| 0.199029628 | 0.328562916 | 0.146860555 | 0.45136235  |
| 0.305826029 | 0.377216053 | 0.258688229 | 0.384015936 |
| 0.382548894 | 0.393590534 | 0.465375357 | 0.418705327 |
| 0.442739603 | 0.296003468 | 0.227700305 | 1           |
| 0.445315547 | 0.144556691 | 0.148208478 | 0.406254771 |
| 0.297440916 | 0.46022265  | 0.522718545 | 0.340501656 |
| 0.412112631 | 0.342835339 | 0.322376998 | 0.463488767 |
| 0.384047548 | 0.364517028 | 0.075944043 | 0.443547125 |
| 0.466694137 | 0.038441929 | 0.132301456 | 0.394280976 |
| 0.109701222 | 0.379988934 | 0.447231042 | 0.471149793 |
| 0.460424143 | 0.06606859  | 0.318975482 | 0.375173534 |
| 0.362464795 | 0.359376289 | 0.421103823 | 0.285196432 |
| 0.388914452 | 0.324114859 | 0.113135693 | 0.299462632 |



|             |             |             |             |
|-------------|-------------|-------------|-------------|
| 0.224613363 | 0.382355598 | 0.240392814 | 0.077249793 |
| 0.360633988 | 0.356317973 | 0.452422326 | 0.412728484 |
| 0.345025227 | 0.006487325 | 0.214020414 | 0.328611524 |
| 0.287311205 | 0.338744574 | 0.52553738  | 0.212424355 |
| 0.336287905 | 0.308512368 | 0.244260613 | 0.462700181 |
| 0.346911315 | 0.283304832 | 0.262677468 | 0.001271513 |
| 0.26152039  | 0.308667506 | 0.433424576 | 0.07606487  |
| 0.370968936 | 0.160733343 | 0.123571283 | 0.446112421 |
| 0.312798287 | 0.446212392 | 0.035532932 | 0.135946825 |
| 0.353661751 | 0.493438104 | 0.384530225 | 0.242669382 |
| 0.478102803 | 0.36426349  | 0.354694434 | 0.448749495 |
| 0.433148498 | 0.429312906 | 0.150628273 | 0.349045079 |
| 0.401088122 | 0.460919986 | 0.390800523 | 0.450624742 |
| 0.374540349 | 0.344391594 | 0.281212206 | 0.37482056  |
| 0.398682913 | 0.436128856 | 0.144414855 | 0.522024837 |
| 0.001377413 | 0.428919003 | 0.45390087  | 0.14377742  |
| 0.508376647 | 0.377294347 | 0.126101642 | 0.292444609 |
| 0.491076042 | 0.522974826 | 0.388797702 | 0.375753974 |
| 0.195572698 | 0.017312035 | 0.468041252 | 0.45158332  |
| 0.460930616 | 0.48194463  | 0.365532665 | 0.08327969  |
| 0.472487514 | 0.294191403 | 0.410265445 | 0.347402795 |
| 0.452144019 | 0.398171481 | 0.349509853 | 0.301354511 |
| 0.013531751 | 0.312781053 | 0.362772692 | 0.233250852 |
| 0.354027403 | 0.234967046 | 0.459883935 | 0.426603162 |
| 0.443770369 | 0.250964397 | 0.384963773 | 0.173178405 |
| 0.302494707 | 0.51095915  | 0.060309944 | 0.446216288 |
| 0.512090688 | 0.438082905 | 0.467703316 | 0.496935024 |
| 0.358851686 | 0.472574494 | 0.459868847 | 0.384008756 |
| 0.001324263 | 0.365370761 | 0.319783073 | 0.430237758 |
| 0.40115084  | 0.384962754 | 0.199383195 | 0.373855276 |
| 0.003302709 | 0.247780558 | 0.216190047 | 0.505538749 |
| 0.453912957 | 0.07338085  | 0.055741826 | 0.466439482 |
| 0.333170598 | 0.051972842 | 0.521571642 | 0.406626601 |
| 0.479003938 | 0.486220667 | 0.286368837 | 0.332679995 |
| 0.169630295 | 0.380644262 | 0.067750518 | 0.467782284 |
| 0.424823725 | 0.076820672 | 0.148584148 | 0.501578291 |
| 0.41771907  | 0.48622674  | 0.371053632 | 0.011976618 |
| 0.308926418 | 0.218755186 | 0.447135785 | 0.203315255 |
| 0.435012892 | 0.451499175 | 0.484223379 | 0.378492782 |
| 0.449092844 | 0.469293157 | 0.442792639 | 0.445108281 |
| 0.151410245 | 0.329418722 | 0.374964483 | 0.103234631 |
| 0.306650133 | 0.471850544 | 0.41319658  | 0.297818696 |
| 0.408850249 | 0.137752954 | 0.316218891 | 0.306450783 |
| 0.487781497 | 0.456777313 | 0.117009147 | 0.234315925 |
| 0.470155711 | 0.397064596 | 0.222868706 | 0.431778063 |
| 0.377970955 | 0.115480201 | 0.1235732   | 0.439121187 |
| 0.500033526 | 0.41440046  | 0.412054045 | 0.211311352 |
| 0.433901976 | 0.102582602 | 0.403655244 | 0.398989773 |
| 0.357563058 | 0.317942169 | 0.313384121 | 0.087970272 |
| 0.028762139 | 0.1504664   | 0.473293491 | 0.46286973  |
| 0.149398119 | 0.284852401 | 0.368504365 | 0.458495035 |
| 0.464066156 | 0.396845359 | 0.383022779 | 0.390902565 |
| 0.467466602 | 0.160899258 | 0.500817922 | 0.370134893 |
| 0.402607425 | 0.425828559 | 0.450362853 | 0.013307425 |

|             |             |             |             |
|-------------|-------------|-------------|-------------|
| 0.401372337 | 0.242250527 | 0.172095469 | 0.449573946 |
| 0.38151347  | 0.231693408 | 0.484628226 | 0.237516898 |
| 0.197774429 | 0.005941573 | 0.408499543 | 0.343043379 |
| 0.386780671 | 0.25490928  | 0.403188317 | 0.13316862  |
| 0.536744765 | 0.393591575 | 0.378662345 | 0.264800339 |
| 0.432362472 | 0.028695036 | 0.245501082 | 0.065776686 |
| 0.396765316 | 0.452306242 | 0.373904076 | 0.324223197 |
| 0.183144603 | 0.482803531 | 0.466266954 | 0.480205428 |
| 0.462429669 | 0.142410271 | 0.492059212 | 0.360345654 |
| 0.316947383 | 0.38754282  | 0.379708763 | 0.392841678 |
| 0.349886703 | 0.173038263 | 0.229739085 | 0.190625263 |
| 0.45167151  | 0.395312635 | 0.477865044 | 0.274361706 |
| 0.105164236 | 0.45987622  | 0.372292582 | 0.373097754 |
| 0.428353228 | 0.306040097 | 0.341144692 | 0.46356079  |
| 0.27570283  | 0.305078849 | 0.084519943 | 0.058114509 |
| 0.270636644 | 0.293994547 | 0.374813308 | 0.421743661 |
| 0.490437015 | 0.244309986 | 0.180946369 | 0.201905754 |
| 0.119120172 | 0.296065086 | 0.404439259 | 0.202366064 |
| 0.462918394 | 0.263875074 | 0.00133605  | 0.246723846 |
| 0.440844693 | 0.380787064 |             |             |
| ENDOD1      | 0.346094325 | 0.476107865 | 0.194034201 |
| 0.026170252 | 0.186522712 | 0.396488525 | 0.361524969 |
| 0.345033491 | 0.27289043  | 0.217873541 | 0.450305453 |
| 0.009088708 | 0.273065678 | 0.071445513 | 0.205887534 |
| 0.436793993 | 0.442293106 | 0.432810921 | 0.447711269 |
| 0.405106107 | 0.158520042 | 0.45431897  | 0.41372886  |
| 0.412975088 | 0.012475358 | 0.23487792  | 0.060291826 |
| 0.313442227 | 0.411174083 | 0.403915619 | 0.358315003 |
| 0.384577885 | 0.345777584 | 0.348346917 | 0.292348568 |
| 0.143474518 | 0.483625451 | 0.08535246  | 0.310528409 |
| 0.30014478  | 0.326543139 | 0.34625678  | 0.067587322 |
| 0.001590281 | 0.235598429 | 0.291579198 | 0.447846319 |
| 0.43279673  | 0.38356624  | 0.378081248 | 0.273394015 |
| 0.090929678 | 0.466568186 | 0.408285365 | 0.086168175 |
| 0.464539356 | 0.003853048 | 0.474763833 | 0.311717155 |
| 0.211982709 | 0.462160546 | 0.304640987 | 0.430721787 |
| 0.407656487 | 0.465469745 | 0.469365056 | 0.103756066 |
| 0.20940614  | 0.387650413 | 0.290109761 | 0.373310112 |
| 0.434009869 | 0.352940413 | 0.389893219 | 0.262194132 |
| 0.338759638 | 0.297807449 | 0.461475089 | 0.38041066  |
| 0.004928117 | 0.276319198 | 0.283256178 | 0.302561629 |
| 0.268290769 | 0.46421607  | 0.359315955 | 0.321986256 |
| 0.345489356 | 0.095138864 | 0.464855165 | 0.464073162 |
| 0.037701153 | 0.320530685 | 0.019727568 | 0.35792324  |
| 0.363714288 | 0.358523134 | 0.393973711 | 0.1827494   |
| 0.074599334 | 0.331796251 | 0.216759435 | 0.290374685 |
| 0.437929466 | 0.421164367 | 0.465957518 | 0.098156158 |
| 0.241071914 | 0.308967882 | 0.45099051  | 0.474009927 |
| 0.439930133 | 0.04806098  | 0.356489559 | 0.395269881 |
| 0.298065245 | 0.154235972 | 0.394660557 | 0.035591627 |
| 0.0242137   | 0.05183486  | 0.38303189  | 0.359761257 |
| 0.198121355 | 0.355407718 | 0.130938117 | 0.354641571 |
| 0.337638153 | 0.362869771 | 0.2150841   | 0.384621093 |
| 0.31422991  | 0.384829507 | 0.35948074  | 0.364927264 |

|             |             |             |             |
|-------------|-------------|-------------|-------------|
| 0.310792515 | 0.409307723 | 0.338394557 | 0.445315547 |
| 1           | 0.191151914 | 0.22471449  | 0.446090038 |
| 0.241532609 | 0.425732838 | 0.484039592 | 0.419817147 |
| 0.324224999 | 0.442107545 | 0.302623754 | 0.42150504  |
| 0.41508303  | 0.437981366 | 0.083066103 | 0.480547385 |
| 0.466547595 | 0.039337132 | 0.208291318 | 0.378825909 |
| 0.053389106 | 0.356222606 | 0.448674954 | 0.42061754  |
| 0.404533826 | 0.049706429 | 0.290993161 | 0.389438459 |
| 0.447206858 | 0.376595034 | 0.437595304 | 0.254084048 |
| 0.456000788 | 0.293327165 | 0.157368197 | 0.245650945 |
| 0.307084979 | 0.462035933 | 0.213981078 | 0.074661613 |
| 0.373358688 | 0.421761847 | 0.420063279 | 0.426045157 |
| 0.3381996   | 0.003111372 | 0.209796864 | 0.370659512 |
| 0.294990763 | 0.314127064 | 0.483641205 | 0.296837995 |
| 0.442781953 | 0.252727879 | 0.344934491 | 0.352310063 |
| 0.369480154 | 0.286990601 | 0.266957672 | 0.004413886 |
| 0.293751291 | 0.26219535  | 0.417648641 | 0.174812248 |
| 0.314275286 | 0.261664894 | 0.211359774 | 0.404722357 |
| 0.386211501 | 0.368721678 | 0.095127697 | 0.161974325 |
| 0.40803411  | 0.4367816   | 0.312652239 | 0.308435802 |
| 0.40627407  | 0.378251159 | 0.31264914  | 0.470002883 |
| 0.361034757 | 0.442312756 | 0.138975858 | 0.44195335  |
| 0.334732645 | 0.401162578 | 0.333955026 | 0.391296396 |
| 0.412506563 | 0.37362062  | 0.26838339  | 0.438117901 |
| 0.44239666  | 0.45417697  | 0.245303573 | 0.489440989 |
| 0.005528123 | 0.473637827 | 0.38107475  | 0.144634368 |
| 0.463507732 | 0.378586506 | 0.223189872 | 0.41565147  |
| 0.455562788 | 0.495182786 | 0.403549095 | 0.331563884 |
| 0.215711644 | 0.058618292 | 0.464609873 | 0.45807168  |
| 0.411487131 | 0.453192391 | 0.233481573 | 0.109462082 |
| 0.430151936 | 0.304890707 | 0.396735498 | 0.334806217 |
| 0.365805402 | 0.30469039  | 0.44590356  | 0.327334184 |
| 0.023729574 | 0.362455929 | 0.340926335 | 0.195377265 |
| 0.322722428 | 0.285695066 | 0.397587192 | 0.473185145 |
| 0.320807754 | 0.267959218 | 0.275258084 | 0.204284322 |
| 0.367287465 | 0.480260398 | 0.034499893 | 0.453437083 |
| 0.471877996 | 0.470058533 | 0.407645077 | 0.468351012 |
| 0.441478261 | 0.466028834 | 0.422698304 | 0.368412824 |
| 0.005389697 | 0.309067407 | 0.255208106 | 0.474727125 |
| 0.355591717 | 0.438074839 | 0.233862711 | 0.284551318 |
| 0.007568564 | 0.346776726 | 0.148808344 | 0.504183147 |
| 0.388567724 | 0.104719678 | 0.027234166 | 0.419438537 |
| 0.267475244 | 0.055012151 | 0.493107451 | 0.405399222 |
| 0.426292958 | 0.43605829  | 0.308169263 | 0.273570583 |
| 0.117622576 | 0.389132375 | 0.054974429 | 0.406099349 |
| 0.361743425 | 0.102544694 | 0.114781927 | 0.47153245  |
| 0.418341422 | 0.460054672 | 0.435475064 | 0.015452988 |
| 0.290918348 | 0.158807345 | 0.378416989 | 0.282471117 |
| 0.451131812 | 0.468155968 | 0.452814349 | 0.318901886 |
| 0.419066997 | 0.461343327 | 0.462943898 | 0.418540463 |
| 0.094811825 | 0.290122127 | 0.341364572 | 0.132083706 |
| 0.295816161 | 0.41337613  | 0.338209588 | 0.339421344 |
| 0.463619462 | 0.071955244 | 0.382882579 | 0.382677464 |
| 0.447615425 | 0.398910301 | 0.175877915 | 0.372095407 |

|             |             |             |             |
|-------------|-------------|-------------|-------------|
| 0.453697364 | 0.456918234 | 0.264671857 | 0.473092488 |
| 0.447568186 | 0.099701007 | 0.149083993 | 0.474493399 |
| 0.476924871 | 0.430656703 | 0.377938126 | 0.172925379 |
| 0.377749707 | 0.195689832 | 0.395335038 | 0.406954816 |
| 0.452445022 | 0.286590718 | 0.28128731  | 0.119053421 |
| 0.036104967 | 0.256459706 | 0.446636629 | 0.468547336 |
| 0.223181959 | 0.394642515 | 0.376404156 | 0.403915054 |
| 0.414851525 | 0.356749238 | 0.441003517 | 0.460719318 |
| 0.471810159 | 0.109314303 | 0.498298664 | 0.446334592 |
| 0.431446297 | 0.397630724 | 0.417819867 | 0.016452693 |
| 0.351624958 | 0.241122239 | 0.229606364 | 0.364760971 |
| 0.342866199 | 0.294160803 | 0.445901177 | 0.356982896 |
| 0.166632267 | 0.014293917 | 0.471826575 | 0.23679409  |
| 0.436543772 | 0.260339672 | 0.459419292 | 0.082724824 |
| 0.511225003 | 0.42257121  | 0.386047543 | 0.221351969 |
| 0.397806242 | 0.011002558 | 0.236279691 | 0.132571426 |
| 0.440893687 | 0.479128634 | 0.378495579 | 0.343338963 |
| 0.277135757 | 0.406413521 | 0.473511981 | 0.368227185 |
| 0.396155807 | 0.117066999 | 0.444165308 | 0.440981005 |
| 0.262888714 | 0.397148772 | 0.437196737 | 0.42474499  |
| 0.327508088 | 0.204591621 | 0.29829028  | 0.329898021 |
| 0.38536785  | 0.40207544  | 0.400572238 | 0.329908468 |
| 0.137641524 | 0.432843374 | 0.349765607 | 0.314397675 |
| 0.396296661 | 0.277597356 | 0.337226498 | 0.473362468 |
| 0.305019951 | 0.39862022  | 0.049217715 | 0.0406176   |
| 0.192856707 | 0.339310159 | 0.397458251 | 0.415083797 |
| 0.445509553 | 0.272201693 | 0.25743218  | 0.335070248 |
| 0.099316404 | 0.29004969  | 0.390533162 | 0.111294099 |
| 0.424016527 | 0.268288636 | 0.004049757 | 0.370630149 |
| 0.470557041 | 0.317093745 |             |             |
| ENPP1       | 0.0436102   | 0.127407869 | 0.074158899 |
| 0.002064878 | 0.02648929  | 0.286662803 | 0.239835798 |
| 0.031210815 | 0.03734433  | 0.064031516 | 0.277477544 |
| 0.001296313 | 0.0270241   | 0.016661624 | 0.028727093 |
| 0.072596329 | 0.071118907 | 0.156174145 | 0.074644082 |
| 0.070118137 | 0.009021618 | 0.149391923 | 0.1272018   |
| 0.220186094 | 0.003155709 | 0.172629303 | 0.008134162 |
| 0.019181416 | 0.058048494 | 0.212884962 | 0.037657235 |
| 0.058786519 | 0.044827715 | 0.021150453 | 0.009352081 |
| 0.001903417 | 0.176946454 | 0.000571606 | 0.034539241 |
| 0.028909399 | 0.127706    | 0.050972559 | 0.021410477 |
| 0.181694627 | 0.015604947 | 0.136098017 | 2.57E-05    |
| 0.26759166  | 0.256783264 | 0.144887368 | 0.073113457 |
| 0.236673499 | 0.096251145 | 0.000418717 | 0.00037337  |
| 0.000283081 | 0.18668598  | 0.026585346 | 0.2257022   |
| 0.111094193 | 0.021944769 | 0.103011145 | 0.177536973 |
| 0.213664955 | 0.099553726 | 0.033671298 | 0.306497909 |
| 0.041778308 | 0.031980905 | 0.076101575 | 0.251793807 |
| 0.020991002 | 0.046770163 | 0.010414109 | 0.110336492 |
| 0.034099917 | 0.246838366 | 0.092772175 | 0.041723453 |
| 0.227383628 | 0.023897423 | 0.03701626  | 0.001316988 |
| 0.250716493 | 0.04321165  | 0.093350098 | 0.018195987 |
| 0.03872133  | 0.141370104 | 0.087727781 | 0.032011301 |
| 0.039470246 | 0.001790923 | 0.059814248 | 0.004755426 |
|             |             |             | 0.061627262 |

|             |             |             |             |
|-------------|-------------|-------------|-------------|
| 0.039468961 | 0.072097936 | 0.088725242 | 0.040421693 |
| 0.115773182 | 0.006551212 | 0.02428064  | 0.074288009 |
| 0.052777768 | 0.218771233 | 0.00132885  | 0.018340841 |
| 0.022345607 | 0.059165948 | 0.181018514 | 0.094694984 |
| 0.019180383 | 0.061539836 | 0.29475875  | 0.005140553 |
| 0.00771714  | 0.247143495 | 0.000637926 | 0.00598798  |
| 0.00211995  | 0.055500002 | 0.11152658  | 0.136703923 |
| 0.224803983 | 0.020440584 | 0.050290384 | 0.022778687 |
| 0.047573148 | 0.044856115 | 0.173685359 | 0.033766187 |
| 0.22680392  | 0.049971569 | 0.055055756 | 0.019067658 |
| 0.046438967 | 0.161005707 | 0.144556691 | 0.191151914 |
| 1           | 0.055438738 | 0.232662521 | 0.019921298 |
| 0.07439968  | 0.100724122 | 0.027298722 | 0.07321016  |
| 0.170613862 | 0.022654699 | 0.151150318 | 0.259747718 |
| 0.086994949 | 0.000545636 | 0.222737274 | 0.23537133  |
| 0.001275949 | 0.156483914 | 0.063327162 | 0.004766448 |
| 0.026670657 | 0.151099659 | 0.089992553 | 0.055319691 |
| 0.006322279 | 0.080212116 | 0.197805813 | 0.160806702 |
| 0.185041883 | 0.095622232 | 0.056394333 | 0.221670003 |
| 0.02194145  | 0.152846132 | 0.019752949 | 0.260996918 |
| 0.151646477 | 0.002770311 | 0.001423278 | 0.049472891 |
| 0.043527268 | 0.110851608 | 0.068885838 | 0.045047364 |
| 0.000318711 | 0.059887885 | 0.058168873 | 0.018042566 |
| 0.035353243 | 0.146990361 | 0.281579262 | 0.214936773 |
| 0.006077347 | 0.252573689 | 0.04670206  | 0.071608324 |
| 0.021257023 | 0.02414533  | 0.003185491 | 0.04335976  |
| 0.013077321 | 0.048649545 | 0.02936882  | 0.060482515 |
| 0.038528019 | 0.007409205 | 0.093213335 | 0.264465593 |
| 0.059730037 | 0.00902053  | 0.003406765 | 0.120570535 |
| 0.14953505  | 0.019065871 | 0.007690894 | 0.094296241 |
| 0.045428708 | 0.02855858  | 0.210059114 | 0.037421067 |
| 0.239913328 | 0.000822362 | 0.088444259 | 0.029639593 |
| 0.084133163 | 0.047211759 | 0.070644257 | 0.16504245  |
| 0.059345723 | 0.003124402 | 0.282696009 | 0.089620475 |
| 0.079985058 | 0.104941248 | 0.131152174 | 0.00275863  |
| 0.182464988 | 0.055522492 | 0.000959385 | 0.138849868 |
| 0.273044141 | 0.136937636 | 0.095303451 | 0.077266219 |
| 0.133594419 | 0.085221242 | 0.040336219 | 0.002132546 |
| 0.014867192 | 0.108574039 | 0.150204771 | 0.056524347 |
| 0.076418542 | 0.007877006 | 0.001592142 | 0.089964487 |
| 0.027492257 | 0.082839417 | 0.033361905 | 0.041947239 |
| 0.014739078 | 0.180672421 | 0.041664895 | 0.000414998 |
| 0.106184402 | 0.044579903 | 0.006773749 | 0.041481572 |
| 0.017101825 | 0.085444061 | 0.249263067 | 0.018267484 |
| 0.006466108 | 0.018357948 | 0.190144717 | 0.278752379 |
| 0.127484725 | 0.000203985 | 0.110640342 | 0.091266995 |
| 0.112468041 | 0.086677482 | 0.089468818 | 0.133725142 |
| 0.212990665 | 0.105630555 | 0.050636821 | 0.001444366 |
| 0.031137436 | 0.021353765 | 0.267201882 | 0.052783506 |
| 0.236610129 | 0.011576925 | 0.014084624 | 0.002653455 |
| 0.261507209 | 0.001916267 | 0.152595533 | 0.074318579 |
| 0.036598473 | 8.10E-05    | 0.092005348 | 0.021250334 |
| 0.000962501 | 0.113075982 | 0.137008914 | 0.122956172 |
| 0.070037748 | 0.186921533 | 0.027498834 | 0.001187465 |

|             |             |             |             |
|-------------|-------------|-------------|-------------|
| 0.023717593 | 0.010633304 | 0.088242187 | 0.029377426 |
| 0.000958464 | 0.029649539 | 0.09152308  | 0.110605089 |
| 0.189221313 | 0.247151562 | 0.002289    | 0.028871734 |
| 0.003568715 | 0.069226539 | 0.034001395 | 0.134156926 |
| 0.229941861 | 0.153276554 | 0.039142368 | 0.063932474 |
| 0.200135021 | 0.231145508 | 0.103963436 | 0.002370606 |
| 0.033893221 | 0.046243801 | 0.036653579 | 0.024072836 |
| 0.079903642 | 0.043885097 | 0.315590919 | 0.14368987  |
| 0.002485614 | 0.317971418 | 0.055965248 | 0.159250424 |
| 0.075138912 | 0.131916022 | 0.075557714 | 0.201291131 |
| 0.075247955 | 0.238200991 | 0.100606605 | 0.268459015 |
| 0.0004664   | 0.001849558 | 0.190636193 | 0.181031959 |
| 0.291840665 | 0.069996068 | 0.019902696 | 0.058609014 |
| 0.088760278 | 0.077810519 | 0.03937088  | 0.180638992 |
| 0.024726658 | 0.025610812 | 0.001302143 | 0.003340632 |
| 0.022326892 | 0.202119263 | 0.210931644 | 0.207218307 |
| 0.23979771  | 0.191022717 | 0.147731697 | 0.06486677  |
| 0.015377214 | 0.263429993 | 0.094800529 | 0.238743101 |
| 0.007539617 | 0.156867347 | 0.11689121  | 0.120788852 |
| 0.092366619 | 0.08979809  | 0.000822627 | 0.039277677 |
| 0.068896026 | 0.015018275 | 0.091815172 | 0.035627309 |
| 0.192600507 | 0.182948563 | 0.116651708 | 0.003922767 |
| 0.002906212 | 0.171247858 | 0.010370172 | 0.314091144 |
| 0.006068788 | 0.089653529 | 0.000324286 | 0.132236221 |
| 0.082595786 | 0.080392887 | 0.005893381 | 0.069883884 |
| 6.03E-05    | 0.086609423 | 0.042432508 | 0.130426468 |
| 0.192552421 | 0.054101567 | 0.035976374 | 0.018845    |
| 0.070055152 | 0.176193288 | 0.055123037 | 0.076952081 |
| 0.000951883 | 0.077830298 | 0.062850428 | 0.021194883 |
| 0.016678637 | 0.262043787 | 0.019626003 | 0.172846804 |
| 0.006512827 | 0.193631615 | 0.03879491  | 0.060960313 |
| 0.020699691 | 0.098587135 | 0.01588524  | 0.064127445 |
| 0.066455082 | 0.047788742 | 0.035864198 | 0.072760029 |
| 0.026375459 | 0.018261715 | 0.24126833  | 0.006239416 |
| 0.061125377 | 0.002934022 | 0.006008846 | 0.003165842 |
| 0.171886259 | 0.0891174   | 0.093237235 | 0.080374163 |
| 0.00526833  | 0.161042809 | 0.115799926 | 0.000507942 |
| 0.034225339 | 0.242143645 | 0.001556049 | 0.068617271 |
| 0.008123643 | 0.003692509 | 0.042847904 | 0.192326209 |
| 0.005958579 |             |             |             |
| ENTPD1      | 0.075489304 | 0.146639769 | 0.088305391 |
| 0.001702976 | 0.01661695  | 0.337507657 | 0.219490675 |
| 0.045036923 | 0.076937105 | 0.070184984 | 0.288826882 |
| 0.012247934 | 0.03064882  | 0.060978364 | 0.033616366 |
| 0.089861904 | 0.085522108 | 0.137144097 | 0.089543766 |
| 0.107852078 | 0.011445466 | 0.196971437 | 0.14037108  |
| 0.264063086 | 0.02638348  | 0.140529933 | 0.009428945 |
| 0.024109896 | 0.070380057 | 0.263332903 | 0.039732532 |
| 0.080933236 | 0.050231422 | 0.025476536 | 0.007417494 |
| 0.001685124 | 0.201452762 | 0.00042879  | 0.035248233 |
| 0.03838192  | 0.098441897 | 0.059145468 | 0.049032553 |
| 2.47E-05    | 0.1572098   | 0.022049001 | 0.179550487 |
| 0.098357186 | 0.323709222 | 0.287689048 | 0.127809104 |
| 0.000538734 | 0.26456242  | 0.13347769  | 0.00044172  |

|             |             |             |             |
|-------------|-------------|-------------|-------------|
| 0.234202212 | 0.000478367 | 0.209560101 | 0.050864131 |
| 0.190798947 | 0.146526551 | 0.037381168 | 0.129113134 |
| 0.323384382 | 0.225601368 | 0.113823987 | 0.039944254 |
| 0.290101411 | 0.052162142 | 0.041072492 | 0.076905036 |
| 0.135620759 | 0.021735029 | 0.049090495 | 0.010468406 |
| 0.052355928 | 0.042722928 | 0.28056685  | 0.088855063 |
| 0.006763473 | 0.199412874 | 0.018345995 | 0.062926038 |
| 0.020903349 | 0.270117562 | 0.061704486 | 0.081308108 |
| 0.039864691 | 0.072143118 | 0.159141849 | 0.102937488 |
| 0.006542193 | 0.045902826 | 0.001347293 | 0.057036479 |
| 0.076394967 | 0.05198516  | 0.105206401 | 0.091326751 |
| 0.054162686 | 0.148348319 | 0.01550971  | 0.031545787 |
| 0.096033242 | 0.064318191 | 0.234670833 | 0.00149501  |
| 0.02174767  | 0.048917575 | 0.063756903 | 0.204108621 |
| 0.11959984  | 0.020265987 | 0.087528782 | 0.307598175 |
| 0.007335437 | 0.009451811 | 0.226081678 | 0.000979105 |
| 0.006456351 | 0.00561022  | 0.070005564 | 0.143441002 |
| 0.119616529 | 0.235257538 | 0.015950729 | 0.048999842 |
| 0.031537302 | 0.06590362  | 0.027315015 | 0.176810856 |
| 0.035117587 | 0.215371859 | 0.040146551 | 0.060232282 |
| 0.013432453 | 0.068403427 | 0.208322753 | 0.148208478 |
| 0.22471449  | 0.055438738 | 1           | 0.270649891 |
| 0.022411318 | 0.08929108  | 0.119728325 | 0.03462452  |
| 0.046919955 | 0.208617456 | 0.033985121 | 0.145537133 |
| 0.245897586 | 0.107307314 | 0.000726061 | 0.238917362 |
| 0.257817364 | 0.000974465 | 0.207754461 | 0.077875165 |
| 0.002047388 | 0.024350792 | 0.186631209 | 0.097954274 |
| 0.054548796 | 0.008836625 | 0.077861447 | 0.222781219 |
| 0.230097903 | 0.194697534 | 0.124698506 | 0.059963528 |
| 0.277851335 | 0.032332837 | 0.140998972 | 0.023065423 |
| 0.275946782 | 0.203689791 | 0.004553078 | 0.003413736 |
| 0.067054575 | 0.055380038 | 0.125407258 | 0.085695073 |
| 0.066376232 | 0.000296413 | 0.064709841 | 0.096763369 |
| 0.030280549 | 0.043730387 | 0.161769619 | 0.310323356 |
| 0.275645868 | 0.006236467 | 0.290881476 | 0.033576025 |
| 0.100627862 | 0.027565034 | 0.030508428 | 0.015789978 |
| 0.040151024 | 0.017672577 | 0.058418101 | 0.068101785 |
| 0.039185547 | 0.073971944 | 0.013991297 | 0.10713467  |
| 0.297327916 | 0.058474105 | 0.02691635  | 0.004520368 |
| 0.124045834 | 0.144969342 | 0.019362644 | 0.017911476 |
| 0.098865291 | 0.057383007 | 0.037515969 | 0.251417204 |
| 0.0252619   | 0.271263521 | 0.001370897 | 0.129628896 |
| 0.032719854 | 0.09184044  | 0.054283075 | 0.071372474 |
| 0.16974087  | 0.077923538 | 0.004508308 | 0.328360314 |
| 0.111235856 | 0.086060721 | 0.145252825 | 0.145450789 |
| 0.016876705 | 0.205875237 | 0.059768862 | 0.001706689 |
| 0.150881271 | 0.251501712 | 0.202037928 | 0.130906376 |
| 0.092740683 | 0.148513462 | 0.112992999 | 0.0500485   |
| 0.004014354 | 0.043708409 | 0.132800431 | 0.185069275 |
| 0.069242243 | 0.071649929 | 0.0052447   | 0.001891367 |
| 0.101510604 | 0.03505759  | 0.111270825 | 0.047075484 |
| 0.040046361 | 0.012171656 | 0.205587516 | 0.060422408 |
| 0.001687307 | 0.143675175 | 0.060636074 | 0.011003295 |
| 0.050124187 | 0.031008173 | 0.091710466 | 0.268565482 |

|             |             |             |             |
|-------------|-------------|-------------|-------------|
| 0.013250276 | 0.011604558 | 0.016615919 | 0.161894836 |
| 0.2951494   | 0.148212128 | 0.00017139  | 0.139783713 |
| 0.106473897 | 0.12501949  | 0.096101866 | 0.10782646  |
| 0.18682355  | 0.227428256 | 0.117469538 | 0.066648527 |
| 0.004493762 | 0.038014807 | 0.022622524 | 0.302381759 |
| 0.066647185 | 0.285439044 | 0.016901353 | 0.013301806 |
| 0.0028948   | 0.325674414 | 0.001908769 | 0.18047652  |
| 0.07864594  | 0.059880981 | 5.71E-05    | 0.094124192 |
| 0.022184704 | 0.001029754 | 0.133876619 | 0.150965822 |
| 0.127095094 | 0.063485043 | 0.208771361 | 0.031649713 |
| 0.001387216 | 0.025470406 | 0.007842071 | 0.085575847 |
| 0.02928571  | 0.002765269 | 0.02237532  | 0.111323627 |
| 0.140185096 | 0.18494397  | 0.270415485 | 0.008987961 |
| 0.041968489 | 0.004499586 | 0.074357453 | 0.040023703 |
| 0.154754814 | 0.254377046 | 0.155701274 | 0.044344448 |
| 0.070620378 | 0.207595502 | 0.263392526 | 0.126417928 |
| 0.001408987 | 0.042798472 | 0.060762942 | 0.036489392 |
| 0.035387618 | 0.090025712 | 0.046792559 | 0.316639835 |
| 0.190507809 | 0.001487489 | 0.363438734 | 0.087914464 |
| 0.161036004 | 0.08798949  | 0.189029709 | 0.089671448 |
| 0.217859614 | 0.094678692 | 0.212712422 | 0.10125316  |
| 0.325272081 | 0.000822868 | 0.002510203 | 0.224177296 |
| 0.197382412 | 0.291720919 | 0.089988327 | 0.020637415 |
| 0.063720447 | 0.094594813 | 0.09152576  | 0.032467154 |
| 0.230772473 | 0.03403837  | 0.034690269 | 0.003047419 |
| 0.013652386 | 0.053723586 | 0.209775282 | 0.240362699 |
| 0.22761199  | 0.292639647 | 0.173776555 | 0.125690178 |
| 0.077672334 | 0.016497431 | 0.292410512 | 0.107013697 |
| 0.259110057 | 0.009716261 | 0.185031444 | 0.159597766 |
| 0.167495566 | 0.080504172 | 0.098265298 | 0.003801039 |
| 0.047811239 | 0.080123344 | 0.027387008 | 0.079477813 |
| 0.04784925  | 0.206472656 | 0.174201095 | 0.17044718  |
| 0.005409792 | 0.003209033 | 0.212482211 | 0.009033487 |
| 0.353797563 | 0.007051117 | 0.104749419 | 0.000360308 |
| 0.156118764 | 0.118564642 | 0.115834229 | 0.00598888  |
| 0.073228973 | 2.57E-05    | 0.093736886 | 0.073414902 |
| 0.180238172 | 0.218995304 | 0.071967821 | 0.059259315 |
| 0.036491509 | 0.069149408 | 0.181349162 | 0.043925323 |
| 0.08502611  | 0.003019137 | 0.093325667 | 0.080283981 |
| 0.026050784 | 0.022610619 | 0.294028209 | 0.02364943  |
| 0.137357877 | 0.012220384 | 0.21983456  | 0.069588058 |
| 0.069171785 | 0.020225142 | 0.081484683 | 0.030509444 |
| 0.057113652 | 0.060132481 | 0.057158584 | 0.041659461 |
| 0.084708556 | 0.03821713  | 0.020283453 | 0.260658717 |
| 0.012137554 | 0.108756883 | 0.00257838  | 0.007599332 |
| 0.004623015 | 0.192843255 | 0.120891716 | 0.110262558 |
| 0.09235904  | 0.008067055 | 0.198396207 | 0.172765691 |
| 0.000537963 | 0.049208378 | 0.225418607 | 0.000815439 |
| 0.073248087 | 0.014328753 | 0.004297935 | 0.075355118 |
| 0.230072046 | 0.006098222 |             |             |
| EOMES       | 0.206962262 | 0.424403728 | 0.244264989 |
| 0.033808744 | 0.181648259 | 0.375614976 | 0.343075239 |
| 0.193579262 | 0.274516565 | 0.272004166 | 0.412644587 |
| 0.008153636 | 0.179396881 | 0.082301701 | 0.164527812 |



|             |             |             |             |
|-------------|-------------|-------------|-------------|
| 0.343111405 | 0.34316475  | 0.326725353 | 0.340038354 |
| 0.259320672 | 0.172430602 | 0.323723147 | 0.325753703 |
| 0.372122892 | 0.014790005 | 0.274325388 | 0.102252065 |
| 0.159561158 | 0.305661883 | 0.362562053 | 0.333327305 |
| 0.299284868 | 0.258343011 | 0.23745675  | 0.196611024 |
| 0.075650016 | 0.463041804 | 0.029568281 | 0.199015189 |
| 0.199787157 | 0.31823891  | 0.265140526 | 0.076081991 |
| 0.001507998 | 0.281272045 | 0.148646279 | 0.316721066 |
| 0.270978397 | 0.374010033 | 0.344753071 | 0.29190757  |
| 0.040043672 | 0.414305509 | 0.304953788 | 0.03711226  |
| 0.464949503 | 0.007282027 | 0.465186139 | 0.183705669 |
| 0.24793439  | 0.331574558 | 0.170562913 | 0.286334459 |
| 0.37007381  | 0.472560581 | 0.387249738 | 0.143897545 |
| 0.264798119 | 0.218984445 | 0.207260815 | 0.259612859 |
| 0.381941698 | 0.295112479 | 0.336510378 | 0.121913261 |
| 0.218109637 | 0.21023036  | 0.360168514 | 0.325297286 |
| 0.006824098 | 0.305912922 | 0.201744128 | 0.177086395 |
| 0.132172941 | 0.425188209 | 0.196257684 | 0.300146253 |
| 0.209663487 | 0.139611718 | 0.331371012 | 0.37516659  |
| 0.049598179 | 0.208882308 | 0.015559324 | 0.291913227 |
| 0.277753658 | 0.254840862 | 0.26189726  | 0.244623103 |
| 0.095127532 | 0.28663464  | 0.128061551 | 0.188111191 |
| 0.269139879 | 0.25873688  | 0.449510547 | 0.031015017 |
| 0.152108884 | 0.279618596 | 0.31389293  | 0.467274731 |
| 0.373398685 | 0.043670641 | 0.28124633  | 0.36998345  |
| 0.181403301 | 0.142627232 | 0.352525521 | 0.027648082 |
| 0.032524917 | 0.022962953 | 0.28925618  | 0.331387029 |
| 0.251424287 | 0.357228524 | 0.144855843 | 0.215959037 |
| 0.178286354 | 0.257589999 | 0.207377016 | 0.357147292 |
| 0.19133734  | 0.349016026 | 0.240397479 | 0.245870966 |
| 0.180195005 | 0.275342379 | 0.34296513  | 0.406254771 |
| 0.446090038 | 0.232662521 | 0.270649891 | 1           |
| 0.154065734 | 0.335813457 | 0.400718857 | 0.267365137 |
| 0.264948424 | 0.344593745 | 0.240275618 | 0.322946937 |
| 0.357952124 | 0.256493206 | 0.027547574 | 0.378599893 |
| 0.483760583 | 0.024367158 | 0.262610074 | 0.267180655 |
| 0.047645281 | 0.287175448 | 0.428542554 | 0.313106501 |
| 0.222419383 | 0.092382067 | 0.296911686 | 0.359981298 |
| 0.351093025 | 0.364444874 | 0.275356512 | 0.267818616 |
| 0.364652929 | 0.237461868 | 0.206077474 | 0.157511822 |
| 0.324210077 | 0.327716884 | 0.119854119 | 0.048241696 |
| 0.197638181 | 0.243188254 | 0.366365766 | 0.255722637 |
| 0.219113328 | 0.005731761 | 0.267572059 | 0.226805671 |
| 0.234294545 | 0.208752569 | 0.447221032 | 0.311223875 |
| 0.349140539 | 0.110990526 | 0.331866386 | 0.247040235 |
| 0.280440892 | 0.27761631  | 0.281757561 | 0.010581798 |
| 0.275837175 | 0.163333458 | 0.242142454 | 0.167401919 |
| 0.280396271 | 0.295187156 | 0.125116618 | 0.351796363 |
| 0.373723814 | 0.258801315 | 0.064760216 | 0.059704889 |
| 0.36701204  | 0.356024886 | 0.212745803 | 0.202160715 |
| 0.317350256 | 0.321797286 | 0.211997716 | 0.432969913 |
| 0.256917704 | 0.420459014 | 0.048348759 | 0.324218664 |
| 0.179791195 | 0.334056833 | 0.252731213 | 0.280895534 |
| 0.36782474  | 0.212164534 | 0.136577844 | 0.377757896 |

|             |             |             |             |
|-------------|-------------|-------------|-------------|
| 0.282764871 | 0.26509986  | 0.281165579 | 0.423192067 |
| 0.010037176 | 0.350512572 | 0.248074846 | 0.056764574 |
| 0.429521574 | 0.351410605 | 0.25811232  | 0.29690661  |
| 0.349396538 | 0.426475276 | 0.316189683 | 0.245997269 |
| 0.100295713 | 0.060678084 | 0.38277838  | 0.362440753 |
| 0.306277387 | 0.293986849 | 0.124715677 | 0.037053864 |
| 0.356132997 | 0.141954391 | 0.272732769 | 0.202469195 |
| 0.202223353 | 0.147761905 | 0.337487433 | 0.17651219  |
| 0.014995336 | 0.354200119 | 0.210131802 | 0.181291065 |
| 0.281700999 | 0.245156616 | 0.32101905  | 0.375222505 |
| 0.190085115 | 0.181593116 | 0.189453932 | 0.252019287 |
| 0.347641381 | 0.428747252 | 0.010980678 | 0.375946974 |
| 0.38072343  | 0.297011368 | 0.349798227 | 0.373212404 |
| 0.341234109 | 0.418909326 | 0.371888582 | 0.260916285 |
| 0.005281877 | 0.215203203 | 0.154298884 | 0.435873579 |
| 0.284849313 | 0.374097523 | 0.097994889 | 0.144491585 |
| 0.005248247 | 0.347521369 | 0.082694852 | 0.445995966 |
| 0.318306726 | 0.139720885 | 0.00728162  | 0.313829353 |
| 0.145343011 | 0.024130561 | 0.417941328 | 0.345392742 |
| 0.38422841  | 0.270283648 | 0.335345549 | 0.190066416 |
| 0.058587259 | 0.20266915  | 0.061221031 | 0.274277626 |
| 0.18868928  | 0.039597361 | 0.155709391 | 0.37659023  |
| 0.366262607 | 0.362006776 | 0.367188164 | 0.037514899 |
| 0.196415319 | 0.134646753 | 0.27903999  | 0.229873739 |
| 0.365779094 | 0.407215561 | 0.410518899 | 0.223193826 |
| 0.24517705  | 0.424261663 | 0.44069327  | 0.358171476 |
| 0.066521274 | 0.216472275 | 0.261792471 | 0.186077634 |
| 0.151886618 | 0.338094526 | 0.232535249 | 0.350382447 |
| 0.317901771 | 0.057807326 | 0.371857874 | 0.221384583 |
| 0.417686576 | 0.332674986 | 0.244595617 | 0.272598144 |
| 0.434885297 | 0.34115992  | 0.286268133 | 0.301956091 |
| 0.3715638   | 0.046946668 | 0.053040189 | 0.366363363 |
| 0.463586462 | 0.381602743 | 0.321179601 | 0.200018438 |
| 0.283755699 | 0.206875522 | 0.292819032 | 0.316897658 |
| 0.347921266 | 0.162257918 | 0.188213197 | 0.057204248 |
| 0.065569326 | 0.246336578 | 0.419953809 | 0.453300618 |
| 0.275225298 | 0.354991952 | 0.356903928 | 0.323317395 |
| 0.322088574 | 0.232168925 | 0.375185009 | 0.298106862 |
| 0.473839793 | 0.119516025 | 0.453646805 | 0.321455181 |
| 0.346795856 | 0.329373653 | 0.313463667 | 0.015384093 |
| 0.196654525 | 0.287404498 | 0.103947505 | 0.281846625 |
| 0.237930011 | 0.327669594 | 0.353372345 | 0.325950877 |
| 0.113378065 | 0.009297436 | 0.34273731  | 0.118482952 |
| 0.401543883 | 0.115297001 | 0.293230529 | 0.035230542 |
| 0.445747282 | 0.293561959 | 0.302638044 | 0.088350476 |
| 0.3146094   | 0.004407819 | 0.276739214 | 0.175040002 |
| 0.342106258 | 0.385354522 | 0.210795966 | 0.211126058 |
| 0.147305873 | 0.245424247 | 0.342082512 | 0.244159716 |
| 0.329160203 | 0.075152117 | 0.35804338  | 0.267014943 |
| 0.171644854 | 0.265510303 | 0.367126623 | 0.264516413 |
| 0.308708617 | 0.122254139 | 0.306828954 | 0.23537708  |
| 0.30549684  | 0.221540936 | 0.294102542 | 0.233775015 |
| 0.20247106  | 0.311315496 | 0.225963818 | 0.203282565 |
| 0.26762546  | 0.173739781 | 0.176579148 | 0.45829596  |

|             |             |             |             |
|-------------|-------------|-------------|-------------|
| 0.192488178 | 0.278697986 | 0.055959837 | 0.069030712 |
| 0.142262768 | 0.362559374 | 0.318929345 | 0.326310012 |
| 0.348430443 | 0.135313506 | 0.291873794 | 0.292688133 |
| 0.032019716 | 0.199400624 | 0.34948495  | 0.05608106  |
| 0.246902904 | 0.133830741 | 0.006227389 | 0.246196713 |
| 0.387472027 | 0.18904269  |             |             |
| EPHX1       | 0.240640554 | 0.348663778 | 0.017941047 |
| 0.01955654  | 0.057860912 | 0.093934648 | 0.094929397 |
| 0.267659413 | 0.033900726 | 0.056151277 | 0.153625253 |
| 0.000393452 | 0.400009231 | 0.002960033 | 0.027482533 |
| 0.435242973 | 0.454962779 | 0.184453201 | 0.443004459 |
| 0.189399507 | 0.082599976 | 0.201898821 | 0.211165188 |
| 0.109565693 | 0.000315281 | 0.045732258 | 0.023653942 |
| 0.320962989 | 0.460659662 | 0.077786785 | 0.133637828 |
| 0.3909211   | 0.430435063 | 0.278666295 | 0.248458899 |
| 0.312629501 | 0.280876162 | 0.234409527 | 0.411687147 |
| 0.427799358 | 0.104589218 | 0.393372953 | 0.002922843 |
| 0.008099261 | 0.032413039 | 0.278513591 | 0.217580156 |
| 0.174939976 | 0.084025695 | 0.06134249  | 0.074372658 |
| 0.234747877 | 0.176308065 | 0.266755112 | 0.264889807 |
| 0.223225951 | 0.003265384 | 0.266315613 | 0.166128122 |
| 0.016608479 | 0.159992789 | 0.294881925 | 0.255145662 |
| 0.103361408 | 0.240730248 | 0.405439296 | 0.00930922  |
| 0.01900051  | 0.326361209 | 0.373864769 | 0.283709037 |
| 0.316907893 | 0.196379986 | 0.150530568 | 0.409060141 |
| 0.367692801 | 0.381603711 | 0.130406904 | 0.070619238 |
| 0.000203277 | 0.056471636 | 0.241218427 | 0.279473108 |
| 0.409500038 | 0.178668805 | 0.29465786  | 0.103343218 |
| 0.327075558 | 0.003417113 | 0.211477794 | 0.429390435 |
| 0.009966395 | 0.374023073 | 0.006563281 | 0.062545025 |
| 0.344489642 | 0.469512625 | 0.275692616 | 0.020862668 |
| 0.002685454 | 0.04344669  | 0.094505092 | 0.462681574 |
| 0.258854866 | 0.312120911 | 0.219443018 | 0.255944691 |
| 0.427981564 | 0.070642621 | 0.204141899 | 0.274219255 |
| 0.364321316 | 0.002043193 | 0.06529118  | 0.088530714 |
| 0.268492297 | 0.084654489 | 0.098121425 | 0.036996864 |
| 0.004448045 | 0.014198713 | 0.413494265 | 0.057580345 |
| 0.035686375 | 0.079944107 | 0.041270338 | 0.350362834 |
| 0.267375464 | 0.406518604 | 0.056858476 | 0.112400868 |
| 0.396367345 | 0.114230259 | 0.299368542 | 0.364117905 |
| 0.327210509 | 0.133718265 | 0.049933609 | 0.297440916 |
| 0.241532609 | 0.019921298 | 0.022411318 | 0.154065734 |
| 1           | 0.41224858  | 0.416697964 | 0.176010188 |
| 0.153387705 | 0.105962476 | 0.192156826 | 0.224393322 |
| 0.104937216 | 0.217793912 | 0.13186357  | 0.183957836 |
| 0.216065757 | 0.034563085 | 0.016185196 | 0.346385622 |
| 0.048058841 | 0.125636009 | 0.26997743  | 0.329616638 |
| 0.349757261 | 0.018789583 | 0.112065953 | 0.115496602 |
| 0.140332572 | 0.109489477 | 0.261626343 | 0.108111202 |
| 0.148516831 | 0.198472371 | 0.01198949  | 0.421667776 |
| 0.038858488 | 0.175561821 | 0.288638771 | 0.054487502 |
| 0.311222279 | 0.224791076 | 0.307126242 | 0.283849595 |
| 0.318961177 | 0.00303645  | 0.056165846 | 0.246679337 |
| 0.178095404 | 0.403062863 | 0.333305907 | 0.034411969 |

|             |             |             |             |
|-------------|-------------|-------------|-------------|
| 0.112393881 | 0.352072688 | 0.047989886 | 0.222933468 |
| 0.299562501 | 0.107033348 | 0.092174712 | 6.87E-05    |
| 0.053699679 | 0.305032989 | 0.299091312 | 0.014844656 |
| 0.121028442 | 0.034825927 | 0.072796345 | 0.334469468 |
| 0.075493217 | 0.380618089 | 0.010320779 | 0.196971283 |
| 0.1145119   | 0.25895169  | 0.285350073 | 0.161917277 |
| 0.316222372 | 0.157689878 | 0.466791336 | 0.206519225 |
| 0.167019854 | 0.17193214  | 0.246560826 | 0.129862282 |
| 0.393806989 | 0.363082475 | 0.380566645 | 0.364541251 |
| 0.112236208 | 0.292652268 | 0.270963467 | 0.118351238 |
| 0.244536384 | 0.26925975  | 0.023151657 | 0.35750795  |
| 8.20E-05    | 0.177742311 | 0.312407387 | 0.237643383 |
| 0.328230434 | 0.10349814  | 0.017225364 | 0.120716869 |
| 0.445611506 | 0.358443406 | 0.318979542 | 0.416873188 |
| 0.221820907 | 0.002175495 | 0.354662694 | 0.233424019 |
| 0.469460711 | 0.243902891 | 0.359792755 | 0.100549778 |
| 0.377193473 | 0.318258132 | 0.266222254 | 0.313508568 |
| 0.366709477 | 0.39237291  | 0.109064185 | 0.293199958 |
| 0.011766581 | 0.106519727 | 0.310357569 | 0.111110325 |
| 0.174036436 | 0.083525573 | 0.339571313 | 0.157575716 |
| 0.330729232 | 0.221980575 | 0.269578008 | 0.024397764 |
| 0.063681761 | 0.355837016 | 0.097999719 | 0.332858294 |
| 0.426779551 | 0.217148431 | 0.364183407 | 0.42057065  |
| 0.154390742 | 0.207460897 | 0.33606702  | 0.404020027 |
| 0.000245137 | 0.44461552  | 0.415584682 | 0.168120023 |
| 0.387627651 | 0.126292686 | 0.243835761 | 0.417237376 |
| 0.000415228 | 0.050528287 | 0.300038746 | 0.324082121 |
| 0.375775631 | 0.006378327 | 0.150927002 | 0.33373466  |
| 0.412977063 | 0.048780857 | 0.39452396  | 0.166959987 |
| 0.30855503  | 0.290218191 | 0.063628039 | 0.405333387 |
| 0.302618213 | 0.293043978 | 0.015074009 | 0.28764305  |
| 0.352910078 | 0.098547918 | 0.037326569 | 0.41953347  |
| 0.285616087 | 0.216192316 | 0.106782493 | 0.002299743 |
| 0.394920698 | 0.15743128  | 0.341503773 | 0.045137066 |
| 0.269280646 | 0.185746929 | 0.288069616 | 0.396013569 |
| 0.313174841 | 0.229631313 | 0.19155892  | 0.303346615 |
| 0.113977064 | 0.370383983 | 0.387565611 | 0.017763574 |
| 0.329416558 | 0.386893815 | 0.285552255 | 0.063256758 |
| 0.209127474 | 0.087601844 | 0.075039765 | 0.2153668   |
| 0.279840343 | 0.380190956 | 0.013290477 | 0.069450002 |
| 0.225595504 | 0.14673659  | 0.034593612 | 0.202000731 |
| 0.118786525 | 0.22530642  | 0.176748125 | 0.197300492 |
| 0.27891136  | 0.130814955 | 0.351407933 | 0.079617685 |
| 0.414721695 | 0.012871862 | 0.333004819 | 0.131207967 |
| 0.130595873 | 0.333797463 | 0.415887027 | 0.124361102 |
| 0.007955491 | 0.046385277 | 0.217899151 | 0.219436814 |
| 0.019859619 | 0.071682514 | 0.111326158 | 0.189611744 |
| 0.437215178 | 0.292910103 | 0.118098878 | 0.194913828 |
| 0.211583587 | 0.061210781 | 0.31608046  | 0.17602471  |
| 0.253618378 | 0.173487651 | 0.325665086 | 0.004395377 |
| 0.360167574 | 0.070187364 | 0.192148105 | 0.220856899 |
| 0.464162744 | 0.043125068 | 0.213940873 | 0.058342763 |
| 0.129014105 | 0.001637756 | 0.198049725 | 0.409943202 |
| 0.118863586 | 0.300637146 | 0.212542764 | 0.298339977 |

|             |             |             |             |
|-------------|-------------|-------------|-------------|
| 0.375232989 | 0.232839919 | 0.284026324 | 0.357001192 |
| 0.214647503 | 0.068190681 | 0.062321407 | 0.00738497  |
| 0.236816405 | 0.212386276 | 0.311462649 | 0.27176026  |
| 0.146933588 | 0.328851157 | 0.215052124 | 0.294382174 |
| 0.377741054 | 0.155615327 | 0.433379518 | 0.183222869 |
| 0.443640158 | 0.237615227 | 0.108982478 | 0.200172178 |
| 0.08701811  | 0.078856761 | 0.038359038 | 0.073309391 |
| 0.419584868 | 0.214753963 | 0.237652386 | 0.195117896 |
| 0.012266327 | 0.222423441 | 0.362348124 | 0.386490748 |
| 0.28168843  | 0.341497675 | 0.315446105 | 0.201845394 |
| 0.211907061 | 0.161954823 | 0.039765772 | 0.014977605 |
| 0.202635945 | 0.071360049 | 0.29841558  | 0.318832015 |
| 0.428226486 | 0.258756179 | 0.027641397 | 0.048724981 |
| 0.240241798 | 0.339654585 | 0.123355778 | 0.248500831 |
| 0.3166956   | 0.283644973 | 0.000101298 | 0.12079613  |
| 0.200699207 | 0.308572708 |             |             |
| ERRFI1      | 0.400230303 | 0.476873018 | 0.074000224 |
| 0.034492547 | 0.114825738 | 0.240277252 | 0.220949484 |
| 0.421060674 | 0.114491286 | 0.147986062 | 0.331178025 |
| 0.00281518  | 0.428940034 | 0.018686542 | 0.07604216  |
| 0.507076499 | 0.512572357 | 0.336353492 | 0.502269742 |
| 0.365514968 | 0.160373261 | 0.392348137 | 0.402718448 |
| 0.261761119 | 0.002648032 | 0.125141675 | 0.057159034 |
| 0.420559999 | 0.501898672 | 0.214533111 | 0.304414312 |
| 0.465762935 | 0.477697296 | 0.41449917  | 0.318073044 |
| 0.277398795 | 0.448554436 | 0.144347228 | 0.464967326 |
| 0.416934447 | 0.232312703 | 0.482055508 | 0.015856729 |
| 0.005019958 | 0.102864507 | 0.397137184 | 0.415152502 |
| 0.332078197 | 0.225578719 | 0.179094804 | 0.174669667 |
| 0.219632738 | 0.359808599 | 0.431200976 | 0.221259864 |
| 0.406322007 | 0.005497891 | 0.437732056 | 0.306849198 |
| 0.067917215 | 0.327940919 | 0.406736213 | 0.446054948 |
| 0.248907469 | 0.421980173 | 0.490497609 | 0.038866059 |
| 0.075280073 | 0.469164957 | 0.45854824  | 0.441560912 |
| 0.475263621 | 0.366044698 | 0.2969366   | 0.402667983 |
| 0.476994316 | 0.44655765  | 0.292479162 | 0.18690772  |
| 0.001558658 | 0.14996898  | 0.332870384 | 0.390280931 |
| 0.446874643 | 0.365343487 | 0.445128095 | 0.217351985 |
| 0.47759199  | 0.020997134 | 0.402271568 | 0.507964491 |
| 0.026558697 | 0.449100786 | 0.013764781 | 0.164517467 |
| 0.474724226 | 0.477549471 | 0.44955345  | 0.0773657   |
| 0.015992721 | 0.136669001 | 0.201472785 | 0.424467279 |
| 0.439196105 | 0.476963642 | 0.400950754 | 0.18492745  |
| 0.394888411 | 0.194284988 | 0.358079944 | 0.447824438 |
| 0.481204347 | 0.010405063 | 0.175718424 | 0.228158188 |
| 0.343174393 | 0.141555922 | 0.232763678 | 0.06025983  |
| 0.017209287 | 0.034464245 | 0.47237838  | 0.180707455 |
| 0.103272647 | 0.206995931 | 0.094972099 | 0.467249021 |
| 0.409053274 | 0.438565859 | 0.116368911 | 0.255642602 |
| 0.476666592 | 0.25249028  | 0.430056908 | 0.48908172  |
| 0.379552301 | 0.288779957 | 0.161810374 | 0.46022265  |
| 0.425732838 | 0.07439968  | 0.08929108  | 0.335813457 |
| 0.41224858  | 1           | 0.511668529 | 0.347044352 |
| 0.265368578 | 0.26038585  | 0.346814159 | 0.401991611 |

|             |             |             |             |
|-------------|-------------|-------------|-------------|
| 0.243606037 | 0.380180962 | 0.126766853 | 0.36099722  |
| 0.403400899 | 0.054468281 | 0.068839071 | 0.473705373 |
| 0.056285381 | 0.242710964 | 0.44924023  | 0.481598402 |
| 0.466872968 | 0.046313336 | 0.24803632  | 0.269716957 |
| 0.315233468 | 0.25805307  | 0.435972768 | 0.230636631 |
| 0.328268855 | 0.351759356 | 0.0507509   | 0.407002219 |
| 0.129226474 | 0.357226622 | 0.351081199 | 0.081385336 |
| 0.441357162 | 0.390005445 | 0.479773757 | 0.451706412 |
| 0.45147616  | 0.005516437 | 0.150624505 | 0.416743471 |
| 0.339838439 | 0.425712969 | 0.470548318 | 0.117253084 |
| 0.271039594 | 0.353073607 | 0.149795704 | 0.326800591 |
| 0.433993132 | 0.249572254 | 0.210483232 | 0.001018039 |
| 0.147444068 | 0.425090835 | 0.44272311  | 0.064424485 |
| 0.244338048 | 0.125957986 | 0.14099639  | 0.486795695 |
| 0.209290956 | 0.485784858 | 0.039213278 | 0.201166911 |
| 0.274594625 | 0.427100357 | 0.430170818 | 0.324709789 |
| 0.467925143 | 0.343470609 | 0.448692105 | 0.392975478 |
| 0.272438483 | 0.356406487 | 0.210764313 | 0.291656571 |
| 0.482059827 | 0.489037583 | 0.48617587  | 0.484519215 |
| 0.272763951 | 0.41538979  | 0.364176879 | 0.284702608 |
| 0.421715011 | 0.431973722 | 0.096293147 | 0.478367743 |
| 0.000948125 | 0.355842197 | 0.458392602 | 0.22164329  |
| 0.474558468 | 0.239431805 | 0.075151994 | 0.282447872 |
| 0.508697686 | 0.474937806 | 0.448683848 | 0.462962535 |
| 0.308846431 | 0.014054025 | 0.471055364 | 0.416703477 |
| 0.506179531 | 0.411128421 | 0.352340139 | 0.104641061 |
| 0.490392929 | 0.395644236 | 0.445733671 | 0.456716116 |
| 0.462754408 | 0.419665289 | 0.256726253 | 0.400645056 |
| 0.023168038 | 0.268148691 | 0.465362569 | 0.196444766 |
| 0.332300127 | 0.207727281 | 0.48264313  | 0.328626567 |
| 0.411549988 | 0.370535213 | 0.36868612  | 0.083161594 |
| 0.176761643 | 0.47994335  | 0.059139284 | 0.46307166  |
| 0.510240398 | 0.381617908 | 0.490879392 | 0.504417597 |
| 0.341365556 | 0.388222665 | 0.487133673 | 0.442520537 |
| 0.001602949 | 0.445724574 | 0.428573491 | 0.348913464 |
| 0.479082296 | 0.295259923 | 0.299392864 | 0.449730033 |
| 0.001600672 | 0.159928815 | 0.310538675 | 0.460154545 |
| 0.492037382 | 0.028833126 | 0.063588426 | 0.483138868 |
| 0.440745345 | 0.054534536 | 0.500169201 | 0.348988047 |
| 0.474975409 | 0.439734876 | 0.174378894 | 0.44584491  |
| 0.277711541 | 0.400891714 | 0.033289082 | 0.456914107 |
| 0.4389662   | 0.12178929  | 0.085572054 | 0.500426422 |
| 0.467327029 | 0.388435581 | 0.255605662 | 0.011994529 |
| 0.406633161 | 0.242297615 | 0.485760307 | 0.125893112 |
| 0.450657003 | 0.364726506 | 0.460186246 | 0.467527268 |
| 0.470528123 | 0.419423877 | 0.381764699 | 0.477152863 |
| 0.13224151  | 0.458385795 | 0.465905994 | 0.061462902 |
| 0.436503326 | 0.490526456 | 0.431794812 | 0.178467221 |
| 0.395808868 | 0.103396132 | 0.206276105 | 0.373393629 |
| 0.455775712 | 0.490032147 | 0.05961956  | 0.186970588 |
| 0.410392847 | 0.31068021  | 0.109419945 | 0.361503286 |
| 0.282023321 | 0.243583821 | 0.187350606 | 0.38158266  |
| 0.446541903 | 0.28927127  | 0.482164725 | 0.16884854  |
| 0.484546269 | 0.056215909 | 0.459338012 | 0.268736938 |

|             |             |             |             |
|-------------|-------------|-------------|-------------|
| 0.301442753 | 0.449390246 | 0.413594429 | 0.182934802 |
| 0.031365008 | 0.157691802 | 0.397617641 | 0.407132689 |
| 0.07934285  | 0.202358182 | 0.263570765 | 0.349938107 |
| 0.492641649 | 0.44200652  | 0.280187608 | 0.370755497 |
| 0.395728475 | 0.108705699 | 0.461841671 | 0.370594224 |
| 0.440151518 | 0.349294135 | 0.478462174 | 0.010392791 |
| 0.478985794 | 0.181787    | 0.270369891 | 0.370994196 |
| 0.462564294 | 0.13879395  | 0.381274999 | 0.178901132 |
| 0.199128421 | 0.005346517 | 0.377540798 | 0.401900459 |
| 0.281564426 | 0.350005709 | 0.397532258 | 0.205854041 |
| 0.491326448 | 0.428828446 | 0.45712768  | 0.328480204 |
| 0.388139349 | 0.027428372 | 0.157571749 | 0.037042161 |
| 0.423039689 | 0.394318273 | 0.456482228 | 0.425306794 |
| 0.262756579 | 0.459810749 | 0.401116792 | 0.414924018 |
| 0.489942085 | 0.218130206 | 0.506447581 | 0.330005835 |
| 0.40915189  | 0.411319989 | 0.25972189  | 0.349611507 |
| 0.195186805 | 0.148518775 | 0.12207466  | 0.192941821 |
| 0.489124763 | 0.324833248 | 0.395618947 | 0.36623815  |
| 0.050132812 | 0.403609165 | 0.458713313 | 0.470834255 |
| 0.462657072 | 0.441846389 | 0.433492878 | 0.38418626  |
| 0.33897225  | 0.331713688 | 0.063278963 | 0.035458658 |
| 0.281960178 | 0.195731568 | 0.444489566 | 0.474400008 |
| 0.493804667 | 0.329288901 | 0.101820321 | 0.15372108  |
| 0.159523508 | 0.421240227 | 0.268201497 | 0.196375637 |
| 0.452889802 | 0.357973681 | 0.000878306 | 0.267913016 |
| 0.388471222 | 0.433426651 |             |             |
| ESM1        | 0.417882666 | 0.528411105 | 0.098208636 |
| 0.039477821 | 0.152097831 | 0.303324754 | 0.287328488 |
| 0.429376505 | 0.153739692 | 0.188256525 | 0.399057164 |
| 0.002941601 | 0.437556542 | 0.02402099  | 0.103308706 |
| 0.507391788 | 0.517939634 | 0.413242429 | 0.506109459 |
| 0.396234391 | 0.193214936 | 0.440126141 | 0.457940251 |
| 0.331021528 | 0.003223717 | 0.167527886 | 0.071250148 |
| 0.429012045 | 0.496110659 | 0.269923891 | 0.350611228 |
| 0.4865856   | 0.499930094 | 0.474592357 | 0.379146001 |
| 0.291999941 | 0.507290441 | 0.151592439 | 0.490174999 |
| 0.423859511 | 0.290797458 | 0.509242504 | 0.023928964 |
| 0.005212032 | 0.142748995 | 0.393033711 | 0.465490199 |
| 0.376923006 | 0.28448922  | 0.231106689 | 0.229372599 |
| 0.201045931 | 0.429271488 | 0.462652643 | 0.200692657 |
| 0.476685055 | 0.006723968 | 0.502789658 | 0.316277572 |
| 0.096834476 | 0.394266705 | 0.429112604 | 0.490176029 |
| 0.317078684 | 0.490191379 | 0.529925671 | 0.054791437 |
| 0.106627476 | 0.504998203 | 0.471010571 | 0.496332892 |
| 0.524370048 | 0.407872513 | 0.369989834 | 0.429103486 |
| 0.508770335 | 0.455622784 | 0.36034213  | 0.238194513 |
| 0.001862126 | 0.200621351 | 0.39165161  | 0.401295695 |
| 0.457211738 | 0.432736301 | 0.463236749 | 0.28338343  |
| 0.5009809   | 0.030739909 | 0.457711446 | 0.525637093 |
| 0.032852842 | 0.468708774 | 0.016082359 | 0.212809479 |
| 0.500317445 | 0.464941394 | 0.482772878 | 0.107268955 |
| 0.023023367 | 0.175979994 | 0.20024396  | 0.403079433 |
| 0.487352406 | 0.528915659 | 0.472960106 | 0.177061104 |
| 0.393267864 | 0.232069825 | 0.433712579 | 0.507698919 |

|             |             |             |             |
|-------------|-------------|-------------|-------------|
| 0.517178819 | 0.013329754 | 0.216112612 | 0.289484339 |
| 0.399493388 | 0.179938184 | 0.298105161 | 0.054976921 |
| 0.018558352 | 0.031401042 | 0.492286123 | 0.220513603 |
| 0.140722536 | 0.266487624 | 0.115160998 | 0.515408481 |
| 0.415849455 | 0.450600882 | 0.162389562 | 0.324253533 |
| 0.496960095 | 0.322999494 | 0.484568367 | 0.523164314 |
| 0.433519027 | 0.330359012 | 0.204620412 | 0.522718545 |
| 0.484039592 | 0.100724122 | 0.119728325 | 0.400718857 |
| 0.416697964 | 0.511668529 | 1           | 0.381691734 |
| 0.329302952 | 0.317848538 | 0.389364714 | 0.467405301 |
| 0.312925633 | 0.420336907 | 0.115826433 | 0.429649351 |
| 0.472437833 | 0.051502657 | 0.097270319 | 0.502904203 |
| 0.071270852 | 0.31428721  | 0.504789067 | 0.533745395 |
| 0.515839073 | 0.059132068 | 0.297151741 | 0.33513915  |
| 0.374849531 | 0.321108891 | 0.488248301 | 0.276603302 |
| 0.390976828 | 0.392656523 | 0.072481417 | 0.408460723 |
| 0.172024073 | 0.413527999 | 0.36229095  | 0.094068733 |
| 0.46853263  | 0.421679023 | 0.527947628 | 0.492911464 |
| 0.471965261 | 0.005967785 | 0.187231455 | 0.442079416 |
| 0.373132129 | 0.432125413 | 0.527802176 | 0.15951928  |
| 0.328037767 | 0.378497433 | 0.19732192  | 0.398606096 |
| 0.457279043 | 0.293268852 | 0.258410411 | 0.001251388 |
| 0.189635008 | 0.436404084 | 0.496518229 | 0.078668011 |
| 0.298814613 | 0.158625615 | 0.154535466 | 0.531048191 |
| 0.266025596 | 0.525409704 | 0.04244948  | 0.201515099 |
| 0.331260978 | 0.497369812 | 0.460297287 | 0.33830468  |
| 0.526986439 | 0.389153129 | 0.427761181 | 0.461340128 |
| 0.341612253 | 0.423296598 | 0.213875652 | 0.350966654 |
| 0.509540382 | 0.534711861 | 0.509805625 | 0.526047306 |
| 0.335878903 | 0.441196398 | 0.364825857 | 0.348217402 |
| 0.4665552   | 0.481455004 | 0.122829613 | 0.529299467 |
| 0.001303634 | 0.423162408 | 0.513338427 | 0.224231832 |
| 0.529992683 | 0.306457544 | 0.101320835 | 0.320464781 |
| 0.513632564 | 0.526459574 | 0.479204027 | 0.474673069 |
| 0.298522811 | 0.017210717 | 0.509241812 | 0.482691517 |
| 0.502792896 | 0.476961446 | 0.38781671  | 0.108067917 |
| 0.529827944 | 0.405574589 | 0.493322188 | 0.476142625 |
| 0.510791711 | 0.450522022 | 0.317026371 | 0.414182061 |
| 0.024072477 | 0.318687621 | 0.486974059 | 0.24027657  |
| 0.383973994 | 0.2457167   | 0.532157436 | 0.398379536 |
| 0.459724369 | 0.375536588 | 0.416199482 | 0.115652767 |
| 0.235221136 | 0.528496465 | 0.06168003  | 0.50274866  |
| 0.522914075 | 0.445541344 | 0.534760203 | 0.515760133 |
| 0.393898052 | 0.461121733 | 0.531929702 | 0.458955817 |
| 0.001710898 | 0.453871518 | 0.435958632 | 0.417294412 |
| 0.500374304 | 0.362158825 | 0.29576179  | 0.472361249 |
| 0.00225759  | 0.208592076 | 0.307725575 | 0.512838632 |
| 0.531998867 | 0.044097841 | 0.063820415 | 0.53204563  |
| 0.449708583 | 0.059135123 | 0.525468629 | 0.40894671  |
| 0.530972023 | 0.500186582 | 0.227786025 | 0.457163277 |
| 0.267540931 | 0.440039165 | 0.044128838 | 0.510895984 |
| 0.484454222 | 0.123812742 | 0.112237819 | 0.516002737 |
| 0.507842617 | 0.463003193 | 0.322979516 | 0.0145352   |
| 0.407320455 | 0.260031867 | 0.529806343 | 0.15862224  |



|             |             |             |             |
|-------------|-------------|-------------|-------------|
| 0.497952967 | 0.437616574 | 0.52015125  | 0.491611411 |
| 0.518613713 | 0.48407093  | 0.44858169  | 0.525221771 |
| 0.14766667  | 0.465822376 | 0.479672661 | 0.080613523 |
| 0.442765609 | 0.531860513 | 0.478262357 | 0.23341952  |
| 0.452387955 | 0.119499242 | 0.265040673 | 0.397644734 |
| 0.51819796  | 0.527786777 | 0.085001794 | 0.223293362 |
| 0.47963321  | 0.37960972  | 0.152785858 | 0.423749991 |
| 0.34858233  | 0.216766761 | 0.186346122 | 0.449063136 |
| 0.510040105 | 0.360621505 | 0.511981692 | 0.203478926 |
| 0.511328328 | 0.076393151 | 0.494965232 | 0.335057497 |
| 0.358053491 | 0.45710601  | 0.412134156 | 0.161935541 |
| 0.036446495 | 0.176288736 | 0.469072112 | 0.474797035 |
| 0.109092365 | 0.254579571 | 0.322246225 | 0.419661394 |
| 0.511448771 | 0.476458483 | 0.344915651 | 0.418855491 |
| 0.466347601 | 0.137232144 | 0.514152907 | 0.417798722 |
| 0.485382598 | 0.409002122 | 0.525741182 | 0.013489812 |
| 0.510071858 | 0.222637767 | 0.26687066  | 0.435810958 |
| 0.448034229 | 0.180864585 | 0.457107553 | 0.222447802 |
| 0.221974813 | 0.005828706 | 0.435343772 | 0.422898152 |
| 0.348757414 | 0.35212893  | 0.443867181 | 0.201104134 |
| 0.526175809 | 0.472339928 | 0.489059512 | 0.340957323 |
| 0.449407004 | 0.028513189 | 0.203586636 | 0.051387905 |
| 0.470223134 | 0.460893141 | 0.48588886  | 0.447370234 |
| 0.267416605 | 0.520624216 | 0.46682179  | 0.478484033 |
| 0.532397603 | 0.211293194 | 0.519607214 | 0.382450518 |
| 0.411218353 | 0.458058314 | 0.328155886 | 0.406334229 |
| 0.258278765 | 0.178372985 | 0.169228849 | 0.220393856 |
| 0.518927394 | 0.381634748 | 0.462864136 | 0.384959547 |
| 0.069748337 | 0.461700245 | 0.482803893 | 0.492712935 |
| 0.506660173 | 0.446710633 | 0.443516388 | 0.455361172 |
| 0.368601393 | 0.37374617  | 0.074920904 | 0.047431445 |
| 0.315251093 | 0.251025465 | 0.475219398 | 0.51144104  |
| 0.519831751 | 0.343508001 | 0.137931872 | 0.191268696 |
| 0.161119284 | 0.42737273  | 0.338193132 | 0.206934716 |
| 0.510780727 | 0.378104791 | 0.001050165 | 0.298104688 |
| 0.454816781 | 0.456191485 |             |             |
| ETAA1       | 0.192397041 | 0.370746616 | 0.03547699  |
| 0.00253348  | 0.01932283  | 0.208233721 | 0.139690349 |
| 0.153557955 | 0.04151471  | 0.028700294 | 0.300202236 |
| 0.00444338  | 0.213106043 | 0.022559046 | 0.034069301 |
| 0.350177737 | 0.339752841 | 0.174462674 | 0.364366265 |
| 0.202131975 | 0.014617993 | 0.341258046 | 0.194693329 |
| 0.178660372 | 0.005875877 | 0.058319368 | 0.004906774 |
| 0.119808117 | 0.331568405 | 0.167342612 | 0.046893948 |
| 0.314274238 | 0.25326596  | 0.049502582 | 0.025840127 |
| 0.011586615 | 0.402064451 | 0.008283999 | 0.193635311 |
| 0.236316939 | 0.071839515 | 0.251948036 | 0.011369268 |
| 8.49E-05    | 0.051392773 | 0.115740105 | 0.279321147 |
| 0.188309128 | 0.186717324 | 0.171326188 | 0.064482462 |
| 0.009445745 | 0.323386245 | 0.360950856 | 0.00979191  |
| 0.355390927 | 0.000281747 | 0.375150565 | 0.11963212  |
| 0.050401713 | 0.156664724 | 0.114041317 | 0.269999071 |
| 0.222210493 | 0.367231918 | 0.362153392 | 0.01375549  |
| 0.068564944 | 0.163029478 | 0.200545647 | 0.162620815 |

|             |             |             |             |
|-------------|-------------|-------------|-------------|
| 0.347097048 | 0.043847917 | 0.042407646 | 0.062764645 |
| 0.191503637 | 0.240490377 | 0.268150853 | 0.070401281 |
| 0.001772835 | 0.084468696 | 0.036558602 | 0.225389704 |
| 0.132845781 | 0.326832193 | 0.219581429 | 0.051877696 |
| 0.135815004 | 0.020468334 | 0.258397996 | 0.361274224 |
| 0.005582935 | 0.238436363 | 0.011850259 | 0.059505061 |
| 0.289598989 | 0.278489058 | 0.258220945 | 0.021753066 |
| 0.017004248 | 0.093515628 | 0.052924263 | 0.228654226 |
| 0.203381945 | 0.161103002 | 0.339331881 | 0.023698472 |
| 0.180827007 | 0.048797036 | 0.09830397  | 0.379736302 |
| 0.354956298 | 0.017333482 | 0.071630821 | 0.20234482  |
| 0.027112459 | 0.013478009 | 0.167375149 | 0.007494053 |
| 0.005322793 | 0.025139539 | 0.304960268 | 0.092517562 |
| 0.037344411 | 0.132966811 | 0.020595286 | 0.158606253 |
| 0.136531044 | 0.303223974 | 0.020738235 | 0.124358533 |
| 0.181780088 | 0.158182434 | 0.106519706 | 0.224018195 |
| 0.046676679 | 0.104242033 | 0.10492896  | 0.340501656 |
| 0.419817147 | 0.027298722 | 0.03462452  | 0.267365137 |
| 0.176010188 | 0.347044352 | 0.381691734 | 1           |
| 0.056604603 | 0.200699709 | 0.044217193 | 0.217062272 |
| 0.188850656 | 0.253658838 | 0.015481862 | 0.330395935 |
| 0.372660835 | 0.010267317 | 0.046886664 | 0.288072357 |
| 0.004091165 | 0.035132269 | 0.371676458 | 0.280351848 |
| 0.189501596 | 0.004031801 | 0.058504369 | 0.157763558 |
| 0.228537957 | 0.134242901 | 0.265437651 | 0.041523284 |
| 0.279055723 | 0.046483714 | 0.03509825  | 0.181397426 |
| 0.119133904 | 0.271838079 | 0.022209525 | 0.007241821 |
| 0.223718181 | 0.153937871 | 0.314243162 | 0.253757946 |
| 0.224207428 | 0.000266519 | 0.028511703 | 0.222142966 |
| 0.039824389 | 0.267701631 | 0.369625591 | 0.121589892 |
| 0.261687841 | 0.036443567 | 0.147433252 | 0.058190786 |
| 0.34799217  | 0.032018254 | 0.027745224 | 0.001961623 |
| 0.042763665 | 0.064000495 | 0.150352458 | 0.046750466 |
| 0.038532234 | 0.039649888 | 0.053485503 | 0.312719075 |
| 0.1755201   | 0.237089443 | 0.03616555  | 0.034711704 |
| 0.100166135 | 0.253231182 | 0.053852961 | 0.058554852 |
| 0.241867581 | 0.06420966  | 0.246709155 | 0.347190245 |
| 0.037776309 | 0.291186946 | 0.016875474 | 0.130018459 |
| 0.147686979 | 0.292181499 | 0.236552991 | 0.275899597 |
| 0.127985269 | 0.280833251 | 0.042338468 | 0.271079483 |
| 0.243682849 | 0.221809974 | 0.053458559 | 0.393343311 |
| 0.001814207 | 0.265505106 | 0.151527044 | 0.018200033 |
| 0.35261456  | 0.173723399 | 0.060225359 | 0.172384241 |
| 0.369499141 | 0.400026944 | 0.367984815 | 0.25479589  |
| 0.043984684 | 0.022254434 | 0.403926899 | 0.295126175 |
| 0.320107797 | 0.145485307 | 0.027714046 | 0.019850982 |
| 0.339978231 | 0.178395251 | 0.20862445  | 0.147656328 |
| 0.146764697 | 0.068373931 | 0.207107638 | 0.244594857 |
| 0.004106357 | 0.102613791 | 0.191200365 | 0.018026394 |
| 0.058415957 | 0.039781203 | 0.269246541 | 0.314690023 |
| 0.044815498 | 0.038090725 | 0.039636018 | 0.048081078 |
| 0.156763842 | 0.374061224 | 0.003305248 | 0.393797748 |
| 0.379544937 | 0.230567712 | 0.301112383 | 0.385827357 |
| 0.210300711 | 0.318086287 | 0.326133841 | 0.311494469 |

|             |             |             |             |
|-------------|-------------|-------------|-------------|
| 0.002375657 | 0.230673216 | 0.168270595 | 0.359174937 |
| 0.273141458 | 0.228411099 | 0.10746599  | 0.075504762 |
| 0.002077737 | 0.148515726 | 0.013816924 | 0.424172971 |
| 0.290058944 | 0.01560177  | 0.002244924 | 0.286635937 |
| 0.156857579 | 0.008419721 | 0.399450225 | 0.158209564 |
| 0.315552295 | 0.17283321  | 0.093905938 | 0.195116402 |
| 0.01302417  | 0.090632335 | 0.005247111 | 0.201607095 |
| 0.110296366 | 0.016170928 | 0.009771176 | 0.377048362 |
| 0.349204034 | 0.266404582 | 0.221003141 | 0.00242421  |
| 0.240837645 | 0.015333948 | 0.22733929  | 0.066116695 |
| 0.378866808 | 0.301208802 | 0.35706308  | 0.220786064 |
| 0.206224438 | 0.336474969 | 0.337773666 | 0.306055478 |
| 0.008657364 | 0.224471581 | 0.272474579 | 0.01945561  |
| 0.157931211 | 0.306381243 | 0.109744397 | 0.153942524 |
| 0.301353837 | 0.005606957 | 0.200745761 | 0.224676289 |
| 0.335800422 | 0.293010135 | 0.033547145 | 0.096457944 |
| 0.313284872 | 0.10117833  | 0.078829142 | 0.185245326 |
| 0.274078587 | 0.012514435 | 0.024111313 | 0.301470088 |
| 0.374709901 | 0.253300766 | 0.295037982 | 0.016295525 |
| 0.289049375 | 0.043903875 | 0.329759793 | 0.048578236 |
| 0.262669116 | 0.14416219  | 0.224696794 | 0.028483311 |
| 0.004843534 | 0.056889429 | 0.291895189 | 0.366068981 |
| 0.06517491  | 0.192004265 | 0.130377753 | 0.160776098 |
| 0.321498979 | 0.048678118 | 0.259178929 | 0.219143688 |
| 0.371787638 | 0.008219605 | 0.421750215 | 0.215119156 |
| 0.31936354  | 0.094936677 | 0.296008096 | 0.002205978 |
| 0.185720251 | 0.038348562 | 0.124207012 | 0.119237385 |
| 0.268695651 | 0.081359025 | 0.243633072 | 0.10923093  |
| 0.017265439 | 0.007258276 | 0.346234315 | 0.059685904 |
| 0.279878147 | 0.046879211 | 0.212316401 | 0.007265475 |
| 0.410738868 | 0.206780164 | 0.29008055  | 0.044275514 |
| 0.108636955 | 0.00084184  | 0.0382409   | 0.02935227  |
| 0.330101966 | 0.343557587 | 0.220977248 | 0.155324451 |
| 0.099947926 | 0.189293657 | 0.294754504 | 0.105478826 |
| 0.285924353 | 0.01611834  | 0.3440675   | 0.14216632  |
| 0.192964491 | 0.054327329 | 0.232717244 | 0.068122063 |
| 0.088477528 | 0.030351504 | 0.08190154  | 0.072037832 |
| 0.279852406 | 0.054729978 | 0.13856911  | 0.050805349 |
| 0.02110018  | 0.116253413 | 0.259964327 | 0.192416695 |
| 0.191431559 | 0.18068429  | 0.106471176 | 0.364685978 |
| 0.040181915 | 0.138661337 | 0.003959329 | 0.002919152 |
| 0.016813389 | 0.089508513 | 0.369574746 | 0.354254863 |
| 0.350025137 | 0.043836727 | 0.06179153  | 0.104807326 |
| 0.012891754 | 0.246940942 | 0.176630984 | 0.01007315  |
| 0.197232016 | 0.04335749  | 0.00183093  | 0.114306342 |
| 0.318387809 | 0.038097289 |             |             |
| ETS2        | 0.073776208 | 0.365135596 | 0.053546938 |
| 0.039092281 | 0.207927662 | 0.247722757 | 0.300332486 |
| 0.063213113 | 0.047872474 | 0.099331014 | 0.350442192 |
| 0.000108133 | 0.166022176 | 0.003669916 | 0.033347603 |
| 0.264503809 | 0.289829945 | 0.331561595 | 0.27269324  |
| 0.073938391 | 0.087701356 | 0.182987115 | 0.223917264 |
| 0.225464912 | 0.000258991 | 0.17548542  | 0.058327171 |
| 0.057339109 | 0.242161318 | 0.122553044 | 0.093187026 |

|             |             |             |             |
|-------------|-------------|-------------|-------------|
| 0.210511241 | 0.250266701 | 0.095847081 | 0.170185927 |
| 0.06284418  | 0.370582825 | 0.041764859 | 0.2289364   |
| 0.155205102 | 0.190720454 | 0.238073489 | 0.007464892 |
| 0.004863994 | 0.108116055 | 0.042030418 | 0.191445378 |
| 0.073344741 | 0.20585224  | 0.12458593  | 0.202940196 |
| 0.015000572 | 0.331040796 | 0.173901934 | 0.017332517 |
| 0.436561947 | 0.00722474  | 0.39942219  | 0.025190829 |
| 0.051014188 | 0.118743992 | 0.064804001 | 0.188785914 |
| 0.31664083  | 0.434010934 | 0.340386143 | 0.061499519 |
| 0.088388912 | 0.119804828 | 0.167101766 | 0.272434869 |
| 0.308643209 | 0.082941756 | 0.128987016 | 0.085978008 |
| 0.1917049   | 0.16162619  | 0.231916142 | 0.079294954 |
| 0.000254064 | 0.223590137 | 0.159688725 | 0.088649066 |
| 0.130323937 | 0.350022796 | 0.10973289  | 0.163468333 |
| 0.114862069 | 0.014336294 | 0.194503338 | 0.318249386 |
| 0.019882605 | 0.17920501  | 0.010778146 | 0.072247345 |
| 0.202403789 | 0.196423116 | 0.156662275 | 0.080006976 |
| 0.009147069 | 0.043673753 | 0.010487655 | 0.147668494 |
| 0.1383137   | 0.165094679 | 0.413079422 | 0.010928384 |
| 0.138723588 | 0.03520875  | 0.118003686 | 0.393405432 |
| 0.280644689 | 0.003522933 | 0.03817623  | 0.249356389 |
| 0.081228278 | 0.096823972 | 0.269840934 | 0.004427072 |
| 0.013059991 | 0.001147063 | 0.225907903 | 0.052574703 |
| 0.125216898 | 0.210016178 | 0.097398755 | 0.264638819 |
| 0.050875287 | 0.176076021 | 0.201717277 | 0.22473498  |
| 0.19495399  | 0.319251863 | 0.229117953 | 0.223074745 |
| 0.151286822 | 0.044709772 | 0.059414053 | 0.412112631 |
| 0.324224999 | 0.07321016  | 0.046919955 | 0.264948424 |
| 0.153387705 | 0.265368578 | 0.329302952 | 0.056604603 |
| 1           | 0.123165954 | 0.064197132 | 0.337400492 |
| 0.276822622 | 0.111289231 | 0.007731354 | 0.304735234 |
| 0.415695724 | 0.007419229 | 0.047130006 | 0.198290666 |
| 0.148163054 | 0.139475097 | 0.313972287 | 0.306743512 |
| 0.210992719 | 0.047005114 | 0.129467376 | 0.236512763 |
| 0.143368146 | 0.203670202 | 0.187515283 | 0.103137448 |
| 0.216575979 | 0.067459222 | 0.061799157 | 0.150058706 |
| 0.109244313 | 0.159875616 | 0.028124867 | 0.013160588 |
| 0.124501025 | 0.062990736 | 0.310118431 | 0.153982316 |
| 0.141622775 | 0.01058467  | 0.095929341 | 0.101548967 |
| 0.048506269 | 0.160798686 | 0.408477664 | 0.110533807 |
| 0.14712614  | 0.049972459 | 0.107450103 | 0.191819256 |
| 0.16798134  | 0.078497462 | 0.079862462 | 0.000352078 |
| 0.119421235 | 0.063181535 | 0.128501028 | 0.011359356 |
| 0.189830893 | 0.034853671 | 0.01305821  | 0.304724016 |
| 0.17500947  | 0.297138288 | 0.003476287 | 0.011750295 |
| 0.096583122 | 0.40317232  | 0.088682834 | 0.028869652 |
| 0.347423698 | 0.089054408 | 0.162058323 | 0.328599596 |
| 0.196607242 | 0.339701324 | 0.015890942 | 0.077141077 |
| 0.156788491 | 0.325447422 | 0.226909352 | 0.295958293 |
| 0.159138755 | 0.131730662 | 0.043151195 | 0.248233476 |
| 0.141470404 | 0.162032365 | 0.039811011 | 0.372408205 |
| 0.0002482   | 0.230800512 | 0.219567681 | 0.012375386 |
| 0.396708494 | 0.339287214 | 0.03464192  | 0.058045653 |
| 0.280489917 | 0.369005601 | 0.206362248 | 0.196020038 |

|             |             |             |             |
|-------------|-------------|-------------|-------------|
| 0.021317066 | 0.002347667 | 0.279690627 | 0.278535959 |
| 0.252163408 | 0.177976759 | 0.119755939 | 0.008560875 |
| 0.31102698  | 0.079781203 | 0.193582435 | 0.099466335 |
| 0.214396716 | 0.105166639 | 0.135628124 | 0.101872943 |
| 0.000948462 | 0.094638125 | 0.144549876 | 0.070253197 |
| 0.091637961 | 0.049334034 | 0.325658494 | 0.297600541 |
| 0.134536625 | 0.031204668 | 0.114333826 | 0.097893506 |
| 0.188378767 | 0.353359526 | 0.018053419 | 0.261426105 |
| 0.316445946 | 0.182288285 | 0.332674696 | 0.292590308 |
| 0.121855718 | 0.389651686 | 0.318114453 | 0.18658294  |
| 0.000121734 | 0.189042625 | 0.16523756  | 0.32636507  |
| 0.228435686 | 0.229757028 | 0.026812656 | 0.106732721 |
| 0.000617125 | 0.111712569 | 0.042394938 | 0.345198985 |
| 0.323144155 | 0.039912999 | 0.014194602 | 0.307080176 |
| 0.155420136 | 0.008795938 | 0.333738339 | 0.206554418 |
| 0.385744615 | 0.220079819 | 0.169995573 | 0.181122727 |
| 0.026120933 | 0.060679055 | 0.065109628 | 0.283134041 |
| 0.132179299 | 0.005214323 | 0.111774967 | 0.298003095 |
| 0.25427275  | 0.387042059 | 0.216925836 | 0.004378654 |
| 0.12982876  | 0.06732038  | 0.281878819 | 0.064922413 |
| 0.265777286 | 0.340434836 | 0.395804692 | 0.213331979 |
| 0.192922822 | 0.375253368 | 0.341846344 | 0.288474009 |
| 0.075242932 | 0.167740315 | 0.195029586 | 0.053251544 |
| 0.088545555 | 0.317520008 | 0.176087527 | 0.236356857 |
| 0.194233269 | 0.099629634 | 0.219159387 | 0.072387605 |
| 0.416438502 | 0.301036471 | 0.047116568 | 0.04370918  |
| 0.393666328 | 0.08978462  | 0.140567244 | 0.148602612 |
| 0.239392227 | 0.010910686 | 0.010551348 | 0.268351586 |
| 0.412887955 | 0.365629394 | 0.245647167 | 0.090341328 |
| 0.266680526 | 0.029294172 | 0.227078574 | 0.135479715 |
| 0.14730408  | 0.107341985 | 0.137599321 | 0.006501517 |
| 0.00814914  | 0.025021771 | 0.414007658 | 0.373048549 |
| 0.059038702 | 0.118951779 | 0.215490228 | 0.333124176 |
| 0.268516195 | 0.077762205 | 0.247364731 | 0.116899792 |
| 0.410097281 | 0.090818489 | 0.347321522 | 0.119007615 |
| 0.209981689 | 0.160810911 | 0.276586416 | 0.00287399  |
| 0.173060814 | 0.093373652 | 0.022348137 | 0.283540052 |
| 0.178371115 | 0.093951712 | 0.403139037 | 0.050910213 |
| 0.046661267 | 0.00089117  | 0.216010169 | 0.116747695 |
| 0.304402741 | 0.030133513 | 0.122767008 | 0.021941719 |
| 0.362220274 | 0.138497666 | 0.185937614 | 0.039119599 |
| 0.15588886  | 0.016728352 | 0.110374193 | 0.019257469 |
| 0.197885899 | 0.300595765 | 0.136079501 | 0.080455587 |
| 0.016606312 | 0.282267287 | 0.301326748 | 0.255523709 |
| 0.324516889 | 0.02468864  | 0.29606562  | 0.072156644 |
| 0.152635764 | 0.067101712 | 0.244879376 | 0.075861375 |
| 0.252858165 | 0.028791634 | 0.095880775 | 0.02496713  |
| 0.285622334 | 0.087638658 | 0.288129355 | 0.034138119 |
| 0.06661915  | 0.14633087  | 0.178393517 | 0.187375281 |
| 0.198103657 | 0.121285212 | 0.057333147 | 0.39565463  |
| 0.034677256 | 0.056268267 | 0.060201256 | 0.048918453 |
| 0.07280257  | 0.125686071 | 0.196456541 | 0.248591804 |
| 0.298248717 | 0.026325457 | 0.063230736 | 0.038957155 |
| 0.015659875 | 0.125053389 | 0.355813156 | 0.090393913 |

|             |             |             |             |
|-------------|-------------|-------------|-------------|
| 0.217055067 | 0.029552362 | 0.000446155 | 0.032055231 |
| 0.282836763 | 0.077477209 |             |             |
| EVL         | 0.152722977 | 0.342312141 | 0.190880405 |
| 0.00600226  | 0.092878213 | 0.336147503 | 0.240934312 |
| 0.108198853 | 0.242923678 | 0.107478013 | 0.395218407 |
| 0.018072305 | 0.133930505 | 0.114755879 | 0.187832218 |
| 0.262270585 | 0.260838103 | 0.236766304 | 0.279233215 |
| 0.188525703 | 0.051289326 | 0.342195499 | 0.20608751  |
| 0.289712626 | 0.030881986 | 0.143111524 | 0.020341026 |
| 0.082449994 | 0.232335964 | 0.275275531 | 0.148983994 |
| 0.231392089 | 0.175992678 | 0.091111932 | 0.080445899 |
| 0.020820041 | 0.404449793 | 0.017320358 | 0.13711631  |
| 0.152219327 | 0.147732048 | 0.188872627 | 0.103584999 |
| 0.000150178 | 0.174683008 | 0.081756505 | 0.287871826 |
| 0.216140849 | 0.30009152  | 0.293121891 | 0.136920783 |
| 0.011797641 | 0.404685992 | 0.307799655 | 0.01064502  |
| 0.415065547 | 0.000822303 | 0.404727299 | 0.130841407 |
| 0.224613352 | 0.235982537 | 0.090213507 | 0.254699456 |
| 0.363268384 | 0.414046784 | 0.309998753 | 0.096598746 |
| 0.195636826 | 0.139059533 | 0.133772513 | 0.154234619 |
| 0.314950563 | 0.11396554  | 0.165031662 | 0.053477701 |
| 0.148920029 | 0.154665658 | 0.394134854 | 0.272788449 |
| 0.008350969 | 0.164399137 | 0.071855889 | 0.166669333 |
| 0.082412418 | 0.406192688 | 0.164841496 | 0.15267771  |
| 0.097302408 | 0.140102469 | 0.269663631 | 0.290270039 |
| 0.020020217 | 0.1722428   | 0.011070939 | 0.269568838 |
| 0.215961068 | 0.183643957 | 0.218222575 | 0.144651248 |
| 0.121402122 | 0.295157579 | 0.110517269 | 0.136122234 |
| 0.204567063 | 0.148326046 | 0.411996304 | 0.017881111 |
| 0.104306694 | 0.192512025 | 0.189567794 | 0.388651374 |
| 0.294523393 | 0.088537528 | 0.27021889  | 0.321312979 |
| 0.082644985 | 0.053736167 | 0.269487415 | 0.007870582 |
| 0.014688265 | 0.047720892 | 0.219929046 | 0.278533541 |
| 0.121664318 | 0.220510836 | 0.06268192  | 0.13373488  |
| 0.107622423 | 0.216524885 | 0.119357068 | 0.197939397 |
| 0.124216805 | 0.255934145 | 0.095528343 | 0.176366584 |
| 0.076066463 | 0.229321667 | 0.258066585 | 0.342835339 |
| 0.442107545 | 0.170613862 | 0.208617456 | 0.344593745 |
| 0.105962476 | 0.26038585  | 0.317848538 | 0.200699709 |
| 0.123165954 | 1           | 0.091279406 | 0.238754784 |
| 0.311061154 | 0.242336664 | 0.021802621 | 0.411653661 |
| 0.438061547 | 0.010961429 | 0.213416874 | 0.22445415  |
| 0.014322602 | 0.167243969 | 0.366626016 | 0.252401785 |
| 0.167700262 | 0.016676798 | 0.113796991 | 0.242004307 |
| 0.297701581 | 0.198783016 | 0.263143846 | 0.092315593 |
| 0.363262104 | 0.08098291  | 0.164915056 | 0.107761544 |
| 0.253394974 | 0.319038058 | 0.043410685 | 0.026386915 |
| 0.184672569 | 0.176002388 | 0.27897314  | 0.20856025  |
| 0.173445836 | 0.000545009 | 0.099641099 | 0.18801234  |
| 0.092906056 | 0.17387752  | 0.357011027 | 0.258750795 |
| 0.357931247 | 0.0622154   | 0.279432643 | 0.117077657 |
| 0.274169319 | 0.118941397 | 0.11313014  | 0.009703033 |
| 0.205810718 | 0.051991778 | 0.149733892 | 0.200157479 |
| 0.132493911 | 0.200889835 | 0.129422968 | 0.267810961 |

|             |             |             |             |
|-------------|-------------|-------------|-------------|
| 0.286209964 | 0.189278904 | 0.117174296 | 0.052130443 |
| 0.214292392 | 0.285505721 | 0.072037668 | 0.123268068 |
| 0.230722091 | 0.150096919 | 0.148058025 | 0.421421165 |
| 0.152598716 | 0.365049391 | 0.034151298 | 0.254987797 |
| 0.106673481 | 0.251427457 | 0.168595297 | 0.223800958 |
| 0.219783079 | 0.226772118 | 0.069131824 | 0.382665129 |
| 0.224916512 | 0.215301914 | 0.241238335 | 0.360209723 |
| 0.012918273 | 0.324941237 | 0.136746461 | 0.033139144 |
| 0.332688936 | 0.284534438 | 0.241753532 | 0.242025853 |
| 0.284311694 | 0.369007305 | 0.303042308 | 0.168116695 |
| 0.062337799 | 0.102987824 | 0.343393041 | 0.335252208 |
| 0.2288576   | 0.173031696 | 0.044115476 | 0.0465109   |
| 0.276304243 | 0.125547647 | 0.199839629 | 0.106468276 |
| 0.127830524 | 0.070445725 | 0.298927307 | 0.185036206 |
| 0.010910241 | 0.175584842 | 0.139271126 | 0.061358353 |
| 0.102523535 | 0.151948694 | 0.239448617 | 0.420932364 |
| 0.076389732 | 0.068367396 | 0.061696214 | 0.166231344 |
| 0.295912898 | 0.34006404  | 0.007267426 | 0.345138723 |
| 0.302081312 | 0.268079012 | 0.250889305 | 0.304843321 |
| 0.247987712 | 0.393138418 | 0.284616295 | 0.223953865 |
| 0.009329643 | 0.147947415 | 0.104287444 | 0.465454295 |
| 0.193402543 | 0.340235657 | 0.073028565 | 0.054064294 |
| 0.014756505 | 0.270528274 | 0.020838764 | 0.409276791 |
| 0.230439253 | 0.128310043 | 0.003833361 | 0.247577763 |
| 0.097509719 | 0.01931105  | 0.34005982  | 0.192852363 |
| 0.294542219 | 0.163236613 | 0.184315325 | 0.126935761 |
| 0.014564369 | 0.13507482  | 0.029674442 | 0.183748854 |
| 0.10006128  | 0.041386326 | 0.048599835 | 0.310232081 |
| 0.300137722 | 0.331915922 | 0.340934152 | 0.008363824 |
| 0.151640194 | 0.030736768 | 0.187945279 | 0.240372001 |
| 0.343186004 | 0.399052326 | 0.355225472 | 0.15928386  |
| 0.186446018 | 0.372183312 | 0.405825048 | 0.276669871 |
| 0.017949444 | 0.14258267  | 0.186295503 | 0.094012848 |
| 0.106160684 | 0.253979401 | 0.096973022 | 0.280091337 |
| 0.330980436 | 0.01368969  | 0.342237762 | 0.188277145 |
| 0.341948076 | 0.237420296 | 0.177318818 | 0.290043622 |
| 0.365296802 | 0.23759105  | 0.210942711 | 0.220112491 |
| 0.407271644 | 0.014555757 | 0.049452727 | 0.377714367 |
| 0.39309486  | 0.374855425 | 0.226167622 | 0.057420726 |
| 0.21554416  | 0.244660735 | 0.27370125  | 0.21160728  |
| 0.323573026 | 0.093692843 | 0.135560122 | 0.036587055 |
| 0.016707042 | 0.185582595 | 0.349914363 | 0.419294895 |
| 0.215074364 | 0.301929461 | 0.185396681 | 0.198040384 |
| 0.237875431 | 0.090274882 | 0.361583427 | 0.215918693 |
| 0.447443672 | 0.035626193 | 0.400621286 | 0.233600255 |
| 0.311605603 | 0.153704244 | 0.257985995 | 0.010984036 |
| 0.143074661 | 0.110181405 | 0.083249821 | 0.135235298 |
| 0.174235363 | 0.219274837 | 0.30825173  | 0.272478837 |
| 0.047195059 | 0.019764836 | 0.383670937 | 0.040714601 |
| 0.419738386 | 0.067573562 | 0.207033371 | 0.009241633 |
| 0.372179416 | 0.196022936 | 0.243056403 | 0.05096466  |
| 0.130956963 | 0.001158657 | 0.117011835 | 0.165456675 |
| 0.327758894 | 0.404847204 | 0.184987273 | 0.120415933 |
| 0.127893387 | 0.18312831  | 0.3372133   | 0.105469602 |

|             |             |             |             |
|-------------|-------------|-------------|-------------|
| 0.236289998 | 0.022158719 | 0.265828368 | 0.223261547 |
| 0.115471616 | 0.134633558 | 0.367615847 | 0.186434348 |
| 0.175667369 | 0.115425387 | 0.245865673 | 0.23446685  |
| 0.211204768 | 0.181956899 | 0.155636898 | 0.109949358 |
| 0.126919815 | 0.155643625 | 0.190993099 | 0.139724381 |
| 0.16721115  | 0.115400351 | 0.091867545 | 0.444040674 |
| 0.101133345 | 0.185489891 | 0.011070191 | 0.015389595 |
| 0.038984052 | 0.199708287 | 0.30676793  | 0.295356851 |
| 0.277570748 | 0.081387146 | 0.230620759 | 0.280396807 |
| 0.02090011  | 0.160497471 | 0.274494027 | 0.018618805 |
| 0.19442321  | 0.073201353 | 0.007880903 | 0.208137902 |
| 0.376637131 | 0.074822151 |             |             |
| EXOSC2      | 0.169845682 | 0.390551596 | 0.023450676 |
| 0.022114995 | 0.023160223 | 0.196304592 | 0.145175764 |
| 0.107088435 | 0.037838523 | 0.096329691 | 0.250172227 |
| 0.000602696 | 0.193630242 | 0.005578571 | 0.012358023 |
| 0.367814823 | 0.364967766 | 0.154323193 | 0.328241035 |
| 0.117623997 | 0.108033492 | 0.212658065 | 0.258367952 |
| 0.179728054 | 0.000833528 | 0.067442275 | 0.081883399 |
| 0.080728306 | 0.325966162 | 0.093830701 | 0.086293076 |
| 0.345713332 | 0.295519006 | 0.108445705 | 0.04876494  |
| 0.047549325 | 0.354286139 | 0.008689464 | 0.221131122 |
| 0.239863659 | 0.096063439 | 0.297783057 | 0.006297313 |
| 0.004032162 | 0.044245934 | 0.068667937 | 0.24634432  |
| 0.076357362 | 0.168686829 | 0.078471927 | 0.113340386 |
| 0.024431686 | 0.2586983   | 0.237722642 | 0.021614661 |
| 0.323795749 | 0.012444437 | 0.364466171 | 0.059820513 |
| 0.023540036 | 0.110677345 | 0.159748204 | 0.257226433 |
| 0.195105531 | 0.343911119 | 0.367740609 | 0.02294067  |
| 0.051487265 | 0.158273839 | 0.286251481 | 0.279650202 |
| 0.353689594 | 0.075556692 | 0.072973151 | 0.07265521  |
| 0.27539644  | 0.23770605  | 0.161303726 | 0.031461412 |
| 0.00157707  | 0.101679306 | 0.08026816  | 0.192091475 |
| 0.164129818 | 0.273251706 | 0.176139999 | 0.07898866  |
| 0.177571011 | 0.007791586 | 0.182593153 | 0.371901507 |
| 0.017200436 | 0.212664    | 0.002116303 | 0.025550704 |
| 0.281333624 | 0.311849459 | 0.265156107 | 0.046031896 |
| 0.004620215 | 0.025836409 | 0.028004277 | 0.240412226 |
| 0.169160793 | 0.171095527 | 0.316187966 | 0.013203033 |
| 0.192751199 | 0.062299077 | 0.076287504 | 0.382822237 |
| 0.385114416 | 0.001134186 | 0.029315372 | 0.144409828 |
| 0.062578586 | 0.072746964 | 0.118092538 | 0.008777952 |
| 0.006183521 | 0.001551433 | 0.325004813 | 0.038122284 |
| 0.068078524 | 0.127509987 | 0.024198205 | 0.239535687 |
| 0.0719527   | 0.27927156  | 0.026787862 | 0.139244059 |
| 0.224092849 | 0.166656762 | 0.147232396 | 0.267764022 |
| 0.053545576 | 0.045505445 | 0.054214914 | 0.322376998 |
| 0.302623754 | 0.022654699 | 0.033985121 | 0.240275618 |
| 0.192156826 | 0.346814159 | 0.389364714 | 0.044217193 |
| 0.064197132 | 0.091279406 | 1           | 0.263724476 |
| 0.130807285 | 0.109574032 | 0.005495444 | 0.206603853 |
| 0.341007699 | 0.006052061 | 0.02738543  | 0.247864316 |
| 0.013230674 | 0.056585492 | 0.358093477 | 0.281484596 |
| 0.158720888 | 0.08424298  | 0.128161937 | 0.200698848 |



|             |             |             |             |
|-------------|-------------|-------------|-------------|
| 0.162179753 | 0.157286749 | 0.231698478 | 0.135849988 |
| 0.2088904   | 0.151097564 | 0.018221121 | 0.203626167 |
| 0.058797364 | 0.172188845 | 0.076938665 | 0.02081322  |
| 0.167159545 | 0.06480286  | 0.347691542 | 0.178457935 |
| 0.261597622 | 0.008073702 | 0.096995474 | 0.215528191 |
| 0.148193446 | 0.214588866 | 0.393775188 | 0.058936419 |
| 0.130504348 | 0.034568408 | 0.065039153 | 0.066467483 |
| 0.243253821 | 0.134515688 | 0.118057588 | 0.00201962  |
| 0.031285129 | 0.146220437 | 0.132335177 | 0.014376434 |
| 0.052985409 | 0.047820009 | 0.014468511 | 0.347461084 |
| 0.120729211 | 0.253464541 | 0.004107938 | 0.012332907 |
| 0.073336457 | 0.289529451 | 0.092190291 | 0.065456613 |
| 0.31460433  | 0.082723584 | 0.274354656 | 0.302984253 |
| 0.042301072 | 0.304840717 | 0.0150948   | 0.079756474 |
| 0.169530433 | 0.334905432 | 0.294466938 | 0.247846295 |
| 0.124089498 | 0.158732957 | 0.034422961 | 0.19806248  |
| 0.160405086 | 0.126047165 | 0.027879229 | 0.3532003   |
| 0.000804846 | 0.173223081 | 0.227107904 | 0.01955071  |
| 0.384612487 | 0.171073299 | 0.023027212 | 0.063233852 |
| 0.337017214 | 0.346320948 | 0.265332115 | 0.298912174 |
| 0.031931626 | 0.002538579 | 0.330371387 | 0.289253389 |
| 0.33990937  | 0.114304834 | 0.042581853 | 0.004496081 |
| 0.32930391  | 0.105468708 | 0.309109741 | 0.186687228 |
| 0.166147561 | 0.059821348 | 0.088524335 | 0.152610803 |
| 0.005495723 | 0.142689323 | 0.263229274 | 0.117286816 |
| 0.143286313 | 0.083243916 | 0.327766447 | 0.193632597 |
| 0.061575216 | 0.081338777 | 0.107924941 | 0.034885718 |
| 0.097264245 | 0.393783168 | 0.003141979 | 0.310855865 |
| 0.364351609 | 0.135680942 | 0.354463462 | 0.349809702 |
| 0.156477629 | 0.285653643 | 0.354691561 | 0.26056815  |
| 0.000230046 | 0.278028611 | 0.186146192 | 0.250887888 |
| 0.353454413 | 0.209303397 | 0.041067503 | 0.097134642 |
| 0.000194649 | 0.086228093 | 0.054078407 | 0.347462194 |
| 0.315969168 | 0.01379463  | 0.003149884 | 0.261392084 |
| 0.172710483 | 0.003515809 | 0.383133248 | 0.220363303 |
| 0.343027349 | 0.129126462 | 0.12221865  | 0.242257377 |
| 0.045155816 | 0.046711994 | 0.011490239 | 0.244933264 |
| 0.101580433 | 0.012992783 | 0.067778156 | 0.358119305 |
| 0.333801029 | 0.237830267 | 0.138422755 | 0.042213142 |
| 0.246174995 | 0.08178747  | 0.306542444 | 0.017297757 |
| 0.26291933  | 0.262302837 | 0.309705531 | 0.251364069 |
| 0.190869066 | 0.307822623 | 0.306700113 | 0.34230258  |
| 0.019977822 | 0.28072173  | 0.324212611 | 0.02229725  |
| 0.167398557 | 0.339979764 | 0.230784095 | 0.132959661 |
| 0.212430763 | 0.030648864 | 0.148715    | 0.114565204 |
| 0.330397156 | 0.373416496 | 0.032371877 | 0.024496492 |
| 0.335768764 | 0.064763367 | 0.054068915 | 0.088827445 |
| 0.190192984 | 0.032526428 | 0.012191296 | 0.240374663 |
| 0.366063711 | 0.213780054 | 0.373539289 | 0.114910495 |
| 0.288702997 | 0.011686847 | 0.238819334 | 0.04590009  |
| 0.137881326 | 0.22198087  | 0.243258401 | 0.016096869 |
| 0.075068406 | 0.044430777 | 0.322435209 | 0.319565197 |
| 0.03193291  | 0.091887371 | 0.135329724 | 0.19056631  |
| 0.347896537 | 0.065483934 | 0.16915862  | 0.095145077 |

|             |             |             |             |
|-------------|-------------|-------------|-------------|
| 0.31613747  | 0.082620523 | 0.363051885 | 0.150449711 |
| 0.300162056 | 0.12026941  | 0.280724069 | 0.005381357 |
| 0.22538209  | 0.108128802 | 0.04756052  | 0.201153757 |
| 0.294530693 | 0.053036146 | 0.246290745 | 0.049685171 |
| 0.035172943 | 0.00035565  | 0.199317542 | 0.091358515 |
| 0.223410416 | 0.026340532 | 0.110567212 | 0.022437491 |
| 0.391029671 | 0.20791534  | 0.326221637 | 0.031779422 |
| 0.148301363 | 0.002002271 | 0.107400114 | 0.012335758 |
| 0.269052403 | 0.244034191 | 0.202999162 | 0.182727851 |
| 0.03506819  | 0.205088537 | 0.22324519  | 0.13911576  |
| 0.34885077  | 0.040751674 | 0.377771421 | 0.062827726 |
| 0.232540942 | 0.073281306 | 0.153090698 | 0.048750384 |
| 0.087833254 | 0.024923986 | 0.052401293 | 0.030768619 |
| 0.349327347 | 0.035098091 | 0.176711855 | 0.074035903 |
| 0.020316441 | 0.099482612 | 0.21162527  | 0.259044669 |
| 0.250561633 | 0.262284788 | 0.060521205 | 0.291709702 |
| 0.071892592 | 0.109196735 | 0.04123186  | 0.078872476 |
| 0.118092802 | 0.102612417 | 0.266331558 | 0.26771936  |
| 0.341513114 | 0.036066852 | 0.036940581 | 0.034720988 |
| 0.008096619 | 0.21697212  | 0.189334668 | 0.019057125 |
| 0.172768215 | 0.054135092 | 0.000171876 | 0.04490446  |
| 0.26625119  | 0.063397288 |             |             |
| EXT1        | 0.184796686 | 0.480046665 | 0.140684816 |
| 0.072798002 | 0.215874438 | 0.294447879 | 0.313236732 |
| 0.189652195 | 0.149438608 | 0.260780533 | 0.373816372 |
| 0.001270928 | 0.244662738 | 0.020311193 | 0.085233196 |
| 0.411148998 | 0.423648644 | 0.343463084 | 0.402790427 |
| 0.200092414 | 0.226641332 | 0.273356939 | 0.339385844 |
| 0.302068925 | 0.00225581  | 0.250369946 | 0.145735955 |
| 0.175706326 | 0.37906845  | 0.237154132 | 0.316432466 |
| 0.349781241 | 0.353768772 | 0.304649926 | 0.293647754 |
| 0.153179882 | 0.47758008  | 0.056339934 | 0.286587518 |
| 0.256963959 | 0.333816339 | 0.345006928 | 0.024028098 |
| 0.006641571 | 0.210057834 | 0.155840879 | 0.286239802 |
| 0.202564523 | 0.283513705 | 0.215050429 | 0.292133995 |
| 0.068044704 | 0.375840626 | 0.284789005 | 0.07045411  |
| 0.475601475 | 0.016930724 | 0.483417018 | 0.131225202 |
| 0.125804687 | 0.258035372 | 0.179024944 | 0.280474591 |
| 0.307971759 | 0.490800339 | 0.458411254 | 0.100567941 |
| 0.156142153 | 0.240544813 | 0.276302324 | 0.336881183 |
| 0.423477001 | 0.318339437 | 0.328559682 | 0.181583    |
| 0.282048072 | 0.267592669 | 0.277110013 | 0.212694814 |
| 0.001670804 | 0.269788975 | 0.318034705 | 0.172983058 |
| 0.193992124 | 0.393393961 | 0.202294167 | 0.30894528  |
| 0.260133279 | 0.046064515 | 0.301252239 | 0.451254243 |
| 0.049611592 | 0.259134196 | 0.017252886 | 0.184482594 |
| 0.322130006 | 0.327634342 | 0.263237059 | 0.171188328 |
| 0.029165622 | 0.144387528 | 0.073986055 | 0.252769394 |
| 0.257165201 | 0.298583031 | 0.451162145 | 0.042718461 |
| 0.21962165  | 0.165036039 | 0.304546873 | 0.49570121  |
| 0.422305654 | 0.011876098 | 0.148502905 | 0.292003305 |
| 0.225119185 | 0.190666285 | 0.303849409 | 0.032135303 |
| 0.031850351 | 0.008234297 | 0.353243126 | 0.187158553 |
| 0.225390074 | 0.297566218 | 0.170080467 | 0.30398265  |

|             |             |             |             |
|-------------|-------------|-------------|-------------|
| 0.176878817 | 0.29768112  | 0.221974791 | 0.328293596 |
| 0.269043094 | 0.328564894 | 0.342843722 | 0.311725479 |
| 0.281033628 | 0.18347108  | 0.198188492 | 0.463488767 |
| 0.42150504  | 0.151150318 | 0.145537133 | 0.322946937 |
| 0.224393322 | 0.401991611 | 0.467405301 | 0.217062272 |
| 0.337400492 | 0.238754784 | 0.263724476 | 1           |
| 0.298450158 | 0.21220386  | 0.030847573 | 0.335731475 |
| 0.477772776 | 0.029251335 | 0.130747437 | 0.302678646 |
| 0.106280214 | 0.278812965 | 0.43596922  | 0.374604969 |
| 0.270154657 | 0.127553521 | 0.32875199  | 0.320394424 |
| 0.260347411 | 0.32577391  | 0.266379852 | 0.303049621 |
| 0.290581915 | 0.277809482 | 0.12049345  | 0.227901017 |
| 0.199428933 | 0.257513393 | 0.147624639 | 0.04700696  |
| 0.203419666 | 0.208781931 | 0.421097851 | 0.256788956 |
| 0.243694016 | 0.018340688 | 0.266352955 | 0.206873262 |
| 0.233010844 | 0.257730613 | 0.508818734 | 0.183130831 |
| 0.238030144 | 0.146167131 | 0.197264051 | 0.32766454  |
| 0.280320978 | 0.26770947  | 0.26271999  | 0.00245808  |
| 0.221359467 | 0.224167269 | 0.254865056 | 0.057792687 |
| 0.334827382 | 0.151912868 | 0.068077717 | 0.416522439 |
| 0.266754645 | 0.349345676 | 0.019700622 | 0.054428441 |
| 0.300568038 | 0.410865187 | 0.30232283  | 0.162940545 |
| 0.397585577 | 0.315891341 | 0.281463918 | 0.400589217 |
| 0.297056173 | 0.396491943 | 0.058563276 | 0.229418404 |
| 0.243362607 | 0.41623374  | 0.336951852 | 0.355340277 |
| 0.306057515 | 0.206883189 | 0.165223155 | 0.296752135 |
| 0.259574291 | 0.261215321 | 0.138089067 | 0.476284332 |
| 0.001653683 | 0.303799063 | 0.317213632 | 0.062582829 |
| 0.497449845 | 0.321522756 | 0.115247456 | 0.196471143 |
| 0.413872859 | 0.473636071 | 0.322663705 | 0.320568369 |
| 0.104236368 | 0.013487424 | 0.407968306 | 0.35248332  |
| 0.386204961 | 0.31255341  | 0.226179105 | 0.029275978 |
| 0.427345306 | 0.150986727 | 0.29089034  | 0.232918265 |
| 0.271413222 | 0.216987006 | 0.23627033  | 0.175342257 |
| 0.00782852  | 0.290596526 | 0.248448065 | 0.219998237 |
| 0.322817663 | 0.181842674 | 0.400505701 | 0.318009277 |
| 0.291835337 | 0.192300889 | 0.296340266 | 0.183474847 |
| 0.244581851 | 0.482599899 | 0.021984641 | 0.388862328 |
| 0.450662085 | 0.266960691 | 0.439262455 | 0.432057876 |
| 0.262307879 | 0.414775174 | 0.433374778 | 0.301634814 |
| 0.000999273 | 0.296221699 | 0.228567386 | 0.373912958 |
| 0.362941923 | 0.298823257 | 0.092837718 | 0.220186555 |
| 0.001463759 | 0.208968591 | 0.153444789 | 0.461022828 |
| 0.412043785 | 0.074149423 | 0.017934455 | 0.37627003  |
| 0.21400923  | 0.024857303 | 0.472976052 | 0.340183879 |
| 0.458569006 | 0.315217951 | 0.276829013 | 0.268969645 |
| 0.108230708 | 0.206234196 | 0.069543255 | 0.339474214 |
| 0.235382735 | 0.028552921 | 0.197487203 | 0.432363783 |
| 0.387344519 | 0.377328639 | 0.279768053 | 0.031313551 |
| 0.238770536 | 0.226549639 | 0.363997784 | 0.147980172 |
| 0.366316983 | 0.374608592 | 0.456415086 | 0.299825006 |
| 0.27695244  | 0.434433349 | 0.41185414  | 0.403665321 |
| 0.128638616 | 0.285269688 | 0.325415464 | 0.134793235 |
| 0.177048202 | 0.422298392 | 0.310902113 | 0.270922758 |

|             |             |             |             |
|-------------|-------------|-------------|-------------|
| 0.275480862 | 0.133333116 | 0.269139039 | 0.17839149  |
| 0.473149251 | 0.418455623 | 0.129003875 | 0.151318846 |
| 0.450508116 | 0.272011273 | 0.201520967 | 0.26689202  |
| 0.28225538  | 0.070012609 | 0.046902749 | 0.325456892 |
| 0.496432902 | 0.342999902 | 0.386081772 | 0.258467873 |
| 0.366257445 | 0.08504674  | 0.320299094 | 0.285717031 |
| 0.25221945  | 0.20736435  | 0.244921734 | 0.050004862 |
| 0.053841177 | 0.131113139 | 0.443117946 | 0.44230468  |
| 0.151364837 | 0.221634621 | 0.335142053 | 0.367956723 |
| 0.403097513 | 0.29277492  | 0.298490002 | 0.248835758 |
| 0.4599919   | 0.176823079 | 0.471175998 | 0.258846605 |
| 0.328843541 | 0.355960671 | 0.359460853 | 0.010416474 |
| 0.249326536 | 0.282055274 | 0.082731271 | 0.361178439 |
| 0.303678344 | 0.226010829 | 0.379438799 | 0.185988699 |
| 0.144788158 | 0.003466471 | 0.287811528 | 0.203045851 |
| 0.326581718 | 0.12985427  | 0.257441615 | 0.073169413 |
| 0.492962533 | 0.27695376  | 0.313744425 | 0.11868712  |
| 0.352925772 | 0.015049456 | 0.267250354 | 0.067483368 |
| 0.308976179 | 0.354269369 | 0.220346423 | 0.210825188 |
| 0.097471832 | 0.307403313 | 0.332948905 | 0.34082812  |
| 0.422056899 | 0.115774473 | 0.437623878 | 0.205061235 |
| 0.24448684  | 0.264482491 | 0.285240625 | 0.236175138 |
| 0.299124625 | 0.092693504 | 0.193235503 | 0.119628254 |
| 0.402324104 | 0.210707353 | 0.362482683 | 0.200335045 |
| 0.132925113 | 0.342741634 | 0.265534984 | 0.273793837 |
| 0.311606068 | 0.219856488 | 0.202761054 | 0.436547506 |
| 0.174654371 | 0.199883408 | 0.113474379 | 0.099055427 |
| 0.228276872 | 0.280504937 | 0.316602588 | 0.35498273  |
| 0.420939788 | 0.128853903 | 0.169213318 | 0.148465305 |
| 0.04438103  | 0.23020587  | 0.33794243  | 0.12615195  |
| 0.278676606 | 0.138328605 | 0.001900865 | 0.154014592 |
| 0.352815148 | 0.258964056 |             |             |
| F2RL1       | 0.106569908 | 0.355141621 | 0.237654505 |
| 0.019592562 | 0.247341797 | 0.369126931 | 0.349786138 |
| 0.099287162 | 0.265152141 | 0.20727787  | 0.434032837 |
| 0.003978519 | 0.127265225 | 0.063253834 | 0.217366527 |
| 0.244472097 | 0.256101204 | 0.315211683 | 0.259437538 |
| 0.157663087 | 0.110342433 | 0.280048827 | 0.227461247 |
| 0.328866181 | 0.009174625 | 0.296387197 | 0.058409285 |
| 0.084927872 | 0.214768207 | 0.325150766 | 0.209481884 |
| 0.205625057 | 0.184572598 | 0.154862482 | 0.185013564 |
| 0.041873515 | 0.411381944 | 0.029889823 | 0.152233687 |
| 0.134648665 | 0.290400609 | 0.193500444 | 0.094602409 |
| 0.000719152 | 0.314268612 | 0.073120779 | 0.258504664 |
| 0.208067342 | 0.320187896 | 0.339113968 | 0.290523214 |
| 0.015178945 | 0.425230483 | 0.239575435 | 0.014107593 |
| 0.468003033 | 0.003133938 | 0.434210045 | 0.09488973  |
| 0.28721971  | 0.280648793 | 0.088827906 | 0.227504819 |
| 0.427474103 | 0.460083796 | 0.315141501 | 0.174691666 |
| 0.287646568 | 0.133522069 | 0.130359828 | 0.196317171 |
| 0.315895928 | 0.166153664 | 0.285651065 | 0.080841658 |
| 0.156165657 | 0.140835523 | 0.380792053 | 0.327994175 |
| 0.003791818 | 0.322130226 | 0.16196528  | 0.118046471 |
| 0.08655347  | 0.430556078 | 0.12684734  | 0.315476884 |

|             |             |             |             |
|-------------|-------------|-------------|-------------|
| 0.107278523 | 0.142267585 | 0.255917993 | 0.289428976 |
| 0.037165602 | 0.158338508 | 0.016986363 | 0.322737244 |
| 0.199287647 | 0.167707234 | 0.18859348  | 0.248439343 |
| 0.114434179 | 0.283459793 | 0.059425058 | 0.119059108 |
| 0.181977116 | 0.171333015 | 0.460457418 | 0.017747919 |
| 0.097970182 | 0.182567095 | 0.284767565 | 0.411917919 |
| 0.279325999 | 0.053126505 | 0.245474717 | 0.358117505 |
| 0.139219329 | 0.128638888 | 0.363688145 | 0.007783911 |
| 0.020715938 | 0.014472062 | 0.20361178  | 0.268933357 |
| 0.260606386 | 0.337385752 | 0.129744034 | 0.170552285 |
| 0.097632387 | 0.180302783 | 0.309325655 | 0.330734037 |
| 0.133748039 | 0.347894987 | 0.168214093 | 0.183283828 |
| 0.155111389 | 0.205514575 | 0.283393834 | 0.384047548 |
| 0.41508303  | 0.259747718 | 0.245897586 | 0.357952124 |
| 0.104937216 | 0.243606037 | 0.312925633 | 0.188850656 |
| 0.276822622 | 0.311061154 | 0.130807285 | 0.298450158 |
| 1           | 0.188516395 | 0.016505662 | 0.413053821 |
| 0.475417908 | 0.011650079 | 0.268084103 | 0.204502263 |
| 0.064333389 | 0.305469974 | 0.362981363 | 0.274363833 |
| 0.181930205 | 0.049416277 | 0.209943619 | 0.30286693  |
| 0.264783329 | 0.298033426 | 0.239275816 | 0.175728391 |
| 0.343240845 | 0.122789547 | 0.252153656 | 0.104068662 |
| 0.332575875 | 0.269643218 | 0.052325035 | 0.032349269 |
| 0.151138977 | 0.166720904 | 0.293720704 | 0.18364478  |
| 0.149097669 | 0.002407972 | 0.188664233 | 0.141895896 |
| 0.115047289 | 0.146858151 | 0.388320455 | 0.335234897 |
| 0.296436283 | 0.081443135 | 0.335386194 | 0.251879422 |
| 0.212814026 | 0.176725777 | 0.189804377 | 0.005165856 |
| 0.318358211 | 0.070738707 | 0.174790137 | 0.128538378 |
| 0.269667476 | 0.204475874 | 0.089413046 | 0.276799041 |
| 0.335302178 | 0.214055915 | 0.049667835 | 0.040299989 |
| 0.291241221 | 0.353902928 | 0.113726764 | 0.09964993  |
| 0.277769893 | 0.201989627 | 0.131753763 | 0.427123359 |
| 0.305212057 | 0.405461285 | 0.033972871 | 0.272859843 |
| 0.114852443 | 0.274260009 | 0.174734636 | 0.23910644  |
| 0.312049353 | 0.174754966 | 0.075224215 | 0.384091333 |
| 0.195463464 | 0.200458137 | 0.236071803 | 0.366922952 |
| 0.006623924 | 0.325128948 | 0.167804673 | 0.032236337 |
| 0.365388054 | 0.378702442 | 0.24348674  | 0.216357487 |
| 0.266431447 | 0.373726196 | 0.250494563 | 0.159953147 |
| 0.050411718 | 0.049206441 | 0.309060587 | 0.342087946 |
| 0.217417367 | 0.247815678 | 0.09370279  | 0.035817575 |
| 0.280947199 | 0.094109346 | 0.202533597 | 0.09896052  |
| 0.152512327 | 0.108926082 | 0.323232414 | 0.132560384 |
| 0.006047005 | 0.233334059 | 0.131908273 | 0.120016142 |
| 0.170360354 | 0.176083549 | 0.268403201 | 0.425461401 |
| 0.142854764 | 0.072858207 | 0.122069115 | 0.29445249  |
| 0.371148155 | 0.34807162  | 0.011728832 | 0.306066594 |
| 0.294196697 | 0.255440362 | 0.275020978 | 0.285679673 |
| 0.231662561 | 0.439803516 | 0.29436248  | 0.1899971   |
| 0.003404358 | 0.14190092  | 0.107098074 | 0.462516592 |
| 0.189969456 | 0.347001706 | 0.056546753 | 0.08415262  |
| 0.009671978 | 0.320973656 | 0.034720872 | 0.393261388 |
| 0.252424015 | 0.192796171 | 0.007183589 | 0.267608691 |

|             |             |             |             |
|-------------|-------------|-------------|-------------|
| 0.101003001 | 0.021870399 | 0.332165067 | 0.242081462 |
| 0.332526942 | 0.212710958 | 0.312038747 | 0.128111353 |
| 0.022406444 | 0.154332253 | 0.078681539 | 0.219524217 |
| 0.140062306 | 0.024807907 | 0.138232737 | 0.296070892 |
| 0.279117714 | 0.396085403 | 0.351029251 | 0.010988739 |
| 0.12342127  | 0.061088588 | 0.215092105 | 0.264881613 |
| 0.314767159 | 0.431205963 | 0.383676302 | 0.164289799 |
| 0.187144793 | 0.401702705 | 0.425149622 | 0.283753515 |
| 0.047268731 | 0.13392448  | 0.170020326 | 0.158125066 |
| 0.086030315 | 0.26993367  | 0.136940388 | 0.344325434 |
| 0.290851272 | 0.044051738 | 0.363167587 | 0.134453585 |
| 0.386528682 | 0.250559118 | 0.239383735 | 0.251744963 |
| 0.417456294 | 0.299164135 | 0.347032626 | 0.272112337 |
| 0.395488389 | 0.0142674   | 0.036536518 | 0.36980274  |
| 0.426759998 | 0.446963839 | 0.222604125 | 0.124488078 |
| 0.216033742 | 0.234068245 | 0.247169077 | 0.322744321 |
| 0.27695532  | 0.087688677 | 0.116331155 | 0.020627343 |
| 0.021663917 | 0.139145321 | 0.417580751 | 0.441996139 |
| 0.281813335 | 0.315516872 | 0.297897761 | 0.273881293 |
| 0.231918476 | 0.132462164 | 0.370842929 | 0.22680337  |
| 0.482901915 | 0.097285047 | 0.38949057  | 0.214906025 |
| 0.273461827 | 0.246572474 | 0.264865837 | 0.011568611 |
| 0.145518642 | 0.195141074 | 0.055518826 | 0.215355967 |
| 0.155623671 | 0.313279074 | 0.387679441 | 0.270925486 |
| 0.072106438 | 0.009681322 | 0.33490544  | 0.070540285 |
| 0.445305708 | 0.067953781 | 0.213845454 | 0.015776362 |
| 0.371616365 | 0.174430324 | 0.212357913 | 0.062454252 |
| 0.214665538 | 0.004303301 | 0.232112151 | 0.165798708 |
| 0.279946655 | 0.397876013 | 0.156579376 | 0.105457862 |
| 0.08129775  | 0.221820142 | 0.348932709 | 0.191108872 |
| 0.260598972 | 0.026401949 | 0.262901102 | 0.230478374 |
| 0.110444486 | 0.164488362 | 0.38360901  | 0.22015026  |
| 0.353115127 | 0.113535617 | 0.348194956 | 0.170048232 |
| 0.222471568 | 0.223555213 | 0.232559618 | 0.105476255 |
| 0.216148139 | 0.232200844 | 0.174148593 | 0.143595717 |
| 0.178056974 | 0.102386098 | 0.100411888 | 0.477497897 |
| 0.106442406 | 0.174995782 | 0.035973773 | 0.049833311 |
| 0.07632041  | 0.305697519 | 0.249449172 | 0.265975032 |
| 0.271486206 | 0.078596712 | 0.297259391 | 0.253344364 |
| 0.024621236 | 0.129993124 | 0.370813899 | 0.043129175 |
| 0.208898552 | 0.076833799 | 0.005379476 | 0.165282616 |
| 0.377551907 | 0.1088625   |             |             |

|             |             |             |             |
|-------------|-------------|-------------|-------------|
| F2RL3       | 0.199184049 | 0.395069915 | 0.096093126 |
| 0.005687004 | 0.065234426 | 0.192743432 | 0.135359156 |
| 0.194407899 | 0.136902681 | 0.067561571 | 0.284341171 |
| 0.01364212  | 0.260206798 | 0.064000462 | 0.146091977 |
| 0.389564229 | 0.386543932 | 0.179197381 | 0.417739386 |
| 0.240607009 | 0.044260996 | 0.334370293 | 0.185724741 |
| 0.173642065 | 0.016312213 | 0.079194836 | 0.013179017 |
| 0.178198822 | 0.378181059 | 0.203869174 | 0.13805713  |
| 0.34872233  | 0.290811309 | 0.124316907 | 0.103932825 |
| 0.048137293 | 0.4158324   | 0.043458438 | 0.229051284 |
| 0.290970965 | 0.111858445 | 0.295104279 | 0.043398669 |
| 0.000255249 | 0.092103188 | 0.171161608 | 0.280363672 |

|             |             |             |             |
|-------------|-------------|-------------|-------------|
| 0.272828307 | 0.167344352 | 0.200247431 | 0.088546401 |
| 0.039894727 | 0.314638626 | 0.38996895  | 0.037649504 |
| 0.361388079 | 0.000633797 | 0.391140808 | 0.215705795 |
| 0.1092643   | 0.235277215 | 0.146974876 | 0.271552665 |
| 0.212433347 | 0.377285276 | 0.40332916  | 0.035512857 |
| 0.089243654 | 0.187232289 | 0.228967301 | 0.165566709 |
| 0.368332114 | 0.142211378 | 0.144985937 | 0.118602258 |
| 0.21986734  | 0.281103226 | 0.276981774 | 0.217722551 |
| 0.004059023 | 0.096935629 | 0.089416165 | 0.259926312 |
| 0.158519942 | 0.31771034  | 0.229376729 | 0.109710834 |
| 0.147072372 | 0.058402801 | 0.257667049 | 0.402021534 |
| 0.012190429 | 0.285460172 | 0.009183169 | 0.218860503 |
| 0.320625945 | 0.328839601 | 0.267943476 | 0.064093521 |
| 0.056006454 | 0.220794139 | 0.179339118 | 0.280941108 |
| 0.221562538 | 0.181336827 | 0.352031247 | 0.072231776 |
| 0.227424689 | 0.161950796 | 0.199607772 | 0.386097765 |
| 0.380773895 | 0.059969129 | 0.243110275 | 0.183069159 |
| 0.11939474  | 0.04536078  | 0.165274112 | 0.018520594 |
| 0.008702926 | 0.083330664 | 0.343920535 | 0.208443718 |
| 0.062878411 | 0.13780966  | 0.045879429 | 0.171917951 |
| 0.200786648 | 0.363033239 | 0.075617885 | 0.144525686 |
| 0.205813264 | 0.152520848 | 0.129289899 | 0.249676412 |
| 0.117642934 | 0.254824494 | 0.178543003 | 0.364517028 |
| 0.437981366 | 0.086994949 | 0.107307314 | 0.256493206 |
| 0.217793912 | 0.380180962 | 0.420336907 | 0.253658838 |
| 0.111289231 | 0.242336664 | 0.109574032 | 0.21220386  |
| 0.188516395 | 1           | 0.072993835 | 0.340335256 |
| 0.37786302  | 0.021225816 | 0.100959353 | 0.329091327 |
| 0.012974976 | 0.137437463 | 0.385768088 | 0.301997561 |
| 0.216123946 | 0.010338171 | 0.094149552 | 0.147330281 |
| 0.225857241 | 0.144351939 | 0.279701618 | 0.078963832 |
| 0.277164217 | 0.101582171 | 0.070195748 | 0.224657266 |
| 0.149231114 | 0.28367776  | 0.091845987 | 0.032899241 |
| 0.267762679 | 0.260973374 | 0.326803025 | 0.247433709 |
| 0.253788932 | 0.000478392 | 0.064380377 | 0.232447488 |
| 0.113671982 | 0.323106635 | 0.390720997 | 0.147917323 |
| 0.257309655 | 0.129185843 | 0.183297672 | 0.127872981 |
| 0.392672982 | 0.098357814 | 0.091540543 | 0.002724884 |
| 0.130689718 | 0.10059003  | 0.201668955 | 0.144290996 |
| 0.109186087 | 0.13434279  | 0.18892748  | 0.33353918  |
| 0.173266885 | 0.267687419 | 0.114460183 | 0.143516717 |
| 0.185653213 | 0.267153935 | 0.113774181 | 0.173611705 |
| 0.259175184 | 0.152461374 | 0.292582104 | 0.359550304 |
| 0.145974952 | 0.278543801 | 0.098031491 | 0.23621842  |
| 0.170944961 | 0.327041021 | 0.266344723 | 0.30548613  |
| 0.170836146 | 0.32680158  | 0.145264581 | 0.254288666 |
| 0.253476971 | 0.247593332 | 0.13961638  | 0.425024044 |
| 0.004995901 | 0.26981247  | 0.158720709 | 0.099230788 |
| 0.370993617 | 0.164901133 | 0.130020194 | 0.267528368 |
| 0.421583395 | 0.437348574 | 0.415768653 | 0.292309498 |
| 0.136213382 | 0.066822607 | 0.438402565 | 0.309057178 |
| 0.368908638 | 0.200654522 | 0.085002817 | 0.121309684 |
| 0.372526327 | 0.222429354 | 0.216167192 | 0.157310015 |
| 0.169182721 | 0.138031753 | 0.250023426 | 0.293186855 |

|             |             |             |             |          |
|-------------|-------------|-------------|-------------|----------|
| 0.016511053 | 0.14652007  | 0.194166703 | 0.061376473 |          |
| 0.11183435  | 0.126433939 | 0.295036377 | 0.318260884 |          |
| 0.118173198 | 0.122435301 | 0.088873206 | 0.081148324 |          |
| 0.168318767 | 0.403289061 | 0.018677258 | 0.439635544 |          |
| 0.417085775 | 0.249760471 | 0.326318958 | 0.42894533  |          |
| 0.222638292 | 0.322941455 | 0.350661258 | 0.373392427 |          |
| 0.007525527 | 0.272464089 | 0.206438423 | 0.360349268 |          |
| 0.296134333 | 0.224061329 | 0.17896594  | 0.120061312 |          |
| 0.00833067  | 0.172736098 | 0.052246399 | 0.459177338 |          |
| 0.317020176 | 0.04494672  | 0.014005348 | 0.308827841 |          |
| 0.18621303  | 0.043323697 | 0.432879467 | 0.154010334 |          |
| 0.329727244 | 0.193588036 | 0.11069201  | 0.235347455 |          |
| 0.04368341  | 0.230650575 | 0.016566656 | 0.199131098 |          |
| 0.1683216   | 0.090552471 | 0.029016415 | 0.427843814 |          |
| 0.355310898 | 0.277934624 | 0.215453978 | 0.003888721 |          |
| 0.290676976 | 0.047538345 | 0.240334488 | 0.187296512 |          |
| 0.386375108 | 0.313102903 | 0.379213388 | 0.26314886  |          |
| 0.222006834 | 0.33649294  | 0.333814738 | 0.324006982 |          |
| 0.030840775 | 0.249934493 | 0.300157635 | 0.054596654 |          |
| 0.176474983 | 0.343473642 | 0.120304912 | 0.138113024 |          |
| 0.317456327 | 0.017725611 | 0.185068853 | 0.241061994 |          |
| 0.351654943 | 0.320781322 | 0.075862785 | 0.272412511 |          |
| 0.321887025 | 0.224976345 | 0.111123797 | 0.257933198 |          |
| 0.267802201 | 0.046700155 | 0.133809358 | 0.320608917 |          |
| 0.38969261  | 0.244227228 | 0.313103108 | 0.048572155 |          |
| 0.333076528 | 0.141035672 | 0.382067481 | 0.182468777 |          |
| 0.244314928 | 0.153664809 | 0.269787763 | 0.096136375 |          |
| 0.010265541 | 0.154802388 | 0.295591251 | 0.368002023 |          |
| 0.108676324 | 0.211508027 | 0.143864212 | 0.154260988 |          |
| 0.362006186 | 0.150996379 | 0.237072334 | 0.263307997 |          |
| 0.381210706 | 0.027426518 | 0.442569497 | 0.231835847 |          |
| 0.34191283  | 0.148094609 | 0.31706043  | 0.007169001 |          |
| 0.206164683 | 0.076746146 | 0.184203714 | 0.124520961 |          |
| 0.322289448 | 0.129156296 | 0.253911032 | 0.201428929 |          |
| 0.066253463 | 0.01953136  | 0.35760853  | 0.092563262 |          |
| 0.269322987 | 0.171055483 | 0.251933083 | 0.032942518 |          |
| 0.443919242 | 0.204004271 | 0.301126509 | 0.127835878 |          |
| 0.150123751 | 0.003846294 | 0.073786816 | 0.083565499 |          |
| 0.3477662   | 0.358775815 | 0.25277112  | 0.166727374 |          |
| 0.224258702 | 0.213002442 | 0.293726578 | 0.134093141 |          |
| 0.316904843 | 0.044428846 | 0.381389053 | 0.271438817 |          |
| 0.238287284 | 0.179607343 | 0.228855812 | 0.221766345 |          |
| 0.119492174 | 0.121478956 | 0.136909641 | 0.24536408  |          |
| 0.315406619 | 0.230284855 | 0.147113183 | 0.166795954 |          |
| 0.05472258  | 0.178451215 | 0.303563212 | 0.225650076 |          |
| 0.190118507 | 0.194634351 | 0.184798766 | 0.368322774 |          |
| 0.152015052 | 0.221295638 | 0.011125636 | 0.008130319 |          |
| 0.05848053  | 0.134130387 | 0.410732362 | 0.385806965 |          |
| 0.396927072 | 0.16918017  | 0.121933866 | 0.218426357 |          |
| 0.074098442 | 0.290441502 | 0.169037584 | 0.039921787 |          |
| 0.229002748 | 0.143586051 | 0.004129154 | 0.253023295 |          |
| 0.322902707 | 0.126655921 |             |             |          |
| FAM105A     | 0.049653937 | 0.086501685 | 0.000884659 | 5.31E-05 |
| 0.001106344 | 0.012865043 | 0.009181858 | 0.065711362 |          |



|             |              |             |             |
|-------------|--------------|-------------|-------------|
| 0.000796976 | 0.001156998  | 0.03141514  | 4.89E-05    |
| 0.15053358  | 0.000184667  | 0.000627593 | 0.127122216 |
| 0.126693771 | 0.023213321  | 0.14557324  | 0.04968589  |
| 0.000398863 | 0.059155549  | 0.025252519 | 0.012242834 |
| 2.72E-05    | 0.002509745  | 0.000119238 | 0.061025297 |
| 0.147817816 | 0.012706038  | 0.003508903 | 0.11090346  |
| 0.115969935 | 0.009735821  | 0.003528489 | 0.006930885 |
| 0.0772364   | 0.004732639  | 0.098791611 | 0.147599478 |
| 0.005496396 | 0.101175868  | 3.80E-05    | 1.65E-05    |
| 0.066929166 | 0.047547875  | 0.037707873 | 0.00189547  |
| 0.012101489 | 0.003452656  | 0.003507756 | 0.011033828 |
| 0.109063708 | 0.011979038  | 0.05389229  | 0.038050624 |
| 0.06345724  | 0.037154213  | 0.001427744 | 3.23E-06    |
| 0.033164707 | 0.05105104   | 0.015762513 | 0.021898567 |
| 0.107399585 | 7.87E-05     | 0.001598289 | 0.059844166 |
| 0.085307291 | 0.030825932  | 0.084193384 | 0.04668295  |
| 0.004074149 | 0.039956069  | 0.065025695 | 0.004912755 |
| 0.030180377 | 0.008073521  | 5.28E-06    | 0.132164103 |
| 0.007477117 | 0.089837562  | 0.003924591 |             |
| 0.075386534 | 0.003837963  | 0.081734289 | 0.041366318 |
| 0.046281413 | 0.120743894  | 0.04073879  | 8.82E-05    |
| 0.005323921 | 0.101146338  | 3.96E-05    | 0.122332903 |
| 0.000480409 | 9.32E-05     | 0.14279239  | 6.07E-05    |
| 0.162722708 | 0.046422971  | 0.008499345 | 0.064518346 |
| 0.058507166 | 0.15276393   | 0.042516463 |             |
| 0.068296062 | 0.096942078  | 0.001592019 | 0.049503162 |
| 0.015015875 | 0.0030793    | 0.000389094 | 0.01305084  |
| 0.000931926 | 0.00013655   | 0.000201229 | 0.007729984 |
| 0.007602172 | 0.001186165  | 0.004561551 | 0.014181586 |
| 0.043834819 | 0.0065802153 | 0.007248403 | 0.127336343 |
| 0.008946062 | 0.081593414  | 0.14947639  | 0.000278609 |
| 0.069143861 | 0.018928569  | 0.01170811  | 0.001345226 |
| 0.075944043 | 0.083066103  | 0.01687643  | 0.025935269 |
| 0.027547574 | 0.13186357   | 0.000545636 | 0.006097896 |
| 0.015481862 | 0.007731354  | 0.126766853 | 0.000726061 |
| 0.030847573 | 0.016505662  | 0.021802621 | 0.115826433 |
| 0.052892946 | 0.054230955  | 0.072993835 | 0.005495444 |
| 0.108216947 | 0.000181265  | 0.000855307 | 1           |
| 0.076156882 | 0.06728463   | 0.001091222 | 0.001091222 |
| 0.010700021 | 0.023300462  | 0.001991874 | 0.068726397 |
| 0.003058175 | 0.030751671  | 6.74E-05    | 0.004583566 |
| 0.14173861  | 0.005888246  | 0.009256835 | 0.048738319 |
| 0.000251623 | 0.094694508  | 0.006076106 | 0.000838877 |
| 0.056068409 | 0.080494949  | 0.042610146 | 0.005463261 |
| 0.052871206 | 0.004981489  | 0.051633995 | 0.070372457 |
| 0.005457893 | 0.027845829  | 5.41E-06    | 0.001234858 |
| 0.011215776 | 0.131432498  | 0.182689747 | 0.078815358 |
| 9.25E-07    | 0.001484139  | 0.023416018 | 0.00869467  |
| 0.001450825 | 0.004392332  | 0.001610537 | 0.001049933 |
| 0.078544678 | 0.011335073  | 0.009139192 | 0.037766147 |
| 0.042349346 | 0.009275931  | 0.000914199 | 0.002620419 |
| 0.005401193 | 0.054278057  | 0.092844556 | 0.001290073 |
| 0.047961576 | 0.006620475  | 0.043731101 | 0.014304891 |
| 0.015271616 | 0.066207184  | 0.008894814 | 0.152177468 |
|             |              | 0.031138141 | 0.012065913 |
|             |              | 0.087152269 | 0.093567137 |

|                      |                      |                      |             |
|----------------------|----------------------|----------------------|-------------|
| 0.10385638           | 0.00990315           | 0.123624337          | 0.028622613 |
| 0.024452789          | 0.056691457          | 0.07994271           | 0.002322849 |
| 0.105097217          | 3.24E-06 0.039737821 | 0.032525594          |             |
| 0.010522667          | 0.077491607          | 0.012717623          | 0.00190703  |
| 0.029134004          | 0.145037548          | 0.107574236          | 0.131685556 |
| 0.121506072          | 0.010105635          | 0.00028588           | 0.11829033  |
| 0.044237232          | 0.139712513          | 0.02598067           | 0.015836323 |
| 0.011173589          | 0.112353783          | 0.118568708          | 0.036394614 |
| 0.044386236          | 0.051006111          | 0.047060554          | 0.024812207 |
| 0.127492085          | 0.000338856          | 0.006662536          | 0.052531701 |
| 0.000479576          | 0.006338384          | 0.000651091          | 0.072641943 |
| 0.040889019          | 0.017500803          | 0.007127637          | 0.008624038 |
| 0.001606444          | 0.009106122          | 0.091098877          | 0.003258301 |
| 0.119920093          | 0.126992905          | 0.045746571          | 0.085818122 |
| 0.136392855          | 0.026854403          | 0.043761564          | 0.083080644 |
| 0.158439953          | 4.25E-05 0.129536436 | 0.122615766          |             |
| 0.045944101          | 0.095626395          | 0.018890729          | 0.095003344 |
| 0.042289014          | 3.87E-05 0.00760675  | 0.00753793           |             |
| 0.102635355          | 0.098917104          | 7.91E-05 0.002083667 |             |
| 0.085676579          | 0.102171545          | 0.005464354          | 0.110522067 |
| 0.016000309          | 0.072683476          | 0.04643454           | 0.003954536 |
| 0.110295322          | 0.009801978          | 0.040407864          | 0.000101209 |
| 0.043100346          | 0.045100965          | 0.002509634          | 0.000388641 |
| 0.126865848          | 0.080527289          | 0.041422028          | 0.017435133 |
| 5.08E-06 0.147512156 | 0.001545943          | 0.058887312          |             |
| 0.002729784          | 0.094221442          | 0.037089953          | 0.083364652 |
| 0.100966242          | 0.055625428          | 0.052043776          | 0.043398529 |
| 0.073566279          | 0.000675185          | 0.102350712          | 0.110670385 |
| 0.00016021           | 0.071881515          | 0.098192264          | 0.021255777 |
| 0.008017222          | 0.053335833          | 0.000357176          | 0.012071913 |
| 0.061170372          | 0.070591481          | 0.087773105          | 0.000559174 |
| 0.016042631          | 0.045855601          | 0.012376447          | 0.003155495 |
| 0.041378389          | 0.024114336          | 0.008062725          | 0.026034115 |
| 0.04519931           | 0.068093347          | 0.022905709          | 0.085156947 |
| 0.000966576          | 0.127132131          | 0.00189306           | 0.126682037 |
| 0.004721 0.02974082  | 0.054431567          | 0.149503756          |             |
| 0.008876291          | 2.25E-05 0.001832872 | 0.039396373          |             |
| 0.052864566          | 0.002119995          | 0.014159569          | 0.011051104 |
| 0.019660244          | 0.125358761          | 0.017118446          | 0.023789281 |
| 0.053478375          | 0.054169099          | 0.000229372          | 0.091263122 |
| 0.033657151          | 0.067094242          | 0.011578555          | 0.077048035 |
| 1.27E-05 0.063064121 | 0.001954139          | 0.0797037            |             |
| 0.01689269           | 0.148201146          | 0.004065682          | 0.035048527 |
| 0.005939912          | 0.00072016           | 0.000284682          | 0.062467522 |
| 0.037148846          | 0.023634639          | 0.074804757          | 0.053647596 |
| 0.006164798          | 0.104222327          | 0.040834726          | 0.067527908 |
| 0.051581605          | 0.014688178          | 0.000541933          | 0.00175032  |
| 0.000203189          | 0.062766496          | 0.055460382          | 0.068711104 |
| 0.038605266          | 0.037719558          | 0.051837361          | 0.047918421 |
| 0.024914244          | 0.087830889          | 0.00163998           | 0.116111502 |
| 0.030988099          | 0.134289412          | 0.009744549          | 0.019477237 |
| 0.009455882          | 0.006243882          | 0.000738112          | 0.003087625 |
| 0.010184605          | 0.102700018          | 0.016667034          | 0.021582508 |
| 0.010977975          | 0.000314499          | 0.020056953          | 0.118944521 |

|             |             |             |             |
|-------------|-------------|-------------|-------------|
| 0.07979555  | 0.039622486 | 0.075242476 | 0.069339506 |
| 0.050759805 | 0.004347103 | 0.020629525 | 0.0001435   |
| 2.48E-05    | 0.001537382 | 0.004447216 | 0.120269447 |
| 0.117405821 | 0.126082512 | 0.014653523 | 0.001996417 |
| 0.008046521 | 0.01334078  | 0.131719902 | 0.014519059 |
| 0.003293099 | 0.057700442 | 0.020125553 | 1.44E-05    |
| 0.019736844 | 0.04469306  | 0.009282687 |             |
| FAM129B     | 0.221121688 | 0.444734639 | 0.219630471 |
| 0.020780356 | 0.210326455 | 0.372522149 | 0.359816357 |
| 0.221791494 | 0.279301241 | 0.200042387 | 0.401914467 |
| 0.007413969 | 0.216993364 | 0.07484502  | 0.240198825 |
| 0.36590115  | 0.375968017 | 0.392176922 | 0.385044407 |
| 0.294737892 | 0.123862838 | 0.350328331 | 0.313492757 |
| 0.382265733 | 0.012559301 | 0.254547716 | 0.05014541  |
| 0.197670936 | 0.337882181 | 0.389498175 | 0.283920549 |
| 0.314967123 | 0.284317343 | 0.248391319 | 0.242491623 |
| 0.085673118 | 0.480213188 | 0.061608936 | 0.229965943 |
| 0.233028949 | 0.307423665 | 0.288841003 | 0.081169008 |
| 0.000955392 | 0.267458288 | 0.178481126 | 0.33622552  |
| 0.352221941 | 0.362556965 | 0.387005919 | 0.271594024 |
| 0.044887781 | 0.416825543 | 0.33573178  | 0.042421193 |
| 0.480336051 | 0.002814349 | 0.48155285  | 0.20767341  |
| 0.252785518 | 0.397341135 | 0.187286514 | 0.307207509 |
| 0.391881599 | 0.487737671 | 0.42271861  | 0.124263386 |
| 0.242381095 | 0.259380825 | 0.211364484 | 0.267757729 |
| 0.403233525 | 0.259903211 | 0.342778256 | 0.169446933 |
| 0.226173443 | 0.236670599 | 0.425179621 | 0.393821165 |
| 0.004373078 | 0.291301275 | 0.220244669 | 0.191950402 |
| 0.160140467 | 0.42394199  | 0.231965452 | 0.313879325 |
| 0.219047968 | 0.119799649 | 0.368694868 | 0.406770501 |
| 0.035226207 | 0.248291086 | 0.019688299 | 0.385287038 |
| 0.296736971 | 0.280416525 | 0.266075831 | 0.200366221 |
| 0.098016228 | 0.346746893 | 0.138334786 | 0.217115421 |
| 0.319557635 | 0.302471267 | 0.46789386  | 0.055128901 |
| 0.180345506 | 0.252232453 | 0.391645425 | 0.470006946 |
| 0.384800464 | 0.063936804 | 0.339959461 | 0.387415087 |
| 0.21882178  | 0.133511682 | 0.396532044 | 0.019341319 |
| 0.022429388 | 0.039129311 | 0.315206273 | 0.340721269 |
| 0.21227115  | 0.352124574 | 0.129681728 | 0.244091731 |
| 0.220435524 | 0.293897621 | 0.251953358 | 0.363426108 |
| 0.2052655   | 0.370798951 | 0.266313041 | 0.257612324 |
| 0.241015705 | 0.334912299 | 0.331764816 | 0.443547125 |
| 0.480547385 | 0.222737274 | 0.238917362 | 0.378599893 |
| 0.183957836 | 0.36099722  | 0.429649351 | 0.330395935 |
| 0.304735234 | 0.411653661 | 0.206603853 | 0.335731475 |
| 0.413053821 | 0.340335256 | 0.052892946 | 1           |
| 0.491877387 | 0.025376046 | 0.238568853 | 0.299910676 |
| 0.054746974 | 0.33826292  | 0.43396283  | 0.345310052 |
| 0.296388675 | 0.040914388 | 0.245258879 | 0.350812017 |
| 0.375844867 | 0.342689167 | 0.321131037 | 0.205307585 |
| 0.388610017 | 0.198038131 | 0.197472569 | 0.18608007  |
| 0.334728308 | 0.375575752 | 0.118731674 | 0.051672631 |
| 0.252155352 | 0.316222315 | 0.370478905 | 0.304580093 |
| 0.227343278 | 0.002266292 | 0.188238801 | 0.243808089 |

|             |             |              |             |
|-------------|-------------|--------------|-------------|
| 0.193012072 | 0.252118158 | 0.464341022  | 0.329998303 |
| 0.398904501 | 0.168527055 | 0.365116939  | 0.310952408 |
| 0.319656751 | 0.225590378 | 0.22008792   | 0.004413994 |
| 0.320368848 | 0.152211791 | 0.305157333  | 0.170424103 |
| 0.295837714 | 0.239460759 | 0.172003246  | 0.363169332 |
| 0.377898626 | 0.292814406 | 0.087475608  | 0.105625277 |
| 0.367785278 | 0.368892207 | 0.207443262  | 0.200546273 |
| 0.328655011 | 0.294717182 | 0.235030076  | 0.445767141 |
| 0.350739358 | 0.390597919 | 0.087376257  | 0.383775983 |
| 0.214797484 | 0.361774078 | 0.264340574  | 0.324089528 |
| 0.373418811 | 0.259346337 | 0.17544518   | 0.397133928 |
| 0.331463502 | 0.352624253 | 0.255347136  | 0.46405042  |
| 0.006009419 | 0.408621147 | 0.269953987  | 0.085730758 |
| 0.441225464 | 0.369016481 | 0.246249448  | 0.348091876 |
| 0.393039393 | 0.472204671 | 0.361001899  | 0.261530504 |
| 0.129099042 | 0.064592908 | 0.42200679   | 0.374161631 |
| 0.338182246 | 0.370067706 | 0.163692256  | 0.085134768 |
| 0.385871176 | 0.196364351 | 0.274835354  | 0.209282466 |
| 0.258599476 | 0.213534422 | 0.425111356  | 0.213505239 |
| 0.01409821  | 0.300256803 | 0.213976361  | 0.150889371 |
| 0.242041596 | 0.233385248 | 0.342257454  | 0.425255303 |
| 0.235070172 | 0.159451407 | 0.191994322  | 0.241162392 |
| 0.386530253 | 0.443745069 | 0.025513041  | 0.416520551 |
| 0.414937408 | 0.393168665 | 0.364835109  | 0.41037398  |
| 0.353088993 | 0.437534132 | 0.383029083  | 0.305019469 |
| 0.005225013 | 0.239137716 | 0.182352455  | 0.455586854 |
| 0.288845978 | 0.387912846 | 0.14782266   | 0.179199065 |
| 0.01006278  | 0.351846355 | 0.081153203  | 0.48804753  |
| 0.34534395  | 0.137024069 | 0.017509699  | 0.343125083 |
| 0.168632108 | 0.045509132 | 0.445751107  | 0.327022465 |
| 0.399909315 | 0.344017956 | 0.306450942  | 0.212244173 |
| 0.059090756 | 0.292336438 | 0.06069067   | 0.29823407  |
| 0.257960923 | 0.061299273 | 0.1111108357 | 0.416677121 |
| 0.367145646 | 0.390984419 | 0.418223307  | 0.010764194 |
| 0.220467887 | 0.102466884 | 0.280518784  | 0.315537527 |
| 0.396692987 | 0.418431684 | 0.44827769   | 0.251386856 |
| 0.301484273 | 0.428335308 | 0.433439286  | 0.361868746 |
| 0.070502096 | 0.222609711 | 0.271059609  | 0.143604228 |
| 0.17648447  | 0.367508544 | 0.230971119  | 0.34726842  |
| 0.364868358 | 0.055780353 | 0.377933785  | 0.26859444  |
| 0.438858391 | 0.345335119 | 0.199465286  | 0.36134802  |
| 0.431814651 | 0.407504501 | 0.304293317  | 0.411343635 |
| 0.40888594  | 0.045303349 | 0.095197849  | 0.391789439 |
| 0.479647386 | 0.40120824  | 0.318843553  | 0.138977003 |
| 0.321816188 | 0.237015808 | 0.348928938  | 0.386855989 |
| 0.394154459 | 0.167953646 | 0.210665917  | 0.063954288 |
| 0.024128478 | 0.204936063 | 0.416325908  | 0.465535548 |
| 0.256810702 | 0.383658921 | 0.344576241  | 0.346278149 |
| 0.347926423 | 0.248467978 | 0.40900883   | 0.376535708 |
| 0.4940051   | 0.093063662 | 0.479530372  | 0.346314219 |
| 0.345938759 | 0.327046005 | 0.342503504  | 0.013710659 |
| 0.228294287 | 0.208396686 | 0.143321913  | 0.290505982 |
| 0.265745353 | 0.31144507  | 0.37882785   | 0.338439509 |
| 0.118283195 | 0.015846712 | 0.385363156  | 0.147990063 |

|             |             |             |             |
|-------------|-------------|-------------|-------------|
| 0.40112395  | 0.170350274 | 0.362589662 | 0.042770114 |
| 0.47671359  | 0.302055705 | 0.293128857 | 0.144264203 |
| 0.311246343 | 0.007620896 | 0.221726756 | 0.156963924 |
| 0.34691389  | 0.423863812 | 0.250599177 | 0.217806775 |
| 0.185958981 | 0.302257678 | 0.390455469 | 0.284493789 |
| 0.350927307 | 0.063849112 | 0.379453203 | 0.370336792 |
| 0.197155922 | 0.287337837 | 0.419588903 | 0.350801072 |
| 0.340667618 | 0.171743805 | 0.331118787 | 0.276495339 |
| 0.324113099 | 0.350950863 | 0.322068556 | 0.211594737 |
| 0.166692104 | 0.348068464 | 0.26594557  | 0.219570286 |
| 0.276770619 | 0.171412087 | 0.224324257 | 0.48055621  |
| 0.202061199 | 0.29591515  | 0.038768371 | 0.036314536 |
| 0.12606236  | 0.324109896 | 0.356529    | 0.367128925 |
| 0.38851951  | 0.177155171 | 0.282874118 | 0.326582836 |
| 0.064119058 | 0.223085531 | 0.368691081 | 0.078001328 |
| 0.317964854 | 0.167085803 | 0.005286486 | 0.290916722 |
| 0.397070119 | 0.211431142 |             |             |
| FASL        | 0.300186035 | 0.484367996 | 0.228370045 |
| 0.04506549  | 0.258196217 | 0.459294674 | 0.452183964 |
| 0.293946872 | 0.294007094 | 0.306274468 | 0.498842806 |
| 0.004855134 | 0.242447748 | 0.057234194 | 0.19050544  |
| 0.412499975 | 0.423338224 | 0.498071267 | 0.416240349 |
| 0.350138352 | 0.226746597 | 0.426932674 | 0.454785007 |
| 0.476353083 | 0.008068427 | 0.326456825 | 0.109526198 |
| 0.264473122 | 0.379374846 | 0.423375327 | 0.411538047 |
| 0.357459196 | 0.333437994 | 0.392152618 | 0.351945776 |
| 0.160524309 | 0.494895946 | 0.079159728 | 0.299676922 |
| 0.263769848 | 0.422733721 | 0.334110433 | 0.066232883 |
| 0.003143928 | 0.308971826 | 0.23982988  | 0.441958051 |
| 0.37623242  | 0.443430612 | 0.396250332 | 0.375674438 |
| 0.080809922 | 0.499594576 | 0.359849812 | 0.077650189 |
| 0.500507471 | 0.008294501 | 0.500058546 | 0.241899932 |
| 0.241278818 | 0.458209992 | 0.27623814  | 0.419828065 |
| 0.477299182 | 0.501353931 | 0.46297451  | 0.150866269 |
| 0.262456176 | 0.363917806 | 0.272725418 | 0.419707438 |
| 0.434876252 | 0.386054707 | 0.462578915 | 0.250354106 |
| 0.332436743 | 0.26712847  | 0.477666077 | 0.383846703 |
| 0.004213909 | 0.370437977 | 0.356922596 | 0.251749337 |
| 0.250840747 | 0.500359401 | 0.31778439  | 0.423312649 |
| 0.341228847 | 0.099664488 | 0.461224832 | 0.451095216 |
| 0.054096185 | 0.287266951 | 0.022793138 | 0.351510722 |
| 0.336123083 | 0.325464673 | 0.370006183 | 0.252062533 |
| 0.0721846   | 0.307447803 | 0.152975695 | 0.252667432 |
| 0.416813577 | 0.42672132  | 0.501362807 | 0.069449898 |
| 0.212162432 | 0.299272324 | 0.480390998 | 0.499219717 |
| 0.428574799 | 0.034416637 | 0.312395787 | 0.456233088 |
| 0.319554373 | 0.216959878 | 0.465233104 | 0.032213744 |
| 0.032553873 | 0.025366603 | 0.35683419  | 0.351640184 |
| 0.287026929 | 0.437500883 | 0.177752291 | 0.381885622 |
| 0.282246777 | 0.31911105  | 0.298820407 | 0.471252977 |
| 0.303753034 | 0.473370339 | 0.409421703 | 0.358047548 |
| 0.347597698 | 0.358367573 | 0.351866699 | 0.466694137 |
| 0.466547595 | 0.23537133  | 0.257817364 | 0.483760583 |
| 0.216065757 | 0.403400899 | 0.472437833 | 0.372660835 |

|             |             |             |             |
|-------------|-------------|-------------|-------------|
| 0.415695724 | 0.438061547 | 0.341007699 | 0.477772776 |
| 0.475417908 | 0.37786302  | 0.054230955 | 0.491877387 |
| 1           | 0.035607198 | 0.240820656 | 0.345635965 |
| 0.087614901 | 0.426291582 | 0.454495229 | 0.42522741  |
| 0.396338183 | 0.09312798  | 0.379403181 | 0.466739367 |
| 0.446246469 | 0.45247543  | 0.422607036 | 0.337974005 |
| 0.47023769  | 0.336206092 | 0.199873829 | 0.220126483 |
| 0.347117144 | 0.440440216 | 0.201260993 | 0.075695196 |
| 0.326706753 | 0.360853891 | 0.426268237 | 0.398432619 |
| 0.308683344 | 0.006852673 | 0.295951425 | 0.332542921 |
| 0.316208609 | 0.270921623 | 0.504690862 | 0.333130783 |
| 0.431654968 | 0.228288513 | 0.36558816  | 0.424803785 |
| 0.319459214 | 0.35183484  | 0.335240863 | 0.004686955 |
| 0.34766871  | 0.267249743 | 0.403616106 | 0.142120157 |
| 0.405795406 | 0.270550226 | 0.150226872 | 0.408563107 |
| 0.434570771 | 0.368175402 | 0.05978495  | 0.108165859 |
| 0.447433562 | 0.483149984 | 0.344773464 | 0.269267147 |
| 0.43462334  | 0.420239664 | 0.276835026 | 0.488885014 |
| 0.42598131  | 0.491724152 | 0.104509107 | 0.429422669 |
| 0.323417751 | 0.406589958 | 0.322712532 | 0.382561085 |
| 0.472766261 | 0.314765223 | 0.234320413 | 0.474766906 |
| 0.410674953 | 0.421373187 | 0.255231802 | 0.489098502 |
| 0.004741427 | 0.485229448 | 0.411171603 | 0.108123033 |
| 0.484932061 | 0.464688061 | 0.231857406 | 0.364652766 |
| 0.425758681 | 0.491235701 | 0.361637809 | 0.308009237 |
| 0.170552937 | 0.041081137 | 0.438104825 | 0.472909168 |
| 0.384434838 | 0.475831907 | 0.258706768 | 0.067644338 |
| 0.422179919 | 0.246530364 | 0.408499686 | 0.316335925 |
| 0.373513841 | 0.297335086 | 0.438508878 | 0.267574019 |
| 0.017095263 | 0.411588264 | 0.331632086 | 0.252737551 |
| 0.384952073 | 0.307581025 | 0.40747877  | 0.493085031 |
| 0.358213208 | 0.250911097 | 0.331119766 | 0.27026275  |
| 0.419819562 | 0.484121303 | 0.031250995 | 0.423619812 |
| 0.454570088 | 0.456227734 | 0.416618502 | 0.442947244 |
| 0.432909314 | 0.505080384 | 0.426346765 | 0.323806079 |
| 0.003280591 | 0.285383925 | 0.233030652 | 0.494709953 |
| 0.344451086 | 0.481073753 | 0.168415313 | 0.278944869 |
| 0.005584979 | 0.37538482  | 0.157023734 | 0.495196278 |
| 0.391386269 | 0.136116137 | 0.024003885 | 0.418658383 |
| 0.247090561 | 0.042832006 | 0.481956873 | 0.465613489 |
| 0.44499497  | 0.449298577 | 0.397543229 | 0.254806648 |
| 0.116183175 | 0.341301807 | 0.082394147 | 0.439867515 |
| 0.351183025 | 0.068180034 | 0.18884882  | 0.448550272 |
| 0.406202073 | 0.505864108 | 0.471611099 | 0.026027753 |
| 0.249691766 | 0.201538997 | 0.393750605 | 0.275768841 |
| 0.430876296 | 0.503147612 | 0.463858782 | 0.300882118 |
| 0.412529375 | 0.489922969 | 0.493534133 | 0.421207778 |
| 0.117633995 | 0.268961899 | 0.318836469 | 0.168415393 |
| 0.260760158 | 0.412813471 | 0.37839164  | 0.414972947 |
| 0.446061715 | 0.107360455 | 0.437693618 | 0.317456084 |
| 0.471382283 | 0.401762368 | 0.219465619 | 0.318181755 |
| 0.493466595 | 0.467851232 | 0.330913416 | 0.453912585 |
| 0.476656335 | 0.084651022 | 0.098705436 | 0.484588051 |
| 0.503678311 | 0.495734563 | 0.371840488 | 0.249702159 |

|             |             |             |             |
|-------------|-------------|-------------|-------------|
| 0.360521221 | 0.187361174 | 0.358117204 | 0.451819392 |
| 0.443292638 | 0.271355373 | 0.245703744 | 0.081510688 |
| 0.052860044 | 0.235261336 | 0.497082252 | 0.492581878 |
| 0.259836533 | 0.402814943 | 0.454968034 | 0.481735939 |
| 0.39613021  | 0.364198452 | 0.479910497 | 0.422658543 |
| 0.500671306 | 0.172644478 | 0.495420163 | 0.427323927 |
| 0.412690829 | 0.467190347 | 0.410783287 | 0.018115528 |
| 0.341332365 | 0.326085763 | 0.160722127 | 0.441758701 |
| 0.306054382 | 0.351175689 | 0.5022375   | 0.35329321  |
| 0.182110924 | 0.009083372 | 0.449278139 | 0.242306178 |
| 0.484909338 | 0.204877665 | 0.427262197 | 0.079441364 |
| 0.507505628 | 0.415099645 | 0.366604396 | 0.186288478 |
| 0.451799203 | 0.012902006 | 0.329751704 | 0.136062818 |
| 0.416999578 | 0.484304976 | 0.343391517 | 0.314164096 |
| 0.198556173 | 0.426162252 | 0.493637488 | 0.422171463 |
| 0.402937132 | 0.120976735 | 0.430396597 | 0.390447091 |
| 0.236184986 | 0.394644987 | 0.478713088 | 0.407274757 |
| 0.423231186 | 0.189404388 | 0.347827022 | 0.263676335 |
| 0.38084923  | 0.376009717 | 0.466320894 | 0.299447603 |
| 0.185222012 | 0.470663078 | 0.312374646 | 0.300923676 |
| 0.413353662 | 0.255591486 | 0.294550229 | 0.502726754 |
| 0.279975051 | 0.359723742 | 0.081612299 | 0.07955237  |
| 0.238708155 | 0.410729365 | 0.356202818 | 0.385832542 |
| 0.426342859 | 0.218161591 | 0.29813107  | 0.307872479 |
| 0.073312225 | 0.246452719 | 0.478303655 | 0.126664351 |
| 0.419617255 | 0.230831684 | 0.003631903 | 0.304890648 |
| 0.486215794 | 0.326513889 |             |             |
| FBXL20      | 0.02268128  | 0.044941375 | 0.001526728 |
| 0.000568652 | 0.001076356 | 0.014451377 | 0.010183008 |
| 0.027336455 | 0.000765872 | 0.003505527 | 0.027545021 |
| 1.94E-05    | 0.038133038 | 0.000151306 | 0.000167117 |
| 0.054123193 | 0.049766044 | 0.014973806 | 0.050955278 |
| 0.019407066 | 0.000987876 | 0.031901401 | 0.028452372 |
| 0.011067775 | 2.03E-05    | 0.005540841 | 0.000689409 |
| 0.020046577 | 0.054687299 | 0.009309099 | 0.007167941 |
| 0.04598238  | 0.045431779 | 0.006436548 | 0.001921042 |
| 0.003057949 | 0.043891671 | 0.000292459 | 0.03370731  |
| 0.037990341 | 0.009275274 | 0.041028736 | 1.70E-05    |
| 0.002997623 | 0.021980433 | 0.030939063 | 6.48E-05    |
| 0.013127593 | 0.007984247 | 0.005702186 | 0.012529304 |
| 0.026712907 | 0.039380177 | 0.004592359 | 0.001402101 |
| 2.04E-05    | 0.03867318  | 0.012236483 | 0.035179071 |
| 0.00956421  | 0.013683065 | 0.031139007 | 0.001530357 |
| 0.037928331 | 0.047261436 | 0.00285026  | 0.014876088 |
| 0.020290613 | 0.038217408 | 0.002742729 | 0.002742729 |
| 0.006794107 | 0.003631512 | 0.025941124 | 0.041171293 |
| 0.043432136 | 0.003631512 | 0.009600513 | 0.029713182 |
| 0.006825126 | 0.01604751  | 0.003428702 | 5.81E-06    |
| 0.030630499 | 0.005788156 | 0.026406129 | 0.028507234 |
| 0.000120816 | 0.027873925 | 0.004074574 | 0.025968237 |
| 0.033534874 | 0.029541616 | 0.051194193 | 0.00011243  |
| 0.048202231 | 0.001251387 | 0.001959272 | 0.044384044 |
| 0.003131456 | 0.032678618 | 0.00137422  | 5.74E-05    |
| 0.020226296 | 0.003029288 | 0.043227953 | 0.01914012  |
|             | 0.031076248 | 0.004082299 | 0.037749548 |

|                      |                      |                      |             |
|----------------------|----------------------|----------------------|-------------|
| 0.001708806          | 0.007026038          | 0.044284876          | 0.048355839 |
| 8.83E-05 0.002949394 | 0.01416238           | 0.00126591           |             |
| 0.000268208          | 0.012157585          | 0.002452875          | 0.00303828  |
| 0.000236101          | 0.047747034          | 0.00541432           | 0.003433958 |
| 0.010149304          | 0.006121033          | 0.025871931          | 0.021187414 |
| 0.042549121          | 0.000995072          | 0.009655651          | 0.036240595 |
| 0.011924652          | 0.019551358          | 0.035345201          | 0.007045289 |
| 0.005724738          | 0.00577719           | 0.038441929          | 0.039337132 |
| 0.001275949          | 0.000974465          | 0.024367158          | 0.034563085 |
| 0.054468281          | 0.051502657          | 0.010267317          | 0.007419229 |
| 0.010961429          | 0.006052061          | 0.029251335          | 0.011650079 |
| 0.021225816          | 0.000855307          | 0.025376046          | 0.035607198 |
| 1                    | 0.001556947          | 0.040509357          | 0.000253296 |
| 0.001326122          | 0.040307105          | 0.036071695          | 0.023646362 |
| 0.000404676          | 0.009711042          | 0.013313205          | 0.015077076 |
| 0.012558754          | 0.02473207           | 0.006731523          | 0.022293092 |
| 0.007401724          | 0.001594077          | 0.036523694          | 0.005925342 |
| 0.020813512          | 0.003119003          | 3.67E-05 0.026062369 |             |
| 0.014984845          | 0.045173643          | 0.028236622          | 0.0312498   |
| 0.00011483           | 0.004371205          | 0.025832142          | 0.005241532 |
| 0.043634925          | 0.045109216          | 0.004743555          | 0.01505048  |
| 0.004213218          | 0.006328908          | 0.006190184          | 0.039869116 |
| 0.00252012           | 0.002047008          | 1.87E-05 0.002973138 |             |
| 0.015269907          | 0.013758196          | 0.000924367          | 0.007330104 |
| 0.001263293          | 0.000584185          | 0.042700134          | 0.011445381 |
| 0.037118358          | 0.000221384          | 0.003074256          | 0.011320799 |
| 0.028674758          | 0.013636653          | 0.003904491          | 0.031544846 |
| 0.009201778          | 0.048361048          | 0.028669111          | 0.003109756 |
| 0.029192284          | 0.000815667          | 0.006667511          | 0.02656816  |
| 0.040757612          | 0.043609962          | 0.039189142          | 0.010704599 |
| 0.029234907          | 0.005880127          | 0.020221338          | 0.027220589 |
| 0.022492117          | 0.002972817          | 0.047307266          | 5.63E-06    |
| 0.021278936          | 0.021590935          | 0.001126391          | 0.046260095 |
| 0.013670015          | 0.002038242          | 0.013513241          | 0.051671318 |
| 0.046859022          | 0.041528588          | 0.048447147          | 0.003377715 |
| 0.000149148          | 0.04827516           | 0.025953627          | 0.0508268   |
| 0.014239609          | 0.005546461          | 0.000213158          | 0.049285762 |
| 0.023777836          | 0.027034005          | 0.028074788          | 0.020149904 |
| 0.011140924          | 0.010535658          | 0.027688803          | 1.25E-05    |
| 0.011064087          | 0.035233443          | 0.000578797          | 0.008634052 |
| 0.000682232          | 0.036735638          | 0.021909464          | 0.007929877 |
| 0.008148399          | 0.007369214          | 0.003532005          | 0.007194246 |
| 0.048539317          | 5.10E-05 0.044988875 | 0.05328732           |             |
| 0.016404043          | 0.04520492           | 0.053813974          | 0.017203003 |
| 0.027501583          | 0.046212604          | 0.04295063           | 9.75E-06    |
| 0.043526366          | 0.034204387          | 0.027010009          | 0.047948046 |
| 0.01604295           | 0.01365752           | 0.015533782          | 1.42E-06    |
| 0.006997932          | 0.005686883          | 0.045042208          | 0.044984878 |
| 0.000140406          | 8.90E-05 0.040120196 | 0.032817756          | 5.56E-05    |
| 0.052004146          | 0.019452685          | 0.041930756          | 0.020515271 |
| 0.006925531          | 0.036905427          | 0.005629431          | 0.008632044 |
| 6.32E-05 0.031894406 | 0.012421851          | 0.000152605          |             |
| 0.001325423          | 0.048951046          | 0.046211308          | 0.024762502 |
| 0.012578639          | 3.76E-05 0.040995773 | 0.002795696          |             |



|             |             |             |             |
|-------------|-------------|-------------|-------------|
| 0.036765147 | 0.001106791 | 0.044298474 | 0.024215921 |
| 0.041553665 | 0.035597167 | 0.02403114  | 0.037084917 |
| 0.031532718 | 0.039921174 | 0.000376154 | 0.046333332 |
| 0.047354929 | 0.000390156 | 0.026323109 | 0.043639173 |
| 0.018668517 | 0.010651147 | 0.025312304 | 0.000516418 |
| 0.01224757  | 0.020484351 | 0.04070663  | 0.044305083 |
| 0.001250939 | 0.004915252 | 0.033085861 | 0.005869063 |
| 0.003513834 | 0.014093322 | 0.016396228 | 0.003783361 |
| 0.001379764 | 0.02357111  | 0.041074221 | 0.019572551 |
| 0.047486822 | 0.002555955 | 0.046309645 | 0.001193179 |
| 0.038338881 | 0.002401774 | 0.016833698 | 0.031097751 |
| 0.043636038 | 0.005399186 | 8.53E-05    | 0.00235866  |
| 0.030349173 | 0.034123248 | 0.003119402 | 0.010080843 |
| 0.016582794 | 0.020231575 | 0.051563695 | 0.010672661 |
| 0.018541227 | 0.019408013 | 0.033221856 | 0.000435666 |
| 0.047919205 | 0.020753326 | 0.034951588 | 0.013891628 |
| 0.037223369 | 5.16E-06    | 0.027554879 | 0.005735618 |
| 0.012672603 | 0.017275378 | 0.045866752 | 0.006450461 |
| 0.023073303 | 0.005368517 | 0.000254005 | 0.00044981  |
| 0.027048064 | 0.013064064 | 0.020154089 | 0.009071049 |
| 0.021564366 | 0.001727762 | 0.049396073 | 0.024401466 |
| 0.038617981 | 0.005879354 | 0.015099246 | 2.90E-05    |
| 0.003896932 | 0.000284055 | 0.033363842 | 0.028104124 |
| 0.027533835 | 0.022206035 | 0.008529286 | 0.022305113 |
| 0.028250295 | 0.01526322  | 0.042511618 | 0.000906888 |
| 0.051999265 | 0.008318563 | 0.038079638 | 0.005092543 |
| 0.013330148 | 0.00369043  | 0.00635054  | 0.000144226 |
| 0.002883882 | 0.003584628 | 0.046714941 | 0.003023367 |
| 0.018601819 | 0.007909553 | 0.001159279 | 0.016703138 |
| 0.036228855 | 0.033499152 | 0.030746764 | 0.035057924 |
| 0.02505177  | 0.031155781 | 0.002532843 | 0.009856546 |
| 0.000633845 | 9.65E-05    | 0.001855403 | 0.007368902 |
| 0.041724515 | 0.044429457 | 0.049969354 | 0.003883791 |
| 0.002860538 | 0.004504979 | 0.000769473 | 0.040567388 |
| 0.015229095 | 0.001144271 | 0.020322246 | 0.00460935  |
| 5.46E-05    | 0.00726181  | 0.027320647 | 0.011427586 |
| FCER1G      | 0.059069778 | 0.124977034 | 0.17493996  |
| 0.002759164 | 0.045268348 | 0.34430274  | 0.232524292 |
| 0.033673383 | 0.185546844 | 0.079717959 | 0.282751825 |
| 0.020031967 | 0.023023633 | 0.132267347 | 0.113852562 |
| 0.069173033 | 0.066895225 | 0.138726083 | 0.071597424 |
| 0.094146909 | 0.024676402 | 0.180986676 | 0.121126596 |
| 0.267427468 | 0.047561304 | 0.149947306 | 0.017416249 |
| 0.019474894 | 0.053494851 | 0.28173631  | 0.061985641 |
| 0.06130803  | 0.037862301 | 0.020879857 | 0.016448568 |
| 0.001689214 | 0.181106166 | 0.000829839 | 0.026998271 |
| 0.02814771  | 0.100621708 | 0.045322544 | 0.148330318 |
| 2.89E-05    | 0.176486119 | 0.015910944 | 0.155395844 |
| 0.09751343  | 0.326866345 | 0.319661535 | 0.130184063 |
| 0.00070385  | 0.25852912  | 0.113062764 | 0.000484203 |
| 0.219872461 | 0.00069244  | 0.191614289 | 0.041051921 |
| 0.234026106 | 0.145475387 | 0.029542187 | 0.111458286 |
| 0.335953062 | 0.207546681 | 0.09422929  | 0.107480943 |
| 0.331570149 | 0.043132753 | 0.029411255 | 0.062413223 |

|             |             |             |             |
|-------------|-------------|-------------|-------------|
| 0.113718479 | 0.036159572 | 0.069814864 | 0.008219696 |
| 0.039703587 | 0.031717021 | 0.29462736  | 0.131619467 |
| 0.013802477 | 0.213353519 | 0.015693369 | 0.048783731 |
| 0.014634159 | 0.257413569 | 0.047030294 | 0.082586974 |
| 0.028690272 | 0.252255546 | 0.15102203  | 0.082696012 |
| 0.01359582  | 0.036621668 | 0.003299078 | 0.129299386 |
| 0.061195677 | 0.037651542 | 0.085433651 | 0.157715063 |
| 0.159535255 | 0.169071266 | 0.028309573 | 0.022066381 |
| 0.080710543 | 0.05193511  | 0.221523061 | 0.001152046 |
| 0.015110751 | 0.117362461 | 0.066021362 | 0.178697351 |
| 0.095886547 | 0.06140864  | 0.133611829 | 0.316393884 |
| 0.015725744 | 0.021902984 | 0.238861302 | 0.001459581 |
| 0.010453177 | 0.009406152 | 0.053143543 | 0.155408373 |
| 0.130420387 | 0.238200752 | 0.03240816  | 0.039321578 |
| 0.023533221 | 0.049642539 | 0.061729723 | 0.175552907 |
| 0.026692474 | 0.220736113 | 0.033632001 | 0.048298983 |
| 0.011818588 | 0.070708475 | 0.22105992  | 0.132301456 |
| 0.208291318 | 0.156483914 | 0.207754461 | 0.262610074 |
| 0.016185196 | 0.068839071 | 0.097270319 | 0.046886664 |
| 0.047130006 | 0.213416874 | 0.02738543  | 0.130747437 |
| 0.268084103 | 0.100959353 | 0.001091222 | 0.238568853 |
| 0.240820656 | 0.001556947 | 1           | 0.063616074 |
| 0.005094244 | 0.063739341 | 0.166142322 | 0.082201573 |
| 0.047346646 | 0.01746505  | 0.067075969 | 0.217544587 |
| 0.226386004 | 0.192005404 | 0.11268056  | 0.052084305 |
| 0.272705725 | 0.025056643 | 0.18313444  | 0.016167655 |
| 0.314622616 | 0.197969578 | 0.006377976 | 0.006517845 |
| 0.053611246 | 0.049832636 | 0.104381674 | 0.077306711 |
| 0.04976297  | 0.000386224 | 0.069706042 | 0.076078679 |
| 0.028668671 | 0.032638069 | 0.139349307 | 0.358669436 |
| 0.286470953 | 0.005817301 | 0.33073155  | 0.033082604 |
| 0.082734537 | 0.053629872 | 0.068099178 | 0.027122464 |
| 0.108238957 | 0.011629403 | 0.05165968  | 0.15402935  |
| 0.047636643 | 0.180067412 | 0.038758834 | 0.088578523 |
| 0.320897086 | 0.046873958 | 0.052823895 | 0.005215278 |
| 0.117134235 | 0.131380523 | 0.013197387 | 0.029118728 |
| 0.083823865 | 0.051399742 | 0.026455087 | 0.236801626 |
| 0.041207088 | 0.253829745 | 0.002484554 | 0.127213507 |
| 0.025209653 | 0.075219813 | 0.040220076 | 0.059318591 |
| 0.169270829 | 0.067969565 | 0.007516039 | 0.326484228 |
| 0.102255732 | 0.078471367 | 0.201921731 | 0.124327325 |
| 0.039901691 | 0.202805189 | 0.050677446 | 0.00339067  |
| 0.128283414 | 0.260070812 | 0.229912482 | 0.123188656 |
| 0.074214919 | 0.129089753 | 0.094842051 | 0.036616658 |
| 0.006245106 | 0.099008774 | 0.112426573 | 0.169588332 |
| 0.052410039 | 0.067061252 | 0.004570501 | 0.004669636 |
| 0.082220289 | 0.028359752 | 0.09276371  | 0.034651821 |
| 0.033629799 | 0.009835577 | 0.221112839 | 0.047999044 |
| 0.003171426 | 0.134314529 | 0.044813779 | 0.024150635 |
| 0.041797032 | 0.069999254 | 0.075951669 | 0.275235029 |
| 0.010829838 | 0.014124348 | 0.013019093 | 0.177940774 |
| 0.333848961 | 0.125194436 | 0.000311371 | 0.118314862 |
| 0.08639766  | 0.12332338  | 0.077342578 | 0.086394163 |
| 0.173145541 | 0.216556638 | 0.098264891 | 0.05214493  |

|             |             |             |             |
|-------------|-------------|-------------|-------------|
| 0.008874099 | 0.026726391 | 0.016322738 | 0.298962809 |
| 0.049349849 | 0.28432776  | 0.013118526 | 0.01014509  |
| 0.010058749 | 0.354677878 | 0.001772723 | 0.158900592 |
| 0.063207993 | 0.178196789 | 0.000105892 | 0.081383735 |
| 0.016110031 | 0.002441388 | 0.111649604 | 0.137122708 |
| 0.108969341 | 0.05876271  | 0.212753256 | 0.023055184 |
| 0.00100683  | 0.024132266 | 0.020850186 | 0.071787691 |
| 0.02513359  | 0.005097821 | 0.036926803 | 0.091325648 |
| 0.115328632 | 0.175937694 | 0.292810221 | 0.014923682 |
| 0.02971171  | 0.006650976 | 0.058631893 | 0.101084621 |
| 0.137339032 | 0.250558439 | 0.138780493 | 0.03437764  |
| 0.0592794   | 0.190479888 | 0.247157181 | 0.103722534 |
| 0.00296635  | 0.030343286 | 0.044314177 | 0.100295975 |
| 0.024509588 | 0.072110875 | 0.037191983 | 0.336670214 |
| 0.173966225 | 0.002873881 | 0.385791885 | 0.076300831 |
| 0.142137022 | 0.068804075 | 0.231700067 | 0.115577785 |
| 0.199310335 | 0.094146631 | 0.254786162 | 0.104649882 |
| 0.332866939 | 0.000925853 | 0.004679481 | 0.21588507  |
| 0.176500732 | 0.297049971 | 0.069170146 | 0.029268126 |
| 0.049292604 | 0.202894276 | 0.0785321   | 0.073336824 |
| 0.233795572 | 0.023408971 | 0.02380733  | 0.004232952 |
| 0.021282874 | 0.109449908 | 0.195719977 | 0.225074199 |
| 0.260723704 | 0.317093871 | 0.164487758 | 0.119181636 |
| 0.059027619 | 0.016233251 | 0.29951946  | 0.105032042 |
| 0.246556029 | 0.018512398 | 0.162790805 | 0.139934112 |
| 0.142304682 | 0.071224633 | 0.085940391 | 0.007716847 |
| 0.036718609 | 0.070219992 | 0.021316873 | 0.069856388 |
| 0.034668776 | 0.20681584  | 0.166937658 | 0.176065503 |
| 0.009032749 | 0.007812212 | 0.208338251 | 0.006602171 |
| 0.357985755 | 0.006772364 | 0.093787751 | 0.000456031 |
| 0.133029008 | 0.097982444 | 0.092149569 | 0.004838903 |
| 0.065214476 | 5.21E-05    | 0.090370571 | 0.211360434 |
| 0.15902437  | 0.209780481 | 0.058152789 | 0.046396096 |
| 0.029697505 | 0.060400155 | 0.171509914 | 0.038910737 |
| 0.068028952 | 0.002332267 | 0.073374553 | 0.082483557 |
| 0.018255778 | 0.03053989  | 0.308309744 | 0.042423974 |
| 0.149399162 | 0.027096257 | 0.258789434 | 0.096149602 |
| 0.052648336 | 0.03289538  | 0.073703877 | 0.029932132 |
| 0.156493188 | 0.054938877 | 0.047356696 | 0.030895649 |
| 0.066728552 | 0.025980971 | 0.015694835 | 0.25266431  |
| 0.024590769 | 0.09845795  | 0.0045369   | 0.015928152 |
| 0.00822635  | 0.19899476  | 0.102069543 | 0.090819828 |
| 0.073890093 | 0.012946079 | 0.213676656 | 0.178808453 |
| 0.00125637  | 0.036629866 | 0.22656113  | 0.001381316 |
| 0.066465363 | 0.010862659 | 0.010295426 | 0.070900268 |
| 0.218136878 | 0.010713202 |             |             |
| FCHSD2      | 0.317087003 | 0.450467437 | 0.061495658 |
| 0.018845519 | 0.087781351 | 0.194528127 | 0.177232887 |
| 0.330461026 | 0.1052689   | 0.107243523 | 0.26231134  |
| 0.003291016 | 0.368838961 | 0.020154169 | 0.083304223 |
| 0.493912244 | 0.503593799 | 0.268269661 | 0.503390378 |
| 0.305799742 | 0.104874871 | 0.321120589 | 0.30182817  |
| 0.211282947 | 0.003338678 | 0.096385863 | 0.033203483 |
| 0.341160981 | 0.494362333 | 0.18586595  | 0.219048428 |

|             |             |             |             |
|-------------|-------------|-------------|-------------|
| 0.44350558  | 0.428628815 | 0.308131353 | 0.243540705 |
| 0.189173689 | 0.409923835 | 0.112296811 | 0.353785509 |
| 0.410190339 | 0.174299133 | 0.414743007 | 0.017764275 |
| 0.002159104 | 0.084786113 | 0.299859322 | 0.331575876 |
| 0.298029158 | 0.181854083 | 0.15900574  | 0.132388499 |
| 0.148770683 | 0.286807261 | 0.353713988 | 0.140743568 |
| 0.338805184 | 0.002859705 | 0.392771653 | 0.263550337 |
| 0.063825948 | 0.283820902 | 0.322062266 | 0.344232413 |
| 0.202281407 | 0.365312139 | 0.485109459 | 0.02927964  |
| 0.065414907 | 0.371712072 | 0.353841815 | 0.318818251 |
| 0.415647098 | 0.269675453 | 0.233958365 | 0.315892514 |
| 0.361284811 | 0.388641818 | 0.250853786 | 0.167260575 |
| 0.001380423 | 0.119162987 | 0.234225002 | 0.317042883 |
| 0.33767063  | 0.288782935 | 0.339527784 | 0.168224295 |
| 0.345741451 | 0.021935109 | 0.329806127 | 0.500943625 |
| 0.0178211   | 0.359186329 | 0.0108687   | 0.154026509 |
| 0.392090224 | 0.46970972  | 0.351701578 | 0.060873818 |
| 0.017055185 | 0.132762498 | 0.170775615 | 0.417586289 |
| 0.346805099 | 0.368755916 | 0.325736682 | 0.165801697 |
| 0.360263386 | 0.173344467 | 0.299644779 | 0.399153659 |
| 0.452175102 | 0.012343846 | 0.174445011 | 0.185361995 |
| 0.273548086 | 0.101557966 | 0.190497135 | 0.040092006 |
| 0.009673833 | 0.035981253 | 0.45109429  | 0.155053261 |
| 0.07969703  | 0.16626168  | 0.069387575 | 0.34348396  |
| 0.31477146  | 0.44365059  | 0.09492931  | 0.201539087 |
| 0.354094499 | 0.200663206 | 0.31054285  | 0.369813655 |
| 0.284343393 | 0.253590086 | 0.141279558 | 0.394280976 |
| 0.378825909 | 0.063327162 | 0.077875165 | 0.267180655 |
| 0.346385622 | 0.473705373 | 0.502904203 | 0.288072357 |
| 0.198290666 | 0.22445415  | 0.247864316 | 0.302678646 |
| 0.204502263 | 0.329091327 | 0.108216947 | 0.299910676 |
| 0.345635965 | 0.040509357 | 0.063616074 | 1           |
| 0.035695324 | 0.194403931 | 0.393451384 | 0.374675078 |
| 0.375034824 | 0.027395921 | 0.173729116 | 0.208516925 |
| 0.265746624 | 0.200751097 | 0.350855115 | 0.160280085 |
| 0.273253677 | 0.246817872 | 0.043930889 | 0.357930316 |
| 0.113204027 | 0.302325693 | 0.271610042 | 0.061525163 |
| 0.361055666 | 0.328158253 | 0.387601697 | 0.363805064 |
| 0.345516066 | 0.002279483 | 0.104864246 | 0.330849793 |
| 0.240878666 | 0.406371616 | 0.441758432 | 0.105062428 |
| 0.236910794 | 0.284716257 | 0.136235426 | 0.251054213 |
| 0.38814025  | 0.17160625  | 0.161382313 | 0.000837964 |
| 0.122848012 | 0.288468503 | 0.356917234 | 0.065731825 |
| 0.17756395  | 0.111584156 | 0.144317948 | 0.408333233 |
| 0.174440881 | 0.369416509 | 0.041236074 | 0.197945881 |
| 0.22539984  | 0.327462317 | 0.2910774   | 0.254963703 |
| 0.35264821  | 0.243546956 | 0.438016581 | 0.316222666 |
| 0.220434985 | 0.278110686 | 0.193576998 | 0.250897357 |
| 0.367260297 | 0.422008524 | 0.387012639 | 0.374613418 |
| 0.21309357  | 0.352713883 | 0.282339795 | 0.233223261 |
| 0.353373269 | 0.356907223 | 0.08372238  | 0.463124348 |
| 0.001203819 | 0.297148531 | 0.339097099 | 0.208692568 |
| 0.430300145 | 0.189581592 | 0.070154748 | 0.249062871 |
| 0.509223562 | 0.468560652 | 0.414437777 | 0.422701605 |

|             |             |             |             |
|-------------|-------------|-------------|-------------|
| 0.228735692 | 0.016542227 | 0.461609427 | 0.332423146 |
| 0.494630214 | 0.321522657 | 0.254482642 | 0.113257359 |
| 0.449560054 | 0.336599921 | 0.336327546 | 0.349438958 |
| 0.352849883 | 0.324391582 | 0.228834106 | 0.33268503  |
| 0.018624118 | 0.206285087 | 0.340018805 | 0.141949358 |
| 0.235757289 | 0.160853793 | 0.378824803 | 0.275041008 |
| 0.29884202  | 0.280320112 | 0.256233426 | 0.069781071 |
| 0.153863126 | 0.462483652 | 0.046124341 | 0.444538464 |
| 0.50282571  | 0.323375183 | 0.426001089 | 0.50192015  |
| 0.276996292 | 0.306496863 | 0.421330197 | 0.444858805 |
| 0.001807035 | 0.414395332 | 0.327144043 | 0.286483776 |
| 0.41904893  | 0.23902738  | 0.267928406 | 0.337770261 |
| 0.002003577 | 0.140429828 | 0.202118209 | 0.453774522 |
| 0.418418377 | 0.026751294 | 0.050249152 | 0.375314611 |
| 0.330889686 | 0.054612397 | 0.495787845 | 0.259666744 |
| 0.38969311  | 0.342222719 | 0.136595923 | 0.368064258 |
| 0.184325067 | 0.353406974 | 0.023334562 | 0.334831668 |
| 0.341999225 | 0.108719189 | 0.056304772 | 0.503125401 |
| 0.380929387 | 0.308007117 | 0.218948243 | 0.006728123 |
| 0.397560893 | 0.152267492 | 0.359889386 | 0.11415358  |
| 0.361378257 | 0.296135306 | 0.392313957 | 0.378821837 |
| 0.360134874 | 0.325319285 | 0.300977027 | 0.377032388 |
| 0.093856621 | 0.372482074 | 0.412171028 | 0.049194692 |
| 0.326521965 | 0.443460799 | 0.305197173 | 0.144649007 |
| 0.32663184  | 0.061881077 | 0.172558521 | 0.316441394 |
| 0.378158895 | 0.432623704 | 0.052370952 | 0.177477882 |
| 0.320010674 | 0.258999565 | 0.093423398 | 0.313919134 |
| 0.234939041 | 0.155412711 | 0.175262029 | 0.311087159 |
| 0.400939412 | 0.232385378 | 0.41426574  | 0.109320823 |
| 0.437840006 | 0.057308831 | 0.400569735 | 0.217294473 |
| 0.255192928 | 0.321892129 | 0.395611447 | 0.136876268 |
| 0.020411018 | 0.129992537 | 0.307259087 | 0.334040548 |
| 0.070957166 | 0.178849649 | 0.200926853 | 0.264807532 |
| 0.479973989 | 0.333359073 | 0.230759816 | 0.310414497 |
| 0.335675142 | 0.071473813 | 0.447621356 | 0.299301599 |
| 0.350572073 | 0.25286363  | 0.374429887 | 0.008972472 |
| 0.360924607 | 0.127807752 | 0.239560685 | 0.268204787 |
| 0.458738734 | 0.115811779 | 0.298403137 | 0.158289152 |
| 0.139774282 | 0.006339566 | 0.320412481 | 0.291602275 |
| 0.229892322 | 0.304072704 | 0.323416741 | 0.148614865 |
| 0.490686187 | 0.330552205 | 0.351346708 | 0.276668535 |
| 0.29349766  | 0.018371101 | 0.116625803 | 0.037085585 |
| 0.345461377 | 0.325097562 | 0.360809346 | 0.337049573 |
| 0.237788091 | 0.353294236 | 0.318361964 | 0.307540974 |
| 0.426106836 | 0.129726685 | 0.493040011 | 0.300545454 |
| 0.384972815 | 0.307377131 | 0.219459137 | 0.289315277 |
| 0.155694298 | 0.12866605  | 0.109887442 | 0.183316442 |
| 0.44634522  | 0.278795332 | 0.292133001 | 0.291338528 |
| 0.04190794  | 0.300751034 | 0.372206316 | 0.355839454 |
| 0.338528515 | 0.322094257 | 0.340211644 | 0.313222106 |
| 0.289823476 | 0.28241902  | 0.037628122 | 0.02036592  |
| 0.190684343 | 0.158130217 | 0.402399577 | 0.400064985 |
| 0.489923662 | 0.295828434 | 0.089193705 | 0.145283077 |
| 0.153117853 | 0.364906215 | 0.209814344 | 0.132271131 |

|             |             |             |             |
|-------------|-------------|-------------|-------------|
| 0.361403899 | 0.29383849  | 0.000982295 | 0.242559387 |
| 0.315608285 | 0.31855064  |             |             |
| FGF13       | 0.008409722 | 0.082180707 | 0.003580016 |
| 0.022420322 | 0.055683195 | 0.044687583 | 0.091537877 |
| 0.008789858 | 0.001498351 | 0.027873906 | 0.073575652 |
| 1.17E-07    | 0.045307588 | 1.75E-05    | 0.000348232 |
| 0.066343828 | 0.113113126 | 0.055793395 | 0.007354778 |
| 0.012796463 | 0.023174058 | 0.052266472 | 0.041684993 |
| 3.46E-07    | 0.084267815 | 0.026141963 | 0.009286415 |
| 0.052155459 | 0.014806268 | 0.010920704 | 0.039179048 |
| 0.074800715 | 0.030499195 | 0.038541286 | 0.038240253 |
| 0.07405118  | 0.00476759  | 0.085136127 | 0.032368966 |
| 0.082412135 | 0.060736716 | 3.80E-05    | 0.015591935 |
| 0.033399658 | 0.006709585 | 0.028113513 | 0.007254548 |
| 0.036027831 | 0.015346728 | 0.087036918 | 0.001007008 |
| 0.062627644 | 0.022240688 | 0.00617278  | 0.102949844 |
| 0.004785963 | 0.084091248 | 0.002058984 | 0.00567181  |
| 0.014796535 | 0.009675324 | 0.029924893 | 0.067267317 |
| 0.100491151 | 0.078046574 | 0.00382527  | 0.016554501 |
| 0.021055637 | 0.041630066 | 0.104343089 | 0.063112247 |
| 0.009600814 | 0.022477975 | 0.038172444 | 0.050205577 |
| 0.034176473 | 0.033751094 | 0.008184264 | 1.04E-06    |
| 0.08207332  | 0.112683361 | 0.010546199 | 0.044300748 |
| 0.069594594 | 0.016408051 | 0.063980601 | 0.02942241  |
| 0.000178507 | 0.032014282 | 0.072425202 | 0.001454822 |
| 0.040031862 | 0.000544872 | 0.00479803  | 0.038908969 |
| 0.042304063 | 0.023916    | 0.012329789 | 5.28E-05    |
| 0.000211915 | 0.033064808 | 0.020691868 | 0.002853542 |
| 0.091209323 | 0.002767128 | 0.039518828 | 0.038804178 |
| 0.026536802 | 0.08562069  | 0.055331887 | 0.00095072  |
| 0.001638096 | 0.051963513 | 0.007438132 | 1.38E-05    |
| 0.073323542 | 0.000121559 | 0.007438132 | 0.007185737 |
| 0.047512356 | 0.003948707 | 0.00088007  | 3.25E-06    |
| 0.00890403  | 0.113168854 | 0.054412025 | 0.050993966 |
| 0.065533957 | 0.059905215 | 0.007746171 | 0.029581587 |
| 0.128600055 | 0.057661475 | 0.064646974 | 0.094940167 |
| 0.006357311 | 0.109701222 | 0.113114123 | 0.003014201 |
| 0.002047388 | 0.047645281 | 0.053389106 | 0.004766448 |
| 0.071270852 | 0.004091165 | 0.048058841 | 0.056285381 |
| 0.013230674 | 0.106280214 | 0.148163054 | 0.014322602 |
| 0.000181265 | 0.106280214 | 0.064333389 | 0.012974976 |
| 0.005094244 | 0.054746974 | 0.087614901 | 0.000253296 |
| 0.056695815 | 0.035695324 | 1           | 0.013926268 |
| 0.055819173 | 0.079992531 | 0.061709709 | 0.016307198 |
| 0.028325875 | 0.053682769 | 0.016652143 | 0.050856118 |
| 0.011580258 | 0.042658987 | 0.030014588 | 0.017571572 |
| 0.002501163 | 0.045280331 | 0.017149896 | 0.019030408 |
| 0.070765285 | 0.000297783 | 0.018244943 | 0.007874021 |
| 0.03035436  | 0.024759215 | 0.023784093 | 0.017194933 |
| 0.099143473 | 0.0123859   | 0.006549785 | 0.032145283 |
| 0.013011405 | 0.015903648 | 0.015773999 | 0.011377234 |
| 0.007467758 | 0.117546124 | 0.022640312 | 0.00759681  |
| 0.024230689 | 3.20E-06    | 0.008134993 | 0.02059035  |
| 9.17E-05    | 0.000149947 | 0.074670677 | 0.0009289   |
| 0.072056252 | 0.028871198 | 0.105044898 | 1.03E-05    |

|                      |                      |                      |             |
|----------------------|----------------------|----------------------|-------------|
| 0.000853915          | 0.017387293          | 0.12505015           | 0.039946358 |
| 0.001003317          | 0.112834056          | 0.016582537          | 0.035793985 |
| 0.0560637            | 0.054083399          | 0.070869555          | 0.000727942 |
| 0.008002116          | 0.049264369          | 0.087789962          | 0.062785195 |
| 0.089573859          | 0.030942002          | 0.017788549          | 0.002390147 |
| 0.039546506          | 0.019866865          | 0.029986748          | 0.002364663 |
| 0.083424639          | 5.67E-07 0.039401008 | 0.075698911          |             |
| 0.000490665          | 0.100225308          | 0.101329397          | 0.00231711  |
| 0.005254134          | 0.058025424          | 0.079806759          | 0.030721395 |
| 0.04631717           | 0.000772591          | 7.03E-06 0.048144718 |             |
| 0.049414258          | 0.057605736          | 0.045451279          | 0.090001486 |
| 9.57E-05 0.075310742 | 0.011573928          | 0.038821926          |             |
| 0.018938488          | 0.082999657          | 0.056031118          | 0.016540955 |
| 0.012903118          | 6.37E-06 0.016428038 | 0.03163458           |             |
| 0.004950528          | 0.029169683          | 0.000806492          | 0.094066446 |
| 0.051774977          | 0.078839122          | 0.002485378          | 0.071429815 |
| 0.030723631          | 0.033013508          | 0.076257387          | 0.002706567 |
| 0.042637416          | 0.069732991          | 0.029420441          | 0.092580374 |
| 0.059213393          | 0.014610425          | 0.086598734          | 0.07301016  |
| 0.032702248          | 1.57E-07 0.050676806 | 0.058610356          |             |
| 0.053602811          | 0.055205435          | 0.036143515          | 0.002928526 |
| 0.04807018           | 1.87E-06 0.01327425  | 0.019077917          |             |
| 0.06287546           | 0.098675393          | 0.001739155          | 0.001815871 |
| 0.084869171          | 0.056133843          | 0.00028853           | 0.068359219 |
| 0.049925795          | 0.109366051          | 0.076230062          | 0.044917498 |
| 0.054442293          | 0.012489092          | 0.010433957          | 0.012590682 |
| 0.098841225          | 0.041253662          | 3.61E-05 0.055943763 |             |
| 0.059399509          | 0.045982313          | 0.104242673          | 0.034608138 |
| 0.000184982          | 0.022261677          | 0.018105078          | 0.089593123 |
| 0.002166806          | 0.046318368          | 0.064568629          | 0.099098097 |
| 0.059321287          | 0.044047638          | 0.083953873          | 0.064271953 |
| 0.062966913          | 0.007676073          | 0.039770397          | 0.042160361 |
| 0.002003352          | 0.016254509          | 0.083032213          | 0.068578952 |
| 0.053976396          | 0.025944934          | 0.053369446          | 0.03689819  |
| 0.007131233          | 0.112367025          | 0.078885037          | 0.00561034  |
| 0.002426107          | 0.091853371          | 0.012895832          | 0.034654961 |
| 0.02668282           | 0.034158016          | 0.001180575          | 0.000405087 |
| 0.04260079           | 0.09340687           | 0.087068829          | 0.054334616 |
| 0.029205588          | 0.071220337          | 0.001088273          | 0.041223084 |
| 0.015160963          | 0.016975782          | 0.025646238          | 0.028081302 |
| 0.00013726           | 0.000257637          | 0.000477445          | 0.10700568  |
| 0.072790506          | 0.009679714          | 0.013202305          | 0.063777311 |
| 0.128994176          | 0.062516768          | 0.016005686          | 0.042635197 |
| 0.016697625          | 0.084333086          | 0.024287849          | 0.064101992 |
| 0.014662466          | 0.03039521           | 0.051963563          | 0.062210922 |
| 5.42E-05 0.043206416 | 0.029287433          | 0.00185943           |             |
| 0.134354697          | 0.036701246          | 0.019323007          | 0.119526393 |
| 0.004207712          | 0.001944951          | 3.94E-06 0.028731855 |             |
| 0.080037573          | 0.052911124          | 0.003711595          | 0.018296692 |
| 0.007739469          | 0.074167382          | 0.022124137          | 0.029757211 |
| 0.012328018          | 0.046512648          | 0.004050402          | 0.039637097 |
| 0.000287249          | 0.026181882          | 0.050198271          | 0.0209517   |
| 0.011326134          | 0.001076015          | 0.099322808          | 0.061944113 |
| 0.141204235          | 0.093756547          | 0.002080206          | 0.067894351 |

|             |             |             |             |
|-------------|-------------|-------------|-------------|
| 0.007888391 | 0.041649245 | 0.006635157 | 0.040398423 |
| 0.005621166 | 0.103046027 | 0.000321479 | 0.01502423  |
| 0.000854908 | 0.08017354  | 0.010024674 | 0.119650926 |
| 0.002640807 | 0.008308025 | 0.045743073 | 0.035222669 |
| 0.050832879 | 0.051426443 | 0.026396025 | 0.012603664 |
| 0.08022315  | 0.001377993 | 0.005219194 | 0.032674642 |
| 0.008049207 | 0.013679753 | 0.025749245 | 0.02719569  |
| 0.045933122 | 0.066820901 | 0.00152777  | 0.007783499 |
| 0.002568753 | 0.001407697 | 0.019910533 | 0.11093159  |
| 0.033840984 | 0.05562862  | 0.003439045 | 4.38E-06    |
| 0.002085121 | 0.04658417  | 0.010318876 |             |
| FGFR10P     | 0.091089549 | 0.355171041 | 0.021359213 |
| 0.003601894 | 0.036176248 | 0.297386787 | 0.303333009 |
| 0.063993535 | 0.031126513 | 0.066671029 | 0.358439197 |
| 0.000207619 | 0.139882727 | 0.003919902 | 0.024017808 |
| 0.248643195 | 0.269395397 | 0.306103679 | 0.26138319  |
| 0.0978552   | 0.024190356 | 0.218126577 | 0.202530649 |
| 0.283137931 | 0.000414888 | 0.140150135 | 0.012934027 |
| 0.052926317 | 0.219088064 | 0.172678708 | 0.042601896 |
| 0.210926001 | 0.203374724 | 0.07897743  | 0.0353731   |
| 0.018996907 | 0.372147506 | 0.009424864 | 0.177924364 |
| 0.147747713 | 0.155669615 | 0.209795951 | 0.009971031 |
| 0.000423116 | 0.111780263 | 0.038575207 | 0.20987436  |
| 0.102858218 | 0.246152967 | 0.175545027 | 0.188840185 |
| 0.003287183 | 0.361417965 | 0.202085202 | 0.003551755 |
| 0.426212097 | 0.00103429  | 0.411157019 | 0.035668767 |
| 0.070675016 | 0.177749346 | 0.081572016 | 0.20850217  |
| 0.359622324 | 0.421898145 | 0.322891089 | 0.024175158 |
| 0.121243089 | 0.122878428 | 0.144488423 | 0.213562407 |
| 0.306868948 | 0.026582625 | 0.089307959 | 0.073683742 |
| 0.174665623 | 0.147002031 | 0.30194223  | 0.062901979 |
| 0.000369228 | 0.210812532 | 0.089716401 | 0.113057863 |
| 0.095972848 | 0.363693569 | 0.117909342 | 0.164071053 |
| 0.092466929 | 0.009279976 | 0.199576629 | 0.291903579 |
| 0.004524636 | 0.176612376 | 0.001976907 | 0.042476502 |
| 0.197769468 | 0.179939746 | 0.171860454 | 0.059975843 |
| 0.007289142 | 0.063571596 | 0.006142413 | 0.133383871 |
| 0.163150031 | 0.150709286 | 0.430651377 | 0.011119502 |
| 0.113833814 | 0.022074976 | 0.138746012 | 0.377990626 |
| 0.27801623  | 0.002247066 | 0.042336509 | 0.26498324  |
| 0.034162425 | 0.032366286 | 0.265236457 | 0.000867857 |
| 0.001958525 | 0.000673083 | 0.214455274 | 0.059725836 |
| 0.122072877 | 0.212249584 | 0.013860665 | 0.196056952 |
| 0.049125741 | 0.185247467 | 0.064302389 | 0.224649321 |
| 0.152306577 | 0.317560228 | 0.144257239 | 0.196543229 |
| 0.0868174   | 0.056446103 | 0.08326567  | 0.379988934 |
| 0.356222606 | 0.026670657 | 0.024350792 | 0.287175448 |
| 0.125636009 | 0.242710964 | 0.31428721  | 0.035132269 |
| 0.139475097 | 0.167243969 | 0.056585492 | 0.278812965 |
| 0.305469974 | 0.137437463 | 0.001991874 | 0.33826292  |
| 0.426291582 | 0.001326122 | 0.063739341 | 0.194403931 |
| 0.013926268 | 1           | 0.330999934 | 0.276477502 |
| 0.190224917 | 0.01151731  | 0.099291978 | 0.263315863 |
| 0.198975029 | 0.20293338  | 0.228446972 | 0.083822325 |



|             |             |             |             |
|-------------|-------------|-------------|-------------|
| 0.264428459 | 0.056517609 | 0.053349653 | 0.125075448 |
| 0.137162086 | 0.21499876  | 0.013186074 | 0.007976148 |
| 0.141037053 | 0.068161728 | 0.282313179 | 0.162091838 |
| 0.155570788 | 0.000598865 | 0.055126169 | 0.12610658  |
| 0.039591122 | 0.149939624 | 0.380998363 | 0.155613669 |
| 0.208652548 | 0.044280707 | 0.154687986 | 0.141935111 |
| 0.191942229 | 0.033281492 | 0.036715238 | 0.000337706 |
| 0.036455817 | 0.050738927 | 0.1457655   | 0.009110951 |
| 0.072169096 | 0.02114509  | 0.007836882 | 0.277540461 |
| 0.210157922 | 0.232265636 | 0.002888705 | 0.011596006 |
| 0.095916398 | 0.361609691 | 0.051253907 | 0.012193655 |
| 0.299343136 | 0.054526199 | 0.144909459 | 0.382305099 |
| 0.092050898 | 0.344575454 | 0.007317631 | 0.12469609  |
| 0.122617817 | 0.290645446 | 0.183641002 | 0.245647173 |
| 0.184517821 | 0.153281006 | 0.009714075 | 0.286942711 |
| 0.156133373 | 0.165820592 | 0.033187381 | 0.352216506 |
| 0.000411943 | 0.255530366 | 0.191036614 | 0.005916075 |
| 0.354942925 | 0.333830852 | 0.046678146 | 0.077205522 |
| 0.266581964 | 0.357381386 | 0.229808582 | 0.171524692 |
| 0.007788714 | 0.002250185 | 0.290369373 | 0.325201826 |
| 0.231603353 | 0.178345123 | 0.052449599 | 0.004666581 |
| 0.273743962 | 0.083935841 | 0.201497863 | 0.091557031 |
| 0.190499175 | 0.073951494 | 0.186380073 | 0.121051716 |
| 0.000829605 | 0.107104923 | 0.129779631 | 0.029624927 |
| 0.082337017 | 0.027610649 | 0.295057798 | 0.342121056 |
| 0.071553692 | 0.0138701   | 0.07549197  | 0.093458917 |
| 0.244554985 | 0.340742096 | 0.00384467  | 0.280768911 |
| 0.292238802 | 0.223675835 | 0.281807479 | 0.276431923 |
| 0.156014915 | 0.407411512 | 0.29111761  | 0.190766928 |
| 0.000136799 | 0.162476699 | 0.127534736 | 0.378003177 |
| 0.2007425   | 0.29188451  | 0.031094103 | 0.077854905 |
| 0.000773601 | 0.165437018 | 0.012553655 | 0.363533189 |
| 0.263638164 | 0.021601382 | 0.003214335 | 0.259883951 |
| 0.120282058 | 0.002612573 | 0.322504366 | 0.197745619 |
| 0.330198079 | 0.181746807 | 0.183452469 | 0.151929591 |
| 0.01093414  | 0.059247888 | 0.016241983 | 0.220273745 |
| 0.136077444 | 0.00492942  | 0.041294442 | 0.297848446 |
| 0.250376503 | 0.367818475 | 0.274778117 | 0.001729466 |
| 0.129405789 | 0.011523015 | 0.224790247 | 0.021922542 |
| 0.264992814 | 0.38719228  | 0.361733845 | 0.186040433 |
| 0.197702669 | 0.360924746 | 0.367591554 | 0.270664555 |
| 0.008978294 | 0.142471471 | 0.179104767 | 0.014666738 |
| 0.089905438 | 0.282459856 | 0.143186677 | 0.26002147  |
| 0.241529475 | 0.011473348 | 0.266803189 | 0.094171824 |
| 0.368795665 | 0.266752073 | 0.055267498 | 0.044710195 |
| 0.389894331 | 0.116691002 | 0.171076859 | 0.167597567 |
| 0.312683319 | 0.002679071 | 0.007289923 | 0.334219283 |
| 0.399801076 | 0.379168553 | 0.224894606 | 0.033291298 |
| 0.230256472 | 0.022447938 | 0.237708192 | 0.055876062 |
| 0.192955719 | 0.094672082 | 0.124567519 | 0.002305316 |
| 0.003357007 | 0.012432344 | 0.402000352 | 0.39415574  |
| 0.074329355 | 0.167952426 | 0.183413204 | 0.26576562  |
| 0.23823994  | 0.037062107 | 0.274443767 | 0.127538462 |
| 0.432053215 | 0.024253106 | 0.354919191 | 0.146646025 |

|             |             |             |             |
|-------------|-------------|-------------|-------------|
| 0.241611221 | 0.132365286 | 0.272259296 | 0.002096568 |
| 0.159775724 | 0.069477772 | 0.031493586 | 0.213155288 |
| 0.169552479 | 0.097414947 | 0.383367315 | 0.076442445 |
| 0.011948946 | 0.000413667 | 0.265142389 | 0.072243396 |
| 0.357862217 | 0.017751508 | 0.133318425 | 0.004474122 |
| 0.358414511 | 0.145436621 | 0.198351936 | 0.039104838 |
| 0.12988821  | 0.001666418 | 0.105714636 | 0.011454138 |
| 0.23718859  | 0.346298227 | 0.157033841 | 0.08929458  |
| 0.02443706  | 0.246677798 | 0.307381919 | 0.174150234 |
| 0.281442507 | 0.004403977 | 0.268600731 | 0.109135256 |
| 0.131443159 | 0.037602506 | 0.306103565 | 0.043027246 |
| 0.233433306 | 0.01863612  | 0.145853334 | 0.029529237 |
| 0.24172081  | 0.054337515 | 0.221402044 | 0.023204992 |
| 0.019604967 | 0.117860592 | 0.176092187 | 0.168144251 |
| 0.17303833  | 0.111363507 | 0.044718183 | 0.417247337 |
| 0.016188714 | 0.090796754 | 0.008290369 | 0.017340157 |
| 0.019672906 | 0.144878009 | 0.222083645 | 0.239965362 |
| 0.279487271 | 0.017519765 | 0.081746732 | 0.063393174 |
| 0.005425742 | 0.125028829 | 0.337712766 | 0.009852152 |
| 0.232217798 | 0.038435072 | 0.000137389 | 0.045870942 |
| 0.325690613 | 0.017350131 |             |             |
| FGL2        | 0.361351735 | 0.4903883   | 0.153104957 |
| 0.03653958  | 0.16570161  | 0.364830494 | 0.335752872 |
| 0.349292317 | 0.227174932 | 0.233355512 | 0.421442126 |
| 0.005744498 | 0.295133639 | 0.049837271 | 0.148803814 |
| 0.466114981 | 0.472572283 | 0.406526393 | 0.4642053   |
| 0.380487124 | 0.195763588 | 0.42777853  | 0.436360763 |
| 0.384070903 | 0.008125061 | 0.216247517 | 0.083769978 |
| 0.326436909 | 0.439830975 | 0.33858581  | 0.367921919 |
| 0.415227734 | 0.381292031 | 0.396884005 | 0.312274178 |
| 0.183014106 | 0.47965128  | 0.08047025  | 0.341270077 |
| 0.327670266 | 0.317424191 | 0.379094293 | 0.047000742 |
| 0.002942864 | 0.205251243 | 0.291614614 | 0.444488032 |
| 0.380816384 | 0.349639668 | 0.304216999 | 0.270710399 |
| 0.113271698 | 0.441125082 | 0.397764685 | 0.107588914 |
| 0.452639635 | 0.007436347 | 0.471484847 | 0.296032324 |
| 0.16226502  | 0.415114969 | 0.342294683 | 0.434770567 |
| 0.370707316 | 0.45643816  | 0.487516802 | 0.08431396  |
| 0.172397896 | 0.404774653 | 0.336396276 | 0.415148424 |
| 0.447371896 | 0.387699914 | 0.387138775 | 0.285117207 |
| 0.38085176  | 0.325385616 | 0.40173536  | 0.301860193 |
| 0.003720686 | 0.255332927 | 0.318274916 | 0.315391645 |
| 0.308071954 | 0.437744437 | 0.365645329 | 0.310207115 |
| 0.389730333 | 0.067274868 | 0.447583489 | 0.489282962 |
| 0.039455418 | 0.335477491 | 0.01722372  | 0.270322032 |
| 0.388746085 | 0.396682732 | 0.415196204 | 0.160862943 |
| 0.049197091 | 0.24957005  | 0.190555494 | 0.322406563 |
| 0.426462544 | 0.441767207 | 0.452334597 | 0.100029867 |
| 0.269497879 | 0.300419065 | 0.425661761 | 0.477416913 |
| 0.462855313 | 0.024821732 | 0.285622795 | 0.348335182 |
| 0.329938169 | 0.17928046  | 0.345408414 | 0.042538461 |
| 0.021009145 | 0.031526046 | 0.410769646 | 0.287319376 |
| 0.18975202  | 0.3285932   | 0.128787373 | 0.397521123 |
| 0.323368777 | 0.381614443 | 0.188290644 | 0.369524006 |

|             |             |             |             |
|-------------|-------------|-------------|-------------|
| 0.352097863 | 0.362921611 | 0.390004361 | 0.399243499 |
| 0.321374972 | 0.35505896  | 0.28688463  | 0.447231042 |
| 0.448674954 | 0.151099659 | 0.186631209 | 0.428542554 |
| 0.26997743  | 0.44924023  | 0.504789067 | 0.371676458 |
| 0.313972287 | 0.366626016 | 0.358093477 | 0.43596922  |
| 0.362981363 | 0.385768088 | 0.068726397 | 0.43396283  |
| 0.454495229 | 0.040307105 | 0.166142322 | 0.393451384 |
| 0.056695815 | 0.330999934 | 1           | 0.434830649 |
| 0.403923864 | 0.074931937 | 0.314781045 | 0.376306419 |
| 0.414449299 | 0.370238341 | 0.436401522 | 0.290976229 |
| 0.427347125 | 0.357645127 | 0.121005017 | 0.273470868 |
| 0.246851564 | 0.425199583 | 0.273711183 | 0.080122682 |
| 0.374140816 | 0.375775492 | 0.444779419 | 0.426955971 |
| 0.366455954 | 0.005427628 | 0.229124672 | 0.385402497 |
| 0.348803355 | 0.326191619 | 0.496861461 | 0.234517379 |
| 0.381121245 | 0.256139391 | 0.276355741 | 0.350142931 |
| 0.367947573 | 0.309221401 | 0.300306694 | 0.003849182 |
| 0.232941888 | 0.327304667 | 0.416222443 | 0.129428807 |
| 0.299424487 | 0.237715171 | 0.175140357 | 0.430054861 |
| 0.336743943 | 0.391810779 | 0.059131557 | 0.144465325 |
| 0.381847715 | 0.44299451  | 0.358807766 | 0.320398584 |
| 0.433872022 | 0.38362202  | 0.350482921 | 0.453351242 |
| 0.324036749 | 0.436164705 | 0.134840985 | 0.387481153 |
| 0.368501236 | 0.42431184  | 0.375375806 | 0.402432608 |
| 0.375808101 | 0.356422472 | 0.264218431 | 0.398461453 |
| 0.433547365 | 0.416746538 | 0.191909138 | 0.491402898 |
| 0.004014233 | 0.437204649 | 0.420782369 | 0.155326725 |
| 0.480109548 | 0.349925624 | 0.171060503 | 0.351263266 |
| 0.473674472 | 0.494903724 | 0.39731327  | 0.36950639  |
| 0.206433495 | 0.036103306 | 0.465181919 | 0.454501216 |
| 0.443435459 | 0.42579652  | 0.259203268 | 0.077994118 |
| 0.448423871 | 0.30028045  | 0.433756475 | 0.382541012 |
| 0.383499383 | 0.308460973 | 0.366002116 | 0.31907349  |
| 0.02430969  | 0.370415416 | 0.38895627  | 0.246361639 |
| 0.373496494 | 0.269014672 | 0.422794549 | 0.421362476 |
| 0.339849244 | 0.329054007 | 0.327285637 | 0.17254635  |
| 0.306908318 | 0.497653257 | 0.030364889 | 0.449837753 |
| 0.491831396 | 0.421255336 | 0.438121967 | 0.484628501 |
| 0.419264898 | 0.448055236 | 0.443693893 | 0.38066145  |
| 0.003228455 | 0.344763673 | 0.283655425 | 0.433833582 |
| 0.397742849 | 0.406357266 | 0.217098309 | 0.320440908 |
| 0.003742992 | 0.289713443 | 0.19530934  | 0.495061479 |
| 0.413113794 | 0.0792678   | 0.027079509 | 0.430925932 |
| 0.296756661 | 0.047506816 | 0.509929948 | 0.412602672 |
| 0.444116975 | 0.422490524 | 0.289777005 | 0.308652329 |
| 0.159125812 | 0.36281344  | 0.048347761 | 0.430210676 |
| 0.363081649 | 0.090880759 | 0.132071513 | 0.487693718 |
| 0.436443788 | 0.441109396 | 0.381851547 | 0.025372194 |
| 0.318355656 | 0.212862809 | 0.418598182 | 0.199901687 |
| 0.440109313 | 0.443593185 | 0.448551906 | 0.35188102  |
| 0.422860224 | 0.453106501 | 0.44965111  | 0.443714986 |
| 0.113565999 | 0.332673211 | 0.376683517 | 0.12253648  |
| 0.319248386 | 0.439496968 | 0.391093475 | 0.299382111 |
| 0.440472979 | 0.087738712 | 0.336363125 | 0.359220649 |

|             |             |             |             |
|-------------|-------------|-------------|-------------|
| 0.451680473 | 0.432991647 | 0.148300203 | 0.27380511  |
| 0.454601055 | 0.40295682  | 0.216262724 | 0.407874518 |
| 0.399398194 | 0.128310534 | 0.127496311 | 0.444516436 |
| 0.477300723 | 0.396621031 | 0.416554988 | 0.215482169 |
| 0.398469565 | 0.131689876 | 0.393068146 | 0.347872711 |
| 0.398778466 | 0.337074217 | 0.313093378 | 0.115989731 |
| 0.052814604 | 0.229279786 | 0.446966006 | 0.457005824 |
| 0.177791617 | 0.329026302 | 0.357349205 | 0.404974307 |
| 0.447482155 | 0.394916825 | 0.393778696 | 0.403896971 |
| 0.452440272 | 0.133951702 | 0.496222266 | 0.416638221 |
| 0.43684287  | 0.39569241  | 0.430135131 | 0.017374278 |
| 0.388206597 | 0.263372391 | 0.210662918 | 0.390358178 |
| 0.378625687 | 0.24977348  | 0.435616454 | 0.300180315 |
| 0.181653112 | 0.008011689 | 0.431446255 | 0.273856428 |
| 0.397281963 | 0.252468401 | 0.409966368 | 0.111756198 |
| 0.521419938 | 0.434577285 | 0.414061045 | 0.218925288 |
| 0.430843176 | 0.012992893 | 0.247979726 | 0.101377819 |
| 0.436906135 | 0.446026487 | 0.388142808 | 0.383068445 |
| 0.245073959 | 0.421572139 | 0.443161282 | 0.391365504 |
| 0.425884665 | 0.143312064 | 0.477350566 | 0.376033572 |
| 0.297943525 | 0.408436604 | 0.382043575 | 0.380555422 |
| 0.297580599 | 0.174791627 | 0.243385977 | 0.266916375 |
| 0.42311062  | 0.334659041 | 0.412781464 | 0.364292484 |
| 0.116144424 | 0.420999303 | 0.361356525 | 0.352400272 |
| 0.428929659 | 0.321038691 | 0.334827755 | 0.44928289  |
| 0.344201685 | 0.386213783 | 0.068182336 | 0.058522205 |
| 0.251185537 | 0.320995939 | 0.394990907 | 0.414648055 |
| 0.464646212 | 0.280586687 | 0.209065587 | 0.26352262  |
| 0.094291546 | 0.313664603 | 0.369589219 | 0.121332501 |
| 0.419791093 | 0.287029586 | 0.002420016 | 0.325749577 |
| 0.452763344 | 0.34617317  |             |             |
| FOX01       | 0.269668115 | 0.507438568 | 0.083460126 |
| 0.036927303 | 0.154067761 | 0.251703397 | 0.258032217 |
| 0.283510645 | 0.126018885 | 0.159793328 | 0.325194161 |
| 0.00138754  | 0.349040147 | 0.015451786 | 0.087936684 |
| 0.496148141 | 0.518352475 | 0.360328855 | 0.503234419 |
| 0.269870721 | 0.158272132 | 0.31824806  | 0.347249794 |
| 0.27433129  | 0.001793128 | 0.159112821 | 0.060823573 |
| 0.284830269 | 0.482308313 | 0.216672319 | 0.264142112 |
| 0.432879392 | 0.442605047 | 0.372323184 | 0.333853688 |
| 0.225292637 | 0.467028065 | 0.134353977 | 0.366857776 |
| 0.373711608 | 0.257999382 | 0.425333729 | 0.018970855 |
| 0.005085367 | 0.131503685 | 0.251801378 | 0.3400956   |
| 0.275321456 | 0.234676143 | 0.190910213 | 0.209541601 |
| 0.126203532 | 0.342376637 | 0.332142158 | 0.127385511 |
| 0.423999739 | 0.006428767 | 0.464060854 | 0.198159857 |
| 0.084986472 | 0.305300502 | 0.284054902 | 0.350743086 |
| 0.272056634 | 0.448636679 | 0.523815083 | 0.054008396 |
| 0.095944233 | 0.356485935 | 0.346192837 | 0.38605559  |
| 0.459993518 | 0.295775078 | 0.306765641 | 0.321802002 |
| 0.363251619 | 0.362460053 | 0.291744645 | 0.196187865 |
| 0.001056022 | 0.185317527 | 0.340063853 | 0.25819489  |
| 0.318966667 | 0.346403542 | 0.311866598 | 0.258612364 |
| 0.349021446 | 0.024717719 | 0.345915736 | 0.527872413 |

|             |             |             |             |
|-------------|-------------|-------------|-------------|
| 0.02783156  | 0.350510977 | 0.016494791 | 0.178471167 |
| 0.385049374 | 0.44186476  | 0.337624795 | 0.096841032 |
| 0.018330455 | 0.138302292 | 0.112425326 | 0.373322504 |
| 0.352426067 | 0.405481428 | 0.406933403 | 0.115991384 |
| 0.328899408 | 0.161080827 | 0.363431833 | 0.470295214 |
| 0.473746631 | 0.009843722 | 0.160935422 | 0.247225937 |
| 0.311255201 | 0.162025673 | 0.266531923 | 0.030948973 |
| 0.016014051 | 0.016670615 | 0.447627854 | 0.165099851 |
| 0.131850435 | 0.234472478 | 0.106285382 | 0.39766711  |
| 0.276217373 | 0.407492836 | 0.168728944 | 0.282021038 |
| 0.353603126 | 0.286127081 | 0.394037053 | 0.374502874 |
| 0.373417364 | 0.238526777 | 0.158971592 | 0.471149793 |
| 0.42061754  | 0.089992553 | 0.097954274 | 0.313106501 |
| 0.329616638 | 0.481598402 | 0.533745395 | 0.280351848 |
| 0.306743512 | 0.252401785 | 0.281484596 | 0.374604969 |
| 0.274363833 | 0.301997561 | 0.076156882 | 0.345310052 |
| 0.42522741  | 0.036071695 | 0.082201573 | 0.374675078 |
| 0.079992531 | 0.276477502 | 0.434830649 | 1           |
| 0.403191045 | 0.049796074 | 0.246332023 | 0.279745886 |
| 0.280737317 | 0.265087725 | 0.355997309 | 0.222726966 |
| 0.301504457 | 0.286358791 | 0.068922691 | 0.336890992 |
| 0.149343886 | 0.30558447  | 0.232564693 | 0.063860793 |
| 0.325667879 | 0.300809927 | 0.432608172 | 0.357485115 |
| 0.32037569  | 0.005868727 | 0.156550932 | 0.295299706 |
| 0.253557584 | 0.370075644 | 0.51408765  | 0.138604107 |
| 0.251571914 | 0.281370152 | 0.165399861 | 0.359940549 |
| 0.357090669 | 0.226833735 | 0.202856623 | 0.000746749 |
| 0.179695425 | 0.290872583 | 0.369177466 | 0.052310492 |
| 0.273814766 | 0.112069806 | 0.100798497 | 0.448460594 |
| 0.2213831   | 0.407484677 | 0.025815339 | 0.129796522 |
| 0.265300035 | 0.402325255 | 0.342038627 | 0.220672747 |
| 0.410409279 | 0.294759688 | 0.397038723 | 0.368023865 |
| 0.322027795 | 0.337212607 | 0.151485951 | 0.268014582 |
| 0.366631363 | 0.470015822 | 0.400013522 | 0.414556833 |
| 0.274408962 | 0.306881809 | 0.264716133 | 0.280507566 |
| 0.339767277 | 0.36506826  | 0.095409335 | 0.516799668 |
| 0.000774834 | 0.335968421 | 0.393126095 | 0.146858274 |
| 0.499684597 | 0.270757254 | 0.080716632 | 0.230128444 |
| 0.51204108  | 0.51700114  | 0.39775199  | 0.408141384 |
| 0.188386332 | 0.01093277  | 0.472635673 | 0.371288129 |
| 0.491632903 | 0.388359968 | 0.321656404 | 0.072596612 |
| 0.482364844 | 0.272762878 | 0.354671909 | 0.321799289 |
| 0.39760191  | 0.359484462 | 0.256613481 | 0.276542041 |
| 0.012637951 | 0.241591949 | 0.332431945 | 0.193122542 |
| 0.294576502 | 0.183696717 | 0.437001158 | 0.324282542 |
| 0.383203902 | 0.24226623  | 0.335138144 | 0.110295386 |
| 0.206561794 | 0.509057563 | 0.057005524 | 0.448935506 |
| 0.526279184 | 0.352026862 | 0.476666568 | 0.512837764 |
| 0.284959328 | 0.373998706 | 0.460942119 | 0.411094111 |
| 0.000866447 | 0.402414685 | 0.322058681 | 0.332658751 |
| 0.427728052 | 0.288589365 | 0.191604041 | 0.344298118 |
| 0.001951017 | 0.169294355 | 0.21250716  | 0.494518045 |
| 0.465749908 | 0.043606974 | 0.056393198 | 0.403281438 |
| 0.316807329 | 0.046296141 | 0.526786199 | 0.322019842 |

|             |             |             |             |
|-------------|-------------|-------------|-------------|
| 0.46185979  | 0.402894176 | 0.201230814 | 0.361814664 |
| 0.174482069 | 0.328646399 | 0.045128723 | 0.397560271 |
| 0.36925486  | 0.069202243 | 0.104227328 | 0.516618568 |
| 0.403602959 | 0.383344052 | 0.26992687  | 0.009452779 |
| 0.34687055  | 0.19698552  | 0.395802637 | 0.138720509 |
| 0.383516666 | 0.351324    | 0.461111825 | 0.385205616 |
| 0.38955851  | 0.388343597 | 0.352545118 | 0.419847205 |
| 0.126868249 | 0.358263024 | 0.403261659 | 0.067529753 |
| 0.289514892 | 0.485403521 | 0.361539834 | 0.205205792 |
| 0.335472094 | 0.115363291 | 0.223045722 | 0.265877833 |
| 0.45735162  | 0.472809898 | 0.072501611 | 0.16966885  |
| 0.396871838 | 0.30089601  | 0.143086306 | 0.339366952 |
| 0.280382359 | 0.121049893 | 0.115906843 | 0.348676362 |
| 0.476654453 | 0.306742181 | 0.431447143 | 0.167331135 |
| 0.454928218 | 0.06286363  | 0.399141157 | 0.284592583 |
| 0.274523825 | 0.301600936 | 0.353353234 | 0.085536017 |
| 0.023772435 | 0.115267207 | 0.380138383 | 0.403323702 |
| 0.094320145 | 0.201452059 | 0.272287574 | 0.358391167 |
| 0.490260242 | 0.354938446 | 0.284775443 | 0.314534023 |
| 0.413007119 | 0.12672187  | 0.489367045 | 0.29998611  |
| 0.345078502 | 0.331692442 | 0.399091726 | 0.00986304  |
| 0.367770459 | 0.181017726 | 0.162363609 | 0.363554886 |
| 0.422256886 | 0.15709818  | 0.381122155 | 0.170313092 |
| 0.164750979 | 0.00421872  | 0.329398243 | 0.318469979 |
| 0.286454067 | 0.243501056 | 0.330467084 | 0.139955739 |
| 0.535491346 | 0.337135888 | 0.341442362 | 0.250154772 |
| 0.356813484 | 0.027025889 | 0.177488344 | 0.040798227 |
| 0.335715617 | 0.362830879 | 0.333120879 | 0.299085865 |
| 0.164729967 | 0.410687893 | 0.372700251 | 0.397356668 |
| 0.475495456 | 0.139924307 | 0.512069872 | 0.287750264 |
| 0.357695712 | 0.330970072 | 0.27632618  | 0.320196221 |
| 0.242620561 | 0.133835749 | 0.151375012 | 0.147804489 |
| 0.474732388 | 0.313558329 | 0.382167379 | 0.247476871 |
| 0.064703412 | 0.373442908 | 0.34872671  | 0.348841112 |
| 0.372510784 | 0.294868009 | 0.312048025 | 0.387703044 |
| 0.252445785 | 0.253392331 | 0.070166681 | 0.043986023 |
| 0.249763476 | 0.206349002 | 0.383163734 | 0.41193976  |
| 0.508303832 | 0.22941411  | 0.118523387 | 0.142785053 |
| 0.117762563 | 0.317852693 | 0.297088944 | 0.182884977 |
| 0.393318261 | 0.249902298 | 0.000796761 | 0.204376176 |
| 0.355528474 | 0.355466746 |             |             |
| FOXP1       | 0.168692258 | 0.482299079 | 0.047797654 |
| 0.018566236 | 0.109420426 | 0.155448842 | 0.16261844  |
| 0.184706528 | 0.074957688 | 0.085714987 | 0.266026589 |
| 0.000738978 | 0.370452109 | 0.008506671 | 0.068402707 |
| 0.479258734 | 0.508101708 | 0.246512821 | 0.503660461 |
| 0.173696909 | 0.084153083 | 0.250129228 | 0.209292618 |
| 0.168705248 | 0.000925573 | 0.094752835 | 0.027601415 |
| 0.197952453 | 0.478399474 | 0.137645168 | 0.150931052 |
| 0.413440285 | 0.440151925 | 0.232821332 | 0.240609911 |
| 0.155293662 | 0.440804156 | 0.146623814 | 0.37902201  |
| 0.382928752 | 0.159054527 | 0.418465682 | 0.011573803 |
| 0.002555627 | 0.078525511 | 0.169511277 | 0.245039527 |
| 0.192181306 | 0.140003359 | 0.124168485 | 0.12461318  |

|             |             |             |             |
|-------------|-------------|-------------|-------------|
| 0.087929644 | 0.29085768  | 0.32302986  | 0.090650125 |
| 0.399910725 | 0.002468404 | 0.438493357 | 0.12701761  |
| 0.051904365 | 0.205224157 | 0.183502947 | 0.263223322 |
| 0.188692687 | 0.422562298 | 0.512393967 | 0.030330959 |
| 0.054980666 | 0.241158453 | 0.328363395 | 0.257053425 |
| 0.434835539 | 0.176116412 | 0.192682543 | 0.249569155 |
| 0.321130431 | 0.363725833 | 0.205011829 | 0.132566887 |
| 0.000478476 | 0.111977578 | 0.222645546 | 0.226506224 |
| 0.257367049 | 0.303832799 | 0.216091897 | 0.16469473  |
| 0.21990841  | 0.013874407 | 0.224574206 | 0.513210745 |
| 0.015239243 | 0.363414497 | 0.011472602 | 0.129566971 |
| 0.375681881 | 0.437546072 | 0.263540391 | 0.053909868 |
| 0.011373525 | 0.092842901 | 0.071809206 | 0.38302061  |
| 0.234783095 | 0.263030457 | 0.384811148 | 0.108035114 |
| 0.346200531 | 0.09164474  | 0.253571191 | 0.434900846 |
| 0.446708575 | 0.007640527 | 0.108194601 | 0.154052326 |
| 0.214000537 | 0.097927237 | 0.174371993 | 0.018447477 |
| 0.008302912 | 0.013247942 | 0.436161906 | 0.102530602 |
| 0.075685922 | 0.140824759 | 0.065190614 | 0.293697797 |
| 0.188348044 | 0.408402765 | 0.12222546  | 0.171478083 |
| 0.321957236 | 0.18067718  | 0.259897101 | 0.344709666 |
| 0.28416846  | 0.157882353 | 0.093916216 | 0.460424143 |
| 0.404533826 | 0.055319691 | 0.054548796 | 0.222419383 |
| 0.349757261 | 0.466872968 | 0.515839073 | 0.189501596 |
| 0.210992719 | 0.167700262 | 0.158720888 | 0.270154657 |
| 0.181930205 | 0.216123946 | 0.06728463  | 0.296388675 |
| 0.396338183 | 0.023646362 | 0.047346646 | 0.375034824 |
| 0.061709709 | 0.190224917 | 0.403923864 | 0.403191045 |
| 1           | 0.021326513 | 0.136913284 | 0.167629514 |
| 0.175954967 | 0.156709009 | 0.273378766 | 0.12136533  |
| 0.20960177  | 0.158513877 | 0.040953559 | 0.353821788 |
| 0.092557648 | 0.202163371 | 0.145504467 | 0.04119989  |
| 0.256018458 | 0.208641222 | 0.405183611 | 0.241067998 |
| 0.282045125 | 0.002275467 | 0.081345479 | 0.195009928 |
| 0.138382614 | 0.386591974 | 0.486062602 | 0.08690531  |
| 0.163994407 | 0.229396095 | 0.105504634 | 0.259275399 |
| 0.35573927  | 0.121987432 | 0.111442282 | 0.00024634  |
| 0.122524462 | 0.171734361 | 0.257714185 | 0.031343575 |
| 0.177359103 | 0.060952852 | 0.073094448 | 0.423950795 |
| 0.13553454  | 0.411482205 | 0.017712035 | 0.114270772 |
| 0.162259581 | 0.358749179 | 0.209225176 | 0.127902128 |
| 0.381675964 | 0.16981513  | 0.397348975 | 0.343281957 |
| 0.246383825 | 0.277866703 | 0.137234332 | 0.174937235 |
| 0.256756862 | 0.459299356 | 0.385121397 | 0.421863871 |
| 0.170573356 | 0.281723105 | 0.185218925 | 0.193333192 |
| 0.225715842 | 0.259942118 | 0.054510031 | 0.504347374 |
| 0.000352431 | 0.227597844 | 0.253566796 | 0.11670711  |
| 0.470956994 | 0.170794341 | 0.047084474 | 0.15245448  |
| 0.509969185 | 0.508243727 | 0.397655226 | 0.397799718 |
| 0.134956564 | 0.006713302 | 0.462710826 | 0.319839707 |
| 0.486468687 | 0.272287645 | 0.247251899 | 0.078704694 |
| 0.470195036 | 0.207488114 | 0.248854435 | 0.202835853 |
| 0.285403157 | 0.282935907 | 0.176812989 | 0.250868146 |
| 0.006686067 | 0.134306486 | 0.234489624 | 0.106813262 |

|             |             |             |             |
|-------------|-------------|-------------|-------------|
| 0.165817065 | 0.112175073 | 0.422747394 | 0.264157707 |
| 0.27463665  | 0.137512553 | 0.20899165  | 0.065605948 |
| 0.133386821 | 0.48149175  | 0.066545714 | 0.441350974 |
| 0.513395007 | 0.251896075 | 0.453545958 | 0.502092841 |
| 0.174357563 | 0.347347773 | 0.436575315 | 0.42028606  |
| 0.000558488 | 0.402989966 | 0.340655046 | 0.306083408 |
| 0.401968455 | 0.182509388 | 0.148233277 | 0.247843273 |
| 0.001839036 | 0.103243317 | 0.13465784  | 0.480456916 |
| 0.456161388 | 0.025923481 | 0.068881532 | 0.397366101 |
| 0.304454336 | 0.040479604 | 0.506210128 | 0.191646865 |
| 0.438535386 | 0.284753842 | 0.116472267 | 0.367243589 |
| 0.113748783 | 0.249584024 | 0.030334142 | 0.279680673 |
| 0.274731737 | 0.055751222 | 0.055623287 | 0.509364216 |
| 0.371148605 | 0.321947549 | 0.176145173 | 0.002544327 |
| 0.345790198 | 0.107204613 | 0.355863693 | 0.100070022 |
| 0.369992429 | 0.304652033 | 0.450435231 | 0.388036098 |
| 0.268893242 | 0.362564636 | 0.320544094 | 0.386764497 |
| 0.086050902 | 0.340919241 | 0.383412693 | 0.037285954 |
| 0.199778457 | 0.472264505 | 0.221495922 | 0.124448547 |
| 0.255945502 | 0.07342803  | 0.136643773 | 0.178386203 |
| 0.436425309 | 0.448877923 | 0.039038623 | 0.120581686 |
| 0.366311251 | 0.202940157 | 0.090549268 | 0.248877162 |
| 0.197215641 | 0.074093064 | 0.10262061  | 0.288035448 |
| 0.448308085 | 0.235033521 | 0.398384041 | 0.086243504 |
| 0.458736807 | 0.041688389 | 0.411332813 | 0.19871731  |
| 0.176943993 | 0.202991965 | 0.352905443 | 0.057053773 |
| 0.008158643 | 0.061634791 | 0.350718667 | 0.3760868   |
| 0.0551176   | 0.127660075 | 0.164744247 | 0.229921762 |
| 0.476424593 | 0.226835571 | 0.184828827 | 0.216934685 |
| 0.390614517 | 0.068892174 | 0.467770667 | 0.190980157 |
| 0.314331499 | 0.203271373 | 0.392244029 | 0.005712282 |
| 0.283458902 | 0.094486292 | 0.118245265 | 0.22829239  |
| 0.422325355 | 0.093549927 | 0.312927832 | 0.103954277 |
| 0.103937852 | 0.003594958 | 0.275641201 | 0.233543103 |
| 0.220327194 | 0.188969223 | 0.227171753 | 0.102315546 |
| 0.514596855 | 0.206000849 | 0.30825248  | 0.213447128 |
| 0.215916801 | 0.028107137 | 0.097607692 | 0.023360806 |
| 0.295958292 | 0.333167416 | 0.258900518 | 0.184584392 |
| 0.113293609 | 0.312249917 | 0.297519978 | 0.269908112 |
| 0.460731892 | 0.078306861 | 0.492248204 | 0.212503513 |
| 0.368198296 | 0.208925826 | 0.180027925 | 0.230646895 |
| 0.15937906  | 0.103270074 | 0.096211299 | 0.096703573 |
| 0.458987754 | 0.253796903 | 0.248494076 | 0.142761057 |
| 0.035641264 | 0.244850396 | 0.361383956 | 0.340842226 |
| 0.237455935 | 0.255861816 | 0.220756576 | 0.367221716 |
| 0.156380491 | 0.157987702 | 0.036834834 | 0.019315396 |
| 0.144740679 | 0.119755381 | 0.376716372 | 0.406811133 |
| 0.505259723 | 0.166883542 | 0.070804091 | 0.091910183 |
| 0.125219136 | 0.317795487 | 0.189156095 | 0.15400978  |
| 0.284903691 | 0.172588681 | 0.000470281 | 0.132255473 |
| 0.30035662  | 0.230412596 |             |             |
| FRYL        | 0.019575893 | 0.0750946   | 0.00824858  |
| 0.065855335 | 0.009464052 | 0.101995527 | 0.103970531 |
| 0.011627174 | 0.005075026 | 0.170218356 | 0.091732274 |



|             |             |             |             |
|-------------|-------------|-------------|-------------|
| 9.56E-06    | 0.018225203 | 0.000263637 | 0.000581266 |
| 0.049214332 | 0.049189215 | 0.053427445 | 0.037186998 |
| 0.013020999 | 0.08984551  | 0.033389996 | 0.127859591 |
| 0.083432121 | 2.58E-05    | 0.102939816 | 0.194451879 |
| 0.007882397 | 0.037713633 | 0.025703341 | 0.039515347 |
| 0.043156689 | 0.043127913 | 0.046255038 | 0.008963799 |
| 0.016410174 | 0.074562755 | 0.000275626 | 0.031647207 |
| 0.020630527 | 0.100214789 | 0.043081108 | 0.000423308 |
| 0.027304823 | 0.050910241 | 0.006228668 | 0.051963427 |
| 0.007748652 | 0.090868178 | 0.021454992 | 0.170133944 |
| 0.000987298 | 0.075418535 | 0.024542564 | 0.002007783 |
| 0.090036962 | 0.077217416 | 0.084763532 | 0.004702053 |
| 0.011989638 | 0.017856348 | 0.020117358 | 0.046654498 |
| 0.093395458 | 0.091030368 | 0.056341553 | 0.009485661 |
| 0.044197353 | 0.019880078 | 0.043777916 | 0.137405986 |
| 0.06175535  | 0.025692431 | 0.032131632 | 0.008662303 |
| 0.047735709 | 0.024939784 | 0.034800035 | 0.006799393 |
| 0.000116529 | 0.121012371 | 0.067950626 | 0.014940627 |
| 0.022227399 | 0.080729865 | 0.018303312 | 0.07164779  |
| 0.041944274 | 0.001249703 | 0.039532345 | 0.054904032 |
| 0.012654253 | 0.020452496 | 0.000351339 | 0.002981854 |
| 0.037334085 | 0.033329063 | 0.04201502  | 0.043195253 |
| 0.000393526 | 0.004455817 | 0.000651613 | 0.020539413 |
| 0.022346038 | 0.033279035 | 0.083694374 | 0.00052209  |
| 0.017413971 | 0.007319212 | 0.016952471 | 0.097122852 |
| 0.06194866  | 5.69E-05    | 0.003039636 | 0.067988853 |
| 0.006024643 | 0.040437808 | 0.053306318 | 0.001053522 |
| 0.002597864 | 9.73E-06    | 0.039131494 | 0.009184754 |
| 0.132206816 | 0.093290138 | 0.011488003 | 0.076060541 |
| 0.006546828 | 0.024284011 | 0.014270524 | 0.095913711 |
| 0.037595086 | 0.106203928 | 0.065474566 | 0.047585442 |
| 0.015186201 | 0.004688693 | 0.020435373 | 0.06606859  |
| 0.049706429 | 0.006322279 | 0.008836625 | 0.092382067 |
| 0.018789583 | 0.046313336 | 0.059132068 | 0.004031801 |
| 0.047005114 | 0.016676798 | 0.08424298  | 0.127553521 |
| 0.049416277 | 0.010338171 | 6.74E-05    | 0.040914388 |
| 0.09312798  | 0.000404676 | 0.01746505  | 0.027395921 |
| 0.016307198 | 0.01151731  | 0.074931937 | 0.049796074 |
| 0.021326513 | 1           | 0.197728988 | 0.12861833  |
| 0.035389531 | 0.128216746 | 0.034591925 | 0.248868933 |
| 0.056382708 | 0.10505503  | 0.016421691 | 0.019422104 |
| 0.026881    | 0.027850835 | 0.007988323 | 0.001285069 |
| 0.015471626 | 0.006427352 | 0.077874039 | 0.024450045 |
| 0.032870269 | 0.068784815 | 0.188977105 | 0.027462881 |
| 0.056631943 | 0.017145319 | 0.088958126 | 0.024902083 |
| 0.02440363  | 0.002767029 | 0.020445182 | 0.028901706 |
| 0.021182781 | 0.046679955 | 0.064731484 | 0.00131638  |
| 0.004400147 | 0.057618443 | 0.016710606 | 0.00078175  |
| 0.03678337  | 0.008653309 | 0.000301063 | 0.068057793 |
| 0.05278419  | 0.042754356 | 6.19E-05    | 0.000401518 |
| 0.033573273 | 0.091864905 | 0.047273419 | 0.003869708 |
| 0.086079623 | 0.042343126 | 0.026784769 | 0.06973491  |
| 0.009990048 | 0.129340782 | 0.000181714 | 0.011997344 |
| 0.026371376 | 0.059459359 | 0.050404578 | 0.036574652 |

|                      |                      |                     |             |
|----------------------|----------------------|---------------------|-------------|
| 0.056254935          | 0.012538176          | 0.001166693         | 0.068758511 |
| 0.024210238          | 0.015228978          | 0.009001185         | 0.057279948 |
| 7.83E-05 0.039043865 | 0.077968269          | 0.000360986         |             |
| 0.090743975          | 0.110603882          | 0.008579525         | 0.008225546 |
| 0.039592987          | 0.054025442          | 0.025653717         | 0.039118268 |
| 0.000571864          | 8.66E-05 0.040711409 | 0.063575029         |             |
| 0.04117278           | 0.022293951          | 0.013238615         | 4.43E-05    |
| 0.052761282          | 0.007190597          | 0.092530944         | 0.037374988 |
| 0.029763357          | 0.008009094          | 0.015086097         | 0.01039683  |
| 0.000125334          | 0.10076906           | 0.062906321         | 0.048229118 |
| 0.145081687          | 0.007237347          | 0.067040236         | 0.042889217 |
| 0.01900807           | 0.012747089          | 0.086774629         | 0.039589663 |
| 0.038570454          | 0.075760932          | 7.91E-05 0.03720802 |             |
| 0.051596192          | 0.017479828          | 0.074602215         | 0.045323598 |
| 0.036556365          | 0.077895743          | 0.069745695         | 0.022432763 |
| 4.67E-06 0.031777888 | 0.020402744          | 0.057078382         |             |
| 0.060908322          | 0.074651776          | 0.001922673         | 0.016626087 |
| 3.51E-06 0.032615636 | 0.018207984          | 0.052295963         |             |
| 0.05701147           | 0.0035825            | 0.000102127         | 0.047220895 |
| 0.020849927          | 0.000103844          | 0.060527865         | 0.126984946 |
| 0.082040701          | 0.025609835          | 0.120014967         | 0.02934697  |
| 0.011558452          | 0.004438148          | 0.006194725         | 0.084193677 |
| 0.012899389          | 9.28E-05 0.191967224 | 0.045747806         |             |
| 0.063872931          | 0.066845759          | 0.041301592         | 0.030461705 |
| 0.019957447          | 0.059117208          | 0.082610168         | 0.001297712 |
| 0.040365912          | 0.070758126          | 0.060486622         | 0.033003989 |
| 0.029805649          | 0.085387234          | 0.093025132         | 0.074168492 |
| 0.007333728          | 0.04058476           | 0.04384226          | 0.010598995 |
| 0.017151605          | 0.057634549          | 0.124451149         | 0.089886197 |
| 0.034691783          | 0.027446253          | 0.069125717         | 0.009855743 |
| 0.080523254          | 0.070677163          | 0.030225694         | 0.002601001 |
| 0.108716537          | 0.012659639          | 0.036881192         | 0.012378093 |
| 0.052256999          | 0.001913393          | 0.000186753         | 0.047302215 |
| 0.088827176          | 0.091059117          | 0.072184899         | 0.183889023 |
| 0.037297702          | 0.001837589          | 0.024300159         | 0.006761653 |
| 0.025908699          | 0.044967297          | 0.021668516         | 0.000332017 |
| 0.034216268          | 0.003944858          | 0.117428343         | 0.079587301 |
| 0.021653012          | 0.024504267          | 0.098639552         | 0.107869733 |
| 0.04877387           | 0.016986964          | 0.054913189         | 0.012710947 |
| 0.079183347          | 0.076120863          | 0.062286741         | 0.027176398 |
| 0.049672971          | 0.073569926          | 0.045534186         | 0.00100075  |
| 0.038534037          | 0.200197582          | 0.002108431         | 0.146365194 |
| 0.028786542          | 0.036429703          | 0.083782217         | 0.01267563  |
| 0.00563511           | 1.04E-05 0.029269411 | 0.019880482         |             |
| 0.082200354          | 0.001574249          | 0.014385795         | 0.002567218 |
| 0.064710253          | 0.045597215          | 0.056612772         | 0.002147806 |
| 0.088914682          | 0.000325999          | 0.187752931         | 0.001872086 |
| 0.042077733          | 0.042824456          | 0.022315091         | 0.029677023 |
| 0.001840063          | 0.044549844          | 0.047283787         | 0.056780909 |
| 0.066525914          | 0.005328018          | 0.058467363         | 0.005937854 |
| 0.022944981          | 0.01058058           | 0.045087589         | 0.003415409 |
| 0.067101145          | 0.000598646          | 0.024247074         | 0.002035751 |
| 0.059968792          | 0.002394796          | 0.089216455         | 0.011363542 |
| 0.013771031          | 0.03150417           | 0.020583328         | 0.038074386 |

|             |             |             |             |
|-------------|-------------|-------------|-------------|
| 0.080925863 | 0.037732047 | 0.006765671 | 0.072862647 |
| 0.004668419 | 0.014866711 | 0.084502861 | 0.106445794 |
| 0.034948133 | 0.087923395 | 0.026901918 | 0.032761126 |
| 0.044510438 | 0.001693594 | 0.020702639 | 0.005929834 |
| 0.00012345  | 0.018845964 | 0.118303531 | 0.002348938 |
| 0.025868324 | 0.004332026 | 2.22E-05    | 0.004271891 |
| 0.060971903 | 0.006437064 |             |             |
| FYN         | 0.098835575 | 0.330572722 | 0.079443001 |
| 0.093816095 | 0.094576841 | 0.280193903 | 0.252433004 |
| 0.074570153 | 0.064450231 | 0.201539345 | 0.338779176 |
| 0.000491705 | 0.122078155 | 0.008877873 | 0.02316697  |
| 0.252213354 | 0.254207771 | 0.216504842 | 0.230723064 |
| 0.08864025  | 0.186649575 | 0.19509439  | 0.286570353 |
| 0.2352808   | 0.001035387 | 0.166373573 | 0.213902202 |
| 0.054541435 | 0.216877167 | 0.128919046 | 0.158884153 |
| 0.213355863 | 0.207541026 | 0.103851462 | 0.087329903 |
| 0.047609782 | 0.343341206 | 0.0090975   | 0.16143184  |
| 0.131447661 | 0.177918561 | 0.20591042  | 0.010288643 |
| 0.009975712 | 0.113542686 | 0.045117406 | 0.223110821 |
| 0.06668455  | 0.247876448 | 0.119923949 | 0.208214823 |
| 0.016129952 | 0.311932768 | 0.173288326 | 0.018102445 |
| 0.373488717 | 0.038031232 | 0.357562296 | 0.035126847 |
| 0.05895002  | 0.105737975 | 0.075302907 | 0.207532204 |
| 0.296023973 | 0.378840846 | 0.288364028 | 0.076384928 |
| 0.107551086 | 0.110005996 | 0.170885241 | 0.279660509 |
| 0.287556656 | 0.128733357 | 0.125299267 | 0.047877663 |
| 0.17946374  | 0.145880332 | 0.198958556 | 0.070367361 |
| 0.00124236  | 0.213243802 | 0.122891998 | 0.096984059 |
| 0.107167654 | 0.333992473 | 0.115120057 | 0.140234819 |
| 0.135228603 | 0.023944543 | 0.196740408 | 0.280481667 |
| 0.044298713 | 0.137456289 | 0.006785428 | 0.05531387  |
| 0.194277241 | 0.181389214 | 0.183857628 | 0.117967939 |
| 0.013179976 | 0.046196518 | 0.018751851 | 0.127832839 |
| 0.131971777 | 0.149810287 | 0.35115183  | 0.005710829 |
| 0.107952008 | 0.065958417 | 0.086791046 | 0.381957303 |
| 0.281186839 | 0.003707889 | 0.042984169 | 0.243226213 |
| 0.061991166 | 0.110838445 | 0.209966368 | 0.011061375 |
| 0.026127443 | 0.001414723 | 0.209727877 | 0.071092845 |
| 0.15202458  | 0.223224379 | 0.095371913 | 0.216752141 |
| 0.051430951 | 0.160968538 | 0.091300171 | 0.220209424 |
| 0.163849891 | 0.269920533 | 0.176266924 | 0.199957933 |
| 0.073133721 | 0.050811294 | 0.08299233  | 0.318975482 |
| 0.290993161 | 0.080212116 | 0.077861447 | 0.296911686 |
| 0.112065953 | 0.24803632  | 0.297151741 | 0.058504369 |
| 0.129467376 | 0.113796991 | 0.128161937 | 0.32875199  |
| 0.209943619 | 0.094149552 | 0.004583566 | 0.245258879 |
| 0.379403181 | 0.009711042 | 0.067075969 | 0.173729116 |
| 0.055819173 | 0.099291978 | 0.314781045 | 0.246332023 |
| 0.136913284 | 0.197728988 | 1           | 0.272503614 |
| 0.162065045 | 0.243689382 | 0.177848451 | 0.207918013 |
| 0.237298383 | 0.137618163 | 0.068614796 | 0.114782005 |
| 0.113287798 | 0.163071117 | 0.040891659 | 0.014214783 |
| 0.112863907 | 0.056446366 | 0.303850532 | 0.144233761 |
| 0.154374985 | 0.044078479 | 0.219609945 | 0.129930652 |

|             |             |                     |             |
|-------------|-------------|---------------------|-------------|
| 0.113312982 | 0.12993033  | 0.364978926         | 0.109924286 |
| 0.149539831 | 0.028253827 | 0.10703283          | 0.10179005  |
| 0.157822007 | 0.166850731 | 0.159220924         | 0.003443814 |
| 0.093542254 | 0.098168572 | 0.100861074         | 0.020932686 |
| 0.152458859 | 0.074620171 | 0.014914035         | 0.283969022 |
| 0.190786709 | 0.21462048  | 0.005111452         | 0.008202406 |
| 0.12054877  | 0.321688354 | 0.115639275         | 0.052978538 |
| 0.290422935 | 0.144680663 | 0.150037457         | 0.308388233 |
| 0.089694216 | 0.372336308 | 0.009179276         | 0.075718462 |
| 0.126875588 | 0.268584736 | 0.211728889         | 0.213044678 |
| 0.170879541 | 0.109194815 | 0.039063171         | 0.266099925 |
| 0.141896641 | 0.120974445 | 0.067141723         | 0.31068813  |
| 0.00114283  | 0.204817189 | 0.202344446         | 0.01062946  |
| 0.36024458  | 0.292432303 | 0.053054603         | 0.064695424 |
| 0.239556614 | 0.303270204 | 0.184698859         | 0.187884548 |
| 0.022426845 | 0.005046663 | 0.251547147         | 0.262525167 |
| 0.22283052  | 0.125279754 | 0.058143 0.00372384 |             |
| 0.269847373 | 0.064829664 | 0.238989985         | 0.126974057 |
| 0.139873228 | 0.051998303 | 0.111508041         | 0.091218471 |
| 0.002469431 | 0.167618772 | 0.187798362         | 0.130237092 |
| 0.16600332  | 0.078926196 | 0.271502571         | 0.243449988 |
| 0.084789749 | 0.06735344  | 0.11983216          | 0.103017793 |
| 0.162359104 | 0.332207998 | 0.003181594         | 0.236480088 |
| 0.278226507 | 0.131858524 | 0.297877173         | 0.261437872 |
| 0.154014105 | 0.329082595 | 0.298277239         | 0.159127548 |
| 0.000338643 | 0.164529021 | 0.117673315         | 0.294122187 |
| 0.236794572 | 0.250102908 | 0.022260803         | 0.07340843  |
| 0.00037208  | 0.130391655 | 0.054218151         | 0.301233205 |
| 0.263322297 | 0.04357091  | 0.002415458         | 0.243134036 |
| 0.114270431 | 0.004454531 | 0.305598477         | 0.263856692 |
| 0.330888228 | 0.144327074 | 0.207336262         | 0.147231929 |
| 0.031613473 | 0.043671688 | 0.041743366         | 0.262541429 |
| 0.080474817 | 0.004949077 | 0.190847477         | 0.259418828 |
| 0.276270434 | 0.292866709 | 0.191433357         | 0.057123576 |
| 0.125812703 | 0.149923929 | 0.264555823         | 0.048920129 |
| 0.243793955 | 0.2994141   | 0.31414885          | 0.169576531 |
| 0.158811486 | 0.346915113 | 0.346504743         | 0.290614994 |
| 0.048023233 | 0.174887887 | 0.20103209          | 0.082083512 |
| 0.093457276 | 0.268588044 | 0.202948298         | 0.243631618 |
| 0.193910867 | 0.074910812 | 0.234150065         | 0.078227612 |
| 0.347708881 | 0.279890113 | 0.081165675         | 0.042331291 |
| 0.369329626 | 0.081681486 | 0.11643818          | 0.099505742 |
| 0.236750652 | 0.020090747 | 0.007223431         | 0.242601781 |
| 0.369688751 | 0.317942847 | 0.26588028          | 0.22417093  |
| 0.212767966 | 0.03337238  | 0.177937026         | 0.093510917 |
| 0.153166313 | 0.137433075 | 0.129803416         | 0.011219296 |
| 0.078020707 | 0.0616504   | 0.37438093          | 0.343068708 |
| 0.076909259 | 0.128433105 | 0.235721169         | 0.276528234 |
| 0.245202884 | 0.089277224 | 0.240196908         | 0.100460502 |
| 0.355046057 | 0.151659388 | 0.320841458         | 0.140081074 |
| 0.232693797 | 0.173945606 | 0.231069382         | 0.00475509  |
| 0.160561382 | 0.215128292 | 0.023240712         | 0.258781279 |
| 0.163451787 | 0.111753057 | 0.306527718         | 0.070487509 |
| 0.052671246 | 0.000842984 | 0.195260413         | 0.070972326 |

|             |             |             |             |
|-------------|-------------|-------------|-------------|
| 0.305377131 | 0.023964662 | 0.109305414 | 0.016388285 |
| 0.324785311 | 0.174531101 | 0.224181927 | 0.020474628 |
| 0.177287508 | 0.003081413 | 0.186912232 | 0.033303754 |
| 0.214829467 | 0.251096007 | 0.131127635 | 0.10916425  |
| 0.021756816 | 0.195370737 | 0.252012602 | 0.167309799 |
| 0.276011514 | 0.054576028 | 0.275011627 | 0.054343725 |
| 0.125799857 | 0.079829138 | 0.213158101 | 0.05990949  |
| 0.172076763 | 0.02239522  | 0.088848776 | 0.033301295 |
| 0.254859381 | 0.047360944 | 0.231138908 | 0.065810376 |
| 0.088413005 | 0.126617951 | 0.141522591 | 0.164701838 |
| 0.228898428 | 0.142734262 | 0.049317104 | 0.337957414 |
| 0.049441535 | 0.073144238 | 0.119492635 | 0.146679512 |
| 0.111976344 | 0.164869224 | 0.186469583 | 0.21582685  |
| 0.251182747 | 0.025895732 | 0.082282399 | 0.0494735   |
| 0.005796868 | 0.122436721 | 0.305895241 | 0.034795819 |
| 0.150233169 | 0.030610428 | 0.001070407 | 0.041728762 |
| 0.273242241 | 0.0785434   |             |             |
| FZD5        | 0.123712398 | 0.377328781 | 0.191096328 |
| 0.037869447 | 0.170157928 | 0.368582244 | 0.309188363 |
| 0.102637928 | 0.236627339 | 0.291340885 | 0.419587003 |
| 0.003269787 | 0.131366058 | 0.045495318 | 0.105761739 |
| 0.274042268 | 0.279386602 | 0.273072936 | 0.268662332 |
| 0.145904506 | 0.196391571 | 0.267648424 | 0.271575636 |
| 0.320278258 | 0.006728947 | 0.276361753 | 0.140473245 |
| 0.081191296 | 0.234794458 | 0.2692055   | 0.263641449 |
| 0.237298721 | 0.206329422 | 0.183345864 | 0.153816277 |
| 0.056976778 | 0.410251388 | 0.019771883 | 0.162523928 |
| 0.147599658 | 0.293268231 | 0.214964326 | 0.064053843 |
| 0.002559169 | 0.258619585 | 0.075574631 | 0.272666857 |
| 0.157575875 | 0.322800165 | 0.252929647 | 0.298875403 |
| 0.021524791 | 0.404326642 | 0.233081287 | 0.019738639 |
| 0.452283278 | 0.011888626 | 0.43602194  | 0.090714482 |
| 0.202648974 | 0.234686722 | 0.104274963 | 0.252615799 |
| 0.397669678 | 0.451918232 | 0.330255696 | 0.189459492 |
| 0.246389851 | 0.136372643 | 0.163219159 | 0.240435174 |
| 0.334563298 | 0.1881386   | 0.279649135 | 0.076465134 |
| 0.184234304 | 0.154869055 | 0.317144603 | 0.214420729 |
| 0.005083368 | 0.29895782  | 0.17742758  | 0.129541522 |
| 0.098689889 | 0.419865896 | 0.139715101 | 0.299472554 |
| 0.128325829 | 0.095466153 | 0.242931161 | 0.309742237 |
| 0.052406393 | 0.162707612 | 0.013334446 | 0.190461167 |
| 0.216062955 | 0.192197417 | 0.213935865 | 0.278830338 |
| 0.059928632 | 0.18047381  | 0.05939694  | 0.135417318 |
| 0.178798629 | 0.172484683 | 0.44396444  | 0.014068648 |
| 0.10908817  | 0.194940385 | 0.235530004 | 0.431515568 |
| 0.314405728 | 0.019022252 | 0.163528456 | 0.322654597 |
| 0.135368513 | 0.164662104 | 0.294134478 | 0.011089031 |
| 0.028479581 | 0.00677316  | 0.229828247 | 0.220690808 |
| 0.281654478 | 0.313495168 | 0.120809693 | 0.195084876 |
| 0.094071387 | 0.193531122 | 0.208955903 | 0.311171841 |
| 0.154407795 | 0.326468237 | 0.177288186 | 0.207038219 |
| 0.132407345 | 0.168475243 | 0.23460515  | 0.375173534 |
| 0.389438459 | 0.197805813 | 0.222781219 | 0.359981298 |
| 0.115496602 | 0.269716957 | 0.33513915  | 0.157763558 |

|             |             |             |             |
|-------------|-------------|-------------|-------------|
| 0.236512763 | 0.242004307 | 0.200698848 | 0.320394424 |
| 0.30286693  | 0.147330281 | 0.010700021 | 0.350812017 |
| 0.466739367 | 0.013313205 | 0.217544587 | 0.208516925 |
| 0.053682769 | 0.263315863 | 0.376306419 | 0.279745886 |
| 0.167629514 | 0.12861833  | 0.272503614 | 1           |
| 0.244384702 | 0.296782355 | 0.243128099 | 0.259337233 |
| 0.324191025 | 0.192499644 | 0.189532425 | 0.117230496 |
| 0.255451598 | 0.244630852 | 0.074354963 | 0.036962128 |
| 0.146349947 | 0.136366952 | 0.322694197 | 0.183273748 |
| 0.175375213 | 0.008508612 | 0.276307449 | 0.164036392 |
| 0.186285984 | 0.15064876  | 0.406922212 | 0.249201238 |
| 0.24717611  | 0.071558493 | 0.245017262 | 0.206152215 |
| 0.210728732 | 0.27429672  | 0.266260239 | 0.007927945 |
| 0.243645526 | 0.105829644 | 0.16049715  | 0.091177394 |
| 0.251188443 | 0.204132314 | 0.055571893 | 0.304969289 |
| 0.293836985 | 0.221779236 | 0.028038383 | 0.026848445 |
| 0.259947827 | 0.357622925 | 0.148255828 | 0.11893748  |
| 0.300771451 | 0.236587964 | 0.15444998  | 0.413488689 |
| 0.219091793 | 0.424409431 | 0.026276231 | 0.231703578 |
| 0.125375896 | 0.292863471 | 0.202286239 | 0.236263336 |
| 0.308324235 | 0.155441803 | 0.072336385 | 0.358357372 |
| 0.182241215 | 0.164681122 | 0.195219067 | 0.36687876  |
| 0.006464811 | 0.280727619 | 0.192915794 | 0.027940868 |
| 0.387952183 | 0.353710809 | 0.185085021 | 0.169583913 |
| 0.276371893 | 0.36596509  | 0.244179326 | 0.187141196 |
| 0.052810969 | 0.027045409 | 0.313762968 | 0.343854447 |
| 0.240407502 | 0.219783736 | 0.08949948  | 0.01554303  |
| 0.292162656 | 0.085751051 | 0.248383689 | 0.119781929 |
| 0.154045612 | 0.094824527 | 0.232981572 | 0.126814149 |
| 0.007307283 | 0.278026533 | 0.169741985 | 0.174678029 |
| 0.227252362 | 0.217286619 | 0.29212346  | 0.358357879 |
| 0.142895542 | 0.102259837 | 0.15971152  | 0.235933338 |
| 0.288244114 | 0.372189886 | 0.007384667 | 0.301328207 |
| 0.311275535 | 0.207875442 | 0.301941332 | 0.297939235 |
| 0.22050307  | 0.420209089 | 0.321897834 | 0.194572604 |
| 0.001834786 | 0.16600993  | 0.117373866 | 0.417141844 |
| 0.230187794 | 0.345488271 | 0.045768712 | 0.087684653 |
| 0.003541186 | 0.263295419 | 0.055206574 | 0.382922646 |
| 0.26976741  | 0.154324071 | 0.004911605 | 0.266575635 |
| 0.111615223 | 0.01129265  | 0.349245898 | 0.278624063 |
| 0.351472101 | 0.182099249 | 0.325449478 | 0.14762549  |
| 0.0363746   | 0.116374638 | 0.076303587 | 0.245163612 |
| 0.125557954 | 0.022008386 | 0.199965604 | 0.307161404 |
| 0.304592837 | 0.363752207 | 0.294456709 | 0.044810163 |
| 0.141872658 | 0.109146231 | 0.248092946 | 0.150925986 |
| 0.30123408  | 0.405327914 | 0.370324602 | 0.178834504 |
| 0.190385936 | 0.404714849 | 0.42462326  | 0.311340408 |
| 0.047464954 | 0.164781477 | 0.204814751 | 0.135087723 |
| 0.102625379 | 0.288446022 | 0.176117137 | 0.315795309 |
| 0.271113798 | 0.059650579 | 0.332219881 | 0.121176949 |
| 0.387981678 | 0.287891252 | 0.227155421 | 0.155865997 |
| 0.425787327 | 0.244395222 | 0.268789441 | 0.19802612  |
| 0.357546089 | 0.023909657 | 0.025734048 | 0.346277032 |
| 0.43048919  | 0.409363252 | 0.265901086 | 0.21080725  |

|             |             |             |             |
|-------------|-------------|-------------|-------------|
| 0.228788572 | 0.132271993 | 0.230837175 | 0.25145062  |
| 0.237557269 | 0.118494468 | 0.136100956 | 0.022424806 |
| 0.076475939 | 0.152358118 | 0.426841753 | 0.431902798 |
| 0.216211443 | 0.247036598 | 0.296785493 | 0.278886058 |
| 0.257571254 | 0.138381073 | 0.33228117  | 0.178649432 |
| 0.456768497 | 0.16055637  | 0.391996507 | 0.206544953 |
| 0.29135032  | 0.271820007 | 0.272354714 | 0.014636247 |
| 0.165810283 | 0.284161972 | 0.047941431 | 0.23609088  |
| 0.177160291 | 0.267392757 | 0.366194829 | 0.226077075 |
| 0.078710042 | 0.003546877 | 0.29066379  | 0.075996406 |
| 0.417862269 | 0.053939194 | 0.181416295 | 0.020046729 |
| 0.382437794 | 0.197029207 | 0.250892969 | 0.050406908 |
| 0.229722616 | 0.003167346 | 0.299251471 | 0.11197135  |
| 0.284033753 | 0.35823862  | 0.167029342 | 0.122686071 |
| 0.069915443 | 0.216947963 | 0.328937922 | 0.18387333  |
| 0.286673075 | 0.04663624  | 0.291795292 | 0.168027352 |
| 0.128051163 | 0.170075531 | 0.327587921 | 0.177539796 |
| 0.291475733 | 0.09012261  | 0.270302922 | 0.130339378 |
| 0.254197265 | 0.150581463 | 0.233236098 | 0.127429133 |
| 0.180596141 | 0.227542605 | 0.172747118 | 0.16871732  |
| 0.212714821 | 0.136971464 | 0.092853275 | 0.442724748 |
| 0.119668465 | 0.171324704 | 0.066415501 | 0.122715933 |
| 0.130591748 | 0.305115171 | 0.245767759 | 0.261649565 |
| 0.285411789 | 0.070342532 | 0.248635784 | 0.182372489 |
| 0.015772653 | 0.140513775 | 0.35697727  | 0.04044692  |
| 0.19330446  | 0.080470677 | 0.00277666  | 0.136349351 |
| 0.363531894 | 0.127277786 |             |             |
| GABARAPL1   | 0.192371495 | 0.390338008 | 0.180259516 |
| 0.010387136 | 0.092317428 | 0.318048083 | 0.223070392 |
| 0.156728422 | 0.279119176 | 0.153328384 | 0.376713875 |
| 0.020978987 | 0.16753514  | 0.12012355  | 0.170589625 |
| 0.325287675 | 0.320553491 | 0.218385696 | 0.329419907 |
| 0.234831793 | 0.086655585 | 0.349464352 | 0.238852828 |
| 0.278020895 | 0.0340538   | 0.157465648 | 0.038121771 |
| 0.125917213 | 0.289565685 | 0.303367064 | 0.211956987 |
| 0.296437817 | 0.226569016 | 0.149373214 | 0.10907423  |
| 0.039778034 | 0.435109948 | 0.018793091 | 0.17061328  |
| 0.199439185 | 0.181075165 | 0.240968831 | 0.103327042 |
| 0.000391386 | 0.183770724 | 0.118074585 | 0.316618713 |
| 0.254324808 | 0.281104172 | 0.291084473 | 0.169727075 |
| 0.024260672 | 0.39530033  | 0.336247912 | 0.021074768 |
| 0.418703182 | 0.00218717  | 0.433187695 | 0.189038107 |
| 0.215019248 | 0.287353868 | 0.145294111 | 0.286101575 |
| 0.330320712 | 0.426546389 | 0.360051026 | 0.091937615 |
| 0.203088055 | 0.168717992 | 0.188744292 | 0.188187839 |
| 0.360852082 | 0.178237049 | 0.223834117 | 0.082533373 |
| 0.197074477 | 0.201298191 | 0.348518449 | 0.266142719 |
| 0.010206082 | 0.187705168 | 0.105324177 | 0.211225441 |
| 0.112853293 | 0.3940884   | 0.190188583 | 0.183957315 |
| 0.137797463 | 0.140867056 | 0.278752268 | 0.347152713 |
| 0.024983327 | 0.204222646 | 0.009751393 | 0.24920449  |
| 0.267682898 | 0.24506878  | 0.268120005 | 0.163495164 |
| 0.100914857 | 0.28711453  | 0.152621595 | 0.18359706  |
| 0.215229091 | 0.179626402 | 0.415179385 | 0.02728519  |

|             |             |             |             |
|-------------|-------------|-------------|-------------|
| 0.140960207 | 0.29338524  | 0.232601286 | 0.42386293  |
| 0.356182754 | 0.053596286 | 0.295970586 | 0.278772824 |
| 0.127722271 | 0.080255028 | 0.239450226 | 0.014863947 |
| 0.014754716 | 0.037295283 | 0.276174366 | 0.293545779 |
| 0.14601481  | 0.238911011 | 0.069393437 | 0.165938784 |
| 0.14360315  | 0.26866868  | 0.118243974 | 0.234776561 |
| 0.162384107 | 0.237814666 | 0.133393768 | 0.220319359 |
| 0.101461434 | 0.269755393 | 0.289398845 | 0.362464795 |
| 0.447206858 | 0.160806702 | 0.230097903 | 0.351093025 |
| 0.140332572 | 0.315233468 | 0.374849531 | 0.228537957 |
| 0.143368146 | 0.297701581 | 0.162179753 | 0.260347411 |
| 0.264783329 | 0.225857241 | 0.023300462 | 0.375844867 |
| 0.446246469 | 0.015077076 | 0.226386004 | 0.265746624 |
| 0.016652143 | 0.198975029 | 0.414449299 | 0.280737317 |
| 0.175954967 | 0.035389531 | 0.162065045 | 0.244384702 |
| 1           | 0.238122923 | 0.289755965 | 0.146113378 |
| 0.363411845 | 0.149511096 | 0.148473711 | 0.144191734 |
| 0.25273777  | 0.320130951 | 0.095348074 | 0.042883569 |
| 0.208114367 | 0.208822829 | 0.3286048   | 0.229187795 |
| 0.223852184 | 0.001260566 | 0.143317719 | 0.233717453 |
| 0.170600305 | 0.209086344 | 0.400547739 | 0.255690909 |
| 0.320891152 | 0.085294208 | 0.28409766  | 0.143840623 |
| 0.310677814 | 0.176716205 | 0.185915231 | 0.013117703 |
| 0.187748243 | 0.102180381 | 0.188243672 | 0.212004291 |
| 0.148679888 | 0.27482948  | 0.15059     | 0.319525502 |
| 0.280094923 | 0.219488839 | 0.101089518 | 0.065627069 |
| 0.259596979 | 0.302003392 | 0.117526379 | 0.191900092 |
| 0.267827277 | 0.20478474  | 0.203744835 | 0.42913426  |
| 0.161497677 | 0.378896502 | 0.045542471 | 0.301357382 |
| 0.136279752 | 0.297257496 | 0.220550889 | 0.247929845 |
| 0.259507664 | 0.239259358 | 0.093135533 | 0.356251617 |
| 0.242519246 | 0.203715821 | 0.243850201 | 0.392372203 |
| 0.017819155 | 0.309001871 | 0.168932928 | 0.054876146 |
| 0.378166416 | 0.258107645 | 0.243851957 | 0.273137112 |
| 0.336156025 | 0.400806754 | 0.337188987 | 0.225842019 |
| 0.084272782 | 0.093212192 | 0.383598221 | 0.357198326 |
| 0.287735843 | 0.205805734 | 0.06666644  | 0.042863567 |
| 0.322060109 | 0.139731373 | 0.254414339 | 0.148329297 |
| 0.144404718 | 0.093939168 | 0.293266203 | 0.205325702 |
| 0.020077496 | 0.250909384 | 0.189998337 | 0.10945195  |
| 0.168107571 | 0.197876111 | 0.280661763 | 0.376670622 |
| 0.106506559 | 0.136862886 | 0.102486119 | 0.164745297 |
| 0.271004386 | 0.395743725 | 0.007138158 | 0.383172554 |
| 0.355452949 | 0.242622731 | 0.303908152 | 0.356727037 |
| 0.281212126 | 0.387141429 | 0.336824141 | 0.269678594 |
| 0.00896374  | 0.197166185 | 0.135507522 | 0.435465559 |
| 0.257388524 | 0.330372802 | 0.096226307 | 0.089704145 |
| 0.008155675 | 0.292322212 | 0.043723217 | 0.437534505 |
| 0.27390899  | 0.121601543 | 0.004705065 | 0.276228471 |
| 0.125874947 | 0.020150654 | 0.395247197 | 0.223737044 |
| 0.33080468  | 0.177105598 | 0.220945231 | 0.170489152 |
| 0.033395824 | 0.165032055 | 0.030091438 | 0.209088624 |
| 0.133656811 | 0.056301905 | 0.069774669 | 0.364468994 |
| 0.350945281 | 0.321426347 | 0.299054651 | 0.021177496 |



|             |             |             |             |
|-------------|-------------|-------------|-------------|
| 0.204033284 | 0.060446929 | 0.232485384 | 0.186305171 |
| 0.358319602 | 0.393095736 | 0.369079021 | 0.203052935 |
| 0.200654326 | 0.382829614 | 0.414534779 | 0.327276314 |
| 0.029095657 | 0.19725384  | 0.246210656 | 0.108708481 |
| 0.137359718 | 0.303234665 | 0.138896742 | 0.243114627 |
| 0.340097273 | 0.021308025 | 0.303895579 | 0.209835272 |
| 0.363926598 | 0.295648768 | 0.199660685 | 0.26870562  |
| 0.387834082 | 0.276241816 | 0.207146717 | 0.240113137 |
| 0.372861306 | 0.031791698 | 0.059833079 | 0.372677573 |
| 0.42153911  | 0.344308454 | 0.29419035  | 0.096021397 |
| 0.256763639 | 0.204047413 | 0.297588824 | 0.222605855 |
| 0.295022566 | 0.135568945 | 0.184380562 | 0.053889059 |
| 0.04048396  | 0.237444965 | 0.366900131 | 0.429592559 |
| 0.215299826 | 0.304916384 | 0.220303147 | 0.200023624 |
| 0.296269114 | 0.142247867 | 0.323260135 | 0.240390875 |
| 0.444692588 | 0.056044552 | 0.438293109 | 0.262908538 |
| 0.359632276 | 0.198392571 | 0.291690281 | 0.018287878 |
| 0.179865042 | 0.162672775 | 0.114063241 | 0.159832479 |
| 0.233441281 | 0.229968555 | 0.305898411 | 0.304400154 |
| 0.069192541 | 0.011792227 | 0.370636602 | 0.068514161 |
| 0.389921518 | 0.091241341 | 0.230348738 | 0.020387992 |
| 0.421412867 | 0.229031681 | 0.306134689 | 0.068679306 |
| 0.194133053 | 0.001788    | 0.161505818 | 0.166522588 |
| 0.36622583  | 0.388775033 | 0.218939539 | 0.17213506  |
| 0.16889363  | 0.201455155 | 0.320708389 | 0.139694286 |
| 0.287129763 | 0.0406405   | 0.329558397 | 0.252696307 |
| 0.159727571 | 0.192455707 | 0.320203641 | 0.21422303  |
| 0.19195275  | 0.124933139 | 0.252193436 | 0.275576059 |
| 0.268251152 | 0.181505706 | 0.174246773 | 0.196771052 |
| 0.128878018 | 0.194919659 | 0.224889485 | 0.183667527 |
| 0.202328705 | 0.164424133 | 0.125504112 | 0.433149816 |
| 0.182035962 | 0.26994098  | 0.019633317 | 0.027846725 |
| 0.076048897 | 0.253232917 | 0.345200713 | 0.320614666 |
| 0.326998422 | 0.128495781 | 0.238254811 | 0.29602323  |
| 0.027245326 | 0.209237479 | 0.256588193 | 0.025988671 |
| 0.205762447 | 0.122685401 | 0.005556007 | 0.261024219 |
| 0.38273188  | 0.115399512 |             |             |
| GABARAPL2   | 0.120050289 | 0.359595305 | 0.189882664 |
| 0.043613137 | 0.165787887 | 0.355139182 | 0.305498477 |
| 0.089250175 | 0.179453272 | 0.248302289 | 0.410014542 |
| 0.002939809 | 0.12790232  | 0.043907908 | 0.095697042 |
| 0.263196208 | 0.266916794 | 0.262552325 | 0.257276847 |
| 0.125901831 | 0.165562838 | 0.264637701 | 0.273936607 |
| 0.303394917 | 0.006797838 | 0.247560389 | 0.137271958 |
| 0.073556099 | 0.227809838 | 0.222302174 | 0.227479566 |
| 0.225404126 | 0.201412091 | 0.148402296 | 0.140732656 |
| 0.045921252 | 0.404834235 | 0.0142671   | 0.156578994 |
| 0.139890565 | 0.25090618  | 0.208131525 | 0.04806311  |
| 0.002126064 | 0.244941173 | 0.064805483 | 0.26774069  |
| 0.135409977 | 0.31309155  | 0.216461232 | 0.257296305 |
| 0.017747196 | 0.395925339 | 0.226770963 | 0.017524646 |
| 0.43933452  | 0.013609303 | 0.418146979 | 0.079215016 |
| 0.180264817 | 0.185991291 | 0.084329548 | 0.234817117 |
| 0.383958282 | 0.439372199 | 0.314394569 | 0.131387111 |

|             |             |             |             |
|-------------|-------------|-------------|-------------|
| 0.211491154 | 0.126113974 | 0.158733376 | 0.235436436 |
| 0.318552534 | 0.197739755 | 0.235029806 | 0.061035723 |
| 0.174899429 | 0.152027919 | 0.304903919 | 0.204334121 |
| 0.003718054 | 0.261360049 | 0.148285544 | 0.121175356 |
| 0.100030733 | 0.403232691 | 0.130855319 | 0.24242049  |
| 0.121639998 | 0.097005673 | 0.249776988 | 0.29884271  |
| 0.047656742 | 0.152311233 | 0.011233849 | 0.176211286 |
| 0.212423989 | 0.185072425 | 0.206419273 | 0.210625341 |
| 0.062449414 | 0.163243359 | 0.049399914 | 0.129614892 |
| 0.164746368 | 0.160277517 | 0.42331545  | 0.011281761 |
| 0.105832984 | 0.161959577 | 0.189255969 | 0.420305698 |
| 0.298490733 | 0.022428169 | 0.149329174 | 0.322153097 |
| 0.110713808 | 0.131743038 | 0.276987582 | 0.016264037 |
| 0.025270936 | 0.006662558 | 0.216605557 | 0.190818151 |
| 0.239015114 | 0.270812095 | 0.129651316 | 0.191558051 |
| 0.079443685 | 0.182285316 | 0.187605148 | 0.268097913 |
| 0.151481032 | 0.321388515 | 0.153734074 | 0.200095465 |
| 0.111376838 | 0.136635881 | 0.218317179 | 0.359376289 |
| 0.376595034 | 0.185041883 | 0.194697534 | 0.364444874 |
| 0.109489477 | 0.25805307  | 0.321108891 | 0.134242901 |
| 0.203670202 | 0.198783016 | 0.157286749 | 0.32577391  |
| 0.298033426 | 0.144351939 | 0.009256835 | 0.342689167 |
| 0.45247543  | 0.012558754 | 0.192005404 | 0.200751097 |
| 0.050856118 | 0.20293338  | 0.370238341 | 0.265087725 |
| 0.156709009 | 0.128216746 | 0.243689382 | 0.296782355 |
| 0.238122923 | 1           | 0.225049356 | 0.229028073 |
| 0.326571608 | 0.160889354 | 0.172058775 | 0.110709011 |
| 0.224779875 | 0.240604851 | 0.060168318 | 0.027453957 |
| 0.142323587 | 0.115732931 | 0.315109792 | 0.17734123  |
| 0.164223689 | 0.010844705 | 0.247895758 | 0.154599376 |
| 0.143511988 | 0.143681622 | 0.39376966  | 0.215910685 |
| 0.245889492 | 0.052585511 | 0.215178482 | 0.173752398 |
| 0.200737703 | 0.199536152 | 0.2231851   | 0.007853514 |
| 0.194183091 | 0.093602583 | 0.127213011 | 0.086383088 |
| 0.219156868 | 0.191187184 | 0.055012213 | 0.295733501 |
| 0.26624261  | 0.213546015 | 0.025549529 | 0.021995711 |
| 0.246580319 | 0.342535137 | 0.131752691 | 0.098563323 |
| 0.288533941 | 0.208148194 | 0.149022018 | 0.394677283 |
| 0.17701008  | 0.420230663 | 0.019251181 | 0.18019182  |
| 0.125376916 | 0.278077897 | 0.201799762 | 0.22755335  |
| 0.242890089 | 0.149725367 | 0.062269604 | 0.357447866 |
| 0.188334717 | 0.160946166 | 0.180978048 | 0.351864736 |
| 0.006162896 | 0.286425968 | 0.189500766 | 0.023032287 |
| 0.37899698  | 0.349077142 | 0.168588026 | 0.150995919 |
| 0.266256568 | 0.353183721 | 0.233073294 | 0.184101485 |
| 0.039903513 | 0.029306262 | 0.297192141 | 0.323113845 |
| 0.230879593 | 0.170313409 | 0.075402068 | 0.012850156 |
| 0.289204151 | 0.083770891 | 0.240089137 | 0.126444518 |
| 0.142474692 | 0.07577482  | 0.194739144 | 0.119305583 |
| 0.006378101 | 0.242725172 | 0.172922899 | 0.156659413 |
| 0.208241587 | 0.144225569 | 0.273657406 | 0.349479839 |
| 0.114445361 | 0.097331392 | 0.131173579 | 0.223007946 |
| 0.253780457 | 0.361006946 | 0.005024782 | 0.291173968 |
| 0.300794502 | 0.191270072 | 0.29794682  | 0.289874071 |

|             |             |             |             |
|-------------|-------------|-------------|-------------|
| 0.209795394 | 0.399493964 | 0.312184867 | 0.184835992 |
| 0.002194213 | 0.157583726 | 0.112452607 | 0.401519492 |
| 0.225010455 | 0.325588083 | 0.037775155 | 0.075311086 |
| 0.00257794  | 0.227894806 | 0.048118275 | 0.367311915 |
| 0.263670043 | 0.117411492 | 0.003252953 | 0.264345936 |
| 0.107833217 | 0.011660914 | 0.339326415 | 0.251699057 |
| 0.340771921 | 0.164678396 | 0.266852072 | 0.141150111 |
| 0.030491851 | 0.09889394  | 0.05722748  | 0.242964293 |
| 0.098371861 | 0.014157197 | 0.182311587 | 0.293133326 |
| 0.303605594 | 0.351648631 | 0.288708165 | 0.042256541 |
| 0.133593833 | 0.113018737 | 0.245714417 | 0.143119215 |
| 0.298924193 | 0.387047383 | 0.358471035 | 0.172588626 |
| 0.176681462 | 0.393155387 | 0.416519711 | 0.307007085 |
| 0.051649815 | 0.163617052 | 0.196846187 | 0.171777948 |
| 0.096173413 | 0.278608501 | 0.158218588 | 0.30955389  |
| 0.267543609 | 0.052016959 | 0.327633579 | 0.114087476 |
| 0.378272474 | 0.274099884 | 0.196440881 | 0.14006446  |
| 0.415718613 | 0.199742723 | 0.225653962 | 0.163958193 |
| 0.342680031 | 0.021021326 | 0.018867128 | 0.324988591 |
| 0.419631084 | 0.401962627 | 0.260902542 | 0.20105755  |
| 0.219237133 | 0.129403932 | 0.221115982 | 0.203163817 |
| 0.23274202  | 0.119188622 | 0.129947517 | 0.021206508 |
| 0.061853498 | 0.134858277 | 0.4131663   | 0.417810989 |
| 0.205834703 | 0.216986841 | 0.258946063 | 0.275174889 |
| 0.250388613 | 0.136054661 | 0.328282026 | 0.154573772 |
| 0.441255645 | 0.125994166 | 0.379487618 | 0.183737263 |
| 0.281685486 | 0.223667678 | 0.25699717  | 0.010756168 |
| 0.159450688 | 0.251135796 | 0.039526322 | 0.219506321 |
| 0.169371116 | 0.243514775 | 0.353912264 | 0.193753433 |
| 0.074552067 | 0.004016873 | 0.285354619 | 0.064224081 |
| 0.404948431 | 0.04876222  | 0.15015695  | 0.018215005 |
| 0.368658914 | 0.195057759 | 0.241655204 | 0.038885751 |
| 0.212978845 | 0.002973549 | 0.248720298 | 0.12136243  |
| 0.277503688 | 0.337641577 | 0.15550057  | 0.120330192 |
| 0.058426316 | 0.21021152  | 0.306887083 | 0.158695552 |
| 0.274833359 | 0.042782524 | 0.284459373 | 0.133451682 |
| 0.121500924 | 0.145537831 | 0.313375286 | 0.13917187  |
| 0.247780892 | 0.062386487 | 0.219388818 | 0.110208938 |
| 0.246037765 | 0.116091745 | 0.218098058 | 0.119082167 |
| 0.189146762 | 0.188388203 | 0.164648436 | 0.157386779 |
| 0.212701715 | 0.128948224 | 0.082352925 | 0.429282465 |
| 0.098882986 | 0.141765977 | 0.067793272 | 0.098666735 |
| 0.102718486 | 0.273398841 | 0.237056283 | 0.253959031 |
| 0.271493106 | 0.059296358 | 0.210023646 | 0.162515101 |
| 0.012313942 | 0.138428452 | 0.34831998  | 0.035025522 |
| 0.182083091 | 0.060981185 | 0.004065413 | 0.116843882 |
| 0.350211742 | 0.102926356 |             |             |
| GADD45B     | 0.258056121 | 0.470357473 | 0.096055204 |
| 0.015168524 | 0.093376856 | 0.239077694 | 0.211412552 |
| 0.234805491 | 0.173794537 | 0.136395429 | 0.305430136 |
| 0.005839913 | 0.285918197 | 0.040377327 | 0.112374137 |
| 0.454387907 | 0.458492023 | 0.262910156 | 0.458463413 |
| 0.266529509 | 0.112792846 | 0.309753599 | 0.271190882 |
| 0.256242634 | 0.007356155 | 0.126595401 | 0.039390198 |

|             |             |             |             |
|-------------|-------------|-------------|-------------|
| 0.21992702  | 0.428878016 | 0.236199878 | 0.228591753 |
| 0.41354989  | 0.358907769 | 0.247463176 | 0.1846767   |
| 0.110674572 | 0.456295712 | 0.060920798 | 0.28425254  |
| 0.33093618  | 0.189395666 | 0.36237769  | 0.041921234 |
| 0.001284428 | 0.124819804 | 0.200917598 | 0.295470779 |
| 0.277454668 | 0.227864379 | 0.212332048 | 0.161893145 |
| 0.072596073 | 0.334771113 | 0.361087596 | 0.06754531  |
| 0.407220412 | 0.002969606 | 0.452029075 | 0.215449627 |
| 0.112223414 | 0.301147    | 0.249415037 | 0.30552689  |
| 0.242148356 | 0.427989936 | 0.473351441 | 0.056225767 |
| 0.113382641 | 0.285347963 | 0.300814357 | 0.253701652 |
| 0.429208726 | 0.223646335 | 0.245158545 | 0.197533951 |
| 0.290995739 | 0.315650955 | 0.278971823 | 0.200445925 |
| 0.003425418 | 0.15500313  | 0.186476094 | 0.265068514 |
| 0.197174796 | 0.340386875 | 0.259964443 | 0.196447181 |
| 0.245587948 | 0.046169557 | 0.28941106  | 0.468642378 |
| 0.022970965 | 0.314752103 | 0.011410657 | 0.188373033 |
| 0.361171276 | 0.390087311 | 0.298503366 | 0.105357734 |
| 0.034750059 | 0.181639658 | 0.156531136 | 0.324327824 |
| 0.303741778 | 0.282116526 | 0.400443704 | 0.07915387  |
| 0.264674921 | 0.222366324 | 0.293579979 | 0.447006194 |
| 0.451836181 | 0.018457406 | 0.207889947 | 0.223915402 |
| 0.224419817 | 0.112450284 | 0.222142404 | 0.023300372 |
| 0.011001391 | 0.028083246 | 0.402792503 | 0.202644306 |
| 0.113769334 | 0.20506017  | 0.068367452 | 0.246512144 |
| 0.225956566 | 0.391016728 | 0.114439943 | 0.229714257 |
| 0.261472267 | 0.229055813 | 0.231438217 | 0.315519805 |
| 0.198804206 | 0.264145075 | 0.188233281 | 0.421103823 |
| 0.437595304 | 0.095622232 | 0.124698506 | 0.275356512 |
| 0.261626343 | 0.435972768 | 0.488248301 | 0.265437651 |
| 0.187515283 | 0.263143846 | 0.231698478 | 0.266379852 |
| 0.239275816 | 0.279701618 | 0.048738319 | 0.321131037 |
| 0.422607036 | 0.02473207  | 0.11268056  | 0.350855115 |
| 0.028325875 | 0.228446972 | 0.436401522 | 0.355997309 |
| 0.273378766 | 0.034591925 | 0.177848451 | 0.243128099 |
| 0.289755965 | 0.225049356 | 1           | 0.166463814 |
| 0.283599437 | 0.217232684 | 0.077669029 | 0.269988208 |
| 0.162801477 | 0.295585205 | 0.192402543 | 0.063844922 |
| 0.26154629  | 0.263975545 | 0.394050973 | 0.294169462 |
| 0.297067541 | 0.00182797  | 0.127737487 | 0.273925032 |
| 0.23157991  | 0.329274451 | 0.467599678 | 0.16012991  |
| 0.268122325 | 0.198438459 | 0.189995847 | 0.218004549 |
| 0.375708867 | 0.19578858  | 0.186514864 | 0.002584061 |
| 0.154983819 | 0.200486816 | 0.299049569 | 0.100297999 |
| 0.175962382 | 0.160140607 | 0.134449989 | 0.408261713 |
| 0.219955335 | 0.323267084 | 0.051372349 | 0.120747854 |
| 0.236691689 | 0.332604789 | 0.210297602 | 0.229175399 |
| 0.338857724 | 0.231586142 | 0.346463198 | 0.392673804 |
| 0.214301464 | 0.321796734 | 0.110415966 | 0.289288805 |
| 0.235845153 | 0.403633639 | 0.33291134  | 0.343828615 |
| 0.253242984 | 0.28332232  | 0.164469131 | 0.260617175 |
| 0.287616127 | 0.282591498 | 0.128536487 | 0.472418143 |
| 0.003409151 | 0.286828107 | 0.263716521 | 0.118564048 |
| 0.446565769 | 0.220506527 | 0.119603957 | 0.247848965 |

|             |             |             |             |
|-------------|-------------|-------------|-------------|
| 0.464319357 | 0.477491403 | 0.406207817 | 0.353153529 |
| 0.162047771 | 0.028735935 | 0.464851951 | 0.355880296 |
| 0.433032772 | 0.296066434 | 0.158694734 | 0.070154582 |
| 0.421698742 | 0.216847607 | 0.283893906 | 0.243291953 |
| 0.255795412 | 0.204618636 | 0.262348045 | 0.259743948 |
| 0.018921677 | 0.231965306 | 0.247016956 | 0.146923717 |
| 0.217388407 | 0.208435972 | 0.375016676 | 0.300368792 |
| 0.210948877 | 0.201185124 | 0.194962135 | 0.104638992 |
| 0.209366315 | 0.472969158 | 0.023949297 | 0.448181318 |
| 0.47402589  | 0.303552444 | 0.404367028 | 0.469725285 |
| 0.282075042 | 0.364556964 | 0.420287972 | 0.388002124 |
| 0.002789295 | 0.337492979 | 0.249219012 | 0.357308227 |
| 0.376273421 | 0.275422744 | 0.166443924 | 0.203985945 |
| 0.004007527 | 0.198129569 | 0.114913347 | 0.485293242 |
| 0.383642557 | 0.057820808 | 0.023222714 | 0.34662499  |
| 0.226169673 | 0.030765554 | 0.491673696 | 0.259559227 |
| 0.400796828 | 0.272203642 | 0.182458679 | 0.297208555 |
| 0.099139767 | 0.255873055 | 0.028871172 | 0.264815604 |
| 0.255740795 | 0.097191713 | 0.069777448 | 0.479452521 |
| 0.395278027 | 0.311881682 | 0.260042685 | 0.012716092 |
| 0.324092388 | 0.107851043 | 0.315962489 | 0.134952482 |
| 0.37901258  | 0.343141355 | 0.417616616 | 0.322322972 |
| 0.288128794 | 0.379316715 | 0.366269032 | 0.384309516 |
| 0.057242429 | 0.310802675 | 0.366221596 | 0.063868103 |
| 0.226407497 | 0.415390138 | 0.240512293 | 0.191803241 |
| 0.305409625 | 0.043581607 | 0.220758097 | 0.264644409 |
| 0.407341526 | 0.409786481 | 0.098650067 | 0.199470639 |
| 0.380281455 | 0.285701993 | 0.143912794 | 0.28710197  |
| 0.274122186 | 0.083158193 | 0.115292535 | 0.332679702 |
| 0.44965497  | 0.265318707 | 0.391587149 | 0.113806627 |
| 0.384588491 | 0.09399939  | 0.379940128 | 0.236993969 |
| 0.277059099 | 0.216518836 | 0.310688531 | 0.084274239 |
| 0.029844003 | 0.159557089 | 0.359356331 | 0.407391532 |
| 0.112933828 | 0.22702451  | 0.216780657 | 0.247398917 |
| 0.427417945 | 0.228145481 | 0.25827224  | 0.275617049 |
| 0.415509026 | 0.074286268 | 0.481706627 | 0.290046151 |
| 0.367525382 | 0.245647847 | 0.367796639 | 0.015455153 |
| 0.25831566  | 0.150358175 | 0.167889876 | 0.234847214 |
| 0.377154644 | 0.155595322 | 0.301141038 | 0.215316205 |
| 0.112131921 | 0.006219222 | 0.321040585 | 0.17215015  |
| 0.279586336 | 0.169664724 | 0.284261079 | 0.068760702 |
| 0.502335562 | 0.282533147 | 0.352996051 | 0.163666629 |
| 0.253095533 | 0.007337226 | 0.14737323  | 0.066071878 |
| 0.356144974 | 0.362289523 | 0.279557124 | 0.256570288 |
| 0.193229175 | 0.271731905 | 0.308662919 | 0.236543164 |
| 0.400241201 | 0.082461045 | 0.455508339 | 0.288633777 |
| 0.294568449 | 0.268967339 | 0.261248562 | 0.280711154 |
| 0.187006792 | 0.165064151 | 0.171213162 | 0.208371661 |
| 0.398277112 | 0.254033035 | 0.255530472 | 0.232768855 |
| 0.066148623 | 0.266386391 | 0.319427083 | 0.294255095 |
| 0.269370068 | 0.254300521 | 0.21727381  | 0.393727747 |
| 0.247011487 | 0.284689784 | 0.031156132 | 0.029545158 |
| 0.14778766  | 0.201361237 | 0.399828174 | 0.391005402 |
| 0.45432175  | 0.210601855 | 0.142993275 | 0.192462677 |

|             |             |             |             |
|-------------|-------------|-------------|-------------|
| 0.076001416 | 0.302997624 | 0.231790321 | 0.070303232 |
| 0.28594912  | 0.220112105 | 0.001407919 | 0.240866003 |
| 0.342947191 | 0.214246647 |             |             |
| GALK1       | 0.095494867 | 0.306698755 | 0.053288784 |
| 0.081377792 | 0.064615245 | 0.254586105 | 0.226480544 |
| 0.066362958 | 0.051366058 | 0.202527877 | 0.293839158 |
| 0.000363566 | 0.113827038 | 0.006203323 | 0.015948842 |
| 0.238576272 | 0.2400649   | 0.186782692 | 0.212928148 |
| 0.077645823 | 0.21271279  | 0.170271963 | 0.274769923 |
| 0.217610438 | 0.000719394 | 0.14711195  | 0.252787533 |
| 0.049639878 | 0.203714482 | 0.108710957 | 0.134072124 |
| 0.206746302 | 0.197371208 | 0.099012655 | 0.070415313 |
| 0.046670362 | 0.308097384 | 0.006885382 | 0.152211763 |
| 0.126816268 | 0.16376328  | 0.197759784 | 0.008251204 |
| 0.012892811 | 0.092098171 | 0.039865967 | 0.203065988 |
| 0.055609625 | 0.223064971 | 0.096889189 | 0.207666228 |
| 0.014630573 | 0.272567342 | 0.154410004 | 0.015430151 |
| 0.329953274 | 0.047430839 | 0.326002351 | 0.031392971 |
| 0.04247726  | 0.094571264 | 0.080488302 | 0.193199659 |
| 0.260378479 | 0.337171389 | 0.267788714 | 0.059695277 |
| 0.094428974 | 0.104714024 | 0.172443    | 0.277135817 |
| 0.264848828 | 0.108481026 | 0.1085273   | 0.046431317 |
| 0.180306792 | 0.137750725 | 0.168433086 | 0.047932922 |
| 0.001160583 | 0.195854058 | 0.109625338 | 0.094333679 |
| 0.103877804 | 0.290468917 | 0.105353599 | 0.123971905 |
| 0.130528332 | 0.016557303 | 0.170287919 | 0.260701575 |
| 0.043212212 | 0.128074305 | 0.003968576 | 0.037212923 |
| 0.183369804 | 0.1764386   | 0.174028708 | 0.105726657 |
| 0.00826158  | 0.031478555 | 0.015080112 | 0.124575148 |
| 0.119879955 | 0.135571628 | 0.313825255 | 0.005342853 |
| 0.10427327  | 0.06018324  | 0.072870529 | 0.346299241 |
| 0.266639713 | 0.001908919 | 0.03076228  | 0.202921966 |
| 0.057205018 | 0.122914846 | 0.17152157  | 0.009702815 |
| 0.016591968 | 0.000764662 | 0.198616649 | 0.050933675 |
| 0.148456409 | 0.196767076 | 0.06530277  | 0.210189626 |
| 0.044116591 | 0.152693692 | 0.067088159 | 0.199835024 |
| 0.157017017 | 0.242156077 | 0.161267362 | 0.193057665 |
| 0.0572651   | 0.037688015 | 0.067902321 | 0.285196432 |
| 0.254084048 | 0.056394333 | 0.059963528 | 0.267818616 |
| 0.108111202 | 0.230636631 | 0.276603302 | 0.041523284 |
| 0.103137448 | 0.092315593 | 0.135849988 | 0.303049621 |
| 0.175728391 | 0.078963832 | 0.003058175 | 0.205307585 |
| 0.337974005 | 0.006731523 | 0.052084305 | 0.160280085 |
| 0.042658987 | 0.083822325 | 0.290976229 | 0.222726966 |
| 0.12136533  | 0.248868933 | 0.207918013 | 0.259337233 |
| 0.146113378 | 0.229028073 | 0.166463814 | 1           |
| 0.209736237 | 0.143182899 | 0.046736374 | 0.111171555 |
| 0.089890616 | 0.143185879 | 0.044122481 | 0.014753592 |
| 0.102003375 | 0.046525396 | 0.283110672 | 0.12889656  |
| 0.150469291 | 0.042774001 | 0.215461608 | 0.125968388 |
| 0.121107016 | 0.119476171 | 0.335707664 | 0.088513712 |
| 0.125772652 | 0.023566082 | 0.085775465 | 0.083830633 |
| 0.143596997 | 0.161601275 | 0.172828278 | 0.003317544 |
| 0.061390266 | 0.105973859 | 0.093359942 | 0.014737269 |

|             |             |             |             |
|-------------|-------------|-------------|-------------|
| 0.110168619 | 0.065854271 | 0.010523308 | 0.267458281 |
| 0.16232373  | 0.195960822 | 0.003095894 | 0.006360083 |
| 0.095811401 | 0.294561028 | 0.096894296 | 0.044118913 |
| 0.27545238  | 0.114747025 | 0.146943675 | 0.277427304 |
| 0.065911632 | 0.340083377 | 0.007488065 | 0.066289646 |
| 0.120423963 | 0.252321159 | 0.203394068 | 0.189910575 |
| 0.153805614 | 0.096373162 | 0.028195521 | 0.228776952 |
| 0.124006821 | 0.100812603 | 0.046761731 | 0.27844293  |
| 0.00108121  | 0.173570952 | 0.19968481  | 0.009241926 |
| 0.331631951 | 0.257898907 | 0.037719163 | 0.052267025 |
| 0.220935953 | 0.271508084 | 0.167063738 | 0.18229701  |
| 0.017666524 | 0.002950125 | 0.228044158 | 0.243642864 |
| 0.211694566 | 0.107607139 | 0.048361426 | 0.002608033 |
| 0.246077936 | 0.058651339 | 0.242027215 | 0.125577095 |
| 0.130365032 | 0.045345659 | 0.089768697 | 0.082372906 |
| 0.002281654 | 0.168758552 | 0.185894809 | 0.152210313 |
| 0.166486343 | 0.073786584 | 0.25668099  | 0.20369205  |
| 0.068153626 | 0.061703123 | 0.114567518 | 0.077427571 |
| 0.135837169 | 0.30880856  | 0.002390768 | 0.213997587 |
| 0.256054086 | 0.112113436 | 0.279218304 | 0.239258728 |
| 0.138206168 | 0.290326491 | 0.278576421 | 0.148497532 |
| 0.000208327 | 0.160439454 | 0.112411324 | 0.251998963 |
| 0.231738424 | 0.228411369 | 0.01928755  | 0.070771203 |
| 0.00020998  | 0.111533051 | 0.050888533 | 0.269025941 |
| 0.242690328 | 0.03269     | 0.002031809 | 0.217307557 |
| 0.108520448 | 0.002980009 | 0.281542983 | 0.253372605 |
| 0.301908246 | 0.121786398 | 0.197384547 | 0.14497774  |
| 0.031940655 | 0.032964044 | 0.032746307 | 0.240151647 |
| 0.07339259  | 0.004575802 | 0.200120868 | 0.240878897 |
| 0.253935032 | 0.255127172 | 0.162084528 | 0.067457445 |
| 0.122419979 | 0.141693608 | 0.253528965 | 0.0289012   |
| 0.210615357 | 0.267861314 | 0.275821305 | 0.162687354 |
| 0.143097162 | 0.307836806 | 0.3093369   | 0.270473483 |
| 0.036306651 | 0.171313697 | 0.195729647 | 0.062087622 |
| 0.090965948 | 0.250482756 | 0.213095289 | 0.211453251 |
| 0.171092395 | 0.065674532 | 0.202177486 | 0.069193854 |
| 0.309871105 | 0.269196286 | 0.068903799 | 0.027649421 |
| 0.338309479 | 0.062470187 | 0.096954103 | 0.081478992 |
| 0.20497845  | 0.018670034 | 0.005739847 | 0.215581759 |
| 0.333710261 | 0.275161733 | 0.258398806 | 0.237565829 |
| 0.196454437 | 0.020625416 | 0.158940357 | 0.069017127 |
| 0.128264756 | 0.139754847 | 0.125957094 | 0.008965638 |
| 0.095661028 | 0.048410651 | 0.343178098 | 0.304877184 |
| 0.057926643 | 0.106362462 | 0.206438425 | 0.248538156 |
| 0.230686715 | 0.070751707 | 0.200236427 | 0.081141722 |
| 0.31282984  | 0.172680961 | 0.289376571 | 0.124088018 |
| 0.217612783 | 0.156815812 | 0.211988365 | 0.005315235 |
| 0.153270517 | 0.208183174 | 0.020654303 | 0.250867742 |
| 0.159481499 | 0.089846447 | 0.273413212 | 0.052477571 |
| 0.044476124 | 0.00042483  | 0.166670417 | 0.069584184 |
| 0.266468742 | 0.01790924  | 0.090321822 | 0.015573259 |
| 0.29723902  | 0.161825377 | 0.217192872 | 0.017591801 |
| 0.169133415 | 0.002557881 | 0.184228989 | 0.023022854 |
| 0.197959417 | 0.217473561 | 0.125203585 | 0.109155927 |

|             |             |             |             |
|-------------|-------------|-------------|-------------|
| 0.016765706 | 0.178634631 | 0.215338459 | 0.153371179 |
| 0.261928373 | 0.040823502 | 0.260006648 | 0.046351909 |
| 0.124390318 | 0.065442143 | 0.180091009 | 0.044667074 |
| 0.14987612  | 0.01836086  | 0.076498481 | 0.024714077 |
| 0.244385749 | 0.03412307  | 0.211537853 | 0.057350928 |
| 0.062263239 | 0.107215716 | 0.130571108 | 0.163268078 |
| 0.21814879  | 0.144964664 | 0.041715766 | 0.294186451 |
| 0.045976747 | 0.070231028 | 0.118497093 | 0.184160454 |
| 0.124418714 | 0.158209725 | 0.168624393 | 0.191054418 |
| 0.232722917 | 0.021560454 | 0.06181063  | 0.035247684 |
| 0.004626756 | 0.116421937 | 0.272838895 | 0.025430949 |
| 0.135824428 | 0.027976744 | 0.000475697 | 0.031140656 |
| 0.242818004 | 0.061542388 |             |             |
| GALNT3      | 0.217170951 | 0.409308648 | 0.236882029 |
| 0.019612957 | 0.145362168 | 0.354164721 | 0.308207694 |
| 0.198253575 | 0.304421618 | 0.214791936 | 0.398506321 |
| 0.016089297 | 0.176865535 | 0.11702237  | 0.207124212 |
| 0.336378636 | 0.335168469 | 0.296302942 | 0.34017875  |
| 0.282557842 | 0.125027858 | 0.343757003 | 0.289999435 |
| 0.352050725 | 0.027320668 | 0.228521995 | 0.062502128 |
| 0.162004194 | 0.301410183 | 0.372345224 | 0.284819181 |
| 0.298011212 | 0.244480415 | 0.204830167 | 0.165208904 |
| 0.058791302 | 0.455733109 | 0.026565317 | 0.186248399 |
| 0.202357864 | 0.263791922 | 0.256351428 | 0.101827449 |
| 0.000747035 | 0.254677658 | 0.146652261 | 0.320501394 |
| 0.306004039 | 0.352327879 | 0.361333497 | 0.243206535 |
| 0.03404354  | 0.409910075 | 0.32924463  | 0.029899582 |
| 0.447223368 | 0.003920007 | 0.453866725 | 0.21496637  |
| 0.264774029 | 0.349422304 | 0.17171069  | 0.285679033 |
| 0.3470287   | 0.45514011  | 0.377155088 | 0.120370001 |
| 0.257150359 | 0.213089233 | 0.197158199 | 0.219382192 |
| 0.375851409 | 0.253007823 | 0.299252136 | 0.111585799 |
| 0.206521121 | 0.210923988 | 0.367118037 | 0.342874571 |
| 0.008827131 | 0.264570197 | 0.158957394 | 0.195282302 |
| 0.123212225 | 0.413885255 | 0.195067344 | 0.257830004 |
| 0.186496576 | 0.158855301 | 0.325824782 | 0.365785176 |
| 0.035415512 | 0.208616771 | 0.013861802 | 0.315420957 |
| 0.276754294 | 0.252173039 | 0.26834576  | 0.212014096 |
| 0.120539446 | 0.337451142 | 0.156603712 | 0.18747559  |
| 0.26757348  | 0.242950524 | 0.437343484 | 0.033629045 |
| 0.148577964 | 0.316539226 | 0.303035276 | 0.449643448 |
| 0.365051551 | 0.061969662 | 0.342719129 | 0.347888501 |
| 0.169198783 | 0.112657229 | 0.327228987 | 0.020797353 |
| 0.022644114 | 0.036619192 | 0.284945912 | 0.349929027 |
| 0.206562617 | 0.325649905 | 0.113831131 | 0.186312828 |
| 0.177915429 | 0.26721375  | 0.176004699 | 0.323008156 |
| 0.176725103 | 0.31389718  | 0.197445873 | 0.232733103 |
| 0.150702428 | 0.312799743 | 0.359712977 | 0.388914452 |
| 0.456000788 | 0.221670003 | 0.277851335 | 0.364652929 |
| 0.148516831 | 0.328268855 | 0.390976828 | 0.279055723 |
| 0.216575979 | 0.363262104 | 0.2088904   | 0.290581915 |
| 0.343240845 | 0.277164217 | 0.030751671 | 0.388610017 |
| 0.47023769  | 0.022293092 | 0.272705725 | 0.273253677 |
| 0.030014588 | 0.264428459 | 0.427347125 | 0.301504457 |



|             |             |             |             |
|-------------|-------------|-------------|-------------|
| 0.20960177  | 0.056382708 | 0.237298383 | 0.324191025 |
| 0.363411845 | 0.326571608 | 0.283599437 | 0.209736237 |
| 1           | 0.199820385 | 0.195923106 | 0.151868662 |
| 0.324699221 | 0.342621426 | 0.115626165 | 0.046815981 |
| 0.208506853 | 0.257444128 | 0.351146194 | 0.253441469 |
| 0.222849737 | 0.002642793 | 0.206361107 | 0.233819146 |
| 0.210152482 | 0.213647823 | 0.427312939 | 0.319933579 |
| 0.372747452 | 0.10766838  | 0.352119714 | 0.210861821 |
| 0.302115314 | 0.232073865 | 0.244986166 | 0.013251324 |
| 0.257630722 | 0.13882449  | 0.23769294  | 0.222377344 |
| 0.227077145 | 0.321735123 | 0.167928609 | 0.336027769 |
| 0.361749847 | 0.241512431 | 0.097703038 | 0.074069113 |
| 0.3541021   | 0.330061888 | 0.170479758 | 0.218970621 |
| 0.291922822 | 0.277935318 | 0.209210879 | 0.437318568 |
| 0.230902251 | 0.401940157 | 0.055565899 | 0.351717403 |
| 0.16186958  | 0.318537681 | 0.23851757  | 0.26794492  |
| 0.338702626 | 0.233467649 | 0.128660668 | 0.367427014 |
| 0.291077536 | 0.266733586 | 0.295418042 | 0.413906663 |
| 0.015304095 | 0.347917581 | 0.215470605 | 0.066236608 |
| 0.407006813 | 0.314723336 | 0.28623072  | 0.330195303 |
| 0.348629223 | 0.421692315 | 0.333784204 | 0.237539058 |
| 0.09890875  | 0.092556157 | 0.389037172 | 0.363119693 |
| 0.299400005 | 0.273988874 | 0.100475615 | 0.048915132 |
| 0.344570329 | 0.150280803 | 0.260080161 | 0.192121302 |
| 0.181395049 | 0.132779619 | 0.362260258 | 0.196051978 |
| 0.019223939 | 0.325731209 | 0.198747963 | 0.149695272 |
| 0.235876213 | 0.232294949 | 0.301062969 | 0.38621415  |
| 0.157156137 | 0.17719811  | 0.150504162 | 0.230522203 |
| 0.346255114 | 0.416147169 | 0.009890419 | 0.387950266 |
| 0.37238193  | 0.303273569 | 0.32945626  | 0.371263868 |
| 0.348697856 | 0.407703321 | 0.356935619 | 0.270352264 |
| 0.008445849 | 0.206264926 | 0.145750439 | 0.444625399 |
| 0.270462387 | 0.361284093 | 0.113738689 | 0.12697461  |
| 0.008095095 | 0.359963009 | 0.064158907 | 0.450485555 |
| 0.298257555 | 0.140552527 | 0.00639164  | 0.299300787 |
| 0.135932625 | 0.028669059 | 0.411811416 | 0.302604833 |
| 0.359228208 | 0.24601502  | 0.296018633 | 0.179809923 |
| 0.046565618 | 0.212704042 | 0.045416247 | 0.236833205 |
| 0.177137037 | 0.051723746 | 0.108736472 | 0.376266459 |
| 0.363554107 | 0.347157967 | 0.368810537 | 0.027099651 |
| 0.203034806 | 0.097012299 | 0.254948303 | 0.242613053 |
| 0.372496236 | 0.405688284 | 0.396225099 | 0.215387982 |
| 0.230790295 | 0.40663947  | 0.433630663 | 0.34677646  |
| 0.050331437 | 0.207632761 | 0.252848185 | 0.160270825 |
| 0.145514368 | 0.325051289 | 0.194256894 | 0.323216686 |
| 0.338364129 | 0.036915323 | 0.359856653 | 0.244835006 |
| 0.395129522 | 0.313939752 | 0.241917025 | 0.320586083 |
| 0.4151236   | 0.341886496 | 0.272493075 | 0.309592868 |
| 0.371533979 | 0.040841449 | 0.065221945 | 0.376033929 |
| 0.448342708 | 0.367222458 | 0.308304493 | 0.14555099  |
| 0.273636545 | 0.244411872 | 0.304385281 | 0.294370201 |
| 0.362128171 | 0.146687481 | 0.188806465 | 0.06204445  |
| 0.049480501 | 0.268346677 | 0.394746252 | 0.447503383 |
| 0.276307108 | 0.375059119 | 0.311208198 | 0.277547423 |

|             |             |             |             |
|-------------|-------------|-------------|-------------|
| 0.313010836 | 0.207569576 | 0.363469281 | 0.30673843  |
| 0.466251552 | 0.085041812 | 0.452948496 | 0.325212433 |
| 0.357421293 | 0.279475566 | 0.305829365 | 0.016652297 |
| 0.190234567 | 0.229057469 | 0.125791055 | 0.232372662 |
| 0.238191544 | 0.308989193 | 0.33328453  | 0.357585177 |
| 0.096696114 | 0.013926946 | 0.368297956 | 0.098955643 |
| 0.400690616 | 0.121953936 | 0.294124919 | 0.0296324   |
| 0.439635444 | 0.282610251 | 0.30505871  | 0.088876769 |
| 0.277174821 | 0.003032248 | 0.225717986 | 0.202337747 |
| 0.360444885 | 0.396225353 | 0.214521384 | 0.213379403 |
| 0.183311997 | 0.221943616 | 0.335979574 | 0.205118105 |
| 0.309402608 | 0.055557634 | 0.346555265 | 0.298627913 |
| 0.166815891 | 0.246450987 | 0.364600102 | 0.263257032 |
| 0.27132732  | 0.135217973 | 0.312707552 | 0.296283684 |
| 0.288004845 | 0.228945285 | 0.250097172 | 0.240406933 |
| 0.181410965 | 0.27252536  | 0.230092077 | 0.193596207 |
| 0.237289641 | 0.166603267 | 0.169269816 | 0.453473024 |
| 0.211508689 | 0.307509832 | 0.035280488 | 0.04340742  |
| 0.109212976 | 0.334355703 | 0.340954715 | 0.330662409 |
| 0.342354708 | 0.150504202 | 0.295227576 | 0.342112439 |
| 0.034213731 | 0.209895467 | 0.309966998 | 0.041919864 |
| 0.234834882 | 0.143213643 | 0.007387109 | 0.295123193 |
| 0.393617784 | 0.163459906 |             |             |
| GART        | 0.16156089  | 0.392794591 | 0.023868662 |
| 0.035231326 | 0.026617326 | 0.184950289 | 0.140308919 |
| 0.109265167 | 0.033740866 | 0.104661855 | 0.244725309 |
| 0.000414098 | 0.200780546 | 0.00445435  | 0.010985702 |
| 0.372084126 | 0.369589617 | 0.152192279 | 0.328703119 |
| 0.111371534 | 0.124214677 | 0.204227913 | 0.266185032 |
| 0.167265079 | 0.000598898 | 0.067971    | 0.100606598 |
| 0.082990859 | 0.332518164 | 0.084001761 | 0.097060295 |
| 0.3447793   | 0.310744843 | 0.11352741  | 0.05647661  |
| 0.057156748 | 0.355791753 | 0.009303088 | 0.230752251 |
| 0.240242836 | 0.098545743 | 0.303550391 | 0.00445884  |
| 0.006788457 | 0.042532291 | 0.070680172 | 0.239931256 |
| 0.070202258 | 0.159885402 | 0.06907385  | 0.112532126 |
| 0.028818496 | 0.253162348 | 0.229069264 | 0.02731784  |
| 0.321872957 | 0.020509702 | 0.360371143 | 0.056475894 |
| 0.019928024 | 0.097458248 | 0.150072539 | 0.246976666 |
| 0.184168011 | 0.34254915  | 0.368354266 | 0.021430486 |
| 0.045881468 | 0.150288898 | 0.295181467 | 0.297046474 |
| 0.355616598 | 0.091327848 | 0.079912715 | 0.07261115  |
| 0.279885837 | 0.246424172 | 0.146880635 | 0.031824331 |
| 0.001141877 | 0.098440336 | 0.087216002 | 0.179928622 |
| 0.176105111 | 0.26610045  | 0.170372191 | 0.074689002 |
| 0.188874511 | 0.007351507 | 0.183616676 | 0.37848926  |
| 0.01945477  | 0.211164507 | 0.002588378 | 0.025218989 |
| 0.287479137 | 0.317193187 | 0.265126688 | 0.044295835 |
| 0.003849037 | 0.023035471 | 0.025670803 | 0.243531216 |
| 0.155824062 | 0.175923018 | 0.30810494  | 0.012918089 |
| 0.199644205 | 0.059469865 | 0.07444327  | 0.386564057 |
| 0.385266227 | 0.001010612 | 0.027812723 | 0.138380855 |
| 0.065348178 | 0.08215363  | 0.113326109 | 0.01174023  |
| 0.008031334 | 0.001365756 | 0.32908844  | 0.036500733 |

|             |             |             |             |
|-------------|-------------|-------------|-------------|
| 0.066044329 | 0.124048422 | 0.029929989 | 0.25551889  |
| 0.072276748 | 0.272568398 | 0.02804304  | 0.136457677 |
| 0.238768612 | 0.162264262 | 0.162801671 | 0.271329501 |
| 0.057803231 | 0.043674697 | 0.050554215 | 0.324114859 |
| 0.293327165 | 0.02194145  | 0.032332837 | 0.237461868 |
| 0.198472371 | 0.351759356 | 0.392656523 | 0.046483714 |
| 0.067459222 | 0.08098291  | 0.151097564 | 0.277809482 |
| 0.122789547 | 0.101582171 | 0.006076106 | 0.198038131 |
| 0.336206092 | 0.007401724 | 0.025056643 | 0.246817872 |
| 0.017571572 | 0.056517609 | 0.357645127 | 0.286358791 |
| 0.158513877 | 0.10505503  | 0.137618163 | 0.192499644 |
| 0.149511096 | 0.160889354 | 0.217232684 | 0.143182899 |
| 0.199820385 | 1           | 0.018081439 | 0.209937186 |
| 0.053905331 | 0.162001262 | 0.077573112 | 0.018494802 |
| 0.161099057 | 0.062454569 | 0.356763237 | 0.177681212 |
| 0.257736812 | 0.015300735 | 0.109658853 | 0.20425581  |
| 0.151556756 | 0.215665598 | 0.399119987 | 0.052124779 |
| 0.118225656 | 0.034767534 | 0.058138829 | 0.068479989 |
| 0.23368082  | 0.138186157 | 0.125639697 | 0.002123874 |
| 0.031383776 | 0.159210582 | 0.122926107 | 0.012320926 |
| 0.059835347 | 0.045792663 | 0.014342867 | 0.352975861 |
| 0.11410215  | 0.263398604 | 0.003378768 | 0.01226467  |
| 0.072935197 | 0.291377124 | 0.105104296 | 0.066455609 |
| 0.325406955 | 0.095364192 | 0.282228673 | 0.288558192 |
| 0.044247876 | 0.304417285 | 0.014167092 | 0.068794088 |
| 0.180236219 | 0.339607317 | 0.30946972  | 0.255803717 |
| 0.113559593 | 0.152405102 | 0.040481654 | 0.189271949 |
| 0.16105015  | 0.123379026 | 0.027473508 | 0.353929415 |
| 0.000581235 | 0.170151247 | 0.243609051 | 0.019320419 |
| 0.39410465  | 0.166225088 | 0.021487835 | 0.058107346 |
| 0.339198365 | 0.346349811 | 0.257183696 | 0.312308454 |
| 0.032761563 | 0.002110231 | 0.323786532 | 0.276766967 |
| 0.345962761 | 0.108619579 | 0.050856725 | 0.00421883  |
| 0.340917451 | 0.101868681 | 0.309482464 | 0.198567981 |
| 0.169335001 | 0.061753953 | 0.078695245 | 0.143505605 |
| 0.005164301 | 0.14226044  | 0.2806796   | 0.14102111  |
| 0.156087138 | 0.072329503 | 0.33394576  | 0.183198716 |
| 0.066561541 | 0.097708461 | 0.11684917  | 0.033440265 |
| 0.087110502 | 0.398717701 | 0.003307393 | 0.304107493 |
| 0.370708682 | 0.12440411  | 0.370921916 | 0.353837106 |
| 0.14911367  | 0.278082249 | 0.360075664 | 0.256979995 |
| 0.000171628 | 0.284644111 | 0.193871925 | 0.236906073 |
| 0.369042151 | 0.19256286  | 0.038810095 | 0.103648175 |
| 0.000122101 | 0.076586897 | 0.068713295 | 0.341138992 |
| 0.332130784 | 0.012522873 | 0.003398905 | 0.272845795 |
| 0.182178557 | 0.003918487 | 0.386669985 | 0.220099374 |
| 0.353962468 | 0.134826846 | 0.11679786  | 0.249436934 |
| 0.055664804 | 0.04507352  | 0.012002499 | 0.264023921 |
| 0.098541502 | 0.009442686 | 0.080478482 | 0.357289526 |
| 0.340753117 | 0.233878387 | 0.127727507 | 0.046432894 |
| 0.244364618 | 0.110192714 | 0.323528966 | 0.017690646 |
| 0.264183551 | 0.248918382 | 0.311388198 | 0.25685314  |
| 0.188684434 | 0.305658716 | 0.302474555 | 0.351528386 |
| 0.0281427   | 0.295488952 | 0.332639134 | 0.027964477 |

|             |             |             |             |
|-------------|-------------|-------------|-------------|
| 0.165713097 | 0.348138339 | 0.245836508 | 0.124806457 |
| 0.202671711 | 0.04226004  | 0.138664736 | 0.106283253 |
| 0.336462554 | 0.382729379 | 0.030914877 | 0.023356727 |
| 0.336439366 | 0.05977867  | 0.048132906 | 0.083748393 |
| 0.174242963 | 0.038005536 | 0.011015825 | 0.22430829  |
| 0.366808604 | 0.207502105 | 0.388325855 | 0.140854844 |
| 0.294514449 | 0.010663833 | 0.234361098 | 0.045742869 |
| 0.127954496 | 0.237316789 | 0.246834105 | 0.01766777  |
| 0.076639448 | 0.044121251 | 0.323909142 | 0.314879959 |
| 0.029804772 | 0.082876996 | 0.136875408 | 0.19816417  |
| 0.356922253 | 0.082730965 | 0.162577079 | 0.092669255 |
| 0.308297239 | 0.090239154 | 0.360143637 | 0.140478809 |
| 0.289879208 | 0.121808456 | 0.282640084 | 0.004830478 |
| 0.231494213 | 0.116782802 | 0.04294285  | 0.212469278 |
| 0.297766437 | 0.050826257 | 0.244604577 | 0.043941577 |
| 0.039471675 | 0.000330842 | 0.190140634 | 0.099002678 |
| 0.210676401 | 0.029675596 | 0.105711976 | 0.027604769 |
| 0.392476083 | 0.20922134  | 0.323206883 | 0.030491061 |
| 0.162850252 | 0.002863633 | 0.106185936 | 0.012151036 |
| 0.257183386 | 0.229797633 | 0.19184543  | 0.183550523 |
| 0.030835861 | 0.210730161 | 0.214909664 | 0.149367401 |
| 0.360529623 | 0.053803817 | 0.387610346 | 0.055301316 |
| 0.238046057 | 0.081693651 | 0.14025512  | 0.050044954 |
| 0.084258623 | 0.019488312 | 0.045074813 | 0.02796383  |
| 0.361950782 | 0.034367195 | 0.182734369 | 0.082370591 |
| 0.022402714 | 0.104371976 | 0.212614632 | 0.26075296  |
| 0.266043882 | 0.26806681  | 0.064977875 | 0.284459519 |
| 0.071366879 | 0.097495873 | 0.058578788 | 0.090923602 |
| 0.143397251 | 0.09882235  | 0.258020927 | 0.265411083 |
| 0.342660904 | 0.038537555 | 0.032631369 | 0.029706815 |
| 0.008748071 | 0.21936505  | 0.185863365 | 0.024004459 |
| 0.171596247 | 0.04996522  | 0.00017054  | 0.040818805 |
| 0.257292277 | 0.075424    |             |             |
| GBA         | 0.03253488  | 0.097067013 | 0.17539073  |
| 0.004927281 | 0.068169945 | 0.285523296 | 0.235854981 |
| 0.021190912 | 0.106469305 | 0.069509377 | 0.249009642 |
| 0.004020079 | 0.017020418 | 0.056374274 | 0.076440171 |
| 0.049141555 | 0.048991836 | 0.139163794 | 0.051673724 |
| 0.0565903   | 0.021812702 | 0.125634909 | 0.097281971 |
| 0.21783743  | 0.012209714 | 0.191964906 | 0.018336476 |
| 0.012363385 | 0.038141995 | 0.209861897 | 0.045980459 |
| 0.040869128 | 0.028945272 | 0.016510429 | 0.017181374 |
| 0.001449187 | 0.141390559 | 0.000971494 | 0.022111879 |
| 0.018564857 | 0.109916911 | 0.032915336 | 0.070724737 |
| 4.14E-05    | 0.197857163 | 0.010932023 | 0.109854549 |
| 0.064663109 | 0.273202675 | 0.256535209 | 0.143758418 |
| 0.000485479 | 0.21332371  | 0.07337662  | 0.000408768 |
| 0.190076244 | 0.000811323 | 0.152099068 | 0.021155524 |
| 0.195632414 | 0.097474322 | 0.016034197 | 0.079061315 |
| 0.302824069 | 0.176009087 | 0.071758713 | 0.135940627 |
| 0.301452981 | 0.02929819  | 0.019771248 | 0.055338234 |
| 0.086507404 | 0.026789767 | 0.051414624 | 0.006706534 |
| 0.028227399 | 0.021743667 | 0.228429392 | 0.102990475 |
| 0.004889929 | 0.233659042 | 0.017638066 | 0.02646797  |

|             |             |             |             |
|-------------|-------------|-------------|-------------|
| 0.01084277  | 0.219401956 | 0.031884055 | 0.087096786 |
| 0.022044546 | 0.143352028 | 0.113378955 | 0.062061527 |
| 0.018587939 | 0.026520033 | 0.006059701 | 0.103869933 |
| 0.042346632 | 0.025115249 | 0.055710632 | 0.138206978 |
| 0.107334863 | 0.118258054 | 0.012245554 | 0.014651251 |
| 0.05786458  | 0.041398149 | 0.185471453 | 0.000742841 |
| 0.010618163 | 0.05114843  | 0.055519184 | 0.144729381 |
| 0.06859015  | 0.043192842 | 0.073139958 | 0.299165352 |
| 0.010826761 | 0.021046017 | 0.24847895  | 0.000945486 |
| 0.016427363 | 0.004673131 | 0.037602239 | 0.10656538  |
| 0.143972132 | 0.236759738 | 0.052942988 | 0.034802855 |
| 0.017296431 | 0.031938137 | 0.081725467 | 0.16949104  |
| 0.02074127  | 0.221608042 | 0.035429036 | 0.03626168  |
| 0.013428346 | 0.043933318 | 0.161854518 | 0.113135693 |
| 0.157368197 | 0.152846132 | 0.140998972 | 0.206077474 |
| 0.01198949  | 0.0507509   | 0.072481417 | 0.03509825  |
| 0.061799157 | 0.164915056 | 0.018221121 | 0.12049345  |
| 0.252153656 | 0.070195748 | 0.000838877 | 0.197472569 |
| 0.199873829 | 0.001594077 | 0.18313444  | 0.043930889 |
| 0.011580258 | 0.053349653 | 0.121005017 | 0.068922691 |
| 0.040953559 | 0.016421691 | 0.068614796 | 0.189532425 |
| 0.148473711 | 0.172058775 | 0.077669029 | 0.046736374 |
| 0.195923106 | 0.018081439 | 1           | 0.011784308 |
| 0.287083401 | 0.130819696 | 0.002888663 | 0.003181839 |
| 0.034915603 | 0.0359367   | 0.08166799  | 0.056145357 |
| 0.031307362 | 0.000742469 | 0.065167524 | 0.044299902 |
| 0.01635082  | 0.022822006 | 0.112780625 | 0.311313031 |
| 0.200624553 | 0.004232096 | 0.264295791 | 0.038030224 |
| 0.052690598 | 0.039841275 | 0.042352819 | 0.011565571 |
| 0.115950791 | 0.008116718 | 0.038183275 | 0.074169298 |
| 0.060585205 | 0.086441876 | 0.018404499 | 0.067589613 |
| 0.268524535 | 0.040627773 | 0.024367514 | 0.002728545 |
| 0.101829349 | 0.118025394 | 0.012573487 | 0.015801919 |
| 0.071461138 | 0.042943882 | 0.017398593 | 0.181164828 |
| 0.043517084 | 0.212170362 | 0.001438608 | 0.083478666 |
| 0.019033351 | 0.059692239 | 0.030075567 | 0.050753493 |
| 0.145267222 | 0.044413507 | 0.005912742 | 0.268864477 |
| 0.069986116 | 0.06217829  | 0.147336693 | 0.099558703 |
| 0.011058315 | 0.163875998 | 0.041761059 | 0.001549828 |
| 0.104760975 | 0.265101523 | 0.157178251 | 0.084572886 |
| 0.053852676 | 0.101436481 | 0.063459131 | 0.025238635 |
| 0.004528879 | 0.044768761 | 0.080898127 | 0.127974796 |
| 0.037588504 | 0.061903426 | 0.004757124 | 0.002951726 |
| 0.064364932 | 0.018044429 | 0.062592014 | 0.021784012 |
| 0.029389705 | 0.009773984 | 0.171780192 | 0.029443259 |
| 0.000961022 | 0.09868758  | 0.030543305 | 0.017105868 |
| 0.03416211  | 0.046816131 | 0.061845097 | 0.228418737 |
| 0.011715843 | 0.007383515 | 0.012344732 | 0.214852322 |
| 0.292635882 | 0.093775002 | 0.000353941 | 0.082677934 |
| 0.064992331 | 0.097495619 | 0.061670643 | 0.063339652 |
| 0.11466861  | 0.186456231 | 0.074443193 | 0.034424425 |
| 0.003150959 | 0.01924193  | 0.012646361 | 0.240151099 |
| 0.035363124 | 0.217688472 | 0.008081982 | 0.008148176 |
| 0.007276519 | 0.265732135 | 0.00138631  | 0.119487002 |

|             |             |             |             |
|-------------|-------------|-------------|-------------|
| 0.052323089 | 0.158980911 | 0.000120415 | 0.067224128 |
| 0.012809916 | 0.001907569 | 0.082706757 | 0.116148662 |
| 0.092722942 | 0.056642455 | 0.204248234 | 0.016650391 |
| 0.000681448 | 0.018163889 | 0.030097604 | 0.065913444 |
| 0.020881931 | 0.001897342 | 0.043974798 | 0.065619002 |
| 0.083895842 | 0.161184747 | 0.241805742 | 0.007424628 |
| 0.018133953 | 0.00615799  | 0.048839942 | 0.108933381 |
| 0.105855731 | 0.199208473 | 0.118381776 | 0.025259451 |
| 0.048623306 | 0.160685198 | 0.199623669 | 0.078410859 |
| 0.003525823 | 0.020811917 | 0.030528036 | 0.103727853 |
| 0.015879356 | 0.056438147 | 0.031058429 | 0.324355704 |
| 0.121338685 | 0.004452493 | 0.324559798 | 0.045035516 |
| 0.123196098 | 0.052648934 | 0.162966523 | 0.077571467 |
| 0.166134673 | 0.072940437 | 0.266626803 | 0.085515176 |
| 0.257346059 | 0.000510679 | 0.002423513 | 0.16159854  |
| 0.144671815 | 0.277159198 | 0.049104371 | 0.027533343 |
| 0.038544886 | 0.151890203 | 0.056980332 | 0.062772342 |
| 0.172479442 | 0.015531119 | 0.015482987 | 0.002112537 |
| 0.010591453 | 0.060414441 | 0.16911743  | 0.181778685 |
| 0.236440381 | 0.233177721 | 0.167578141 | 0.123630175 |
| 0.043511878 | 0.012503413 | 0.260998101 | 0.082241626 |
| 0.204751286 | 0.019449773 | 0.122412341 | 0.096766172 |
| 0.092714092 | 0.069683144 | 0.067031753 | 0.003039252 |
| 0.027428894 | 0.06421949  | 0.011110972 | 0.07150995  |
| 0.022638849 | 0.206596722 | 0.154394071 | 0.122273552 |
| 0.007560694 | 0.005888831 | 0.149333101 | 0.006018555 |
| 0.297049092 | 0.004464288 | 0.074511406 | 0.000320526 |
| 0.100490154 | 0.067661942 | 0.059458223 | 0.003724946 |
| 0.057374653 | 9.05E-05    | 0.085431343 | 0.145813404 |
| 0.103197247 | 0.16590257  | 0.03751657  | 0.025999471 |
| 0.015018092 | 0.052826    | 0.148482206 | 0.040373977 |
| 0.054236401 | 0.002216616 | 0.0537154   | 0.054520215 |
| 0.012634001 | 0.021766539 | 0.259223913 | 0.032770232 |
| 0.172298851 | 0.017392518 | 0.219800147 | 0.046090005 |
| 0.040209498 | 0.026506495 | 0.07470989  | 0.014192439 |
| 0.172781982 | 0.054962106 | 0.033287154 | 0.022474642 |
| 0.053915227 | 0.017133979 | 0.012953966 | 0.211938085 |
| 0.011063991 | 0.051989165 | 0.006407507 | 0.016701435 |
| 0.006332431 | 0.159421165 | 0.066442215 | 0.068575572 |
| 0.055521768 | 0.006396903 | 0.184767799 | 0.116351573 |
| 0.0009055   | 0.022169309 | 0.2297503   | 0.002164004 |
| 0.052498595 | 0.00548712  | 0.00944526  | 0.040148106 |
| 0.168625926 | 0.009275908 |             |             |
| GBP3        | 0.25726516  | 0.33998284  | 0.018294258 |
| 0.019786421 | 0.055175656 | 0.095112506 | 0.093925211 |
| 0.285942305 | 0.034211918 | 0.057033474 | 0.155787183 |
| 0.000473319 | 0.411687237 | 0.003197206 | 0.02683219  |
| 0.430312468 | 0.446390146 | 0.182895998 | 0.434234774 |
| 0.200966632 | 0.084046737 | 0.209736331 | 0.217908415 |
| 0.110928241 | 0.000354047 | 0.04492363  | 0.024431007 |
| 0.3339601   | 0.454319427 | 0.078924144 | 0.138548293 |
| 0.388815046 | 0.420727956 | 0.286405304 | 0.24098852  |
| 0.317005178 | 0.272614979 | 0.22958846  | 0.42090162  |
| 0.422866709 | 0.104382574 | 0.39612057  | 0.002933964 |

|             |             |             |             |
|-------------|-------------|-------------|-------------|
| 0.008195808 | 0.031973364 | 0.299259575 | 0.226228233 |
| 0.179670496 | 0.085458656 | 0.061746283 | 0.073754559 |
| 0.258873072 | 0.179293094 | 0.279370537 | 0.285619172 |
| 0.226324073 | 0.003277498 | 0.260177139 | 0.179685353 |
| 0.016437549 | 0.163390126 | 0.311995534 | 0.266790941 |
| 0.103643453 | 0.241346102 | 0.394683611 | 0.009268797 |
| 0.018883955 | 0.336354962 | 0.392241573 | 0.291018514 |
| 0.317219247 | 0.202630996 | 0.151008034 | 0.412087623 |
| 0.381853189 | 0.391652682 | 0.131645112 | 0.070659485 |
| 0.000241467 | 0.055645018 | 0.240029804 | 0.298142493 |
| 0.423795116 | 0.182203177 | 0.31298332  | 0.102229318 |
| 0.344308492 | 0.00337423  | 0.216510355 | 0.419955471 |
| 0.010242071 | 0.387817051 | 0.006290541 | 0.062243873 |
| 0.359518327 | 0.465288611 | 0.290820463 | 0.020931451 |
| 0.002731283 | 0.044001997 | 0.106075159 | 0.459994725 |
| 0.269878196 | 0.32057367  | 0.222451673 | 0.261590837 |
| 0.422067758 | 0.07358433  | 0.203718606 | 0.266474953 |
| 0.359863792 | 0.002037659 | 0.066437171 | 0.089012164 |
| 0.269154526 | 0.083288144 | 0.097294095 | 0.041549662 |
| 0.004908196 | 0.016039206 | 0.409932651 | 0.05962455  |
| 0.035173458 | 0.07987628  | 0.040696625 | 0.356493329 |
| 0.285549635 | 0.404167058 | 0.053681176 | 0.112402548 |
| 0.409955252 | 0.113442115 | 0.302061657 | 0.37551548  |
| 0.322492257 | 0.139890181 | 0.051287409 | 0.299462632 |
| 0.245650945 | 0.019752949 | 0.023065423 | 0.157511822 |
| 0.421667776 | 0.407002219 | 0.408460723 | 0.181397426 |
| 0.150058706 | 0.107761544 | 0.203626167 | 0.227901017 |
| 0.104068662 | 0.224657266 | 0.14173861  | 0.18608007  |
| 0.220126483 | 0.036523694 | 0.016167655 | 0.357930316 |
| 0.045280331 | 0.125075448 | 0.273470868 | 0.336890992 |
| 0.353821788 | 0.019422104 | 0.114782005 | 0.117230496 |
| 0.144191734 | 0.110709011 | 0.269988208 | 0.111171555 |
| 0.151868662 | 0.209937186 | 0.011784308 | 1           |
| 0.038846961 | 0.181383349 | 0.302587504 | 0.057330831 |
| 0.325280571 | 0.232763365 | 0.316475085 | 0.292430796 |
| 0.338808528 | 0.003213495 | 0.057597056 | 0.262939392 |
| 0.192628878 | 0.3987067   | 0.323060394 | 0.03428091  |
| 0.11481614  | 0.355393664 | 0.048046982 | 0.217800731 |
| 0.31349597  | 0.113860514 | 0.094331124 | 7.72E-05    |
| 0.052702761 | 0.325978955 | 0.305425532 | 0.015754929 |
| 0.120066776 | 0.036559923 | 0.074906106 | 0.340230041 |
| 0.076267641 | 0.388235808 | 0.011260389 | 0.203064027 |
| 0.115973573 | 0.261604363 | 0.298562932 | 0.174783471 |
| 0.322342274 | 0.166010309 | 0.465053371 | 0.210966839 |
| 0.162075135 | 0.175550949 | 0.251729307 | 0.133797438 |
| 0.404877835 | 0.36241079  | 0.394869375 | 0.372068106 |
| 0.114374516 | 0.303949177 | 0.283795979 | 0.120612633 |
| 0.252050521 | 0.275352568 | 0.023972517 | 0.347028955 |
| 8.94E-05    | 0.180306127 | 0.3201401   | 0.24591472  |
| 0.318218976 | 0.103046179 | 0.017574998 | 0.125515689 |
| 0.43674721  | 0.347288045 | 0.319614271 | 0.413688821 |
| 0.244874008 | 0.002328627 | 0.347748119 | 0.23936488  |
| 0.462934964 | 0.246326695 | 0.356446247 | 0.101206178 |
| 0.3679738   | 0.330982005 | 0.277721551 | 0.330223735 |

|             |             |             |             |
|-------------|-------------|-------------|-------------|
| 0.371944242 | 0.393814252 | 0.10985055  | 0.309087182 |
| 0.01381342  | 0.110771887 | 0.328448508 | 0.113522166 |
| 0.181111962 | 0.088824295 | 0.348694325 | 0.158820624 |
| 0.332615867 | 0.239445273 | 0.273985135 | 0.023870844 |
| 0.063125478 | 0.34738377  | 0.095466018 | 0.326635521 |
| 0.417861485 | 0.219927888 | 0.356424545 | 0.41272413  |
| 0.161187612 | 0.210184917 | 0.3344972   | 0.398826221 |
| 0.000287054 | 0.440349064 | 0.429306283 | 0.170860186 |
| 0.384439085 | 0.128908453 | 0.257473586 | 0.424871234 |
| 0.000393258 | 0.051220716 | 0.315709254 | 0.315431754 |
| 0.374906306 | 0.006127859 | 0.14427805  | 0.340476617 |
| 0.427227182 | 0.04823484  | 0.385674628 | 0.171999586 |
| 0.315406267 | 0.292770749 | 0.063804589 | 0.419013879 |
| 0.321127938 | 0.294858864 | 0.015032589 | 0.29519464  |
| 0.358213873 | 0.107018875 | 0.037182485 | 0.410911585 |
| 0.297873898 | 0.217148487 | 0.106917286 | 0.002705998 |
| 0.395721243 | 0.164786815 | 0.351270622 | 0.044786726 |
| 0.277581173 | 0.187843541 | 0.293237611 | 0.407541789 |
| 0.324042275 | 0.234182679 | 0.196239039 | 0.314071129 |
| 0.11145915  | 0.388750926 | 0.387206504 | 0.017989646 |
| 0.35266757  | 0.376233282 | 0.295533496 | 0.063270184 |
| 0.216362471 | 0.086930037 | 0.075554164 | 0.226536775 |
| 0.284936302 | 0.372566454 | 0.013360329 | 0.071017794 |
| 0.229840576 | 0.149828693 | 0.033906569 | 0.202561359 |
| 0.120685838 | 0.251825506 | 0.187027004 | 0.202114827 |
| 0.269355402 | 0.131210912 | 0.350793527 | 0.082383818 |
| 0.405220035 | 0.012807072 | 0.342646538 | 0.130170097 |
| 0.134048308 | 0.356596919 | 0.415840231 | 0.14131562  |
| 0.009043734 | 0.05019734  | 0.220956663 | 0.223569348 |
| 0.019808277 | 0.072641224 | 0.112545307 | 0.19000005  |
| 0.43010812  | 0.303259215 | 0.119402064 | 0.200197914 |
| 0.214820393 | 0.061524505 | 0.307614655 | 0.184515756 |
| 0.264975393 | 0.177373461 | 0.3346302   | 0.004427795 |
| 0.373826203 | 0.072438771 | 0.207462335 | 0.222830702 |
| 0.461128958 | 0.04332849  | 0.214736003 | 0.059882599 |
| 0.132541574 | 0.001631682 | 0.202740647 | 0.414984151 |
| 0.120388239 | 0.312196779 | 0.220481127 | 0.30409095  |
| 0.365804095 | 0.244813205 | 0.299189057 | 0.360256513 |
| 0.218803912 | 0.064597156 | 0.063091448 | 0.007475322 |
| 0.246153797 | 0.215915827 | 0.326644515 | 0.287301878 |
| 0.158649428 | 0.3322218   | 0.218867796 | 0.29369698  |
| 0.369717409 | 0.170843676 | 0.425601538 | 0.186020004 |
| 0.438361179 | 0.250394073 | 0.109308544 | 0.204452081 |
| 0.084992072 | 0.0802037   | 0.037878747 | 0.077513616 |
| 0.411049848 | 0.214315152 | 0.238839518 | 0.209046241 |
| 0.012060826 | 0.227600183 | 0.374431268 | 0.401659717 |
| 0.294282836 | 0.365039355 | 0.32951185  | 0.204369454 |
| 0.220305414 | 0.170969379 | 0.039749805 | 0.015533925 |
| 0.210082757 | 0.071955954 | 0.307071473 | 0.329608103 |
| 0.418698956 | 0.268030339 | 0.027819639 | 0.050204304 |
| 0.233286272 | 0.357194952 | 0.122969468 | 0.244840001 |
| 0.322082358 | 0.302077498 | 0.000105873 | 0.127498029 |
| 0.205434729 | 0.318589829 |             |             |

GCNT1 0.080626831 0.208471669 0.284896507



|             |             |             |             |
|-------------|-------------|-------------|-------------|
| 0.007822165 | 0.115435775 | 0.377391634 | 0.282820254 |
| 0.055413166 | 0.240793105 | 0.135132528 | 0.374036599 |
| 0.013480324 | 0.052466342 | 0.133326285 | 0.190195094 |
| 0.127645269 | 0.126840347 | 0.209324355 | 0.134278886 |
| 0.122867979 | 0.049384059 | 0.243480031 | 0.169273589 |
| 0.300873592 | 0.031987146 | 0.197861977 | 0.030371331 |
| 0.035448892 | 0.105333286 | 0.293199025 | 0.127329512 |
| 0.108545436 | 0.079933388 | 0.053149585 | 0.052473292 |
| 0.007545585 | 0.278425141 | 0.004896224 | 0.060595118 |
| 0.058363832 | 0.155553425 | 0.088674317 | 0.133494142 |
| 0.000103093 | 0.250354161 | 0.031589102 | 0.211841305 |
| 0.130026102 | 0.350803735 | 0.335764689 | 0.157202792 |
| 0.003352571 | 0.347050946 | 0.172473608 | 0.002717892 |
| 0.327940891 | 0.00126165  | 0.288533347 | 0.064301856 |
| 0.319081646 | 0.173149913 | 0.042934197 | 0.163983385 |
| 0.397033767 | 0.314533199 | 0.168026503 | 0.166001121 |
| 0.293969952 | 0.071157295 | 0.057749509 | 0.105924288 |
| 0.18897799  | 0.085022437 | 0.140459974 | 0.018943764 |
| 0.073177903 | 0.065554842 | 0.357613081 | 0.260767852 |
| 0.010181079 | 0.236035204 | 0.046768122 | 0.074129198 |
| 0.033436498 | 0.353718706 | 0.079410847 | 0.149100754 |
| 0.052874829 | 0.252782202 | 0.211370506 | 0.152161592 |
| 0.027994026 | 0.073786573 | 0.010489591 | 0.256004823 |
| 0.109555802 | 0.07560643  | 0.129251781 | 0.222797738 |
| 0.20272435  | 0.280774555 | 0.052303824 | 0.048627732 |
| 0.122853029 | 0.089080501 | 0.321683166 | 0.004012394 |
| 0.036324903 | 0.154079821 | 0.130152775 | 0.276052618 |
| 0.161284184 | 0.098411699 | 0.224290139 | 0.374334854 |
| 0.042719163 | 0.047354094 | 0.30555019  | 0.004179001 |
| 0.023607761 | 0.020474906 | 0.101943798 | 0.266502362 |
| 0.174505589 | 0.276140207 | 0.084637761 | 0.076665252 |
| 0.045684691 | 0.09203167  | 0.142269685 | 0.218257121 |
| 0.056810854 | 0.280510864 | 0.065781068 | 0.0896659   |
| 0.040476717 | 0.147186649 | 0.284228282 | 0.224613363 |
| 0.307084979 | 0.260996918 | 0.275946782 | 0.324210077 |
| 0.038858488 | 0.129226474 | 0.172024073 | 0.119133904 |
| 0.109244313 | 0.253394974 | 0.058797364 | 0.199428933 |
| 0.332575875 | 0.149231114 | 0.005888246 | 0.334728308 |
| 0.347117144 | 0.005925342 | 0.314622616 | 0.113204027 |
| 0.017149896 | 0.137162086 | 0.246851564 | 0.149343886 |
| 0.092557648 | 0.026881    | 0.113287798 | 0.255451598 |
| 0.25273777  | 0.224779875 | 0.162801477 | 0.089890616 |
| 0.324699221 | 0.053905331 | 0.287083401 | 0.038846961 |
| 1           | 0.244352712 | 0.016130445 | 0.012258448 |
| 0.090861099 | 0.090986962 | 0.174804489 | 0.123392945 |
| 0.083497105 | 0.000937773 | 0.126160459 | 0.104996186 |
| 0.058289704 | 0.069164297 | 0.230547414 | 0.341872032 |
| 0.324546267 | 0.021139673 | 0.328719409 | 0.082790401 |
| 0.135135519 | 0.104546586 | 0.109505123 | 0.017982349 |
| 0.232345842 | 0.022495068 | 0.084100011 | 0.197261296 |
| 0.130010018 | 0.223459305 | 0.076422681 | 0.15236926  |
| 0.344613236 | 0.097751338 | 0.07823963  | 0.01598261  |
| 0.19931185  | 0.210879454 | 0.039486346 | 0.06182389  |
| 0.146109208 | 0.120105294 | 0.056187004 | 0.323353878 |

|             |             |             |             |
|-------------|-------------|-------------|-------------|
| 0.116181464 | 0.334038061 | 0.008952213 | 0.173230454 |
| 0.050886996 | 0.138779804 | 0.080604933 | 0.118978414 |
| 0.201928157 | 0.112979343 | 0.029054402 | 0.390534143 |
| 0.150074597 | 0.132023997 | 0.307236479 | 0.21537848  |
| 0.020678883 | 0.2752412   | 0.086580105 | 0.010158178 |
| 0.21508797  | 0.325262462 | 0.316189292 | 0.170666922 |
| 0.138962516 | 0.220947706 | 0.156702164 | 0.073646819 |
| 0.021977205 | 0.11209429  | 0.188815349 | 0.240501713 |
| 0.103295024 | 0.111660641 | 0.019629912 | 0.015147779 |
| 0.152068675 | 0.052818684 | 0.130772473 | 0.056820058 |
| 0.067559892 | 0.028537104 | 0.267614306 | 0.081264234 |
| 0.004979803 | 0.164155705 | 0.075267798 | 0.048476463 |
| 0.078655219 | 0.124320232 | 0.137689672 | 0.365710076 |
| 0.039718585 | 0.034382861 | 0.035096226 | 0.254385221 |
| 0.35499744  | 0.205938193 | 0.001818306 | 0.193170216 |
| 0.158368836 | 0.184175178 | 0.141693691 | 0.15705838  |
| 0.204485268 | 0.314282476 | 0.167278102 | 0.097552326 |
| 0.009373558 | 0.058461525 | 0.03960504  | 0.395632618 |
| 0.093404864 | 0.328049777 | 0.024909454 | 0.022972489 |
| 0.013497285 | 0.336383363 | 0.007510403 | 0.253870012 |
| 0.124084077 | 0.213215556 | 0.000743778 | 0.147774845 |
| 0.038561265 | 0.008645216 | 0.191139632 | 0.180062765 |
| 0.189447991 | 0.109116535 | 0.224919001 | 0.050517606 |
| 0.004414053 | 0.063099958 | 0.042930556 | 0.126714443 |
| 0.049438357 | 0.010600247 | 0.069164981 | 0.161758091 |
| 0.183891004 | 0.267331144 | 0.344474951 | 0.013942919 |
| 0.058336748 | 0.020352044 | 0.108652476 | 0.230631497 |
| 0.22133037  | 0.332825444 | 0.235013789 | 0.070360961 |
| 0.10662606  | 0.28488421  | 0.338028972 | 0.170748285 |
| 0.011866289 | 0.061291285 | 0.084359838 | 0.166702523 |
| 0.044854855 | 0.135150761 | 0.06275192  | 0.366375732 |
| 0.23515972  | 0.010722625 | 0.41112873  | 0.104493398 |
| 0.236459001 | 0.126296512 | 0.280436093 | 0.227870878 |
| 0.2898831   | 0.173724914 | 0.272455119 | 0.156425151 |
| 0.387725348 | 0.003643796 | 0.014168416 | 0.290371848 |
| 0.276326616 | 0.382864373 | 0.120884354 | 0.059661787 |
| 0.101127594 | 0.310752596 | 0.140654734 | 0.168642034 |
| 0.283997306 | 0.043434792 | 0.050829414 | 0.012123318 |
| 0.022452439 | 0.166800635 | 0.284489475 | 0.322346386 |
| 0.32115109  | 0.329121416 | 0.21267783  | 0.18276704  |
| 0.114519327 | 0.050778086 | 0.371030699 | 0.155955755 |
| 0.354053912 | 0.037556351 | 0.255597831 | 0.17717501  |
| 0.199370196 | 0.121681431 | 0.150196577 | 0.007412475 |
| 0.069913198 | 0.125557563 | 0.032730645 | 0.112637796 |
| 0.069866819 | 0.285451004 | 0.252547308 | 0.255643912 |
| 0.025468893 | 0.015705418 | 0.282526274 | 0.016802669 |
| 0.425357703 | 0.025236681 | 0.142902657 | 0.002398336 |
| 0.221721051 | 0.136640755 | 0.138640878 | 0.01574274  |
| 0.097564249 | 0.000416053 | 0.13926163  | 0.272014195 |
| 0.216109022 | 0.300486088 | 0.09334988  | 0.066156869 |
| 0.056736435 | 0.110708285 | 0.259401509 | 0.073513785 |
| 0.128050605 | 0.008978258 | 0.135300436 | 0.126613724 |
| 0.041887971 | 0.079989106 | 0.365631185 | 0.111066939 |
| 0.192333651 | 0.057614117 | 0.290150763 | 0.15853104  |

|             |             |             |             |
|-------------|-------------|-------------|-------------|
| 0.103616462 | 0.094886221 | 0.122845251 | 0.061303318 |
| 0.240616604 | 0.109698175 | 0.089674252 | 0.062205018 |
| 0.109868425 | 0.049637692 | 0.040555691 | 0.359614405 |
| 0.049190085 | 0.111291999 | 0.012152507 | 0.024830964 |
| 0.022667241 | 0.219548181 | 0.162898601 | 0.160043396 |
| 0.139138919 | 0.033284266 | 0.301975118 | 0.259078758 |
| 0.005643576 | 0.067718568 | 0.295752001 | 0.007974701 |
| 0.114210077 | 0.027061877 | 0.015370168 | 0.128035975 |
| 0.299348062 | 0.0376672   |             |             |
| GEM         | 0.221486633 | 0.414418459 | 0.165023905 |
| 0.010545746 | 0.097843356 | 0.274539751 | 0.22357381  |
| 0.207456161 | 0.24676504  | 0.136939702 | 0.354626729 |
| 0.02074869  | 0.208906753 | 0.10808563  | 0.192740447 |
| 0.36781031  | 0.363598712 | 0.23915787  | 0.377929733 |
| 0.285517449 | 0.081790268 | 0.355988802 | 0.23667984  |
| 0.275074654 | 0.02828595  | 0.146140844 | 0.031549705 |
| 0.169956593 | 0.337910827 | 0.309446747 | 0.220837045 |
| 0.331114259 | 0.265843529 | 0.175011343 | 0.130290169 |
| 0.053356066 | 0.45073526  | 0.030006148 | 0.202275716 |
| 0.240689752 | 0.186983756 | 0.275709211 | 0.084208353 |
| 0.000438837 | 0.169873535 | 0.160475305 | 0.316945309 |
| 0.306738679 | 0.269020926 | 0.296062272 | 0.161426838 |
| 0.038187236 | 0.378850012 | 0.36918788  | 0.032993216 |
| 0.416530013 | 0.00171838  | 0.439140736 | 0.236844255 |
| 0.194010448 | 0.318855061 | 0.175610454 | 0.292713454 |
| 0.291274994 | 0.428630533 | 0.395296339 | 0.0754957   |
| 0.176640857 | 0.206287536 | 0.215259075 | 0.192726471 |
| 0.384274412 | 0.200359838 | 0.235670221 | 0.114310791 |
| 0.218386051 | 0.24393422  | 0.329127752 | 0.288593774 |
| 0.00817428  | 0.17680745  | 0.122914904 | 0.235572441 |
| 0.137000297 | 0.380784484 | 0.209593474 | 0.183665668 |
| 0.173276927 | 0.115691431 | 0.289975362 | 0.387874065 |
| 0.021474474 | 0.241924586 | 0.0105377   | 0.280624059 |
| 0.305284904 | 0.289118775 | 0.285208389 | 0.139669954 |
| 0.09154317  | 0.302494564 | 0.187583044 | 0.226272201 |
| 0.25575944  | 0.220176042 | 0.409170246 | 0.046576687 |
| 0.178612263 | 0.278858408 | 0.266556736 | 0.432544045 |
| 0.385576304 | 0.059594485 | 0.326185635 | 0.265362097 |
| 0.150854255 | 0.077635198 | 0.248843194 | 0.019065011 |
| 0.014827257 | 0.052821233 | 0.318482855 | 0.29948185  |
| 0.129403991 | 0.232543223 | 0.070471257 | 0.179773893 |
| 0.191873315 | 0.314277178 | 0.119639533 | 0.235371393 |
| 0.19066046  | 0.23170732  | 0.163976682 | 0.242856144 |
| 0.132830957 | 0.310293694 | 0.287351921 | 0.382355598 |
| 0.462035933 | 0.151646477 | 0.203689791 | 0.327716884 |
| 0.175561821 | 0.357226622 | 0.413527999 | 0.271838079 |
| 0.159875616 | 0.319038058 | 0.172188845 | 0.257513393 |
| 0.269643218 | 0.28367776  | 0.042610146 | 0.375575752 |
| 0.440440216 | 0.020813512 | 0.197969578 | 0.302325693 |
| 0.019030408 | 0.21499876  | 0.425199583 | 0.30558447  |
| 0.202163371 | 0.027850835 | 0.163071117 | 0.244630852 |
| 0.320130951 | 0.240604851 | 0.295585205 | 0.143185879 |
| 0.342621426 | 0.162001262 | 0.130819696 | 0.181383349 |
| 0.244352712 | 1           | 0.111307882 | 0.044673106 |

|             |             |             |             |
|-------------|-------------|-------------|-------------|
| 0.239277997 | 0.26140572  | 0.349360532 | 0.245024645 |
| 0.249793409 | 0.001169921 | 0.129075443 | 0.243494387 |
| 0.179640235 | 0.257718335 | 0.419718782 | 0.244210063 |
| 0.331302191 | 0.117099895 | 0.283260986 | 0.167822974 |
| 0.350615349 | 0.175571813 | 0.175509019 | 0.008375624 |
| 0.192245454 | 0.127582038 | 0.226855906 | 0.211685351 |
| 0.160651032 | 0.255038054 | 0.189182885 | 0.340892134 |
| 0.280496755 | 0.250855757 | 0.115399103 | 0.100090928 |
| 0.274251755 | 0.304737005 | 0.146404426 | 0.214657464 |
| 0.281563593 | 0.223145682 | 0.247437026 | 0.418524331 |
| 0.187092132 | 0.356085419 | 0.070954234 | 0.32292975  |
| 0.158242807 | 0.326709508 | 0.252397246 | 0.282903934 |
| 0.266036218 | 0.276883127 | 0.131555676 | 0.326487397 |
| 0.277583593 | 0.261095267 | 0.228686272 | 0.424857201 |
| 0.012745688 | 0.307517253 | 0.189790523 | 0.080810592 |
| 0.398216356 | 0.232193519 | 0.223805089 | 0.317270605 |
| 0.38471028  | 0.435567584 | 0.379242559 | 0.266503341 |
| 0.121266981 | 0.09358551  | 0.420617329 | 0.35437316  |
| 0.334314321 | 0.243308075 | 0.091402547 | 0.071561402 |
| 0.361251782 | 0.1701286   | 0.253951101 | 0.18383384  |
| 0.172122036 | 0.131737997 | 0.32178844  | 0.240473941 |
| 0.022817144 | 0.250324327 | 0.205769456 | 0.11000359  |
| 0.181255447 | 0.200591535 | 0.304997317 | 0.365018678 |
| 0.137066512 | 0.165660872 | 0.121405912 | 0.149462026 |
| 0.26791733  | 0.422922124 | 0.012025011 | 0.422315394 |
| 0.398074443 | 0.285434582 | 0.332718414 | 0.402487585 |
| 0.309573091 | 0.377964735 | 0.361742065 | 0.31807053  |
| 0.00939189  | 0.2361716   | 0.168491576 | 0.420023915 |
| 0.289775153 | 0.296518434 | 0.140947571 | 0.124507797 |
| 0.008240074 | 0.284498848 | 0.059991453 | 0.467109375 |
| 0.308667817 | 0.096108879 | 0.007998571 | 0.305737891 |
| 0.156000189 | 0.031755629 | 0.430994854 | 0.237878259 |
| 0.350245288 | 0.223760638 | 0.204723298 | 0.204189166 |
| 0.047109743 | 0.216926741 | 0.02988947  | 0.221268335 |
| 0.17554017  | 0.070753465 | 0.061947625 | 0.408545008 |
| 0.37264628  | 0.318183986 | 0.301791293 | 0.01411354  |
| 0.244943807 | 0.071018986 | 0.250928362 | 0.20577768  |
| 0.386523746 | 0.376250057 | 0.392207193 | 0.236098281 |
| 0.220656797 | 0.382508855 | 0.402834785 | 0.346242222 |
| 0.03807139  | 0.230134845 | 0.281514362 | 0.104788787 |
| 0.159220404 | 0.337241237 | 0.164526799 | 0.233707007 |
| 0.346676332 | 0.026059041 | 0.275724415 | 0.25730965  |
| 0.379865353 | 0.32415659  | 0.164520076 | 0.30836715  |
| 0.383675321 | 0.307975947 | 0.193785859 | 0.291784845 |
| 0.338968478 | 0.044660497 | 0.091673494 | 0.36811811  |
| 0.431024992 | 0.316371045 | 0.321972405 | 0.093199164 |
| 0.299518709 | 0.199772685 | 0.341461752 | 0.242773071 |
| 0.321424642 | 0.15411309  | 0.224664995 | 0.077555485 |
| 0.029230357 | 0.234714245 | 0.358138853 | 0.424779229 |
| 0.196360045 | 0.312805384 | 0.228227096 | 0.214622274 |
| 0.338546724 | 0.186046982 | 0.297297349 | 0.293530502 |
| 0.439507793 | 0.052004953 | 0.461869241 | 0.301041641 |
| 0.370318945 | 0.216955119 | 0.319391118 | 0.013811347 |
| 0.201103824 | 0.149869159 | 0.157111183 | 0.179600798 |

|             |             |             |             |
|-------------|-------------|-------------|-------------|
| 0.27896418  | 0.219798499 | 0.300500264 | 0.304911869 |
| 0.080244397 | 0.014822779 | 0.37899696  | 0.094887855 |
| 0.353110803 | 0.140027313 | 0.284177055 | 0.030219674 |
| 0.453646898 | 0.256628895 | 0.320140087 | 0.10242975  |
| 0.219824837 | 0.002925759 | 0.146938199 | 0.152699779 |
| 0.374861523 | 0.390944508 | 0.241234421 | 0.207766232 |
| 0.216611558 | 0.217861836 | 0.322667143 | 0.169521328 |
| 0.31815437  | 0.051222661 | 0.368762503 | 0.302210527 |
| 0.197124925 | 0.228628422 | 0.297340252 | 0.256218616 |
| 0.192935098 | 0.136050536 | 0.237122916 | 0.310368685 |
| 0.303880719 | 0.228630539 | 0.199686797 | 0.224956531 |
| 0.111390723 | 0.232334385 | 0.265119631 | 0.211320955 |
| 0.213217504 | 0.186782018 | 0.176199436 | 0.425292282 |
| 0.201654586 | 0.299337354 | 0.020296511 | 0.022419257 |
| 0.088704325 | 0.241233747 | 0.382990035 | 0.356669685 |
| 0.371063555 | 0.172022857 | 0.21982927  | 0.309526794 |
| 0.046403336 | 0.249197927 | 0.230213916 | 0.037378567 |
| 0.227097808 | 0.159278703 | 0.005192527 | 0.306773981 |
| 0.377693608 | 0.148600682 |             |             |
| GEMIN6      | 0.171322303 | 0.314260934 | 0.002671799 |
| 0.002570928 | 0.00413603  | 0.071762939 | 0.051015182 |
| 0.105965249 | 0.007407434 | 0.020192633 | 0.116906618 |
| 0.00019711  | 0.273067694 | 0.001106715 | 0.002965746 |
| 0.385762234 | 0.389614144 | 0.078999969 | 0.358595397 |
| 0.092493104 | 0.019834304 | 0.148270065 | 0.147203401 |
| 0.071253031 | 0.000209608 | 0.015841232 | 0.007285451 |
| 0.10952954  | 0.379629982 | 0.037006189 | 0.022597805 |
| 0.377833631 | 0.341348648 | 0.070434594 | 0.020302214 |
| 0.037313696 | 0.254774866 | 0.007267906 | 0.264156044 |
| 0.353394613 | 0.032084794 | 0.344467093 | 0.001046963 |
| 0.000939328 | 0.010252794 | 0.07645771  | 0.167718918 |
| 0.059968279 | 0.057635355 | 0.028495079 | 0.032149877 |
| 0.02013535  | 0.137420027 | 0.220109606 | 0.01821476  |
| 0.192748427 | 0.00125865  | 0.249622467 | 0.05820339  |
| 0.005570746 | 0.067931773 | 0.193136585 | 0.192261857 |
| 0.073315991 | 0.215431309 | 0.347058971 | 0.001409306 |
| 0.010281337 | 0.175186907 | 0.357122795 | 0.181815697 |
| 0.290163856 | 0.025902524 | 0.026024003 | 0.100537869 |
| 0.289942265 | 0.309725202 | 0.080412907 | 0.010486316 |
| 0.000161328 | 0.02722705  | 0.045930125 | 0.237064971 |
| 0.220538563 | 0.139935133 | 0.173593728 | 0.027323708 |
| 0.158971067 | 0.000900572 | 0.12259751  | 0.367011882 |
| 0.001762802 | 0.263856748 | 0.000454582 | 0.005549163 |
| 0.295476366 | 0.411317379 | 0.225232748 | 0.005347209 |
| 0.000540223 | 0.010364612 | 0.013972194 | 0.370957643 |
| 0.13418538  | 0.138824164 | 0.18920908  | 0.034248436 |
| 0.308931782 | 0.022891776 | 0.045976628 | 0.257030058 |
| 0.347125977 | 0.000193159 | 0.01274575  | 0.050767983 |
| 0.039602448 | 0.016749803 | 0.042862592 | 0.004896301 |
| 0.000467188 | 0.001031865 | 0.355588553 | 0.014420942 |
| 0.014447925 | 0.041177519 | 0.004310863 | 0.206089548 |
| 0.06995985  | 0.352952599 | 0.004549857 | 0.053524828 |
| 0.253431546 | 0.063848101 | 0.100009923 | 0.280461094 |
| 0.042683257 | 0.030093461 | 0.019359845 | 0.240392814 |

|             |             |             |             |
|-------------|-------------|-------------|-------------|
| 0.213981078 | 0.002770311 | 0.004553078 | 0.119854119 |
| 0.288638771 | 0.351081199 | 0.36229095  | 0.022209525 |
| 0.028124867 | 0.043410685 | 0.076938665 | 0.147624639 |
| 0.052325035 | 0.091845987 | 0.005463261 | 0.118731674 |
| 0.201260993 | 0.003119003 | 0.006377976 | 0.271610042 |
| 0.002501163 | 0.013186074 | 0.273711183 | 0.232564693 |
| 0.145504467 | 0.007988323 | 0.040891659 | 0.074354963 |
| 0.095348074 | 0.060168318 | 0.192402543 | 0.044122481 |
| 0.115626165 | 0.077573112 | 0.002888663 | 0.302587504 |
| 0.016130445 | 0.111307882 | 1           | 0.011438202 |
| 0.181514559 | 0.056083757 | 0.278170983 | 0.159759419 |
| 0.27015493  | 0.000582469 | 0.01869328  | 0.194619685 |
| 0.068764539 | 0.289090462 | 0.29927415  | 0.016066241 |
| 0.06844029  | 0.046026554 | 0.021986302 | 0.039729829 |
| 0.262847796 | 0.021409009 | 0.028116307 | 0.000157398 |
| 0.004877052 | 0.132229963 | 0.125691476 | 0.003579644 |
| 0.015469535 | 0.010544645 | 0.008612348 | 0.313076992 |
| 0.041615443 | 0.247445718 | 0.001312577 | 0.021210036 |
| 0.034433686 | 0.185487651 | 0.060467402 | 0.02871498  |
| 0.23934773  | 0.032095068 | 0.394023373 | 0.187999997 |
| 0.014898045 | 0.15137064  | 0.016935808 | 0.045534989 |
| 0.18911352  | 0.310198773 | 0.324711174 | 0.233880561 |
| 0.047215611 | 0.174329658 | 0.019476669 | 0.086165897 |
| 0.133655347 | 0.101221526 | 0.005483814 | 0.292846718 |
| 0.000179152 | 0.099785154 | 0.167811338 | 0.027098544 |
| 0.293568197 | 0.061156617 | 0.005911306 | 0.039076822 |
| 0.363221048 | 0.293123566 | 0.268814289 | 0.361801712 |
| 0.017723229 | 0.00048818  | 0.307736901 | 0.193713381 |
| 0.390719399 | 0.073302252 | 0.040484235 | 0.004157428 |
| 0.305391339 | 0.147012237 | 0.233373147 | 0.191767005 |
| 0.152367397 | 0.063951068 | 0.043977687 | 0.184413549 |
| 0.003358748 | 0.056974795 | 0.238574265 | 0.029763762 |
| 0.063658945 | 0.015782803 | 0.274943985 | 0.102209368 |
| 0.046999307 | 0.04220453  | 0.069734837 | 0.007513151 |
| 0.032428833 | 0.32691159  | 0.002462501 | 0.28776813  |
| 0.356343281 | 0.093469258 | 0.316989572 | 0.350245272 |
| 0.093242927 | 0.162290092 | 0.311053075 | 0.326045061 |
| 7.61E-05    | 0.361791719 | 0.262001286 | 0.135655218 |
| 0.367851834 | 0.094258677 | 0.062556721 | 0.1214139   |
| 3.32E-05    | 0.029040582 | 0.038279755 | 0.279205038 |
| 0.293561491 | 0.001085195 | 0.004555371 | 0.224428968 |
| 0.225560703 | 0.002676839 | 0.350047089 | 0.098481124 |
| 0.260558661 | 0.092237596 | 0.032848556 | 0.325443765 |
| 0.054342713 | 0.052112288 | 0.001209025 | 0.160691675 |
| 0.102593283 | 0.013204    | 0.008236963 | 0.358049541 |
| 0.272190605 | 0.13830483  | 0.061117278 | 0.003408897 |
| 0.354267481 | 0.021800807 | 0.260771503 | 0.003370042 |
| 0.205884548 | 0.149390549 | 0.228869044 | 0.316098939 |
| 0.153106628 | 0.190091047 | 0.168777819 | 0.276310011 |
| 0.008818029 | 0.343140784 | 0.358741585 | 0.002808228 |
| 0.186898589 | 0.326499781 | 0.153949901 | 0.038531725 |
| 0.146732883 | 0.006692247 | 0.051377208 | 0.111504582 |
| 0.230453346 | 0.347280834 | 0.0059707   | 0.010537175 |
| 0.198469533 | 0.032876744 | 0.012897926 | 0.059561544 |

|             |             |             |             |
|-------------|-------------|-------------|-------------|
| 0.087208567 | 0.027778224 | 0.012113738 | 0.14501413  |
| 0.254365572 | 0.090084255 | 0.351124767 | 0.01749331  |
| 0.31316651  | 0.001804053 | 0.248557127 | 0.01185523  |
| 0.0736397   | 0.231216897 | 0.353387894 | 0.01250368  |
| 0.008269927 | 0.011085037 | 0.182511865 | 0.196998447 |
| 0.00737153  | 0.038336168 | 0.048911068 | 0.092265506 |
| 0.373850095 | 0.041888132 | 0.072484825 | 0.064813456 |
| 0.187599371 | 0.011552641 | 0.286701789 | 0.092604692 |
| 0.239224221 | 0.053731285 | 0.243650482 | 0.002230013 |
| 0.233913398 | 0.027866019 | 0.066549282 | 0.104012753 |
| 0.402853621 | 0.01420736  | 0.13904163  | 0.020584597 |
| 0.014257059 | 0.000119627 | 0.13556727  | 0.112023867 |
| 0.094808472 | 0.031318576 | 0.073484458 | 0.027539628 |
| 0.330976784 | 0.145220902 | 0.289972662 | 0.051258049 |
| 0.083794328 | 0.002013453 | 0.027116042 | 0.001645058 |
| 0.214276632 | 0.156285218 | 0.206201571 | 0.190782634 |
| 0.03784559  | 0.169868944 | 0.131637726 | 0.098282769 |
| 0.320474433 | 0.017144194 | 0.385081701 | 0.048990383 |
| 0.355479565 | 0.032307979 | 0.065153701 | 0.018099814 |
| 0.029587998 | 0.010021216 | 0.01458708  | 0.014892016 |
| 0.362406068 | 0.016518018 | 0.103467251 | 0.050431451 |
| 0.002026581 | 0.053294302 | 0.24718607  | 0.301633389 |
| 0.170973064 | 0.294442834 | 0.062488877 | 0.16975677  |
| 0.056725603 | 0.086745554 | 0.005805839 | 0.006468486 |
| 0.032223874 | 0.035040074 | 0.269456202 | 0.251214713 |
| 0.349893216 | 0.031867677 | 0.008909564 | 0.015208191 |
| 0.010103714 | 0.295600061 | 0.073161545 | 0.010231269 |
| 0.145650743 | 0.07286836  | 1.87E-05    | 0.033221883 |
| 0.159709194 | 0.027453759 |             |             |
| GGT1        | 0.043527904 | 0.090640226 | 0.001949711 |
| 0.000146506 | 0.001688273 | 0.039702406 | 0.031030876 |
| 0.023082227 | 0.005414547 | 0.008382108 | 0.050371668 |
| 1.69E-05    | 0.054288953 | 0.000413478 | 0.0006135   |
| 0.089275965 | 0.091816689 | 0.037349758 | 0.086998635 |
| 0.028377834 | 0.002873928 | 0.05007084  | 0.042051867 |
| 0.042482725 | 3.58E-05    | 0.010658193 | 0.001695786 |
| 0.021445378 | 0.081397321 | 0.023822205 | 0.007456487 |
| 0.088738433 | 0.07053765  | 0.021672135 | 0.005288136 |
| 0.008026055 | 0.079977667 | 0.000773474 | 0.058138745 |
| 0.072143643 | 0.015063297 | 0.07484691  | 0.000581774 |
| 7.90E-05    | 0.008845479 | 0.017259156 | 0.05079213  |
| 0.022310312 | 0.032359341 | 0.02072411  | 0.019604266 |
| 0.00079105  | 0.058215805 | 0.061847332 | 0.002341519 |
| 0.071761074 | 4.55E-05    | 0.083341946 | 0.014984699 |
| 0.006194397 | 0.036366483 | 0.047471017 | 0.057587147 |
| 0.043056816 | 0.076212038 | 0.09277394  | 0.000700843 |
| 0.010573626 | 0.046895561 | 0.069359304 | 0.049448067 |
| 0.080555691 | 0.00622519  | 0.014207326 | 0.027085413 |
| 0.068197263 | 0.057430488 | 0.044269391 | 0.006829507 |
| 1.03E-05    | 0.018751082 | 0.015684719 | 0.06057732  |
| 0.040416135 | 0.056900347 | 0.048875572 | 0.019453733 |
| 0.033224004 | 0.0003665   | 0.036719822 | 0.088767028 |
| 7.18E-05    | 0.066373325 | 1.37E-05    | 0.004274987 |
| 0.082595237 | 0.055484121 | 0.004783302 | 0.000143694 |

|             |             |             |             |
|-------------|-------------|-------------|-------------|
| 0.008234618 | 0.003391665 | 0.070768304 | 0.049677299 |
| 0.038409327 | 0.074609329 | 0.006543345 | 0.055443674 |
| 0.006133163 | 0.020010788 | 0.079712588 | 0.090152167 |
| 2.91E-05    | 0.00706053  | 0.029992441 | 0.010843387 |
| 0.001990202 | 0.025754459 | 4.88E-05    | 1.56E-05    |
| 0.079715184 | 0.009117661 | 5.63E-05    |             |
| 0.000250829 | 0.050985918 | 0.00987538  | 0.022812395 |
| 0.004317769 | 0.0279326   | 0.018587289 | 0.082389423 |
| 0.02680783  | 0.066118877 | 0.052078426 | 0.035791918 |
| 0.011128703 | 0.077249793 | 0.014124716 | 0.012871175 |
| 0.003413736 | 0.048241696 | 0.074661613 | 0.001423278 |
| 0.094068733 | 0.007241821 | 0.054487502 | 0.081385336 |
| 0.02081322  | 0.04700696  | 0.013160588 | 0.026386915 |
| 0.000251623 | 0.051672631 | 0.032349269 | 0.032899241 |
| 0.006517845 | 0.061525163 | 0.075695196 | 3.67E-05    |
| 0.080122682 | 0.063860793 | 0.000297783 | 0.007976148 |
| 0.014214783 | 0.036962128 | 0.04119989  | 0.001285069 |
| 0.063844922 | 0.014753592 | 0.042883569 | 0.027453957 |
| 0.003181839 | 0.057330831 | 0.046815981 | 0.018494802 |
| 0.011438202 | 1           | 0.012258448 | 0.044673106 |
| 0.069643643 | 0.048920646 | 0.017977532 |             |
| 0.007122136 | 0.042470602 | 0.066636855 | 2.96E-05    |
| 0.087727988 | 0.051719881 | 0.017629935 | 0.061203014 |
| 0.016677233 | 0.014875441 | 0.035277778 | 0.016764373 |
| 0.006684319 | 0.017583336 | 0.069484391 | 0.006498308 |
| 0.046199025 | 7.57E-06    | 0.001833374 | 0.0260336   |
| 0.000740628 | 0.001850008 | 0.006797261 | 0.00380649  |
| 0.000231833 | 0.081848455 | 0.024299771 | 0.060986662 |
| 0.014000324 | 0.00570485  | 0.013385721 | 0.065405504 |
| 0.072712614 | 0.005360165 | 0.069858767 | 0.010980629 |
| 0.002879407 | 0.07485301  | 0.008313748 | 0.056854164 |
| 0.065851398 | 0.027802152 | 0.041701536 | 0.079179882 |
| 0.001728019 | 0.061449882 | 0.025720044 | 0.048941144 |
| 0.003850191 | 0.040834595 | 0.034962335 | 0.033926257 |
| 0.04630095  | 0.084985015 | 1.31E-05    | 0.040132488 |
| 0.005459502 | 0.003736876 | 0.082113957 | 0.035644373 |
| 0.074375009 | 0.015257648 | 0.087335544 | 0.084711073 |
| 0.084009881 | 0.070449532 | 0.002667634 | 0.000119464 |
| 0.010766537 | 0.071089701 | 0.087766612 | 0.029764537 |
| 0.063789853 | 0.000405691 | 0.075089354 | 0.033573469 |
| 0.026339489 | 0.036183402 | 0.045104707 | 0.017041052 |
| 0.049480284 | 0.050957447 | 0.000434727 | 0.019601164 |
| 0.075535472 | 0.003589851 | 0.018014632 | 0.002221744 |
| 0.018770101 | 0.049261192 | 0.013598851 | 0.006232583 |
| 0.00013919  | 0.00626846  | 0.025788029 | 0.089003757 |
| 0.07730055  | 0.081049828 | 0.087997275 | 0.040977212 |
| 0.079023861 | 0.085902215 | 0.036117791 | 0.067216887 |
| 0.051543252 | 0.076382865 | 2.99E-06    | 0.074069691 |
| 0.013573403 | 0.060848927 | 0.077390215 | 0.048121397 |
| 0.006360878 | 0.025754256 | 2.58E-05    | 0.021035624 |
| 0.000335088 | 0.086628612 | 0.071029509 | 0.001010362 |
| 0.09126287  | 0.059640755 | 0.045176492 | 6.01E-05    |
| 0.02018229  | 0.034504926 | 0.073543402 | 0.03036891  |
| 0.000157495 | 0.067395135 | 0.007725952 | 0.015176655 |
|             | 0.04431564  | 0.037202526 | 0.007979199 |



|             |             |             |             |
|-------------|-------------|-------------|-------------|
| 0.004065326 | 0.091441429 | 0.069640073 | 0.056829395 |
| 0.034443848 | 7.45E-05    | 0.068388403 | 0.002483234 |
| 0.062650236 | 0.000963312 | 0.058330944 | 0.064898576 |
| 0.072135597 | 0.069269431 | 0.04757509  | 0.066115844 |
| 0.06362489  | 0.072815654 | 0.000207256 | 0.063327192 |
| 0.077267502 | 0.000319327 | 0.046386993 | 0.080773512 |
| 0.038698169 | 0.02599391  | 0.053943995 | 0.000522032 |
| 0.031777194 | 0.034063135 | 0.072434827 | 0.084553157 |
| 0.005958937 | 0.006167843 | 0.070148667 | 0.021348903 |
| 0.013324268 | 0.025443378 | 0.048511401 | 0.003369932 |
| 0.004801559 | 0.062503081 | 0.08168222  | 0.046351606 |
| 0.077466906 | 0.005543792 | 0.073408829 | 0.001831729 |
| 0.066460449 | 0.007980992 | 0.033350767 | 0.044641298 |
| 0.064029568 | 0.000991996 | 0.000191112 | 0.002243474 |
| 0.067928926 | 0.072034716 | 0.006219792 | 0.023275377 |
| 0.021197473 | 0.034106036 | 0.082513777 | 0.008551314 |
| 0.035432416 | 0.023485713 | 0.073955757 | 0.003551589 |
| 0.084309504 | 0.034449732 | 0.071345721 | 0.020251937 |
| 0.065447168 | 0.008045005 | 0.054788789 | 0.010655875 |
| 0.017598674 | 0.034925581 | 0.08032693  | 0.009043993 |
| 0.057432452 | 0.011985736 | 0.011745124 | 4.94E-06    |
| 0.051125908 | 0.024230913 | 0.049109704 | 0.005674129 |
| 0.026889158 | 0.003059413 | 0.092432438 | 0.041587388 |
| 0.071598879 | 0.01481334  | 0.022938976 | 3.51E-05    |
| 0.013346351 | 0.000515622 | 0.065269817 | 0.062174939 |
| 0.058641119 | 0.038530747 | 0.011122374 | 0.054174318 |
| 0.050702941 | 0.030514606 | 0.079585706 | 0.000721288 |
| 0.089303994 | 0.023658494 | 0.065397473 | 0.010205457 |
| 0.039715366 | 0.008367567 | 0.020919462 | 0.002146863 |
| 0.014423344 | 0.007802356 | 0.081292249 | 0.010206693 |
| 0.035737294 | 0.01060398  | 0.001254317 | 0.017286955 |
| 0.057085058 | 0.066283467 | 0.044270455 | 0.058713567 |
| 0.012650228 | 0.06825198  | 0.007823357 | 0.032844547 |
| 0.00061666  | 0.000683649 | 0.004521772 | 0.019370267 |
| 0.07100694  | 0.068306587 | 0.086019453 | 0.006644568 |
| 0.007769446 | 0.01013266  | 0.001375445 | 0.056057521 |
| 0.038678228 | 0.000858093 | 0.050913333 | 0.028709694 |
| 7.69E-07    | 0.012216589 | 0.058748299 | 0.004402293 |
| GINS4       | 0.248902105 | 0.41663089  | 0.052446894 |
| 0.009968366 | 0.056924369 | 0.142901306 | 0.123717906 |
| 0.254752781 | 0.089729484 | 0.068669406 | 0.213522266 |
| 0.004859771 | 0.341166731 | 0.025420846 | 0.080752657 |
| 0.462393852 | 0.466969462 | 0.182478694 | 0.476641452 |
| 0.254224122 | 0.062711085 | 0.265728098 | 0.204865848 |
| 0.156116956 | 0.005040488 | 0.064393527 | 0.019119569 |
| 0.252761913 | 0.461823466 | 0.147919669 | 0.148116374 |
| 0.420780544 | 0.382555396 | 0.198279697 | 0.153909494 |
| 0.110973926 | 0.389247801 | 0.076457064 | 0.303919737 |
| 0.389588604 | 0.112582935 | 0.378002132 | 0.019607828 |
| 0.000884075 | 0.064443946 | 0.227103029 | 0.246801579 |
| 0.251809232 | 0.134799548 | 0.132323718 | 0.088432711 |
| 0.096452491 | 0.246045925 | 0.361659076 | 0.09229703  |
| 0.315383689 | 0.00148779  | 0.365877509 | 0.231754529 |
| 0.056375277 | 0.225155666 | 0.233676504 | 0.258003348 |

|             |             |             |             |
|-------------|-------------|-------------|-------------|
| 0.147418702 | 0.340343738 | 0.448325618 | 0.020557041 |
| 0.052177107 | 0.262809206 | 0.319673408 | 0.205619822 |
| 0.389718436 | 0.181334712 | 0.156370306 | 0.211077    |
| 0.284891228 | 0.365776444 | 0.195331177 | 0.142669448 |
| 0.001595262 | 0.081565608 | 0.142541459 | 0.28652161  |
| 0.227570717 | 0.250245408 | 0.259161242 | 0.113572387 |
| 0.235086954 | 0.020910216 | 0.240260806 | 0.463155891 |
| 0.011548596 | 0.342241091 | 0.006573858 | 0.133480941 |
| 0.368693086 | 0.437838023 | 0.281301133 | 0.043209445 |
| 0.020100546 | 0.126558446 | 0.164392058 | 0.394427533 |
| 0.266126157 | 0.257851859 | 0.306097959 | 0.127091266 |
| 0.331873769 | 0.141376415 | 0.208892344 | 0.371611399 |
| 0.423014109 | 0.015660922 | 0.162275474 | 0.137442283 |
| 0.193675345 | 0.062140451 | 0.136924392 | 0.025867224 |
| 0.005817622 | 0.047159514 | 0.422119442 | 0.132730934 |
| 0.052613229 | 0.118537158 | 0.042809235 | 0.220481814 |
| 0.243146751 | 0.437620926 | 0.063810001 | 0.142469021 |
| 0.273441284 | 0.139612607 | 0.193114766 | 0.302339776 |
| 0.177497559 | 0.221080328 | 0.120738038 | 0.360633988 |
| 0.373358688 | 0.049472891 | 0.067054575 | 0.197638181 |
| 0.311222279 | 0.441357162 | 0.46853263  | 0.223718181 |
| 0.124501025 | 0.184672569 | 0.167159545 | 0.203419666 |
| 0.151138977 | 0.267762679 | 0.094694508 | 0.252155352 |
| 0.326706753 | 0.026062369 | 0.053611246 | 0.361055666 |
| 0.018244943 | 0.141037053 | 0.374140816 | 0.325667879 |
| 0.256018458 | 0.015471626 | 0.112863907 | 0.146349947 |
| 0.208114367 | 0.142323587 | 0.26154629  | 0.102003375 |
| 0.208506853 | 0.161099057 | 0.034915603 | 0.325280571 |
| 0.090861099 | 0.239277997 | 0.181514559 | 0.048920646 |
| 1           | 0.259858887 | 0.351243754 | 0.261542744 |
| 0.306030191 | 0.00109145  | 0.067375104 | 0.253011331 |
| 0.16882823  | 0.39320241  | 0.405016066 | 0.087374045 |
| 0.195316027 | 0.204257062 | 0.115048867 | 0.161199645 |
| 0.395883787 | 0.118509796 | 0.1066212   | 0.000933278 |
| 0.086668186 | 0.194064719 | 0.261489527 | 0.0727449   |
| 0.11398645  | 0.098566389 | 0.144349181 | 0.372410488 |
| 0.131729404 | 0.320336957 | 0.051376683 | 0.173953323 |
| 0.168374228 | 0.262101253 | 0.1864058   | 0.206906318 |
| 0.290815066 | 0.17213922  | 0.406962719 | 0.304012757 |
| 0.147832157 | 0.231833448 | 0.164395583 | 0.209402767 |
| 0.241615581 | 0.379019363 | 0.34810909  | 0.337842436 |
| 0.154724447 | 0.308191952 | 0.192324844 | 0.176765866 |
| 0.266964185 | 0.271331721 | 0.074212509 | 0.433191312 |
| 0.001496517 | 0.22408045  | 0.221101749 | 0.173525006 |
| 0.390100953 | 0.132649064 | 0.065647306 | 0.214155911 |
| 0.48158594  | 0.440794316 | 0.415399768 | 0.387842484 |
| 0.177629317 | 0.022239693 | 0.444581229 | 0.281604961 |
| 0.461031228 | 0.225715828 | 0.153968245 | 0.111000614 |
| 0.415640987 | 0.258974169 | 0.235337413 | 0.244241595 |
| 0.234768787 | 0.212988208 | 0.189303652 | 0.298962605 |
| 0.022201971 | 0.148566066 | 0.239705366 | 0.093116941 |
| 0.158600175 | 0.119872728 | 0.338150383 | 0.222584275 |
| 0.18529769  | 0.197839871 | 0.156808933 | 0.052179247 |
| 0.119712302 | 0.428460461 | 0.030929129 | 0.43793221  |

|             |             |             |             |
|-------------|-------------|-------------|-------------|
| 0.468086247 | 0.246195867 | 0.382872487 | 0.47634455  |
| 0.222038067 | 0.273954956 | 0.384018071 | 0.432882659 |
| 0.002601267 | 0.378813901 | 0.290683933 | 0.26627936  |
| 0.381176745 | 0.178765248 | 0.224658028 | 0.218434267 |
| 0.002567917 | 0.116751728 | 0.122249371 | 0.43891533  |
| 0.373534608 | 0.02126458  | 0.030570125 | 0.324058737 |
| 0.257642235 | 0.051123511 | 0.465786446 | 0.175372397 |
| 0.348980332 | 0.23421911  | 0.09504219  | 0.329324883 |
| 0.110334425 | 0.266640633 | 0.014333491 | 0.220669636 |
| 0.243861929 | 0.113223158 | 0.033954044 | 0.475343659 |
| 0.365981884 | 0.2381579   | 0.16861248  | 0.004597859 |
| 0.384220252 | 0.093642549 | 0.290277132 | 0.098724998 |
| 0.350189172 | 0.25082182  | 0.363531474 | 0.344359969 |
| 0.260085167 | 0.297696973 | 0.279440783 | 0.352352318 |
| 0.054094796 | 0.341684109 | 0.383007623 | 0.03721125  |
| 0.237446623 | 0.405458051 | 0.195953488 | 0.105948386 |
| 0.263833064 | 0.032125233 | 0.130631267 | 0.260822998 |
| 0.34506204  | 0.388576932 | 0.042876883 | 0.166027797 |
| 0.295262627 | 0.203309788 | 0.071835168 | 0.237263302 |
| 0.182405816 | 0.10889505  | 0.163536333 | 0.259335337 |
| 0.37408349  | 0.175623125 | 0.379119171 | 0.069353702 |
| 0.402944888 | 0.057504    | 0.392297818 | 0.156196636 |
| 0.204434843 | 0.223154971 | 0.374012371 | 0.120988653 |
| 0.012705061 | 0.114041883 | 0.26906291  | 0.318092311 |
| 0.058564025 | 0.148315768 | 0.137545744 | 0.172260157 |
| 0.444982184 | 0.226267042 | 0.172239627 | 0.243505094 |
| 0.320281512 | 0.041521309 | 0.424790897 | 0.233522671 |
| 0.327362322 | 0.17021506  | 0.333819175 | 0.006880075 |
| 0.261391195 | 0.084068188 | 0.216404033 | 0.17022537  |
| 0.432294341 | 0.087416511 | 0.225103718 | 0.137929435 |
| 0.101419198 | 0.006947234 | 0.271693315 | 0.181422754 |
| 0.185453869 | 0.233771403 | 0.249711397 | 0.09186462  |
| 0.460911377 | 0.24115376  | 0.326467881 | 0.201985443 |
| 0.196808302 | 0.00954341  | 0.07693755  | 0.037788679 |
| 0.312698012 | 0.288621004 | 0.268792368 | 0.245843022 |
| 0.221637209 | 0.240269648 | 0.239640018 | 0.194907791 |
| 0.379880581 | 0.085046911 | 0.455025149 | 0.245489803 |
| 0.35084555  | 0.225515922 | 0.167898427 | 0.216579416 |
| 0.106833615 | 0.11202157  | 0.088313891 | 0.177655745 |
| 0.401541439 | 0.220535751 | 0.190695002 | 0.219302965 |
| 0.030825805 | 0.202343911 | 0.340356184 | 0.302980094 |
| 0.231135586 | 0.267097139 | 0.24138233  | 0.299712785 |
| 0.217347937 | 0.234090724 | 0.020279106 | 0.01187654  |
| 0.112213948 | 0.115167529 | 0.406517612 | 0.388861568 |
| 0.455897533 | 0.223402641 | 0.073501577 | 0.136301567 |
| 0.109885159 | 0.355069909 | 0.143693595 | 0.076121978 |
| 0.256266354 | 0.238831032 | 0.001092172 | 0.219922693 |
| 0.268878728 | 0.196296893 |             |             |
| GMD5        | 0.2037456   | 0.391892194 | 0.050933478 |
| 0.003920267 | 0.036314195 | 0.175450646 | 0.120916484 |
| 0.169241299 | 0.068750101 | 0.038146934 | 0.267674543 |
| 0.006622341 | 0.266476878 | 0.030981967 | 0.062230344 |
| 0.396901421 | 0.391338724 | 0.16573366  | 0.420161705 |
| 0.205203622 | 0.02663318  | 0.3226421   | 0.18501411  |

|             |             |             |             |
|-------------|-------------|-------------|-------------|
| 0.156568025 | 0.007576995 | 0.045109666 | 0.008211687 |
| 0.143029269 | 0.386771179 | 0.142670829 | 0.08175696  |
| 0.354718121 | 0.300723504 | 0.073761077 | 0.060305199 |
| 0.031071028 | 0.404503226 | 0.024639843 | 0.235171032 |
| 0.297594451 | 0.062400477 | 0.299395704 | 0.019412245 |
| 0.000187576 | 0.047125217 | 0.129347861 | 0.275564469 |
| 0.177112173 | 0.153355846 | 0.141752981 | 0.055033065 |
| 0.025832173 | 0.296602814 | 0.384539058 | 0.025984224 |
| 0.345914192 | 0.000456029 | 0.374959847 | 0.129485837 |
| 0.052474653 | 0.154986023 | 0.127506748 | 0.268343921 |
| 0.191693331 | 0.363468455 | 0.401736297 | 0.019207136 |
| 0.049656384 | 0.18465858  | 0.240530912 | 0.169265465 |
| 0.368013406 | 0.087013243 | 0.079622547 | 0.080037304 |
| 0.223168633 | 0.286422591 | 0.246537856 | 0.114647003 |
| 0.002114403 | 0.069348027 | 0.053954553 | 0.256931247 |
| 0.166307758 | 0.301712375 | 0.239042644 | 0.058296696 |
| 0.14513446  | 0.028898815 | 0.250120981 | 0.407376003 |
| 0.007374098 | 0.287092912 | 0.00591822  | 0.106988703 |
| 0.31796762  | 0.338399709 | 0.271076728 | 0.032951846 |
| 0.02501481  | 0.110380497 | 0.106580179 | 0.290171088 |
| 0.213633676 | 0.177321853 | 0.332347008 | 0.039955093 |
| 0.23659003  | 0.085884929 | 0.105837729 | 0.380936537 |
| 0.383764455 | 0.031377947 | 0.123157041 | 0.169087667 |
| 0.065539876 | 0.025064331 | 0.142871586 | 0.01446645  |
| 0.006093269 | 0.05441669  | 0.353362091 | 0.114638759 |
| 0.033327078 | 0.107977274 | 0.027514185 | 0.176995792 |
| 0.144571171 | 0.364028486 | 0.039009905 | 0.11001098  |
| 0.214451884 | 0.13932317  | 0.111380169 | 0.251740158 |
| 0.069307085 | 0.142166336 | 0.094644076 | 0.356317973 |
| 0.421761847 | 0.043527268 | 0.055380038 | 0.243188254 |
| 0.224791076 | 0.390005445 | 0.421679023 | 0.153937871 |
| 0.062990736 | 0.176002388 | 0.06480286  | 0.208781931 |
| 0.166720904 | 0.260973374 | 0.051633995 | 0.316222315 |
| 0.360853891 | 0.014984845 | 0.049832636 | 0.328158253 |
| 0.007874021 | 0.068161728 | 0.375775492 | 0.300809927 |
| 0.208641222 | 0.006427352 | 0.056446366 | 0.136366952 |
| 0.208822829 | 0.115732931 | 0.263975545 | 0.046525396 |
| 0.257444128 | 0.062454569 | 0.0359367   | 0.232763365 |
| 0.090986962 | 0.26140572  | 0.056083757 | 0.017977532 |
| 0.259858887 | 1           | 0.326158959 | 0.246995289 |
| 0.257072722 | 0.000366492 | 0.03788789  | 0.231325685 |
| 0.068597927 | 0.331826034 | 0.386472207 | 0.094452988 |
| 0.232269998 | 0.071757318 | 0.118718122 | 0.071669403 |
| 0.390001956 | 0.057961786 | 0.05061541  | 0.001832244 |
| 0.070679089 | 0.070386569 | 0.163800567 | 0.073004048 |
| 0.063378866 | 0.069136721 | 0.100588966 | 0.338487642 |
| 0.144237165 | 0.273462522 | 0.067193849 | 0.078316437 |
| 0.103236857 | 0.259136441 | 0.072848021 | 0.108785199 |
| 0.259680308 | 0.095762697 | 0.304345374 | 0.336173793 |
| 0.077199239 | 0.267287272 | 0.052324287 | 0.125342073 |
| 0.178096419 | 0.326970008 | 0.276019448 | 0.310059922 |
| 0.110984897 | 0.319823061 | 0.111413579 | 0.235142778 |
| 0.243922954 | 0.242883114 | 0.075343124 | 0.421792585 |
| 0.002358545 | 0.249551533 | 0.159081884 | 0.054822216 |

|             |             |             |             |
|-------------|-------------|-------------|-------------|
| 0.37017733  | 0.150506861 | 0.064983121 | 0.154465511 |
| 0.42467847  | 0.42942863  | 0.409737917 | 0.302136905 |
| 0.08284728  | 0.032629595 | 0.435825714 | 0.288624017 |
| 0.37538482  | 0.139856989 | 0.051455886 | 0.058686618 |
| 0.37608689  | 0.222070116 | 0.216474696 | 0.160797753 |
| 0.165216977 | 0.083189938 | 0.185975002 | 0.292063926 |
| 0.010487589 | 0.085119666 | 0.203827646 | 0.034737357 |
| 0.065792287 | 0.065620179 | 0.294263263 | 0.291575914 |
| 0.071841957 | 0.076534234 | 0.054581415 | 0.042269759 |
| 0.130733543 | 0.401030284 | 0.010680081 | 0.429661721 |
| 0.423400818 | 0.227415647 | 0.332329311 | 0.433408448 |
| 0.197262686 | 0.305370386 | 0.353527556 | 0.37470424  |
| 0.003456678 | 0.282276399 | 0.214760723 | 0.334679084 |
| 0.307047245 | 0.204437385 | 0.128710732 | 0.095072805 |
| 0.003970352 | 0.11996635  | 0.034730916 | 0.445843248 |
| 0.324496066 | 0.021810662 | 0.008298035 | 0.311691119 |
| 0.192064507 | 0.024495373 | 0.432559536 | 0.143727997 |
| 0.332902568 | 0.174775576 | 0.074525499 | 0.243005624 |
| 0.028885393 | 0.132803693 | 0.009187227 | 0.203020133 |
| 0.128856605 | 0.047873406 | 0.016617354 | 0.423768693 |
| 0.358375808 | 0.263364804 | 0.189237498 | 0.002689169 |
| 0.300210709 | 0.031557124 | 0.245934074 | 0.108318447 |
| 0.38335581  | 0.289207729 | 0.372414267 | 0.268095521 |
| 0.214655929 | 0.326239638 | 0.316758807 | 0.329191361 |
| 0.020083642 | 0.263300944 | 0.312956508 | 0.028958552 |
| 0.180166111 | 0.345824336 | 0.113961846 | 0.124665832 |
| 0.295326291 | 0.011884622 | 0.166635881 | 0.232059437 |
| 0.347682751 | 0.328022698 | 0.03788291  | 0.148448687 |
| 0.307819571 | 0.116679582 | 0.061796369 | 0.185101902 |
| 0.242275446 | 0.035036173 | 0.071499785 | 0.294373006 |
| 0.379460164 | 0.223982239 | 0.322078946 | 0.028929616 |
| 0.338431249 | 0.069176842 | 0.370544233 | 0.100126732 |
| 0.229079428 | 0.161784275 | 0.282776562 | 0.065346173 |
| 0.007507618 | 0.094066691 | 0.283336269 | 0.351526821 |
| 0.055865197 | 0.160681488 | 0.111286151 | 0.149482009 |
| 0.370899721 | 0.091934061 | 0.221063299 | 0.212155028 |
| 0.359321109 | 0.016517764 | 0.432585098 | 0.202031884 |
| 0.334386826 | 0.0880919   | 0.310195613 | 0.003554357 |
| 0.211044084 | 0.045268809 | 0.143775871 | 0.117533033 |
| 0.328569843 | 0.069617742 | 0.239486482 | 0.104924762 |
| 0.040550899 | 0.011386549 | 0.335345595 | 0.075275519 |
| 0.245703271 | 0.104351606 | 0.206308572 | 0.021474774 |
| 0.438547479 | 0.210879408 | 0.306006637 | 0.073033696 |
| 0.103032594 | 0.002491705 | 0.040923    | 0.038769814 |
| 0.332911878 | 0.332314676 | 0.242398149 | 0.16575635  |
| 0.133381628 | 0.209831183 | 0.280805821 | 0.113651608 |
| 0.319716923 | 0.036372515 | 0.389002234 | 0.143937809 |
| 0.245889159 | 0.106923217 | 0.203199319 | 0.121866466 |
| 0.077138136 | 0.056587084 | 0.066454298 | 0.132821785 |
| 0.323743334 | 0.122842455 | 0.13749237  | 0.10567173  |
| 0.029748053 | 0.105034326 | 0.301100081 | 0.227986283 |
| 0.191615086 | 0.207823063 | 0.119557126 | 0.347273487 |
| 0.086395706 | 0.136493525 | 0.007259655 | 0.004681187 |
| 0.036202501 | 0.07555829  | 0.404899033 | 0.389333844 |

|             |             |             |             |
|-------------|-------------|-------------|-------------|
| 0.396403746 | 0.093950899 | 0.060263104 | 0.110764798 |
| 0.038775431 | 0.294268551 | 0.157198184 | 0.02617568  |
| 0.216519216 | 0.078551244 | 0.002147919 | 0.141142619 |
| 0.30219248  | 0.083861905 |             |             |
| GNA15       | 0.324037336 | 0.502798205 | 0.106615535 |
| 0.048129554 | 0.152809919 | 0.293621184 | 0.282290414 |
| 0.331196192 | 0.149829737 | 0.208570773 | 0.366256368 |
| 0.002463085 | 0.326984809 | 0.02291572  | 0.092398567 |
| 0.496956438 | 0.506582797 | 0.369927603 | 0.48934743  |
| 0.318252284 | 0.200135633 | 0.366748732 | 0.41431771  |
| 0.310890948 | 0.003100499 | 0.182146933 | 0.090356766 |
| 0.317517386 | 0.476049108 | 0.251899548 | 0.338203337 |
| 0.437849874 | 0.428082068 | 0.403859628 | 0.324280705 |
| 0.225309324 | 0.47038713  | 0.095636626 | 0.368126767 |
| 0.358309405 | 0.293987681 | 0.415696605 | 0.022804448 |
| 0.005558789 | 0.153073306 | 0.284849182 | 0.397542909 |
| 0.303144584 | 0.278509815 | 0.217304842 | 0.236924307 |
| 0.141371474 | 0.380823613 | 0.359541511 | 0.137536457 |
| 0.419468318 | 0.009533988 | 0.462280446 | 0.243000307 |
| 0.101122418 | 0.334209966 | 0.324895895 | 0.40214702  |
| 0.30308193  | 0.445069261 | 0.510730211 | 0.063932833 |
| 0.116881012 | 0.390574093 | 0.355584398 | 0.429039181 |
| 0.455367926 | 0.37364859  | 0.341526631 | 0.308691771 |
| 0.394772388 | 0.356823961 | 0.319343103 | 0.216811254 |
| 0.001894331 | 0.211275802 | 0.346378321 | 0.292251659 |
| 0.33891806  | 0.386407744 | 0.347557416 | 0.274516204 |
| 0.403063862 | 0.034208143 | 0.397268293 | 0.518224417 |
| 0.035984308 | 0.339911506 | 0.016664997 | 0.190593825 |
| 0.389951885 | 0.436142222 | 0.389433202 | 0.12186765  |
| 0.023844093 | 0.15877835  | 0.147092233 | 0.361525708 |
| 0.385740247 | 0.432652273 | 0.409986704 | 0.106358018 |
| 0.311114306 | 0.215979307 | 0.373790502 | 0.47575224  |
| 0.480242024 | 0.011798876 | 0.189027157 | 0.27995133  |
| 0.315972027 | 0.175471041 | 0.286373077 | 0.046078583 |
| 0.022737668 | 0.019492566 | 0.441932062 | 0.203503615 |
| 0.158560685 | 0.268947669 | 0.127957173 | 0.421966972 |
| 0.306804977 | 0.399863902 | 0.160764961 | 0.314193844 |
| 0.379843469 | 0.310933159 | 0.417289026 | 0.409488866 |
| 0.349601027 | 0.26935625  | 0.200333393 | 0.452422326 |
| 0.420063279 | 0.110851608 | 0.125407258 | 0.366365766 |
| 0.307126242 | 0.479773757 | 0.527947628 | 0.314243162 |
| 0.310118431 | 0.27897314  | 0.347691542 | 0.421097851 |
| 0.293720704 | 0.326803025 | 0.070372457 | 0.370478905 |
| 0.426268237 | 0.045173643 | 0.104381674 | 0.387601697 |
| 0.070765285 | 0.282313179 | 0.444779419 | 0.432608172 |
| 0.405183611 | 0.077874039 | 0.303850532 | 0.322694197 |
| 0.3286048   | 0.315109792 | 0.394050973 | 0.283110672 |
| 0.351146194 | 0.356763237 | 0.08166799  | 0.316475085 |
| 0.174804489 | 0.349360532 | 0.278170983 | 0.069643643 |
| 0.351243754 | 0.326158959 | 1           | 0.395359187 |
| 0.358806086 | 0.009010493 | 0.210513385 | 0.34984119  |
| 0.327674867 | 0.352804667 | 0.509213662 | 0.159906297 |
| 0.288690653 | 0.260541832 | 0.190862104 | 0.347348976 |
| 0.356251294 | 0.285516821 | 0.264187191 | 0.0019045   |

|             |             |             |             |
|-------------|-------------|-------------|-------------|
| 0.192228106 | 0.352827581 | 0.385528446 | 0.07181731  |
| 0.294636524 | 0.159003875 | 0.117776273 | 0.448784323 |
| 0.260060874 | 0.41068718  | 0.03204472  | 0.126165959 |
| 0.318336983 | 0.428014562 | 0.394754407 | 0.278604452 |
| 0.436975518 | 0.358231569 | 0.39265346  | 0.396399073 |
| 0.301551598 | 0.387723678 | 0.13424249  | 0.29703704  |
| 0.390804078 | 0.454581353 | 0.399137717 | 0.410137025 |
| 0.316165326 | 0.325977725 | 0.278400428 | 0.323932667 |
| 0.38629834  | 0.380082253 | 0.126340497 | 0.502758377 |
| 0.00157109  | 0.370539952 | 0.428898938 | 0.146619845 |
| 0.497601094 | 0.29777964  | 0.103683395 | 0.271346697 |
| 0.498964539 | 0.502542917 | 0.392810101 | 0.409898452 |
| 0.20726633  | 0.016089901 | 0.468400341 | 0.40792381  |
| 0.481569477 | 0.398783144 | 0.301489795 | 0.06400374  |
| 0.474273403 | 0.288156336 | 0.414616276 | 0.384128468 |
| 0.399186642 | 0.335793916 | 0.276713401 | 0.296303079 |
| 0.016316364 | 0.313520212 | 0.393618442 | 0.232157847 |
| 0.362876405 | 0.223093071 | 0.428682906 | 0.350265553 |
| 0.375767447 | 0.325790737 | 0.362098844 | 0.128854491 |
| 0.227600654 | 0.511300155 | 0.037896877 | 0.44624406  |
| 0.517673809 | 0.363210218 | 0.470840365 | 0.506108182 |
| 0.341910544 | 0.401915076 | 0.463829554 | 0.398420241 |
| 0.001444767 | 0.390642908 | 0.313013937 | 0.36611813  |
| 0.435687208 | 0.332227862 | 0.200293006 | 0.355704191 |
| 0.001701583 | 0.203417424 | 0.242189196 | 0.487392482 |
| 0.450239883 | 0.049835895 | 0.035972394 | 0.429283341 |
| 0.327487292 | 0.041964038 | 0.525015851 | 0.381069192 |
| 0.453555544 | 0.41093606  | 0.236821849 | 0.348258457 |
| 0.197915752 | 0.331694811 | 0.046382666 | 0.437079364 |
| 0.361669569 | 0.070665431 | 0.129441551 | 0.506284727 |
| 0.419176285 | 0.404231429 | 0.298403101 | 0.022039909 |
| 0.344167129 | 0.248806051 | 0.433695367 | 0.143721239 |
| 0.407047227 | 0.384975263 | 0.446736851 | 0.368783509 |
| 0.41082213  | 0.419272189 | 0.39697615  | 0.431069947 |
| 0.133943025 | 0.366521161 | 0.40993703  | 0.093538592 |
| 0.3243421   | 0.470861638 | 0.410006094 | 0.236683626 |
| 0.377021435 | 0.115878107 | 0.259233734 | 0.304289362 |
| 0.448118126 | 0.468207488 | 0.09569936  | 0.189004188 |
| 0.420826672 | 0.324906155 | 0.157506464 | 0.349219915 |
| 0.315750971 | 0.149699002 | 0.110819715 | 0.382359086 |
| 0.473991543 | 0.337120215 | 0.444601679 | 0.21900135  |
| 0.436302589 | 0.075661944 | 0.381799451 | 0.294866466 |
| 0.313375462 | 0.354653673 | 0.34864671  | 0.110310327 |
| 0.047234957 | 0.166105278 | 0.415031863 | 0.41061071  |
| 0.11809424  | 0.23720412  | 0.319200711 | 0.389190444 |
| 0.484314948 | 0.407527701 | 0.320547063 | 0.342247932 |
| 0.409533448 | 0.143983794 | 0.491369945 | 0.354985742 |
| 0.396832203 | 0.379592866 | 0.421158548 | 0.012198983 |
| 0.395708165 | 0.241153138 | 0.180217681 | 0.396286919 |
| 0.415199858 | 0.19046081  | 0.402657855 | 0.208524891 |
| 0.182079302 | 0.004901038 | 0.363333366 | 0.316853742 |
| 0.325115803 | 0.250263711 | 0.361390162 | 0.140076028 |
| 0.530164286 | 0.396630305 | 0.39349403  | 0.227692544 |
| 0.413116813 | 0.019172154 | 0.218926996 | 0.056134535 |

|             |             |             |             |
|-------------|-------------|-------------|-------------|
| 0.387046179 | 0.390233386 | 0.370611179 | 0.360168297 |
| 0.194179993 | 0.419995299 | 0.400859748 | 0.407406295 |
| 0.46250368  | 0.168292473 | 0.509926396 | 0.301182724 |
| 0.342035292 | 0.373167639 | 0.302087373 | 0.325992119 |
| 0.253563974 | 0.135991382 | 0.169382794 | 0.180400415 |
| 0.466893969 | 0.289655838 | 0.410094362 | 0.325752906 |
| 0.083994709 | 0.407787748 | 0.360494424 | 0.373831634 |
| 0.429293379 | 0.33619783  | 0.338391482 | 0.396929592 |
| 0.303347706 | 0.306724032 | 0.085173516 | 0.061032141 |
| 0.286352085 | 0.254970411 | 0.384605436 | 0.404174689 |
| 0.494270215 | 0.252445123 | 0.144189871 | 0.173381751 |
| 0.098660358 | 0.319983449 | 0.324385958 | 0.158210067 |
| 0.402219025 | 0.268307674 | 0.001359792 | 0.243175654 |
| 0.395266413 | 0.382821279 |             |             |
| GNPTAB      | 0.225345732 | 0.463695045 | 0.072247191 |
| 0.014298109 | 0.076434369 | 0.182498263 | 0.158630913 |
| 0.223692855 | 0.116525294 | 0.098676148 | 0.282795655 |
| 0.004515179 | 0.313350641 | 0.030013383 | 0.084346613 |
| 0.46788064  | 0.470506325 | 0.211131687 | 0.474694307 |
| 0.234474169 | 0.085834565 | 0.304804351 | 0.228346401 |
| 0.189334116 | 0.005484746 | 0.095400879 | 0.028354586 |
| 0.21632727  | 0.452329943 | 0.179458396 | 0.191640713 |
| 0.420911731 | 0.380911496 | 0.201891637 | 0.157315128 |
| 0.100157797 | 0.448540426 | 0.055219216 | 0.300093732 |
| 0.35150358  | 0.149050198 | 0.373791703 | 0.023621015 |
| 0.001105044 | 0.090068266 | 0.198726091 | 0.283444933 |
| 0.242442184 | 0.172413413 | 0.160634507 | 0.117959724 |
| 0.071114987 | 0.313439    | 0.367581135 | 0.070833785 |
| 0.386738642 | 0.0023318   | 0.431508226 | 0.197984449 |
| 0.076934131 | 0.228440974 | 0.207974059 | 0.294882531 |
| 0.201097764 | 0.408956553 | 0.474641972 | 0.036321461 |
| 0.077265261 | 0.244516105 | 0.313930218 | 0.229493667 |
| 0.427132777 | 0.201780399 | 0.189082871 | 0.174441377 |
| 0.289991227 | 0.342431474 | 0.227338144 | 0.165459906 |
| 0.002186439 | 0.112942974 | 0.155582097 | 0.266210488 |
| 0.214076381 | 0.317713228 | 0.24232081  | 0.140023371 |
| 0.223945534 | 0.033509469 | 0.254243711 | 0.480602075 |
| 0.017149137 | 0.327851427 | 0.01352921  | 0.151462818 |
| 0.374807325 | 0.411577618 | 0.300789023 | 0.06830904  |
| 0.024496837 | 0.143555721 | 0.136729059 | 0.349755707 |
| 0.248582582 | 0.249259449 | 0.372444089 | 0.079689087 |
| 0.291522688 | 0.164964819 | 0.237699287 | 0.436014937 |
| 0.451338178 | 0.01692452  | 0.171023972 | 0.174536071 |
| 0.174392771 | 0.080702677 | 0.173375099 | 0.025894413 |
| 0.010645873 | 0.032503501 | 0.418825966 | 0.160302986 |
| 0.079212114 | 0.156790742 | 0.06167198  | 0.241479667 |
| 0.21699134  | 0.40372521  | 0.084158225 | 0.176363807 |
| 0.278697473 | 0.174445029 | 0.207913349 | 0.318589139 |
| 0.176766225 | 0.222661335 | 0.1479783   | 0.412728484 |
| 0.426045157 | 0.068885838 | 0.085695073 | 0.255722637 |
| 0.283849595 | 0.451706412 | 0.492911464 | 0.253757946 |
| 0.153982316 | 0.20856025  | 0.178457935 | 0.256788956 |
| 0.18364478  | 0.247433709 | 0.056068409 | 0.304580093 |
| 0.398432619 | 0.028236622 | 0.077306711 | 0.363805064 |



|             |             |             |             |
|-------------|-------------|-------------|-------------|
| 0.024759215 | 0.162091838 | 0.426955971 | 0.357485115 |
| 0.241067998 | 0.024450045 | 0.144233761 | 0.183273748 |
| 0.229187795 | 0.17734123  | 0.294169462 | 0.12889656  |
| 0.253441469 | 0.177681212 | 0.056145357 | 0.292430796 |
| 0.123392945 | 0.245024645 | 0.159759419 | 0.042470602 |
| 0.261542744 | 0.246995289 | 0.395359187 | 1           |
| 0.298619649 | 0.001717002 | 0.096922776 | 0.242941066 |
| 0.17910833  | 0.356807156 | 0.459683682 | 0.116422193 |
| 0.214797205 | 0.168176434 | 0.144036498 | 0.178782851 |
| 0.385862432 | 0.146900052 | 0.136779767 | 0.0018503   |
| 0.121561326 | 0.182200673 | 0.244851716 | 0.078779972 |
| 0.145716845 | 0.114249651 | 0.136127096 | 0.409612956 |
| 0.170227484 | 0.335225318 | 0.047841528 | 0.119837968 |
| 0.196313778 | 0.314810333 | 0.192220178 | 0.200922577 |
| 0.33185908  | 0.198786899 | 0.374116245 | 0.362047344 |
| 0.170104669 | 0.299523382 | 0.097579968 | 0.219637917 |
| 0.219825568 | 0.403952558 | 0.349959688 | 0.358108549 |
| 0.188838385 | 0.295521051 | 0.173342323 | 0.227822163 |
| 0.25952682  | 0.253071782 | 0.100326421 | 0.472848003 |
| 0.002115336 | 0.244545489 | 0.228271328 | 0.109654734 |
| 0.44312504  | 0.168176301 | 0.087504614 | 0.216589842 |
| 0.481332882 | 0.478494022 | 0.413903263 | 0.375978875 |
| 0.148894793 | 0.024392611 | 0.469544666 | 0.328295675 |
| 0.450692936 | 0.24301773  | 0.14496363  | 0.067096843 |
| 0.436273155 | 0.20671501  | 0.269805751 | 0.223008781 |
| 0.221926878 | 0.189994252 | 0.208552305 | 0.269414398 |
| 0.015319543 | 0.184139593 | 0.256371869 | 0.110767646 |
| 0.179631619 | 0.14154591  | 0.370723543 | 0.278795805 |
| 0.185118539 | 0.191321251 | 0.164126594 | 0.076946517 |
| 0.152874875 | 0.470950369 | 0.021364341 | 0.450079709 |
| 0.488741572 | 0.248389588 | 0.413376113 | 0.485785422 |
| 0.231599941 | 0.338768776 | 0.422782359 | 0.40571631  |
| 0.00225011  | 0.355831457 | 0.270080703 | 0.329949874 |
| 0.391071412 | 0.210808509 | 0.164687042 | 0.189778894 |
| 0.00280005  | 0.145545555 | 0.110393293 | 0.478664341 |
| 0.398348186 | 0.03607264  | 0.020793497 | 0.358856417 |
| 0.24493826  | 0.032868913 | 0.498128007 | 0.209435138 |
| 0.400953096 | 0.244389649 | 0.132936288 | 0.312845252 |
| 0.094939429 | 0.234799767 | 0.020604521 | 0.255024617 |
| 0.218262935 | 0.070505718 | 0.050536685 | 0.485835845 |
| 0.40184657  | 0.291882    | 0.201198803 | 0.008613802 |
| 0.344633977 | 0.100799634 | 0.319970288 | 0.121205773 |
| 0.389353174 | 0.311238193 | 0.414160564 | 0.336202404 |
| 0.248423883 | 0.363791897 | 0.344442244 | 0.386130761 |
| 0.058470569 | 0.333811845 | 0.381548393 | 0.053688044 |
| 0.205708555 | 0.422625956 | 0.205546976 | 0.142124402 |
| 0.291398294 | 0.040023007 | 0.166612037 | 0.23671147  |
| 0.401137249 | 0.413028452 | 0.064587893 | 0.173683333 |
| 0.357907503 | 0.220150006 | 0.100764914 | 0.244467421 |
| 0.232096723 | 0.083856748 | 0.104008994 | 0.303538056 |
| 0.435918974 | 0.238362645 | 0.401993437 | 0.089340967 |
| 0.401085511 | 0.072804665 | 0.390535213 | 0.184227018 |
| 0.228383505 | 0.212574723 | 0.33568948  | 0.088251893 |
| 0.019992408 | 0.132687447 | 0.336469891 | 0.387506485 |

|             |             |             |             |
|-------------|-------------|-------------|-------------|
| 0.084324875 | 0.177067161 | 0.174572516 | 0.205003421 |
| 0.445297987 | 0.219883063 | 0.211476264 | 0.249504227 |
| 0.389695856 | 0.0525172   | 0.476880059 | 0.237963793 |
| 0.354455719 | 0.201053784 | 0.369423006 | 0.009178221 |
| 0.26579801  | 0.114134728 | 0.159508158 | 0.19429235  |
| 0.398201736 | 0.119189941 | 0.279468898 | 0.167987994 |
| 0.094323815 | 0.00689248  | 0.312510902 | 0.159369375 |
| 0.247960077 | 0.17564967  | 0.247833925 | 0.068727947 |
| 0.501314385 | 0.244380775 | 0.351232464 | 0.149826119 |
| 0.22061795  | 0.008023518 | 0.104121662 | 0.050558053 |
| 0.343465823 | 0.339325416 | 0.268876167 | 0.228643245 |
| 0.178255536 | 0.257128723 | 0.293347213 | 0.205921271 |
| 0.404351686 | 0.081910011 | 0.469329661 | 0.237418829 |
| 0.315887232 | 0.232397369 | 0.199572875 | 0.235930421 |
| 0.139127505 | 0.106302122 | 0.117550535 | 0.173052849 |
| 0.41044857  | 0.20879376  | 0.213562676 | 0.208034018 |
| 0.050918177 | 0.234382134 | 0.335923493 | 0.298144776 |
| 0.238607691 | 0.26463323  | 0.219686975 | 0.370613882 |
| 0.203395094 | 0.225501026 | 0.027066461 | 0.018340557 |
| 0.122004768 | 0.148939514 | 0.408675776 | 0.402239638 |
| 0.464173868 | 0.202064682 | 0.100820357 | 0.150392278 |
| 0.076609813 | 0.326459448 | 0.179451401 | 0.069741882 |
| 0.247046363 | 0.175700137 | 0.001342816 | 0.21126372  |
| 0.321918533 | 0.203995718 |             |             |
| GPATCH4     | 0.306682586 | 0.420615774 | 0.047756046 |
| 0.017397672 | 0.05715314  | 0.158341993 | 0.133951884 |
| 0.298208333 | 0.089531775 | 0.096095362 | 0.206991427 |
| 0.003854892 | 0.331445292 | 0.019686217 | 0.053664663 |
| 0.477073211 | 0.475487059 | 0.196607051 | 0.464251493 |
| 0.274077311 | 0.105100575 | 0.268389674 | 0.260395465 |
| 0.173791313 | 0.003485236 | 0.071698139 | 0.037214751 |
| 0.278237389 | 0.465675606 | 0.145533796 | 0.198003842 |
| 0.443973545 | 0.397454973 | 0.274043521 | 0.17262072  |
| 0.165130121 | 0.371346485 | 0.073882738 | 0.307649077 |
| 0.39305462  | 0.134783506 | 0.387251464 | 0.016002829 |
| 0.0026066   | 0.063639154 | 0.269306814 | 0.283271323 |
| 0.232802887 | 0.149504122 | 0.119069314 | 0.105696121 |
| 0.146949824 | 0.230585877 | 0.329812737 | 0.135990149 |
| 0.296501342 | 0.003739019 | 0.353451757 | 0.250004101 |
| 0.047416683 | 0.229306659 | 0.31356159  | 0.304585135 |
| 0.157652757 | 0.32294875  | 0.445472437 | 0.023985376 |
| 0.05103672  | 0.310356525 | 0.356865458 | 0.274563627 |
| 0.391426356 | 0.226574149 | 0.188349482 | 0.245423695 |
| 0.315709583 | 0.368502787 | 0.191307513 | 0.118653414 |
| 0.001908076 | 0.089545791 | 0.189528855 | 0.297497041 |
| 0.27949672  | 0.232834162 | 0.312946062 | 0.130751253 |
| 0.311900282 | 0.016032668 | 0.260032198 | 0.465389961 |
| 0.01511868  | 0.334356701 | 0.006812656 | 0.103624064 |
| 0.37084785  | 0.456587053 | 0.322131496 | 0.051314853 |
| 0.01272181  | 0.099083014 | 0.175394003 | 0.40633717  |
| 0.299394703 | 0.308756415 | 0.287103842 | 0.123098821 |
| 0.337998569 | 0.166241415 | 0.224656906 | 0.367602634 |
| 0.441197882 | 0.007067015 | 0.134000009 | 0.142067895 |
| 0.23085996  | 0.088665934 | 0.138180041 | 0.036883448 |

|             |             |             |             |
|-------------|-------------|-------------|-------------|
| 0.008616506 | 0.028730459 | 0.44122094  | 0.125964225 |
| 0.062816241 | 0.12907581  | 0.047550182 | 0.283556402 |
| 0.274102228 | 0.432302277 | 0.061858763 | 0.15964384  |
| 0.298610337 | 0.153418915 | 0.245076681 | 0.314670205 |
| 0.204318195 | 0.219382586 | 0.116187267 | 0.345025227 |
| 0.3381996   | 0.045047364 | 0.066376232 | 0.219113328 |
| 0.318961177 | 0.45147616  | 0.471965261 | 0.224207428 |
| 0.141622775 | 0.173445836 | 0.261597622 | 0.243694016 |
| 0.149097669 | 0.253788932 | 0.080494949 | 0.227343278 |
| 0.308683344 | 0.0312498   | 0.04976297  | 0.345516066 |
| 0.023784093 | 0.155570788 | 0.366455954 | 0.32037569  |
| 0.282045125 | 0.032870269 | 0.154374985 | 0.175375213 |
| 0.223852184 | 0.164223689 | 0.297067541 | 0.150469291 |
| 0.222849737 | 0.257736812 | 0.031307362 | 0.338808528 |
| 0.083497105 | 0.249793409 | 0.27015493  | 0.066636855 |
| 0.306030191 | 0.257072722 | 0.358806086 | 0.298619649 |
| 1           | 0.002772419 | 0.096429571 | 0.315450375 |
| 0.275052629 | 0.37653329  | 0.403723787 | 0.077881714 |
| 0.187592299 | 0.2276514   | 0.10138128  | 0.180248416 |
| 0.367129945 | 0.185149182 | 0.152464827 | 0.001221427 |
| 0.082706741 | 0.299817366 | 0.289686959 | 0.058462031 |
| 0.130560588 | 0.105916688 | 0.111665735 | 0.383032191 |
| 0.136664532 | 0.318719567 | 0.034483895 | 0.146944369 |
| 0.174233677 | 0.259047477 | 0.263873627 | 0.261906023 |
| 0.301944584 | 0.222751245 | 0.431180962 | 0.281767796 |
| 0.149749147 | 0.229263843 | 0.151887286 | 0.213431255 |
| 0.297780581 | 0.383822975 | 0.366025303 | 0.325417826 |
| 0.174923453 | 0.283246037 | 0.218316005 | 0.186675001 |
| 0.283951953 | 0.271935151 | 0.068607598 | 0.415924414 |
| 0.001340276 | 0.227918914 | 0.28935276  | 0.173215437 |
| 0.391892657 | 0.144395458 | 0.056585292 | 0.198298405 |
| 0.469794099 | 0.416411638 | 0.384416745 | 0.412578373 |
| 0.218346436 | 0.013734694 | 0.427047431 | 0.277445406 |
| 0.472179902 | 0.248736968 | 0.190046102 | 0.070475926 |
| 0.408678458 | 0.26572706  | 0.308756201 | 0.315356643 |
| 0.281321057 | 0.237124729 | 0.168871564 | 0.28550594  |
| 0.030552465 | 0.190014963 | 0.321468376 | 0.144162611 |
| 0.22545314  | 0.157400179 | 0.35106487  | 0.207497689 |
| 0.23029293  | 0.284709022 | 0.226225418 | 0.049898914 |
| 0.113608889 | 0.431289224 | 0.029018055 | 0.408624793 |
| 0.466549729 | 0.244779246 | 0.393819231 | 0.465592698 |
| 0.244616338 | 0.255488969 | 0.391548549 | 0.415391144 |
| 0.001647821 | 0.404004801 | 0.297803368 | 0.232845818 |
| 0.417832122 | 0.198524034 | 0.214039492 | 0.269629689 |
| 0.001258228 | 0.112012073 | 0.196411183 | 0.410605383 |
| 0.379615457 | 0.01955293  | 0.031649327 | 0.313427035 |
| 0.272952185 | 0.033883054 | 0.460856546 | 0.225935775 |
| 0.352460813 | 0.256966389 | 0.11163495  | 0.35011215  |
| 0.184117131 | 0.250450466 | 0.017554455 | 0.278743919 |
| 0.273859397 | 0.113099359 | 0.051408768 | 0.466531853 |
| 0.368164529 | 0.23454979  | 0.165672025 | 0.013410081 |
| 0.398297269 | 0.151038318 | 0.308602256 | 0.071734491 |
| 0.320540882 | 0.2334499   | 0.341653227 | 0.349909709 |
| 0.304477216 | 0.285196133 | 0.264386816 | 0.360060105 |

|             |             |             |             |
|-------------|-------------|-------------|-------------|
| 0.067775178 | 0.373751394 | 0.418191456 | 0.037921442 |
| 0.307719695 | 0.407992314 | 0.279318449 | 0.111994259 |
| 0.272436616 | 0.051670591 | 0.134892696 | 0.273291969 |
| 0.334311304 | 0.414223129 | 0.043882812 | 0.127268703 |
| 0.287449149 | 0.206522273 | 0.068152592 | 0.221623409 |
| 0.188843112 | 0.178697674 | 0.144950178 | 0.253777674 |
| 0.361124159 | 0.178081409 | 0.411462427 | 0.111864255 |
| 0.400716519 | 0.038520619 | 0.353404742 | 0.157115911 |
| 0.206270883 | 0.314444013 | 0.392303381 | 0.135655993 |
| 0.032271067 | 0.130558739 | 0.264506757 | 0.29960196  |
| 0.05259261  | 0.138551759 | 0.158093171 | 0.204740606 |
| 0.455183986 | 0.274483114 | 0.178378312 | 0.237472481 |
| 0.294710312 | 0.06798386  | 0.406675534 | 0.25814556  |
| 0.322207806 | 0.211795465 | 0.330662321 | 0.00891642  |
| 0.319023033 | 0.120662238 | 0.213773995 | 0.219504976 |
| 0.448719107 | 0.086622494 | 0.230896652 | 0.132271463 |
| 0.122294313 | 0.003336046 | 0.252119285 | 0.232172035 |
| 0.182685558 | 0.224113563 | 0.256236878 | 0.127484762 |
| 0.451431949 | 0.299597136 | 0.348084451 | 0.205919727 |
| 0.244574309 | 0.011449495 | 0.103596038 | 0.028851515 |
| 0.295182969 | 0.253750919 | 0.315342143 | 0.318306953 |
| 0.215457275 | 0.279589584 | 0.249635412 | 0.235362245 |
| 0.394149959 | 0.142308596 | 0.468267473 | 0.225712244 |
| 0.370657893 | 0.280522717 | 0.167457633 | 0.226060248 |
| 0.112568693 | 0.104825029 | 0.082342416 | 0.161701509 |
| 0.423215079 | 0.198733823 | 0.230864683 | 0.285285952 |
| 0.030273871 | 0.240394426 | 0.324018603 | 0.325583053 |
| 0.300409114 | 0.314563889 | 0.266778426 | 0.272002216 |
| 0.271617119 | 0.265216687 | 0.035002204 | 0.027983952 |
| 0.191201001 | 0.129285018 | 0.376117311 | 0.361283583 |
| 0.450739761 | 0.243368833 | 0.069896065 | 0.116220788 |
| 0.096260984 | 0.348743676 | 0.161151526 | 0.091598649 |
| 0.285751901 | 0.293323741 | 0.000526829 | 0.215031665 |
| 0.257462404 | 0.26299592  |             |             |
| GPR174      | 0.001083953 | 0.006961508 | 0.000531038 |
| 0.189692334 | 0.0020811   | 0.004965791 | 0.0071737   |
| 0.001256141 | 9.20E-05    | 0.018684706 | 0.006323974 |
| 0.002559264 | 1.07E-06    | 3.87E-06    | 0.005480011 |
| 0.004487847 | 0.003642558 | 0.000609363 | 0.00541364  |
| 0.001855981 | 0.014410254 | 0.003885934 | 0.014783294 |
| 0.013098158 | 0.07805888  | 0.000721244 | 2.38E-08    |
| 0.000769273 | 0.003629475 | 0.004150521 | 0.004521611 |
| 0.005942812 | 0.002772379 | 0.004150521 | 0.007277983 |
| 5.09E-05    | 0.00563748  | 0.016012949 | 0.006133294 |
| 0.005503421 | 8.12E-07    | 0.00209049  | 0.012024716 |
| 0.000821762 | 0.128027659 | 0.003237777 |             |
| 0.000596692 | 0.003333672 | 0.000279035 | 0.004571644 |
| 0.001510599 | 0.018521035 | 0.000401825 | 0.004761212 |
| 0.006293822 | 0.003010275 | 0.007292952 | 0.071338997 |
| 0.001043466 | 0.000201657 | 0.000248016 | 0.000552726 |
| 0.005549573 | 0.00306193  | 0.00491966  | 0.007644904 |
| 0.006263332 | 0.00045531  | 0.001496965 | 0.001360921 |
| 0.002092955 | 0.028046103 | 0.005602954 | 0.005164568 |
| 0.001263194 | 0.001239929 | 0.005420638 | 0.003188029 |
|             | 0.000237934 | 3.97E-07    | 0.009976851 |

|             |             |             |             |             |
|-------------|-------------|-------------|-------------|-------------|
| 0.026880489 | 0.000806979 | 0.005117634 | 0.005584609 |             |
| 0.001619422 | 0.00622359  | 0.008793765 | 9.97E-06    |             |
| 0.002739632 | 0.005982354 | 0.00135437  | 0.001982158 |             |
| 0.000187386 | 9.40E-05    | 0.003693322 | 0.00394726  |             |
| 0.003097957 | 0.001991175 | 1.58E-06    | 7.64E-05    | 2.34E-05    |
| 0.002628261 | 0.001352343 | 0.004235664 | 0.005844934 |             |
| 5.60E-05    | 0.002905042 | 0.000161617 | 0.000934735 |             |
| 0.009269283 | 0.005870774 | 2.78E-07    | 5.42E-05    | 0.003987953 |
| 0.000422069 | 0.003063114 | 0.003537977 | 0.000136815 |             |
| 0.000810017 | 9.21E-08    | 0.004337633 | 0.000286299 |             |
| 0.011810395 | 0.006680502 | 0.009372263 | 0.017286754 |             |
| 0.000817903 | 0.001999889 | 0.001609319 | 0.007621911 |             |
| 0.007452832 | 0.007953771 | 0.025556597 | 0.0055291   |             |
| 0.004695839 | 0.00012734  | 0.000710508 | 0.006487325 |             |
| 0.003111372 | 0.000318711 | 0.000296413 | 0.005731761 |             |
| 0.00303645  | 0.005516437 | 0.005967785 | 0.000266519 |             |
| 0.01058467  | 0.000545009 | 0.008073702 | 0.018340688 |             |
| 0.002407972 | 0.000478392 | 5.41E-06    | 0.002266292 |             |
| 0.006852673 | 0.00011483  | 0.000386224 | 0.002279483 |             |
| 0.017194933 | 0.000598865 | 0.005427628 | 0.005868727 |             |
| 0.002275467 | 0.068784815 | 0.044078479 | 0.008508612 |             |
| 0.001260566 | 0.010844705 | 0.00182797  | 0.042774001 |             |
| 0.002642793 | 0.015300735 | 0.000742469 | 0.003213495 |             |
| 0.000937773 | 0.001169921 | 0.000582469 | 2.96E-05    |             |
| 0.00109145  | 0.000366492 | 0.009010493 | 0.001717002 |             |
| 0.002772419 | 1           | 0.030528797 | 0.001541953 |             |
| 0.004027634 | 0.001838777 | 0.009068597 | 0.000688434 |             |
| 0.000765015 | 0.000260122 | 0.000536975 | 0.004575973 |             |
| 0.001327282 | 0.004214536 | 0.004472451 | 7.52E-06    |             |
| 0.000292261 | 0.017156301 | 0.001009101 | 8.72E-06    |             |
| 0.0120099   | 0.000240433 | 3.69E-06    | 0.007291648 |             |
| 0.002273237 | 0.00711762  | 3.17E-07    | 1.76E-05    | 0.002602134 |
| 0.00957606  | 0.026778172 | 0.000268198 | 0.01108544  |             |
| 0.007472008 | 0.003598511 | 0.0038856   | 0.000972668 |             |
| 0.009993464 | 1.18E-05    | 0.000325882 | 0.004406739 |             |
| 0.00677739  | 0.009110717 | 0.005026602 | 0.003013521 |             |
| 0.000722724 | 0.000270113 | 0.003574837 | 0.001607443 |             |
| 0.001140736 | 0.00031243  | 0.005534013 | 1.08E-07    |             |
| 0.002294628 | 0.011244622 | 1.87E-05    | 0.010387127 |             |
| 0.008267834 | 0.000175981 | 0.00032276  | 0.00393084  |             |
| 0.004823893 | 0.001715602 | 0.005611029 | 9.24E-05    | 2.63E-07    |
| 0.003115451 | 0.003716072 | 0.004941333 | 0.00183712  |             |
| 0.005940854 | 8.22E-07    | 0.00670172  | 0.000485737 |             |
| 0.007491888 | 0.005242575 | 0.004134276 | 0.001658166 |             |
| 0.000450283 | 0.000616507 | 1.32E-06    | 0.006799612 |             |
| 0.010137482 | 0.003967352 | 0.025388893 | 0.000126931 |             |
| 0.007888195 | 0.002093707 | 0.005782952 | 0.002279293 |             |
| 0.032663805 | 0.00280849  | 0.001261573 | 0.007227384 |             |
| 2.65E-05    | 0.002694011 | 0.005548594 | 0.000814666 |             |
| 0.011099911 | 0.004724473 | 0.001841089 | 0.005483384 |             |
| 0.007224449 | 0.001844007 | 6.10E-09    | 0.005004864 |             |
| 0.003850409 | 0.00289057  | 0.008984791 | 0.003266895 |             |
| 0.000112842 | 0.003884413 | 1.76E-08    | 0.000929539 |             |
| 0.025283826 | 0.003882801 | 0.008954752 | 7.51E-05    | 3.04E-05    |

|             |             |             |             |             |
|-------------|-------------|-------------|-------------|-------------|
| 0.005916466 | 0.004487484 | 6.82E-06    | 0.005782797 |             |
| 0.011250182 | 0.010185353 | 0.003413882 | 0.008193724 |             |
| 0.004492265 | 0.011427789 | 0.000274513 | 0.00094863  |             |
| 0.016972806 | 0.001258514 | 7.84E-07    | 0.045172379 |             |
| 0.004014126 | 0.006515692 | 0.005489715 | 0.001561592 |             |
| 0.001790327 | 0.001842217 | 0.106850119 | 0.015541525 |             |
| 5.08E-05    | 0.003421652 | 0.003721239 | 0.006027579 |             |
| 0.00417523  | 0.002973693 | 0.00729423  | 0.006569641 |             |
| 0.008205369 | 0.006820058 | 0.007127886 | 0.005587034 |             |
| 0.000471363 | 0.002166204 | 0.007319813 | 0.02419512  |             |
| 0.004990586 | 0.001885474 | 0.038334289 | 0.00290439  |             |
| 0.000429359 | 0.008978253 | 0.00903542  | 0.000879408 |             |
| 6.35E-05    | 0.009132096 | 0.000547627 | 0.001511129 |             |
| 0.000635792 | 0.002041986 | 0.001245964 | 6.91E-06    |             |
| 0.002314825 | 0.007925162 | 0.005871394 | 0.009168199 |             |
| 0.058451411 | 0.005171726 | 3.00E-05    | 0.001841481 |             |
| 0.00038566  | 0.000990473 | 0.008413338 | 0.00272318  |             |
| 3.83E-05    | 0.001563583 | 0.000150482 | 0.010254499 |             |
| 0.005597524 | 0.000761788 | 0.000712832 | 0.011072351 |             |
| 0.016113642 | 0.006431164 | 0.007239986 | 0.002874473 |             |
| 0.000740545 | 0.005329244 | 0.027288747 | 0.004877707 |             |
| 0.001514289 | 0.003019727 | 0.009842869 | 0.004090187 |             |
| 1.30E-05    | 0.005266434 | 0.029073423 | 9.03E-05    | 0.030801943 |
| 0.003141404 | 0.002196133 | 0.007262586 | 0.000340544 |             |
| 0.000625524 | 1.69E-07    | 0.001369169 | 0.007308239 |             |
| 0.004076994 | 0.000192575 | 0.001046347 | 0.003182395 |             |
| 0.005720517 | 0.003619125 | 0.004442446 | 0.000216596 |             |
| 0.01777675  | 0.000308841 | 0.019892394 | 3.03E-05    |             |
| 0.002255983 | 0.002301725 | 0.001528527 | 0.002079357 |             |
| 5.84E-05    | 0.005307967 | 0.003357729 | 0.013267467 |             |
| 0.008982009 | 0.004094081 | 0.006875483 | 0.000174499 |             |
| 0.00341307  | 0.000878829 | 0.001788183 | 0.000180238 |             |
| 0.00546724  | 6.43E-06    | 0.000595134 | 3.49E-05    | 0.009110979 |
| 0.000125084 | 0.014088018 | 0.000856744 | 0.001092424 |             |
| 0.004613134 | 0.001798108 | 0.005141351 | 0.013322921 |             |
| 0.005224304 | 0.001243521 | 0.00470813  | 0.000197231 |             |
| 0.000463097 | 0.177269181 | 0.013917894 | 0.017366739 |             |
| 0.004866851 | 0.001687002 | 0.003056744 | 0.004754833 |             |
| 8.41E-05    | 0.000631371 | 0.000116041 | 1.43E-05    | 0.001691819 |
| 0.010091476 | 0.003389157 | 0.002101974 | 0.000211123 |             |
| 1.29E-06    | 0.000125951 | 0.003480393 | 0.002908675 |             |
| GPX1        | 0.070072544 | 0.222615905 | 0.063722077 |             |
| 0.061391086 | 0.054683113 | 0.288540534 | 0.247786655 |             |
| 0.047449386 | 0.048894751 | 0.182137667 | 0.295115302 |             |
| 0.000487675 | 0.062368923 | 0.008812628 | 0.014087753 |             |
| 0.152945556 | 0.150457091 | 0.168354189 | 0.134730855 |             |
| 0.065853113 | 0.149920723 | 0.149403346 | 0.250803603 |             |
| 0.232317909 | 0.001226905 | 0.193264441 | 0.192996907 |             |
| 0.03136891  | 0.124489287 | 0.127300458 | 0.101733882 |             |
| 0.130749437 | 0.116173012 | 0.06424539  | 0.037010407 |             |
| 0.016786166 | 0.246066657 | 0.002449017 | 0.086659503 |             |
| 0.069432183 | 0.176149095 | 0.119213511 | 0.009678204 |             |
| 0.0053328   | 0.124865593 | 0.02704717  | 0.177717395 |             |
| 0.048700575 | 0.262298827 | 0.119700299 | 0.232765778 |             |

|             |             |             |             |
|-------------|-------------|-------------|-------------|
| 0.005289745 | 0.256336983 | 0.114444063 | 0.005499402 |
| 0.28531315  | 0.030826813 | 0.263320528 | 0.025442944 |
| 0.0586424   | 0.085266152 | 0.050967002 | 0.15510146  |
| 0.284979301 | 0.284097972 | 0.17972679  | 0.070586918 |
| 0.141795648 | 0.070427531 | 0.100666045 | 0.2118929   |
| 0.191840143 | 0.075134077 | 0.073535615 | 0.024431238 |
| 0.111514328 | 0.079852163 | 0.169261458 | 0.041644855 |
| 0.001485253 | 0.241368343 | 0.071843468 | 0.060367949 |
| 0.057188331 | 0.276940678 | 0.072333007 | 0.125589374 |
| 0.092636938 | 0.024330553 | 0.15145446  | 0.171586213 |
| 0.057145889 | 0.075062138 | 0.003731643 | 0.032694104 |
| 0.119878096 | 0.100751947 | 0.129263378 | 0.108799741 |
| 0.012426692 | 0.035968286 | 0.009730514 | 0.065908543 |
| 0.092428263 | 0.097255118 | 0.26944875  | 0.002382701 |
| 0.05317541  | 0.046635955 | 0.062221752 | 0.281996404 |
| 0.185031115 | 0.003040903 | 0.025728439 | 0.238605892 |
| 0.026705836 | 0.078521194 | 0.193751551 | 0.007289265 |
| 0.018701918 | 0.000684388 | 0.122674298 | 0.053679278 |
| 0.190268363 | 0.236482454 | 0.067246711 | 0.138578621 |
| 0.032073856 | 0.091226244 | 0.055213558 | 0.213831477 |
| 0.09251259  | 0.25527785  | 0.119488049 | 0.124360946 |
| 0.035365988 | 0.030638981 | 0.088085051 | 0.214020414 |
| 0.209796864 | 0.059887885 | 0.064709841 | 0.267572059 |
| 0.056165846 | 0.150624505 | 0.187231455 | 0.028511703 |
| 0.095929341 | 0.099641099 | 0.096995474 | 0.266352955 |
| 0.188664233 | 0.064380377 | 0.001234858 | 0.188238801 |
| 0.295951425 | 0.004371205 | 0.069706042 | 0.104864246 |
| 0.03035436  | 0.055126169 | 0.229124672 | 0.156550932 |
| 0.081345479 | 0.188977105 | 0.219609945 | 0.276307449 |
| 0.143317719 | 0.247895758 | 0.127737487 | 0.215461608 |
| 0.206361107 | 0.109658853 | 0.065167524 | 0.057597056 |
| 0.126160459 | 0.129075443 | 0.01869328  | 0.007122136 |
| 0.067375104 | 0.03788789  | 0.210513385 | 0.096922776 |
| 0.096429571 | 0.030528797 | 1           | 0.094289964 |
| 0.075668312 | 0.068611223 | 0.251563474 | 0.123164512 |
| 0.131938052 | 0.010271518 | 0.111273423 | 0.065270045 |
| 0.097213685 | 0.118363059 | 0.127647842 | 0.00553884  |
| 0.05779524  | 0.070159552 | 0.065820213 | 0.016560262 |
| 0.0852718   | 0.059132664 | 0.007395381 | 0.186637624 |
| 0.195903536 | 0.124039836 | 0.003498969 | 0.002763161 |
| 0.1054916   | 0.234998832 | 0.070220087 | 0.027789557 |
| 0.196475567 | 0.088748607 | 0.080210976 | 0.241806897 |
| 0.0416318   | 0.330070894 | 0.002728737 | 0.063591252 |
| 0.072494239 | 0.167660093 | 0.125734184 | 0.124753205 |
| 0.165732985 | 0.06573418  | 0.014309268 | 0.247517407 |
| 0.099566262 | 0.077084062 | 0.05321194  | 0.20133366  |
| 0.001615401 | 0.162196428 | 0.140441273 | 0.00351192  |
| 0.248583871 | 0.281520201 | 0.049266599 | 0.054232183 |
| 0.140862413 | 0.195763737 | 0.114695355 | 0.107321711 |
| 0.008682708 | 0.00489118  | 0.160796559 | 0.201015598 |
| 0.127572877 | 0.087314403 | 0.02214884  | 0.001215203 |
| 0.167110202 | 0.035897557 | 0.187812268 | 0.086158733 |
| 0.081464228 | 0.026789785 | 0.094309312 | 0.052893209 |
| 0.001288983 | 0.18485195  | 0.129354348 | 0.08917223  |

|             |             |             |             |
|-------------|-------------|-------------|-------------|
| 0.148944812 | 0.058764502 | 0.174135622 | 0.196643652 |
| 0.039752854 | 0.034377153 | 0.079209652 | 0.113990186 |
| 0.163749703 | 0.223374227 | 0.000803361 | 0.152134307 |
| 0.170184385 | 0.093599647 | 0.189361452 | 0.15884366  |
| 0.132378496 | 0.25498165  | 0.197934104 | 0.089575196 |
| 0.000330792 | 0.088939782 | 0.059455174 | 0.2400966   |
| 0.14633747  | 0.236309335 | 0.012017629 | 0.038831398 |
| 0.000278856 | 0.141503132 | 0.020457176 | 0.202221249 |
| 0.159121511 | 0.041279089 | 0.000553101 | 0.153238755 |
| 0.059040751 | 0.00144196  | 0.196136339 | 0.250911252 |
| 0.223730815 | 0.092725353 | 0.24382038  | 0.078853088 |
| 0.011449093 | 0.02301415  | 0.029054587 | 0.18554292  |
| 0.045569282 | 0.002014976 | 0.15874228  | 0.15897051  |
| 0.192350426 | 0.220748947 | 0.173900242 | 0.066740041 |
| 0.06872876  | 0.084629018 | 0.175580469 | 0.029778061 |
| 0.166026341 | 0.24328148  | 0.211510442 | 0.093571341 |
| 0.101106646 | 0.2653493   | 0.283158934 | 0.19886032  |
| 0.019106882 | 0.101177334 | 0.120587481 | 0.064576674 |
| 0.055641697 | 0.163553294 | 0.156729296 | 0.261264301 |
| 0.145291376 | 0.034751761 | 0.242436994 | 0.053978812 |
| 0.242200282 | 0.177258926 | 0.083200997 | 0.024210854 |
| 0.290498432 | 0.059324899 | 0.129971215 | 0.07038803  |
| 0.214397056 | 0.006892361 | 0.002467576 | 0.188901574 |
| 0.266757231 | 0.28528597  | 0.174260092 | 0.169676763 |
| 0.120545208 | 0.026103691 | 0.105791563 | 0.049061673 |
| 0.132598323 | 0.087347072 | 0.069130332 | 0.00454602  |
| 0.093956869 | 0.04486105  | 0.297323183 | 0.263632742 |
| 0.090360314 | 0.126673963 | 0.229534985 | 0.228235518 |
| 0.144845269 | 0.038281723 | 0.219498791 | 0.073027441 |
| 0.27409926  | 0.115540742 | 0.222001661 | 0.115172951 |
| 0.170895503 | 0.150297237 | 0.148784699 | 0.003996737 |
| 0.095506263 | 0.209345816 | 0.013916555 | 0.211969528 |
| 0.089595274 | 0.125493317 | 0.234225867 | 0.064425628 |
| 0.024901152 | 0.000536883 | 0.146397849 | 0.036859105 |
| 0.28309732  | 0.0080303   | 0.079006871 | 0.004917339 |
| 0.213992909 | 0.136307986 | 0.158980736 | 0.009182046 |
| 0.148537006 | 0.000764257 | 0.207965625 | 0.030881424 |
| 0.160198164 | 0.188044662 | 0.084225511 | 0.077579334 |
| 0.013358149 | 0.121840076 | 0.190169956 | 0.111110279 |
| 0.171361629 | 0.023686015 | 0.168342821 | 0.039049568 |
| 0.06453406  | 0.039284985 | 0.192514564 | 0.02827768  |
| 0.164327995 | 0.01128926  | 0.100035608 | 0.019299143 |
| 0.152075897 | 0.01957136  | 0.174922093 | 0.034587816 |
| 0.074995119 | 0.095483409 | 0.080958613 | 0.095291716 |
| 0.169365682 | 0.087835034 | 0.028987081 | 0.263186029 |
| 0.024060721 | 0.060649888 | 0.078146052 | 0.129076052 |
| 0.061519668 | 0.185263973 | 0.118239835 | 0.134396306 |
| 0.149776051 | 0.010171383 | 0.082460552 | 0.043227748 |
| 0.001640547 | 0.069216308 | 0.284853014 | 0.010976483 |
| 0.093466919 | 0.014096699 | 0.001196449 | 0.027546358 |
| 0.216652921 | 0.032405587 |             |             |
| GPX8        | 0.276337976 | 0.404514902 | 0.068762682 |
| 0.010908199 | 0.044577874 | 0.163074096 | 0.122341198 |
| 0.248913271 | 0.125566291 | 0.095031337 | 0.231440183 |



|             |             |             |             |
|-------------|-------------|-------------|-------------|
| 0.013889941 | 0.268165682 | 0.050096156 | 0.068229204 |
| 0.438725848 | 0.423452457 | 0.155373232 | 0.424045592 |
| 0.27132144  | 0.079899813 | 0.291609171 | 0.218765254 |
| 0.170530374 | 0.013880118 | 0.070194364 | 0.029859957 |
| 0.206650948 | 0.414368926 | 0.168718306 | 0.183437109 |
| 0.417003691 | 0.329397077 | 0.189645296 | 0.107369866 |
| 0.083167812 | 0.38486528  | 0.033873368 | 0.243376836 |
| 0.33152113  | 0.115009297 | 0.332819572 | 0.030734445 |
| 0.000860228 | 0.070904584 | 0.210098571 | 0.281530173 |
| 0.231210911 | 0.159346365 | 0.142496703 | 0.093131187 |
| 0.081181102 | 0.259294937 | 0.363887392 | 0.069913327 |
| 0.31089068  | 0.002367568 | 0.365243527 | 0.265237677 |
| 0.069489731 | 0.222225228 | 0.245560272 | 0.287344963 |
| 0.16078758  | 0.33466483  | 0.411537203 | 0.030235147 |
| 0.06959671  | 0.236098589 | 0.304268257 | 0.194545588 |
| 0.381848392 | 0.189784499 | 0.157910253 | 0.142676644 |
| 0.271235979 | 0.318545068 | 0.190309026 | 0.131483164 |
| 0.005588377 | 0.088052282 | 0.115199435 | 0.301117335 |
| 0.18741499  | 0.266762941 | 0.247561834 | 0.108815278 |
| 0.224326531 | 0.034268611 | 0.232268874 | 0.424699031 |
| 0.015469404 | 0.287553973 | 0.006337633 | 0.117786141 |
| 0.350055378 | 0.393932001 | 0.312734027 | 0.063196037 |
| 0.026689233 | 0.135473354 | 0.225393207 | 0.333702088 |
| 0.249760691 | 0.225103827 | 0.303929819 | 0.071220817 |
| 0.262090356 | 0.221756371 | 0.184770537 | 0.377374978 |
| 0.427931945 | 0.015795183 | 0.175262401 | 0.144701994 |
| 0.152547613 | 0.063383941 | 0.130585822 | 0.031776541 |
| 0.009971963 | 0.049834262 | 0.39564004  | 0.165905792 |
| 0.064166321 | 0.129511004 | 0.042735648 | 0.193715186 |
| 0.224121704 | 0.397968008 | 0.050667382 | 0.144208845 |
| 0.238576023 | 0.135687643 | 0.159521109 | 0.27972202  |
| 0.119874906 | 0.237247458 | 0.151116745 | 0.328611524 |
| 0.370659512 | 0.058168873 | 0.096763369 | 0.226805671 |
| 0.246679337 | 0.416743471 | 0.442079416 | 0.222142966 |
| 0.101548967 | 0.18801234  | 0.215528191 | 0.206873262 |
| 0.141895896 | 0.232447488 | 0.052871206 | 0.243808089 |
| 0.332542921 | 0.025832142 | 0.076078679 | 0.330849793 |
| 0.0123859   | 0.12610658  | 0.385402497 | 0.295299706 |
| 0.195009928 | 0.027462881 | 0.129930652 | 0.164036392 |
| 0.233717453 | 0.154599376 | 0.273925032 | 0.125968388 |
| 0.233819146 | 0.20425581  | 0.044299902 | 0.262939392 |
| 0.104996186 | 0.243494387 | 0.194619685 | 0.051719881 |
| 0.253011331 | 0.231325685 | 0.34984119  | 0.242941066 |
| 0.315450375 | 0.001541953 | 0.094289964 | 1           |
| 0.241652911 | 0.327275802 | 0.389422859 | 0.100216379 |
| 0.205688155 | 0.138279029 | 0.126996143 | 0.120091145 |
| 0.380297072 | 0.166501717 | 0.147056755 | 0.005318867 |
| 0.086920295 | 0.201598672 | 0.221024063 | 0.113271747 |
| 0.102346657 | 0.154700152 | 0.13444603  | 0.358980297 |
| 0.150640163 | 0.266731784 | 0.070028646 | 0.112423875 |
| 0.177011642 | 0.247417642 | 0.178240539 | 0.281855545 |
| 0.27157583  | 0.198620153 | 0.361983987 | 0.316536489 |
| 0.109788603 | 0.259944882 | 0.093375751 | 0.22244372  |
| 0.193186907 | 0.343298308 | 0.313835772 | 0.28399947  |

|             |             |             |             |
|-------------|-------------|-------------|-------------|
| 0.171739187 | 0.273447302 | 0.15521632  | 0.19921233  |
| 0.246933807 | 0.215934574 | 0.107771346 | 0.39932193  |
| 0.005626753 | 0.207189456 | 0.198907386 | 0.115061345 |
| 0.375733935 | 0.131373495 | 0.092956425 | 0.227737205 |
| 0.429248232 | 0.402276876 | 0.39118309  | 0.355095239 |
| 0.177627358 | 0.038711286 | 0.426140952 | 0.292761135 |
| 0.413178099 | 0.192718568 | 0.100540664 | 0.056463154 |
| 0.375524635 | 0.198046074 | 0.26994995  | 0.241033858 |
| 0.18004595  | 0.140721392 | 0.178539297 | 0.27227175  |
| 0.031284226 | 0.197962104 | 0.260808726 | 0.109498535 |
| 0.178938312 | 0.174017508 | 0.313974177 | 0.222094481 |
| 0.138803606 | 0.252339426 | 0.139589718 | 0.058776253 |
| 0.125059311 | 0.418539741 | 0.013154939 | 0.415322488 |
| 0.430371189 | 0.209578973 | 0.353325057 | 0.436413332 |
| 0.247765052 | 0.272098286 | 0.371538871 | 0.381795263 |
| 0.005581351 | 0.331385604 | 0.228716181 | 0.277614255 |
| 0.372291616 | 0.197062602 | 0.173569139 | 0.158127995 |
| 0.002357593 | 0.140675875 | 0.10773229  | 0.418790086 |
| 0.330054616 | 0.03043116  | 0.011819284 | 0.288156249 |
| 0.207324123 | 0.023510596 | 0.442206958 | 0.197501269 |
| 0.328516342 | 0.183672158 | 0.114827931 | 0.280263685 |
| 0.099526176 | 0.191470467 | 0.014265733 | 0.20733816  |
| 0.178138987 | 0.099552708 | 0.040660514 | 0.437714259 |
| 0.378672725 | 0.223498146 | 0.168548373 | 0.019520437 |
| 0.354180771 | 0.096937242 | 0.273898418 | 0.084124632 |
| 0.33800002  | 0.25930403  | 0.33238331  | 0.289671153 |
| 0.22125177  | 0.301840202 | 0.298524181 | 0.349542565 |
| 0.037799664 | 0.322120845 | 0.375186742 | 0.045352124 |
| 0.224435659 | 0.362548147 | 0.191221676 | 0.118721016 |
| 0.274875506 | 0.025892091 | 0.147484507 | 0.261498117 |
| 0.323694312 | 0.371054481 | 0.067277807 | 0.160443323 |
| 0.301299252 | 0.196800493 | 0.07742889  | 0.193042524 |
| 0.202321905 | 0.10926706  | 0.109610638 | 0.267990072 |
| 0.364525363 | 0.18476229  | 0.385488649 | 0.086656943 |
| 0.344441186 | 0.066246545 | 0.337876285 | 0.137071397 |
| 0.216087108 | 0.222632938 | 0.332511253 | 0.127158298 |
| 0.044532924 | 0.19468629  | 0.273187664 | 0.325118812 |
| 0.07523982  | 0.166266883 | 0.146555773 | 0.157898449 |
| 0.403952573 | 0.197101192 | 0.177409879 | 0.217255121 |
| 0.319834929 | 0.046885825 | 0.420016636 | 0.257010816 |
| 0.359327685 | 0.172236946 | 0.312603191 | 0.01131792  |
| 0.239099793 | 0.116358714 | 0.198056408 | 0.155716811 |
| 0.386312147 | 0.10470565  | 0.212396806 | 0.174266598 |
| 0.085449378 | 0.006476169 | 0.275204191 | 0.126986851 |
| 0.21030089  | 0.158872283 | 0.230738651 | 0.060541087 |
| 0.440420388 | 0.262016622 | 0.366165021 | 0.122775955 |
| 0.191719614 | 0.003821813 | 0.097891266 | 0.053859412 |
| 0.342834604 | 0.284928326 | 0.268507571 | 0.267890528 |
| 0.239270737 | 0.197560974 | 0.237945558 | 0.152196563 |
| 0.346591712 | 0.09378999  | 0.424052405 | 0.214592172 |
| 0.292499317 | 0.226662773 | 0.167771606 | 0.194314583 |
| 0.098354297 | 0.105346404 | 0.100232651 | 0.219797154 |
| 0.363737954 | 0.154582679 | 0.165861144 | 0.283427805 |
| 0.040889615 | 0.188079718 | 0.295991242 | 0.274499288 |

|             |             |             |             |
|-------------|-------------|-------------|-------------|
| 0.227423117 | 0.282137686 | 0.196892236 | 0.299120568 |
| 0.252301853 | 0.28074775  | 0.020885352 | 0.021410512 |
| 0.121617819 | 0.139424776 | 0.393444283 | 0.355219167 |
| 0.40904863  | 0.197396921 | 0.095131943 | 0.163334637 |
| 0.054278599 | 0.326936128 | 0.140062347 | 0.043761008 |
| 0.203881818 | 0.215628611 | 0.001733043 | 0.251926988 |
| 0.283277355 | 0.181383056 |             |             |
| GRWD1       | 0.19613453  | 0.368779737 | 0.020354614 |
| 0.012872844 | 0.01431896  | 0.187531687 | 0.122026622 |
| 0.119085765 | 0.033678522 | 0.075972906 | 0.233571123 |
| 0.001181693 | 0.181065    | 0.007685617 | 0.010352077 |
| 0.362555525 | 0.347993236 | 0.127888614 | 0.316024332 |
| 0.135439163 | 0.078726143 | 0.224023662 | 0.248272017 |
| 0.16870611  | 0.001472812 | 0.055612106 | 0.053950332 |
| 0.083198256 | 0.317474277 | 0.096457819 | 0.073495301 |
| 0.351300226 | 0.27252163  | 0.095648197 | 0.030086272 |
| 0.030991283 | 0.336525761 | 0.005599924 | 0.194565566 |
| 0.235860194 | 0.080508263 | 0.277076569 | 0.006447332 |
| 0.001693109 | 0.038436908 | 0.076638545 | 0.254445975 |
| 0.080916079 | 0.164394078 | 0.079308634 | 0.09154534  |
| 0.021190054 | 0.24454545  | 0.251348637 | 0.017882615 |
| 0.292972308 | 0.006910282 | 0.338333308 | 0.075800462 |
| 0.023799266 | 0.109525233 | 0.172693332 | 0.265974073 |
| 0.176766249 | 0.313206015 | 0.34367763  | 0.01786044  |
| 0.049323424 | 0.155480185 | 0.283146927 | 0.246844955 |
| 0.338814983 | 0.061555542 | 0.054018636 | 0.060984661 |
| 0.260340762 | 0.233357494 | 0.155041646 | 0.026335998 |
| 0.002171932 | 0.084503055 | 0.059468488 | 0.214736871 |
| 0.150308279 | 0.258058832 | 0.188874169 | 0.062517523 |
| 0.176523029 | 0.008165194 | 0.180625249 | 0.352654089 |
| 0.01319409  | 0.204463272 | 0.001463612 | 0.021049218 |
| 0.278497589 | 0.307607149 | 0.281347795 | 0.036062972 |
| 0.005039611 | 0.028863752 | 0.033398017 | 0.237911399 |
| 0.170857479 | 0.158010858 | 0.286685537 | 0.012601606 |
| 0.182917256 | 0.062174812 | 0.067242843 | 0.360514807 |
| 0.382180632 | 0.00139505  | 0.028599927 | 0.134620359 |
| 0.044406801 | 0.045878467 | 0.102689448 | 0.008781704 |
| 0.005540029 | 0.00247212  | 0.322382164 | 0.042950535 |
| 0.055933388 | 0.114204404 | 0.016656869 | 0.204587092 |
| 0.07880963  | 0.283714234 | 0.016104471 | 0.120898084 |
| 0.20668075  | 0.140643886 | 0.121081967 | 0.25050092  |
| 0.040517204 | 0.052105951 | 0.059881633 | 0.287311205 |
| 0.294990763 | 0.018042566 | 0.030280549 | 0.234294545 |
| 0.178095404 | 0.339838439 | 0.373132129 | 0.039824389 |
| 0.048506269 | 0.092906056 | 0.148193446 | 0.233010844 |
| 0.115047289 | 0.113671982 | 0.004981489 | 0.193012072 |
| 0.316208609 | 0.005241532 | 0.028668671 | 0.240878666 |
| 0.006549785 | 0.039591122 | 0.348803355 | 0.253557584 |
| 0.138382614 | 0.056631943 | 0.113312982 | 0.186285984 |
| 0.170600305 | 0.143511988 | 0.23157991  | 0.121107016 |
| 0.210152482 | 0.151556756 | 0.01635082  | 0.192628878 |
| 0.058289704 | 0.179640235 | 0.068764539 | 0.017629935 |
| 0.16882823  | 0.068597927 | 0.327674867 | 0.17910833  |
| 0.275052629 | 0.004027634 | 0.075668312 | 0.241652911 |

| 1           | 0.211909495 | 0.362387253 | 0.058260293 |
|-------------|-------------|-------------|-------------|
| 0.136926529 | 0.028939923 | 0.06591143  | 0.049862649 |
| 0.254663643 | 0.117680912 | 0.094349863 | 0.003534898 |
| 0.023464232 | 0.148593258 | 0.124475442 | 0.017448376 |
| 0.035664782 | 0.047906835 | 0.015832891 | 0.328499564 |
| 0.119034026 | 0.222222562 | 0.005772033 | 0.011366744 |
| 0.07054742  | 0.249995198 | 0.084043171 | 0.066929362 |
| 0.276668167 | 0.074412451 | 0.274489167 | 0.289117391 |
| 0.027473283 | 0.287726067 | 0.011800645 | 0.083401082 |
| 0.154494297 | 0.303550098 | 0.276383837 | 0.222145865 |
| 0.11915845  | 0.162791141 | 0.028893793 | 0.19400449  |
| 0.162692013 | 0.119602273 | 0.027629254 | 0.328770612 |
| 0.00126493  | 0.164049318 | 0.202060422 | 0.01672969  |
| 0.352993232 | 0.146736736 | 0.025840061 | 0.071585176 |
| 0.324172698 | 0.322052314 | 0.269881577 | 0.294086213 |
| 0.030797873 | 0.003873782 | 0.32662397  | 0.276281958 |
| 0.328331182 | 0.101690715 | 0.030893916 | 0.003955606 |
| 0.307939737 | 0.106911085 | 0.310258223 | 0.192096214 |
| 0.141683358 | 0.049585803 | 0.087306223 | 0.162270292 |
| 0.007375168 | 0.146511945 | 0.270698142 | 0.085672858 |
| 0.132866184 | 0.077778918 | 0.296728379 | 0.181175099 |
| 0.04869598  | 0.077456352 | 0.087785859 | 0.030184767 |
| 0.08988909  | 0.374750579 | 0.001975336 | 0.308129458 |
| 0.348767274 | 0.127415525 | 0.324279922 | 0.338554659 |
| 0.168946475 | 0.258849119 | 0.335982085 | 0.259742166 |
| 0.000436087 | 0.267525354 | 0.169705414 | 0.240021046 |
| 0.347708505 | 0.205031824 | 0.045139687 | 0.08357095  |
| 0.000213243 | 0.089382198 | 0.040862294 | 0.333224452 |
| 0.286329731 | 0.010675202 | 0.001912649 | 0.237262639 |
| 0.157657687 | 0.002615834 | 0.368116432 | 0.211700736 |
| 0.31050958  | 0.112765922 | 0.110462143 | 0.22735625  |
| 0.03633958  | 0.043488912 | 0.007503672 | 0.219629039 |
| 0.089516151 | 0.013493251 | 0.043189703 | 0.344647519 |
| 0.33528641  | 0.206296929 | 0.1304077   | 0.042528137 |
| 0.256264373 | 0.058564723 | 0.277442071 | 0.014084906 |
| 0.257847867 | 0.242711558 | 0.280333601 | 0.231224456 |
| 0.179406791 | 0.285990819 | 0.292829205 | 0.328820496 |
| 0.012338148 | 0.28037329  | 0.329068664 | 0.018115606 |
| 0.176343049 | 0.311048555 | 0.210086468 | 0.121688984 |
| 0.214916055 | 0.016586831 | 0.143196381 | 0.130488344 |
| 0.296623737 | 0.351044508 | 0.030403024 | 0.023777998 |
| 0.305932075 | 0.062434761 | 0.047776999 | 0.08226819  |
| 0.186705992 | 0.03176281  | 0.011555137 | 0.232310003 |
| 0.336836647 | 0.190885382 | 0.369727058 | 0.081984499 |
| 0.267697667 | 0.011323215 | 0.228441243 | 0.0343598   |
| 0.144705196 | 0.230032711 | 0.246787892 | 0.01803081  |
| 0.074087662 | 0.049705118 | 0.288345995 | 0.299295445 |
| 0.032649196 | 0.096477952 | 0.122399242 | 0.159663084 |
| 0.333348885 | 0.051019672 | 0.162347001 | 0.097101775 |
| 0.291135148 | 0.050671195 | 0.349868223 | 0.161283515 |
| 0.311556653 | 0.10924483  | 0.263482832 | 0.004370557 |
| 0.213790609 | 0.099584701 | 0.058389655 | 0.166255256 |
| 0.293220753 | 0.050875825 | 0.210629976 | 0.055754312 |
| 0.026412885 | 0.000407816 | 0.200118966 | 0.074762508 |

|             |             |             |             |
|-------------|-------------|-------------|-------------|
| 0.212446321 | 0.022035632 | 0.112162147 | 0.015855877 |
| 0.371983659 | 0.219740647 | 0.344129692 | 0.028137986 |
| 0.133215203 | 0.001003536 | 0.09399519  | 0.012734885 |
| 0.27999755  | 0.230236834 | 0.207207363 | 0.200945681 |
| 0.045463173 | 0.175382785 | 0.208345884 | 0.110784802 |
| 0.316867817 | 0.035982816 | 0.362821328 | 0.063461219 |
| 0.222338619 | 0.06401223  | 0.142730511 | 0.040196337 |
| 0.069854296 | 0.020708324 | 0.04909624  | 0.033528687 |
| 0.325165287 | 0.026462772 | 0.147495459 | 0.073957411 |
| 0.015989059 | 0.091260973 | 0.204108732 | 0.242805115 |
| 0.240411841 | 0.276704337 | 0.060405562 | 0.268595471 |
| 0.065826879 | 0.125852474 | 0.023209287 | 0.05371436  |
| 0.084463263 | 0.096976568 | 0.274652861 | 0.259742711 |
| 0.322304053 | 0.03300842  | 0.03711449  | 0.040425936 |
| 0.006074522 | 0.224031664 | 0.160887617 | 0.011386861 |
| 0.154946815 | 0.056863299 | 0.000218937 | 0.054747885 |
| 0.256787528 | 0.049089262 |             |             |
| GSG2        | 0.324997786 | 0.365305965 | 0.035445999 |
| 0.015199224 | 0.064536603 | 0.134451276 | 0.122316779 |
| 0.359099291 | 0.062350679 | 0.068425113 | 0.204968378 |
| 0.002227327 | 0.417208548 | 0.011179083 | 0.055436751 |
| 0.446565219 | 0.454948718 | 0.218514036 | 0.45905699  |
| 0.29015935  | 0.080119791 | 0.288151724 | 0.254754923 |
| 0.15116965  | 0.001757068 | 0.059905726 | 0.021989588 |
| 0.392656376 | 0.464902414 | 0.12919727  | 0.171793854 |
| 0.404638087 | 0.409830964 | 0.283956054 | 0.22816447  |
| 0.229326735 | 0.323941801 | 0.181737721 | 0.407880678 |
| 0.418491351 | 0.124791235 | 0.406515761 | 0.008378864 |
| 0.002607039 | 0.049600399 | 0.363830902 | 0.290922403 |
| 0.272724652 | 0.124029798 | 0.10740866  | 0.088619869 |
| 0.213633281 | 0.234013467 | 0.359988215 | 0.223701732 |
| 0.273954075 | 0.002042626 | 0.307953063 | 0.270362804 |
| 0.033842187 | 0.23150107  | 0.34076744  | 0.3242726   |
| 0.142858622 | 0.28892148  | 0.414246378 | 0.015253315 |
| 0.034312815 | 0.381317698 | 0.388836439 | 0.29645983  |
| 0.360993723 | 0.233598076 | 0.178554584 | 0.381382077 |
| 0.384794791 | 0.411526116 | 0.193364805 | 0.122495947 |
| 0.000746361 | 0.074734431 | 0.216305294 | 0.358330714 |
| 0.403929919 | 0.23566906  | 0.374454386 | 0.119920837 |
| 0.361994719 | 0.009771783 | 0.284743168 | 0.43729832  |
| 0.012298744 | 0.413800786 | 0.00835879  | 0.112106667 |
| 0.397064353 | 0.459195758 | 0.346056574 | 0.032528773 |
| 0.008475156 | 0.09125466  | 0.18147484  | 0.443156097 |
| 0.336616017 | 0.359093831 | 0.270662592 | 0.267614069 |
| 0.396040554 | 0.118312592 | 0.250875822 | 0.312405822 |
| 0.384249831 | 0.008175593 | 0.128616681 | 0.12982232  |
| 0.267905561 | 0.077826534 | 0.135665975 | 0.046763461 |
| 0.006961732 | 0.047401732 | 0.419852033 | 0.110183268 |
| 0.046335425 | 0.110915575 | 0.048977964 | 0.347089455 |
| 0.363040762 | 0.429176529 | 0.065001953 | 0.144323275 |
| 0.401483721 | 0.144027317 | 0.29825397  | 0.389652336 |
| 0.29830078  | 0.222937796 | 0.09194704  | 0.338744574 |
| 0.314127064 | 0.035353243 | 0.043730387 | 0.208752569 |
| 0.403062863 | 0.425712969 | 0.432125413 | 0.267701631 |

|             |             |             |             |
|-------------|-------------|-------------|-------------|
| 0.160798686 | 0.17387752  | 0.214588866 | 0.257730613 |
| 0.146858151 | 0.323106635 | 0.182689747 | 0.252118158 |
| 0.270921623 | 0.043634925 | 0.032638069 | 0.406371616 |
| 0.032145283 | 0.149939624 | 0.326191619 | 0.370075644 |
| 0.386591974 | 0.017145319 | 0.12993033  | 0.15064876  |
| 0.209086344 | 0.143681622 | 0.329274451 | 0.119476171 |
| 0.213647823 | 0.215665598 | 0.022822006 | 0.3987067   |
| 0.069164297 | 0.257718335 | 0.289090462 | 0.061203014 |
| 0.39320241  | 0.331826034 | 0.352804667 | 0.356807156 |
| 0.37653329  | 0.001838777 | 0.068611223 | 0.327275802 |
| 0.211909495 | 1           | 0.347741887 | 0.062935671 |
| 0.182769148 | 0.35516823  | 0.087162384 | 0.222820808 |
| 0.385379661 | 0.132903397 | 0.111120685 | 0.000270908 |
| 0.081759875 | 0.31253214  | 0.35530017  | 0.042442318 |
| 0.137995811 | 0.067062092 | 0.141473965 | 0.370480488 |
| 0.117563434 | 0.396120992 | 0.036405212 | 0.275594388 |
| 0.165543096 | 0.290979062 | 0.293528662 | 0.239835302 |
| 0.33805415  | 0.20592994  | 0.449746341 | 0.268467765 |
| 0.185316708 | 0.220780951 | 0.276298448 | 0.202587166 |
| 0.406051499 | 0.383315596 | 0.400417104 | 0.398165103 |
| 0.156214967 | 0.386478423 | 0.330186711 | 0.173267592 |
| 0.328604825 | 0.354574989 | 0.050300037 | 0.380353439 |
| 0.000429197 | 0.245246268 | 0.326850139 | 0.27574726  |
| 0.344606287 | 0.13442233  | 0.039162216 | 0.211049585 |
| 0.461554329 | 0.383916657 | 0.388114195 | 0.405422886 |
| 0.295771467 | 0.00983142  | 0.392625277 | 0.291527601 |
| 0.465695938 | 0.293147288 | 0.293837559 | 0.162253133 |
| 0.392208126 | 0.400272973 | 0.310306216 | 0.359566101 |
| 0.373366696 | 0.381773823 | 0.177370141 | 0.386188275 |
| 0.021491315 | 0.148377033 | 0.352046738 | 0.112102571 |
| 0.195336765 | 0.121402459 | 0.366841784 | 0.22125396  |
| 0.309660017 | 0.271428233 | 0.245078433 | 0.038978549 |
| 0.100117197 | 0.374983497 | 0.076752912 | 0.379129132 |
| 0.441070165 | 0.29238114  | 0.376736869 | 0.443460842 |
| 0.229521799 | 0.258867257 | 0.369025924 | 0.427358434 |
| 0.001303138 | 0.416002762 | 0.4073186   | 0.232890764 |
| 0.388174754 | 0.17814288  | 0.343677767 | 0.393051453 |
| 0.001423249 | 0.089066921 | 0.247603781 | 0.363665234 |
| 0.391264873 | 0.012436388 | 0.095234181 | 0.375906114 |
| 0.407802252 | 0.066643774 | 0.417320835 | 0.206778232 |
| 0.34567567  | 0.332689967 | 0.087130576 | 0.40406897  |
| 0.242673532 | 0.372111427 | 0.016206227 | 0.316512826 |
| 0.378205618 | 0.152531754 | 0.036981195 | 0.43955129  |
| 0.350299529 | 0.261425506 | 0.15820971  | 0.003242544 |
| 0.404046999 | 0.145572059 | 0.360614187 | 0.087004181 |
| 0.346321454 | 0.240655262 | 0.340108667 | 0.409859933 |
| 0.366271566 | 0.283637413 | 0.249845578 | 0.353574825 |
| 0.094622593 | 0.394068801 | 0.392967185 | 0.028679273 |
| 0.382232291 | 0.391320233 | 0.291229943 | 0.093316492 |
| 0.290500477 | 0.060113805 | 0.114994437 | 0.321236666 |
| 0.324760209 | 0.381605928 | 0.02565462  | 0.143103317 |
| 0.272622822 | 0.21081674  | 0.055175858 | 0.280323474 |
| 0.176008746 | 0.228364078 | 0.257905405 | 0.2648322   |
| 0.315213496 | 0.173673388 | 0.374950957 | 0.082090565 |

|             |             |             |             |
|-------------|-------------|-------------|-------------|
| 0.414286866 | 0.033244033 | 0.401694809 | 0.17396461  |
| 0.203929673 | 0.361365427 | 0.408807185 | 0.193411715 |
| 0.011202887 | 0.093963976 | 0.258984984 | 0.277513467 |
| 0.038656992 | 0.124118223 | 0.146150062 | 0.215274667 |
| 0.436741946 | 0.329197145 | 0.171933097 | 0.28779026  |
| 0.268312633 | 0.053155842 | 0.352305402 | 0.258459006 |
| 0.328125284 | 0.208177346 | 0.373755889 | 0.005927201 |
| 0.389929982 | 0.08661382  | 0.29984718  | 0.230478181 |
| 0.456376988 | 0.070961669 | 0.251450519 | 0.107838249 |
| 0.138942547 | 0.005283225 | 0.281657565 | 0.351301536 |
| 0.169010107 | 0.379044074 | 0.303964709 | 0.213333538 |
| 0.401275475 | 0.30314536  | 0.347392418 | 0.368737048 |
| 0.246937341 | 0.03289319  | 0.075354608 | 0.018758116 |
| 0.316352336 | 0.281388451 | 0.379790061 | 0.335025132 |
| 0.258653231 | 0.350952519 | 0.276601405 | 0.291775655 |
| 0.383411378 | 0.158656468 | 0.436403029 | 0.275644955 |
| 0.40359154  | 0.296605973 | 0.159816257 | 0.269155585 |
| 0.10796177  | 0.114684329 | 0.064728424 | 0.151620764 |
| 0.40151575  | 0.280984133 | 0.256678621 | 0.267101745 |
| 0.02136057  | 0.267808029 | 0.41548928  | 0.397898994 |
| 0.322646668 | 0.371153632 | 0.38715587  | 0.259336981 |
| 0.264930024 | 0.245089872 | 0.030197346 | 0.01255135  |
| 0.178464994 | 0.102333119 | 0.378900401 | 0.389783402 |
| 0.435994546 | 0.329291475 | 0.050881615 | 0.10070354  |
| 0.236000918 | 0.397719621 | 0.153777263 | 0.175771773 |
| 0.362652432 | 0.335794635 | 0.000474958 | 0.214481987 |
| 0.265217872 | 0.324685351 |             |             |
| GZMK        | 0.358532049 | 0.511698736 | 0.138778275 |
| 0.054036076 | 0.215197776 | 0.372815086 | 0.373337121 |
| 0.363249926 | 0.196471256 | 0.254345404 | 0.456018299 |
| 0.002454766 | 0.355467039 | 0.028191308 | 0.125366468 |
| 0.486180508 | 0.501454015 | 0.47920203  | 0.485184308 |
| 0.362769848 | 0.240692349 | 0.43185797  | 0.484019213 |
| 0.399773911 | 0.003427018 | 0.243147672 | 0.105601555 |
| 0.354760006 | 0.463184205 | 0.321327189 | 0.39497212  |
| 0.424873293 | 0.433752627 | 0.480165075 | 0.420187494 |
| 0.264825563 | 0.507442584 | 0.125955559 | 0.428452902 |
| 0.345800261 | 0.373023663 | 0.446978759 | 0.03273003  |
| 0.006229471 | 0.209272702 | 0.31551458  | 0.462360034 |
| 0.363482989 | 0.351768641 | 0.284770211 | 0.312800115 |
| 0.145110137 | 0.473522072 | 0.413206865 | 0.14562755  |
| 0.512014605 | 0.010327557 | 0.515224529 | 0.263184046 |
| 0.13956983  | 0.417931653 | 0.361851057 | 0.468241239 |
| 0.393267482 | 0.517246753 | 0.515701089 | 0.088839839 |
| 0.158507209 | 0.454977173 | 0.39621939  | 0.50804756  |
| 0.499394959 | 0.424834138 | 0.43421165  | 0.368268562 |
| 0.451981161 | 0.374224126 | 0.407843918 | 0.286549538 |
| 0.002098881 | 0.281434491 | 0.437348671 | 0.324224489 |
| 0.380279969 | 0.476591504 | 0.397294333 | 0.368871612 |
| 0.451336382 | 0.045964498 | 0.468376648 | 0.516227317 |
| 0.044289581 | 0.394251191 | 0.020085673 | 0.254342258 |
| 0.436874507 | 0.418716528 | 0.43928058  | 0.161383957 |
| 0.032892419 | 0.207381604 | 0.15592322  | 0.344681084 |
| 0.461788914 | 0.512574852 | 0.50856056  | 0.118092704 |

|             |             |             |             |
|-------------|-------------|-------------|-------------|
| 0.306931533 | 0.247932353 | 0.471916618 | 0.516015165 |
| 0.475187244 | 0.016000734 | 0.233926064 | 0.362037445 |
| 0.394956062 | 0.22701909  | 0.377501569 | 0.044178576 |
| 0.024798724 | 0.021277863 | 0.430672706 | 0.254388582 |
| 0.209346712 | 0.347047923 | 0.154922018 | 0.500851646 |
| 0.347245161 | 0.388174828 | 0.235690935 | 0.406698804 |
| 0.4327397   | 0.407424605 | 0.503622207 | 0.473587669 |
| 0.44320384  | 0.324396017 | 0.249899825 | 0.52553738  |
| 0.483641205 | 0.146990361 | 0.161769619 | 0.447221032 |
| 0.333305907 | 0.470548318 | 0.527802176 | 0.369625591 |
| 0.408477664 | 0.357011027 | 0.393775188 | 0.508818734 |
| 0.388320455 | 0.390720997 | 0.078815358 | 0.464341022 |
| 0.504690862 | 0.045109216 | 0.139349307 | 0.441758432 |
| 0.099143473 | 0.380998363 | 0.496861461 | 0.51408765  |
| 0.486062602 | 0.088958126 | 0.364978926 | 0.406922212 |
| 0.400547739 | 0.39376966  | 0.467599678 | 0.335707664 |
| 0.427312939 | 0.399119987 | 0.112780625 | 0.323060394 |
| 0.230547414 | 0.419718782 | 0.29927415  | 0.087727988 |
| 0.405016066 | 0.386472207 | 0.509213662 | 0.459683682 |
| 0.403723787 | 0.009068597 | 0.251563474 | 0.389422859 |
| 0.362387253 | 0.347741887 | 1           | 0.215699701 |
| 0.359792546 | 0.318818544 | 0.251111103 | 0.458202261 |
| 0.391312323 | 0.336661409 | 0.310496927 | 0.001914173 |
| 0.253735283 | 0.38390999  | 0.469588736 | 0.086207909 |
| 0.378634476 | 0.189842429 | 0.135962665 | 0.499598735 |
| 0.331509312 | 0.485906087 | 0.038257545 | 0.143540074 |
| 0.387371616 | 0.528594666 | 0.448122394 | 0.299917937 |
| 0.525100184 | 0.420400849 | 0.371639089 | 0.487301144 |
| 0.408765283 | 0.472479187 | 0.156627    | 0.374075431 |
| 0.449240312 | 0.50097088  | 0.448365563 | 0.487079699 |
| 0.400596886 | 0.377821723 | 0.310747588 | 0.403861769 |
| 0.445743345 | 0.46115209  | 0.158094094 | 0.514330731 |
| 0.001748359 | 0.457311367 | 0.507614247 | 0.16248896  |
| 0.522981083 | 0.389815293 | 0.134888774 | 0.32074442  |
| 0.494789225 | 0.514018804 | 0.420448443 | 0.396928316 |
| 0.224884017 | 0.0191952   | 0.469115751 | 0.495070641 |
| 0.471448475 | 0.499839667 | 0.373934304 | 0.077978575 |
| 0.487918727 | 0.326368754 | 0.477887562 | 0.417422761 |
| 0.482004725 | 0.407651459 | 0.357274618 | 0.338321441 |
| 0.018190966 | 0.366530587 | 0.434927273 | 0.277570297 |
| 0.420590015 | 0.266177699 | 0.507654861 | 0.444180039 |
| 0.462802523 | 0.326000998 | 0.4336674   | 0.175011281 |
| 0.305851715 | 0.514945085 | 0.05048922  | 0.458006274 |
| 0.516132094 | 0.454059222 | 0.503560924 | 0.502238209 |
| 0.407359684 | 0.502820105 | 0.503046024 | 0.389227828 |
| 0.001575819 | 0.377312332 | 0.356044168 | 0.457273182 |
| 0.436523644 | 0.416979489 | 0.221199312 | 0.412323994 |
| 0.00271187  | 0.263165225 | 0.261950865 | 0.498901754 |
| 0.492729125 | 0.071632588 | 0.04731253  | 0.508556468 |
| 0.371701504 | 0.051336018 | 0.526034762 | 0.457187609 |
| 0.526248569 | 0.506564642 | 0.306292329 | 0.377889221 |
| 0.208886169 | 0.39924471  | 0.064465434 | 0.518090914 |
| 0.445966188 | 0.085285799 | 0.166333791 | 0.504578333 |
| 0.478004627 | 0.509476699 | 0.385199028 | 0.021137947 |



|             |             |             |             |
|-------------|-------------|-------------|-------------|
| 0.324859029 | 0.272998686 | 0.505089258 | 0.193813871 |
| 0.478943671 | 0.481379229 | 0.521038085 | 0.424526864 |
| 0.490828685 | 0.510063142 | 0.484481595 | 0.503863123 |
| 0.160523442 | 0.388127767 | 0.405172073 | 0.114932152 |
| 0.359537718 | 0.49139146  | 0.477150663 | 0.310330282 |
| 0.451370926 | 0.144748979 | 0.333910781 | 0.348260472 |
| 0.528685455 | 0.484549786 | 0.126911234 | 0.238880174 |
| 0.512661362 | 0.415050054 | 0.219945693 | 0.438369274 |
| 0.401768945 | 0.152033556 | 0.129622607 | 0.472313993 |
| 0.521411004 | 0.432623331 | 0.461066922 | 0.257214875 |
| 0.449261581 | 0.101950505 | 0.440821088 | 0.395252097 |
| 0.386051705 | 0.385763458 | 0.329242433 | 0.110910015 |
| 0.045854809 | 0.184447852 | 0.511575807 | 0.501944877 |
| 0.155941494 | 0.301836858 | 0.396692482 | 0.485647246 |
| 0.47522106  | 0.455788268 | 0.404703618 | 0.415577884 |
| 0.500383025 | 0.182530369 | 0.498743437 | 0.416590009 |
| 0.459576523 | 0.465798064 | 0.495378963 | 0.015356451 |
| 0.457144517 | 0.286596592 | 0.197857315 | 0.488564334 |
| 0.396978531 | 0.24400588  | 0.509022999 | 0.259230001 |
| 0.223255475 | 0.005707025 | 0.440005618 | 0.373203339 |
| 0.4115989   | 0.278417263 | 0.433250014 | 0.154530472 |
| 0.536419722 | 0.456389669 | 0.444207888 | 0.272170644 |
| 0.488293343 | 0.025544538 | 0.275017979 | 0.071678118 |
| 0.449375537 | 0.480903706 | 0.424626917 | 0.39212397  |
| 0.212887666 | 0.515857914 | 0.494674184 | 0.506805945 |
| 0.494980346 | 0.18073747  | 0.503354148 | 0.373287214 |
| 0.327197595 | 0.440983011 | 0.392548291 | 0.406562953 |
| 0.346394817 | 0.177180189 | 0.23137645  | 0.212565405 |
| 0.463632938 | 0.381622129 | 0.510520521 | 0.344714302 |
| 0.110158436 | 0.492882722 | 0.412156126 | 0.425116994 |
| 0.493034813 | 0.36758927  | 0.379368779 | 0.493576329 |
| 0.33210896  | 0.354762627 | 0.099803358 | 0.074152448 |
| 0.323787421 | 0.322132679 | 0.419908043 | 0.466469051 |
| 0.492156907 | 0.276966208 | 0.189295078 | 0.216444308 |
| 0.115419914 | 0.343751966 | 0.420642091 | 0.197707401 |
| 0.491166843 | 0.305709867 | 0.001479275 | 0.27971385  |
| 0.480345555 | 0.428193922 |             |             |
| H2-AA       | 0.077004636 | 0.195174559 | 0.300482473 |
| 0.006224687 | 0.118972338 | 0.37328043  | 0.2805171   |
| 0.05004054  | 0.291805525 | 0.13626942  | 0.35861846  |
| 0.017502603 | 0.047122265 | 0.158991677 | 0.235377015 |
| 0.116638279 | 0.116601902 | 0.204411072 | 0.124747667 |
| 0.118481465 | 0.047886603 | 0.23563338  | 0.154368627 |
| 0.302607161 | 0.040894662 | 0.20431879  | 0.028006088 |
| 0.032315614 | 0.095437456 | 0.298134988 | 0.125730302 |
| 0.100389653 | 0.071282608 | 0.053615708 | 0.053858325 |
| 0.006864111 | 0.263985866 | 0.004935757 | 0.054444102 |
| 0.053387326 | 0.157216056 | 0.080871388 | 0.185513139 |
| 7.77E-05    | 0.271863654 | 0.030227931 | 0.199567783 |
| 0.140103261 | 0.344322609 | 0.344701172 | 0.165801844 |
| 0.002843458 | 0.338052802 | 0.165372208 | 0.002295792 |
| 0.313543993 | 0.001049101 | 0.27633069  | 0.066687896 |
| 0.369489615 | 0.181295081 | 0.041481939 | 0.154480789 |
| 0.395100731 | 0.29958623  | 0.157224207 | 0.181743177 |

|             |             |             |             |
|-------------|-------------|-------------|-------------|
| 0.32960724  | 0.067875715 | 0.051336204 | 0.095265231 |
| 0.177015758 | 0.081398228 | 0.150671141 | 0.0192107   |
| 0.066910896 | 0.058558433 | 0.364374589 | 0.287889443 |
| 0.012111146 | 0.231325545 | 0.046245363 | 0.071779563 |
| 0.029193986 | 0.338213521 | 0.074668782 | 0.161892039 |
| 0.045968249 | 0.288854493 | 0.198843359 | 0.139811972 |
| 0.025913003 | 0.068807091 | 0.009567311 | 0.290232739 |
| 0.100228934 | 0.068349343 | 0.11980727  | 0.244881759 |
| 0.238161613 | 0.322210115 | 0.055881444 | 0.043673032 |
| 0.119747814 | 0.083220019 | 0.312628489 | 0.004088699 |
| 0.032092433 | 0.176891867 | 0.14107327  | 0.258546996 |
| 0.149531979 | 0.115347885 | 0.257181368 | 0.365126213 |
| 0.046321718 | 0.05006164  | 0.300173048 | 0.003366038 |
| 0.019660086 | 0.022510367 | 0.092584573 | 0.287862699 |
| 0.185758834 | 0.267524041 | 0.076219139 | 0.068971299 |
| 0.044672646 | 0.086149827 | 0.156898309 | 0.213079826 |
| 0.05009045  | 0.27644807  | 0.057661538 | 0.082077224 |
| 0.040195592 | 0.159876633 | 0.305664413 | 0.212424355 |
| 0.296837995 | 0.281579262 | 0.310323356 | 0.311223875 |
| 0.034411969 | 0.117253084 | 0.15951928  | 0.121589892 |
| 0.110533807 | 0.258750795 | 0.058936419 | 0.183130831 |
| 0.335234897 | 0.147917323 | 0.005457893 | 0.329998303 |
| 0.333130783 | 0.004743555 | 0.358669436 | 0.105062428 |
| 0.015903648 | 0.155613669 | 0.234517379 | 0.138604107 |
| 0.08690531  | 0.024902083 | 0.109924286 | 0.249201238 |
| 0.255690909 | 0.215910685 | 0.16012991  | 0.088513712 |
| 0.319933579 | 0.052124779 | 0.311313031 | 0.03428091  |
| 0.341872032 | 0.244210063 | 0.016066241 | 0.014875441 |
| 0.087374045 | 0.094452988 | 0.159906297 | 0.116422193 |
| 0.077881714 | 0.000688434 | 0.123164512 | 0.100216379 |
| 0.058260293 | 0.062935671 | 0.215699701 | 1           |
| 0.329927756 | 0.022495444 | 0.339539481 | 0.086391151 |
| 0.12943593  | 0.105019324 | 0.114317704 | 0.02018109  |
| 0.242896962 | 0.020948231 | 0.083085364 | 0.228113102 |
| 0.126718732 | 0.250083856 | 0.085042658 | 0.141186647 |
| 0.33922418  | 0.088431863 | 0.092431055 | 0.017591193 |
| 0.205252782 | 0.199913405 | 0.036033544 | 0.063489162 |
| 0.13549724  | 0.116466477 | 0.049977601 | 0.318681194 |
| 0.124915035 | 0.316618478 | 0.009961783 | 0.198718108 |
| 0.045604226 | 0.128065704 | 0.071571253 | 0.108968333 |
| 0.208873671 | 0.109608807 | 0.025918454 | 0.380049994 |
| 0.142447968 | 0.127296931 | 0.326648778 | 0.201889519 |
| 0.026728072 | 0.269034948 | 0.079557573 | 0.010743838 |
| 0.198987981 | 0.31847696  | 0.355017638 | 0.181813192 |
| 0.128674797 | 0.208472918 | 0.149934136 | 0.065418369 |
| 0.021069676 | 0.131142837 | 0.17814669  | 0.235405109 |
| 0.094214515 | 0.109328315 | 0.018718073 | 0.017805407 |
| 0.1390089   | 0.049962704 | 0.122733312 | 0.050714156 |
| 0.063171046 | 0.027911098 | 0.276740015 | 0.078832532 |
| 0.005607038 | 0.167774267 | 0.066947955 | 0.05038838  |
| 0.077777316 | 0.133357668 | 0.127245932 | 0.364419174 |
| 0.038097106 | 0.032045998 | 0.033804757 | 0.273434939 |
| 0.367407217 | 0.192124057 | 0.001918172 | 0.183942992 |
| 0.145718036 | 0.185278687 | 0.129126031 | 0.145173355 |

|             |             |             |             |
|-------------|-------------|-------------|-------------|
| 0.200063398 | 0.305915771 | 0.154082005 | 0.091307549 |
| 0.010852495 | 0.052145209 | 0.034916625 | 0.389916182 |
| 0.083418799 | 0.326608681 | 0.024814583 | 0.020456094 |
| 0.020165392 | 0.344890129 | 0.006463559 | 0.242977686 |
| 0.112023677 | 0.260566099 | 0.000743588 | 0.135698245 |
| 0.033928252 | 0.009289175 | 0.178335451 | 0.166101271 |
| 0.174118481 | 0.101316481 | 0.226913085 | 0.045202632 |
| 0.003793531 | 0.0668139   | 0.044501734 | 0.113314155 |
| 0.04789102  | 0.013608818 | 0.069498807 | 0.151393281 |
| 0.16985366  | 0.258842705 | 0.349928516 | 0.013200893 |
| 0.052883344 | 0.017245092 | 0.097617179 | 0.247430599 |
| 0.207086153 | 0.329617122 | 0.220922646 | 0.064389978 |
| 0.100377521 | 0.269612477 | 0.324517844 | 0.157710721 |
| 0.01011364  | 0.053868674 | 0.075667489 | 0.165326793 |
| 0.041221539 | 0.124619358 | 0.055996193 | 0.362079098 |
| 0.232302633 | 0.009178754 | 0.409343981 | 0.103006573 |
| 0.220766817 | 0.115041562 | 0.319666309 | 0.253800852 |
| 0.275855476 | 0.193845803 | 0.306726502 | 0.156819434 |
| 0.391580965 | 0.00319914  | 0.016000317 | 0.288611237 |
| 0.261886486 | 0.374464225 | 0.109063795 | 0.057612838 |
| 0.092012533 | 0.354714441 | 0.134127077 | 0.184486645 |
| 0.2806844   | 0.038025434 | 0.04505876  | 0.011470838 |
| 0.021112409 | 0.172335389 | 0.271705984 | 0.311592248 |
| 0.348486758 | 0.334399384 | 0.197142709 | 0.169377132 |
| 0.103711583 | 0.047633554 | 0.360492875 | 0.149498451 |
| 0.343616799 | 0.03798057  | 0.242200239 | 0.171490157 |
| 0.190955599 | 0.120697373 | 0.13992551  | 0.010012931 |
| 0.064289551 | 0.12465099  | 0.031967841 | 0.102926629 |
| 0.06335836  | 0.29830569  | 0.244528839 | 0.283402448 |
| 0.026014378 | 0.017734286 | 0.279216735 | 0.014631435 |
| 0.420700683 | 0.024327705 | 0.135968735 | 0.002106718 |
| 0.208385936 | 0.126691214 | 0.129196549 | 0.016468341 |
| 0.095985233 | 0.000354052 | 0.144702865 | 0.297605386 |
| 0.209455073 | 0.296477031 | 0.089715204 | 0.061222326 |
| 0.060646697 | 0.104829372 | 0.247944814 | 0.067279153 |
| 0.116978284 | 0.007468322 | 0.123569996 | 0.144636583 |
| 0.037168039 | 0.080072954 | 0.372527884 | 0.118235112 |
| 0.199975359 | 0.070624888 | 0.335919778 | 0.181206407 |
| 0.093396482 | 0.10643347  | 0.113786121 | 0.060866081 |
| 0.248568354 | 0.106430774 | 0.083275384 | 0.056383605 |
| 0.098789547 | 0.043649861 | 0.037814237 | 0.349712087 |
| 0.053148099 | 0.123614582 | 0.010449442 | 0.024568441 |
| 0.02111471  | 0.235591216 | 0.155862455 | 0.149977624 |
| 0.128702661 | 0.03502005  | 0.338124378 | 0.2934461   |
| 0.005879612 | 0.061862069 | 0.287158477 | 0.006903979 |
| 0.111200952 | 0.03005007  | 0.014692901 | 0.140305954 |
| 0.290257872 | 0.034025652 |             |             |
| H2-AB1      | 0.170497712 | 0.347462529 | 0.240436554 |
| 0.007913427 | 0.107643255 | 0.326706587 | 0.240102188 |
| 0.152630411 | 0.310522039 | 0.141754089 | 0.382436356 |
| 0.03125842  | 0.141577507 | 0.176426001 | 0.261686585 |
| 0.276138517 | 0.272188651 | 0.225382663 | 0.289733197 |
| 0.250805087 | 0.068425643 | 0.353177916 | 0.212741144 |
| 0.289604455 | 0.052999449 | 0.172643345 | 0.02797741  |

|             |             |             |             |
|-------------|-------------|-------------|-------------|
| 0.120033539 | 0.245945461 | 0.359055416 | 0.202115162 |
| 0.246611178 | 0.185494469 | 0.125804892 | 0.102455967 |
| 0.02878829  | 0.410574328 | 0.018735188 | 0.140613021 |
| 0.163753764 | 0.185409594 | 0.199432561 | 0.135389315 |
| 0.000206551 | 0.220369532 | 0.113436767 | 0.300461133 |
| 0.297632546 | 0.29761723  | 0.368506752 | 0.170544083 |
| 0.018046537 | 0.39708433  | 0.324206393 | 0.015431101 |
| 0.405109569 | 0.001229957 | 0.404856063 | 0.199769782 |
| 0.291450913 | 0.312686835 | 0.121268538 | 0.260935386 |
| 0.344305001 | 0.407331395 | 0.315956473 | 0.105439457 |
| 0.249118998 | 0.153922294 | 0.146018652 | 0.155736586 |
| 0.321998162 | 0.166093078 | 0.218709131 | 0.071577432 |
| 0.15792057  | 0.169046627 | 0.381567192 | 0.357766766 |
| 0.012817443 | 0.203429939 | 0.090972076 | 0.18390066  |
| 0.089121147 | 0.394788146 | 0.16948082  | 0.186072991 |
| 0.118445857 | 0.200578245 | 0.28026565  | 0.301089984 |
| 0.024200025 | 0.177177337 | 0.011553193 | 0.350225174 |
| 0.232785301 | 0.198700386 | 0.236728112 | 0.17922603  |
| 0.172188868 | 0.399474729 | 0.16631108  | 0.147371468 |
| 0.213080698 | 0.166637521 | 0.400869927 | 0.025877365 |
| 0.112546723 | 0.289392149 | 0.244667038 | 0.39100938  |
| 0.306750495 | 0.111825533 | 0.389594296 | 0.303622264 |
| 0.113149578 | 0.067784582 | 0.275254657 | 0.012634072 |
| 0.016754534 | 0.061211485 | 0.232059874 | 0.369319494 |
| 0.150681954 | 0.261005127 | 0.075954123 | 0.135513083 |
| 0.145321704 | 0.23090933  | 0.136740089 | 0.245060542 |
| 0.131004258 | 0.240479277 | 0.119664499 | 0.183390869 |
| 0.094979364 | 0.316293594 | 0.360107325 | 0.336287905 |
| 0.442781953 | 0.214936773 | 0.275645868 | 0.349140539 |
| 0.112393881 | 0.271039594 | 0.328037767 | 0.261687841 |
| 0.14712614  | 0.357931247 | 0.130504348 | 0.238030144 |
| 0.296436283 | 0.257309655 | 0.027845829 | 0.398904501 |
| 0.431654968 | 0.01505048  | 0.286470953 | 0.236910794 |
| 0.015773999 | 0.208652548 | 0.381121245 | 0.251571914 |
| 0.163994407 | 0.02440363  | 0.149539831 | 0.24717611  |
| 0.320891152 | 0.245889492 | 0.268122325 | 0.125772652 |
| 0.372747452 | 0.118225656 | 0.200624553 | 0.11481614  |
| 0.324546267 | 0.331302191 | 0.06844029  | 0.035277778 |
| 0.195316027 | 0.232269998 | 0.288690653 | 0.214797205 |
| 0.187592299 | 0.000765015 | 0.131938052 | 0.205688155 |
| 0.136926529 | 0.182769148 | 0.359792546 | 0.329927756 |
| 1           | 0.078947901 | 0.365208476 | 0.142988419 |
| 0.288909846 | 0.15719466  | 0.162456092 | 0.015306055 |
| 0.234436573 | 0.077583468 | 0.183024877 | 0.297667136 |
| 0.156223373 | 0.307558709 | 0.203217657 | 0.274799128 |
| 0.324258274 | 0.189422258 | 0.158202867 | 0.074141174 |
| 0.289411131 | 0.27670337  | 0.09832938  | 0.178045322 |
| 0.230651075 | 0.199042739 | 0.162173406 | 0.41858221  |
| 0.178800375 | 0.364408103 | 0.04545529  | 0.33325048  |
| 0.112378399 | 0.256019366 | 0.179822053 | 0.222576429 |
| 0.277786351 | 0.235611634 | 0.091541594 | 0.378334364 |
| 0.241504546 | 0.22118436  | 0.324681558 | 0.3607531   |
| 0.022348214 | 0.325962287 | 0.140825709 | 0.051736459 |
| 0.336984206 | 0.265246645 | 0.330009819 | 0.332959167 |

|             |             |             |             |
|-------------|-------------|-------------|-------------|
| 0.295821764 | 0.372034183 | 0.315626814 | 0.183220485 |
| 0.082303349 | 0.156874757 | 0.351800829 | 0.336537791 |
| 0.241251568 | 0.212719471 | 0.057076703 | 0.059375759 |
| 0.285778103 | 0.132759722 | 0.212960772 | 0.12505496  |
| 0.125336112 | 0.088708441 | 0.362002713 | 0.193756005 |
| 0.018884094 | 0.247250756 | 0.153448623 | 0.087888813 |
| 0.14586378  | 0.197860596 | 0.241172894 | 0.405052943 |
| 0.095857094 | 0.111696858 | 0.082428381 | 0.203081291 |
| 0.325217398 | 0.35108257  | 0.007273121 | 0.358106695 |
| 0.312043999 | 0.265468027 | 0.259200191 | 0.316808845 |
| 0.298552055 | 0.378358247 | 0.293790926 | 0.237005543 |
| 0.01552041  | 0.156894437 | 0.109123901 | 0.453140393 |
| 0.207629237 | 0.334164132 | 0.102904607 | 0.075615072 |
| 0.015141801 | 0.355932445 | 0.030701603 | 0.41390544  |
| 0.235534196 | 0.148432734 | 0.004055885 | 0.250843612 |
| 0.101948938 | 0.026881669 | 0.35170198  | 0.214768995 |
| 0.294440614 | 0.181807492 | 0.230861797 | 0.134795671 |
| 0.022362583 | 0.179620094 | 0.032489232 | 0.183797046 |
| 0.127601505 | 0.054251864 | 0.061379811 | 0.322741514 |
| 0.315899328 | 0.31589044  | 0.332959421 | 0.014518089 |
| 0.166776329 | 0.045062956 | 0.19349197  | 0.278224365 |
| 0.350237632 | 0.39013537  | 0.349249397 | 0.167161431 |
| 0.184655724 | 0.365736697 | 0.405888109 | 0.287694889 |
| 0.025228278 | 0.15621892  | 0.19981518  | 0.135583112 |
| 0.113153491 | 0.260867    | 0.115165523 | 0.274416904 |
| 0.341825774 | 0.016948005 | 0.331334733 | 0.219690158 |
| 0.337361409 | 0.245644267 | 0.237191057 | 0.380039311 |
| 0.36415178  | 0.30787808  | 0.254716237 | 0.279704617 |
| 0.396456431 | 0.022046054 | 0.066715025 | 0.373954963 |
| 0.392594861 | 0.356188441 | 0.242885677 | 0.07875765  |
| 0.2208125   | 0.320582345 | 0.280852969 | 0.253418125 |
| 0.337735375 | 0.104767747 | 0.148202315 | 0.054638999 |
| 0.026864424 | 0.267626419 | 0.343116701 | 0.414967174 |
| 0.283906585 | 0.374390369 | 0.232856347 | 0.190898129 |
| 0.250173187 | 0.131884716 | 0.349392376 | 0.279473257 |
| 0.437884427 | 0.044241435 | 0.408412066 | 0.277607271 |
| 0.329840269 | 0.194152694 | 0.262753687 | 0.01433256  |
| 0.149228219 | 0.147657665 | 0.12116626  | 0.145858129 |
| 0.18983559  | 0.279221121 | 0.294691756 | 0.37180956  |
| 0.061910493 | 0.023643626 | 0.388737776 | 0.055480868 |
| 0.407069761 | 0.096862728 | 0.256798684 | 0.01411649  |
| 0.381315118 | 0.210521167 | 0.261726274 | 0.066241425 |
| 0.182680576 | 0.001453443 | 0.15162536  | 0.248958277 |
| 0.346854701 | 0.394628479 | 0.194249105 | 0.150480123 |
| 0.188392638 | 0.180444442 | 0.321827414 | 0.128638111 |
| 0.242608658 | 0.029543585 | 0.279458872 | 0.292103455 |
| 0.125035897 | 0.186896793 | 0.347950464 | 0.236244625 |
| 0.210522052 | 0.136498068 | 0.308282038 | 0.339028359 |
| 0.220772302 | 0.214475254 | 0.165762737 | 0.174797663 |
| 0.161585367 | 0.198882856 | 0.200753136 | 0.146939191 |
| 0.174048096 | 0.126167365 | 0.126372932 | 0.432708973 |
| 0.155728014 | 0.272081563 | 0.014764136 | 0.020204151 |
| 0.05523938  | 0.268691444 | 0.323630089 | 0.29918649  |
| 0.285652995 | 0.125204195 | 0.29704525  | 0.389258725 |

|             |             |             |             |
|-------------|-------------|-------------|-------------|
| 0.028449072 | 0.178780321 | 0.255751717 | 0.022377266 |
| 0.193044108 | 0.10757864  | 0.010828582 | 0.304179186 |
| 0.37922296  | 0.099807427 |             |             |
| H2-DMA      | 0.114719776 | 0.333491879 | 0.004822113 |
| 0.002392961 | 0.016122337 | 0.071582252 | 0.066268196 |
| 0.090265862 | 0.01159138  | 0.011409682 | 0.134512281 |
| 9.55E-05    | 0.347837936 | 0.001023953 | 0.011982375 |
| 0.371669007 | 0.405706674 | 0.129512647 | 0.405142289 |
| 0.081441536 | 0.015244914 | 0.148349013 | 0.110711286 |
| 0.07593495  | 9.70E-05    | 0.019050421 | 0.003652206 |
| 0.104364973 | 0.387831859 | 0.043719228 | 0.023833415 |
| 0.334320157 | 0.358468359 | 0.058372509 | 0.055477336 |
| 0.051045599 | 0.273476951 | 0.094781939 | 0.333069214 |
| 0.376022019 | 0.036362804 | 0.34013731  | 0.002100913 |
| 0.000900781 | 0.012522577 | 0.075022686 | 0.140076206 |
| 0.077136651 | 0.055741755 | 0.039801425 | 0.033181154 |
| 0.027355345 | 0.159602014 | 0.227516172 | 0.031313124 |
| 0.231954334 | 0.000427955 | 0.274024859 | 0.042474194 |
| 0.007122138 | 0.08333283  | 0.125921528 | 0.175316382 |
| 0.090444627 | 0.24991496  | 0.385039259 | 0.00361252  |
| 0.010880647 | 0.167127472 | 0.277522687 | 0.16063986  |
| 0.298810801 | 0.028772818 | 0.03380976  | 0.169125742 |
| 0.254961133 | 0.30937714  | 0.111051351 | 0.019568115 |
| 5.99E-05    | 0.03129129  | 0.056753293 | 0.201408297 |
| 0.21901224  | 0.162145349 | 0.173204449 | 0.03696253  |
| 0.119902851 | 0.001262888 | 0.121157675 | 0.383373284 |
| 0.002118355 | 0.346942863 | 0.001754476 | 0.019791767 |
| 0.281586222 | 0.384842024 | 0.177294615 | 0.006475582 |
| 0.001172617 | 0.015294782 | 0.016744872 | 0.381794499 |
| 0.150528072 | 0.144972305 | 0.230242539 | 0.081162518 |
| 0.350141353 | 0.015719776 | 0.072173233 | 0.261758003 |
| 0.323211308 | 0.000812589 | 0.017796506 | 0.063338777 |
| 0.069855714 | 0.02248011  | 0.067058123 | 0.003114362 |
| 0.000576023 | 0.003082436 | 0.356064844 | 0.015177561 |
| 0.013003691 | 0.04422214  | 0.007631253 | 0.212395861 |
| 0.077734109 | 0.365982459 | 0.020355727 | 0.058104245 |
| 0.260333521 | 0.08161337  | 0.116535165 | 0.269548276 |
| 0.089122078 | 0.034979668 | 0.016625171 | 0.308512368 |
| 0.252727879 | 0.006077347 | 0.006236467 | 0.110990526 |
| 0.352072688 | 0.353073607 | 0.378497433 | 0.036443567 |
| 0.049972459 | 0.0622154   | 0.034568408 | 0.146167131 |
| 0.081443135 | 0.129185843 | 0.023416018 | 0.168527055 |
| 0.228288513 | 0.004213218 | 0.005817301 | 0.284716257 |
| 0.011377234 | 0.044280707 | 0.256139391 | 0.281370152 |
| 0.229396095 | 0.002767029 | 0.028253827 | 0.071558493 |
| 0.085294208 | 0.052585511 | 0.198438459 | 0.023566082 |
| 0.10766838  | 0.034767534 | 0.004232096 | 0.355393664 |
| 0.021139673 | 0.117099895 | 0.046026554 | 0.016764373 |
| 0.204257062 | 0.071757318 | 0.260541832 | 0.168176434 |
| 0.2276514   | 0.000260122 | 0.010271518 | 0.138279029 |
| 0.028939923 | 0.35516823  | 0.318818544 | 0.022495444 |
| 0.078947901 | 1           | 0.029148933 | 0.07693462  |
| 0.283073588 | 0.02054434  | 0.018042673 | 1.47E-05    |
| 0.017416969 | 0.070607681 | 0.16317723  | 0.004175811 |

|             |             |             |             |
|-------------|-------------|-------------|-------------|
| 0.027203649 | 0.007891696 | 0.018108955 | 0.303232187 |
| 0.04579809  | 0.31794238  | 0.003025331 | 0.05292447  |
| 0.031036631 | 0.22495249  | 0.049051672 | 0.026708    |
| 0.260615578 | 0.026267875 | 0.367643932 | 0.207247188 |
| 0.056425455 | 0.141944818 | 0.083163066 | 0.055309944 |
| 0.197638354 | 0.339818301 | 0.293970856 | 0.319396566 |
| 0.053203694 | 0.229541984 | 0.039874591 | 0.0913131   |
| 0.130466578 | 0.155222158 | 0.005945315 | 0.34840922  |
| 2.90E-05    | 0.121278182 | 0.162787555 | 0.054158131 |
| 0.302571088 | 0.079981041 | 0.005544557 | 0.041597851 |
| 0.40368247  | 0.352475956 | 0.306771908 | 0.32561013  |
| 0.037691825 | 0.000675879 | 0.340529253 | 0.205262122 |
| 0.404260886 | 0.125995086 | 0.075548533 | 0.039061136 |
| 0.330435806 | 0.186575433 | 0.161487195 | 0.122878126 |
| 0.232702161 | 0.136455227 | 0.071017768 | 0.223222148 |
| 0.002359511 | 0.031994893 | 0.159950939 | 0.022172025 |
| 0.036992476 | 0.021327455 | 0.308924392 | 0.14509791  |
| 0.075297704 | 0.027007926 | 0.059985364 | 0.009561876 |
| 0.048006814 | 0.324774288 | 0.043473808 | 0.316952537 |
| 0.382984704 | 0.158181808 | 0.316243392 | 0.373906219 |
| 0.076260795 | 0.206875715 | 0.301106745 | 0.368644642 |
| 5.75E-05    | 0.367038183 | 0.32792447  | 0.169402721 |
| 0.306950086 | 0.095000193 | 0.089344301 | 0.14469089  |
| 0.000844104 | 0.030364973 | 0.036795023 | 0.325249744 |
| 0.331186593 | 0.003044494 | 0.072389014 | 0.268477118 |
| 0.278374534 | 0.012208255 | 0.360623145 | 0.080508053 |
| 0.28711951  | 0.150037036 | 0.031137068 | 0.341269583 |
| 0.036521065 | 0.084753183 | 0.004548784 | 0.169256941 |
| 0.194598336 | 0.043964703 | 0.007887863 | 0.389642208 |
| 0.239360387 | 0.189539466 | 0.081431798 | 0.000226606 |
| 0.325314532 | 0.018994598 | 0.243614337 | 0.013961475 |
| 0.232132561 | 0.175784158 | 0.291587    | 0.343690399 |
| 0.202911928 | 0.211907617 | 0.175847538 | 0.253422792 |
| 0.017472449 | 0.277958134 | 0.309988243 | 0.00336914  |
| 0.168403012 | 0.352147998 | 0.117787487 | 0.04573228  |
| 0.154903351 | 0.014799441 | 0.056581426 | 0.107913392 |
| 0.271748543 | 0.331889405 | 0.004235679 | 0.019422044 |
| 0.209041112 | 0.048445813 | 0.021608527 | 0.109020729 |
| 0.102851836 | 0.024059305 | 0.058610416 | 0.176218948 |
| 0.278787508 | 0.116497685 | 0.282916851 | 0.013047063 |
| 0.37224444  | 0.004753794 | 0.326761705 | 0.040000602 |
| 0.08342383  | 0.154383438 | 0.329460373 | 0.014880213 |
| 0.000939583 | 0.008602567 | 0.201740196 | 0.220959031 |
| 0.007679198 | 0.043110549 | 0.050021069 | 0.111120217 |
| 0.369854288 | 0.041945991 | 0.08792908  | 0.090335574 |
| 0.227973993 | 0.012351276 | 0.304694829 | 0.085246755 |
| 0.202967061 | 0.055639731 | 0.284669857 | 0.001583156 |
| 0.22901599  | 0.013918493 | 0.0758621   | 0.108771832 |
| 0.385006528 | 0.015087484 | 0.186561878 | 0.019339347 |
| 0.023571546 | 0.000480627 | 0.165013608 | 0.148181157 |
| 0.107626949 | 0.050205168 | 0.09896359  | 0.0416672   |
| 0.35467528  | 0.110249663 | 0.213676878 | 0.130121636 |
| 0.067884289 | 0.014739379 | 0.016867229 | 0.002179365 |
| 0.187703201 | 0.205684975 | 0.206094439 | 0.110297621 |

|             |             |             |             |
|-------------|-------------|-------------|-------------|
| 0.035520452 | 0.234539048 | 0.178193219 | 0.131127339 |
| 0.338928737 | 0.017421571 | 0.371766528 | 0.083034778 |
| 0.368126954 | 0.043516648 | 0.090655633 | 0.054114529 |
| 0.049330882 | 0.038296025 | 0.021181654 | 0.018284434 |
| 0.355465983 | 0.084866722 | 0.124645363 | 0.027175618 |
| 0.003194052 | 0.068715107 | 0.30034866  | 0.292660227 |
| 0.143731562 | 0.213130812 | 0.073465774 | 0.211387022 |
| 0.039098449 | 0.059408279 | 0.005851516 | 0.002954247 |
| 0.03209254  | 0.02734881  | 0.281778543 | 0.292369085 |
| 0.393711839 | 0.050008048 | 0.010009356 | 0.01634468  |
| 0.076551641 | 0.268597732 | 0.092737069 | 0.046027286 |
| 0.223646179 | 0.065755251 | 1.89E-05    | 0.030008011 |
| 0.172090614 | 0.047584675 |             |             |
| H2-EB1      | 0.100445169 | 0.231234443 | 0.274419478 |
| 0.005500382 | 0.105207855 | 0.369637528 | 0.267251959 |
| 0.067246042 | 0.289016461 | 0.121778405 | 0.37428223  |
| 0.024553882 | 0.065299998 | 0.176456467 | 0.257942379 |
| 0.15001899  | 0.149208197 | 0.211343405 | 0.161186978 |
| 0.148729359 | 0.044979687 | 0.278566886 | 0.169635597 |
| 0.302665947 | 0.051277663 | 0.177786751 | 0.023004581 |
| 0.045124063 | 0.12636583  | 0.306248548 | 0.131282353 |
| 0.130495843 | 0.093452393 | 0.060696502 | 0.058197089 |
| 0.00882124  | 0.306584559 | 0.006353832 | 0.070702201 |
| 0.074323417 | 0.148746537 | 0.104837366 | 0.170536734 |
| 7.63E-05    | 0.241827845 | 0.04136194  | 0.231266773 |
| 0.174361246 | 0.338712978 | 0.351408966 | 0.150052642 |
| 0.004210235 | 0.365137793 | 0.21069782  | 0.003418527 |
| 0.343042413 | 0.000888453 | 0.313051543 | 0.091667483 |
| 0.34256191  | 0.203455402 | 0.054052161 | 0.181533262 |
| 0.390338599 | 0.332158253 | 0.193015824 | 0.137501822 |
| 0.291901075 | 0.084647066 | 0.068549886 | 0.106730402 |
| 0.212689078 | 0.092582482 | 0.153451209 | 0.025047717 |
| 0.084310877 | 0.081089442 | 0.390510381 | 0.308200665 |
| 0.012428968 | 0.206523965 | 0.048649702 | 0.097647651 |
| 0.039922314 | 0.36132606  | 0.095950439 | 0.150835444 |
| 0.057465478 | 0.270112228 | 0.230475421 | 0.175545161 |
| 0.021908925 | 0.09090972  | 0.009545295 | 0.309592309 |
| 0.130140468 | 0.093224883 | 0.149647605 | 0.203533425 |
| 0.230622504 | 0.352938357 | 0.075695766 | 0.062064901 |
| 0.141994031 | 0.099656027 | 0.341322612 | 0.006608071 |
| 0.045992794 | 0.200279021 | 0.155405334 | 0.294451115 |
| 0.18421443  | 0.134030442 | 0.301791904 | 0.359396091 |
| 0.054194364 | 0.047135537 | 0.292856231 | 0.0044382   |
| 0.016703553 | 0.033877483 | 0.120994999 | 0.304199647 |
| 0.157425526 | 0.25548387  | 0.070257171 | 0.081790918 |
| 0.058848083 | 0.116415414 | 0.137800852 | 0.209005403 |
| 0.065280954 | 0.268676406 | 0.064529921 | 0.10250363  |
| 0.045793952 | 0.193472294 | 0.318103074 | 0.244260613 |
| 0.344934491 | 0.252573689 | 0.290881476 | 0.331866386 |
| 0.047989886 | 0.149795704 | 0.19732192  | 0.147433252 |
| 0.107450103 | 0.279432643 | 0.065039153 | 0.197264051 |
| 0.335386194 | 0.183297672 | 0.00869467  | 0.365116939 |
| 0.36558816  | 0.006328908 | 0.33073155  | 0.136235426 |
| 0.013011405 | 0.154687986 | 0.276355741 | 0.165399861 |



|             |             |             |             |
|-------------|-------------|-------------|-------------|
| 0.105504634 | 0.020445182 | 0.10703283  | 0.245017262 |
| 0.28409766  | 0.215178482 | 0.189995847 | 0.085775465 |
| 0.352119714 | 0.058138829 | 0.264295791 | 0.048046982 |
| 0.328719409 | 0.283260986 | 0.021986302 | 0.016677233 |
| 0.115048867 | 0.118718122 | 0.190862104 | 0.144036498 |
| 0.10138128  | 0.000536975 | 0.111273423 | 0.126996143 |
| 0.06591143  | 0.087162384 | 0.251111103 | 0.339539481 |
| 0.365208476 | 0.029148933 | 1           | 0.089962452 |
| 0.16981532  | 0.10346942  | 0.114564576 | 0.018840932 |
| 0.22836757  | 0.027009225 | 0.099362351 | 0.261562744 |
| 0.120867518 | 0.263068728 | 0.120277691 | 0.170853347 |
| 0.33640914  | 0.109257891 | 0.119327226 | 0.0271218   |
| 0.218182867 | 0.218519441 | 0.042136915 | 0.081606083 |
| 0.155885733 | 0.123093421 | 0.070311235 | 0.354622839 |
| 0.127719613 | 0.335422772 | 0.014663378 | 0.222933585 |
| 0.058798352 | 0.155773468 | 0.092931763 | 0.134338263 |
| 0.208929204 | 0.144454834 | 0.034864685 | 0.39679574  |
| 0.177068841 | 0.154550994 | 0.324623793 | 0.241491535 |
| 0.027057919 | 0.29985187  | 0.092318979 | 0.016678496 |
| 0.232273268 | 0.306285687 | 0.35062531  | 0.215873877 |
| 0.165866938 | 0.250889629 | 0.192374492 | 0.088134943 |
| 0.028234393 | 0.156199936 | 0.221377522 | 0.265929217 |
| 0.123671854 | 0.121618715 | 0.022497539 | 0.026084623 |
| 0.17294183  | 0.069665354 | 0.143462382 | 0.066696763 |
| 0.075846451 | 0.035141173 | 0.301935297 | 0.10690962  |
| 0.008077812 | 0.174893523 | 0.085259895 | 0.052543122 |
| 0.083728995 | 0.133952347 | 0.151297652 | 0.394434907 |
| 0.043516496 | 0.043636982 | 0.03769564  | 0.239125002 |
| 0.357462338 | 0.230568512 | 0.002458267 | 0.22960144  |
| 0.183073024 | 0.212881901 | 0.157691851 | 0.184640968 |
| 0.22808053  | 0.33103108  | 0.186281844 | 0.122831646 |
| 0.013891539 | 0.070664931 | 0.047819693 | 0.423785504 |
| 0.107775566 | 0.338306561 | 0.037058638 | 0.026765253 |
| 0.019868239 | 0.344718527 | 0.008690748 | 0.290465938 |
| 0.138311982 | 0.211527227 | 0.001022498 | 0.163829599 |
| 0.045944136 | 0.013420372 | 0.219885701 | 0.171633658 |
| 0.202200065 | 0.116754104 | 0.209316399 | 0.060897228 |
| 0.005413452 | 0.086319529 | 0.0341704   | 0.128834205 |
| 0.058325187 | 0.019202886 | 0.05696087  | 0.190916997 |
| 0.207552908 | 0.278376521 | 0.363828531 | 0.012145406 |
| 0.074705089 | 0.019733242 | 0.117207347 | 0.2585653   |
| 0.25038905  | 0.355518784 | 0.255493181 | 0.084551627 |
| 0.120302595 | 0.298202462 | 0.355236105 | 0.189414678 |
| 0.011918265 | 0.073153855 | 0.099498382 | 0.152728937 |
| 0.054746129 | 0.154493846 | 0.063903099 | 0.33970503  |
| 0.273256276 | 0.009029325 | 0.403076389 | 0.133316595 |
| 0.251021813 | 0.141582154 | 0.282952011 | 0.293565109 |
| 0.302068843 | 0.210223394 | 0.275940536 | 0.17996358  |
| 0.411982634 | 0.004869622 | 0.023623134 | 0.321426171 |
| 0.298384547 | 0.378499203 | 0.137522799 | 0.054481399 |
| 0.11832475  | 0.359487226 | 0.171803761 | 0.187911793 |
| 0.312197541 | 0.050490226 | 0.063856256 | 0.017287208 |
| 0.019469169 | 0.19182129  | 0.2921571   | 0.346652723 |
| 0.324164595 | 0.351453171 | 0.1930102   | 0.173797299 |

|             |             |             |             |
|-------------|-------------|-------------|-------------|
| 0.134127808 | 0.059895773 | 0.373732211 | 0.176813057 |
| 0.377313485 | 0.032792949 | 0.287879564 | 0.196179357 |
| 0.229542035 | 0.124083653 | 0.169536559 | 0.010334416 |
| 0.082009666 | 0.116435217 | 0.046920656 | 0.10679996  |
| 0.087440314 | 0.280692077 | 0.260286734 | 0.304291411 |
| 0.029519461 | 0.023049966 | 0.326142331 | 0.018838455 |
| 0.431840867 | 0.035645506 | 0.15897592  | 0.003203431 |
| 0.251650823 | 0.149012047 | 0.160625123 | 0.022715167 |
| 0.106740993 | 0.00044687  | 0.130076406 | 0.296470796 |
| 0.252042028 | 0.333851314 | 0.113532888 | 0.080380334 |
| 0.085244938 | 0.122423443 | 0.272704066 | 0.074285661 |
| 0.143156304 | 0.00920685  | 0.156844649 | 0.174288593 |
| 0.052269943 | 0.094189228 | 0.382897241 | 0.135912815 |
| 0.186398787 | 0.080184192 | 0.316198568 | 0.223413364 |
| 0.118560981 | 0.124626059 | 0.120742978 | 0.078837107 |
| 0.213418947 | 0.116267784 | 0.109779178 | 0.073077753 |
| 0.115406107 | 0.05837475  | 0.050556866 | 0.38261171  |
| 0.069869391 | 0.150515773 | 0.009641437 | 0.018671667 |
| 0.023756381 | 0.22987396  | 0.200855822 | 0.187485167 |
| 0.16293655  | 0.050363075 | 0.315786826 | 0.324441552 |
| 0.008860993 | 0.087058687 | 0.279627979 | 0.008245742 |
| 0.132398514 | 0.040380654 | 0.015003928 | 0.178392284 |
| 0.324623753 | 0.041440728 |             |             |
| H2-Q10      | 0.089294208 | 0.420662836 | 0.03331231  |
| 0.024091842 | 0.160217526 | 0.212123833 | 0.259250622 |
| 0.07430793  | 0.040640265 | 0.070615358 | 0.320620384 |
| 8.34E-05    | 0.234900156 | 0.002711268 | 0.033465586 |
| 0.331441712 | 0.370702572 | 0.330498449 | 0.349693893 |
| 0.081786572 | 0.073120194 | 0.19301642  | 0.213786252 |
| 0.205821415 | 0.000182786 | 0.12297378  | 0.036149646 |
| 0.075557974 | 0.314888083 | 0.106694267 | 0.074785198 |
| 0.270257294 | 0.326969318 | 0.11018663  | 0.206076088 |
| 0.084643607 | 0.403315192 | 0.067407388 | 0.306518384 |
| 0.224309225 | 0.150642718 | 0.310946244 | 0.006096611 |
| 0.004365643 | 0.07817515  | 0.051525037 | 0.199902263 |
| 0.083347853 | 0.170163084 | 0.107391146 | 0.16422468  |
| 0.020331201 | 0.324834929 | 0.207026328 | 0.023946624 |
| 0.446516145 | 0.004736681 | 0.432109754 | 0.029700547 |
| 0.037813696 | 0.127002044 | 0.086623862 | 0.205509611 |
| 0.279276043 | 0.451891509 | 0.41503393  | 0.034395759 |
| 0.060935505 | 0.150392431 | 0.22190502  | 0.289433293 |
| 0.360589653 | 0.077402714 | 0.122252333 | 0.127424801 |
| 0.246553719 | 0.219449058 | 0.227130842 | 0.070513741 |
| 0.000142264 | 0.170129308 | 0.171373763 | 0.118714272 |
| 0.179992625 | 0.334357513 | 0.134707433 | 0.146821885 |
| 0.133350391 | 0.00878203  | 0.197368227 | 0.392847106 |
| 0.012695992 | 0.244105825 | 0.007590019 | 0.065772799 |
| 0.252096249 | 0.269825016 | 0.182165385 | 0.05067697  |
| 0.006280025 | 0.039342158 | 0.011700524 | 0.215455408 |
| 0.160496025 | 0.193442499 | 0.429157552 | 0.020591834 |
| 0.205379707 | 0.033237602 | 0.128340218 | 0.41726655  |
| 0.334000676 | 0.002544621 | 0.037789371 | 0.207726049 |
| 0.111816184 | 0.098228436 | 0.231912461 | 0.00411782  |
| 0.005154019 | 0.001237597 | 0.290367417 | 0.042791134 |

|             |             |             |             |
|-------------|-------------|-------------|-------------|
| 0.085934567 | 0.170688966 | 0.059646893 | 0.312949615 |
| 0.060356281 | 0.240347582 | 0.175556251 | 0.199741579 |
| 0.248190771 | 0.285452355 | 0.240319584 | 0.276051206 |
| 0.180033851 | 0.047991167 | 0.048015494 | 0.462700181 |
| 0.352310063 | 0.04670206  | 0.033576025 | 0.247040235 |
| 0.222933468 | 0.326800591 | 0.398606096 | 0.058190786 |
| 0.191819256 | 0.117077657 | 0.066467483 | 0.32766454  |
| 0.251879422 | 0.127872981 | 0.011215776 | 0.310952408 |
| 0.424803785 | 0.006190184 | 0.033082604 | 0.251054213 |
| 0.117546124 | 0.141935111 | 0.350142931 | 0.359940549 |
| 0.259275399 | 0.028901706 | 0.10179005  | 0.206152215 |
| 0.143840623 | 0.173752398 | 0.218004549 | 0.083830633 |
| 0.210861821 | 0.068479989 | 0.038030224 | 0.217800731 |
| 0.082790401 | 0.167822974 | 0.039729829 | 0.017583336 |
| 0.161199645 | 0.071669403 | 0.347348976 | 0.178782851 |
| 0.180248416 | 0.004575973 | 0.065270045 | 0.120091145 |
| 0.049862649 | 0.222820808 | 0.458202261 | 0.086391151 |
| 0.142988419 | 0.07693462  | 0.089962452 | 1           |
| 0.213591124 | 0.064799338 | 0.068295954 | 0.000142974 |
| 0.087664761 | 0.074307601 | 0.16116364  | 0.009493504 |
| 0.149409552 | 0.027641566 | 0.015581466 | 0.359243304 |
| 0.143129582 | 0.36666697  | 0.003223707 | 0.019189497 |
| 0.083645561 | 0.428107584 | 0.089108846 | 0.032016281 |
| 0.39737893  | 0.076264888 | 0.227960715 | 0.346394634 |
| 0.202999927 | 0.319994662 | 0.029206558 | 0.080505517 |
| 0.20071205  | 0.395256742 | 0.288141521 | 0.360555598 |
| 0.136698672 | 0.169266481 | 0.050157544 | 0.223406946 |
| 0.15865016  | 0.185737457 | 0.02719223  | 0.432106476 |
| 0.000129872 | 0.233808041 | 0.24943707  | 0.02216722  |
| 0.44190661  | 0.291224134 | 0.025137336 | 0.057434098 |
| 0.357986113 | 0.431495962 | 0.257746668 | 0.257773247 |
| 0.026058399 | 0.001683866 | 0.335623679 | 0.305456026 |
| 0.330856558 | 0.18996317  | 0.152054282 | 0.013516527 |
| 0.373622037 | 0.110538344 | 0.214769002 | 0.120467279 |
| 0.268438218 | 0.137137671 | 0.133393092 | 0.136110301 |
| 0.001204265 | 0.079464868 | 0.168444341 | 0.073839622 |
| 0.086584452 | 0.044404911 | 0.385134584 | 0.294766573 |
| 0.152174692 | 0.034954626 | 0.125776047 | 0.065629538 |
| 0.161929396 | 0.40638386  | 0.029414711 | 0.315445125 |
| 0.387415265 | 0.20495669  | 0.395230446 | 0.361535173 |
| 0.121809502 | 0.399839793 | 0.367389283 | 0.252751589 |
| 8.73E-05    | 0.260385316 | 0.233553112 | 0.324123513 |
| 0.285648763 | 0.213782597 | 0.038317851 | 0.14364053  |
| 0.000648778 | 0.092185119 | 0.051418196 | 0.396961988 |
| 0.39001508  | 0.025775203 | 0.028191617 | 0.354277721 |
| 0.213177307 | 0.013257704 | 0.397566729 | 0.18444877  |
| 0.428709285 | 0.241592648 | 0.131349636 | 0.251508423 |
| 0.035480508 | 0.078210813 | 0.042010733 | 0.293705629 |
| 0.174639823 | 0.009338424 | 0.077292187 | 0.372076649 |
| 0.28685396  | 0.397967711 | 0.202933046 | 0.002066619 |
| 0.183766728 | 0.061626677 | 0.327516469 | 0.053034405 |
| 0.293952789 | 0.345546197 | 0.43630409  | 0.288900009 |
| 0.226918508 | 0.37952082  | 0.338836073 | 0.330781375 |
| 0.077424695 | 0.219132722 | 0.249468551 | 0.031161311 |

|             |             |             |             |
|-------------|-------------|-------------|-------------|
| 0.114984739 | 0.391633541 | 0.190890563 | 0.184672661 |
| 0.211684494 | 0.088465444 | 0.18267     | 0.086326545 |
| 0.448611494 | 0.365563483 | 0.031130261 | 0.041168437 |
| 0.403017112 | 0.091198548 | 0.107852125 | 0.160656461 |
| 0.226231585 | 0.014867659 | 0.017430699 | 0.282066504 |
| 0.44689512  | 0.331928492 | 0.295294879 | 0.070824163 |
| 0.341130981 | 0.021529065 | 0.288374381 | 0.127635091 |
| 0.143719418 | 0.132808883 | 0.194838392 | 0.008123454 |
| 0.004456036 | 0.019604415 | 0.417601705 | 0.387461268 |
| 0.040051278 | 0.104759268 | 0.170489255 | 0.309328358 |
| 0.341060165 | 0.083891291 | 0.222069459 | 0.122614522 |
| 0.422300109 | 0.079590245 | 0.390413812 | 0.119349633 |
| 0.236822946 | 0.139590545 | 0.325133645 | 0.00320633  |
| 0.220761289 | 0.067440944 | 0.030780719 | 0.277216281 |
| 0.24939445  | 0.066876424 | 0.413220689 | 0.044266557 |
| 0.053057709 | 0.000751345 | 0.23204561  | 0.158872    |
| 0.275166255 | 0.041245741 | 0.128323587 | 0.036712212 |
| 0.423703692 | 0.147840255 | 0.217234168 | 0.062233501 |
| 0.153533765 | 0.026543167 | 0.084147936 | 0.01306294  |
| 0.221468821 | 0.320355731 | 0.169637029 | 0.098180184 |
| 0.020400191 | 0.338147208 | 0.305294992 | 0.280940904 |
| 0.394646096 | 0.02512156  | 0.368074475 | 0.0842029   |
| 0.223000011 | 0.073880327 | 0.22795041  | 0.085258357 |
| 0.218649656 | 0.036002493 | 0.079130047 | 0.025416259 |
| 0.359121386 | 0.107277365 | 0.287847469 | 0.037671177 |
| 0.036873487 | 0.136508149 | 0.234437733 | 0.247259897 |
| 0.209769352 | 0.156528652 | 0.067520993 | 0.403909431 |
| 0.043897803 | 0.062848997 | 0.046321553 | 0.032830348 |
| 0.078672212 | 0.100820826 | 0.24276745  | 0.298308456 |
| 0.373892762 | 0.036469586 | 0.045911154 | 0.034816381 |
| 0.028443038 | 0.171547352 | 0.314164697 | 0.104914552 |
| 0.264156867 | 0.042789114 | 0.000172149 | 0.034599861 |
| 0.293251706 | 0.082382145 |             |             |
| HAVCR2      | 0.376411495 | 0.406609201 | 0.077753772 |
| 0.012667889 | 0.075265028 | 0.208324246 | 0.17229159  |
| 0.376859302 | 0.140349508 | 0.099784585 | 0.269094289 |
| 0.010372219 | 0.327832726 | 0.044185927 | 0.112241774 |
| 0.453844262 | 0.452185185 | 0.252755561 | 0.464942022 |
| 0.380305457 | 0.089104711 | 0.367984612 | 0.293702896 |
| 0.224587344 | 0.009694926 | 0.090921488 | 0.025726403 |
| 0.36414219  | 0.45061538  | 0.222977617 | 0.222946468 |
| 0.417976289 | 0.366315114 | 0.274464842 | 0.196429432 |
| 0.146756405 | 0.380392895 | 0.094997671 | 0.321444038 |
| 0.379443763 | 0.158121175 | 0.360637875 | 0.03137322  |
| 0.001070095 | 0.089863244 | 0.345673482 | 0.356481665 |
| 0.369051493 | 0.198449534 | 0.195282782 | 0.121288885 |
| 0.134378291 | 0.299973485 | 0.401666195 | 0.127270321 |
| 0.314634768 | 0.001850028 | 0.357431453 | 0.360071927 |
| 0.083386226 | 0.324388755 | 0.34676993  | 0.36813026  |
| 0.210051591 | 0.329597751 | 0.434941295 | 0.031951525 |
| 0.07789182  | 0.379776947 | 0.32736111  | 0.284480628 |
| 0.380543    | 0.257129    | 0.223077052 | 0.284078183 |
| 0.353885327 | 0.281657906 | 0.203739812 | 0.003355781 |
| 0.114477723 | 0.187547092 | 0.370552692 | 0.307676706 |

|             |             |             |             |
|-------------|-------------|-------------|-------------|
| 0.297382049 | 0.382987753 | 0.154369626 | 0.334150414 |
| 0.034949295 | 0.346828411 | 0.448763655 | 0.016906935 |
| 0.356350186 | 0.010612219 | 0.191473073 | 0.374284868 |
| 0.427011063 | 0.376655711 | 0.065571614 | 0.029597448 |
| 0.189299536 | 0.27785591  | 0.384236019 | 0.38110093  |
| 0.357914535 | 0.315927382 | 0.17768914  | 0.317797132 |
| 0.22665813  | 0.299372907 | 0.36253107  | 0.419548529 |
| 0.024681629 | 0.244131042 | 0.198359804 | 0.25249858  |
| 0.084861258 | 0.193757126 | 0.040968493 | 0.009764686 |
| 0.082709569 | 0.415261896 | 0.207929629 | 0.074941686 |
| 0.169030808 | 0.059397736 | 0.300420669 | 0.368174964 |
| 0.430389982 | 0.084046653 | 0.197758804 | 0.325844761 |
| 0.193979713 | 0.263851506 | 0.35153682  | 0.234024665 |
| 0.33625726  | 0.180108408 | 0.346911315 | 0.369480154 |
| 0.071608324 | 0.100627862 | 0.280440892 | 0.299562501 |
| 0.433993132 | 0.457279043 | 0.34799217  | 0.16798134  |
| 0.274169319 | 0.243253821 | 0.280320978 | 0.212814026 |
| 0.392672982 | 0.131432498 | 0.319656751 | 0.319459214 |
| 0.039869116 | 0.082734537 | 0.38814025  | 0.022640312 |
| 0.191942229 | 0.367947573 | 0.357090669 | 0.35573927  |
| 0.021182781 | 0.157822007 | 0.210728732 | 0.310677814 |
| 0.200737703 | 0.375708867 | 0.143596997 | 0.302115314 |
| 0.23368082  | 0.052690598 | 0.31349597  | 0.135135519 |
| 0.350615349 | 0.262847796 | 0.069484391 | 0.395883787 |
| 0.390001956 | 0.356251294 | 0.385862432 | 0.367129945 |
| 0.001327282 | 0.097213685 | 0.380297072 | 0.254663643 |
| 0.385379661 | 0.391312323 | 0.12943593  | 0.288909846 |
| 0.283073588 | 0.16981532  | 0.213591124 | 1           |
| 0.175419152 | 0.156153426 | 0.001840719 | 0.128437703 |
| 0.273465106 | 0.368769744 | 0.119802144 | 0.155905633 |
| 0.150060929 | 0.221742839 | 0.363424433 | 0.195195206 |
| 0.338383487 | 0.090904312 | 0.256595122 | 0.238857085 |
| 0.304255919 | 0.260194826 | 0.32400409  | 0.323266005 |
| 0.251865799 | 0.39973226  | 0.331614326 | 0.199547643 |
| 0.279784838 | 0.213852113 | 0.309735489 | 0.33770835  |
| 0.363715087 | 0.342419496 | 0.355445448 | 0.225712106 |
| 0.39954576  | 0.281444659 | 0.255441678 | 0.382555081 |
| 0.382373748 | 0.1173053   | 0.420220938 | 0.00302642  |
| 0.316857149 | 0.308548789 | 0.232630257 | 0.376893731 |
| 0.185815744 | 0.10208595  | 0.323931499 | 0.468539982 |
| 0.426996806 | 0.414233134 | 0.377393705 | 0.281400502 |
| 0.038769095 | 0.441661673 | 0.342919153 | 0.447680661 |
| 0.319848031 | 0.20073275  | 0.157058972 | 0.400137381 |
| 0.372228714 | 0.336312548 | 0.347944541 | 0.322109838 |
| 0.288820365 | 0.275341097 | 0.388017531 | 0.033551847 |
| 0.221370889 | 0.33930264  | 0.127807872 | 0.220179682 |
| 0.188843713 | 0.343502862 | 0.296637059 | 0.249231489 |
| 0.293233735 | 0.210816754 | 0.074037277 | 0.173237666 |
| 0.417782739 | 0.039010986 | 0.430881566 | 0.456667182 |
| 0.351796608 | 0.366320464 | 0.463946038 | 0.32516874  |
| 0.307290606 | 0.374655058 | 0.427118424 | 0.00489733  |
| 0.366866833 | 0.301315003 | 0.308263956 | 0.372641007 |
| 0.260051014 | 0.3339647   | 0.295004836 | 0.00418212  |
| 0.173325941 | 0.167463358 | 0.429376187 | 0.357982202 |

|             |             |             |             |
|-------------|-------------|-------------|-------------|
| 0.033662597 | 0.039042968 | 0.357322789 | 0.306634646 |
| 0.059688113 | 0.454695776 | 0.255401386 | 0.340160344 |
| 0.326556488 | 0.138283034 | 0.317876628 | 0.155977797 |
| 0.374464811 | 0.019892285 | 0.308671946 | 0.334051688 |
| 0.173550994 | 0.045768566 | 0.463686545 | 0.371535324 |
| 0.2978904   | 0.242439644 | 0.007599339 | 0.381660442 |
| 0.123845174 | 0.329743976 | 0.145732119 | 0.379638367 |
| 0.303978781 | 0.351192947 | 0.340776963 | 0.363621916 |
| 0.324150681 | 0.311247644 | 0.359379724 | 0.068783601 |
| 0.332832145 | 0.379485532 | 0.052187818 | 0.349774845 |
| 0.386523955 | 0.273541873 | 0.153005118 | 0.36596922  |
| 0.041592365 | 0.19105324  | 0.396341903 | 0.335950995 |
| 0.376957918 | 0.065998702 | 0.250666192 | 0.312013479 |
| 0.293958354 | 0.103278798 | 0.340990795 | 0.265159501 |
| 0.160406002 | 0.242717469 | 0.334483524 | 0.36129095  |
| 0.235007115 | 0.372149713 | 0.09388537  | 0.386773103 |
| 0.087698002 | 0.391341396 | 0.223792894 | 0.304304084 |
| 0.318594917 | 0.366462265 | 0.19164194  | 0.022285374 |
| 0.190010649 | 0.295481989 | 0.329362242 | 0.087957203 |
| 0.221245588 | 0.196059271 | 0.239050031 | 0.429146368 |
| 0.308040967 | 0.250412946 | 0.357807126 | 0.320218154 |
| 0.05512861  | 0.419023179 | 0.348238124 | 0.378646188 |
| 0.240996103 | 0.367828354 | 0.011239732 | 0.350605163 |
| 0.121370311 | 0.333783079 | 0.232994912 | 0.422321929 |
| 0.128542687 | 0.2832204   | 0.211757052 | 0.132573812 |
| 0.011240733 | 0.360441351 | 0.242088637 | 0.246626191 |
| 0.325337335 | 0.366559116 | 0.118656382 | 0.449495956 |
| 0.35503113  | 0.371751772 | 0.275902896 | 0.271545227 |
| 0.01143994  | 0.108492208 | 0.056405988 | 0.380433634 |
| 0.343888451 | 0.387788873 | 0.362177523 | 0.351521068 |
| 0.326493476 | 0.326190663 | 0.26154521  | 0.36443111  |
| 0.12579635  | 0.441547154 | 0.362968159 | 0.33817528  |
| 0.32762343  | 0.241476496 | 0.322896468 | 0.146784755 |
| 0.162739274 | 0.129341382 | 0.283735323 | 0.384853359 |
| 0.308372082 | 0.261444358 | 0.332162581 | 0.04580397  |
| 0.290491414 | 0.376655275 | 0.335698291 | 0.327636563 |
| 0.325220312 | 0.351062463 | 0.315077303 | 0.318677444 |
| 0.355151524 | 0.025703895 | 0.015772714 | 0.156352882 |
| 0.166715443 | 0.405339644 | 0.390232571 | 0.442080251 |
| 0.33871615  | 0.110200866 | 0.207750802 | 0.153733314 |
| 0.358531751 | 0.200733984 | 0.09651934  | 0.356809219 |
| 0.332774299 | 0.00174816  | 0.339642977 | 0.331557639 |
| 0.284764646 |             |             |             |

|             |             |             |             |
|-------------|-------------|-------------|-------------|
| HDDC2       | 0.12531678  | 0.324228962 | 0.021584991 |
| 0.011966799 | 0.01638351  | 0.276870394 | 0.201535825 |
| 0.08225196  | 0.027723189 | 0.118227889 | 0.309000789 |
| 0.000458786 | 0.113702776 | 0.004805022 | 0.007947753 |
| 0.256895778 | 0.250880744 | 0.173482479 | 0.22735616  |
| 0.106888064 | 0.059166536 | 0.206329931 | 0.264615774 |
| 0.236724916 | 0.000719884 | 0.11583715  | 0.049018435 |
| 0.051303247 | 0.213470033 | 0.138066926 | 0.072536955 |
| 0.232508278 | 0.190198523 | 0.087016468 | 0.018066938 |
| 0.020229012 | 0.320948014 | 0.002561537 | 0.140199332 |
| 0.136858276 | 0.138785833 | 0.192976736 | 0.005595955 |

|             |             |              |             |
|-------------|-------------|--------------|-------------|
| 0.001449347 | 0.076805316 | 0.049851954  | 0.232355642 |
| 0.071760769 | 0.248097127 | 0.119575803  | 0.160817343 |
| 0.006040046 | 0.292921663 | 0.189635885  | 0.005691333 |
| 0.332393367 | 0.005643354 | 0.339083497  | 0.047529303 |
| 0.045265697 | 0.116744191 | 0.10074663   | 0.236198622 |
| 0.270006331 | 0.339798658 | 0.276107011  | 0.032683797 |
| 0.102760454 | 0.112057433 | 0.174691703  | 0.24762967  |
| 0.288697588 | 0.037062413 | 0.064354163  | 0.04187773  |
| 0.181261325 | 0.145623183 | 0.195945451  | 0.036044467 |
| 0.00192766  | 0.160725928 | 0.072699601  | 0.124517357 |
| 0.092644765 | 0.317925384 | 0.133618173  | 0.104533    |
| 0.130017959 | 0.008427898 | 0.180541584  | 0.269811328 |
| 0.010644757 | 0.139692082 | 0.001510109  | 0.019997297 |
| 0.195842985 | 0.185860338 | 0.212875432  | 0.070229667 |
| 0.004706654 | 0.038645311 | 0.010650793  | 0.131871409 |
| 0.146044854 | 0.138296295 | 0.323899539  | 0.005743855 |
| 0.103204878 | 0.030565578 | 0.07781302   | 0.358630641 |
| 0.295775309 | 0.001227684 | 0.027499308  | 0.212956807 |
| 0.019591228 | 0.033041466 | 0.170132085  | 0.002695506 |
| 0.007567285 | 0.000787862 | 0.222985405  | 0.058645337 |
| 0.117352079 | 0.186395064 | 0.015445991  | 0.179971671 |
| 0.056390642 | 0.176646282 | 0.02126432   | 0.180548526 |
| 0.148386568 | 0.218001726 | 0.131096611  | 0.186880981 |
| 0.043059723 | 0.049030029 | 0.081640866  | 0.283304832 |
| 0.286990601 | 0.021257023 | 0.027565034  | 0.27761631  |
| 0.107033348 | 0.249572254 | 0.293268852  | 0.032018254 |
| 0.078497462 | 0.118941397 | 0.134515688  | 0.26770947  |
| 0.176725777 | 0.098357814 | 0.001610537  | 0.225590378 |
| 0.35183484  | 0.00252012  | 0.053629872  | 0.17160625  |
| 0.00759681  | 0.033281492 | 0.309221401  | 0.226833735 |
| 0.121987432 | 0.046679955 | 0.166850731  | 0.27429672  |
| 0.176716205 | 0.199536152 | 0.19578858   | 0.161601275 |
| 0.232073865 | 0.138186157 | 0.039841275  | 0.113860514 |
| 0.104546586 | 0.175571813 | 0.021409009  | 0.006498308 |
| 0.118509796 | 0.057961786 | 0.285516821  | 0.146900052 |
| 0.185149182 | 0.004214536 | 0.118363059  | 0.166501717 |
| 0.117680912 | 0.132903397 | 0.336661409  | 0.105019324 |
| 0.15719466  | 0.02054434  | 0.10346942   | 0.064799338 |
| 0.175419152 | 1           | 0.0060355267 | 0.002238759 |
| 0.026910894 | 0.103539858 | 0.101967928  | 0.009826336 |
| 0.058313256 | 0.03020176  | 0.006277411  | 0.268210864 |
| 0.185774925 | 0.183896351 | 0.002804169  | 0.00613458  |
| 0.088925589 | 0.275734461 | 0.08157336   | 0.024216279 |
| 0.259383604 | 0.090854402 | 0.156230955  | 0.306013501 |
| 0.033685445 | 0.345035322 | 0.003555053  | 0.091493719 |
| 0.110234323 | 0.249535428 | 0.192391948  | 0.187473968 |
| 0.17968048  | 0.116742905 | 0.012050576  | 0.253677343 |
| 0.136886811 | 0.11261784  | 0.038779888  | 0.291107791 |
| 0.000773855 | 0.182906569 | 0.184999018  | 0.004145101 |
| 0.325600831 | 0.238306357 | 0.041988154  | 0.069344979 |
| 0.234506622 | 0.282620349 | 0.197683867  | 0.187507365 |
| 0.010853693 | 0.002485556 | 0.259320298  | 0.2710206   |
| 0.222176028 | 0.11873276  | 0.029241496  | 0.001415892 |
| 0.245903802 | 0.066152919 | 0.259355772  | 0.124601337 |

|                     |             |             |             |
|---------------------|-------------|-------------|-------------|
| 0.125456168         | 0.042503941 | 0.111134554 | 0.105081299 |
| 0.002051726         | 0.17704133  | 0.193739151 | 0.047206235 |
| 0.142288324         | 0.053369894 | 0.259677454 | 0.224678468 |
| 0.051783971         | 0.032526685 | 0.091473525 | 0.065943151 |
| 0.150092862         | 0.320300154 | 0.000926815 | 0.240990991 |
| 0.268995339         | 0.13354217  | 0.266466953 | 0.254075942 |
| 0.164849614         | 0.304794549 | 0.282408055 | 0.167131614 |
| 0.000190871         | 0.165629582 | 0.107430214 | 0.28500617  |
| 0.2396005           | 0.264344485 | 0.025907749 | 0.059770237 |
| 0.00021403          | 0.134631143 | 0.022890434 | 0.295947585 |
| 0.234174079         | 0.015913147 | 0.000680001 | 0.210104514 |
| 0.103857787         | 0.001124302 | 0.295677942 | 0.26834139  |
| 0.295265429         | 0.119789363 | 0.194660041 | 0.141921217 |
| 0.02031433          | 0.034695176 | 0.012878461 | 0.22727586  |
| 0.076270003         | 0.003348169 | 0.061063974 | 0.259972583 |
| 0.275295349         | 0.246442136 | 0.179335304 | 0.026447971 |
| 0.143189411         | 0.034155132 | 0.232309887 | 0.012758525 |
| 0.232747359         | 0.28327765  | 0.278026129 | 0.156806257 |
| 0.161602387         | 0.315514501 | 0.332025689 | 0.279208211 |
| 0.007509149         | 0.174864663 | 0.215576936 | 0.017307401 |
| 0.108962349         | 0.247188943 | 0.198468598 | 0.217473696 |
| 0.199872901         | 0.014996679 | 0.222237963 | 0.092214573 |
| 0.302820648         | 0.274074318 | 0.058932492 | 0.028714923 |
| 0.335196032         | 0.074624957 | 0.101087968 | 0.091692871 |
| 0.241802275         | 0.007808534 | 0.003738839 | 0.252303759 |
| 0.336181691         | 0.274678958 | 0.271071021 | 0.079731624 |
| 0.19828553          | 0.013345683 | 0.175063163 | 0.030664177 |
| 0.163696633         | 0.148077618 | 0.139045414 | 0.004666622 |
| 0.039636063         | 0.02785927  | 0.33495504  | 0.323395242 |
| 0.061919756         | 0.129393636 | 0.19177067  | 0.216998885 |
| 0.23676003          | 0.041901913 | 0.223289489 | 0.09873146  |
| 0.327482855         | 0.042478507 | 0.311687009 | 0.155592329 |
| 0.253892168         | 0.155608668 | 0.227616969 | 0.002127032 |
| 0.158225388         | 0.148142875 | 0.031894759 | 0.207808382 |
| 0.17258197          | 0.090362349 | 0.257122179 | 0.070859805 |
| 0.013255231         | 0.000238258 | 0.197866332 | 0.05508881  |
| 0.293116283         | 0.013904821 | 0.112373065 | 0.004474145 |
| 0.315277105         | 0.189062761 | 0.254026459 | 0.018474674 |
| 0.142522563         | 0.000494939 | 0.150079082 | 0.011063183 |
| 0.230545255         | 0.246286072 | 0.146763021 | 0.127411137 |
| 0.027414535         | 0.16454573  | 0.242983887 | 0.120501748 |
| 0.256349065         | 0.016364536 | 0.266316355 | 0.060394459 |
| 0.1264977           | 0.043456607 | 0.202658778 | 0.027971714 |
| 0.126239852         | 0.010218528 | 0.089868403 | 0.025729778 |
| 0.239569893         | 0.021989593 | 0.180482197 | 0.042528634 |
| 0.0197075           | 0.114656953 | 0.141887698 | 0.165290233 |
| 0.218543059         | 0.169967761 | 0.045060046 | 0.308969794 |
| 0.020943726         | 0.095867817 | 0.020452734 | 0.061746562 |
| 0.04507231          | 0.144650186 | 0.200144561 | 0.207259241 |
| 0.243527906         | 0.013859554 | 0.069543564 | 0.048460199 |
| 0.001898523         | 0.129524484 | 0.250209737 | 0.00648598  |
| 0.1419244           | 0.032251993 | 0.000212894 | 0.044375642 |
| 0.273491903         | 0.02455546  |             |             |
| HDGFRP3 0.112597778 | 0.289653    | 0.021717408 | 0.01170039  |



|             |             |             |             |
|-------------|-------------|-------------|-------------|
| 0.018786465 | 0.28433849  | 0.22698721  | 0.067309297 |
| 0.033146886 | 0.139999146 | 0.295517012 | 0.00078058  |
| 0.099461804 | 0.006668447 | 0.010858672 | 0.220735085 |
| 0.220651344 | 0.177085426 | 0.201243584 | 0.0955975   |
| 0.07009183  | 0.192223807 | 0.253146475 | 0.243360934 |
| 0.001332956 | 0.128049594 | 0.057715202 | 0.049218959 |
| 0.185754797 | 0.13967194  | 0.064964014 | 0.200273455 |
| 0.167626181 | 0.084373311 | 0.020848056 | 0.017356774 |
| 0.302688392 | 0.001896969 | 0.124419086 | 0.120236867 |
| 0.144930687 | 0.177432554 | 0.008552404 | 0.001356085 |
| 0.092440255 | 0.036815218 | 0.217100794 | 0.072379235 |
| 0.247676117 | 0.124218799 | 0.186971096 | 0.004038816 |
| 0.283540029 | 0.170375999 | 0.00350331  | 0.31871285  |
| 0.008936532 | 0.326021493 | 0.042598939 | 0.054930051 |
| 0.121046449 | 0.098200574 | 0.200739175 | 0.279373648 |
| 0.323438573 | 0.249756731 | 0.023604421 | 0.118023956 |
| 0.106784507 | 0.153759037 | 0.22350219  | 0.257097943 |
| 0.039599602 | 0.076731797 | 0.039126416 | 0.164469791 |
| 0.128076914 | 0.200937583 | 0.03928212  | 0.001138924 |
| 0.189470236 | 0.069430439 | 0.11135801  | 0.083367472 |
| 0.292278879 | 0.104157767 | 0.115972087 | 0.108064765 |
| 0.012941066 | 0.181009763 | 0.240300964 | 0.011976425 |
| 0.119498328 | 0.001328167 | 0.021721848 | 0.1776274   |
| 0.162850026 | 0.185985828 | 0.072675785 | 0.00635093  |
| 0.04282001  | 0.008749989 | 0.112210406 | 0.125249093 |
| 0.124260927 | 0.31379542  | 0.005317362 | 0.088653411 |
| 0.04620548  | 0.081403611 | 0.328025096 | 0.255381155 |
| 0.001502822 | 0.033179392 | 0.211064909 | 0.024950491 |
| 0.049650357 | 0.172565512 | 0.002419739 | 0.003861487 |
| 0.000525035 | 0.185063071 | 0.05507873  | 0.147051423 |
| 0.19846796  | 0.016776678 | 0.166059415 | 0.041592975 |
| 0.15263389  | 0.026602653 | 0.19477679  | 0.129020402 |
| 0.237944055 | 0.117045948 | 0.172173661 | 0.039839719 |
| 0.044027288 | 0.088997151 | 0.262677468 | 0.266957672 |
| 0.02414533  | 0.030508428 | 0.281757561 | 0.092174712 |
| 0.210483232 | 0.258410411 | 0.027745224 | 0.079862462 |
| 0.11313014  | 0.118057588 | 0.26271999  | 0.189804377 |
| 0.091540543 | 0.001049933 | 0.22008792  | 0.335240863 |
| 0.002047008 | 0.068099178 | 0.161382313 | 0.007467758 |
| 0.036715238 | 0.300306694 | 0.202856623 | 0.111442282 |
| 0.064731484 | 0.159220924 | 0.266260239 | 0.185915231 |
| 0.2231851   | 0.186514864 | 0.172828278 | 0.244986166 |
| 0.125639697 | 0.042352819 | 0.094331124 | 0.109505123 |
| 0.175509019 | 0.028116307 | 0.006684319 | 0.1066212   |
| 0.05061541  | 0.264187191 | 0.136779767 | 0.152464827 |
| 0.004472451 | 0.127647842 | 0.147056755 | 0.094349863 |
| 0.111120685 | 0.310496927 | 0.114317704 | 0.162456092 |
| 0.018042673 | 0.114564576 | 0.068295954 | 0.156153426 |
| 0.060355267 | 1           | 0.00292549  | 0.024477332 |
| 0.083908731 | 0.096936629 | 0.012306511 | 0.05229134  |
| 0.043782575 | 0.007215052 | 0.244479363 | 0.188301534 |
| 0.161352475 | 0.002495825 | 0.006024057 | 0.097871848 |
| 0.264308697 | 0.061710309 | 0.020809088 | 0.239741536 |
| 0.069742833 | 0.13338574  | 0.298686248 | 0.034869572 |

|             |             |             |             |
|-------------|-------------|-------------|-------------|
| 0.338539758 | 0.003232693 | 0.088776529 | 0.101266694 |
| 0.22775791  | 0.172373751 | 0.163754379 | 0.160488556 |
| 0.106559106 | 0.009075202 | 0.251391876 | 0.138934765 |
| 0.101147697 | 0.038593984 | 0.260523764 | 0.002382468 |
| 0.187854535 | 0.174201983 | 0.004979094 | 0.300658162 |
| 0.251113044 | 0.047881117 | 0.066378358 | 0.208097829 |
| 0.260083426 | 0.176493064 | 0.162108282 | 0.006530241 |
| 0.003134802 | 0.229726028 | 0.260996524 | 0.191411758 |
| 0.102104267 | 0.026234939 | 0.001363787 | 0.220365262 |
| 0.061479282 | 0.245847764 | 0.120948925 | 0.11123944  |
| 0.035408185 | 0.112823708 | 0.089950141 | 0.001540811 |
| 0.181692176 | 0.167281159 | 0.074302219 | 0.143768176 |
| 0.036376742 | 0.228813563 | 0.224398025 | 0.042901431 |
| 0.032151759 | 0.084257978 | 0.077642597 | 0.163865186 |
| 0.293786769 | 0.000641642 | 0.219650102 | 0.23639973  |
| 0.125860684 | 0.243228241 | 0.224295044 | 0.160991595 |
| 0.289251569 | 0.258530288 | 0.147898936 | 0.00025276  |
| 0.137256713 | 0.091537776 | 0.275291686 | 0.205007518 |
| 0.260221529 | 0.022164034 | 0.055569022 | 0.000212377 |
| 0.147846626 | 0.017417713 | 0.271407732 | 0.205979179 |
| 0.018075613 | 0.000528283 | 0.193754624 | 0.087138167 |
| 0.001196151 | 0.268517326 | 0.238293152 | 0.265721972 |
| 0.106529999 | 0.202620202 | 0.123329315 | 0.016053961 |
| 0.034854401 | 0.009852931 | 0.194907299 | 0.066591274 |
| 0.003005554 | 0.073775075 | 0.234278151 | 0.245874205 |
| 0.242384511 | 0.192489959 | 0.023170384 | 0.121833052 |
| 0.030223666 | 0.210101533 | 0.012339524 | 0.210890512 |
| 0.28846574  | 0.254144413 | 0.144255252 | 0.133001136 |
| 0.292566514 | 0.315847251 | 0.252260444 | 0.008757002 |
| 0.149322453 | 0.176757114 | 0.022519937 | 0.08488309  |
| 0.223721779 | 0.175978728 | 0.223485795 | 0.193600653 |
| 0.012039621 | 0.233589346 | 0.085569448 | 0.278339108 |
| 0.239126574 | 0.07505186  | 0.02813102  | 0.327610642 |
| 0.072157078 | 0.109695899 | 0.09010385  | 0.241312311 |
| 0.005039688 | 0.003050997 | 0.239777975 | 0.318274638 |
| 0.279661735 | 0.238768623 | 0.083345379 | 0.170121039 |
| 0.015676644 | 0.160952771 | 0.029295164 | 0.156220714 |
| 0.120424624 | 0.115943262 | 0.003388868 | 0.038076753 |
| 0.02634524  | 0.327200753 | 0.311325232 | 0.072808421 |
| 0.139281213 | 0.182925993 | 0.213944718 | 0.206116025 |
| 0.039571216 | 0.218080652 | 0.08822628  | 0.31705238  |
| 0.04517973  | 0.290327004 | 0.139301005 | 0.23691893  |
| 0.127383825 | 0.205227593 | 0.003908691 | 0.137119644 |
| 0.152377807 | 0.026767649 | 0.196907261 | 0.150469479 |
| 0.094899839 | 0.256769614 | 0.074268825 | 0.011795376 |
| 0.000277566 | 0.194241963 | 0.048589474 | 0.293779303 |
| 0.012403813 | 0.093571418 | 0.004319306 | 0.28796609  |
| 0.165440731 | 0.226040332 | 0.016279171 | 0.151163211 |
| 0.000448349 | 0.172859692 | 0.015257166 | 0.225753927 |
| 0.235926554 | 0.131405685 | 0.126831454 | 0.024174724 |
| 0.155390559 | 0.21391116  | 0.117028271 | 0.229438659 |
| 0.007962599 | 0.23661856  | 0.06152499  | 0.109141853 |
| 0.035331748 | 0.208295102 | 0.024032176 | 0.141321487 |
| 0.009854758 | 0.101744712 | 0.027123585 | 0.209866368 |

|             |             |             |             |             |
|-------------|-------------|-------------|-------------|-------------|
| 0.019627543 | 0.170032583 | 0.043206282 | 0.024529442 |             |
| 0.091837212 | 0.129402222 | 0.144858609 | 0.186740587 |             |
| 0.132382394 | 0.036566117 | 0.30185124  | 0.029842683 |             |
| 0.100631142 | 0.022279623 | 0.054957504 | 0.042379872 |             |
| 0.175643082 | 0.183666874 | 0.182510982 | 0.215152468 |             |
| 0.015416322 | 0.075122997 | 0.053169232 | 0.001875254 |             |
| 0.119589938 | 0.25909944  | 0.004840336 | 0.132820788 |             |
| 0.030273434 | 0.000243584 | 0.043374281 | 0.264790307 |             |
| 0.01879893  |             |             |             |             |
| HEG1        | 0.005639244 | 0.001739323 | 0.011904672 | 2.34E-05    |
| 0.000136455 | 0.015495222 | 0.004912831 | 0.002501749 |             |
| 0.007785948 | 0.00471032  | 0.007914906 | 0.016771601 |             |
| 0.000114182 | 0.047877139 | 0.000399039 | 0.001029702 |             |
| 0.000683824 | 0.001288831 | 0.000748148 | 0.008069605 |             |
| 0.000433826 | 0.008847193 | 0.005341881 | 0.009385802 |             |
| 0.036950368 | 0.00437743  | 0.000882011 | 0.000404208 |             |
| 0.000602495 | 0.015807339 | 0.003608917 | 0.001100209 |             |
| 0.000276074 | 0.000296125 | 2.49E-05    | 6.70E-06    | 0.003427001 |
| 2.41E-07    | 0.000118889 | 0.000221898 | 0.002199792 |             |
| 0.00041628  | 0.003957432 | 3.82E-07    | 0.007485904 |             |
| 0.000792436 | 0.007649788 | 0.003734436 | 0.017776218 |             |
| 0.016234708 | 0.003394415 | 1.08E-06    | 0.006596352 |             |
| 0.003673861 | 1.63E-06    | 0.003491985 | 2.74E-05    | 0.003175429 |
| 0.006384641 | 0.018281706 | 0.004336521 | 0.000921071 |             |
| 0.004354072 | 0.009459659 | 0.003330922 | 0.000999946 |             |
| 0.001128622 | 0.026391982 | 0.000739772 | 0.000426173 |             |
| 0.001038033 | 0.001744696 | 0.000861533 | 0.001129018 |             |
| 1.92E-05    | 0.000427455 | 0.000326206 | 0.00798153  |             |
| 0.003552065 | 0.020816574 | 0.00636806  | 0.000122523 |             |
| 0.00168607  | 8.87E-05    | 0.006599335 | 0.001681831 |             |
| 0.001355778 | 0.000732233 | 0.009195091 | 0.005103753 |             |
| 0.000932065 | 4.82E-05    | 0.0002577   | 3.48E-06    | 0.001902543 |
| 0.000963363 | 0.000399579 | 0.003310112 | 0.006974997 |             |
| 0.004899857 | 0.013383491 | 0.004752191 | 0.000174584 |             |
| 0.001909955 | 0.000690663 | 0.003511666 | 2.67E-06    | 7.67E-05    |
| 0.011358624 | 0.00073708  | 0.003619279 | 0.001838114 |             |
| 0.000945714 | 0.008353445 | 0.01134509  | 3.87E-05    | 6.65E-05    |
| 0.004796869 | 1.33E-05    | 0.000138905 | 0.000434071 |             |
| 0.000677484 | 0.019774405 | 0.00562284  | 0.008696378 |             |
| 0.000111582 | 0.000327847 | 0.000947682 | 0.000653447 |             |
| 0.000266268 | 0.004500624 | 0.000219073 | 0.004297156 |             |
| 0.000296133 | 0.000561459 | 2.96E-05    | 0.004660986 |             |
| 0.026504083 | 0.001271513 | 0.004413886 | 0.003185491 |             |
| 0.015789978 | 0.010581798 | 6.87E-05    | 0.001018039 |             |
| 0.001251388 | 0.001961623 | 0.000352078 | 0.009703033 |             |
| 0.00201962  | 0.00245808  | 0.005165856 | 0.002724884 |             |
| 9.25E-07    | 0.004413994 | 0.004686955 | 1.87E-05    | 0.027122464 |
| 0.000837964 | 3.20E-06    | 0.000337706 | 0.003849182 |             |
| 0.000746749 | 0.00024634  | 0.00131638  | 0.003443814 |             |
| 0.007927945 | 0.013117703 | 0.007853514 | 0.002584061 |             |
| 0.003317544 | 0.013251324 | 0.002123874 | 0.011565571 |             |
| 7.72E-05    | 0.017982349 | 0.008375624 | 0.000157398 | 7.57E-06    |
| 0.000933278 | 0.001832244 | 0.0019045   | 0.0018503   |             |
| 0.001221427 | 7.52E-06    | 0.00553884  | 0.005318867 |             |

|                               |                               |                               |                   |
|-------------------------------|-------------------------------|-------------------------------|-------------------|
| 0.003534898                   | 0.000270908                   | 0.001914173                   | 0.02018109        |
| 0.015306055                   | 1.47E-05 0.018840932          | 0.000142974                   |                   |
| 0.001840719                   | 0.002238759                   | 0.00292549                    | 1                 |
| 0.000780047                   | 0.00056066                    | 0.000521032                   | 0.040077182       |
| 0.000536573                   | 0.025230213                   | 0.000487251                   | 0.001300643       |
| 0.015873774                   | 0.000264751                   | 0.005444161                   | 4.55E-05          |
| 0.006462181                   | 0.001417711                   | 0.000322377                   | 0.003812453       |
| 0.000811745                   | 0.003352591                   | 0.000270649                   | 0.005566689       |
| 0.000126791                   | 0.008216305                   | 2.53E-06 0.005865708          |                   |
| 0.000183879                   | 0.000666451                   | 0.000443751                   | 0.00037403        |
| 0.00630618                    | 0.00105425                    | 3.56E-05 0.014370623          |                   |
| 0.003201006                   | 0.000980846                   | 0.03549789                    | 0.001445027       |
| 0.029075572                   | 0.004819943                   | 0.000625445                   | 1.26E-05          |
| 0.001802511                   | 0.005608794                   | 0.041522757                   | 0.011920753       |
| 0.000785089                   | 0.00147221                    | 0.001633332                   | 0.000440227       |
| 5.41E-05 0.02357109           | 0.001908968                   | 0.003466727                   |                   |
| 0.000516983                   | 0.000671939                   | 9.22E-06 3.55E-06 0.000903699 |                   |
| 0.000349378                   | 0.003402299                   | 0.001226271                   | 0.000155134       |
| 2.24E-05 0.006835788          | 0.000965413                   | 7.00E-05 0.016230727          |                   |
| 0.001741387                   | 0.000242939                   | 0.002397095                   | 0.000784933       |
| 0.000704718                   | 0.00579559                    | 4.60E-05 0.001348975          |                   |
| 0.00018979                    | 0.008386268                   | 0.010758716                   | 0.002041615       |
| 1.45E-07 0.002016583          | 0.001034193                   | 0.001612555                   |                   |
| 0.000870967                   | 0.001132398                   | 0.013783113                   | 0.003452144       |
| 0.001592031                   | 0.000558352                   | 0.00115761                    | 0.000207674       |
| 6.63E-05 0.007596246          | 0.000795688                   | 0.011785247                   |                   |
| 0.000288301                   | 4.50E-05 6.92E-05 0.027794255 | 2.17E-05                      |                   |
| 0.002485018                   | 0.000518445                   | 0.002837413                   | 1.53E-06          |
| 0.000764844                   | 7.47E-05 4.93E-07 0.001679831 | 0.005690037                   |                   |
| 0.00127587                    | 0.000418683                   | 0.00952518                    | 0.000144468       |
| 1.27E-05 0.000188939          | 2.05E-05 0.001033673          | 0.000106628                   |                   |
| 2.30E-05 0.000916611          | 0.001068241                   | 0.003469833                   |                   |
| 0.002076793                   | 0.00874311                    | 0.058746099                   | 0.000432698       |
| 0.000156125                   | 0.000727044                   | 0.000781469                   | 0.003027654       |
| 0.005166479                   | 0.001551108                   | 0.000231027                   | 0.000655842       |
| 0.003905834                   | 0.007079052                   | 0.001968181                   | 1.33E-06          |
| 0.000499298                   | 0.000742607                   | 0.001013206                   | 0.000483716       |
| 0.000672048                   | 0.000818013                   | 0.013372006                   | 0.005843717       |
| 5.14E-06 0.017888 0.005080214 |                               | 0.001745775                   | 0.000830363       |
| 0.03067599                    | 0.006612774                   | 0.003761965                   | 0.002298101       |
| 0.008172716                   | 0.001278948                   | 0.012678649                   | 2.72E-05 2.68E-05 |
| 0.005016621                   | 0.002812394                   | 0.006522122                   | 0.001447007       |
| 0.001598719                   | 0.000371684                   | 0.012539783                   | 0.000788617       |
| 0.000445171                   | 0.012234295                   | 0.000675057                   | 0.000274215       |
| 0.000248366                   | 0.010821294                   | 0.033577025                   | 0.003338917       |
| 0.004668096                   | 0.023668678                   | 0.021188107                   | 0.005948246       |
| 0.001654958                   | 0.000680454                   | 0.000213761                   | 0.010309249       |
| 0.003007518                   | 0.004401534                   | 0.000160277                   | 0.003083184       |
| 0.009717897                   | 0.005439055                   | 0.00202966                    | 0.000991079       |
| 4.85E-05 0.000432111          | 0.007607078                   | 0.001303026                   |                   |
| 0.000985302                   | 0.000354422                   | 0.01383063                    | 0.001912025       |
| 0.023291409                   | 1.34E-05 8.55E-05 0.005625637 | 2.02E-05                      |                   |
| 0.012663114                   | 4.77E-05 0.002748991          | 6.77E-07 0.00189772           |                   |
| 0.005189032                   | 0.004125868                   | 1.05E-05 0.001664119          | 1.10E-06          |

|             |             |             |             |
|-------------|-------------|-------------|-------------|
| 0.004854528 | 0.010985718 | 0.006422982 | 0.003875698 |
| 0.001203022 | 0.002970709 | 0.004663279 | 0.000366636 |
| 0.002983626 | 0.000236153 | 0.00061669  | 1.88E-05    |
| 0.000939492 | 0.001666079 | 0.000109973 | 0.000497876 |
| 0.008690681 | 0.000330646 | 0.002118685 | 4.77E-05    |
| 0.011282371 | 0.013891978 | 0.000519695 | 0.000113901 |
| 0.000831596 | 0.00400697  | 0.005294842 | 0.000970332 |
| 0.000405349 | 0.000278585 | 0.001697282 | 0.000657512 |
| 0.000255751 | 0.004553461 | 0.00086333  | 0.009648022 |
| 4.45E-05    | 0.00023411  | 8.62E-05    | 0.013212969 |
| 0.001387827 | 0.000738175 | 0.000187994 | 0.018804389 |
| 0.023852617 | 4.25E-07    | 0.000617783 | 0.004312197 |
| 0.000463236 | 0.000228968 | 0.000280725 | 4.05E-07    |
| 0.00560775  | 7.96E-05    |             | 0.008832478 |
| HERC2       | 0.062434212 | 0.226834951 | 0.048381964 |
| 0.002459245 | 0.031402931 | 0.318005454 | 0.284787575 |
| 0.050370191 | 0.036615856 | 0.062299879 | 0.365232458 |
| 0.000462229 | 0.067150331 | 0.006952307 | 0.020716134 |
| 0.141567851 | 0.145448615 | 0.250098985 | 0.151611631 |
| 0.089741446 | 0.009798964 | 0.202011418 | 0.169313646 |
| 0.256708276 | 0.000989198 | 0.180707814 | 0.006571764 |
| 0.034185146 | 0.120624174 | 0.224942636 | 0.04433329  |
| 0.113985967 | 0.100730936 | 0.037017192 | 0.016957713 |
| 0.00537363  | 0.277481776 | 0.002716539 | 0.083919527 |
| 0.067629559 | 0.156998743 | 0.105357268 | 0.01049137  |
| 4.88E-05    | 0.144181717 | 0.029526925 | 0.184371717 |
| 0.098476332 | 0.286931888 | 0.245391408 | 0.158389684 |
| 0.000927336 | 0.32364135  | 0.153542154 | 0.001276496 |
| 0.346166959 | 0.000233571 | 0.298233411 | 0.032823519 |
| 0.120599694 | 0.146109671 | 0.038533838 | 0.159693743 |
| 0.36520821  | 0.331691731 | 0.191888476 | 0.034662063 |
| 0.191604461 | 0.075414995 | 0.066142016 | 0.129362646 |
| 0.199551586 | 0.022857059 | 0.060454962 | 0.028009526 |
| 0.083696635 | 0.074682034 | 0.305898663 | 0.085844309 |
| 0.000541829 | 0.231710385 | 0.044594868 | 0.063938797 |
| 0.042628593 | 0.350959101 | 0.078678158 | 0.116706063 |
| 0.05673719  | 0.018824148 | 0.190573696 | 0.171463013 |
| 0.004583909 | 0.089070764 | 0.009365857 | 0.05820121  |
| 0.114953564 | 0.086148428 | 0.116441099 | 0.075159992 |
| 0.013957694 | 0.097966886 | 0.006637615 | 0.058521349 |
| 0.117587906 | 0.097886974 | 0.335058013 | 0.004416217 |
| 0.047626694 | 0.02034517  | 0.099778394 | 0.286935261 |
| 0.170909088 | 0.008751483 | 0.055038415 | 0.331971196 |
| 0.008763458 | 0.010013432 | 0.316198062 | 0.000651005 |
| 0.007664656 | 0.001901231 | 0.116506382 | 0.098015291 |
| 0.127888514 | 0.250683927 | 0.020426845 | 0.100951283 |
| 0.041928547 | 0.097390567 | 0.057265584 | 0.208086407 |
| 0.074746049 | 0.285979808 | 0.096241884 | 0.105938517 |
| 0.045894909 | 0.058383697 | 0.126064102 | 0.26152039  |
| 0.293751291 | 0.04335976  | 0.040151024 | 0.275837175 |
| 0.053699679 | 0.147444068 | 0.189635008 | 0.042763665 |
| 0.119421235 | 0.205810718 | 0.031285129 | 0.221359467 |
| 0.318358211 | 0.130689718 | 0.001484139 | 0.320368848 |
| 0.34766871  | 0.002973138 | 0.108238957 | 0.122848012 |

|              |             |             |             |
|--------------|-------------|-------------|-------------|
| 0.008134993  | 0.036455817 | 0.232941888 | 0.179695425 |
| 0.122524462  | 0.004400147 | 0.093542254 | 0.243645526 |
| 0.187748243  | 0.194183091 | 0.154983819 | 0.061390266 |
| 0.257630722  | 0.031383776 | 0.115950791 | 0.052702761 |
| 0.232345842  | 0.192245454 | 0.004877052 | 0.001833374 |
| 0.086668186  | 0.070679089 | 0.192228106 | 0.121561326 |
| 0.082706741  | 0.000292261 | 0.05779524  | 0.086920295 |
| 0.023464232  | 0.081759875 | 0.253735283 | 0.242896962 |
| 0.234436573  | 0.017416969 | 0.22836757  | 0.087664761 |
| 0.128437703  | 0.026910894 | 0.024477332 | 0.000780047 |
| 1            | 0.022950075 | 0.087787189 | 0.01733574  |
| 0.088127165  | 0.023293841 | 0.006544657 | 0.168648534 |
| 0.27704256   | 0.131773029 | 0.006074346 | 0.007645138 |
| 0.118599268  | 0.24944761  | 0.03395774  | 0.010165376 |
| 0.175091798  | 0.058185608 | 0.066105261 | 0.30039039  |
| 0.0711154144 | 0.313242949 | 0.002211061 | 0.113635932 |
| 0.062848966  | 0.167160333 | 0.095199284 | 0.152633065 |
| 0.194092058  | 0.108520138 | 0.006999229 | 0.321260824 |
| 0.128493052  | 0.139830368 | 0.073476435 | 0.24089938  |
| 0.00081235   | 0.240238187 | 0.101182274 | 0.001996886 |
| 0.239780128  | 0.330545171 | 0.091524593 | 0.103405197 |
| 0.155069227  | 0.242526211 | 0.15369458  | 0.084450216 |
| 0.004450794  | 0.006139474 | 0.198180763 | 0.229196625 |
| 0.1194432    | 0.145375222 | 0.021230003 | 0.003307165 |
| 0.170476965  | 0.054358798 | 0.124233234 | 0.052786062 |
| 0.09540824   | 0.042339348 | 0.218478301 | 0.078426781 |
| 0.000330375  | 0.109578911 | 0.075034667 | 0.0078083   |
| 0.051824121  | 0.018811387 | 0.168791934 | 0.339045804 |
| 0.042255818  | 0.009007294 | 0.034062702 | 0.157465826 |
| 0.295049169  | 0.219605332 | 0.001113449 | 0.190386336 |
| 0.17758611   | 0.187529874 | 0.164297593 | 0.170739215 |
| 0.14629793   | 0.326862776 | 0.186204283 | 0.105606235 |
| 0.000390884  | 0.073667893 | 0.056230973 | 0.361962025 |
| 0.10469588   | 0.276977769 | 0.024211915 | 0.03278811  |
| 0.001668665  | 0.223939779 | 0.00455766  | 0.259473291 |
| 0.15304383   | 0.029197153 | 0.000597391 | 0.173923337 |
| 0.054582745  | 0.00149211  | 0.203934817 | 0.182268516 |
| 0.222449125  | 0.137176013 | 0.204654556 | 0.065281919 |
| 0.003249483  | 0.044956727 | 0.013218666 | 0.156376749 |
| 0.066232495  | 0.001570146 | 0.028461265 | 0.175628716 |
| 0.177186299  | 0.297629872 | 0.288247137 | 0.001033802 |
| 0.063331772  | 0.00507145  | 0.129744449 | 0.035179096 |
| 0.219417887  | 0.319640065 | 0.269552591 | 0.086791911 |
| 0.124000611  | 0.302075686 | 0.315436728 | 0.1749588   |
| 0.004033208  | 0.07009617  | 0.093333191 | 0.01866925  |
| 0.047745324  | 0.158953109 | 0.076096829 | 0.327674161 |
| 0.195803748  | 0.004656238 | 0.32975392  | 0.081205486 |
| 0.270786097  | 0.147912807 | 0.086437904 | 0.076019393 |
| 0.297376608  | 0.099763695 | 0.22625345  | 0.164344274 |
| 0.317518801  | 0.000994265 | 0.004203297 | 0.268436244 |
| 0.290887147  | 0.373981243 | 0.128219362 | 0.020866437 |
| 0.127186538  | 0.057033027 | 0.152098547 | 0.054094128 |
| 0.216468819  | 0.046056416 | 0.059036499 | 0.00155789  |
| 0.002312321  | 0.015630392 | 0.304227831 | 0.318838734 |

|             |             |             |             |
|-------------|-------------|-------------|-------------|
| 0.147261062 | 0.22536526  | 0.223936666 | 0.226687357 |
| 0.13124321  | 0.025378014 | 0.323445517 | 0.138075356 |
| 0.354590485 | 0.008319284 | 0.260277026 | 0.145450779 |
| 0.175410964 | 0.128195048 | 0.172644846 | 0.000877928 |
| 0.080438879 | 0.067860628 | 0.024971445 | 0.146091836 |
| 0.078959215 | 0.171114509 | 0.284995577 | 0.105228401 |
| 0.004836122 | 0.002151849 | 0.242059541 | 0.027445349 |
| 0.373696568 | 0.013016177 | 0.138504245 | 0.001048698 |
| 0.234607142 | 0.117177027 | 0.128627805 | 0.017599434 |
| 0.097057682 | 0.000278614 | 0.087390341 | 0.019200811 |
| 0.182835219 | 0.296636902 | 0.093894845 | 0.054558154 |
| 0.024703306 | 0.135907209 | 0.284783312 | 0.103840433 |
| 0.155051586 | 0.001918845 | 0.150422147 | 0.096657502 |
| 0.053997887 | 0.026073901 | 0.323355939 | 0.03545842  |
| 0.217138347 | 0.009614794 | 0.182790965 | 0.037762158 |
| 0.125445532 | 0.042381785 | 0.160021757 | 0.018188622 |
| 0.045495363 | 0.115744748 | 0.102177696 | 0.078704894 |
| 0.118008281 | 0.054887667 | 0.03765774  | 0.356578907 |
| 0.008990348 | 0.070609244 | 0.003592812 | 0.004858319 |
| 0.005815215 | 0.154043278 | 0.153028775 | 0.171053049 |
| 0.16298     | 0.009901595 | 0.130862109 | 0.095595403 |
| 0.001768821 | 0.068327065 | 0.316243722 | 0.004327424 |
| 0.131904243 | 0.014668694 | 0.001208435 | 0.049453913 |
| 0.273356332 | 0.014965857 |             |             |
| HIP1        | 0.173695356 | 0.391300406 | 0.014566696 |
| 0.041762419 | 0.024251542 | 0.096787549 | 0.074362878 |
| 0.13415814  | 0.01956715  | 0.061118848 | 0.166667718 |
| 0.000276222 | 0.300541016 | 0.002310982 | 0.007928019 |
| 0.455005307 | 0.446249338 | 0.109581863 | 0.405473729 |
| 0.103125723 | 0.094293133 | 0.179450938 | 0.210938914 |
| 0.091609569 | 0.000273625 | 0.031034107 | 0.061848834 |
| 0.11788797  | 0.437116008 | 0.044703283 | 0.101492037 |
| 0.419155348 | 0.406555325 | 0.131622651 | 0.081741747 |
| 0.111587134 | 0.328834096 | 0.024254449 | 0.309225266 |
| 0.346376418 | 0.061832947 | 0.382228504 | 0.001691448 |
| 0.011117183 | 0.022014363 | 0.099632313 | 0.201778738 |
| 0.061267635 | 0.08146083  | 0.034916348 | 0.052893453 |
| 0.082251792 | 0.186364694 | 0.245139489 | 0.092828382 |
| 0.259694471 | 0.013568996 | 0.310251794 | 0.066083081 |
| 0.009837122 | 0.068633242 | 0.158385932 | 0.229989963 |
| 0.101304802 | 0.286815505 | 0.407195712 | 0.008274778 |
| 0.014145176 | 0.169500282 | 0.393019253 | 0.266964936 |
| 0.35233517  | 0.125739551 | 0.074412745 | 0.100200266 |
| 0.319183642 | 0.343053276 | 0.095501578 | 0.028465163 |
| 0.000405201 | 0.043065748 | 0.110680016 | 0.21808674  |
| 0.258548316 | 0.193872293 | 0.205413076 | 0.052836253 |
| 0.218798154 | 0.002692425 | 0.155810383 | 0.434377031 |
| 0.010601338 | 0.285056059 | 0.002447633 | 0.021437507 |
| 0.344748457 | 0.437947753 | 0.26189527  | 0.019057372 |
| 0.001671281 | 0.017655982 | 0.03977551  | 0.38164985  |
| 0.150938407 | 0.176269056 | 0.243246191 | 0.032783408 |
| 0.327221237 | 0.047335613 | 0.069123647 | 0.343892225 |
| 0.416943534 | 0.000616923 | 0.024730642 | 0.075777841 |
| 0.090876619 | 0.060650585 | 0.063901524 | 0.027092659 |

|             |             |             |             |
|-------------|-------------|-------------|-------------|
| 0.00710342  | 0.00281938  | 0.409631457 | 0.030381439 |
| 0.029915696 | 0.061376654 | 0.028241495 | 0.272525803 |
| 0.092001908 | 0.360117028 | 0.021609669 | 0.077359689 |
| 0.319029428 | 0.092358635 | 0.15986341  | 0.323509112 |
| 0.089239896 | 0.049517432 | 0.031002826 | 0.308667506 |
| 0.26219535  | 0.013077321 | 0.017672577 | 0.163333458 |
| 0.305032989 | 0.425090835 | 0.436404084 | 0.064000495 |
| 0.063181535 | 0.051991778 | 0.146220437 | 0.224167269 |
| 0.070738707 | 0.10059003  | 0.019139192 | 0.152211791 |
| 0.267249743 | 0.015269907 | 0.011629403 | 0.288468503 |
| 0.02059035  | 0.050738927 | 0.327304667 | 0.290872583 |
| 0.171734361 | 0.057618443 | 0.098168572 | 0.105829644 |
| 0.102180381 | 0.093602583 | 0.200486816 | 0.105973859 |
| 0.13882449  | 0.159210582 | 0.008116718 | 0.325978955 |
| 0.022495068 | 0.127582038 | 0.132229963 | 0.0260336   |
| 0.194064719 | 0.070386569 | 0.352827581 | 0.182200673 |
| 0.299817366 | 0.017156301 | 0.070159552 | 0.201598672 |
| 0.148593258 | 0.31253214  | 0.38390999  | 0.020948231 |
| 0.077583468 | 0.070607681 | 0.027009225 | 0.074307601 |
| 0.273465106 | 0.103539858 | 0.083908731 | 0.00056066  |
| 0.022950075 | 1           | 0.124638288 | 0.008663511 |
| 0.062002245 | 0.030369235 | 0.02033977  | 0.380605084 |
| 0.057797677 | 0.312938517 | 0.003477173 | 0.02866003  |
| 0.062236601 | 0.248508989 | 0.163686885 | 0.091407251 |
| 0.311402021 | 0.110296164 | 0.421740828 | 0.225648525 |
| 0.049035335 | 0.211695375 | 0.03483156  | 0.052271198 |
| 0.230930744 | 0.366257228 | 0.394455959 | 0.297179989 |
| 0.065452349 | 0.179001823 | 0.079837765 | 0.116626084 |
| 0.154746193 | 0.126246197 | 0.017088746 | 0.364909835 |
| 0.000146453 | 0.12891576  | 0.231086991 | 0.043936476 |
| 0.383097521 | 0.092844903 | 0.011582514 | 0.047856203 |
| 0.414257478 | 0.356991415 | 0.291784578 | 0.424369744 |
| 0.068533054 | 0.001200574 | 0.352075187 | 0.224286265 |
| 0.448722628 | 0.09499441  | 0.096324236 | 0.00979177  |
| 0.387202386 | 0.141602434 | 0.276069724 | 0.231363437 |
| 0.188862123 | 0.087623021 | 0.050782388 | 0.183811938 |
| 0.00774063  | 0.085362049 | 0.320944204 | 0.103660083 |
| 0.141694817 | 0.050900547 | 0.343371931 | 0.130137071 |
| 0.105810299 | 0.150536598 | 0.14117617  | 0.016449377 |
| 0.041065647 | 0.405762245 | 0.009151143 | 0.327731806 |
| 0.429981462 | 0.104374016 | 0.405889976 | 0.417639202 |
| 0.114079788 | 0.214472086 | 0.381139792 | 0.336235666 |
| 0.000131764 | 0.407303226 | 0.296032642 | 0.171083581 |
| 0.451724155 | 0.115721025 | 0.056556396 | 0.147057181 |
| 6.04E-05    | 0.035137917 | 0.155262381 | 0.335430811 |
| 0.380671151 | 0.004110504 | 0.011694553 | 0.293539031 |
| 0.27299125  | 0.008043233 | 0.422034307 | 0.146166771 |
| 0.347769489 | 0.132330951 | 0.049828791 | 0.358467493 |
| 0.13343622  | 0.070109038 | 0.00803828  | 0.252039196 |
| 0.115889415 | 0.0195187   | 0.051155788 | 0.405582729 |
| 0.350597912 | 0.184924134 | 0.074745564 | 0.019281939 |
| 0.347520122 | 0.160080363 | 0.346567637 | 0.01519625  |
| 0.262646416 | 0.180872782 | 0.300227987 | 0.341204737 |
| 0.197708392 | 0.258305643 | 0.229334886 | 0.352725467 |



|             |             |             |             |
|-------------|-------------|-------------|-------------|
| 0.048123628 | 0.410617395 | 0.428458161 | 0.019530772 |
| 0.219674104 | 0.39355513  | 0.221448182 | 0.057985864 |
| 0.173738795 | 0.05764074  | 0.068927144 | 0.111194859 |
| 0.313273802 | 0.422787824 | 0.012757344 | 0.023068535 |
| 0.266451883 | 0.057031118 | 0.018566616 | 0.070378352 |
| 0.10722406  | 0.121064687 | 0.025866474 | 0.173392974 |
| 0.329184135 | 0.128810973 | 0.433926326 | 0.111995533 |
| 0.377866843 | 0.006037196 | 0.272068785 | 0.047518239 |
| 0.087873707 | 0.305992445 | 0.368719205 | 0.050269398 |
| 0.030736692 | 0.038469934 | 0.250770604 | 0.254273197 |
| 0.013703001 | 0.045322247 | 0.082772822 | 0.144120323 |
| 0.443966993 | 0.135955338 | 0.099546052 | 0.082880604 |
| 0.243412255 | 0.062559163 | 0.348626724 | 0.113972108 |
| 0.270435729 | 0.097675365 | 0.292956682 | 0.003128273 |
| 0.277787181 | 0.081952639 | 0.057727805 | 0.165279073 |
| 0.41695427  | 0.027395163 | 0.189570432 | 0.031796489 |
| 0.068611818 | 0.000347325 | 0.157200042 | 0.140335964 |
| 0.12662158  | 0.066003218 | 0.096398719 | 0.08000401  |
| 0.401154217 | 0.185915035 | 0.331255117 | 0.059870061 |
| 0.127475417 | 0.009023908 | 0.059620529 | 0.005852567 |
| 0.233724811 | 0.185252277 | 0.218965598 | 0.190483901 |
| 0.045359056 | 0.216187211 | 0.173780169 | 0.143360794 |
| 0.395908256 | 0.118001666 | 0.459860013 | 0.050276673 |
| 0.363462623 | 0.110971289 | 0.082179378 | 0.061616513 |
| 0.044883572 | 0.022635193 | 0.019226427 | 0.028999998 |
| 0.440042918 | 0.047982736 | 0.155157573 | 0.117736064 |
| 0.011588129 | 0.096959068 | 0.263708314 | 0.330457086 |
| 0.258300872 | 0.343258286 | 0.097604022 | 0.219949106 |
| 0.094384144 | 0.07641953  | 0.059401741 | 0.043746788 |
| 0.144191531 | 0.049673371 | 0.286816698 | 0.301435678 |
| 0.407095803 | 0.068317093 | 0.017752452 | 0.022464837 |
| 0.023389751 | 0.29863576  | 0.110113805 | 0.057503761 |
| 0.174508966 | 0.088180285 | 7.87E-05    | 0.047694382 |
| 0.195909928 | 0.121136325 |             |             |
| HIST2H2BE   | 0.181907815 | 0.47124094  | 0.045791262 |
| 0.009566493 | 0.064683694 | 0.180134839 | 0.147292438 |
| 0.138135855 | 0.083585908 | 0.071283434 | 0.276513877 |
| 0.001401758 | 0.320659684 | 0.014265659 | 0.063837485 |
| 0.46180508  | 0.48097115  | 0.20785638  | 0.478510921 |
| 0.149392847 | 0.06512865  | 0.274466699 | 0.209701073 |
| 0.175712126 | 0.001925466 | 0.072233594 | 0.020620922 |
| 0.145437074 | 0.447444441 | 0.124910626 | 0.118831837 |
| 0.414796697 | 0.387943194 | 0.163333343 | 0.146818885 |
| 0.089309266 | 0.440530907 | 0.068652668 | 0.323297354 |
| 0.362822876 | 0.11117078  | 0.388631564 | 0.018653652 |
| 0.001087822 | 0.068500549 | 0.125059405 | 0.263934398 |
| 0.16324784  | 0.148014468 | 0.114962588 | 0.097444614 |
| 0.050724753 | 0.307986534 | 0.340105821 | 0.050002465 |
| 0.395629054 | 0.001659201 | 0.439636519 | 0.114093998 |
| 0.056084846 | 0.178349903 | 0.159229435 | 0.282334852 |
| 0.208299929 | 0.417953215 | 0.490631554 | 0.02740288  |
| 0.055488582 | 0.219281834 | 0.315218121 | 0.23709724  |
| 0.426853188 | 0.130226302 | 0.145881316 | 0.158721936 |
| 0.306209126 | 0.331282599 | 0.231216107 | 0.114024474 |

|             |             |             |             |
|-------------|-------------|-------------|-------------|
| 0.00091432  | 0.089135814 | 0.137098289 | 0.252547329 |
| 0.220468699 | 0.313059595 | 0.230669876 | 0.126043448 |
| 0.171019155 | 0.018200141 | 0.225872494 | 0.485329707 |
| 0.013618403 | 0.34307039  | 0.006315623 | 0.107085299 |
| 0.35855146  | 0.413391008 | 0.273895369 | 0.050584851 |
| 0.015782488 | 0.093528651 | 0.074179218 | 0.355947106 |
| 0.230560411 | 0.207138448 | 0.389807088 | 0.066251942 |
| 0.301405273 | 0.100750936 | 0.185096425 | 0.430645113 |
| 0.444304691 | 0.008418192 | 0.106666432 | 0.158812344 |
| 0.173304581 | 0.07513369  | 0.147299921 | 0.012621254 |
| 0.004415717 | 0.01401886  | 0.413184003 | 0.10026641  |
| 0.061486725 | 0.11579143  | 0.040174807 | 0.259809347 |
| 0.140181952 | 0.406963318 | 0.080743746 | 0.138054754 |
| 0.279276954 | 0.172429069 | 0.159157798 | 0.330737455 |
| 0.155487675 | 0.147267379 | 0.092340285 | 0.433424576 |
| 0.417648641 | 0.048649545 | 0.058418101 | 0.242142454 |
| 0.299091312 | 0.44272311  | 0.496518229 | 0.150352458 |
| 0.128501028 | 0.149733892 | 0.132335177 | 0.254865056 |
| 0.174790137 | 0.201668955 | 0.037766147 | 0.305157333 |
| 0.403616106 | 0.013758196 | 0.05165968  | 0.356917234 |
| 0.024230689 | 0.1457655   | 0.416222443 | 0.369177466 |
| 0.257714185 | 0.016710606 | 0.100861074 | 0.16049715  |
| 0.188243672 | 0.127213011 | 0.299049569 | 0.093359942 |
| 0.23769294  | 0.122926107 | 0.038183275 | 0.305425532 |
| 0.084100011 | 0.226855906 | 0.125691476 | 0.046199025 |
| 0.261489527 | 0.163800567 | 0.385528446 | 0.244851716 |
| 0.289686959 | 0.001009101 | 0.065820213 | 0.221024063 |
| 0.124475442 | 0.35530017  | 0.469588736 | 0.083085364 |
| 0.183024877 | 0.16317723  | 0.099362351 | 0.16116364  |
| 0.368769744 | 0.101967928 | 0.096936629 | 0.000521032 |
| 0.087787189 | 0.124638288 | 1           | 0.041208034 |
| 0.112883101 | 0.070123077 | 0.072461216 | 0.41529059  |
| 0.124386643 | 0.356012437 | 0.022347926 | 0.088277855 |
| 0.132159447 | 0.340000118 | 0.133812398 | 0.11917661  |
| 0.353686934 | 0.12948948  | 0.367645261 | 0.371708163 |
| 0.15425815  | 0.291000786 | 0.096256842 | 0.164715465 |
| 0.223929276 | 0.425346705 | 0.352467722 | 0.370463419 |
| 0.143660856 | 0.284704196 | 0.111369233 | 0.217401332 |
| 0.217908462 | 0.219028881 | 0.057326932 | 0.481908314 |
| 0.000733985 | 0.236663096 | 0.220261016 | 0.094161739 |
| 0.447819744 | 0.175951591 | 0.053782082 | 0.133480102 |
| 0.484416928 | 0.486198841 | 0.402816007 | 0.366426638 |
| 0.096234702 | 0.009852256 | 0.461519406 | 0.341859412 |
| 0.456245661 | 0.195206063 | 0.129636775 | 0.054052645 |
| 0.43458586  | 0.203851589 | 0.262798843 | 0.178782474 |
| 0.236478391 | 0.160366505 | 0.153326513 | 0.262388599 |
| 0.00928314  | 0.117489343 | 0.231418905 | 0.087685814 |
| 0.125223806 | 0.107009827 | 0.389896279 | 0.280300854 |
| 0.157586314 | 0.105263033 | 0.135723659 | 0.055840303 |
| 0.124293521 | 0.467972081 | 0.02762303  | 0.443915363 |
| 0.48673055  | 0.233956822 | 0.418448206 | 0.480343341 |
| 0.168697232 | 0.354362442 | 0.420983256 | 0.406437463 |
| 0.000883297 | 0.366912876 | 0.286110664 | 0.330539585 |
| 0.381115038 | 0.214407701 | 0.110413544 | 0.150850345 |

|             |             |             |             |
|-------------|-------------|-------------|-------------|
| 0.002453412 | 0.101283167 | 0.079412652 | 0.479315236 |
| 0.405544424 | 0.02697086  | 0.031464175 | 0.356716583 |
| 0.253064803 | 0.026169147 | 0.49339195  | 0.163398922 |
| 0.408411397 | 0.196279936 | 0.099090628 | 0.329070788 |
| 0.069470422 | 0.183157484 | 0.018189576 | 0.249154785 |
| 0.190575957 | 0.07408553  | 0.040604128 | 0.490910485 |
| 0.375059886 | 0.313404234 | 0.183664162 | 0.003593767 |
| 0.337363619 | 0.067525071 | 0.327917966 | 0.079332285 |
| 0.363346675 | 0.324916421 | 0.423872036 | 0.356228    |
| 0.258630319 | 0.362731073 | 0.336693608 | 0.380658501 |
| 0.043601061 | 0.319223749 | 0.370267139 | 0.030012414 |
| 0.198717514 | 0.437952199 | 0.16616726  | 0.124654521 |
| 0.280237832 | 0.032959556 | 0.153757095 | 0.17297148  |
| 0.410617714 | 0.422874138 | 0.044288495 | 0.108849891 |
| 0.364873981 | 0.168379547 | 0.079866489 | 0.182765155 |
| 0.232158727 | 0.053753745 | 0.086410508 | 0.312294255 |
| 0.443888403 | 0.244779657 | 0.38494179  | 0.063580173 |
| 0.413431883 | 0.044960052 | 0.394456158 | 0.152697603 |
| 0.183792567 | 0.195333868 | 0.331546392 | 0.046826572 |
| 0.010011774 | 0.067691617 | 0.346767557 | 0.385856401 |
| 0.0539387   | 0.119774604 | 0.123186939 | 0.191058471 |
| 0.446754842 | 0.143521475 | 0.201854506 | 0.16647989  |
| 0.399087697 | 0.048865915 | 0.466500706 | 0.172192082 |
| 0.339685745 | 0.147721518 | 0.369499989 | 0.008047675 |
| 0.271047501 | 0.077754706 | 0.101658517 | 0.170397088 |
| 0.399653457 | 0.080156581 | 0.303118158 | 0.106138826 |
| 0.082075653 | 0.003062708 | 0.294853301 | 0.135606508 |
| 0.246080026 | 0.119833986 | 0.171310218 | 0.059129432 |
| 0.501808903 | 0.200426368 | 0.327616757 | 0.136865991 |
| 0.15377022  | 0.008924686 | 0.081080457 | 0.027635107 |
| 0.324571259 | 0.347928279 | 0.270526283 | 0.1696462   |
| 0.105417924 | 0.284548618 | 0.297098464 | 0.169488733 |
| 0.42005858  | 0.052195987 | 0.469021894 | 0.178147904 |
| 0.329415002 | 0.164954588 | 0.201012    | 0.177921272 |
| 0.118350141 | 0.117380957 | 0.091749779 | 0.100835152 |
| 0.421350793 | 0.1882827   | 0.188590826 | 0.122799773 |
| 0.031073248 | 0.162591352 | 0.332714131 | 0.314577372 |
| 0.225967249 | 0.251286172 | 0.141015191 | 0.376578301 |
| 0.141906926 | 0.153065122 | 0.020453449 | 0.015188633 |
| 0.092854474 | 0.106743035 | 0.388940908 | 0.397572666 |
| 0.473666613 | 0.126948571 | 0.069198888 | 0.094469984 |
| 0.069000189 | 0.306768089 | 0.191510528 | 0.063530872 |
| 0.265739131 | 0.145243059 | 0.000497748 | 0.123992392 |
| 0.317876915 | 0.138135706 |             |             |
| HMG3        | 0.10305403  | 0.085460712 | 0.057749258 |
| 0.000117862 | 0.003631572 | 0.178594814 | 0.079394471 |
| 0.060927031 | 0.056726918 | 0.017742042 | 0.156062254 |
| 0.174458196 | 0.023372617 | 0.265446796 | 0.04651585  |
| 0.065802954 | 0.056896264 | 0.054182657 | 0.069175845 |
| 0.16710163  | 0.001882043 | 0.208580174 | 0.069236447 |
| 0.13326139  | 0.289363591 | 0.037781334 | 0.000805291 |
| 0.02920887  | 0.054190811 | 0.216937266 | 0.020421945 |
| 0.065115211 | 0.028959599 | 0.008750189 | 0.001807532 |
| 0.00041693  | 0.130755868 | 0.00019764  | 0.018095475 |

|             |             |             |             |
|-------------|-------------|-------------|-------------|
| 0.033286973 | 0.028198559 | 0.036269045 | 0.069773733 |
| 7.94E-07    | 0.065238037 | 0.029437226 | 0.146176577 |
| 0.151612637 | 0.178970516 | 0.254576403 | 0.031597878 |
| 0.000289592 | 0.161435983 | 0.159726598 | 0.000209108 |
| 0.120165146 | 2.10E-05    | 0.118648756 | 0.122187217 |
| 0.150400276 | 0.123184222 | 0.036137873 | 0.100996461 |
| 0.154749822 | 0.118447066 | 0.070297397 | 0.009492401 |
| 0.156064508 | 0.040257458 | 0.026572486 | 0.026205745 |
| 0.086417911 | 0.01127349  | 0.019052092 | 0.005247232 |
| 0.028833526 | 0.036445893 | 0.214998621 | 0.088250078 |
| 0.040606345 | 0.060972604 | 0.003723055 | 0.088696234 |
| 0.012046248 | 0.153500464 | 0.064714552 | 0.021238703 |
| 0.023903815 | 0.083925721 | 0.129649282 | 0.066961444 |
| 0.001355564 | 0.036104016 | 0.000578397 | 0.060630295 |
| 0.062039306 | 0.040711925 | 0.096632399 | 0.031337087 |
| 0.089778889 | 0.222584891 | 0.050080914 | 0.027191365 |
| 0.079444368 | 0.035693144 | 0.121815442 | 0.002295248 |
| 0.016263956 | 0.059010211 | 0.035322585 | 0.114404768 |
| 0.082398886 | 0.079719918 | 0.158538946 | 0.164257789 |
| 0.003055605 | 0.001534378 | 0.101932794 | 0.000909831 |
| 0.002240633 | 0.052191406 | 0.052320056 | 0.169769926 |
| 0.029337946 | 0.099301063 | 0.003750997 | 0.017902469 |
| 0.041124274 | 0.064605145 | 0.0066727   | 0.068415103 |
| 0.018804217 | 0.078284209 | 0.012132508 | 0.034706814 |
| 0.004028535 | 0.113015323 | 0.219180119 | 0.07606487  |
| 0.174812248 | 0.02936882  | 0.068101785 | 0.167401919 |
| 0.014844656 | 0.064424485 | 0.078668011 | 0.046750466 |
| 0.011359356 | 0.200157479 | 0.014376434 | 0.057792687 |
| 0.128538378 | 0.144290996 | 0.001450825 | 0.170424103 |
| 0.142120157 | 0.000924367 | 0.15402935  | 0.065731825 |
| 0.000149947 | 0.009110951 | 0.129428807 | 0.052310492 |
| 0.031343575 | 0.00078175  | 0.020932686 | 0.091177394 |
| 0.212004291 | 0.086383088 | 0.100297999 | 0.014737269 |
| 0.222377344 | 0.012320926 | 0.074169298 | 0.015754929 |
| 0.197261296 | 0.211685351 | 0.003579644 | 0.001850008 |
| 0.0727449   | 0.073004048 | 0.07181731  | 0.078779972 |
| 0.058462031 | 8.72E-06    | 0.016560262 | 0.113271747 |
| 0.017448376 | 0.042442318 | 0.086207909 | 0.228113102 |
| 0.297667136 | 0.004175811 | 0.261562744 | 0.009493504 |
| 0.119802144 | 0.009826336 | 0.012306511 | 0.040077182 |
| 0.01733574  | 0.008663511 | 0.041208034 | 1           |
| 0.009980552 | 0.078884009 | 0.042688834 | 0.062204658 |
| 0.190568769 | 0.028590864 | 0.153836075 | 0.012201491 |
| 0.082981467 | 0.0585673   | 0.006421824 | 0.025828588 |
| 0.041007664 | 0.027922871 | 0.031160026 | 0.163398252 |
| 0.009035443 | 0.139408538 | 0.001593553 | 0.128421952 |
| 0.017964861 | 0.048307697 | 0.031688771 | 0.040414205 |
| 0.086567788 | 0.099987736 | 0.003632907 | 0.223547998 |
| 0.118441002 | 0.076047906 | 0.167437828 | 0.090635983 |
| 0.100633666 | 0.154814416 | 0.024100677 | 0.0027155   |
| 0.078276571 | 0.094619691 | 0.241492012 | 0.206484505 |
| 0.070718521 | 0.097072925 | 0.116762808 | 0.035868212 |
| 0.005714308 | 0.254109372 | 0.109863206 | 0.116425116 |
| 0.049237029 | 0.037358825 | 0.001457689 | 0.004583906 |

|             |             |             |             |
|-------------|-------------|-------------|-------------|
| 0.064492651 | 0.047459267 | 0.065532405 | 0.037506186 |
| 0.017725137 | 0.005791836 | 0.203533365 | 0.084379356 |
| 0.004644974 | 0.089049542 | 0.041605851 | 0.002910568 |
| 0.017933349 | 0.018462559 | 0.044017777 | 0.188106211 |
| 0.003914146 | 0.012018481 | 0.003890761 | 0.06509789  |
| 0.176302389 | 0.090936108 | 7.97E-05    | 0.123245166 |
| 0.072943426 | 0.101443662 | 0.050069896 | 0.081565675 |
| 0.186475891 | 0.117517437 | 0.06963962  | 0.064340237 |
| 0.046821357 | 0.025216125 | 0.013554238 | 0.208987064 |
| 0.042354954 | 0.174943838 | 0.04084644  | 0.006157281 |
| 0.007474989 | 0.27434536  | 0.000579753 | 0.132044722 |
| 0.041112534 | 0.02391482  | 2.29E-05    | 0.053495078 |
| 0.013002932 | 0.001506223 | 0.092390915 | 0.064922234 |
| 0.061489126 | 0.033333323 | 0.073776182 | 0.019254062 |
| 0.000521351 | 0.026949655 | 0.001088794 | 0.035222675 |
| 0.016502186 | 0.005896232 | 0.002796356 | 0.081693229 |
| 0.107649891 | 0.085671137 | 0.190108464 | 0.004751108 |
| 0.043627572 | 0.000817992 | 0.033664719 | 0.036228516 |
| 0.130861696 | 0.146118875 | 0.087264382 | 0.027183393 |
| 0.044452334 | 0.113498449 | 0.160014474 | 0.076640881 |
| 0.000329888 | 0.030695468 | 0.044813258 | 0.018566386 |
| 0.032003668 | 0.050723408 | 0.016029386 | 0.144737969 |
| 0.179863535 | 0.000142611 | 0.216667014 | 0.144892348 |
| 0.079911203 | 0.047211911 | 0.115175339 | 0.155912252 |
| 0.106846204 | 0.068938014 | 0.097731994 | 0.086368422 |
| 0.233860924 | 0.000607003 | 0.006278856 | 0.158351466 |
| 0.108887914 | 0.138057723 | 0.058124434 | 0.003720075 |
| 0.040255504 | 0.135020673 | 0.081619895 | 0.016759854 |
| 0.238326568 | 0.023332926 | 0.031250354 | 0.008941881 |
| 0.005587903 | 0.08906351  | 0.092647917 | 0.142991372 |
| 0.16555804  | 0.290064654 | 0.069514114 | 0.041170557 |
| 0.052307311 | 0.009108066 | 0.190606401 | 0.118356028 |
| 0.148152114 | 0.000903031 | 0.130759688 | 0.158600367 |
| 0.144036713 | 0.029613406 | 0.061914388 | 0.002119878 |
| 0.029119091 | 0.022908261 | 0.080349838 | 0.021476703 |
| 0.040107793 | 0.114229668 | 0.072916164 | 0.216323686 |
| 0.001930326 | 0.016238662 | 0.209318421 | 0.003200007 |
| 0.208903774 | 0.010351092 | 0.102747303 | 0.000137552 |
| 0.102963669 | 0.093223768 | 0.097476544 | 0.004929056 |
| 0.031138598 | 5.09E-06    | 0.023112191 | 0.101414931 |
| 0.172451431 | 0.155770085 | 0.065399539 | 0.062761959 |
| 0.111100519 | 0.031079981 | 0.108386338 | 0.013444685 |
| 0.042973026 | 0.000716109 | 0.061108203 | 0.098062842 |
| 0.01831858  | 0.01655121  | 0.185894097 | 0.019729846 |
| 0.042404543 | 0.010658324 | 0.132131779 | 0.171707299 |
| 0.038200252 | 0.016345046 | 0.026830847 | 0.035740296 |
| 0.024712598 | 0.028312338 | 0.048942225 | 0.023890189 |
| 0.043619655 | 0.028390527 | 0.020597073 | 0.152719792 |
| 0.013933023 | 0.147058759 | 0.000195607 | 0.000546383 |
| 0.000927071 | 0.096056737 | 0.133255414 | 0.091031626 |
| 0.062529769 | 0.014204747 | 0.139125642 | 0.276726069 |
| 0.000641039 | 0.055530697 | 0.079089194 | 0.000172941 |
| 0.043747247 | 0.015041901 | 0.011012383 | 0.164929963 |
| 0.159197498 | 0.002600607 |             |             |

| HPCAL1      | 0.07499753  | 0.335872923 | 0.050766523 |
|-------------|-------------|-------------|-------------|
| 0.036056915 | 0.116021917 | 0.268735005 | 0.294053937 |
| 0.064884394 | 0.033514624 | 0.082464669 | 0.368270901 |
| 0.000137063 | 0.13439946  | 0.003614678 | 0.01946594  |
| 0.240790433 | 0.254255146 | 0.296023278 | 0.240543223 |
| 0.078252007 | 0.057712894 | 0.189972521 | 0.241061456 |
| 0.230125221 | 0.000316832 | 0.193872337 | 0.047728779 |
| 0.052366716 | 0.214671054 | 0.135778654 | 0.070451075 |
| 0.191274133 | 0.211441602 | 0.071130741 | 0.077049317 |
| 0.028169044 | 0.354615187 | 0.015550322 | 0.184030795 |
| 0.129017283 | 0.199866275 | 0.20469558  | 0.005452081 |
| 0.002579744 | 0.120098072 | 0.042046802 | 0.201102023 |
| 0.072662462 | 0.232318613 | 0.138798383 | 0.204175537 |
| 0.008228389 | 0.331805502 | 0.169108457 | 0.009622628 |
| 0.419213405 | 0.006519183 | 0.375352995 | 0.0272083   |
| 0.052206702 | 0.113567989 | 0.057695715 | 0.191517569 |
| 0.325043145 | 0.416207521 | 0.302825327 | 0.049170265 |
| 0.106622204 | 0.10965864  | 0.146524407 | 0.257300638 |
| 0.285198156 | 0.058332267 | 0.072974835 | 0.061429946 |
| 0.165330764 | 0.139927563 | 0.231069375 | 0.054168205 |
| 0.000277725 | 0.235261532 | 0.114311345 | 0.082099395 |
| 0.107065465 | 0.36198367  | 0.107171967 | 0.146388577 |
| 0.113480777 | 0.012743734 | 0.199471521 | 0.284444879 |
| 0.019611685 | 0.149962848 | 0.00928416  | 0.045907598 |
| 0.183833512 | 0.169149997 | 0.153097504 | 0.058859067 |
| 0.00853857  | 0.040998614 | 0.008032329 | 0.123269667 |
| 0.135387133 | 0.151152785 | 0.391162907 | 0.007476325 |
| 0.111102944 | 0.024649315 | 0.101353006 | 0.384434221 |
| 0.262509352 | 0.003434433 | 0.025658824 | 0.275057321 |
| 0.037989293 | 0.050947691 | 0.276629371 | 0.003974451 |
| 0.016770761 | 0.001142216 | 0.201120666 | 0.051907393 |
| 0.135439322 | 0.23183972  | 0.100013414 | 0.226368158 |
| 0.051852181 | 0.155164073 | 0.101278864 | 0.228988458 |
| 0.165648345 | 0.310690725 | 0.208005807 | 0.198457513 |
| 0.102142154 | 0.037699489 | 0.073444575 | 0.370968936 |
| 0.314275286 | 0.060482515 | 0.039185547 | 0.280396271 |
| 0.121028442 | 0.244338048 | 0.298814613 | 0.038532234 |
| 0.189830893 | 0.132493911 | 0.052985409 | 0.334827382 |
| 0.269667476 | 0.109186087 | 0.004392332 | 0.295837714 |
| 0.405795406 | 0.007330104 | 0.047636643 | 0.17756395  |
| 0.074670677 | 0.072169096 | 0.299424487 | 0.273814766 |
| 0.177359103 | 0.03678337  | 0.152458859 | 0.251188443 |
| 0.148679888 | 0.219156868 | 0.175962382 | 0.110168619 |
| 0.227077145 | 0.059835347 | 0.060585205 | 0.120066776 |
| 0.130010018 | 0.160651032 | 0.015469535 | 0.006797261 |
| 0.11398645  | 0.063378866 | 0.294636524 | 0.145716845 |
| 0.130560588 | 0.0120099   | 0.0852718   | 0.102346657 |
| 0.035664782 | 0.137995811 | 0.378634476 | 0.126718732 |
| 0.156223373 | 0.027203649 | 0.120867518 | 0.149409552 |
| 0.155905633 | 0.058313256 | 0.05229134  | 0.000536573 |
| 0.088127165 | 0.062002245 | 0.112883101 | 0.009980552 |
| 1           | 0.027677927 | 0.008515241 | 0.279494443 |
| 0.197008555 | 0.252342529 | 0.003264617 | 0.006467244 |
| 0.113364468 | 0.367897441 | 0.083254294 | 0.020903806 |

|             |             |             |             |
|-------------|-------------|-------------|-------------|
| 0.305940894 | 0.078143672 | 0.137899545 | 0.318907751 |
| 0.097047917 | 0.354792968 | 0.007280217 | 0.077719732 |
| 0.131550311 | 0.284942632 | 0.201160157 | 0.255061644 |
| 0.176359321 | 0.11896784  | 0.026717294 | 0.271547747 |
| 0.138752613 | 0.150488933 | 0.036479156 | 0.341482653 |
| 0.000265916 | 0.227885507 | 0.191839182 | 0.006077713 |
| 0.370331464 | 0.342696378 | 0.036098195 | 0.066667734 |
| 0.248076297 | 0.334939331 | 0.189428253 | 0.171737849 |
| 0.013869046 | 0.002549083 | 0.259998368 | 0.263460592 |
| 0.219813433 | 0.166739973 | 0.065043231 | 0.004121341 |
| 0.2811793   | 0.070392485 | 0.187699999 | 0.096076446 |
| 0.172570806 | 0.081050269 | 0.138330351 | 0.09319914  |
| 0.000637003 | 0.112831848 | 0.141639646 | 0.039092656 |
| 0.094424059 | 0.035652667 | 0.286468419 | 0.292596985 |
| 0.094671845 | 0.021322631 | 0.093686445 | 0.116618247 |
| 0.194508607 | 0.327911718 | 0.006661134 | 0.242633316 |
| 0.285258007 | 0.167699015 | 0.298226868 | 0.26602104  |
| 0.132559827 | 0.371920013 | 0.295664383 | 0.16187513  |
| 0.000155838 | 0.160127777 | 0.13122266  | 0.32839081  |
| 0.207399382 | 0.241871222 | 0.024663903 | 0.082757413 |
| 0.000452354 | 0.128751161 | 0.023425053 | 0.321848587 |
| 0.283003054 | 0.029019755 | 0.004554334 | 0.274070406 |
| 0.125686992 | 0.004183458 | 0.306604798 | 0.226962335 |
| 0.355422732 | 0.194511447 | 0.189429431 | 0.147950573 |
| 0.014150389 | 0.049346825 | 0.039034679 | 0.272239985 |
| 0.104807576 | 0.002907967 | 0.074557169 | 0.265105871 |
| 0.250850061 | 0.35987935  | 0.219064642 | 0.005744225 |
| 0.113213808 | 0.048559479 | 0.257082567 | 0.048282321 |
| 0.259709675 | 0.327269044 | 0.366923605 | 0.175956131 |
| 0.176565943 | 0.374356826 | 0.34726707  | 0.272407644 |
| 0.037998108 | 0.150769817 | 0.177202445 | 0.043034842 |
| 0.081903084 | 0.278776724 | 0.164615853 | 0.264211973 |
| 0.19257272  | 0.05241144  | 0.242136782 | 0.073065462 |
| 0.390382649 | 0.269754321 | 0.044469208 | 0.034466583 |
| 0.380079922 | 0.081420405 | 0.148263896 | 0.136878619 |
| 0.248809776 | 0.006963965 | 0.005422873 | 0.26043471  |
| 0.391158431 | 0.368053363 | 0.228626423 | 0.065246355 |
| 0.231591271 | 0.024759676 | 0.199747147 | 0.079075935 |
| 0.158315806 | 0.101403321 | 0.119239227 | 0.004884186 |
| 0.009417403 | 0.022929512 | 0.395674601 | 0.361926877 |
| 0.076206449 | 0.133905234 | 0.250021974 | 0.32459958  |
| 0.240033141 | 0.049067319 | 0.265729734 | 0.118848863 |
| 0.394871898 | 0.055381465 | 0.32996984  | 0.130809468 |
| 0.207526202 | 0.180629492 | 0.247954863 | 0.001698115 |
| 0.152177334 | 0.098044377 | 0.021929162 | 0.270070876 |
| 0.152197223 | 0.119630754 | 0.368291313 | 0.056678731 |
| 0.029258817 | 0.000932424 | 0.211535836 | 0.086538282 |
| 0.321174643 | 0.017877758 | 0.127477822 | 0.00926479  |
| 0.332763717 | 0.144032597 | 0.182666901 | 0.028023728 |
| 0.154782646 | 0.004842146 | 0.112748002 | 0.017481132 |
| 0.196609857 | 0.289018892 | 0.12613521  | 0.078388503 |
| 0.016781151 | 0.233711562 | 0.29965705  | 0.214918671 |
| 0.283464852 | 0.019939918 | 0.265671352 | 0.066320935 |
| 0.12349162  | 0.041406858 | 0.248069724 | 0.043906658 |

|             |             |             |             |
|-------------|-------------|-------------|-------------|
| 0.236185484 | 0.0169222   | 0.100677388 | 0.017629599 |
| 0.250502266 | 0.045158133 | 0.272825799 | 0.023584215 |
| 0.056328815 | 0.151442987 | 0.152209326 | 0.16004332  |
| 0.198917815 | 0.111986456 | 0.055239742 | 0.381766442 |
| 0.020685602 | 0.057579323 | 0.042702931 | 0.032659057 |
| 0.039899513 | 0.140798827 | 0.183905791 | 0.232736165 |
| 0.264439835 | 0.01393757  | 0.068118907 | 0.042235922 |
| 0.006036838 | 0.111067251 | 0.354201277 | 0.047275282 |
| 0.180507369 | 0.020460145 | 0.000898913 | 0.030436593 |
| 0.279451402 | 0.047803397 |             |             |
| HPSE        | 0.131537356 | 0.180152427 | 0.05631814  |
| 0.001259803 | 0.008699724 | 0.311233708 | 0.175194136 |
| 0.074044688 | 0.061736239 | 0.064406736 | 0.277363941 |
| 0.021547505 | 0.046082453 | 0.067746319 | 0.02924699  |
| 0.131199349 | 0.119691252 | 0.115922018 | 0.125144712 |
| 0.163106318 | 0.011674607 | 0.250662156 | 0.169651958 |
| 0.244267585 | 0.037070533 | 0.091983551 | 0.008299993 |
| 0.040870545 | 0.105157957 | 0.255142322 | 0.048772557 |
| 0.123636824 | 0.071909087 | 0.029740091 | 0.006027631 |
| 0.002374054 | 0.238619737 | 0.00040056  | 0.047184434 |
| 0.062086589 | 0.082581121 | 0.085728883 | 0.042921502 |
| 2.84E-05    | 0.113843049 | 0.034686504 | 0.22720868  |
| 0.125918679 | 0.293200531 | 0.26314728  | 0.098908466 |
| 0.00091584  | 0.272037043 | 0.191528799 | 0.000807369 |
| 0.238634546 | 0.000440362 | 0.235790465 | 0.091198712 |
| 0.156965009 | 0.162990232 | 0.066543401 | 0.171387903 |
| 0.277849279 | 0.237580024 | 0.145981516 | 0.017755692 |
| 0.215553402 | 0.073495609 | 0.068269952 | 0.088599649 |
| 0.168510333 | 0.028819627 | 0.050077683 | 0.013365465 |
| 0.074546591 | 0.069375079 | 0.277481254 | 0.085648968 |
| 0.010103694 | 0.14630458  | 0.017041239 | 0.110801671 |
| 0.031981461 | 0.268838789 | 0.0901473   | 0.062327577 |
| 0.0569134   | 0.057390751 | 0.195657882 | 0.13860647  |
| 0.0036286   | 0.066024096 | 0.000695949 | 0.050086487 |
| 0.114855506 | 0.083743673 | 0.157082828 | 0.068261686 |
| 0.045808399 | 0.152446964 | 0.026125133 | 0.053413112 |
| 0.118871507 | 0.075144903 | 0.23944466  | 0.002646766 |
| 0.035942559 | 0.075861975 | 0.061053181 | 0.233226091 |
| 0.164418204 | 0.0162177   | 0.11056101  | 0.253898524 |
| 0.007803441 | 0.007217123 | 0.170796952 | 0.001561636 |
| 0.003027119 | 0.006420862 | 0.104073294 | 0.15150338  |
| 0.088349383 | 0.186255961 | 0.008406532 | 0.058875606 |
| 0.043619592 | 0.103714592 | 0.015841098 | 0.150880419 |
| 0.051620018 | 0.174391859 | 0.041870528 | 0.08476345  |
| 0.01263977  | 0.090074476 | 0.226652987 | 0.160733343 |
| 0.261664894 | 0.038528019 | 0.073971944 | 0.295187156 |
| 0.034825927 | 0.125957986 | 0.158625615 | 0.039649888 |
| 0.034853671 | 0.200889835 | 0.047820009 | 0.151912868 |
| 0.204475874 | 0.13434279  | 0.000914199 | 0.239460759 |
| 0.270550226 | 0.001263293 | 0.180067412 | 0.111584156 |
| 0.0009289   | 0.02114509  | 0.237715171 | 0.112069806 |
| 0.060952852 | 0.008653309 | 0.074620171 | 0.204132314 |
| 0.27482948  | 0.191187184 | 0.160140607 | 0.065854271 |
| 0.321735123 | 0.045792663 | 0.086441876 | 0.036559923 |



|             |             |             |             |
|-------------|-------------|-------------|-------------|
| 0.223459305 | 0.255038054 | 0.010544645 | 0.00380649  |
| 0.098566389 | 0.069136721 | 0.159003875 | 0.114249651 |
| 0.105916688 | 0.000240433 | 0.059132664 | 0.154700152 |
| 0.047906835 | 0.067062092 | 0.189842429 | 0.250083856 |
| 0.307558709 | 0.007891696 | 0.263068728 | 0.027641566 |
| 0.150060929 | 0.03020176  | 0.043782575 | 0.025230213 |
| 0.023293841 | 0.030369235 | 0.070123077 | 0.078884009 |
| 0.027677927 | 1           | 0.02130401  | 0.139732609 |
| 0.273206103 | 0.070917927 | 0.029056724 | 0.007678041 |
| 0.125879855 | 0.147231996 | 0.022727173 | 0.025177527 |
| 0.111593947 | 0.055871789 | 0.064338691 | 0.276626953 |
| 0.019518119 | 0.281166815 | 0.001727824 | 0.142597158 |
| 0.045551084 | 0.114881959 | 0.079680111 | 0.0848495   |
| 0.159644859 | 0.111015804 | 0.005014926 | 0.32255059  |
| 0.154621215 | 0.09867047  | 0.135057536 | 0.172623124 |
| 0.027076318 | 0.215171527 | 0.072422344 | 0.002943929 |
| 0.178274015 | 0.201382244 | 0.185864815 | 0.157518371 |
| 0.12931588  | 0.178782422 | 0.158748199 | 0.080644367 |
| 0.004852825 | 0.049263213 | 0.176950958 | 0.210174999 |
| 0.101621426 | 0.069222203 | 0.005850606 | 0.002114477 |
| 0.131263754 | 0.054800636 | 0.156276869 | 0.079423343 |
| 0.045920511 | 0.013419225 | 0.199559246 | 0.09308071  |
| 0.004044105 | 0.172713952 | 0.096483342 | 0.012868249 |
| 0.06189617  | 0.027334946 | 0.110703579 | 0.26039861  |
| 0.013506202 | 0.023013855 | 0.019358683 | 0.103333036 |
| 0.2401633   | 0.19077408  | 0.000142423 | 0.187635921 |
| 0.143211082 | 0.129706912 | 0.122845386 | 0.147732442 |
| 0.244991619 | 0.22443791  | 0.155224161 | 0.100921522 |
| 0.007030785 | 0.058823836 | 0.03375559  | 0.307184127 |
| 0.100829264 | 0.292739582 | 0.027720274 | 0.01889343  |
| 0.001953232 | 0.316805586 | 0.003291125 | 0.219258159 |
| 0.098818408 | 0.028286437 | 6.24E-05    | 0.113440843 |
| 0.032594924 | 0.001095036 | 0.177684118 | 0.159954939 |
| 0.146277888 | 0.064320213 | 0.163313915 | 0.048857133 |
| 0.002809104 | 0.031303663 | 0.003637769 | 0.095548481 |
| 0.033987768 | 0.004265089 | 0.018199668 | 0.151721015 |
| 0.191079008 | 0.173372848 | 0.254896849 | 0.014331574 |
| 0.073786036 | 0.005186742 | 0.093382092 | 0.023239553 |
| 0.191782565 | 0.263049371 | 0.171149045 | 0.064354419 |
| 0.083948787 | 0.223888132 | 0.285964409 | 0.163381369 |
| 0.00154676  | 0.071826891 | 0.09533067  | 0.028762038 |
| 0.055371642 | 0.115767997 | 0.060139556 | 0.251821839 |
| 0.234270135 | 0.001132667 | 0.322846128 | 0.133335175 |
| 0.174977942 | 0.11686675  | 0.157614315 | 0.094393355 |
| 0.231818455 | 0.090220207 | 0.148206594 | 0.102273685 |
| 0.323273891 | 0.001696381 | 0.004166018 | 0.248331314 |
| 0.221882854 | 0.254272958 | 0.132318588 | 0.021928193 |
| 0.086153962 | 0.081592601 | 0.121475662 | 0.028487629 |
| 0.255749592 | 0.058675246 | 0.059982261 | 0.005245118 |
| 0.016880108 | 0.06751108  | 0.214682778 | 0.257874196 |
| 0.184374917 | 0.302455982 | 0.149710298 | 0.113418003 |
| 0.111209801 | 0.02174917  | 0.268892849 | 0.122913255 |
| 0.267236576 | 0.006593944 | 0.228015572 | 0.194114776 |
| 0.232001512 | 0.078492073 | 0.124192556 | 0.003136905 |

|             |             |             |             |          |
|-------------|-------------|-------------|-------------|----------|
| 0.067240303 | 0.078703825 | 0.049733106 | 0.076716108 |          |
| 0.078906997 | 0.152074856 | 0.165004408 | 0.185803923 |          |
| 0.005083533 | 0.002564339 | 0.249675381 | 0.011968409 |          |
| 0.33541196  | 0.010764378 | 0.115515154 | 0.000679232 |          |
| 0.196374295 | 0.157551189 | 0.175980856 | 0.007838107 |          |
| 0.084209226 | 2.76E-05    | 0.081996074 | 0.066760426 |          |
| 0.247213615 | 0.230654187 | 0.105638196 | 0.106795392 |          |
| 0.063590621 | 0.075921218 | 0.182324502 | 0.043873245 |          |
| 0.107902757 | 0.002216329 | 0.131845106 | 0.093438949 |          |
| 0.043082333 | 0.028002    | 0.260282879 | 0.023517127 |          |
| 0.097548239 | 0.010141935 | 0.17081562  | 0.101084541 |          |
| 0.096286743 | 0.018569214 | 0.079941187 | 0.054998565 |          |
| 0.037798899 | 0.059203977 | 0.081843547 | 0.061511236 |          |
| 0.105674202 | 0.064822841 | 0.027550149 | 0.264343265 |          |
| 0.023039544 | 0.168103134 | 0.002121072 | 0.006076753 |          |
| 0.005510615 | 0.196585057 | 0.17606055  | 0.141388565 |          |
| 0.12425584  | 0.014903355 | 0.155790608 | 0.189263933 |          |
| 0.00068566  | 0.084868683 | 0.183295057 | 0.000707474 |          |
| 0.08411021  | 0.024630062 | 0.003038336 | 0.110714374 |          |
| 0.255068951 | 0.007119788 |             |             |          |
| HSPA4L      | 0.132798988 | 0.142361753 | 0.012887564 | 5.76E-05 |
| 0.002824874 | 0.093726061 | 0.050419251 | 0.093629992 |          |
| 0.017298751 | 0.007778979 | 0.121612808 | 0.003275868 |          |
| 0.099932515 | 0.013689346 | 0.01633798  | 0.147208252 |          |
| 0.139814092 | 0.058881814 | 0.167086934 | 0.167873458 |          |
| 0.001236676 | 0.207231307 | 0.068473216 | 0.078671426 |          |
| 0.004957838 | 0.016789961 | 0.000391732 | 0.086158023 |          |
| 0.146267491 | 0.105564019 | 0.014033203 | 0.14079688  |          |
| 0.09351506  | 0.014216776 | 0.003949853 | 0.002440441 |          |
| 0.175841862 | 0.00067324  | 0.067011302 | 0.122886371 |          |
| 0.01947799  | 0.10034384  | 0.003954152 | 2.16E-06    |          |
| 0.025723903 | 0.060007064 | 0.139389537 | 0.18790264  |          |
| 0.085187864 | 0.122848367 | 0.018109637 | 0.000684066 |          |
| 0.147552008 | 0.232220786 | 0.001789241 | 0.13575452  |          |
| 8.33E-06    | 0.151402177 | 0.130603367 | 0.044467283 |          |
| 0.100267984 | 0.066302197 | 0.121318647 | 0.093974672 |          |
| 0.140631933 | 0.143261706 | 0.000943672 | 0.039668664 |          |
| 0.075767786 | 0.079054646 | 0.043003034 | 0.143627278 |          |
| 0.012565301 | 0.015376399 | 0.023210065 | 0.068307542 |          |
| 0.120817912 | 0.160029477 | 0.065755503 | 0.000665646 |          |
| 0.027633591 | 0.007337701 | 0.164911399 | 0.049159751 |          |
| 0.132312977 | 0.110415395 | 0.01424466  | 0.046825837 |          |
| 0.007475403 | 0.142137757 | 0.147719612 | 0.000229104 |          |
| 0.114222081 | 0.000316155 | 0.042440964 | 0.138291451 |          |
| 0.126667325 | 0.137372187 | 0.00759048  | 0.006867357 |          |
| 0.11837336  | 0.033128339 | 0.111878723 | 0.099572802 |          |
| 0.061324377 | 0.132732265 | 0.027027064 | 0.082388506 |          |
| 0.026049266 | 0.045887488 | 0.1454729   | 0.143965368 |          |
| 0.00732755  | 0.1146637   | 0.089824697 | 0.00557996  |          |
| 0.000671188 | 0.065875945 | 0.000534896 | 0.000153558 |          |
| 0.010092008 | 0.130733269 | 0.067167275 | 0.010668173 |          |
| 0.05184373  | 0.000891494 | 0.044266666 | 0.068972949 |          |
| 0.16623478  | 0.004911423 | 0.046254603 | 0.062429252 |          |
| 0.055278336 | 0.025408524 | 0.082488858 | 0.011388003 |          |

|             |             |             |             |
|-------------|-------------|-------------|-------------|
| 0.110475222 | 0.091372909 | 0.123571283 | 0.211359774 |
| 0.007409205 | 0.013991297 | 0.125116618 | 0.072796345 |
| 0.14099639  | 0.154535466 | 0.053485503 | 0.01305821  |
| 0.129422968 | 0.014468511 | 0.068077717 | 0.089413046 |
| 0.18892748  | 0.002620419 | 0.172003246 | 0.150226872 |
| 0.000584185 | 0.038758834 | 0.144317948 | 9.17E-05    |
| 0.007836882 | 0.175140357 | 0.100798497 | 0.073094448 |
| 0.000301063 | 0.014914035 | 0.055571893 | 0.15059     |
| 0.055012213 | 0.134449989 | 0.010523308 | 0.167928609 |
| 0.014342867 | 0.018404499 | 0.074906106 | 0.076422681 |
| 0.189182885 | 0.008612348 | 0.000740628 | 0.144349181 |
| 0.100588966 | 0.117776273 | 0.136127096 | 0.111665735 |
| 3.69E-06    | 0.007395381 | 0.13444603  | 0.015832891 |
| 0.141473965 | 0.135962665 | 0.085042658 | 0.203217657 |
| 0.018108955 | 0.120277691 | 0.015581466 | 0.221742839 |
| 0.006277411 | 0.007215052 | 0.000487251 | 0.006544657 |
| 0.02033977  | 0.072461216 | 0.042688834 | 0.008515241 |
| 0.02130401  | 1           | 0.117252131 | 0.09433824  |
| 0.078092481 | 0.012966465 | 0.073245322 | 0.052784772 |
| 0.07928888  | 0.012273116 | 0.020773199 | 0.074418183 |
| 0.0203058   | 0.115036056 | 0.164648319 | 0.011756757 |
| 0.115301005 | 0.006959213 | 0.093305591 | 0.052780019 |
| 0.103958898 | 0.087557893 | 0.100576403 | 0.048808081 |
| 0.204644222 | 0.005624197 | 0.141464908 | 0.169110655 |
| 0.121313162 | 0.041349377 | 0.157643081 | 0.001342805 |
| 0.151012209 | 0.046550644 | 0.018151346 | 0.125572278 |
| 0.06080365  | 0.060314506 | 0.143826143 | 0.169347809 |
| 0.17137357  | 0.214079323 | 0.107752809 | 0.007265054 |
| 0.013237826 | 0.194365113 | 0.132776159 | 0.134709834 |
| 0.050513239 | 0.006382169 | 0.007921592 | 0.136406294 |
| 0.134852747 | 0.082479444 | 0.069948229 | 0.046178715 |
| 0.021623248 | 0.153143514 | 0.176405311 | 0.004434915 |
| 0.048158203 | 0.076884332 | 0.001862676 | 0.018577078 |
| 0.003713855 | 0.088483303 | 0.166533641 | 0.009946216 |
| 0.016665213 | 0.008589211 | 0.02154399  | 0.087609751 |
| 0.150025582 | 0.000214237 | 0.206744183 | 0.158411101 |
| 0.129203744 | 0.106326504 | 0.172970647 | 0.140038759 |
| 0.125218122 | 0.125706009 | 0.171676028 | 0.002422325 |
| 0.088898883 | 0.062946726 | 0.180096417 | 0.103150159 |
| 0.109563245 | 0.108427486 | 0.025079925 | 0.000715584 |
| 0.109760968 | 0.002911105 | 0.198592476 | 0.100016519 |
| 0.0026266   | 0.000181332 | 0.109137614 | 0.055693666 |
| 0.00351728  | 0.172294343 | 0.0511681   | 0.106333821 |
| 0.063295395 | 0.031829234 | 0.073808227 | 0.00341308  |
| 0.070226647 | 0.00019027  | 0.058753618 | 0.044004329 |
| 0.005646973 | 0.001627201 | 0.171290146 | 0.160407219 |
| 0.096676818 | 0.132687103 | 0.000215433 | 0.134624268 |
| 0.001463444 | 0.070508223 | 0.012462945 | 0.192537823 |
| 0.134360843 | 0.136151281 | 0.090416128 | 0.081427546 |
| 0.127301302 | 0.150856426 | 0.123922177 | 0.000538579 |
| 0.092644228 | 0.111007235 | 0.002924959 | 0.068185648 |
| 0.115091528 | 0.029314533 | 0.064112597 | 0.187040106 |
| 0.000140676 | 0.104283118 | 0.183992885 | 0.117975445 |
| 0.101008898 | 0.022580064 | 0.101085616 | 0.116783839 |

|             |             |             |             |
|-------------|-------------|-------------|-------------|
| 0.053905441 | 0.038060259 | 0.108790526 | 0.153787434 |
| 0.002577597 | 0.02872981  | 0.153247166 | 0.147199648 |
| 0.101329265 | 0.116056487 | 0.003024329 | 0.111009394 |
| 0.042184307 | 0.182931874 | 0.013894523 | 0.183013015 |
| 0.056095538 | 0.110653701 | 0.008245477 | 0.000338821 |
| 0.018926818 | 0.101315084 | 0.157372461 | 0.048201401 |
| 0.149259445 | 0.042307045 | 0.045278607 | 0.130819571 |
| 0.019056106 | 0.130093626 | 0.141969139 | 0.156926008 |
| 0.000435057 | 0.188836599 | 0.117936848 | 0.167107729 |
| 0.026071422 | 0.121777048 | 0.000275593 | 0.073708114 |
| 0.010637375 | 0.148493672 | 0.028356786 | 0.13069223  |
| 0.038351513 | 0.084264008 | 0.095903212 | 0.001133624 |
| 0.001699409 | 0.227340956 | 0.015759456 | 0.132475388 |
| 0.036891244 | 0.108392252 | 0.00165992  | 0.17485507  |
| 0.098563176 | 0.139131227 | 0.026900424 | 0.039968042 |
| 3.97E-05    | 0.010669089 | 0.015937518 | 0.191984675 |
| 0.168990984 | 0.110888573 | 0.095670557 | 0.123536996 |
| 0.065523446 | 0.117764196 | 0.027560369 | 0.096966962 |
| 0.000634594 | 0.139559634 | 0.12036144  | 0.083122397 |
| 0.023008957 | 0.121230569 | 0.027382373 | 0.028231341 |
| 0.00382378  | 0.050743495 | 0.099053655 | 0.099006939 |
| 0.028289124 | 0.037396264 | 0.033877557 | 0.006154652 |
| 0.0357054   | 0.134071515 | 0.068661677 | 0.063001997 |
| 0.070845581 | 0.048281235 | 0.159805047 | 0.017955225 |
| 0.11899297  | 0.000160156 | 0.000104612 | 0.001646318 |
| 0.042279734 | 0.231203973 | 0.166881876 | 0.144037782 |
| 0.054928594 | 0.038952614 | 0.117382883 | 0.008848248 |
| 0.152205249 | 0.056702361 | 0.000447043 | 0.084927287 |
| 0.030373324 | 0.000473646 | 0.137879099 | 0.160792927 |
| 0.005654169 |             |             |             |
| HVCN1       | 0.340620821 | 0.497992328 | 0.089619246 |
| 0.04316552  | 0.145734441 | 0.272252421 | 0.26489364  |
| 0.341786929 | 0.135795339 | 0.185753583 | 0.35079499  |
| 0.001900593 | 0.349685635 | 0.019153183 | 0.081705671 |
| 0.507443154 | 0.518995402 | 0.364850712 | 0.501169264 |
| 0.314933064 | 0.198055193 | 0.364207678 | 0.406952038 |
| 0.295717312 | 0.002363864 | 0.16263515  | 0.080724087 |
| 0.348292858 | 0.491008132 | 0.232069908 | 0.323296153 |
| 0.449773095 | 0.443581001 | 0.414153474 | 0.346916947 |
| 0.26103854  | 0.454234481 | 0.116274618 | 0.407457433 |
| 0.381525597 | 0.271830056 | 0.429212138 | 0.020364988 |
| 0.006102947 | 0.135601319 | 0.31088458  | 0.392056893 |
| 0.300538638 | 0.255130926 | 0.198459017 | 0.221113365 |
| 0.156629127 | 0.373303231 | 0.371005212 | 0.163226539 |
| 0.413560353 | 0.008419555 | 0.444264923 | 0.242292876 |
| 0.087096134 | 0.327500342 | 0.351239602 | 0.412300756 |
| 0.284334425 | 0.424293983 | 0.515999227 | 0.05362681  |
| 0.099636965 | 0.424852619 | 0.393413501 | 0.441589552 |
| 0.448074652 | 0.370439223 | 0.334088144 | 0.352239281 |
| 0.426258887 | 0.367471573 | 0.306224227 | 0.202803907 |
| 0.001513815 | 0.191121738 | 0.364554693 | 0.315514871 |
| 0.37695305  | 0.374686847 | 0.375836048 | 0.264639924 |
| 0.425796261 | 0.027775584 | 0.386608839 | 0.523846496 |
| 0.032900798 | 0.378358606 | 0.014434266 | 0.174598102 |

|             |             |             |             |
|-------------|-------------|-------------|-------------|
| 0.408675214 | 0.457284666 | 0.396967184 | 0.103147221 |
| 0.019259821 | 0.143768242 | 0.147852946 | 0.38967313  |
| 0.403052657 | 0.448281386 | 0.409592141 | 0.126320539 |
| 0.3372403   | 0.200285536 | 0.368475895 | 0.456576053 |
| 0.481155926 | 0.010036679 | 0.172861763 | 0.25883942  |
| 0.347937389 | 0.178730883 | 0.266538586 | 0.046850051 |
| 0.017217006 | 0.019766366 | 0.453045099 | 0.186654157 |
| 0.139077942 | 0.245584997 | 0.11242205  | 0.451268958 |
| 0.327466498 | 0.415933745 | 0.154224443 | 0.29867742  |
| 0.416286103 | 0.295801166 | 0.432297762 | 0.444349842 |
| 0.37580458  | 0.262930363 | 0.177589627 | 0.446112421 |
| 0.404722357 | 0.093213335 | 0.10713467  | 0.351796363 |
| 0.334469468 | 0.486795695 | 0.531048191 | 0.312719075 |
| 0.304724016 | 0.267810961 | 0.347461084 | 0.416522439 |
| 0.276799041 | 0.33353918  | 0.078544678 | 0.363169332 |
| 0.408563107 | 0.042700134 | 0.088578523 | 0.408333233 |
| 0.072056252 | 0.277540461 | 0.430054861 | 0.448460594 |
| 0.423950795 | 0.068057793 | 0.283969022 | 0.304969289 |
| 0.319525502 | 0.295733501 | 0.408261713 | 0.267458281 |
| 0.336027769 | 0.352975861 | 0.067589613 | 0.340230041 |
| 0.15236926  | 0.340892134 | 0.313076992 | 0.081848455 |
| 0.372410488 | 0.338487642 | 0.448784323 | 0.409612956 |
| 0.383032191 | 0.007291648 | 0.186637624 | 0.358980297 |
| 0.328499564 | 0.370480488 | 0.499598735 | 0.141186647 |
| 0.274799128 | 0.303232187 | 0.170853347 | 0.359243304 |
| 0.363424433 | 0.268210864 | 0.244479363 | 0.001300643 |
| 0.168648534 | 0.380605084 | 0.41529059  | 0.062204658 |
| 0.279494443 | 0.139732609 | 0.117252131 | 1           |
| 0.235789349 | 0.441784141 | 0.030222073 | 0.142452696 |
| 0.294873768 | 0.436294445 | 0.405649512 | 0.278328808 |
| 0.456542047 | 0.344645594 | 0.416580105 | 0.395408751 |
| 0.300606422 | 0.373796221 | 0.154328112 | 0.292380536 |
| 0.425741297 | 0.45679421  | 0.427749931 | 0.437745156 |
| 0.299252048 | 0.345121664 | 0.289187397 | 0.303198571 |
| 0.382858185 | 0.390414973 | 0.107336755 | 0.497764975 |
| 0.001104054 | 0.358260217 | 0.446656156 | 0.165642383 |
| 0.487092332 | 0.280059988 | 0.088184914 | 0.256917519 |
| 0.509568672 | 0.496493693 | 0.393994773 | 0.424651848 |
| 0.219741085 | 0.012698527 | 0.467651255 | 0.410786708 |
| 0.498941448 | 0.40728038  | 0.337994787 | 0.071005875 |
| 0.474246979 | 0.314442548 | 0.426538215 | 0.397829069 |
| 0.429027604 | 0.368628257 | 0.264499609 | 0.321084366 |
| 0.018001665 | 0.288734482 | 0.412800181 | 0.228592705 |
| 0.352035338 | 0.207272802 | 0.450931035 | 0.340071048 |
| 0.399503085 | 0.314326833 | 0.382448706 | 0.110556149 |
| 0.208950586 | 0.50446041  | 0.046147266 | 0.442313336 |
| 0.523912344 | 0.366038915 | 0.4717767   | 0.511244597 |
| 0.333849594 | 0.400612674 | 0.46221221  | 0.412633916 |
| 0.001127511 | 0.414227735 | 0.353895946 | 0.356739046 |
| 0.445310661 | 0.317798187 | 0.216191558 | 0.397697632 |
| 0.001690902 | 0.182832739 | 0.270501031 | 0.476816054 |
| 0.454773617 | 0.041586536 | 0.048858485 | 0.448522148 |
| 0.366171014 | 0.044097787 | 0.524885836 | 0.367088595 |
| 0.456716943 | 0.422509189 | 0.214181699 | 0.37533525  |

|             |             |             |             |
|-------------|-------------|-------------|-------------|
| 0.228394888 | 0.353502599 | 0.041684069 | 0.444704784 |
| 0.400297538 | 0.090732535 | 0.119520837 | 0.510040512 |
| 0.426840518 | 0.403807113 | 0.281064511 | 0.016896889 |
| 0.361503845 | 0.24824679  | 0.457302891 | 0.131982435 |
| 0.412492932 | 0.379767265 | 0.441671049 | 0.408047326 |
| 0.429541886 | 0.420295432 | 0.3883067   | 0.446345516 |
| 0.139955922 | 0.385413958 | 0.424208976 | 0.077140503 |
| 0.353776094 | 0.47559381  | 0.426161986 | 0.21402541  |
| 0.374217532 | 0.118666191 | 0.236468213 | 0.316550262 |
| 0.446035204 | 0.473589157 | 0.080528623 | 0.175786154 |
| 0.417330447 | 0.317506981 | 0.140864607 | 0.347426286 |
| 0.302017877 | 0.179593598 | 0.129359251 | 0.378911513 |
| 0.4582091   | 0.320615446 | 0.444918924 | 0.204034304 |
| 0.450108051 | 0.064137794 | 0.398365821 | 0.296144812 |
| 0.300562704 | 0.381488111 | 0.368997845 | 0.120486825 |
| 0.038072188 | 0.149829224 | 0.413034554 | 0.409074582 |
| 0.099478021 | 0.218575979 | 0.294991352 | 0.379310301 |
| 0.495446599 | 0.403053911 | 0.300532686 | 0.341173653 |
| 0.40174696  | 0.140442294 | 0.477937359 | 0.345957235 |
| 0.403635496 | 0.371579751 | 0.438366276 | 0.012745567 |
| 0.428165048 | 0.217864176 | 0.194697378 | 0.399235821 |
| 0.435801796 | 0.164203542 | 0.402787607 | 0.189754818 |
| 0.201927692 | 0.004149082 | 0.358583984 | 0.361218326 |
| 0.306649077 | 0.263876511 | 0.358807958 | 0.170811269 |
| 0.523440246 | 0.398435139 | 0.409024639 | 0.262920496 |
| 0.402847432 | 0.02486618  | 0.197923663 | 0.044604185 |
| 0.389740391 | 0.38752048  | 0.394334174 | 0.370749317 |
| 0.197849165 | 0.446664642 | 0.397708544 | 0.428205587 |
| 0.465777403 | 0.183655257 | 0.519291836 | 0.304474437 |
| 0.367398359 | 0.383063771 | 0.286125671 | 0.329037454 |
| 0.240560123 | 0.145698193 | 0.15096812  | 0.170193009 |
| 0.478982361 | 0.306175526 | 0.418959991 | 0.321357619 |
| 0.068595247 | 0.398078448 | 0.385926598 | 0.408579694 |
| 0.434697529 | 0.366866364 | 0.352233738 | 0.392884568 |
| 0.308966435 | 0.30553898  | 0.08015415  | 0.053134318 |
| 0.28770255  | 0.233416708 | 0.3824304   | 0.420281855 |
| 0.501938593 | 0.264975459 | 0.123233727 | 0.155700477 |
| 0.115111555 | 0.337845841 | 0.308884154 | 0.180765975 |
| 0.422852098 | 0.293670223 | 0.000848385 | 0.232511817 |
| 0.386116469 | 0.385239664 |             |             |
| ICA1        | 0.116338391 | 0.306297125 | 0.278643453 |
| 0.015768086 | 0.149983166 | 0.396163691 | 0.299127235 |
| 0.090925588 | 0.286448889 | 0.208256281 | 0.426344664 |
| 0.011276666 | 0.094477574 | 0.11395243  | 0.180225851 |
| 0.209697896 | 0.208876075 | 0.248100398 | 0.213467964 |
| 0.156833319 | 0.098171313 | 0.292683299 | 0.230092653 |
| 0.32690728  | 0.023516937 | 0.251265733 | 0.058770959 |
| 0.066765244 | 0.177723187 | 0.326860034 | 0.217103433 |
| 0.180283577 | 0.1426016   | 0.111360633 | 0.097480417 |
| 0.022646667 | 0.372367565 | 0.010996255 | 0.10864865  |
| 0.105515472 | 0.236664415 | 0.152517941 | 0.114290843 |
| 0.000395725 | 0.282113295 | 0.064264128 | 0.269758966 |
| 0.182160844 | 0.359659728 | 0.331945903 | 0.228552434 |
| 0.010608527 | 0.406794044 | 0.23248539  | 0.009030822 |

|             |             |             |             |
|-------------|-------------|-------------|-------------|
| 0.413488715 | 0.003011965 | 0.384389625 | 0.104409804 |
| 0.307244138 | 0.23637893  | 0.0731521   | 0.226611957 |
| 0.416813033 | 0.405842857 | 0.258786321 | 0.182986582 |
| 0.309871768 | 0.108445233 | 0.108328996 | 0.165755831 |
| 0.275939072 | 0.152445372 | 0.229335002 | 0.044787033 |
| 0.126697819 | 0.115269619 | 0.37199061  | 0.297316441 |
| 0.009736739 | 0.270530138 | 0.096270277 | 0.114254083 |
| 0.064359379 | 0.417747634 | 0.119865892 | 0.224622656 |
| 0.087847705 | 0.217166479 | 0.256903038 | 0.240667099 |
| 0.038255629 | 0.123234644 | 0.013218869 | 0.279025827 |
| 0.174536479 | 0.136457104 | 0.188810466 | 0.269945184 |
| 0.147698732 | 0.296391921 | 0.078894665 | 0.092696866 |
| 0.16342216  | 0.13165732  | 0.404331299 | 0.009838024 |
| 0.071778328 | 0.219993888 | 0.206229016 | 0.375075055 |
| 0.250123369 | 0.067323367 | 0.257858799 | 0.371115149 |
| 0.08518798  | 0.08575226  | 0.306755227 | 0.009225698 |
| 0.029561069 | 0.019747102 | 0.172188905 | 0.315331421 |
| 0.232011874 | 0.301081754 | 0.10820061  | 0.128443064 |
| 0.085086934 | 0.152029753 | 0.180432512 | 0.268922385 |
| 0.104129251 | 0.307252772 | 0.113042193 | 0.14923591  |
| 0.082615079 | 0.203830966 | 0.327853705 | 0.312798287 |
| 0.386211501 | 0.264465593 | 0.297327916 | 0.373723814 |
| 0.075493217 | 0.209290956 | 0.266025596 | 0.1755201   |
| 0.17500947  | 0.286209964 | 0.120729211 | 0.266754645 |
| 0.335302178 | 0.173266885 | 0.011335073 | 0.377898626 |
| 0.434570771 | 0.011445381 | 0.320897086 | 0.174440881 |
| 0.028871198 | 0.210157922 | 0.336743943 | 0.2213831   |
| 0.13553454  | 0.05278419  | 0.190786709 | 0.293836985 |
| 0.280094923 | 0.26624261  | 0.219955335 | 0.16232373  |
| 0.361749847 | 0.11410215  | 0.268524535 | 0.076267641 |
| 0.344613236 | 0.280496755 | 0.041615443 | 0.024299771 |
| 0.131729404 | 0.144237165 | 0.260060874 | 0.170227484 |
| 0.136664532 | 0.002273237 | 0.195903536 | 0.150640163 |
| 0.119034026 | 0.117563434 | 0.331509312 | 0.33922418  |
| 0.324258274 | 0.04579809  | 0.33640914  | 0.143129582 |
| 0.195195206 | 0.185774925 | 0.188301534 | 0.015873774 |
| 0.27704256  | 0.057797677 | 0.124386643 | 0.190568769 |
| 0.197008555 | 0.273206103 | 0.09433824  | 0.235789349 |
| 1           | 0.159827014 | 0.07253573  | 0.02814615  |
| 0.272493952 | 0.28829148  | 0.088989548 | 0.107726323 |
| 0.222089376 | 0.198719036 | 0.106724539 | 0.396924213 |
| 0.177350612 | 0.40324737  | 0.018815494 | 0.24598673  |
| 0.089150314 | 0.218707984 | 0.141318018 | 0.184332885 |
| 0.286846427 | 0.154856031 | 0.059647142 | 0.409421744 |
| 0.190864758 | 0.167081622 | 0.316842076 | 0.308846612 |
| 0.017364206 | 0.308372227 | 0.137430988 | 0.021581463 |
| 0.313077419 | 0.347262265 | 0.31152204  | 0.223751936 |
| 0.22006387  | 0.313697788 | 0.22424926  | 0.13302128  |
| 0.043671424 | 0.088149183 | 0.273666506 | 0.310875303 |
| 0.176480583 | 0.176820349 | 0.047186537 | 0.021608938 |
| 0.23393932  | 0.079201094 | 0.196444871 | 0.093832195 |
| 0.108734019 | 0.061659891 | 0.28086401  | 0.118703056 |
| 0.008508679 | 0.251577965 | 0.12646471  | 0.095183706 |
| 0.149286551 | 0.189479629 | 0.215903877 | 0.39749825  |

|             |             |             |             |
|-------------|-------------|-------------|-------------|
| 0.085139028 | 0.075060634 | 0.080569598 | 0.272049397 |
| 0.32873882  | 0.305133935 | 0.004093242 | 0.272900087 |
| 0.247527436 | 0.215646416 | 0.225316858 | 0.242792934 |
| 0.233108536 | 0.387348053 | 0.255399333 | 0.157808674 |
| 0.007015477 | 0.110145067 | 0.076397688 | 0.445665384 |
| 0.163018624 | 0.362806572 | 0.044556235 | 0.051341581 |
| 0.008803197 | 0.339102759 | 0.023607598 | 0.34626552  |
| 0.200380784 | 0.201662792 | 0.002102201 | 0.219411796 |
| 0.073399285 | 0.012660182 | 0.287040221 | 0.230034415 |
| 0.278497999 | 0.147206485 | 0.292390054 | 0.096377906 |
| 0.015065689 | 0.106893084 | 0.058532237 | 0.188773588 |
| 0.086631318 | 0.019301615 | 0.111936064 | 0.248976851 |
| 0.264683525 | 0.32969996  | 0.345631811 | 0.024774316 |
| 0.105127424 | 0.050337737 | 0.176109179 | 0.233033427 |
| 0.291857572 | 0.395562279 | 0.321251575 | 0.124061574 |
| 0.155127619 | 0.367373118 | 0.411260821 | 0.25296893  |
| 0.026907061 | 0.113620178 | 0.148101931 | 0.179776557 |
| 0.077298382 | 0.215487428 | 0.104883716 | 0.354045508 |
| 0.284211038 | 0.025238098 | 0.398687917 | 0.131164142 |
| 0.326514972 | 0.207874697 | 0.294317109 | 0.253559126 |
| 0.37575255  | 0.249601597 | 0.30464672  | 0.204809943 |
| 0.407175792 | 0.011908011 | 0.025376387 | 0.347903505 |
| 0.372691147 | 0.417771544 | 0.199132781 | 0.111988305 |
| 0.168780356 | 0.271987718 | 0.203526446 | 0.242283527 |
| 0.29551903  | 0.080585214 | 0.095483943 | 0.023261782 |
| 0.042471623 | 0.211149576 | 0.368783714 | 0.404859883 |
| 0.323661335 | 0.322348631 | 0.267191911 | 0.232353835 |
| 0.191269683 | 0.102767674 | 0.383685279 | 0.197199646 |
| 0.434589096 | 0.070706095 | 0.351425428 | 0.208984691 |
| 0.271916055 | 0.207672686 | 0.223095426 | 0.01157177  |
| 0.117719586 | 0.202200264 | 0.051371913 | 0.159934401 |
| 0.12652626  | 0.326415732 | 0.317921371 | 0.303299835 |
| 0.050230585 | 0.011204526 | 0.326573004 | 0.039409321 |
| 0.454418872 | 0.048999297 | 0.184323774 | 0.008214724 |
| 0.321692628 | 0.184809303 | 0.209682307 | 0.034445447 |
| 0.173780153 | 0.001223796 | 0.213183674 | 0.232971423 |
| 0.281178066 | 0.359619965 | 0.140923096 | 0.102555794 |
| 0.087270139 | 0.164621742 | 0.31747699  | 0.119278102 |
| 0.207959409 | 0.024573772 | 0.22080435  | 0.184383846 |
| 0.082610606 | 0.142177196 | 0.372615324 | 0.17183319  |
| 0.252788843 | 0.083243222 | 0.325864573 | 0.198671654 |
| 0.178114167 | 0.143502962 | 0.169674462 | 0.115436011 |
| 0.240970112 | 0.187672372 | 0.142096246 | 0.112273672 |
| 0.166034339 | 0.092812929 | 0.079367047 | 0.431817011 |
| 0.094569154 | 0.176253078 | 0.026002918 | 0.046359506 |
| 0.057115328 | 0.299497859 | 0.230028725 | 0.229956076 |
| 0.221229781 | 0.064157723 | 0.325334712 | 0.286778899 |
| 0.012138913 | 0.113877817 | 0.331531054 | 0.019655404 |
| 0.16243598  | 0.057534424 | 0.01001085  | 0.177030549 |
| 0.361378301 | 0.08305035  |             |             |
| ID2         | 0.248030289 | 0.482869959 | 0.052028295 |
| 0.041737225 | 0.145402984 | 0.188586115 | 0.20449017  |
| 0.274601699 | 0.075845807 | 0.123757841 | 0.269996478 |
| 0.000534812 | 0.391302542 | 0.006886796 | 0.056240852 |



|             |             |             |             |
|-------------|-------------|-------------|-------------|
| 0.502590303 | 0.529441768 | 0.321217419 | 0.510345304 |
| 0.228650366 | 0.148941288 | 0.272710754 | 0.314333844 |
| 0.210758854 | 0.000627907 | 0.121101611 | 0.055094353 |
| 0.301840884 | 0.503270703 | 0.153914284 | 0.225710821 |
| 0.433598116 | 0.478246238 | 0.364394221 | 0.371043988 |
| 0.300740806 | 0.423709197 | 0.201861673 | 0.410926174 |
| 0.404242036 | 0.21944242  | 0.447214043 | 0.008542523 |
| 0.009047719 | 0.090971819 | 0.261260675 | 0.296893809 |
| 0.226547912 | 0.172553675 | 0.131596616 | 0.169604499 |
| 0.16702669  | 0.288951756 | 0.301223337 | 0.184065809 |
| 0.372724457 | 0.006622755 | 0.415619509 | 0.167704052 |
| 0.049241356 | 0.243805991 | 0.276008721 | 0.3209821   |
| 0.209700567 | 0.399451264 | 0.518128178 | 0.032996675 |
| 0.057355322 | 0.356916639 | 0.372359596 | 0.387607816 |
| 0.431493003 | 0.283309705 | 0.263262399 | 0.381099644 |
| 0.382996147 | 0.384565872 | 0.227978485 | 0.144875667 |
| 0.000434444 | 0.140101994 | 0.370068492 | 0.250535112 |
| 0.373548732 | 0.293975079 | 0.305898361 | 0.217176106 |
| 0.362172921 | 0.01176435  | 0.303134646 | 0.528596404 |
| 0.022555361 | 0.371505808 | 0.013232334 | 0.1279558   |
| 0.384027512 | 0.471737505 | 0.313431643 | 0.061599948 |
| 0.008855441 | 0.088826838 | 0.089361633 | 0.417941242 |
| 0.323338877 | 0.392969906 | 0.35364513  | 0.147622991 |
| 0.383626602 | 0.109702978 | 0.312033902 | 0.425832157 |
| 0.458036131 | 0.005309375 | 0.108982709 | 0.187183782 |
| 0.318275254 | 0.151456538 | 0.208800997 | 0.034629041 |
| 0.012461583 | 0.012233023 | 0.457439482 | 0.113860155 |
| 0.096165865 | 0.175873176 | 0.094841859 | 0.427380213 |
| 0.273724078 | 0.415471279 | 0.145980402 | 0.226692213 |
| 0.398083944 | 0.232448477 | 0.418973867 | 0.396403099 |
| 0.431656683 | 0.18327208  | 0.106197082 | 0.446212392 |
| 0.368721678 | 0.059730037 | 0.058474105 | 0.258801315 |
| 0.380618089 | 0.485784858 | 0.525409704 | 0.237089443 |
| 0.297138288 | 0.189278904 | 0.253464541 | 0.349345676 |
| 0.214055915 | 0.267687419 | 0.092844556 | 0.292814406 |
| 0.368175402 | 0.037118358 | 0.046873958 | 0.369416509 |
| 0.105044898 | 0.232265636 | 0.391810779 | 0.407484677 |
| 0.411482205 | 0.042754356 | 0.21462048  | 0.221779236 |
| 0.219488839 | 0.213546015 | 0.323267084 | 0.195960822 |
| 0.241512431 | 0.263398604 | 0.040627773 | 0.388235808 |
| 0.097751338 | 0.250855757 | 0.247445718 | 0.060986662 |
| 0.320336957 | 0.273462522 | 0.41068718  | 0.335225318 |
| 0.318719567 | 0.00711762  | 0.124039836 | 0.266731784 |
| 0.222222562 | 0.396120992 | 0.485906087 | 0.088431863 |
| 0.189422258 | 0.31794238  | 0.109257891 | 0.36666697  |
| 0.338383487 | 0.183896351 | 0.161352475 | 0.000264751 |
| 0.131773029 | 0.312938517 | 0.356012437 | 0.028590864 |
| 0.252342529 | 0.070917927 | 0.078092481 | 0.441784141 |
| 0.159827014 | 1           | 0.015072778 | 0.133978315 |
| 0.211000587 | 0.383137277 | 0.361929692 | 0.183831117 |
| 0.411756819 | 0.25659096  | 0.436584254 | 0.310035169 |
| 0.302939599 | 0.285571374 | 0.170727331 | 0.203765001 |
| 0.407240171 | 0.470531238 | 0.42479469  | 0.426614794 |
| 0.216111425 | 0.297282358 | 0.284663439 | 0.217435848 |

|             |             |             |             |
|-------------|-------------|-------------|-------------|
| 0.305229331 | 0.344498898 | 0.057715898 | 0.494394473 |
| 0.000246999 | 0.281762462 | 0.397592271 | 0.157879888 |
| 0.476299799 | 0.217311607 | 0.045479284 | 0.178231851 |
| 0.518089977 | 0.492699498 | 0.377384295 | 0.43644255  |
| 0.188386622 | 0.004860533 | 0.449108365 | 0.327656157 |
| 0.514339262 | 0.358910796 | 0.412262362 | 0.074107371 |
| 0.481759185 | 0.284516247 | 0.333310293 | 0.324928256 |
| 0.425428878 | 0.419770213 | 0.193462828 | 0.273774888 |
| 0.009708874 | 0.186985113 | 0.335848307 | 0.171453823 |
| 0.266922834 | 0.134448217 | 0.433293189 | 0.266042676 |
| 0.433030711 | 0.225786783 | 0.362291082 | 0.073343915 |
| 0.145077746 | 0.485775769 | 0.086611154 | 0.422473556 |
| 0.525845251 | 0.306003146 | 0.47868585  | 0.509786532 |
| 0.231376179 | 0.32836428  | 0.449776386 | 0.420230095 |
| 0.000401943 | 0.444056038 | 0.375444465 | 0.274973384 |
| 0.441316675 | 0.225510275 | 0.192658682 | 0.412145559 |
| 0.000986603 | 0.112561405 | 0.271409042 | 0.454694825 |
| 0.479319451 | 0.022906135 | 0.098799904 | 0.409269582 |
| 0.373572221 | 0.048998833 | 0.510635842 | 0.277178371 |
| 0.446900098 | 0.399544455 | 0.146740837 | 0.407396748 |
| 0.229496841 | 0.324448489 | 0.040842452 | 0.394633539 |
| 0.393474463 | 0.066334885 | 0.091819193 | 0.508474091 |
| 0.375392371 | 0.345749508 | 0.203796114 | 0.005436531 |
| 0.36557087  | 0.215432219 | 0.410503247 | 0.100291215 |
| 0.349071014 | 0.298695141 | 0.433886508 | 0.416704693 |
| 0.380939467 | 0.344904064 | 0.30152447  | 0.398305162 |
| 0.161662673 | 0.384732379 | 0.418536797 | 0.047786802 |
| 0.302314284 | 0.489443732 | 0.367668309 | 0.148661357 |
| 0.287257929 | 0.148887363 | 0.160709964 | 0.235489164 |
| 0.42953564  | 0.476400397 | 0.040737793 | 0.120982207 |
| 0.349004333 | 0.24062505  | 0.096134994 | 0.295921599 |
| 0.214934023 | 0.153927808 | 0.119847644 | 0.29627953  |
| 0.434549599 | 0.249056218 | 0.42728403  | 0.15065236  |
| 0.479775594 | 0.035447888 | 0.38915279  | 0.245576077 |
| 0.212627488 | 0.321834301 | 0.385280218 | 0.090082616 |
| 0.014789567 | 0.077448172 | 0.34102819  | 0.347293764 |
| 0.057219335 | 0.141709158 | 0.223830645 | 0.327931769 |
| 0.505276644 | 0.360040802 | 0.221259404 | 0.273931586 |
| 0.354799124 | 0.121421852 | 0.448614206 | 0.249412801 |
| 0.313108963 | 0.299871583 | 0.386671528 | 0.006799595 |
| 0.383473288 | 0.144582288 | 0.152463163 | 0.354848542 |
| 0.450960262 | 0.10742096  | 0.346197791 | 0.112874737 |
| 0.174932237 | 0.002671361 | 0.278902537 | 0.402588494 |
| 0.222951255 | 0.262637136 | 0.291040663 | 0.205457975 |
| 0.507604617 | 0.302540114 | 0.320525174 | 0.295655827 |
| 0.328387144 | 0.055898703 | 0.137619997 | 0.021365054 |
| 0.297387526 | 0.31313071  | 0.326640399 | 0.281612017 |
| 0.138131898 | 0.421684627 | 0.328791405 | 0.422061108 |
| 0.482209477 | 0.159024928 | 0.519466305 | 0.239073066 |
| 0.406481378 | 0.304625408 | 0.209920471 | 0.274646748 |
| 0.197960288 | 0.107092865 | 0.096930392 | 0.102016029 |
| 0.496808177 | 0.291224127 | 0.374386384 | 0.218988929 |
| 0.040513556 | 0.345184278 | 0.355616536 | 0.379647029 |
| 0.36132332  | 0.313352606 | 0.32683742  | 0.329319083 |

|             |             |             |             |          |
|-------------|-------------|-------------|-------------|----------|
| 0.221868844 | 0.202722399 | 0.077366243 | 0.036689766 |          |
| 0.256528495 | 0.153072997 | 0.357448752 | 0.398053295 |          |
| 0.513326599 | 0.218795429 | 0.072819642 | 0.092376249 |          |
| 0.150710339 | 0.325496958 | 0.246170735 | 0.276183222 |          |
| 0.388690953 | 0.24541228  | 0.000360849 | 0.153914803 |          |
| 0.301719435 | 0.364643283 |             |             |          |
| IDH3A       | 0.069362647 | 0.040559943 | 0.024932851 | 6.02E-06 |
| 0.001037349 | 0.060407906 | 0.023121186 | 0.048408034 |          |
| 0.024246374 | 0.003493967 | 0.062239363 | 0.053369644 |          |
| 0.017652805 | 0.099633992 | 0.008051982 | 0.038807278 |          |
| 0.032029311 | 0.020413061 | 0.044567286 | 0.117725626 |          |
| 0.000236701 | 0.123581724 | 0.024546743 | 0.044979363 |          |
| 0.069109315 | 0.009488661 | 9.01E-05    | 0.023982855 |          |
| 0.034948242 | 0.102288845 | 0.00741945  | 0.039064451 |          |
| 0.015930404 | 0.002618696 | 0.000578187 | 0.000141926 |          |
| 0.062301426 | 7.04E-05    | 0.010128517 | 0.02442421  |          |
| 0.00732927  | 0.01895354  | 0.009414916 | 6.18E-08    |          |
| 0.018443486 | 0.030641101 | 0.072996214 | 0.104931801 |          |
| 0.062306335 | 0.120777656 | 0.007051104 | 7.62E-05    |          |
| 0.069160217 | 0.112890153 | 0.000193124 | 0.050197484 |          |
| 4.83E-07    | 0.050881624 | 0.106168898 | 0.05532608  |          |
| 0.061040051 | 0.018479857 | 0.052805044 | 0.053127371 |          |
| 0.05033189  | 0.037065904 | 0.001316573 | 0.046323287 |          |
| 0.023524045 | 0.013847388 | 0.008531573 | 0.043251323 |          |
| 0.004142628 | 0.005665471 | 0.003033361 | 0.013090129 |          |
| 0.024121755 | 0.102322907 | 0.049379099 | 0.007196541 |          |
| 0.01527575  | 0.000981493 | 0.067063288 | 0.006970768 |          |
| 0.0657206   | 0.049517983 | 0.005460503 | 0.011972945 |          |
| 0.018080837 | 0.064616561 | 0.036470528 | 0.000105919 |          |
| 0.025868519 | 0.000125783 | 0.036071701 | 0.035518418 |          |
| 0.026161206 | 0.052952722 | 0.007314703 | 0.011710453 |          |
| 0.136674919 | 0.061278737 | 0.020904811 | 0.046323503 |          |
| 0.017929025 | 0.050370789 | 0.003362198 | 0.012350689 |          |
| 0.026634636 | 0.014773776 | 0.050517791 | 0.043790354 |          |
| 0.056976129 | 0.098494039 | 0.063465534 | 0.000869396 |          |
| 0.000108923 | 0.039167155 | 0.000243018 | 0.000275771 |          |
| 0.148917877 | 0.032296566 | 0.098768276 | 0.005963635 |          |
| 0.030436037 | 0.000342795 | 0.006654336 | 0.041683597 |          |
| 0.046938058 | 0.002050929 | 0.020576426 | 0.009952087 |          |
| 0.023747307 | 0.004341817 | 0.016823739 | 0.001724396 |          |
| 0.075570669 | 0.094443843 | 0.035532932 | 0.095127697 |          |
| 0.00902053  | 0.02691635  | 0.064760216 | 0.010320779 |          |
| 0.039213278 | 0.04244948  | 0.03616555  | 0.003476287 |          |
| 0.117174296 | 0.004107938 | 0.019700622 | 0.049667835 |          |
| 0.114460183 | 0.001290073 | 0.087475608 | 0.05978495  |          |
| 0.000221384 | 0.052823895 | 0.041236074 | 1.03E-05    |          |
| 0.002888705 | 0.059131557 | 0.025815339 | 0.017712035 |          |
| 6.19E-05    | 0.005111452 | 0.028038383 | 0.101089518 |          |
| 0.025549529 | 0.051372349 | 0.003095894 | 0.097703038 |          |
| 0.003378768 | 0.024367514 | 0.011260389 | 0.07823963  |          |
| 0.115399103 | 0.001312577 | 0.000231833 | 0.051376683 |          |
| 0.067193849 | 0.03204472  | 0.047841528 | 0.034483895 |          |
| 3.17E-07    | 0.003498969 | 0.070028646 | 0.005772033 |          |
| 0.036405212 | 0.038257545 | 0.092431055 | 0.158202867 |          |

|             |             |             |             |
|-------------|-------------|-------------|-------------|
| 0.003025331 | 0.119327226 | 0.003223707 | 0.090904312 |
| 0.002804169 | 0.002495825 | 0.005444161 | 0.006074346 |
| 0.003477173 | 0.022347926 | 0.153836075 | 0.003264617 |
| 0.029056724 | 0.012966465 | 0.030222073 | 0.07253573  |
| 0.015072778 | 1           | 0.015687243 | 0.033755987 |
| 0.022009258 | 0.002679295 | 0.01760989  | 0.015997977 |
| 0.012065748 | 0.021787679 | 0.071657495 | 0.003623277 |
| 0.050501004 | 0.00139691  | 0.071897408 | 0.009781086 |
| 0.02255064  | 0.016092891 | 0.024009702 | 0.031982753 |
| 0.082084439 | 0.002562304 | 0.091631499 | 0.067342149 |
| 0.055222536 | 0.08265852  | 0.048666853 | 0.019049494 |
| 0.073883938 | 0.008698497 | 0.002135638 | 0.034372718 |
| 0.029625009 | 0.115101888 | 0.150218913 | 0.044466033 |
| 0.052104931 | 0.082517368 | 0.021011041 | 0.005080855 |
| 0.115121277 | 0.068026875 | 0.049588658 | 0.030146432 |
| 0.018885745 | 0.000580643 | 0.002858889 | 0.035071888 |
| 0.044712648 | 0.025479168 | 0.018184966 | 0.008455195 |
| 0.004003668 | 0.117665102 | 0.076739294 | 0.00098833  |
| 0.028791647 | 0.020135736 | 0.000335255 | 0.004734547 |
| 0.003013121 | 0.019453069 | 0.091726594 | 0.0015686   |
| 0.005855987 | 0.001025519 | 0.019958577 | 0.067592344 |
| 0.043402982 | 3.42E-05    | 0.075887881 | 0.04211744  |
| 0.059271595 | 0.023050613 | 0.049891411 | 0.091421026 |
| 0.049195265 | 0.03313425  | 0.048173033 | 0.012043841 |
| 0.01608433  | 0.009194884 | 0.098032156 | 0.021904304 |
| 0.06627246  | 0.053212917 | 0.003120283 | 0.006442711 |
| 0.111591575 | 0.000224798 | 0.072303724 | 0.020862202 |
| 0.004447659 | 7.85E-06    | 0.028014652 | 0.008490464 |
| 0.000438777 | 0.049606054 | 0.021544651 | 0.02726248  |
| 0.018091885 | 0.019723776 | 0.011533648 | 0.000213852 |
| 0.021033298 | 7.96E-05    | 0.014278246 | 0.009808121 |
| 0.002209939 | 0.000431781 | 0.04672708  | 0.056445161 |
| 0.035703212 | 0.078213954 | 0.000299255 | 0.03320645  |
| 0.000162232 | 0.013955731 | 0.018416072 | 0.078132924 |
| 0.059281746 | 0.043735083 | 0.015268827 | 0.023835    |
| 0.049832311 | 0.06594005  | 0.035586177 | 2.63E-05    |
| 0.017828534 | 0.026920034 | 0.001512807 | 0.02318721  |
| 0.025292563 | 0.004990587 | 0.046829575 | 0.096285335 |
| 1.14E-05    | 0.078685066 | 0.11934379  | 0.035786522 |
| 0.022294803 | 0.033364423 | 0.132946484 | 0.040422132 |
| 0.034169604 | 0.031966017 | 0.055743052 | 0.101519594 |
| 0.000533011 | 0.00888813  | 0.073604874 | 0.047542484 |
| 0.050215945 | 0.028238827 | 0.00068946  | 0.024689818 |
| 0.090057047 | 0.054954277 | 0.008169924 | 0.126943116 |
| 0.011966843 | 0.023214194 | 0.009330291 | 0.00041568  |
| 0.040222002 | 0.033716522 | 0.062954554 | 0.060559659 |
| 0.139356821 | 0.023178582 | 0.012855314 | 0.029888636 |
| 0.004077252 | 0.081309729 | 0.084618333 | 0.064231941 |
| 8.85E-05    | 0.067816531 | 0.091051232 | 0.075149313 |
| 0.010702852 | 0.03106881  | 0.000184704 | 0.015057741 |
| 0.005225989 | 0.099497493 | 0.006100429 | 0.026698479 |
| 0.041585289 | 0.027080139 | 0.107215157 | 0.000248097 |
| 0.019132652 | 0.120416929 | 0.001480483 | 0.0812916   |
| 0.010992845 | 0.072574071 | 6.15E-05    | 0.0528186   |

|             |             |             |             |
|-------------|-------------|-------------|-------------|
| 0.047264965 | 0.051264289 | 0.00485397  | 0.009608047 |
| 6.86E-07    | 0.004566272 | 0.023348665 | 0.092640481 |
| 0.078587427 | 0.040193673 | 0.032959577 | 0.120745018 |
| 0.013830846 | 0.053357918 | 0.00469206  | 0.019786601 |
| 0.000182387 | 0.032791363 | 0.068087711 | 0.012103153 |
| 0.008106543 | 0.079368714 | 0.012106057 | 0.012661655 |
| 0.001906311 | 0.045406145 | 0.144292527 | 0.019105563 |
| 0.012729187 | 0.009086862 | 0.01926784  | 0.007345803 |
| 0.012680924 | 0.033383689 | 0.012057252 | 0.018524839 |
| 0.016522163 | 0.018569271 | 0.067127809 | 0.006287367 |
| 0.083598174 | 1.51E-05    | 2.30E-05    | 0.000177658 |
| 0.091430884 | 0.061490098 | 0.036335079 | 0.010278037 |
| 0.050651963 | 0.170561028 | 0.00066844  | 0.041125156 |
| 0.024576878 | 4.60E-05    | 0.022869143 | 0.008998415 |
| 0.002387228 | 0.124680475 | 0.069964694 | 0.001352304 |
| IFI30       | 0.106523556 | 0.159337992 | 0.003541912 |
| 0.000283971 | 0.003639885 | 0.034859042 | 0.023437844 |
| 0.087532103 | 0.00890627  | 0.003080201 | 0.064495575 |
| 0.001356862 | 0.225568442 | 0.004311061 | 0.019673372 |
| 0.21313917  | 0.218455533 | 0.047008344 | 0.251437222 |
| 0.094486955 | 0.002800006 | 0.122478543 | 0.047459884 |
| 0.034123879 | 0.00111279  | 0.005784664 | 0.000510745 |
| 0.101867569 | 0.238360886 | 0.034109518 | 0.009308969 |
| 0.203179566 | 0.176172444 | 0.018558511 | 0.012580337 |
| 0.009884737 | 0.147266707 | 0.025323653 | 0.146409926 |
| 0.261060674 | 0.01072628  | 0.172042286 | 0.002784903 |
| 2.86E-05    | 0.005539907 | 0.072311339 | 0.091619084 |
| 0.099216167 | 0.028634624 | 0.033515556 | 0.008611674 |
| 0.01182244  | 0.082732674 | 0.207845872 | 0.011879147 |
| 0.104286528 | 3.33E-05    | 0.131466802 | 0.075639847 |
| 0.00639429  | 0.060139829 | 0.084435798 | 0.101563662 |
| 0.040303076 | 0.113804186 | 0.194183848 | 0.000985925 |
| 0.00652568  | 0.097230552 | 0.141758163 | 0.05064398  |
| 0.156044909 | 0.012515178 | 0.011118195 | 0.069466324 |
| 0.115975534 | 0.213742985 | 0.075937345 | 0.017730253 |
| 0.000213979 | 0.010239545 | 0.011007866 | 0.19919918  |
| 0.111070352 | 0.08002115  | 0.126416695 | 0.009266373 |
| 0.057952096 | 0.002478589 | 0.085258256 | 0.205066021 |
| 0.000525302 | 0.214869563 | 0.000775387 | 0.019551427 |
| 0.181845609 | 0.239862792 | 0.121780416 | 0.002153512 |
| 0.002710292 | 0.024211381 | 0.037162475 | 0.260168313 |
| 0.092439355 | 0.069901916 | 0.103277833 | 0.108950134 |
| 0.219146834 | 0.015029275 | 0.036279201 | 0.124217156 |
| 0.174376727 | 0.004005884 | 0.030401353 | 0.032427634 |
| 0.022100495 | 0.003555106 | 0.029899522 | 0.002479646 |
| 0.000237874 | 0.027424247 | 0.209200582 | 0.016346706 |
| 0.003647485 | 0.018678674 | 0.002312817 | 0.069542168 |
| 0.074566907 | 0.274085764 | 0.004436807 | 0.021414402 |
| 0.11767753  | 0.028608252 | 0.033962187 | 0.123743352 |
| 0.022902087 | 0.044356126 | 0.016809463 | 0.135946825 |
| 0.161974325 | 0.003406765 | 0.004520368 | 0.059704889 |
| 0.196971283 | 0.201166911 | 0.201515099 | 0.034711704 |
| 0.011750295 | 0.052130443 | 0.012332907 | 0.054428441 |
| 0.040299989 | 0.143516717 | 0.042349346 | 0.105625277 |

|             |             |             |             |
|-------------|-------------|-------------|-------------|
| 0.108165859 | 0.003074256 | 0.005215278 | 0.197945881 |
| 0.000853915 | 0.011596006 | 0.144465325 | 0.129796522 |
| 0.114270772 | 0.000401518 | 0.008202406 | 0.026848445 |
| 0.065627069 | 0.021995711 | 0.120747854 | 0.006360083 |
| 0.074069113 | 0.01226467  | 0.002728545 | 0.203064027 |
| 0.01598261  | 0.100090928 | 0.021210036 | 0.00570485  |
| 0.173953323 | 0.078316437 | 0.126165959 | 0.119837968 |
| 0.146944369 | 1.76E-05    | 0.002763161 | 0.112423875 |
| 0.011366744 | 0.275594388 | 0.143540074 | 0.017591193 |
| 0.074141174 | 0.05292447  | 0.0271218   | 0.019189497 |
| 0.256595122 | 0.00613458  | 0.006024057 | 4.55E-05    |
| 0.007645138 | 0.02866003  | 0.088277855 | 0.012201491 |
| 0.006467244 | 0.007678041 | 0.073245322 | 0.142452696 |
| 0.02814615  | 0.133978315 | 0.015687243 | 1           |
| 0.0195274   | 0.080607861 | 0.01613097  | 0.02451994  |
| 0.095213338 | 0.01121285  | 0.242220338 | 0.110559537 |
| 0.015118501 | 0.064973264 | 0.073453608 | 0.044657025 |
| 0.09539462  | 0.151977368 | 0.143470735 | 0.154268603 |
| 0.022723579 | 0.240077405 | 0.027194296 | 0.054813889 |
| 0.114121459 | 0.116439747 | 0.006543645 | 0.180685283 |
| 0.000242305 | 0.081522973 | 0.058582507 | 0.075144027 |
| 0.135064809 | 0.029083284 | 0.007413302 | 0.057004542 |
| 0.248796496 | 0.192787562 | 0.249879723 | 0.189038436 |
| 0.033955987 | 0.005115017 | 0.220918622 | 0.104307741 |
| 0.230588789 | 0.050876005 | 0.017525668 | 0.109207374 |
| 0.176937905 | 0.208068723 | 0.075590192 | 0.077752309 |
| 0.084843198 | 0.053581671 | 0.063614129 | 0.236539692 |
| 0.005009109 | 0.016805602 | 0.085622656 | 0.005494009 |
| 0.012664824 | 0.009505528 | 0.125610623 | 0.090351866 |
| 0.019106037 | 0.018834788 | 0.013569694 | 0.00459248  |
| 0.028428947 | 0.164610498 | 0.010271238 | 0.223906835 |
| 0.212936875 | 0.105992182 | 0.141506698 | 0.227678131 |
| 0.059478341 | 0.091237888 | 0.146684108 | 0.284301972 |
| 0.000909381 | 0.195781947 | 0.166019556 | 0.100320233 |
| 0.15636758  | 0.049078555 | 0.160398139 | 0.057785383 |
| 0.001289252 | 0.024373527 | 0.009634072 | 0.19461664  |
| 0.14957466  | 0.001675927 | 0.015402659 | 0.133768411 |
| 0.137095509 | 0.022882017 | 0.20045646  | 0.031047589 |
| 0.120290842 | 0.067987001 | 0.011289923 | 0.170471105 |
| 0.011035186 | 0.082825053 | 0.000686966 | 0.063050841 |
| 0.082849024 | 0.058394387 | 0.001172803 | 0.232110888 |
| 0.142934554 | 0.078944784 | 0.051457295 | 0.000106037 |
| 0.255109807 | 0.004400766 | 0.095758884 | 0.014598293 |
| 0.159391583 | 0.087380416 | 0.139922895 | 0.173909181 |
| 0.098025335 | 0.097873582 | 0.089458961 | 0.126736174 |
| 0.003881487 | 0.156953828 | 0.176472826 | 0.002145678 |
| 0.112348073 | 0.166803037 | 0.03660642  | 0.020487791 |
| 0.116840918 | 0.001479172 | 0.032431376 | 0.133944108 |
| 0.117681372 | 0.147927703 | 0.00287499  | 0.030879743 |
| 0.090589495 | 0.030360829 | 0.010181294 | 0.084293067 |
| 0.063413745 | 0.013187011 | 0.107671746 | 0.101614586 |
| 0.130014651 | 0.051168478 | 0.146802096 | 0.00268841  |
| 0.192492965 | 0.008289492 | 0.239293839 | 0.015661438 |
| 0.071390896 | 0.082312576 | 0.230553421 | 0.02877457  |

|             |             |             |             |
|-------------|-------------|-------------|-------------|
| 0.000403069 | 0.011305208 | 0.079383538 | 0.111818633 |
| 0.006723207 | 0.040048485 | 0.019604604 | 0.035432555 |
| 0.201496733 | 0.020050545 | 0.052322988 | 0.083932092 |
| 0.112057205 | 0.001560071 | 0.176410175 | 0.065742943 |
| 0.135838442 | 0.018409952 | 0.147173489 | 0.00064664  |
| 0.110539745 | 0.004320032 | 0.159717508 | 0.028647787 |
| 0.25603954  | 0.009099572 | 0.069424631 | 0.021202581 |
| 0.007021855 | 0.002522447 | 0.137650343 | 0.045132198 |
| 0.05693173  | 0.061329752 | 0.078759943 | 0.013503051 |
| 0.192523807 | 0.069068828 | 0.132452729 | 0.088191059 |
| 0.027422984 | 0.00236178  | 0.004618333 | 0.004370645 |
| 0.139954805 | 0.122889651 | 0.139534563 | 0.084397572 |
| 0.082757729 | 0.08972904  | 0.08904648  | 0.0370755   |
| 0.146680284 | 0.00586911  | 0.19707096  | 0.088919159 |
| 0.213063914 | 0.022059221 | 0.052405054 | 0.03271246  |
| 0.014803058 | 0.019597983 | 0.013233911 | 0.035326433 |
| 0.163241609 | 0.046009811 | 0.036873971 | 0.022596529 |
| 0.001735581 | 0.028103677 | 0.215844206 | 0.134652097 |
| 0.062954737 | 0.118520411 | 0.060885023 | 0.107301791 |
| 0.028439848 | 0.060222796 | 0.000674409 | 0.00031315  |
| 0.00673535  | 0.012866336 | 0.239721703 | 0.19283394  |
| 0.215952218 | 0.068197378 | 0.007273222 | 0.025319171 |
| 0.096806516 | 0.236543512 | 0.031642603 | 0.007464352 |
| 0.111308182 | 0.049965057 | 0.000131314 | 0.052722287 |
| 0.099330268 | 0.017319949 |             |             |
| IFITM2      | 0.142540109 | 0.357250123 | 0.133043999 |
| 0.014927422 | 0.077231789 | 0.337152106 | 0.264722467 |
| 0.106811988 | 0.108193321 | 0.102378125 | 0.406693883 |
| 0.004753536 | 0.139392691 | 0.044236112 | 0.074937803 |
| 0.278093115 | 0.276201447 | 0.240063281 | 0.278645524 |
| 0.160308026 | 0.056457647 | 0.307693378 | 0.26282143  |
| 0.279137361 | 0.009553131 | 0.143442264 | 0.038555706 |
| 0.080519828 | 0.246479217 | 0.223079054 | 0.119936276 |
| 0.238602923 | 0.203402011 | 0.070358199 | 0.068177025 |
| 0.019841675 | 0.417001308 | 0.008077753 | 0.15516236  |
| 0.153223723 | 0.141084874 | 0.213575868 | 0.034534873 |
| 0.00042662  | 0.127600411 | 0.061596077 | 0.295086958 |
| 0.144916989 | 0.302018858 | 0.235608488 | 0.152505342 |
| 0.010329277 | 0.396319485 | 0.272246946 | 0.009654833 |
| 0.430109329 | 0.002799661 | 0.414015095 | 0.074166404 |
| 0.116617744 | 0.17571858  | 0.087508131 | 0.247373601 |
| 0.35987643  | 0.43325116  | 0.321005442 | 0.057840103 |
| 0.154448444 | 0.136174398 | 0.15997536  | 0.203703278 |
| 0.324073577 | 0.115753406 | 0.113004891 | 0.047703486 |
| 0.169806668 | 0.168114312 | 0.328444558 | 0.141710137 |
| 0.003153891 | 0.200024105 | 0.063677734 | 0.143999692 |
| 0.102390574 | 0.405683367 | 0.148666901 | 0.108240208 |
| 0.122636211 | 0.071729798 | 0.281147764 | 0.30970612  |
| 0.020665813 | 0.16314349  | 0.007519369 | 0.124989132 |
| 0.229698267 | 0.198252917 | 0.223203326 | 0.09388967  |
| 0.057305897 | 0.127157694 | 0.046262759 | 0.142333487 |
| 0.180243959 | 0.161234758 | 0.411614416 | 0.009014344 |
| 0.114308971 | 0.104156464 | 0.106890777 | 0.419490746 |
| 0.307129499 | 0.0316709   | 0.119338111 | 0.321298775 |

|             |             |             |             |
|-------------|-------------|-------------|-------------|
| 0.055334614 | 0.046311976 | 0.26751319  | 0.011666303 |
| 0.015802749 | 0.012270076 | 0.228106139 | 0.137766516 |
| 0.104306408 | 0.248540724 | 0.085933843 | 0.170958044 |
| 0.075510916 | 0.205554671 | 0.083743281 | 0.226727461 |
| 0.149178917 | 0.280933998 | 0.129461143 | 0.199953625 |
| 0.055739311 | 0.100516226 | 0.15636476  | 0.353661751 |
| 0.40803411  | 0.120570535 | 0.124045834 | 0.36701204  |
| 0.1145119   | 0.274594625 | 0.331260978 | 0.100166135 |
| 0.096583122 | 0.214292392 | 0.073336457 | 0.300568038 |
| 0.291241221 | 0.185653213 | 0.009275931 | 0.367785278 |
| 0.447433562 | 0.011320799 | 0.117134235 | 0.22539984  |
| 0.017387293 | 0.095916398 | 0.381847715 | 0.265300035 |
| 0.162259581 | 0.033573273 | 0.12054877  | 0.259947827 |
| 0.259596979 | 0.246580319 | 0.236691689 | 0.095811401 |
| 0.3541021   | 0.072935197 | 0.101829349 | 0.115973573 |
| 0.19931185  | 0.274251755 | 0.034433686 | 0.013385721 |
| 0.168374228 | 0.103236857 | 0.318336983 | 0.196313778 |
| 0.174233677 | 0.002602134 | 0.1054916   | 0.177011642 |
| 0.07054742  | 0.165543096 | 0.387371616 | 0.205252782 |
| 0.289411131 | 0.031036631 | 0.218182867 | 0.083645561 |
| 0.238857085 | 0.088925589 | 0.097871848 | 0.006462181 |
| 0.118599268 | 0.062236601 | 0.132159447 | 0.082981467 |
| 0.113364468 | 0.125879855 | 0.052784772 | 0.294873768 |
| 0.272493952 | 0.211000587 | 0.033755987 | 0.0195274   |
| 1           | 0.315360531 | 0.067158321 | 0.072947218 |
| 0.264486381 | 0.116296009 | 0.161120303 | 0.400563452 |
| 0.090848994 | 0.406382665 | 0.014529586 | 0.133819619 |
| 0.125756939 | 0.274937194 | 0.205206004 | 0.232388706 |
| 0.191013437 | 0.184317128 | 0.044702044 | 0.375696458 |
| 0.223365876 | 0.186561206 | 0.135221653 | 0.364162152 |
| 0.005304262 | 0.311215899 | 0.166465043 | 0.01755445  |
| 0.373333673 | 0.310032491 | 0.122648327 | 0.147318221 |
| 0.28735423  | 0.369467586 | 0.268703902 | 0.192776016 |
| 0.02923376  | 0.03738539  | 0.32543105  | 0.321802714 |
| 0.242457196 | 0.14612553  | 0.035947821 | 0.013382869 |
| 0.301308485 | 0.107740097 | 0.229219374 | 0.136251379 |
| 0.133579488 | 0.052461849 | 0.224472228 | 0.149083811 |
| 0.004582831 | 0.16185799  | 0.173975299 | 0.057265478 |
| 0.096488132 | 0.078746578 | 0.260595381 | 0.371127033 |
| 0.057867259 | 0.062501715 | 0.056970984 | 0.124657801 |
| 0.254657064 | 0.365795321 | 0.002914538 | 0.325096011 |
| 0.31523498  | 0.210633333 | 0.293015613 | 0.313023444 |
| 0.236253529 | 0.386612566 | 0.315929707 | 0.20976542  |
| 0.003360779 | 0.162799329 | 0.115785714 | 0.422333561 |
| 0.226195236 | 0.320351069 | 0.047125408 | 0.065233648 |
| 0.002973642 | 0.234476484 | 0.022516848 | 0.391546037 |
| 0.260911326 | 0.061252524 | 0.001700034 | 0.269086517 |
| 0.109880083 | 0.010342861 | 0.354756875 | 0.228011316 |
| 0.329765631 | 0.164148537 | 0.190279312 | 0.142429217 |
| 0.014576642 | 0.070221876 | 0.02206576  | 0.225202014 |
| 0.090613367 | 0.011583049 | 0.058696824 | 0.310892971 |
| 0.323823155 | 0.339114875 | 0.301001766 | 0.014511675 |
| 0.151740798 | 0.047026082 | 0.232986561 | 0.113741343 |
| 0.335601302 | 0.382861861 | 0.364631227 | 0.17579256  |



|             |             |             |             |
|-------------|-------------|-------------|-------------|
| 0.179489778 | 0.392213205 | 0.418075986 | 0.309580009 |
| 0.024690934 | 0.170854526 | 0.204041206 | 0.096240389 |
| 0.104534236 | 0.280078338 | 0.131098472 | 0.289888083 |
| 0.300410625 | 0.017839366 | 0.329006128 | 0.148642211 |
| 0.371884906 | 0.267937357 | 0.108244711 | 0.12062795  |
| 0.399013328 | 0.119281668 | 0.159110447 | 0.171256333 |
| 0.355580189 | 0.012671321 | 0.016149997 | 0.336812797 |
| 0.417258535 | 0.382093714 | 0.263153494 | 0.072230349 |
| 0.228921401 | 0.111787388 | 0.24987086  | 0.113133433 |
| 0.268990826 | 0.118283971 | 0.144498427 | 0.02030714  |
| 0.023052822 | 0.105341886 | 0.383156579 | 0.419005277 |
| 0.133786135 | 0.252626025 | 0.230572434 | 0.242529547 |
| 0.262232177 | 0.080835073 | 0.34338343  | 0.17794217  |
| 0.440983905 | 0.039799379 | 0.40117377  | 0.212522312 |
| 0.307059023 | 0.141566868 | 0.261076882 | 0.005045135 |
| 0.158906322 | 0.11072018  | 0.054302096 | 0.180133031 |
| 0.183310461 | 0.159038077 | 0.326610974 | 0.136040925 |
| 0.040168381 | 0.007562099 | 0.327280783 | 0.051856932 |
| 0.404628089 | 0.038823432 | 0.174255667 | 0.009399086 |
| 0.381169007 | 0.207152541 | 0.256628483 | 0.025724527 |
| 0.157407988 | 0.001134709 | 0.102965525 | 0.095693842 |
| 0.312205128 | 0.35948212  | 0.171689957 | 0.133922499 |
| 0.053772606 | 0.197365976 | 0.315739903 | 0.134218911 |
| 0.266983499 | 0.021263363 | 0.292772805 | 0.112891445 |
| 0.127298339 | 0.083746613 | 0.319774345 | 0.08632356  |
| 0.173543745 | 0.041195927 | 0.144660153 | 0.093006415 |
| 0.244421075 | 0.075262679 | 0.191594873 | 0.08273812  |
| 0.111707625 | 0.12412903  | 0.18251104  | 0.15691266  |
| 0.204545694 | 0.130936578 | 0.065906517 | 0.431951875 |
| 0.065100479 | 0.128022837 | 0.021408448 | 0.022223605 |
| 0.039224838 | 0.183360446 | 0.277782613 | 0.284758013 |
| 0.285913826 | 0.042379939 | 0.128739011 | 0.127699132 |
| 0.008939379 | 0.16343769  | 0.305630415 | 0.017369958 |
| 0.181392888 | 0.038473196 | 0.006075006 | 0.093760745 |
| 0.363679307 | 0.058794421 |             |             |
| IFNG        | 0.219686115 | 0.504345688 | 0.129199735 |
| 0.053401728 | 0.245898739 | 0.325025199 | 0.358507948 |
| 0.221987092 | 0.171026037 | 0.243810148 | 0.378328167 |
| 0.001135985 | 0.277667847 | 0.019209192 | 0.106799779 |
| 0.437604543 | 0.460419036 | 0.426134782 | 0.440961387 |
| 0.234024009 | 0.222818016 | 0.303110318 | 0.369726296 |
| 0.348094841 | 0.001897021 | 0.256636788 | 0.110772572 |
| 0.217957851 | 0.409578124 | 0.268473239 | 0.313849551 |
| 0.373543188 | 0.384280688 | 0.372492106 | 0.382123193 |
| 0.204304514 | 0.486470298 | 0.102531533 | 0.322585607 |
| 0.292549631 | 0.357359524 | 0.376237736 | 0.02951243  |
| 0.006811715 | 0.215900185 | 0.1881299   | 0.329814531 |
| 0.249707408 | 0.305200186 | 0.244481366 | 0.317627429 |
| 0.085092363 | 0.379214708 | 0.298108574 | 0.086120138 |
| 0.484340697 | 0.010876533 | 0.499531253 | 0.151262365 |
| 0.134377097 | 0.32535408  | 0.227899206 | 0.328607215 |
| 0.353025277 | 0.501058437 | 0.495266419 | 0.102937489 |
| 0.159092953 | 0.310699243 | 0.294227058 | 0.393922065 |
| 0.445443747 | 0.312557779 | 0.382863653 | 0.261856331 |

|             |             |             |             |
|-------------|-------------|-------------|-------------|
| 0.308822672 | 0.290187328 | 0.33454445  | 0.240766166 |
| 0.001436538 | 0.28861845  | 0.394339802 | 0.19469804  |
| 0.247591855 | 0.388236064 | 0.253375621 | 0.371038782 |
| 0.300602418 | 0.041410052 | 0.343996193 | 0.483192382 |
| 0.042490287 | 0.295642702 | 0.018313208 | 0.215868787 |
| 0.337352133 | 0.359349668 | 0.289711711 | 0.171428031 |
| 0.028533892 | 0.164096055 | 0.083792945 | 0.285631764 |
| 0.326035941 | 0.370582707 | 0.466759272 | 0.066942439 |
| 0.251077715 | 0.176635824 | 0.387360292 | 0.499595169 |
| 0.441751382 | 0.01186113  | 0.170289478 | 0.322411662 |
| 0.309430292 | 0.22463227  | 0.35068113  | 0.024588396 |
| 0.022477205 | 0.009494872 | 0.382482857 | 0.199989816 |
| 0.226853123 | 0.320809215 | 0.151050651 | 0.377861187 |
| 0.21508138  | 0.331603576 | 0.276929562 | 0.370720181 |
| 0.293229146 | 0.3805448   | 0.40690876  | 0.332915483 |
| 0.37864958  | 0.223352351 | 0.201396123 | 0.493438104 |
| 0.4367816   | 0.14953505  | 0.144969342 | 0.356024886 |
| 0.25895169  | 0.427100357 | 0.497369812 | 0.253231182 |
| 0.40317232  | 0.285505721 | 0.289529451 | 0.410865187 |
| 0.353902928 | 0.267153935 | 0.043731101 | 0.368892207 |
| 0.483149984 | 0.028674758 | 0.131380523 | 0.327462317 |
| 0.12505015  | 0.361609691 | 0.44299451  | 0.402325255 |
| 0.358749179 | 0.091864905 | 0.321688354 | 0.357622925 |
| 0.302003392 | 0.342535137 | 0.332604789 | 0.294561028 |
| 0.330061888 | 0.291377124 | 0.118025394 | 0.261604363 |
| 0.210879454 | 0.304737005 | 0.185487651 | 0.065405504 |
| 0.262101253 | 0.259136441 | 0.428014562 | 0.314810333 |
| 0.259047477 | 0.00957606  | 0.234998832 | 0.247417642 |
| 0.249995198 | 0.290979062 | 0.528594666 | 0.199913405 |
| 0.27670337  | 0.22495249  | 0.218519441 | 0.428107584 |
| 0.304255919 | 0.275734461 | 0.264308697 | 0.001417711 |
| 0.24944761  | 0.248508989 | 0.340000118 | 0.0585673   |
| 0.367897441 | 0.147231996 | 0.07928888  | 0.436294445 |
| 0.28829148  | 0.383137277 | 0.022009258 | 0.080607861 |
| 0.315360531 | 1           | 0.327321645 | 0.181336899 |
| 0.419012287 | 0.321116061 | 0.30944797  | 0.412321687 |
| 0.39913767  | 0.380511073 | 0.096555775 | 0.286646563 |
| 0.307940649 | 0.449968212 | 0.354852311 | 0.388661007 |
| 0.347939517 | 0.24389002  | 0.201356052 | 0.330786771 |
| 0.305193305 | 0.332559659 | 0.130842931 | 0.50703904  |
| 0.001282606 | 0.356770939 | 0.381955438 | 0.092031025 |
| 0.511734174 | 0.365564086 | 0.114895913 | 0.222159039 |
| 0.450632254 | 0.505487517 | 0.349986405 | 0.340789761 |
| 0.130714211 | 0.012093434 | 0.436840686 | 0.375265968 |
| 0.420911272 | 0.402737584 | 0.309471569 | 0.047174022 |
| 0.449414668 | 0.201200475 | 0.339537213 | 0.265425182 |
| 0.362574041 | 0.304789112 | 0.288627539 | 0.209197312 |
| 0.009051844 | 0.288167823 | 0.282894675 | 0.232034109 |
| 0.328179239 | 0.209416788 | 0.430072384 | 0.36182606  |
| 0.382176483 | 0.191248406 | 0.356520256 | 0.183959765 |
| 0.283743711 | 0.500842841 | 0.042689643 | 0.414459049 |
| 0.481123933 | 0.348256888 | 0.458606816 | 0.461126917 |
| 0.293824733 | 0.428692944 | 0.45043238  | 0.337113947 |
| 0.000842873 | 0.328710528 | 0.261408002 | 0.379150818 |

|             |             |             |             |
|-------------|-------------|-------------|-------------|
| 0.376661191 | 0.34488327  | 0.125669827 | 0.289095445 |
| 0.002275221 | 0.226563334 | 0.177026136 | 0.488018037 |
| 0.438152159 | 0.07931346  | 0.038024233 | 0.395081641 |
| 0.2448056   | 0.03424189  | 0.497908947 | 0.370543189 |
| 0.475802087 | 0.394211797 | 0.292823014 | 0.301194076 |
| 0.131361957 | 0.277121131 | 0.078993723 | 0.395232566 |
| 0.329329072 | 0.048020163 | 0.184415309 | 0.468076032 |
| 0.38713331  | 0.423157821 | 0.328371608 | 0.016719772 |
| 0.265460957 | 0.208259249 | 0.373682592 | 0.167230658 |
| 0.374297453 | 0.390992862 | 0.47997493  | 0.334808686 |
| 0.353157796 | 0.436106775 | 0.404957505 | 0.412425255 |
| 0.140619612 | 0.298010226 | 0.34310045  | 0.105974744 |
| 0.222519395 | 0.454435842 | 0.36011488  | 0.293288    |
| 0.324704809 | 0.148839738 | 0.295296205 | 0.21917447  |
| 0.488761089 | 0.443547207 | 0.124292946 | 0.176478685 |
| 0.451773038 | 0.332958349 | 0.226874283 | 0.341579859 |
| 0.330546437 | 0.080732613 | 0.073998301 | 0.36576111  |
| 0.510360924 | 0.379748196 | 0.393529975 | 0.231171759 |
| 0.402384651 | 0.087838805 | 0.354592182 | 0.35988038  |
| 0.292268669 | 0.241414804 | 0.271184904 | 0.054482085 |
| 0.035485559 | 0.12417011  | 0.445839394 | 0.44931739  |
| 0.146491452 | 0.246088641 | 0.352323211 | 0.42407993  |
| 0.431323179 | 0.316499293 | 0.337530316 | 0.298746869 |
| 0.471138865 | 0.193283729 | 0.488202208 | 0.29704561  |
| 0.334163918 | 0.394251857 | 0.383835717 | 0.012395828 |
| 0.310287027 | 0.257316493 | 0.108170166 | 0.41948607  |
| 0.336009556 | 0.225674776 | 0.429505    | 0.201658242 |
| 0.170910884 | 0.003605758 | 0.322108613 | 0.272443829 |
| 0.348228056 | 0.167981616 | 0.311204924 | 0.099535744 |
| 0.519335935 | 0.315649553 | 0.316693074 | 0.182844101 |
| 0.382283581 | 0.024322371 | 0.269083153 | 0.059664564 |
| 0.31297761  | 0.37311168  | 0.280558037 | 0.244908429 |
| 0.119659061 | 0.397466115 | 0.39043052  | 0.423918576 |
| 0.451247854 | 0.114002723 | 0.46371785  | 0.271588267 |
| 0.278198262 | 0.307296189 | 0.338750084 | 0.304266487 |
| 0.353692219 | 0.135687374 | 0.222195273 | 0.139076672 |
| 0.430422871 | 0.303259304 | 0.432486043 | 0.210294725 |
| 0.114975028 | 0.391664508 | 0.294669645 | 0.302083147 |
| 0.353292998 | 0.228865513 | 0.24337308  | 0.446278255 |
| 0.211490778 | 0.236748586 | 0.100305574 | 0.084613126 |
| 0.256660198 | 0.289495116 | 0.338353607 | 0.379404908 |
| 0.458266235 | 0.164843057 | 0.175618613 | 0.163649706 |
| 0.073167751 | 0.24820293  | 0.388677493 | 0.172244358 |
| 0.366510968 | 0.191235861 | 0.001132663 | 0.178899843 |
| 0.368224741 | 0.305741622 |             |             |
| IFNGR1      | 0.143703407 | 0.436528739 | 0.020554605 |
| 0.057217401 | 0.039440869 | 0.139309951 | 0.120736366 |
| 0.1262343   | 0.018197644 | 0.059343968 | 0.238739386 |
| 0.000133435 | 0.290835157 | 0.001609611 | 0.008162746 |
| 0.444662947 | 0.445869796 | 0.168994364 | 0.409109272 |
| 0.10136103  | 0.074411047 | 0.201400293 | 0.253520888 |
| 0.126820916 | 0.000144582 | 0.057190064 | 0.056765476 |
| 0.1064448   | 0.422760477 | 0.064759376 | 0.090854675 |
| 0.384460169 | 0.410770501 | 0.101448565 | 0.082438845 |

|             |             |             |             |
|-------------|-------------|-------------|-------------|
| 0.082085327 | 0.38790707  | 0.023679235 | 0.327803308 |
| 0.30171695  | 0.095430909 | 0.375391771 | 0.001484084 |
| 0.011159411 | 0.031075829 | 0.095200674 | 0.225285689 |
| 0.067002749 | 0.119546345 | 0.05388503  | 0.084644433 |
| 0.049136386 | 0.246058115 | 0.245673739 | 0.062519459 |
| 0.344807078 | 0.013844212 | 0.374650033 | 0.04805008  |
| 0.011798144 | 0.082653343 | 0.123013258 | 0.24294693  |
| 0.154192386 | 0.369783223 | 0.437777019 | 0.013317014 |
| 0.025309299 | 0.165980945 | 0.343819414 | 0.320933117 |
| 0.383646469 | 0.104955837 | 0.07078405  | 0.105297839 |
| 0.311565883 | 0.312911611 | 0.132014696 | 0.030605043 |
| 0.000220019 | 0.076822348 | 0.107692481 | 0.175979329 |
| 0.251666963 | 0.26621138  | 0.19385154  | 0.063284791 |
| 0.221254698 | 0.003170512 | 0.189294514 | 0.45313193  |
| 0.013232021 | 0.276406876 | 0.003969408 | 0.024625174 |
| 0.336814462 | 0.390566958 | 0.250729601 | 0.023463402 |
| 0.001855493 | 0.017160943 | 0.022547618 | 0.324821204 |
| 0.161992706 | 0.199059061 | 0.316919349 | 0.021685791 |
| 0.290938993 | 0.029858758 | 0.072647732 | 0.413760575 |
| 0.423775547 | 0.000784321 | 0.020187486 | 0.122818791 |
| 0.063567117 | 0.050910039 | 0.110464257 | 0.018923252 |
| 0.016493511 | 0.002046792 | 0.391495848 | 0.029989357 |
| 0.04160102  | 0.098017588 | 0.043777506 | 0.315157597 |
| 0.096080275 | 0.321383514 | 0.032030699 | 0.1146049   |
| 0.325370454 | 0.144387435 | 0.221737771 | 0.328371583 |
| 0.092870529 | 0.036406135 | 0.03412655  | 0.384530225 |
| 0.312652239 | 0.019065871 | 0.019362644 | 0.212745803 |
| 0.285350073 | 0.430170818 | 0.460297287 | 0.053852961 |
| 0.088682834 | 0.072037668 | 0.092190291 | 0.30232283  |
| 0.113726764 | 0.113774181 | 0.014304891 | 0.207443262 |
| 0.344773464 | 0.013636653 | 0.013197387 | 0.2910774   |
| 0.039946358 | 0.051253907 | 0.358807766 | 0.342038627 |
| 0.209225176 | 0.047273419 | 0.115639275 | 0.148255828 |
| 0.117526379 | 0.131752691 | 0.210297602 | 0.096894296 |
| 0.170479758 | 0.105104296 | 0.012573487 | 0.298562932 |
| 0.039486346 | 0.146404426 | 0.060467402 | 0.014000324 |
| 0.1864058   | 0.072848021 | 0.394754407 | 0.192220178 |
| 0.263873627 | 0.026778172 | 0.070220087 | 0.178240539 |
| 0.084043171 | 0.293528662 | 0.448122394 | 0.036033544 |
| 0.09832938  | 0.049051672 | 0.042136915 | 0.089108846 |
| 0.260194826 | 0.08157336  | 0.061710309 | 0.000322377 |
| 0.03395774  | 0.163686885 | 0.133812398 | 0.006421824 |
| 0.083254294 | 0.022727173 | 0.012273116 | 0.405649512 |
| 0.088989548 | 0.361929692 | 0.002679295 | 0.01613097  |
| 0.067158321 | 0.327321645 | 1           | 0.054037587 |
| 0.371170899 | 0.107798896 | 0.361723824 | 0.273278673 |
| 0.058857533 | 0.278262219 | 0.020275454 | 0.054128122 |
| 0.245468554 | 0.403984608 | 0.391452801 | 0.349048643 |
| 0.096462716 | 0.179101372 | 0.067653699 | 0.162812306 |
| 0.166166374 | 0.155088712 | 0.018988413 | 0.422141484 |
| 8.63E-05    | 0.170588584 | 0.265100123 | 0.021282791 |
| 0.450173015 | 0.151672743 | 0.012237559 | 0.053669251 |
| 0.419464085 | 0.410274801 | 0.293026748 | 0.390617478 |
| 0.048178597 | 0.000974056 | 0.36951485  | 0.259572926 |

|             |             |             |             |
|-------------|-------------|-------------|-------------|
| 0.43342256  | 0.128946439 | 0.090474366 | 0.006999851 |
| 0.425887244 | 0.1319649   | 0.275041279 | 0.209087862 |
| 0.223727872 | 0.102559636 | 0.071118936 | 0.167975715 |
| 0.002510441 | 0.094150895 | 0.298151687 | 0.067293358 |
| 0.119112915 | 0.040062404 | 0.388913139 | 0.182084407 |
| 0.103358919 | 0.083514138 | 0.120626658 | 0.025534604 |
| 0.067133166 | 0.444817155 | 0.010128361 | 0.344311214 |
| 0.451315252 | 0.132185087 | 0.446274258 | 0.431763788 |
| 0.125704982 | 0.284311318 | 0.412405536 | 0.315195655 |
| 9.12E-05    | 0.375046827 | 0.291275515 | 0.228176811 |
| 0.429269424 | 0.152071559 | 0.049517468 | 0.156387914 |
| 7.25E-05    | 0.051328546 | 0.106080451 | 0.380526517 |
| 0.429005626 | 0.006164674 | 0.010246984 | 0.350703601 |
| 0.275482828 | 0.006532076 | 0.447146284 | 0.190937051 |
| 0.418748572 | 0.182833131 | 0.078781264 | 0.335865771 |
| 0.076685542 | 0.056914976 | 0.014509104 | 0.322765983 |
| 0.130803459 | 0.008282226 | 0.052306049 | 0.417262907 |
| 0.366598828 | 0.259213513 | 0.107390374 | 0.011819194 |
| 0.286546728 | 0.135362505 | 0.386858091 | 0.020717309 |
| 0.303395277 | 0.236171591 | 0.377089475 | 0.331859127 |
| 0.224101244 | 0.332679261 | 0.290089041 | 0.380163437 |
| 0.050876862 | 0.364460503 | 0.392410158 | 0.023843003 |
| 0.198056268 | 0.422678859 | 0.24227664  | 0.097994098 |
| 0.195827641 | 0.077107346 | 0.105514041 | 0.104414929 |
| 0.397613583 | 0.441659185 | 0.014048541 | 0.022405884 |
| 0.340780055 | 0.055794444 | 0.035414169 | 0.096507917 |
| 0.144518619 | 0.058500378 | 0.014244126 | 0.213301084 |
| 0.398910661 | 0.196158841 | 0.423424295 | 0.094678745 |
| 0.396566535 | 0.007428856 | 0.286831874 | 0.053118957 |
| 0.110222955 | 0.265561032 | 0.311402918 | 0.027527345 |
| 0.01836619  | 0.028253479 | 0.329993665 | 0.318115347 |
| 0.01911505  | 0.063301204 | 0.134706389 | 0.217733985 |
| 0.440943663 | 0.11232416  | 0.146336382 | 0.104930479 |
| 0.317750252 | 0.059525819 | 0.394784013 | 0.132015096 |
| 0.277217601 | 0.13258766  | 0.325786516 | 0.001856338 |
| 0.269387392 | 0.077286698 | 0.045924122 | 0.230140246 |
| 0.363359057 | 0.04028528  | 0.264051011 | 0.028870277 |
| 0.056384512 | 0.000390217 | 0.188095436 | 0.157203119 |
| 0.180469128 | 0.04662452  | 0.123115874 | 0.046715284 |
| 0.442034264 | 0.197061378 | 0.309628607 | 0.047374576 |
| 0.157577233 | 0.009640618 | 0.059437697 | 0.005945993 |
| 0.242876216 | 0.234633371 | 0.210604407 | 0.157658011 |
| 0.027318944 | 0.262643156 | 0.23429165  | 0.19883262  |
| 0.433722861 | 0.12210158  | 0.462295162 | 0.053766586 |
| 0.317409921 | 0.083968413 | 0.120920562 | 0.054696659 |
| 0.080398388 | 0.017598867 | 0.028524795 | 0.020153381 |
| 0.448769842 | 0.045271298 | 0.21729833  | 0.068265351 |
| 0.016868927 | 0.128800624 | 0.265794993 | 0.316385615 |
| 0.295089146 | 0.290250548 | 0.096378487 | 0.291189628 |
| 0.050033334 | 0.069171671 | 0.065645277 | 0.033522891 |
| 0.104699552 | 0.068410485 | 0.281045566 | 0.327495275 |
| 0.424632929 | 0.03896006  | 0.02079274  | 0.020312275 |
| 0.016194441 | 0.257701662 | 0.174701682 | 0.070163599 |
| 0.206469323 | 0.046502175 | 0.000150758 | 0.032144287 |

|             |             |             |             |
|-------------|-------------|-------------|-------------|
| 0.239635929 | 0.10813393  |             |             |
| IFT57       | 0.251055616 | 0.311481976 | 0.013899861 |
| 0.001524188 | 0.004265348 | 0.146002249 | 0.081380032 |
| 0.161998956 | 0.020524325 | 0.026338683 | 0.197513029 |
| 0.004956106 | 0.18256467  | 0.015053061 | 0.008126104 |
| 0.340533353 | 0.314710248 | 0.096614441 | 0.318908768 |
| 0.201962204 | 0.008939746 | 0.278560905 | 0.181710768 |
| 0.126531392 | 0.006421023 | 0.031536088 | 0.004105473 |
| 0.107718794 | 0.311494319 | 0.106632666 | 0.036002657 |
| 0.336609355 | 0.23209753  | 0.049080239 | 0.009249276 |
| 0.011521529 | 0.311061613 | 0.002339076 | 0.161808325 |
| 0.238442328 | 0.043680688 | 0.240052787 | 0.005626587 |
| 7.76E-05    | 0.027341595 | 0.10540742  | 0.263897798 |
| 0.1334201   | 0.131848647 | 0.094886339 | 0.042669995 |
| 0.007034751 | 0.220973341 | 0.327010124 | 0.007858737 |
| 0.244522024 | 0.000377077 | 0.287337322 | 0.146125441 |
| 0.026922461 | 0.118132821 | 0.151676979 | 0.252053037 |
| 0.137700272 | 0.263779062 | 0.307610878 | 0.004103052 |
| 0.040495774 | 0.153611802 | 0.227927714 | 0.147276844 |
| 0.305765848 | 0.030270241 | 0.029499671 | 0.049719086 |
| 0.197091787 | 0.236022827 | 0.163950937 | 0.032835465 |
| 0.001959937 | 0.049192726 | 0.027309905 | 0.270034147 |
| 0.12855827  | 0.224956412 | 0.226487773 | 0.032432665 |
| 0.144032894 | 0.006624452 | 0.192146695 | 0.320078837 |
| 0.002345393 | 0.203655945 | 0.001323366 | 0.018897846 |
| 0.270697157 | 0.29255886  | 0.281996994 | 0.013712369 |
| 0.005470021 | 0.052302043 | 0.040230147 | 0.238917192 |
| 0.181738702 | 0.144209353 | 0.238717062 | 0.018451492 |
| 0.176708466 | 0.036870895 | 0.057491661 | 0.308322499 |
| 0.344376137 | 0.003426533 | 0.048543041 | 0.117892097 |
| 0.013471155 | 0.006246854 | 0.086064239 | 0.004401126 |
| 0.002030034 | 0.011971311 | 0.301139157 | 0.062000185 |
| 0.02396301  | 0.084555343 | 0.005808314 | 0.135521745 |
| 0.113899619 | 0.309308262 | 0.006349836 | 0.083869193 |
| 0.16590875  | 0.095881019 | 0.077057934 | 0.204722107 |
| 0.027421349 | 0.083155897 | 0.074167353 | 0.242669382 |
| 0.308435802 | 0.007690894 | 0.017911476 | 0.202160715 |
| 0.161917277 | 0.324709789 | 0.33830468  | 0.058554852 |
| 0.028869652 | 0.123268068 | 0.065456613 | 0.162940545 |
| 0.09964993  | 0.173611705 | 0.005401193 | 0.200546273 |
| 0.269267147 | 0.003904491 | 0.029118728 | 0.254963703 |
| 0.001003317 | 0.012193655 | 0.320398584 | 0.220672747 |
| 0.127902128 | 0.003869708 | 0.052978538 | 0.11893748  |
| 0.191900092 | 0.098563323 | 0.229175399 | 0.044118913 |
| 0.218970621 | 0.066455609 | 0.015801919 | 0.174783471 |
| 0.06182389  | 0.214657464 | 0.02871498  | 0.005360165 |
| 0.206906318 | 0.108785199 | 0.278604452 | 0.200922577 |
| 0.261906023 | 0.000268198 | 0.027789557 | 0.281855545 |
| 0.066929362 | 0.239835302 | 0.299917937 | 0.063489162 |
| 0.178045322 | 0.026708    | 0.081606083 | 0.032016281 |
| 0.32400409  | 0.024216279 | 0.020809088 | 0.003812453 |
| 0.010165376 | 0.091407251 | 0.11917661  | 0.025828588 |
| 0.020903806 | 0.025177527 | 0.020773199 | 0.278328808 |
| 0.107726323 | 0.183831117 | 0.01760989  | 0.02451994  |

|             |             |             |             |
|-------------|-------------|-------------|-------------|
| 0.072947218 | 0.181336899 | 0.054037587 | 1           |
| 0.196391725 | 0.060095307 | 0.265072738 | 0.266418052 |
| 0.016373802 | 0.226263544 | 0.008026683 | 0.103660243 |
| 0.129715609 | 0.247658764 | 0.232061551 | 0.200924451 |
| 0.08788232  | 0.222565169 | 0.016876482 | 0.18612383  |
| 0.197650469 | 0.143037623 | 0.038074709 | 0.305589458 |
| 0.002304234 | 0.172735604 | 0.130898144 | 0.010602749 |
| 0.289371434 | 0.101360559 | 0.040723147 | 0.129801745 |
| 0.32316827  | 0.305921136 | 0.319137323 | 0.262338074 |
| 0.021877676 | 0.011810896 | 0.342772825 | 0.240001699 |
| 0.305414155 | 0.089397628 | 0.018582948 | 0.005360216 |
| 0.283311418 | 0.149371266 | 0.230546458 | 0.18099615  |
| 0.108672537 | 0.04334573  | 0.115637974 | 0.23066927  |
| 0.004894303 | 0.105847099 | 0.228150745 | 0.012102794 |
| 0.06495555  | 0.022715069 | 0.225854886 | 0.186358569 |
| 0.030565841 | 0.059375646 | 0.03781903  | 0.024581746 |
| 0.083882511 | 0.326191002 | 0.000904657 | 0.334730251 |
| 0.327660164 | 0.140948878 | 0.265078324 | 0.339359517 |
| 0.193882229 | 0.216966119 | 0.285925957 | 0.288247877 |
| 0.001620687 | 0.236024815 | 0.149160526 | 0.237827407 |
| 0.289571505 | 0.171731669 | 0.093360438 | 0.064442493 |
| 0.000452812 | 0.096952657 | 0.016655572 | 0.333908998 |
| 0.237590911 | 0.004918592 | 0.000682486 | 0.210310124 |
| 0.137937256 | 0.002347582 | 0.346841486 | 0.135427828 |
| 0.246294217 | 0.099814964 | 0.064751875 | 0.19002513  |
| 0.018527409 | 0.056364916 | 0.001355105 | 0.158139446 |
| 0.078504664 | 0.011791063 | 0.007078849 | 0.330983794 |
| 0.330555038 | 0.170123057 | 0.129765986 | 0.006624999 |
| 0.272901422 | 0.011619614 | 0.205612993 | 0.012389362 |
| 0.284799735 | 0.209269248 | 0.250812182 | 0.201454927 |
| 0.162154968 | 0.244375416 | 0.256045202 | 0.283769402 |
| 0.003330864 | 0.248970879 | 0.293186738 | 0.00639818  |
| 0.180729751 | 0.267792385 | 0.111349219 | 0.091178318 |
| 0.248425602 | 0.002268063 | 0.126334159 | 0.216729317 |
| 0.245675976 | 0.278494463 | 0.024596454 | 0.051485251 |
| 0.239231902 | 0.064040484 | 0.03780956  | 0.097743441 |
| 0.185305937 | 0.012680274 | 0.013047089 | 0.220853823 |
| 0.288221092 | 0.152210188 | 0.311710049 | 0.015979956 |
| 0.246801787 | 0.016590955 | 0.254901996 | 0.016769155 |
| 0.181029052 | 0.182657171 | 0.24785011  | 0.019736097 |
| 0.011891073 | 0.046911119 | 0.213195106 | 0.269651969 |
| 0.035470612 | 0.120930204 | 0.086912425 | 0.103773473 |
| 0.305602555 | 0.043557368 | 0.157933256 | 0.131193925 |
| 0.256743284 | 0.00499775  | 0.34148764  | 0.193898449 |
| 0.319468552 | 0.070927163 | 0.231747925 | 0.002074673 |
| 0.183719887 | 0.040859031 | 0.132558776 | 0.090295146 |
| 0.28431417  | 0.048197835 | 0.158318081 | 0.082758246 |
| 0.009663602 | 0.001612467 | 0.241751047 | 0.050074977 |
| 0.186985741 | 0.033175422 | 0.142247659 | 0.005891042 |
| 0.343822215 | 0.215494496 | 0.33285739  | 0.031164246 |
| 0.092248336 | 0.000226859 | 0.033889611 | 0.010698641 |
| 0.311949843 | 0.234523926 | 0.216377997 | 0.209619781 |
| 0.112865123 | 0.136959059 | 0.191801516 | 0.071353045 |
| 0.250309021 | 0.013755195 | 0.322698344 | 0.090667237 |

|             |             |             |             |
|-------------|-------------|-------------|-------------|
| 0.199010127 | 0.042072047 | 0.139126755 | 0.02979191  |
| 0.045104557 | 0.012772332 | 0.044921701 | 0.067268059 |
| 0.264950389 | 0.023701038 | 0.095366133 | 0.082945787 |
| 0.006724268 | 0.071865802 | 0.213922042 | 0.194512207 |
| 0.184188964 | 0.229932352 | 0.07518677  | 0.242480315 |
| 0.038270234 | 0.162548688 | 0.002424704 | 0.002702824 |
| 0.012115907 | 0.067737479 | 0.335412863 | 0.287901994 |
| 0.303784388 | 0.032669987 | 0.03841979  | 0.074483602 |
| 0.003808744 | 0.262042289 | 0.108071255 | 0.00346387  |
| 0.137521023 | 0.056194732 | 0.000602831 | 0.110329338 |
| 0.241928223 | 0.020412989 |             |             |
| IFT80       | 0.245947223 | 0.511856341 | 0.084009333 |
| 0.055598324 | 0.18196513  | 0.261133324 | 0.281690896 |
| 0.251153661 | 0.121578548 | 0.199549217 | 0.328633951 |
| 0.000768309 | 0.328738024 | 0.011844727 | 0.072786452 |
| 0.484187695 | 0.508593014 | 0.37352759  | 0.481003663 |
| 0.235328055 | 0.218068841 | 0.292519852 | 0.363698615 |
| 0.286283898 | 0.001115061 | 0.185000518 | 0.100768743 |
| 0.256304707 | 0.463585253 | 0.206837554 | 0.286610498 |
| 0.420114507 | 0.440877653 | 0.410456528 | 0.380554918 |
| 0.267245239 | 0.466627154 | 0.121125038 | 0.367948092 |
| 0.350562213 | 0.292886982 | 0.422881355 | 0.016704131 |
| 0.010343958 | 0.146972499 | 0.223052463 | 0.325829834 |
| 0.233645102 | 0.242493098 | 0.179591116 | 0.250345253 |
| 0.123145131 | 0.340878162 | 0.302278363 | 0.127553988 |
| 0.435657775 | 0.012603463 | 0.470881118 | 0.162522129 |
| 0.083899812 | 0.285876015 | 0.271387503 | 0.338116162 |
| 0.28233747  | 0.459579695 | 0.519678662 | 0.062541638 |
| 0.102334866 | 0.341806875 | 0.349503226 | 0.420082265 |
| 0.455591987 | 0.317291393 | 0.340004983 | 0.314790264 |
| 0.364166846 | 0.340899347 | 0.277658747 | 0.181782329 |
| 0.000960646 | 0.211960265 | 0.40898358  | 0.228490034 |
| 0.312556021 | 0.344721649 | 0.285617973 | 0.299063508 |
| 0.35123218  | 0.0231629   | 0.328532479 | 0.520065582 |
| 0.034835351 | 0.332674937 | 0.014921842 | 0.158749496 |
| 0.370613592 | 0.425047076 | 0.318597608 | 0.113435192 |
| 0.015530131 | 0.11798667  | 0.087336845 | 0.351512732 |
| 0.331392411 | 0.397297613 | 0.41732745  | 0.091597871 |
| 0.312281485 | 0.153029933 | 0.355601868 | 0.478873831 |
| 0.469222191 | 0.006422513 | 0.134145179 | 0.25194292  |
| 0.333989739 | 0.213979539 | 0.27285722  | 0.031130128 |
| 0.017194133 | 0.008552669 | 0.431974446 | 0.151452161 |
| 0.161308678 | 0.249781746 | 0.120057072 | 0.422976544 |
| 0.24197003  | 0.378162759 | 0.197652033 | 0.305444973 |
| 0.352145534 | 0.309675329 | 0.429482861 | 0.37406319  |
| 0.398570517 | 0.203382412 | 0.151714572 | 0.478102803 |
| 0.40627407  | 0.094296241 | 0.098865291 | 0.317350256 |
| 0.316222372 | 0.467925143 | 0.526986439 | 0.241867581 |
| 0.347423698 | 0.230722091 | 0.31460433  | 0.397585577 |
| 0.277769893 | 0.259175184 | 0.054278057 | 0.328655011 |
| 0.43462334  | 0.031544846 | 0.083823865 | 0.35264821  |
| 0.112834056 | 0.299343136 | 0.433872022 | 0.410409279 |
| 0.381675964 | 0.086079623 | 0.290422935 | 0.300771451 |
| 0.267827277 | 0.288533941 | 0.338857724 | 0.27545238  |



|             |             |             |             |
|-------------|-------------|-------------|-------------|
| 0.291922822 | 0.325406955 | 0.071461138 | 0.322342274 |
| 0.146109208 | 0.281563593 | 0.23934773  | 0.069858767 |
| 0.290815066 | 0.259680308 | 0.436975518 | 0.33185908  |
| 0.301944584 | 0.01108544  | 0.196475567 | 0.27157583  |
| 0.276668167 | 0.33805415  | 0.525100184 | 0.13549724  |
| 0.230651075 | 0.260615578 | 0.155885733 | 0.39737893  |
| 0.323266005 | 0.259383604 | 0.239741536 | 0.000811745 |
| 0.175091798 | 0.311402021 | 0.353686934 | 0.041007664 |
| 0.305940894 | 0.111593947 | 0.074418183 | 0.456542047 |
| 0.222089376 | 0.411756819 | 0.015997977 | 0.095213338 |
| 0.264486381 | 0.419012287 | 0.371170899 | 0.196391725 |
| 1           | 0.308136625 | 0.378268596 | 0.368757975 |
| 0.335194026 | 0.346752245 | 0.11880399  | 0.246248121 |
| 0.364086998 | 0.474926108 | 0.403576784 | 0.409080011 |
| 0.284116531 | 0.265198011 | 0.234127589 | 0.276773407 |
| 0.309295564 | 0.330399982 | 0.089511058 | 0.509710887 |
| 0.000643901 | 0.32100972  | 0.416842522 | 0.11953677  |
| 0.512233075 | 0.291688771 | 0.075079623 | 0.195512414 |
| 0.49107437  | 0.506485714 | 0.366046493 | 0.399961164 |
| 0.156879032 | 0.007092963 | 0.450101995 | 0.365373815 |
| 0.477893716 | 0.37867062  | 0.355424677 | 0.047875664 |
| 0.476277456 | 0.23313864  | 0.364019    | 0.31321466  |
| 0.398240189 | 0.343854368 | 0.231762207 | 0.237131611 |
| 0.010786862 | 0.256046285 | 0.331761894 | 0.244572124 |
| 0.336343394 | 0.182806465 | 0.448525632 | 0.311155792 |
| 0.41040419  | 0.232710822 | 0.397205283 | 0.120188677 |
| 0.206803647 | 0.511413474 | 0.049734637 | 0.424211032 |
| 0.515153376 | 0.322092589 | 0.4874713   | 0.494409905 |
| 0.271605052 | 0.377997918 | 0.466116532 | 0.379679781 |
| 0.000511356 | 0.393309454 | 0.314498854 | 0.321592174 |
| 0.430008379 | 0.291684131 | 0.147554387 | 0.349553894 |
| 0.001188098 | 0.16529622  | 0.239700767 | 0.47897654  |
| 0.471036065 | 0.04583293  | 0.051299607 | 0.403927942 |
| 0.304758615 | 0.036012386 | 0.518539    | 0.343620594 |
| 0.476831104 | 0.394872529 | 0.223975989 | 0.35967151  |
| 0.191890105 | 0.288552012 | 0.056499706 | 0.413452207 |
| 0.357132423 | 0.054314018 | 0.15195547  | 0.499192824 |
| 0.396936672 | 0.388794633 | 0.26320658  | 0.016231001 |
| 0.32022128  | 0.244529503 | 0.407709492 | 0.11934058  |
| 0.364677445 | 0.351203137 | 0.461765815 | 0.382153018 |
| 0.373756483 | 0.397854536 | 0.358705304 | 0.424501745 |
| 0.153408623 | 0.354043412 | 0.396853061 | 0.075975355 |
| 0.27014576  | 0.486153108 | 0.399742337 | 0.217359569 |
| 0.311900191 | 0.163065984 | 0.226340645 | 0.22787835  |
| 0.469333846 | 0.481814623 | 0.079263049 | 0.136343849 |
| 0.413496932 | 0.287951167 | 0.151363818 | 0.306565271 |
| 0.273938593 | 0.120418822 | 0.08553189  | 0.33631996  |
| 0.485671496 | 0.31599419  | 0.434229527 | 0.224164474 |
| 0.444592834 | 0.053118654 | 0.369830763 | 0.291359729 |
| 0.252854175 | 0.300435708 | 0.331680874 | 0.068748352 |
| 0.035006746 | 0.104741469 | 0.402760919 | 0.407101171 |
| 0.095015556 | 0.189014884 | 0.29147318  | 0.387114125 |
| 0.481124698 | 0.353295544 | 0.279218335 | 0.279952495 |
| 0.418271386 | 0.184888405 | 0.479441787 | 0.279027434 |

|             |             |             |             |
|-------------|-------------|-------------|-------------|
| 0.331030866 | 0.358333346 | 0.393310992 | 0.010974766 |
| 0.360325735 | 0.221262746 | 0.124496117 | 0.41068653  |
| 0.401030791 | 0.160595894 | 0.39569844  | 0.155539118 |
| 0.180953357 | 0.002402712 | 0.30103631  | 0.336756569 |
| 0.287834134 | 0.199592162 | 0.296774509 | 0.15012286  |
| 0.528351161 | 0.327998365 | 0.335484685 | 0.218775992 |
| 0.380474414 | 0.033440436 | 0.218842961 | 0.037127577 |
| 0.314249328 | 0.344149988 | 0.310108462 | 0.282433711 |
| 0.126031615 | 0.41851756  | 0.361591314 | 0.435161798 |
| 0.48486349  | 0.15138527  | 0.508560173 | 0.247189711 |
| 0.344315502 | 0.326642397 | 0.271202172 | 0.290350239 |
| 0.270082226 | 0.119045134 | 0.152207409 | 0.117802448 |
| 0.480456683 | 0.27831887  | 0.416622534 | 0.234311328 |
| 0.072026844 | 0.375198932 | 0.32489663  | 0.34648997  |
| 0.380518876 | 0.286474252 | 0.278039852 | 0.391111439 |
| 0.234885663 | 0.231076137 | 0.105579169 | 0.077880915 |
| 0.308790247 | 0.225620161 | 0.351633823 | 0.390624012 |
| 0.494000123 | 0.193099563 | 0.118110142 | 0.122627424 |
| 0.092804364 | 0.290075235 | 0.32118984  | 0.202710179 |
| 0.380514278 | 0.227090814 | 0.000551218 | 0.167362095 |
| 0.344304016 | 0.348426284 |             |             |
| IGF2R       | 0.15986681  | 0.401989387 | 0.059989719 |
| 0.024277489 | 0.040317546 | 0.267912875 | 0.198771381 |
| 0.127141774 | 0.047163594 | 0.078276341 | 0.354103773 |
| 0.001403491 | 0.178205229 | 0.013025704 | 0.019952488 |
| 0.348537004 | 0.337709295 | 0.202563403 | 0.323419463 |
| 0.147343117 | 0.05871301  | 0.278390621 | 0.288484912 |
| 0.22545687  | 0.002219488 | 0.110484801 | 0.049650247 |
| 0.086610235 | 0.308567503 | 0.153921863 | 0.099684596 |
| 0.304797046 | 0.267817088 | 0.078437896 | 0.046033005 |
| 0.025285763 | 0.41663125  | 0.007295838 | 0.200245282 |
| 0.196556021 | 0.130025746 | 0.261431599 | 0.008774635 |
| 0.001345656 | 0.078781897 | 0.089095866 | 0.29007745  |
| 0.103752925 | 0.243411319 | 0.142942457 | 0.129047883 |
| 0.015948655 | 0.34567812  | 0.271359854 | 0.018563811 |
| 0.403317146 | 0.005166282 | 0.40592166  | 0.07083993  |
| 0.047235042 | 0.131708275 | 0.105670797 | 0.271733805 |
| 0.27552912  | 0.416659727 | 0.364337326 | 0.034999023 |
| 0.09119475  | 0.146382149 | 0.225069559 | 0.263954917 |
| 0.361070627 | 0.089866903 | 0.072331388 | 0.058434309 |
| 0.22244763  | 0.2122582   | 0.234394385 | 0.057655622 |
| 0.001615533 | 0.147173348 | 0.069395446 | 0.163646063 |
| 0.143700655 | 0.370482909 | 0.185606409 | 0.087120024 |
| 0.176341508 | 0.020361084 | 0.244639055 | 0.365054906 |
| 0.020255586 | 0.197805025 | 0.004259104 | 0.04842562  |
| 0.27108777  | 0.261757163 | 0.257707943 | 0.052652803 |
| 0.012747974 | 0.052872763 | 0.0336083   | 0.195617053 |
| 0.183597074 | 0.18101361  | 0.377809797 | 0.010294756 |
| 0.159050526 | 0.053653689 | 0.089131595 | 0.440552762 |
| 0.372919307 | 0.006006373 | 0.044021451 | 0.24284617  |
| 0.039267901 | 0.035737469 | 0.196136626 | 0.013721746 |
| 0.026122305 | 0.005690529 | 0.295478195 | 0.074895146 |
| 0.082233773 | 0.188866621 | 0.046069251 | 0.218313077 |
| 0.100355324 | 0.247380428 | 0.03830994  | 0.181286586 |

|             |             |             |             |
|-------------|-------------|-------------|-------------|
| 0.204895774 | 0.220778991 | 0.165190386 | 0.243395798 |
| 0.058419997 | 0.060689566 | 0.098467756 | 0.36426349  |
| 0.378251159 | 0.045428708 | 0.057383007 | 0.321797286 |
| 0.157689878 | 0.343470609 | 0.389153129 | 0.06420966  |
| 0.089054408 | 0.150096919 | 0.082723584 | 0.315891341 |
| 0.201989627 | 0.152461374 | 0.008894814 | 0.294717182 |
| 0.420239664 | 0.009201778 | 0.051399742 | 0.243546956 |
| 0.016582537 | 0.054526199 | 0.38362202  | 0.294759688 |
| 0.16981513  | 0.042343126 | 0.144680663 | 0.236587964 |
| 0.20478474  | 0.208148194 | 0.231586142 | 0.114747025 |
| 0.277935318 | 0.095364192 | 0.042943882 | 0.166010309 |
| 0.120105294 | 0.223145682 | 0.032095068 | 0.010980629 |
| 0.17213922  | 0.095762697 | 0.358231569 | 0.198786899 |
| 0.222751245 | 0.007472008 | 0.088748607 | 0.198620153 |
| 0.074412451 | 0.20592994  | 0.420400849 | 0.116466477 |
| 0.199042739 | 0.026267875 | 0.123093421 | 0.076264888 |
| 0.251865799 | 0.090854402 | 0.069742833 | 0.003352591 |
| 0.058185608 | 0.110296164 | 0.12948948  | 0.027922871 |
| 0.078143672 | 0.055871789 | 0.0203058   | 0.344645594 |
| 0.198719036 | 0.25659096  | 0.012065748 | 0.01121285  |
| 0.116296009 | 0.321116061 | 0.107798896 | 0.060095307 |
| 0.308136625 | 1           | 0.224953317 | 0.354737174 |
| 0.050833868 | 0.380306801 | 0.010088623 | 0.099737523 |
| 0.163015634 | 0.318680466 | 0.268639204 | 0.270290349 |
| 0.16755929  | 0.178315999 | 0.045785035 | 0.294925258 |
| 0.194415168 | 0.170559014 | 0.059990701 | 0.391740899 |
| 0.001447677 | 0.245819477 | 0.209239905 | 0.011540328 |
| 0.413387189 | 0.245193933 | 0.049572387 | 0.107009911 |
| 0.33354618  | 0.383514886 | 0.28243958  | 0.262264171 |
| 0.035411318 | 0.009367165 | 0.35034625  | 0.30492871  |
| 0.310421208 | 0.140374345 | 0.037624256 | 0.005998676 |
| 0.350338456 | 0.109152542 | 0.271160571 | 0.169977159 |
| 0.158218256 | 0.063472365 | 0.143876571 | 0.157814721 |
| 0.003819459 | 0.158171694 | 0.242921758 | 0.050056727 |
| 0.121176807 | 0.059467546 | 0.312369984 | 0.283563077 |
| 0.062860003 | 0.060413998 | 0.07778492  | 0.071782463 |
| 0.159742177 | 0.407442805 | 0.002823686 | 0.336817139 |
| 0.371190433 | 0.171444488 | 0.352114502 | 0.361491947 |
| 0.203614948 | 0.351535291 | 0.359335223 | 0.244160795 |
| 0.00086808  | 0.231754094 | 0.161078945 | 0.345124032 |
| 0.311748203 | 0.263842359 | 0.046147389 | 0.086061775 |
| 0.000579132 | 0.145205596 | 0.036521077 | 0.392742475 |
| 0.322415874 | 0.02368239  | 0.001837351 | 0.297620946 |
| 0.155997225 | 0.004604451 | 0.396059684 | 0.25065699  |
| 0.373209142 | 0.170059306 | 0.158477622 | 0.198550273 |
| 0.023432879 | 0.055320121 | 0.016171678 | 0.28203135  |
| 0.099313858 | 0.007568701 | 0.049652294 | 0.350812176 |
| 0.363794872 | 0.302109029 | 0.204654553 | 0.021025365 |
| 0.198741755 | 0.068249859 | 0.296124767 | 0.046079737 |
| 0.330695291 | 0.32139454  | 0.37095384  | 0.217379769 |
| 0.203158649 | 0.384440709 | 0.384170476 | 0.353756677 |
| 0.020543755 | 0.241639056 | 0.286957632 | 0.044541653 |
| 0.151829824 | 0.328564833 | 0.186311362 | 0.212434525 |
| 0.260765568 | 0.027122247 | 0.234213271 | 0.136760232 |

|             |             |             |             |
|-------------|-------------|-------------|-------------|
| 0.389048197 | 0.341267862 | 0.047314012 | 0.048474215 |
| 0.387984708 | 0.090637856 | 0.096155449 | 0.12995523  |
| 0.26808553  | 0.023189641 | 0.010359673 | 0.290815217 |
| 0.417314649 | 0.306793272 | 0.340802303 | 0.077445615 |
| 0.28351084  | 0.032174424 | 0.253413357 | 0.063639925 |
| 0.205491795 | 0.185730468 | 0.199311085 | 0.02206419  |
| 0.032508514 | 0.064981659 | 0.373562058 | 0.387877328 |
| 0.072867503 | 0.158698394 | 0.208733372 | 0.237741151 |
| 0.328482367 | 0.071415948 | 0.26576888  | 0.151284786 |
| 0.39605497  | 0.040925463 | 0.408054982 | 0.198788085 |
| 0.315686419 | 0.159195797 | 0.286889067 | 0.002827443 |
| 0.200063904 | 0.108646432 | 0.053260471 | 0.208687017 |
| 0.241394963 | 0.106938407 | 0.296667148 | 0.080527148 |
| 0.038607371 | 0.001609572 | 0.266498139 | 0.076079437 |
| 0.317659204 | 0.02889708  | 0.166167322 | 0.011616334 |
| 0.412450602 | 0.236701302 | 0.303485794 | 0.028322811 |
| 0.163110328 | 0.001361605 | 0.094932059 | 0.027867192 |
| 0.294658827 | 0.305721019 | 0.191268077 | 0.152956136 |
| 0.043550141 | 0.212793415 | 0.294308382 | 0.150029224 |
| 0.328416705 | 0.079411198 | 0.359699685 | 0.080254918 |
| 0.178908237 | 0.074651875 | 0.227136574 | 0.057771285 |
| 0.127051866 | 0.021899996 | 0.083773506 | 0.04216816  |
| 0.31716014  | 0.042726497 | 0.203693273 | 0.067712105 |
| 0.044972955 | 0.140501642 | 0.205839279 | 0.207667653 |
| 0.268367049 | 0.204886952 | 0.082881968 | 0.37646794  |
| 0.042827645 | 0.109597508 | 0.028794681 | 0.028102781 |
| 0.050909762 | 0.137526447 | 0.281214327 | 0.305820767 |
| 0.33415057  | 0.028227789 | 0.067527254 | 0.06471452  |
| 0.006400637 | 0.19321986  | 0.25556006  | 0.02093132  |
| 0.184353991 | 0.035154204 | 0.001485708 | 0.060648744 |
| 0.319801326 | 0.063808276 |             |             |
| IGFBP4      | 0.361155346 | 0.389506856 | 0.028626014 |
| 0.022269421 | 0.058740329 | 0.130187335 | 0.117944108 |
| 0.383938351 | 0.053854583 | 0.078270363 | 0.201651069 |
| 0.001422874 | 0.465407198 | 0.007547737 | 0.037740273 |
| 0.453115813 | 0.455140327 | 0.212646178 | 0.447555312 |
| 0.283893214 | 0.106449107 | 0.285105262 | 0.287089182 |
| 0.147787839 | 0.001085933 | 0.057340184 | 0.03210358  |
| 0.424428379 | 0.465990564 | 0.112490717 | 0.193357108 |
| 0.449792295 | 0.47478382  | 0.339398397 | 0.249521948 |
| 0.308614792 | 0.339669417 | 0.165337621 | 0.464496502 |
| 0.460491168 | 0.12850041  | 0.467907886 | 0.005534987 |
| 0.006031073 | 0.04391052  | 0.38765214  | 0.304589248 |
| 0.244045464 | 0.119210582 | 0.087737797 | 0.091852259 |
| 0.284850414 | 0.231904238 | 0.36595441  | 0.29897789  |
| 0.279377258 | 0.003925119 | 0.323359887 | 0.267709987 |
| 0.025542745 | 0.215795295 | 0.407691285 | 0.349089531 |
| 0.135261756 | 0.298158393 | 0.424528108 | 0.012675494 |
| 0.028644311 | 0.41794717  | 0.476939508 | 0.348817808 |
| 0.391751842 | 0.274774125 | 0.188357111 | 0.425624817 |
| 0.456075862 | 0.470191563 | 0.173606286 | 0.097049383 |
| 0.000628468 | 0.071799412 | 0.253261286 | 0.393748717 |
| 0.482962683 | 0.233575445 | 0.403582802 | 0.120837998 |
| 0.434200623 | 0.006672302 | 0.285987508 | 0.440528124 |

|             |             |             |             |
|-------------|-------------|-------------|-------------|
| 0.013632883 | 0.450710585 | 0.007437383 | 0.083843576 |
| 0.446255528 | 0.473714805 | 0.384520264 | 0.030079138 |
| 0.005086857 | 0.067337937 | 0.171905032 | 0.461201436 |
| 0.343907804 | 0.389894957 | 0.275005672 | 0.270139206 |
| 0.462501123 | 0.123197447 | 0.244508234 | 0.333410374 |
| 0.420819541 | 0.003734769 | 0.102144752 | 0.118695249 |
| 0.305661222 | 0.095212849 | 0.122080206 | 0.061748847 |
| 0.006803191 | 0.028126189 | 0.458574336 | 0.091554995 |
| 0.046525876 | 0.106525961 | 0.050679635 | 0.406791084 |
| 0.368409082 | 0.445807872 | 0.057412121 | 0.144128825 |
| 0.47344629  | 0.141260095 | 0.338553536 | 0.450124454 |
| 0.316150032 | 0.197921427 | 0.080154897 | 0.354694434 |
| 0.31264914  | 0.02855858  | 0.037515969 | 0.211997716 |
| 0.466791336 | 0.448692105 | 0.427761181 | 0.246709155 |
| 0.162058323 | 0.148058025 | 0.274354656 | 0.281463918 |
| 0.131753763 | 0.292582104 | 0.152177468 | 0.235030076 |
| 0.276835026 | 0.048361048 | 0.026455087 | 0.438016581 |
| 0.035793985 | 0.144909459 | 0.350482921 | 0.397038723 |
| 0.397348975 | 0.026784769 | 0.150037457 | 0.15444998  |
| 0.203744835 | 0.149022018 | 0.346463198 | 0.146943675 |
| 0.209210879 | 0.282228673 | 0.017398593 | 0.465053371 |
| 0.056187004 | 0.247437026 | 0.394023373 | 0.072712614 |
| 0.406962719 | 0.304345374 | 0.39265346  | 0.374116245 |
| 0.431180962 | 0.003598511 | 0.080210976 | 0.361983987 |
| 0.274489167 | 0.449746341 | 0.371639089 | 0.049977601 |
| 0.162173406 | 0.367643932 | 0.070311235 | 0.227960715 |
| 0.39973226  | 0.156230955 | 0.13338574  | 0.000270649 |
| 0.066105261 | 0.421740828 | 0.367645261 | 0.031160026 |
| 0.137899545 | 0.064338691 | 0.115036056 | 0.416580105 |
| 0.106724539 | 0.436584254 | 0.021787679 | 0.242220338 |
| 0.161120303 | 0.30944797  | 0.361723824 | 0.265072738 |
| 0.378268596 | 0.224953317 | 1           | 0.271074803 |
| 0.169157968 | 0.229802451 | 0.260325621 | 0.184551116 |
| 0.468277224 | 0.426149275 | 0.471489516 | 0.42477535  |
| 0.15132588  | 0.379702881 | 0.333381825 | 0.164331058 |
| 0.333194577 | 0.334228085 | 0.040400369 | 0.389421416 |
| 0.000300314 | 0.233712109 | 0.380975408 | 0.288333885 |
| 0.377367351 | 0.129500455 | 0.030132401 | 0.182794342 |
| 0.446932825 | 0.387953955 | 0.401003392 | 0.477029888 |
| 0.309010538 | 0.005571778 | 0.403675267 | 0.303716924 |
| 0.468046464 | 0.288077681 | 0.335614058 | 0.112279557 |
| 0.429803071 | 0.404287519 | 0.363207971 | 0.435307481 |
| 0.407570393 | 0.393561938 | 0.147495722 | 0.389977581 |
| 0.023149156 | 0.163380081 | 0.429426577 | 0.14649605  |
| 0.240827275 | 0.125479898 | 0.409129341 | 0.203503324 |
| 0.339843069 | 0.354557902 | 0.30717829  | 0.033280543 |
| 0.085265931 | 0.396738943 | 0.066834315 | 0.395394195 |
| 0.436844562 | 0.269410375 | 0.426818624 | 0.436419594 |
| 0.229661035 | 0.259895378 | 0.410870198 | 0.445055736 |
| 0.000766739 | 0.476859882 | 0.470425445 | 0.221492192 |
| 0.462896777 | 0.174343477 | 0.324238686 | 0.462251706 |
| 0.000552516 | 0.076545919 | 0.352485618 | 0.365342891 |
| 0.437160264 | 0.009243468 | 0.09368874  | 0.402800472 |
| 0.472875504 | 0.052674805 | 0.415539002 | 0.225647978 |

|             |             |             |             |
|-------------|-------------|-------------|-------------|
| 0.377294893 | 0.3336724   | 0.086179299 | 0.478829955 |
| 0.35807049  | 0.348641403 | 0.015037658 | 0.353858513 |
| 0.391864939 | 0.139549672 | 0.045282955 | 0.432201048 |
| 0.385381123 | 0.260661837 | 0.142760249 | 0.006179128 |
| 0.450402486 | 0.205525913 | 0.419660124 | 0.05952892  |
| 0.351890261 | 0.238688105 | 0.351296453 | 0.470526141 |
| 0.386644382 | 0.293761652 | 0.254840713 | 0.392688548 |
| 0.11420949  | 0.477222164 | 0.463612362 | 0.027742386 |
| 0.442539013 | 0.436508999 | 0.358863089 | 0.085514339 |
| 0.28739862  | 0.078157453 | 0.104955158 | 0.313761095 |
| 0.34280208  | 0.439131986 | 0.022241446 | 0.103437674 |
| 0.287037066 | 0.194131137 | 0.045423422 | 0.247531376 |
| 0.163523659 | 0.322499896 | 0.220730923 | 0.259312979 |
| 0.332763013 | 0.166708134 | 0.440262384 | 0.108218695 |
| 0.459403773 | 0.021223677 | 0.412153943 | 0.155676629 |
| 0.186236101 | 0.45592234  | 0.463555849 | 0.208641343 |
| 0.018241797 | 0.090232475 | 0.272825535 | 0.283514044 |
| 0.031064778 | 0.106260474 | 0.146709605 | 0.226426756 |
| 0.461408557 | 0.37815655  | 0.159223386 | 0.25982962  |
| 0.268949332 | 0.069073066 | 0.36440004  | 0.256214699 |
| 0.350795372 | 0.221816183 | 0.402734301 | 0.006950725 |
| 0.449639524 | 0.101906193 | 0.283812235 | 0.260348057 |
| 0.468941429 | 0.062220816 | 0.256097685 | 0.093693232 |
| 0.160292506 | 0.00275533  | 0.266359351 | 0.422388885 |
| 0.16081166  | 0.367829611 | 0.283278218 | 0.299010205 |
| 0.39511828  | 0.330475179 | 0.396105515 | 0.365180922 |
| 0.279285102 | 0.03847863  | 0.083775553 | 0.013939898 |
| 0.329922827 | 0.272105086 | 0.413052776 | 0.394676195 |
| 0.234668662 | 0.376987427 | 0.2707779   | 0.322175447 |
| 0.434573113 | 0.214487018 | 0.450662243 | 0.239981822 |
| 0.470199244 | 0.322806165 | 0.14411033  | 0.249666515 |
| 0.101138167 | 0.101598967 | 0.053284532 | 0.124653499 |
| 0.461127428 | 0.235814885 | 0.278610357 | 0.31447645  |
| 0.018507883 | 0.275088597 | 0.445072331 | 0.469687    |
| 0.372705447 | 0.458609656 | 0.400699187 | 0.25663657  |
| 0.309916479 | 0.25090353  | 0.043452007 | 0.019251368 |
| 0.245644494 | 0.102322439 | 0.393094805 | 0.405503302 |
| 0.444727582 | 0.348278097 | 0.042297612 | 0.079860292 |
| 0.214980708 | 0.447180042 | 0.152146094 | 0.196509763 |
| 0.372796673 | 0.377713145 | 0.000246134 | 0.192603809 |
| 0.266024963 | 0.37277924  |             |             |
| IL10RA      | 0.289268316 | 0.471754737 | 0.208297553 |
| 0.028947738 | 0.197911791 | 0.417456706 | 0.393735117 |
| 0.268634912 | 0.30707144  | 0.256321196 | 0.439667892 |
| 0.007330726 | 0.233648509 | 0.071023538 | 0.2017143   |
| 0.404119811 | 0.412932304 | 0.427188848 | 0.410335826 |
| 0.339254854 | 0.181700846 | 0.398278054 | 0.391091863 |
| 0.436167304 | 0.011897857 | 0.270249644 | 0.08050619  |
| 0.239260596 | 0.370356665 | 0.40362398  | 0.34950993  |
| 0.356618    | 0.315839746 | 0.332466641 | 0.28207432  |
| 0.124696774 | 0.486698843 | 0.064583758 | 0.252962894 |
| 0.262770957 | 0.345328628 | 0.322958358 | 0.081931987 |
| 0.001907397 | 0.272498377 | 0.21438772  | 0.402900925 |
| 0.371395469 | 0.402619377 | 0.381191473 | 0.316653428 |

|             |             |             |             |
|-------------|-------------|-------------|-------------|
| 0.065815356 | 0.448021104 | 0.339654562 | 0.061108106 |
| 0.473671354 | 0.005758327 | 0.49179882  | 0.245038305 |
| 0.23976805  | 0.443978532 | 0.262510545 | 0.380903258 |
| 0.428615224 | 0.487117595 | 0.451422291 | 0.130555169 |
| 0.246641414 | 0.331263837 | 0.251331795 | 0.347411086 |
| 0.428118551 | 0.321412139 | 0.401048838 | 0.214959669 |
| 0.288930855 | 0.262008902 | 0.448271438 | 0.361639798 |
| 0.005131382 | 0.316492016 | 0.280006914 | 0.243085888 |
| 0.211237209 | 0.442762087 | 0.292419673 | 0.362314418 |
| 0.290947907 | 0.104071605 | 0.41341246  | 0.438407086 |
| 0.043252434 | 0.266546842 | 0.018349092 | 0.334885627 |
| 0.321667014 | 0.319947375 | 0.337986007 | 0.224311765 |
| 0.080598294 | 0.317348789 | 0.163096459 | 0.249056577 |
| 0.387224228 | 0.37287422  | 0.464525904 | 0.064553613 |
| 0.204367825 | 0.3143922   | 0.432734043 | 0.48515028  |
| 0.422156014 | 0.037962592 | 0.327849779 | 0.40685046  |
| 0.289027295 | 0.181807065 | 0.407437304 | 0.025073479 |
| 0.022273555 | 0.029520324 | 0.349998311 | 0.340885353 |
| 0.241912722 | 0.385757472 | 0.133841493 | 0.315708439 |
| 0.254397749 | 0.324293105 | 0.244606194 | 0.413467294 |
| 0.255158392 | 0.412027118 | 0.324730707 | 0.310169265 |
| 0.27457247  | 0.362208989 | 0.340087278 | 0.448749495 |
| 0.470002883 | 0.210059114 | 0.251417204 | 0.432969913 |
| 0.206519225 | 0.392975478 | 0.461340128 | 0.347190245 |
| 0.328599596 | 0.421421165 | 0.302984253 | 0.400589217 |
| 0.427123359 | 0.359550304 | 0.047961576 | 0.445767141 |
| 0.488885014 | 0.028669111 | 0.236801626 | 0.316222666 |
| 0.0560637   | 0.382305099 | 0.453351242 | 0.368023865 |
| 0.343281957 | 0.06973491  | 0.308388233 | 0.413488689 |
| 0.42913426  | 0.394677283 | 0.392673804 | 0.277427304 |
| 0.437318568 | 0.288558192 | 0.181164828 | 0.210966839 |
| 0.323353878 | 0.418524331 | 0.187999997 | 0.07485301  |
| 0.304012757 | 0.336173793 | 0.396399073 | 0.362047344 |
| 0.281767796 | 0.0038856   | 0.241806897 | 0.316536489 |
| 0.289117391 | 0.268467765 | 0.487301144 | 0.318681194 |
| 0.41858221  | 0.207247188 | 0.354622839 | 0.346394634 |
| 0.331614326 | 0.306013501 | 0.298686248 | 0.005566689 |
| 0.30039039  | 0.225648525 | 0.371708163 | 0.163398252 |
| 0.318907751 | 0.276626953 | 0.164648319 | 0.395408751 |
| 0.396924213 | 0.310035169 | 0.071657495 | 0.110559537 |
| 0.400563452 | 0.412321687 | 0.273278673 | 0.266418052 |
| 0.368757975 | 0.354737174 | 0.271074803 | 1           |
| 0.357542421 | 0.432702763 | 0.103350975 | 0.42852822  |
| 0.272397045 | 0.390228784 | 0.298394644 | 0.331684458 |
| 0.423266487 | 0.295046081 | 0.194819394 | 0.433189712 |
| 0.378194012 | 0.378558445 | 0.247629022 | 0.476270371 |
| 0.006405926 | 0.440704739 | 0.345435391 | 0.109021536 |
| 0.464404245 | 0.402475639 | 0.236474971 | 0.355779748 |
| 0.418916311 | 0.480978613 | 0.370067034 | 0.297252589 |
| 0.154945756 | 0.050903617 | 0.438792432 | 0.430846788 |
| 0.374800208 | 0.417743807 | 0.199756321 | 0.069580507 |
| 0.405995646 | 0.22928844  | 0.36336728  | 0.279725754 |
| 0.316634624 | 0.245282618 | 0.423338481 | 0.254194346 |
| 0.020161712 | 0.370674516 | 0.288982777 | 0.21979212  |

|             |             |             |             |
|-------------|-------------|-------------|-------------|
| 0.324889086 | 0.293613461 | 0.369539866 | 0.45020635  |
| 0.284000306 | 0.227126377 | 0.264760815 | 0.237019666 |
| 0.392534475 | 0.471688136 | 0.024987629 | 0.427751812 |
| 0.44236623  | 0.424501055 | 0.395877895 | 0.435055183 |
| 0.410074406 | 0.447499151 | 0.41203603  | 0.326336686 |
| 0.004187798 | 0.27503942  | 0.202688743 | 0.45182158  |
| 0.331688366 | 0.44440623  | 0.164260559 | 0.230408419 |
| 0.007101658 | 0.363309216 | 0.122237435 | 0.494095885 |
| 0.368526659 | 0.132789115 | 0.019510913 | 0.357063495 |
| 0.208086464 | 0.039999957 | 0.473104073 | 0.400387069 |
| 0.418487594 | 0.378750904 | 0.349908727 | 0.243176367 |
| 0.092881067 | 0.314585439 | 0.062585467 | 0.364013262 |
| 0.308710443 | 0.081042941 | 0.145769197 | 0.443635554 |
| 0.391053006 | 0.439840794 | 0.440185234 | 0.022684097 |
| 0.252529707 | 0.15127644  | 0.33201582  | 0.253172373 |
| 0.390209907 | 0.454624221 | 0.446544169 | 0.280250817 |
| 0.364322788 | 0.428763597 | 0.441045219 | 0.389520798 |
| 0.084133434 | 0.259373774 | 0.310878975 | 0.140683081 |
| 0.234496081 | 0.397394336 | 0.313999923 | 0.369666027 |
| 0.417976978 | 0.070944402 | 0.401866911 | 0.311263314 |
| 0.444739161 | 0.38514504  | 0.212741479 | 0.319326228 |
| 0.438961384 | 0.437666674 | 0.301850605 | 0.415334455 |
| 0.446976272 | 0.072309315 | 0.102930445 | 0.44662962  |
| 0.490693887 | 0.436926139 | 0.360718321 | 0.197842325 |
| 0.345874161 | 0.193440811 | 0.351886238 | 0.396134428 |
| 0.421984994 | 0.234924248 | 0.242890476 | 0.077336755 |
| 0.046718487 | 0.23628393  | 0.430531436 | 0.463715279 |
| 0.243466542 | 0.389723235 | 0.383368673 | 0.398928881 |
| 0.383991262 | 0.301110459 | 0.4343805   | 0.387286162 |
| 0.483391189 | 0.135497948 | 0.491260171 | 0.399448171 |
| 0.380219394 | 0.388774853 | 0.360387164 | 0.019856703 |
| 0.299118697 | 0.271921635 | 0.164815209 | 0.359585015 |
| 0.303220958 | 0.312865316 | 0.433632511 | 0.355463641 |
| 0.15410128  | 0.009772152 | 0.41994681  | 0.194270347 |
| 0.441074196 | 0.18351819  | 0.387805539 | 0.06424329  |
| 0.498835442 | 0.374311906 | 0.333790447 | 0.167249591 |
| 0.381623831 | 0.008385525 | 0.280735407 | 0.141644407 |
| 0.389299199 | 0.442839748 | 0.316503596 | 0.29291748  |
| 0.208891561 | 0.363454879 | 0.436815545 | 0.34068395  |
| 0.383154514 | 0.09313152  | 0.417535617 | 0.385871151 |
| 0.228843331 | 0.351194666 | 0.444330225 | 0.375941724 |
| 0.360958595 | 0.200174556 | 0.33526792  | 0.285750884 |
| 0.362855445 | 0.348698999 | 0.38488108  | 0.282174482 |
| 0.158973942 | 0.391230608 | 0.27848073  | 0.261269104 |
| 0.351947575 | 0.225160004 | 0.251858767 | 0.464130024 |
| 0.28045229  | 0.36383575  | 0.056246839 | 0.061792431 |
| 0.190764637 | 0.369842301 | 0.367635645 | 0.374278034 |
| 0.41613238  | 0.212228485 | 0.28535415  | 0.318765876 |
| 0.066525094 | 0.245728976 | 0.410996815 | 0.089580591 |
| 0.370005967 | 0.227671388 | 0.003512904 | 0.315942716 |
| 0.44302613  | 0.265494157 |             |             |
| IL18        | 0.079701252 | 0.373782506 | 0.025451547 |
| 0.007780806 | 0.099969766 | 0.243134549 | 0.290337717 |
| 0.066284969 | 0.031726363 | 0.047804027 | 0.347311319 |



|             |             |             |             |
|-------------|-------------|-------------|-------------|
| 0.000107814 | 0.183970235 | 0.003081404 | 0.033499092 |
| 0.27157878  | 0.303522234 | 0.357076517 | 0.298643573 |
| 0.086670629 | 0.029513439 | 0.203395108 | 0.191509488 |
| 0.23034252  | 0.000247763 | 0.13865282  | 0.013199075 |
| 0.06262807  | 0.253690507 | 0.140626412 | 0.039653814 |
| 0.218983881 | 0.249434049 | 0.075301061 | 0.092566496 |
| 0.02743011  | 0.382099993 | 0.041118643 | 0.23655249  |
| 0.174430857 | 0.157386569 | 0.243220299 | 0.007296916 |
| 0.000823027 | 0.09589914  | 0.044047441 | 0.195621047 |
| 0.0994624   | 0.197712255 | 0.149510723 | 0.168177439 |
| 0.007348276 | 0.344227938 | 0.201879379 | 0.007669604 |
| 0.44644991  | 0.00099408  | 0.41611016  | 0.030655699 |
| 0.051291681 | 0.150135657 | 0.071052768 | 0.196080031 |
| 0.322067956 | 0.441877641 | 0.358971866 | 0.027339925 |
| 0.084933034 | 0.131213092 | 0.159863016 | 0.229636401 |
| 0.321484495 | 0.034672702 | 0.075077963 | 0.101819715 |
| 0.188931726 | 0.172384371 | 0.277758272 | 0.062101344 |
| 0.000149357 | 0.192450594 | 0.116584652 | 0.104887907 |
| 0.125660147 | 0.356058847 | 0.11983652  | 0.151860958 |
| 0.100850466 | 0.009220295 | 0.201706333 | 0.329442269 |
| 0.006637147 | 0.207169549 | 0.005588166 | 0.053547016 |
| 0.211467377 | 0.205699058 | 0.161704587 | 0.036655921 |
| 0.007649347 | 0.051729544 | 0.007299264 | 0.16067198  |
| 0.158309939 | 0.16652873  | 0.435250976 | 0.017905719 |
| 0.149279942 | 0.021616357 | 0.142019217 | 0.38776235  |
| 0.285195162 | 0.003674263 | 0.034025544 | 0.246659228 |
| 0.050815746 | 0.043539008 | 0.278391911 | 0.001517616 |
| 0.003542682 | 0.001319163 | 0.23724329  | 0.047000596 |
| 0.095549079 | 0.192661684 | 0.032858669 | 0.239061111 |
| 0.055713518 | 0.200983476 | 0.114763396 | 0.210087669 |
| 0.185902711 | 0.310261499 | 0.193998084 | 0.220500111 |
| 0.144184081 | 0.048477998 | 0.063021073 | 0.433148498 |
| 0.361034757 | 0.037421067 | 0.0252619   | 0.256917704 |
| 0.167019854 | 0.272438483 | 0.341612253 | 0.037776309 |
| 0.196607242 | 0.152598716 | 0.042301072 | 0.297056173 |
| 0.305212057 | 0.145974952 | 0.006620475 | 0.350739358 |
| 0.42598131  | 0.003109756 | 0.041207088 | 0.220434985 |
| 0.054083399 | 0.092050898 | 0.324036749 | 0.322027795 |
| 0.246383825 | 0.009990048 | 0.089694216 | 0.219091793 |
| 0.161497677 | 0.17701008  | 0.214301464 | 0.065911632 |
| 0.230902251 | 0.044247876 | 0.043517084 | 0.162075135 |
| 0.116181464 | 0.187092132 | 0.014898045 | 0.008313748 |
| 0.147832157 | 0.077199239 | 0.301551598 | 0.170104669 |
| 0.149749147 | 0.000972668 | 0.0416318   | 0.109788603 |
| 0.027473283 | 0.185316708 | 0.408765283 | 0.124915035 |
| 0.178800375 | 0.056425455 | 0.127719613 | 0.202999927 |
| 0.199547643 | 0.033685445 | 0.034869572 | 0.000126791 |
| 0.071154144 | 0.049035335 | 0.15425815  | 0.009035443 |
| 0.097047917 | 0.019518119 | 0.011756757 | 0.300606422 |
| 0.177350612 | 0.302939599 | 0.003623277 | 0.015118501 |
| 0.090848994 | 0.39913767  | 0.058857533 | 0.016373802 |
| 0.335194026 | 0.050833868 | 0.169157968 | 0.357542421 |
| 1           | 0.320550409 | 0.017087209 | 0.099427242 |
| 0.151887348 | 0.334018719 | 0.216246802 | 0.314205546 |

|             |             |             |             |
|-------------|-------------|-------------|-------------|
| 0.157181575 | 0.168361632 | 0.023981239 | 0.255475935 |
| 0.157516749 | 0.194896323 | 0.023887211 | 0.395454841 |
| 0.000176018 | 0.255124178 | 0.2005826   | 0.010618584 |
| 0.387399555 | 0.324574353 | 0.030963942 | 0.071522892 |
| 0.304403499 | 0.399187318 | 0.242192356 | 0.194601589 |
| 0.013686233 | 0.002201508 | 0.310463383 | 0.303303185 |
| 0.263983643 | 0.205099389 | 0.090657667 | 0.012219103 |
| 0.316071173 | 0.101425618 | 0.180710076 | 0.091785578 |
| 0.23380939  | 0.123383993 | 0.177866846 | 0.129051426 |
| 0.000665038 | 0.07988689  | 0.128373546 | 0.030442169 |
| 0.068210593 | 0.029122351 | 0.328725013 | 0.342711231 |
| 0.109439148 | 0.014398245 | 0.084426175 | 0.084613681 |
| 0.213231481 | 0.356405432 | 0.017539405 | 0.294132407 |
| 0.329644591 | 0.238533834 | 0.320653693 | 0.309946226 |
| 0.128883001 | 0.412322141 | 0.314532968 | 0.215922159 |
| 0.000123406 | 0.19423976  | 0.174123733 | 0.363360118 |
| 0.217494685 | 0.240434345 | 0.038768753 | 0.104065697 |
| 0.001202616 | 0.124075132 | 0.016064905 | 0.381033186 |
| 0.31898321  | 0.023110386 | 0.015436455 | 0.311041953 |
| 0.159739926 | 0.007761624 | 0.346802834 | 0.177512283 |
| 0.375079992 | 0.235310074 | 0.14724089  | 0.185094182 |
| 0.013046441 | 0.077190547 | 0.02794413  | 0.250284426 |
| 0.163582953 | 0.00628719  | 0.036097002 | 0.324525157 |
| 0.252516824 | 0.40738563  | 0.249157753 | 0.000697371 |
| 0.144118616 | 0.020059168 | 0.256908992 | 0.043969055 |
| 0.286670099 | 0.368694709 | 0.414961998 | 0.223705082 |
| 0.212770232 | 0.373071564 | 0.345532699 | 0.282038481 |
| 0.029458769 | 0.160293759 | 0.192776389 | 0.019552289 |
| 0.091929366 | 0.324354327 | 0.143882776 | 0.223920185 |
| 0.221142317 | 0.031938683 | 0.223554484 | 0.089316593 |
| 0.4146978   | 0.293982906 | 0.032345702 | 0.044042962 |
| 0.38791552  | 0.101177641 | 0.146989678 | 0.194127099 |
| 0.2677883   | 0.004782284 | 0.012140093 | 0.306293368 |
| 0.419396428 | 0.37018191  | 0.23383802  | 0.028990657 |
| 0.280524956 | 0.022177571 | 0.271299663 | 0.085760212 |
| 0.172286157 | 0.095340478 | 0.146696177 | 0.003769178 |
| 0.001843481 | 0.0133759   | 0.403668474 | 0.389894157 |
| 0.057466573 | 0.138717991 | 0.180952782 | 0.300878376 |
| 0.272876166 | 0.043208622 | 0.259978602 | 0.139501541 |
| 0.435329446 | 0.03128488  | 0.368262737 | 0.12816378  |
| 0.222431257 | 0.134851324 | 0.2970852   | 0.001651442 |
| 0.174951175 | 0.050993117 | 0.031872189 | 0.237922885 |
| 0.191806436 | 0.085095831 | 0.414671264 | 0.056350011 |
| 0.021688729 | 0.000968347 | 0.257999637 | 0.109606188 |
| 0.31596678  | 0.025522431 | 0.142402321 | 0.010239095 |
| 0.381177283 | 0.134545089 | 0.18621057  | 0.059341544 |
| 0.131996239 | 0.009293003 | 0.076529445 | 0.011954237 |
| 0.217261044 | 0.350001009 | 0.153354272 | 0.081055627 |
| 0.022028942 | 0.295977927 | 0.328016525 | 0.237108776 |
| 0.322070548 | 0.008272495 | 0.297867257 | 0.10740554  |
| 0.162570647 | 0.036919833 | 0.278485037 | 0.05462868  |
| 0.25119467  | 0.026077245 | 0.111531432 | 0.021581823 |
| 0.279208164 | 0.076203102 | 0.260453598 | 0.019504431 |
| 0.026420086 | 0.136458449 | 0.205908888 | 0.19078445  |

|             |             |             |             |
|-------------|-------------|-------------|-------------|
| 0.174524992 | 0.115458354 | 0.059533069 | 0.424119796 |
| 0.021374482 | 0.067047844 | 0.015337192 | 0.012663032 |
| 0.028019129 | 0.111555692 | 0.228664578 | 0.272877552 |
| 0.319452845 | 0.019282595 | 0.057745715 | 0.047483303 |
| 0.016661638 | 0.138839005 | 0.337075208 | 0.042621066 |
| 0.25340118  | 0.031056963 | 0.000210765 | 0.037414379 |
| 0.307136004 | 0.036876981 |             |             |
| IL18RAP     | 0.233287896 | 0.447039113 | 0.243768576 |
| 0.05156522  | 0.222796886 | 0.421717234 | 0.404587257 |
| 0.221314536 | 0.280645484 | 0.333736054 | 0.425775031 |
| 0.005323555 | 0.195010641 | 0.062572432 | 0.155196952 |
| 0.363836843 | 0.368643425 | 0.396791504 | 0.358473868 |
| 0.278416912 | 0.232554022 | 0.341344572 | 0.39162415  |
| 0.423140315 | 0.009724162 | 0.325603308 | 0.144209404 |
| 0.186037687 | 0.325691001 | 0.378481725 | 0.387676978 |
| 0.315847022 | 0.284819201 | 0.309879625 | 0.260257413 |
| 0.11122794  | 0.471708386 | 0.041621164 | 0.222725015 |
| 0.215564816 | 0.388703726 | 0.288906361 | 0.065708799 |
| 0.003030006 | 0.30861644  | 0.171284231 | 0.362350859 |
| 0.287835013 | 0.415135818 | 0.353614051 | 0.358734531 |
| 0.05415686  | 0.413462702 | 0.29794838  | 0.050876835 |
| 0.477465533 | 0.012144235 | 0.479557963 | 0.190903711 |
| 0.241365351 | 0.365828645 | 0.205044969 | 0.330063159 |
| 0.423059609 | 0.487009283 | 0.4116387   | 0.165972052 |
| 0.275253799 | 0.264293573 | 0.226957869 | 0.335396849 |
| 0.401570077 | 0.342923144 | 0.3968973   | 0.160610015 |
| 0.240684889 | 0.225604614 | 0.394397004 | 0.328362833 |
| 0.005368579 | 0.358726481 | 0.278637411 | 0.180768702 |
| 0.170986999 | 0.424735044 | 0.231401023 | 0.371632037 |
| 0.261731656 | 0.114656678 | 0.375386897 | 0.399976305 |
| 0.061825354 | 0.222448092 | 0.019652494 | 0.290814904 |
| 0.289932688 | 0.275101104 | 0.288157951 | 0.27430978  |
| 0.077018125 | 0.269540632 | 0.122798167 | 0.204317003 |
| 0.31412923  | 0.32208468  | 0.460845625 | 0.038227831 |
| 0.168208329 | 0.283544361 | 0.37213073  | 0.484085686 |
| 0.391732014 | 0.03134511  | 0.266662549 | 0.412818037 |
| 0.231716343 | 0.194828327 | 0.405398845 | 0.029016713 |
| 0.038354777 | 0.018066661 | 0.309732048 | 0.323832293 |
| 0.300519652 | 0.411978984 | 0.177799997 | 0.283345045 |
| 0.203366907 | 0.269527608 | 0.253411494 | 0.423581747 |
| 0.213439369 | 0.415641537 | 0.315615879 | 0.2652685   |
| 0.240968116 | 0.287431083 | 0.340026235 | 0.429312906 |
| 0.442312756 | 0.239913328 | 0.271263521 | 0.420459014 |
| 0.17193214  | 0.356406487 | 0.423296598 | 0.291186946 |
| 0.339701324 | 0.365049391 | 0.304840717 | 0.396491943 |
| 0.405461285 | 0.278543801 | 0.031138141 | 0.390597919 |
| 0.491724152 | 0.029192284 | 0.253829745 | 0.278110686 |
| 0.070869555 | 0.344575454 | 0.436164705 | 0.337212607 |
| 0.277866703 | 0.129340782 | 0.372336308 | 0.424409431 |
| 0.378896502 | 0.420230663 | 0.321796734 | 0.340083377 |
| 0.401940157 | 0.304417285 | 0.212170362 | 0.175550949 |
| 0.334038061 | 0.356085419 | 0.15137064  | 0.056854164 |
| 0.231833448 | 0.267287272 | 0.387723678 | 0.299523382 |
| 0.229263843 | 0.009993464 | 0.330070894 | 0.259944882 |

|             |             |             |             |
|-------------|-------------|-------------|-------------|
| 0.287726067 | 0.220780951 | 0.472479187 | 0.316618478 |
| 0.364408103 | 0.141944818 | 0.335422772 | 0.319994662 |
| 0.279784838 | 0.345035322 | 0.338539758 | 0.008216305 |
| 0.313242949 | 0.211695375 | 0.291000786 | 0.139408538 |
| 0.354792968 | 0.281166815 | 0.115301005 | 0.373796221 |
| 0.40324737  | 0.285571374 | 0.050501004 | 0.064973264 |
| 0.406382665 | 0.380511073 | 0.278262219 | 0.226263544 |
| 0.346752245 | 0.380306801 | 0.229802451 | 0.432702763 |
| 0.320550409 | 1           | 0.060046319 | 0.349550951 |
| 0.227757357 | 0.362584417 | 0.276402092 | 0.302779586 |
| 0.420355212 | 0.2200307   | 0.166374989 | 0.418259664 |
| 0.319779387 | 0.306270165 | 0.265526587 | 0.443387677 |
| 0.006853048 | 0.3943192   | 0.31611651  | 0.067690741 |
| 0.455494254 | 0.41307117  | 0.238670398 | 0.302028063 |
| 0.368483053 | 0.444105407 | 0.317743973 | 0.265699305 |
| 0.116835658 | 0.043177302 | 0.392693251 | 0.373395519 |
| 0.329232924 | 0.357868397 | 0.173323901 | 0.037251125 |
| 0.37752628  | 0.164965223 | 0.330142623 | 0.245111467 |
| 0.260957842 | 0.193954709 | 0.357204021 | 0.184250316 |
| 0.014304762 | 0.400739928 | 0.258548458 | 0.237610149 |
| 0.352933606 | 0.27892114  | 0.349774597 | 0.400012468 |
| 0.256760696 | 0.217118375 | 0.262353913 | 0.276958339 |
| 0.376207262 | 0.449005648 | 0.015530815 | 0.380605032 |
| 0.402541239 | 0.34064625  | 0.378696616 | 0.391074479 |
| 0.369090461 | 0.42898724  | 0.393081763 | 0.271739288 |
| 0.003439635 | 0.237519812 | 0.172566155 | 0.424286903 |
| 0.308527593 | 0.420219812 | 0.109698827 | 0.188937491 |
| 0.004261693 | 0.353998716 | 0.11639564  | 0.454976108 |
| 0.346511208 | 0.144953191 | 0.010993671 | 0.331863629 |
| 0.164203477 | 0.027017295 | 0.436756087 | 0.414542786 |
| 0.411338089 | 0.330715699 | 0.391312374 | 0.210450417 |
| 0.082048589 | 0.2350306   | 0.077428098 | 0.345404211 |
| 0.237082475 | 0.041784469 | 0.207668081 | 0.395253481 |
| 0.375231445 | 0.400111412 | 0.403661526 | 0.046410061 |
| 0.20860907  | 0.188273502 | 0.306318294 | 0.232376537 |
| 0.366807346 | 0.409853579 | 0.428605186 | 0.244578274 |
| 0.301165111 | 0.434117406 | 0.440903204 | 0.376782539 |
| 0.092342827 | 0.23493339  | 0.280373635 | 0.187432537 |
| 0.184862071 | 0.366184785 | 0.303964396 | 0.393013306 |
| 0.352814467 | 0.089108595 | 0.40499642  | 0.239304191 |
| 0.440042274 | 0.362023175 | 0.245032867 | 0.260700984 |
| 0.449350984 | 0.376116589 | 0.3129515   | 0.339054121 |
| 0.408491156 | 0.060231479 | 0.057869974 | 0.386148092 |
| 0.481487366 | 0.425991447 | 0.343049556 | 0.266787106 |
| 0.307221317 | 0.181507802 | 0.300954563 | 0.360912753 |
| 0.372323345 | 0.203673621 | 0.203693163 | 0.059415861 |
| 0.081799823 | 0.237776833 | 0.437489302 | 0.459249106 |
| 0.2713254   | 0.361366023 | 0.419763582 | 0.402876034 |
| 0.346596358 | 0.287404579 | 0.417732807 | 0.325816518 |
| 0.478970422 | 0.17287558  | 0.463305275 | 0.353056402 |
| 0.344561068 | 0.404405646 | 0.330522502 | 0.016766598 |
| 0.246243196 | 0.351774342 | 0.110243602 | 0.365224668 |
| 0.256185074 | 0.350890866 | 0.400174803 | 0.325807505 |
| 0.1416024   | 0.007432785 | 0.352663653 | 0.161694285 |

|             |             |             |             |
|-------------|-------------|-------------|-------------|
| 0.424012986 | 0.134639465 | 0.328203398 | 0.050545426 |
| 0.464579162 | 0.340060962 | 0.309815373 | 0.111718362 |
| 0.386520113 | 0.007017379 | 0.341890766 | 0.150814621 |
| 0.333859876 | 0.38316834  | 0.249102941 | 0.247952575 |
| 0.148862634 | 0.309931383 | 0.38973651  | 0.318513194 |
| 0.359778504 | 0.100096843 | 0.382464332 | 0.287849807 |
| 0.190908804 | 0.311610709 | 0.408221497 | 0.30262175  |
| 0.37068749  | 0.135610333 | 0.324783395 | 0.221031673 |
| 0.334806702 | 0.256410032 | 0.372856167 | 0.258951876 |
| 0.210709069 | 0.379508353 | 0.236444571 | 0.225049383 |
| 0.330418216 | 0.188703433 | 0.20949154  | 0.460671014 |
| 0.224068443 | 0.29612155  | 0.085900986 | 0.103002155 |
| 0.203795789 | 0.400623295 | 0.318366558 | 0.335231873 |
| 0.371349304 | 0.153008348 | 0.299202697 | 0.276750911 |
| 0.039481643 | 0.206819568 | 0.418717592 | 0.082220252 |
| 0.300494968 | 0.160106172 | 0.004817462 | 0.248582318 |
| 0.394758247 | 0.248726115 |             |             |
| IL2RA       | 0.080518812 | 0.169944008 | 0.000955011 |
| 0.000159552 | 0.001527498 | 0.028254177 | 0.023081677 |
| 0.0667076   | 0.002661743 | 0.003087956 | 0.056205588 |
| 6.49E-05    | 0.250814889 | 0.000298077 | 0.003265207 |
| 0.224089917 | 0.245590785 | 0.052162802 | 0.260870488 |
| 0.061536312 | 0.001251102 | 0.087538502 | 0.047153917 |
| 0.030246125 | 4.72E-05    | 0.005375611 | 0.00029745  |
| 0.078741353 | 0.250128062 | 0.021460047 | 0.005603365 |
| 0.20925738  | 0.212185757 | 0.025950197 | 0.009463763 |
| 0.016465792 | 0.138439799 | 0.023719438 | 0.195372602 |
| 0.287119465 | 0.011432374 | 0.208856416 | 0.000584603 |
| 4.06E-05    | 0.004081438 | 0.053312864 | 0.076968977 |
| 0.06080499  | 0.021865687 | 0.019918567 | 0.009857269 |
| 0.005997013 | 0.07101377  | 0.16289785  | 0.009939692 |
| 0.104140426 | 2.34E-05    | 0.132606346 | 0.040530833 |
| 0.003290634 | 0.051701422 | 0.08475912  | 0.091477469 |
| 0.035378351 | 0.115363077 | 0.215143654 | 0.000296809 |
| 0.003998988 | 0.09969087  | 0.165491169 | 0.065784953 |
| 0.164061839 | 0.006734085 | 0.009926416 | 0.11324472  |
| 0.143486965 | 0.223898079 | 0.057505879 | 0.008968405 |
| 1.31E-05    | 0.009772451 | 0.019182771 | 0.163725043 |
| 0.137508451 | 0.072035024 | 0.112297896 | 0.012116501 |
| 0.06182688  | 0.000197178 | 0.065570483 | 0.223148342 |
| 0.000181707 | 0.231317917 | 0.000193871 | 0.006513683 |
| 0.176100981 | 0.264150038 | 0.10843565  | 0.001401562 |
| 0.000254041 | 0.0103614   | 0.007455321 | 0.287598241 |
| 0.089905763 | 0.080134554 | 0.105489988 | 0.11127018  |
| 0.261354349 | 0.00395095  | 0.033945919 | 0.125500222 |
| 0.179311963 | 0.000285709 | 0.011664708 | 0.024958746 |
| 0.014155911 | 0.002007964 | 0.025994731 | 0.000523762 |
| 4.67E-05    | 0.002573763 | 0.224873959 | 0.007985065 |
| 0.003594101 | 0.01604359  | 0.000749939 | 0.096177812 |
| 0.055072685 | 0.277223407 | 0.003408265 | 0.021432541 |
| 0.141882351 | 0.029257197 | 0.045329357 | 0.142930506 |
| 0.03869941  | 0.025556176 | 0.008248759 | 0.150628273 |
| 0.138975858 | 0.000822362 | 0.001370897 | 0.048348759 |
| 0.246560826 | 0.210764313 | 0.213875652 | 0.016875474 |

|             |             |             |             |
|-------------|-------------|-------------|-------------|
| 0.015890942 | 0.034151298 | 0.0150948   | 0.058563276 |
| 0.033972871 | 0.098031491 | 0.012065913 | 0.087376257 |
| 0.104509107 | 0.000815667 | 0.002484554 | 0.193576998 |
| 0.000727942 | 0.007317631 | 0.134840985 | 0.151485951 |
| 0.137234332 | 0.000181714 | 0.009179276 | 0.026276231 |
| 0.045542471 | 0.019251181 | 0.110415966 | 0.007488065 |
| 0.055565899 | 0.014167092 | 0.001438608 | 0.251729307 |
| 0.008952213 | 0.070954234 | 0.016935808 | 0.002879407 |
| 0.164395583 | 0.052324287 | 0.13424249  | 0.097579968 |
| 0.151887286 | 1.18E-05    | 0.002728737 | 0.093375751 |
| 0.011800645 | 0.276298448 | 0.156627    | 0.009961783 |
| 0.04545529  | 0.083163066 | 0.014663378 | 0.029206558 |
| 0.213852113 | 0.003555053 | 0.003232693 | 2.53E-06    |
| 0.002211061 | 0.03483156  | 0.096256842 | 0.001593553 |
| 0.007280217 | 0.001727824 | 0.006959213 | 0.154328112 |
| 0.018815494 | 0.170727331 | 0.00139691  | 0.073453608 |
| 0.014529586 | 0.096555775 | 0.020275454 | 0.008026683 |
| 0.11880399  | 0.010088623 | 0.260325621 | 0.103350975 |
| 0.017087209 | 0.060046319 | 1           | 0.033855165 |
| 0.110467536 | 0.184309833 | 0.169459186 | 0.175707006 |
| 0.020611433 | 0.187749423 | 0.008537025 | 0.041464539 |
| 0.085895731 | 0.102414098 | 0.00224842  | 0.189178297 |
| 1.00E-05    | 0.063905124 | 0.070816018 | 0.032752671 |
| 0.147789823 | 0.028221672 | 0.002874203 | 0.030479267 |
| 0.257645692 | 0.197291376 | 0.216467562 | 0.205173529 |
| 0.009408243 | 0.000267752 | 0.207756961 | 0.103817721 |
| 0.254933287 | 0.057857443 | 0.032729335 | 0.029984765 |
| 0.187181511 | 0.171798079 | 0.078464211 | 0.075134328 |
| 0.119849713 | 0.083428102 | 0.041788347 | 0.196795629 |
| 0.000850409 | 0.012871568 | 0.086402757 | 0.002496386 |
| 0.014231641 | 0.002906388 | 0.154750119 | 0.071854    |
| 0.032137944 | 0.0104464   | 0.022654384 | 0.003211926 |
| 0.02050454  | 0.171591335 | 0.014469951 | 0.204664336 |
| 0.221509727 | 0.094936897 | 0.164238445 | 0.230302693 |
| 0.042384061 | 0.092361365 | 0.156419912 | 0.276424931 |
| 3.41E-05    | 0.237544282 | 0.213281832 | 0.083130343 |
| 0.173609849 | 0.041586051 | 0.111988454 | 0.081319892 |
| 0.000246957 | 0.014334929 | 0.012079354 | 0.186266615 |
| 0.174141436 | 0.000353571 | 0.016998291 | 0.13896044  |
| 0.17175579  | 0.008372726 | 0.203320793 | 0.030684311 |
| 0.13484267  | 0.070679863 | 0.010186294 | 0.210913149 |
| 0.016745666 | 0.07042341  | 0.000345756 | 0.071835221 |
| 0.113716397 | 0.018598351 | 0.001134876 | 0.241059819 |
| 0.132828574 | 0.084585228 | 0.037653907 | 2.01E-05    |
| 0.258317654 | 0.002448773 | 0.116841911 | 0.002496041 |
| 0.1352026   | 0.081717303 | 0.146268451 | 0.213381178 |
| 0.10988721  | 0.095310534 | 0.081386236 | 0.133970327 |
| 0.001981981 | 0.171790375 | 0.18598667  | 0.000353786 |
| 0.112173552 | 0.198896796 | 0.048066004 | 0.016512317 |
| 0.094933004 | 0.001087244 | 0.023309187 | 0.085760245 |
| 0.12773689  | 0.175706342 | 0.001575558 | 0.014125742 |
| 0.094145896 | 0.02399422  | 0.007667212 | 0.066735553 |
| 0.048331718 | 0.006966058 | 0.047167696 | 0.092122747 |
| 0.134723374 | 0.04617672  | 0.156428164 | 0.002400035 |

|             |             |             |             |
|-------------|-------------|-------------|-------------|
| 0.224590959 | 0.001857471 | 0.229716457 | 0.008480431 |
| 0.045362253 | 0.088663974 | 0.24924604  | 0.005196658 |
| 9.81E-05    | 0.001620066 | 0.084629425 | 0.104894731 |
| 0.003111629 | 0.022362848 | 0.018152845 | 0.040807034 |
| 0.22501522  | 0.019194675 | 0.038711049 | 0.05566656  |
| 0.106765955 | 0.001010995 | 0.165930805 | 0.049100765 |
| 0.12027822  | 0.020352838 | 0.153114896 | 0.000216587 |
| 0.133684413 | 0.00437281  | 0.092955109 | 0.038578699 |
| 0.278111402 | 0.005910405 | 0.078429697 | 0.010453808 |
| 0.003287441 | 0.000299939 | 0.100019108 | 0.074825977 |
| 0.046557118 | 0.046524549 | 0.059943796 | 0.014587802 |
| 0.19618487  | 0.058731533 | 0.124079151 | 0.134425139 |
| 0.028330589 | 0.001937004 | 0.005178578 | 0.00038215  |
| 0.114310513 | 0.110694298 | 0.134084903 | 0.072798765 |
| 0.04146546  | 0.114550424 | 0.084398857 | 0.051821244 |
| 0.178949555 | 0.002495183 | 0.213744109 | 0.063337839 |
| 0.263176178 | 0.014726515 | 0.041443012 | 0.017183307 |
| 0.01597806  | 0.008254316 | 0.009113217 | 0.013158366 |
| 0.198249893 | 0.038819722 | 0.046573851 | 0.014520867 |
| 0.00045828  | 0.027700795 | 0.208693235 | 0.175848542 |
| 0.067392484 | 0.128901542 | 0.049432557 | 0.098491881 |
| 0.013398176 | 0.041485682 | 0.000433363 | 0.000176324 |
| 0.004275776 | 0.010173441 | 0.202345458 | 0.18309376  |
| 0.238504039 | 0.028809711 | 0.004253226 | 0.01125531  |
| 0.031543006 | 0.215843212 | 0.033029805 | 0.006190473 |
| 0.124099777 | 0.063865794 | 6.40E-06    | 0.026093481 |
| 0.088485451 | 0.010491792 |             |             |
| IL2RB       | 0.181565388 | 0.367743942 | 0.095544372 |
| 0.003503302 | 0.049271457 | 0.309259925 | 0.214581082 |
| 0.117890558 | 0.18670821  | 0.071414789 | 0.361177045 |
| 0.014515222 | 0.156662767 | 0.073741596 | 0.11724464  |
| 0.300095485 | 0.299384085 | 0.218921328 | 0.31419276  |
| 0.199397361 | 0.038920312 | 0.340688684 | 0.205689375 |
| 0.278101318 | 0.021621737 | 0.085992114 | 0.013882225 |
| 0.0857984   | 0.266641657 | 0.244168161 | 0.101469062 |
| 0.275401537 | 0.203301545 | 0.076012296 | 0.056772171 |
| 0.018989185 | 0.410379978 | 0.014184431 | 0.156802536 |
| 0.189477693 | 0.094246297 | 0.22021851  | 0.086141748 |
| 0.000138422 | 0.099003904 | 0.071290789 | 0.293764006 |
| 0.190792015 | 0.269880282 | 0.247819026 | 0.104544062 |
| 0.01143245  | 0.386254133 | 0.332013179 | 0.009734349 |
| 0.402571711 | 0.000651835 | 0.415392723 | 0.106865633 |
| 0.129309824 | 0.234205862 | 0.119975817 | 0.272391112 |
| 0.32990112  | 0.407680481 | 0.341239995 | 0.054828907 |
| 0.130583493 | 0.15769785  | 0.164632072 | 0.163339944 |
| 0.342902236 | 0.077234071 | 0.119347548 | 0.055568482 |
| 0.177324183 | 0.184330834 | 0.368443599 | 0.156133936 |
| 0.006069701 | 0.137427125 | 0.053666177 | 0.209232169 |
| 0.097127983 | 0.381479547 | 0.18674777  | 0.104566582 |
| 0.106882414 | 0.073875982 | 0.257567329 | 0.322531783 |
| 0.011274596 | 0.200761591 | 0.00538049  | 0.153129017 |
| 0.244193678 | 0.224200267 | 0.248313601 | 0.089947009 |
| 0.061543349 | 0.180102019 | 0.088005743 | 0.170802132 |
| 0.219879488 | 0.160319097 | 0.408757113 | 0.016967844 |

|             |             |             |             |
|-------------|-------------|-------------|-------------|
| 0.12943194  | 0.164659052 | 0.137351406 | 0.395158709 |
| 0.330770198 | 0.034793921 | 0.182755638 | 0.272272095 |
| 0.073108082 | 0.041864407 | 0.227164187 | 0.005131324 |
| 0.006077623 | 0.026779676 | 0.258533794 | 0.167223611 |
| 0.075462839 | 0.190118634 | 0.030468069 | 0.146189666 |
| 0.089060285 | 0.2617732   | 0.069037795 | 0.181195579 |
| 0.142650757 | 0.232285949 | 0.094444904 | 0.199011178 |
| 0.055041177 | 0.169535391 | 0.156496149 | 0.349045079 |
| 0.44195335  | 0.088444259 | 0.129628896 | 0.324218664 |
| 0.129862282 | 0.291656571 | 0.350966654 | 0.130018459 |
| 0.077141077 | 0.254987797 | 0.079756474 | 0.229418404 |
| 0.272859843 | 0.23621842  | 0.015271616 | 0.383775983 |
| 0.429422669 | 0.006667511 | 0.127213507 | 0.250897357 |
| 0.008002116 | 0.12469609  | 0.387481153 | 0.268014582 |
| 0.174937235 | 0.011997344 | 0.075718462 | 0.231703578 |
| 0.301357382 | 0.18019182  | 0.289288805 | 0.066289646 |
| 0.351717403 | 0.068794088 | 0.083478666 | 0.133797438 |
| 0.173230454 | 0.32292975  | 0.045534989 | 0.027802152 |
| 0.209402767 | 0.125342073 | 0.29703704  | 0.219637917 |
| 0.213431255 | 0.000325882 | 0.063591252 | 0.22244372  |
| 0.083401082 | 0.202587166 | 0.374075431 | 0.198718108 |
| 0.33325048  | 0.055309944 | 0.222933585 | 0.080505517 |
| 0.309735489 | 0.091493719 | 0.088776529 | 0.005865708 |
| 0.113635932 | 0.052271198 | 0.164715465 | 0.128421952 |
| 0.077719732 | 0.142597158 | 0.093305591 | 0.292380536 |
| 0.24598673  | 0.203765001 | 0.071897408 | 0.044657025 |
| 0.133819619 | 0.286646563 | 0.054128122 | 0.103660243 |
| 0.246248121 | 0.099737523 | 0.184551116 | 0.42852822  |
| 0.099427242 | 0.349550951 | 0.033855165 | 1           |
| 0.119488407 | 0.277274205 | 0.192939505 | 0.234875722 |
| 0.181189718 | 0.246468685 | 0.047654614 | 0.344792323 |
| 0.229338418 | 0.209284346 | 0.131086813 | 0.376163405 |
| 0.010019714 | 0.302695027 | 0.1494004   | 0.033753359 |
| 0.346724954 | 0.250582535 | 0.139752437 | 0.165567853 |
| 0.318578009 | 0.385826104 | 0.334778991 | 0.200185996 |
| 0.048482703 | 0.057808937 | 0.372518213 | 0.353748885 |
| 0.266985358 | 0.158656385 | 0.034593358 | 0.034355943 |
| 0.295504922 | 0.140205429 | 0.226596317 | 0.12356997  |
| 0.140903386 | 0.0549551   | 0.269688358 | 0.213943151 |
| 0.012907903 | 0.129396962 | 0.160817284 | 0.052304489 |
| 0.078213984 | 0.115667576 | 0.263144175 | 0.387724276 |
| 0.056678757 | 0.060356508 | 0.05006944  | 0.089729529 |
| 0.257702217 | 0.366649325 | 0.005862656 | 0.372778598 |
| 0.331636619 | 0.265371878 | 0.273422504 | 0.335120457 |
| 0.247349789 | 0.385413884 | 0.307515527 | 0.262431254 |
| 0.005128016 | 0.180534948 | 0.124058496 | 0.440578162 |
| 0.22658983  | 0.329320908 | 0.07355014  | 0.060570057 |
| 0.008989804 | 0.235342016 | 0.018982993 | 0.428473317 |
| 0.248884736 | 0.081578556 | 0.003968317 | 0.253818739 |
| 0.11413879  | 0.012830882 | 0.36984212  | 0.186953267 |
| 0.304250056 | 0.155057717 | 0.150806235 | 0.154300593 |
| 0.014475496 | 0.098258933 | 0.017008247 | 0.184877684 |
| 0.111396114 | 0.048008028 | 0.031727473 | 0.347637457 |
| 0.320454936 | 0.317034724 | 0.309909123 | 0.006657464 |



|             |             |             |             |
|-------------|-------------|-------------|-------------|
| 0.192561202 | 0.023536922 | 0.203829233 | 0.115957667 |
| 0.342129204 | 0.393055696 | 0.35417155  | 0.187583208 |
| 0.200012329 | 0.362456407 | 0.396646326 | 0.298939619 |
| 0.012285997 | 0.171551286 | 0.221558409 | 0.046662976 |
| 0.12858553  | 0.28216695  | 0.108379821 | 0.237817188 |
| 0.340023906 | 0.009475399 | 0.299285122 | 0.203524976 |
| 0.341563643 | 0.268950094 | 0.108709934 | 0.170310209 |
| 0.364360343 | 0.166722401 | 0.142394537 | 0.200377955 |
| 0.384666129 | 0.014511912 | 0.045382745 | 0.382435404 |
| 0.399538196 | 0.337502411 | 0.259624936 | 0.041274277 |
| 0.240894505 | 0.124543657 | 0.297188931 | 0.134459602 |
| 0.300906665 | 0.114411973 | 0.169866767 | 0.027558101 |
| 0.014138371 | 0.123353618 | 0.346607592 | 0.417595313 |
| 0.115581164 | 0.262860011 | 0.157751381 | 0.183471416 |
| 0.271252418 | 0.066402566 | 0.317903479 | 0.194686299 |
| 0.436634429 | 0.027024366 | 0.417434981 | 0.231355558 |
| 0.340745486 | 0.107613697 | 0.278055625 | 0.01219932  |
| 0.167843918 | 0.074197556 | 0.094683367 | 0.133251977 |
| 0.21624651  | 0.121613705 | 0.298922095 | 0.178791576 |
| 0.035379156 | 0.00773728  | 0.376821576 | 0.046155149 |
| 0.386987292 | 0.050674189 | 0.192510909 | 0.009299343 |
| 0.399272161 | 0.206622862 | 0.279903485 | 0.043950326 |
| 0.112082797 | 0.000899703 | 0.080534388 | 0.087982452 |
| 0.35128993  | 0.40016791  | 0.213625094 | 0.146622131 |
| 0.103406136 | 0.193223196 | 0.321566291 | 0.104807755 |
| 0.262783813 | 0.017533733 | 0.300295821 | 0.17228637  |
| 0.146356248 | 0.101078213 | 0.337905572 | 0.131598995 |
| 0.137447642 | 0.093973772 | 0.156843494 | 0.175646402 |
| 0.241789654 | 0.127464624 | 0.150463158 | 0.092139891 |
| 0.062322379 | 0.104340018 | 0.215876129 | 0.168833826 |
| 0.176052342 | 0.14530616  | 0.064562468 | 0.427368286 |
| 0.097984826 | 0.17886782  | 0.007528002 | 0.012337043 |
| 0.034819005 | 0.141719508 | 0.340191867 | 0.310071122 |
| 0.309879093 | 0.072116352 | 0.138327023 | 0.178837324 |
| 0.018089007 | 0.193780684 | 0.247646009 | 0.013148736 |
| 0.20814716  | 0.076465451 | 0.002476787 | 0.158878421 |
| 0.376599313 | 0.05710287  |             |             |
| IL4RA       | 0.177889552 | 0.452797204 | 0.027414396 |
| 0.024364127 | 0.070345326 | 0.107404225 | 0.109240119 |
| 0.196543401 | 0.041810318 | 0.071286274 | 0.199225825 |
| 0.00042711  | 0.402176472 | 0.00423388  | 0.029169466 |
| 0.504275991 | 0.522708242 | 0.178201045 | 0.503935815 |
| 0.153535129 | 0.087444978 | 0.208879792 | 0.20117233  |
| 0.119321346 | 0.000447913 | 0.061476338 | 0.032088364 |
| 0.220000093 | 0.51150198  | 0.087314093 | 0.141719488 |
| 0.442477625 | 0.482569883 | 0.237476172 | 0.218433132 |
| 0.199730029 | 0.390756027 | 0.102328699 | 0.40245486  |
| 0.421703668 | 0.120091277 | 0.447276455 | 0.004377008 |
| 0.005464754 | 0.046164691 | 0.191727796 | 0.218185692 |
| 0.141503925 | 0.09774775  | 0.07112346  | 0.08999702  |
| 0.130348631 | 0.224210778 | 0.294830789 | 0.141427027 |
| 0.324848869 | 0.003862127 | 0.375043401 | 0.121959583 |
| 0.024478885 | 0.145557026 | 0.199334166 | 0.241217167 |
| 0.125451511 | 0.352912321 | 0.495473621 | 0.014399607 |

|             |             |             |             |
|-------------|-------------|-------------|-------------|
| 0.028906852 | 0.23984956  | 0.391806848 | 0.260077585 |
| 0.405746021 | 0.197904155 | 0.160214758 | 0.251794224 |
| 0.349034356 | 0.398564349 | 0.135241241 | 0.079892145 |
| 0.000291917 | 0.073197906 | 0.21392372  | 0.233163903 |
| 0.308873718 | 0.233872628 | 0.217271941 | 0.114375757 |
| 0.253745037 | 0.006487366 | 0.192890114 | 0.514865955 |
| 0.012467682 | 0.36799024  | 0.006212793 | 0.069292354 |
| 0.388661819 | 0.493942682 | 0.261196778 | 0.030865658 |
| 0.004315649 | 0.049372719 | 0.06848157  | 0.445584012 |
| 0.204663123 | 0.252460785 | 0.306428856 | 0.109017093 |
| 0.40734859  | 0.073281425 | 0.18035618  | 0.389130828 |
| 0.449317226 | 0.00286966  | 0.066011796 | 0.102528942 |
| 0.198899252 | 0.083134916 | 0.11021471  | 0.032620152 |
| 0.006785991 | 0.008977465 | 0.459438006 | 0.066418188 |
| 0.049574967 | 0.095202371 | 0.05182782  | 0.30553598  |
| 0.191956497 | 0.424866809 | 0.068334664 | 0.125157036 |
| 0.364922747 | 0.126204441 | 0.259964332 | 0.363578443 |
| 0.252897112 | 0.111649171 | 0.061669651 | 0.401088122 |
| 0.334732645 | 0.029639593 | 0.032719854 | 0.179791195 |
| 0.393806989 | 0.482059827 | 0.509540382 | 0.147686979 |
| 0.156788491 | 0.106673481 | 0.169530433 | 0.243362607 |
| 0.114852443 | 0.170944961 | 0.066207184 | 0.214797484 |
| 0.323417751 | 0.02656816  | 0.025209653 | 0.367260297 |
| 0.049264369 | 0.122617817 | 0.368501236 | 0.366631363 |
| 0.256756862 | 0.026371376 | 0.126875588 | 0.125375896 |
| 0.136279752 | 0.125376916 | 0.235845153 | 0.120423963 |
| 0.16186958  | 0.180236219 | 0.019033351 | 0.404877835 |
| 0.050886996 | 0.158242807 | 0.18911352  | 0.041701536 |
| 0.241615581 | 0.178096419 | 0.390804078 | 0.219825568 |
| 0.297780581 | 0.004406739 | 0.072494239 | 0.193186907 |
| 0.154494297 | 0.406051499 | 0.449240312 | 0.045604226 |
| 0.112378399 | 0.197638354 | 0.058798352 | 0.20071205  |
| 0.33770835  | 0.110234323 | 0.101266694 | 0.000183879 |
| 0.062848966 | 0.230930744 | 0.223929276 | 0.017964861 |
| 0.131550311 | 0.045551084 | 0.052780019 | 0.425741297 |
| 0.089150314 | 0.407240171 | 0.009781086 | 0.09539462  |
| 0.125756939 | 0.307940649 | 0.245468554 | 0.129715609 |
| 0.364086998 | 0.163015634 | 0.468277224 | 0.272397045 |
| 0.151887348 | 0.227757357 | 0.110467536 | 0.119488407 |
| 1           | 0.446457857 | 0.431479184 | 0.401406498 |
| 0.12017698  | 0.251914576 | 0.197538141 | 0.137701859 |
| 0.200758677 | 0.214869076 | 0.032340202 | 0.45943354  |
| 0.000185716 | 0.171767165 | 0.260048342 | 0.114326782 |
| 0.444460411 | 0.117356948 | 0.024776243 | 0.112060363 |
| 0.51106044  | 0.458843243 | 0.370665575 | 0.457247182 |
| 0.135626534 | 0.002984195 | 0.43068447  | 0.263227666 |
| 0.519920066 | 0.20397334  | 0.252298245 | 0.049422226 |
| 0.467435432 | 0.202417006 | 0.254507388 | 0.239474919 |
| 0.267299418 | 0.257319532 | 0.10790294  | 0.2383049   |
| 0.007728375 | 0.117395586 | 0.272138421 | 0.108442757 |
| 0.173406498 | 0.078800017 | 0.405322805 | 0.183569933 |
| 0.255662999 | 0.176626685 | 0.225448575 | 0.036110707 |
| 0.075953395 | 0.464080653 | 0.044002778 | 0.408117556 |
| 0.512466745 | 0.178826286 | 0.462157512 | 0.500346782 |

|             |             |             |             |
|-------------|-------------|-------------|-------------|
| 0.147384422 | 0.269232171 | 0.432049538 | 0.428194297 |
| 0.000283782 | 0.460171187 | 0.38504463  | 0.223195415 |
| 0.451966549 | 0.131768962 | 0.137948728 | 0.288452092 |
| 0.000370218 | 0.062433251 | 0.203607485 | 0.421970334 |
| 0.461407535 | 0.010558276 | 0.052878646 | 0.380240502 |
| 0.34334459  | 0.030580362 | 0.49238133  | 0.168182821 |
| 0.4122153   | 0.240948825 | 0.078890955 | 0.423421446 |
| 0.181786579 | 0.20774199  | 0.018458096 | 0.270068376 |
| 0.242724513 | 0.046325081 | 0.048616287 | 0.495588136 |
| 0.363722801 | 0.249860533 | 0.112840842 | 0.004139793 |
| 0.389213384 | 0.147674722 | 0.371260046 | 0.051736212 |
| 0.325529728 | 0.231515138 | 0.39138321  | 0.417694446 |
| 0.237556502 | 0.305902024 | 0.258897025 | 0.380312512 |
| 0.101081888 | 0.406551445 | 0.434163239 | 0.028854438 |
| 0.224245387 | 0.469504172 | 0.240315668 | 0.078565461 |
| 0.208360424 | 0.081623516 | 0.088977374 | 0.161164534 |
| 0.387481902 | 0.464697292 | 0.021756821 | 0.069428719 |
| 0.310283235 | 0.14111206  | 0.046395618 | 0.173758931 |
| 0.13411582  | 0.133086448 | 0.082115592 | 0.219232523 |
| 0.392302196 | 0.164300416 | 0.430874194 | 0.091324169 |
| 0.470102503 | 0.01826577  | 0.372647662 | 0.13374682  |
| 0.126139227 | 0.252434725 | 0.409996619 | 0.07768446  |
| 0.011658921 | 0.052265151 | 0.292917313 | 0.306580971 |
| 0.030277399 | 0.081026443 | 0.126562435 | 0.188305949 |
| 0.503831588 | 0.250315718 | 0.126382383 | 0.168740945 |
| 0.308361632 | 0.06670292  | 0.420119536 | 0.159829455 |
| 0.293248205 | 0.174456727 | 0.359987414 | 0.004352012 |
| 0.295980605 | 0.08691274  | 0.112325525 | 0.209921985 |
| 0.474184497 | 0.057934694 | 0.245720787 | 0.064732303 |
| 0.114150799 | 0.001596095 | 0.21175546  | 0.271778378 |
| 0.153497136 | 0.186567207 | 0.18053543  | 0.155338723 |
| 0.480493444 | 0.203330783 | 0.316979811 | 0.191717109 |
| 0.207247941 | 0.029790551 | 0.077123694 | 0.011737095 |
| 0.263998932 | 0.249763965 | 0.251418739 | 0.204163872 |
| 0.099183929 | 0.285198529 | 0.22672817  | 0.255101363 |
| 0.464070836 | 0.12305648  | 0.515947718 | 0.145277824 |
| 0.428776487 | 0.198619747 | 0.115525761 | 0.1611346   |
| 0.100598245 | 0.058968275 | 0.048971082 | 0.066163751 |
| 0.492816602 | 0.158970425 | 0.220104595 | 0.168431012 |
| 0.02115597  | 0.203105582 | 0.354949149 | 0.369678648 |
| 0.24233082  | 0.307105512 | 0.227601714 | 0.283677073 |
| 0.156312071 | 0.137116869 | 0.043871811 | 0.019313316 |
| 0.168806361 | 0.088873819 | 0.351017298 | 0.381173649 |
| 0.499081131 | 0.159223594 | 0.037875504 | 0.05433952  |
| 0.10048433  | 0.347089146 | 0.134921532 | 0.157418215 |
| 0.244898269 | 0.173164076 | 0.000211648 | 0.100726758 |
| 0.235589658 | 0.240070532 |             |             |
| IL6ST       | 0.317335288 | 0.498679528 | 0.075526733 |
| 0.042022868 | 0.153868186 | 0.256408381 | 0.262242061 |
| 0.328733375 | 0.119405778 | 0.171017893 | 0.340953529 |
| 0.001198679 | 0.374540226 | 0.013358269 | 0.080619134 |
| 0.508183069 | 0.529806804 | 0.380050036 | 0.50988901  |
| 0.29649654  | 0.187247562 | 0.346152099 | 0.391193021 |
| 0.283357059 | 0.001448697 | 0.155789305 | 0.071998334 |

|             |             |             |             |
|-------------|-------------|-------------|-------------|
| 0.343199716 | 0.498314026 | 0.214308667 | 0.289553392 |
| 0.446420258 | 0.460811625 | 0.438217229 | 0.384714868 |
| 0.296233928 | 0.446030754 | 0.158497147 | 0.439390178 |
| 0.396303635 | 0.269762165 | 0.442707536 | 0.016678141 |
| 0.007501922 | 0.12526175  | 0.297458051 | 0.378063968 |
| 0.290126354 | 0.236807292 | 0.183489649 | 0.217822101 |
| 0.171394619 | 0.362943043 | 0.364482678 | 0.171295665 |
| 0.415872184 | 0.007925519 | 0.441490514 | 0.221919729 |
| 0.076597866 | 0.32324413  | 0.348780191 | 0.399527164 |
| 0.275749898 | 0.426422449 | 0.523970251 | 0.0482999   |
| 0.087914182 | 0.425535839 | 0.400872465 | 0.450631192 |
| 0.449439555 | 0.341098727 | 0.33254793  | 0.397527559 |
| 0.443635092 | 0.381305995 | 0.29815524  | 0.188562854 |
| 0.000990848 | 0.184831358 | 0.397374844 | 0.309957073 |
| 0.400451323 | 0.367949603 | 0.36470931  | 0.272096513 |
| 0.420556719 | 0.02080101  | 0.376347671 | 0.532060752 |
| 0.029397041 | 0.395509657 | 0.014724175 | 0.167388667 |
| 0.415226059 | 0.467383949 | 0.389591443 | 0.093091521 |
| 0.015373781 | 0.12829666  | 0.125129939 | 0.402521024 |
| 0.398516004 | 0.460446476 | 0.412744144 | 0.147548803 |
| 0.356425432 | 0.171404515 | 0.383900978 | 0.449265458 |
| 0.475953073 | 0.007649945 | 0.156874619 | 0.245566143 |
| 0.375584305 | 0.185412383 | 0.263854901 | 0.039316093 |
| 0.01443521  | 0.015427151 | 0.459825272 | 0.161442826 |
| 0.131883687 | 0.234050599 | 0.107741182 | 0.474668031 |
| 0.315966533 | 0.421577491 | 0.166398341 | 0.291443661 |
| 0.434477886 | 0.294424706 | 0.454311775 | 0.45358751  |
| 0.428741841 | 0.247248453 | 0.154690423 | 0.460919986 |
| 0.401162578 | 0.084133163 | 0.09184044  | 0.334056833 |
| 0.363082475 | 0.489037583 | 0.534711861 | 0.292181499 |
| 0.325447422 | 0.251427457 | 0.334905432 | 0.41623374  |
| 0.274260009 | 0.327041021 | 0.087152269 | 0.361774078 |
| 0.406589958 | 0.040757612 | 0.075219813 | 0.422008524 |
| 0.087789962 | 0.290645446 | 0.42431184  | 0.470015822 |
| 0.459299356 | 0.059459359 | 0.268584736 | 0.292863471 |
| 0.297257496 | 0.278077897 | 0.403633639 | 0.252321159 |
| 0.318537681 | 0.339607317 | 0.059692239 | 0.36241079  |
| 0.138779804 | 0.326709508 | 0.310198773 | 0.079179882 |
| 0.379019363 | 0.326970008 | 0.454581353 | 0.403952558 |
| 0.383822975 | 0.00677739  | 0.167660093 | 0.343298308 |
| 0.303550098 | 0.383315596 | 0.50097088  | 0.128065704 |
| 0.256019366 | 0.339818301 | 0.155773468 | 0.395256742 |
| 0.363715087 | 0.249535428 | 0.22775791  | 0.000666451 |
| 0.167160333 | 0.366257228 | 0.425346705 | 0.048307697 |
| 0.284942632 | 0.114881959 | 0.103958898 | 0.45679421  |
| 0.218707984 | 0.470531238 | 0.02255064  | 0.151977368 |
| 0.274937194 | 0.449968212 | 0.403984608 | 0.247658764 |
| 0.474926108 | 0.318680466 | 0.426149275 | 0.390228784 |
| 0.334018719 | 0.362584417 | 0.184309833 | 0.277274205 |
| 0.446457857 | 1           | 0.441282243 | 0.461719946 |
| 0.285328298 | 0.350812046 | 0.301798691 | 0.287525145 |
| 0.376650614 | 0.399047267 | 0.087953819 | 0.503058864 |
| 0.000655173 | 0.353013113 | 0.459843605 | 0.185820097 |
| 0.488759907 | 0.2760443   | 0.072839458 | 0.236141272 |

|             |             |             |             |
|-------------|-------------|-------------|-------------|
| 0.51820845  | 0.502549868 | 0.392342193 | 0.430587407 |
| 0.218174927 | 0.008825892 | 0.465292414 | 0.410805834 |
| 0.5090601   | 0.420656135 | 0.391112139 | 0.079091078 |
| 0.481067417 | 0.324749269 | 0.415638498 | 0.390138627 |
| 0.465713109 | 0.419573894 | 0.254473315 | 0.32359386  |
| 0.014713877 | 0.258914116 | 0.400071404 | 0.225374857 |
| 0.336298555 | 0.195603199 | 0.471300404 | 0.33503791  |
| 0.446897323 | 0.290274298 | 0.405692917 | 0.101563103 |
| 0.1992104   | 0.502797115 | 0.065551676 | 0.440376866 |
| 0.528432332 | 0.374659977 | 0.478886433 | 0.51431955  |
| 0.306966709 | 0.402312058 | 0.460717084 | 0.421641134 |
| 0.00075085  | 0.428662819 | 0.383169781 | 0.349270248 |
| 0.444781553 | 0.30247124  | 0.222541199 | 0.42990434  |
| 0.001459423 | 0.164111232 | 0.280500116 | 0.475436613 |
| 0.468329918 | 0.036752703 | 0.071960291 | 0.463037662 |
| 0.393150239 | 0.04976079  | 0.523377423 | 0.352478088 |
| 0.467723201 | 0.442463661 | 0.201425021 | 0.39669088  |
| 0.239761706 | 0.370175961 | 0.045611328 | 0.452047883 |
| 0.430942632 | 0.086128174 | 0.114703062 | 0.5180904   |
| 0.418356166 | 0.413204247 | 0.270924491 | 0.011129833 |
| 0.368346406 | 0.239923128 | 0.469216699 | 0.123752632 |
| 0.410484878 | 0.376866284 | 0.452596442 | 0.429853165 |
| 0.442791458 | 0.416092607 | 0.379125451 | 0.448029246 |
| 0.152352187 | 0.389809188 | 0.421714461 | 0.065065558 |
| 0.353446551 | 0.488427047 | 0.431115626 | 0.20148187  |
| 0.364508936 | 0.136282835 | 0.220930578 | 0.29765012  |
| 0.455271758 | 0.481069912 | 0.067243283 | 0.160762628 |
| 0.418912877 | 0.31068649  | 0.133385097 | 0.35478072  |
| 0.286934003 | 0.166992447 | 0.137393945 | 0.375486734 |
| 0.455083578 | 0.315611777 | 0.440417372 | 0.190841685 |
| 0.465050251 | 0.053839589 | 0.41375036  | 0.295096674 |
| 0.281833049 | 0.374872145 | 0.378477121 | 0.104666267 |
| 0.028449446 | 0.118561325 | 0.41501075  | 0.405660711 |
| 0.085633271 | 0.198198576 | 0.282290078 | 0.387315661 |
| 0.50307907  | 0.407495614 | 0.287915639 | 0.331388097 |
| 0.401453449 | 0.148413671 | 0.472026456 | 0.325459707 |
| 0.393463237 | 0.361765923 | 0.451892384 | 0.010862014 |
| 0.439640398 | 0.196050577 | 0.18764631  | 0.410605662 |
| 0.447640239 | 0.149477128 | 0.413223794 | 0.165840015 |
| 0.196039896 | 0.003477223 | 0.35131348  | 0.401771135 |
| 0.293911901 | 0.283521634 | 0.353303501 | 0.195262295 |
| 0.524764288 | 0.380539137 | 0.396828324 | 0.302513678 |
| 0.397541936 | 0.035991248 | 0.188687186 | 0.035677983 |
| 0.377831053 | 0.389145199 | 0.394454372 | 0.356425466 |
| 0.182263336 | 0.472103558 | 0.399626239 | 0.456642903 |
| 0.480413825 | 0.170719633 | 0.522649999 | 0.303694588 |
| 0.387534747 | 0.37211311  | 0.277184781 | 0.334981134 |
| 0.244377785 | 0.143822072 | 0.141918847 | 0.148892407 |
| 0.490317223 | 0.328289267 | 0.428772073 | 0.290286491 |
| 0.058310776 | 0.401293086 | 0.405247695 | 0.429994136 |
| 0.430124292 | 0.36681124  | 0.358675027 | 0.391505058 |
| 0.29854842  | 0.281420253 | 0.082755418 | 0.051699096 |
| 0.305969651 | 0.212647179 | 0.382160636 | 0.424938951 |
| 0.513347437 | 0.26840158  | 0.109723179 | 0.13682007  |

|             |             |             |             |
|-------------|-------------|-------------|-------------|
| 0.143321263 | 0.346140095 | 0.307864659 | 0.221325277 |
| 0.44592035  | 0.30670841  | 0.000599549 | 0.212288436 |
| 0.382553142 | 0.406226023 |             |             |
| INPP4B      | 0.302537464 | 0.453350708 | 0.045261285 |
| 0.043430718 | 0.096354697 | 0.170926086 | 0.168140137 |
| 0.322728383 | 0.067804409 | 0.120599463 | 0.246801908 |
| 0.00086482  | 0.387783516 | 0.007840871 | 0.044329074 |
| 0.510794041 | 0.523579422 | 0.265386633 | 0.500353126 |
| 0.255063076 | 0.15135714  | 0.283229885 | 0.329549653 |
| 0.189646649 | 0.000890347 | 0.095185573 | 0.060514338 |
| 0.348200038 | 0.512473274 | 0.137454256 | 0.234982673 |
| 0.453991287 | 0.473863121 | 0.369861392 | 0.311535238 |
| 0.300404935 | 0.391329956 | 0.134218027 | 0.419480431 |
| 0.421511477 | 0.185322594 | 0.446747415 | 0.007062043 |
| 0.008826153 | 0.072677677 | 0.304888135 | 0.315108948 |
| 0.227428685 | 0.157686351 | 0.112282317 | 0.141970599 |
| 0.209480268 | 0.269811038 | 0.322920555 | 0.222045947 |
| 0.320599949 | 0.008264677 | 0.374036689 | 0.208110376 |
| 0.039441717 | 0.229129461 | 0.330877395 | 0.340591251 |
| 0.180240329 | 0.349892748 | 0.491667443 | 0.023127638 |
| 0.046575524 | 0.382597323 | 0.409656788 | 0.392129287 |
| 0.410102594 | 0.321810003 | 0.236537804 | 0.368968669 |
| 0.419093937 | 0.403045914 | 0.202424833 | 0.122121821 |
| 0.000596844 | 0.113222035 | 0.322131121 | 0.298958019 |
| 0.41586007  | 0.273347122 | 0.342002558 | 0.174550876 |
| 0.41755861  | 0.010237116 | 0.306035806 | 0.514525093 |
| 0.022438622 | 0.373518175 | 0.009596643 | 0.10240538  |
| 0.394552522 | 0.498151122 | 0.353439752 | 0.050020467 |
| 0.007625126 | 0.078304236 | 0.117944374 | 0.446421207 |
| 0.332107899 | 0.398017566 | 0.313014919 | 0.156734845 |
| 0.398188447 | 0.127191325 | 0.271383678 | 0.392481693 |
| 0.457150105 | 0.00417095  | 0.105985423 | 0.160637219 |
| 0.311908571 | 0.133799907 | 0.167647371 | 0.055198873 |
| 0.011215299 | 0.014638958 | 0.464509621 | 0.107534317 |
| 0.078521693 | 0.152315492 | 0.082228825 | 0.428059941 |
| 0.303405078 | 0.431893594 | 0.093861668 | 0.198792615 |
| 0.427355555 | 0.195147563 | 0.391101188 | 0.424489409 |
| 0.351558372 | 0.185193668 | 0.103037517 | 0.390800523 |
| 0.333955026 | 0.047211759 | 0.054283075 | 0.252731213 |
| 0.380566645 | 0.48617587  | 0.509805625 | 0.236552991 |
| 0.226909352 | 0.168595297 | 0.294466938 | 0.336951852 |
| 0.174734636 | 0.266344723 | 0.093567137 | 0.264340574 |
| 0.322712532 | 0.043609962 | 0.040220076 | 0.387012639 |
| 0.062785195 | 0.183641002 | 0.375375806 | 0.400013522 |
| 0.385121397 | 0.050404578 | 0.211728889 | 0.202286239 |
| 0.220550889 | 0.201799762 | 0.33291134  | 0.203394068 |
| 0.23851757  | 0.30946972  | 0.030075567 | 0.394869375 |
| 0.080604933 | 0.252397246 | 0.324711174 | 0.065851398 |
| 0.34810909  | 0.276019448 | 0.399137717 | 0.349959688 |
| 0.366025303 | 0.009110717 | 0.125734184 | 0.313835772 |
| 0.276383837 | 0.400417104 | 0.448365563 | 0.071571253 |
| 0.179822053 | 0.293970856 | 0.092931763 | 0.288141521 |
| 0.342419496 | 0.192391948 | 0.172373751 | 0.000443751 |
| 0.095199284 | 0.394455959 | 0.352467722 | 0.031688771 |

|             |             |             |             |
|-------------|-------------|-------------|-------------|
| 0.201160157 | 0.079680111 | 0.087557893 | 0.427749931 |
| 0.141318018 | 0.42479469  | 0.016092891 | 0.143470735 |
| 0.205206004 | 0.354852311 | 0.391452801 | 0.232061551 |
| 0.403576784 | 0.268639204 | 0.471489516 | 0.298394644 |
| 0.216246802 | 0.276402092 | 0.169459186 | 0.192939505 |
| 0.431479184 | 0.441282243 | 1           | 0.408861285 |
| 0.193188624 | 0.31231636  | 0.293745762 | 0.202704605 |
| 0.323657967 | 0.326336812 | 0.05472455  | 0.454183984 |
| 0.000327529 | 0.264869592 | 0.402629067 | 0.186333657 |
| 0.442727996 | 0.180980951 | 0.041415755 | 0.182358234 |
| 0.508582369 | 0.452547301 | 0.371014339 | 0.461136145 |
| 0.216135357 | 0.005351049 | 0.432722767 | 0.322798282 |
| 0.520188208 | 0.314066317 | 0.350870534 | 0.066119308 |
| 0.462997985 | 0.311727706 | 0.368293669 | 0.396828841 |
| 0.399524932 | 0.367725334 | 0.168005285 | 0.301547091 |
| 0.014684769 | 0.201703204 | 0.400379816 | 0.184019774 |
| 0.293697971 | 0.134947804 | 0.409033992 | 0.236246418 |
| 0.37437019  | 0.318825188 | 0.356291018 | 0.056878122 |
| 0.117189631 | 0.465154165 | 0.052937652 | 0.409536575 |
| 0.510702354 | 0.275697843 | 0.459753132 | 0.500946261 |
| 0.245344954 | 0.300192333 | 0.433712504 | 0.425166424 |
| 0.000554868 | 0.459399156 | 0.387482964 | 0.25331161  |
| 0.462760923 | 0.211109673 | 0.216947356 | 0.423410941 |
| 0.000531219 | 0.101144509 | 0.321508295 | 0.420923624 |
| 0.450972791 | 0.015883594 | 0.064596752 | 0.404743561 |
| 0.396596576 | 0.044716437 | 0.494800931 | 0.273751271 |
| 0.406700186 | 0.356972904 | 0.127022539 | 0.413729794 |
| 0.287789141 | 0.313484198 | 0.025714582 | 0.38931583  |
| 0.364454799 | 0.076058471 | 0.08103867  | 0.494504215 |
| 0.377158756 | 0.307689484 | 0.177640753 | 0.01067491  |
| 0.398859687 | 0.255570627 | 0.429881373 | 0.075717815 |
| 0.348841704 | 0.275909241 | 0.382274259 | 0.414121678 |
| 0.376511918 | 0.32955735  | 0.291879643 | 0.397157028 |
| 0.145158482 | 0.418351503 | 0.444313476 | 0.047017192 |
| 0.353901572 | 0.467179819 | 0.388659751 | 0.124248676 |
| 0.292461678 | 0.115894562 | 0.141175461 | 0.262678993 |
| 0.380373419 | 0.466400044 | 0.036072894 | 0.108066213 |
| 0.328848415 | 0.216150732 | 0.071209964 | 0.258165488 |
| 0.195836854 | 0.227315242 | 0.124995879 | 0.280967373 |
| 0.392696487 | 0.215666953 | 0.443480576 | 0.161917497 |
| 0.461739141 | 0.028886182 | 0.367405543 | 0.194346887 |
| 0.2039887   | 0.396301795 | 0.418325879 | 0.132870447 |
| 0.025104778 | 0.094352111 | 0.319765363 | 0.314882262 |
| 0.048525312 | 0.12976169  | 0.201433815 | 0.289604978 |
| 0.508497012 | 0.395192025 | 0.197971608 | 0.261273883 |
| 0.305846099 | 0.109633027 | 0.421360814 | 0.261170618 |
| 0.339377637 | 0.278873678 | 0.388941458 | 0.00738117  |
| 0.414248187 | 0.150052757 | 0.183147108 | 0.32709345  |
| 0.479177008 | 0.09275602  | 0.307334342 | 0.109433883 |
| 0.183267962 | 0.002413292 | 0.271445939 | 0.39641656  |
| 0.201362932 | 0.282594994 | 0.28149479  | 0.237549575 |
| 0.480482731 | 0.332880285 | 0.366253783 | 0.276129205 |
| 0.335069252 | 0.037319855 | 0.128120307 | 0.020634622 |
| 0.319748802 | 0.292391909 | 0.358236057 | 0.346432366 |

|             |             |             |             |
|-------------|-------------|-------------|-------------|
| 0.165849961 | 0.396310838 | 0.300718604 | 0.377963717 |
| 0.458286781 | 0.20226078  | 0.519525288 | 0.222110368 |
| 0.425583235 | 0.324348461 | 0.180259591 | 0.246373657 |
| 0.150202198 | 0.096376797 | 0.076512042 | 0.109453262 |
| 0.492348923 | 0.231170796 | 0.339625773 | 0.28972043  |
| 0.033598976 | 0.315869386 | 0.375040616 | 0.414013492 |
| 0.389242533 | 0.378667347 | 0.348798683 | 0.293239257 |
| 0.271915204 | 0.230364543 | 0.075407288 | 0.037475541 |
| 0.275169635 | 0.143580654 | 0.357342687 | 0.380203978 |
| 0.496138532 | 0.251934026 | 0.061656124 | 0.089085347 |
| 0.133582881 | 0.353674076 | 0.207999761 | 0.210697589 |
| 0.365668665 | 0.284229262 | 0.000400471 | 0.169338347 |
| 0.292644369 | 0.369810103 |             |             |
| INSL6       | 0.265138231 | 0.485589406 | 0.064207743 |
| 0.034304013 | 0.148975874 | 0.209319502 | 0.218990152 |
| 0.294397442 | 0.09328774  | 0.125580835 | 0.29296765  |
| 0.000950184 | 0.383529494 | 0.010696131 | 0.074033294 |
| 0.499450669 | 0.522456424 | 0.337457114 | 0.512658825 |
| 0.258093493 | 0.135867798 | 0.303245365 | 0.321940182 |
| 0.231163461 | 0.001130121 | 0.129553033 | 0.047084789 |
| 0.315498034 | 0.498668743 | 0.182546504 | 0.237662694 |
| 0.431852921 | 0.461443698 | 0.352228061 | 0.3486441   |
| 0.255911972 | 0.437258094 | 0.188613475 | 0.400123968 |
| 0.397012574 | 0.226394723 | 0.433114713 | 0.012227264 |
| 0.005349496 | 0.103127019 | 0.280839934 | 0.318124781 |
| 0.263538829 | 0.193653424 | 0.159442521 | 0.173142229 |
| 0.15168008  | 0.313654954 | 0.323678522 | 0.165955486 |
| 0.3850396   | 0.004696156 | 0.426187322 | 0.193087782 |
| 0.062396522 | 0.273571572 | 0.281136132 | 0.339150844 |
| 0.230916555 | 0.410439284 | 0.516820324 | 0.03832339  |
| 0.069255719 | 0.3652956   | 0.355725152 | 0.376685411 |
| 0.436029394 | 0.288216588 | 0.275497316 | 0.366856051 |
| 0.375751948 | 0.379188499 | 0.259826186 | 0.176417543 |
| 0.00064278  | 0.150307124 | 0.338918452 | 0.265943331 |
| 0.360366641 | 0.317441741 | 0.322903645 | 0.221504763 |
| 0.359192749 | 0.01717457  | 0.329555353 | 0.525273008 |
| 0.022924946 | 0.371000316 | 0.015026271 | 0.161111441 |
| 0.386069016 | 0.46067242  | 0.328221731 | 0.069874803 |
| 0.012959764 | 0.116236277 | 0.109994682 | 0.406403858 |
| 0.343949281 | 0.399449588 | 0.365964274 | 0.152123136 |
| 0.367756226 | 0.127929321 | 0.337780559 | 0.434005464 |
| 0.459825206 | 0.009194643 | 0.138728369 | 0.210862609 |
| 0.307083166 | 0.139699004 | 0.231874533 | 0.035985659 |
| 0.014028056 | 0.019447511 | 0.453673177 | 0.141292697 |
| 0.101561949 | 0.192557514 | 0.096606785 | 0.410476225 |
| 0.299709383 | 0.418201544 | 0.152040335 | 0.239873607 |
| 0.388619657 | 0.246736008 | 0.4052187   | 0.392888425 |
| 0.413411781 | 0.216947256 | 0.128649712 | 0.450624742 |
| 0.391296396 | 0.070644257 | 0.071372474 | 0.280895534 |
| 0.364541251 | 0.484519215 | 0.526047306 | 0.275899597 |
| 0.295958293 | 0.223800958 | 0.247846295 | 0.355340277 |
| 0.23910644  | 0.30548613  | 0.10385638  | 0.324089528 |
| 0.382561085 | 0.039189142 | 0.059318591 | 0.374613418 |
| 0.089573859 | 0.245647173 | 0.402432608 | 0.414556833 |



|             |             |             |             |
|-------------|-------------|-------------|-------------|
| 0.421863871 | 0.036574652 | 0.213044678 | 0.236263336 |
| 0.247929845 | 0.22755335  | 0.343828615 | 0.189910575 |
| 0.26794492  | 0.255803717 | 0.050753493 | 0.372068106 |
| 0.118978414 | 0.282903934 | 0.233880561 | 0.061449882 |
| 0.337842436 | 0.310059922 | 0.410137025 | 0.358108549 |
| 0.325417826 | 0.005026602 | 0.124753205 | 0.28399947  |
| 0.222145865 | 0.398165103 | 0.487079699 | 0.108968333 |
| 0.222576429 | 0.319396566 | 0.134338263 | 0.360555598 |
| 0.355445448 | 0.187473968 | 0.163754379 | 0.00037403  |
| 0.152633065 | 0.297179989 | 0.370463419 | 0.040414205 |
| 0.255061644 | 0.0848495   | 0.100576403 | 0.437745156 |
| 0.184332885 | 0.426614794 | 0.024009702 | 0.154268603 |
| 0.232388706 | 0.388661007 | 0.349048643 | 0.200924451 |
| 0.409080011 | 0.270290349 | 0.42477535  | 0.331684458 |
| 0.314205546 | 0.302779586 | 0.175707006 | 0.234875722 |
| 0.401406498 | 0.461719946 | 0.408861285 | 1           |
| 0.236338891 | 0.324461936 | 0.298934778 | 0.243438795 |
| 0.331547074 | 0.375362124 | 0.074051182 | 0.501762755 |
| 0.000423974 | 0.311471371 | 0.392344995 | 0.162272379 |
| 0.47532692  | 0.233428131 | 0.059855725 | 0.213761002 |
| 0.519931647 | 0.502169425 | 0.394951259 | 0.424851629 |
| 0.207746711 | 0.008285877 | 0.462508669 | 0.346099132 |
| 0.506426515 | 0.378911856 | 0.37612861  | 0.093069971 |
| 0.481158922 | 0.30314021  | 0.337888363 | 0.326265678 |
| 0.420993525 | 0.413488014 | 0.229452593 | 0.295395456 |
| 0.011394325 | 0.20136841  | 0.335984179 | 0.162914021 |
| 0.262978459 | 0.149997307 | 0.425138355 | 0.297498644 |
| 0.410471144 | 0.229001456 | 0.329926915 | 0.084572582 |
| 0.16932633  | 0.488346389 | 0.081805556 | 0.438082111 |
| 0.526721513 | 0.338821108 | 0.468530436 | 0.513818253 |
| 0.257494412 | 0.347955228 | 0.447625027 | 0.426226145 |
| 0.000703906 | 0.427232029 | 0.357938332 | 0.303682197 |
| 0.4293301   | 0.24836643  | 0.215457496 | 0.3928021   |
| 0.001706562 | 0.135187637 | 0.23943172  | 0.471056141 |
| 0.469858739 | 0.029422383 | 0.087274161 | 0.418821019 |
| 0.364218115 | 0.054471925 | 0.51503457  | 0.287699954 |
| 0.444096191 | 0.417290252 | 0.159457806 | 0.389136021 |
| 0.202192885 | 0.350889909 | 0.040277842 | 0.396315738 |
| 0.398478185 | 0.076843972 | 0.084659149 | 0.512448187 |
| 0.382996457 | 0.362670009 | 0.232393187 | 0.005066766 |
| 0.362409714 | 0.191725955 | 0.403323614 | 0.129393439 |
| 0.36838575  | 0.320990873 | 0.44248901  | 0.402395374 |
| 0.393816428 | 0.361001315 | 0.322601074 | 0.398134164 |
| 0.143515322 | 0.371575434 | 0.411242276 | 0.05497521  |
| 0.309066052 | 0.480619724 | 0.352819231 | 0.166882768 |
| 0.315235899 | 0.122631781 | 0.183724252 | 0.265696101 |
| 0.433281028 | 0.464662372 | 0.049867248 | 0.157364371 |
| 0.356264885 | 0.273662931 | 0.112361808 | 0.334170429 |
| 0.243088743 | 0.143973612 | 0.138342524 | 0.322466468 |
| 0.442164531 | 0.270900201 | 0.420479883 | 0.139996345 |
| 0.471820344 | 0.049933727 | 0.401795847 | 0.270499372 |
| 0.245913074 | 0.316185332 | 0.375763384 | 0.101469724 |
| 0.014483948 | 0.094177523 | 0.353195921 | 0.362587732 |
| 0.071389658 | 0.170262033 | 0.238195864 | 0.333695215 |

|             |             |             |             |
|-------------|-------------|-------------|-------------|
| 0.496571766 | 0.362884257 | 0.249423269 | 0.312921204 |
| 0.371467198 | 0.104638737 | 0.462869836 | 0.277838807 |
| 0.33181976  | 0.306843281 | 0.398401822 | 0.007558919 |
| 0.380361395 | 0.145801501 | 0.175841609 | 0.345216396 |
| 0.441966951 | 0.125283329 | 0.358653325 | 0.138364097 |
| 0.168868588 | 0.004299499 | 0.312729028 | 0.370857446 |
| 0.247586407 | 0.282085544 | 0.326602782 | 0.174000402 |
| 0.514999242 | 0.320107324 | 0.331105385 | 0.299278057 |
| 0.331615394 | 0.043172919 | 0.139116406 | 0.029109112 |
| 0.320457672 | 0.340907589 | 0.341126948 | 0.290578239 |
| 0.165191717 | 0.421916238 | 0.35364583  | 0.408429015 |
| 0.470133217 | 0.150801156 | 0.512668542 | 0.278260321 |
| 0.388165608 | 0.322728892 | 0.238099203 | 0.31075079  |
| 0.209949039 | 0.122580231 | 0.116284735 | 0.130614933 |
| 0.480286947 | 0.326173692 | 0.371699938 | 0.231900532 |
| 0.048142309 | 0.363480483 | 0.368156303 | 0.370481402 |
| 0.365195246 | 0.309684984 | 0.347240634 | 0.347251904 |
| 0.230156832 | 0.227866688 | 0.063162096 | 0.030246043 |
| 0.230289635 | 0.168056418 | 0.374649119 | 0.409507045 |
| 0.511510838 | 0.240379634 | 0.089059576 | 0.118378035 |
| 0.158127754 | 0.328293246 | 0.25986088  | 0.239067649 |
| 0.403762749 | 0.25154469  | 0.000582695 | 0.185534281 |
| 0.32561564  | 0.361079747 |             |             |
| IRAK2       | 0.130431696 | 0.37563742  | 0.154222042 |
| 0.017565677 | 0.11591386  | 0.373274749 | 0.295256906 |
| 0.091230842 | 0.17436091  | 0.176218341 | 0.433090119 |
| 0.003809966 | 0.130489464 | 0.044559425 | 0.092238172 |
| 0.27496817  | 0.27552891  | 0.269711191 | 0.273036286 |
| 0.142479175 | 0.106047524 | 0.292142131 | 0.263563068 |
| 0.320845488 | 0.007004687 | 0.182074917 | 0.06596058  |
| 0.064225144 | 0.235721268 | 0.238019703 | 0.186762985 |
| 0.236445354 | 0.197020148 | 0.11342581  | 0.096550693 |
| 0.031976072 | 0.416199811 | 0.015323967 | 0.155425237 |
| 0.145984302 | 0.199465014 | 0.207758332 | 0.055136188 |
| 0.000826921 | 0.180968284 | 0.059710706 | 0.285994705 |
| 0.126709837 | 0.330333916 | 0.236681549 | 0.188485738 |
| 0.014810467 | 0.413509406 | 0.25263511  | 0.012995969 |
| 0.455170818 | 0.003733366 | 0.436880789 | 0.07434018  |
| 0.163595074 | 0.191635749 | 0.089972244 | 0.267207266 |
| 0.400166109 | 0.454128654 | 0.329416057 | 0.137409024 |
| 0.181447903 | 0.139204843 | 0.15462524  | 0.219010361 |
| 0.330454776 | 0.127868791 | 0.187504545 | 0.05255916  |
| 0.174719941 | 0.152514086 | 0.344870457 | 0.175340028 |
| 0.005016108 | 0.222662074 | 0.10713186  | 0.136982183 |
| 0.092952478 | 0.437711798 | 0.148964418 | 0.197336939 |
| 0.115763623 | 0.082373116 | 0.255214268 | 0.30662755  |
| 0.032965328 | 0.166525099 | 0.009527207 | 0.161137806 |
| 0.217890702 | 0.188252586 | 0.21500691  | 0.196371763 |
| 0.060155419 | 0.156834322 | 0.056794451 | 0.134385323 |
| 0.193733046 | 0.157470549 | 0.447170638 | 0.010930246 |
| 0.106473805 | 0.141670867 | 0.167067967 | 0.430549251 |
| 0.315849457 | 0.022950395 | 0.138462436 | 0.335151419 |
| 0.087272968 | 0.087778131 | 0.287350651 | 0.008532849 |
| 0.023295723 | 0.008935626 | 0.228839398 | 0.193636644 |

|             |             |             |             |
|-------------|-------------|-------------|-------------|
| 0.178720121 | 0.257470156 | 0.082343761 | 0.177289854 |
| 0.076192959 | 0.198809798 | 0.138805912 | 0.239524203 |
| 0.147406816 | 0.310840096 | 0.135757064 | 0.203427364 |
| 0.088344888 | 0.139166618 | 0.188593908 | 0.374540349 |
| 0.412506563 | 0.16504245  | 0.16974087  | 0.36782474  |
| 0.112236208 | 0.272763951 | 0.335878903 | 0.127985269 |
| 0.159138755 | 0.219783079 | 0.124089498 | 0.306057515 |
| 0.312049353 | 0.170836146 | 0.00990315  | 0.373418811 |
| 0.472766261 | 0.010704599 | 0.169270829 | 0.21309357  |
| 0.030942002 | 0.184517821 | 0.375808101 | 0.274408962 |
| 0.170573356 | 0.056254935 | 0.170879541 | 0.308324235 |
| 0.259507664 | 0.242890089 | 0.253242984 | 0.153805614 |
| 0.338702626 | 0.113559593 | 0.145267222 | 0.114374516 |
| 0.201928157 | 0.266036218 | 0.047215611 | 0.025720044 |
| 0.154724447 | 0.110984897 | 0.316165326 | 0.188838385 |
| 0.174923453 | 0.003013521 | 0.165732985 | 0.171739187 |
| 0.11915845  | 0.156214967 | 0.400596886 | 0.208873671 |
| 0.277786351 | 0.053203694 | 0.208929204 | 0.136698672 |
| 0.225712106 | 0.17968048  | 0.160488556 | 0.00630618  |
| 0.194092058 | 0.065452349 | 0.143660856 | 0.086567788 |
| 0.176359321 | 0.159644859 | 0.048808081 | 0.299252048 |
| 0.286846427 | 0.216111425 | 0.031982753 | 0.022723579 |
| 0.191013437 | 0.347939517 | 0.096462716 | 0.08788232  |
| 0.284116531 | 0.16755929  | 0.15132588  | 0.423266487 |
| 0.157181575 | 0.420355212 | 0.020611433 | 0.181189718 |
| 0.12017698  | 0.285328298 | 0.193188624 | 0.236338891 |
| 1           | 0.170431182 | 0.054869674 | 0.37743558  |
| 0.190366932 | 0.179289672 | 0.167985246 | 0.372519416 |
| 0.005552973 | 0.292778336 | 0.17591962  | 0.020494672 |
| 0.380079997 | 0.34610322  | 0.155867478 | 0.14529375  |
| 0.2796605   | 0.371974815 | 0.259965054 | 0.18213185  |
| 0.046068669 | 0.030237413 | 0.327396885 | 0.347451866 |
| 0.23828238  | 0.173647266 | 0.057265381 | 0.015696187 |
| 0.290271408 | 0.094364779 | 0.237709575 | 0.114266987 |
| 0.149650748 | 0.068240705 | 0.222732059 | 0.139606447 |
| 0.005558425 | 0.191313177 | 0.160266898 | 0.089987386 |
| 0.136673459 | 0.176246664 | 0.2834483   | 0.381633975 |
| 0.097520329 | 0.065391039 | 0.094566799 | 0.166018826 |
| 0.276652957 | 0.370027117 | 0.00587928  | 0.316287856 |
| 0.312243435 | 0.227452932 | 0.288161352 | 0.301910305 |
| 0.220750692 | 0.423107887 | 0.319505183 | 0.201019136 |
| 0.002550974 | 0.161724562 | 0.114411144 | 0.44303852  |
| 0.220252731 | 0.360917856 | 0.038305497 | 0.06373395  |
| 0.004011182 | 0.235369718 | 0.031966144 | 0.396007295 |
| 0.261159096 | 0.110236599 | 0.003613031 | 0.265142394 |
| 0.108708333 | 0.008711378 | 0.350346477 | 0.259819915 |
| 0.343755593 | 0.170218322 | 0.224109685 | 0.142662316 |
| 0.021176234 | 0.089629758 | 0.055056978 | 0.234996515 |
| 0.103172986 | 0.020328655 | 0.106731229 | 0.310454841 |
| 0.306050904 | 0.363975052 | 0.310009435 | 0.020543426 |
| 0.142691097 | 0.057447067 | 0.233211438 | 0.129390665 |
| 0.31643935  | 0.41505504  | 0.377135825 | 0.172265828 |
| 0.195664094 | 0.413989311 | 0.43111017  | 0.302783487 |
| 0.027852409 | 0.158086698 | 0.201951028 | 0.096031775 |

|             |             |             |             |
|-------------|-------------|-------------|-------------|
| 0.106191086 | 0.279180479 | 0.144557358 | 0.321127278 |
| 0.287089694 | 0.031937759 | 0.346846441 | 0.131221605 |
| 0.386380929 | 0.277016565 | 0.165201883 | 0.142976369 |
| 0.419744639 | 0.187677669 | 0.198534362 | 0.173194967 |
| 0.380144517 | 0.016081068 | 0.023486485 | 0.367265601 |
| 0.428393381 | 0.412777448 | 0.254866245 | 0.111019955 |
| 0.228959816 | 0.123887994 | 0.241500033 | 0.199874832 |
| 0.263640427 | 0.111146183 | 0.134998267 | 0.020698913 |
| 0.038617482 | 0.129186919 | 0.416402763 | 0.434963358 |
| 0.169852356 | 0.240142657 | 0.240295961 | 0.265261409 |
| 0.253285566 | 0.091558465 | 0.349850666 | 0.165356413 |
| 0.466276217 | 0.081394237 | 0.401514162 | 0.21278811  |
| 0.303243275 | 0.195346917 | 0.274419267 | 0.008585418 |
| 0.157039985 | 0.173475482 | 0.044483135 | 0.204046478 |
| 0.174493494 | 0.20175819  | 0.358311028 | 0.182720529 |
| 0.053502832 | 0.004215732 | 0.314617849 | 0.053715275 |
| 0.434048049 | 0.042151538 | 0.175246534 | 0.011414033 |
| 0.384077023 | 0.200078342 | 0.250857477 | 0.038103018 |
| 0.147751902 | 0.001801935 | 0.181917996 | 0.095764591 |
| 0.299588425 | 0.379344215 | 0.17800378  | 0.116322997 |
| 0.061447872 | 0.20791805  | 0.349803791 | 0.142849609 |
| 0.274930772 | 0.028958979 | 0.286261428 | 0.136923956 |
| 0.123333874 | 0.122454114 | 0.343864501 | 0.138235692 |
| 0.20154561  | 0.076738406 | 0.203737125 | 0.11536269  |
| 0.244044734 | 0.122204686 | 0.212585382 | 0.09065438  |
| 0.126916709 | 0.167786852 | 0.177274171 | 0.162881837 |
| 0.205341129 | 0.131451998 | 0.07141949  | 0.452323713 |
| 0.080163617 | 0.131802715 | 0.030085771 | 0.054199624 |
| 0.068104953 | 0.213275391 | 0.259946093 | 0.274050529 |
| 0.287612229 | 0.051376517 | 0.192682092 | 0.158274931 |
| 0.01242074  | 0.142119793 | 0.344157403 | 0.027074772 |
| 0.195468533 | 0.058431463 | 0.003216174 | 0.111768143 |
| 0.373365276 | 0.086180739 |             |             |
| IRF4        | 0.270720533 | 0.391821099 | 0.062752408 |
| 0.007999159 | 0.0635875   | 0.158924093 | 0.134549784 |
| 0.281969768 | 0.11083472  | 0.068676833 | 0.210663965 |
| 0.0082265   | 0.327971292 | 0.036931948 | 0.112592883 |
| 0.432031414 | 0.435002346 | 0.201443782 | 0.457686297 |
| 0.29356377  | 0.058018058 | 0.284574099 | 0.208920498 |
| 0.171448708 | 0.008046593 | 0.070030647 | 0.015604557 |
| 0.282670715 | 0.435344165 | 0.180842284 | 0.15616848  |
| 0.393104192 | 0.351007616 | 0.194500771 | 0.152580614 |
| 0.102104762 | 0.374396824 | 0.087118211 | 0.279977102 |
| 0.370297221 | 0.118793287 | 0.344524392 | 0.0270534   |
| 0.000605336 | 0.072279856 | 0.261228194 | 0.264518881 |
| 0.30881227  | 0.151137025 | 0.164505566 | 0.090090987 |
| 0.091494998 | 0.242894585 | 0.365248008 | 0.087421317 |
| 0.304032435 | 0.001014469 | 0.350402636 | 0.276028338 |
| 0.071434106 | 0.259686745 | 0.245465231 | 0.269354714 |
| 0.164209854 | 0.325428333 | 0.42260494  | 0.024384058 |
| 0.06247625  | 0.282362698 | 0.285186077 | 0.20123886  |
| 0.367127584 | 0.182687981 | 0.16959445  | 0.221191339 |
| 0.257255668 | 0.343527149 | 0.230467975 | 0.181422895 |
| 0.002346506 | 0.08827826  | 0.135882614 | 0.283527534 |

|             |             |             |             |
|-------------|-------------|-------------|-------------|
| 0.226811765 | 0.246086553 | 0.282640821 | 0.11743647  |
| 0.234508992 | 0.031088567 | 0.269714418 | 0.433917365 |
| 0.011689744 | 0.332613449 | 0.008681037 | 0.178431957 |
| 0.350056493 | 0.406577544 | 0.274004092 | 0.049109865 |
| 0.027861695 | 0.169824352 | 0.208859352 | 0.370104572 |
| 0.287882332 | 0.266337303 | 0.295155822 | 0.157511043 |
| 0.309625805 | 0.163701662 | 0.242050208 | 0.349800659 |
| 0.396597889 | 0.027826156 | 0.214188465 | 0.15736364  |
| 0.189536801 | 0.059720008 | 0.157436055 | 0.027658913 |
| 0.00676838  | 0.077404349 | 0.396386356 | 0.168750182 |
| 0.055740039 | 0.129748492 | 0.044710832 | 0.217643594 |
| 0.283999479 | 0.420225652 | 0.071753459 | 0.150051227 |
| 0.249573976 | 0.150177817 | 0.194180099 | 0.276765915 |
| 0.185414461 | 0.273185062 | 0.144279823 | 0.344391594 |
| 0.37362062  | 0.059345723 | 0.077923538 | 0.212164534 |
| 0.292652268 | 0.41538979  | 0.441196398 | 0.280833251 |
| 0.131730662 | 0.226772118 | 0.158732957 | 0.206883189 |
| 0.174754966 | 0.32680158  | 0.123624337 | 0.259346337 |
| 0.314765223 | 0.029234907 | 0.067969565 | 0.352713883 |
| 0.017788549 | 0.153281006 | 0.356422472 | 0.306881809 |
| 0.281723105 | 0.012538176 | 0.109194815 | 0.155441803 |
| 0.239259358 | 0.149725367 | 0.28332232  | 0.096373162 |
| 0.233467649 | 0.152405102 | 0.044413507 | 0.303949177 |
| 0.112979343 | 0.276883127 | 0.174329658 | 0.048941144 |
| 0.308191952 | 0.319823061 | 0.325977725 | 0.295521051 |
| 0.283246037 | 0.000722724 | 0.06573418  | 0.273447302 |
| 0.162791141 | 0.386478423 | 0.377821723 | 0.109608807 |
| 0.235611634 | 0.229541984 | 0.144454834 | 0.169266481 |
| 0.39954576  | 0.116742905 | 0.106559106 | 0.00105425  |
| 0.108520138 | 0.179001823 | 0.284704196 | 0.099987736 |
| 0.11896784  | 0.111015804 | 0.204644222 | 0.345121664 |
| 0.154856031 | 0.297282358 | 0.082084439 | 0.240077405 |
| 0.184317128 | 0.24389002  | 0.179101372 | 0.222565169 |
| 0.265198011 | 0.178315999 | 0.379702881 | 0.295046081 |
| 0.168361632 | 0.2200307   | 0.187749423 | 0.246468685 |
| 0.251914576 | 0.350812046 | 0.31231636  | 0.324461936 |
| 0.170431182 | 1           | 0.222748435 | 0.198982301 |
| 0.299794118 | 0.314160095 | 0.094279176 | 0.415085501 |
| 0.00236149  | 0.254344022 | 0.22367679  | 0.196203613 |
| 0.362385638 | 0.144707343 | 0.08496053  | 0.265678667 |
| 0.460587626 | 0.425473571 | 0.417447034 | 0.356089878 |
| 0.210670415 | 0.03580422  | 0.435983563 | 0.269685332 |
| 0.430059117 | 0.250489369 | 0.154334106 | 0.172099442 |
| 0.390618563 | 0.302085514 | 0.236285521 | 0.245996833 |
| 0.2458832   | 0.23219322  | 0.235389344 | 0.307251358 |
| 0.023877874 | 0.155696098 | 0.235696309 | 0.086469787 |
| 0.150022257 | 0.133187926 | 0.312112417 | 0.241363347 |
| 0.187783975 | 0.193738279 | 0.145665765 | 0.060135617 |
| 0.143720291 | 0.401861768 | 0.037107597 | 0.42995406  |
| 0.443913241 | 0.289751491 | 0.349043396 | 0.453556365 |
| 0.245175423 | 0.26489284  | 0.357804319 | 0.425912691 |
| 0.004176916 | 0.346768502 | 0.271138031 | 0.269625886 |
| 0.344364939 | 0.197618888 | 0.281397289 | 0.220722601 |
| 0.004747776 | 0.140019179 | 0.110161368 | 0.428297124 |

|             |             |             |             |
|-------------|-------------|-------------|-------------|
| 0.346447294 | 0.028369152 | 0.036814941 | 0.311494538 |
| 0.239500566 | 0.061436851 | 0.440969803 | 0.182488191 |
| 0.325160454 | 0.260808278 | 0.103020536 | 0.302626895 |
| 0.10205272  | 0.320058827 | 0.015650288 | 0.226181565 |
| 0.263627747 | 0.143875732 | 0.031381555 | 0.454427163 |
| 0.343276639 | 0.23243754  | 0.19737307  | 0.003582383 |
| 0.365975161 | 0.079151037 | 0.258938957 | 0.139327582 |
| 0.347806196 | 0.246833269 | 0.350509878 | 0.317363397 |
| 0.275585315 | 0.285798732 | 0.268172627 | 0.323486665 |
| 0.051387229 | 0.307398519 | 0.352728027 | 0.041508663 |
| 0.251842574 | 0.372681317 | 0.188660189 | 0.119691914 |
| 0.284562689 | 0.029344361 | 0.150895809 | 0.31039699  |
| 0.325640455 | 0.353981263 | 0.051093469 | 0.22804572  |
| 0.277578797 | 0.238445875 | 0.085944618 | 0.292213769 |
| 0.209296622 | 0.101986655 | 0.223410476 | 0.260589105 |
| 0.352987293 | 0.184435347 | 0.344589526 | 0.061285814 |
| 0.37739024  | 0.082862872 | 0.391330594 | 0.186149112 |
| 0.243545784 | 0.219017832 | 0.348803065 | 0.14185636  |
| 0.011394381 | 0.135522192 | 0.253162043 | 0.308649219 |
| 0.073331239 | 0.182003709 | 0.147084331 | 0.179944183 |
| 0.40995824  | 0.227909538 | 0.199068303 | 0.296807259 |
| 0.312589792 | 0.036604419 | 0.412081388 | 0.26313678  |
| 0.314567371 | 0.174965398 | 0.321803666 | 0.007691708 |
| 0.255031575 | 0.081570655 | 0.272030863 | 0.168258824 |
| 0.404453528 | 0.102146178 | 0.218442251 | 0.169177213 |
| 0.0941461   | 0.011798749 | 0.290440428 | 0.179119766 |
| 0.192049206 | 0.277867449 | 0.294551024 | 0.084036523 |
| 0.43895     | 0.257225769 | 0.304299949 | 0.234389684 |
| 0.19720228  | 0.00998224  | 0.076129779 | 0.049128054 |
| 0.307420601 | 0.290902185 | 0.289530485 | 0.256104461 |
| 0.28267961  | 0.250034418 | 0.254359851 | 0.197130348 |
| 0.348000999 | 0.080046017 | 0.420934234 | 0.311540648 |
| 0.32338068  | 0.242203018 | 0.195318534 | 0.266292919 |
| 0.117293485 | 0.131784598 | 0.107844659 | 0.234717541 |
| 0.363281292 | 0.276039437 | 0.193942142 | 0.229188025 |
| 0.036724876 | 0.221179176 | 0.339826307 | 0.273487381 |
| 0.233341338 | 0.240778439 | 0.27714099  | 0.295902388 |
| 0.225126929 | 0.264691625 | 0.016573281 | 0.009541195 |
| 0.102577284 | 0.124808179 | 0.405890971 | 0.380084625 |
| 0.431134118 | 0.275452097 | 0.089051948 | 0.175618554 |
| 0.152812214 | 0.343902151 | 0.154251559 | 0.075546945 |
| 0.281781128 | 0.246989236 | 0.00160799  | 0.273538629 |
| 0.262908422 | 0.204608031 |             |             |
| ITGAV       | 0.133204019 | 0.316867776 | 0.004655181 |
| 0.001429452 | 0.005425582 | 0.078726582 | 0.06009054  |
| 0.145914488 | 0.004285265 | 0.013151594 | 0.152726834 |
| 0.000108174 | 0.294625282 | 0.000616728 | 0.002295335 |
| 0.364592785 | 0.365439692 | 0.106748937 | 0.371415362 |
| 0.117704096 | 0.004088066 | 0.183503393 | 0.138568959 |
| 0.071494949 | 9.53E-05    | 0.022505154 | 0.001904491 |
| 0.124300308 | 0.376155388 | 0.052387622 | 0.022116832 |
| 0.312909652 | 0.330206653 | 0.051064459 | 0.015523726 |
| 0.024206369 | 0.287264724 | 0.007271376 | 0.265283724 |
| 0.299675523 | 0.040613543 | 0.297071219 | 0.00029522  |

|             |             |             |             |
|-------------|-------------|-------------|-------------|
| 0.000178047 | 0.013815976 | 0.131337834 | 0.181360654 |
| 0.080649116 | 0.06760851  | 0.045718165 | 0.030457304 |
| 0.010475213 | 0.166866214 | 0.258001636 | 0.018271166 |
| 0.233108094 | 0.000141502 | 0.261197688 | 0.06904646  |
| 0.007746309 | 0.070199628 | 0.097628058 | 0.184992678 |
| 0.089184262 | 0.252692493 | 0.343070086 | 0.00108878  |
| 0.012806376 | 0.141596073 | 0.257562862 | 0.163028398 |
| 0.296041627 | 0.025962254 | 0.024632842 | 0.088235507 |
| 0.222525616 | 0.297787465 | 0.108002331 | 0.022426194 |
| 4.20E-05    | 0.03250181  | 0.042906801 | 0.180949661 |
| 0.207789795 | 0.182852653 | 0.183142104 | 0.026987721 |
| 0.151256141 | 0.000680842 | 0.163458938 | 0.370465752 |
| 0.000870616 | 0.263085193 | 0.000856468 | 0.012927845 |
| 0.283042217 | 0.34618962  | 0.209226367 | 0.005159451 |
| 0.000531569 | 0.019539799 | 0.012972525 | 0.314687472 |
| 0.137120881 | 0.153279352 | 0.213619735 | 0.0380882   |
| 0.285626137 | 0.007623665 | 0.052805347 | 0.284153159 |
| 0.322269208 | 0.000850257 | 0.018447814 | 0.077548605 |
| 0.011441915 | 0.003070423 | 0.06984811  | 0.005525349 |
| 0.002158992 | 0.003289308 | 0.340292118 | 0.026251697 |
| 0.013079122 | 0.050879442 | 0.004064199 | 0.186684243 |
| 0.132019942 | 0.316213169 | 0.007279263 | 0.058560303 |
| 0.243638037 | 0.073965882 | 0.123721093 | 0.234026941 |
| 0.061503833 | 0.039809031 | 0.027476589 | 0.281212206 |
| 0.26838339  | 0.003124402 | 0.004508308 | 0.136577844 |
| 0.270963467 | 0.364176879 | 0.364825857 | 0.042338468 |
| 0.043151195 | 0.069131824 | 0.034422961 | 0.165223155 |
| 0.075224215 | 0.145264581 | 0.028622613 | 0.17544518  |
| 0.234320413 | 0.005880127 | 0.007516039 | 0.282339795 |
| 0.002390147 | 0.009714075 | 0.264218431 | 0.264716133 |
| 0.185218925 | 0.001166693 | 0.039063171 | 0.072336385 |
| 0.093135533 | 0.062269604 | 0.164469131 | 0.028195521 |
| 0.128660668 | 0.040481654 | 0.005912742 | 0.283795979 |
| 0.029054402 | 0.131555676 | 0.019476669 | 0.001728019 |
| 0.192324844 | 0.111413579 | 0.278400428 | 0.173342323 |
| 0.218316005 | 0.000270113 | 0.014309268 | 0.15521632  |
| 0.028893793 | 0.330186711 | 0.310747588 | 0.025918454 |
| 0.091541594 | 0.039874591 | 0.034864685 | 0.050157544 |
| 0.281444659 | 0.012050576 | 0.009075202 | 3.56E-05    |
| 0.006999229 | 0.079837765 | 0.111369233 | 0.003632907 |
| 0.026717294 | 0.005014926 | 0.005624197 | 0.289187397 |
| 0.059647142 | 0.284663439 | 0.002562304 | 0.027194296 |
| 0.044702044 | 0.201356052 | 0.067653699 | 0.016876482 |
| 0.234127589 | 0.045785035 | 0.333381825 | 0.194819394 |
| 0.023981239 | 0.166374989 | 0.008537025 | 0.047654614 |
| 0.197538141 | 0.301798691 | 0.293745762 | 0.298934778 |
| 0.054869674 | 0.222748435 | 1           | 0.113706502 |
| 0.160102505 | 0.172929889 | 0.010473988 | 0.341374527 |
| 2.75E-05    | 0.139079449 | 0.149059667 | 0.010867074 |
| 0.310606111 | 0.078253127 | 0.008885729 | 0.070975783 |
| 0.377927774 | 0.338701061 | 0.301729243 | 0.3229301   |
| 0.015310592 | 0.000686549 | 0.333763391 | 0.180555067 |
| 0.365966787 | 0.094044926 | 0.047725855 | 0.005377426 |
| 0.345637614 | 0.178525826 | 0.167407288 | 0.151088037 |

|             |             |             |             |
|-------------|-------------|-------------|-------------|
| 0.160141564 | 0.100817913 | 0.071028606 | 0.20913662  |
| 0.000815891 | 0.045666292 | 0.193967816 | 0.004311528 |
| 0.043627878 | 0.005211992 | 0.26980279  | 0.14712988  |
| 0.063406651 | 0.027819047 | 0.048980459 | 0.011958659 |
| 0.044710662 | 0.327765544 | 0.003395665 | 0.318646847 |
| 0.377492845 | 0.125014508 | 0.314187022 | 0.377750471 |
| 0.099599614 | 0.190505015 | 0.302716096 | 0.328045792 |
| 8.32E-05    | 0.314491031 | 0.265394405 | 0.177034418 |
| 0.310627929 | 0.096607634 | 0.095620036 | 0.115939071 |
| 6.15E-05    | 0.036773584 | 0.027146653 | 0.319613489 |
| 0.326131122 | 0.000677515 | 0.003297638 | 0.282248092 |
| 0.234412818 | 0.004271001 | 0.354766784 | 0.099355901 |
| 0.290684909 | 0.148574017 | 0.034062539 | 0.275585337 |
| 0.030140381 | 0.073439362 | 0.001337366 | 0.192550865 |
| 0.108901557 | 0.003137337 | 0.005017928 | 0.358392371 |
| 0.279765299 | 0.175692879 | 0.077012299 | 0.00023969  |
| 0.296608885 | 0.010402779 | 0.24267067  | 0.007341217 |
| 0.28015113  | 0.162686195 | 0.291121227 | 0.271842876 |
| 0.170664306 | 0.223154736 | 0.192385105 | 0.275806769 |
| 0.00580573  | 0.285510929 | 0.312362428 | 0.002178239 |
| 0.167574236 | 0.320463335 | 0.113392952 | 0.051870739 |
| 0.165062443 | 0.004672543 | 0.067014861 | 0.129654144 |
| 0.278482591 | 0.314259692 | 0.005311415 | 0.030687049 |
| 0.214216834 | 0.042495817 | 0.019083034 | 0.102407479 |
| 0.104257971 | 0.015213132 | 0.013370108 | 0.163111293 |
| 0.276373336 | 0.118483758 | 0.302127695 | 0.009868663 |
| 0.336171562 | 0.00497131  | 0.288119485 | 0.017292228 |
| 0.10277207  | 0.17395317  | 0.309606326 | 0.010900313 |
| 0.000878938 | 0.007185122 | 0.196104101 | 0.222289127 |
| 0.012626676 | 0.054872068 | 0.068485239 | 0.114164406 |
| 0.360922858 | 0.057028862 | 0.107804014 | 0.130786388 |
| 0.223478059 | 0.002649281 | 0.314117093 | 0.112010551 |
| 0.225931884 | 0.065285501 | 0.255588914 | 0.000162771 |
| 0.198107895 | 0.020315396 | 0.084725318 | 0.104300749 |
| 0.333912014 | 0.024378388 | 0.162542889 | 0.024173704 |
| 0.005969339 | 0.000530546 | 0.182275    | 0.105669265 |
| 0.116695173 | 0.073030025 | 0.135878308 | 0.013356602 |
| 0.348184169 | 0.156265519 | 0.235282103 | 0.061339337 |
| 0.082891845 | 0.001469034 | 0.01810254  | 0.001143538 |
| 0.205346254 | 0.191782257 | 0.178805424 | 0.128063595 |
| 0.050938559 | 0.183330397 | 0.181299605 | 0.113258261 |
| 0.309873459 | 0.012481375 | 0.361723619 | 0.063835661 |
| 0.288030409 | 0.03557661  | 0.085281618 | 0.026686278 |
| 0.039225675 | 0.003294682 | 0.017610214 | 0.020415564 |
| 0.330670725 | 0.029340615 | 0.113326323 | 0.040171398 |
| 0.002801955 | 0.086790068 | 0.270735944 | 0.237094117 |
| 0.171854776 | 0.221212303 | 0.142271676 | 0.209377508 |
| 0.01477646  | 0.062495255 | 0.002043938 | 0.000650322 |
| 0.010130156 | 0.032436921 | 0.2870492   | 0.310347181 |
| 0.356335928 | 0.025611728 | 0.011971651 | 0.023129483 |
| 0.008428678 | 0.271638843 | 0.090076136 | 0.010020727 |
| 0.16636252  | 0.039197816 | 8.54E-05    | 0.042167083 |
| 0.179001223 | 0.043912459 |             |             |
| ITGB1       | 0.179718422 | 0.379790581 | 0.306485241 |



|             |             |             |             |
|-------------|-------------|-------------|-------------|
| 0.024613449 | 0.185524491 | 0.39311333  | 0.35443407  |
| 0.166295524 | 0.324562703 | 0.256465518 | 0.427025443 |
| 0.012906743 | 0.14306045  | 0.121656678 | 0.216603252 |
| 0.288070497 | 0.288453412 | 0.318481089 | 0.291601799 |
| 0.25154375  | 0.137928763 | 0.325068202 | 0.28702274  |
| 0.383736121 | 0.025188766 | 0.29283143  | 0.078075381 |
| 0.129761663 | 0.252580992 | 0.40449861  | 0.298236857 |
| 0.250284338 | 0.206441529 | 0.193342635 | 0.165985732 |
| 0.050163734 | 0.435122898 | 0.024034879 | 0.158735552 |
| 0.16016149  | 0.307637628 | 0.216669621 | 0.109448816 |
| 0.000804822 | 0.319694409 | 0.123032662 | 0.304588603 |
| 0.281932309 | 0.395935306 | 0.404109075 | 0.289869427 |
| 0.026119395 | 0.422662047 | 0.288327698 | 0.023163165 |
| 0.453833991 | 0.004688091 | 0.440737524 | 0.176706547 |
| 0.321712047 | 0.340898169 | 0.13823221  | 0.26646813  |
| 0.388326167 | 0.454877523 | 0.337548098 | 0.174389124 |
| 0.322970682 | 0.184095534 | 0.160496929 | 0.211787596 |
| 0.3448057   | 0.244581388 | 0.312496997 | 0.093687337 |
| 0.1772883   | 0.170529603 | 0.38287445  | 0.376633108 |
| 0.00932817  | 0.323124559 | 0.16275382  | 0.155816022 |
| 0.100053282 | 0.433135041 | 0.167475269 | 0.297732249 |
| 0.164938107 | 0.19188357  | 0.314269338 | 0.321821126 |
| 0.048631841 | 0.174636334 | 0.017259298 | 0.349589686 |
| 0.236318976 | 0.203366987 | 0.236045874 | 0.275387296 |
| 0.149415025 | 0.358741719 | 0.128442104 | 0.145912746 |
| 0.248618216 | 0.222744947 | 0.442097268 | 0.023467047 |
| 0.115441625 | 0.285339428 | 0.307272432 | 0.435918585 |
| 0.324049938 | 0.069822434 | 0.332583284 | 0.39885746  |
| 0.152944691 | 0.123723679 | 0.378977435 | 0.018175266 |
| 0.03365525  | 0.031085393 | 0.240892623 | 0.382152789 |
| 0.260880401 | 0.379664642 | 0.14460943  | 0.171340915 |
| 0.156258531 | 0.217825285 | 0.221208122 | 0.361371484 |
| 0.149564786 | 0.354402954 | 0.194855106 | 0.202959816 |
| 0.147697343 | 0.298398332 | 0.395636543 | 0.37482056  |
| 0.438117901 | 0.282696009 | 0.328360314 | 0.377757896 |
| 0.118351238 | 0.284702608 | 0.348217402 | 0.271079483 |
| 0.248233476 | 0.382665129 | 0.19806248  | 0.296752135 |
| 0.384091333 | 0.254288666 | 0.024452789 | 0.397133928 |
| 0.474766906 | 0.020221338 | 0.326484228 | 0.233223261 |
| 0.039546506 | 0.286942711 | 0.398461453 | 0.280507566 |
| 0.193333192 | 0.068758511 | 0.266099925 | 0.358357372 |
| 0.356251617 | 0.357447866 | 0.260617175 | 0.228776952 |
| 0.367427014 | 0.189271949 | 0.268864477 | 0.120612633 |
| 0.390534143 | 0.326487397 | 0.086165897 | 0.040834595 |
| 0.176765866 | 0.235142778 | 0.323932667 | 0.227822163 |
| 0.186675001 | 0.003574837 | 0.247517407 | 0.19921233  |
| 0.19400449  | 0.173267592 | 0.403861769 | 0.380049994 |
| 0.378334364 | 0.0913131   | 0.39679574  | 0.223406946 |
| 0.255441678 | 0.253677343 | 0.251391876 | 0.014370623 |
| 0.321260824 | 0.116626084 | 0.217401332 | 0.223547998 |
| 0.271547747 | 0.32255059  | 0.141464908 | 0.303198571 |
| 0.409421744 | 0.217435848 | 0.091631499 | 0.054813889 |
| 0.375696458 | 0.330786771 | 0.162812306 | 0.18612383  |
| 0.276773407 | 0.294925258 | 0.164331058 | 0.433189712 |

|             |             |             |             |
|-------------|-------------|-------------|-------------|
| 0.255475935 | 0.418259664 | 0.041464539 | 0.344792323 |
| 0.137701859 | 0.287525145 | 0.202704605 | 0.243438795 |
| 0.37743558  | 0.198982301 | 0.113706502 | 1           |
| 0.262957429 | 0.249857182 | 0.350691136 | 0.384582321 |
| 0.014292502 | 0.35119296  | 0.20093555  | 0.04686761  |
| 0.38384252  | 0.361216301 | 0.334372196 | 0.321609945 |
| 0.299985358 | 0.389592302 | 0.289044636 | 0.194890195 |
| 0.086656551 | 0.095376067 | 0.346854971 | 0.352544257 |
| 0.251849207 | 0.278334383 | 0.0927058   | 0.03837471  |
| 0.30859302  | 0.120681362 | 0.237190788 | 0.159602472 |
| 0.165907188 | 0.120284809 | 0.378411926 | 0.160780861 |
| 0.014260061 | 0.340356599 | 0.170594453 | 0.148012679 |
| 0.235559356 | 0.252711222 | 0.277486406 | 0.402692698 |
| 0.153682816 | 0.142270872 | 0.144539846 | 0.298140701 |
| 0.396960596 | 0.380423669 | 0.008903964 | 0.345081897 |
| 0.328388413 | 0.298117001 | 0.296843372 | 0.324278885 |
| 0.337133852 | 0.418011666 | 0.323532866 | 0.222342413 |
| 0.008354014 | 0.168006557 | 0.118408572 | 0.458724825 |
| 0.22982358  | 0.3823184   | 0.088256218 | 0.105949515 |
| 0.009096901 | 0.401879986 | 0.052736245 | 0.418429284 |
| 0.268335815 | 0.185874869 | 0.00515659  | 0.276183536 |
| 0.11203617  | 0.023979604 | 0.368423859 | 0.319345525 |
| 0.341556656 | 0.242867613 | 0.352959944 | 0.146257679 |
| 0.035927901 | 0.187847324 | 0.063001823 | 0.230765791 |
| 0.160181122 | 0.037058059 | 0.137220869 | 0.329278414 |
| 0.329570254 | 0.35861297  | 0.39732245  | 0.030291335 |
| 0.15842832  | 0.094341095 | 0.232928036 | 0.289877957 |
| 0.34787017  | 0.414053174 | 0.382365778 | 0.179635255 |
| 0.215189234 | 0.407568585 | 0.439786251 | 0.317572692 |
| 0.048436007 | 0.168708856 | 0.211318171 | 0.199070751 |
| 0.119713532 | 0.288927003 | 0.182613962 | 0.383291076 |
| 0.320086751 | 0.041388666 | 0.407158259 | 0.209350368 |
| 0.385358108 | 0.278732062 | 0.296360405 | 0.331743939 |
| 0.41664002  | 0.352739179 | 0.338977729 | 0.307129251 |
| 0.392490302 | 0.029359503 | 0.049270395 | 0.373870454 |
| 0.43471314  | 0.405316487 | 0.267663802 | 0.162688338 |
| 0.236532312 | 0.289380502 | 0.266120761 | 0.323866182 |
| 0.369556827 | 0.120711413 | 0.147884112 | 0.047765773 |
| 0.053212849 | 0.26750215  | 0.402314209 | 0.44505711  |
| 0.341961711 | 0.403018317 | 0.354868362 | 0.298379442 |
| 0.267904342 | 0.188293088 | 0.397088756 | 0.300413042 |
| 0.47168822  | 0.099739999 | 0.421454873 | 0.314246212 |
| 0.324018741 | 0.302157884 | 0.279839585 | 0.014929267 |
| 0.163731926 | 0.262748276 | 0.096802217 | 0.242416868 |
| 0.190081202 | 0.378193535 | 0.345474689 | 0.378644523 |
| 0.092166061 | 0.01430841  | 0.354581776 | 0.084373303 |
| 0.434161443 | 0.098783653 | 0.288571206 | 0.021688659 |
| 0.401955489 | 0.262380823 | 0.266022625 | 0.071915519 |
| 0.275319231 | 0.002783669 | 0.266226667 | 0.242531149 |
| 0.328115745 | 0.393525071 | 0.184538024 | 0.175082353 |
| 0.148308665 | 0.208671607 | 0.344284543 | 0.203092535 |
| 0.277680182 | 0.052209034 | 0.300523593 | 0.277688049 |
| 0.130900637 | 0.237775128 | 0.395723243 | 0.266071464 |
| 0.32213065  | 0.13100782  | 0.367645912 | 0.26855979  |

|             |             |             |             |
|-------------|-------------|-------------|-------------|
| 0.249280916 | 0.227129028 | 0.257979136 | 0.198801575 |
| 0.241074743 | 0.287192219 | 0.194165558 | 0.162635472 |
| 0.223169449 | 0.136125375 | 0.149056601 | 0.462234948 |
| 0.167333616 | 0.270563058 | 0.040933191 | 0.056542016 |
| 0.10298719  | 0.37137678  | 0.293793088 | 0.295965766 |
| 0.29908715  | 0.11686041  | 0.356251318 | 0.354562951 |
| 0.025857562 | 0.165676376 | 0.349915075 | 0.040720469 |
| 0.217551694 | 0.112321583 | 0.01028767  | 0.263821302 |
| 0.391711822 | 0.151549856 |             |             |
| ITGB2       | 0.215001902 | 0.443079012 | 0.095286619 |
| 0.013399288 | 0.077769406 | 0.206095876 | 0.163821236 |
| 0.219803809 | 0.13268087  | 0.100272217 | 0.303884459 |
| 0.008315538 | 0.281605338 | 0.050199484 | 0.121760683 |
| 0.435821432 | 0.435317289 | 0.201256017 | 0.44555405  |
| 0.252166002 | 0.07321008  | 0.330207055 | 0.230032698 |
| 0.195290323 | 0.011192739 | 0.101057685 | 0.027406615 |
| 0.201295771 | 0.419311928 | 0.202528977 | 0.184284442 |
| 0.388542373 | 0.344224083 | 0.177382734 | 0.14052049  |
| 0.073687687 | 0.454904362 | 0.039511502 | 0.264437239 |
| 0.315287435 | 0.148467001 | 0.344620501 | 0.033262077 |
| 0.000674389 | 0.107158583 | 0.177230289 | 0.303674604 |
| 0.2620745   | 0.186027309 | 0.189489708 | 0.119217302 |
| 0.057782123 | 0.332600578 | 0.382117825 | 0.052323247 |
| 0.394534751 | 0.002133689 | 0.431753707 | 0.216999127 |
| 0.102729119 | 0.239404632 | 0.181379116 | 0.289148099 |
| 0.22346591  | 0.414902938 | 0.4452882   | 0.037413485 |
| 0.095130849 | 0.213811295 | 0.280198055 | 0.214282944 |
| 0.413871225 | 0.204878917 | 0.184317822 | 0.139617667 |
| 0.263083632 | 0.321257414 | 0.258858532 | 0.202117377 |
| 0.003131545 | 0.121164219 | 0.129800172 | 0.258557696 |
| 0.192003375 | 0.335858055 | 0.2276298   | 0.135938849 |
| 0.198121474 | 0.052482681 | 0.277982299 | 0.453454608 |
| 0.016149148 | 0.293890891 | 0.01002276  | 0.188047661 |
| 0.361451212 | 0.373454046 | 0.304500141 | 0.075012979 |
| 0.044472043 | 0.189014932 | 0.149191384 | 0.307960885 |
| 0.232660208 | 0.228349525 | 0.379002444 | 0.065884713 |
| 0.254518536 | 0.187608908 | 0.224844106 | 0.437004101 |
| 0.426098888 | 0.031445182 | 0.224189814 | 0.18829209  |
| 0.153470674 | 0.067217542 | 0.181617886 | 0.026132869 |
| 0.010686973 | 0.042680167 | 0.384887901 | 0.189717234 |
| 0.084008385 | 0.167715497 | 0.065790325 | 0.21778905  |
| 0.198281739 | 0.377471444 | 0.085636919 | 0.181198851 |
| 0.247883912 | 0.176259359 | 0.179644442 | 0.289722482 |
| 0.147398929 | 0.242241585 | 0.18868847  | 0.398682913 |
| 0.44239666  | 0.089620475 | 0.111235856 | 0.282764871 |
| 0.244536384 | 0.421715011 | 0.4665552   | 0.243682849 |
| 0.141470404 | 0.224916512 | 0.160405086 | 0.259574291 |
| 0.195463464 | 0.253476971 | 0.056691457 | 0.331463502 |
| 0.410674953 | 0.027220589 | 0.102255732 | 0.353373269 |
| 0.019866865 | 0.156133373 | 0.433547365 | 0.339767277 |
| 0.225715842 | 0.024210238 | 0.141896641 | 0.182241215 |
| 0.242519246 | 0.188334717 | 0.287616127 | 0.124006821 |
| 0.291077536 | 0.16105015  | 0.069986116 | 0.252050521 |
| 0.150074597 | 0.277583593 | 0.133655347 | 0.034962335 |

|             |             |             |             |
|-------------|-------------|-------------|-------------|
| 0.266964185 | 0.243922954 | 0.38629834  | 0.25952682  |
| 0.283951953 | 0.001607443 | 0.099566262 | 0.246933807 |
| 0.162692013 | 0.328604825 | 0.445743345 | 0.142447968 |
| 0.241504546 | 0.130466578 | 0.177068841 | 0.15865016  |
| 0.382555081 | 0.136886811 | 0.138934765 | 0.003201006 |
| 0.128493052 | 0.154746193 | 0.217908462 | 0.118441002 |
| 0.138752613 | 0.154621215 | 0.169110655 | 0.382858185 |
| 0.190864758 | 0.305229331 | 0.067342149 | 0.114121459 |
| 0.223365876 | 0.305193305 | 0.166166374 | 0.197650469 |
| 0.309295564 | 0.194415168 | 0.333194577 | 0.378194012 |
| 0.157516749 | 0.319779387 | 0.085895731 | 0.229338418 |
| 0.200758677 | 0.376650614 | 0.323657967 | 0.331547074 |
| 0.190366932 | 0.299794118 | 0.160102505 | 0.262957429 |
| 1           | 0.249152993 | 0.132346867 | 0.457710695 |
| 0.004206064 | 0.276012254 | 0.1999819   | 0.10476001  |
| 0.430210996 | 0.180672267 | 0.120479344 | 0.250832184 |
| 0.454294056 | 0.468637443 | 0.409781967 | 0.345111766 |
| 0.124569378 | 0.045877974 | 0.454652662 | 0.332712639 |
| 0.412419251 | 0.216723169 | 0.114098128 | 0.070799403 |
| 0.420394259 | 0.204802835 | 0.262857666 | 0.211583593 |
| 0.188771553 | 0.155898623 | 0.231094939 | 0.266160327 |
| 0.017277185 | 0.19624413  | 0.246101255 | 0.10237483  |
| 0.174109319 | 0.134948094 | 0.341831022 | 0.307003588 |
| 0.152395544 | 0.195828437 | 0.135226305 | 0.092716193 |
| 0.171122026 | 0.458285175 | 0.014731333 | 0.450987452 |
| 0.460893456 | 0.24193427  | 0.390282373 | 0.465838614 |
| 0.250012399 | 0.34479942  | 0.403986614 | 0.381372928 |
| 0.004595344 | 0.311525149 | 0.232594135 | 0.358278983 |
| 0.35852138  | 0.23188272  | 0.158726489 | 0.157785088 |
| 0.003643125 | 0.176353695 | 0.085445916 | 0.479416542 |
| 0.369351122 | 0.041994093 | 0.012087542 | 0.345428809 |
| 0.212309828 | 0.041476336 | 0.480010361 | 0.200985674 |
| 0.381875472 | 0.222633626 | 0.138042046 | 0.271066951 |
| 0.069974661 | 0.226440155 | 0.019680105 | 0.243340062 |
| 0.183389034 | 0.058797504 | 0.048450118 | 0.464158286 |
| 0.403325058 | 0.297115655 | 0.218189451 | 0.009884252 |
| 0.315621829 | 0.091891922 | 0.297084338 | 0.142986999 |
| 0.402701164 | 0.327850206 | 0.407776595 | 0.301857279 |
| 0.235766037 | 0.367418758 | 0.366901183 | 0.380167573 |
| 0.054243153 | 0.303924387 | 0.346015269 | 0.075492049 |
| 0.186194986 | 0.396836036 | 0.175965307 | 0.15521502  |
| 0.32055795  | 0.031009793 | 0.187892947 | 0.236160335 |
| 0.394406709 | 0.37936226  | 0.08287366  | 0.216753385 |
| 0.367585078 | 0.226098001 | 0.113996537 | 0.247051548 |
| 0.261470494 | 0.064439537 | 0.094006382 | 0.322587699 |
| 0.435826661 | 0.259460279 | 0.380450072 | 0.086077782 |
| 0.367158661 | 0.108268783 | 0.38337864  | 0.179056634 |
| 0.245991118 | 0.196489785 | 0.30260141  | 0.087923672 |
| 0.021092412 | 0.159605365 | 0.338836622 | 0.398496979 |
| 0.112267426 | 0.209281131 | 0.180796834 | 0.193356846 |
| 0.4152078   | 0.220364585 | 0.23934174  | 0.257660936 |
| 0.404095777 | 0.045195149 | 0.476504143 | 0.246843157 |
| 0.367000406 | 0.187965189 | 0.350666987 | 0.008055016 |
| 0.244273972 | 0.116546234 | 0.15847707  | 0.173189589 |

|             |             |             |             |
|-------------|-------------|-------------|-------------|
| 0.361703214 | 0.142949685 | 0.281695946 | 0.199023249 |
| 0.08393519  | 0.010583784 | 0.344190149 | 0.124967775 |
| 0.278304605 | 0.176634134 | 0.248614087 | 0.051438346 |
| 0.489102527 | 0.239082774 | 0.344431499 | 0.123302894 |
| 0.218694709 | 0.005178414 | 0.106378885 | 0.084259843 |
| 0.363620344 | 0.355219654 | 0.257581944 | 0.219671997 |
| 0.193444994 | 0.241087296 | 0.29761107  | 0.179458246 |
| 0.373786604 | 0.063613549 | 0.439165787 | 0.242362967 |
| 0.274154167 | 0.21567246  | 0.220066561 | 0.215486142 |
| 0.140068169 | 0.095594424 | 0.136530132 | 0.213188613 |
| 0.374867939 | 0.193905212 | 0.191413155 | 0.22217405  |
| 0.066269682 | 0.216513936 | 0.316694425 | 0.264983666 |
| 0.233213559 | 0.234870837 | 0.205283684 | 0.386863714 |
| 0.200466558 | 0.238274786 | 0.024397371 | 0.016930411 |
| 0.099367025 | 0.166803435 | 0.413066445 | 0.393815815 |
| 0.434184415 | 0.188929338 | 0.124060631 | 0.195982054 |
| 0.062665579 | 0.315824019 | 0.189815376 | 0.052100689 |
| 0.2373411   | 0.159253124 | 0.003044071 | 0.244601409 |
| 0.34542687  | 0.17232938  |             |             |
| JAZF1       | 0.178023498 | 0.457149694 | 0.07915684  |
| 0.010915585 | 0.095824335 | 0.194749411 | 0.15913181  |
| 0.189849001 | 0.107819631 | 0.079568336 | 0.306568525 |
| 0.003667    | 0.309069824 | 0.027619616 | 0.109495092 |
| 0.440224403 | 0.451237356 | 0.219199161 | 0.468612973 |
| 0.208595141 | 0.060712197 | 0.311605927 | 0.210967031 |
| 0.179619538 | 0.004610338 | 0.096679562 | 0.020019867 |
| 0.183022394 | 0.430275797 | 0.180673462 | 0.150518936 |
| 0.380966542 | 0.362609721 | 0.165687452 | 0.158499991 |
| 0.079287009 | 0.458855005 | 0.072703005 | 0.297605325 |
| 0.327171475 | 0.143126417 | 0.355614335 | 0.025869696 |
| 0.000706505 | 0.096407611 | 0.16917699  | 0.279855872 |
| 0.232898221 | 0.165125924 | 0.17294786  | 0.112693785 |
| 0.053654074 | 0.334409824 | 0.372090156 | 0.053493659 |
| 0.414482372 | 0.001221188 | 0.440596538 | 0.164254788 |
| 0.085771648 | 0.224053027 | 0.14915396  | 0.278560207 |
| 0.226314306 | 0.433098852 | 0.46922856  | 0.037372364 |
| 0.079084659 | 0.202172095 | 0.272826738 | 0.218195078 |
| 0.419060828 | 0.162628893 | 0.174197191 | 0.15769606  |
| 0.265937878 | 0.31961677  | 0.266065489 | 0.194159914 |
| 0.001459621 | 0.114224211 | 0.141646287 | 0.239167678 |
| 0.201694251 | 0.342838452 | 0.229459793 | 0.141193528 |
| 0.174709574 | 0.035039416 | 0.262920062 | 0.468783367 |
| 0.013944724 | 0.324010022 | 0.009903794 | 0.189657861 |
| 0.351829871 | 0.375825164 | 0.275907005 | 0.064582217 |
| 0.031427573 | 0.161512437 | 0.110221726 | 0.319490873 |
| 0.223929387 | 0.220282908 | 0.398796006 | 0.074738395 |
| 0.274428988 | 0.1213462   | 0.223561934 | 0.440204674 |
| 0.423998923 | 0.031972023 | 0.176273771 | 0.187737677 |
| 0.15132183  | 0.063831316 | 0.184207706 | 0.017990863 |
| 0.009902282 | 0.039359842 | 0.39257681  | 0.16173465  |
| 0.075161129 | 0.150574652 | 0.059259679 | 0.233534145 |
| 0.194802519 | 0.384026372 | 0.105144422 | 0.168437553 |
| 0.261911589 | 0.179066458 | 0.186217879 | 0.2972778   |
| 0.182058493 | 0.20501965  | 0.143839614 | 0.436128856 |

|             |             |             |             |
|-------------|-------------|-------------|-------------|
| 0.45417697  | 0.079985058 | 0.086060721 | 0.26509986  |
| 0.26925975  | 0.431973722 | 0.481455004 | 0.221809974 |
| 0.162032365 | 0.215301914 | 0.126047165 | 0.261215321 |
| 0.200458137 | 0.247593332 | 0.07994271  | 0.352624253 |
| 0.421373187 | 0.022492117 | 0.078471367 | 0.356907223 |
| 0.029986748 | 0.165820592 | 0.416746538 | 0.36506826  |
| 0.259942118 | 0.015228978 | 0.120974445 | 0.164681122 |
| 0.203715821 | 0.160946166 | 0.282591498 | 0.100812603 |
| 0.266733586 | 0.123379026 | 0.06217829  | 0.275352568 |
| 0.132023997 | 0.261095267 | 0.101221526 | 0.033926257 |
| 0.271331721 | 0.242883114 | 0.380082253 | 0.253071782 |
| 0.271935151 | 0.001140736 | 0.077084062 | 0.215934574 |
| 0.119602273 | 0.354574989 | 0.46115209  | 0.127296931 |
| 0.22118436  | 0.155222158 | 0.154550994 | 0.185737457 |
| 0.382373748 | 0.11261784  | 0.101147697 | 0.000980846 |
| 0.139830368 | 0.126246197 | 0.219028881 | 0.076047906 |
| 0.150488933 | 0.09867047  | 0.121313162 | 0.390414973 |
| 0.167081622 | 0.344498898 | 0.055222536 | 0.116439747 |
| 0.186561206 | 0.332559659 | 0.155088712 | 0.143037623 |
| 0.330399982 | 0.170559014 | 0.334228085 | 0.378558445 |
| 0.194896323 | 0.306270165 | 0.102414098 | 0.209284346 |
| 0.214869076 | 0.399047267 | 0.326336812 | 0.375362124 |
| 0.179289672 | 0.314160095 | 0.172929889 | 0.249857182 |
| 0.249152993 | 1           | 0.099463294 | 0.4885945   |
| 0.001610557 | 0.2752831   | 0.204392969 | 0.094269631 |
| 0.442526908 | 0.190418841 | 0.08904562  | 0.21441453  |
| 0.474970926 | 0.496960463 | 0.419452914 | 0.342424915 |
| 0.124293596 | 0.027605966 | 0.466771436 | 0.330813469 |
| 0.427550405 | 0.234251602 | 0.140152051 | 0.097474715 |
| 0.437488621 | 0.217251563 | 0.240458205 | 0.171664004 |
| 0.220710145 | 0.191539795 | 0.224640696 | 0.277069566 |
| 0.011088562 | 0.145482138 | 0.220083463 | 0.078710176 |
| 0.138386542 | 0.11363253  | 0.365643514 | 0.32347245  |
| 0.178598251 | 0.123351909 | 0.133108291 | 0.083722899 |
| 0.162969488 | 0.462597899 | 0.032882223 | 0.459003262 |
| 0.479173277 | 0.252013216 | 0.401673175 | 0.480661526 |
| 0.204958178 | 0.365435055 | 0.408668146 | 0.397462852 |
| 0.002495166 | 0.327550671 | 0.262489434 | 0.366712033 |
| 0.349278707 | 0.222797573 | 0.154015842 | 0.165373571 |
| 0.004792898 | 0.146340803 | 0.078750883 | 0.497135058 |
| 0.396057612 | 0.038487651 | 0.02653638  | 0.371748435 |
| 0.236752076 | 0.047733303 | 0.487519786 | 0.177246296 |
| 0.404374147 | 0.24050517  | 0.122161724 | 0.290271021 |
| 0.062607409 | 0.236791348 | 0.024833656 | 0.254021136 |
| 0.2080576   | 0.062204112 | 0.042978468 | 0.478805355 |
| 0.383086472 | 0.327865046 | 0.208347839 | 0.003150543 |
| 0.310444465 | 0.072145278 | 0.303352591 | 0.163154443 |
| 0.406542787 | 0.336216081 | 0.443966293 | 0.321313044 |
| 0.255114429 | 0.379183218 | 0.358961035 | 0.375451995 |
| 0.053364762 | 0.293106181 | 0.341475107 | 0.053403936 |
| 0.18597131  | 0.41678507  | 0.160094284 | 0.142961421 |
| 0.307530022 | 0.037295122 | 0.178637037 | 0.205419022 |
| 0.422546161 | 0.389439108 | 0.060959954 | 0.205796177 |
| 0.371823252 | 0.221503657 | 0.111948673 | 0.262739316 |

|             |             |             |             |
|-------------|-------------|-------------|-------------|
| 0.256533509 | 0.054687744 | 0.107600426 | 0.329072219 |
| 0.448344751 | 0.269664305 | 0.362002164 | 0.066999634 |
| 0.400199747 | 0.092971898 | 0.408525226 | 0.205699326 |
| 0.216878059 | 0.178315767 | 0.303416632 | 0.071873669 |
| 0.00891198  | 0.104413497 | 0.349952357 | 0.403075272 |
| 0.089685878 | 0.178851701 | 0.166447724 | 0.198201515 |
| 0.424612869 | 0.18940522  | 0.236823592 | 0.253040831 |
| 0.420360444 | 0.043576184 | 0.479980591 | 0.214131645 |
| 0.343929767 | 0.182928551 | 0.36439964  | 0.005636392 |
| 0.248571816 | 0.090429817 | 0.140809779 | 0.172385513 |
| 0.362817878 | 0.123091427 | 0.308309153 | 0.15342834  |
| 0.084479782 | 0.010689604 | 0.341750545 | 0.138679372 |
| 0.273626688 | 0.178316209 | 0.247521517 | 0.050708274 |
| 0.500633268 | 0.209602353 | 0.31314612  | 0.151526294 |
| 0.185686274 | 0.009303987 | 0.089502146 | 0.051671559 |
| 0.335982896 | 0.371722889 | 0.25689499  | 0.167285944 |
| 0.156549127 | 0.273127494 | 0.321290801 | 0.193138715 |
| 0.393334356 | 0.058951055 | 0.444909571 | 0.241550276 |
| 0.28713184  | 0.192806861 | 0.226479228 | 0.221702865 |
| 0.148804564 | 0.100520424 | 0.124530744 | 0.163376796 |
| 0.388707602 | 0.245555935 | 0.196221558 | 0.152461831 |
| 0.052641025 | 0.216270594 | 0.333103099 | 0.27497244  |
| 0.224115906 | 0.22111372  | 0.202769546 | 0.402413228 |
| 0.141922292 | 0.184008414 | 0.020725979 | 0.012627566 |
| 0.086379683 | 0.136547465 | 0.406589041 | 0.416480988 |
| 0.45794459  | 0.151926903 | 0.102539097 | 0.155134063 |
| 0.079871654 | 0.300876413 | 0.201744105 | 0.076531178 |
| 0.267940911 | 0.144558027 | 0.001889353 | 0.187295481 |
| 0.336613635 | 0.168288086 |             |             |
| KCNAB2      | 0.090119513 | 0.146419281 | 0.157873112 |
| 0.002270001 | 0.025194373 | 0.319116323 | 0.186556928 |
| 0.05930002  | 0.10692761  | 0.054160688 | 0.295418497 |
| 0.036959141 | 0.033219317 | 0.149511852 | 0.066789962 |
| 0.095215153 | 0.086742941 | 0.123423506 | 0.095309044 |
| 0.140588725 | 0.014748274 | 0.237886788 | 0.139855325 |
| 0.236676383 | 0.073396114 | 0.120301656 | 0.009892642 |
| 0.0308543   | 0.076185705 | 0.286922879 | 0.05263125  |
| 0.084441562 | 0.050429506 | 0.019968321 | 0.009909305 |
| 0.001452326 | 0.210035474 | 0.000751857 | 0.034367782 |
| 0.040157025 | 0.08692765  | 0.057879549 | 0.068374557 |
| 2.13E-05    | 0.143044252 | 0.031827303 | 0.196534118 |
| 0.126853134 | 0.315392655 | 0.32769413  | 0.096263    |
| 0.001020621 | 0.271118669 | 0.159796443 | 0.000787692 |
| 0.229513286 | 0.00042069  | 0.204646084 | 0.073841474 |
| 0.194799431 | 0.140811769 | 0.035838022 | 0.143268031 |
| 0.298678603 | 0.221544164 | 0.113622386 | 0.055512297 |
| 0.262336677 | 0.053631777 | 0.041190601 | 0.06835325  |
| 0.135783052 | 0.033261465 | 0.040896112 | 0.009319981 |
| 0.048421757 | 0.046907648 | 0.293096675 | 0.112103606 |
| 0.018202645 | 0.163579152 | 0.013798764 | 0.071291284 |
| 0.020819448 | 0.278267664 | 0.072843406 | 0.059378909 |
| 0.042686243 | 0.15179647  | 0.184009645 | 0.105545972 |
| 0.010160088 | 0.049289898 | 0.003165507 | 0.09568482  |
| 0.083612562 | 0.053901108 | 0.115032311 | 0.078989825 |

|             |             |             |             |
|-------------|-------------|-------------|-------------|
| 0.118227057 | 0.190034782 | 0.045597174 | 0.033946314 |
| 0.102072883 | 0.060631232 | 0.222744796 | 0.00179095  |
| 0.02301307  | 0.084424255 | 0.0594612   | 0.204928064 |
| 0.123545437 | 0.073887222 | 0.112730056 | 0.312774481 |
| 0.009681564 | 0.010159632 | 0.217967059 | 0.002719729 |
| 0.015508295 | 0.022903897 | 0.074056539 | 0.193801692 |
| 0.08893857  | 0.215933073 | 0.028885478 | 0.043913921 |
| 0.044582769 | 0.070905088 | 0.028522924 | 0.153149201 |
| 0.035916202 | 0.183368689 | 0.037545881 | 0.060444014 |
| 0.011657753 | 0.091657829 | 0.256713819 | 0.144414855 |
| 0.245303573 | 0.104941248 | 0.145252825 | 0.281165579 |
| 0.023151657 | 0.096293147 | 0.122829613 | 0.053458559 |
| 0.039811011 | 0.241238335 | 0.027879229 | 0.138089067 |
| 0.236071803 | 0.13961638  | 0.002322849 | 0.255347136 |
| 0.255231802 | 0.002972817 | 0.201921731 | 0.08372238  |
| 0.002364663 | 0.033187381 | 0.191909138 | 0.095409335 |
| 0.054510031 | 0.009001185 | 0.067141723 | 0.195219067 |
| 0.243850201 | 0.180978048 | 0.128536487 | 0.046761731 |
| 0.295418042 | 0.027473508 | 0.147336693 | 0.023972517 |
| 0.307236479 | 0.228686272 | 0.005483814 | 0.003850191 |
| 0.074212509 | 0.075343124 | 0.126340497 | 0.100326421 |
| 0.068607598 | 0.00031243  | 0.05321194  | 0.107771346 |
| 0.027629254 | 0.050300037 | 0.158094094 | 0.326648778 |
| 0.324681558 | 0.005945315 | 0.324623793 | 0.02719223  |
| 0.1173053   | 0.038779888 | 0.038593984 | 0.03549789  |
| 0.073476435 | 0.017088746 | 0.057326932 | 0.167437828 |
| 0.036479156 | 0.135057536 | 0.041349377 | 0.107336755 |
| 0.316842076 | 0.057715898 | 0.08265852  | 0.006543645 |
| 0.135221653 | 0.130842931 | 0.018988413 | 0.038074709 |
| 0.089511058 | 0.059990701 | 0.040400369 | 0.247629022 |
| 0.023887211 | 0.265526587 | 0.00224842  | 0.131086813 |
| 0.032340202 | 0.087953819 | 0.05472455  | 0.074051182 |
| 0.167985246 | 0.094279176 | 0.010473988 | 0.350691136 |
| 0.132346867 | 0.099463294 | 1           | 0.149724991 |
| 0.032649514 | 0.221262514 | 0.053905836 | 0.00315513  |
| 0.148103742 | 0.223396303 | 0.235871107 | 0.182459395 |
| 0.098740049 | 0.153301884 | 0.128066648 | 0.052955429 |
| 0.010251199 | 0.130439895 | 0.145828619 | 0.178061818 |
| 0.071915928 | 0.071865549 | 0.004576727 | 0.004957703 |
| 0.105942561 | 0.043395445 | 0.105203756 | 0.049463134 |
| 0.036700631 | 0.012290694 | 0.235775379 | 0.07216912  |
| 0.00370004  | 0.146470438 | 0.063995705 | 0.013293282 |
| 0.043089439 | 0.051994549 | 0.086541517 | 0.283603113 |
| 0.012051228 | 0.016834265 | 0.012942333 | 0.149187219 |
| 0.283789394 | 0.149054713 | 0.000286952 | 0.152850881 |
| 0.112603589 | 0.133507084 | 0.093575483 | 0.115743871 |
| 0.216207315 | 0.217779347 | 0.11965118  | 0.072819704 |
| 0.015314292 | 0.038835162 | 0.023300352 | 0.317859981 |
| 0.068269908 | 0.279268216 | 0.025155936 | 0.012604052 |
| 0.006345463 | 0.350016177 | 0.002020455 | 0.189221942 |
| 0.078982832 | 0.076232499 | 8.99E-05    | 0.097875072 |
| 0.023147231 | 0.002381151 | 0.139660938 | 0.146192541 |
| 0.125447956 | 0.06760115  | 0.174773497 | 0.031617689 |
| 0.001313846 | 0.030049281 | 0.009798444 | 0.084932506 |



|             |             |             |             |
|-------------|-------------|-------------|-------------|
| 0.027928898 | 0.004752713 | 0.01734419  | 0.115115843 |
| 0.153563384 | 0.172857915 | 0.278943157 | 0.014238657 |
| 0.045929757 | 0.006657936 | 0.071110127 | 0.094503624 |
| 0.180061711 | 0.24378335  | 0.159096696 | 0.043576619 |
| 0.072935438 | 0.212052327 | 0.268332236 | 0.126702602 |
| 0.002417921 | 0.045809761 | 0.0648666   | 0.077313315 |
| 0.038427796 | 0.0874094   | 0.041419859 | 0.297702121 |
| 0.206941259 | 0.001993566 | 0.362844222 | 0.114971262 |
| 0.15886923  | 0.085082019 | 0.163327261 | 0.131511796 |
| 0.205605501 | 0.093811884 | 0.193806188 | 0.114507634 |
| 0.334446171 | 0.001664123 | 0.005169609 | 0.227085013 |
| 0.194727533 | 0.278177327 | 0.091655862 | 0.018746118 |
| 0.066145412 | 0.165823339 | 0.100491338 | 0.049285996 |
| 0.281120299 | 0.035724466 | 0.037886028 | 0.009999651 |
| 0.018272111 | 0.147897943 | 0.193428316 | 0.239048652 |
| 0.251044788 | 0.34526808  | 0.170675406 | 0.113947599 |
| 0.080509056 | 0.017412213 | 0.316476531 | 0.143299759 |
| 0.256554822 | 0.00874639  | 0.194768219 | 0.186067036 |
| 0.177104748 | 0.0785398   | 0.102066124 | 0.003156496 |
| 0.046796934 | 0.06500413  | 0.041409827 | 0.067150498 |
| 0.05002505  | 0.212859979 | 0.157015239 | 0.21031618  |
| 0.008167152 | 0.012970802 | 0.243355206 | 0.008196196 |
| 0.351001358 | 0.009822868 | 0.131012514 | 0.000486119 |
| 0.159494387 | 0.128736655 | 0.12286603  | 0.006058424 |
| 0.06980321  | 4.20E-05    | 0.067428335 | 0.170292245 |
| 0.196983819 | 0.226186036 | 0.076672205 | 0.063841577 |
| 0.056532839 | 0.063183159 | 0.191994331 | 0.038491776 |
| 0.081135219 | 0.005165558 | 0.095927001 | 0.089983651 |
| 0.026513593 | 0.028714046 | 0.287860076 | 0.035355424 |
| 0.113157139 | 0.019569831 | 0.198714876 | 0.096980005 |
| 0.068013206 | 0.025124614 | 0.073888159 | 0.033868188 |
| 0.101788283 | 0.066512886 | 0.06255491  | 0.039885906 |
| 0.085181149 | 0.040178149 | 0.02806808  | 0.261859904 |
| 0.019680722 | 0.118453093 | 0.002939567 | 0.006532336 |
| 0.005812872 | 0.175088481 | 0.138699051 | 0.123376242 |
| 0.095300192 | 0.012173074 | 0.196365542 | 0.219231284 |
| 0.001135194 | 0.055543908 | 0.195601444 | 0.00138598  |
| 0.070301638 | 0.012347055 | 0.015018397 | 0.103482622 |
| 0.236527189 | 0.011018591 |             |             |
| KCNK5       | 0.371638215 | 0.506268595 | 0.125565599 |
| 0.039563128 | 0.191543336 | 0.341336158 | 0.334737842 |
| 0.386964123 | 0.182656124 | 0.204871009 | 0.433083784 |
| 0.002995099 | 0.383910912 | 0.029130575 | 0.131841597 |
| 0.493398975 | 0.508260371 | 0.456772794 | 0.500734258 |
| 0.382148401 | 0.189672391 | 0.440507875 | 0.452009759 |
| 0.368156937 | 0.003788409 | 0.206221358 | 0.071133596 |
| 0.383057356 | 0.47772893  | 0.310834158 | 0.355550548 |
| 0.431986177 | 0.445953014 | 0.447095544 | 0.393995864 |
| 0.251220672 | 0.503438742 | 0.149400657 | 0.44298288  |
| 0.366238668 | 0.327861298 | 0.457306648 | 0.03155939  |
| 0.004177177 | 0.180525416 | 0.346671768 | 0.458076142 |
| 0.389158134 | 0.321590298 | 0.277406915 | 0.264539783 |
| 0.153675019 | 0.456541445 | 0.437349063 | 0.154652035 |
| 0.496028147 | 0.00606584  | 0.504773202 | 0.288282886 |

|             |             |             |             |
|-------------|-------------|-------------|-------------|
| 0.12789437  | 0.418697073 | 0.36862912  | 0.468423832 |
| 0.362838732 | 0.503113409 | 0.516305389 | 0.073465994 |
| 0.137665985 | 0.467252385 | 0.402860321 | 0.475356164 |
| 0.500751524 | 0.393559154 | 0.394618252 | 0.388105567 |
| 0.4535152   | 0.396634193 | 0.402351162 | 0.287032112 |
| 0.001967197 | 0.24202092  | 0.393287316 | 0.348612195 |
| 0.394968923 | 0.459792847 | 0.419261037 | 0.324245946 |
| 0.447067197 | 0.042430758 | 0.466477282 | 0.51941134  |
| 0.03638695  | 0.42098957  | 0.019587385 | 0.26186944  |
| 0.451419941 | 0.43349909  | 0.443980854 | 0.133112765 |
| 0.032466237 | 0.213757595 | 0.178124921 | 0.366375202 |
| 0.47357182  | 0.510150969 | 0.49276015  | 0.146539185 |
| 0.331811566 | 0.234030775 | 0.463614644 | 0.50406186  |
| 0.47613499  | 0.019654557 | 0.244829201 | 0.337029129 |
| 0.38084308  | 0.186511265 | 0.353082999 | 0.044358939 |
| 0.021466494 | 0.032055344 | 0.441127871 | 0.252988571 |
| 0.170309456 | 0.310528713 | 0.134388138 | 0.484010491 |
| 0.381563411 | 0.40927668  | 0.208835219 | 0.365694946 |
| 0.440961612 | 0.368822846 | 0.477352662 | 0.476331958 |
| 0.438654566 | 0.342842271 | 0.236923332 | 0.522024837 |
| 0.489440989 | 0.131152174 | 0.145450789 | 0.423192067 |
| 0.35750795  | 0.478367743 | 0.529299467 | 0.393343311 |
| 0.372408205 | 0.360209723 | 0.3532003   | 0.476284332 |
| 0.366922952 | 0.425024044 | 0.105097217 | 0.46405042  |
| 0.489098502 | 0.047307266 | 0.124327325 | 0.463124348 |
| 0.083424639 | 0.352216506 | 0.491402898 | 0.516799668 |
| 0.504347374 | 0.057279948 | 0.31068813  | 0.36687876  |
| 0.392372203 | 0.351864736 | 0.472418143 | 0.27844293  |
| 0.413906663 | 0.353929415 | 0.099558703 | 0.347028955 |
| 0.21537848  | 0.424857201 | 0.292846718 | 0.084985015 |
| 0.433191312 | 0.421792585 | 0.502758377 | 0.472848003 |
| 0.415924414 | 0.005534013 | 0.20133366  | 0.39932193  |
| 0.328770612 | 0.380353439 | 0.514330731 | 0.201889519 |
| 0.3607531   | 0.34840922  | 0.241491535 | 0.432106476 |
| 0.420220938 | 0.291107791 | 0.260523764 | 0.001445027 |
| 0.24089938  | 0.364909835 | 0.481908314 | 0.090635983 |
| 0.341482653 | 0.172623124 | 0.157643081 | 0.497764975 |
| 0.308846612 | 0.494394473 | 0.048666853 | 0.180685283 |
| 0.364162152 | 0.50703904  | 0.422141484 | 0.305589458 |
| 0.509710887 | 0.391740899 | 0.389421416 | 0.476270371 |
| 0.395454841 | 0.443387677 | 0.189178297 | 0.376163405 |
| 0.45943354  | 0.503058864 | 0.454183984 | 0.501762755 |
| 0.372519416 | 0.415085501 | 0.341374527 | 0.384582321 |
| 0.457710695 | 0.4885945   | 0.149724991 | 1           |
| 0.001591753 | 0.452620764 | 0.485746472 | 0.188304288 |
| 0.514182059 | 0.353487081 | 0.127398486 | 0.339570916 |
| 0.508988936 | 0.515139612 | 0.447172495 | 0.411162791 |
| 0.256669038 | 0.021953966 | 0.480971776 | 0.485255167 |
| 0.483492384 | 0.499570276 | 0.369629516 | 0.10777011  |
| 0.497029659 | 0.36642852  | 0.458858704 | 0.416831919 |
| 0.487339591 | 0.433707204 | 0.363797513 | 0.375368059 |
| 0.019517382 | 0.328086944 | 0.428611407 | 0.229115156 |
| 0.369201315 | 0.251229903 | 0.504154809 | 0.438958334 |
| 0.452901993 | 0.314987922 | 0.390913186 | 0.151155594 |

|             |             |             |             |          |
|-------------|-------------|-------------|-------------|----------|
| 0.286261819 | 0.506211895 | 0.06199836  | 0.476610078 |          |
| 0.521994062 | 0.470165505 | 0.500522862 | 0.512322493 |          |
| 0.400687811 | 0.486067546 | 0.501516242 | 0.41282144  |          |
| 0.001949892 | 0.390053375 | 0.378656569 | 0.449214578 |          |
| 0.440705899 | 0.393062475 | 0.264352448 | 0.421416083 |          |
| 0.003479749 | 0.247190178 | 0.249491352 | 0.502092797 |          |
| 0.497327739 | 0.061912749 | 0.058653363 | 0.513941556 |          |
| 0.392371023 | 0.061486932 | 0.526064135 | 0.419479355 |          |
| 0.517391782 | 0.512193275 | 0.265190323 | 0.394337783 |          |
| 0.205047078 | 0.436650722 | 0.054997334 | 0.498453115 |          |
| 0.465257082 | 0.105097853 | 0.124164947 | 0.513473286 |          |
| 0.478833002 | 0.49282161  | 0.369664894 | 0.01237949  |          |
| 0.34486206  | 0.23158329  | 0.493614216 | 0.205101795 |          |
| 0.490919928 | 0.464692125 | 0.521205826 | 0.438938743 |          |
| 0.499826022 | 0.49553962  | 0.466175812 | 0.498398452 |          |
| 0.145581471 | 0.398619394 | 0.417031795 | 0.096811891 |          |
| 0.37928859  | 0.496238447 | 0.442610186 | 0.278834163 |          |
| 0.456442584 | 0.120252468 | 0.308777029 | 0.376840483 |          |
| 0.519158969 | 0.484068567 | 0.107404221 | 0.262318025 |          |
| 0.490731977 | 0.412555534 | 0.197224211 | 0.459314873 |          |
| 0.386749981 | 0.158206463 | 0.165334506 | 0.467572407 |          |
| 0.510652286 | 0.405041822 | 0.460428652 | 0.201214247 |          |
| 0.466872143 | 0.103702713 | 0.468300915 | 0.38481378  |          |
| 0.386955721 | 0.385627681 | 0.347548333 | 0.130427595 |          |
| 0.031230756 | 0.17995037  | 0.485019576 | 0.489137542 |          |
| 0.140724932 | 0.29435135  | 0.359224989 | 0.448204801 |          |
| 0.481242082 | 0.446777319 | 0.387828528 | 0.43898142  |          |
| 0.487801624 | 0.140450507 | 0.501455771 | 0.419643219 |          |
| 0.462390795 | 0.428838182 | 0.50187448  | 0.013514958 |          |
| 0.461805783 | 0.234055348 | 0.235121082 | 0.444244622 |          |
| 0.414655298 | 0.221067647 | 0.485088214 | 0.252749169 |          |
| 0.212598703 | 0.007609789 | 0.450994593 | 0.376883136 |          |
| 0.38832672  | 0.321811197 | 0.455289707 | 0.157905997 |          |
| 0.53357325  | 0.450644415 | 0.445134518 | 0.311237463 |          |
| 0.449969818 | 0.026492005 | 0.224577499 | 0.066743329 |          |
| 0.45470395  | 0.482141341 | 0.442728366 | 0.394090282 |          |
| 0.246578643 | 0.511497697 | 0.490437891 | 0.481610665 |          |
| 0.495106898 | 0.17420636  | 0.504713898 | 0.402113879 |          |
| 0.34640081  | 0.437751145 | 0.376223346 | 0.424996938 |          |
| 0.310079149 | 0.187753705 | 0.212527225 | 0.230952289 |          |
| 0.468560324 | 0.41606145  | 0.477048136 | 0.340988288 |          |
| 0.092148247 | 0.478791231 | 0.439977897 | 0.434089137 |          |
| 0.476276719 | 0.375373597 | 0.41176497  | 0.481339467 |          |
| 0.329807674 | 0.359370818 | 0.074194136 | 0.047284172 |          |
| 0.279569173 | 0.283638241 | 0.443916944 | 0.486813409 |          |
| 0.50098799  | 0.304546185 | 0.172110682 | 0.220892078 |          |
| 0.144618107 | 0.369648646 | 0.382283671 | 0.200825043 |          |
| 0.502156768 | 0.324729081 | 0.001562426 | 0.299915883 |          |
| 0.470604667 | 0.425959169 |             |             |          |
| KCNRG       | 0.005300938 | 0.001688757 | 0.008061885 | 7.53E-07 |
| 0.000101882 | 0.015483034 | 0.004801739 | 0.002044214 |          |
| 0.013790535 | 0.002090464 | 0.007318919 | 0.078374011 |          |
| 0.000159766 | 0.12482857  | 0.00106174  | 0.000995561 |          |
| 0.000725759 | 0.001498105 | 0.000963316 | 0.010392723 |          |

|             |             |             |             |
|-------------|-------------|-------------|-------------|
| 7.31E-05    | 0.010046717 | 0.003133154 | 0.010095341 |
| 0.137699034 | 0.003003006 | 6.64E-05    | 0.000482636 |
| 0.00064703  | 0.021580378 | 0.001673979 | 0.001130523 |
| 0.000251561 | 0.000186395 | 1.64E-05    | 1.23E-06    |
| 1.07E-07    | 0.000115226 | 0.000323515 | 0.001516465 |
| 0.000415477 | 0.013134189 | 2.69E-07    | 0.006555203 |
| 0.000618705 | 0.00697003  | 0.007138051 | 0.016761197 |
| 0.021926077 | 0.002164898 | 5.52E-07    | 0.006824159 |
| 0.005225421 | 4.00E-07    | 0.00355276  | 3.32E-07    |
| 0.009699344 | 0.025293808 | 0.007686031 | 0.00137033  |
| 0.003653877 | 0.010044232 | 0.003310314 | 0.001101933 |
| 0.000791256 | 0.028938612 | 0.000842774 | 0.00031502  |
| 0.000467181 | 0.001788984 | 0.00043668  | 0.001405234 |
| 2.67E-05    | 0.000382523 | 0.000388606 | 0.011875357 |
| 0.004951977 | 0.029413479 | 0.005432966 | 4.00E-05    |
| 0.002854698 | 7.63E-05    | 0.006346162 | 0.00149519  |
| 0.001096268 | 0.000351564 | 0.026430458 | 0.005420358 |
| 0.000958687 | 1.35E-05    | 0.000382809 | 1.90E-06    |
| 0.001069865 | 0.000448546 | 0.003249749 | 0.005955145 |
| 0.007211626 | 0.026206956 | 0.008949758 | 0.000214772 |
| 0.002172068 | 0.000673204 | 0.003880485 | 9.74E-06    |
| 0.017708228 | 0.001172164 | 0.003138258 | 0.001720157 |
| 0.004534865 | 0.019428227 | 0.010913247 | 4.53E-05    |
| 0.005130343 | 5.38E-06    | 3.96E-05    | 0.002127457 |
| 0.021199891 | 0.003849664 | 0.007324171 | 3.16E-05    |
| 0.000177946 | 0.000905171 | 0.000969448 | 0.000285208 |
| 0.00380322  | 0.000168405 | 0.004031312 | 0.000138075 |
| 0.000464975 | 2.54E-05    | 0.007819295 | 0.029060747 |
| 0.001377413 | 0.005528123 | 0.00275863  | 0.016876705 |
| 0.010037176 | 8.20E-05    | 0.000948125 | 0.001303634 |
| 0.001814207 | 0.0002482   | 0.012918273 | 0.000804846 |
| 0.001653683 | 0.006623924 | 0.004995901 | 3.24E-06    |
| 0.006009419 | 0.004741427 | 5.63E-06    | 0.039901691 |
| 0.001203819 | 5.67E-07    | 0.000411943 | 0.004014233 |
| 0.000774834 | 0.000352431 | 7.83E-05    | 0.00114283  |
| 0.006464811 | 0.017819155 | 0.006162896 | 0.003409151 |
| 0.00108121  | 0.015304095 | 0.000581235 | 0.011058315 |
| 8.94E-05    | 0.020678883 | 0.012745688 | 0.000179152 |
| 0.001496517 | 0.002358545 | 0.00157109  | 0.002115336 |
| 0.001340276 | 1.08E-07    | 0.001615401 | 0.005626753 |
| 0.00126493  | 0.000429197 | 0.001748359 | 0.026728072 |
| 0.022348214 | 2.90E-05    | 0.027057919 | 0.000129872 |
| 0.00302642  | 0.000773855 | 0.002382468 | 0.029075572 |
| 0.00081235  | 0.000146453 | 0.000733985 | 0.100633666 |
| 0.000265916 | 0.027076318 | 0.001342805 | 0.001104054 |
| 0.017364206 | 0.000246999 | 0.019049494 | 0.000242305 |
| 0.005304262 | 0.001282606 | 8.63E-05    | 0.002304234 |
| 0.000643901 | 0.001447677 | 0.000300314 | 0.006405926 |
| 0.000176018 | 0.006853048 | 1.00E-05    | 0.010019714 |
| 0.000185716 | 0.000655173 | 0.000327529 | 0.000423974 |
| 0.005552973 | 0.00236149  | 2.75E-05    | 0.014292502 |
| 0.004206064 | 0.001610557 | 0.032649514 | 0.001591753 |
| 1           | 0.006213043 | 0.000421113 | 4.33E-05    |
| 0.005207711 | 0.059186517 | 0.016795513 | 0.000972783 |

|                                        |                      |                      |             |
|----------------------------------------|----------------------|----------------------|-------------|
| 0.00177654                             | 0.002686012          | 0.00040467           | 8.24E-05    |
| 0.084904041                            | 0.002361689          | 0.003939873          | 0.00055636  |
| 0.000747981                            | 5.25E-06 2.78E-05    | 0.000900778          | 0.000753892 |
| 0.002762351                            | 0.000960218          | 0.000167816          | 2.87E-05    |
| 0.011049546                            | 0.001987812          | 0.000125209          | 0.009946807 |
| 0.000973425                            | 0.000107039          | 0.000845604          | 0.000775547 |
| 0.000637712                            | 0.007857883          | 2.92E-05 0.000622608 | 4.67E-05    |
| 0.006959082                            | 0.014865582          | 0.002025622          | 4.38E-08    |
| 0.002802819                            | 0.001083521          | 0.002753291          | 0.000704575 |
| 0.001265133                            | 0.013822692          | 0.003658789          | 0.001406423 |
| 0.000949481                            | 0.006350484          | 0.00019486           | 7.07E-05    |
| 0.009146071                            | 0.000566402          | 0.012448875          | 0.000829749 |
| 3.92E-05 0.000338976                   | 0.034642442          | 2.87E-06 0.003147038 |             |
| 0.000453499                            | 0.004965474          | 7.08E-07 0.000830007 | 7.20E-05    |
| 2.42E-06 0.001750699                   | 0.003412544          | 0.001059889          |             |
| 0.000473122                            | 0.007588705          | 0.000143868          | 2.24E-06    |
| 0.000413574                            | 1.30E-05 0.000613432 | 0.000156415          |             |
| 0.000104307                            | 0.000212907          | 0.001368102          | 0.002803473 |
| 0.002293304                            | 0.011387641          | 0.002064009          | 0.00059124  |
| 9.88E-06 0.00043108                    | 0.000908029          | 0.003290952          |             |
| 0.006349296                            | 0.00167119           | 0.000253899          | 0.000665112 |
| 0.00348056                             | 0.006592978          | 0.001640271          | 3.31E-07    |
| 0.000353324                            | 0.000608871          | 0.000668526          | 0.000530496 |
| 0.000650015                            | 0.000295679          | 0.01251194           | 0.00779273  |
| 4.47E-07 0.019956725                   | 0.007496837          | 0.001625859          |             |
| 0.000669793                            | 0.033952705          | 0.012754698          | 0.003547663 |
| 0.003475679                            | 0.009567162          | 0.002489292          | 0.015371379 |
| 8.21E-06 0.000162188                   | 0.00653107           | 0.002680961          |             |
| 0.006763323                            | 0.001084234          | 0.000205331          | 0.000393899 |
| 0.023097564                            | 0.001337332          | 0.000669143          | 0.014757332 |
| 0.000374519                            | 0.000301132          | 0.000224059          | 0.000938713 |
| 0.019901762                            | 0.003060745          | 0.004986889          | 0.027611954 |
| 0.028378838                            | 0.003888435          | 0.001161659          | 0.000626511 |
| 0.000137097                            | 0.010758701          | 0.003895042          | 0.004911698 |
| 2.79E-05 0.003453197                   | 0.009932175          | 0.00600844           |             |
| 0.001090309                            | 0.001123012          | 0.000100825          | 0.000361599 |
| 0.002543436                            | 0.003369982          | 0.00045157           | 0.000444992 |
| 0.012115819                            | 0.001941351          | 0.029895615          | 5.24E-06    |
| 0.000546322                            | 0.008828452          | 1.14E-05 0.013547295 |             |
| 0.000111599                            | 0.003361357          | 1.90E-07 0.002105729 |             |
| 0.004020868                            | 0.003444854          | 2.86E-05 0.000968396 | 9.06E-07    |
| 0.002619415                            | 0.014757753          | 0.007969383          | 0.005221379 |
| 0.00165946                             | 0.002951318          | 0.009836943          | 0.000377984 |
| 0.003170743                            | 0.000152185          | 0.00054118           | 2.32E-06    |
| 0.000868608                            | 0.004407013          | 0.000121388          | 0.000406308 |
| 0.011325547                            | 0.000507031          | 0.00206883           | 9.19E-05    |
| 0.016514886                            | 0.032347817          | 0.000418575          | 0.000262603 |
| 0.000507064                            | 0.002969421          | 0.004601248          | 0.000677042 |
| 0.000712568                            | 0.000254097          | 0.000986993          | 0.000409172 |
| 0.000264997                            | 0.005198864          | 0.001507026          | 0.015254855 |
| 2.10E-06 2.53E-05 1.71E-05 0.012446883 |                      | 0.00359434           |             |
| 0.001604656                            | 0.000845454          | 0.000528061          | 0.021009408 |
| 0.044577407                            | 1.99E-06 0.000935249 | 0.003836659          | 6.32E-08    |
| 0.000743959                            | 0.000473408          | 0.000695574          | 0.017334803 |

|             |             |             |             |
|-------------|-------------|-------------|-------------|
| 0.006366565 | 3.64E-05    |             |             |
| KLF7        | 0.185078145 | 0.436818286 | 0.190533298 |
| 0.019010596 | 0.160222844 | 0.302439064 | 0.285554334 |
| 0.183972181 | 0.22588099  | 0.168975148 | 0.397735148 |
| 0.007452455 | 0.211211461 | 0.071040794 | 0.199693497 |
| 0.362337806 | 0.369767195 | 0.301713135 | 0.376859004 |
| 0.246323327 | 0.101686306 | 0.337753628 | 0.259358158 |
| 0.306953824 | 0.013433358 | 0.205566881 | 0.045142752 |
| 0.161780117 | 0.334108711 | 0.313505266 | 0.233748692 |
| 0.313981334 | 0.280132989 | 0.201408975 | 0.189064699 |
| 0.066487119 | 0.47788287  | 0.039022207 | 0.221597991 |
| 0.22894594  | 0.243701168 | 0.285162284 | 0.065421477 |
| 0.000763637 | 0.222291633 | 0.143563171 | 0.309912997 |
| 0.287318957 | 0.296573972 | 0.312544746 | 0.21832737  |
| 0.036513528 | 0.413312686 | 0.336910225 | 0.03400143  |
| 0.470663062 | 0.002937227 | 0.474177828 | 0.178890952 |
| 0.209842245 | 0.313990118 | 0.1538488   | 0.280837254 |
| 0.336996055 | 0.479147314 | 0.412565441 | 0.094430527 |
| 0.201216894 | 0.204430506 | 0.211969729 | 0.223722463 |
| 0.399075332 | 0.228655667 | 0.273658404 | 0.128268296 |
| 0.224757626 | 0.237180752 | 0.345959207 | 0.322656302 |
| 0.004059407 | 0.234671752 | 0.169771849 | 0.193749403 |
| 0.145282076 | 0.417507941 | 0.18916825  | 0.242632486 |
| 0.181594593 | 0.108456627 | 0.303836521 | 0.401166271 |
| 0.030029834 | 0.237773848 | 0.014982013 | 0.313092991 |
| 0.298448851 | 0.278942023 | 0.265598288 | 0.160257746 |
| 0.088580683 | 0.289158042 | 0.118419136 | 0.213536924 |
| 0.252036889 | 0.242558303 | 0.456236767 | 0.041744089 |
| 0.176261193 | 0.219451732 | 0.30526788  | 0.466946169 |
| 0.381558185 | 0.054664973 | 0.289727806 | 0.31202899  |
| 0.172473032 | 0.105599981 | 0.311427047 | 0.019054405 |
| 0.018492809 | 0.032290724 | 0.310337835 | 0.279862434 |
| 0.172064445 | 0.287221699 | 0.11058649  | 0.210786682 |
| 0.176025194 | 0.28987847  | 0.18968122  | 0.293475218 |
| 0.201318664 | 0.294080755 | 0.209561187 | 0.252916254 |
| 0.179870356 | 0.272169465 | 0.286490803 | 0.428919003 |
| 0.473637827 | 0.182464988 | 0.205875237 | 0.350512572 |
| 0.177742311 | 0.355842197 | 0.423162408 | 0.265505106 |
| 0.230800512 | 0.324941237 | 0.173223081 | 0.303799063 |
| 0.325128948 | 0.26981247  | 0.039737821 | 0.408621147 |
| 0.485229448 | 0.021278936 | 0.202805189 | 0.297148531 |
| 0.039401008 | 0.255530366 | 0.437204649 | 0.335968421 |
| 0.227597844 | 0.039043865 | 0.204817189 | 0.280727619 |
| 0.309001871 | 0.286425968 | 0.286828107 | 0.173570952 |
| 0.347917581 | 0.170151247 | 0.163875998 | 0.180306127 |
| 0.2752412   | 0.307517253 | 0.099785154 | 0.040132488 |
| 0.22408045  | 0.249551533 | 0.370539952 | 0.244545489 |
| 0.227918914 | 0.002294628 | 0.162196428 | 0.207189456 |
| 0.164049318 | 0.245246268 | 0.457311367 | 0.269034948 |
| 0.325962287 | 0.121278182 | 0.29985187  | 0.233808041 |
| 0.316857149 | 0.182906569 | 0.187854535 | 0.004819943 |
| 0.240238187 | 0.12891576  | 0.236663096 | 0.154814416 |
| 0.227885507 | 0.215171527 | 0.151012209 | 0.358260217 |
| 0.308372227 | 0.281762462 | 0.073883938 | 0.081522973 |

|             |             |             |             |
|-------------|-------------|-------------|-------------|
| 0.311215899 | 0.356770939 | 0.170588584 | 0.172735604 |
| 0.32100972  | 0.245819477 | 0.233712109 | 0.440704739 |
| 0.255124178 | 0.3943192   | 0.063905124 | 0.302695027 |
| 0.171767165 | 0.353013113 | 0.264869592 | 0.311471371 |
| 0.292778336 | 0.254344022 | 0.139079449 | 0.35119296  |
| 0.276012254 | 0.2752831   | 0.221262514 | 0.452620764 |
| 0.006213043 | 1           | 0.217104169 | 0.069936807 |
| 0.436460351 | 0.292484883 | 0.213506086 | 0.289871894 |
| 0.386145955 | 0.461853726 | 0.356038678 | 0.262158863 |
| 0.101021162 | 0.062028737 | 0.4136026   | 0.369930591 |
| 0.333193489 | 0.277465298 | 0.122070743 | 0.060377983 |
| 0.382806465 | 0.155646707 | 0.252718292 | 0.179854475 |
| 0.197014574 | 0.157598275 | 0.335651292 | 0.20888306  |
| 0.01274442  | 0.258064476 | 0.200927854 | 0.130750846 |
| 0.208815291 | 0.184607963 | 0.331958474 | 0.398539379 |
| 0.175712138 | 0.14808094  | 0.151770401 | 0.199766474 |
| 0.306843872 | 0.440229987 | 0.01528515  | 0.412873105 |
| 0.408151735 | 0.302411173 | 0.362379356 | 0.405750457 |
| 0.296431879 | 0.425394042 | 0.378461796 | 0.299303735 |
| 0.005329405 | 0.234345849 | 0.175397869 | 0.448366971 |
| 0.290623255 | 0.311733174 | 0.117295079 | 0.140505848 |
| 0.006984589 | 0.29178937  | 0.066622725 | 0.47971057  |
| 0.338597528 | 0.108956011 | 0.010219747 | 0.336187794 |
| 0.163044479 | 0.037717253 | 0.441304961 | 0.264632276 |
| 0.391287453 | 0.266083717 | 0.248196547 | 0.206829337 |
| 0.048611238 | 0.227605869 | 0.043868192 | 0.254397848 |
| 0.192584855 | 0.043967631 | 0.091933037 | 0.410179243 |
| 0.372710001 | 0.374207222 | 0.335432643 | 0.01211046  |
| 0.21944059  | 0.092192191 | 0.279457412 | 0.250503899 |
| 0.395282101 | 0.410043259 | 0.435017636 | 0.245376202 |
| 0.235014331 | 0.42038148  | 0.434099783 | 0.36368995  |
| 0.058607712 | 0.224772615 | 0.270517907 | 0.136551912 |
| 0.142437676 | 0.361329262 | 0.18690959  | 0.279168474 |
| 0.339290119 | 0.042476069 | 0.307815508 | 0.219249447 |
| 0.428746046 | 0.340523525 | 0.171467762 | 0.292729023 |
| 0.428926568 | 0.323523222 | 0.23958833  | 0.316163996 |
| 0.35396787  | 0.037723701 | 0.069038064 | 0.378991055 |
| 0.473339835 | 0.372258873 | 0.323124284 | 0.121859111 |
| 0.312092758 | 0.200820871 | 0.340299717 | 0.286978578 |
| 0.320830803 | 0.146967899 | 0.209272661 | 0.054830161 |
| 0.024268951 | 0.180701148 | 0.409286622 | 0.460099471 |
| 0.220227486 | 0.316419609 | 0.278981411 | 0.273079146 |
| 0.345041645 | 0.214854613 | 0.330216569 | 0.299970995 |
| 0.484830985 | 0.074509805 | 0.475010663 | 0.283563895 |
| 0.350454852 | 0.25630407  | 0.333710837 | 0.011461582 |
| 0.207759884 | 0.178471828 | 0.116355072 | 0.229126013 |
| 0.264266478 | 0.260775992 | 0.358308534 | 0.284699048 |
| 0.095923889 | 0.013296182 | 0.376017948 | 0.114265726 |
| 0.385836761 | 0.138471464 | 0.286297287 | 0.035097749 |
| 0.470984511 | 0.251396926 | 0.298493903 | 0.105092425 |
| 0.262890971 | 0.005228978 | 0.183532392 | 0.149497983 |
| 0.352778473 | 0.412640719 | 0.221788694 | 0.186572489 |
| 0.155212971 | 0.252840615 | 0.352771414 | 0.221038173 |
| 0.344552686 | 0.054529654 | 0.376955679 | 0.286149597 |

|             |             |             |             |
|-------------|-------------|-------------|-------------|
| 0.193315471 | 0.237391712 | 0.332087687 | 0.271039388 |
| 0.263422826 | 0.126897601 | 0.264303161 | 0.232520647 |
| 0.319837034 | 0.252594356 | 0.250735642 | 0.190882517 |
| 0.145979199 | 0.272627673 | 0.260046724 | 0.214514456 |
| 0.227638039 | 0.172775516 | 0.181015701 | 0.471596716 |
| 0.173929195 | 0.249112744 | 0.033819741 | 0.03138581  |
| 0.104261691 | 0.271594469 | 0.355667321 | 0.35995159  |
| 0.379364406 | 0.147352685 | 0.234868815 | 0.277156299 |
| 0.046194961 | 0.226576756 | 0.290942045 | 0.056013149 |
| 0.245948264 | 0.133691918 | 0.00554815  | 0.247269051 |
| 0.396989574 | 0.167590933 |             |             |
| KLHDC10     | 0.163790709 | 0.496943399 | 0.050514101 |
| 0.045858456 | 0.111279142 | 0.176371876 | 0.175114908 |
| 0.167311387 | 0.073214193 | 0.139899133 | 0.281292003 |
| 0.000469449 | 0.322035855 | 0.00684295  | 0.041143037 |
| 0.47741237  | 0.497333589 | 0.231636792 | 0.464937744 |
| 0.150537609 | 0.167179242 | 0.237653849 | 0.253659512 |
| 0.179576691 | 0.000663025 | 0.116051086 | 0.084435789 |
| 0.168276755 | 0.455841065 | 0.125201786 | 0.199711612 |
| 0.41712789  | 0.438110945 | 0.283865821 | 0.242373988 |
| 0.188978298 | 0.448604464 | 0.069921507 | 0.360012769 |
| 0.343760772 | 0.190999738 | 0.415127176 | 0.008989251 |
| 0.009612824 | 0.090374262 | 0.148026525 | 0.252948358 |
| 0.143571733 | 0.15298388  | 0.10564096  | 0.161582867 |
| 0.08883809  | 0.302245511 | 0.287916881 | 0.094002978 |
| 0.411256983 | 0.012867984 | 0.449890683 | 0.106001446 |
| 0.047991951 | 0.174473089 | 0.184313327 | 0.271603064 |
| 0.203115168 | 0.435345362 | 0.501801637 | 0.037158472 |
| 0.061425347 | 0.217902872 | 0.354699093 | 0.320227018 |
| 0.440848926 | 0.222091388 | 0.228007111 | 0.202956292 |
| 0.34200089  | 0.339145653 | 0.18616875  | 0.108037119 |
| 0.000647041 | 0.132201214 | 0.274958896 | 0.207016754 |
| 0.25568939  | 0.312780113 | 0.206086343 | 0.18659672  |
| 0.240325678 | 0.013605942 | 0.220709204 | 0.506001353 |
| 0.022844561 | 0.321786756 | 0.009381818 | 0.093750036 |
| 0.368645096 | 0.422552104 | 0.27696072  | 0.072102586 |
| 0.008244295 | 0.068721043 | 0.056768803 | 0.349364988 |
| 0.207215828 | 0.257103262 | 0.391730988 | 0.058633992 |
| 0.310188108 | 0.101728013 | 0.225405637 | 0.461952057 |
| 0.461914436 | 0.00327968  | 0.080489419 | 0.154541714 |
| 0.217503216 | 0.155225201 | 0.165045051 | 0.02383488  |
| 0.012404847 | 0.004560191 | 0.426450215 | 0.091166976 |
| 0.105004228 | 0.155306317 | 0.078123897 | 0.332904973 |
| 0.156725808 | 0.367423564 | 0.116816809 | 0.1914308   |
| 0.334108319 | 0.193154265 | 0.287460766 | 0.357375075 |
| 0.256539025 | 0.124048577 | 0.093766958 | 0.45390087  |
| 0.38107475  | 0.055522492 | 0.059768862 | 0.248074846 |
| 0.312407387 | 0.458392602 | 0.513338427 | 0.151527044 |
| 0.219567681 | 0.136746461 | 0.227107904 | 0.317213632 |
| 0.167804673 | 0.158720709 | 0.032525594 | 0.269953987 |
| 0.411171603 | 0.021590935 | 0.050677446 | 0.339097099 |
| 0.075698911 | 0.191036614 | 0.420782369 | 0.393126095 |
| 0.253566796 | 0.077968269 | 0.202344446 | 0.192915794 |
| 0.168932928 | 0.189500766 | 0.263716521 | 0.19968481  |



|             |             |             |             |
|-------------|-------------|-------------|-------------|
| 0.215470605 | 0.243609051 | 0.041761059 | 0.3201401   |
| 0.086580105 | 0.189790523 | 0.167811338 | 0.04630095  |
| 0.221101749 | 0.159081884 | 0.428898938 | 0.228271328 |
| 0.28935276  | 0.011244622 | 0.140441273 | 0.198907386 |
| 0.202060422 | 0.326850139 | 0.507614247 | 0.079557573 |
| 0.140825709 | 0.162787555 | 0.092318979 | 0.24943707  |
| 0.308548789 | 0.184999018 | 0.174201983 | 0.000625445 |
| 0.101182274 | 0.231086991 | 0.220261016 | 0.024100677 |
| 0.191839182 | 0.072422344 | 0.046550644 | 0.446656156 |
| 0.137430988 | 0.397592271 | 0.008698497 | 0.058582507 |
| 0.166465043 | 0.381955438 | 0.265100123 | 0.130898144 |
| 0.416842522 | 0.209239905 | 0.380975408 | 0.345435391 |
| 0.2005826   | 0.31611651  | 0.070816018 | 0.1494004   |
| 0.260048342 | 0.459843605 | 0.402629067 | 0.392344995 |
| 0.17591962  | 0.22367679  | 0.149059667 | 0.20093555  |
| 0.1999819   | 0.204392969 | 0.053905836 | 0.485746472 |
| 0.000421113 | 0.217104169 | 1           | 0.075660994 |
| 0.497538223 | 0.18979415  | 0.044371414 | 0.11920447  |
| 0.47520544  | 0.48224426  | 0.349011604 | 0.404211315 |
| 0.105066728 | 0.003973425 | 0.430320878 | 0.325005734 |
| 0.471251673 | 0.233927723 | 0.236197183 | 0.027241711 |
| 0.464136978 | 0.158194536 | 0.298141168 | 0.218175419 |
| 0.262081653 | 0.215563901 | 0.136436933 | 0.20119044  |
| 0.007665476 | 0.17511802  | 0.281252917 | 0.196946921 |
| 0.24704055  | 0.117575695 | 0.43832842  | 0.243387436 |
| 0.264090979 | 0.175485295 | 0.27794638  | 0.072189798 |
| 0.122822051 | 0.499127313 | 0.028510537 | 0.404921436 |
| 0.501229355 | 0.195124957 | 0.48062051  | 0.479240226 |
| 0.174281223 | 0.353305711 | 0.455237918 | 0.366725237 |
| 0.000281201 | 0.392179444 | 0.310288477 | 0.293459233 |
| 0.436215916 | 0.195345661 | 0.09181935  | 0.235640681 |
| 0.000497834 | 0.099884139 | 0.182759806 | 0.454391072 |
| 0.462320615 | 0.026792421 | 0.029830888 | 0.391770327 |
| 0.284891558 | 0.021374873 | 0.503956656 | 0.227592836 |
| 0.462403876 | 0.252518032 | 0.142217847 | 0.35928571  |
| 0.147119563 | 0.17524168  | 0.035138467 | 0.320324427 |
| 0.225804821 | 0.031640221 | 0.112814598 | 0.483194657 |
| 0.390768975 | 0.320353086 | 0.16023991  | 0.016487334 |
| 0.316716073 | 0.192673448 | 0.397330833 | 0.067037378 |
| 0.347130378 | 0.306837983 | 0.436794207 | 0.374840411 |
| 0.256633805 | 0.378203903 | 0.341654102 | 0.415697799 |
| 0.107811071 | 0.361405861 | 0.40062212  | 0.054492859 |
| 0.198554028 | 0.472851894 | 0.280688876 | 0.13323456  |
| 0.242874004 | 0.121036088 | 0.139934495 | 0.144139573 |
| 0.448520314 | 0.476315788 | 0.049119954 | 0.078181668 |
| 0.396810928 | 0.17985184  | 0.089011552 | 0.185078964 |
| 0.195866932 | 0.090578936 | 0.051186068 | 0.276826014 |
| 0.463870088 | 0.24775484  | 0.438773757 | 0.177717908 |
| 0.431920282 | 0.02937984  | 0.349935005 | 0.174112621 |
| 0.1556424   | 0.242571717 | 0.329562196 | 0.0476568   |
| 0.030554893 | 0.06772298  | 0.386799434 | 0.385868562 |
| 0.05711206  | 0.11406968  | 0.186145742 | 0.250623314 |
| 0.472828179 | 0.248218036 | 0.185224913 | 0.172712739 |
| 0.39195586  | 0.133024307 | 0.459540072 | 0.177497944 |

|             |             |             |             |
|-------------|-------------|-------------|-------------|
| 0.319686481 | 0.232777753 | 0.381868067 | 0.007839828 |
| 0.295004697 | 0.157674038 | 0.078533716 | 0.273341432 |
| 0.399135586 | 0.097616643 | 0.326076382 | 0.095248677 |
| 0.118491734 | 0.001242973 | 0.245539657 | 0.22642504  |
| 0.230638366 | 0.126949671 | 0.184133286 | 0.106343682 |
| 0.509962943 | 0.217102962 | 0.333916583 | 0.134633254 |
| 0.259909625 | 0.022822055 | 0.149316006 | 0.022555426 |
| 0.290011282 | 0.303804345 | 0.242767527 | 0.193547596 |
| 0.078503366 | 0.313127694 | 0.281989627 | 0.284032963 |
| 0.476943902 | 0.114186641 | 0.50160653  | 0.14864861  |
| 0.343739744 | 0.219864447 | 0.17020736  | 0.181390355 |
| 0.16437845  | 0.06825206  | 0.089839136 | 0.071767547 |
| 0.476295853 | 0.162582616 | 0.269829596 | 0.162730573 |
| 0.045513713 | 0.245481204 | 0.314687538 | 0.343764074 |
| 0.280506657 | 0.284010431 | 0.182401473 | 0.364833239 |
| 0.157205426 | 0.149295577 | 0.084695965 | 0.069787351 |
| 0.24322852  | 0.145344049 | 0.335574229 | 0.36991498  |
| 0.478050805 | 0.130836176 | 0.071244841 | 0.073082096 |
| 0.057670891 | 0.286967196 | 0.213713245 | 0.130788122 |
| 0.261845912 | 0.149693987 | 0.000278083 | 0.105119694 |
| 0.30011454  | 0.233824432 |             |             |
| KLHL6       | 0.104986635 | 0.177584465 | 0.00111723  |
| 0.000230567 | 0.001359041 | 0.031593565 | 0.022930941 |
| 0.078443336 | 0.002855645 | 0.003906978 | 0.058345381 |
| 0.000191931 | 0.245667042 | 0.000827437 | 0.006203985 |
| 0.241084125 | 0.257927475 | 0.044829254 | 0.266610186 |
| 0.076030017 | 0.001972313 | 0.09953631  | 0.055704098 |
| 0.032591106 | 0.000183441 | 0.005457887 | 0.000409541 |
| 0.096388211 | 0.266094957 | 0.023022488 | 0.006800296 |
| 0.233616103 | 0.219595958 | 0.028969813 | 0.008365572 |
| 0.015290108 | 0.14843377  | 0.010031881 | 0.181427868 |
| 0.308339883 | 0.011355288 | 0.220594647 | 0.000679047 |
| 4.13E-05    | 0.004558148 | 0.059422963 | 0.091090012 |
| 0.069417125 | 0.024950581 | 0.020956523 | 0.010336486 |
| 0.007729086 | 0.074805617 | 0.181063373 | 0.008719941 |
| 0.104487927 | 4.76E-05    | 0.138264797 | 0.056459509 |
| 0.003908107 | 0.051235961 | 0.110882572 | 0.101106606 |
| 0.036073814 | 0.117025418 | 0.217558953 | 0.00029453  |
| 0.004686438 | 0.107450315 | 0.193604541 | 0.069492818 |
| 0.17542901  | 0.008992126 | 0.010635642 | 0.08745375  |
| 0.157866718 | 0.249530622 | 0.057438151 | 0.00995242  |
| 4.26E-05    | 0.010076383 | 0.016791132 | 0.196753933 |
| 0.144957196 | 0.073684883 | 0.117954378 | 0.010897732 |
| 0.073270994 | 0.000526943 | 0.077269192 | 0.236533543 |
| 0.000257919 | 0.22206624  | 0.000183937 | 0.006446171 |
| 0.199249467 | 0.291557632 | 0.133315499 | 0.001511247 |
| 0.000601586 | 0.012578687 | 0.01012892  | 0.303581623 |
| 0.090221775 | 0.082848987 | 0.104198933 | 0.086175836 |
| 0.261997192 | 0.00659943  | 0.032295088 | 0.133474246 |
| 0.19477283  | 0.000446067 | 0.016555437 | 0.025911366 |
| 0.023291386 | 0.002810605 | 0.023823208 | 0.001132474 |
| 6.33E-05    | 0.003594619 | 0.240339774 | 0.009340919 |
| 0.003808753 | 0.017527172 | 0.000972193 | 0.097188974 |
| 0.05756947  | 0.296550629 | 0.0024893   | 0.023028489 |

|             |             |             |             |
|-------------|-------------|-------------|-------------|
| 0.145063145 | 0.028966514 | 0.042878294 | 0.151267207 |
| 0.026431994 | 0.03082995  | 0.01178942  | 0.14377742  |
| 0.144634368 | 0.000959385 | 0.001706689 | 0.056764574 |
| 0.237643383 | 0.22164329  | 0.224231832 | 0.018200033 |
| 0.012375386 | 0.033139144 | 0.01955071  | 0.062582829 |
| 0.032236337 | 0.099230788 | 0.010522667 | 0.085730758 |
| 0.108123033 | 0.001126391 | 0.00339067  | 0.208692568 |
| 0.000490665 | 0.005916075 | 0.155326725 | 0.146858274 |
| 0.11670711  | 0.000360986 | 0.01062946  | 0.027940868 |
| 0.054876146 | 0.023032287 | 0.118564048 | 0.009241926 |
| 0.066236608 | 0.019320419 | 0.001549828 | 0.24591472  |
| 0.010158178 | 0.080810592 | 0.027098544 | 0.003736876 |
| 0.173525006 | 0.054822216 | 0.146619845 | 0.109654734 |
| 0.173215437 | 1.87E-05    | 0.00351192  | 0.115061345 |
| 0.01672969  | 0.27574726  | 0.16248896  | 0.010743838 |
| 0.051736459 | 0.054158131 | 0.016678496 | 0.02216722  |
| 0.232630257 | 0.004145101 | 0.004979094 | 1.26E-05    |
| 0.001996886 | 0.043936476 | 0.094161739 | 0.0027155   |
| 0.006077713 | 0.002943929 | 0.018151346 | 0.165642383 |
| 0.021581463 | 0.157879888 | 0.002135638 | 0.075144027 |
| 0.01755445  | 0.092031025 | 0.021282791 | 0.010602749 |
| 0.11953677  | 0.011540328 | 0.288333885 | 0.109021536 |
| 0.010618584 | 0.067690741 | 0.032752671 | 0.033753359 |
| 0.114326782 | 0.185820097 | 0.186333657 | 0.162272379 |
| 0.020494672 | 0.196203613 | 0.010867074 | 0.04686761  |
| 0.10476001  | 0.094269631 | 0.00315513  | 0.188304288 |
| 4.33E-05    | 0.069936807 | 0.075660994 | 1           |
| 0.027558192 | 0.004116264 | 0.035778369 | 0.154981905 |
| 0.19838774  | 0.229218302 | 0.231130541 | 0.268039739 |
| 0.000787253 | 0.216647008 | 0.1106006   | 0.010778077 |
| 0.045347354 | 0.02338175  | 0.018066239 | 0.267332054 |
| 0.180086962 | 0.095619997 | 0.098650554 | 0.196552103 |
| 0.055679697 | 0.040488118 | 0.201020175 | 0.098312769 |
| 0.018076193 | 0.107567984 | 0.005379193 | 0.002208935 |
| 0.003843299 | 0.15210031  | 0.070823436 | 0.018159181 |
| 0.016759725 | 0.022708975 | 0.00341186  | 0.024144723 |
| 0.184268353 | 0.003371448 | 0.217774032 | 0.020150683 |
| 0.084174665 | 0.174097847 | 0.242606498 | 0.232334806 |
| 0.089998376 | 0.168546585 | 0.28997163  | 0.052778847 |
| 0.242418576 | 0.197972661 | 0.085027124 | 0.000217094 |
| 0.045552763 | 0.11253133  | 0.075203785 | 0.197443043 |
| 0.017204587 | 0.012563945 | 0.190956118 | 0.000128526 |
| 0.000388424 | 0.006656004 | 0.140061178 | 0.175825201 |
| 0.010512244 | 0.217344975 | 0.034768289 | 0.159059685 |
| 0.062899587 | 0.011121604 | 0.213706904 | 0.137465378 |
| 0.072628267 | 0.000277157 | 0.073191585 | 0.019043424 |
| 0.016877213 | 0.001251158 | 0.253244537 | 0.085683669 |
| 0.07865197  | 0.039856946 | 9.27E-05    | 0.153203907 |
| 0.003389544 | 0.124458172 | 0.002767047 | 0.29447688  |
| 0.08373037  | 0.140946299 | 0.002767047 | 0.145362089 |
| 0.097022172 | 0.088638474 | 0.218887108 | 0.102393601 |
| 0.198506301 | 0.209100999 | 0.150775045 | 0.002571168 |
| 0.203026178 | 0.053243065 | 0.000737095 | 0.118070419 |
| 0.001014196 | 0.026095923 | 0.017164252 | 0.104824316 |
|             |             | 0.100693115 | 0.126282151 |

|             |             |             |             |
|-------------|-------------|-------------|-------------|
| 0.185927955 | 0.002182511 | 0.014937491 | 0.099084101 |
| 0.022802704 | 0.007043817 | 0.058298398 | 0.051290291 |
| 0.008186864 | 0.036020284 | 0.093252376 | 0.14010428  |
| 0.046145881 | 0.182474507 | 0.002949132 | 0.215651029 |
| 0.00227331  | 0.22850621  | 0.006588059 | 0.052163422 |
| 0.108551794 | 0.277414364 | 0.00847528  | 0.000347829 |
| 0.003286651 | 0.086350899 | 0.109523716 | 0.004180895 |
| 0.026423404 | 0.019131795 | 0.039439926 | 0.24068449  |
| 0.022916719 | 0.041848523 | 0.058752299 | 0.107791706 |
| 0.001260228 | 0.176333461 | 0.054530471 | 0.140022533 |
| 0.019912763 | 0.156348825 | 0.000398487 | 0.142422964 |
| 0.005588296 | 0.107644252 | 0.037632459 | 0.308276959 |
| 0.006757212 | 0.073768954 | 0.013487235 | 0.004019438 |
| 0.000300084 | 0.109005769 | 0.063787356 | 0.049360711 |
| 0.050943844 | 0.058126716 | 0.016166362 | 0.207161734 |
| 0.072331469 | 0.150280422 | 0.082807636 | 0.034754007 |
| 0.001336364 | 0.006132394 | 0.001088847 | 0.134513717 |
| 0.10805315  | 0.139669694 | 0.10271109  | 0.051962612 |
| 0.106309586 | 0.079373024 | 0.047176129 | 0.182404672 |
| 0.003432203 | 0.233175817 | 0.058812971 | 0.274018859 |
| 0.017633524 | 0.04047661  | 0.015751109 | 0.013885238 |
| 0.005943354 | 0.009108457 | 0.016934462 | 0.207808503 |
| 0.022475282 | 0.043674984 | 0.022736894 | 0.000604079 |
| 0.026698772 | 0.21561298  | 0.178119845 | 0.074795358 |
| 0.152194459 | 0.052685652 | 0.099963866 | 0.021183984 |
| 0.054978532 | 0.000575903 | 0.000288186 | 0.005266654 |
| 0.01263236  | 0.224606526 | 0.1848865   | 0.238656995 |
| 0.041351587 | 0.004828274 | 0.014281494 | 0.026037284 |
| 0.255066478 | 0.031893334 | 0.003905406 | 0.110988716 |
| 0.068407257 | 1.73E-05    | 0.034640138 | 0.097198333 |
| 0.010242455 |             |             |             |
| KLRG1       | 0.345844398 | 0.511898116 | 0.131249351 |
| 0.057814381 | 0.208096251 | 0.352985095 | 0.354183339 |
| 0.355122912 | 0.178649734 | 0.248377912 | 0.436682468 |
| 0.002164216 | 0.349098885 | 0.02489009  | 0.112548884 |
| 0.490093757 | 0.504777164 | 0.457822835 | 0.486953617 |
| 0.346778078 | 0.237221163 | 0.413239526 | 0.473886295 |
| 0.376873476 | 0.002976699 | 0.233225645 | 0.107784462 |
| 0.347271011 | 0.468022231 | 0.300356175 | 0.386317213 |
| 0.42722585  | 0.427365897 | 0.470032574 | 0.411201426 |
| 0.265389234 | 0.490337211 | 0.120690916 | 0.421374917 |
| 0.348291233 | 0.362170463 | 0.438246025 | 0.02793876  |
| 0.00668992  | 0.196836057 | 0.309358808 | 0.447017457 |
| 0.341589336 | 0.33348484  | 0.264060419 | 0.299633592 |
| 0.147684298 | 0.451741496 | 0.39746344  | 0.148640473 |
| 0.492707684 | 0.010925357 | 0.496406476 | 0.252088725 |
| 0.127111389 | 0.391370589 | 0.349133095 | 0.451431507 |
| 0.371572764 | 0.498689796 | 0.516937881 | 0.082688585 |
| 0.14676367  | 0.440052598 | 0.390802673 | 0.500281978 |
| 0.483925932 | 0.424536621 | 0.416331041 | 0.358745215 |
| 0.443506834 | 0.367488512 | 0.382724134 | 0.267111281 |
| 0.001879275 | 0.268150148 | 0.4304007   | 0.31179754  |
| 0.378392916 | 0.456819942 | 0.383598974 | 0.350381553 |
| 0.447326874 | 0.041726236 | 0.452942455 | 0.519551238 |

|             |             |             |             |
|-------------|-------------|-------------|-------------|
| 0.043900957 | 0.382336173 | 0.019480016 | 0.235299676 |
| 0.427052569 | 0.423832304 | 0.426398577 | 0.151428425 |
| 0.029213795 | 0.189216599 | 0.147992358 | 0.348973082 |
| 0.440963064 | 0.49853335  | 0.487257642 | 0.114381827 |
| 0.303270208 | 0.232404629 | 0.446694853 | 0.500138644 |
| 0.477066873 | 0.014303811 | 0.215522546 | 0.343103936 |
| 0.376726217 | 0.218053334 | 0.357456244 | 0.04699862  |
| 0.025917454 | 0.019678172 | 0.433814193 | 0.238028844 |
| 0.200209822 | 0.330165339 | 0.156320603 | 0.493356947 |
| 0.338050607 | 0.388523602 | 0.22215154  | 0.387528059 |
| 0.427803177 | 0.387419476 | 0.498911518 | 0.463635517 |
| 0.434425997 | 0.302038483 | 0.234586947 | 0.508376647 |
| 0.463507732 | 0.138849868 | 0.150881271 | 0.429521574 |
| 0.328230434 | 0.474558468 | 0.529992683 | 0.35261456  |
| 0.396708494 | 0.332688936 | 0.384612487 | 0.497449845 |
| 0.365388054 | 0.370993617 | 0.077491607 | 0.441225464 |
| 0.484932061 | 0.046260095 | 0.128283414 | 0.430300145 |
| 0.100225308 | 0.354942925 | 0.480109548 | 0.499684597 |
| 0.470956994 | 0.090743975 | 0.36024458  | 0.387952183 |
| 0.378166416 | 0.37899698  | 0.446565769 | 0.331631951 |
| 0.407006813 | 0.39410465  | 0.104760975 | 0.318218976 |
| 0.21508797  | 0.398216356 | 0.293568197 | 0.082113957 |
| 0.390100953 | 0.37017733  | 0.497601094 | 0.44312504  |
| 0.391892657 | 0.010387127 | 0.248583871 | 0.375733935 |
| 0.352993232 | 0.344606287 | 0.522981083 | 0.198987981 |
| 0.336984206 | 0.302571088 | 0.232273268 | 0.44190661  |
| 0.376893731 | 0.325600831 | 0.300658162 | 0.001802511 |
| 0.239780128 | 0.383097521 | 0.447819744 | 0.078276571 |
| 0.370331464 | 0.178274015 | 0.125572278 | 0.487092332 |
| 0.313077419 | 0.476299799 | 0.034372718 | 0.135064809 |
| 0.373333673 | 0.511734174 | 0.450173015 | 0.289371434 |
| 0.512233075 | 0.413387189 | 0.377367351 | 0.464404245 |
| 0.387399555 | 0.455494254 | 0.147789823 | 0.346724954 |
| 0.444460411 | 0.488759907 | 0.442727996 | 0.47532692  |
| 0.380079997 | 0.362385638 | 0.310606111 | 0.38384252  |
| 0.430210996 | 0.442526908 | 0.148103742 | 0.514182059 |
| 0.001550589 | 0.436460351 | 0.497538223 | 0.154981905 |
| 1           | 0.371027823 | 0.123686248 | 0.303903421 |
| 0.496907009 | 0.513249275 | 0.405209897 | 0.398958217 |
| 0.218513185 | 0.01707836  | 0.467633493 | 0.47309905  |
| 0.475763039 | 0.476376496 | 0.370299189 | 0.072127751 |
| 0.478278911 | 0.315919781 | 0.465472584 | 0.413434771 |
| 0.468286955 | 0.398554162 | 0.332025484 | 0.324606807 |
| 0.01668462  | 0.354669219 | 0.429462481 | 0.268866377 |
| 0.414457122 | 0.250094697 | 0.494614331 | 0.420178847 |
| 0.455829082 | 0.326567691 | 0.429160091 | 0.165091091 |
| 0.283933371 | 0.516716285 | 0.048514122 | 0.445404371 |
| 0.518965401 | 0.428033225 | 0.493689628 | 0.50466926  |
| 0.388329309 | 0.48037416  | 0.490834204 | 0.38989934  |
| 0.001428252 | 0.382900743 | 0.351493557 | 0.43401419  |
| 0.429747311 | 0.394300336 | 0.212394474 | 0.408773265 |
| 0.002207809 | 0.244612787 | 0.266969395 | 0.495725011 |
| 0.483407245 | 0.064694615 | 0.045461538 | 0.496981853 |
| 0.367373764 | 0.049094576 | 0.52738999  | 0.444044788 |

|             |             |             |             |
|-------------|-------------|-------------|-------------|
| 0.513128848 | 0.490747999 | 0.290965318 | 0.372258575 |
| 0.212450127 | 0.38232739  | 0.062314683 | 0.509190059 |
| 0.427183003 | 0.076436276 | 0.163664172 | 0.505380908 |
| 0.465229226 | 0.488850538 | 0.360772204 | 0.021573813 |
| 0.327458692 | 0.280797305 | 0.49731012  | 0.180879915 |
| 0.463059699 | 0.458286659 | 0.504435653 | 0.415676583 |
| 0.472719526 | 0.492330681 | 0.464684935 | 0.491009494 |
| 0.164003961 | 0.383574476 | 0.399156557 | 0.112757758 |
| 0.351585402 | 0.479760886 | 0.470553815 | 0.293113008 |
| 0.430243481 | 0.148427283 | 0.314555019 | 0.331905966 |
| 0.513343156 | 0.474458574 | 0.117455323 | 0.221172925 |
| 0.495163469 | 0.389195602 | 0.203384831 | 0.41501296  |
| 0.377299605 | 0.15408879  | 0.120120378 | 0.44812975  |
| 0.503894295 | 0.411692576 | 0.45270514  | 0.256587029 |
| 0.439606198 | 0.092579107 | 0.425293794 | 0.372690378 |
| 0.363602718 | 0.382460128 | 0.333770925 | 0.110191472 |
| 0.046568526 | 0.176193132 | 0.493481216 | 0.481402399 |
| 0.145759191 | 0.281712602 | 0.384697453 | 0.472010746 |
| 0.480280179 | 0.455800375 | 0.383874777 | 0.396449864 |
| 0.479071976 | 0.179971176 | 0.497292623 | 0.398992466 |
| 0.44353892  | 0.45347902  | 0.480056637 | 0.01395707  |
| 0.445679225 | 0.282166282 | 0.188020613 | 0.478658048 |
| 0.401141042 | 0.232302392 | 0.488660793 | 0.240193365 |
| 0.218966964 | 0.005324031 | 0.418212895 | 0.371313422 |
| 0.389898143 | 0.273168352 | 0.415096801 | 0.156451992 |
| 0.536410686 | 0.443630887 | 0.431874731 | 0.261557463 |
| 0.479325165 | 0.025926927 | 0.265709557 | 0.065825269 |
| 0.431981127 | 0.457379755 | 0.409849601 | 0.382744186 |
| 0.201346361 | 0.500091399 | 0.473401751 | 0.497208937 |
| 0.484633822 | 0.18618638  | 0.507963408 | 0.347834365 |
| 0.332274061 | 0.425875967 | 0.367708595 | 0.382437511 |
| 0.327824905 | 0.160041657 | 0.212099956 | 0.196140493 |
| 0.467331931 | 0.354991134 | 0.497209467 | 0.339963482 |
| 0.105551766 | 0.479728383 | 0.401016435 | 0.417051576 |
| 0.485111829 | 0.36214045  | 0.374871029 | 0.471691741 |
| 0.318735446 | 0.335063798 | 0.10319233  | 0.073139187 |
| 0.323066519 | 0.307215858 | 0.404573596 | 0.452155548 |
| 0.494510622 | 0.265340866 | 0.175447805 | 0.199532212 |
| 0.110706773 | 0.336424575 | 0.402054827 | 0.200392768 |
| 0.471785797 | 0.29080862  | 0.001472356 | 0.262202858 |
| 0.458839271 | 0.427730051 |             |             |
| KLRK1       | 0.105572514 | 0.352209009 | 0.249749707 |
| 0.042750354 | 0.302528323 | 0.366684643 | 0.400627105 |
| 0.099173676 | 0.249711471 | 0.300274346 | 0.427429363 |
| 0.00226564  | 0.120953478 | 0.044825085 | 0.151451237 |
| 0.240536432 | 0.251757034 | 0.343126421 | 0.245332057 |
| 0.14565355  | 0.18265392  | 0.247934547 | 0.248344114 |
| 0.356827382 | 0.005556793 | 0.376735604 | 0.126986239 |
| 0.083356848 | 0.208374273 | 0.310969966 | 0.262423947 |
| 0.200923348 | 0.187971743 | 0.190706561 | 0.220850979 |
| 0.059945081 | 0.396200551 | 0.028898263 | 0.154821166 |
| 0.127411205 | 0.367707375 | 0.194176992 | 0.06969273  |
| 0.002199499 | 0.359124052 | 0.073366545 | 0.245882148 |
| 0.176539367 | 0.349436041 | 0.311758872 | 0.376998179 |

|             |             |             |             |
|-------------|-------------|-------------|-------------|
| 0.019155625 | 0.406593543 | 0.208806224 | 0.018540005 |
| 0.460506852 | 0.009373432 | 0.423832116 | 0.082970176 |
| 0.263473165 | 0.263223934 | 0.093311487 | 0.220350879 |
| 0.420906674 | 0.45359881  | 0.308219294 | 0.226464371 |
| 0.30575712  | 0.139410249 | 0.136107097 | 0.224076196 |
| 0.308474862 | 0.203520899 | 0.330189051 | 0.087091474 |
| 0.161520602 | 0.135089765 | 0.330937878 | 0.28922491  |
| 0.003489952 | 0.39312804  | 0.217932558 | 0.103810124 |
| 0.089448605 | 0.419039707 | 0.118087836 | 0.386353029 |
| 0.126212439 | 0.118664713 | 0.236885283 | 0.284234841 |
| 0.05659511  | 0.148266186 | 0.018908532 | 0.266824645 |
| 0.191391155 | 0.164380562 | 0.180637245 | 0.311994476 |
| 0.082234648 | 0.223738678 | 0.04949419  | 0.114926159 |
| 0.183409421 | 0.187357457 | 0.44871592  | 0.015114912 |
| 0.095927268 | 0.176353881 | 0.286442624 | 0.411800699 |
| 0.276476599 | 0.029353024 | 0.190496226 | 0.368846021 |
| 0.154716233 | 0.18383435  | 0.388418737 | 0.010242046 |
| 0.03124487  | 0.007375106 | 0.199424465 | 0.246647888 |
| 0.350234216 | 0.384784009 | 0.175939049 | 0.188181545 |
| 0.095285357 | 0.166299686 | 0.358763621 | 0.382297306 |
| 0.140128896 | 0.391879766 | 0.210833695 | 0.187492773 |
| 0.180356161 | 0.176831898 | 0.269322548 | 0.377294347 |
| 0.378586506 | 0.273044141 | 0.251501712 | 0.351410605 |
| 0.10349814  | 0.239431805 | 0.306457544 | 0.173723399 |
| 0.339287214 | 0.284534438 | 0.171073299 | 0.321522756 |
| 0.378702442 | 0.164901133 | 0.012717623 | 0.369016481 |
| 0.464688061 | 0.013670015 | 0.260070812 | 0.189581592 |
| 0.101329397 | 0.333830852 | 0.349925624 | 0.270757254 |
| 0.170794341 | 0.110603882 | 0.292432303 | 0.353710809 |
| 0.258107645 | 0.349077142 | 0.220506527 | 0.257898907 |
| 0.314723336 | 0.166225088 | 0.265101523 | 0.103046179 |
| 0.325262462 | 0.232193519 | 0.061156617 | 0.035644373 |
| 0.132649064 | 0.150506861 | 0.29777964  | 0.168176301 |
| 0.144395458 | 0.008267834 | 0.281520201 | 0.131373495 |
| 0.146736736 | 0.13442233  | 0.389815293 | 0.31847696  |
| 0.265246645 | 0.079981041 | 0.306285687 | 0.291224134 |
| 0.185815744 | 0.238306357 | 0.251113044 | 0.005608794 |
| 0.330545171 | 0.092844903 | 0.175951591 | 0.094619691 |
| 0.342696378 | 0.201382244 | 0.06080365  | 0.280059988 |
| 0.347262265 | 0.217311607 | 0.029625009 | 0.029083284 |
| 0.310032491 | 0.365564086 | 0.151672743 | 0.101360559 |
| 0.291688771 | 0.245193933 | 0.129500455 | 0.402475639 |
| 0.324574353 | 0.41307117  | 0.028221672 | 0.250582535 |
| 0.117356948 | 0.2760443   | 0.180980951 | 0.233428131 |
| 0.34610322  | 0.144707343 | 0.078253127 | 0.361216301 |
| 0.180672267 | 0.190418841 | 0.223396303 | 0.353487081 |
| 0.005207711 | 0.292484883 | 0.18979415  | 0.027558192 |
| 0.371027823 | 1           | 0.216464994 | 0.187724951 |
| 0.252876784 | 0.354902554 | 0.221591798 | 0.1610149   |
| 0.049300688 | 0.02992348  | 0.286962337 | 0.326281098 |
| 0.213270367 | 0.259983215 | 0.116338999 | 0.021035177 |
| 0.275781402 | 0.07833841  | 0.21167621  | 0.110611919 |
| 0.159004772 | 0.116374466 | 0.286189699 | 0.111236141 |
| 0.005214936 | 0.27512816  | 0.139655515 | 0.167129813 |

|             |             |             |             |
|-------------|-------------|-------------|-------------|
| 0.225547199 | 0.194783419 | 0.274994624 | 0.379701104 |
| 0.17471622  | 0.08481429  | 0.169621312 | 0.334216395 |
| 0.367907375 | 0.344904944 | 0.011026561 | 0.278604885 |
| 0.286214658 | 0.238839972 | 0.282803116 | 0.272927416 |
| 0.231104852 | 0.42786145  | 0.296433899 | 0.172698907 |
| 0.0019156   | 0.143333983 | 0.107566706 | 0.422860117 |
| 0.196771794 | 0.333526255 | 0.046564358 | 0.097223428 |
| 0.004997347 | 0.30858548  | 0.050860686 | 0.365789813 |
| 0.256903007 | 0.19614784  | 0.007039785 | 0.26341905  |
| 0.102418283 | 0.016320122 | 0.322085466 | 0.292129227 |
| 0.34077479  | 0.224951372 | 0.377523306 | 0.130380265 |
| 0.031590151 | 0.138431577 | 0.111533959 | 0.237235469 |
| 0.14496621  | 0.018525594 | 0.233646973 | 0.281233394 |
| 0.272746913 | 0.388341785 | 0.341463117 | 0.024492336 |
| 0.116161949 | 0.102529183 | 0.230460476 | 0.224137571 |
| 0.28921624  | 0.409886685 | 0.372445591 | 0.163608166 |
| 0.180177988 | 0.39929721  | 0.414357858 | 0.285364484 |
| 0.066980346 | 0.13795515  | 0.171836772 | 0.187614591 |
| 0.083788492 | 0.270155073 | 0.177023697 | 0.382659218 |
| 0.257573235 | 0.07690147  | 0.357989222 | 0.120748855 |
| 0.38807155  | 0.258695647 | 0.257600747 | 0.193789955 |
| 0.421067396 | 0.287710588 | 0.365561476 | 0.247958325 |
| 0.358760251 | 0.018376092 | 0.026666874 | 0.338431007 |
| 0.421584732 | 0.440297973 | 0.228750004 | 0.204561957 |
| 0.212607237 | 0.180432759 | 0.219802931 | 0.331213138 |
| 0.260729119 | 0.094291003 | 0.112943884 | 0.019048737 |
| 0.043111451 | 0.136630471 | 0.428124083 | 0.425717218 |
| 0.279809167 | 0.291216907 | 0.355004815 | 0.32563142  |
| 0.230498396 | 0.152745368 | 0.345461712 | 0.208431075 |
| 0.462426463 | 0.166951261 | 0.369874326 | 0.214254217 |
| 0.256908309 | 0.304266603 | 0.256394933 | 0.012592553 |
| 0.147510702 | 0.281847886 | 0.044982644 | 0.275251994 |
| 0.150363919 | 0.337655872 | 0.390454903 | 0.246716322 |
| 0.089007443 | 0.005215678 | 0.286551773 | 0.086409671 |
| 0.425086043 | 0.060519123 | 0.204503185 | 0.020547267 |
| 0.35847613  | 0.18696903  | 0.208857947 | 0.058229397 |
| 0.2574221   | 0.005788303 | 0.323420211 | 0.140199894 |
| 0.254673307 | 0.359268263 | 0.144945917 | 0.111685117 |
| 0.064902345 | 0.22293709  | 0.330923638 | 0.230762512 |
| 0.267272084 | 0.039857796 | 0.262188047 | 0.19341511  |
| 0.109952113 | 0.176252212 | 0.350320628 | 0.205666911 |
| 0.408086207 | 0.097523387 | 0.339541729 | 0.131994564 |
| 0.229468081 | 0.195235889 | 0.281064418 | 0.112119685 |
| 0.254265792 | 0.263821065 | 0.159022793 | 0.147447476 |
| 0.190481081 | 0.107082598 | 0.101248939 | 0.453010464 |
| 0.107080067 | 0.163854456 | 0.07222961  | 0.107672211 |
| 0.115643041 | 0.351240859 | 0.220250683 | 0.246101644 |
| 0.26268167  | 0.069371358 | 0.297659431 | 0.208152646 |
| 0.019713112 | 0.118943913 | 0.3903615   | 0.058398079 |
| 0.194923587 | 0.074763928 | 0.004219957 | 0.137459774 |
| 0.353126106 | 0.13187417  |             |             |
| LAT2        | 0.076687136 | 0.124322735 | 0.186720898 |
| 0.001580224 | 0.030257262 | 0.314777582 | 0.187288766 |
| 0.045405336 | 0.169299009 | 0.053261013 | 0.270040311 |



|             |             |             |             |
|-------------|-------------|-------------|-------------|
| 0.065203258 | 0.025547775 | 0.231474878 | 0.120852909 |
| 0.07527487  | 0.07035497  | 0.117930267 | 0.078408398 |
| 0.126735129 | 0.01481771  | 0.215022801 | 0.11375542  |
| 0.239477864 | 0.133206319 | 0.113078745 | 0.008902174 |
| 0.024552613 | 0.059434641 | 0.291401554 | 0.053825261 |
| 0.068157401 | 0.038536372 | 0.017142913 | 0.011600721 |
| 0.001264523 | 0.184845395 | 0.000780477 | 0.026509389 |
| 0.03205057  | 0.076253499 | 0.04623682  | 0.141416737 |
| 1.22E-05    | 0.148517094 | 0.022235177 | 0.170670131 |
| 0.12910389  | 0.306093138 | 0.343208835 | 0.092827254 |
| 0.00074797  | 0.254424719 | 0.140419087 | 0.000519222 |
| 0.207297273 | 0.000333267 | 0.1846436   | 0.065655069 |
| 0.22808101  | 0.149741057 | 0.032298735 | 0.120684894 |
| 0.298845524 | 0.197885506 | 0.095495942 | 0.073222994 |
| 0.291247411 | 0.045919027 | 0.030807535 | 0.053363273 |
| 0.11668945  | 0.033024453 | 0.05094478  | 0.007774751 |
| 0.038910495 | 0.036441998 | 0.301587772 | 0.139958449 |
| 0.026469956 | 0.162201598 | 0.0111148   | 0.062692026 |
| 0.015142669 | 0.251248053 | 0.058516344 | 0.059299611 |
| 0.030868001 | 0.234795303 | 0.163272588 | 0.08623741  |
| 0.010305058 | 0.0402549   | 0.003180932 | 0.137713992 |
| 0.06786745  | 0.041866376 | 0.097211132 | 0.109841891 |
| 0.196641754 | 0.211260209 | 0.049752191 | 0.025567447 |
| 0.091024991 | 0.051738178 | 0.207092049 | 0.001482903 |
| 0.016852687 | 0.120235824 | 0.060520331 | 0.175880298 |
| 0.100970201 | 0.10178353  | 0.162991051 | 0.300045081 |
| 0.012581394 | 0.012739364 | 0.213349188 | 0.001781924 |
| 0.01128368  | 0.027561151 | 0.058255414 | 0.180716572 |
| 0.089056934 | 0.208883389 | 0.027210177 | 0.03444127  |
| 0.032868626 | 0.058649243 | 0.039743813 | 0.148560015 |
| 0.026362714 | 0.180871396 | 0.028140387 | 0.047986946 |
| 0.009561953 | 0.091824919 | 0.25551176  | 0.126101642 |
| 0.223189872 | 0.136937636 | 0.202037928 | 0.25811232  |
| 0.017225364 | 0.075151994 | 0.101320835 | 0.060225359 |
| 0.03464192  | 0.241753532 | 0.023027212 | 0.115247456 |
| 0.24348674  | 0.130020194 | 0.00190703  | 0.246249448 |
| 0.231857406 | 0.002038242 | 0.229912482 | 0.070154748 |
| 0.00231711  | 0.046678146 | 0.171060503 | 0.080716632 |
| 0.047084474 | 0.008579525 | 0.053054603 | 0.185085021 |
| 0.243851957 | 0.168588026 | 0.119603957 | 0.037719163 |
| 0.28623072  | 0.021487835 | 0.157178251 | 0.017574998 |
| 0.316189292 | 0.223805089 | 0.005911306 | 0.005459502 |
| 0.065647306 | 0.064983121 | 0.103683395 | 0.087504614 |
| 0.056585292 | 0.000175981 | 0.049266599 | 0.092956425 |
| 0.025840061 | 0.039162216 | 0.134888774 | 0.355017638 |
| 0.330009819 | 0.005544557 | 0.35062531  | 0.025137336 |
| 0.10208595  | 0.041988154 | 0.047881117 | 0.041522757 |
| 0.091524593 | 0.011582514 | 0.053782082 | 0.241492012 |
| 0.036098195 | 0.185864815 | 0.060314506 | 0.088184914 |
| 0.31152204  | 0.045479284 | 0.115101888 | 0.007413302 |
| 0.122648327 | 0.114895913 | 0.012237559 | 0.040723147 |
| 0.075079623 | 0.049572387 | 0.030132401 | 0.236474971 |
| 0.030963942 | 0.238670398 | 0.002874203 | 0.139752437 |
| 0.024776243 | 0.072839458 | 0.041415755 | 0.059855725 |

|             |             |             |             |
|-------------|-------------|-------------|-------------|
| 0.155867478 | 0.08496053  | 0.008885729 | 0.334372196 |
| 0.120479344 | 0.08904562  | 0.235871107 | 0.127398486 |
| 0.059186517 | 0.213506086 | 0.044371414 | 0.004116264 |
| 0.123686248 | 0.216464994 | 1           | 0.170717144 |
| 0.081199533 | 0.132931933 | 0.111834439 | 0.039838851 |
| 0.009105664 | 0.198271109 | 0.124347455 | 0.168093661 |
| 0.056760285 | 0.064495385 | 0.003412262 | 0.006658178 |
| 0.085971872 | 0.036624277 | 0.089164713 | 0.038504148 |
| 0.030725263 | 0.009561952 | 0.248120518 | 0.062782777 |
| 0.004989763 | 0.130882471 | 0.04817317  | 0.016192313 |
| 0.035312683 | 0.064168862 | 0.071459008 | 0.279743348 |
| 0.00903081  | 0.016368432 | 0.009772467 | 0.151368338 |
| 0.309169859 | 0.125559407 | 0.000293833 | 0.133438302 |
| 0.091621556 | 0.13226493  | 0.075466938 | 0.09479915  |
| 0.201055106 | 0.203600171 | 0.097832422 | 0.06059217  |
| 0.024114574 | 0.028860012 | 0.016984408 | 0.305157267 |
| 0.05193336  | 0.273184639 | 0.021161853 | 0.009419172 |
| 0.012902874 | 0.369080395 | 0.001487521 | 0.168264197 |
| 0.062408957 | 0.130194741 | 8.81E-05    | 0.080434316 |
| 0.016740345 | 0.003215149 | 0.117254118 | 0.122462609 |
| 0.103335021 | 0.057523813 | 0.171497308 | 0.023697957 |
| 0.000876406 | 0.028335263 | 0.011465567 | 0.066020745 |
| 0.024694232 | 0.006762817 | 0.019427463 | 0.09741854  |
| 0.127245737 | 0.160166756 | 0.291430832 | 0.013272321 |
| 0.035876938 | 0.005027335 | 0.055491145 | 0.117773579 |
| 0.154823073 | 0.236382448 | 0.136882174 | 0.034902925 |
| 0.062153668 | 0.184489276 | 0.245454876 | 0.105704411 |
| 0.002080573 | 0.033419844 | 0.048956078 | 0.090591416 |
| 0.02909333  | 0.072028989 | 0.031586798 | 0.295434509 |
| 0.19773336  | 0.001563182 | 0.365565042 | 0.104353266 |
| 0.135118485 | 0.06775235  | 0.193929446 | 0.150855657 |
| 0.184391116 | 0.096160775 | 0.214671563 | 0.112409291 |
| 0.337265713 | 0.001135774 | 0.006515026 | 0.219400598 |
| 0.171692096 | 0.267977622 | 0.072089567 | 0.018866875 |
| 0.051769972 | 0.236843426 | 0.088663303 | 0.061772219 |
| 0.272204053 | 0.025604288 | 0.028165887 | 0.008171415 |
| 0.016723598 | 0.155566168 | 0.174016952 | 0.220404296 |
| 0.260327777 | 0.353390171 | 0.146532932 | 0.098027542 |
| 0.063279481 | 0.015711297 | 0.302487736 | 0.128813361 |
| 0.238593022 | 0.009599445 | 0.170073655 | 0.164555289 |
| 0.156283225 | 0.062392321 | 0.086728645 | 0.005979583 |
| 0.037970048 | 0.054240584 | 0.036462412 | 0.054664368 |
| 0.039242449 | 0.202355873 | 0.145861019 | 0.215330606 |
| 0.008176102 | 0.01630569  | 0.235224466 | 0.005843551 |
| 0.343006173 | 0.00890125  | 0.112638744 | 0.000401935 |
| 0.137125836 | 0.107525565 | 0.102007755 | 0.005260816 |
| 0.058751655 | 3.38E-05    | 0.063489657 | 0.252877139 |
| 0.179456266 | 0.216504897 | 0.065571989 | 0.054074301 |
| 0.051713098 | 0.055251337 | 0.17154229  | 0.031592799 |
| 0.065607075 | 0.002741026 | 0.076853019 | 0.095907663 |
| 0.019799933 | 0.03199275  | 0.298442503 | 0.044282146 |
| 0.114262984 | 0.028959089 | 0.232866105 | 0.133514518 |
| 0.052800709 | 0.033508977 | 0.061322711 | 0.034925021 |
| 0.126581125 | 0.053088726 | 0.052310245 | 0.030982693 |

|             |             |             |             |
|-------------|-------------|-------------|-------------|
| 0.066115744 | 0.029082035 | 0.020032556 | 0.245915698 |
| 0.025794074 | 0.11891546  | 0.00240703  | 0.007187869 |
| 0.005547105 | 0.173528201 | 0.122397386 | 0.102970785 |
| 0.077933706 | 0.015543992 | 0.210789317 | 0.233140711 |
| 0.00134489  | 0.044918575 | 0.185582102 | 0.001077501 |
| 0.064616387 | 0.012131674 | 0.017178209 | 0.104663514 |
| 0.223367698 | 0.009798365 |             |             |
| LEF1        | 0.196317624 | 0.317961404 | 0.124280201 |
| 0.003428208 | 0.040073136 | 0.249072206 | 0.152998111 |
| 0.149612757 | 0.133401714 | 0.054829804 | 0.314525819 |
| 0.035971176 | 0.155204483 | 0.129291292 | 0.125209775 |
| 0.286092506 | 0.271860213 | 0.162826597 | 0.299322067 |
| 0.238486061 | 0.02579487  | 0.361585224 | 0.188059567 |
| 0.20688672  | 0.053718778 | 0.06515051  | 0.009901658 |
| 0.102743101 | 0.26291661  | 0.224021398 | 0.098632937 |
| 0.258468288 | 0.187002289 | 0.057808583 | 0.04314967  |
| 0.014355817 | 0.375232777 | 0.009898603 | 0.137030498 |
| 0.180317183 | 0.074652451 | 0.198072452 | 0.057126279 |
| 7.91E-05    | 0.085741228 | 0.09478805  | 0.297207093 |
| 0.210493541 | 0.228525449 | 0.238830301 | 0.068497107 |
| 0.013107783 | 0.331094512 | 0.359644999 | 0.011096981 |
| 0.337754409 | 0.000417504 | 0.348960635 | 0.157515195 |
| 0.125515928 | 0.187485755 | 0.101797848 | 0.254357355 |
| 0.253558705 | 0.346008915 | 0.299637998 | 0.037072718 |
| 0.107854728 | 0.14074654  | 0.151362335 | 0.13056555  |
| 0.302128795 | 0.090374736 | 0.087865434 | 0.043397403 |
| 0.151379733 | 0.188133237 | 0.318510442 | 0.18016081  |
| 0.01016772  | 0.099577584 | 0.037276389 | 0.214222331 |
| 0.094616591 | 0.335489126 | 0.190629678 | 0.066845497 |
| 0.108201415 | 0.096615918 | 0.271348927 | 0.296745775 |
| 0.010546063 | 0.183753859 | 0.006793782 | 0.17670645  |
| 0.244192337 | 0.215350359 | 0.247371759 | 0.064787955 |
| 0.092960601 | 0.216698868 | 0.155042616 | 0.16755859  |
| 0.19920532  | 0.138548184 | 0.327869583 | 0.019643569 |
| 0.126589947 | 0.15059292  | 0.108721019 | 0.349668583 |
| 0.303113784 | 0.090565423 | 0.222299927 | 0.238200894 |
| 0.049536503 | 0.022823358 | 0.183977409 | 0.012491204 |
| 0.010969645 | 0.084763703 | 0.243159135 | 0.207374502 |
| 0.05236037  | 0.152866639 | 0.03793784  | 0.11702337  |
| 0.1164935   | 0.255379153 | 0.045939893 | 0.134434859 |
| 0.130692146 | 0.166278721 | 0.078199949 | 0.175265775 |
| 0.043514553 | 0.192243684 | 0.187093293 | 0.292444609 |
| 0.41565147  | 0.095303451 | 0.130906376 | 0.29690661  |
| 0.120716869 | 0.282447872 | 0.320464781 | 0.172384241 |
| 0.058045653 | 0.242025853 | 0.063233852 | 0.196471143 |
| 0.216357487 | 0.267528368 | 0.029134004 | 0.348091876 |
| 0.364652766 | 0.013513241 | 0.123188656 | 0.249062871 |
| 0.005254134 | 0.077205522 | 0.351263266 | 0.230128444 |
| 0.15245448  | 0.008225546 | 0.064695424 | 0.169583913 |
| 0.273137112 | 0.150995919 | 0.247848965 | 0.052267025 |
| 0.330195303 | 0.058107346 | 0.084572886 | 0.125515689 |
| 0.170666922 | 0.317270605 | 0.039076822 | 0.015257648 |
| 0.214155911 | 0.154465511 | 0.271346697 | 0.216589842 |
| 0.198298405 | 0.00032276  | 0.054232183 | 0.227737205 |

|             |             |              |             |
|-------------|-------------|--------------|-------------|
| 0.071585176 | 0.211049585 | 0.32074442   | 0.181813192 |
| 0.332959167 | 0.041597851 | 0.215873877  | 0.057434098 |
| 0.323931499 | 0.069344979 | 0.066378358  | 0.011920753 |
| 0.103405197 | 0.047856203 | 0.133480102  | 0.206484505 |
| 0.066667734 | 0.157518371 | 0.143826143  | 0.256917519 |
| 0.223751936 | 0.178231851 | 0.150218913  | 0.057004542 |
| 0.147318221 | 0.222159039 | 0.053669251  | 0.129801745 |
| 0.195512414 | 0.107009911 | 0.182794342  | 0.355779748 |
| 0.071522892 | 0.302028063 | 0.030479267  | 0.165567853 |
| 0.112060363 | 0.236141272 | 0.182358234  | 0.213761002 |
| 0.14529375  | 0.265678667 | 0.070975783  | 0.321609945 |
| 0.250832184 | 0.21441453  | 0.182459395  | 0.339570916 |
| 0.016795513 | 0.289871894 | 0.11920447   | 0.035778369 |
| 0.303903421 | 0.187724951 | 0.170717144  | 1           |
| 0.304649636 | 0.350530617 | 0.339035736  | 0.196536775 |
| 0.069349241 | 0.131452594 | 0.356096591  | 0.287999603 |
| 0.250631078 | 0.124446616 | 0.027072195  | 0.045746785 |
| 0.282539329 | 0.161184475 | 0.193296957  | 0.131975449 |
| 0.109225016 | 0.048398191 | 0.253959726  | 0.23063026  |
| 0.013459074 | 0.120743803 | 0.159789593  | 0.034187537 |
| 0.067498712 | 0.097225288 | 0.215370908  | 0.342171986 |
| 0.04567466  | 0.077727733 | 0.036743762  | 0.081295699 |
| 0.203502061 | 0.329051255 | 0.003972475  | 0.366859652 |
| 0.311523934 | 0.229241706 | 0.242475935  | 0.325695643 |
| 0.253428251 | 0.305951065 | 0.277149845  | 0.261003273 |
| 0.016866278 | 0.167039707 | 0.115252416  | 0.388304297 |
| 0.212220558 | 0.267363506 | 0.100622009  | 0.053051131 |
| 0.008840094 | 0.221455536 | 0.017774231  | 0.393211486 |
| 0.224288929 | 0.051632493 | 0.002085682  | 0.236446406 |
| 0.107152511 | 0.018781976 | 0.342428572  | 0.156874827 |
| 0.261829196 | 0.140184768 | 0.108429927  | 0.138942706 |
| 0.013618315 | 0.107133806 | 0.0111101973 | 0.162265611 |
| 0.085752081 | 0.037386068 | 0.019825609  | 0.321367172 |
| 0.317694671 | 0.252886989 | 0.262002838  | 0.007453784 |
| 0.194390012 | 0.02348573  | 0.177586187  | 0.162092861 |
| 0.354254792 | 0.314793381 | 0.314545403  | 0.165442007 |
| 0.172584038 | 0.316754819 | 0.347625737  | 0.271425448 |
| 0.012471623 | 0.169654769 | 0.213197857  | 0.063134844 |
| 0.129177502 | 0.247056842 | 0.084693379  | 0.190532039 |
| 0.32869891  | 0.006855428 | 0.257325481  | 0.236268168 |
| 0.295316262 | 0.2328464   | 0.096961722  | 0.238600534 |
| 0.303004511 | 0.146703217 | 0.105220356  | 0.18941457  |
| 0.324851042 | 0.017455616 | 0.050601392  | 0.322027171 |
| 0.342706679 | 0.271449596 | 0.243325377  | 0.03147047  |
| 0.223592235 | 0.177589013 | 0.289070092  | 0.109558117 |
| 0.305631936 | 0.113162717 | 0.171650923  | 0.061603846 |
| 0.014541645 | 0.187411019 | 0.273965519  | 0.354195642 |
| 0.130426558 | 0.266223761 | 0.140302873  | 0.143203661 |
| 0.256538836 | 0.0772817   | 0.292461001  | 0.224529213 |
| 0.367444586 | 0.01486605  | 0.387133301  | 0.24634473  |
| 0.328224313 | 0.0895045   | 0.245123962  | 0.005311416 |
| 0.144388435 | 0.062144213 | 0.132093887  | 0.098162837 |
| 0.208604459 | 0.130097817 | 0.227241005  | 0.198834178 |
| 0.031433388 | 0.02565859  | 0.372906497  | 0.03765268  |

|             |             |             |             |
|-------------|-------------|-------------|-------------|
| 0.32466397  | 0.074878299 | 0.215371879 | 0.008541168 |
| 0.361072998 | 0.209633598 | 0.268515428 | 0.040008275 |
| 0.099946814 | 0.000697009 | 0.056299198 | 0.133806809 |
| 0.346883248 | 0.347307346 | 0.201687851 | 0.15066952  |
| 0.159575485 | 0.152544177 | 0.281070799 | 0.080529921 |
| 0.225368718 | 0.021207987 | 0.278634321 | 0.159364899 |
| 0.135841732 | 0.102527966 | 0.27163247  | 0.124065825 |
| 0.09265739  | 0.066648585 | 0.123031897 | 0.227799719 |
| 0.215718326 | 0.108908616 | 0.115200778 | 0.119254026 |
| 0.068785305 | 0.100866562 | 0.212264612 | 0.145176918 |
| 0.164927862 | 0.138159083 | 0.090608614 | 0.361722326 |
| 0.089252333 | 0.173070119 | 0.005798569 | 0.005883336 |
| 0.025294045 | 0.116966405 | 0.35002502  | 0.311246418 |
| 0.285123245 | 0.081119629 | 0.13270727  | 0.22332883  |
| 0.018963007 | 0.210388278 | 0.181470129 | 0.011613037 |
| 0.170209242 | 0.062429455 | 0.010164317 | 0.206436115 |
| 0.332108984 | 0.057940486 |             |             |
| LGALS1      | 0.413552543 | 0.501132273 | 0.075681398 |
| 0.029634547 | 0.12458711  | 0.250531909 | 0.235458215 |
| 0.434918252 | 0.124738409 | 0.141875632 | 0.346249598 |
| 0.002861872 | 0.467512271 | 0.020613803 | 0.095560913 |
| 0.504897913 | 0.512787491 | 0.36407091  | 0.511000129 |
| 0.386519057 | 0.150993547 | 0.414821717 | 0.404827031 |
| 0.276535039 | 0.002927964 | 0.128406155 | 0.048809788 |
| 0.455602105 | 0.501290328 | 0.229872527 | 0.293567514 |
| 0.48710077  | 0.505957695 | 0.428042945 | 0.351884894 |
| 0.286960536 | 0.474116184 | 0.174738712 | 0.499783559 |
| 0.451854969 | 0.235345856 | 0.512269261 | 0.018946774 |
| 0.004035871 | 0.109815485 | 0.408774613 | 0.430064046 |
| 0.373196256 | 0.233082701 | 0.19652898  | 0.180221504 |
| 0.213752374 | 0.381190396 | 0.46173751  | 0.217730445 |
| 0.430257847 | 0.00456324  | 0.463192788 | 0.323992752 |
| 0.075686526 | 0.360422389 | 0.42749836  | 0.45902708  |
| 0.264458634 | 0.446029245 | 0.517365225 | 0.037584436 |
| 0.079744849 | 0.499757599 | 0.475605162 | 0.448424406 |
| 0.500966463 | 0.36548117  | 0.313484528 | 0.449487067 |
| 0.49936027  | 0.477127496 | 0.320492779 | 0.211471546 |
| 0.001396091 | 0.156485849 | 0.345172785 | 0.416582409 |
| 0.47480085  | 0.382353079 | 0.463229225 | 0.230164426 |
| 0.481742242 | 0.023441766 | 0.42570281  | 0.518465645 |
| 0.024825696 | 0.487014806 | 0.014060679 | 0.190840616 |
| 0.500909183 | 0.476934355 | 0.464894663 | 0.076459601 |
| 0.018663626 | 0.157420421 | 0.205019608 | 0.430254598 |
| 0.466028365 | 0.504512013 | 0.426500767 | 0.223636502 |
| 0.426507467 | 0.20175295  | 0.394744004 | 0.467097579 |
| 0.500169649 | 0.012987299 | 0.202614115 | 0.240830176 |
| 0.383834475 | 0.145990347 | 0.250057646 | 0.053831171 |
| 0.012940712 | 0.039671219 | 0.496487675 | 0.189305821 |
| 0.104212794 | 0.216274765 | 0.093198512 | 0.488094741 |
| 0.425188232 | 0.46970985  | 0.131707987 | 0.269497591 |
| 0.498850491 | 0.268703579 | 0.443610233 | 0.513048412 |
| 0.414957532 | 0.315808986 | 0.171451939 | 0.491076042 |
| 0.455562788 | 0.077266219 | 0.092740683 | 0.349396538 |
| 0.445611506 | 0.508697686 | 0.513632564 | 0.369499141 |

|             |             |             |             |
|-------------|-------------|-------------|-------------|
| 0.280489917 | 0.284311694 | 0.337017214 | 0.413872859 |
| 0.266431447 | 0.421583395 | 0.145037548 | 0.393039393 |
| 0.425758681 | 0.051671318 | 0.074214919 | 0.509223562 |
| 0.058025424 | 0.266581964 | 0.473674472 | 0.51204108  |
| 0.509969185 | 0.039592987 | 0.239556614 | 0.276371893 |
| 0.336156025 | 0.266256568 | 0.464319357 | 0.220935953 |
| 0.348629223 | 0.339198365 | 0.053852676 | 0.43674721  |
| 0.138962516 | 0.38471028  | 0.363221048 | 0.087335544 |
| 0.48158594  | 0.42467847  | 0.498964539 | 0.481332882 |
| 0.469794099 | 0.00393084  | 0.140862413 | 0.429248232 |
| 0.324172698 | 0.461554329 | 0.494789225 | 0.128674797 |
| 0.295821764 | 0.40368247  | 0.165866938 | 0.357986113 |
| 0.468539982 | 0.234506622 | 0.208097829 | 0.000785089 |
| 0.155069227 | 0.414257478 | 0.484416928 | 0.070718521 |
| 0.248076297 | 0.12931588  | 0.169347809 | 0.509568672 |
| 0.22006387  | 0.518089977 | 0.044466033 | 0.248796496 |
| 0.28735423  | 0.450632254 | 0.419464085 | 0.32316827  |
| 0.49107437  | 0.33354618  | 0.446932825 | 0.418916311 |
| 0.304403499 | 0.368483053 | 0.257645692 | 0.318578009 |
| 0.51106044  | 0.51820845  | 0.508582369 | 0.519931647 |
| 0.2796605   | 0.460587626 | 0.377927774 | 0.299985358 |
| 0.454294056 | 0.474970926 | 0.098740049 | 0.508988936 |
| 0.000972783 | 0.386145955 | 0.47520544  | 0.268039739 |
| 0.496907009 | 0.252876784 | 0.081199533 | 0.304649636 |
| 1           | 0.508718909 | 0.484645006 | 0.484572882 |
| 0.310204639 | 0.016040358 | 0.501486478 | 0.442679328 |
| 0.504812723 | 0.439483751 | 0.381605035 | 0.13888     |
| 0.519445591 | 0.441641693 | 0.454051789 | 0.46798344  |
| 0.497704211 | 0.462253647 | 0.287782559 | 0.439123269 |
| 0.024408956 | 0.264604074 | 0.468331013 | 0.198950057 |
| 0.326923566 | 0.203880288 | 0.507013037 | 0.358123513 |
| 0.432379303 | 0.360437766 | 0.372298983 | 0.088162378 |
| 0.194307309 | 0.503595443 | 0.071461163 | 0.496800267 |
| 0.516574415 | 0.423394368 | 0.515052668 | 0.513806984 |
| 0.356966617 | 0.413294398 | 0.50934154  | 0.479812287 |
| 0.00168334  | 0.469804179 | 0.460369235 | 0.374178383 |
| 0.494231285 | 0.309649659 | 0.339991489 | 0.481757662 |
| 0.002231305 | 0.171901113 | 0.301205712 | 0.492204177 |
| 0.519312597 | 0.031696958 | 0.079501981 | 0.514203034 |
| 0.469294629 | 0.070313665 | 0.511326816 | 0.348094819 |
| 0.497677412 | 0.474349536 | 0.177997601 | 0.473075974 |
| 0.272101287 | 0.460911756 | 0.032966123 | 0.467929291 |
| 0.484840859 | 0.143844833 | 0.081404384 | 0.512503234 |
| 0.485052508 | 0.416630671 | 0.279547584 | 0.008536644 |
| 0.433330808 | 0.225529665 | 0.502916671 | 0.143619042 |
| 0.47963132  | 0.390322995 | 0.490192639 | 0.50251509  |
| 0.49877716  | 0.438636141 | 0.400177288 | 0.49797194  |
| 0.138466148 | 0.474128606 | 0.481274558 | 0.062029519 |
| 0.449050108 | 0.520633648 | 0.432598288 | 0.186456742 |
| 0.425256729 | 0.098659482 | 0.218432888 | 0.402943996 |
| 0.480608087 | 0.51040145  | 0.061980106 | 0.213003375 |
| 0.430355632 | 0.339236541 | 0.119210065 | 0.405452799 |
| 0.302615243 | 0.229467193 | 0.227046347 | 0.409087651 |
| 0.471621282 | 0.30746954  | 0.496632514 | 0.157381195 |

|             |             |             |             |
|-------------|-------------|-------------|-------------|
| 0.515817979 | 0.064885028 | 0.503508067 | 0.292855741 |
| 0.323779089 | 0.450701527 | 0.438250902 | 0.180699837 |
| 0.024106499 | 0.152242597 | 0.416620952 | 0.431333321 |
| 0.084768625 | 0.219905034 | 0.266285745 | 0.362927511 |
| 0.512161546 | 0.455679466 | 0.297817818 | 0.40338335  |
| 0.421684424 | 0.104496656 | 0.488957076 | 0.383468313 |
| 0.460284272 | 0.348991406 | 0.507904488 | 0.01121894  |
| 0.50482429  | 0.171194729 | 0.300998897 | 0.378634173 |
| 0.464274395 | 0.143632895 | 0.407272874 | 0.191550608 |
| 0.205696964 | 0.006448285 | 0.411467221 | 0.429025409 |
| 0.297726581 | 0.395840508 | 0.423084988 | 0.222453343 |
| 0.50599186  | 0.437693546 | 0.469459405 | 0.383195074 |
| 0.398827862 | 0.03199626  | 0.155303093 | 0.041245965 |
| 0.447085068 | 0.426160737 | 0.48274514  | 0.438853568 |
| 0.286742023 | 0.496635099 | 0.424782251 | 0.439959217 |
| 0.515486956 | 0.197039581 | 0.513473512 | 0.377215062 |
| 0.43815537  | 0.424771981 | 0.282509048 | 0.384238117 |
| 0.210658949 | 0.16862452  | 0.13520243  | 0.212732144 |
| 0.512541251 | 0.378412468 | 0.411023122 | 0.366184882 |
| 0.051158243 | 0.412891013 | 0.498632888 | 0.494392324 |
| 0.466659667 | 0.447102297 | 0.457473937 | 0.410985572 |
| 0.361409491 | 0.351892666 | 0.057690936 | 0.030473716 |
| 0.272672199 | 0.201766606 | 0.479046698 | 0.507444573 |
| 0.518048515 | 0.371805149 | 0.107855653 | 0.170234599 |
| 0.203299461 | 0.452664429 | 0.282031909 | 0.208970379 |
| 0.4953435   | 0.392431705 | 0.00089171  | 0.291913314 |
| 0.413128924 | 0.433718967 |             |             |
| LGALS3      | 0.374855145 | 0.506079032 | 0.127194803 |
| 0.036556812 | 0.19140256  | 0.344307979 | 0.337119647 |
| 0.390117649 | 0.189155175 | 0.200851225 | 0.435227844 |
| 0.00333714  | 0.386902722 | 0.031618851 | 0.144477956 |
| 0.490275556 | 0.505640579 | 0.459477755 | 0.500610806 |
| 0.390503619 | 0.182507226 | 0.447674421 | 0.448898551 |
| 0.371414167 | 0.004285746 | 0.205123749 | 0.066517985 |
| 0.389689412 | 0.476127727 | 0.318558139 | 0.350751963 |
| 0.430467396 | 0.445256504 | 0.441947122 | 0.393851066 |
| 0.243928306 | 0.506421506 | 0.148881968 | 0.442229029 |
| 0.366975651 | 0.324979855 | 0.457817111 | 0.034090181 |
| 0.00366118  | 0.183323827 | 0.345754346 | 0.461102994 |
| 0.404870835 | 0.32401921  | 0.286213943 | 0.26276502  |
| 0.150059022 | 0.460583194 | 0.444700979 | 0.149689568 |
| 0.49787335  | 0.005558783 | 0.507203048 | 0.29659075  |
| 0.133417369 | 0.429895002 | 0.371384515 | 0.468481063 |
| 0.366481652 | 0.504613555 | 0.513990994 | 0.071779389 |
| 0.14058221  | 0.469266266 | 0.400694859 | 0.467767801 |
| 0.501555267 | 0.391529786 | 0.397133038 | 0.38998214  |
| 0.451502599 | 0.399788158 | 0.41225273  | 0.298691106 |
| 0.002016968 | 0.242586253 | 0.384140038 | 0.35406539  |
| 0.394298946 | 0.461676742 | 0.418927857 | 0.323250568 |
| 0.44131789  | 0.045347427 | 0.473876647 | 0.516867954 |
| 0.034717433 | 0.423699634 | 0.019469026 | 0.275649644 |
| 0.454660609 | 0.431946372 | 0.446072364 | 0.132549722 |
| 0.035146321 | 0.226592986 | 0.182186446 | 0.365672983 |
| 0.475668262 | 0.509580522 | 0.495337355 | 0.153020853 |

|             |             |             |             |
|-------------|-------------|-------------|-------------|
| 0.333156786 | 0.2423791   | 0.472602735 | 0.503996851 |
| 0.475458535 | 0.021879784 | 0.261346475 | 0.340225656 |
| 0.384835049 | 0.183361397 | 0.356808936 | 0.043083568 |
| 0.019542006 | 0.034181109 | 0.438357089 | 0.258814425 |
| 0.169535934 | 0.312105585 | 0.131830937 | 0.478628782 |
| 0.381538965 | 0.410387689 | 0.211491037 | 0.366656322 |
| 0.43884007  | 0.370620552 | 0.469611528 | 0.475080492 |
| 0.435694426 | 0.353637706 | 0.24427398  | 0.522974826 |
| 0.495182786 | 0.133594419 | 0.148513462 | 0.426475276 |
| 0.358443406 | 0.474937806 | 0.526459574 | 0.400026944 |
| 0.369005601 | 0.369007305 | 0.346320948 | 0.473636071 |
| 0.373726196 | 0.437348574 | 0.107574236 | 0.472204671 |
| 0.491235701 | 0.046859022 | 0.129089753 | 0.468560652 |
| 0.079806759 | 0.357381386 | 0.494903724 | 0.51700114  |
| 0.508243727 | 0.054025442 | 0.303270204 | 0.36596509  |
| 0.400806754 | 0.353183721 | 0.477491403 | 0.271508084 |
| 0.421692315 | 0.346349811 | 0.101436481 | 0.347288045 |
| 0.220947706 | 0.435567584 | 0.293123566 | 0.084711073 |
| 0.440794316 | 0.42942863  | 0.502542917 | 0.478494022 |
| 0.416411638 | 0.004823893 | 0.195763737 | 0.402276876 |
| 0.322052314 | 0.383916657 | 0.514018804 | 0.208472918 |
| 0.372034183 | 0.352475956 | 0.250889629 | 0.431495962 |
| 0.426996806 | 0.282620349 | 0.260083426 | 0.00147221  |
| 0.242526211 | 0.356991415 | 0.486198841 | 0.097072925 |
| 0.334939331 | 0.178782422 | 0.17137357  | 0.496493693 |
| 0.313697788 | 0.492699498 | 0.052104931 | 0.192787562 |
| 0.369467586 | 0.505487517 | 0.410274801 | 0.305921136 |
| 0.506485714 | 0.383514886 | 0.387953955 | 0.480978613 |
| 0.399187318 | 0.444105407 | 0.197291376 | 0.385826104 |
| 0.458843243 | 0.502549868 | 0.452547301 | 0.502169425 |
| 0.371974815 | 0.425473571 | 0.338701061 | 0.389592302 |
| 0.468637443 | 0.496960463 | 0.153301884 | 0.515139612 |
| 0.00177654  | 0.461853726 | 0.48224426  | 0.19838774  |
| 0.513249275 | 0.354902554 | 0.132931933 | 0.350530617 |
| 0.508718909 | 1           | 0.453684142 | 0.411089313 |
| 0.25419641  | 0.024447508 | 0.484553793 | 0.489011198 |
| 0.48100608  | 0.5001543   | 0.364904475 | 0.117897838 |
| 0.498006521 | 0.375796879 | 0.456916666 | 0.418170637 |
| 0.4865745   | 0.432783998 | 0.376212665 | 0.382769723 |
| 0.019933316 | 0.327940802 | 0.425521857 | 0.227399106 |
| 0.364024353 | 0.249399116 | 0.501927504 | 0.447343113 |
| 0.44437357  | 0.315823865 | 0.380868078 | 0.153399104 |
| 0.293613786 | 0.503744034 | 0.061580062 | 0.482159331 |
| 0.519691049 | 0.480063496 | 0.499016221 | 0.511371544 |
| 0.40669702  | 0.488343964 | 0.501148104 | 0.415111953 |
| 0.002153066 | 0.388734831 | 0.378279051 | 0.455413239 |
| 0.43826557  | 0.396640522 | 0.274196623 | 0.420845503 |
| 0.003817967 | 0.254515091 | 0.241513207 | 0.506514643 |
| 0.495772093 | 0.063739878 | 0.058430003 | 0.515318753 |
| 0.391532297 | 0.065975999 | 0.524618736 | 0.414613542 |
| 0.515262354 | 0.513975227 | 0.264567482 | 0.393430475 |
| 0.199222501 | 0.449983151 | 0.053262971 | 0.49311103  |
| 0.467523406 | 0.10880986  | 0.119927334 | 0.513484524 |
| 0.479907882 | 0.495057048 | 0.378861319 | 0.011433404 |



|             |             |             |             |
|-------------|-------------|-------------|-------------|
| 0.346802471 | 0.222045237 | 0.489259355 | 0.212254581 |
| 0.496167685 | 0.469735444 | 0.52274763  | 0.439971    |
| 0.500097377 | 0.496037944 | 0.468975034 | 0.497766544 |
| 0.143771082 | 0.397177305 | 0.415011939 | 0.098932132 |
| 0.377790647 | 0.496203082 | 0.434334107 | 0.280887443 |
| 0.465140787 | 0.113020366 | 0.313717044 | 0.385831906 |
| 0.518727995 | 0.481264178 | 0.109926868 | 0.275652427 |
| 0.49168968  | 0.421247558 | 0.20115872  | 0.472050687 |
| 0.393533616 | 0.15279287  | 0.174043496 | 0.473835053 |
| 0.511900927 | 0.408389351 | 0.458767141 | 0.194237337 |
| 0.46695217  | 0.110698362 | 0.475874069 | 0.388095074 |
| 0.39550385  | 0.381790944 | 0.348022637 | 0.130718137 |
| 0.029160018 | 0.181827564 | 0.484963039 | 0.492528814 |
| 0.145158472 | 0.30393049  | 0.356893667 | 0.445274959 |
| 0.478071593 | 0.447472327 | 0.393051273 | 0.447918705 |
| 0.491529628 | 0.133958063 | 0.504964862 | 0.424007331 |
| 0.466094894 | 0.421341523 | 0.504196335 | 0.013851179 |
| 0.460770578 | 0.228232512 | 0.243657559 | 0.436672003 |
| 0.414192168 | 0.223663027 | 0.486330215 | 0.2614072   |
| 0.208466014 | 0.008359467 | 0.461889621 | 0.372400948 |
| 0.392935815 | 0.331765571 | 0.460544887 | 0.156354769 |
| 0.532495056 | 0.450230484 | 0.445409971 | 0.31767901  |
| 0.449129936 | 0.025813485 | 0.221256027 | 0.071494377 |
| 0.461372072 | 0.489146544 | 0.446459082 | 0.397746708 |
| 0.256100355 | 0.51164788  | 0.492528002 | 0.476978219 |
| 0.493365595 | 0.163162837 | 0.501391438 | 0.41849742  |
| 0.347048389 | 0.435967633 | 0.383735645 | 0.431602627 |
| 0.311751052 | 0.19227558  | 0.219440892 | 0.243493772 |
| 0.466460991 | 0.426291187 | 0.471849618 | 0.343550726 |
| 0.093448694 | 0.47466358  | 0.445901624 | 0.432563973 |
| 0.471674925 | 0.371324245 | 0.413986939 | 0.485818807 |
| 0.337813895 | 0.368571461 | 0.069843868 | 0.044312992 |
| 0.27068667  | 0.286441102 | 0.451196126 | 0.490143614 |
| 0.499379923 | 0.318349369 | 0.17666303  | 0.232317972 |
| 0.152824018 | 0.375213968 | 0.3824457   | 0.193756917 |
| 0.507503044 | 0.331012561 | 0.001661468 | 0.312681026 |
| 0.47624721  | 0.417609669 |             |             |
| LITAF       | 0.380396533 | 0.432547591 | 0.089569439 |
| 0.015834337 | 0.095983656 | 0.239755981 | 0.206348962 |
| 0.386752944 | 0.153883195 | 0.118282331 | 0.308455591 |
| 0.008326115 | 0.347848986 | 0.041758978 | 0.125462389 |
| 0.467492886 | 0.469868301 | 0.298958239 | 0.480093915 |
| 0.390925962 | 0.104454437 | 0.394399009 | 0.328227992 |
| 0.258988722 | 0.008191548 | 0.112013377 | 0.03133324  |
| 0.376022476 | 0.462201801 | 0.250198546 | 0.250141776 |
| 0.42493201  | 0.383014122 | 0.312331491 | 0.234524678 |
| 0.166005519 | 0.406397068 | 0.10962244  | 0.353370616 |
| 0.381067332 | 0.190700823 | 0.380535879 | 0.033092303 |
| 0.001352431 | 0.108917333 | 0.354061509 | 0.385733321 |
| 0.387720087 | 0.227838415 | 0.221137993 | 0.147527781 |
| 0.140180797 | 0.339680501 | 0.421039932 | 0.133640964 |
| 0.358699746 | 0.002245224 | 0.3856209   | 0.3499982   |
| 0.096241403 | 0.357192981 | 0.357279627 | 0.39686623  |
| 0.245496168 | 0.36884058  | 0.458512328 | 0.039603127 |

|             |             |             |             |
|-------------|-------------|-------------|-------------|
| 0.091934602 | 0.405488079 | 0.347337282 | 0.323744688 |
| 0.404323352 | 0.286472739 | 0.262286389 | 0.313497182 |
| 0.370587237 | 0.365837475 | 0.317960858 | 0.231712808 |
| 0.003025988 | 0.13930849  | 0.224178014 | 0.37373804  |
| 0.331981044 | 0.337882819 | 0.398479911 | 0.187522802 |
| 0.361406407 | 0.03857536  | 0.381516977 | 0.469727927 |
| 0.020236558 | 0.379963689 | 0.012223306 | 0.219787926 |
| 0.399959599 | 0.432580365 | 0.398324952 | 0.079267507 |
| 0.032078514 | 0.205301533 | 0.257781377 | 0.384056761 |
| 0.410660968 | 0.395130779 | 0.359460227 | 0.178223068 |
| 0.321387082 | 0.23214839  | 0.344068679 | 0.389610391 |
| 0.435889505 | 0.025571423 | 0.256362729 | 0.231268907 |
| 0.283092928 | 0.10193661  | 0.230191726 | 0.042223106 |
| 0.011724986 | 0.069913431 | 0.42563481  | 0.225908928 |
| 0.092044512 | 0.198879572 | 0.071819387 | 0.339837307 |
| 0.381851729 | 0.431375165 | 0.107406163 | 0.232466997 |
| 0.35561228  | 0.230796786 | 0.306941559 | 0.383426389 |
| 0.277950678 | 0.348903603 | 0.198299182 | 0.388797702 |
| 0.403549095 | 0.085221242 | 0.112992999 | 0.316189683 |
| 0.318979542 | 0.448683848 | 0.479204027 | 0.367984815 |
| 0.206362248 | 0.303042308 | 0.265332115 | 0.322663705 |
| 0.250494563 | 0.415768653 | 0.131685556 | 0.361001899 |
| 0.361637809 | 0.041528588 | 0.094842051 | 0.414437777 |
| 0.030721395 | 0.229808582 | 0.39731327  | 0.39775199  |
| 0.397655226 | 0.025653717 | 0.184698859 | 0.244179326 |
| 0.337188987 | 0.233073294 | 0.406207817 | 0.167063738 |
| 0.333784204 | 0.257183696 | 0.063459131 | 0.319614271 |
| 0.156702164 | 0.379242559 | 0.268814289 | 0.074375009 |
| 0.415399768 | 0.409737917 | 0.392810101 | 0.413903263 |
| 0.384416745 | 0.001715602 | 0.114695355 | 0.39118309  |
| 0.269881577 | 0.388114195 | 0.420448443 | 0.149934136 |
| 0.315626814 | 0.306771908 | 0.192374492 | 0.257746668 |
| 0.414233134 | 0.197683867 | 0.176493064 | 0.001633332 |
| 0.15369458  | 0.291784578 | 0.402816007 | 0.116762808 |
| 0.189428253 | 0.158748199 | 0.214079323 | 0.393994773 |
| 0.22424926  | 0.377384295 | 0.082517368 | 0.249879723 |
| 0.268703902 | 0.349986405 | 0.293026748 | 0.319137323 |
| 0.366046493 | 0.28243958  | 0.401003392 | 0.370067034 |
| 0.242192356 | 0.317743973 | 0.216467562 | 0.334778991 |
| 0.370665575 | 0.392342193 | 0.371014339 | 0.394951259 |
| 0.259965054 | 0.417447034 | 0.301729243 | 0.289044636 |
| 0.409781967 | 0.419452914 | 0.128066648 | 0.447172495 |
| 0.002686012 | 0.356038678 | 0.349011604 | 0.229218302 |
| 0.405209897 | 0.221591798 | 0.111834439 | 0.339035736 |
| 0.484645006 | 0.453684142 | 1           | 0.386100076 |
| 0.286067916 | 0.036027975 | 0.457186457 | 0.381104892 |
| 0.461106999 | 0.364568042 | 0.235684521 | 0.157691339 |
| 0.422387573 | 0.383155062 | 0.365987093 | 0.367246308 |
| 0.363635882 | 0.326525882 | 0.306555316 | 0.396772241 |
| 0.030328144 | 0.244827334 | 0.36137582  | 0.146515283 |
| 0.249297684 | 0.20697882  | 0.383177066 | 0.336680137 |
| 0.291316597 | 0.297455495 | 0.243423032 | 0.089683359 |
| 0.202528018 | 0.44212087  | 0.045532894 | 0.445404661 |
| 0.47716198  | 0.390966928 | 0.39003183  | 0.481279384 |

|             |             |             |             |
|-------------|-------------|-------------|-------------|
| 0.349265247 | 0.35070925  | 0.397731597 | 0.4313098   |
| 0.00422945  | 0.375357065 | 0.324600173 | 0.347072078 |
| 0.384910354 | 0.293897478 | 0.327888824 | 0.326780856 |
| 0.004366028 | 0.195284399 | 0.18271554  | 0.453034545 |
| 0.38612276  | 0.040543025 | 0.044589631 | 0.39865648  |
| 0.331882163 | 0.063256134 | 0.476235176 | 0.290406301 |
| 0.382338207 | 0.374221822 | 0.16385065  | 0.33949026  |
| 0.166129519 | 0.402399956 | 0.025856554 | 0.351007342 |
| 0.371580733 | 0.161559944 | 0.057151609 | 0.482193689 |
| 0.401023634 | 0.343977259 | 0.277046235 | 0.007793749 |
| 0.376606271 | 0.140422208 | 0.36721734  | 0.166513433 |
| 0.413759338 | 0.345028263 | 0.394899514 | 0.368166813 |
| 0.401415185 | 0.365827903 | 0.35003747  | 0.394281736 |
| 0.08148814  | 0.350668235 | 0.386961999 | 0.061973807 |
| 0.364169748 | 0.408868564 | 0.307871147 | 0.180807508 |
| 0.396733464 | 0.052582387 | 0.220373937 | 0.401996478 |
| 0.380147746 | 0.397543402 | 0.076134038 | 0.266750617 |
| 0.354595942 | 0.332614825 | 0.124682465 | 0.38180169  |
| 0.29871733  | 0.158402918 | 0.235159279 | 0.372928688 |
| 0.390096627 | 0.274666639 | 0.385826456 | 0.110674058 |
| 0.404718684 | 0.096606214 | 0.420570592 | 0.263768024 |
| 0.332185814 | 0.33616291  | 0.364916647 | 0.17873743  |
| 0.022781239 | 0.188779843 | 0.338846735 | 0.369933632 |
| 0.101939851 | 0.245490712 | 0.22964244  | 0.281749181 |
| 0.444790264 | 0.341864287 | 0.285850008 | 0.389421006 |
| 0.362931129 | 0.067511314 | 0.442288577 | 0.37358576  |
| 0.405345308 | 0.27874507  | 0.405221737 | 0.011880104 |
| 0.378726452 | 0.14086139  | 0.318039111 | 0.273547664 |
| 0.425214211 | 0.150116462 | 0.329084246 | 0.227363143 |
| 0.148682421 | 0.010917481 | 0.393087397 | 0.272553695 |
| 0.282076458 | 0.337525073 | 0.399649583 | 0.126693407 |
| 0.474547384 | 0.381691433 | 0.392915675 | 0.294614453 |
| 0.308967046 | 0.014095334 | 0.12932367  | 0.061313685 |
| 0.406295936 | 0.383743474 | 0.410267148 | 0.373116826 |
| 0.33337336  | 0.370975546 | 0.368792181 | 0.306568432 |
| 0.388326151 | 0.13467627  | 0.459855348 | 0.389182411 |
| 0.342638866 | 0.360000895 | 0.277108026 | 0.360131569 |
| 0.179558085 | 0.175762298 | 0.151530924 | 0.28132439  |
| 0.404072168 | 0.347545563 | 0.305053291 | 0.336486321 |
| 0.05511962  | 0.334221791 | 0.402239643 | 0.362142139 |
| 0.362956324 | 0.339719066 | 0.375304795 | 0.357558664 |
| 0.322977911 | 0.364933949 | 0.031721761 | 0.019685989 |
| 0.178349653 | 0.192603002 | 0.421101629 | 0.421000821 |
| 0.461377027 | 0.342580793 | 0.12681896  | 0.220314051 |
| 0.161599984 | 0.36915559  | 0.238669611 | 0.115464684 |
| 0.399353838 | 0.339945206 | 0.001759544 | 0.340209553 |
| 0.369392049 | 0.315693272 |             |             |
| LRIG1       | 0.347367183 | 0.410773089 | 0.039823299 |
| 0.031027076 | 0.077312822 | 0.159559752 | 0.147726229 |
| 0.371402849 | 0.065715361 | 0.103704477 | 0.235754214 |
| 0.001403666 | 0.421569091 | 0.009117244 | 0.044590346 |
| 0.4889595   | 0.494708403 | 0.245288455 | 0.478589839 |
| 0.28776621  | 0.132028261 | 0.301224568 | 0.323373042 |
| 0.177694129 | 0.001209438 | 0.078074296 | 0.046296716 |

|             |             |             |             |
|-------------|-------------|-------------|-------------|
| 0.39398795  | 0.495951119 | 0.134788586 | 0.229590648 |
| 0.442380843 | 0.455924653 | 0.364413294 | 0.274390503 |
| 0.295817909 | 0.36248762  | 0.140371286 | 0.443522036 |
| 0.423998885 | 0.162871734 | 0.45189795  | 0.007090222 |
| 0.006855251 | 0.060776893 | 0.359484318 | 0.32673686  |
| 0.248169098 | 0.147645732 | 0.107491981 | 0.119259893 |
| 0.254473634 | 0.26347792  | 0.359531007 | 0.258294333 |
| 0.3112046   | 0.005557128 | 0.348534148 | 0.253396321 |
| 0.03505018  | 0.234557983 | 0.379412253 | 0.362072249 |
| 0.165356153 | 0.32855063  | 0.452411338 | 0.018782097 |
| 0.040210131 | 0.407499346 | 0.450790138 | 0.380560602 |
| 0.401859857 | 0.312555103 | 0.223035002 | 0.390819281 |
| 0.44594773  | 0.434501101 | 0.198733901 | 0.117336203 |
| 0.000764205 | 0.095270109 | 0.285998806 | 0.35630723  |
| 0.45142325  | 0.266369843 | 0.385535155 | 0.150141457 |
| 0.440657967 | 0.009640268 | 0.312516175 | 0.478823129 |
| 0.018114973 | 0.417281704 | 0.008678539 | 0.100637282 |
| 0.434507475 | 0.491690861 | 0.387479779 | 0.042881393 |
| 0.007206845 | 0.079973623 | 0.156173475 | 0.454152648 |
| 0.350506753 | 0.403524905 | 0.305064675 | 0.202261916 |
| 0.407126259 | 0.136885792 | 0.268212892 | 0.360506706 |
| 0.429978071 | 0.004556418 | 0.113852771 | 0.14723968  |
| 0.308182087 | 0.113784102 | 0.150721977 | 0.063670351 |
| 0.01005963  | 0.022238222 | 0.451783377 | 0.109449195 |
| 0.064480875 | 0.134732879 | 0.066699122 | 0.422525145 |
| 0.349976093 | 0.432994522 | 0.07488982  | 0.176745274 |
| 0.458580457 | 0.173302907 | 0.370874473 | 0.446217303 |
| 0.332362884 | 0.205145918 | 0.100492869 | 0.375753974 |
| 0.331563884 | 0.040336219 | 0.0500485   | 0.245997269 |
| 0.416873188 | 0.462962535 | 0.474673069 | 0.25479589  |
| 0.196020038 | 0.168116695 | 0.298912174 | 0.320568369 |
| 0.159953147 | 0.292309498 | 0.121506072 | 0.261530504 |
| 0.308009237 | 0.048447147 | 0.036616658 | 0.422701605 |
| 0.04631717  | 0.171524692 | 0.36950639  | 0.408141384 |
| 0.397799718 | 0.039118268 | 0.187884548 | 0.187141196 |
| 0.225842019 | 0.184101485 | 0.353153529 | 0.18229701  |
| 0.237539058 | 0.312308454 | 0.025238635 | 0.413688821 |
| 0.073646819 | 0.266503341 | 0.361801712 | 0.070449532 |
| 0.387842484 | 0.302136905 | 0.409898452 | 0.375978875 |
| 0.412578373 | 0.005611029 | 0.107321711 | 0.355095239 |
| 0.294086213 | 0.405422886 | 0.396928316 | 0.065418369 |
| 0.183220485 | 0.32561013  | 0.088134943 | 0.257773247 |
| 0.377393705 | 0.187507365 | 0.162108282 | 0.000440227 |
| 0.084450216 | 0.424369744 | 0.366426638 | 0.035868212 |
| 0.171737849 | 0.080644367 | 0.107752809 | 0.424651848 |
| 0.13302128  | 0.43644255  | 0.021011041 | 0.189038436 |
| 0.192776016 | 0.340789761 | 0.390617478 | 0.262338074 |
| 0.399961164 | 0.262264171 | 0.477029888 | 0.297252589 |
| 0.194601589 | 0.265699305 | 0.205173529 | 0.200185996 |
| 0.457247182 | 0.430587407 | 0.461136145 | 0.424851629 |
| 0.18213185  | 0.356089878 | 0.3229301   | 0.194890195 |
| 0.345111766 | 0.342424915 | 0.052955429 | 0.411162791 |
| 0.00040467  | 0.262158863 | 0.404211315 | 0.231130541 |
| 0.398958217 | 0.1610149   | 0.039838851 | 0.196536775 |

|             |             |             |             |
|-------------|-------------|-------------|-------------|
| 0.484572882 | 0.411089313 | 0.386100076 | 1           |
| 0.273490905 | 0.006553378 | 0.409469051 | 0.326279694 |
| 0.501428718 | 0.310069193 | 0.338295461 | 0.087983684 |
| 0.4333087   | 0.362350463 | 0.382130436 | 0.432948153 |
| 0.409177832 | 0.378815637 | 0.167064631 | 0.353442693 |
| 0.020577487 | 0.196318704 | 0.433230882 | 0.17152661  |
| 0.281114009 | 0.141170789 | 0.419573005 | 0.230798775 |
| 0.358340191 | 0.359626314 | 0.334120121 | 0.046685572 |
| 0.106873228 | 0.423630506 | 0.055753291 | 0.393146028 |
| 0.478031353 | 0.283015539 | 0.436487005 | 0.472873238 |
| 0.253908612 | 0.290638517 | 0.421833131 | 0.423869272 |
| 0.000812908 | 0.450116462 | 0.428562474 | 0.249493625 |
| 0.45178733  | 0.204005739 | 0.271704633 | 0.444598564 |
| 0.000577857 | 0.09629857  | 0.340893821 | 0.385421809 |
| 0.441125432 | 0.013298937 | 0.070054881 | 0.415574446 |
| 0.437244875 | 0.04837125  | 0.458061345 | 0.262998193 |
| 0.399309197 | 0.355987588 | 0.111478312 | 0.4421543   |
| 0.323868031 | 0.335020459 | 0.020847276 | 0.385348473 |
| 0.381838308 | 0.104926234 | 0.063332451 | 0.467531084 |
| 0.397883156 | 0.292494007 | 0.169129624 | 0.009404721 |
| 0.411278234 | 0.23617546  | 0.434536237 | 0.071719995 |
| 0.365804157 | 0.268344685 | 0.372843809 | 0.445646663 |
| 0.394433852 | 0.324559906 | 0.287320423 | 0.408753939 |
| 0.128097448 | 0.450797231 | 0.441742986 | 0.040650624 |
| 0.410256402 | 0.437288945 | 0.385818952 | 0.110427366 |
| 0.305513991 | 0.095144292 | 0.130911703 | 0.301058716 |
| 0.369768001 | 0.440615056 | 0.031687353 | 0.114913052 |
| 0.320363679 | 0.217842256 | 0.061130629 | 0.263659719 |
| 0.190381294 | 0.278880668 | 0.170050647 | 0.283947204 |
| 0.358883675 | 0.199791695 | 0.440280455 | 0.139766048 |
| 0.444329414 | 0.027766508 | 0.398556927 | 0.181707611 |
| 0.208333431 | 0.442765539 | 0.425440989 | 0.178628273 |
| 0.024156983 | 0.103146828 | 0.307462299 | 0.311993615 |
| 0.043178016 | 0.12733161  | 0.18213649  | 0.265502493 |
| 0.480319983 | 0.404063466 | 0.188935581 | 0.275218358 |
| 0.298785787 | 0.087781555 | 0.383971574 | 0.276240199 |
| 0.361951489 | 0.260578045 | 0.409189632 | 0.00745105  |
| 0.440212384 | 0.132197478 | 0.237826322 | 0.299535977 |
| 0.48030148  | 0.082416731 | 0.289818138 | 0.110859243 |
| 0.172444822 | 0.002789109 | 0.283605912 | 0.404561646 |
| 0.191379924 | 0.330221196 | 0.298285901 | 0.253255524 |
| 0.439930635 | 0.3503878   | 0.39788886  | 0.313030855 |
| 0.31931663  | 0.033926856 | 0.109808139 | 0.019577311 |
| 0.34130852  | 0.294303825 | 0.399031773 | 0.387092143 |
| 0.209876163 | 0.392858827 | 0.29809069  | 0.352808787 |
| 0.438708957 | 0.214758661 | 0.48690436  | 0.241581816 |
| 0.42541349  | 0.341970241 | 0.170600885 | 0.259901119 |
| 0.128004075 | 0.101348561 | 0.06910185  | 0.128644922 |
| 0.456728611 | 0.238486494 | 0.315264932 | 0.322375447 |
| 0.027515834 | 0.310465552 | 0.418869015 | 0.447874676 |
| 0.39890639  | 0.430696615 | 0.388632408 | 0.286473333 |
| 0.299595452 | 0.256760002 | 0.057204562 | 0.02875031  |
| 0.267804359 | 0.130221219 | 0.38077416  | 0.403131402 |
| 0.466352801 | 0.308302256 | 0.056434673 | 0.09326859  |

|             |             |             |             |
|-------------|-------------|-------------|-------------|
| 0.165347813 | 0.406081263 | 0.185887238 | 0.193854973 |
| 0.38000304  | 0.33684187  | 0.000358152 | 0.195354101 |
| 0.293355892 | 0.380958835 |             |             |
| LSM8        | 0.149185014 | 0.248500815 | 0.003995525 |
| 0.000561226 | 0.0021169   | 0.059510486 | 0.036407107 |
| 0.131617434 | 0.00465214  | 0.008434886 | 0.11093612  |
| 0.001323302 | 0.236905921 | 0.001412146 | 0.002410568 |
| 0.318731588 | 0.297194619 | 0.066074738 | 0.311614335 |
| 0.117199049 | 0.00256486  | 0.173312244 | 0.099087897 |
| 0.055465169 | 0.000413459 | 0.011788826 | 0.000911772 |
| 0.095027927 | 0.319220669 | 0.045863871 | 0.017399191 |
| 0.30345773  | 0.243768563 | 0.034881619 | 0.007165201 |
| 0.013746185 | 0.2187696   | 0.004601751 | 0.185691129 |
| 0.271253751 | 0.023190374 | 0.224935204 | 0.00048623  |
| 5.17E-05    | 0.008543444 | 0.125377186 | 0.150627773 |
| 0.078725845 | 0.05297334  | 0.039399928 | 0.016993205 |
| 0.010292719 | 0.124987138 | 0.249390649 | 0.017139027 |
| 0.161479487 | 5.16E-05    | 0.196296024 | 0.08415478  |
| 0.006278188 | 0.064245042 | 0.109286452 | 0.177896783 |
| 0.062562346 | 0.1768421   | 0.269709379 | 0.001056684 |
| 0.009629914 | 0.118771231 | 0.213009343 | 0.106200603 |
| 0.231040992 | 0.01652703  | 0.015493247 | 0.066241565 |
| 0.180643121 | 0.252034607 | 0.087207298 | 0.015184392 |
| 0.000608247 | 0.018235732 | 0.021411846 | 0.225250476 |
| 0.150185935 | 0.138050101 | 0.199804647 | 0.016313489 |
| 0.121214016 | 0.000652733 | 0.114789466 | 0.283791278 |
| 0.000802458 | 0.234899381 | 0.000792907 | 0.011260068 |
| 0.253045979 | 0.306420882 | 0.188862825 | 0.004328535 |
| 0.000627968 | 0.018820043 | 0.031163102 | 0.29863026  |
| 0.135299671 | 0.101371167 | 0.153767147 | 0.043575671 |
| 0.239826767 | 0.009006038 | 0.041319184 | 0.208258336 |
| 0.287463342 | 0.000728046 | 0.017303374 | 0.05381729  |
| 0.008043753 | 0.00222324  | 0.044928756 | 0.004537463 |
| 0.001645499 | 0.007171098 | 0.298961166 | 0.026652879 |
| 0.007677139 | 0.03197221  | 0.002160026 | 0.115945332 |
| 0.135673507 | 0.313244193 | 0.003422791 | 0.034568232 |
| 0.179386296 | 0.045302958 | 0.066331385 | 0.184660704 |
| 0.031886881 | 0.042528311 | 0.022550787 | 0.195572698 |
| 0.215711644 | 0.002132546 | 0.004014354 | 0.100295713 |
| 0.221820907 | 0.308846431 | 0.298522811 | 0.043984684 |
| 0.021317066 | 0.062337799 | 0.031931626 | 0.104236368 |
| 0.050411718 | 0.136213382 | 0.010105635 | 0.129099042 |
| 0.170552937 | 0.003377715 | 0.006245106 | 0.228735692 |
| 0.000772591 | 0.007788714 | 0.206433495 | 0.188386332 |
| 0.134956564 | 0.000571864 | 0.022426845 | 0.052810969 |
| 0.084272782 | 0.039903513 | 0.162047771 | 0.017666524 |
| 0.09890875  | 0.032761563 | 0.004528879 | 0.244874008 |
| 0.021977205 | 0.121266981 | 0.017723229 | 0.002667634 |
| 0.177629317 | 0.08284728  | 0.20726633  | 0.148894793 |
| 0.218346436 | 9.24E-05    | 0.008682708 | 0.177627358 |
| 0.030797873 | 0.295771467 | 0.224884017 | 0.021069676 |
| 0.082303349 | 0.037691825 | 0.028234393 | 0.026058399 |
| 0.281400502 | 0.010853693 | 0.006530241 | 5.41E-05    |
| 0.004450794 | 0.068533054 | 0.096234702 | 0.005714308 |

|             |             |             |             |
|-------------|-------------|-------------|-------------|
| 0.013869046 | 0.004852825 | 0.007265054 | 0.219741085 |
| 0.043671424 | 0.188386622 | 0.005080855 | 0.033955987 |
| 0.02923376  | 0.130714211 | 0.048178597 | 0.021877676 |
| 0.156879032 | 0.035411318 | 0.309010538 | 0.154945756 |
| 0.013686233 | 0.116835658 | 0.009408243 | 0.048482703 |
| 0.135626534 | 0.218174927 | 0.216135357 | 0.207746711 |
| 0.046068669 | 0.210670415 | 0.015310592 | 0.086656551 |
| 0.124569378 | 0.124293596 | 0.010251199 | 0.256669038 |
| 8.24E-05    | 0.101021162 | 0.105066728 | 0.010778077 |
| 0.218513185 | 0.049300688 | 0.009105664 | 0.069349241 |
| 0.310204639 | 0.25419641  | 0.286067916 | 0.273490905 |
| 1           | 0.001462422 | 0.289992192 | 0.153204061 |
| 0.316297329 | 0.076647217 | 0.024723179 | 0.007559721 |
| 0.255556607 | 0.162542153 | 0.138828163 | 0.126927614 |
| 0.118368579 | 0.060258148 | 0.059897285 | 0.224208782 |
| 0.001363512 | 0.036722781 | 0.165994338 | 0.003466817 |
| 0.031023407 | 0.015488705 | 0.201563948 | 0.110004265 |
| 0.033732178 | 0.026638472 | 0.028614057 | 0.006929618 |
| 0.033482286 | 0.251427641 | 0.002479058 | 0.279817312 |
| 0.297692055 | 0.109076195 | 0.219190093 | 0.306755535 |
| 0.088051832 | 0.136617588 | 0.223776833 | 0.304605714 |
| 0.00065783  | 0.28057173  | 0.204315462 | 0.137576853 |
| 0.26348978  | 0.079412749 | 0.108800308 | 0.075482592 |
| 9.75E-05    | 0.031611118 | 0.018603729 | 0.258770408 |
| 0.227025745 | 0.000737885 | 0.001992118 | 0.188133013 |
| 0.190051548 | 0.001769298 | 0.28247742  | 0.071429973 |
| 0.194820126 | 0.09691063  | 0.022631167 | 0.229416426 |
| 0.024572052 | 0.050488227 | 0.000731989 | 0.128655927 |
| 0.087824604 | 0.008527643 | 0.002435402 | 0.299755567 |
| 0.229747927 | 0.113616379 | 0.05978698  | 0.000249992 |
| 0.291762943 | 0.005623396 | 0.170042287 | 0.005692536 |
| 0.215087288 | 0.1195299   | 0.20244625  | 0.204953544 |
| 0.153972484 | 0.163355089 | 0.144894625 | 0.198259582 |
| 0.002050797 | 0.241297778 | 0.292031947 | 0.001411864 |
| 0.21442744  | 0.23355294  | 0.080946309 | 0.035269453 |
| 0.14911663  | 0.001593626 | 0.048817145 | 0.138438181 |
| 0.18618881  | 0.242518599 | 0.004467202 | 0.026998365 |
| 0.150177758 | 0.044546485 | 0.013537809 | 0.077533069 |
| 0.086021351 | 0.015554934 | 0.021081887 | 0.137938602 |
| 0.196820423 | 0.080870267 | 0.247892633 | 0.006134928 |
| 0.263790604 | 0.004529346 | 0.243196036 | 0.011288482 |
| 0.090645199 | 0.164050666 | 0.281987142 | 0.019642686 |
| 0.000830086 | 0.008095182 | 0.133246817 | 0.165536371 |
| 0.008914098 | 0.04629685  | 0.042487345 | 0.066130702 |
| 0.286088637 | 0.034097365 | 0.078636098 | 0.09926755  |
| 0.164030241 | 0.00148172  | 0.252204193 | 0.119771492 |
| 0.203060219 | 0.043442664 | 0.205394266 | 0.00032304  |
| 0.154968494 | 0.012861709 | 0.122856768 | 0.060263769 |
| 0.310759849 | 0.017050205 | 0.103748136 | 0.026643279 |
| 0.004793241 | 0.000542759 | 0.15223294  | 0.065236407 |
| 0.088199818 | 0.044590288 | 0.128463325 | 0.008202281 |
| 0.273147509 | 0.1261697   | 0.2175436   | 0.049882194 |
| 0.048976184 | 0.000591837 | 0.011070252 | 0.001259608 |
| 0.190676296 | 0.156598769 | 0.199198281 | 0.116792877 |

|             |             |             |             |          |
|-------------|-------------|-------------|-------------|----------|
| 0.073308538 | 0.118211527 | 0.139589211 | 0.05932332  |          |
| 0.227844731 | 0.009832644 | 0.286029852 | 0.063153335 |          |
| 0.252032445 | 0.035314909 | 0.066382746 | 0.033004251 |          |
| 0.022386254 | 0.007859225 | 0.014972616 | 0.027172143 |          |
| 0.250219324 | 0.024661752 | 0.067548048 | 0.0341877   |          |
| 0.001485313 | 0.063831335 | 0.232838353 | 0.200815917 |          |
| 0.142638575 | 0.221317332 | 0.095949199 | 0.150383639 |          |
| 0.014560393 | 0.072780432 | 0.000832213 | 0.000458677 |          |
| 0.006939795 | 0.022002862 | 0.264487473 | 0.250497875 |          |
| 0.292746921 | 0.028784806 | 0.011581171 | 0.026357496 |          |
| 0.007630857 | 0.255019044 | 0.054689055 | 0.004406768 |          |
| 0.130239659 | 0.04940868  | 7.99E-05    | 0.049693432 |          |
| 0.140047194 | 0.019599985 |             |             |          |
| LTB         | 0.036691158 | 0.019086356 | 0.039596076 | 5.68E-06 |
| 0.001008902 | 0.068175497 | 0.024572375 | 0.022247223 |          |
| 0.031453261 | 0.004860249 | 0.053727125 | 0.158458516 |          |
| 0.004339772 | 0.204647251 | 0.01393931  | 0.013910069 |          |
| 0.011123562 | 0.014008656 | 0.015632429 | 0.081385091 |          |
| 0.000192721 | 0.087572426 | 0.018092149 | 0.045402999 |          |
| 0.235736994 | 0.013161089 | 0.000106576 | 0.00861733  |          |
| 0.011297455 | 0.111307419 | 0.006919012 | 0.013859392 |          |
| 0.004703061 | 0.001247216 | 0.000276004 | 2.50E-05    |          |
| 0.037019265 | 1.03E-05    | 0.002636602 | 0.006326351 |          |
| 0.007569872 | 0.0062256   | 0.026083284 | 4.82E-08    |          |
| 0.029746157 | 0.009789892 | 0.051391307 | 0.078173188 |          |
| 0.073922216 | 0.14355404  | 0.008043303 | 1.38E-05    |          |
| 0.054584372 | 0.058874878 | 1.92E-05    | 0.033140873 | 6.10E-07 |
| 0.030743874 | 0.06811335  | 0.096303796 | 0.048548854 |          |
| 0.007933214 | 0.02983487  | 0.054710278 | 0.03177373  |          |
| 0.014668175 | 0.001929679 | 0.083144487 | 0.009093197 |          |
| 0.004126138 | 0.00408026  | 0.020516623 | 0.003250054 |          |
| 0.004912138 | 0.000662881 | 0.004459249 | 0.007671591 |          |
| 0.091930383 | 0.053884147 | 0.024874259 | 0.020315201 |          |
| 0.000413697 | 0.027763654 | 0.001725628 | 0.050687763 |          |
| 0.018691589 | 0.004719534 | 0.004764216 | 0.044104586 |          |
| 0.049034719 | 0.014083671 | 0.000182748 | 0.007410883 |          |
| 9.61E-05    | 0.039195577 | 0.014762596 | 0.007484271 |          |
| 0.028779313 | 0.012461802 | 0.036588621 | 0.167091898 |          |
| 0.03850634  | 0.004776292 | 0.023739559 | 0.007826649 |          |
| 0.033039364 | 0.000485484 | 0.002532104 | 0.033595225 |          |
| 0.010197031 | 0.029620653 | 0.018520772 | 0.089459717 |          |
| 0.116586696 | 0.068988675 | 0.000409174 | 8.30E-05    |          |
| 0.038160976 | 0.000134835 | 0.000577579 | 0.04840788  |          |
| 0.01078146  | 0.112697155 | 0.009088635 | 0.036799061 |          |
| 0.000557405 | 0.002455893 | 0.01507579  | 0.015140114 |          |
| 0.002017205 | 0.020727877 | 0.00287501  | 0.022810792 |          |
| 0.00185262  | 0.006099421 | 0.000558301 | 0.061084009 |          |
| 0.138474379 | 0.017312035 | 0.058618292 | 0.014867192 |          |
| 0.043708409 | 0.060678084 | 0.002175495 | 0.014054025 |          |
| 0.017210717 | 0.022254434 | 0.002347667 | 0.102987824 |          |
| 0.002538579 | 0.013487424 | 0.049206441 | 0.066822607 |          |
| 0.00028588  | 0.064592908 | 0.041081137 | 0.000149148 |          |
| 0.099008774 | 0.016542227 | 7.03E-06    | 0.002250185 |          |
| 0.036103306 | 0.01093277  | 0.006713302 | 8.66E-05    |          |



|             |             |             |              |
|-------------|-------------|-------------|--------------|
| 0.005046663 | 0.027045409 | 0.093212192 | 0.029306262  |
| 0.028735935 | 0.002950125 | 0.092556157 | 0.002110231  |
| 0.044768761 | 0.002328627 | 0.11209429  | 0.09358551   |
| 0.00048818  | 0.000119464 | 0.022239693 | 0.032629595  |
| 0.016089901 | 0.024392611 | 0.013734694 | 2.63E-07     |
| 0.00489118  | 0.038711286 | 0.003873782 | 0.00983142   |
| 0.0191952   | 0.131142837 | 0.156874757 | 0.000675879  |
| 0.156199936 | 0.001683866 | 0.038769095 | 0.002485556  |
| 0.003134802 | 0.02357109  | 0.006139474 | 0.001200574  |
| 0.009852256 | 0.254109372 | 0.002549083 | 0.049263213  |
| 0.013237826 | 0.012698527 | 0.088149183 | 0.004860533  |
| 0.115121277 | 0.005115017 | 0.03738539  | 0.012093434  |
| 0.000974056 | 0.011810896 | 0.007092963 | 0.009367165  |
| 0.005571778 | 0.050903617 | 0.002201508 | 0.043177302  |
| 0.000267752 | 0.057808937 | 0.002984195 | 0.008825892  |
| 0.005351049 | 0.008285877 | 0.030237413 | 0.03580422   |
| 0.000686549 | 0.095376067 | 0.045877974 | 0.027605966  |
| 0.130439895 | 0.021953966 | 0.084904041 | 0.062028737  |
| 0.003973425 | 0.000787253 | 0.01707836  | 0.02992348   |
| 0.198271109 | 0.131452594 | 0.016040358 | 0.024447508  |
| 0.036027975 | 0.006553378 | 0.001462422 | 1            |
| 0.030016923 | 0.032376293 | 0.00944845  | 0.009369856  |
| 0.000143127 | 0.001213514 | 0.014396039 | 0.014962397  |
| 0.014339761 | 0.008548878 | 0.002738903 | 0.0009416    |
| 0.10555754  | 0.02843842  | 0.001100008 | 0.034718659  |
| 0.008788903 | 0.000261274 | 0.003710303 | 0.002858662  |
| 0.007754494 | 0.073986736 | 0.00048965  | 0.003423102  |
| 0.000394413 | 0.03258972  | 0.079381607 | 0.020961006  |
| 4.51E-06    | 0.036193942 | 0.016244605 | 0.03575646   |
| 0.009385137 | 0.019472914 | 0.083317131 | 0.0327879    |
| 0.015041569 | 0.01567653  | 0.0510926   | 0.003898122  |
| 0.001923118 | 0.07784906  | 0.007599117 | 0.06393095   |
| 0.016898995 | 0.000799275 | 0.004993652 | 0.154176874  |
| 4.39E-05    | 0.037503682 | 0.007587089 | 0.007989582  |
| 0.012170102 | 0.001893004 | 0.000323989 | 7.28E-07     |
| 0.017722981 | 0.012789617 | 0.00853919  | 0.021948073  |
| 0.00274841  | 3.49E-05    | 0.009424309 | 0.024843672  |
| 0.006981586 | 0.003049285 | 0.000111335 | 0.000925525  |
| 0.018887883 | 0.029980308 | 0.000505759 | 0.0002276752 |
| 0.001148401 | 0.009505789 | 0.081532236 | 7.70E-05     |
| 0.015370304 | 0.043649742 | 0.005624056 | 0.045149534  |
| 0.00445205  | 0.01031613  | 0.022035208 | 0.031838203  |
| 0.017707964 | 2.02E-05    | 0.051647205 | 0.00542529   |
| 0.004775617 | 0.00706538  | 0.008650374 | 0.009594749  |
| 0.058514909 | 0.070327329 | 0.002251072 | 4.79E-06     |
| 0.066568514 | 0.018791924 | 0.096179588 | 0.008245419  |
| 0.120567211 | 0.027649376 | 0.068309706 | 0.027285823  |
| 0.035219988 | 0.097093138 | 0.043465999 | 8.73E-05     |
| 0.053314183 | 0.027603457 | 0.00252442  | 0.046535852  |
| 0.000642342 | 0.007596962 | 0.011713072 | 0.131685878  |
| 0.005754621 | 0.115929642 | 0.022829706 | 0.004162753  |
| 0.002760079 | 0.000993162 | 0.005981032 | 0.053247279  |
| 0.04239387  | 0.10783781  | 0.022672239 | 0.166454872  |
| 0.009296417 | 0.01028721  | 0.02384472  | 0.002123285  |
|             |             | 0.080254986 |              |

|             |                   |             |             |
|-------------|-------------------|-------------|-------------|
| 0.054396706 | 0.044398 5.86E-05 | 0.036553968 | 0.069748674 |
| 0.045102969 | 0.007512024       | 0.014208626 | 0.000228237 |
| 0.005261969 | 0.006454734       | 0.039471202 | 0.003533554 |
| 0.007596339 | 0.060763661       | 0.017707396 | 0.141094633 |
| 0.000143341 | 0.023997988       | 0.087759924 | 0.000304541 |
| 0.080302849 | 0.00370557        | 0.043095882 | 8.34E-06    |
| 0.025189711 | 0.029632181       | 0.025752882 | 0.000933143 |
| 0.007541239 | 1.11E-07          | 0.005803203 | 0.053291658 |
| 0.061000254 | 0.052468138       | 0.017069381 | 0.017918773 |
| 0.070016477 | 0.005793347       | 0.033496286 | 0.002114008 |
| 0.007408327 | 3.75E-05          | 0.012285383 | 0.04463049  |
| 0.002682996 | 0.004845214       | 0.075321803 | 0.006890088 |
| 0.012358823 | 0.001578698       | 0.063339227 | 0.140771232 |
| 0.006337378 | 0.005649964       | 0.005130179 | 0.01334279  |
| 0.015462249 | 0.007747237       | 0.011806437 | 0.003504618 |
| 0.009495227 | 0.005035225       | 0.006581816 | 0.047878181 |
| 0.00413965  | 0.070431863       | 1.01E-05    | 3.01E-05    |
| 0.037347952 | 0.043432151       | 0.025504648 | 7.13E-05    |
| 0.005427636 | 0.080525493       | 0.219233864 | 0.013119639 |
| 0.014246033 | 0.022261537       | 7.38E-06    | 0.000116403 |
| 0.003400063 | 0.010663882       | 0.010174639 | 0.053781154 |
| 0.000449353 |                   | 0.107236453 |             |
| LXN         | 0.40748558        | 0.472276373 | 0.108726194 |
| 0.0253489   | 0.132461922       | 0.298491583 | 0.268689011 |
| 0.41331459  | 0.176368005       | 0.164440532 | 0.380695139 |
| 0.005861264 | 0.381979606       | 0.037804416 | 0.127869113 |
| 0.488982623 | 0.494533843       | 0.377182712 | 0.495444391 |
| 0.410827112 | 0.150891663       | 0.440440751 | 0.408421036 |
| 0.320915304 | 0.00624857        | 0.154969887 | 0.049944531 |
| 0.402181193 | 0.476850271       | 0.290687921 | 0.32194808  |
| 0.438422124 | 0.424942747       | 0.38854883  | 0.303120681 |
| 0.211691925 | 0.467310568       | 0.125447433 | 0.412309555 |
| 0.379101767 | 0.258409302       | 0.439250348 | 0.034129104 |
| 0.002454472 | 0.141767698       | 0.374111754 | 0.445067002 |
| 0.405528454 | 0.282846029       | 0.25527889  | 0.202307358 |
| 0.157498704 | 0.410296863       | 0.453624071 | 0.152896536 |
| 0.438050077 | 0.003843631       | 0.460451697 | 0.342197232 |
| 0.113570392 | 0.402252098       | 0.391774765 | 0.461321714 |
| 0.308079009 | 0.448173411       | 0.490834101 | 0.056726218 |
| 0.1159247   | 0.463740044       | 0.399320386 | 0.411240233 |
| 0.473023201 | 0.353685303       | 0.332163389 | 0.359466072 |
| 0.432519373 | 0.402389511       | 0.369318592 | 0.261065414 |
| 0.002837456 | 0.187492978       | 0.302981219 | 0.387626316 |
| 0.378497649 | 0.41117822        | 0.437356506 | 0.251178216 |
| 0.427175327 | 0.042149275       | 0.442089117 | 0.498816945 |
| 0.028270284 | 0.420989177       | 0.016366493 | 0.239831479 |
| 0.449620101 | 0.440833421       | 0.448576828 | 0.108182974 |
| 0.03287703  | 0.214799637       | 0.235851791 | 0.381968772 |
| 0.465277835 | 0.468192333       | 0.437376647 | 0.1662665   |
| 0.336036997 | 0.254039213       | 0.411383195 | 0.46016981  |
| 0.463861635 | 0.022502507       | 0.259659401 | 0.287769696 |
| 0.338399129 | 0.142673645       | 0.290848339 | 0.046638719 |
| 0.016958944 | 0.050771981       | 0.441302553 | 0.252039206 |
| 0.129201275 | 0.256593808       | 0.100139294 | 0.422718448 |

|             |             |             |             |
|-------------|-------------|-------------|-------------|
| 0.404139874 | 0.427527396 | 0.145678759 | 0.300256425 |
| 0.41742783  | 0.298882164 | 0.395324429 | 0.452597422 |
| 0.350863588 | 0.365919639 | 0.226317796 | 0.468041252 |
| 0.464609873 | 0.108574039 | 0.132800431 | 0.38277838  |
| 0.354662694 | 0.471055364 | 0.509241812 | 0.403926899 |
| 0.279690627 | 0.343393041 | 0.330371387 | 0.407968306 |
| 0.309060587 | 0.438402565 | 0.11829033  | 0.42200679  |
| 0.438104825 | 0.04827516  | 0.112426573 | 0.461609427 |
| 0.048144718 | 0.290369373 | 0.465181919 | 0.472635673 |
| 0.462710826 | 0.040711409 | 0.251547147 | 0.313762968 |
| 0.383598221 | 0.297192141 | 0.464851951 | 0.228044158 |
| 0.389037172 | 0.323786532 | 0.080898127 | 0.347748119 |
| 0.188815349 | 0.420617329 | 0.307736901 | 0.084009881 |
| 0.444581229 | 0.435825714 | 0.468400341 | 0.469544666 |
| 0.427047431 | 0.003115451 | 0.160796559 | 0.426140952 |
| 0.32662397  | 0.392625277 | 0.469115751 | 0.17814669  |
| 0.351800829 | 0.340529253 | 0.221377522 | 0.335623679 |
| 0.441661673 | 0.259320298 | 0.229726028 | 0.001908968 |
| 0.198180763 | 0.352075187 | 0.461519406 | 0.109863206 |
| 0.259998368 | 0.176950958 | 0.194365113 | 0.467651255 |
| 0.273666506 | 0.449108365 | 0.068026875 | 0.220918622 |
| 0.32543105  | 0.436840686 | 0.36951485  | 0.342772825 |
| 0.450101995 | 0.35034625  | 0.403675267 | 0.438792432 |
| 0.310463383 | 0.392693251 | 0.207756961 | 0.372518213 |
| 0.43068447  | 0.465292414 | 0.432722767 | 0.462508669 |
| 0.327396885 | 0.435983563 | 0.333763391 | 0.346854971 |
| 0.454652662 | 0.466771436 | 0.145828619 | 0.480971776 |
| 0.002361689 | 0.4136026   | 0.430320878 | 0.216647008 |
| 0.467633493 | 0.286962337 | 0.124347455 | 0.356096591 |
| 0.501486478 | 0.484553793 | 0.457186457 | 0.409469051 |
| 0.289992192 | 0.030016923 | 1           | 0.450831863 |
| 0.478544292 | 0.445221226 | 0.298549515 | 0.130163681 |
| 0.468286572 | 0.393018086 | 0.437252403 | 0.417023489 |
| 0.436401984 | 0.38458131  | 0.343633285 | 0.407636597 |
| 0.026713285 | 0.303180506 | 0.421523634 | 0.192162008 |
| 0.31967278  | 0.247514559 | 0.460555811 | 0.396392746 |
| 0.372465371 | 0.333920259 | 0.322032212 | 0.117950553 |
| 0.246369991 | 0.478005215 | 0.051221621 | 0.471847264 |
| 0.504417893 | 0.443710064 | 0.460629917 | 0.501549382 |
| 0.395376194 | 0.428740626 | 0.471589457 | 0.427124825 |
| 0.003121541 | 0.388737773 | 0.367193258 | 0.410347159 |
| 0.429700503 | 0.356444451 | 0.30977253  | 0.385756769 |
| 0.004008643 | 0.228249596 | 0.227588357 | 0.47849245  |
| 0.457594018 | 0.051108991 | 0.050434541 | 0.471007012 |
| 0.378067198 | 0.060135844 | 0.506271829 | 0.369944332 |
| 0.464967731 | 0.449499674 | 0.217125133 | 0.386097747 |
| 0.198596031 | 0.431644953 | 0.037841514 | 0.436937558 |
| 0.430685231 | 0.141954924 | 0.08691889  | 0.502432711 |
| 0.464060794 | 0.423877922 | 0.330277987 | 0.011566673 |
| 0.369377094 | 0.189383372 | 0.446805907 | 0.184159792 |
| 0.472209128 | 0.416470782 | 0.471554046 | 0.422431366 |
| 0.469269424 | 0.445775481 | 0.422264486 | 0.466197397 |
| 0.109777648 | 0.399017511 | 0.418625444 | 0.078687638 |
| 0.397250998 | 0.463066568 | 0.390706049 | 0.232006218 |

|             |             |             |             |
|-------------|-------------|-------------|-------------|
| 0.444873043 | 0.079459322 | 0.270283299 | 0.415331877 |
| 0.462044073 | 0.454843185 | 0.094392008 | 0.271927504 |
| 0.434310649 | 0.380812315 | 0.159433631 | 0.429631094 |
| 0.353849599 | 0.175386841 | 0.207017374 | 0.435688207 |
| 0.462222612 | 0.343500323 | 0.446140905 | 0.156611901 |
| 0.446875092 | 0.101897064 | 0.463427007 | 0.326457318 |
| 0.375831922 | 0.386555928 | 0.364193753 | 0.166287053 |
| 0.030922287 | 0.203324899 | 0.421940901 | 0.444234698 |
| 0.122909818 | 0.279513286 | 0.298924836 | 0.367178209 |
| 0.468637811 | 0.404624547 | 0.345173071 | 0.429454764 |
| 0.437131004 | 0.100020869 | 0.476602385 | 0.419682973 |
| 0.459094919 | 0.363691146 | 0.474355052 | 0.013773989 |
| 0.441781688 | 0.192784314 | 0.292266149 | 0.361653052 |
| 0.427568194 | 0.187538595 | 0.411539862 | 0.253465938 |
| 0.18407492  | 0.009374761 | 0.438787215 | 0.330849926 |
| 0.344000039 | 0.338115592 | 0.444634289 | 0.146778529 |
| 0.507064544 | 0.440378724 | 0.448487764 | 0.310702181 |
| 0.38864649  | 0.018213867 | 0.177933805 | 0.065798048 |
| 0.455370839 | 0.447638096 | 0.453495551 | 0.413640317 |
| 0.308517005 | 0.449155267 | 0.4437486   | 0.393357569 |
| 0.456911469 | 0.162807903 | 0.488316735 | 0.411022105 |
| 0.35009913  | 0.416788338 | 0.332909313 | 0.405161652 |
| 0.238517558 | 0.191366036 | 0.183760505 | 0.271814579 |
| 0.44282534  | 0.385288646 | 0.395762054 | 0.366387856 |
| 0.072860983 | 0.417711814 | 0.441546196 | 0.419935491 |
| 0.43871455  | 0.384973909 | 0.410389511 | 0.43058684  |
| 0.353614702 | 0.388025053 | 0.049549874 | 0.032225073 |
| 0.235802552 | 0.243949808 | 0.456889826 | 0.474829923 |
| 0.485550105 | 0.344040428 | 0.153057889 | 0.229786579 |
| 0.15371249  | 0.391963212 | 0.310447712 | 0.150762175 |
| 0.462791032 | 0.352041054 | 0.00168618  | 0.33970823  |
| 0.435549041 | 0.387326393 |             |             |
| LY96        | 0.266614928 | 0.484647499 | 0.147757655 |
| 0.026448008 | 0.154495693 | 0.337172239 | 0.318022691 |
| 0.245983649 | 0.233708315 | 0.213976133 | 0.366648221 |
| 0.004905835 | 0.257615492 | 0.047471857 | 0.14998063  |
| 0.430857898 | 0.44150551  | 0.363317462 | 0.434031853 |
| 0.294085412 | 0.165679703 | 0.343236183 | 0.345145379 |
| 0.358017264 | 0.007549593 | 0.209107354 | 0.071365528 |
| 0.223251438 | 0.398714215 | 0.315481639 | 0.295684624 |
| 0.38379705  | 0.344280458 | 0.318895485 | 0.255170331 |
| 0.130730682 | 0.482764907 | 0.065829961 | 0.274674626 |
| 0.291959217 | 0.284767095 | 0.348573539 | 0.055902127 |
| 0.002174554 | 0.203862529 | 0.20042206  | 0.353647213 |
| 0.313548656 | 0.322399807 | 0.291155514 | 0.258150459 |
| 0.071662598 | 0.379977919 | 0.341675522 | 0.065721247 |
| 0.458816374 | 0.005802329 | 0.488169554 | 0.216046937 |
| 0.170371606 | 0.373790015 | 0.25777739  | 0.344263586 |
| 0.346672856 | 0.475874715 | 0.471284381 | 0.096350747 |
| 0.180111744 | 0.309762031 | 0.27824784  | 0.323038469 |
| 0.440110878 | 0.281864801 | 0.341290184 | 0.21506422  |
| 0.284173302 | 0.287150509 | 0.365247774 | 0.273223646 |
| 0.003782311 | 0.248195768 | 0.260431747 | 0.232336376 |
| 0.211362811 | 0.388121899 | 0.272558064 | 0.301345663 |

|             |             |             |             |
|-------------|-------------|-------------|-------------|
| 0.278791519 | 0.067379326 | 0.354494904 | 0.461641414 |
| 0.036611084 | 0.287288549 | 0.015127382 | 0.254475502 |
| 0.341944127 | 0.353023019 | 0.312650188 | 0.171571919 |
| 0.051645628 | 0.234644203 | 0.141961913 | 0.280086632 |
| 0.348548082 | 0.341462687 | 0.450216878 | 0.067760097 |
| 0.231140398 | 0.258675645 | 0.378794169 | 0.482430953 |
| 0.442270357 | 0.022494336 | 0.251641482 | 0.321781187 |
| 0.276036863 | 0.167604291 | 0.32470866  | 0.024136532 |
| 0.017110093 | 0.021770119 | 0.377613914 | 0.258573397 |
| 0.189800773 | 0.307006905 | 0.106616285 | 0.300599445 |
| 0.233258369 | 0.350438427 | 0.191935223 | 0.338081101 |
| 0.250203382 | 0.337708478 | 0.299602733 | 0.306796802 |
| 0.256663596 | 0.302722591 | 0.257496299 | 0.45158332  |
| 0.45807168  | 0.150204771 | 0.185069275 | 0.362440753 |
| 0.233424019 | 0.416703477 | 0.482691517 | 0.295126175 |
| 0.278535959 | 0.335252208 | 0.289253389 | 0.35248332  |
| 0.342087946 | 0.309057178 | 0.044237232 | 0.374161631 |
| 0.472909168 | 0.025953627 | 0.169588332 | 0.332423146 |
| 0.049414258 | 0.325201826 | 0.454501216 | 0.371288129 |
| 0.319839707 | 0.063575029 | 0.262525167 | 0.343854447 |
| 0.357198326 | 0.323113845 | 0.355880296 | 0.243642864 |
| 0.363119693 | 0.276766967 | 0.127974796 | 0.23936488  |
| 0.240501713 | 0.35437316  | 0.193713381 | 0.071089701 |
| 0.281604961 | 0.288624017 | 0.40792381  | 0.328295675 |
| 0.277445406 | 0.003716072 | 0.201015598 | 0.292761135 |
| 0.276281958 | 0.291527601 | 0.495070641 | 0.235405109 |
| 0.336537791 | 0.205262122 | 0.265929217 | 0.305456026 |
| 0.342919153 | 0.2710206   | 0.260996524 | 0.003466727 |
| 0.229196625 | 0.224286265 | 0.341859412 | 0.116425116 |
| 0.263460592 | 0.210174999 | 0.132776159 | 0.410786708 |
| 0.310875303 | 0.327656157 | 0.049588658 | 0.104307741 |
| 0.321802714 | 0.375265968 | 0.259572926 | 0.240001699 |
| 0.365373815 | 0.30492871  | 0.303716924 | 0.430846788 |
| 0.303303185 | 0.373395519 | 0.103817721 | 0.353748885 |
| 0.263227666 | 0.410805834 | 0.322798282 | 0.346099132 |
| 0.347451866 | 0.269685332 | 0.180555067 | 0.352544257 |
| 0.332712639 | 0.330813469 | 0.178061818 | 0.485255167 |
| 0.003939873 | 0.369930591 | 0.325005734 | 0.1106006   |
| 0.47309905  | 0.326281098 | 0.168093661 | 0.287999603 |
| 0.442679328 | 0.489011198 | 0.381104892 | 0.326279694 |
| 0.153204061 | 0.032376293 | 0.450831863 | 1           |
| 0.405696846 | 0.368111723 | 0.195536988 | 0.06044264  |
| 0.423142141 | 0.215815788 | 0.335661416 | 0.267531292 |
| 0.301435226 | 0.235108792 | 0.336638151 | 0.236795306 |
| 0.018004215 | 0.310445348 | 0.27568983  | 0.209051568 |
| 0.294676701 | 0.260735027 | 0.388034165 | 0.372176377 |
| 0.26820588  | 0.218674788 | 0.255330015 | 0.173159355 |
| 0.303400089 | 0.483956009 | 0.025453709 | 0.437024132 |
| 0.463526048 | 0.367338058 | 0.414784735 | 0.45483148  |
| 0.344220509 | 0.414300035 | 0.425501782 | 0.350006067 |
| 0.002717162 | 0.306955267 | 0.226881606 | 0.401822463 |
| 0.359995863 | 0.367812854 | 0.153620877 | 0.226484759 |
| 0.004530675 | 0.27657214  | 0.127590377 | 0.496350643 |
| 0.388955089 | 0.094390174 | 0.021769357 | 0.35721711  |

|             |             |             |             |
|-------------|-------------|-------------|-------------|
| 0.207977616 | 0.034364659 | 0.488854249 | 0.346060122 |
| 0.426764601 | 0.338419204 | 0.279263551 | 0.271569644 |
| 0.101841796 | 0.281857866 | 0.049870888 | 0.332653088 |
| 0.290808679 | 0.077502915 | 0.122353592 | 0.465766399 |
| 0.397926767 | 0.378857717 | 0.354081017 | 0.020724686 |
| 0.280355181 | 0.146188847 | 0.328130686 | 0.184835195 |
| 0.386435003 | 0.388786116 | 0.445537147 | 0.304799903 |
| 0.336948052 | 0.416944054 | 0.412492554 | 0.399086865 |
| 0.077858874 | 0.285295911 | 0.338828925 | 0.103119974 |
| 0.230308521 | 0.418624305 | 0.299074079 | 0.288118444 |
| 0.361751831 | 0.067866686 | 0.315510797 | 0.274098655 |
| 0.443665009 | 0.410111517 | 0.154327888 | 0.240728238 |
| 0.429513435 | 0.366826482 | 0.226094657 | 0.349807406 |
| 0.363766873 | 0.07602254  | 0.097585389 | 0.383793106 |
| 0.487254384 | 0.359080266 | 0.384151211 | 0.177541828 |
| 0.369585682 | 0.130205784 | 0.363892149 | 0.320864828 |
| 0.345699771 | 0.232134489 | 0.271541395 | 0.072091813 |
| 0.043985358 | 0.184507637 | 0.411553488 | 0.449202748 |
| 0.173430416 | 0.300843087 | 0.312234371 | 0.344380346 |
| 0.410954283 | 0.279016163 | 0.351848586 | 0.325681481 |
| 0.465122705 | 0.124321906 | 0.493603194 | 0.342131087 |
| 0.368143107 | 0.332317524 | 0.370489715 | 0.017611987 |
| 0.286596307 | 0.227704121 | 0.151101168 | 0.322081332 |
| 0.336610838 | 0.235716152 | 0.375418803 | 0.275375857 |
| 0.139661771 | 0.006412955 | 0.357770697 | 0.19539046  |
| 0.359545208 | 0.172773885 | 0.333976131 | 0.070640703 |
| 0.511032708 | 0.334222371 | 0.341549283 | 0.164808326 |
| 0.337719387 | 0.009023324 | 0.233888569 | 0.096820105 |
| 0.355776323 | 0.391855217 | 0.297832239 | 0.275947639 |
| 0.182385918 | 0.334655762 | 0.377097327 | 0.31087241  |
| 0.40680572  | 0.093175445 | 0.443194562 | 0.327084582 |
| 0.26027225  | 0.32255569  | 0.357708778 | 0.334885359 |
| 0.289511936 | 0.179798282 | 0.254393174 | 0.225666508 |
| 0.390668316 | 0.301556902 | 0.340458962 | 0.255084874 |
| 0.111362128 | 0.343798056 | 0.295833989 | 0.278649956 |
| 0.325798279 | 0.230875274 | 0.234075082 | 0.44311108  |
| 0.263576437 | 0.316290357 | 0.052705838 | 0.058028263 |
| 0.195939192 | 0.292687708 | 0.37605308  | 0.381880906 |
| 0.439977186 | 0.203503928 | 0.212150815 | 0.240915068 |
| 0.068451648 | 0.266930909 | 0.338747899 | 0.087902111 |
| 0.338960103 | 0.224379274 | 0.00205226  | 0.26276243  |
| 0.382567699 | 0.253457963 |             |             |

|             |             |             |             |
|-------------|-------------|-------------|-------------|
| LYPD6B      | 0.399797085 | 0.48169689  | 0.055451452 |
| 0.032059416 | 0.103945292 | 0.209022284 | 0.197198191 |
| 0.42017163  | 0.094046329 | 0.126543365 | 0.300572727 |
| 0.001851627 | 0.480088834 | 0.013082619 | 0.066235568 |
| 0.50563089  | 0.512529018 | 0.320033842 | 0.503643203 |
| 0.346103644 | 0.151089452 | 0.370085353 | 0.380755203 |
| 0.23412891  | 0.001719122 | 0.104652169 | 0.050114426 |
| 0.446104943 | 0.505601467 | 0.181991383 | 0.269852728 |
| 0.491591633 | 0.518262238 | 0.427578239 | 0.338660617 |
| 0.324785684 | 0.439933775 | 0.18042715  | 0.512023373 |
| 0.466263017 | 0.206035318 | 0.518709062 | 0.011911082 |
| 0.005996048 | 0.084511697 | 0.405291817 | 0.39333389  |

|             |             |             |             |
|-------------|-------------|-------------|-------------|
| 0.317225405 | 0.193059686 | 0.150052702 | 0.15555795  |
| 0.250393096 | 0.33448234  | 0.430281179 | 0.260606219 |
| 0.389130622 | 0.005403711 | 0.42817254  | 0.29477492  |
| 0.052378376 | 0.307573149 | 0.433611115 | 0.433358594 |
| 0.220224069 | 0.407393315 | 0.504434345 | 0.027957466 |
| 0.057994158 | 0.485045233 | 0.499006576 | 0.443968606 |
| 0.480072124 | 0.350130828 | 0.279976264 | 0.463638009 |
| 0.510370515 | 0.48769386  | 0.264930434 | 0.161303566 |
| 0.001001015 | 0.127989194 | 0.344115506 | 0.411682295 |
| 0.500277038 | 0.336946294 | 0.453388919 | 0.200178348 |
| 0.491185556 | 0.014385845 | 0.379269021 | 0.510481175 |
| 0.022423933 | 0.488438892 | 0.011586348 | 0.142343771 |
| 0.497148243 | 0.49087827  | 0.448479958 | 0.059327018 |
| 0.011216175 | 0.113587119 | 0.184980122 | 0.453183917 |
| 0.433808047 | 0.483571539 | 0.384596454 | 0.233147575 |
| 0.452582628 | 0.169591071 | 0.347630399 | 0.436287039 |
| 0.49177818  | 0.007188383 | 0.152815269 | 0.196575654 |
| 0.37701314  | 0.141529668 | 0.204451996 | 0.058123848 |
| 0.011469168 | 0.02930265  | 0.501064043 | 0.14662112  |
| 0.085637678 | 0.178519649 | 0.081367338 | 0.491645461 |
| 0.408865354 | 0.471564473 | 0.106834257 | 0.230705289 |
| 0.515731841 | 0.229032599 | 0.436469316 | 0.515464893 |
| 0.407508998 | 0.264722378 | 0.132174419 | 0.460930616 |
| 0.411487131 | 0.056524347 | 0.069242243 | 0.306277387 |
| 0.469460711 | 0.506179531 | 0.502792896 | 0.320107797 |
| 0.252163408 | 0.2288576   | 0.33990937  | 0.386204961 |
| 0.217417367 | 0.368908638 | 0.139712513 | 0.338182246 |
| 0.384434838 | 0.0508268   | 0.052410039 | 0.494630214 |
| 0.057605736 | 0.231603353 | 0.443435459 | 0.491632903 |
| 0.486468687 | 0.04117278  | 0.22283052  | 0.240407502 |
| 0.287735843 | 0.230879593 | 0.433032772 | 0.211694566 |
| 0.299400005 | 0.345962761 | 0.037588504 | 0.462934964 |
| 0.103295024 | 0.334314321 | 0.390719399 | 0.087766612 |
| 0.461031228 | 0.37538482  | 0.481569477 | 0.450692936 |
| 0.472179902 | 0.004941333 | 0.127572877 | 0.413178099 |
| 0.328331182 | 0.465695938 | 0.471448475 | 0.094214515 |
| 0.241251568 | 0.404260886 | 0.123671854 | 0.330856558 |
| 0.447680661 | 0.222176028 | 0.191411758 | 0.000516983 |
| 0.1194432   | 0.448722628 | 0.456245661 | 0.049237029 |
| 0.219813433 | 0.101621426 | 0.134709834 | 0.498941448 |
| 0.176480583 | 0.514339262 | 0.030146432 | 0.230588789 |
| 0.242457196 | 0.420911272 | 0.43342256  | 0.305414155 |
| 0.477893716 | 0.310421208 | 0.468046464 | 0.374800208 |
| 0.263983643 | 0.329232924 | 0.254933287 | 0.266985358 |
| 0.519920066 | 0.5090601   | 0.520188208 | 0.506426515 |
| 0.23828238  | 0.430059117 | 0.365966787 | 0.251849207 |
| 0.412419251 | 0.427550405 | 0.071915928 | 0.483492384 |
| 0.00055636  | 0.333193489 | 0.471251673 | 0.267332054 |
| 0.475763039 | 0.213270367 | 0.056760285 | 0.250631078 |
| 0.504812723 | 0.48100608  | 0.461106999 | 0.501428718 |
| 0.316297329 | 0.00944845  | 0.478544292 | 0.405696846 |
| 1           | 0.398816951 | 0.39719643  | 0.117543315 |
| 0.507292774 | 0.42563088  | 0.443252686 | 0.47413067  |
| 0.492505402 | 0.45866749  | 0.229078059 | 0.421073049 |

|             |             |             |             |
|-------------|-------------|-------------|-------------|
| 0.023381849 | 0.234958801 | 0.477681153 | 0.197895129 |
| 0.319800264 | 0.181477068 | 0.497974086 | 0.302750161 |
| 0.430651677 | 0.370148735 | 0.384678592 | 0.065975494 |
| 0.15062871  | 0.484877143 | 0.073655378 | 0.470609476 |
| 0.506652566 | 0.36959617  | 0.508577907 | 0.502317633 |
| 0.313077786 | 0.369723668 | 0.49509515  | 0.476284997 |
| 0.001058024 | 0.49301169  | 0.483788121 | 0.322195892 |
| 0.50722558  | 0.264517104 | 0.321500583 | 0.502338321 |
| 0.001218574 | 0.131876005 | 0.348140321 | 0.458949292 |
| 0.51474721  | 0.021420034 | 0.088437892 | 0.49346428  |
| 0.492547272 | 0.060517543 | 0.49475889  | 0.31912652  |
| 0.477438834 | 0.43980935  | 0.147699952 | 0.49716367  |
| 0.324594402 | 0.417327975 | 0.028150639 | 0.453422835 |
| 0.471679224 | 0.137419938 | 0.076232335 | 0.500028145 |
| 0.465140976 | 0.37295531  | 0.227571238 | 0.008920714 |
| 0.447706827 | 0.244707863 | 0.502567932 | 0.103909609 |
| 0.441896609 | 0.343211904 | 0.456747133 | 0.512397047 |
| 0.478578478 | 0.400628187 | 0.357729349 | 0.480695303 |
| 0.140943942 | 0.495658719 | 0.495637494 | 0.048916002 |
| 0.463723606 | 0.513670207 | 0.439721472 | 0.149620198 |
| 0.379603256 | 0.106269148 | 0.175412039 | 0.365500129 |
| 0.450315877 | 0.510908819 | 0.044822593 | 0.158638042 |
| 0.394526817 | 0.288690255 | 0.089353404 | 0.345137184 |
| 0.25199377  | 0.272427071 | 0.212704725 | 0.361540682 |
| 0.438541043 | 0.261509171 | 0.499307573 | 0.156836211 |
| 0.516785162 | 0.041880284 | 0.479197742 | 0.245672949 |
| 0.27015033  | 0.477025644 | 0.458865807 | 0.184769539 |
| 0.024318061 | 0.125071349 | 0.381256881 | 0.389209136 |
| 0.060532467 | 0.171626047 | 0.2300943   | 0.330485156 |
| 0.514776418 | 0.448822256 | 0.247533079 | 0.347639562 |
| 0.376997442 | 0.105209632 | 0.457607044 | 0.341037647 |
| 0.431633889 | 0.320287912 | 0.488214774 | 0.009945179 |
| 0.508746365 | 0.156514829 | 0.281733128 | 0.362249062 |
| 0.478244426 | 0.11117288  | 0.367718697 | 0.149010956 |
| 0.204338698 | 0.004042625 | 0.358116516 | 0.45853161  |
| 0.250250249 | 0.379183974 | 0.374362674 | 0.26388188  |
| 0.483379246 | 0.411727236 | 0.458854898 | 0.381878797 |
| 0.375028694 | 0.038191663 | 0.137440787 | 0.027257732 |
| 0.411421875 | 0.376133983 | 0.471097455 | 0.432945046 |
| 0.253876967 | 0.477932565 | 0.378515844 | 0.426024926 |
| 0.512736125 | 0.222671863 | 0.512336238 | 0.318971569 |
| 0.465606094 | 0.405441349 | 0.231119129 | 0.338796701 |
| 0.175116545 | 0.145594433 | 0.100802703 | 0.167898333 |
| 0.520074236 | 0.326591542 | 0.386792006 | 0.352587517 |
| 0.037321926 | 0.379638607 | 0.489661072 | 0.510733135 |
| 0.45896605  | 0.472407521 | 0.443211143 | 0.363804338 |
| 0.347210412 | 0.314462485 | 0.061737006 | 0.031952282 |
| 0.294231524 | 0.16749048  | 0.453148841 | 0.482805235 |
| 0.510752087 | 0.355960733 | 0.079896286 | 0.127470702 |
| 0.201270056 | 0.456414978 | 0.242994577 | 0.225779009 |
| 0.467836355 | 0.396437028 | 0.00049351  | 0.244691784 |
| 0.367404689 | 0.434851214 |             |             |
| LYSMD2      | 0.149702696 | 0.484349561 | 0.065957125 |
| 0.014813658 | 0.107574274 | 0.245229241 | 0.21808523  |



|             |             |             |             |
|-------------|-------------|-------------|-------------|
| 0.118178234 | 0.094479462 | 0.092837956 | 0.364366599 |
| 0.000976073 | 0.267127314 | 0.013178875 | 0.068389048 |
| 0.417030896 | 0.435962984 | 0.282595396 | 0.433578796 |
| 0.140335196 | 0.077477039 | 0.288929042 | 0.24242994  |
| 0.228342624 | 0.001476249 | 0.110912053 | 0.029542114 |
| 0.1036609   | 0.390834318 | 0.152016498 | 0.139677437 |
| 0.356597105 | 0.348310867 | 0.145463242 | 0.150582357 |
| 0.072747598 | 0.475815748 | 0.066688887 | 0.297136758 |
| 0.280565418 | 0.154863488 | 0.343977116 | 0.019892004 |
| 0.001399801 | 0.097764303 | 0.093197017 | 0.274896731 |
| 0.140705835 | 0.205270474 | 0.148619056 | 0.130109019 |
| 0.034419398 | 0.378127959 | 0.314166654 | 0.035261459 |
| 0.475627356 | 0.002073143 | 0.487976345 | 0.079555922 |
| 0.07312885  | 0.172211447 | 0.122696325 | 0.29063571  |
| 0.291014618 | 0.4882734   | 0.47742786  | 0.054449915 |
| 0.07849721  | 0.194421524 | 0.258684609 | 0.264198876 |
| 0.428794222 | 0.123262723 | 0.163490133 | 0.120830409 |
| 0.269788097 | 0.274275274 | 0.286805296 | 0.131354084 |
| 0.000983345 | 0.133724785 | 0.150999657 | 0.194469769 |
| 0.182158504 | 0.394779896 | 0.206060066 | 0.160933402 |
| 0.157917279 | 0.023284672 | 0.252350592 | 0.457210876 |
| 0.01697989  | 0.299750127 | 0.012090763 | 0.126462954 |
| 0.323480635 | 0.333828271 | 0.254783405 | 0.080372788 |
| 0.018217827 | 0.099688052 | 0.050350134 | 0.27158597  |
| 0.225535704 | 0.210536891 | 0.463274703 | 0.036645112 |
| 0.233945652 | 0.087203784 | 0.195055024 | 0.477880271 |
| 0.423270113 | 0.010002322 | 0.098835778 | 0.229534635 |
| 0.131019121 | 0.084651205 | 0.222681287 | 0.009244363 |
| 0.011424563 | 0.008945347 | 0.366931412 | 0.113398469 |
| 0.093666748 | 0.168108113 | 0.064265901 | 0.26784449  |
| 0.111136777 | 0.330405077 | 0.1242461   | 0.18032675  |
| 0.258572826 | 0.245560094 | 0.186184605 | 0.308185055 |
| 0.167016476 | 0.129764639 | 0.102689836 | 0.48194463  |
| 0.453192391 | 0.076418542 | 0.071649929 | 0.293986849 |
| 0.243902891 | 0.411128421 | 0.476961446 | 0.145485307 |
| 0.177976759 | 0.173031696 | 0.114304834 | 0.31255341  |
| 0.247815678 | 0.200654522 | 0.02598067  | 0.370067706 |
| 0.475831907 | 0.014239609 | 0.067061252 | 0.321522657 |
| 0.045451279 | 0.178345123 | 0.42579652  | 0.388359968 |
| 0.272287645 | 0.022293951 | 0.125279754 | 0.219783736 |
| 0.205805734 | 0.170313409 | 0.296066434 | 0.107607139 |
| 0.273988874 | 0.108619579 | 0.061903426 | 0.246326695 |
| 0.111660641 | 0.243308075 | 0.073302252 | 0.029764537 |
| 0.225715828 | 0.139856989 | 0.398783144 | 0.24301773  |
| 0.248736968 | 0.00183712  | 0.087314403 | 0.192718568 |
| 0.101690715 | 0.293147288 | 0.499839667 | 0.109328315 |
| 0.212719471 | 0.125995086 | 0.121618715 | 0.18996317  |
| 0.319848031 | 0.11873276  | 0.102104267 | 0.000671939 |
| 0.145375222 | 0.09499441  | 0.195206063 | 0.037358825 |
| 0.166739973 | 0.069222203 | 0.050513239 | 0.40728038  |
| 0.176820349 | 0.358910796 | 0.018885745 | 0.050876005 |
| 0.14612553  | 0.402737584 | 0.128946439 | 0.089397628 |
| 0.37867062  | 0.140374345 | 0.288077681 | 0.417743807 |
| 0.205099389 | 0.357868397 | 0.057857443 | 0.158656385 |

|             |             |             |             |
|-------------|-------------|-------------|-------------|
| 0.20397334  | 0.420656135 | 0.314066317 | 0.378911856 |
| 0.173647266 | 0.250489369 | 0.094044926 | 0.278334383 |
| 0.216723169 | 0.234251602 | 0.071865549 | 0.499570276 |
| 0.000747981 | 0.277465298 | 0.233927723 | 0.045347354 |
| 0.476376496 | 0.259983215 | 0.064495385 | 0.124446616 |
| 0.439483751 | 0.5001543   | 0.364568042 | 0.310069193 |
| 0.076647217 | 0.009369856 | 0.445221226 | 0.368111723 |
| 0.398816951 | 1           | 0.128452246 | 0.037227363 |
| 0.423499212 | 0.161624592 | 0.257899323 | 0.152606097 |
| 0.251073923 | 0.149096613 | 0.185939643 | 0.215019443 |
| 0.004571595 | 0.125401304 | 0.21069563  | 0.081425931 |
| 0.124238237 | 0.114479226 | 0.403475822 | 0.35021455  |
| 0.166846108 | 0.076284275 | 0.132973415 | 0.086196369 |
| 0.179560995 | 0.473398216 | 0.029369645 | 0.41991848  |
| 0.462989876 | 0.263723009 | 0.414344876 | 0.44756857  |
| 0.178660983 | 0.431252192 | 0.422270134 | 0.338017074 |
| 0.00068109  | 0.305000625 | 0.24350514  | 0.40073217  |
| 0.338901414 | 0.266609641 | 0.071456766 | 0.125233754 |
| 0.002862443 | 0.127807971 | 0.062799646 | 0.4935729   |
| 0.404199446 | 0.043682718 | 0.025882094 | 0.374711102 |
| 0.223866267 | 0.018371291 | 0.480091175 | 0.208558002 |
| 0.444313388 | 0.235461865 | 0.131542195 | 0.275042542 |
| 0.047136675 | 0.144801324 | 0.035240939 | 0.290415846 |
| 0.179284016 | 0.035933737 | 0.061599447 | 0.457007107 |
| 0.370239339 | 0.388583627 | 0.239519241 | 0.003924709 |
| 0.255989647 | 0.0659888   | 0.328905035 | 0.103713398 |
| 0.382475324 | 0.388369601 | 0.474678641 | 0.309236951 |
| 0.273405454 | 0.430468601 | 0.400015703 | 0.37934452  |
| 0.048293053 | 0.267053901 | 0.318657644 | 0.042921421 |
| 0.166182995 | 0.422980703 | 0.178029651 | 0.192785183 |
| 0.291717253 | 0.04843087  | 0.215368751 | 0.151366342 |
| 0.466815597 | 0.404855949 | 0.059140604 | 0.113000174 |
| 0.427068007 | 0.175169176 | 0.11596424  | 0.198629029 |
| 0.289912788 | 0.032085584 | 0.051716668 | 0.356488406 |
| 0.491623686 | 0.33637367  | 0.354994774 | 0.076516696 |
| 0.386849512 | 0.05636379  | 0.368768295 | 0.188695718 |
| 0.213848154 | 0.166592778 | 0.255093257 | 0.028819447 |
| 0.009920901 | 0.064920471 | 0.421582242 | 0.447457485 |
| 0.073837197 | 0.151846176 | 0.172817276 | 0.262987647 |
| 0.402346736 | 0.128374292 | 0.268410856 | 0.176080806 |
| 0.473318525 | 0.061019215 | 0.484777319 | 0.186196973 |
| 0.327700846 | 0.178522542 | 0.381416992 | 0.006147605 |
| 0.248654405 | 0.097207791 | 0.065360226 | 0.219297995 |
| 0.316309622 | 0.109541619 | 0.380572439 | 0.112870027 |
| 0.069487499 | 0.003246806 | 0.320119514 | 0.115856769 |
| 0.324520607 | 0.083936444 | 0.188787248 | 0.034821247 |
| 0.503832703 | 0.200209737 | 0.300385393 | 0.099198294 |
| 0.15504315  | 0.009374539 | 0.103992608 | 0.032278867 |
| 0.315905056 | 0.399455434 | 0.242786633 | 0.14045206  |
| 0.07058363  | 0.304177642 | 0.366245463 | 0.199429234 |
| 0.413148526 | 0.041785511 | 0.430933851 | 0.160084777 |
| 0.256923797 | 0.143157402 | 0.267291765 | 0.174556368 |
| 0.162635341 | 0.095507398 | 0.117945894 | 0.085216939 |
| 0.389758676 | 0.190436697 | 0.24081202  | 0.087995011 |

|             |             |             |             |
|-------------|-------------|-------------|-------------|
| 0.051164658 | 0.190284435 | 0.295788795 | 0.278130745 |
| 0.240501261 | 0.207239609 | 0.117716015 | 0.45259933  |
| 0.095502238 | 0.119018011 | 0.028357802 | 0.02282647  |
| 0.08828617  | 0.127348664 | 0.350232641 | 0.38433062  |
| 0.446282614 | 0.085333841 | 0.092997399 | 0.095801343 |
| 0.044456193 | 0.239234237 | 0.276296481 | 0.073166998 |
| 0.280889647 | 0.092220661 | 0.000679801 | 0.101434648 |
| 0.36170647  | 0.132992234 |             |             |
| MAP3K8      | 0.078656133 | 0.36059074  | 0.005181357 |
| 0.020104173 | 0.055232025 | 0.077882769 | 0.098153784 |
| 0.073832514 | 0.007052005 | 0.022111552 | 0.157655821 |
| 8.75E-06    | 0.341631399 | 0.000241629 | 0.005873161 |
| 0.36340713  | 0.407714142 | 0.182524755 | 0.37621289  |
| 0.054873913 | 0.041733139 | 0.120350087 | 0.146515825 |
| 0.08048102  | 1.08E-05    | 0.038674281 | 0.017521982 |
| 0.087375763 | 0.376213149 | 0.034668588 | 0.034086334 |
| 0.297258183 | 0.42031397  | 0.086805425 | 0.137367478 |
| 0.13792927  | 0.293458128 | 0.112731138 | 0.413590093 |
| 0.308489362 | 0.071294555 | 0.367389729 | 0.000466821 |
| 0.013864323 | 0.018536379 | 0.059919419 | 0.131608533 |
| 0.046420052 | 0.060263006 | 0.03026132  | 0.064747028 |
| 0.041628757 | 0.171425931 | 0.169538216 | 0.060175321 |
| 0.278169729 | 0.004368868 | 0.298965825 | 0.022814575 |
| 0.005241467 | 0.060356978 | 0.088927774 | 0.156181499 |
| 0.105188707 | 0.296062492 | 0.399607633 | 0.004787104 |
| 0.010780551 | 0.14131414  | 0.29416158  | 0.26248086  |
| 0.305823581 | 0.046127886 | 0.049967742 | 0.183177472 |
| 0.281313892 | 0.287307827 | 0.093992948 | 0.017673998 |
| 1.39E-05    | 0.053364126 | 0.147167875 | 0.1226198   |
| 0.274052463 | 0.180353189 | 0.131138529 | 0.062737321 |
| 0.145684593 | 0.0006942   | 0.123888893 | 0.400919024 |
| 0.004027036 | 0.29681132  | 0.002851414 | 0.015487652 |
| 0.268596389 | 0.356068018 | 0.156610343 | 0.008599258 |
| 0.000482093 | 0.008148829 | 0.006551165 | 0.32999496  |
| 0.118002104 | 0.166032339 | 0.259706608 | 0.043162339 |
| 0.344955887 | 0.009885019 | 0.072249893 | 0.302543804 |
| 0.318265005 | 0.000231079 | 0.009268698 | 0.073914408 |
| 0.075194214 | 0.050538834 | 0.086664062 | 0.004426828 |
| 0.001988304 | 0.000472322 | 0.335251345 | 0.010536435 |
| 0.024654757 | 0.058580154 | 0.022616783 | 0.338454283 |
| 0.060529393 | 0.280664553 | 0.051352    | 0.082569578 |
| 0.332866945 | 0.11869852  | 0.236154583 | 0.301634015 |
| 0.183839896 | 0.018828993 | 0.013610532 | 0.365532665 |
| 0.233481573 | 0.007877006 | 0.0052447   | 0.124715677 |
| 0.359792755 | 0.352340139 | 0.38781671  | 0.027714046 |
| 0.119755939 | 0.044115476 | 0.042581853 | 0.226179105 |
| 0.09370279  | 0.085002817 | 0.015836323 | 0.163692256 |
| 0.258706768 | 0.005546461 | 0.004570501 | 0.254482642 |
| 0.090001486 | 0.052449599 | 0.259203268 | 0.321656404 |
| 0.247251899 | 0.013238615 | 0.058143    | 0.08949948  |
| 0.06666644  | 0.075402068 | 0.158694734 | 0.048361426 |
| 0.100475615 | 0.050856725 | 0.004757124 | 0.356446247 |
| 0.019629912 | 0.091402547 | 0.040484235 | 0.010766537 |
| 0.153968245 | 0.051455886 | 0.301489795 | 0.14496363  |

|             |             |             |             |
|-------------|-------------|-------------|-------------|
| 0.190046102 | 0.005940854 | 0.02214884  | 0.100540664 |
| 0.030893916 | 0.293837559 | 0.373934304 | 0.018718073 |
| 0.057076703 | 0.075548533 | 0.022497539 | 0.152054282 |
| 0.20073275  | 0.029241496 | 0.026234939 | 9.22E-06    |
| 0.021230003 | 0.096324236 | 0.129636775 | 0.001457689 |
| 0.065043231 | 0.005850606 | 0.006382169 | 0.337994787 |
| 0.047186537 | 0.412262362 | 0.000580643 | 0.017525668 |
| 0.035947821 | 0.309471569 | 0.090474366 | 0.018582948 |
| 0.355424677 | 0.037624256 | 0.335614058 | 0.199756321 |
| 0.090657667 | 0.173323901 | 0.032729335 | 0.034593358 |
| 0.252298245 | 0.391112139 | 0.350870534 | 0.37612861  |
| 0.057265381 | 0.154334106 | 0.047725855 | 0.0927058   |
| 0.114098128 | 0.140152051 | 0.004576727 | 0.369629516 |
| 5.25E-06    | 0.122070743 | 0.236197183 | 0.02338175  |
| 0.370299189 | 0.116338999 | 0.003412262 | 0.027072195 |
| 0.381605035 | 0.364904475 | 0.235684521 | 0.338295461 |
| 0.024723179 | 0.000143127 | 0.298549515 | 0.195536988 |
| 0.39719643  | 0.128452246 | 1           | 0.010279039 |
| 0.371299684 | 0.125630614 | 0.17662466  | 0.130011192 |
| 0.290339566 | 0.182501105 | 0.049831123 | 0.137965942 |
| 0.000731697 | 0.037073168 | 0.179836311 | 0.040014169 |
| 0.061577694 | 0.015419099 | 0.37112441  | 0.138789866 |
| 0.149464242 | 0.028346914 | 0.132591146 | 0.013966697 |
| 0.045251603 | 0.354414566 | 0.048852377 | 0.273109134 |
| 0.392398814 | 0.120644467 | 0.394492793 | 0.365108484 |
| 0.064363984 | 0.232514156 | 0.338435848 | 0.291302605 |
| 8.63E-06    | 0.373453104 | 0.375192279 | 0.161056051 |
| 0.335482014 | 0.091201233 | 0.043451765 | 0.21400374  |
| 5.87E-05    | 0.024297742 | 0.086519694 | 0.308303394 |
| 0.416437712 | 0.002511171 | 0.075853313 | 0.330641317 |
| 0.333170225 | 0.009483703 | 0.366470653 | 0.108146552 |
| 0.36900807  | 0.19811317  | 0.042588442 | 0.370144278 |
| 0.070267866 | 0.062963391 | 0.016017545 | 0.257662673 |
| 0.181180607 | 0.006873231 | 0.029648587 | 0.367008318 |
| 0.242413671 | 0.238652921 | 0.074539795 | 0.00060432  |
| 0.248119164 | 0.059210298 | 0.333473105 | 0.012049782 |
| 0.224061506 | 0.182465264 | 0.339476561 | 0.364979705 |
| 0.200122931 | 0.247710428 | 0.192503809 | 0.285705113 |
| 0.078001153 | 0.293694498 | 0.303926845 | 0.006835073 |
| 0.140978404 | 0.39944758  | 0.189201511 | 0.056393807 |
| 0.128903831 | 0.102799706 | 0.058332367 | 0.064279048 |
| 0.345080667 | 0.382060956 | 0.003868031 | 0.010650198 |
| 0.257918589 | 0.040209686 | 0.024460435 | 0.0911204   |
| 0.090422996 | 0.027063324 | 0.015510837 | 0.1578198   |
| 0.321128482 | 0.14495122  | 0.30793177  | 0.036757352 |
| 0.40179519  | 0.002555463 | 0.273483055 | 0.045824935 |
| 0.063738636 | 0.170755688 | 0.283473934 | 0.008847787 |
| 0.001451199 | 0.005713202 | 0.262763211 | 0.236864228 |
| 0.007463484 | 0.032835787 | 0.077394214 | 0.190981836 |
| 0.386665829 | 0.065319531 | 0.090785927 | 0.07443014  |
| 0.248667922 | 0.046273292 | 0.302100584 | 0.069183156 |
| 0.17778536  | 0.086392949 | 0.292792842 | 0.000888438 |
| 0.242167555 | 0.025939322 | 0.030630914 | 0.211146054 |
| 0.335563028 | 0.017715304 | 0.251629592 | 0.012334206 |

|             |             |             |             |          |
|-------------|-------------|-------------|-------------|----------|
| 0.037954595 | 0.000132625 | 0.133107678 | 0.267878575 |          |
| 0.112247753 | 0.040756781 | 0.083156256 | 0.085809506 |          |
| 0.36328128  | 0.109076371 | 0.193455499 | 0.091046779 |          |
| 0.107041489 | 0.082413452 | 0.031007552 | 0.001433066 |          |
| 0.15478832  | 0.185125287 | 0.162145212 | 0.092574356 |          |
| 0.014328871 | 0.307621113 | 0.184699059 | 0.258070744 |          |
| 0.410773308 | 0.032650329 | 0.393837029 | 0.045674318 |          |
| 0.354320645 | 0.044725246 | 0.084482941 | 0.040463078 |          |
| 0.083846006 | 0.013868314 | 0.017469717 | 0.007681151 |          |
| 0.417281612 | 0.055237923 | 0.213245164 | 0.024488685 |          |
| 0.005298486 | 0.096258652 | 0.260513689 | 0.313148889 |          |
| 0.185719579 | 0.204006608 | 0.075969545 | 0.228457955 |          |
| 0.027520467 | 0.036296307 | 0.037925304 | 0.014971701 |          |
| 0.074572972 | 0.034048467 | 0.213994111 | 0.270984508 |          |
| 0.393181515 | 0.028599344 | 0.008418564 | 0.008791092 |          |
| 0.041065839 | 0.211143785 | 0.139567246 | 0.17667133  |          |
| 0.22735321  | 0.037738139 | 1.11E-05    | 0.015509623 |          |
| 0.167000394 | 0.07202577  |             |             |          |
| MAPKAPK2    | 0.05174574  | 0.085352008 | 0.001996551 | 1.58E-05 |
| 0.001485322 | 0.023129503 | 0.016736498 | 0.050210595 |          |
| 0.003365513 | 0.00140719  | 0.043844194 | 0.000160224 |          |
| 0.127895955 | 0.000830359 | 0.005250397 | 0.108129844 |          |
| 0.111165421 | 0.035720405 | 0.142738508 | 0.059364427 |          |
| 0.000308307 | 0.080579069 | 0.023058196 | 0.022434594 |          |
| 0.000139878 | 0.004040846 | 7.43E-05    | 0.05731709  |          |
| 0.124104579 | 0.029757862 | 0.003320095 | 0.097584891 |          |
| 0.085449114 | 0.007974521 | 0.003467051 | 0.00298586  |          |
| 0.087881544 | 0.004544163 | 0.076925242 | 0.130336804 |          |
| 0.006816376 | 0.084698981 | 0.00036743  | 2.47E-06    |          |
| 0.004838244 | 0.041819534 | 0.052437922 | 0.075791337 |          |
| 0.019211615 | 0.032605819 | 0.004962239 | 0.000892854 |          |
| 0.054646236 | 0.131666278 | 0.002761785 | 0.066480531 |          |
| 9.36E-07    | 0.077208196 | 0.042855134 | 0.006468832 |          |
| 0.048161588 | 0.035189404 | 0.054778145 | 0.029249355 |          |
| 0.070398821 | 0.106637472 | 0.000194448 | 0.005540299 |          |
| 0.051938027 | 0.057963504 | 0.022373645 | 0.082055123 |          |
| 0.003687363 | 0.006300421 | 0.044337375 | 0.052123752 |          |
| 0.106185253 | 0.065199173 | 0.018534756 | 1.80E-05    |          |
| 0.00732423  | 0.005260822 | 0.104630386 | 0.052894337 |          |
| 0.053668045 | 0.06964543  | 0.006163176 | 0.024712659 |          |
| 0.000526148 | 0.055373935 | 0.106866846 | 2.96E-05    |          |
| 0.125332893 | 5.95E-05    | 0.018726146 | 0.095139744 |          |
| 0.113812629 | 0.059328686 | 0.001277404 | 0.000478794 |          |
| 0.024929218 | 0.010730554 | 0.127500679 | 0.057677647 |          |
| 0.037162227 | 0.066540458 | 0.109091484 | 0.110899718 |          |
| 0.003784823 | 0.025726569 | 0.069467228 | 0.088454734 |          |
| 0.001980434 | 0.023022113 | 0.025540114 | 0.004037728 |          |
| 0.000237453 | 0.02617872  | 0.000132181 | 2.64E-05    |          |
| 0.005759709 | 0.103390981 | 0.014577673 | 0.002333662 |          |
| 0.012176704 | 0.000184752 | 0.03137727  | 0.048225749 |          |
| 0.148200263 | 0.003053654 | 0.013025606 | 0.056301521 |          |
| 0.019274549 | 0.01691239  | 0.060237745 | 0.015999671 |          |
| 0.029962525 | 0.012616178 | 0.08327969  | 0.109462082 |          |
| 0.001592142 | 0.001891367 | 0.037053864 | 0.100549778 |          |

|             |             |             |             |
|-------------|-------------|-------------|-------------|
| 0.104641061 | 0.108067917 | 0.019850982 | 0.008560875 |
| 0.0465109   | 0.004496081 | 0.029275978 | 0.035817575 |
| 0.121309684 | 0.011173589 | 0.085134768 | 0.067644338 |
| 0.000213158 | 0.004669636 | 0.113257359 | 9.57E-05    |
| 0.004666581 | 0.077994118 | 0.072596612 | 0.078704694 |
| 4.43E-05    | 0.00372384  | 0.01554303  | 0.042863567 |
| 0.012850156 | 0.070154582 | 0.002608033 | 0.048915132 |
| 0.00421883  | 0.002951726 | 0.101206178 | 0.015147779 |
| 0.071561402 | 0.004157428 | 0.000405691 | 0.111000614 |
| 0.058686618 | 0.06400374  | 0.067096843 | 0.070475926 |
| 8.22E-07    | 0.001215203 | 0.056463154 | 0.003955606 |
| 0.162253133 | 0.077978575 | 0.017805407 | 0.059375759 |
| 0.039061136 | 0.026084623 | 0.013516527 | 0.157058972 |
| 0.001415892 | 0.001363787 | 3.55E-06    | 0.003307165 |
| 0.00979177  | 0.054052645 | 0.004583906 | 0.004121341 |
| 0.002114477 | 0.007921592 | 0.071005875 | 0.021608938 |
| 0.074107371 | 0.002858889 | 0.109207374 | 0.013382869 |
| 0.047174022 | 0.006999851 | 0.005360216 | 0.047875664 |
| 0.005998676 | 0.112279557 | 0.069580507 | 0.012219103 |
| 0.037251125 | 0.029984765 | 0.034355943 | 0.049422226 |
| 0.079091078 | 0.066119308 | 0.093069971 | 0.015696187 |
| 0.172099442 | 0.005377426 | 0.03837471  | 0.070799403 |
| 0.097474715 | 0.004957703 | 0.10777011  | 2.78E-05    |
| 0.060377983 | 0.027241711 | 0.018066239 | 0.072127751 |
| 0.021035177 | 0.006658178 | 0.045746785 | 0.13888     |
| 0.117897838 | 0.157691339 | 0.087983684 | 0.007559721 |
| 0.001213514 | 0.130163681 | 0.06044264  | 0.117543315 |
| 0.037227363 | 0.010279039 | 1           | 0.097616932 |
| 0.147675878 | 0.033805352 | 0.033890281 | 0.051196021 |
| 0.039259829 | 0.061258762 | 0.158552616 | 0.000220717 |
| 0.008112886 | 0.035728288 | 0.000478151 | 0.005163767 |
| 0.001038757 | 0.064918968 | 0.074404619 | 0.011114021 |
| 0.004595622 | 0.005359128 | 0.004251069 | 0.026537968 |
| 0.08872835  | 0.003201    | 0.138881186 | 0.114770505 |
| 0.088143448 | 0.070063417 | 0.127158166 | 0.036574408 |
| 0.059142302 | 0.075752378 | 0.165112522 | 9.52E-05    |
| 0.092637228 | 0.087354823 | 0.073668551 | 0.068451363 |
| 0.032165304 | 0.120983145 | 0.031113001 | 0.000470661 |
| 0.02026195  | 0.002529859 | 0.122188901 | 0.077801963 |
| 0.000541034 | 0.001941767 | 0.079409255 | 0.072940381 |
| 0.004711408 | 0.109157009 | 0.015615311 | 0.064129496 |
| 0.048000521 | 0.006820193 | 0.082119204 | 0.003303365 |
| 0.065149322 | 8.53E-05    | 0.032322848 | 0.05838326  |
| 0.007203723 | 0.000384865 | 0.129551377 | 0.073996359 |
| 0.054967372 | 0.041035006 | 3.16E-06    | 0.121663213 |
| 0.000555157 | 0.043947258 | 0.00539932  | 0.101601301 |
| 0.059436166 | 0.089831959 | 0.087120665 | 0.058435612 |
| 0.060434321 | 0.054629068 | 0.063475268 | 0.000226367 |
| 0.067388276 | 0.080483046 | 0.000300453 | 0.058635142 |
| 0.086539064 | 0.014506527 | 0.015738683 | 0.078180079 |
| 0.000121142 | 0.024719352 | 0.085515691 | 0.070407633 |
| 0.0698082   | 0.002191257 | 0.034546222 | 0.053073738 |
| 0.026244876 | 0.010203518 | 0.08477753  | 0.046903907 |
| 0.002077331 | 0.072235038 | 0.071299442 | 0.075103531 |

|             |             |             |             |
|-------------|-------------|-------------|-------------|
| 0.037362141 | 0.065483166 | 0.000710056 | 0.107592632 |
| 0.007966121 | 0.158997625 | 0.009495334 | 0.050906528 |
| 0.03305354  | 0.106707905 | 0.005027286 | 1.29E-05    |
| 0.002214354 | 0.046380252 | 0.06906616  | 0.006466814 |
| 0.034022721 | 0.012805556 | 0.020682438 | 0.100231661 |
| 0.00987381  | 0.038432943 | 0.067716613 | 0.074357056 |
| 0.000172844 | 0.104552583 | 0.044457515 | 0.07626539  |
| 0.010497471 | 0.082176336 | 3.94E-05    | 0.050971251 |
| 0.001912684 | 0.107589909 | 0.013937522 | 0.122766447 |
| 0.00782418  | 0.045328257 | 0.01516244  | 0.000456494 |
| 0.002416088 | 0.101374074 | 0.022206597 | 0.040970103 |
| 0.047497337 | 0.063676474 | 0.002581461 | 0.108077618 |
| 0.035499166 | 0.062126312 | 0.080544912 | 0.012733923 |
| 0.000190193 | 0.002274704 | 0.001040282 | 0.082682726 |
| 0.088889764 | 0.083357459 | 0.035568113 | 0.054056787 |
| 0.05262024  | 0.062407753 | 0.02023778  | 0.073285727 |
| 0.000258567 | 0.097467689 | 0.085017395 | 0.098802379 |
| 0.008515026 | 0.043407492 | 0.01616526  | 0.011988449 |
| 0.00236421  | 0.0125083   | 0.02359544  | 0.077719234 |
| 0.040974694 | 0.020199677 | 0.008996182 | 0.000792412 |
| 0.01717049  | 0.130064718 | 0.063434987 | 0.030559526 |
| 0.046848372 | 0.039275604 | 0.072450257 | 0.005775619 |
| 0.034525031 | 6.18E-05    | 2.12E-05    | 0.000881918 |
| 0.144916497 | 0.120822349 | 0.120329559 | 0.026999307 |
| 0.006565049 | 0.022757318 | 0.044529583 | 0.122134664 |
| 0.021327502 | 0.001139394 | 0.077972613 | 0.027507258 |
| 3.83E-05    | 0.034282789 | 0.06166897  | 0.003980339 |
| MAPRE2      | 0.354618118 | 0.487853229 | 0.087957222 |
| 0.041636399 | 0.149798985 | 0.264532279 | 0.258212352 |
| 0.380931581 | 0.12455646  | 0.16493649  | 0.356433114 |
| 0.002058624 | 0.399012704 | 0.018746023 | 0.092154514 |
| 0.508932032 | 0.522410832 | 0.37657959  | 0.510680434 |
| 0.343122834 | 0.168294668 | 0.386363943 | 0.409114158 |
| 0.287400516 | 0.002395863 | 0.15338458  | 0.064268045 |
| 0.388856712 | 0.502122204 | 0.232584714 | 0.307526076 |
| 0.447194278 | 0.454489514 | 0.422485323 | 0.366416123 |
| 0.270236328 | 0.454831333 | 0.146222236 | 0.448974529 |
| 0.395159463 | 0.265228864 | 0.458161853 | 0.01747303  |
| 0.005027751 | 0.129042026 | 0.349558394 | 0.409304004 |
| 0.332158768 | 0.248079691 | 0.201653257 | 0.206258135 |
| 0.182233165 | 0.381957127 | 0.406343277 | 0.18754878  |
| 0.428942348 | 0.006492549 | 0.447907414 | 0.2696457   |
| 0.08293315  | 0.338571864 | 0.36070034  | 0.423929611 |
| 0.280379586 | 0.440820793 | 0.512743225 | 0.045647588 |
| 0.091399459 | 0.440695931 | 0.418174    | 0.44961376  |
| 0.466540011 | 0.380909044 | 0.328075994 | 0.3906934   |
| 0.452156389 | 0.410640837 | 0.31680122  | 0.217442055 |
| 0.001246496 | 0.180626336 | 0.364645384 | 0.340897633 |
| 0.421825652 | 0.385292127 | 0.400701095 | 0.252477963 |
| 0.452518056 | 0.025881729 | 0.413312151 | 0.526249158 |
| 0.030020689 | 0.416416502 | 0.015448894 | 0.194369921 |
| 0.447180612 | 0.467152923 | 0.421635211 | 0.089565178 |
| 0.019846984 | 0.153640013 | 0.161367239 | 0.405020007 |
| 0.422523701 | 0.477633837 | 0.421825464 | 0.160828955 |

|             |             |             |             |
|-------------|-------------|-------------|-------------|
| 0.356309269 | 0.187479287 | 0.386324606 | 0.454696442 |
| 0.472980268 | 0.012420051 | 0.18812701  | 0.258708806 |
| 0.353350922 | 0.158517843 | 0.269964297 | 0.054211487 |
| 0.017850014 | 0.027361131 | 0.458319655 | 0.188841479 |
| 0.124544234 | 0.238373578 | 0.114874942 | 0.472242078 |
| 0.370013923 | 0.426558077 | 0.153882968 | 0.290874571 |
| 0.451917362 | 0.290540587 | 0.454253119 | 0.467566547 |
| 0.41414686  | 0.28089941  | 0.179067128 | 0.472487514 |
| 0.430151936 | 0.089964487 | 0.101510604 | 0.356132997 |
| 0.377193473 | 0.490392929 | 0.529827944 | 0.339978231 |
| 0.31102698  | 0.276304243 | 0.32930391  | 0.427345306 |
| 0.280947199 | 0.372526327 | 0.112353783 | 0.385871176 |
| 0.422179919 | 0.049285762 | 0.082220289 | 0.449560054 |
| 0.075310742 | 0.273743962 | 0.448423871 | 0.482364844 |
| 0.470195036 | 0.052761282 | 0.269847373 | 0.292162656 |
| 0.322060109 | 0.289204151 | 0.421698742 | 0.246077936 |
| 0.344570329 | 0.340917451 | 0.064364932 | 0.3679738   |
| 0.152068675 | 0.361251782 | 0.305391339 | 0.075089354 |
| 0.415640987 | 0.37608689  | 0.474273403 | 0.436273155 |
| 0.408678458 | 0.00670172  | 0.167110202 | 0.375524635 |
| 0.307939737 | 0.392208126 | 0.487918727 | 0.1390089   |
| 0.285778103 | 0.330435806 | 0.17294183  | 0.373622037 |
| 0.400137381 | 0.245903802 | 0.220365262 | 0.000903699 |
| 0.170476965 | 0.387202386 | 0.43458586  | 0.064492651 |
| 0.2811793   | 0.131263754 | 0.136406294 | 0.474246979 |
| 0.23393932  | 0.481759185 | 0.035071888 | 0.176937905 |
| 0.301308485 | 0.449414668 | 0.425887244 | 0.283311418 |
| 0.476277456 | 0.350338456 | 0.429803071 | 0.405995646 |
| 0.316071173 | 0.37752628  | 0.187181511 | 0.295504922 |
| 0.467435432 | 0.481067417 | 0.462997985 | 0.481158922 |
| 0.290271408 | 0.390618563 | 0.345637614 | 0.30859302  |
| 0.420394259 | 0.437488621 | 0.105942561 | 0.497029659 |
| 0.000900778 | 0.382806465 | 0.464136978 | 0.196552103 |
| 0.478278911 | 0.275781402 | 0.085971872 | 0.282539329 |
| 0.519445591 | 0.498006521 | 0.422387573 | 0.4333087   |
| 0.255556607 | 0.014396039 | 0.468286572 | 0.423142141 |
| 0.507292774 | 0.423499212 | 0.371299684 | 0.097616932 |
| 1           | 0.362523321 | 0.430000693 | 0.428422332 |
| 0.462585804 | 0.421475848 | 0.279058341 | 0.360570767 |
| 0.018097142 | 0.276719207 | 0.433581641 | 0.210124675 |
| 0.345491829 | 0.196778587 | 0.476670585 | 0.355832048 |
| 0.428291136 | 0.335349322 | 0.377605915 | 0.105140535 |
| 0.206064408 | 0.496416954 | 0.059236809 | 0.448478516 |
| 0.52718205  | 0.393374048 | 0.485351982 | 0.518748602 |
| 0.34271608  | 0.411201734 | 0.475803128 | 0.427939655 |
| 0.001394606 | 0.423081375 | 0.397654046 | 0.369433228 |
| 0.446591347 | 0.312824807 | 0.261457596 | 0.437739197 |
| 0.001749403 | 0.179502265 | 0.282721039 | 0.475559824 |
| 0.485453172 | 0.036568834 | 0.060370984 | 0.487087728 |
| 0.411140874 | 0.06048365  | 0.521988241 | 0.360066856 |
| 0.480776733 | 0.463818887 | 0.198999423 | 0.410428956 |
| 0.240236072 | 0.401640817 | 0.040394095 | 0.467758771 |
| 0.432674219 | 0.092108431 | 0.102034874 | 0.515217195 |
| 0.452775061 | 0.419278157 | 0.285061029 | 0.011233374 |



|             |             |             |             |
|-------------|-------------|-------------|-------------|
| 0.373173312 | 0.248751037 | 0.481672949 | 0.149618869 |
| 0.448718064 | 0.386700491 | 0.471438418 | 0.443096818 |
| 0.461393928 | 0.433365083 | 0.399113322 | 0.470954467 |
| 0.151732925 | 0.417184106 | 0.424323402 | 0.078632514 |
| 0.38405608  | 0.480269024 | 0.427566664 | 0.206025783 |
| 0.39887572  | 0.11867622  | 0.232588612 | 0.342223486 |
| 0.47021575  | 0.471437288 | 0.070762802 | 0.199366654 |
| 0.430271985 | 0.331896007 | 0.134034914 | 0.382352736 |
| 0.303332971 | 0.188850082 | 0.155544052 | 0.393146882 |
| 0.458083285 | 0.323609843 | 0.456013468 | 0.184911716 |
| 0.46223941  | 0.067587639 | 0.443607336 | 0.298582031 |
| 0.312811572 | 0.405647744 | 0.382347018 | 0.143399334 |
| 0.027538835 | 0.145005781 | 0.420655809 | 0.422921835 |
| 0.096758396 | 0.221891909 | 0.292169603 | 0.384863209 |
| 0.500961484 | 0.455873199 | 0.307596033 | 0.378209298 |
| 0.416676796 | 0.12185117  | 0.472021243 | 0.361731214 |
| 0.423252574 | 0.366459659 | 0.46922277  | 0.010288546 |
| 0.455482993 | 0.196322741 | 0.226814758 | 0.398277305 |
| 0.448531434 | 0.162446756 | 0.413556598 | 0.188921881 |
| 0.204231978 | 0.005603855 | 0.385942612 | 0.395772347 |
| 0.307120599 | 0.333009771 | 0.396105924 | 0.190518827 |
| 0.52016923  | 0.41499786  | 0.42491808  | 0.307810058 |
| 0.414732138 | 0.030978123 | 0.177967906 | 0.045681667 |
| 0.410408576 | 0.407963358 | 0.420707701 | 0.388675304 |
| 0.224566358 | 0.475522552 | 0.415756716 | 0.44793272  |
| 0.480413447 | 0.194150921 | 0.519132977 | 0.331005877 |
| 0.380759099 | 0.406587757 | 0.288533407 | 0.357373302 |
| 0.23478272  | 0.143617411 | 0.144840829 | 0.182726027 |
| 0.478615205 | 0.340499077 | 0.423375418 | 0.335436203 |
| 0.064155434 | 0.422012897 | 0.432441278 | 0.43757692  |
| 0.456275407 | 0.389030491 | 0.414197924 | 0.407424707 |
| 0.311517482 | 0.31136166  | 0.073918344 | 0.040152052 |
| 0.27856596  | 0.220144682 | 0.418321702 | 0.45885005  |
| 0.507469623 | 0.299774206 | 0.118274911 | 0.16398916  |
| 0.149998978 | 0.380230402 | 0.304726584 | 0.210220944 |
| 0.458576504 | 0.315313797 | 0.001079672 | 0.254183977 |
| 0.402620718 | 0.417867923 |             |             |
| MDM1        | 0.195820483 | 0.342783703 | 0.028317776 |
| 0.005421353 | 0.034824452 | 0.084380386 | 0.071824857 |
| 0.210937632 | 0.049940068 | 0.036847983 | 0.153015816 |
| 0.003590107 | 0.348039173 | 0.014791236 | 0.05572324  |
| 0.414516687 | 0.418487868 | 0.121279276 | 0.440092528 |
| 0.193963867 | 0.036139156 | 0.216852658 | 0.136520245 |
| 0.092528681 | 0.003031114 | 0.034628568 | 0.009246966 |
| 0.233101211 | 0.432813845 | 0.093827335 | 0.093363802 |
| 0.37767621  | 0.353055723 | 0.134870761 | 0.110919604 |
| 0.089994614 | 0.312328805 | 0.081688001 | 0.285414971 |
| 0.389968407 | 0.066627086 | 0.342047591 | 0.009986149 |
| 0.000556415 | 0.033526601 | 0.205798715 | 0.194872586 |
| 0.198194124 | 0.078720553 | 0.082807523 | 0.048044862 |
| 0.089678854 | 0.180293067 | 0.323479341 | 0.088191422 |
| 0.239801489 | 0.000663545 | 0.287174263 | 0.192352164 |
| 0.030253268 | 0.154883956 | 0.185633118 | 0.209831115 |
| 0.095245958 | 0.261687814 | 0.388722582 | 0.009753627 |

|             |             |             |             |
|-------------|-------------|-------------|-------------|
| 0.026400782 | 0.214048979 | 0.292472964 | 0.147728762 |
| 0.321034833 | 0.12685243  | 0.098341794 | 0.187072495 |
| 0.249294596 | 0.353278073 | 0.134770912 | 0.09580946  |
| 0.000889834 | 0.044642128 | 0.094737443 | 0.27147794  |
| 0.220871993 | 0.18433944  | 0.215931234 | 0.064984556 |
| 0.179537846 | 0.011574385 | 0.174707348 | 0.40734261  |
| 0.006508205 | 0.331598901 | 0.004545556 | 0.091899663 |
| 0.33348964  | 0.419036904 | 0.233437032 | 0.021275345 |
| 0.010962102 | 0.083470867 | 0.143359365 | 0.402183042 |
| 0.197762373 | 0.188360613 | 0.231206427 | 0.159197318 |
| 0.344867879 | 0.088066461 | 0.14602471  | 0.289688057 |
| 0.360270753 | 0.012522432 | 0.114762225 | 0.082842229 |
| 0.139475629 | 0.036187216 | 0.083929358 | 0.024573319 |
| 0.003413049 | 0.056870771 | 0.384659775 | 0.087237885 |
| 0.026971672 | 0.067684981 | 0.026532489 | 0.179593305 |
| 0.212446834 | 0.419068907 | 0.037152479 | 0.08312357  |
| 0.251728047 | 0.082650598 | 0.138818048 | 0.266482948 |
| 0.137376758 | 0.16251961  | 0.071779306 | 0.294191403 |
| 0.304890707 | 0.027492257 | 0.03505759  | 0.141954391 |
| 0.318258132 | 0.395644236 | 0.405574589 | 0.178395251 |
| 0.079781203 | 0.125547647 | 0.105468708 | 0.150986727 |
| 0.094109346 | 0.222429354 | 0.118568708 | 0.196364351 |
| 0.246530364 | 0.023777836 | 0.028359752 | 0.336599921 |
| 0.011573928 | 0.083935841 | 0.30028045  | 0.272762878 |
| 0.207488114 | 0.007190597 | 0.064829664 | 0.085751051 |
| 0.139731373 | 0.083770891 | 0.216847607 | 0.058651339 |
| 0.150280803 | 0.101868681 | 0.018044429 | 0.330982005 |
| 0.052818684 | 0.1701286   | 0.147012237 | 0.033573469 |
| 0.258974169 | 0.222070116 | 0.288156336 | 0.20671501  |
| 0.26572706  | 0.000485737 | 0.035897557 | 0.198046074 |
| 0.106911085 | 0.400272973 | 0.326368754 | 0.049962704 |
| 0.132759722 | 0.186575433 | 0.069665354 | 0.110538344 |
| 0.372228714 | 0.066152919 | 0.061479282 | 0.000349378 |
| 0.054358798 | 0.141602434 | 0.203851589 | 0.047459267 |
| 0.070392485 | 0.054800636 | 0.134852747 | 0.314442548 |
| 0.079201094 | 0.284516247 | 0.044712648 | 0.208068723 |
| 0.107740097 | 0.201200475 | 0.1319649   | 0.149371266 |
| 0.23313864  | 0.109152542 | 0.404287519 | 0.22928844  |
| 0.101425618 | 0.164965223 | 0.171798079 | 0.140205429 |
| 0.202417006 | 0.324749269 | 0.311727706 | 0.30314021  |
| 0.094364779 | 0.302085514 | 0.178525826 | 0.120681362 |
| 0.204802835 | 0.217251563 | 0.043395445 | 0.36642852  |
| 0.000753892 | 0.155646707 | 0.158194536 | 0.180086962 |
| 0.315919781 | 0.07833841  | 0.036624277 | 0.161184475 |
| 0.441641693 | 0.375796879 | 0.383155062 | 0.362350463 |
| 0.162542153 | 0.014962397 | 0.393018086 | 0.215815788 |
| 0.42563088  | 0.161624592 | 0.125630614 | 0.147675878 |
| 0.362523321 | 1           | 0.183415816 | 0.190528173 |
| 0.183335915 | 0.186240724 | 0.131313717 | 0.296637261 |
| 0.014972717 | 0.088144378 | 0.199317923 | 0.053470989 |
| 0.095984663 | 0.073215582 | 0.281298984 | 0.168646145 |
| 0.139852059 | 0.144510197 | 0.106789633 | 0.027282592 |
| 0.070862506 | 0.355541963 | 0.034488171 | 0.386406724 |
| 0.414665873 | 0.185075092 | 0.322501657 | 0.426019422 |

|             |             |             |             |
|-------------|-------------|-------------|-------------|
| 0.148759078 | 0.203439584 | 0.323922073 | 0.423220051 |
| 0.002235784 | 0.362137659 | 0.292589267 | 0.19980983  |
| 0.334916345 | 0.111207028 | 0.234329811 | 0.186278268 |
| 0.00200004  | 0.06816553  | 0.098266556 | 0.367935941 |
| 0.325141726 | 0.010368449 | 0.039341634 | 0.281111046 |
| 0.25379977  | 0.052822743 | 0.3999667   | 0.110774535 |
| 0.283919405 | 0.177222703 | 0.05166093  | 0.318294845 |
| 0.095887864 | 0.24369496  | 0.007859554 | 0.167259279 |
| 0.197574328 | 0.116341639 | 0.017012527 | 0.423013241 |
| 0.300880585 | 0.180348911 | 0.106663114 | 0.001706459 |
| 0.383171908 | 0.06025209  | 0.239900974 | 0.072490068 |
| 0.297007439 | 0.186796842 | 0.2989604   | 0.321644057 |
| 0.19389989  | 0.229400382 | 0.204375814 | 0.285261798 |
| 0.041387041 | 0.315657841 | 0.34751459  | 0.020001796 |
| 0.200925046 | 0.34891073  | 0.134708961 | 0.059756664 |
| 0.208301861 | 0.020874131 | 0.077223235 | 0.217607929 |
| 0.27517434  | 0.330678611 | 0.021008837 | 0.126905405 |
| 0.220615601 | 0.135593163 | 0.038839137 | 0.185579947 |
| 0.125431248 | 0.10000162  | 0.191680217 | 0.197355473 |
| 0.293552947 | 0.121251563 | 0.32198463  | 0.03705995  |
| 0.369917407 | 0.036534747 | 0.364731319 | 0.1073601   |
| 0.1399368   | 0.183948349 | 0.373223109 | 0.126459146 |
| 0.006174525 | 0.073698964 | 0.198478223 | 0.242113419 |
| 0.03211526  | 0.094852053 | 0.083427807 | 0.111292205 |
| 0.3992505   | 0.167925146 | 0.110256221 | 0.190595788 |
| 0.243125676 | 0.022521017 | 0.352929123 | 0.165033931 |
| 0.267616365 | 0.108203597 | 0.286103075 | 0.00401256  |
| 0.223961755 | 0.045587295 | 0.215702796 | 0.110498213 |
| 0.419695101 | 0.04997917  | 0.166400736 | 0.085066879 |
| 0.069869585 | 0.006990526 | 0.222962425 | 0.154495078 |
| 0.127662559 | 0.237203341 | 0.191594504 | 0.087026194 |
| 0.387616334 | 0.171456757 | 0.271141653 | 0.204516715 |
| 0.128494536 | 0.010756908 | 0.040560627 | 0.020077936 |
| 0.257435916 | 0.22807511  | 0.240470032 | 0.188800632 |
| 0.202680116 | 0.193478333 | 0.186746086 | 0.13966269  |
| 0.324350521 | 0.064270385 | 0.400804173 | 0.19881587  |
| 0.35208469  | 0.159275113 | 0.105401834 | 0.163418879 |
| 0.062150476 | 0.081620937 | 0.048909076 | 0.1328789   |
| 0.353343629 | 0.18028605  | 0.128507299 | 0.161777837 |
| 0.015881553 | 0.13967507  | 0.330864278 | 0.274084592 |
| 0.163102692 | 0.240456108 | 0.216238324 | 0.227248994 |
| 0.1605546   | 0.166438013 | 0.011258367 | 0.004911458 |
| 0.073703643 | 0.065615801 | 0.369736354 | 0.347556824 |
| 0.409145798 | 0.209029315 | 0.039656139 | 0.089216448 |
| 0.149841439 | 0.351803777 | 0.086385289 | 0.067354089 |
| 0.197733755 | 0.1908492   | 0.000779304 | 0.165457647 |
| 0.202541649 | 0.152234024 |             |             |
| METTL1      | 0.253783625 | 0.475803431 | 0.083995703 |
| 0.0350289   | 0.092370583 | 0.226317554 | 0.202625734 |
| 0.232000424 | 0.133747524 | 0.187211309 | 0.290694096 |
| 0.002999377 | 0.280384058 | 0.024361808 | 0.062598214 |
| 0.467894084 | 0.467955021 | 0.241144779 | 0.444849934 |
| 0.235687022 | 0.184085896 | 0.276716377 | 0.306775463 |
| 0.238993524 | 0.00383781  | 0.133692549 | 0.097806062 |

|             |             |             |             |
|-------------|-------------|-------------|-------------|
| 0.210184929 | 0.434990816 | 0.19199285  | 0.269914565 |
| 0.425739177 | 0.384247158 | 0.298249571 | 0.198185072 |
| 0.149816016 | 0.445350215 | 0.045252033 | 0.296200167 |
| 0.326637224 | 0.208272394 | 0.381269342 | 0.024671977 |
| 0.004412086 | 0.117540227 | 0.19460688  | 0.290913837 |
| 0.206944201 | 0.217060034 | 0.160713051 | 0.181246353 |
| 0.093092994 | 0.312238671 | 0.324040194 | 0.08784153  |
| 0.393826118 | 0.010673562 | 0.44043164  | 0.187377016 |
| 0.082811937 | 0.244586021 | 0.255126488 | 0.300101031 |
| 0.221431954 | 0.418482828 | 0.471438049 | 0.054229345 |
| 0.098762224 | 0.272722254 | 0.340932989 | 0.301981328 |
| 0.431557416 | 0.275438399 | 0.257630128 | 0.189292354 |
| 0.318811739 | 0.321419785 | 0.22593186  | 0.149581343 |
| 0.002719368 | 0.158484319 | 0.230900747 | 0.245456463 |
| 0.218420053 | 0.322662907 | 0.247256456 | 0.199817859 |
| 0.284527253 | 0.032722178 | 0.273501065 | 0.477633237 |
| 0.030302927 | 0.29700187  | 0.008756078 | 0.126328759 |
| 0.364101881 | 0.405903977 | 0.308491199 | 0.108786408 |
| 0.020285939 | 0.1186136   | 0.123606463 | 0.328604341 |
| 0.273027991 | 0.291876883 | 0.380557951 | 0.059191991 |
| 0.271934259 | 0.206448454 | 0.249016746 | 0.455235485 |
| 0.465436666 | 0.008161401 | 0.142695386 | 0.202226353 |
| 0.224789261 | 0.142770509 | 0.194511889 | 0.034089368 |
| 0.016102094 | 0.012571713 | 0.413475707 | 0.160407034 |
| 0.129582119 | 0.199586329 | 0.080342886 | 0.280669362 |
| 0.20615111  | 0.374196906 | 0.102515246 | 0.230218855 |
| 0.288505558 | 0.2211182   | 0.268195177 | 0.33264481  |
| 0.203642562 | 0.19908975  | 0.161197962 | 0.410265445 |
| 0.396735498 | 0.082839417 | 0.111270825 | 0.272732769 |
| 0.266222254 | 0.445733671 | 0.493322188 | 0.20862445  |
| 0.193582435 | 0.199839629 | 0.309109741 | 0.29089034  |
| 0.202533597 | 0.216167192 | 0.036394614 | 0.274835354 |
| 0.408499686 | 0.027034005 | 0.09276371  | 0.336327546 |
| 0.038821926 | 0.201497863 | 0.433756475 | 0.354671909 |
| 0.248854435 | 0.092530944 | 0.238989985 | 0.248383689 |
| 0.254414339 | 0.240089137 | 0.283893906 | 0.242027215 |
| 0.260080161 | 0.309482464 | 0.062592014 | 0.277721551 |
| 0.130772473 | 0.253951101 | 0.233373147 | 0.063789853 |
| 0.235337413 | 0.216474696 | 0.414616276 | 0.269805751 |
| 0.308756201 | 0.007491888 | 0.187812268 | 0.26994995  |
| 0.310258223 | 0.310306216 | 0.477887562 | 0.122733312 |
| 0.212960772 | 0.161487195 | 0.143462382 | 0.214769002 |
| 0.336312548 | 0.259355772 | 0.245847764 | 0.003402299 |
| 0.124233234 | 0.276069724 | 0.262798843 | 0.065532405 |
| 0.187699999 | 0.156276869 | 0.082479444 | 0.426538215 |
| 0.196444871 | 0.333310293 | 0.025479168 | 0.075590192 |
| 0.229219374 | 0.339537213 | 0.275041279 | 0.230546458 |
| 0.364019    | 0.271160571 | 0.363207971 | 0.36336728  |
| 0.180710076 | 0.330142623 | 0.078464211 | 0.226596317 |
| 0.254507388 | 0.415638498 | 0.368293669 | 0.337888363 |
| 0.237709575 | 0.236285521 | 0.167407288 | 0.237190788 |
| 0.262857666 | 0.240458205 | 0.105203756 | 0.458858704 |
| 0.002762351 | 0.252718292 | 0.298141168 | 0.095619997 |
| 0.465472584 | 0.21167621  | 0.089164713 | 0.193296957 |

|             |             |             |             |
|-------------|-------------|-------------|-------------|
| 0.454051789 | 0.456916666 | 0.365987093 | 0.382130436 |
| 0.138828163 | 0.014339761 | 0.437252403 | 0.335661416 |
| 0.443252686 | 0.257899323 | 0.17662466  | 0.033805352 |
| 0.430000693 | 0.183415816 | 1           | 0.278237305 |
| 0.252781561 | 0.191648171 | 0.191363023 | 0.221664035 |
| 0.018645716 | 0.264548844 | 0.290520065 | 0.213299954 |
| 0.293270915 | 0.192779297 | 0.391330344 | 0.253329389 |
| 0.229764113 | 0.261764966 | 0.258440066 | 0.09581064  |
| 0.167640166 | 0.485343193 | 0.01716697  | 0.416575162 |
| 0.476223287 | 0.23818725  | 0.435409149 | 0.464811106 |
| 0.264167592 | 0.342622229 | 0.438198184 | 0.363435872 |
| 0.00135266  | 0.357643876 | 0.258354326 | 0.313860797 |
| 0.419033851 | 0.253679628 | 0.124664054 | 0.223645678 |
| 0.001224017 | 0.16281473  | 0.171753731 | 0.453901596 |
| 0.404004901 | 0.043073466 | 0.01653408  | 0.349189038 |
| 0.23656981  | 0.021587196 | 0.491528515 | 0.289194353 |
| 0.418670235 | 0.253841822 | 0.188893534 | 0.316471708 |
| 0.143860003 | 0.203335798 | 0.031858417 | 0.293704128 |
| 0.228737546 | 0.058733389 | 0.114282261 | 0.467987948 |
| 0.407449341 | 0.294566059 | 0.213345265 | 0.037374282 |
| 0.324793624 | 0.190512508 | 0.354632041 | 0.088206692 |
| 0.353749453 | 0.315344972 | 0.4030228   | 0.333050291 |
| 0.271922183 | 0.372822102 | 0.356290051 | 0.408570488 |
| 0.077789418 | 0.348614595 | 0.395862831 | 0.073613647 |
| 0.230564162 | 0.429719528 | 0.301315259 | 0.178314478 |
| 0.272396804 | 0.073712702 | 0.196988419 | 0.220635018 |
| 0.411013675 | 0.442688007 | 0.091453106 | 0.127976281 |
| 0.385410434 | 0.232010119 | 0.117628435 | 0.220461381 |
| 0.234143002 | 0.11854388  | 0.07001603  | 0.295622694 |
| 0.446621081 | 0.246724942 | 0.433997601 | 0.197102147 |
| 0.387617253 | 0.056867707 | 0.338719331 | 0.19917423  |
| 0.227854343 | 0.260702045 | 0.322289787 | 0.07957331  |
| 0.072794287 | 0.154068722 | 0.365807012 | 0.388211823 |
| 0.09482895  | 0.180227615 | 0.228796912 | 0.261523681 |
| 0.446318536 | 0.265817158 | 0.227489288 | 0.224763371 |
| 0.388525326 | 0.125758188 | 0.463417807 | 0.263577449 |
| 0.36147836  | 0.270456919 | 0.35773745  | 0.013255549 |
| 0.275036384 | 0.215313884 | 0.125853245 | 0.274176286 |
| 0.385758365 | 0.142908431 | 0.292977885 | 0.1673396   |
| 0.129379142 | 0.002714437 | 0.270965726 | 0.195785693 |
| 0.255006231 | 0.144511951 | 0.239497754 | 0.088680574 |
| 0.495892999 | 0.298217902 | 0.372636708 | 0.131765383 |
| 0.293380221 | 0.008570092 | 0.190566343 | 0.0481095   |
| 0.334412359 | 0.313700384 | 0.260791244 | 0.277641659 |
| 0.144806144 | 0.2718184   | 0.279588185 | 0.25955241  |
| 0.425098484 | 0.127714834 | 0.477233538 | 0.2039002   |
| 0.307986987 | 0.271640578 | 0.216181473 | 0.214568874 |
| 0.174322969 | 0.099600468 | 0.131936398 | 0.145714526 |
| 0.431680125 | 0.174896239 | 0.274346932 | 0.272717755 |
| 0.066955652 | 0.266050812 | 0.297581382 | 0.314419829 |
| 0.304737948 | 0.291624156 | 0.20790173  | 0.362625758 |
| 0.248788601 | 0.253383726 | 0.06532131  | 0.072821462 |
| 0.231661551 | 0.208365938 | 0.363257437 | 0.367346416 |
| 0.449029911 | 0.172269561 | 0.116583116 | 0.136177207 |

|             |             |             |             |          |
|-------------|-------------|-------------|-------------|----------|
| 0.050280971 | 0.297150652 | 0.228714789 | 0.0816086   |          |
| 0.260965474 | 0.203154757 | 0.000884032 | 0.185071897 |          |
| 0.31824856  | 0.245037985 |             |             |          |
| METTL2      | 0.20634503  | 0.424174864 | 0.03675511  | 0.023468 |
| 0.04193337  | 0.124058655 | 0.092580998 | 0.203664486 |          |
| 0.053959794 | 0.08040574  | 0.20535575  | 0.002039951 |          |
| 0.330172044 | 0.011900971 | 0.032242014 | 0.483679694 |          |
| 0.476418991 | 0.12990086  | 0.458609287 | 0.176035212 |          |
| 0.083981665 | 0.241953125 | 0.217572568 | 0.114857328 |          |
| 0.002118991 | 0.054250136 | 0.039947448 | 0.195996909 |          |
| 0.474367165 | 0.093806668 | 0.152894991 | 0.44325255  |          |
| 0.413925911 | 0.190187249 | 0.128738733 | 0.116060239 |          |
| 0.38550049  | 0.037775035 | 0.312699653 | 0.378067709 |          |
| 0.099927814 | 0.399066904 | 0.007442211 | 0.002573432 |          |
| 0.047227484 | 0.177563832 | 0.252937449 | 0.145889876 |          |
| 0.10513123  | 0.076347734 | 0.077634747 | 0.104661936 |          |
| 0.230009464 | 0.321411344 | 0.100160078 | 0.30467024  |          |
| 0.005158729 | 0.360277071 | 0.160713784 | 0.030957267 |          |
| 0.139067919 | 0.198154619 | 0.260459583 | 0.130321902 |          |
| 0.33292007  | 0.446019898 | 0.014353276 | 0.035071341 |          |
| 0.202195342 | 0.375058811 | 0.238341071 | 0.39207479  |          |
| 0.209903039 | 0.130458993 | 0.154375858 | 0.318922437 |          |
| 0.378039831 | 0.142784841 | 0.079286018 | 0.001076563 |          |
| 0.065695559 | 0.134798942 | 0.265071194 | 0.259618403 |          |
| 0.237653527 | 0.228004616 | 0.086909949 | 0.234183666 |          |
| 0.011687723 | 0.207527658 | 0.473165569 | 0.014091335 |          |
| 0.31278747  | 0.004936143 | 0.066586126 | 0.387577449 |          |
| 0.461102646 | 0.299481469 | 0.034601946 | 0.008431959 |          |
| 0.06145592  | 0.104801509 | 0.398924149 | 0.185131327 |          |
| 0.207740583 | 0.288098356 | 0.069514999 | 0.337262564 |          |
| 0.116760229 | 0.14208456  | 0.384009846 | 0.44519597  |          |
| 0.004466766 | 0.085753403 | 0.10206063  | 0.14659308  |          |
| 0.063558784 | 0.092499194 | 0.047492089 | 0.008060535 |          |
| 0.014876824 | 0.432735771 | 0.082566906 | 0.047976783 |          |
| 0.092979653 | 0.048602183 | 0.252028158 | 0.17597294  |          |
| 0.410591176 | 0.041107479 | 0.112453823 | 0.308489406 |          |
| 0.108230228 | 0.181119303 | 0.328775172 | 0.137606441 |          |
| 0.126846199 | 0.083470576 | 0.347402795 | 0.334806217 |          |
| 0.033361905 | 0.047075484 | 0.202469195 | 0.313508568 |          |
| 0.456716116 | 0.476142625 | 0.147656328 | 0.099466335 |          |
| 0.106468276 | 0.186687228 | 0.232918265 | 0.09896052  |          |
| 0.157310015 | 0.044386236 | 0.209282466 | 0.316335925 |          |
| 0.028074788 | 0.034651821 | 0.349438958 | 0.018938488 |          |
| 0.091557031 | 0.382541012 | 0.321799289 | 0.202835853 |          |
| 0.037374988 | 0.126974057 | 0.119781929 | 0.148329297 |          |
| 0.126444518 | 0.243291953 | 0.125577095 | 0.192121302 |          |
| 0.198567981 | 0.021784012 | 0.330223735 | 0.056820058 |          |
| 0.18383384  | 0.191767005 | 0.036183402 | 0.244241595 |          |
| 0.160797753 | 0.384128468 | 0.223008781 | 0.315356643 |          |
| 0.005242575 | 0.086158733 | 0.241033858 | 0.192096214 |          |
| 0.359566101 | 0.417422761 | 0.050714156 | 0.12505496  |          |
| 0.122878126 | 0.066696763 | 0.120467279 | 0.347944541 |          |
| 0.124601337 | 0.120948925 | 0.001226271 | 0.052786062 |          |
| 0.231363437 | 0.178782474 | 0.037506186 | 0.096076446 |          |

|             |             |             |             |
|-------------|-------------|-------------|-------------|
| 0.079423343 | 0.069948229 | 0.397829069 | 0.093832195 |
| 0.324928256 | 0.018184966 | 0.077752309 | 0.136251379 |
| 0.265425182 | 0.209087862 | 0.18099615  | 0.31321466  |
| 0.169977159 | 0.435307481 | 0.279725754 | 0.091785578 |
| 0.245111467 | 0.075134328 | 0.12356997  | 0.239474919 |
| 0.390138627 | 0.396828841 | 0.326265678 | 0.114266987 |
| 0.245996833 | 0.151088037 | 0.159602472 | 0.211583593 |
| 0.171664004 | 0.049463134 | 0.416831919 | 0.000960218 |
| 0.179854475 | 0.218175419 | 0.098650554 | 0.413434771 |
| 0.110611919 | 0.038504148 | 0.131975449 | 0.46798344  |
| 0.418170637 | 0.367246308 | 0.432948153 | 0.126927614 |
| 0.008548878 | 0.417023489 | 0.267531292 | 0.47413067  |
| 0.152606097 | 0.130011192 | 0.033890281 | 0.428422332 |
| 0.190528173 | 0.278237305 | 1           | 0.192666182 |
| 0.148130838 | 0.103717133 | 0.239749868 | 0.014137789 |
| 0.148512704 | 0.306877345 | 0.113668645 | 0.184839727 |
| 0.093288505 | 0.351793447 | 0.182675778 | 0.15293159  |
| 0.258783437 | 0.163396438 | 0.037648459 | 0.072706073 |
| 0.445573968 | 0.014080671 | 0.403812301 | 0.472050167 |
| 0.147039294 | 0.419369598 | 0.471597718 | 0.167959521 |
| 0.253051743 | 0.408131316 | 0.397417484 | 0.001120673 |
| 0.403642077 | 0.297671697 | 0.230012764 | 0.443609694 |
| 0.148976409 | 0.124914819 | 0.189656263 | 0.000409847 |
| 0.075040981 | 0.155075276 | 0.406036955 | 0.395977073 |
| 0.011692771 | 0.014784832 | 0.328561838 | 0.271313188 |
| 0.022410911 | 0.470866476 | 0.16178221  | 0.366641691 |
| 0.170938351 | 0.079005346 | 0.352917179 | 0.139977872 |
| 0.158917774 | 0.011063471 | 0.245282256 | 0.162034554 |
| 0.045351199 | 0.044768086 | 0.462573349 | 0.390995829 |
| 0.21978601  | 0.110734516 | 0.015626351 | 0.38277503  |
| 0.148567122 | 0.338172976 | 0.046588603 | 0.3287108   |
| 0.228522358 | 0.346663055 | 0.353243953 | 0.21622213  |
| 0.296146151 | 0.274233131 | 0.378117049 | 0.062048633 |
| 0.400714818 | 0.427046774 | 0.04091325  | 0.227582783 |
| 0.417923177 | 0.203067704 | 0.077035387 | 0.233707005 |
| 0.041259683 | 0.098739156 | 0.170836051 | 0.346836212 |
| 0.425470149 | 0.031836895 | 0.077883161 | 0.302670455 |
| 0.12785244  | 0.043260431 | 0.138052589 | 0.150327931 |
| 0.131439231 | 0.065279744 | 0.224565827 | 0.373342601 |
| 0.161935301 | 0.440193944 | 0.1030274   | 0.401682345 |
| 0.025745094 | 0.340858861 | 0.096666775 | 0.133271335 |
| 0.276097866 | 0.387880647 | 0.1008899   | 0.032458873 |
| 0.094818309 | 0.275792332 | 0.304926681 | 0.039344456 |
| 0.092671626 | 0.118621685 | 0.149257186 | 0.468581073 |
| 0.233207319 | 0.138004425 | 0.152796958 | 0.29769379  |
| 0.05213635  | 0.414836676 | 0.172413012 | 0.327572649 |
| 0.149355523 | 0.328783567 | 0.005779821 | 0.276090154 |
| 0.103215786 | 0.120216163 | 0.159292866 | 0.445300903 |
| 0.065476062 | 0.214500027 | 0.087055873 | 0.092441524 |
| 0.00237834  | 0.226382017 | 0.16256811  | 0.168143987 |
| 0.151222572 | 0.163232957 | 0.096155449 | 0.457063606 |
| 0.212912523 | 0.359607484 | 0.11449584  | 0.195052171 |
| 0.007745512 | 0.080236921 | 0.02278093  | 0.302114759 |
| 0.245897272 | 0.255343944 | 0.228818136 | 0.125324155 |

|             |             |             |             |
|-------------|-------------|-------------|-------------|
| 0.228173052 | 0.213696216 | 0.167996889 | 0.406902188 |
| 0.114372341 | 0.484576576 | 0.130023275 | 0.36680087  |
| 0.190023856 | 0.118014273 | 0.132549207 | 0.075406123 |
| 0.054306046 | 0.051089197 | 0.094339763 | 0.440162923 |
| 0.106754176 | 0.163062904 | 0.23241874  | 0.026570475 |
| 0.165540761 | 0.317050362 | 0.326465217 | 0.252939829 |
| 0.320446955 | 0.190160252 | 0.274304411 | 0.191285459 |
| 0.169009554 | 0.037269121 | 0.02395977  | 0.142885102 |
| 0.098378697 | 0.365645379 | 0.359949814 | 0.449671107 |
| 0.155665928 | 0.047283915 | 0.074995357 | 0.052673317 |
| 0.356239204 | 0.125366331 | 0.065597817 | 0.203552725 |
| 0.160568039 | 0.000647184 | 0.132538349 | 0.250485972 |
| 0.186645791 |             |             |             |
| METTL8      | 0.149171501 | 0.478460453 | 0.034262863 |
| 0.025150611 | 0.107132611 | 0.138247941 | 0.147175005 |
| 0.16065614  | 0.056337467 | 0.085089505 | 0.2424376   |
| 0.000301998 | 0.373038807 | 0.00432272  | 0.042321623 |
| 0.479223778 | 0.511618075 | 0.227857799 | 0.49187899  |
| 0.139133137 | 0.104451876 | 0.21659126  | 0.204175461 |
| 0.147927331 | 0.000361569 | 0.086128262 | 0.037627495 |
| 0.175864972 | 0.475806682 | 0.105561828 | 0.145020872 |
| 0.413348511 | 0.458488383 | 0.246283128 | 0.259561574 |
| 0.202810117 | 0.41805346  | 0.155220808 | 0.402152144 |
| 0.383581784 | 0.153532669 | 0.430312536 | 0.007248204 |
| 0.006768042 | 0.06559168  | 0.150590107 | 0.220867092 |
| 0.145029116 | 0.117861369 | 0.091033339 | 0.122785699 |
| 0.098133582 | 0.266842592 | 0.28595463  | 0.10835946  |
| 0.380149845 | 0.004586111 | 0.420494155 | 0.097468244 |
| 0.035841376 | 0.168670395 | 0.175863435 | 0.250028181 |
| 0.169659863 | 0.403831049 | 0.510091194 | 0.025885081 |
| 0.041929764 | 0.224759872 | 0.348774707 | 0.279315508 |
| 0.423532888 | 0.167293412 | 0.188088885 | 0.259960938 |
| 0.336201347 | 0.359963043 | 0.171805161 | 0.096556919 |
| 0.000303306 | 0.101019552 | 0.260625891 | 0.210254078 |
| 0.272277189 | 0.277920151 | 0.206540873 | 0.162720407 |
| 0.216325935 | 0.007889061 | 0.196671538 | 0.509691075 |
| 0.014148357 | 0.364962006 | 0.009246771 | 0.089786858 |
| 0.36601085  | 0.443971467 | 0.249410503 | 0.047087484 |
| 0.005879555 | 0.060072513 | 0.052524632 | 0.392167501 |
| 0.208654011 | 0.249212189 | 0.365562999 | 0.09538558  |
| 0.361227562 | 0.072553093 | 0.224501695 | 0.420431543 |
| 0.44342201  | 0.003059238 | 0.071046489 | 0.12768307  |
| 0.22630929  | 0.118147132 | 0.147288839 | 0.01644299  |
| 0.007182942 | 0.005799496 | 0.437996332 | 0.07363006  |
| 0.071632609 | 0.121003785 | 0.059101726 | 0.322279939 |
| 0.161464755 | 0.395722386 | 0.116907479 | 0.156221762 |
| 0.345358901 | 0.165089289 | 0.273294602 | 0.357727225 |
| 0.306202778 | 0.118399662 | 0.068437187 | 0.452144019 |
| 0.365805402 | 0.041947239 | 0.040046361 | 0.202223353 |
| 0.366709477 | 0.462754408 | 0.510791711 | 0.146764697 |
| 0.214396716 | 0.127830524 | 0.166147561 | 0.271413222 |
| 0.152512327 | 0.169182721 | 0.051006111 | 0.258599476 |
| 0.373513841 | 0.020149904 | 0.033629799 | 0.352849883 |
| 0.082999657 | 0.190499175 | 0.383499383 | 0.39760191  |



|             |             |             |             |
|-------------|-------------|-------------|-------------|
| 0.285403157 | 0.029763357 | 0.139873228 | 0.154045612 |
| 0.144404718 | 0.142474692 | 0.255795412 | 0.130365032 |
| 0.181395049 | 0.169335001 | 0.029389705 | 0.371944242 |
| 0.067559892 | 0.172122036 | 0.152367397 | 0.045104707 |
| 0.234768787 | 0.165216977 | 0.399186642 | 0.221926878 |
| 0.281321057 | 0.004134276 | 0.081464228 | 0.18004595  |
| 0.141683358 | 0.373366696 | 0.482004725 | 0.063171046 |
| 0.125336112 | 0.232702161 | 0.075846451 | 0.268438218 |
| 0.322109838 | 0.125456168 | 0.11123944  | 0.000155134 |
| 0.09540824  | 0.188862123 | 0.236478391 | 0.017725137 |
| 0.172570806 | 0.045920511 | 0.046178715 | 0.429027604 |
| 0.108734019 | 0.425428878 | 0.008455195 | 0.084843198 |
| 0.133579488 | 0.362574041 | 0.223727872 | 0.108672537 |
| 0.398240189 | 0.158218256 | 0.407570393 | 0.316634624 |
| 0.23380939  | 0.260957842 | 0.119849713 | 0.140903386 |
| 0.267299418 | 0.465713109 | 0.399524932 | 0.420993525 |
| 0.149650748 | 0.2458832   | 0.160141564 | 0.165907188 |
| 0.188771553 | 0.220710145 | 0.036700631 | 0.487339591 |
| 0.000167816 | 0.197014574 | 0.262081653 | 0.098312769 |
| 0.468286955 | 0.159004772 | 0.030725263 | 0.109225016 |
| 0.497704211 | 0.4865745   | 0.363635882 | 0.409177832 |
| 0.118368579 | 0.002738903 | 0.436401984 | 0.301435226 |
| 0.492505402 | 0.251073923 | 0.290339566 | 0.051196021 |
| 0.462585804 | 0.183335915 | 0.252781561 | 0.192666182 |
| 1           | 0.281900321 | 0.132481004 | 0.224364598 |
| 0.005870751 | 0.11977075  | 0.241786385 | 0.123791737 |
| 0.172597003 | 0.09664805  | 0.436488945 | 0.227947528 |
| 0.2954624   | 0.128138691 | 0.246291358 | 0.052422935 |
| 0.105219013 | 0.475046099 | 0.070911234 | 0.408737382 |
| 0.506572501 | 0.210144633 | 0.463993936 | 0.48718787  |
| 0.14558388  | 0.329055973 | 0.436512463 | 0.40112826  |
| 0.000200399 | 0.423416762 | 0.362091469 | 0.268819424 |
| 0.416955395 | 0.163218834 | 0.114628233 | 0.265083905 |
| 0.000889093 | 0.077561395 | 0.168494894 | 0.449710059 |
| 0.466651688 | 0.018905974 | 0.080533521 | 0.391702243 |
| 0.324635886 | 0.029454942 | 0.494826608 | 0.18144988  |
| 0.44198671  | 0.265582425 | 0.103988802 | 0.392641864 |
| 0.141412615 | 0.204972432 | 0.032285618 | 0.289815147 |
| 0.273878231 | 0.047839683 | 0.067630485 | 0.495316766 |
| 0.355721001 | 0.306650646 | 0.142152166 | 0.003251059 |
| 0.340223641 | 0.128977593 | 0.37295843  | 0.065472146 |
| 0.335543183 | 0.280358182 | 0.433693336 | 0.404468854 |
| 0.265482967 | 0.346230049 | 0.297652839 | 0.382683878 |
| 0.102235468 | 0.355638625 | 0.393859455 | 0.030009891 |
| 0.200992901 | 0.478478935 | 0.239848806 | 0.104711925 |
| 0.225023393 | 0.107505586 | 0.11062884  | 0.143349597 |
| 0.428943868 | 0.463821675 | 0.029505461 | 0.076676257 |
| 0.353969984 | 0.169950452 | 0.072987675 | 0.20045707  |
| 0.169274564 | 0.084323769 | 0.08097099  | 0.260668735 |
| 0.433831933 | 0.214369282 | 0.404960828 | 0.10152501  |
| 0.465349727 | 0.023723348 | 0.381330695 | 0.176051339 |
| 0.138546421 | 0.216714411 | 0.355947133 | 0.046559354 |
| 0.008860319 | 0.045190507 | 0.345215477 | 0.352083462 |
| 0.038878506 | 0.09464706  | 0.148135716 | 0.22303044  |

|             |             |             |             |
|-------------|-------------|-------------|-------------|
| 0.479917555 | 0.215685514 | 0.15742568  | 0.171836958 |
| 0.363460806 | 0.091562677 | 0.440445082 | 0.158494567 |
| 0.291340576 | 0.198315391 | 0.38473674  | 0.005444447 |
| 0.294966263 | 0.094864108 | 0.090331358 | 0.239689846 |
| 0.425948792 | 0.071890225 | 0.307286757 | 0.075463769 |
| 0.108923322 | 0.0014363   | 0.233868625 | 0.263788565 |
| 0.194042647 | 0.152280177 | 0.185342828 | 0.125684494 |
| 0.497927414 | 0.185328918 | 0.299715658 | 0.202076881 |
| 0.208543075 | 0.042373742 | 0.097700575 | 0.013724253 |
| 0.265618966 | 0.296551732 | 0.248257346 | 0.168892858 |
| 0.081233232 | 0.323932778 | 0.272782208 | 0.283977071 |
| 0.475303281 | 0.088616401 | 0.496603035 | 0.163725527 |
| 0.387197963 | 0.192480166 | 0.151221681 | 0.191159179 |
| 0.147310084 | 0.084240117 | 0.073533645 | 0.064939898 |
| 0.478821106 | 0.215447373 | 0.252099822 | 0.124370711 |
| 0.027418972 | 0.227387956 | 0.343757957 | 0.360525277 |
| 0.24181061  | 0.268994612 | 0.19152016  | 0.337730106 |
| 0.139118708 | 0.129876109 | 0.052409172 | 0.030178511 |
| 0.180485061 | 0.104213504 | 0.341080165 | 0.380673362 |
| 0.500284834 | 0.13871849  | 0.052381177 | 0.060967591 |
| 0.106205105 | 0.299934202 | 0.181551826 | 0.187735939 |
| 0.281032455 | 0.164839635 | 0.000148904 | 0.09551091  |
| 0.271100682 | 0.225637064 |             |             |
| MGST2       | 0.112385797 | 0.406424713 | 0.011539595 |
| 0.011350064 | 0.05515085  | 0.093004004 | 0.094752897 |
| 0.105687972 | 0.017244643 | 0.02737481  | 0.18439649  |
| 7.82E-05    | 0.39528668  | 0.001178861 | 0.017217724 |
| 0.428331651 | 0.467096343 | 0.180584814 | 0.458381911 |
| 0.087794605 | 0.035282113 | 0.172057522 | 0.153175289 |
| 0.093389262 | 8.67E-05    | 0.033000398 | 0.011304616 |
| 0.116052351 | 0.446583617 | 0.052123665 | 0.053276316 |
| 0.359679932 | 0.441791887 | 0.103561735 | 0.136655031 |
| 0.116494682 | 0.345276876 | 0.179557627 | 0.412104275 |
| 0.377439533 | 0.061057043 | 0.397482502 | 0.001779418 |
| 0.003629329 | 0.022317944 | 0.086471749 | 0.172615075 |
| 0.077828115 | 0.0738519   | 0.047336297 | 0.05081386  |
| 0.059494017 | 0.204645178 | 0.246506882 | 0.072498783 |
| 0.309731359 | 0.001347232 | 0.341377387 | 0.042832264 |
| 0.011311166 | 0.086281548 | 0.111053826 | 0.198676958 |
| 0.120261164 | 0.330826259 | 0.454714401 | 0.008367753 |
| 0.014027578 | 0.174327347 | 0.312623524 | 0.228974135 |
| 0.3603271   | 0.069093266 | 0.071470291 | 0.177043384 |
| 0.295106141 | 0.345963316 | 0.130689301 | 0.040682683 |
| 5.70E-05    | 0.048752921 | 0.125712869 | 0.178715004 |
| 0.275739637 | 0.216980484 | 0.180031377 | 0.063363106 |
| 0.156436542 | 0.002200279 | 0.159724481 | 0.460587498 |
| 0.005278204 | 0.358003456 | 0.004970346 | 0.038606323 |
| 0.323461844 | 0.417307356 | 0.201606932 | 0.013816034 |
| 0.001835159 | 0.02296925  | 0.021736237 | 0.392722313 |
| 0.159195602 | 0.18728264  | 0.293323989 | 0.070964153 |
| 0.385317164 | 0.02280438  | 0.097888742 | 0.342932593 |
| 0.375612472 | 0.001595618 | 0.027782608 | 0.089941766 |
| 0.100064922 | 0.042839276 | 0.097888843 | 0.00807802  |
| 0.003228048 | 0.004038954 | 0.400418042 | 0.027606299 |

|             |             |             |             |
|-------------|-------------|-------------|-------------|
| 0.023328073 | 0.063929096 | 0.027209843 | 0.291180443 |
| 0.090864476 | 0.366803198 | 0.054673949 | 0.082216319 |
| 0.330528606 | 0.115463613 | 0.190271414 | 0.317292153 |
| 0.182481313 | 0.049822843 | 0.023752575 | 0.398171481 |
| 0.30469039  | 0.014739078 | 0.012171656 | 0.147761905 |
| 0.39237291  | 0.419665289 | 0.450522022 | 0.068373931 |
| 0.105166639 | 0.070445725 | 0.059821348 | 0.216987006 |
| 0.108926082 | 0.138031753 | 0.047060554 | 0.213534422 |
| 0.297335086 | 0.011140924 | 0.009835577 | 0.324391582 |
| 0.056031118 | 0.073951494 | 0.308460973 | 0.359484462 |
| 0.282935907 | 0.008009094 | 0.051998303 | 0.094824527 |
| 0.093939168 | 0.07577482  | 0.204618636 | 0.045345659 |
| 0.132779619 | 0.061753953 | 0.009773984 | 0.393814252 |
| 0.028537104 | 0.131737997 | 0.063951068 | 0.017041052 |
| 0.212988208 | 0.083189938 | 0.335793916 | 0.189994252 |
| 0.237124729 | 0.001658166 | 0.026789785 | 0.140721392 |
| 0.049585803 | 0.381773823 | 0.407651459 | 0.027911098 |
| 0.088708441 | 0.136455227 | 0.035141173 | 0.137137671 |
| 0.288820365 | 0.042503941 | 0.035408185 | 2.24E-05    |
| 0.042339348 | 0.087623021 | 0.160366505 | 0.005791836 |
| 0.081050269 | 0.013419225 | 0.021623248 | 0.368628257 |
| 0.061659891 | 0.419770213 | 0.004003668 | 0.053581671 |
| 0.052461849 | 0.304789112 | 0.102559636 | 0.04334573  |
| 0.343854368 | 0.063472365 | 0.393561938 | 0.245282618 |
| 0.123383993 | 0.193954709 | 0.083428102 | 0.0549551   |
| 0.257319532 | 0.419573894 | 0.367725334 | 0.413488014 |
| 0.068240705 | 0.23219322  | 0.100817913 | 0.120284809 |
| 0.155898623 | 0.191539795 | 0.012290694 | 0.433707204 |
| 2.87E-05    | 0.157598275 | 0.215563901 | 0.055679697 |
| 0.398554162 | 0.116374466 | 0.009561952 | 0.048398191 |
| 0.462253647 | 0.432783998 | 0.326525882 | 0.378815637 |
| 0.060258148 | 0.0009416   | 0.38458131  | 0.235108792 |
| 0.45866749  | 0.149096613 | 0.182501105 | 0.039259829 |
| 0.421475848 | 0.186240724 | 0.191648171 | 0.148130838 |
| 0.281900321 | 1           | 0.079365162 | 0.211422548 |
| 0.002106905 | 0.041927811 | 0.196530828 | 0.040742535 |
| 0.063345526 | 0.03318632  | 0.385448955 | 0.181835809 |
| 0.170075121 | 0.051045519 | 0.110040797 | 0.018104141 |
| 0.059383626 | 0.401784108 | 0.087573322 | 0.358397998 |
| 0.459179364 | 0.169559094 | 0.410515684 | 0.442731311 |
| 0.089140266 | 0.263435173 | 0.374666208 | 0.382288356 |
| 7.44E-05    | 0.411782377 | 0.391144143 | 0.210075789 |
| 0.365562501 | 0.114196393 | 0.079732104 | 0.189270209 |
| 0.000588354 | 0.035985511 | 0.0864148   | 0.386081449 |
| 0.435738166 | 0.005427363 | 0.10305778  | 0.360650931 |
| 0.341995126 | 0.021988249 | 0.430539906 | 0.11273372  |
| 0.385585935 | 0.21132951  | 0.043921668 | 0.386674679 |
| 0.074373884 | 0.112762137 | 0.017011017 | 0.248780773 |
| 0.196718814 | 0.023951718 | 0.022603189 | 0.443904729 |
| 0.293882013 | 0.256852113 | 0.098024767 | 0.000465895 |
| 0.322078217 | 0.054262619 | 0.32551337  | 0.032712511 |
| 0.292110166 | 0.216150781 | 0.384283788 | 0.388158706 |
| 0.234881639 | 0.2802389   | 0.227584787 | 0.320959784 |
| 0.059231018 | 0.323723711 | 0.350807719 | 0.010018482 |

|                  |                     |                     |             |
|------------------|---------------------|---------------------|-------------|
| 0.177298244      | 0.433090494         | 0.158717065         | 0.064731825 |
| 0.177279861      | 0.061970931         | 0.074671256         | 0.105641514 |
| 0.370246828      | 0.40706 0.007945339 | 0.035256202         |             |
| 0.279362514      | 0.068618997         | 0.028615207         | 0.129068644 |
| 0.12156216       | 0.042982478         | 0.050294011         | 0.203284313 |
| 0.3586519        | 0.161196633         | 0.342330208         | 0.033862234 |
| 0.450029854      | 0.008774727         | 0.358563312         | 0.079720417 |
| 0.096584943      | 0.182099767         | 0.347311077         | 0.024115512 |
| 0.001823132      | 0.0153348           | 0.271690371         | 0.279325084 |
| 0.01268629       | 0.05097649          | 0.079675174         | 0.172030977 |
| 0.440583306      | 0.102114244         | 0.118067112         | 0.112658547 |
| 0.29141558       | 0.032416315         | 0.370293927         | 0.099949324 |
| 0.231298754      | 0.083592439         | 0.338161967         | 0.001450508 |
| 0.261854397      | 0.03116906          | 0.060574312         | 0.167177335 |
| 0.40250314       | 0.025828183         | 0.252356576         | 0.02619814  |
| 0.049633306      | 0.00092769          | 0.191295156         | 0.20545156  |
| 0.139310695      | 0.094849477         | 0.1235069           | 0.081774611 |
| 0.428860663      | 0.137632187         | 0.239332157         | 0.136293279 |
| 0.100430711      | 0.048946423         | 0.03186592          | 0.004019112 |
| 0.209531461      | 0.243163845         | 0.210311788         | 0.117387587 |
| 0.038185714      | 0.297638232         | 0.228610286         | 0.20207854  |
| 0.427209995      | 0.043207124         | 0.443223252         | 0.076081184 |
| 0.391856775      | 0.082679435         | 0.110729966         | 0.089442281 |
| 0.073504421      | 0.035354054         | 0.024659589         | 0.025440376 |
| 0.437145964      | 0.121416133         | 0.183082012         | 0.049923277 |
| 0.008802198      | 0.1050863           | 0.330649649         | 0.331021394 |
| 0.194909253      | 0.233384536         | 0.106236431         | 0.270985889 |
| 0.055449197      | 0.055364934         | 0.02144126          | 0.007699304 |
| 0.070478246      | 0.037048249         | 0.299580358         | 0.348532026 |
| 0.460301486      | 0.066025619         | 0.016720086         | 0.02219846  |
| 0.090042597      | 0.280030311         | 0.135831531         | 0.167603981 |
| 0.255161219      | 0.07281995          | 6.48E-05 0.03933348 |             |
| 0.210833088      | 0.116897553         |                     |             |
| MLF1 0.143616504 | 0.340942934         | 0.18805212          |             |
| 0.00566831       | 0.106287314         | 0.327471108         | 0.245101537 |
| 0.106263998      | 0.24567269          | 0.10374531          | 0.390862073 |
| 0.015296325      | 0.139036684         | 0.11124908          | 0.243437869 |
| 0.258731096      | 0.261897164         | 0.247367364         | 0.282516857 |
| 0.184457467      | 0.049153545         | 0.337255333         | 0.19639604  |
| 0.285430457      | 0.027140369         | 0.148076776         | 0.018432096 |
| 0.088296009      | 0.232532891         | 0.28753722          | 0.142274177 |
| 0.226061552      | 0.177951175         | 0.095801036         | 0.0927971   |
| 0.022177846      | 0.405732324         | 0.022076507         | 0.141042811 |
| 0.154936326      | 0.153354552         | 0.190968502         | 0.110690112 |
| 0.000142722      | 0.186535255         | 0.080737665         | 0.278980853 |
| 0.238806213      | 0.288797513         | 0.306476705         | 0.143150386 |
| 0.011971744      | 0.404535544         | 0.307247735         | 0.010604408 |
| 0.418728094      | 0.000735613         | 0.407226728         | 0.132504728 |
| 0.243244185      | 0.255884977         | 0.087695306         | 0.244175743 |
| 0.363620391      | 0.416674379         | 0.312155804         | 0.091715945 |
| 0.201956176      | 0.137656256         | 0.130691766         | 0.150305541 |
| 0.314320436      | 0.114697243         | 0.17494085          | 0.060364824 |
| 0.147832204      | 0.157553574         | 0.40516428          | 0.307445798 |
| 0.006444497      | 0.172695073         | 0.077291782         | 0.163151864 |

|              |             |              |             |
|--------------|-------------|--------------|-------------|
| 0.083727113  | 0.401627881 | 0.157229722  | 0.163672193 |
| 0.092595764  | 0.1452678   | 0.271516033  | 0.291633634 |
| 0.018592051  | 0.175806998 | 0.011221904  | 0.314221344 |
| 0.216688656  | 0.183467189 | 0.212040631  | 0.141700148 |
| 0.138268084  | 0.327840133 | 0.102736108  | 0.136923874 |
| 0.201400254  | 0.148673037 | 0.416559323  | 0.022000584 |
| 0.106858746  | 0.190736207 | 0.212181156  | 0.384453139 |
| 0.287684918  | 0.103165929 | 0.30435207   | 0.31809456  |
| 0.093012073  | 0.056877642 | 0.27505679   | 0.006937481 |
| 0.0111748144 | 0.047463793 | 0.217927843  | 0.279246654 |
| 0.124130729  | 0.217034828 | 0.063693862  | 0.134401593 |
| 0.107816377  | 0.217399713 | 0.139517055  | 0.203412284 |
| 0.124233391  | 0.259646957 | 0.096859715  | 0.175105548 |
| 0.086619404  | 0.243605002 | 0.267028406  | 0.349509853 |
| 0.44590356   | 0.180672421 | 0.205587516  | 0.337487433 |
| 0.109064185  | 0.256726253 | 0.317026371  | 0.207107638 |
| 0.135628124  | 0.298927307 | 0.088524335  | 0.23627033  |
| 0.323232414  | 0.250023426 | 0.024812207  | 0.425111356 |
| 0.438508878  | 0.010535658 | 0.221112839  | 0.228834106 |
| 0.016540955  | 0.186380073 | 0.366002116  | 0.256613481 |
| 0.176812989  | 0.015086097 | 0.111508041  | 0.232981572 |
| 0.293266203  | 0.194739144 | 0.262348045  | 0.089768697 |
| 0.362260258  | 0.078695245 | 0.171780192  | 0.10985055  |
| 0.267614306  | 0.32178844  | 0.043977687  | 0.026339489 |
| 0.189303652  | 0.185975002 | 0.276713401  | 0.208552305 |
| 0.168871564  | 0.000450283 | 0.094309312  | 0.178539297 |
| 0.087306223  | 0.177370141 | 0.357274618  | 0.276740015 |
| 0.362002713  | 0.071017768 | 0.301935297  | 0.133393092 |
| 0.275341097  | 0.111134554 | 0.112823708  | 0.006835788 |
| 0.218478301  | 0.050782388 | 0.153326513  | 0.203533365 |
| 0.138330351  | 0.199559246 | 0.153143514  | 0.264499609 |
| 0.28086401   | 0.193462828 | 0.117665102  | 0.063614129 |
| 0.224472228  | 0.288627539 | 0.0711118936 | 0.115637974 |
| 0.231762207  | 0.143876571 | 0.147495722  | 0.423338481 |
| 0.177866846  | 0.357204021 | 0.041788347  | 0.269688358 |
| 0.10790294   | 0.254473315 | 0.168005285  | 0.229452593 |
| 0.222732059  | 0.235389344 | 0.071028606  | 0.378411926 |
| 0.231094939  | 0.224640696 | 0.235775379  | 0.363797513 |
| 0.011049546  | 0.335651292 | 0.136436933  | 0.040488118 |
| 0.332025484  | 0.286189699 | 0.248120518  | 0.253959726 |
| 0.287782559  | 0.376212665 | 0.306555316  | 0.167064631 |
| 0.059897285  | 0.10555754  | 0.343633285  | 0.336638151 |
| 0.229078059  | 0.185939643 | 0.049831123  | 0.061258762 |
| 0.279058341  | 0.131313717 | 0.191363023  | 0.103717133 |
| 0.132481004  | 0.079365162 | 1            | 0.187212527 |
| 0.010465186  | 0.171662398 | 0.132365765  | 0.063833032 |
| 0.103004781  | 0.14539412  | 0.240326813  | 0.433435885 |
| 0.08255376   | 0.066879742 | 0.064059236  | 0.175835262 |
| 0.30310372   | 0.338718561 | 0.009307461  | 0.348924848 |
| 0.302609259  | 0.28111808  | 0.251350127  | 0.306078677 |
| 0.240651098  | 0.396990736 | 0.282247517  | 0.227994709 |
| 0.009109494  | 0.147087411 | 0.106784519  | 0.469810772 |
| 0.188702159  | 0.332797581 | 0.08045056   | 0.059034489 |
| 0.017690036  | 0.279787934 | 0.020801599  | 0.414335994 |

|             |             |             |             |
|-------------|-------------|-------------|-------------|
| 0.232648567 | 0.132220589 | 0.005153956 | 0.252386484 |
| 0.099187311 | 0.026551647 | 0.340193054 | 0.18117514  |
| 0.294336643 | 0.169903771 | 0.185878522 | 0.127591585 |
| 0.014614359 | 0.155844035 | 0.030363385 | 0.180766668 |
| 0.110228416 | 0.043541488 | 0.048496805 | 0.314001165 |
| 0.29375041  | 0.340443205 | 0.350761199 | 0.006031064 |
| 0.15091322  | 0.029859271 | 0.18591892  | 0.267314502 |
| 0.346022544 | 0.404164217 | 0.361113938 | 0.162602747 |
| 0.187827918 | 0.368791945 | 0.402881614 | 0.273688049 |
| 0.020221965 | 0.139329243 | 0.180423042 | 0.098158263 |
| 0.101055402 | 0.25703022  | 0.09329245  | 0.27486762  |
| 0.334444562 | 0.014290469 | 0.33799699  | 0.185069899 |
| 0.344356315 | 0.234516767 | 0.176970721 | 0.319606756 |
| 0.36560089  | 0.255900604 | 0.227544961 | 0.248205695 |
| 0.406724933 | 0.013152191 | 0.05820991  | 0.381804428 |
| 0.395013065 | 0.378394287 | 0.220576117 | 0.05577571  |
| 0.217975983 | 0.269520064 | 0.285075258 | 0.229066347 |
| 0.322555705 | 0.088933907 | 0.134844848 | 0.033600054 |
| 0.012413629 | 0.166451205 | 0.349791112 | 0.420691088 |
| 0.224242531 | 0.302815697 | 0.185983045 | 0.198814529 |
| 0.237492188 | 0.096647339 | 0.360895187 | 0.227932381 |
| 0.45268971  | 0.03550808  | 0.401296692 | 0.22388512  |
| 0.30452754  | 0.15361377  | 0.261566514 | 0.010133231 |
| 0.142689482 | 0.104197709 | 0.08747238  | 0.133357205 |
| 0.175086118 | 0.22399739  | 0.316105814 | 0.280903416 |
| 0.04779356  | 0.022386098 | 0.393554737 | 0.044332789 |
| 0.416734221 | 0.077693819 | 0.206653361 | 0.010215397 |
| 0.374249405 | 0.186294587 | 0.232674143 | 0.060138173 |
| 0.137796844 | 0.001520896 | 0.116206883 | 0.177893424 |
| 0.324005934 | 0.414113547 | 0.182695838 | 0.116141817 |
| 0.131174082 | 0.189946273 | 0.33811098  | 0.108859581 |
| 0.237648461 | 0.018655152 | 0.264629149 | 0.250834502 |
| 0.117192125 | 0.138032987 | 0.374362562 | 0.202949607 |
| 0.192342623 | 0.124321947 | 0.265982873 | 0.245294892 |
| 0.21053508  | 0.211426622 | 0.155572361 | 0.1068223   |
| 0.128526197 | 0.16123614  | 0.197526261 | 0.139364821 |
| 0.160838764 | 0.108890401 | 0.096863296 | 0.450778499 |
| 0.10566074  | 0.190174508 | 0.011055993 | 0.014388597 |
| 0.039310651 | 0.204019412 | 0.309543946 | 0.296916215 |
| 0.280215942 | 0.091950674 | 0.237690746 | 0.298599407 |
| 0.027960254 | 0.162367742 | 0.275294741 | 0.020689671 |
| 0.203918373 | 0.078749297 | 0.007860155 | 0.219666773 |
| 0.379856191 | 0.075878717 |             |             |
| MLKL        | 0.275430797 | 0.357376896 | 0.045975069 |
| 0.006569787 | 0.044474572 | 0.126059539 | 0.102203623 |
| 0.280227086 | 0.088553889 | 0.054470051 | 0.171493955 |
| 0.008514486 | 0.322056111 | 0.030480632 | 0.077756812 |
| 0.420093116 | 0.417751412 | 0.159879539 | 0.43799386  |
| 0.277292082 | 0.050194791 | 0.254290301 | 0.184641366 |
| 0.137882322 | 0.007118237 | 0.050421913 | 0.013118923 |
| 0.276277545 | 0.425133401 | 0.142607805 | 0.134779409 |
| 0.390385074 | 0.337775557 | 0.175953239 | 0.12670535  |
| 0.100762526 | 0.329697991 | 0.081304068 | 0.266665059 |
| 0.375874266 | 0.091889605 | 0.332485055 | 0.021420889 |

|             |             |             |             |
|-------------|-------------|-------------|-------------|
| 0.000593704 | 0.050964698 | 0.266226854 | 0.238856573 |
| 0.269788571 | 0.119527329 | 0.124972896 | 0.069013504 |
| 0.1020914   | 0.201699958 | 0.345499973 | 0.098404727 |
| 0.256298301 | 0.00089456  | 0.305119223 | 0.278640976 |
| 0.049866822 | 0.222028613 | 0.250420619 | 0.251527463 |
| 0.128050296 | 0.278267602 | 0.393185741 | 0.017259066 |
| 0.044120696 | 0.271360815 | 0.287728999 | 0.181626161 |
| 0.337225311 | 0.160087549 | 0.136034568 | 0.21181922  |
| 0.248644686 | 0.340049226 | 0.185472437 | 0.134284304 |
| 0.002259472 | 0.064962339 | 0.117029777 | 0.292582979 |
| 0.223298702 | 0.205215996 | 0.284725191 | 0.091822198 |
| 0.226892374 | 0.020355015 | 0.230581949 | 0.408241117 |
| 0.009261559 | 0.325730412 | 0.00613924  | 0.12818094  |
| 0.334005534 | 0.409182409 | 0.262215202 | 0.035677304 |
| 0.018728847 | 0.128470758 | 0.225813328 | 0.383687959 |
| 0.270815265 | 0.24430009  | 0.249891879 | 0.163460582 |
| 0.317061259 | 0.14590773  | 0.19449431  | 0.309000457 |
| 0.378013318 | 0.018992052 | 0.170690356 | 0.121035297 |
| 0.173634208 | 0.049115636 | 0.118573361 | 0.027499499 |
| 0.005305896 | 0.083043343 | 0.389868675 | 0.136582986 |
| 0.040696925 | 0.099197486 | 0.033321307 | 0.199299033 |
| 0.280588622 | 0.423160018 | 0.049657334 | 0.118610139 |
| 0.240526392 | 0.116426519 | 0.168801028 | 0.263286548 |
| 0.157645151 | 0.242789475 | 0.112119244 | 0.301354511 |
| 0.327334184 | 0.041664895 | 0.060422408 | 0.17651219  |
| 0.293199958 | 0.400645056 | 0.414182061 | 0.244594857 |
| 0.101872943 | 0.185036206 | 0.152610803 | 0.175342257 |
| 0.132560384 | 0.293186855 | 0.127492085 | 0.213505239 |
| 0.267574019 | 0.027688803 | 0.047999044 | 0.33268503  |
| 0.012903118 | 0.121051716 | 0.31907349  | 0.276542041 |
| 0.250868146 | 0.01039683  | 0.091218471 | 0.126814149 |
| 0.205325702 | 0.119305583 | 0.259743948 | 0.082372906 |
| 0.196051978 | 0.143505605 | 0.029443259 | 0.309087182 |
| 0.081264234 | 0.240473941 | 0.184413549 | 0.050957447 |
| 0.298962605 | 0.292063926 | 0.296303079 | 0.269414398 |
| 0.28550594  | 0.000616507 | 0.052893209 | 0.27227175  |
| 0.162270292 | 0.386188275 | 0.338321441 | 0.078832532 |
| 0.193756005 | 0.223222148 | 0.10690962  | 0.136110301 |
| 0.388017531 | 0.105081299 | 0.089950141 | 0.000965413 |
| 0.078426781 | 0.183811938 | 0.262388599 | 0.084379356 |
| 0.09319914  | 0.09308071  | 0.176405311 | 0.321084366 |
| 0.118703056 | 0.273774888 | 0.076739294 | 0.236539692 |
| 0.149083811 | 0.209197312 | 0.167975715 | 0.23066927  |
| 0.237131611 | 0.157814721 | 0.389977581 | 0.254194346 |
| 0.129051426 | 0.184250316 | 0.196795629 | 0.213943151 |
| 0.2383049   | 0.32359386  | 0.301547091 | 0.295395456 |
| 0.139606447 | 0.307251358 | 0.20913662  | 0.160780861 |
| 0.266160327 | 0.277069566 | 0.07216912  | 0.375368059 |
| 0.001987812 | 0.20888306  | 0.20119044  | 0.201020175 |
| 0.324606807 | 0.111236141 | 0.062782777 | 0.23063026  |
| 0.439123269 | 0.382769723 | 0.396772241 | 0.353442693 |
| 0.224208782 | 0.02843842  | 0.407636597 | 0.236795306 |
| 0.421073049 | 0.215019443 | 0.137965942 | 0.158552616 |
| 0.360570767 | 0.296637261 | 0.221664035 | 0.239749868 |

|             |             |             |             |
|-------------|-------------|-------------|-------------|
| 0.224364598 | 0.211422548 | 0.187212527 | 1           |
| 0.028457233 | 0.132684051 | 0.231444483 | 0.075099698 |
| 0.132849665 | 0.119366068 | 0.286276053 | 0.195136722 |
| 0.166514849 | 0.194461888 | 0.13348426  | 0.041673691 |
| 0.106615336 | 0.368098566 | 0.035416397 | 0.400048855 |
| 0.41740085  | 0.246473221 | 0.322099513 | 0.429240283 |
| 0.217565985 | 0.222619862 | 0.330198967 | 0.419300782 |
| 0.003878038 | 0.351026261 | 0.268737659 | 0.223401482 |
| 0.337437621 | 0.163883128 | 0.286873812 | 0.210914164 |
| 0.003554029 | 0.107343846 | 0.114548375 | 0.385816951 |
| 0.319253634 | 0.018966137 | 0.0361535   | 0.277496554 |
| 0.235602004 | 0.050970856 | 0.409609775 | 0.156683846 |
| 0.289845508 | 0.220520994 | 0.078985086 | 0.302251417 |
| 0.110135011 | 0.283206075 | 0.011306597 | 0.200043236 |
| 0.244812745 | 0.169991178 | 0.024261545 | 0.42798462  |
| 0.319202044 | 0.193073764 | 0.153444561 | 0.003523113 |
| 0.380303661 | 0.074535214 | 0.239159606 | 0.099761953 |
| 0.309898119 | 0.205679634 | 0.3065098   | 0.307469238 |
| 0.254319195 | 0.245983467 | 0.22780773  | 0.298009862 |
| 0.043389318 | 0.310051169 | 0.353508418 | 0.028507289 |
| 0.26141066  | 0.347664446 | 0.174978324 | 0.090183348 |
| 0.252395965 | 0.024467351 | 0.115944757 | 0.300107624 |
| 0.284098007 | 0.335352693 | 0.036847937 | 0.181956146 |
| 0.237024904 | 0.195891635 | 0.060645832 | 0.239639617 |
| 0.170333828 | 0.125000264 | 0.234850227 | 0.224107424 |
| 0.309104329 | 0.145161136 | 0.331013722 | 0.052373581 |
| 0.360932882 | 0.057444385 | 0.363082005 | 0.146120104 |
| 0.203163916 | 0.223656098 | 0.361963996 | 0.163587582 |
| 0.01143786  | 0.126607918 | 0.213947001 | 0.263830637 |
| 0.050946203 | 0.142436326 | 0.117166338 | 0.146502078 |
| 0.395944847 | 0.203343474 | 0.157357387 | 0.253434263 |
| 0.263444935 | 0.03097685  | 0.370288657 | 0.23781468  |
| 0.292976267 | 0.149676183 | 0.291816962 | 0.006890277 |
| 0.247762031 | 0.067959283 | 0.288486994 | 0.143573465 |
| 0.410054273 | 0.075320013 | 0.181138987 | 0.136606563 |
| 0.089734924 | 0.009270327 | 0.249098909 | 0.171209671 |
| 0.154293065 | 0.26224781  | 0.259392893 | 0.088899064 |
| 0.400694819 | 0.238798682 | 0.295069495 | 0.228571392 |
| 0.16760913  | 0.008705113 | 0.060515832 | 0.033421667 |
| 0.281459666 | 0.247492403 | 0.2827205   | 0.253003585 |
| 0.290787469 | 0.221866363 | 0.215962297 | 0.168725653 |
| 0.323164311 | 0.086267724 | 0.401673648 | 0.268442946 |
| 0.330975262 | 0.219177067 | 0.15353427  | 0.223467365 |
| 0.08704605  | 0.120027811 | 0.078006922 | 0.211952039 |
| 0.348362884 | 0.232246499 | 0.165095044 | 0.227074595 |
| 0.02460189  | 0.185481494 | 0.321847313 | 0.269750929 |
| 0.21499973  | 0.249926935 | 0.257847377 | 0.246601281 |
| 0.221547001 | 0.2504102   | 0.013925588 | 0.007796543 |
| 0.096248755 | 0.097848676 | 0.385611879 | 0.354127357 |
| 0.40834813  | 0.259267583 | 0.065296992 | 0.140824354 |
| 0.138968867 | 0.344965283 | 0.12089017  | 0.06824248  |
| 0.250600841 | 0.261562595 | 0.001123099 | 0.250564444 |
| 0.224109268 | 0.190086459 |             |             |
| MPP5        | 0.031814812 | 0.021221015 | 0.000954797 |
|             |             |             | 9.79E-06    |



|                      |                      |                      |             |
|----------------------|----------------------|----------------------|-------------|
| 0.000126939          | 0.010400926          | 0.004198711          | 0.01699641  |
| 0.002248778          | 0.00125814           | 0.011782342          | 0.000325462 |
| 0.013511802          | 0.002060244          | 0.00043429           | 0.025853819 |
| 0.023199304          | 0.004457915          | 0.024021533          | 0.028119392 |
| 0.000339277          | 0.024945998          | 0.010509219          | 0.009709504 |
| 0.000721403          | 0.001299895          | 0.000136383          | 0.010080144 |
| 0.023069984          | 0.009803453          | 0.002142698          | 0.029135876 |
| 0.014794136          | 0.003274269          | 0.000312847          | 0.000627011 |
| 0.021085492          | 5.44E-05 0.009244814 | 0.022925912          |             |
| 0.001790608          | 0.016340922          | 0.000370719          | 1.52E-06    |
| 0.00183803           | 0.010707512          | 0.020954793          | 0.015369854 |
| 0.009544628          | 0.00867049           | 0.001983456          | 0.000230043 |
| 0.015531138          | 0.033083501          | 0.000529301          | 0.014085003 |
| 2.29E-06 0.018244738 | 0.024576031          | 0.002824249          |             |
| 0.012150913          | 0.019483101          | 0.020249284          | 0.008739259 |
| 0.015461288          | 0.020322086          | 8.69E-05 0.003185529 |             |
| 0.011571665          | 0.018493326          | 0.007458614          | 0.022508118 |
| 0.001734558          | 0.001980873          | 0.003085476          | 0.014146202 |
| 0.019512137          | 0.013488473          | 0.003428066          | 0.000400473 |
| 0.002305021          | 0.001044119          | 0.037330959          | 0.007923947 |
| 0.014097994          | 0.022299686          | 0.001504115          | 0.009560844 |
| 0.000450964          | 0.01396281           | 0.022370975          | 1.46E-05    |
| 0.017441931          | 2.03E-06 0.001767294 | 0.020667113          |             |
| 0.024704086          | 0.028754952          | 0.000798545          | 0.000290461 |
| 0.00763066           | 0.006450131          | 0.021647524          | 0.015876975 |
| 0.009703374          | 0.014487326          | 0.002393792          | 0.014185112 |
| 0.005055894          | 0.003711412          | 0.019402507          | 0.026095113 |
| 0.000106471          | 0.008570988          | 0.007514335          | 0.001021633 |
| 0.000108059          | 0.004393156          | 2.97E-05 4.90E-06    | 0.000417911 |
| 0.025422491          | 0.006517832          | 0.00102271           | 0.004596079 |
| 2.90E-05 0.006666843 | 0.010782266          | 0.031397958          |             |
| 0.000250504          | 0.004805147          | 0.010061922          | 0.004895129 |
| 0.002996276          | 0.012696104          | 0.00101553           | 0.014621814 |
| 0.009013039          | 0.013531751          | 0.023729574          | 0.000414998 |
| 0.001687307          | 0.014995336          | 0.011766581          | 0.023168038 |
| 0.024072477          | 0.004106357          | 0.000948462          | 0.010910241 |
| 0.005495723          | 0.00782852           | 0.006047005          | 0.016511053 |
| 0.000338856          | 0.01409821           | 0.017095263          | 1.25E-05    |
| 0.003171426          | 0.018624118          | 6.37E-06 0.000829605 |             |
| 0.02430969           | 0.012637951          | 0.006686067          | 0.000125334 |
| 0.002469431          | 0.007307283          | 0.020077496          | 0.006378101 |
| 0.018921677          | 0.002281654          | 0.019223939          | 0.005164301 |
| 0.000961022          | 0.01381342           | 0.004979803          | 0.022817144 |
| 0.003358748          | 0.000434727          | 0.022201971          | 0.010487589 |
| 0.016316364          | 0.015319543          | 0.030552465          | 1.32E-06    |
| 0.001288983          | 0.031284226          | 0.007375168          | 0.021491315 |
| 0.018190966          | 0.005607038          | 0.018884094          | 0.002359511 |
| 0.008077812          | 0.001204265          | 0.033551847          | 0.002051726 |
| 0.001540811          | 7.00E-05 0.000330375 | 0.00774063           |             |
| 0.00928314           | 0.004644974          | 0.000637003          | 0.004044105 |
| 0.004434915          | 0.018001665          | 0.008508679          | 0.009708874 |
| 0.00098833           | 0.005009109          | 0.004582831          | 0.009051844 |
| 0.002510441          | 0.004894303          | 0.010786862          | 0.003819459 |
| 0.023149156          | 0.020161712          | 0.000665038          | 0.014304762 |

|             |             |             |             |             |
|-------------|-------------|-------------|-------------|-------------|
| 0.000850409 | 0.012907903 | 0.007728375 | 0.014713877 |             |
| 0.014684769 | 0.011394325 | 0.005558425 | 0.023877874 |             |
| 0.000815891 | 0.014260061 | 0.017277185 | 0.011088562 |             |
| 0.00370004  | 0.019517382 | 0.000125209 | 0.01274442  |             |
| 0.007665476 | 0.002208935 | 0.01668462  | 0.005214936 |             |
| 0.004989763 | 0.013459074 | 0.024408956 | 0.019933316 |             |
| 0.030328144 | 0.020577487 | 0.001363512 | 0.001100008 |             |
| 0.026713285 | 0.018004215 | 0.023381849 | 0.004571595 |             |
| 0.000731697 | 0.000220717 | 0.018097142 | 0.014972717 |             |
| 0.018645716 | 0.014137789 | 0.005870751 | 0.002106905 |             |
| 0.010465186 | 0.028457233 | 1           | 0.008217657 |             |
| 0.018213049 | 0.000561716 | 0.004218065 | 0.000715374 |             |
| 0.013611947 | 0.01316633  | 0.001217324 | 0.00451613  |             |
| 0.001800393 | 0.001262701 | 0.006219361 | 0.022314315 |             |
| 8.20E-06    | 0.028005343 | 0.023136458 | 0.010722123 |             |
| 0.015695994 | 0.025006856 | 0.022062128 | 0.01346251  |             |
| 0.018344083 | 0.027015312 | 4.61E-05    | 0.01787235  |             |
| 0.009742739 | 0.017498095 | 0.021257883 | 0.013866825 |             |
| 0.011790914 | 0.003499192 | 1.14E-05    | 0.010106698 |             |
| 0.000961208 | 0.024674397 | 0.01376048  | 0.000183072 |             |
| 1.54E-05    | 0.011904038 | 0.008386743 | 2.86E-05    | 0.024550141 |
| 0.008085495 | 0.013828565 | 0.005276408 | 0.003543049 |             |
| 0.013732767 | 0.0013666   | 0.004422406 | 7.34E-06    |             |
| 0.008035595 | 0.005551941 | 0.001079679 | 0.00027747  |             |
| 0.025407502 | 0.025386581 | 0.008789321 | 0.009954324 |             |
| 9.24E-05    | 0.029560394 | 0.0004128   | 0.010930253 |             |
| 0.00040863  | 0.020773287 | 0.014132138 | 0.014191745 |             |
| 0.014145249 | 0.01153566  | 0.014087126 | 0.018301486 |             |
| 0.020977708 | 1.70E-05    | 0.019384394 | 0.024661205 |             |
| 0.000158885 | 0.016315301 | 0.016851653 | 0.006537735 |             |
| 0.005549312 | 0.023442342 | 2.24E-05    | 0.0095382   |             |
| 0.026142476 | 0.013442564 | 0.01824268  | 0.002384036 |             |
| 0.00621144  | 0.014210979 | 0.005592354 | 0.002434788 |             |
| 0.006591792 | 0.016061376 | 0.001409117 | 0.003090404 |             |
| 0.018407836 | 0.017665337 | 0.008756322 | 0.023095363 |             |
| 0.00077065  | 0.015767575 | 0.001842823 | 0.020118486 |             |
| 0.000992185 | 0.018509323 | 0.016154778 | 0.023465271 |             |
| 0.001496423 | 0.000104638 | 0.003416088 | 0.011969923 |             |
| 0.017748454 | 0.00313695  | 0.01236096  | 0.004095367 |             |
| 0.004280709 | 0.021757979 | 0.002305357 | 0.011188485 |             |
| 0.012086241 | 0.016304213 | 0.00010901  | 0.023377222 |             |
| 0.016576324 | 0.029615981 | 0.003468307 | 0.015246989 |             |
| 2.41E-05    | 0.014300781 | 0.002146926 | 0.022986322 |             |
| 0.00376086  | 0.026053082 | 0.002792398 | 0.008200751 |             |
| 0.009309112 | 0.000105913 | 1.35E-05    | 0.022112843 |             |
| 0.002387719 | 0.013306951 | 0.00331688  | 0.010939185 |             |
| 0.000409968 | 0.024139934 | 0.020112049 | 0.030183932 |             |
| 0.002823289 | 0.005029289 | 1.41E-06    | 0.001753019 |             |
| 0.000911418 | 0.02826025  | 0.016147047 | 0.018694198 |             |
| 0.022749927 | 0.018952468 | 0.007758491 | 0.011537949 |             |
| 0.002876805 | 0.014927567 | 0.00021262  | 0.02315431  |             |
| 0.009923489 | 0.016267379 | 0.005962644 | 0.010028695 |             |
| 0.002924765 | 0.002006418 | 0.000182937 | 0.003698145 |             |
| 0.012711833 | 0.017107752 | 0.001917762 | 0.004049591 |             |

|             |             |                      |                   |
|-------------|-------------|----------------------|-------------------|
| 0.009379919 | 0.000376986 | 0.00365424           | 0.016754401       |
| 0.013241469 | 0.011039103 | 0.021238988          | 0.005057882       |
| 0.015499427 | 0.004227233 | 0.024907157          | 3.29E-05 6.76E-05 |
| 0.000560229 | 0.005107572 | 0.032729638          | 0.020489287       |
| 0.020439166 | 0.004979461 | 0.002977305          | 0.01004827        |
| 0.000364642 | 0.025422738 | 0.005227402          | 4.51E-05          |
| 0.009731896 | 0.011454968 | 3.75E-06 0.018265318 |                   |
| 0.01871741  | 0.000897876 |                      |                   |
| MRPL23      | 0.158585548 | 0.346752325          | 0.122947263       |
| 0.026830437 | 0.062739459 | 0.334172171          | 0.234029023       |
| 0.105353787 | 0.136945412 | 0.18097205           | 0.372463955       |
| 0.006828086 | 0.123226781 | 0.052749903          | 0.055560956       |
| 0.27615643  | 0.265868619 | 0.196763207          | 0.256064639       |
| 0.154187035 | 0.12446153  | 0.284888274          | 0.284206246       |
| 0.276029148 | 0.012290763 | 0.13003137           | 0.102178579       |
| 0.070065761 | 0.235056149 | 0.200674661          | 0.181369855       |
| 0.248589122 | 0.194456699 | 0.099651591          | 0.062646669       |
| 0.027019026 | 0.384792304 | 0.006570129          | 0.139636629       |
| 0.146578069 | 0.143263319 | 0.203752202          | 0.03923259        |
| 0.001231771 | 0.128086266 | 0.059854258          | 0.292616584       |
| 0.116198899 | 0.302933498 | 0.19010051           | 0.155970199       |
| 0.015185466 | 0.361600572 | 0.250753576          | 0.013612117       |
| 0.385649518 | 0.00988976  | 0.388028458          | 0.081105082       |
| 0.113564138 | 0.156193916 | 0.10531223           | 0.259205824       |
| 0.327019466 | 0.392005694 | 0.300173798          | 0.080133363       |
| 0.144582046 | 0.129651042 | 0.172680762          | 0.220623194       |
| 0.31474818  | 0.140575569 | 0.140098468          | 0.040544585       |
| 0.177325985 | 0.161371217 | 0.273845386          | 0.120370936       |
| 0.006667943 | 0.183997294 | 0.076586993          | 0.152001026       |
| 0.096585227 | 0.374611207 | 0.149697152          | 0.124070468       |
| 0.133316632 | 0.075647047 | 0.249211997          | 0.29361233        |
| 0.036514735 | 0.148851997 | 0.006225549          | 0.101028816       |
| 0.225190834 | 0.197588675 | 0.241075796          | 0.141803871       |
| 0.046693623 | 0.114797087 | 0.06098004           | 0.138291657       |
| 0.16918146  | 0.150471769 | 0.372120092          | 0.007799044       |
| 0.106194694 | 0.159869863 | 0.111164905          | 0.40219617        |
| 0.314904974 | 0.016138562 | 0.113759084          | 0.27893105        |
| 0.063821346 | 0.075424328 | 0.215569494          | 0.014035375       |
| 0.021407392 | 0.008364256 | 0.229612456          | 0.149396693       |
| 0.136142275 | 0.22824903  | 0.06892154           | 0.167306659       |
| 0.069566783 | 0.198003445 | 0.069523579          | 0.208279471       |
| 0.146586908 | 0.249685604 | 0.121764766          | 0.195980671       |
| 0.053295924 | 0.111392404 | 0.163084277          | 0.312781053       |
| 0.362455929 | 0.106184402 | 0.143675175          | 0.354200119       |
| 0.106519727 | 0.268148691 | 0.318687621          | 0.102613791       |
| 0.094638125 | 0.175584842 | 0.142689323          | 0.290596526       |
| 0.233334059 | 0.14652007  | 0.006662536          | 0.300256803       |
| 0.411588264 | 0.011064087 | 0.134314529          | 0.206285087       |
| 0.016428038 | 0.107104923 | 0.370415416          | 0.241591949       |
| 0.134306486 | 0.10076906  | 0.167618772          | 0.278026533       |
| 0.250909384 | 0.242725172 | 0.231965306          | 0.168758552       |
| 0.325731209 | 0.14226044  | 0.09868758           | 0.110771887       |
| 0.164155705 | 0.250324327 | 0.056974795          | 0.019601164       |
| 0.148566066 | 0.085119666 | 0.313520212          | 0.184139593       |

|             |             |             |             |
|-------------|-------------|-------------|-------------|
| 0.190014963 | 0.006799612 | 0.18485195  | 0.197962104 |
| 0.146511945 | 0.148377033 | 0.366530587 | 0.167774267 |
| 0.247250756 | 0.031994893 | 0.174893523 | 0.079464868 |
| 0.221370889 | 0.17704133  | 0.181692176 | 0.016230727 |
| 0.109578911 | 0.085362049 | 0.117489343 | 0.089049542 |
| 0.112831848 | 0.172713952 | 0.048158203 | 0.288734482 |
| 0.251577965 | 0.186985113 | 0.028791647 | 0.016805602 |
| 0.16185799  | 0.288167823 | 0.094150895 | 0.105847099 |
| 0.256046285 | 0.158171694 | 0.163380081 | 0.370674516 |
| 0.07988689  | 0.400739928 | 0.012871568 | 0.129396962 |
| 0.117395586 | 0.258914116 | 0.201703204 | 0.20136841  |
| 0.191313177 | 0.155696098 | 0.045666292 | 0.340356599 |
| 0.19624413  | 0.145482138 | 0.146470438 | 0.328086944 |
| 0.009946807 | 0.258064476 | 0.17511802  | 0.018076193 |
| 0.354669219 | 0.27512816  | 0.130882471 | 0.120743803 |
| 0.264604074 | 0.327940802 | 0.244827334 | 0.196318704 |
| 0.036722781 | 0.034718659 | 0.303180506 | 0.310445348 |
| 0.234958801 | 0.125401304 | 0.037073168 | 0.008112886 |
| 0.276719207 | 0.088144378 | 0.264548844 | 0.148512704 |
| 0.11977075  | 0.041927811 | 0.171662398 | 0.132684051 |
| 0.008217657 | 1           | 0.201033719 | 0.114430925 |
| 0.154977828 | 0.131687089 | 0.254027455 | 0.304285543 |
| 0.062009313 | 0.103728066 | 0.081869098 | 0.116362542 |
| 0.210879689 | 0.354688533 | 0.002256759 | 0.295963552 |
| 0.296849745 | 0.170285281 | 0.281535258 | 0.290339523 |
| 0.230756292 | 0.347572663 | 0.307388839 | 0.193424228 |
| 0.003149855 | 0.162419575 | 0.105867556 | 0.368552941 |
| 0.241584504 | 0.316174111 | 0.037142687 | 0.058857626 |
| 0.001699265 | 0.210015858 | 0.036135103 | 0.353276547 |
| 0.243300384 | 0.071354626 | 0.001445464 | 0.238406265 |
| 0.102301314 | 0.006088283 | 0.335985627 | 0.259147886 |
| 0.310544102 | 0.134601897 | 0.204339433 | 0.139504979 |
| 0.024805067 | 0.061834481 | 0.026254195 | 0.223727533 |
| 0.076649216 | 0.013652867 | 0.104359994 | 0.29198666  |
| 0.322324271 | 0.286241874 | 0.252587899 | 0.065194865 |
| 0.154775935 | 0.084040059 | 0.232972936 | 0.078676684 |
| 0.295811597 | 0.345287814 | 0.317282143 | 0.163853375 |
| 0.166959673 | 0.362321818 | 0.395464703 | 0.306110594 |
| 0.024908842 | 0.180590813 | 0.218157848 | 0.098887527 |
| 0.112717103 | 0.261794517 | 0.159431079 | 0.265478317 |
| 0.270922984 | 0.025096587 | 0.300276464 | 0.137191544 |
| 0.334757201 | 0.271940561 | 0.140885365 | 0.100312988 |
| 0.377734464 | 0.126939656 | 0.131179963 | 0.127214723 |
| 0.321528828 | 0.021326078 | 0.014908914 | 0.307168141 |
| 0.383984067 | 0.335207364 | 0.282184806 | 0.145951723 |
| 0.208664087 | 0.088574705 | 0.213329622 | 0.109766758 |
| 0.238596461 | 0.142049687 | 0.145357352 | 0.024072642 |
| 0.095100377 | 0.151412996 | 0.364289339 | 0.385744995 |
| 0.133116146 | 0.213547727 | 0.216537011 | 0.223952899 |
| 0.253080307 | 0.093132407 | 0.300056655 | 0.142299772 |
| 0.393060148 | 0.07766207  | 0.372734331 | 0.206258816 |
| 0.310077946 | 0.14609134  | 0.246933768 | 0.009144909 |
| 0.158565883 | 0.191058376 | 0.048498012 | 0.183936843 |
| 0.183298916 | 0.154036027 | 0.284754273 | 0.153346367 |

|             |             |             |             |
|-------------|-------------|-------------|-------------|
| 0.044500223 | 0.003231979 | 0.279979052 | 0.047483685 |
| 0.370933255 | 0.03462703  | 0.147183468 | 0.011579087 |
| 0.35803596  | 0.221668667 | 0.28240259  | 0.023345601 |
| 0.159595937 | 0.000963115 | 0.166239379 | 0.096600382 |
| 0.303612538 | 0.309754122 | 0.169732017 | 0.154329213 |
| 0.060564657 | 0.17180458  | 0.279200282 | 0.117037975 |
| 0.258597403 | 0.038034296 | 0.286665361 | 0.090435874 |
| 0.125226152 | 0.108415945 | 0.27107229  | 0.091200276 |
| 0.142142504 | 0.042652196 | 0.132792659 | 0.103038993 |
| 0.240910409 | 0.063699599 | 0.176627823 | 0.119787888 |
| 0.106217492 | 0.12148126  | 0.164823401 | 0.158900887 |
| 0.220846142 | 0.156820072 | 0.060023245 | 0.379202636 |
| 0.09293096  | 0.136987642 | 0.040495912 | 0.071277912 |
| 0.080967907 | 0.185632172 | 0.25581455  | 0.249900056 |
| 0.265400198 | 0.04978726  | 0.143240238 | 0.128113414 |
| 0.007329442 | 0.158417217 | 0.276378597 | 0.01571938  |
| 0.156984751 | 0.049867409 | 0.003626936 | 0.105691263 |
| 0.337130356 | 0.074048203 |             |             |
| MRPS18B     | 0.255114565 | 0.441948378 | 0.049415728 |
| 0.03934802  | 0.061364769 | 0.148522325 | 0.129111622 |
| 0.256896475 | 0.070093853 | 0.118783863 | 0.218241267 |
| 0.002014164 | 0.323275819 | 0.013206287 | 0.03601298  |
| 0.491099278 | 0.482878785 | 0.17803294  | 0.459163063 |
| 0.218209075 | 0.135908064 | 0.241830887 | 0.267227164 |
| 0.15737463  | 0.002061061 | 0.07953204  | 0.068879149 |
| 0.239344767 | 0.47341131  | 0.122665135 | 0.222393338 |
| 0.44825652  | 0.418618429 | 0.260155421 | 0.171168822 |
| 0.164210597 | 0.396496801 | 0.050298553 | 0.317885536 |
| 0.369228785 | 0.144834569 | 0.400316017 | 0.008933314 |
| 0.005510702 | 0.065332504 | 0.230685634 | 0.25370567  |
| 0.176658683 | 0.142462165 | 0.098638275 | 0.113153289 |
| 0.135435959 | 0.242673275 | 0.314560093 | 0.139660289 |
| 0.320470403 | 0.009360583 | 0.373630483 | 0.190131832 |
| 0.039813182 | 0.176367991 | 0.250958994 | 0.271444477 |
| 0.144941951 | 0.34862839  | 0.456490273 | 0.023952746 |
| 0.048126991 | 0.259620581 | 0.380653498 | 0.279179738 |
| 0.404351787 | 0.269531877 | 0.180796102 | 0.196986856 |
| 0.324037398 | 0.368604505 | 0.157736129 | 0.100925382 |
| 0.001421635 | 0.092937436 | 0.197780909 | 0.256188978 |
| 0.255368108 | 0.251199171 | 0.256888593 | 0.124757339 |
| 0.309526597 | 0.014179453 | 0.237349143 | 0.480542784 |
| 0.020760302 | 0.31598397  | 0.007295626 | 0.082484697 |
| 0.383536126 | 0.455831034 | 0.301710852 | 0.052213042 |
| 0.009514367 | 0.074186303 | 0.124008204 | 0.391284044 |
| 0.242281043 | 0.275518739 | 0.302679152 | 0.077879958 |
| 0.330199098 | 0.141283574 | 0.18855344  | 0.401650057 |
| 0.458759863 | 0.004747772 | 0.09855505  | 0.133882495 |
| 0.1902487   | 0.097074048 | 0.127593238 | 0.052917685 |
| 0.014862631 | 0.015461558 | 0.440516932 | 0.107230285 |
| 0.07074247  | 0.128421742 | 0.064964495 | 0.274342625 |
| 0.228637906 | 0.403310515 | 0.058809677 | 0.15618923  |
| 0.317825956 | 0.14715742  | 0.253613526 | 0.337082807 |
| 0.189252305 | 0.159548826 | 0.105479289 | 0.362772692 |
| 0.340926335 | 0.044579903 | 0.060636074 | 0.210131802 |

|             |             |             |             |
|-------------|-------------|-------------|-------------|
| 0.310357569 | 0.465362569 | 0.486974059 | 0.191200365 |
| 0.144549876 | 0.139271126 | 0.263229274 | 0.248448065 |
| 0.131908273 | 0.194166703 | 0.052531701 | 0.213976361 |
| 0.331632086 | 0.035233443 | 0.044813779 | 0.340018805 |
| 0.03163458  | 0.129779631 | 0.38895627  | 0.332431945 |
| 0.234489624 | 0.062906321 | 0.187798362 | 0.169741985 |
| 0.189998337 | 0.172922899 | 0.247016956 | 0.185894809 |
| 0.198747963 | 0.2806796   | 0.030543305 | 0.328448508 |
| 0.075267798 | 0.205769456 | 0.238574265 | 0.049480284 |
| 0.239705366 | 0.203827646 | 0.393618442 | 0.256371869 |
| 0.321468376 | 0.010137482 | 0.129354348 | 0.260808726 |
| 0.270698142 | 0.352046738 | 0.434927273 | 0.066947955 |
| 0.153448623 | 0.159950939 | 0.085259895 | 0.168444341 |
| 0.33930264  | 0.193739151 | 0.167281159 | 0.001741387 |
| 0.075034667 | 0.320944204 | 0.231418905 | 0.041605851 |
| 0.141639646 | 0.096483342 | 0.076884332 | 0.412800181 |
| 0.12646471  | 0.335848307 | 0.020135736 | 0.085622656 |
| 0.173975299 | 0.282894675 | 0.298151687 | 0.228150745 |
| 0.331761894 | 0.242921758 | 0.429426577 | 0.288982777 |
| 0.128373546 | 0.258548458 | 0.086402757 | 0.160817284 |
| 0.272138421 | 0.400071404 | 0.400379816 | 0.335984179 |
| 0.160266898 | 0.235696309 | 0.193967816 | 0.170594453 |
| 0.246101255 | 0.220083463 | 0.063995705 | 0.428611407 |
| 0.000973425 | 0.200927854 | 0.281252917 | 0.107567984 |
| 0.429462481 | 0.139655515 | 0.04817317  | 0.159789593 |
| 0.468331013 | 0.425521857 | 0.36137582  | 0.433230882 |
| 0.165994338 | 0.008788903 | 0.421523634 | 0.27568983  |
| 0.477681153 | 0.21069563  | 0.179836311 | 0.035728288 |
| 0.433581641 | 0.199317923 | 0.290520065 | 0.306877345 |
| 0.241786385 | 0.196530828 | 0.132365765 | 0.231444483 |
| 0.018213049 | 0.201033719 | 1           | 0.165208131 |
| 0.260952288 | 0.129280662 | 0.369597653 | 0.187671982 |
| 0.214771671 | 0.310471996 | 0.237740972 | 0.051908598 |
| 0.097399951 | 0.458204435 | 0.019075497 | 0.400417777 |
| 0.48105648  | 0.190027692 | 0.432240929 | 0.474471705 |
| 0.216261863 | 0.26906378  | 0.42091506  | 0.38766096  |
| 0.001008274 | 0.407767031 | 0.298533607 | 0.237431792 |
| 0.454539305 | 0.176025599 | 0.143798139 | 0.246210419 |
| 0.000504704 | 0.097023259 | 0.222089173 | 0.412382752 |
| 0.408848627 | 0.01677058  | 0.019820021 | 0.336846232 |
| 0.27435365  | 0.02395969  | 0.479758707 | 0.228074215 |
| 0.386463878 | 0.230998691 | 0.113769816 | 0.356122482 |
| 0.191879045 | 0.192347286 | 0.01820037  | 0.277881588 |
| 0.216509514 | 0.053898219 | 0.073951105 | 0.464260531 |
| 0.398916563 | 0.231538992 | 0.142622609 | 0.02527174  |
| 0.372446561 | 0.219717426 | 0.352729819 | 0.060184879 |
| 0.33122974  | 0.237139195 | 0.360001247 | 0.355113635 |
| 0.257774804 | 0.312610148 | 0.287188742 | 0.390506911 |
| 0.083871419 | 0.404715664 | 0.437226119 | 0.05228785  |
| 0.257285169 | 0.427158359 | 0.287614977 | 0.107725408 |
| 0.23203205  | 0.071298176 | 0.123928987 | 0.210591457 |
| 0.364097946 | 0.441692894 | 0.04278081  | 0.093796472 |
| 0.316831215 | 0.168635687 | 0.060952307 | 0.17613226  |
| 0.161787475 | 0.182112512 | 0.075815266 | 0.231065079 |

|             |             |             |             |
|-------------|-------------|-------------|-------------|
| 0.388679228 | 0.172899514 | 0.450584902 | 0.161368931 |
| 0.408595115 | 0.030488783 | 0.334471228 | 0.135273315 |
| 0.172333155 | 0.304592316 | 0.380870339 | 0.119506947 |
| 0.047099456 | 0.119935416 | 0.294449955 | 0.318279148 |
| 0.051070674 | 0.117814834 | 0.166396417 | 0.206123521 |
| 0.473616736 | 0.294359168 | 0.161725005 | 0.196454092 |
| 0.31036034  | 0.084281108 | 0.421995463 | 0.22156109  |
| 0.327873956 | 0.21752352  | 0.338361575 | 0.00749663  |
| 0.286434477 | 0.153387498 | 0.139886435 | 0.22852946  |
| 0.437101103 | 0.087113552 | 0.22893023  | 0.110639533 |
| 0.127934918 | 0.002306693 | 0.224004941 | 0.216453436 |
| 0.176710808 | 0.17331832  | 0.211604632 | 0.120574684 |
| 0.466561424 | 0.275144446 | 0.365958536 | 0.141503286 |
| 0.260949103 | 0.011108181 | 0.118154566 | 0.026363577 |
| 0.297272696 | 0.250480592 | 0.255997795 | 0.284585969 |
| 0.144774613 | 0.24890012  | 0.225787544 | 0.232241415 |
| 0.419946949 | 0.176862681 | 0.4930045   | 0.160349463 |
| 0.361940788 | 0.257270348 | 0.143172517 | 0.176452238 |
| 0.107459403 | 0.068663366 | 0.068214447 | 0.110949298 |
| 0.451764956 | 0.140790485 | 0.229990841 | 0.277257824 |
| 0.036490877 | 0.233436203 | 0.309513567 | 0.332332325 |
| 0.300013689 | 0.331130169 | 0.238948508 | 0.286018216 |
| 0.225279046 | 0.207936049 | 0.06175194  | 0.044356961 |
| 0.213018649 | 0.132535182 | 0.357348744 | 0.361968645 |
| 0.454618555 | 0.181275595 | 0.0628858   | 0.089288244 |
| 0.059678436 | 0.337017723 | 0.15642602  | 0.094214673 |
| 0.235553161 | 0.198557345 | 0.000573685 | 0.158327863 |
| 0.255866139 | 0.255826724 |             |             |
| MRPS27      | 0.083436383 | 0.261377187 | 0.008544336 |
| 0.00860379  | 0.010270373 | 0.16297242  | 0.155156242 |
| 0.051197831 | 0.011783496 | 0.093930736 | 0.190952167 |
| 4.33E-05    | 0.112078951 | 0.000618592 | 0.002450122 |
| 0.210534442 | 0.222629957 | 0.141581467 | 0.191544183 |
| 0.059611929 | 0.051929243 | 0.125507906 | 0.189228956 |
| 0.154966714 | 8.20E-05    | 0.078461983 | 0.046434456 |
| 0.043788179 | 0.183885076 | 0.06579509  | 0.040195635 |
| 0.193453423 | 0.186835188 | 0.104928326 | 0.023556302 |
| 0.033781783 | 0.244374524 | 0.001475151 | 0.146607173 |
| 0.132600666 | 0.097752845 | 0.186965309 | 0.000979558 |
| 0.001878262 | 0.05293601  | 0.030891655 | 0.146102186 |
| 0.047269986 | 0.135246136 | 0.058818647 | 0.143325538 |
| 0.002379881 | 0.199399194 | 0.127586035 | 0.005412804 |
| 0.246570946 | 0.010383425 | 0.263882365 | 0.025964063 |
| 0.021338458 | 0.075890482 | 0.094793013 | 0.147276705 |
| 0.173614019 | 0.255246606 | 0.235431564 | 0.004411524 |
| 0.049392158 | 0.091282712 | 0.168892743 | 0.232438051 |
| 0.23257016  | 0.030925394 | 0.058608394 | 0.052170147 |
| 0.177896421 | 0.134423689 | 0.119893087 | 0.021196992 |
| 0.000111718 | 0.113953898 | 0.095065842 | 0.094019034 |
| 0.099990194 | 0.195378304 | 0.088313846 | 0.090402123 |
| 0.106368005 | 0.001376623 | 0.121014449 | 0.231714976 |
| 0.003111516 | 0.123587299 | 0.000463556 | 0.011438919 |
| 0.165379819 | 0.17343095  | 0.153523904 | 0.031192179 |
| 0.000717856 | 0.018422786 | 0.003667748 | 0.126869317 |

|                   |             |             |             |
|-------------------|-------------|-------------|-------------|
| 0.096387565       | 0.118990832 | 0.241723984 | 0.006784805 |
| 0.106590461       | 0.018176037 | 0.069290002 | 0.266476166 |
| 0.228900566       | 0.000146849 | 0.015003937 | 0.120145332 |
| 0.035017298       | 0.063986396 | 0.10706186  | 0.00077161  |
| 0.000661 8.62E-05 | 0.183824605 | 0.022148946 | 0.086169114 |
| 0.1212556         | 0.005115345 | 0.195442402 | 0.033291888 |
| 0.147867166       | 0.021533926 | 0.140875828 | 0.14335246  |
| 0.172056436       | 0.12606916  | 0.171117412 | 0.05018122  |
| 0.025636526       | 0.039381283 | 0.233250852 | 0.195377265 |
| 0.006773749       | 0.011003295 | 0.181291065 | 0.111110325 |
| 0.196444766       | 0.24027657  | 0.018026394 | 0.070253197 |
| 0.061358353       | 0.117286816 | 0.219998237 | 0.120016142 |
| 0.061376473       | 0.000479576 | 0.150889371 | 0.252737551 |
| 0.000578797       | 0.024150635 | 0.141949358 | 0.004950528 |
| 0.029624927       | 0.246361639 | 0.193122542 | 0.106813262 |
| 0.048229118       | 0.130237092 | 0.174678029 | 0.10945195  |
| 0.156659413       | 0.146923717 | 0.152210313 | 0.149695272 |
| 0.14102111        | 0.017105868 | 0.113522166 | 0.048476463 |
| 0.11000359        | 0.029763762 | 0.003589851 | 0.093116941 |
| 0.034737357       | 0.232157847 | 0.110767646 | 0.144162611 |
| 0.003967352       | 0.08917223  | 0.109498535 | 0.085672858 |
| 0.112102571       | 0.277570297 | 0.05038838  | 0.087888813 |
| 0.022172025       | 0.052543122 | 0.073839622 | 0.127807872 |
| 0.047206235       | 0.074302219 | 0.000242939 | 0.0078083   |
| 0.103660083       | 0.087685814 | 0.002910568 | 0.039092656 |
| 0.012868249       | 0.001862676 | 0.228592705 | 0.095183706 |
| 0.171453823       | 0.000335255 | 0.005494009 | 0.057265478 |
| 0.232034109       | 0.067293358 | 0.012102794 | 0.244572124 |
| 0.050056727       | 0.14649605  | 0.21979212  | 0.030442169 |
| 0.237610149       | 0.002496386 | 0.052304489 | 0.108442757 |
| 0.225374857       | 0.184019774 | 0.162914021 | 0.089987386 |
| 0.086469787       | 0.004311528 | 0.148012679 | 0.10237483  |
| 0.078710176       | 0.013293282 | 0.229115156 | 0.000107039 |
| 0.130750846       | 0.196946921 | 0.005379193 | 0.268866377 |
| 0.167129813       | 0.016192313 | 0.034187537 | 0.198950057 |
| 0.227399106       | 0.146515283 | 0.17152661  | 0.003466817 |
| 0.000261274       | 0.192162008 | 0.209051568 | 0.197895129 |
| 0.081425931       | 0.040014169 | 0.000478151 | 0.210124675 |
| 0.053470989       | 0.213299954 | 0.113668645 | 0.123791737 |
| 0.040742535       | 0.063833032 | 0.075099698 | 0.000561716 |
| 0.114430925       | 0.165208131 | 1           | 0.16482796  |
| 0.009449507       | 0.229113384 | 0.146495572 | 0.049634658 |
| 0.029494708       | 0.116288108 | 0.039291735 | 0.087532224 |
| 0.258482923       | 0.000486098 | 0.181707195 | 0.222712075 |
| 0.092352381       | 0.246001015 | 0.207200199 | 0.099135552 |
| 0.223292859       | 0.229399658 | 0.140973514 | 1.59E-05    |
| 0.155967611       | 0.109278382 | 0.17955894  | 0.215052878 |
| 0.155474293       | 0.018260231 | 0.067816059 | 2.55E-05    |
| 0.066457927       | 0.02726862  | 0.221923284 | 0.212908103 |
| 0.003619471       | 0.000575448 | 0.178313255 | 0.102897533 |
| 0.000632451       | 0.241661526 | 0.163978447 | 0.24429445  |
| 0.097826893       | 0.118562275 | 0.14329124  | 0.026300385 |
| 0.030104167       | 0.002796357 | 0.186297087 | 0.071786606 |
| 0.001115081       | 0.079523671 | 0.217431058 | 0.207368834 |



|             |             |             |             |
|-------------|-------------|-------------|-------------|
| 0.191065569 | 0.116252717 | 0.007921021 | 0.123235587 |
| 0.031763058 | 0.219533826 | 0.002941569 | 0.163191477 |
| 0.20155416  | 0.214063198 | 0.16159531  | 0.124269637 |
| 0.21820764  | 0.228768565 | 0.230646036 | 0.005812269 |
| 0.160127414 | 0.179486269 | 0.006155263 | 0.081372979 |
| 0.227515334 | 0.203069491 | 0.119613585 | 0.137845322 |
| 0.00972119  | 0.122485528 | 0.057231132 | 0.238251745 |
| 0.242157131 | 0.028092823 | 0.012804381 | 0.260141933 |
| 0.048479409 | 0.056383758 | 0.061927126 | 0.142845778 |
| 0.0053726   | 0.002597221 | 0.166549218 | 0.265887383 |
| 0.186046885 | 0.234433264 | 0.106353681 | 0.173528228 |
| 0.004944696 | 0.143660772 | 0.018729241 | 0.090139332 |
| 0.131663456 | 0.124069158 | 0.001276174 | 0.010174006 |
| 0.006039525 | 0.263472061 | 0.236781979 | 0.028356637 |
| 0.066092671 | 0.11062667  | 0.175445045 | 0.208097317 |
| 0.042073071 | 0.129861051 | 0.058228243 | 0.236518282 |
| 0.02737784  | 0.232941506 | 0.082594918 | 0.175064826 |
| 0.090772722 | 0.186317804 | 0.004792436 | 0.151726236 |
| 0.107850136 | 0.019314673 | 0.193505578 | 0.161422591 |
| 0.043557507 | 0.213499976 | 0.033525059 | 0.005999141 |
| 3.65E-05    | 0.130257099 | 0.070168669 | 0.175364355 |
| 0.011575627 | 0.061983986 | 0.009486815 | 0.253933946 |
| 0.122867068 | 0.187337345 | 0.019265404 | 0.147242549 |
| 0.000764221 | 0.125416605 | 0.002373572 | 0.159306864 |
| 0.167937282 | 0.109180366 | 0.106923353 | 0.01391467  |
| 0.166143517 | 0.151555609 | 0.129923856 | 0.238186195 |
| 0.004631327 | 0.233803515 | 0.040100701 | 0.131087453 |
| 0.033103735 | 0.125102718 | 0.019305769 | 0.101025074 |
| 0.003316175 | 0.049335886 | 0.011358613 | 0.223126101 |
| 0.016360156 | 0.15612425  | 0.029453433 | 0.009604356 |
| 0.071364676 | 0.122564155 | 0.157784275 | 0.173873624 |
| 0.139524244 | 0.031896276 | 0.221802099 | 0.022361305 |
| 0.06167313  | 0.017319026 | 0.041239171 | 0.049809793 |
| 0.096231854 | 0.147788187 | 0.155395743 | 0.205692267 |
| 0.014025512 | 0.030618492 | 0.021687545 | 0.001632466 |
| 0.113203251 | 0.18210977  | 0.003640643 | 0.126368069 |
| 0.03147444  | 1.72E-05    | 0.023676193 | 0.191157431 |
| 0.016580225 |             |             |             |
| MRT04       | 0.141086919 | 0.398124711 | 0.043683838 |
| 0.060479456 | 0.05135438  | 0.230175323 | 0.193572628 |
| 0.102626847 | 0.047960117 | 0.13733139  | 0.299993162 |
| 0.000502322 | 0.185000743 | 0.006930515 | 0.019540869 |
| 0.347586779 | 0.349091567 | 0.193184286 | 0.315652003 |
| 0.110791446 | 0.150148225 | 0.220886061 | 0.288635224 |
| 0.204413941 | 0.00088323  | 0.101718466 | 0.145932314 |
| 0.079777146 | 0.309490421 | 0.107216781 | 0.125071703 |
| 0.308230826 | 0.292153464 | 0.119249434 | 0.081091991 |
| 0.057338221 | 0.388436089 | 0.010846461 | 0.221663767 |
| 0.207824027 | 0.129870689 | 0.286696167 | 0.007226722 |
| 0.007138117 | 0.069295924 | 0.063691232 | 0.247945829 |
| 0.079626463 | 0.199290021 | 0.095989932 | 0.151635159 |
| 0.024946248 | 0.303073826 | 0.226783634 | 0.026546152 |
| 0.373824308 | 0.028923023 | 0.391984093 | 0.050534966 |
| 0.035918932 | 0.111379835 | 0.118694849 | 0.241245795 |

|             |             |             |             |
|-------------|-------------|-------------|-------------|
| 0.240679651 | 0.390236528 | 0.366136287 | 0.03327848  |
| 0.06788494  | 0.142569278 | 0.256374246 | 0.30760431  |
| 0.354932148 | 0.123242663 | 0.107547933 | 0.068628354 |
| 0.25148588  | 0.223495252 | 0.185365143 | 0.05430839  |
| 0.000965389 | 0.142238238 | 0.110360678 | 0.151906353 |
| 0.161659554 | 0.312446784 | 0.1567932   | 0.098824676 |
| 0.178129156 | 0.013546571 | 0.20903237  | 0.368374344 |
| 0.024586203 | 0.196980322 | 0.004046805 | 0.043422663 |
| 0.273034131 | 0.278440987 | 0.244652531 | 0.065142732 |
| 0.007942861 | 0.037445422 | 0.024648896 | 0.208020181 |
| 0.157742563 | 0.180915743 | 0.354505482 | 0.010682608 |
| 0.174196666 | 0.066585376 | 0.086318856 | 0.417233572 |
| 0.365332694 | 0.002171076 | 0.040577395 | 0.187260006 |
| 0.075727148 | 0.102405235 | 0.158365116 | 0.013038563 |
| 0.011562328 | 0.001655686 | 0.297654172 | 0.053086795 |
| 0.091940079 | 0.166734375 | 0.051697793 | 0.260324458 |
| 0.068270828 | 0.242822985 | 0.053614525 | 0.179239701 |
| 0.225870804 | 0.216800773 | 0.181188608 | 0.261954217 |
| 0.071403937 | 0.05281363  | 0.06745278  | 0.354027403 |
| 0.322722428 | 0.041481572 | 0.050124187 | 0.281700999 |
| 0.174036436 | 0.332300127 | 0.383973994 | 0.058415957 |
| 0.091637961 | 0.102523535 | 0.143286313 | 0.322817663 |
| 0.170360354 | 0.11183435  | 0.006338384 | 0.242041596 |
| 0.384952073 | 0.008634052 | 0.041797032 | 0.235757289 |
| 0.029169683 | 0.082337017 | 0.373496494 | 0.294576502 |
| 0.165817065 | 0.145081687 | 0.16600332  | 0.227252362 |
| 0.168107571 | 0.208241587 | 0.217388407 | 0.166486343 |
| 0.235876213 | 0.156087138 | 0.03416211  | 0.181111962 |
| 0.078655219 | 0.181255447 | 0.063658945 | 0.018014632 |
| 0.158600175 | 0.065792287 | 0.362876405 | 0.179631619 |
| 0.22545314  | 0.025388893 | 0.148944812 | 0.178938312 |
| 0.132866184 | 0.195336765 | 0.420590015 | 0.077777316 |
| 0.14586378  | 0.036992476 | 0.083728995 | 0.086584452 |
| 0.220179682 | 0.142288324 | 0.143768176 | 0.002397095 |
| 0.051824121 | 0.141694817 | 0.125223806 | 0.017933349 |
| 0.094424059 | 0.06189617  | 0.018577078 | 0.352035338 |
| 0.149286551 | 0.266922834 | 0.004734547 | 0.012664824 |
| 0.096488132 | 0.328179239 | 0.119112915 | 0.06495555  |
| 0.336343394 | 0.121176807 | 0.240827275 | 0.324889086 |
| 0.068210593 | 0.352933606 | 0.014231641 | 0.078213984 |
| 0.173406498 | 0.336298555 | 0.293697971 | 0.262978459 |
| 0.136673459 | 0.150022257 | 0.043627878 | 0.235559356 |
| 0.174109319 | 0.138386542 | 0.043089439 | 0.369201315 |
| 0.000845604 | 0.208815291 | 0.24704055  | 0.018159181 |
| 0.414457122 | 0.225547199 | 0.035312683 | 0.067498712 |
| 0.326923566 | 0.364024353 | 0.249297684 | 0.281114009 |
| 0.031023407 | 0.003710303 | 0.31967278  | 0.294676701 |
| 0.319800264 | 0.124238237 | 0.061577694 | 0.005163767 |
| 0.345491829 | 0.095984663 | 0.293270915 | 0.184839727 |
| 0.172597003 | 0.063345526 | 0.103004781 | 0.132849665 |
| 0.004218065 | 0.154977828 | 0.260952288 | 0.16482796  |
| 1           | 0.070025349 | 0.331204204 | 0.229974313 |
| 0.080492065 | 0.097217405 | 0.121321638 | 0.055882397 |
| 0.12380821  | 0.404685725 | 0.003807619 | 0.305269828 |

|             |             |             |             |
|-------------|-------------|-------------|-------------|
| 0.363328127 | 0.142502651 | 0.37443096  | 0.347180166 |
| 0.165618932 | 0.325049094 | 0.362088482 | 0.234433675 |
| 0.000290022 | 0.249656677 | 0.175188841 | 0.283789351 |
| 0.336338774 | 0.225932167 | 0.034857775 | 0.101348468 |
| 0.000233932 | 0.10391385  | 0.069257821 | 0.358806837 |
| 0.333374566 | 0.021969866 | 0.003288008 | 0.28909512  |
| 0.167966784 | 0.005695678 | 0.388008175 | 0.238543273 |
| 0.373653544 | 0.155135751 | 0.148600078 | 0.221251119 |
| 0.047792581 | 0.05041642  | 0.019421289 | 0.285230145 |
| 0.101594339 | 0.008078301 | 0.124513501 | 0.346222463 |
| 0.344240959 | 0.281811008 | 0.16858987  | 0.047005139 |
| 0.202865039 | 0.147207838 | 0.325371491 | 0.031690069 |
| 0.284426382 | 0.292958995 | 0.344147771 | 0.241473297 |
| 0.194196352 | 0.348178169 | 0.348753017 | 0.355955401 |
| 0.042594243 | 0.263693622 | 0.293962415 | 0.05521005  |
| 0.141925612 | 0.34645751  | 0.23942944  | 0.172332764 |
| 0.224334404 | 0.054691909 | 0.183512409 | 0.103391971 |
| 0.372912043 | 0.363347917 | 0.048920033 | 0.035718067 |
| 0.379822497 | 0.075864467 | 0.07493226  | 0.101741813 |
| 0.215636629 | 0.032775906 | 0.010904824 | 0.25381342  |
| 0.404242794 | 0.269201194 | 0.361954892 | 0.191817058 |
| 0.285837487 | 0.020456375 | 0.236382301 | 0.069219356 |
| 0.150802389 | 0.208720813 | 0.208000843 | 0.017229453 |
| 0.061759094 | 0.051253684 | 0.371486592 | 0.357400025 |
| 0.046629623 | 0.110151963 | 0.177523541 | 0.242368028 |
| 0.338309531 | 0.105310661 | 0.206444226 | 0.107096908 |
| 0.358896527 | 0.110015645 | 0.377414216 | 0.149916278 |
| 0.285723874 | 0.143590695 | 0.284878992 | 0.005481439 |
| 0.221044649 | 0.154726399 | 0.037149931 | 0.24243816  |
| 0.257443698 | 0.07310892  | 0.294615827 | 0.057785549 |
| 0.052651725 | 0.000597234 | 0.2156497   | 0.095128444 |
| 0.264205265 | 0.033085881 | 0.11716773  | 0.025852737 |
| 0.399916776 | 0.205245706 | 0.296760574 | 0.028550841 |
| 0.188571849 | 0.003356143 | 0.130971052 | 0.022512379 |
| 0.261309787 | 0.262726908 | 0.179659487 | 0.16013019  |
| 0.028820242 | 0.228659798 | 0.245960406 | 0.171718413 |
| 0.353221784 | 0.055921734 | 0.371337692 | 0.062364893 |
| 0.20234831  | 0.092139223 | 0.183553145 | 0.061939008 |
| 0.123039789 | 0.024188857 | 0.064726153 | 0.034710889 |
| 0.34396427  | 0.04675982  | 0.215886168 | 0.083323609 |
| 0.043680222 | 0.119468144 | 0.199993647 | 0.234113915 |
| 0.271464412 | 0.219105427 | 0.064673796 | 0.336203584 |
| 0.068609161 | 0.093071389 | 0.088896275 | 0.117842176 |
| 0.135180992 | 0.129842313 | 0.25098824  | 0.270831284 |
| 0.333014091 | 0.038722461 | 0.052235771 | 0.041862544 |
| 0.008972031 | 0.193215585 | 0.243261188 | 0.030626299 |
| 0.182939898 | 0.046337705 | 0.000416242 | 0.04719881  |
| 0.288328189 | 0.081097351 |             |             |
| MS4A4C      | 0.128469798 | 0.266439736 | 0.024163392 |
| 0.000691955 | 0.007079333 | 0.258106178 | 0.162102531 |
| 0.077282497 | 0.033746386 | 0.06878955  | 0.276312837 |
| 0.000927682 | 0.092797872 | 0.005471468 | 0.005244632 |
| 0.212978174 | 0.203567054 | 0.147500997 | 0.200582964 |
| 0.12410074  | 0.012869278 | 0.225218915 | 0.183030754 |

|             |             |             |             |
|-------------|-------------|-------------|-------------|
| 0.223096118 | 0.001111335 | 0.078696038 | 0.0087211   |
| 0.045179257 | 0.178022868 | 0.170499316 | 0.045712538 |
| 0.201126673 | 0.136516764 | 0.053261865 | 0.009137464 |
| 0.007695335 | 0.279103307 | 0.000801588 | 0.10054596  |
| 0.118186408 | 0.091204246 | 0.146795411 | 0.004391238 |
| 5.80E-05    | 0.065569302 | 0.047433485 | 0.223611874 |
| 0.09566749  | 0.234197949 | 0.156797063 | 0.099601137 |
| 0.001335421 | 0.26573993  | 0.205184095 | 0.002771009 |
| 0.283092824 | 0.000238405 | 0.296026272 | 0.062221968 |
| 0.062239224 | 0.143894622 | 0.097194392 | 0.224791407 |
| 0.248980392 | 0.286744567 | 0.23145051  | 0.014451031 |
| 0.112874944 | 0.106676731 | 0.122552348 | 0.142655654 |
| 0.240466511 | 0.022631638 | 0.048712923 | 0.034246012 |
| 0.137670101 | 0.118340005 | 0.227686222 | 0.043291473 |
| 0.005415265 | 0.120356432 | 0.032801762 | 0.140060218 |
| 0.063822491 | 0.292032611 | 0.129582054 | 0.076049064 |
| 0.089778666 | 0.005830227 | 0.168584327 | 0.217962087 |
| 0.003346218 | 0.124062927 | 0.000468351 | 0.029349082 |
| 0.171580446 | 0.151510149 | 0.186281163 | 0.071493953 |
| 0.003509552 | 0.06289445  | 0.019126057 | 0.110012299 |
| 0.157362903 | 0.103182375 | 0.286429401 | 0.006864146 |
| 0.079208628 | 0.031909245 | 0.080381356 | 0.28960315  |
| 0.250153754 | 0.001190709 | 0.043567202 | 0.201760169 |
| 0.010917877 | 0.005409056 | 0.158313124 | 0.000696825 |
| 0.001620906 | 0.001019003 | 0.183004447 | 0.080469424 |
| 0.0799113   | 0.153532809 | 0.003149697 | 0.107702244 |
| 0.060538258 | 0.168325146 | 0.015844319 | 0.135744501 |
| 0.099474344 | 0.173210778 | 0.072337186 | 0.144236751 |
| 0.027459639 | 0.067972881 | 0.095862476 | 0.234967046 |
| 0.285695066 | 0.017101825 | 0.031008173 | 0.245156616 |
| 0.083525573 | 0.207727281 | 0.2457167   | 0.039781203 |
| 0.049334034 | 0.151948694 | 0.083243916 | 0.181842674 |
| 0.176083549 | 0.126433939 | 0.000651091 | 0.233385248 |
| 0.307581025 | 0.000682232 | 0.069999254 | 0.160853793 |
| 0.000806492 | 0.027610649 | 0.269014672 | 0.183696717 |
| 0.112175073 | 0.007237347 | 0.078926196 | 0.217286619 |
| 0.197876111 | 0.144225569 | 0.208435972 | 0.073786584 |
| 0.232294949 | 0.072329503 | 0.046816131 | 0.088824295 |
| 0.124320232 | 0.200591535 | 0.015782803 | 0.002221744 |
| 0.119872728 | 0.065620179 | 0.223093071 | 0.14154591  |
| 0.157400179 | 0.000126931 | 0.058764502 | 0.174017508 |
| 0.077778918 | 0.121402459 | 0.266177699 | 0.133357668 |
| 0.197860596 | 0.021327455 | 0.133952347 | 0.044404911 |
| 0.188843713 | 0.053369894 | 0.036376742 | 0.000784933 |
| 0.018811387 | 0.050900547 | 0.107009827 | 0.018462559 |
| 0.035652667 | 0.027334946 | 0.003713855 | 0.207272802 |
| 0.189479629 | 0.134448217 | 0.003013121 | 0.009505528 |
| 0.078746578 | 0.209416788 | 0.040062404 | 0.022715069 |
| 0.182806465 | 0.059467546 | 0.125479898 | 0.293613461 |
| 0.029122351 | 0.27892114  | 0.002906388 | 0.115667576 |
| 0.078800017 | 0.195603199 | 0.134947804 | 0.149997307 |
| 0.176246664 | 0.133187926 | 0.005211992 | 0.252711222 |
| 0.134948094 | 0.11363253  | 0.051994549 | 0.251229903 |
| 0.000775547 | 0.184607963 | 0.117575695 | 0.003843299 |

|             |             |             |             |
|-------------|-------------|-------------|-------------|
| 0.250094697 | 0.194783419 | 0.064168862 | 0.097225288 |
| 0.203880288 | 0.249399116 | 0.20697882  | 0.141170789 |
| 0.015488705 | 0.002858662 | 0.247514559 | 0.260735027 |
| 0.181477068 | 0.114479226 | 0.015419099 | 0.001038757 |
| 0.196778587 | 0.073215582 | 0.192779297 | 0.093288505 |
| 0.09664805  | 0.03318632  | 0.14539412  | 0.119366068 |
| 0.000715374 | 0.131687089 | 0.129280662 | 0.009449507 |
| 0.070025349 | 1           | 0.197139762 | 0.237994783 |
| 0.031474291 | 0.022394708 | 0.039458691 | 0.058118244 |
| 0.169922341 | 0.25937623  | 0.000324335 | 0.238891567 |
| 0.222132118 | 0.160129928 | 0.190020775 | 0.218096014 |
| 0.167194578 | 0.267771523 | 0.220131738 | 0.161251653 |
| 0.000366198 | 0.128077219 | 0.079900154 | 0.294341398 |
| 0.173313305 | 0.265004441 | 0.034989991 | 0.038196171 |
| 0.000252885 | 0.164457221 | 0.008279381 | 0.278915385 |
| 0.170746056 | 0.012585355 | 0.000197603 | 0.164549192 |
| 0.076818703 | 0.000386641 | 0.248585897 | 0.191879567 |
| 0.218474508 | 0.098855226 | 0.151893932 | 0.106367442 |
| 0.008815271 | 0.037742982 | 0.003044906 | 0.146595875 |
| 0.067958929 | 0.002465638 | 0.020222989 | 0.231514059 |
| 0.22703461  | 0.211213204 | 0.197525615 | 0.00321796  |
| 0.128658987 | 0.006444511 | 0.155538412 | 0.008080432 |
| 0.21727828  | 0.270734496 | 0.23541506  | 0.118427101 |
| 0.144188318 | 0.266175971 | 0.288901626 | 0.210096646 |
| 0.00091636  | 0.123250616 | 0.168448418 | 0.004356642 |
| 0.105237246 | 0.188849489 | 0.105760304 | 0.197802639 |
| 0.212871066 | 0.001177529 | 0.225905879 | 0.114195813 |
| 0.237393685 | 0.202653962 | 0.066575649 | 0.046954965 |
| 0.272035864 | 0.092371648 | 0.105806019 | 0.107781579 |
| 0.261138803 | 0.003467341 | 0.006345772 | 0.262782847 |
| 0.276722664 | 0.24606779  | 0.199219294 | 0.025875931 |
| 0.158510244 | 0.024688515 | 0.1742098   | 0.030657701 |
| 0.193169813 | 0.096095228 | 0.114011601 | 0.003525908 |
| 0.007134034 | 0.02058082  | 0.260235677 | 0.28620863  |
| 0.072810841 | 0.162543703 | 0.140240204 | 0.14631615  |
| 0.184634329 | 0.025851366 | 0.224205619 | 0.11095251  |
| 0.299778214 | 0.007279635 | 0.284415043 | 0.180940448 |
| 0.245860618 | 0.101456397 | 0.1971881   | 0.000993    |
| 0.112455909 | 0.073752469 | 0.047800438 | 0.116460721 |
| 0.145839466 | 0.091352329 | 0.206007126 | 0.096866127 |
| 0.002679599 | 0.000263798 | 0.221954796 | 0.031459411 |
| 0.28590273  | 0.013981274 | 0.132682904 | 0.001999348 |
| 0.271537077 | 0.159372688 | 0.216003351 | 0.018598432 |
| 0.086180616 | 5.86E-05    | 0.086643618 | 0.008940021 |
| 0.242052781 | 0.261775065 | 0.157762633 | 0.107976371 |
| 0.045075218 | 0.122014788 | 0.234808405 | 0.071912002 |
| 0.190200969 | 0.00219845  | 0.207363554 | 0.086237738 |
| 0.098456044 | 0.038982594 | 0.219511402 | 0.040434174 |
| 0.099719238 | 0.009901508 | 0.113192878 | 0.044962835 |
| 0.172229582 | 0.028125159 | 0.115611979 | 0.036700539 |
| 0.015528365 | 0.089933276 | 0.135667582 | 0.127168963 |
| 0.152359537 | 0.126022365 | 0.0407735   | 0.285718074 |
| 0.019025156 | 0.118244807 | 0.001727232 | 0.005136906 |
| 0.012434368 | 0.119181147 | 0.206694456 | 0.192826804 |

|             |             |             |             |
|-------------|-------------|-------------|-------------|
| 0.208758752 | 0.01681113  | 0.090875948 | 0.08018881  |
| 0.00164427  | 0.121225341 | 0.1934819   | 0.001171578 |
| 0.12901734  | 0.035870697 | 0.000185614 | 0.06405881  |
| 0.264271522 | 0.014590919 |             |             |
| MS4A6D      | 0.286715242 | 0.50394689  | 0.075977766 |
| 0.044697448 | 0.156708486 | 0.253534085 | 0.2617359   |
| 0.295629426 | 0.118412895 | 0.177750854 | 0.330863451 |
| 0.001038259 | 0.350926596 | 0.012390307 | 0.074625104 |
| 0.50054013  | 0.521533123 | 0.369673153 | 0.498639284 |
| 0.269739665 | 0.197453316 | 0.321144749 | 0.374213988 |
| 0.279488367 | 0.001263062 | 0.160547412 | 0.080237088 |
| 0.299246133 | 0.484921041 | 0.208358922 | 0.288622635 |
| 0.438693682 | 0.451736183 | 0.422812201 | 0.362293498 |
| 0.280692918 | 0.451490067 | 0.145091921 | 0.398560263 |
| 0.378421338 | 0.273803286 | 0.432193264 | 0.01653956  |
| 0.008803827 | 0.127477458 | 0.267057269 | 0.351821923 |
| 0.261884026 | 0.235086469 | 0.177841876 | 0.222633549 |
| 0.154980177 | 0.348703579 | 0.329697495 | 0.155111199 |
| 0.406580703 | 0.009050212 | 0.450608708 | 0.196204008 |
| 0.076289374 | 0.304446237 | 0.316563885 | 0.374695117 |
| 0.272329726 | 0.432281027 | 0.521447887 | 0.054087176 |
| 0.09037919  | 0.384607454 | 0.362753325 | 0.43236913  |
| 0.451481135 | 0.319433904 | 0.330442103 | 0.35806945  |
| 0.40654815  | 0.363659668 | 0.284724678 | 0.17939301  |
| 0.001076408 | 0.188096935 | 0.393271624 | 0.276299251 |
| 0.356536556 | 0.3543552   | 0.333224791 | 0.275198487 |
| 0.38713842  | 0.020581059 | 0.34968896  | 0.526058304 |
| 0.029991165 | 0.356758036 | 0.014797165 | 0.159623857 |
| 0.384425442 | 0.450971246 | 0.359181733 | 0.100599339 |
| 0.014556422 | 0.120650055 | 0.111704371 | 0.383542226 |
| 0.368661057 | 0.426749721 | 0.393969485 | 0.121964212 |
| 0.338810631 | 0.161756979 | 0.368774361 | 0.458479338 |
| 0.475845836 | 0.00669906  | 0.143075221 | 0.24219741  |
| 0.347704095 | 0.191895079 | 0.260666765 | 0.03483537  |
| 0.016581397 | 0.012151874 | 0.452487401 | 0.155892589 |
| 0.138650861 | 0.232536749 | 0.106547569 | 0.445140733 |
| 0.285792133 | 0.406400513 | 0.169122487 | 0.287176168 |
| 0.397262622 | 0.291740366 | 0.436077051 | 0.415506287 |
| 0.409295091 | 0.228552756 | 0.149077962 | 0.459883935 |
| 0.397587192 | 0.085444061 | 0.091710466 | 0.32101905  |
| 0.339571313 | 0.48264313  | 0.532157436 | 0.269246541 |
| 0.325658494 | 0.239448617 | 0.327766447 | 0.400505701 |
| 0.268403201 | 0.295036377 | 0.072641943 | 0.342257454 |
| 0.40747877  | 0.036735638 | 0.075951669 | 0.378824803 |
| 0.094066446 | 0.295057798 | 0.422794549 | 0.437001158 |
| 0.422747394 | 0.067040236 | 0.271502571 | 0.29212346  |
| 0.280661763 | 0.273657406 | 0.375016676 | 0.25668099  |
| 0.301062969 | 0.33394576  | 0.061845097 | 0.348694325 |
| 0.137689672 | 0.304997317 | 0.274943985 | 0.075535472 |
| 0.338150383 | 0.294263263 | 0.428682906 | 0.370723543 |
| 0.35106487  | 0.007888195 | 0.174135622 | 0.313974177 |
| 0.296728379 | 0.366841784 | 0.507654861 | 0.127245932 |
| 0.241172894 | 0.308924392 | 0.151297652 | 0.385134584 |
| 0.343502862 | 0.259677454 | 0.228813563 | 0.000704718 |

|             |             |             |             |
|-------------|-------------|-------------|-------------|
| 0.168791934 | 0.343371931 | 0.389896279 | 0.044017777 |
| 0.286468419 | 0.110703579 | 0.088483303 | 0.450931035 |
| 0.215903877 | 0.433293189 | 0.019453069 | 0.125610623 |
| 0.260595381 | 0.430072384 | 0.388913139 | 0.225854886 |
| 0.448525632 | 0.312369984 | 0.409129341 | 0.369539866 |
| 0.328725013 | 0.349774597 | 0.154750119 | 0.263144175 |
| 0.405322805 | 0.471300404 | 0.409033992 | 0.425138355 |
| 0.2834483   | 0.312112417 | 0.26980279  | 0.277486406 |
| 0.341831022 | 0.365643514 | 0.086541517 | 0.504154809 |
| 0.000637712 | 0.331958474 | 0.43832842  | 0.15210031  |
| 0.494614331 | 0.274994624 | 0.071459008 | 0.215370908 |
| 0.507013037 | 0.501927504 | 0.383177066 | 0.419573005 |
| 0.201563948 | 0.007754494 | 0.460555811 | 0.388034165 |
| 0.497974086 | 0.403475822 | 0.37112441  | 0.064918968 |
| 0.476670585 | 0.281298984 | 0.391330344 | 0.351793447 |
| 0.436488945 | 0.385448955 | 0.240326813 | 0.286276053 |
| 0.013611947 | 0.254027455 | 0.369597653 | 0.229113384 |
| 0.331204204 | 0.197139762 | 1           | 0.319305104 |
| 0.428713456 | 0.262979482 | 0.397331364 | 0.103369071 |
| 0.196801521 | 0.505115441 | 0.060833686 | 0.43367872  |
| 0.522985783 | 0.349954553 | 0.478816483 | 0.505659147 |
| 0.288017042 | 0.38593588  | 0.461370091 | 0.405981765 |
| 0.000627324 | 0.416896974 | 0.342712898 | 0.332802915 |
| 0.440163651 | 0.294156991 | 0.188518137 | 0.390162503 |
| 0.001353151 | 0.160663949 | 0.264541306 | 0.475926796 |
| 0.46768731  | 0.039146596 | 0.064555302 | 0.428813669 |
| 0.354537783 | 0.041022031 | 0.520360727 | 0.346394117 |
| 0.45891286  | 0.418517069 | 0.205441036 | 0.377887039 |
| 0.221551425 | 0.325745858 | 0.050391126 | 0.432594648 |
| 0.399977612 | 0.074499702 | 0.124877401 | 0.510969399 |
| 0.39538463  | 0.394934756 | 0.261671879 | 0.013094522 |
| 0.351544524 | 0.23581909  | 0.436779128 | 0.117418018 |
| 0.378409627 | 0.360074386 | 0.446284211 | 0.393066268 |
| 0.415167129 | 0.396006798 | 0.362559132 | 0.415947904 |
| 0.144297898 | 0.370834166 | 0.415484969 | 0.065566192 |
| 0.32196963  | 0.48500334  | 0.41610697  | 0.202777991 |
| 0.338299941 | 0.14642774  | 0.217760196 | 0.265922864 |
| 0.446864908 | 0.48147731  | 0.069476672 | 0.147293179 |
| 0.399849428 | 0.299819157 | 0.136306611 | 0.330058013 |
| 0.277103183 | 0.149567375 | 0.11695363  | 0.356390925 |
| 0.463157489 | 0.30904535  | 0.43844784  | 0.199981902 |
| 0.457321789 | 0.051153095 | 0.383406437 | 0.289523542 |
| 0.266273963 | 0.344343938 | 0.36144671  | 0.089815051 |
| 0.031365941 | 0.112349912 | 0.399705376 | 0.385167609 |
| 0.085495841 | 0.189722175 | 0.280005794 | 0.37972395  |
| 0.493501548 | 0.375786798 | 0.278739302 | 0.306158232 |
| 0.392376396 | 0.159119513 | 0.473567673 | 0.305176155 |
| 0.363308072 | 0.357877434 | 0.420169303 | 0.010689862 |
| 0.403001168 | 0.201597603 | 0.160650485 | 0.403225608 |
| 0.430618937 | 0.148618026 | 0.398164053 | 0.159077391 |
| 0.182750106 | 0.002811319 | 0.325931335 | 0.368586754 |
| 0.286276609 | 0.241834652 | 0.328988056 | 0.169437029 |
| 0.525001299 | 0.355568607 | 0.36560303  | 0.265372983 |
| 0.379669685 | 0.034259424 | 0.195507525 | 0.034157237 |

|             |             |             |             |
|-------------|-------------|-------------|-------------|
| 0.347366052 | 0.366069251 | 0.359612381 | 0.321657162 |
| 0.158008981 | 0.442337822 | 0.381307422 | 0.436557518 |
| 0.481130011 | 0.164286544 | 0.516111201 | 0.277721512 |
| 0.371453495 | 0.353096771 | 0.269231627 | 0.318510685 |
| 0.246001575 | 0.134308301 | 0.142335577 | 0.135366713 |
| 0.485521953 | 0.307606046 | 0.415600049 | 0.261337319 |
| 0.060037766 | 0.391539465 | 0.363785379 | 0.391606328 |
| 0.407590605 | 0.335270346 | 0.321566764 | 0.372888899 |
| 0.265440939 | 0.258868458 | 0.08836132  | 0.062001037 |
| 0.311128561 | 0.210942674 | 0.366991569 | 0.397348899 |
| 0.506169865 | 0.235052913 | 0.110740798 | 0.128166575 |
| 0.12038669  | 0.314010383 | 0.30545142  | 0.210585833 |
| 0.416802986 | 0.275663591 | 0.000500192 | 0.192052846 |
| 0.361881946 | 0.382323749 |             |             |
| MSC         | 0.200336999 | 0.421996175 | 0.24676395  |
| 0.019399434 | 0.216168777 | 0.387313735 | 0.37337482  |
| 0.194535376 | 0.31184597  | 0.211127163 | 0.416827119 |
| 0.008431093 | 0.1883008   | 0.087720074 | 0.258370286 |
| 0.332588637 | 0.341339744 | 0.383944084 | 0.350555233 |
| 0.275684225 | 0.122558788 | 0.333573526 | 0.297455973 |
| 0.394091936 | 0.015171779 | 0.274027354 | 0.05171393  |
| 0.170008582 | 0.302428615 | 0.409269782 | 0.280696942 |
| 0.286377243 | 0.252111026 | 0.225697481 | 0.223107548 |
| 0.070093446 | 0.467315799 | 0.049463761 | 0.20324004  |
| 0.203480527 | 0.311717931 | 0.259528659 | 0.098745804 |
| 0.000789039 | 0.295043264 | 0.153029564 | 0.317728417 |
| 0.338395429 | 0.379112844 | 0.411820378 | 0.284287853 |
| 0.034520286 | 0.427483263 | 0.318365362 | 0.032364602 |
| 0.479947134 | 0.002747304 | 0.473291398 | 0.190060958 |
| 0.29017814  | 0.394530397 | 0.166289997 | 0.285273038 |
| 0.404821232 | 0.483243331 | 0.393194036 | 0.144695975 |
| 0.277304859 | 0.23252816  | 0.186784724 | 0.243425604 |
| 0.381736542 | 0.243811712 | 0.342501614 | 0.142770937 |
| 0.204931272 | 0.207852051 | 0.429782633 | 0.409802511 |
| 0.00531492  | 0.311656779 | 0.201389916 | 0.176344773 |
| 0.132327531 | 0.432827232 | 0.205549993 | 0.322532357 |
| 0.19096344  | 0.145745012 | 0.350221966 | 0.373609591 |
| 0.037276036 | 0.2223185   | 0.019774945 | 0.402068089 |
| 0.270949406 | 0.246862719 | 0.244835022 | 0.227601072 |
| 0.116995253 | 0.371272093 | 0.129314516 | 0.186805168 |
| 0.296306098 | 0.272767669 | 0.469818471 | 0.043161184 |
| 0.153113791 | 0.263849592 | 0.38081051  | 0.457972331 |
| 0.358641539 | 0.071756497 | 0.352955667 | 0.402677184 |
| 0.199940109 | 0.13336846  | 0.409107347 | 0.016377066 |
| 0.023019744 | 0.036359199 | 0.283463226 | 0.360386328 |
| 0.232529311 | 0.369325393 | 0.131678245 | 0.215119041 |
| 0.193077108 | 0.263360346 | 0.265507248 | 0.372169822 |
| 0.181834919 | 0.379565045 | 0.239247264 | 0.236018477 |
| 0.213160143 | 0.328668848 | 0.354389771 | 0.426603162 |
| 0.473185145 | 0.249263067 | 0.268565482 | 0.375222505 |
| 0.157575716 | 0.328626567 | 0.398379536 | 0.314690023 |
| 0.297600541 | 0.420932364 | 0.193632597 | 0.318009277 |
| 0.425461401 | 0.318260884 | 0.040889019 | 0.425255303 |
| 0.493085031 | 0.021909464 | 0.275235029 | 0.275041008 |



|             |             |             |             |
|-------------|-------------|-------------|-------------|
| 0.051774977 | 0.342121056 | 0.421362476 | 0.324282542 |
| 0.264157707 | 0.042889217 | 0.243449988 | 0.358357879 |
| 0.376670622 | 0.349479839 | 0.300368792 | 0.20369205  |
| 0.38621415  | 0.183198716 | 0.228418737 | 0.158820624 |
| 0.365710076 | 0.365018678 | 0.102209368 | 0.049261192 |
| 0.222584275 | 0.291575914 | 0.350265553 | 0.278795805 |
| 0.207497689 | 0.002093707 | 0.196643652 | 0.222094481 |
| 0.181175099 | 0.22125396  | 0.444180039 | 0.364419174 |
| 0.405052943 | 0.14509791  | 0.394434907 | 0.294766573 |
| 0.296637059 | 0.224678468 | 0.224398025 | 0.00579559  |
| 0.339045804 | 0.130137071 | 0.280300854 | 0.188106211 |
| 0.292596985 | 0.26039861  | 0.166533641 | 0.340071048 |
| 0.39749825  | 0.266042676 | 0.091726594 | 0.090351866 |
| 0.371127033 | 0.36182606  | 0.182084407 | 0.186358569 |
| 0.311155792 | 0.283563077 | 0.203503324 | 0.45020635  |
| 0.342711231 | 0.400012468 | 0.071854    | 0.387724276 |
| 0.183569933 | 0.33503791  | 0.236246418 | 0.297498644 |
| 0.381633975 | 0.241363347 | 0.14712988  | 0.402692698 |
| 0.307003588 | 0.32347245  | 0.283603113 | 0.438958334 |
| 0.007857883 | 0.398539379 | 0.243387436 | 0.070823436 |
| 0.420178847 | 0.379701104 | 0.279743348 | 0.342171986 |
| 0.358123513 | 0.447343113 | 0.336680137 | 0.230798775 |
| 0.110004265 | 0.073986736 | 0.396392746 | 0.372176377 |
| 0.302750161 | 0.35021455  | 0.138789866 | 0.074404619 |
| 0.355832048 | 0.168646145 | 0.253329389 | 0.182675778 |
| 0.227947528 | 0.181835809 | 0.433435885 | 0.195136722 |
| 0.01316633  | 0.304285543 | 0.187671982 | 0.146495572 |
| 0.229974313 | 0.237994783 | 0.319305104 | 1           |
| 0.206664519 | 0.140083259 | 0.171399755 | 0.269495776 |
| 0.413586351 | 0.419565245 | 0.020219637 | 0.3921995   |
| 0.381838267 | 0.376604964 | 0.337334774 | 0.377053748 |
| 0.346148494 | 0.442080147 | 0.359390718 | 0.273965954 |
| 0.005844984 | 0.208429328 | 0.156752555 | 0.469316298 |
| 0.259975555 | 0.394057835 | 0.125889489 | 0.150180383 |
| 0.011623296 | 0.380015678 | 0.065631104 | 0.468453541 |
| 0.315790284 | 0.165643738 | 0.013216568 | 0.32085924  |
| 0.145796132 | 0.038925709 | 0.417008528 | 0.319556052 |
| 0.379637871 | 0.314930528 | 0.327009093 | 0.185023327 |
| 0.046669513 | 0.263451513 | 0.06411133  | 0.271166837 |
| 0.228320951 | 0.055454803 | 0.117067033 | 0.384806677 |
| 0.347986742 | 0.389274772 | 0.43054177  | 0.012151914 |
| 0.192652541 | 0.089611127 | 0.259432526 | 0.3289221   |
| 0.380813302 | 0.428955423 | 0.431287451 | 0.223930589 |
| 0.272002949 | 0.425379852 | 0.438942333 | 0.341715815 |
| 0.060995729 | 0.195904728 | 0.242418687 | 0.156542505 |
| 0.15112345  | 0.337984191 | 0.207701343 | 0.370155894 |
| 0.347803049 | 0.049157603 | 0.398841777 | 0.248240659 |
| 0.423845996 | 0.317147242 | 0.233040123 | 0.36921162  |
| 0.430103722 | 0.406899056 | 0.336743178 | 0.395303959 |
| 0.417266769 | 0.035507348 | 0.08158319  | 0.391695284 |
| 0.468055063 | 0.405474051 | 0.292456039 | 0.137168398 |
| 0.289407701 | 0.26882696  | 0.323516779 | 0.389547362 |
| 0.394438342 | 0.142856451 | 0.181949579 | 0.053626021 |
| 0.025976704 | 0.213273517 | 0.417251319 | 0.466211105 |

|             |             |             |             |
|-------------|-------------|-------------|-------------|
| 0.290281332 | 0.403585698 | 0.348509251 | 0.334768282 |
| 0.313862113 | 0.218350293 | 0.415397029 | 0.357262788 |
| 0.497287304 | 0.092692565 | 0.46146677  | 0.333860351 |
| 0.334778032 | 0.316821351 | 0.322238124 | 0.015055476 |
| 0.198576811 | 0.215112399 | 0.12535099  | 0.273832772 |
| 0.233024598 | 0.337015034 | 0.372841627 | 0.359635163 |
| 0.107274129 | 0.016367678 | 0.378408072 | 0.1225319   |
| 0.412773843 | 0.141709137 | 0.340682734 | 0.032811723 |
| 0.450945856 | 0.280792246 | 0.276422809 | 0.120241982 |
| 0.29370233  | 0.005810901 | 0.233298781 | 0.181895565 |
| 0.339464598 | 0.426097598 | 0.223955189 | 0.194664025 |
| 0.170306264 | 0.272949458 | 0.374078522 | 0.258898267 |
| 0.322572728 | 0.052730493 | 0.346370623 | 0.358940776 |
| 0.168916936 | 0.265432026 | 0.431909516 | 0.335038183 |
| 0.354608154 | 0.171567356 | 0.366211051 | 0.28036054  |
| 0.29238815  | 0.331425969 | 0.303378965 | 0.193453902 |
| 0.191497841 | 0.327073264 | 0.240735667 | 0.195816931 |
| 0.250704925 | 0.15161809  | 0.192442647 | 0.486545422 |
| 0.18669119  | 0.287263488 | 0.036191874 | 0.038648824 |
| 0.111499157 | 0.34288311  | 0.334326505 | 0.34269025  |
| 0.355491034 | 0.156824794 | 0.316470507 | 0.346910384 |
| 0.051770077 | 0.197737852 | 0.374155771 | 0.063549735 |
| 0.289124747 | 0.146333607 | 0.006200816 | 0.28322495  |
| 0.400440535 | 0.18339251  |             |             |
| MTCH2       | 0.106169969 | 0.444757386 | 0.013071634 |
| 0.022199882 | 0.06631166  | 0.132987471 | 0.145328651 |
| 0.09526403  | 0.016023606 | 0.039610619 | 0.239953067 |
| 3.57E-05    | 0.326756088 | 0.000846342 | 0.011025756 |
| 0.418626186 | 0.456215914 | 0.231508913 | 0.424555474 |
| 0.082121754 | 0.055544761 | 0.176418719 | 0.20503759  |
| 0.130169451 | 4.62E-05    | 0.061677057 | 0.025848328 |
| 0.096183827 | 0.412589476 | 0.064205551 | 0.057233938 |
| 0.345718547 | 0.42954334  | 0.101201586 | 0.1259219   |
| 0.108696772 | 0.382440515 | 0.087779386 | 0.394903752 |
| 0.314351711 | 0.102588645 | 0.391346974 | 0.001524326 |
| 0.008974654 | 0.032614837 | 0.072745309 | 0.19316751  |
| 0.067576123 | 0.106700266 | 0.057360695 | 0.093597595 |
| 0.043359329 | 0.249002278 | 0.224370234 | 0.046625014 |
| 0.374642105 | 0.004141869 | 0.393373667 | 0.033403072 |
| 0.011904607 | 0.092619182 | 0.10700101  | 0.217270922 |
| 0.168843637 | 0.39449844  | 0.464888927 | 0.012740961 |
| 0.023953441 | 0.171097951 | 0.310825539 | 0.309413644 |
| 0.384019752 | 0.064412062 | 0.072365431 | 0.15631768  |
| 0.31035037  | 0.302669605 | 0.14914245  | 0.03174834  |
| 7.50E-05    | 0.085895243 | 0.143667556 | 0.150391705 |
| 0.256489122 | 0.269484363 | 0.166515233 | 0.085644296 |
| 0.172906874 | 0.002192963 | 0.175581079 | 0.462946966 |
| 0.007565769 | 0.310584624 | 0.004576558 | 0.027801221 |
| 0.30973124  | 0.375508844 | 0.207892353 | 0.020262262 |
| 0.001564964 | 0.016197027 | 0.011721904 | 0.323553048 |
| 0.162304653 | 0.203326234 | 0.352907183 | 0.032301705 |
| 0.31470078  | 0.019268573 | 0.093315887 | 0.4016019   |
| 0.39132332  | 0.000669776 | 0.018088069 | 0.124990521 |
| 0.080306773 | 0.058389336 | 0.134689739 | 0.006031712 |

|             |             |             |             |
|-------------|-------------|-------------|-------------|
| 0.005274668 | 0.001034559 | 0.38070213  | 0.023090634 |
| 0.041703142 | 0.097882585 | 0.035656598 | 0.351693803 |
| 0.077635958 | 0.315557696 | 0.061834826 | 0.123461766 |
| 0.332148233 | 0.171360571 | 0.251947414 | 0.33183993  |
| 0.161559094 | 0.032730985 | 0.027014516 | 0.443770369 |
| 0.320807754 | 0.018267484 | 0.013250276 | 0.190085115 |
| 0.330729232 | 0.411549988 | 0.459724369 | 0.044815498 |
| 0.134536625 | 0.076389732 | 0.061575216 | 0.291835337 |
| 0.142854764 | 0.118173198 | 0.017500803 | 0.235070172 |
| 0.358213208 | 0.007929877 | 0.010829838 | 0.29884202  |
| 0.078839122 | 0.071553692 | 0.339849244 | 0.383203902 |
| 0.27463665  | 0.01900807  | 0.084789749 | 0.142895542 |
| 0.106506559 | 0.114445361 | 0.210948877 | 0.068153626 |
| 0.157156137 | 0.066561541 | 0.011715843 | 0.332615867 |
| 0.039718585 | 0.137066512 | 0.046999307 | 0.013598851 |
| 0.18529769  | 0.071841957 | 0.375767447 | 0.185118539 |
| 0.23029293  | 0.005782952 | 0.039752854 | 0.138803606 |
| 0.04869598  | 0.309660017 | 0.462802523 | 0.038097106 |
| 0.095857094 | 0.075297704 | 0.043516496 | 0.152174692 |
| 0.249231489 | 0.051783971 | 0.042901431 | 4.60E-05    |
| 0.042255818 | 0.105810299 | 0.157586314 | 0.003914146 |
| 0.094671845 | 0.013506202 | 0.009946216 | 0.399503085 |
| 0.085139028 | 0.433030711 | 0.0015686   | 0.019106037 |
| 0.057867259 | 0.382176483 | 0.103358919 | 0.030565841 |
| 0.41040419  | 0.062860003 | 0.339843069 | 0.284000306 |
| 0.109439148 | 0.256760696 | 0.032137944 | 0.056678757 |
| 0.255662999 | 0.446897323 | 0.37437019  | 0.410471144 |
| 0.097520329 | 0.187783975 | 0.063406651 | 0.153682816 |
| 0.152395544 | 0.178598251 | 0.012051228 | 0.452901993 |
| 2.92E-05    | 0.175712138 | 0.264090979 | 0.024144723 |
| 0.455829082 | 0.17471622  | 0.00903081  | 0.04567466  |
| 0.432379303 | 0.44437357  | 0.291316597 | 0.358340191 |
| 0.033732178 | 0.00048965  | 0.372465371 | 0.26820588  |
| 0.430651677 | 0.166846108 | 0.149464242 | 0.011114021 |
| 0.428291136 | 0.139852059 | 0.229764113 | 0.15293159  |
| 0.2954624   | 0.170075121 | 0.08255376  | 0.166514849 |
| 0.001217324 | 0.062009313 | 0.214771671 | 0.049634658 |
| 0.080492065 | 0.031474291 | 0.428713456 | 0.206664519 |
| 1           | 0.039014987 | 0.134910533 | 0.02648508  |
| 0.07971591  | 0.436247597 | 0.040296086 | 0.342055328 |
| 0.45542476  | 0.166278897 | 0.447908018 | 0.426986539 |
| 0.101067761 | 0.319673374 | 0.408156885 | 0.32396771  |
| 3.31E-05    | 0.376684172 | 0.342602106 | 0.243717495 |
| 0.37538816  | 0.150085017 | 0.050430711 | 0.187421049 |
| 0.000162067 | 0.048054255 | 0.076856232 | 0.395824451 |
| 0.457458663 | 0.006480635 | 0.044000424 | 0.378754575 |
| 0.307186981 | 0.009269364 | 0.440547907 | 0.163271327 |
| 0.444935679 | 0.226994917 | 0.074312334 | 0.357154782 |
| 0.05912087  | 0.072548528 | 0.028800353 | 0.309724064 |
| 0.185286247 | 0.009095935 | 0.041739882 | 0.4302004   |
| 0.312800608 | 0.313310219 | 0.120271124 | 0.001540507 |
| 0.269308425 | 0.067645779 | 0.376369165 | 0.022923027 |
| 0.295139098 | 0.261889892 | 0.422022178 | 0.366634308 |
| 0.242816009 | 0.337818769 | 0.27902299  | 0.356352865 |

|             |             |             |             |
|-------------|-------------|-------------|-------------|
| 0.063188576 | 0.311746344 | 0.341654005 | 0.012908937 |
| 0.162519595 | 0.449126544 | 0.217659641 | 0.100762336 |
| 0.184105111 | 0.096521096 | 0.104334008 | 0.089713572 |
| 0.430815419 | 0.439567868 | 0.010189074 | 0.021473576 |
| 0.348265052 | 0.060002707 | 0.044826042 | 0.124007023 |
| 0.148864684 | 0.028132776 | 0.018156305 | 0.229210076 |
| 0.415013517 | 0.217592835 | 0.364026813 | 0.052024226 |
| 0.429955259 | 0.006705389 | 0.318355243 | 0.07049861  |
| 0.10527381  | 0.190180376 | 0.295576578 | 0.011930805 |
| 0.00391961  | 0.013391669 | 0.349914032 | 0.32693019  |
| 0.016451094 | 0.060487714 | 0.123501684 | 0.246863702 |
| 0.431648935 | 0.080467708 | 0.148428663 | 0.107334656 |
| 0.344068456 | 0.059027654 | 0.391352923 | 0.108926841 |
| 0.244447619 | 0.124758073 | 0.350251865 | 0.001372377 |
| 0.26685041  | 0.043482274 | 0.039134653 | 0.252383299 |
| 0.351725775 | 0.035103638 | 0.321685783 | 0.024174018 |
| 0.044774377 | 0.000308376 | 0.192118351 | 0.215284658 |
| 0.182953797 | 0.046934165 | 0.121520749 | 0.05538562  |
| 0.448385991 | 0.154782613 | 0.252089188 | 0.080464363 |
| 0.136123957 | 0.034574748 | 0.0498058   | 0.003843413 |
| 0.216108946 | 0.263079721 | 0.19895609  | 0.11780579  |
| 0.021305064 | 0.330010297 | 0.262958986 | 0.26343687  |
| 0.45960982  | 0.039442263 | 0.447378064 | 0.064977519 |
| 0.336125932 | 0.064703761 | 0.137361679 | 0.060359683 |
| 0.115022961 | 0.021915117 | 0.033769092 | 0.015326601 |
| 0.452492674 | 0.071968589 | 0.254052103 | 0.037267631 |
| 0.01204738  | 0.129938718 | 0.287800032 | 0.330095002 |
| 0.234851317 | 0.231615108 | 0.088092193 | 0.319025468 |
| 0.038618889 | 0.055767701 | 0.040525353 | 0.020650247 |
| 0.084930152 | 0.058654184 | 0.270197656 | 0.332203188 |
| 0.446923555 | 0.034712802 | 0.01834324  | 0.017667552 |
| 0.031844321 | 0.233529998 | 0.202277688 | 0.138162203 |
| 0.256404492 | 0.044209713 | 5.04E-05    | 0.025254239 |
| 0.24272219  | 0.094662697 |             |             |
| MTX1        | 0.218601673 | 0.333929094 | 0.008510527 |
| 0.007427012 | 0.005875774 | 0.11120351  | 0.06815134  |
| 0.163823409 | 0.012839344 | 0.030721564 | 0.169403137 |
| 0.00115999  | 0.237257314 | 0.004706103 | 0.005774255 |
| 0.395186615 | 0.369621524 | 0.088095414 | 0.350826926 |
| 0.152752674 | 0.019883373 | 0.222825034 | 0.207541947 |
| 0.095996322 | 0.001223746 | 0.026561388 | 0.011993395 |
| 0.120947239 | 0.376325699 | 0.06330597  | 0.038536976 |
| 0.378583397 | 0.313933649 | 0.065864406 | 0.017557346 |
| 0.020938653 | 0.312911068 | 0.004000721 | 0.214617191 |
| 0.288976711 | 0.045852513 | 0.304434607 | 0.001845015 |
| 0.000669738 | 0.019244209 | 0.10328582  | 0.240352789 |
| 0.088820215 | 0.098306974 | 0.051165403 | 0.04178439  |
| 0.020960647 | 0.188548688 | 0.284364876 | 0.018652913 |
| 0.233520635 | 0.002192217 | 0.284380919 | 0.105079482 |
| 0.011659258 | 0.081440049 | 0.161810684 | 0.231165297 |
| 0.104960275 | 0.257286288 | 0.336932212 | 0.00294026  |
| 0.021338249 | 0.148716124 | 0.313426724 | 0.195506038 |
| 0.321526891 | 0.047347744 | 0.029623945 | 0.062736444 |
| 0.252107639 | 0.312533446 | 0.112087394 | 0.019677867 |

|             |             |             |             |
|-------------|-------------|-------------|-------------|
| 0.000606853 | 0.040681847 | 0.038210482 | 0.247252458 |
| 0.196004565 | 0.194275135 | 0.199398577 | 0.028600366 |
| 0.194289101 | 0.003145776 | 0.18587722  | 0.369608176 |
| 0.003293937 | 0.224160949 | 0.001189265 | 0.011337691 |
| 0.330092708 | 0.371243729 | 0.296401969 | 0.009182755 |
| 0.002172021 | 0.023182787 | 0.03023221  | 0.307735291 |
| 0.145903491 | 0.1549533   | 0.218799804 | 0.022402088 |
| 0.246116271 | 0.036009775 | 0.051079333 | 0.317279911 |
| 0.374377339 | 0.001074107 | 0.025642173 | 0.084664727 |
| 0.022354586 | 0.011921957 | 0.063869367 | 0.013897424 |
| 0.002549763 | 0.004515481 | 0.35240463  | 0.030999839 |
| 0.021577914 | 0.06716331  | 0.009960915 | 0.185217833 |
| 0.098464388 | 0.330052626 | 0.005370892 | 0.072848581 |
| 0.234223394 | 0.082500362 | 0.106421239 | 0.251082259 |
| 0.035397187 | 0.048231251 | 0.044839005 | 0.250964397 |
| 0.267959218 | 0.006466108 | 0.011604558 | 0.181593116 |
| 0.221980575 | 0.370535213 | 0.375536588 | 0.038090725 |
| 0.031204668 | 0.068367396 | 0.081338777 | 0.192300889 |
| 0.072858207 | 0.122435301 | 0.007127637 | 0.159451407 |
| 0.250911097 | 0.008148399 | 0.014124348 | 0.280320112 |
| 0.002485378 | 0.0138701   | 0.329054007 | 0.24226623  |
| 0.137512553 | 0.012747089 | 0.06735344  | 0.102259837 |
| 0.136862886 | 0.097331392 | 0.201185124 | 0.061703123 |
| 0.17719811  | 0.097708461 | 0.007383515 | 0.239445273 |
| 0.034382861 | 0.165660872 | 0.04220453  | 0.006232583 |
| 0.197839871 | 0.076534234 | 0.325790737 | 0.191321251 |
| 0.284709022 | 0.002279293 | 0.034377153 | 0.252339426 |
| 0.077456352 | 0.271428233 | 0.326000998 | 0.032045998 |
| 0.111696858 | 0.027007926 | 0.043636982 | 0.034954626 |
| 0.293233735 | 0.032526685 | 0.032151759 | 0.001348975 |
| 0.009007294 | 0.150536598 | 0.105263033 | 0.012018481 |
| 0.021322631 | 0.023013855 | 0.016665213 | 0.314326833 |
| 0.075060634 | 0.225786783 | 0.005855987 | 0.018834788 |
| 0.062501715 | 0.191248406 | 0.083514138 | 0.059375646 |
| 0.232710822 | 0.060413998 | 0.354557902 | 0.227126377 |
| 0.014398245 | 0.217118375 | 0.0104464   | 0.060356508 |
| 0.176626685 | 0.290274298 | 0.318825188 | 0.229001456 |
| 0.065391039 | 0.193738279 | 0.027819047 | 0.142270872 |
| 0.195828437 | 0.123351909 | 0.016834265 | 0.314987922 |
| 0.000622608 | 0.14808094  | 0.175485295 | 0.016759725 |
| 0.326567691 | 0.08481429  | 0.016368432 | 0.077727733 |
| 0.360437766 | 0.315823865 | 0.297455495 | 0.359626314 |
| 0.026638472 | 0.003423102 | 0.333920259 | 0.218674788 |
| 0.370148735 | 0.076284275 | 0.028346914 | 0.004595622 |
| 0.335349322 | 0.144510197 | 0.261764966 | 0.258783437 |
| 0.128138691 | 0.051045519 | 0.066879742 | 0.194461888 |
| 0.00451613  | 0.103728066 | 0.310471996 | 0.029494708 |
| 0.097217405 | 0.022394708 | 0.262979482 | 0.140083259 |
| 0.039014987 | 1           | 0.057829563 | 0.015747156 |
| 0.050027501 | 0.360895238 | 0.00140133  | 0.325527847 |
| 0.369031032 | 0.105200933 | 0.33075155  | 0.374321771 |
| 0.150357706 | 0.192311863 | 0.326172257 | 0.308300806 |
| 0.000472411 | 0.30955142  | 0.205511406 | 0.183850734 |
| 0.38360227  | 0.128732622 | 0.072918149 | 0.095893041 |

|             |             |             |             |
|-------------|-------------|-------------|-------------|
| 7.88E-05    | 0.055086329 | 0.035116738 | 0.318967498 |
| 0.297190847 | 0.002371585 | 0.001383547 | 0.244364904 |
| 0.193758553 | 0.003505677 | 0.3779814   | 0.137653624 |
| 0.279104322 | 0.105653593 | 0.051662436 | 0.257683533 |
| 0.040338684 | 0.049894267 | 0.001669172 | 0.199554713 |
| 0.079622883 | 0.007987163 | 0.010967307 | 0.361429984 |
| 0.356287989 | 0.156809732 | 0.089957394 | 0.01164057  |
| 0.322659015 | 0.038921149 | 0.270034452 | 0.008074898 |
| 0.274710795 | 0.176873619 | 0.254811258 | 0.25621498  |
| 0.164355354 | 0.234341963 | 0.234906058 | 0.320418469 |
| 0.010983169 | 0.348926754 | 0.365497701 | 0.010574646 |
| 0.199214564 | 0.318120622 | 0.159405066 | 0.064315913 |
| 0.205616263 | 0.007088317 | 0.086860284 | 0.151789275 |
| 0.260536199 | 0.337684662 | 0.012835658 | 0.023553393 |
| 0.244126508 | 0.044943287 | 0.021131553 | 0.073731218 |
| 0.126540219 | 0.029883792 | 0.010132359 | 0.178570153 |
| 0.293280353 | 0.126228956 | 0.396071834 | 0.029110454 |
| 0.29415744  | 0.00565819  | 0.255441994 | 0.013800538 |
| 0.119686729 | 0.271968008 | 0.317934665 | 0.02674038  |
| 0.019266135 | 0.032980216 | 0.216144784 | 0.247537324 |
| 0.018946957 | 0.070285287 | 0.080911487 | 0.114313725 |
| 0.373547238 | 0.074033028 | 0.117374464 | 0.097849128 |
| 0.230398682 | 0.010732326 | 0.33844977  | 0.146556335 |
| 0.298813255 | 0.071596367 | 0.254436593 | 0.00152386  |
| 0.222544045 | 0.048726056 | 0.086805092 | 0.112073384 |
| 0.359791176 | 0.031483339 | 0.15376619  | 0.042840339 |
| 0.015648654 | 0.000632863 | 0.189846604 | 0.078028928 |
| 0.141976904 | 0.038728443 | 0.108414269 | 0.015175533 |
| 0.36358771  | 0.211189574 | 0.348331922 | 0.032707136 |
| 0.125165685 | 0.000773498 | 0.037048432 | 0.006654933 |
| 0.278377898 | 0.190284239 | 0.209763603 | 0.24146049  |
| 0.063450482 | 0.155296721 | 0.162726598 | 0.091417288 |
| 0.309657897 | 0.027295292 | 0.389153232 | 0.057469381 |
| 0.275628815 | 0.043752309 | 0.093295994 | 0.022357678 |
| 0.036146292 | 0.008723228 | 0.023570383 | 0.03108378  |
| 0.341450987 | 0.016078469 | 0.108001776 | 0.092160299 |
| 0.006149546 | 0.075822211 | 0.240798306 | 0.249434741 |
| 0.234068604 | 0.299062339 | 0.088382316 | 0.212373934 |
| 0.051954468 | 0.116431398 | 0.010165761 | 0.008172802 |
| 0.032851697 | 0.056539292 | 0.311322297 | 0.280155949 |
| 0.341995677 | 0.034353722 | 0.019810891 | 0.034589293 |
| 0.006610237 | 0.314208457 | 0.095444925 | 0.008107481 |
| 0.140545001 | 0.053191272 | 0.000228946 | 0.064667312 |
| 0.213768459 | 0.036602328 |             |             |
| MX1         | 0.107943889 | 0.413339887 | 0.014353275 |
| 0.061217862 | 0.053973924 | 0.137960236 | 0.145311851 |
| 0.085198606 | 0.0189332   | 0.076352638 | 0.222649794 |
| 3.78E-05    | 0.258785183 | 0.000913067 | 0.008439482 |
| 0.384678842 | 0.412063462 | 0.19439943  | 0.363080434 |
| 0.072926    | 0.13576976  | 0.156823946 | 0.228216665 |
| 0.134369277 | 5.43E-05    | 0.066857374 | 0.094453368 |
| 0.082559736 | 0.363142084 | 0.056421394 | 0.078124453 |
| 0.330115036 | 0.384454811 | 0.130651248 | 0.124629849 |
| 0.142273301 | 0.349734645 | 0.035067644 | 0.331804158 |

|             |             |             |             |
|-------------|-------------|-------------|-------------|
| 0.272377596 | 0.107683284 | 0.361466881 | 0.001662408 |
| 0.036630177 | 0.034985568 | 0.060499059 | 0.185390434 |
| 0.053977248 | 0.111286689 | 0.047790757 | 0.117190434 |
| 0.039919207 | 0.230936034 | 0.192417023 | 0.046443937 |
| 0.33930076  | 0.030660046 | 0.365468707 | 0.030324008 |
| 0.012478462 | 0.080312877 | 0.1155591   | 0.207709553 |
| 0.163056017 | 0.360109971 | 0.415655142 | 0.015877556 |
| 0.026622326 | 0.156786958 | 0.314932492 | 0.34475557  |
| 0.357376997 | 0.082130308 | 0.086415145 | 0.121977925 |
| 0.306749855 | 0.26629134  | 0.12511122  | 0.027551197 |
| 0.000169745 | 0.093704188 | 0.175360809 | 0.13994276  |
| 0.227652155 | 0.244662613 | 0.149797388 | 0.092120785 |
| 0.178347979 | 0.002447761 | 0.15720021  | 0.416436909 |
| 0.012305886 | 0.253829047 | 0.003521826 | 0.021716932 |
| 0.282627745 | 0.343178668 | 0.20612563  | 0.029762567 |
| 0.001441142 | 0.014113635 | 0.011644829 | 0.281213889 |
| 0.142975406 | 0.190570544 | 0.321798413 | 0.019390555 |
| 0.260826269 | 0.026842056 | 0.079182616 | 0.38184212  |
| 0.372186389 | 0.000352799 | 0.016499129 | 0.115020837 |
| 0.096637223 | 0.121164844 | 0.114691827 | 0.007376798 |
| 0.005378607 | 0.000482528 | 0.343809274 | 0.022071399 |
| 0.056318368 | 0.102866668 | 0.036796518 | 0.3534093   |
| 0.061814977 | 0.275845794 | 0.053568676 | 0.131909082 |
| 0.30317341  | 0.171076938 | 0.239941173 | 0.31589746  |
| 0.123691169 | 0.030401884 | 0.026526594 | 0.384963773 |
| 0.275258084 | 0.018357948 | 0.016615919 | 0.189453932 |
| 0.269578008 | 0.36868612  | 0.416199482 | 0.039636018 |
| 0.114333826 | 0.061696214 | 0.107924941 | 0.296340266 |
| 0.122069115 | 0.088873206 | 0.008624038 | 0.191994322 |
| 0.331119766 | 0.007369214 | 0.013019093 | 0.256233426 |
| 0.071429815 | 0.07549197  | 0.327285637 | 0.335138144 |
| 0.20899165  | 0.086774629 | 0.11983216  | 0.15971152  |
| 0.102486119 | 0.131173579 | 0.194962135 | 0.114567518 |
| 0.150504162 | 0.11684917  | 0.012344732 | 0.273985135 |
| 0.035096226 | 0.121405912 | 0.069734837 | 0.018770101 |
| 0.156808933 | 0.054581415 | 0.362098844 | 0.164126594 |
| 0.226225418 | 0.032663805 | 0.079209652 | 0.139589718 |
| 0.087785859 | 0.245078433 | 0.4336674   | 0.033804757 |
| 0.082428381 | 0.059985364 | 0.03769564  | 0.125776047 |
| 0.210816754 | 0.091473525 | 0.084257978 | 0.00018979  |
| 0.034062702 | 0.14117617  | 0.135723659 | 0.003890761 |
| 0.093686445 | 0.019358683 | 0.008589211 | 0.382448706 |
| 0.080569598 | 0.362291082 | 0.001025519 | 0.013569694 |
| 0.056970984 | 0.356520256 | 0.120626658 | 0.03781903  |
| 0.397205283 | 0.07778492  | 0.30717829  | 0.264760815 |
| 0.084426175 | 0.262353913 | 0.022654384 | 0.05006944  |
| 0.225448575 | 0.405692917 | 0.356291018 | 0.329926915 |
| 0.094566799 | 0.145665765 | 0.048980459 | 0.144539846 |
| 0.135226305 | 0.133108291 | 0.012942333 | 0.390913186 |
| 4.67E-05    | 0.151770401 | 0.27794638  | 0.022708975 |
| 0.429160091 | 0.169621312 | 0.009772467 | 0.036743762 |
| 0.372298983 | 0.380868078 | 0.243423032 | 0.334120121 |
| 0.028614057 | 0.000394413 | 0.322032212 | 0.255330015 |
| 0.384678592 | 0.132973415 | 0.132591146 | 0.005359128 |

|             |             |             |             |
|-------------|-------------|-------------|-------------|
| 0.377605915 | 0.106789633 | 0.258440066 | 0.163396438 |
| 0.246291358 | 0.110040797 | 0.064059236 | 0.13348426  |
| 0.001800393 | 0.081869098 | 0.237740972 | 0.116288108 |
| 0.121321638 | 0.039458691 | 0.397331364 | 0.171399755 |
| 0.134910533 | 0.057829563 | 1           | 0.02695237  |
| 0.07063186  | 0.409463131 | 0.013903746 | 0.29378986  |
| 0.40292001  | 0.126771422 | 0.425469299 | 0.374017911 |
| 0.099867053 | 0.290478729 | 0.385218867 | 0.270417775 |
| 2.32E-05    | 0.337692784 | 0.275736548 | 0.211855218 |
| 0.374462084 | 0.148550347 | 0.035437467 | 0.161714457 |
| 5.88E-05    | 0.045920314 | 0.111553845 | 0.343044581 |
| 0.405300585 | 0.007657668 | 0.019237363 | 0.322742007 |
| 0.251334114 | 0.006117313 | 0.401580473 | 0.182775314 |
| 0.410401894 | 0.174307109 | 0.088607076 | 0.317642787 |
| 0.084302392 | 0.052651258 | 0.021354877 | 0.301056789 |
| 0.142789044 | 0.007756901 | 0.0956425   | 0.37820899  |
| 0.303017268 | 0.272477494 | 0.106592478 | 0.012630669 |
| 0.241683124 | 0.133356737 | 0.375981653 | 0.016117484 |
| 0.251267511 | 0.239901177 | 0.358267164 | 0.328064685 |
| 0.208802385 | 0.311293802 | 0.268589458 | 0.348293415 |
| 0.068597319 | 0.306709902 | 0.328318173 | 0.017973814 |
| 0.150740693 | 0.410063055 | 0.267842948 | 0.100578667 |
| 0.165546986 | 0.133537685 | 0.100945985 | 0.076976297 |
| 0.385628816 | 0.42399297  | 0.015146242 | 0.016294969 |
| 0.33722265  | 0.050824117 | 0.041192807 | 0.088450163 |
| 0.136500014 | 0.037761533 | 0.012254831 | 0.202988098 |
| 0.386118578 | 0.20061364  | 0.369821655 | 0.125801645 |
| 0.363151256 | 0.005579501 | 0.255402548 | 0.059985388 |
| 0.091209493 | 0.210216067 | 0.263736813 | 0.011693306 |
| 0.020171103 | 0.017101956 | 0.341872905 | 0.303306462 |
| 0.016241631 | 0.053350819 | 0.124939603 | 0.240389875 |
| 0.393841923 | 0.088415239 | 0.132402473 | 0.081322586 |
| 0.308793254 | 0.140672584 | 0.351688028 | 0.099449665 |
| 0.234372889 | 0.128643432 | 0.30856448  | 0.003230806 |
| 0.260852205 | 0.084442746 | 0.030194315 | 0.277750775 |
| 0.317846642 | 0.03393654  | 0.293139819 | 0.023194025 |
| 0.054284202 | 0.00015077  | 0.160260013 | 0.185473112 |
| 0.172963325 | 0.03555959  | 0.09318953  | 0.065917754 |
| 0.405027921 | 0.15611379  | 0.259632888 | 0.049794076 |
| 0.154375722 | 0.024889304 | 0.081598221 | 0.00451946  |
| 0.202718381 | 0.221609304 | 0.179218097 | 0.128646349 |
| 0.01722499  | 0.28922502  | 0.219895442 | 0.241642492 |
| 0.427207047 | 0.053860073 | 0.417030761 | 0.048339735 |
| 0.295529515 | 0.070908804 | 0.120764731 | 0.050870816 |
| 0.105802862 | 0.018805057 | 0.031703041 | 0.014164806 |
| 0.425729246 | 0.049016873 | 0.248846065 | 0.048168523 |
| 0.015333494 | 0.112090569 | 0.23364272  | 0.311865789 |
| 0.246569215 | 0.241114218 | 0.066498955 | 0.283264975 |
| 0.050470816 | 0.056260509 | 0.105566344 | 0.087535495 |
| 0.172880725 | 0.069242912 | 0.233095008 | 0.277821032 |
| 0.38831252  | 0.033701014 | 0.019762514 | 0.015291347 |
| 0.017257086 | 0.20752577  | 0.198997303 | 0.090331401 |
| 0.209069358 | 0.04822853  | 3.72E-05    | 0.023622014 |
| 0.224320968 | 0.095409564 |             |             |



| MX2         | 0.043143216 | 0.148682861 | 0.199423824 |
|-------------|-------------|-------------|-------------|
| 0.014308741 | 0.129938308 | 0.319759515 | 0.302418612 |
| 0.029777881 | 0.123857376 | 0.118377403 | 0.306685525 |
| 0.002399965 | 0.032184661 | 0.041654264 | 0.081547101 |
| 0.081816443 | 0.083888617 | 0.196100367 | 0.084745215 |
| 0.06349289  | 0.048334657 | 0.147846244 | 0.142498851 |
| 0.254379668 | 0.007173631 | 0.232928352 | 0.045011897 |
| 0.019968164 | 0.065932994 | 0.202193962 | 0.079135033 |
| 0.067144873 | 0.05522709  | 0.03290635  | 0.045274941 |
| 0.005245608 | 0.200302881 | 0.002552986 | 0.043696596 |
| 0.034155009 | 0.151396347 | 0.06118458  | 0.05807839  |
| 0.000236639 | 0.211290223 | 0.015102674 | 0.140036784 |
| 0.070554939 | 0.293396234 | 0.237074885 | 0.199621286 |
| 0.001487851 | 0.268375289 | 0.096443188 | 0.001376221 |
| 0.264030879 | 0.002834368 | 0.217043072 | 0.022568927 |
| 0.183027786 | 0.112990652 | 0.024891271 | 0.105060983 |
| 0.355832324 | 0.249173082 | 0.116715124 | 0.147289874 |
| 0.264496063 | 0.045951816 | 0.038259727 | 0.096783488 |
| 0.131094275 | 0.05552406  | 0.09357573  | 0.013612489 |
| 0.0509979   | 0.039375527 | 0.252803499 | 0.132131489 |
| 0.00308649  | 0.287866342 | 0.040460215 | 0.03777504  |
| 0.022885286 | 0.273728731 | 0.045395963 | 0.126640901 |
| 0.037163117 | 0.123799981 | 0.144965453 | 0.102764714 |
| 0.026006822 | 0.045053249 | 0.009030912 | 0.123425404 |
| 0.068131922 | 0.046315452 | 0.078396147 | 0.169961503 |
| 0.08942186  | 0.116001893 | 0.013625765 | 0.028362305 |
| 0.07688894  | 0.067131457 | 0.256308014 | 0.001396757 |
| 0.022117731 | 0.066508988 | 0.072816125 | 0.209363622 |
| 0.106484472 | 0.036916636 | 0.083992064 | 0.328732988 |
| 0.026036344 | 0.047938887 | 0.290333442 | 0.002055137 |
| 0.01911752  | 0.003950462 | 0.063422657 | 0.11450544  |
| 0.177361671 | 0.278071798 | 0.095717146 | 0.066856355 |
| 0.022023274 | 0.052484871 | 0.149039656 | 0.224578133 |
| 0.040586776 | 0.292577041 | 0.064676648 | 0.064153376 |
| 0.028586299 | 0.052977874 | 0.143977105 | 0.173178405 |
| 0.204284322 | 0.190144717 | 0.161894836 | 0.252019287 |
| 0.024397764 | 0.083161594 | 0.115652767 | 0.048081078 |
| 0.097893506 | 0.166231344 | 0.034885718 | 0.183474847 |
| 0.29445249  | 0.081148324 | 0.001606444 | 0.241162392 |
| 0.27026275  | 0.003532005 | 0.177940774 | 0.069781071 |
| 0.030723631 | 0.093458917 | 0.17254635  | 0.110295386 |
| 0.065605948 | 0.039589663 | 0.103017793 | 0.235933338 |
| 0.164745297 | 0.223007946 | 0.104638992 | 0.077427571 |
| 0.230522203 | 0.033440265 | 0.214852322 | 0.023870844 |
| 0.254385221 | 0.149462026 | 0.007513151 | 0.00626846  |
| 0.052179247 | 0.042269759 | 0.128854491 | 0.076946517 |
| 0.049898914 | 0.00280849  | 0.113990186 | 0.058776253 |
| 0.030184767 | 0.038978549 | 0.175011281 | 0.273434939 |
| 0.203081291 | 0.009561876 | 0.239125002 | 0.065629538 |
| 0.074037277 | 0.065943151 | 0.077642597 | 0.008386268 |
| 0.157465826 | 0.016449377 | 0.055840303 | 0.06509789  |
| 0.116618247 | 0.103333036 | 0.02154399  | 0.110556149 |
| 0.272049397 | 0.073343915 | 0.019958577 | 0.00459248  |
| 0.124657801 | 0.183959765 | 0.025534604 | 0.024581746 |

|             |             |             |             |
|-------------|-------------|-------------|-------------|
| 0.120188677 | 0.071782463 | 0.033280543 | 0.237019666 |
| 0.084613681 | 0.276958339 | 0.003211926 | 0.089729529 |
| 0.036110707 | 0.101563103 | 0.056878122 | 0.084572582 |
| 0.166018826 | 0.060135617 | 0.011958659 | 0.298140701 |
| 0.092716193 | 0.083722899 | 0.149187219 | 0.151155594 |
| 0.006959082 | 0.199766474 | 0.072189798 | 0.00341186  |
| 0.165091091 | 0.334216395 | 0.151368338 | 0.081295699 |
| 0.088162378 | 0.153399104 | 0.089683359 | 0.046685572 |
| 0.006929618 | 0.03258972  | 0.117950553 | 0.173159355 |
| 0.065975494 | 0.086196369 | 0.013966697 | 0.004251069 |
| 0.105140535 | 0.027282592 | 0.09581064  | 0.037648459 |
| 0.052422935 | 0.018104141 | 0.175835262 | 0.041673691 |
| 0.001262701 | 0.116362542 | 0.051908598 | 0.039291735 |
| 0.055882397 | 0.058118244 | 0.103369071 | 0.269495776 |
| 0.02648508  | 0.015747156 | 0.02695237  | 1           |
| 0.298512843 | 0.146056013 | 0.000908083 | 0.118533075 |
| 0.105071792 | 0.119904212 | 0.106887988 | 0.101284438 |
| 0.130633233 | 0.25288018  | 0.120224216 | 0.055790612 |
| 0.002066167 | 0.037245389 | 0.025988258 | 0.286388532 |
| 0.062921482 | 0.249765256 | 0.010685712 | 0.017682033 |
| 0.005021391 | 0.2444802   | 0.004870043 | 0.169707761 |
| 0.090820097 | 0.15760409  | 0.000397464 | 0.108019091 |
| 0.025789422 | 0.003651305 | 0.129573386 | 0.153992667 |
| 0.147824856 | 0.084029506 | 0.236016129 | 0.033258014 |
| 0.002425157 | 0.026868628 | 0.04859091  | 0.106503413 |
| 0.034948263 | 0.002946087 | 0.093595622 | 0.104024697 |
| 0.123405202 | 0.228826183 | 0.265304536 | 0.011428649 |
| 0.032000499 | 0.019284419 | 0.086686717 | 0.126616694 |
| 0.143735473 | 0.258611872 | 0.176381597 | 0.048198633 |
| 0.072942279 | 0.223601656 | 0.259025985 | 0.123280776 |
| 0.011820969 | 0.039677051 | 0.052739246 | 0.142145245 |
| 0.025724005 | 0.097761351 | 0.056101783 | 0.352513562 |
| 0.150751248 | 0.013945309 | 0.33893106  | 0.052938001 |
| 0.187690044 | 0.090735381 | 0.1794785   | 0.086769719 |
| 0.236966281 | 0.085736646 | 0.261553719 | 0.103461562 |
| 0.283312632 | 0.001600559 | 0.003937531 | 0.201192878 |
| 0.213174229 | 0.341761669 | 0.082587919 | 0.062740769 |
| 0.068143664 | 0.146070604 | 0.085720401 | 0.100445816 |
| 0.177442776 | 0.028730867 | 0.029142237 | 0.003314364 |
| 0.016454755 | 0.063950783 | 0.244247108 | 0.245578642 |
| 0.200620413 | 0.220736412 | 0.212888398 | 0.18574842  |
| 0.076038233 | 0.028669601 | 0.287021905 | 0.09189358  |
| 0.273352497 | 0.047017525 | 0.174855287 | 0.109320908 |
| 0.125609734 | 0.100120834 | 0.102813379 | 0.004457591 |
| 0.049331897 | 0.106059441 | 0.012907756 | 0.120429866 |
| 0.041411341 | 0.202120024 | 0.226580079 | 0.113433107 |
| 0.018338926 | 0.005663462 | 0.175965015 | 0.014082952 |
| 0.341255013 | 0.008948702 | 0.085924397 | 0.00139587  |
| 0.152420464 | 0.089080766 | 0.088049591 | 0.006713213 |
| 0.090605367 | 0.000399871 | 0.123086934 | 0.129847614 |
| 0.133756329 | 0.210241653 | 0.055355151 | 0.039497208 |
| 0.01586459  | 0.090303155 | 0.190868973 | 0.074175469 |
| 0.094557606 | 0.005240629 | 0.091370143 | 0.061283416 |
| 0.025824945 | 0.036286375 | 0.289142519 | 0.047952227 |

|             |             |             |             |
|-------------|-------------|-------------|-------------|
| 0.226436951 | 0.024510603 | 0.202107819 | 0.051142872 |
| 0.073701255 | 0.043710329 | 0.122641227 | 0.025562292 |
| 0.228404163 | 0.073970964 | 0.053285578 | 0.042609357 |
| 0.084381038 | 0.030489615 | 0.018799357 | 0.27763473  |
| 0.02165295  | 0.058185415 | 0.020129666 | 0.037064261 |
| 0.016997978 | 0.187975719 | 0.093312518 | 0.102084881 |
| 0.092201839 | 0.011484681 | 0.179980177 | 0.103785052 |
| 0.001967953 | 0.037371266 | 0.305357628 | 0.00712757  |
| 0.080713543 | 0.010563377 | 0.007434328 | 0.043373269 |
| 0.213365626 | 0.020766671 |             |             |
| MYADM       | 0.094207387 | 0.278352036 | 0.270045277 |
| 0.011007104 | 0.177691289 | 0.393502327 | 0.326342297 |
| 0.06935656  | 0.316807077 | 0.18398273  | 0.412896231 |
| 0.00834643  | 0.081079255 | 0.104098404 | 0.239381116 |
| 0.177168205 | 0.182532362 | 0.269636794 | 0.18912582  |
| 0.132607764 | 0.080723273 | 0.265077283 | 0.195381869 |
| 0.335843407 | 0.019490773 | 0.262563338 | 0.043915865 |
| 0.054302852 | 0.14975142  | 0.327348327 | 0.171719333 |
| 0.151670909 | 0.12079157  | 0.100798274 | 0.108694112 |
| 0.018669703 | 0.345034843 | 0.01323098  | 0.096523089 |
| 0.089758564 | 0.229186842 | 0.13255419  | 0.154740293 |
| 0.000253193 | 0.308653026 | 0.048047147 | 0.235748674 |
| 0.180213308 | 0.349498533 | 0.34908629  | 0.241086677 |
| 0.006901071 | 0.399017289 | 0.205874762 | 0.005949982 |
| 0.404240251 | 0.001951327 | 0.367469186 | 0.081366119 |
| 0.348818019 | 0.248605045 | 0.061995598 | 0.19689492  |
| 0.436809097 | 0.391630972 | 0.235904556 | 0.196445216 |
| 0.331684891 | 0.098828775 | 0.08647208  | 0.144860895 |
| 0.249921451 | 0.11936375  | 0.228798773 | 0.043602968 |
| 0.109125499 | 0.094595162 | 0.393414935 | 0.316678495 |
| 0.007208977 | 0.287538667 | 0.095104179 | 0.096973462 |
| 0.052679837 | 0.399908912 | 0.101454048 | 0.251949958 |
| 0.068415609 | 0.21408467  | 0.23137492  | 0.211617341 |
| 0.03286113  | 0.110353963 | 0.013114189 | 0.316284056 |
| 0.14725898  | 0.112871235 | 0.156592845 | 0.27135328  |
| 0.171053186 | 0.316984371 | 0.058384917 | 0.076008673 |
| 0.15431333  | 0.120946069 | 0.40389832  | 0.00919105  |
| 0.059012522 | 0.198978409 | 0.220621923 | 0.342833691 |
| 0.215346514 | 0.074323991 | 0.263652239 | 0.376561817 |
| 0.090601542 | 0.092278723 | 0.331214665 | 0.004848685 |
| 0.018763228 | 0.016438211 | 0.144340519 | 0.290060177 |
| 0.24068842  | 0.304344586 | 0.098747586 | 0.115329228 |
| 0.067691397 | 0.131314913 | 0.238388283 | 0.277666321 |
| 0.085996616 | 0.331427254 | 0.100147127 | 0.130025514 |
| 0.085393624 | 0.192233932 | 0.304903783 | 0.302494707 |
| 0.367287465 | 0.278752379 | 0.2951494   | 0.347641381 |
| 0.063681761 | 0.176761643 | 0.235221136 | 0.156763842 |
| 0.188378767 | 0.295912898 | 0.097264245 | 0.244581851 |
| 0.371148155 | 0.168318767 | 0.009106122 | 0.386530253 |
| 0.419819562 | 0.007194246 | 0.333848961 | 0.153863126 |
| 0.033013508 | 0.244554985 | 0.306908318 | 0.206561794 |
| 0.133386821 | 0.038570454 | 0.162359104 | 0.288244114 |
| 0.271004386 | 0.253780457 | 0.209366315 | 0.135837169 |
| 0.346255114 | 0.087110502 | 0.292635882 | 0.063125478 |

|             |             |             |             |
|-------------|-------------|-------------|-------------|
| 0.35499744  | 0.26791733  | 0.032428833 | 0.025788029 |
| 0.119712302 | 0.130733543 | 0.227600654 | 0.152874875 |
| 0.113608889 | 0.001261573 | 0.163749703 | 0.125059311 |
| 0.08988909  | 0.100117197 | 0.305851715 | 0.367407217 |
| 0.325217398 | 0.048006814 | 0.357462338 | 0.161929396 |
| 0.173237666 | 0.150092862 | 0.163865186 | 0.010758716 |
| 0.295049169 | 0.041065647 | 0.124293521 | 0.176302389 |
| 0.194508607 | 0.2401633   | 0.087609751 | 0.208950586 |
| 0.32873882  | 0.145077746 | 0.067592344 | 0.028428947 |
| 0.254657064 | 0.283743711 | 0.067133166 | 0.083882511 |
| 0.206803647 | 0.159742177 | 0.085265931 | 0.392534475 |
| 0.213231481 | 0.376207262 | 0.02050454  | 0.257702217 |
| 0.075953395 | 0.1992104   | 0.117189631 | 0.16932633  |
| 0.276652957 | 0.143720291 | 0.044710662 | 0.396960596 |
| 0.171122026 | 0.162969488 | 0.283789394 | 0.286261819 |
| 0.014865582 | 0.306843872 | 0.122822051 | 0.020150683 |
| 0.283933371 | 0.367907375 | 0.309169859 | 0.203502061 |
| 0.194307309 | 0.293613786 | 0.202528018 | 0.106873228 |
| 0.033482286 | 0.079381607 | 0.246369991 | 0.303400089 |
| 0.15062871  | 0.179560995 | 0.045251603 | 0.026537968 |
| 0.206064408 | 0.070862506 | 0.167640166 | 0.072706073 |
| 0.105219013 | 0.059383626 | 0.30310372  | 0.106615336 |
| 0.006219361 | 0.210879689 | 0.097399951 | 0.087532224 |
| 0.12380821  | 0.169922341 | 0.196801521 | 0.413586351 |
| 0.07971591  | 0.050027501 | 0.07063186  | 0.298512843 |
| 1           | 0.272299821 | 0.005157967 | 0.248033222 |
| 0.217054306 | 0.229158683 | 0.198444784 | 0.212807043 |
| 0.20998679  | 0.390384218 | 0.224143339 | 0.138381748 |
| 0.005709643 | 0.090961263 | 0.064561103 | 0.446739814 |
| 0.132104877 | 0.358225779 | 0.038896638 | 0.04426213  |
| 0.015200759 | 0.343378788 | 0.016027408 | 0.325145422 |
| 0.176442723 | 0.254490821 | 0.0026376   | 0.198877682 |
| 0.061537674 | 0.013965929 | 0.255693565 | 0.2010497   |
| 0.253318577 | 0.143114179 | 0.291142484 | 0.080784487 |
| 0.010010356 | 0.108239304 | 0.063800583 | 0.164267226 |
| 0.087211318 | 0.021850635 | 0.107670712 | 0.223207218 |
| 0.22588928  | 0.339971203 | 0.369785684 | 0.012849656 |
| 0.08491062  | 0.033478974 | 0.152676478 | 0.257593829 |
| 0.263222342 | 0.401934754 | 0.305668743 | 0.109321    |
| 0.144706302 | 0.345578072 | 0.389887747 | 0.22181786  |
| 0.022177972 | 0.08866376  | 0.118776711 | 0.156326323 |
| 0.062349664 | 0.194124236 | 0.087670943 | 0.36656282  |
| 0.271592017 | 0.020864362 | 0.4044942   | 0.116733011 |
| 0.307140376 | 0.179934739 | 0.300394303 | 0.259308418 |
| 0.358956886 | 0.261507982 | 0.353056137 | 0.216751883 |
| 0.416708365 | 0.00710477  | 0.026412188 | 0.346953918 |
| 0.352884114 | 0.431591415 | 0.16334705  | 0.091549447 |
| 0.14822011  | 0.296909415 | 0.19105126  | 0.264271597 |
| 0.285301211 | 0.059936722 | 0.075878832 | 0.014784471 |
| 0.023806181 | 0.157629265 | 0.358131879 | 0.392632724 |
| 0.326138288 | 0.322047951 | 0.247478778 | 0.22730338  |
| 0.16267965  | 0.081858659 | 0.380205656 | 0.183706314 |
| 0.430635543 | 0.069525063 | 0.322536076 | 0.186137809 |
| 0.23972254  | 0.184552826 | 0.203380101 | 0.013442685 |

|             |             |             |             |
|-------------|-------------|-------------|-------------|
| 0.102581929 | 0.168712243 | 0.043104925 | 0.151030775 |
| 0.104706    | 0.318303442 | 0.328528603 | 0.293508256 |
| 0.046150958 | 0.011913202 | 0.318532823 | 0.034323627 |
| 0.456654841 | 0.041155577 | 0.168809984 | 0.006296162 |
| 0.293079078 | 0.153878122 | 0.173934919 | 0.035184322 |
| 0.152680451 | 0.001292739 | 0.202880592 | 0.224105928 |
| 0.253477649 | 0.363803012 | 0.12547588  | 0.081157134 |
| 0.072319155 | 0.162478815 | 0.309229014 | 0.116077695 |
| 0.185076018 | 0.014202175 | 0.189362223 | 0.199356477 |
| 0.068023244 | 0.1210762   | 0.40176738  | 0.174209818 |
| 0.289927033 | 0.103015489 | 0.374739514 | 0.185677437 |
| 0.152190655 | 0.168222598 | 0.164557899 | 0.083375169 |
| 0.236701188 | 0.165165081 | 0.126481737 | 0.096141224 |
| 0.137773556 | 0.070252184 | 0.062589549 | 0.431473483 |
| 0.08349069  | 0.159572192 | 0.020335697 | 0.039781034 |
| 0.044300595 | 0.288858486 | 0.20572555  | 0.207905445 |
| 0.197187714 | 0.056308822 | 0.339692884 | 0.28568849  |
| 0.013106924 | 0.093214171 | 0.347419931 | 0.017868677 |
| 0.162448313 | 0.05387022  | 0.008017044 | 0.159170345 |
| 0.348816236 | 0.064404593 |             |             |
| MYC         | 0.391303569 | 0.508090715 | 0.122696826 |
| 0.044778222 | 0.174738188 | 0.342545409 | 0.326967643 |
| 0.396989968 | 0.182852672 | 0.224833079 | 0.427349457 |
| 0.00333775  | 0.378494347 | 0.029813075 | 0.11739929  |
| 0.49831532  | 0.508234464 | 0.434210456 | 0.494832492 |
| 0.386982285 | 0.215670594 | 0.439644649 | 0.473268307 |
| 0.367161224 | 0.004073514 | 0.203111779 | 0.089203681 |
| 0.385030845 | 0.478666098 | 0.303494513 | 0.382436175 |
| 0.441819997 | 0.450217035 | 0.466519634 | 0.376770761 |
| 0.259254197 | 0.502169977 | 0.119419911 | 0.438207765 |
| 0.365990228 | 0.329608354 | 0.46334866  | 0.031035962 |
| 0.005198031 | 0.17687801  | 0.347337426 | 0.467695084 |
| 0.371998407 | 0.323885307 | 0.263169888 | 0.267361934 |
| 0.164815316 | 0.450362945 | 0.435848972 | 0.161331902 |
| 0.487758089 | 0.008287954 | 0.502628682 | 0.297740364 |
| 0.122415236 | 0.408672922 | 0.391057    | 0.477569951 |
| 0.355149951 | 0.496860398 | 0.511654962 | 0.071688182 |
| 0.136477997 | 0.469514989 | 0.421443499 | 0.491265374 |
| 0.502590343 | 0.421153006 | 0.403323042 | 0.373580676 |
| 0.466485503 | 0.402099687 | 0.3857624   | 0.265999046 |
| 0.00233246  | 0.240007302 | 0.3937649   | 0.358542469 |
| 0.401199498 | 0.45321562  | 0.422470006 | 0.318119928 |
| 0.466828899 | 0.04233534  | 0.466781385 | 0.517894174 |
| 0.037355109 | 0.414774536 | 0.017192205 | 0.236019691 |
| 0.459949232 | 0.439638689 | 0.460934274 | 0.137841765 |
| 0.030082442 | 0.199281879 | 0.185122016 | 0.368492645 |
| 0.466967719 | 0.509505451 | 0.484221752 | 0.135302339 |
| 0.332821139 | 0.257466085 | 0.443714351 | 0.506351124 |
| 0.485852236 | 0.015989692 | 0.236174051 | 0.327190876 |
| 0.381405737 | 0.195190522 | 0.334121023 | 0.050086001 |
| 0.02223954  | 0.026839743 | 0.444522896 | 0.247677839 |
| 0.17562908  | 0.307174778 | 0.132284555 | 0.490103493 |
| 0.37394085  | 0.408860904 | 0.188582873 | 0.36267432  |
| 0.44947547  | 0.360372807 | 0.476813756 | 0.484858797 |

|             |             |             |             |
|-------------|-------------|-------------|-------------|
| 0.411107718 | 0.33212549  | 0.238335362 | 0.51095915  |
| 0.480260398 | 0.127484725 | 0.148212128 | 0.428747252 |
| 0.355837016 | 0.47994335  | 0.528496465 | 0.374061224 |
| 0.353359526 | 0.34006404  | 0.393783168 | 0.482599899 |
| 0.34807162  | 0.403289061 | 0.091098877 | 0.443745069 |
| 0.484121303 | 0.048539317 | 0.125194436 | 0.462483652 |
| 0.076257387 | 0.340742096 | 0.497653257 | 0.509057563 |
| 0.48149175  | 0.075760932 | 0.332207998 | 0.372189886 |
| 0.395743725 | 0.361006946 | 0.472969158 | 0.30880856  |
| 0.416147169 | 0.398717701 | 0.093775002 | 0.34738377  |
| 0.205938193 | 0.422922124 | 0.32691159  | 0.089003757 |
| 0.428460461 | 0.401030284 | 0.511300155 | 0.470950369 |
| 0.431289224 | 0.007227384 | 0.223374227 | 0.418539741 |
| 0.374750579 | 0.374983497 | 0.514945085 | 0.192124057 |
| 0.35108257  | 0.324774288 | 0.230568512 | 0.40638386  |
| 0.417782739 | 0.320300154 | 0.293786769 | 0.002041615 |
| 0.219605332 | 0.405762245 | 0.467972081 | 0.090936108 |
| 0.327911718 | 0.19077408  | 0.150025582 | 0.50446041  |
| 0.305133935 | 0.485775769 | 0.043402982 | 0.164610498 |
| 0.365795321 | 0.500842841 | 0.444817155 | 0.326191002 |
| 0.511413474 | 0.407442805 | 0.396738943 | 0.471688136 |
| 0.356405432 | 0.449005648 | 0.171591335 | 0.366649325 |
| 0.464080653 | 0.502797115 | 0.465154165 | 0.488346389 |
| 0.370027117 | 0.401861768 | 0.327765544 | 0.380423669 |
| 0.458285175 | 0.462597899 | 0.149054713 | 0.506211895 |
| 0.002025622 | 0.440229987 | 0.499127313 | 0.184268353 |
| 0.516716285 | 0.344904944 | 0.125559407 | 0.329051255 |
| 0.503595443 | 0.503744034 | 0.44212087  | 0.423630506 |
| 0.251427641 | 0.020961006 | 0.478005215 | 0.483956009 |
| 0.484877143 | 0.473398216 | 0.354414566 | 0.08872835  |
| 0.496416954 | 0.355541963 | 0.485343193 | 0.445573968 |
| 0.475046099 | 0.401784108 | 0.338718561 | 0.368098566 |
| 0.022314315 | 0.354688533 | 0.458204435 | 0.258482923 |
| 0.404685725 | 0.25937623  | 0.505115441 | 0.419565245 |
| 0.436247597 | 0.360895238 | 0.409463131 | 0.146056013 |
| 0.272299821 | 1           | 0.04800423  | 0.473066516 |
| 0.518984544 | 0.440937006 | 0.506346614 | 0.508686703 |
| 0.409686816 | 0.474927297 | 0.508662434 | 0.407700441 |
| 0.00191386  | 0.396255699 | 0.375944652 | 0.436494298 |
| 0.457452904 | 0.393392612 | 0.250627595 | 0.423812716 |
| 0.002501013 | 0.244350524 | 0.274615315 | 0.495377172 |
| 0.496408098 | 0.058855418 | 0.045909475 | 0.507883136 |
| 0.391264154 | 0.052773906 | 0.525164587 | 0.435077288 |
| 0.516522723 | 0.486941803 | 0.268698616 | 0.400037628 |
| 0.227271985 | 0.406558888 | 0.052339356 | 0.504116748 |
| 0.442841485 | 0.099653721 | 0.13715783  | 0.509718157 |
| 0.489508077 | 0.476243798 | 0.355662373 | 0.020147482 |
| 0.352189007 | 0.26301332  | 0.503670824 | 0.174718704 |
| 0.483886363 | 0.45701811  | 0.509245153 | 0.440904637 |
| 0.490284229 | 0.492196492 | 0.46621254  | 0.507303383 |
| 0.147230724 | 0.415956811 | 0.431417425 | 0.102845672 |
| 0.391193099 | 0.496906645 | 0.468664317 | 0.274059566 |
| 0.453326489 | 0.123242582 | 0.304556266 | 0.374784434 |
| 0.512888099 | 0.493048723 | 0.11186669  | 0.236985968 |

|             |             |             |             |
|-------------|-------------|-------------|-------------|
| 0.491511687 | 0.3965328   | 0.186294446 | 0.424883372 |
| 0.378367946 | 0.179030276 | 0.149799876 | 0.459151043 |
| 0.507980128 | 0.394306251 | 0.478925327 | 0.231120378 |
| 0.463487001 | 0.093988471 | 0.455746304 | 0.358896277 |
| 0.376867655 | 0.41532348  | 0.354766999 | 0.1358171   |
| 0.045821448 | 0.195495246 | 0.484401368 | 0.484569176 |
| 0.138233756 | 0.286650069 | 0.360680054 | 0.443810051 |
| 0.483652878 | 0.461944158 | 0.376584422 | 0.415649419 |
| 0.478392014 | 0.154068053 | 0.500304171 | 0.423648628 |
| 0.47348818  | 0.433893056 | 0.499273223 | 0.014748611 |
| 0.469743565 | 0.260592143 | 0.229620833 | 0.450071831 |
| 0.420068244 | 0.217159515 | 0.472738839 | 0.25059816  |
| 0.21492348  | 0.006071734 | 0.438696885 | 0.374019435 |
| 0.382960932 | 0.304231653 | 0.435437232 | 0.163490835 |
| 0.529633098 | 0.467622859 | 0.465644567 | 0.285242019 |
| 0.467071778 | 0.022537779 | 0.241010466 | 0.066685883 |
| 0.462231278 | 0.466047366 | 0.448167806 | 0.42327352  |
| 0.244392622 | 0.499657603 | 0.473871497 | 0.472660759 |
| 0.498602267 | 0.189639917 | 0.509098068 | 0.376166456 |
| 0.351330211 | 0.442661213 | 0.360730688 | 0.394778744 |
| 0.294649528 | 0.170954169 | 0.203213366 | 0.229017851 |
| 0.476410107 | 0.363827549 | 0.473204493 | 0.379238022 |
| 0.093031066 | 0.468614405 | 0.434387292 | 0.443236836 |
| 0.494984316 | 0.397774514 | 0.401011199 | 0.469797408 |
| 0.355513747 | 0.375020147 | 0.083849627 | 0.06046938  |
| 0.312657922 | 0.29450033  | 0.442457432 | 0.478403762 |
| 0.495958194 | 0.306985103 | 0.169329304 | 0.214437086 |
| 0.125446607 | 0.376887912 | 0.374557616 | 0.181623371 |
| 0.486531271 | 0.334911473 | 0.001407179 | 0.29911337  |
| 0.466753065 | 0.430061304 |             |             |
| MYCBP       | 0.010227674 | 0.0517131   | 0.000180627 |
| 0.000164793 | 0.002265904 | 0.006456897 | 0.008787561 |
| 0.011302234 | 0.000293219 | 0.000894771 | 0.016530567 |
| 1.86E-07    | 0.089718067 | 6.19E-06    | 0.000209218 |
| 0.071362175 | 0.029153538 | 0.073196258 | 0.007731833 |
| 0.000480931 | 0.015578409 | 0.011990375 | 0.007484262 |
| 1.26E-07    | 0.002445967 | 0.000159562 | 0.015212823 |
| 0.068839941 | 0.003945336 | 0.001452878 | 0.047084041 |
| 0.077403531 | 0.009490027 | 0.008875503 | 0.017671905 |
| 0.03759873  | 0.036538389 | 0.09573985  | 0.071351783 |
| 0.005767442 | 0.063176843 | 8.21E-06    | 0.00020276  |
| 0.001187304 | 0.011606993 | 0.014329792 | 0.008625162 |
| 0.004822378 | 0.00380054  | 0.004209395 | 0.00178478  |
| 0.019328201 | 0.028138229 | 0.009111249 | 0.035507136 |
| 3.87E-06    | 0.038876029 | 0.003616615 | 0.000455654 |
| 0.009973995 | 0.012580001 | 0.019842956 | 0.010261721 |
| 0.03785553  | 0.067778038 | 9.26E-05    | 0.000699317 |
| 0.023570468 | 0.043156687 | 0.02744401  | 0.043989787 |
| 0.001761428 | 0.003645858 | 0.066389039 | 0.04258441  |
| 0.054757976 | 0.013514881 | 0.002093213 | 8.22E-08    |
| 0.00365297  | 0.019220118 | 0.022490862 | 0.05316047  |
| 0.021152342 | 0.023368456 | 0.006529256 | 0.016815682 |
| 9.21E-06    | 0.013903551 | 0.065433814 | 1.26E-05    |
| 2.92E-05    | 0.001727588 | 0.041425092 | 0.074518293 |
|             |             |             | 0.066346903 |

|             |             |             |             |             |
|-------------|-------------|-------------|-------------|-------------|
| 0.018969758 | 0.000365308 | 6.57E-06    | 0.001364136 |             |
| 0.000640562 | 0.077222238 | 0.020023355 | 0.024089298 |             |
| 0.034562549 | 0.032740371 | 0.090237975 | 0.000330365 |             |
| 0.012497597 | 0.036212526 | 0.045549376 | 9.11E-06    |             |
| 0.001087637 | 0.007046231 | 0.004297031 | 0.000564934 |             |
| 0.01052299  | 2.46E-05    | 6.66E-06    | 5.13E-05    | 0.059866904 |
| 0.001220634 | 0.001325292 | 0.004404387 | 0.000165136 |             |
| 0.047217851 | 0.012456188 | 0.05852458  | 0.004003813 |             |
| 0.006553515 | 0.058197904 | 0.011209765 | 0.03292655  |             |
| 0.045782794 | 0.054061852 | 0.003254909 | 0.001077694 |             |
| 0.060309944 | 0.034499893 | 0.000203985 | 0.00017139  |             |
| 0.010980678 | 0.097999719 | 0.059139284 | 0.06168003  |             |
| 0.003305248 | 0.018053419 | 0.007267426 | 0.003141979 |             |
| 0.021984641 | 0.011728832 | 0.018677258 | 0.003258301 |             |
| 0.025513041 | 0.031250995 | 5.10E-05    | 0.000311371 |             |
| 0.046124341 | 0.002706567 | 0.00384467  | 0.030364889 |             |
| 0.057005524 | 0.066545714 | 7.91E-05    | 0.003181594 |             |
| 0.007384667 | 0.007138158 | 0.005024782 | 0.023949297 |             |
| 0.002390768 | 0.009890419 | 0.003307393 | 0.000353941 |             |
| 0.095466018 | 0.001818306 | 0.012025011 | 0.002462501 |             |
| 0.00013919  | 0.030929129 | 0.010680081 | 0.037896877 |             |
| 0.021364341 | 0.029018055 | 2.65E-05    | 0.000803361 |             |
| 0.013154939 | 0.001975336 | 0.076752912 | 0.05048922  |             |
| 0.001918172 | 0.007273121 | 0.043473808 | 0.002458267 |             |
| 0.029414711 | 0.039010986 | 0.000926815 | 0.000641642 |             |
| 1.45E-07    | 0.001113449 | 0.009151143 | 0.02762303  | 7.97E-05    |
| 0.006661134 | 0.000142423 | 0.000214237 | 0.046147266 |             |
| 0.004093242 | 0.086611154 | 3.42E-05    | 0.010271238 |             |
| 0.002914538 | 0.042689643 | 0.010128361 | 0.000904657 |             |
| 0.049734637 | 0.002823686 | 0.066834315 | 0.024987629 |             |
| 0.017539405 | 0.015530815 | 0.014469951 | 0.005862656 |             |
| 0.044002778 | 0.065551676 | 0.052937652 | 0.081805556 |             |
| 0.00587928  | 0.037107597 | 0.003395665 | 0.008903964 |             |
| 0.014731333 | 0.032882223 | 0.000286952 | 0.06199836  |             |
| 4.38E-08    | 0.01528515  | 0.028510537 | 0.003371448 |             |
| 0.048514122 | 0.011026561 | 0.000293833 | 0.003972475 |             |
| 0.071461163 | 0.061580062 | 0.045532894 | 0.055753291 |             |
| 0.002479058 | 4.51E-06    | 0.051221621 | 0.025453709 |             |
| 0.073655378 | 0.029369645 | 0.048852377 | 0.003201    |             |
| 0.059236809 | 0.034488171 | 0.01716697  | 0.014080671 |             |
| 0.070911234 | 0.087573322 | 0.009307461 | 0.035416397 |             |
| 8.20E-06    | 0.002256759 | 0.019075497 | 0.000486098 |             |
| 0.003807619 | 0.000324335 | 0.060833686 | 0.020219637 |             |
| 0.040296086 | 0.00140133  | 0.013903746 | 0.000908083 |             |
| 0.005157967 | 0.04800423  | 1           | 0.046235032 |             |
| 0.065335912 | 0.0297516   | 0.055445081 | 0.062045457 |             |
| 0.006395254 | 0.031276268 | 0.045666609 | 0.064712507 |             |
| 1.59E-07    | 0.078196326 | 0.100846257 | 0.021170503 |             |
| 0.046890704 | 0.008970619 | 0.016570244 | 0.044891369 |             |
| 2.53E-05    | 0.00217766  | 0.008281296 | 0.049431605 |             |
| 0.070283094 | 6.25E-05    | 0.039555631 | 0.053763407 |             |
| 0.082799613 | 0.000309975 | 0.0546737   | 0.008732979 |             |
| 0.051491365 | 0.040574473 | 0.002836179 | 0.078135403 |             |
| 0.009655643 | 0.019205743 | 0.000345184 | 0.031832719 |             |



|             |             |             |             |
|-------------|-------------|-------------|-------------|
| 0.060804431 | 0.000793139 | 0.000728394 | 0.064165666 |
| 0.028988037 | 0.035228215 | 0.008694112 | 3.06E-07    |
| 0.050727637 | 0.001226005 | 0.043004516 | 0.000689911 |
| 0.033088104 | 0.022549459 | 0.055499297 | 0.07200512  |
| 0.03867785  | 0.030093503 | 0.020438853 | 0.034525688 |
| 0.000554722 | 0.044321326 | 0.047483792 | 3.51E-05    |
| 0.026581083 | 0.066016202 | 0.018311126 | 0.004570838 |
| 0.017324467 | 0.001967453 | 0.005045669 | 0.011191626 |
| 0.048984713 | 0.056505586 | 0.000197886 | 0.002212713 |
| 0.029009506 | 0.00684133  | 0.002477078 | 0.022691062 |
| 0.010353618 | 0.002048083 | 0.007652696 | 0.022570907 |
| 0.041107109 | 0.015520326 | 0.038366044 | 0.000914478 |
| 0.083873496 | 0.000224918 | 0.060594394 | 0.004742547 |
| 0.007931794 | 0.020937598 | 0.058788343 | 0.000558452 |
| 2.21E-06    | 0.000145726 | 0.029557656 | 0.029029829 |
| 0.000507195 | 0.003495146 | 0.0061583   | 0.020739406 |
| 0.06427637  | 0.006182711 | 0.009650539 | 0.01312696  |
| 0.032455332 | 0.000594024 | 0.042559739 | 0.008598821 |
| 0.021878539 | 0.00844963  | 0.048535386 | 6.25E-06    |
| 0.037933613 | 0.001156649 | 0.009503319 | 0.021600039 |
| 0.065967705 | 0.001334832 | 0.034109815 | 0.001244706 |
| 0.000313758 | 7.43E-06    | 0.020021887 | 0.064589287 |
| 0.011299688 | 0.011312591 | 0.01550714  | 0.009089993 |
| 0.054276349 | 0.011254545 | 0.0226618   | 0.071004055 |
| 0.008223218 | 0.002401956 | 0.00157336  | 2.05E-05    |
| 0.019338645 | 0.029927412 | 0.028620929 | 0.00985355  |
| 0.003380328 | 0.056087353 | 0.029493338 | 0.038909935 |
| 0.065840596 | 0.000456495 | 0.05990686  | 0.013410893 |
| 0.082630032 | 0.00356145  | 0.010756549 | 0.006044168 |
| 0.009169168 | 0.000545825 | 0.00185363  | 0.001056754 |
| 0.067047496 | 0.026376153 | 0.025637181 | 0.001754029 |
| 0.000109822 | 0.013221988 | 0.057165931 | 0.057639842 |
| 0.02019018  | 0.029681956 | 0.01557731  | 0.029732577 |
| 0.001320488 | 0.004460526 | 0.000424935 | 5.77E-05    |
| 0.002095806 | 0.002113467 | 0.037049502 | 0.049454892 |
| 0.073587439 | 0.003601554 | 0.000705145 | 0.001170992 |
| 0.013331213 | 0.038900306 | 0.013676889 | 0.020472381 |
| 0.050458299 | 0.009022727 | 8.07E-08    | 0.002381955 |
| 0.020049187 | 0.005512551 |             |             |
| MYL4        | 0.397310645 | 0.463843672 | 0.113644912 |
| 0.022696974 | 0.126842067 | 0.293734152 | 0.261353369 |
| 0.40382314  | 0.179908598 | 0.156030087 | 0.369665283 |
| 0.007068104 | 0.363210681 | 0.043710296 | 0.14180233  |
| 0.481258611 | 0.486198878 | 0.361784427 | 0.490327047 |
| 0.413420576 | 0.135009453 | 0.435402229 | 0.389796146 |
| 0.315458009 | 0.007789654 | 0.149242965 | 0.045190041 |
| 0.390012802 | 0.470054264 | 0.293758602 | 0.301915316 |
| 0.431968967 | 0.400570762 | 0.367332982 | 0.287356936 |
| 0.189730695 | 0.451629736 | 0.113635659 | 0.386555349 |
| 0.373548342 | 0.244609675 | 0.416171893 | 0.037192016 |
| 0.001891512 | 0.143353681 | 0.359631427 | 0.435912077 |
| 0.412337561 | 0.279315185 | 0.262001886 | 0.193805894 |
| 0.145874069 | 0.399469059 | 0.446458582 | 0.138874857 |
| 0.421864958 | 0.003348501 | 0.442655523 | 0.348740692 |

|             |             |             |             |
|-------------|-------------|-------------|-------------|
| 0.120029415 | 0.403548309 | 0.374926775 | 0.440879037 |
| 0.302238448 | 0.431341112 | 0.483205449 | 0.053236522 |
| 0.118444647 | 0.440412614 | 0.374862927 | 0.384306656 |
| 0.452151907 | 0.343620504 | 0.320469136 | 0.337648533 |
| 0.409040959 | 0.38476267  | 0.369859945 | 0.271658317 |
| 0.003059544 | 0.18272932  | 0.27760413  | 0.378064356 |
| 0.358672588 | 0.398802711 | 0.418236872 | 0.24053124  |
| 0.404923948 | 0.046679441 | 0.435030688 | 0.491654486 |
| 0.026898013 | 0.399012007 | 0.014389361 | 0.254341901 |
| 0.432108497 | 0.433561518 | 0.433653837 | 0.104881282 |
| 0.038527812 | 0.230771441 | 0.24405329  | 0.37461837  |
| 0.452264961 | 0.447047721 | 0.421735041 | 0.162676911 |
| 0.317246973 | 0.257978568 | 0.39823689  | 0.441254695 |
| 0.456099285 | 0.026861905 | 0.27844015  | 0.284412515 |
| 0.324511104 | 0.130502375 | 0.284876227 | 0.046228352 |
| 0.015387896 | 0.056868213 | 0.432749493 | 0.258580511 |
| 0.12407543  | 0.251077674 | 0.095412108 | 0.394081426 |
| 0.392660708 | 0.425565051 | 0.141758954 | 0.291452816 |
| 0.390125305 | 0.289544825 | 0.366772481 | 0.425843882 |
| 0.326541572 | 0.36972838  | 0.235937591 | 0.446216288 |
| 0.453437083 | 0.110640342 | 0.139783713 | 0.375946974 |
| 0.332858294 | 0.46307166  | 0.50274866  | 0.393797748 |
| 0.261426105 | 0.345138723 | 0.310855865 | 0.388862328 |
| 0.306066594 | 0.439635544 | 0.119920093 | 0.416520551 |
| 0.423619812 | 0.044988875 | 0.118314862 | 0.444538464 |
| 0.042637416 | 0.280768911 | 0.449837753 | 0.448935506 |
| 0.441350974 | 0.03720802  | 0.236480088 | 0.301328207 |
| 0.383172554 | 0.291173968 | 0.448181318 | 0.213997587 |
| 0.387950266 | 0.304107493 | 0.082677934 | 0.326635521 |
| 0.193170216 | 0.422315394 | 0.28776813  | 0.081049828 |
| 0.43793221  | 0.429661721 | 0.44624406  | 0.450079709 |
| 0.408624793 | 0.002694011 | 0.152134307 | 0.415322488 |
| 0.308129458 | 0.379129132 | 0.458006274 | 0.183942992 |
| 0.358106695 | 0.316952537 | 0.22960144  | 0.315445125 |
| 0.430881566 | 0.240990991 | 0.219650102 | 0.002016583 |
| 0.190386336 | 0.327731806 | 0.443915363 | 0.123245166 |
| 0.242633316 | 0.187635921 | 0.206744183 | 0.442313336 |
| 0.272900087 | 0.422473556 | 0.075887881 | 0.223906835 |
| 0.325096011 | 0.414459049 | 0.344311214 | 0.334730251 |
| 0.424211032 | 0.336817139 | 0.395394195 | 0.427751812 |
| 0.294132407 | 0.380605032 | 0.204664336 | 0.372778598 |
| 0.408117556 | 0.440376866 | 0.409536575 | 0.438082111 |
| 0.316287856 | 0.42995406  | 0.318646847 | 0.345081897 |
| 0.450987452 | 0.459003262 | 0.152850881 | 0.476610078 |
| 0.002802819 | 0.412873105 | 0.404921436 | 0.217774032 |
| 0.445404371 | 0.278604885 | 0.133438302 | 0.366859652 |
| 0.496800267 | 0.482159331 | 0.445404661 | 0.393146028 |
| 0.279817312 | 0.036193942 | 0.471847264 | 0.437024132 |
| 0.470609476 | 0.41991848  | 0.273109134 | 0.138881186 |
| 0.448478516 | 0.386406724 | 0.416575162 | 0.403812301 |
| 0.408737382 | 0.358397998 | 0.348924848 | 0.400048855 |
| 0.028005343 | 0.295963552 | 0.400417777 | 0.181707195 |
| 0.305269828 | 0.238891567 | 0.43367872  | 0.3921995   |
| 0.342055328 | 0.325527847 | 0.29378986  | 0.118533075 |

|             |             |             |             |
|-------------|-------------|-------------|-------------|
| 0.248033222 | 0.473066516 | 0.046235032 | 1           |
| 0.49734402  | 0.435633828 | 0.436649308 | 0.49792648  |
| 0.396046775 | 0.412903275 | 0.447310645 | 0.425984509 |
| 0.003971423 | 0.378383131 | 0.343766058 | 0.403721895 |
| 0.405752131 | 0.350368422 | 0.309741469 | 0.361228852 |
| 0.004277493 | 0.23512302  | 0.20554141  | 0.479609371 |
| 0.432550606 | 0.05192228  | 0.043284488 | 0.449123624 |
| 0.354243564 | 0.06463811  | 0.501346641 | 0.350665778 |
| 0.439731743 | 0.428759471 | 0.209739936 | 0.36199224  |
| 0.17920719  | 0.425682301 | 0.034923262 | 0.411128715 |
| 0.406430079 | 0.140700554 | 0.079851269 | 0.498862686 |
| 0.447044841 | 0.408361201 | 0.330056547 | 0.010809626 |
| 0.364916563 | 0.175197297 | 0.420971303 | 0.191207857 |
| 0.459291463 | 0.405675432 | 0.45157914  | 0.398450286 |
| 0.447263467 | 0.427267195 | 0.41100852  | 0.44620621  |
| 0.100883033 | 0.376223575 | 0.39553676  | 0.082423281 |
| 0.379232059 | 0.439684321 | 0.362033934 | 0.228329439 |
| 0.443475204 | 0.069016785 | 0.270073311 | 0.412719558 |
| 0.440915604 | 0.42862946  | 0.097833005 | 0.287579342 |
| 0.418828755 | 0.382398941 | 0.159375339 | 0.425315495 |
| 0.351783069 | 0.160095542 | 0.207194668 | 0.427642434 |
| 0.44363395  | 0.335392595 | 0.423490434 | 0.146113214 |
| 0.423064775 | 0.112579747 | 0.449731955 | 0.314829013 |
| 0.376181072 | 0.365286822 | 0.357481163 | 0.1675625   |
| 0.028940775 | 0.206848203 | 0.403589176 | 0.429434452 |
| 0.128675728 | 0.286854591 | 0.287604634 | 0.346661526 |
| 0.461018782 | 0.394175037 | 0.341155269 | 0.426653436 |
| 0.424120219 | 0.090735142 | 0.471406975 | 0.417057214 |
| 0.448286941 | 0.340516295 | 0.450576102 | 0.013482943 |
| 0.416420874 | 0.18288993  | 0.295528731 | 0.336633882 |
| 0.421568191 | 0.189696354 | 0.394402333 | 0.260471153 |
| 0.176091112 | 0.010661583 | 0.436794096 | 0.305120043 |
| 0.339241325 | 0.339277953 | 0.439419493 | 0.135026112 |
| 0.503754684 | 0.427924308 | 0.429778566 | 0.296062606 |
| 0.373280255 | 0.015826064 | 0.169999454 | 0.074688463 |
| 0.448143127 | 0.437654395 | 0.437954234 | 0.400913913 |
| 0.317054734 | 0.425998069 | 0.426561508 | 0.367594454 |
| 0.431691615 | 0.149465922 | 0.480359443 | 0.412951689 |
| 0.339109145 | 0.404630025 | 0.330732722 | 0.394866639 |
| 0.230231966 | 0.190217939 | 0.187342945 | 0.287023726 |
| 0.425263139 | 0.376384757 | 0.369993369 | 0.365359399 |
| 0.073965765 | 0.393819948 | 0.424177464 | 0.393963138 |
| 0.41816408  | 0.360540921 | 0.397607727 | 0.418218726 |
| 0.345985479 | 0.391580007 | 0.044054603 | 0.028747104 |
| 0.214097844 | 0.242225874 | 0.446120621 | 0.458136572 |
| 0.478586462 | 0.33833658  | 0.157509345 | 0.245957643 |
| 0.14951097  | 0.379919363 | 0.298656121 | 0.13479527  |
| 0.444976953 | 0.346301367 | 0.002104696 | 0.350882605 |
| 0.426655819 | 0.355822721 |             |             |
| MY01F       | 0.410785192 | 0.517938363 | 0.089049768 |
| 0.037681941 | 0.14575351  | 0.281043615 | 0.267230575 |
| 0.43103973  | 0.137885201 | 0.169801267 | 0.379439596 |
| 0.002675937 | 0.448526619 | 0.021708433 | 0.097336629 |
| 0.507924096 | 0.519020219 | 0.395976669 | 0.509279648 |

|             |             |             |             |
|-------------|-------------|-------------|-------------|
| 0.387948949 | 0.17859943  | 0.42811431  | 0.439351155 |
| 0.3069468   | 0.002904151 | 0.153845505 | 0.063037808 |
| 0.440311223 | 0.501405204 | 0.251451105 | 0.332315674 |
| 0.483633728 | 0.50354055  | 0.454471552 | 0.373744702 |
| 0.29348644  | 0.495019297 | 0.161163649 | 0.495688567 |
| 0.430873208 | 0.27229283  | 0.509660077 | 0.020431366 |
| 0.00504951  | 0.129635276 | 0.400894928 | 0.449389221 |
| 0.370911616 | 0.263040034 | 0.215151225 | 0.210585177 |
| 0.205972455 | 0.410999009 | 0.458268292 | 0.210542358 |
| 0.459912681 | 0.00604157  | 0.486978543 | 0.313465209 |
| 0.086720984 | 0.37352036  | 0.419817717 | 0.475933967 |
| 0.295531713 | 0.474127395 | 0.524546491 | 0.047627822 |
| 0.09460147  | 0.4997516   | 0.472057597 | 0.481412612 |
| 0.51468077  | 0.39731436  | 0.34773804  | 0.434456916 |
| 0.502697368 | 0.462363391 | 0.341646612 | 0.228195953 |
| 0.001564863 | 0.183535435 | 0.379331262 | 0.399069996 |
| 0.465073452 | 0.413481027 | 0.460467673 | 0.261515286 |
| 0.496096949 | 0.027453961 | 0.446573741 | 0.522876778 |
| 0.029950797 | 0.473810523 | 0.016072078 | 0.202816987 |
| 0.498879367 | 0.471164836 | 0.473107948 | 0.093685414 |
| 0.020700244 | 0.165961538 | 0.195264953 | 0.413611147 |
| 0.473629444 | 0.520792121 | 0.454561331 | 0.189657741 |
| 0.404757271 | 0.214008765 | 0.416886547 | 0.49310769  |
| 0.509082307 | 0.013227923 | 0.206818237 | 0.270850087 |
| 0.388161686 | 0.166537242 | 0.280334114 | 0.05620527  |
| 0.017266521 | 0.033734754 | 0.492379475 | 0.206582556 |
| 0.126156645 | 0.247152399 | 0.110316903 | 0.50913882  |
| 0.419976368 | 0.452931566 | 0.151801765 | 0.303419752 |
| 0.500751099 | 0.302194942 | 0.477523771 | 0.519705566 |
| 0.433197748 | 0.319825521 | 0.190201688 | 0.512090688 |
| 0.471877996 | 0.091266995 | 0.106473897 | 0.38072343  |
| 0.426779551 | 0.510240398 | 0.522914075 | 0.379544937 |
| 0.316445946 | 0.302081312 | 0.364351609 | 0.450662085 |
| 0.294196697 | 0.417085775 | 0.126992905 | 0.414937408 |
| 0.454570088 | 0.05328732  | 0.08639766  | 0.50282571  |
| 0.069732991 | 0.292238802 | 0.491831396 | 0.526279184 |
| 0.513395007 | 0.051596192 | 0.278226507 | 0.311275535 |
| 0.355452949 | 0.300794502 | 0.47402589  | 0.256054086 |
| 0.37238193  | 0.370708682 | 0.064992331 | 0.417861485 |
| 0.158368836 | 0.398074443 | 0.356343281 | 0.087997275 |
| 0.468086247 | 0.423400818 | 0.517673809 | 0.488741572 |
| 0.466549729 | 0.005548594 | 0.170184385 | 0.430371189 |
| 0.348767274 | 0.441070165 | 0.516132094 | 0.145718036 |
| 0.312043999 | 0.382984704 | 0.183073024 | 0.387415265 |
| 0.456667182 | 0.268995339 | 0.23639973  | 0.001034193 |
| 0.17758611  | 0.429981462 | 0.48673055  | 0.072943426 |
| 0.285258007 | 0.143211082 | 0.158411101 | 0.523912344 |
| 0.247527436 | 0.525845251 | 0.04211744  | 0.212936875 |
| 0.31523498  | 0.481123933 | 0.451315252 | 0.327660164 |
| 0.515153376 | 0.371190433 | 0.436844562 | 0.44236623  |
| 0.329644591 | 0.402541239 | 0.221509727 | 0.331636619 |
| 0.512466745 | 0.528432332 | 0.510702354 | 0.526721513 |
| 0.312243435 | 0.443913241 | 0.377492845 | 0.328388413 |
| 0.460893456 | 0.479173277 | 0.112603589 | 0.521994062 |

|             |             |             |             |
|-------------|-------------|-------------|-------------|
| 0.001083521 | 0.408151735 | 0.501229355 | 0.232334806 |
| 0.518965401 | 0.286214658 | 0.091621556 | 0.311523934 |
| 0.516574415 | 0.519691049 | 0.47716198  | 0.478031353 |
| 0.297692055 | 0.016244605 | 0.504417893 | 0.463526048 |
| 0.506652566 | 0.462989876 | 0.392398814 | 0.114770505 |
| 0.52718205  | 0.414665873 | 0.476223287 | 0.472050167 |
| 0.506572501 | 0.459179364 | 0.302609259 | 0.41740085  |
| 0.023136458 | 0.296849745 | 0.48105648  | 0.222712075 |
| 0.363328127 | 0.222132118 | 0.522985783 | 0.381838267 |
| 0.45542476  | 0.369031032 | 0.40292001  | 0.105071792 |
| 0.217054306 | 0.518984544 | 0.065335912 | 0.49734402  |
| 1           | 0.433022716 | 0.529380656 | 0.514488827 |
| 0.376632575 | 0.442725884 | 0.524420704 | 0.462877016 |
| 0.001602167 | 0.458514689 | 0.445952103 | 0.39905595  |
| 0.49812166  | 0.338470818 | 0.306692398 | 0.4791331   |
| 0.002147243 | 0.191404792 | 0.309861685 | 0.503386936 |
| 0.530117138 | 0.038171162 | 0.06964123  | 0.528887501 |
| 0.458502125 | 0.063196176 | 0.519916597 | 0.386640828 |
| 0.521395846 | 0.496104976 | 0.207693253 | 0.46251792  |
| 0.270995696 | 0.446153276 | 0.040271196 | 0.500046743 |
| 0.483122557 | 0.122913082 | 0.101451939 | 0.512521069 |
| 0.499414466 | 0.44617991  | 0.30400312  | 0.011777848 |
| 0.412742321 | 0.252879387 | 0.522264328 | 0.154836403 |
| 0.491942317 | 0.417408603 | 0.510666289 | 0.49549976  |
| 0.509957984 | 0.468099317 | 0.429690755 | 0.515672031 |
| 0.150938414 | 0.469497654 | 0.479224097 | 0.074795615 |
| 0.440199009 | 0.528014865 | 0.463426783 | 0.214609755 |
| 0.437708911 | 0.116782726 | 0.24542097  | 0.394755363 |
| 0.506395807 | 0.521301001 | 0.074094834 | 0.21780071  |
| 0.460766839 | 0.359093072 | 0.13853224  | 0.415679484 |
| 0.327879247 | 0.22292724  | 0.193799604 | 0.429885883 |
| 0.496114056 | 0.340289511 | 0.506092662 | 0.187223395 |
| 0.513612357 | 0.071011279 | 0.495438906 | 0.319884061 |
| 0.34273756  | 0.454772888 | 0.419428377 | 0.168241334 |
| 0.030446708 | 0.165021348 | 0.449955568 | 0.457995144 |
| 0.099070675 | 0.238774034 | 0.303212402 | 0.402135107 |
| 0.511633635 | 0.474850417 | 0.326778277 | 0.414474452 |
| 0.448755556 | 0.124303817 | 0.50375759  | 0.400021468 |
| 0.471523445 | 0.389804185 | 0.518956612 | 0.011997987 |
| 0.508332178 | 0.203157106 | 0.272567957 | 0.418303494 |
| 0.454755827 | 0.16615549  | 0.439205334 | 0.207320288 |
| 0.217072173 | 0.00607054  | 0.423620291 | 0.429482256 |
| 0.327456676 | 0.367888282 | 0.434740707 | 0.210274255 |
| 0.517828119 | 0.458131424 | 0.478817781 | 0.352750465 |
| 0.434426801 | 0.031334978 | 0.183568166 | 0.046700216 |
| 0.456667762 | 0.444819464 | 0.478215065 | 0.440364891 |
| 0.267549308 | 0.513848513 | 0.451066837 | 0.470630623 |
| 0.526625096 | 0.210171947 | 0.517397653 | 0.373669611 |
| 0.419181162 | 0.44527027  | 0.308107111 | 0.395370521 |
| 0.240597289 | 0.166366545 | 0.152791909 | 0.211545373 |
| 0.517275405 | 0.377522822 | 0.448049767 | 0.374619592 |
| 0.063109669 | 0.449206164 | 0.486381549 | 0.491138413 |
| 0.493015912 | 0.444944634 | 0.453884918 | 0.438309061 |
| 0.357682509 | 0.35620302  | 0.070757688 | 0.040170564 |

|             |             |             |             |
|-------------|-------------|-------------|-------------|
| 0.298833681 | 0.230548255 | 0.472690828 | 0.509490173 |
| 0.518090493 | 0.348943264 | 0.123985032 | 0.178987762 |
| 0.173549894 | 0.432969232 | 0.317458154 | 0.215261676 |
| 0.503447556 | 0.370047438 | 0.000991283 | 0.290279932 |
| 0.436569632 | 0.454075631 |             |             |
| MY05A       | 0.166711545 | 0.446230891 | 0.106955689 |
| 0.009192139 | 0.1110067   | 0.250177672 | 0.207336915 |
| 0.158887585 | 0.170367018 | 0.103333959 | 0.351869426 |
| 0.004708459 | 0.25028245  | 0.041937691 | 0.160786198 |
| 0.389051201 | 0.403227812 | 0.254439905 | 0.417793426 |
| 0.205117094 | 0.069128771 | 0.322037771 | 0.214291636 |
| 0.232170209 | 0.006987479 | 0.128961001 | 0.022136075 |
| 0.149223408 | 0.367815773 | 0.235895006 | 0.161549762 |
| 0.340968886 | 0.305113895 | 0.168055895 | 0.158379159 |
| 0.064261554 | 0.461525158 | 0.068524317 | 0.25221785  |
| 0.273836716 | 0.170385268 | 0.31002085  | 0.050798389 |
| 0.000527074 | 0.136088837 | 0.133629601 | 0.286231716 |
| 0.25413156  | 0.211642521 | 0.23286992  | 0.147747774 |
| 0.036700926 | 0.377102074 | 0.351188612 | 0.034050044 |
| 0.445781221 | 0.00118069  | 0.464175317 | 0.151707933 |
| 0.137104172 | 0.274828727 | 0.147097118 | 0.283295411 |
| 0.289903999 | 0.456947482 | 0.440901963 | 0.062381624 |
| 0.124763054 | 0.196512879 | 0.228179914 | 0.209141643 |
| 0.407132216 | 0.149866318 | 0.205993128 | 0.142657321 |
| 0.240288738 | 0.264190928 | 0.325963509 | 0.233419784 |
| 0.00241342  | 0.154576699 | 0.141353918 | 0.219502508 |
| 0.158463751 | 0.383256394 | 0.207676399 | 0.185887275 |
| 0.152212172 | 0.056458639 | 0.265356465 | 0.424721027 |
| 0.018511265 | 0.284458942 | 0.01240472  | 0.23835491  |
| 0.31411836  | 0.314671611 | 0.260917838 | 0.102677702 |
| 0.051385487 | 0.214389953 | 0.103837031 | 0.256661588 |
| 0.234107667 | 0.20895538  | 0.440362055 | 0.059010758 |
| 0.213105015 | 0.157892944 | 0.272235776 | 0.444393934 |
| 0.396514871 | 0.034442132 | 0.220015202 | 0.234629276 |
| 0.165278601 | 0.083339135 | 0.233964739 | 0.011537492 |
| 0.009626741 | 0.031032496 | 0.34295915  | 0.200690496 |
| 0.107458833 | 0.196441543 | 0.063472023 | 0.212541195 |
| 0.164020692 | 0.335927949 | 0.142159025 | 0.210181726 |
| 0.216672616 | 0.225158728 | 0.171873779 | 0.269863705 |
| 0.171221439 | 0.23967643  | 0.184265398 | 0.438082905 |
| 0.470058533 | 0.112468041 | 0.12501949  | 0.297011368 |
| 0.217148431 | 0.381617908 | 0.445541344 | 0.230567712 |
| 0.182288285 | 0.268079012 | 0.135680942 | 0.266960691 |
| 0.255440362 | 0.249760471 | 0.045746571 | 0.393168665 |
| 0.456227734 | 0.016404043 | 0.12332338  | 0.323375183 |
| 0.029420441 | 0.223675835 | 0.421255336 | 0.352026862 |
| 0.251896075 | 0.017479828 | 0.131858524 | 0.207875442 |
| 0.242622731 | 0.191270072 | 0.303552444 | 0.112113436 |
| 0.303273569 | 0.12440411  | 0.097495619 | 0.219927888 |
| 0.184175178 | 0.285434582 | 0.093469258 | 0.040977212 |
| 0.246195867 | 0.227415647 | 0.363210218 | 0.248389588 |
| 0.244779246 | 0.000814666 | 0.093599647 | 0.209578973 |
| 0.127415525 | 0.29238114  | 0.454059222 | 0.185278687 |
| 0.265468027 | 0.158181808 | 0.212881901 | 0.20495669  |

|             |             |             |             |
|-------------|-------------|-------------|-------------|
| 0.351796608 | 0.13354217  | 0.125860684 | 0.001612555 |
| 0.187529874 | 0.104374016 | 0.233956822 | 0.101443662 |
| 0.167699015 | 0.129706912 | 0.129203744 | 0.366038915 |
| 0.215646416 | 0.306003146 | 0.059271595 | 0.105992182 |
| 0.210633333 | 0.348256888 | 0.132185087 | 0.140948878 |
| 0.322092589 | 0.171444488 | 0.269410375 | 0.424501055 |
| 0.238533834 | 0.34064625  | 0.094936897 | 0.265371878 |
| 0.178826286 | 0.374659977 | 0.275697843 | 0.338821108 |
| 0.227452932 | 0.289751491 | 0.125014508 | 0.298117001 |
| 0.24193427  | 0.252013216 | 0.133507084 | 0.470165505 |
| 0.002753291 | 0.302411173 | 0.195124957 | 0.084174665 |
| 0.428033225 | 0.238839972 | 0.13226493  | 0.229241706 |
| 0.423394368 | 0.480063496 | 0.390966928 | 0.283015539 |
| 0.109076195 | 0.03575646  | 0.443710064 | 0.367338058 |
| 0.36959617  | 0.263723009 | 0.120644467 | 0.088143448 |
| 0.393374048 | 0.185075092 | 0.23818725  | 0.147039294 |
| 0.210144633 | 0.169559094 | 0.28111808  | 0.246473221 |
| 0.010722123 | 0.170285281 | 0.190027692 | 0.092352381 |
| 0.142502651 | 0.160129928 | 0.349954553 | 0.376604964 |
| 0.166278897 | 0.105200933 | 0.126771422 | 0.119904212 |
| 0.229158683 | 0.440937006 | 0.0297516   | 0.435633828 |
| 0.433022716 | 1           | 0.364629936 | 0.430893319 |
| 0.224024131 | 0.409534722 | 0.382463572 | 0.346884163 |
| 0.002989818 | 0.270639394 | 0.209724439 | 0.422236811 |
| 0.301761649 | 0.276879191 | 0.129563664 | 0.134415837 |
| 0.008201433 | 0.202056988 | 0.057315817 | 0.493513286 |
| 0.352840037 | 0.072435949 | 0.024665744 | 0.340846854 |
| 0.19023369  | 0.036104305 | 0.455427158 | 0.197049624 |
| 0.388517904 | 0.236625441 | 0.16756848  | 0.239430354 |
| 0.0454565   | 0.228892135 | 0.032124699 | 0.239336307 |
| 0.205477891 | 0.070769122 | 0.053704113 | 0.443191136 |
| 0.35970747  | 0.360339055 | 0.267535437 | 0.004017657 |
| 0.257555816 | 0.057955388 | 0.27683511  | 0.188281674 |
| 0.390813298 | 0.388959486 | 0.439111485 | 0.276595533 |
| 0.25195095  | 0.3981114   | 0.393600912 | 0.353097404 |
| 0.041193972 | 0.238467569 | 0.291348241 | 0.062106512 |
| 0.159783656 | 0.380582465 | 0.15294278  | 0.192711094 |
| 0.325822624 | 0.031416179 | 0.233676736 | 0.199646573 |
| 0.418846727 | 0.35556398  | 0.099428783 | 0.23640012  |
| 0.397048339 | 0.271419108 | 0.168609709 | 0.290643659 |
| 0.319966986 | 0.035222199 | 0.101821636 | 0.373023089 |
| 0.458660585 | 0.326093892 | 0.323368898 | 0.072469204 |
| 0.347441804 | 0.130837431 | 0.381427546 | 0.247630874 |
| 0.255175747 | 0.14639735  | 0.243943959 | 0.049364848 |
| 0.010946541 | 0.117460806 | 0.379577442 | 0.436560836 |
| 0.128631266 | 0.230012902 | 0.192372351 | 0.215926755 |
| 0.36919835  | 0.158677354 | 0.284972412 | 0.256002106 |
| 0.462499685 | 0.051615172 | 0.476091721 | 0.229423999 |
| 0.342321138 | 0.19649172  | 0.354596597 | 0.009675595 |
| 0.221642298 | 0.106966444 | 0.122723805 | 0.179941179 |
| 0.303952298 | 0.162753295 | 0.341621267 | 0.20619644  |
| 0.077976819 | 0.010028006 | 0.367370006 | 0.112799319 |
| 0.33594674  | 0.13662187  | 0.251190232 | 0.035401726 |
| 0.482291049 | 0.203026551 | 0.295632303 | 0.135468747 |

|             |             |             |             |
|-------------|-------------|-------------|-------------|
| 0.1873536   | 0.006462408 | 0.118159859 | 0.077661526 |
| 0.34358939  | 0.416174879 | 0.245852572 | 0.154806449 |
| 0.146879868 | 0.264511736 | 0.351879511 | 0.186691797 |
| 0.361060686 | 0.041389756 | 0.395568412 | 0.281338479 |
| 0.232153623 | 0.197425048 | 0.290778804 | 0.266232163 |
| 0.196726318 | 0.154724892 | 0.193728463 | 0.190416927 |
| 0.339557436 | 0.285726158 | 0.204621711 | 0.136895643 |
| 0.072872445 | 0.223430586 | 0.297243508 | 0.241905349 |
| 0.20997399  | 0.186077936 | 0.162677644 | 0.447548405 |
| 0.149753986 | 0.206447115 | 0.019142394 | 0.017256965 |
| 0.083091516 | 0.176173531 | 0.381025133 | 0.382634366 |
| 0.415791098 | 0.14675999  | 0.154317108 | 0.201183516 |
| 0.071795229 | 0.25182928  | 0.246140971 | 0.05742174  |
| 0.267706947 | 0.141631335 | 0.002138293 | 0.204159298 |
| 0.374519641 | 0.146189554 |             |             |
| N4BP2       | 0.33078373  | 0.49895083  | 0.081949693 |
| 0.055902398 | 0.159617025 | 0.263678566 | 0.267696518 |
| 0.347224377 | 0.118423856 | 0.186067866 | 0.351218703 |
| 0.001250628 | 0.378315483 | 0.013948814 | 0.075785814 |
| 0.510713223 | 0.52799319  | 0.380483699 | 0.505447822 |
| 0.305864136 | 0.206542614 | 0.356846199 | 0.417429189 |
| 0.288017407 | 0.001562209 | 0.164494168 | 0.088286512 |
| 0.358193202 | 0.499152342 | 0.215616583 | 0.317795666 |
| 0.448026166 | 0.463074075 | 0.450606558 | 0.395677215 |
| 0.305041892 | 0.449901365 | 0.137640958 | 0.445391325 |
| 0.389254662 | 0.282501223 | 0.452362178 | 0.015109758 |
| 0.008877733 | 0.131729965 | 0.31334857  | 0.391789831 |
| 0.290679536 | 0.245526912 | 0.183521708 | 0.227292545 |
| 0.177516335 | 0.37360806  | 0.371304975 | 0.186624134 |
| 0.42539422  | 0.011037435 | 0.442399909 | 0.230899213 |
| 0.07666483  | 0.316717213 | 0.351425015 | 0.408845909 |
| 0.280439012 | 0.436906849 | 0.52047525  | 0.048294126 |
| 0.090245114 | 0.427273717 | 0.416492393 | 0.47487957  |
| 0.457713055 | 0.386110521 | 0.34232862  | 0.387156359 |
| 0.453210041 | 0.390693508 | 0.297020696 | 0.193625649 |
| 0.00101445  | 0.191450844 | 0.412014159 | 0.312468146 |
| 0.415534727 | 0.376731774 | 0.374758254 | 0.272617802 |
| 0.449975444 | 0.021978068 | 0.391788659 | 0.532298013 |
| 0.032399435 | 0.395488742 | 0.015211851 | 0.166868382 |
| 0.427520915 | 0.46694167  | 0.404751806 | 0.09457823  |
| 0.015442739 | 0.12871941  | 0.128954495 | 0.399106835 |
| 0.399320702 | 0.476320958 | 0.418461091 | 0.137489721 |
| 0.353239423 | 0.178084297 | 0.377775137 | 0.454814442 |
| 0.478446728 | 0.007858052 | 0.15787272  | 0.253255867 |
| 0.369748538 | 0.191256037 | 0.26709888  | 0.048622109 |
| 0.017787455 | 0.01584841  | 0.45860262  | 0.165984649 |
| 0.138124849 | 0.243577706 | 0.121620148 | 0.49290487  |
| 0.328481846 | 0.414921051 | 0.164443281 | 0.302475681 |
| 0.450394824 | 0.300931362 | 0.478622822 | 0.465746176 |
| 0.429565523 | 0.245476177 | 0.163395678 | 0.467703316 |
| 0.407645077 | 0.086677482 | 0.096101866 | 0.349798227 |
| 0.364183407 | 0.490879392 | 0.534760203 | 0.301112383 |
| 0.332674696 | 0.250889305 | 0.354463462 | 0.439262455 |
| 0.275020978 | 0.326318958 | 0.085818122 | 0.364835109 |



|             |             |             |             |
|-------------|-------------|-------------|-------------|
| 0.416618502 | 0.04520492  | 0.077342578 | 0.426001089 |
| 0.092580374 | 0.281807479 | 0.438121967 | 0.476666568 |
| 0.453545958 | 0.074602215 | 0.297877173 | 0.301941332 |
| 0.303908152 | 0.29794682  | 0.404367028 | 0.279218304 |
| 0.32945626  | 0.370921916 | 0.061670643 | 0.356424545 |
| 0.141693691 | 0.332718414 | 0.316989572 | 0.07730055  |
| 0.382872487 | 0.332329311 | 0.470840365 | 0.413376113 |
| 0.393819231 | 0.011099911 | 0.189361452 | 0.353325057 |
| 0.324279922 | 0.376736869 | 0.503560924 | 0.129126031 |
| 0.259200191 | 0.316243392 | 0.157691851 | 0.395230446 |
| 0.366320464 | 0.266466953 | 0.243228241 | 0.000870967 |
| 0.164297593 | 0.405889976 | 0.418448206 | 0.050069896 |
| 0.298226868 | 0.122845386 | 0.106326504 | 0.4717767   |
| 0.225316858 | 0.47868585  | 0.023050613 | 0.141506698 |
| 0.293015613 | 0.458606816 | 0.446274258 | 0.265078324 |
| 0.4874713   | 0.352114502 | 0.426818624 | 0.395877895 |
| 0.320653693 | 0.378696616 | 0.164238445 | 0.273422504 |
| 0.462157512 | 0.478886433 | 0.459753132 | 0.468530436 |
| 0.288161352 | 0.349043396 | 0.314187022 | 0.296843372 |
| 0.390282373 | 0.401673175 | 0.093575483 | 0.500522862 |
| 0.000704575 | 0.362379356 | 0.48062051  | 0.174097847 |
| 0.493689628 | 0.282803116 | 0.075466938 | 0.242475935 |
| 0.515052668 | 0.499016221 | 0.39003183  | 0.436487005 |
| 0.219190093 | 0.009385137 | 0.460629917 | 0.414784735 |
| 0.508577907 | 0.414344876 | 0.394492793 | 0.070063417 |
| 0.485351982 | 0.322501657 | 0.435409149 | 0.419369598 |
| 0.463993936 | 0.410515684 | 0.251350127 | 0.322099513 |
| 0.015695994 | 0.281535258 | 0.432240929 | 0.246001015 |
| 0.37443096  | 0.190020775 | 0.478816483 | 0.337334774 |
| 0.447908018 | 0.33075155  | 0.425469299 | 0.106887988 |
| 0.198444784 | 0.506346614 | 0.055445081 | 0.436649308 |
| 0.529380656 | 0.364629936 | 1           | 0.515397957 |
| 0.322191253 | 0.408142034 | 0.471169139 | 0.413594887 |
| 0.000791512 | 0.427415703 | 0.386889114 | 0.353100889 |
| 0.454564125 | 0.306714521 | 0.217703468 | 0.441788342 |
| 0.001171793 | 0.167361838 | 0.309079535 | 0.471600881 |
| 0.481434799 | 0.036191567 | 0.059008872 | 0.476768234 |
| 0.400595439 | 0.049811332 | 0.525804973 | 0.370711712 |
| 0.482314963 | 0.450758927 | 0.209257833 | 0.403488414 |
| 0.257219484 | 0.363465729 | 0.044618195 | 0.476873522 |
| 0.421145945 | 0.075305513 | 0.128538759 | 0.513217376 |
| 0.439034846 | 0.418225073 | 0.27231645  | 0.015769028 |
| 0.363845406 | 0.287808156 | 0.490543957 | 0.125907577 |
| 0.422800668 | 0.38012143  | 0.461156368 | 0.43670477  |
| 0.446821534 | 0.428499573 | 0.392300002 | 0.467144637 |
| 0.170707354 | 0.409412569 | 0.427917125 | 0.078263768 |
| 0.363272366 | 0.488761284 | 0.457400043 | 0.206995939 |
| 0.372920822 | 0.150012425 | 0.226448774 | 0.303087668 |
| 0.468054795 | 0.483657093 | 0.070191047 | 0.160884263 |
| 0.431508264 | 0.310184681 | 0.133036919 | 0.348335036 |
| 0.290119564 | 0.187546774 | 0.123373909 | 0.376390628 |
| 0.457285547 | 0.322437386 | 0.452101385 | 0.222862147 |
| 0.462552557 | 0.054590689 | 0.413605242 | 0.290972176 |
| 0.286709822 | 0.40355939  | 0.376948456 | 0.116195733 |

|             |             |             |             |
|-------------|-------------|-------------|-------------|
| 0.034609751 | 0.129607714 | 0.427068113 | 0.415689693 |
| 0.09045324  | 0.202197676 | 0.298743693 | 0.40184224  |
| 0.506402077 | 0.450798354 | 0.295214869 | 0.337862864 |
| 0.408389712 | 0.157298057 | 0.472095092 | 0.334599724 |
| 0.404452669 | 0.380460645 | 0.457135909 | 0.010850963 |
| 0.454221574 | 0.219985277 | 0.1859616   | 0.429987153 |
| 0.444660499 | 0.157184354 | 0.419554106 | 0.170160235 |
| 0.212379165 | 0.003540881 | 0.355242939 | 0.410181076 |
| 0.300172908 | 0.286271534 | 0.357218857 | 0.203485374 |
| 0.524451251 | 0.401796847 | 0.413770394 | 0.283014401 |
| 0.430938186 | 0.035005957 | 0.200590051 | 0.038664248 |
| 0.386954707 | 0.388433652 | 0.396566688 | 0.376204701 |
| 0.182590036 | 0.479495087 | 0.401810784 | 0.472314091 |
| 0.480884828 | 0.202257724 | 0.527406456 | 0.29175722  |
| 0.382515122 | 0.390809534 | 0.277656976 | 0.326770265 |
| 0.245982342 | 0.12879757  | 0.139291325 | 0.149465206 |
| 0.494127876 | 0.307692808 | 0.444408007 | 0.319936109 |
| 0.065058699 | 0.416856511 | 0.405397279 | 0.435528367 |
| 0.458665834 | 0.382973444 | 0.37498079  | 0.39817747  |
| 0.305406603 | 0.286391488 | 0.099532473 | 0.059505185 |
| 0.326004369 | 0.224914202 | 0.38704787  | 0.433375102 |
| 0.508860851 | 0.267297175 | 0.111808559 | 0.138681962 |
| 0.127329505 | 0.353592747 | 0.315549852 | 0.224482717 |
| 0.444026135 | 0.297470833 | 0.000714564 | 0.216907614 |
| 0.38933412  | 0.423744046 |             |             |

|             |             |             |             |
|-------------|-------------|-------------|-------------|
| NCALD       | 0.419521692 | 0.505589374 | 0.089698049 |
| 0.033210069 | 0.133759231 | 0.27315725  | 0.254123585 |
| 0.441100063 | 0.138953702 | 0.158134791 | 0.368850241 |
| 0.003458085 | 0.445627743 | 0.024803603 | 0.102466754 |
| 0.503769238 | 0.51250121  | 0.37782503  | 0.506868844 |
| 0.401226291 | 0.160858462 | 0.432200772 | 0.426051907 |
| 0.297613252 | 0.003642754 | 0.143692981 | 0.055652744 |
| 0.447387163 | 0.49904674  | 0.251348689 | 0.31869762  |
| 0.480507065 | 0.492857898 | 0.431579354 | 0.350587693 |
| 0.271372155 | 0.48639966  | 0.152515855 | 0.482063479 |
| 0.430570996 | 0.254642783 | 0.500879463 | 0.021677366 |
| 0.003929167 | 0.124630387 | 0.40844991  | 0.448421824 |
| 0.38400315  | 0.256402251 | 0.216412785 | 0.196222647 |
| 0.202307895 | 0.401727276 | 0.466265109 | 0.205686659 |
| 0.446289611 | 0.005108742 | 0.4748912   | 0.333346771 |
| 0.087185486 | 0.374853094 | 0.418776475 | 0.470307743 |
| 0.285670003 | 0.460988014 | 0.514393071 | 0.044091537 |
| 0.092386316 | 0.494661253 | 0.463754968 | 0.457987083 |
| 0.505335445 | 0.388427239 | 0.32965043  | 0.421816113 |
| 0.490534223 | 0.461984805 | 0.339777091 | 0.230926787 |
| 0.001727975 | 0.173157039 | 0.348183886 | 0.408589193 |
| 0.457197701 | 0.4034347   | 0.463572756 | 0.244566255 |
| 0.486604375 | 0.028552761 | 0.444652386 | 0.514329154 |
| 0.027929007 | 0.469540506 | 0.015122214 | 0.207065727 |
| 0.496232484 | 0.469691938 | 0.472344989 | 0.088032632 |
| 0.022519458 | 0.174054998 | 0.214565464 | 0.414521793 |
| 0.473405419 | 0.510063459 | 0.4415208   | 0.196507215 |
| 0.402317256 | 0.219290748 | 0.403422749 | 0.481260099 |
| 0.501560595 | 0.015385875 | 0.218774169 | 0.263664137 |

|             |             |             |             |
|-------------|-------------|-------------|-------------|
| 0.373200678 | 0.150424973 | 0.270208344 | 0.057365865 |
| 0.016142492 | 0.041840024 | 0.487071392 | 0.211435579 |
| 0.117115869 | 0.237705455 | 0.104026228 | 0.485756874 |
| 0.428799451 | 0.455819639 | 0.140169519 | 0.290357058 |
| 0.486999361 | 0.287787092 | 0.449917535 | 0.507013164 |
| 0.406190586 | 0.33004163  | 0.193463951 | 0.496935024 |
| 0.468351012 | 0.089468818 | 0.10782646  | 0.373212404 |
| 0.42057065  | 0.504417597 | 0.515760133 | 0.385827357 |
| 0.292590308 | 0.304843321 | 0.349809702 | 0.432057876 |
| 0.285679673 | 0.42894533  | 0.136392855 | 0.41037398  |
| 0.442947244 | 0.053813974 | 0.086394163 | 0.50192015  |
| 0.059213393 | 0.276431923 | 0.484628501 | 0.512837764 |
| 0.502092841 | 0.045323598 | 0.261437872 | 0.297939235 |
| 0.356727037 | 0.289874071 | 0.469725285 | 0.239258728 |
| 0.371263868 | 0.353837106 | 0.063339652 | 0.41272413  |
| 0.15705838  | 0.402487585 | 0.350245272 | 0.085902215 |
| 0.47634455  | 0.433408448 | 0.506108182 | 0.485785422 |
| 0.465592698 | 0.004724473 | 0.15884366  | 0.436413332 |
| 0.338554659 | 0.443460842 | 0.502238209 | 0.145173355 |
| 0.316808845 | 0.373906219 | 0.184640968 | 0.361535173 |
| 0.463946038 | 0.254075942 | 0.224295044 | 0.001132398 |
| 0.170739215 | 0.417639202 | 0.480343341 | 0.081565675 |
| 0.26602104  | 0.147732442 | 0.172970647 | 0.511244597 |
| 0.242792934 | 0.509786532 | 0.049891411 | 0.227678131 |
| 0.313023444 | 0.461126917 | 0.431763788 | 0.339359517 |
| 0.494409905 | 0.361491947 | 0.436419594 | 0.435055183 |
| 0.309946226 | 0.391074479 | 0.230302693 | 0.335120457 |
| 0.500346782 | 0.51431955  | 0.500946261 | 0.513818253 |
| 0.301910305 | 0.453556365 | 0.377750471 | 0.324278885 |
| 0.465838614 | 0.480661526 | 0.115743871 | 0.512322493 |
| 0.001265133 | 0.405750457 | 0.479240226 | 0.242606498 |
| 0.50466926  | 0.272927416 | 0.09479915  | 0.325695643 |
| 0.513806984 | 0.511371544 | 0.481279384 | 0.472873238 |
| 0.306755535 | 0.019472914 | 0.501549382 | 0.45483148  |
| 0.502317633 | 0.44756857  | 0.365108484 | 0.127158166 |
| 0.518748602 | 0.426019422 | 0.464811106 | 0.471597718 |
| 0.48718787  | 0.442731311 | 0.306078677 | 0.429240283 |
| 0.025006856 | 0.290339523 | 0.474471705 | 0.207200199 |
| 0.347180166 | 0.218096014 | 0.505659147 | 0.377053748 |
| 0.426986539 | 0.374321771 | 0.374017911 | 0.101284438 |
| 0.212807043 | 0.508686703 | 0.062045457 | 0.49792648  |
| 0.514488827 | 0.430893319 | 0.515397957 | 1           |
| 0.380277491 | 0.429410445 | 0.512465373 | 0.465293448 |
| 0.002047378 | 0.452238642 | 0.437204065 | 0.393777185 |
| 0.489293363 | 0.331589435 | 0.325410033 | 0.463546106 |
| 0.002395356 | 0.192055761 | 0.293805364 | 0.498400585 |
| 0.515550518 | 0.03700927  | 0.064438072 | 0.515839894 |
| 0.4490994   | 0.067492399 | 0.512592685 | 0.370670194 |
| 0.504096246 | 0.479734561 | 0.197192575 | 0.453400621 |
| 0.258153441 | 0.451380571 | 0.035936961 | 0.479572761 |
| 0.469911299 | 0.132130655 | 0.090173001 | 0.507417819 |
| 0.495257899 | 0.431234308 | 0.299866297 | 0.010953121 |
| 0.415762669 | 0.237543821 | 0.504936639 | 0.158504306 |
| 0.490144417 | 0.407454466 | 0.498154717 | 0.486025184 |

|             |             |             |             |
|-------------|-------------|-------------|-------------|
| 0.500147475 | 0.455396914 | 0.420804596 | 0.505621718 |
| 0.138834825 | 0.464343992 | 0.473720105 | 0.073324177 |
| 0.441467984 | 0.516473922 | 0.439606066 | 0.206819301 |
| 0.441099975 | 0.100723726 | 0.240486561 | 0.409303986 |
| 0.491049632 | 0.507592005 | 0.073009327 | 0.230798758 |
| 0.446954711 | 0.356764566 | 0.133413289 | 0.415090745 |
| 0.324262444 | 0.223069583 | 0.206901327 | 0.424796557 |
| 0.483636614 | 0.32868676  | 0.497379273 | 0.172500362 |
| 0.505126338 | 0.075449801 | 0.49606647  | 0.307234245 |
| 0.345164337 | 0.44884503  | 0.419911694 | 0.18300406  |
| 0.028820856 | 0.173197491 | 0.433011389 | 0.447776192 |
| 0.098903473 | 0.241528389 | 0.29059555  | 0.380336565 |
| 0.504893284 | 0.46796832  | 0.321045401 | 0.418919629 |
| 0.438143726 | 0.110464511 | 0.497353626 | 0.40472858  |
| 0.471435965 | 0.370819834 | 0.50734434  | 0.011773282 |
| 0.49831242  | 0.191355979 | 0.29344041  | 0.392049104 |
| 0.454904549 | 0.163427619 | 0.421415486 | 0.212321112 |
| 0.210941121 | 0.007221764 | 0.426244618 | 0.408709304 |
| 0.320508454 | 0.381486095 | 0.438542193 | 0.202066888 |
| 0.509558131 | 0.455308693 | 0.476216279 | 0.351748257 |
| 0.418424101 | 0.027343669 | 0.171295841 | 0.04944247  |
| 0.459277275 | 0.439883386 | 0.479370539 | 0.443310742 |
| 0.290560304 | 0.494971346 | 0.440432745 | 0.443189059 |
| 0.511624435 | 0.203833147 | 0.509010921 | 0.381916921 |
| 0.41474757  | 0.437339732 | 0.302936597 | 0.39047062  |
| 0.226208252 | 0.169226945 | 0.150175001 | 0.228040705 |
| 0.505106085 | 0.374534211 | 0.423576532 | 0.38402419  |
| 0.061046178 | 0.430888556 | 0.484830303 | 0.480465843 |
| 0.480318883 | 0.439328058 | 0.45685645  | 0.428050501 |
| 0.362946644 | 0.366242994 | 0.062073157 | 0.03422657  |
| 0.27537396  | 0.223618989 | 0.478156508 | 0.508231945 |
| 0.511090313 | 0.357622564 | 0.123427544 | 0.188837256 |
| 0.17572133  | 0.439238308 | 0.30175999  | 0.197721726 |
| 0.491985854 | 0.376415745 | 0.001200691 | 0.307341122 |
| 0.430673373 | 0.436688819 |             |             |
| NDFIP2      | 0.208370166 | 0.399626356 | 0.158387908 |
| 0.012597491 | 0.076511158 | 0.287428117 | 0.19259209  |
| 0.165344635 | 0.197279857 | 0.133109357 | 0.357155459 |
| 0.018915344 | 0.18359029  | 0.104493299 | 0.128406617 |
| 0.352721871 | 0.342188359 | 0.197293223 | 0.348720607 |
| 0.228778508 | 0.081264939 | 0.352309566 | 0.247942584 |
| 0.248761541 | 0.029945436 | 0.127836378 | 0.040536498 |
| 0.129202613 | 0.316566702 | 0.247464482 | 0.200667735 |
| 0.320273264 | 0.247651199 | 0.138578896 | 0.097590371 |
| 0.041271313 | 0.438663801 | 0.017529821 | 0.183196689 |
| 0.217555589 | 0.155437202 | 0.259722586 | 0.067941742 |
| 0.000488023 | 0.149424605 | 0.127006133 | 0.324845708 |
| 0.226475542 | 0.256275899 | 0.236866784 | 0.139902881 |
| 0.029486607 | 0.376128978 | 0.351574985 | 0.026650391 |
| 0.40442008  | 0.00263704  | 0.423604966 | 0.192575567 |
| 0.165452728 | 0.237268122 | 0.137466892 | 0.293952093 |
| 0.293836807 | 0.417315722 | 0.371755416 | 0.066613054 |
| 0.155067049 | 0.167788581 | 0.212298049 | 0.197849367 |
| 0.370582745 | 0.184055224 | 0.184393738 | 0.077779269 |

|             |             |             |             |
|-------------|-------------|-------------|-------------|
| 0.209812194 | 0.224517542 | 0.313326763 | 0.227154222 |
| 0.009187361 | 0.150403836 | 0.09740557  | 0.224584934 |
| 0.127823204 | 0.378610886 | 0.206970759 | 0.147119469 |
| 0.14511325  | 0.105794807 | 0.281579774 | 0.367723112 |
| 0.022798328 | 0.216520421 | 0.007811017 | 0.202791189 |
| 0.288155005 | 0.270817538 | 0.286478789 | 0.123511641 |
| 0.08764116  | 0.23596034  | 0.156767303 | 0.206451853 |
| 0.218493668 | 0.175438206 | 0.394528859 | 0.02645158  |
| 0.159655936 | 0.238796553 | 0.188829814 | 0.429245143 |
| 0.376253835 | 0.046390684 | 0.248521631 | 0.253426906 |
| 0.112723883 | 0.065175733 | 0.198949655 | 0.020151619 |
| 0.01616207  | 0.040024588 | 0.300423758 | 0.256426502 |
| 0.114669823 | 0.197850497 | 0.065804701 | 0.175232447 |
| 0.149180887 | 0.290223591 | 0.088901731 | 0.197416003 |
| 0.179296989 | 0.21165137  | 0.128579456 | 0.234065018 |
| 0.092634974 | 0.241993248 | 0.255335284 | 0.358851686 |
| 0.441478261 | 0.133725142 | 0.18682355  | 0.341234109 |
| 0.154390742 | 0.341365556 | 0.393898052 | 0.210300711 |
| 0.121855718 | 0.247987712 | 0.156477629 | 0.262307879 |
| 0.231662561 | 0.222638292 | 0.026854403 | 0.353088993 |
| 0.432909314 | 0.017203003 | 0.173145541 | 0.276996292 |
| 0.014610425 | 0.156014915 | 0.419264898 | 0.284959328 |
| 0.174357563 | 0.036556365 | 0.154014105 | 0.22050307  |
| 0.281212126 | 0.209795394 | 0.282075042 | 0.138206168 |
| 0.348697856 | 0.14911367  | 0.11466861  | 0.161187612 |
| 0.204485268 | 0.309573091 | 0.093242927 | 0.036117791 |
| 0.222038067 | 0.197262686 | 0.341910544 | 0.231599941 |
| 0.244616338 | 0.001841089 | 0.132378496 | 0.247765052 |
| 0.168946475 | 0.229521799 | 0.407359684 | 0.200063398 |
| 0.298552055 | 0.076260795 | 0.22808053  | 0.121809502 |
| 0.32516874  | 0.164849614 | 0.160991595 | 0.013783113 |
| 0.14629793  | 0.114079788 | 0.168697232 | 0.186475891 |
| 0.132559827 | 0.244991619 | 0.140038759 | 0.333849594 |
| 0.233108536 | 0.231376179 | 0.091421026 | 0.059478341 |
| 0.236253529 | 0.293824733 | 0.125704982 | 0.193882229 |
| 0.271605052 | 0.203614948 | 0.229661035 | 0.410074406 |
| 0.128883001 | 0.369090461 | 0.042384061 | 0.247349789 |
| 0.147384422 | 0.306966709 | 0.245344954 | 0.257494412 |
| 0.220750692 | 0.245175423 | 0.099599614 | 0.337133852 |
| 0.250012399 | 0.204958178 | 0.216207315 | 0.400687811 |
| 0.013822692 | 0.296431879 | 0.174281223 | 0.052778847 |
| 0.388329309 | 0.231104852 | 0.201055106 | 0.253428251 |
| 0.356966617 | 0.40669702  | 0.349265247 | 0.253908612 |
| 0.088051832 | 0.083317131 | 0.395376194 | 0.344220509 |
| 0.313077786 | 0.178660983 | 0.064363984 | 0.036574408 |
| 0.34271608  | 0.148759078 | 0.264167592 | 0.167959521 |
| 0.14558388  | 0.089140266 | 0.240651098 | 0.217565985 |
| 0.022062128 | 0.230756292 | 0.216261863 | 0.099135552 |
| 0.165618932 | 0.167194578 | 0.288017042 | 0.346148494 |
| 0.101067761 | 0.150357706 | 0.099867053 | 0.130633233 |
| 0.20998679  | 0.409686816 | 0.006395254 | 0.396046775 |
| 0.376632575 | 0.224024131 | 0.322191253 | 0.380277491 |
| 1           | 0.366161436 | 0.352176154 | 0.28671637  |
| 0.009121124 | 0.220200949 | 0.150011284 | 0.408620648 |

|             |             |             |             |
|-------------|-------------|-------------|-------------|
| 0.285921858 | 0.304799619 | 0.095500824 | 0.0902649   |
| 0.005538077 | 0.239719939 | 0.050792149 | 0.440430486 |
| 0.291019146 | 0.075552952 | 0.00411302  | 0.285123511 |
| 0.139793839 | 0.020009964 | 0.412876968 | 0.208085892 |
| 0.339329636 | 0.162209315 | 0.178100184 | 0.187792909 |
| 0.038435129 | 0.149139498 | 0.023769702 | 0.219865525 |
| 0.122843326 | 0.048531162 | 0.062129953 | 0.380012027 |
| 0.375123093 | 0.302841779 | 0.265650763 | 0.023987601 |
| 0.227023742 | 0.072154258 | 0.248835384 | 0.156238972 |
| 0.369638634 | 0.364748791 | 0.369698026 | 0.217839055 |
| 0.206845189 | 0.378096821 | 0.406058267 | 0.346017081 |
| 0.030757187 | 0.226559002 | 0.275268441 | 0.105113666 |
| 0.152795403 | 0.319061151 | 0.137159337 | 0.214395195 |
| 0.337431205 | 0.021698015 | 0.271205875 | 0.206007076 |
| 0.366223671 | 0.314090113 | 0.152862131 | 0.233814061 |
| 0.379549043 | 0.228997553 | 0.155956023 | 0.202667542 |
| 0.339135322 | 0.04137643  | 0.054915405 | 0.353523561 |
| 0.420748274 | 0.313962348 | 0.321215888 | 0.096953553 |
| 0.276449368 | 0.166438033 | 0.304584554 | 0.18097839  |
| 0.281382288 | 0.159717962 | 0.209816277 | 0.066898955 |
| 0.041588002 | 0.234289833 | 0.353604378 | 0.414644461 |
| 0.175671594 | 0.255969106 | 0.195911534 | 0.192048973 |
| 0.323550678 | 0.149313141 | 0.299797003 | 0.221783582 |
| 0.424997407 | 0.049601203 | 0.442727787 | 0.244579113 |
| 0.370376867 | 0.184167781 | 0.295844624 | 0.011335426 |
| 0.194977467 | 0.150830826 | 0.114431691 | 0.149605347 |
| 0.257738838 | 0.192809125 | 0.288134395 | 0.258059732 |
| 0.072722744 | 0.01081741  | 0.357019148 | 0.069376147 |
| 0.357339471 | 0.094616037 | 0.214627613 | 0.022832661 |
| 0.432183588 | 0.2431398   | 0.327284591 | 0.063790073 |
| 0.185563579 | 0.001797405 | 0.136543676 | 0.147794729 |
| 0.370369771 | 0.366640762 | 0.227032225 | 0.180688517 |
| 0.167320782 | 0.202228834 | 0.308217183 | 0.129512403 |
| 0.301253629 | 0.05227803  | 0.355003311 | 0.207677957 |
| 0.178237193 | 0.188354006 | 0.281163277 | 0.181807695 |
| 0.151352631 | 0.095936109 | 0.186316773 | 0.241332431 |
| 0.291395701 | 0.149258424 | 0.16256264  | 0.205847447 |
| 0.105326917 | 0.181616824 | 0.233289886 | 0.198004853 |
| 0.219130285 | 0.188168832 | 0.130573194 | 0.410484678 |
| 0.163966847 | 0.243655881 | 0.021514075 | 0.026412082 |
| 0.075258495 | 0.214171907 | 0.358971699 | 0.336157389 |
| 0.344300769 | 0.116278385 | 0.186555473 | 0.251137052 |
| 0.02380936  | 0.230227327 | 0.231775352 | 0.026868677 |
| 0.201048868 | 0.115232607 | 0.005841959 | 0.240391153 |
| 0.369930528 | 0.115127531 |             |             |
| NEDD4L      | 0.24310585  | 0.479801443 | 0.20047391  |
| 0.037930155 | 0.250218927 | 0.41165898  | 0.420757846 |
| 0.235718759 | 0.271979454 | 0.269035472 | 0.441689046 |
| 0.003517867 | 0.232821755 | 0.047229413 | 0.177527956 |
| 0.395979176 | 0.411351047 | 0.45921562  | 0.404264585 |
| 0.288305355 | 0.200052758 | 0.361251575 | 0.384270051 |
| 0.431180586 | 0.006174161 | 0.304882071 | 0.092888598 |
| 0.214741933 | 0.362747527 | 0.376794499 | 0.346803869 |
| 0.341578919 | 0.321733161 | 0.339441661 | 0.325106694 |

|             |             |             |             |
|-------------|-------------|-------------|-------------|
| 0.139285107 | 0.491582686 | 0.078071588 | 0.263320565 |
| 0.252013864 | 0.382574173 | 0.323527961 | 0.063539757 |
| 0.002932612 | 0.28758287  | 0.191622767 | 0.371018726 |
| 0.325152975 | 0.394574112 | 0.357776407 | 0.350348835 |
| 0.062497716 | 0.441990592 | 0.314712994 | 0.06092531  |
| 0.497505805 | 0.007127588 | 0.503636848 | 0.191647851 |
| 0.223350421 | 0.408440373 | 0.2281202   | 0.354887045 |
| 0.435977932 | 0.508188159 | 0.456522446 | 0.146485353 |
| 0.242570384 | 0.308189369 | 0.245635384 | 0.360741749 |
| 0.429906649 | 0.312129943 | 0.415180882 | 0.218848319 |
| 0.278216715 | 0.253143543 | 0.429435177 | 0.34473185  |
| 0.003315926 | 0.344900498 | 0.325288534 | 0.205662517 |
| 0.205534124 | 0.440305678 | 0.264210944 | 0.400781441 |
| 0.278020783 | 0.0863969   | 0.391218949 | 0.439769326 |
| 0.046911941 | 0.263909039 | 0.021629973 | 0.318421729 |
| 0.311333812 | 0.308714282 | 0.306292317 | 0.23319877  |
| 0.063763391 | 0.273973439 | 0.116722072 | 0.238562332 |
| 0.358523948 | 0.368067961 | 0.484654001 | 0.057690141 |
| 0.201102264 | 0.251947303 | 0.438585302 | 0.496790117 |
| 0.415067527 | 0.02932776  | 0.271064862 | 0.412083661 |
| 0.289019355 | 0.206187641 | 0.430319786 | 0.02177268  |
| 0.025857119 | 0.01928631  | 0.343055221 | 0.302047961 |
| 0.267614047 | 0.398978932 | 0.155358194 | 0.329367461 |
| 0.229404128 | 0.30537341  | 0.299765517 | 0.431698678 |
| 0.253049933 | 0.438211865 | 0.356726238 | 0.301541904 |
| 0.317088053 | 0.310549151 | 0.302974689 | 0.472574494 |
| 0.466028834 | 0.212990665 | 0.227428256 | 0.418909326 |
| 0.207460897 | 0.388222665 | 0.461121733 | 0.318086287 |
| 0.389651686 | 0.393138418 | 0.285653643 | 0.414775174 |
| 0.439803516 | 0.322941455 | 0.043761564 | 0.437534132 |
| 0.505080384 | 0.027501583 | 0.216556638 | 0.306496863 |
| 0.086598734 | 0.407411512 | 0.448055236 | 0.373998706 |
| 0.347347773 | 0.077895743 | 0.329082595 | 0.420209089 |
| 0.387141429 | 0.399493964 | 0.364556964 | 0.290326491 |
| 0.407703321 | 0.278082249 | 0.186456231 | 0.210184917 |
| 0.314282476 | 0.377964735 | 0.162290092 | 0.067216887 |
| 0.273954956 | 0.305370386 | 0.401915076 | 0.338768776 |
| 0.255488969 | 0.005483384 | 0.25498165  | 0.272098286 |
| 0.258849119 | 0.258867257 | 0.502820105 | 0.305915771 |
| 0.378358247 | 0.206875715 | 0.33103108  | 0.399839793 |
| 0.307290606 | 0.304794549 | 0.289251569 | 0.003452144 |
| 0.326862776 | 0.214472086 | 0.354362442 | 0.117517437 |
| 0.371920013 | 0.22443791  | 0.125218122 | 0.400612674 |
| 0.387348053 | 0.32836428  | 0.049195265 | 0.091237888 |
| 0.386612566 | 0.428692944 | 0.284311318 | 0.216966119 |
| 0.377997918 | 0.351535291 | 0.259895378 | 0.447499151 |
| 0.412322141 | 0.42898724  | 0.092361365 | 0.385413884 |
| 0.269232171 | 0.402312058 | 0.300192333 | 0.347955228 |
| 0.423107887 | 0.26489284  | 0.190505015 | 0.418011666 |
| 0.34479942  | 0.365435055 | 0.217779347 | 0.486067546 |
| 0.003658789 | 0.425394042 | 0.353305711 | 0.089998376 |
| 0.48037416  | 0.42786145  | 0.203600171 | 0.305951065 |
| 0.413294398 | 0.488343964 | 0.35070925  | 0.290638517 |
| 0.136617588 | 0.0327879   | 0.428740626 | 0.414300035 |

|             |             |             |             |
|-------------|-------------|-------------|-------------|
| 0.369723668 | 0.431252192 | 0.232514156 | 0.059142302 |
| 0.411201734 | 0.203439584 | 0.342622229 | 0.253051743 |
| 0.329055973 | 0.263435173 | 0.396990736 | 0.222619862 |
| 0.01346251  | 0.347572663 | 0.26906378  | 0.223292859 |
| 0.325049094 | 0.267771523 | 0.38593588  | 0.442080147 |
| 0.319673374 | 0.192311863 | 0.290478729 | 0.25288018  |
| 0.390384218 | 0.474927297 | 0.031276268 | 0.412903275 |
| 0.442725884 | 0.409534722 | 0.408142034 | 0.429410445 |
| 0.366161436 | 1           | 0.416981224 | 0.310893518 |
| 0.002354238 | 0.272196767 | 0.207323725 | 0.438767757 |
| 0.327660854 | 0.427342812 | 0.13766152  | 0.235246127 |
| 0.005827801 | 0.334737734 | 0.126628757 | 0.49189623  |
| 0.384079393 | 0.133556769 | 0.02443666  | 0.363554504 |
| 0.205791112 | 0.037632614 | 0.471230664 | 0.402313192 |
| 0.440405887 | 0.397007123 | 0.364229049 | 0.244016906 |
| 0.09201483  | 0.296733877 | 0.079846542 | 0.377313391 |
| 0.313454629 | 0.059724369 | 0.174136193 | 0.437717346 |
| 0.381605318 | 0.454755589 | 0.428688925 | 0.019034514 |
| 0.234542182 | 0.162998101 | 0.333431869 | 0.252156133 |
| 0.385835508 | 0.448491882 | 0.46666566  | 0.282926311 |
| 0.358423032 | 0.445124619 | 0.438142999 | 0.391540819 |
| 0.102359547 | 0.252289726 | 0.301639037 | 0.141227314 |
| 0.21161939  | 0.406448904 | 0.322060586 | 0.379868469 |
| 0.383197977 | 0.098038969 | 0.393827406 | 0.263291022 |
| 0.469151471 | 0.39186177  | 0.197700897 | 0.278078328 |
| 0.457010627 | 0.418794725 | 0.315988111 | 0.40631705  |
| 0.427023702 | 0.063631786 | 0.084897946 | 0.427486919 |
| 0.506236168 | 0.449234063 | 0.355240764 | 0.214404543 |
| 0.351357097 | 0.167313634 | 0.344551054 | 0.418877739 |
| 0.387104645 | 0.217534816 | 0.230543847 | 0.059193069 |
| 0.039325734 | 0.187433779 | 0.448182042 | 0.474390442 |
| 0.23181201  | 0.355679142 | 0.401814556 | 0.432210219 |
| 0.381671114 | 0.297879674 | 0.42779162  | 0.363717455 |
| 0.499351904 | 0.160260457 | 0.489127302 | 0.358904626 |
| 0.346424619 | 0.41050817  | 0.363781567 | 0.016653687 |
| 0.289685097 | 0.279871458 | 0.129335263 | 0.392776938 |
| 0.289919579 | 0.312272905 | 0.453432442 | 0.309555158 |
| 0.156505449 | 0.007463074 | 0.389530888 | 0.207547316 |
| 0.43372551  | 0.166642445 | 0.365200557 | 0.065308342 |
| 0.500368599 | 0.344353226 | 0.310560405 | 0.164152296 |
| 0.387404636 | 0.012431412 | 0.297535686 | 0.11598414  |
| 0.350525764 | 0.428745419 | 0.286751238 | 0.25385767  |
| 0.159085375 | 0.376594336 | 0.43705307  | 0.376704005 |
| 0.396223889 | 0.09325079  | 0.415939339 | 0.347901178 |
| 0.224522859 | 0.332863335 | 0.437606798 | 0.365122993 |
| 0.403912228 | 0.176981387 | 0.327441534 | 0.221691053 |
| 0.369043126 | 0.352730967 | 0.416336196 | 0.231982767 |
| 0.166369822 | 0.410770574 | 0.270912682 | 0.253638782 |
| 0.345072912 | 0.206867835 | 0.23982903  | 0.480141397 |
| 0.232828392 | 0.300761659 | 0.071790299 | 0.073014982 |
| 0.203649747 | 0.363120312 | 0.344441094 | 0.368929139 |
| 0.416376091 | 0.18049542  | 0.270510246 | 0.266313258 |
| 0.064519998 | 0.226662006 | 0.43919511  | 0.11432827  |
| 0.36955635  | 0.194431092 | 0.002640508 | 0.25514514  |



|             |             |             |             |
|-------------|-------------|-------------|-------------|
| 0.425367797 | 0.274138004 |             |             |
| NME4        | 0.349910757 | 0.500401029 | 0.098750602 |
| 0.043391722 | 0.154391603 | 0.290304368 | 0.280012062 |
| 0.357366153 | 0.145134181 | 0.197322099 | 0.371361562 |
| 0.002315745 | 0.35355129  | 0.02175745  | 0.091146717 |
| 0.506293384 | 0.516600665 | 0.38090045  | 0.500787693 |
| 0.334477835 | 0.201780552 | 0.382966952 | 0.425356382 |
| 0.311532216 | 0.002782322 | 0.174020531 | 0.083410907 |
| 0.356492665 | 0.489054864 | 0.251400141 | 0.343176098 |
| 0.446350212 | 0.439656544 | 0.420912389 | 0.347992707 |
| 0.254625239 | 0.461047558 | 0.114671854 | 0.410841954 |
| 0.375928207 | 0.29101756  | 0.43040069  | 0.022600795 |
| 0.005800682 | 0.145878658 | 0.317632841 | 0.412016923 |
| 0.317135614 | 0.273244946 | 0.21522766  | 0.232259002 |
| 0.160918252 | 0.391375876 | 0.386275236 | 0.159764439 |
| 0.431200661 | 0.008072194 | 0.450943932 | 0.256879437 |
| 0.096079593 | 0.346428124 | 0.354606125 | 0.427712181 |
| 0.301720959 | 0.440945476 | 0.516004703 | 0.059008554 |
| 0.10906595  | 0.431793486 | 0.3958758   | 0.451265408 |
| 0.452211311 | 0.383453393 | 0.350609635 | 0.350431666 |
| 0.430924832 | 0.372627983 | 0.325807717 | 0.218920124 |
| 0.001743999 | 0.204428487 | 0.367372434 | 0.322082965 |
| 0.378547791 | 0.395388834 | 0.382309532 | 0.276431306 |
| 0.431829071 | 0.031740596 | 0.410546337 | 0.523974981 |
| 0.033316989 | 0.383146062 | 0.015234995 | 0.190026195 |
| 0.419908676 | 0.452001103 | 0.411817132 | 0.114035259 |
| 0.022270395 | 0.157431492 | 0.15623558  | 0.382493985 |
| 0.414409755 | 0.459234685 | 0.426585293 | 0.126611592 |
| 0.330988912 | 0.214278267 | 0.383846058 | 0.463356036 |
| 0.482025332 | 0.011824145 | 0.189843313 | 0.276609302 |
| 0.346790342 | 0.177401343 | 0.284028762 | 0.047787824 |
| 0.019765488 | 0.02152982  | 0.451984371 | 0.203994888 |
| 0.150036094 | 0.261156779 | 0.119901297 | 0.456237712 |
| 0.336007918 | 0.413726589 | 0.161374024 | 0.313049876 |
| 0.422177822 | 0.3105933   | 0.442193282 | 0.450773051 |
| 0.380889336 | 0.279492315 | 0.194778573 | 0.459868847 |
| 0.422698304 | 0.105630555 | 0.117469538 | 0.371888582 |
| 0.33606702  | 0.487133673 | 0.531929702 | 0.326133841 |
| 0.318114453 | 0.284616295 | 0.354691561 | 0.433374778 |
| 0.29436248  | 0.350661258 | 0.083080644 | 0.383029083 |
| 0.426346765 | 0.046212604 | 0.098264891 | 0.421330197 |
| 0.07301016  | 0.29111761  | 0.443693893 | 0.460942119 |
| 0.436575315 | 0.069745695 | 0.298277239 | 0.321897834 |
| 0.336824141 | 0.312184867 | 0.420287972 | 0.278576421 |
| 0.356935619 | 0.360075664 | 0.074443193 | 0.3344972   |
| 0.167278102 | 0.361742065 | 0.311053075 | 0.079023861 |
| 0.384018071 | 0.353527556 | 0.463829554 | 0.422782359 |
| 0.391548549 | 0.007224449 | 0.197934104 | 0.371538871 |
| 0.335982085 | 0.369025924 | 0.503046024 | 0.154082005 |
| 0.293790926 | 0.301106745 | 0.186281844 | 0.367389283 |
| 0.374655058 | 0.282408055 | 0.258530288 | 0.001592031 |
| 0.186204283 | 0.381139792 | 0.420983256 | 0.06963962  |
| 0.295664383 | 0.155224161 | 0.125706009 | 0.46221221  |
| 0.255399333 | 0.449776386 | 0.03313425  | 0.146684108 |

|             |             |             |             |
|-------------|-------------|-------------|-------------|
| 0.315929707 | 0.45043238  | 0.412405536 | 0.285925957 |
| 0.466116532 | 0.359335223 | 0.410870198 | 0.41203603  |
| 0.314532968 | 0.393081763 | 0.156419912 | 0.307515527 |
| 0.432049538 | 0.460717084 | 0.433712504 | 0.447625027 |
| 0.319505183 | 0.357804319 | 0.302716096 | 0.323532866 |
| 0.403986614 | 0.408668146 | 0.11965118  | 0.501516242 |
| 0.001406423 | 0.378461796 | 0.455237918 | 0.168546585 |
| 0.490834204 | 0.296433899 | 0.097832422 | 0.277149845 |
| 0.50934154  | 0.501148104 | 0.397731597 | 0.421833131 |
| 0.223776833 | 0.015041569 | 0.471589457 | 0.425501782 |
| 0.49509515  | 0.422270134 | 0.338435848 | 0.075752378 |
| 0.475803128 | 0.323922073 | 0.438198184 | 0.408131316 |
| 0.436512463 | 0.374666208 | 0.282247517 | 0.330198967 |
| 0.018344083 | 0.307388839 | 0.42091506  | 0.229399658 |
| 0.362088482 | 0.220131738 | 0.461370091 | 0.359390718 |
| 0.408156885 | 0.326172257 | 0.385218867 | 0.120224216 |
| 0.224143339 | 0.508662434 | 0.045666609 | 0.447310645 |
| 0.524420704 | 0.382463572 | 0.471169139 | 0.512465373 |
| 0.352176154 | 0.416981224 | 1           | 0.411932224 |
| 0.001375561 | 0.407365765 | 0.355868859 | 0.3762584   |
| 0.441560375 | 0.336500448 | 0.224521283 | 0.401899056 |
| 0.001816618 | 0.199037821 | 0.268779565 | 0.483198825 |
| 0.456716935 | 0.044998013 | 0.046323101 | 0.462298464 |
| 0.368945119 | 0.046268219 | 0.527089203 | 0.386442974 |
| 0.469704421 | 0.437078238 | 0.228116568 | 0.376901045 |
| 0.223936912 | 0.364978802 | 0.045985665 | 0.458789587 |
| 0.404769409 | 0.087768196 | 0.124296329 | 0.511798884 |
| 0.440631766 | 0.420288168 | 0.298958723 | 0.017570591 |
| 0.358980388 | 0.249554402 | 0.464791781 | 0.142210956 |
| 0.430705438 | 0.39804958  | 0.45750424  | 0.411776993 |
| 0.441056309 | 0.438299606 | 0.407456205 | 0.458809361 |
| 0.143744031 | 0.38974897  | 0.420303307 | 0.085568038 |
| 0.357777937 | 0.474580765 | 0.433241231 | 0.23050267  |
| 0.392290992 | 0.120190331 | 0.254478632 | 0.328824005 |
| 0.46158268  | 0.471586981 | 0.088529054 | 0.192695018 |
| 0.435095585 | 0.332865188 | 0.152103778 | 0.367604361 |
| 0.319853346 | 0.176242333 | 0.133127148 | 0.39803585  |
| 0.463852914 | 0.338969198 | 0.444422523 | 0.209252747 |
| 0.448305595 | 0.072314092 | 0.410753309 | 0.312391571 |
| 0.319339511 | 0.386075396 | 0.365082764 | 0.124066044 |
| 0.040358281 | 0.163958641 | 0.429761704 | 0.426304155 |
| 0.110455806 | 0.236466705 | 0.31592131  | 0.396874366 |
| 0.493360443 | 0.418357395 | 0.320228276 | 0.360766118 |
| 0.41961148  | 0.141805656 | 0.484747881 | 0.366381669 |
| 0.419943243 | 0.390862727 | 0.452313591 | 0.012274811 |
| 0.433231632 | 0.23062748  | 0.201797867 | 0.410805044 |
| 0.431089248 | 0.179929977 | 0.418399569 | 0.204682778 |
| 0.198940415 | 0.004785089 | 0.378469802 | 0.358960953 |
| 0.326270469 | 0.275988771 | 0.378955082 | 0.163216637 |
| 0.527482481 | 0.414367029 | 0.420546659 | 0.264935472 |
| 0.418440573 | 0.023539583 | 0.209508941 | 0.050822301 |
| 0.407064291 | 0.406073594 | 0.404718264 | 0.38217284  |
| 0.209418706 | 0.454671833 | 0.417367705 | 0.436197116 |
| 0.464593674 | 0.177903064 | 0.517538151 | 0.320576589 |

|             |             |             |             |
|-------------|-------------|-------------|-------------|
| 0.360508611 | 0.39060389  | 0.303473566 | 0.339432758 |
| 0.253285202 | 0.144960922 | 0.163185179 | 0.185615486 |
| 0.475591035 | 0.315650848 | 0.431689871 | 0.336296978 |
| 0.076203903 | 0.418683944 | 0.396422625 | 0.413621338 |
| 0.447780252 | 0.369994282 | 0.365848177 | 0.410832179 |
| 0.31698561  | 0.320116796 | 0.080848773 | 0.054554542 |
| 0.29018518  | 0.250395985 | 0.395894141 | 0.432469671 |
| 0.502211783 | 0.273581044 | 0.135551871 | 0.170942611 |
| 0.116525687 | 0.345870048 | 0.325232788 | 0.179268353 |
| 0.435275804 | 0.298383407 | 0.0010653   | 0.249288772 |
| 0.40587499  | 0.398598578 |             |             |
| NQ02        | 0.375156967 | 0.403337183 | 0.051070629 |
| 0.01624011  | 0.077090105 | 0.178937318 | 0.159496616 |
| 0.390818994 | 0.095860532 | 0.091580187 | 0.253569467 |
| 0.003685194 | 0.422911619 | 0.019054376 | 0.078953652 |
| 0.465122056 | 0.47290787  | 0.26228856  | 0.47650715  |
| 0.343800194 | 0.098180717 | 0.344378029 | 0.302699613 |
| 0.199689504 | 0.003221555 | 0.079887599 | 0.027596497 |
| 0.415054925 | 0.474497948 | 0.174793339 | 0.210552335 |
| 0.426556231 | 0.429284472 | 0.328318145 | 0.251323082 |
| 0.22609325  | 0.37528261  | 0.154665538 | 0.421091115 |
| 0.419125197 | 0.155453984 | 0.434841967 | 0.015971535 |
| 0.00222943  | 0.070389146 | 0.377186564 | 0.34781845  |
| 0.328628916 | 0.16603838  | 0.147181878 | 0.116000703 |
| 0.196533561 | 0.286865461 | 0.408690092 | 0.194725877 |
| 0.324700815 | 0.002409773 | 0.361540218 | 0.315694646 |
| 0.052956026 | 0.294195461 | 0.390546609 | 0.377264606 |
| 0.186846555 | 0.339851966 | 0.440332534 | 0.022542965 |
| 0.052872075 | 0.427661122 | 0.411777121 | 0.334368756 |
| 0.408486252 | 0.270785955 | 0.225323369 | 0.39046859  |
| 0.419942902 | 0.429019486 | 0.247369644 | 0.159421244 |
| 0.001340135 | 0.100984579 | 0.239429808 | 0.39906271  |
| 0.411288626 | 0.286769148 | 0.411270182 | 0.153956938 |
| 0.392220921 | 0.017166207 | 0.337712784 | 0.45949271  |
| 0.015644798 | 0.434984131 | 0.009516819 | 0.147801263 |
| 0.432659415 | 0.464348278 | 0.396108958 | 0.048569364 |
| 0.014120816 | 0.127795867 | 0.216509459 | 0.433626174 |
| 0.390483635 | 0.403417422 | 0.323835265 | 0.249593352 |
| 0.393659336 | 0.169882969 | 0.304953564 | 0.36264858  |
| 0.418330472 | 0.011525299 | 0.174982709 | 0.16941993  |
| 0.3096444   | 0.096992815 | 0.173746637 | 0.045805753 |
| 0.007662561 | 0.051547748 | 0.433088058 | 0.148433613 |
| 0.064610484 | 0.147051617 | 0.058163269 | 0.376834064 |
| 0.385769423 | 0.442036398 | 0.083045089 | 0.185464817 |
| 0.417755106 | 0.184489239 | 0.324021536 | 0.423810922 |
| 0.3102107   | 0.277624876 | 0.128290291 | 0.384008756 |
| 0.368412824 | 0.050636821 | 0.066648527 | 0.260916285 |
| 0.404020027 | 0.442520537 | 0.458955817 | 0.311494469 |
| 0.18658294  | 0.223953865 | 0.26056815  | 0.301634814 |
| 0.1899971   | 0.373392427 | 0.158439953 | 0.305019469 |
| 0.323806079 | 0.04295063  | 0.05214493  | 0.444858805 |
| 0.032702248 | 0.190766928 | 0.38066145  | 0.411094111 |
| 0.42028606  | 0.022432763 | 0.159127548 | 0.194572604 |
| 0.269678594 | 0.184835992 | 0.388002124 | 0.148497532 |

|             |             |             |             |
|-------------|-------------|-------------|-------------|
| 0.270352264 | 0.256979995 | 0.034424425 | 0.398826221 |
| 0.097552326 | 0.31807053  | 0.326045061 | 0.076382865 |
| 0.432882659 | 0.37470424  | 0.398420241 | 0.40571631  |
| 0.415391144 | 0.001844007 | 0.089575196 | 0.381795263 |
| 0.259742166 | 0.427358434 | 0.389227828 | 0.091307549 |
| 0.237005543 | 0.368644642 | 0.122831646 | 0.252751589 |
| 0.427118424 | 0.167131614 | 0.147898936 | 0.000558352 |
| 0.105606235 | 0.336235666 | 0.406437463 | 0.064340237 |
| 0.16187513  | 0.100921522 | 0.171676028 | 0.412633916 |
| 0.157808674 | 0.420230095 | 0.048173033 | 0.284301972 |
| 0.20976542  | 0.337113947 | 0.315195655 | 0.288247877 |
| 0.379679781 | 0.244160795 | 0.445055736 | 0.326336686 |
| 0.215922159 | 0.271739288 | 0.276424931 | 0.262431254 |
| 0.428194297 | 0.421641134 | 0.425166424 | 0.426226145 |
| 0.201019136 | 0.425912691 | 0.328045792 | 0.222342413 |
| 0.381372928 | 0.397462852 | 0.072819704 | 0.41282144  |
| 0.000949481 | 0.299303735 | 0.366725237 | 0.28997163  |
| 0.38989934  | 0.172698907 | 0.06059217  | 0.261003273 |
| 0.479812287 | 0.415111953 | 0.4313098   | 0.423869272 |
| 0.304605714 | 0.01567653  | 0.427124825 | 0.350006067 |
| 0.476284997 | 0.338017074 | 0.291302605 | 0.165112522 |
| 0.427939655 | 0.423220051 | 0.363435872 | 0.397417484 |
| 0.40112826  | 0.382288356 | 0.227994709 | 0.419300782 |
| 0.027015312 | 0.193424228 | 0.38766096  | 0.140973514 |
| 0.234433675 | 0.161251653 | 0.405981765 | 0.273965954 |
| 0.32396771  | 0.308300806 | 0.270417775 | 0.055790612 |
| 0.138381748 | 0.407700441 | 0.064712507 | 0.425984509 |
| 0.462877016 | 0.346884163 | 0.413594887 | 0.465293448 |
| 0.28671637  | 0.310893518 | 0.411932224 | 1           |
| 0.001951654 | 0.41644949  | 0.407185904 | 0.287547202 |
| 0.417565263 | 0.23109891  | 0.357369404 | 0.400881102 |
| 0.002161111 | 0.12669353  | 0.242955708 | 0.404377986 |
| 0.421310452 | 0.020866205 | 0.076693859 | 0.41295555  |
| 0.409531536 | 0.066888476 | 0.447127835 | 0.252653451 |
| 0.387463342 | 0.367116667 | 0.118586456 | 0.415874087 |
| 0.235521905 | 0.40945309  | 0.019807386 | 0.352873226 |
| 0.405993426 | 0.173344629 | 0.047329353 | 0.465614521 |
| 0.397014047 | 0.310166568 | 0.207519033 | 0.005203383 |
| 0.409345244 | 0.156167547 | 0.395885732 | 0.108606669 |
| 0.393524828 | 0.296586822 | 0.384938988 | 0.431982157 |
| 0.406704199 | 0.33381245  | 0.303300149 | 0.399343574 |
| 0.095415789 | 0.412485703 | 0.419071137 | 0.039283307 |
| 0.408655431 | 0.427121709 | 0.326858831 | 0.126485177 |
| 0.349535583 | 0.06048682  | 0.155807174 | 0.372546304 |
| 0.369837543 | 0.418163052 | 0.041822415 | 0.181887509 |
| 0.324641614 | 0.266521474 | 0.079009482 | 0.330661867 |
| 0.228708463 | 0.215800765 | 0.265502739 | 0.322904483 |
| 0.365648599 | 0.219356046 | 0.41303221  | 0.100402938 |
| 0.437622951 | 0.049783159 | 0.440159291 | 0.213624572 |
| 0.257892318 | 0.385182638 | 0.406532315 | 0.190654451 |
| 0.017123704 | 0.127683606 | 0.309016869 | 0.331923105 |
| 0.057840742 | 0.16845711  | 0.182539881 | 0.254790676 |
| 0.450455935 | 0.356763913 | 0.219122351 | 0.334265474 |
| 0.321900689 | 0.065280233 | 0.397588381 | 0.315523076 |

|             |             |             |             |             |          |
|-------------|-------------|-------------|-------------|-------------|----------|
| 0.385133191 | 0.246514993 | 0.41677045  | 0.009174222 |             |          |
| 0.421554478 | 0.112651552 | 0.325025237 | 0.266227199 |             |          |
| 0.460068599 | 0.097908668 | 0.298922284 | 0.150363334 |             |          |
| 0.154260115 | 0.006418738 | 0.339163603 | 0.349017885 |             |          |
| 0.218115197 | 0.380990968 | 0.351250343 | 0.197839606 |             |          |
| 0.435418359 | 0.356072515 | 0.397074909 | 0.366466271 |             |          |
| 0.290435804 | 0.02461856  | 0.101006865 | 0.030228772 |             |          |
| 0.37591545  | 0.337912414 | 0.425820611 | 0.38463377  |             |          |
| 0.299338156 | 0.388170548 | 0.326802841 | 0.320993573 |             |          |
| 0.418675035 | 0.15811665  | 0.456424159 | 0.334125985 |             |          |
| 0.400824425 | 0.341722621 | 0.208801586 | 0.317598717 |             |          |
| 0.139214456 | 0.147262352 | 0.095489613 | 0.200548886 |             |          |
| 0.425696527 | 0.31841618  | 0.294383874 | 0.318366603 |             |          |
| 0.03157321  | 0.304887824 | 0.445461481 | 0.423150647 |             |          |
| 0.364133708 | 0.394820157 | 0.399204846 | 0.312670029 |             |          |
| 0.322957356 | 0.311497692 | 0.033458255 | 0.016745871 |             |          |
| 0.200918414 | 0.139988862 | 0.425103362 | 0.429670715 |             |          |
| 0.454956548 | 0.367576274 | 0.075601627 | 0.141025199 |             |          |
| 0.220902429 | 0.42250482  | 0.193919085 | 0.154721384 |             |          |
| 0.405901761 | 0.380218814 | 0.000693326 | 0.268792767 |             |          |
| 0.322368145 | 0.344203211 |             |             |             |          |
| NR4A2       | 0.005658525 | 0.001669412 | 0.003502066 | 1.71E-07    |          |
| 5.77E-05    | 0.005185792 | 0.001482573 | 0.003433224 |             |          |
| 0.002855452 | 0.00031197  | 0.004227608 | 0.031680746 |             |          |
| 0.000486985 | 0.039564548 | 0.001438959 | 0.001604907 |             |          |
| 0.001112649 | 0.000858172 | 0.001651384 | 0.010643109 |             |          |
| 1.04E-05    | 0.009766358 | 0.001599633 | 0.003339734 |             |          |
| 0.039553269 | 0.000713921 | 6.63E-06    | 0.001172861 |             |          |
| 0.001341243 | 0.010068166 | 0.00060627  | 0.001685622 |             |          |
| 0.000447512 | 8.61E-05    | 1.48E-05    | 1.63E-06    | 0.003256926 | 8.90E-07 |
| 0.000227776 | 0.000783396 | 0.000467891 | 0.000606951 |             |          |
| 0.002095597 | 7.90E-08    | 0.002177164 | 0.002030419 |             |          |
| 0.005660119 | 0.007984151 | 0.005837934 | 0.013199301 |             |          |
| 0.000455247 | 6.15E-06    | 0.004232524 | 0.007227888 | 5.98E-06    |          |
| 0.002518268 | 5.70E-09    | 0.002464794 | 0.012009033 |             |          |
| 0.009753434 | 0.004312969 | 0.001021577 | 0.003389252 |             |          |
| 0.003795199 | 0.002491572 | 0.001328579 | 0.000102267 |             |          |
| 0.00629293  | 0.0009645   | 0.000477583 | 0.000297256 |             |          |
| 0.00177646  | 0.000334836 | 0.000296471 | 5.63E-05    |             |          |
| 0.000448549 | 0.00092605  | 0.0076663   | 0.004556283 |             |          |
| 0.00187166  | 0.001196351 | 2.00E-05    | 0.004555521 |             |          |
| 0.000191686 | 0.004190429 | 0.002577289 | 0.000259693 |             |          |
| 0.000590392 | 0.004504948 | 0.004629122 | 0.001353523 |             |          |
| 3.20E-06    | 0.000790371 | 9.37E-07    | 0.003598756 | 0.001798685 |          |
| 0.00092721  | 0.003198869 | 0.000787335 | 0.011217943 |             |          |
| 0.018276921 | 0.015972797 | 0.00067595  | 0.002662327 |             |          |
| 0.00060451  | 0.002466739 | 0.000102687 | 0.000321749 |             |          |
| 0.003851544 | 0.000653666 | 0.002506078 | 0.001995967 |             |          |
| 0.004405914 | 0.013430472 | 0.005138803 | 2.97E-05    | 2.76E-06    |          |
| 0.002497155 | 7.52E-05    | 1.23E-05    | 0.004424441 | 0.001208211 |          |
| 0.013287583 | 0.000485566 | 0.002456792 | 2.19E-05    |             |          |
| 0.000171188 | 0.002754055 | 0.001987736 | 0.000102383 |             |          |
| 0.001336076 | 0.000271838 | 0.00137562  | 0.00011675  |             |          |
| 0.000601588 | 3.30E-05    | 0.006581473 | 0.015410812 |             |          |

|             |             |             |             |             |
|-------------|-------------|-------------|-------------|-------------|
| 0.001324263 | 0.005389697 | 0.001444366 | 0.004493762 |             |
| 0.005281877 | 0.000245137 | 0.001602949 | 0.001710898 |             |
| 0.002375657 | 0.000121734 | 0.009329643 | 0.000230046 |             |
| 0.000999273 | 0.003404358 | 0.007525527 | 4.25E-05    |             |
| 0.005225013 | 0.003280591 | 9.75E-06    | 0.008874099 |             |
| 0.001807035 | 1.57E-07    | 0.000136799 | 0.003228455 |             |
| 0.000866447 | 0.000558488 | 4.67E-06    | 0.000338643 |             |
| 0.001834786 | 0.00896374  | 0.002194213 | 0.002789295 |             |
| 0.000208327 | 0.008445849 | 0.000171628 | 0.003150959 |             |
| 0.000287054 | 0.009373558 | 0.00939189  | 7.61E-05    | 2.99E-06    |
| 0.002601267 | 0.003456678 | 0.001444767 | 0.00225011  |             |
| 0.001647821 | 6.10E-09    | 0.000330792 | 0.005581351 |             |
| 0.000436087 | 0.001303138 | 0.001575819 | 0.010852495 |             |
| 0.01552041  | 5.75E-05    | 0.013891539 | 8.73E-05    | 0.00489733  |
| 0.000190871 | 0.00025276  | 0.00115761  | 0.000390884 |             |
| 0.000131764 | 0.000883297 | 0.046821357 | 0.000155838 |             |
| 0.007030785 | 0.002422325 | 0.001127511 | 0.007015477 |             |
| 0.000401943 | 0.012043841 | 0.000909381 | 0.003360779 |             |
| 0.000842873 | 9.12E-05    | 0.001620687 | 0.000511356 |             |
| 0.00086808  | 0.000766739 | 0.004187798 | 0.000123406 |             |
| 0.003439635 | 3.41E-05    | 0.005128016 | 0.000283782 |             |
| 0.00075085  | 0.000554868 | 0.000703906 | 0.002550974 |             |
| 0.004176916 | 8.32E-05    | 0.008354014 | 0.004595344 |             |
| 0.002495166 | 0.015314292 | 0.001949892 | 0.006350484 |             |
| 0.005329405 | 0.000281201 | 0.000217094 | 0.001428252 |             |
| 0.0019156   | 0.024114574 | 0.016866278 | 0.00168334  |             |
| 0.002153066 | 0.00422945  | 0.000812908 | 0.00065783  |             |
| 0.0510926   | 0.003121541 | 0.002717162 | 0.001058024 |             |
| 0.00068109  | 8.63E-06    | 9.52E-05    | 0.001394606 | 0.002235784 |
| 0.00135266  | 0.001120673 | 0.000200399 | 7.44E-05    |             |
| 0.009109494 | 0.003878038 | 4.61E-05    | 0.003149855 |             |
| 0.001008274 | 1.59E-05    | 0.000290022 | 0.000366198 |             |
| 0.000627324 | 0.005844984 | 3.31E-05    | 0.000472411 | 2.32E-05    |
| 0.002066167 | 0.005709643 | 0.00191386  | 1.59E-07    |             |
| 0.003971423 | 0.001602167 | 0.002989818 | 0.000791512 |             |
| 0.002047378 | 0.009121124 | 0.002354238 | 0.001375561 |             |
| 0.001951654 | 1           | 0.000472111 | 0.000209982 |             |
| 0.006499755 | 0.000834952 | 0.005433844 | 0.002797758 |             |
| 6.86E-05    | 0.000117286 | 0.014846887 | 3.88E-06    | 0.00345587  |
| 0.000653061 | 0.000410531 | 4.35E-08    | 0.001022222 |             |
| 0.000205884 | 7.99E-06    | 0.002087394 | 0.001417906 |             |
| 0.001006132 | 0.000639542 | 0.001500507 | 0.000307556 |             |
| 3.94E-06    | 0.000860004 | 1.89E-06    | 0.000540231 | 0.000239002 |
| 0.000171098 | 2.39E-05    | 0.001913083 | 0.003089967 |             |
| 0.001595111 | 0.006371405 | 3.19E-05    | 0.001433216 | 5.33E-06    |
| 0.000475622 | 0.001139103 | 0.004234576 | 0.003465835 |             |
| 0.001813057 | 0.000411502 | 0.000930199 | 0.002641633 |             |
| 0.004287715 | 0.001589059 | 4.49E-07    | 0.000667729 |             |
| 0.001131713 | 0.000393494 | 0.001453315 | 0.000826254 |             |
| 0.000165911 | 0.004088368 | 0.006995106 | 1.37E-07    |             |
| 0.007535318 | 0.00884694  | 0.00148616  | 0.000754929 |             |
| 0.006023742 | 0.013136236 | 0.002165514 | 0.002401798 |             |
| 0.002774498 | 0.002881023 | 0.008064647 | 3.85E-05    |             |
| 0.000558254 | 0.004630432 | 0.002213846 | 0.003279365 |             |

|             |             |             |             |
|-------------|-------------|-------------|-------------|
| 0.001209283 | 3.96E-05    | 0.000771144 | 0.015499001 |
| 0.002280068 | 0.000435969 | 0.011168905 | 0.000578965 |
| 0.000882835 | 0.003151921 | 2.80E-05    | 0.007532385 |
| 0.001607527 | 0.00327571  | 0.0093848   | 0.016198097 |
| 0.001772472 | 0.000567685 | 0.00108514  | 0.000197914 |
| 0.006382931 | 0.005291407 | 0.003487615 | 2.29E-06    |
| 0.003393454 | 0.009157366 | 0.005118743 | 0.000590665 |
| 0.001230307 | 3.16E-06    | 0.000448085 | 0.000455078 |
| 0.008094117 | 0.000212558 | 0.000993928 | 0.004907464 |
| 0.001173146 | 0.015724762 | 5.43E-06    | 0.000498292 |
| 0.008098693 | 2.41E-05    | 0.006345474 | 0.000525027 |
| 0.005014063 | 7.90E-07    | 0.002291068 | 0.003237903 |
| 0.002936598 | 9.67E-05    | 0.000554935 | 3.10E-09    |
| 0.010148614 | 0.006913802 | 0.004422635 | 0.002489676 |
| 0.002139068 | 0.01339304  | 0.000401159 | 0.002753338 |
| 0.000126312 | 0.000634864 | 2.63E-06    | 0.001236167 |
| 0.003989863 | 0.00033115  | 0.000508237 | 0.005610937 |
| 0.000586547 | 0.000679347 | 7.33E-05    | 0.004673054 |
| 0.02021352  | 0.000606298 | 0.000409244 | 0.000335812 |
| 0.001990345 | 0.000933615 | 0.000618951 | 0.001311188 |
| 0.000364383 | 0.000962559 | 0.000706603 | 0.000908513 |
| 0.003653922 | 0.000406089 | 0.008897838 | 3.44E-07    |
| 4.21E-06    | 0.003003792 | 0.004926176 | 0.002681545 |
| 0.001322655 | 0.000767391 | 0.007167305 | 0.028560972 |
| 2.08E-05    | 0.002038182 | 0.001354868 | 4.98E-07    |
| 0.000413104 | 0.005830438 | 0.013316878 | 0.004575741 |
| 3.80E-05    |             |             |             |
| NRARP       | 0.323038313 | 0.390249004 | 0.03006763  |
| 0.028243204 | 0.071093622 | 0.136765336 | 0.13120534  |
| 0.344186011 | 0.053386755 | 0.087063447 | 0.210606136 |
| 0.000834223 | 0.439415284 | 0.00573629  | 0.035773655 |
| 0.471208329 | 0.482589322 | 0.232798639 | 0.465745603 |
| 0.255514505 | 0.12070079  | 0.271143685 | 0.291600342 |
| 0.156703961 | 0.000671241 | 0.06639413  | 0.039229648 |
| 0.379815591 | 0.483736922 | 0.112789852 | 0.196562347 |
| 0.427411406 | 0.463202114 | 0.356812925 | 0.281567286 |
| 0.336549091 | 0.339516844 | 0.188331579 | 0.463535857 |
| 0.428780186 | 0.144245788 | 0.455672851 | 0.005219238 |
| 0.008697129 | 0.049109328 | 0.347859417 | 0.295393409 |
| 0.223600813 | 0.124583405 | 0.089156284 | 0.106045189 |
| 0.267191293 | 0.238146423 | 0.338545081 | 0.289816668 |
| 0.290587969 | 0.00501639  | 0.328853752 | 0.223089478 |
| 0.026605291 | 0.213881215 | 0.373759988 | 0.340129834 |
| 0.145357831 | 0.308179639 | 0.436411314 | 0.015497204 |
| 0.030918334 | 0.404113488 | 0.453775941 | 0.367410142 |
| 0.387884946 | 0.27192837  | 0.200964987 | 0.431880961 |
| 0.448697165 | 0.435727341 | 0.176465888 | 0.097152624 |
| 0.000490977 | 0.081616307 | 0.292442302 | 0.348660046 |
| 0.465836104 | 0.241767428 | 0.378370943 | 0.140417798 |
| 0.423219971 | 0.00603727  | 0.277688871 | 0.460526785 |
| 0.015981824 | 0.430144712 | 0.007974365 | 0.083700004 |
| 0.421564648 | 0.487202954 | 0.36107748  | 0.034100373 |
| 0.004736129 | 0.062998564 | 0.137747464 | 0.462752806 |
| 0.338935458 | 0.39190555  | 0.286233844 | 0.232014822 |

|             |             |             |             |
|-------------|-------------|-------------|-------------|
| 0.431932628 | 0.109425693 | 0.25322745  | 0.338140907 |
| 0.409410563 | 0.002984237 | 0.090348782 | 0.126530399 |
| 0.316612809 | 0.112321601 | 0.133737149 | 0.052349367 |
| 0.007846215 | 0.018677678 | 0.440368672 | 0.088051706 |
| 0.05384693  | 0.115654906 | 0.057233976 | 0.424322658 |
| 0.337907689 | 0.426157846 | 0.070385926 | 0.157506758 |
| 0.464601721 | 0.156349906 | 0.365062698 | 0.444690989 |
| 0.353354039 | 0.181210444 | 0.077327132 | 0.365370761 |
| 0.309067407 | 0.031137436 | 0.038014807 | 0.215203203 |
| 0.44461552  | 0.445724574 | 0.453871518 | 0.230673216 |
| 0.189042625 | 0.147947415 | 0.278028611 | 0.296221699 |
| 0.14190092  | 0.272464089 | 0.129536436 | 0.239137716 |
| 0.285383925 | 0.043526366 | 0.026726391 | 0.414395332 |
| 0.050676806 | 0.162476699 | 0.344763673 | 0.402414685 |
| 0.402989966 | 0.031777888 | 0.164529021 | 0.16600993  |
| 0.197166185 | 0.157583726 | 0.337492979 | 0.160439454 |
| 0.206264926 | 0.284644111 | 0.01924193  | 0.440349064 |
| 0.058461525 | 0.2361716   | 0.361791719 | 0.074069691 |
| 0.378813901 | 0.282276399 | 0.390642908 | 0.355831457 |
| 0.404004801 | 0.005004864 | 0.088939782 | 0.331385604 |
| 0.267525354 | 0.416002762 | 0.377312332 | 0.052145209 |
| 0.156894437 | 0.367038183 | 0.070664931 | 0.260385316 |
| 0.366866833 | 0.165629582 | 0.137256713 | 0.000207674 |
| 0.073667893 | 0.407303226 | 0.366912876 | 0.025216125 |
| 0.160127777 | 0.058823836 | 0.088898883 | 0.414227735 |
| 0.110145067 | 0.444056038 | 0.01608433  | 0.195781947 |
| 0.162799329 | 0.328710528 | 0.375046827 | 0.236024815 |
| 0.393309454 | 0.231754094 | 0.476859882 | 0.27503942  |
| 0.19423976  | 0.237519812 | 0.237544282 | 0.180534948 |
| 0.460171187 | 0.428662819 | 0.459399156 | 0.427232029 |
| 0.161724562 | 0.346768502 | 0.314491031 | 0.168006557 |
| 0.311525149 | 0.327550671 | 0.038835162 | 0.390053375 |
| 0.00019486  | 0.234345849 | 0.392179444 | 0.242418576 |
| 0.382900743 | 0.143333983 | 0.028860012 | 0.167039707 |
| 0.469804179 | 0.388734831 | 0.375357065 | 0.450116462 |
| 0.28057173  | 0.003898122 | 0.388737773 | 0.306955267 |
| 0.49301169  | 0.305000625 | 0.373453104 | 0.092637228 |
| 0.423081375 | 0.362137659 | 0.357643876 | 0.403642077 |
| 0.423416762 | 0.411782377 | 0.147087411 | 0.351026261 |
| 0.01787235  | 0.162419575 | 0.407767031 | 0.155967611 |
| 0.249656677 | 0.128077219 | 0.416896974 | 0.208429328 |
| 0.376684172 | 0.30955142  | 0.337692784 | 0.037245389 |
| 0.090961263 | 0.396255699 | 0.078196326 | 0.378383131 |
| 0.458514689 | 0.270639394 | 0.427415703 | 0.452238642 |
| 0.220200949 | 0.272196767 | 0.407365765 | 0.41644949  |
| 0.000472111 | 1           | 0.45628883  | 0.225864898 |
| 0.445496341 | 0.180020503 | 0.272126017 | 0.463891768 |
| 0.000522454 | 0.077076167 | 0.356126407 | 0.360232765 |
| 0.438405061 | 0.010369302 | 0.106830653 | 0.40367403  |
| 0.460375805 | 0.04747238  | 0.432667203 | 0.235924885 |
| 0.386493152 | 0.346561717 | 0.095073661 | 0.461724925 |
| 0.34795218  | 0.330594793 | 0.019754029 | 0.367338284 |
| 0.401236111 | 0.117277821 | 0.055706003 | 0.448991189 |
| 0.372423518 | 0.276979832 | 0.14726059  | 0.006093776 |



|             |             |             |             |
|-------------|-------------|-------------|-------------|
| 0.407851952 | 0.218241833 | 0.426411074 | 0.060530445 |
| 0.341524217 | 0.246677685 | 0.358921092 | 0.457574925 |
| 0.389464491 | 0.302219616 | 0.259992087 | 0.389239518 |
| 0.125114284 | 0.448429457 | 0.439233305 | 0.028180523 |
| 0.41253245  | 0.434629853 | 0.373025247 | 0.093223775 |
| 0.278181873 | 0.100717542 | 0.109674136 | 0.278968769 |
| 0.353883656 | 0.436896287 | 0.023131472 | 0.094864833 |
| 0.297508163 | 0.198164246 | 0.051091827 | 0.246794025 |
| 0.167158508 | 0.287065615 | 0.182783755 | 0.261947231 |
| 0.33962159  | 0.178587046 | 0.424930122 | 0.121820386 |
| 0.450788752 | 0.020015132 | 0.393474668 | 0.169486835 |
| 0.181236803 | 0.428182003 | 0.425518593 | 0.164285469 |
| 0.01736738  | 0.078559541 | 0.286801863 | 0.28891466  |
| 0.031786894 | 0.104384931 | 0.158502938 | 0.247409357 |
| 0.466003067 | 0.368951714 | 0.164285552 | 0.24956972  |
| 0.277375931 | 0.086569553 | 0.358996592 | 0.246603624 |
| 0.336035864 | 0.239696303 | 0.398755262 | 0.006787874 |
| 0.439933332 | 0.110643431 | 0.230733064 | 0.287544294 |
| 0.477628073 | 0.065868187 | 0.274671507 | 0.089022153 |
| 0.170769297 | 0.002080394 | 0.256919082 | 0.441685793 |
| 0.16738201  | 0.324992395 | 0.276377398 | 0.296271417 |
| 0.413626765 | 0.318356593 | 0.374958521 | 0.352736807 |
| 0.287183921 | 0.048533889 | 0.094555289 | 0.012610493 |
| 0.313264003 | 0.274904215 | 0.391388003 | 0.35656107  |
| 0.19054841  | 0.392912498 | 0.279660484 | 0.351821418 |
| 0.436830085 | 0.214925869 | 0.467767859 | 0.226220936 |
| 0.441590785 | 0.318454133 | 0.150784483 | 0.249733314 |
| 0.11672609  | 0.104849951 | 0.057043477 | 0.105220524 |
| 0.455065181 | 0.244188776 | 0.303723788 | 0.276277685 |
| 0.019879289 | 0.288785268 | 0.418972625 | 0.459733468 |
| 0.374108279 | 0.429326933 | 0.373098167 | 0.264576075 |
| 0.277323529 | 0.227319025 | 0.054425609 | 0.025163281 |
| 0.265120445 | 0.107272181 | 0.364933946 | 0.392699429 |
| 0.453648061 | 0.293881018 | 0.04401691  | 0.073234766 |
| 0.193467848 | 0.400808352 | 0.168424836 | 0.235126638 |
| 0.376850543 | 0.345254281 | 0.000192902 | 0.16613634  |
| 0.267258599 | 0.376673297 |             |             |
| NRM         | 0.222047773 | 0.368757216 | 0.018910858 |
| 0.022910593 | 0.065550337 | 0.094873881 | 0.098547827 |
| 0.252034046 | 0.032697263 | 0.058756347 | 0.15535207  |
| 0.000309527 | 0.409105831 | 0.002629087 | 0.025847686 |
| 0.450560452 | 0.471272809 | 0.188813011 | 0.457235833 |
| 0.176915925 | 0.086579838 | 0.194261465 | 0.211615357 |
| 0.110207072 | 0.000252082 | 0.049441042 | 0.026378171 |
| 0.301196714 | 0.474411363 | 0.077227737 | 0.136523372 |
| 0.398940655 | 0.449463933 | 0.274433654 | 0.260856463 |
| 0.316788366 | 0.299124469 | 0.236423722 | 0.400329169 |
| 0.427346767 | 0.110871743 | 0.408691568 | 0.002703707 |
| 0.009594532 | 0.034382494 | 0.263521564 | 0.210991616 |
| 0.162850868 | 0.085024082 | 0.06128026  | 0.0788056   |
| 0.226366275 | 0.175989095 | 0.250670396 | 0.262217864 |
| 0.235911115 | 0.003567232 | 0.28411319  | 0.148955634 |
| 0.016808246 | 0.153913119 | 0.267069708 | 0.246294654 |
| 0.105232476 | 0.260410825 | 0.425533542 | 0.010168787 |

|             |             |             |             |
|-------------|-------------|-------------|-------------|
| 0.019610672 | 0.311284092 | 0.36580752  | 0.286293447 |
| 0.331636591 | 0.20007292  | 0.153527761 | 0.393067444 |
| 0.352343456 | 0.385967039 | 0.128844603 | 0.071290059 |
| 0.000177907 | 0.059919085 | 0.25442195  | 0.251945463 |
| 0.394079907 | 0.179128149 | 0.278202757 | 0.10847839  |
| 0.318753258 | 0.003368906 | 0.207207084 | 0.448217938 |
| 0.010716201 | 0.359225241 | 0.006599647 | 0.062324194 |
| 0.343165684 | 0.476203068 | 0.259897023 | 0.02199287  |
| 0.002616073 | 0.041826853 | 0.083834711 | 0.464250405 |
| 0.248937042 | 0.304517938 | 0.223107358 | 0.222099309 |
| 0.434409552 | 0.06515127  | 0.199084368 | 0.293956781 |
| 0.379524187 | 0.002007562 | 0.060695518 | 0.090917054 |
| 0.25653585  | 0.087197896 | 0.10145152  | 0.036850861 |
| 0.005211857 | 0.012058999 | 0.423993829 | 0.057237558 |
| 0.038187977 | 0.082235899 | 0.045349709 | 0.350425669 |
| 0.254288639 | 0.407583578 | 0.062513936 | 0.115543671 |
| 0.386422367 | 0.117920856 | 0.309339265 | 0.353786552 |
| 0.341043619 | 0.123724383 | 0.049472864 | 0.319783073 |
| 0.255208106 | 0.021353765 | 0.022622524 | 0.154298884 |
| 0.415584682 | 0.428573491 | 0.435958632 | 0.168270595 |
| 0.16523756  | 0.104287444 | 0.186146192 | 0.228567386 |
| 0.107098074 | 0.206438423 | 0.122615766 | 0.182352455 |
| 0.233030652 | 0.034204387 | 0.016322738 | 0.327144043 |
| 0.058610356 | 0.127534736 | 0.283655425 | 0.322058681 |
| 0.340655046 | 0.020402744 | 0.117673315 | 0.117373866 |
| 0.135507522 | 0.112452607 | 0.249219012 | 0.112411324 |
| 0.145750439 | 0.193871925 | 0.012646361 | 0.429306283 |
| 0.03960504  | 0.168491576 | 0.262001286 | 0.051543252 |
| 0.290683933 | 0.214760723 | 0.313013937 | 0.270080703 |
| 0.297803368 | 0.003850409 | 0.059455174 | 0.228716181 |
| 0.169705414 | 0.4073186   | 0.356044168 | 0.034916625 |
| 0.109123901 | 0.32792447  | 0.047819693 | 0.233553112 |
| 0.301315003 | 0.107430214 | 0.091537776 | 6.63E-05    |
| 0.056230973 | 0.296032642 | 0.286110664 | 0.013554238 |
| 0.13122266  | 0.03375559  | 0.062946726 | 0.353895946 |
| 0.076397688 | 0.375444465 | 0.009194884 | 0.166019556 |
| 0.115785714 | 0.261408002 | 0.291275515 | 0.149160526 |
| 0.314498854 | 0.161078945 | 0.470425445 | 0.202688743 |
| 0.174123733 | 0.172566155 | 0.213281832 | 0.124058496 |
| 0.38504463  | 0.383169781 | 0.387482964 | 0.357938332 |
| 0.114411144 | 0.271138031 | 0.265394405 | 0.118408572 |
| 0.232594135 | 0.262489434 | 0.023300352 | 0.378656569 |
| 7.07E-05    | 0.175397869 | 0.310288477 | 0.197972661 |
| 0.351493557 | 0.107566706 | 0.016984408 | 0.115252416 |
| 0.460369235 | 0.378279051 | 0.324600173 | 0.428562474 |
| 0.204315462 | 0.001923118 | 0.367193258 | 0.226881606 |
| 0.483788121 | 0.24350514  | 0.375192279 | 0.087354823 |
| 0.397654046 | 0.292589267 | 0.258354326 | 0.297671697 |
| 0.362091469 | 0.391144143 | 0.106784519 | 0.268737659 |
| 0.009742739 | 0.105867556 | 0.298533607 | 0.109278382 |
| 0.175188841 | 0.079900154 | 0.342712898 | 0.156752555 |
| 0.342602106 | 0.205511406 | 0.275736548 | 0.025988258 |
| 0.064561103 | 0.375944652 | 0.100846257 | 0.343766058 |
| 0.445952103 | 0.209724439 | 0.386889114 | 0.437204065 |

|             |             |             |             |
|-------------|-------------|-------------|-------------|
| 0.150011284 | 0.207323725 | 0.355868859 | 0.407185904 |
| 0.000209982 | 0.45628883  | 1           | 0.166587222 |
| 0.402188717 | 0.125794023 | 0.214939214 | 0.413043911 |
| 0.000371722 | 0.050424992 | 0.301128401 | 0.340136092 |
| 0.399589482 | 0.006526093 | 0.147092842 | 0.329660142 |
| 0.39841283  | 0.045179263 | 0.413173164 | 0.168908527 |
| 0.329484254 | 0.291749162 | 0.065741684 | 0.418956072 |
| 0.291944239 | 0.27645203  | 0.017589828 | 0.290290986 |
| 0.343341729 | 0.082284454 | 0.041371004 | 0.433730451 |
| 0.290676369 | 0.218475943 | 0.106137105 | 0.002262812 |
| 0.390603248 | 0.164536173 | 0.337650005 | 0.046332257 |
| 0.261292894 | 0.184640814 | 0.309954271 | 0.395728097 |
| 0.304399439 | 0.229947163 | 0.190313626 | 0.304084491 |
| 0.123662247 | 0.380948648 | 0.398493635 | 0.018990648 |
| 0.309114284 | 0.406992434 | 0.285149042 | 0.0655915   |
| 0.201149794 | 0.101313486 | 0.076006529 | 0.198817779 |
| 0.299725779 | 0.399865101 | 0.013546414 | 0.066984883 |
| 0.225351667 | 0.14435386  | 0.036167257 | 0.197703884 |
| 0.117782719 | 0.214382756 | 0.150153992 | 0.193127538 |
| 0.299206882 | 0.133442827 | 0.365499783 | 0.083999395 |
| 0.434700647 | 0.012791395 | 0.333294725 | 0.136278647 |
| 0.126753318 | 0.318133198 | 0.416566517 | 0.114108461 |
| 0.007604265 | 0.044318425 | 0.219348721 | 0.222900726 |
| 0.020445413 | 0.070819644 | 0.116224354 | 0.19592552  |
| 0.454120566 | 0.290312504 | 0.118513457 | 0.189856428 |
| 0.222514748 | 0.065859298 | 0.332725081 | 0.170713364 |
| 0.242782463 | 0.180103024 | 0.314951575 | 0.004017942 |
| 0.344901318 | 0.07336971  | 0.167086699 | 0.228916234 |
| 0.46638519  | 0.044758063 | 0.21697253  | 0.056177652 |
| 0.133127427 | 0.00149712  | 0.190566345 | 0.411335799 |
| 0.119515728 | 0.277344247 | 0.207383071 | 0.284357638 |
| 0.394005874 | 0.225584309 | 0.269641427 | 0.331941327 |
| 0.215868825 | 0.073769099 | 0.064989279 | 0.007152901 |
| 0.225635623 | 0.20756188  | 0.293867785 | 0.251221044 |
| 0.129019357 | 0.327398928 | 0.213996315 | 0.304537351 |
| 0.399440529 | 0.157645816 | 0.45190358  | 0.171331646 |
| 0.448047086 | 0.230103382 | 0.109028836 | 0.191252459 |
| 0.092115158 | 0.073672694 | 0.038510401 | 0.066579108 |
| 0.440681208 | 0.209099103 | 0.245628796 | 0.182873819 |
| 0.013215367 | 0.225827125 | 0.340239205 | 0.369296144 |
| 0.278786745 | 0.320269239 | 0.303987794 | 0.202588489 |
| 0.190044161 | 0.149483607 | 0.044664732 | 0.016216445 |
| 0.201621323 | 0.073253218 | 0.302620666 | 0.325392044 |
| 0.445815587 | 0.225127418 | 0.027956966 | 0.046502307 |
| 0.209881139 | 0.331084635 | 0.127883667 | 0.273906639 |
| 0.308745809 | 0.251933404 | 0.000103522 | 0.109553154 |
| 0.195939077 | 0.304810488 |             |             |
| NRP1        | 0.251622978 | 0.437771073 | 0.268873902 |
| 0.024321387 | 0.220173149 | 0.442411568 | 0.412959585 |
| 0.239707017 | 0.346424549 | 0.255028212 | 0.449269653 |
| 0.010188679 | 0.197440012 | 0.097935382 | 0.252442107 |
| 0.354564949 | 0.360777924 | 0.425571477 | 0.366168413 |
| 0.329527008 | 0.154704173 | 0.390650528 | 0.361136574 |
| 0.450015578 | 0.017420629 | 0.301037323 | 0.068126695 |

|             |             |             |             |
|-------------|-------------|-------------|-------------|
| 0.204817925 | 0.321291751 | 0.456133257 | 0.34144076  |
| 0.308409768 | 0.267605674 | 0.276451652 | 0.247977524 |
| 0.088538825 | 0.474923201 | 0.053449588 | 0.212794191 |
| 0.217962129 | 0.354857389 | 0.275681115 | 0.104696342 |
| 0.001104084 | 0.317059371 | 0.189032642 | 0.381878269 |
| 0.379185154 | 0.433965073 | 0.447102904 | 0.321536756 |
| 0.04660614  | 0.447228767 | 0.328132191 | 0.042679049 |
| 0.478690134 | 0.003852315 | 0.479964849 | 0.232947751 |
| 0.306627687 | 0.447531677 | 0.210802916 | 0.347447473 |
| 0.45354045  | 0.485442726 | 0.408704942 | 0.161314838 |
| 0.302172272 | 0.283277202 | 0.205280531 | 0.297159837 |
| 0.396664988 | 0.295195419 | 0.390907361 | 0.169798924 |
| 0.232866462 | 0.22195249  | 0.476743864 | 0.429366472 |
| 0.006750789 | 0.344400364 | 0.236886008 | 0.204423682 |
| 0.164110852 | 0.443694534 | 0.253508853 | 0.361614313 |
| 0.240901975 | 0.152347483 | 0.406490374 | 0.391773286 |
| 0.045154192 | 0.232208449 | 0.020891197 | 0.408897458 |
| 0.286265043 | 0.26661296  | 0.296655298 | 0.260085897 |
| 0.120444322 | 0.391177724 | 0.162289118 | 0.202368691 |
| 0.355070534 | 0.326113006 | 0.4684462   | 0.050264517 |
| 0.164543847 | 0.315142812 | 0.423843587 | 0.469964572 |
| 0.380616449 | 0.065555708 | 0.380100775 | 0.448280726 |
| 0.236268373 | 0.156169523 | 0.446084093 | 0.021854661 |
| 0.028357676 | 0.039305309 | 0.303273576 | 0.405955746 |
| 0.261481489 | 0.414865313 | 0.146532336 | 0.260639881 |
| 0.233806317 | 0.280596861 | 0.26866577  | 0.421109379 |
| 0.204883867 | 0.423221595 | 0.283366271 | 0.25674471  |
| 0.239937848 | 0.37824268  | 0.39812114  | 0.430237758 |
| 0.474727125 | 0.267201882 | 0.302381759 | 0.435873579 |
| 0.168120023 | 0.348913464 | 0.417294412 | 0.359174937 |
| 0.32636507  | 0.465454295 | 0.250887888 | 0.373912958 |
| 0.462516592 | 0.360349268 | 0.045944101 | 0.455586854 |
| 0.494709953 | 0.027010009 | 0.298962809 | 0.286483776 |
| 0.053602811 | 0.378003177 | 0.433833582 | 0.332658751 |
| 0.306083408 | 0.057078382 | 0.294122187 | 0.417141844 |
| 0.435465559 | 0.401519492 | 0.357308227 | 0.251998963 |
| 0.444625399 | 0.236906073 | 0.240151099 | 0.170860186 |
| 0.395632618 | 0.420023915 | 0.135655218 | 0.060848927 |
| 0.26627936  | 0.334679084 | 0.36611813  | 0.329949874 |
| 0.232845818 | 0.00289057  | 0.2400966   | 0.277614255 |
| 0.240021046 | 0.232890764 | 0.457273182 | 0.389916182 |
| 0.453140393 | 0.169402721 | 0.423785504 | 0.324123513 |
| 0.308263956 | 0.28500617  | 0.275291686 | 0.007596246 |
| 0.361962025 | 0.171083581 | 0.330539585 | 0.208987064 |
| 0.32839081  | 0.307184127 | 0.180096417 | 0.356739046 |
| 0.445665384 | 0.274973384 | 0.098032156 | 0.100320233 |
| 0.422333561 | 0.379150818 | 0.228176811 | 0.237827407 |
| 0.321592174 | 0.345124032 | 0.221492192 | 0.45182158  |
| 0.363360118 | 0.424286903 | 0.083130343 | 0.440578162 |
| 0.223195415 | 0.349270248 | 0.25331161  | 0.303682197 |
| 0.44303852  | 0.269625886 | 0.177034418 | 0.458724825 |
| 0.358278983 | 0.366712033 | 0.317859981 | 0.449214578 |
| 0.009146071 | 0.448366971 | 0.293459233 | 0.085027124 |
| 0.43401419  | 0.422860117 | 0.305157267 | 0.388304297 |

|             |             |             |             |
|-------------|-------------|-------------|-------------|
| 0.374178383 | 0.455413239 | 0.347072078 | 0.249493625 |
| 0.137576853 | 0.07784906  | 0.410347159 | 0.401822463 |
| 0.322195892 | 0.40073217  | 0.161056051 | 0.073668551 |
| 0.369433228 | 0.19980983  | 0.313860797 | 0.230012764 |
| 0.268819424 | 0.210075789 | 0.469810772 | 0.223401482 |
| 0.017498095 | 0.368552941 | 0.237431792 | 0.17955894  |
| 0.283789351 | 0.294341398 | 0.332802915 | 0.469316298 |
| 0.243717495 | 0.183850734 | 0.211855218 | 0.286388532 |
| 0.446739814 | 0.436494298 | 0.021170503 | 0.403721895 |
| 0.39905595  | 0.422236811 | 0.353100889 | 0.393777185 |
| 0.408620648 | 0.438767757 | 0.3762584   | 0.287547202 |
| 0.006499755 | 0.225864898 | 0.166587222 | 1           |
| 0.281789623 | 0.455873592 | 0.147846549 | 0.181867613 |
| 0.010712438 | 0.421373596 | 0.086492543 | 0.476518833 |
| 0.328788884 | 0.171930118 | 0.014278406 | 0.326695513 |
| 0.164230666 | 0.039454959 | 0.433839587 | 0.385363086 |
| 0.390881197 | 0.357344611 | 0.373782022 | 0.19907805  |
| 0.062802001 | 0.295410496 | 0.070091588 | 0.324434035 |
| 0.265962268 | 0.067447611 | 0.137857072 | 0.401113483 |
| 0.365242876 | 0.427113659 | 0.474522174 | 0.018878085 |
| 0.209938652 | 0.116836258 | 0.278609277 | 0.329233712 |
| 0.385668839 | 0.448471914 | 0.434245261 | 0.236547014 |
| 0.323626481 | 0.429839247 | 0.441997252 | 0.358041404 |
| 0.070256004 | 0.21438062  | 0.263900924 | 0.170048459 |
| 0.190965821 | 0.352910538 | 0.25888445  | 0.412363489 |
| 0.404229608 | 0.058346107 | 0.44607164  | 0.29449455  |
| 0.42955628  | 0.337259761 | 0.260150133 | 0.390759283 |
| 0.435107899 | 0.453496376 | 0.357678499 | 0.431218916 |
| 0.471292771 | 0.049746722 | 0.092654646 | 0.438319068 |
| 0.475536466 | 0.454398885 | 0.314794043 | 0.171400658 |
| 0.303292281 | 0.27306699  | 0.328558936 | 0.424222033 |
| 0.448152827 | 0.184085136 | 0.198951118 | 0.069236759 |
| 0.039602911 | 0.262384112 | 0.419913062 | 0.467295106 |
| 0.312190015 | 0.44579168  | 0.401182486 | 0.384480248 |
| 0.333661679 | 0.262054396 | 0.466680201 | 0.40216712  |
| 0.494079777 | 0.114148891 | 0.472422626 | 0.39684392  |
| 0.350659039 | 0.376581302 | 0.331798179 | 0.017799464 |
| 0.244104493 | 0.264451894 | 0.150552124 | 0.324047169 |
| 0.251756421 | 0.372659949 | 0.41575715  | 0.404802258 |
| 0.130339742 | 0.01537929  | 0.421193092 | 0.149103282 |
| 0.463474414 | 0.164160837 | 0.392240071 | 0.042074903 |
| 0.465467802 | 0.343731391 | 0.297658196 | 0.138404397 |
| 0.348415174 | 0.00619259  | 0.277321452 | 0.194206748 |
| 0.362156999 | 0.435418832 | 0.273447379 | 0.245602375 |
| 0.204309451 | 0.318307379 | 0.43062899  | 0.299938427 |
| 0.338436703 | 0.071972906 | 0.366883339 | 0.39514463  |
| 0.183250492 | 0.320805923 | 0.477183295 | 0.376487987 |
| 0.383209362 | 0.193820077 | 0.392912992 | 0.317613114 |
| 0.311524761 | 0.354440264 | 0.353674089 | 0.24807477  |
| 0.204111988 | 0.381483398 | 0.248921761 | 0.211107968 |
| 0.307761525 | 0.175719396 | 0.228724866 | 0.480163006 |
| 0.232572491 | 0.345594371 | 0.045074877 | 0.050558963 |
| 0.144021447 | 0.392980626 | 0.345626306 | 0.352201521 |
| 0.371657675 | 0.184231928 | 0.346632232 | 0.379887022 |

|             |             |             |             |
|-------------|-------------|-------------|-------------|
| 0.056013569 | 0.211387493 | 0.420559002 | 0.073121964 |
| 0.3335986   | 0.182082793 | 0.006450423 | 0.327670658 |
| 0.431389764 | 0.226604698 |             |             |
| NSG2        | 0.359318778 | 0.446396206 | 0.053506755 |
| 0.04328641  | 0.093166748 | 0.19616854  | 0.182008985 |
| 0.369711578 | 0.084769244 | 0.140432409 | 0.274112544 |
| 0.00153439  | 0.393312338 | 0.011517428 | 0.049457769 |
| 0.50474272  | 0.50944364  | 0.279147224 | 0.486584352 |
| 0.300294435 | 0.173307139 | 0.324717309 | 0.368614237 |
| 0.216025028 | 0.001489215 | 0.103147033 | 0.069835063 |
| 0.374970636 | 0.499228675 | 0.160747493 | 0.276117797 |
| 0.45689038  | 0.451469588 | 0.405059887 | 0.29474915  |
| 0.298288672 | 0.390531823 | 0.119582342 | 0.432963725 |
| 0.40973392  | 0.200236932 | 0.449660312 | 0.0095781   |
| 0.008471327 | 0.080602728 | 0.34843355  | 0.357970945 |
| 0.257773238 | 0.183203373 | 0.129383591 | 0.153558671 |
| 0.227238572 | 0.300460082 | 0.364835688 | 0.234325877 |
| 0.346870401 | 0.00899883  | 0.380677866 | 0.253927657 |
| 0.046636105 | 0.259414923 | 0.386935557 | 0.39040195  |
| 0.200960844 | 0.363305808 | 0.477006969 | 0.028210218 |
| 0.0555156   | 0.416778802 | 0.447690433 | 0.422615546 |
| 0.424692582 | 0.351136469 | 0.260894345 | 0.371338135 |
| 0.454741295 | 0.415405931 | 0.226396154 | 0.135141773 |
| 0.001095019 | 0.123157795 | 0.324430387 | 0.348340792 |
| 0.432401479 | 0.303879929 | 0.392224332 | 0.185462412 |
| 0.462033198 | 0.013331739 | 0.338223991 | 0.499775978 |
| 0.025393914 | 0.401971048 | 0.010630156 | 0.114065211 |
| 0.434317976 | 0.48734124  | 0.407190854 | 0.060781735 |
| 0.009466992 | 0.092800991 | 0.156982327 | 0.433780403 |
| 0.372287318 | 0.429015374 | 0.340685408 | 0.160068455 |
| 0.376689771 | 0.163726623 | 0.297147711 | 0.394895053 |
| 0.458615289 | 0.004964535 | 0.125195662 | 0.179864929 |
| 0.323589955 | 0.144836021 | 0.181959348 | 0.063401911 |
| 0.014389472 | 0.018990634 | 0.460608391 | 0.130363007 |
| 0.087825758 | 0.169680392 | 0.083597498 | 0.446311357 |
| 0.346564267 | 0.428941461 | 0.092168173 | 0.216656201 |
| 0.453070668 | 0.21082202  | 0.403216987 | 0.455444671 |
| 0.341568592 | 0.221604742 | 0.123003931 | 0.40115084  |
| 0.355591717 | 0.052783506 | 0.066647185 | 0.284849313 |
| 0.387627651 | 0.479082296 | 0.500374304 | 0.273141458 |
| 0.228435686 | 0.193402543 | 0.353454413 | 0.362941923 |
| 0.189969456 | 0.296134333 | 0.095626395 | 0.288845978 |
| 0.344451086 | 0.047948046 | 0.049349849 | 0.41904893  |
| 0.055205435 | 0.2007425   | 0.397742849 | 0.427728052 |
| 0.401968455 | 0.060908322 | 0.236794572 | 0.230187794 |
| 0.257388524 | 0.225010455 | 0.376273421 | 0.231738424 |
| 0.270462387 | 0.369042151 | 0.035363124 | 0.384439085 |
| 0.093404864 | 0.289775153 | 0.367851834 | 0.077390215 |
| 0.381176745 | 0.307047245 | 0.435687208 | 0.391071412 |
| 0.417832122 | 0.008984791 | 0.14633747  | 0.372291616 |
| 0.347708505 | 0.388174754 | 0.436523644 | 0.083418799 |
| 0.207629237 | 0.306950086 | 0.107775566 | 0.285648763 |
| 0.372641007 | 0.2396005   | 0.205007518 | 0.000795688 |
| 0.10469588  | 0.451724155 | 0.381115038 | 0.042354954 |

|             |             |             |             |
|-------------|-------------|-------------|-------------|
| 0.207399382 | 0.100829264 | 0.103150159 | 0.445310661 |
| 0.163018624 | 0.441316675 | 0.021904304 | 0.15636758  |
| 0.226195236 | 0.376661191 | 0.429269424 | 0.289571505 |
| 0.430008379 | 0.311748203 | 0.462896777 | 0.331688366 |
| 0.217494685 | 0.308527593 | 0.173609849 | 0.22658983  |
| 0.451966549 | 0.444781553 | 0.462760923 | 0.4293301   |
| 0.220252731 | 0.344364939 | 0.310627929 | 0.22982358  |
| 0.35852138  | 0.349278707 | 0.068269908 | 0.440705899 |
| 0.000566402 | 0.290623255 | 0.436215916 | 0.197443043 |
| 0.429747311 | 0.196771794 | 0.05193336  | 0.212220558 |
| 0.494231285 | 0.43826557  | 0.384910354 | 0.45178733  |
| 0.26348978  | 0.007599117 | 0.429700503 | 0.359995863 |
| 0.50722558  | 0.338901414 | 0.335482014 | 0.068451363 |
| 0.446591347 | 0.334916345 | 0.419033851 | 0.443609694 |
| 0.416955395 | 0.365562501 | 0.188702159 | 0.337437621 |
| 0.021257883 | 0.241584504 | 0.454539305 | 0.215052878 |
| 0.336338774 | 0.173313305 | 0.440163651 | 0.259975555 |
| 0.37538816  | 0.38360227  | 0.374462084 | 0.062921482 |
| 0.132104877 | 0.457452904 | 0.046890704 | 0.405752131 |
| 0.49812166  | 0.301761649 | 0.454564125 | 0.489293363 |
| 0.285921858 | 0.327660854 | 0.441560375 | 0.417565263 |
| 0.000834952 | 0.445496341 | 0.402188717 | 0.281789623 |
| 1           | 0.241827046 | 0.240652093 | 0.428216901 |
| 0.000673929 | 0.119461604 | 0.344419623 | 0.414877016 |
| 0.451487515 | 0.019608686 | 0.055536336 | 0.428946516 |
| 0.414789222 | 0.041877458 | 0.485629432 | 0.311423203 |
| 0.427092141 | 0.37488645  | 0.145646826 | 0.424845327 |
| 0.314770658 | 0.325289906 | 0.026769085 | 0.420646954 |
| 0.381290391 | 0.093994264 | 0.088965095 | 0.48440652  |
| 0.421402573 | 0.326953976 | 0.199214329 | 0.017438022 |
| 0.398358298 | 0.277756198 | 0.459439194 | 0.082743516 |
| 0.383286158 | 0.30330481  | 0.39668833  | 0.436149878 |
| 0.412286715 | 0.360285449 | 0.32567617  | 0.435021322 |
| 0.133510456 | 0.444023824 | 0.445671561 | 0.052983444 |
| 0.405361921 | 0.448401436 | 0.428352026 | 0.140304705 |
| 0.329882135 | 0.112572724 | 0.161489104 | 0.305380555 |
| 0.399741417 | 0.456907025 | 0.045048117 | 0.124511211 |
| 0.358849263 | 0.246271997 | 0.080137999 | 0.277598555 |
| 0.223500378 | 0.263519923 | 0.140892762 | 0.314195074 |
| 0.391077847 | 0.236544856 | 0.456563184 | 0.186590385 |
| 0.4410577   | 0.034348879 | 0.393901366 | 0.207397144 |
| 0.23611228  | 0.450326119 | 0.411183812 | 0.160312276 |
| 0.039124635 | 0.12485927  | 0.347821553 | 0.347331163 |
| 0.05713183  | 0.150914547 | 0.221828444 | 0.307545542 |
| 0.493774184 | 0.422351777 | 0.222682389 | 0.29008794  |
| 0.33310983  | 0.117888564 | 0.417136545 | 0.304765906 |
| 0.38554523  | 0.306359488 | 0.42388507  | 0.009638035 |
| 0.449255859 | 0.175989449 | 0.216083695 | 0.34575365  |
| 0.470947272 | 0.105752416 | 0.326585151 | 0.134129015 |
| 0.19009724  | 0.00273342  | 0.304156621 | 0.392952125 |
| 0.227139308 | 0.294047113 | 0.315754098 | 0.229550014 |
| 0.471900061 | 0.383548029 | 0.420170072 | 0.278406618 |
| 0.36405864  | 0.028993103 | 0.146655347 | 0.025643865 |
| 0.363456188 | 0.321982721 | 0.402961749 | 0.401953145 |

|             |             |             |             |
|-------------|-------------|-------------|-------------|
| 0.20242677  | 0.412162568 | 0.330096683 | 0.381764392 |
| 0.453095427 | 0.236184741 | 0.507257242 | 0.24944052  |
| 0.408550788 | 0.374542867 | 0.201983725 | 0.280067771 |
| 0.158033027 | 0.112001643 | 0.088935625 | 0.13800215  |
| 0.474413359 | 0.24421161  | 0.355412649 | 0.346008628 |
| 0.038416183 | 0.347344284 | 0.405266263 | 0.445360493 |
| 0.434892348 | 0.432712384 | 0.376396497 | 0.320593269 |
| 0.317287202 | 0.279608283 | 0.076697933 | 0.046804132 |
| 0.312708362 | 0.163824131 | 0.382180656 | 0.41001124  |
| 0.480879019 | 0.289175926 | 0.074181794 | 0.108225835 |
| 0.130707587 | 0.385723922 | 0.224719045 | 0.186936899 |
| 0.390473378 | 0.326606091 | 0.000452264 | 0.207047829 |
| 0.326928901 | 0.401905745 |             |             |
| NSMAF       | 0.171516647 | 0.39557236  | 0.237429698 |
| 0.021288669 | 0.158969825 | 0.365631664 | 0.33012845  |
| 0.148246886 | 0.313130907 | 0.254245047 | 0.423326429 |
| 0.009685568 | 0.14785577  | 0.092939303 | 0.177416837 |
| 0.301351967 | 0.302912469 | 0.297250055 | 0.302115425 |
| 0.22330616  | 0.149230986 | 0.317911423 | 0.269376197 |
| 0.365576411 | 0.017866247 | 0.260971803 | 0.083134391 |
| 0.117275425 | 0.262056959 | 0.363430591 | 0.281122727 |
| 0.265623157 | 0.21590128  | 0.195750501 | 0.157089455 |
| 0.053030962 | 0.438451372 | 0.024063086 | 0.167550916 |
| 0.170398832 | 0.286831627 | 0.229116345 | 0.107051829 |
| 0.000985591 | 0.277402519 | 0.11016558  | 0.304921686 |
| 0.244838443 | 0.3626224   | 0.350301265 | 0.279545764 |
| 0.026008778 | 0.422004342 | 0.286808385 | 0.022392506 |
| 0.458863844 | 0.004976356 | 0.453841409 | 0.153682727 |
| 0.274450867 | 0.326463655 | 0.142677956 | 0.27838872  |
| 0.389917871 | 0.461354769 | 0.353396478 | 0.169757219 |
| 0.286036371 | 0.182338289 | 0.173172086 | 0.215606898 |
| 0.356046141 | 0.214425481 | 0.306555768 | 0.094726132 |
| 0.191855763 | 0.175112769 | 0.359578189 | 0.306356173 |
| 0.008408531 | 0.297823824 | 0.163021024 | 0.165055617 |
| 0.104240281 | 0.432955902 | 0.164877775 | 0.297013522 |
| 0.155601735 | 0.14954592  | 0.277796919 | 0.333536042 |
| 0.044411553 | 0.184779443 | 0.013281387 | 0.282177863 |
| 0.242496632 | 0.21547344  | 0.241384181 | 0.272054253 |
| 0.110962346 | 0.292782952 | 0.112876847 | 0.155633674 |
| 0.23955282  | 0.209499202 | 0.45406569  | 0.022535958 |
| 0.122197993 | 0.277181007 | 0.289590204 | 0.443418024 |
| 0.34033936  | 0.043121662 | 0.275791088 | 0.35290341  |
| 0.159512761 | 0.134206028 | 0.337123905 | 0.014405275 |
| 0.025204562 | 0.019631842 | 0.253212773 | 0.326077743 |
| 0.25181046  | 0.341501379 | 0.110894463 | 0.18152424  |
| 0.138135641 | 0.229480361 | 0.202342298 | 0.335626114 |
| 0.157509906 | 0.331109162 | 0.182982919 | 0.216629305 |
| 0.140554995 | 0.264215224 | 0.330172581 | 0.384962754 |
| 0.438074839 | 0.236610129 | 0.285439044 | 0.374097523 |
| 0.126292686 | 0.295259923 | 0.362158825 | 0.228411099 |
| 0.229757028 | 0.340235657 | 0.209303397 | 0.298823257 |
| 0.347001706 | 0.224061329 | 0.018890729 | 0.387912846 |
| 0.481073753 | 0.01604295  | 0.28432776  | 0.23902738  |
| 0.036143515 | 0.29188451  | 0.406357266 | 0.288589365 |



|             |             |             |             |
|-------------|-------------|-------------|-------------|
| 0.182509388 | 0.074651776 | 0.250102908 | 0.345488271 |
| 0.330372802 | 0.325588083 | 0.275422744 | 0.228411369 |
| 0.361284093 | 0.19256286  | 0.217688472 | 0.128908453 |
| 0.328049777 | 0.296518434 | 0.094258677 | 0.048121397 |
| 0.178765248 | 0.204437385 | 0.332227862 | 0.210808509 |
| 0.198524034 | 0.003266895 | 0.236309335 | 0.197062602 |
| 0.205031824 | 0.17814288  | 0.416979489 | 0.326608681 |
| 0.334164132 | 0.095000193 | 0.338306561 | 0.213782597 |
| 0.260051014 | 0.264344485 | 0.260221529 | 0.011785247 |
| 0.276977769 | 0.115721025 | 0.214407701 | 0.174943838 |
| 0.241871222 | 0.292739582 | 0.109563245 | 0.317798187 |
| 0.362806572 | 0.225510275 | 0.06627246  | 0.049078555 |
| 0.320351069 | 0.34488327  | 0.152071559 | 0.171731669 |
| 0.291684131 | 0.263842359 | 0.174343477 | 0.44440623  |
| 0.240434345 | 0.420219812 | 0.041586051 | 0.329320908 |
| 0.131768962 | 0.30247124  | 0.211109673 | 0.24836643  |
| 0.360917856 | 0.197618888 | 0.096607634 | 0.3823184   |
| 0.23188272  | 0.222797573 | 0.279268216 | 0.393062475 |
| 0.012448875 | 0.311733174 | 0.195345661 | 0.045552763 |
| 0.394300336 | 0.333526255 | 0.273184639 | 0.267363506 |
| 0.309649659 | 0.396640522 | 0.293897478 | 0.204005739 |
| 0.079412749 | 0.06393095  | 0.356444451 | 0.367812854 |
| 0.264517104 | 0.266609641 | 0.091201233 | 0.032165304 |
| 0.312824807 | 0.111207028 | 0.253679628 | 0.148976409 |
| 0.163218834 | 0.114196393 | 0.332797581 | 0.163883128 |
| 0.013866825 | 0.316174111 | 0.176025599 | 0.155474293 |
| 0.225932167 | 0.265004441 | 0.294156991 | 0.394057835 |
| 0.150085017 | 0.128732622 | 0.148550347 | 0.249765256 |
| 0.358225779 | 0.393392612 | 0.008970619 | 0.350368422 |
| 0.338470818 | 0.276879191 | 0.306714521 | 0.331589435 |
| 0.304799619 | 0.427342812 | 0.336500448 | 0.23109891  |
| 0.005433844 | 0.180020503 | 0.125794023 | 0.455873592 |
| 0.241827046 | 1           | 0.077591329 | 0.10355403  |
| 0.007530215 | 0.354184389 | 0.053167361 | 0.425426031 |
| 0.276088815 | 0.171124203 | 0.005770721 | 0.278210089 |
| 0.117954972 | 0.017957709 | 0.379209249 | 0.305102846 |
| 0.351454972 | 0.219699262 | 0.333523395 | 0.158016595 |
| 0.037624858 | 0.168756723 | 0.062782498 | 0.231224023 |
| 0.158748207 | 0.043229682 | 0.140042351 | 0.341872075 |
| 0.331947736 | 0.363417657 | 0.357888519 | 0.031684656 |
| 0.168170891 | 0.087194085 | 0.242764065 | 0.215136843 |
| 0.339594614 | 0.424883739 | 0.386537314 | 0.191181776 |
| 0.205572382 | 0.413249658 | 0.441110809 | 0.325281137 |
| 0.041921715 | 0.177029899 | 0.223600626 | 0.148917956 |
| 0.118569582 | 0.300803274 | 0.182443069 | 0.347446343 |
| 0.317305416 | 0.040172596 | 0.365558229 | 0.189819398 |
| 0.391597401 | 0.295366502 | 0.268071142 | 0.262384256 |
| 0.425737443 | 0.326619888 | 0.305461247 | 0.273686803 |
| 0.392044261 | 0.029762527 | 0.04772007  | 0.383256712 |
| 0.443561346 | 0.402562986 | 0.279048901 | 0.161321078 |
| 0.246204399 | 0.218163291 | 0.26954383  | 0.306419948 |
| 0.326056917 | 0.123227834 | 0.156440125 | 0.039990842 |
| 0.058971267 | 0.228072552 | 0.414699048 | 0.450684089 |
| 0.277286904 | 0.348733932 | 0.318203132 | 0.277884142 |

|             |             |             |             |
|-------------|-------------|-------------|-------------|
| 0.278364449 | 0.162273556 | 0.351502926 | 0.256796779 |
| 0.476987027 | 0.111805056 | 0.428352809 | 0.287184063 |
| 0.333365852 | 0.287003309 | 0.29005475  | 0.017303047 |
| 0.172722249 | 0.254332803 | 0.086242037 | 0.235043886 |
| 0.201750393 | 0.3151095   | 0.35470637  | 0.32750152  |
| 0.088480618 | 0.008270362 | 0.345218315 | 0.084029779 |
| 0.432701647 | 0.082833547 | 0.25468015  | 0.021933075 |
| 0.412919324 | 0.243029934 | 0.278312383 | 0.070751859 |
| 0.249864805 | 0.00266895  | 0.267526429 | 0.177335524 |
| 0.332907212 | 0.396980152 | 0.196425672 | 0.166688625 |
| 0.128487917 | 0.216429947 | 0.346853019 | 0.193486004 |
| 0.291746899 | 0.04667213  | 0.313019444 | 0.256712667 |
| 0.141120576 | 0.218796797 | 0.361819304 | 0.243110784 |
| 0.300430882 | 0.137198488 | 0.33635508  | 0.231757953 |
| 0.26290725  | 0.210724974 | 0.246654554 | 0.180916924 |
| 0.188929938 | 0.259271014 | 0.199649522 | 0.176963908 |
| 0.20994926  | 0.147006005 | 0.127601177 | 0.463658175 |
| 0.167015165 | 0.258326747 | 0.039143791 | 0.068078808 |
| 0.110050738 | 0.34416759  | 0.296970866 | 0.297804262 |
| 0.311658466 | 0.108047673 | 0.310790917 | 0.295012327 |
| 0.024362003 | 0.169431436 | 0.32689969  | 0.037929865 |
| 0.208353233 | 0.117970884 | 0.005309276 | 0.226153058 |
| 0.393296049 | 0.140893632 |             |             |
| NUCKS1      | 0.160160441 | 0.239737532 | 0.01387507  |
| 0.001455849 | 0.011494248 | 0.056793909 | 0.036430088 |
| 0.136402912 | 0.025568467 | 0.012243187 | 0.104357118 |
| 0.005615175 | 0.275905717 | 0.014494013 | 0.032818135 |
| 0.31250579  | 0.308465442 | 0.067334647 | 0.341078018 |
| 0.140225574 | 0.011016482 | 0.183327224 | 0.085609604 |
| 0.053293172 | 0.004173216 | 0.011858302 | 0.002483577 |
| 0.129372347 | 0.333696158 | 0.050050355 | 0.037031832 |
| 0.293734412 | 0.250465994 | 0.049710791 | 0.036826524 |
| 0.030572795 | 0.222839396 | 0.037555015 | 0.196990344 |
| 0.320138193 | 0.022970595 | 0.243433044 | 0.006122393 |
| 0.000121753 | 0.012537231 | 0.118425339 | 0.150375083 |
| 0.119108361 | 0.04813034  | 0.046925679 | 0.015733964 |
| 0.041168201 | 0.126662693 | 0.288074918 | 0.039967521 |
| 0.160866598 | 0.000169251 | 0.197842365 | 0.138634219 |
| 0.014464136 | 0.078560763 | 0.112354299 | 0.159754106 |
| 0.062538447 | 0.17648926  | 0.278114576 | 0.003746094 |
| 0.011106626 | 0.134229257 | 0.209048161 | 0.088067946 |
| 0.233828992 | 0.048480376 | 0.035437028 | 0.079381469 |
| 0.171427185 | 0.284826276 | 0.103238474 | 0.048305282 |
| 0.000934487 | 0.017117816 | 0.030119121 | 0.25603139  |
| 0.156274519 | 0.128761544 | 0.186442033 | 0.021756871 |
| 0.09924112  | 0.006656642 | 0.130236167 | 0.296637147 |
| 0.002261288 | 0.262285132 | 0.002850069 | 0.048448998 |
| 0.25756548  | 0.326836892 | 0.188241749 | 0.007788818 |
| 0.007443934 | 0.051499286 | 0.124393515 | 0.32946975  |
| 0.134974267 | 0.108299058 | 0.155844626 | 0.103836157 |
| 0.272655232 | 0.047805262 | 0.063107954 | 0.199640177 |
| 0.265834238 | 0.011708462 | 0.073888976 | 0.052392716 |
| 0.053105171 | 0.011155212 | 0.045293408 | 0.01254433  |
| 0.001764296 | 0.08245594  | 0.297657481 | 0.048872154 |

|             |             |             |             |
|-------------|-------------|-------------|-------------|
| 0.008852291 | 0.031279855 | 0.009699263 | 0.108961945 |
| 0.123769515 | 0.35435079  | 0.012297257 | 0.035246551 |
| 0.17225951  | 0.044901778 | 0.057052272 | 0.18150675  |
| 0.049355336 | 0.103535808 | 0.037037819 | 0.199383195 |
| 0.233862711 | 0.011576925 | 0.016901353 | 0.097994889 |
| 0.243835761 | 0.299392864 | 0.29576179  | 0.10746599  |
| 0.026812656 | 0.073028565 | 0.041067503 | 0.092837718 |
| 0.056546753 | 0.17896594  | 0.095003344 | 0.14782266  |
| 0.168415313 | 0.01365752  | 0.013118526 | 0.267928406 |
| 0.002928526 | 0.031094103 | 0.217098309 | 0.191604041 |
| 0.148233277 | 0.001922673 | 0.022260803 | 0.045768712 |
| 0.096226307 | 0.037775155 | 0.166443924 | 0.01928755  |
| 0.113738689 | 0.038810095 | 0.008081982 | 0.257473586 |
| 0.024909454 | 0.140947571 | 0.062556721 | 0.013573403 |
| 0.224658028 | 0.128710732 | 0.200293006 | 0.164687042 |
| 0.214039492 | 0.000112842 | 0.012017629 | 0.173569139 |
| 0.045139687 | 0.343677767 | 0.221199312 | 0.024814583 |
| 0.102904607 | 0.089344301 | 0.037058638 | 0.038317851 |
| 0.3339647   | 0.025907749 | 0.022164034 | 0.000288301 |
| 0.024211915 | 0.056556396 | 0.110413544 | 0.04084644  |
| 0.024663903 | 0.027720274 | 0.108427486 | 0.216191558 |
| 0.044556235 | 0.192658682 | 0.053212917 | 0.160398139 |
| 0.047125408 | 0.125669827 | 0.049517468 | 0.093360438 |
| 0.147554387 | 0.046147389 | 0.324238686 | 0.164260559 |
| 0.038768753 | 0.109698827 | 0.111988454 | 0.07355014  |
| 0.137948728 | 0.222541199 | 0.216947356 | 0.215457496 |
| 0.038305497 | 0.281397289 | 0.095620036 | 0.088256218 |
| 0.158726489 | 0.154015842 | 0.025155936 | 0.264352448 |
| 0.000829749 | 0.117295079 | 0.09181935  | 0.11253133  |
| 0.212394474 | 0.046564358 | 0.021161853 | 0.100622009 |
| 0.339991489 | 0.274196623 | 0.327888824 | 0.271704633 |
| 0.108800308 | 0.016898995 | 0.30977253  | 0.153620877 |
| 0.321500583 | 0.071456766 | 0.043451765 | 0.120983145 |
| 0.261457596 | 0.234329811 | 0.124664054 | 0.124914819 |
| 0.114628233 | 0.079732104 | 0.08045056  | 0.286873812 |
| 0.011790914 | 0.037142687 | 0.143798139 | 0.018260231 |
| 0.034857775 | 0.034989991 | 0.188518137 | 0.125889489 |
| 0.050430711 | 0.072918149 | 0.035437467 | 0.010685712 |
| 0.038896638 | 0.250627595 | 0.016570244 | 0.309741469 |
| 0.306692398 | 0.129563664 | 0.217703468 | 0.325410033 |
| 0.095500824 | 0.13766152  | 0.224521283 | 0.357369404 |
| 0.002797758 | 0.272126017 | 0.214939214 | 0.147846549 |
| 0.240652093 | 0.077591329 | 1           | 0.079374632 |
| 0.001742784 | 0.036536533 | 0.035920934 | 0.278000885 |
| 0.22277543  | 0.004590273 | 0.017806493 | 0.195519843 |
| 0.184600384 | 0.034980683 | 0.293284544 | 0.05677484  |
| 0.187838439 | 0.095776243 | 0.019554729 | 0.229633649 |
| 0.03734419  | 0.128189997 | 0.002489495 | 0.106621009 |
| 0.096297399 | 0.087431585 | 0.004753842 | 0.32119604  |
| 0.226270751 | 0.118318654 | 0.070446566 | 0.000731098 |
| 0.33156493  | 0.019895745 | 0.154532723 | 0.042994889 |
| 0.234309403 | 0.128281687 | 0.207956582 | 0.229993401 |
| 0.141029069 | 0.155720907 | 0.143046481 | 0.200186883 |
| 0.013184932 | 0.234973411 | 0.263480859 | 0.00791212  |

|             |             |             |             |
|-------------|-------------|-------------|-------------|
| 0.166858617 | 0.243909274 | 0.063343574 | 0.033592325 |
| 0.168856789 | 0.005806346 | 0.050947125 | 0.179931438 |
| 0.183475132 | 0.227269338 | 0.0089686   | 0.084613593 |
| 0.14507848  | 0.063083759 | 0.01565248  | 0.100707388 |
| 0.093490048 | 0.049326375 | 0.148984436 | 0.146218933 |
| 0.200123916 | 0.079443159 | 0.231182616 | 0.011722004 |
| 0.270604846 | 0.023556263 | 0.298418029 | 0.043498697 |
| 0.103687953 | 0.134137891 | 0.308996199 | 0.098116921 |
| 0.002644778 | 0.049361852 | 0.126628401 | 0.17010839  |
| 0.014967259 | 0.057575338 | 0.035900222 | 0.059163338 |
| 0.294148017 | 0.071288987 | 0.081073463 | 0.11577915  |
| 0.168380568 | 0.006423862 | 0.261430992 | 0.10785781  |
| 0.208846349 | 0.040447071 | 0.206995158 | 0.001701946 |
| 0.1603035   | 0.015734273 | 0.182487487 | 0.049969738 |
| 0.337141876 | 0.021813509 | 0.104971649 | 0.04862541  |
| 0.025508857 | 0.00782959  | 0.185706324 | 0.062301161 |
| 0.089297007 | 0.145686676 | 0.117623199 | 0.03434688  |
| 0.282232568 | 0.117305281 | 0.209627084 | 0.10751589  |
| 0.048862485 | 0.003701001 | 0.013478498 | 0.012263962 |
| 0.207384805 | 0.172146062 | 0.193507429 | 0.128285648 |
| 0.16632473  | 0.12529998  | 0.134490474 | 0.057307441 |
| 0.219846974 | 0.027762214 | 0.28960038  | 0.112647324 |
| 0.272299578 | 0.072572544 | 0.074126894 | 0.083737256 |
| 0.022083418 | 0.042585754 | 0.021546477 | 0.100481427 |
| 0.24427877  | 0.091854432 | 0.060583851 | 0.084458846 |
| 0.006327446 | 0.057944083 | 0.269036347 | 0.193738046 |
| 0.109974304 | 0.184898297 | 0.114537988 | 0.158856574 |
| 0.081791595 | 0.092675888 | 0.003081411 | 0.001354625 |
| 0.025544488 | 0.025055066 | 0.319534622 | 0.274410004 |
| 0.304182725 | 0.128885429 | 0.018662749 | 0.056264986 |
| 0.094017051 | 0.308192199 | 0.051479879 | 0.023130441 |
| 0.141856306 | 0.101471658 | 0.000761609 | 0.117379798 |
| 0.149209434 | 0.06522975  |             |             |
| NUP155      | 0.131263877 | 0.413886339 | 0.011521865 |
| 0.018113175 | 0.048384504 | 0.082687044 | 0.079253579 |
| 0.117083334 | 0.018083102 | 0.038320263 | 0.164332076 |
| 9.67E-05    | 0.412025892 | 0.001184886 | 0.013607863 |
| 0.472513877 | 0.500073175 | 0.145434652 | 0.476832686 |
| 0.087795707 | 0.057698169 | 0.167135326 | 0.168864251 |
| 0.083149353 | 9.60E-05    | 0.033777507 | 0.021042674 |
| 0.133741892 | 0.489457868 | 0.042131122 | 0.077681224 |
| 0.407524475 | 0.485292528 | 0.148436337 | 0.16710269  |
| 0.172644629 | 0.34354164  | 0.101453749 | 0.425390955 |
| 0.415402311 | 0.070926551 | 0.443534109 | 0.001523833 |
| 0.007755469 | 0.023240067 | 0.108591914 | 0.177015375 |
| 0.07360778  | 0.065464423 | 0.035106846 | 0.052724328 |
| 0.096299159 | 0.186901484 | 0.24871301  | 0.114028035 |
| 0.285845184 | 0.003267387 | 0.332077918 | 0.059684427 |
| 0.010271659 | 0.077385213 | 0.133666499 | 0.205278174 |
| 0.100932068 | 0.312132548 | 0.467865057 | 0.006742266 |
| 0.012605948 | 0.185809568 | 0.384139705 | 0.250008593 |
| 0.364701556 | 0.112073574 | 0.093376593 | 0.188685522 |
| 0.336233916 | 0.386848091 | 0.106693656 | 0.039031493 |
| 7.24E-05    | 0.040948269 | 0.159105233 | 0.201611524 |

|             |             |             |             |
|-------------|-------------|-------------|-------------|
| 0.320118585 | 0.194448787 | 0.189708481 | 0.069831397 |
| 0.183944644 | 0.002041072 | 0.156680693 | 0.484351631 |
| 0.006272379 | 0.363685229 | 0.003551162 | 0.033354809 |
| 0.358954206 | 0.479755725 | 0.22117964  | 0.014711801 |
| 0.00142551  | 0.021158227 | 0.030142566 | 0.448474187 |
| 0.152841284 | 0.189154648 | 0.269263289 | 0.081041199 |
| 0.429787292 | 0.032761691 | 0.105010578 | 0.342780103 |
| 0.406947913 | 0.000908229 | 0.029211385 | 0.073151041 |
| 0.138507151 | 0.058561016 | 0.073720474 | 0.015955575 |
| 0.003034419 | 0.003149838 | 0.433880122 | 0.028927233 |
| 0.027104901 | 0.054397957 | 0.030031114 | 0.312563916 |
| 0.10593191  | 0.397612767 | 0.045995649 | 0.073564766 |
| 0.375186368 | 0.098311395 | 0.188436393 | 0.355326393 |
| 0.19545802  | 0.054260295 | 0.026999397 | 0.373855276 |
| 0.284551318 | 0.014084624 | 0.013301806 | 0.144491585 |
| 0.417237376 | 0.449730033 | 0.472361249 | 0.075504762 |
| 0.106732721 | 0.054064294 | 0.097134642 | 0.220186555 |
| 0.08415262  | 0.120061312 | 0.042289014 | 0.179199065 |
| 0.278944869 | 0.015533782 | 0.01014509  | 0.337770261 |
| 0.04807018  | 0.077854905 | 0.320440908 | 0.344298118 |
| 0.247843273 | 0.016626087 | 0.07340843  | 0.087684653 |
| 0.089704145 | 0.075311086 | 0.203985945 | 0.070771203 |
| 0.12697461  | 0.103648175 | 0.008148176 | 0.424871234 |
| 0.022972489 | 0.124507797 | 0.1214139   | 0.025754256 |
| 0.218434267 | 0.095072805 | 0.355704191 | 0.189778894 |
| 0.269629689 | 0.003884413 | 0.038831398 | 0.158127995 |
| 0.08357095  | 0.393051453 | 0.412323994 | 0.020456094 |
| 0.075615072 | 0.14469089  | 0.026765253 | 0.14364053  |
| 0.295004836 | 0.059770237 | 0.055569022 | 4.50E-05    |
| 0.03278811  | 0.147057181 | 0.150850345 | 0.006157281 |
| 0.082757413 | 0.01889343  | 0.025079925 | 0.397697632 |
| 0.051341581 | 0.412145559 | 0.003120283 | 0.057785383 |
| 0.065233648 | 0.289095445 | 0.156387914 | 0.064442493 |
| 0.349553894 | 0.086061775 | 0.462251706 | 0.230408419 |
| 0.104065697 | 0.188937491 | 0.081319892 | 0.060570057 |
| 0.288452092 | 0.42990434  | 0.423410941 | 0.3928021   |
| 0.06373395  | 0.220722601 | 0.115939071 | 0.105949515 |
| 0.157785088 | 0.165373571 | 0.012604052 | 0.421416083 |
| 3.92E-05    | 0.140505848 | 0.235640681 | 0.075203785 |
| 0.408773265 | 0.097223428 | 0.009419172 | 0.053051131 |
| 0.481757662 | 0.420845503 | 0.326780856 | 0.444598564 |
| 0.075482592 | 0.000799275 | 0.385756769 | 0.226484759 |
| 0.502338321 | 0.125233754 | 0.21400374  | 0.031113001 |
| 0.437739197 | 0.186278268 | 0.223645678 | 0.189656263 |
| 0.265083905 | 0.189270209 | 0.059034489 | 0.210914164 |
| 0.003499192 | 0.058857626 | 0.246210419 | 0.067816059 |
| 0.101348468 | 0.038196171 | 0.390162503 | 0.150180383 |
| 0.187421049 | 0.095893041 | 0.161714457 | 0.017682033 |
| 0.04426213  | 0.423812716 | 0.044891369 | 0.361228852 |
| 0.4791331   | 0.134415837 | 0.441788342 | 0.463546106 |
| 0.0902649   | 0.235246127 | 0.401899056 | 0.400881102 |
| 6.86E-05    | 0.463891768 | 0.413043911 | 0.181867613 |
| 0.428216901 | 0.10355403  | 0.079374632 | 1           |
| 0.000133124 | 0.029514477 | 0.158579037 | 0.373981121 |

|             |             |             |             |             |
|-------------|-------------|-------------|-------------|-------------|
| 0.44866342  | 0.004351204 | 0.0613012   | 0.359968841 |             |
| 0.365700038 | 0.02040063  | 0.452251955 | 0.114051238 |             |
| 0.385472558 | 0.179874342 | 0.040691808 | 0.438466576 |             |
| 0.13913239  | 0.125713351 | 0.012344192 | 0.253885064 |             |
| 0.172911611 | 0.026376638 | 0.032274607 | 0.459878672 |             |
| 0.317876004 | 0.224761688 | 0.07943709  | 0.00167943  |             |
| 0.368635243 | 0.100447271 | 0.357322901 | 0.023994773 |             |
| 0.281335    | 0.196527405 | 0.359444743 | 0.426020513 |             |
| 0.221158387 | 0.268572515 | 0.21700717  | 0.34301315  |             |
| 0.086445175 | 0.395533978 | 0.40789512  | 0.013500792 |             |
| 0.204972856 | 0.45319843  | 0.185161896 | 0.052478945 |             |
| 0.170933127 | 0.074932432 | 0.062389236 | 0.10539433  |             |
| 0.356437335 | 0.442157731 | 0.008780527 | 0.031029087 |             |
| 0.272574909 | 0.074667929 | 0.023183846 | 0.099473117 |             |
| 0.103823495 | 0.089049461 | 0.050200279 | 0.183730634 |             |
| 0.351822227 | 0.136565944 | 0.396182131 | 0.056715328 |             |
| 0.46567386  | 0.00693411  | 0.344918416 | 0.077837455 |             |
| 0.082388737 | 0.237588089 | 0.400182005 | 0.04038729  |             |
| 0.004443528 | 0.020840428 | 0.261384267 | 0.263612498 |             |
| 0.012689416 | 0.04181335  | 0.072203634 | 0.156461754 |             |
| 0.48209523  | 0.152388305 | 0.097928245 | 0.094112265 |             |
| 0.265992515 | 0.047574412 | 0.370251143 | 0.097560936 |             |
| 0.246279463 | 0.103135117 | 0.335005615 | 0.002154136 |             |
| 0.2887185   | 0.046638235 | 0.05979969  | 0.166250496 |             |
| 0.460550469 | 0.026928828 | 0.225662403 | 0.028650448 |             |
| 0.074687092 | 0.000579036 | 0.171376653 | 0.214297078 |             |
| 0.121214247 | 0.113741934 | 0.105277641 | 0.136576972 |             |
| 0.435550218 | 0.148372966 | 0.274041554 | 0.141334849 |             |
| 0.122166251 | 0.041792843 | 0.042653139 | 0.004207072 |             |
| 0.218152498 | 0.211480336 | 0.22674444  | 0.145008173 |             |
| 0.047887592 | 0.284762884 | 0.195031346 | 0.192677831 |             |
| 0.449479502 | 0.074268179 | 0.487841254 | 0.078096988 |             |
| 0.444651575 | 0.109186078 | 0.088417619 | 0.088158128 |             |
| 0.05983564  | 0.032669769 | 0.023033041 | 0.028529172 |             |
| 0.484281089 | 0.098717988 | 0.175032502 | 0.085394534 |             |
| 0.009449733 | 0.119168136 | 0.334392311 | 0.372643074 |             |
| 0.217411931 | 0.285847076 | 0.13446602  | 0.242652667 |             |
| 0.087722619 | 0.068328492 | 0.034926543 | 0.013813809 |             |
| 0.117012398 | 0.045058632 | 0.306008933 | 0.344443734 |             |
| 0.476250937 | 0.091702244 | 0.016586601 | 0.022963627 |             |
| 0.078960232 | 0.320173557 | 0.116289506 | 0.152820695 |             |
| 0.235348219 | 0.107440124 | 5.14E-05    | 0.047090159 |             |
| 0.195526746 | 0.14928214  |             |             |             |
| NUP93       | 0.002045216 | 0.002687736 | 0.00294677  | 1.84E-07    |
| 0.000273425 | 0.007484645 | 0.004506388 | 0.00121513  |             |
| 0.004426807 | 0.000370548 | 0.006479403 | 0.000700954 |             |
| 0.000740664 | 0.004881194 | 0.004375279 | 0.001539346 |             |
| 0.001551081 | 0.003518619 | 0.002292368 | 0.004795613 |             |
| 1.89E-05    | 0.007201167 | 0.001356276 | 0.006273111 |             |
| 0.001671958 | 0.001888876 | 5.64E-06    | 0.000744351 |             |
| 0.001301229 | 0.012284385 | 0.000418502 | 0.001447715 |             |
| 0.000617748 | 0.00016149  | 7.21E-05    | 4.77E-06    | 0.004407842 |
| 0.000105809 | 0.000559842 | 0.000925426 | 0.001008901 |             |
| 0.000843056 | 0.015474348 | 1.57E-07    | 0.004307819 |             |

|             |             |             |             |             |
|-------------|-------------|-------------|-------------|-------------|
| 0.000669913 | 0.003803932 | 0.007948726 | 0.00694944  |             |
| 0.019513385 | 0.001302319 | 6.13E-07    | 0.007007719 |             |
| 0.005271958 | 1.52E-06    | 0.005007918 | 5.49E-09    | 0.004375375 |
| 0.002640284 | 0.018412248 | 0.007743515 | 0.000752904 |             |
| 0.002939435 | 0.008337097 | 0.004637386 | 0.00237918  |             |
| 0.000606731 | 0.011542075 | 0.001456854 | 0.000370649 |             |
| 0.000477399 | 0.002718582 | 0.000161445 | 0.000690494 |             |
| 0.000361828 | 0.000551116 | 0.000740285 | 0.013956998 |             |
| 0.007412526 | 9.20E-05    | 0.003197222 | 9.48E-05    | 0.002227543 |
| 0.000181353 | 0.00630327  | 0.002026788 | 0.001216399 |             |
| 0.000321417 | 0.00226321  | 0.004143912 | 0.00186038  |             |
| 4.01E-06    | 0.001630711 | 4.47E-06    | 0.007655137 | 0.001352551 |
| 0.000815034 | 0.001992454 | 0.002017579 | 0.004595058 |             |
| 0.019400581 | 0.001128083 | 0.000609702 | 0.003457263 |             |
| 0.001160661 | 0.005546646 | 0.000285539 | 0.00037114  |             |
| 0.001518693 | 0.002299792 | 0.00353372  | 0.002054983 |             |
| 0.005274371 | 0.00876031  | 0.008569587 | 0.000104873 |             |
| 1.77E-05    | 0.007190109 | 6.15E-07    | 3.85E-06    | 0.00184004  |
| 0.001273461 | 0.008049058 | 0.00138219  | 0.004452893 |             |
| 2.56E-05    | 0.000378153 | 0.001248977 | 0.001890896 |             |
| 0.001009385 | 0.003058396 | 0.00035217  | 0.004138812 |             |
| 0.000270285 | 0.000835054 | 0.000262324 | 0.005451256 |             |
| 0.008130783 | 0.003302709 | 0.007568564 | 0.002653455 |             |
| 0.0028948   | 0.005248247 | 0.000415228 | 0.001600672 |             |
| 0.00225759  | 0.002077737 | 0.000617125 | 0.014756505 |             |
| 0.000194649 | 0.001463759 | 0.009671978 | 0.00833067  |             |
| 3.87E-05    | 0.01006278  | 0.005584979 | 1.42E-06    | 0.010058749 |
| 0.002003577 | 1.87E-06    | 0.000773601 | 0.003742992 |             |
| 0.001951017 | 0.001839036 | 3.51E-06    | 0.00037208  |             |
| 0.003541186 | 0.008155675 | 0.00257794  | 0.004007527 |             |
| 0.00020998  | 0.008095095 | 0.000122101 | 0.007276519 |             |
| 0.000393258 | 0.013497285 | 0.008240074 | 3.32E-05    | 2.58E-05    |
| 0.002567917 | 0.003970352 | 0.001701583 | 0.00280005  |             |
| 0.001258228 | 1.76E-08    | 0.000278856 | 0.002357593 |             |
| 0.000213243 | 0.001423249 | 0.00271187  | 0.020165392 |             |
| 0.015141801 | 0.000844104 | 0.019868239 | 0.000648778 |             |
| 0.00418212  | 0.00021403  | 0.000212377 | 6.92E-05    |             |
| 0.001668665 | 6.04E-05    | 0.002453412 | 0.007474989 |             |
| 0.000452354 | 0.001953232 | 0.000715584 | 0.001690902 |             |
| 0.008803197 | 0.000986603 | 0.006442711 | 0.001289252 |             |
| 0.002973642 | 0.002275221 | 7.25E-05    | 0.000452812 |             |
| 0.001188098 | 0.000579132 | 0.000552516 | 0.007101658 |             |
| 0.001202616 | 0.004261693 | 0.000246957 | 0.008989804 |             |
| 0.000370218 | 0.001459423 | 0.000531219 | 0.001706562 |             |
| 0.004011182 | 0.004747776 | 6.15E-05    | 0.009096901 |             |
| 0.003643125 | 0.004792898 | 0.006345463 | 0.003479749 |             |
| 0.000338976 | 0.006984589 | 0.000497834 | 0.000128526 |             |
| 0.002207809 | 0.004997347 | 0.012902874 | 0.008840094 |             |
| 0.002231305 | 0.003817967 | 0.004366028 | 0.000577857 |             |
| 9.75E-05    | 0.004993652 | 0.004008643 | 0.004530675 |             |
| 0.001218574 | 0.002862443 | 5.87E-05    | 0.000470661 |             |
| 0.001749403 | 0.00200004  | 0.001224017 | 0.000409847 |             |
| 0.000889093 | 0.000588354 | 0.017690036 | 0.003554029 |             |
| 1.14E-05    | 0.001699265 | 0.000504704 | 2.55E-05    | 0.000233932 |

|             |             |             |             |
|-------------|-------------|-------------|-------------|
| 0.000252885 | 0.001353151 | 0.011623296 | 0.000162067 |
| 7.88E-05    | 5.88E-05    | 0.005021391 | 0.015200759 |
| 0.002501013 |             |             |             |
| 2.53E-05    | 0.004277493 | 0.002147243 | 0.008201433 |
| 0.001171793 | 0.002395356 | 0.005538077 | 0.005827801 |
| 0.001816618 | 0.002161111 | 0.000117286 | 0.000522454 |
| 0.000371722 | 0.010712438 | 0.000673929 | 0.007530215 |
| 0.001742784 | 0.000133124 | 1           | 0.01496612  |
|             |             |             | 2.37E-06    |
| 0.005278136 | 0.001096676 | 0.00309148  | 1.19E-05    |
| 0.001755625 | 0.000319134 | 1.99E-05    | 0.002743162 |
| 0.001597079 | 0.001876479 | 0.001830631 | 0.003122424 |
| 0.000421675 | 1.81E-06    | 0.002060054 | 1.49E-05    |
|             |             |             | 0.000809773 |
| 0.001643272 | 0.001664667 | 6.40E-05    | 0.002590373 |
| 0.002526284 | 0.0045373   | 0.011872398 | 2.54E-06    |
| 0.000902822 | 2.73E-06    | 0.000661258 | 0.003081422 |
| 0.004728203 | 0.007046496 | 0.003714688 | 0.000765327 |
| 0.001920418 | 0.004270347 | 0.005671585 | 0.001848514 |
| 5.53E-07    | 0.000415584 | 0.000779757 | 0.000143123 |
| 0.000611096 | 0.001458453 | 0.000233926 | 0.007965812 |
| 0.006791505 | 6.17E-07    | 0.010736131 | 0.005206209 |
| 0.002886551 | 0.001078362 | 0.006372292 | 0.015263074 |
| 0.003505541 | 0.004156012 | 0.011704875 | 0.007626112 |
| 0.012456128 | 2.68E-06    | 0.001734031 | 0.007652445 |
| 0.003880741 | 0.006987811 | 0.000972696 | 4.29E-05    |
| 0.001259441 | 0.024210847 | 0.003786301 | 0.00168775  |
| 0.010903153 | 0.00022311  | 0.000567597 | 7.04E-05    |
|             |             |             | 3.11E-06    |
| 0.001259944 | 0.003326638 | 0.005845539 | 0.009571539 |
| 0.015610559 | 0.002359865 | 0.001429141 | 0.001198425 |
| 0.000125446 | 0.009174193 | 0.006494425 | 0.006654719 |
| 9.75E-06    | 0.00448176  | 0.004916872 | 0.003777583 |
| 0.000955373 | 0.002179749 | 1.43E-05    | 0.000746573 |
| 0.000376556 | 0.002666271 | 0.000544331 | 0.000834497 |
| 0.005269531 | 0.003522603 | 0.008992938 | 8.46E-06    |
| 0.000387149 | 0.009857053 | 7.27E-05    | 0.009824016 |
| 0.000389548 | 0.004937777 | 7.33E-07    | 0.003326983 |
| 0.001979877 | 0.001954139 | 0.000966539 | 0.000581603 |
| 5.72E-08    | 0.000616152 | 0.002397303 | 0.004976872 |
| 0.008536173 | 0.002010602 | 0.000896724 | 0.003380284 |
| 0.001394664 | 0.005652079 | 0.00043364  | 0.00109284  |
| 1.04E-06    | 0.001417734 | 0.008693481 | 0.000382896 |
| 0.000426712 | 0.012681608 | 0.001499972 | 0.003322831 |
| 0.000732759 | 0.014597987 | 0.007567624 | 0.000805307 |
| 0.00420474  | 0.000936094 | 0.000380304 | 0.001164144 |
| 0.000970464 | 0.001789661 | 0.000524717 | 0.000750854 |
| 0.000357047 | 0.000562169 | 0.007282705 | 0.000284307 |
| 0.004221196 | 6.57E-07    | 3.40E-06    | 6.57E-06    |
|             |             |             | 0.00323182  |
| 0.004550962 | 0.00351654  | 0.002000327 | 0.000479645 |
| 0.009263612 | 0.015017704 | 0.000174162 | 0.001116194 |
| 0.003868304 | 4.20E-06    | 0.002514037 | 0.000591383 |
|             |             |             | 5.52E-05    |
| 0.005614507 | 0.006163744 | 4.54E-05    |             |
| OASL2       | 0.111495182 | 0.243946696 | 0.288913434 |
| 0.007410411 | 0.101562116 | 0.385000923 | 0.268302021 |
| 0.071210293 | 0.312911972 | 0.154607682 | 0.381781949 |
| 0.029095891 | 0.06663052  | 0.193784287 | 0.221327064 |
| 0.1615469   | 0.158277338 | 0.20532806  | 0.166877348 |



|             |             |             |             |
|-------------|-------------|-------------|-------------|
| 0.152888197 | 0.061494391 | 0.283318968 | 0.188814248 |
| 0.315161527 | 0.060012263 | 0.191293348 | 0.035558435 |
| 0.048523522 | 0.133900172 | 0.311770365 | 0.159743412 |
| 0.142533207 | 0.099370388 | 0.072324947 | 0.060390748 |
| 0.010752756 | 0.315534751 | 0.005863086 | 0.073634186 |
| 0.078578803 | 0.166696073 | 0.112288793 | 0.180272996 |
| 0.000130306 | 0.253484845 | 0.046035197 | 0.246658526 |
| 0.172571482 | 0.353793416 | 0.335172137 | 0.170215188 |
| 0.00543665  | 0.369539027 | 0.214542178 | 0.004271158 |
| 0.348740529 | 0.001515805 | 0.323793679 | 0.101034291 |
| 0.347092565 | 0.215137732 | 0.061496409 | 0.196874973 |
| 0.39363864  | 0.340089395 | 0.201837969 | 0.152899435 |
| 0.312364535 | 0.090367815 | 0.077537308 | 0.118821033 |
| 0.222820402 | 0.110139934 | 0.173058773 | 0.027101046 |
| 0.093479001 | 0.085340615 | 0.378177306 | 0.294284019 |
| 0.016679356 | 0.215108698 | 0.055449717 | 0.105253583 |
| 0.043040411 | 0.370081828 | 0.102350204 | 0.167382939 |
| 0.064867848 | 0.278884535 | 0.233087659 | 0.184692578 |
| 0.026813867 | 0.093453657 | 0.008442258 | 0.283240601 |
| 0.137973777 | 0.101006098 | 0.16237925  | 0.237832971 |
| 0.228717538 | 0.340275497 | 0.087301963 | 0.066734246 |
| 0.148817779 | 0.103327456 | 0.34773951  | 0.006413621 |
| 0.048761611 | 0.236567337 | 0.158990121 | 0.309032996 |
| 0.19959552  | 0.102495956 | 0.294534855 | 0.357126448 |
| 0.060945267 | 0.056450985 | 0.281457405 | 0.005969023 |
| 0.01971109  | 0.028049237 | 0.129867724 | 0.324642902 |
| 0.181300746 | 0.259709945 | 0.073123329 | 0.088060917 |
| 0.063663139 | 0.123065404 | 0.132766212 | 0.214548    |
| 0.07044314  | 0.270632233 | 0.067936124 | 0.111242048 |
| 0.04719262  | 0.199506459 | 0.340537021 | 0.247780558 |
| 0.346776726 | 0.261507209 | 0.325674414 | 0.347521369 |
| 0.050528287 | 0.159928815 | 0.208592076 | 0.148515726 |
| 0.111712569 | 0.270528274 | 0.086228093 | 0.208968591 |
| 0.320973656 | 0.172736098 | 0.00760675  | 0.351846355 |
| 0.37538482  | 0.006997932 | 0.354677878 | 0.140429828 |
| 0.01327425  | 0.165437018 | 0.289713443 | 0.169294355 |
| 0.103243317 | 0.032615636 | 0.130391655 | 0.263295419 |
| 0.292322212 | 0.227894806 | 0.198129569 | 0.111533051 |
| 0.359963009 | 0.076586897 | 0.265732135 | 0.051220716 |
| 0.336383363 | 0.284498848 | 0.029040582 | 0.021035624 |
| 0.116751728 | 0.11996635  | 0.203417424 | 0.145545555 |
| 0.112012073 | 0.000929539 | 0.141503132 | 0.140675875 |
| 0.089382198 | 0.089066921 | 0.263165225 | 0.344890129 |
| 0.355932445 | 0.030364973 | 0.344718527 | 0.092185119 |
| 0.173325941 | 0.134631143 | 0.147846626 | 0.027794255 |
| 0.223939779 | 0.035137917 | 0.101283167 | 0.27434536  |
| 0.128751161 | 0.316805586 | 0.109760968 | 0.182832739 |
| 0.339102759 | 0.112561405 | 0.111591575 | 0.024373527 |
| 0.234476484 | 0.226563334 | 0.051328546 | 0.096952657 |
| 0.16529622  | 0.145205596 | 0.076545919 | 0.363309216 |
| 0.124075132 | 0.353998716 | 0.014334929 | 0.235342016 |
| 0.062433251 | 0.164111232 | 0.101144509 | 0.135187637 |
| 0.235369718 | 0.140019179 | 0.036773584 | 0.401879986 |
| 0.176353695 | 0.146340803 | 0.350016177 | 0.247190178 |

|             |             |             |             |
|-------------|-------------|-------------|-------------|
| 0.034642442 | 0.29178937  | 0.099884139 | 0.017204587 |
| 0.244612787 | 0.30858548  | 0.369080395 | 0.221455536 |
| 0.171901113 | 0.254515091 | 0.195284399 | 0.09629857  |
| 0.031611118 | 0.154176874 | 0.228249596 | 0.27657214  |
| 0.131876005 | 0.127807971 | 0.024297742 | 0.02026195  |
| 0.179502265 | 0.06816553  | 0.16281473  | 0.075040981 |
| 0.077561395 | 0.035985511 | 0.279787934 | 0.107343846 |
| 0.010106698 | 0.210015858 | 0.097023259 | 0.066457927 |
| 0.10391385  | 0.164457221 | 0.160663949 | 0.380015678 |
| 0.048054255 | 0.055086329 | 0.045920314 | 0.2444802   |
| 0.343378788 | 0.244350524 | 0.00217766  | 0.23512302  |
| 0.191404792 | 0.202056988 | 0.167361838 | 0.192055761 |
| 0.239719939 | 0.334737734 | 0.199037821 | 0.12669353  |
| 0.014846887 | 0.077076167 | 0.050424992 | 0.421373596 |
| 0.119461604 | 0.354184389 | 0.036536533 | 0.029514477 |
| 0.01496612  | 1           | 0.011337237 | 0.295377713 |
| 0.14451257  | 0.214695723 | 0.000951333 | 0.166489033 |
| 0.048481547 | 0.010578229 | 0.230149804 | 0.191323687 |
| 0.211689183 | 0.112452018 | 0.236847555 | 0.066190361 |
| 0.007201916 | 0.083364434 | 0.038165214 | 0.137066767 |
| 0.058456996 | 0.021088712 | 0.072587795 | 0.19888682  |
| 0.220987337 | 0.276783947 | 0.352047238 | 0.021863271 |
| 0.081049718 | 0.026590696 | 0.127214317 | 0.224377966 |
| 0.250797757 | 0.360933925 | 0.257778464 | 0.08931951  |
| 0.123813021 | 0.308736183 | 0.367566598 | 0.202389678 |
| 0.012973654 | 0.081398083 | 0.110416928 | 0.16308729  |
| 0.061054277 | 0.162046742 | 0.073584352 | 0.344046108 |
| 0.275670349 | 0.010708801 | 0.406425276 | 0.133989897 |
| 0.258029661 | 0.153879868 | 0.319610135 | 0.274921233 |
| 0.315498434 | 0.218672649 | 0.280385265 | 0.169171071 |
| 0.412786072 | 0.006738688 | 0.02247263  | 0.326284354 |
| 0.308242648 | 0.378043369 | 0.151778383 | 0.072530217 |
| 0.123423185 | 0.338281815 | 0.169597419 | 0.193010137 |
| 0.307768603 | 0.058678817 | 0.069608333 | 0.02041125  |
| 0.034009414 | 0.229865365 | 0.304610394 | 0.353428812 |
| 0.336580442 | 0.34292213  | 0.201850444 | 0.179048097 |
| 0.143195544 | 0.06635167  | 0.369520962 | 0.167014366 |
| 0.381263489 | 0.043749038 | 0.296852089 | 0.206388931 |
| 0.246730715 | 0.143833441 | 0.174995244 | 0.012502066 |
| 0.087791993 | 0.149078139 | 0.047703375 | 0.115744515 |
| 0.094401314 | 0.296920196 | 0.262252075 | 0.322809575 |
| 0.034981488 | 0.016405933 | 0.317735456 | 0.020868471 |
| 0.43827815  | 0.034751692 | 0.155949658 | 0.00387147  |
| 0.261452175 | 0.162942851 | 0.178296502 | 0.022542325 |
| 0.121088199 | 0.000425389 | 0.160745785 | 0.30711131  |
| 0.264700397 | 0.329735661 | 0.121803585 | 0.090219745 |
| 0.089608804 | 0.124012052 | 0.273589607 | 0.076106889 |
| 0.152324244 | 0.012554227 | 0.167857974 | 0.171037303 |
| 0.056591952 | 0.106432242 | 0.372601759 | 0.136871087 |
| 0.193091798 | 0.082319369 | 0.324175985 | 0.230141527 |
| 0.128277053 | 0.115855532 | 0.126522369 | 0.097851248 |
| 0.220395136 | 0.126401553 | 0.111042532 | 0.080363059 |
| 0.127548769 | 0.067548057 | 0.052881886 | 0.382428162 |
| 0.082286933 | 0.170825889 | 0.012783278 | 0.028773094 |

|             |             |             |             |
|-------------|-------------|-------------|-------------|
| 0.031290491 | 0.262576443 | 0.204659348 | 0.189989124 |
| 0.170089582 | 0.051700042 | 0.334861412 | 0.329807697 |
| 0.007712665 | 0.091742841 | 0.284397587 | 0.008743353 |
| 0.131351419 | 0.047159896 | 0.014107978 | 0.184626582 |
| 0.330593888 | 0.047494921 |             |             |
| OGFRL1      | 0.091523541 | 0.265151431 | 0.00181945  |
| 0.035157215 | 0.00819033  | 0.043179644 | 0.040305637 |
| 0.081670364 | 0.002188229 | 0.017348391 | 0.089463002 |
| 7.59E-06    | 0.269323397 | 8.92E-05    | 0.000909088 |
| 0.335549458 | 0.07240822  | 0.296727451 | 0.047909245 |
| 0.030939915 | 0.089991652 | 0.129323625 | 0.042623674 |
| 5.75E-06    | 0.01598859  | 0.02117715  | 0.081340328 |
| 0.334689836 | 0.016745671 | 0.023375423 | 0.29241178  |
| 0.352702037 | 0.068337359 | 0.033617231 | 0.092080916 |
| 0.202371264 | 0.018685651 | 0.295039579 | 0.279287512 |
| 0.036881731 | 0.307516073 | 7.80E-05    | 0.039849273 |
| 0.006752686 | 0.06674269  | 0.106914678 | 0.027772883 |
| 0.03500184  | 0.012110231 | 0.032020748 | 0.048700235 |
| 0.099626919 | 0.138763706 | 0.067812646 | 0.159828701 |
| 0.013570342 | 0.19270371  | 0.025332609 | 0.0015626   |
| 0.031777913 | 0.097286451 | 0.132907675 | 0.04894716  |
| 0.178727795 | 0.294157611 | 0.0012578   | 0.004084377 |
| 0.113217576 | 0.318526003 | 0.214748539 | 0.230975979 |
| 0.031788365 | 0.021350477 | 0.105178788 | 0.250581624 |
| 0.269825606 | 0.043303646 | 0.005420605 | 1.99E-05    |
| 0.022097946 | 0.083874722 | 0.128554015 | 0.247349123 |
| 0.106691891 | 0.127274164 | 0.025683177 | 0.159556228 |
| 0.000153666 | 0.085421202 | 0.316647583 | 0.002159406 |
| 0.224521045 | 0.000827592 | 0.0032261   | 0.242029398 |
| 0.347230487 | 0.152777608 | 0.003043965 | 8.24E-05    |
| 0.003095835 | 0.006018987 | 0.326804042 | 0.085391432 |
| 0.121419813 | 0.146422206 | 0.027750337 | 0.314975846 |
| 0.006076636 | 0.032157043 | 0.216417071 | 0.281412062 |
| 3.36E-05    | 0.003514172 | 0.034727898 | 0.028130168 |
| 0.022379546 | 0.03290975  | 0.007930005 | 0.002296185 |
| 0.000280429 | 0.30541474  | 0.005936282 | 0.012133647 |
| 0.029065919 | 0.008527701 | 0.245412665 | 0.057611199 |
| 0.254904255 | 0.006073976 | 0.041447693 | 0.293493403 |
| 0.051914715 | 0.152339023 | 0.251673531 | 0.072534603 |
| 0.011913503 | 0.007795482 | 0.216190047 | 0.148808344 |
| 0.001916267 | 0.001908769 | 0.082694852 | 0.300038746 |
| 0.310538675 | 0.307725575 | 0.013816924 | 0.042394938 |
| 0.020838764 | 0.054078407 | 0.153444789 | 0.034720872 |
| 0.052246399 | 0.00753793  | 0.081153203 | 0.157023734 |
| 0.005686883 | 0.001772723 | 0.202118209 | 0.019077917 |
| 0.012553655 | 0.19530934  | 0.21250716  | 0.13465784  |
| 0.018207984 | 0.054218151 | 0.055206574 | 0.043723217 |
| 0.048118275 | 0.114913347 | 0.050888533 | 0.064158907 |
| 0.068713295 | 0.00138631  | 0.315709254 | 0.007510403 |
| 0.059991453 | 0.038279755 | 0.006360878 | 0.122249371 |
| 0.034730916 | 0.242189196 | 0.110393293 | 0.196411183 |
| 0.025283826 | 0.020457176 | 0.10773229  | 0.040862294 |
| 0.247603781 | 0.261950865 | 0.006463559 | 0.030701603 |
| 0.036795023 | 0.008690748 | 0.051418196 | 0.167463358 |

|             |             |             |             |
|-------------|-------------|-------------|-------------|
| 0.022890434 | 0.017417713 | 2.17E-05    | 0.00455766  |
| 0.155262381 | 0.079412652 | 0.000579753 | 0.023425053 |
| 0.003291125 | 0.002911105 | 0.270501031 | 0.023607598 |
| 0.271409042 | 0.000224798 | 0.009634072 | 0.022516848 |
| 0.177026136 | 0.106080451 | 0.016655572 | 0.239700767 |
| 0.036521077 | 0.352485618 | 0.122237435 | 0.016064905 |
| 0.11639564  | 0.012079354 | 0.018982993 | 0.203607485 |
| 0.280500116 | 0.321508295 | 0.23943172  | 0.031966144 |
| 0.110161368 | 0.027146653 | 0.052736245 | 0.085445916 |
| 0.078750883 | 0.002020455 | 0.249491352 | 2.87E-06    |
| 0.066622725 | 0.182759806 | 0.012563945 | 0.266969395 |
| 0.050860686 | 0.001487521 | 0.017774231 | 0.301205712 |
| 0.241513207 | 0.18271554  | 0.340893821 | 0.018603729 |
| 4.39E-05    | 0.227588357 | 0.127590377 | 0.348140321 |
| 0.062799646 | 0.086519694 | 0.002529859 | 0.282721039 |
| 0.098266556 | 0.171753731 | 0.155075276 | 0.168494894 |
| 0.0864148   | 0.020801599 | 0.114548375 | 0.000961208 |
| 0.036135103 | 0.222089173 | 0.02726862  | 0.069257821 |
| 0.008279381 | 0.264541306 | 0.065631104 | 0.076856232 |
| 0.035116738 | 0.111553845 | 0.004870043 | 0.016027408 |
| 0.274615315 | 0.008281296 | 0.20554141  | 0.309861685 |
| 0.057315817 | 0.309079535 | 0.293805364 | 0.050792149 |
| 0.126628757 | 0.268779565 | 0.242955708 | 3.88E-06    |
| 0.356126407 | 0.301128401 | 0.086492543 | 0.344419623 |
| 0.053167361 | 0.035920934 | 0.158579037 | 2.37E-06    |
| 0.011337237 | 1           | 0.208878985 | 0.306364986 |
| 0.000388487 | 0.016414994 | 0.220818736 | 0.274579087 |
| 0.002403364 | 0.287168194 | 0.085350434 | 0.253021475 |
| 0.099049948 | 0.023391107 | 0.330739161 | 0.113951416 |
| 0.033429106 | 0.003311593 | 0.194747147 | 0.094216431 |
| 0.003654169 | 0.016012694 | 0.283394214 | 0.216683046 |
| 0.117560234 | 0.032618171 | 0.002513996 | 0.261335604 |
| 0.078329161 | 0.273799074 | 0.002380094 | 0.15859251  |
| 0.098871793 | 0.204975047 | 0.289462491 | 0.135277054 |
| 0.158878173 | 0.125299532 | 0.233052789 | 0.031077429 |
| 0.329673394 | 0.32137784  | 0.003243513 | 0.158107361 |
| 0.299515928 | 0.18382841  | 0.025472644 | 0.088378503 |
| 0.065958233 | 0.028076667 | 0.054832913 | 0.21663545  |
| 0.32231833  | 0.001784166 | 0.004046472 | 0.16449665  |
| 0.01964587  | 0.007016692 | 0.039572953 | 0.046756157 |
| 0.052264261 | 0.006437231 | 0.091274797 | 0.210005073 |
| 0.068538369 | 0.307476015 | 0.033509246 | 0.308600125 |
| 0.000499071 | 0.185065697 | 0.011010692 | 0.037029035 |
| 0.233100768 | 0.299739703 | 0.012451075 | 0.003937161 |
| 0.004558326 | 0.159601529 | 0.146917472 | 0.002972738 |
| 0.015915343 | 0.046863022 | 0.103213819 | 0.337119093 |
| 0.051539701 | 0.046205757 | 0.042924267 | 0.141027225 |
| 0.028164824 | 0.217189482 | 0.054501762 | 0.151022584 |
| 0.06076234  | 0.20573616  | 0.000466937 | 0.210348529 |
| 0.028643707 | 0.030118206 | 0.135983092 | 0.32878018  |
| 0.008521714 | 0.124655312 | 0.007015512 | 0.021272529 |
| 3.18E-05    | 0.079293717 | 0.18513599  | 0.059418951 |
| 0.025907618 | 0.052367344 | 0.063583552 | 0.266226416 |
| 0.102249175 | 0.199297621 | 0.045526288 | 0.08327694  |

|             |             |             |             |
|-------------|-------------|-------------|-------------|
| 0.019850945 | 0.02344161  | 0.000422254 | 0.124509768 |
| 0.10162155  | 0.140711256 | 0.109349162 | 0.01378903  |
| 0.170672548 | 0.102063425 | 0.133099322 | 0.312399806 |
| 0.055298052 | 0.338861697 | 0.022274848 | 0.336609161 |
| 0.02564955  | 0.036805072 | 0.013518159 | 0.026729111 |
| 0.003971037 | 0.005581437 | 0.003910153 | 0.356954376 |
| 0.011926501 | 0.121132674 | 0.027262043 | 0.001634922 |
| 0.060186858 | 0.196662623 | 0.280619616 | 0.179534897 |
| 0.259719777 | 0.063481007 | 0.124844949 | 0.019456234 |
| 0.031781417 | 0.045036789 | 0.014548726 | 0.070377229 |
| 0.020607319 | 0.172599762 | 0.200073092 | 0.30338889  |
| 0.016562661 | 0.003565059 | 0.004357713 | 0.010630631 |
| 0.212203858 | 0.064776995 | 0.061569694 | 0.125226644 |
| 0.035072925 | 4.05E-06    | 0.011876019 | 0.104018016 |
| 0.046999187 |             |             |             |
| OSBPL3      | 0.39163514  | 0.492432581 | 0.151072737 |
| 0.030846512 | 0.180797663 | 0.371882513 | 0.347716332 |
| 0.396183933 | 0.229426635 | 0.208991714 | 0.450062172 |
| 0.005953842 | 0.355391731 | 0.047716112 | 0.170941799 |
| 0.475058541 | 0.484868801 | 0.452552088 | 0.484482124 |
| 0.422535154 | 0.17447223  | 0.471979371 | 0.448512797 |
| 0.396913631 | 0.007533694 | 0.212702159 | 0.063542137 |
| 0.377350731 | 0.455779959 | 0.359928881 | 0.362322614 |
| 0.420064887 | 0.410501192 | 0.418019475 | 0.348475429 |
| 0.20351103  | 0.504167317 | 0.120656532 | 0.400679293 |
| 0.347322993 | 0.324295586 | 0.428069289 | 0.048251998 |
| 0.002550444 | 0.201026843 | 0.343633036 | 0.477133767 |
| 0.437573531 | 0.353786253 | 0.326690368 | 0.266161322 |
| 0.132068626 | 0.475392095 | 0.455794554 | 0.127475698 |
| 0.496503198 | 0.004772187 | 0.504215987 | 0.329118472 |
| 0.162466169 | 0.462840518 | 0.370875283 | 0.476390573 |
| 0.388011825 | 0.501335019 | 0.497845379 | 0.082398598 |
| 0.165970783 | 0.458036637 | 0.373911204 | 0.440393712 |
| 0.490996995 | 0.384339474 | 0.400709542 | 0.347688227 |
| 0.424484757 | 0.376331854 | 0.443410319 | 0.332414794 |
| 0.003240925 | 0.253750419 | 0.342095964 | 0.360667548 |
| 0.355531931 | 0.474587681 | 0.420544461 | 0.323594186 |
| 0.420389592 | 0.061794315 | 0.486065602 | 0.498540616 |
| 0.035584101 | 0.400659991 | 0.01918464  | 0.30995875  |
| 0.439445462 | 0.410083825 | 0.450791181 | 0.151379643 |
| 0.048578428 | 0.272943503 | 0.217182846 | 0.342740435 |
| 0.485209337 | 0.492251586 | 0.496905676 | 0.138298464 |
| 0.302149202 | 0.286384819 | 0.475943103 | 0.499256514 |
| 0.46430639  | 0.030314435 | 0.310098293 | 0.364877107 |
| 0.362093783 | 0.172606655 | 0.372501523 | 0.041481542 |
| 0.020770884 | 0.044696243 | 0.422890199 | 0.304657527 |
| 0.178773172 | 0.33104454  | 0.127284889 | 0.437997462 |
| 0.385156011 | 0.401336273 | 0.205747813 | 0.377589237 |
| 0.401912566 | 0.378693922 | 0.427894924 | 0.447641898 |
| 0.382702142 | 0.397184236 | 0.285929467 | 0.505538749 |
| 0.504183147 | 0.152595533 | 0.18047652  | 0.445995966 |
| 0.324082121 | 0.460154545 | 0.512838632 | 0.424172971 |
| 0.345198985 | 0.409276791 | 0.347462194 | 0.461022828 |
| 0.393261388 | 0.459177338 | 0.102635355 | 0.48804753  |

|             |             |             |             |
|-------------|-------------|-------------|-------------|
| 0.495196278 | 0.045042208 | 0.158900592 | 0.453774522 |
| 0.06287546  | 0.363533189 | 0.495061479 | 0.494518045 |
| 0.480456916 | 0.052295963 | 0.301233205 | 0.382922646 |
| 0.437534505 | 0.367311915 | 0.485293242 | 0.269025941 |
| 0.450485555 | 0.341138992 | 0.119487002 | 0.315431754 |
| 0.253870012 | 0.467109375 | 0.279205038 | 0.086628612 |
| 0.43891533  | 0.445843248 | 0.487392482 | 0.478664341 |
| 0.410605383 | 0.003882801 | 0.202221249 | 0.418790086 |
| 0.333224452 | 0.363665234 | 0.498901754 | 0.242977686 |
| 0.41390544  | 0.325249744 | 0.290465938 | 0.396961988 |
| 0.429376187 | 0.295947585 | 0.271407732 | 0.002485018 |
| 0.259473291 | 0.335430811 | 0.479315236 | 0.132044722 |
| 0.321848587 | 0.219258159 | 0.198592476 | 0.476816054 |
| 0.34626552  | 0.454694825 | 0.072303724 | 0.19461664  |
| 0.391546037 | 0.488018037 | 0.380526517 | 0.333908998 |
| 0.47897654  | 0.392742475 | 0.365342891 | 0.494095885 |
| 0.381033186 | 0.454976108 | 0.186266615 | 0.428473317 |
| 0.421970334 | 0.475436613 | 0.420923624 | 0.471056141 |
| 0.396007295 | 0.428297124 | 0.319613489 | 0.418429284 |
| 0.479416542 | 0.497135058 | 0.189221942 | 0.502092797 |
| 0.003147038 | 0.47971057  | 0.454391072 | 0.190956118 |
| 0.495725011 | 0.365789813 | 0.168264197 | 0.393211486 |
| 0.492204177 | 0.506514643 | 0.453034545 | 0.385421809 |
| 0.258770408 | 0.037503682 | 0.47849245  | 0.496350643 |
| 0.458949292 | 0.4935729   | 0.308303394 | 0.122188901 |
| 0.475559824 | 0.367935941 | 0.453901596 | 0.406036955 |
| 0.449710059 | 0.386081449 | 0.414335994 | 0.385816951 |
| 0.024674397 | 0.353276547 | 0.412382752 | 0.221923284 |
| 0.358806837 | 0.278915385 | 0.475926796 | 0.468453541 |
| 0.395824451 | 0.318967498 | 0.343044581 | 0.169707761 |
| 0.325145422 | 0.495377172 | 0.049431605 | 0.479609371 |
| 0.503386936 | 0.493513286 | 0.471600881 | 0.498400585 |
| 0.440430486 | 0.49189623  | 0.483198825 | 0.404377986 |
| 0.00345587  | 0.360232765 | 0.340136092 | 0.476518833 |
| 0.414877016 | 0.425426031 | 0.278000885 | 0.373981121 |
| 0.005278136 | 0.295377713 | 0.208878985 | 1           |
| 0.463896181 | 0.078271219 | 0.043861568 | 0.490414089 |
| 0.353415831 | 0.063175179 | 0.51468427  | 0.421657294 |
| 0.493175482 | 0.490828558 | 0.283537564 | 0.359669217 |
| 0.171754452 | 0.441309891 | 0.052007166 | 0.468885983 |
| 0.439338421 | 0.120577473 | 0.115691251 | 0.501553738 |
| 0.476811614 | 0.490112009 | 0.409236214 | 0.013850795 |
| 0.333332477 | 0.199228151 | 0.458627657 | 0.236964952 |
| 0.497248063 | 0.482319545 | 0.508751701 | 0.406828318 |
| 0.487311335 | 0.495508469 | 0.481276765 | 0.48512784  |
| 0.119327046 | 0.372099861 | 0.395723838 | 0.109169901 |
| 0.368366703 | 0.469372103 | 0.407924727 | 0.304842399 |
| 0.487043414 | 0.091548194 | 0.345293311 | 0.411058713 |
| 0.503078918 | 0.456028431 | 0.134981028 | 0.321164372 |
| 0.489920525 | 0.450696295 | 0.224080474 | 0.484916976 |
| 0.426611033 | 0.140642753 | 0.179407014 | 0.492292831 |
| 0.504631548 | 0.422676326 | 0.441137207 | 0.188143586 |
| 0.43741719  | 0.140997545 | 0.464559447 | 0.397105134 |
| 0.432818822 | 0.363255713 | 0.32804408  | 0.137877025 |

|             |             |             |             |
|-------------|-------------|-------------|-------------|
| 0.034293961 | 0.222314102 | 0.480789064 | 0.498279591 |
| 0.172763458 | 0.346660567 | 0.366787399 | 0.431880388 |
| 0.456993803 | 0.423008294 | 0.419395597 | 0.468056082 |
| 0.497274982 | 0.123842175 | 0.502018329 | 0.454987968 |
| 0.476975013 | 0.418130866 | 0.487912328 | 0.015973244 |
| 0.435977499 | 0.236739994 | 0.260941158 | 0.411746736 |
| 0.394167718 | 0.250281216 | 0.478320136 | 0.308523292 |
| 0.196495548 | 0.010647302 | 0.484852656 | 0.320725392 |
| 0.419125597 | 0.317533536 | 0.478590787 | 0.127565232 |
| 0.525541926 | 0.46140813  | 0.446717808 | 0.289663181 |
| 0.438051842 | 0.017566897 | 0.229358458 | 0.093477606 |
| 0.477754542 | 0.502126768 | 0.444925494 | 0.401907525 |
| 0.289392645 | 0.480389562 | 0.498295222 | 0.434743028 |
| 0.46397872  | 0.151051826 | 0.482202593 | 0.448324845 |
| 0.316938763 | 0.439730159 | 0.413012935 | 0.445259262 |
| 0.315426928 | 0.210516203 | 0.252141647 | 0.296073388 |
| 0.435858875 | 0.428338309 | 0.447635842 | 0.362935553 |
| 0.106751751 | 0.465812281 | 0.427003701 | 0.402559376 |
| 0.45877414  | 0.354531691 | 0.39766697  | 0.493516626 |
| 0.350582619 | 0.408713917 | 0.059555536 | 0.043119617 |
| 0.246573924 | 0.311172301 | 0.454072527 | 0.480534479 |
| 0.481284144 | 0.321427751 | 0.209115527 | 0.281525897 |
| 0.135167307 | 0.362642306 | 0.388026083 | 0.153152198 |
| 0.490449217 | 0.333283104 | 0.002368232 | 0.359126138 |
| 0.491400718 | 0.387877874 |             |             |
| PACSIN1     | 0.30832259  | 0.490944494 | 0.068823848 |
| 0.0493443   | 0.15502083  | 0.233612025 | 0.241140738 |
| 0.335449512 | 0.098752352 | 0.156891135 | 0.324404995 |
| 0.000946096 | 0.388595661 | 0.010741226 | 0.068617615 |
| 0.510267495 | 0.530209482 | 0.363422533 | 0.510505717 |
| 0.285923468 | 0.179240143 | 0.334393692 | 0.382679066 |
| 0.25733504  | 0.001115586 | 0.14487489  | 0.069837273 |
| 0.35303219  | 0.505288845 | 0.192742908 | 0.284700133 |
| 0.444707479 | 0.471820084 | 0.425915906 | 0.389037825 |
| 0.311645796 | 0.436933609 | 0.170203761 | 0.451741122 |
| 0.399769158 | 0.258470351 | 0.444957697 | 0.011602232 |
| 0.008674307 | 0.112606172 | 0.314019754 | 0.363357843 |
| 0.274785614 | 0.216565872 | 0.163803275 | 0.200244766 |
| 0.187258057 | 0.346771979 | 0.357348792 | 0.19987426  |
| 0.402298591 | 0.008289006 | 0.425680274 | 0.215569076 |
| 0.063763403 | 0.292227095 | 0.332734654 | 0.38659326  |
| 0.252663853 | 0.413776075 | 0.518731186 | 0.040953288 |
| 0.07458581  | 0.411854529 | 0.407139594 | 0.450417676 |
| 0.44109462  | 0.352060437 | 0.314302473 | 0.400982351 |
| 0.441778935 | 0.390055014 | 0.273908974 | 0.177581104 |
| 0.00074794  | 0.167823051 | 0.399514587 | 0.301745568 |
| 0.419251464 | 0.35153007  | 0.363941232 | 0.247542024 |
| 0.432566509 | 0.017284203 | 0.367396855 | 0.531737049 |
| 0.028377674 | 0.399600685 | 0.015205778 | 0.156018948 |
| 0.418150236 | 0.473128855 | 0.382687593 | 0.078918236 |
| 0.012419057 | 0.114319976 | 0.119673143 | 0.412521169 |
| 0.380736196 | 0.456320608 | 0.394325419 | 0.153111373 |
| 0.370651108 | 0.148423752 | 0.362114303 | 0.439235624 |
| 0.471010686 | 0.00712563  | 0.140731444 | 0.228346551 |

|             |             |             |             |
|-------------|-------------|-------------|-------------|
| 0.352092979 | 0.171368836 | 0.245884462 | 0.047006463 |
| 0.016954055 | 0.016189565 | 0.462299108 | 0.147646179 |
| 0.117443633 | 0.214894036 | 0.111477795 | 0.480795392 |
| 0.328253842 | 0.419129873 | 0.155255456 | 0.270428348 |
| 0.450350244 | 0.273123856 | 0.46968299  | 0.454251169 |
| 0.446116636 | 0.228505674 | 0.140488762 | 0.453912957 |
| 0.388567724 | 0.074318579 | 0.07864594  | 0.318306726 |
| 0.375775631 | 0.492037382 | 0.531998867 | 0.290058944 |
| 0.323144155 | 0.230439253 | 0.315969168 | 0.412043785 |
| 0.252424015 | 0.317020176 | 0.098917104 | 0.34534395  |
| 0.391386269 | 0.044984878 | 0.063207993 | 0.418418377 |
| 0.098675393 | 0.263638164 | 0.413113794 | 0.465749908 |
| 0.456161388 | 0.05701147  | 0.263322297 | 0.26976741  |
| 0.27390899  | 0.263670043 | 0.383642557 | 0.242690328 |
| 0.298257555 | 0.332130784 | 0.052323089 | 0.374906306 |
| 0.124084077 | 0.308667817 | 0.293561491 | 0.071029509 |
| 0.373534608 | 0.324496066 | 0.450239883 | 0.398348186 |
| 0.379615457 | 0.008954752 | 0.159121511 | 0.330054616 |
| 0.286329731 | 0.391264873 | 0.492729125 | 0.112023677 |
| 0.235534196 | 0.331186593 | 0.138311982 | 0.39001508  |
| 0.357982202 | 0.234174079 | 0.205979179 | 0.000518445 |
| 0.15304383  | 0.380671151 | 0.405544424 | 0.041112534 |
| 0.283003054 | 0.098818408 | 0.100016519 | 0.454773617 |
| 0.200380784 | 0.479319451 | 0.020862202 | 0.14957466  |
| 0.260911326 | 0.438152159 | 0.429005626 | 0.237590911 |
| 0.471036065 | 0.322415874 | 0.437160264 | 0.368526659 |
| 0.31898321  | 0.346511208 | 0.174141436 | 0.248884736 |
| 0.461407535 | 0.468329918 | 0.450972791 | 0.469858739 |
| 0.261159096 | 0.346447294 | 0.326131122 | 0.268335815 |
| 0.369351122 | 0.396057612 | 0.078982832 | 0.497327739 |
| 0.000453499 | 0.338597528 | 0.462320615 | 0.175825201 |
| 0.483407245 | 0.256903007 | 0.062408957 | 0.224288929 |
| 0.519312597 | 0.495772093 | 0.38612276  | 0.441125432 |
| 0.227025745 | 0.007587089 | 0.457594018 | 0.388955089 |
| 0.51474721  | 0.404199446 | 0.416437712 | 0.077801963 |
| 0.485453172 | 0.325141726 | 0.404004901 | 0.395977073 |
| 0.466651688 | 0.435738166 | 0.232648567 | 0.319253634 |
| 0.01376048  | 0.243300384 | 0.408848627 | 0.212908103 |
| 0.333374566 | 0.170746056 | 0.46768731  | 0.315790284 |
| 0.457458663 | 0.297190847 | 0.405300585 | 0.090820097 |
| 0.176442723 | 0.496408098 | 0.070283094 | 0.432550606 |
| 0.530117138 | 0.352840037 | 0.481434799 | 0.515550518 |
| 0.291019146 | 0.384079393 | 0.456716935 | 0.421310452 |
| 0.000653061 | 0.438405061 | 0.399589482 | 0.328788884 |
| 0.451487515 | 0.276088815 | 0.22277543  | 0.44866342  |
| 0.001096676 | 0.14451257  | 0.306364986 | 0.463896181 |
| 1           | 0.029619127 | 0.077072909 | 0.469240697 |
| 0.412330233 | 0.052066796 | 0.519564216 | 0.338155056 |
| 0.46651829  | 0.450544584 | 0.181528353 | 0.407406058 |
| 0.259585449 | 0.363439589 | 0.043316844 | 0.460168901 |
| 0.426876926 | 0.074686082 | 0.10915911  | 0.513147108 |
| 0.416608872 | 0.397313111 | 0.247016026 | 0.00991286  |
| 0.369784276 | 0.2613371   | 0.474050406 | 0.120287289 |
| 0.407446565 | 0.353236826 | 0.447627845 | 0.435012845 |



|             |             |             |             |
|-------------|-------------|-------------|-------------|
| 0.438122223 | 0.40462637  | 0.36331798  | 0.444896357 |
| 0.170950999 | 0.401763052 | 0.428506783 | 0.065537617 |
| 0.358192392 | 0.487560694 | 0.431772677 | 0.182327447 |
| 0.3482009   | 0.152399698 | 0.200037221 | 0.287826835 |
| 0.450395593 | 0.480018552 | 0.055600949 | 0.150572696 |
| 0.404248296 | 0.290231991 | 0.116310564 | 0.340235802 |
| 0.262721119 | 0.184525435 | 0.13150131  | 0.352592123 |
| 0.443186883 | 0.296365782 | 0.44222198  | 0.18920243  |
| 0.471901858 | 0.046829674 | 0.409990319 | 0.277984833 |
| 0.26349353  | 0.388139985 | 0.385727859 | 0.115579039 |
| 0.02420969  | 0.108812406 | 0.400347381 | 0.389995471 |
| 0.075802665 | 0.179301659 | 0.270538076 | 0.378580985 |
| 0.50780297  | 0.432998033 | 0.270038913 | 0.327534439 |
| 0.384487864 | 0.137546683 | 0.461238476 | 0.309304447 |
| 0.37937355  | 0.353379698 | 0.447216242 | 0.008851065 |
| 0.441488871 | 0.185369385 | 0.184397749 | 0.40554523  |
| 0.452384082 | 0.136380981 | 0.397229643 | 0.147695702 |
| 0.199436585 | 0.003394574 | 0.335823956 | 0.424504829 |
| 0.271605336 | 0.298354668 | 0.34690259  | 0.212272003 |
| 0.51688057  | 0.373750455 | 0.389174825 | 0.303809134 |
| 0.396342768 | 0.044759973 | 0.170416151 | 0.030928485 |
| 0.361742751 | 0.368028435 | 0.384374779 | 0.349021002 |
| 0.173868231 | 0.471048289 | 0.383997479 | 0.463747203 |
| 0.480658962 | 0.196589011 | 0.525383661 | 0.280728106 |
| 0.396691356 | 0.374012962 | 0.252519238 | 0.32294536  |
| 0.225414837 | 0.121558483 | 0.120469951 | 0.134073018 |
| 0.495453141 | 0.313906803 | 0.423788115 | 0.285809534 |
| 0.053436676 | 0.405550307 | 0.407069377 | 0.43035815  |
| 0.434698174 | 0.373056334 | 0.382114957 | 0.374466104 |
| 0.273806367 | 0.257691609 | 0.088259929 | 0.046338813 |
| 0.302766949 | 0.192917122 | 0.37482711  | 0.424015066 |
| 0.512202582 | 0.263793259 | 0.094682483 | 0.121345007 |
| 0.148013131 | 0.349179862 | 0.288668864 | 0.254622462 |
| 0.439379742 | 0.286712115 | 0.000560824 | 0.198370203 |
| 0.362571595 | 0.420526024 |             |             |
| PCYT1A      | 0.020916238 | 0.061941313 | 0.051984147 |
| 0.000531145 | 0.014198453 | 0.229989017 | 0.182537492 |
| 0.011167714 | 0.081425205 | 0.050875888 | 0.171295188 |
| 0.000986832 | 0.009082551 | 0.013694018 | 0.018219749 |
| 0.028360103 | 0.028972104 | 0.10061031  | 0.030851186 |
| 0.035010789 | 0.004716684 | 0.082381858 | 0.060512518 |
| 0.182967892 | 0.003364061 | 0.13635459  | 0.004357405 |
| 0.006352195 | 0.021082839 | 0.17528352  | 0.019855701 |
| 0.024943238 | 0.015796036 | 0.011763642 | 0.004351234 |
| 0.000525855 | 0.090237489 | 0.000143181 | 0.012265715 |
| 0.010678453 | 0.075998714 | 0.018979225 | 0.037308113 |
| 4.06E-06    | 0.141600827 | 0.00529133  | 0.070497043 |
| 0.044127198 | 0.216180327 | 0.197095712 | 0.10923709  |
| 4.52E-05    | 0.15043393  | 0.04617221  | 6.61E-05    |
| 0.000132212 | 0.104687663 | 0.01236262  | 0.174023325 |
| 0.087249455 | 0.011987541 | 0.051629567 | 0.238741481 |
| 0.1167105   | 0.0450638   | 0.045993838 | 0.276982892 |
| 0.019284347 | 0.010732434 | 0.033668603 | 0.055977655 |
| 0.007350986 | 0.034423704 | 0.004246489 | 0.017256644 |

|             |             |             |             |
|-------------|-------------|-------------|-------------|
| 0.011474907 | 0.178580444 | 0.055489469 | 0.00151571  |
| 0.179508051 | 0.011183004 | 0.017856272 | 0.005404222 |
| 0.14995281  | 0.019583409 | 0.071828046 | 0.011045732 |
| 0.037815928 | 0.06882585  | 0.036600285 | 0.002875053 |
| 0.015850989 | 0.00097145  | 0.041816759 | 0.024160444 |
| 0.0140406   | 0.034886385 | 0.100773001 | 0.020642573 |
| 0.09056883  | 0.003169566 | 0.007824369 | 0.038784023 |
| 0.026804715 | 0.132724573 | 0.000456424 | 0.005390318 |
| 0.027410437 | 0.046519088 | 0.09284164  | 0.042785445 |
| 0.006379409 | 0.044769462 | 0.21300075  | 0.002805396 |
| 0.005061098 | 0.181758792 | 7.57E-05    | 0.001978296 |
| 0.000552143 | 0.021692526 | 0.073539313 | 0.122901358 |
| 0.1747246   | 0.006217305 | 0.020238049 | 0.008917485 |
| 0.019264556 | 0.035951832 | 0.12401191  | 0.010986921 |
| 0.168607411 | 0.019353255 | 0.021171344 | 0.007917085 |
| 0.030531826 | 0.10809748  | 0.07338085  | 0.104719678 |
| 0.036598473 | 0.059880981 | 0.139720885 | 0.006378327 |
| 0.028833126 | 0.044097841 | 0.01560177  | 0.039912999 |
| 0.128310043 | 0.01379463  | 0.074149423 | 0.192796171 |
| 0.04494672  | 7.91E-05    | 0.137024069 | 0.136116137 |
| 0.000140406 | 0.178196789 | 0.026751294 | 0.001739155 |
| 0.021601382 | 0.0792678   | 0.043606974 | 0.025923481 |
| 0.0035825   | 0.04357091  | 0.154324071 | 0.121601543 |
| 0.117411492 | 0.057820808 | 0.03269     | 0.140552527 |
| 0.012522873 | 0.158980911 | 0.006127859 | 0.213215556 |
| 0.096108879 | 0.001085195 | 0.001010362 | 0.02126458  |
| 0.021810662 | 0.049835895 | 0.03607264  | 0.01955293  |
| 7.51E-05    | 0.041279089 | 0.03043116  | 0.010675202 |
| 0.012436388 | 0.071632588 | 0.260566099 | 0.148432734 |
| 0.00304494  | 0.211527227 | 0.025775203 | 0.033662597 |
| 0.015913147 | 0.018075613 | 0.002837413 | 0.029197153 |
| 0.004110504 | 0.02697086  | 0.02391482  | 0.029019755 |
| 0.028286437 | 0.0026266   | 0.041586536 | 0.201662792 |
| 0.022906135 | 0.004447659 | 0.001675927 | 0.061252524 |
| 0.07931346  | 0.006164674 | 0.004918592 | 0.04583293  |
| 0.02368239  | 0.009243468 | 0.132789115 | 0.023110386 |
| 0.144953191 | 0.000353571 | 0.081578556 | 0.010558276 |
| 0.036752703 | 0.015883594 | 0.029422383 | 0.110236599 |
| 0.028369152 | 0.000677515 | 0.185874869 | 0.041994093 |
| 0.038487651 | 0.076232499 | 0.061912749 | 0.004965474 |
| 0.108956011 | 0.026792421 | 0.000388424 | 0.064694615 |
| 0.19614784  | 0.130194741 | 0.051632493 | 0.031696958 |
| 0.063739878 | 0.040543025 | 0.013298937 | 0.000737885 |
| 0.007989582 | 0.051108991 | 0.094390174 | 0.021420034 |
| 0.043682718 | 0.002511171 | 0.000541034 | 0.036568834 |
| 0.010368449 | 0.043073466 | 0.011692771 | 0.018905974 |
| 0.005427363 | 0.132220589 | 0.018966137 | 0.000183072 |
| 0.071354626 | 0.01677058  | 0.003619471 | 0.021969866 |
| 0.012585355 | 0.039146596 | 0.165643738 | 0.006480635 |
| 0.002371585 | 0.007657668 | 0.15760409  | 0.254490821 |
| 0.058855418 | 6.25E-05    | 0.05192228  | 0.038171162 |
| 0.072435949 | 0.036191567 | 0.03700927  | 0.075552952 |
| 0.133556769 | 0.044998013 | 0.020866205 | 0.000410531 |
| 0.010369302 | 0.006526093 | 0.171930118 | 0.019608686 |

|             |             |             |             |
|-------------|-------------|-------------|-------------|
| 0.171124203 | 0.004590273 | 0.004351204 | 0.00309148  |
| 0.214695723 | 0.000388487 | 0.078271219 | 0.029619127 |
| 1           | 2.03E-05    | 0.039460351 | 0.000229952 |
| 0.050696545 | 0.079757488 | 0.056342083 | 0.03351908  |
| 0.173858665 | 0.009113585 | 0.000249628 | 0.01133446  |
| 0.007559342 | 0.037901054 | 0.013892774 | 0.000622429 |
| 0.02082676  | 0.04062119  | 0.049514086 | 0.111475561 |
| 0.188745592 | 0.001702803 | 0.010176893 | 0.000871514 |
| 0.027897554 | 0.016619683 | 0.062807054 | 0.14983995  |
| 0.07380091  | 0.014660626 | 0.030378155 | 0.104666151 |
| 0.135055472 | 0.04731918  | 0.000362851 | 0.010652292 |
| 0.016841788 | 0.013665618 | 0.009469714 | 0.033939142 |
| 0.019102602 | 0.251464962 | 0.084211461 | 0.000575929 |
| 0.253784041 | 0.03031025  | 0.076738397 | 0.03172484  |
| 0.162749231 | 0.045060076 | 0.1127218   | 0.062126628 |
| 0.234355469 | 0.060833347 | 0.203028311 | 7.85E-05    |
| 0.000927524 | 0.119451807 | 0.093930992 | 0.201390432 |
| 0.02851439  | 0.011176589 | 0.021638562 | 0.066149909 |
| 0.035641633 | 0.024690192 | 0.11899071  | 0.007966418 |
| 0.008023491 | 0.000210643 | 0.002919136 | 0.012012756 |
| 0.118193463 | 0.128330184 | 0.173782503 | 0.172758787 |
| 0.106957877 | 0.080727604 | 0.02425517  | 0.005160735 |
| 0.181748446 | 0.048151127 | 0.142697747 | 0.004421063 |
| 0.079567892 | 0.065787782 | 0.062035584 | 0.043985483 |
| 0.042361142 | 0.005194412 | 0.016365602 | 0.046797813 |
| 0.006769735 | 0.045875375 | 0.012728097 | 0.14135277  |
| 0.107852609 | 0.097494165 | 0.001054689 | 0.000725886 |
| 0.104066651 | 0.003059633 | 0.225626981 | 0.001800783 |
| 0.045589294 | 6.70E-05    | 0.063723787 | 0.042372297 |
| 0.038082001 | 0.002449265 | 0.033919025 | 8.92E-06    |
| 0.070566056 | 0.025538408 | 0.070422932 | 0.120545621 |
| 0.024870864 | 0.016287071 | 0.00943939  | 0.033611276 |
| 0.09980357  | 0.023866698 | 0.032664344 | 0.000204219 |
| 0.03100442  | 0.046494691 | 0.006745996 | 0.008965337 |
| 0.214694779 | 0.014891094 | 0.133007961 | 0.005987463 |
| 0.226798669 | 0.029451827 | 0.022689596 | 0.013673477 |
| 0.046367751 | 0.006817277 | 0.053012364 | 0.031833366 |
| 0.020291025 | 0.013189338 | 0.031339219 | 0.009338357 |
| 0.00586982  | 0.148150341 | 0.004500241 | 0.043594149 |
| 0.000879873 | 0.003837568 | 0.001504938 | 0.123615649 |
| 0.04226382  | 0.040844516 | 0.033255353 | 0.002955805 |
| 0.168240234 | 0.09011529  | 0.000215268 | 0.012475036 |
| 0.170279424 | 0.000200285 | 0.036577777 | 0.004582022 |
| 0.000923327 | 0.029038868 | 0.118006852 | 0.002203076 |
| PDE2A       | 0.009586734 | 0.050407723 | 5.34E-05    |
| 0.001506188 | 0.003752659 | 0.005804884 | 0.009679796 |
| 0.000128158 | 0.00062521  | 0.010815983 | 3.87E-08    |
| 0.123554001 | 1.26E-06    | 0.000103457 | 0.065133505 |
| 0.08309411  | 0.022661155 | 0.081627219 | 0.005493475 |
| 0.000623764 | 0.010958508 | 0.009592836 | 0.0047542   |
| 1.44E-08    | 0.00144546  | 0.000185859 | 0.01744994  |
| 0.080979708 | 0.001927076 | 0.001019114 | 0.053872614 |
| 0.098970841 | 0.010336157 | 0.009767054 | 0.044413769 |
| 0.031586662 | 0.055101075 | 0.128639736 | 0.102548171 |

|             |             |             |             |             |
|-------------|-------------|-------------|-------------|-------------|
| 0.004011144 | 0.078130391 | 2.39E-06    | 0.000967802 |             |
| 0.000579067 | 0.011154039 | 0.01085222  | 0.006275291 |             |
| 0.002616816 | 0.001685908 | 0.003039351 | 0.002962641 |             |
| 0.013498758 | 0.024172762 | 0.016935638 | 0.027850436 |             |
| 2.47E-05    | 0.033446769 | 0.002749252 | 0.00015816  |             |
| 0.007207733 | 0.016977088 | 0.017382784 | 0.006249993 |             |
| 0.030504104 | 0.072078236 | 3.57E-05    | 0.0002646   |             |
| 0.027420579 | 0.059383923 | 0.028021667 | 0.042744657 |             |
| 0.001442906 | 0.002744252 | 0.098737054 | 0.052911319 |             |
| 0.07052104  | 0.008316261 | 0.000955303 | 2.64E-08    |             |
| 0.002186974 | 0.022960584 | 0.024886609 | 0.074859459 |             |
| 0.014467046 | 0.02248587  | 0.004935498 | 0.018172343 |             |
| 2.17E-06    | 0.010204811 | 0.071497258 | 1.63E-05    | 0.094840193 |
| 3.59E-05    | 0.000718667 | 0.044590265 | 0.087606312 |             |
| 0.017773899 | 0.00016742  | 1.45E-06    | 0.00049659  |             |
| 0.000352238 | 0.112107217 | 0.017408682 | 0.023083811 |             |
| 0.027529086 | 0.058792384 | 0.137429929 | 0.000205166 |             |
| 0.010899101 | 0.030275823 | 0.046122592 | 1.47E-06    |             |
| 0.000532348 | 0.003792089 | 0.006269621 | 0.000749072 |             |
| 0.006172781 | 4.40E-05    | 4.44E-06    | 1.77E-05    | 0.070314958 |
| 0.000491699 | 0.000786793 | 0.00257196  | 0.000107787 |             |
| 0.057191521 | 0.010585943 | 0.070333918 | 0.002708199 |             |
| 0.004504266 | 0.074465636 | 0.007712352 | 0.034054844 |             |
| 0.054242579 | 0.05935172  | 0.00224594  | 0.000464118 |             |
| 0.055741826 | 0.027234166 | 8.10E-05    | 5.71E-05    | 0.00728162  |
| 0.150927002 | 0.063588426 | 0.063820415 | 0.002244924 |             |
| 0.014194602 | 0.003833361 | 0.003149884 | 0.017934455 |             |
| 0.007183589 | 0.014005348 | 0.002083667 | 0.017509699 |             |
| 0.024003885 | 8.90E-05    | 0.000105892 | 0.050249152 |             |
| 0.001815871 | 0.003214335 | 0.027079509 | 0.056393198 |             |
| 0.068881532 | 0.000102127 | 0.002415458 | 0.004911605 |             |
| 0.004705065 | 0.003252953 | 0.023222714 | 0.002031809 |             |
| 0.00639164  | 0.003398905 | 0.000120415 | 0.14427805  |             |
| 0.000743778 | 0.007998571 | 0.004555371 | 0.000335088 |             |
| 0.030570125 | 0.008298035 | 0.035972394 | 0.020793497 |             |
| 0.031649327 | 3.04E-05    | 0.000553101 | 0.011819284 |             |
| 0.001912649 | 0.095234181 | 0.04731253  | 0.000743588 |             |
| 0.004055885 | 0.072389014 | 0.001022498 | 0.028191617 |             |
| 0.039042968 | 0.000680001 | 0.000528283 | 1.53E-06    |             |
| 0.000597391 | 0.011694553 | 0.031464175 | 2.29E-05    |             |
| 0.004554334 | 6.24E-05    | 0.000181332 | 0.048858485 |             |
| 0.002102201 | 0.098799904 | 7.85E-06    | 0.015402659 |             |
| 0.001700034 | 0.038024233 | 0.010246984 | 0.000682486 |             |
| 0.051299607 | 0.001837351 | 0.09368874  | 0.019510913 |             |
| 0.015436455 | 0.010993671 | 0.016998291 | 0.003968317 |             |
| 0.052878646 | 0.071960291 | 0.064596752 | 0.087274161 |             |
| 0.003613031 | 0.036814941 | 0.003297638 | 0.00515659  |             |
| 0.012087542 | 0.02653638  | 8.99E-05    | 0.058653363 | 7.08E-07    |
| 0.010219747 | 0.029830888 | 0.006656004 | 0.045461538 |             |
| 0.007039785 | 8.81E-05    | 0.002085682 | 0.079501981 |             |
| 0.058430003 | 0.044589631 | 0.070054881 | 0.001992118 |             |
| 7.28E-07    | 0.050434541 | 0.021769357 | 0.088437892 |             |
| 0.025882094 | 0.075853313 | 0.001941767 | 0.060370984 |             |
| 0.039341634 | 0.01653408  | 0.014784832 | 0.080533521 |             |

|                      |                      |                      |             |
|----------------------|----------------------|----------------------|-------------|
| 0.10305778           | 0.005153956          | 0.0361535            | 1.54E-05    |
| 0.001445464          | 0.019820021          | 0.000575448          | 0.003288008 |
| 0.000197603          | 0.064555302          | 0.013216568          | 0.044000424 |
| 0.001383547          | 0.019237363          | 0.000397464          | 0.0026376   |
| 0.045909475          | 0.039555631          | 0.043284488          | 0.06964123  |
| 0.024665744          | 0.059008872          | 0.064438072          | 0.00411302  |
| 0.02443666           | 0.046323101          | 0.076693859          | 4.35E-08    |
| 0.106830653          | 0.147092842          | 0.014278406          | 0.055536336 |
| 0.005770721          | 0.017806493          | 0.0613012            | 1.19E-05    |
| 0.000951333          | 0.016414994          | 0.043861568          | 0.077072909 |
| 2.03E-05 1           | 0.052684738          | 0.114157779          | 0.000649731 |
| 0.05480852           | 0.006536443          | 0.049754446          | 0.035826644 |
| 0.001658381          | 0.111090824          | 0.023314973          | 0.020887324 |
| 0.000226836          | 0.02896207           | 0.073262581          | 0.001121001 |
| 0.000693053          | 0.068492159          | 0.025934642          | 0.027714144 |
| 0.005252038          | 3.37E-07 0.068941597 | 0.001659404          |             |
| 0.046928415          | 0.000254423          | 0.027367296          | 0.017117257 |
| 0.048788038          | 0.096838617          | 0.036927353          | 0.023673736 |
| 0.014652969          | 0.03315484           | 0.001470663          | 0.056851331 |
| 0.056554409          | 1.49E-05 0.028096165 | 0.072495371          |             |
| 0.020757389          | 0.002394197          | 0.012451102          | 0.002671011 |
| 0.002631441          | 0.009171024          | 0.042749002          | 0.063406345 |
| 6.90E-05 0.000867769 | 0.022970175          | 0.004080683          |             |
| 0.001185782          | 0.016935579          | 0.006239824          | 0.003172298 |
| 0.010025615          | 0.016807998          | 0.035562141          | 0.009964296 |
| 0.041617601          | 0.000858757          | 0.096254631          | 5.50E-05    |
| 0.063383465          | 0.003305359          | 0.004770564          | 0.024535012 |
| 0.08214646           | 0.000398274          | 2.81E-06 6.71E-05    | 0.023765193 |
| 0.022639983          | 0.000175546          | 0.001659795          | 0.00379595  |
| 0.016433934          | 0.074049373          | 0.005685978          | 0.0056435   |
| 0.008975678          | 0.024749598          | 0.000739071          | 0.037527892 |
| 0.005390962          | 0.018495725          | 0.006275135          | 0.049910659 |
| 1.00E-05 0.045885456 | 0.000793185          | 0.008883516          |             |
| 0.020140698          | 0.089171583          | 0.000572017          | 0.027813823 |
| 0.000565726          | 0.000472481          | 1.62E-06 0.014384279 |             |
| 0.105072081          | 0.006770887          | 0.012845129          | 0.010387958 |
| 0.028110712          | 0.052066539          | 0.009056897          | 0.022020947 |
| 0.095946967          | 0.007070472          | 0.019340225          | 0.001112033 |
| 5.72E-06 0.015740596 | 0.022950376          | 0.028463528          |             |
| 0.010552346          | 0.002535489          | 0.059127099          | 0.022337538 |
| 0.040839717          | 0.072850184          | 0.000612347          | 0.067190423 |
| 0.01118407           | 0.128673675          | 0.003075097          | 0.006335671 |
| 0.004833774          | 0.006289319          | 0.000757 0.000860748 |             |
| 0.000519967          | 0.079748914          | 0.02207429           | 0.023392506 |
| 0.001479052          | 4.04E-05 0.010106614 | 0.06730738           |             |
| 0.074619083          | 0.017664781          | 0.038275227          | 0.015396623 |
| 0.022383386          | 0.001615728          | 0.003359398          | 0.000601514 |
| 7.80E-05 0.003084205 | 0.001199514          | 0.035909918          |             |
| 0.046822259          | 0.080387895          | 0.005243555          | 0.000260171 |
| 0.000445487          | 0.026941632          | 0.047506897          | 0.009339494 |
| 0.023991607          | 0.049638087          | 0.011522429          | 9.82E-09    |
| 0.001478297          | 0.014976992          | 0.005825743          |             |
| PDE4D 0.268216113    | 0.501548012          | 0.084955608          |             |
| 0.038338071          | 0.163353993          | 0.243265896          | 0.248870226 |

|             |             |             |             |
|-------------|-------------|-------------|-------------|
| 0.293715655 | 0.115564428 | 0.153374753 | 0.321825523 |
| 0.001410398 | 0.357792538 | 0.015660133 | 0.087391856 |
| 0.497699002 | 0.515480301 | 0.351725308 | 0.505367207 |
| 0.271679945 | 0.151072673 | 0.321008109 | 0.347620662 |
| 0.261892084 | 0.001820203 | 0.156211159 | 0.058218454 |
| 0.30323551  | 0.488184415 | 0.214258257 | 0.272824407 |
| 0.429428399 | 0.447563493 | 0.353024295 | 0.337219746 |
| 0.221825682 | 0.46735491  | 0.127857324 | 0.370504383 |
| 0.372861541 | 0.257059456 | 0.424765386 | 0.016762615 |
| 0.00453035  | 0.129694375 | 0.268106776 | 0.337527758 |
| 0.27508513  | 0.228239002 | 0.188411091 | 0.199806606 |
| 0.131006807 | 0.338505242 | 0.333928361 | 0.137377752 |
| 0.418541066 | 0.005500801 | 0.455915597 | 0.20115441  |
| 0.082067724 | 0.292596259 | 0.272273773 | 0.346384374 |
| 0.262150029 | 0.443071893 | 0.520159953 | 0.048824373 |
| 0.091522094 | 0.353409323 | 0.348147146 | 0.380663312 |
| 0.449759735 | 0.320474543 | 0.306523237 | 0.317721756 |
| 0.358002074 | 0.366045764 | 0.285922999 | 0.205109784 |
| 0.00099071  | 0.179806951 | 0.330648414 | 0.254667285 |
| 0.329668993 | 0.341400583 | 0.31069922  | 0.24285827  |
| 0.353784487 | 0.026706791 | 0.353856507 | 0.526585796 |
| 0.026715391 | 0.352971041 | 0.015588685 | 0.185723381 |
| 0.389624186 | 0.443388996 | 0.332433105 | 0.09098844  |
| 0.018636331 | 0.140283413 | 0.115642272 | 0.377713984 |
| 0.341508121 | 0.394733974 | 0.397036456 | 0.119378149 |
| 0.336643539 | 0.15565163  | 0.348573434 | 0.465299456 |
| 0.470028237 | 0.012375039 | 0.16419877  | 0.243604792 |
| 0.292707306 | 0.146144366 | 0.260322238 | 0.03955839  |
| 0.01749191  | 0.019510478 | 0.44513375  | 0.170101901 |
| 0.126507041 | 0.225336662 | 0.112664822 | 0.396003409 |
| 0.288846033 | 0.404340959 | 0.166305201 | 0.270091284 |
| 0.364101979 | 0.27510874  | 0.401089102 | 0.377421267 |
| 0.37819279  | 0.230948966 | 0.161365988 | 0.466439482 |
| 0.419438537 | 0.092005348 | 0.094124192 | 0.313829353 |
| 0.33373466  | 0.483138868 | 0.53204563  | 0.286635937 |
| 0.307080176 | 0.247577763 | 0.261392084 | 0.37627003  |
| 0.267608691 | 0.308827841 | 0.085676579 | 0.343125083 |
| 0.418658383 | 0.040120196 | 0.081383735 | 0.375314611 |
| 0.084869171 | 0.259883951 | 0.430925932 | 0.403281438 |
| 0.397366101 | 0.047220895 | 0.243134036 | 0.266575635 |
| 0.276228471 | 0.264345936 | 0.34662499  | 0.217307557 |
| 0.299300787 | 0.272845795 | 0.067224128 | 0.340476617 |
| 0.147774845 | 0.305737891 | 0.224428968 | 0.059640755 |
| 0.324058737 | 0.311691119 | 0.429283341 | 0.358856417 |
| 0.313427035 | 0.005916466 | 0.153238755 | 0.288156249 |
| 0.237262639 | 0.375906114 | 0.508556468 | 0.135698245 |
| 0.250843612 | 0.268477118 | 0.163829599 | 0.354277721 |
| 0.357322789 | 0.210104514 | 0.193754624 | 0.000764844 |
| 0.173923337 | 0.293539031 | 0.356716583 | 0.053495078 |
| 0.274070406 | 0.113440843 | 0.109137614 | 0.448522148 |
| 0.219411796 | 0.409269582 | 0.028014652 | 0.133768411 |
| 0.269086517 | 0.395081641 | 0.350703601 | 0.210310124 |
| 0.403927942 | 0.297620946 | 0.402800472 | 0.357063495 |
| 0.311041953 | 0.331863629 | 0.13896044  | 0.253818739 |

|             |             |             |             |
|-------------|-------------|-------------|-------------|
| 0.380240502 | 0.463037662 | 0.404743561 | 0.418821019 |
| 0.265142394 | 0.311494538 | 0.282248092 | 0.276183536 |
| 0.345428809 | 0.371748435 | 0.097875072 | 0.513941556 |
| 0.000830007 | 0.336187794 | 0.391770327 | 0.140061178 |
| 0.496981853 | 0.26341905  | 0.080434316 | 0.236446406 |
| 0.514203034 | 0.515318753 | 0.39865648  | 0.415574446 |
| 0.188133013 | 0.012170102 | 0.471007012 | 0.35721711  |
| 0.49346428  | 0.374711102 | 0.330641317 | 0.079409255 |
| 0.487087728 | 0.281111046 | 0.349189038 | 0.328561838 |
| 0.391702243 | 0.360650931 | 0.252386484 | 0.277496554 |
| 0.011904038 | 0.238406265 | 0.336846232 | 0.178313255 |
| 0.28909512  | 0.164549192 | 0.428813669 | 0.32085924  |
| 0.378754575 | 0.244364904 | 0.322742007 | 0.108019091 |
| 0.198877682 | 0.507883136 | 0.053763407 | 0.449123624 |
| 0.528887501 | 0.340846854 | 0.476768234 | 0.515839894 |
| 0.285123511 | 0.363554504 | 0.462298464 | 0.41295555  |
| 0.001022222 | 0.40367403  | 0.329660142 | 0.326695513 |
| 0.428946516 | 0.278210089 | 0.195519843 | 0.359968841 |
| 0.001755625 | 0.166489033 | 0.220818736 | 0.490414089 |
| 0.469240697 | 0.039460351 | 0.052684738 | 1           |
| 0.326071881 | 0.049502584 | 0.527264248 | 0.31581235  |
| 0.460531176 | 0.410473084 | 0.19023448  | 0.367431182 |
| 0.179698052 | 0.334139579 | 0.04427033  | 0.40106653  |
| 0.362670078 | 0.064076136 | 0.100629364 | 0.513851219 |
| 0.404240762 | 0.376014526 | 0.262232934 | 0.008352567 |
| 0.345158232 | 0.201328952 | 0.395385166 | 0.146249722 |
| 0.387872202 | 0.342748545 | 0.460907194 | 0.387218421 |
| 0.380080894 | 0.386901789 | 0.346518745 | 0.415963357 |
| 0.143014031 | 0.36469893  | 0.405868816 | 0.077056344 |
| 0.290359648 | 0.480548688 | 0.354836674 | 0.198924107 |
| 0.331288739 | 0.117779122 | 0.217868138 | 0.269068987 |
| 0.456052051 | 0.467080628 | 0.069569733 | 0.177758917 |
| 0.389755521 | 0.294587574 | 0.136621066 | 0.342137912 |
| 0.272051095 | 0.129672515 | 0.115907211 | 0.339250514 |
| 0.470675059 | 0.300304279 | 0.430339662 | 0.161298106 |
| 0.458555896 | 0.066013017 | 0.399322301 | 0.288360115 |
| 0.271648368 | 0.306809816 | 0.354667537 | 0.098082024 |
| 0.021003453 | 0.117703817 | 0.373026243 | 0.39596386  |
| 0.095971391 | 0.202168184 | 0.27228127  | 0.354024217 |
| 0.490917275 | 0.372923101 | 0.280535428 | 0.325554701 |
| 0.405875259 | 0.111622418 | 0.487477429 | 0.29928025  |
| 0.341864716 | 0.329756152 | 0.395900638 | 0.00869128  |
| 0.36127845  | 0.176422461 | 0.165153036 | 0.356614947 |
| 0.422354429 | 0.156484622 | 0.372505227 | 0.166417005 |
| 0.167329215 | 0.005014059 | 0.329702467 | 0.327309443 |
| 0.279338246 | 0.258738218 | 0.334870266 | 0.14242283  |
| 0.531466637 | 0.336353595 | 0.337059359 | 0.247594246 |
| 0.357348802 | 0.029276488 | 0.165937357 | 0.042443216 |
| 0.333587081 | 0.353332121 | 0.331097914 | 0.296205334 |
| 0.166511904 | 0.407742482 | 0.365569942 | 0.401082854 |
| 0.470926225 | 0.144802754 | 0.514003424 | 0.283615128 |
| 0.358822152 | 0.328686293 | 0.26640326  | 0.308521115 |
| 0.234193504 | 0.117352532 | 0.141802218 | 0.149384303 |
| 0.474787527 | 0.30404007  | 0.380377184 | 0.253294156 |

|             |             |             |             |
|-------------|-------------|-------------|-------------|
| 0.067481914 | 0.375903705 | 0.352220137 | 0.344147961 |
| 0.373455448 | 0.292438812 | 0.333288995 | 0.381330793 |
| 0.236346386 | 0.246525414 | 0.068154257 | 0.036588216 |
| 0.230410352 | 0.205287667 | 0.382897408 | 0.414891464 |
| 0.506679935 | 0.232344984 | 0.113972068 | 0.143739002 |
| 0.121437262 | 0.321341067 | 0.287883884 | 0.191664882 |
| 0.390691869 | 0.233240496 | 0.000969183 | 0.202684741 |
| 0.345379525 | 0.348987194 |             |             |
| PDIA3       | 0.199914942 | 0.383500243 | 0.019191734 |
| 0.023766206 | 0.062700083 | 0.090545537 | 0.093599867 |
| 0.22894522  | 0.031430352 | 0.05757464  | 0.146706463 |
| 0.000305231 | 0.409399556 | 0.002555565 | 0.024087904 |
| 0.462617001 | 0.480499395 | 0.175170122 | 0.465817878 |
| 0.161157177 | 0.082813104 | 0.179889426 | 0.198655801 |
| 0.104002924 | 0.000246739 | 0.048417458 | 0.026716015 |
| 0.265281258 | 0.483368979 | 0.073409668 | 0.133262115 |
| 0.408355077 | 0.457346589 | 0.248972094 | 0.234218835 |
| 0.275408156 | 0.314765874 | 0.19145673  | 0.391480564 |
| 0.423952831 | 0.107133683 | 0.414559539 | 0.002530046 |
| 0.008815501 | 0.033804874 | 0.237333636 | 0.194200777 |
| 0.14778892  | 0.081855279 | 0.058382409 | 0.075328347 |
| 0.198986141 | 0.165477834 | 0.254521097 | 0.2355337   |
| 0.249913931 | 0.003603061 | 0.298466535 | 0.134231682 |
| 0.016345474 | 0.140732691 | 0.23501513  | 0.225756206 |
| 0.099836192 | 0.274983611 | 0.437462568 | 0.010348689 |
| 0.019392463 | 0.274782626 | 0.370800307 | 0.26381627  |
| 0.343542862 | 0.190085837 | 0.144149318 | 0.338862452 |
| 0.315110856 | 0.390255671 | 0.11995485  | 0.067363797 |
| 0.000182377 | 0.057824001 | 0.232303958 | 0.222362798 |
| 0.347167801 | 0.173477357 | 0.250387326 | 0.10174509  |
| 0.290966348 | 0.003365856 | 0.191804038 | 0.459397836 |
| 0.010421364 | 0.36138583  | 0.006661518 | 0.059626964 |
| 0.354294018 | 0.479724661 | 0.235928235 | 0.022048329 |
| 0.002537065 | 0.039696815 | 0.07769281  | 0.462465446 |
| 0.224692783 | 0.274581825 | 0.235587257 | 0.182243747 |
| 0.431068216 | 0.061540464 | 0.183688467 | 0.310114803 |
| 0.393476607 | 0.001903467 | 0.056166463 | 0.087019503 |
| 0.222421481 | 0.081407964 | 0.096573305 | 0.035902837 |
| 0.006258033 | 0.010615384 | 0.432033154 | 0.055002438 |
| 0.037722523 | 0.078776579 | 0.045298868 | 0.315877434 |
| 0.230734631 | 0.409884619 | 0.05885514  | 0.108610497 |
| 0.347035162 | 0.111304958 | 0.284884511 | 0.328399875 |
| 0.306813253 | 0.112294972 | 0.047754297 | 0.333170598 |
| 0.267475244 | 0.021250334 | 0.022184704 | 0.145343011 |
| 0.412977063 | 0.440745345 | 0.449708583 | 0.156857579 |
| 0.155420136 | 0.097509719 | 0.172710483 | 0.21400923  |
| 0.101003001 | 0.18621303  | 0.102171545 | 0.168632108 |
| 0.247090561 | 0.032817756 | 0.016110031 | 0.330889686 |
| 0.056133843 | 0.120282058 | 0.296756661 | 0.316807329 |
| 0.304454336 | 0.020849927 | 0.114270431 | 0.111615223 |
| 0.125874947 | 0.107833217 | 0.226169673 | 0.108520448 |
| 0.135932625 | 0.182178557 | 0.012809916 | 0.427227182 |
| 0.038561265 | 0.156000189 | 0.225560703 | 0.045176492 |
| 0.257642235 | 0.192064507 | 0.327487292 | 0.24493826  |



|             |             |             |             |
|-------------|-------------|-------------|-------------|
| 0.272952185 | 0.004487484 | 0.059040751 | 0.207324123 |
| 0.157657687 | 0.407802252 | 0.371701504 | 0.033928252 |
| 0.101948938 | 0.278374534 | 0.045944136 | 0.213177307 |
| 0.306634646 | 0.103857787 | 0.087138167 | 7.47E-05    |
| 0.054582745 | 0.27299125  | 0.253064803 | 0.013002932 |
| 0.125686992 | 0.032594924 | 0.055693666 | 0.366171014 |
| 0.073399285 | 0.373572221 | 0.008490464 | 0.137095509 |
| 0.109880083 | 0.2448056   | 0.275482828 | 0.137937256 |
| 0.304758615 | 0.155997225 | 0.472875504 | 0.208086464 |
| 0.159739926 | 0.164203477 | 0.17175579  | 0.11413879  |
| 0.34334459  | 0.393150239 | 0.396596576 | 0.364218115 |
| 0.108708333 | 0.239500566 | 0.234412818 | 0.11203617  |
| 0.212309828 | 0.236752076 | 0.023147231 | 0.392371023 |
| 7.20E-05    | 0.163044479 | 0.284891558 | 0.159059685 |
| 0.367373764 | 0.102418283 | 0.016740345 | 0.107152511 |
| 0.469294629 | 0.391532297 | 0.331882163 | 0.437244875 |
| 0.190051548 | 0.001893004 | 0.378067198 | 0.207977616 |
| 0.492547272 | 0.223866267 | 0.333170225 | 0.072940381 |
| 0.411140874 | 0.25379977  | 0.23656981  | 0.271313188 |
| 0.324635886 | 0.341995126 | 0.099187311 | 0.235602004 |
| 0.008386743 | 0.102301314 | 0.27435365  | 0.102897533 |
| 0.167966784 | 0.076818703 | 0.354537783 | 0.145796132 |
| 0.307186981 | 0.193758553 | 0.251334114 | 0.025789422 |
| 0.061537674 | 0.391264154 | 0.082799613 | 0.354243564 |
| 0.458502125 | 0.19023369  | 0.400595439 | 0.4490994   |
| 0.139793839 | 0.205791112 | 0.368945119 | 0.409531536 |
| 0.000205884 | 0.460375805 | 0.39841283  | 0.164230666 |
| 0.414789222 | 0.117954972 | 0.184600384 | 0.365700038 |
| 0.000319134 | 0.048481547 | 0.274579087 | 0.353415831 |
| 0.412330233 | 0.006584026 | 0.114157779 | 0.326071881 |
| 1           | 0.038017092 | 0.427443061 | 0.159540465 |
| 0.343765078 | 0.267494077 | 0.063580767 | 0.421664779 |
| 0.259271376 | 0.240015902 | 0.016699058 | 0.269937409 |
| 0.302901793 | 0.066947206 | 0.040931076 | 0.44415072  |
| 0.304937961 | 0.201149828 | 0.100010822 | 0.002545872 |
| 0.388859282 | 0.159083746 | 0.320469036 | 0.044192042 |
| 0.270078151 | 0.1713028   | 0.323833476 | 0.398478027 |
| 0.276974462 | 0.238508165 | 0.193847538 | 0.316048458 |
| 0.112860117 | 0.389662405 | 0.408853979 | 0.020128512 |
| 0.278645989 | 0.417678208 | 0.26318474  | 0.063388532 |
| 0.185264552 | 0.096199808 | 0.072675188 | 0.178218215 |
| 0.314520374 | 0.411748597 | 0.013488465 | 0.062282192 |
| 0.237214109 | 0.135866991 | 0.035212207 | 0.18037324  |
| 0.110502469 | 0.191334678 | 0.12308736  | 0.177902749 |
| 0.314004884 | 0.126167132 | 0.379250858 | 0.08354722  |
| 0.44367395  | 0.012496868 | 0.339454662 | 0.126013564 |
| 0.11815315  | 0.290035077 | 0.415497294 | 0.105327492 |
| 0.007651946 | 0.042721971 | 0.222967128 | 0.236088541 |
| 0.020288998 | 0.067198892 | 0.111946297 | 0.184035488 |
| 0.464166453 | 0.271947121 | 0.112061299 | 0.174036815 |
| 0.235611834 | 0.061766429 | 0.347603734 | 0.159768787 |
| 0.23771197  | 0.170688183 | 0.315661722 | 0.003795902 |
| 0.307795156 | 0.072229392 | 0.144870667 | 0.213053781 |
| 0.468283583 | 0.043940407 | 0.200298476 | 0.054107493 |

|             |             |             |             |             |
|-------------|-------------|-------------|-------------|-------------|
| 0.121703345 | 0.001389242 | 0.174821123 | 0.361224418 |             |
| 0.11301622  | 0.240767718 | 0.19166599  | 0.238034695 |             |
| 0.408563322 | 0.207391963 | 0.269263997 | 0.277618661 |             |
| 0.202453489 | 0.060780057 | 0.062714107 | 0.007211378 |             |
| 0.211874905 | 0.195494967 | 0.264638486 | 0.226077808 |             |
| 0.113961395 | 0.294430753 | 0.197782458 | 0.277215305 |             |
| 0.411633547 | 0.14999191  | 0.464041989 | 0.15373401  |             |
| 0.445336351 | 0.212939136 | 0.102690683 | 0.175747739 |             |
| 0.087259177 | 0.067050165 | 0.037166886 | 0.061396495 |             |
| 0.451457204 | 0.185127541 | 0.227329675 | 0.167902443 |             |
| 0.013573011 | 0.213944582 | 0.334207963 | 0.353371608 |             |
| 0.260648351 | 0.293800584 | 0.275251575 | 0.214638473 |             |
| 0.168163743 | 0.136300173 | 0.043984875 | 0.016422675 |             |
| 0.188367449 | 0.070487484 | 0.309565257 | 0.334950169 |             |
| 0.45659329  | 0.197907825 | 0.0277921   | 0.044374039 |             |
| 0.170162456 | 0.33356928  | 0.120885857 | 0.242022977 |             |
| 0.278364128 | 0.21780231  | 0.000108484 | 0.100489333 |             |
| 0.180953628 | 0.278727399 |             |             |             |
| PDIA6       | 0.0208306   | 0.050656766 | 0.00131054  | 6.96E-05    |
| 0.002148341 | 0.014722404 | 0.013668772 | 0.022898573 |             |
| 0.001237428 | 0.001471399 | 0.0276691   | 8.64E-06    |             |
| 0.06126102  | 0.000248659 | 0.002921925 | 0.055774892 |             |
| 0.061417311 | 0.024369917 | 0.068897171 | 0.024823417 |             |
| 0.00040805  | 0.036461121 | 0.017643929 | 0.014100739 |             |
| 2.58E-05    | 0.004269246 | 0.0001497   | 0.029455818 |             |
| 0.062790762 | 0.012465609 | 0.002347691 | 0.047208741 |             |
| 0.053028603 | 0.006937773 | 0.006867725 | 0.003202692 |             |
| 0.052660315 | 0.002021861 | 0.047393401 | 0.058850591 |             |
| 0.006150365 | 0.051071103 | 8.61E-05    | 8.12E-06    | 0.004569695 |
| 0.015693117 | 0.028675974 | 0.032563966 | 0.012083933 |             |
| 0.015216476 | 0.005609299 | 0.000515092 | 0.033634899 |             |
| 0.054473691 | 0.001784924 | 0.043392345 | 4.34E-06    |             |
| 0.046581745 | 0.015036264 | 0.00362814  | 0.019060596 |             |
| 0.015442453 | 0.025952279 | 0.019328513 | 0.04605025  |             |
| 0.05897557  | 0.000118984 | 0.003494193 | 0.024924841 |             |
| 0.034811936 | 0.020402317 | 0.049714833 | 0.003443151 |             |
| 0.004284481 | 0.021461343 | 0.031750756 | 0.056517479 |             |
| 0.030493239 | 0.012481877 | 8.89E-07    | 0.006656852 |             |
| 0.006944496 | 0.035103029 | 0.034339669 | 0.031974704 |             |
| 0.027640484 | 0.00547753  | 0.01750077  | 0.000275935 |             |
| 0.033373475 | 0.062429219 | 1.35E-05    | 0.05181921  | 2.55E-05    |
| 0.008014607 | 0.048342193 | 0.057068216 | 0.031947524 |             |
| 0.000799725 | 0.000263549 | 0.011166979 | 0.001912579 |             |
| 0.055817047 | 0.025940606 | 0.027420736 | 0.041032461 |             |
| 0.020753822 | 0.053423706 | 0.00156969  | 0.013223476 |             |
| 0.045690984 | 0.046451059 | 0.000301798 | 0.010505137 |             |
| 0.016841136 | 0.003732695 | 0.000331785 | 0.017167495 |             |
| 3.52E-05    | 6.70E-06    | 0.000580039 | 0.052157149 | 0.005635653 |
| 0.002225173 | 0.010202758 | 0.000230153 | 0.027879736 |             |
| 0.017860511 | 0.061332157 | 0.003402039 | 0.012210979 |             |
| 0.034853135 | 0.016104768 | 0.016983456 | 0.035509226 |             |
| 0.013752657 | 0.011425373 | 0.007741182 | 0.051972842 |             |
| 0.055012151 | 0.000962501 | 0.001029754 | 0.024130561 |             |
| 0.048780857 | 0.054534536 | 0.059135123 | 0.008419721 |             |

|                      |                      |                    |             |
|----------------------|----------------------|--------------------|-------------|
| 0.008795938          | 0.01931105           | 0.003515809        | 0.024857303 |
| 0.021870399          | 0.043323697          | 0.005464354        | 0.045509132 |
| 0.042832006          | 5.56E-05 0.002441388 | 0.054612397        |             |
| 0.00028853           | 0.002612573          | 0.047506816        | 0.046296141 |
| 0.040479604          | 0.000103844          | 0.004454531        | 0.01129265  |
| 0.020150654          | 0.011660914          | 0.030765554        | 0.002980009 |
| 0.028669059          | 0.003918487          | 0.001907569        | 0.04823484  |
| 0.008645216          | 0.031755629          | 0.002676839        | 6.01E-05    |
| 0.051123511          | 0.024495373          | 0.041964038        | 0.032868913 |
| 0.033883054          | 6.82E-06 0.00144196  | 0.023510596        |             |
| 0.002615834          | 0.066643774          | 0.051336018        | 0.009289175 |
| 0.026881669          | 0.012208255          | 0.013420372        | 0.013257704 |
| 0.059688113          | 0.001124302          | 0.001196151        | 4.93E-07    |
| 0.00149211           | 0.008043233          | 0.026169147        | 0.001506223 |
| 0.004183458          | 0.001095036          | 0.00351728         | 0.044097787 |
| 0.012660182          | 0.048998833          | 0.000438777        | 0.022882017 |
| 0.010342861          | 0.03424189           | 0.006532076        | 0.002347582 |
| 0.036012386          | 0.004604451          | 0.052674805        | 0.039999957 |
| 0.007761624          | 0.027017295          | 0.008372726        | 0.012830882 |
| 0.030580362          | 0.04976079           | 0.044716437        | 0.054471925 |
| 0.008711378          | 0.061436851          | 0.004271001        | 0.023979604 |
| 0.041476336          | 0.047733303          | 0.002381151        | 0.061486932 |
| 2.42E-06 0.037717253 | 0.021374873          | 0.010512244        |             |
| 0.049094576          | 0.016320122          | 0.003215149        | 0.018781976 |
| 0.070313665          | 0.065975999          | 0.063256134        | 0.04837125  |
| 0.001769298          | 0.000323989          | 0.060135844        | 0.034364659 |
| 0.060517543          | 0.018371291          | 0.009483703        | 0.004711408 |
| 0.06048365           | 0.052822743          | 0.021587196        | 0.022410911 |
| 0.029454942          | 0.021988249          | 0.026551647        | 0.050970856 |
| 2.86E-05 0.006088283 | 0.02395969           | 0.000632451        |             |
| 0.005695678          | 0.000386641          | 0.041022031        | 0.038925709 |
| 0.009269364          | 0.003505677          | 0.006117313        | 0.003651305 |
| 0.013965929          | 0.052773906          | 0.000309975        | 0.06463811  |
| 0.063196176          | 0.036104305          | 0.049811332        | 0.067492399 |
| 0.020009964          | 0.037632614          | 0.046268219        | 0.066888476 |
| 7.99E-06 0.04747238  | 0.045179263          | 0.039454959        |             |
| 0.041877458          | 0.017957709          | 0.034980683        | 0.02040063  |
| 1.99E-05 0.010578229 | 0.002403364          | 0.063175179        |             |
| 0.052066796          | 0.000229952          | 0.000649731        | 0.049502584 |
| 0.038017092          | 1 0.061170364        | 0.011606014        |             |
| 0.044980405          | 0.030935981          | 0.005527294        | 0.042548597 |
| 0.002522211          | 0.03740256           | 4.20E-05 0.0259626 |             |
| 0.02607878           | 0.00063575           | 0.000673776        | 0.065583008 |
| 0.044954333          | 0.03688314           | 0.023004752        | 1.99E-06    |
| 0.051069441          | 0.001052482          | 0.034132947        | 0.00376722  |
| 0.056026661          | 0.033913316          | 0.054430961        | 0.050200957 |
| 0.031344757          | 0.037354106          | 0.035896294        | 0.044362484 |
| 0.000517951          | 0.039669639          | 0.041450685        | 0.000368302 |
| 0.021999222          | 0.055993302          | 0.013034998        | 0.010778908 |
| 0.040240766          | 0.000245652          | 0.014990894        | 0.029510847 |
| 0.047792715          | 0.044417783          | 0.001294782        | 0.013484113 |
| 0.036964162          | 0.010861668          | 0.006165598        | 0.033319304 |
| 0.024664056          | 0.001013229          | 0.007931767        | 0.035351361 |
| 0.049924664          | 0.025250314          | 0.041474562        | 0.001111728 |

|             |             |             |             |
|-------------|-------------|-------------|-------------|
| 0.057851381 | 0.003534461 | 0.070998258 | 0.004390557 |
| 0.024839776 | 0.020382332 | 0.050255101 | 0.001232675 |
| 5.54E-06    | 0.000818672 | 0.033113802 | 0.042375823 |
| 0.004293983 | 0.016676016 | 0.010302125 | 0.018365842 |
| 0.058918445 | 0.011373839 | 0.023575878 | 0.032634115 |
| 0.044799548 | 0.000298331 | 0.05620209  | 0.018686958 |
| 0.037672201 | 0.008247638 | 0.043952217 | 6.70E-06    |
| 0.033887652 | 0.002079034 | 0.025715215 | 0.014332137 |
| 0.057842019 | 0.005231318 | 0.033106428 | 0.007156033 |
| 0.000293427 | 9.05E-05    | 0.047245804 | 0.01745903  |
| 0.024365691 | 0.036581241 | 0.026378982 | 0.002724741 |
| 0.061428151 | 0.02075394  | 0.033067283 | 0.024057472 |
| 0.014004768 | 0.000123251 | 0.002426296 | 0.000708581 |
| 0.039078666 | 0.043887183 | 0.030907154 | 0.020178713 |
| 0.013634032 | 0.038068335 | 0.03328264  | 0.02059872  |
| 0.04793625  | 0.000223612 | 0.057501443 | 0.024385911 |
| 0.048925114 | 0.005231353 | 0.022832737 | 0.006209002 |
| 0.01008885  | 0.000346755 | 0.00602803  | 0.006603918 |
| 0.049718749 | 0.01323881  | 0.01804833  | 0.005074278 |
| 0.000760719 | 0.011886299 | 0.055009563 | 0.035152697 |
| 0.021753294 | 0.02472521  | 0.023417433 | 0.043948534 |
| 0.00342778  | 0.013285452 | 0.000213964 | 3.95E-05    |
| 0.000952079 | 0.006132333 | 0.062429545 | 0.06023271  |
| 0.062245179 | 0.009490641 | 0.003352018 | 0.009085162 |
| 0.007023191 | 0.055358918 | 0.017224953 | 0.001294611 |
| 0.037631193 | 0.009897732 | 5.59E-06    | 0.013310354 |
| 0.037119212 | 0.003013019 |             |             |
| PDK1        | 0.42039869  | 0.523936876 | 0.111283684 |
| 0.03913121  | 0.159518511 | 0.322052324 | 0.303320257 |
| 0.429651852 | 0.171452935 | 0.196880525 | 0.415067208 |
| 0.003629198 | 0.419720131 | 0.029717489 | 0.117551955 |
| 0.503281502 | 0.512616292 | 0.422537005 | 0.50347337  |
| 0.408673439 | 0.194124192 | 0.454607463 | 0.465520131 |
| 0.347942696 | 0.004245804 | 0.179969102 | 0.072414835 |
| 0.428197791 | 0.490024004 | 0.291621614 | 0.364698422 |
| 0.474322952 | 0.482247541 | 0.459939854 | 0.375244025 |
| 0.269014543 | 0.512903469 | 0.136613106 | 0.470449081 |
| 0.406703016 | 0.30179355  | 0.494641921 | 0.028539427 |
| 0.004453639 | 0.157868291 | 0.385601539 | 0.474791657 |
| 0.396988749 | 0.303338385 | 0.253235436 | 0.240281567 |
| 0.1813432   | 0.445294051 | 0.46656981  | 0.182670281 |
| 0.485301589 | 0.006701074 | 0.50751869  | 0.326096515 |
| 0.111332228 | 0.409886025 | 0.418717106 | 0.492032163 |
| 0.335299716 | 0.497180276 | 0.521577446 | 0.059793216 |
| 0.120231888 | 0.499669446 | 0.453272918 | 0.488335537 |
| 0.52080099  | 0.418589573 | 0.379872657 | 0.40654663  |
| 0.490454501 | 0.441334458 | 0.380623198 | 0.262544652 |
| 0.002158646 | 0.214627114 | 0.380818431 | 0.395288941 |
| 0.436167438 | 0.445681566 | 0.457344303 | 0.291786038 |
| 0.48901877  | 0.037983803 | 0.473575165 | 0.517544537 |
| 0.033618393 | 0.453999334 | 0.017225693 | 0.23402591  |
| 0.491580856 | 0.454707649 | 0.481631802 | 0.116696868 |
| 0.028344809 | 0.199058521 | 0.206358046 | 0.390364452 |
| 0.488099516 | 0.525829564 | 0.48154727  | 0.165779026 |

|             |             |             |             |
|-------------|-------------|-------------|-------------|
| 0.372983832 | 0.252677084 | 0.443161694 | 0.511580092 |
| 0.509070327 | 0.016907195 | 0.241512576 | 0.309096564 |
| 0.392177201 | 0.179953685 | 0.315920347 | 0.053768496 |
| 0.019032144 | 0.034879601 | 0.477554575 | 0.241638749 |
| 0.151200562 | 0.28481337  | 0.122066977 | 0.501571291 |
| 0.410848393 | 0.438028027 | 0.171108867 | 0.34093121  |
| 0.478883506 | 0.33827566  | 0.475646821 | 0.511261995 |
| 0.418414612 | 0.348223614 | 0.227568513 | 0.521571642 |
| 0.493107451 | 0.113075982 | 0.133876619 | 0.417941328 |
| 0.39452396  | 0.500169201 | 0.525468629 | 0.399450225 |
| 0.333738339 | 0.34005982  | 0.383133248 | 0.472976052 |
| 0.332165067 | 0.432879467 | 0.110522067 | 0.445751107 |
| 0.481956873 | 0.052004146 | 0.111649604 | 0.495787845 |
| 0.068359219 | 0.322504366 | 0.509929948 | 0.526786199 |
| 0.506210128 | 0.060527865 | 0.305598477 | 0.349245898 |
| 0.395247197 | 0.339326415 | 0.491673696 | 0.281542983 |
| 0.411811416 | 0.386669985 | 0.082706757 | 0.385674628 |
| 0.191139632 | 0.430994854 | 0.350047089 | 0.09126287  |
| 0.465786446 | 0.432559536 | 0.525015851 | 0.498128007 |
| 0.460856546 | 0.005782797 | 0.196136339 | 0.442206958 |
| 0.368116432 | 0.417320835 | 0.526034762 | 0.178335451 |
| 0.35170198  | 0.360623145 | 0.219885701 | 0.397566729 |
| 0.454695776 | 0.295677942 | 0.268517326 | 0.001679831 |
| 0.203934817 | 0.422034307 | 0.49339195  | 0.092390915 |
| 0.306604798 | 0.177684118 | 0.172294343 | 0.524885836 |
| 0.287040221 | 0.510635842 | 0.049606054 | 0.20045646  |
| 0.354756875 | 0.497908947 | 0.447146284 | 0.346841486 |
| 0.518539    | 0.396059684 | 0.415539002 | 0.473104073 |
| 0.346802834 | 0.436756087 | 0.203320793 | 0.36984212  |
| 0.49238133  | 0.523377423 | 0.494800931 | 0.51503457  |
| 0.350346477 | 0.440969803 | 0.354766784 | 0.368423859 |
| 0.480010361 | 0.487519786 | 0.139660938 | 0.526064135 |
| 0.001750699 | 0.441304961 | 0.503956656 | 0.217344975 |
| 0.52738999  | 0.322085466 | 0.117254118 | 0.342428572 |
| 0.511326816 | 0.524618736 | 0.476235176 | 0.458061345 |
| 0.28247742  | 0.021948073 | 0.506271829 | 0.488854249 |
| 0.49475889  | 0.480091175 | 0.366470653 | 0.109157009 |
| 0.521988241 | 0.3999667   | 0.491528515 | 0.470866476 |
| 0.494826608 | 0.430539906 | 0.340193054 | 0.409609775 |
| 0.024550141 | 0.335985627 | 0.479758707 | 0.241661526 |
| 0.388008175 | 0.248585897 | 0.520360727 | 0.417008528 |
| 0.440547907 | 0.3779814   | 0.401580473 | 0.129573386 |
| 0.255693565 | 0.525164587 | 0.0546737   | 0.501346641 |
| 0.519916597 | 0.455427158 | 0.525804973 | 0.512592685 |
| 0.412876968 | 0.471230664 | 0.527089203 | 0.447127835 |
| 0.002087394 | 0.432667203 | 0.413173164 | 0.433839587 |
| 0.485629432 | 0.379209249 | 0.293284544 | 0.452251955 |
| 0.002743162 | 0.230149804 | 0.287168194 | 0.51468427  |
| 0.519564216 | 0.050696545 | 0.05480852  | 0.527264248 |
| 0.427443061 | 0.061170364 | 1           | 0.417137173 |
| 0.526838474 | 0.499770419 | 0.242748285 | 0.435313697 |
| 0.244459736 | 0.44419212  | 0.044472503 | 0.506494551 |
| 0.471509717 | 0.120661424 | 0.115983584 | 0.511732572 |
| 0.509417536 | 0.47150941  | 0.345409992 | 0.015664588 |

|             |             |             |             |
|-------------|-------------|-------------|-------------|
| 0.391613102 | 0.254699747 | 0.51877759  | 0.175901731 |
| 0.504616508 | 0.451111689 | 0.521149974 | 0.475501383 |
| 0.51212902  | 0.49236573  | 0.461946671 | 0.522830721 |
| 0.146099517 | 0.450370676 | 0.463683011 | 0.091517209 |
| 0.425345095 | 0.521436427 | 0.467233697 | 0.25134951  |
| 0.466024323 | 0.112330211 | 0.285674602 | 0.408116677 |
| 0.51907383  | 0.51429388  | 0.097019982 | 0.246777486 |
| 0.486539064 | 0.39437653  | 0.168257376 | 0.438259205 |
| 0.369142096 | 0.201808936 | 0.181621116 | 0.460865728 |
| 0.514400311 | 0.37744093  | 0.502047348 | 0.20660801  |
| 0.496509471 | 0.090840339 | 0.490796646 | 0.348026694 |
| 0.379546096 | 0.44207025  | 0.394229756 | 0.159976156 |
| 0.037377365 | 0.193280185 | 0.47624465  | 0.485673702 |
| 0.12491327  | 0.278918947 | 0.337550843 | 0.426691256 |
| 0.498544587 | 0.475527147 | 0.365336098 | 0.434551082 |
| 0.477143714 | 0.133880192 | 0.517009699 | 0.430498027 |
| 0.489230985 | 0.416222241 | 0.520274931 | 0.014403515 |
| 0.498863183 | 0.232285773 | 0.267947894 | 0.434233242 |
| 0.437223586 | 0.198543315 | 0.464623172 | 0.246346168 |
| 0.220152574 | 0.007024479 | 0.451471594 | 0.39792026  |
| 0.368004027 | 0.346207782 | 0.452460849 | 0.183918046 |
| 0.523371717 | 0.476790566 | 0.486974046 | 0.324067759 |
| 0.458532328 | 0.024685543 | 0.212102124 | 0.062230447 |
| 0.478804463 | 0.472481387 | 0.478795968 | 0.447943625 |
| 0.276479256 | 0.513669863 | 0.475607125 | 0.471682492 |
| 0.518983832 | 0.197571452 | 0.51019626  | 0.397794209 |
| 0.389582042 | 0.455850409 | 0.348942949 | 0.410948925 |
| 0.271758023 | 0.181619838 | 0.186852569 | 0.241152727 |
| 0.503371994 | 0.385671299 | 0.464423609 | 0.392987197 |
| 0.080351136 | 0.465245768 | 0.471462898 | 0.472936815 |
| 0.501861735 | 0.42784837  | 0.436885342 | 0.468147402 |
| 0.375972682 | 0.38794035  | 0.073706292 | 0.047026278 |
| 0.298972073 | 0.270475612 | 0.475792401 | 0.509054652 |
| 0.508756799 | 0.345195379 | 0.154257164 | 0.213788529 |
| 0.151579602 | 0.417218221 | 0.351975128 | 0.190228821 |
| 0.505783691 | 0.3651605   | 0.001362362 | 0.318367925 |
| 0.467522563 | 0.44138565  |             |             |
| PDLIM1      | 0.153167986 | 0.434161794 | 0.134083963 |
| 0.045681876 | 0.128193597 | 0.309462478 | 0.245833765 |
| 0.129169214 | 0.151112674 | 0.247714885 | 0.39220417  |
| 0.002348615 | 0.183516489 | 0.028383856 | 0.065081082 |
| 0.356045869 | 0.356359687 | 0.24552509  | 0.338609731 |
| 0.153576894 | 0.196047758 | 0.281158223 | 0.300137684 |
| 0.267064407 | 0.003934199 | 0.200780999 | 0.140219131 |
| 0.104017336 | 0.314032684 | 0.207978709 | 0.270479709 |
| 0.309611208 | 0.279166006 | 0.198239713 | 0.148183963 |
| 0.078030248 | 0.444150926 | 0.023483405 | 0.216311573 |
| 0.204923088 | 0.250664707 | 0.280515134 | 0.030473839 |
| 0.003647989 | 0.172541013 | 0.10204813  | 0.296910977 |
| 0.144163047 | 0.271974224 | 0.184805289 | 0.227002467 |
| 0.037821204 | 0.381741397 | 0.270607751 | 0.035368069 |
| 0.451546154 | 0.013091295 | 0.455456459 | 0.103829624 |
| 0.122709498 | 0.195812141 | 0.124033269 | 0.28702662  |
| 0.326493853 | 0.462148191 | 0.394716697 | 0.116845578 |

|             |             |             |             |
|-------------|-------------|-------------|-------------|
| 0.155891805 | 0.161596589 | 0.230885803 | 0.28293528  |
| 0.385108863 | 0.21417611  | 0.238153209 | 0.092785928 |
| 0.239019843 | 0.215197478 | 0.270010376 | 0.161293999 |
| 0.003722749 | 0.216110169 | 0.184101677 | 0.164402032 |
| 0.143622934 | 0.406486633 | 0.175815491 | 0.225793102 |
| 0.165676107 | 0.055594893 | 0.256518861 | 0.385047443 |
| 0.049277264 | 0.210683598 | 0.011574555 | 0.13738204  |
| 0.277908804 | 0.26748665  | 0.258925428 | 0.187268371 |
| 0.033223061 | 0.126259847 | 0.068428012 | 0.197682209 |
| 0.194102539 | 0.189416254 | 0.433345838 | 0.019942069 |
| 0.162305609 | 0.161831974 | 0.203188117 | 0.469590483 |
| 0.386382065 | 0.011925894 | 0.124622864 | 0.267561837 |
| 0.132371502 | 0.13593688  | 0.22791397  | 0.019812606 |
| 0.033286413 | 0.007407218 | 0.303982033 | 0.17876971  |
| 0.19890461  | 0.241250212 | 0.112326755 | 0.24030152  |
| 0.117997669 | 0.254086136 | 0.136591684 | 0.247264218 |
| 0.212786156 | 0.268544707 | 0.200703631 | 0.263309647 |
| 0.142443769 | 0.151133567 | 0.182899947 | 0.406626601 |
| 0.405399222 | 0.137008914 | 0.150965822 | 0.345392742 |
| 0.166959987 | 0.348988047 | 0.40894671  | 0.158209564 |
| 0.206554418 | 0.192852363 | 0.220363303 | 0.340183879 |
| 0.242081462 | 0.154010334 | 0.016000309 | 0.327022465 |
| 0.465613489 | 0.019452685 | 0.137122708 | 0.259666744 |
| 0.049925795 | 0.197745619 | 0.412602672 | 0.322019842 |
| 0.191646865 | 0.126984946 | 0.263856692 | 0.278624063 |
| 0.223737044 | 0.251699057 | 0.259559227 | 0.253372605 |
| 0.302604833 | 0.220099374 | 0.116148662 | 0.171999586 |
| 0.180062765 | 0.237878259 | 0.098481124 | 0.034504926 |
| 0.175372397 | 0.143727997 | 0.381069192 | 0.209435138 |
| 0.225935775 | 0.011250182 | 0.250911252 | 0.197501269 |
| 0.211700736 | 0.206778232 | 0.457187609 | 0.166101271 |
| 0.214768995 | 0.080508053 | 0.171633658 | 0.18444877  |
| 0.255401386 | 0.26834139  | 0.238293152 | 0.005690037 |
| 0.182268516 | 0.146166771 | 0.163398922 | 0.064922234 |
| 0.226962335 | 0.159954939 | 0.0511681   | 0.367088595 |
| 0.230034415 | 0.277178371 | 0.021544651 | 0.031047589 |
| 0.228011316 | 0.370543189 | 0.190937051 | 0.135427828 |
| 0.343620594 | 0.25065699  | 0.225647978 | 0.400387069 |
| 0.177512283 | 0.414542786 | 0.030684311 | 0.186953267 |
| 0.168182821 | 0.352478088 | 0.273751271 | 0.287699954 |
| 0.259819915 | 0.182488191 | 0.099355901 | 0.319345525 |
| 0.200985674 | 0.177246296 | 0.146192541 | 0.419479355 |
| 0.003412544 | 0.264632276 | 0.227592836 | 0.034768289 |
| 0.444044788 | 0.292129227 | 0.122462609 | 0.156874827 |
| 0.348094819 | 0.414613542 | 0.290406301 | 0.262998193 |
| 0.071429973 | 0.017722981 | 0.369944332 | 0.346060122 |
| 0.31912652  | 0.208558002 | 0.108146552 | 0.015615311 |
| 0.360066856 | 0.110774535 | 0.289194353 | 0.16178221  |
| 0.18144988  | 0.11273372  | 0.18117514  | 0.156683846 |
| 0.008085495 | 0.259147886 | 0.228074215 | 0.163978447 |
| 0.238543273 | 0.191879567 | 0.346394117 | 0.319556052 |
| 0.163271327 | 0.137653624 | 0.182775314 | 0.153992667 |
| 0.2010497   | 0.435077288 | 0.008732979 | 0.350665778 |
| 0.386640828 | 0.197049624 | 0.370711712 | 0.370670194 |

|             |             |             |             |
|-------------|-------------|-------------|-------------|
| 0.208085892 | 0.402313192 | 0.386442974 | 0.252653451 |
| 0.001417906 | 0.235924885 | 0.168908527 | 0.385363086 |
| 0.311423203 | 0.305102846 | 0.05677484  | 0.114051238 |
| 0.001597079 | 0.191323687 | 0.085350434 | 0.421657294 |
| 0.338155056 | 0.079757488 | 0.006536443 | 0.31581235  |
| 0.159540465 | 0.011606014 | 0.417137173 | 1           |
| 0.404048801 | 0.188550117 | 0.245683917 | 0.2088973   |
| 0.05981652  | 0.1213014   | 0.055873624 | 0.28849747  |
| 0.135497719 | 0.02197828  | 0.163754739 | 0.373908049 |
| 0.36242635  | 0.348344971 | 0.239914098 | 0.049391928 |
| 0.2016105   | 0.145161356 | 0.308898303 | 0.110408526 |
| 0.338165263 | 0.376222078 | 0.40445369  | 0.235759876 |
| 0.217403454 | 0.420063708 | 0.418470318 | 0.366546025 |
| 0.059102561 | 0.23665858  | 0.282387122 | 0.107307786 |
| 0.141866128 | 0.35259828  | 0.204939079 | 0.247791461 |
| 0.273398705 | 0.071903099 | 0.267118489 | 0.131566156 |
| 0.423447045 | 0.362007479 | 0.142902334 | 0.123678508 |
| 0.432850845 | 0.201681473 | 0.17232839  | 0.176796285 |
| 0.304647725 | 0.043394147 | 0.029158184 | 0.331143689 |
| 0.458154516 | 0.354433487 | 0.344115732 | 0.210833031 |
| 0.296446866 | 0.082619744 | 0.271411045 | 0.205216795 |
| 0.217122332 | 0.171468424 | 0.199421429 | 0.034910157 |
| 0.085459733 | 0.145691903 | 0.425684031 | 0.430197261 |
| 0.144902782 | 0.190195489 | 0.262560352 | 0.274343328 |
| 0.336971658 | 0.169569962 | 0.290951126 | 0.174480655 |
| 0.445245308 | 0.140715016 | 0.436413099 | 0.203872904 |
| 0.328021623 | 0.268015663 | 0.31749309  | 0.009661589 |
| 0.21009494  | 0.262474848 | 0.057550665 | 0.237501004 |
| 0.247706958 | 0.19985733  | 0.349422728 | 0.173187646 |
| 0.0873996   | 0.002757341 | 0.285616416 | 0.10096987  |
| 0.361647757 | 0.070317269 | 0.183056657 | 0.032023666 |
| 0.440899863 | 0.227161771 | 0.307414558 | 0.060788226 |
| 0.235005347 | 0.004502962 | 0.240931637 | 0.071263154 |
| 0.30937699  | 0.345963305 | 0.202073389 | 0.152989123 |
| 0.07732804  | 0.241006088 | 0.328309392 | 0.193654845 |
| 0.354073225 | 0.07766511  | 0.372777633 | 0.145164702 |
| 0.187357906 | 0.18578017  | 0.265706192 | 0.164136545 |
| 0.211829698 | 0.070158398 | 0.173095488 | 0.109600158 |
| 0.332484347 | 0.13112579  | 0.233137451 | 0.15602054  |
| 0.120706582 | 0.235607855 | 0.219511753 | 0.225564626 |
| 0.259108016 | 0.197930413 | 0.120453839 | 0.424292332 |
| 0.127252663 | 0.163832226 | 0.073263383 | 0.102553448 |
| 0.157176996 | 0.240599289 | 0.290136166 | 0.31123803  |
| 0.355372836 | 0.081194829 | 0.165824904 | 0.1359984   |
| 0.019963963 | 0.192963297 | 0.305002574 | 0.054312197 |
| 0.209622158 | 0.091002997 | 0.002084571 | 0.126876007 |
| 0.356046839 | 0.163001416 |             |             |
| PECAM1      | 0.301637249 | 0.514244081 | 0.112891482 |
| 0.056723762 | 0.206074172 | 0.314971266 | 0.325087412 |
| 0.315008257 | 0.15167365  | 0.223345093 | 0.396474037 |
| 0.001439175 | 0.327793953 | 0.018891306 | 0.095913334 |
| 0.489206141 | 0.507158926 | 0.428298197 | 0.487735965 |
| 0.301417144 | 0.223908699 | 0.365619904 | 0.427962359 |
| 0.337783852 | 0.00202055  | 0.216024713 | 0.099353178 |



|             |             |             |             |
|-------------|-------------|-------------|-------------|
| 0.313191812 | 0.468402004 | 0.263665731 | 0.349645776 |
| 0.423215185 | 0.433211171 | 0.434523106 | 0.397897641 |
| 0.261892508 | 0.479795108 | 0.127205371 | 0.39561932  |
| 0.348696947 | 0.338383001 | 0.416587582 | 0.022305507 |
| 0.007565808 | 0.176524742 | 0.27976672  | 0.396318965 |
| 0.298930882 | 0.296405697 | 0.231522574 | 0.277212502 |
| 0.137904675 | 0.409384438 | 0.353069855 | 0.141594238 |
| 0.451882295 | 0.01037569  | 0.476951512 | 0.213900239 |
| 0.10904262  | 0.345386231 | 0.309339307 | 0.406137118 |
| 0.336022429 | 0.467291887 | 0.520117315 | 0.076053472 |
| 0.127869054 | 0.399039043 | 0.357315222 | 0.465730978 |
| 0.459616581 | 0.379380752 | 0.382394705 | 0.339397    |
| 0.406287117 | 0.344090108 | 0.3414791   | 0.23741883  |
| 0.001420808 | 0.245193012 | 0.420596994 | 0.2743093   |
| 0.35013553  | 0.414834606 | 0.345284919 | 0.326661558 |
| 0.406763077 | 0.034174838 | 0.405431098 | 0.521991801 |
| 0.039994646 | 0.353297916 | 0.018944643 | 0.207853515 |
| 0.386251696 | 0.423057232 | 0.380269666 | 0.135301446 |
| 0.023520915 | 0.161131663 | 0.121007192 | 0.349787708 |
| 0.395906956 | 0.457366977 | 0.445680812 | 0.10551358  |
| 0.307514307 | 0.192621292 | 0.410508712 | 0.487840218 |
| 0.474689417 | 0.011670432 | 0.181690593 | 0.309424108 |
| 0.349399077 | 0.20772442  | 0.327948037 | 0.040618395 |
| 0.02452882  | 0.015915326 | 0.434687186 | 0.205696786 |
| 0.182646923 | 0.297961463 | 0.14596915  | 0.464100764 |
| 0.304779651 | 0.384425199 | 0.215050583 | 0.353472178 |
| 0.398586269 | 0.35612319  | 0.47675121  | 0.426584201 |
| 0.42729116  | 0.263659704 | 0.200989445 | 0.479003938 |
| 0.426292958 | 0.122956172 | 0.127095094 | 0.38422841  |
| 0.30855503  | 0.474975409 | 0.530972023 | 0.315552295 |
| 0.385744615 | 0.294542219 | 0.343027349 | 0.458569006 |
| 0.332526942 | 0.329727244 | 0.072683476 | 0.399909315 |
| 0.44499497  | 0.041930756 | 0.108969341 | 0.38969311  |
| 0.109366051 | 0.330198079 | 0.444116975 | 0.46185979  |
| 0.438535386 | 0.082040701 | 0.330888228 | 0.351472101 |
| 0.33080468  | 0.340771921 | 0.400796828 | 0.301908246 |
| 0.359228208 | 0.353962468 | 0.092722942 | 0.315406267 |
| 0.189447991 | 0.350245288 | 0.260558661 | 0.073543402 |
| 0.348980332 | 0.332902568 | 0.453555544 | 0.400953096 |
| 0.352460813 | 0.010185353 | 0.223730815 | 0.328516342 |
| 0.31050958  | 0.34567567  | 0.526248569 | 0.174118481 |
| 0.294440614 | 0.28711951  | 0.202200065 | 0.428709285 |
| 0.340160344 | 0.295265429 | 0.265721972 | 0.00127587  |
| 0.222449125 | 0.347769489 | 0.408411397 | 0.061489126 |
| 0.355422732 | 0.146277888 | 0.106333821 | 0.456716943 |
| 0.278497999 | 0.446900098 | 0.02726248  | 0.120290842 |
| 0.329765631 | 0.475802087 | 0.418748572 | 0.246294217 |
| 0.476831104 | 0.373209142 | 0.377294893 | 0.418487594 |
| 0.375079992 | 0.411338089 | 0.13484267  | 0.304250056 |
| 0.4122153   | 0.467723201 | 0.406700186 | 0.444096191 |
| 0.343755593 | 0.325160454 | 0.290684909 | 0.341556656 |
| 0.381875472 | 0.404374147 | 0.125447956 | 0.517391782 |
| 0.001059889 | 0.391287453 | 0.462403876 | 0.137465378 |
| 0.513128848 | 0.34077479  | 0.103335021 | 0.261829196 |

|             |             |             |             |
|-------------|-------------|-------------|-------------|
| 0.497677412 | 0.515262354 | 0.382338207 | 0.399309197 |
| 0.194820126 | 0.012789617 | 0.464967731 | 0.426764601 |
| 0.477438834 | 0.444313388 | 0.36900807  | 0.064129496 |
| 0.480776733 | 0.283919405 | 0.418670235 | 0.366641691 |
| 0.44198671  | 0.385585935 | 0.294336643 | 0.289845508 |
| 0.013828565 | 0.310544102 | 0.386463878 | 0.24429445  |
| 0.373653544 | 0.218474508 | 0.45891286  | 0.379637871 |
| 0.444935679 | 0.279104322 | 0.410401894 | 0.147824856 |
| 0.253318577 | 0.516522723 | 0.051491365 | 0.439731743 |
| 0.521395846 | 0.388517904 | 0.482314963 | 0.504096246 |
| 0.339329636 | 0.440405887 | 0.469704421 | 0.387463342 |
| 0.001006132 | 0.386493152 | 0.329484254 | 0.390881197 |
| 0.427092141 | 0.351454972 | 0.187838439 | 0.385472558 |
| 0.001876479 | 0.211689183 | 0.253021475 | 0.493175482 |
| 0.46651829  | 0.056342083 | 0.049754446 | 0.460531176 |
| 0.343765078 | 0.044980405 | 0.526838474 | 0.404048801 |
| 1           | 0.462532177 | 0.26263989  | 0.350044782 |
| 0.200069504 | 0.349044152 | 0.062167153 | 0.474562862 |
| 0.402640708 | 0.065809612 | 0.155302697 | 0.50461915  |
| 0.419027075 | 0.451555654 | 0.322109476 | 0.017128432 |
| 0.323956183 | 0.261135548 | 0.459704687 | 0.163254731 |
| 0.419272123 | 0.415080267 | 0.469670213 | 0.384831624 |
| 0.43548085  | 0.450296046 | 0.419592638 | 0.447381066 |
| 0.164762494 | 0.353883767 | 0.39829393  | 0.098253022 |
| 0.315896311 | 0.481160121 | 0.437394738 | 0.264030587 |
| 0.380756267 | 0.157117911 | 0.279322114 | 0.290037547 |
| 0.474433746 | 0.474360932 | 0.099575697 | 0.191609914 |
| 0.451576526 | 0.347556294 | 0.183595679 | 0.378223076 |
| 0.335748941 | 0.139661974 | 0.107621252 | 0.403097241 |
| 0.491875977 | 0.375374321 | 0.434567035 | 0.234813879 |
| 0.444185769 | 0.077610875 | 0.387034966 | 0.348970273 |
| 0.321170428 | 0.34539096  | 0.332961185 | 0.094029093 |
| 0.037819803 | 0.146037911 | 0.453516681 | 0.437372002 |
| 0.125830052 | 0.245028788 | 0.351492307 | 0.442103412 |
| 0.481843627 | 0.413922445 | 0.344988763 | 0.358011396 |
| 0.436370397 | 0.17235645  | 0.493855561 | 0.34943937  |
| 0.394012493 | 0.421609505 | 0.441531706 | 0.011733324 |
| 0.410063213 | 0.252618622 | 0.162265155 | 0.452008331 |
| 0.399627022 | 0.204751265 | 0.453312478 | 0.2050546   |
| 0.202160012 | 0.004305007 | 0.37283471  | 0.35790224  |
| 0.349417872 | 0.247768996 | 0.373491307 | 0.150059617 |
| 0.535930039 | 0.395354909 | 0.385495807 | 0.247283275 |
| 0.437220491 | 0.029951519 | 0.240269709 | 0.053450321 |
| 0.381338128 | 0.413289129 | 0.366701678 | 0.335833382 |
| 0.16991608  | 0.469352636 | 0.434112276 | 0.476582231 |
| 0.475145847 | 0.17224842  | 0.50933152  | 0.308571052 |
| 0.335745214 | 0.386213167 | 0.329689274 | 0.350132402 |
| 0.30678169  | 0.139670669 | 0.186441733 | 0.163055796 |
| 0.47246843  | 0.332627968 | 0.46933955  | 0.28948822  |
| 0.092950291 | 0.449079935 | 0.366356252 | 0.383898147 |
| 0.441000307 | 0.328454781 | 0.343850904 | 0.429760485 |
| 0.273790605 | 0.285982059 | 0.101660107 | 0.068457586 |
| 0.303590937 | 0.271227879 | 0.369612515 | 0.411429342 |
| 0.49675352  | 0.234440536 | 0.151434433 | 0.167070008 |

|             |             |             |             |
|-------------|-------------|-------------|-------------|
| 0.105747595 | 0.300980389 | 0.37110019  | 0.209683093 |
| 0.437143868 | 0.25658992  | 0.001076911 | 0.222508094 |
| 0.412143991 | 0.401441359 |             |             |
| PELI1       | 0.145061145 | 0.491132903 | 0.063217218 |
| 0.023888429 | 0.140647148 | 0.201174774 | 0.18654734  |
| 0.142987421 | 0.077163198 | 0.094203383 | 0.327374531 |
| 0.000684263 | 0.31869988  | 0.010278589 | 0.068524632 |
| 0.446107948 | 0.470049524 | 0.26459318  | 0.465346023 |
| 0.143090231 | 0.085353026 | 0.272773804 | 0.234294226 |
| 0.187951959 | 0.001079638 | 0.116286267 | 0.032783725 |
| 0.144967067 | 0.433296653 | 0.141276203 | 0.155228125 |
| 0.375350257 | 0.402005902 | 0.187308132 | 0.214105676 |
| 0.112239794 | 0.474889128 | 0.094141967 | 0.343982195 |
| 0.317318809 | 0.172902101 | 0.378278803 | 0.012137148 |
| 0.002339051 | 0.098152529 | 0.131055651 | 0.261051718 |
| 0.161276399 | 0.168174807 | 0.132256698 | 0.136212229 |
| 0.055402973 | 0.346711606 | 0.314855988 | 0.061331877 |
| 0.45481215  | 0.002854727 | 0.470394575 | 0.097368616 |
| 0.063106731 | 0.175810501 | 0.125416913 | 0.271140468 |
| 0.243568761 | 0.471500107 | 0.495464667 | 0.040778076 |
| 0.068602358 | 0.189853039 | 0.290227852 | 0.27569143  |
| 0.436097674 | 0.167064407 | 0.187822184 | 0.167299142 |
| 0.291793695 | 0.316431898 | 0.244668452 | 0.148250373 |
| 0.00056092  | 0.128059383 | 0.200965919 | 0.194599842 |
| 0.225219935 | 0.359277545 | 0.205473468 | 0.166366012 |
| 0.175524654 | 0.02040335  | 0.251012822 | 0.490537711 |
| 0.017892957 | 0.324434418 | 0.013490932 | 0.141741661 |
| 0.351033528 | 0.376007199 | 0.25932657  | 0.066171561 |
| 0.01536125  | 0.100017374 | 0.054419058 | 0.313851046 |
| 0.206136598 | 0.220558782 | 0.430941594 | 0.05681082  |
| 0.283534279 | 0.082555528 | 0.224061126 | 0.471724428 |
| 0.433256954 | 0.011215785 | 0.104716776 | 0.195528782 |
| 0.160669977 | 0.091888218 | 0.192519044 | 0.016877019 |
| 0.013901659 | 0.011485227 | 0.397238182 | 0.111115393 |
| 0.090039494 | 0.152481896 | 0.080646933 | 0.296347479 |
| 0.149617078 | 0.35193507  | 0.143106358 | 0.176198401 |
| 0.300282582 | 0.213897977 | 0.232178544 | 0.32588168  |
| 0.24133141  | 0.137687302 | 0.10528603  | 0.486220667 |
| 0.43605829  | 0.070037748 | 0.063485043 | 0.270283648 |
| 0.290218191 | 0.439734876 | 0.500186582 | 0.17283321  |
| 0.220079819 | 0.163236613 | 0.129126462 | 0.315217951 |
| 0.212710958 | 0.193588036 | 0.04643454  | 0.344017956 |
| 0.449298577 | 0.020515271 | 0.05876271  | 0.342222719 |
| 0.076230062 | 0.181746807 | 0.422490524 | 0.402894176 |
| 0.284753842 | 0.025609835 | 0.144327074 | 0.182099249 |
| 0.177105598 | 0.164678396 | 0.272203642 | 0.121786398 |
| 0.24601502  | 0.134826846 | 0.056642455 | 0.292770749 |
| 0.109116535 | 0.223760638 | 0.092237596 | 0.03036891  |
| 0.23421911  | 0.174775576 | 0.41093606  | 0.244389649 |
| 0.256966389 | 0.003413882 | 0.092725353 | 0.183672158 |
| 0.112765922 | 0.332689967 | 0.506564642 | 0.101316481 |
| 0.181807492 | 0.150037036 | 0.116754104 | 0.241592648 |
| 0.326556488 | 0.119789363 | 0.106529999 | 0.000418683 |
| 0.137176013 | 0.132330951 | 0.196279936 | 0.033333323 |

|             |             |             |             |
|-------------|-------------|-------------|-------------|
| 0.194511447 | 0.064320213 | 0.063295395 | 0.422509189 |
| 0.147206485 | 0.399544455 | 0.018091885 | 0.067987001 |
| 0.164148537 | 0.394211797 | 0.182833131 | 0.099814964 |
| 0.394872529 | 0.170059306 | 0.3336724   | 0.378750904 |
| 0.235310074 | 0.330715699 | 0.070679863 | 0.155057717 |
| 0.240948825 | 0.442463661 | 0.356972904 | 0.417290252 |
| 0.170218322 | 0.260808278 | 0.148574017 | 0.242867613 |
| 0.222633626 | 0.24050517  | 0.06760115  | 0.512193275 |
| 0.000473122 | 0.266083717 | 0.252518032 | 0.062899587 |
| 0.490747999 | 0.224951372 | 0.057523813 | 0.140184768 |
| 0.474349536 | 0.513975227 | 0.374221822 | 0.355987588 |
| 0.09691063  | 0.00853919  | 0.449499674 | 0.338419204 |
| 0.43980935  | 0.235461865 | 0.19811317  | 0.048000521 |
| 0.463818887 | 0.177222703 | 0.253841822 | 0.170938351 |
| 0.265582425 | 0.21132951  | 0.169903771 | 0.220520994 |
| 0.005276408 | 0.134601897 | 0.230998691 | 0.097826893 |
| 0.155135751 | 0.098855226 | 0.418517069 | 0.314930528 |
| 0.226994917 | 0.105653593 | 0.174307109 | 0.084029506 |
| 0.143114179 | 0.486941803 | 0.040574473 | 0.428759471 |
| 0.496104976 | 0.236625441 | 0.450758927 | 0.479734561 |
| 0.162209315 | 0.397007123 | 0.437078238 | 0.367116667 |
| 0.000639542 | 0.346561717 | 0.291749162 | 0.357344611 |
| 0.37488645  | 0.219699262 | 0.095776243 | 0.179874342 |
| 0.001830631 | 0.112452018 | 0.099049948 | 0.490828558 |
| 0.450544584 | 0.03351908  | 0.035826644 | 0.410473084 |
| 0.267494077 | 0.030935981 | 0.499770419 | 0.188550117 |
| 0.462532177 | 1           | 0.128384954 | 0.317174796 |
| 0.075552272 | 0.187789437 | 0.037256279 | 0.310866413 |
| 0.207449189 | 0.030287082 | 0.06707296  | 0.480267431 |
| 0.38108115  | 0.368248037 | 0.201193533 | 0.003486626 |
| 0.28405707  | 0.100301446 | 0.356955178 | 0.120115138 |
| 0.391390901 | 0.34708694  | 0.480809053 | 0.346576413 |
| 0.271090758 | 0.409302926 | 0.371528725 | 0.395839647 |
| 0.086436638 | 0.305658881 | 0.350102322 | 0.054270113 |
| 0.176195641 | 0.453724414 | 0.186403534 | 0.154007849 |
| 0.274573324 | 0.079254888 | 0.175730259 | 0.1450986   |
| 0.473630645 | 0.430641611 | 0.049163537 | 0.122842053 |
| 0.410216548 | 0.190282043 | 0.107271142 | 0.219013854 |
| 0.241541172 | 0.048594951 | 0.059768144 | 0.317926405 |
| 0.483843789 | 0.297838278 | 0.383115003 | 0.091381876 |
| 0.425863867 | 0.052718969 | 0.385825095 | 0.200706758 |
| 0.187040501 | 0.188908449 | 0.292152844 | 0.041593738 |
| 0.008543415 | 0.062797025 | 0.400920785 | 0.421522945 |
| 0.071424409 | 0.133348938 | 0.175317023 | 0.255140537 |
| 0.441916533 | 0.195767813 | 0.23594873  | 0.19828902  |
| 0.442483712 | 0.066524963 | 0.482268235 | 0.166601219 |
| 0.316661074 | 0.199716848 | 0.390514604 | 0.004901076 |
| 0.266824141 | 0.102414565 | 0.078578634 | 0.218829013 |
| 0.356419974 | 0.110397452 | 0.360913678 | 0.107672829 |
| 0.089124843 | 0.003831105 | 0.302795248 | 0.169712567 |
| 0.275566971 | 0.132933271 | 0.199079574 | 0.062403274 |
| 0.516522222 | 0.200091416 | 0.299835972 | 0.133790441 |
| 0.201102736 | 0.021717243 | 0.103872835 | 0.031543162 |
| 0.300652424 | 0.362399359 | 0.23715564  | 0.145739658 |

|             |             |             |             |
|-------------|-------------|-------------|-------------|
| 0.081971899 | 0.322953935 | 0.335769381 | 0.23937648  |
| 0.445500441 | 0.066602803 | 0.4675723   | 0.17231265  |
| 0.300674736 | 0.184732184 | 0.221334891 | 0.202229903 |
| 0.172870452 | 0.075293551 | 0.105592508 | 0.085902743 |
| 0.429907439 | 0.210674332 | 0.237998038 | 0.113197971 |
| 0.051713133 | 0.236250814 | 0.324916713 | 0.299123711 |
| 0.252454952 | 0.226909151 | 0.176705111 | 0.421798261 |
| 0.109795007 | 0.127392646 | 0.040983685 | 0.022328906 |
| 0.116791313 | 0.129074183 | 0.355859475 | 0.399319415 |
| 0.472644621 | 0.114360255 | 0.082717666 | 0.094009689 |
| 0.068063344 | 0.269508128 | 0.243380239 | 0.125904069 |
| 0.287408228 | 0.109422918 | 0.000739979 | 0.112832748 |
| 0.333769343 | 0.18427597  |             |             |
| PELO        | 0.084068251 | 0.274577982 | 0.188351206 |
| 0.032410598 | 0.149338568 | 0.389198373 | 0.336543906 |
| 0.055321559 | 0.200571503 | 0.259643027 | 0.395677594 |
| 0.002503254 | 0.074932247 | 0.042319974 | 0.0820869   |
| 0.175240173 | 0.179082627 | 0.251342039 | 0.172005855 |
| 0.095766637 | 0.149835541 | 0.214554074 | 0.232598127 |
| 0.326545894 | 0.006540167 | 0.260565303 | 0.127667838 |
| 0.03793473  | 0.144296414 | 0.219866782 | 0.181290645 |
| 0.149943071 | 0.126488097 | 0.102962278 | 0.093027678 |
| 0.024697677 | 0.319785433 | 0.007866587 | 0.098969362 |
| 0.08389238  | 0.229949914 | 0.13479595  | 0.062485833 |
| 0.001565976 | 0.245828833 | 0.034033714 | 0.220409783 |
| 0.091871956 | 0.347424798 | 0.221976444 | 0.254813438 |
| 0.00773022  | 0.362855785 | 0.163131845 | 0.006956895 |
| 0.384597694 | 0.010931156 | 0.349360676 | 0.046413254 |
| 0.194316703 | 0.153174066 | 0.059455784 | 0.190294569 |
| 0.415195341 | 0.375060605 | 0.226095931 | 0.20840002  |
| 0.243650624 | 0.090875884 | 0.097352078 | 0.186576894 |
| 0.242448335 | 0.117764046 | 0.19694638  | 0.033173887 |
| 0.118633686 | 0.090834045 | 0.297382158 | 0.162643375 |
| 0.004797312 | 0.289959528 | 0.106270412 | 0.080382236 |
| 0.056808165 | 0.376983235 | 0.091123907 | 0.234929453 |
| 0.08060087  | 0.107596409 | 0.201299256 | 0.206462084 |
| 0.054093085 | 0.098255225 | 0.010879868 | 0.144945876 |
| 0.139680741 | 0.112433182 | 0.15191536  | 0.276353265 |
| 0.062885956 | 0.140040035 | 0.030309709 | 0.07380028  |
| 0.13181896  | 0.120960118 | 0.377987197 | 0.004873577 |
| 0.058402538 | 0.137920043 | 0.149176194 | 0.342814874 |
| 0.215511669 | 0.01790815  | 0.115485437 | 0.346933648 |
| 0.072565563 | 0.125239153 | 0.299968351 | 0.005729344 |
| 0.025500625 | 0.003607463 | 0.142967394 | 0.167746639 |
| 0.271573307 | 0.301287854 | 0.108786198 | 0.136674953 |
| 0.044972321 | 0.116323991 | 0.184083685 | 0.268425821 |
| 0.094452305 | 0.34312948  | 0.113254797 | 0.135837379 |
| 0.070417495 | 0.103031709 | 0.188811393 | 0.286368837 |
| 0.308169263 | 0.186921533 | 0.208771361 | 0.335345549 |
| 0.063628039 | 0.174378894 | 0.227786025 | 0.093905938 |
| 0.169995573 | 0.184315325 | 0.12221865  | 0.276829013 |
| 0.312038747 | 0.11069201  | 0.003954536 | 0.306450942 |
| 0.397543229 | 0.006925531 | 0.212753256 | 0.136595923 |
| 0.044917498 | 0.183452469 | 0.289777005 | 0.201230814 |

|             |             |             |             |
|-------------|-------------|-------------|-------------|
| 0.116472267 | 0.120014967 | 0.207336262 | 0.325449478 |
| 0.220945231 | 0.266852072 | 0.182458679 | 0.197384547 |
| 0.296018633 | 0.11679786  | 0.204248234 | 0.063804589 |
| 0.224919001 | 0.204723298 | 0.032848556 | 0.02018229  |
| 0.09504219  | 0.074525499 | 0.236821849 | 0.132936288 |
| 0.11163495  | 0.008193724 | 0.24382038  | 0.114827931 |
| 0.110462143 | 0.087130576 | 0.306292329 | 0.226913085 |
| 0.230861797 | 0.031137068 | 0.209316399 | 0.131349636 |
| 0.138283034 | 0.194660041 | 0.202620202 | 0.00952518  |
| 0.204654556 | 0.049828791 | 0.099090628 | 0.073776182 |
| 0.189429431 | 0.163313915 | 0.031829234 | 0.214181699 |
| 0.292390054 | 0.146740837 | 0.019723776 | 0.011289923 |
| 0.190279312 | 0.292823014 | 0.078781264 | 0.064751875 |
| 0.223975989 | 0.158477622 | 0.086179299 | 0.349908727 |
| 0.14724089  | 0.391312374 | 0.010186294 | 0.150806235 |
| 0.078890955 | 0.201425021 | 0.127022539 | 0.159457806 |
| 0.224109685 | 0.103020536 | 0.034062539 | 0.352959944 |
| 0.138042046 | 0.122161724 | 0.174773497 | 0.265190323 |
| 0.007588705 | 0.248196547 | 0.142217847 | 0.011121604 |
| 0.290965318 | 0.377523306 | 0.171497308 | 0.108429927 |
| 0.177997601 | 0.264567482 | 0.16385065  | 0.111478312 |
| 0.022631167 | 0.024843672 | 0.217125133 | 0.279263551 |
| 0.147699952 | 0.131542195 | 0.042588442 | 0.006820193 |
| 0.198999423 | 0.05166093  | 0.188893534 | 0.079005346 |
| 0.103988802 | 0.043921668 | 0.185878522 | 0.078985086 |
| 0.003543049 | 0.204339433 | 0.113769816 | 0.118562275 |
| 0.148600078 | 0.151893932 | 0.205441036 | 0.327009093 |
| 0.074312334 | 0.051662436 | 0.088607076 | 0.236016129 |
| 0.291142484 | 0.268698616 | 0.002836179 | 0.209739936 |
| 0.207693253 | 0.16756848  | 0.209257833 | 0.197192575 |
| 0.178100184 | 0.364229049 | 0.228116568 | 0.118586456 |
| 0.001500507 | 0.095073661 | 0.065741684 | 0.373782022 |
| 0.145646826 | 0.333523395 | 0.019554729 | 0.040691808 |
| 0.003122424 | 0.236847555 | 0.023391107 | 0.283537564 |
| 0.181528353 | 0.173858665 | 0.001658381 | 0.19023448  |
| 0.063580767 | 0.005527294 | 0.242748285 | 0.245683917 |
| 0.26263989  | 0.128384954 | 1           | 0.084713663 |
| 0.014103379 | 0.059702836 | 0.073063481 | 0.188194931 |
| 0.066685488 | 0.009098965 | 0.187019792 | 0.204763229 |
| 0.220971207 | 0.316000811 | 0.293847642 | 0.042456515 |
| 0.0801831   | 0.064688179 | 0.174155438 | 0.12459004  |
| 0.226006107 | 0.359588971 | 0.283057039 | 0.1090175   |
| 0.134033337 | 0.33666656  | 0.370790952 | 0.22699653  |
| 0.0269117   | 0.09745881  | 0.125399024 | 0.131424968 |
| 0.061314366 | 0.194532208 | 0.122603072 | 0.363540764 |
| 0.217545886 | 0.037219345 | 0.363140549 | 0.083440217 |
| 0.303172122 | 0.193682497 | 0.231990582 | 0.109699867 |
| 0.361129623 | 0.16148582  | 0.24581847  | 0.128928483 |
| 0.345495065 | 0.008491626 | 0.01046222  | 0.291598836 |
| 0.341363505 | 0.407470833 | 0.177880143 | 0.163766921 |
| 0.143758201 | 0.124089091 | 0.154058405 | 0.173711173 |
| 0.217370897 | 0.072448341 | 0.075502051 | 0.009128053 |
| 0.070161742 | 0.11090899  | 0.369385937 | 0.364184161 |
| 0.210792064 | 0.219754971 | 0.249533221 | 0.257884843 |

|             |             |             |             |
|-------------|-------------|-------------|-------------|
| 0.163420576 | 0.072767638 | 0.331169036 | 0.118334334 |
| 0.390551126 | 0.131363615 | 0.293972683 | 0.157890375 |
| 0.21824226  | 0.180742912 | 0.192329893 | 0.011646131 |
| 0.107016903 | 0.23629965  | 0.022473958 | 0.196084529 |
| 0.102019031 | 0.240148691 | 0.320300548 | 0.172320043 |
| 0.043579961 | 0.002761662 | 0.239352103 | 0.035141811 |
| 0.41436549  | 0.023337852 | 0.120700875 | 0.007311813 |
| 0.274970663 | 0.154153457 | 0.176349386 | 0.020827986 |
| 0.146116432 | 0.001322934 | 0.259596321 | 0.113822379 |
| 0.217183762 | 0.298258774 | 0.110183503 | 0.081863948 |
| 0.034922004 | 0.158120382 | 0.276627163 | 0.121486692 |
| 0.194377134 | 0.022761507 | 0.190846202 | 0.098211157 |
| 0.069973764 | 0.095295901 | 0.327786323 | 0.105203677 |
| 0.237566503 | 0.052225522 | 0.236055489 | 0.083665164 |
| 0.162781006 | 0.085344366 | 0.188236048 | 0.068825285 |
| 0.199320507 | 0.139658711 | 0.108815046 | 0.102981051 |
| 0.159134568 | 0.081715953 | 0.043980505 | 0.38474168  |
| 0.06261632  | 0.100007517 | 0.051843035 | 0.112899911 |
| 0.072620192 | 0.248561115 | 0.167078498 | 0.180143953 |
| 0.18642288  | 0.032753635 | 0.228121255 | 0.138029171 |
| 0.006071101 | 0.083060521 | 0.369188082 | 0.018963828 |
| 0.138931526 | 0.035710437 | 0.003556033 | 0.081583679 |
| 0.310004913 | 0.065116079 |             |             |
| PFKP        | 0.27255582  | 0.391681698 | 0.025126302 |
| 0.026105934 | 0.07017728  | 0.120482298 | 0.120173278 |
| 0.291514994 | 0.045241625 | 0.078300944 | 0.187083433 |
| 0.000518088 | 0.398012908 | 0.0041816   | 0.031056217 |
| 0.471709247 | 0.487634224 | 0.215149313 | 0.469156295 |
| 0.213382412 | 0.112801009 | 0.233110436 | 0.258444176 |
| 0.139115338 | 0.000440263 | 0.061036308 | 0.036128873 |
| 0.335734769 | 0.48640612  | 0.097627382 | 0.173280134 |
| 0.424290513 | 0.453574793 | 0.326562442 | 0.277302437 |
| 0.328674393 | 0.320804543 | 0.186373387 | 0.427904479 |
| 0.431650734 | 0.133135884 | 0.420168098 | 0.004317787 |
| 0.009569988 | 0.04423758  | 0.296351503 | 0.255602309 |
| 0.190550147 | 0.108778675 | 0.076932567 | 0.098199402 |
| 0.236999659 | 0.211297485 | 0.291336323 | 0.260719006 |
| 0.261477261 | 0.004727213 | 0.306134793 | 0.180929085 |
| 0.022886763 | 0.187188294 | 0.325967554 | 0.296073587 |
| 0.129840722 | 0.279247471 | 0.443248168 | 0.013502728 |
| 0.026905505 | 0.361309544 | 0.406215725 | 0.334873269 |
| 0.352636757 | 0.243259934 | 0.187814174 | 0.407481923 |
| 0.404727849 | 0.3912883   | 0.155494761 | 0.085187861 |
| 0.000336749 | 0.074981382 | 0.281987249 | 0.297682097 |
| 0.42598268  | 0.213890095 | 0.324246231 | 0.131196898 |
| 0.372015724 | 0.005057723 | 0.244349064 | 0.465374165 |
| 0.013794354 | 0.386694581 | 0.006905566 | 0.073351845 |
| 0.372891401 | 0.489717086 | 0.3107742   | 0.03025807  |
| 0.003732242 | 0.052721371 | 0.106595343 | 0.465714655 |
| 0.294126686 | 0.348692444 | 0.257348547 | 0.211146538 |
| 0.422910631 | 0.091345205 | 0.230102638 | 0.317152291 |
| 0.406307821 | 0.002353282 | 0.075789335 | 0.111801821 |
| 0.297847264 | 0.108072464 | 0.120411994 | 0.043699892 |
| 0.006103174 | 0.013001954 | 0.439906352 | 0.073607712 |

|             |             |             |             |
|-------------|-------------|-------------|-------------|
| 0.049664881 | 0.10276581  | 0.052168749 | 0.39312222  |
| 0.286392524 | 0.422079051 | 0.069385623 | 0.142024305 |
| 0.425177491 | 0.142731502 | 0.341417775 | 0.403264517 |
| 0.344058058 | 0.15055441  | 0.065046171 | 0.332679995 |
| 0.273570583 | 0.027498834 | 0.031649713 | 0.190066416 |
| 0.405333387 | 0.44584491  | 0.457163277 | 0.195116402 |
| 0.181122727 | 0.126935761 | 0.242257377 | 0.268969645 |
| 0.128111353 | 0.235347455 | 0.110295322 | 0.212244173 |
| 0.254806648 | 0.036905427 | 0.023055184 | 0.368064258 |
| 0.054442293 | 0.151929591 | 0.308652329 | 0.361814664 |
| 0.367243589 | 0.02934697  | 0.147231929 | 0.14762549  |
| 0.170489152 | 0.141150111 | 0.297208555 | 0.14497774  |
| 0.179809923 | 0.249436934 | 0.016650391 | 0.419013879 |
| 0.050517606 | 0.204189166 | 0.325443765 | 0.067395135 |
| 0.329324883 | 0.243005624 | 0.348258457 | 0.312845252 |
| 0.35011215  | 0.004492265 | 0.078853088 | 0.280263685 |
| 0.22735625  | 0.40406897  | 0.377889221 | 0.045202632 |
| 0.134795671 | 0.341269583 | 0.060897228 | 0.251508423 |
| 0.317876628 | 0.141921217 | 0.123329315 | 0.000144468 |
| 0.065281919 | 0.358467493 | 0.329070788 | 0.019254062 |
| 0.147950573 | 0.048857133 | 0.073808227 | 0.37533525  |
| 0.096377906 | 0.407396748 | 0.011533648 | 0.170471105 |
| 0.142429217 | 0.301194076 | 0.335865771 | 0.19002513  |
| 0.35967151  | 0.198550273 | 0.478829955 | 0.243176367 |
| 0.185094182 | 0.210450417 | 0.210913149 | 0.154300593 |
| 0.423421446 | 0.39669088  | 0.413729794 | 0.389136021 |
| 0.142662316 | 0.302626895 | 0.275585337 | 0.146257679 |
| 0.271066951 | 0.290271021 | 0.031617689 | 0.394337783 |
| 0.000143868 | 0.206829337 | 0.35928571  | 0.213706904 |
| 0.372258575 | 0.130380265 | 0.023697957 | 0.138942706 |
| 0.473075974 | 0.393430475 | 0.33949026  | 0.4421543   |
| 0.229416426 | 0.00274841  | 0.386097747 | 0.271569644 |
| 0.49716367  | 0.275042542 | 0.370144278 | 0.082119204 |
| 0.410428956 | 0.318294845 | 0.316471708 | 0.352917179 |
| 0.392641864 | 0.386674679 | 0.127591585 | 0.302251417 |
| 0.013732767 | 0.139504979 | 0.356122482 | 0.14329124  |
| 0.221251119 | 0.106367442 | 0.377887039 | 0.185023327 |
| 0.357154782 | 0.257683533 | 0.317642787 | 0.033258014 |
| 0.080784487 | 0.400037628 | 0.078135403 | 0.36199224  |
| 0.46251792  | 0.239430354 | 0.403488414 | 0.453400621 |
| 0.187792909 | 0.244016906 | 0.376901045 | 0.415874087 |
| 0.000307556 | 0.461724925 | 0.418956072 | 0.19907805  |
| 0.424845327 | 0.158016595 | 0.229633649 | 0.438466576 |
| 0.000421675 | 0.066190361 | 0.330739161 | 0.359669217 |
| 0.407406058 | 0.009113585 | 0.111090824 | 0.367431182 |
| 0.421664779 | 0.042548597 | 0.435313697 | 0.2088973   |
| 0.350044782 | 0.317174796 | 0.084713663 | 1           |
| 0.322154599 | 0.297346169 | 0.019062623 | 0.332345685 |
| 0.369926401 | 0.098340217 | 0.053131357 | 0.451592872 |
| 0.325239774 | 0.251854411 | 0.130050278 | 0.004597765 |
| 0.402846837 | 0.196177681 | 0.386299047 | 0.051889405 |
| 0.299735167 | 0.221131114 | 0.323853416 | 0.417247221 |
| 0.345021496 | 0.270529346 | 0.229160175 | 0.345269398 |
| 0.125805155 | 0.397809636 | 0.419826407 | 0.024783219 |



|             |             |             |             |
|-------------|-------------|-------------|-------------|
| 0.357370287 | 0.420476538 | 0.338815254 | 0.082800272 |
| 0.240590698 | 0.102529901 | 0.096314192 | 0.235579754 |
| 0.320068582 | 0.420333175 | 0.019883424 | 0.078785149 |
| 0.267020808 | 0.174300933 | 0.045870538 | 0.220969478 |
| 0.146065661 | 0.246187147 | 0.15694138  | 0.230845205 |
| 0.320185006 | 0.160518438 | 0.39170291  | 0.109561033 |
| 0.437948938 | 0.016554235 | 0.349620623 | 0.157368391 |
| 0.155066158 | 0.374630685 | 0.423564325 | 0.130430075 |
| 0.0136114   | 0.061626953 | 0.259576989 | 0.256979079 |
| 0.027378205 | 0.089740742 | 0.141483173 | 0.227411413 |
| 0.469325692 | 0.328131544 | 0.143953058 | 0.216599667 |
| 0.248009245 | 0.082663454 | 0.355088441 | 0.209679329 |
| 0.292101743 | 0.215282951 | 0.357846145 | 0.006022594 |
| 0.392562801 | 0.097607816 | 0.189385465 | 0.266496114 |
| 0.478529077 | 0.057118088 | 0.251372324 | 0.073930421 |
| 0.155172078 | 0.001584804 | 0.224153907 | 0.423087488 |
| 0.147537135 | 0.28416652  | 0.23814242  | 0.284797864 |
| 0.416166714 | 0.274452494 | 0.324975783 | 0.327028712 |
| 0.2579605   | 0.053961661 | 0.085478419 | 0.01020926  |
| 0.271743744 | 0.242911171 | 0.343084515 | 0.306374328 |
| 0.153113407 | 0.363228769 | 0.248302481 | 0.333900211 |
| 0.413672707 | 0.182691855 | 0.472287254 | 0.197846288 |
| 0.446149445 | 0.275523141 | 0.133184326 | 0.218523629 |
| 0.109089982 | 0.090347566 | 0.050197625 | 0.084785798 |
| 0.455232453 | 0.221423205 | 0.281736381 | 0.231936362 |
| 0.017613435 | 0.257440126 | 0.374740547 | 0.415064814 |
| 0.330022189 | 0.374267714 | 0.326502474 | 0.236526416 |
| 0.23854901  | 0.191354126 | 0.052164956 | 0.023351277 |
| 0.244488373 | 0.095776294 | 0.319722772 | 0.346776872 |
| 0.458676974 | 0.2565746   | 0.037517185 | 0.060286212 |
| 0.185434881 | 0.350132692 | 0.153664393 | 0.236321262 |
| 0.343847742 | 0.299559885 | 0.000132734 | 0.135166535 |
| 0.234435978 | 0.335639337 |             |             |
| PGM2L1      | 0.085647607 | 0.22006173  | 0.001124312 |
| 0.01571063  | 0.005557329 | 0.028365786 | 0.024937122 |
| 0.072276873 | 0.001845865 | 0.010520282 | 0.061114159 |
| 8.04E-06    | 0.262245913 | 7.63E-05    | 0.000787185 |
| 0.304134792 | 0.049771808 | 0.268935456 | 0.040887273 |
| 0.026159286 | 0.071852076 | 0.094096086 | 0.029103547 |
| 5.24E-06    | 0.008514853 | 0.012550589 | 0.075576092 |
| 0.311200476 | 0.011284328 | 0.019524969 | 0.275885333 |
| 0.321937713 | 0.056510093 | 0.030712917 | 0.100583258 |
| 0.158986111 | 0.02296152  | 0.267288649 | 0.28547969  |
| 0.022042509 | 0.278670443 | 5.98E-05    | 0.035451863 |
| 0.003581944 | 0.063095364 | 0.085528029 | 0.022822674 |
| 0.022591028 | 0.007814916 | 0.018772281 | 0.06552302  |
| 0.071088221 | 0.122033014 | 0.078163028 | 0.11712183  |
| 0.006630841 | 0.150501605 | 0.024042015 | 0.000860318 |
| 0.02461705  | 0.101658875 | 0.1117183   | 0.031679842 |
| 0.133112313 | 0.253223596 | 0.000737162 | 0.002190864 |
| 0.102454475 | 0.306895986 | 0.162266413 | 0.193621049 |
| 0.029087876 | 0.016603037 | 0.100341816 | 0.233342825 |
| 0.260845202 | 0.030792196 | 0.003602708 | 2.20E-05    |
| 0.012563676 | 0.058844084 | 0.131107573 | 0.235493232 |

|             |             |             |             |
|-------------|-------------|-------------|-------------|
| 0.075932331 | 0.115454572 | 0.016059021 | 0.139323856 |
| 0.000103284 | 0.06496445  | 0.277834512 | 0.001733544 |
| 0.213298372 | 0.000638118 | 0.002707971 | 0.221627717 |
| 0.341652013 | 0.135231523 | 0.002005117 | 5.59E-05    |
| 0.002065471 | 0.007727266 | 0.336990403 | 0.072065655 |
| 0.097173148 | 0.108364716 | 0.033287877 | 0.320032705 |
| 0.006202596 | 0.024779407 | 0.166318912 | 0.246941555 |
| 2.32E-05    | 0.002871925 | 0.021632303 | 0.03123168  |
| 0.019935486 | 0.020346915 | 0.011211844 | 0.001132295 |
| 0.000333633 | 0.285142211 | 0.003949618 | 0.006593229 |
| 0.017691118 | 0.005587131 | 0.199185923 | 0.052441269 |
| 0.249671268 | 0.00436463  | 0.026180122 | 0.262062006 |
| 0.033000745 | 0.110905328 | 0.22234468  | 0.05502588  |
| 0.009921736 | 0.005008915 | 0.169630295 | 0.117622576 |
| 0.001187465 | 0.001387216 | 0.058587259 | 0.302618213 |
| 0.277711541 | 0.267540931 | 0.01302417  | 0.026120933 |
| 0.014564369 | 0.045155816 | 0.108230708 | 0.022406444 |
| 0.04368341  | 0.009801978 | 0.059090756 | 0.116183175 |
| 0.005629431 | 0.00100683  | 0.184325067 | 0.012489092 |
| 0.01093414  | 0.159125812 | 0.174482069 | 0.113748783 |
| 0.011558452 | 0.031613473 | 0.0363746   | 0.033395824 |
| 0.030491851 | 0.099139767 | 0.031940655 | 0.046565618 |
| 0.055664804 | 0.000681448 | 0.321127938 | 0.004414053 |
| 0.047109743 | 0.054342713 | 0.007725952 | 0.110334425 |
| 0.028885393 | 0.197915752 | 0.094939429 | 0.184117131 |
| 0.011427789 | 0.011449093 | 0.099526176 | 0.03633958  |
| 0.242673532 | 0.208886169 | 0.003793531 | 0.022362583 |
| 0.036521065 | 0.005413452 | 0.035480508 | 0.155977797 |
| 0.02031433  | 0.016053961 | 1.27E-05    | 0.003249483 |
| 0.13343622  | 0.069470422 | 0.000521351 | 0.014150389 |
| 0.002809104 | 0.00341308  | 0.228394888 | 0.015065689 |
| 0.229496841 | 0.000213852 | 0.011035186 | 0.014576642 |
| 0.131361957 | 0.076685542 | 0.018527409 | 0.191890105 |
| 0.023432879 | 0.35807049  | 0.092881067 | 0.013046441 |
| 0.082048589 | 0.016745666 | 0.014475496 | 0.181786579 |
| 0.239761706 | 0.287789141 | 0.202192885 | 0.021176234 |
| 0.10205272  | 0.030140381 | 0.035927901 | 0.069974661 |
| 0.062607409 | 0.001313846 | 0.205047078 | 2.24E-06    |
| 0.048611238 | 0.147119563 | 0.019043424 | 0.212450127 |
| 0.031590151 | 0.000876406 | 0.013618315 | 0.272101287 |
| 0.199222501 | 0.166129519 | 0.323868031 | 0.024572052 |
| 3.49E-05    | 0.198596031 | 0.101841796 | 0.324594402 |
| 0.047136675 | 0.070267866 | 0.003303365 | 0.240236072 |
| 0.095887864 | 0.143860003 | 0.139977872 | 0.141412615 |
| 0.074373884 | 0.014614359 | 0.110135011 | 0.0013666   |
| 0.024805067 | 0.191879045 | 0.026300385 | 0.047792581 |
| 0.008815271 | 0.221551425 | 0.046669513 | 0.05912087  |
| 0.040338684 | 0.084302392 | 0.002425157 | 0.010010356 |
| 0.227271985 | 0.009655643 | 0.17920719  | 0.270995696 |
| 0.0454565   | 0.257219484 | 0.258153441 | 0.038435129 |
| 0.09201483  | 0.223936912 | 0.235521905 | 3.94E-06    |
| 0.34795218  | 0.291944239 | 0.062802001 | 0.314770658 |
| 0.037624858 | 0.03734419  | 0.13913239  | 1.81E-06    |
| 0.007201916 | 0.113951416 | 0.171754452 | 0.259585449 |

|             |             |             |             |
|-------------|-------------|-------------|-------------|
| 0.000249628 | 0.023314973 | 0.179698052 | 0.259271376 |
| 0.002522211 | 0.244459736 | 0.05981652  | 0.200069504 |
| 0.075552272 | 0.014103379 | 0.322154599 | 1           |
| 0.02909169  | 0.002084976 | 0.145065676 | 0.081571252 |
| 0.005887796 | 0.010716949 | 0.252980452 | 0.178908273 |
| 0.084086199 | 0.02217674  | 0.001853341 | 0.271197875 |
| 0.060053728 | 0.225957711 | 0.001826099 | 0.127648639 |
| 0.072554781 | 0.159297115 | 0.26812616  | 0.112184401 |
| 0.117194157 | 0.090884501 | 0.190436996 | 0.02536844  |
| 0.310712867 | 0.304231961 | 0.002028607 | 0.15436226  |
| 0.255669833 | 0.144198202 | 0.014989155 | 0.069716462 |
| 0.04845936  | 0.017882646 | 0.049106433 | 0.164735874 |
| 0.280927789 | 0.00097548  | 0.002842659 | 0.121585076 |
| 0.014584578 | 0.003862647 | 0.03010278  | 0.032676205 |
| 0.063738288 | 0.009565147 | 0.069788287 | 0.161424336 |
| 0.045276033 | 0.27177808  | 0.023990374 | 0.274005417 |
| 0.000354632 | 0.164607529 | 0.009400828 | 0.02752574  |
| 0.21382629  | 0.306592225 | 0.016387371 | 0.003890754 |
| 0.004118227 | 0.115442364 | 0.109812909 | 0.001601786 |
| 0.010681466 | 0.028172169 | 0.068736697 | 0.303119256 |
| 0.039988126 | 0.031212094 | 0.033422532 | 0.104242765 |
| 0.021289675 | 0.177376558 | 0.042635021 | 0.127904978 |
| 0.039099117 | 0.175227748 | 0.000521407 | 0.184286422 |
| 0.016475834 | 0.031989976 | 0.093073205 | 0.330910028 |
| 0.004805533 | 0.088327777 | 0.004817013 | 0.01892818  |
| 2.71E-05    | 0.062451796 | 0.165568379 | 0.040008612 |
| 0.025068497 | 0.041348438 | 0.086554731 | 0.223034968 |
| 0.083708963 | 0.175726028 | 0.045384563 | 0.05872479  |
| 0.024571231 | 0.014160295 | 0.000302963 | 0.104782425 |
| 0.077892757 | 0.129690535 | 0.102206847 | 0.013641524 |
| 0.135866609 | 0.075823145 | 0.097333174 | 0.267840324 |
| 0.049110662 | 0.300761988 | 0.018542878 | 0.346550189 |
| 0.027896484 | 0.024707746 | 0.014465116 | 0.015959305 |
| 0.004336086 | 0.003397066 | 0.003633583 | 0.315893801 |
| 0.012061738 | 0.084125422 | 0.026449624 | 0.00095238  |
| 0.0426874   | 0.186386595 | 0.262179545 | 0.14012357  |
| 0.256155985 | 0.056428755 | 0.091460385 | 0.023759595 |
| 0.027927537 | 0.026687494 | 0.010488849 | 0.072045876 |
| 0.01273342  | 0.155083613 | 0.170140665 | 0.268713012 |
| 0.022564559 | 0.002040536 | 0.003037634 | 0.015779621 |
| 0.211997471 | 0.041066595 | 0.058354711 | 0.103872057 |
| 0.036954675 | 2.61E-06    | 0.010030088 | 0.079143314 |
| 0.04838703  |             |             |             |
| PGRMC1      | 0.163441912 | 0.401185181 | 0.022554484 |
| 0.003343208 | 0.032278996 | 0.140260585 | 0.11478819  |
| 0.136506976 | 0.036354427 | 0.024466529 | 0.232129464 |
| 0.001059113 | 0.331917585 | 0.009112915 | 0.049066464 |
| 0.413139674 | 0.433285091 | 0.177672748 | 0.456055717 |
| 0.152879275 | 0.020735488 | 0.261858229 | 0.164567524 |
| 0.133520133 | 0.001501298 | 0.038335269 | 0.005691888 |
| 0.146654289 | 0.422251307 | 0.103483445 | 0.048579036 |
| 0.362903326 | 0.355695586 | 0.065778784 | 0.070962884 |
| 0.037411861 | 0.390462364 | 0.044882121 | 0.30010643  |
| 0.356018656 | 0.057019224 | 0.350417172 | 0.008834102 |

|             |             |             |             |
|-------------|-------------|-------------|-------------|
| 0.000263304 | 0.031790084 | 0.101032641 | 0.23151369  |
| 0.15484286  | 0.115750779 | 0.104827397 | 0.052917428 |
| 0.024203551 | 0.263881368 | 0.342846444 | 0.024643073 |
| 0.337825125 | 0.000416455 | 0.373463818 | 0.083591288 |
| 0.028091371 | 0.140305717 | 0.129955236 | 0.234890988 |
| 0.166945737 | 0.356991226 | 0.435212243 | 0.009506942 |
| 0.032976375 | 0.195033503 | 0.269729819 | 0.180169635 |
| 0.372043658 | 0.060694648 | 0.061250776 | 0.120061665 |
| 0.25448244  | 0.328025753 | 0.214783104 | 0.071853551 |
| 0.000350699 | 0.061200428 | 0.055212448 | 0.240230295 |
| 0.208649312 | 0.265015128 | 0.208452605 | 0.049943524 |
| 0.142150999 | 0.011033913 | 0.220287952 | 0.43979041  |
| 0.004504825 | 0.330746465 | 0.003617901 | 0.070660112 |
| 0.333740941 | 0.384680309 | 0.241750393 | 0.017739243 |
| 0.010739589 | 0.060685503 | 0.043513716 | 0.34576983  |
| 0.198681015 | 0.183223896 | 0.327373362 | 0.060603572 |
| 0.30217216  | 0.044560285 | 0.09713279  | 0.36460495  |
| 0.379008689 | 0.011074905 | 0.072388928 | 0.134788916 |
| 0.074407315 | 0.024827552 | 0.127910231 | 0.006765876 |
| 0.001823855 | 0.01837727  | 0.374325611 | 0.053434988 |
| 0.024463121 | 0.090158496 | 0.019040099 | 0.211814765 |
| 0.112055104 | 0.391785646 | 0.037677322 | 0.101431317 |
| 0.249933519 | 0.134480361 | 0.127194207 | 0.2820838   |
| 0.077480498 | 0.084108943 | 0.052941252 | 0.380644262 |
| 0.389132375 | 0.023717593 | 0.025470406 | 0.20266915  |
| 0.293043978 | 0.400891714 | 0.440039165 | 0.090632335 |
| 0.060679055 | 0.13507482  | 0.046711994 | 0.206234196 |
| 0.154332253 | 0.230650575 | 0.040407864 | 0.292336438 |
| 0.341301807 | 0.008632044 | 0.024132266 | 0.353406974 |
| 0.010433957 | 0.059247888 | 0.36281344  | 0.328646399 |
| 0.249584024 | 0.004438148 | 0.043671688 | 0.116374638 |
| 0.165032055 | 0.09889394  | 0.255873055 | 0.032964044 |
| 0.212704042 | 0.04507352  | 0.018163889 | 0.294858864 |
| 0.063099958 | 0.216926741 | 0.052112288 | 0.015176655 |
| 0.266640633 | 0.132803693 | 0.331694811 | 0.234799767 |
| 0.250450466 | 0.000274513 | 0.02301415  | 0.191470467 |
| 0.043488912 | 0.372111427 | 0.39924471  | 0.0668139   |
| 0.179620094 | 0.084753183 | 0.086319529 | 0.078210813 |
| 0.374464811 | 0.034695176 | 0.034854401 | 0.000188939 |
| 0.044956727 | 0.070109038 | 0.183157484 | 0.026949655 |
| 0.049346825 | 0.031303663 | 0.070226647 | 0.353502599 |
| 0.106893084 | 0.324448489 | 0.021033298 | 0.082825053 |
| 0.070221876 | 0.277121131 | 0.056914976 | 0.056364916 |
| 0.288552012 | 0.055320121 | 0.348641403 | 0.314585439 |
| 0.077190547 | 0.2350306   | 0.07042341  | 0.098258933 |
| 0.20774199  | 0.370175961 | 0.313484198 | 0.350889909 |
| 0.089629758 | 0.320058827 | 0.073439362 | 0.187847324 |
| 0.226440155 | 0.236791348 | 0.030049281 | 0.436650722 |
| 0.000413574 | 0.227605869 | 0.17524168  | 0.072628267 |
| 0.38232739  | 0.138431577 | 0.028335263 | 0.107133806 |
| 0.460911756 | 0.449983151 | 0.402399956 | 0.335020459 |
| 0.050488227 | 0.009424309 | 0.431644953 | 0.281857866 |
| 0.417327975 | 0.144801324 | 0.062963391 | 0.065149322 |
| 0.401640817 | 0.24369496  | 0.203335798 | 0.158917774 |

|             |             |             |             |
|-------------|-------------|-------------|-------------|
| 0.204972432 | 0.112762137 | 0.155844035 | 0.283206075 |
| 0.004422406 | 0.061834481 | 0.192347286 | 0.030104167 |
| 0.05041642  | 0.037742982 | 0.325745858 | 0.263451513 |
| 0.072548528 | 0.049894267 | 0.052651258 | 0.026868628 |
| 0.108239304 | 0.406558888 | 0.019205743 | 0.425682301 |
| 0.446153276 | 0.228892135 | 0.363465729 | 0.451380571 |
| 0.149139498 | 0.296733877 | 0.364978802 | 0.40945309  |
| 0.000860004 | 0.330594793 | 0.27645203  | 0.295410496 |
| 0.325289906 | 0.168756723 | 0.128189997 | 0.125713351 |
| 0.002060054 | 0.083364434 | 0.033429106 | 0.441309891 |
| 0.363439589 | 0.01133446  | 0.020887324 | 0.334139579 |
| 0.240015902 | 0.03740256  | 0.44419212  | 0.1213014   |
| 0.349044152 | 0.187789437 | 0.059702836 | 0.297346169 |
| 0.02909169  | 1           | 0.006872098 | 0.205963332 |
| 0.16128301  | 0.03849956  | 0.012947709 | 0.453480836 |
| 0.332115536 | 0.270082862 | 0.165111044 | 0.000716858 |
| 0.328364707 | 0.026236939 | 0.270751554 | 0.06004896  |
| 0.356318627 | 0.274573139 | 0.38362755  | 0.328291192 |
| 0.223855346 | 0.307027513 | 0.283128096 | 0.327731834 |
| 0.022909086 | 0.285034059 | 0.321663469 | 0.015479706 |
| 0.172678135 | 0.388713293 | 0.121245368 | 0.098113725 |
| 0.261091555 | 0.012657576 | 0.128347497 | 0.185430964 |
| 0.356308267 | 0.354959301 | 0.017788408 | 0.080630047 |
| 0.300413823 | 0.081172165 | 0.050004504 | 0.182832315 |
| 0.198666081 | 0.024098092 | 0.069411072 | 0.270564691 |
| 0.380243222 | 0.2033875   | 0.32720118  | 0.021326856 |
| 0.384372278 | 0.032033447 | 0.404570272 | 0.074839315 |
| 0.176025571 | 0.160964823 | 0.319648411 | 0.031161552 |
| 0.002349675 | 0.033300226 | 0.279670802 | 0.331533313 |
| 0.029373159 | 0.115614761 | 0.091985281 | 0.152710041 |
| 0.405612316 | 0.075035569 | 0.180070174 | 0.175385011 |
| 0.344188361 | 0.01475213  | 0.420900168 | 0.152656271 |
| 0.297293443 | 0.077940378 | 0.330328337 | 0.002329896 |
| 0.234445554 | 0.027435866 | 0.117923642 | 0.12656896  |
| 0.377302835 | 0.042380066 | 0.25118574  | 0.054258698 |
| 0.034089802 | 0.004433498 | 0.296653798 | 0.108230024 |
| 0.204778119 | 0.094857866 | 0.169466644 | 0.029937669 |
| 0.448451843 | 0.171542436 | 0.276531163 | 0.094104998 |
| 0.101781122 | 0.005782126 | 0.028044667 | 0.01722993  |
| 0.294584974 | 0.317319051 | 0.240083882 | 0.150501917 |
| 0.072499709 | 0.248506901 | 0.261563934 | 0.138893997 |
| 0.360546682 | 0.021196686 | 0.417497066 | 0.137847643 |
| 0.310951042 | 0.074577229 | 0.175603762 | 0.091950866 |
| 0.078460421 | 0.047360462 | 0.051301345 | 0.064274006 |
| 0.365860711 | 0.112519451 | 0.148376253 | 0.060610582 |
| 0.014759666 | 0.094825573 | 0.339013023 | 0.268465942 |
| 0.181762048 | 0.207471077 | 0.105532971 | 0.330146308 |
| 0.06698649  | 0.104100819 | 0.006957626 | 0.003520585 |
| 0.032913638 | 0.058813963 | 0.390095346 | 0.387077604 |
| 0.434671645 | 0.082514908 | 0.031564667 | 0.056092681 |
| 0.0674749   | 0.316591773 | 0.149165801 | 0.034251112 |
| 0.244704064 | 0.069268428 | 0.000548338 | 0.076868602 |
| 0.277467775 | 0.066456745 |             |             |
| PHF21A      | 0.009305892 | 0.055615336 | 0.009365877 |

|             |             |             |             |
|-------------|-------------|-------------|-------------|
| 0.001804507 | 0.024384569 | 0.078725393 | 0.100424479 |
| 0.007947566 | 0.005766485 | 0.032998307 | 0.08656074  |
| 2.55E-06    | 0.016001598 | 0.000253065 | 0.000891182 |
| 0.031887254 | 0.034672625 | 0.078769608 | 0.031925842 |
| 0.011685771 | 0.006239238 | 0.031093468 | 0.045705137 |
| 0.067936084 | 9.70E-06    | 0.088147444 | 0.009642281 |
| 0.005316913 | 0.026530995 | 0.038183011 | 0.013226681 |
| 0.02415906  | 0.028181266 | 0.016485495 | 0.008767074 |
| 0.005685456 | 0.060153188 | 0.000937509 | 0.026508266 |
| 0.014502989 | 0.075374717 | 0.02709615  | 0.000344897 |
| 0.000824439 | 0.050875748 | 0.004948756 | 0.033980378 |
| 0.010863941 | 0.068989468 | 0.038322291 | 0.08532326  |
| 0.0004403   | 0.070306669 | 0.023143992 | 0.000785476 |
| 0.086211043 | 0.000141318 | 0.07010927  | 0.00332763  |
| 0.02093231  | 0.0252118   | 0.007645221 | 0.032780099 |
| 0.096570976 | 0.081719345 | 0.045652095 | 0.022834059 |
| 0.050784701 | 0.015115768 | 0.017623809 | 0.049830413 |
| 0.044738524 | 0.005932429 | 0.024843022 | 0.009773913 |
| 0.024218596 | 0.015881463 | 0.054462916 | 0.013137048 |
| 2.51E-05    | 0.102089059 | 0.031653699 | 0.009622602 |
| 0.012722725 | 0.080573074 | 0.013980923 | 0.065032669 |
| 0.014823101 | 0.001278917 | 0.034313889 | 0.040358266 |
| 0.000408048 | 0.019919724 | 0.000131692 | 0.008308193 |
| 0.023828116 | 0.019510157 | 0.022193455 | 0.04063029  |
| 0.000457799 | 0.009743377 | 0.000575219 | 0.01306685  |
| 0.022270475 | 0.02340255  | 0.082711657 | 0.000759712 |
| 0.012298588 | 0.002823817 | 0.022923464 | 0.068424624 |
| 0.038788821 | 7.64E-05    | 0.004958629 | 0.07830143  |
| 0.003297837 | 0.003162669 | 0.084108694 | 2.69E-05    |
| 0.000947757 | 1.15E-05    | 0.026894964 | 0.013600005 |
| 0.075496181 | 0.06883555  | 0.002200131 | 0.038431363 |
| 0.006687715 | 0.01839383  | 0.038458258 | 0.06422732  |
| 0.023124584 | 0.095791914 | 0.042913966 | 0.027793258 |
| 0.02586272  | 0.006644483 | 0.018152792 | 0.067750518 |
| 0.054974429 | 0.010633304 | 0.007842071 | 0.061221031 |
| 0.015074009 | 0.033289082 | 0.044128838 | 0.005247111 |
| 0.065109628 | 0.029674442 | 0.011490239 | 0.069543255 |
| 0.078681539 | 0.016566656 | 0.000101209 | 0.06069067  |
| 0.082394147 | 6.32E-05    | 0.020850186 | 0.023334562 |
| 0.012590682 | 0.016241983 | 0.048347761 | 0.045128723 |
| 0.030334142 | 0.006194725 | 0.041743366 | 0.076303587 |
| 0.030091438 | 0.05722748  | 0.028871172 | 0.032746307 |
| 0.045416247 | 0.012002499 | 0.030097604 | 0.015032589 |
| 0.042930556 | 0.02988947  | 0.001209025 | 0.000157495 |
| 0.014333491 | 0.009187227 | 0.046382666 | 0.020604521 |
| 0.017554455 | 0.00094863  | 0.029054587 | 0.014265733 |
| 0.007503672 | 0.016206227 | 0.064465434 | 0.044501734 |
| 0.032489232 | 0.004548784 | 0.0341704   | 0.042010733 |
| 0.019892285 | 0.012878461 | 0.009852931 | 2.05E-05    |
| 0.013218666 | 0.00803828  | 0.018189576 | 0.001088794 |
| 0.039034679 | 0.003637769 | 0.00019027  | 0.041684069 |
| 0.058532237 | 0.040842452 | 7.96E-05    | 0.000686966 |
| 0.02206576  | 0.078993723 | 0.014509104 | 0.001355105 |
| 0.056499706 | 0.016171678 | 0.015037658 | 0.062585467 |

|             |             |             |             |
|-------------|-------------|-------------|-------------|
| 0.02794413  | 0.077428098 | 0.000345756 | 0.017008247 |
| 0.018458096 | 0.045611328 | 0.025714582 | 0.040277842 |
| 0.055056978 | 0.015650288 | 0.001337366 | 0.063001823 |
| 0.019680105 | 0.024833656 | 0.009798444 | 0.054997334 |
| 1.30E-05    | 0.043868192 | 0.035138467 | 0.000277157 |
| 0.062314683 | 0.111533959 | 0.011465567 | 0.011101973 |
| 0.032966123 | 0.053262971 | 0.025856554 | 0.020847276 |
| 0.000731989 | 0.000111335 | 0.037841514 | 0.049870888 |
| 0.028150639 | 0.035240939 | 0.016017545 | 8.53E-05    |
| 0.040394095 | 0.007859554 | 0.031858417 | 0.011063471 |
| 0.032285618 | 0.017011017 | 0.030363385 | 0.011306597 |
| 7.34E-06    | 0.026254195 | 0.01820037  | 0.002796357 |
| 0.019421289 | 0.003044906 | 0.050391126 | 0.06411133  |
| 0.028800353 | 0.001669172 | 0.021354877 | 0.04859091  |
| 0.063800583 | 0.052339356 | 0.000345184 | 0.034923262 |
| 0.040271196 | 0.032124699 | 0.044618195 | 0.035936961 |
| 0.023769702 | 0.079846542 | 0.045985665 | 0.019807386 |
| 1.89E-06    | 0.019754029 | 0.017589828 | 0.070091588 |
| 0.026769085 | 0.062782498 | 0.002489495 | 0.012344192 |
| 1.49E-05    | 0.038165214 | 0.003311593 | 0.052007166 |
| 0.043316844 | 0.007559342 | 0.000226836 | 0.04427033  |
| 0.016699058 | 4.20E-05    | 0.044472503 | 0.055873624 |
| 0.062167153 | 0.037256279 | 0.073063481 | 0.019062623 |
| 0.002084976 | 0.006872098 | 1           | 0.051108247 |
| 0.018948286 | 5.68E-05    | 0.031616665 | 0.037792795 |
| 0.035775406 | 0.079667981 | 0.054023033 | 0.000118294 |
| 0.012294413 | 0.003309476 | 0.039293947 | 0.003042755 |
| 0.039720364 | 0.073257729 | 0.065572407 | 0.022865248 |
| 0.02938445  | 0.073073162 | 0.07025189  | 0.041751865 |
| 0.00065992  | 0.017152531 | 0.022361378 | 0.002391335 |
| 0.010212942 | 0.040977187 | 0.031023587 | 0.093908137 |
| 0.032204583 | 0.009264919 | 0.072039796 | 0.009497594 |
| 0.072295167 | 0.040964112 | 0.021829694 | 0.006788503 |
| 0.078532819 | 0.019772417 | 0.069970907 | 0.027202409 |
| 0.060127095 | 0.000346148 | 0.000453911 | 0.054733876 |
| 0.069761068 | 0.09882918  | 0.031165217 | 0.014456684 |
| 0.032410563 | 0.005227908 | 0.027652019 | 0.020052065 |
| 0.031405128 | 0.012351896 | 0.012912238 | 0.000128285 |
| 0.000252129 | 0.001811171 | 0.087089335 | 0.069581145 |
| 0.027555565 | 0.032409496 | 0.068871488 | 0.082471408 |
| 0.031268224 | 0.006841127 | 0.062949365 | 0.020210547 |
| 0.080903617 | 0.009515591 | 0.052895846 | 0.024143501 |
| 0.032906865 | 0.045841926 | 0.040348681 | 3.65E-05    |
| 0.020314423 | 0.031366593 | 0.002282622 | 0.066321396 |
| 0.017353618 | 0.037608937 | 0.08590812  | 0.01308994  |
| 0.000396691 | 8.44E-06    | 0.037221058 | 0.015202739 |
| 0.082445286 | 0.001941528 | 0.022781789 | 0.000643446 |
| 0.051824861 | 0.023418466 | 0.025636365 | 0.00440871  |
| 0.028464627 | 0.000110645 | 0.05005161  | 0.001469723 |
| 0.030616074 | 0.055716301 | 0.017796203 | 0.009476774 |
| 0.002028685 | 0.042594592 | 0.062603473 | 0.046568871 |
| 0.044637637 | 0.000417543 | 0.035986701 | 0.01208538  |
| 0.014306904 | 0.005719054 | 0.064361193 | 0.006213051 |
| 0.093243034 | 0.000322542 | 0.040074067 | 0.003160049 |

|             |             |             |             |
|-------------|-------------|-------------|-------------|
| 0.035346463 | 0.008038379 | 0.060880295 | 0.00286457  |
| 0.013851638 | 0.033442487 | 0.020263189 | 0.022447049 |
| 0.03282082  | 0.013864693 | 0.007085807 | 0.078444885 |
| 0.001364991 | 0.00974667  | 0.004022533 | 0.00488646  |
| 0.004172521 | 0.043703378 | 0.024290052 | 0.032392249 |
| 0.037305052 | 0.001256815 | 0.025969241 | 0.009548029 |
| 0.000359698 | 0.011697389 | 0.109473804 | 0.003404279 |
| 0.033467333 | 0.002944823 | 1.04E-05    | 0.004709547 |
| 0.054166421 | 0.004596595 |             |             |
| PHTF2       | 0.188028701 | 0.501445496 | 0.082008691 |
| 0.065217452 | 0.157100582 | 0.214223724 | 0.224825996 |
| 0.203728398 | 0.094101124 | 0.176944347 | 0.318366842 |
| 0.000745358 | 0.304935112 | 0.010491138 | 0.054227796 |
| 0.468699545 | 0.482313743 | 0.287697488 | 0.457106843 |
| 0.187610684 | 0.184590536 | 0.25866952  | 0.301999848 |
| 0.225149685 | 0.001041158 | 0.163091242 | 0.100476015 |
| 0.192955762 | 0.443870833 | 0.169709914 | 0.265525815 |
| 0.401177754 | 0.419250864 | 0.299955106 | 0.271136368 |
| 0.186674473 | 0.469492473 | 0.07776858  | 0.342246492 |
| 0.317072011 | 0.255161861 | 0.396088781 | 0.011713143 |
| 0.009054727 | 0.125852359 | 0.180069231 | 0.270767165 |
| 0.178795323 | 0.204132296 | 0.146944245 | 0.203550852 |
| 0.097190613 | 0.330579876 | 0.298393213 | 0.104769305 |
| 0.440342369 | 0.013078708 | 0.465719145 | 0.129480136 |
| 0.069180261 | 0.21123605  | 0.190277873 | 0.283326013 |
| 0.229060024 | 0.462426564 | 0.497051126 | 0.058296606 |
| 0.087691107 | 0.245421784 | 0.330246063 | 0.330318565 |
| 0.44409779  | 0.279144555 | 0.264096068 | 0.210238685 |
| 0.320000992 | 0.324134657 | 0.215974723 | 0.15094133  |
| 0.00094811  | 0.176980169 | 0.308200873 | 0.196725746 |
| 0.238981763 | 0.348743125 | 0.21814131  | 0.227290224 |
| 0.278634615 | 0.021461341 | 0.266811274 | 0.50015435  |
| 0.032609987 | 0.308412154 | 0.015040109 | 0.13048702  |
| 0.362465607 | 0.396052355 | 0.278823436 | 0.101054456 |
| 0.013616067 | 0.096252198 | 0.072469858 | 0.321952962 |
| 0.24717595  | 0.299084092 | 0.414259587 | 0.058218414 |
| 0.285210302 | 0.12059789  | 0.264733124 | 0.485563143 |
| 0.459591543 | 0.006282589 | 0.1061688   | 0.211582861 |
| 0.217316654 | 0.154596717 | 0.223547202 | 0.032297899 |
| 0.028239567 | 0.0082181   | 0.413861151 | 0.132807985 |
| 0.139605719 | 0.208036519 | 0.122639404 | 0.323301195 |
| 0.195450983 | 0.350628389 | 0.149945519 | 0.243229937 |
| 0.321091577 | 0.244808062 | 0.344004375 | 0.346741205 |
| 0.294545676 | 0.15773741  | 0.132264738 | 0.467782284 |
| 0.406099349 | 0.088242187 | 0.085575847 | 0.274277626 |
| 0.28764305  | 0.456914107 | 0.510895984 | 0.201607095 |
| 0.283134041 | 0.183748854 | 0.244933264 | 0.339474214 |
| 0.219524217 | 0.199131098 | 0.043100346 | 0.29823407  |
| 0.439867515 | 0.031894406 | 0.071787691 | 0.334831668 |
| 0.098841225 | 0.220273745 | 0.430210676 | 0.397560271 |
| 0.279680673 | 0.084193677 | 0.262541429 | 0.245163612 |
| 0.209088624 | 0.242964293 | 0.264815604 | 0.240151647 |
| 0.236833205 | 0.264023921 | 0.065913444 | 0.29519464  |
| 0.126714443 | 0.221268335 | 0.160691675 | 0.04431564  |



|             |             |             |             |
|-------------|-------------|-------------|-------------|
| 0.220669636 | 0.203020133 | 0.437079364 | 0.255024617 |
| 0.278743919 | 0.016972806 | 0.18554292  | 0.20733816  |
| 0.219629039 | 0.316512826 | 0.518090914 | 0.113314155 |
| 0.183797046 | 0.169256941 | 0.128834205 | 0.293705629 |
| 0.308671946 | 0.22727586  | 0.194907299 | 0.001033673 |
| 0.156376749 | 0.252039196 | 0.249154785 | 0.035222675 |
| 0.272239985 | 0.095548481 | 0.058753618 | 0.444704784 |
| 0.188773588 | 0.394633539 | 0.014278246 | 0.063050841 |
| 0.225202014 | 0.395232566 | 0.322765983 | 0.158139446 |
| 0.413452207 | 0.28203135  | 0.353858513 | 0.364013262 |
| 0.250284426 | 0.345404211 | 0.071835221 | 0.184877684 |
| 0.270068376 | 0.452047883 | 0.38931583  | 0.396315738 |
| 0.234996515 | 0.226181565 | 0.192550865 | 0.230765791 |
| 0.243340062 | 0.254021136 | 0.084932506 | 0.498453115 |
| 0.000613432 | 0.254397848 | 0.320324427 | 0.073191585 |
| 0.509190059 | 0.237235469 | 0.066020745 | 0.162265611 |
| 0.467929291 | 0.49311103  | 0.351007342 | 0.385348473 |
| 0.128655927 | 0.006981586 | 0.436937558 | 0.332653088 |
| 0.453422835 | 0.290415846 | 0.257662673 | 0.032322848 |
| 0.467758771 | 0.167259279 | 0.293704128 | 0.245282256 |
| 0.289815147 | 0.248780773 | 0.180766668 | 0.200043236 |
| 0.008035595 | 0.223727533 | 0.277881588 | 0.186297087 |
| 0.285230145 | 0.146595875 | 0.432594648 | 0.271166837 |
| 0.309724064 | 0.199554713 | 0.301056789 | 0.106503413 |
| 0.164267226 | 0.504116748 | 0.031832719 | 0.411128715 |
| 0.500046743 | 0.239336307 | 0.476873522 | 0.479572761 |
| 0.219865525 | 0.377313391 | 0.458789587 | 0.352873226 |
| 0.000540231 | 0.367338284 | 0.290290986 | 0.324434035 |
| 0.420646954 | 0.231224023 | 0.106621009 | 0.253885064 |
| 0.000809773 | 0.137066767 | 0.194747147 | 0.468885983 |
| 0.460168901 | 0.037901054 | 0.02896207  | 0.40106653  |
| 0.269937409 | 0.0259626   | 0.506494551 | 0.28849747  |
| 0.474562862 | 0.310866413 | 0.188194931 | 0.332345685 |
| 0.145065676 | 0.205963332 | 0.051108247 | 1           |
| 0.251797462 | 0.03128545  | 0.135963938 | 0.476123064 |
| 0.403381374 | 0.343113564 | 0.207538446 | 0.018961919 |
| 0.295203403 | 0.23070008  | 0.394008685 | 0.104761119 |
| 0.371241276 | 0.327250332 | 0.459308448 | 0.352306529 |
| 0.284271851 | 0.408631121 | 0.370554092 | 0.420810916 |
| 0.130372673 | 0.344853492 | 0.385917476 | 0.081681729 |
| 0.203719578 | 0.464835563 | 0.314353996 | 0.18388112  |
| 0.257641965 | 0.146125321 | 0.187404475 | 0.173862452 |
| 0.470772944 | 0.464659345 | 0.068524247 | 0.114061057 |
| 0.417830091 | 0.222892254 | 0.124105035 | 0.235052066 |
| 0.218922109 | 0.098116986 | 0.055604045 | 0.294881924 |
| 0.483471376 | 0.278467925 | 0.429631275 | 0.20652177  |
| 0.4249255   | 0.047044974 | 0.35038678  | 0.227678918 |
| 0.203671192 | 0.236971191 | 0.308378918 | 0.061370734 |
| 0.034665145 | 0.097523945 | 0.40758816  | 0.409873177 |
| 0.086107424 | 0.155612902 | 0.2574139   | 0.315663205 |
| 0.46241545  | 0.300685232 | 0.229993225 | 0.226833947 |
| 0.419675873 | 0.141341209 | 0.475562844 | 0.226944404 |
| 0.327535412 | 0.307818368 | 0.384016831 | 0.007254979 |
| 0.284128561 | 0.204265556 | 0.091489559 | 0.327893436 |

|             |             |             |             |
|-------------|-------------|-------------|-------------|
| 0.371203414 | 0.144784682 | 0.344488042 | 0.129887347 |
| 0.13986032  | 0.002326202 | 0.265310933 | 0.24040844  |
| 0.260998283 | 0.150727932 | 0.240450798 | 0.098543019 |
| 0.515883559 | 0.262544184 | 0.332835503 | 0.143229547 |
| 0.313221009 | 0.022353255 | 0.183411522 | 0.034641368 |
| 0.299901503 | 0.325797241 | 0.238733977 | 0.215265781 |
| 0.096705403 | 0.310075269 | 0.311184598 | 0.331825251 |
| 0.466226281 | 0.149539226 | 0.491333604 | 0.180110474 |
| 0.312393692 | 0.261007081 | 0.213085244 | 0.221153105 |
| 0.212916798 | 0.078217803 | 0.119830895 | 0.094284768 |
| 0.460787802 | 0.198883311 | 0.329762131 | 0.190647308 |
| 0.071781051 | 0.323099974 | 0.305739683 | 0.32245118  |
| 0.311220923 | 0.268074688 | 0.227151377 | 0.393446522 |
| 0.165736433 | 0.173979671 | 0.101328749 | 0.068982986 |
| 0.240061813 | 0.189883343 | 0.338962412 | 0.381763217 |
| 0.471963583 | 0.138667589 | 0.102425314 | 0.10136216  |
| 0.05834725  | 0.273251377 | 0.258502469 | 0.157899904 |
| 0.279403244 | 0.151057199 | 0.00074397  | 0.13321838  |
| 0.320435343 | 0.286565325 |             |             |
| PIGF        | 0.144710753 | 0.449312466 | 0.024494645 |
| 0.010517419 | 0.066687466 | 0.130015685 | 0.120421281 |
| 0.118145479 | 0.043959464 | 0.048714165 | 0.226358647 |
| 0.000349614 | 0.365237546 | 0.004477025 | 0.038343422 |
| 0.456225425 | 0.48757819  | 0.198215012 | 0.481304358 |
| 0.114259424 | 0.056241697 | 0.217811441 | 0.178420871 |
| 0.131136315 | 0.000423451 | 0.053012209 | 0.01711355  |
| 0.129460171 | 0.456563173 | 0.078617695 | 0.090062272 |
| 0.39790606  | 0.42265334  | 0.150060516 | 0.163639031 |
| 0.117806093 | 0.3961316   | 0.136396713 | 0.375259267 |
| 0.383561789 | 0.092744465 | 0.403525304 | 0.007581686 |
| 0.002362368 | 0.044195795 | 0.110721646 | 0.210375835 |
| 0.116445934 | 0.104188481 | 0.071752183 | 0.075568719 |
| 0.06076076  | 0.255666818 | 0.293382844 | 0.067448926 |
| 0.354804509 | 0.001663708 | 0.39483656  | 0.07698106  |
| 0.028359435 | 0.12792757  | 0.138258077 | 0.241769149 |
| 0.160521796 | 0.376790062 | 0.48575253  | 0.017115864 |
| 0.029772503 | 0.199388695 | 0.322485896 | 0.236658586 |
| 0.39953518  | 0.103123122 | 0.120418719 | 0.185970528 |
| 0.307353304 | 0.346024563 | 0.176616749 | 0.076027187 |
| 0.000259758 | 0.064045299 | 0.153211145 | 0.220970359 |
| 0.248054221 | 0.26171587  | 0.211319259 | 0.10490152  |
| 0.162459726 | 0.006686062 | 0.187213545 | 0.482020603 |
| 0.008547351 | 0.371228608 | 0.005684081 | 0.072466479 |
| 0.347621906 | 0.426371069 | 0.237279522 | 0.03039113  |
| 0.005766621 | 0.051729879 | 0.044473318 | 0.387800839 |
| 0.197237721 | 0.199114447 | 0.345661245 | 0.081839638 |
| 0.351295175 | 0.053278188 | 0.156748701 | 0.388265146 |
| 0.418505304 | 0.003623976 | 0.060206603 | 0.118477764 |
| 0.164190418 | 0.068762416 | 0.119795872 | 0.009763424 |
| 0.003353553 | 0.007434438 | 0.419434685 | 0.057550063 |
| 0.043028456 | 0.084368662 | 0.032993056 | 0.281299308 |
| 0.120120839 | 0.40111153  | 0.077321613 | 0.104871434 |
| 0.312923298 | 0.143598712 | 0.171234724 | 0.333600614 |
| 0.196461029 | 0.096946413 | 0.050957824 | 0.424823725 |

|             |             |             |             |
|-------------|-------------|-------------|-------------|
| 0.361743425 | 0.029377426 | 0.02928571  | 0.18868928  |
| 0.352910078 | 0.4389662   | 0.484454222 | 0.110296366 |
| 0.132179299 | 0.10006128  | 0.101580433 | 0.235382735 |
| 0.140062306 | 0.1683216   | 0.045100965 | 0.257960923 |
| 0.351183025 | 0.012421851 | 0.02513359  | 0.341999225 |
| 0.041253662 | 0.136077444 | 0.363081649 | 0.36925486  |
| 0.274731737 | 0.012899389 | 0.080474817 | 0.125557954 |
| 0.133656811 | 0.098371861 | 0.255740795 | 0.07339259  |
| 0.177137037 | 0.098541502 | 0.020881931 | 0.358213873 |
| 0.049438357 | 0.17554017  | 0.102593283 | 0.037202526 |
| 0.243861929 | 0.128856605 | 0.361669569 | 0.218262935 |
| 0.273859397 | 0.001258514 | 0.045569282 | 0.178138987 |
| 0.089516151 | 0.378205618 | 0.445966188 | 0.04789102  |
| 0.127601505 | 0.194598336 | 0.058325187 | 0.174639823 |
| 0.334051688 | 0.076270003 | 0.066591274 | 0.000106628 |
| 0.066232495 | 0.115889415 | 0.190575957 | 0.016502186 |
| 0.104807576 | 0.033987768 | 0.044004329 | 0.400297538 |
| 0.086631318 | 0.393474463 | 0.009808121 | 0.082849024 |
| 0.090613367 | 0.329329072 | 0.130803459 | 0.078504664 |
| 0.357132423 | 0.099313858 | 0.391864939 | 0.308710443 |
| 0.163582953 | 0.237082475 | 0.113716397 | 0.111396114 |
| 0.242724513 | 0.430942632 | 0.364454799 | 0.398478185 |
| 0.103172986 | 0.263627747 | 0.108901557 | 0.160181122 |
| 0.183389034 | 0.2080576   | 0.027928898 | 0.465257082 |
| 0.000156415 | 0.192584855 | 0.225804821 | 0.085683669 |
| 0.427183003 | 0.14496621  | 0.024694232 | 0.085752081 |
| 0.484840859 | 0.467523406 | 0.371580733 | 0.381838308 |
| 0.087824604 | 0.003049285 | 0.430685231 | 0.290808679 |
| 0.471679224 | 0.179284016 | 0.181180607 | 0.05838326  |
| 0.432674219 | 0.197574328 | 0.228737546 | 0.162034554 |
| 0.273878231 | 0.196718814 | 0.110228416 | 0.244812745 |
| 0.005551941 | 0.076649216 | 0.216509514 | 0.071786606 |
| 0.101594339 | 0.067958929 | 0.399977612 | 0.228320951 |
| 0.185286247 | 0.079622883 | 0.142789044 | 0.034948263 |
| 0.087211318 | 0.442841485 | 0.060804431 | 0.406430079 |
| 0.483122557 | 0.205477891 | 0.421145945 | 0.469911299 |
| 0.122843326 | 0.313454629 | 0.404769409 | 0.405993426 |
| 0.000239002 | 0.401236111 | 0.343341729 | 0.265962268 |
| 0.381290391 | 0.158748207 | 0.096297399 | 0.172911611 |
| 0.001643272 | 0.058456996 | 0.094216431 | 0.439338421 |
| 0.426876926 | 0.013892774 | 0.073262581 | 0.362670078 |
| 0.302901793 | 0.02607878  | 0.471509717 | 0.135497719 |
| 0.402640708 | 0.207449189 | 0.066685488 | 0.369926401 |
| 0.081571252 | 0.16128301  | 0.018948286 | 0.251797462 |
| 1           | 0.060853902 | 0.035298217 | 0.479267788 |
| 0.335273986 | 0.287949416 | 0.135895127 | 0.001337799 |
| 0.339390342 | 0.066358231 | 0.329946038 | 0.053690165 |
| 0.326496828 | 0.270332101 | 0.409689434 | 0.386344765 |
| 0.259200918 | 0.323158807 | 0.280555914 | 0.354347182 |
| 0.05640065  | 0.329137188 | 0.370780387 | 0.018168483 |
| 0.194705267 | 0.446016478 | 0.167737137 | 0.089876053 |
| 0.226633567 | 0.050716839 | 0.106523828 | 0.135828998 |
| 0.395101796 | 0.423919528 | 0.020998353 | 0.067145123 |
| 0.323176085 | 0.126197448 | 0.052349909 | 0.152187735 |

|             |             |             |             |
|-------------|-------------|-------------|-------------|
| 0.170721513 | 0.055214    | 0.087296588 | 0.25992126  |
| 0.405823856 | 0.200543997 | 0.368734885 | 0.053082933 |
| 0.443413995 | 0.021212054 | 0.386610765 | 0.131131485 |
| 0.132372936 | 0.194242848 | 0.34760317  | 0.036680427 |
| 0.004206706 | 0.033715876 | 0.313478103 | 0.333794227 |
| 0.028185157 | 0.077242795 | 0.094191896 | 0.182214147 |
| 0.452593515 | 0.13302062  | 0.152447973 | 0.131951483 |
| 0.34681019  | 0.046439627 | 0.42105081  | 0.130691647 |
| 0.282883846 | 0.125710529 | 0.364619395 | 0.004059471 |
| 0.278825623 | 0.054252765 | 0.079058861 | 0.171707373 |
| 0.41404896  | 0.048650045 | 0.284425764 | 0.058660679 |
| 0.073823516 | 0.001549454 | 0.239019611 | 0.1679634   |
| 0.186542278 | 0.11557354  | 0.143069244 | 0.078074211 |
| 0.473231805 | 0.164523205 | 0.284154213 | 0.166852257 |
| 0.128513936 | 0.025073885 | 0.057381327 | 0.011088028 |
| 0.261936666 | 0.295166814 | 0.24827499  | 0.141038606 |
| 0.070252258 | 0.304335715 | 0.263655316 | 0.187289274 |
| 0.432832927 | 0.050973242 | 0.466438799 | 0.135650142 |
| 0.371643013 | 0.132969779 | 0.151634835 | 0.145776111 |
| 0.097416214 | 0.079047564 | 0.054868082 | 0.056738113 |
| 0.43962493  | 0.188906488 | 0.190432376 | 0.084013944 |
| 0.017450691 | 0.146726658 | 0.338767411 | 0.334476949 |
| 0.211789269 | 0.248621944 | 0.132630908 | 0.32396903  |
| 0.099201197 | 0.098902255 | 0.023173487 | 0.013204158 |
| 0.094466895 | 0.068862073 | 0.347714257 | 0.376456739 |
| 0.479262708 | 0.106110916 | 0.038096933 | 0.05053025  |
| 0.095484149 | 0.29654167  | 0.163243471 | 0.110753582 |
| 0.277177742 | 0.127385582 | 0.000129288 | 0.077361896 |
| 0.261041273 | 0.136269866 |             |             |
| PIH1D1      | 0.097472215 | 0.100286948 | 0.001476234 |
|             |             |             | 1.43E-05    |
| 0.000513333 | 0.02775159  | 0.015147896 | 0.055167929 |
| 0.006473883 | 0.002481444 | 0.040405374 | 0.00046533  |
| 0.107107807 | 0.001475717 | 0.001541701 | 0.134187535 |
| 0.130507755 | 0.025459677 | 0.1485157   | 0.07023633  |
| 0.000725679 | 0.083817992 | 0.030606404 | 0.029830006 |
| 0.000305315 | 0.003366939 | 0.000141461 | 0.053022822 |
| 0.135778859 | 0.02787316  | 0.004828503 | 0.143143962 |
| 0.088336459 | 0.011861003 | 0.002397841 | 0.004029498 |
| 0.08753055  | 0.002291778 | 0.07188408  | 0.154860194 |
| 0.005820554 | 0.097658202 | 0.00247988  | 3.32E-06    |
| 0.003720444 | 0.046048493 | 0.064562292 | 0.059750703 |
| 0.022595177 | 0.024966046 | 0.006012742 | 0.001215115 |
| 0.053417916 | 0.13896929  | 0.003174753 | 0.061518973 |
| 2.17E-06    | 0.082321227 | 0.059936998 | 0.005876908 |
| 0.054771375 | 0.079440004 | 0.080690959 | 0.028963596 |
| 0.067900148 | 0.119168779 | 0.000269682 | 0.006273429 |
| 0.077841445 | 0.089454175 | 0.02897905  | 0.095975582 |
| 0.004063476 | 0.006519446 | 0.039131456 | 0.074737028 |
| 0.108343268 | 0.053941773 | 0.008616491 | 9.12E-05    |
| 0.006881294 | 0.0055807   | 0.167409966 | 0.051031003 |
| 0.051172428 | 0.105429688 | 0.007448386 | 0.034461304 |
| 0.000436576 | 0.04468474  | 0.117158925 | 7.85E-05    |
| 0.13689912  | 2.56E-05    | 0.006147339 | 0.102745349 |
| 0.143156371 | 0.082870893 | 0.001872247 | 0.000289755 |

|             |             |             |             |
|-------------|-------------|-------------|-------------|
| 0.016234633 | 0.020082398 | 0.153501926 | 0.083726897 |
| 0.039635471 | 0.066993623 | 0.043046373 | 0.111103868 |
| 0.008955396 | 0.019898509 | 0.075555836 | 0.119286656 |
| 0.000268643 | 0.017466982 | 0.021190714 | 0.007314053 |
| 0.000520678 | 0.017185396 | 0.000151767 | 1.62E-05    |
| 0.002639303 | 0.129157921 | 0.013832917 | 0.002753463 |
| 0.012448995 | 0.000112179 | 0.035766618 | 0.048085209 |
| 0.185211139 | 0.001415082 | 0.014683525 | 0.059511076 |
| 0.018475192 | 0.014444616 | 0.078326379 | 0.009106305 |
| 0.034455893 | 0.012234611 | 0.076820672 | 0.102544694 |
| 0.000958464 | 0.002765269 | 0.039597361 | 0.098547918 |
| 0.12178929  | 0.123812742 | 0.016170928 | 0.005214323 |
| 0.041386326 | 0.012992783 | 0.028552921 | 0.024807907 |
| 0.090552471 | 0.002509634 | 0.061299273 | 0.068180034 |
| 0.000152605 | 0.005097821 | 0.108719189 | 3.61E-05    |
| 0.00492942  | 0.090880759 | 0.069202243 | 0.055751222 |
| 9.28E-05    | 0.004949077 | 0.022008386 | 0.056301905 |
| 0.014157197 | 0.097191713 | 0.004575802 | 0.051723746 |
| 0.009442686 | 0.001897342 | 0.107018875 | 0.010600247 |
| 0.070753465 | 0.013204    | 0.007979199 | 0.113223158 |
| 0.047873406 | 0.070665431 | 0.070505718 | 0.113099359 |
| 7.84E-07    | 0.002014976 | 0.099552708 | 0.013493251 |
| 0.152531754 | 0.085285799 | 0.013608818 | 0.054251864 |
| 0.043964703 | 0.019202886 | 0.009338424 | 0.173550994 |
| 0.003348169 | 0.003005554 | 2.30E-05    | 0.001570146 |
| 0.0195187   | 0.07408553  | 0.005896232 | 0.002907967 |
| 0.004265089 | 0.005646973 | 0.090732535 | 0.019301615 |
| 0.066334885 | 0.002209939 | 0.058394387 | 0.011583049 |
| 0.048020163 | 0.008282226 | 0.011791063 | 0.054314018 |
| 0.007568701 | 0.139549672 | 0.081042941 | 0.00628719  |
| 0.041784469 | 0.018598351 | 0.048008028 | 0.046325081 |
| 0.086128174 | 0.076058471 | 0.076843972 | 0.020328655 |
| 0.143875732 | 0.003137337 | 0.037058059 | 0.058797504 |
| 0.062204112 | 0.004752713 | 0.105097853 | 0.000104307 |
| 0.043967631 | 0.031640221 | 0.016877213 | 0.076436276 |
| 0.018525594 | 0.006762817 | 0.037386068 | 0.143844833 |
| 0.10880986  | 0.161559944 | 0.104926234 | 0.008527643 |
| 0.000925525 | 0.141954924 | 0.077502915 | 0.137419938 |
| 0.035933737 | 0.006873231 | 0.007203723 | 0.092108431 |
| 0.116341639 | 0.058733389 | 0.045351199 | 0.047839683 |
| 0.023951718 | 0.043541488 | 0.169991178 | 0.001079679 |
| 0.013652867 | 0.053898219 | 0.001115081 | 0.008078301 |
| 0.002465638 | 0.074499702 | 0.055454803 | 0.009095935 |
| 0.007987163 | 0.007756901 | 0.002946087 | 0.021850635 |
| 0.099653721 | 0.000793139 | 0.140700554 | 0.122913082 |
| 0.070769122 | 0.075305513 | 0.132130655 | 0.048531162 |
| 0.059724369 | 0.087768196 | 0.173344629 | 0.000171098 |
| 0.117277821 | 0.082284454 | 0.067447611 | 0.093994264 |
| 0.043229682 | 0.087431585 | 0.026376638 | 0.001664667 |
| 0.021088712 | 0.003654169 | 0.120577473 | 0.074686082 |
| 0.000622429 | 0.001121001 | 0.064076136 | 0.066947206 |
| 0.00063575  | 0.120661424 | 0.02197828  | 0.065809612 |
| 0.030287082 | 0.009098965 | 0.098340217 | 0.005887796 |
| 0.03849956  | 5.68E-05    | 0.03128545  | 0.060853902 |
|             |             |             | 1           |

|             |             |             |             |
|-------------|-------------|-------------|-------------|
| 0.000528041 | 0.139461119 | 0.088811872 | 0.04619033  |
| 0.034485383 | 2.82E-05    | 0.163559558 | 0.000734599 |
| 0.052487738 | 0.001583727 | 0.086063827 | 0.061480036 |
| 0.076728798 | 0.097144985 | 0.064545559 | 0.061361947 |
| 0.057982709 | 0.075867227 | 0.000126831 | 0.090298465 |
| 0.115343985 | 0.000126978 | 0.087325113 | 0.092724811 |
| 0.022539428 | 0.015237129 | 0.080949355 | 7.82E-05    |
| 0.0241196   | 0.10437185  | 0.064717111 | 0.090329893 |
| 0.003530525 | 0.018223334 | 0.055222524 | 0.023438214 |
| 0.008099449 | 0.045402978 | 0.05100379  | 0.004734256 |
| 0.066951479 | 0.076013489 | 0.078270457 | 0.031633151 |
| 0.088786896 | 0.001162735 | 0.106817568 | 0.003538848 |
| 0.13282094  | 0.006915416 | 0.049668666 | 0.052870057 |
| 0.136373218 | 0.006197113 | 9.69E-05    | 0.004429387 |
| 0.048627013 | 0.070523914 | 0.00462578  | 0.029601165 |
| 0.011643862 | 0.017689012 | 0.115156107 | 0.007068359 |
| 0.032012058 | 0.045111567 | 0.070484545 | 0.000327704 |
| 0.107699026 | 0.053508624 | 0.103133541 | 0.012415295 |
| 0.083103954 | 0.000503726 | 0.068454677 | 0.003450974 |
| 0.118884123 | 0.015907141 | 0.153435786 | 0.00600374  |
| 0.040813931 | 0.018036254 | 0.00092757  | 0.000131787 |
| 0.083452149 | 0.020351976 | 0.041267155 | 0.021276428 |
| 0.048235251 | 0.002891649 | 0.115064413 | 0.049210467 |
| 0.100910165 | 0.051082707 | 0.012879588 | 4.65E-05    |
| 0.003863367 | 0.000669924 | 0.102565608 | 0.080739207 |
| 0.111600814 | 0.061176477 | 0.068397199 | 0.048858479 |
| 0.056095251 | 0.016825315 | 0.080959927 | 0.000509205 |
| 0.115726054 | 0.066231099 | 0.117519192 | 0.011347778 |
| 0.038740918 | 0.013775062 | 0.009230389 | 0.014287113 |
| 0.012176971 | 0.028455649 | 0.092580151 | 0.025736802 |
| 0.021124443 | 0.016711318 | 0.000515019 | 0.013737636 |
| 0.11308313  | 0.085462541 | 0.03751369  | 0.084600792 |
| 0.025013763 | 0.065574435 | 0.012995413 | 0.063989063 |
| 6.39E-05    | 4.49E-05    | 0.001576411 | 0.010743969 |
| 0.115636402 | 0.126908114 | 0.022717535 | 0.154645513 |
| 0.020120692 | 0.009976918 | 0.13311089  | 0.006493012 |
| 0.000509062 | 0.06578464  | 0.05854197  | 0.019838534 |
| 0.039002354 | 0.063740261 | 0.003895878 | 8.86E-06    |
| PIK3AP1     | 0.028757854 | 0.140829888 | 0.023597092 |
| 0.06991679  | 0.053538456 | 0.18234729  | 0.219886757 |
| 0.020023757 | 0.017111069 | 0.155603111 | 0.185790162 |
| 3.13E-05    | 0.038556781 | 0.001206689 | 0.00514085  |
| 0.087420505 | 0.092482312 | 0.142972092 | 0.077740134 |
| 0.025636216 | 0.145382317 | 0.068855129 | 0.157509509 |
| 0.156405578 | 9.54E-05    | 0.191110716 | 0.195050391 |
| 0.015108333 | 0.070913448 | 0.063510999 | 0.04569099  |
| 0.071388862 | 0.078116494 | 0.055437614 | 0.0326994   |
| 0.021051929 | 0.147003695 | 0.002281279 | 0.065354816 |
| 0.039569399 | 0.167909744 | 0.077909197 | 0.002616282 |
| 0.015965268 | 0.108866388 | 0.011426261 | 0.086104969 |
| 0.021192743 | 0.157367067 | 0.06099411  | 0.250510594 |
| 0.002478306 | 0.158558136 | 0.052225798 | 0.002949057 |
| 0.191596272 | 0.044286552 | 0.168184103 | 0.008043648 |
| 0.032962157 | 0.046542573 | 0.026251216 | 0.080513236 |

|             |             |             |             |
|-------------|-------------|-------------|-------------|
| 0.201685346 | 0.187770573 | 0.113704192 | 0.046614898 |
| 0.093748789 | 0.039533259 | 0.062994625 | 0.175751327 |
| 0.115094135 | 0.031331569 | 0.055321401 | 0.02075731  |
| 0.07357612  | 0.044758386 | 0.096068912 | 0.021319889 |
| 0.00027778  | 0.226232691 | 0.097716296 | 0.026290507 |
| 0.037879118 | 0.16740087  | 0.034825627 | 0.137191647 |
| 0.05314864  | 0.006159767 | 0.07852801  | 0.104766547 |
| 0.021439312 | 0.045869357 | 0.001954259 | 0.012365543 |
| 0.06563303  | 0.057582887 | 0.063420311 | 0.07315114  |
| 0.002842621 | 0.01439358  | 0.001716441 | 0.037537415 |
| 0.048451444 | 0.062402364 | 0.182165356 | 0.001344262 |
| 0.033241295 | 0.013754477 | 0.044013571 | 0.174783815 |
| 0.105513941 | 0.000472766 | 0.008476112 | 0.152032177 |
| 0.019446387 | 0.091542681 | 0.143591247 | 0.001493929 |
| 0.006791675 | 6.55E-05    | 0.070671161 | 0.021373206 |
| 0.200086142 | 0.169534973 | 0.035716848 | 0.121653247 |
| 0.013445832 | 0.047608055 | 0.054727512 | 0.172694162 |
| 0.065597947 | 0.219595985 | 0.110113238 | 0.082812488 |
| 0.040729366 | 0.012050284 | 0.039070702 | 0.148584148 |
| 0.114781927 | 0.029649539 | 0.02237532  | 0.155709391 |
| 0.037326569 | 0.085572054 | 0.112237819 | 0.009771176 |
| 0.111774967 | 0.048599835 | 0.067778156 | 0.197487203 |
| 0.138232737 | 0.029016415 | 0.000388641 | 0.111108357 |
| 0.18884882  | 0.001325423 | 0.036926803 | 0.056304772 |
| 0.055943763 | 0.041294442 | 0.132071513 | 0.104227328 |
| 0.055623287 | 0.191967224 | 0.190847477 | 0.199965604 |
| 0.069774669 | 0.182311587 | 0.069777448 | 0.200120868 |
| 0.108736472 | 0.080478482 | 0.043974798 | 0.037182485 |
| 0.069164981 | 0.061947625 | 0.008236963 | 0.004065326 |
| 0.033954044 | 0.016617354 | 0.129441551 | 0.050536685 |
| 0.051408768 | 0.045172379 | 0.15874228  | 0.040660514 |
| 0.043189703 | 0.036981195 | 0.166333791 | 0.069498807 |
| 0.061379811 | 0.007887863 | 0.05696087  | 0.077292187 |
| 0.045768566 | 0.061063974 | 0.073775075 | 0.000916611 |
| 0.028461265 | 0.051155788 | 0.040604128 | 0.002796356 |
| 0.074557169 | 0.018199668 | 0.001627201 | 0.119520837 |
| 0.111936064 | 0.091819193 | 0.000431781 | 0.001172803 |
| 0.058696824 | 0.184415309 | 0.052306049 | 0.007078849 |
| 0.15195547  | 0.049652294 | 0.045282955 | 0.145769197 |
| 0.036097002 | 0.207668081 | 0.001134876 | 0.031727473 |
| 0.048616287 | 0.114703062 | 0.08103867  | 0.084659149 |
| 0.106731229 | 0.031381555 | 0.005017928 | 0.137220869 |
| 0.048450118 | 0.042978468 | 0.01734419  | 0.124164947 |
| 0.000212907 | 0.091933037 | 0.112814598 | 0.001251158 |
| 0.163664172 | 0.233646973 | 0.019427463 | 0.019825609 |
| 0.081404384 | 0.119927334 | 0.057151609 | 0.063332451 |
| 0.002435402 | 0.000505759 | 0.08691889  | 0.122353592 |
| 0.076232335 | 0.061599447 | 0.029648587 | 0.000384865 |
| 0.102034874 | 0.017012527 | 0.114282261 | 0.044768086 |
| 0.067630485 | 0.022603189 | 0.048496805 | 0.024261545 |
| 0.00027747  | 0.104359994 | 0.073951105 | 0.079523671 |
| 0.124513501 | 0.020222989 | 0.124877401 | 0.117067033 |
| 0.041739882 | 0.010967307 | 0.0956425   | 0.093595622 |
| 0.107670712 | 0.13715783  | 0.000728394 | 0.079851269 |

|             |             |             |             |
|-------------|-------------|-------------|-------------|
| 0.101451939 | 0.053704113 | 0.128538759 | 0.090173001 |
| 0.062129953 | 0.174136193 | 0.124296329 | 0.047329353 |
| 2.39E-05    | 0.055706003 | 0.041371004 | 0.137857072 |
| 0.088965095 | 0.140042351 | 0.004753842 | 0.032274607 |
| 6.40E-05    | 0.072587795 | 0.016012694 | 0.115691251 |
| 0.10915911  | 0.02082676  | 0.000693053 | 0.100629364 |
| 0.040931076 | 0.000673776 | 0.115983584 | 0.163754739 |
| 0.155302697 | 0.06707296  | 0.187019792 | 0.053131357 |
| 0.010716949 | 0.012947709 | 0.031616665 | 0.135963938 |
| 0.035298217 | 0.000528041 | 1           | 0.092361128 |
| 0.103758061 | 0.16198406  | 0.105880647 | 0.026004585 |
| 0.034781258 | 0.064296504 | 0.125776613 | 0.010396069 |
| 0.08773288  | 0.15745554  | 0.138641286 | 0.06414669  |
| 0.064494615 | 0.169217545 | 0.172337932 | 0.121779797 |
| 0.018574151 | 0.059661542 | 0.068221898 | 0.034191175 |
| 0.027936389 | 0.109495037 | 0.136138754 | 0.186640754 |
| 0.073746484 | 0.054427259 | 0.145506993 | 0.021400633 |
| 0.165909395 | 0.117090666 | 0.049172762 | 0.008859062 |
| 0.196498299 | 0.03390312  | 0.105733045 | 0.040805241 |
| 0.121230138 | 0.002682185 | 0.000761848 | 0.110094516 |
| 0.174046334 | 0.203033612 | 0.103000727 | 0.138500309 |
| 0.07736664  | 0.006856507 | 0.059015442 | 0.026976325 |
| 0.061149355 | 0.051706295 | 0.037243322 | 0.000897097 |
| 0.030688866 | 0.009923904 | 0.21634317  | 0.163716053 |
| 0.049280999 | 0.059895889 | 0.162450184 | 0.197231916 |
| 0.087363861 | 0.02260225  | 0.124585492 | 0.03454736  |
| 0.175460486 | 0.127511024 | 0.126098894 | 0.051173474 |
| 0.085191278 | 0.11276299  | 0.093737666 | 0.002388707 |
| 0.064726509 | 0.168697647 | 0.004724499 | 0.205882304 |
| 0.050243517 | 0.072871174 | 0.187574098 | 0.026610544 |
| 0.014976225 | 7.26E-05    | 0.073103294 | 0.037876601 |
| 0.173188489 | 0.003654789 | 0.037210751 | 0.004031515 |
| 0.127849348 | 0.066250793 | 0.081106899 | 0.006393154 |
| 0.110847373 | 0.001616301 | 0.197557347 | 0.00806852  |
| 0.076999129 | 0.108662314 | 0.043440617 | 0.036100447 |
| 0.00396861  | 0.099676653 | 0.115624208 | 0.112532173 |
| 0.119103399 | 0.009031345 | 0.102590805 | 0.019224634 |
| 0.040864727 | 0.015864646 | 0.119373336 | 0.010666923 |
| 0.168969152 | 0.004263046 | 0.065376123 | 0.005158538 |
| 0.102313731 | 0.00962987  | 0.158623204 | 0.011687605 |
| 0.040238564 | 0.063592776 | 0.045191738 | 0.06456526  |
| 0.106280495 | 0.04866105  | 0.014075486 | 0.167375039 |
| 0.008233863 | 0.025008102 | 0.099790774 | 0.178201389 |
| 0.050982895 | 0.127796168 | 0.05729081  | 0.073020504 |
| 0.090910775 | 0.003300086 | 0.045845513 | 0.015617253 |
| 0.000816732 | 0.033348027 | 0.239827641 | 0.011176588 |
| 0.065387003 | 0.007584749 | 0.000111    | 0.009506084 |
| 0.123917363 | 0.014828924 |             |             |
| PLEK        | 0.415438882 | 0.508611199 | 0.088803694 |
| 0.030338746 | 0.135256869 | 0.28185221  | 0.263960326 |
| 0.426894813 | 0.148996037 | 0.162557724 | 0.373803118 |
| 0.003415264 | 0.441999626 | 0.025175253 | 0.110223616 |
| 0.500698507 | 0.51248893  | 0.389193968 | 0.505875772 |
| 0.398116596 | 0.16405786  | 0.43131361  | 0.423933709 |



|             |             |             |             |
|-------------|-------------|-------------|-------------|
| 0.309455919 | 0.003654736 | 0.147173984 | 0.055071717 |
| 0.4337887   | 0.494647332 | 0.259334595 | 0.314542207 |
| 0.479267191 | 0.489489768 | 0.445115576 | 0.354394519 |
| 0.272503198 | 0.487758085 | 0.157356544 | 0.480750706 |
| 0.430820247 | 0.259792249 | 0.500033699 | 0.024826459 |
| 0.003858639 | 0.128846695 | 0.389262432 | 0.448735831 |
| 0.387058844 | 0.263242755 | 0.223252918 | 0.203691029 |
| 0.196400618 | 0.407147651 | 0.464263204 | 0.191521938 |
| 0.451865473 | 0.00497926  | 0.481821019 | 0.327120454 |
| 0.092230806 | 0.390929288 | 0.429953125 | 0.472287845 |
| 0.295587051 | 0.465623263 | 0.516389627 | 0.046707693 |
| 0.097473174 | 0.497173163 | 0.459606817 | 0.458228447 |
| 0.50827463  | 0.372813181 | 0.343510791 | 0.430267492 |
| 0.494239226 | 0.458030282 | 0.350400589 | 0.232453864 |
| 0.001804972 | 0.179757397 | 0.353648349 | 0.41096511  |
| 0.449712676 | 0.408568916 | 0.456534587 | 0.257477801 |
| 0.47453281  | 0.029656808 | 0.443329806 | 0.513564516 |
| 0.027493362 | 0.470339951 | 0.014843597 | 0.212403712 |
| 0.49441912  | 0.467223623 | 0.472529074 | 0.094137552 |
| 0.023180817 | 0.178416692 | 0.208065921 | 0.410935331 |
| 0.47705507  | 0.509358505 | 0.450148965 | 0.199466183 |
| 0.397690194 | 0.22866903  | 0.42290571  | 0.482560817 |
| 0.501542142 | 0.014432222 | 0.224498526 | 0.268649961 |
| 0.392436834 | 0.159952895 | 0.277678073 | 0.049978056 |
| 0.014259698 | 0.036759218 | 0.485930857 | 0.211640487 |
| 0.122871232 | 0.243767473 | 0.099498988 | 0.4856932   |
| 0.412015304 | 0.455953282 | 0.148022707 | 0.297702323 |
| 0.481595666 | 0.297617183 | 0.446193137 | 0.505808256 |
| 0.410682328 | 0.3359446   | 0.195387823 | 0.501578291 |
| 0.47153245  | 0.09152308  | 0.111323627 | 0.37659023  |
| 0.41953347  | 0.500426422 | 0.516002737 | 0.377048362 |
| 0.298003095 | 0.310232081 | 0.358119305 | 0.432363783 |
| 0.296070892 | 0.427843814 | 0.126865848 | 0.416677121 |
| 0.448550272 | 0.048951046 | 0.091325648 | 0.503125401 |
| 0.059399509 | 0.297848446 | 0.487693718 | 0.516618568 |
| 0.509364216 | 0.045747806 | 0.259418828 | 0.307161404 |
| 0.364468994 | 0.293133326 | 0.479452521 | 0.240878897 |
| 0.376266459 | 0.357289526 | 0.065619002 | 0.410911585 |
| 0.161758091 | 0.408545008 | 0.358049541 | 0.091441429 |
| 0.475343659 | 0.423768693 | 0.506284727 | 0.485835845 |
| 0.466531853 | 0.004014126 | 0.15897051  | 0.437714259 |
| 0.344647519 | 0.43955129  | 0.504578333 | 0.151393281 |
| 0.322741514 | 0.389642208 | 0.190916997 | 0.372076649 |
| 0.463686545 | 0.259972583 | 0.234278151 | 0.001068241 |
| 0.175628716 | 0.405582729 | 0.490910485 | 0.081693229 |
| 0.265105871 | 0.151721015 | 0.171290146 | 0.510040512 |
| 0.248976851 | 0.508474091 | 0.04672708  | 0.232110888 |
| 0.310892971 | 0.468076032 | 0.417262907 | 0.330983794 |
| 0.499192824 | 0.350812176 | 0.432201048 | 0.443635554 |
| 0.324525157 | 0.395253481 | 0.241059819 | 0.347637457 |
| 0.495588136 | 0.5180904   | 0.494504215 | 0.512448187 |
| 0.310454841 | 0.454427163 | 0.358392371 | 0.329278414 |
| 0.464158286 | 0.478805355 | 0.115115843 | 0.513473286 |
| 0.001368102 | 0.410179243 | 0.483194657 | 0.253244537 |

|             |             |             |             |
|-------------|-------------|-------------|-------------|
| 0.505380908 | 0.281233394 | 0.09741854  | 0.321367172 |
| 0.512503234 | 0.513484524 | 0.482193689 | 0.467531084 |
| 0.299755567 | 0.018887883 | 0.502432711 | 0.465766399 |
| 0.500028145 | 0.457007107 | 0.367008318 | 0.129551377 |
| 0.515217195 | 0.423013241 | 0.467987948 | 0.462573349 |
| 0.495316766 | 0.443904729 | 0.314001165 | 0.42798462  |
| 0.025407502 | 0.29198666  | 0.464260531 | 0.217431058 |
| 0.346222463 | 0.231514059 | 0.510969399 | 0.384806677 |
| 0.4302004   | 0.361429984 | 0.37820899  | 0.104024697 |
| 0.223207218 | 0.509718157 | 0.064165666 | 0.498862686 |
| 0.512521069 | 0.443191136 | 0.513217376 | 0.507417819 |
| 0.380012027 | 0.437717346 | 0.511798884 | 0.465614521 |
| 0.001913083 | 0.448991189 | 0.433730451 | 0.401113483 |
| 0.48440652  | 0.341872075 | 0.32119604  | 0.459878672 |
| 0.002590373 | 0.19888682  | 0.283394214 | 0.501553738 |
| 0.513147108 | 0.04062119  | 0.068492159 | 0.513851219 |
| 0.44415072  | 0.065583008 | 0.511732572 | 0.373908049 |
| 0.50461915  | 0.480267431 | 0.204763229 | 0.451592872 |
| 0.252980452 | 0.453480836 | 0.037792795 | 0.476123064 |
| 0.479267788 | 0.139461119 | 0.092361128 | 1           |
| 0.490069185 | 0.438772632 | 0.310444211 | 0.010795617 |
| 0.414701409 | 0.224357965 | 0.501809672 | 0.155048402 |
| 0.486830049 | 0.418155611 | 0.499835675 | 0.485708922 |
| 0.503846581 | 0.457615475 | 0.425202683 | 0.503742765 |
| 0.13355603  | 0.455500956 | 0.46863773  | 0.071201398 |
| 0.437322978 | 0.51673015  | 0.440732027 | 0.213525615 |
| 0.444909481 | 0.09940379  | 0.247999379 | 0.405174924 |
| 0.492420227 | 0.50813557  | 0.077384615 | 0.228764344 |
| 0.453045485 | 0.369091544 | 0.141047617 | 0.422751356 |
| 0.333515146 | 0.206085342 | 0.213392841 | 0.435337776 |
| 0.486789152 | 0.336959144 | 0.493928149 | 0.171542239 |
| 0.501993433 | 0.076244821 | 0.498610875 | 0.315890505 |
| 0.349303509 | 0.438799499 | 0.415682048 | 0.164468196 |
| 0.029384209 | 0.167895725 | 0.439983407 | 0.453498577 |
| 0.101214442 | 0.246644836 | 0.29122397  | 0.385275294 |
| 0.500859547 | 0.452534097 | 0.326432882 | 0.414330848 |
| 0.445208114 | 0.115540237 | 0.499341832 | 0.404958974 |
| 0.473698419 | 0.369766831 | 0.512709899 | 0.013028887 |
| 0.496462998 | 0.191651164 | 0.289106785 | 0.395515744 |
| 0.454021779 | 0.165513542 | 0.430380324 | 0.216834975 |
| 0.203659636 | 0.00653528  | 0.431294718 | 0.406223735 |
| 0.328651783 | 0.371703644 | 0.435627157 | 0.19883934  |
| 0.511625345 | 0.451580758 | 0.474687725 | 0.359741196 |
| 0.416245468 | 0.027243403 | 0.178327626 | 0.050285113 |
| 0.462462509 | 0.449123769 | 0.48311888  | 0.441620146 |
| 0.285950459 | 0.499928733 | 0.446374426 | 0.444811776 |
| 0.513494345 | 0.186025516 | 0.506197574 | 0.394945444 |
| 0.413839108 | 0.436642647 | 0.313648325 | 0.403017959 |
| 0.235966807 | 0.181703545 | 0.161135471 | 0.230658709 |
| 0.502651949 | 0.387515061 | 0.425774014 | 0.374023071 |
| 0.061253442 | 0.429660957 | 0.487699444 | 0.482721352 |
| 0.475042067 | 0.434801829 | 0.439492594 | 0.435070844 |
| 0.373048241 | 0.374562556 | 0.060300072 | 0.036848996 |
| 0.283636687 | 0.229392562 | 0.478257079 | 0.503783862 |

|             |             |             |             |
|-------------|-------------|-------------|-------------|
| 0.511274113 | 0.366819653 | 0.129050653 | 0.192509131 |
| 0.184037748 | 0.436137817 | 0.310231571 | 0.191153253 |
| 0.502277527 | 0.393447863 | 0.001024366 | 0.308265764 |
| 0.438793032 | 0.430269085 |             |             |
| PLEKHF1     | 0.36341345  | 0.478092376 | 0.119026718 |
| 0.037445165 | 0.124475909 | 0.289132986 | 0.255768808 |
| 0.365427126 | 0.164352038 | 0.186459955 | 0.354327998 |
| 0.005592863 | 0.311363379 | 0.039512478 | 0.10426998  |
| 0.48585446  | 0.484673275 | 0.329511021 | 0.475823741 |
| 0.365040841 | 0.168809709 | 0.392314407 | 0.399798546 |
| 0.302891946 | 0.006777771 | 0.161092008 | 0.073681134 |
| 0.335586103 | 0.463851795 | 0.266638598 | 0.334897906 |
| 0.435445823 | 0.398827079 | 0.356882399 | 0.265479191 |
| 0.181776474 | 0.456775638 | 0.076487478 | 0.336023141 |
| 0.350384195 | 0.255818637 | 0.390722858 | 0.029419896 |
| 0.003116818 | 0.147647751 | 0.317067681 | 0.409090936 |
| 0.339211944 | 0.278699317 | 0.233382832 | 0.205692092 |
| 0.134402647 | 0.375343915 | 0.383717618 | 0.133187613 |
| 0.393030262 | 0.007024252 | 0.4375749   | 0.301984245 |
| 0.111330204 | 0.341607106 | 0.333117609 | 0.408620687 |
| 0.28969237  | 0.418501951 | 0.48367034  | 0.058289292 |
| 0.119872967 | 0.384515546 | 0.345505127 | 0.386455649 |
| 0.438582281 | 0.372393702 | 0.309055933 | 0.272334325 |
| 0.370999363 | 0.349981982 | 0.323769269 | 0.237301358 |
| 0.003214832 | 0.188747418 | 0.278872709 | 0.318127408 |
| 0.317558671 | 0.375513015 | 0.370601114 | 0.234216113 |
| 0.398292039 | 0.044845537 | 0.40314767  | 0.495289408 |
| 0.033243106 | 0.332366516 | 0.014976903 | 0.206819378 |
| 0.384802215 | 0.425146791 | 0.403917432 | 0.113297452 |
| 0.03406857  | 0.192600416 | 0.203883126 | 0.354871029 |
| 0.395388772 | 0.41413514  | 0.387768517 | 0.105286515 |
| 0.296813357 | 0.250152574 | 0.346665613 | 0.45483228  |
| 0.46950409  | 0.019259497 | 0.230082145 | 0.275558032 |
| 0.283450868 | 0.139801178 | 0.267894457 | 0.053656362 |
| 0.022341465 | 0.037513179 | 0.431228874 | 0.238052715 |
| 0.137214273 | 0.25549524  | 0.111440273 | 0.375330841 |
| 0.33965612  | 0.402806301 | 0.130362533 | 0.292459437 |
| 0.354621302 | 0.282392058 | 0.361358412 | 0.387810693 |
| 0.286939569 | 0.313849639 | 0.230272644 | 0.41771907  |
| 0.418341422 | 0.110605089 | 0.140185096 | 0.366262607 |
| 0.285616087 | 0.467327029 | 0.507842617 | 0.349204034 |
| 0.25427275  | 0.300137722 | 0.333801029 | 0.387344519 |
| 0.279117714 | 0.355310898 | 0.080527289 | 0.367145646 |
| 0.406202073 | 0.046211308 | 0.115328632 | 0.380929387 |
| 0.045982313 | 0.250376503 | 0.436443788 | 0.403602959 |
| 0.371148605 | 0.063872931 | 0.276270434 | 0.304592837 |
| 0.350945281 | 0.303605594 | 0.395278027 | 0.253935032 |
| 0.363554107 | 0.340753117 | 0.083895842 | 0.297873898 |
| 0.183891004 | 0.37264628  | 0.272190605 | 0.069640073 |
| 0.365981884 | 0.358375808 | 0.419176285 | 0.40184657  |
| 0.368164529 | 0.006515692 | 0.192350426 | 0.378672725 |
| 0.33528641  | 0.350299529 | 0.478004627 | 0.16985366  |
| 0.315899328 | 0.239360387 | 0.207552908 | 0.28685396  |
| 0.371535324 | 0.275295349 | 0.245874205 | 0.003469833 |

|             |             |             |             |
|-------------|-------------|-------------|-------------|
| 0.177186299 | 0.350597912 | 0.375059886 | 0.107649891 |
| 0.250850061 | 0.191079008 | 0.160407219 | 0.426840518 |
| 0.264683525 | 0.375392371 | 0.056445161 | 0.142934554 |
| 0.323823155 | 0.38713331  | 0.366598828 | 0.330555038 |
| 0.396936672 | 0.363794872 | 0.385381123 | 0.391053006 |
| 0.252516824 | 0.375231445 | 0.132828574 | 0.320454936 |
| 0.363722801 | 0.418356166 | 0.377158756 | 0.382996457 |
| 0.306050904 | 0.343276639 | 0.279765299 | 0.329570254 |
| 0.403325058 | 0.383086472 | 0.153563384 | 0.478833002 |
| 0.002803473 | 0.372710001 | 0.390768975 | 0.153203907 |
| 0.465229226 | 0.272746913 | 0.127245737 | 0.317694671 |
| 0.485052508 | 0.479907882 | 0.401023634 | 0.397883156 |
| 0.229747927 | 0.029980308 | 0.464060794 | 0.397926767 |
| 0.465140976 | 0.370239339 | 0.242413671 | 0.073996359 |
| 0.452775061 | 0.300880585 | 0.407449341 | 0.390995829 |
| 0.355721001 | 0.293882013 | 0.29375041  | 0.319202044 |
| 0.025386581 | 0.322324271 | 0.398916563 | 0.207368834 |
| 0.344240959 | 0.22703461  | 0.39538463  | 0.347986742 |
| 0.312800608 | 0.356287989 | 0.303017268 | 0.123405202 |
| 0.22588928  | 0.489508077 | 0.028988037 | 0.447044841 |
| 0.499414466 | 0.35970747  | 0.439034846 | 0.495257899 |
| 0.375123093 | 0.381605318 | 0.440631766 | 0.397014047 |
| 0.003089967 | 0.372423518 | 0.290676369 | 0.365242876 |
| 0.421402573 | 0.331947736 | 0.226270751 | 0.317876004 |
| 0.002526284 | 0.220987337 | 0.216683046 | 0.476811614 |
| 0.416608872 | 0.049514086 | 0.025934642 | 0.404240762 |
| 0.304937961 | 0.044954333 | 0.509417536 | 0.36242635  |
| 0.419027075 | 0.38108115  | 0.220971207 | 0.325239774 |
| 0.178908273 | 0.332115536 | 0.035775406 | 0.403381374 |
| 0.335273986 | 0.088811872 | 0.103758061 | 0.490069185 |
| 1           | 0.373268163 | 0.299617642 | 0.024397067 |
| 0.347385389 | 0.225208093 | 0.402213869 | 0.159624157 |
| 0.411710447 | 0.370408    | 0.418752664 | 0.347245317 |
| 0.397510812 | 0.401953526 | 0.391338881 | 0.420697737 |
| 0.107381302 | 0.35974776  | 0.404946179 | 0.098238366 |
| 0.333651899 | 0.440332511 | 0.372061995 | 0.227736194 |
| 0.394837412 | 0.081474025 | 0.260690671 | 0.348246121 |
| 0.415648646 | 0.438390985 | 0.10272853  | 0.230575136 |
| 0.397113147 | 0.330572064 | 0.151103736 | 0.346064924 |
| 0.323191119 | 0.164263049 | 0.127660377 | 0.380846645 |
| 0.448683403 | 0.318833708 | 0.432405224 | 0.19366599  |
| 0.411783911 | 0.095985827 | 0.375420882 | 0.275312276 |
| 0.33936476  | 0.358596111 | 0.345831447 | 0.147675022 |
| 0.049342705 | 0.216138822 | 0.38554526  | 0.398848792 |
| 0.129078851 | 0.261021579 | 0.298746529 | 0.343534386 |
| 0.466241032 | 0.394836289 | 0.321787801 | 0.36613147  |
| 0.39045393  | 0.108831807 | 0.479331587 | 0.381173265 |
| 0.408960015 | 0.350410638 | 0.401502239 | 0.012795032 |
| 0.382723586 | 0.224911983 | 0.221788441 | 0.3426876   |
| 0.40718294  | 0.19278121  | 0.366629667 | 0.243034441 |
| 0.175919917 | 0.007518291 | 0.378548566 | 0.271334432 |
| 0.321682944 | 0.261364567 | 0.378318687 | 0.121123208 |
| 0.510648376 | 0.413459204 | 0.405098413 | 0.212017175 |
| 0.388442902 | 0.012553085 | 0.193407541 | 0.074398308 |

|             |             |             |             |
|-------------|-------------|-------------|-------------|
| 0.403275865 | 0.383937947 | 0.37617716  | 0.38199804  |
| 0.250071527 | 0.381923623 | 0.385912276 | 0.34883988  |
| 0.42553105  | 0.174851125 | 0.490664676 | 0.319232235 |
| 0.324015547 | 0.386371514 | 0.299693342 | 0.328503753 |
| 0.220979802 | 0.14197106  | 0.170202979 | 0.235838842 |
| 0.436890092 | 0.282285193 | 0.36205349  | 0.370312138 |
| 0.084291066 | 0.381698706 | 0.352062036 | 0.350217277 |
| 0.415337441 | 0.338446072 | 0.346894288 | 0.383122439 |
| 0.320704884 | 0.348849332 | 0.063893571 | 0.046515912 |
| 0.236893743 | 0.251173661 | 0.397171256 | 0.401100709 |
| 0.47163559  | 0.269960904 | 0.152995537 | 0.212520365 |
| 0.090721067 | 0.325985602 | 0.29310804  | 0.120836097 |
| 0.377988363 | 0.277620367 | 0.002138135 | 0.300018254 |
| 0.392347082 | 0.345181204 |             |             |
| PLSCR1      | 0.197511367 | 0.481107157 | 0.170799059 |
| 0.038139666 | 0.264501673 | 0.352295827 | 0.383698082 |
| 0.198973987 | 0.214973146 | 0.233064756 | 0.398950277 |
| 0.001995628 | 0.241606532 | 0.0318014   | 0.152627143 |
| 0.394740148 | 0.415269524 | 0.428553446 | 0.407433455 |
| 0.235390619 | 0.174643771 | 0.304600731 | 0.336143422 |
| 0.371037034 | 0.003690016 | 0.282793558 | 0.082242282 |
| 0.189231741 | 0.365618135 | 0.315351057 | 0.292584998 |
| 0.335091206 | 0.332502502 | 0.306973944 | 0.336244191 |
| 0.136994036 | 0.490612107 | 0.083808505 | 0.27846615  |
| 0.253639019 | 0.353784749 | 0.331199005 | 0.04659114  |
| 0.003015135 | 0.258630252 | 0.163519349 | 0.316714249 |
| 0.272145692 | 0.334760209 | 0.302258641 | 0.322540275 |
| 0.056894428 | 0.408117385 | 0.302867493 | 0.056758097 |
| 0.504681532 | 0.006303025 | 0.504900362 | 0.150553326 |
| 0.185699971 | 0.348027436 | 0.190062583 | 0.301109644 |
| 0.383542005 | 0.514771695 | 0.462627181 | 0.124274661 |
| 0.203701509 | 0.271160912 | 0.2463345   | 0.328811889 |
| 0.427870971 | 0.27912158  | 0.373172835 | 0.209437438 |
| 0.264485483 | 0.254395183 | 0.371852221 | 0.300348436 |
| 0.001967229 | 0.316098071 | 0.319066143 | 0.176776569 |
| 0.19167074  | 0.420673425 | 0.223466139 | 0.374268335 |
| 0.24528198  | 0.066707821 | 0.341197266 | 0.444675475 |
| 0.041648522 | 0.266702374 | 0.020072318 | 0.280350037 |
| 0.309129079 | 0.310126014 | 0.258233804 | 0.195216805 |
| 0.049446853 | 0.2231138   | 0.086937487 | 0.240760218 |
| 0.307853208 | 0.329829812 | 0.489161851 | 0.054231593 |
| 0.20827299  | 0.1925526   | 0.391953564 | 0.496958073 |
| 0.409534516 | 0.024032574 | 0.218438798 | 0.361406406 |
| 0.265222964 | 0.190094021 | 0.39068303  | 0.019224631 |
| 0.022535354 | 0.014544706 | 0.341075262 | 0.244133005 |
| 0.242213244 | 0.352248692 | 0.15489734  | 0.307383501 |
| 0.196371473 | 0.300930067 | 0.309623665 | 0.386782312 |
| 0.245065613 | 0.398934044 | 0.340552407 | 0.295965543 |
| 0.321363021 | 0.247776734 | 0.246059656 | 0.48622674  |
| 0.460054672 | 0.189221313 | 0.18494397  | 0.362006776 |
| 0.216192316 | 0.388435581 | 0.463003193 | 0.266404582 |
| 0.387042059 | 0.331915922 | 0.237830267 | 0.377328639 |
| 0.396085403 | 0.277934624 | 0.041422028 | 0.390984419 |
| 0.505864108 | 0.024762502 | 0.175937694 | 0.308007117 |

|             |             |             |             |
|-------------|-------------|-------------|-------------|
| 0.104242673 | 0.367818475 | 0.441109396 | 0.383344052 |
| 0.321947549 | 0.066845759 | 0.292866709 | 0.363752207 |
| 0.321426347 | 0.351648631 | 0.311881682 | 0.255127172 |
| 0.347157967 | 0.233878387 | 0.161184747 | 0.217148487 |
| 0.267331144 | 0.318183986 | 0.13830483  | 0.056829395 |
| 0.2381579   | 0.263364804 | 0.404231429 | 0.291882    |
| 0.23454979  | 0.005489715 | 0.220748947 | 0.223498146 |
| 0.206296929 | 0.261425506 | 0.509476699 | 0.258842705 |
| 0.31589044  | 0.189539466 | 0.278376521 | 0.397967711 |
| 0.2978904   | 0.246442136 | 0.242384511 | 0.002076793 |
| 0.297629872 | 0.184924134 | 0.313404234 | 0.085671137 |
| 0.35987935  | 0.173372848 | 0.096676818 | 0.403807113 |
| 0.32969996  | 0.345749508 | 0.035703212 | 0.078944784 |
| 0.339114875 | 0.423157821 | 0.259213513 | 0.170123057 |
| 0.388794633 | 0.302109029 | 0.260661837 | 0.439840794 |
| 0.40738563  | 0.400111412 | 0.084585228 | 0.317034724 |
| 0.249860533 | 0.413204247 | 0.307689484 | 0.362670009 |
| 0.363975052 | 0.23243754  | 0.175692879 | 0.35861297  |
| 0.297115655 | 0.327865046 | 0.172857915 | 0.49282161  |
| 0.002293304 | 0.374207222 | 0.320353086 | 0.07865197  |
| 0.488850538 | 0.388341785 | 0.160166756 | 0.252886989 |
| 0.416630671 | 0.495057048 | 0.343977259 | 0.292494007 |
| 0.113616379 | 0.022726752 | 0.423877922 | 0.378857717 |
| 0.37295531  | 0.388583627 | 0.238652921 | 0.054967372 |
| 0.419278157 | 0.180348911 | 0.294566059 | 0.21978601  |
| 0.306650646 | 0.256852113 | 0.340443205 | 0.193073764 |
| 0.008789321 | 0.286241874 | 0.231538992 | 0.191065569 |
| 0.281811008 | 0.211213204 | 0.394934756 | 0.389274772 |
| 0.313310219 | 0.156809732 | 0.272477494 | 0.228826183 |
| 0.339971203 | 0.476243798 | 0.035228215 | 0.408361201 |
| 0.44617991  | 0.360339055 | 0.418225073 | 0.431234308 |
| 0.302841779 | 0.454755589 | 0.420288168 | 0.310166568 |
| 0.001595111 | 0.276979832 | 0.218475943 | 0.427113659 |
| 0.326953976 | 0.363417657 | 0.118318654 | 0.224761688 |
| 0.0045373   | 0.276783947 | 0.117560234 | 0.490112009 |
| 0.397313111 | 0.111475561 | 0.027714144 | 0.376014526 |
| 0.201149828 | 0.03688314  | 0.47150941  | 0.348344971 |
| 0.451555654 | 0.368248037 | 0.316000811 | 0.251854411 |
| 0.084086199 | 0.270082862 | 0.079667981 | 0.343113564 |
| 0.287949416 | 0.04619033  | 0.16198406  | 0.438772632 |
| 0.373268163 | 1           | 0.37122465  | 0.01236638  |
| 0.230319454 | 0.149397372 | 0.333969378 | 0.227509015 |
| 0.38244772  | 0.418352216 | 0.47853367  | 0.291762854 |
| 0.316690788 | 0.447468493 | 0.431025215 | 0.390783255 |
| 0.108669916 | 0.251934938 | 0.297911869 | 0.12479353  |
| 0.18211254  | 0.415999257 | 0.28830016  | 0.332427589 |
| 0.326811968 | 0.103705704 | 0.337569523 | 0.21696778  |
| 0.481902878 | 0.396883847 | 0.159371203 | 0.23164926  |
| 0.461211893 | 0.360582225 | 0.280080878 | 0.365163226 |
| 0.363292164 | 0.053866592 | 0.071756106 | 0.369798219 |
| 0.510899534 | 0.401418494 | 0.35177274  | 0.188353039 |
| 0.361275069 | 0.137327845 | 0.346546577 | 0.385551695 |
| 0.322675524 | 0.187636356 | 0.229961093 | 0.047771402 |
| 0.027209012 | 0.140121522 | 0.45496048  | 0.471700462 |

|             |             |             |             |
|-------------|-------------|-------------|-------------|
| 0.195201458 | 0.29620289  | 0.360161573 | 0.400935016 |
| 0.38573534  | 0.271764856 | 0.370642365 | 0.314898807 |
| 0.501163559 | 0.15100895  | 0.486282214 | 0.300415385 |
| 0.33381762  | 0.367622177 | 0.365625606 | 0.012747415 |
| 0.256914618 | 0.239700403 | 0.104782472 | 0.366260106 |
| 0.289802776 | 0.271910403 | 0.415646589 | 0.24553635  |
| 0.145454512 | 0.006484856 | 0.334750607 | 0.203665099 |
| 0.375243138 | 0.15245771  | 0.316992793 | 0.064675466 |
| 0.501264362 | 0.291652835 | 0.297188698 | 0.155388704 |
| 0.347303088 | 0.015659434 | 0.261227571 | 0.090048797 |
| 0.322125179 | 0.406311362 | 0.247108528 | 0.211153135 |
| 0.124826779 | 0.349983175 | 0.387033297 | 0.364582959 |
| 0.40707184  | 0.081757802 | 0.418836547 | 0.29744367  |
| 0.229870835 | 0.281482915 | 0.38055961  | 0.313631071 |
| 0.381446797 | 0.147339558 | 0.27874407  | 0.1699594   |
| 0.37745533  | 0.321513201 | 0.388893738 | 0.189031083 |
| 0.14806868  | 0.368203295 | 0.273813288 | 0.258479144 |
| 0.304033673 | 0.191642099 | 0.215972276 | 0.481549289 |
| 0.190289872 | 0.240072975 | 0.070586676 | 0.06190746  |
| 0.181824616 | 0.31295062  | 0.33486738  | 0.370081602 |
| 0.421954584 | 0.150187684 | 0.223811892 | 0.212585506 |
| 0.06325547  | 0.223501226 | 0.400444863 | 0.127637307 |
| 0.335209267 | 0.163208059 | 0.002287587 | 0.199990644 |
| 0.383417508 | 0.250725464 |             |             |
| PLXDC1      | 0.130950389 | 0.359755816 | 0.244908619 |
| 0.014001038 | 0.17270708  | 0.369559659 | 0.314753715 |
| 0.116784541 | 0.305201292 | 0.190468025 | 0.426782574 |
| 0.009542526 | 0.131222138 | 0.102454099 | 0.248006696 |
| 0.258704903 | 0.265077544 | 0.283674956 | 0.272566449 |
| 0.192988326 | 0.097977749 | 0.314992876 | 0.22851506  |
| 0.329397813 | 0.019745523 | 0.248346715 | 0.046765961 |
| 0.097077607 | 0.227186593 | 0.352403591 | 0.214285192 |
| 0.22411608  | 0.185091805 | 0.147278124 | 0.14585766  |
| 0.035477073 | 0.421039772 | 0.023203351 | 0.146797847 |
| 0.145592245 | 0.250274631 | 0.197376455 | 0.120551096 |
| 0.00043978  | 0.28476377  | 0.084624057 | 0.281510112 |
| 0.248579171 | 0.326694822 | 0.365762119 | 0.246865971 |
| 0.015705691 | 0.428946393 | 0.273450824 | 0.013961791 |
| 0.454329936 | 0.002505435 | 0.435373801 | 0.129321735 |
| 0.306808112 | 0.305239562 | 0.104614393 | 0.246796035 |
| 0.410471421 | 0.450087925 | 0.320089292 | 0.150420251 |
| 0.288780905 | 0.144195927 | 0.137465143 | 0.183039996 |
| 0.326066335 | 0.169676739 | 0.265950491 | 0.076683407 |
| 0.159009061 | 0.152062941 | 0.395525747 | 0.347534897 |
| 0.006587    | 0.28015064  | 0.130183467 | 0.143165133 |
| 0.086530253 | 0.428803111 | 0.143125373 | 0.266214059 |
| 0.112944609 | 0.173428338 | 0.271562105 | 0.297369872 |
| 0.033423658 | 0.16559365  | 0.015254031 | 0.340467175 |
| 0.214998379 | 0.179880502 | 0.21149648  | 0.232781742 |
| 0.144718827 | 0.339433119 | 0.089013016 | 0.128796125 |
| 0.198514598 | 0.172724761 | 0.4498127   | 0.019877836 |
| 0.101956938 | 0.236057675 | 0.281325017 | 0.413824208 |
| 0.294833544 | 0.069273803 | 0.30927074  | 0.348002181 |
| 0.133659514 | 0.108130256 | 0.337147878 | 0.009057985 |

|             |             |             |             |
|-------------|-------------|-------------|-------------|
| 0.018306583 | 0.023838    | 0.21591235  | 0.313436099 |
| 0.221462077 | 0.320705324 | 0.106341525 | 0.157560004 |
| 0.111785452 | 0.19989322  | 0.225057165 | 0.308258224 |
| 0.132255867 | 0.313025861 | 0.147472926 | 0.18593103  |
| 0.12513306  | 0.25512534  | 0.327021606 | 0.371053632 |
| 0.435475064 | 0.247151562 | 0.270415485 | 0.367188164 |
| 0.106782493 | 0.255605662 | 0.322979516 | 0.221003141 |
| 0.216925836 | 0.340934152 | 0.138422755 | 0.279768053 |
| 0.351029251 | 0.215453978 | 0.017435133 | 0.418223307 |
| 0.471611099 | 0.012578639 | 0.292810221 | 0.218948243 |
| 0.034608138 | 0.274778117 | 0.381851547 | 0.26992687  |
| 0.176145173 | 0.041301592 | 0.191433357 | 0.294456709 |
| 0.299054651 | 0.288708165 | 0.260042685 | 0.162084528 |
| 0.368810537 | 0.127727507 | 0.241805742 | 0.106917286 |
| 0.344474951 | 0.301791293 | 0.061117278 | 0.034443848 |
| 0.16861248  | 0.189237498 | 0.298403101 | 0.201198803 |
| 0.165672025 | 0.001561592 | 0.173900242 | 0.168548373 |
| 0.1304077   | 0.15820971  | 0.385199028 | 0.349928516 |
| 0.332959421 | 0.081431798 | 0.363828531 | 0.202933046 |
| 0.242439644 | 0.179335304 | 0.192489959 | 0.00874311  |
| 0.288247137 | 0.074745564 | 0.183664162 | 0.190108464 |
| 0.219064642 | 0.254896849 | 0.132687103 | 0.281064511 |
| 0.345631811 | 0.203796114 | 0.078213954 | 0.051457295 |
| 0.301001766 | 0.328371608 | 0.107390374 | 0.129765986 |
| 0.26320658  | 0.204654553 | 0.142760249 | 0.440185234 |
| 0.249157753 | 0.403661526 | 0.037653907 | 0.309909123 |
| 0.112840842 | 0.270924491 | 0.177640753 | 0.232393187 |
| 0.310009435 | 0.19737307  | 0.077012299 | 0.39732245  |
| 0.218189451 | 0.208347839 | 0.278943157 | 0.369664894 |
| 0.011387641 | 0.335432643 | 0.16023991  | 0.039856946 |
| 0.360772204 | 0.341463117 | 0.291430832 | 0.262002838 |
| 0.279547584 | 0.378861319 | 0.277046235 | 0.169129624 |
| 0.05978698  | 0.081532236 | 0.330277987 | 0.354081017 |
| 0.227571238 | 0.239519241 | 0.074539795 | 0.041035006 |
| 0.285061029 | 0.106663114 | 0.213345265 | 0.110734516 |
| 0.142152166 | 0.098024767 | 0.350761199 | 0.153444561 |
| 0.009954324 | 0.252587899 | 0.142622609 | 0.116252717 |
| 0.16858987  | 0.197525615 | 0.261671879 | 0.43054177  |
| 0.120271124 | 0.089957394 | 0.106592478 | 0.265304536 |
| 0.369785684 | 0.355662373 | 0.008694112 | 0.330056547 |
| 0.30400312  | 0.267535437 | 0.27231645  | 0.299866297 |
| 0.265650763 | 0.428688925 | 0.298958723 | 0.207519033 |
| 0.006371405 | 0.14726059  | 0.106137105 | 0.474522174 |
| 0.199214329 | 0.357888519 | 0.070446566 | 0.07943709  |
| 0.011872398 | 0.352047238 | 0.032618171 | 0.409236214 |
| 0.247016026 | 0.188745592 | 0.005252038 | 0.262232934 |
| 0.100010822 | 0.023004752 | 0.345409992 | 0.239914098 |
| 0.322109476 | 0.201193533 | 0.293847642 | 0.130050278 |
| 0.02217674  | 0.165111044 | 0.054023033 | 0.207538446 |
| 0.135895127 | 0.034485383 | 0.105880647 | 0.310444211 |
| 0.299617642 | 0.37122465  | 1           | 0.014432768 |
| 0.139134494 | 0.055498665 | 0.209548511 | 0.268437126 |
| 0.333554432 | 0.429799853 | 0.37481198  | 0.166165845 |
| 0.190082837 | 0.396714019 | 0.432588738 | 0.291200233 |



|             |             |             |             |
|-------------|-------------|-------------|-------------|
| 0.035764287 | 0.143052495 | 0.182317829 | 0.152448645 |
| 0.095567806 | 0.269812807 | 0.131648803 | 0.329309863 |
| 0.319801513 | 0.028980836 | 0.366648571 | 0.166324761 |
| 0.372283826 | 0.252165939 | 0.256227432 | 0.301248941 |
| 0.407707779 | 0.313477886 | 0.321937353 | 0.279394861 |
| 0.413904613 | 0.016341306 | 0.045478121 | 0.384377652 |
| 0.423961166 | 0.423830156 | 0.234652414 | 0.110757369 |
| 0.217627932 | 0.274751208 | 0.262670435 | 0.294457743 |
| 0.312105808 | 0.095002567 | 0.12750199  | 0.028622375 |
| 0.026548593 | 0.186267846 | 0.398764487 | 0.445941869 |
| 0.29570894  | 0.352675064 | 0.278265437 | 0.243295552 |
| 0.24069357  | 0.133593706 | 0.376506523 | 0.248942459 |
| 0.47905761  | 0.07491524  | 0.40581876  | 0.243238528 |
| 0.301433902 | 0.229215267 | 0.269955584 | 0.014270206 |
| 0.149688992 | 0.185007532 | 0.075135002 | 0.18929906  |
| 0.168987601 | 0.310746979 | 0.357705972 | 0.326530136 |
| 0.067767641 | 0.013015489 | 0.365350171 | 0.06279934  |
| 0.448086129 | 0.075686745 | 0.231000009 | 0.014774781 |
| 0.382776412 | 0.191402447 | 0.236510309 | 0.062305695 |
| 0.209565539 | 0.002470149 | 0.208799971 | 0.210432586 |
| 0.313613846 | 0.409573784 | 0.17328181  | 0.125581208 |
| 0.114166339 | 0.206939341 | 0.346577541 | 0.164157746 |
| 0.256612054 | 0.026346149 | 0.272377613 | 0.261104066 |
| 0.115650696 | 0.179108629 | 0.385687934 | 0.235990071 |
| 0.297591874 | 0.13117035  | 0.35346288  | 0.23146679  |
| 0.223418206 | 0.221828198 | 0.207432982 | 0.131107839 |
| 0.199001967 | 0.222560631 | 0.185145168 | 0.146244925 |
| 0.179919499 | 0.11222816  | 0.107491678 | 0.474297308 |
| 0.132401787 | 0.21784207  | 0.026297968 | 0.038686789 |
| 0.070142088 | 0.304791099 | 0.280760081 | 0.280091742 |
| 0.279510877 | 0.099322806 | 0.315862691 | 0.314427379 |
| 0.025303901 | 0.148188328 | 0.332208642 | 0.030490097 |
| 0.205285165 | 0.089856437 | 0.007055487 | 0.21917284  |
| 0.393332304 | 0.105264444 |             |             |
| PN01        | 0.015465893 | 0.019166726 | 0.00614411  |
| 0.002397572 | 0.00064792  | 0.042370215 | 0.021179532 |
| 0.006417229 | 0.00497558  | 0.056002986 | 0.029774369 |
| 0.000700215 | 0.002425688 | 0.003977611 | 0.000144778 |
| 0.013195964 | 0.010748279 | 0.00756597  | 0.007878847 |
| 0.010513213 | 0.014879922 | 0.017834044 | 0.048504406 |
| 0.029896803 | 0.00180033  | 0.021397403 | 0.030230108 |
| 0.002351442 | 0.008480351 | 0.014722046 | 0.019598907 |
| 0.01413835  | 0.007204761 | 0.010958465 | 0.000645113 |
| 0.001156023 | 0.021290104 | 2.69E-06    | 0.003520446 |
| 0.004168607 | 0.019346611 | 0.008220345 | 0.000454631 |
| 0.000459451 | 0.013415571 | 0.002723451 | 0.026079931 |
| 0.004047825 | 0.04291483  | 0.011462761 | 0.032138215 |
| 0.000102084 | 0.024574646 | 0.010596483 | 0.00028724  |
| 0.021602774 | 0.001407287 | 0.022457386 | 0.006233128 |
| 0.008270443 | 0.006770305 | 0.010477126 | 0.02149264  |
| 0.027745584 | 0.022306747 | 0.011841807 | 0.001975296 |
| 0.023701182 | 0.005478142 | 0.011594823 | 0.031038689 |
| 0.017464995 | 0.009173851 | 0.006807045 | 0.000593687 |
| 0.011490814 | 0.00568746  | 0.011914213 | 0.002740972 |

|             |             |             |             |
|-------------|-------------|-------------|-------------|
| 0.002603311 | 0.026300146 | 0.006800053 | 0.008004041 |
| 0.003337749 | 0.026200626 | 0.00786566  | 0.0109315   |
| 0.01426404  | 0.001710343 | 0.015286596 | 0.012294676 |
| 0.000993746 | 0.003406785 | 1.07E-05    | 0.001145282 |
| 0.010643718 | 0.007879826 | 0.021334924 | 0.015790696 |
| 0.000504414 | 0.004432691 | 0.001835856 | 0.00406694  |
| 0.008253824 | 0.007933979 | 0.020221068 | 4.40E-05    |
| 0.002461391 | 0.010704121 | 0.003287943 | 0.028682628 |
| 0.019788468 | 6.22E-05    | 0.003267121 | 0.023497743 |
| 0.000842898 | 0.002430331 | 0.011843222 | 9.60E-05    |
| 0.000298162 | 2.72E-05    | 0.010164111 | 0.00990104  |
| 0.029413722 | 0.031132734 | 0.000836901 | 0.011782623 |
| 0.002846378 | 0.006698638 | 0.00096041  | 0.024585835 |
| 0.006125895 | 0.022284114 | 0.009239382 | 0.010017154 |
| 0.000803356 | 0.003949388 | 0.018926294 | 0.011976618 |
| 0.015452988 | 0.002289    | 0.008987961 | 0.037514899 |
| 0.002299743 | 0.011994529 | 0.0145352   | 0.00242421  |
| 0.004378654 | 0.008363824 | 0.042213142 | 0.031313551 |
| 0.010988739 | 0.003888721 | 5.08E-06    | 0.010764194 |
| 0.026027753 | 3.76E-05    | 0.014923682 | 0.006728123 |
| 0.000184982 | 0.001729466 | 0.025372194 | 0.009452779 |
| 0.002544327 | 0.030461705 | 0.057123576 | 0.044810163 |
| 0.021177496 | 0.042256541 | 0.012716092 | 0.067457445 |
| 0.027099651 | 0.046432894 | 0.007424628 | 0.002705998 |
| 0.013942919 | 0.01411354  | 0.003408897 | 7.45E-05    |
| 0.004597859 | 0.002689169 | 0.022039909 | 0.008613802 |
| 0.013410081 | 0.001790327 | 0.066740041 | 0.019520437 |
| 0.042528137 | 0.003242544 | 0.021137947 | 0.013200893 |
| 0.014518089 | 0.000226606 | 0.012145406 | 0.002066619 |
| 0.007599339 | 0.026447971 | 0.023170384 | 0.058746099 |
| 0.001033802 | 0.019281939 | 0.003593767 | 0.004751108 |
| 0.005744225 | 0.014331574 | 0.000215433 | 0.016896889 |
| 0.024774316 | 0.005436531 | 0.000299255 | 0.000106037 |
| 0.014511675 | 0.016719772 | 0.011819194 | 0.006624999 |
| 0.016231001 | 0.021025365 | 0.006179128 | 0.022684097 |
| 0.000697371 | 0.046410061 | 2.01E-05    | 0.006657464 |
| 0.004139793 | 0.011129833 | 0.01067491  | 0.005066766 |
| 0.020543426 | 0.003582383 | 0.00023969  | 0.030291335 |
| 0.009884252 | 0.003150543 | 0.014238657 | 0.01237949  |
| 0.002064009 | 0.01211046  | 0.016487334 | 9.27E-05    |
| 0.021573813 | 0.024492336 | 0.013272321 | 0.007453784 |
| 0.008536644 | 0.011433404 | 0.007793749 | 0.009404721 |
| 0.000249992 | 0.001148401 | 0.011566673 | 0.020724686 |
| 0.008920714 | 0.003924709 | 0.00060432  | 3.16E-06    |
| 0.011233374 | 0.001706459 | 0.037374282 | 0.015626351 |
| 0.003251059 | 0.000465895 | 0.006031064 | 0.003523113 |
| 9.24E-05    | 0.065194865 | 0.02527174  | 0.007921021 |
| 0.047005139 | 0.00321796  | 0.013094522 | 0.012151914 |
| 0.001540507 | 0.01164057  | 0.012630669 | 0.011428649 |
| 0.012849656 | 0.020147482 | 3.06E-07    | 0.010809626 |
| 0.011777848 | 0.004017657 | 0.015769028 | 0.010953121 |
| 0.023987601 | 0.019034514 | 0.017570591 | 0.005203383 |
| 3.19E-05    | 0.006093776 | 0.002262812 | 0.018878085 |
| 0.017438022 | 0.031684656 | 0.000731098 | 0.00167943  |

|             |             |             |             |             |
|-------------|-------------|-------------|-------------|-------------|
| 2.54E-06    | 0.021863271 | 0.002513996 | 0.013850795 |             |
| 0.00991286  | 0.001702803 | 3.37E-07    | 0.008352567 |             |
| 0.002545872 | 1.99E-06    | 0.015664588 | 0.049391928 |             |
| 0.017128432 | 0.003486626 | 0.042456515 | 0.004597765 |             |
| 0.001853341 | 0.000716858 | 0.000118294 | 0.018961919 |             |
| 0.001337799 | 2.82E-05    | 0.026004585 | 0.010795617 |             |
| 0.024397067 | 0.01236638  | 0.014432768 | 1           |             |
| 0.006046014 | 0.010014765 | 0.018179434 | 0.000379052 |             |
| 0.012539113 | 0.019507832 | 0.011782865 | 0.005098732 |             |
| 0.006792651 | 0.023645733 | 0.032515531 | 0.021886611 |             |
| 9.89E-05    | 0.011042658 | 0.013338502 | 0.00176008  |             |
| 0.006017743 | 0.011137245 | 0.030715854 | 0.029867545 |             |
| 0.014678985 | 0.000654478 | 0.029647463 | 0.006863139 |             |
| 0.01664473  | 0.016803647 | 0.025026159 | 0.002327481 |             |
| 0.028941606 | 0.004225515 | 0.009759821 | 0.002499848 |             |
| 0.022205694 | 0.000703245 | 5.46E-05    | 0.015465103 |             |
| 0.022287915 | 0.023579171 | 0.023582494 | 0.042119296 |             |
| 0.006129285 | 0.002663615 | 0.004920441 | 0.001124335 |             |
| 0.015263567 | 0.016277067 | 0.005437868 | 0.000275954 |             |
| 0.072212486 | 0.016464738 | 0.028519995 | 0.023677251 |             |
| 0.014371246 | 0.016196235 | 0.030623015 | 0.020142244 |             |
| 0.011136951 | 0.004322603 | 0.021303885 | 0.004699064 |             |
| 0.02075265  | 0.00739091  | 0.018327958 | 0.016777798 |             |
| 0.022659177 | 0.020360439 | 0.010180182 | 0.000124186 |             |
| 0.008893044 | 0.076667397 | 0.001662348 | 0.026167535 |             |
| 0.006940503 | 0.017147439 | 0.014816205 | 0.014789808 |             |
| 0.000277889 | 5.78E-06    | 0.011182744 | 0.001463406 |             |
| 0.030674671 | 0.000306227 | 0.005219461 | 0.00020447  |             |
| 0.016588648 | 0.024412165 | 0.027845813 | 0.00014473  |             |
| 0.02492513  | 4.36E-07    | 0.051494504 | 0.002955619 |             |
| 0.020302066 | 0.01203116  | 0.007497787 | 0.018500701 |             |
| 0.002700779 | 0.005751594 | 0.012397582 | 0.006125807 |             |
| 0.01286319  | 0.000706849 | 0.014156322 | 0.002028322 |             |
| 0.003828197 | 0.004652706 | 0.014834419 | 0.000955116 |             |
| 0.009347039 | 5.51E-05    | 0.010259784 | 0.004105929 |             |
| 0.012122552 | 0.000303474 | 0.014656212 | 0.011785774 |             |
| 0.005710994 | 0.008073631 | 0.00397796  | 0.00761368  |             |
| 0.026802795 | 0.015008628 | 0.001659953 | 0.019181026 |             |
| 0.00322204  | 0.013485158 | 0.005073061 | 0.007775035 |             |
| 0.006912146 | 0.035240299 | 0.00965691  | 0.008124661 |             |
| 0.009082446 | 0.000715259 | 0.013968066 | 0.007966367 |             |
| 6.19E-06    | 0.006091769 | 0.025211253 | 4.88E-05    | 0.003826914 |
| 0.001730336 | 2.75E-05    | 0.005483582 | 0.021799344 |             |
| 0.001498036 |             |             |             |             |
| POLI        | 0.354927268 | 0.343657835 | 0.029889368 |             |
| 0.014086768 | 0.046743904 | 0.124622686 | 0.106047444 |             |
| 0.36379833  | 0.060894592 | 0.06847846  | 0.184511987 |             |
| 0.002888504 | 0.399388789 | 0.012298331 | 0.043785865 |             |
| 0.432128025 | 0.434582947 | 0.185181714 | 0.430628182 |             |
| 0.292716568 | 0.084450834 | 0.275730351 | 0.252167752 |             |
| 0.140258212 | 0.002178886 | 0.050309631 | 0.023766445 |             |
| 0.385348566 | 0.445303528 | 0.115950289 | 0.169710494 |             |
| 0.404152543 | 0.40050444  | 0.288129103 | 0.19319783  |             |
| 0.226826367 | 0.30438819  | 0.128024708 | 0.384552274 |             |

|             |             |             |             |
|-------------|-------------|-------------|-------------|
| 0.412618874 | 0.109291634 | 0.403141468 | 0.008352276 |
| 0.002793811 | 0.041616855 | 0.35681376  | 0.28861875  |
| 0.251453101 | 0.115091964 | 0.091795732 | 0.079380752 |
| 0.230785512 | 0.213232053 | 0.352535792 | 0.221210236 |
| 0.248576203 | 0.002481476 | 0.289732083 | 0.290665302 |
| 0.028913642 | 0.216712027 | 0.385990987 | 0.324059449 |
| 0.126702948 | 0.26499395  | 0.385536809 | 0.01257259  |
| 0.030260771 | 0.380031567 | 0.409071418 | 0.288491739 |
| 0.351807045 | 0.22931027  | 0.164647012 | 0.351857672 |
| 0.392971035 | 0.414793116 | 0.170389283 | 0.098106451 |
| 0.001034062 | 0.064611894 | 0.194995574 | 0.385014789 |
| 0.397360233 | 0.214463556 | 0.376930924 | 0.105059469 |
| 0.369727637 | 0.008669364 | 0.266257395 | 0.412321133 |
| 0.011562896 | 0.398655352 | 0.006358228 | 0.08618853  |
| 0.396213741 | 0.4559261   | 0.360993177 | 0.029681434 |
| 0.00718647  | 0.07756054  | 0.201101257 | 0.438590762 |
| 0.325593536 | 0.345000428 | 0.247404436 | 0.246305929 |
| 0.393416005 | 0.137260443 | 0.222770797 | 0.296481108 |
| 0.375453952 | 0.00536269  | 0.118053748 | 0.112301256 |
| 0.267491769 | 0.07587348  | 0.112426473 | 0.049937889 |
| 0.005537634 | 0.041964556 | 0.409660105 | 0.099080256 |
| 0.041388962 | 0.099129768 | 0.040493881 | 0.331253626 |
| 0.344708565 | 0.422360819 | 0.048135556 | 0.130375167 |
| 0.3910546   | 0.126146977 | 0.26825529  | 0.383845924 |
| 0.243701818 | 0.216336261 | 0.086087113 | 0.308926418 |
| 0.290918348 | 0.028871734 | 0.041968489 | 0.196415319 |
| 0.394920698 | 0.406633161 | 0.407320455 | 0.240837645 |
| 0.12982876  | 0.151640194 | 0.246174995 | 0.238770536 |
| 0.12342127  | 0.290676976 | 0.147512156 | 0.220467887 |
| 0.249691766 | 0.040995773 | 0.02971171  | 0.397560893 |
| 0.022261677 | 0.129405789 | 0.318355656 | 0.34687055  |
| 0.345790198 | 0.019957447 | 0.125812703 | 0.141872658 |
| 0.204033284 | 0.133593833 | 0.324092388 | 0.122419979 |
| 0.203034806 | 0.244364618 | 0.018133953 | 0.395721243 |
| 0.058336748 | 0.244943807 | 0.354267481 | 0.068388403 |
| 0.384220252 | 0.300210709 | 0.344167129 | 0.344633977 |
| 0.398297269 | 0.001842217 | 0.06872876  | 0.354180771 |
| 0.256264373 | 0.404046999 | 0.324859029 | 0.052883344 |
| 0.166776329 | 0.325314532 | 0.074705089 | 0.183766728 |
| 0.381660442 | 0.143189411 | 0.121833052 | 0.000432698 |
| 0.063331772 | 0.347520122 | 0.337363619 | 0.043627572 |
| 0.113213808 | 0.073786036 | 0.134624268 | 0.361503845 |
| 0.105127424 | 0.36557087  | 0.03320645  | 0.255109807 |
| 0.151740798 | 0.265460957 | 0.286546728 | 0.272901422 |
| 0.32022128  | 0.198741755 | 0.450402486 | 0.252529707 |
| 0.144118616 | 0.20860907  | 0.258317654 | 0.192561202 |
| 0.389213384 | 0.368346406 | 0.398859687 | 0.362409714 |
| 0.142691097 | 0.365975161 | 0.296608885 | 0.15842832  |
| 0.315621829 | 0.310444465 | 0.045929757 | 0.34486206  |
| 0.00059124  | 0.21944059  | 0.316716073 | 0.29447688  |
| 0.327458692 | 0.116161949 | 0.035876938 | 0.194390012 |
| 0.433330808 | 0.346802471 | 0.376606271 | 0.411278234 |
| 0.291762943 | 0.009505789 | 0.369377094 | 0.280355181 |
| 0.447706827 | 0.255989647 | 0.248119164 | 0.121663213 |

|             |             |             |             |
|-------------|-------------|-------------|-------------|
| 0.373173312 | 0.383171908 | 0.324793624 | 0.38277503  |
| 0.340223641 | 0.322078217 | 0.15091322  | 0.380303661 |
| 0.029560394 | 0.154775935 | 0.372446561 | 0.123235587 |
| 0.202865039 | 0.128658987 | 0.351544524 | 0.192652541 |
| 0.269308425 | 0.322659015 | 0.241683124 | 0.032000499 |
| 0.08491062  | 0.352189007 | 0.050727637 | 0.364916563 |
| 0.412742321 | 0.257555816 | 0.363845406 | 0.415762669 |
| 0.227023742 | 0.234542182 | 0.358980388 | 0.409345244 |
| 0.001433216 | 0.407851952 | 0.390603248 | 0.209938652 |
| 0.398358298 | 0.168170891 | 0.33156493  | 0.368635243 |
| 0.000902822 | 0.081049718 | 0.261335604 | 0.333332477 |
| 0.369784276 | 0.010176893 | 0.068941597 | 0.345158232 |
| 0.388859282 | 0.051069441 | 0.391613102 | 0.2016105   |
| 0.323956183 | 0.28405707  | 0.0801831   | 0.402846837 |
| 0.271197875 | 0.328364707 | 0.012294413 | 0.295203403 |
| 0.339390342 | 0.163559558 | 0.034781258 | 0.414701409 |
| 0.347385389 | 0.230319454 | 0.139134494 | 0.006046014 |
| 1           | 0.152319526 | 0.350877916 | 0.061117688 |
| 0.322756577 | 0.2205975   | 0.308224975 | 0.401823665 |
| 0.343392689 | 0.261131994 | 0.234015739 | 0.347635106 |
| 0.081302606 | 0.40909912  | 0.405589889 | 0.024980808 |
| 0.397281562 | 0.377230024 | 0.295665589 | 0.081481722 |
| 0.276828598 | 0.050516512 | 0.103155785 | 0.320141212 |
| 0.297417497 | 0.378628559 | 0.02458491  | 0.116868349 |
| 0.254869537 | 0.186561395 | 0.044829296 | 0.234767279 |
| 0.160430526 | 0.266244182 | 0.241194573 | 0.245885871 |
| 0.294867627 | 0.152013661 | 0.384758574 | 0.085009103 |
| 0.394546026 | 0.025886795 | 0.377107612 | 0.140940122 |
| 0.188081999 | 0.389636738 | 0.412463376 | 0.203881856 |
| 0.019077197 | 0.104885873 | 0.239367183 | 0.257806359 |
| 0.033164599 | 0.111084107 | 0.130478135 | 0.191238113 |
| 0.418518079 | 0.314154045 | 0.152326453 | 0.251314283 |
| 0.24416244  | 0.053359078 | 0.329927097 | 0.251599448 |
| 0.33101059  | 0.190912371 | 0.355896396 | 0.007142706 |
| 0.390618608 | 0.088782712 | 0.307328139 | 0.212669249 |
| 0.455962878 | 0.06150193  | 0.22336701  | 0.102735408 |
| 0.130709472 | 0.003751019 | 0.258696397 | 0.323750949 |
| 0.153202695 | 0.343306895 | 0.270904211 | 0.22211227  |
| 0.373028185 | 0.308844103 | 0.365403644 | 0.325564927 |
| 0.238326911 | 0.022572942 | 0.074205745 | 0.017269426 |
| 0.315483355 | 0.255679112 | 0.381267867 | 0.372174893 |
| 0.269216274 | 0.318442596 | 0.247619423 | 0.25711141  |
| 0.370784482 | 0.167717484 | 0.418234264 | 0.24580645  |
| 0.403345461 | 0.291959839 | 0.139731487 | 0.237295134 |
| 0.088757944 | 0.10472025  | 0.055704547 | 0.151375913 |
| 0.392279444 | 0.222954844 | 0.230257609 | 0.306710525 |
| 0.017949783 | 0.236903215 | 0.400092717 | 0.402596784 |
| 0.319155974 | 0.403869716 | 0.353610169 | 0.234096661 |
| 0.309072668 | 0.264058325 | 0.029148458 | 0.01460284  |
| 0.193890583 | 0.096855409 | 0.373035816 | 0.366903671 |
| 0.407496784 | 0.341053631 | 0.04506691  | 0.092556768 |
| 0.191645917 | 0.410734894 | 0.134594039 | 0.132097503 |
| 0.328569174 | 0.372412651 | 0.000365876 | 0.21696133  |
| 0.250217837 | 0.313024419 |             |             |

|             |             |             |             |
|-------------|-------------|-------------|-------------|
| POLK        | 0.079420464 | 0.25440521  | 0.005299571 |
| 0.141181213 | 0.008997583 | 0.088785777 | 0.084504131 |
| 0.068535881 | 0.003021171 | 0.064454629 | 0.142706561 |
| 7.83E-06    | 0.154690167 | 0.000156615 | 0.000866723 |
| 0.253961549 | 0.254377991 | 0.098351159 | 0.216603823 |
| 0.048943775 | 0.040000887 | 0.101672895 | 0.197555336 |
| 0.078041152 | 1.18E-05    | 0.051826064 | 0.066247178 |
| 0.057963253 | 0.23601122  | 0.029824961 | 0.041744981 |
| 0.218466653 | 0.249873979 | 0.077425312 | 0.02347235  |
| 0.056463077 | 0.223404861 | 0.00339532  | 0.19524654  |
| 0.16063296  | 0.080021502 | 0.226359693 | 0.000137166 |
| 0.03036314  | 0.02474873  | 0.047210006 | 0.129097139 |
| 0.029124009 | 0.076803242 | 0.024073745 | 0.087768175 |
| 0.011228994 | 0.141382721 | 0.11944371  | 0.024457491 |
| 0.202641557 | 0.058937477 | 0.216560906 | 0.022877028 |
| 0.00559739  | 0.037290914 | 0.07048914  | 0.133841316 |
| 0.093509749 | 0.218773238 | 0.245737916 | 0.002663353 |
| 0.016303929 | 0.088826039 | 0.224130668 | 0.267677786 |
| 0.22142716  | 0.0452636   | 0.032039556 | 0.058315232 |
| 0.194111682 | 0.178226305 | 0.061663079 | 0.010228169 |
| 3.36E-05    | 0.062767828 | 0.106416853 | 0.086504214 |
| 0.159832898 | 0.151544546 | 0.099094941 | 0.049440654 |
| 0.15882846  | 0.000423908 | 0.107617208 | 0.260291887 |
| 0.005369642 | 0.139562985 | 0.000915049 | 0.0047033   |
| 0.191259572 | 0.222692704 | 0.146431575 | 0.011689819 |
| 0.000214866 | 0.006021946 | 0.002953211 | 0.177641385 |
| 0.080954133 | 0.122442774 | 0.181202729 | 0.008841063 |
| 0.16263171  | 0.006335362 | 0.037279232 | 0.254082718 |
| 0.24406398  | 5.80E-05    | 0.005572641 | 0.072379827 |
| 0.013021167 | 0.0216377   | 0.062771985 | 0.005004317 |
| 0.003519327 | 0.000104612 | 0.218231656 | 0.011417519 |
| 0.044316407 | 0.072559812 | 0.018377132 | 0.236505732 |
| 0.04484923  | 0.164812877 | 0.010242211 | 0.088007414 |
| 0.206141679 | 0.100755168 | 0.178254525 | 0.202345388 |
| 0.061446161 | 0.013379533 | 0.019644257 | 0.218755186 |
| 0.158807345 | 0.003568715 | 0.004499586 | 0.134646753 |
| 0.15743128  | 0.242297615 | 0.260031867 | 0.015333948 |
| 0.06732038  | 0.030736768 | 0.08178747  | 0.226549639 |
| 0.061088588 | 0.047538345 | 0.001545943 | 0.102466884 |
| 0.201538997 | 0.002795696 | 0.006650976 | 0.152267492 |
| 0.018105078 | 0.011523015 | 0.212862809 | 0.19698552  |
| 0.107204613 | 0.059117208 | 0.149923929 | 0.109146231 |
| 0.060446929 | 0.113018737 | 0.107851043 | 0.141693608 |
| 0.097012299 | 0.110192714 | 0.00615799  | 0.164786815 |
| 0.020352044 | 0.071018986 | 0.021800807 | 0.002483234 |
| 0.093642549 | 0.031557124 | 0.248806051 | 0.100799634 |
| 0.151038318 | 0.106850119 | 0.084629018 | 0.096937242 |
| 0.058564723 | 0.145572059 | 0.272998686 | 0.017245092 |
| 0.045062956 | 0.018994598 | 0.019733242 | 0.061626677 |
| 0.123845174 | 0.034155132 | 0.030223666 | 0.000156125 |
| 0.00507145  | 0.160080363 | 0.067525071 | 0.000817992 |
| 0.048559479 | 0.005186742 | 0.001463444 | 0.24824679  |
| 0.050337737 | 0.215432219 | 0.000162232 | 0.004400766 |
| 0.047026082 | 0.208259249 | 0.135362505 | 0.011619614 |

|             |             |             |             |
|-------------|-------------|-------------|-------------|
| 0.244529503 | 0.068249859 | 0.205525913 | 0.15127644  |
| 0.020059168 | 0.188273502 | 0.002448773 | 0.023536922 |
| 0.147674722 | 0.239923128 | 0.255570627 | 0.191725955 |
| 0.057447067 | 0.079151037 | 0.010402779 | 0.094341095 |
| 0.091891922 | 0.072145278 | 0.006657936 | 0.23158329  |
| 9.88E-06    | 0.092192191 | 0.192673448 | 0.003389544 |
| 0.280797305 | 0.102529183 | 0.005027335 | 0.02348573  |
| 0.225529665 | 0.222045237 | 0.140422208 | 0.23617546  |
| 0.005623396 | 7.70E-05    | 0.189383372 | 0.146188847 |
| 0.244707863 | 0.0659888   | 0.059210298 | 0.000555157 |
| 0.248751037 | 0.06025209  | 0.190512508 | 0.148567122 |
| 0.128977593 | 0.054262619 | 0.029859271 | 0.074535214 |
| 0.0004128   | 0.084040059 | 0.219717426 | 0.031763058 |
| 0.147207838 | 0.006444511 | 0.23581909  | 0.089611127 |
| 0.067645779 | 0.038921149 | 0.133356737 | 0.019284419 |
| 0.033478974 | 0.26301332  | 0.001226005 | 0.175197297 |
| 0.252879387 | 0.057955388 | 0.287808156 | 0.237543821 |
| 0.072154258 | 0.162998101 | 0.249554402 | 0.156167547 |
| 5.33E-06    | 0.218241833 | 0.164536173 | 0.116836258 |
| 0.277756198 | 0.087194085 | 0.019895745 | 0.100447271 |
| 2.73E-06    | 0.026590696 | 0.078329161 | 0.199228151 |
| 0.2613371   | 0.000871514 | 0.001659404 | 0.201328952 |
| 0.159083746 | 0.001052482 | 0.254699747 | 0.145161356 |
| 0.261135548 | 0.100301446 | 0.064688179 | 0.196177681 |
| 0.060053728 | 0.026236939 | 0.003309476 | 0.23070008  |
| 0.066358231 | 0.000734599 | 0.064296504 | 0.224357965 |
| 0.225208093 | 0.149397372 | 0.055498665 | 0.010014765 |
| 0.152319526 | 1           | 0.272977187 | 0.002438537 |
| 0.161605466 | 0.129839096 | 0.210300711 | 0.194797225 |
| 0.121969852 | 0.198012388 | 0.177491942 | 0.242225508 |
| 0.031838499 | 0.236679317 | 0.234678347 | 0.008231478 |
| 0.106000579 | 0.25476446  | 0.219659933 | 0.063942711 |
| 0.101815552 | 0.047794736 | 0.061059841 | 0.047043199 |
| 0.239652391 | 0.275615903 | 0.00864284  | 0.006056751 |
| 0.216087209 | 0.025321959 | 0.019611319 | 0.041309047 |
| 0.074298313 | 0.017907141 | 0.001967188 | 0.108179965 |
| 0.240418014 | 0.117965815 | 0.27602752  | 0.110215623 |
| 0.221719225 | 0.00143683  | 0.140251049 | 0.011402202 |
| 0.052535641 | 0.195323001 | 0.174117448 | 0.004044638 |
| 0.010391472 | 0.004862438 | 0.213763291 | 0.183059451 |
| 0.011487018 | 0.030222053 | 0.103607924 | 0.162809378 |
| 0.261425436 | 0.068612493 | 0.080255041 | 0.047180415 |
| 0.177664193 | 0.036864677 | 0.216405889 | 0.066859245 |
| 0.152784262 | 0.102758186 | 0.179367365 | 0.000449881 |
| 0.172675914 | 0.102964141 | 0.017897687 | 0.204493544 |
| 0.201966235 | 0.026093386 | 0.163592038 | 0.014113515 |
| 0.014905537 | 3.47E-05    | 0.089026754 | 0.113566571 |
| 0.103197503 | 0.016767049 | 0.055121022 | 0.021575158 |
| 0.248047356 | 0.119725086 | 0.188265259 | 0.020736472 |
| 0.145065508 | 0.00373735  | 0.07784802  | 0.001097218 |
| 0.12945916  | 0.115959919 | 0.106065341 | 0.102356969 |
| 0.010567879 | 0.160013883 | 0.1216585   | 0.148965674 |
| 0.267835854 | 0.033579593 | 0.276168112 | 0.020710164 |
| 0.181588587 | 0.029738293 | 0.060875985 | 0.011606375 |

|             |             |             |             |
|-------------|-------------|-------------|-------------|
| 0.054235444 | 0.001816604 | 0.013931097 | 0.004772136 |
| 0.281899267 | 0.009974645 | 0.163751976 | 0.032342564 |
| 0.005668072 | 0.079549621 | 0.131644775 | 0.19167525  |
| 0.214627956 | 0.185461196 | 0.050677795 | 0.16094118  |
| 0.011814401 | 0.034580756 | 0.116496203 | 0.035123496 |
| 0.042785945 | 0.054998278 | 0.139387267 | 0.169654858 |
| 0.232668789 | 0.01006778  | 0.011079981 | 0.008165508 |
| 0.001823852 | 0.138701417 | 0.12117664  | 0.019026592 |
| 0.105115524 | 0.021151274 | 2.59E-05    | 0.013562899 |
| 0.133860575 | 0.027741657 |             |             |
| PON3        | 0.254901561 | 0.497687069 | 0.065158396 |
| 0.062892036 | 0.13503357  | 0.210830201 | 0.218147838 |
| 0.26507735  | 0.088193162 | 0.169438018 | 0.280693494 |
| 0.000707167 | 0.351662725 | 0.009007577 | 0.051282731 |
| 0.505784826 | 0.522506482 | 0.305517232 | 0.492607386 |
| 0.227273934 | 0.198608026 | 0.273259783 | 0.34594078  |
| 0.229956729 | 0.000900851 | 0.140112109 | 0.096629415 |
| 0.273262619 | 0.491149877 | 0.163320248 | 0.267912903 |
| 0.442716906 | 0.463315981 | 0.378526639 | 0.333847756 |
| 0.272297318 | 0.444341671 | 0.108287984 | 0.379534024 |
| 0.377122033 | 0.240101974 | 0.440208927 | 0.009938869 |
| 0.011023935 | 0.107272054 | 0.241388425 | 0.308258224 |
| 0.21132463  | 0.196456163 | 0.137706672 | 0.1956399   |
| 0.148358125 | 0.294689439 | 0.303086678 | 0.159936897 |
| 0.392983944 | 0.014111358 | 0.437021226 | 0.167556396 |
| 0.057402038 | 0.238858834 | 0.276386107 | 0.324105206 |
| 0.223491172 | 0.420802994 | 0.515666461 | 0.041144659 |
| 0.071272216 | 0.337227645 | 0.381498213 | 0.401795381 |
| 0.444525361 | 0.328046743 | 0.277367567 | 0.308647459 |
| 0.367838506 | 0.369371203 | 0.225948302 | 0.142783129 |
| 0.000759094 | 0.159902828 | 0.363209185 | 0.236831302 |
| 0.335629531 | 0.29956722  | 0.291093874 | 0.229080672 |
| 0.37309008  | 0.015464843 | 0.304173708 | 0.527013987 |
| 0.032656114 | 0.34214244  | 0.012513985 | 0.120506742 |
| 0.387924168 | 0.459976941 | 0.316840546 | 0.079882824 |
| 0.010598287 | 0.090142483 | 0.092515931 | 0.389925281 |
| 0.311854581 | 0.377677218 | 0.37224992  | 0.098949484 |
| 0.346242754 | 0.134313503 | 0.294059613 | 0.455212625 |
| 0.47596579  | 0.004612624 | 0.109332061 | 0.200896734 |
| 0.298854378 | 0.176077727 | 0.212083896 | 0.04453746  |
| 0.017240239 | 0.009178608 | 0.451145443 | 0.124250332 |
| 0.120006688 | 0.198318192 | 0.110937481 | 0.41083012  |
| 0.251825634 | 0.399339716 | 0.135462752 | 0.247237212 |
| 0.364179427 | 0.245362738 | 0.404963436 | 0.377024959 |
| 0.35499803  | 0.178592278 | 0.123770071 | 0.447135785 |
| 0.378416989 | 0.069226539 | 0.074357453 | 0.27903999  |
| 0.341503773 | 0.485760307 | 0.529806343 | 0.22733929  |
| 0.281878819 | 0.187945279 | 0.306542444 | 0.363997784 |
| 0.215092105 | 0.240334488 | 0.058887312 | 0.280518784 |
| 0.393750605 | 0.036765147 | 0.058631893 | 0.359889386 |
| 0.089593123 | 0.224790247 | 0.418598182 | 0.395802637 |
| 0.355863693 | 0.082610168 | 0.264555823 | 0.248092946 |
| 0.232485384 | 0.245714417 | 0.315962489 | 0.253528965 |
| 0.254948303 | 0.323528966 | 0.048839942 | 0.351270622 |



|             |             |              |             |
|-------------|-------------|--------------|-------------|
| 0.108652476 | 0.250928362 | 0.260771503  | 0.062650236 |
| 0.290277132 | 0.245934074 | 0.433695367  | 0.319970288 |
| 0.308602256 | 0.015541525 | 0.175580469  | 0.273898418 |
| 0.277442071 | 0.360614187 | 0.505089258  | 0.097617179 |
| 0.19349197  | 0.243614337 | 0.117207347  | 0.327516469 |
| 0.329743976 | 0.232309887 | 0.210101533  | 0.000727044 |
| 0.129744449 | 0.346567637 | 0.327917966  | 0.033664719 |
| 0.257082567 | 0.093382092 | 0.070508223  | 0.457302891 |
| 0.176109179 | 0.410503247 | 0.013955731  | 0.095758884 |
| 0.232986561 | 0.373682592 | 0.386858091  | 0.205612993 |
| 0.407709492 | 0.296124767 | 0.419660124  | 0.33201582  |
| 0.256908992 | 0.306318294 | 0.116841911  | 0.203829233 |
| 0.371260046 | 0.469216699 | 0.429881373  | 0.403323614 |
| 0.233211438 | 0.258938957 | 0.24267067   | 0.232928036 |
| 0.297084338 | 0.303352591 | 0.0711110127 | 0.493614216 |
| 0.00043108  | 0.279457412 | 0.397330833  | 0.124458172 |
| 0.49731012  | 0.230460476 | 0.055491145  | 0.177586187 |
| 0.502916671 | 0.489259355 | 0.36721734   | 0.434536237 |
| 0.170042287 | 0.005624056 | 0.446805907  | 0.328130686 |
| 0.502567932 | 0.328905035 | 0.333473105  | 0.043947258 |
| 0.481672949 | 0.239900974 | 0.354632041  | 0.338172976 |
| 0.37295843  | 0.32551337  | 0.18591892   | 0.239159606 |
| 0.010930253 | 0.232972936 | 0.352729819  | 0.219533826 |
| 0.325371491 | 0.155538412 | 0.436779128  | 0.259432526 |
| 0.376369165 | 0.270034452 | 0.375981653  | 0.086686717 |
| 0.152676478 | 0.503670824 | 0.043004516  | 0.420971303 |
| 0.522264328 | 0.27683511  | 0.490543957  | 0.504936639 |
| 0.248835384 | 0.333431869 | 0.464791781  | 0.395885732 |
| 0.000475622 | 0.426411074 | 0.337650005  | 0.278609277 |
| 0.459439194 | 0.242764065 | 0.154532723  | 0.357322901 |
| 0.000661258 | 0.127214317 | 0.273799074  | 0.458627657 |
| 0.474050406 | 0.027897554 | 0.046928415  | 0.395385166 |
| 0.320469036 | 0.034132947 | 0.51877759   | 0.308898303 |
| 0.459704687 | 0.356955178 | 0.174155438  | 0.386299047 |
| 0.225957711 | 0.270751554 | 0.039293947  | 0.394008685 |
| 0.329946038 | 0.052487738 | 0.125776613  | 0.501809672 |
| 0.402213869 | 0.333969378 | 0.209548511  | 0.018179434 |
| 0.350877916 | 0.272977187 | 1            | 0.091575477 |
| 0.354566901 | 0.29958601  | 0.434688416  | 0.397701377 |
| 0.353576205 | 0.367913529 | 0.32544544   | 0.42159081  |
| 0.150442727 | 0.392516239 | 0.427787443  | 0.065724594 |
| 0.287680573 | 0.487604576 | 0.391057124  | 0.166636196 |
| 0.285393002 | 0.146998857 | 0.177698734  | 0.223954963 |
| 0.44172271  | 0.488737407 | 0.05586959   | 0.111786596 |
| 0.378348389 | 0.237309686 | 0.104629935  | 0.2607828   |
| 0.224196079 | 0.157360571 | 0.083484068  | 0.29198207  |
| 0.456194325 | 0.257636534 | 0.454399494  | 0.214080979 |
| 0.45782831  | 0.03789542  | 0.366573507  | 0.228341928 |
| 0.21707019  | 0.330809288 | 0.368323384  | 0.088210961 |
| 0.036360184 | 0.098714889 | 0.36280151   | 0.370160884 |
| 0.0696401   | 0.151580733 | 0.248414473  | 0.33448743  |
| 0.503218458 | 0.367038983 | 0.230672746  | 0.253161996 |
| 0.374124894 | 0.154651524 | 0.463083768  | 0.25918874  |
| 0.32548892  | 0.319966396 | 0.382805468  | 0.008916926 |

|             |             |             |             |
|-------------|-------------|-------------|-------------|
| 0.362763003 | 0.19937597  | 0.130794334 | 0.368625896 |
| 0.435066328 | 0.125690892 | 0.338395663 | 0.126997942 |
| 0.182018679 | 0.002139689 | 0.267990157 | 0.342837543 |
| 0.236423739 | 0.210176264 | 0.272514575 | 0.175072271 |
| 0.516871026 | 0.318669057 | 0.34559748  | 0.211983022 |
| 0.357904171 | 0.032307573 | 0.17829895  | 0.028025639 |
| 0.299473513 | 0.300662697 | 0.309361885 | 0.295105307 |
| 0.127755379 | 0.385254055 | 0.316737227 | 0.395264287 |
| 0.48517549  | 0.184103976 | 0.525390344 | 0.211438108 |
| 0.378024705 | 0.315518514 | 0.214396885 | 0.249818015 |
| 0.201783762 | 0.099124068 | 0.106420971 | 0.102645292 |
| 0.498369101 | 0.228294785 | 0.372518248 | 0.251309112 |
| 0.05350794  | 0.34019595  | 0.331695195 | 0.362920438 |
| 0.378805263 | 0.310023571 | 0.290448715 | 0.346649752 |
| 0.235312333 | 0.21517014  | 0.104918113 | 0.065670454 |
| 0.297444193 | 0.183483238 | 0.354172647 | 0.390866756 |
| 0.501242707 | 0.195149586 | 0.086439195 | 0.098844954 |
| 0.090806723 | 0.316523156 | 0.258633516 | 0.199047702 |
| 0.345813395 | 0.224925831 | 0.000525886 | 0.15422838  |
| 0.304454407 | 0.348601864 |             |             |
| PPP4C       | 0.068825473 | 0.177803674 | 0.062864902 |
| 0.000659176 | 0.022343872 | 0.235335909 | 0.187444226 |
| 0.060220304 | 0.03175538  | 0.030064754 | 0.281775798 |
| 0.001214315 | 0.065121007 | 0.010595473 | 0.024687343 |
| 0.120987758 | 0.121665131 | 0.175846725 | 0.139966198 |
| 0.115355543 | 0.003321533 | 0.221615122 | 0.112831335 |
| 0.190241575 | 0.002526489 | 0.10990864  | 0.00200356  |
| 0.044977418 | 0.109234602 | 0.213466055 | 0.026568865 |
| 0.099783348 | 0.080507877 | 0.022291898 | 0.011193645 |
| 0.002745137 | 0.240635089 | 0.001421322 | 0.065025957 |
| 0.064458344 | 0.080935805 | 0.083690134 | 0.008063601 |
| 7.25E-06    | 0.11714153  | 0.042978044 | 0.165993176 |
| 0.14664755  | 0.219246194 | 0.274107352 | 0.085152271 |
| 0.000425774 | 0.274636871 | 0.177499297 | 0.000999572 |
| 0.267838224 | 4.59E-05    | 0.231699691 | 0.053196918 |
| 0.125100857 | 0.13677973  | 0.032389949 | 0.129368408 |
| 0.270464477 | 0.258185618 | 0.155881217 | 0.010294872 |
| 0.152611632 | 0.065238545 | 0.051332456 | 0.076062825 |
| 0.16410562  | 0.0192829   | 0.037597261 | 0.021429996 |
| 0.061847641 | 0.069846092 | 0.299131187 | 0.13838364  |
| 0.000469963 | 0.140910793 | 0.02172507  | 0.071031074 |
| 0.036335364 | 0.275100055 | 0.083171874 | 0.063060587 |
| 0.04600753  | 0.018248032 | 0.183264408 | 0.144247162 |
| 0.002229453 | 0.082818735 | 0.002874826 | 0.099855725 |
| 0.103678748 | 0.076573537 | 0.104812785 | 0.037709114 |
| 0.01754558  | 0.16613939  | 0.012424415 | 0.055151312 |
| 0.111297755 | 0.080657234 | 0.25550132  | 0.005824379 |
| 0.043700487 | 0.018690503 | 0.080008119 | 0.223319087 |
| 0.138963552 | 0.035811733 | 0.091852063 | 0.281788377 |
| 0.006159464 | 0.003000231 | 0.246775626 | 0.000639825 |
| 0.00240518  | 0.009916806 | 0.098809042 | 0.121539783 |
| 0.062292047 | 0.182526186 | 0.011651646 | 0.064697311 |
| 0.061797283 | 0.096705547 | 0.037637263 | 0.144458216 |
| 0.055526075 | 0.191933998 | 0.056778387 | 0.079217385 |

|             |             |             |             |
|-------------|-------------|-------------|-------------|
| 0.029251422 | 0.079021731 | 0.149091835 | 0.203315255 |
| 0.282471117 | 0.034001395 | 0.040023703 | 0.229873739 |
| 0.045137066 | 0.125893112 | 0.15862224  | 0.066116695 |
| 0.064922413 | 0.240372001 | 0.017297757 | 0.147980172 |
| 0.264881613 | 0.187296512 | 0.002729784 | 0.315537527 |
| 0.275768841 | 0.001106791 | 0.101084621 | 0.11415358  |
| 0.002166806 | 0.021922542 | 0.199901687 | 0.138720509 |
| 0.100070022 | 0.001297712 | 0.048920129 | 0.150925986 |
| 0.186305171 | 0.143119215 | 0.134952482 | 0.0289012   |
| 0.242613053 | 0.017690646 | 0.108933381 | 0.044786726 |
| 0.230631497 | 0.20577768  | 0.003370042 | 0.000963312 |
| 0.098724998 | 0.108318447 | 0.143721239 | 0.121205773 |
| 0.071734491 | 5.08E-05    | 0.029778061 | 0.084124632 |
| 0.014084906 | 0.087004181 | 0.193813871 | 0.247430599 |
| 0.278224365 | 0.013961475 | 0.2585653   | 0.053034405 |
| 0.145732119 | 0.012758525 | 0.012339524 | 0.000781469 |
| 0.035179096 | 0.01519625  | 0.079332285 | 0.036228516 |
| 0.048282321 | 0.023239553 | 0.012462945 | 0.131982435 |
| 0.233033427 | 0.100291215 | 0.018416072 | 0.014598293 |
| 0.113741343 | 0.167230658 | 0.020717309 | 0.012389362 |
| 0.11934058  | 0.046079737 | 0.05952892  | 0.253172373 |
| 0.043969055 | 0.232376537 | 0.002496041 | 0.115957667 |
| 0.051736212 | 0.123752632 | 0.075717815 | 0.129393439 |
| 0.129390665 | 0.139327582 | 0.007341217 | 0.289877957 |
| 0.142986999 | 0.163154443 | 0.094503624 | 0.205101795 |
| 0.000908029 | 0.250503899 | 0.067037378 | 0.002767047 |
| 0.180879915 | 0.224137571 | 0.117773579 | 0.162092861 |
| 0.143619042 | 0.212254581 | 0.166513433 | 0.071719995 |
| 0.005692536 | 0.015370304 | 0.184159792 | 0.184835195 |
| 0.103909609 | 0.103713398 | 0.012049782 | 0.00539932  |
| 0.149618869 | 0.072490068 | 0.088206692 | 0.046588603 |
| 0.065472146 | 0.032712511 | 0.267314502 | 0.099761953 |
| 0.00040863  | 0.078676684 | 0.060184879 | 0.002941569 |
| 0.031690069 | 0.008080432 | 0.117418018 | 0.3289221   |
| 0.022923027 | 0.008074898 | 0.016117484 | 0.126616694 |
| 0.257593829 | 0.174718704 | 0.000689911 | 0.191207857 |
| 0.154836403 | 0.188281674 | 0.125907577 | 0.158504306 |
| 0.156238972 | 0.252156133 | 0.142210956 | 0.108606669 |
| 0.001139103 | 0.060530445 | 0.046332257 | 0.329233712 |
| 0.082743516 | 0.215136843 | 0.042994889 | 0.023994773 |
| 0.003081422 | 0.224377966 | 0.002380094 | 0.236964952 |
| 0.120287289 | 0.016619683 | 0.000254423 | 0.146249722 |
| 0.044192042 | 0.00376722  | 0.175901731 | 0.110408526 |
| 0.163254731 | 0.120115138 | 0.12459004  | 0.051889405 |
| 0.001826099 | 0.06004896  | 0.003042755 | 0.104761119 |
| 0.053690165 | 0.001583727 | 0.010396069 | 0.155048402 |
| 0.159624157 | 0.227509015 | 0.268437126 | 0.000379052 |
| 0.061117688 | 0.002438537 | 0.091575477 | 1           |
| 0.222635599 | 0.252927968 | 0.220801357 | 0.070823873 |
| 0.10075552  | 0.230901088 | 0.256060648 | 0.142872768 |
| 0.001448045 | 0.058189684 | 0.078871985 | 0.014269317 |
| 0.044641105 | 0.125529972 | 0.042297116 | 0.234828009 |
| 0.207270434 | 0.001039194 | 0.274187134 | 0.115532608 |
| 0.206166439 | 0.108560823 | 0.069405938 | 0.15447525  |

|             |             |             |             |
|-------------|-------------|-------------|-------------|
| 0.217872401 | 0.102142621 | 0.17110179  | 0.181914183 |
| 0.289917307 | 0.00087754  | 0.006895328 | 0.231753457 |
| 0.229645696 | 0.28561821  | 0.100932584 | 0.009366934 |
| 0.10654552  | 0.107667531 | 0.156474183 | 0.043167127 |
| 0.245985318 | 0.03614466  | 0.054823558 | 0.002757885 |
| 0.000648689 | 0.018373339 | 0.210041747 | 0.260205834 |
| 0.156487726 | 0.260827616 | 0.14669962  | 0.134431916 |
| 0.111412136 | 0.022694047 | 0.294851274 | 0.189940174 |
| 0.290200313 | 0.002188092 | 0.226910986 | 0.145718215 |
| 0.159494045 | 0.07221517  | 0.135380597 | 0.000437454 |
| 0.063630953 | 0.035152988 | 0.047800681 | 0.077962412 |
| 0.071570228 | 0.155164035 | 0.200971151 | 0.124996186 |
| 0.002835941 | 0.01367654  | 0.269587574 | 0.018010696 |
| 0.301550518 | 0.022218398 | 0.160310054 | 0.000765144 |
| 0.199378589 | 0.106828435 | 0.109274671 | 0.018033324 |
| 0.068765402 | 0.000112264 | 0.041852035 | 0.021930676 |
| 0.178462248 | 0.266571601 | 0.084908618 | 0.050480339 |
| 0.047648421 | 0.103866871 | 0.226883806 | 0.064581856 |
| 0.113903449 | 0.001264368 | 0.125658705 | 0.119350831 |
| 0.045031326 | 0.02622977  | 0.28582086  | 0.039875772 |
| 0.137463513 | 0.007146365 | 0.151379481 | 0.062379543 |
| 0.09519902  | 0.05018534  | 0.094967862 | 0.019379741 |
| 0.040595793 | 0.08053386  | 0.098620805 | 0.056004448 |
| 0.085469265 | 0.043136519 | 0.049168915 | 0.29965065  |
| 0.00822717  | 0.07738247  | 0.000807014 | 0.000809954 |
| 0.002431618 | 0.110829038 | 0.166227419 | 0.173714626 |
| 0.137107681 | 0.012422014 | 0.1161491   | 0.146303938 |
| 0.002180655 | 0.072587488 | 0.203694527 | 0.001533842 |
| 0.112341271 | 0.013374316 | 0.002688783 | 0.077647473 |
| 0.234407867 | 0.008543277 |             |             |
| PQLC3       | 0.320895303 | 0.475262429 | 0.139550971 |
| 0.026274945 | 0.144622839 | 0.300687473 | 0.271867635 |
| 0.338372639 | 0.183398283 | 0.165918231 | 0.365856474 |
| 0.006874119 | 0.303454309 | 0.049628417 | 0.147342069 |
| 0.462567796 | 0.466075669 | 0.349610371 | 0.471217757 |
| 0.363121529 | 0.131231257 | 0.395194371 | 0.36241969  |
| 0.311758577 | 0.00873976  | 0.172739248 | 0.04938345  |
| 0.313241721 | 0.444449529 | 0.301764539 | 0.304158702 |
| 0.406546952 | 0.376268624 | 0.307869168 | 0.256426228 |
| 0.143499961 | 0.47231092  | 0.083331961 | 0.303248973 |
| 0.330844479 | 0.25896634  | 0.369391393 | 0.038243566 |
| 0.001665592 | 0.166078873 | 0.293705307 | 0.391152321 |
| 0.37316465  | 0.290792272 | 0.277986823 | 0.204013766 |
| 0.102675801 | 0.383659534 | 0.37440957  | 0.1003648   |
| 0.419605047 | 0.003640726 | 0.453454296 | 0.292715966 |
| 0.139710769 | 0.363086747 | 0.281037584 | 0.381021394 |
| 0.309238086 | 0.44090373  | 0.47895381  | 0.066624065 |
| 0.139140382 | 0.353265896 | 0.299800255 | 0.337837092 |
| 0.436022885 | 0.325817265 | 0.305801608 | 0.250902647 |
| 0.320221881 | 0.331784039 | 0.359664279 | 0.293641384 |
| 0.003300586 | 0.201006747 | 0.249162895 | 0.285763013 |
| 0.273063065 | 0.383536603 | 0.337624071 | 0.238944124 |
| 0.336105678 | 0.060655008 | 0.408343602 | 0.483803681 |
| 0.029542237 | 0.317234032 | 0.018300164 | 0.271140363 |

|             |             |             |             |
|-------------|-------------|-------------|-------------|
| 0.371209431 | 0.393680152 | 0.364265788 | 0.121016008 |
| 0.048806712 | 0.246292647 | 0.198799601 | 0.32732215  |
| 0.380850054 | 0.384596126 | 0.401378028 | 0.104662626 |
| 0.275812957 | 0.238245559 | 0.36784477  | 0.46175845  |
| 0.450942011 | 0.035891978 | 0.278933431 | 0.302154812 |
| 0.256182331 | 0.120885845 | 0.301565032 | 0.041704794 |
| 0.022178956 | 0.052036429 | 0.409720277 | 0.273959782 |
| 0.140089578 | 0.26942543  | 0.114113119 | 0.331064752 |
| 0.3289166   | 0.388375909 | 0.154042856 | 0.297556215 |
| 0.30991759  | 0.295033296 | 0.331886477 | 0.343758981 |
| 0.283799191 | 0.341503931 | 0.257055142 | 0.435012892 |
| 0.451131812 | 0.134156926 | 0.154754814 | 0.365779094 |
| 0.269280646 | 0.450657003 | 0.497952967 | 0.378866808 |
| 0.265777286 | 0.343186004 | 0.26291933  | 0.366316983 |
| 0.314767159 | 0.386375108 | 0.094221442 | 0.396692987 |
| 0.430876296 | 0.044298474 | 0.137339032 | 0.361378257 |
| 0.046318368 | 0.264992814 | 0.440109313 | 0.383516666 |
| 0.369992429 | 0.040365912 | 0.243793955 | 0.30123408  |
| 0.358319602 | 0.298924193 | 0.37901258  | 0.210615357 |
| 0.372496236 | 0.264183551 | 0.105855731 | 0.277581173 |
| 0.22133037  | 0.386523746 | 0.205884548 | 0.058330944 |
| 0.350189172 | 0.38335581  | 0.407047227 | 0.389353174 |
| 0.320540882 | 0.003421652 | 0.166026341 | 0.33800002  |
| 0.257847867 | 0.346321454 | 0.478943671 | 0.207086153 |
| 0.350237632 | 0.232132561 | 0.25038905  | 0.293952789 |
| 0.379638367 | 0.232747359 | 0.210890512 | 0.003027654 |
| 0.219417887 | 0.262646416 | 0.363346675 | 0.130861696 |
| 0.259709675 | 0.191782565 | 0.192537823 | 0.412492932 |
| 0.291857572 | 0.349071014 | 0.078132924 | 0.159391583 |
| 0.335601302 | 0.374297453 | 0.303395277 | 0.284799735 |
| 0.364677445 | 0.330695291 | 0.351890261 | 0.390209907 |
| 0.286670099 | 0.366807346 | 0.1352026   | 0.342129204 |
| 0.325529728 | 0.410484878 | 0.348841704 | 0.36838575  |
| 0.31643935  | 0.347806196 | 0.28015113  | 0.34787017  |
| 0.402701164 | 0.406542787 | 0.180061711 | 0.490919928 |
| 0.003290952 | 0.395282101 | 0.347130378 | 0.145362089 |
| 0.463059699 | 0.28921624  | 0.154823073 | 0.354254792 |
| 0.47963132  | 0.496167685 | 0.413759338 | 0.365804157 |
| 0.215087288 | 0.043649742 | 0.472209128 | 0.386435003 |
| 0.441896609 | 0.382475324 | 0.224061506 | 0.101601301 |
| 0.448718064 | 0.297007439 | 0.353749453 | 0.3287108   |
| 0.335543183 | 0.292110166 | 0.346022544 | 0.309898119 |
| 0.020773287 | 0.295811597 | 0.33122974  | 0.163191477 |
| 0.284426382 | 0.21727828  | 0.378409627 | 0.380813302 |
| 0.295139098 | 0.274710795 | 0.251267511 | 0.143735473 |
| 0.263222342 | 0.483886363 | 0.033088104 | 0.459291463 |
| 0.491942317 | 0.390813298 | 0.422800668 | 0.490144417 |
| 0.369638634 | 0.385835508 | 0.430705438 | 0.393524828 |
| 0.004234576 | 0.341524217 | 0.261292894 | 0.385668839 |
| 0.383286158 | 0.339594614 | 0.234309403 | 0.281335    |
| 0.004728203 | 0.250797757 | 0.15859251  | 0.497248063 |
| 0.407446565 | 0.062807054 | 0.027367296 | 0.387872202 |
| 0.270078151 | 0.056026661 | 0.504616508 | 0.338165263 |
| 0.419272123 | 0.391390901 | 0.226006107 | 0.299735167 |

|             |             |             |             |
|-------------|-------------|-------------|-------------|
| 0.127648639 | 0.356318627 | 0.039720364 | 0.371241276 |
| 0.326496828 | 0.086063827 | 0.08773288  | 0.486830049 |
| 0.411710447 | 0.38244772  | 0.333554432 | 0.012539113 |
| 0.322756577 | 0.161605466 | 0.354566901 | 0.222635599 |
| 1           | 0.379233998 | 0.440867348 | 0.327373572 |
| 0.379166491 | 0.395288192 | 0.388023468 | 0.399111176 |
| 0.096522563 | 0.321754534 | 0.369711768 | 0.104387408 |
| 0.28728419  | 0.428840683 | 0.310752802 | 0.248989458 |
| 0.397174101 | 0.068504037 | 0.285477676 | 0.347063038 |
| 0.429185933 | 0.414084507 | 0.113942467 | 0.299570374 |
| 0.387281759 | 0.3579969   | 0.180605064 | 0.395826862 |
| 0.346118143 | 0.113146106 | 0.140252457 | 0.390010975 |
| 0.461477585 | 0.338207745 | 0.399228388 | 0.147681485 |
| 0.402477546 | 0.136829213 | 0.39377406  | 0.311797406 |
| 0.36747659  | 0.287462132 | 0.31717543  | 0.131038243 |
| 0.028892216 | 0.210849463 | 0.375416107 | 0.412707913 |
| 0.15607872  | 0.298835843 | 0.303267235 | 0.33931232  |
| 0.443501114 | 0.354191149 | 0.349376671 | 0.403763056 |
| 0.421996589 | 0.086296841 | 0.49287889  | 0.379237119 |
| 0.382387797 | 0.334403068 | 0.381490858 | 0.011204159 |
| 0.335768652 | 0.192199836 | 0.223381476 | 0.314452366 |
| 0.377958616 | 0.218121639 | 0.369496822 | 0.271284436 |
| 0.150585217 | 0.012809778 | 0.400886165 | 0.235425777 |
| 0.33991578  | 0.271344204 | 0.402705385 | 0.091971555 |
| 0.514129349 | 0.37811755  | 0.356321541 | 0.213870583 |
| 0.354466572 | 0.012109975 | 0.176681276 | 0.09384248  |
| 0.387237392 | 0.399900401 | 0.346701051 | 0.326070296 |
| 0.258460281 | 0.3645295   | 0.398874551 | 0.329581858 |
| 0.410108126 | 0.125005872 | 0.468016556 | 0.362122777 |
| 0.296293945 | 0.356056691 | 0.332271388 | 0.356947876 |
| 0.242610072 | 0.152440253 | 0.202404083 | 0.267729213 |
| 0.409781072 | 0.331560779 | 0.345073009 | 0.310461444 |
| 0.097538213 | 0.382687041 | 0.335050621 | 0.303296601 |
| 0.36602329  | 0.275697717 | 0.341448927 | 0.401814947 |
| 0.275307421 | 0.33295182  | 0.046391281 | 0.030345694 |
| 0.179310811 | 0.253773144 | 0.407655751 | 0.412702574 |
| 0.465067593 | 0.263257621 | 0.178412575 | 0.253732562 |
| 0.101297518 | 0.311929791 | 0.303845005 | 0.113976713 |
| 0.375399486 | 0.244176313 | 0.003311362 | 0.320508826 |
| 0.3948965   | 0.310653292 |             |             |
| PRDM1       | 0.232236924 | 0.458997797 | 0.214970509 |
| 0.028242875 | 0.223531655 | 0.411619422 | 0.40539258  |
| 0.216691133 | 0.303624877 | 0.262455265 | 0.421469964 |
| 0.005495678 | 0.211558156 | 0.063651743 | 0.203561643 |
| 0.37295666  | 0.38432742  | 0.42155432  | 0.382021382 |
| 0.284431094 | 0.176414401 | 0.349781322 | 0.355648484 |
| 0.42701678  | 0.009615715 | 0.29308654  | 0.082200215 |
| 0.194290446 | 0.338758228 | 0.395621905 | 0.328018076 |
| 0.32408796  | 0.29256441  | 0.297440617 | 0.274820346 |
| 0.106555937 | 0.483050318 | 0.057073443 | 0.2361646   |
| 0.233367126 | 0.356535977 | 0.300302949 | 0.084330792 |
| 0.001778407 | 0.293004713 | 0.170176467 | 0.355322888 |
| 0.32363864  | 0.397036592 | 0.378149883 | 0.332301048 |
| 0.050007895 | 0.420094219 | 0.316668541 | 0.045875649 |

|             |             |             |             |
|-------------|-------------|-------------|-------------|
| 0.490896364 | 0.005350435 | 0.496218025 | 0.192756162 |
| 0.25384603  | 0.412471807 | 0.212048034 | 0.330549358 |
| 0.427691355 | 0.499405599 | 0.432535408 | 0.148185827 |
| 0.264393454 | 0.281895551 | 0.22629032  | 0.312273592 |
| 0.411997792 | 0.289112882 | 0.399136518 | 0.183124003 |
| 0.243112167 | 0.234478774 | 0.430042074 | 0.355926205 |
| 0.004532933 | 0.33852026  | 0.267751211 | 0.192704208 |
| 0.172807608 | 0.428895963 | 0.237888636 | 0.37761734  |
| 0.24130163  | 0.112400702 | 0.374101272 | 0.413757105 |
| 0.043823165 | 0.245082908 | 0.018273382 | 0.333569185 |
| 0.297476304 | 0.286437013 | 0.28237518  | 0.246137612 |
| 0.083149343 | 0.304814977 | 0.124584189 | 0.218166914 |
| 0.334516527 | 0.324403218 | 0.481884567 | 0.04985856  |
| 0.180454522 | 0.282208151 | 0.410868534 | 0.484010442 |
| 0.397420389 | 0.037860956 | 0.302587312 | 0.406773108 |
| 0.258218045 | 0.181483345 | 0.415258934 | 0.01988921  |
| 0.02284902  | 0.021372533 | 0.319799426 | 0.326283189 |
| 0.265842465 | 0.390369389 | 0.139337169 | 0.27851391  |
| 0.206178544 | 0.290642517 | 0.278525561 | 0.412008428 |
| 0.214168369 | 0.41693647  | 0.299050109 | 0.27246254  |
| 0.258969738 | 0.314323407 | 0.327686202 | 0.451499175 |
| 0.468155968 | 0.229941861 | 0.254377046 | 0.407215561 |
| 0.185746929 | 0.364726506 | 0.437616574 | 0.301208802 |
| 0.340434836 | 0.399052326 | 0.262302837 | 0.374608592 |
| 0.431205963 | 0.313102903 | 0.037089953 | 0.418431684 |
| 0.503147612 | 0.024215921 | 0.250558439 | 0.296135306 |
| 0.064568629 | 0.38719228  | 0.443593185 | 0.351324    |
| 0.304652033 | 0.070758126 | 0.2994141   | 0.405327914 |
| 0.393095736 | 0.387047383 | 0.343141355 | 0.267861314 |
| 0.405688284 | 0.248918382 | 0.199208473 | 0.187843541 |
| 0.332825444 | 0.376250057 | 0.149390549 | 0.064898576 |
| 0.25082182  | 0.289207729 | 0.384975263 | 0.311238193 |
| 0.2334499   | 0.003721239 | 0.24328148  | 0.25930403  |
| 0.242711558 | 0.240655262 | 0.481379229 | 0.329617122 |
| 0.39013537  | 0.175784158 | 0.355518784 | 0.345546197 |
| 0.303978781 | 0.28327765  | 0.28846574  | 0.005166479 |
| 0.319640065 | 0.180872782 | 0.324916421 | 0.146118875 |
| 0.327269044 | 0.263049371 | 0.134360843 | 0.379767265 |
| 0.395562279 | 0.298695141 | 0.059281746 | 0.087380416 |
| 0.382861861 | 0.390992862 | 0.236171591 | 0.209269248 |
| 0.351203137 | 0.32139454  | 0.238688105 | 0.454624221 |
| 0.368694709 | 0.409853579 | 0.081717303 | 0.393055696 |
| 0.231515138 | 0.376866284 | 0.275909241 | 0.320990873 |
| 0.41505504  | 0.246833269 | 0.162686195 | 0.414053174 |
| 0.327850206 | 0.336216081 | 0.24378335  | 0.464692125 |
| 0.006349296 | 0.410043259 | 0.306837983 | 0.08373037  |
| 0.458286659 | 0.409886685 | 0.236382448 | 0.314793381 |
| 0.390322995 | 0.469735444 | 0.345028263 | 0.268344685 |
| 0.1195299   | 0.045149534 | 0.416470782 | 0.388786116 |
| 0.343211904 | 0.388369601 | 0.182465264 | 0.059436166 |
| 0.386700491 | 0.186796842 | 0.315344972 | 0.228522358 |
| 0.280358182 | 0.216150781 | 0.404164217 | 0.205679634 |
| 0.014132138 | 0.345287814 | 0.237139195 | 0.20155416  |
| 0.292958995 | 0.270734496 | 0.360074386 | 0.428955423 |

|             |             |             |             |
|-------------|-------------|-------------|-------------|
| 0.261889892 | 0.176873619 | 0.239901177 | 0.258611872 |
| 0.401934754 | 0.45701811  | 0.022549459 | 0.405675432 |
| 0.417408603 | 0.388959486 | 0.38012143  | 0.407454466 |
| 0.364748791 | 0.448491882 | 0.39804958  | 0.296586822 |
| 0.003465835 | 0.246677685 | 0.184640814 | 0.448471914 |
| 0.30330481  | 0.424883739 | 0.128281687 | 0.196527405 |
| 0.007046496 | 0.360933925 | 0.098871793 | 0.482319545 |
| 0.353236826 | 0.14983995  | 0.017117257 | 0.342748545 |
| 0.1713028   | 0.033913316 | 0.451111689 | 0.376222078 |
| 0.415080267 | 0.34708694  | 0.359588971 | 0.221131114 |
| 0.072554781 | 0.274573139 | 0.073257729 | 0.327250332 |
| 0.270332101 | 0.061480036 | 0.15745554  | 0.418155611 |
| 0.370408    | 0.418352216 | 0.429799853 | 0.019507832 |
| 0.2205975   | 0.129839096 | 0.29958601  | 0.252927968 |
| 0.379233998 | 1           | 0.448271587 | 0.259755534 |
| 0.315809084 | 0.438924232 | 0.442253365 | 0.374196121 |
| 0.080203801 | 0.231521077 | 0.280304904 | 0.146762624 |
| 0.187075887 | 0.378707518 | 0.27628006  | 0.380775754 |
| 0.36957537  | 0.070839687 | 0.402010653 | 0.257156813 |
| 0.449140868 | 0.364846889 | 0.22638145  | 0.296614854 |
| 0.451766328 | 0.411931717 | 0.325405477 | 0.389340019 |
| 0.427291536 | 0.051791744 | 0.081058047 | 0.411022872 |
| 0.492796712 | 0.430937411 | 0.334642673 | 0.188568775 |
| 0.323578926 | 0.197920232 | 0.33280677  | 0.402364673 |
| 0.3876562   | 0.187425932 | 0.212261544 | 0.055712408 |
| 0.041375747 | 0.206444401 | 0.44046731  | 0.473364178 |
| 0.256444144 | 0.377083787 | 0.381208568 | 0.388529627 |
| 0.354785848 | 0.258206584 | 0.419663603 | 0.346892845 |
| 0.500022327 | 0.138558848 | 0.480472567 | 0.353880858 |
| 0.351065268 | 0.371662133 | 0.34683327  | 0.018084651 |
| 0.249078958 | 0.267886296 | 0.12572363  | 0.342293959 |
| 0.269467141 | 0.322686901 | 0.414506605 | 0.332783371 |
| 0.134847971 | 0.008845876 | 0.378648249 | 0.166550628 |
| 0.42814922  | 0.148305604 | 0.34501802  | 0.050191731 |
| 0.482126158 | 0.322632657 | 0.305171095 | 0.139870364 |
| 0.349443532 | 0.007995453 | 0.288580899 | 0.14106072  |
| 0.345506546 | 0.415862735 | 0.264900555 | 0.237513858 |
| 0.16303184  | 0.327115211 | 0.405653733 | 0.319649023 |
| 0.367398954 | 0.07158969  | 0.389960651 | 0.349125257 |
| 0.202684672 | 0.300106076 | 0.435755464 | 0.338144846 |
| 0.382601744 | 0.177504223 | 0.350000987 | 0.247609518 |
| 0.339416901 | 0.323475903 | 0.365506057 | 0.228626602 |
| 0.176413713 | 0.363090615 | 0.258031338 | 0.233468896 |
| 0.305638284 | 0.182243448 | 0.209640176 | 0.482500672 |
| 0.228890126 | 0.310388118 | 0.055130444 | 0.064211593 |
| 0.16724173  | 0.372540708 | 0.341841135 | 0.355069274 |
| 0.391833635 | 0.17149725  | 0.294457378 | 0.298443521 |
| 0.055526789 | 0.217551081 | 0.414214737 | 0.082524004 |
| 0.330783165 | 0.181906681 | 0.003531173 | 0.265210391 |
| 0.405049184 | 0.229356671 |             |             |
| PRDX4       | 0.304334238 | 0.507750824 | 0.141691257 |
| 0.042365231 | 0.226240328 | 0.348549273 | 0.355959669 |
| 0.321278714 | 0.187691633 | 0.215840276 | 0.428959716 |
| 0.002450868 | 0.314925761 | 0.028819229 | 0.139131738 |



|             |             |             |             |
|-------------|-------------|-------------|-------------|
| 0.471258883 | 0.488353061 | 0.460235037 | 0.481304924 |
| 0.330851003 | 0.188267561 | 0.398642349 | 0.421726865 |
| 0.371056938 | 0.003492111 | 0.234758601 | 0.076241163 |
| 0.315248749 | 0.451171359 | 0.316013288 | 0.346501611 |
| 0.405455259 | 0.406085473 | 0.40041059  | 0.387245319 |
| 0.214231167 | 0.490787644 | 0.13203837  | 0.375801556 |
| 0.332168014 | 0.349346787 | 0.394831713 | 0.033695327 |
| 0.003974777 | 0.20601686  | 0.281621186 | 0.41340596  |
| 0.350798646 | 0.329782953 | 0.288881069 | 0.286019728 |
| 0.116857953 | 0.441515891 | 0.374579525 | 0.118689523 |
| 0.473311613 | 0.006157315 | 0.487145309 | 0.23472226  |
| 0.1441603   | 0.395196162 | 0.296224994 | 0.413804177 |
| 0.37477991  | 0.481210399 | 0.511319408 | 0.088312443 |
| 0.156399231 | 0.398452883 | 0.328008332 | 0.43458595  |
| 0.455127591 | 0.366372231 | 0.394521445 | 0.326986354 |
| 0.381412901 | 0.328454475 | 0.397815352 | 0.299523561 |
| 0.001852422 | 0.268807278 | 0.38122632  | 0.277780054 |
| 0.323941871 | 0.445488147 | 0.348275743 | 0.343810234 |
| 0.379016991 | 0.04916264  | 0.434144022 | 0.507458862 |
| 0.03836397  | 0.349624676 | 0.021042136 | 0.275506702 |
| 0.380132041 | 0.398341051 | 0.378006825 | 0.151953335 |
| 0.036959047 | 0.218260582 | 0.140676186 | 0.328247107 |
| 0.416874603 | 0.45245859  | 0.469352146 | 0.109328328 |
| 0.286422672 | 0.214657328 | 0.446223688 | 0.49082639  |
| 0.461833217 | 0.022117217 | 0.236457042 | 0.352161192 |
| 0.338280073 | 0.187445559 | 0.374391342 | 0.036231669 |
| 0.024537517 | 0.025423376 | 0.416243461 | 0.254511703 |
| 0.193935986 | 0.32803442  | 0.150664388 | 0.431753781 |
| 0.318019751 | 0.377334377 | 0.245024586 | 0.376945804 |
| 0.372452543 | 0.384673088 | 0.448735119 | 0.408614084 |
| 0.417489326 | 0.30900884  | 0.242439026 | 0.484223379 |
| 0.452814349 | 0.153276554 | 0.155701274 | 0.410518899 |
| 0.288069616 | 0.460186246 | 0.52015125  | 0.35706308  |
| 0.395804692 | 0.355225472 | 0.309705531 | 0.456415086 |
| 0.383676302 | 0.379213388 | 0.083364652 | 0.44827769  |
| 0.463858782 | 0.041553665 | 0.138780493 | 0.392313957 |
| 0.099098097 | 0.361733845 | 0.448551906 | 0.461111825 |
| 0.450435231 | 0.060486622 | 0.31414885  | 0.370324602 |
| 0.369079021 | 0.358471035 | 0.417616616 | 0.275821305 |
| 0.396225099 | 0.311388198 | 0.118381776 | 0.293237611 |
| 0.235013789 | 0.392207193 | 0.228869044 | 0.072135597 |
| 0.363531474 | 0.372414267 | 0.446736851 | 0.414160564 |
| 0.341653227 | 0.006027579 | 0.211510442 | 0.33238331  |
| 0.280333601 | 0.340108667 | 0.521038085 | 0.220922646 |
| 0.349249397 | 0.291587    | 0.255493181 | 0.43630409  |
| 0.351192947 | 0.278026129 | 0.254144413 | 0.001551108 |
| 0.269552591 | 0.300227987 | 0.423872036 | 0.087264382 |
| 0.366923605 | 0.171149045 | 0.136151281 | 0.441671049 |
| 0.321251575 | 0.433886508 | 0.043735083 | 0.139922895 |
| 0.364631227 | 0.47997493  | 0.377089475 | 0.250812182 |
| 0.461765815 | 0.37095384  | 0.351296453 | 0.446544169 |
| 0.414961998 | 0.428605186 | 0.146268451 | 0.35417155  |
| 0.39138321  | 0.452596442 | 0.382274259 | 0.44248901  |
| 0.377135825 | 0.350509878 | 0.291121227 | 0.382365778 |

|             |             |             |             |
|-------------|-------------|-------------|-------------|
| 0.407776595 | 0.443966293 | 0.159096696 | 0.521205826 |
| 0.00167119  | 0.435017636 | 0.436794207 | 0.140946299 |
| 0.504435653 | 0.372445591 | 0.136882174 | 0.314545403 |
| 0.490192639 | 0.52274763  | 0.394899514 | 0.372843809 |
| 0.20244625  | 0.022035208 | 0.471554046 | 0.445537147 |
| 0.456747133 | 0.474678641 | 0.339476561 | 0.089831959 |
| 0.471438418 | 0.2989604   | 0.4030228   | 0.346663055 |
| 0.433693336 | 0.384283788 | 0.361113938 | 0.3065098   |
| 0.014191745 | 0.317282143 | 0.360001247 | 0.214063198 |
| 0.344147771 | 0.23541506  | 0.446284211 | 0.431287451 |
| 0.422022178 | 0.254811258 | 0.358267164 | 0.176381597 |
| 0.305668743 | 0.509245153 | 0.055499297 | 0.45157914  |
| 0.510666289 | 0.439111485 | 0.461156368 | 0.498154717 |
| 0.369698026 | 0.46666566  | 0.45750424  | 0.384938988 |
| 0.001813057 | 0.358921092 | 0.309954271 | 0.434245261 |
| 0.39668833  | 0.386537314 | 0.207956582 | 0.359444743 |
| 0.003714688 | 0.257778464 | 0.204975047 | 0.508751701 |
| 0.447627845 | 0.07380091  | 0.048788038 | 0.460907194 |
| 0.323833476 | 0.054430961 | 0.521149974 | 0.40445369  |
| 0.469670213 | 0.480809053 | 0.283057039 | 0.323853416 |
| 0.159297115 | 0.38362755  | 0.065572407 | 0.459308448 |
| 0.409689434 | 0.076728798 | 0.138641286 | 0.499835675 |
| 0.418752664 | 0.47853367  | 0.37481198  | 0.011782865 |
| 0.308224975 | 0.210300711 | 0.434688416 | 0.220801357 |
| 0.440867348 | 0.448271587 | 1           | 0.367155304 |
| 0.44276441  | 0.467711514 | 0.44343522  | 0.439685487 |
| 0.143830151 | 0.325295235 | 0.372817881 | 0.110284956 |
| 0.305085131 | 0.464838817 | 0.395792501 | 0.300399574 |
| 0.415290458 | 0.124903447 | 0.321860666 | 0.318494886 |
| 0.481120601 | 0.448866461 | 0.120680997 | 0.258220761 |
| 0.464050912 | 0.399499447 | 0.223827808 | 0.439436809 |
| 0.382641185 | 0.115297027 | 0.126847421 | 0.439835236 |
| 0.498406903 | 0.412799863 | 0.409172352 | 0.200928974 |
| 0.42989117  | 0.11548593  | 0.402791313 | 0.39851391  |
| 0.369750829 | 0.313611831 | 0.311556418 | 0.097698966 |
| 0.028355413 | 0.165873235 | 0.464588751 | 0.460300875 |
| 0.158868487 | 0.298356854 | 0.372212323 | 0.447709489 |
| 0.460697028 | 0.39762862  | 0.390018227 | 0.407527716 |
| 0.464856808 | 0.143792423 | 0.504106598 | 0.382676975 |
| 0.405193389 | 0.423936519 | 0.443368894 | 0.01239982  |
| 0.39081211  | 0.239583228 | 0.182106896 | 0.431392692 |
| 0.377579873 | 0.241626142 | 0.473087519 | 0.250399373 |
| 0.192666158 | 0.007618359 | 0.417301061 | 0.323119237 |
| 0.390089613 | 0.263861764 | 0.417667108 | 0.122072329 |
| 0.535765582 | 0.397787657 | 0.377818761 | 0.256016495 |
| 0.425349676 | 0.024765507 | 0.236633844 | 0.073688092 |
| 0.401638577 | 0.45314317  | 0.372927963 | 0.324629905 |
| 0.197882469 | 0.466011999 | 0.467008761 | 0.45854171  |
| 0.453292324 | 0.141622043 | 0.488214368 | 0.368121844 |
| 0.309730462 | 0.386161373 | 0.382218461 | 0.39170374  |
| 0.339315841 | 0.169478631 | 0.231736179 | 0.207746206 |
| 0.443903596 | 0.392855201 | 0.463158749 | 0.283290991 |
| 0.110649511 | 0.460825742 | 0.368930694 | 0.361028754 |
| 0.424284417 | 0.300280133 | 0.351193239 | 0.461816621 |

|             |             |             |             |
|-------------|-------------|-------------|-------------|
| 0.271730983 | 0.312085266 | 0.077107231 | 0.050825094 |
| 0.247573315 | 0.296192774 | 0.381918414 | 0.423266973 |
| 0.487324591 | 0.244950735 | 0.188309528 | 0.218462335 |
| 0.115011696 | 0.295995375 | 0.396759641 | 0.189271664 |
| 0.452618575 | 0.257029473 | 0.001858147 | 0.262802624 |
| 0.441432636 | 0.37423631  |             |             |
| PRKD3       | 0.280274908 | 0.432921018 | 0.035419017 |
| 0.027313553 | 0.090168422 | 0.150921182 | 0.153440898 |
| 0.294882985 | 0.063192291 | 0.094255028 | 0.222214132 |
| 0.000696003 | 0.400178543 | 0.006563933 | 0.046173489 |
| 0.492593788 | 0.513995716 | 0.255458438 | 0.496990823 |
| 0.234752401 | 0.124622904 | 0.261063532 | 0.284361232 |
| 0.172288137 | 0.000726566 | 0.080737647 | 0.040396398 |
| 0.340063554 | 0.50219264  | 0.125102808 | 0.19392126  |
| 0.439271453 | 0.466055258 | 0.342061225 | 0.311196565 |
| 0.300935062 | 0.367695569 | 0.175686095 | 0.422291887 |
| 0.434797214 | 0.160550058 | 0.440077003 | 0.007428975 |
| 0.007232409 | 0.062364103 | 0.284483795 | 0.28245684  |
| 0.223678011 | 0.13658265  | 0.102990948 | 0.124070097 |
| 0.191489441 | 0.248618995 | 0.309451522 | 0.208670408 |
| 0.300937349 | 0.005111665 | 0.354452362 | 0.191372182 |
| 0.035187361 | 0.223214642 | 0.324585489 | 0.314961706 |
| 0.163930107 | 0.328311051 | 0.480895777 | 0.019217943 |
| 0.039688168 | 0.376294555 | 0.391804034 | 0.353092595 |
| 0.391738828 | 0.26146863  | 0.219787725 | 0.400830292 |
| 0.402227909 | 0.398940555 | 0.192253775 | 0.113827189 |
| 0.000431553 | 0.098649705 | 0.30417583  | 0.2961652   |
| 0.405689844 | 0.24861537  | 0.327233572 | 0.162575096 |
| 0.36898582  | 0.008535838 | 0.277830796 | 0.49907583  |
| 0.015893639 | 0.383699964 | 0.008681279 | 0.098489132 |
| 0.377837158 | 0.494208787 | 0.324620775 | 0.041367892 |
| 0.006433883 | 0.073742077 | 0.106599083 | 0.4564475   |
| 0.318072625 | 0.376622926 | 0.294864013 | 0.192908662 |
| 0.411793092 | 0.112165013 | 0.269430099 | 0.363333978 |
| 0.433988686 | 0.00393128  | 0.100947045 | 0.142450268 |
| 0.329822613 | 0.125410074 | 0.154053405 | 0.036648898 |
| 0.006295211 | 0.01446238  | 0.454554465 | 0.093591645 |
| 0.065804148 | 0.132619635 | 0.062822888 | 0.405820124 |
| 0.283862622 | 0.435603515 | 0.093769357 | 0.178235771 |
| 0.414029463 | 0.178730439 | 0.35998438  | 0.408199824 |
| 0.360501505 | 0.178065953 | 0.086667852 | 0.378492782 |
| 0.318901886 | 0.039142368 | 0.044344448 | 0.223193826 |
| 0.396013569 | 0.467527268 | 0.491611411 | 0.220786064 |
| 0.213331979 | 0.15928386  | 0.251364069 | 0.299825006 |
| 0.164289799 | 0.26314886  | 0.100966242 | 0.251386856 |
| 0.300882118 | 0.035597167 | 0.03437764  | 0.378821837 |
| 0.059321287 | 0.186040433 | 0.35188102  | 0.385205616 |
| 0.388036098 | 0.033003989 | 0.169576531 | 0.178834504 |
| 0.203052935 | 0.172588626 | 0.322322972 | 0.162687354 |
| 0.215387982 | 0.25685314  | 0.025259451 | 0.407541789 |
| 0.070360961 | 0.236098281 | 0.316098939 | 0.069269431 |
| 0.344359969 | 0.268095521 | 0.368783509 | 0.336202404 |
| 0.349909709 | 0.00417523  | 0.093571341 | 0.289671153 |
| 0.231224456 | 0.409859933 | 0.424526864 | 0.064389978 |

|             |             |             |             |
|-------------|-------------|-------------|-------------|
| 0.167161431 | 0.343690399 | 0.084551627 | 0.288900009 |
| 0.340776963 | 0.156806257 | 0.144255252 | 0.000231027 |
| 0.086791911 | 0.341204737 | 0.356228    | 0.027183393 |
| 0.175956131 | 0.064354419 | 0.090416128 | 0.408047326 |
| 0.124061574 | 0.416704693 | 0.015268827 | 0.173909181 |
| 0.17579256  | 0.334808686 | 0.331859127 | 0.201454927 |
| 0.382153018 | 0.217379769 | 0.470526141 | 0.280250817 |
| 0.223705082 | 0.244578274 | 0.213381178 | 0.187583208 |
| 0.417694446 | 0.429853165 | 0.414121678 | 0.402395374 |
| 0.172265828 | 0.317363397 | 0.271842876 | 0.179635255 |
| 0.301857279 | 0.321313044 | 0.043576619 | 0.438938743 |
| 0.000253899 | 0.245376202 | 0.374840411 | 0.218887108 |
| 0.415676583 | 0.163608166 | 0.034902925 | 0.165442007 |
| 0.50251509  | 0.439971    | 0.368166813 | 0.445646663 |
| 0.204953544 | 0.00445205  | 0.422431366 | 0.304799903 |
| 0.512397047 | 0.309236951 | 0.364979705 | 0.087120665 |
| 0.443096818 | 0.321644057 | 0.333050291 | 0.353243953 |
| 0.404468854 | 0.388158706 | 0.162602747 | 0.307469238 |
| 0.014145249 | 0.163853375 | 0.355113635 | 0.16159531  |
| 0.241473297 | 0.118427101 | 0.393066268 | 0.223930589 |
| 0.366634308 | 0.25621498  | 0.328064685 | 0.048198633 |
| 0.109321    | 0.440904637 | 0.07200512  | 0.398450286 |
| 0.49549976  | 0.276595533 | 0.43670477  | 0.486025184 |
| 0.217839055 | 0.282926311 | 0.411776993 | 0.431982157 |
| 0.000411502 | 0.457574925 | 0.395728097 | 0.236547014 |
| 0.436149878 | 0.191181776 | 0.229993401 | 0.426020513 |
| 0.000765327 | 0.08931951  | 0.289462491 | 0.406828318 |
| 0.435012845 | 0.014660626 | 0.096838617 | 0.387218421 |
| 0.398478027 | 0.050200957 | 0.475501383 | 0.235759876 |
| 0.384831624 | 0.346576413 | 0.1090175   | 0.417247221 |
| 0.26812616  | 0.328291192 | 0.022865248 | 0.352306529 |
| 0.386344765 | 0.097144985 | 0.06414669  | 0.485708922 |
| 0.347245317 | 0.291762854 | 0.166165845 | 0.005098732 |
| 0.401823665 | 0.194797225 | 0.397701377 | 0.070823873 |
| 0.327373572 | 0.259755534 | 0.367155304 | 1           |
| 0.364780437 | 0.303725549 | 0.264889811 | 0.367511497 |
| 0.133197733 | 0.398321726 | 0.424089754 | 0.033314472 |
| 0.337378764 | 0.454446226 | 0.348379408 | 0.108819257 |
| 0.273542081 | 0.101659172 | 0.124950079 | 0.254392807 |
| 0.359361857 | 0.445762808 | 0.029486563 | 0.102819182 |
| 0.301469538 | 0.206961353 | 0.065510865 | 0.258780618 |
| 0.181024395 | 0.199947688 | 0.155538953 | 0.266604522 |
| 0.370030411 | 0.196979244 | 0.412560569 | 0.122196578 |
| 0.457603761 | 0.025869005 | 0.371578449 | 0.191186574 |
| 0.187790072 | 0.356450129 | 0.417950677 | 0.113928472 |
| 0.014348457 | 0.073708021 | 0.294995571 | 0.293593179 |
| 0.040154617 | 0.11724629  | 0.170745168 | 0.262344188 |
| 0.491973691 | 0.341293392 | 0.178409755 | 0.247990578 |
| 0.288718652 | 0.09252728  | 0.400767822 | 0.233931276 |
| 0.313866306 | 0.243667099 | 0.376667978 | 0.007355507 |
| 0.40133033  | 0.114429231 | 0.189743298 | 0.294862656 |
| 0.480258292 | 0.076584607 | 0.291088715 | 0.097145072 |
| 0.164591538 | 0.002284464 | 0.258912764 | 0.402057902 |
| 0.182030964 | 0.285390896 | 0.263601887 | 0.248551002 |

|             |             |             |             |
|-------------|-------------|-------------|-------------|
| 0.461236476 | 0.294543038 | 0.336396291 | 0.323511522 |
| 0.290495515 | 0.045860889 | 0.104819935 | 0.016324063 |
| 0.297231302 | 0.280308952 | 0.348540963 | 0.315786088 |
| 0.162520477 | 0.39094603  | 0.283299725 | 0.361435095 |
| 0.442212054 | 0.158435852 | 0.499805993 | 0.231313117 |
| 0.436477903 | 0.290716031 | 0.169178589 | 0.245711715 |
| 0.14101966  | 0.104857855 | 0.071452752 | 0.103879421 |
| 0.475362849 | 0.256235522 | 0.314415462 | 0.241744415 |
| 0.025899057 | 0.283848843 | 0.377467991 | 0.406400111 |
| 0.342086161 | 0.353045593 | 0.325499055 | 0.27529402  |
| 0.260985238 | 0.214743164 | 0.055957289 | 0.02677328  |
| 0.240966865 | 0.121941481 | 0.351113755 | 0.369711696 |
| 0.488279411 | 0.264143854 | 0.053000194 | 0.080484379 |
| 0.178074067 | 0.350143294 | 0.188865756 | 0.216560215 |
| 0.369157999 | 0.299484277 | 0.000220409 | 0.158773881 |
| 0.271114401 | 0.335325816 |             |             |
| PRPS2       | 0.197088368 | 0.491820276 | 0.060895654 |
| 0.020371159 | 0.094972418 | 0.175860274 | 0.169741914 |
| 0.203633037 | 0.092378173 | 0.103137895 | 0.284814808 |
| 0.001508699 | 0.334670593 | 0.014288591 | 0.067515544 |
| 0.48623303  | 0.500387075 | 0.237388133 | 0.49157025  |
| 0.200312112 | 0.101382845 | 0.274787829 | 0.231904015 |
| 0.190129461 | 0.001809257 | 0.101629082 | 0.037214105 |
| 0.195864246 | 0.469253978 | 0.157026263 | 0.184001675 |
| 0.428334818 | 0.415816355 | 0.235562224 | 0.19934582  |
| 0.136308564 | 0.455475559 | 0.094689993 | 0.341953842 |
| 0.363661072 | 0.167426485 | 0.402468289 | 0.015766478 |
| 0.002488053 | 0.088930489 | 0.183771255 | 0.267048755 |
| 0.204058731 | 0.163522741 | 0.140438626 | 0.134111427 |
| 0.087668083 | 0.311744179 | 0.340207764 | 0.088622536 |
| 0.407090661 | 0.003347315 | 0.447912941 | 0.151073237 |
| 0.062480531 | 0.219471256 | 0.19913028  | 0.290074973 |
| 0.203380184 | 0.430665417 | 0.504832531 | 0.038584257 |
| 0.067360961 | 0.243968703 | 0.330789555 | 0.262798208 |
| 0.444291543 | 0.193969866 | 0.199824128 | 0.211392371 |
| 0.315795636 | 0.351670535 | 0.215992553 | 0.142847076 |
| 0.001110683 | 0.119552461 | 0.208013705 | 0.243967036 |
| 0.234903843 | 0.323341631 | 0.237444588 | 0.168036988 |
| 0.235735479 | 0.018591822 | 0.236339412 | 0.506455151 |
| 0.018545632 | 0.348959013 | 0.010910852 | 0.132981504 |
| 0.378372234 | 0.427348509 | 0.287874642 | 0.068244317 |
| 0.015616773 | 0.107492523 | 0.095864827 | 0.366204727 |
| 0.255614054 | 0.265390683 | 0.393019272 | 0.081461528 |
| 0.31536615  | 0.11741247  | 0.246402416 | 0.452955353 |
| 0.465607729 | 0.00857673  | 0.122032685 | 0.170228835 |
| 0.205777582 | 0.101208642 | 0.179630155 | 0.021666046 |
| 0.012003021 | 0.01601601  | 0.438963426 | 0.126999152 |
| 0.084809575 | 0.1555684   | 0.065144188 | 0.28043655  |
| 0.203423381 | 0.408540564 | 0.1046498   | 0.184994541 |
| 0.306965208 | 0.188047918 | 0.247463924 | 0.341053234 |
| 0.234206137 | 0.183991855 | 0.117289722 | 0.449092844 |
| 0.419066997 | 0.063932474 | 0.070620378 | 0.24517705  |
| 0.313174841 | 0.470528123 | 0.518613713 | 0.206224438 |
| 0.192922822 | 0.186446018 | 0.190869066 | 0.27695244  |

|             |             |             |             |
|-------------|-------------|-------------|-------------|
| 0.187144793 | 0.222006834 | 0.055625428 | 0.301484273 |
| 0.412529375 | 0.02403114  | 0.0592794   | 0.360134874 |
| 0.044047638 | 0.197702669 | 0.422860224 | 0.38955851  |
| 0.268893242 | 0.029805649 | 0.158811486 | 0.190385936 |
| 0.200654326 | 0.176681462 | 0.288128794 | 0.143097162 |
| 0.230790295 | 0.188684434 | 0.048623306 | 0.324042275 |
| 0.10662606  | 0.220656797 | 0.153106628 | 0.04757509  |
| 0.260085167 | 0.214655929 | 0.41082213  | 0.248423883 |
| 0.304477216 | 0.002973693 | 0.101106646 | 0.22125177  |
| 0.179406791 | 0.366271566 | 0.490828685 | 0.100377521 |
| 0.184655724 | 0.202911928 | 0.120302595 | 0.226918508 |
| 0.363621916 | 0.161602387 | 0.133001136 | 0.000655842 |
| 0.124000611 | 0.197708392 | 0.258630319 | 0.044452334 |
| 0.176565943 | 0.083948787 | 0.081427546 | 0.429541886 |
| 0.155127619 | 0.380939467 | 0.023835    | 0.098025335 |
| 0.179489778 | 0.353157796 | 0.224101244 | 0.162154968 |
| 0.373756483 | 0.203158649 | 0.386644382 | 0.364322788 |
| 0.212770232 | 0.301165111 | 0.10988721  | 0.200012329 |
| 0.237556502 | 0.442791458 | 0.376511918 | 0.393816428 |
| 0.195664094 | 0.275585315 | 0.170664306 | 0.215189234 |
| 0.235766037 | 0.255114429 | 0.072935438 | 0.499826022 |
| 0.000665112 | 0.235014331 | 0.256633805 | 0.102393601 |
| 0.472719526 | 0.180177988 | 0.062153668 | 0.172584038 |
| 0.49877716  | 0.500097377 | 0.401415185 | 0.394433852 |
| 0.153972484 | 0.01031613  | 0.469269424 | 0.336948052 |
| 0.478578478 | 0.273405454 | 0.200122931 | 0.058435612 |
| 0.461393928 | 0.19389989  | 0.271922183 | 0.21622213  |
| 0.265482967 | 0.234881639 | 0.187827918 | 0.254319195 |
| 0.01153566  | 0.166959673 | 0.257774804 | 0.124269637 |
| 0.194196352 | 0.144188318 | 0.415167129 | 0.272002949 |
| 0.242816009 | 0.164355354 | 0.208802385 | 0.072942279 |
| 0.144706302 | 0.490284229 | 0.03867785  | 0.447263467 |
| 0.509957984 | 0.25195095  | 0.446821534 | 0.500147475 |
| 0.206845189 | 0.358423032 | 0.441056309 | 0.406704199 |
| 0.000930199 | 0.389464491 | 0.304399439 | 0.323626481 |
| 0.412286715 | 0.205572382 | 0.141029069 | 0.221158387 |
| 0.001920418 | 0.123813021 | 0.135277054 | 0.487311335 |
| 0.438122223 | 0.030378155 | 0.036927353 | 0.380080894 |
| 0.276974462 | 0.031344757 | 0.51212902  | 0.217403454 |
| 0.43548085  | 0.271090758 | 0.134033337 | 0.345021496 |
| 0.112184401 | 0.223855346 | 0.02938445  | 0.284271851 |
| 0.259200918 | 0.064545559 | 0.064494615 | 0.503846581 |
| 0.397510812 | 0.316690788 | 0.190082837 | 0.006792651 |
| 0.343392689 | 0.121969852 | 0.353576205 | 0.10075552  |
| 0.379166491 | 0.315809084 | 0.44276441  | 0.364780437 |
| 1           | 0.377409128 | 0.34701905  | 0.401518313 |
| 0.071720906 | 0.346638493 | 0.397556059 | 0.045932725 |
| 0.21234576  | 0.459686817 | 0.236367651 | 0.140557421 |
| 0.276781827 | 0.064905681 | 0.154900926 | 0.196681298 |
| 0.433860068 | 0.448724451 | 0.051655173 | 0.13186794  |
| 0.378172907 | 0.219870133 | 0.099757308 | 0.238317103 |
| 0.219123814 | 0.087201447 | 0.096400408 | 0.306318268 |
| 0.457864414 | 0.245867497 | 0.414598869 | 0.107410113 |
| 0.438739499 | 0.049215447 | 0.395137705 | 0.198435208 |

|             |             |             |             |
|-------------|-------------|-------------|-------------|
| 0.200491805 | 0.221846564 | 0.3457737   | 0.070027545 |
| 0.015670968 | 0.089044544 | 0.360717298 | 0.392333051 |
| 0.066697322 | 0.147325408 | 0.181358023 | 0.23127747  |
| 0.472008568 | 0.229646192 | 0.200191055 | 0.226816724 |
| 0.402289026 | 0.074257296 | 0.478088191 | 0.219507368 |
| 0.33994697  | 0.224682155 | 0.388696759 | 0.007267364 |
| 0.287767927 | 0.118024645 | 0.126966702 | 0.231536697 |
| 0.412125094 | 0.107431071 | 0.309901175 | 0.130170878 |
| 0.111303826 | 0.003364571 | 0.286777353 | 0.200752914 |
| 0.241615483 | 0.166468406 | 0.240399351 | 0.083785459 |
| 0.519039649 | 0.232499772 | 0.338694379 | 0.172623328 |
| 0.229258134 | 0.015599787 | 0.114185486 | 0.031965397 |
| 0.3183412   | 0.340317686 | 0.270012212 | 0.205188851 |
| 0.129918159 | 0.29510274  | 0.305718458 | 0.249137379 |
| 0.447260294 | 0.094012515 | 0.492837927 | 0.212243774 |
| 0.342738462 | 0.239344544 | 0.193813774 | 0.236826725 |
| 0.157955848 | 0.11290234  | 0.108038802 | 0.118663479 |
| 0.449894764 | 0.233651424 | 0.248924861 | 0.169223811 |
| 0.042216552 | 0.257432126 | 0.338756411 | 0.330586094 |
| 0.255340513 | 0.274398925 | 0.213880258 | 0.377413025 |
| 0.171551491 | 0.188075697 | 0.039077688 | 0.028165015 |
| 0.154266541 | 0.139546865 | 0.385902663 | 0.406015335 |
| 0.493135568 | 0.162262175 | 0.086746216 | 0.111367169 |
| 0.080561717 | 0.311369328 | 0.195157428 | 0.109432343 |
| 0.272297347 | 0.184055638 | 0.00059907  | 0.157033388 |
| 0.318677879 | 0.221843487 |             |             |
| PRR13       | 0.275027059 | 0.490798159 | 0.190926562 |
| 0.045560224 | 0.227859644 | 0.390798744 | 0.384535613 |
| 0.2749239   | 0.234669047 | 0.268627532 | 0.438754757 |
| 0.003838597 | 0.255522716 | 0.043823537 | 0.147259097 |
| 0.428770539 | 0.437190642 | 0.436011114 | 0.429570027 |
| 0.31031368  | 0.211578094 | 0.380542186 | 0.416688527 |
| 0.403261573 | 0.005955242 | 0.279318001 | 0.103378364 |
| 0.250562784 | 0.396604564 | 0.355671141 | 0.385558409 |
| 0.370078363 | 0.349629936 | 0.350600431 | 0.318700382 |
| 0.156285371 | 0.495011975 | 0.075389732 | 0.284133091 |
| 0.275422961 | 0.377676525 | 0.3477398   | 0.048506218 |
| 0.003324966 | 0.254591512 | 0.229540782 | 0.395785261 |
| 0.325286248 | 0.377412773 | 0.327787674 | 0.322054914 |
| 0.081797303 | 0.437993488 | 0.32849473  | 0.081324437 |
| 0.481625413 | 0.007847011 | 0.496443771 | 0.215607724 |
| 0.189723786 | 0.389097857 | 0.251695713 | 0.384061631 |
| 0.405576335 | 0.497228289 | 0.473806276 | 0.126047875 |
| 0.210363975 | 0.337874785 | 0.274841336 | 0.389600197 |
| 0.437696255 | 0.36268838  | 0.400736563 | 0.234921204 |
| 0.309396219 | 0.279395088 | 0.405687542 | 0.319545464 |
| 0.003438469 | 0.313782344 | 0.33029445  | 0.231131749 |
| 0.240544615 | 0.442245529 | 0.296420538 | 0.361980668 |
| 0.323078353 | 0.076123568 | 0.412506024 | 0.46347716  |
| 0.048128774 | 0.281137244 | 0.021157617 | 0.287910652 |
| 0.337034725 | 0.341135902 | 0.335850619 | 0.20988668  |
| 0.053810114 | 0.247192986 | 0.139241939 | 0.268443778 |
| 0.375109597 | 0.386840032 | 0.463268152 | 0.066252002 |
| 0.226855993 | 0.251600917 | 0.413087936 | 0.500754196 |

|             |             |             |             |
|-------------|-------------|-------------|-------------|
| 0.439753507 | 0.02749881  | 0.253483215 | 0.389053629 |
| 0.281303947 | 0.190105775 | 0.397082591 | 0.033761544 |
| 0.033345221 | 0.022810223 | 0.370465444 | 0.299544603 |
| 0.243921159 | 0.371253404 | 0.168096153 | 0.357368134 |
| 0.265240796 | 0.329555615 | 0.249751059 | 0.403232977 |
| 0.291334342 | 0.405029304 | 0.385284111 | 0.337893744 |
| 0.322641705 | 0.304481264 | 0.291731415 | 0.469293157 |
| 0.461343327 | 0.200135021 | 0.207595502 | 0.424261663 |
| 0.229631313 | 0.419423877 | 0.48407093  | 0.336474969 |
| 0.375253368 | 0.372183312 | 0.307822623 | 0.434433349 |
| 0.401702705 | 0.33649294  | 0.052043776 | 0.428335308 |
| 0.489922969 | 0.037084917 | 0.190479888 | 0.325319285 |
| 0.083953873 | 0.360924746 | 0.453106501 | 0.388343597 |
| 0.362564636 | 0.085387234 | 0.346915113 | 0.404714849 |
| 0.382829614 | 0.393155387 | 0.379316715 | 0.307836806 |
| 0.40663947  | 0.305658716 | 0.160685198 | 0.234182679 |
| 0.28488421  | 0.382508855 | 0.190091047 | 0.066115844 |
| 0.297696973 | 0.326239638 | 0.419272189 | 0.363791897 |
| 0.285196133 | 0.00729423  | 0.2653493   | 0.301840202 |
| 0.285990819 | 0.283637413 | 0.510063142 | 0.269612477 |
| 0.365736697 | 0.211907617 | 0.298202462 | 0.37952082  |
| 0.324150681 | 0.315514501 | 0.292566514 | 0.003905834 |
| 0.302075686 | 0.258305643 | 0.362731073 | 0.113498449 |
| 0.374356826 | 0.223888132 | 0.127301302 | 0.420295432 |
| 0.367373118 | 0.344904064 | 0.049832311 | 0.097873582 |
| 0.392213205 | 0.436106775 | 0.332679261 | 0.244375416 |
| 0.397854536 | 0.384440709 | 0.293761652 | 0.428763597 |
| 0.373071564 | 0.434117406 | 0.095310534 | 0.362456407 |
| 0.305902024 | 0.416092607 | 0.32955735  | 0.361001315 |
| 0.413989311 | 0.285798732 | 0.223154736 | 0.407568585 |
| 0.367418758 | 0.379183218 | 0.212052327 | 0.49553962  |
| 0.00348056  | 0.42038148  | 0.378203903 | 0.097022172 |
| 0.492330681 | 0.39929721  | 0.184489276 | 0.316754819 |
| 0.438636141 | 0.496037944 | 0.365827903 | 0.324559906 |
| 0.163355089 | 0.031838203 | 0.445775481 | 0.416944054 |
| 0.400628187 | 0.430468601 | 0.247710428 | 0.060434321 |
| 0.433365083 | 0.229400382 | 0.372822102 | 0.296146151 |
| 0.346230049 | 0.2802389   | 0.368791945 | 0.245983467 |
| 0.014087126 | 0.362321818 | 0.312610148 | 0.21820764  |
| 0.348178169 | 0.266175971 | 0.396006798 | 0.425379852 |
| 0.337818769 | 0.234341963 | 0.311293802 | 0.223601656 |
| 0.345578072 | 0.492196492 | 0.030093503 | 0.427267195 |
| 0.468099317 | 0.3981114   | 0.428499573 | 0.455396914 |
| 0.378096821 | 0.445124619 | 0.438299606 | 0.33381245  |
| 0.002641633 | 0.302219616 | 0.229947163 | 0.429839247 |
| 0.360285449 | 0.413249658 | 0.155720907 | 0.268572515 |
| 0.004270347 | 0.308736183 | 0.158878173 | 0.495508469 |
| 0.40462637  | 0.104666151 | 0.023673736 | 0.386901789 |
| 0.238508165 | 0.037354106 | 0.49236573  | 0.420063708 |
| 0.450296046 | 0.409302926 | 0.33666656  | 0.270529346 |
| 0.117194157 | 0.307027513 | 0.073073162 | 0.408631121 |
| 0.323158807 | 0.061361947 | 0.169217545 | 0.457615475 |
| 0.401953526 | 0.447468493 | 0.396714019 | 0.023645733 |
| 0.261131994 | 0.198012388 | 0.367913529 | 0.230901088 |



|             |             |             |             |
|-------------|-------------|-------------|-------------|
| 0.395288192 | 0.438924232 | 0.467711514 | 0.303725549 |
| 0.377409128 | 1           | 0.435569496 | 0.405225821 |
| 0.115492605 | 0.285882991 | 0.334746281 | 0.144472036 |
| 0.247134214 | 0.423471821 | 0.353966572 | 0.350895419 |
| 0.391210026 | 0.106267604 | 0.367538944 | 0.28595447  |
| 0.470701833 | 0.41450706  | 0.174316583 | 0.266737975 |
| 0.446705516 | 0.39718722  | 0.270116608 | 0.397593472 |
| 0.405039295 | 0.088399479 | 0.089909107 | 0.423122772 |
| 0.503257198 | 0.42769452  | 0.3842962   | 0.228745217 |
| 0.37650827  | 0.14862194  | 0.35454873  | 0.397050815 |
| 0.380156181 | 0.259851211 | 0.259844371 | 0.081443307 |
| 0.047510985 | 0.207159402 | 0.44334805  | 0.45954522  |
| 0.210329698 | 0.336395802 | 0.406322305 | 0.433851523 |
| 0.411715316 | 0.338746084 | 0.411357469 | 0.375032097 |
| 0.478515734 | 0.153909838 | 0.498264887 | 0.380526625 |
| 0.371581992 | 0.432368451 | 0.377117739 | 0.014792034 |
| 0.318176977 | 0.292941154 | 0.146792462 | 0.405477601 |
| 0.320195311 | 0.295677851 | 0.444464297 | 0.293682927 |
| 0.1714139   | 0.007857736 | 0.392377825 | 0.234521531 |
| 0.4158844   | 0.190155933 | 0.383441806 | 0.07866498  |
| 0.512923449 | 0.374211569 | 0.33719646  | 0.173948722 |
| 0.40710763  | 0.012977864 | 0.283825887 | 0.104873502 |
| 0.372873042 | 0.425167868 | 0.317515405 | 0.287317945 |
| 0.176930046 | 0.388289942 | 0.440769218 | 0.390217313 |
| 0.414259391 | 0.121354283 | 0.445369191 | 0.335821186 |
| 0.250690203 | 0.351897324 | 0.403818841 | 0.352568363 |
| 0.360120988 | 0.161994389 | 0.278638899 | 0.220718628 |
| 0.397108877 | 0.328103761 | 0.428990769 | 0.27144526  |
| 0.15486313  | 0.432533887 | 0.28972726  | 0.284753647 |
| 0.383627331 | 0.243425731 | 0.278823568 | 0.456487142 |
| 0.247717355 | 0.310730091 | 0.079228747 | 0.069257857 |
| 0.221354446 | 0.350786948 | 0.359453532 | 0.385486973 |
| 0.43987541  | 0.196640807 | 0.242473145 | 0.251609163 |
| 0.068226574 | 0.251265382 | 0.414754302 | 0.127686173 |
| 0.378178581 | 0.206439528 | 0.003024679 | 0.259901527 |
| 0.424917502 | 0.310614679 |             |             |
| PRUNE       | 0.27139518  | 0.464497837 | 0.233664225 |
| 0.040408153 | 0.215010683 | 0.426912793 | 0.403104101 |
| 0.261109909 | 0.290607724 | 0.2893599   | 0.44675996  |
| 0.006875013 | 0.218327508 | 0.070786289 | 0.184338406 |
| 0.390577477 | 0.396034314 | 0.421015827 | 0.390476596 |
| 0.326080932 | 0.204503238 | 0.386846948 | 0.404545739 |
| 0.43525072  | 0.011519835 | 0.298493642 | 0.106637971 |
| 0.223092272 | 0.354508435 | 0.401290918 | 0.382945722 |
| 0.340668513 | 0.305025284 | 0.325759768 | 0.274634046 |
| 0.120079867 | 0.486093795 | 0.05408737  | 0.23975716  |
| 0.241660725 | 0.374257015 | 0.30909909  | 0.071544203 |
| 0.002402326 | 0.293754635 | 0.205340446 | 0.396934084 |
| 0.344805398 | 0.417265527 | 0.378465574 | 0.336167786 |
| 0.063920691 | 0.445295691 | 0.326304744 | 0.060273073 |
| 0.478599002 | 0.008266967 | 0.488507025 | 0.231445107 |
| 0.244059843 | 0.411978257 | 0.237092336 | 0.368663384 |
| 0.433342821 | 0.490600094 | 0.43592492  | 0.145923872 |
| 0.261390474 | 0.303508801 | 0.241891531 | 0.35163207  |

|             |             |             |             |
|-------------|-------------|-------------|-------------|
| 0.419921086 | 0.346200254 | 0.403194942 | 0.190348395 |
| 0.271472165 | 0.249603563 | 0.432825236 | 0.362497599 |
| 0.005454653 | 0.33751278  | 0.283860967 | 0.21868899  |
| 0.198095689 | 0.444188277 | 0.27358283  | 0.365362037 |
| 0.288892966 | 0.111478311 | 0.412988659 | 0.425249659 |
| 0.050174389 | 0.248173944 | 0.020030994 | 0.328172051 |
| 0.312163043 | 0.301554099 | 0.32675919  | 0.24606066  |
| 0.083216281 | 0.30685799  | 0.151447198 | 0.230046627 |
| 0.361367743 | 0.359737638 | 0.463708966 | 0.05195941  |
| 0.189349489 | 0.301049179 | 0.410886804 | 0.490107105 |
| 0.412402718 | 0.03826732  | 0.310916699 | 0.420652754 |
| 0.259949018 | 0.183586139 | 0.41579015  | 0.0287476   |
| 0.032409251 | 0.026671533 | 0.335981745 | 0.347267362 |
| 0.266650263 | 0.40415997  | 0.159209657 | 0.308442861 |
| 0.24317814  | 0.301146461 | 0.248398234 | 0.423777686 |
| 0.244139151 | 0.418762208 | 0.332294067 | 0.293752394 |
| 0.265700011 | 0.340087351 | 0.35487654  | 0.442792639 |
| 0.462943898 | 0.231145508 | 0.263392526 | 0.44069327  |
| 0.19155892  | 0.381764699 | 0.44858169  | 0.337773666 |
| 0.341846344 | 0.405825048 | 0.306700113 | 0.41185414  |
| 0.425149622 | 0.333814738 | 0.043398529 | 0.433439286 |
| 0.493534133 | 0.031532718 | 0.247157181 | 0.300977027 |
| 0.064271953 | 0.367591554 | 0.44965111  | 0.352545118 |
| 0.320544094 | 0.093025132 | 0.346504743 | 0.42462326  |
| 0.414534779 | 0.416519711 | 0.366269032 | 0.3093369   |
| 0.433630663 | 0.302474555 | 0.199623669 | 0.196239039 |
| 0.338028972 | 0.402834785 | 0.168777819 | 0.06362489  |
| 0.279440783 | 0.316758807 | 0.39697615  | 0.344442244 |
| 0.264386816 | 0.006569641 | 0.283158934 | 0.298524181 |
| 0.292829205 | 0.249845578 | 0.484481595 | 0.324517844 |
| 0.405888109 | 0.175847538 | 0.355236105 | 0.338836073 |
| 0.311247644 | 0.332025689 | 0.315847251 | 0.007079052 |
| 0.315436728 | 0.229334886 | 0.336693608 | 0.160014474 |
| 0.34726707  | 0.285964409 | 0.150856426 | 0.3883067   |
| 0.411260821 | 0.30152447  | 0.06594005  | 0.089458961 |
| 0.418075986 | 0.404957505 | 0.290089041 | 0.256045202 |
| 0.358705304 | 0.384170476 | 0.254840713 | 0.441045219 |
| 0.345532699 | 0.440903204 | 0.081386236 | 0.396646326 |
| 0.258897025 | 0.379125451 | 0.291879643 | 0.322601074 |
| 0.43111017  | 0.268172627 | 0.192385105 | 0.439786251 |
| 0.366901183 | 0.358961035 | 0.268332236 | 0.466175812 |
| 0.006592978 | 0.434099783 | 0.341654102 | 0.088638474 |
| 0.464684935 | 0.414357858 | 0.245454876 | 0.347625737 |
| 0.400177288 | 0.468975034 | 0.35003747  | 0.287320423 |
| 0.144894625 | 0.051647205 | 0.422264486 | 0.412492554 |
| 0.357729349 | 0.400015703 | 0.192503809 | 0.054629068 |
| 0.399113322 | 0.204375814 | 0.356290051 | 0.274233131 |
| 0.297652839 | 0.227584787 | 0.402881614 | 0.22780773  |
| 0.018301486 | 0.395464703 | 0.287188742 | 0.228768565 |
| 0.348753017 | 0.288901626 | 0.362559132 | 0.438942333 |
| 0.27902299  | 0.234906058 | 0.268589458 | 0.259025985 |
| 0.389887747 | 0.46621254  | 0.020438853 | 0.41100852  |
| 0.429690755 | 0.393600912 | 0.392300002 | 0.420804596 |
| 0.406058267 | 0.438142999 | 0.407456205 | 0.303300149 |

|             |             |             |             |
|-------------|-------------|-------------|-------------|
| 0.004287715 | 0.259992087 | 0.190313626 | 0.441997252 |
| 0.32567617  | 0.441110809 | 0.143046481 | 0.21700717  |
| 0.005671585 | 0.367566598 | 0.125299532 | 0.481276765 |
| 0.36331798  | 0.135055472 | 0.014652969 | 0.346518745 |
| 0.193847538 | 0.035896294 | 0.461946671 | 0.418470318 |
| 0.419592638 | 0.371528725 | 0.370790952 | 0.229160175 |
| 0.090884501 | 0.283128096 | 0.07025189  | 0.370554092 |
| 0.280555914 | 0.057982709 | 0.172337932 | 0.425202683 |
| 0.391338881 | 0.431025215 | 0.432588738 | 0.032515531 |
| 0.234015739 | 0.177491942 | 0.32544544  | 0.256060648 |
| 0.388023468 | 0.442253365 | 0.44343522  | 0.264889811 |
| 0.34701905  | 0.435569496 | 1           | 0.388716383 |
| 0.092832438 | 0.25271047  | 0.301334846 | 0.172519577 |
| 0.218156163 | 0.386340843 | 0.318529228 | 0.387115498 |
| 0.401018601 | 0.082723004 | 0.411789892 | 0.286928895 |
| 0.447267313 | 0.377195905 | 0.227031041 | 0.307684165 |
| 0.445901349 | 0.418465201 | 0.30981985  | 0.390950203 |
| 0.438688845 | 0.0706028   | 0.081268989 | 0.429007781 |
| 0.490468727 | 0.442074943 | 0.357664149 | 0.233558639 |
| 0.332221893 | 0.196545899 | 0.332054769 | 0.387021345 |
| 0.413451288 | 0.230703276 | 0.227339195 | 0.074677124 |
| 0.059257178 | 0.249065315 | 0.430498514 | 0.464892165 |
| 0.263924694 | 0.388361354 | 0.413100178 | 0.411963637 |
| 0.371612847 | 0.3134453   | 0.440258208 | 0.376998058 |
| 0.484043887 | 0.147869707 | 0.483693916 | 0.391876107 |
| 0.36463448  | 0.410369946 | 0.349027045 | 0.017040783 |
| 0.283427416 | 0.311065555 | 0.143869042 | 0.370750307 |
| 0.283677736 | 0.339419276 | 0.427229955 | 0.35335144  |
| 0.152101609 | 0.009453934 | 0.402085884 | 0.183108532 |
| 0.443571169 | 0.169193358 | 0.37683309  | 0.058537521 |
| 0.48812208  | 0.371963796 | 0.323800683 | 0.141542152 |
| 0.398506579 | 0.008011371 | 0.306247306 | 0.155063959 |
| 0.371740184 | 0.423143249 | 0.291751029 | 0.280619273 |
| 0.188259549 | 0.34700244  | 0.428154379 | 0.33900394  |
| 0.375115541 | 0.102605185 | 0.406196788 | 0.344719198 |
| 0.212255199 | 0.347805252 | 0.435429361 | 0.351137403 |
| 0.368207079 | 0.16372892  | 0.331510131 | 0.265640286 |
| 0.353456651 | 0.310131919 | 0.389649341 | 0.281495003 |
| 0.186673918 | 0.406219951 | 0.26066675  | 0.243140518 |
| 0.356643472 | 0.214220377 | 0.246613388 | 0.465273036 |
| 0.254120154 | 0.338373172 | 0.071231223 | 0.0782808   |
| 0.200023105 | 0.389170553 | 0.349489948 | 0.361574241 |
| 0.399347126 | 0.189084977 | 0.297386825 | 0.310958607 |
| 0.053279395 | 0.23058022  | 0.421281286 | 0.089883033 |
| 0.346352588 | 0.196212262 | 0.004486379 | 0.298040854 |
| 0.433005817 | 0.268482476 |             |             |
| PUS7L       | 0.329243241 | 0.499132634 | 0.104874971 |
| 0.044489876 | 0.142814209 | 0.285219959 | 0.27089036  |
| 0.332338239 | 0.148970836 | 0.195423194 | 0.352747729 |
| 0.002697764 | 0.324587687 | 0.025687904 | 0.091957987 |
| 0.495757304 | 0.505447541 | 0.35274139  | 0.487597977 |
| 0.323767727 | 0.189975992 | 0.361949196 | 0.399845249 |
| 0.304836539 | 0.003516911 | 0.171636101 | 0.085662378 |
| 0.317942957 | 0.474044019 | 0.246607045 | 0.320767233 |

|             |             |             |             |
|-------------|-------------|-------------|-------------|
| 0.439572952 | 0.424137027 | 0.394860882 | 0.313423287 |
| 0.217824987 | 0.466822124 | 0.09056632  | 0.357565162 |
| 0.360826642 | 0.272619552 | 0.413372558 | 0.024412103 |
| 0.004950474 | 0.149590951 | 0.288166199 | 0.391039993 |
| 0.303204164 | 0.27068146  | 0.214525924 | 0.226837687 |
| 0.13606368  | 0.372517695 | 0.357683812 | 0.134230201 |
| 0.412395785 | 0.009171788 | 0.455487723 | 0.251413841 |
| 0.101434088 | 0.329672584 | 0.324179695 | 0.393357121 |
| 0.293638523 | 0.438584506 | 0.50626003  | 0.058965987 |
| 0.114325661 | 0.383448094 | 0.352901186 | 0.414781742 |
| 0.455123349 | 0.362440664 | 0.329322515 | 0.298059083 |
| 0.386519473 | 0.355989423 | 0.312772273 | 0.218923006 |
| 0.001972465 | 0.200505771 | 0.332255074 | 0.293772167 |
| 0.331153119 | 0.373610736 | 0.349668969 | 0.262487275 |
| 0.397375643 | 0.035343664 | 0.386465656 | 0.516378282 |
| 0.033915387 | 0.334929319 | 0.014046663 | 0.187811585 |
| 0.385683254 | 0.436995644 | 0.388202792 | 0.113223323 |
| 0.025986673 | 0.162860715 | 0.150919569 | 0.36284643  |
| 0.384072197 | 0.430507546 | 0.397857372 | 0.102875665 |
| 0.310440531 | 0.215215757 | 0.356669871 | 0.47121665  |
| 0.478445204 | 0.012792698 | 0.193684437 | 0.271943318 |
| 0.317680914 | 0.166483458 | 0.273951435 | 0.044232079 |
| 0.01934175  | 0.022105288 | 0.442297226 | 0.203187754 |
| 0.146959033 | 0.25990764  | 0.113447579 | 0.409554657 |
| 0.308407604 | 0.403581043 | 0.152471551 | 0.307573109 |
| 0.368352208 | 0.299702869 | 0.397782753 | 0.397945748 |
| 0.331291545 | 0.27576125  | 0.202930877 | 0.445108281 |
| 0.418540463 | 0.103963436 | 0.126417928 | 0.358171476 |
| 0.303346615 | 0.477152863 | 0.525221771 | 0.306055478 |
| 0.288474009 | 0.276669871 | 0.34230258  | 0.403665321 |
| 0.283753515 | 0.324006982 | 0.073566279 | 0.361868746 |
| 0.421207778 | 0.039921174 | 0.103722534 | 0.377032388 |
| 0.062966913 | 0.270664555 | 0.443714986 | 0.419847205 |
| 0.386764497 | 0.074168492 | 0.290614994 | 0.311340408 |
| 0.327276314 | 0.307007085 | 0.384309516 | 0.270473483 |
| 0.34677646  | 0.351528386 | 0.078410859 | 0.314071129 |
| 0.170748285 | 0.346242222 | 0.276310011 | 0.072815654 |
| 0.352352318 | 0.329191361 | 0.431069947 | 0.386130761 |
| 0.360060105 | 0.008205369 | 0.19886032  | 0.349542565 |
| 0.328820496 | 0.353574825 | 0.503863123 | 0.157710721 |
| 0.287694889 | 0.253422792 | 0.189414678 | 0.330781375 |
| 0.359379724 | 0.279208211 | 0.252260444 | 0.001968181 |
| 0.1749588   | 0.352725467 | 0.380658501 | 0.076640881 |
| 0.272407644 | 0.163381369 | 0.123922177 | 0.446345516 |
| 0.25296893  | 0.398305162 | 0.035586177 | 0.126736174 |
| 0.309580009 | 0.412425255 | 0.380163437 | 0.283769402 |
| 0.424501745 | 0.353756677 | 0.392688548 | 0.389520798 |
| 0.282038481 | 0.376782539 | 0.133970327 | 0.298939619 |
| 0.380312512 | 0.448029246 | 0.397157028 | 0.398134164 |
| 0.302783487 | 0.323486665 | 0.275806769 | 0.317572692 |
| 0.380167573 | 0.375451995 | 0.126702602 | 0.498398452 |
| 0.001640271 | 0.36368995  | 0.415697799 | 0.150775045 |
| 0.491009494 | 0.285364484 | 0.105704411 | 0.271425448 |
| 0.49797194  | 0.497766544 | 0.394281736 | 0.408753939 |

|             |             |             |             |
|-------------|-------------|-------------|-------------|
| 0.198259582 | 0.017707964 | 0.466197397 | 0.399086865 |
| 0.480695303 | 0.37934452  | 0.285705113 | 0.063475268 |
| 0.470954467 | 0.285261798 | 0.408570488 | 0.378117049 |
| 0.382683878 | 0.320959784 | 0.273688049 | 0.298009862 |
| 0.020977708 | 0.306110594 | 0.390506911 | 0.230646036 |
| 0.355955401 | 0.210096646 | 0.415947904 | 0.341715815 |
| 0.356352865 | 0.320418469 | 0.348293415 | 0.123280776 |
| 0.22181786  | 0.507303383 | 0.034525688 | 0.44620621  |
| 0.515672031 | 0.353097404 | 0.467144637 | 0.505621718 |
| 0.346017081 | 0.391540819 | 0.458809361 | 0.399343574 |
| 0.001589059 | 0.389239518 | 0.304084491 | 0.358041404 |
| 0.435021322 | 0.325281137 | 0.200186883 | 0.34301315  |
| 0.001848514 | 0.202389678 | 0.233052789 | 0.48512784  |
| 0.444896357 | 0.04731918  | 0.03315484  | 0.415963357 |
| 0.316048458 | 0.044362484 | 0.522830721 | 0.366546025 |
| 0.447381066 | 0.395839647 | 0.22699653  | 0.345269398 |
| 0.190436996 | 0.327731834 | 0.041751865 | 0.420810916 |
| 0.354347182 | 0.075867227 | 0.121779797 | 0.503742765 |
| 0.420697737 | 0.390783255 | 0.291200233 | 0.021886611 |
| 0.347635106 | 0.242225508 | 0.42159081  | 0.142872768 |
| 0.399111176 | 0.374196121 | 0.439685487 | 0.367511497 |
| 0.401518313 | 0.405225821 | 0.388716383 | 1           |
| 0.126856839 | 0.367393601 | 0.411433139 | 0.090688741 |
| 0.319423264 | 0.468030176 | 0.397533327 | 0.227686658 |
| 0.374867016 | 0.106390982 | 0.252897086 | 0.307875246 |
| 0.441177666 | 0.464859953 | 0.094527957 | 0.192141529 |
| 0.407957384 | 0.319029652 | 0.15202006  | 0.336539571 |
| 0.311708104 | 0.15475526  | 0.113138693 | 0.375025342 |
| 0.469493448 | 0.325028444 | 0.444103153 | 0.211645493 |
| 0.431997103 | 0.076783251 | 0.379455217 | 0.284509857 |
| 0.312044101 | 0.351985664 | 0.351293563 | 0.113228163 |
| 0.04598594  | 0.170401893 | 0.401049815 | 0.40059718  |
| 0.116629281 | 0.236050364 | 0.302198233 | 0.368263866 |
| 0.483922749 | 0.395771743 | 0.312569711 | 0.340143424 |
| 0.404299264 | 0.137327346 | 0.48611944  | 0.348273098 |
| 0.393244769 | 0.362029118 | 0.406600665 | 0.011985137 |
| 0.393887544 | 0.23074972  | 0.185474959 | 0.378229441 |
| 0.416124853 | 0.182642575 | 0.388941973 | 0.208563404 |
| 0.186063371 | 0.004791893 | 0.35816065  | 0.304931061 |
| 0.316432945 | 0.248075642 | 0.353085426 | 0.138348283 |
| 0.527014973 | 0.39800814  | 0.391105261 | 0.222377865 |
| 0.402374627 | 0.017967823 | 0.208696189 | 0.058474208 |
| 0.381364735 | 0.378958823 | 0.36125359  | 0.360863141 |
| 0.200524697 | 0.411323804 | 0.386118191 | 0.391687867 |
| 0.456266414 | 0.172927608 | 0.509230091 | 0.29571837  |
| 0.340476659 | 0.377091447 | 0.294705316 | 0.316882108 |
| 0.241540127 | 0.13067478  | 0.164838587 | 0.186789028 |
| 0.463804197 | 0.284604515 | 0.392206016 | 0.333474453 |
| 0.079813206 | 0.385543282 | 0.349705742 | 0.362999662 |
| 0.416609857 | 0.334182849 | 0.329781024 | 0.386340144 |
| 0.302459667 | 0.311776256 | 0.07934012  | 0.058373237 |
| 0.27039549  | 0.247722443 | 0.387180969 | 0.404252254 |
| 0.488958619 | 0.245457127 | 0.139342025 | 0.175921384 |
| 0.09245512  | 0.320681278 | 0.31064778  | 0.147077056 |

|             |             |             |             |
|-------------|-------------|-------------|-------------|
| 0.391337436 | 0.272713579 | 0.001276889 | 0.249891984 |
| 0.387156656 | 0.359792957 |             |             |
| PVR         | 0.030638266 | 0.144509591 | 0.00196179  |
| 0.013491796 | 0.020177591 | 0.041637049 | 0.057887918 |
| 0.031658057 | 0.001263514 | 0.01646824  | 0.081073532 |
| 3.09E-07    | 0.113470797 | 2.86E-05    | 0.000337194 |
| 0.14936484  | 0.086829259 | 0.13382139  | 0.022767614 |
| 0.009062042 | 0.051175667 | 0.082505083 | 0.038170664 |
| 8.94E-07    | 0.032142881 | 0.010166491 | 0.037124923 |
| 0.137023664 | 0.01609763  | 0.014177218 | 0.106021474 |
| 0.160581985 | 0.037219382 | 0.035490203 | 0.041810024 |
| 0.128859201 | 0.003429031 | 0.150056795 | 0.098766396 |
| 0.051043298 | 0.139642054 | 1.73E-05    | 0.004165188 |
| 0.014504425 | 0.022816067 | 0.059218289 | 0.018092756 |
| 0.033309648 | 0.014424058 | 0.044408693 | 0.002981656 |
| 0.081236393 | 0.063426415 | 0.010908499 | 0.128572599 |
| 0.001952308 | 0.127796272 | 0.009434262 | 0.003101173 |
| 0.021786835 | 0.029793191 | 0.061981472 | 0.054563106 |
| 0.134844495 | 0.150736237 | 0.000654133 | 0.007183993 |
| 0.051404185 | 0.112966505 | 0.132695334 | 0.121727894 |
| 0.019519253 | 0.019932167 | 0.054909138 | 0.103897901 |
| 0.105313892 | 0.039605266 | 0.00823153  | 4.33E-07    |
| 0.037703559 | 0.079551436 | 0.039777017 | 0.104950194 |
| 0.084911129 | 0.04565092  | 0.03238428  | 0.066713731 |
| 0.000114463 | 0.06408432  | 0.155181475 | 0.000241498 |
| 0.094988952 | 0.000193116 | 0.004029615 | 0.103432665 |
| 0.123907596 | 0.064493682 | 0.004358801 | 3.96E-05    |
| 0.003780776 | 0.00094555  | 0.105407744 | 0.041422982 |
| 0.070628706 | 0.113170922 | 0.009299803 | 0.111782396 |
| 0.002086378 | 0.028214242 | 0.137227122 | 0.121494877 |
| 1.46E-05    | 0.003595891 | 0.041487304 | 0.010148916 |
| 0.004075374 | 0.047446569 | 0.000279727 | 0.000155474 |
| 1.65E-05    | 0.119351737 | 0.005243875 | 0.020020857 |
| 0.037877112 | 0.003427196 | 0.157035287 | 0.022115466 |
| 0.09143804  | 0.01871026  | 0.049710618 | 0.133146083 |
| 0.066858342 | 0.133727161 | 0.119202461 | 0.079700679 |
| 0.006992449 | 0.008863065 | 0.151410245 | 0.094811825 |
| 0.002370606 | 0.001408987 | 0.066521274 | 0.113977064 |
| 0.13224151  | 0.14766667  | 0.008657364 | 0.075242932 |
| 0.017949444 | 0.019977822 | 0.128638616 | 0.047268731 |
| 0.030840775 | 0.000675185 | 0.070502096 | 0.117633995 |
| 0.000376154 | 0.00296635  | 0.093856621 | 0.007676073 |
| 0.008978294 | 0.113565999 | 0.126868249 | 0.086050902 |
| 0.007333728 | 0.048023233 | 0.047464954 | 0.029095657 |
| 0.051649815 | 0.057242429 | 0.036306651 | 0.050331437 |
| 0.0281427   | 0.003525823 | 0.11145915  | 0.011866289 |
| 0.03807139  | 0.008818029 | 0.000207256 | 0.054094796 |
| 0.020083642 | 0.133943025 | 0.058470569 | 0.067775178 |
| 0.006820058 | 0.019106882 | 0.037799664 | 0.012338148 |
| 0.094622593 | 0.160523442 | 0.01011364  | 0.025228278 |
| 0.017472449 | 0.011918265 | 0.077424695 | 0.068783601 |
| 0.007509149 | 0.008757002 | 1.33E-06    | 0.004033208 |
| 0.048123628 | 0.043601061 | 0.000329888 | 0.037998108 |
| 0.00154676  | 0.000538579 | 0.139955922 | 0.026907061 |

|             |             |             |             |
|-------------|-------------|-------------|-------------|
| 0.161662673 | 2.63E-05    | 0.003881487 | 0.024690934 |
| 0.140619612 | 0.050876862 | 0.003330864 | 0.153408623 |
| 0.020543755 | 0.11420949  | 0.084133434 | 0.029458769 |
| 0.092342827 | 0.001981981 | 0.012285997 | 0.101081888 |
| 0.152352187 | 0.145158482 | 0.143515322 | 0.027852409 |
| 0.051387229 | 0.00580573  | 0.048436007 | 0.054243153 |
| 0.053364762 | 0.002417921 | 0.145581471 | 3.31E-07    |
| 0.058607712 | 0.107811071 | 0.002571168 | 0.164003961 |
| 0.066980346 | 0.002080573 | 0.012471623 | 0.138466148 |
| 0.143771082 | 0.08148814  | 0.128097448 | 0.002050797 |
| 2.02E-05    | 0.109777648 | 0.077858874 | 0.140943942 |
| 0.048293053 | 0.078001153 | 0.000226367 | 0.151732925 |
| 0.041387041 | 0.077789418 | 0.062048633 | 0.102235468 |
| 0.059231018 | 0.020221965 | 0.043389318 | 1.70E-05    |
| 0.024908842 | 0.083871419 | 0.005812269 | 0.042594243 |
| 0.00091636  | 0.144297898 | 0.060995729 | 0.063188576 |
| 0.010983169 | 0.068597319 | 0.011820969 | 0.022177972 |
| 0.147230724 | 0.000554722 | 0.100883033 | 0.150938414 |
| 0.041193972 | 0.170707354 | 0.138834825 | 0.030757187 |
| 0.102359547 | 0.143744031 | 0.095415789 | 4.49E-07    |
| 0.125114284 | 0.123662247 | 0.070256004 | 0.133510456 |
| 0.041921715 | 0.013184932 | 0.086445175 | 5.53E-07    |
| 0.012973654 | 0.031077429 | 0.119327046 | 0.170950999 |
| 0.000362851 | 0.001470663 | 0.143014031 | 0.112860117 |
| 0.000517951 | 0.146099517 | 0.059102561 | 0.164762494 |
| 0.086436638 | 0.0269117   | 0.125805155 | 0.02536844  |
| 0.022909086 | 0.00065992  | 0.130372673 | 0.05640065  |
| 0.000126831 | 0.018574151 | 0.13355603  | 0.107381302 |
| 0.108669916 | 0.035764287 | 9.89E-05    | 0.081302606 |
| 0.031838499 | 0.150442727 | 0.001448045 | 0.096522563 |
| 0.080203801 | 0.143830151 | 0.133197733 | 0.071720906 |
| 0.115492605 | 0.092832438 | 0.126856839 | 1           |
| 0.116694041 | 0.111997858 | 0.001683255 | 0.045940402 |
| 0.157830481 | 0.09382589  | 0.034195842 | 0.053063415 |
| 0.013561174 | 0.032140196 | 0.023939913 | 0.155692061 |
| 0.15020921  | 0.002662567 | 0.004205248 | 0.121944236 |
| 0.014712902 | 0.014027136 | 0.034468503 | 0.040339034 |
| 0.00453772  | 0.001535902 | 0.062400555 | 0.143490072 |
| 0.075534622 | 0.129348442 | 0.022686627 | 0.145128726 |
| 0.000948586 | 0.094878008 | 0.010787936 | 0.028207874 |
| 0.072499095 | 0.095606349 | 0.000976696 | 0.000117256 |
| 0.001084682 | 0.126414561 | 0.106048169 | 0.005890206 |
| 0.016677668 | 0.052336919 | 0.112904279 | 0.148258412 |
| 0.039119161 | 0.046859228 | 0.03161213  | 0.10992894  |
| 0.007050904 | 0.123765643 | 0.029005957 | 0.071689731 |
| 0.049067884 | 0.112986141 | 2.26E-05    | 0.094995416 |
| 0.021975991 | 0.009431511 | 0.119153298 | 0.112669893 |
| 0.012644382 | 0.11894432  | 0.006217932 | 0.001348021 |
| 7.42E-06    | 0.054472094 | 0.103562752 | 0.055799819 |
| 0.013596695 | 0.032029487 | 0.023172914 | 0.144341192 |
| 0.049446103 | 0.079101272 | 0.021935089 | 0.078142688 |
| 0.008495626 | 0.022396323 | 0.000364427 | 0.063236662 |
| 0.072846742 | 0.054518387 | 0.041250887 | 0.005021235 |
| 0.127665056 | 0.07755805  | 0.138746669 | 0.162287004 |

|             |             |             |             |
|-------------|-------------|-------------|-------------|
| 0.001941034 | 0.154879277 | 0.014535795 | 0.114098731 |
| 0.012754335 | 0.038041729 | 0.007630215 | 0.049106557 |
| 0.000227359 | 0.008417378 | 0.002354432 | 0.163541647 |
| 0.009987897 | 0.115595599 | 0.010423019 | 0.003002354 |
| 0.049411274 | 0.088160678 | 0.109560184 | 0.088502276 |
| 0.074957267 | 0.03251658  | 0.102905339 | 0.00497553  |
| 0.01402427  | 0.022544807 | 0.002354295 | 0.01335224  |
| 0.022696543 | 0.078237599 | 0.10265706  | 0.142608909 |
| 0.006215924 | 0.004960059 | 0.004174306 | 0.002683259 |
| 0.075711955 | 0.078519054 | 0.014321519 | 0.079755557 |
| 0.010550266 | 3.48E-06    | 0.006496691 | 0.07394326  |
| 0.015179723 |             |             |             |
| RAB19       | 0.319977363 | 0.40181526  | 0.034370274 |
| 0.033104831 | 0.064503904 | 0.138248434 | 0.126204732 |
| 0.338227869 | 0.055701772 | 0.095220561 | 0.204990812 |
| 0.001213147 | 0.372972095 | 0.007798478 | 0.034229143 |
| 0.48562243  | 0.487349797 | 0.207863688 | 0.467974729 |
| 0.254878537 | 0.127624522 | 0.265393983 | 0.294691074 |
| 0.153133342 | 0.001051063 | 0.067625465 | 0.047833861 |
| 0.357170411 | 0.490709788 | 0.113681646 | 0.213751152 |
| 0.441742714 | 0.4414837   | 0.323337981 | 0.237869381 |
| 0.272526902 | 0.339916726 | 0.113318555 | 0.392975666 |
| 0.41778471  | 0.142276798 | 0.414482516 | 0.005573431 |
| 0.007785862 | 0.051541439 | 0.327637654 | 0.290926741 |
| 0.212478875 | 0.12825253  | 0.089360652 | 0.10454224  |
| 0.234887804 | 0.229667201 | 0.31722205  | 0.249052293 |
| 0.270916814 | 0.006498416 | 0.317910641 | 0.227938138 |
| 0.028612757 | 0.198231808 | 0.344229556 | 0.324442792 |
| 0.141427011 | 0.29038561  | 0.442166088 | 0.01598977  |
| 0.033697411 | 0.364854289 | 0.414409663 | 0.345153506 |
| 0.366899335 | 0.291970371 | 0.191470814 | 0.338517573 |
| 0.40016957  | 0.396084676 | 0.167316247 | 0.097258601 |
| 0.000699331 | 0.081706289 | 0.255153287 | 0.319733732 |
| 0.40661602  | 0.231550569 | 0.349514945 | 0.128296765 |
| 0.407612528 | 0.00784494  | 0.274291921 | 0.47049706  |
| 0.016950005 | 0.368108103 | 0.007672938 | 0.080249918 |
| 0.388270927 | 0.489596422 | 0.349588687 | 0.03670494  |
| 0.005735337 | 0.065299251 | 0.140854718 | 0.452204135 |
| 0.308900479 | 0.359764404 | 0.264784944 | 0.170276374 |
| 0.396077546 | 0.123840085 | 0.225214224 | 0.338075052 |
| 0.426041283 | 0.003497345 | 0.094410788 | 0.126028604 |
| 0.269935141 | 0.103419645 | 0.127004517 | 0.062712235 |
| 0.009631449 | 0.019126014 | 0.447122225 | 0.093780507 |
| 0.056276432 | 0.117066872 | 0.060625067 | 0.379668298 |
| 0.313081201 | 0.426013004 | 0.060786198 | 0.154553278 |
| 0.413339923 | 0.148967886 | 0.330642497 | 0.402171307 |
| 0.28302941  | 0.17636408  | 0.086739511 | 0.329418722 |
| 0.290122127 | 0.033893221 | 0.042798472 | 0.216472275 |
| 0.370383983 | 0.458385795 | 0.465822376 | 0.224471581 |
| 0.167740315 | 0.14258267  | 0.28072173  | 0.285269688 |
| 0.13392448  | 0.249934493 | 0.102350712 | 0.222609711 |
| 0.268961899 | 0.046333332 | 0.030343286 | 0.372482074 |
| 0.039770397 | 0.142471471 | 0.332673211 | 0.358263024 |
| 0.340919241 | 0.04058476  | 0.174887887 | 0.164781477 |



|             |             |             |             |
|-------------|-------------|-------------|-------------|
| 0.19725384  | 0.163617052 | 0.310802675 | 0.171313697 |
| 0.207632761 | 0.295488952 | 0.020811917 | 0.388750926 |
| 0.061291285 | 0.230134845 | 0.343140784 | 0.063327192 |
| 0.341684109 | 0.263300944 | 0.366521161 | 0.333811845 |
| 0.373751394 | 0.007127886 | 0.101177334 | 0.322120845 |
| 0.28037329  | 0.394068801 | 0.388127767 | 0.053868674 |
| 0.15621892  | 0.277958134 | 0.073153855 | 0.219132722 |
| 0.332832145 | 0.174864663 | 0.149322453 | 0.000499298 |
| 0.07009617  | 0.410617395 | 0.319223749 | 0.030695468 |
| 0.150769817 | 0.071826891 | 0.092644228 | 0.385413958 |
| 0.113620178 | 0.384732379 | 0.017828534 | 0.156953828 |
| 0.170854526 | 0.298010226 | 0.364460503 | 0.248970879 |
| 0.354043412 | 0.241639056 | 0.477222164 | 0.259373774 |
| 0.160293759 | 0.23493339  | 0.171790375 | 0.171551286 |
| 0.406551445 | 0.389809188 | 0.418351503 | 0.371575434 |
| 0.158086698 | 0.307398519 | 0.285510929 | 0.168708856 |
| 0.303924387 | 0.293106181 | 0.045809761 | 0.398619394 |
| 0.000353324 | 0.224772615 | 0.361405861 | 0.198506301 |
| 0.383574476 | 0.13795515  | 0.033419844 | 0.169654769 |
| 0.474128606 | 0.397177305 | 0.350668235 | 0.450797231 |
| 0.241297778 | 0.00542529  | 0.399017511 | 0.285295911 |
| 0.495658719 | 0.267053901 | 0.293694498 | 0.067388276 |
| 0.417184106 | 0.315657841 | 0.348614595 | 0.400714818 |
| 0.355638625 | 0.323723711 | 0.139329243 | 0.310051169 |
| 0.019384394 | 0.180590813 | 0.404715664 | 0.160127414 |
| 0.263693622 | 0.123250616 | 0.370834166 | 0.195904728 |
| 0.311746344 | 0.348926754 | 0.306709902 | 0.039677051 |
| 0.08866376  | 0.415956811 | 0.044321326 | 0.376223575 |
| 0.469497654 | 0.238467569 | 0.409412569 | 0.464343992 |
| 0.226559002 | 0.252289726 | 0.38974897  | 0.412485703 |
| 0.000667729 | 0.448429457 | 0.380948648 | 0.21438062  |
| 0.444023824 | 0.177029899 | 0.234973411 | 0.395533978 |
| 0.000415584 | 0.081398083 | 0.329673394 | 0.372099861 |
| 0.401763052 | 0.010652292 | 0.056851331 | 0.36469893  |
| 0.389662405 | 0.039669639 | 0.450370676 | 0.23665858  |
| 0.353883767 | 0.305658881 | 0.09745881  | 0.397809636 |
| 0.310712867 | 0.285034059 | 0.017152531 | 0.344853492 |
| 0.329137188 | 0.090298465 | 0.059661542 | 0.455500956 |
| 0.35974776  | 0.251934938 | 0.143052495 | 0.011042658 |
| 0.40909912  | 0.236679317 | 0.392516239 | 0.058189684 |
| 0.321754534 | 0.231521077 | 0.325295235 | 0.398321726 |
| 0.346638493 | 0.285882991 | 0.25271047  | 0.367393601 |
| 0.116694041 | 1           | 0.437395887 | 0.036254063 |
| 0.371343939 | 0.418546739 | 0.355299369 | 0.094509989 |
| 0.266721003 | 0.08819249  | 0.11169297  | 0.267539789 |
| 0.324832645 | 0.424686851 | 0.027033964 | 0.094572413 |
| 0.28104801  | 0.182642137 | 0.050346094 | 0.219576013 |
| 0.163308679 | 0.282615336 | 0.140376715 | 0.244512237 |
| 0.333650393 | 0.171138103 | 0.41912758  | 0.136530019 |
| 0.425866789 | 0.022292657 | 0.346238145 | 0.152003439 |
| 0.179743309 | 0.415175877 | 0.425608242 | 0.170626721 |
| 0.025809534 | 0.096627737 | 0.269682817 | 0.273210107 |
| 0.036212141 | 0.107996846 | 0.160982298 | 0.23262805  |
| 0.476797124 | 0.366391367 | 0.162114261 | 0.236066451 |

|             |             |             |             |
|-------------|-------------|-------------|-------------|
| 0.259032223 | 0.081940469 | 0.37355982  | 0.243446286 |
| 0.322483964 | 0.234388154 | 0.359307361 | 0.006783326 |
| 0.399566656 | 0.124830008 | 0.208795896 | 0.268072954 |
| 0.476554769 | 0.070504585 | 0.250602935 | 0.096007558 |
| 0.160829845 | 0.002266175 | 0.24337146  | 0.36037684  |
| 0.164844211 | 0.283192169 | 0.256269249 | 0.237072056 |
| 0.428875661 | 0.316893484 | 0.363476563 | 0.263780709 |
| 0.289479696 | 0.028821174 | 0.099059249 | 0.016383887 |
| 0.302195445 | 0.252639245 | 0.353827162 | 0.357899779 |
| 0.184640864 | 0.343055404 | 0.257513698 | 0.309911051 |
| 0.408469515 | 0.214854206 | 0.483084083 | 0.20110212  |
| 0.422144191 | 0.304924439 | 0.144264649 | 0.217924249 |
| 0.107878674 | 0.084827208 | 0.056486132 | 0.10988731  |
| 0.453816032 | 0.1949927   | 0.279751908 | 0.303864906 |
| 0.023951368 | 0.27201434  | 0.365053296 | 0.402732081 |
| 0.362863902 | 0.398999232 | 0.343437937 | 0.247803206 |
| 0.276353084 | 0.22802635  | 0.057949372 | 0.02897572  |
| 0.250511494 | 0.114658009 | 0.339376139 | 0.356189627 |
| 0.456057906 | 0.268039734 | 0.047301699 | 0.078012866 |
| 0.131772406 | 0.364093894 | 0.16036005  | 0.170348648 |
| 0.325502534 | 0.296241833 | 0.000306472 | 0.170360794 |
| 0.255175137 | 0.344191439 |             |             |
| RAB27A      | 0.366899054 | 0.420679299 | 0.047961568 |
| 0.030886851 | 0.077010967 | 0.176443524 | 0.157265636 |
| 0.377466011 | 0.079054657 | 0.116299185 | 0.250188752 |
| 0.00211333  | 0.393368816 | 0.012523855 | 0.047131279 |
| 0.491618227 | 0.491839499 | 0.249456033 | 0.475453348 |
| 0.305519207 | 0.142590648 | 0.317797698 | 0.336696367 |
| 0.195077187 | 0.001773805 | 0.08549741  | 0.051522746 |
| 0.379253814 | 0.489274752 | 0.151464516 | 0.251009683 |
| 0.449553336 | 0.434641164 | 0.365834612 | 0.254049231 |
| 0.270372039 | 0.368567196 | 0.119092644 | 0.416590536 |
| 0.411154768 | 0.171165787 | 0.434518066 | 0.009558049 |
| 0.005973176 | 0.068074184 | 0.367432376 | 0.342916333 |
| 0.257624549 | 0.165189007 | 0.121070695 | 0.127888978 |
| 0.234601136 | 0.277743541 | 0.36707692  | 0.23848613  |
| 0.319207209 | 0.005753286 | 0.35560853  | 0.270390134 |
| 0.041936243 | 0.249394922 | 0.388744267 | 0.380847008 |
| 0.179250221 | 0.335823541 | 0.454535907 | 0.024091877 |
| 0.048242724 | 0.409380503 | 0.438784573 | 0.382022746 |
| 0.405481759 | 0.316950592 | 0.231532965 | 0.359508021 |
| 0.437340547 | 0.413748393 | 0.212473967 | 0.126489395 |
| 0.001249349 | 0.103670961 | 0.277647264 | 0.363473663 |
| 0.419991868 | 0.281137996 | 0.400685572 | 0.158448093 |
| 0.442153183 | 0.01246498  | 0.319286877 | 0.47818717  |
| 0.021358921 | 0.403970258 | 0.009170432 | 0.107950507 |
| 0.426272012 | 0.481726679 | 0.399051788 | 0.051968746 |
| 0.00917783  | 0.090685245 | 0.181119782 | 0.438176471 |
| 0.366997049 | 0.402824895 | 0.314391529 | 0.175804854 |
| 0.377526264 | 0.158091421 | 0.273476228 | 0.368851238 |
| 0.442089543 | 0.005484054 | 0.124170388 | 0.161443062 |
| 0.297541395 | 0.117925889 | 0.161148775 | 0.064035362 |
| 0.012685935 | 0.026225193 | 0.452454018 | 0.128172517 |
| 0.071835059 | 0.147409674 | 0.068377254 | 0.409002238 |

|             |             |             |             |
|-------------|-------------|-------------|-------------|
| 0.362737672 | 0.431812441 | 0.076188652 | 0.188592887 |
| 0.437220153 | 0.18335407  | 0.360334244 | 0.437211319 |
| 0.307461743 | 0.225480602 | 0.114856967 | 0.374964483 |
| 0.341364572 | 0.046243801 | 0.060762942 | 0.261792471 |
| 0.387565611 | 0.465905994 | 0.479672661 | 0.272474579 |
| 0.195029586 | 0.186295503 | 0.324212611 | 0.325415464 |
| 0.170020326 | 0.300157635 | 0.110670385 | 0.271059609 |
| 0.318836469 | 0.047354929 | 0.044314177 | 0.412171028 |
| 0.042160361 | 0.179104767 | 0.376683517 | 0.403261659 |
| 0.383412693 | 0.04384226  | 0.20103209  | 0.204814751 |
| 0.246210656 | 0.196846187 | 0.366221596 | 0.195729647 |
| 0.252848185 | 0.332639134 | 0.030528036 | 0.387206504 |
| 0.084359838 | 0.281514362 | 0.358741585 | 0.077267502 |
| 0.383007623 | 0.312956508 | 0.40993703  | 0.381548393 |
| 0.418191456 | 0.005587034 | 0.120587481 | 0.375186742 |
| 0.329068664 | 0.392967185 | 0.405172073 | 0.075667489 |
| 0.19981518  | 0.309988243 | 0.099498382 | 0.249468551 |
| 0.379485532 | 0.215576936 | 0.176757114 | 0.000742607 |
| 0.093333191 | 0.428458161 | 0.370267139 | 0.044813258 |
| 0.177202445 | 0.09533067  | 0.111007235 | 0.424208976 |
| 0.148101931 | 0.418536797 | 0.026920034 | 0.176472826 |
| 0.204041206 | 0.34310045  | 0.392410158 | 0.293186738 |
| 0.396853061 | 0.286957632 | 0.463612362 | 0.310878975 |
| 0.192776389 | 0.280373635 | 0.18598667  | 0.221558409 |
| 0.434163239 | 0.421714461 | 0.444313476 | 0.411242276 |
| 0.201951028 | 0.352728027 | 0.312362428 | 0.211318171 |
| 0.346015269 | 0.341475107 | 0.0648666   | 0.417031795 |
| 0.000608871 | 0.270517907 | 0.40062212  | 0.209100999 |
| 0.399156557 | 0.171836772 | 0.048956078 | 0.213197857 |
| 0.481274558 | 0.415011939 | 0.386961999 | 0.441742986 |
| 0.292031947 | 0.008650374 | 0.418625444 | 0.338828925 |
| 0.495637494 | 0.318657644 | 0.303926845 | 0.080483046 |
| 0.424323402 | 0.34751459  | 0.395862831 | 0.427046774 |
| 0.393859455 | 0.350807719 | 0.180423042 | 0.353508418 |
| 0.024661205 | 0.218157848 | 0.437226119 | 0.179486269 |
| 0.293962415 | 0.168448418 | 0.415484969 | 0.242418687 |
| 0.341654005 | 0.365497701 | 0.328318173 | 0.052739246 |
| 0.118776711 | 0.431417425 | 0.047483792 | 0.39553676  |
| 0.479224097 | 0.291348241 | 0.427917125 | 0.473720105 |
| 0.275268441 | 0.301639037 | 0.420303307 | 0.419071137 |
| 0.001131713 | 0.439233305 | 0.398493635 | 0.263900924 |
| 0.445671561 | 0.223600626 | 0.263480859 | 0.40789512  |
| 0.000779757 | 0.110416928 | 0.32137784  | 0.395723838 |
| 0.428506783 | 0.016841788 | 0.056554409 | 0.405868816 |
| 0.408853979 | 0.041450685 | 0.463683011 | 0.282387122 |
| 0.39829393  | 0.350102322 | 0.125399024 | 0.419826407 |
| 0.304231961 | 0.321663469 | 0.022361378 | 0.385917476 |
| 0.370780387 | 0.115343985 | 0.068221898 | 0.46863773  |
| 0.404946179 | 0.297911869 | 0.182317829 | 0.013338502 |
| 0.405589889 | 0.234678347 | 0.427787443 | 0.078871985 |
| 0.369711768 | 0.280304904 | 0.372817881 | 0.424089754 |
| 0.397556059 | 0.334746281 | 0.301334846 | 0.411433139 |
| 0.111997858 | 0.437395887 | 1           | 0.043636032 |
| 0.415633853 | 0.426815174 | 0.389462627 | 0.123325567 |

|                      |                      |              |             |
|----------------------|----------------------|--------------|-------------|
| 0.318169175          | 0.089000936          | 0.145581009  | 0.316519488 |
| 0.371017911          | 0.43636317           | 0.039368016  | 0.126608112 |
| 0.328619193          | 0.23417839           | 0.069724921  | 0.267191564 |
| 0.208207121          | 0.278904537          | 0.166344972  | 0.298080117 |
| 0.364109642          | 0.211849682          | 0.439216522  | 0.149822375 |
| 0.42894026           | 0.03308563           | 0.389270171  | 0.19170752  |
| 0.227231146          | 0.440868411          | 0.414719819  | 0.185575925 |
| 0.032867772          | 0.126405814          | 0.316051934  | 0.322972779 |
| 0.050661918          | 0.142393955          | 0.195180138  | 0.270233896 |
| 0.476053779          | 0.386959157          | 0.204146739  | 0.285805865 |
| 0.308835844          | 0.09230007           | 0.395336736  | 0.298973503 |
| 0.375502303          | 0.275645613          | 0.406424773  | 0.008921505 |
| 0.432284942          | 0.148090613          | 0.243686679  | 0.302648797 |
| 0.469494154          | 0.093310289          | 0.294680549  | 0.128594449 |
| 0.17445358           | 0.003063936          | 0.294264336  | 0.368891711 |
| 0.20734272           | 0.302990225          | 0.312429882  | 0.217305533 |
| 0.447606774          | 0.369644672          | 0.410863555  | 0.285783396 |
| 0.321918912          | 0.02538245           | 0.121663288  | 0.023448056 |
| 0.354158251          | 0.304921931          | 0.40438324   | 0.394522605 |
| 0.225464286          | 0.382470847          | 0.310194487  | 0.339837563 |
| 0.429113631          | 0.228761038          | 0.486370809  | 0.250745341 |
| 0.406180201          | 0.361151669          | 0.184994515  | 0.274147424 |
| 0.135097216          | 0.114004553          | 0.079388844  | 0.14677696  |
| 0.451117572          | 0.240851009          | 0.316860492  | 0.33946045  |
| 0.031819789          | 0.319922361          | 0.40390352   | 0.43349289  |
| 0.406464224          | 0.432789037          | 0.376967464  | 0.29673196  |
| 0.307469903          | 0.280903427          | 0.056247066  | 0.033208462 |
| 0.269911258          | 0.143982533          | 0.382611002  | 0.402004254 |
| 0.463994977          | 0.29825157           | 0.06671222   | 0.107010787 |
| 0.139571103          | 0.391332251          | 0.196351799  | 0.167728477 |
| 0.373551689          | 0.33780035           | 0.000445511  | 0.213779947 |
| 0.305905045          | 0.376774111          |              |             |
| RABGAP1L 0.036231272 | 0.098524966          | 0.059711911  |             |
| 0.001891049          | 0.02297696           | 0.19353231   | 0.162902703 |
| 0.028298795          | 0.019446106          | 0.059933319  | 0.193972482 |
| 0.000249048          | 0.024380019          | 0.006486917  | 0.005480098 |
| 0.061482095          | 0.058751587          | 0.09884083   | 0.05856446  |
| 0.052517389          | 0.008942544          | 0.10916454   | 0.114383305 |
| 0.143805397          | 0.000802125          | 0.138992494  | 0.013182092 |
| 0.018733761          | 0.050611449          | 0.123665397  | 0.037247839 |
| 0.050219027          | 0.042365098          | 0.01937716   | 0.007939126 |
| 0.002176447          | 0.139201572          | 0.000130378  | 0.029595969 |
| 0.024580917          | 0.098803922          | 0.043787018  | 0.002333887 |
| 6.63E-05 0.148905549 | 0.014453912          | 0.103144298  |             |
| 0.047588184          | 0.187005582          | 0.145850767  | 0.113271973 |
| 0.000250577          | 0.170141196          | 0.0711103052 | 0.000761178 |
| 0.16062817           | 0.000389 0.134931287 | 0.021637664  |             |
| 0.093581007          | 0.05976065           | 0.017909811  | 0.073398337 |
| 0.197144857          | 0.154527046          | 0.075688474  | 0.010107365 |
| 0.156504462          | 0.028543633          | 0.031930924  | 0.070999005 |
| 0.086084999          | 0.035529768          | 0.036009704  | 0.007400996 |
| 0.036548401          | 0.033357073          | 0.143245267  | 0.069623226 |
| 0.000293161          | 0.16350127           | 0.020470829  | 0.028553207 |
| 0.020466602          | 0.170442018          | 0.032675253  | 0.058034732 |

|             |             |                      |             |
|-------------|-------------|----------------------|-------------|
| 0.035575292 | 0.016942243 | 0.113723422          | 0.072256594 |
| 0.001772167 | 0.02972738  | 0.00043886           | 0.041582755 |
| 0.056138066 | 0.036025459 | 0.062635216          | 0.052342557 |
| 0.007018222 | 0.069135371 | 0.004272834          | 0.022076023 |
| 0.046533038 | 0.042711436 | 0.146368041          | 0.000953137 |
| 0.017465803 | 0.01585301  | 0.037251986          | 0.141106969 |
| 0.076536675 | 0.003102542 | 0.039305946          | 0.202552267 |
| 0.003680358 | 0.002781588 | 0.155860304          | 0.00133421  |
| 0.002972763 | 0.000345594 | 0.046738522          | 0.069389296 |
| 0.102119695 | 0.162174671 | 0.007775933          | 0.046545712 |
| 0.018648338 | 0.037286418 | 0.02942611           | 0.12687291  |
| 0.032979713 | 0.156015258 | 0.047144704          | 0.046254323 |
| 0.014450249 | 0.028647178 | 0.126166899          | 0.103234631 |
| 0.132083706 | 0.036653579 | 0.036489392          | 0.186077634 |
| 0.017763574 | 0.061462902 | 0.080613523          | 0.01945561  |
| 0.053251544 | 0.094012848 | 0.02229725           | 0.134793235 |
| 0.158125066 | 0.054596654 | 0.00016021           | 0.143604228 |
| 0.168415393 | 0.000390156 | 0.100295975          | 0.049194692 |
| 0.002003352 | 0.014666738 | 0.12253648           | 0.067529753 |
| 0.037285954 | 0.010598995 | 0.082083512          | 0.135087723 |
| 0.108708481 | 0.171777948 | 0.063868103          | 0.062087622 |
| 0.160270825 | 0.027964477 | 0.103727853          | 0.017989646 |
| 0.166702523 | 0.104788787 | 0.002808228          | 0.000319327 |
| 0.03721125  | 0.028958552 | 0.093538592          | 0.053688044 |
| 0.037921442 | 0.000471363 | 0.064576674          | 0.045352124 |
| 0.018115606 | 0.028679273 | 0.114932152          | 0.165326793 |
| 0.135583112 | 0.00336914  | 0.152728937          | 0.031161311 |
| 0.052187818 | 0.017307401 | 0.022519937          | 0.001013206 |
| 0.01866925  | 0.019530772 | 0.030012414          | 0.018566386 |
| 0.043034842 | 0.028762038 | 0.002924959          | 0.077140503 |
| 0.179776557 | 0.047786802 | 0.001512807          | 0.002145678 |
| 0.096240389 | 0.105974744 | 0.023843003          | 0.00639818  |
| 0.075975355 | 0.044541653 | 0.027742386          | 0.140683081 |
| 0.019552289 | 0.187432537 | 0.000353786          | 0.046662976 |
| 0.028854438 | 0.065065558 | 0.047017192          | 0.05497521  |
| 0.096031775 | 0.041508663 | 0.002178239          | 0.199070751 |
| 0.075492049 | 0.053403936 | 0.077313315          | 0.096811891 |
| 0.000668526 | 0.136551912 | 0.054492859          | 0.000737095 |
| 0.112757758 | 0.187614591 | 0.090591416          | 0.063134844 |
| 0.062029519 | 0.098932132 | 0.061973807          | 0.040650624 |
| 0.001411864 | 0.004775617 | 0.078687638          | 0.103119974 |
| 0.048916002 | 0.042921421 | 0.006835073          | 0.000300453 |
| 0.078632514 | 0.020001796 | 0.073613647          | 0.04091325  |
| 0.030009891 | 0.010018482 | 0.098158263          | 0.028507289 |
| 0.000158885 | 0.098887527 | 0.05228785           | 0.006155263 |
| 0.05521005  | 0.004356642 | 0.065566192          | 0.156542505 |
| 0.012908937 | 0.010574646 | 0.017973814          | 0.142145245 |
| 0.156326323 | 0.102845672 | 3.51E-05 0.082423281 |             |
| 0.074795615 | 0.062106512 | 0.078263768          | 0.073324177 |
| 0.105113666 | 0.141227314 | 0.085568038          | 0.039283307 |
| 0.000393494 | 0.028180523 | 0.018990648          | 0.170048459 |
| 0.052983444 | 0.148917956 | 0.00791212           | 0.013500792 |
| 0.000143123 | 0.16308729  | 0.003243513          | 0.109169901 |
| 0.065537617 | 0.013665618 | 1.49E-05 0.077056344 |             |

|             |             |             |             |
|-------------|-------------|-------------|-------------|
| 0.020128512 | 0.000368302 | 0.091517209 | 0.107307786 |
| 0.098253022 | 0.054270113 | 0.131424968 | 0.024783219 |
| 0.002028607 | 0.015479706 | 0.002391335 | 0.081681729 |
| 0.018168483 | 0.000126978 | 0.034191175 | 0.071201398 |
| 0.098238366 | 0.12479353  | 0.152448645 | 0.00176008  |
| 0.024980808 | 0.008231478 | 0.065724594 | 0.014269317 |
| 0.104387408 | 0.146762624 | 0.110284956 | 0.033314472 |
| 0.045932725 | 0.144472036 | 0.172519577 | 0.090688741 |
| 0.001683255 | 0.036254063 | 0.043636032 | 1           |
| 0.02081936  | 0.065899058 | 0.045271446 | 0.204589247 |
| 0.103754027 | 0.001434971 | 0.208724349 | 0.038796165 |
| 0.120204372 | 0.06356013  | 0.087441267 | 0.042855742 |
| 0.15204629  | 0.047454257 | 0.13184681  | 0.057559598 |
| 0.165986656 | 0.000719919 | 0.000884748 | 0.118426066 |
| 0.136557863 | 0.198889812 | 0.068500185 | 0.030108255 |
| 0.047249168 | 0.049197918 | 0.056060259 | 0.020419912 |
| 0.119231112 | 0.030833307 | 0.023587395 | 0.001004624 |
| 0.001809458 | 0.015048284 | 0.149568005 | 0.150910127 |
| 0.159209995 | 0.152537704 | 0.145133581 | 0.113771672 |
| 0.05715291  | 0.026963717 | 0.179871601 | 0.066835019 |
| 0.163613693 | 0.004965957 | 0.117593892 | 0.079158177 |
| 0.091400703 | 0.066053963 | 0.068123388 | 0.000218264 |
| 0.034987631 | 0.070895705 | 0.01027391  | 0.076595111 |
| 0.032299162 | 0.140267745 | 0.124904424 | 0.075305177 |
| 0.001574199 | 0.000383766 | 0.115980094 | 0.009971414 |
| 0.204657516 | 0.006000719 | 0.058318905 | 0.000611169 |
| 0.10274583  | 0.071955293 | 0.068881307 | 0.003390711 |
| 0.080318143 | 2.95E-05    | 0.071467438 | 0.034688523 |
| 0.096781077 | 0.117934279 | 0.038217301 | 0.036169378 |
| 0.012258596 | 0.053437738 | 0.109438013 | 0.046322962 |
| 0.064855913 | 0.000811658 | 0.068695235 | 0.032298499 |
| 0.019668744 | 0.016482412 | 0.153202801 | 0.012460529 |
| 0.110226023 | 0.000929328 | 0.099653216 | 0.022641753 |
| 0.054491824 | 0.010026582 | 0.075208501 | 0.017714414 |
| 0.079717733 | 0.05257033  | 0.037566412 | 0.029526772 |
| 0.072733018 | 0.026680181 | 0.018218794 | 0.164552979 |
| 0.005140811 | 0.042497525 | 0.003625234 | 0.00346947  |
| 0.004183203 | 0.135510303 | 0.066188716 | 0.069174006 |
| 0.062261783 | 0.004662427 | 0.097724436 | 0.070667768 |
| 0.000294684 | 0.031747737 | 0.165782969 | 0.000684655 |
| 0.047164131 | 0.005413736 | 0.001240295 | 0.02967527  |
| 0.134236513 | 0.005511941 |             |             |
| RAD51C      | 0.215383139 | 0.380618041 | 0.027219705 |
| 0.012227574 | 0.033570599 | 0.091083794 | 0.075633214 |
| 0.218610171 | 0.046885401 | 0.054112404 | 0.16065168  |
| 0.002871056 | 0.338583459 | 0.009432356 | 0.027589432 |
| 0.46149175  | 0.452265219 | 0.121973897 | 0.446587843 |
| 0.181089728 | 0.061094866 | 0.211013104 | 0.170035882 |
| 0.100778963 | 0.001706457 | 0.039311383 | 0.020632475 |
| 0.206325455 | 0.458873703 | 0.085005411 | 0.127401813 |
| 0.431389227 | 0.388547857 | 0.180037509 | 0.11437762  |
| 0.124225134 | 0.327280759 | 0.059259337 | 0.30270506  |
| 0.391838593 | 0.080031156 | 0.368755695 | 0.006570879 |
| 0.001913265 | 0.03306327  | 0.21938211  | 0.20800664  |

|             |             |             |             |
|-------------|-------------|-------------|-------------|
| 0.149740673 | 0.086332723 | 0.067541696 | 0.058565269 |
| 0.129789851 | 0.185203695 | 0.305316524 | 0.130213622 |
| 0.251167382 | 0.001947132 | 0.305642699 | 0.17193208  |
| 0.022904483 | 0.140911898 | 0.220137016 | 0.238671903 |
| 0.097324686 | 0.276356588 | 0.414663498 | 0.012271583 |
| 0.02522588  | 0.220241947 | 0.349420769 | 0.192130264 |
| 0.349535264 | 0.15714221  | 0.113312722 | 0.186091454 |
| 0.295874978 | 0.362046878 | 0.117838272 | 0.067818988 |
| 0.001263622 | 0.04904025  | 0.123401883 | 0.276859434 |
| 0.243451695 | 0.194263992 | 0.237919658 | 0.075108645 |
| 0.230233434 | 0.007289919 | 0.167771182 | 0.434911053 |
| 0.009967    | 0.32990595  | 0.004365023 | 0.06174743  |
| 0.357243109 | 0.454536556 | 0.262727288 | 0.026264015 |
| 0.005586677 | 0.054333023 | 0.140379696 | 0.421597191 |
| 0.206564437 | 0.205568754 | 0.241209771 | 0.106794904 |
| 0.353405557 | 0.094199629 | 0.140173198 | 0.320981035 |
| 0.415168195 | 0.003962643 | 0.07415142  | 0.082695101 |
| 0.144973392 | 0.051569237 | 0.080463752 | 0.036827288 |
| 0.007334187 | 0.024528848 | 0.425913042 | 0.077241967 |
| 0.033335585 | 0.072181428 | 0.030954864 | 0.214358451 |
| 0.220009371 | 0.423670637 | 0.03445161  | 0.090411755 |
| 0.289790542 | 0.08840078  | 0.169437797 | 0.300974492 |
| 0.145144225 | 0.133357716 | 0.06323063  | 0.306650133 |
| 0.295816161 | 0.024072836 | 0.035387618 | 0.151886618 |
| 0.329416558 | 0.436503326 | 0.442765609 | 0.157931211 |
| 0.088545555 | 0.106160684 | 0.167398557 | 0.177048202 |
| 0.086030315 | 0.176474983 | 0.071881515 | 0.17648447  |
| 0.260760158 | 0.026323109 | 0.024509588 | 0.326521965 |
| 0.016254509 | 0.089905438 | 0.319248386 | 0.289514892 |
| 0.199778457 | 0.017151605 | 0.093457276 | 0.102625379 |
| 0.137359718 | 0.096173413 | 0.226407497 | 0.090965948 |
| 0.145514368 | 0.165713097 | 0.015879356 | 0.35266757  |
| 0.044854855 | 0.159220404 | 0.186898589 | 0.046386993 |
| 0.237446623 | 0.180166111 | 0.3243421   | 0.205708555 |
| 0.307719695 | 0.002166204 | 0.055641697 | 0.224435659 |
| 0.176343049 | 0.382232291 | 0.359537718 | 0.041221539 |
| 0.113153491 | 0.168403012 | 0.054746129 | 0.114984739 |
| 0.349774845 | 0.108962349 | 0.08488309  | 0.000483716 |
| 0.047745324 | 0.219674104 | 0.198717514 | 0.032003668 |
| 0.081903084 | 0.055371642 | 0.068185648 | 0.353776094 |
| 0.077298382 | 0.302314284 | 0.02318721  | 0.112348073 |
| 0.104534236 | 0.222519395 | 0.198056268 | 0.180729751 |
| 0.27014576  | 0.151829824 | 0.442539013 | 0.234496081 |
| 0.091929366 | 0.184862071 | 0.112173552 | 0.12858553  |
| 0.224245387 | 0.353446551 | 0.353901572 | 0.309066052 |
| 0.106191086 | 0.251842574 | 0.167574236 | 0.119713532 |
| 0.186194986 | 0.18597131  | 0.038427796 | 0.37928859  |
| 0.000530496 | 0.142437676 | 0.198554028 | 0.118070419 |
| 0.351585402 | 0.083788492 | 0.02909333  | 0.129177502 |
| 0.449050108 | 0.377790647 | 0.364169748 | 0.410256402 |
| 0.21442744  | 0.00706538  | 0.397250998 | 0.230308521 |
| 0.463723606 | 0.166182995 | 0.140978404 | 0.058635142 |
| 0.38405608  | 0.200925046 | 0.230564162 | 0.227582783 |
| 0.200992901 | 0.177298244 | 0.101055402 | 0.26141066  |

|             |             |             |             |
|-------------|-------------|-------------|-------------|
| 0.016315301 | 0.112717103 | 0.257285169 | 0.081372979 |
| 0.141925612 | 0.105237246 | 0.32196963  | 0.15112345  |
| 0.162519595 | 0.199214564 | 0.150740693 | 0.025724005 |
| 0.062349664 | 0.391193099 | 0.026581083 | 0.379232059 |
| 0.440199009 | 0.159783656 | 0.363272366 | 0.441467984 |
| 0.152795403 | 0.21161939  | 0.357777937 | 0.408655431 |
| 0.001453315 | 0.41253245  | 0.309114284 | 0.190965821 |
| 0.405361921 | 0.118569582 | 0.166858617 | 0.204972856 |
| 0.000611096 | 0.061054277 | 0.158107361 | 0.368366703 |
| 0.358192392 | 0.009469714 | 0.028096165 | 0.290359648 |
| 0.278645989 | 0.021999222 | 0.425345095 | 0.141866128 |
| 0.315896311 | 0.176195641 | 0.061314366 | 0.357370287 |
| 0.15436226  | 0.172678135 | 0.010212942 | 0.203719578 |
| 0.194705267 | 0.087325113 | 0.027936389 | 0.437322978 |
| 0.333651899 | 0.18211254  | 0.095567806 | 0.006017743 |
| 0.397281562 | 0.106000579 | 0.287680573 | 0.044641105 |
| 0.28728419  | 0.187075887 | 0.305085131 | 0.337378764 |
| 0.21234576  | 0.247134214 | 0.218156163 | 0.319423264 |
| 0.045940402 | 0.371343939 | 0.415633853 | 0.02081936  |
| 1           | 0.377214963 | 0.189789601 | 0.062048545 |
| 0.200186888 | 0.035554116 | 0.075816738 | 0.19132267  |
| 0.29518291  | 0.388057211 | 0.021267582 | 0.07804441  |
| 0.242999527 | 0.133192639 | 0.035372084 | 0.14568705  |
| 0.120205659 | 0.160813162 | 0.113844039 | 0.195244984 |
| 0.312911963 | 0.123656177 | 0.385845292 | 0.066415355 |
| 0.391401396 | 0.020246034 | 0.331021807 | 0.097912333 |
| 0.126149963 | 0.247184689 | 0.396938625 | 0.132619811 |
| 0.016559235 | 0.079681457 | 0.221700358 | 0.252294386 |
| 0.026839056 | 0.079432683 | 0.096052214 | 0.128212573 |
| 0.435916888 | 0.19399906  | 0.10610838  | 0.158527207 |
| 0.247827999 | 0.039024388 | 0.365379503 | 0.175279234 |
| 0.287079351 | 0.136037165 | 0.302145089 | 0.005391368 |
| 0.252819868 | 0.070312265 | 0.164378637 | 0.141508697 |
| 0.448258329 | 0.048897554 | 0.174671629 | 0.075040927 |
| 0.088123823 | 0.002331292 | 0.195678472 | 0.180073605 |
| 0.128808235 | 0.170841161 | 0.180465071 | 0.103423507 |
| 0.409501437 | 0.20030723  | 0.317539107 | 0.157873859 |
| 0.153117631 | 0.009929009 | 0.056623414 | 0.013236248 |
| 0.261287235 | 0.215459548 | 0.258186194 | 0.215347727 |
| 0.154236091 | 0.202593848 | 0.188159094 | 0.158119242 |
| 0.368277006 | 0.127616952 | 0.443369216 | 0.147674634 |
| 0.379672966 | 0.193433921 | 0.097811718 | 0.154672267 |
| 0.063752349 | 0.076203009 | 0.042668116 | 0.098415978 |
| 0.404720821 | 0.13336984  | 0.150567014 | 0.191594747 |
| 0.015419347 | 0.161487334 | 0.315853843 | 0.318030885 |
| 0.212069168 | 0.314052666 | 0.208347736 | 0.226190154 |
| 0.169605945 | 0.168939743 | 0.021694714 | 0.012709394 |
| 0.126807757 | 0.072510449 | 0.34756912  | 0.340226603 |
| 0.430071289 | 0.172116421 | 0.037378545 | 0.066946388 |
| 0.079231827 | 0.344270547 | 0.094904128 | 0.07625929  |
| 0.196532905 | 0.203573239 | 0.000331824 | 0.133347387 |
| 0.204065771 | 0.192011978 |             |             |
| RAMP1       | 0.339997333 | 0.49067094  | 0.074551572 |
| 0.043287883 | 0.147836349 | 0.252742745 | 0.255627995 |



|             |             |             |             |
|-------------|-------------|-------------|-------------|
| 0.355712888 | 0.117143936 | 0.164015971 | 0.341570911 |
| 0.001359637 | 0.400860882 | 0.013989994 | 0.080519808 |
| 0.510936077 | 0.530791928 | 0.376412068 | 0.512280747 |
| 0.314825185 | 0.182859445 | 0.360465927 | 0.399916917 |
| 0.279694884 | 0.001614379 | 0.149033901 | 0.069741306 |
| 0.372867408 | 0.503937314 | 0.212132912 | 0.292885892 |
| 0.450367661 | 0.463539182 | 0.442595617 | 0.390155868 |
| 0.305222008 | 0.443245368 | 0.161025792 | 0.46185285  |
| 0.40437842  | 0.261758102 | 0.466816495 | 0.015969245 |
| 0.007300418 | 0.121116113 | 0.322951165 | 0.390241704 |
| 0.305585553 | 0.233568028 | 0.181510703 | 0.21014176  |
| 0.183480256 | 0.368177693 | 0.386025735 | 0.190264067 |
| 0.421405986 | 0.008109092 | 0.442926509 | 0.241676478 |
| 0.073637988 | 0.326326659 | 0.366799059 | 0.412209683 |
| 0.271409252 | 0.433918771 | 0.519238639 | 0.043525101 |
| 0.083583361 | 0.442817564 | 0.426406314 | 0.460508552 |
| 0.464787062 | 0.357153591 | 0.327804168 | 0.414582656 |
| 0.462608221 | 0.409326602 | 0.298867564 | 0.191576269 |
| 0.000957754 | 0.1771147   | 0.39613809  | 0.332621318 |
| 0.427738214 | 0.370532856 | 0.389195452 | 0.261596389 |
| 0.444614839 | 0.020087932 | 0.38859267  | 0.530932783 |
| 0.028016904 | 0.418893889 | 0.01452404  | 0.168290926 |
| 0.438941536 | 0.475354758 | 0.41014066  | 0.08544651  |
| 0.015170353 | 0.13081542  | 0.136580307 | 0.413575763 |
| 0.413047187 | 0.48165041  | 0.417150631 | 0.161919941 |
| 0.366078017 | 0.175017456 | 0.383104915 | 0.447261172 |
| 0.473462305 | 0.008129611 | 0.162623569 | 0.242709719 |
| 0.384893281 | 0.179393868 | 0.258683399 | 0.043048087 |
| 0.013938412 | 0.018574027 | 0.462939063 | 0.162045916 |
| 0.123919253 | 0.229858052 | 0.106510414 | 0.489957822 |
| 0.339714126 | 0.428762503 | 0.157563813 | 0.288969628 |
| 0.458428736 | 0.289121856 | 0.463061523 | 0.473762154 |
| 0.433722009 | 0.256781313 | 0.156089385 | 0.471850544 |
| 0.41337613  | 0.079903642 | 0.090025712 | 0.338094526 |
| 0.386893815 | 0.490526456 | 0.531860513 | 0.306381243 |
| 0.317520008 | 0.253979401 | 0.339979764 | 0.422298392 |
| 0.26993367  | 0.343473642 | 0.098192264 | 0.367508544 |
| 0.412813471 | 0.043639173 | 0.072110875 | 0.443460799 |
| 0.083032213 | 0.282459856 | 0.439496968 | 0.485403521 |
| 0.472264505 | 0.057634549 | 0.268588044 | 0.288446022 |
| 0.303234665 | 0.278608501 | 0.415390138 | 0.250482756 |
| 0.325051289 | 0.348138339 | 0.056438147 | 0.376233282 |
| 0.135150761 | 0.337241237 | 0.326499781 | 0.080773512 |
| 0.405458051 | 0.345824336 | 0.470861638 | 0.422625956 |
| 0.407992314 | 0.007319813 | 0.163553294 | 0.362548147 |
| 0.311048555 | 0.391320233 | 0.49139146  | 0.124619358 |
| 0.260867    | 0.352147998 | 0.154493846 | 0.391633541 |
| 0.386523955 | 0.247188943 | 0.223721779 | 0.000672048 |
| 0.158953109 | 0.39355513  | 0.437952199 | 0.050723408 |
| 0.278776724 | 0.115767997 | 0.115091528 | 0.47559381  |
| 0.215487428 | 0.489443732 | 0.025292563 | 0.166803037 |
| 0.280078338 | 0.454435842 | 0.422678859 | 0.267792385 |
| 0.486153108 | 0.328564833 | 0.436508999 | 0.397394336 |
| 0.324354327 | 0.366184785 | 0.198896796 | 0.28216695  |

|             |             |             |             |
|-------------|-------------|-------------|-------------|
| 0.469504172 | 0.488427047 | 0.467179819 | 0.480619724 |
| 0.279180479 | 0.372681317 | 0.320463335 | 0.288927003 |
| 0.396836036 | 0.41678507  | 0.0874094   | 0.496238447 |
| 0.000650015 | 0.361329262 | 0.472851894 | 0.203026178 |
| 0.479760886 | 0.270155073 | 0.072028989 | 0.247056842 |
| 0.520633648 | 0.496203082 | 0.408868564 | 0.437288945 |
| 0.23355294  | 0.009594749 | 0.463066568 | 0.418624305 |
| 0.513670207 | 0.422980703 | 0.39944758  | 0.086539064 |
| 0.480269024 | 0.34891073  | 0.429719528 | 0.417923177 |
| 0.478478935 | 0.433090494 | 0.25703022  | 0.347664446 |
| 0.016851653 | 0.261794517 | 0.427158359 | 0.227515334 |
| 0.34645751  | 0.188849489 | 0.48500334  | 0.337984191 |
| 0.449126544 | 0.318120622 | 0.410063055 | 0.097761351 |
| 0.194124236 | 0.496906645 | 0.066016202 | 0.439684321 |
| 0.528014865 | 0.380582465 | 0.488761284 | 0.516473922 |
| 0.319061151 | 0.406448904 | 0.474580765 | 0.427121709 |
| 0.000826254 | 0.434629853 | 0.406992434 | 0.352910538 |
| 0.448401436 | 0.300803274 | 0.243909274 | 0.45319843  |
| 0.001458453 | 0.162046742 | 0.299515928 | 0.469372103 |
| 0.487560694 | 0.033939142 | 0.072495371 | 0.480548688 |
| 0.417678208 | 0.055993302 | 0.521436427 | 0.35259828  |
| 0.481160121 | 0.453724414 | 0.194532208 | 0.420476538 |
| 0.255669833 | 0.388713293 | 0.040977187 | 0.464835563 |
| 0.446016478 | 0.092724811 | 0.109495037 | 0.51673015  |
| 0.440332511 | 0.415999257 | 0.269812807 | 0.011137245 |
| 0.377230024 | 0.25476446  | 0.487604576 | 0.125529972 |
| 0.428840683 | 0.378707518 | 0.464838817 | 0.454446226 |
| 0.459686817 | 0.423471821 | 0.386340843 | 0.468030176 |
| 0.157830481 | 0.418546739 | 0.426815174 | 0.065899058 |
| 0.377214963 | 1           | 0.44241428  | 0.195569273 |
| 0.379366862 | 0.133044074 | 0.217312009 | 0.318232734 |
| 0.46638962  | 0.477885507 | 0.063761448 | 0.166830961 |
| 0.424948208 | 0.31329371  | 0.127046337 | 0.360691314 |
| 0.287582949 | 0.188383652 | 0.148971782 | 0.381006619 |
| 0.453561612 | 0.31302019  | 0.454764696 | 0.192375052 |
| 0.466266948 | 0.053773306 | 0.435258753 | 0.289144    |
| 0.287631927 | 0.403204021 | 0.388243578 | 0.120292284 |
| 0.027097338 | 0.123307204 | 0.418773012 | 0.413874251 |
| 0.083320455 | 0.19896758  | 0.279334011 | 0.385656094 |
| 0.506696053 | 0.435667608 | 0.288111849 | 0.344716588 |
| 0.407005015 | 0.141155194 | 0.465282263 | 0.335392149 |
| 0.409529331 | 0.362002194 | 0.466931686 | 0.010756287 |
| 0.466231939 | 0.193433322 | 0.207330283 | 0.410957295 |
| 0.456183709 | 0.145868688 | 0.414920758 | 0.168023477 |
| 0.207166885 | 0.003837054 | 0.362516321 | 0.419524734 |
| 0.292774214 | 0.30904335  | 0.365098609 | 0.212686745 |
| 0.519214249 | 0.397067088 | 0.417792847 | 0.319099112 |
| 0.409808232 | 0.036653304 | 0.181212452 | 0.035995089 |
| 0.393052033 | 0.395390737 | 0.41338899  | 0.380610913 |
| 0.198923223 | 0.486274878 | 0.403470352 | 0.46321934  |
| 0.487552802 | 0.187015337 | 0.52404738  | 0.311814156 |
| 0.394886778 | 0.387356097 | 0.275367906 | 0.339273928 |
| 0.235580954 | 0.142900699 | 0.13610856  | 0.1570439   |
| 0.490310156 | 0.333561212 | 0.431414694 | 0.312322332 |

|             |             |             |             |
|-------------|-------------|-------------|-------------|
| 0.056262605 | 0.405601716 | 0.426532802 | 0.451047064 |
| 0.447587463 | 0.391151763 | 0.383406861 | 0.396596919 |
| 0.316529004 | 0.293815844 | 0.082781264 | 0.048151858 |
| 0.306706337 | 0.209209951 | 0.404526821 | 0.4470924   |
| 0.512287673 | 0.287877325 | 0.106119795 | 0.139920422 |
| 0.151493378 | 0.373177332 | 0.302375527 | 0.226086183 |
| 0.459152745 | 0.326190203 | 0.000621946 | 0.226387804 |
| 0.389869751 | 0.41888492  |             |             |
| RANGRF      | 0.151987751 | 0.466101013 | 0.039553795 |
| 0.066463015 | 0.083731499 | 0.166564727 | 0.147793079 |
| 0.131929404 | 0.053415916 | 0.149616198 | 0.260645324 |
| 0.000295678 | 0.28651896  | 0.004484551 | 0.023708582 |
| 0.451543435 | 0.464368566 | 0.193824065 | 0.422328444 |
| 0.113816488 | 0.207605078 | 0.212529459 | 0.260689822 |
| 0.156730861 | 0.000398745 | 0.09842933  | 0.133051303 |
| 0.127306184 | 0.423273489 | 0.091137019 | 0.185490485 |
| 0.397482283 | 0.41140115  | 0.244703113 | 0.187092283 |
| 0.181972117 | 0.411129118 | 0.047419889 | 0.332325543 |
| 0.313883408 | 0.164628552 | 0.391849682 | 0.005768429 |
| 0.019171765 | 0.070738155 | 0.11557295  | 0.238325919 |
| 0.09898864  | 0.138655075 | 0.074185138 | 0.14415173  |
| 0.081427781 | 0.274272972 | 0.255882435 | 0.08618205  |
| 0.376698673 | 0.025614769 | 0.414595222 | 0.080138614 |
| 0.033819996 | 0.125662797 | 0.151517894 | 0.260934171 |
| 0.185411091 | 0.401090915 | 0.464029779 | 0.034388636 |
| 0.04784655  | 0.183122792 | 0.351944606 | 0.333192403 |
| 0.411154668 | 0.192328035 | 0.178091444 | 0.151855239 |
| 0.330999491 | 0.313003736 | 0.157405637 | 0.072173862 |
| 0.000748306 | 0.10909429  | 0.250781711 | 0.190104096 |
| 0.239731869 | 0.288642211 | 0.193938772 | 0.155068736 |
| 0.207136356 | 0.008924263 | 0.198646523 | 0.470797318 |
| 0.025479244 | 0.289011136 | 0.007096215 | 0.058432952 |
| 0.341979046 | 0.397001176 | 0.264912394 | 0.066460131 |
| 0.005269273 | 0.043812169 | 0.043164442 | 0.324207338 |
| 0.176817299 | 0.209180477 | 0.357437267 | 0.038329834 |
| 0.284585211 | 0.082330274 | 0.160868052 | 0.436329345 |
| 0.440554942 | 0.001616392 | 0.051920912 | 0.13754497  |
| 0.171785527 | 0.161971018 | 0.12623566  | 0.022182839 |
| 0.013892774 | 0.002513823 | 0.401784447 | 0.067300452 |
| 0.09675161  | 0.125180212 | 0.069342094 | 0.330050497 |
| 0.119199807 | 0.33583097  | 0.083042593 | 0.155260392 |
| 0.319497961 | 0.173836367 | 0.241185368 | 0.343582232 |
| 0.194193903 | 0.089045504 | 0.070304533 | 0.41319658  |
| 0.338209588 | 0.043885097 | 0.046792559 | 0.232535249 |
| 0.285552255 | 0.431794812 | 0.478262357 | 0.109744397 |
| 0.176087527 | 0.096973022 | 0.230784095 | 0.310902113 |
| 0.136940388 | 0.120304912 | 0.021255777 | 0.230971119 |
| 0.37839164  | 0.018668517 | 0.037191983 | 0.305197173 |
| 0.068578952 | 0.143186677 | 0.391093475 | 0.361539834 |
| 0.221495922 | 0.124451149 | 0.202948298 | 0.176117137 |
| 0.138896742 | 0.158218588 | 0.240512293 | 0.213095289 |
| 0.194256894 | 0.245836508 | 0.031058429 | 0.295533496 |
| 0.06275192  | 0.164526799 | 0.153949901 | 0.038698169 |
| 0.195953488 | 0.113961846 | 0.410006094 | 0.205546976 |

|             |             |             |             |
|-------------|-------------|-------------|-------------|
| 0.279318449 | 0.02419512  | 0.156729296 | 0.191221676 |
| 0.210086468 | 0.291229943 | 0.477150663 | 0.055996193 |
| 0.115165523 | 0.117787487 | 0.063903099 | 0.190890563 |
| 0.273541873 | 0.198468598 | 0.175978728 | 0.000818013 |
| 0.076096829 | 0.221448182 | 0.16616726  | 0.016029386 |
| 0.164615853 | 0.060139556 | 0.029314533 | 0.426161986 |
| 0.104883716 | 0.367668309 | 0.004990587 | 0.03660642  |
| 0.131098472 | 0.36011488  | 0.24227664  | 0.111349219 |
| 0.399742337 | 0.186311362 | 0.358863089 | 0.313999923 |
| 0.143882776 | 0.303964396 | 0.048066004 | 0.108379821 |
| 0.240315668 | 0.431115626 | 0.388659751 | 0.352819231 |
| 0.144557358 | 0.188660189 | 0.113392952 | 0.182613962 |
| 0.175965307 | 0.160094284 | 0.041419859 | 0.442610186 |
| 0.000295679 | 0.18690959  | 0.280688876 | 0.053243065 |
| 0.470553815 | 0.177023697 | 0.031586798 | 0.084693379 |
| 0.432598288 | 0.434334107 | 0.307871147 | 0.385818952 |
| 0.080946309 | 0.002251072 | 0.390706049 | 0.299074079 |
| 0.439721472 | 0.178029651 | 0.189201511 | 0.014506527 |
| 0.427566664 | 0.134708961 | 0.301315259 | 0.203067704 |
| 0.239848806 | 0.158717065 | 0.09329245  | 0.174978324 |
| 0.006537735 | 0.159431079 | 0.287614977 | 0.203069491 |
| 0.23942944  | 0.105760304 | 0.41610697  | 0.207701343 |
| 0.217659641 | 0.159405066 | 0.267842948 | 0.056101783 |
| 0.087670943 | 0.468664317 | 0.018311126 | 0.362033934 |
| 0.463426783 | 0.15294278  | 0.457400043 | 0.439606066 |
| 0.137159337 | 0.322060586 | 0.433241231 | 0.326858831 |
| 0.000165911 | 0.373025247 | 0.285149042 | 0.25888445  |
| 0.428352026 | 0.182443069 | 0.063343574 | 0.185161896 |
| 0.000233926 | 0.073584352 | 0.18382841  | 0.407924727 |
| 0.431772677 | 0.019102602 | 0.020757389 | 0.354836674 |
| 0.26318474  | 0.013034998 | 0.467233697 | 0.204939079 |
| 0.437394738 | 0.186403534 | 0.122603072 | 0.338815254 |
| 0.144198202 | 0.121245368 | 0.031023587 | 0.314353996 |
| 0.167737137 | 0.022539428 | 0.136138754 | 0.440732027 |
| 0.372061995 | 0.28830016  | 0.131648803 | 0.030715854 |
| 0.295665589 | 0.219659933 | 0.391057124 | 0.042297116 |
| 0.310752802 | 0.27628006  | 0.395792501 | 0.348379408 |
| 0.236367651 | 0.353966572 | 0.318529228 | 0.397533327 |
| 0.09382589  | 0.355299369 | 0.389462627 | 0.045271446 |
| 0.189789601 | 0.44241428  | 1           | 0.116174593 |
| 0.214668892 | 0.133451593 | 0.126352102 | 0.110587685 |
| 0.416335137 | 0.460416371 | 0.040568423 | 0.050066361 |
| 0.373093067 | 0.126813639 | 0.065462178 | 0.126433917 |
| 0.173010443 | 0.09010632  | 0.033261027 | 0.246731578 |
| 0.431172663 | 0.22431277  | 0.430232109 | 0.212978952 |
| 0.398477299 | 0.018337309 | 0.304136378 | 0.12675465  |
| 0.1255389   | 0.251208628 | 0.311451505 | 0.038581572 |
| 0.051497326 | 0.058989775 | 0.365994822 | 0.352494508 |
| 0.042007216 | 0.081529861 | 0.15775542  | 0.23370692  |
| 0.446395338 | 0.199460402 | 0.164518597 | 0.12268392  |
| 0.353818227 | 0.164436729 | 0.419603935 | 0.137965718 |
| 0.298959329 | 0.205695553 | 0.350069572 | 0.006654675 |
| 0.28437772  | 0.171814097 | 0.055506014 | 0.24696835  |
| 0.372157575 | 0.076198039 | 0.299215243 | 0.070065014 |

|             |             |             |             |
|-------------|-------------|-------------|-------------|
| 0.103810872 | 0.000636154 | 0.209012856 | 0.18412053  |
| 0.209740465 | 0.087659081 | 0.134771658 | 0.093152055 |
| 0.468788705 | 0.200858209 | 0.327005108 | 0.093113169 |
| 0.220002102 | 0.018853275 | 0.152068894 | 0.015666218 |
| 0.264942171 | 0.266012373 | 0.223828777 | 0.169555767 |
| 0.056100703 | 0.285687253 | 0.255024205 | 0.230033382 |
| 0.451990043 | 0.116208159 | 0.474287664 | 0.099658652 |
| 0.32204993  | 0.175784991 | 0.146567165 | 0.126108618 |
| 0.126430584 | 0.047843585 | 0.063850048 | 0.048749553 |
| 0.457602789 | 0.107357103 | 0.232035069 | 0.138144238 |
| 0.036935602 | 0.196859601 | 0.276351948 | 0.332280738 |
| 0.281895084 | 0.288838305 | 0.136057228 | 0.326353434 |
| 0.12872091  | 0.114731222 | 0.115428769 | 0.112007562 |
| 0.262508442 | 0.121492824 | 0.298894477 | 0.332755919 |
| 0.440001693 | 0.091512725 | 0.053709657 | 0.049265834 |
| 0.034893309 | 0.260741576 | 0.202281497 | 0.108459018 |
| 0.227755579 | 0.116068394 | 0.000181747 | 0.074575463 |
| 0.271970618 | 0.196623185 |             |             |
| RAP2A       | 0.088298557 | 0.278919919 | 0.311897759 |
| 0.027660375 | 0.222544124 | 0.396014183 | 0.344171305 |
| 0.07554334  | 0.294738854 | 0.279060231 | 0.416589847 |
| 0.005656476 | 0.077788875 | 0.08379052  | 0.167180407 |
| 0.17804357  | 0.181117178 | 0.263646132 | 0.180589872 |
| 0.130723265 | 0.139222956 | 0.241519321 | 0.222124607 |
| 0.330384493 | 0.013734005 | 0.346571173 | 0.10200507  |
| 0.056296759 | 0.14827871  | 0.326527386 | 0.235778492 |
| 0.150119874 | 0.124784465 | 0.124783781 | 0.127091595 |
| 0.026763013 | 0.337227524 | 0.012362148 | 0.098328294 |
| 0.085152945 | 0.304882782 | 0.134132309 | 0.111669366 |
| 0.000835405 | 0.362060322 | 0.052426002 | 0.232616521 |
| 0.157399755 | 0.355247539 | 0.334208284 | 0.317453259 |
| 0.009642677 | 0.385687563 | 0.1834861   | 0.00860487  |
| 0.401517081 | 0.00603656  | 0.360507759 | 0.076910435 |
| 0.330119176 | 0.233695119 | 0.065515971 | 0.196693788 |
| 0.430805158 | 0.39021368  | 0.231803674 | 0.263255169 |
| 0.362372193 | 0.096922756 | 0.092172806 | 0.169320214 |
| 0.246595123 | 0.159473435 | 0.265714008 | 0.046180687 |
| 0.112996211 | 0.092911637 | 0.341373932 | 0.292275414 |
| 0.007302684 | 0.359116929 | 0.128683368 | 0.085606136 |
| 0.055297983 | 0.398819578 | 0.096779185 | 0.306586344 |
| 0.083879886 | 0.194526983 | 0.222460103 | 0.210653467 |
| 0.053538603 | 0.10336812  | 0.016132905 | 0.270730866 |
| 0.144495115 | 0.112109659 | 0.1547069   | 0.349875656 |
| 0.137045209 | 0.263757182 | 0.053662994 | 0.07429678  |
| 0.142555862 | 0.129189881 | 0.393647958 | 0.007783079 |
| 0.058607248 | 0.196399142 | 0.220331152 | 0.350023746 |
| 0.217225719 | 0.049823941 | 0.214635795 | 0.373457586 |
| 0.096239814 | 0.127119784 | 0.345934673 | 0.007622646 |
| 0.035371715 | 0.010452651 | 0.144301078 | 0.288202742 |
| 0.330433664 | 0.36025234  | 0.149901141 | 0.127791818 |
| 0.071219687 | 0.12196093  | 0.269754561 | 0.327713691 |
| 0.09222787  | 0.341911347 | 0.131778658 | 0.134514158 |
| 0.099186921 | 0.173039732 | 0.311463375 | 0.297818696 |
| 0.339421344 | 0.315590919 | 0.316639835 | 0.350382447 |

|             |             |             |             |
|-------------|-------------|-------------|-------------|
| 0.063256758 | 0.178467221 | 0.23341952  | 0.153942524 |
| 0.236356857 | 0.280091337 | 0.132959661 | 0.270922758 |
| 0.344325434 | 0.138113024 | 0.008017222 | 0.34726842  |
| 0.414972947 | 0.010651147 | 0.336670214 | 0.144649007 |
| 0.053976396 | 0.26002147  | 0.299382111 | 0.205205792 |
| 0.124448547 | 0.089886197 | 0.243631618 | 0.315795309 |
| 0.243114627 | 0.30955389  | 0.191803241 | 0.211453251 |
| 0.323216686 | 0.124806457 | 0.324355704 | 0.063270184 |
| 0.366375732 | 0.233707007 | 0.038531725 | 0.02599391  |
| 0.105948386 | 0.124665832 | 0.236683626 | 0.142124402 |
| 0.111994259 | 0.004990586 | 0.261264301 | 0.118721016 |
| 0.121688984 | 0.093316492 | 0.310330282 | 0.362079098 |
| 0.274416904 | 0.04573228  | 0.33970503  | 0.184672661 |
| 0.153005118 | 0.217473696 | 0.223485795 | 0.013372006 |
| 0.327674161 | 0.057985864 | 0.124654521 | 0.144737969 |
| 0.264211973 | 0.251821839 | 0.064112597 | 0.21402541  |
| 0.354045508 | 0.148661357 | 0.046829575 | 0.020487791 |
| 0.289888083 | 0.293288    | 0.097994098 | 0.091178318 |
| 0.217359569 | 0.212434525 | 0.085514339 | 0.369666027 |
| 0.223920185 | 0.393013306 | 0.016512317 | 0.237817188 |
| 0.078565461 | 0.20148187  | 0.124248676 | 0.166882768 |
| 0.321127278 | 0.119691914 | 0.051870739 | 0.383291076 |
| 0.15521502  | 0.142961421 | 0.297702121 | 0.278834163 |
| 0.01251194  | 0.279168474 | 0.13323456  | 0.017164252 |
| 0.293113008 | 0.382659218 | 0.295434509 | 0.190532039 |
| 0.186456742 | 0.280887443 | 0.180807508 | 0.110427366 |
| 0.035269453 | 0.058514909 | 0.232006218 | 0.288118444 |
| 0.149620198 | 0.192785183 | 0.056393807 | 0.015738683 |
| 0.206025783 | 0.059756664 | 0.178314478 | 0.077035387 |
| 0.104711925 | 0.064731825 | 0.27486762  | 0.090183348 |
| 0.005549312 | 0.265478317 | 0.107725408 | 0.119613585 |
| 0.172332764 | 0.197802639 | 0.202777991 | 0.370155894 |
| 0.100762336 | 0.064315913 | 0.100578667 | 0.352513562 |
| 0.36656282  | 0.274059566 | 0.004570838 | 0.228329439 |
| 0.214609755 | 0.192711094 | 0.206995939 | 0.206819301 |
| 0.214395195 | 0.379868469 | 0.23050267  | 0.126485177 |
| 0.004088368 | 0.093223775 | 0.0655915   | 0.412363489 |
| 0.140304705 | 0.347446343 | 0.033592325 | 0.052478945 |
| 0.007965812 | 0.344046108 | 0.025472644 | 0.304842399 |
| 0.182327447 | 0.251464962 | 0.002394197 | 0.198924107 |
| 0.063388532 | 0.010778908 | 0.25134951  | 0.247791461 |
| 0.264030587 | 0.154007849 | 0.363540764 | 0.082800272 |
| 0.014989155 | 0.098113725 | 0.093908137 | 0.18388112  |
| 0.089876053 | 0.015237129 | 0.186640754 | 0.213525615 |
| 0.227736194 | 0.332427589 | 0.329309863 | 0.029867545 |
| 0.081481722 | 0.063942711 | 0.166636196 | 0.234828009 |
| 0.248989458 | 0.380775754 | 0.300399574 | 0.108819257 |
| 0.140557421 | 0.350895419 | 0.387115498 | 0.227686658 |
| 0.034195842 | 0.094509989 | 0.123325567 | 0.204589247 |
| 0.062048545 | 0.195569273 | 0.116174593 | 1           |
| 0.242637418 | 0.039206641 | 0.390308665 | 0.102925061 |
| 0.313023152 | 0.188380188 | 0.33127886  | 0.215111964 |
| 0.366087686 | 0.253120885 | 0.375673976 | 0.201179265 |
| 0.37951726  | 0.010305191 | 0.019193988 | 0.317823276 |

|             |             |             |             |
|-------------|-------------|-------------|-------------|
| 0.352028887 | 0.428113104 | 0.172415971 | 0.159071472 |
| 0.148066827 | 0.251349108 | 0.170076622 | 0.275412455 |
| 0.250944897 | 0.067330487 | 0.075635643 | 0.015694474 |
| 0.050439542 | 0.174637165 | 0.369757845 | 0.380941674 |
| 0.345620601 | 0.311794587 | 0.315495811 | 0.252063241 |
| 0.164867624 | 0.101427998 | 0.362934692 | 0.178809677 |
| 0.414434099 | 0.118921044 | 0.310758672 | 0.194311106 |
| 0.229731071 | 0.244812813 | 0.198865997 | 0.012532278 |
| 0.104836118 | 0.259996435 | 0.036726395 | 0.191614617 |
| 0.102312482 | 0.367416094 | 0.328603679 | 0.281945857 |
| 0.058716944 | 0.007808133 | 0.275517107 | 0.04269882  |
| 0.441373982 | 0.039217472 | 0.17146087  | 0.008327869 |
| 0.28559398  | 0.157118893 | 0.175771305 | 0.032352227 |
| 0.192506749 | 0.001668691 | 0.290396375 | 0.210537574 |
| 0.234477214 | 0.328717052 | 0.116901015 | 0.083910849 |
| 0.061855381 | 0.160905269 | 0.298973423 | 0.142664096 |
| 0.191295575 | 0.025001423 | 0.191957859 | 0.167546591 |
| 0.068323725 | 0.135068548 | 0.362204701 | 0.164324444 |
| 0.335939036 | 0.083521809 | 0.366911779 | 0.153019171 |
| 0.159445209 | 0.144954658 | 0.196091124 | 0.096262175 |
| 0.300615371 | 0.201655639 | 0.116120789 | 0.099519726 |
| 0.15346208  | 0.076173423 | 0.068738355 | 0.411251411 |
| 0.084412748 | 0.152894918 | 0.044614351 | 0.086259066 |
| 0.069298537 | 0.34379526  | 0.184062634 | 0.195894807 |
| 0.192856487 | 0.050054345 | 0.354531813 | 0.249876134 |
| 0.010088088 | 0.087113244 | 0.366829369 | 0.025820687 |
| 0.148758893 | 0.051310145 | 0.008327893 | 0.139676778 |
| 0.329901271 | 0.085272114 |             |             |
| RAPGEF6     | 0.259622875 | 0.445627877 | 0.157684889 |
| 0.015464719 | 0.112327239 | 0.287533002 | 0.247390827 |
| 0.247147178 | 0.229753377 | 0.150994642 | 0.343478902 |
| 0.013561479 | 0.242920384 | 0.083769921 | 0.178305397 |
| 0.408816939 | 0.408651751 | 0.280004828 | 0.417433525 |
| 0.313487616 | 0.10065591  | 0.344771619 | 0.281412413 |
| 0.297406904 | 0.019545314 | 0.157771674 | 0.039948908 |
| 0.212118625 | 0.380740138 | 0.306534326 | 0.244921792 |
| 0.367008269 | 0.308672218 | 0.225028285 | 0.174736444 |
| 0.080027935 | 0.46682434  | 0.044268811 | 0.238531091 |
| 0.277537789 | 0.211080179 | 0.316243554 | 0.067073653 |
| 0.00076298  | 0.174058754 | 0.196348716 | 0.320906588 |
| 0.333647433 | 0.280890152 | 0.291731537 | 0.183617788 |
| 0.05537525  | 0.37089862  | 0.374877252 | 0.050552861 |
| 0.425575535 | 0.00265975  | 0.454163165 | 0.256152935 |
| 0.175812678 | 0.344161733 | 0.216728276 | 0.29903095  |
| 0.287967723 | 0.442116469 | 0.434124816 | 0.071722526 |
| 0.164938382 | 0.257269446 | 0.250425774 | 0.236046737 |
| 0.412830824 | 0.242184431 | 0.261678757 | 0.158049636 |
| 0.249112569 | 0.278535852 | 0.336604596 | 0.289894947 |
| 0.005748278 | 0.189943361 | 0.165779041 | 0.246684979 |
| 0.166844881 | 0.373888177 | 0.248297404 | 0.21184024  |
| 0.226794657 | 0.087982091 | 0.328187457 | 0.42993255  |
| 0.024997741 | 0.27164852  | 0.012187058 | 0.276887062 |
| 0.333499249 | 0.332434434 | 0.296422781 | 0.132882958 |
| 0.075481966 | 0.282484393 | 0.190146575 | 0.26576192  |

|             |             |             |             |
|-------------|-------------|-------------|-------------|
| 0.306641385 | 0.278867723 | 0.416158891 | 0.06261626  |
| 0.214125399 | 0.268829698 | 0.305018156 | 0.452358396 |
| 0.417469582 | 0.046283454 | 0.308610956 | 0.281227875 |
| 0.197092838 | 0.098166391 | 0.270373648 | 0.023882109 |
| 0.015183679 | 0.049272933 | 0.356194982 | 0.2844324   |
| 0.136454983 | 0.251894249 | 0.084084325 | 0.217878901 |
| 0.230810685 | 0.348886751 | 0.135422592 | 0.26649435  |
| 0.221117879 | 0.261628143 | 0.214907769 | 0.273829406 |
| 0.177898355 | 0.323653225 | 0.277350137 | 0.408850249 |
| 0.463619462 | 0.14368987  | 0.190507809 | 0.317901771 |
| 0.209127474 | 0.395808868 | 0.452387955 | 0.301353837 |
| 0.194233269 | 0.330980436 | 0.212430763 | 0.275480862 |
| 0.290851272 | 0.317456327 | 0.053335833 | 0.364868358 |
| 0.446061715 | 0.025312304 | 0.173966225 | 0.32663184  |
| 0.025944934 | 0.241529475 | 0.440472979 | 0.335472094 |
| 0.255945502 | 0.034691783 | 0.193910867 | 0.271113798 |
| 0.340097273 | 0.267543609 | 0.305409625 | 0.171092395 |
| 0.338364129 | 0.202671711 | 0.121338685 | 0.216362471 |
| 0.23515972  | 0.346676332 | 0.146732883 | 0.053943995 |
| 0.263833064 | 0.295326291 | 0.377021435 | 0.291398294 |
| 0.272436616 | 0.001885474 | 0.145291376 | 0.274875506 |
| 0.214916055 | 0.290500477 | 0.451370926 | 0.232302633 |
| 0.341825774 | 0.154903351 | 0.273256276 | 0.211684494 |
| 0.36596922  | 0.199872901 | 0.193600653 | 0.005843717 |
| 0.195803748 | 0.173738795 | 0.280237832 | 0.179863535 |
| 0.19257272  | 0.234270135 | 0.187040106 | 0.374217532 |
| 0.284211038 | 0.287257929 | 0.096285335 | 0.116840918 |
| 0.300410625 | 0.324704809 | 0.195827641 | 0.248425602 |
| 0.311900191 | 0.260765568 | 0.28739862  | 0.417976978 |
| 0.221142317 | 0.352814467 | 0.094933004 | 0.340023906 |
| 0.208360424 | 0.364508936 | 0.292461678 | 0.315235899 |
| 0.287089694 | 0.284562689 | 0.165062443 | 0.320086751 |
| 0.32055795  | 0.307530022 | 0.206941259 | 0.456442584 |
| 0.00779273  | 0.339290119 | 0.242874004 | 0.104824316 |
| 0.430243481 | 0.257573235 | 0.19773336  | 0.32869891  |
| 0.425256729 | 0.465140787 | 0.396733464 | 0.305513991 |
| 0.14911663  | 0.070327329 | 0.444873043 | 0.361751831 |
| 0.379603256 | 0.291717253 | 0.128903831 | 0.078180079 |
| 0.39887572  | 0.208301861 | 0.272396804 | 0.233707005 |
| 0.225023393 | 0.177279861 | 0.334444562 | 0.252395965 |
| 0.023442342 | 0.270922984 | 0.23203205  | 0.137845322 |
| 0.224334404 | 0.212871066 | 0.338299941 | 0.347803049 |
| 0.184105111 | 0.205616263 | 0.165546986 | 0.150751248 |
| 0.271592017 | 0.453326489 | 0.017324467 | 0.443475204 |
| 0.437708911 | 0.325822624 | 0.372920822 | 0.441099975 |
| 0.337431205 | 0.383197977 | 0.392290992 | 0.349535583 |
| 0.006995106 | 0.278181873 | 0.201149794 | 0.404229608 |
| 0.329882135 | 0.317305416 | 0.168856789 | 0.170933127 |
| 0.006791505 | 0.275670349 | 0.088378503 | 0.487043414 |
| 0.3482009   | 0.084211461 | 0.012451102 | 0.331288739 |
| 0.185264552 | 0.040240766 | 0.466024323 | 0.273398705 |
| 0.380756267 | 0.274573324 | 0.217545886 | 0.240590698 |
| 0.069716462 | 0.261091555 | 0.032204583 | 0.257641965 |
| 0.226633567 | 0.080949355 | 0.073746484 | 0.444909481 |



|             |             |             |             |
|-------------|-------------|-------------|-------------|
| 0.394837412 | 0.326811968 | 0.319801513 | 0.014678985 |
| 0.276828598 | 0.101815552 | 0.285393002 | 0.207270434 |
| 0.397174101 | 0.36957537  | 0.415290458 | 0.273542081 |
| 0.276781827 | 0.391210026 | 0.401018601 | 0.374867016 |
| 0.053063415 | 0.266721003 | 0.318169175 | 0.103754027 |
| 0.200186888 | 0.379366862 | 0.214668892 | 0.242637418 |
| 1           | 0.036846645 | 0.282686899 | 0.288819805 |
| 0.404423094 | 0.364420653 | 0.146997525 | 0.299304818 |
| 0.394708697 | 0.333928224 | 0.192931818 | 0.324226661 |
| 0.329465584 | 0.06422099  | 0.106461551 | 0.360651512 |
| 0.452890743 | 0.30458292  | 0.357331848 | 0.118078546 |
| 0.340742989 | 0.172927294 | 0.365332408 | 0.263500765 |
| 0.33995671  | 0.191954184 | 0.260820486 | 0.09143285  |
| 0.030285707 | 0.222308936 | 0.368473556 | 0.429225249 |
| 0.179742548 | 0.309305021 | 0.254476044 | 0.257575709 |
| 0.383698894 | 0.239863113 | 0.315622392 | 0.32473182  |
| 0.442183743 | 0.067644842 | 0.480597443 | 0.331518213 |
| 0.376114103 | 0.256394245 | 0.342463627 | 0.01410382  |
| 0.23026141  | 0.16911149  | 0.178894523 | 0.226776192 |
| 0.320105666 | 0.219834179 | 0.310951218 | 0.297132954 |
| 0.109129418 | 0.013113644 | 0.36395397  | 0.136021395 |
| 0.32977813  | 0.175853873 | 0.321271572 | 0.048133643 |
| 0.485007738 | 0.299987925 | 0.337789428 | 0.135806402 |
| 0.269322424 | 0.004770768 | 0.16416328  | 0.130585555 |
| 0.373780067 | 0.388022453 | 0.261617843 | 0.251201363 |
| 0.230296683 | 0.256308896 | 0.323852297 | 0.221108232 |
| 0.358585683 | 0.073413419 | 0.41216397  | 0.32475984  |
| 0.235173952 | 0.275581455 | 0.316729779 | 0.291485895 |
| 0.216066694 | 0.155534994 | 0.230298238 | 0.292428377 |
| 0.348715671 | 0.26462677  | 0.249479993 | 0.25763934  |
| 0.10467961  | 0.276373555 | 0.288476663 | 0.244919691 |
| 0.264532868 | 0.213440845 | 0.218799907 | 0.424331297 |
| 0.238654485 | 0.321049432 | 0.029232209 | 0.027947605 |
| 0.120553321 | 0.250872538 | 0.397728444 | 0.382221361 |
| 0.411886311 | 0.198854156 | 0.207379057 | 0.290776352 |
| 0.059402987 | 0.275168202 | 0.261137845 | 0.056253178 |
| 0.276587313 | 0.198410636 | 0.00429356  | 0.31330837  |
| 0.374233868 | 0.193544556 |             |             |
| RCN3        | 0.018476235 | 0.128146466 | 0.002087274 |
| 0.035271355 | 0.019344326 | 0.043243346 | 0.065999124 |
| 0.019215443 | 0.00119689  | 0.029821794 | 0.078124707 |
| 1.55E-07    | 0.077224219 | 1.36E-05    | 0.000188816 |
| 0.116912629 | 0.090380511 | 0.095191764 | 0.013230529 |
| 0.022623981 | 0.034852667 | 0.082756172 | 0.040732487 |
| 2.86E-07    | 0.047103475 | 0.037854075 | 0.017987919 |
| 0.097054962 | 0.01353759  | 0.017315142 | 0.079011628 |
| 0.13214556  | 0.053530902 | 0.028846428 | 0.088995007 |
| 0.104089514 | 0.004288368 | 0.130894146 | 0.064256647 |
| 0.069555623 | 0.108032785 | 2.17E-05    | 0.064513034 |
| 0.016802177 | 0.01434799  | 0.044845586 | 0.009638193 |
| 0.03512725  | 0.01136913  | 0.069622348 | 0.003710582 |
| 0.071962366 | 0.038993926 | 0.017679191 | 0.119382465 |
| 0.01496273  | 0.112773223 | 0.004430124 | 0.002764451 |
| 0.016754684 | 0.021583766 | 0.051528858 | 0.056811004 |

|             |             |             |             |
|-------------|-------------|-------------|-------------|
| 0.123154261 | 0.123144604 | 0.001664049 | 0.008705301 |
| 0.03576806  | 0.090557379 | 0.170967975 | 0.103059991 |
| 0.014661155 | 0.02363965  | 0.048704778 | 0.093497621 |
| 0.068473157 | 0.031363691 | 0.00530791  | 3.12E-06    |
| 0.05038468  | 0.146713946 | 0.023082277 | 0.079984676 |
| 0.080906345 | 0.032520384 | 0.049875021 | 0.058209614 |
| 7.87E-05    | 0.043740149 | 0.122021445 | 0.000971538 |
| 0.067890405 | 0.000397261 | 0.002754294 | 0.07202601  |
| 0.086335562 | 0.047944375 | 0.007966769 | 2.55E-05    |
| 0.00218229  | 0.000463727 | 0.069175166 | 0.031830262 |
| 0.061946311 | 0.106055613 | 0.00453056  | 0.077225827 |
| 0.001419148 | 0.025768833 | 0.124364465 | 0.101004882 |
| 6.45E-06    | 0.0016582   | 0.041368304 | 0.009638781 |
| 0.009541563 | 0.049085171 | 0.000306751 | 0.000927055 |
| 5.55E-06    | 0.093070379 | 0.004014328 | 0.035147677 |
| 0.04059919  | 0.004837103 | 0.174830748 | 0.014684902 |
| 0.058540922 | 0.021700567 | 0.054050859 | 0.118315306 |
| 0.075168164 | 0.165388786 | 0.098304332 | 0.098152657 |
| 0.004253675 | 0.006071332 | 0.137752954 | 0.071955244 |
| 0.002485614 | 0.001487489 | 0.057807326 | 0.087601844 |
| 0.103396132 | 0.119499242 | 0.005606957 | 0.099629634 |
| 0.01368969  | 0.030648864 | 0.133333116 | 0.044051738 |
| 0.017725611 | 0.000357176 | 0.055780353 | 0.107360455 |
| 0.000516418 | 0.002873881 | 0.061881077 | 0.053369446 |
| 0.011473348 | 0.087738712 | 0.115363291 | 0.07342803  |
| 0.027446253 | 0.074910812 | 0.059650579 | 0.021308025 |
| 0.052016959 | 0.043581607 | 0.065674532 | 0.036915323 |
| 0.04226004  | 0.004452493 | 0.086930037 | 0.010722625 |
| 0.026059041 | 0.006692247 | 0.000522032 | 0.032125233 |
| 0.011884622 | 0.115878107 | 0.040023007 | 0.051670591 |
| 0.038334289 | 0.034751761 | 0.025892091 | 0.016586831 |
| 0.060113805 | 0.144748979 | 0.009178754 | 0.016948005 |
| 0.014799441 | 0.009029325 | 0.088465444 | 0.041592365 |
| 0.014996679 | 0.012039621 | 5.14E-06    | 0.004656238 |
| 0.05764074  | 0.032959556 | 0.000142611 | 0.05241144  |
| 0.001132667 | 0.000140676 | 0.118666191 | 0.025238098 |
| 0.148887363 | 1.14E-05    | 0.001479172 | 0.017839366 |
| 0.148839738 | 0.077107346 | 0.002268063 | 0.163065984 |
| 0.027122247 | 0.078157453 | 0.070944402 | 0.031938683 |
| 0.089108595 | 0.001087244 | 0.009475399 | 0.081623516 |
| 0.136282835 | 0.115894562 | 0.122631781 | 0.031937759 |
| 0.029344361 | 0.004672543 | 0.041388666 | 0.031009793 |
| 0.037295122 | 0.001993566 | 0.120252468 | 4.47E-07    |
| 0.042476069 | 0.121036088 | 0.001014196 | 0.148427283 |
| 0.07690147  | 0.001563182 | 0.006855428 | 0.098659482 |
| 0.113020366 | 0.052582387 | 0.095144292 | 0.001593626 |
| 4.79E-06    | 0.079459322 | 0.067866686 | 0.106269148 |
| 0.04843087  | 0.102799706 | 0.000121142 | 0.11867622  |
| 0.020874131 | 0.073712702 | 0.041259683 | 0.107505586 |
| 0.061970931 | 0.014290469 | 0.024467351 | 2.24E-05    |
| 0.025096587 | 0.071298176 | 0.00972119  | 0.054691909 |
| 0.001177529 | 0.14642774  | 0.049157603 | 0.096521096 |
| 0.007088317 | 0.133537685 | 0.013945309 | 0.020864362 |
| 0.123242582 | 0.001967453 | 0.069016785 | 0.116782726 |

|             |             |             |             |
|-------------|-------------|-------------|-------------|
| 0.031416179 | 0.150012425 | 0.100723726 | 0.021698015 |
| 0.098038969 | 0.120190331 | 0.06048682  | 1.37E-07    |
| 0.100717542 | 0.101313486 | 0.058346107 | 0.112572724 |
| 0.040172596 | 0.005806346 | 0.074932432 | 6.17E-07    |
| 0.010708801 | 0.065958233 | 0.091548194 | 0.152399698 |
| 0.000575929 | 0.002671011 | 0.117779122 | 0.096199808 |
| 0.000245652 | 0.112330211 | 0.071903099 | 0.157117911 |
| 0.079254888 | 0.037219345 | 0.102529901 | 0.04845936  |
| 0.012657576 | 0.009264919 | 0.146125321 | 0.050716839 |
| 7.82E-05    | 0.054427259 | 0.09940379  | 0.081474025 |
| 0.103705704 | 0.028980836 | 0.000654478 | 0.050516512 |
| 0.047794736 | 0.146998857 | 0.001039194 | 0.068504037 |
| 0.070839687 | 0.124903447 | 0.101659172 | 0.064905681 |
| 0.106267604 | 0.082723004 | 0.106390982 | 0.013561174 |
| 0.08819249  | 0.089000936 | 0.001434971 | 0.035554116 |
| 0.133044074 | 0.133451593 | 0.039206641 | 0.036846645 |
| 1           | 0.030492084 | 0.012825556 | 0.145073051 |
| 0.140230651 | 0.003302694 | 0.002227594 | 0.117022131 |
| 0.012949507 | 0.016521151 | 0.024841086 | 0.034498838 |
| 0.005568305 | 0.000713539 | 0.05236182  | 0.125673298 |
| 0.075658832 | 0.108424871 | 0.04876789  | 0.116361265 |
| 0.000544076 | 0.062319594 | 0.010532442 | 0.020001981 |
| 0.064080357 | 0.062853236 | 0.000394946 | 0.000792739 |
| 0.00082327  | 0.130350997 | 0.092488291 | 0.005226104 |
| 0.011779739 | 0.060821509 | 0.132254572 | 0.113764921 |
| 0.027549002 | 0.040696718 | 0.020711974 | 0.097298898 |
| 0.032703436 | 0.096170827 | 0.022134789 | 0.052522909 |
| 0.0656218   | 0.094951495 | 6.08E-05    | 0.080752725 |
| 0.039343475 | 0.00405386  | 0.171533166 | 0.076205748 |
| 0.012696725 | 0.121124453 | 0.004309341 | 0.002944851 |
| 2.71E-06    | 0.036744192 | 0.120299655 | 0.052292849 |
| 0.006341297 | 0.024279717 | 0.020338111 | 0.11555563  |
| 0.040222382 | 0.060431507 | 0.015574184 | 0.067251495 |
| 0.006422883 | 0.042304083 | 0.000168841 | 0.042689257 |
| 0.058362487 | 0.038018952 | 0.025682799 | 0.002165135 |
| 0.120475153 | 0.071835822 | 0.154612103 | 0.151633181 |
| 0.007022271 | 0.121261779 | 0.009051808 | 0.084845957 |
| 0.011103942 | 0.033841013 | 0.00636074  | 0.059489153 |
| 0.000343514 | 0.008530617 | 0.001164951 | 0.143171785 |
| 0.008129313 | 0.135575775 | 0.006091275 | 0.003684997 |
| 0.05563788  | 0.059251534 | 0.097728408 | 0.092242567 |
| 0.064992474 | 0.021408138 | 0.089144553 | 0.002889108 |
| 0.008892893 | 0.058846879 | 0.012553726 | 0.03924253  |
| 0.023603171 | 0.0480428   | 0.072109834 | 0.110571928 |
| 0.003015069 | 0.00505482  | 0.002405483 | 0.001541622 |
| 0.042514588 | 0.092827335 | 0.028553291 | 0.068313776 |
| 0.007155179 | 9.70E-07    | 0.003320267 | 0.060328999 |
| 0.021396466 |             |             |             |
| REEP5       | 0.118392339 | 0.306723427 | 0.332820086 |
| 0.019690868 | 0.188967392 | 0.399990835 | 0.34583201  |
| 0.103507276 | 0.355104727 | 0.260319034 | 0.42617574  |
| 0.012010095 | 0.093311886 | 0.129398198 | 0.219144407 |
| 0.207431811 | 0.208672078 | 0.273017998 | 0.211903755 |
| 0.180614602 | 0.123171263 | 0.284899468 | 0.228913004 |

|             |             |             |             |
|-------------|-------------|-------------|-------------|
| 0.359355637 | 0.026426651 | 0.314852614 | 0.076521123 |
| 0.077597148 | 0.175449042 | 0.389189482 | 0.252411206 |
| 0.178902858 | 0.142186965 | 0.139115167 | 0.126714382 |
| 0.02828992  | 0.371307076 | 0.013549431 | 0.109477533 |
| 0.104962341 | 0.290243976 | 0.153498133 | 0.144617272 |
| 0.000519609 | 0.352891862 | 0.07229579  | 0.265396598 |
| 0.214606852 | 0.380853562 | 0.39706127  | 0.293181922 |
| 0.01223219  | 0.408017962 | 0.226337632 | 0.010429995 |
| 0.417556768 | 0.004102339 | 0.387667921 | 0.117403391 |
| 0.374105467 | 0.289511642 | 0.088658967 | 0.222455983 |
| 0.42581741  | 0.40958296  | 0.259894312 | 0.224413166 |
| 0.379986306 | 0.122466737 | 0.107911586 | 0.168355964 |
| 0.276148474 | 0.181512509 | 0.283443969 | 0.05585909  |
| 0.12826712  | 0.113063604 | 0.373640022 | 0.352431855 |
| 0.010594646 | 0.340854877 | 0.122753828 | 0.112036429 |
| 0.064413563 | 0.416396144 | 0.117008539 | 0.290578025 |
| 0.102467517 | 0.24871456  | 0.250953402 | 0.239963467 |
| 0.048182284 | 0.122181676 | 0.015307319 | 0.331419272 |
| 0.171447088 | 0.135531929 | 0.184489391 | 0.330751111 |
| 0.176528887 | 0.347911135 | 0.086476898 | 0.091733277 |
| 0.177941998 | 0.153943821 | 0.41105439  | 0.011611785 |
| 0.071125526 | 0.262628438 | 0.253969989 | 0.375263815 |
| 0.248140546 | 0.073455513 | 0.300509336 | 0.381079736 |
| 0.11025068  | 0.11432547  | 0.362107188 | 0.010065296 |
| 0.031534759 | 0.020084006 | 0.16969004  | 0.361993557 |
| 0.294237734 | 0.372433275 | 0.133192941 | 0.131219304 |
| 0.096613331 | 0.150656821 | 0.236278079 | 0.337908161 |
| 0.103013721 | 0.334342064 | 0.13729064  | 0.149854381 |
| 0.102801131 | 0.23628232  | 0.383371521 | 0.316218891 |
| 0.382882579 | 0.317971418 | 0.363438734 | 0.371857874 |
| 0.075039765 | 0.206276105 | 0.265040673 | 0.200745761 |
| 0.219159387 | 0.342237762 | 0.148715    | 0.269139039 |
| 0.363167587 | 0.185068853 | 0.012071913 | 0.377933785 |
| 0.437693618 | 0.01224757  | 0.385791885 | 0.172558521 |
| 0.03689819  | 0.266803189 | 0.336363125 | 0.223045722 |
| 0.136643773 | 0.069125717 | 0.234150065 | 0.332219881 |
| 0.303895579 | 0.327633579 | 0.220758097 | 0.202177486 |
| 0.359856653 | 0.138664736 | 0.324559798 | 0.075554164 |
| 0.41112873  | 0.275724415 | 0.051377208 | 0.031777194 |
| 0.130631267 | 0.166635881 | 0.259233734 | 0.166612037 |
| 0.134892696 | 0.00290439  | 0.242436994 | 0.147484507 |
| 0.143196381 | 0.114994437 | 0.333910781 | 0.409343981 |
| 0.331334733 | 0.056581426 | 0.403076389 | 0.18267     |
| 0.19105324  | 0.222237963 | 0.233589346 | 0.017888    |
| 0.32975392  | 0.068927144 | 0.153757095 | 0.216667014 |
| 0.242136782 | 0.322846128 | 0.104283118 | 0.236468213 |
| 0.398687917 | 0.160709964 | 0.078685066 | 0.032431376 |
| 0.329006128 | 0.295296205 | 0.105514041 | 0.126334159 |
| 0.226340645 | 0.234213271 | 0.104955158 | 0.401866911 |
| 0.223554484 | 0.40499642  | 0.023309187 | 0.299285122 |
| 0.088977374 | 0.220930578 | 0.141175461 | 0.183724252 |
| 0.346846441 | 0.150895809 | 0.067014861 | 0.407158259 |
| 0.187892947 | 0.178637037 | 0.362844222 | 0.308777029 |
| 0.019956725 | 0.307815508 | 0.139934495 | 0.026095923 |

|             |             |             |             |
|-------------|-------------|-------------|-------------|
| 0.314555019 | 0.357989222 | 0.365565042 | 0.257325481 |
| 0.218432888 | 0.313717044 | 0.220373937 | 0.130911703 |
| 0.048817145 | 0.096179588 | 0.270283299 | 0.315510797 |
| 0.175412039 | 0.215368751 | 0.058332367 | 0.024719352 |
| 0.232588612 | 0.077223235 | 0.196988419 | 0.098739156 |
| 0.11062884  | 0.074671256 | 0.33799699  | 0.115944757 |
| 0.0095382   | 0.300276464 | 0.123928987 | 0.122485528 |
| 0.183512409 | 0.225905879 | 0.217760196 | 0.398841777 |
| 0.104334008 | 0.086860284 | 0.100945985 | 0.33893106  |
| 0.4044942   | 0.304556266 | 0.005045669 | 0.270073311 |
| 0.24542097  | 0.233676736 | 0.226448774 | 0.240486561 |
| 0.271205875 | 0.393827406 | 0.254478632 | 0.155807174 |
| 0.007535318 | 0.109674136 | 0.076006529 | 0.44607164  |
| 0.161489104 | 0.365558229 | 0.050947125 | 0.062389236 |
| 0.010736131 | 0.406425276 | 0.028076667 | 0.345293311 |
| 0.200037221 | 0.253784041 | 0.002631441 | 0.217868138 |
| 0.072675188 | 0.014990894 | 0.285674602 | 0.267118489 |
| 0.279322114 | 0.175730259 | 0.363140549 | 0.096314192 |
| 0.017882646 | 0.128347497 | 0.072039796 | 0.187404475 |
| 0.106523828 | 0.0241196   | 0.145506993 | 0.247999379 |
| 0.260690671 | 0.337569523 | 0.366648571 | 0.029647463 |
| 0.103155785 | 0.061059841 | 0.177698734 | 0.274187134 |
| 0.285477676 | 0.402010653 | 0.321860666 | 0.124950079 |
| 0.154900926 | 0.367538944 | 0.411789892 | 0.252897086 |
| 0.032140196 | 0.11169297  | 0.145581009 | 0.208724349 |
| 0.075816738 | 0.217312009 | 0.126352102 | 0.390308665 |
| 0.282686899 | 0.030492084 | 1           | 0.145218953 |
| 0.328473898 | 0.208615859 | 0.360255654 | 0.291029165 |
| 0.38059532  | 0.303640077 | 0.379068249 | 0.245506203 |
| 0.409169808 | 0.013680514 | 0.029503392 | 0.349684414 |
| 0.376025456 | 0.424901829 | 0.197229318 | 0.14174282  |
| 0.168095639 | 0.316791298 | 0.201875269 | 0.295218225 |
| 0.313020854 | 0.078749108 | 0.093805221 | 0.025072228 |
| 0.051333091 | 0.234278438 | 0.375061861 | 0.407616502 |
| 0.384686548 | 0.382303944 | 0.323060029 | 0.249096279 |
| 0.190298367 | 0.121325494 | 0.381296011 | 0.228415435 |
| 0.438857477 | 0.095712676 | 0.349477212 | 0.244895328 |
| 0.269192272 | 0.249832102 | 0.22148907  | 0.015541943 |
| 0.118353051 | 0.24966804  | 0.058187523 | 0.191802098 |
| 0.125366294 | 0.392199053 | 0.327266391 | 0.357104602 |
| 0.063627929 | 0.012227965 | 0.321548916 | 0.048504296 |
| 0.457257203 | 0.055875748 | 0.214884589 | 0.010205812 |
| 0.321271369 | 0.190292748 | 0.206768739 | 0.041969841 |
| 0.21177991  | 0.00150069  | 0.270884932 | 0.269037296 |
| 0.277984683 | 0.361693716 | 0.139992091 | 0.113588961 |
| 0.097974654 | 0.168769563 | 0.316116089 | 0.148334461 |
| 0.209511348 | 0.028180408 | 0.219814101 | 0.221646688 |
| 0.082288026 | 0.167779231 | 0.378564077 | 0.204340433 |
| 0.321848278 | 0.106458836 | 0.403518601 | 0.22630475  |
| 0.178491076 | 0.175387381 | 0.201676411 | 0.134444374 |
| 0.289443524 | 0.220077155 | 0.139794797 | 0.113056318 |
| 0.164327058 | 0.090840752 | 0.089879047 | 0.435547918 |
| 0.116163807 | 0.210039643 | 0.033242823 | 0.061513251 |
| 0.070541765 | 0.368069878 | 0.225767715 | 0.227429171 |

|             |             |             |             |
|-------------|-------------|-------------|-------------|
| 0.220677002 | 0.074024871 | 0.393257951 | 0.334722799 |
| 0.01422807  | 0.111332107 | 0.342661828 | 0.023927715 |
| 0.164130497 | 0.071009569 | 0.010936119 | 0.202695975 |
| 0.361907711 | 0.097060082 |             |             |
| RFC2        | 0.233927045 | 0.361649711 | 0.069340418 |
| 0.004601167 | 0.036634408 | 0.157322063 | 0.09759505  |
| 0.200801668 | 0.11942541  | 0.055163208 | 0.229120647 |
| 0.021868827 | 0.250875133 | 0.070800755 | 0.091699241 |
| 0.388905052 | 0.374692756 | 0.129967503 | 0.400024217 |
| 0.240382292 | 0.039606641 | 0.314172444 | 0.17321809  |
| 0.141425908 | 0.023828356 | 0.052745758 | 0.011639472 |
| 0.176319816 | 0.375472848 | 0.158493527 | 0.124734318 |
| 0.36538132  | 0.280698163 | 0.110135725 | 0.074148019 |
| 0.044296844 | 0.368128017 | 0.027630563 | 0.210653551 |
| 0.302465458 | 0.079122964 | 0.286902442 | 0.037731792 |
| 0.000236173 | 0.061092405 | 0.176889942 | 0.269412326 |
| 0.236755762 | 0.137647076 | 0.145526986 | 0.062916731 |
| 0.043371672 | 0.261862789 | 0.385783051 | 0.040662136 |
| 0.29658129  | 0.000680187 | 0.339648394 | 0.247943873 |
| 0.075628023 | 0.19214842  | 0.16310295  | 0.265764133 |
| 0.162552216 | 0.315713462 | 0.373169159 | 0.023166278 |
| 0.063644056 | 0.181501569 | 0.245233952 | 0.150013563 |
| 0.344751208 | 0.130115197 | 0.112006085 | 0.100188049 |
| 0.218464745 | 0.286512063 | 0.217657288 | 0.148453066 |
| 0.006124979 | 0.066180516 | 0.068444091 | 0.29576847  |
| 0.156689459 | 0.261386083 | 0.242403315 | 0.075536395 |
| 0.144581927 | 0.045412288 | 0.227284263 | 0.381135353 |
| 0.009450691 | 0.274461225 | 0.006837838 | 0.138893751 |
| 0.316422859 | 0.343334081 | 0.281107016 | 0.045810297 |
| 0.039219558 | 0.167102775 | 0.227374106 | 0.298196535 |
| 0.207669883 | 0.160633987 | 0.290054593 | 0.066095621 |
| 0.232550899 | 0.18055355  | 0.148624582 | 0.343873189 |
| 0.375968029 | 0.036947172 | 0.204862294 | 0.13862672  |
| 0.101527869 | 0.035663758 | 0.111460077 | 0.021089317 |
| 0.006531363 | 0.095939386 | 0.347460038 | 0.171809592 |
| 0.043813801 | 0.101550663 | 0.031549125 | 0.154724132 |
| 0.195581562 | 0.375858497 | 0.042066481 | 0.10823049  |
| 0.199017514 | 0.113320901 | 0.102947704 | 0.240069592 |
| 0.083114107 | 0.236854915 | 0.147047228 | 0.306450783 |
| 0.382677464 | 0.055965248 | 0.087914464 | 0.221384583 |
| 0.2153668   | 0.373393629 | 0.397644734 | 0.224676289 |
| 0.072387605 | 0.188277145 | 0.114565204 | 0.17839149  |
| 0.134453585 | 0.241061994 | 0.061170372 | 0.26859444  |
| 0.317456084 | 0.020484351 | 0.076300831 | 0.316441394 |
| 0.007131233 | 0.094171824 | 0.359220649 | 0.265877833 |
| 0.178386203 | 0.009855743 | 0.078227612 | 0.121176949 |
| 0.209835272 | 0.114087476 | 0.264644409 | 0.069193854 |
| 0.244835006 | 0.106283253 | 0.045035516 | 0.226536775 |
| 0.104493398 | 0.25730965  | 0.111504582 | 0.034063135 |
| 0.260822998 | 0.232059437 | 0.304289362 | 0.23671147  |
| 0.273291969 | 0.000429359 | 0.053978812 | 0.261498117 |
| 0.130488344 | 0.321236666 | 0.348260472 | 0.103006573 |
| 0.219690158 | 0.107913392 | 0.133316595 | 0.086326545 |
| 0.396341903 | 0.092214573 | 0.085569448 | 0.005080214 |

|             |             |             |             |
|-------------|-------------|-------------|-------------|
| 0.081205486 | 0.111194859 | 0.17297148  | 0.144892348 |
| 0.073065462 | 0.133335175 | 0.183992885 | 0.316550262 |
| 0.131164142 | 0.235489164 | 0.11934379  | 0.133944108 |
| 0.148642211 | 0.21917447  | 0.104414929 | 0.216729317 |
| 0.22787835  | 0.136760232 | 0.313761095 | 0.311263314 |
| 0.089316593 | 0.239304191 | 0.085760245 | 0.203524976 |
| 0.161164534 | 0.29765012  | 0.262678993 | 0.265696101 |
| 0.131221605 | 0.31039699  | 0.129654144 | 0.209350368 |
| 0.236160335 | 0.205419022 | 0.114971262 | 0.376840483 |
| 0.007496837 | 0.219249447 | 0.144139573 | 0.100693115 |
| 0.331905966 | 0.120748855 | 0.104353266 | 0.236268168 |
| 0.402943996 | 0.385831906 | 0.401996478 | 0.301058716 |
| 0.138438181 | 0.066568514 | 0.415331877 | 0.274098655 |
| 0.365500129 | 0.151366342 | 0.064279048 | 0.085515691 |
| 0.342223486 | 0.217607929 | 0.220635018 | 0.170836051 |
| 0.143349597 | 0.105641514 | 0.185069899 | 0.300107624 |
| 0.026142476 | 0.137191544 | 0.210591457 | 0.057231132 |
| 0.103391971 | 0.114195813 | 0.265922864 | 0.248240659 |
| 0.089713572 | 0.151789275 | 0.076976297 | 0.052938001 |
| 0.116733011 | 0.374784434 | 0.011191626 | 0.412719558 |
| 0.394755363 | 0.199646573 | 0.303087668 | 0.409303986 |
| 0.206007076 | 0.263291022 | 0.328824005 | 0.372546304 |
| 0.00884694  | 0.278968769 | 0.198817779 | 0.29449455  |
| 0.305380555 | 0.189819398 | 0.179931438 | 0.10539433  |
| 0.005206209 | 0.133989897 | 0.054832913 | 0.411058713 |
| 0.287826835 | 0.03031025  | 0.009171024 | 0.269068987 |
| 0.178218215 | 0.029510847 | 0.408116677 | 0.131566156 |
| 0.290037547 | 0.1450986   | 0.083440217 | 0.235579754 |
| 0.049106433 | 0.185430964 | 0.009497594 | 0.173862452 |
| 0.135828998 | 0.10437185  | 0.021400633 | 0.405174924 |
| 0.348246121 | 0.21696778  | 0.166324761 | 0.006863139 |
| 0.320141212 | 0.047043199 | 0.223954963 | 0.115532608 |
| 0.347063038 | 0.257156813 | 0.318494886 | 0.254392807 |
| 0.196681298 | 0.28595447  | 0.286928895 | 0.307875246 |
| 0.023939913 | 0.267539789 | 0.316519488 | 0.038796165 |
| 0.19132267  | 0.318232734 | 0.110587685 | 0.102925061 |
| 0.288819805 | 0.012825556 | 0.145218953 | 1           |
| 0.297461844 | 0.309005436 | 0.05992981  | 0.207535756 |
| 0.272774541 | 0.171659276 | 0.071485066 | 0.187289703 |
| 0.220536256 | 0.063495822 | 0.125565708 | 0.271624025 |
| 0.338352372 | 0.185501174 | 0.319997443 | 0.042646976 |
| 0.310991798 | 0.095704436 | 0.347044386 | 0.122243235 |
| 0.212892647 | 0.171705326 | 0.292302193 | 0.121403214 |
| 0.017123306 | 0.17812411  | 0.246076639 | 0.315442612 |
| 0.077413526 | 0.165897808 | 0.108052514 | 0.119751902 |
| 0.354986456 | 0.13328945  | 0.187841216 | 0.212646163 |
| 0.314197626 | 0.021847145 | 0.402724635 | 0.210961465 |
| 0.339128225 | 0.117743525 | 0.286049262 | 0.008291195 |
| 0.204422913 | 0.067429838 | 0.206504053 | 0.098003762 |
| 0.339029733 | 0.09270504  | 0.198444248 | 0.174950696 |
| 0.058563411 | 0.013795246 | 0.310295213 | 0.079663321 |
| 0.216719187 | 0.149246734 | 0.206414454 | 0.034289751 |
| 0.407736167 | 0.207423156 | 0.321735249 | 0.105101745 |
| 0.127871223 | 0.002452951 | 0.058326857 | 0.065796986 |

|             |             |             |             |
|-------------|-------------|-------------|-------------|
| 0.339784232 | 0.297385303 | 0.252179024 | 0.188292357 |
| 0.256381778 | 0.178198923 | 0.238724273 | 0.102341306 |
| 0.292512361 | 0.051940473 | 0.372126897 | 0.218959883 |
| 0.247588159 | 0.163525211 | 0.175850853 | 0.172329157 |
| 0.077233863 | 0.096404267 | 0.09476407  | 0.2480289   |
| 0.304725399 | 0.156524385 | 0.113326628 | 0.200019594 |
| 0.037557672 | 0.137604023 | 0.287304005 | 0.224042717 |
| 0.180847387 | 0.221348214 | 0.164137648 | 0.300682716 |
| 0.176169659 | 0.232092766 | 0.009051998 | 0.00682047  |
| 0.056151829 | 0.107100984 | 0.405703073 | 0.357277671 |
| 0.37302593  | 0.172691541 | 0.089869512 | 0.183528176 |
| 0.055511077 | 0.310429502 | 0.12627722  | 0.028263483 |
| 0.191352072 | 0.151699301 | 0.003002919 | 0.25811838  |
| 0.27914453  | 0.115142172 |             |             |
| RGS1        | 0.294401357 | 0.511402294 | 0.146820991 |
| 0.053797032 | 0.240704061 | 0.35938571  | 0.372699785 |
| 0.307846811 | 0.187324411 | 0.244327605 | 0.435278    |
| 0.002012375 | 0.30386435  | 0.02629682  | 0.125778283 |
| 0.467051493 | 0.484333046 | 0.466273366 | 0.470770818 |
| 0.314826966 | 0.218244686 | 0.386335532 | 0.437687042 |
| 0.381129979 | 0.003002073 | 0.255817351 | 0.099241922 |
| 0.298723992 | 0.443008763 | 0.311901852 | 0.366927521 |
| 0.401041704 | 0.404891843 | 0.419160308 | 0.402592202 |
| 0.225939683 | 0.493450437 | 0.118604457 | 0.369020113 |
| 0.320932104 | 0.374577958 | 0.393567122 | 0.031782035 |
| 0.005482853 | 0.219341249 | 0.266241181 | 0.410843869 |
| 0.32576995  | 0.340501921 | 0.282444979 | 0.312752755 |
| 0.115579776 | 0.443302754 | 0.356713604 | 0.117743703 |
| 0.476553753 | 0.00896005  | 0.49297647  | 0.218089206 |
| 0.144618166 | 0.383198993 | 0.289749895 | 0.408917254 |
| 0.384559512 | 0.489608046 | 0.509362617 | 0.096764426 |
| 0.164181906 | 0.388072713 | 0.325729399 | 0.454291846 |
| 0.456708242 | 0.384235634 | 0.411932874 | 0.315765688 |
| 0.380918904 | 0.320218519 | 0.389324886 | 0.288312489 |
| 0.001819005 | 0.289202895 | 0.409977871 | 0.262442549 |
| 0.318763945 | 0.44837916  | 0.334983963 | 0.366219768 |
| 0.383254709 | 0.048509972 | 0.428529854 | 0.505222    |
| 0.043406588 | 0.33396256  | 0.020965044 | 0.258735294 |
| 0.370360878 | 0.39101737  | 0.372935527 | 0.166105169 |
| 0.034659564 | 0.203488147 | 0.12681718  | 0.317254341 |
| 0.404840189 | 0.453026357 | 0.47156787  | 0.094542599 |
| 0.277188567 | 0.214037185 | 0.439923472 | 0.499786269 |
| 0.462002208 | 0.018066166 | 0.218933499 | 0.359742025 |
| 0.341547666 | 0.209003085 | 0.381249291 | 0.037083252 |
| 0.02779324  | 0.019180744 | 0.4106339   | 0.247017596 |
| 0.215935807 | 0.344198153 | 0.164888152 | 0.4426761   |
| 0.29941035  | 0.364146591 | 0.25787365  | 0.395786054 |
| 0.36953509  | 0.401299289 | 0.466829905 | 0.405955493 |
| 0.421089985 | 0.2892009   | 0.242146536 | 0.487781497 |
| 0.447615425 | 0.159250424 | 0.161036004 | 0.417686576 |
| 0.279840343 | 0.455775712 | 0.51819796  | 0.335800422 |
| 0.416438502 | 0.341948076 | 0.330397156 | 0.473149251 |
| 0.386528682 | 0.351654943 | 0.070591481 | 0.438858391 |
| 0.471382283 | 0.04070663  | 0.142137022 | 0.378158895 |



|             |             |             |             |
|-------------|-------------|-------------|-------------|
| 0.112367025 | 0.368795665 | 0.451680473 | 0.45735162  |
| 0.436425309 | 0.080523254 | 0.347708881 | 0.387981678 |
| 0.363926598 | 0.378272474 | 0.407341526 | 0.309871105 |
| 0.395129522 | 0.336462554 | 0.123196098 | 0.284936302 |
| 0.236459001 | 0.379865353 | 0.230453346 | 0.072434827 |
| 0.34506204  | 0.347682751 | 0.448118126 | 0.401137249 |
| 0.334311304 | 0.008978253 | 0.242200282 | 0.323694312 |
| 0.296623737 | 0.324760209 | 0.528685455 | 0.220766817 |
| 0.337361409 | 0.271748543 | 0.251021813 | 0.448611494 |
| 0.335950995 | 0.302820648 | 0.278339108 | 0.001745775 |
| 0.270786097 | 0.313273802 | 0.410617714 | 0.079911203 |
| 0.390382649 | 0.174977942 | 0.117975445 | 0.446035204 |
| 0.326514972 | 0.42953564  | 0.035786522 | 0.117681372 |
| 0.371884906 | 0.488761089 | 0.397613583 | 0.245675976 |
| 0.469333846 | 0.389048197 | 0.34280208  | 0.444739161 |
| 0.4146978   | 0.440042274 | 0.12773689  | 0.341563643 |
| 0.387481902 | 0.455271758 | 0.380373419 | 0.433281028 |
| 0.386380929 | 0.325640455 | 0.278482591 | 0.385358108 |
| 0.394406709 | 0.422546161 | 0.15886923  | 0.519158969 |
| 0.001625859 | 0.428746046 | 0.448520314 | 0.126282151 |
| 0.513343156 | 0.38807155  | 0.135118485 | 0.295316262 |
| 0.480608087 | 0.518727995 | 0.380147746 | 0.369768001 |
| 0.18618881  | 0.018791924 | 0.462044073 | 0.443665009 |
| 0.450315877 | 0.466815597 | 0.345080667 | 0.070407633 |
| 0.47021575  | 0.27517434  | 0.411013675 | 0.346836212 |
| 0.428943868 | 0.370246828 | 0.344356315 | 0.284098007 |
| 0.013442564 | 0.334757201 | 0.364097946 | 0.238251745 |
| 0.372912043 | 0.237393685 | 0.446864908 | 0.423845996 |
| 0.430815419 | 0.260536199 | 0.385628816 | 0.187690044 |
| 0.307140376 | 0.512888099 | 0.048984713 | 0.440915604 |
| 0.506395807 | 0.418846727 | 0.468054795 | 0.491049632 |
| 0.366223671 | 0.469151471 | 0.46158268  | 0.369837543 |
| 0.00148616  | 0.353883656 | 0.299725779 | 0.42955628  |
| 0.399741417 | 0.391597401 | 0.183475132 | 0.356437335 |
| 0.002886551 | 0.258029661 | 0.21663545  | 0.503078918 |
| 0.450395593 | 0.076738397 | 0.042749002 | 0.456052051 |
| 0.314520374 | 0.047792715 | 0.51907383  | 0.423447045 |
| 0.474433746 | 0.473630645 | 0.303172122 | 0.320068582 |
| 0.164735874 | 0.356308267 | 0.072295167 | 0.470772944 |
| 0.395101796 | 0.064717111 | 0.165909395 | 0.492420227 |
| 0.415648646 | 0.481902878 | 0.372283826 | 0.01664473  |
| 0.297417497 | 0.239652391 | 0.44172271  | 0.206166439 |
| 0.429185933 | 0.449140868 | 0.481120601 | 0.359361857 |
| 0.433860068 | 0.470701833 | 0.447267313 | 0.441177666 |
| 0.155692061 | 0.324832645 | 0.371017911 | 0.120204372 |
| 0.29518291  | 0.46638962  | 0.416335137 | 0.313023152 |
| 0.404423094 | 0.145073051 | 0.328473898 | 0.297461844 |
| 1           | 0.454375555 | 0.12834445  | 0.233830415 |
| 0.471638182 | 0.389927584 | 0.230810415 | 0.415890346 |
| 0.380982823 | 0.115524881 | 0.105900862 | 0.433404825 |
| 0.505816956 | 0.421313032 | 0.414202176 | 0.235474047 |
| 0.424252937 | 0.10773433  | 0.383497558 | 0.395693592 |
| 0.359028377 | 0.315487297 | 0.302752573 | 0.088798471 |
| 0.036443553 | 0.16492805  | 0.474908345 | 0.460747438 |

|             |             |             |             |
|-------------|-------------|-------------|-------------|
| 0.162941555 | 0.292182383 | 0.391678381 | 0.467103526 |
| 0.458069102 | 0.404711311 | 0.391136359 | 0.386205396 |
| 0.464742383 | 0.171026586 | 0.502243759 | 0.374293704 |
| 0.399044245 | 0.44466211  | 0.435782343 | 0.012750358 |
| 0.38801708  | 0.27101537  | 0.160711325 | 0.457683129 |
| 0.368239559 | 0.250661278 | 0.481150766 | 0.244107667 |
| 0.200048936 | 0.006014506 | 0.401592479 | 0.324566963 |
| 0.394987477 | 0.240097234 | 0.398664769 | 0.123005749 |
| 0.534722154 | 0.398797532 | 0.374994229 | 0.233462942 |
| 0.445631601 | 0.024949775 | 0.265213824 | 0.072677151 |
| 0.392267614 | 0.443120977 | 0.359154083 | 0.321268323 |
| 0.176455441 | 0.466163041 | 0.462135062 | 0.473867827 |
| 0.458184019 | 0.152384648 | 0.487757317 | 0.339241927 |
| 0.30237483  | 0.385078303 | 0.380856269 | 0.371427158 |
| 0.355633167 | 0.1554679   | 0.233666364 | 0.189237823 |
| 0.446841431 | 0.361767448 | 0.481140537 | 0.28436457  |
| 0.120505085 | 0.466110851 | 0.351645768 | 0.356498758 |
| 0.433591576 | 0.297880099 | 0.3340111   | 0.460961496 |
| 0.267278276 | 0.301715912 | 0.095415773 | 0.067376595 |
| 0.27423717  | 0.31314982  | 0.368612509 | 0.409155456 |
| 0.48098558  | 0.225148404 | 0.19184905  | 0.206047665 |
| 0.097872313 | 0.281689809 | 0.414186861 | 0.192836123 |
| 0.441058066 | 0.244377041 | 0.001745625 | 0.243845746 |
| 0.438983516 | 0.380069174 |             |             |
| RGS10       | 0.347660129 | 0.48688142  | 0.07111847  |
| 0.047694505 | 0.133538733 | 0.247598941 | 0.243272767 |
| 0.354986513 | 0.112227457 | 0.176102507 | 0.331794118 |
| 0.001336936 | 0.388161381 | 0.013087942 | 0.06618168  |
| 0.511822657 | 0.52621371  | 0.354891571 | 0.502085402 |
| 0.308501802 | 0.204126195 | 0.351240872 | 0.406981027 |
| 0.272999642 | 0.001486665 | 0.144195022 | 0.08323783  |
| 0.360470479 | 0.499773326 | 0.202557659 | 0.307427317 |
| 0.455626951 | 0.459655541 | 0.455864096 | 0.360528727 |
| 0.314696608 | 0.432656854 | 0.139269466 | 0.450434228 |
| 0.39920802  | 0.258978704 | 0.460977205 | 0.014447605 |
| 0.009359242 | 0.113443867 | 0.326417968 | 0.388842278 |
| 0.281649674 | 0.230148497 | 0.168122087 | 0.206923645 |
| 0.19714269  | 0.355656315 | 0.3756859   | 0.199515233 |
| 0.408033549 | 0.009920069 | 0.433111641 | 0.239876157 |
| 0.067234614 | 0.3096842   | 0.379702994 | 0.416832801 |
| 0.260005119 | 0.421529383 | 0.511236539 | 0.044598091 |
| 0.080018357 | 0.438855779 | 0.435468908 | 0.468661505 |
| 0.45883084  | 0.363300478 | 0.324346981 | 0.395383876 |
| 0.468459491 | 0.402910353 | 0.280078016 | 0.171160829 |
| 0.0011735   | 0.170747767 | 0.394705168 | 0.334028101 |
| 0.423812978 | 0.3610769   | 0.391250346 | 0.253082115 |
| 0.457801478 | 0.018623997 | 0.375319802 | 0.524574022 |
| 0.030695439 | 0.40859431  | 0.013460889 | 0.147234973 |
| 0.435754706 | 0.475743355 | 0.414968349 | 0.088059319 |
| 0.013090791 | 0.116053094 | 0.141479088 | 0.411614585 |
| 0.405692262 | 0.470186407 | 0.403567694 | 0.146627283 |
| 0.360335013 | 0.178722631 | 0.362142865 | 0.441224939 |
| 0.477510228 | 0.006282223 | 0.145921414 | 0.23178444  |
| 0.369134615 | 0.184938036 | 0.242006425 | 0.04871126  |

|             |             |             |             |
|-------------|-------------|-------------|-------------|
| 0.0165182   | 0.015951019 | 0.464239633 | 0.156906681 |
| 0.123808329 | 0.221719262 | 0.103514134 | 0.48772886  |
| 0.338187724 | 0.423880824 | 0.139505758 | 0.278370704 |
| 0.457995085 | 0.276149918 | 0.458882248 | 0.473106522 |
| 0.40731943  | 0.244919137 | 0.149284725 | 0.456777313 |
| 0.398910301 | 0.075138912 | 0.08798949  | 0.332674986 |
| 0.380190956 | 0.490032147 | 0.527786777 | 0.293010135 |
| 0.301036471 | 0.237420296 | 0.373416496 | 0.418455623 |
| 0.250559118 | 0.320781322 | 0.087773105 | 0.345335119 |
| 0.401762368 | 0.044305083 | 0.068804075 | 0.432623704 |
| 0.078885037 | 0.266752073 | 0.432991647 | 0.472809898 |
| 0.448877923 | 0.070677163 | 0.279890113 | 0.287891252 |
| 0.295648768 | 0.274099884 | 0.409786481 | 0.269196286 |
| 0.313939752 | 0.382729379 | 0.052648934 | 0.372566454 |
| 0.126296512 | 0.32415659  | 0.347280834 | 0.084553157 |
| 0.388576932 | 0.328022698 | 0.468207488 | 0.413028452 |
| 0.414223129 | 0.00903542  | 0.177258926 | 0.371054481 |
| 0.351044508 | 0.381605928 | 0.484549786 | 0.115041562 |
| 0.245644267 | 0.331889405 | 0.141582154 | 0.365563483 |
| 0.376957918 | 0.274074318 | 0.239126574 | 0.000830363 |
| 0.147912807 | 0.422787824 | 0.422874138 | 0.047211911 |
| 0.269754321 | 0.11686675  | 0.101008898 | 0.473589157 |
| 0.207874697 | 0.476400397 | 0.022294803 | 0.147927703 |
| 0.267937357 | 0.443547207 | 0.441659185 | 0.278494463 |
| 0.481814623 | 0.341267862 | 0.439131986 | 0.38514504  |
| 0.293982906 | 0.362023175 | 0.175706342 | 0.268950094 |
| 0.464697292 | 0.481069912 | 0.466400044 | 0.464662372 |
| 0.277016565 | 0.353981263 | 0.314259692 | 0.278732062 |
| 0.37936226  | 0.389439108 | 0.085082019 | 0.484068567 |
| 0.000669793 | 0.340523525 | 0.476315788 | 0.185927955 |
| 0.474458574 | 0.258695647 | 0.06775235  | 0.2328464   |
| 0.51040145  | 0.481264178 | 0.397543402 | 0.440615056 |
| 0.242518599 | 0.008245419 | 0.454843185 | 0.410111517 |
| 0.510908819 | 0.404855949 | 0.382060956 | 0.0698082   |
| 0.471437288 | 0.330678611 | 0.442688007 | 0.425470149 |
| 0.463821675 | 0.40706     | 0.234516767 | 0.335352693 |
| 0.01824268  | 0.271940561 | 0.441692894 | 0.242157131 |
| 0.363347917 | 0.202653962 | 0.48147731  | 0.317147242 |
| 0.439567868 | 0.337684662 | 0.42399297  | 0.090735381 |
| 0.179934739 | 0.493048723 | 0.056505586 | 0.42862946  |
| 0.521301001 | 0.35556398  | 0.483657093 | 0.507592005 |
| 0.314090113 | 0.39186177  | 0.471586981 | 0.418163052 |
| 0.000754929 | 0.436896287 | 0.399865101 | 0.337259761 |
| 0.456907025 | 0.295366502 | 0.227269338 | 0.442157731 |
| 0.001078362 | 0.153879868 | 0.32231833  | 0.456028431 |
| 0.480018552 | 0.03172484  | 0.063406345 | 0.467080628 |
| 0.411748597 | 0.044417783 | 0.51429388  | 0.362007479 |
| 0.474360932 | 0.430641611 | 0.193682497 | 0.420333175 |
| 0.280927789 | 0.354959301 | 0.040964112 | 0.464659345 |
| 0.423919528 | 0.090329893 | 0.117090666 | 0.50813557  |
| 0.438390985 | 0.396883847 | 0.252165939 | 0.016803647 |
| 0.378628559 | 0.275615903 | 0.488737407 | 0.108560823 |
| 0.414084507 | 0.364846889 | 0.448866461 | 0.445762808 |
| 0.448724451 | 0.41450706  | 0.377195905 | 0.464859953 |

|             |             |             |             |
|-------------|-------------|-------------|-------------|
| 0.15020921  | 0.424686851 | 0.43636317  | 0.06356013  |
| 0.388057211 | 0.477885507 | 0.460416371 | 0.188380188 |
| 0.364420653 | 0.140230651 | 0.208615859 | 0.309005436 |
| 0.454375555 | 1           | 0.063269864 | 0.147671846 |
| 0.416661135 | 0.297375588 | 0.117425343 | 0.330632913 |
| 0.275068989 | 0.210539326 | 0.135611155 | 0.367345205 |
| 0.442395385 | 0.299189376 | 0.461650514 | 0.210983694 |
| 0.457619533 | 0.046449556 | 0.415303012 | 0.271496809 |
| 0.274915724 | 0.421646506 | 0.389782592 | 0.124612885 |
| 0.039641932 | 0.130088657 | 0.410600045 | 0.40165214  |
| 0.078131389 | 0.186833617 | 0.275917167 | 0.37687183  |
| 0.503322358 | 0.42782024  | 0.275100348 | 0.324148627 |
| 0.392381397 | 0.154762948 | 0.45609709  | 0.332963237 |
| 0.408715669 | 0.364971555 | 0.458364504 | 0.01123827  |
| 0.4619835   | 0.208998293 | 0.198696247 | 0.41203235  |
| 0.455876936 | 0.139933148 | 0.397998693 | 0.160266561 |
| 0.205087282 | 0.002970602 | 0.343683729 | 0.412331327 |
| 0.282152164 | 0.284559118 | 0.350487454 | 0.212073856 |
| 0.51041557  | 0.403805257 | 0.426087214 | 0.292684428 |
| 0.406661097 | 0.033067229 | 0.189557836 | 0.032474286 |
| 0.38750065  | 0.376891054 | 0.411964308 | 0.389298938 |
| 0.192279356 | 0.467461344 | 0.389561905 | 0.448661627 |
| 0.483751175 | 0.212206027 | 0.522300614 | 0.286638659 |
| 0.393914543 | 0.393213126 | 0.258441475 | 0.323473252 |
| 0.22023746  | 0.134404339 | 0.126067654 | 0.148223479 |
| 0.49024524  | 0.298122746 | 0.423278517 | 0.326778255 |
| 0.053763123 | 0.400579257 | 0.414432877 | 0.4530135   |
| 0.456542232 | 0.410199991 | 0.372487759 | 0.380429389 |
| 0.31715302  | 0.293762399 | 0.090265232 | 0.059541875 |
| 0.339574807 | 0.206906398 | 0.393106588 | 0.433202488 |
| 0.50370903  | 0.276402978 | 0.100970885 | 0.129013336 |
| 0.131370574 | 0.367720065 | 0.291450453 | 0.213704905 |
| 0.438659529 | 0.324429645 | 0.000529698 | 0.215645168 |
| 0.377527223 | 0.427818628 |             |             |
| RHOQ        | 0.051384683 | 0.112327057 | 0.153589735 |
| 0.004452383 | 0.039745883 | 0.336659474 | 0.232787903 |
| 0.027360458 | 0.16144249  | 0.094455671 | 0.262124618 |
| 0.014830494 | 0.018300477 | 0.104174744 | 0.071682621 |
| 0.060214887 | 0.057952639 | 0.126713508 | 0.059588338 |
| 0.075825499 | 0.033334987 | 0.151660933 | 0.123034961 |
| 0.261223864 | 0.036692686 | 0.163493631 | 0.029423349 |
| 0.015178574 | 0.045112774 | 0.24658441  | 0.058842827 |
| 0.053883501 | 0.03279325  | 0.021940414 | 0.014254084 |
| 0.001591998 | 0.159513467 | 0.000551243 | 0.023094326 |
| 0.023095466 | 0.107555646 | 0.039724528 | 0.124800523 |
| 7.08E-05    | 0.178756653 | 0.012632285 | 0.139266634 |
| 0.073722058 | 0.319974653 | 0.27137585  | 0.150173347 |
| 0.000592789 | 0.233348326 | 0.091031787 | 0.000405793 |
| 0.199876952 | 0.001611615 | 0.173297665 | 0.031900025 |
| 0.211502019 | 0.123422613 | 0.026917172 | 0.100809935 |
| 0.321312387 | 0.188622477 | 0.082284146 | 0.112110897 |
| 0.331483537 | 0.037658801 | 0.026905786 | 0.065286843 |
| 0.101173644 | 0.032874225 | 0.062274851 | 0.006869079 |
| 0.036640171 | 0.026091394 | 0.249359624 | 0.093091162 |

|             |             |             |             |
|-------------|-------------|-------------|-------------|
| 0.013062823 | 0.228017897 | 0.017330954 | 0.040163605 |
| 0.012579756 | 0.23491813  | 0.040016638 | 0.089843467 |
| 0.027398655 | 0.192487243 | 0.128213858 | 0.071755189 |
| 0.017976183 | 0.029797518 | 0.002764788 | 0.087894004 |
| 0.05192647  | 0.032086751 | 0.075492668 | 0.161883834 |
| 0.121370378 | 0.131859876 | 0.019847372 | 0.018218044 |
| 0.070253728 | 0.046809255 | 0.201940383 | 0.000749042 |
| 0.012306577 | 0.101601511 | 0.057076084 | 0.164142434 |
| 0.085946443 | 0.033771485 | 0.090977228 | 0.294569411 |
| 0.013429899 | 0.026509575 | 0.219780527 | 0.001308863 |
| 0.01052953  | 0.004753578 | 0.045698781 | 0.125309706 |
| 0.15650971  | 0.240279839 | 0.031990419 | 0.038019122 |
| 0.018568335 | 0.040893815 | 0.054115721 | 0.178136654 |
| 0.023512629 | 0.220525438 | 0.032996522 | 0.043732881 |
| 0.010443015 | 0.053696834 | 0.195041271 | 0.117009147 |
| 0.175877915 | 0.131916022 | 0.189029709 | 0.244595617 |
| 0.013290477 | 0.05961956  | 0.085001794 | 0.033547145 |
| 0.047116568 | 0.177318818 | 0.032371877 | 0.129003875 |
| 0.239383735 | 0.075862785 | 0.000559174 | 0.199465286 |
| 0.219465619 | 0.001250939 | 0.231700067 | 0.052370952 |
| 0.00561034  | 0.055267498 | 0.148300203 | 0.072501611 |
| 0.039038623 | 0.030225694 | 0.081165675 | 0.227155421 |
| 0.199660685 | 0.196440881 | 0.098650067 | 0.068903799 |
| 0.241917025 | 0.030914877 | 0.162966523 | 0.013360329 |
| 0.280436093 | 0.164520076 | 0.0059707   | 0.005958937 |
| 0.042876883 | 0.03788291  | 0.09569936  | 0.064587893 |
| 0.043882812 | 0.000879408 | 0.083200997 | 0.067277807 |
| 0.030403024 | 0.02565462  | 0.126911234 | 0.319666309 |
| 0.237191057 | 0.004235679 | 0.282952011 | 0.031130261 |
| 0.065998702 | 0.058932492 | 0.07505186  | 0.03067599  |
| 0.086437904 | 0.012757344 | 0.044288495 | 0.115175339 |
| 0.044469208 | 0.157614315 | 0.022580064 | 0.080528623 |
| 0.294317109 | 0.040737793 | 0.033364423 | 0.00287499  |
| 0.108244711 | 0.124292946 | 0.014048541 | 0.024596454 |
| 0.079263049 | 0.047314012 | 0.022241446 | 0.212741479 |
| 0.032345702 | 0.245032867 | 0.001575558 | 0.108709934 |
| 0.021756821 | 0.067243283 | 0.036072894 | 0.049867248 |
| 0.165201883 | 0.051093469 | 0.005311415 | 0.296360405 |
| 0.08287366  | 0.060959954 | 0.163327261 | 0.107404221 |
| 0.033952705 | 0.171467762 | 0.049119954 | 0.002182511 |
| 0.117455323 | 0.257600747 | 0.193929446 | 0.096961722 |
| 0.061980106 | 0.109926868 | 0.076134038 | 0.031687353 |
| 0.004467202 | 0.068309706 | 0.094392008 | 0.154327888 |
| 0.044822593 | 0.059140604 | 0.003868031 | 0.002191257 |
| 0.070762802 | 0.021008837 | 0.091453106 | 0.031836895 |
| 0.029505461 | 0.007945339 | 0.176970721 | 0.036847937 |
| 0.002384036 | 0.140885365 | 0.04278081  | 0.028092823 |
| 0.048920033 | 0.066575649 | 0.069476672 | 0.233040123 |
| 0.010189074 | 0.012835658 | 0.015146242 | 0.1794785   |
| 0.300394303 | 0.11186669  | 0.000197886 | 0.097833005 |
| 0.074094834 | 0.099428783 | 0.070191047 | 0.073009327 |
| 0.152862131 | 0.197700897 | 0.088529054 | 0.041822415 |
| 0.006023742 | 0.023131472 | 0.013546414 | 0.260150133 |
| 0.045048117 | 0.268071142 | 0.0089686   | 0.008780527 |

|             |                      |                      |             |
|-------------|----------------------|----------------------|-------------|
| 0.006372292 | 0.319610135          | 0.001784166          | 0.134981028 |
| 0.055600949 | 0.162749231          | 6.90E-05 0.069569733 |             |
| 0.013488465 | 0.001294782          | 0.097019982          | 0.142902334 |
| 0.099575697 | 0.049163537          | 0.231990582          | 0.019883424 |
| 0.00097548  | 0.017788408          | 0.021829694          | 0.068524247 |
| 0.020998353 | 0.003530525          | 0.049172762          | 0.077384615 |
| 0.10272853  | 0.159371203          | 0.256227432          | 0.025026159 |
| 0.02458491  | 0.00864284           | 0.05586959           | 0.069405938 |
| 0.113942467 | 0.22638145           | 0.120680997          | 0.029486563 |
| 0.051655173 | 0.174316583          | 0.227031041          | 0.094527957 |
| 0.002662567 | 0.027033964          | 0.039368016          | 0.087441267 |
| 0.021267582 | 0.063761448          | 0.040568423          | 0.33127886  |
| 0.146997525 | 0.003302694          | 0.360255654          | 0.05992981  |
| 0.12834445  | 0.063269864          | 1                    | 0.075586786 |
| 0.187343367 | 0.080745768          | 0.24263136           | 0.08052638  |
| 0.296957123 | 0.000845746          | 0.002712352          | 0.188368232 |
| 0.160065503 | 0.27815382           | 0.063668559          | 0.038957602 |
| 0.041835571 | 0.14527246           | 0.062294746          | 0.056917433 |
| 0.195966667 | 0.022259877          | 0.01993561           | 0.00295034  |
| 0.034490751 | 0.091396445          | 0.18704781           | 0.202980552 |
| 0.24085287  | 0.269740554          | 0.165966671          | 0.119036545 |
| 0.051370824 | 0.013092508          | 0.266909033          | 0.081120422 |
| 0.22062574  | 0.027182773          | 0.141268802          | 0.12213929  |
| 0.125496157 | 0.073588342          | 0.074297596          | 0.008402025 |
| 0.033032768 | 0.090256447          | 0.015078573          | 0.075404363 |
| 0.029140497 | 0.198043581          | 0.155597098          | 0.154487696 |
| 0.00851314  | 0.003893283          | 0.168585333          | 0.005948861 |
| 0.331200496 | 0.004175087          | 0.075519197          | 0.000382405 |
| 0.115916216 | 0.089423461          | 0.084291201          | 0.003542928 |
| 0.065673089 | 3.81E-05 0.114997726 | 0.167350851          |             |
| 0.137115372 | 0.179057934          | 0.049593106          | 0.041990939 |
| 0.021683545 | 0.053667152          | 0.15057685           | 0.037263077 |
| 0.061499749 | 0.00254567           | 0.064542688          | 0.062213083 |
| 0.015384269 | 0.024702853          | 0.274273613          | 0.030843396 |
| 0.149001351 | 0.020649523          | 0.239858775          | 0.066446329 |
| 0.047353426 | 0.022144056          | 0.0735515            | 0.024894013 |
| 0.141535629 | 0.050435346          | 0.037674345          | 0.027852728 |
| 0.064852623 | 0.024219339          | 0.012133948          | 0.224131444 |
| 0.020581738 | 0.085130691          | 0.007002237          | 0.027290813 |
| 0.009976718 | 0.204284116          | 0.082475855          | 0.075201036 |
| 0.06308384  | 0.008539823          | 0.205542226          | 0.146430413 |
| 0.000679573 | 0.029517216          | 0.227117829          | 0.001130805 |
| 0.055338717 | 0.009167387          | 0.007309326          | 0.054980955 |
| 0.193566424 | 0.009127441          |                      |             |
| ROM1        | 0.138283128          | 0.232737997          | 0.092540235 |
| 0.000969925 | 0.027767073          | 0.254768043          | 0.16036881  |
| 0.108881111 | 0.092858013          | 0.025920393          | 0.300810109 |
| 0.026469939 | 0.098828817          | 0.100829181          | 0.126969914 |
| 0.185436488 | 0.178233902          | 0.159250233          | 0.209362538 |
| 0.211041201 | 0.00924994           | 0.32738538           | 0.136236318 |
| 0.208354454 | 0.042724998          | 0.070803472          | 0.003270685 |
| 0.074844669 | 0.169120388          | 0.264765459          | 0.04333237  |
| 0.163103805 | 0.112923072          | 0.026113613          | 0.01877756  |
| 0.003714407 | 0.305548698          | 0.004875479          | 0.084673197 |

|                      |                      |             |             |
|----------------------|----------------------|-------------|-------------|
| 0.110687133          | 0.065669772          | 0.122847099 | 0.054024597 |
| 1.40E-05 0.089360993 | 0.068425997          | 0.240054416 |             |
| 0.226067156          | 0.236187218          | 0.313744897 | 0.064776203 |
| 0.003010743          | 0.314212408          | 0.294567408 | 0.002513336 |
| 0.295328261          | 9.45E-05 0.284479802 | 0.122659569 |             |
| 0.134361793          | 0.193919879          | 0.062675276 | 0.193084448 |
| 0.268594106          | 0.293254022          | 0.212098435 | 0.02692337  |
| 0.144005296          | 0.099544359          | 0.082577277 | 0.083520986 |
| 0.222008173          | 0.03546874           | 0.044490484 | 0.02770935  |
| 0.089792056          | 0.116329661          | 0.35901746  | 0.145696048 |
| 0.006336596          | 0.106915491          | 0.017603296 | 0.148382758 |
| 0.05227418           | 0.310136927          | 0.136656972 | 0.051217018 |
| 0.064091364          | 0.088595967          | 0.242312843 | 0.202834363 |
| 0.005053144          | 0.126775123          | 0.003991039 | 0.152679222 |
| 0.163208145          | 0.127544278          | 0.174790437 | 0.042246162 |
| 0.095659051          | 0.216507474          | 0.07217279  | 0.096532631 |
| 0.163107406          | 0.100981743          | 0.289415107 | 0.012064439 |
| 0.071697007          | 0.079586531          | 0.088415897 | 0.273286839 |
| 0.205160417          | 0.133160137          | 0.166945461 | 0.265623947 |
| 0.020113991          | 0.009562905          | 0.209889117 | 0.00340183  |
| 0.005411709          | 0.072454937          | 0.155272328 | 0.161866895 |
| 0.045472088          | 0.159940022          | 0.019062256 | 0.072527113 |
| 0.092002126          | 0.170017717          | 0.032947688 | 0.131242999 |
| 0.076604927          | 0.167198469          | 0.052572117 | 0.110719505 |
| 0.024356108          | 0.134798391          | 0.193419102 | 0.234315925 |
| 0.372095407          | 0.075557714          | 0.089671448 | 0.272598144 |
| 0.069450002          | 0.186970588          | 0.223293362 | 0.096457944 |
| 0.04370918           | 0.290043622          | 0.024496492 | 0.151318846 |
| 0.251744963          | 0.272412511          | 0.016042631 | 0.36134802  |
| 0.318181755          | 0.004915252          | 0.115577785 | 0.177477882 |
| 0.002426107          | 0.044710195          | 0.27380511  | 0.16966885  |
| 0.120581686          | 0.002601001          | 0.042331291 | 0.155865997 |
| 0.26870562           | 0.14006446           | 0.199470639 | 0.027649421 |
| 0.320586083          | 0.023356727          | 0.077571467 | 0.071017794 |
| 0.227870878          | 0.30836715           | 0.010537175 | 0.006167843 |
| 0.166027797          | 0.148448687          | 0.189004188 | 0.173683333 |
| 0.127268703          | 6.35E-05 0.024210854 | 0.160443323 |             |
| 0.023777998          | 0.143103317          | 0.238880174 | 0.253800852 |
| 0.380039311          | 0.019422044          | 0.293565109 | 0.041168437 |
| 0.250666192          | 0.028714923          | 0.02813102  | 0.006612774 |
| 0.076019393          | 0.023068535          | 0.108849891 | 0.155912252 |
| 0.034466583          | 0.094393355          | 0.101085616 | 0.175786154 |
| 0.253559126          | 0.120982207          | 0.132946484 | 0.030879743 |
| 0.12062795           | 0.176478685          | 0.022405884 | 0.051485251 |
| 0.136343849          | 0.048474215          | 0.103437674 | 0.319326228 |
| 0.044042962          | 0.260700984          | 0.014125742 | 0.170310209 |
| 0.069428719          | 0.160762628          | 0.108066213 | 0.157364371 |
| 0.142976369          | 0.22804572           | 0.030687049 | 0.331743939 |
| 0.216753385          | 0.205796177          | 0.131511796 | 0.262318025 |
| 0.012754698          | 0.292729023          | 0.078181668 | 0.014937491 |
| 0.221172925          | 0.193789955          | 0.150855657 | 0.238600534 |
| 0.213003375          | 0.275652427          | 0.266750617 | 0.114913052 |
| 0.026998365          | 0.120567211          | 0.271927504 | 0.240728238 |
| 0.158638042          | 0.113000174          | 0.010650198 | 0.034546222 |

|             |             |             |             |
|-------------|-------------|-------------|-------------|
| 0.199366654 | 0.126905405 | 0.127976281 | 0.077883161 |
| 0.076676257 | 0.035256202 | 0.319606756 | 0.181956146 |
| 0.00621144  | 0.100312988 | 0.093796472 | 0.012804381 |
| 0.035718067 | 0.046954965 | 0.147293179 | 0.36921162  |
| 0.021473576 | 0.023553393 | 0.016294969 | 0.086769719 |
| 0.259308418 | 0.236985968 | 0.002212713 | 0.287579342 |
| 0.21780071  | 0.23640012  | 0.160884263 | 0.230798758 |
| 0.233814061 | 0.278078328 | 0.192695018 | 0.181887509 |
| 0.013136236 | 0.094864833 | 0.066984883 | 0.390759283 |
| 0.124511211 | 0.262384256 | 0.084613593 | 0.031029087 |
| 0.015263074 | 0.274921233 | 0.004046472 | 0.321164372 |
| 0.150572696 | 0.045060076 | 0.000867769 | 0.177758917 |
| 0.062282192 | 0.013484113 | 0.246777486 | 0.123678508 |
| 0.191609914 | 0.122842053 | 0.109699867 | 0.078785149 |
| 0.002842659 | 0.080630047 | 0.006788503 | 0.114061057 |
| 0.067145123 | 0.018223334 | 0.008859062 | 0.228764344 |
| 0.230575136 | 0.23164926  | 0.301248941 | 0.002327481 |
| 0.116868349 | 0.006056751 | 0.111786596 | 0.15447525  |
| 0.299570374 | 0.296614854 | 0.258220761 | 0.102819182 |
| 0.13186794  | 0.266737975 | 0.307684165 | 0.192141529 |
| 0.004205248 | 0.094572413 | 0.126608112 | 0.042855742 |
| 0.07804441  | 0.166830961 | 0.050066361 | 0.215111964 |
| 0.299304818 | 0.002227594 | 0.291029165 | 0.207535756 |
| 0.233830415 | 0.147671846 | 0.075586786 | 1           |
| 0.248779011 | 0.120690149 | 0.14369536  | 0.211770855 |
| 0.349623216 | 0.003867534 | 0.027329599 | 0.302900672 |
| 0.275152757 | 0.277137154 | 0.150344945 | 0.01139552  |
| 0.148460977 | 0.171983135 | 0.231050533 | 0.071759784 |
| 0.329508738 | 0.060256666 | 0.098635485 | 0.022729651 |
| 0.004053113 | 0.100342753 | 0.227482486 | 0.309817295 |
| 0.149780484 | 0.328337799 | 0.130655641 | 0.11979406  |
| 0.164031209 | 0.028892747 | 0.314482871 | 0.237444651 |
| 0.333380007 | 0.00561184  | 0.306336493 | 0.21867673  |
| 0.251330166 | 0.071249713 | 0.181674394 | 0.002548812 |
| 0.091397767 | 0.031994358 | 0.110157622 | 0.07078705  |
| 0.123932926 | 0.134056627 | 0.201858688 | 0.179970548 |
| 0.011810892 | 0.034955351 | 0.370780251 | 0.02042429  |
| 0.335070244 | 0.03496907  | 0.207648713 | 0.001883639 |
| 0.270358573 | 0.157222854 | 0.179998343 | 0.026252384 |
| 0.073706006 | 0.000224963 | 0.036493176 | 0.111366101 |
| 0.281888768 | 0.331157389 | 0.14298688  | 0.096212597 |
| 0.110695634 | 0.115622408 | 0.259927043 | 0.058479846 |
| 0.147207928 | 0.005249903 | 0.181646994 | 0.176072065 |
| 0.074647844 | 0.045149534 | 0.309048922 | 0.070852856 |
| 0.102356316 | 0.040402927 | 0.157410126 | 0.147333057 |
| 0.132300377 | 0.073542716 | 0.089015513 | 0.043712593 |
| 0.051187884 | 0.081418542 | 0.152262962 | 0.084235747 |
| 0.108871942 | 0.074172984 | 0.064958204 | 0.338861543 |
| 0.034155491 | 0.150461593 | 0.001723942 | 0.002242862 |
| 0.007152638 | 0.117543489 | 0.275443333 | 0.243272448 |
| 0.196298783 | 0.036194491 | 0.122815446 | 0.218891438 |
| 0.009611634 | 0.135465013 | 0.176920655 | 0.003947937 |
| 0.140740897 | 0.028367354 | 0.009618572 | 0.152518976 |
| 0.299964151 | 0.019905981 |             |             |



| RORA        | 0.269524821 | 0.490384364 | 0.190464792 |
|-------------|-------------|-------------|-------------|
| 0.051537594 | 0.23947308  | 0.407677301 | 0.411434524 |
| 0.264971279 | 0.244388067 | 0.298920592 | 0.446858215 |
| 0.003233611 | 0.2490629   | 0.04074723  | 0.150854361 |
| 0.420835693 | 0.433682027 | 0.45432009  | 0.420169965 |
| 0.3035004   | 0.234920269 | 0.374042415 | 0.427545935 |
| 0.424675582 | 0.005364175 | 0.299977186 | 0.124795719 |
| 0.240507147 | 0.387606466 | 0.357262936 | 0.381034152 |
| 0.36421374  | 0.348308428 | 0.387630787 | 0.344541371 |
| 0.168650245 | 0.492712388 | 0.073371759 | 0.287347265 |
| 0.270344018 | 0.3976638   | 0.347079011 | 0.050068935 |
| 0.004275276 | 0.273653705 | 0.213749362 | 0.399284217 |
| 0.31704397  | 0.391388251 | 0.328541288 | 0.356019728 |
| 0.082063642 | 0.445964992 | 0.31962086  | 0.078222637 |
| 0.48534016  | 0.010913798 | 0.5002445   | 0.207034837 |
| 0.196432602 | 0.398721581 | 0.258154899 | 0.38022047  |
| 0.4244463   | 0.500541127 | 0.470239663 | 0.131435694 |
| 0.223566969 | 0.334188167 | 0.273296348 | 0.408423576 |
| 0.439176617 | 0.36807213  | 0.431816581 | 0.240184756 |
| 0.319718881 | 0.27489538  | 0.411662242 | 0.316087856 |
| 0.00315677  | 0.339970824 | 0.358631912 | 0.227134366 |
| 0.244143085 | 0.448736868 | 0.285837397 | 0.397484225 |
| 0.326169745 | 0.075694442 | 0.413450402 | 0.460287063 |
| 0.051409745 | 0.271974262 | 0.019855912 | 0.285664112 |
| 0.331919509 | 0.33639171  | 0.340309265 | 0.226366401 |
| 0.052879538 | 0.242072194 | 0.12490139  | 0.260715584 |
| 0.37222611  | 0.399019649 | 0.468797898 | 0.063513747 |
| 0.221260341 | 0.259439972 | 0.431367637 | 0.502161843 |
| 0.434869345 | 0.022465806 | 0.251210019 | 0.399264852 |
| 0.306991468 | 0.219822233 | 0.410501941 | 0.03107733  |
| 0.029710975 | 0.016633043 | 0.364631701 | 0.286057045 |
| 0.270815269 | 0.392719058 | 0.168609333 | 0.372060886 |
| 0.248104348 | 0.321198638 | 0.274740502 | 0.430637078 |
| 0.292560876 | 0.432004059 | 0.398301361 | 0.339201328 |
| 0.335796002 | 0.296871395 | 0.294120673 | 0.470155711 |
| 0.453697364 | 0.201291131 | 0.217859614 | 0.434885297 |
| 0.225595504 | 0.410392847 | 0.47963321  | 0.313284872 |
| 0.393666328 | 0.365296802 | 0.335768764 | 0.450508116 |
| 0.417456294 | 0.321887025 | 0.045855601 | 0.431814651 |
| 0.493466595 | 0.033085861 | 0.199310335 | 0.320010674 |
| 0.091853371 | 0.389894331 | 0.454601055 | 0.396871838 |
| 0.366311251 | 0.108716537 | 0.369329626 | 0.425787327 |
| 0.387834082 | 0.415718613 | 0.380281455 | 0.338309479 |
| 0.4151236   | 0.336439366 | 0.166134673 | 0.229840576 |
| 0.2898831   | 0.383675321 | 0.198469533 | 0.070148667 |
| 0.295262627 | 0.307819571 | 0.420826672 | 0.357907503 |
| 0.287449149 | 0.009132096 | 0.290498432 | 0.301299252 |
| 0.305932075 | 0.272622822 | 0.512661362 | 0.275855476 |
| 0.36415178  | 0.209041112 | 0.302068843 | 0.403017112 |
| 0.312013479 | 0.335196032 | 0.327610642 | 0.003761965 |
| 0.297376608 | 0.266451883 | 0.364873981 | 0.106846204 |
| 0.380079922 | 0.231818455 | 0.116783839 | 0.417330447 |
| 0.37575255  | 0.349004333 | 0.040422132 | 0.090589495 |
| 0.399013328 | 0.451773038 | 0.340780055 | 0.239231902 |

|             |             |             |             |
|-------------|-------------|-------------|-------------|
| 0.413496932 | 0.387984708 | 0.287037066 | 0.438961384 |
| 0.38791552  | 0.449350984 | 0.094145896 | 0.364360343 |
| 0.310283235 | 0.418912877 | 0.328848415 | 0.356264885 |
| 0.419744639 | 0.277578797 | 0.214216834 | 0.41664002  |
| 0.367585078 | 0.371823252 | 0.205605501 | 0.490731977 |
| 0.003547663 | 0.428926568 | 0.396810928 | 0.099084101 |
| 0.495163469 | 0.421067396 | 0.184391116 | 0.303004511 |
| 0.430355632 | 0.49168968  | 0.354595942 | 0.320363679 |
| 0.150177758 | 0.027649376 | 0.434310649 | 0.429513435 |
| 0.394526817 | 0.427068007 | 0.257918589 | 0.053073738 |
| 0.430271985 | 0.220615601 | 0.385410434 | 0.302670455 |
| 0.353969984 | 0.279362514 | 0.36560089  | 0.237024904 |
| 0.014210979 | 0.377734464 | 0.316831215 | 0.260141933 |
| 0.379822497 | 0.272035864 | 0.399849428 | 0.430103722 |
| 0.348265052 | 0.244126508 | 0.33722265  | 0.236966281 |
| 0.358956886 | 0.491511687 | 0.029009506 | 0.418828755 |
| 0.460766839 | 0.397048339 | 0.431508264 | 0.446954711 |
| 0.379549043 | 0.457010627 | 0.435095585 | 0.324641614 |
| 0.002165514 | 0.297508163 | 0.225351667 | 0.435107899 |
| 0.358849263 | 0.425737443 | 0.14507848  | 0.272574909 |
| 0.003505541 | 0.315498434 | 0.16449665  | 0.489920525 |
| 0.404248296 | 0.1127218   | 0.022970175 | 0.389755521 |
| 0.237214109 | 0.036964162 | 0.486539064 | 0.432850845 |
| 0.451576526 | 0.410216548 | 0.361129623 | 0.267020808 |
| 0.121585076 | 0.300413823 | 0.078532819 | 0.417830091 |
| 0.323176085 | 0.055222524 | 0.196498299 | 0.453045485 |
| 0.397113147 | 0.461211893 | 0.407707779 | 0.028941606 |
| 0.254869537 | 0.216087209 | 0.378348389 | 0.217872401 |
| 0.387281759 | 0.451766328 | 0.464050912 | 0.301469538 |
| 0.378172907 | 0.446705516 | 0.445901349 | 0.407957384 |
| 0.121944236 | 0.28104801  | 0.328619193 | 0.15204629  |
| 0.242999527 | 0.424948208 | 0.373093067 | 0.366087686 |
| 0.394708697 | 0.117022131 | 0.38059532  | 0.272774541 |
| 0.471638182 | 0.416661135 | 0.187343367 | 0.248779011 |
| 1           | 0.405175562 | 0.284271374 | 0.391151185 |
| 0.413106237 | 0.083584271 | 0.081648954 | 0.430256764 |
| 0.505819999 | 0.443959241 | 0.385087822 | 0.262143331 |
| 0.369318605 | 0.141377021 | 0.346007657 | 0.393906683 |
| 0.376835517 | 0.262658989 | 0.253585255 | 0.070425871 |
| 0.056703301 | 0.195716065 | 0.460025859 | 0.461753828 |
| 0.215888258 | 0.336170889 | 0.416284806 | 0.452904254 |
| 0.407363552 | 0.35199356  | 0.418383834 | 0.360656281 |
| 0.48140485  | 0.18650606  | 0.492858708 | 0.375075889 |
| 0.374835013 | 0.434855283 | 0.379889323 | 0.016102154 |
| 0.323294769 | 0.318300994 | 0.135312855 | 0.428182491 |
| 0.31560802  | 0.303921717 | 0.462614935 | 0.290784558 |
| 0.1737137   | 0.006181263 | 0.39126854  | 0.241065316 |
| 0.427856673 | 0.184082628 | 0.370539096 | 0.083284135 |
| 0.510831495 | 0.37907239  | 0.339336616 | 0.170413868 |
| 0.431787612 | 0.013787849 | 0.320103087 | 0.106732191 |
| 0.374330725 | 0.429300931 | 0.313446198 | 0.293081328 |
| 0.163831748 | 0.400536181 | 0.440817705 | 0.407535452 |
| 0.418333862 | 0.120538761 | 0.441721107 | 0.328504833 |
| 0.247572409 | 0.358203253 | 0.414829448 | 0.350075852 |

|             |             |             |             |
|-------------|-------------|-------------|-------------|
| 0.385776881 | 0.157538246 | 0.294205457 | 0.209939556 |
| 0.396947487 | 0.319256384 | 0.441801642 | 0.277266135 |
| 0.161682099 | 0.430585346 | 0.287998352 | 0.289108128 |
| 0.392636771 | 0.244557256 | 0.267308009 | 0.45858879  |
| 0.259569192 | 0.313704841 | 0.093066243 | 0.092872679 |
| 0.255326334 | 0.371179241 | 0.34897126  | 0.373707138 |
| 0.433393484 | 0.194328126 | 0.250517635 | 0.246758943 |
| 0.065810708 | 0.245704793 | 0.43797232  | 0.127881918 |
| 0.384819756 | 0.213789949 | 0.002641807 | 0.25257759  |
| 0.436164495 | 0.314991177 |             |             |
| RPL12       | 0.153403307 | 0.401377807 | 0.080287513 |
| 0.004809321 | 0.058658862 | 0.3169865   | 0.244773785 |
| 0.110317212 | 0.115730865 | 0.065596596 | 0.392340658 |
| 0.004098213 | 0.17562205  | 0.033928589 | 0.089027725 |
| 0.31733673  | 0.322604458 | 0.260967513 | 0.333105999 |
| 0.171466929 | 0.036482374 | 0.328694871 | 0.22252393  |
| 0.287366315 | 0.006699092 | 0.104736674 | 0.014695671 |
| 0.083952669 | 0.285359426 | 0.230832132 | 0.087375096 |
| 0.280407405 | 0.232003711 | 0.07300826  | 0.062858849 |
| 0.02046974  | 0.444193243 | 0.015261136 | 0.185030244 |
| 0.194754889 | 0.115152516 | 0.240035056 | 0.038732254 |
| 0.000203629 | 0.097584614 | 0.070721472 | 0.289261224 |
| 0.169983012 | 0.276539214 | 0.23706583  | 0.124171382 |
| 0.010991197 | 0.409908595 | 0.314929223 | 0.010191458 |
| 0.449180443 | 0.00073874  | 0.450347718 | 0.079126161 |
| 0.09539223  | 0.217504107 | 0.108886489 | 0.26940421  |
| 0.352437564 | 0.452224395 | 0.37124317  | 0.048242572 |
| 0.128405461 | 0.155095946 | 0.174716523 | 0.193970295 |
| 0.362936973 | 0.073003645 | 0.111871356 | 0.066613808 |
| 0.19604087  | 0.194859962 | 0.367780245 | 0.130045219 |
| 0.002509269 | 0.160032304 | 0.058125964 | 0.183674984 |
| 0.114566691 | 0.411157844 | 0.177739049 | 0.103780449 |
| 0.118727752 | 0.049206125 | 0.266220182 | 0.349603352 |
| 0.011585584 | 0.213923445 | 0.005301365 | 0.139069696 |
| 0.260713537 | 0.235169098 | 0.239538199 | 0.076769676 |
| 0.038073116 | 0.126500766 | 0.050914159 | 0.178709602 |
| 0.214860166 | 0.171833508 | 0.445926314 | 0.016032299 |
| 0.142540166 | 0.095564546 | 0.136249319 | 0.42974803  |
| 0.347011406 | 0.022294265 | 0.119625846 | 0.293044548 |
| 0.064765659 | 0.04167927  | 0.257096575 | 0.005104921 |
| 0.006903927 | 0.012564374 | 0.270932573 | 0.121506938 |
| 0.078116359 | 0.205740203 | 0.034069208 | 0.176990822 |
| 0.090078515 | 0.258617299 | 0.077133654 | 0.198202196 |
| 0.166387005 | 0.264694291 | 0.122586676 | 0.2194571   |
| 0.062665388 | 0.111167982 | 0.128343749 | 0.397064596 |
| 0.456918234 | 0.075247955 | 0.094678692 | 0.34115992  |
| 0.14673659  | 0.31068021  | 0.37960972  | 0.10117833  |
| 0.08978462  | 0.23759105  | 0.064763367 | 0.272011273 |
| 0.299164135 | 0.224976345 | 0.012376447 | 0.407504501 |
| 0.467851232 | 0.005869063 | 0.094146631 | 0.258999565 |
| 0.012895832 | 0.116691002 | 0.40295682  | 0.30089601  |
| 0.202940157 | 0.012659639 | 0.081681486 | 0.244395222 |
| 0.276241816 | 0.199742723 | 0.285701993 | 0.062470187 |
| 0.341886496 | 0.05977867  | 0.072940437 | 0.149828693 |

|             |             |             |             |
|-------------|-------------|-------------|-------------|
| 0.173724914 | 0.307975947 | 0.032876744 | 0.021348903 |
| 0.203309788 | 0.116679582 | 0.324906155 | 0.220150006 |
| 0.206522273 | 0.000547627 | 0.059324899 | 0.196800493 |
| 0.062434761 | 0.21081674  | 0.415050054 | 0.193845803 |
| 0.30787808  | 0.048445813 | 0.210223394 | 0.091198548 |
| 0.293958354 | 0.074624957 | 0.072157078 | 0.002298101 |
| 0.099763695 | 0.057031118 | 0.168379547 | 0.068938014 |
| 0.081420405 | 0.090220207 | 0.053905441 | 0.317506981 |
| 0.249601597 | 0.24062505  | 0.034169604 | 0.030360829 |
| 0.119281668 | 0.332958349 | 0.055794444 | 0.064040484 |
| 0.287951167 | 0.090637856 | 0.194131137 | 0.437666674 |
| 0.101177641 | 0.376116589 | 0.02399422  | 0.166722401 |
| 0.14111206  | 0.31068649  | 0.216150732 | 0.273662931 |
| 0.187677669 | 0.238445875 | 0.042495817 | 0.352739179 |
| 0.226098001 | 0.221503657 | 0.093811884 | 0.412555534 |
| 0.003475679 | 0.323523222 | 0.17985184  | 0.022802704 |
| 0.389195602 | 0.287710588 | 0.096160775 | 0.146703217 |
| 0.339236541 | 0.421247558 | 0.332614825 | 0.217842256 |
| 0.044546485 | 0.027285823 | 0.380812315 | 0.366826482 |
| 0.288690255 | 0.175169176 | 0.040209686 | 0.026244876 |
| 0.331896007 | 0.135593163 | 0.232010119 | 0.12785244  |
| 0.169950452 | 0.068618997 | 0.255900604 | 0.195891635 |
| 0.005592354 | 0.126939656 | 0.168635687 | 0.048479409 |
| 0.075864467 | 0.092371648 | 0.299819157 | 0.406899056 |
| 0.060002707 | 0.044943287 | 0.050824117 | 0.085736646 |
| 0.261507982 | 0.3965328   | 0.00684133  | 0.382398941 |
| 0.359093072 | 0.271419108 | 0.310184681 | 0.356764566 |
| 0.228997553 | 0.418794725 | 0.332865188 | 0.266521474 |
| 0.002401798 | 0.198164246 | 0.14435386  | 0.453496376 |
| 0.246271997 | 0.326619888 | 0.063083759 | 0.074667929 |
| 0.004156012 | 0.218672649 | 0.01964587  | 0.450696295 |
| 0.290231991 | 0.062126628 | 0.004080683 | 0.294587574 |
| 0.135866991 | 0.010861668 | 0.39437653  | 0.201681473 |
| 0.347556294 | 0.190282043 | 0.16148582  | 0.174300933 |
| 0.014584578 | 0.081172165 | 0.019772417 | 0.222892254 |
| 0.126197448 | 0.023438214 | 0.03390312  | 0.369091544 |
| 0.330572064 | 0.360582225 | 0.313477886 | 0.004225515 |
| 0.186561395 | 0.025321959 | 0.237309686 | 0.102142621 |
| 0.3579969   | 0.411931717 | 0.399499447 | 0.206961353 |
| 0.219870133 | 0.39718722  | 0.418465201 | 0.319029652 |
| 0.014712902 | 0.182642137 | 0.23417839  | 0.047454257 |
| 0.133192639 | 0.31329371  | 0.126813639 | 0.253120885 |
| 0.333928224 | 0.012949507 | 0.303640077 | 0.171659276 |
| 0.389927584 | 0.297375588 | 0.080745768 | 0.120690149 |
| 0.405175562 | 1           | 0.151474833 | 0.211578216 |
| 0.376794156 | 0.01159465  | 0.029490096 | 0.387472641 |
| 0.437247863 | 0.376747141 | 0.276876739 | 0.041492888 |
| 0.269471229 | 0.087851918 | 0.31037484  | 0.122072441 |
| 0.282067099 | 0.122283647 | 0.172168041 | 0.019395724 |
| 0.009071513 | 0.072792765 | 0.390319586 | 0.443810993 |
| 0.099105274 | 0.243370324 | 0.179661147 | 0.222234967 |
| 0.293012055 | 0.065774125 | 0.331740756 | 0.196906588 |
| 0.473803496 | 0.027819871 | 0.440222335 | 0.222453511 |
| 0.330887239 | 0.122013231 | 0.305390075 | 0.007390755 |

|             |             |             |             |
|-------------|-------------|-------------|-------------|
| 0.178161644 | 0.066178299 | 0.072474843 | 0.164028966 |
| 0.224561541 | 0.117994981 | 0.344660208 | 0.122418329 |
| 0.033258692 | 0.00478108  | 0.372140811 | 0.060504167 |
| 0.398779208 | 0.043146887 | 0.201340173 | 0.009408222 |
| 0.428994331 | 0.204501078 | 0.269480901 | 0.041295396 |
| 0.129459653 | 0.001478504 | 0.072898523 | 0.060768442 |
| 0.336847618 | 0.412761605 | 0.213510756 | 0.131865212 |
| 0.059733509 | 0.228945558 | 0.346157704 | 0.135413356 |
| 0.300783197 | 0.018044832 | 0.325244075 | 0.156345884 |
| 0.159267816 | 0.092714472 | 0.342963075 | 0.123575772 |
| 0.165389406 | 0.073031294 | 0.152689156 | 0.101090733 |
| 0.2710207   | 0.110710464 | 0.181919494 | 0.063746737 |
| 0.056521812 | 0.12517555  | 0.231233512 | 0.184960117 |
| 0.201236467 | 0.147904955 | 0.071500054 | 0.4612612   |
| 0.062393915 | 0.145992142 | 0.0092519   | 0.012279957 |
| 0.035600728 | 0.145621358 | 0.326112658 | 0.323753124 |
| 0.335850857 | 0.053375213 | 0.108091589 | 0.121155739 |
| 0.016860985 | 0.190238558 | 0.285171673 | 0.016757214 |
| 0.237341161 | 0.053739263 | 0.001727232 | 0.09814825  |
| 0.385944471 | 0.053948008 |             |             |
| RRAS2       | 0.056179866 | 0.193476419 | 0.215960139 |
| 0.01040495  | 0.163607116 | 0.362648208 | 0.331064813 |
| 0.036879953 | 0.206693419 | 0.146840152 | 0.353609521 |
| 0.003396464 | 0.044886646 | 0.061504771 | 0.152958812 |
| 0.108368992 | 0.112773179 | 0.239547288 | 0.115559166 |
| 0.081925236 | 0.061816241 | 0.18610036  | 0.154012317 |
| 0.303947216 | 0.00955049  | 0.229756983 | 0.04251056  |
| 0.025289696 | 0.088013438 | 0.246541842 | 0.10851493  |
| 0.090444597 | 0.072455006 | 0.054595742 | 0.06916779  |
| 0.00881973  | 0.249758302 | 0.006675773 | 0.059098081 |
| 0.048542701 | 0.173852877 | 0.080740842 | 0.117074393 |
| 0.000210134 | 0.262784698 | 0.019683321 | 0.168272038 |
| 0.094948488 | 0.324711619 | 0.282609521 | 0.201070269 |
| 0.002508452 | 0.324391038 | 0.129025101 | 0.002217643 |
| 0.321929827 | 0.001936444 | 0.27495712  | 0.03381479  |
| 0.271855577 | 0.156757715 | 0.035293144 | 0.137345489 |
| 0.409578369 | 0.304998533 | 0.155558478 | 0.210714578 |
| 0.273338831 | 0.062662736 | 0.049688426 | 0.11128679  |
| 0.170151128 | 0.066553231 | 0.149007152 | 0.020310352 |
| 0.067698178 | 0.05260152  | 0.323327564 | 0.20163124  |
| 0.004695652 | 0.284368204 | 0.061822575 | 0.054033839 |
| 0.02938734  | 0.327831412 | 0.062017707 | 0.193466789 |
| 0.043395942 | 0.16176751  | 0.169738701 | 0.135015667 |
| 0.027541997 | 0.065348015 | 0.009851195 | 0.2007301   |
| 0.089395624 | 0.062848059 | 0.100361165 | 0.243987459 |
| 0.13206626  | 0.191199469 | 0.023797234 | 0.039852251 |
| 0.105687459 | 0.08349384  | 0.321381131 | 0.002982784 |
| 0.030841004 | 0.107608191 | 0.1272199   | 0.254777595 |
| 0.139782641 | 0.046166846 | 0.142875261 | 0.356465741 |
| 0.048344503 | 0.070196049 | 0.322116067 | 0.002022562 |
| 0.016235793 | 0.006236006 | 0.086260675 | 0.177066982 |
| 0.216039322 | 0.283817035 | 0.080828073 | 0.081750904 |
| 0.029155753 | 0.074319739 | 0.214178972 | 0.240564458 |
| 0.052437891 | 0.324166765 | 0.072609467 | 0.083555107 |

|             |             |             |             |
|-------------|-------------|-------------|-------------|
| 0.049301557 | 0.097240927 | 0.194542871 | 0.222868706 |
| 0.264671857 | 0.238200991 | 0.212712422 | 0.286268133 |
| 0.034593612 | 0.109419945 | 0.152785858 | 0.078829142 |
| 0.140567244 | 0.210942711 | 0.054068915 | 0.201520967 |
| 0.347032626 | 0.111123797 | 0.003155495 | 0.304293317 |
| 0.330913416 | 0.003513834 | 0.254786162 | 0.093423398 |
| 0.034654961 | 0.171076859 | 0.216262724 | 0.143086306 |
| 0.090549268 | 0.036881192 | 0.11643818  | 0.268789441 |
| 0.207146717 | 0.225653962 | 0.143912794 | 0.096954103 |
| 0.272493075 | 0.048132906 | 0.266626803 | 0.033906569 |
| 0.272455119 | 0.193785859 | 0.012897926 | 0.013324268 |
| 0.071835168 | 0.061796369 | 0.157506464 | 0.100764914 |
| 0.068152592 | 0.001511129 | 0.129971215 | 0.07742889  |
| 0.047776999 | 0.055175858 | 0.219945693 | 0.306726502 |
| 0.254716237 | 0.021608527 | 0.275940536 | 0.107852125 |
| 0.103278798 | 0.101087968 | 0.109695899 | 0.008172716 |
| 0.22625345  | 0.018566616 | 0.079866489 | 0.097731994 |
| 0.148263896 | 0.148206594 | 0.038060259 | 0.140864607 |
| 0.30464672  | 0.096134994 | 0.031966017 | 0.010181294 |
| 0.159110447 | 0.226874283 | 0.035414169 | 0.03780956  |
| 0.151363818 | 0.096155449 | 0.045423422 | 0.301850605 |
| 0.146989678 | 0.3129515   | 0.007667212 | 0.142394537 |
| 0.046395618 | 0.133385097 | 0.071209964 | 0.112361808 |
| 0.198534362 | 0.085944618 | 0.019083034 | 0.338977729 |
| 0.113996537 | 0.111948673 | 0.193806188 | 0.197224211 |
| 0.009567162 | 0.23958833  | 0.089011552 | 0.007043817 |
| 0.203384831 | 0.365561476 | 0.214671563 | 0.105220356 |
| 0.119210065 | 0.20115872  | 0.124682465 | 0.061130629 |
| 0.013537809 | 0.043465999 | 0.159433631 | 0.226094657 |
| 0.089353404 | 0.11596424  | 0.024460435 | 0.010203518 |
| 0.134034914 | 0.038839137 | 0.117628435 | 0.043260431 |
| 0.072987675 | 0.028615207 | 0.227544961 | 0.060645832 |
| 0.002434788 | 0.131179963 | 0.060952307 | 0.056383758 |
| 0.07493226  | 0.105806019 | 0.136306611 | 0.336743178 |
| 0.044826042 | 0.021131553 | 0.041192807 | 0.261553719 |
| 0.353056137 | 0.186294446 | 0.002477078 | 0.159375339 |
| 0.13853224  | 0.168609709 | 0.133036919 | 0.133413289 |
| 0.155956023 | 0.315988111 | 0.152103778 | 0.079009482 |
| 0.002774498 | 0.051091827 | 0.036167257 | 0.357678499 |
| 0.080137999 | 0.305461247 | 0.01565248  | 0.023183846 |
| 0.011704875 | 0.280385265 | 0.007016692 | 0.224080474 |
| 0.116310564 | 0.234355469 | 0.001185782 | 0.136621066 |
| 0.035212207 | 0.006165598 | 0.168257376 | 0.17232839  |
| 0.183595679 | 0.107271142 | 0.24581847  | 0.045870538 |
| 0.003862647 | 0.050004504 | 0.069970907 | 0.124105035 |
| 0.052349909 | 0.008099449 | 0.105733045 | 0.141047617 |
| 0.151103736 | 0.280080878 | 0.321937353 | 0.009759821 |
| 0.044829296 | 0.019611319 | 0.104629935 | 0.17110179  |
| 0.180605064 | 0.325405477 | 0.223827808 | 0.065510865 |
| 0.099757308 | 0.270116608 | 0.30981985  | 0.15202006  |
| 0.014027136 | 0.050346094 | 0.069724921 | 0.13184681  |
| 0.035372084 | 0.127046337 | 0.065462178 | 0.375673976 |
| 0.192931818 | 0.016521151 | 0.379068249 | 0.071485066 |
| 0.230810415 | 0.117425343 | 0.24263136  | 0.14369536  |

|             |             |             |             |
|-------------|-------------|-------------|-------------|
| 0.284271374 | 0.151474833 | 1           | 0.140324471 |
| 0.350430857 | 0.002459432 | 0.009839239 | 0.265971223 |
| 0.263645885 | 0.39208219  | 0.10309047  | 0.070314522 |
| 0.091688325 | 0.208120199 | 0.11954845  | 0.175777193 |
| 0.221057463 | 0.035029351 | 0.039973068 | 0.005081766 |
| 0.01666475  | 0.087884246 | 0.293019752 | 0.303698095 |
| 0.252708643 | 0.259416369 | 0.211470603 | 0.204912539 |
| 0.099284011 | 0.039815125 | 0.329294207 | 0.117542525 |
| 0.340005972 | 0.060017566 | 0.224075926 | 0.135073699 |
| 0.161471446 | 0.119978356 | 0.137850196 | 0.007587549 |
| 0.064717566 | 0.126226224 | 0.018856199 | 0.133304836 |
| 0.057293431 | 0.237212114 | 0.276637462 | 0.177129279 |
| 0.025818425 | 0.006092934 | 0.229384768 | 0.018586562 |
| 0.400016467 | 0.015829189 | 0.111102112 | 0.002280386 |
| 0.19850836  | 0.106817415 | 0.111636184 | 0.014548197 |
| 0.093833269 | 0.000756033 | 0.161638265 | 0.162356158 |
| 0.171440944 | 0.275246037 | 0.07768209  | 0.048420515 |
| 0.029088972 | 0.118390965 | 0.242746753 | 0.087861488 |
| 0.1226462   | 0.00633292  | 0.118725679 | 0.100162254 |
| 0.036227368 | 0.061314392 | 0.353350626 | 0.091322722 |
| 0.249242124 | 0.053311686 | 0.277317499 | 0.091437542 |
| 0.095478117 | 0.089674719 | 0.141020514 | 0.036640268 |
| 0.217975337 | 0.09740615  | 0.074858757 | 0.057944487 |
| 0.097962708 | 0.03989985  | 0.027064726 | 0.343678265 |
| 0.036743827 | 0.078053122 | 0.017907182 | 0.043516609 |
| 0.024965261 | 0.202722625 | 0.126829828 | 0.134112238 |
| 0.124254305 | 0.022140524 | 0.254862413 | 0.166120327 |
| 0.00489491  | 0.050056114 | 0.337357401 | 0.010308518 |
| 0.113596263 | 0.022191041 | 0.005692116 | 0.075515061 |
| 0.266899536 | 0.031684563 |             |             |
| RREB1       | 0.154102429 | 0.42580168  | 0.094062135 |
| 0.007293203 | 0.102175131 | 0.253449755 | 0.20866398  |
| 0.12678997  | 0.131590666 | 0.076758745 | 0.360610559 |
| 0.003994499 | 0.240192378 | 0.035315665 | 0.146979383 |
| 0.36499661  | 0.377552528 | 0.262596297 | 0.400210191 |
| 0.173400974 | 0.048274532 | 0.325890841 | 0.208903815 |
| 0.229872966 | 0.00600191  | 0.106501526 | 0.015942995 |
| 0.115178483 | 0.348207295 | 0.192929427 | 0.124422888 |
| 0.312694023 | 0.287890199 | 0.116417903 | 0.123392805 |
| 0.043615634 | 0.457017906 | 0.049440473 | 0.23926955  |
| 0.251561051 | 0.136295175 | 0.28950795  | 0.040064899 |
| 0.000336795 | 0.114037208 | 0.101841851 | 0.280490631 |
| 0.202294375 | 0.216204007 | 0.202134668 | 0.113510709 |
| 0.024510488 | 0.381841723 | 0.347081132 | 0.023535556 |
| 0.447094312 | 0.000758623 | 0.453698664 | 0.114197069 |
| 0.116768814 | 0.209712474 | 0.110300114 | 0.268597153 |
| 0.297348547 | 0.45473306  | 0.420303578 | 0.050121755 |
| 0.102866353 | 0.176651794 | 0.206185731 | 0.197003608 |
| 0.386798904 | 0.117470825 | 0.159878287 | 0.100996145 |
| 0.218426241 | 0.248395377 | 0.341099828 | 0.208351379 |
| 0.001778402 | 0.126452019 | 0.10350903  | 0.201241206 |
| 0.14938288  | 0.387701923 | 0.194209945 | 0.141071612 |
| 0.128155378 | 0.053505913 | 0.276209042 | 0.40399499  |
| 0.013427269 | 0.269002524 | 0.010878591 | 0.217769303 |

|             |             |             |             |
|-------------|-------------|-------------|-------------|
| 0.299510483 | 0.289471206 | 0.245037142 | 0.080383088 |
| 0.046727575 | 0.186764344 | 0.078173464 | 0.234864812 |
| 0.218155442 | 0.186926144 | 0.436618203 | 0.044429657 |
| 0.198242354 | 0.117286408 | 0.208275553 | 0.434299029 |
| 0.371740426 | 0.043023384 | 0.187009784 | 0.248941588 |
| 0.111324456 | 0.057336354 | 0.233411969 | 0.009404781 |
| 0.008821615 | 0.030047668 | 0.318765074 | 0.168694957 |
| 0.085333691 | 0.167993415 | 0.055732742 | 0.200324711 |
| 0.126136723 | 0.311269803 | 0.123422899 | 0.168621042 |
| 0.206262353 | 0.230055725 | 0.138634634 | 0.252555032 |
| 0.133379201 | 0.181692979 | 0.15213644  | 0.431778063 |
| 0.473092488 | 0.100606605 | 0.10125316  | 0.301956091 |
| 0.202000731 | 0.361503286 | 0.423749991 | 0.185245326 |
| 0.148602612 | 0.220112491 | 0.088827445 | 0.26689202  |
| 0.272112337 | 0.257933198 | 0.041378389 | 0.411343635 |
| 0.453912585 | 0.014093322 | 0.104649882 | 0.313919134 |
| 0.02668282  | 0.167597567 | 0.407874518 | 0.339366952 |
| 0.248877162 | 0.012378093 | 0.099505742 | 0.19802612  |
| 0.240113137 | 0.163958193 | 0.28710197  | 0.081478992 |
| 0.309592868 | 0.083748393 | 0.085515176 | 0.202561359 |
| 0.156425151 | 0.291784845 | 0.059561544 | 0.025443378 |
| 0.237263302 | 0.185101902 | 0.349219915 | 0.244467421 |
| 0.221623409 | 0.000635792 | 0.07038803  | 0.193042524 |
| 0.08226819  | 0.280323474 | 0.438369274 | 0.156819434 |
| 0.279704617 | 0.109020729 | 0.17996358  | 0.160656461 |
| 0.340990795 | 0.091692871 | 0.09010385  | 0.001278948 |
| 0.164344274 | 0.070378352 | 0.182765155 | 0.086368422 |
| 0.136878619 | 0.102273685 | 0.108790526 | 0.347426286 |
| 0.204809943 | 0.295921599 | 0.055743052 | 0.084293067 |
| 0.171256333 | 0.341579859 | 0.096507917 | 0.097743441 |
| 0.306565271 | 0.12995523  | 0.247531376 | 0.415334455 |
| 0.194127099 | 0.339054121 | 0.066735553 | 0.200377955 |
| 0.173758931 | 0.35478072  | 0.258165488 | 0.334170429 |
| 0.173194967 | 0.292213769 | 0.102407479 | 0.307129251 |
| 0.247051548 | 0.262739316 | 0.114507634 | 0.459314873 |
| 0.002489292 | 0.316163996 | 0.185078964 | 0.058298398 |
| 0.41501296  | 0.247958325 | 0.112409291 | 0.18941457  |
| 0.405452799 | 0.472050687 | 0.38180169  | 0.263659719 |
| 0.077533069 | 0.035219988 | 0.429631094 | 0.349807406 |
| 0.345137184 | 0.198629029 | 0.0911204   | 0.08477753  |
| 0.382352736 | 0.185579947 | 0.220461381 | 0.138052589 |
| 0.20045707  | 0.129068644 | 0.248205695 | 0.239639617 |
| 0.006591792 | 0.127214723 | 0.17613226  | 0.061927126 |
| 0.101741813 | 0.107781579 | 0.330058013 | 0.395303959 |
| 0.124007023 | 0.073731218 | 0.088450163 | 0.103461562 |
| 0.216751883 | 0.424883372 | 0.022691062 | 0.425315495 |
| 0.415679484 | 0.290643659 | 0.348335036 | 0.415090745 |
| 0.202667542 | 0.40631705  | 0.367604361 | 0.330661867 |
| 0.002881023 | 0.246794025 | 0.197703884 | 0.431218916 |
| 0.277598555 | 0.273686803 | 0.100707388 | 0.099473117 |
| 0.007626112 | 0.169171071 | 0.039572953 | 0.484916976 |
| 0.340235802 | 0.060833347 | 0.016935579 | 0.342137912 |
| 0.18037324  | 0.033319304 | 0.438259205 | 0.176796285 |
| 0.378223076 | 0.219013854 | 0.128928483 | 0.220969478 |



|             |             |             |             |
|-------------|-------------|-------------|-------------|
| 0.03010278  | 0.182832315 | 0.027202409 | 0.235052066 |
| 0.152187735 | 0.045402978 | 0.040805241 | 0.422751356 |
| 0.346064924 | 0.365163226 | 0.279394861 | 0.002499848 |
| 0.234767279 | 0.041309047 | 0.2607828   | 0.181914183 |
| 0.395826862 | 0.389340019 | 0.439436809 | 0.258780618 |
| 0.238317103 | 0.397593472 | 0.390950203 | 0.336539571 |
| 0.034468503 | 0.219576013 | 0.267191564 | 0.057559598 |
| 0.14568705  | 0.360691314 | 0.126433917 | 0.201179265 |
| 0.324226661 | 0.024841086 | 0.245506203 | 0.187289703 |
| 0.415890346 | 0.330632913 | 0.08052638  | 0.211770855 |
| 0.391151185 | 0.211578216 | 0.140324471 | 1           |
| 0.325713858 | 0.023122813 | 0.076921926 | 0.369266826 |
| 0.449282601 | 0.337367875 | 0.300550432 | 0.051904261 |
| 0.331886584 | 0.124786282 | 0.375969122 | 0.205969431 |
| 0.261433223 | 0.132291866 | 0.222379044 | 0.038145948 |
| 0.006913969 | 0.092286233 | 0.374959018 | 0.433700382 |
| 0.11315563  | 0.207823269 | 0.158343217 | 0.219098119 |
| 0.34659282  | 0.122924502 | 0.298174922 | 0.218505611 |
| 0.463580079 | 0.035568246 | 0.467582619 | 0.205240801 |
| 0.328234388 | 0.149613187 | 0.342039769 | 0.006106667 |
| 0.20339062  | 0.079473295 | 0.092803733 | 0.161705933 |
| 0.278346747 | 0.137437659 | 0.342254981 | 0.163516153 |
| 0.055354045 | 0.012418146 | 0.37996769  | 0.081370807 |
| 0.344220696 | 0.111331442 | 0.214242956 | 0.023761787 |
| 0.465799566 | 0.195665708 | 0.274178499 | 0.100223052 |
| 0.141517331 | 0.005277397 | 0.086861661 | 0.068847881 |
| 0.334736454 | 0.417857339 | 0.230441345 | 0.135921793 |
| 0.112768858 | 0.257098767 | 0.354323717 | 0.153094018 |
| 0.34053804  | 0.02813372  | 0.372917788 | 0.224402149 |
| 0.210693093 | 0.140472261 | 0.302284284 | 0.19845564  |
| 0.159048862 | 0.102997177 | 0.156979311 | 0.154644251 |
| 0.316856173 | 0.226215366 | 0.188004297 | 0.099800086 |
| 0.06686808  | 0.17343853  | 0.289615897 | 0.219934189 |
| 0.199860292 | 0.1645197   | 0.130181596 | 0.452518625 |
| 0.101651389 | 0.149896631 | 0.014341719 | 0.011342232 |
| 0.055302585 | 0.139085631 | 0.371557289 | 0.377346191 |
| 0.39599839  | 0.110206697 | 0.12694884  | 0.169098975 |
| 0.057784249 | 0.238466805 | 0.252222653 | 0.045791423 |
| 0.263872238 | 0.093334794 | 0.002554416 | 0.158848195 |
| 0.369644612 | 0.10813516  |             |             |
| RYK         | 0.183286129 | 0.380975494 | 0.279746293 |
| 0.016665269 | 0.174744701 | 0.394722555 | 0.35531764  |
| 0.161168944 | 0.369748608 | 0.232007894 | 0.422894096 |
| 0.014498708 | 0.14363997  | 0.127655319 | 0.245479741 |
| 0.286804604 | 0.289296006 | 0.324422161 | 0.29556121  |
| 0.25491373  | 0.124526351 | 0.329923808 | 0.270293244 |
| 0.394963162 | 0.027019854 | 0.273422428 | 0.059688687 |
| 0.129059344 | 0.25121991  | 0.421072355 | 0.277444138 |
| 0.252256581 | 0.202519071 | 0.189183124 | 0.163111909 |
| 0.047533309 | 0.434916074 | 0.027015752 | 0.15792162  |
| 0.163679655 | 0.28908451  | 0.215522918 | 0.138757305 |
| 0.000602887 | 0.309078333 | 0.120102103 | 0.299927007 |
| 0.300988131 | 0.392763295 | 0.420961777 | 0.280479423 |
| 0.023494232 | 0.428053171 | 0.295277191 | 0.020864147 |

|             |             |             |             |
|-------------|-------------|-------------|-------------|
| 0.454644979 | 0.003180319 | 0.445449283 | 0.178933685 |
| 0.334720455 | 0.37258267  | 0.144990142 | 0.268671986 |
| 0.394107503 | 0.454785033 | 0.341197848 | 0.173133178 |
| 0.323668945 | 0.190750488 | 0.157278333 | 0.200945601 |
| 0.346119717 | 0.215566735 | 0.317950593 | 0.097848296 |
| 0.175926944 | 0.16831946  | 0.403784772 | 0.386193529 |
| 0.009705394 | 0.312572632 | 0.15619885  | 0.164132989 |
| 0.096306948 | 0.431426949 | 0.171519942 | 0.303206978 |
| 0.154128004 | 0.191852255 | 0.307014239 | 0.320576119 |
| 0.040205596 | 0.181059468 | 0.015779664 | 0.367018725 |
| 0.234007422 | 0.203185273 | 0.233729111 | 0.27233781  |
| 0.150643284 | 0.384654709 | 0.132690407 | 0.14742269  |
| 0.259034049 | 0.221266984 | 0.450531296 | 0.025785779 |
| 0.115339839 | 0.307930845 | 0.325043155 | 0.430334167 |
| 0.323869339 | 0.071895164 | 0.358531186 | 0.394460744 |
| 0.163536122 | 0.124449333 | 0.37947738  | 0.013350741 |
| 0.023813542 | 0.032318611 | 0.240873408 | 0.387042135 |
| 0.248671831 | 0.369326564 | 0.114647163 | 0.16589708  |
| 0.154095844 | 0.224171633 | 0.22537266  | 0.357814763 |
| 0.145558534 | 0.355474805 | 0.182045553 | 0.202120018 |
| 0.146274197 | 0.319437169 | 0.388513185 | 0.377970955 |
| 0.447568186 | 0.268459015 | 0.325272081 | 0.3715638   |
| 0.118786525 | 0.282023321 | 0.34858233  | 0.274078587 |
| 0.239392227 | 0.407271644 | 0.190192984 | 0.28225538  |
| 0.395488389 | 0.267802201 | 0.024114336 | 0.40888594  |
| 0.476656335 | 0.016396228 | 0.332866939 | 0.234939041 |
| 0.034158016 | 0.312683319 | 0.399398194 | 0.280382359 |
| 0.197215641 | 0.052256999 | 0.236750652 | 0.357546089 |
| 0.372861306 | 0.342680031 | 0.274122186 | 0.20497845  |
| 0.371533979 | 0.174242963 | 0.257346059 | 0.120685838 |
| 0.387725348 | 0.338968478 | 0.087208567 | 0.048511401 |
| 0.182405816 | 0.242275446 | 0.315750971 | 0.232096723 |
| 0.188843112 | 0.002041986 | 0.214397056 | 0.202321905 |
| 0.186705992 | 0.176008746 | 0.401768945 | 0.391580965 |
| 0.396456431 | 0.102851836 | 0.411982634 | 0.226231585 |
| 0.265159501 | 0.241802275 | 0.241312311 | 0.012678649 |
| 0.317518801 | 0.10722406  | 0.232158727 | 0.233860924 |
| 0.248809776 | 0.323273891 | 0.153787434 | 0.302017877 |
| 0.407175792 | 0.214934023 | 0.101519594 | 0.063413745 |
| 0.355580189 | 0.330546437 | 0.144518619 | 0.185305937 |
| 0.273938593 | 0.26808553  | 0.163523659 | 0.446976272 |
| 0.2677883   | 0.408491156 | 0.048331718 | 0.384666129 |
| 0.13411582  | 0.286934003 | 0.195836854 | 0.243088743 |
| 0.380144517 | 0.209296622 | 0.104257971 | 0.392490302 |
| 0.261470494 | 0.256533509 | 0.334446171 | 0.386749981 |
| 0.015371379 | 0.35396787  | 0.195866932 | 0.051290291 |
| 0.377299605 | 0.358760251 | 0.337265713 | 0.324851042 |
| 0.302615243 | 0.393533616 | 0.29871733  | 0.190381294 |
| 0.086021351 | 0.097093138 | 0.353849599 | 0.363766873 |
| 0.25199377  | 0.289912788 | 0.090422996 | 0.046903907 |
| 0.303332971 | 0.125431248 | 0.234143002 | 0.150327931 |
| 0.169274564 | 0.12156216  | 0.406724933 | 0.170333828 |
| 0.016061376 | 0.321528828 | 0.161787475 | 0.142845778 |
| 0.215636629 | 0.261138803 | 0.277103183 | 0.417266769 |

|             |             |             |             |
|-------------|-------------|-------------|-------------|
| 0.148864684 | 0.126540219 | 0.136500014 | 0.283312632 |
| 0.416708365 | 0.378367946 | 0.010353618 | 0.351783069 |
| 0.327879247 | 0.319966986 | 0.290119564 | 0.324262444 |
| 0.339135322 | 0.427023702 | 0.319853346 | 0.228708463 |
| 0.008064647 | 0.167158508 | 0.117782719 | 0.471292771 |
| 0.223500378 | 0.392044261 | 0.093490048 | 0.103823495 |
| 0.012456128 | 0.412786072 | 0.046756157 | 0.426611033 |
| 0.262721119 | 0.203028311 | 0.006239824 | 0.272051095 |
| 0.110502469 | 0.024664056 | 0.369142096 | 0.304647725 |
| 0.335748941 | 0.241541172 | 0.345495065 | 0.146065661 |
| 0.032676205 | 0.198666081 | 0.060127095 | 0.218922109 |
| 0.170721513 | 0.05100379  | 0.121230138 | 0.333515146 |
| 0.323191119 | 0.363292164 | 0.413904613 | 0.022205694 |
| 0.160430526 | 0.074298313 | 0.224196079 | 0.289917307 |
| 0.346118143 | 0.427291536 | 0.382641185 | 0.181024395 |
| 0.219123814 | 0.405039295 | 0.438688845 | 0.311708104 |
| 0.040339034 | 0.163308679 | 0.208207121 | 0.165986656 |
| 0.120205659 | 0.287582949 | 0.173010443 | 0.37951726  |
| 0.329465584 | 0.034498838 | 0.409169808 | 0.220536256 |
| 0.380982823 | 0.275068989 | 0.296957123 | 0.349623216 |
| 0.413106237 | 0.376794156 | 0.350430857 | 0.325713858 |
| 1           | 0.027102665 | 0.059585888 | 0.389836053 |
| 0.434560537 | 0.406735106 | 0.260020325 | 0.138681662 |
| 0.236134295 | 0.296871816 | 0.274921708 | 0.343106046 |
| 0.380172319 | 0.114300827 | 0.147175311 | 0.044702058 |
| 0.04156872  | 0.256110698 | 0.400893405 | 0.450969378 |
| 0.329054706 | 0.415602756 | 0.331196074 | 0.286700394 |
| 0.264532758 | 0.168515922 | 0.396431541 | 0.304406958 |
| 0.479080997 | 0.091659989 | 0.424433427 | 0.315490762 |
| 0.326988581 | 0.286932695 | 0.282450427 | 0.018896118 |
| 0.163822495 | 0.233337391 | 0.10430104  | 0.230807418 |
| 0.191126186 | 0.354787911 | 0.349369555 | 0.393202082 |
| 0.089028917 | 0.014005149 | 0.36777214  | 0.081938779 |
| 0.440208834 | 0.096548706 | 0.290412774 | 0.020333116 |
| 0.40403411  | 0.255004377 | 0.264647208 | 0.078970179 |
| 0.255718384 | 0.00262385  | 0.250761968 | 0.228496474 |
| 0.334036956 | 0.409364867 | 0.19126093  | 0.172129916 |
| 0.157171772 | 0.211181297 | 0.34897146  | 0.196880727 |
| 0.274208267 | 0.04258172  | 0.297551194 | 0.313312333 |
| 0.13109276  | 0.233282804 | 0.415028729 | 0.283680386 |
| 0.32555761  | 0.161234266 | 0.393515615 | 0.295362225 |
| 0.24481327  | 0.256981477 | 0.250806272 | 0.186257436 |
| 0.21381382  | 0.273007707 | 0.198054566 | 0.162497541 |
| 0.210889178 | 0.132680451 | 0.140547635 | 0.470368411 |
| 0.175997742 | 0.289003189 | 0.031066681 | 0.048015934 |
| 0.093601725 | 0.363073603 | 0.302416917 | 0.298828769 |
| 0.301124828 | 0.1248969   | 0.360066258 | 0.372940036 |
| 0.029294216 | 0.165860887 | 0.346965588 | 0.037011281 |
| 0.226948287 | 0.124345526 | 0.00747473  | 0.279220861 |
| 0.39728599  | 0.139198977 |             |             |
| S1PR1       | 0.106431425 | 0.16727783  | 0.000736036 |
| 0.002790015 | 0.001026902 | 0.020692911 | 0.013633624 |
| 0.093605676 | 0.00086121  | 0.005424612 | 0.044635605 |
| 4.33E-05    | 0.210455118 | 0.000138266 | 0.000315552 |

|             |             |             |             |
|-------------|-------------|-------------|-------------|
| 0.263828351 | 0.243963122 | 0.027074919 | 0.228569703 |
| 0.051042275 | 0.004978452 | 0.073308779 | 0.074262594 |
| 0.020280949 | 2.24E-05    | 0.004389996 | 0.002511964 |
| 0.085226768 | 0.271754928 | 0.010341687 | 0.012672546 |
| 0.251656238 | 0.238716643 | 0.030440324 | 0.006041452 |
| 0.029254541 | 0.125689875 | 0.004342077 | 0.178454598 |
| 0.247527748 | 0.011295201 | 0.214186746 | 4.71E-05    |
| 0.001958438 | 0.002239153 | 0.090530622 | 0.079829663 |
| 0.023870648 | 0.017404003 | 0.007106456 | 0.008719331 |
| 0.026875463 | 0.054286248 | 0.128725445 | 0.044320273 |
| 0.080992787 | 0.000572154 | 0.108319915 | 0.03728009  |
| 0.000783555 | 0.020733377 | 0.090529317 | 0.103908957 |
| 0.020907083 | 0.094351633 | 0.194630364 | 0.000256426 |
| 0.001685772 | 0.089797888 | 0.258658922 | 0.101055393 |
| 0.15208175  | 0.016681929 | 0.008278981 | 0.058111725 |
| 0.170355315 | 0.227264359 | 0.024538165 | 0.003151087 |
| 2.50E-05    | 0.006691176 | 0.021882048 | 0.146964834 |
| 0.176222596 | 0.057195829 | 0.133237991 | 0.007342783 |
| 0.123972565 | 7.06E-05    | 0.056043853 | 0.220764831 |
| 0.000576609 | 0.179595853 | 0.00012167  | 0.001443968 |
| 0.190408165 | 0.297383677 | 0.128569183 | 0.000992749 |
| 4.86E-05    | 0.002432236 | 0.008417373 | 0.305796716 |
| 0.068328475 | 0.074632843 | 0.074779247 | 0.029880737 |
| 0.266317438 | 0.003346143 | 0.014396237 | 0.127714616 |
| 0.212357627 | 4.12E-05    | 0.00309019  | 0.016020817 |
| 0.008047421 | 0.002611045 | 0.012640205 | 0.00860543  |
| 0.000623155 | 0.001247483 | 0.247509132 | 0.00524662  |
| 0.003088948 | 0.011419283 | 0.001493975 | 0.117340258 |
| 0.070700028 | 0.238059811 | 0.001050099 | 0.016081842 |
| 0.193785693 | 0.018391141 | 0.05984238  | 0.170136901 |
| 0.023395133 | 0.011515715 | 0.005442607 | 0.115480201 |
| 0.099701007 | 0.0004664   | 0.000822868 | 0.046946668 |
| 0.22530642  | 0.243583821 | 0.216766761 | 0.012514435 |
| 0.010910686 | 0.014555757 | 0.032526428 | 0.070012609 |
| 0.0142674   | 0.046700155 | 0.008062725 | 0.045303349 |
| 0.084651022 | 0.003783361 | 0.000925853 | 0.155412711 |
| 0.001180575 | 0.002679071 | 0.128310534 | 0.121049893 |
| 0.074093064 | 0.001913393 | 0.020090747 | 0.023909657 |
| 0.031791698 | 0.021021326 | 0.083158193 | 0.018670034 |
| 0.040841449 | 0.038005536 | 0.000510679 | 0.251825506 |
| 0.003643796 | 0.044660497 | 0.027778224 | 0.003369932 |
| 0.10889505  | 0.035036173 | 0.149699002 | 0.083856748 |
| 0.178697674 | 0.001245964 | 0.006892361 | 0.10926706  |
| 0.03176281  | 0.228364078 | 0.152033556 | 0.00319914  |
| 0.022046054 | 0.024059305 | 0.004869622 | 0.014867659 |
| 0.160406002 | 0.007808534 | 0.005039688 | 2.72E-05    |
| 0.000994265 | 0.121064687 | 0.053753745 | 0.000607003 |
| 0.006963965 | 0.001696381 | 0.002577597 | 0.179593598 |
| 0.011908011 | 0.153927808 | 0.000533011 | 0.013187011 |
| 0.012671321 | 0.080732613 | 0.058500378 | 0.012680274 |
| 0.120418822 | 0.023189641 | 0.322499896 | 0.072309315 |
| 0.004782284 | 0.060231479 | 0.006966058 | 0.014511912 |
| 0.133086448 | 0.166992447 | 0.227315242 | 0.143973612 |
| 0.016081068 | 0.101986655 | 0.015213132 | 0.029359503 |

|                      |                      |             |             |
|----------------------|----------------------|-------------|-------------|
| 0.064439537          | 0.054687744          | 0.001664123 | 0.158206463 |
| 8.21E-06 0.037723701 | 0.090578936          | 0.008186864 |             |
| 0.15408879           | 0.018376092          | 0.001135774 | 0.017455616 |
| 0.229467193          | 0.15279287           | 0.158402918 | 0.278880668 |
| 0.015554934          | 8.73E-05 0.175386841 | 0.07602254  |             |
| 0.272427071          | 0.032085584          | 0.027063324 | 0.002077331 |
| 0.188850082          | 0.10000162           | 0.11854388  | 0.131439231 |
| 0.084323769          | 0.042982478          | 0.013152191 | 0.125000264 |
| 0.001409117          | 0.021326078          | 0.182112512 | 0.0053726   |
| 0.032775906          | 0.003467341          | 0.149567375 | 0.035507348 |
| 0.028132776          | 0.029883792          | 0.037761533 | 0.001600559 |
| 0.00710477           | 0.179030276          | 0.002048083 | 0.160095542 |
| 0.22292724           | 0.035222199          | 0.187546774 | 0.223069583 |
| 0.04137643           | 0.063631786          | 0.176242333 | 0.215800765 |
| 3.85E-05 0.287065615 | 0.214382756          | 0.049746722 |             |
| 0.263519923          | 0.029762527          | 0.049326375 | 0.089049461 |
| 2.68E-06 0.006738688 | 0.052264261          | 0.140642753 |             |
| 0.184525435          | 7.85E-05 0.003172298 | 0.129672515 |             |
| 0.191334678          | 0.001013229          | 0.201808936 | 0.043394147 |
| 0.139661974          | 0.048594951          | 0.008491626 | 0.246187147 |
| 0.063738288          | 0.024098092          | 0.000346148 | 0.098116986 |
| 0.055214 0.004734256 | 0.002682185          | 0.206085342 |             |
| 0.164263049          | 0.053866592          | 0.016341306 | 0.000703245 |
| 0.266244182          | 0.017907141          | 0.157360571 | 0.00087754  |
| 0.113146106          | 0.051791744          | 0.115297027 | 0.199947688 |
| 0.087201447          | 0.088399479          | 0.0706028   | 0.15475526  |
| 0.00453772           | 0.282615336          | 0.278904537 | 0.000719919 |
| 0.160813162          | 0.188383652          | 0.09010632  | 0.010305191 |
| 0.06422099           | 0.005568305          | 0.013680514 | 0.063495822 |
| 0.115524881          | 0.210539326          | 0.000845746 | 0.003867534 |
| 0.083584271          | 0.01159465           | 0.002459432 | 0.023122813 |
| 0.027102665          | 1                    | 0.007568828 | 0.055523601 |
| 0.11843206           | 0.029302605          | 0.227840444 | 0.008995241 |
| 0.216731871          | 0.000330918          | 0.137770764 | 0.003768613 |
| 0.026782739          | 0.205155768          | 0.29117784  | 0.022242069 |
| 0.001466636          | 0.003734319          | 0.075242233 | 0.082233309 |
| 0.001461284          | 0.010522026          | 0.019633952 | 0.03731225  |
| 0.252473991          | 0.030313964          | 0.024114343 | 0.033673558 |
| 0.075180817          | 0.002756763          | 0.144857642 | 0.045465835 |
| 0.120974928          | 0.028234162          | 0.128304581 | 0.000185754 |
| 0.14743413           | 0.011137499          | 0.052093033 | 0.048367795 |
| 0.290397526          | 0.003915826          | 0.053110688 | 0.00545611  |
| 0.010648797          | 4.08E-05 0.055390038 | 0.085259028 |             |
| 0.030277064          | 0.025387347          | 0.040972676 | 0.02192427  |
| 0.176064317          | 0.082852588          | 0.170681297 | 0.032848412 |
| 0.038750752          | 0.001745212          | 0.006874684 | 0.000171165 |
| 0.09918686           | 0.060126852          | 0.122004214 | 0.10331872  |
| 0.023854174          | 0.083920841          | 0.056720675 | 0.048762414 |
| 0.18608188           | 0.040848277          | 0.246424839 | 0.017204252 |
| 0.274100634          | 0.018901077          | 0.018333718 | 0.007559784 |
| 0.007781212          | 0.001976197          | 0.00237153  | 0.005305591 |
| 0.239485734          | 0.006789029          | 0.048281083 | 0.031098313 |
| 0.000381158          | 0.029048274          | 0.151400659 | 0.195957414 |
| 0.112380345          | 0.241942031          | 0.057714889 | 0.065842843 |

|             |             |             |             |
|-------------|-------------|-------------|-------------|
| 0.010891863 | 0.031936972 | 0.003574703 | 0.001012354 |
| 0.01219884  | 0.009495585 | 0.152230245 | 0.154824974 |
| 0.215044363 | 0.015183811 | 0.00174972  | 0.003945866 |
| 0.00471031  | 0.207641103 | 0.023324258 | 0.010384458 |
| 0.070546051 | 0.034447943 | 4.83E-06    | 0.013607039 |
| 0.061028598 | 0.016358923 |             |             |
| SAE1        | 0.102669182 | 0.147547119 | 0.001835429 |
| 0.000117272 | 0.001768973 | 0.032386541 | 0.021182012 |
| 0.08202681  | 0.005056773 | 0.002819589 | 0.058665141 |
| 0.00104905  | 0.198026029 | 0.002328982 | 0.008983671 |
| 0.198829631 | 0.200384393 | 0.042773912 | 0.231800786 |
| 0.089636223 | 0.001457695 | 0.111575312 | 0.042211002 |
| 0.032676847 | 0.00062148  | 0.005067153 | 0.00025561  |
| 0.086328187 | 0.216809975 | 0.032343878 | 0.006181924 |
| 0.191548486 | 0.154166252 | 0.016705812 | 0.005627395 |
| 0.007042276 | 0.131627406 | 0.016587016 | 0.12937996  |
| 0.239190639 | 0.009740467 | 0.153968933 | 0.002022536 |
| 1.34E-05    | 0.004860461 | 0.070219114 | 0.083805468 |
| 0.085210937 | 0.026543928 | 0.030915732 | 0.007917671 |
| 0.006832787 | 0.074676562 | 0.193971156 | 0.006233886 |
| 0.094156927 | 1.26E-05    | 0.119266223 | 0.071310012 |
| 0.005818394 | 0.059707141 | 0.080753648 | 0.099805685 |
| 0.037357013 | 0.102896616 | 0.179045199 | 0.000658427 |
| 0.006106288 | 0.092494462 | 0.128753787 | 0.045266779 |
| 0.141841513 | 0.006133186 | 0.008993786 | 0.064179183 |
| 0.105936601 | 0.187104879 | 0.070750959 | 0.01391456  |
| 0.000177558 | 0.009267616 | 0.009911981 | 0.195552676 |
| 0.093110879 | 0.074279495 | 0.128170672 | 0.009285497 |
| 0.051348574 | 0.001078198 | 0.072022448 | 0.185077832 |
| 0.000290549 | 0.208513112 | 0.000275979 | 0.010620964 |
| 0.162152231 | 0.218078206 | 0.111897372 | 0.001868782 |
| 0.001282126 | 0.020499512 | 0.023121738 | 0.240441359 |
| 0.094593287 | 0.061521525 | 0.095562072 | 0.094960251 |
| 0.196154896 | 0.007701792 | 0.031428797 | 0.112236416 |
| 0.164770016 | 0.001924386 | 0.022069854 | 0.0293243   |
| 0.011545769 | 0.001860095 | 0.027016298 | 0.001152514 |
| 0.000144451 | 0.016186964 | 0.197415204 | 0.015717445 |
| 0.003393868 | 0.016320097 | 0.000990308 | 0.06031019  |
| 0.072288635 | 0.262293799 | 0.002578238 | 0.01899888  |
| 0.104687263 | 0.025747762 | 0.028749445 | 0.11329755  |
| 0.020359696 | 0.042350775 | 0.014455403 | 0.1235732   |
| 0.149083993 | 0.001849558 | 0.002510203 | 0.053040189 |
| 0.176748125 | 0.187350606 | 0.186346122 | 0.024111313 |
| 0.010551348 | 0.049452727 | 0.012191296 | 0.046902749 |
| 0.036536518 | 0.133809358 | 0.026034115 | 0.095197849 |
| 0.098705436 | 0.001379764 | 0.004679481 | 0.175262029 |
| 0.000405087 | 0.007289923 | 0.127496311 | 0.115906843 |
| 0.10262061  | 0.000186753 | 0.007223431 | 0.025734048 |
| 0.059833079 | 0.018867128 | 0.115292535 | 0.005739847 |
| 0.065221945 | 0.011015825 | 0.002423513 | 0.187027004 |
| 0.014168416 | 0.091673494 | 0.012113738 | 0.004801559 |
| 0.163536333 | 0.071499785 | 0.110819715 | 0.104008994 |
| 0.144950178 | 6.91E-06    | 0.002467576 | 0.109610638 |
| 0.011555137 | 0.257905405 | 0.129622607 | 0.016000317 |

|             |             |             |             |
|-------------|-------------|-------------|-------------|
| 0.066715025 | 0.058610416 | 0.023623134 | 0.017430699 |
| 0.242717469 | 0.003738839 | 0.003050997 | 2.68E-05    |
| 0.004203297 | 0.025866474 | 0.086410508 | 0.006278856 |
| 0.005422873 | 0.004166018 | 0.02872981  | 0.129359251 |
| 0.025376387 | 0.119847644 | 0.00888813  | 0.107671746 |
| 0.016149997 | 0.073998301 | 0.014244126 | 0.013047089 |
| 0.08553189  | 0.010359673 | 0.220730923 | 0.102930445 |
| 0.012140093 | 0.057869974 | 0.047167696 | 0.045382745 |
| 0.082115592 | 0.137393945 | 0.124995879 | 0.138342524 |
| 0.023486485 | 0.223410476 | 0.013370108 | 0.049270395 |
| 0.094006382 | 0.107600426 | 0.005169609 | 0.165334506 |
| 0.000162188 | 0.069038064 | 0.051186068 | 0.036020284 |
| 0.120120378 | 0.026666874 | 0.006515026 | 0.050601392 |
| 0.227046347 | 0.174043496 | 0.235159279 | 0.170050647 |
| 0.021081887 | 0.00252442  | 0.207017374 | 0.097585389 |
| 0.212704725 | 0.051716668 | 0.015510837 | 0.072235038 |
| 0.155544052 | 0.191680217 | 0.07001603  | 0.065279744 |
| 0.08097099  | 0.050294011 | 0.05820991  | 0.234850227 |
| 0.003090404 | 0.014908914 | 0.075815266 | 0.002597221 |
| 0.010904824 | 0.006345772 | 0.11695363  | 0.08158319  |
| 0.018156305 | 0.010132359 | 0.012254831 | 0.003937531 |
| 0.026412188 | 0.149799876 | 0.007652696 | 0.207194668 |
| 0.193799604 | 0.101821636 | 0.123373909 | 0.206901327 |
| 0.054915405 | 0.084897946 | 0.133127148 | 0.265502739 |
| 0.000558254 | 0.182783755 | 0.150153992 | 0.092654646 |
| 0.140892762 | 0.04772007  | 0.148984436 | 0.050200279 |
| 0.001734031 | 0.02247263  | 0.006437231 | 0.179407014 |
| 0.13150131  | 0.000927524 | 0.010025615 | 0.115907211 |
| 0.12308736  | 0.007931767 | 0.181621116 | 0.029158184 |
| 0.107621252 | 0.059768144 | 0.01046222  | 0.15694138  |
| 0.009565147 | 0.069411072 | 0.000453911 | 0.055604045 |
| 0.087296588 | 0.066951479 | 0.000761848 | 0.213392841 |
| 0.127660377 | 0.071756106 | 0.045478121 | 5.46E-05    |
| 0.241194573 | 0.001967188 | 0.083484068 | 0.006895328 |
| 0.140252457 | 0.081058047 | 0.126847421 | 0.155538953 |
| 0.096400408 | 0.089909107 | 0.081268989 | 0.113138693 |
| 0.001535902 | 0.140376715 | 0.166344972 | 0.000884748 |
| 0.113844039 | 0.148971782 | 0.033261027 | 0.019193988 |
| 0.106461551 | 0.000713539 | 0.029503392 | 0.125565708 |
| 0.105900862 | 0.135611155 | 0.002712352 | 0.027329599 |
| 0.081648954 | 0.029490096 | 0.009839239 | 0.076921926 |
| 0.059585888 | 0.007568828 | 1           | 0.098517143 |
| 0.116861164 | 0.046267624 | 0.130931651 | 0.001616829 |
| 0.177950646 | 0.004627555 | 0.217358285 | 0.009599977 |
| 0.06415056  | 0.075517705 | 0.214529326 | 0.016632808 |
| 0.000224535 | 0.006274253 | 0.072000267 | 0.100472443 |
| 0.005647214 | 0.035477846 | 0.017683989 | 0.031009967 |
| 0.182032327 | 0.014544974 | 0.046077267 | 0.074831184 |
| 0.102342731 | 0.000822263 | 0.159286149 | 0.064149509 |
| 0.128214363 | 0.017887401 | 0.134151207 | 0.00036641  |
| 0.100895982 | 0.003934985 | 0.158191171 | 0.025786105 |
| 0.234557768 | 0.008041404 | 0.063460171 | 0.018562893 |
| 0.003886924 | 0.00114377  | 0.122007988 | 0.039256282 |
| 0.052711732 | 0.048815458 | 0.075257808 | 0.005707391 |

|             |             |             |             |
|-------------|-------------|-------------|-------------|
| 0.174509645 | 0.063459686 | 0.123831957 | 0.090521545 |
| 0.021730933 | 0.000917735 | 0.004359677 | 0.001701671 |
| 0.128286405 | 0.114030313 | 0.139726298 | 0.073329379 |
| 0.081242659 | 0.081296377 | 0.084587687 | 0.031869966 |
| 0.131550971 | 0.003139935 | 0.177718058 | 0.086203202 |
| 0.193298456 | 0.015641944 | 0.048570171 | 0.020536213 |
| 0.013812314 | 0.014316687 | 0.01263445  | 0.029359727 |
| 0.147497682 | 0.038428392 | 0.033701568 | 0.017689459 |
| 0.000784803 | 0.025497209 | 0.19309156  | 0.126802115 |
| 0.056902451 | 0.113810257 | 0.051268312 | 0.096523731 |
| 0.013641476 | 0.058049734 | 0.000293656 | 0.000177863 |
| 0.003405833 | 0.011648259 | 0.220741715 | 0.177121822 |
| 0.199448999 | 0.036857898 | 0.006775712 | 0.022397466 |
| 0.043069992 | 0.207713415 | 0.028902003 | 0.003725312 |
| 0.105756316 | 0.053955325 | 5.79E-05    | 0.046554331 |
| 0.089443535 | 0.00852615  |             |             |
| SAMSN1      | 0.243479627 | 0.459671078 | 0.184535138 |
| 0.019242898 | 0.163629178 | 0.357383622 | 0.329564319 |
| 0.22899646  | 0.275030522 | 0.203845278 | 0.385137973 |
| 0.008247128 | 0.225868553 | 0.070624583 | 0.197690045 |
| 0.391354103 | 0.398397273 | 0.359154268 | 0.401463323 |
| 0.29962806  | 0.136166706 | 0.34480235  | 0.318416865 |
| 0.372317251 | 0.01233926  | 0.221674197 | 0.056165854 |
| 0.198116714 | 0.358221474 | 0.363500127 | 0.287952309 |
| 0.344842179 | 0.299507728 | 0.264564671 | 0.219873192 |
| 0.093004629 | 0.479901244 | 0.056453476 | 0.238399235 |
| 0.253735511 | 0.285891681 | 0.307703208 | 0.081478812 |
| 0.001170803 | 0.231606659 | 0.181700246 | 0.341150461 |
| 0.330993459 | 0.34608738  | 0.345958472 | 0.256176023 |
| 0.053074564 | 0.403583214 | 0.345044489 | 0.047157928 |
| 0.467859625 | 0.003324866 | 0.484461185 | 0.218216076 |
| 0.220510282 | 0.394474564 | 0.215975468 | 0.321778926 |
| 0.366142223 | 0.479655373 | 0.438524831 | 0.114918586 |
| 0.218106806 | 0.273204071 | 0.235626807 | 0.275189414 |
| 0.41711628  | 0.253888164 | 0.335738452 | 0.174616504 |
| 0.247059741 | 0.253014289 | 0.396299387 | 0.327193566 |
| 0.00519411  | 0.263174029 | 0.21661221  | 0.215388341 |
| 0.167359531 | 0.412299631 | 0.245997144 | 0.299886724 |
| 0.231839122 | 0.099383306 | 0.352255821 | 0.423887005 |
| 0.033427734 | 0.261927955 | 0.015002543 | 0.312790258 |
| 0.314124504 | 0.306384122 | 0.282359158 | 0.196860975 |
| 0.080665466 | 0.298973087 | 0.151796109 | 0.239018794 |
| 0.330807152 | 0.302905753 | 0.460768145 | 0.056301906 |
| 0.194816091 | 0.273365324 | 0.370075487 | 0.473920287 |
| 0.410850067 | 0.040739362 | 0.306700852 | 0.350214257 |
| 0.232938865 | 0.138004114 | 0.349549359 | 0.019567002 |
| 0.019270434 | 0.030963813 | 0.339794141 | 0.314266261 |
| 0.198992076 | 0.322043972 | 0.104283977 | 0.248675706 |
| 0.218895757 | 0.319303654 | 0.204204768 | 0.34032627  |
| 0.217103878 | 0.342711803 | 0.256701081 | 0.274292011 |
| 0.222149403 | 0.328578854 | 0.304525139 | 0.439121187 |
| 0.474493399 | 0.190636193 | 0.224177296 | 0.366363363 |
| 0.197300492 | 0.38158266  | 0.449063136 | 0.301470088 |
| 0.268351586 | 0.377714367 | 0.240374663 | 0.325456892 |



|             |             |             |             |
|-------------|-------------|-------------|-------------|
| 0.36980274  | 0.320608917 | 0.04519931  | 0.391789439 |
| 0.484588051 | 0.02357111  | 0.21588507  | 0.311087159 |
| 0.04260079  | 0.334219283 | 0.444516436 | 0.348676362 |
| 0.288035448 | 0.047302215 | 0.242601781 | 0.346277032 |
| 0.372677573 | 0.324988591 | 0.332679702 | 0.215581759 |
| 0.376033929 | 0.22430829  | 0.16159854  | 0.202114827 |
| 0.290371848 | 0.36811811  | 0.14501413  | 0.062503081 |
| 0.259335337 | 0.294373006 | 0.382359086 | 0.303538056 |
| 0.253777674 | 0.002314825 | 0.188901574 | 0.267990072 |
| 0.232310003 | 0.2648322   | 0.472313993 | 0.288611237 |
| 0.373954963 | 0.176218948 | 0.321426171 | 0.282066504 |
| 0.334483524 | 0.252303759 | 0.239777975 | 0.005016621 |
| 0.268436244 | 0.173392974 | 0.312294255 | 0.158351466 |
| 0.26043471  | 0.248331314 | 0.153247166 | 0.378911513 |
| 0.347903505 | 0.29627953  | 0.073604874 | 0.101614586 |
| 0.336812797 | 0.36576111  | 0.213301084 | 0.220853823 |
| 0.33631996  | 0.290815217 | 0.259312979 | 0.44662962  |
| 0.306293368 | 0.386148092 | 0.092122747 | 0.382435404 |
| 0.219232523 | 0.375486734 | 0.280967373 | 0.322466468 |
| 0.367265601 | 0.260589105 | 0.163111293 | 0.373870454 |
| 0.322587699 | 0.329072219 | 0.227085013 | 0.467572407 |
| 0.00653107  | 0.378991055 | 0.276826014 | 0.093252376 |
| 0.44812975  | 0.338431007 | 0.219400598 | 0.322027171 |
| 0.409087651 | 0.473835053 | 0.372928688 | 0.283947204 |
| 0.137938602 | 0.053314183 | 0.435688207 | 0.383793106 |
| 0.361540682 | 0.356488406 | 0.1578198   | 0.071299442 |
| 0.393146882 | 0.197355473 | 0.295622694 | 0.224565827 |
| 0.260668735 | 0.203284313 | 0.381804428 | 0.224107424 |
| 0.018407836 | 0.307168141 | 0.231065079 | 0.166549218 |
| 0.25381342  | 0.262782847 | 0.356390925 | 0.391695284 |
| 0.229210076 | 0.178570153 | 0.202988098 | 0.201192878 |
| 0.346953918 | 0.459151043 | 0.022570907 | 0.427642434 |
| 0.429885883 | 0.373023089 | 0.376390628 | 0.424796557 |
| 0.353523561 | 0.427486919 | 0.39803585  | 0.322904483 |
| 0.004630432 | 0.261947231 | 0.193127538 | 0.438319068 |
| 0.314195074 | 0.383256712 | 0.146218933 | 0.183730634 |
| 0.007652445 | 0.326284354 | 0.091274797 | 0.492292831 |
| 0.352592123 | 0.119451807 | 0.016807998 | 0.339250514 |
| 0.177902749 | 0.035351361 | 0.460865728 | 0.331143689 |
| 0.403097241 | 0.317926405 | 0.291598836 | 0.230845205 |
| 0.069788287 | 0.270564691 | 0.054733876 | 0.294881924 |
| 0.25992126  | 0.076013489 | 0.110094516 | 0.435337776 |
| 0.380846645 | 0.369798219 | 0.384377652 | 0.015465103 |
| 0.245885871 | 0.108179965 | 0.29198207  | 0.231753457 |
| 0.390010975 | 0.411022872 | 0.439835236 | 0.266604522 |
| 0.306318268 | 0.423122772 | 0.429007781 | 0.375025342 |
| 0.062400555 | 0.244512237 | 0.298080117 | 0.118426066 |
| 0.195244984 | 0.381006619 | 0.246731578 | 0.317823276 |
| 0.360651512 | 0.05236182  | 0.349684414 | 0.271624025 |
| 0.433404825 | 0.367345205 | 0.188368232 | 0.302900672 |
| 0.430256764 | 0.387472641 | 0.265971223 | 0.369266826 |
| 0.389836053 | 0.055523601 | 0.098517143 | 1           |
| 0.479487942 | 0.371158663 | 0.343597524 | 0.146785869 |
| 0.334546542 | 0.187006272 | 0.352404669 | 0.34928053  |

|             |             |             |             |
|-------------|-------------|-------------|-------------|
| 0.372263736 | 0.187310831 | 0.233473582 | 0.068042727 |
| 0.033879161 | 0.210707721 | 0.412423584 | 0.459353378 |
| 0.218402106 | 0.350197985 | 0.319961347 | 0.325885985 |
| 0.368346459 | 0.24050884  | 0.375324864 | 0.342245678 |
| 0.482214605 | 0.1003728   | 0.485660216 | 0.34921234  |
| 0.365604658 | 0.321231879 | 0.351544963 | 0.015842901 |
| 0.240907354 | 0.214065945 | 0.148759319 | 0.286000636 |
| 0.292234832 | 0.271726731 | 0.360590213 | 0.319544527 |
| 0.1200011   | 0.010010566 | 0.367096552 | 0.151660749 |
| 0.380057213 | 0.159038424 | 0.342831405 | 0.046903544 |
| 0.488703318 | 0.312129886 | 0.320000569 | 0.143779619 |
| 0.303499439 | 0.006359158 | 0.225284035 | 0.132602919 |
| 0.360615617 | 0.413859328 | 0.268514025 | 0.23931886  |
| 0.191341233 | 0.296787584 | 0.374106111 | 0.271056538 |
| 0.366232658 | 0.069477066 | 0.400813125 | 0.350556239 |
| 0.217512513 | 0.293081625 | 0.387635699 | 0.331044627 |
| 0.302084168 | 0.179874842 | 0.300818206 | 0.270826331 |
| 0.34449844  | 0.315193551 | 0.310958849 | 0.231761907 |
| 0.134551594 | 0.329210311 | 0.274694761 | 0.24105414  |
| 0.285790501 | 0.196407597 | 0.212677733 | 0.463779487 |
| 0.227790953 | 0.318098087 | 0.038419663 | 0.04472198  |
| 0.143936819 | 0.311842077 | 0.3693435   | 0.370282872 |
| 0.405460064 | 0.182350884 | 0.257038813 | 0.297987902 |
| 0.059785483 | 0.240342798 | 0.342135421 | 0.069548439 |
| 0.313697276 | 0.19638345  | 0.003400988 | 0.287004144 |
| 0.394524675 | 0.212426839 |             |             |
| SATB1       | 0.334094637 | 0.505821115 | 0.172841705 |
| 0.04994209  | 0.234603354 | 0.407706483 | 0.407227629 |
| 0.334125497 | 0.234238968 | 0.271824607 | 0.475019769 |
| 0.003325042 | 0.304058531 | 0.039073375 | 0.154438464 |
| 0.459470604 | 0.473474788 | 0.48961326  | 0.461817005 |
| 0.359833324 | 0.23195687  | 0.432389876 | 0.471578136 |
| 0.431183847 | 0.005114487 | 0.276212148 | 0.10537037  |
| 0.318257807 | 0.432110793 | 0.362270718 | 0.399417334 |
| 0.399712604 | 0.386437275 | 0.43748859  | 0.39565138  |
| 0.214061707 | 0.495149756 | 0.104242654 | 0.370772336 |
| 0.313482966 | 0.392255337 | 0.393597108 | 0.044897014 |
| 0.004504773 | 0.249557346 | 0.281337731 | 0.454759714 |
| 0.375190952 | 0.387874596 | 0.33088748  | 0.338570716 |
| 0.112160484 | 0.486945083 | 0.392588099 | 0.111296768 |
| 0.509261509 | 0.009382045 | 0.500918141 | 0.25598809  |
| 0.178765158 | 0.43706345  | 0.322581464 | 0.44702452  |
| 0.428733805 | 0.509332096 | 0.499602703 | 0.109263545 |
| 0.197124242 | 0.417018042 | 0.339803569 | 0.468293672 |
| 0.466368683 | 0.410298402 | 0.443579146 | 0.314979671 |
| 0.397195819 | 0.32436787  | 0.439508345 | 0.330480061 |
| 0.002731914 | 0.317186826 | 0.401690954 | 0.292505496 |
| 0.321029404 | 0.487449138 | 0.362908447 | 0.391324453 |
| 0.401627873 | 0.064690011 | 0.468929238 | 0.494659751 |
| 0.047403819 | 0.347036994 | 0.021437744 | 0.296350147 |
| 0.392795817 | 0.381956237 | 0.409249067 | 0.191991263 |
| 0.047624776 | 0.250200629 | 0.154008147 | 0.30715258  |
| 0.444318522 | 0.477916077 | 0.507598801 | 0.095633121 |
| 0.262635383 | 0.269395308 | 0.477144712 | 0.499031978 |

|             |             |             |             |
|-------------|-------------|-------------|-------------|
| 0.459653165 | 0.023314945 | 0.270169085 | 0.401149812 |
| 0.365013862 | 0.222060461 | 0.415136142 | 0.038261274 |
| 0.026588139 | 0.023703751 | 0.402579456 | 0.292520073 |
| 0.23843312  | 0.385027449 | 0.166047384 | 0.448449422 |
| 0.318481494 | 0.362876692 | 0.263704181 | 0.436113827 |
| 0.373968781 | 0.436651146 | 0.462135355 | 0.422942251 |
| 0.401447886 | 0.341721392 | 0.291912905 | 0.500033526 |
| 0.476924871 | 0.181031959 | 0.197382412 | 0.463586462 |
| 0.27891136  | 0.446541903 | 0.510040105 | 0.374709901 |
| 0.412887955 | 0.39309486  | 0.366063711 | 0.496432902 |
| 0.426759998 | 0.38969261  | 0.068093347 | 0.479647386 |
| 0.503678311 | 0.041074221 | 0.176500732 | 0.400939412 |
| 0.09340687  | 0.399801076 | 0.477300723 | 0.476654453 |
| 0.448308085 | 0.088827176 | 0.369688751 | 0.43048919  |
| 0.42153911  | 0.419631084 | 0.44965497  | 0.333710261 |
| 0.448342708 | 0.366808604 | 0.144671815 | 0.269355402 |
| 0.276326616 | 0.431024992 | 0.254365572 | 0.08168222  |
| 0.37408349  | 0.379460164 | 0.473991543 | 0.435918974 |
| 0.361124159 | 0.007925162 | 0.266757231 | 0.364525363 |
| 0.336836647 | 0.315213496 | 0.521411004 | 0.261886486 |
| 0.392594861 | 0.278787508 | 0.298384547 | 0.44689512  |
| 0.36129095  | 0.336181691 | 0.318274638 | 0.002812394 |
| 0.290887147 | 0.329184135 | 0.443888403 | 0.108887914 |
| 0.391158431 | 0.221882854 | 0.147199648 | 0.4582091   |
| 0.372691147 | 0.434549599 | 0.047542484 | 0.130014651 |
| 0.417258535 | 0.510360924 | 0.398910661 | 0.288221092 |
| 0.485671496 | 0.417314649 | 0.332763013 | 0.490693887 |
| 0.419396428 | 0.481487366 | 0.134723374 | 0.399538196 |
| 0.392302196 | 0.455083578 | 0.392696487 | 0.442164531 |
| 0.428393381 | 0.352987293 | 0.276373336 | 0.43471314  |
| 0.435826661 | 0.448344751 | 0.194727533 | 0.510652286 |
| 0.002680961 | 0.473339835 | 0.463870088 | 0.14010428  |
| 0.503894295 | 0.421584732 | 0.171692096 | 0.342706679 |
| 0.471621282 | 0.511900927 | 0.390096627 | 0.358883675 |
| 0.196820423 | 0.027603457 | 0.462222612 | 0.487254384 |
| 0.438541043 | 0.491623686 | 0.321128482 | 0.075103531 |
| 0.458083285 | 0.293552947 | 0.446621081 | 0.373342601 |
| 0.433831933 | 0.3586519   | 0.395013065 | 0.309104329 |
| 0.017665337 | 0.383984067 | 0.388679228 | 0.265887383 |
| 0.404242794 | 0.276722664 | 0.463157489 | 0.468055063 |
| 0.415013517 | 0.293280353 | 0.386118578 | 0.213174229 |
| 0.352884114 | 0.507980128 | 0.041107109 | 0.44363395  |
| 0.496114056 | 0.458660585 | 0.457285547 | 0.483636614 |
| 0.420748274 | 0.506236168 | 0.463852914 | 0.365648599 |
| 0.002213846 | 0.33962159  | 0.299206882 | 0.475536466 |
| 0.391077847 | 0.443561346 | 0.200123916 | 0.351822227 |
| 0.003880741 | 0.308242648 | 0.210005073 | 0.504631548 |
| 0.443186883 | 0.093930992 | 0.035562141 | 0.470675059 |
| 0.314004884 | 0.049924664 | 0.514400311 | 0.458154516 |
| 0.491875977 | 0.483843789 | 0.341363505 | 0.320185006 |
| 0.161424336 | 0.380243222 | 0.069761068 | 0.483471376 |
| 0.405823856 | 0.078270457 | 0.174046334 | 0.486789152 |
| 0.448683403 | 0.510899534 | 0.423961166 | 0.022287915 |
| 0.294867627 | 0.240418014 | 0.456194325 | 0.229645696 |

|             |             |             |             |
|-------------|-------------|-------------|-------------|
| 0.461477585 | 0.492796712 | 0.498406903 | 0.370030411 |
| 0.457864414 | 0.503257198 | 0.490468727 | 0.469493448 |
| 0.143490072 | 0.333650393 | 0.364109642 | 0.136557863 |
| 0.312911963 | 0.453561612 | 0.431172663 | 0.352028887 |
| 0.452890743 | 0.125673298 | 0.376025456 | 0.338352372 |
| 0.505816956 | 0.442395385 | 0.160065503 | 0.275152757 |
| 0.505819999 | 0.437247863 | 0.263645885 | 0.449282601 |
| 0.434560537 | 0.11843206  | 0.116861164 | 0.479487942 |
| 1           | 0.460374286 | 0.413487071 | 0.252202605 |
| 0.407387905 | 0.135601471 | 0.407327497 | 0.419397392 |
| 0.412555457 | 0.332541199 | 0.295398502 | 0.09750285  |
| 0.046298485 | 0.204206688 | 0.506555042 | 0.500538502 |
| 0.19558407  | 0.34468237  | 0.420654562 | 0.484926718 |
| 0.446764395 | 0.417800239 | 0.437432943 | 0.422432736 |
| 0.502961228 | 0.175258544 | 0.504257517 | 0.421365266 |
| 0.440311463 | 0.465499832 | 0.459089019 | 0.016423172 |
| 0.407372816 | 0.299890133 | 0.183331986 | 0.468070779 |
| 0.360772379 | 0.285949072 | 0.508746487 | 0.298949588 |
| 0.207514903 | 0.007329517 | 0.447636293 | 0.312282589 |
| 0.442984995 | 0.248376824 | 0.431982956 | 0.118109797 |
| 0.531175047 | 0.438309166 | 0.410513648 | 0.234357468 |
| 0.475703641 | 0.019172998 | 0.294546584 | 0.096592006 |
| 0.437572535 | 0.485451965 | 0.389032548 | 0.359076949 |
| 0.208997354 | 0.479044065 | 0.495769089 | 0.471615696 |
| 0.445327038 | 0.149382392 | 0.477817372 | 0.384666381 |
| 0.28927372  | 0.419368303 | 0.430374068 | 0.406626122 |
| 0.379686312 | 0.183876613 | 0.27716175  | 0.235673718 |
| 0.431061216 | 0.383327075 | 0.493315657 | 0.325615482 |
| 0.138603791 | 0.482136921 | 0.368353778 | 0.368446395 |
| 0.45695592  | 0.314630445 | 0.342521682 | 0.500333587 |
| 0.313079419 | 0.358248975 | 0.091504078 | 0.073995636 |
| 0.279634593 | 0.358169835 | 0.392522984 | 0.433935467 |
| 0.469872925 | 0.252805984 | 0.230400599 | 0.254976738 |
| 0.096278808 | 0.301145814 | 0.445583353 | 0.164019599 |
| 0.461363648 | 0.272076683 | 0.002269594 | 0.294015021 |
| 0.485396373 | 0.380037522 |             |             |
| SDCBP2      | 0.160480373 | 0.399760196 | 0.279272133 |
| 0.037402004 | 0.29128817  | 0.421960009 | 0.440861778 |
| 0.152973021 | 0.30560194  | 0.30282979  | 0.438436376 |
| 0.004192787 | 0.153396229 | 0.064497792 | 0.201751271 |
| 0.291725411 | 0.30220393  | 0.408625799 | 0.299139024 |
| 0.217706208 | 0.182138597 | 0.29032753  | 0.313951743 |
| 0.424301629 | 0.00904583  | 0.374555028 | 0.105475422 |
| 0.129756239 | 0.257644949 | 0.39286431  | 0.317083323 |
| 0.24712642  | 0.225938604 | 0.241094362 | 0.252426582 |
| 0.075688025 | 0.443835726 | 0.039834274 | 0.183312929 |
| 0.163570926 | 0.394865574 | 0.232064115 | 0.085593608 |
| 0.001768781 | 0.370527668 | 0.116077466 | 0.292216486 |
| 0.25988197  | 0.414051853 | 0.390357782 | 0.382209284 |
| 0.029682393 | 0.429843302 | 0.258752619 | 0.028273867 |
| 0.487145901 | 0.007024504 | 0.463470615 | 0.134272787 |
| 0.301346272 | 0.351293535 | 0.139348127 | 0.259287614 |
| 0.441955664 | 0.485257629 | 0.35867929  | 0.211154137 |
| 0.328765047 | 0.199781479 | 0.166351811 | 0.262158907 |

|             |             |             |             |
|-------------|-------------|-------------|-------------|
| 0.354918915 | 0.259166142 | 0.384876396 | 0.123690573 |
| 0.190056715 | 0.171668203 | 0.40191354  | 0.368830275 |
| 0.004664001 | 0.404399189 | 0.244746043 | 0.135632739 |
| 0.11441361  | 0.441212811 | 0.167220126 | 0.405535091 |
| 0.178494949 | 0.142147651 | 0.321046429 | 0.336295299 |
| 0.05591027  | 0.18393369  | 0.021901466 | 0.346866515 |
| 0.234359156 | 0.20702566  | 0.217092003 | 0.311170822 |
| 0.101512399 | 0.302646221 | 0.084118482 | 0.149314156 |
| 0.257633479 | 0.255165023 | 0.474449017 | 0.026423524 |
| 0.12369369  | 0.237766936 | 0.367688679 | 0.451956284 |
| 0.326110404 | 0.043404676 | 0.271361101 | 0.434680461 |
| 0.197126009 | 0.184752095 | 0.448258185 | 0.015299331 |
| 0.033432733 | 0.015182167 | 0.244931404 | 0.324640557 |
| 0.336258036 | 0.431733558 | 0.180897313 | 0.21819992  |
| 0.14800148  | 0.211793892 | 0.347978801 | 0.431484944 |
| 0.166502367 | 0.439669146 | 0.260505067 | 0.218493329 |
| 0.221878461 | 0.257729661 | 0.341301655 | 0.41440046  |
| 0.430656703 | 0.291840665 | 0.291720919 | 0.381602743 |
| 0.130814955 | 0.28927127  | 0.360621505 | 0.253300766 |
| 0.365629394 | 0.374855425 | 0.213780054 | 0.342999902 |
| 0.446963839 | 0.244227228 | 0.022905709 | 0.40120824  |
| 0.495734563 | 0.019572551 | 0.297049971 | 0.232385378 |
| 0.087068829 | 0.379168553 | 0.396621031 | 0.306742181 |
| 0.235033521 | 0.091059117 | 0.317942847 | 0.409363252 |
| 0.344308454 | 0.401962627 | 0.265318707 | 0.275161733 |
| 0.367222458 | 0.207502105 | 0.277159198 | 0.131210912 |
| 0.382864373 | 0.316371045 | 0.090084255 | 0.046351606 |
| 0.175623125 | 0.223982239 | 0.337120215 | 0.238362645 |
| 0.178081409 | 0.005871394 | 0.28528597  | 0.18476229  |
| 0.190885382 | 0.173673388 | 0.432623331 | 0.374464225 |
| 0.356188441 | 0.116497685 | 0.378499203 | 0.331928492 |
| 0.235007115 | 0.274678958 | 0.279661735 | 0.006522122 |
| 0.373981243 | 0.128810973 | 0.244779657 | 0.138057723 |
| 0.368053363 | 0.254272958 | 0.101329265 | 0.320615446 |
| 0.417771544 | 0.249056218 | 0.050215945 | 0.051168478 |
| 0.382093714 | 0.379748196 | 0.196158841 | 0.152210188 |
| 0.31599419  | 0.306793272 | 0.166708134 | 0.436926139 |
| 0.37018191  | 0.425991447 | 0.04617672  | 0.337502411 |
| 0.164300416 | 0.315611777 | 0.215666953 | 0.270900201 |
| 0.412777448 | 0.184435347 | 0.118483758 | 0.405316487 |
| 0.259460279 | 0.269664305 | 0.278177327 | 0.405041822 |
| 0.006763323 | 0.372258873 | 0.24775484  | 0.046145881 |
| 0.411692576 | 0.440297973 | 0.267977622 | 0.271449596 |
| 0.30746954  | 0.408389351 | 0.274666639 | 0.199791695 |
| 0.080870267 | 0.046535852 | 0.343500323 | 0.359080266 |
| 0.261509171 | 0.33637367  | 0.14495122  | 0.037362141 |
| 0.323609843 | 0.121251563 | 0.246724942 | 0.161935301 |
| 0.214369282 | 0.161196633 | 0.378394287 | 0.145161136 |
| 0.008756322 | 0.335207364 | 0.172899514 | 0.186046885 |
| 0.269201194 | 0.24606779  | 0.30904535  | 0.405474051 |
| 0.217592835 | 0.126228956 | 0.20061364  | 0.341761669 |
| 0.431591415 | 0.394306251 | 0.015520326 | 0.335392595 |
| 0.340289511 | 0.326093892 | 0.322437386 | 0.32868676  |
| 0.313962348 | 0.449234063 | 0.338969198 | 0.219356046 |

|             |             |             |             |
|-------------|-------------|-------------|-------------|
| 0.003279365 | 0.178587046 | 0.133442827 | 0.454398885 |
| 0.236544856 | 0.402562986 | 0.079443159 | 0.136565944 |
| 0.006987811 | 0.378043369 | 0.068538369 | 0.422676326 |
| 0.296365782 | 0.201390432 | 0.009964296 | 0.300304279 |
| 0.126167132 | 0.025250314 | 0.37744093  | 0.354433487 |
| 0.375374321 | 0.297838278 | 0.407470833 | 0.160518438 |
| 0.045276033 | 0.2033875   | 0.09882918  | 0.278467925 |
| 0.200543997 | 0.031633151 | 0.203033612 | 0.336959144 |
| 0.318833708 | 0.401418494 | 0.423830156 | 0.023579171 |
| 0.152013661 | 0.117965815 | 0.257636534 | 0.28561821  |
| 0.338207745 | 0.430937411 | 0.412799863 | 0.196979244 |
| 0.245867497 | 0.42769452  | 0.442074943 | 0.325028444 |
| 0.075534622 | 0.171138103 | 0.211849682 | 0.198889812 |
| 0.123656177 | 0.31302019  | 0.22431277  | 0.428113104 |
| 0.30458292  | 0.075658832 | 0.424901829 | 0.185501174 |
| 0.421313032 | 0.299189376 | 0.27815382  | 0.277137154 |
| 0.443959241 | 0.376747141 | 0.39208219  | 0.337367875 |
| 0.406735106 | 0.029302605 | 0.046267624 | 0.371158663 |
| 0.460374286 | 1           | 0.270611254 | 0.205485421 |
| 0.255008399 | 0.229634223 | 0.268297761 | 0.395349375 |
| 0.351579729 | 0.12828542  | 0.146644095 | 0.034120477 |
| 0.043833327 | 0.188554684 | 0.441980739 | 0.459836091 |
| 0.317682761 | 0.37422767  | 0.406495781 | 0.380580576 |
| 0.277965237 | 0.210362684 | 0.418086663 | 0.295574224 |
| 0.493996062 | 0.151585002 | 0.424384257 | 0.296530629 |
| 0.300738455 | 0.359567341 | 0.296437174 | 0.015369833 |
| 0.178317813 | 0.29608859  | 0.077674359 | 0.319885598 |
| 0.191727788 | 0.383176758 | 0.396203695 | 0.324785194 |
| 0.111262343 | 0.008641507 | 0.330581209 | 0.117350171 |
| 0.432193769 | 0.098658145 | 0.288860925 | 0.029719718 |
| 0.414229613 | 0.259080901 | 0.248785673 | 0.08884302  |
| 0.318675311 | 0.006571789 | 0.326400497 | 0.173118442 |
| 0.299473873 | 0.397368233 | 0.186228861 | 0.165857988 |
| 0.109044085 | 0.263728622 | 0.359184932 | 0.280281292 |
| 0.306285365 | 0.055256209 | 0.31203783  | 0.278129021 |
| 0.140080095 | 0.245605975 | 0.430961371 | 0.287793745 |
| 0.432562838 | 0.136938089 | 0.389617677 | 0.199978261 |
| 0.269888281 | 0.26852363  | 0.335647958 | 0.166098928 |
| 0.254551658 | 0.336396575 | 0.198197658 | 0.176545408 |
| 0.248467643 | 0.133399197 | 0.154192361 | 0.48265718  |
| 0.156870344 | 0.236819811 | 0.064873222 | 0.084074015 |
| 0.137471441 | 0.397378261 | 0.272950145 | 0.294866415 |
| 0.313785897 | 0.112161414 | 0.342930769 | 0.28564065  |
| 0.03262528  | 0.155314747 | 0.433736135 | 0.069710213 |
| 0.260111856 | 0.114064648 | 0.005464433 | 0.209142573 |
| 0.386528694 | 0.180046777 |             |             |
| SELL        | 0.368614737 | 0.467162379 | 0.071639803 |
| 0.044947503 | 0.105579472 | 0.233568182 | 0.213454892 |
| 0.372439599 | 0.111085613 | 0.168466689 | 0.308445926 |
| 0.002325506 | 0.362916072 | 0.017508276 | 0.063593966 |
| 0.506141565 | 0.50955957  | 0.30445555  | 0.487873008 |
| 0.325232134 | 0.188283072 | 0.35158808  | 0.395730874 |
| 0.252501901 | 0.002476525 | 0.126414907 | 0.080780825 |
| 0.362411374 | 0.492567451 | 0.195862709 | 0.308626705 |

|             |             |             |             |
|-------------|-------------|-------------|-------------|
| 0.457449906 | 0.440881663 | 0.413365862 | 0.29375709  |
| 0.263601666 | 0.416537752 | 0.099290362 | 0.405535188 |
| 0.392259371 | 0.229035706 | 0.431822875 | 0.014646286 |
| 0.006907659 | 0.103361649 | 0.335764925 | 0.38620373  |
| 0.282638602 | 0.22041722  | 0.16058577  | 0.180106751 |
| 0.194780996 | 0.333062739 | 0.375285328 | 0.193118015 |
| 0.372488182 | 0.009831769 | 0.401565185 | 0.271366231 |
| 0.064652627 | 0.291713316 | 0.382240416 | 0.406865918 |
| 0.236274525 | 0.386835373 | 0.48777684  | 0.038490962 |
| 0.075978763 | 0.413847931 | 0.422380748 | 0.429441772 |
| 0.433283876 | 0.370965673 | 0.291832871 | 0.339523009 |
| 0.439604794 | 0.392791903 | 0.260776017 | 0.163722654 |
| 0.001642142 | 0.150213941 | 0.324763534 | 0.342841366 |
| 0.398085901 | 0.336164411 | 0.388287346 | 0.211276173 |
| 0.452550378 | 0.020866786 | 0.368016954 | 0.507390681 |
| 0.029049732 | 0.380710966 | 0.012066441 | 0.139016975 |
| 0.426119088 | 0.472233863 | 0.419719926 | 0.08090294  |
| 0.014490256 | 0.118761315 | 0.168977152 | 0.407697559 |
| 0.385262729 | 0.437995932 | 0.366944096 | 0.13585417  |
| 0.349277931 | 0.200534397 | 0.323055753 | 0.419733899 |
| 0.472065137 | 0.007291127 | 0.155107212 | 0.214388274 |
| 0.321872065 | 0.155062318 | 0.213697665 | 0.060052954 |
| 0.017233105 | 0.021140977 | 0.458018492 | 0.16128963  |
| 0.10995051  | 0.203965637 | 0.095057248 | 0.436885902 |
| 0.341709683 | 0.423154638 | 0.107286162 | 0.250828971 |
| 0.427555985 | 0.242837042 | 0.403493378 | 0.442388817 |
| 0.329614903 | 0.250922357 | 0.156397439 | 0.412054045 |
| 0.377938126 | 0.069996068 | 0.089988327 | 0.321179601 |
| 0.351407933 | 0.482164725 | 0.511981692 | 0.295037982 |
| 0.245647167 | 0.226167622 | 0.373539289 | 0.386081772 |
| 0.222604125 | 0.313103108 | 0.085156947 | 0.318843553 |
| 0.371840488 | 0.047486822 | 0.069170146 | 0.41426574  |
| 0.054334616 | 0.224894606 | 0.416554988 | 0.431447143 |
| 0.398384041 | 0.072184899 | 0.26588028  | 0.265901086 |
| 0.29419035  | 0.260902542 | 0.391587149 | 0.258398806 |
| 0.308304493 | 0.388325855 | 0.049104371 | 0.350793527 |
| 0.120884354 | 0.321972405 | 0.351124767 | 0.077466906 |
| 0.379119171 | 0.322078946 | 0.444601679 | 0.401993437 |
| 0.411462427 | 0.009168199 | 0.174260092 | 0.385488649 |
| 0.369727058 | 0.374950957 | 0.461066922 | 0.109063795 |
| 0.242885677 | 0.282916851 | 0.137522799 | 0.295294879 |
| 0.372149713 | 0.271071021 | 0.238768623 | 0.001447007 |
| 0.128219362 | 0.433926326 | 0.38494179  | 0.058124434 |
| 0.228626423 | 0.132318588 | 0.116056487 | 0.444918924 |
| 0.199132781 | 0.42728403  | 0.028238827 | 0.146802096 |
| 0.263153494 | 0.393529975 | 0.423424295 | 0.311710049 |
| 0.434229527 | 0.340802303 | 0.440262384 | 0.360718321 |
| 0.23383802  | 0.343049556 | 0.156428164 | 0.259624936 |
| 0.430874194 | 0.440417372 | 0.443480576 | 0.420479883 |
| 0.254866245 | 0.344589526 | 0.302127695 | 0.267663802 |
| 0.380450072 | 0.362002164 | 0.091655862 | 0.460428652 |
| 0.001084234 | 0.323124284 | 0.438773757 | 0.182474507 |
| 0.45270514  | 0.228750004 | 0.072089567 | 0.243325377 |
| 0.496632514 | 0.458767141 | 0.385826456 | 0.440280455 |

|             |             |             |             |
|-------------|-------------|-------------|-------------|
| 0.247892633 | 0.011713072 | 0.446140905 | 0.384151211 |
| 0.499307573 | 0.354994774 | 0.30793177  | 0.065483166 |
| 0.456013468 | 0.32198463  | 0.433997601 | 0.440193944 |
| 0.404960828 | 0.342330208 | 0.220576117 | 0.331013722 |
| 0.023095363 | 0.282184806 | 0.450584902 | 0.234433264 |
| 0.361954892 | 0.199219294 | 0.43844784  | 0.292456039 |
| 0.364026813 | 0.396071834 | 0.369821655 | 0.082587919 |
| 0.16334705  | 0.478925327 | 0.038366044 | 0.423490434 |
| 0.506092662 | 0.323368898 | 0.452101385 | 0.497379273 |
| 0.321215888 | 0.355240764 | 0.444422523 | 0.41303221  |
| 0.001209283 | 0.424930122 | 0.365499783 | 0.314794043 |
| 0.456563184 | 0.279048901 | 0.231182616 | 0.396182131 |
| 0.000972696 | 0.151778383 | 0.307476015 | 0.441137207 |
| 0.44222198  | 0.02851439  | 0.041617601 | 0.430339662 |
| 0.379250858 | 0.041474562 | 0.502047348 | 0.344115732 |
| 0.434567035 | 0.383115003 | 0.177880143 | 0.39170291  |
| 0.27177808  | 0.32720118  | 0.031165217 | 0.429631275 |
| 0.368734885 | 0.088786896 | 0.103000727 | 0.493928149 |
| 0.432405224 | 0.35177274  | 0.234652414 | 0.023582494 |
| 0.384758574 | 0.27602752  | 0.454399494 | 0.100932584 |
| 0.399228388 | 0.334642673 | 0.409172352 | 0.412560569 |
| 0.414598869 | 0.3842962   | 0.357664149 | 0.444103153 |
| 0.129348442 | 0.41912758  | 0.439216522 | 0.068500185 |
| 0.385845292 | 0.454764696 | 0.430232109 | 0.172415971 |
| 0.357331848 | 0.108424871 | 0.197229318 | 0.319997443 |
| 0.414202176 | 0.461650514 | 0.063668559 | 0.150344945 |
| 0.385087822 | 0.276876739 | 0.10309047  | 0.300550432 |
| 0.260020325 | 0.227840444 | 0.130931651 | 0.343597524 |
| 0.413487071 | 0.270611254 | 1           | 0.207087624 |
| 0.435652713 | 0.048207117 | 0.391166877 | 0.231822591 |
| 0.271213279 | 0.430880768 | 0.391993889 | 0.149771445 |
| 0.050844315 | 0.155301095 | 0.373920418 | 0.374856145 |
| 0.078104063 | 0.185176454 | 0.255626984 | 0.332954734 |
| 0.492313354 | 0.427318293 | 0.259234483 | 0.313811823 |
| 0.360818543 | 0.127546916 | 0.445113176 | 0.335255361 |
| 0.404586639 | 0.332906916 | 0.426881283 | 0.011316976 |
| 0.437199258 | 0.207100386 | 0.213496718 | 0.361721759 |
| 0.454427657 | 0.134562211 | 0.350945661 | 0.167249611 |
| 0.188122889 | 0.003523276 | 0.332619985 | 0.354878471 |
| 0.264195125 | 0.28016971  | 0.336903734 | 0.189574337 |
| 0.494093008 | 0.407215053 | 0.428654312 | 0.252403701 |
| 0.390536005 | 0.021540978 | 0.175128579 | 0.037585989 |
| 0.385921294 | 0.348852198 | 0.400178412 | 0.410992953 |
| 0.214752566 | 0.412379521 | 0.3556991   | 0.383399001 |
| 0.446744458 | 0.218991958 | 0.511098538 | 0.271424384 |
| 0.382541237 | 0.387685287 | 0.237026236 | 0.297777222 |
| 0.184123963 | 0.119706163 | 0.115212058 | 0.165742735 |
| 0.471452363 | 0.253526584 | 0.370404932 | 0.371130027 |
| 0.052880453 | 0.368222286 | 0.392586711 | 0.422353685 |
| 0.444065578 | 0.410916872 | 0.36679417  | 0.34969109  |
| 0.335204171 | 0.310351276 | 0.079651063 | 0.055373197 |
| 0.312653151 | 0.199483471 | 0.387066457 | 0.41122507  |
| 0.48446936  | 0.286858292 | 0.098515738 | 0.137066003 |
| 0.112778371 | 0.369192824 | 0.256440435 | 0.161168746 |



|             |             |             |             |
|-------------|-------------|-------------|-------------|
| 0.393983729 | 0.317323209 | 0.000733303 | 0.236759099 |
| 0.358481927 | 0.398183944 |             |             |
| SEPHS2      | 0.064913438 | 0.230191077 | 0.019947488 |
| 0.089802688 | 0.028831326 | 0.188879495 | 0.182322104 |
| 0.046182235 | 0.01603362  | 0.152501695 | 0.216250453 |
| 6.45E-05    | 0.082095024 | 0.001449295 | 0.004629757 |
| 0.175999654 | 0.177960784 | 0.140468275 | 0.150479956 |
| 0.049376397 | 0.134718847 | 0.113668028 | 0.233353984 |
| 0.162307284 | 0.000140983 | 0.131433873 | 0.185330064 |
| 0.033802611 | 0.148104424 | 0.067571485 | 0.060575939 |
| 0.152054735 | 0.15313015  | 0.084504692 | 0.032050788 |
| 0.030375038 | 0.22682259  | 0.00275349  | 0.117513659 |
| 0.089585599 | 0.1441024   | 0.149687731 | 0.001981676 |
| 0.016825434 | 0.077402033 | 0.027380261 | 0.142070797 |
| 0.034747937 | 0.165589481 | 0.060547529 | 0.20059136  |
| 0.006471639 | 0.199496179 | 0.101574832 | 0.00817786  |
| 0.245334414 | 0.054883528 | 0.240049132 | 0.019242812 |
| 0.024794626 | 0.059383354 | 0.057783424 | 0.136022527 |
| 0.193113149 | 0.251506654 | 0.19592244  | 0.023690926 |
| 0.068127984 | 0.070759536 | 0.136312739 | 0.25889965  |
| 0.197316056 | 0.049048367 | 0.055060812 | 0.034785697 |
| 0.140545536 | 0.101886788 | 0.109002671 | 0.021533217 |
| 0.000353585 | 0.165227409 | 0.10609551  | 0.061933335 |
| 0.081488791 | 0.209479302 | 0.073393698 | 0.10723556  |
| 0.110009477 | 0.004522402 | 0.118634978 | 0.192769618 |
| 0.020729878 | 0.089807719 | 0.001737065 | 0.011699965 |
| 0.134756544 | 0.129393051 | 0.127773749 | 0.049142564 |
| 0.002233572 | 0.016031957 | 0.004134128 | 0.089930368 |
| 0.080925194 | 0.104731232 | 0.229841768 | 0.003412473 |
| 0.076698018 | 0.01953291  | 0.051856368 | 0.264135306 |
| 0.197581922 | 0.000432047 | 0.011257687 | 0.147377501 |
| 0.024890903 | 0.078232435 | 0.125144153 | 0.003810953 |
| 0.007538531 | 0.000170315 | 0.145911222 | 0.025169881 |
| 0.137387382 | 0.157150758 | 0.032059551 | 0.185601711 |
| 0.029829092 | 0.105308768 | 0.028235146 | 0.166645457 |
| 0.125132044 | 0.195811379 | 0.146680312 | 0.147737982 |
| 0.046710851 | 0.019133773 | 0.045368571 | 0.211311352 |
| 0.172925379 | 0.019902696 | 0.020637415 | 0.200018438 |
| 0.079617685 | 0.16884854  | 0.203478926 | 0.016295525 |
| 0.090341328 | 0.057420726 | 0.114910495 | 0.258467873 |
| 0.124488078 | 0.048572155 | 0.000966576 | 0.138977003 |
| 0.249702159 | 0.002555955 | 0.029268126 | 0.109320823 |
| 0.029205588 | 0.033291298 | 0.215482169 | 0.167331135 |
| 0.086243504 | 0.183889023 | 0.22417093  | 0.21080725  |
| 0.096021397 | 0.20105755  | 0.113806627 | 0.237565829 |
| 0.14555099  | 0.140854844 | 0.027533343 | 0.082383818 |
| 0.059661787 | 0.093199164 | 0.01749331  | 0.005543792 |
| 0.069353702 | 0.028929616 | 0.21900135  | 0.089340967 |
| 0.111864255 | 0.058451411 | 0.169676763 | 0.086656943 |
| 0.081984499 | 0.082090565 | 0.257214875 | 0.057612838 |
| 0.07875765  | 0.013047063 | 0.054481399 | 0.070824163 |
| 0.09388537  | 0.079731624 | 0.083345379 | 0.001598719 |
| 0.020866437 | 0.111995533 | 0.063580173 | 0.003720075 |
| 0.065246355 | 0.021928193 | 0.003024329 | 0.204034304 |

|             |             |             |             |
|-------------|-------------|-------------|-------------|
| 0.111988305 | 0.15065236  | 0.00068946  | 0.00268841  |
| 0.072230349 | 0.231171759 | 0.094678745 | 0.015979956 |
| 0.224164474 | 0.077445615 | 0.108218695 | 0.197842325 |
| 0.028990657 | 0.266787106 | 0.002400035 | 0.041274277 |
| 0.091324169 | 0.190841685 | 0.161917497 | 0.139996345 |
| 0.111019955 | 0.061285814 | 0.009868663 | 0.162688338 |
| 0.086077782 | 0.066999634 | 0.018746118 | 0.201214247 |
| 0.000205331 | 0.121859111 | 0.177717908 | 0.002949132 |
| 0.256587029 | 0.204561957 | 0.018866875 | 0.03147047  |
| 0.157381195 | 0.194237337 | 0.110674058 | 0.139766048 |
| 0.006134928 | 0.000642342 | 0.156611901 | 0.177541828 |
| 0.156836211 | 0.076516696 | 0.036757352 | 0.000710056 |
| 0.184911716 | 0.03705995  | 0.197102147 | 0.1030274   |
| 0.10152501  | 0.033862234 | 0.05577571  | 0.052373581 |
| 0.00077065  | 0.145951723 | 0.161368931 | 0.106353681 |
| 0.191817058 | 0.025875931 | 0.199981902 | 0.137168398 |
| 0.052024226 | 0.029110454 | 0.125801645 | 0.062740769 |
| 0.091549447 | 0.231120378 | 0.000914478 | 0.146113214 |
| 0.187223395 | 0.072469204 | 0.222862147 | 0.172500362 |
| 0.096953553 | 0.214404543 | 0.209252747 | 0.100402938 |
| 3.96E-05    | 0.121820386 | 0.083999395 | 0.171400658 |
| 0.186590385 | 0.161321078 | 0.011722004 | 0.056715328 |
| 4.29E-05    | 0.072530217 | 0.033509246 | 0.188143586 |
| 0.18920243  | 0.011176589 | 0.000858757 | 0.161298106 |
| 0.08354722  | 0.001111728 | 0.20660801  | 0.210833031 |
| 0.234813879 | 0.091381876 | 0.163766921 | 0.109561033 |
| 0.023990374 | 0.021326856 | 0.014456684 | 0.20652177  |
| 0.053082933 | 0.001162735 | 0.138500309 | 0.171542239 |
| 0.19366599  | 0.188353039 | 0.110757369 | 0.042119296 |
| 0.085009103 | 0.110215623 | 0.214080979 | 0.009366934 |
| 0.147681485 | 0.188568775 | 0.200928974 | 0.122196578 |
| 0.107410113 | 0.228745217 | 0.233558639 | 0.211645493 |
| 0.022686627 | 0.136530019 | 0.149822375 | 0.030108255 |
| 0.066415355 | 0.192375052 | 0.212978952 | 0.159071472 |
| 0.118078546 | 0.04876789  | 0.14174282  | 0.042646976 |
| 0.235474047 | 0.210983694 | 0.038957602 | 0.01139552  |
| 0.262143331 | 0.041492888 | 0.070314522 | 0.051904261 |
| 0.138681662 | 0.008995241 | 0.001616829 | 0.146785869 |
| 0.252202605 | 0.205485421 | 0.207087624 | 1           |
| 0.145293807 | 0.005827297 | 0.107840395 | 0.023123908 |
| 0.082709978 | 0.123915189 | 0.090795638 | 0.003032513 |
| 0.046756565 | 0.015695744 | 0.270250446 | 0.223618457 |
| 0.039761993 | 0.066779501 | 0.169256932 | 0.210926796 |
| 0.174285925 | 0.046066341 | 0.139876222 | 0.052265812 |
| 0.225904901 | 0.110727279 | 0.205781204 | 0.082118922 |
| 0.151070972 | 0.133967306 | 0.154864249 | 0.002659248 |
| 0.124082924 | 0.195138441 | 0.012099975 | 0.239043    |
| 0.115762445 | 0.065356199 | 0.211597839 | 0.032958106 |
| 0.022274365 | 0.00010359  | 0.108478872 | 0.060758931 |
| 0.189654884 | 0.008525961 | 0.058613227 | 0.008046388 |
| 0.216782346 | 0.119535265 | 0.161722366 | 0.011707641 |
| 0.161804169 | 0.001551535 | 0.184194012 | 0.007567494 |
| 0.13399533  | 0.146613942 | 0.084900086 | 0.081883845 |
| 0.009282167 | 0.14039741  | 0.149675729 | 0.134468425 |

|             |             |             |             |
|-------------|-------------|-------------|-------------|
| 0.205563185 | 0.02387386  | 0.197026852 | 0.027531436 |
| 0.092690266 | 0.029225186 | 0.122448307 | 0.014810783 |
| 0.121361776 | 0.005498639 | 0.050944553 | 0.008239292 |
| 0.192586764 | 0.011907524 | 0.183379558 | 0.027178774 |
| 0.025700132 | 0.08459163  | 0.088951534 | 0.125933823 |
| 0.190632879 | 0.115581388 | 0.029737653 | 0.210761986 |
| 0.016643314 | 0.044520263 | 0.112688279 | 0.151067468 |
| 0.077522482 | 0.127039697 | 0.112105806 | 0.13240334  |
| 0.168457488 | 0.007277201 | 0.038934081 | 0.019532188 |
| 0.001493048 | 0.080568405 | 0.219464214 | 0.013094501 |
| 0.097106791 | 0.016533328 | 0.000124433 | 0.017351686 |
| 0.173420615 | 0.025391867 |             |             |
| SEPP1       | 0.328690551 | 0.456183218 | 0.054352519 |
| 0.033127667 | 0.117815653 | 0.198040187 | 0.197119259 |
| 0.358351311 | 0.085166283 | 0.119730927 | 0.287283309 |
| 0.00119412  | 0.426155189 | 0.010150487 | 0.063752003 |
| 0.505118137 | 0.521437753 | 0.319443804 | 0.510051278 |
| 0.295719544 | 0.141291721 | 0.329845852 | 0.347552567 |
| 0.221086044 | 0.001167577 | 0.108663094 | 0.047843965 |
| 0.385780292 | 0.509459209 | 0.171130941 | 0.248295737 |
| 0.445451301 | 0.464575691 | 0.386414341 | 0.344268754 |
| 0.304514642 | 0.40367066  | 0.196986644 | 0.469368459 |
| 0.422076681 | 0.208248965 | 0.461853647 | 0.010488106 |
| 0.006345374 | 0.085523731 | 0.34539311  | 0.349914221 |
| 0.282146428 | 0.182311104 | 0.143871148 | 0.156118588 |
| 0.213310205 | 0.314515796 | 0.37520082  | 0.229187851 |
| 0.369053476 | 0.004995137 | 0.396158171 | 0.237190439 |
| 0.050896238 | 0.281536282 | 0.353632704 | 0.383778569 |
| 0.214073857 | 0.383589351 | 0.497382557 | 0.029800611 |
| 0.056715758 | 0.429404566 | 0.42852367  | 0.4118793   |
| 0.432188483 | 0.31590869  | 0.267147318 | 0.429892398 |
| 0.448429396 | 0.421829219 | 0.251200854 | 0.157194605 |
| 0.00069443  | 0.130072001 | 0.343657452 | 0.337601198 |
| 0.443229902 | 0.318762712 | 0.390249508 | 0.202487316 |
| 0.428770586 | 0.013093311 | 0.347682793 | 0.513212594 |
| 0.021299629 | 0.433603705 | 0.012314521 | 0.139900328 |
| 0.434365368 | 0.486554899 | 0.384531638 | 0.058956397 |
| 0.010343724 | 0.10498476  | 0.142280809 | 0.442232355 |
| 0.387873469 | 0.441621857 | 0.363591894 | 0.200208872 |
| 0.396116007 | 0.13864495  | 0.33056604  | 0.401896116 |
| 0.452891539 | 0.007062709 | 0.135251285 | 0.192178731 |
| 0.342440322 | 0.136921085 | 0.206222168 | 0.046522437 |
| 0.012127691 | 0.023123226 | 0.462631828 | 0.134754319 |
| 0.087087021 | 0.174545279 | 0.085379363 | 0.457852969 |
| 0.354803819 | 0.438230581 | 0.119079481 | 0.224752549 |
| 0.464365881 | 0.226923701 | 0.423845797 | 0.46238078  |
| 0.416855177 | 0.230379318 | 0.120435494 | 0.433901976 |
| 0.377749707 | 0.058609014 | 0.063720447 | 0.283755699 |
| 0.414721695 | 0.484546269 | 0.511328328 | 0.289049375 |
| 0.266680526 | 0.21554416  | 0.288702997 | 0.366257445 |
| 0.216033742 | 0.333076528 | 0.127132131 | 0.321816188 |
| 0.360521221 | 0.046309645 | 0.049292604 | 0.437840006 |
| 0.071220337 | 0.230256472 | 0.398469565 | 0.454928218 |
| 0.458736807 | 0.037297702 | 0.212767966 | 0.228788572 |

|             |             |             |             |
|-------------|-------------|-------------|-------------|
| 0.256763639 | 0.219237133 | 0.384588491 | 0.196454437 |
| 0.273636545 | 0.294514449 | 0.038544886 | 0.405220035 |
| 0.101127594 | 0.299518709 | 0.31316651  | 0.073408829 |
| 0.402944888 | 0.338431249 | 0.436302589 | 0.401085511 |
| 0.400716519 | 0.005171726 | 0.120545208 | 0.344441186 |
| 0.267697667 | 0.414286866 | 0.449261581 | 0.092012533 |
| 0.2208125   | 0.37224444  | 0.11832475  | 0.341130981 |
| 0.386773103 | 0.19828553  | 0.170121039 | 0.000371684 |
| 0.127186538 | 0.377866843 | 0.413431883 | 0.040255504 |
| 0.231591271 | 0.086153962 | 0.111009394 | 0.450108051 |
| 0.168780356 | 0.479775594 | 0.024689818 | 0.192492965 |
| 0.228921401 | 0.402384651 | 0.396566535 | 0.246801787 |
| 0.444592834 | 0.28351084  | 0.459403773 | 0.345874161 |
| 0.280524956 | 0.307221317 | 0.224590959 | 0.240894505 |
| 0.470102503 | 0.465050251 | 0.461739141 | 0.471820344 |
| 0.228959816 | 0.37739024  | 0.336171562 | 0.236532312 |
| 0.367158661 | 0.400199747 | 0.066145412 | 0.466872143 |
| 0.000393899 | 0.312092758 | 0.431920282 | 0.215651029 |
| 0.439606198 | 0.212607237 | 0.051769972 | 0.223592235 |
| 0.515817979 | 0.46695217  | 0.404718684 | 0.444329414 |
| 0.263790604 | 0.007596962 | 0.446875092 | 0.369585682 |
| 0.516785162 | 0.386849512 | 0.40179519  | 0.107592632 |
| 0.46223941  | 0.369917407 | 0.387617253 | 0.401682345 |
| 0.465349727 | 0.450029854 | 0.217975983 | 0.360932882 |
| 0.015767575 | 0.208664087 | 0.408595115 | 0.173528228 |
| 0.285837487 | 0.158510244 | 0.457321789 | 0.289407701 |
| 0.429955259 | 0.29415744  | 0.363151256 | 0.068143664 |
| 0.14822011  | 0.463487001 | 0.083873496 | 0.423064775 |
| 0.513612357 | 0.347441804 | 0.462552557 | 0.505126338 |
| 0.276449368 | 0.351357097 | 0.448305595 | 0.437622951 |
| 0.000771144 | 0.450788752 | 0.434700647 | 0.303292281 |
| 0.4410577   | 0.246204399 | 0.270604846 | 0.46567386  |
| 0.001259441 | 0.123423185 | 0.308600125 | 0.43741719  |
| 0.471901858 | 0.021638562 | 0.096254631 | 0.458555896 |
| 0.44367395  | 0.057851381 | 0.496509471 | 0.296446866 |
| 0.444185769 | 0.425863867 | 0.143758201 | 0.437948938 |
| 0.274005417 | 0.384372278 | 0.032410563 | 0.4249255   |
| 0.443413995 | 0.106817568 | 0.07736664  | 0.501993433 |
| 0.411783911 | 0.361275069 | 0.217627932 | 0.006129285 |
| 0.394546026 | 0.221719225 | 0.45782831  | 0.10654552  |
| 0.402477546 | 0.323578926 | 0.42989117  | 0.457603761 |
| 0.438739499 | 0.37650827  | 0.332221893 | 0.431997103 |
| 0.145128726 | 0.425866789 | 0.42894026  | 0.047249168 |
| 0.391401396 | 0.466266948 | 0.398477299 | 0.148066827 |
| 0.340742989 | 0.116361265 | 0.168095639 | 0.310991798 |
| 0.424252937 | 0.457619533 | 0.041835571 | 0.148460977 |
| 0.369318605 | 0.269471229 | 0.091688325 | 0.331886584 |
| 0.236134295 | 0.216731871 | 0.177950646 | 0.334546542 |
| 0.407387905 | 0.255008399 | 0.435652713 | 0.145293807 |
| 1           | 0.040490078 | 0.43095697  | 0.249078183 |
| 0.246577811 | 0.401713804 | 0.40907421  | 0.144240073 |
| 0.017319746 | 0.102867052 | 0.361085914 | 0.3623957   |
| 0.058719056 | 0.159882445 | 0.226100975 | 0.325532311 |
| 0.499751336 | 0.406489629 | 0.236274087 | 0.322188255 |

|             |             |             |             |
|-------------|-------------|-------------|-------------|
| 0.355329345 | 0.103677824 | 0.430515593 | 0.303090993 |
| 0.37809967  | 0.310489977 | 0.444578891 | 0.008017311 |
| 0.451188231 | 0.145476487 | 0.226945192 | 0.351813506 |
| 0.471088877 | 0.109205446 | 0.356759061 | 0.1334433   |
| 0.190245365 | 0.003846654 | 0.326644604 | 0.43309383  |
| 0.237988848 | 0.33537181  | 0.345266431 | 0.231378023 |
| 0.486466618 | 0.359512609 | 0.393512179 | 0.35364573  |
| 0.347064264 | 0.044204661 | 0.131530977 | 0.024341491 |
| 0.360990993 | 0.35152004  | 0.409401868 | 0.357721633 |
| 0.204343644 | 0.452546076 | 0.359978493 | 0.419240951 |
| 0.466222164 | 0.189733924 | 0.509628569 | 0.290679744 |
| 0.418032556 | 0.354935316 | 0.222650759 | 0.31266339  |
| 0.181760715 | 0.131779192 | 0.09854596  | 0.140627086 |
| 0.479179122 | 0.321865691 | 0.378228098 | 0.284742256 |
| 0.037925656 | 0.365523227 | 0.433419525 | 0.451504036 |
| 0.412051066 | 0.395297464 | 0.39836854  | 0.344134307 |
| 0.282383331 | 0.261538349 | 0.062724607 | 0.029830936 |
| 0.262949647 | 0.158517862 | 0.395466319 | 0.436086551 |
| 0.503234251 | 0.291856067 | 0.076715745 | 0.113786292 |
| 0.185593065 | 0.385121143 | 0.241299398 | 0.247790424 |
| 0.436445057 | 0.324513347 | 0.000467998 | 0.205217134 |
| 0.337968482 | 0.401957376 |             |             |
| SERPINB6A   | 0.055543704 | 0.092812026 | 0.105196416 |
| 0.000465085 | 0.019497095 | 0.248816204 | 0.155974244 |
| 0.037321142 | 0.077709908 | 0.028128571 | 0.225112745 |
| 0.030584025 | 0.021018606 | 0.115032253 | 0.104239157 |
| 0.055054276 | 0.052033142 | 0.103821602 | 0.062997542 |
| 0.110853779 | 0.004040891 | 0.18865339  | 0.07833414  |
| 0.186719945 | 0.060482373 | 0.092701564 | 0.002154318 |
| 0.02231136  | 0.04529423  | 0.268019117 | 0.023051779 |
| 0.047819895 | 0.027791984 | 0.010284831 | 0.005705953 |
| 0.000499085 | 0.149875595 | 0.000519179 | 0.019995908 |
| 0.024113346 | 0.057728066 | 0.03343141  | 0.075410411 |
| 1.88E-06    | 0.137094107 | 0.019173819 | 0.133765655 |
| 0.135772982 | 0.242188123 | 0.351649634 | 0.066397413 |
| 0.000245943 | 0.213729178 | 0.122881202 | 0.000175229 |
| 0.169944473 | 5.06E-05    | 0.144834588 | 0.056328685 |
| 0.233409102 | 0.134350516 | 0.020318015 | 0.089792718 |
| 0.250813027 | 0.16009005  | 0.073343938 | 0.033523511 |
| 0.252887473 | 0.035515791 | 0.019601757 | 0.033845447 |
| 0.087444073 | 0.014307681 | 0.028913578 | 0.00616519  |
| 0.025479043 | 0.027594372 | 0.290153759 | 0.141509691 |
| 0.008329382 | 0.131424106 | 0.007263478 | 0.047188178 |
| 0.01072335  | 0.207585518 | 0.045680507 | 0.044375516 |
| 0.020242041 | 0.132851639 | 0.143601713 | 0.065227161 |
| 0.003940841 | 0.032861289 | 0.002094003 | 0.10572641  |
| 0.051472483 | 0.029763517 | 0.069239265 | 0.05637224  |
| 0.138104764 | 0.244029056 | 0.025035689 | 0.0187763   |
| 0.074704171 | 0.038973484 | 0.168466004 | 0.001706302 |
| 0.012666732 | 0.048925478 | 0.052628367 | 0.134322319 |
| 0.07229218  | 0.167864831 | 0.140737092 | 0.267627558 |
| 0.0052631   | 0.004158033 | 0.199950128 | 0.000722986 |
| 0.005407391 | 0.031555719 | 0.042070411 | 0.174113238 |
| 0.063442391 | 0.170796104 | 0.015339071 | 0.023208694 |

|             |             |             |             |
|-------------|-------------|-------------|-------------|
| 0.030262006 | 0.045424519 | 0.02436405  | 0.117552427 |
| 0.018530383 | 0.147572108 | 0.020022424 | 0.034208048 |
| 0.00808614  | 0.086404805 | 0.234601945 | 0.102582602 |
| 0.195689832 | 0.088760278 | 0.094594813 | 0.206875522 |
| 0.012871862 | 0.056215909 | 0.076393151 | 0.043903875 |
| 0.029294172 | 0.244660735 | 0.011686847 | 0.08504674  |
| 0.234068245 | 0.141035672 | 0.00189306  | 0.237015808 |
| 0.187361174 | 0.001193179 | 0.202894276 | 0.057308831 |
| 0.001088273 | 0.022447938 | 0.131689876 | 0.06286363  |
| 0.041688389 | 0.001837589 | 0.03337238  | 0.132271993 |
| 0.204047413 | 0.129403932 | 0.09399939  | 0.020625416 |
| 0.244411872 | 0.010663833 | 0.151890203 | 0.012807072 |
| 0.310752596 | 0.199772685 | 0.001804053 | 0.001831729 |
| 0.057504    | 0.069176842 | 0.075661944 | 0.072804665 |
| 0.038520619 | 3.00E-05    | 0.026103691 | 0.066246545 |
| 0.011323215 | 0.033244033 | 0.101950505 | 0.354714441 |
| 0.320582345 | 0.004753794 | 0.359487226 | 0.021529065 |
| 0.087698002 | 0.013345683 | 0.015676644 | 0.012539783 |
| 0.057033027 | 0.006037196 | 0.044960052 | 0.135020673 |
| 0.024759676 | 0.081592601 | 0.042184307 | 0.064137794 |
| 0.271987718 | 0.035447888 | 0.090057047 | 0.008289492 |
| 0.111787388 | 0.087838805 | 0.007428856 | 0.016590955 |
| 0.053118654 | 0.032174424 | 0.021223677 | 0.193440811 |
| 0.022177571 | 0.181507802 | 0.001857471 | 0.124543657 |
| 0.01826577  | 0.053839589 | 0.028886182 | 0.049933727 |
| 0.123887994 | 0.082862872 | 0.00497131  | 0.289380502 |
| 0.108268783 | 0.092971898 | 0.165823339 | 0.103702713 |
| 0.023097564 | 0.200820871 | 0.02937984  | 0.00227331  |
| 0.092579107 | 0.180432759 | 0.236843426 | 0.177589013 |
| 0.064885028 | 0.110698362 | 0.096606214 | 0.027766508 |
| 0.004529346 | 0.131685878 | 0.101897064 | 0.130205784 |
| 0.041880284 | 0.05636379  | 0.002555463 | 0.007966121 |
| 0.067587639 | 0.036534747 | 0.056867707 | 0.025745094 |
| 0.023723348 | 0.008774727 | 0.269520064 | 0.057444385 |
| 0.001842823 | 0.088574705 | 0.030488783 | 0.004944696 |
| 0.020456375 | 0.024688515 | 0.051153095 | 0.26882696  |
| 0.006705389 | 0.00565819  | 0.005579501 | 0.146070604 |
| 0.296909415 | 0.093988471 | 0.000224918 | 0.112579747 |
| 0.071011279 | 0.130837431 | 0.054590689 | 0.075449801 |
| 0.166438033 | 0.167313634 | 0.072314092 | 0.049783159 |
| 0.015499001 | 0.020015132 | 0.012791395 | 0.27306699  |
| 0.034348879 | 0.218163291 | 0.023556263 | 0.00693411  |
| 0.024210847 | 0.338281815 | 0.000499071 | 0.140997545 |
| 0.046829674 | 0.066149909 | 5.50E-05    | 0.066013017 |
| 0.012496868 | 0.003534461 | 0.090840339 | 0.082619744 |
| 0.077610875 | 0.052718969 | 0.124089091 | 0.016554235 |
| 0.000354632 | 0.032033447 | 0.005227908 | 0.047044974 |
| 0.021212054 | 0.003538848 | 0.006856507 | 0.076244821 |
| 0.095985827 | 0.137327845 | 0.274751208 | 0.002663615 |
| 0.025886795 | 0.00143683  | 0.03789542  | 0.107667531 |
| 0.136829213 | 0.197920232 | 0.11548593  | 0.025869005 |
| 0.049215447 | 0.14862194  | 0.196545899 | 0.076783251 |
| 0.000948586 | 0.022292657 | 0.03308563  | 0.049197918 |
| 0.020246034 | 0.053773306 | 0.018337309 | 0.251349108 |

|             |             |             |             |
|-------------|-------------|-------------|-------------|
| 0.172927294 | 0.000544076 | 0.316791298 | 0.095704436 |
| 0.10773433  | 0.046449556 | 0.14527246  | 0.171983135 |
| 0.141377021 | 0.087851918 | 0.208120199 | 0.124786282 |
| 0.296871816 | 0.000330918 | 0.004627555 | 0.187006272 |
| 0.135601471 | 0.229634223 | 0.048207117 | 0.005827297 |
| 0.040490078 | 1           | 0.080318754 | 0.036053275 |
| 0.252799323 | 0.015398609 | 0.020036158 | 0.004334218 |
| 0.003255197 | 0.069276872 | 0.132023517 | 0.179037999 |
| 0.251600837 | 0.345748715 | 0.117725291 | 0.074829807 |
| 0.046486933 | 0.010069761 | 0.271295091 | 0.136653633 |
| 0.200329732 | 0.002654203 | 0.137598583 | 0.138234856 |
| 0.119092726 | 0.045240928 | 0.067643441 | 0.001683441 |
| 0.026521816 | 0.031576676 | 0.036024365 | 0.036594996 |
| 0.02810167  | 0.18453746  | 0.119395841 | 0.194153842 |
| 0.003458742 | 0.039969809 | 0.222602178 | 0.004011849 |
| 0.290717521 | 0.008872857 | 0.110504537 | 0.000130615 |
| 0.107173153 | 0.077832688 | 0.070066997 | 0.005543549 |
| 0.041639986 | 1.67E-05    | 0.038187612 | 0.138725963 |
| 0.144746691 | 0.194182473 | 0.05067534  | 0.035911536 |
| 0.049897093 | 0.04396834  | 0.148388216 | 0.023971478 |
| 0.046815455 | 0.000667422 | 0.055961035 | 0.102516005 |
| 0.013837983 | 0.015826667 | 0.275399797 | 0.024091987 |
| 0.100972127 | 0.016175549 | 0.2174427   | 0.099824573 |
| 0.036853786 | 0.026451599 | 0.045825838 | 0.018300123 |
| 0.07052242  | 0.042217688 | 0.044026625 | 0.020892295 |
| 0.044550207 | 0.017535819 | 0.019211019 | 0.21114342  |
| 0.009973701 | 0.092952045 | 0.00068716  | 0.001579438 |
| 0.001507417 | 0.1335905   | 0.104661079 | 0.08971638  |
| 0.06075724  | 0.008495076 | 0.186692992 | 0.239738926 |
| 0.001115519 | 0.034967188 | 0.148738232 | 0.000519396 |
| 0.055460748 | 0.008417942 | 0.016033944 | 0.098176828 |
| 0.184138539 | 0.003907246 |             |             |
| SESN1       | 0.32347142  | 0.448403159 | 0.075562192 |
| 0.017352883 | 0.108469234 | 0.221024869 | 0.206464011 |
| 0.341216609 | 0.127886306 | 0.11006313  | 0.294736592 |
| 0.00385865  | 0.361802786 | 0.02618295  | 0.119904036 |
| 0.477163586 | 0.490600792 | 0.310286283 | 0.498374042 |
| 0.33315164  | 0.102703993 | 0.354283904 | 0.308746292 |
| 0.242079009 | 0.004243035 | 0.11163961  | 0.030410685 |
| 0.355076205 | 0.478167765 | 0.221167778 | 0.225768525 |
| 0.425139619 | 0.410471596 | 0.31092095  | 0.268161518 |
| 0.183421151 | 0.41704378  | 0.14448534  | 0.367126567 |
| 0.396193121 | 0.192211476 | 0.398290631 | 0.024703318 |
| 0.001722632 | 0.104096942 | 0.311277628 | 0.349085105 |
| 0.352328511 | 0.206494009 | 0.198695486 | 0.148762854 |
| 0.135810971 | 0.323899553 | 0.382781683 | 0.134513761 |
| 0.352935525 | 0.002372381 | 0.399944959 | 0.279990199 |
| 0.083670792 | 0.329694701 | 0.321408124 | 0.3625305   |
| 0.235640696 | 0.376135527 | 0.480863256 | 0.035865681 |
| 0.080644645 | 0.386555771 | 0.335120165 | 0.323994361 |
| 0.412796977 | 0.268520839 | 0.256922453 | 0.339063159 |
| 0.362581353 | 0.373002475 | 0.298779165 | 0.215827413 |
| 0.001516696 | 0.137528043 | 0.246656018 | 0.329816831 |
| 0.336727508 | 0.322042161 | 0.358767642 | 0.193303125 |

|             |             |             |             |
|-------------|-------------|-------------|-------------|
| 0.342009075 | 0.028680153 | 0.357999965 | 0.49044729  |
| 0.018684586 | 0.374656871 | 0.012984401 | 0.207292488 |
| 0.382816835 | 0.445826089 | 0.360755836 | 0.070628194 |
| 0.024865062 | 0.176090598 | 0.182104234 | 0.398568444 |
| 0.380705164 | 0.388568363 | 0.352717316 | 0.18729498  |
| 0.344427429 | 0.18196854  | 0.347340981 | 0.400463615 |
| 0.439164298 | 0.019801031 | 0.218176659 | 0.217876515 |
| 0.297280593 | 0.108713481 | 0.228324395 | 0.034169586 |
| 0.009653801 | 0.047004098 | 0.43536651  | 0.185164654 |
| 0.089882001 | 0.190365765 | 0.074185494 | 0.351653971 |
| 0.337400103 | 0.435087356 | 0.121631491 | 0.228226016 |
| 0.357894089 | 0.231326815 | 0.323048936 | 0.378525936 |
| 0.317064493 | 0.298820791 | 0.166716603 | 0.403655244 |
| 0.395335038 | 0.077810519 | 0.09152576  | 0.292819032 |
| 0.333004819 | 0.459338012 | 0.494965232 | 0.329759793 |
| 0.227078574 | 0.27370125  | 0.238819334 | 0.320299094 |
| 0.247169077 | 0.382067481 | 0.126682037 | 0.348928938 |
| 0.358117204 | 0.038338881 | 0.0785321   | 0.400569735 |
| 0.041223084 | 0.237708192 | 0.393068146 | 0.399141157 |
| 0.411332813 | 0.024300159 | 0.177937026 | 0.230837175 |
| 0.297588824 | 0.221115982 | 0.379940128 | 0.158940357 |
| 0.304385281 | 0.234361098 | 0.056980332 | 0.342646538 |
| 0.140654734 | 0.341461752 | 0.248557127 | 0.066460449 |
| 0.392297818 | 0.370544233 | 0.381799451 | 0.390535213 |
| 0.353404742 | 0.001841481 | 0.105791563 | 0.337876285 |
| 0.228441243 | 0.401694809 | 0.440821088 | 0.134127077 |
| 0.280852969 | 0.326761705 | 0.171803761 | 0.288374381 |
| 0.391341396 | 0.175063163 | 0.160952771 | 0.000788617 |
| 0.152098547 | 0.272068785 | 0.394456158 | 0.081619895 |
| 0.199747147 | 0.121475662 | 0.182931874 | 0.398365821 |
| 0.203526446 | 0.38915279  | 0.054954277 | 0.239293839 |
| 0.24987086  | 0.354592182 | 0.286831874 | 0.254901996 |
| 0.369830763 | 0.253413357 | 0.412153943 | 0.351886238 |
| 0.271299663 | 0.300954563 | 0.229716457 | 0.297188931 |
| 0.372647662 | 0.41375036  | 0.367405543 | 0.401795847 |
| 0.241500033 | 0.391330594 | 0.288119485 | 0.266120761 |
| 0.38337864  | 0.408525226 | 0.100491338 | 0.468300915 |
| 0.001337332 | 0.340299717 | 0.349935005 | 0.22850621  |
| 0.425293794 | 0.219802931 | 0.088663303 | 0.289070092 |
| 0.503508067 | 0.475874069 | 0.420570592 | 0.398556927 |
| 0.243196036 | 0.022829706 | 0.463427007 | 0.363892149 |
| 0.479197742 | 0.368768295 | 0.273483055 | 0.158997625 |
| 0.443607336 | 0.364731319 | 0.338719331 | 0.340858861 |
| 0.381330695 | 0.358563312 | 0.285075258 | 0.363082005 |
| 0.020118486 | 0.213329622 | 0.334471228 | 0.143660772 |
| 0.236382301 | 0.1742098   | 0.383406437 | 0.323516779 |
| 0.318355243 | 0.255441994 | 0.255402548 | 0.085720401 |
| 0.19105126  | 0.455746304 | 0.060594394 | 0.449731955 |
| 0.495438906 | 0.381427546 | 0.413605242 | 0.49606647  |
| 0.304584554 | 0.344551054 | 0.410753309 | 0.440159291 |
| 0.002280068 | 0.393474668 | 0.333294725 | 0.328558936 |
| 0.393901366 | 0.26954383  | 0.298418029 | 0.344918416 |
| 0.003786301 | 0.169597419 | 0.185065697 | 0.464559447 |
| 0.409990319 | 0.035641633 | 0.063383465 | 0.399322301 |



|             |             |             |             |
|-------------|-------------|-------------|-------------|
| 0.339454662 | 0.070998258 | 0.490796646 | 0.271411045 |
| 0.387034966 | 0.385825095 | 0.154058405 | 0.349620623 |
| 0.164607529 | 0.404570272 | 0.027652019 | 0.35038678  |
| 0.386610765 | 0.13282094  | 0.059015442 | 0.498610875 |
| 0.375420882 | 0.346546577 | 0.262670435 | 0.004920441 |
| 0.377107612 | 0.140251049 | 0.366573507 | 0.156474183 |
| 0.39377406  | 0.33280677  | 0.402791313 | 0.371578449 |
| 0.395137705 | 0.35454873  | 0.332054769 | 0.379455217 |
| 0.094878008 | 0.346238145 | 0.389270171 | 0.056060259 |
| 0.331021807 | 0.435258753 | 0.304136378 | 0.170076622 |
| 0.365332408 | 0.062319594 | 0.201875269 | 0.347044386 |
| 0.383497558 | 0.415303012 | 0.062294746 | 0.231050533 |
| 0.346007657 | 0.31037484  | 0.11954845  | 0.375969122 |
| 0.274921708 | 0.137770764 | 0.217358285 | 0.352404669 |
| 0.407327497 | 0.268297761 | 0.391166877 | 0.107840395 |
| 0.43095697  | 0.080318754 | 1           | 0.263505502 |
| 0.297016654 | 0.312330125 | 0.372560731 | 0.137203464 |
| 0.014794807 | 0.134658536 | 0.334265516 | 0.356527488 |
| 0.0877541   | 0.21564904  | 0.220603497 | 0.288702556 |
| 0.463447237 | 0.338677781 | 0.267929894 | 0.361197725 |
| 0.352926469 | 0.070838844 | 0.451224915 | 0.326132495 |
| 0.368292732 | 0.271223217 | 0.399140151 | 0.009762663 |
| 0.3733459   | 0.128154855 | 0.266140226 | 0.281993067 |
| 0.437013101 | 0.135413583 | 0.334269176 | 0.190119748 |
| 0.147606649 | 0.008872183 | 0.365498457 | 0.29754795  |
| 0.263998288 | 0.332764933 | 0.368165951 | 0.140353861 |
| 0.490291768 | 0.340497013 | 0.356233686 | 0.315904054 |
| 0.304462618 | 0.021245953 | 0.123092462 | 0.048438546 |
| 0.368504778 | 0.369333609 | 0.380465609 | 0.331625692 |
| 0.26390892  | 0.384971505 | 0.358411461 | 0.329356318 |
| 0.414136907 | 0.118821759 | 0.476874482 | 0.363475848 |
| 0.364005054 | 0.330789869 | 0.263024645 | 0.345201061 |
| 0.186855431 | 0.163874379 | 0.139738399 | 0.218502122 |
| 0.427427484 | 0.360005733 | 0.315307933 | 0.276189356 |
| 0.049483943 | 0.330689712 | 0.393548808 | 0.359106424 |
| 0.345600211 | 0.313157142 | 0.358855458 | 0.347929258 |
| 0.286898682 | 0.303827335 | 0.035369816 | 0.019488055 |
| 0.17929451  | 0.175204679 | 0.405928843 | 0.404790752 |
| 0.48344751  | 0.31849653  | 0.110088618 | 0.180758622 |
| 0.187268245 | 0.349473338 | 0.238787053 | 0.143488448 |
| 0.403583189 | 0.311369806 | 0.001193497 | 0.278454151 |
| 0.349968387 | 0.312839141 |             |             |
| SFMBT1      | 0.105216287 | 0.368667066 | 0.03168624  |
| 0.003370712 | 0.051232928 | 0.307087705 | 0.285444728 |
| 0.081269806 | 0.037423924 | 0.054992719 | 0.394638293 |
| 0.000439198 | 0.153927506 | 0.00738991  | 0.029682003 |
| 0.269244516 | 0.282056906 | 0.304281662 | 0.287758485 |
| 0.12068427  | 0.019586414 | 0.261829676 | 0.213707892 |
| 0.277099662 | 0.000837608 | 0.139712551 | 0.00887852  |
| 0.06921277  | 0.242038763 | 0.209288991 | 0.047493878 |
| 0.223235952 | 0.211738439 | 0.063449848 | 0.037483997 |
| 0.014671507 | 0.403765593 | 0.010558829 | 0.182575755 |
| 0.157603894 | 0.148283861 | 0.216067498 | 0.011876968 |
| 0.000182078 | 0.113058142 | 0.054894727 | 0.24005529  |

|             |             |             |             |
|-------------|-------------|-------------|-------------|
| 0.125588144 | 0.262764544 | 0.217726512 | 0.157613457 |
| 0.003880755 | 0.389516571 | 0.239688161 | 0.003891797 |
| 0.451205782 | 0.000400221 | 0.423028931 | 0.04648873  |
| 0.08232772  | 0.18363715  | 0.076938545 | 0.232070349 |
| 0.36449297  | 0.447036511 | 0.340148534 | 0.028097698 |
| 0.127468479 | 0.139480517 | 0.149695313 | 0.202365615 |
| 0.317998272 | 0.031041561 | 0.079065162 | 0.067778705 |
| 0.171215609 | 0.156325561 | 0.339837141 | 0.086157463 |
| 0.000552287 | 0.199553339 | 0.073182204 | 0.123255488 |
| 0.103013774 | 0.401910907 | 0.139267152 | 0.133805653 |
| 0.101689543 | 0.016974759 | 0.236164989 | 0.311924051 |
| 0.005630242 | 0.189928396 | 0.002743616 | 0.055810006 |
| 0.210650004 | 0.191432327 | 0.1822923   | 0.051711942 |
| 0.012629169 | 0.086445072 | 0.011142706 | 0.144586296 |
| 0.181694011 | 0.156933414 | 0.442269625 | 0.012557075 |
| 0.122936535 | 0.026735206 | 0.127400064 | 0.402733927 |
| 0.295524634 | 0.007729685 | 0.054727777 | 0.302509014 |
| 0.027308857 | 0.021786148 | 0.289689093 | 0.001666824 |
| 0.003594822 | 0.002816536 | 0.227006256 | 0.088709525 |
| 0.100114149 | 0.217650914 | 0.020074079 | 0.187836342 |
| 0.06923773  | 0.200830655 | 0.062049029 | 0.216901286 |
| 0.159028205 | 0.300936101 | 0.146804042 | 0.20656776  |
| 0.081126727 | 0.068447913 | 0.105902908 | 0.398989773 |
| 0.406954816 | 0.03937088  | 0.032467154 | 0.316897658 |
| 0.131207967 | 0.268736938 | 0.335057497 | 0.048578236 |
| 0.135479715 | 0.21160728  | 0.04590009  | 0.285717031 |
| 0.322744321 | 0.182468777 | 0.004721    | 0.386855989 |
| 0.451819392 | 0.002401774 | 0.073336824 | 0.217294473 |
| 0.015160963 | 0.055876062 | 0.347872711 | 0.284592583 |
| 0.19871731  | 0.006761653 | 0.093510917 | 0.25145062  |
| 0.222605855 | 0.203163817 | 0.236993969 | 0.069017127 |
| 0.294370201 | 0.045742869 | 0.062772342 | 0.130170097 |
| 0.168642034 | 0.242773071 | 0.01185523  | 0.007980992 |
| 0.156196636 | 0.100126732 | 0.294866466 | 0.184227018 |
| 0.157115911 | 0.00038566  | 0.049061673 | 0.137071397 |
| 0.0343598   | 0.17396461  | 0.395252097 | 0.184486645 |
| 0.253418125 | 0.040000602 | 0.187911793 | 0.127635091 |
| 0.223792894 | 0.030664177 | 0.029295164 | 0.000445171 |
| 0.054094128 | 0.047518239 | 0.152697603 | 0.016759854 |
| 0.079075935 | 0.028487629 | 0.013894523 | 0.296144812 |
| 0.242283527 | 0.245576077 | 0.008169924 | 0.015661438 |
| 0.113133433 | 0.35988038  | 0.053118957 | 0.016769155 |
| 0.291359729 | 0.063639925 | 0.155676629 | 0.396134428 |
| 0.085760212 | 0.360912753 | 0.008480431 | 0.134459602 |
| 0.13374682  | 0.295096674 | 0.194346887 | 0.270499372 |
| 0.199874832 | 0.186149112 | 0.017292228 | 0.323866182 |
| 0.179056634 | 0.205699326 | 0.049285996 | 0.38481378  |
| 0.000669143 | 0.286978578 | 0.174112621 | 0.006588059 |
| 0.372690378 | 0.331213138 | 0.061772219 | 0.109558117 |
| 0.292855741 | 0.388095074 | 0.263768024 | 0.181707611 |
| 0.011288482 | 0.005754621 | 0.326457318 | 0.320864828 |
| 0.245672949 | 0.188695718 | 0.045824935 | 0.009495334 |
| 0.298582031 | 0.1073601   | 0.19917423  | 0.096666775 |
| 0.176051339 | 0.079720417 | 0.229066347 | 0.146120104 |

|             |             |             |             |
|-------------|-------------|-------------|-------------|
| 0.000992185 | 0.109766758 | 0.135273315 | 0.018729241 |
| 0.069219356 | 0.030657701 | 0.289523542 | 0.389547362 |
| 0.07049861  | 0.013800538 | 0.059985388 | 0.100445816 |
| 0.264271597 | 0.358896277 | 0.004742547 | 0.314829013 |
| 0.319884061 | 0.247630874 | 0.290972176 | 0.307234245 |
| 0.18097839  | 0.418877739 | 0.312391571 | 0.213624572 |
| 0.000435969 | 0.169486835 | 0.136278647 | 0.424222033 |
| 0.207397144 | 0.306419948 | 0.043498697 | 0.077837455 |
| 0.00168775  | 0.193010137 | 0.011010692 | 0.397105134 |
| 0.277984833 | 0.024690192 | 0.003305359 | 0.288360115 |
| 0.126013564 | 0.004390557 | 0.348026694 | 0.205216795 |
| 0.348970273 | 0.200706758 | 0.173711173 | 0.157368391 |
| 0.009400828 | 0.074839315 | 0.020052065 | 0.227678918 |
| 0.131131485 | 0.006915416 | 0.026976325 | 0.315890505 |
| 0.275312276 | 0.385551695 | 0.294457743 | 0.001124335 |
| 0.140940122 | 0.011402202 | 0.228341928 | 0.043167127 |
| 0.311797406 | 0.402364673 | 0.39851391  | 0.191186574 |
| 0.198435208 | 0.397050815 | 0.387021345 | 0.284509857 |
| 0.010787936 | 0.152003439 | 0.19170752  | 0.020419912 |
| 0.097912333 | 0.289144    | 0.12675465  | 0.275412455 |
| 0.263500765 | 0.010532442 | 0.295218225 | 0.122243235 |
| 0.395693592 | 0.271496809 | 0.056917433 | 0.071759784 |
| 0.393906683 | 0.122072441 | 0.175777193 | 0.205969431 |
| 0.343106046 | 0.003768613 | 0.009599977 | 0.34928053  |
| 0.419397392 | 0.395349375 | 0.231822591 | 0.023123908 |
| 0.249078183 | 0.036053275 | 0.263505502 | 1           |
| 0.234876188 | 0.095502972 | 0.136517773 | 0.00466297  |
| 0.002765023 | 0.022085513 | 0.399544804 | 0.414985349 |
| 0.094362595 | 0.211357886 | 0.203450151 | 0.261452775 |
| 0.255066675 | 0.039523949 | 0.316487577 | 0.174150511 |
| 0.458015035 | 0.016658494 | 0.389113652 | 0.176481219 |
| 0.265014978 | 0.144630865 | 0.279004028 | 0.001711841 |
| 0.157201451 | 0.062240397 | 0.043839157 | 0.197055511 |
| 0.177542314 | 0.118165102 | 0.376556998 | 0.09221423  |
| 0.015390265 | 0.0014924   | 0.309462974 | 0.068931817 |
| 0.384714164 | 0.024446621 | 0.172968267 | 0.004005172 |
| 0.380663195 | 0.165733449 | 0.212048691 | 0.041707755 |
| 0.125761039 | 0.001454248 | 0.082017586 | 0.017736949 |
| 0.263458556 | 0.376882431 | 0.168254872 | 0.093154604 |
| 0.034826788 | 0.240411756 | 0.346464805 | 0.169331852 |
| 0.281645874 | 0.006022219 | 0.285621281 | 0.128710963 |
| 0.134376709 | 0.039576344 | 0.329503306 | 0.046483794 |
| 0.220689386 | 0.02165902  | 0.145997377 | 0.040192022 |
| 0.248554584 | 0.063943707 | 0.221416321 | 0.027266513 |
| 0.02734379  | 0.131180983 | 0.193553001 | 0.164915468 |
| 0.177367856 | 0.115135482 | 0.061001213 | 0.448144504 |
| 0.017493264 | 0.097584992 | 0.006197146 | 0.007022818 |
| 0.014502508 | 0.147431868 | 0.254237929 | 0.283862635 |
| 0.298474461 | 0.017814293 | 0.08887503  | 0.084178014 |
| 0.006834708 | 0.139814648 | 0.330744477 | 0.012579227 |
| 0.225417698 | 0.031526466 | 0.000505123 | 0.056960681 |
| 0.339187405 | 0.022600783 |             |             |
| SGCB        | 0.177859124 | 0.375288871 | 0.206656996 |
| 0.009469624 | 0.101095858 | 0.316142586 | 0.223696124 |

|             |             |             |             |
|-------------|-------------|-------------|-------------|
| 0.15756683  | 0.257064617 | 0.139304501 | 0.384632781 |
| 0.021563927 | 0.160454329 | 0.134720966 | 0.200081058 |
| 0.306255327 | 0.302318855 | 0.222256469 | 0.316669075 |
| 0.242264196 | 0.073148876 | 0.355578689 | 0.225348107 |
| 0.271457697 | 0.036298359 | 0.162784101 | 0.029824038 |
| 0.124251024 | 0.274491222 | 0.317840022 | 0.202547807 |
| 0.273196297 | 0.211480317 | 0.133323955 | 0.104523244 |
| 0.034356901 | 0.428702159 | 0.02121525  | 0.160603717 |
| 0.184858872 | 0.181195726 | 0.222555462 | 0.09690988  |
| 0.000284679 | 0.193370067 | 0.12253555  | 0.309383665 |
| 0.276235068 | 0.282699587 | 0.320684134 | 0.162610403 |
| 0.022029666 | 0.398955095 | 0.335569275 | 0.019334428 |
| 0.417873952 | 0.001507532 | 0.421470555 | 0.194675271 |
| 0.236736228 | 0.282708176 | 0.12532445  | 0.276765943 |
| 0.333669871 | 0.422738144 | 0.343410459 | 0.096682478 |
| 0.21140908  | 0.158089164 | 0.167990337 | 0.17383535  |
| 0.348012338 | 0.167636405 | 0.206447539 | 0.077214838 |
| 0.17729084  | 0.190647057 | 0.361567403 | 0.309860247 |
| 0.010290713 | 0.187259601 | 0.09797144  | 0.19462163  |
| 0.103103285 | 0.401507767 | 0.184819333 | 0.176116221 |
| 0.130122744 | 0.153393572 | 0.284185355 | 0.331650936 |
| 0.025945596 | 0.196339681 | 0.013150918 | 0.294299474 |
| 0.25432174  | 0.224735998 | 0.254749866 | 0.159948071 |
| 0.129815241 | 0.331718046 | 0.156530649 | 0.168887501 |
| 0.212527913 | 0.17333697  | 0.409734915 | 0.027069949 |
| 0.130435858 | 0.250273051 | 0.23617483  | 0.413782996 |
| 0.33511223  | 0.079215719 | 0.326967875 | 0.293937454 |
| 0.114155302 | 0.069193656 | 0.256402613 | 0.01444684  |
| 0.018229809 | 0.054070294 | 0.260867818 | 0.32588191  |
| 0.13859911  | 0.245225031 | 0.076383971 | 0.15356947  |
| 0.153497613 | 0.252967049 | 0.12359769  | 0.233215187 |
| 0.150234521 | 0.236233176 | 0.129710754 | 0.203584828 |
| 0.101192043 | 0.300288648 | 0.316149879 | 0.357563058 |
| 0.452445022 | 0.180638992 | 0.230772473 | 0.347921266 |
| 0.130595873 | 0.301442753 | 0.358053491 | 0.262669116 |
| 0.14730408  | 0.323573026 | 0.137881326 | 0.25221945  |
| 0.27695532  | 0.244314928 | 0.02974082  | 0.394154459 |
| 0.443292638 | 0.016833698 | 0.233795572 | 0.255192928 |
| 0.016975782 | 0.192955719 | 0.398778466 | 0.274523825 |
| 0.176943993 | 0.025908699 | 0.153166313 | 0.237557269 |
| 0.295022566 | 0.23274202  | 0.277059099 | 0.128264756 |
| 0.362128171 | 0.127954496 | 0.172479442 | 0.134048308 |
| 0.283997306 | 0.321424642 | 0.0736397   | 0.033350767 |
| 0.204434843 | 0.229079428 | 0.313375462 | 0.228383505 |
| 0.206270883 | 0.000990473 | 0.132598323 | 0.216087108 |
| 0.144705196 | 0.203929673 | 0.386051705 | 0.2806844   |
| 0.337735375 | 0.08342383  | 0.312197541 | 0.143719418 |
| 0.304304084 | 0.163696633 | 0.156220714 | 0.012234295 |
| 0.216468819 | 0.087873707 | 0.183792567 | 0.238326568 |
| 0.158315806 | 0.255749592 | 0.183013015 | 0.300562704 |
| 0.29551903  | 0.212627488 | 0.126943116 | 0.071390896 |
| 0.268990826 | 0.292268669 | 0.110222955 | 0.181029052 |
| 0.252854175 | 0.205491795 | 0.186236101 | 0.421984994 |
| 0.172286157 | 0.372323345 | 0.045362253 | 0.300906665 |

|             |             |             |             |
|-------------|-------------|-------------|-------------|
| 0.126139227 | 0.281833049 | 0.2039887   | 0.245913074 |
| 0.263640427 | 0.243545784 | 0.10277207  | 0.369556827 |
| 0.245991118 | 0.216878059 | 0.281120299 | 0.386955721 |
| 0.014757332 | 0.320830803 | 0.1556424   | 0.052163422 |
| 0.363602718 | 0.260729119 | 0.272204053 | 0.305631936 |
| 0.323779089 | 0.39550385  | 0.332185814 | 0.208333431 |
| 0.090645199 | 0.115929642 | 0.375831922 | 0.345699771 |
| 0.27015033  | 0.213848154 | 0.063738636 | 0.050906528 |
| 0.312811572 | 0.1399368   | 0.227854343 | 0.133271335 |
| 0.138546421 | 0.096584943 | 0.322555705 | 0.203163916 |
| 0.018509323 | 0.238596461 | 0.172333155 | 0.090139332 |
| 0.150802389 | 0.193169813 | 0.266273963 | 0.394438342 |
| 0.10527381  | 0.119686729 | 0.091209493 | 0.177442776 |
| 0.285301211 | 0.376867655 | 0.007931794 | 0.376181072 |
| 0.34273756  | 0.255175747 | 0.286709822 | 0.345164337 |
| 0.281382288 | 0.387104645 | 0.319339511 | 0.257892318 |
| 0.011168905 | 0.181236803 | 0.126753318 | 0.448152827 |
| 0.23611228  | 0.326056917 | 0.103687953 | 0.082388737 |
| 0.010903153 | 0.307768603 | 0.037029035 | 0.432818822 |
| 0.26349353  | 0.11899071  | 0.004770564 | 0.271648368 |
| 0.11815315  | 0.024839776 | 0.379546096 | 0.217122332 |
| 0.321170428 | 0.187040501 | 0.217370897 | 0.155066158 |
| 0.02752574  | 0.176025571 | 0.031405128 | 0.203671192 |
| 0.132372936 | 0.049668666 | 0.061149355 | 0.349303509 |
| 0.33936476  | 0.322675524 | 0.312105808 | 0.015263567 |
| 0.188081999 | 0.052535641 | 0.21707019  | 0.245985318 |
| 0.36747659  | 0.3876562   | 0.369750829 | 0.187790072 |
| 0.200491805 | 0.380156181 | 0.413451288 | 0.312044101 |
| 0.028207874 | 0.179743309 | 0.227231146 | 0.119231112 |
| 0.126149963 | 0.287631927 | 0.1255389   | 0.250944897 |
| 0.33995671  | 0.020001981 | 0.313020854 | 0.212892647 |
| 0.359028377 | 0.274915724 | 0.195966667 | 0.329508738 |
| 0.376835517 | 0.282067099 | 0.221057463 | 0.261433223 |
| 0.380172319 | 0.026782739 | 0.06415056  | 0.372263736 |
| 0.412555457 | 0.351579729 | 0.271213279 | 0.082709978 |
| 0.246577811 | 0.252799323 | 0.297016654 | 0.234876188 |
| 1           | 0.120823695 | 0.170515703 | 0.056929844 |
| 0.028669648 | 0.246348481 | 0.355666363 | 0.42512474  |
| 0.240024327 | 0.328451746 | 0.226339097 | 0.198580708 |
| 0.27992567  | 0.139457635 | 0.343105855 | 0.270673255 |
| 0.445055209 | 0.046361975 | 0.428914365 | 0.265181831 |
| 0.340974583 | 0.197734374 | 0.284757975 | 0.012026963 |
| 0.167697938 | 0.14690814  | 0.119539202 | 0.152363323 |
| 0.214442023 | 0.251040647 | 0.302534337 | 0.327817157 |
| 0.064332215 | 0.018073272 | 0.383897338 | 0.062894047 |
| 0.395331204 | 0.100342466 | 0.25163947  | 0.017137417 |
| 0.407915312 | 0.219902181 | 0.282229327 | 0.069013514 |
| 0.186756949 | 0.001824362 | 0.1465519   | 0.200050579 |
| 0.352225129 | 0.396256089 | 0.204931983 | 0.15488327  |
| 0.180465074 | 0.194925666 | 0.332657673 | 0.135404441 |
| 0.27003376  | 0.037708238 | 0.309965964 | 0.264802715 |
| 0.145374906 | 0.197312226 | 0.330316629 | 0.237727514 |
| 0.195957605 | 0.123430413 | 0.26173307  | 0.293710818 |
| 0.249241232 | 0.204076567 | 0.170630614 | 0.17465028  |

|             |             |             |             |
|-------------|-------------|-------------|-------------|
| 0.139281912 | 0.208312387 | 0.218280611 | 0.16666232  |
| 0.19142212  | 0.147384846 | 0.136039633 | 0.43800868  |
| 0.151918665 | 0.251576305 | 0.016978258 | 0.021617936 |
| 0.063314669 | 0.242325931 | 0.338938383 | 0.319854668 |
| 0.313323142 | 0.125008268 | 0.252969929 | 0.327659125 |
| 0.029163049 | 0.195993992 | 0.255716418 | 0.026411771 |
| 0.202005924 | 0.106360131 | 0.008497632 | 0.28093747  |
| 0.384404251 | 0.113230689 |             |             |
| SH2D2A      | 0.219796709 | 0.399791327 | 0.027065978 |
| 0.031080688 | 0.040987947 | 0.098761455 | 0.085924707 |
| 0.226173889 | 0.040782576 | 0.079574846 | 0.167215674 |
| 0.00110933  | 0.337095403 | 0.006460976 | 0.021326278 |
| 0.478137464 | 0.469411316 | 0.131415571 | 0.443322346 |
| 0.172827287 | 0.106226655 | 0.199946699 | 0.209773353 |
| 0.107545289 | 0.000917886 | 0.048952676 | 0.049773029 |
| 0.217336901 | 0.470524763 | 0.078796928 | 0.164982901 |
| 0.440433012 | 0.420175762 | 0.223021794 | 0.141192724 |
| 0.169582319 | 0.340937767 | 0.053764699 | 0.321143812 |
| 0.385838955 | 0.100998606 | 0.394941638 | 0.004225445 |
| 0.006711947 | 0.037840423 | 0.21349074  | 0.211863505 |
| 0.132916547 | 0.093545028 | 0.060842384 | 0.075867076 |
| 0.15926988  | 0.190481645 | 0.282619498 | 0.162966809 |
| 0.262944846 | 0.007258462 | 0.317719772 | 0.156260184 |
| 0.020739363 | 0.129164105 | 0.230701316 | 0.239376323 |
| 0.099941093 | 0.290349115 | 0.426175685 | 0.012849219 |
| 0.025727906 | 0.226358625 | 0.390751086 | 0.236296347 |
| 0.364549177 | 0.213324854 | 0.132463364 | 0.191950677 |
| 0.319537433 | 0.376478533 | 0.109313942 | 0.063502339 |
| 0.000780917 | 0.058248384 | 0.166833379 | 0.251313088 |
| 0.267285448 | 0.198339011 | 0.228837649 | 0.087215398 |
| 0.27959887  | 0.006187669 | 0.181102419 | 0.455262946 |
| 0.013904459 | 0.317641359 | 0.004746215 | 0.051750674 |
| 0.370707071 | 0.468857164 | 0.274651458 | 0.02990221  |
| 0.004345965 | 0.044072467 | 0.102371614 | 0.420874726 |
| 0.200161866 | 0.230505279 | 0.247785726 | 0.086829911 |
| 0.359822595 | 0.094764042 | 0.142200901 | 0.344359813 |
| 0.430238612 | 0.002194834 | 0.062608961 | 0.087250918 |
| 0.165838201 | 0.075461934 | 0.084098159 | 0.050871606 |
| 0.009738485 | 0.011415556 | 0.436409654 | 0.067469656 |
| 0.043349398 | 0.082644117 | 0.043331264 | 0.252583125 |
| 0.203312457 | 0.404907084 | 0.038035866 | 0.106336418 |
| 0.3215323   | 0.1006155   | 0.214640692 | 0.325523064 |
| 0.165865803 | 0.116693455 | 0.064269114 | 0.317942169 |
| 0.286590718 | 0.024726658 | 0.03403837  | 0.162257918 |
| 0.333797463 | 0.449390246 | 0.45710601  | 0.14416219  |
| 0.107341985 | 0.093692843 | 0.22198087  | 0.20736435  |
| 0.087688677 | 0.153664809 | 0.054431567 | 0.167953646 |
| 0.271355373 | 0.031097751 | 0.023408971 | 0.321892129 |
| 0.025646238 | 0.094672082 | 0.337074217 | 0.301600936 |
| 0.202991965 | 0.044967297 | 0.137433075 | 0.118494468 |
| 0.135568945 | 0.119188622 | 0.216518836 | 0.139754847 |
| 0.146687481 | 0.237316789 | 0.015531119 | 0.356596919 |
| 0.043434792 | 0.15411309  | 0.231216897 | 0.044641298 |
| 0.223154971 | 0.161784275 | 0.354653673 | 0.212574723 |

|             |             |             |             |
|-------------|-------------|-------------|-------------|
| 0.314444013 | 0.008413338 | 0.087347072 | 0.222632938 |
| 0.230032711 | 0.361365427 | 0.385763458 | 0.038025434 |
| 0.104767747 | 0.154383438 | 0.050490226 | 0.132808883 |
| 0.318594917 | 0.148077618 | 0.120424624 | 0.000675057 |
| 0.046056416 | 0.305992445 | 0.195333868 | 0.023332926 |
| 0.101403321 | 0.058675246 | 0.056095538 | 0.381488111 |
| 0.080585214 | 0.321834301 | 0.011966843 | 0.082312576 |
| 0.118283971 | 0.241414804 | 0.265561032 | 0.182657171 |
| 0.300435708 | 0.185730468 | 0.45592234  | 0.234924248 |
| 0.095340478 | 0.203673621 | 0.088663974 | 0.114411973 |
| 0.252434725 | 0.374872145 | 0.396301795 | 0.316185332 |
| 0.111146183 | 0.219017832 | 0.17395317  | 0.120711413 |
| 0.196489785 | 0.178315767 | 0.035724466 | 0.385627681 |
| 0.000374519 | 0.146967899 | 0.242571717 | 0.108551794 |
| 0.382460128 | 0.094291003 | 0.025604288 | 0.113162717 |
| 0.450701527 | 0.381790944 | 0.33616291  | 0.442765539 |
| 0.164050666 | 0.004162753 | 0.386555928 | 0.232134489 |
| 0.477025644 | 0.166592778 | 0.170755688 | 0.03305354  |
| 0.405647744 | 0.183948349 | 0.260702045 | 0.276097866 |
| 0.216714411 | 0.182099767 | 0.088933907 | 0.223656098 |
| 0.016154778 | 0.142049687 | 0.304592316 | 0.131663456 |
| 0.208720813 | 0.096095228 | 0.344343938 | 0.142856451 |
| 0.190180376 | 0.271968008 | 0.210216067 | 0.028730867 |
| 0.059936722 | 0.41532348  | 0.020937598 | 0.365286822 |
| 0.454772888 | 0.14639735  | 0.40355939  | 0.44884503  |
| 0.159717962 | 0.217534816 | 0.386075396 | 0.385182638 |
| 0.000578965 | 0.428182003 | 0.318133198 | 0.184085136 |
| 0.450326119 | 0.123227834 | 0.134137891 | 0.237588089 |
| 0.00022311  | 0.058678817 | 0.233100768 | 0.363255713 |
| 0.388139985 | 0.007966418 | 0.024535012 | 0.306809816 |
| 0.290035077 | 0.020382332 | 0.44207025  | 0.171468424 |
| 0.34539096  | 0.188908449 | 0.072448341 | 0.374630685 |
| 0.21382629  | 0.160964823 | 0.012351896 | 0.236971191 |
| 0.194242848 | 0.052870057 | 0.051706295 | 0.438799499 |
| 0.358596111 | 0.187636356 | 0.095002567 | 0.016277067 |
| 0.389636738 | 0.195323001 | 0.330809288 | 0.03614466  |
| 0.287462132 | 0.187425932 | 0.313611831 | 0.356450129 |
| 0.221846564 | 0.259851211 | 0.230703276 | 0.351985664 |
| 0.072499095 | 0.415175877 | 0.440868411 | 0.030833307 |
| 0.247184689 | 0.403204021 | 0.251208628 | 0.067330487 |
| 0.191954184 | 0.064080357 | 0.078749108 | 0.171705326 |
| 0.315487297 | 0.421646506 | 0.022259877 | 0.060256666 |
| 0.262658989 | 0.122283647 | 0.035029351 | 0.132291866 |
| 0.114300827 | 0.205155768 | 0.075517705 | 0.187310831 |
| 0.332541199 | 0.12828542  | 0.430880768 | 0.123915189 |
| 0.401713804 | 0.015398609 | 0.312330125 | 0.095502972 |
| 0.120823695 | 1           | 0.404011021 | 0.119987106 |
| 0.031715819 | 0.078007439 | 0.242351885 | 0.260687355 |
| 0.027191326 | 0.074441945 | 0.114733461 | 0.155327582 |
| 0.462664887 | 0.252511772 | 0.109843935 | 0.149054471 |
| 0.251928589 | 0.065837913 | 0.370018544 | 0.169173349 |
| 0.287261776 | 0.164803646 | 0.310390804 | 0.005184784 |
| 0.277769988 | 0.106546697 | 0.127252432 | 0.182384804 |
| 0.454476362 | 0.051637146 | 0.186408177 | 0.069150718 |

|                     |             |             |             |
|---------------------|-------------|-------------|-------------|
| 0.109461606         | 0.001270651 | 0.180794645 | 0.213935858 |
| 0.129333002         | 0.162102463 | 0.165858758 | 0.136989522 |
| 0.421640408         | 0.2222594   | 0.336601977 | 0.13983013  |
| 0.203328797         | 0.013480609 | 0.079907683 | 0.013006964 |
| 0.254936015         | 0.203627349 | 0.242275315 | 0.247265122 |
| 0.118969251         | 0.217263338 | 0.184401486 | 0.193763055 |
| 0.398714338         | 0.171992999 | 0.473966809 | 0.121591133 |
| 0.391415065         | 0.214504175 | 0.095823336 | 0.137847567 |
| 0.071148372         | 0.053098919 | 0.039476017 | 0.075709835 |
| 0.44288479          | 0.111320386 | 0.182748099 | 0.226656659 |
| 0.01895594          | 0.183541722 | 0.302250319 | 0.337091821 |
| 0.255566526         | 0.342326157 | 0.214692786 | 0.228979236 |
| 0.186038189         | 0.159923161 | 0.050047843 | 0.03318031  |
| 0.193742886         | 0.085261867 | 0.327744333 | 0.331478988 |
| 0.435639286         | 0.163223884 | 0.03553992  | 0.054956193 |
| 0.063148184         | 0.340096915 | 0.108643023 | 0.094746261 |
| 0.200251339         | 0.190179632 | 0.000227633 | 0.115723457 |
| 0.20659054          | 0.225184432 |             |             |
| SH3BGRL 0.333113193 | 0.346274293 | 0.025986383 |             |
| 0.017958125         | 0.049275088 | 0.115598661 | 0.102586718 |
| 0.353953213         | 0.048750326 | 0.067341159 | 0.178537008 |
| 0.001611983         | 0.415631259 | 0.007860377 | 0.035042874 |
| 0.438905917         | 0.443653224 | 0.185263575 | 0.434917898 |
| 0.266328978         | 0.089465587 | 0.258731718 | 0.253160494 |
| 0.130955618         | 0.00120254  | 0.049276933 | 0.026481901 |
| 0.385679478         | 0.455458322 | 0.101848262 | 0.167588053 |
| 0.405117836         | 0.42025345  | 0.296330078 | 0.211877053 |
| 0.26291097          | 0.301948603 | 0.148427444 | 0.408991122 |
| 0.418730456         | 0.110310779 | 0.417128348 | 0.005304693 |
| 0.00445082          | 0.038295722 | 0.355388084 | 0.276469372 |
| 0.226228519         | 0.106047587 | 0.079937388 | 0.079046173 |
| 0.259179101         | 0.205693836 | 0.335574086 | 0.260948254 |
| 0.246921467         | 0.003081456 | 0.286787959 | 0.256409542 |
| 0.023388867         | 0.19650481  | 0.369133379 | 0.314662832 |
| 0.119519797         | 0.264046516 | 0.391285681 | 0.011230831 |
| 0.025585262         | 0.377208733 | 0.424978472 | 0.303726319 |
| 0.351261406         | 0.2378634   | 0.161068204 | 0.373439636 |
| 0.404491027         | 0.423991117 | 0.156349424 | 0.087964881 |
| 0.000644531         | 0.06213931  | 0.215297377 | 0.36290209  |
| 0.425357182         | 0.2080383   | 0.368405773 | 0.104485455 |
| 0.38607199          | 0.006148293 | 0.257046798 | 0.42011055  |
| 0.01217638          | 0.404473224 | 0.006371064 | 0.075345577 |
| 0.398815659         | 0.466521568 | 0.349869417 | 0.026323488 |
| 0.005140289         | 0.062965501 | 0.166854486 | 0.45175867  |
| 0.314253795         | 0.349432525 | 0.243632752 | 0.247271766 |
| 0.413985213         | 0.112656095 | 0.214186146 | 0.296367679 |
| 0.376247296         | 0.003797467 | 0.09626321  | 0.105443389 |
| 0.270644322         | 0.079251167 | 0.107513789 | 0.054893146 |
| 0.005898577         | 0.031249818 | 0.41523103  | 0.084830807 |
| 0.039642899         | 0.09410231  | 0.043174688 | 0.354086027 |
| 0.338163144         | 0.418914431 | 0.048403982 | 0.127062337 |
| 0.414908225         | 0.12319747  | 0.290915825 | 0.39736874  |
| 0.268932328         | 0.188027813 | 0.073998598 | 0.313384121 |
| 0.28128731          | 0.025610812 | 0.034690269 | 0.188213197 |



|             |             |             |             |
|-------------|-------------|-------------|-------------|
| 0.415887027 | 0.413594429 | 0.412134156 | 0.224696794 |
| 0.137599321 | 0.135560122 | 0.243258401 | 0.244921734 |
| 0.116331155 | 0.269787763 | 0.149503756 | 0.210665917 |
| 0.245703744 | 0.043636038 | 0.02380733  | 0.395611447 |
| 0.028081302 | 0.124567519 | 0.313093378 | 0.353353234 |
| 0.352905443 | 0.021668516 | 0.129803416 | 0.136100956 |
| 0.184380562 | 0.129947517 | 0.310688531 | 0.125957094 |
| 0.188806465 | 0.246834105 | 0.015482987 | 0.415840231 |
| 0.050829414 | 0.224664995 | 0.353387894 | 0.064029568 |
| 0.374012371 | 0.282776562 | 0.34864671  | 0.33568948  |
| 0.392303381 | 0.00272318  | 0.069130332 | 0.332511253 |
| 0.246787892 | 0.408807185 | 0.329242433 | 0.04505876  |
| 0.148202315 | 0.329460373 | 0.063856256 | 0.194838392 |
| 0.366462265 | 0.139045414 | 0.115943262 | 0.000274215 |
| 0.059036499 | 0.368719205 | 0.331546392 | 0.031250354 |
| 0.119239227 | 0.059982261 | 0.110653701 | 0.368997845 |
| 0.095483943 | 0.385280218 | 0.023214194 | 0.230553421 |
| 0.144498427 | 0.271184904 | 0.311402918 | 0.24785011  |
| 0.331680874 | 0.199311085 | 0.463555849 | 0.242890476 |
| 0.146696177 | 0.203693163 | 0.24924604  | 0.169866767 |
| 0.409996619 | 0.378477121 | 0.418325879 | 0.375763384 |
| 0.134998267 | 0.348803065 | 0.309606326 | 0.147884112 |
| 0.30260141  | 0.303416632 | 0.037886028 | 0.347548333 |
| 0.000301132 | 0.209272661 | 0.329562196 | 0.277414364 |
| 0.333770925 | 0.112943884 | 0.028165887 | 0.171650923 |
| 0.438250902 | 0.348022637 | 0.364916647 | 0.425440989 |
| 0.281987142 | 0.005981032 | 0.364193753 | 0.271541395 |
| 0.458865807 | 0.255093257 | 0.283473934 | 0.106707905 |
| 0.382347018 | 0.373223109 | 0.322289787 | 0.387880647 |
| 0.355947133 | 0.347311077 | 0.134844848 | 0.361963996 |
| 0.023465271 | 0.145357352 | 0.380870339 | 0.124069158 |
| 0.208000843 | 0.114011601 | 0.36144671  | 0.181949579 |
| 0.295576578 | 0.317934665 | 0.263736813 | 0.029142237 |
| 0.075878832 | 0.354766999 | 0.058788343 | 0.357481163 |
| 0.419428377 | 0.243943959 | 0.376948456 | 0.419911694 |
| 0.209816277 | 0.230543847 | 0.365082764 | 0.406532315 |
| 0.000882835 | 0.425518593 | 0.416566517 | 0.198951118 |
| 0.411183812 | 0.156440125 | 0.308996199 | 0.400182005 |
| 0.000567597 | 0.069608333 | 0.299739703 | 0.32804408  |
| 0.385727859 | 0.008023491 | 0.08214646  | 0.354667537 |
| 0.415497294 | 0.050255101 | 0.394229756 | 0.199421429 |
| 0.332961185 | 0.292152844 | 0.075502051 | 0.423564325 |
| 0.306592225 | 0.319648411 | 0.012912238 | 0.308378918 |
| 0.34760317  | 0.136373218 | 0.037243322 | 0.415682048 |
| 0.345831447 | 0.229961093 | 0.12750199  | 0.005437868 |
| 0.412463376 | 0.174117448 | 0.368323384 | 0.054823558 |
| 0.31717543  | 0.212261544 | 0.311556418 | 0.417950677 |
| 0.3457737   | 0.259844371 | 0.227339195 | 0.351293563 |
| 0.095606349 | 0.425608242 | 0.414719819 | 0.023587395 |
| 0.396938625 | 0.388243578 | 0.311451505 | 0.075635643 |
| 0.260820486 | 0.062853236 | 0.093805221 | 0.292302193 |
| 0.302752573 | 0.389782592 | 0.01993561  | 0.098635485 |
| 0.253585255 | 0.172168041 | 0.039973068 | 0.222379044 |
| 0.147175311 | 0.29117784  | 0.214529326 | 0.233473582 |

|             |             |             |             |
|-------------|-------------|-------------|-------------|
| 0.295398502 | 0.146644095 | 0.391993889 | 0.090795638 |
| 0.40907421  | 0.020036158 | 0.372560731 | 0.136517773 |
| 0.170515703 | 0.404011021 | 1           | 0.197907817 |
| 0.01667118  | 0.086887369 | 0.2393953   | 0.251947286 |
| 0.028000478 | 0.096874718 | 0.128896326 | 0.19630388  |
| 0.430407163 | 0.330594429 | 0.142696041 | 0.23769713  |
| 0.238851062 | 0.058140925 | 0.325645533 | 0.233459834 |
| 0.318044588 | 0.194627198 | 0.357802988 | 0.005880404 |
| 0.401721104 | 0.088296695 | 0.273673056 | 0.224624901 |
| 0.463609554 | 0.055760935 | 0.224578645 | 0.086355292 |
| 0.14037907  | 0.002863915 | 0.24157262  | 0.363130449 |
| 0.143445005 | 0.342617274 | 0.258183934 | 0.258734392 |
| 0.373278114 | 0.299442365 | 0.357784977 | 0.332270385 |
| 0.244049859 | 0.031527676 | 0.07264009  | 0.01315013  |
| 0.299096633 | 0.244691421 | 0.371801307 | 0.359089286 |
| 0.229513824 | 0.330699565 | 0.242200026 | 0.276987314 |
| 0.383918941 | 0.18768317  | 0.428208139 | 0.220133411 |
| 0.420979306 | 0.288984264 | 0.128667906 | 0.223800729 |
| 0.087238443 | 0.092428522 | 0.047507093 | 0.120488932 |
| 0.408860756 | 0.21354693  | 0.241417538 | 0.288678539 |
| 0.016030841 | 0.241426242 | 0.39969583  | 0.417666633 |
| 0.327382607 | 0.412200231 | 0.362051043 | 0.228020853 |
| 0.28411638  | 0.232114454 | 0.035284973 | 0.015705628 |
| 0.20813409  | 0.089896704 | 0.359325638 | 0.366022146 |
| 0.414508429 | 0.315264167 | 0.03802495  | 0.075076429 |
| 0.192861884 | 0.407315773 | 0.132680723 | 0.165521804 |
| 0.329125504 | 0.348742445 | 0.000271043 | 0.18365147  |
| 0.239545105 | 0.330130232 |             |             |
| SHC1        | 0.130448991 | 0.12390413  | 0.003108815 |
| 0.000248117 | 0.00069367  | 0.028684737 | 0.013667046 |
| 0.124253803 | 0.002673258 | 0.003819896 | 0.052903969 |
| 0.003418107 | 0.142966257 | 0.002301009 | 0.001190426 |
| 0.191993698 | 0.164106057 | 0.023179249 | 0.180594028 |
| 0.102917152 | 0.001090198 | 0.117949102 | 0.05779409  |
| 0.024556569 | 0.001045516 | 0.004361412 | 0.000498855 |
| 0.091565099 | 0.199523131 | 0.026866467 | 0.010920606 |
| 0.184729377 | 0.135803009 | 0.01410421  | 0.002771912 |
| 0.005865753 | 0.117745206 | 0.001082203 | 0.09297455  |
| 0.169443668 | 0.008651979 | 0.127680219 | 0.000341032 |
| 1.78E-05    | 0.003971305 | 0.121103062 | 0.097857658 |
| 0.05684744  | 0.026814358 | 0.023048212 | 0.00614201  |
| 0.007215059 | 0.061934647 | 0.177058291 | 0.016886131 |
| 0.073833614 | 2.51E-05    | 0.093319809 | 0.098688167 |
| 0.003959485 | 0.033481787 | 0.065880868 | 0.102661659 |
| 0.026487357 | 0.083453477 | 0.138895774 | 0.000235942 |
| 0.005021648 | 0.07118972  | 0.138230603 | 0.049370594 |
| 0.118212846 | 0.01537356  | 0.006317051 | 0.028236313 |
| 0.093882496 | 0.166361037 | 0.044179326 | 0.009842632 |
| 0.000868002 | 0.007100755 | 0.007337317 | 0.168261656 |
| 0.094729956 | 0.066021534 | 0.135956023 | 0.005189125 |
| 0.082734728 | 0.000614777 | 0.074620278 | 0.156739251 |
| 0.000319781 | 0.131248057 | 0.000147224 | 0.005974154 |
| 0.157425614 | 0.195044509 | 0.122297435 | 0.001565339 |
| 0.00064404  | 0.014578906 | 0.050306845 | 0.200514388 |

|             |             |             |             |
|-------------|-------------|-------------|-------------|
| 0.075835332 | 0.05235839  | 0.068301732 | 0.03011442  |
| 0.155997165 | 0.00748748  | 0.014461756 | 0.107126262 |
| 0.160897516 | 0.001214834 | 0.015246546 | 0.025722161 |
| 0.003398429 | 0.000553011 | 0.017442662 | 0.023527876 |
| 0.000551767 | 0.020916322 | 0.17296235  | 0.022597357 |
| 0.002814169 | 0.014178165 | 0.001064782 | 0.053646443 |
| 0.110495071 | 0.20082422  | 0.000916005 | 0.014890794 |
| 0.102395436 | 0.017113159 | 0.028614409 | 0.102926464 |
| 0.010590709 | 0.03092747  | 0.018643215 | 0.087970272 |
| 0.119053421 | 0.001302143 | 0.003047419 | 0.057204248 |
| 0.124361102 | 0.182934802 | 0.161935541 | 0.028483311 |
| 0.006501517 | 0.036587055 | 0.016096869 | 0.050004862 |
| 0.020627343 | 0.096136375 | 0.008876291 | 0.063954288 |
| 0.081510688 | 0.005399186 | 0.004232952 | 0.136876268 |
| 0.00013726  | 0.002305316 | 0.115989731 | 0.085536017 |
| 0.057053773 | 0.000332017 | 0.011219296 | 0.022424806 |
| 0.053889059 | 0.021206508 | 0.084274239 | 0.008965638 |
| 0.06204445  | 0.01766777  | 0.002112537 | 0.14131562  |
| 0.012123318 | 0.077555485 | 0.01250368  | 0.000991996 |
| 0.120988653 | 0.065346173 | 0.110310327 | 0.088251893 |
| 0.135655993 | 3.83E-05    | 0.00454602  | 0.127158298 |
| 0.01803081  | 0.193411715 | 0.110910015 | 0.011470838 |
| 0.054638999 | 0.014880213 | 0.017287208 | 0.008123454 |
| 0.19164194  | 0.004666622 | 0.003388868 | 0.000248366 |
| 0.00155789  | 0.050269398 | 0.046826572 | 0.008941881 |
| 0.004884186 | 0.005245118 | 0.008245477 | 0.120486825 |
| 0.023261782 | 0.090082616 | 0.009330291 | 0.02877457  |
| 0.02030714  | 0.054482085 | 0.027527345 | 0.019736097 |
| 0.068748352 | 0.02206419  | 0.208641343 | 0.077336755 |
| 0.003769178 | 0.059415861 | 0.005196658 | 0.027558101 |
| 0.07768446  | 0.104666267 | 0.132870447 | 0.101469724 |
| 0.020698913 | 0.14185636  | 0.010900313 | 0.047765773 |
| 0.087923672 | 0.071873669 | 0.009999651 | 0.130427595 |
| 0.000224059 | 0.054830161 | 0.0476568   | 0.00847528  |
| 0.110191472 | 0.019048737 | 0.008171415 | 0.061603846 |
| 0.180699837 | 0.130718137 | 0.17873743  | 0.178628273 |
| 0.019642686 | 0.002760079 | 0.166287053 | 0.072091813 |
| 0.184769539 | 0.028819447 | 0.008847787 | 0.005027286 |
| 0.143399334 | 0.126459146 | 0.07957331  | 0.1008899   |
| 0.046559354 | 0.024115512 | 0.033600054 | 0.163587582 |
| 0.001496423 | 0.024072642 | 0.119506947 | 0.001276174 |
| 0.017229453 | 0.003525908 | 0.089815051 | 0.053626021 |
| 0.011930805 | 0.02674038  | 0.011693306 | 0.003314364 |
| 0.014784471 | 0.1358171   | 0.000558452 | 0.1675625   |
| 0.168241334 | 0.049364848 | 0.116195733 | 0.18300406  |
| 0.066898955 | 0.059193069 | 0.124066044 | 0.190654451 |
| 0.003151921 | 0.164285469 | 0.114108461 | 0.069236759 |
| 0.160312276 | 0.039990842 | 0.098116921 | 0.04038729  |
| 7.04E-05    | 0.02041125  | 0.012451075 | 0.137877025 |
| 0.115579039 | 0.000210643 | 0.000398274 | 0.098082024 |
| 0.105327492 | 0.001232675 | 0.159976156 | 0.034910157 |
| 0.094029093 | 0.041593738 | 0.009128053 | 0.130430075 |
| 0.016387371 | 0.031161552 | 0.000128285 | 0.061370734 |
| 0.036680427 | 0.006197113 | 0.000897097 | 0.164468196 |

|             |             |             |             |
|-------------|-------------|-------------|-------------|
| 0.147675022 | 0.047771402 | 0.028622375 | 0.000275954 |
| 0.203881856 | 0.004044638 | 0.088210961 | 0.002757885 |
| 0.131038243 | 0.055712408 | 0.097698966 | 0.113928472 |
| 0.070027545 | 0.081443307 | 0.074677124 | 0.113228163 |
| 0.000976696 | 0.170626721 | 0.185575925 | 0.001004624 |
| 0.132619811 | 0.120292284 | 0.038581572 | 0.015694474 |
| 0.09143285  | 0.000394946 | 0.025072228 | 0.121403214 |
| 0.088798471 | 0.124612885 | 0.00295034  | 0.022729651 |
| 0.070425871 | 0.019395724 | 0.005081766 | 0.038145948 |
| 0.044702058 | 0.022242069 | 0.016632808 | 0.068042727 |
| 0.09750285  | 0.034120477 | 0.149771445 | 0.003032513 |
| 0.144240073 | 0.004334218 | 0.137203464 | 0.00466297  |
| 0.056929844 | 0.119987106 | 0.197907817 | 1           |
| 0.000716555 | 0.011389586 | 0.058603115 | 0.080804049 |
| 0.006272792 | 0.031737834 | 0.020640446 | 0.025540497 |
| 0.170012808 | 0.02364679  | 0.039413999 | 0.065845718 |
| 0.076758562 | 0.000399798 | 0.137499743 | 0.081180831 |
| 0.129951406 | 0.020255657 | 0.09864252  | 0.000120303 |
| 0.085707012 | 0.007118596 | 0.133507219 | 0.023795971 |
| 0.197668181 | 0.009858091 | 0.041619116 | 0.020060283 |
| 0.002751923 | 0.000813758 | 0.090203762 | 0.030107703 |
| 0.04332605  | 0.037063391 | 0.075140795 | 0.005215137 |
| 0.144421824 | 0.086214668 | 0.143560367 | 0.024032821 |
| 0.026767158 | 0.000116859 | 0.004550795 | 0.001134591 |
| 0.124963163 | 0.07499377  | 0.118081957 | 0.09251961  |
| 0.089436198 | 0.051068438 | 0.062627115 | 0.0238498   |
| 0.110421027 | 0.007202993 | 0.166984282 | 0.035958337 |
| 0.150885101 | 0.018482867 | 0.030250325 | 0.011288101 |
| 0.007200269 | 0.002423575 | 0.006258928 | 0.029976808 |
| 0.136930611 | 0.009629289 | 0.027999664 | 0.038568817 |
| 0.000976285 | 0.026587471 | 0.130844547 | 0.104758624 |
| 0.078651273 | 0.143508705 | 0.07483775  | 0.070390302 |
| 0.010584281 | 0.057301972 | 0.000296248 | 0.00010878  |
| 0.002739317 | 0.012819873 | 0.17715116  | 0.152815865 |
| 0.157667752 | 0.020355431 | 0.006489172 | 0.023567962 |
| 0.003759945 | 0.190934566 | 0.020785015 | 0.001468589 |
| 0.05652239  | 0.028232385 | 0.000201502 | 0.046656068 |
| 0.070846558 | 0.009306032 |             |             |
| SHMT2       | 0.034768321 | 0.043843233 | 0.007754982 |
| 0.002293717 | 0.001049078 | 0.07267468  | 0.037040886 |
| 0.015795414 | 0.008752491 | 0.087341891 | 0.055182409 |
| 0.000306876 | 0.008148112 | 0.002560005 | 0.000222324 |
| 0.033702966 | 0.028489768 | 0.016845925 | 0.022783101 |
| 0.023067609 | 0.020184316 | 0.036473368 | 0.081403513 |
| 0.05380869  | 0.000639498 | 0.033499964 | 0.034390463 |
| 0.006647272 | 0.023664752 | 0.02753274  | 0.028327792 |
| 0.035935285 | 0.019129021 | 0.021968811 | 0.001126947 |
| 0.002243595 | 0.04473308  | 1.48E-05    | 0.010305856 |
| 0.01365167  | 0.03244471  | 0.02164927  | 0.000564162 |
| 0.000476771 | 0.018751264 | 0.007596856 | 0.054890402 |
| 0.008725304 | 0.071242056 | 0.019891756 | 0.049785154 |
| 0.000272078 | 0.045667857 | 0.02735227  | 0.000523799 |
| 0.044800886 | 0.00121674  | 0.048651094 | 0.014639924 |
| 0.011642898 | 0.01599899  | 0.026152311 | 0.046146419 |

|             |             |             |             |
|-------------|-------------|-------------|-------------|
| 0.050262111 | 0.046548713 | 0.030586153 | 0.003895753 |
| 0.035642847 | 0.015384908 | 0.02821891  | 0.053921251 |
| 0.040669575 | 0.01386742  | 0.013034883 | 0.002211933 |
| 0.028854921 | 0.015792411 | 0.025170538 | 0.004336694 |
| 0.001121662 | 0.043817225 | 0.010528549 | 0.022460535 |
| 0.009248341 | 0.052253572 | 0.019590393 | 0.020150012 |
| 0.028450908 | 0.002087237 | 0.031165061 | 0.031674894 |
| 0.001848266 | 0.010854398 | 2.13E-05    | 0.00202784  |
| 0.026281907 | 0.022713823 | 0.047183293 | 0.026301379 |
| 0.000421445 | 0.006574774 | 0.004017717 | 0.012898239 |
| 0.020255638 | 0.01815698  | 0.043157956 | 0.000244347 |
| 0.008124226 | 0.017665236 | 0.007808686 | 0.058174692 |
| 0.046818463 | 6.96E-05    | 0.005477161 | 0.041144091 |
| 0.001734812 | 0.003580082 | 0.023016975 | 0.000316447 |
| 0.000650565 | 4.83E-05    | 0.027520187 | 0.015923842 |
| 0.046692338 | 0.051219034 | 0.001217335 | 0.023222866 |
| 0.007860057 | 0.020364178 | 0.001787067 | 0.040482474 |
| 0.015230187 | 0.039213566 | 0.016843444 | 0.023928525 |
| 0.002106091 | 0.008018779 | 0.026182848 | 0.028762139 |
| 0.036104967 | 0.003340632 | 0.013652386 | 0.065569326 |
| 0.007955491 | 0.031365008 | 0.036446495 | 0.004843534 |
| 0.00814914  | 0.016707042 | 0.075068406 | 0.053841177 |
| 0.021663917 | 0.010265541 | 2.25E-05    | 0.024128478 |
| 0.052860044 | 8.53E-05    | 0.021282874 | 0.020411018 |
| 0.000257637 | 0.003357007 | 0.052814604 | 0.023772435 |
| 0.008158643 | 0.034216268 | 0.078020707 | 0.076475939 |
| 0.04048396  | 0.061853498 | 0.029844003 | 0.095661028 |
| 0.049480501 | 0.076639448 | 0.010591453 | 0.009043734 |
| 0.022452439 | 0.029230357 | 0.008269927 | 0.000191112 |
| 0.012705061 | 0.007507618 | 0.047234957 | 0.019992408 |
| 0.032271067 | 0.001563583 | 0.093956869 | 0.044532924 |
| 0.074087662 | 0.011202887 | 0.045854809 | 0.021112409 |
| 0.026864424 | 0.000939583 | 0.019469169 | 0.004456036 |
| 0.022285374 | 0.039636063 | 0.038076753 | 0.010821294 |
| 0.002312321 | 0.030736692 | 0.010011774 | 0.005587903 |
| 0.009417403 | 0.016880108 | 0.000338821 | 0.038072188 |
| 0.042471623 | 0.014789567 | 0.00041568  | 0.000403069 |
| 0.023052822 | 0.035485559 | 0.01836619  | 0.011891073 |
| 0.035006746 | 0.032508514 | 0.018241797 | 0.046718487 |
| 0.001843481 | 0.081799823 | 9.81E-05    | 0.014138371 |
| 0.011658921 | 0.028449446 | 0.025104778 | 0.014483948 |
| 0.038617482 | 0.011394381 | 0.000878938 | 0.053212849 |
| 0.021092412 | 0.00891198  | 0.018272111 | 0.031230756 |
| 0.000938713 | 0.024268951 | 0.030554893 | 0.000347829 |
| 0.046568526 | 0.043111451 | 0.016723598 | 0.014541645 |
| 0.024106499 | 0.029160018 | 0.022781239 | 0.024156983 |
| 0.000830086 | 0.000993162 | 0.030922287 | 0.043985358 |
| 0.024318061 | 0.009920901 | 0.001451199 | 1.29E-05    |
| 0.027538835 | 0.006174525 | 0.072794287 | 0.032458873 |
| 0.008860319 | 0.001823132 | 0.012413629 | 0.01143786  |
| 0.000104638 | 0.095100377 | 0.047099456 | 0.010174006 |
| 0.061759094 | 0.007134034 | 0.031365941 | 0.025976704 |
| 0.00391961  | 0.019266135 | 0.020171103 | 0.016454755 |
| 0.023806181 | 0.045821448 | 2.21E-06    | 0.028940775 |

|                      |                      |                      |             |
|----------------------|----------------------|----------------------|-------------|
| 0.030446708          | 0.010946541          | 0.034609751          | 0.028820856 |
| 0.041588002          | 0.039325734          | 0.040358281          | 0.017123704 |
| 2.80E-05 0.01736738  | 0.007604265          | 0.039602911          |             |
| 0.039124635          | 0.058971267          | 0.002644778          | 0.004443528 |
| 3.11E-06 0.034009414 | 0.003937161          | 0.034293961          |             |
| 0.02420969           | 0.002919136          | 2.81E-06 0.021003453 |             |
| 0.007651946          | 5.54E-06 0.037377365 | 0.085459733          |             |
| 0.037819803          | 0.008543415          | 0.070161742          | 0.0136114   |
| 0.003890754          | 0.002349675          | 0.000252129          | 0.034665145 |
| 0.004206706          | 9.69E-05 0.03068866  | 0.029384209          |             |
| 0.049342705          | 0.027209012          | 0.026548593          | 0.072212486 |
| 0.019077197          | 0.010391472          | 0.036360184          | 0.000648689 |
| 0.028892216          | 0.041375747          | 0.028355413          | 0.014348457 |
| 0.015670968          | 0.047510985          | 0.059257178          | 0.04598594  |
| 0.000117256          | 0.025809534          | 0.032867772          | 0.001809458 |
| 0.016559235          | 0.027097338          | 0.051497326          | 0.050439542 |
| 0.030285707          | 0.000792739          | 0.051333091          | 0.017123306 |
| 0.036443553          | 0.039641932          | 0.034490751          | 0.004053113 |
| 0.056703301          | 0.009071513          | 0.01666475           | 0.006913969 |
| 0.04156872           | 0.001466636          | 0.000224535          | 0.033879161 |
| 0.046298485          | 0.043833327          | 0.050844315          | 0.046756565 |
| 0.017319746          | 0.003255197          | 0.014794807          | 0.002765023 |
| 0.028669648          | 0.031715819          | 0.01667118           | 0.000716555 |
| 1                    | 0.022351767          | 0.054777915          | 0.047775069 |
| 0.019851467          | 0.026807314          | 0.050091387          | 0.036146588 |
| 0.02825529           | 0.007004212          | 0.039433356          | 0.010899422 |
| 0.043608841          | 0.011450998          | 0.042577545          | 0.034329687 |
| 0.051644389          | 0.033998942          | 0.02528456           | 0.000210508 |
| 0.019289334          | 0.106874775          | 0.005110578          | 0.043090882 |
| 0.020523968          | 0.027556907          | 0.030169972          | 0.021325621 |
| 0.000368056          | 1.02E-05 0.025519305 | 0.003722256          |             |
| 0.055916841          | 0.001116727          | 0.013282653          | 0.000421999 |
| 0.039855287          | 0.05086553           | 0.059807379          | 0.000720928 |
| 0.036721057          | 1.44E-06 0.081053791 | 0.002688377          |             |
| 0.045277927          | 0.028439239          | 0.020261383          | 0.040234069 |
| 0.006943256          | 0.013313488          | 0.02882006           | 0.011767786 |
| 0.030912 0.001198052 | 0.034427617          | 0.005614658          |             |
| 0.012025072          | 0.008762414          | 0.028989301          | 0.002514121 |
| 0.017220781          | 0.000154614          | 0.017940967          | 0.007488773 |
| 0.029212589          | 0.000971325          | 0.025882115          | 0.026900066 |
| 0.007234198          | 0.015772493          | 0.013161718          | 0.020232725 |
| 0.047411564          | 0.035353614          | 0.004844467          | 0.040163626 |
| 0.007251987          | 0.028079165          | 0.004893264          | 0.008503231 |
| 0.012028826          | 0.05402279           | 0.026227786          | 0.022059127 |
| 0.024991482          | 0.00203551           | 0.020752916          | 0.01207872  |
| 3.66E-05 0.018482535 | 0.045434269          | 0.00011529           |             |
| 0.010543929          | 0.005015579          | 2.74E-05 0.010741849 |             |
| 0.044324019          | 0.003726875          |                      |             |
| SIT1                 | 0.175637728          | 0.183894392          | 0.053686908 |
| 0.000890738          | 0.004639389          | 0.228730874          | 0.110132501 |
| 0.112659014          | 0.043012887          | 0.042484483          | 0.233808611 |
| 0.027518569          | 0.060258709          | 0.063608795          | 0.012731298 |
| 0.160922143          | 0.138707879          | 0.085453384          | 0.148704642 |
| 0.202006942          | 0.006781648          | 0.273340041          | 0.161330189 |

|             |             |             |             |
|-------------|-------------|-------------|-------------|
| 0.171825447 | 0.041936654 | 0.058978097 | 0.004944005 |
| 0.056069966 | 0.133362544 | 0.207519792 | 0.051122895 |
| 0.155355088 | 0.086113046 | 0.025266336 | 0.00428683  |
| 0.002669492 | 0.229407639 | 0.00037525  | 0.054598859 |
| 0.082001231 | 0.058173447 | 0.096719235 | 0.017831228 |
| 1.56E-05    | 0.064964717 | 0.063124068 | 0.239466921 |
| 0.132469591 | 0.225909625 | 0.203837516 | 0.057850571 |
| 0.001253945 | 0.230768999 | 0.232803988 | 0.001625432 |
| 0.20527674  | 0.000222217 | 0.211976212 | 0.138934079 |
| 0.094040866 | 0.126689488 | 0.074121442 | 0.192775504 |
| 0.195177243 | 0.209596382 | 0.155863275 | 0.00941022  |
| 0.129486293 | 0.082929547 | 0.086335069 | 0.084230665 |
| 0.177636083 | 0.027592099 | 0.032390956 | 0.014133042 |
| 0.081893265 | 0.090324949 | 0.215500833 | 0.065084245 |
| 0.014310383 | 0.086332052 | 0.013429829 | 0.146355792 |
| 0.040216182 | 0.238464306 | 0.128858071 | 0.036459448 |
| 0.072799894 | 0.032241259 | 0.189020924 | 0.155920885 |
| 0.002564736 | 0.081591554 | 0.000762664 | 0.037064327 |
| 0.135000435 | 0.108907718 | 0.18554447  | 0.039087367 |
| 0.02343249  | 0.124772944 | 0.051791841 | 0.075719592 |
| 0.127850826 | 0.078355895 | 0.19949232  | 0.003976463 |
| 0.050070953 | 0.059831539 | 0.047022276 | 0.226022136 |
| 0.189239943 | 0.015822945 | 0.091481649 | 0.197017429 |
| 0.004945461 | 0.003271002 | 0.12412218  | 0.002574158 |
| 0.00505983  | 0.014472921 | 0.132144337 | 0.16376279  |
| 0.047551008 | 0.133081035 | 0.006021297 | 0.058223083 |
| 0.074781255 | 0.133715106 | 0.008232069 | 0.103102874 |
| 0.062653582 | 0.115264212 | 0.040810616 | 0.093644871 |
| 0.011172877 | 0.10122133  | 0.188607293 | 0.1504664   |
| 0.256459706 | 0.022326892 | 0.053723586 | 0.246336578 |
| 0.046385277 | 0.157691802 | 0.176288736 | 0.056889429 |
| 0.025021771 | 0.185582595 | 0.044430777 | 0.131113139 |
| 0.139145321 | 0.154802388 | 0.001832872 | 0.204936063 |
| 0.235261336 | 0.00235866  | 0.109449908 | 0.129992537 |
| 0.000477445 | 0.012432344 | 0.229279786 | 0.115267207 |
| 0.061634791 | 0.003944858 | 0.0616504   | 0.152358118 |
| 0.237444965 | 0.134858277 | 0.159557089 | 0.048410651 |
| 0.268346677 | 0.044121251 | 0.060414441 | 0.05019734  |
| 0.166800635 | 0.234714245 | 0.011085037 | 0.002243474 |
| 0.114041883 | 0.094066691 | 0.166105278 | 0.132687447 |
| 0.130558739 | 0.000150482 | 0.04486105  | 0.19468629  |
| 0.049705118 | 0.093963976 | 0.184447852 | 0.172335389 |
| 0.267626419 | 0.008602567 | 0.19182129  | 0.019604415 |
| 0.190010649 | 0.02785927  | 0.02634524  | 0.033577025 |
| 0.015630392 | 0.038469934 | 0.067691617 | 0.08906351  |
| 0.022929512 | 0.06751108  | 0.018926818 | 0.149829224 |
| 0.211149576 | 0.077448172 | 0.040222002 | 0.011305208 |
| 0.105341886 | 0.12417011  | 0.028253479 | 0.046911119 |
| 0.104741469 | 0.064981659 | 0.090232475 | 0.23628393  |
| 0.0133759   | 0.237776833 | 0.001620066 | 0.123353618 |
| 0.052265151 | 0.118561325 | 0.094352111 | 0.094177523 |
| 0.129186919 | 0.135522192 | 0.007185122 | 0.26750215  |
| 0.159605365 | 0.104413497 | 0.147897943 | 0.17995037  |
| 0.019901762 | 0.180701148 | 0.06772298  | 0.003286651 |

|             |             |             |             |
|-------------|-------------|-------------|-------------|
| 0.176193132 | 0.136630471 | 0.155566168 | 0.187411019 |
| 0.152242597 | 0.181827564 | 0.188779843 | 0.103146828 |
| 0.008095182 | 0.053247279 | 0.203324899 | 0.184507637 |
| 0.125071349 | 0.064920471 | 0.005713202 | 0.002214354 |
| 0.145005781 | 0.073698964 | 0.154068722 | 0.094818309 |
| 0.045190507 | 0.0153348   | 0.166451205 | 0.126607918 |
| 0.003416088 | 0.151412996 | 0.119935416 | 0.006039525 |
| 0.051253684 | 0.02058082  | 0.112349912 | 0.213273517 |
| 0.013391669 | 0.032980216 | 0.017101956 | 0.063950783 |
| 0.157629265 | 0.195495246 | 0.000145726 | 0.206848203 |
| 0.165021348 | 0.117460806 | 0.129607714 | 0.173197491 |
| 0.234289833 | 0.187433779 | 0.163958641 | 0.127683606 |
| 0.007532385 | 0.078559541 | 0.044318425 | 0.262384112 |
| 0.12485927  | 0.228072552 | 0.049361852 | 0.020840428 |
| 0.001259944 | 0.229865365 | 0.004558326 | 0.222314102 |
| 0.108812406 | 0.012012756 | 6.71E-05    | 0.117703817 |
| 0.042721971 | 0.000818672 | 0.193280185 | 0.145691903 |
| 0.146037911 | 0.062797025 | 0.11090899  | 0.061626953 |
| 0.004118227 | 0.033300226 | 0.001811171 | 0.097523945 |
| 0.033715876 | 0.004429387 | 0.009923904 | 0.167895725 |
| 0.216138822 | 0.140121522 | 0.186267846 | 0.016464738 |
| 0.104885873 | 0.004862438 | 0.098714889 | 0.018373339 |
| 0.210849463 | 0.206444401 | 0.165873235 | 0.073708021 |
| 0.089044544 | 0.207159402 | 0.249065315 | 0.170401893 |
| 0.001084682 | 0.096627737 | 0.126405814 | 0.015048284 |
| 0.079681457 | 0.123307204 | 0.058989775 | 0.174637165 |
| 0.222308936 | 0.00082327  | 0.234278438 | 0.17812411  |
| 0.16492805  | 0.130088657 | 0.091396445 | 0.100342753 |
| 0.195716065 | 0.072792765 | 0.087884246 | 0.092286233 |
| 0.256110698 | 0.003734319 | 0.006274253 | 0.210707721 |
| 0.204206688 | 0.188554684 | 0.155301095 | 0.015695744 |
| 0.102867052 | 0.069276872 | 0.134658536 | 0.022085513 |
| 0.246348481 | 0.078007439 | 0.086887369 | 0.011389586 |
| 0.022351767 | 1           | 0.176476597 | 0.228529537 |
| 0.130580674 | 0.246102519 | 0.123789787 | 0.090496762 |
| 0.133828218 | 0.023558278 | 0.225688251 | 0.137588325 |
| 0.22711064  | 0.003077891 | 0.23348219  | 0.214424651 |
| 0.243441669 | 0.073153099 | 0.129479466 | 0.001592332 |
| 0.077037516 | 0.060512693 | 0.088937769 | 0.063361855 |
| 0.10330868  | 0.119908622 | 0.127322799 | 0.174248669 |
| 0.003881586 | 0.003357057 | 0.237528015 | 0.013583799 |
| 0.259198337 | 0.015807036 | 0.136414501 | 0.000909025 |
| 0.203454023 | 0.17872367  | 0.208009279 | 0.009331557 |
| 0.071320399 | 2.48E-05    | 0.049471393 | 0.037274202 |
| 0.254339203 | 0.206121992 | 0.121838991 | 0.127665109 |
| 0.10729507  | 0.068299107 | 0.172339865 | 0.037351975 |
| 0.114174251 | 0.004427814 | 0.151892219 | 0.086608794 |
| 0.057840279 | 0.030535584 | 0.19323308  | 0.024237432 |
| 0.059244821 | 0.007219549 | 0.101589402 | 0.117145436 |
| 0.110505573 | 0.017080648 | 0.067499867 | 0.07070422  |
| 0.025936496 | 0.061216377 | 0.097417674 | 0.07218898  |
| 0.114844457 | 0.093102899 | 0.042620365 | 0.223608445 |
| 0.022236867 | 0.164793815 | 0.001212772 | 0.00238025  |
| 0.004281932 | 0.12529595  | 0.208678996 | 0.167520749 |



|             |             |             |             |
|-------------|-------------|-------------|-------------|
| 0.142158465 | 0.017642775 | 0.110611525 | 0.173123304 |
| 0.00072922  | 0.114303052 | 0.128238372 | 0.000689692 |
| 0.076310943 | 0.0244687   | 0.003472078 | 0.1357383   |
| 0.22394023  | 0.009798954 |             |             |
| SLAMF7      | 0.242789013 | 0.486158925 | 0.185236414 |
| 0.055595124 | 0.260540976 | 0.403205792 | 0.42117967  |
| 0.237933687 | 0.239829831 | 0.30764236  | 0.43831381  |
| 0.002411765 | 0.239490061 | 0.034979046 | 0.14087357  |
| 0.406988865 | 0.422107379 | 0.458115253 | 0.40682157  |
| 0.2725769   | 0.250345849 | 0.347886039 | 0.412713515 |
| 0.420956173 | 0.00419254  | 0.315828654 | 0.135214112 |
| 0.218538367 | 0.372877902 | 0.3448797   | 0.377926829 |
| 0.349904904 | 0.340205867 | 0.377984604 | 0.353423977 |
| 0.170286095 | 0.488147774 | 0.074055786 | 0.277276045 |
| 0.257393355 | 0.410741735 | 0.338168642 | 0.047842349 |
| 0.005212472 | 0.281114654 | 0.192873587 | 0.372364181 |
| 0.290367569 | 0.385805134 | 0.317133399 | 0.372764621 |
| 0.07394126  | 0.434267704 | 0.300328635 | 0.072707516 |
| 0.491806526 | 0.012380275 | 0.500772967 | 0.178757243 |
| 0.193087028 | 0.378877114 | 0.236588321 | 0.358418115 |
| 0.424226262 | 0.504774326 | 0.463170914 | 0.143034189 |
| 0.225926341 | 0.313686826 | 0.263929748 | 0.401099214 |
| 0.432020135 | 0.349717458 | 0.436700337 | 0.23040549  |
| 0.300742177 | 0.261341117 | 0.39755956  | 0.303698542 |
| 0.002808821 | 0.353284773 | 0.372765514 | 0.203802966 |
| 0.226891931 | 0.436342635 | 0.263407477 | 0.414640356 |
| 0.303921394 | 0.071817406 | 0.389346782 | 0.449582171 |
| 0.052396579 | 0.264330556 | 0.020724863 | 0.272628932 |
| 0.318647787 | 0.321295834 | 0.313596994 | 0.237246311 |
| 0.047484832 | 0.225061474 | 0.104799484 | 0.247501739 |
| 0.348355311 | 0.380333808 | 0.475279373 | 0.056401708 |
| 0.211431478 | 0.24075802  | 0.424799657 | 0.500701491 |
| 0.423854395 | 0.019529635 | 0.228115389 | 0.396260081 |
| 0.300797251 | 0.236965866 | 0.414015819 | 0.026641108 |
| 0.029990859 | 0.01275916  | 0.351978336 | 0.269155195 |
| 0.287608929 | 0.395431846 | 0.172198478 | 0.363728239 |
| 0.224536742 | 0.30471687  | 0.298723884 | 0.434870607 |
| 0.277630423 | 0.439684675 | 0.39785728  | 0.322098654 |
| 0.341142005 | 0.271719175 | 0.276889987 | 0.473293491 |
| 0.446636629 | 0.202119263 | 0.209775282 | 0.419953809 |
| 0.217899151 | 0.397617641 | 0.469072112 | 0.291895189 |
| 0.414007658 | 0.349914363 | 0.322435209 | 0.443117946 |
| 0.417580751 | 0.295591251 | 0.039396373 | 0.416325908 |
| 0.497082252 | 0.030349173 | 0.195719977 | 0.307259087 |
| 0.10700568  | 0.402000352 | 0.446966006 | 0.380138383 |
| 0.350718667 | 0.117428343 | 0.37438093  | 0.426841753 |
| 0.366900131 | 0.4131663   | 0.359356331 | 0.343178098 |
| 0.394746252 | 0.323909142 | 0.16911743  | 0.220956663 |
| 0.284489475 | 0.358138853 | 0.182511865 | 0.067928926 |
| 0.26906291  | 0.283336269 | 0.415031863 | 0.336469891 |
| 0.264506757 | 0.010254499 | 0.297323183 | 0.273187664 |
| 0.288345995 | 0.258984984 | 0.511575807 | 0.271705984 |
| 0.343116701 | 0.201740196 | 0.2921571   | 0.417601705 |
| 0.295481989 | 0.33495504  | 0.327200753 | 0.003338917 |

|             |             |             |             |
|-------------|-------------|-------------|-------------|
| 0.304227831 | 0.250770604 | 0.346767557 | 0.092647917 |
| 0.395674601 | 0.214682778 | 0.101315084 | 0.413034554 |
| 0.368783714 | 0.34102819  | 0.033716522 | 0.079383538 |
| 0.383156579 | 0.445839394 | 0.329993665 | 0.213195106 |
| 0.402760919 | 0.373562058 | 0.272825535 | 0.430531436 |
| 0.403668474 | 0.437489302 | 0.084629425 | 0.346607592 |
| 0.292917313 | 0.41501075  | 0.319765363 | 0.353195921 |
| 0.416402763 | 0.253162043 | 0.196104101 | 0.402314209 |
| 0.338836622 | 0.349952357 | 0.193428316 | 0.485019576 |
| 0.003060745 | 0.409286622 | 0.386799434 | 0.086350899 |
| 0.493481216 | 0.428124083 | 0.174016952 | 0.273965519 |
| 0.416620952 | 0.484963039 | 0.338846735 | 0.307462299 |
| 0.133246817 | 0.022672239 | 0.421940901 | 0.411553488 |
| 0.381256881 | 0.421582242 | 0.262763211 | 0.046380252 |
| 0.420655809 | 0.198478223 | 0.365807012 | 0.275792332 |
| 0.345215477 | 0.271690371 | 0.349791112 | 0.213947001 |
| 0.011969923 | 0.364289339 | 0.294449955 | 0.263472061 |
| 0.371486592 | 0.260235677 | 0.399705376 | 0.417251319 |
| 0.349914032 | 0.216144784 | 0.341872905 | 0.244247108 |
| 0.358131879 | 0.484401368 | 0.029557656 | 0.403589176 |
| 0.449955568 | 0.379577442 | 0.427068113 | 0.433011389 |
| 0.353604378 | 0.448182042 | 0.429761704 | 0.309016869 |
| 0.001607527 | 0.286801863 | 0.219348721 | 0.419913062 |
| 0.347821553 | 0.414699048 | 0.126628401 | 0.261384267 |
| 0.003326638 | 0.304610394 | 0.159601529 | 0.480789064 |
| 0.400347381 | 0.118193463 | 0.023765193 | 0.373026243 |
| 0.222967128 | 0.033113802 | 0.47624465  | 0.425684031 |
| 0.453516681 | 0.400920785 | 0.369385937 | 0.259576989 |
| 0.115442364 | 0.279670802 | 0.087089335 | 0.40758816  |
| 0.313478103 | 0.048627013 | 0.21634317  | 0.439983407 |
| 0.38554526  | 0.45496048  | 0.398764487 | 0.028519995 |
| 0.239367183 | 0.213763291 | 0.36280151  | 0.210041747 |
| 0.375416107 | 0.44046731  | 0.464588751 | 0.294995571 |
| 0.360717298 | 0.44334805  | 0.430498514 | 0.401049815 |
| 0.126414561 | 0.269682817 | 0.316051934 | 0.149568005 |
| 0.221700358 | 0.418773012 | 0.365994822 | 0.369757845 |
| 0.368473556 | 0.130350997 | 0.375061861 | 0.246076639 |
| 0.474908345 | 0.410600045 | 0.18704781  | 0.227482486 |
| 0.460025859 | 0.390319586 | 0.293019752 | 0.374959018 |
| 0.400893405 | 0.075242233 | 0.072000267 | 0.412423584 |
| 0.506555042 | 0.441980739 | 0.373920418 | 0.270250446 |
| 0.361085914 | 0.132023517 | 0.334265516 | 0.399544804 |
| 0.355666363 | 0.242351885 | 0.2393953   | 0.058603115 |
| 0.054777915 | 0.176476597 | 1           | 0.463830525 |
| 0.211478529 | 0.32040901  | 0.416565359 | 0.457036949 |
| 0.394849748 | 0.328616229 | 0.407531191 | 0.337342633 |
| 0.48534039  | 0.201821827 | 0.484406307 | 0.347658596 |
| 0.347956278 | 0.436227787 | 0.366110148 | 0.016167507 |
| 0.305800776 | 0.322455077 | 0.116469906 | 0.433663695 |
| 0.300033926 | 0.299482609 | 0.460069508 | 0.273781654 |
| 0.169110637 | 0.005130724 | 0.36742803  | 0.23532492  |
| 0.41927234  | 0.162693082 | 0.345594373 | 0.078871082 |
| 0.50190495  | 0.352767978 | 0.316151241 | 0.159980977 |
| 0.420243774 | 0.01525004  | 0.330928778 | 0.097387919 |

|             |             |             |             |
|-------------|-------------|-------------|-------------|
| 0.346620993 | 0.411575563 | 0.289534378 | 0.265750314 |
| 0.140125491 | 0.391574674 | 0.427962488 | 0.410417255 |
| 0.414292813 | 0.112848639 | 0.430375744 | 0.307605037 |
| 0.237170656 | 0.336095014 | 0.408199491 | 0.334665899 |
| 0.403265092 | 0.149362891 | 0.294731669 | 0.186285523 |
| 0.389395369 | 0.310822412 | 0.445260503 | 0.24482383  |
| 0.165793962 | 0.423266512 | 0.270657781 | 0.271883273 |
| 0.373339607 | 0.225180657 | 0.244289705 | 0.46315606  |
| 0.235591331 | 0.28498075  | 0.101486    | 0.103995654 |
| 0.25664439  | 0.369246889 | 0.33245324  | 0.36242605  |
| 0.422686075 | 0.175165704 | 0.246668105 | 0.225753591 |
| 0.060682047 | 0.229536298 | 0.44520862  | 0.132534446 |
| 0.370672894 | 0.193348403 | 0.002097456 | 0.224653281 |
| 0.416719313 | 0.302079348 |             |             |
| SLC11A2     | 0.296141423 | 0.483943534 | 0.208301339 |
| 0.038277343 | 0.225664155 | 0.427489232 | 0.414547279 |
| 0.28715967  | 0.288328858 | 0.273639565 | 0.464901126 |
| 0.005549656 | 0.246800551 | 0.058444307 | 0.185788731 |
| 0.417148697 | 0.427389751 | 0.460823215 | 0.422206083 |
| 0.342660861 | 0.203585451 | 0.41183428  | 0.424539498 |
| 0.444231958 | 0.008928026 | 0.291898986 | 0.092433163 |
| 0.259468933 | 0.384797906 | 0.400222853 | 0.38270225  |
| 0.364123114 | 0.335364708 | 0.364843406 | 0.320634109 |
| 0.147785943 | 0.494507715 | 0.073474224 | 0.284832064 |
| 0.270856234 | 0.3803063   | 0.336693199 | 0.066593539 |
| 0.002648745 | 0.279523519 | 0.233148938 | 0.420577838 |
| 0.371998893 | 0.412187618 | 0.373805753 | 0.337725322 |
| 0.075878969 | 0.471105792 | 0.350647416 | 0.073535436 |
| 0.481413898 | 0.007228947 | 0.497786448 | 0.243109298 |
| 0.225416659 | 0.439406361 | 0.271311714 | 0.400869217 |
| 0.443090009 | 0.495589702 | 0.464918391 | 0.134048723 |
| 0.241610979 | 0.350079501 | 0.262954876 | 0.38907214  |
| 0.437429739 | 0.35798037  | 0.428155763 | 0.238172419 |
| 0.315950478 | 0.273349951 | 0.452747076 | 0.362694727 |
| 0.004218534 | 0.333920614 | 0.322513132 | 0.249716303 |
| 0.239025381 | 0.467888988 | 0.309200071 | 0.381819115 |
| 0.322413924 | 0.094829157 | 0.439069141 | 0.453920347 |
| 0.046630124 | 0.277721023 | 0.022015982 | 0.332935407 |
| 0.331183636 | 0.331879126 | 0.357965424 | 0.225900481 |
| 0.067567145 | 0.299175705 | 0.154853189 | 0.259201408 |
| 0.397863596 | 0.407149555 | 0.470774565 | 0.069828807 |
| 0.216479038 | 0.298971373 | 0.45720063  | 0.495986391 |
| 0.431737198 | 0.033924836 | 0.309712242 | 0.422333434 |
| 0.301827278 | 0.198260572 | 0.429161367 | 0.029199109 |
| 0.02749256  | 0.027040246 | 0.362193284 | 0.332576632 |
| 0.255976647 | 0.403455814 | 0.156940482 | 0.356697719 |
| 0.273084137 | 0.327678588 | 0.265067681 | 0.435176461 |
| 0.288959284 | 0.435596771 | 0.376167921 | 0.340450838 |
| 0.318613129 | 0.352829244 | 0.332236137 | 0.46286973  |
| 0.468547336 | 0.210931644 | 0.240362699 | 0.453300618 |
| 0.219436814 | 0.407132689 | 0.474797035 | 0.366068981 |
| 0.373048549 | 0.419294895 | 0.319565197 | 0.44230468  |
| 0.441996139 | 0.368002023 | 0.052864566 | 0.465535548 |
| 0.492581878 | 0.034123248 | 0.225074199 | 0.334040548 |

|             |             |             |             |
|-------------|-------------|-------------|-------------|
| 0.072790506 | 0.39415574  | 0.457005824 | 0.403323702 |
| 0.3760868   | 0.079587301 | 0.343068708 | 0.431902798 |
| 0.429592559 | 0.417810989 | 0.407391532 | 0.304877184 |
| 0.447503383 | 0.314879959 | 0.181778685 | 0.223569348 |
| 0.322346386 | 0.424779229 | 0.196998447 | 0.072034716 |
| 0.318092311 | 0.351526821 | 0.41061071  | 0.387506485 |
| 0.29960196  | 0.005597524 | 0.263632742 | 0.325118812 |
| 0.299295445 | 0.277513467 | 0.501944877 | 0.311592248 |
| 0.414967174 | 0.220959031 | 0.346652723 | 0.387461268 |
| 0.329362242 | 0.323395242 | 0.311325232 | 0.004668096 |
| 0.318838734 | 0.254273197 | 0.385856401 | 0.142991372 |
| 0.361926877 | 0.257874196 | 0.157372461 | 0.409074582 |
| 0.404859883 | 0.347293764 | 0.062954554 | 0.111818633 |
| 0.419005277 | 0.44931739  | 0.318115347 | 0.269651969 |
| 0.407101171 | 0.387877328 | 0.283514044 | 0.463715279 |
| 0.389894157 | 0.459249106 | 0.104894731 | 0.417595313 |
| 0.306580971 | 0.405660711 | 0.314882262 | 0.362587732 |
| 0.434963358 | 0.308649219 | 0.222289127 | 0.44505711  |
| 0.398496979 | 0.403075272 | 0.239048652 | 0.489137542 |
| 0.004986889 | 0.460099471 | 0.385868562 | 0.109523716 |
| 0.481402399 | 0.425717218 | 0.220404296 | 0.354195642 |
| 0.431333321 | 0.492528814 | 0.369933632 | 0.311993615 |
| 0.165536371 | 0.04239387  | 0.444234698 | 0.449202748 |
| 0.389209136 | 0.447457485 | 0.236864228 | 0.06906616  |
| 0.422921835 | 0.242113419 | 0.388211823 | 0.304926681 |
| 0.352083462 | 0.279325084 | 0.420691088 | 0.263830637 |
| 0.017748454 | 0.385744995 | 0.318279148 | 0.236781979 |
| 0.357400025 | 0.28620863  | 0.385167609 | 0.466211105 |
| 0.32693019  | 0.247537324 | 0.303306462 | 0.245578642 |
| 0.392632724 | 0.484569176 | 0.029029829 | 0.429434452 |
| 0.457995144 | 0.436560836 | 0.415689693 | 0.447776192 |
| 0.414644461 | 0.474390442 | 0.426304155 | 0.331923105 |
| 0.00327571  | 0.28891466  | 0.222900726 | 0.467295106 |
| 0.347331163 | 0.450684089 | 0.17010839  | 0.263612498 |
| 0.005845539 | 0.353428812 | 0.146917472 | 0.498279591 |
| 0.389995471 | 0.128330184 | 0.022639983 | 0.39596386  |
| 0.236088541 | 0.042375823 | 0.485673702 | 0.430197261 |
| 0.437372002 | 0.421522945 | 0.364184161 | 0.256979079 |
| 0.109812909 | 0.331533313 | 0.069581145 | 0.409873177 |
| 0.333794227 | 0.070523914 | 0.163716053 | 0.453498577 |
| 0.398848792 | 0.471700462 | 0.445941869 | 0.023677251 |
| 0.257806359 | 0.183059451 | 0.370160884 | 0.260205834 |
| 0.412707913 | 0.473364178 | 0.460300875 | 0.293593179 |
| 0.392333051 | 0.45954522  | 0.464892165 | 0.40059718  |
| 0.106048169 | 0.273210107 | 0.322972779 | 0.150910127 |
| 0.252294386 | 0.413874251 | 0.352494508 | 0.380941674 |
| 0.429225249 | 0.092488291 | 0.407616502 | 0.315442612 |
| 0.460747438 | 0.40165214  | 0.202980552 | 0.309817295 |
| 0.461753828 | 0.443810993 | 0.303698095 | 0.433700382 |
| 0.450969378 | 0.082233309 | 0.100472443 | 0.459353378 |
| 0.500538502 | 0.459836091 | 0.374856145 | 0.223618457 |
| 0.3623957   | 0.179037999 | 0.356527488 | 0.414985349 |
| 0.42512474  | 0.260687355 | 0.251947286 | 0.080804049 |
| 0.047775069 | 0.228529537 | 0.463830525 | 1           |

|                      |             |             |             |
|----------------------|-------------|-------------|-------------|
| 0.239985144          | 0.383265891 | 0.414618704 | 0.442133569 |
| 0.399654633          | 0.344143217 | 0.450111724 | 0.405363262 |
| 0.48464693           | 0.150406635 | 0.498068463 | 0.407468295 |
| 0.395911769          | 0.426822158 | 0.391946674 | 0.01850277  |
| 0.328346947          | 0.293874581 | 0.164136067 | 0.403384305 |
| 0.313228516          | 0.321420651 | 0.466954328 | 0.342573327 |
| 0.167665707          | 0.009335194 | 0.432850295 | 0.225849759 |
| 0.453735987          | 0.20012132  | 0.406143965 | 0.075794397 |
| 0.509806892          | 0.395692702 | 0.354105613 | 0.180892503 |
| 0.422502525          | 0.011252529 | 0.295966965 | 0.129138449 |
| 0.402166441          | 0.46050876  | 0.331695113 | 0.308505057 |
| 0.202499069          | 0.400452947 | 0.463806649 | 0.387862689 |
| 0.401669445          | 0.111674094 | 0.433538784 | 0.383597674 |
| 0.240764715          | 0.373176625 | 0.451371281 | 0.390872854 |
| 0.383991229          | 0.1845663   | 0.326278726 | 0.266545003 |
| 0.381403819          | 0.359724537 | 0.428399304 | 0.292100835 |
| 0.16755483           | 0.436225883 | 0.302542195 | 0.287546303 |
| 0.388433822          | 0.246862413 | 0.282155643 | 0.473711733 |
| 0.281767042          | 0.354276935 | 0.070849241 | 0.067705731 |
| 0.220401035          | 0.378697378 | 0.365923373 | 0.381470714 |
| 0.429874832          | 0.22287718  | 0.278485771 | 0.299736515 |
| 0.072969572          | 0.250706823 | 0.438687285 | 0.112545273 |
| 0.398900545          | 0.227629879 | 0.003270432 | 0.306974199 |
| 0.461529746          | 0.308041672 |             |             |
| SLC25A24 0.058932265 | 0.137791992 | 0.243590625 |             |
| 0.005453564          | 0.075004769 | 0.338987101 | 0.24559532  |
| 0.038326763          | 0.174268463 | 0.095181915 | 0.304766492 |
| 0.014756203          | 0.028291912 | 0.12811751  | 0.128993355 |
| 0.078495526          | 0.076237177 | 0.154179426 | 0.081353926 |
| 0.096569595          | 0.030622898 | 0.189589716 | 0.133664717 |
| 0.2586693            | 0.03739415  | 0.171347249 | 0.023331587 |
| 0.023156544          | 0.062491789 | 0.269925575 | 0.08033427  |
| 0.066972173          | 0.045759335 | 0.025546316 | 0.025497128 |
| 0.002713237          | 0.199498678 | 0.00138613  | 0.033202218 |
| 0.032159433          | 0.112377659 | 0.052469514 | 0.112967432 |
| 5.21E-05 0.190921854 | 0.019178578 | 0.164214181 |             |
| 0.100574406          | 0.323857492 | 0.31761199  | 0.138534844 |
| 0.001162436          | 0.274034774 | 0.120300998 | 0.00090725  |
| 0.241751832          | 0.001023941 | 0.205223318 | 0.04122716  |
| 0.253487729          | 0.135127815 | 0.027796201 | 0.116356385 |
| 0.342515123          | 0.228854053 | 0.105423741 | 0.124737004 |
| 0.306955649          | 0.045659681 | 0.033908528 | 0.072283955 |
| 0.124952429          | 0.054262531 | 0.083009274 | 0.009653164 |
| 0.044031125          | 0.037729362 | 0.294672034 | 0.176599709 |
| 0.010795666          | 0.226430594 | 0.022166382 | 0.048254006 |
| 0.018472953          | 0.276662721 | 0.051217901 | 0.087924903 |
| 0.03466971           | 0.258036203 | 0.166674575 | 0.094654929 |
| 0.019950226          | 0.041786369 | 0.005996631 | 0.169077912 |
| 0.069222948          | 0.043284178 | 0.090302753 | 0.168617489 |
| 0.182997486          | 0.198989086 | 0.032331451 | 0.026048743 |
| 0.084227615          | 0.058919055 | 0.23580367  | 0.001371134 |
| 0.018726327          | 0.110553626 | 0.06751227  | 0.197834762 |
| 0.104657255          | 0.090139093 | 0.154129326 | 0.338752928 |
| 0.019564938          | 0.026577406 | 0.262588347 | 0.00274217  |

|             |             |             |             |
|-------------|-------------|-------------|-------------|
| 0.019262973 | 0.013280163 | 0.060396515 | 0.189581944 |
| 0.129904463 | 0.254597901 | 0.062658368 | 0.04737463  |
| 0.02804537  | 0.054408179 | 0.088396577 | 0.188221699 |
| 0.03262895  | 0.235774745 | 0.043077359 | 0.055200657 |
| 0.016883843 | 0.085069382 | 0.22102327  | 0.149398119 |
| 0.223181959 | 0.207218307 | 0.22761199  | 0.275225298 |
| 0.019859619 | 0.07934285  | 0.109092365 | 0.06517491  |
| 0.059038702 | 0.215074364 | 0.03193291  | 0.151364837 |
| 0.281813335 | 0.108676324 | 0.002119995 | 0.256810702 |
| 0.259836533 | 0.003119402 | 0.260723704 | 0.070957166 |
| 0.009679714 | 0.074329355 | 0.177791617 | 0.094320145 |
| 0.0551176   | 0.021653012 | 0.076909259 | 0.216211443 |
| 0.215299826 | 0.205834703 | 0.112933828 | 0.057926643 |
| 0.276307108 | 0.029804772 | 0.236440381 | 0.019808277 |
| 0.32115109  | 0.196360045 | 0.00737153  | 0.006219792 |
| 0.058564025 | 0.055865197 | 0.11809424  | 0.084324875 |
| 0.05259261  | 0.000761788 | 0.090360314 | 0.07523982  |
| 0.032649196 | 0.038656992 | 0.155941494 | 0.348486758 |
| 0.283906585 | 0.007679198 | 0.324164595 | 0.040051278 |
| 0.087957203 | 0.061919756 | 0.072808421 | 0.023668678 |
| 0.147261062 | 0.013703001 | 0.0539387   | 0.16555804  |
| 0.076206449 | 0.184374917 | 0.048201401 | 0.099478021 |
| 0.323661335 | 0.057219335 | 0.060559659 | 0.006723207 |
| 0.133786135 | 0.146491452 | 0.01911505  | 0.035470612 |
| 0.095015556 | 0.072867503 | 0.031064778 | 0.243466542 |
| 0.057466573 | 0.2713254   | 0.003111629 | 0.115581164 |
| 0.030277399 | 0.085633271 | 0.048525312 | 0.071389658 |
| 0.169852356 | 0.073331239 | 0.012626676 | 0.341961711 |
| 0.112267426 | 0.089685878 | 0.251044788 | 0.140724932 |
| 0.027611954 | 0.220227486 | 0.05711206  | 0.004180895 |
| 0.145759191 | 0.279809167 | 0.260327777 | 0.130426558 |
| 0.084768625 | 0.145158472 | 0.101939851 | 0.043178016 |
| 0.008914098 | 0.10783781  | 0.122909818 | 0.173430416 |
| 0.060532467 | 0.073837197 | 0.007463484 | 0.006466814 |
| 0.096758396 | 0.03211526  | 0.09482895  | 0.039344456 |
| 0.038878506 | 0.01268629  | 0.224242531 | 0.050946203 |
| 0.00313695  | 0.133116146 | 0.051070674 | 0.028356637 |
| 0.046629623 | 0.072810841 | 0.085495841 | 0.290281332 |
| 0.016451094 | 0.018946957 | 0.016241631 | 0.200620413 |
| 0.326138288 | 0.138233756 | 0.000507195 | 0.128675728 |
| 0.099070675 | 0.128631266 | 0.09045324  | 0.098903473 |
| 0.175671594 | 0.23181201  | 0.110455806 | 0.057840742 |
| 0.0093848   | 0.031786894 | 0.020445413 | 0.312190015 |
| 0.05713183  | 0.277286904 | 0.014967259 | 0.012689416 |
| 0.009571539 | 0.336580442 | 0.002972738 | 0.172763458 |
| 0.075802665 | 0.173782503 | 0.000175546 | 0.095971391 |
| 0.020288998 | 0.004293983 | 0.12491327  | 0.144902782 |
| 0.125830052 | 0.071424409 | 0.210792064 | 0.027378205 |
| 0.001601786 | 0.029373159 | 0.027555565 | 0.086107424 |
| 0.028185157 | 0.00462578  | 0.049280999 | 0.101214442 |
| 0.129078851 | 0.195201458 | 0.29570894  | 0.014371246 |
| 0.033164599 | 0.011487018 | 0.0696401   | 0.156487726 |
| 0.15607872  | 0.256444144 | 0.158868487 | 0.040154617 |
| 0.066697322 | 0.210329698 | 0.263924694 | 0.116629281 |

|             |             |             |             |
|-------------|-------------|-------------|-------------|
| 0.005890206 | 0.036212141 | 0.050661918 | 0.159209995 |
| 0.026839056 | 0.083320455 | 0.042007216 | 0.345620601 |
| 0.179742548 | 0.005226104 | 0.384686548 | 0.077413526 |
| 0.162941555 | 0.078131389 | 0.24085287  | 0.149780484 |
| 0.215888258 | 0.099105274 | 0.252708643 | 0.11315563  |
| 0.329054706 | 0.001461284 | 0.005647214 | 0.218402106 |
| 0.19558407  | 0.317682761 | 0.078104063 | 0.039761993 |
| 0.058719056 | 0.251600837 | 0.0877541   | 0.094362595 |
| 0.240024327 | 0.027191326 | 0.028000478 | 0.006272792 |
| 0.019851467 | 0.130580674 | 0.211478529 | 0.239985144 |
| 1           | 0.313412958 | 0.188205352 | 0.138410532 |
| 0.069102842 | 0.025848796 | 0.319227049 | 0.118889515 |
| 0.264329623 | 0.022981299 | 0.177349127 | 0.142968376 |
| 0.145895248 | 0.081327715 | 0.095634904 | 0.005233026 |
| 0.042182177 | 0.087991421 | 0.02191556  | 0.081351376 |
| 0.039506896 | 0.224184075 | 0.184063616 | 0.180269396 |
| 0.013802332 | 0.013501795 | 0.216676604 | 0.008663131 |
| 0.364033266 | 0.010808656 | 0.10466838  | 0.000797912 |
| 0.147042189 | 0.104290583 | 0.096531922 | 0.005603402 |
| 0.07647238  | 0.000116967 | 0.094672819 | 0.253260225 |
| 0.161986856 | 0.219768636 | 0.060132394 | 0.047497034 |
| 0.031291912 | 0.069891013 | 0.187613761 | 0.048158179 |
| 0.078480704 | 0.004381472 | 0.08418503  | 0.079474582 |
| 0.021812696 | 0.041276646 | 0.308584667 | 0.054678125 |
| 0.163642692 | 0.028580565 | 0.233977794 | 0.105177145 |
| 0.061856899 | 0.043441602 | 0.087086769 | 0.037081637 |
| 0.222976888 | 0.065774085 | 0.053350279 | 0.035214108 |
| 0.07678479  | 0.029341001 | 0.020599331 | 0.271497069 |
| 0.026217057 | 0.088043954 | 0.007740126 | 0.017674803 |
| 0.010745688 | 0.194521968 | 0.108974381 | 0.103952648 |
| 0.084309956 | 0.015656809 | 0.230477937 | 0.186829313 |
| 0.001819942 | 0.041086724 | 0.245269414 | 0.002809801 |
| 0.072228082 | 0.011850742 | 0.016909226 | 0.078032546 |
| 0.228222247 | 0.016613181 |             |             |
| SLC27A4     | 0.13526595  | 0.284437729 | 0.269642761 |
| 0.006884804 | 0.101491559 | 0.362573764 | 0.249458124 |
| 0.095443137 | 0.295323796 | 0.135723335 | 0.389331613 |
| 0.030843459 | 0.093844709 | 0.189957056 | 0.240254832 |
| 0.204422561 | 0.200241652 | 0.213273958 | 0.214330632 |
| 0.179696641 | 0.0567711   | 0.322314147 | 0.198900411 |
| 0.300022776 | 0.059060936 | 0.174472196 | 0.027574681 |
| 0.071098335 | 0.175900132 | 0.324620102 | 0.168264169 |
| 0.18036794  | 0.130359065 | 0.083147822 | 0.071321878 |
| 0.014957201 | 0.358659867 | 0.009209252 | 0.09761021  |
| 0.108418015 | 0.164115291 | 0.143649281 | 0.150250752 |
| 0.000126449 | 0.230978668 | 0.067428442 | 0.273078647 |
| 0.217390324 | 0.330951979 | 0.343999105 | 0.15741096  |
| 0.008385753 | 0.388391391 | 0.263792114 | 0.006966115 |
| 0.376138226 | 0.001128514 | 0.358315569 | 0.133556342 |
| 0.318504411 | 0.241458546 | 0.074574046 | 0.223844007 |
| 0.375849935 | 0.371160784 | 0.245766109 | 0.120968612 |
| 0.273898819 | 0.110963082 | 0.10111768  | 0.130912329 |
| 0.261697114 | 0.127487863 | 0.178662621 | 0.038594583 |
| 0.115375024 | 0.115750615 | 0.391709133 | 0.326791994 |

|             |             |             |             |
|-------------|-------------|-------------|-------------|
| 0.014638502 | 0.198580683 | 0.062629777 | 0.134859886 |
| 0.059178647 | 0.386814028 | 0.129364528 | 0.160900951 |
| 0.079542276 | 0.250744081 | 0.261199312 | 0.229292973 |
| 0.024076441 | 0.124536808 | 0.00985323  | 0.316387143 |
| 0.174534326 | 0.135444073 | 0.191851564 | 0.194613766 |
| 0.207705183 | 0.371239918 | 0.114763349 | 0.094499115 |
| 0.171906883 | 0.121486654 | 0.371965149 | 0.01150744  |
| 0.070553477 | 0.244407626 | 0.182060122 | 0.344286463 |
| 0.240179459 | 0.126151408 | 0.3355346   | 0.343224078 |
| 0.07249685  | 0.053766841 | 0.272994513 | 0.008488174 |
| 0.018582066 | 0.044485559 | 0.16699697  | 0.346379799 |
| 0.154455308 | 0.241920806 | 0.074586478 | 0.104807115 |
| 0.090288962 | 0.162452121 | 0.128043368 | 0.213480168 |
| 0.092281369 | 0.257143071 | 0.080339281 | 0.137992911 |
| 0.060240866 | 0.240263237 | 0.348444776 | 0.284852401 |
| 0.394642515 | 0.23979771  | 0.292639647 | 0.354991952 |
| 0.071682514 | 0.202358182 | 0.254579571 | 0.192004265 |
| 0.118951779 | 0.301929461 | 0.091887371 | 0.221634621 |
| 0.315516872 | 0.211508027 | 0.014159569 | 0.383658921 |
| 0.402814943 | 0.010080843 | 0.317093871 | 0.178849649 |
| 0.013202305 | 0.167952426 | 0.329026302 | 0.201452059 |
| 0.127660075 | 0.024504267 | 0.128433105 | 0.247036598 |
| 0.304916384 | 0.216986841 | 0.22702451  | 0.106362462 |
| 0.375059119 | 0.082876996 | 0.233177721 | 0.072641224 |
| 0.329121416 | 0.312805384 | 0.038336168 | 0.023275377 |
| 0.148315768 | 0.160681488 | 0.23720412  | 0.177067161 |
| 0.138551759 | 0.000712832 | 0.126673963 | 0.166266883 |
| 0.096477952 | 0.124118223 | 0.301836858 | 0.334399384 |
| 0.374390369 | 0.043110549 | 0.351453171 | 0.104759268 |
| 0.221245588 | 0.129393636 | 0.139281213 | 0.021188107 |
| 0.22536526  | 0.045322247 | 0.119774604 | 0.290064654 |
| 0.133905234 | 0.302455982 | 0.149259445 | 0.218575979 |
| 0.322348631 | 0.141709158 | 0.139356821 | 0.040048485 |
| 0.252626025 | 0.246088641 | 0.063301204 | 0.120930204 |
| 0.189014884 | 0.158698394 | 0.106260474 | 0.389723235 |
| 0.138717991 | 0.361366023 | 0.022362848 | 0.262860011 |
| 0.081026443 | 0.198198576 | 0.12976169  | 0.170262033 |
| 0.240142657 | 0.182003709 | 0.054872068 | 0.403018317 |
| 0.209281131 | 0.178851701 | 0.34526808  | 0.29435135  |
| 0.028378838 | 0.316419609 | 0.11406968  | 0.026423404 |
| 0.281712602 | 0.291216907 | 0.353390171 | 0.266223761 |
| 0.219905034 | 0.30393049  | 0.245490712 | 0.12733161  |
| 0.04629685  | 0.166454872 | 0.279513286 | 0.300843087 |
| 0.171626047 | 0.151846176 | 0.032835787 | 0.034022721 |
| 0.221891909 | 0.094852053 | 0.180227615 | 0.092671626 |
| 0.09464706  | 0.05097649  | 0.302815697 | 0.142436326 |
| 0.01236096  | 0.213547727 | 0.117814834 | 0.066092671 |
| 0.110151963 | 0.162543703 | 0.189722175 | 0.403585698 |
| 0.060487714 | 0.070285287 | 0.053350819 | 0.220736412 |
| 0.322047951 | 0.286650069 | 0.003495146 | 0.286854591 |
| 0.238774034 | 0.230012902 | 0.202197676 | 0.241528389 |
| 0.255969106 | 0.355679142 | 0.236466705 | 0.16845711  |
| 0.016198097 | 0.104384931 | 0.070819644 | 0.44579168  |
| 0.150914547 | 0.348733932 | 0.057575338 | 0.04181335  |



|             |             |              |             |
|-------------|-------------|--------------|-------------|
| 0.015610559 | 0.34292213  | 0.015915343  | 0.346660567 |
| 0.179301659 | 0.172758787 | 0.001659795  | 0.202168184 |
| 0.067198892 | 0.016676016 | 0.278918947  | 0.190195489 |
| 0.245028788 | 0.133348938 | 0.219754971  | 0.089740742 |
| 0.010681466 | 0.115614761 | 0.032409496  | 0.155612902 |
| 0.077242795 | 0.029601165 | 0.059895889  | 0.246644836 |
| 0.261021579 | 0.29620289  | 0.352675064  | 0.016196235 |
| 0.111084107 | 0.030222053 | 0.151580733  | 0.260827616 |
| 0.298835843 | 0.377083787 | 0.298356854  | 0.11724629  |
| 0.147325408 | 0.336395802 | 0.388361354  | 0.236050364 |
| 0.016677668 | 0.107996846 | 0.142393955  | 0.152537704 |
| 0.079432683 | 0.19896758  | 0.081529861  | 0.311794587 |
| 0.309305021 | 0.011779739 | 0.382303944  | 0.165897808 |
| 0.292182383 | 0.186833617 | 0.269740554  | 0.328337799 |
| 0.336170889 | 0.243370324 | 0.259416369  | 0.207823269 |
| 0.415602756 | 0.010522026 | 0.035477846  | 0.350197985 |
| 0.34468237  | 0.37422767  | 0.185176454  | 0.066779501 |
| 0.159882445 | 0.345748715 | 0.21564904   | 0.211357886 |
| 0.328451746 | 0.074441945 | 0.096874718  | 0.031737834 |
| 0.026807314 | 0.246102519 | 0.32040901   | 0.383265891 |
| 0.313412958 | 1           | 0.206019949  | 0.183077845 |
| 0.182893231 | 0.085653849 | 0.373065377  | 0.208169068 |
| 0.410073245 | 0.037470017 | 0.3454871    | 0.225913104 |
| 0.281864791 | 0.154295465 | 0.209846134  | 0.011771202 |
| 0.109674555 | 0.13654041  | 0.0711160062 | 0.119411056 |
| 0.127645963 | 0.285475081 | 0.276474658  | 0.339418996 |
| 0.041937859 | 0.023418834 | 0.359412025  | 0.029786649 |
| 0.432595049 | 0.054544257 | 0.186195753  | 0.006271621 |
| 0.309979056 | 0.182980765 | 0.21042064   | 0.034578468 |
| 0.136768578 | 0.000689344 | 0.141964644  | 0.286175093 |
| 0.30230681  | 0.363395075 | 0.149412002  | 0.10867541  |
| 0.123454926 | 0.145747757 | 0.29905072   | 0.087540285 |
| 0.185129648 | 0.016819578 | 0.209844701  | 0.211665225 |
| 0.079460739 | 0.129146714 | 0.370680259  | 0.168021188 |
| 0.189740193 | 0.096573858 | 0.304991496  | 0.271959614 |
| 0.161476352 | 0.148685256 | 0.135021003  | 0.120271466 |
| 0.194092291 | 0.147532047 | 0.145960031  | 0.102911676 |
| 0.145046563 | 0.087291668 | 0.076925099  | 0.410491276 |
| 0.100981508 | 0.199509248 | 0.011948471  | 0.019892124 |
| 0.034848056 | 0.253023402 | 0.255200018  | 0.236913176 |
| 0.214058698 | 0.073853654 | 0.309110348  | 0.356619284 |
| 0.01354211  | 0.124345892 | 0.272191572  | 0.012509715 |
| 0.155873453 | 0.06115558  | 0.014553232  | 0.227031091 |
| 0.355494004 | 0.061894759 |              |             |
| SLC2A3      | 0.110948177 | 0.360795596  | 0.187839068 |
| 0.045759148 | 0.177283932 | 0.348787655  | 0.303135103 |
| 0.08628282  | 0.150279174 | 0.224628533  | 0.423171298 |
| 0.002197297 | 0.129364667 | 0.032948071  | 0.078192903 |
| 0.263578221 | 0.265982343 | 0.271969205  | 0.258075821 |
| 0.120479466 | 0.143495186 | 0.259399603  | 0.277918214 |
| 0.290492535 | 0.00460786  | 0.243622713  | 0.116400938 |
| 0.066711135 | 0.228731086 | 0.20610127   | 0.224852457 |
| 0.219636801 | 0.203177229 | 0.13187318   | 0.13091387  |
| 0.043932941 | 0.402359831 | 0.016294495  | 0.160624829 |

|             |             |             |             |
|-------------|-------------|-------------|-------------|
| 0.136539045 | 0.255994621 | 0.206693783 | 0.035556243 |
| 0.002096686 | 0.220478436 | 0.063418774 | 0.265974564 |
| 0.118493423 | 0.310617515 | 0.201428539 | 0.236124326 |
| 0.018183642 | 0.391847474 | 0.221822598 | 0.018014731 |
| 0.447155427 | 0.009566846 | 0.416586338 | 0.068561351 |
| 0.15711944  | 0.164961258 | 0.075598944 | 0.238022303 |
| 0.381145032 | 0.44599218  | 0.316019147 | 0.141558168 |
| 0.190463949 | 0.124493213 | 0.154367243 | 0.241099185 |
| 0.316137982 | 0.176912754 | 0.209402237 | 0.057681777 |
| 0.171112805 | 0.150103589 | 0.298020156 | 0.182040431 |
| 0.003058445 | 0.246730335 | 0.145326126 | 0.112471196 |
| 0.09973779  | 0.417971616 | 0.130864766 | 0.225865889 |
| 0.12229205  | 0.078616586 | 0.250023188 | 0.299650148 |
| 0.047273098 | 0.153001446 | 0.014545981 | 0.159290645 |
| 0.209202103 | 0.181383552 | 0.198864046 | 0.201635803 |
| 0.050914005 | 0.139462793 | 0.04479353  | 0.127832422 |
| 0.164081789 | 0.159252433 | 0.425234743 | 0.010700317 |
| 0.10608603  | 0.125994837 | 0.172835731 | 0.425426404 |
| 0.297886628 | 0.020957218 | 0.122236362 | 0.329433478 |
| 0.091429086 | 0.108362154 | 0.289772526 | 0.013875913 |
| 0.040144606 | 0.00708632  | 0.21755215  | 0.180235236 |
| 0.223932006 | 0.267756479 | 0.156663971 | 0.194546367 |
| 0.078835986 | 0.178058295 | 0.180565631 | 0.24789215  |
| 0.155192571 | 0.318534596 | 0.16206932  | 0.200671081 |
| 0.114639962 | 0.120696942 | 0.191430237 | 0.368504365 |
| 0.376404156 | 0.191022717 | 0.173776555 | 0.356903928 |
| 0.111326158 | 0.263570765 | 0.322246225 | 0.130377753 |
| 0.215490228 | 0.185396681 | 0.135329724 | 0.335142053 |
| 0.297897761 | 0.143864212 | 0.011051104 | 0.344576241 |
| 0.454968034 | 0.016582794 | 0.164487758 | 0.200926853 |
| 0.063777311 | 0.183413204 | 0.357349205 | 0.272287574 |
| 0.164744247 | 0.098639552 | 0.235721169 | 0.296785493 |
| 0.220303147 | 0.258946063 | 0.216780657 | 0.206438425 |
| 0.311208198 | 0.136875408 | 0.167578141 | 0.112545307 |
| 0.21267783  | 0.228227096 | 0.048911068 | 0.021197473 |
| 0.137545744 | 0.111286151 | 0.319200711 | 0.174572516 |
| 0.158093171 | 0.011072351 | 0.229534985 | 0.146555773 |
| 0.122399242 | 0.146150062 | 0.396692482 | 0.197142709 |
| 0.232856347 | 0.050021069 | 0.1930102   | 0.170489255 |
| 0.196059271 | 0.19177067  | 0.182925993 | 0.005948246 |
| 0.223936666 | 0.082772822 | 0.123186939 | 0.069514114 |
| 0.250021974 | 0.149710298 | 0.042307045 | 0.294991352 |
| 0.267191911 | 0.223830645 | 0.023178582 | 0.019604604 |
| 0.230572434 | 0.352323211 | 0.134706389 | 0.086912425 |
| 0.29147318  | 0.208733372 | 0.146709605 | 0.383368673 |
| 0.180952782 | 0.419763582 | 0.018152845 | 0.157751381 |
| 0.126562435 | 0.282290078 | 0.201433815 | 0.238195864 |
| 0.240295961 | 0.147084331 | 0.068485239 | 0.354868362 |
| 0.180796834 | 0.166447724 | 0.170675406 | 0.359224989 |
| 0.003888435 | 0.278981411 | 0.186145742 | 0.019131795 |
| 0.384697453 | 0.355004815 | 0.146532932 | 0.140302873 |
| 0.266285745 | 0.356893667 | 0.22964244  | 0.18213649  |
| 0.042487345 | 0.02384472  | 0.298924836 | 0.312234371 |
| 0.2300943   | 0.172817276 | 0.077394214 | 0.012805556 |

|             |             |             |             |
|-------------|-------------|-------------|-------------|
| 0.292169603 | 0.083427807 | 0.228796912 | 0.118621685 |
| 0.148135716 | 0.079675174 | 0.185983045 | 0.117166338 |
| 0.004095367 | 0.216537011 | 0.166396417 | 0.11062667  |
| 0.177523541 | 0.140240204 | 0.280005794 | 0.348509251 |
| 0.123501684 | 0.080911487 | 0.124939603 | 0.212888398 |
| 0.247478778 | 0.360680054 | 0.0061583   | 0.287604634 |
| 0.303212402 | 0.192372351 | 0.298743693 | 0.29059555  |
| 0.195911534 | 0.401814556 | 0.31592131  | 0.182539881 |
| 0.001772472 | 0.158502938 | 0.116224354 | 0.401182486 |
| 0.221828444 | 0.318203132 | 0.035900222 | 0.072203634 |
| 0.002359865 | 0.201850444 | 0.046863022 | 0.366787399 |
| 0.270538076 | 0.106957877 | 0.00379595  | 0.27228127  |
| 0.111946297 | 0.010302125 | 0.337550843 | 0.262560352 |
| 0.351492307 | 0.175317023 | 0.249533221 | 0.141483173 |
| 0.028172169 | 0.091985281 | 0.068871488 | 0.2574139   |
| 0.094191896 | 0.011643862 | 0.162450184 | 0.29122397  |
| 0.298746529 | 0.360161573 | 0.278265437 | 0.030623015 |
| 0.130478135 | 0.103607924 | 0.248414473 | 0.14669962  |
| 0.303267235 | 0.381208568 | 0.372212323 | 0.170745168 |
| 0.181358023 | 0.406322305 | 0.413100178 | 0.302198233 |
| 0.052336919 | 0.160982298 | 0.195180138 | 0.145133581 |
| 0.096052214 | 0.279334011 | 0.15775542  | 0.315495811 |
| 0.254476044 | 0.060821509 | 0.323060029 | 0.108052514 |
| 0.391678381 | 0.275917167 | 0.165966671 | 0.130655641 |
| 0.416284806 | 0.179661147 | 0.211470603 | 0.158343217 |
| 0.331196074 | 0.019633952 | 0.017683989 | 0.319961347 |
| 0.420654562 | 0.406495781 | 0.255626984 | 0.169256932 |
| 0.226100975 | 0.117725291 | 0.220603497 | 0.203450151 |
| 0.226339097 | 0.114733461 | 0.128896326 | 0.020640446 |
| 0.050091387 | 0.123789787 | 0.416565359 | 0.414618704 |
| 0.188205352 | 0.206019949 | 1           | 0.293370117 |
| 0.250760456 | 0.125659901 | 0.33198556  | 0.149543936 |
| 0.442173853 | 0.113253433 | 0.379623976 | 0.185018827 |
| 0.272251274 | 0.236101791 | 0.261225093 | 0.007130988 |
| 0.155672342 | 0.230821546 | 0.035418895 | 0.231134236 |
| 0.165199653 | 0.238987449 | 0.35882025  | 0.168872411 |
| 0.067433367 | 0.004466702 | 0.27727504  | 0.062856085 |
| 0.40270288  | 0.047380637 | 0.156268318 | 0.015956293 |
| 0.367307507 | 0.190625228 | 0.232689952 | 0.038107232 |
| 0.191870612 | 0.003221141 | 0.22270106  | 0.096846896 |
| 0.265502206 | 0.338842652 | 0.153158753 | 0.109205172 |
| 0.051904607 | 0.210647462 | 0.325710398 | 0.163440921 |
| 0.278056472 | 0.047556728 | 0.282315287 | 0.119801221 |
| 0.120607275 | 0.129917149 | 0.307655989 | 0.131010542 |
| 0.236925171 | 0.054984832 | 0.195480907 | 0.092925586 |
| 0.247811733 | 0.113269775 | 0.232601766 | 0.10008582  |
| 0.181658119 | 0.199784883 | 0.165234026 | 0.158580806 |
| 0.21616711  | 0.126794588 | 0.083928007 | 0.42939118  |
| 0.078250457 | 0.11653153  | 0.064026788 | 0.076987268 |
| 0.090639891 | 0.241344837 | 0.230638478 | 0.258572232 |
| 0.27553163  | 0.049411504 | 0.19333725  | 0.140127221 |
| 0.012143752 | 0.133374372 | 0.356538301 | 0.044827679 |
| 0.181595011 | 0.051322194 | 0.004891892 | 0.099277121 |
| 0.343336278 | 0.111716292 |             |             |

| SLC30A4     | 0.118647888 | 0.44882333  | 0.125352519 |
|-------------|-------------|-------------|-------------|
| 0.064413005 | 0.243209851 | 0.286122694 | 0.296189739 |
| 0.122187452 | 0.131572672 | 0.231251378 | 0.394489452 |
| 0.00067507  | 0.207139889 | 0.014521405 | 0.07668557  |
| 0.35373195  | 0.372449424 | 0.310010367 | 0.353015212 |
| 0.136598688 | 0.196187067 | 0.250755833 | 0.279443623 |
| 0.261208981 | 0.001376863 | 0.254641085 | 0.125977204 |
| 0.112851459 | 0.321930772 | 0.200696918 | 0.247131703 |
| 0.294510182 | 0.308535257 | 0.234210484 | 0.263276103 |
| 0.119074803 | 0.454100209 | 0.051960352 | 0.25834578  |
| 0.211967147 | 0.313708797 | 0.301440465 | 0.021828212 |
| 0.006618279 | 0.206449413 | 0.098154875 | 0.262251961 |
| 0.149368149 | 0.243867522 | 0.187209562 | 0.283448106 |
| 0.041345225 | 0.385359276 | 0.247066541 | 0.042598205 |
| 0.486659316 | 0.015050141 | 0.474360577 | 0.081409221 |
| 0.119211351 | 0.206726528 | 0.117263298 | 0.256016544 |
| 0.33544234  | 0.493573846 | 0.419576178 | 0.11369939  |
| 0.151374726 | 0.169093906 | 0.228166799 | 0.304949734 |
| 0.391998809 | 0.22187783  | 0.28346642  | 0.133871999 |
| 0.246500511 | 0.221709957 | 0.268850829 | 0.181975311 |
| 0.001191335 | 0.265988674 | 0.282432815 | 0.13874492  |
| 0.161510768 | 0.405479086 | 0.156818904 | 0.301533486 |
| 0.17443486  | 0.040502013 | 0.248150891 | 0.403414302 |
| 0.0431842   | 0.226074624 | 0.018360199 | 0.161103732 |
| 0.275364682 | 0.270096959 | 0.227510478 | 0.173266503 |
| 0.025448283 | 0.119057862 | 0.042544693 | 0.203224719 |
| 0.187891455 | 0.222316583 | 0.463702791 | 0.027126852 |
| 0.179099227 | 0.119767025 | 0.260142156 | 0.477249919 |
| 0.373498833 | 0.009451652 | 0.11420511  | 0.267127303 |
| 0.177993089 | 0.182010943 | 0.284155859 | 0.015346049 |
| 0.028256316 | 0.004505438 | 0.3034794   | 0.149270696 |
| 0.229671494 | 0.27151795  | 0.160198826 | 0.283961465 |
| 0.11600714  | 0.247811355 | 0.254102292 | 0.295330821 |
| 0.235303927 | 0.30626995  | 0.278394691 | 0.277274977 |
| 0.246039852 | 0.137104669 | 0.159800939 | 0.458495035 |
| 0.403915054 | 0.147731697 | 0.125690178 | 0.323317395 |
| 0.189611744 | 0.349938107 | 0.419661394 | 0.160776098 |
| 0.333124176 | 0.198040384 | 0.19056631  | 0.367956723 |
| 0.273881293 | 0.154260988 | 0.019660244 | 0.346278149 |
| 0.481735939 | 0.020231575 | 0.119181636 | 0.264807532 |
| 0.128994176 | 0.26576562  | 0.404974307 | 0.358391167 |
| 0.229921762 | 0.107869733 | 0.276528234 | 0.278886058 |
| 0.200023624 | 0.275174889 | 0.247398917 | 0.248538156 |
| 0.277547423 | 0.19816417  | 0.123630175 | 0.19000005  |
| 0.18276704  | 0.214622274 | 0.092265506 | 0.034106036 |
| 0.172260157 | 0.149482009 | 0.389190444 | 0.205003421 |
| 0.204740606 | 0.016113642 | 0.228235518 | 0.157898449 |
| 0.159663084 | 0.215274667 | 0.485647246 | 0.169377132 |
| 0.190898129 | 0.111120217 | 0.173797299 | 0.309328358 |
| 0.239050031 | 0.216998885 | 0.213944718 | 0.001654958 |
| 0.226687357 | 0.144120323 | 0.191058471 | 0.041170557 |
| 0.32459958  | 0.113418003 | 0.045278607 | 0.379310301 |
| 0.232353835 | 0.327931769 | 0.012855314 | 0.035432555 |
| 0.242529547 | 0.42407993  | 0.217733985 | 0.103773473 |

|             |             |             |             |
|-------------|-------------|-------------|-------------|
| 0.387114125 | 0.237741151 | 0.226426756 | 0.398928881 |
| 0.300878376 | 0.402876034 | 0.040807034 | 0.183471416 |
| 0.188305949 | 0.387315661 | 0.289604978 | 0.333695215 |
| 0.265261409 | 0.179944183 | 0.114164406 | 0.298379442 |
| 0.193356846 | 0.198201515 | 0.113947599 | 0.448204801 |
| 0.001161659 | 0.273079146 | 0.250623314 | 0.039439926 |
| 0.472010746 | 0.32563142  | 0.098027542 | 0.143203661 |
| 0.362927511 | 0.445274959 | 0.281749181 | 0.265502493 |
| 0.066130702 | 0.009296417 | 0.367178209 | 0.344380346 |
| 0.330485156 | 0.262987647 | 0.190981836 | 0.020682438 |
| 0.384863209 | 0.111292205 | 0.261523681 | 0.149257186 |
| 0.22303044  | 0.172030977 | 0.198814529 | 0.146502078 |
| 0.004280709 | 0.223952899 | 0.206123521 | 0.175445045 |
| 0.242368028 | 0.14631615  | 0.37972395  | 0.334768282 |
| 0.246863702 | 0.114313725 | 0.240389875 | 0.18574842  |
| 0.22730338  | 0.443810051 | 0.020739406 | 0.346661526 |
| 0.402135107 | 0.215926755 | 0.40184224  | 0.380336565 |
| 0.192048973 | 0.432210219 | 0.396874366 | 0.254790676 |
| 0.000567685 | 0.247409357 | 0.19592552  | 0.384480248 |
| 0.307545542 | 0.277884142 | 0.059163338 | 0.156461754 |
| 0.001429141 | 0.179048097 | 0.103213819 | 0.431880388 |
| 0.378580985 | 0.080727604 | 0.016433934 | 0.354024217 |
| 0.184035488 | 0.018365842 | 0.426691256 | 0.274343328 |
| 0.442103412 | 0.255140537 | 0.257884843 | 0.227411413 |
| 0.068736697 | 0.152710041 | 0.082471408 | 0.315663205 |
| 0.182214147 | 0.017689012 | 0.197231916 | 0.385275294 |
| 0.343534386 | 0.400935016 | 0.243295552 | 0.020142244 |
| 0.191238113 | 0.162809378 | 0.33448743  | 0.134431916 |
| 0.33931232  | 0.388529627 | 0.447709489 | 0.262344188 |
| 0.23127747  | 0.433851523 | 0.411963637 | 0.368263866 |
| 0.112904279 | 0.23262805  | 0.270233896 | 0.113771672 |
| 0.128212573 | 0.385656094 | 0.23370692  | 0.252063241 |
| 0.257575709 | 0.132254572 | 0.249096279 | 0.119751902 |
| 0.467103526 | 0.37687183  | 0.119036545 | 0.11979406  |
| 0.452904254 | 0.222234967 | 0.204912539 | 0.219098119 |
| 0.286700394 | 0.03731225  | 0.031009967 | 0.325885985 |
| 0.484926718 | 0.380580576 | 0.332954734 | 0.210926796 |
| 0.325532311 | 0.074829807 | 0.288702556 | 0.261452775 |
| 0.198580708 | 0.155327582 | 0.19630388  | 0.025540497 |
| 0.036146588 | 0.090496762 | 0.457036949 | 0.442133569 |
| 0.138410532 | 0.183077845 | 0.293370117 | 1           |
| 0.349306754 | 0.203787145 | 0.284581452 | 0.189156049 |
| 0.468713069 | 0.169244944 | 0.439415229 | 0.188985072 |
| 0.292733389 | 0.299941267 | 0.337035012 | 0.008263075 |
| 0.220930625 | 0.234331063 | 0.050483423 | 0.306698812 |
| 0.24858798  | 0.204561305 | 0.407816743 | 0.149283288 |
| 0.105737495 | 0.002510123 | 0.276858123 | 0.150247363 |
| 0.349951047 | 0.084879617 | 0.194113805 | 0.047848568 |
| 0.454785443 | 0.194991078 | 0.268986333 | 0.086608247 |
| 0.274338144 | 0.015098999 | 0.244646294 | 0.055805727 |
| 0.276842092 | 0.356939687 | 0.1888347   | 0.136143985 |
| 0.060672202 | 0.29336026  | 0.34239656  | 0.286333241 |
| 0.388040267 | 0.069535806 | 0.383135898 | 0.159800003 |
| 0.201076127 | 0.188646946 | 0.270823468 | 0.189444715 |

|             |             |             |             |
|-------------|-------------|-------------|-------------|
| 0.301006046 | 0.074402111 | 0.185128943 | 0.084545319 |
| 0.355432828 | 0.180528572 | 0.307381139 | 0.122403685 |
| 0.130914474 | 0.28222518  | 0.231965871 | 0.238563982 |
| 0.251929567 | 0.177410298 | 0.137599098 | 0.448936699 |
| 0.116574703 | 0.138002807 | 0.103862483 | 0.097795537 |
| 0.177631179 | 0.241022904 | 0.275163767 | 0.318804096 |
| 0.376206101 | 0.084916254 | 0.155256695 | 0.116016253 |
| 0.032335265 | 0.184804668 | 0.343555575 | 0.113423252 |
| 0.241551713 | 0.091666087 | 0.001400952 | 0.107309987 |
| 0.350034527 | 0.194026684 |             |             |
| SLC6A19     | 0.389024076 | 0.480128496 | 0.063582025 |
| 0.038248623 | 0.114806152 | 0.224871149 | 0.213991734 |
| 0.410235568 | 0.10048802  | 0.141927056 | 0.316719743 |
| 0.001825714 | 0.450412281 | 0.014239305 | 0.06908889  |
| 0.508961204 | 0.520083531 | 0.333393303 | 0.50494693  |
| 0.344646751 | 0.164450225 | 0.373168895 | 0.39736381  |
| 0.248709921 | 0.001841233 | 0.118662256 | 0.059349703 |
| 0.428764424 | 0.508426641 | 0.192857831 | 0.286696513 |
| 0.472997107 | 0.500481187 | 0.431785533 | 0.348131793 |
| 0.313696684 | 0.445129562 | 0.161015039 | 0.492103548 |
| 0.435793918 | 0.224775308 | 0.503525724 | 0.012703137 |
| 0.006431122 | 0.09587047  | 0.385465825 | 0.401471455 |
| 0.315632826 | 0.208688907 | 0.160719055 | 0.172166525 |
| 0.231525756 | 0.347691827 | 0.420452884 | 0.238794469 |
| 0.401114711 | 0.006651007 | 0.434744118 | 0.286219114 |
| 0.059039149 | 0.311745955 | 0.411798239 | 0.4324442   |
| 0.236300425 | 0.418286323 | 0.495731895 | 0.032493173 |
| 0.066100352 | 0.473414101 | 0.479775085 | 0.454773031 |
| 0.478672509 | 0.36813815  | 0.292119665 | 0.434365576 |
| 0.495898922 | 0.464261952 | 0.275195924 | 0.172080622 |
| 0.001057987 | 0.142898642 | 0.357110872 | 0.386339814 |
| 0.477450522 | 0.350939529 | 0.43672115  | 0.215450435 |
| 0.488797945 | 0.016614762 | 0.39023657  | 0.512561797 |
| 0.025506326 | 0.461160146 | 0.012583973 | 0.148988734 |
| 0.481980764 | 0.489875165 | 0.444531687 | 0.067445813 |
| 0.01299502  | 0.120046268 | 0.173323396 | 0.438925486 |
| 0.429683443 | 0.487575373 | 0.395329476 | 0.198312536 |
| 0.419893863 | 0.175939559 | 0.352108359 | 0.44512543  |
| 0.483021673 | 0.007824269 | 0.158260537 | 0.212848107 |
| 0.371417837 | 0.149982569 | 0.220457132 | 0.058316215 |
| 0.013528641 | 0.026912152 | 0.481984347 | 0.155685188 |
| 0.097261873 | 0.196530771 | 0.092816228 | 0.492659629 |
| 0.392182516 | 0.445746934 | 0.116698093 | 0.250401773 |
| 0.498081078 | 0.24666775  | 0.447270569 | 0.504374636 |
| 0.404579994 | 0.265804292 | 0.144734967 | 0.464066156 |
| 0.414851525 | 0.06486677  | 0.077672334 | 0.322088574 |
| 0.437215178 | 0.492641649 | 0.511448771 | 0.321498979 |
| 0.268516195 | 0.237875431 | 0.347896537 | 0.403097513 |
| 0.231918476 | 0.362006186 | 0.125358761 | 0.347926423 |
| 0.39613021  | 0.051563695 | 0.059027619 | 0.479973989 |
| 0.062516768 | 0.23823994  | 0.447482155 | 0.490260242 |
| 0.476424593 | 0.04877387  | 0.245202884 | 0.257571254 |
| 0.296269114 | 0.250388613 | 0.427417945 | 0.230686715 |
| 0.313010836 | 0.356922253 | 0.043511878 | 0.43010812  |

|             |             |             |             |
|-------------|-------------|-------------|-------------|
| 0.114519327 | 0.338546724 | 0.373850095 | 0.082513777 |
| 0.444982184 | 0.370899721 | 0.484314948 | 0.445297987 |
| 0.455183986 | 0.006431164 | 0.144845269 | 0.403952573 |
| 0.333348885 | 0.436741946 | 0.47522106  | 0.103711583 |
| 0.250173187 | 0.369854288 | 0.134127808 | 0.341060165 |
| 0.429146368 | 0.23676003  | 0.206116025 | 0.000680454 |
| 0.13124321  | 0.443966993 | 0.446754842 | 0.052307311 |
| 0.240033141 | 0.111209801 | 0.130819571 | 0.495446599 |
| 0.191269683 | 0.505276644 | 0.029888636 | 0.201496733 |
| 0.262232177 | 0.431323179 | 0.440943663 | 0.305602555 |
| 0.481124698 | 0.328482367 | 0.461408557 | 0.383991262 |
| 0.272876166 | 0.346596358 | 0.22501522  | 0.271252418 |
| 0.503831588 | 0.50307907  | 0.508497012 | 0.496571766 |
| 0.253285566 | 0.40995824  | 0.360922858 | 0.267904342 |
| 0.4152078   | 0.424612869 | 0.080509056 | 0.481242082 |
| 0.000626511 | 0.345041645 | 0.472828179 | 0.24068449  |
| 0.480280179 | 0.230498396 | 0.063279481 | 0.256538836 |
| 0.512161546 | 0.478071593 | 0.444790264 | 0.480319983 |
| 0.286088637 | 0.01028721  | 0.468637811 | 0.410954283 |
| 0.514776418 | 0.402346736 | 0.386665829 | 0.100231661 |
| 0.500961484 | 0.3992505   | 0.446318536 | 0.468581073 |
| 0.479917555 | 0.440583306 | 0.237492188 | 0.395944847 |
| 0.021757979 | 0.253080307 | 0.473616736 | 0.208097317 |
| 0.338309531 | 0.184634329 | 0.493501548 | 0.313862113 |
| 0.431648935 | 0.373547238 | 0.393841923 | 0.076038233 |
| 0.16267965  | 0.483652878 | 0.06427637  | 0.461018782 |
| 0.511633635 | 0.36919835  | 0.506402077 | 0.504893284 |
| 0.323550678 | 0.381671114 | 0.493360443 | 0.450455935 |
| 0.00108514  | 0.466003067 | 0.454120566 | 0.333661679 |
| 0.493774184 | 0.278364449 | 0.294148017 | 0.48209523  |
| 0.001198425 | 0.143195544 | 0.337119093 | 0.456993803 |
| 0.50780297  | 0.02425517  | 0.074049373 | 0.490917275 |
| 0.464166453 | 0.058918445 | 0.498544587 | 0.336971658 |
| 0.481843627 | 0.441916533 | 0.163420576 | 0.469325692 |
| 0.303119256 | 0.405612316 | 0.031268224 | 0.46241545  |
| 0.452593515 | 0.115156107 | 0.087363861 | 0.500859547 |
| 0.466241032 | 0.38573534  | 0.24069357  | 0.011136951 |
| 0.418518079 | 0.261425436 | 0.503218458 | 0.111412136 |
| 0.443501114 | 0.354785848 | 0.460697028 | 0.491973691 |
| 0.472008568 | 0.411715316 | 0.371612847 | 0.483922749 |
| 0.148258412 | 0.476797124 | 0.476053779 | 0.05715291  |
| 0.435916888 | 0.506696053 | 0.446395338 | 0.164867624 |
| 0.383698894 | 0.113764921 | 0.190298367 | 0.354986456 |
| 0.458069102 | 0.503322358 | 0.051370824 | 0.164031209 |
| 0.407363552 | 0.293012055 | 0.099284011 | 0.34659282  |
| 0.264532758 | 0.252473991 | 0.182032327 | 0.368346459 |
| 0.446764395 | 0.277965237 | 0.492313354 | 0.174285925 |
| 0.499751336 | 0.046486933 | 0.463447237 | 0.255066675 |
| 0.27992567  | 0.462664887 | 0.430407163 | 0.170012808 |
| 0.02825529  | 0.133828218 | 0.394849748 | 0.399654633 |
| 0.069102842 | 0.182893231 | 0.250760456 | 0.349306754 |
| 1           | 0.457793092 | 0.263229775 | 0.351045852 |
| 0.387824507 | 0.11603534  | 0.457972671 | 0.346022661 |
| 0.431072611 | 0.339430461 | 0.481418443 | 0.009864322 |

|             |             |             |             |
|-------------|-------------|-------------|-------------|
| 0.498180032 | 0.175067332 | 0.256924814 | 0.379848558 |
| 0.474348351 | 0.124812897 | 0.38123616  | 0.158522694 |
| 0.209274392 | 0.00420994  | 0.361795224 | 0.439364453 |
| 0.265657643 | 0.358248498 | 0.374948892 | 0.243941086 |
| 0.487592056 | 0.418012491 | 0.454186071 | 0.346869521 |
| 0.395634444 | 0.034950638 | 0.15323295  | 0.031561214 |
| 0.411383397 | 0.382345697 | 0.452225828 | 0.427154052 |
| 0.240006306 | 0.477147318 | 0.38772726  | 0.435737012 |
| 0.505744865 | 0.220955504 | 0.512733569 | 0.311759337 |
| 0.433866842 | 0.405944996 | 0.244163495 | 0.333530098 |
| 0.190263302 | 0.138766306 | 0.109937502 | 0.167745486 |
| 0.508204919 | 0.317053378 | 0.402199349 | 0.357279513 |
| 0.044314248 | 0.392133615 | 0.466332321 | 0.490705684 |
| 0.464461368 | 0.451598007 | 0.431107976 | 0.375387758 |
| 0.343252141 | 0.312512197 | 0.070791344 | 0.037519114 |
| 0.29930504  | 0.183774017 | 0.440433838 | 0.474631532 |
| 0.497057651 | 0.329842768 | 0.088733997 | 0.134088247 |
| 0.171334597 | 0.431720152 | 0.261169131 | 0.220007965 |
| 0.458243613 | 0.366326057 | 0.000637297 | 0.244544232 |
| 0.378120423 | 0.436615652 |             |             |
| SLC9A7      | 0.161347901 | 0.443127973 | 0.016281996 |
| 0.021427283 | 0.027047689 | 0.147446046 | 0.124053681 |
| 0.149596482 | 0.016488215 | 0.034508076 | 0.251065498 |
| 0.000253056 | 0.319340942 | 0.002550667 | 0.012745817 |
| 0.456971899 | 0.462197844 | 0.17486487  | 0.442671365 |
| 0.132300434 | 0.031653533 | 0.241056796 | 0.241734475 |
| 0.133175906 | 0.000331535 | 0.051811382 | 0.01882622  |
| 0.130728545 | 0.448666822 | 0.079597991 | 0.05485469  |
| 0.394142176 | 0.417492312 | 0.087470582 | 0.058820484 |
| 0.040421773 | 0.421573152 | 0.015784728 | 0.326125406 |
| 0.328045053 | 0.083780161 | 0.386930911 | 0.001800264 |
| 0.00185074  | 0.034852427 | 0.102789323 | 0.251116907 |
| 0.098514457 | 0.125694399 | 0.071661627 | 0.073172732 |
| 0.029940952 | 0.269251062 | 0.297423357 | 0.031507689 |
| 0.361630031 | 0.004174584 | 0.395286557 | 0.068047575 |
| 0.015977543 | 0.101629859 | 0.128848622 | 0.24626307  |
| 0.165570303 | 0.386836972 | 0.451904825 | 0.006951021 |
| 0.02920098  | 0.172177127 | 0.333507897 | 0.276586708 |
| 0.404097367 | 0.078343794 | 0.050845375 | 0.104875667 |
| 0.302800988 | 0.352733287 | 0.163459029 | 0.033062414 |
| 0.000161039 | 0.074104454 | 0.077797698 | 0.203209778 |
| 0.258322514 | 0.279959806 | 0.199874148 | 0.055853246 |
| 0.210608226 | 0.004180821 | 0.231652859 | 0.475503435 |
| 0.005803205 | 0.292633809 | 0.003007128 | 0.028750511 |
| 0.37178395  | 0.41036852  | 0.277245484 | 0.014263495 |
| 0.002978283 | 0.027578686 | 0.020843867 | 0.341673223 |
| 0.172273835 | 0.210057675 | 0.332687727 | 0.028926221 |
| 0.305610172 | 0.027859673 | 0.083509555 | 0.425571693 |
| 0.427014716 | 0.001778122 | 0.027074967 | 0.134333523 |
| 0.04676859  | 0.025572673 | 0.120855993 | 0.01464088  |
| 0.005569845 | 0.003255066 | 0.403955444 | 0.032598536 |
| 0.035050125 | 0.10269463  | 0.028582555 | 0.286352131 |
| 0.105632313 | 0.354830339 | 0.023688547 | 0.116900514 |
| 0.314775223 | 0.147018062 | 0.194063629 | 0.320677846 |



|             |             |             |             |
|-------------|-------------|-------------|-------------|
| 0.085592736 | 0.044566068 | 0.047214039 | 0.396845359 |
| 0.356749238 | 0.015377214 | 0.016497431 | 0.232168925 |
| 0.292910103 | 0.44200652  | 0.476458483 | 0.048678118 |
| 0.077762205 | 0.090274882 | 0.065483934 | 0.29277492  |
| 0.132462164 | 0.150996379 | 0.017118446 | 0.248467978 |
| 0.364198452 | 0.010672661 | 0.016233251 | 0.333359073 |
| 0.016005686 | 0.037062107 | 0.394916825 | 0.354938446 |
| 0.226835571 | 0.016986964 | 0.089277224 | 0.138381073 |
| 0.142247867 | 0.136054661 | 0.228145481 | 0.070751707 |
| 0.207569576 | 0.082730965 | 0.012503413 | 0.303259215 |
| 0.050778086 | 0.186046982 | 0.041888132 | 0.008551314 |
| 0.226267042 | 0.091934061 | 0.407527701 | 0.219883063 |
| 0.274483114 | 0.007239986 | 0.038281723 | 0.197101192 |
| 0.051019672 | 0.329197145 | 0.455788268 | 0.047633554 |
| 0.131884716 | 0.041945991 | 0.059895773 | 0.083891291 |
| 0.308040967 | 0.041901913 | 0.039571216 | 0.000213761 |
| 0.025378014 | 0.135955338 | 0.143521475 | 0.009108066 |
| 0.049067319 | 0.02174917  | 0.019056106 | 0.403053911 |
| 0.102767674 | 0.360040802 | 0.004077252 | 0.020050545 |
| 0.080835073 | 0.316499293 | 0.11232416  | 0.043557368 |
| 0.353295544 | 0.071415948 | 0.37815655  | 0.301110459 |
| 0.043208622 | 0.287404579 | 0.019194675 | 0.066402566 |
| 0.250315718 | 0.407495614 | 0.395192025 | 0.362884257 |
| 0.091558465 | 0.227909538 | 0.057028862 | 0.188293088 |
| 0.220364585 | 0.18940522  | 0.017412213 | 0.446777319 |
| 0.000137097 | 0.214854613 | 0.248218036 | 0.022916719 |
| 0.455800375 | 0.152745368 | 0.015711297 | 0.0772817   |
| 0.455679466 | 0.447472327 | 0.341864287 | 0.404063466 |
| 0.034097365 | 0.002123285 | 0.404624547 | 0.279016163 |
| 0.448822256 | 0.128374292 | 0.065319531 | 0.00987381  |
| 0.455873199 | 0.167925146 | 0.265817158 | 0.233207319 |
| 0.215685514 | 0.102114244 | 0.096647339 | 0.203343474 |
| 0.002305357 | 0.093132407 | 0.294359168 | 0.042073071 |
| 0.105310661 | 0.025851366 | 0.375786798 | 0.218350293 |
| 0.080467708 | 0.074033028 | 0.088415239 | 0.028669601 |
| 0.081858659 | 0.461944158 | 0.006182711 | 0.394175037 |
| 0.474850417 | 0.158677354 | 0.450798354 | 0.46796832  |
| 0.149313141 | 0.297879674 | 0.418357395 | 0.356763913 |
| 0.000197914 | 0.368951714 | 0.290312504 | 0.262054396 |
| 0.422351777 | 0.162273556 | 0.071288987 | 0.152388305 |
| 0.000125446 | 0.06635167  | 0.051539701 | 0.423008294 |
| 0.432998033 | 0.005160735 | 0.005685978 | 0.372923101 |
| 0.271947121 | 0.011373839 | 0.475527147 | 0.169569962 |
| 0.413922445 | 0.195767813 | 0.072767638 | 0.328131544 |
| 0.039988126 | 0.075035569 | 0.006841127 | 0.300685232 |
| 0.13302062  | 0.007068359 | 0.02260225  | 0.452534097 |
| 0.394836289 | 0.271764856 | 0.133593706 | 0.004322603 |
| 0.314154045 | 0.068612493 | 0.367038983 | 0.022694047 |
| 0.354191149 | 0.258206584 | 0.39762862  | 0.341293392 |
| 0.229646192 | 0.338746084 | 0.3134453   | 0.395771743 |
| 0.039119161 | 0.366391367 | 0.386959157 | 0.026963717 |
| 0.19399906  | 0.435667608 | 0.199460402 | 0.101427998 |
| 0.239863113 | 0.027549002 | 0.121325494 | 0.13328945  |
| 0.404711311 | 0.42782024  | 0.013092508 | 0.028892747 |

|             |             |             |             |
|-------------|-------------|-------------|-------------|
| 0.35199356  | 0.065774125 | 0.039815125 | 0.122924502 |
| 0.168515922 | 0.030313964 | 0.014544974 | 0.24050884  |
| 0.417800239 | 0.210362684 | 0.427318293 | 0.046066341 |
| 0.406489629 | 0.010069761 | 0.338677781 | 0.039523949 |
| 0.139457635 | 0.252511772 | 0.330594429 | 0.02364679  |
| 0.007004212 | 0.023558278 | 0.328616229 | 0.344143217 |
| 0.025848796 | 0.085653849 | 0.125659901 | 0.203787145 |
| 0.457793092 | 1           | 0.170182759 | 0.134969038 |
| 0.34434664  | 0.022363694 | 0.43157611  | 0.148588579 |
| 0.306906052 | 0.109264972 | 0.343451553 | 0.001305092 |
| 0.271625546 | 0.051223067 | 0.064893636 | 0.190617289 |
| 0.388764132 | 0.045631778 | 0.268576623 | 0.039454909 |
| 0.032779781 | 0.000862977 | 0.240174206 | 0.137089058 |
| 0.200061105 | 0.052888564 | 0.144095094 | 0.029117951 |
| 0.473453646 | 0.208221566 | 0.322279232 | 0.053755517 |
| 0.167315604 | 0.004737244 | 0.046117975 | 0.008796586 |
| 0.284202603 | 0.269763191 | 0.224312408 | 0.182313884 |
| 0.040651572 | 0.265850593 | 0.247114217 | 0.181672873 |
| 0.429056302 | 0.041953897 | 0.476554825 | 0.073335751 |
| 0.324349502 | 0.06254623  | 0.142734041 | 0.046147392 |
| 0.079354088 | 0.014272557 | 0.035827803 | 0.02386325  |
| 0.441517433 | 0.039664627 | 0.192168567 | 0.060098289 |
| 0.013967006 | 0.123430843 | 0.304257986 | 0.304909474 |
| 0.279689469 | 0.272726841 | 0.116202674 | 0.321314854 |
| 0.045241904 | 0.086624501 | 0.025972755 | 0.010894755 |
| 0.051148473 | 0.071341713 | 0.336205785 | 0.363488268 |
| 0.445861343 | 0.040645505 | 0.024658841 | 0.03293462  |
| 0.01620847  | 0.308208923 | 0.170486439 | 0.033687646 |
| 0.224498717 | 0.047608224 | 0.000289291 | 0.048219447 |
| 0.275323443 | 0.069048723 |             |             |
| SMAD3       | 0.154700908 | 0.379080198 | 0.280865787 |
| 0.021899618 | 0.191332024 | 0.3649068   | 0.339589398 |
| 0.146417703 | 0.297994433 | 0.229056856 | 0.434534149 |
| 0.009237377 | 0.143336952 | 0.100089001 | 0.207617179 |
| 0.281638907 | 0.285052893 | 0.310460747 | 0.28966478  |
| 0.222337489 | 0.121329886 | 0.320544328 | 0.257617276 |
| 0.35667746  | 0.018667866 | 0.283813731 | 0.063305293 |
| 0.117321314 | 0.248150985 | 0.37686528  | 0.267223677 |
| 0.242240617 | 0.204956881 | 0.175677955 | 0.162054341 |
| 0.046431179 | 0.435526295 | 0.025540171 | 0.160360063 |
| 0.157056488 | 0.292203423 | 0.213007042 | 0.096962917 |
| 0.000696996 | 0.303164017 | 0.111195295 | 0.296020148 |
| 0.261763035 | 0.366589705 | 0.380764917 | 0.273237103 |
| 0.022431057 | 0.429003762 | 0.281944783 | 0.020426374 |
| 0.462648898 | 0.003669384 | 0.443542442 | 0.151532564 |
| 0.300678981 | 0.314106916 | 0.120317878 | 0.260525211 |
| 0.397924763 | 0.461179476 | 0.337075936 | 0.170746195 |
| 0.302232019 | 0.1669227   | 0.154125747 | 0.201935299 |
| 0.343442342 | 0.214550583 | 0.292176271 | 0.088520168 |
| 0.172805992 | 0.166677339 | 0.371707525 | 0.360431608 |
| 0.007233808 | 0.308139818 | 0.155265505 | 0.147515895 |
| 0.098166105 | 0.439248542 | 0.154603884 | 0.283748763 |
| 0.146340983 | 0.175647278 | 0.288757151 | 0.319432953 |
| 0.045065782 | 0.174964773 | 0.01932171  | 0.339506257 |

|             |             |             |             |
|-------------|-------------|-------------|-------------|
| 0.230806352 | 0.197476565 | 0.227174893 | 0.255099084 |
| 0.131413382 | 0.334884443 | 0.105949382 | 0.14197376  |
| 0.225537054 | 0.205857055 | 0.449850025 | 0.022154019 |
| 0.113617648 | 0.244106014 | 0.298030171 | 0.435478097 |
| 0.31710724  | 0.066766443 | 0.304158347 | 0.378828853 |
| 0.140729526 | 0.116201269 | 0.368856229 | 0.014844892 |
| 0.031384279 | 0.028272628 | 0.236432294 | 0.34882243  |
| 0.24484674  | 0.35948132  | 0.139816615 | 0.172244334 |
| 0.142897918 | 0.211737896 | 0.227462108 | 0.340948362 |
| 0.14836044  | 0.339052888 | 0.185014343 | 0.199923253 |
| 0.146723392 | 0.274618648 | 0.357560481 | 0.383022779 |
| 0.441003517 | 0.263429993 | 0.292410512 | 0.375185009 |
| 0.118098878 | 0.280187608 | 0.344915651 | 0.259178929 |
| 0.247364731 | 0.361583427 | 0.16915862  | 0.298490002 |
| 0.370842929 | 0.237072334 | 0.023789281 | 0.40900883  |
| 0.479910497 | 0.018541227 | 0.29951946  | 0.230759816 |
| 0.042635197 | 0.274443767 | 0.393778696 | 0.284775443 |
| 0.184828827 | 0.054913189 | 0.240196908 | 0.33228117  |
| 0.323260135 | 0.328282026 | 0.25827224  | 0.200236427 |
| 0.363469281 | 0.162577079 | 0.260998101 | 0.119402064 |
| 0.371030699 | 0.297297349 | 0.072484825 | 0.035432416 |
| 0.172239627 | 0.221063299 | 0.320547063 | 0.211476264 |
| 0.178378312 | 0.002874473 | 0.219498791 | 0.177409879 |
| 0.162347001 | 0.171933097 | 0.404703618 | 0.360492875 |
| 0.349392376 | 0.08792908  | 0.373732211 | 0.222069459 |
| 0.250412946 | 0.223289489 | 0.218080652 | 0.010309249 |
| 0.323445517 | 0.099546052 | 0.201854506 | 0.190606401 |
| 0.265729734 | 0.268892849 | 0.130093626 | 0.300532686 |
| 0.383685279 | 0.221259404 | 0.081309729 | 0.052322988 |
| 0.34338343  | 0.337530316 | 0.146336382 | 0.157933256 |
| 0.279218335 | 0.26576888  | 0.159223386 | 0.4343805   |
| 0.259978602 | 0.417732807 | 0.038711049 | 0.317903479 |
| 0.126382383 | 0.287915639 | 0.197971608 | 0.249423269 |
| 0.349850666 | 0.199068303 | 0.107804014 | 0.397088756 |
| 0.23934174  | 0.236823592 | 0.316476531 | 0.387828528 |
| 0.010758701 | 0.330216569 | 0.185224913 | 0.041848523 |
| 0.383874777 | 0.345461712 | 0.302487736 | 0.292461001 |
| 0.297817818 | 0.393051273 | 0.285850008 | 0.188935581 |
| 0.078636098 | 0.080254986 | 0.345173071 | 0.351848586 |
| 0.247533079 | 0.268410856 | 0.090785927 | 0.038432943 |
| 0.307596033 | 0.110256221 | 0.227489288 | 0.138004425 |
| 0.15742568  | 0.118067112 | 0.360895187 | 0.157357387 |
| 0.011188485 | 0.300056655 | 0.161725005 | 0.129861051 |
| 0.206444226 | 0.224205619 | 0.278739302 | 0.415397029 |
| 0.148428663 | 0.117374464 | 0.132402473 | 0.287021905 |
| 0.380205656 | 0.376584422 | 0.009650539 | 0.341155269 |
| 0.326778277 | 0.284972412 | 0.295214869 | 0.321045401 |
| 0.299797003 | 0.42779162  | 0.320228276 | 0.219122351 |
| 0.006382931 | 0.164285552 | 0.118513457 | 0.466680201 |
| 0.222682389 | 0.351502926 | 0.081073463 | 0.097928245 |
| 0.009174193 | 0.369520962 | 0.046205757 | 0.419395597 |
| 0.270038913 | 0.181748446 | 0.0056435   | 0.280535428 |
| 0.112061299 | 0.023575878 | 0.365336098 | 0.290951126 |
| 0.344988763 | 0.23594873  | 0.331169036 | 0.143953058 |

|             |             |             |             |
|-------------|-------------|-------------|-------------|
| 0.031212094 | 0.180070174 | 0.062949365 | 0.229993225 |
| 0.152447973 | 0.032012058 | 0.124585492 | 0.326432882 |
| 0.321787801 | 0.370642365 | 0.376506523 | 0.021303885 |
| 0.152326453 | 0.080255041 | 0.230672746 | 0.294851274 |
| 0.349376671 | 0.419663603 | 0.390018227 | 0.178409755 |
| 0.200191055 | 0.411357469 | 0.440258208 | 0.312569711 |
| 0.046859228 | 0.162114261 | 0.204146739 | 0.179871601 |
| 0.10610838  | 0.288111849 | 0.164518597 | 0.362934692 |
| 0.315622392 | 0.040696718 | 0.381296011 | 0.187841216 |
| 0.391136359 | 0.275100348 | 0.266909033 | 0.314482871 |
| 0.418383834 | 0.331740756 | 0.329294207 | 0.298174922 |
| 0.396431541 | 0.024114343 | 0.046077267 | 0.375324864 |
| 0.437432943 | 0.418086663 | 0.259234483 | 0.139876222 |
| 0.236274087 | 0.271295091 | 0.267929894 | 0.316487577 |
| 0.343105855 | 0.109843935 | 0.142696041 | 0.039413999 |
| 0.039433356 | 0.225688251 | 0.407531191 | 0.450111724 |
| 0.319227049 | 0.373065377 | 0.33198556  | 0.284581452 |
| 0.263229775 | 0.170182759 | 1           | 0.284887056 |
| 0.479595943 | 0.089087294 | 0.420587239 | 0.280924796 |
| 0.312627701 | 0.280072982 | 0.282291073 | 0.013164235 |
| 0.161308405 | 0.230560582 | 0.085644746 | 0.227152139 |
| 0.184349497 | 0.355274702 | 0.356338581 | 0.344087015 |
| 0.081970543 | 0.013861239 | 0.357794935 | 0.079106074 |
| 0.439826323 | 0.092209045 | 0.269765637 | 0.019495525 |
| 0.400754503 | 0.233421859 | 0.254256267 | 0.069348584 |
| 0.251534677 | 0.00308629  | 0.240334153 | 0.213560638 |
| 0.318194746 | 0.401019583 | 0.178480703 | 0.150924528 |
| 0.12919689  | 0.213038379 | 0.353570492 | 0.194716923 |
| 0.277058209 | 0.044928419 | 0.295568245 | 0.263422341 |
| 0.12816247  | 0.217458038 | 0.376347811 | 0.260341953 |
| 0.316237942 | 0.122264138 | 0.350160538 | 0.237934737 |
| 0.245658628 | 0.227686942 | 0.244179378 | 0.164538869 |
| 0.229452768 | 0.274638847 | 0.19469903  | 0.159132168 |
| 0.200603367 | 0.129271701 | 0.139463678 | 0.472540527 |
| 0.143576663 | 0.234630843 | 0.036484827 | 0.046822584 |
| 0.090983153 | 0.336288523 | 0.288556542 | 0.295799937 |
| 0.297571768 | 0.107575284 | 0.330524048 | 0.320655641 |
| 0.026375074 | 0.159567756 | 0.334444057 | 0.041246396 |
| 0.205687479 | 0.09714177  | 0.00894985  | 0.235505848 |
| 0.392937558 | 0.141990515 |             |             |
| SMARCC1     | 0.182848017 | 0.411070184 | 0.104940003 |
| 0.007557613 | 0.076762585 | 0.234567199 | 0.169772835 |
| 0.153157973 | 0.121026157 | 0.074304011 | 0.336564102 |
| 0.007923271 | 0.23557154  | 0.053355123 | 0.123046954 |
| 0.37457788  | 0.373207851 | 0.211125312 | 0.396338317 |
| 0.203486778 | 0.046323815 | 0.345702093 | 0.211278127 |
| 0.205626147 | 0.011071562 | 0.092513662 | 0.016061966 |
| 0.13271958  | 0.355904485 | 0.19044268  | 0.136762852 |
| 0.32639455  | 0.282297942 | 0.109833501 | 0.096332395 |
| 0.040017669 | 0.444207957 | 0.032158072 | 0.221959654 |
| 0.254482768 | 0.120159499 | 0.281789729 | 0.036115259 |
| 0.000296028 | 0.102746343 | 0.134684607 | 0.295497851 |
| 0.215033804 | 0.206739293 | 0.191242523 | 0.095439086 |
| 0.029229104 | 0.359296784 | 0.371104297 | 0.028411577 |

|             |             |             |             |
|-------------|-------------|-------------|-------------|
| 0.407243135 | 0.000823644 | 0.420791993 | 0.157221742 |
| 0.111566296 | 0.193062404 | 0.115039767 | 0.278711823 |
| 0.259004885 | 0.419310806 | 0.401530318 | 0.043373498 |
| 0.097031122 | 0.173164684 | 0.215662639 | 0.186138258 |
| 0.379496886 | 0.134037172 | 0.139492414 | 0.087232373 |
| 0.213258525 | 0.257367987 | 0.306577214 | 0.211247522 |
| 0.003358404 | 0.105890961 | 0.086634682 | 0.221711467 |
| 0.14900562  | 0.365877174 | 0.216193476 | 0.110511971 |
| 0.141463231 | 0.063079763 | 0.281551794 | 0.399090135 |
| 0.014525409 | 0.26163004  | 0.010534894 | 0.204411234 |
| 0.307328406 | 0.298069231 | 0.267969542 | 0.072401526 |
| 0.055919979 | 0.198199775 | 0.120532807 | 0.24277551  |
| 0.217894256 | 0.18104272  | 0.390290389 | 0.040404713 |
| 0.198893512 | 0.131287564 | 0.177346063 | 0.421290985 |
| 0.378205892 | 0.055617815 | 0.204067029 | 0.229963804 |
| 0.095380549 | 0.044521599 | 0.197007521 | 0.017814342 |
| 0.012537077 | 0.053707003 | 0.327537704 | 0.195961828 |
| 0.071081187 | 0.150716221 | 0.054085347 | 0.184198094 |
| 0.160076388 | 0.321189348 | 0.082790995 | 0.146890575 |
| 0.202747705 | 0.189735618 | 0.12533031  | 0.245404132 |
| 0.106934351 | 0.210517903 | 0.175877859 | 0.390902565 |
| 0.460719318 | 0.094800529 | 0.107013697 | 0.298106862 |
| 0.194913828 | 0.370755497 | 0.418855491 | 0.219143688 |
| 0.116899792 | 0.215918693 | 0.095145077 | 0.248835758 |
| 0.22680337  | 0.263307997 | 0.053478375 | 0.376535708 |
| 0.422658543 | 0.019408013 | 0.105032042 | 0.310414497 |
| 0.016697625 | 0.127538462 | 0.403896971 | 0.314534023 |
| 0.216934685 | 0.012710947 | 0.100460502 | 0.178649432 |
| 0.240390875 | 0.154573772 | 0.275617049 | 0.081141722 |
| 0.30673843  | 0.092669255 | 0.082241626 | 0.200197914 |
| 0.155955755 | 0.293530502 | 0.064813456 | 0.023485713 |
| 0.243505094 | 0.212155028 | 0.342247932 | 0.249504227 |
| 0.237472481 | 0.000740545 | 0.073027441 | 0.217255121 |
| 0.097101775 | 0.28779026  | 0.415577884 | 0.149498451 |
| 0.279473257 | 0.090335574 | 0.176813057 | 0.122614522 |
| 0.357807126 | 0.09873146  | 0.08822628  | 0.003007518 |
| 0.138075356 | 0.082880604 | 0.16647989  | 0.118356028 |
| 0.118848863 | 0.122913255 | 0.141969139 | 0.341173653 |
| 0.197199646 | 0.273931586 | 0.084618333 | 0.083932092 |
| 0.17794217  | 0.298746869 | 0.104930479 | 0.131193925 |
| 0.279952495 | 0.151284786 | 0.25982962  | 0.387286162 |
| 0.139501541 | 0.325816518 | 0.05566656  | 0.194686299 |
| 0.168740945 | 0.331388097 | 0.261273883 | 0.312921204 |
| 0.165356413 | 0.296807259 | 0.130786388 | 0.300413042 |
| 0.257660936 | 0.253040831 | 0.143299759 | 0.43898142  |
| 0.003895042 | 0.299970995 | 0.172712739 | 0.058752299 |
| 0.396449864 | 0.208431075 | 0.128813361 | 0.224529213 |
| 0.40338335  | 0.447918705 | 0.389421006 | 0.275218358 |
| 0.09926755  | 0.054396706 | 0.429454764 | 0.325681481 |
| 0.347639562 | 0.176080806 | 0.07443014  | 0.067716613 |
| 0.378209298 | 0.190595788 | 0.224763371 | 0.152796958 |
| 0.171836958 | 0.112658547 | 0.227932381 | 0.253434263 |
| 0.012086241 | 0.142299772 | 0.196454092 | 0.058228243 |
| 0.107096908 | 0.11095251  | 0.306158232 | 0.357262788 |

|             |             |             |             |
|-------------|-------------|-------------|-------------|
| 0.107334656 | 0.097849128 | 0.081322586 | 0.09189358  |
| 0.183706314 | 0.415649419 | 0.01312696  | 0.426653436 |
| 0.414474452 | 0.256002106 | 0.337862864 | 0.418919629 |
| 0.221783582 | 0.363717455 | 0.360766118 | 0.334265474 |
| 0.005291407 | 0.24956972  | 0.189856428 | 0.40216712  |
| 0.29008794  | 0.256796779 | 0.11577915  | 0.094112265 |
| 0.006494425 | 0.167014366 | 0.042924267 | 0.468056082 |
| 0.327534439 | 0.048151127 | 0.008975678 | 0.325554701 |
| 0.174036815 | 0.032634115 | 0.434551082 | 0.174480655 |
| 0.358011396 | 0.19828902  | 0.118334334 | 0.216599667 |
| 0.033422532 | 0.175385011 | 0.020210547 | 0.226833947 |
| 0.131951483 | 0.045111567 | 0.03454736  | 0.414330848 |
| 0.36613147  | 0.314898807 | 0.248942459 | 0.004699064 |
| 0.251314283 | 0.047180415 | 0.253161996 | 0.189940174 |
| 0.403763056 | 0.346892845 | 0.407527716 | 0.247990578 |
| 0.226816724 | 0.375032097 | 0.376998058 | 0.340143424 |
| 0.03161213  | 0.236066451 | 0.285805865 | 0.066835019 |
| 0.158527207 | 0.344716588 | 0.12268392  | 0.178809677 |
| 0.32473182  | 0.020711974 | 0.228415435 | 0.212646163 |
| 0.386205396 | 0.324148627 | 0.081120422 | 0.237444651 |
| 0.360656281 | 0.196906588 | 0.117542525 | 0.218505611 |
| 0.304406958 | 0.033673558 | 0.074831184 | 0.342245678 |
| 0.422432736 | 0.295574224 | 0.313811823 | 0.052265812 |
| 0.322188255 | 0.136653633 | 0.361197725 | 0.174150511 |
| 0.270673255 | 0.149054471 | 0.23769713  | 0.065845718 |
| 0.010899422 | 0.137588325 | 0.337342633 | 0.405363262 |
| 0.118889515 | 0.208169068 | 0.149543936 | 0.189156049 |
| 0.351045852 | 0.134969038 | 0.284887056 | 1           |
| 0.423320049 | 0.029121437 | 0.456483044 | 0.219790958 |
| 0.3415893   | 0.146213199 | 0.323921778 | 0.005388644 |
| 0.20278063  | 0.082698403 | 0.117549517 | 0.141402335 |
| 0.2867891   | 0.138764495 | 0.291250889 | 0.182852537 |
| 0.056952201 | 0.01574146  | 0.373165937 | 0.074585307 |
| 0.317169197 | 0.125649885 | 0.22195975  | 0.023700018 |
| 0.453065424 | 0.217570646 | 0.296603514 | 0.085796298 |
| 0.14373032  | 0.003504513 | 0.079073222 | 0.087038141 |
| 0.345343476 | 0.380569081 | 0.231138311 | 0.154481154 |
| 0.15176622  | 0.226267259 | 0.327262654 | 0.129747709 |
| 0.322837535 | 0.041823869 | 0.375883071 | 0.207927177 |
| 0.210125715 | 0.16161888  | 0.263977032 | 0.192710315 |
| 0.124833236 | 0.083884409 | 0.134326243 | 0.188695033 |
| 0.311966068 | 0.185608791 | 0.163739111 | 0.133073339 |
| 0.067458591 | 0.174546378 | 0.28163974  | 0.211964461 |
| 0.205754962 | 0.183509902 | 0.154191526 | 0.412768785 |
| 0.110132389 | 0.169588221 | 0.01318084  | 0.00998421  |
| 0.053397551 | 0.135031682 | 0.385430958 | 0.380385733 |
| 0.38424543  | 0.117012169 | 0.123428803 | 0.189827671 |
| 0.043714177 | 0.254840201 | 0.211304098 | 0.036872199 |
| 0.231762741 | 0.094416643 | 0.004199294 | 0.196902776 |
| 0.353094714 | 0.113313451 |             |             |
| SMPDL3B     | 0.288081239 | 0.479709549 | 0.229282285 |
| 0.038588812 | 0.260271275 | 0.455325193 | 0.451733463 |
| 0.281696149 | 0.303138793 | 0.287837837 | 0.492106882 |
| 0.005134519 | 0.239203212 | 0.060268234 | 0.209521658 |

|             |             |             |             |
|-------------|-------------|-------------|-------------|
| 0.404194408 | 0.416439545 | 0.498032627 | 0.412648372 |
| 0.344065911 | 0.206258728 | 0.421010144 | 0.432895665 |
| 0.473841057 | 0.008652625 | 0.322015844 | 0.094010147 |
| 0.25567794  | 0.372300839 | 0.429249456 | 0.388347056 |
| 0.349734584 | 0.325373229 | 0.371834175 | 0.34572453  |
| 0.148015825 | 0.494569805 | 0.081035671 | 0.287485992 |
| 0.259392616 | 0.410911442 | 0.327393235 | 0.072413206 |
| 0.00255242  | 0.311197464 | 0.228787331 | 0.428874964 |
| 0.383149371 | 0.438540191 | 0.407336724 | 0.367565411 |
| 0.07326558  | 0.494250222 | 0.352987462 | 0.070244778 |
| 0.491973955 | 0.006676115 | 0.501059614 | 0.236402078 |
| 0.251684267 | 0.464429954 | 0.26438711  | 0.40584818  |
| 0.477286743 | 0.503063486 | 0.458891585 | 0.149763343 |
| 0.266382995 | 0.353032427 | 0.256467758 | 0.396647847 |
| 0.431020773 | 0.362163527 | 0.454359789 | 0.244126741 |
| 0.316027162 | 0.261659488 | 0.485119578 | 0.397173607 |
| 0.004145594 | 0.367618529 | 0.339637218 | 0.244009021 |
| 0.237205257 | 0.492715244 | 0.306233862 | 0.420163667 |
| 0.319382183 | 0.104291327 | 0.452641621 | 0.444638713 |
| 0.05015614  | 0.278793849 | 0.022906924 | 0.370789675 |
| 0.323030326 | 0.317537578 | 0.354751245 | 0.248291369 |
| 0.077761084 | 0.323813731 | 0.149773073 | 0.246718887 |
| 0.409117701 | 0.412181899 | 0.494597744 | 0.069635081 |
| 0.207099852 | 0.296388972 | 0.484353956 | 0.495591205 |
| 0.42092716  | 0.038812687 | 0.326169745 | 0.456068838 |
| 0.313632269 | 0.208168393 | 0.469302892 | 0.028251949 |
| 0.029025347 | 0.026960171 | 0.349439783 | 0.354808798 |
| 0.280901671 | 0.433672482 | 0.170168959 | 0.363045669 |
| 0.272647422 | 0.315618088 | 0.308054246 | 0.465604515 |
| 0.287969907 | 0.471269518 | 0.389345499 | 0.342405078 |
| 0.340278859 | 0.362539821 | 0.353319679 | 0.467466602 |
| 0.471810159 | 0.238743101 | 0.259110057 | 0.473839793 |
| 0.211583587 | 0.395728475 | 0.466347601 | 0.371787638 |
| 0.410097281 | 0.447443672 | 0.31613747  | 0.4599919   |
| 0.482901915 | 0.381210706 | 0.054169099 | 0.4940051   |
| 0.500671306 | 0.033221856 | 0.246556029 | 0.335675142 |
| 0.084333086 | 0.432053215 | 0.452440272 | 0.413007119 |
| 0.390614517 | 0.079183347 | 0.355046057 | 0.456768497 |
| 0.444692588 | 0.441255645 | 0.415509026 | 0.31282984  |
| 0.466251552 | 0.308297239 | 0.204751286 | 0.214820393 |
| 0.354053912 | 0.439507793 | 0.187599371 | 0.073955757 |
| 0.320281512 | 0.359321109 | 0.409533448 | 0.389695856 |
| 0.294710312 | 0.005329244 | 0.27409926  | 0.319834929 |
| 0.291135148 | 0.268312633 | 0.500383025 | 0.343616799 |
| 0.437884427 | 0.227973993 | 0.377313485 | 0.422300109 |
| 0.320218154 | 0.327482855 | 0.31705238  | 0.004401534 |
| 0.354590485 | 0.243412255 | 0.399087697 | 0.148152114 |
| 0.394871898 | 0.267236576 | 0.156926008 | 0.40174696  |
| 0.434589096 | 0.354799124 | 0.064231941 | 0.112057205 |
| 0.440983905 | 0.471138865 | 0.317750252 | 0.256743284 |
| 0.418271386 | 0.39605497  | 0.268949332 | 0.483391189 |
| 0.435329446 | 0.478970422 | 0.106765955 | 0.436634429 |
| 0.308361632 | 0.401453449 | 0.305846099 | 0.371467198 |
| 0.466276217 | 0.312589792 | 0.223478059 | 0.47168822  |

|             |             |             |             |
|-------------|-------------|-------------|-------------|
| 0.404095777 | 0.420360444 | 0.256554822 | 0.487801624 |
| 0.004911698 | 0.484830985 | 0.39195586  | 0.107791706 |
| 0.479071976 | 0.462426463 | 0.238593022 | 0.367444586 |
| 0.421684424 | 0.491529628 | 0.362931129 | 0.298785787 |
| 0.164030241 | 0.044398    | 0.437131004 | 0.465122705 |
| 0.376997442 | 0.473318525 | 0.248667922 | 0.074357056 |
| 0.416676796 | 0.243125676 | 0.388525326 | 0.29769379  |
| 0.363460806 | 0.29141558  | 0.45268971  | 0.263444935 |
| 0.016304213 | 0.393060148 | 0.31036034  | 0.236518282 |
| 0.358896527 | 0.299778214 | 0.392376396 | 0.497287304 |
| 0.344068456 | 0.230398682 | 0.308793254 | 0.273352497 |
| 0.430635543 | 0.478392014 | 0.032455332 | 0.424120219 |
| 0.448755556 | 0.462499685 | 0.408389712 | 0.438143726 |
| 0.424997407 | 0.499351904 | 0.41961148  | 0.321900689 |
| 0.003487615 | 0.277375931 | 0.222514748 | 0.494079777 |
| 0.33310983  | 0.476987027 | 0.168380568 | 0.265992515 |
| 0.006654719 | 0.381263489 | 0.141027225 | 0.497274982 |
| 0.384487864 | 0.142697747 | 0.024749598 | 0.405875259 |
| 0.235611834 | 0.044799548 | 0.477143714 | 0.445245308 |
| 0.436370397 | 0.442483712 | 0.390551126 | 0.248009245 |
| 0.104242765 | 0.344188361 | 0.080903617 | 0.419675873 |
| 0.34681019  | 0.070484545 | 0.175460486 | 0.445208114 |
| 0.39045393  | 0.501163559 | 0.47905761  | 0.02075265  |
| 0.24416244  | 0.177664193 | 0.374124894 | 0.290200313 |
| 0.421996589 | 0.500022327 | 0.464856808 | 0.288718652 |
| 0.402289026 | 0.478515734 | 0.484043887 | 0.404299264 |
| 0.10992894  | 0.259032223 | 0.308835844 | 0.163613693 |
| 0.247827999 | 0.407005015 | 0.353818227 | 0.414434099 |
| 0.442183743 | 0.097298898 | 0.438857477 | 0.314197626 |
| 0.464742383 | 0.392381397 | 0.22062574  | 0.333380007 |
| 0.48140485  | 0.473803496 | 0.340005972 | 0.463580079 |
| 0.479080997 | 0.075180817 | 0.102342731 | 0.482214605 |
| 0.502961228 | 0.493996062 | 0.360818543 | 0.225904901 |
| 0.355329345 | 0.200329732 | 0.352926469 | 0.458015035 |
| 0.445055209 | 0.251928589 | 0.238851062 | 0.076758562 |
| 0.043608841 | 0.22711064  | 0.48534039  | 0.48464693  |
| 0.264329623 | 0.410073245 | 0.442173853 | 0.468713069 |
| 0.387824507 | 0.34434664  | 0.479595943 | 0.423320049 |
| 1           | 0.158847012 | 0.494956437 | 0.419296084 |
| 0.40036622  | 0.447788388 | 0.399365526 | 0.018194311 |
| 0.326199023 | 0.302758893 | 0.160087921 | 0.422106311 |
| 0.299170825 | 0.350571779 | 0.495855856 | 0.35882932  |
| 0.172771947 | 0.010110395 | 0.449959763 | 0.229554267 |
| 0.483323017 | 0.201980962 | 0.424296435 | 0.073278037 |
| 0.504548119 | 0.397372862 | 0.349974856 | 0.186458211 |
| 0.431436495 | 0.012461471 | 0.314512296 | 0.140847762 |
| 0.408014506 | 0.483721842 | 0.333658233 | 0.298333905 |
| 0.198309867 | 0.415620627 | 0.488385376 | 0.407593155 |
| 0.395533232 | 0.105527087 | 0.421742971 | 0.403286032 |
| 0.229916622 | 0.379193684 | 0.485726984 | 0.411573737 |
| 0.42647712  | 0.198261704 | 0.359966551 | 0.271034245 |
| 0.371290965 | 0.390891975 | 0.450913384 | 0.280820759 |
| 0.184352444 | 0.455904412 | 0.304375833 | 0.286565641 |
| 0.391376605 | 0.238624356 | 0.283984775 | 0.498473781 |



|             |             |             |             |
|-------------|-------------|-------------|-------------|
| 0.271293283 | 0.355219751 | 0.071716593 | 0.069443011 |
| 0.216567862 | 0.403572287 | 0.357167077 | 0.376820989 |
| 0.421932578 | 0.216545584 | 0.303797041 | 0.318528069 |
| 0.075778079 | 0.238566416 | 0.473421307 | 0.120392845 |
| 0.414694819 | 0.225549799 | 0.003731095 | 0.307482415 |
| 0.480267166 | 0.30692547  |             |             |
| SND1        | 0.03230223  | 0.160393108 | 0.008167138 |
| 0.029314626 | 0.015554912 | 0.130992188 | 0.156485101 |
| 0.021864312 | 0.007636237 | 0.116131883 | 0.143232647 |
| 4.86E-06    | 0.057335845 | 0.00018896  | 0.001119919 |
| 0.112521144 | 0.123946548 | 0.124021152 | 0.100450419 |
| 0.023830622 | 0.051759497 | 0.060190209 | 0.140196241 |
| 0.122669182 | 1.27E-05    | 0.111618197 | 0.09714883  |
| 0.018172753 | 0.095121278 | 0.042016482 | 0.031998746 |
| 0.095369365 | 0.110996467 | 0.081197124 | 0.023692778 |
| 0.047106207 | 0.143669266 | 0.001575354 | 0.096877461 |
| 0.06186238  | 0.116202638 | 0.109084769 | 0.000518854 |
| 0.021543888 | 0.057799329 | 0.013566417 | 0.081816594 |
| 0.018468443 | 0.108619924 | 0.037579711 | 0.187144824 |
| 0.001769054 | 0.129161907 | 0.056083694 | 0.004140469 |
| 0.176016593 | 0.027965037 | 0.168742526 | 0.007998017 |
| 0.016751267 | 0.042249627 | 0.037447495 | 0.082049232 |
| 0.146929068 | 0.1785688   | 0.140355355 | 0.010895256 |
| 0.050874739 | 0.049632372 | 0.091824656 | 0.204564785 |
| 0.134578912 | 0.020363584 | 0.045311925 | 0.034957659 |
| 0.108366561 | 0.062836352 | 0.073944244 | 0.012185242 |
| 5.89E-05    | 0.145656024 | 0.133896894 | 0.034413391 |
| 0.058540787 | 0.139793374 | 0.041773091 | 0.124712768 |
| 0.063392571 | 0.000838411 | 0.065888969 | 0.13241212  |
| 0.005664187 | 0.063010302 | 0.000476275 | 0.006243402 |
| 0.079689256 | 0.085667241 | 0.071629571 | 0.044729038 |
| 0.000380709 | 0.008142405 | 0.001037044 | 0.059617031 |
| 0.053520449 | 0.075953324 | 0.172024296 | 0.002555072 |
| 0.054390176 | 0.00654759  | 0.040718687 | 0.17473576  |
| 0.127199468 | 5.16E-05    | 0.005420689 | 0.100296937 |
| 0.014227694 | 0.041315372 | 0.097548789 | 0.000436737 |
| 0.00150752  | 1.64E-05    | 0.096251754 | 0.012608518 |
| 0.126956403 | 0.115500939 | 0.008246191 | 0.161598411 |
| 0.015328321 | 0.067149136 | 0.031363505 | 0.13243349  |
| 0.089598959 | 0.166681222 | 0.123768615 | 0.105126718 |
| 0.052413373 | 0.010100302 | 0.022162645 | 0.160899258 |
| 0.109314303 | 0.007539617 | 0.009716261 | 0.119516025 |
| 0.061210781 | 0.108705699 | 0.137232144 | 0.008219605 |
| 0.090818489 | 0.035626193 | 0.082620523 | 0.176823079 |
| 0.097285047 | 0.027426518 | 0.000229372 | 0.093063662 |
| 0.172644478 | 0.000435666 | 0.018512398 | 0.071473813 |
| 0.024287849 | 0.024253106 | 0.133951702 | 0.12672187  |
| 0.068892174 | 0.076120863 | 0.151659388 | 0.16055637  |
| 0.056044552 | 0.125994166 | 0.074286268 | 0.172680961 |
| 0.085041812 | 0.090239154 | 0.019449773 | 0.061524505 |
| 0.037556351 | 0.052004953 | 0.011552641 | 0.003551589 |
| 0.041521309 | 0.016517764 | 0.143983794 | 0.0525172   |
| 0.06798386  | 0.027288747 | 0.115540742 | 0.046885825 |
| 0.050671195 | 0.053155842 | 0.182530369 | 0.03798057  |

|             |             |             |             |
|-------------|-------------|-------------|-------------|
| 0.044241435 | 0.012351276 | 0.032792949 | 0.079590245 |
| 0.05512861  | 0.042478507 | 0.04517973  | 0.000160277 |
| 0.008319284 | 0.062559163 | 0.048865915 | 0.000903031 |
| 0.055381465 | 0.006593944 | 0.000435057 | 0.140442294 |
| 0.070706095 | 0.121421852 | 8.85E-05    | 0.001560071 |
| 0.039799379 | 0.193283729 | 0.059525819 | 0.00499775  |
| 0.184888405 | 0.040925463 | 0.069073066 | 0.135497948 |
| 0.03128488  | 0.17287558  | 0.001010995 | 0.027024366 |
| 0.06670292  | 0.148413671 | 0.109633027 | 0.104638737 |
| 0.081394237 | 0.036604419 | 0.002649281 | 0.099739999 |
| 0.045195149 | 0.043576184 | 0.00874639  | 0.140450507 |
| 2.79E-05    | 0.074509805 | 0.133024307 | 0.001260228 |
| 0.179971176 | 0.166951261 | 0.009599445 | 0.01486605  |
| 0.104496656 | 0.133958063 | 0.067511314 | 0.087781555 |
| 0.00148172  | 5.86E-05    | 0.100020869 | 0.124321906 |
| 0.105209632 | 0.061019215 | 0.046273292 | 0.000172844 |
| 0.12185117  | 0.022521017 | 0.125758188 | 0.05213635  |
| 0.091562677 | 0.032416315 | 0.03550808  | 0.03097685  |
| 0.00010901  | 0.07766207  | 0.084281108 | 0.02737784  |
| 0.110015645 | 0.007279635 | 0.159119513 | 0.092692565 |
| 0.059027654 | 0.010732326 | 0.140672584 | 0.047017525 |
| 0.069525063 | 0.154068053 | 0.000594024 | 0.090735142 |
| 0.124303817 | 0.051615172 | 0.157298057 | 0.110464511 |
| 0.049601203 | 0.160260457 | 0.141805656 | 0.065280233 |
| 2.29E-06    | 0.086569553 | 0.065859298 | 0.114148891 |
| 0.117888564 | 0.111805056 | 0.006423862 | 0.047574412 |
| 9.75E-06    | 0.043749038 | 0.028164824 | 0.123842175 |
| 0.137546683 | 0.004421063 | 0.000739071 | 0.111622418 |
| 0.061766429 | 0.000298331 | 0.133880192 | 0.140715016 |
| 0.17235645  | 0.066524963 | 0.131363615 | 0.082663454 |
| 0.021289675 | 0.01475213  | 0.009515591 | 0.141341209 |
| 0.046439627 | 0.000327704 | 0.127511024 | 0.115540237 |
| 0.108831807 | 0.15100895  | 0.07491524  | 0.00739091  |
| 0.053359078 | 0.036864677 | 0.154651524 | 0.002188092 |
| 0.086296841 | 0.138558848 | 0.143792423 | 0.09252728  |
| 0.074257296 | 0.153909838 | 0.147869707 | 0.137327346 |
| 0.007050904 | 0.081940469 | 0.09230007  | 0.004965957 |
| 0.039024388 | 0.141155194 | 0.164436729 | 0.118921044 |
| 0.067644842 | 0.032703436 | 0.095712676 | 0.021847145 |
| 0.171026586 | 0.154762948 | 0.027182773 | 0.00561184  |
| 0.18650606  | 0.027819871 | 0.060017566 | 0.035568246 |
| 0.091659989 | 0.002756763 | 0.000822263 | 0.1003728   |
| 0.175258544 | 0.151585002 | 0.127546916 | 0.110727279 |
| 0.103677824 | 0.002654203 | 0.070838844 | 0.016658494 |
| 0.046361975 | 0.065837913 | 0.058140925 | 0.000399798 |
| 0.011450998 | 0.003077891 | 0.201821827 | 0.150406635 |
| 0.022981299 | 0.037470017 | 0.113253433 | 0.169244944 |
| 0.11603534  | 0.022363694 | 0.089087294 | 0.029121437 |
| 0.158847012 | 1           | 0.13144666  | 0.044261352 |
| 0.089666593 | 0.09578015  | 0.106942262 | 0.001321986 |
| 0.086557155 | 0.132188692 | 0.005803853 | 0.213936777 |
| 0.075895156 | 0.041245913 | 0.175523501 | 0.016663033 |
| 0.006888474 | 1.23E-05    | 0.06409107  | 0.063898184 |
| 0.12859698  | 0.004843449 | 0.033804085 | 0.007465172 |

|             |             |             |             |
|-------------|-------------|-------------|-------------|
| 0.145038504 | 0.066405679 | 0.092686659 | 0.010465321 |
| 0.095667056 | 0.001397113 | 0.163125024 | 0.001164849 |
| 0.076456008 | 0.10110105  | 0.052807614 | 0.042083631 |
| 0.004107439 | 0.119761128 | 0.105104151 | 0.127897359 |
| 0.156507196 | 0.00524081  | 0.130367961 | 0.017715412 |
| 0.068116678 | 0.015933246 | 0.08812348  | 0.009425467 |
| 0.119423334 | 0.001774668 | 0.040428347 | 0.003660891 |
| 0.139474879 | 0.009733328 | 0.155216409 | 0.011762761 |
| 0.011578421 | 0.054626793 | 0.059405231 | 0.097823426 |
| 0.111814167 | 0.070478515 | 0.01605512  | 0.147028826 |
| 0.006757404 | 0.023599511 | 0.046487916 | 0.056953709 |
| 0.047030649 | 0.083945771 | 0.065713588 | 0.084089346 |
| 0.116853473 | 0.003815185 | 0.025093045 | 0.00932325  |
| 0.000675444 | 0.046512457 | 0.184894265 | 0.006953039 |
| 0.07495882  | 0.012026074 | 1.06E-05    | 0.007823519 |
| 0.112501385 | 0.01339045  |             |             |
| SNX10       | 0.392913838 | 0.493609792 | 0.156222321 |
| 0.035544875 | 0.181135444 | 0.378666264 | 0.351444711 |
| 0.394332762 | 0.230002304 | 0.226660906 | 0.454513097 |
| 0.005943061 | 0.345589712 | 0.047548412 | 0.158786582 |
| 0.477034619 | 0.484120944 | 0.448030572 | 0.480802202 |
| 0.416703632 | 0.190312104 | 0.470273194 | 0.464547252 |
| 0.399836214 | 0.00758574  | 0.221409066 | 0.074116488 |
| 0.372416674 | 0.455147218 | 0.359460256 | 0.386121245 |
| 0.42201372  | 0.407112819 | 0.422284614 | 0.344757057 |
| 0.204495605 | 0.50350025  | 0.105691737 | 0.393802802 |
| 0.34169115  | 0.336324158 | 0.424365617 | 0.046026542 |
| 0.002901182 | 0.20552734  | 0.339337662 | 0.481561944 |
| 0.422782786 | 0.361855385 | 0.322449715 | 0.274733701 |
| 0.132359683 | 0.476067211 | 0.447574791 | 0.128103294 |
| 0.49620807  | 0.005809458 | 0.503698135 | 0.324221389 |
| 0.162024818 | 0.451174118 | 0.370454704 | 0.479131956 |
| 0.390383685 | 0.501074422 | 0.497936197 | 0.086334554 |
| 0.17039198  | 0.454679294 | 0.375249067 | 0.450040787 |
| 0.488071506 | 0.406625047 | 0.406998891 | 0.334170721 |
| 0.423880525 | 0.370640148 | 0.435642885 | 0.323503487 |
| 0.003492111 | 0.261441599 | 0.345848294 | 0.35360713  |
| 0.352866528 | 0.476540723 | 0.414733033 | 0.3255519   |
| 0.428288231 | 0.063770525 | 0.488935763 | 0.499165168 |
| 0.038638085 | 0.389090751 | 0.020022596 | 0.296710176 |
| 0.437510335 | 0.409060713 | 0.452208667 | 0.159558508 |
| 0.047082773 | 0.263286652 | 0.215012006 | 0.338539975 |
| 0.475710858 | 0.488563515 | 0.494882094 | 0.126220672 |
| 0.294621493 | 0.296925456 | 0.467545915 | 0.501687102 |
| 0.467539952 | 0.027974324 | 0.300239244 | 0.368329139 |
| 0.352195177 | 0.178837888 | 0.372102168 | 0.045982226 |
| 0.023846244 | 0.040283096 | 0.422252375 | 0.306004588 |
| 0.188876181 | 0.338906208 | 0.137514484 | 0.440601301 |
| 0.377563485 | 0.395452443 | 0.202056068 | 0.383145979 |
| 0.401635342 | 0.38196316  | 0.434421739 | 0.448352964 |
| 0.373211705 | 0.384520798 | 0.290040473 | 0.500817922 |
| 0.498298664 | 0.156867347 | 0.185031444 | 0.453646805 |
| 0.31608046  | 0.461841671 | 0.514152907 | 0.421750215 |
| 0.347321522 | 0.400621286 | 0.363051885 | 0.471175998 |

|             |             |             |             |
|-------------|-------------|-------------|-------------|
| 0.38949057  | 0.442569497 | 0.091263122 | 0.479530372 |
| 0.495420163 | 0.047919205 | 0.162790805 | 0.447621356 |
| 0.064101992 | 0.354919191 | 0.496222266 | 0.489367045 |
| 0.467770667 | 0.062286741 | 0.320841458 | 0.391996507 |
| 0.438293109 | 0.379487618 | 0.481706627 | 0.289376571 |
| 0.452948496 | 0.360143637 | 0.122412341 | 0.307614655 |
| 0.255597831 | 0.461869241 | 0.286701789 | 0.084309504 |
| 0.424790897 | 0.432585098 | 0.491369945 | 0.476880059 |
| 0.406675534 | 0.004877707 | 0.222001661 | 0.420016636 |
| 0.349868223 | 0.352305402 | 0.498743437 | 0.242200239 |
| 0.408412066 | 0.304694829 | 0.287879564 | 0.390413812 |
| 0.419023179 | 0.311687009 | 0.290327004 | 0.003083184 |
| 0.260277026 | 0.348626724 | 0.466500706 | 0.130759688 |
| 0.32996984  | 0.228015572 | 0.188836599 | 0.477937359 |
| 0.351425428 | 0.448614206 | 0.067816531 | 0.176410175 |
| 0.40117377  | 0.488202208 | 0.394784013 | 0.34148764  |
| 0.479441787 | 0.408054982 | 0.36440004  | 0.491260171 |
| 0.368262737 | 0.463305275 | 0.165930805 | 0.417434981 |
| 0.420119536 | 0.472026456 | 0.421360814 | 0.462869836 |
| 0.401514162 | 0.412081388 | 0.314117093 | 0.421454873 |
| 0.476504143 | 0.479980591 | 0.194768219 | 0.501455771 |
| 0.003453197 | 0.475010663 | 0.459540072 | 0.176333461 |
| 0.497292623 | 0.369874326 | 0.170073655 | 0.387133301 |
| 0.488957076 | 0.504964862 | 0.442288577 | 0.383971574 |
| 0.252204193 | 0.036553968 | 0.476602385 | 0.493603194 |
| 0.457607044 | 0.484777319 | 0.302100584 | 0.104552583 |
| 0.472021243 | 0.352929123 | 0.463417807 | 0.414836676 |
| 0.440445082 | 0.370293927 | 0.401296692 | 0.370288657 |
| 0.023377222 | 0.372734331 | 0.421995463 | 0.232941506 |
| 0.377414216 | 0.284415043 | 0.473567673 | 0.46146677  |
| 0.391352923 | 0.33844977  | 0.351688028 | 0.174855287 |
| 0.322536076 | 0.500304171 | 0.042559739 | 0.471406975 |
| 0.50375759  | 0.476091721 | 0.472095092 | 0.497353626 |
| 0.442727787 | 0.489127302 | 0.484747881 | 0.397588381 |
| 0.003393454 | 0.358996592 | 0.332725081 | 0.472422626 |
| 0.417136545 | 0.428352809 | 0.261430992 | 0.370251143 |
| 0.00448176  | 0.296852089 | 0.217189482 | 0.502018329 |
| 0.461238476 | 0.079567892 | 0.037527892 | 0.487477429 |
| 0.347603734 | 0.05620209  | 0.517009699 | 0.436413099 |
| 0.493855561 | 0.482268235 | 0.293972683 | 0.355088441 |
| 0.177376558 | 0.420900168 | 0.052895846 | 0.475562844 |
| 0.42105081  | 0.107699026 | 0.126098894 | 0.499341832 |
| 0.479331587 | 0.486282214 | 0.40581876  | 0.018327958 |
| 0.329927097 | 0.216405889 | 0.463083768 | 0.226910986 |
| 0.49287889  | 0.480472567 | 0.504106598 | 0.400767822 |
| 0.478088191 | 0.498264887 | 0.483693916 | 0.48611944  |
| 0.123765643 | 0.37355982  | 0.395336736 | 0.117593892 |
| 0.365379503 | 0.465282263 | 0.419603935 | 0.310758672 |
| 0.480597443 | 0.096170827 | 0.349477212 | 0.402724635 |
| 0.502243759 | 0.45609709  | 0.141268802 | 0.306336493 |
| 0.492858708 | 0.440222335 | 0.224075926 | 0.467582619 |
| 0.424433427 | 0.144857642 | 0.159286149 | 0.485660216 |
| 0.504257517 | 0.424384257 | 0.445113176 | 0.205781204 |
| 0.430515593 | 0.137598583 | 0.451224915 | 0.389113652 |

|             |             |             |             |
|-------------|-------------|-------------|-------------|
| 0.428914365 | 0.370018544 | 0.325645533 | 0.137499743 |
| 0.042577545 | 0.23348219  | 0.484406307 | 0.498068463 |
| 0.177349127 | 0.3454871   | 0.379623976 | 0.439415229 |
| 0.457972671 | 0.43157611  | 0.420587239 | 0.456483044 |
| 0.494956437 | 0.13144666  | 1           | 0.456326645 |
| 0.477078508 | 0.430009143 | 0.484084375 | 0.016609677 |
| 0.432442492 | 0.257600323 | 0.246998862 | 0.421226397 |
| 0.391523929 | 0.257996045 | 0.476292867 | 0.309844431 |
| 0.197402385 | 0.00999245  | 0.476252367 | 0.316972573 |
| 0.421469855 | 0.301324907 | 0.468562569 | 0.126519127 |
| 0.527017809 | 0.467269004 | 0.451028777 | 0.267995524 |
| 0.451680795 | 0.016313203 | 0.243048926 | 0.095129634 |
| 0.477212356 | 0.494168577 | 0.439476745 | 0.408605086 |
| 0.278410034 | 0.472482842 | 0.494200635 | 0.435323172 |
| 0.462199214 | 0.158524874 | 0.485102937 | 0.427259733 |
| 0.311940581 | 0.438994626 | 0.408917167 | 0.429502374 |
| 0.315951814 | 0.198412134 | 0.250301868 | 0.287452213 |
| 0.434509254 | 0.396062259 | 0.453100069 | 0.376822307 |
| 0.114260832 | 0.470604678 | 0.417258669 | 0.399828989 |
| 0.468301759 | 0.357079046 | 0.392346484 | 0.490901875 |
| 0.355503473 | 0.407278662 | 0.066373242 | 0.048951117 |
| 0.259050944 | 0.323399474 | 0.445325078 | 0.472388553 |
| 0.47964403  | 0.314321847 | 0.212740999 | 0.276578148 |
| 0.121193615 | 0.35688222  | 0.392683907 | 0.14918225  |
| 0.476917776 | 0.318778898 | 0.002534613 | 0.35090975  |
| 0.489428339 | 0.395168229 |             |             |
| SNX18       | 0.211911574 | 0.413775493 | 0.137513291 |
| 0.010934239 | 0.068707731 | 0.263699562 | 0.174827427 |
| 0.173777067 | 0.171749061 | 0.11673892  | 0.346125767 |
| 0.018796668 | 0.205917797 | 0.08203923  | 0.106685085 |
| 0.38042349  | 0.366403372 | 0.194190828 | 0.377174003 |
| 0.224912374 | 0.071530484 | 0.353085353 | 0.243991061 |
| 0.22850694  | 0.023252333 | 0.111468382 | 0.032129701 |
| 0.13265766  | 0.345709443 | 0.22777453  | 0.191284818 |
| 0.344507327 | 0.2687018   | 0.137142695 | 0.093887136 |
| 0.043689139 | 0.441363432 | 0.021069714 | 0.200957065 |
| 0.240077511 | 0.146771517 | 0.277805881 | 0.052252195 |
| 0.000450865 | 0.12183721  | 0.140376806 | 0.325996982 |
| 0.216859204 | 0.235187421 | 0.211492006 | 0.121854576 |
| 0.036008738 | 0.360047946 | 0.367562259 | 0.031524971 |
| 0.401479693 | 0.001735833 | 0.426363873 | 0.19191606  |
| 0.13255744  | 0.227858482 | 0.140676902 | 0.305756739 |
| 0.271212428 | 0.416573568 | 0.393729015 | 0.062652133 |
| 0.128363866 | 0.177421907 | 0.226641445 | 0.200737389 |
| 0.380974718 | 0.170591473 | 0.170105362 | 0.086154109 |
| 0.224775461 | 0.24481692  | 0.298230463 | 0.193912543 |
| 0.008462221 | 0.131717942 | 0.095594015 | 0.240372854 |
| 0.140769603 | 0.374942751 | 0.222900831 | 0.135211315 |
| 0.152360245 | 0.078260456 | 0.276796624 | 0.388923853 |
| 0.020887518 | 0.23851276  | 0.008252301 | 0.183338525 |
| 0.309402721 | 0.296681699 | 0.291758915 | 0.110890831 |
| 0.061860186 | 0.201110956 | 0.174966874 | 0.23230513  |
| 0.227520066 | 0.177395613 | 0.390961607 | 0.032753825 |
| 0.180689457 | 0.206776577 | 0.184024563 | 0.432607884 |

|             |             |             |             |
|-------------|-------------|-------------|-------------|
| 0.399002447 | 0.039890914 | 0.212101648 | 0.233887674 |
| 0.107070639 | 0.057981592 | 0.187413259 | 0.022224935 |
| 0.019094857 | 0.047032493 | 0.326447866 | 0.23714397  |
| 0.09960523  | 0.174938218 | 0.062372338 | 0.181117127 |
| 0.16604826  | 0.31751809  | 0.078643724 | 0.174106116 |
| 0.195597219 | 0.194140289 | 0.131260624 | 0.249573653 |
| 0.097946942 | 0.225035553 | 0.213735333 | 0.370134893 |
| 0.446334592 | 0.11689121  | 0.159597766 | 0.321455181 |
| 0.17602471  | 0.370594224 | 0.417798722 | 0.215119156 |
| 0.119007615 | 0.233600255 | 0.150449711 | 0.258846605 |
| 0.214906025 | 0.231835847 | 0.033657151 | 0.346314219 |
| 0.427323927 | 0.020753326 | 0.139934112 | 0.299301599 |
| 0.014662466 | 0.146646025 | 0.416638221 | 0.29998611  |
| 0.190980157 | 0.027176398 | 0.140081074 | 0.206544953 |
| 0.262908538 | 0.183737263 | 0.290046151 | 0.124088018 |
| 0.325212433 | 0.140478809 | 0.096766172 | 0.184515756 |
| 0.17717501  | 0.301041641 | 0.092604692 | 0.034449732 |
| 0.233522671 | 0.202031884 | 0.354985742 | 0.237963793 |
| 0.25814556  | 0.001514289 | 0.115172951 | 0.257010816 |
| 0.161283515 | 0.258459006 | 0.416590009 | 0.171490157 |
| 0.277607271 | 0.085246755 | 0.196179357 | 0.119349633 |
| 0.348238124 | 0.155592329 | 0.139301005 | 0.009717897 |
| 0.145450779 | 0.113972108 | 0.172192082 | 0.158600367 |
| 0.130809468 | 0.194114776 | 0.117936848 | 0.345957235 |
| 0.208984691 | 0.249412801 | 0.091051232 | 0.065742943 |
| 0.212522312 | 0.29704561  | 0.132015096 | 0.193898449 |
| 0.279027434 | 0.198788085 | 0.256214699 | 0.399448171 |
| 0.12816378  | 0.353056402 | 0.049100765 | 0.231355558 |
| 0.159829455 | 0.325459707 | 0.261170618 | 0.277838807 |
| 0.21278811  | 0.26313678  | 0.112010551 | 0.314246212 |
| 0.246843157 | 0.214131645 | 0.186067036 | 0.419643219 |
| 0.009932175 | 0.283563895 | 0.177497944 | 0.054530471 |
| 0.398992466 | 0.214254217 | 0.164555289 | 0.24634473  |
| 0.383468313 | 0.424007331 | 0.37358576  | 0.276240199 |
| 0.119771492 | 0.069748674 | 0.419682973 | 0.342131087 |
| 0.341037647 | 0.186196973 | 0.069183156 | 0.044457515 |
| 0.361731214 | 0.165033931 | 0.263577449 | 0.172413012 |
| 0.158494567 | 0.099949324 | 0.22388512  | 0.23781468  |
| 0.016576324 | 0.206258816 | 0.22156109  | 0.082594918 |
| 0.149916278 | 0.180940448 | 0.305176155 | 0.333860351 |
| 0.108926841 | 0.146556335 | 0.099449665 | 0.109320908 |
| 0.186137809 | 0.423648628 | 0.008598821 | 0.417057214 |
| 0.400021468 | 0.229423999 | 0.334599724 | 0.40472858  |
| 0.244579113 | 0.358904626 | 0.366381669 | 0.315523076 |
| 0.009157366 | 0.246603624 | 0.170713364 | 0.39684392  |
| 0.304765906 | 0.287184063 | 0.10785781  | 0.097560936 |
| 0.004916872 | 0.206388931 | 0.054501762 | 0.454987968 |
| 0.309304447 | 0.065787782 | 0.005390962 | 0.29928025  |
| 0.159768787 | 0.018686958 | 0.430498027 | 0.203872904 |
| 0.34943937  | 0.166601219 | 0.157890375 | 0.209679329 |
| 0.042635021 | 0.152656271 | 0.024143501 | 0.226944404 |
| 0.130691647 | 0.053508624 | 0.051173474 | 0.404958974 |
| 0.381173265 | 0.300415385 | 0.243238528 | 0.016777798 |
| 0.251599448 | 0.066859245 | 0.25918874  | 0.145718215 |

|             |             |             |             |
|-------------|-------------|-------------|-------------|
| 0.379237119 | 0.353880858 | 0.382676975 | 0.233931276 |
| 0.219507368 | 0.380526625 | 0.391876107 | 0.348273098 |
| 0.029005957 | 0.243446286 | 0.298973503 | 0.079158177 |
| 0.175279234 | 0.335392149 | 0.137965718 | 0.194311106 |
| 0.331518213 | 0.022134789 | 0.244895328 | 0.210961465 |
| 0.374293704 | 0.332963237 | 0.12213929  | 0.21867673  |
| 0.375075889 | 0.222453511 | 0.135073699 | 0.205240801 |
| 0.315490762 | 0.045465835 | 0.064149509 | 0.34921234  |
| 0.421365266 | 0.296530629 | 0.335255361 | 0.082118922 |
| 0.303090993 | 0.138234856 | 0.326132495 | 0.176481219 |
| 0.265181831 | 0.169173349 | 0.233459834 | 0.081180831 |
| 0.034329687 | 0.214424651 | 0.347658596 | 0.407468295 |
| 0.142968376 | 0.225913104 | 0.185018827 | 0.188985072 |
| 0.346022661 | 0.148588579 | 0.280924796 | 0.219790958 |
| 0.419296084 | 0.044261352 | 0.456326645 | 1           |
| 0.376159277 | 0.182587673 | 0.312952865 | 0.009724121 |
| 0.201652659 | 0.132495291 | 0.124321468 | 0.148381308 |
| 0.28426917  | 0.171989878 | 0.282452558 | 0.225597975 |
| 0.068771379 | 0.011573702 | 0.351766765 | 0.075640647 |
| 0.335135331 | 0.104216261 | 0.226592495 | 0.024235522 |
| 0.448179154 | 0.241388444 | 0.335263532 | 0.073346507 |
| 0.1705595   | 0.00201044  | 0.11910439  | 0.105637666 |
| 0.3736065   | 0.369072755 | 0.248906841 | 0.179370829 |
| 0.174101939 | 0.206395691 | 0.315966083 | 0.12917553  |
| 0.320145682 | 0.057052964 | 0.374920821 | 0.207415473 |
| 0.200826406 | 0.18274514  | 0.262534544 | 0.186703298 |
| 0.13682884  | 0.103618945 | 0.16172386  | 0.224928148 |
| 0.311607821 | 0.155580502 | 0.162517603 | 0.194284901 |
| 0.084869252 | 0.187451473 | 0.257790062 | 0.218741651 |
| 0.227449575 | 0.205136595 | 0.145074097 | 0.401189494 |
| 0.153561942 | 0.229597565 | 0.018548727 | 0.020500514 |
| 0.075411267 | 0.183812559 | 0.37603854  | 0.357398143 |
| 0.372948924 | 0.118985471 | 0.16319815  | 0.222147598 |
| 0.029269076 | 0.250809364 | 0.217766773 | 0.030710681 |
| 0.210983404 | 0.120889204 | 0.005231231 | 0.225191984 |
| 0.360044807 | 0.127523459 |             |             |
| SOCS3       | 0.342658349 | 0.461934197 | 0.129221109 |
| 0.02154763  | 0.104873436 | 0.290264862 | 0.243059901 |
| 0.322818699 | 0.201809665 | 0.174147105 | 0.330313468 |
| 0.010636056 | 0.279989211 | 0.059868037 | 0.124589827 |
| 0.458440927 | 0.454269116 | 0.294823175 | 0.452600757 |
| 0.36064514  | 0.137479866 | 0.373304964 | 0.349958459 |
| 0.303123668 | 0.012605649 | 0.150285823 | 0.056456357 |
| 0.282597678 | 0.431135122 | 0.28892623  | 0.296647265 |
| 0.417473643 | 0.357447768 | 0.303158699 | 0.208235867 |
| 0.130056261 | 0.452488119 | 0.056281954 | 0.273860467 |
| 0.326609484 | 0.227493955 | 0.360209351 | 0.048557243 |
| 0.001557772 | 0.149817233 | 0.26896553  | 0.384082064 |
| 0.335661824 | 0.281591962 | 0.254642953 | 0.189560983 |
| 0.099440161 | 0.348271462 | 0.371294782 | 0.088657826 |
| 0.393600199 | 0.004131612 | 0.438414962 | 0.306775519 |
| 0.134991969 | 0.35553455  | 0.307285889 | 0.372999844 |
| 0.284040796 | 0.416706405 | 0.461574032 | 0.063738968 |
| 0.137599836 | 0.341586663 | 0.307544505 | 0.314065344 |

|             |             |             |             |
|-------------|-------------|-------------|-------------|
| 0.426289412 | 0.307045309 | 0.290799897 | 0.219196712 |
| 0.310401074 | 0.320528466 | 0.328105685 | 0.243352895 |
| 0.005272278 | 0.183220244 | 0.215026875 | 0.296297543 |
| 0.24719047  | 0.348501891 | 0.327194949 | 0.21996882  |
| 0.321408913 | 0.06239302  | 0.369647504 | 0.466792629 |
| 0.028737617 | 0.301430405 | 0.011141769 | 0.219287955 |
| 0.365148964 | 0.393556583 | 0.362943525 | 0.125719802 |
| 0.04730801  | 0.223069165 | 0.229006331 | 0.322969764 |
| 0.368128713 | 0.350752808 | 0.382646191 | 0.087847634 |
| 0.262370259 | 0.291092209 | 0.320468769 | 0.446775401 |
| 0.454788943 | 0.026100237 | 0.263911819 | 0.2704896   |
| 0.247454152 | 0.117337826 | 0.256042677 | 0.039639326 |
| 0.017578793 | 0.044344283 | 0.405437822 | 0.265214463 |
| 0.13453319  | 0.246382196 | 0.087593841 | 0.296841478 |
| 0.296512219 | 0.390968785 | 0.119852357 | 0.272820483 |
| 0.279573658 | 0.263596202 | 0.280014323 | 0.320972395 |
| 0.221449864 | 0.32768482  | 0.251507694 | 0.402607425 |
| 0.431446297 | 0.120788852 | 0.167495566 | 0.346795856 |
| 0.253618378 | 0.440151518 | 0.485382598 | 0.31936354  |
| 0.209981689 | 0.311605603 | 0.300162056 | 0.328843541 |
| 0.273461827 | 0.34191283  | 0.067094242 | 0.345938759 |
| 0.412690829 | 0.034951588 | 0.142304682 | 0.350572073 |
| 0.03039521  | 0.241611221 | 0.43684287  | 0.345078502 |
| 0.314331499 | 0.049672971 | 0.232693797 | 0.29135032  |
| 0.359632276 | 0.281685486 | 0.367525382 | 0.217612783 |
| 0.357421293 | 0.289879208 | 0.092714092 | 0.264975393 |
| 0.199370196 | 0.370318945 | 0.239224221 | 0.071345721 |
| 0.327362322 | 0.334386826 | 0.396832203 | 0.354455719 |
| 0.322207806 | 0.003019727 | 0.170895503 | 0.359327685 |
| 0.311556653 | 0.328125284 | 0.459576523 | 0.190955599 |
| 0.329840269 | 0.202967061 | 0.229542035 | 0.236822946 |
| 0.378646188 | 0.253892168 | 0.23691893  | 0.005439055 |
| 0.175410964 | 0.270435729 | 0.339685745 | 0.144036713 |
| 0.207526202 | 0.232001512 | 0.167107729 | 0.403635496 |
| 0.271916055 | 0.313108963 | 0.075149313 | 0.135838442 |
| 0.307059023 | 0.334163918 | 0.277217601 | 0.319468552 |
| 0.331030866 | 0.315686419 | 0.350795372 | 0.380219394 |
| 0.222431257 | 0.344561068 | 0.12027822  | 0.340745486 |
| 0.293248205 | 0.393463237 | 0.339377637 | 0.33181976  |
| 0.303243275 | 0.314567371 | 0.225931884 | 0.324018741 |
| 0.367000406 | 0.343929767 | 0.177104748 | 0.462390795 |
| 0.00600844  | 0.350454852 | 0.319686481 | 0.140022533 |
| 0.44353892  | 0.256908309 | 0.156283225 | 0.328224313 |
| 0.460284272 | 0.466094894 | 0.405345308 | 0.361951489 |
| 0.203060219 | 0.045102969 | 0.459094919 | 0.368143107 |
| 0.431633889 | 0.327700846 | 0.17778536  | 0.07626539  |
| 0.423252574 | 0.267616365 | 0.36147836  | 0.327572649 |
| 0.291340576 | 0.231298754 | 0.30452754  | 0.292976267 |
| 0.029615981 | 0.310077946 | 0.327873956 | 0.175064826 |
| 0.285723874 | 0.245860618 | 0.363308072 | 0.334778032 |
| 0.244447619 | 0.298813255 | 0.234372889 | 0.125609734 |
| 0.23972254  | 0.47348818  | 0.021878539 | 0.448286941 |
| 0.471523445 | 0.342321138 | 0.404452669 | 0.471435965 |
| 0.370376867 | 0.346424619 | 0.419943243 | 0.385133191 |



|             |             |             |             |
|-------------|-------------|-------------|-------------|
| 0.005118743 | 0.336035864 | 0.242782463 | 0.350659039 |
| 0.38554523  | 0.333365852 | 0.208846349 | 0.246279463 |
| 0.003777583 | 0.246730715 | 0.151022584 | 0.476975013 |
| 0.37937355  | 0.062035584 | 0.018495725 | 0.341864716 |
| 0.23771197  | 0.037672201 | 0.489230985 | 0.328021623 |
| 0.394012493 | 0.316661074 | 0.21824226  | 0.292101743 |
| 0.127904978 | 0.297293443 | 0.032906865 | 0.327535412 |
| 0.282883846 | 0.103133541 | 0.085191278 | 0.473698419 |
| 0.408960015 | 0.33381762  | 0.301433902 | 0.022659177 |
| 0.33101059  | 0.152784262 | 0.32548892  | 0.159494045 |
| 0.382387797 | 0.351065268 | 0.405193389 | 0.313866306 |
| 0.33994697  | 0.371581992 | 0.36463448  | 0.393244769 |
| 0.071689731 | 0.322483964 | 0.375502303 | 0.091400703 |
| 0.287079351 | 0.409529331 | 0.298959329 | 0.229731071 |
| 0.376114103 | 0.052522909 | 0.269192272 | 0.339128225 |
| 0.399044245 | 0.408715669 | 0.125496157 | 0.251330166 |
| 0.374835013 | 0.330887239 | 0.161471446 | 0.328234388 |
| 0.326988581 | 0.120974928 | 0.128214363 | 0.365604658 |
| 0.440311463 | 0.300738455 | 0.404586639 | 0.151070972 |
| 0.37809967  | 0.119092726 | 0.368292732 | 0.265014978 |
| 0.340974583 | 0.287261776 | 0.318044588 | 0.129951406 |
| 0.051644389 | 0.243441669 | 0.347956278 | 0.395911769 |
| 0.145895248 | 0.281864791 | 0.272251274 | 0.292733389 |
| 0.431072611 | 0.306906052 | 0.312627701 | 0.3415893   |
| 0.40036622  | 0.089666593 | 0.477078508 | 0.376159277 |
| 1           | 0.303334035 | 0.354076888 | 0.015081475 |
| 0.312389667 | 0.202684963 | 0.219569976 | 0.280792402 |
| 0.379131005 | 0.199486799 | 0.324477429 | 0.268422359 |
| 0.140682269 | 0.008758575 | 0.363777167 | 0.202276306 |
| 0.317020456 | 0.219667324 | 0.354332418 | 0.083419339 |
| 0.497062212 | 0.377786692 | 0.368946147 | 0.178697472 |
| 0.32291641  | 0.00721079  | 0.18327034  | 0.09153385  |
| 0.381907881 | 0.36124576  | 0.341078175 | 0.343666809 |
| 0.26526582  | 0.31654429  | 0.351835668 | 0.276712486 |
| 0.393921741 | 0.122418376 | 0.457879902 | 0.327030273 |
| 0.290469488 | 0.336256418 | 0.301767603 | 0.305893814 |
| 0.206826013 | 0.154826981 | 0.192933544 | 0.278466565 |
| 0.398274528 | 0.263752294 | 0.29980992  | 0.353272953 |
| 0.086992365 | 0.320584322 | 0.311747119 | 0.28914875  |
| 0.345957499 | 0.279229731 | 0.282958481 | 0.377508148 |
| 0.311274092 | 0.369450868 | 0.040712112 | 0.037846206 |
| 0.183857891 | 0.254919058 | 0.403759854 | 0.390228376 |
| 0.446189863 | 0.246553378 | 0.174177515 | 0.248807888 |
| 0.075833562 | 0.313072385 | 0.27017765  | 0.08005782  |
| 0.329727513 | 0.267176966 | 0.002705292 | 0.319715841 |
| 0.367559426 | 0.272671618 |             |             |
| SPINT2      | 0.133012536 | 0.435735925 | 0.082393316 |
| 0.038037385 | 0.108392477 | 0.290885325 | 0.254179911 |
| 0.105258271 | 0.07854769  | 0.14292271  | 0.394477143 |
| 0.000805304 | 0.190206415 | 0.011673313 | 0.036730913 |
| 0.353071994 | 0.357654126 | 0.266306714 | 0.340314213 |
| 0.123237439 | 0.123626151 | 0.261826217 | 0.296727418 |
| 0.252371537 | 0.001325105 | 0.138109233 | 0.090550453 |
| 0.081420121 | 0.314389082 | 0.157341342 | 0.172457246 |

|             |             |             |             |
|-------------|-------------|-------------|-------------|
| 0.297190505 | 0.288059975 | 0.121663157 | 0.1131241   |
| 0.058166566 | 0.442116702 | 0.021336772 | 0.232656319 |
| 0.201575766 | 0.17371694  | 0.285428801 | 0.01427661  |
| 0.003465905 | 0.110247535 | 0.069005997 | 0.275000823 |
| 0.098291417 | 0.253129103 | 0.147272919 | 0.169279176 |
| 0.025145684 | 0.377597095 | 0.253465675 | 0.026389394 |
| 0.463006009 | 0.008478161 | 0.453767478 | 0.053376973 |
| 0.068229479 | 0.14426028  | 0.100052211 | 0.274609879 |
| 0.321984256 | 0.472467113 | 0.401047253 | 0.074768902 |
| 0.095933939 | 0.158787176 | 0.22700515  | 0.298041565 |
| 0.378543336 | 0.134507192 | 0.148474724 | 0.07426274  |
| 0.234822846 | 0.212005278 | 0.258964413 | 0.099081751 |
| 0.001377695 | 0.186611952 | 0.13937158  | 0.145912815 |
| 0.148783758 | 0.406936507 | 0.169951271 | 0.153971584 |
| 0.160589604 | 0.025398603 | 0.246645382 | 0.387052839 |
| 0.027361258 | 0.216129167 | 0.008844486 | 0.083706194 |
| 0.269537401 | 0.262465786 | 0.234972377 | 0.108709676 |
| 0.016278395 | 0.068564542 | 0.033963284 | 0.197407771 |
| 0.188881675 | 0.191192477 | 0.439951038 | 0.013053671 |
| 0.167810536 | 0.077000141 | 0.12710034  | 0.471188052 |
| 0.377234822 | 0.006469484 | 0.064694218 | 0.26481418  |
| 0.085412536 | 0.088699068 | 0.238046478 | 0.011310739 |
| 0.026051137 | 0.003991282 | 0.299771543 | 0.100790288 |
| 0.126179809 | 0.212058548 | 0.089259394 | 0.259550749 |
| 0.079396238 | 0.245566594 | 0.105489233 | 0.215538648 |
| 0.224077994 | 0.277692461 | 0.201653208 | 0.270187244 |
| 0.110876493 | 0.08233932  | 0.09900577  | 0.425828559 |
| 0.397630724 | 0.092366619 | 0.080504172 | 0.329373653 |
| 0.173487651 | 0.349294135 | 0.409002122 | 0.094936677 |
| 0.160810911 | 0.153704244 | 0.12026941  | 0.355960671 |
| 0.246572474 | 0.148094609 | 0.011578555 | 0.327046005 |
| 0.467190347 | 0.013891628 | 0.071224633 | 0.25286363  |
| 0.051963563 | 0.132365286 | 0.39569241  | 0.331692442 |
| 0.203271373 | 0.073569926 | 0.173945606 | 0.271820007 |
| 0.198392571 | 0.223667678 | 0.245647847 | 0.156815812 |
| 0.279475566 | 0.121808456 | 0.069683144 | 0.177373461 |
| 0.121681431 | 0.216955119 | 0.053731285 | 0.020251937 |
| 0.17021506  | 0.0880919   | 0.379592866 | 0.201053784 |
| 0.211795465 | 0.009842869 | 0.150297237 | 0.172236946 |
| 0.10924483  | 0.208177346 | 0.465798064 | 0.120697373 |
| 0.194152694 | 0.055639731 | 0.124083653 | 0.139590545 |
| 0.240996103 | 0.155608668 | 0.127383825 | 0.00202966  |
| 0.128195048 | 0.097675365 | 0.147721518 | 0.029613406 |
| 0.180629492 | 0.078492073 | 0.026071422 | 0.371579751 |
| 0.207672686 | 0.299871583 | 0.010702852 | 0.018409952 |
| 0.141566868 | 0.394251857 | 0.13258766  | 0.070927163 |
| 0.358333346 | 0.159195797 | 0.221816183 | 0.388774853 |
| 0.134851324 | 0.404405646 | 0.020352838 | 0.107613697 |
| 0.174456727 | 0.361765923 | 0.278873678 | 0.306843281 |
| 0.195346917 | 0.174965398 | 0.065285501 | 0.302157884 |
| 0.187965189 | 0.182928551 | 0.0785398   | 0.428838182 |
| 0.001090309 | 0.25630407  | 0.232777753 | 0.019912763 |
| 0.45347902  | 0.304266603 | 0.062392321 | 0.0895045   |
| 0.348991406 | 0.421341523 | 0.27874507  | 0.260578045 |

|             |             |             |             |
|-------------|-------------|-------------|-------------|
| 0.043442664 | 0.007512024 | 0.363691146 | 0.332317524 |
| 0.320287912 | 0.178522542 | 0.086392949 | 0.010497471 |
| 0.366459659 | 0.108203597 | 0.270456919 | 0.149355523 |
| 0.198315391 | 0.083592439 | 0.15361377  | 0.149676183 |
| 0.003468307 | 0.14609134  | 0.21752352  | 0.090772722 |
| 0.143590695 | 0.101456397 | 0.357877434 | 0.316821351 |
| 0.124758073 | 0.071596367 | 0.128643432 | 0.100120834 |
| 0.184552826 | 0.433893056 | 0.00844963  | 0.340516295 |
| 0.389804185 | 0.19649172  | 0.380460645 | 0.370819834 |
| 0.184167781 | 0.41050817  | 0.390862727 | 0.246514993 |
| 0.000590665 | 0.239696303 | 0.180103024 | 0.376581302 |
| 0.306359488 | 0.287003309 | 0.040447071 | 0.103135117 |
| 0.000955373 | 0.143833441 | 0.06076234  | 0.418130866 |
| 0.353379698 | 0.043985483 | 0.006275135 | 0.329756152 |
| 0.170688183 | 0.008247638 | 0.416222241 | 0.268015663 |
| 0.421609505 | 0.199716848 | 0.180742912 | 0.215282951 |
| 0.039099117 | 0.077940378 | 0.045841926 | 0.307818368 |
| 0.125710529 | 0.012415295 | 0.11276299  | 0.369766831 |
| 0.350410638 | 0.367622177 | 0.229215267 | 0.020360439 |
| 0.190912371 | 0.102758186 | 0.319966396 | 0.07221517  |
| 0.334403068 | 0.371662133 | 0.423936519 | 0.243667099 |
| 0.224682155 | 0.432368451 | 0.410369946 | 0.362029118 |
| 0.049067884 | 0.234388154 | 0.275645613 | 0.066053963 |
| 0.136037165 | 0.362002194 | 0.205695553 | 0.244812813 |
| 0.256394245 | 0.0656218   | 0.249832102 | 0.117743525 |
| 0.44466211  | 0.364971555 | 0.073588342 | 0.071249713 |
| 0.434855283 | 0.122013231 | 0.119978356 | 0.149613187 |
| 0.286932695 | 0.028234162 | 0.017887401 | 0.321231879 |
| 0.465499832 | 0.359567341 | 0.332906916 | 0.133967306 |
| 0.310489977 | 0.045240928 | 0.271223217 | 0.144630865 |
| 0.197734374 | 0.164803646 | 0.194627198 | 0.020255657 |
| 0.033998942 | 0.073153099 | 0.436227787 | 0.426822158 |
| 0.081327715 | 0.154295465 | 0.236101791 | 0.299941267 |
| 0.339430461 | 0.109264972 | 0.280072982 | 0.146213199 |
| 0.447788388 | 0.09578015  | 0.430009143 | 0.182587673 |
| 0.303334035 | 1           | 0.319873396 | 0.004652563 |
| 0.21325173  | 0.157853574 | 0.041112725 | 0.263603304 |
| 0.240896482 | 0.121020526 | 0.371050117 | 0.092670224 |
| 0.064353382 | 0.001590709 | 0.269019508 | 0.095931053 |
| 0.349290374 | 0.044561368 | 0.160431923 | 0.022398331 |
| 0.438119006 | 0.208120835 | 0.283777626 | 0.042397163 |
| 0.170952944 | 0.004763546 | 0.144103189 | 0.033758973 |
| 0.283265316 | 0.341428725 | 0.193826422 | 0.131885113 |
| 0.040170896 | 0.259994527 | 0.337605358 | 0.199018182 |
| 0.363377995 | 0.055753144 | 0.372928838 | 0.086560194 |
| 0.189034768 | 0.1090006   | 0.25798742  | 0.099979782 |
| 0.178298167 | 0.042760609 | 0.099979533 | 0.055269633 |
| 0.340996798 | 0.090701585 | 0.263920497 | 0.079883186 |
| 0.075312841 | 0.160547244 | 0.216324345 | 0.229149886 |
| 0.259184164 | 0.186790759 | 0.077587708 | 0.425834335 |
| 0.065941019 | 0.094714023 | 0.057364644 | 0.061502105 |
| 0.096205034 | 0.148368931 | 0.274446495 | 0.314168968 |
| 0.361120633 | 0.044220843 | 0.093117371 | 0.071383739 |
| 0.013641657 | 0.180822469 | 0.32040179  | 0.053111408 |

|             |             |             |             |
|-------------|-------------|-------------|-------------|
| 0.217496408 | 0.051987054 | 0.001047039 | 0.065710062 |
| 0.339625258 | 0.108530214 |             |             |
| SPRED1      | 0.289620845 | 0.495912418 | 0.082320196 |
| 0.029290323 | 0.135077387 | 0.249355701 | 0.242843327 |
| 0.298955501 | 0.130691581 | 0.153364629 | 0.320381756 |
| 0.002126976 | 0.346098523 | 0.019549504 | 0.094606479 |
| 0.495420867 | 0.510067585 | 0.339917808 | 0.500423936 |
| 0.28882782  | 0.151855352 | 0.332249285 | 0.343641845 |
| 0.269940029 | 0.002540261 | 0.145755434 | 0.054252664 |
| 0.297916322 | 0.481516513 | 0.224082644 | 0.273131316 |
| 0.436521189 | 0.430334687 | 0.351242871 | 0.292373915 |
| 0.20516496  | 0.458350312 | 0.119766539 | 0.351282452 |
| 0.375942399 | 0.244197056 | 0.41498181  | 0.021361035 |
| 0.003809423 | 0.124575768 | 0.266636667 | 0.34552435  |
| 0.291895159 | 0.233829409 | 0.195603755 | 0.192155802 |
| 0.130747134 | 0.33991649  | 0.341672114 | 0.127270767 |
| 0.406191239 | 0.004989714 | 0.451307777 | 0.220823437 |
| 0.086717625 | 0.312091743 | 0.300662794 | 0.363191335 |
| 0.263885235 | 0.430357143 | 0.512124364 | 0.051527389 |
| 0.094926788 | 0.362570342 | 0.344838515 | 0.367081026 |
| 0.448077352 | 0.293789127 | 0.300120416 | 0.310399899 |
| 0.359306739 | 0.364393212 | 0.294030186 | 0.199592175 |
| 0.001493346 | 0.172282361 | 0.302044299 | 0.278549846 |
| 0.313197593 | 0.342231891 | 0.324353755 | 0.23704411  |
| 0.347533623 | 0.028083696 | 0.351548398 | 0.516731038 |
| 0.025553903 | 0.352751418 | 0.015506613 | 0.184064378 |
| 0.389918658 | 0.442381899 | 0.34787381  | 0.097090112 |
| 0.020593544 | 0.148903065 | 0.134109341 | 0.37792159  |
| 0.357351964 | 0.386769923 | 0.390650775 | 0.123603948 |
| 0.327562306 | 0.179900923 | 0.359869609 | 0.455121116 |
| 0.472193033 | 0.011566201 | 0.177315911 | 0.240584336 |
| 0.298844096 | 0.148101329 | 0.253417526 | 0.033812691 |
| 0.015774409 | 0.020375023 | 0.44753975  | 0.178085561 |
| 0.12376532  | 0.222553588 | 0.094918179 | 0.376563336 |
| 0.288593285 | 0.414283255 | 0.147094332 | 0.264115143 |
| 0.352174662 | 0.268589262 | 0.366187579 | 0.375038525 |
| 0.337853129 | 0.257915997 | 0.167396653 | 0.450362853 |
| 0.417819867 | 0.08979809  | 0.098265298 | 0.313463667 |
| 0.325665086 | 0.478462174 | 0.525741182 | 0.296008096 |
| 0.276586416 | 0.257985995 | 0.280724069 | 0.359460853 |
| 0.264865837 | 0.31706043  | 0.077048035 | 0.342503504 |
| 0.410783287 | 0.037223369 | 0.085940391 | 0.374429887 |
| 0.062210922 | 0.272259296 | 0.430135131 | 0.399091726 |
| 0.392244029 | 0.045534186 | 0.231069382 | 0.272354714 |
| 0.291690281 | 0.25699717  | 0.367796639 | 0.211988365 |
| 0.305829365 | 0.282640084 | 0.067031753 | 0.3346302   |
| 0.150196577 | 0.319391118 | 0.243650482 | 0.065447168 |
| 0.333819175 | 0.310195613 | 0.421158548 | 0.369423006 |
| 0.330662321 | 0.004090187 | 0.148784699 | 0.312603191 |
| 0.263482832 | 0.373755889 | 0.495378963 | 0.13992551  |
| 0.262753687 | 0.284669857 | 0.169536559 | 0.325133645 |
| 0.367828354 | 0.227616969 | 0.205227593 | 0.000991079 |
| 0.172644846 | 0.292956682 | 0.369499989 | 0.061914388 |
| 0.247954863 | 0.124192556 | 0.121777048 | 0.438366276 |

|             |             |             |             |
|-------------|-------------|-------------|-------------|
| 0.223095426 | 0.386671528 | 0.03106881  | 0.147173489 |
| 0.261076882 | 0.383835717 | 0.325786516 | 0.231747925 |
| 0.393310992 | 0.286889067 | 0.402734301 | 0.360387164 |
| 0.2970852   | 0.330522502 | 0.153114896 | 0.278055625 |
| 0.359987414 | 0.451892384 | 0.388941458 | 0.398401822 |
| 0.274419267 | 0.321803666 | 0.255588914 | 0.279839585 |
| 0.350666987 | 0.36439964  | 0.102066124 | 0.50187448  |
| 0.001123012 | 0.333710837 | 0.381868067 | 0.156348825 |
| 0.480056637 | 0.256394933 | 0.086728645 | 0.245123962 |
| 0.507904488 | 0.504196335 | 0.405221737 | 0.409189632 |
| 0.205394266 | 0.014208626 | 0.474355052 | 0.370489715 |
| 0.488214774 | 0.381416992 | 0.292792842 | 0.082176336 |
| 0.46922277  | 0.286103075 | 0.35773745  | 0.328783567 |
| 0.38473674  | 0.338161967 | 0.261566514 | 0.291816962 |
| 0.015246989 | 0.246933768 | 0.338361575 | 0.186317804 |
| 0.284878992 | 0.1971881   | 0.420169303 | 0.322238124 |
| 0.350251865 | 0.254436593 | 0.30856448  | 0.102813379 |
| 0.203380101 | 0.499273223 | 0.048535386 | 0.450576102 |
| 0.518956612 | 0.354596597 | 0.457135909 | 0.50734434  |
| 0.295844624 | 0.363781567 | 0.452313591 | 0.41677045  |
| 0.001230307 | 0.398755262 | 0.314951575 | 0.331798179 |
| 0.42388507  | 0.29005475  | 0.206995158 | 0.335005615 |
| 0.002179749 | 0.174995244 | 0.20573616  | 0.487912328 |
| 0.447216242 | 0.042361142 | 0.049910659 | 0.395900638 |
| 0.315661722 | 0.043952217 | 0.520274931 | 0.31749309  |
| 0.441531706 | 0.390514604 | 0.192329893 | 0.357846145 |
| 0.175227748 | 0.330328337 | 0.040348681 | 0.384016831 |
| 0.364619395 | 0.083103954 | 0.093737666 | 0.512709899 |
| 0.401502239 | 0.365625606 | 0.269955584 | 0.010180182 |
| 0.355896396 | 0.179367365 | 0.382805468 | 0.135380597 |
| 0.381490858 | 0.34683327  | 0.443368894 | 0.376667978 |
| 0.388696759 | 0.377117739 | 0.349027045 | 0.406600665 |
| 0.112986141 | 0.359307361 | 0.406424773 | 0.068123388 |
| 0.302145089 | 0.466931686 | 0.350069572 | 0.198865997 |
| 0.342463627 | 0.094951495 | 0.22148907  | 0.286049262 |
| 0.435782343 | 0.458364504 | 0.074297596 | 0.181674394 |
| 0.379889323 | 0.305390075 | 0.137850196 | 0.342039769 |
| 0.282450427 | 0.128304581 | 0.134151207 | 0.351544963 |
| 0.459089019 | 0.296437174 | 0.426881283 | 0.154864249 |
| 0.444578891 | 0.067643441 | 0.399140151 | 0.279004028 |
| 0.284757975 | 0.310390804 | 0.357802988 | 0.09864252  |
| 0.02528456  | 0.129479466 | 0.366110148 | 0.391946674 |
| 0.095634904 | 0.209846134 | 0.261225093 | 0.337035012 |
| 0.481418443 | 0.343451553 | 0.282291073 | 0.323921778 |
| 0.399365526 | 0.106942262 | 0.484084375 | 0.312952865 |
| 0.354076888 | 0.319873396 | 1           | 0.010705923 |
| 0.363545926 | 0.173294244 | 0.182646858 | 0.337447587 |
| 0.42637425  | 0.152933748 | 0.362735254 | 0.18307843  |
| 0.152829454 | 0.004702721 | 0.338513697 | 0.299806282 |
| 0.283895379 | 0.248921961 | 0.338062751 | 0.130686791 |
| 0.525335757 | 0.341283327 | 0.348128858 | 0.249084098 |
| 0.341809431 | 0.022369701 | 0.166449366 | 0.045286324 |
| 0.34783705  | 0.362195373 | 0.348898073 | 0.313177785 |
| 0.186854839 | 0.392089475 | 0.368657107 | 0.366070978 |

|             |             |             |             |             |
|-------------|-------------|-------------|-------------|-------------|
| 0.456796827 | 0.130310309 | 0.504350477 | 0.304287604 |             |
| 0.356624972 | 0.337278503 | 0.27288461  | 0.329039044 |             |
| 0.223099064 | 0.141810935 | 0.15103175  | 0.169694054 |             |
| 0.460768473 | 0.311228497 | 0.360019912 | 0.26011476  |             |
| 0.062121591 | 0.367439043 | 0.351755831 | 0.347991479 |             |
| 0.368512369 | 0.303864835 | 0.31709758  | 0.374966185 |             |
| 0.264106442 | 0.274475813 | 0.057654652 | 0.039426774 |             |
| 0.233871205 | 0.204747858 | 0.391431157 | 0.406823447 |             |
| 0.500596439 | 0.258163884 | 0.120898427 | 0.155768233 |             |
| 0.124468595 | 0.326086658 | 0.279295064 | 0.153363999 |             |
| 0.390457975 | 0.26348386  | 0.000827815 | 0.225683074 |             |
| 0.354825869 | 0.33488096  |             |             |             |
| SPRED2      | 0.009248777 | 0.015116743 | 0.001495714 | 5.62E-05    |
| 0.000449285 | 0.018109953 | 0.011793566 | 0.003482105 |             |
| 0.014715605 | 0.00507164  | 0.01543101  | 4.44E-05    |             |
| 0.004844354 | 0.00081216  | 0.000297952 | 0.011450179 |             |
| 0.011418071 | 0.009138656 | 0.011116482 | 0.006886369 |             |
| 0.002441592 | 0.013619944 | 0.010294211 | 0.017109679 |             |
| 0.000153063 | 0.005282558 | 0.000795161 | 0.002804449 |             |
| 0.009432015 | 0.012395203 | 0.002596585 | 0.012154201 |             |
| 0.0073375   | 0.003673644 | 0.000856418 | 0.000672457 |             |
| 0.01642037  | 3.34E-05    | 0.005514089 | 0.007144303 |             |
| 0.004822329 | 0.008596246 | 0.001065288 | 1.11E-05    |             |
| 0.004876463 | 0.002018842 | 0.012352539 | 0.00684474  |             |
| 0.01575006  | 0.010188008 | 0.007896873 | 4.01E-05    |             |
| 0.017158997 | 0.011718084 | 0.0001137   | 0.016459096 |             |
| 0.000133405 | 0.018177368 | 0.003746481 | 0.005225934 |             |
| 0.011766209 | 0.009069881 | 0.011912127 | 0.017006994 |             |
| 0.016557221 | 0.013455601 | 0.000744222 | 0.010150647 |             |
| 0.007501177 | 0.007434468 | 0.008226431 | 0.013873089 |             |
| 0.001487699 | 0.003997282 | 0.002409101 | 0.008414976 |             |
| 0.00615633  | 0.015375699 | 0.002706181 | 2.39E-05    |             |
| 0.008586491 | 0.002807374 | 0.010058791 | 0.003483839 |             |
| 0.015403912 | 0.007126629 | 0.00574436  | 0.004414255 |             |
| 0.000853557 | 0.009163425 | 0.011918547 | 5.78E-05    |             |
| 0.006992448 | 6.22E-06    | 0.00182269  | 0.009372041 |             |
| 0.008765063 | 0.010507831 | 0.00369843  | 0.000150066 |             |
| 0.004894859 | 0.000976937 | 0.006261448 | 0.009093083 |             |
| 0.006243709 | 0.017771461 | 0.000386215 | 0.004236197 |             |
| 0.008784717 | 0.00602824  | 0.016211818 | 0.013960155 |             |
| 2.94E-05    | 0.003875047 | 0.012290976 | 0.001689447 |             |
| 0.011540584 | 0.009535768 | 7.32E-06    | 7.26E-06    | 1.50E-05    |
| 0.009356229 | 0.004574526 | 0.006197336 | 0.010895075 |             |
| 0.000103429 | 0.006740869 | 0.002497872 | 0.009807546 |             |
| 0.001272754 | 0.010192443 | 0.005236465 | 0.01279202  |             |
| 0.003782306 | 0.008813898 | 0.001512371 | 0.004192644 |             |
| 0.006249721 | 0.013307425 | 0.016452693 | 0.000822627 |             |
| 0.003801039 | 0.015384093 | 0.004395377 | 0.010392791 |             |
| 0.013489812 | 0.002205978 | 0.00287399  | 0.010984036 |             |
| 0.005381357 | 0.010416474 | 0.011568611 | 0.007169001 |             |
| 1.27E-05    | 0.013710659 | 0.018115528 | 5.16E-06    | 0.007716847 |
| 0.008972472 | 5.42E-05    | 0.002096568 | 0.017374278 |             |
| 0.00986304  | 0.005712282 | 0.00100075  | 0.00475509  |             |
| 0.014636247 | 0.018287878 | 0.010756168 | 0.015455153 |             |

|                      |                      |                      |             |
|----------------------|----------------------|----------------------|-------------|
| 0.005315235          | 0.016652297          | 0.004830478          | 0.003039252 |
| 0.004427795          | 0.007412475          | 0.013811347          | 0.002230013 |
| 0.008045005          | 0.006880075          | 0.003554357          | 0.012198983 |
| 0.009178221          | 0.00891642           | 1.30E-05 0.003996737 |             |
| 0.01131792           | 0.004370557          | 0.005927201          | 0.015356451 |
| 0.010012931          | 0.01433256           | 0.001583156          | 0.010334416 |
| 0.00320633           | 0.011239732          | 0.002127032          | 0.003908691 |
| 4.85E-05 0.000877928 | 0.003128273          | 0.008047675          |             |
| 0.002119878          | 0.001698115          | 0.003136905          | 0.000275593 |
| 0.012745567          | 0.01157177           | 0.006799595          | 0.000184704 |
| 0.00064664           | 0.005045135          | 0.012395828          | 0.001856338 |
| 0.002074673          | 0.010974766          | 0.002827443          | 0.006950725 |
| 0.019856703          | 0.001651442          | 0.016766598          | 0.000216587 |
| 0.01219932           | 0.004352012          | 0.010862014          | 0.00738117  |
| 0.007558919          | 0.008585418          | 0.007691708          | 0.000162771 |
| 0.014929267          | 0.008055016          | 0.005636392          | 0.003156496 |
| 0.013514958          | 0.000100825          | 0.011461582          | 0.007839828 |
| 0.000398487          | 0.01395707           | 0.012592553          | 0.005979583 |
| 0.005311416          | 0.01121894           | 0.013851179          | 0.011880104 |
| 0.00745105           | 0.00032304           | 0.000228237          | 0.013773989 |
| 0.017611987          | 0.009945179          | 0.006147605          | 0.000888438 |
| 3.94E-05 0.010288546 | 0.00401256           | 0.013255549          |             |
| 0.005779821          | 0.005444447          | 0.001450508          | 0.010133231 |
| 0.006890277          | 2.41E-05 0.009144909 | 0.00749663           |             |
| 0.004792436          | 0.005481439          | 0.000993 0.010689862 |             |
| 0.015055476          | 0.001372377          | 0.00152386           | 0.003230806 |
| 0.004457591          | 0.013442685          | 0.014748611          | 6.25E-06    |
| 0.013482943          | 0.011997987          | 0.009675595          | 0.010850963 |
| 0.011773282          | 0.011335426          | 0.016653687          | 0.012274811 |
| 0.009174222          | 3.16E-06 0.006787874 | 0.004017942          |             |
| 0.017799464          | 0.009638035          | 0.017303047          | 0.001701946 |
| 0.002154136          | 1.43E-05 0.012502066 | 0.000466937          |             |
| 0.015973244          | 0.008851065          | 0.005194412          | 1.00E-05    |
| 0.00869128           | 0.003795902          | 6.70E-06 0.014403515 |             |
| 0.009661589          | 0.011733324          | 0.004901076          | 0.011646131 |
| 0.006022594          | 0.000521407          | 0.002329896          | 3.65E-05    |
| 0.007254979          | 0.004059471          | 0.000503726          | 0.002388707 |
| 0.013028887          | 0.012795032          | 0.012747415          | 0.014270206 |
| 0.000124186          | 0.007142706          | 0.000449881          | 0.008916926 |
| 0.000437454          | 0.011204159          | 0.018084651          | 0.01239982  |
| 0.007355507          | 0.007267364          | 0.014792034          | 0.017040783 |
| 0.011985137          | 2.26E-05 0.006783326 | 0.008921505          |             |
| 0.000218264          | 0.005391368          | 0.010756287          | 0.006654675 |
| 0.012532278          | 0.01410382           | 6.08E-05 0.015541943 |             |
| 0.008291195          | 0.012750358          | 0.01123827           | 0.008402025 |
| 0.002548812          | 0.016102154          | 0.007390755          | 0.007587549 |
| 0.006106667          | 0.018896118          | 0.000185754          | 0.00036641  |
| 0.015842901          | 0.016423172          | 0.015369833          | 0.011316976 |
| 0.002659248          | 0.008017311          | 0.001683441          | 0.009762663 |
| 0.001711841          | 0.012026963          | 0.005184784          | 0.005880404 |
| 0.000120303          | 0.000210508          | 0.001592332          | 0.016167507 |
| 0.01850277           | 0.005233026          | 0.011771202          | 0.007130988 |
| 0.008263075          | 0.009864322          | 0.001305092          | 0.013164235 |
| 0.005388644          | 0.018194311          | 0.001321986          | 0.016609677 |

|             |             |             |             |
|-------------|-------------|-------------|-------------|
| 0.009724121 | 0.015081475 | 0.004652563 | 0.010705923 |
| 1           | 0.006972298 | 0.005156466 | 0.002795879 |
| 0.007191032 | 0.008391422 | 0.005432467 | 0.012883003 |
| 0.008684097 | 0.000279129 | 4.04E-06    | 0.014088601 |
| 0.001830893 | 0.018526724 | 0.000543634 | 0.005667948 |
| 0.000186754 | 0.0155554   | 0.008969042 | 0.013517548 |
| 0.001032375 | 0.005782867 | 1.71E-06    | 0.006440189 |
| 0.000669742 | 0.016103024 | 0.015920311 | 0.009573001 |
| 0.008432128 | 0.002730851 | 0.007598114 | 0.011551134 |
| 0.004393989 | 0.010489543 | 5.75E-05    | 0.011713911 |
| 0.00697081  | 0.005517745 | 0.002051244 | 0.016850179 |
| 0.002205155 | 0.007162871 | 0.008414732 | 0.010929589 |
| 0.004386835 | 0.009385624 | 0.001699913 | 0.006823414 |
| 0.002706564 | 0.001262462 | 0.003561699 | 0.007357023 |
| 0.007168006 | 0.007708556 | 0.006502943 | 0.001509748 |
| 0.017700936 | 0.004476747 | 0.01215972  | 0.000270655 |
| 0.000548917 | 0.00121496  | 0.009909206 | 0.012450101 |
| 0.010281788 | 0.011225223 | 0.001548206 | 0.007493971 |
| 0.006586246 | 8.55E-05    | 0.007114012 | 0.012641933 |
| 0.007732468 | 0.00325202  | 1.25E-06    | 0.005136654 |
| 0.015782931 | 0.00054979  |             | 5.10E-05    |
| SQRDL       | 0.229993661 | 0.462791471 | 0.038204365 |
| 0.027449797 | 0.074372617 | 0.141566216 | 0.138968155 |
| 0.234596126 | 0.065179161 | 0.093757714 | 0.215130263 |
| 0.000889494 | 0.369560521 | 0.008143328 | 0.041011298 |
| 0.503486862 | 0.519209069 | 0.209771447 | 0.497230201 |
| 0.199411816 | 0.118765361 | 0.227424845 | 0.244019024 |
| 0.158279725 | 0.000997223 | 0.077850099 | 0.045159308 |
| 0.245527307 | 0.497513267 | 0.116130096 | 0.179208913 |
| 0.452124837 | 0.454826634 | 0.274768911 | 0.224020517 |
| 0.204480564 | 0.403646533 | 0.09730723  | 0.370330465 |
| 0.412392262 | 0.143783375 | 0.435813467 | 0.008598311 |
| 0.005818066 | 0.062589615 | 0.215104113 | 0.237796816 |
| 0.184602606 | 0.130479474 | 0.096932921 | 0.115909071 |
| 0.128715919 | 0.245010644 | 0.311554894 | 0.138240149 |
| 0.337407371 | 0.006240396 | 0.390455513 | 0.160711691 |
| 0.037100846 | 0.189261576 | 0.25081175  | 0.260327008 |
| 0.150031612 | 0.365567245 | 0.494432736 | 0.021847699 |
| 0.042663624 | 0.282052348 | 0.385182091 | 0.285696407 |
| 0.42296778  | 0.218143867 | 0.186602074 | 0.262972348 |
| 0.339942679 | 0.389611753 | 0.167177156 | 0.102847179 |
| 0.000623462 | 0.09307377  | 0.238601283 | 0.252050667 |
| 0.278870967 | 0.250752942 | 0.258410463 | 0.143174069 |
| 0.289595687 | 0.0097762   | 0.230433151 | 0.511518021 |
| 0.015374094 | 0.360611078 | 0.00804107  | 0.086886615 |
| 0.385248401 | 0.481374244 | 0.282061596 | 0.044336471 |
| 0.007462152 | 0.070667082 | 0.091726298 | 0.427310146 |
| 0.257078165 | 0.301505902 | 0.323393829 | 0.109169708 |
| 0.374158937 | 0.109028382 | 0.21980579  | 0.405091926 |
| 0.459805961 | 0.003791371 | 0.091887022 | 0.132297827 |
| 0.246041405 | 0.111069951 | 0.138366767 | 0.02801213  |
| 0.00736419  | 0.011854229 | 0.461271128 | 0.089718325 |
| 0.065305399 | 0.126088833 | 0.05598072  | 0.306536178 |
| 0.218935557 | 0.43200912  | 0.078269231 | 0.163192073 |



|             |             |             |             |
|-------------|-------------|-------------|-------------|
| 0.337861075 | 0.159831764 | 0.27789157  | 0.355738444 |
| 0.251797771 | 0.157600728 | 0.086807345 | 0.401372337 |
| 0.351624958 | 0.039277677 | 0.047811239 | 0.196654525 |
| 0.360167574 | 0.478985794 | 0.510071858 | 0.185720251 |
| 0.173060814 | 0.143074661 | 0.22538209  | 0.249326536 |
| 0.145518642 | 0.206164683 | 0.063064121 | 0.228294287 |
| 0.341332365 | 0.027554879 | 0.036718609 | 0.360924607 |
| 0.043206416 | 0.159775724 | 0.388206597 | 0.367770459 |
| 0.283458902 | 0.038534037 | 0.160561382 | 0.165810283 |
| 0.179865042 | 0.159450688 | 0.25831566  | 0.153270517 |
| 0.190234567 | 0.231494213 | 0.027428894 | 0.373826203 |
| 0.069913198 | 0.201103824 | 0.233913398 | 0.054788789 |
| 0.261391195 | 0.211044084 | 0.395708165 | 0.26579801  |
| 0.319023033 | 0.005266434 | 0.095506263 | 0.239099793 |
| 0.213790609 | 0.389929982 | 0.457144517 | 0.064289551 |
| 0.149228219 | 0.22901599  | 0.082009666 | 0.220761289 |
| 0.350605163 | 0.158225388 | 0.137119644 | 0.000432111 |
| 0.080438879 | 0.277787181 | 0.271047501 | 0.029119091 |
| 0.152177334 | 0.067240303 | 0.073708114 | 0.428165048 |
| 0.117719586 | 0.383473288 | 0.015057741 | 0.110539745 |
| 0.158906322 | 0.310287027 | 0.269387392 | 0.183719887 |
| 0.360325735 | 0.200063904 | 0.449639524 | 0.299118697 |
| 0.174951175 | 0.246243196 | 0.133684413 | 0.167843918 |
| 0.295980605 | 0.439640398 | 0.414248187 | 0.380361395 |
| 0.157039985 | 0.255031575 | 0.198107895 | 0.163731926 |
| 0.244273972 | 0.248571816 | 0.046796934 | 0.461805783 |
| 0.000361599 | 0.207759884 | 0.295004697 | 0.142422964 |
| 0.445679225 | 0.147510702 | 0.037970048 | 0.144388435 |
| 0.50482429  | 0.460770578 | 0.378726452 | 0.440212384 |
| 0.154968494 | 0.005261969 | 0.441781688 | 0.286596307 |
| 0.508746365 | 0.248654405 | 0.242167555 | 0.050971251 |
| 0.455482993 | 0.223961755 | 0.275036384 | 0.276090154 |
| 0.294966263 | 0.261854397 | 0.142689482 | 0.247762031 |
| 0.014300781 | 0.158565883 | 0.286434477 | 0.151726236 |
| 0.221044649 | 0.112455909 | 0.403001168 | 0.198576811 |
| 0.26685041  | 0.222544045 | 0.260852205 | 0.049331897 |
| 0.102581929 | 0.469743565 | 0.037933613 | 0.416420874 |
| 0.508332178 | 0.221642298 | 0.454221574 | 0.49831242  |
| 0.194977467 | 0.289685097 | 0.433231632 | 0.421554478 |
| 0.000448085 | 0.439933332 | 0.344901318 | 0.244104493 |
| 0.449255859 | 0.172722249 | 0.1603035   | 0.2887185   |
| 0.000746573 | 0.087791993 | 0.210348529 | 0.435977499 |
| 0.441488871 | 0.016365602 | 0.045885456 | 0.36127845  |
| 0.307795156 | 0.033887652 | 0.498863183 | 0.21009494  |
| 0.410063213 | 0.266824141 | 0.107016903 | 0.392562801 |
| 0.184286422 | 0.234445554 | 0.020314423 | 0.284128561 |
| 0.278825623 | 0.068454677 | 0.064726509 | 0.496462998 |
| 0.382723586 | 0.256914618 | 0.149688992 | 0.008893044 |
| 0.390618608 | 0.172675914 | 0.362763003 | 0.063630953 |
| 0.335768652 | 0.249078958 | 0.39081211  | 0.40133033  |
| 0.287767927 | 0.318176977 | 0.283427416 | 0.393887544 |
| 0.094995416 | 0.399566656 | 0.432284942 | 0.034987631 |
| 0.252819868 | 0.466231939 | 0.28437772  | 0.104836118 |
| 0.23026141  | 0.080752725 | 0.118353051 | 0.204422913 |

|             |             |             |             |
|-------------|-------------|-------------|-------------|
| 0.38801708  | 0.4619835   | 0.033032768 | 0.091397767 |
| 0.323294769 | 0.178161644 | 0.064717566 | 0.20339062  |
| 0.163822495 | 0.14743413  | 0.100895982 | 0.240907354 |
| 0.407372816 | 0.178317813 | 0.437199258 | 0.124082924 |
| 0.451188231 | 0.026521816 | 0.3733459   | 0.157201451 |
| 0.167697938 | 0.277769988 | 0.401721104 | 0.085707012 |
| 0.019289334 | 0.077037516 | 0.305800776 | 0.328346947 |
| 0.042182177 | 0.109674555 | 0.155672342 | 0.220930625 |
| 0.498180032 | 0.271625546 | 0.161308405 | 0.20278063  |
| 0.326199023 | 0.086557155 | 0.432442492 | 0.201652659 |
| 0.312389667 | 0.21325173  | 0.363545926 | 0.006972298 |
| 1           | 0.115459527 | 0.14076242  | 0.244332767 |
| 0.464909123 | 0.075670872 | 0.254716575 | 0.096400253 |
| 0.131422908 | 0.001914877 | 0.227712616 | 0.266770917 |
| 0.173149725 | 0.194326534 | 0.214959157 | 0.151901542 |
| 0.489215958 | 0.250029433 | 0.341026741 | 0.203404399 |
| 0.249473484 | 0.022828729 | 0.103402256 | 0.018724781 |
| 0.28323873  | 0.26863428  | 0.26510756  | 0.256551502 |
| 0.130941929 | 0.296363709 | 0.240029019 | 0.274338684 |
| 0.452600368 | 0.131863903 | 0.512031846 | 0.182768615 |
| 0.404930831 | 0.244704645 | 0.152505533 | 0.19962799  |
| 0.124854557 | 0.084587505 | 0.07052639  | 0.095185291 |
| 0.479510087 | 0.192729202 | 0.254632851 | 0.207646287 |
| 0.028023159 | 0.238259637 | 0.339829261 | 0.361052752 |
| 0.281454241 | 0.313431595 | 0.239018563 | 0.301777201 |
| 0.215453028 | 0.186798071 | 0.053446985 | 0.033250596 |
| 0.204177548 | 0.116154995 | 0.367408443 | 0.383301034 |
| 0.492886308 | 0.191807181 | 0.055308852 | 0.07755862  |
| 0.094791456 | 0.343184188 | 0.167542283 | 0.133313902 |
| 0.278657928 | 0.225293897 | 0.000252922 | 0.141995755 |
| 0.259163281 | 0.260526623 |             |             |
| SRM         | 0.088086413 | 0.25783629  | 0.07387145  |
| 0.061848598 | 0.058040324 | 0.29836575  | 0.246560565 |
| 0.059238843 | 0.064148407 | 0.197474594 | 0.313040965 |
| 0.000875852 | 0.077621708 | 0.01214413  | 0.018111641 |
| 0.185901628 | 0.182152748 | 0.176651027 | 0.164493661 |
| 0.080005635 | 0.164612651 | 0.173333628 | 0.269429942 |
| 0.24375547  | 0.001873524 | 0.176185733 | 0.208413555 |
| 0.039141494 | 0.152675945 | 0.137402732 | 0.12766063  |
| 0.161372732 | 0.140258538 | 0.071459598 | 0.045870924 |
| 0.02262615  | 0.279921913 | 0.00336645  | 0.103887195 |
| 0.088422321 | 0.171311699 | 0.14467963  | 0.013371049 |
| 0.005754684 | 0.117499605 | 0.033677075 | 0.202845337 |
| 0.057484469 | 0.269578855 | 0.126341935 | 0.220743291 |
| 0.007843359 | 0.279903843 | 0.13990693  | 0.008207745 |
| 0.312538319 | 0.031560251 | 0.296492762 | 0.032582428 |
| 0.058656001 | 0.098889987 | 0.064272497 | 0.18024588  |
| 0.294178208 | 0.314098104 | 0.213091343 | 0.076559791 |
| 0.137091972 | 0.085312309 | 0.12379491  | 0.230412702 |
| 0.224592276 | 0.093586591 | 0.092821881 | 0.029658524 |
| 0.133586773 | 0.099475737 | 0.186295995 | 0.052043324 |
| 0.002061763 | 0.228254066 | 0.074134027 | 0.078305684 |
| 0.069656973 | 0.299882292 | 0.089849135 | 0.12439546  |
| 0.106515301 | 0.028926171 | 0.170001144 | 0.204646166 |

|             |             |             |             |
|-------------|-------------|-------------|-------------|
| 0.047374965 | 0.093108923 | 0.003925053 | 0.040728787 |
| 0.144710083 | 0.126390334 | 0.155090735 | 0.121592442 |
| 0.014568017 | 0.039167106 | 0.015443712 | 0.084370905 |
| 0.109458853 | 0.113874836 | 0.297663598 | 0.003187881 |
| 0.06760501  | 0.064901396 | 0.068280649 | 0.316982682 |
| 0.220596455 | 0.003773837 | 0.035082204 | 0.243057849 |
| 0.036560045 | 0.087035294 | 0.195262385 | 0.00807781  |
| 0.021048521 | 0.001091556 | 0.150867361 | 0.061314179 |
| 0.173810433 | 0.233393164 | 0.066914707 | 0.155713397 |
| 0.039144578 | 0.115658686 | 0.060494579 | 0.216296762 |
| 0.11104254  | 0.257102407 | 0.12748893  | 0.146917338 |
| 0.038315695 | 0.037024524 | 0.092695849 | 0.242250527 |
| 0.241122239 | 0.068896026 | 0.080123344 | 0.287404498 |
| 0.070187364 | 0.181787    | 0.222637767 | 0.038348562 |
| 0.093373652 | 0.110181405 | 0.108128802 | 0.282055274 |
| 0.195141074 | 0.076746146 | 0.001954139 | 0.208396686 |
| 0.326085763 | 0.005735618 | 0.070219992 | 0.127807752 |
| 0.029287433 | 0.069477772 | 0.263372391 | 0.181017726 |
| 0.094486292 | 0.200197582 | 0.215128292 | 0.284161972 |
| 0.162672775 | 0.251135796 | 0.150358175 | 0.208183174 |
| 0.229057469 | 0.116782802 | 0.06421949  | 0.072438771 |
| 0.125557563 | 0.149869159 | 0.027866019 | 0.010655875 |
| 0.084068188 | 0.045268809 | 0.241153138 | 0.114134728 |
| 0.120662238 | 0.029073423 | 0.209345816 | 0.116358714 |
| 0.099584701 | 0.08661382  | 0.286596592 | 0.12465099  |
| 0.147657665 | 0.013918493 | 0.116435217 | 0.067440944 |
| 0.121370311 | 0.148142875 | 0.152377807 | 0.007607078 |
| 0.067860628 | 0.081952639 | 0.077754706 | 0.022908261 |
| 0.098044377 | 0.078703825 | 0.010637375 | 0.217864176 |
| 0.202200264 | 0.144582288 | 0.005225989 | 0.004320032 |
| 0.11072018  | 0.257316493 | 0.077286698 | 0.040859031 |
| 0.221262746 | 0.108646432 | 0.101906193 | 0.271921635 |
| 0.050993117 | 0.351774342 | 0.00437281  | 0.074197556 |
| 0.08691274  | 0.196050577 | 0.150052757 | 0.145801501 |
| 0.173475482 | 0.081570655 | 0.020315396 | 0.262748276 |
| 0.116546234 | 0.090429817 | 0.06500413  | 0.234055348 |
| 0.002543436 | 0.178471828 | 0.157674038 | 0.005588296 |
| 0.282166282 | 0.281847886 | 0.054240584 | 0.062144213 |
| 0.171194729 | 0.228232512 | 0.14086139  | 0.132197478 |
| 0.012861709 | 0.006454734 | 0.192784314 | 0.227704121 |
| 0.156514829 | 0.097207791 | 0.025939322 | 0.001912684 |
| 0.196322741 | 0.045587295 | 0.215313884 | 0.103215786 |
| 0.094864108 | 0.03116906  | 0.104197709 | 0.067959283 |
| 0.002146926 | 0.191058376 | 0.153387498 | 0.107850136 |
| 0.154726399 | 0.073752469 | 0.201597603 | 0.215112399 |
| 0.043482274 | 0.048726056 | 0.084442746 | 0.106059441 |
| 0.168712243 | 0.260592143 | 0.001156649 | 0.18288993  |
| 0.203157106 | 0.106966444 | 0.219985277 | 0.191355979 |
| 0.150830826 | 0.279871458 | 0.23062748  | 0.112651552 |
| 0.000455078 | 0.110643431 | 0.07336971  | 0.264451894 |
| 0.175989449 | 0.254332803 | 0.015734273 | 0.046638235 |
| 0.000376556 | 0.149078139 | 0.028643707 | 0.236739994 |
| 0.185369385 | 0.046797813 | 0.000793185 | 0.176422461 |
| 0.072229392 | 0.002079034 | 0.232285773 | 0.262474848 |

|             |             |             |             |
|-------------|-------------|-------------|-------------|
| 0.252618622 | 0.102414565 | 0.23629965  | 0.097607816 |
| 0.016475834 | 0.027435866 | 0.031366593 | 0.204265556 |
| 0.054252765 | 0.003450974 | 0.168697647 | 0.191651164 |
| 0.224911983 | 0.239700403 | 0.185007532 | 0.076667397 |
| 0.088782712 | 0.102964141 | 0.19937597  | 0.035152988 |
| 0.192199836 | 0.267886296 | 0.239583228 | 0.114429231 |
| 0.118024645 | 0.292941154 | 0.311065555 | 0.23074972  |
| 0.021975991 | 0.124830008 | 0.148090613 | 0.070895705 |
| 0.070312265 | 0.193433322 | 0.171814097 | 0.259996435 |
| 0.16911149  | 0.039343475 | 0.24966804  | 0.067429838 |
| 0.27101537  | 0.208998293 | 0.090256447 | 0.031994358 |
| 0.318300994 | 0.066178299 | 0.126226224 | 0.079473295 |
| 0.233337391 | 0.011137499 | 0.003934985 | 0.214065945 |
| 0.299890133 | 0.29608859  | 0.207100386 | 0.195138441 |
| 0.145476487 | 0.031576676 | 0.128154855 | 0.062240397 |
| 0.14690814  | 0.106546697 | 0.088296695 | 0.007118596 |
| 0.106874775 | 0.060512693 | 0.322455077 | 0.293874581 |
| 0.087991421 | 0.13654041  | 0.230821546 | 0.234331063 |
| 0.175067332 | 0.051223067 | 0.230560582 | 0.082698403 |
| 0.302758893 | 0.132188692 | 0.257600323 | 0.132495291 |
| 0.202684963 | 0.157853574 | 0.173294244 | 0.005156466 |
| 0.115459527 | 1           | 0.018678669 | 0.219186702 |
| 0.11329544  | 0.122518338 | 0.252259234 | 0.070046218 |
| 0.033063055 | 0.00070822  | 0.168355384 | 0.042810355 |
| 0.300786274 | 0.011892599 | 0.090413346 | 0.007035291 |
| 0.250730492 | 0.157388785 | 0.190884516 | 0.011611286 |
| 0.156764648 | 0.000903391 | 0.196420631 | 0.035729523 |
| 0.189280839 | 0.21231606  | 0.103682326 | 0.09541151  |
| 0.017529755 | 0.138890906 | 0.20996813  | 0.118700135 |
| 0.200411007 | 0.033245808 | 0.201705863 | 0.046535842 |
| 0.081551026 | 0.05228959  | 0.205824979 | 0.037618565 |
| 0.159700752 | 0.016016432 | 0.101815262 | 0.028178127 |
| 0.181427614 | 0.026822587 | 0.184532889 | 0.050269575 |
| 0.081679185 | 0.101427794 | 0.099276068 | 0.11621677  |
| 0.190519915 | 0.108852542 | 0.034100757 | 0.289198296 |
| 0.035977695 | 0.074189538 | 0.08323886  | 0.140148904 |
| 0.07858235  | 0.187372259 | 0.145355937 | 0.160684494 |
| 0.180246842 | 0.015333074 | 0.082797726 | 0.048190474 |
| 0.002453611 | 0.088268598 | 0.287754917 | 0.013540714 |
| 0.109564152 | 0.018741091 | 0.001210756 | 0.033363467 |
| 0.241703847 | 0.043803284 |             |             |
| SSBP2       | 0.188415874 | 0.218302363 | 0.020455991 |
| 0.001171132 | 0.009837541 | 0.063428762 | 0.035132812 |
| 0.144550275 | 0.040502655 | 0.014145897 | 0.104157095 |
| 0.019012201 | 0.222335332 | 0.036530568 | 0.040518131 |
| 0.28491183  | 0.270044004 | 0.057399484 | 0.302470064 |
| 0.167935341 | 0.011296014 | 0.200559546 | 0.08449033  |
| 0.05821846  | 0.014241796 | 0.01256511  | 0.002589835 |
| 0.123485736 | 0.293645422 | 0.060478694 | 0.043702552 |
| 0.278861425 | 0.204675928 | 0.046479085 | 0.028107158 |
| 0.022907281 | 0.210526447 | 0.021962266 | 0.152297097 |
| 0.278121619 | 0.022610238 | 0.205621519 | 0.013013134 |
| 7.97E-05    | 0.015298568 | 0.13080918  | 0.159961374 |
| 0.140395362 | 0.055480556 | 0.056093909 | 0.0162445   |

|             |             |             |             |
|-------------|-------------|-------------|-------------|
| 0.036081584 | 0.127518075 | 0.298970555 | 0.03289663  |
| 0.148120868 | 0.000152883 | 0.184143403 | 0.194357849 |
| 0.021751047 | 0.087604214 | 0.11809726  | 0.16577555  |
| 0.064682726 | 0.162358012 | 0.244934182 | 0.004797253 |
| 0.016114973 | 0.126211446 | 0.18500947  | 0.075423782 |
| 0.215618671 | 0.051185102 | 0.03685917  | 0.06293682  |
| 0.149292053 | 0.245931458 | 0.10910226  | 0.057536582 |
| 0.003588679 | 0.0171645   | 0.024222755 | 0.276821875 |
| 0.123385717 | 0.127439755 | 0.193210548 | 0.021445383 |
| 0.09118339  | 0.013241305 | 0.129694464 | 0.260418197 |
| 0.002564267 | 0.22780419  | 0.002476808 | 0.05651343  |
| 0.23531792  | 0.287793251 | 0.195532561 | 0.010496436 |
| 0.01404113  | 0.073656744 | 0.209014877 | 0.284480299 |
| 0.137828622 | 0.096099523 | 0.145432321 | 0.084361733 |
| 0.220130725 | 0.079051779 | 0.061210986 | 0.187324784 |
| 0.251836781 | 0.019179675 | 0.105185543 | 0.055710277 |
| 0.048369948 | 0.010410809 | 0.043536642 | 0.014547308 |
| 0.002041505 | 0.132970128 | 0.268472706 | 0.071481292 |
| 0.009942035 | 0.032593264 | 0.008834277 | 0.08662365  |
| 0.137326399 | 0.331138088 | 0.01092007  | 0.034753839 |
| 0.140624257 | 0.04257762  | 0.043975154 | 0.157552851 |
| 0.036249195 | 0.139430207 | 0.054786325 | 0.172095469 |
| 0.229606364 | 0.015018275 | 0.027387008 | 0.103947505 |
| 0.192148105 | 0.270369891 | 0.26687066  | 0.124207012 |
| 0.022348137 | 0.083249821 | 0.04756052  | 0.082731271 |
| 0.055518826 | 0.184203714 | 0.0797037   | 0.143321913 |
| 0.160722127 | 0.012672603 | 0.021316873 | 0.239560685 |
| 0.00185943  | 0.031493586 | 0.210662918 | 0.162363609 |
| 0.118245265 | 0.002108431 | 0.023240712 | 0.047941431 |
| 0.114063241 | 0.039526322 | 0.167889876 | 0.020654303 |
| 0.125791055 | 0.04294285  | 0.011109772 | 0.207462335 |
| 0.032730645 | 0.157111183 | 0.066549282 | 0.017598674 |
| 0.216404033 | 0.143775871 | 0.180217681 | 0.159508158 |
| 0.213773995 | 9.03E-05    | 0.013916555 | 0.198056408 |
| 0.058389655 | 0.29984718  | 0.197857315 | 0.031967841 |
| 0.12116626  | 0.0758621   | 0.046920656 | 0.030780719 |
| 0.333783079 | 0.031894759 | 0.026767649 | 0.001303026 |
| 0.024971445 | 0.057727805 | 0.101658517 | 0.080349838 |
| 0.021929162 | 0.049733106 | 0.148493672 | 0.194697378 |
| 0.051371913 | 0.152463163 | 0.099497493 | 0.159717508 |
| 0.054302096 | 0.108170166 | 0.045924122 | 0.132558776 |
| 0.124496117 | 0.053260471 | 0.283812235 | 0.164815209 |
| 0.031872189 | 0.110243602 | 0.092955109 | 0.094683367 |
| 0.112325525 | 0.18764631  | 0.183147108 | 0.175841609 |
| 0.044483135 | 0.272030863 | 0.084725318 | 0.096802217 |
| 0.15847707  | 0.140809779 | 0.041409827 | 0.235121082 |
| 0.003369982 | 0.116355072 | 0.078533716 | 0.107644252 |
| 0.188020613 | 0.044982644 | 0.036462412 | 0.132093887 |
| 0.300998897 | 0.243657559 | 0.318039111 | 0.237826322 |
| 0.122856768 | 0.039471202 | 0.292266149 | 0.151101168 |
| 0.281733128 | 0.065360226 | 0.030630914 | 0.107589909 |
| 0.226814758 | 0.215702796 | 0.125853245 | 0.120216163 |
| 0.090331358 | 0.060574312 | 0.08747238  | 0.288486994 |
| 0.022986322 | 0.048498012 | 0.139886435 | 0.019314673 |

|             |             |             |             |
|-------------|-------------|-------------|-------------|
| 0.037149931 | 0.047800438 | 0.160650485 | 0.12535099  |
| 0.039134653 | 0.086805092 | 0.030194315 | 0.012907756 |
| 0.043104925 | 0.229620833 | 0.009503319 | 0.295528731 |
| 0.272567957 | 0.122723805 | 0.1859616   | 0.29344041  |
| 0.114431691 | 0.129335263 | 0.201797867 | 0.325025237 |
| 0.008094117 | 0.230733064 | 0.167086699 | 0.150552124 |
| 0.216083695 | 0.086242037 | 0.182487487 | 0.05979969  |
| 0.002666271 | 0.047703375 | 0.030118206 | 0.260941158 |
| 0.184397749 | 0.006769735 | 0.008883516 | 0.165153036 |
| 0.144870667 | 0.025715215 | 0.267947894 | 0.057550665 |
| 0.162265155 | 0.078578634 | 0.022473958 | 0.189385465 |
| 0.031989976 | 0.117923642 | 0.002282622 | 0.091489559 |
| 0.079058861 | 0.118884123 | 0.004724499 | 0.289106785 |
| 0.221788441 | 0.104782472 | 0.075135002 | 0.001662348 |
| 0.307328139 | 0.017897687 | 0.130794334 | 0.047800681 |
| 0.223381476 | 0.12572363  | 0.182106896 | 0.189743298 |
| 0.126966702 | 0.146792462 | 0.143869042 | 0.185474959 |
| 0.009431511 | 0.208795896 | 0.243686679 | 0.01027391  |
| 0.164378637 | 0.207330283 | 0.055506014 | 0.036726395 |
| 0.178894523 | 0.00405386  | 0.058187523 | 0.206504053 |
| 0.160711325 | 0.198696247 | 0.015078573 | 0.110157622 |
| 0.135312855 | 0.072474843 | 0.018856199 | 0.092803733 |
| 0.10430104  | 0.052093033 | 0.158191171 | 0.148759319 |
| 0.183331986 | 0.077674359 | 0.213496718 | 0.012099975 |
| 0.226945192 | 0.036024365 | 0.266140226 | 0.043839157 |
| 0.119539202 | 0.127252432 | 0.273673056 | 0.133507219 |
| 0.005110578 | 0.088937769 | 0.116469906 | 0.164136067 |
| 0.02191556  | 0.071160062 | 0.035418895 | 0.050483423 |
| 0.256924814 | 0.064893636 | 0.085644746 | 0.117549517 |
| 0.160087921 | 0.005803853 | 0.246998862 | 0.124321468 |
| 0.219569976 | 0.041112725 | 0.182646858 | 0.002795879 |
| 0.14076242  | 0.018678669 | 1           | 0.041684318 |
| 0.298550873 | 0.027528958 | 0.092244914 | 0.072850964 |
| 0.02512566  | 0.009925399 | 0.192082998 | 0.04393806  |
| 0.095523974 | 0.129678769 | 0.119429202 | 0.025020378 |
| 0.257925261 | 0.126416087 | 0.217454039 | 0.086707844 |
| 0.04783561  | 0.00163122  | 0.015176617 | 0.02262118  |
| 0.220778465 | 0.166878046 | 0.191710478 | 0.137676098 |
| 0.23296816  | 0.102063093 | 0.126562112 | 0.043657587 |
| 0.185009893 | 0.028795998 | 0.257074329 | 0.125604171 |
| 0.224004108 | 0.080483449 | 0.078451782 | 0.087792733 |
| 0.021441673 | 0.050295542 | 0.028020008 | 0.159112464 |
| 0.207131009 | 0.085568099 | 0.050689536 | 0.112517666 |
| 0.008496263 | 0.055593649 | 0.233764361 | 0.164137901 |
| 0.10297886  | 0.176080758 | 0.108032716 | 0.151479022 |
| 0.099474143 | 0.129371511 | 0.002445442 | 0.001440264 |
| 0.022994517 | 0.031517133 | 0.317067658 | 0.252940086 |
| 0.26531625  | 0.137584974 | 0.027090528 | 0.085713728 |
| 0.0654025   | 0.286521351 | 0.048133949 | 0.013946491 |
| 0.122138712 | 0.113846902 | 0.001314414 | 0.168182966 |
| 0.149930458 | 0.056933391 |             |             |
| ST3GAL6     | 0.118250672 | 0.45523851  | 0.076131986 |
| 0.087418647 | 0.182693594 | 0.234821509 | 0.236958302 |
| 0.10848426  | 0.083710957 | 0.208224583 | 0.339359744 |

|             |             |             |             |
|-------------|-------------|-------------|-------------|
| 0.000271951 | 0.229965962 | 0.006587932 | 0.04118971  |
| 0.379355622 | 0.40118728  | 0.272356392 | 0.368272635 |
| 0.107305547 | 0.232113071 | 0.218643531 | 0.276885621 |
| 0.215940137 | 0.000505392 | 0.189163098 | 0.166946331 |
| 0.104654706 | 0.348198153 | 0.133855477 | 0.213250118 |
| 0.318766636 | 0.347377116 | 0.241455104 | 0.25623299  |
| 0.162814313 | 0.431391545 | 0.054211573 | 0.293738728 |
| 0.237728025 | 0.255468612 | 0.334626156 | 0.010865372 |
| 0.01711883  | 0.141066654 | 0.091006627 | 0.241620017 |
| 0.108109208 | 0.196073967 | 0.119039011 | 0.236386473 |
| 0.051041591 | 0.336316231 | 0.230876255 | 0.05565165  |
| 0.448470365 | 0.028324431 | 0.450889131 | 0.064452761 |
| 0.068469293 | 0.154654947 | 0.114958712 | 0.24811063  |
| 0.275218177 | 0.462315946 | 0.435234555 | 0.077124441 |
| 0.094996046 | 0.164565084 | 0.268131314 | 0.339089508 |
| 0.394306408 | 0.202378402 | 0.234897977 | 0.139879312 |
| 0.27917999  | 0.242748366 | 0.212504933 | 0.115519525 |
| 0.000708493 | 0.198743411 | 0.306577536 | 0.141578812 |
| 0.190732185 | 0.355722017 | 0.160362487 | 0.252005178 |
| 0.176346077 | 0.018720788 | 0.217930208 | 0.424412936 |
| 0.039294966 | 0.242403265 | 0.012314295 | 0.09668555  |
| 0.286844112 | 0.304399481 | 0.226825407 | 0.12330748  |
| 0.01128705  | 0.067972682 | 0.032387869 | 0.23490206  |
| 0.174346677 | 0.20676812  | 0.426061487 | 0.026918458 |
| 0.210605882 | 0.086593571 | 0.203984532 | 0.462314943 |
| 0.389339824 | 0.003407928 | 0.068465892 | 0.210521364 |
| 0.17864303  | 0.200777428 | 0.204643358 | 0.015754788 |
| 0.021535432 | 0.002245311 | 0.328538009 | 0.095426554 |
| 0.178446202 | 0.200566075 | 0.124935169 | 0.32443838  |
| 0.102319374 | 0.264259795 | 0.186873138 | 0.233585027 |
| 0.268971786 | 0.264552771 | 0.275029564 | 0.304650254 |
| 0.241322107 | 0.097136565 | 0.10255118  | 0.449573946 |
| 0.364760971 | 0.091815172 | 0.079477813 | 0.281846625 |
| 0.220856899 | 0.370994196 | 0.435810958 | 0.119237385 |
| 0.283540052 | 0.135235298 | 0.201153757 | 0.361178439 |
| 0.215355967 | 0.124520961 | 0.01689269  | 0.290505982 |
| 0.441758701 | 0.017275378 | 0.069856388 | 0.268204787 |
| 0.134354697 | 0.213155288 | 0.390358178 | 0.363554886 |
| 0.22829239  | 0.146365194 | 0.258781279 | 0.23609088  |
| 0.159832479 | 0.219506321 | 0.234847214 | 0.250867742 |
| 0.232372662 | 0.212469278 | 0.07150995  | 0.222830702 |
| 0.112637796 | 0.179600798 | 0.104012753 | 0.034925581 |
| 0.17022537  | 0.117533033 | 0.396286919 | 0.19429235  |
| 0.219504976 | 0.030801943 | 0.211969528 | 0.155716811 |
| 0.166255256 | 0.230478181 | 0.488564334 | 0.102926629 |
| 0.145858129 | 0.108771832 | 0.10679996  | 0.277216281 |
| 0.232994912 | 0.207808382 | 0.196907261 | 0.000985302 |
| 0.146091836 | 0.165279073 | 0.170397088 | 0.021476703 |
| 0.270070876 | 0.076716108 | 0.028356786 | 0.399235821 |
| 0.159934401 | 0.354848542 | 0.006100429 | 0.028647787 |
| 0.180133031 | 0.41948607  | 0.230140246 | 0.090295146 |
| 0.41068653  | 0.208687017 | 0.260348057 | 0.359585015 |
| 0.237922885 | 0.365224668 | 0.038578699 | 0.133251977 |
| 0.209921985 | 0.410605662 | 0.32709345  | 0.345216396 |

|             |             |             |             |
|-------------|-------------|-------------|-------------|
| 0.204046478 | 0.168258824 | 0.104300749 | 0.242416868 |
| 0.173189589 | 0.172385513 | 0.067150498 | 0.444244622 |
| 0.00045157  | 0.229126013 | 0.273341432 | 0.037632459 |
| 0.478658048 | 0.275251994 | 0.054664368 | 0.098162837 |
| 0.378634173 | 0.436672003 | 0.273547664 | 0.299535977 |
| 0.060263769 | 0.003533554 | 0.361653052 | 0.322081332 |
| 0.362249062 | 0.219297995 | 0.211146054 | 0.013937522 |
| 0.398277305 | 0.110498213 | 0.274176286 | 0.159292866 |
| 0.239689846 | 0.167177335 | 0.133357205 | 0.143573465 |
| 0.00376086  | 0.183936843 | 0.22852946  | 0.193505578 |
| 0.24243816  | 0.116460721 | 0.403225608 | 0.273832772 |
| 0.252383299 | 0.112073384 | 0.277750775 | 0.120429866 |
| 0.151030775 | 0.450071831 | 0.021600039 | 0.336633882 |
| 0.418303494 | 0.179941179 | 0.429987153 | 0.392049104 |
| 0.149605347 | 0.392776938 | 0.410805044 | 0.266227199 |
| 0.000212558 | 0.287544294 | 0.228916234 | 0.324047169 |
| 0.34575365  | 0.235043886 | 0.049969738 | 0.166250496 |
| 0.000544331 | 0.115744515 | 0.135983092 | 0.411746736 |
| 0.40554523  | 0.045875375 | 0.020140698 | 0.356614947 |
| 0.213053781 | 0.014332137 | 0.434233242 | 0.237501004 |
| 0.452008331 | 0.218829013 | 0.196084529 | 0.266496114 |
| 0.093073205 | 0.12656896  | 0.066321396 | 0.327893436 |
| 0.171707373 | 0.015907141 | 0.205882304 | 0.395515744 |
| 0.3426876   | 0.366260106 | 0.18929906  | 0.026167535 |
| 0.212669249 | 0.204493544 | 0.368625896 | 0.077962412 |
| 0.314452366 | 0.342293959 | 0.431392692 | 0.294862656 |
| 0.231536697 | 0.405477601 | 0.370750307 | 0.378229441 |
| 0.119153298 | 0.268072954 | 0.302648797 | 0.076595111 |
| 0.141508697 | 0.410957295 | 0.24696835  | 0.191614617 |
| 0.226776192 | 0.171533166 | 0.191802098 | 0.098003762 |
| 0.457683129 | 0.41203235  | 0.075404363 | 0.07078705  |
| 0.428182491 | 0.164028966 | 0.133304836 | 0.161705933 |
| 0.230807418 | 0.048367795 | 0.025786105 | 0.286000636 |
| 0.468070779 | 0.319885598 | 0.361721759 | 0.239043    |
| 0.351813506 | 0.036594996 | 0.281993067 | 0.197055511 |
| 0.152363323 | 0.182384804 | 0.224624901 | 0.023795971 |
| 0.043090882 | 0.063361855 | 0.433663695 | 0.403384305 |
| 0.081351376 | 0.119411056 | 0.231134236 | 0.306698812 |
| 0.379848558 | 0.190617289 | 0.227152139 | 0.141402335 |
| 0.422106311 | 0.213936777 | 0.421226397 | 0.148381308 |
| 0.280792402 | 0.263603304 | 0.337447587 | 0.007191032 |
| 0.244332767 | 0.219186702 | 0.041684318 | 1           |
| 0.279422282 | 0.134230588 | 0.38065696  | 0.09599895  |
| 0.111006407 | 0.001015207 | 0.232889026 | 0.17086616  |
| 0.287192657 | 0.074277975 | 0.150534288 | 0.066249787 |
| 0.453392379 | 0.188745917 | 0.276684674 | 0.083660746 |
| 0.247567063 | 0.021344078 | 0.218386155 | 0.028286736 |
| 0.2556591   | 0.311443104 | 0.191403615 | 0.131047891 |
| 0.045877561 | 0.304962219 | 0.305017334 | 0.278021482 |
| 0.419857159 | 0.087889961 | 0.412035927 | 0.115423342 |
| 0.237614743 | 0.167875265 | 0.212950602 | 0.145027087 |
| 0.228308977 | 0.056774851 | 0.117333455 | 0.053370533 |
| 0.396994428 | 0.13799936  | 0.284049569 | 0.109819789 |
| 0.080567297 | 0.23711242  | 0.237013171 | 0.273244642 |



|             |             |             |             |
|-------------|-------------|-------------|-------------|
| 0.264799714 | 0.207228403 | 0.122377315 | 0.397552027 |
| 0.104864412 | 0.108947309 | 0.14096827  | 0.132493899 |
| 0.224686247 | 0.181502247 | 0.264768113 | 0.314345141 |
| 0.394362681 | 0.071562406 | 0.095824935 | 0.069128994 |
| 0.029431166 | 0.19603412  | 0.300811467 | 0.132786916 |
| 0.23622931  | 0.088536058 | 0.000488311 | 0.074773097 |
| 0.309803217 | 0.189298048 |             |             |
| ST6GAL1     | 0.380887462 | 0.414017249 | 0.035633486 |
| 0.021742934 | 0.066520933 | 0.152622518 | 0.138204086 |
| 0.395241039 | 0.068612347 | 0.089238923 | 0.227380969 |
| 0.001872748 | 0.467377553 | 0.010415912 | 0.049689242 |
| 0.466557596 | 0.471162634 | 0.239447506 | 0.464423487 |
| 0.311600567 | 0.113251079 | 0.313276003 | 0.308313424 |
| 0.173192094 | 0.001546152 | 0.06756717  | 0.034121884 |
| 0.430641371 | 0.475700017 | 0.134514176 | 0.207062137 |
| 0.463595607 | 0.48137085  | 0.363972661 | 0.26613359  |
| 0.298574924 | 0.366986594 | 0.165344037 | 0.470696955 |
| 0.467073671 | 0.144451547 | 0.480796107 | 0.008353071 |
| 0.004782249 | 0.054295363 | 0.387010578 | 0.333028373 |
| 0.276194293 | 0.139965684 | 0.107518192 | 0.106718917 |
| 0.263130637 | 0.260112579 | 0.391874885 | 0.265267012 |
| 0.307954592 | 0.003904286 | 0.352815688 | 0.288935088 |
| 0.034080346 | 0.250716064 | 0.429408146 | 0.374064196 |
| 0.158744385 | 0.326748503 | 0.446119491 | 0.016097547 |
| 0.037082018 | 0.440259825 | 0.479420241 | 0.36622472  |
| 0.418068359 | 0.285659005 | 0.211685785 | 0.435665187 |
| 0.471071644 | 0.476637236 | 0.20294979  | 0.116374965 |
| 0.000831074 | 0.085361276 | 0.267094178 | 0.412284353 |
| 0.479569801 | 0.261347906 | 0.419417362 | 0.140663125 |
| 0.441668588 | 0.009230557 | 0.313244567 | 0.459347987 |
| 0.015351456 | 0.46230979  | 0.00810717  | 0.10260269  |
| 0.461584129 | 0.479495987 | 0.408238177 | 0.037533538 |
| 0.007374886 | 0.084762975 | 0.185312788 | 0.459105047 |
| 0.37512002  | 0.415825518 | 0.305254799 | 0.267433927 |
| 0.456193385 | 0.145249047 | 0.276842758 | 0.360024477 |
| 0.440414608 | 0.004962127 | 0.124848618 | 0.139298756 |
| 0.335350019 | 0.10585632  | 0.143253595 | 0.055942962 |
| 0.006877019 | 0.031175791 | 0.470933924 | 0.108808046 |
| 0.055528393 | 0.125441275 | 0.055127088 | 0.420715434 |
| 0.377490434 | 0.460196196 | 0.06850276  | 0.166738195 |
| 0.474292917 | 0.163771515 | 0.350901723 | 0.463363442 |
| 0.328472292 | 0.228286762 | 0.097217151 | 0.38151347  |
| 0.342866199 | 0.035627309 | 0.04784925  | 0.237930011 |
| 0.464162744 | 0.462564294 | 0.448034229 | 0.268695651 |
| 0.178371115 | 0.174235363 | 0.294530693 | 0.303678344 |
| 0.155623671 | 0.322289448 | 0.148201146 | 0.265745353 |
| 0.306054382 | 0.045866752 | 0.034668776 | 0.458738734 |
| 0.036701246 | 0.169552479 | 0.378625687 | 0.422256886 |
| 0.422325355 | 0.028786542 | 0.163451787 | 0.177160291 |
| 0.233441281 | 0.169371116 | 0.377154644 | 0.159481499 |
| 0.238191544 | 0.297766437 | 0.022638849 | 0.461128958 |
| 0.069866819 | 0.27896418  | 0.402853621 | 0.08032693  |
| 0.432294341 | 0.328569843 | 0.415199858 | 0.398201736 |
| 0.448719107 | 0.003141404 | 0.089595274 | 0.386312147 |

|             |             |             |             |
|-------------|-------------|-------------|-------------|
| 0.293220753 | 0.456376988 | 0.396978531 | 0.06335836  |
| 0.18983559  | 0.385006528 | 0.087440314 | 0.24939445  |
| 0.422321929 | 0.17258197  | 0.150469479 | 0.000354422 |
| 0.078959215 | 0.41695427  | 0.399653457 | 0.040107793 |
| 0.152197223 | 0.078906997 | 0.13069223  | 0.435801796 |
| 0.12652626  | 0.450960262 | 0.026698479 | 0.25603954  |
| 0.183310461 | 0.336009556 | 0.363359057 | 0.28431417  |
| 0.401030791 | 0.241394963 | 0.468941429 | 0.303220958 |
| 0.191806436 | 0.256185074 | 0.278111402 | 0.21624651  |
| 0.474184497 | 0.447640239 | 0.479177008 | 0.441966951 |
| 0.174493494 | 0.404453528 | 0.333912014 | 0.190081202 |
| 0.361703214 | 0.362817878 | 0.05002505  | 0.414655298 |
| 0.000444992 | 0.264266478 | 0.399135586 | 0.308276959 |
| 0.401141042 | 0.150363919 | 0.039242449 | 0.208604459 |
| 0.464274395 | 0.414192168 | 0.425214211 | 0.48030148  |
| 0.310759849 | 0.007596339 | 0.427568194 | 0.336610838 |
| 0.478244426 | 0.316309622 | 0.335563028 | 0.122766447 |
| 0.448531434 | 0.419695101 | 0.385758365 | 0.445300903 |
| 0.425948792 | 0.40250314  | 0.175086118 | 0.410054273 |
| 0.026053082 | 0.183298916 | 0.437101103 | 0.161422591 |
| 0.257443698 | 0.145839466 | 0.430618937 | 0.233024598 |
| 0.351725775 | 0.359791176 | 0.317846642 | 0.041411341 |
| 0.104706    | 0.420068244 | 0.065967705 | 0.421568191 |
| 0.454755827 | 0.303952298 | 0.444660499 | 0.454904549 |
| 0.257738838 | 0.289919579 | 0.431089248 | 0.460068599 |
| 0.000993928 | 0.477628073 | 0.46638519  | 0.251756421 |
| 0.470947272 | 0.201750393 | 0.337141876 | 0.460550469 |
| 0.000834497 | 0.094401314 | 0.32878018  | 0.394167718 |
| 0.452384082 | 0.012728097 | 0.089171583 | 0.422354429 |
| 0.468283583 | 0.057842019 | 0.437223586 | 0.247706958 |
| 0.399627022 | 0.356419974 | 0.102019031 | 0.478529077 |
| 0.330910028 | 0.377302835 | 0.017353618 | 0.371203414 |
| 0.41404896  | 0.153435786 | 0.050243517 | 0.454021779 |
| 0.40718294  | 0.289802776 | 0.168987601 | 0.006940503 |
| 0.455962878 | 0.201966235 | 0.435066328 | 0.071570228 |
| 0.377958616 | 0.269467141 | 0.377579873 | 0.480258292 |
| 0.412125094 | 0.320195311 | 0.283677736 | 0.416124853 |
| 0.112669893 | 0.476554769 | 0.469494154 | 0.032299162 |
| 0.448258329 | 0.456183709 | 0.372157575 | 0.102312482 |
| 0.320105666 | 0.076205748 | 0.125366294 | 0.339029733 |
| 0.368239559 | 0.455876936 | 0.029140497 | 0.123932926 |
| 0.31560802  | 0.224561541 | 0.057293431 | 0.278346747 |
| 0.191126186 | 0.290397526 | 0.234557768 | 0.292234832 |
| 0.360772379 | 0.191727788 | 0.454427657 | 0.115762445 |
| 0.471088877 | 0.02810167  | 0.437013101 | 0.177542314 |
| 0.214442023 | 0.454476362 | 0.463609554 | 0.197668181 |
| 0.020523968 | 0.10330868  | 0.300033926 | 0.313228516 |
| 0.039506896 | 0.127645963 | 0.165199653 | 0.24858798  |
| 0.474348351 | 0.388764132 | 0.184349497 | 0.2867891   |
| 0.299170825 | 0.075895156 | 0.391523929 | 0.28426917  |
| 0.379131005 | 0.240896482 | 0.42637425  | 0.008391422 |
| 0.464909123 | 0.11329544  | 0.298550873 | 0.279422282 |
| 1           | 0.075241409 | 0.284309328 | 0.113463611 |
| 0.167003742 | 0.003333086 | 0.298301505 | 0.416531155 |

|             |             |             |             |
|-------------|-------------|-------------|-------------|
| 0.186544955 | 0.37774316  | 0.310792767 | 0.2796658   |
| 0.420539464 | 0.354829676 | 0.416840441 | 0.376719561 |
| 0.300886887 | 0.034276978 | 0.097030006 | 0.01876357  |
| 0.35987583  | 0.305098274 | 0.4350911   | 0.4137031   |
| 0.255920377 | 0.400898082 | 0.299971644 | 0.339504522 |
| 0.452684491 | 0.200870066 | 0.465731873 | 0.2739671   |
| 0.468035301 | 0.34635014  | 0.170337888 | 0.279881997 |
| 0.118899682 | 0.121005113 | 0.068262206 | 0.147574947 |
| 0.472651978 | 0.266177044 | 0.299246954 | 0.331224565 |
| 0.022833987 | 0.295864456 | 0.461949901 | 0.479246401 |
| 0.389778649 | 0.459937133 | 0.405994096 | 0.286697301 |
| 0.338788608 | 0.283025066 | 0.043877072 | 0.021682469 |
| 0.252553717 | 0.11998828  | 0.418352744 | 0.427847043 |
| 0.462845807 | 0.367568692 | 0.053692303 | 0.098742325 |
| 0.218839502 | 0.456869123 | 0.174368288 | 0.185880179 |
| 0.400681545 | 0.40670727  | 0.000326063 | 0.220417834 |
| 0.298316404 | 0.37827121  |             |             |
| ST8SIA4     | 0.079184793 | 0.217201818 | 0.23056502  |
| 0.012592335 | 0.098384353 | 0.373350856 | 0.291684616 |
| 0.056674954 | 0.156398342 | 0.127735513 | 0.378719348 |
| 0.006910703 | 0.056075259 | 0.074618996 | 0.095017476 |
| 0.136982343 | 0.135082762 | 0.211048977 | 0.138473187 |
| 0.110788015 | 0.051457202 | 0.228603232 | 0.193930081 |
| 0.293109151 | 0.016666026 | 0.197255579 | 0.041216875 |
| 0.035718288 | 0.113101567 | 0.260096617 | 0.11024989  |
| 0.115338897 | 0.089831971 | 0.045968135 | 0.045650605 |
| 0.00770956  | 0.282429054 | 0.003537996 | 0.067723042 |
| 0.061462448 | 0.149752278 | 0.097734703 | 0.065997187 |
| 0.000198536 | 0.193068386 | 0.03075112  | 0.21532133  |
| 0.106915463 | 0.348873953 | 0.288465333 | 0.174628757 |
| 0.003444823 | 0.339284574 | 0.163039983 | 0.00295456  |
| 0.334755247 | 0.002226704 | 0.292884335 | 0.0458055   |
| 0.19908743  | 0.151497902 | 0.043381072 | 0.165376332 |
| 0.390150304 | 0.323330474 | 0.175794279 | 0.129412161 |
| 0.259004817 | 0.072739843 | 0.066529354 | 0.126767628 |
| 0.194835006 | 0.080623924 | 0.109680631 | 0.020208657 |
| 0.082012009 | 0.070272068 | 0.317897861 | 0.164642744 |
| 0.006254645 | 0.257270764 | 0.043488695 | 0.070924339 |
| 0.039635742 | 0.355536043 | 0.079618231 | 0.121358888 |
| 0.062624402 | 0.152630747 | 0.209249748 | 0.161307152 |
| 0.030225873 | 0.074668911 | 0.008914517 | 0.154762307 |
| 0.115052249 | 0.082669761 | 0.131484152 | 0.170557257 |
| 0.107760372 | 0.161896452 | 0.034738093 | 0.053100579 |
| 0.118646166 | 0.095039176 | 0.32264023  | 0.002840985 |
| 0.040654096 | 0.103740528 | 0.091145662 | 0.290323717 |
| 0.170786292 | 0.051343996 | 0.127306223 | 0.370709332 |
| 0.032809755 | 0.043188234 | 0.302969652 | 0.005265063 |
| 0.02800779  | 0.010576654 | 0.108365911 | 0.175915394 |
| 0.151493243 | 0.289667885 | 0.096733453 | 0.089800864 |
| 0.042759022 | 0.09347009  | 0.111158908 | 0.230099476 |
| 0.065483334 | 0.291369109 | 0.079709581 | 0.099046766 |
| 0.034206154 | 0.088839472 | 0.191291871 | 0.231693408 |
| 0.294160803 | 0.192600507 | 0.206472656 | 0.327669594 |
| 0.043125068 | 0.13879395  | 0.180864585 | 0.081359025 |

|             |             |             |             |
|-------------|-------------|-------------|-------------|
| 0.093951712 | 0.219274837 | 0.053036146 | 0.226010829 |
| 0.313279074 | 0.129156296 | 0.004065682 | 0.31144507  |
| 0.351175689 | 0.006450461 | 0.20681584  | 0.115811779 |
| 0.019323007 | 0.097414947 | 0.24977348  | 0.15709818  |
| 0.093549927 | 0.036429703 | 0.111753057 | 0.267392757 |
| 0.229968555 | 0.243514775 | 0.155595322 | 0.089846447 |
| 0.308989193 | 0.050826257 | 0.206596722 | 0.04332849  |
| 0.285451004 | 0.219798499 | 0.01420736  | 0.009043993 |
| 0.087416511 | 0.069617742 | 0.19046081  | 0.119189941 |
| 0.086622494 | 0.002196133 | 0.125493317 | 0.10470565  |
| 0.050875825 | 0.070961669 | 0.24400588  | 0.29830569  |
| 0.279221121 | 0.015087484 | 0.280692077 | 0.066876424 |
| 0.128542687 | 0.090362349 | 0.094899839 | 0.01383063  |
| 0.171114509 | 0.027395163 | 0.080156581 | 0.114229668 |
| 0.119630754 | 0.152074856 | 0.038351513 | 0.164203542 |
| 0.326415732 | 0.10742096  | 0.041585289 | 0.009099572 |
| 0.159038077 | 0.225674776 | 0.04028528  | 0.048197835 |
| 0.160595894 | 0.106938407 | 0.062220816 | 0.312865316 |
| 0.085095831 | 0.350890866 | 0.005910405 | 0.121613705 |
| 0.057934694 | 0.149477128 | 0.09275602  | 0.125283329 |
| 0.20175819  | 0.102146178 | 0.024378388 | 0.378193535 |
| 0.142949685 | 0.123091427 | 0.212859979 | 0.221067647 |
| 0.012115819 | 0.260775992 | 0.097616643 | 0.006757212 |
| 0.232302392 | 0.337655872 | 0.202355873 | 0.130097817 |
| 0.143632895 | 0.223663027 | 0.150116462 | 0.082416731 |
| 0.017050205 | 0.060763661 | 0.187538595 | 0.235716152 |
| 0.11117288  | 0.109541619 | 0.017715304 | 0.00782418  |
| 0.162446756 | 0.04997917  | 0.142908431 | 0.065476062 |
| 0.071890225 | 0.025828183 | 0.22399739  | 0.075320013 |
| 0.002792398 | 0.154036027 | 0.087113552 | 0.043557507 |
| 0.07310892  | 0.091352329 | 0.148618026 | 0.337015034 |
| 0.035103638 | 0.031483339 | 0.03393654  | 0.202120024 |
| 0.318303442 | 0.217159515 | 0.001334832 | 0.189696354 |
| 0.16615549  | 0.162753295 | 0.157184354 | 0.163427619 |
| 0.192809125 | 0.312272905 | 0.179929977 | 0.097908668 |
| 0.004907464 | 0.065868187 | 0.044758063 | 0.372659949 |
| 0.105752416 | 0.3151095   | 0.021813509 | 0.026928828 |
| 0.005269531 | 0.296920196 | 0.008521714 | 0.250281216 |
| 0.136380981 | 0.14135277  | 0.000572017 | 0.156484622 |
| 0.043940407 | 0.005231318 | 0.198543315 | 0.19985733  |
| 0.204751265 | 0.110397452 | 0.240148691 | 0.057118088 |
| 0.004805533 | 0.042380066 | 0.037608937 | 0.144784682 |
| 0.048650045 | 0.00600374  | 0.072871174 | 0.165513542 |
| 0.19278121  | 0.271910403 | 0.310746979 | 0.017147439 |
| 0.06150193  | 0.026093386 | 0.125690892 | 0.155164035 |
| 0.218121639 | 0.322686901 | 0.241626142 | 0.076584607 |
| 0.107431071 | 0.295677851 | 0.339419276 | 0.182642575 |
| 0.012644382 | 0.070504585 | 0.093310289 | 0.140267745 |
| 0.048897554 | 0.145868688 | 0.076198039 | 0.367416094 |
| 0.219834179 | 0.012696725 | 0.392199053 | 0.09270504  |
| 0.250661278 | 0.139933148 | 0.198043581 | 0.134056627 |
| 0.303921717 | 0.117994981 | 0.237212114 | 0.137437659 |
| 0.354787911 | 0.003915826 | 0.008041404 | 0.271726731 |
| 0.285949072 | 0.383176758 | 0.134562211 | 0.065356199 |

|             |             |             |             |
|-------------|-------------|-------------|-------------|
| 0.109205446 | 0.18453746  | 0.135413583 | 0.118165102 |
| 0.251040647 | 0.051637146 | 0.055760935 | 0.009858091 |
| 0.027556907 | 0.119908622 | 0.299482609 | 0.321420651 |
| 0.224184075 | 0.285475081 | 0.238987449 | 0.204561305 |
| 0.124812897 | 0.045631778 | 0.355274702 | 0.138764495 |
| 0.350571779 | 0.041245913 | 0.257996045 | 0.171989878 |
| 0.199486799 | 0.121020526 | 0.152933748 | 0.005432467 |
| 0.075670872 | 0.122518338 | 0.027528958 | 0.134230588 |
| 0.075241409 | 1           | 0.260169028 | 0.164743065 |
| 0.023970743 | 0.009240188 | 0.254007758 | 0.020592256 |
| 0.411774947 | 0.018234744 | 0.134726018 | 0.002513183 |
| 0.227441782 | 0.142342203 | 0.145774787 | 0.011302991 |
| 0.111368384 | 0.000395102 | 0.126199567 | 0.16699739  |
| 0.209742351 | 0.282616965 | 0.093638804 | 0.069320515 |
| 0.035340046 | 0.116194146 | 0.254882708 | 0.084443864 |
| 0.141041546 | 0.012451057 | 0.146254458 | 0.087611837 |
| 0.046958658 | 0.060133254 | 0.335520312 | 0.073221368 |
| 0.198833517 | 0.035459393 | 0.207588066 | 0.091470038 |
| 0.11645323  | 0.059495079 | 0.13947741  | 0.050848483 |
| 0.20253746  | 0.09874785  | 0.089789825 | 0.069919478 |
| 0.126478177 | 0.056928075 | 0.034489486 | 0.351887506 |
| 0.036575179 | 0.094498885 | 0.016732399 | 0.028701156 |
| 0.023348993 | 0.205256031 | 0.155565042 | 0.161426274 |
| 0.146287201 | 0.021644065 | 0.209643475 | 0.157560476 |
| 0.003587586 | 0.070231526 | 0.313073655 | 0.008517687 |
| 0.11128647  | 0.019360411 | 0.012458065 | 0.077944337 |
| 0.289123503 | 0.034807593 |             |             |
| STARD10     | 0.186407189 | 0.478868502 | 0.158971286 |
| 0.044867676 | 0.276709617 | 0.346753608 | 0.3888153   |
| 0.18600059  | 0.203343446 | 0.248043129 | 0.395316686 |
| 0.00149147  | 0.236237453 | 0.026609465 | 0.138356252 |
| 0.388508991 | 0.410827047 | 0.428504904 | 0.39781525  |
| 0.217618928 | 0.19914693  | 0.286907398 | 0.335165811 |
| 0.367432495 | 0.002843786 | 0.2910132   | 0.100413828 |
| 0.177837579 | 0.358109734 | 0.297036174 | 0.294866894 |
| 0.329242441 | 0.331911795 | 0.317380417 | 0.35307643  |
| 0.149492617 | 0.483731812 | 0.083455229 | 0.27934314  |
| 0.247749635 | 0.36577493  | 0.329865415 | 0.041922015 |
| 0.00433843  | 0.260281054 | 0.151309543 | 0.30317951  |
| 0.24943102  | 0.3276799   | 0.282370427 | 0.339964776 |
| 0.056970765 | 0.40330546  | 0.287428542 | 0.057140551 |
| 0.502759776 | 0.008791867 | 0.502091332 | 0.135716366 |
| 0.175046093 | 0.331319815 | 0.18542896  | 0.2912045   |
| 0.379101143 | 0.512399323 | 0.458098733 | 0.126573587 |
| 0.198816898 | 0.261321222 | 0.246785954 | 0.336786622 |
| 0.42343125  | 0.277116785 | 0.38186928  | 0.208573618 |
| 0.265638035 | 0.249223636 | 0.354081387 | 0.278830064 |
| 0.001749841 | 0.324114598 | 0.344139058 | 0.168619882 |
| 0.188432943 | 0.414926978 | 0.211964843 | 0.39113709  |
| 0.241442851 | 0.059276278 | 0.326294121 | 0.439427566 |
| 0.042625922 | 0.261321019 | 0.019469744 | 0.256379991 |
| 0.303178699 | 0.304910383 | 0.249394637 | 0.201084661 |
| 0.042941256 | 0.199854031 | 0.074781609 | 0.235515594 |
| 0.293801296 | 0.323529617 | 0.487517521 | 0.049928247 |

|             |                      |             |             |
|-------------|----------------------|-------------|-------------|
| 0.204927769 | 0.183320057          | 0.38600538  | 0.494039183 |
| 0.404419979 | 0.018162331          | 0.196192527 | 0.351303763 |
| 0.275381369 | 0.214641525          | 0.383434751 | 0.017889688 |
| 0.021769612 | 0.010129908          | 0.335997564 | 0.222546194 |
| 0.256430793 | 0.350492414          | 0.154794665 | 0.313366272 |
| 0.180339731 | 0.291276848          | 0.324592871 | 0.390482205 |
| 0.246726902 | 0.403399785          | 0.349449012 | 0.296273621 |
| 0.331094015 | 0.227524301          | 0.230304156 | 0.484628226 |
| 0.445901177 | 0.182948563          | 0.174201095 | 0.353372345 |
| 0.213940873 | 0.381274999          | 0.457107553 | 0.243633072 |
| 0.403139037 | 0.30825173           | 0.246290745 | 0.379438799 |
| 0.387679441 | 0.253911032          | 0.035048527 | 0.37882785  |
| 0.5022375   | 0.023073303          | 0.166937658 | 0.298403137 |
| 0.119526393 | 0.383367315          | 0.435616454 | 0.381122155 |
| 0.312927832 | 0.083782217          | 0.306527718 | 0.366194829 |
| 0.305898411 | 0.353912264          | 0.301141038 | 0.273413212 |
| 0.33328453  | 0.244604577          | 0.154394071 | 0.214736003 |
| 0.252547308 | 0.300500264          | 0.13904163  | 0.057432452 |
| 0.225103718 | 0.239486482          | 0.402657855 | 0.279468898 |
| 0.230896652 | 0.007262586          | 0.234225867 | 0.212396806 |
| 0.210629976 | 0.251450519          | 0.509022999 | 0.244528839 |
| 0.294691756 | 0.186561878          | 0.260286734 | 0.413220689 |
| 0.2832204   | 0.257122179          | 0.256769614 | 0.001912025 |
| 0.284995577 | 0.189570432          | 0.303118158 | 0.072916164 |
| 0.368291313 | 0.165004408          | 0.084264008 | 0.402787607 |
| 0.317921371 | 0.346197791          | 0.027080139 | 0.069424631 |
| 0.326610974 | 0.429505 0.264051011 | 0.158318081 |             |
| 0.39569844  | 0.296667148          | 0.256097685 | 0.433632511 |
| 0.414671264 | 0.400174803          | 0.078429697 | 0.298922095 |
| 0.245720787 | 0.413223794          | 0.307334342 | 0.358653325 |
| 0.358311028 | 0.218442251          | 0.162542889 | 0.345474689 |
| 0.281695946 | 0.308309153          | 0.157015239 | 0.485088214 |
| 0.001941351 | 0.358308534          | 0.326076382 | 0.073768954 |
| 0.488660793 | 0.390454903          | 0.145861019 | 0.227241005 |
| 0.407272874 | 0.486330215          | 0.329084246 | 0.289818138 |
| 0.103748136 | 0.017707396          | 0.411539862 | 0.375418803 |
| 0.367718697 | 0.380572439          | 0.251629592 | 0.045328257 |
| 0.413556598 | 0.166400736          | 0.292977885 | 0.214500027 |
| 0.307286757 | 0.252356576          | 0.316105814 | 0.181138987 |
| 0.008200751 | 0.284754273          | 0.22893023  | 0.213499976 |
| 0.294615827 | 0.206007126          | 0.398164053 | 0.372841627 |
| 0.321685783 | 0.15376619           | 0.293139819 | 0.226580079 |
| 0.328528603 | 0.472738839          | 0.034109815 | 0.394402333 |
| 0.439205334 | 0.341621267          | 0.419554106 | 0.421415486 |
| 0.288134395 | 0.453432442          | 0.418399569 | 0.298922284 |
| 0.001173146 | 0.274671507          | 0.21697253  | 0.41575715  |
| 0.326585151 | 0.35470637           | 0.104971649 | 0.225662403 |
| 0.003522603 | 0.262252075          | 0.124655312 | 0.478320136 |
| 0.397229643 | 0.107852609          | 0.027813823 | 0.372505227 |
| 0.200298476 | 0.033106428          | 0.464623172 | 0.349422728 |
| 0.453312478 | 0.360913678          | 0.320300548 | 0.251372324 |
| 0.088327777 | 0.25118574           | 0.08590812  | 0.344488042 |
| 0.284425764 | 0.040813931          | 0.187574098 | 0.430380324 |
| 0.366629667 | 0.415646589          | 0.357705972 | 0.014816205 |

|                      |             |             |             |
|----------------------|-------------|-------------|-------------|
| 0.22336701           | 0.163592038 | 0.338395663 | 0.200971151 |
| 0.369496822          | 0.414506605 | 0.473087519 | 0.291088715 |
| 0.309901175          | 0.444464297 | 0.427229955 | 0.388941973 |
| 0.11894432           | 0.250602935 | 0.294680549 | 0.124904424 |
| 0.174671629          | 0.414920758 | 0.299215243 | 0.328603679 |
| 0.310951218          | 0.121124453 | 0.327266391 | 0.198444248 |
| 0.481150766          | 0.397998693 | 0.155597098 | 0.201858688 |
| 0.462614935          | 0.344660208 | 0.276637462 | 0.342254981 |
| 0.349369555          | 0.053110688 | 0.063460171 | 0.360590213 |
| 0.508746487          | 0.396203695 | 0.350945661 | 0.211597839 |
| 0.356759061          | 0.119395841 | 0.334269176 | 0.376556998 |
| 0.302534337          | 0.186408177 | 0.224578645 | 0.041619116 |
| 0.030169972          | 0.127322799 | 0.460069508 | 0.466954328 |
| 0.184063616          | 0.276474658 | 0.35882025  | 0.407816743 |
| 0.38123616           | 0.268576623 | 0.356338581 | 0.291250889 |
| 0.495855856          | 0.175523501 | 0.476292867 | 0.282452558 |
| 0.324477429          | 0.371050117 | 0.362735254 | 0.012883003 |
| 0.254716575          | 0.252259234 | 0.092244914 | 0.38065696  |
| 0.284309328          | 0.260169028 | 1           | 0.227939415 |
| 0.146543543          | 0.004655091 | 0.315425457 | 0.208745733 |
| 0.365319493          | 0.138759458 | 0.294515027 | 0.067533856 |
| 0.494183562          | 0.281042593 | 0.292106574 | 0.148096562 |
| 0.35221339           | 0.018135975 | 0.27847625  | 0.081636126 |
| 0.310785988          | 0.394962073 | 0.236642966 | 0.204262677 |
| 0.10882549           | 0.350165693 | 0.374698377 | 0.375268215 |
| 0.408949193          | 0.081210753 | 0.415268506 | 0.27366925  |
| 0.227861197          | 0.274552281 | 0.367177461 | 0.296843927 |
| 0.390440124          | 0.136476584 | 0.269726981 | 0.149841533 |
| 0.37822543           | 0.302339108 | 0.39740157  | 0.178928457 |
| 0.145031459          | 0.363838791 | 0.265312966 | 0.259221332 |
| 0.302105759          | 0.190801536 | 0.201694526 | 0.475423959 |
| 0.184367882          | 0.225638363 | 0.084912528 | 0.080877462 |
| 0.201867759          | 0.312805125 | 0.320344107 | 0.357191381 |
| 0.41522755           | 0.141398498 | 0.213438618 | 0.190730158 |
| 0.058689887          | 0.214900573 | 0.404379412 | 0.133518727 |
| 0.328757021          | 0.15807212  | 0.001657826 | 0.180692199 |
| 0.376501818          | 0.247327649 |             |             |
| STARD3NL 0.145192814 | 0.248352526 | 0.150921565 |             |
| 0.002996594          | 0.037957219 | 0.339268178 | 0.210339054 |
| 0.09116214           | 0.180636786 | 0.068617227 | 0.347352697 |
| 0.04090793           | 0.077242563 | 0.168018226 | 0.121725263 |
| 0.181903666          | 0.173387374 | 0.171694588 | 0.186854292 |
| 0.190402214          | 0.028218575 | 0.317676711 | 0.180314572 |
| 0.275953052          | 0.075700277 | 0.103570305 | 0.013395729 |
| 0.056923145          | 0.153650194 | 0.289230761 | 0.087975521 |
| 0.166784278          | 0.107715589 | 0.037867864 | 0.027299163 |
| 0.005913937          | 0.317798592 | 0.003455227 | 0.077217118 |
| 0.094859849          | 0.09215256  | 0.121190492 | 0.098442053 |
| 5.12E-05 0.117896462 | 0.049621044 | 0.260875739 |             |
| 0.184094862          | 0.315370314 | 0.31649431  | 0.103329833 |
| 0.00385207           | 0.350815371 | 0.256446123 | 0.003101866 |
| 0.322515538          | 0.000621976 | 0.314194795 | 0.104191424 |
| 0.170633167          | 0.199349771 | 0.075281627 | 0.213822612 |
| 0.335159914          | 0.319111864 | 0.211167386 | 0.062472305 |

|             |             |             |             |
|-------------|-------------|-------------|-------------|
| 0.205685502 | 0.099732559 | 0.088508569 | 0.108919716 |
| 0.233475665 | 0.060641117 | 0.081082451 | 0.023944427 |
| 0.09867378  | 0.102298864 | 0.358680598 | 0.15944875  |
| 0.01681198  | 0.154713029 | 0.025151456 | 0.139250028 |
| 0.047369701 | 0.345420474 | 0.126300336 | 0.073426749 |
| 0.071323118 | 0.147367535 | 0.238771052 | 0.197858349 |
| 0.012248777 | 0.10681421  | 0.005696032 | 0.15369327  |
| 0.157659958 | 0.119144584 | 0.187647751 | 0.102302677 |
| 0.126999233 | 0.208563066 | 0.082754834 | 0.082317795 |
| 0.161219052 | 0.104748269 | 0.321584739 | 0.005704384 |
| 0.058091336 | 0.162161402 | 0.093563734 | 0.303433549 |
| 0.217575296 | 0.068904448 | 0.193870888 | 0.309213236 |
| 0.032597522 | 0.024802614 | 0.23265937  | 0.004224814 |
| 0.010171049 | 0.032426171 | 0.148664418 | 0.195333016 |
| 0.080643039 | 0.215938759 | 0.033022423 | 0.083436955 |
| 0.066229042 | 0.149125811 | 0.049496554 | 0.17640672  |
| 0.075435234 | 0.217265054 | 0.059935043 | 0.1177254   |
| 0.023059039 | 0.143188757 | 0.220334851 | 0.237516898 |
| 0.356982896 | 0.116651708 | 0.17044718  | 0.325950877 |
| 0.058342763 | 0.178901132 | 0.222447802 | 0.10923093  |
| 0.050910213 | 0.272478837 | 0.049685171 | 0.185988699 |
| 0.270925486 | 0.201428929 | 0.005939912 | 0.338439509 |
| 0.35329321  | 0.005368517 | 0.176065503 | 0.158289152 |
| 0.004207712 | 0.076442445 | 0.300180315 | 0.170313092 |
| 0.103954277 | 0.01267563  | 0.070487509 | 0.226077075 |
| 0.304400154 | 0.193753433 | 0.215316205 | 0.052477571 |
| 0.357585177 | 0.043941577 | 0.122273552 | 0.059882599 |
| 0.255643912 | 0.304911869 | 0.020584597 | 0.011985736 |
| 0.137929435 | 0.104924762 | 0.208524891 | 0.167987994 |
| 0.132271463 | 0.000340544 | 0.064425628 | 0.174266598 |
| 0.055754312 | 0.107838249 | 0.259230001 | 0.283402448 |
| 0.37180956  | 0.019339347 | 0.304291411 | 0.044266557 |
| 0.211757052 | 0.070859805 | 0.074268825 | 0.023291409 |
| 0.105228401 | 0.031796489 | 0.106138826 | 0.216323686 |
| 0.056678731 | 0.185803923 | 0.095903212 | 0.189754818 |
| 0.303299835 | 0.112874737 | 0.107215157 | 0.021202581 |
| 0.136040925 | 0.201658242 | 0.028870277 | 0.082758246 |
| 0.155539118 | 0.080527148 | 0.093693232 | 0.355463641 |
| 0.056350011 | 0.325807505 | 0.010453808 | 0.178791576 |
| 0.064732303 | 0.165840015 | 0.109433883 | 0.138364097 |
| 0.182720529 | 0.169177213 | 0.024173704 | 0.378644523 |
| 0.199023249 | 0.15342834  | 0.21031618  | 0.252749169 |
| 0.029895615 | 0.284699048 | 0.095248677 | 0.013487235 |
| 0.240193365 | 0.246716322 | 0.215330606 | 0.198834178 |
| 0.191550608 | 0.2614072   | 0.227363143 | 0.110859243 |
| 0.026643279 | 0.141094633 | 0.253465938 | 0.275375857 |
| 0.149010956 | 0.112870027 | 0.012334206 | 0.01516244  |
| 0.188921881 | 0.085066879 | 0.1673396   | 0.087055873 |
| 0.075463769 | 0.02619814  | 0.280903416 | 0.136606563 |
| 0.009309112 | 0.153346367 | 0.110639533 | 0.033525059 |
| 0.057785549 | 0.096866127 | 0.159077391 | 0.359635163 |
| 0.024174018 | 0.042840339 | 0.023194025 | 0.113433107 |
| 0.293508256 | 0.25059816  | 0.001244706 | 0.260471153 |
| 0.207320288 | 0.20619644  | 0.170160235 | 0.212321112 |



|             |             |             |             |
|-------------|-------------|-------------|-------------|
| 0.258059732 | 0.309555158 | 0.204682778 | 0.150363334 |
| 0.015724762 | 0.089022153 | 0.056177652 | 0.404802258 |
| 0.134129015 | 0.32750152  | 0.04862541  | 0.028650448 |
| 0.008992938 | 0.322809575 | 0.007015512 | 0.308523292 |
| 0.147695702 | 0.097494165 | 0.000565726 | 0.166417005 |
| 0.054107493 | 0.007156033 | 0.246346168 | 0.173187646 |
| 0.2050546   | 0.107672829 | 0.172320043 | 0.073930421 |
| 0.004817013 | 0.054258698 | 0.01308994  | 0.129887347 |
| 0.058660679 | 0.018036254 | 0.026610544 | 0.216834975 |
| 0.243034441 | 0.24553635  | 0.326530136 | 0.014789808 |
| 0.102735408 | 0.014113515 | 0.126997942 | 0.124996186 |
| 0.271284436 | 0.332783371 | 0.250399373 | 0.097145072 |
| 0.130170878 | 0.293682927 | 0.35335144  | 0.208563404 |
| 0.006217932 | 0.096007558 | 0.128594449 | 0.075305177 |
| 0.075040927 | 0.168023477 | 0.070065014 | 0.281945857 |
| 0.297132954 | 0.004309341 | 0.357104602 | 0.174950696 |
| 0.244107667 | 0.160266561 | 0.154487696 | 0.179970548 |
| 0.290784558 | 0.122418329 | 0.177129279 | 0.163516153 |
| 0.393202082 | 0.00545611  | 0.018562893 | 0.319544527 |
| 0.298949588 | 0.324785194 | 0.167249611 | 0.032958106 |
| 0.1334433   | 0.194153842 | 0.190119748 | 0.09221423  |
| 0.327817157 | 0.069150718 | 0.086355292 | 0.020060283 |
| 0.021325621 | 0.174248669 | 0.273781654 | 0.342573327 |
| 0.180269396 | 0.339418996 | 0.168872411 | 0.149283288 |
| 0.158522694 | 0.039454909 | 0.344087015 | 0.182852537 |
| 0.35882932  | 0.016663033 | 0.309844431 | 0.225597975 |
| 0.268422359 | 0.092670224 | 0.18307843  | 0.008684097 |
| 0.096400253 | 0.070046218 | 0.072850964 | 0.09599895  |
| 0.113463611 | 0.164743065 | 0.227939415 | 1           |
| 0.018611915 | 0.013264557 | 0.33824596  | 0.019790662 |
| 0.397318367 | 0.025237149 | 0.168841357 | 0.002521592 |
| 0.272642228 | 0.175318863 | 0.204623663 | 0.015684067 |
| 0.095806361 | 0.000203679 | 0.069473706 | 0.187659736 |
| 0.293277922 | 0.327586101 | 0.140179472 | 0.111423747 |
| 0.081778444 | 0.116452411 | 0.262848807 | 0.064610815 |
| 0.154696948 | 0.008359619 | 0.182586768 | 0.140282685 |
| 0.067005612 | 0.066649583 | 0.339317263 | 0.085623046 |
| 0.128094468 | 0.054278651 | 0.195356333 | 0.177024633 |
| 0.135949356 | 0.067254982 | 0.108052833 | 0.069570433 |
| 0.096208689 | 0.08675578  | 0.126736758 | 0.087676256 |
| 0.129662074 | 0.082140284 | 0.044269276 | 0.360328769 |
| 0.061379461 | 0.168641958 | 0.005124752 | 0.010433567 |
| 0.016677101 | 0.170511273 | 0.242514539 | 0.209881884 |
| 0.184617312 | 0.04189526  | 0.174218599 | 0.213589016 |
| 0.005509121 | 0.116035027 | 0.228370663 | 0.004376835 |
| 0.129555013 | 0.032622172 | 0.009761051 | 0.14514575  |
| 0.32817143  | 0.028394678 |             |             |
| SURF1       | 0.073071786 | 0.213530111 | 0.00659766  |
| 0.001929876 | 0.007339782 | 0.078970952 | 0.074241307 |
| 0.056343348 | 0.004569059 | 0.021950161 | 0.125544117 |
| 7.25E-06    | 0.136008051 | 0.0003094   | 0.000812582 |
| 0.208472601 | 0.21425803  | 0.095340851 | 0.200801862 |
| 0.052789921 | 0.008223368 | 0.105488855 | 0.117835471 |
| 0.076356083 | 1.71E-05    | 0.033287823 | 0.00879647  |

|             |             |             |             |
|-------------|-------------|-------------|-------------|
| 0.055032587 | 0.198168602 | 0.039124832 | 0.021342544 |
| 0.18117437  | 0.187359468 | 0.043829979 | 0.021205928 |
| 0.021906454 | 0.197702058 | 0.001676324 | 0.157281851 |
| 0.144796889 | 0.045736545 | 0.182712527 | 0.000158775 |
| 0.000433788 | 0.023773695 | 0.043000725 | 0.112839984 |
| 0.040697427 | 0.065870403 | 0.037040727 | 0.050957358 |
| 0.002231041 | 0.134547238 | 0.125944436 | 0.00980678  |
| 0.181432371 | 0.000238867 | 0.192112372 | 0.024141581 |
| 0.009777365 | 0.051410113 | 0.059115097 | 0.118229416 |
| 0.091726883 | 0.193518588 | 0.218128947 | 0.001290302 |
| 0.018241861 | 0.091705775 | 0.157415587 | 0.145831485 |
| 0.186513282 | 0.027547133 | 0.024985561 | 0.056794676 |
| 0.146098441 | 0.140179025 | 0.081933261 | 0.016287111 |
| 7.00E-06    | 0.047525422 | 0.052139202 | 0.087891643 |
| 0.116657116 | 0.137379051 | 0.098691862 | 0.040679144 |
| 0.099565708 | 0.000452537 | 0.094560074 | 0.218493207 |
| 0.000494045 | 0.137529153 | 8.08E-05    | 0.00832061  |
| 0.153220748 | 0.181372651 | 0.113346602 | 0.007879006 |
| 0.000239286 | 0.012307931 | 0.004159028 | 0.151480334 |
| 0.095725099 | 0.099868504 | 0.171871942 | 0.010684425 |
| 0.134015948 | 0.005874013 | 0.038717805 | 0.20426663  |
| 0.199125192 | 6.73E-05    | 0.009593096 | 0.072299878 |
| 0.01244546  | 0.003528057 | 0.065258797 | 0.000590289 |
| 0.000256851 | 0.000100843 | 0.177217551 | 0.016366185 |
| 0.023693176 | 0.057505001 | 0.001825331 | 0.151557205 |
| 0.04542005  | 0.158723182 | 0.012240029 | 0.070566395 |
| 0.143074457 | 0.087271725 | 0.099133311 | 0.162249113 |
| 0.047552695 | 0.019254904 | 0.022346968 | 0.197774429 |
| 0.166632267 | 0.003922767 | 0.005409792 | 0.113378065 |
| 0.129014105 | 0.199128421 | 0.221974813 | 0.017265439 |
| 0.046661267 | 0.047195059 | 0.035172943 | 0.144788158 |
| 0.072106438 | 0.066253463 | 0.00072016  | 0.118283195 |
| 0.182110924 | 0.000254005 | 0.009032749 | 0.139774282 |
| 0.001944951 | 0.011948946 | 0.181653112 | 0.164750979 |
| 0.103937852 | 0.00563511  | 0.052671246 | 0.078710042 |
| 0.069192541 | 0.074552067 | 0.112131921 | 0.044476124 |
| 0.096696114 | 0.039471675 | 0.007560694 | 0.132541574 |
| 0.025468893 | 0.080244397 | 0.014257059 | 0.011745124 |
| 0.101419198 | 0.040550899 | 0.182079302 | 0.094323815 |
| 0.122294313 | 0.000625524 | 0.024901152 | 0.085449378 |
| 0.026412885 | 0.138942547 | 0.223255475 | 0.026014378 |
| 0.061910493 | 0.023571546 | 0.029519461 | 0.053057709 |
| 0.132573812 | 0.013255231 | 0.011795376 | 1.34E-05    |
| 0.004836122 | 0.068611818 | 0.082075653 | 0.001930326 |
| 0.029258817 | 0.005083533 | 0.001133624 | 0.201927692 |
| 0.050230585 | 0.174932237 | 0.000248097 | 0.007021855 |
| 0.040168381 | 0.170910884 | 0.056384512 | 0.009663602 |
| 0.180953357 | 0.038607371 | 0.160292506 | 0.15410128  |
| 0.021688729 | 0.1416024   | 0.003287441 | 0.035379156 |
| 0.114150799 | 0.196039896 | 0.183267962 | 0.168868588 |
| 0.053502832 | 0.0941461   | 0.005969339 | 0.092166061 |
| 0.08393519  | 0.084479782 | 0.008167152 | 0.212598703 |
| 5.24E-06    | 0.095923889 | 0.118491734 | 0.004019438 |
| 0.218966964 | 0.089007443 | 0.008176102 | 0.031433388 |

|             |             |             |             |
|-------------|-------------|-------------|-------------|
| 0.205696964 | 0.208466014 | 0.148682421 | 0.172444822 |
| 0.004793241 | 0.000143341 | 0.18407492  | 0.139661771 |
| 0.204338698 | 0.069487499 | 0.037954595 | 0.000456494 |
| 0.204231978 | 0.069869585 | 0.129379142 | 0.092441524 |
| 0.108923322 | 0.049633306 | 0.04779356  | 0.089734924 |
| 0.000105913 | 0.044500223 | 0.127934918 | 0.005999141 |
| 0.052651725 | 0.002679599 | 0.182750106 | 0.107274129 |
| 0.044774377 | 0.015648654 | 0.054284202 | 0.018338926 |
| 0.046150958 | 0.21492348  | 0.000313758 | 0.176091112 |
| 0.217072173 | 0.077976819 | 0.212379165 | 0.210941121 |
| 0.072722744 | 0.156505449 | 0.198940415 | 0.154260115 |
| 5.43E-06    | 0.170769297 | 0.133127427 | 0.130339742 |
| 0.19009724  | 0.088480618 | 0.025508857 | 0.074687092 |
| 8.46E-06    | 0.034981488 | 0.021272529 | 0.196495548 |
| 0.199436585 | 0.001054689 | 0.000472481 | 0.167329215 |
| 0.121703345 | 0.000293427 | 0.220152574 | 0.0873996   |
| 0.202160012 | 0.089124843 | 0.043579961 | 0.155172078 |
| 0.01892818  | 0.034089802 | 0.000396691 | 0.13986032  |
| 0.073823516 | 0.00092757  | 0.014976225 | 0.203659636 |
| 0.175919917 | 0.145454512 | 0.067767641 | 0.000277889 |
| 0.130709472 | 0.014905537 | 0.182018679 | 0.002835941 |
| 0.150585217 | 0.134847971 | 0.192666158 | 0.164591538 |
| 0.111303826 | 0.1714139   | 0.152101609 | 0.186063371 |
| 0.001348021 | 0.160829845 | 0.17445358  | 0.001574199 |
| 0.088123823 | 0.207166885 | 0.103810872 | 0.058716944 |
| 0.109129418 | 0.002944851 | 0.063627929 | 0.058563411 |
| 0.200048936 | 0.205087282 | 0.00851314  | 0.011810892 |
| 0.1737137   | 0.033258692 | 0.025818425 | 0.055354045 |
| 0.089028917 | 0.010648797 | 0.003886924 | 0.1200011   |
| 0.207514903 | 0.111262343 | 0.188122889 | 0.022274365 |
| 0.190245365 | 0.003458742 | 0.147606649 | 0.015390265 |
| 0.064332215 | 0.109461606 | 0.14037907  | 0.002751923 |
| 0.000368056 | 0.003881586 | 0.169110637 | 0.167665707 |
| 0.013802332 | 0.041937859 | 0.067433367 | 0.105737495 |
| 0.209274392 | 0.032779781 | 0.081970543 | 0.056952201 |
| 0.172771947 | 0.006888474 | 0.197402385 | 0.068771379 |
| 0.140682269 | 0.064353382 | 0.152829454 | 0.000279129 |
| 0.131422908 | 0.033063055 | 0.02512566  | 0.111006407 |
| 0.167003742 | 0.023970743 | 0.146543543 | 0.018611915 |
| 1           | 1.96E-05    | 0.103466652 | 0.103446024 |
| 0.016294184 | 0.063076236 | 0.009393056 | 0.218356754 |
| 0.093815365 | 0.145802572 | 0.026050718 | 0.073915074 |
| 0.000263625 | 0.030734916 | 0.001045006 | 0.126460304 |
| 0.130781743 | 0.105941279 | 0.072088193 | 0.015323488 |
| 0.141529212 | 0.121860098 | 0.103146566 | 0.202656436 |
| 0.005021089 | 0.220322011 | 0.033495494 | 0.143475823 |
| 0.023320086 | 0.075994698 | 0.014523318 | 0.052779937 |
| 0.001149696 | 0.0206321   | 0.008423741 | 0.209758668 |
| 0.017038579 | 0.113938306 | 0.021459628 | 0.004261716 |
| 0.054052877 | 0.124009844 | 0.146044349 | 0.126524727 |
| 0.120960794 | 0.040671494 | 0.160074083 | 0.009613434 |
| 0.039756752 | 0.004228477 | 0.001989566 | 0.010240544 |
| 0.041986831 | 0.14372229  | 0.169775272 | 0.205575131 |
| 0.009663715 | 0.013151515 | 0.014406607 | 0.002200932 |

|             |             |             |             |
|-------------|-------------|-------------|-------------|
| 0.118709739 | 0.098898253 | 0.005829626 | 0.107311398 |
| 0.023095428 | 9.17E-06    | 0.01764502  | 0.126812873 |
| 0.01425672  |             |             |             |
| SURF4       | 0.006151184 | 0.005549071 | 0.005908955 |
|             |             |             | 3.88E-06    |
| 0.000423584 | 0.008176027 | 0.004071058 | 0.005877518 |
| 0.002336175 | 0.000494459 | 0.010149863 | 0.001996209 |
| 0.002963795 | 0.007112935 | 0.001918311 | 0.005011063 |
| 0.004388201 | 0.004095203 | 0.006428843 | 0.013039443 |
| 2.82E-05    | 0.016815345 | 0.003574547 | 0.005591055 |
| 0.004578678 | 0.002099473 | 1.61E-05    | 0.003635269 |
| 0.004944321 | 0.01514942  | 0.000875288 | 0.00441543  |
| 0.002477012 | 0.000326893 | 0.000159524 | 2.16E-05    |
| 0.009391454 | 1.78E-05    | 0.001740855 | 0.003160944 |
| 0.001417377 | 0.002784421 | 0.000596748 | 1.33E-08    |
| 0.003736582 | 0.003606183 | 0.009765164 | 0.016010753 |
| 0.008374258 | 0.022584237 | 0.001146624 | 1.06E-05    |
| 0.010267383 | 0.014482047 | 2.35E-05    | 0.008230832 |
|             |             |             | 6.99E-08    |
| 0.007506769 | 0.009747555 | 0.010834885 | 0.007785888 |
| 0.001558081 | 0.006033328 | 0.008224093 | 0.008090035 |
| 0.00536608  | 0.000194181 | 0.007163749 | 0.003042565 |
| 0.001645492 | 0.001241019 | 0.005791297 | 0.000783667 |
| 0.000783015 | 0.0005422   | 0.001645608 | 0.00353529  |
| 0.0166843   | 0.013458734 | 6.31E-05    | 0.002925186 |
| 0.000171635 | 0.00609047  | 0.001154811 | 0.010229055 |
| 0.005316198 | 0.000839168 | 0.001597172 | 0.004593995 |
| 0.011118618 | 0.005264302 | 8.91E-06    | 0.003578811 |
|             |             |             | 6.68E-05    |
| 0.0105511   | 0.004951575 | 0.003334957 | 0.00563106  |
| 0.000915816 | 0.002200669 | 0.026313525 | 0.004080898 |
| 0.002684872 | 0.005732084 | 0.002598555 | 0.007731959 |
| 0.000868482 | 0.001854521 | 0.001986674 | 0.002455778 |
| 0.007417948 | 0.005326926 | 0.09144101  | 0.015033078 |
| 0.011460548 | 0.000116273 | 1.46E-05    | 0.008481127 |
|             |             |             | 1.49E-05    |
| 3.45E-05    | 0.012957114 | 0.004015332 | 0.015191257 |
| 0.001045643 | 0.005375589 | 0.00022324  | 0.001081986 |
| 0.005567433 | 0.005598357 | 0.000612578 | 0.003318258 |
| 0.001542587 | 0.00407153  | 0.000875184 | 0.002399287 |
| 0.000435939 | 0.008234313 | 0.013798968 | 0.005941573 |
| 0.014293917 | 0.002906212 | 0.003209033 | 0.009297436 |
| 0.001637756 | 0.005346517 | 0.005828706 | 0.007258276 |
| 0.00089117  | 0.019764836 | 0.00035565  | 0.003466471 |
| 0.009681322 | 0.01953136  | 0.000284682 | 0.015846712 |
| 0.009083372 | 0.00044981  | 0.007812212 | 0.006339566 |
| 3.94E-06    | 0.000413667 | 0.008011689 | 0.00421872  |
| 0.003594958 | 1.04E-05    | 0.000842984 | 0.003546877 |
| 0.011792227 | 0.004016873 | 0.006219222 | 0.00042483  |
| 0.013926946 | 0.000330842 | 0.005888831 | 0.001631682 |
| 0.015705418 | 0.014822779 | 0.000119627 | 4.94E-06    |
| 0.006947234 | 0.011386549 | 0.004901038 | 0.00689248  |
| 0.003336046 | 1.69E-07    | 0.000536883 | 0.006476169 |
| 0.000407816 | 0.005283225 | 0.005707025 | 0.017734286 |
| 0.023643626 | 0.000480627 | 0.023049966 | 0.000751345 |
| 0.011240733 | 0.000238258 | 0.000277566 | 8.55E-05    |
| 0.002151849 | 0.000347325 | 0.003062708 | 0.016238662 |
| 0.000932424 | 0.002564339 | 0.001699409 | 0.004149082 |

|             |             |             |                        |
|-------------|-------------|-------------|------------------------|
| 0.011204526 | 0.002671361 | 0.019132652 | 0.002522447            |
| 0.007562099 | 0.003605758 | 0.000390217 | 0.001612467            |
| 0.002402712 | 0.001609572 | 0.00275533  | 0.009772152            |
| 0.000968347 | 0.007432785 | 0.000299939 | 0.00773728             |
| 0.001596095 | 0.003477223 | 0.002413292 | 0.004299499            |
| 0.004215732 | 0.011798749 | 0.000530546 | 0.01430841             |
| 0.010583784 | 0.010689604 | 0.012970802 | 0.007609789            |
| 0.000546322 | 0.013296182 | 0.001242973 | 0.000300084            |
| 0.005324031 | 0.005215678 | 0.01630569  | 0.02565859             |
| 0.006448285 | 0.008359467 | 0.010917481 | 0.002789109            |
| 0.000542759 | 0.023997988 | 0.009374761 | 0.006412955            |
| 0.004042625 | 0.003246806 | 0.000132625 | 0.002416088            |
| 0.005603855 | 0.006990526 | 0.002714437 | 0.00237834             |
| 0.0014363   | 0.00092769  | 0.022386098 | 0.009270327            |
| 1.35E-05    | 0.003231979 | 0.002306693 | 3.65E-05 0.000597234   |
| 0.000263798 | 0.002811319 | 0.016367678 | 0.000308376            |
| 0.000632863 | 0.00015077  | 0.005663462 | 0.011913202            |
| 0.006071734 | 7.43E-06    | 0.010661583 | 0.00607054             |
| 0.010028006 | 0.003540881 | 0.007221764 | 0.01081741             |
| 0.007463074 | 0.004785089 | 0.006418738 | 0.000498292            |
| 0.002080394 | 0.00149712  | 0.01537929  | 0.00273342             |
| 0.008270362 | 0.00782959  | 0.000579036 | 0.000387149            |
| 0.016405933 | 3.18E-05    | 0.010647302 | 0.003394574            |
| 0.000725886 | 1.62E-06    | 0.005014059 | 0.001389242 9.05E-05   |
| 0.007024479 | 0.002757341 | 0.004305007 | 0.003831105            |
| 0.002761662 | 0.001584804 | 2.71E-05    | 0.004433498 8.44E-06   |
| 0.002326202 | 0.001549454 | 0.000131787 | 7.26E-05               |
| 0.00653528  | 0.007518291 | 0.006484856 | 0.013015489            |
| 5.78E-06    | 0.003751019 | 3.47E-05    | 0.002139689 0.01367654 |
| 0.012809778 | 0.008845876 | 0.007618359 | 0.002284464            |
| 0.003364571 | 0.007857736 | 0.009453934 | 0.004791893            |
| 7.42E-06    | 0.002266175 | 0.003063936 | 0.000383766            |
| 0.002331292 | 0.003837054 | 0.000636154 | 0.007808133            |
| 0.013113644 | 2.71E-06    | 0.012227965 | 0.013795246            |
| 0.006014506 | 0.002970602 | 0.003893283 | 0.034955351            |
| 0.006181263 | 0.00478108  | 0.006092934 | 0.012418146            |
| 0.014005149 | 4.08E-05    | 0.00114377  | 0.010010566            |
| 0.007329517 | 0.008641507 | 0.003523276 | 0.00010359             |
| 0.003846654 | 0.039969809 | 0.008872183 | 0.0014924              |
| 0.018073272 | 0.001270651 | 0.002863915 | 0.000813758            |
| 1.02E-05    | 0.003357057 | 0.005130724 | 0.009335194            |
| 0.013501795 | 0.023418834 | 0.004466702 | 0.002510123            |
| 0.00420994  | 0.000862977 | 0.013861239 | 0.01574146             |
| 0.010110395 | 1.23E-05    | 0.00999245  | 0.011573702            |
| 0.008758575 | 0.001590709 | 0.004702721 | 4.04E-06               |
| 0.001914877 | 0.00070822  | 0.009925399 | 0.001015207            |
| 0.003333086 | 0.009240188 | 0.004655091 | 0.013264557            |
| 1.96E-05    | 0.018357925 | 0.000265584 | 0.012177659            |
| 0.002433324 | 0.01248139  | 1.20E-05    | 0.007579721            |
| 0.005369321 | 0.005398825 | 0.001023629 | 0.001715355            |
| 1.39E-07    | 0.000619757 | 0.00350323  | 0.01152208             |
| 0.012551495 | 0.004707208 | 0.003263026 | 0.011690733            |
| 0.002329415 | 0.008799534 | 0.000958788 | 0.002959893            |
| 1.20E-05    | 0.004489075 | 0.010387928 | 0.00167211             |

|             |             |             |             |             |
|-------------|-------------|-------------|-------------|-------------|
| 0.000915941 | 0.012877477 | 0.001862095 | 0.002529626 |             |
| 0.000145221 | 0.007016459 | 0.014920299 | 0.00271037  |             |
| 0.002690771 | 0.00161155  | 0.001865709 | 0.002750857 |             |
| 0.002283703 | 0.005206129 | 0.001606282 | 0.002527445 |             |
| 0.001621791 | 0.00368565  | 0.010854879 | 0.00058665  |             |
| 0.007158546 | 5.35E-06    | 2.71E-06    | 2.35E-05    | 0.004002267 |
| 0.011860403 | 0.009634333 | 0.005400114 | 0.001235601 |             |
| 0.00794364  | 0.025333949 | 0.000253037 | 0.005344971 |             |
| 0.004264532 | 1.32E-05    | 0.003706602 | 0.000739894 |             |
| 0.002670731 | 0.012840885 | 0.009954541 | 0.00026121  |             |
| SWAP70      | 0.259018782 | 0.433115282 | 0.181298067 |             |
| 0.013590345 | 0.132827212 | 0.31730598  | 0.275537375 |             |
| 0.253565563 | 0.261801908 | 0.155000216 | 0.354706773 |             |
| 0.015264181 | 0.234166457 | 0.097530296 | 0.229047971 |             |
| 0.386469786 | 0.388634984 | 0.312982683 | 0.40434473  |             |
| 0.333559471 | 0.0966437   | 0.358679749 | 0.286867835 |             |
| 0.324735237 | 0.021822142 | 0.178407834 | 0.034467815 |             |
| 0.222252316 | 0.361815036 | 0.35551071  | 0.254863795 |             |
| 0.342916066 | 0.291318444 | 0.222829696 | 0.183550215 |             |
| 0.075635385 | 0.463487186 | 0.04984976  | 0.227662158 |             |
| 0.262002546 | 0.230828345 | 0.297136145 | 0.080924112 |             |
| 0.000591223 | 0.198584067 | 0.204989512 | 0.335598459 |             |
| 0.377214918 | 0.310989324 | 0.345477935 | 0.196360086 |             |
| 0.050302301 | 0.380292838 | 0.371858712 | 0.045448342 |             |
| 0.430985715 | 0.00193734  | 0.452092356 | 0.268826144 |             |
| 0.213605016 | 0.379452563 | 0.212106154 | 0.308086457 |             |
| 0.32147528  | 0.443663166 | 0.42049164  | 0.084792355 |             |
| 0.193623449 | 0.264763157 | 0.227821741 | 0.235219126 |             |
| 0.40068774  | 0.24253694  | 0.284499444 | 0.161782029 |             |
| 0.231197225 | 0.262799204 | 0.38341594  | 0.351721605 |             |
| 0.006244883 | 0.212377403 | 0.167582596 | 0.233182627 |             |
| 0.164272577 | 0.38304598  | 0.251916313 | 0.228622934 |             |
| 0.221007625 | 0.115246848 | 0.357424516 | 0.413359932 |             |
| 0.026118435 | 0.263784775 | 0.01550156  | 0.343951109 |             |
| 0.318592554 | 0.309511897 | 0.283564403 | 0.150840737 |             |
| 0.094599546 | 0.345179361 | 0.197501371 | 0.246804376 |             |
| 0.317787563 | 0.286160702 | 0.420783588 | 0.068253495 |             |
| 0.199943781 | 0.283635707 | 0.34425665  | 0.444269273 |             |
| 0.39722216  | 0.067733847 | 0.36865755  | 0.319921145 |             |
| 0.196975874 | 0.098700089 | 0.312019808 | 0.022860832 |             |
| 0.016781836 | 0.061887568 | 0.337238861 | 0.333036005 |             |
| 0.149735091 | 0.28017597  | 0.091689891 | 0.21837867  |             |
| 0.24512667  | 0.330690979 | 0.160067895 | 0.288862605 |             |
| 0.208068314 | 0.288333744 | 0.222050115 | 0.258672154 |             |
| 0.190990722 | 0.366831776 | 0.317117836 | 0.408499543 |             |
| 0.471826575 | 0.171247858 | 0.212482211 | 0.34273731  |             |
| 0.198049725 | 0.377540798 | 0.435343772 | 0.346234315 |             |
| 0.216010169 | 0.383670937 | 0.199317542 | 0.287811528 |             |
| 0.33490544  | 0.35760853  | 0.062467522 | 0.385363156 |             |
| 0.449278139 | 0.027048064 | 0.208338251 | 0.320412481 |             |
| 0.028731855 | 0.265142389 | 0.431446255 | 0.329398243 |             |
| 0.275641201 | 0.029269411 | 0.195260413 | 0.29066379  |             |
| 0.370636602 | 0.285354619 | 0.321040585 | 0.166670417 |             |
| 0.368297956 | 0.190140634 | 0.149333101 | 0.202740647 |             |

|             |             |             |             |
|-------------|-------------|-------------|-------------|
| 0.282526274 | 0.37899696  | 0.13556727  | 0.051125908 |
| 0.271693315 | 0.335345595 | 0.363333366 | 0.312510902 |
| 0.252119285 | 0.001369169 | 0.146397849 | 0.275204191 |
| 0.200118966 | 0.281657565 | 0.440005618 | 0.279216735 |
| 0.388737776 | 0.165013608 | 0.326142331 | 0.23204561  |
| 0.360441351 | 0.197866332 | 0.194241963 | 0.005625637 |
| 0.242059541 | 0.157200042 | 0.294853301 | 0.209318421 |
| 0.211535836 | 0.249675381 | 0.227340956 | 0.358583984 |
| 0.326573004 | 0.278902537 | 0.120416929 | 0.137650343 |
| 0.327280783 | 0.322108613 | 0.188095436 | 0.241751047 |
| 0.30103631  | 0.266498139 | 0.266359351 | 0.41994681  |
| 0.257999637 | 0.352663653 | 0.100019108 | 0.376821576 |
| 0.21175546  | 0.35131348  | 0.271445939 | 0.312729028 |
| 0.314617849 | 0.290440428 | 0.182275    | 0.354581776 |
| 0.344190149 | 0.341750545 | 0.243355206 | 0.450994593 |
| 0.008828452 | 0.376017948 | 0.245539657 | 0.109005769 |
| 0.418212895 | 0.286551773 | 0.235224466 | 0.372906497 |
| 0.411467221 | 0.461889621 | 0.393087397 | 0.283605912 |
| 0.15223294  | 0.087759924 | 0.438787215 | 0.357770697 |
| 0.358116516 | 0.320119514 | 0.133107678 | 0.101374074 |
| 0.385942612 | 0.222962425 | 0.270965726 | 0.226382017 |
| 0.233868625 | 0.191295156 | 0.393554737 | 0.249098909 |
| 0.022112843 | 0.279979052 | 0.224004941 | 0.130257099 |
| 0.2156497   | 0.221954796 | 0.325931335 | 0.378408072 |
| 0.192118351 | 0.189846604 | 0.160260013 | 0.175965015 |
| 0.318532823 | 0.438696885 | 0.020021887 | 0.436794096 |
| 0.423620291 | 0.367370006 | 0.355242939 | 0.426244618 |
| 0.357019148 | 0.389530888 | 0.378469802 | 0.339163603 |
| 0.008098693 | 0.256919082 | 0.190566345 | 0.421193092 |
| 0.304156621 | 0.345218315 | 0.185706324 | 0.171376653 |
| 0.009857053 | 0.317735456 | 0.079293717 | 0.484852656 |
| 0.335823956 | 0.104066651 | 0.014384279 | 0.329702467 |
| 0.174821123 | 0.047245804 | 0.451471594 | 0.285616416 |
| 0.37283471  | 0.302795248 | 0.239352103 | 0.224153907 |
| 0.062451796 | 0.296653798 | 0.037221058 | 0.265310933 |
| 0.239019611 | 0.083452149 | 0.073103294 | 0.431294718 |
| 0.378548566 | 0.334750607 | 0.365350171 | 0.011182744 |
| 0.258696397 | 0.089026754 | 0.267990157 | 0.269587574 |
| 0.400886165 | 0.378648249 | 0.417301061 | 0.258912764 |
| 0.286777353 | 0.392377825 | 0.402085884 | 0.35816065  |
| 0.054472094 | 0.24337146  | 0.294264336 | 0.115980094 |
| 0.195678472 | 0.362516321 | 0.209012856 | 0.275517107 |
| 0.36395397  | 0.036744192 | 0.321548916 | 0.310295213 |
| 0.401592479 | 0.343683729 | 0.168585333 | 0.370780251 |
| 0.39126854  | 0.372140811 | 0.229384768 | 0.37996769  |
| 0.36777214  | 0.055390038 | 0.122007988 | 0.367096552 |
| 0.447636293 | 0.330581209 | 0.332619985 | 0.108478872 |
| 0.326644604 | 0.222602178 | 0.365498457 | 0.309462974 |
| 0.383897338 | 0.180794645 | 0.24157262  | 0.090203762 |
| 0.025519305 | 0.237528015 | 0.36742803  | 0.432850295 |
| 0.216676604 | 0.359412025 | 0.27727504  | 0.276858123 |
| 0.361795224 | 0.240174206 | 0.357794935 | 0.373165937 |
| 0.449959763 | 0.06409107  | 0.476252367 | 0.351766765 |
| 0.363777167 | 0.269019508 | 0.338513697 | 0.014088601 |

|             |             |             |             |
|-------------|-------------|-------------|-------------|
| 0.227712616 | 0.168355384 | 0.192082998 | 0.232889026 |
| 0.298301505 | 0.254007758 | 0.315425457 | 0.33824596  |
| 0.103466652 | 0.018357925 | 1           | 0.134871388 |
| 0.347823975 | 0.193569997 | 0.356926462 | 0.043995363 |
| 0.474125678 | 0.307633222 | 0.316935638 | 0.147958422 |
| 0.275393799 | 0.005246986 | 0.168802608 | 0.156101336 |
| 0.367298383 | 0.400495064 | 0.266001989 | 0.247349543 |
| 0.25008751  | 0.268012914 | 0.348381705 | 0.231358382 |
| 0.341878467 | 0.064949267 | 0.390611867 | 0.377419491 |
| 0.217747274 | 0.284819938 | 0.360556229 | 0.334818173 |
| 0.24513182  | 0.166980111 | 0.272245985 | 0.335785067 |
| 0.326614506 | 0.31431109  | 0.261564211 | 0.250749523 |
| 0.124420585 | 0.301018196 | 0.286288132 | 0.226859987 |
| 0.263324411 | 0.192154662 | 0.23661206  | 0.43625356  |
| 0.233511689 | 0.333467123 | 0.026198147 | 0.023904954 |
| 0.111581086 | 0.272200313 | 0.39255757  | 0.377619893 |
| 0.397133409 | 0.218685124 | 0.241098712 | 0.340244721 |
| 0.072303333 | 0.261471376 | 0.287210658 | 0.058378753 |
| 0.296317664 | 0.191380139 | 0.005424648 | 0.348027615 |
| 0.378428782 | 0.199216373 |             |             |
| SYNGR2      | 0.103989779 | 0.372254512 | 0.008112085 |
| 0.02721704  | 0.053988807 | 0.066834405 | 0.070723714 |
| 0.092969381 | 0.012387213 | 0.035957983 | 0.138727177 |
| 3.01E-05    | 0.388084679 | 0.000520783 | 0.008670898 |
| 0.421266104 | 0.456136448 | 0.136831604 | 0.42383285  |
| 0.065334738 | 0.066188995 | 0.13081274  | 0.147441375 |
| 0.06924495  | 2.97E-05    | 0.031457567 | 0.025685679 |
| 0.111896019 | 0.4399443   | 0.030734075 | 0.065566579 |
| 0.36034401  | 0.461213126 | 0.149408908 | 0.191954818 |
| 0.244001665 | 0.296245383 | 0.151688131 | 0.423788607 |
| 0.379696064 | 0.067184123 | 0.410513636 | 0.000758284 |
| 0.020194581 | 0.019092542 | 0.091545911 | 0.144224227 |
| 0.055054693 | 0.052065161 | 0.025382119 | 0.051661458 |
| 0.102365528 | 0.156935086 | 0.198931706 | 0.140913725 |
| 0.252716895 | 0.005953202 | 0.291265491 | 0.042714419 |
| 0.00690019  | 0.060728922 | 0.115209105 | 0.172938164 |
| 0.08451941  | 0.276137538 | 0.423707394 | 0.005716463 |
| 0.009111682 | 0.16318761  | 0.357583442 | 0.246673181 |
| 0.323639068 | 0.098148463 | 0.082709471 | 0.200051574 |
| 0.3172577   | 0.346136111 | 0.083654371 | 0.028896287 |
| 3.58E-05    | 0.036306906 | 0.192576209 | 0.163448094 |
| 0.3126939   | 0.164892386 | 0.16063855  | 0.069352813 |
| 0.170721505 | 0.001062336 | 0.125826913 | 0.438158548 |
| 0.006850669 | 0.332265067 | 0.003532625 | 0.024044387 |
| 0.312423206 | 0.436500954 | 0.184359443 | 0.011726247 |
| 0.000754679 | 0.013574834 | 0.02002022  | 0.414949953 |
| 0.1298563   | 0.170881971 | 0.236780236 | 0.077443724 |
| 0.412634926 | 0.022248961 | 0.093389925 | 0.301406913 |
| 0.359060117 | 0.000376281 | 0.018603025 | 0.059688174 |
| 0.139497423 | 0.071504501 | 0.06333338  | 0.0138148   |
| 0.002884277 | 0.001539501 | 0.390085318 | 0.019975275 |
| 0.024414901 | 0.046094616 | 0.030607276 | 0.318276181 |
| 0.088893477 | 0.346226476 | 0.049978684 | 0.065623347 |
| 0.358120453 | 0.088982469 | 0.196967319 | 0.329447462 |



|             |             |             |             |
|-------------|-------------|-------------|-------------|
| 0.226835948 | 0.040049349 | 0.018706387 | 0.343043379 |
| 0.23679409  | 0.010370172 | 0.009033487 | 0.118482952 |
| 0.409943202 | 0.401900459 | 0.422898152 | 0.059685904 |
| 0.116747695 | 0.040714601 | 0.091358515 | 0.203045851 |
| 0.070540285 | 0.092563262 | 0.037148846 | 0.147990063 |
| 0.242306178 | 0.013064064 | 0.006602171 | 0.291602275 |
| 0.080037573 | 0.072243396 | 0.273856428 | 0.318469979 |
| 0.233543103 | 0.019880482 | 0.070972326 | 0.075996406 |
| 0.068514161 | 0.064224081 | 0.17215015  | 0.069584184 |
| 0.098955643 | 0.099002678 | 0.006018555 | 0.414984151 |
| 0.016802669 | 0.094887855 | 0.112023867 | 0.024230913 |
| 0.181422754 | 0.075275519 | 0.316853742 | 0.159369375 |
| 0.232172035 | 0.007308239 | 0.036859105 | 0.126986851 |
| 0.074762508 | 0.351301536 | 0.373203339 | 0.014631435 |
| 0.055480868 | 0.148181157 | 0.018838455 | 0.158872    |
| 0.242088637 | 0.05508881  | 0.048589474 | 2.02E-05    |
| 0.027445349 | 0.140335964 | 0.135606508 | 0.003200007 |
| 0.086538282 | 0.011968409 | 0.015759456 | 0.361218326 |
| 0.039409321 | 0.402588494 | 0.001480483 | 0.045132198 |
| 0.051856932 | 0.272443829 | 0.157203119 | 0.050074977 |
| 0.336756569 | 0.076079437 | 0.422388885 | 0.194270347 |
| 0.109606188 | 0.161694285 | 0.074825977 | 0.046155149 |
| 0.271778378 | 0.401771135 | 0.39641656  | 0.370857446 |
| 0.053715275 | 0.179119766 | 0.105669265 | 0.084373303 |
| 0.124967775 | 0.138679372 | 0.008196196 | 0.376883136 |
| 1.14E-05    | 0.114265726 | 0.22642504  | 0.063787356 |
| 0.371313422 | 0.086409671 | 0.005843551 | 0.03765268  |
| 0.429025409 | 0.372400948 | 0.272553695 | 0.404561646 |
| 0.065236407 | 0.000304541 | 0.330849926 | 0.19539046  |
| 0.45853161  | 0.115856769 | 0.267878575 | 0.022206597 |
| 0.395772347 | 0.154495078 | 0.195785693 | 0.16256811  |
| 0.263788565 | 0.20545156  | 0.044332789 | 0.171209671 |
| 0.002387719 | 0.047483685 | 0.216453436 | 0.070168669 |
| 0.095128444 | 0.031459411 | 0.368586754 | 0.1225319   |
| 0.215284658 | 0.078028928 | 0.185473112 | 0.014082952 |
| 0.034323627 | 0.374019435 | 0.064589287 | 0.305120043 |
| 0.429482256 | 0.112799319 | 0.410181076 | 0.408709304 |
| 0.069376147 | 0.207547316 | 0.358960953 | 0.349017885 |
| 2.41E-05    | 0.441685793 | 0.411335799 | 0.149103282 |
| 0.392952125 | 0.084029779 | 0.062301161 | 0.214297078 |
| 7.27E-05    | 0.020868471 | 0.18513599  | 0.320725392 |
| 0.424504829 | 0.003059633 | 0.105072081 | 0.327309443 |
| 0.361224418 | 0.01745903  | 0.39792026  | 0.10096987  |
| 0.35790224  | 0.169712567 | 0.035141811 | 0.423087488 |
| 0.165568379 | 0.108230024 | 0.015202739 | 0.24040844  |
| 0.1679634   | 0.020351976 | 0.037876601 | 0.406223735 |
| 0.271334432 | 0.203665099 | 0.06279934  | 0.001463406 |
| 0.323750949 | 0.113566571 | 0.342837543 | 0.018010696 |
| 0.235425777 | 0.166550628 | 0.323119237 | 0.402057902 |
| 0.200752914 | 0.234521531 | 0.183108532 | 0.304931061 |
| 0.103562752 | 0.36037684  | 0.368891711 | 0.009971414 |
| 0.180073605 | 0.419524734 | 0.18412053  | 0.04269882  |
| 0.136021395 | 0.120299655 | 0.048504296 | 0.079663321 |
| 0.324566963 | 0.412331327 | 0.005948861 | 0.02042429  |

|             |             |             |             |
|-------------|-------------|-------------|-------------|
| 0.241065316 | 0.060504167 | 0.018586562 | 0.081370807 |
| 0.081938779 | 0.085259028 | 0.039256282 | 0.151660749 |
| 0.312282589 | 0.117350171 | 0.354878471 | 0.060758931 |
| 0.43309383  | 0.004011849 | 0.29754795  | 0.068931817 |
| 0.062894047 | 0.213935858 | 0.363130449 | 0.030107703 |
| 0.003722256 | 0.013583799 | 0.23532492  | 0.225849759 |
| 0.008663131 | 0.029786649 | 0.062856085 | 0.150247363 |
| 0.439364453 | 0.137089058 | 0.079106074 | 0.074585307 |
| 0.229554267 | 0.063898184 | 0.316972573 | 0.075640647 |
| 0.202276306 | 0.095931053 | 0.299806282 | 0.001830893 |
| 0.266770917 | 0.042810355 | 0.04393806  | 0.17086616  |
| 0.416531155 | 0.020592256 | 0.208745733 | 0.019790662 |
| 0.075764333 | 0.000265584 | 0.134871388 | 1           |
| 0.09805359  | 0.097015575 | 0.085135969 | 0.188309373 |
| 0.383352313 | 0.12350396  | 0.231452368 | 0.141562467 |
| 0.112239895 | 0.091750469 | 0.040494706 | 0.002368602 |
| 0.17506178  | 0.176800903 | 0.191732503 | 0.118679089 |
| 0.033010526 | 0.276458064 | 0.169063931 | 0.203446427 |
| 0.424362892 | 0.081872079 | 0.441630293 | 0.059853761 |
| 0.427401131 | 0.09772673  | 0.070768351 | 0.076618485 |
| 0.057346755 | 0.027903791 | 0.017170195 | 0.017744836 |
| 0.455571532 | 0.090124532 | 0.173773141 | 0.066085878 |
| 0.006922578 | 0.110732809 | 0.294453749 | 0.352711411 |
| 0.19629209  | 0.261184488 | 0.118216216 | 0.208275356 |
| 0.070667004 | 0.050958726 | 0.050985389 | 0.019149006 |
| 0.13522175  | 0.03596681  | 0.250743919 | 0.297823711 |
| 0.429893999 | 0.072592481 | 0.01165287  | 0.014639287 |
| 0.081224254 | 0.271726451 | 0.10588948  | 0.243368149 |
| 0.213512666 | 0.091078921 | 2.11E-05    | 0.03236728  |
| 0.162735844 | 0.146609094 |             |             |
| SYTL2       | 0.18648141  | 0.38506376  | 0.317684308 |
| 0.02780087  | 0.228253617 | 0.447510403 | 0.421880628 |
| 0.169856566 | 0.37549571  | 0.301209485 | 0.435382503 |
| 0.010272778 | 0.141879316 | 0.109082129 | 0.233438712 |
| 0.285038156 | 0.288751707 | 0.37794472  | 0.290041304 |
| 0.256974352 | 0.167772601 | 0.317540892 | 0.318733238 |
| 0.443437458 | 0.019864648 | 0.347395948 | 0.093851499 |
| 0.135450153 | 0.24881771  | 0.447212386 | 0.33405644  |
| 0.246555513 | 0.207363764 | 0.224809394 | 0.201497788 |
| 0.059900488 | 0.436523499 | 0.029516683 | 0.162513287 |
| 0.157907333 | 0.366253697 | 0.217993075 | 0.124367449 |
| 0.001086525 | 0.367866625 | 0.125125691 | 0.316660333 |
| 0.295741573 | 0.445557262 | 0.441514445 | 0.35261053  |
| 0.027725102 | 0.429784605 | 0.276016088 | 0.024802352 |
| 0.466975434 | 0.005514653 | 0.450870064 | 0.17105188  |
| 0.352885237 | 0.386280972 | 0.151103727 | 0.276199226 |
| 0.44953456  | 0.466199775 | 0.342214956 | 0.216120435 |
| 0.366095654 | 0.204719031 | 0.159014786 | 0.243370575 |
| 0.346334595 | 0.259444336 | 0.374073641 | 0.109184753 |
| 0.17920586  | 0.165944268 | 0.430147847 | 0.401137423 |
| 0.008661963 | 0.385649166 | 0.199859817 | 0.148794896 |
| 0.105742282 | 0.439852954 | 0.179214486 | 0.370078674 |
| 0.176704347 | 0.193301807 | 0.338476849 | 0.321808233 |
| 0.052978615 | 0.175490783 | 0.019406484 | 0.375537805 |

|             |             |             |             |
|-------------|-------------|-------------|-------------|
| 0.231391375 | 0.200114875 | 0.227647581 | 0.332627931 |
| 0.141216772 | 0.371296894 | 0.120454805 | 0.143209826 |
| 0.273426452 | 0.249181943 | 0.458309308 | 0.025466917 |
| 0.114239247 | 0.308749574 | 0.358196345 | 0.440375541 |
| 0.322821789 | 0.062302192 | 0.340102379 | 0.449297579 |
| 0.18179846  | 0.158377208 | 0.438963637 | 0.016187415 |
| 0.034286019 | 0.024575882 | 0.238467264 | 0.397429709 |
| 0.320195277 | 0.434848574 | 0.157428325 | 0.195808044 |
| 0.159750613 | 0.213058664 | 0.28165136  | 0.42136193  |
| 0.151339439 | 0.420091361 | 0.226218648 | 0.205837546 |
| 0.178299921 | 0.30864722  | 0.408496771 | 0.386780671 |
| 0.436543772 | 0.314091144 | 0.353797563 | 0.401543883 |
| 0.118863586 | 0.281564426 | 0.348757414 | 0.279878147 |
| 0.304402741 | 0.419738386 | 0.223410416 | 0.326581718 |
| 0.445305708 | 0.269322987 | 0.023634639 | 0.40112395  |
| 0.484909338 | 0.020154089 | 0.357985755 | 0.229892322 |
| 0.052911124 | 0.357862217 | 0.397281963 | 0.286454067 |
| 0.220327194 | 0.082200354 | 0.305377131 | 0.417862269 |
| 0.389921518 | 0.404948431 | 0.279586336 | 0.266468742 |
| 0.400690616 | 0.210676401 | 0.297049092 | 0.120388239 |
| 0.425357703 | 0.353110803 | 0.094808472 | 0.049109704 |
| 0.185453869 | 0.245703271 | 0.325115803 | 0.247960077 |
| 0.182685558 | 0.004076994 | 0.28309732  | 0.21030089  |
| 0.212446321 | 0.169010107 | 0.4115989   | 0.420700683 |
| 0.407069761 | 0.107626949 | 0.431840867 | 0.275166255 |
| 0.246626191 | 0.293116283 | 0.293779303 | 0.012663114 |
| 0.373696568 | 0.12662158  | 0.246080026 | 0.208903774 |
| 0.321174643 | 0.33541196  | 0.132475388 | 0.306649077 |
| 0.454418872 | 0.222951255 | 0.0812916   | 0.05693173  |
| 0.404628089 | 0.348228056 | 0.180469128 | 0.186985741 |
| 0.287834134 | 0.317659204 | 0.16081166  | 0.441074196 |
| 0.31596678  | 0.424012986 | 0.046557118 | 0.386987292 |
| 0.153497136 | 0.293911901 | 0.201362932 | 0.247586407 |
| 0.434048049 | 0.192049206 | 0.116695173 | 0.434161443 |
| 0.278304605 | 0.273626688 | 0.351001358 | 0.38832672  |
| 0.013547295 | 0.385836761 | 0.230638366 | 0.049360711 |
| 0.389898143 | 0.425086043 | 0.343006173 | 0.32466397  |
| 0.297726581 | 0.392935815 | 0.282076458 | 0.191379924 |
| 0.088199818 | 0.080302849 | 0.344000039 | 0.359545208 |
| 0.250250249 | 0.324520607 | 0.112247753 | 0.040970103 |
| 0.307120599 | 0.127662559 | 0.255006231 | 0.168143987 |
| 0.194042647 | 0.139310695 | 0.416734221 | 0.154293065 |
| 0.013306951 | 0.370933255 | 0.176710808 | 0.175364355 |
| 0.264205265 | 0.28590273  | 0.286276609 | 0.412773843 |
| 0.182953797 | 0.141976904 | 0.172963325 | 0.341255013 |
| 0.456654841 | 0.382960932 | 0.011299688 | 0.339241325 |
| 0.327456676 | 0.33594674  | 0.300172908 | 0.320508454 |
| 0.357339471 | 0.43372551  | 0.326270469 | 0.218115197 |
| 0.006345474 | 0.16738201  | 0.119515728 | 0.463474414 |
| 0.227139308 | 0.432701647 | 0.089297007 | 0.121214247 |
| 0.009824016 | 0.43827815  | 0.059418951 | 0.419125597 |
| 0.271605336 | 0.225626981 | 0.006770887 | 0.279338246 |
| 0.11301622  | 0.024365691 | 0.368004027 | 0.361647757 |
| 0.349417872 | 0.275566971 | 0.41436549  | 0.147537135 |

|             |             |             |             |
|-------------|-------------|-------------|-------------|
| 0.040008612 | 0.204778119 | 0.082445286 | 0.260998283 |
| 0.186542278 | 0.041267155 | 0.173188489 | 0.328651783 |
| 0.321682944 | 0.375243138 | 0.448086129 | 0.030674671 |
| 0.153202695 | 0.103197503 | 0.236423739 | 0.301550518 |
| 0.33991578  | 0.42814922  | 0.390089613 | 0.182030964 |
| 0.241615483 | 0.4158844   | 0.443571169 | 0.316432945 |
| 0.055799819 | 0.164844211 | 0.20734272  | 0.204657516 |
| 0.128808235 | 0.292774214 | 0.209740465 | 0.441373982 |
| 0.32977813  | 0.052292849 | 0.457257203 | 0.216719187 |
| 0.394987477 | 0.282152164 | 0.331200496 | 0.335070244 |
| 0.427856673 | 0.398779208 | 0.400016467 | 0.344220696 |
| 0.440208834 | 0.030277064 | 0.052711732 | 0.380057213 |
| 0.442984995 | 0.432193769 | 0.264195125 | 0.189654884 |
| 0.237988848 | 0.290717521 | 0.263998288 | 0.384714164 |
| 0.395331204 | 0.129333002 | 0.143445005 | 0.04332605  |
| 0.055916841 | 0.259198337 | 0.41927234  | 0.453735987 |
| 0.364033266 | 0.432595049 | 0.40270288  | 0.349951047 |
| 0.265657643 | 0.200061105 | 0.439826323 | 0.317169197 |
| 0.483323017 | 0.12859698  | 0.421469855 | 0.335135331 |
| 0.317020456 | 0.349290374 | 0.283895379 | 0.018526724 |
| 0.173149725 | 0.300786274 | 0.095523974 | 0.287192657 |
| 0.186544955 | 0.411774947 | 0.365319493 | 0.397318367 |
| 0.103446024 | 0.012177659 | 0.347823975 | 0.09805359  |
| 1           | 0.100204896 | 0.308492371 | 0.024242246 |
| 0.403510891 | 0.279740455 | 0.259344905 | 0.082250584 |
| 0.306485086 | 0.003559114 | 0.319563922 | 0.229218197 |
| 0.31958142  | 0.399608735 | 0.196719988 | 0.18362537  |
| 0.142990619 | 0.241696819 | 0.361454631 | 0.240367198 |
| 0.283134413 | 0.052626141 | 0.299299242 | 0.308416957 |
| 0.130325835 | 0.253128314 | 0.452229661 | 0.294011551 |
| 0.393164784 | 0.152485588 | 0.426536975 | 0.270274142 |
| 0.251250976 | 0.262533784 | 0.303994049 | 0.198072701 |
| 0.264599359 | 0.322354747 | 0.192449502 | 0.165229593 |
| 0.245709769 | 0.132542757 | 0.154080985 | 0.473039891 |
| 0.180153647 | 0.287021013 | 0.049174362 | 0.073767741 |
| 0.12198174  | 0.422213625 | 0.28467926  | 0.291573357 |
| 0.300291892 | 0.123231739 | 0.394959127 | 0.36260411  |
| 0.029197701 | 0.158229634 | 0.413772238 | 0.048877919 |
| 0.24980598  | 0.124847864 | 0.007873827 | 0.264123103 |
| 0.393041905 | 0.168241486 |             |             |
| TAF12       | 0.13974933  | 0.290649595 | 0.006498158 |
| 0.001781246 | 0.009728061 | 0.063334733 | 0.04735113  |
| 0.139662404 | 0.008819524 | 0.007956325 | 0.125488342 |
| 0.000652709 | 0.337447005 | 0.002967564 | 0.014325555 |
| 0.36106733  | 0.36839951  | 0.090490191 | 0.3914864   |
| 0.125464047 | 0.007325942 | 0.18275521  | 0.107863062 |
| 0.059672    | 0.000586969 | 0.014229163 | 0.002024847 |
| 0.142052608 | 0.391313019 | 0.047904934 | 0.02043217  |
| 0.319549907 | 0.325566972 | 0.041635695 | 0.029351164 |
| 0.023471254 | 0.267722524 | 0.027902512 | 0.264611949 |
| 0.353071281 | 0.02712482  | 0.30220572  | 0.001404259 |
| 0.000167278 | 0.011045331 | 0.112445528 | 0.162812556 |
| 0.106170697 | 0.052981192 | 0.04529398  | 0.02086273  |
| 0.028038672 | 0.147442005 | 0.283840943 | 0.027089588 |

|             |             |             |             |
|-------------|-------------|-------------|-------------|
| 0.202058693 | 0.000173585 | 0.238400097 | 0.082651101 |
| 0.007741446 | 0.07622095  | 0.108237061 | 0.167099609 |
| 0.073662368 | 0.22096061  | 0.333987575 | 0.001824402 |
| 0.010133706 | 0.143359427 | 0.252155117 | 0.124926189 |
| 0.276768104 | 0.032313151 | 0.021759429 | 0.09990797  |
| 0.213075728 | 0.335964332 | 0.10841879  | 0.025137724 |
| 0.000132849 | 0.022844846 | 0.030099808 | 0.22383785  |
| 0.212729837 | 0.152899521 | 0.179715618 | 0.019934262 |
| 0.128162438 | 0.002315729 | 0.153566093 | 0.361407315 |
| 0.001471361 | 0.292718321 | 0.00137484  | 0.024463497 |
| 0.300157141 | 0.374916822 | 0.201409137 | 0.003932343 |
| 0.00254232  | 0.024786275 | 0.032463041 | 0.366241768 |
| 0.137272678 | 0.135795801 | 0.189337226 | 0.076557967 |
| 0.328315256 | 0.016568667 | 0.052789485 | 0.245697596 |
| 0.30274112  | 0.003951577 | 0.028264435 | 0.061700285 |
| 0.031636105 | 0.007308909 | 0.056695551 | 0.010162589 |
| 0.001417052 | 0.017899735 | 0.340658301 | 0.022941263 |
| 0.008324613 | 0.038294345 | 0.007730414 | 0.157703097 |
| 0.115110515 | 0.367432082 | 0.009014261 | 0.045276027 |
| 0.22860725  | 0.058496435 | 0.090901934 | 0.224250933 |
| 0.052056403 | 0.046107376 | 0.025888038 | 0.25490928  |
| 0.260339672 | 0.006068788 | 0.007051117 | 0.115297001 |
| 0.300637146 | 0.350005709 | 0.35212893  | 0.046879211 |
| 0.030133513 | 0.067573562 | 0.026340532 | 0.12985427  |
| 0.067953781 | 0.171055483 | 0.074804757 | 0.170350274 |
| 0.204877665 | 0.009071049 | 0.006772364 | 0.304072704 |
| 0.003711595 | 0.017751508 | 0.252468401 | 0.243501056 |
| 0.188969223 | 0.001574249 | 0.023964662 | 0.053939194 |
| 0.091241341 | 0.04876222  | 0.169664724 | 0.01790924  |
| 0.121953936 | 0.029675596 | 0.004464288 | 0.312196779 |
| 0.025236681 | 0.140027313 | 0.031318576 | 0.005674129 |
| 0.233771403 | 0.104351606 | 0.250263711 | 0.17564967  |
| 0.224113563 | 0.000192575 | 0.0080303   | 0.158872283 |
| 0.022035632 | 0.379044074 | 0.278417263 | 0.024327705 |
| 0.096862728 | 0.050205168 | 0.035645506 | 0.041245741 |
| 0.325337335 | 0.013904821 | 0.012403813 | 4.77E-05    |
| 0.013016177 | 0.066003218 | 0.119833986 | 0.010351092 |
| 0.017877758 | 0.010764378 | 0.036891244 | 0.263876511 |
| 0.048999297 | 0.262637136 | 0.010992845 | 0.061329752 |
| 0.038823432 | 0.167981616 | 0.04662452  | 0.033175422 |
| 0.199592162 | 0.02889708  | 0.367829611 | 0.18351819  |
| 0.025522431 | 0.134639465 | 0.046524549 | 0.050674189 |
| 0.186567207 | 0.283521634 | 0.282594994 | 0.282085544 |
| 0.042151538 | 0.277867449 | 0.073030025 | 0.098783653 |
| 0.176634134 | 0.178316209 | 0.009822868 | 0.321811197 |
| 0.000111599 | 0.138471464 | 0.126949671 | 0.050943844 |
| 0.273168352 | 0.060519123 | 0.00890125  | 0.074878299 |
| 0.395840508 | 0.331765571 | 0.337525073 | 0.330221196 |
| 0.044590288 | 0.00370557  | 0.338115592 | 0.172773885 |
| 0.379183974 | 0.083936444 | 0.040756781 | 0.047497337 |
| 0.333009771 | 0.237203341 | 0.144511951 | 0.151222572 |
| 0.152280177 | 0.094849477 | 0.077693819 | 0.26224781  |
| 0.00331688  | 0.03462703  | 0.17331832  | 0.011575627 |
| 0.033085881 | 0.013981274 | 0.241834652 | 0.141709137 |

|             |             |             |             |
|-------------|-------------|-------------|-------------|
| 0.046934165 | 0.038728443 | 0.03555959  | 0.008948702 |
| 0.041155577 | 0.304231653 | 0.011312591 | 0.339277953 |
| 0.367888282 | 0.13662187  | 0.286271534 | 0.381486095 |
| 0.094616037 | 0.166642445 | 0.275988771 | 0.380990968 |
| 0.000525027 | 0.324992395 | 0.277344247 | 0.164160837 |
| 0.294047113 | 0.082833547 | 0.145686676 | 0.113741934 |
| 0.000389548 | 0.034751692 | 0.025907618 | 0.317533536 |
| 0.298354668 | 0.001800783 | 0.012845129 | 0.258738218 |
| 0.240767718 | 0.036581241 | 0.346207782 | 0.070317269 |
| 0.247768996 | 0.132933271 | 0.023337852 | 0.28416652  |
| 0.025068497 | 0.094857866 | 0.001941528 | 0.150727932 |
| 0.11557354  | 0.021276428 | 0.003654789 | 0.371703644 |
| 0.261364567 | 0.15245771  | 0.075686745 | 0.000306227 |
| 0.343306895 | 0.016767049 | 0.210176264 | 0.022218398 |
| 0.271344204 | 0.148305604 | 0.263861764 | 0.285390896 |
| 0.166468406 | 0.190155933 | 0.169193358 | 0.248075642 |
| 0.013596695 | 0.283192169 | 0.302990225 | 0.006000719 |
| 0.170841161 | 0.30904335  | 0.087659081 | 0.039217472 |
| 0.175853873 | 0.006341297 | 0.055875748 | 0.149246734 |
| 0.240097234 | 0.284559118 | 0.004175087 | 0.03496907  |
| 0.184082628 | 0.043146887 | 0.015829189 | 0.111331442 |
| 0.096548706 | 0.025387347 | 0.048815458 | 0.159038424 |
| 0.248376824 | 0.098658145 | 0.28016971  | 0.008525961 |
| 0.33537181  | 0.008872857 | 0.332764933 | 0.024446621 |
| 0.100342466 | 0.162102463 | 0.342617274 | 0.037063391 |
| 0.001116727 | 0.015807036 | 0.162693082 | 0.20012132  |
| 0.010808656 | 0.054544257 | 0.047380637 | 0.084879617 |
| 0.358248498 | 0.052888564 | 0.092209045 | 0.125649885 |
| 0.201980962 | 0.004843449 | 0.301324907 | 0.104216261 |
| 0.219667324 | 0.044561368 | 0.248921961 | 0.000543634 |
| 0.194326534 | 0.011892599 | 0.129678769 | 0.074277975 |
| 0.37774316  | 0.018234744 | 0.138759458 | 0.025237149 |
| 0.016294184 | 0.002433324 | 0.193569997 | 0.097015575 |
| 0.100204896 | 1           | 0.126158049 | 0.025137393 |
| 0.335851255 | 0.129819383 | 0.221603275 | 0.084200932 |
| 0.067841974 | 0.004637928 | 0.011591245 | 0.004854411 |
| 0.211629558 | 0.189631904 | 0.195457943 | 0.132304458 |
| 0.070867524 | 0.170816986 | 0.157660194 | 0.09031367  |
| 0.286147548 | 0.018259841 | 0.352329768 | 0.083370389 |
| 0.323093332 | 0.04026617  | 0.079364209 | 0.040784119 |
| 0.030067789 | 0.014750795 | 0.016795306 | 0.030224245 |
| 0.312498393 | 0.045486192 | 0.086726099 | 0.039362975 |
| 0.003668874 | 0.064683998 | 0.306030486 | 0.235269826 |
| 0.142499209 | 0.206453227 | 0.119861897 | 0.189635879 |
| 0.035345165 | 0.070183887 | 0.003136501 | 0.001030761 |
| 0.017630697 | 0.025312292 | 0.32395855  | 0.310986401 |
| 0.360968927 | 0.055711176 | 0.010574225 | 0.027734436 |
| 0.049519132 | 0.328171618 | 0.068091009 | 0.022707543 |
| 0.172761484 | 0.052629228 | 0.000271834 | 0.053351965 |
| 0.169580081 | 0.04299094  |             |             |
| TAF9B       | 0.188872233 | 0.431179364 | 0.099833035 |
| 0.009021546 | 0.072885252 | 0.228788835 | 0.164714254 |
| 0.160875722 | 0.116181981 | 0.080198082 | 0.334361041 |
| 0.008000819 | 0.249785274 | 0.043871249 | 0.099190542 |

|             |             |             |             |
|-------------|-------------|-------------|-------------|
| 0.402296126 | 0.39800374  | 0.210284261 | 0.416907723 |
| 0.198674224 | 0.05148454  | 0.341006451 | 0.221699653 |
| 0.202209144 | 0.009286171 | 0.092078617 | 0.018803908 |
| 0.133795395 | 0.380081264 | 0.184317126 | 0.146537049 |
| 0.352879204 | 0.303688247 | 0.123936575 | 0.100729328 |
| 0.047015694 | 0.450816441 | 0.035735281 | 0.238689453 |
| 0.271798135 | 0.127004673 | 0.302140144 | 0.030643813 |
| 0.000399503 | 0.09568154  | 0.144696865 | 0.302837995 |
| 0.202711825 | 0.201401862 | 0.17661005  | 0.098554541 |
| 0.037571183 | 0.351813906 | 0.374879313 | 0.035329938 |
| 0.411556408 | 0.000931181 | 0.431339487 | 0.157877053 |
| 0.096724936 | 0.196225255 | 0.123937898 | 0.293270347 |
| 0.251160988 | 0.426589804 | 0.423742794 | 0.04593656  |
| 0.09034706  | 0.181294411 | 0.235437799 | 0.201781136 |
| 0.395190293 | 0.140249524 | 0.144284537 | 0.097998452 |
| 0.234353613 | 0.273315876 | 0.290587271 | 0.181103173 |
| 0.003483978 | 0.106305352 | 0.096224287 | 0.233648823 |
| 0.162346395 | 0.368653963 | 0.22901004  | 0.117053977 |
| 0.153980053 | 0.048706917 | 0.273814055 | 0.42044927  |
| 0.015931556 | 0.275938978 | 0.010044079 | 0.179502507 |
| 0.325624041 | 0.322672223 | 0.278551245 | 0.075409572 |
| 0.042086917 | 0.168179803 | 0.13226046  | 0.264244065 |
| 0.228280995 | 0.187317014 | 0.395775787 | 0.043269686 |
| 0.215907443 | 0.128665268 | 0.179876942 | 0.435050797 |
| 0.405421293 | 0.038466505 | 0.173498508 | 0.218669315 |
| 0.10162216  | 0.048238259 | 0.188384317 | 0.0205328   |
| 0.016495724 | 0.047923643 | 0.352358299 | 0.186156094 |
| 0.073393789 | 0.14455946  | 0.056382108 | 0.197550631 |
| 0.17153573  | 0.342444866 | 0.079590411 | 0.146439442 |
| 0.219591766 | 0.185774323 | 0.13451978  | 0.263549915 |
| 0.11630638  | 0.19667929  | 0.158885771 | 0.403188317 |
| 0.459419292 | 0.089653529 | 0.104749419 | 0.293230529 |
| 0.212542764 | 0.397532258 | 0.443867181 | 0.212316401 |
| 0.122767008 | 0.207033371 | 0.110567212 | 0.257441615 |
| 0.213845454 | 0.251933083 | 0.053647596 | 0.362589662 |
| 0.427262197 | 0.021564366 | 0.093787751 | 0.323416741 |
| 0.018296692 | 0.133318425 | 0.409966368 | 0.330467084 |
| 0.227171753 | 0.014385795 | 0.109305414 | 0.181416295 |
| 0.230348738 | 0.15015695  | 0.284261079 | 0.090321822 |
| 0.294124919 | 0.105711976 | 0.074511406 | 0.220481127 |
| 0.142902657 | 0.284177055 | 0.073484458 | 0.026889158 |
| 0.249711397 | 0.206308572 | 0.361390162 | 0.247833925 |
| 0.256236878 | 0.001046347 | 0.079006871 | 0.230738651 |
| 0.112162147 | 0.303964709 | 0.433250014 | 0.135968735 |
| 0.256798684 | 0.09896359  | 0.15897592  | 0.128323587 |
| 0.366559116 | 0.112373065 | 0.093571418 | 0.002748991 |
| 0.138504245 | 0.096398719 | 0.171310218 | 0.102747303 |
| 0.127477822 | 0.115515154 | 0.108392252 | 0.358807958 |
| 0.184323774 | 0.291040663 | 0.072574071 | 0.078759943 |
| 0.174255667 | 0.311204924 | 0.123115874 | 0.142247659 |
| 0.296774509 | 0.166167322 | 0.283278218 | 0.387805539 |
| 0.142402321 | 0.328203398 | 0.059943796 | 0.192510909 |
| 0.18053543  | 0.353303501 | 0.28149479  | 0.326602782 |
| 0.175246534 | 0.294551024 | 0.135878308 | 0.288571206 |

|             |             |             |             |
|-------------|-------------|-------------|-------------|
| 0.248614087 | 0.247521517 | 0.131012514 | 0.455289707 |
| 0.003361357 | 0.286297287 | 0.184133286 | 0.058126716 |
| 0.415096801 | 0.204503185 | 0.112638744 | 0.215371879 |
| 0.423084988 | 0.460544887 | 0.399649583 | 0.298285901 |
| 0.128463325 | 0.043095882 | 0.444634289 | 0.333976131 |
| 0.374362674 | 0.188787248 | 0.083156256 | 0.063676474 |
| 0.396105924 | 0.191594504 | 0.239497754 | 0.163232957 |
| 0.185342828 | 0.1235069   | 0.206653361 | 0.259392893 |
| 0.010939185 | 0.147183468 | 0.211604632 | 0.061983986 |
| 0.11716773  | 0.132682904 | 0.328988056 | 0.340682734 |
| 0.121520749 | 0.108414269 | 0.09318953  | 0.085924397 |
| 0.168809984 | 0.435437232 | 0.01550714  | 0.439419493 |
| 0.434740707 | 0.251190232 | 0.357218857 | 0.438542193 |
| 0.214627613 | 0.365200557 | 0.378955082 | 0.351250343 |
| 0.005014063 | 0.276377398 | 0.207383071 | 0.392240071 |
| 0.315754098 | 0.25468015  | 0.117623199 | 0.105277641 |
| 0.004937777 | 0.155949658 | 0.052367344 | 0.478590787 |
| 0.34690259  | 0.045589294 | 0.010387958 | 0.334870266 |
| 0.19166599  | 0.026378982 | 0.452460849 | 0.183056657 |
| 0.373491307 | 0.199079574 | 0.120700875 | 0.23814242  |
| 0.041348438 | 0.169466644 | 0.022781789 | 0.240450798 |
| 0.143069244 | 0.048235251 | 0.037210751 | 0.435627157 |
| 0.378318687 | 0.316992793 | 0.231000009 | 0.005219461 |
| 0.270904211 | 0.055121022 | 0.272514575 | 0.160310054 |
| 0.402705385 | 0.34501802  | 0.417667108 | 0.263601887 |
| 0.240399351 | 0.383441806 | 0.37683309  | 0.353085426 |
| 0.032029487 | 0.256269249 | 0.312429882 | 0.058318905 |
| 0.180465071 | 0.365098609 | 0.134771658 | 0.17146087  |
| 0.321271572 | 0.024279717 | 0.214884589 | 0.206414454 |
| 0.398664769 | 0.350487454 | 0.075519197 | 0.207648713 |
| 0.370539096 | 0.201340173 | 0.111102112 | 0.214242956 |
| 0.290412774 | 0.040972676 | 0.075257808 | 0.342831405 |
| 0.431982956 | 0.288860925 | 0.336903734 | 0.058613227 |
| 0.345266431 | 0.110504537 | 0.368165951 | 0.172968267 |
| 0.25163947  | 0.165858758 | 0.258183934 | 0.075140795 |
| 0.013282653 | 0.136414501 | 0.345594373 | 0.406143965 |
| 0.10466838  | 0.186195753 | 0.156268318 | 0.194113805 |
| 0.374948892 | 0.144095094 | 0.269765637 | 0.22195975  |
| 0.424296435 | 0.033804085 | 0.468562569 | 0.226592495 |
| 0.354332418 | 0.160431923 | 0.338062751 | 0.005667948 |
| 0.214959157 | 0.090413346 | 0.119429202 | 0.150534288 |
| 0.310792767 | 0.134726018 | 0.294515027 | 0.168841357 |
| 0.063076236 | 0.01248139  | 0.356926462 | 0.085135969 |
| 0.308492371 | 0.126158049 | 1           | 0.027150887 |
| 0.470423576 | 0.223738497 | 0.313631967 | 0.091932886 |
| 0.149066062 | 0.003772099 | 0.084928837 | 0.068123587 |
| 0.351325149 | 0.379335032 | 0.250528858 | 0.15951794  |
| 0.15057021  | 0.233517334 | 0.331686694 | 0.134790846 |
| 0.347189163 | 0.053133265 | 0.398804624 | 0.201526057 |
| 0.23110095  | 0.169951604 | 0.250542494 | 0.196187921 |
| 0.124991682 | 0.092953302 | 0.126635556 | 0.173858124 |
| 0.337446017 | 0.183464302 | 0.170763328 | 0.141194579 |
| 0.060743195 | 0.18699484  | 0.293786979 | 0.235690493 |
| 0.223822981 | 0.205551324 | 0.162511962 | 0.407761169 |



|             |             |             |             |             |
|-------------|-------------|-------------|-------------|-------------|
| 0.115277791 | 0.173245323 | 0.015251604 | 0.011763598 |             |
| 0.064340199 | 0.134180018 | 0.390618822 | 0.391097322 |             |
| 0.40921923  | 0.114905981 | 0.118333943 | 0.171667736 |             |
| 0.043763479 | 0.267723402 | 0.21044681  | 0.042727462 |             |
| 0.238511797 | 0.10695154  | 0.003630772 | 0.184437421 |             |
| 0.350750513 | 0.129937285 |             |             |             |
| TBRG4       | 0.053502469 | 0.159364    | 0.000284065 | 0.006782837 |
| 0.003097568 | 0.015751044 | 0.016884559 | 0.046556809 |             |
| 0.00053504  | 0.004579866 | 0.037790676 | 1.13E-06    |             |
| 0.254883936 | 1.52E-05    | 0.000377623 | 0.223683491 |             |
| 0.246465793 | 0.039303075 | 0.219690029 | 0.025556093 |             |
| 0.007415727 | 0.045448235 | 0.055151234 | 0.017300546 |             |
| 8.91E-07    | 0.005061567 | 0.002977238 | 0.064069481 |             |
| 0.250461957 | 0.006218181 | 0.00647276  | 0.201989166 |             |
| 0.279359901 | 0.04052759  | 0.024349634 | 0.097976921 |             |
| 0.112466057 | 0.025051276 | 0.260846456 | 0.263225259 |             |
| 0.012801331 | 0.24074625  | 1.53E-05    | 0.01122586  |             |
| 0.002156381 | 0.041584896 | 0.05335388  | 0.017552682 |             |
| 0.01183996  | 0.004634579 | 0.011824518 | 0.024582096 |             |
| 0.046551556 | 0.08668844  | 0.041318573 | 0.08300461  |             |
| 0.003123376 | 0.106711795 | 0.014887434 | 0.000462959 |             |
| 0.016987351 | 0.07196077  | 0.067638501 | 0.019742626 |             |
| 0.094995506 | 0.200018393 | 0.000151761 | 0.00103681  |             |
| 0.080348395 | 0.240399384 | 0.112796395 | 0.142637965 |             |
| 0.011372369 | 0.009483797 | 0.118642538 | 0.184574104 |             |
| 0.22290518  | 0.020711727 | 0.002462778 | 1.25E-06    |             |
| 0.007639252 | 0.054289959 | 0.094675419 | 0.225203218 |             |
| 0.04769102  | 0.078037058 | 0.011311313 | 0.094526791 |             |
| 2.40E-05    | 0.043627197 | 0.220405122 | 0.000499323 |             |
| 0.186442269 | 0.000259763 | 0.001217186 | 0.164419871 |             |
| 0.286075041 | 0.086580546 | 0.00060833  | 1.64E-05    |             |
| 0.001290606 | 0.002110145 | 0.304602496 | 0.050519197 |             |
| 0.077662727 | 0.07704588  | 0.048366544 | 0.316853202 |             |
| 0.001706164 | 0.018923691 | 0.113639999 | 0.170182418 |             |
| 7.85E-06    | 0.001777807 | 0.013003209 | 0.02088247  |             |
| 0.008427121 | 0.01366609  | 0.002459042 | 0.000121651 |             |
| 0.000135971 | 0.21676174  | 0.001928389 | 0.003242989 |             |
| 0.010782072 | 0.002222444 | 0.17252635  | 0.034995387 |             |
| 0.204982768 | 0.003079635 | 0.01798851  | 0.213127647 |             |
| 0.022980706 | 0.090242118 | 0.17489058  | 0.061873885 |             |
| 0.006406596 | 0.002637834 | 0.13316862  | 0.082724824 |             |
| 0.000324286 | 0.000360308 | 0.035230542 | 0.298339977 |             |
| 0.205854041 | 0.201104134 | 0.007265475 | 0.021941719 |             |
| 0.009241633 | 0.022437491 | 0.073169413 | 0.015776362 |             |
| 0.032942518 | 0.006164798 | 0.042770114 | 0.079441364 |             |
| 0.001727762 | 0.000456031 | 0.148614865 | 0.007739469 |             |
| 0.004474122 | 0.111756198 | 0.139955739 | 0.102315546 |             |
| 0.002567218 | 0.016388285 | 0.020046729 | 0.020387992 |             |
| 0.018215005 | 0.068760702 | 0.015573259 | 0.0296324   |             |
| 0.027604769 | 0.000320526 | 0.30409095  | 0.002398336 |             |
| 0.030219674 | 0.027539628 | 0.003059413 | 0.09186462  |             |
| 0.021474774 | 0.140076028 | 0.068727947 | 0.127484762 |             |
| 0.003182395 | 0.004917339 | 0.060541087 | 0.015855877 |             |
| 0.213333538 | 0.154530472 | 0.002106718 | 0.01411649  |             |

|                      |                      |                      |             |
|----------------------|----------------------|----------------------|-------------|
| 0.0416672            | 0.003203431          | 0.036712212          | 0.118656382 |
| 0.004474145          | 0.004319306          | 6.77E-07 0.001048698 |             |
| 0.08000401           | 0.059129432          | 0.000137552          | 0.00926479  |
| 0.000679232          | 0.00165992           | 0.170811269          | 0.008214724 |
| 0.205457975          | 6.15E-05 0.013503051 | 0.009399086          |             |
| 0.099535744          | 0.046715284          | 0.005891042          | 0.15012286  |
| 0.011616334          | 0.299010205          | 0.06424329           | 0.010239095 |
| 0.050545426          | 0.014587802          | 0.009299343          | 0.155338723 |
| 0.195262295          | 0.237549575          | 0.174000402          | 0.011414033 |
| 0.084036523          | 0.013356602          | 0.021688659          | 0.051438346 |
| 0.050708274          | 0.000486119          | 0.157905997          | 1.90E-07    |
| 0.035097749          | 0.106343682          | 0.016166362          | 0.156451992 |
| 0.020547267          | 0.000401935          | 0.008541168          | 0.222453343 |
| 0.156354769          | 0.126693407          | 0.253255524          | 0.008202281 |
| 8.34E-06 0.146778529 | 0.070640703          | 0.26388188           |             |
| 0.034821247          | 0.085809506          | 0.002581461          | 0.190518827 |
| 0.087026194          | 0.088680574          | 0.096155449          | 0.125684494 |
| 0.081774611          | 0.010215397          | 0.088899064          | 0.000409968 |
| 0.011579087          | 0.120574684          | 0.009486815          | 0.025852737 |
| 0.001999348          | 0.169437029          | 0.032811723          | 0.05538562  |
| 0.015175533          | 0.065917754          | 0.00139587           | 0.006296162 |
| 0.163490835          | 0.009089993          | 0.135026112          | 0.210274255 |
| 0.035401726          | 0.203485374          | 0.202066888          | 0.022832661 |
| 0.065308342          | 0.163216637          | 0.197839606          | 7.90E-07    |
| 0.296271417          | 0.284357638          | 0.042074903          | 0.229550014 |
| 0.021933075          | 0.03434688           | 0.136576972          | 7.33E-07    |
| 0.00387147           | 0.063583552          | 0.127565232          | 0.212272003 |
| 6.70E-05 0.028110712 | 0.14242283           | 0.238034695          |             |
| 0.002724741          | 0.183918046          | 0.032023666          | 0.150059617 |
| 0.062403274          | 0.007311813          | 0.284797864          | 0.086554731 |
| 0.029937669          | 0.000643446          | 0.098543019          | 0.078074211 |
| 0.002891649          | 0.004031515          | 0.19883934           | 0.121123208 |
| 0.064675466          | 0.014774781          | 0.00020447           | 0.22211227  |
| 0.021575158          | 0.175072271          | 0.000765144          | 0.091971555 |
| 0.050191731          | 0.122072329          | 0.248551002          | 0.083785459 |
| 0.07866498           | 0.058537521          | 0.138348283          | 0.023172914 |
| 0.237072056          | 0.217305533          | 0.000611169          | 0.103423507 |
| 0.212686745          | 0.093152055          | 0.008327869          | 0.048133643 |
| 0.020338111          | 0.010205812          | 0.034289751          | 0.123005749 |
| 0.212073856          | 0.000382405          | 0.001883639          | 0.083284135 |
| 0.009408222          | 0.002280386          | 0.023761787          | 0.020333116 |
| 0.02192427           | 0.005707391          | 0.046903544          | 0.118109797 |
| 0.029719718          | 0.189574337          | 0.008046388          | 0.231378023 |
| 0.000130615          | 0.140353861          | 0.004005172          | 0.017137417 |
| 0.136989522          | 0.258734392          | 0.005215137          | 0.000421999 |
| 0.000909025          | 0.078871082          | 0.075794397          | 0.000797912 |
| 0.006271621          | 0.015956293          | 0.047848568          | 0.243941086 |
| 0.029117951          | 0.019495525          | 0.023700018          | 0.073278037 |
| 0.007465172          | 0.126519127          | 0.024235522          | 0.083419339 |
| 0.022398331          | 0.130686791          | 0.000186754          | 0.151901542 |
| 0.007035291          | 0.025020378          | 0.066249787          | 0.2796658   |
| 0.002513183          | 0.067533856          | 0.002521592          | 0.009393056 |
| 1.20E-05 0.043995363 | 0.188309373          | 0.024242246          |             |
| 0.025137393          | 0.027150887          | 1                    | 0.166602008 |

|             |             |             |             |
|-------------|-------------|-------------|-------------|
| 0.050159247 | 0.112313647 | 0.057749212 | 0.040754323 |
| 0.046609359 | 0.006799001 | 8.89E-05    | 0.069571996 |
| 0.055923874 | 0.091024596 | 0.067732551 | 0.009167474 |
| 0.12334037  | 0.051368918 | 0.090713666 | 0.213818369 |
| 0.015834984 | 0.233563366 | 0.014470425 | 0.325836565 |
| 0.013613975 | 0.016228388 | 0.006985604 | 0.012043674 |
| 0.00189256  | 0.001951591 | 0.001803928 | 0.255173194 |
| 0.008856664 | 0.063854325 | 0.013650033 | 0.000255746 |
| 0.026473374 | 0.155863862 | 0.214954065 | 0.086038825 |
| 0.170529965 | 0.043013022 | 0.064828993 | 0.010676715 |
| 0.016784725 | 0.010492292 | 0.002264562 | 0.022294288 |
| 0.006816417 | 0.117630669 | 0.133041515 | 0.21580079  |
| 0.01424544  | 0.000950699 | 0.001699996 | 0.015745759 |
| 0.174619539 | 0.027359284 | 0.048490572 | 0.086564618 |
| 0.031079523 | 5.72E-07    | 0.006320991 | 0.053498453 |
| 0.018334539 |             |             |             |
| TBX21       | 0.412113359 | 0.530800412 | 0.12927482  |
| 0.039869535 | 0.179829995 | 0.357206915 | 0.339890753 |
| 0.418820748 | 0.197808162 | 0.217846488 | 0.446934541 |
| 0.003932294 | 0.402062486 | 0.034257059 | 0.136969802 |
| 0.49488915  | 0.506520472 | 0.457939563 | 0.497594585 |
| 0.416261864 | 0.202247108 | 0.469057436 | 0.479417183 |
| 0.384697043 | 0.004869422 | 0.206330104 | 0.076922353 |
| 0.409015607 | 0.47782077  | 0.325541597 | 0.378595625 |
| 0.462429423 | 0.468559887 | 0.474334467 | 0.388775737 |
| 0.257758341 | 0.527068158 | 0.134731986 | 0.458045129 |
| 0.38884863  | 0.331546716 | 0.482770934 | 0.035091684 |
| 0.004196163 | 0.183901943 | 0.368863488 | 0.489703378 |
| 0.413440766 | 0.337323465 | 0.286906968 | 0.269456659 |
| 0.165298399 | 0.474487932 | 0.467703552 | 0.162044681 |
| 0.511144137 | 0.006850404 | 0.526861953 | 0.323632687 |
| 0.1333553   | 0.441540921 | 0.409988251 | 0.499075037 |
| 0.37320045  | 0.520089574 | 0.521305179 | 0.073016328 |
| 0.143658153 | 0.494135575 | 0.433432488 | 0.495990676 |
| 0.527779731 | 0.420159591 | 0.411841576 | 0.396775604 |
| 0.482612357 | 0.424089191 | 0.41648614  | 0.292863952 |
| 0.00246053  | 0.245217758 | 0.394067023 | 0.383946238 |
| 0.416015293 | 0.475566253 | 0.447836271 | 0.326299693 |
| 0.477528977 | 0.046388335 | 0.491797949 | 0.515856309 |
| 0.037171935 | 0.441293896 | 0.018846954 | 0.265467471 |
| 0.48258836  | 0.438194871 | 0.482570538 | 0.138563706 |
| 0.034679294 | 0.225544559 | 0.202950555 | 0.369741089 |
| 0.497997531 | 0.533674214 | 0.508850457 | 0.153285368 |
| 0.350686201 | 0.269777374 | 0.477832247 | 0.527147011 |
| 0.506445722 | 0.019687474 | 0.265666615 | 0.344914669 |
| 0.400123646 | 0.193548885 | 0.354361382 | 0.04901143  |
| 0.020907122 | 0.034013151 | 0.466239139 | 0.266804149 |
| 0.174518419 | 0.319514157 | 0.131906484 | 0.500819512 |
| 0.401790967 | 0.424472892 | 0.198517335 | 0.375821423 |
| 0.462707104 | 0.375127508 | 0.483654503 | 0.501496871 |
| 0.428595195 | 0.368697354 | 0.254401954 | 0.536744765 |
| 0.511225003 | 0.132236221 | 0.156118764 | 0.445747282 |
| 0.375232989 | 0.491326448 | 0.526175809 | 0.410738868 |
| 0.362220274 | 0.372179416 | 0.391029671 | 0.492962533 |

|             |             |             |             |
|-------------|-------------|-------------|-------------|
| 0.371616365 | 0.443919242 | 0.104222327 | 0.47671359  |
| 0.507505628 | 0.049396073 | 0.133029008 | 0.490686187 |
| 0.074167382 | 0.358414511 | 0.521419938 | 0.535491346 |
| 0.514596855 | 0.064710253 | 0.324785311 | 0.382437794 |
| 0.421412867 | 0.368658914 | 0.502335562 | 0.29723902  |
| 0.439635444 | 0.392476083 | 0.100490154 | 0.365804095 |
| 0.221721051 | 0.453646898 | 0.330976784 | 0.092432438 |
| 0.460911377 | 0.438547479 | 0.530164286 | 0.501314385 |
| 0.451431949 | 0.005720517 | 0.213992909 | 0.440420388 |
| 0.371983659 | 0.401275475 | 0.536419722 | 0.208385936 |
| 0.381315118 | 0.35467528  | 0.251650823 | 0.423703692 |
| 0.449495956 | 0.315277105 | 0.28796609  | 0.00189772  |
| 0.234607142 | 0.401154217 | 0.501808903 | 0.102963669 |
| 0.332763717 | 0.196374295 | 0.17485507  | 0.523440246 |
| 0.321692628 | 0.507604617 | 0.0528186   | 0.192523807 |
| 0.381169007 | 0.519335935 | 0.442034264 | 0.343822215 |
| 0.528351161 | 0.412450602 | 0.39511828  | 0.498835442 |
| 0.381177283 | 0.464579162 | 0.19618487  | 0.399272161 |
| 0.480493444 | 0.524764288 | 0.480482731 | 0.514999242 |
| 0.384077023 | 0.43895     | 0.348184169 | 0.401955489 |
| 0.489102527 | 0.500633268 | 0.159494387 | 0.53357325  |
| 0.002105729 | 0.470984511 | 0.509962943 | 0.207161734 |
| 0.536410686 | 0.35847613  | 0.137125836 | 0.361072998 |
| 0.50599186  | 0.532495056 | 0.474547384 | 0.439930635 |
| 0.273147509 | 0.025189711 | 0.507064544 | 0.511032708 |
| 0.483379246 | 0.503832703 | 0.36328128  | 0.108077618 |
| 0.52016923  | 0.387616334 | 0.495892999 | 0.457063606 |
| 0.497927414 | 0.428860663 | 0.374249405 | 0.400694819 |
| 0.024139934 | 0.35803596  | 0.466561424 | 0.253933946 |
| 0.399916776 | 0.271537077 | 0.525001299 | 0.450945856 |
| 0.448385991 | 0.36358771  | 0.405027921 | 0.152420464 |
| 0.293079078 | 0.529633098 | 0.054276349 | 0.503754684 |
| 0.517828119 | 0.482291049 | 0.524451251 | 0.509558131 |
| 0.432183588 | 0.500368599 | 0.527482481 | 0.435418359 |
| 0.002291068 | 0.413626765 | 0.394005874 | 0.465467802 |
| 0.471900061 | 0.412919324 | 0.282232568 | 0.435550218 |
| 0.003326983 | 0.261452175 | 0.266226416 | 0.525541926 |
| 0.51688057  | 0.063723787 | 0.052066539 | 0.531466637 |
| 0.408563322 | 0.061428151 | 0.523371717 | 0.440899863 |
| 0.535930039 | 0.516522222 | 0.274970663 | 0.416166714 |
| 0.223034968 | 0.448451843 | 0.051824861 | 0.515883559 |
| 0.473231805 | 0.115064413 | 0.127849348 | 0.511625345 |
| 0.510648376 | 0.501264362 | 0.382776412 | 0.016588648 |
| 0.373028185 | 0.248047356 | 0.516871026 | 0.199378589 |
| 0.514129349 | 0.482126158 | 0.535765582 | 0.461236476 |
| 0.519039649 | 0.512923449 | 0.48812208  | 0.527014973 |
| 0.144341192 | 0.428875661 | 0.447606774 | 0.10274583  |
| 0.409501437 | 0.519214249 | 0.468788705 | 0.28559398  |
| 0.485007738 | 0.11555563  | 0.321271369 | 0.407736167 |
| 0.534722154 | 0.51041557  | 0.115916216 | 0.270358573 |
| 0.510831495 | 0.428994331 | 0.19850836  | 0.465799566 |
| 0.40403411  | 0.176064317 | 0.174509645 | 0.488703318 |
| 0.531175047 | 0.414229613 | 0.494093008 | 0.216782346 |
| 0.486466618 | 0.107173153 | 0.490291768 | 0.380663195 |

|             |             |             |             |
|-------------|-------------|-------------|-------------|
| 0.407915312 | 0.421640408 | 0.373278114 | 0.144421824 |
| 0.039855287 | 0.203454023 | 0.50190495  | 0.509806892 |
| 0.147042189 | 0.309979056 | 0.367307507 | 0.454785443 |
| 0.487592056 | 0.473453646 | 0.400754503 | 0.453065424 |
| 0.504548119 | 0.145038504 | 0.527017809 | 0.448179154 |
| 0.497062212 | 0.438119006 | 0.525335757 | 0.0155554   |
| 0.489215958 | 0.250730492 | 0.257925261 | 0.453392379 |
| 0.420539464 | 0.227441782 | 0.494183562 | 0.272642228 |
| 0.218356754 | 0.007579721 | 0.474125678 | 0.383352313 |
| 0.403510891 | 0.335851255 | 0.470423576 | 0.166602008 |
| 1           | 0.485626592 | 0.483484166 | 0.314892689 |
| 0.47507582  | 0.023400414 | 0.236782174 | 0.073647853 |
| 0.489064705 | 0.499536462 | 0.473799649 | 0.439423065 |
| 0.273712546 | 0.523299268 | 0.502407371 | 0.484167177 |
| 0.517889178 | 0.185737422 | 0.504245562 | 0.41986054  |
| 0.368787132 | 0.466632996 | 0.387283218 | 0.437311121 |
| 0.30735494  | 0.193959189 | 0.219914399 | 0.256396526 |
| 0.493343464 | 0.4094941   | 0.483082532 | 0.388009913 |
| 0.094719861 | 0.487335279 | 0.464119899 | 0.459657294 |
| 0.505369877 | 0.409186645 | 0.427867874 | 0.497022045 |
| 0.374368439 | 0.400601856 | 0.075938464 | 0.052526521 |
| 0.302616478 | 0.299997039 | 0.474138877 | 0.508581406 |
| 0.503353291 | 0.337831272 | 0.180604859 | 0.23822722  |
| 0.145415909 | 0.400731891 | 0.387817646 | 0.185705207 |
| 0.517797965 | 0.358845593 | 0.001612914 | 0.331678052 |
| 0.49465693  | 0.44138589  |             |             |
| TCF4        | 0.218371192 | 0.455774862 | 0.096440686 |
| 0.020619085 | 0.07162731  | 0.219097008 | 0.160674995 |
| 0.208510872 | 0.127243452 | 0.132124476 | 0.308922826 |
| 0.006457303 | 0.258124529 | 0.039902152 | 0.068672443 |
| 0.444283843 | 0.435845982 | 0.186133939 | 0.427941558 |
| 0.229846448 | 0.103375736 | 0.314897935 | 0.258136846 |
| 0.198814905 | 0.00814389  | 0.109134302 | 0.050747341 |
| 0.172461696 | 0.411510825 | 0.187171644 | 0.213258836 |
| 0.403544676 | 0.344494953 | 0.199509039 | 0.130337967 |
| 0.082616992 | 0.44991768  | 0.029729441 | 0.258558866 |
| 0.300470074 | 0.157461282 | 0.342764745 | 0.027507837 |
| 0.001339138 | 0.104664883 | 0.17666297  | 0.315402614 |
| 0.200346446 | 0.192719719 | 0.163593671 | 0.131461786 |
| 0.062746788 | 0.329745251 | 0.356483952 | 0.057975387 |
| 0.394566021 | 0.004255212 | 0.432808699 | 0.195535788 |
| 0.089147054 | 0.211961999 | 0.186185734 | 0.306287657 |
| 0.227172236 | 0.416960354 | 0.443698264 | 0.048064439 |
| 0.09645782  | 0.205353481 | 0.300278935 | 0.245724884 |
| 0.421901696 | 0.219042038 | 0.190583953 | 0.124572222 |
| 0.281976245 | 0.302718108 | 0.235642223 | 0.156936845 |
| 0.003897064 | 0.126803332 | 0.142407723 | 0.252381474 |
| 0.191839989 | 0.342024877 | 0.236735737 | 0.142649608 |
| 0.214662492 | 0.045109004 | 0.261040587 | 0.453319812 |
| 0.024643471 | 0.27773888  | 0.007979655 | 0.135080527 |
| 0.351152457 | 0.372412687 | 0.31902312  | 0.090301052 |
| 0.031518079 | 0.13933465  | 0.143826812 | 0.297622349 |
| 0.22539541  | 0.225257762 | 0.378609999 | 0.043872561 |
| 0.24085018  | 0.186028464 | 0.195954626 | 0.45260426  |

|             |             |             |             |
|-------------|-------------|-------------|-------------|
| 0.448063937 | 0.016688594 | 0.161339864 | 0.188665514 |
| 0.144694742 | 0.078178921 | 0.168772404 | 0.033026376 |
| 0.018768275 | 0.027513687 | 0.391512371 | 0.178560181 |
| 0.09599803  | 0.170372071 | 0.066564726 | 0.233407791 |
| 0.192957295 | 0.362529565 | 0.076911998 | 0.18402256  |
| 0.253409894 | 0.175373518 | 0.186488912 | 0.297256793 |
| 0.137008556 | 0.204919904 | 0.17328921  | 0.393591575 |
| 0.42257121  | 0.082595786 | 0.118564642 | 0.293561959 |
| 0.232839919 | 0.428828446 | 0.472339928 | 0.206780164 |
| 0.138497666 | 0.196022936 | 0.20791534  | 0.27695376  |
| 0.174430324 | 0.204004271 | 0.040834726 | 0.302055705 |
| 0.415099645 | 0.024401466 | 0.097982444 | 0.330552205 |
| 0.022124137 | 0.145436621 | 0.434577285 | 0.337135888 |
| 0.206000849 | 0.045597215 | 0.174531101 | 0.197029207 |
| 0.229031681 | 0.195057759 | 0.282533147 | 0.161825377 |
| 0.282610251 | 0.20922134  | 0.067661942 | 0.244813205 |
| 0.136640755 | 0.256628895 | 0.145220902 | 0.041587388 |
| 0.24115376  | 0.210879408 | 0.396630305 | 0.244380775 |
| 0.299597136 | 0.003619125 | 0.136307986 | 0.262016622 |
| 0.219740647 | 0.30314536  | 0.456389669 | 0.126691214 |
| 0.210521167 | 0.110249663 | 0.149012047 | 0.147840255 |
| 0.35503113  | 0.189062761 | 0.165440731 | 0.005189032 |
| 0.117177027 | 0.185915035 | 0.200426368 | 0.093223768 |
| 0.144032597 | 0.157551189 | 0.098563176 | 0.398435139 |
| 0.184809303 | 0.302540114 | 0.047264965 | 0.069068828 |
| 0.207152541 | 0.315649553 | 0.197061378 | 0.215494496 |
| 0.327998365 | 0.236701302 | 0.330475179 | 0.374311906 |
| 0.134545089 | 0.340060962 | 0.058731533 | 0.206622862 |
| 0.203330783 | 0.380539137 | 0.332880285 | 0.320107324 |
| 0.200078342 | 0.257225769 | 0.156265519 | 0.262380823 |
| 0.239082774 | 0.209602353 | 0.128736655 | 0.450644415 |
| 0.004020868 | 0.251396926 | 0.217102962 | 0.072331469 |
| 0.443630887 | 0.18696903  | 0.107525565 | 0.209633598 |
| 0.437693546 | 0.450230484 | 0.381691433 | 0.3503878   |
| 0.1261697   | 0.029632181 | 0.440378724 | 0.334222371 |
| 0.411727236 | 0.200209737 | 0.109076371 | 0.035499166 |
| 0.41499786  | 0.171456757 | 0.298217902 | 0.212912523 |
| 0.185328918 | 0.137632187 | 0.186294587 | 0.238798682 |
| 0.020112049 | 0.221668667 | 0.275144446 | 0.122867068 |
| 0.205245706 | 0.159372688 | 0.355568607 | 0.280792246 |
| 0.154782613 | 0.211189574 | 0.15611379  | 0.089080766 |
| 0.153878122 | 0.467622859 | 0.011254545 | 0.427924308 |
| 0.458131424 | 0.203026551 | 0.401796847 | 0.455308693 |
| 0.2431398   | 0.344353226 | 0.414367029 | 0.356072515 |
| 0.003237903 | 0.318356593 | 0.225584309 | 0.343731391 |
| 0.383548029 | 0.243029934 | 0.117305281 | 0.148372966 |
| 0.001979877 | 0.162942851 | 0.102249175 | 0.46140813  |
| 0.373750455 | 0.042372297 | 0.009056897 | 0.336353595 |
| 0.207391963 | 0.02075394  | 0.476790566 | 0.227161771 |
| 0.395354909 | 0.200091416 | 0.154153457 | 0.274452494 |
| 0.083708963 | 0.171542436 | 0.023418466 | 0.262544184 |
| 0.164523205 | 0.049210467 | 0.066250793 | 0.451580758 |
| 0.413459204 | 0.291652835 | 0.191402447 | 0.024412165 |
| 0.308844103 | 0.119725086 | 0.318669057 | 0.106828435 |

|             |             |             |             |
|-------------|-------------|-------------|-------------|
| 0.37811755  | 0.322632657 | 0.397787657 | 0.294543038 |
| 0.232499772 | 0.374211569 | 0.371963796 | 0.39800814  |
| 0.049446103 | 0.316893484 | 0.369644672 | 0.071955293 |
| 0.20030723  | 0.397067088 | 0.200858209 | 0.157118893 |
| 0.299987925 | 0.040222382 | 0.190292748 | 0.207423156 |
| 0.398797532 | 0.403805257 | 0.089423461 | 0.157222854 |
| 0.37907239  | 0.204501078 | 0.106817415 | 0.195665708 |
| 0.255004377 | 0.082852588 | 0.063459686 | 0.312129886 |
| 0.438309166 | 0.259080901 | 0.407215053 | 0.119535265 |
| 0.359512609 | 0.077832688 | 0.340497013 | 0.165733449 |
| 0.219902181 | 0.2222594   | 0.299442365 | 0.086214668 |
| 0.05086553  | 0.17872367  | 0.352767978 | 0.395692702 |
| 0.104290583 | 0.182980765 | 0.190625228 | 0.194991078 |
| 0.418012491 | 0.208221566 | 0.233421859 | 0.217570646 |
| 0.397372862 | 0.066405679 | 0.467269004 | 0.241388444 |
| 0.377786692 | 0.208120835 | 0.341283327 | 0.008969042 |
| 0.250029433 | 0.157388785 | 0.126416087 | 0.188745917 |
| 0.354829676 | 0.142342203 | 0.281042593 | 0.175318863 |
| 0.093815365 | 0.005369321 | 0.307633222 | 0.12350396  |
| 0.279740455 | 0.129819383 | 0.223738497 | 0.050159247 |
| 0.485626592 | 1           | 0.371259168 | 0.095930999 |
| 0.221665431 | 0.004335196 | 0.133391402 | 0.064991877 |
| 0.356903947 | 0.331469203 | 0.254040978 | 0.221871825 |
| 0.159879522 | 0.237696247 | 0.292234275 | 0.178139447 |
| 0.385498561 | 0.106286453 | 0.447159396 | 0.186160071 |
| 0.268239924 | 0.228604071 | 0.207282728 | 0.189216257 |
| 0.135157059 | 0.080573788 | 0.123116513 | 0.170647243 |
| 0.388589163 | 0.149924368 | 0.195507669 | 0.248180352 |
| 0.067404831 | 0.215558455 | 0.289041628 | 0.273347634 |
| 0.259711535 | 0.267359237 | 0.182996621 | 0.375509907 |
| 0.18868138  | 0.229118701 | 0.033958703 | 0.032757549 |
| 0.129567463 | 0.175295004 | 0.382408231 | 0.376020193 |
| 0.4241802   | 0.141139421 | 0.117700566 | 0.15721914  |
| 0.037393894 | 0.293179105 | 0.199460997 | 0.05118686  |
| 0.221124849 | 0.148732569 | 0.002219276 | 0.20024717  |
| 0.33676142  | 0.185182641 |             |             |
| TCF7        | 0.355087911 | 0.452782402 | 0.087572627 |
| 0.026200778 | 0.082636476 | 0.23523906  | 0.195559581 |
| 0.334046393 | 0.145287399 | 0.156641549 | 0.283984266 |
| 0.006705585 | 0.302770044 | 0.0369212   | 0.077428444 |
| 0.480050216 | 0.473238063 | 0.254068643 | 0.461972427 |
| 0.332488672 | 0.149466065 | 0.339297953 | 0.341859402 |
| 0.248424427 | 0.007207575 | 0.117431934 | 0.062561711 |
| 0.300321328 | 0.456285459 | 0.217805249 | 0.28571495  |
| 0.443117183 | 0.385778922 | 0.315395154 | 0.20222348  |
| 0.161605201 | 0.421156831 | 0.059725481 | 0.293373019 |
| 0.357799043 | 0.195715044 | 0.381792869 | 0.027766886 |
| 0.00271041  | 0.10726247  | 0.288741145 | 0.359911449 |
| 0.287709273 | 0.22645286  | 0.182375319 | 0.158649306 |
| 0.130003755 | 0.305419801 | 0.351539242 | 0.121829153 |
| 0.350280001 | 0.005898525 | 0.403916524 | 0.293963836 |
| 0.084844174 | 0.293472637 | 0.336211172 | 0.367034557 |
| 0.22812738  | 0.376561251 | 0.46185391  | 0.044717142 |
| 0.092575236 | 0.350189037 | 0.346539891 | 0.328028393 |

|             |             |             |             |
|-------------|-------------|-------------|-------------|
| 0.418918718 | 0.307874379 | 0.253676018 | 0.23739703  |
| 0.338051916 | 0.347969608 | 0.260870778 | 0.175328898 |
| 0.003765089 | 0.142179129 | 0.222534327 | 0.312508281 |
| 0.282047501 | 0.305862142 | 0.342587144 | 0.182342078 |
| 0.35481182  | 0.035160514 | 0.335059893 | 0.476124784 |
| 0.02588136  | 0.315248612 | 0.010196959 | 0.150318852 |
| 0.376605567 | 0.431677867 | 0.372134203 | 0.09159993  |
| 0.025084602 | 0.151251273 | 0.2123373   | 0.364259212 |
| 0.349674328 | 0.354314748 | 0.33806883  | 0.098147512 |
| 0.297944429 | 0.250512077 | 0.280160609 | 0.420511737 |
| 0.462810165 | 0.013189916 | 0.192099709 | 0.212456979 |
| 0.249036897 | 0.117437561 | 0.200522282 | 0.046913298 |
| 0.015855236 | 0.034423952 | 0.430757879 | 0.196509016 |
| 0.10579844  | 0.197948559 | 0.076622716 | 0.317820392 |
| 0.301752694 | 0.4104818   | 0.08926111  | 0.229352186 |
| 0.312656678 | 0.218026557 | 0.289283512 | 0.343665405 |
| 0.221487343 | 0.277539708 | 0.186388526 | 0.378662345 |
| 0.386047543 | 0.080392887 | 0.115834229 | 0.302638044 |
| 0.284026324 | 0.45712768  | 0.489059512 | 0.29008055  |
| 0.185937614 | 0.243056403 | 0.326221637 | 0.313744425 |
| 0.212357913 | 0.301126509 | 0.067527908 | 0.293128857 |
| 0.366604396 | 0.038617981 | 0.092149569 | 0.351346708 |
| 0.029757211 | 0.198351936 | 0.414061045 | 0.341442362 |
| 0.30825248  | 0.056612772 | 0.224181927 | 0.250892969 |
| 0.306134689 | 0.241655204 | 0.352996051 | 0.217192872 |
| 0.30505871  | 0.323206883 | 0.059458223 | 0.299189057 |
| 0.138640878 | 0.320140087 | 0.289972662 | 0.071598879 |
| 0.326467881 | 0.306006637 | 0.39349403  | 0.351232464 |
| 0.348084451 | 0.004442446 | 0.158980736 | 0.366165021 |
| 0.344129692 | 0.347392418 | 0.444207888 | 0.129196549 |
| 0.261726274 | 0.213676878 | 0.160625123 | 0.217234168 |
| 0.371751772 | 0.254026459 | 0.226040332 | 0.004125868 |
| 0.128627805 | 0.331255117 | 0.327616757 | 0.097476544 |
| 0.182666901 | 0.175980856 | 0.139131227 | 0.409024639 |
| 0.209682307 | 0.320525174 | 0.051264289 | 0.132452729 |
| 0.256628483 | 0.316693074 | 0.309628607 | 0.33285739  |
| 0.335484685 | 0.303485794 | 0.396105515 | 0.333790447 |
| 0.18621057  | 0.309815373 | 0.124079151 | 0.279903485 |
| 0.316979811 | 0.396828324 | 0.366253783 | 0.331105385 |
| 0.250857477 | 0.304299949 | 0.235282103 | 0.266022625 |
| 0.344431499 | 0.31314612  | 0.12286603  | 0.445134518 |
| 0.003444854 | 0.298493903 | 0.333916583 | 0.150280422 |
| 0.431874731 | 0.208857947 | 0.102007755 | 0.268515428 |
| 0.469459405 | 0.445409971 | 0.392915675 | 0.39788886  |
| 0.2175436   | 0.025752882 | 0.448487764 | 0.341549283 |
| 0.458854898 | 0.300385393 | 0.193455499 | 0.062126312 |
| 0.42491808  | 0.271141653 | 0.372636708 | 0.359607484 |
| 0.299715658 | 0.239332157 | 0.232674143 | 0.295069495 |
| 0.030183932 | 0.28240259  | 0.365958536 | 0.187337345 |
| 0.296760574 | 0.216003351 | 0.36560303  | 0.276422809 |
| 0.252089188 | 0.348331922 | 0.259632888 | 0.088049591 |
| 0.173934919 | 0.465644567 | 0.0226618   | 0.429778566 |
| 0.478817781 | 0.295632303 | 0.413770394 | 0.476216279 |
| 0.327284591 | 0.310560405 | 0.420546659 | 0.397074909 |



|             |             |             |             |
|-------------|-------------|-------------|-------------|
| 0.002936598 | 0.374958521 | 0.269641427 | 0.297658196 |
| 0.420170072 | 0.278312383 | 0.209627084 | 0.274041554 |
| 0.001954139 | 0.178296502 | 0.199297621 | 0.446717808 |
| 0.389174825 | 0.038082001 | 0.022020947 | 0.337059359 |
| 0.269263997 | 0.033067283 | 0.486974046 | 0.307414558 |
| 0.385495807 | 0.299835972 | 0.176349386 | 0.324975783 |
| 0.175726028 | 0.276531163 | 0.025636365 | 0.332835503 |
| 0.284154213 | 0.100910165 | 0.081106899 | 0.474687725 |
| 0.405098413 | 0.297188698 | 0.236510309 | 0.027845813 |
| 0.365403644 | 0.188265259 | 0.34559748  | 0.109274671 |
| 0.356321541 | 0.305171095 | 0.377818761 | 0.336396291 |
| 0.338694379 | 0.33719646  | 0.323800683 | 0.391105261 |
| 0.079101272 | 0.363476563 | 0.410863555 | 0.068881307 |
| 0.317539107 | 0.417792847 | 0.327005108 | 0.175771305 |
| 0.337789428 | 0.060431507 | 0.206768739 | 0.321735249 |
| 0.374994229 | 0.426087214 | 0.084291201 | 0.179998343 |
| 0.339336616 | 0.269480901 | 0.111636184 | 0.274178499 |
| 0.264647208 | 0.170681297 | 0.123831957 | 0.320000569 |
| 0.410513648 | 0.248785673 | 0.428654312 | 0.161722366 |
| 0.393512179 | 0.070066997 | 0.356233686 | 0.212048691 |
| 0.282229327 | 0.336601977 | 0.357784977 | 0.143560367 |
| 0.059807379 | 0.208009279 | 0.316151241 | 0.354105613 |
| 0.096531922 | 0.21042064  | 0.232689952 | 0.268986333 |
| 0.454186071 | 0.322279232 | 0.254256267 | 0.296603514 |
| 0.349974856 | 0.092686659 | 0.451028777 | 0.335263532 |
| 0.368946147 | 0.283777626 | 0.348128858 | 0.013517548 |
| 0.341026741 | 0.190884516 | 0.217454039 | 0.276684674 |
| 0.416840441 | 0.145774787 | 0.292106574 | 0.204623663 |
| 0.145802572 | 0.005398825 | 0.316935638 | 0.231452368 |
| 0.259344905 | 0.221603275 | 0.313631967 | 0.112313647 |
| 0.483484166 | 0.371259168 | 1           | 0.186079141 |
| 0.317433721 | 0.009024568 | 0.161049525 | 0.056198501 |
| 0.360562959 | 0.317846549 | 0.346354809 | 0.368908797 |
| 0.245736899 | 0.314490451 | 0.314800941 | 0.27628791  |
| 0.404621836 | 0.158025128 | 0.477039376 | 0.272162379 |
| 0.330568929 | 0.333540513 | 0.237305003 | 0.270179612 |
| 0.163239932 | 0.127469503 | 0.132555104 | 0.218587211 |
| 0.423494485 | 0.22229383  | 0.288908994 | 0.365066028 |
| 0.059974722 | 0.302506646 | 0.315891322 | 0.319674129 |
| 0.358644369 | 0.326620865 | 0.291398349 | 0.326464125 |
| 0.326399028 | 0.336163359 | 0.048417738 | 0.042768911 |
| 0.218912024 | 0.204504628 | 0.391182426 | 0.379225183 |
| 0.454116452 | 0.254975607 | 0.119919091 | 0.177004431 |
| 0.078507609 | 0.333703117 | 0.227038864 | 0.090313231 |
| 0.316467384 | 0.280468595 | 0.001385646 | 0.274662056 |
| 0.328606832 | 0.297908996 |             |             |
| TCP11L2     | 0.103735362 | 0.285755486 | 0.004775053 |
| 0.002267918 | 0.016941658 | 0.051749585 | 0.047341517 |
| 0.091435513 | 0.010563093 | 0.00993154  | 0.105428855 |
| 0.000137194 | 0.360762331 | 0.001072087 | 0.014516946 |
| 0.343287994 | 0.374216942 | 0.101925567 | 0.384924863 |
| 0.077916244 | 0.012694069 | 0.130987774 | 0.088884331 |
| 0.054337309 | 0.000117424 | 0.012993743 | 0.00294959  |
| 0.109925344 | 0.374019429 | 0.034249811 | 0.02351586  |

|             |             |             |             |
|-------------|-------------|-------------|-------------|
| 0.304258614 | 0.342470537 | 0.054204653 | 0.063520937 |
| 0.059890801 | 0.235276329 | 0.133200749 | 0.31925888  |
| 0.373993722 | 0.02631287  | 0.318019497 | 0.001865679 |
| 0.000725029 | 0.008582823 | 0.077385308 | 0.121554871 |
| 0.07341039  | 0.040335827 | 0.031160095 | 0.022251025 |
| 0.039621649 | 0.126743925 | 0.218309072 | 0.045563311 |
| 0.190252129 | 0.000288691 | 0.227360736 | 0.043794795 |
| 0.005828602 | 0.068989093 | 0.107171166 | 0.145613191 |
| 0.066195143 | 0.207321918 | 0.343776402 | 0.002708601 |
| 0.007077539 | 0.147269846 | 0.255407967 | 0.130394385 |
| 0.261071387 | 0.032901781 | 0.033919865 | 0.158971448 |
| 0.227036162 | 0.310072204 | 0.090401554 | 0.023066497 |
| 4.55E-05    | 0.02160338  | 0.051176135 | 0.191470284 |
| 0.22129459  | 0.130330221 | 0.157334743 | 0.02628967  |
| 0.10718843  | 0.001222583 | 0.108756061 | 0.352268202 |
| 0.001785612 | 0.328760817 | 0.001698569 | 0.02359336  |
| 0.264097394 | 0.373407186 | 0.158279591 | 0.005149202 |
| 0.001214404 | 0.016077785 | 0.022953821 | 0.385385205 |
| 0.127943927 | 0.129767824 | 0.185822888 | 0.10320448  |
| 0.365495257 | 0.015515877 | 0.056826739 | 0.220573623 |
| 0.284316009 | 0.001409309 | 0.022323623 | 0.047994758 |
| 0.071612496 | 0.017932351 | 0.05119164  | 0.004274639 |
| 0.000568502 | 0.007145379 | 0.332643849 | 0.015897351 |
| 0.008201657 | 0.031748618 | 0.007996432 | 0.182476041 |
| 0.078928161 | 0.355629826 | 0.019776391 | 0.042367752 |
| 0.245348683 | 0.059168551 | 0.10015012  | 0.237860453 |
| 0.089526835 | 0.038855381 | 0.012977193 | 0.264800339 |
| 0.221351969 | 0.005893381 | 0.00598888  | 0.088350476 |
| 0.357001192 | 0.328480204 | 0.340957323 | 0.044275514 |
| 0.039119599 | 0.05096466  | 0.031779422 | 0.11868712  |
| 0.062454252 | 0.127835878 | 0.051581605 | 0.144264203 |
| 0.186288478 | 0.005879354 | 0.004838903 | 0.276668535 |
| 0.012328018 | 0.039104838 | 0.218925288 | 0.250154772 |
| 0.213447128 | 0.002147806 | 0.020474628 | 0.050406908 |
| 0.068679306 | 0.038885751 | 0.163666629 | 0.017591801 |
| 0.088876769 | 0.030491061 | 0.003724946 | 0.360256513 |
| 0.01574274  | 0.10242975  | 0.051258049 | 0.01481334  |
| 0.201985443 | 0.073033696 | 0.227692544 | 0.149826119 |
| 0.205919727 | 0.000216596 | 0.009182046 | 0.122775955 |
| 0.028137986 | 0.368737048 | 0.272170644 | 0.016468341 |
| 0.066241425 | 0.130121636 | 0.022715167 | 0.062233501 |
| 0.275902896 | 0.018474674 | 0.016279171 | 1.05E-05    |
| 0.017599434 | 0.059870061 | 0.136865991 | 0.004929056 |
| 0.028023728 | 0.007838107 | 0.026900424 | 0.262920496 |
| 0.034445447 | 0.295655827 | 0.00485397  | 0.088191059 |
| 0.025724527 | 0.182844101 | 0.047374576 | 0.031164246 |
| 0.218775992 | 0.028322811 | 0.365180922 | 0.167249591 |
| 0.059341544 | 0.111718362 | 0.134425139 | 0.043950326 |
| 0.191717109 | 0.302513678 | 0.276129205 | 0.299278057 |
| 0.038103018 | 0.234389684 | 0.061339337 | 0.071915519 |
| 0.123302894 | 0.151526294 | 0.006058424 | 0.311237463 |
| 2.86E-05    | 0.105092425 | 0.134633254 | 0.082807636 |
| 0.261557463 | 0.058229397 | 0.005260816 | 0.040008275 |
| 0.383195074 | 0.31767901  | 0.294614453 | 0.313030855 |

|             |             |             |             |
|-------------|-------------|-------------|-------------|
| 0.049882194 | 0.000933143 | 0.310702181 | 0.164808326 |
| 0.381878797 | 0.099198294 | 0.091046779 | 0.080544912 |
| 0.307810058 | 0.204516715 | 0.131765383 | 0.11449584  |
| 0.202076881 | 0.136293279 | 0.060138173 | 0.228571392 |
| 0.002823289 | 0.023345601 | 0.141503286 | 0.019265404 |
| 0.028550841 | 0.018598432 | 0.265372983 | 0.120241982 |
| 0.080464363 | 0.032707136 | 0.049794076 | 0.006713213 |
| 0.035184322 | 0.285242019 | 0.071004055 | 0.296062606 |
| 0.352750465 | 0.135468747 | 0.283014401 | 0.351748257 |
| 0.063790073 | 0.164152296 | 0.264935472 | 0.366466271 |
| 9.67E-05    | 0.352736807 | 0.331941327 | 0.138404397 |
| 0.278406618 | 0.070751859 | 0.10751589  | 0.141334849 |
| 0.000966539 | 0.022542325 | 0.045526288 | 0.289663181 |
| 0.303809134 | 0.002449265 | 0.095946967 | 0.247594246 |
| 0.277618661 | 0.024057472 | 0.324067759 | 0.060788226 |
| 0.247283275 | 0.133790441 | 0.020827986 | 0.327028712 |
| 0.045384563 | 0.094104998 | 0.00440871  | 0.143229547 |
| 0.166852257 | 0.051082707 | 0.006393154 | 0.359741196 |
| 0.212017175 | 0.155388704 | 0.062305695 | 0.00014473  |
| 0.325564927 | 0.020736472 | 0.211983022 | 0.018033324 |
| 0.213870583 | 0.139870364 | 0.256016495 | 0.323511522 |
| 0.172623328 | 0.173948722 | 0.141542152 | 0.222377865 |
| 0.021935089 | 0.263780709 | 0.285783396 | 0.003390711 |
| 0.157873859 | 0.319099112 | 0.093113169 | 0.032352227 |
| 0.135806402 | 0.015574184 | 0.041969841 | 0.105101745 |
| 0.233462942 | 0.292684428 | 0.003542928 | 0.026252384 |
| 0.170413868 | 0.041295396 | 0.014548197 | 0.100223052 |
| 0.078970179 | 0.032848412 | 0.090521545 | 0.143779619 |
| 0.234357468 | 0.08884302  | 0.252403701 | 0.011707641 |
| 0.35364573  | 0.005543549 | 0.315904054 | 0.041707755 |
| 0.069013514 | 0.13983013  | 0.332270385 | 0.024032821 |
| 0.000720928 | 0.009331557 | 0.159980977 | 0.180892503 |
| 0.005603402 | 0.034578468 | 0.038107232 | 0.086608247 |
| 0.346869521 | 0.053755517 | 0.069348584 | 0.085796298 |
| 0.186458211 | 0.010465321 | 0.267995524 | 0.073346507 |
| 0.178697472 | 0.042397163 | 0.249084098 | 0.001032375 |
| 0.203404399 | 0.011611286 | 0.086707844 | 0.083660746 |
| 0.376719561 | 0.011302991 | 0.148096562 | 0.015684067 |
| 0.026050718 | 0.001023629 | 0.147958422 | 0.141562467 |
| 0.082250584 | 0.084200932 | 0.091932886 | 0.057749212 |
| 0.314892689 | 0.095930999 | 0.186079141 | 1           |
| 0.055224173 | 0.022045229 | 0.011998677 | 0.002159617 |
| 0.165731549 | 0.172869014 | 0.18552039  | 0.099583921 |
| 0.042108542 | 0.201590523 | 0.14667947  | 0.110814182 |
| 0.30201501  | 0.021268981 | 0.340176422 | 0.076156926 |
| 0.365761566 | 0.047993276 | 0.069302734 | 0.058999062 |
| 0.034873921 | 0.033270813 | 0.014457507 | 0.023418042 |
| 0.324831626 | 0.098023255 | 0.097857431 | 0.033882275 |
| 0.002971237 | 0.056049224 | 0.296444818 | 0.26628473  |
| 0.121817962 | 0.192825215 | 0.078797012 | 0.172671188 |
| 0.044749459 | 0.050445041 | 0.005320211 | 0.001959224 |
| 0.031874405 | 0.019502996 | 0.269888036 | 0.276827351 |
| 0.364911937 | 0.067109109 | 0.007926081 | 0.015455531 |
| 0.1293389   | 0.275703526 | 0.068358569 | 0.067490718 |

|             |             |             |             |
|-------------|-------------|-------------|-------------|
| 0.195523965 | 0.07308943  | 3.17E-05    | 0.032960869 |
| 0.141867176 | 0.059270931 |             |             |
| TEX2        | 0.151983482 | 0.45970636  | 0.069127696 |
| 0.053889001 | 0.097012159 | 0.249360791 | 0.219988328 |
| 0.119933322 | 0.073552484 | 0.141203911 | 0.34958912  |
| 0.000726176 | 0.235042251 | 0.011321437 | 0.042458211 |
| 0.400043381 | 0.411082667 | 0.242548125 | 0.385922654 |
| 0.132420286 | 0.129875526 | 0.265045715 | 0.291928608 |
| 0.221723431 | 0.001394949 | 0.12244783  | 0.093510733 |
| 0.101907885 | 0.368893104 | 0.129315136 | 0.161955895 |
| 0.344775575 | 0.345264456 | 0.160630833 | 0.146161508 |
| 0.078912904 | 0.460022868 | 0.023349234 | 0.271948157 |
| 0.252207869 | 0.161175831 | 0.337234847 | 0.01136775  |
| 0.00469374  | 0.105335323 | 0.079134005 | 0.281532804 |
| 0.106854855 | 0.213239498 | 0.121840211 | 0.147489348 |
| 0.035407976 | 0.357186906 | 0.277784575 | 0.036209914 |
| 0.446321094 | 0.017168516 | 0.459845168 | 0.072974603 |
| 0.061774685 | 0.135793082 | 0.122514337 | 0.267578103 |
| 0.276879415 | 0.463149852 | 0.436373276 | 0.043778428 |
| 0.076737213 | 0.169972899 | 0.277824137 | 0.308750905 |
| 0.413191441 | 0.176620007 | 0.162099932 | 0.087068924 |
| 0.276149052 | 0.268833243 | 0.233980755 | 0.105286977 |
| 0.000887706 | 0.151117218 | 0.158384507 | 0.172852282 |
| 0.191489111 | 0.366468149 | 0.1788733   | 0.146383424 |
| 0.186104613 | 0.02407872  | 0.257619861 | 0.437832505 |
| 0.025900399 | 0.243962852 | 0.008523091 | 0.087750759 |
| 0.318606432 | 0.324132875 | 0.26910025  | 0.08031951  |
| 0.015481654 | 0.072467252 | 0.037716504 | 0.2475733   |
| 0.184910086 | 0.213565129 | 0.421200922 | 0.020686898 |
| 0.213526553 | 0.092427869 | 0.148306677 | 0.478050266 |
| 0.409343842 | 0.005748039 | 0.078890789 | 0.221515176 |
| 0.117707701 | 0.105544213 | 0.198073427 | 0.018440644 |
| 0.013764886 | 0.004005156 | 0.344752634 | 0.0899023   |
| 0.111613106 | 0.184392938 | 0.085765299 | 0.28848329  |
| 0.087713361 | 0.290213542 | 0.099742713 | 0.197027066 |
| 0.260214523 | 0.246839486 | 0.204582888 | 0.299568897 |
| 0.130819509 | 0.094398787 | 0.104472033 | 0.432362472 |
| 0.397806242 | 0.069883884 | 0.073228973 | 0.3146094   |
| 0.214647503 | 0.388139349 | 0.449407004 | 0.108636955 |
| 0.15588886  | 0.130956963 | 0.148301363 | 0.352925772 |
| 0.214665538 | 0.150123751 | 0.014688178 | 0.311246343 |
| 0.451799203 | 0.015099246 | 0.065214476 | 0.29349766  |
| 0.046512648 | 0.12988821  | 0.430843176 | 0.356813484 |
| 0.215916801 | 0.088914682 | 0.177287508 | 0.229722616 |
| 0.194133053 | 0.212978845 | 0.253095533 | 0.169133415 |
| 0.277174821 | 0.162850252 | 0.057374653 | 0.218803912 |
| 0.097564249 | 0.219824837 | 0.083794328 | 0.022938976 |
| 0.196808302 | 0.103032594 | 0.413116813 | 0.22061795  |
| 0.244574309 | 0.01777675  | 0.148537006 | 0.191719614 |
| 0.133215203 | 0.246937341 | 0.488293343 | 0.095985233 |
| 0.182680576 | 0.067884289 | 0.106740993 | 0.153533765 |
| 0.271545227 | 0.142522563 | 0.151163211 | 0.001664119 |
| 0.097057682 | 0.127475417 | 0.15377022  | 0.031138598 |
| 0.154782646 | 0.084209226 | 0.039968042 | 0.402847432 |

|             |             |             |             |
|-------------|-------------|-------------|-------------|
| 0.173780153 | 0.328387144 | 0.009608047 | 0.027422984 |
| 0.157407988 | 0.382283581 | 0.157577233 | 0.092248336 |
| 0.380474414 | 0.163110328 | 0.279285102 | 0.381623831 |
| 0.131996239 | 0.386520113 | 0.028330589 | 0.112082797 |
| 0.207247941 | 0.397541936 | 0.335069252 | 0.331615394 |
| 0.147751902 | 0.19720228  | 0.082891845 | 0.275319231 |
| 0.218694709 | 0.185686274 | 0.06980321  | 0.449969818 |
| 0.000968396 | 0.262890971 | 0.259909625 | 0.034754007 |
| 0.479325165 | 0.2574221   | 0.058751655 | 0.099946814 |
| 0.398827862 | 0.449129936 | 0.308967046 | 0.31931663  |
| 0.048976184 | 0.007541239 | 0.38864649  | 0.337719387 |
| 0.375028694 | 0.15504315  | 0.107041489 | 0.012733923 |
| 0.414732138 | 0.128494536 | 0.293380221 | 0.195052171 |
| 0.208543075 | 0.100430711 | 0.137796844 | 0.16760913  |
| 0.005029289 | 0.159595937 | 0.260949103 | 0.147242549 |
| 0.188571849 | 0.086180616 | 0.379669685 | 0.29370233  |
| 0.136123957 | 0.125165685 | 0.154375722 | 0.090605367 |
| 0.152680451 | 0.467071778 | 0.008223218 | 0.373280255 |
| 0.434426801 | 0.1873536   | 0.430938186 | 0.418424101 |
| 0.185563579 | 0.387404636 | 0.418440573 | 0.290435804 |
| 0.000554935 | 0.287183921 | 0.215868825 | 0.348415174 |
| 0.36405864  | 0.249864805 | 0.048862485 | 0.122166251 |
| 0.000581603 | 0.121088199 | 0.08327694  | 0.438051842 |
| 0.396342768 | 0.033919025 | 0.007070472 | 0.357348802 |
| 0.202453489 | 0.014004768 | 0.458532328 | 0.235005347 |
| 0.437220491 | 0.201102736 | 0.146116432 | 0.2579605   |
| 0.05872479  | 0.101781122 | 0.028464627 | 0.313221009 |
| 0.128513936 | 0.012879588 | 0.110847373 | 0.416245468 |
| 0.388442902 | 0.347303088 | 0.209565539 | 0.02492513  |
| 0.238326911 | 0.145065508 | 0.357904171 | 0.068765402 |
| 0.354466572 | 0.349443532 | 0.425349676 | 0.290495515 |
| 0.229258134 | 0.40710763  | 0.398506579 | 0.402374627 |
| 0.078142688 | 0.289479696 | 0.321918912 | 0.080318143 |
| 0.153117631 | 0.409808232 | 0.220002102 | 0.192506749 |
| 0.269322424 | 0.067251495 | 0.21177991  | 0.127871223 |
| 0.445631601 | 0.406661097 | 0.065673089 | 0.073706006 |
| 0.431787612 | 0.129459653 | 0.093833269 | 0.141517331 |
| 0.255718384 | 0.038750752 | 0.021730933 | 0.303499439 |
| 0.475703641 | 0.318675311 | 0.390536005 | 0.161804169 |
| 0.347064264 | 0.041639986 | 0.304462618 | 0.125761039 |
| 0.186756949 | 0.203328797 | 0.244049859 | 0.026767158 |
| 0.036721057 | 0.071320399 | 0.420243774 | 0.422502525 |
| 0.07647238  | 0.136768578 | 0.191870612 | 0.274338144 |
| 0.395634444 | 0.167315604 | 0.251534677 | 0.14373032  |
| 0.431436495 | 0.095667056 | 0.451680795 | 0.1705595   |
| 0.32291641  | 0.170952944 | 0.341809431 | 0.005782867 |
| 0.249473484 | 0.156764648 | 0.04783561  | 0.247567063 |
| 0.300886887 | 0.111368384 | 0.35221339  | 0.095806361 |
| 0.073915074 | 0.001715355 | 0.275393799 | 0.112239895 |
| 0.306485086 | 0.067841974 | 0.149066062 | 0.040754323 |
| 0.47507582  | 0.221665431 | 0.317433721 | 0.055224173 |
| 1           | 0.007148463 | 0.142288768 | 0.03900127  |
| 0.303879179 | 0.328526481 | 0.206936466 | 0.169150235 |
| 0.051310339 | 0.278806937 | 0.302984919 | 0.203480238 |

|             |             |             |                         |
|-------------|-------------|-------------|-------------------------|
| 0.406923079 | 0.060964971 | 0.429278232 | 0.097767754             |
| 0.239200549 | 0.139205525 | 0.225931493 | 0.112617271             |
| 0.14662773  | 0.040594907 | 0.092049487 | 0.061846429             |
| 0.392323746 | 0.094024485 | 0.242533416 | 0.118814896             |
| 0.068515543 | 0.165314867 | 0.253402987 | 0.263791044             |
| 0.277359916 | 0.223209144 | 0.102927849 | 0.410046066             |
| 0.10298303  | 0.106001719 | 0.076927146 | 0.066939937             |
| 0.131521485 | 0.144322744 | 0.309701596 | 0.33738833              |
| 0.401259269 | 0.070945431 | 0.08221953  | 0.075308413             |
| 0.020485259 | 0.233702697 | 0.275712638 | 0.05598227              |
| 0.228585707 | 0.071532298 | 0.001019197 | 0.083591195             |
| 0.341712036 | 0.130664935 |             |                         |
| TFDP2       | 0.003047715 | 0.024382708 | 3.47E-05 0.000732647    |
| 0.002582349 | 0.002184994 | 0.005050017 | 0.003676547             |
| 3.87E-05    | 0.000746334 | 0.006421067 | 6.99E-08 0.052862426    |
| 1.70E-07    | 2.59E-05    | 0.027912044 | 0.036436584 0.014862353 |
| 0.031541214 | 0.001792966 | 0.00114797  | 0.004223973             |
| 0.00655305  | 0.002582007 | 1.96E-07    | 0.001954524             |
| 0.000520718 | 0.006818702 | 0.034446572 | 0.000745864             |
| 0.000766659 | 0.02080823  | 0.053427794 | 0.008102658             |
| 0.011834288 | 0.060633053 | 0.01599067  | 0.02136798              |
| 0.071296338 | 0.036080408 | 0.004549479 | 0.037602787             |
| 2.12E-07    | 0.003364865 | 0.000627465 | 0.004128501             |
| 0.004752774 | 0.00171023  | 0.001543367 | 0.000658071             |
| 0.003804175 | 0.002086751 | 0.007245359 | 0.007872345             |
| 0.015858361 | 0.015805263 | 0.000111634 | 0.016477787             |
| 0.000765788 | 6.95E-05    | 0.001913617 | 0.005087903             |
| 0.006697249 | 0.003836878 | 0.016931271 | 0.031573091             |
| 2.09E-05    | 0.000160529 | 0.008972973 | 0.030430714             |
| 0.024474191 | 0.019201695 | 0.001348167 | 0.002125469             |
| 0.042765616 | 0.026545178 | 0.030079836 | 0.003124658             |
| 0.000512921 | 9.18E-08    | 0.002343231 | 0.03174239              |
| 0.006472421 | 0.044591395 | 0.007602189 | 0.007167733             |
| 0.004326624 | 0.011456371 | 8.70E-07    | 0.005216214             |
| 0.033013231 | 1.13E-05    | 0.033112332 | 1.77E-05 0.00031765     |
| 0.019452588 | 0.03585288  | 0.007301868 | 0.00011898              |
| 3.37E-07    | 0.000144261 | 6.76E-05    | 0.04289448 0.005425331  |
| 0.011615659 | 0.01391338  | 0.014470568 | 0.060892963             |
| 7.16E-05    | 0.004576209 | 0.016422105 | 0.019792291 1.51E-07    |
| 0.000149881 | 0.002464852 | 0.003258591 | 0.000928776             |
| 0.004118937 | 1.78E-05    | 4.27E-06    | 1.08E-06 0.02870437     |
| 0.000181404 | 0.000932673 | 0.00203767  | 0.000180615             |
| 0.04820766  | 0.003771609 | 0.022240766 | 0.003377939             |
| 0.003833894 | 0.044547334 | 0.006366973 | 0.035164699             |
| 0.027718125 | 0.051568655 | 0.000540617 | 0.000238526             |
| 0.028695036 | 0.011002558 | 6.03E-05    | 2.57E-05 0.004407819    |
| 0.068190681 | 0.027428372 | 0.028513189 | 0.00084184              |
| 0.016728352 | 0.001158657 | 0.002002271 | 0.015049456             |
| 0.004303301 | 0.003846294 | 0.000541933 | 0.007620896             |
| 0.012902006 | 2.90E-05    | 5.21E-05    | 0.018371101 0.004050402 |
| 0.001666418 | 0.012992893 | 0.027025889 | 0.028107137             |
| 0.000325999 | 0.003081413 | 0.003167346 | 0.001788                |
| 0.002973549 | 0.007337226 | 0.002557881 | 0.003032248             |
| 0.002863633 | 9.05E-05    | 0.064597156 | 0.000416053             |

|             |             |             |             |
|-------------|-------------|-------------|-------------|
| 0.002925759 | 0.002013453 | 3.51E-05    | 0.00954341  |
| 0.002491705 | 0.019172154 | 0.008023518 | 0.011449495 |
| 0.000308841 | 0.000764257 | 0.003821813 | 0.001003536 |
| 0.03289319  | 0.025544538 | 0.000354052 | 0.001453443 |
| 0.014739379 | 0.00044687  | 0.026543167 | 0.01143994  |
| 0.000494939 | 0.000448349 | 1.10E-06    | 0.000278614 |
| 0.009023908 | 0.008924686 | 5.09E-06    | 0.004842146 |
| 3.97E-05    | 0.02486618  | 0.001223796 | 0.055898703 |
| 0.00236178  | 0.001134709 | 0.024322371 | 0.009640618 |
| 0.000226859 | 0.033440436 | 0.001361605 | 0.03847863  |
| 0.008385525 | 0.009293003 | 0.007017379 | 0.001937004 |
| 0.000899703 | 0.029790551 | 0.035991248 | 0.037319855 |
| 0.043172919 | 0.001801935 | 0.00998224  | 0.001469034 |
| 0.002783669 | 0.005178414 | 0.009303987 | 4.20E-05    |
| 0.026492005 | 9.06E-07    | 0.005228978 | 0.022822055 |
| 0.001336364 | 0.025926927 | 0.005788303 | 3.38E-05    |
| 0.000697009 | 0.03199626  | 0.025813485 | 0.014095334 |
| 0.033926856 | 0.000591837 | 1.11E-07    | 0.018213867 |
| 0.009023324 | 0.038191663 | 0.009374539 | 0.082413452 |
| 0.000190193 | 0.030978123 | 0.010756908 | 0.008570092 |
| 0.007745512 | 0.042373742 | 0.048946423 | 0.001520896 |
| 0.008705113 | 1.41E-06    | 0.000963115 | 0.011108181 |
| 0.000764221 | 0.003356143 | 5.86E-05    | 0.034259424 |
| 0.005810901 | 0.034574748 | 0.000773498 | 0.024889304 |
| 0.000399871 | 0.001292739 | 0.022537779 | 0.002401956 |
| 0.015826064 | 0.031334978 | 0.006462408 | 0.035005957 |
| 0.027343669 | 0.001797405 | 0.012431412 | 0.023539583 |
| 0.02461856  | 3.10E-09    | 0.048533889 | 0.073769099 |
| 0.00619259  | 0.028993103 | 0.00266895  | 0.003701001 |
| 0.041792843 | 5.72E-08    | 0.000425389 | 0.019850945 |
| 0.017566897 | 0.044759973 | 8.92E-06    | 0.019340225 |
| 0.029276488 | 0.060780057 | 0.000123251 | 0.024685543 |
| 0.004502962 | 0.029951519 | 0.021717243 | 0.001322934 |
| 0.053961661 | 0.024571231 | 0.005782126 | 0.000110645 |
| 0.022353255 | 0.025073885 | 4.65E-05    | 0.001616301 |
| 0.027243403 | 0.012553085 | 0.015659434 | 0.002470149 |
| 4.36E-07    | 0.022572942 | 0.00373735  | 0.032307573 |
| 0.000112264 | 0.012109975 | 0.007995453 | 0.024765507 |
| 0.045860889 | 0.015599787 | 0.012977864 | 0.008011371 |
| 0.017967823 | 0.008495626 | 0.028821174 | 0.02538245  |
| 2.95E-05    | 0.009929009 | 0.036653304 | 0.018853275 |
| 0.001668691 | 0.004770768 | 0.006422883 | 0.00150069  |
| 0.002452951 | 0.024949775 | 0.033067229 | 3.81E-05    |
| 0.000224963 | 0.013787849 | 0.001478504 | 0.000756033 |
| 0.005277397 | 0.00262385  | 0.001745212 | 0.000917735 |
| 0.006359158 | 0.019172998 | 0.006571789 | 0.021540978 |
| 0.001551535 | 0.044204661 | 1.67E-05    | 0.021245953 |
| 0.001454248 | 0.001824362 | 0.013480609 | 0.031527676 |
| 0.000116859 | 1.44E-06    | 2.48E-05    | 0.01525004  |
| 0.000116967 | 0.000689344 | 0.003221141 | 0.015098999 |
| 0.034950638 | 0.004737244 | 0.00308629  | 0.003504513 |
| 0.012461471 | 0.001397113 | 0.016313203 | 0.00201044  |
| 0.00721079  | 0.004763546 | 0.022369701 | 1.71E-06    |
| 0.022828729 | 0.000903391 | 0.00163122  | 0.021344078 |

|             |             |             |             |
|-------------|-------------|-------------|-------------|
| 0.034276978 | 0.000395102 | 0.018135975 | 0.000203679 |
| 0.000263625 | 1.39E-07    | 0.005246986 | 0.091750469 |
| 0.003559114 | 0.004637928 | 0.003772099 | 0.046609359 |
| 0.023400414 | 0.004335196 | 0.009024568 | 0.022045229 |
| 0.007148463 | 1           | 0.001242189 | 3.24E-06    |
| 0.008361258 | 0.008960611 | 0.004309327 | 0.000489223 |
| 0.036146083 | 0.009596844 | 0.041980541 | 0.040079541 |
| 0.000657036 | 0.03253959  | 0.001906435 | 0.056362065 |
| 0.001661043 | 0.002753785 | 0.001398237 | 0.005960339 |
| 3.91E-05    | 0.000373717 | 0.000108742 | 0.043358707 |
| 0.003703958 | 0.021154529 | 0.000658601 | 5.36E-05    |
| 0.006939381 | 0.023944683 | 0.034555265 | 0.011248699 |
| 0.017088247 | 0.007267811 | 0.011303825 | 0.000518358 |
| 0.000979216 | 0.002137728 | 0.000210084 | 0.004150526 |
| 0.000898859 | 0.01150544  | 0.018078522 | 0.033526738 |
| 0.00149224  | 0.000121508 | 0.000133289 | 0.007418106 |
| 0.01650885  | 0.007585909 | 0.024579414 | 0.020360045 |
| 0.002365975 | 5.84E-09    | 0.000401107 | 0.006788936 |
| 0.003502386 |             |             |             |
| TFRC        | 0.070326346 | 0.244460656 | 0.079398585 |
| 0.046838605 | 0.083159075 | 0.317286469 | 0.29445736  |
| 0.045272958 | 0.082440908 | 0.216048353 | 0.317284908 |
| 0.000618042 | 0.068658492 | 0.012146866 | 0.027570659 |
| 0.160840993 | 0.165184746 | 0.208026524 | 0.149321551 |
| 0.069156316 | 0.169087742 | 0.157609631 | 0.23243203  |
| 0.270370017 | 0.001567335 | 0.202022744 | 0.191648078 |
| 0.031582403 | 0.131664645 | 0.146705465 | 0.114291642 |
| 0.138367062 | 0.124220233 | 0.078678593 | 0.06132963  |
| 0.025290692 | 0.266636518 | 0.00452581  | 0.0968842   |
| 0.077706369 | 0.184882355 | 0.130790271 | 0.019925117 |
| 0.005024767 | 0.138732912 | 0.024820329 | 0.181734698 |
| 0.057140136 | 0.278858633 | 0.140241117 | 0.256857707 |
| 0.00636761  | 0.284906849 | 0.12462725  | 0.005668038 |
| 0.320590104 | 0.025730148 | 0.297376921 | 0.025364979 |
| 0.077064824 | 0.110381372 | 0.057515601 | 0.161201488 |
| 0.332151457 | 0.31668539  | 0.201196677 | 0.110396651 |
| 0.161914982 | 0.078862718 | 0.102516138 | 0.210354299 |
| 0.212142976 | 0.078285603 | 0.11806508  | 0.03072206  |
| 0.122340264 | 0.084560789 | 0.206927949 | 0.063565279 |
| 0.001988284 | 0.270537156 | 0.086631817 | 0.066540187 |
| 0.059014953 | 0.301175215 | 0.074850265 | 0.15941299  |
| 0.083338454 | 0.034938119 | 0.157044512 | 0.186894326 |
| 0.043896895 | 0.085508213 | 0.004549839 | 0.052941532 |
| 0.125525664 | 0.107767755 | 0.13344928  | 0.167358635 |
| 0.019310394 | 0.047676212 | 0.012268936 | 0.070579944 |
| 0.105527479 | 0.10795171  | 0.313970769 | 0.002935372 |
| 0.057380923 | 0.067942325 | 0.079679808 | 0.299220073 |
| 0.195482291 | 0.003885661 | 0.041282337 | 0.25990337  |
| 0.049557581 | 0.119112514 | 0.225514587 | 0.004113337 |
| 0.014612205 | 0.000758467 | 0.131732761 | 0.065446217 |
| 0.207436505 | 0.252881502 | 0.064356489 | 0.147755212 |
| 0.030600977 | 0.101780169 | 0.101558432 | 0.239755731 |
| 0.095576879 | 0.300745082 | 0.11955833  | 0.13161007  |
| 0.04392722  | 0.04138031  | 0.089916993 | 0.245501082 |



|             |             |             |             |
|-------------|-------------|-------------|-------------|
| 0.236279691 | 0.086609423 | 0.093736886 | 0.276739214 |
| 0.062321407 | 0.157571749 | 0.203586636 | 0.0382409   |
| 0.110374193 | 0.117011835 | 0.107400114 | 0.267250354 |
| 0.232112151 | 0.073786816 | 0.00175032  | 0.221726756 |
| 0.329751704 | 0.003896932 | 0.090370571 | 0.116625803 |
| 0.039637097 | 0.105714636 | 0.247979726 | 0.177488344 |
| 0.097607692 | 0.187752931 | 0.186912232 | 0.299251471 |
| 0.161505818 | 0.248720298 | 0.14737323  | 0.184228989 |
| 0.225717986 | 0.106185936 | 0.085431343 | 0.063091448 |
| 0.13926163  | 0.146938199 | 0.027116042 | 0.013346351 |
| 0.07693755  | 0.040923    | 0.218926996 | 0.104121662 |
| 0.103596038 | 0.019892394 | 0.207965625 | 0.097891266 |
| 0.09399519  | 0.075354608 | 0.275017979 | 0.144702865 |
| 0.15162536  | 0.016867229 | 0.130076406 | 0.084147936 |
| 0.108492208 | 0.150079082 | 0.172859692 | 0.004854528 |
| 0.087390341 | 0.059620529 | 0.081080457 | 0.023112191 |
| 0.112748002 | 0.081996074 | 0.010669089 | 0.197923663 |
| 0.213183674 | 0.137619997 | 0.004566272 | 0.004618333 |
| 0.102965525 | 0.269083153 | 0.059437697 | 0.033889611 |
| 0.218842961 | 0.094932059 | 0.083775553 | 0.280735407 |
| 0.076529445 | 0.341890766 | 0.005178578 | 0.080534388 |
| 0.077123694 | 0.188687186 | 0.128120307 | 0.139116406 |
| 0.181917996 | 0.076129779 | 0.01810254  | 0.266226667 |
| 0.106378885 | 0.089502146 | 0.067428335 | 0.224577499 |
| 0.002619415 | 0.183532392 | 0.149316006 | 0.006132394 |
| 0.265709557 | 0.323420211 | 0.063489657 | 0.056299198 |
| 0.155303093 | 0.221256027 | 0.12932367  | 0.109808139 |
| 0.011070252 | 0.005803203 | 0.177933805 | 0.233888569 |
| 0.137440787 | 0.103992608 | 0.031007552 | 0.002274704 |
| 0.177967906 | 0.040560627 | 0.190566343 | 0.080236921 |
| 0.097700575 | 0.03186592  | 0.116206883 | 0.060515832 |
| 0.001753019 | 0.166239379 | 0.118154566 | 0.125416605 |
| 0.130971052 | 0.086643618 | 0.195507525 | 0.233298781 |
| 0.0498058   | 0.037048432 | 0.081598221 | 0.123086934 |
| 0.202880592 | 0.241010466 | 0.00157336  | 0.169999454 |
| 0.183568166 | 0.118159859 | 0.200590051 | 0.171295841 |
| 0.136543676 | 0.297535686 | 0.209508941 | 0.101006865 |
| 0.000364271 | 0.094555289 | 0.064989279 | 0.277321452 |
| 0.146655347 | 0.267526429 | 0.013478498 | 0.042653139 |
| 0.000616152 | 0.160745785 | 0.02344161  | 0.229358458 |
| 0.170416151 | 0.070566056 | 0.001112033 | 0.165937357 |
| 0.062714107 | 0.002426296 | 0.212102124 | 0.240931637 |
| 0.240269709 | 0.103872835 | 0.259596321 | 0.085478419 |
| 0.014160295 | 0.028044667 | 0.05005161  | 0.183411522 |
| 0.057381327 | 0.003863367 | 0.197557347 | 0.178327626 |
| 0.193407541 | 0.261227571 | 0.208799971 | 0.051494504 |
| 0.074205745 | 0.07784802  | 0.17829895  | 0.041852035 |
| 0.176681276 | 0.288580899 | 0.236633844 | 0.104819935 |
| 0.114185486 | 0.283825887 | 0.306247306 | 0.208696189 |
| 0.022396323 | 0.099059249 | 0.121663288 | 0.071467438 |
| 0.056623414 | 0.181212452 | 0.152068894 | 0.290396375 |
| 0.16416328  | 0.042304083 | 0.270884932 | 0.058326857 |
| 0.265213824 | 0.189557836 | 0.114997726 | 0.036493176 |
| 0.320103087 | 0.072898523 | 0.161638265 | 0.086861661 |

|             |             |             |             |             |
|-------------|-------------|-------------|-------------|-------------|
| 0.250761968 | 0.006874684 | 0.004359677 | 0.225284035 |             |
| 0.294546584 | 0.326400497 | 0.175128579 | 0.184194012 |             |
| 0.131530977 | 0.038187612 | 0.123092462 | 0.082017586 |             |
| 0.1465519   | 0.079907683 | 0.07264009  | 0.004550795 |             |
| 0.081053791 | 0.049471393 | 0.330928778 | 0.295966965 |             |
| 0.094672819 | 0.141964644 | 0.22270106  | 0.244646294 |             |
| 0.15323295  | 0.046117975 | 0.240334153 | 0.079073222 |             |
| 0.314512296 | 0.163125024 | 0.243048926 | 0.11910439  |             |
| 0.18327034  | 0.144103189 | 0.166449366 | 0.006440189 |             |
| 0.103402256 | 0.196420631 | 0.015176617 | 0.218386155 |             |
| 0.097030006 | 0.126199567 | 0.27847625  | 0.069473706 |             |
| 0.030734916 | 0.000619757 | 0.168802608 | 0.040494706 |             |
| 0.319563922 | 0.011591245 | 0.084928837 | 0.006799001 |             |
| 0.236782174 | 0.133391402 | 0.161049525 | 0.011998677 |             |
| 0.142288768 | 0.001242189 | 1           | 0.040759181 |             |
| 0.173647358 | 0.223887012 | 0.093581376 | 0.077089016 |             |
| 0.014218328 | 0.144775138 | 0.214689861 | 0.123968899 |             |
| 0.187999957 | 0.018054753 | 0.178162936 | 0.051077638 |             |
| 0.07050571  | 0.052152294 | 0.23402212  | 0.045384186 |             |
| 0.204936465 | 0.02175015  | 0.128161886 | 0.02967775  |             |
| 0.161359141 | 0.035841061 | 0.186559273 | 0.040599415 |             |
| 0.094924018 | 0.09469545  | 0.091897519 | 0.104888331 |             |
| 0.159616142 | 0.085712081 | 0.027548462 | 0.302873238 |             |
| 0.036899325 | 0.068483902 | 0.07700101  | 0.173968551 |             |
| 0.084514027 | 0.192482586 | 0.131751994 | 0.146334744 |             |
| 0.165856632 | 0.015629467 | 0.099073018 | 0.049661156 |             |
| 0.002932083 | 0.073595978 | 0.326140628 | 0.014231005 |             |
| 0.11553204  | 0.020704849 | 0.000917968 | 0.032150152 |             |
| 0.245918668 | 0.04084839  |             |             |             |
| TGFBI       | 0.045841067 | 0.06458602  | 0.077691868 |             |
| 0.000269142 | 0.007371591 | 0.214666325 | 0.122700476 |             |
| 0.026674565 | 0.048767294 | 0.032657672 | 0.171372232 |             |
| 0.015226215 | 0.012007374 | 0.058821901 | 0.033528825 |             |
| 0.037258622 | 0.034452147 | 0.066822314 | 0.039107161 |             |
| 0.08916523  | 0.002393607 | 0.141123626 | 0.068302515 |             |
| 0.153952483 | 0.03365065  | 0.08231784  | 0.002154455 |             |
| 0.014483213 | 0.029330017 | 0.208326421 | 0.021244964 |             |
| 0.033492864 | 0.01821925  | 0.00848972  | 0.002619919 |             |
| 0.00034348  | 0.107815414 | 6.46E-05    | 0.01182408  |             |
| 0.014972786 | 0.047551458 | 0.022392762 | 0.028078393 |             |
| 1.56E-06    | 0.130149485 | 0.011404791 | 0.107047327 |             |
| 0.096343926 | 0.215607459 | 0.272513155 | 0.060189206 |             |
| 6.91E-05    | 0.159674917 | 0.084172869 | 9.37E-05    | 0.119422499 |
| 6.09E-05    | 0.103138409 | 0.048159875 | 0.216612299 |             |
| 0.092836496 | 0.016473626 | 0.066461007 | 0.197077709 |             |
| 0.112825692 | 0.047414063 | 0.011417393 | 0.250235856 |             |
| 0.022524726 | 0.014456716 | 0.026893328 | 0.061949465 |             |
| 0.012919538 | 0.022871258 | 0.003210623 | 0.018223743 |             |
| 0.018966036 | 0.203043558 | 0.101692019 | 0.005516574 |             |
| 0.113831801 | 0.005267325 | 0.034206989 | 0.007085387 |             |
| 0.152800999 | 0.029520991 | 0.033661524 | 0.01642789  |             |
| 0.060050781 | 0.111008093 | 0.043862862 | 0.001723467 |             |
| 0.018691245 | 0.000524649 | 0.067780104 | 0.036946182 |             |
| 0.019855869 | 0.05697341  | 0.056880702 | 0.074477748 |             |

|             |             |             |             |
|-------------|-------------|-------------|-------------|
| 0.196380476 | 0.013866345 | 0.011479417 | 0.049544207 |
| 0.026780188 | 0.116736297 | 0.000671034 | 0.007394027 |
| 0.037318287 | 0.035339608 | 0.098751217 | 0.05101864  |
| 0.024275789 | 0.121283189 | 0.212311515 | 0.002221864 |
| 0.001563669 | 0.142435355 | 0.000274261 | 0.001840281 |
| 0.004774602 | 0.028108085 | 0.141300104 | 0.062189076 |
| 0.148666687 | 0.005278552 | 0.016548688 | 0.017496596 |
| 0.029051653 | 0.014777812 | 0.097407489 | 0.012112065 |
| 0.114315217 | 0.014039698 | 0.023216665 | 0.004385387 |
| 0.06922696  | 0.246467151 | 0.065776686 | 0.132571426 |
| 0.042432508 | 0.073414902 | 0.175040002 | 0.00738497  |
| 0.037042161 | 0.051387905 | 0.02935227  | 0.019257469 |
| 0.165456675 | 0.012335758 | 0.067483368 | 0.165798708 |
| 0.083565499 | 0.000203189 | 0.156963924 | 0.136062818 |
| 0.000284055 | 0.211360434 | 0.037085585 | 0.000287249 |
| 0.011454138 | 0.101377819 | 0.040798227 | 0.023360806 |
| 0.001872086 | 0.033303754 | 0.11197135  | 0.166522588 |
| 0.12136243  | 0.066071878 | 0.023022854 | 0.202337747 |
| 0.012151036 | 0.145813404 | 0.007475322 | 0.272014195 |
| 0.152699779 | 0.001645058 | 0.000515622 | 0.037788679 |
| 0.038769814 | 0.056134535 | 0.050558053 | 0.028851515 |
| 3.03E-05    | 0.030881424 | 0.053859412 | 0.012734885 |
| 0.018758116 | 0.071678118 | 0.297605386 | 0.248958277 |
| 0.002179365 | 0.296470796 | 0.01306294  | 0.056405988 |
| 0.011063183 | 0.015257166 | 0.010985718 | 0.019200811 |
| 0.005852567 | 0.027635107 | 0.101414931 | 0.017481132 |
| 0.066760426 | 0.015937518 | 0.044604185 | 0.232971423 |
| 0.021365054 | 0.023348665 | 0.004370645 | 0.095693842 |
| 0.059664564 | 0.005945993 | 0.010698641 | 0.037127577 |
| 0.027867192 | 0.013939898 | 0.141644407 | 0.011954237 |
| 0.150814621 | 0.00038215  | 0.087982452 | 0.011737095 |
| 0.035677983 | 0.020634622 | 0.029109112 | 0.095764591 |
| 0.049128054 | 0.001143538 | 0.242531149 | 0.084259843 |
| 0.051671559 | 0.170292245 | 0.066743329 | 0.014757753 |
| 0.149497983 | 0.022555426 | 0.001088847 | 0.065825269 |
| 0.140199894 | 0.252877139 | 0.133806809 | 0.041245965 |
| 0.071494377 | 0.061313685 | 0.019577311 | 0.001259608 |
| 0.053291658 | 0.065798048 | 0.096820105 | 0.027257732 |
| 0.032278867 | 0.001433066 | 0.001040282 | 0.045681667 |
| 0.020077936 | 0.0481095   | 0.02278093  | 0.013724253 |
| 0.004019112 | 0.177893424 | 0.033421667 | 0.000911418 |
| 0.096600382 | 0.026363577 | 0.002373572 | 0.022512379 |
| 0.008940021 | 0.034157237 | 0.181895565 | 0.003843413 |
| 0.006654933 | 0.00451946  | 0.129847614 | 0.224105928 |
| 0.066685883 | 2.05E-05    | 0.074688463 | 0.046700216 |
| 0.077661526 | 0.038664248 | 0.04944247  | 0.147794729 |
| 0.11598414  | 0.050822301 | 0.030228772 | 0.010148614 |
| 0.012610493 | 0.007152901 | 0.194206748 | 0.025643865 |
| 0.177335524 | 0.012263962 | 0.004207072 | 0.002397303 |
| 0.30711131  | 0.000422254 | 0.093477606 | 0.030928485 |
| 0.025538408 | 5.72E-06    | 0.042443216 | 0.007211378 |
| 0.000708581 | 0.062230447 | 0.071263154 | 0.053450321 |
| 0.031543162 | 0.113822379 | 0.01020926  | 0.000302963 |
| 0.01722993  | 0.001469723 | 0.034641368 | 0.011088028 |

|                      |                      |                      |             |
|----------------------|----------------------|----------------------|-------------|
| 0.000669924          | 0.00806852           | 0.050285113          | 0.074398308 |
| 0.090048797          | 0.210432586          | 0.002955619          | 0.017269426 |
| 0.001097218          | 0.028025639          | 0.021930676          | 0.09384248  |
| 0.14106072           | 0.073688092          | 0.016324063          | 0.031965397 |
| 0.104873502          | 0.155063959          | 0.058474208          | 0.000364427 |
| 0.016383887          | 0.023448056          | 0.034688523          | 0.013236248 |
| 0.035995089          | 0.015666218          | 0.210537574          | 0.130585555 |
| 0.000168841          | 0.269037296          | 0.065796986          | 0.072677151 |
| 0.032474286          | 0.167350851          | 0.111366101          | 0.106732191 |
| 0.060768442          | 0.162356158          | 0.068847881          | 0.228496474 |
| 0.000171165          | 0.001701671          | 0.132602919          | 0.096592006 |
| 0.173118442          | 0.037585989          | 0.007567494          | 0.024341491 |
| 0.138725963          | 0.048438546          | 0.017736949          | 0.200050579 |
| 0.013006964          | 0.01315013           | 0.001134591          | 0.002688377 |
| 0.037274202          | 0.097387919          | 0.129138449          | 0.253260225 |
| 0.286175093          | 0.096846896          | 0.055805727          | 0.031561214 |
| 0.008796586          | 0.213560638          | 0.087038141          | 0.140847762 |
| 0.001164849          | 0.095129634          | 0.105637666          | 0.09153385  |
| 0.033758973          | 0.045286324          | 0.000669742          | 0.018724781 |
| 0.035729523          | 0.02262118           | 0.028286736          | 0.01876357  |
| 0.16699739           | 0.081636126          | 0.187659736          | 0.001045006 |
| 0.00350323           | 0.156101336          | 0.002368602          | 0.229218197 |
| 0.004854411          | 0.068123587          | 8.89E-05 0.073647853 |             |
| 0.064991877          | 0.056198501          | 0.002159617          | 0.03900127  |
| 3.24E-06 0.040759181 | 1                    | 0.111428063          | 0.128705019 |
| 0.033386193          | 0.033052246          | 0.036174035          | 0.027841893 |
| 0.096904175          | 0.016038152          | 0.031848764          | 0.000220124 |
| 0.038942294          | 0.060062048          | 0.008652856          | 0.013737872 |
| 0.198356831          | 0.015230714          | 0.072360817          | 0.003641342 |
| 0.179361289          | 0.082136663          | 0.025194848          | 0.011619325 |
| 0.032245034          | 0.018594761          | 0.054117146          | 0.03012501  |
| 0.026682996          | 0.01374902           | 0.036086737          | 0.013449065 |
| 0.011225538          | 0.148165302          | 0.006843154          | 0.081887624 |
| 0.000372907          | 0.001044831          | 0.000924296          | 0.128515743 |
| 0.070534522          | 0.054915605          | 0.03833773           | 0.006701683 |
| 0.180256713          | 0.213514488          | 0.000213456          | 0.024320134 |
| 0.112775124          | 9.22E-05 0.033088154 | 0.005910787          |             |
| 0.010042514          | 0.084463062          | 0.142545654          | 0.001957043 |
| THA1 0.32793458      | 0.450397826          | 0.141498077          |             |
| 0.017903324          | 0.102632201          | 0.292584435          | 0.242085356 |
| 0.305992118          | 0.221266584          | 0.165061894          | 0.325966381 |
| 0.014376598          | 0.266602946          | 0.076474 0.148623588 |             |
| 0.440027574          | 0.435104598          | 0.286842785          | 0.439867652 |
| 0.359723821          | 0.121004785          | 0.372155376          | 0.32907511  |
| 0.302944113          | 0.018099627          | 0.149790383          | 0.047450042 |
| 0.268106403          | 0.413570434          | 0.304236316          | 0.28269334  |
| 0.400938849          | 0.336343959          | 0.270248192          | 0.190867621 |
| 0.10742073           | 0.453381526          | 0.050178285          | 0.256926028 |
| 0.310721626          | 0.218312212          | 0.342173639          | 0.058099846 |
| 0.001065318          | 0.156770744          | 0.249972922          | 0.37185318  |
| 0.352376253          | 0.285055912          | 0.27489007           | 0.182864898 |
| 0.082271509          | 0.343711018          | 0.378143871          | 0.072995167 |
| 0.396547263          | 0.003246097          | 0.438596113          | 0.308983268 |
| 0.152971484          | 0.361138126          | 0.285230996          | 0.35458376  |

|             |             |             |             |
|-------------|-------------|-------------|-------------|
| 0.285937584 | 0.417573252 | 0.448003053 | 0.06490346  |
| 0.149040745 | 0.320487427 | 0.286142251 | 0.282198458 |
| 0.416920521 | 0.289692091 | 0.279315538 | 0.197245044 |
| 0.27906623  | 0.306985633 | 0.337913479 | 0.264588782 |
| 0.006302243 | 0.183149734 | 0.188829723 | 0.281759638 |
| 0.219457151 | 0.342759563 | 0.306163471 | 0.211376765 |
| 0.28943692  | 0.076708045 | 0.365126738 | 0.450152274 |
| 0.027215711 | 0.290193862 | 0.011920458 | 0.244448493 |
| 0.356219239 | 0.372719963 | 0.341351692 | 0.128078931 |
| 0.059851052 | 0.255394513 | 0.237611649 | 0.30409631  |
| 0.353029342 | 0.324425364 | 0.386607773 | 0.082998122 |
| 0.244816354 | 0.3076006   | 0.318877344 | 0.442163476 |
| 0.440151861 | 0.035130932 | 0.297392762 | 0.275556431 |
| 0.22830455  | 0.107682763 | 0.259886531 | 0.036051418 |
| 0.016329002 | 0.05302349  | 0.386310579 | 0.284869574 |
| 0.133265896 | 0.248342838 | 0.086625269 | 0.265130431 |
| 0.28101871  | 0.378995598 | 0.11991641  | 0.268224733 |
| 0.249518031 | 0.260174848 | 0.251398821 | 0.295073371 |
| 0.199642851 | 0.342029012 | 0.270771968 | 0.396765316 |
| 0.440893687 | 0.130426468 | 0.180238172 | 0.342106258 |
| 0.236816405 | 0.423039689 | 0.470223134 | 0.330101966 |
| 0.197885899 | 0.327758894 | 0.269052403 | 0.308976179 |
| 0.279946655 | 0.3477662   | 0.062766496 | 0.34691389  |
| 0.416999578 | 0.033363842 | 0.15902437  | 0.345461377 |
| 0.026181882 | 0.23718859  | 0.436906135 | 0.335715617 |
| 0.295958292 | 0.042077733 | 0.214829467 | 0.284033753 |
| 0.36622583  | 0.277503688 | 0.356144974 | 0.197959417 |
| 0.360444885 | 0.257183386 | 0.103197247 | 0.246153797 |
| 0.216109022 | 0.374861523 | 0.214276632 | 0.065269817 |
| 0.312698012 | 0.332911878 | 0.387046179 | 0.343465823 |
| 0.295182969 | 0.002255983 | 0.160198164 | 0.342834604 |
| 0.27999755  | 0.316352336 | 0.449375537 | 0.209455073 |
| 0.346854701 | 0.187703201 | 0.252042028 | 0.221468821 |
| 0.380433634 | 0.230545255 | 0.225753927 | 0.006422982 |
| 0.182835219 | 0.233724811 | 0.324571259 | 0.172451431 |
| 0.196609857 | 0.247213615 | 0.191984675 | 0.389740391 |
| 0.281178066 | 0.297387526 | 0.092640481 | 0.139954805 |
| 0.312205128 | 0.31297761  | 0.242876216 | 0.311949843 |
| 0.314249328 | 0.294658827 | 0.329922827 | 0.389299199 |
| 0.217261044 | 0.333859876 | 0.114310513 | 0.35128993  |
| 0.263998932 | 0.377831053 | 0.319748802 | 0.320457672 |
| 0.299588425 | 0.307420601 | 0.205346254 | 0.328115745 |
| 0.363620344 | 0.335982896 | 0.196983819 | 0.45470395  |
| 0.007969383 | 0.352778473 | 0.290011282 | 0.134513717 |
| 0.431981127 | 0.254673307 | 0.179456266 | 0.346883248 |
| 0.447085068 | 0.461372072 | 0.406295936 | 0.34130852  |
| 0.190676296 | 0.061000254 | 0.455370839 | 0.355776323 |
| 0.411421875 | 0.315905056 | 0.15478832  | 0.082682726 |
| 0.410408576 | 0.257435916 | 0.334412359 | 0.302114759 |
| 0.265618966 | 0.209531461 | 0.324005934 | 0.281459666 |
| 0.02826025  | 0.303612538 | 0.297272696 | 0.159306864 |
| 0.261309787 | 0.242052781 | 0.347366052 | 0.339464598 |
| 0.216108946 | 0.278377898 | 0.202718381 | 0.133756329 |
| 0.253477649 | 0.462231278 | 0.019338645 | 0.448143127 |

|             |             |             |             |
|-------------|-------------|-------------|-------------|
| 0.456667762 | 0.34358939  | 0.386954707 | 0.459277275 |
| 0.370369771 | 0.350525764 | 0.407064291 | 0.37591545  |
| 0.006913802 | 0.313264003 | 0.225635623 | 0.362156999 |
| 0.363456188 | 0.332907212 | 0.207384805 | 0.218152498 |
| 0.004976872 | 0.264700397 | 0.124509768 | 0.477754542 |
| 0.361742751 | 0.070422932 | 0.015740596 | 0.333587081 |
| 0.211874905 | 0.039078666 | 0.478804463 | 0.30937699  |
| 0.381338128 | 0.300652424 | 0.217183762 | 0.271743744 |
| 0.104782425 | 0.294584974 | 0.030616074 | 0.299901503 |
| 0.261936666 | 0.102565608 | 0.076999129 | 0.462462509 |
| 0.403275865 | 0.322125179 | 0.313613846 | 0.020302066 |
| 0.315483355 | 0.12945916  | 0.299473513 | 0.178462248 |
| 0.387237392 | 0.345506546 | 0.401638577 | 0.297231302 |
| 0.3183412   | 0.372873042 | 0.371740184 | 0.381364735 |
| 0.063236662 | 0.302195445 | 0.354158251 | 0.096781077 |
| 0.261287235 | 0.393052033 | 0.264942171 | 0.234477214 |
| 0.373780067 | 0.042689257 | 0.277984683 | 0.339784232 |
| 0.392267614 | 0.38750065  | 0.137115372 | 0.281888768 |
| 0.374330725 | 0.336847618 | 0.171440944 | 0.334736454 |
| 0.334036956 | 0.09918686  | 0.128286405 | 0.360615617 |
| 0.437572535 | 0.299473873 | 0.385921294 | 0.13399533  |
| 0.360990993 | 0.144746691 | 0.368504778 | 0.263458556 |
| 0.352225129 | 0.254936015 | 0.299096633 | 0.124963163 |
| 0.045277927 | 0.254339203 | 0.346620993 | 0.402166441 |
| 0.161986856 | 0.30230681  | 0.265502206 | 0.276842092 |
| 0.411383397 | 0.284202603 | 0.318194746 | 0.345343476 |
| 0.408014506 | 0.076456008 | 0.477212356 | 0.3736065   |
| 0.381907881 | 0.283265316 | 0.34783705  | 0.016103024 |
| 0.28323873  | 0.189280839 | 0.220778465 | 0.2556591   |
| 0.35987583  | 0.209742351 | 0.310785988 | 0.293277922 |
| 0.126460304 | 0.01152208  | 0.367298383 | 0.17506178  |
| 0.31958142  | 0.211629558 | 0.351325149 | 0.069571996 |
| 0.489064705 | 0.356903947 | 0.360562959 | 0.165731549 |
| 0.303879179 | 0.005875007 | 0.173647358 | 0.111428063 |
| 1           | 0.357815552 | 0.322691508 | 0.323210432 |
| 0.274885293 | 0.292192791 | 0.34239126  | 0.251156868 |
| 0.375027276 | 0.099557008 | 0.438763326 | 0.341229617 |
| 0.270371405 | 0.3165586   | 0.310909779 | 0.307284286 |
| 0.205486635 | 0.16309436  | 0.208854659 | 0.306444394 |
| 0.375514247 | 0.265612346 | 0.277671394 | 0.335243424 |
| 0.094170172 | 0.303938724 | 0.306139909 | 0.271240989 |
| 0.317761229 | 0.247310232 | 0.266451815 | 0.387398059 |
| 0.304916959 | 0.372192956 | 0.033957371 | 0.031203003 |
| 0.155441407 | 0.257408422 | 0.407108128 | 0.386827128 |
| 0.431888206 | 0.247289693 | 0.190550719 | 0.279199322 |
| 0.073889763 | 0.30571674  | 0.263889159 | 0.067733135 |
| 0.3120858   | 0.248258331 | 0.003672237 | 0.339242497 |
| 0.361279486 | 0.243297858 |             |             |
| THADA       | 0.258862252 | 0.467178584 | 0.187846881 |
| 0.020853226 | 0.182792931 | 0.368585087 | 0.349038171 |
| 0.250944308 | 0.274504118 | 0.201789314 | 0.400065045 |
| 0.007320878 | 0.243073195 | 0.06571828  | 0.211915494 |
| 0.402608341 | 0.412957155 | 0.397983247 | 0.418725518 |
| 0.317765902 | 0.135792498 | 0.371973167 | 0.338676158 |

|             |             |             |             |
|-------------|-------------|-------------|-------------|
| 0.384777467 | 0.011213917 | 0.232823155 | 0.052096285 |
| 0.226240466 | 0.374150121 | 0.375689863 | 0.295408286 |
| 0.352361549 | 0.315243717 | 0.284610823 | 0.253982912 |
| 0.106135931 | 0.484964224 | 0.072794539 | 0.254449684 |
| 0.267790481 | 0.301928248 | 0.320673355 | 0.074978303 |
| 0.001193904 | 0.236809053 | 0.203790945 | 0.364834977 |
| 0.366005447 | 0.355117643 | 0.361459227 | 0.264910714 |
| 0.05934219  | 0.408112442 | 0.350128891 | 0.054570975 |
| 0.471667135 | 0.00313335  | 0.488267211 | 0.231064692 |
| 0.220227143 | 0.416979091 | 0.23189166  | 0.345798336 |
| 0.385193073 | 0.484025461 | 0.45278644  | 0.11277061  |
| 0.21606596  | 0.304547914 | 0.242192791 | 0.300334738 |
| 0.424886141 | 0.272409962 | 0.348914374 | 0.20506301  |
| 0.258522537 | 0.266100419 | 0.423674055 | 0.350479764 |
| 0.004314753 | 0.273314958 | 0.240353509 | 0.225591327 |
| 0.193402594 | 0.408843133 | 0.270473535 | 0.314358451 |
| 0.25576995  | 0.094580227 | 0.38356725  | 0.438509402 |
| 0.03495352  | 0.275022881 | 0.019228568 | 0.34039655  |
| 0.323492904 | 0.319838203 | 0.30400513  | 0.188301103 |
| 0.077231932 | 0.312564243 | 0.157091387 | 0.252881176 |
| 0.359265913 | 0.337574631 | 0.462304827 | 0.070348056 |
| 0.209051784 | 0.268071843 | 0.411062312 | 0.47700472  |
| 0.416419974 | 0.04438873  | 0.320407597 | 0.369915234 |
| 0.252869705 | 0.145593188 | 0.378588315 | 0.021567564 |
| 0.020133152 | 0.036671942 | 0.350555774 | 0.320132203 |
| 0.20015336  | 0.339032096 | 0.119681525 | 0.279404926 |
| 0.246349461 | 0.330711656 | 0.225576659 | 0.359736661 |
| 0.232236624 | 0.365595974 | 0.289828219 | 0.283111327 |
| 0.260367852 | 0.348870451 | 0.306257908 | 0.452306242 |
| 0.479128634 | 0.192552421 | 0.218995304 | 0.385354522 |
| 0.212386276 | 0.394318273 | 0.460893141 | 0.343557587 |
| 0.300595765 | 0.404847204 | 0.244034191 | 0.354269369 |
| 0.397876013 | 0.358775815 | 0.055460382 | 0.423863812 |
| 0.484304976 | 0.028104124 | 0.209780481 | 0.325097562 |
| 0.050198271 | 0.346298227 | 0.446026487 | 0.362830879 |
| 0.333167416 | 0.042824456 | 0.251096007 | 0.35823862  |
| 0.388775033 | 0.337641577 | 0.362289523 | 0.217473561 |
| 0.396225353 | 0.229797633 | 0.16590257  | 0.215915827 |
| 0.300486088 | 0.390944508 | 0.156285218 | 0.062174939 |
| 0.288621004 | 0.332314676 | 0.390233386 | 0.339325416 |
| 0.253750919 | 0.002301725 | 0.188044662 | 0.284928326 |
| 0.230236834 | 0.281388451 | 0.480903706 | 0.296477031 |
| 0.394628479 | 0.205684975 | 0.333851314 | 0.320355731 |
| 0.343888451 | 0.246286072 | 0.235926554 | 0.003875698 |
| 0.296636902 | 0.185252277 | 0.347928279 | 0.155770085 |
| 0.289018892 | 0.230654187 | 0.168990984 | 0.38752048  |
| 0.359619965 | 0.31313071  | 0.078587427 | 0.122889651 |
| 0.35948212  | 0.37311168  | 0.234633371 | 0.234523926 |
| 0.344149988 | 0.305721019 | 0.272105086 | 0.442839748 |
| 0.350001009 | 0.38316834  | 0.110694298 | 0.40016791  |
| 0.249763965 | 0.389145199 | 0.292391909 | 0.340907589 |
| 0.379344215 | 0.290902185 | 0.191782257 | 0.393525071 |
| 0.355219654 | 0.371722889 | 0.226186036 | 0.482141341 |
| 0.005221379 | 0.412640719 | 0.303804345 | 0.10805315  |

|             |             |             |             |
|-------------|-------------|-------------|-------------|
| 0.457379755 | 0.359268263 | 0.216504897 | 0.347307346 |
| 0.426160737 | 0.489146544 | 0.383743474 | 0.294303825 |
| 0.156598769 | 0.052468138 | 0.447638096 | 0.391855217 |
| 0.376133983 | 0.399455434 | 0.185125287 | 0.088889764 |
| 0.407963358 | 0.22807511  | 0.313700384 | 0.245897272 |
| 0.296551732 | 0.243163845 | 0.414113547 | 0.247492403 |
| 0.016147047 | 0.309754122 | 0.250480592 | 0.167937282 |
| 0.262726908 | 0.261775065 | 0.366069251 | 0.426097598 |
| 0.263079721 | 0.190284239 | 0.221609304 | 0.210241653 |
| 0.363803012 | 0.466047366 | 0.029927412 | 0.437654395 |
| 0.444819464 | 0.416174879 | 0.388433652 | 0.439883386 |
| 0.366640762 | 0.428745419 | 0.406073594 | 0.337912414 |
| 0.004422635 | 0.274904215 | 0.20756188  | 0.435418832 |
| 0.321982721 | 0.396980152 | 0.172146062 | 0.211480336 |
| 0.008536173 | 0.329735661 | 0.10162155  | 0.502126768 |
| 0.368028435 | 0.120545621 | 0.022950376 | 0.353332121 |
| 0.195494967 | 0.043887183 | 0.472481387 | 0.345963305 |
| 0.413289129 | 0.362399359 | 0.298258774 | 0.242911171 |
| 0.077892757 | 0.317319051 | 0.055716301 | 0.325797241 |
| 0.295166814 | 0.080739207 | 0.108662314 | 0.449123769 |
| 0.383937947 | 0.406311362 | 0.409573784 | 0.01203116  |
| 0.255679112 | 0.115959919 | 0.300662697 | 0.266571601 |
| 0.399900401 | 0.415862735 | 0.45314317  | 0.280308952 |
| 0.340317686 | 0.425167868 | 0.423143249 | 0.378958823 |
| 0.072846742 | 0.252639245 | 0.304921931 | 0.117934279 |
| 0.215459548 | 0.395390737 | 0.266012373 | 0.328717052 |
| 0.388022453 | 0.058362487 | 0.361693716 | 0.297385303 |
| 0.443120977 | 0.376891054 | 0.179057934 | 0.331157389 |
| 0.429300931 | 0.412761605 | 0.275246037 | 0.417857339 |
| 0.409364867 | 0.060126852 | 0.114030313 | 0.413859328 |
| 0.485451965 | 0.397368233 | 0.348852198 | 0.146613942 |
| 0.35152004  | 0.194182473 | 0.369333609 | 0.376882431 |
| 0.396256089 | 0.203627349 | 0.244691421 | 0.07499377  |
| 0.028439239 | 0.206121992 | 0.411575563 | 0.46050876  |
| 0.219768636 | 0.363395075 | 0.338842652 | 0.356939687 |
| 0.382345697 | 0.269763191 | 0.401019583 | 0.380569081 |
| 0.483721842 | 0.10110105  | 0.494168577 | 0.369072755 |
| 0.36124576  | 0.341428725 | 0.362195373 | 0.015920311 |
| 0.26863428  | 0.21231606  | 0.166878046 | 0.311443104 |
| 0.305098274 | 0.282616965 | 0.394962073 | 0.327586101 |
| 0.130781743 | 0.012551495 | 0.400495064 | 0.176800903 |
| 0.399608735 | 0.189631904 | 0.379335032 | 0.055923874 |
| 0.499536462 | 0.331469203 | 0.317846549 | 0.172869014 |
| 0.328526481 | 0.008361258 | 0.223887012 | 0.128705019 |
| 0.357815552 | 1           | 0.294732086 | 0.256639465 |
| 0.207960913 | 0.333527329 | 0.411018048 | 0.306092022 |
| 0.379021957 | 0.075840164 | 0.412967019 | 0.389149282 |
| 0.230965642 | 0.314143913 | 0.412946121 | 0.372988083 |
| 0.324769977 | 0.199955652 | 0.308311514 | 0.278036712 |
| 0.356984655 | 0.365573146 | 0.342423164 | 0.240145487 |
| 0.137331574 | 0.36405859  | 0.289961249 | 0.250324337 |
| 0.310326486 | 0.198759316 | 0.247188138 | 0.466200087 |
| 0.24340437  | 0.326402816 | 0.040927479 | 0.038943077 |
| 0.152304286 | 0.313868107 | 0.378218872 | 0.384651979 |



|             |             |             |             |
|-------------|-------------|-------------|-------------|
| 0.422057948 | 0.207701311 | 0.258675714 | 0.305999495 |
| 0.077527333 | 0.251271126 | 0.365635438 | 0.086546626 |
| 0.350697304 | 0.208148759 | 0.003770519 | 0.303271604 |
| 0.406395787 | 0.244273569 |             |             |
| THRA        | 0.258338222 | 0.438587454 | 0.054844287 |
| 0.012139094 | 0.058916602 | 0.158236453 | 0.134922596 |
| 0.249647331 | 0.098805331 | 0.087368346 | 0.2283548   |
| 0.004961479 | 0.331789785 | 0.022546287 | 0.067023381 |
| 0.479824869 | 0.477541777 | 0.19316855  | 0.479270354 |
| 0.24471028  | 0.08283646  | 0.269413473 | 0.229006647 |
| 0.172367568 | 0.004217292 | 0.073014134 | 0.026875679 |
| 0.239409258 | 0.468234969 | 0.156712602 | 0.178865313 |
| 0.440694613 | 0.390486292 | 0.220768895 | 0.156107799 |
| 0.123305945 | 0.402395434 | 0.067872716 | 0.308387271 |
| 0.382918874 | 0.12991801  | 0.385676532 | 0.02005202  |
| 0.001310728 | 0.068676458 | 0.227141108 | 0.258048082 |
| 0.230669198 | 0.149682794 | 0.133638945 | 0.101325889 |
| 0.106386276 | 0.256961976 | 0.354173633 | 0.099496044 |
| 0.330812515 | 0.001992003 | 0.38624181  | 0.21539434  |
| 0.057139513 | 0.231332823 | 0.255051119 | 0.28091319  |
| 0.159286906 | 0.356231369 | 0.4645395   | 0.027187427 |
| 0.05779742  | 0.278666751 | 0.337177519 | 0.228898305 |
| 0.400607879 | 0.198748663 | 0.1774072   | 0.21405341  |
| 0.30433279  | 0.358556741 | 0.19916736  | 0.130257158 |
| 0.002233941 | 0.092234339 | 0.158106842 | 0.288627057 |
| 0.229664408 | 0.265785799 | 0.268328279 | 0.129149052 |
| 0.253037267 | 0.020790047 | 0.24271568  | 0.472426967 |
| 0.014566714 | 0.343028522 | 0.00694333  | 0.122504022 |
| 0.378799003 | 0.443874984 | 0.289371864 | 0.055911853 |
| 0.016565556 | 0.113304054 | 0.167979597 | 0.393194618 |
| 0.276731463 | 0.258739932 | 0.322482517 | 0.109401687 |
| 0.326045652 | 0.158618843 | 0.219561289 | 0.390573365 |
| 0.449829103 | 0.010636789 | 0.14280607  | 0.145797333 |
| 0.197867542 | 0.076922581 | 0.143751136 | 0.030161704 |
| 0.008094648 | 0.031695475 | 0.433073851 | 0.138763828 |
| 0.064326169 | 0.128370071 | 0.047411904 | 0.2363598   |
| 0.241881834 | 0.434048479 | 0.066764302 | 0.152242599 |
| 0.287321335 | 0.151308252 | 0.209127096 | 0.323318582 |
| 0.183340151 | 0.207779553 | 0.119878806 | 0.373904076 |
| 0.378495579 | 0.054101567 | 0.071967821 | 0.210795966 |
| 0.311462649 | 0.456482228 | 0.48588886  | 0.220977248 |
| 0.136079501 | 0.184987273 | 0.202999162 | 0.220346423 |
| 0.156579376 | 0.25277112  | 0.068711104 | 0.250599177 |
| 0.343391517 | 0.027533835 | 0.058152789 | 0.360809346 |
| 0.0209517   | 0.157033841 | 0.388142808 | 0.333120879 |
| 0.258900518 | 0.022315091 | 0.131127635 | 0.167029342 |
| 0.218939539 | 0.15550057  | 0.279557124 | 0.125203585 |
| 0.214521384 | 0.19184543  | 0.03751657  | 0.326644515 |
| 0.09334988  | 0.241234421 | 0.206201571 | 0.058641119 |
| 0.268792368 | 0.242398149 | 0.370611179 | 0.268876167 |
| 0.315342143 | 0.001528527 | 0.084225511 | 0.268507571 |
| 0.207207363 | 0.379790061 | 0.424626917 | 0.089715204 |
| 0.194249105 | 0.206094439 | 0.113532888 | 0.169637029 |
| 0.387788873 | 0.146763021 | 0.131405685 | 0.001203022 |

|             |             |             |             |
|-------------|-------------|-------------|-------------|
| 0.093894845 | 0.218965598 | 0.270526283 | 0.065399539 |
| 0.12613521  | 0.105638196 | 0.110888573 | 0.394334174 |
| 0.140923096 | 0.326640399 | 0.040193673 | 0.139534563 |
| 0.171689957 | 0.280558037 | 0.210604407 | 0.216377997 |
| 0.310108462 | 0.191268077 | 0.413052776 | 0.316503596 |
| 0.153354272 | 0.249102941 | 0.134084903 | 0.213625094 |
| 0.251418739 | 0.394454372 | 0.358236057 | 0.341126948 |
| 0.17800378  | 0.289530485 | 0.178805424 | 0.184538024 |
| 0.257581944 | 0.25689499  | 0.076672205 | 0.442728366 |
| 0.00165946  | 0.221788694 | 0.242767527 | 0.139669694 |
| 0.409849601 | 0.144945917 | 0.065571989 | 0.201687851 |
| 0.48274514  | 0.446459082 | 0.410267148 | 0.399031773 |
| 0.199198281 | 0.017069381 | 0.453495551 | 0.297832239 |
| 0.471097455 | 0.242786633 | 0.162145212 | 0.083357459 |
| 0.420707701 | 0.240470032 | 0.260791244 | 0.255343944 |
| 0.248257346 | 0.210311788 | 0.182695838 | 0.2827205   |
| 0.018694198 | 0.169732017 | 0.255997795 | 0.109180366 |
| 0.179659487 | 0.157762633 | 0.359612381 | 0.223955189 |
| 0.19895609  | 0.209763603 | 0.179218097 | 0.055355151 |
| 0.12547588  | 0.448167806 | 0.028620929 | 0.437954234 |
| 0.478215065 | 0.245852572 | 0.396566688 | 0.479370539 |
| 0.227032225 | 0.286751238 | 0.404718264 | 0.425820611 |
| 0.002489676 | 0.391388003 | 0.293867785 | 0.273447379 |
| 0.402961749 | 0.196425672 | 0.193507429 | 0.22674444  |
| 0.002010602 | 0.121803585 | 0.140711256 | 0.444925494 |
| 0.384374779 | 0.024870864 | 0.028463528 | 0.331097914 |
| 0.264638486 | 0.030907154 | 0.478795968 | 0.202073389 |
| 0.366701678 | 0.23715564  | 0.110183503 | 0.343084515 |
| 0.129690535 | 0.240083882 | 0.017796203 | 0.238733977 |
| 0.24827499  | 0.111600814 | 0.043440617 | 0.48311888  |
| 0.37617716  | 0.247108528 | 0.17328181  | 0.007497787 |
| 0.381267867 | 0.106065341 | 0.309361885 | 0.084908618 |
| 0.346701051 | 0.264900555 | 0.372927963 | 0.348540963 |
| 0.270012212 | 0.317515405 | 0.291751029 | 0.36125359  |
| 0.054518387 | 0.353827162 | 0.40438324  | 0.038217301 |
| 0.258186194 | 0.41338899  | 0.223828777 | 0.116901015 |
| 0.261617843 | 0.038018952 | 0.139992091 | 0.252179024 |
| 0.359154083 | 0.411964308 | 0.049593106 | 0.14298688  |
| 0.313446198 | 0.213510756 | 0.07768209  | 0.230441345 |
| 0.19126093  | 0.122004214 | 0.139726298 | 0.268514025 |
| 0.389032548 | 0.186228861 | 0.400178412 | 0.084900086 |
| 0.409401868 | 0.05067534  | 0.380465609 | 0.168254872 |
| 0.204931983 | 0.242275315 | 0.371801307 | 0.118081957 |
| 0.020261383 | 0.121838991 | 0.289534378 | 0.331695113 |
| 0.060132394 | 0.149412002 | 0.153158753 | 0.1888347   |
| 0.452225828 | 0.224312408 | 0.178480703 | 0.231138311 |
| 0.333658233 | 0.052807614 | 0.439476745 | 0.248906841 |
| 0.341078175 | 0.193826422 | 0.348898073 | 0.009573001 |
| 0.26510756  | 0.103682326 | 0.191710478 | 0.191403615 |
| 0.4350911   | 0.093638804 | 0.236642966 | 0.140179472 |
| 0.105941279 | 0.004707208 | 0.266001989 | 0.191732503 |
| 0.196719988 | 0.195457943 | 0.250528858 | 0.091024596 |
| 0.473799649 | 0.254040978 | 0.346354809 | 0.18552039  |
| 0.206936466 | 0.008960611 | 0.093581376 | 0.033386193 |

|             |             |             |             |
|-------------|-------------|-------------|-------------|
| 0.322691508 | 0.294732086 | 1           | 0.254826684 |
| 0.198349446 | 0.246380173 | 0.25116991  | 0.20676517  |
| 0.398159095 | 0.097897401 | 0.469089366 | 0.236071364 |
| 0.354021511 | 0.23808775  | 0.174759418 | 0.223005527 |
| 0.116470219 | 0.129936594 | 0.094499879 | 0.16389857  |
| 0.41812143  | 0.20745359  | 0.209822584 | 0.226944251 |
| 0.033574915 | 0.219712029 | 0.338777449 | 0.321424402 |
| 0.253909481 | 0.288973757 | 0.232447275 | 0.309968969 |
| 0.224206278 | 0.243491487 | 0.024548319 | 0.017475153 |
| 0.137589065 | 0.130131926 | 0.397978322 | 0.385820612 |
| 0.46652219  | 0.212909547 | 0.080079855 | 0.129235348 |
| 0.092833211 | 0.345037207 | 0.157509342 | 0.077739748 |
| 0.26196558  | 0.240406671 | 0.000819135 | 0.200222148 |
| 0.275494812 | 0.212330881 |             |             |
| TIMM9       | 0.231835512 | 0.40413     | 0.040974449 |
| 0.034031576 | 0.13852143  | 0.091311167 | 0.012468778 |
| 0.076852725 | 0.076036181 | 0.209796127 | 0.195967119 |
| 0.289836942 | 0.025019939 | 0.042210772 | 0.00534137  |
| 0.441363763 | 0.124129498 | 0.43103243  | 0.451619181 |
| 0.073451254 | 0.263108351 | 0.208618554 | 0.195282617 |
| 0.00591485  | 0.051061742 | 0.029719925 | 0.126704978 |
| 0.434130282 | 0.108477216 | 0.143755282 | 0.177730363 |
| 0.360951474 | 0.165113657 | 0.096750861 | 0.427304623 |
| 0.37548789  | 0.027963393 | 0.266165334 | 0.083626575 |
| 0.088215301 | 0.359562319 | 0.015256011 | 0.354396086 |
| 0.048704139 | 0.16268003  | 0.266314225 | 0.001198659 |
| 0.118418828 | 0.089039521 | 0.071605641 | 0.162604335 |
| 0.238461183 | 0.339926664 | 0.067253151 | 0.075753466 |
| 0.003315634 | 0.354074344 | 0.189942343 | 0.296337351 |
| 0.152349024 | 0.203592327 | 0.269938569 | 0.040978477 |
| 0.322048006 | 0.417267453 | 0.016804388 | 0.140496551 |
| 0.191561646 | 0.338966698 | 0.208538725 | 0.043064036 |
| 0.169671145 | 0.123353947 | 0.1242035   | 0.382812981 |
| 0.345922751 | 0.160569876 | 0.087168059 | 0.290228573 |
| 0.063591478 | 0.103197393 | 0.289686709 | 0.002441997 |
| 0.242147881 | 0.233163584 | 0.08016307  | 0.214461672 |
| 0.019388455 | 0.212191519 | 0.439990881 | 0.195551306 |
| 0.292450646 | 0.004753894 | 0.073496612 | 0.011573595 |
| 0.423828378 | 0.312382888 | 0.039577981 | 0.362966961 |
| 0.081502914 | 0.136210057 | 0.361064158 | 0.013906987 |
| 0.187253861 | 0.286000382 | 0.060340961 | 0.189511728 |
| 0.162498686 | 0.138898259 | 0.371072262 | 0.291898418 |
| 0.007323452 | 0.114217085 | 0.110277185 | 0.428773312 |
| 0.056284209 | 0.090873827 | 0.030758222 | 0.134245796 |
| 0.023965936 | 0.408688367 | 0.10029132  | 0.00615736  |
| 0.093923664 | 0.035599005 | 0.214226245 | 0.046809576 |
| 0.401734518 | 0.036565418 | 0.109358296 | 0.164550281 |
| 0.109247036 | 0.140197084 | 0.295973422 | 0.26324434  |
| 0.157859247 | 0.100669831 | 0.324223197 | 0.102981469 |
| 0.035976374 | 0.059259315 | 0.211126058 | 0.343338963 |
| 0.425306794 | 0.447370234 | 0.155324451 | 0.27176026  |
| 0.120415933 | 0.182727851 | 0.210825188 | 0.080455587 |
| 0.166727374 | 0.038605266 | 0.217806775 | 0.105457862 |
| 0.022206035 | 0.046396096 | 0.337049573 | 0.314164096 |
|             |             |             | 0.011326134 |

|             |             |             |             |
|-------------|-------------|-------------|-------------|
| 0.08929458  | 0.383068445 | 0.299085865 | 0.184584392 |
| 0.029677023 | 0.10916425  | 0.122686071 | 0.17213506  |
| 0.120330192 | 0.256570288 | 0.109155927 | 0.213379403 |
| 0.183550523 | 0.025999471 | 0.287301878 | 0.066156869 |
| 0.207766232 | 0.190782634 | 0.038530747 | 0.245843022 |
| 0.16575635  | 0.360168297 | 0.228643245 | 0.318306953 |
| 0.002079357 | 0.077579334 | 0.267890528 | 0.200945681 |
| 0.335025132 | 0.39212397  | 0.061222326 | 0.150480123 |
| 0.110297621 | 0.080380334 | 0.098180184 | 0.362177523 |
| 0.127411137 | 0.126831454 | 0.002970709 | 0.054558154 |
| 0.190483901 | 0.1696462   | 0.062761959 | 0.078388503 |
| 0.106795392 | 0.095670557 | 0.370749317 | 0.102555794 |
| 0.281612017 | 0.032959577 | 0.084397572 | 0.133922499 |
| 0.244908429 | 0.157658011 | 0.209619781 | 0.282433711 |
| 0.152956136 | 0.394676195 | 0.29291748  | 0.081055627 |
| 0.247952575 | 0.072798765 | 0.146622131 | 0.204163872 |
| 0.356425466 | 0.346432366 | 0.290578239 | 0.116322997 |
| 0.256104461 | 0.128063595 | 0.175082353 | 0.219671997 |
| 0.167285944 | 0.063841577 | 0.394090282 | 0.002951318 |
| 0.186572489 | 0.193547596 | 0.10271109  | 0.382744186 |
| 0.111685117 | 0.054074301 | 0.15066952  | 0.438853568 |
| 0.397746708 | 0.373116826 | 0.387092143 | 0.116792877 |
| 0.017918773 | 0.413640317 | 0.275947639 | 0.432945046 |
| 0.14045206  | 0.092574356 | 0.035568113 | 0.388675304 |
| 0.188800632 | 0.277641659 | 0.228818136 | 0.168892858 |
| 0.117387587 | 0.116141817 | 0.253003585 | 0.022749927 |
| 0.154329213 | 0.284585969 | 0.106923353 | 0.16013019  |
| 0.107976371 | 0.321657162 | 0.194664025 | 0.11780579  |
| 0.24146049  | 0.128646349 | 0.039497208 | 0.081157134 |
| 0.42327352  | 0.009853355 | 0.400913913 | 0.440364891 |
| 0.154806449 | 0.376204701 | 0.443310742 | 0.180688517 |
| 0.25385767  | 0.38217284  | 0.38463377  | 0.002139068 |
| 0.35656107  | 0.251221044 | 0.245602375 | 0.401953145 |
| 0.166688625 | 0.128285648 | 0.145008173 | 0.000896724 |
| 0.090219745 | 0.109349162 | 0.401907525 | 0.349021002 |
| 0.016287071 | 0.010552346 | 0.296205334 | 0.226077808 |
| 0.020178713 | 0.447943625 | 0.152989123 | 0.335833382 |
| 0.145739658 | 0.081863948 | 0.306374328 | 0.102206847 |
| 0.150501917 | 0.009476774 | 0.215265781 | 0.141038606 |
| 0.061176477 | 0.036100447 | 0.441620146 | 0.38199804  |
| 0.211153135 | 0.125581208 | 0.018500701 | 0.372174893 |
| 0.102356969 | 0.295105307 | 0.050480339 | 0.326070296 |
| 0.237513858 | 0.324629905 | 0.315786088 | 0.205188851 |
| 0.287317945 | 0.280619273 | 0.360863141 | 0.041250887 |
| 0.357899779 | 0.394522605 | 0.036169378 | 0.215347727 |
| 0.380610913 | 0.169555767 | 0.083910849 | 0.251201363 |
| 0.025682799 | 0.113588961 | 0.188292357 | 0.321268323 |
| 0.389298938 | 0.041990939 | 0.096212597 | 0.293081328 |
| 0.131865212 | 0.048420515 | 0.135921793 | 0.172129916 |
| 0.10331872  | 0.073329379 | 0.23931886  | 0.359076949 |
| 0.165857988 | 0.410992953 | 0.081883845 | 0.357721633 |
| 0.035911536 | 0.331625692 | 0.093154604 | 0.15488327  |
| 0.247265122 | 0.359089286 | 0.09251961  | 0.040234069 |
| 0.127665109 | 0.265750314 | 0.308505057 | 0.047497034 |

|             |             |             |             |
|-------------|-------------|-------------|-------------|
| 0.10867541  | 0.109205172 | 0.136143985 | 0.427154052 |
| 0.182313884 | 0.150924528 | 0.154481154 | 0.298333905 |
| 0.042083631 | 0.408605086 | 0.179370829 | 0.343666809 |
| 0.131885113 | 0.313177785 | 0.008432128 | 0.256551502 |
| 0.09541151  | 0.137676098 | 0.131047891 | 0.4137031   |
| 0.069320515 | 0.204262677 | 0.111423747 | 0.072088193 |
| 0.003263026 | 0.247349543 | 0.118679089 | 0.18362537  |
| 0.132304458 | 0.15951794  | 0.067732551 | 0.439423065 |
| 0.221871825 | 0.368908797 | 0.099583921 | 0.169150235 |
| 0.004309327 | 0.077089016 | 0.033052246 | 0.323210432 |
| 0.256639465 | 0.254826684 | 1           | 0.158030018 |
| 0.204285662 | 0.215141558 | 0.132287482 | 0.364776881 |
| 0.083297105 | 0.446146322 | 0.144535618 | 0.324466411 |
| 0.177819126 | 0.132735637 | 0.134553652 | 0.070791224 |
| 0.06128492  | 0.061845241 | 0.134566965 | 0.39082677  |
| 0.104409122 | 0.135929423 | 0.242249298 | 0.028154242 |
| 0.144532432 | 0.300711372 | 0.293044057 | 0.228194065 |
| 0.301526685 | 0.160765381 | 0.278015626 | 0.224116411 |
| 0.201952457 | 0.023264747 | 0.020706354 | 0.116644749 |
| 0.102237764 | 0.379397993 | 0.34621706  | 0.416540142 |
| 0.165199981 | 0.057549059 | 0.098988685 | 0.045701721 |
| 0.345133867 | 0.124102504 | 0.04069118  | 0.19246193  |
| 0.168024226 | 0.000824927 | 0.16995099  | 0.264056791 |
| 0.155308857 |             |             |             |

|             |             |             |             |
|-------------|-------------|-------------|-------------|
| TJP2        | 0.22562212  | 0.230680037 | 0.027405644 |
| 0.000761093 | 0.007851132 | 0.10072796  | 0.051233151 |
| 0.164092852 | 0.048380924 | 0.01360996  | 0.143778368 |
| 0.035452164 | 0.178785139 | 0.06721109  | 0.042846661 |
| 0.27403537  | 0.252619669 | 0.069423142 | 0.286575812 |
| 0.229139983 | 0.008345454 | 0.265056387 | 0.106376045 |
| 0.0874948   | 0.035719272 | 0.016180225 | 0.002171341 |
| 0.116792599 | 0.268540777 | 0.10260621  | 0.037187127 |
| 0.26971303  | 0.177191966 | 0.02899073  | 0.016110696 |
| 0.009962874 | 0.243021152 | 0.008084456 | 0.125900658 |
| 0.231200798 | 0.023746253 | 0.185534796 | 0.020895862 |
| 3.37E-05    | 0.018083993 | 0.113200606 | 0.209255662 |
| 0.170951414 | 0.091283674 | 0.098447989 | 0.020682834 |
| 0.015672081 | 0.169086533 | 0.344622928 | 0.012591542 |
| 0.178639933 | 0.000105318 | 0.213675539 | 0.19157373  |
| 0.029183282 | 0.116422651 | 0.12089125  | 0.197028473 |
| 0.097238947 | 0.19230668  | 0.24227586  | 0.006085413 |
| 0.029506051 | 0.129022464 | 0.162597433 | 0.078401544 |
| 0.230901543 | 0.037984761 | 0.029236566 | 0.043024144 |
| 0.138272715 | 0.214992379 | 0.157766557 | 0.056513137 |
| 0.007332601 | 0.027673524 | 0.014028897 | 0.287421434 |
| 0.099102884 | 0.169360766 | 0.203379381 | 0.018099466 |
| 0.091418055 | 0.023011756 | 0.168333979 | 0.253851988 |
| 0.002401624 | 0.197686665 | 0.002057714 | 0.055233207 |
| 0.23108404  | 0.24993605  | 0.226673896 | 0.012837059 |
| 0.024318179 | 0.083486838 | 0.187804962 | 0.226771462 |
| 0.158914662 | 0.101152443 | 0.176279179 | 0.036540941 |
| 0.166410051 | 0.08602551  | 0.048068273 | 0.217740031 |
| 0.26100121  | 0.029015677 | 0.110771528 | 0.088012612 |
| 0.027690142 | 0.007196451 | 0.064271353 | 0.009654716 |

|             |             |             |             |
|-------------|-------------|-------------|-------------|
| 0.002314676 | 0.119557997 | 0.250320969 | 0.079664581 |
| 0.011187109 | 0.051861967 | 0.007653684 | 0.080212991 |
| 0.124900974 | 0.30559581  | 0.009060494 | 0.049889311 |
| 0.120697355 | 0.05955388  | 0.042988594 | 0.148339319 |
| 0.019136677 | 0.125609479 | 0.071377206 | 0.183144603 |
| 0.277135757 | 0.018845    | 0.036491509 | 0.147305873 |
| 0.146933588 | 0.262756579 | 0.267416605 | 0.099947926 |
| 0.016606312 | 0.127893387 | 0.03506819  | 0.097471832 |
| 0.08129775  | 0.224258702 | 0.037719558 | 0.185958981 |
| 0.198556173 | 0.008529286 | 0.029697505 | 0.237788091 |
| 0.001076015 | 0.02443706  | 0.245073959 | 0.164729967 |
| 0.113293609 | 0.001840063 | 0.021756816 | 0.069915443 |
| 0.16889363  | 0.058426316 | 0.193229175 | 0.016765706 |
| 0.183311997 | 0.030835861 | 0.015018092 | 0.158649428 |
| 0.056736435 | 0.216611558 | 0.03784559  | 0.011122374 |
| 0.221637209 | 0.133381628 | 0.194179993 | 0.178255536 |
| 0.215457275 | 5.84E-05    | 0.013358149 | 0.239270737 |
| 0.045463173 | 0.258653231 | 0.212887666 | 0.060646697 |
| 0.188392638 | 0.035520452 | 0.085244938 | 0.020400191 |
| 0.351521068 | 0.027414535 | 0.024174724 | 0.004663279 |
| 0.024703306 | 0.045359056 | 0.105417924 | 0.111100519 |
| 0.016781151 | 0.063590621 | 0.123536996 | 0.197849165 |
| 0.087270139 | 0.138131898 | 0.120745018 | 0.082757729 |
| 0.053772606 | 0.119659061 | 0.027318944 | 0.112865123 |
| 0.126031615 | 0.043550141 | 0.234668662 | 0.208891561 |
| 0.022028942 | 0.148862634 | 0.04146546  | 0.103406136 |
| 0.099183929 | 0.182263336 | 0.165849961 | 0.165191717 |
| 0.061447872 | 0.28267961  | 0.050938559 | 0.148308665 |
| 0.193444994 | 0.156549127 | 0.056532839 | 0.246578643 |
| 0.009836943 | 0.155212971 | 0.078503366 | 0.051962612 |
| 0.201346361 | 0.064902345 | 0.051713098 | 0.159575485 |
| 0.286742023 | 0.256100355 | 0.33337336  | 0.209876163 |
| 0.073308538 | 0.070016477 | 0.308517005 | 0.182385918 |
| 0.253876967 | 0.07058363  | 0.014328871 | 0.054056787 |
| 0.224566358 | 0.202680116 | 0.144806144 | 0.125324155 |
| 0.081233232 | 0.038185714 | 0.131174082 | 0.290787469 |
| 0.018952468 | 0.060564657 | 0.144774613 | 0.01391467  |
| 0.028820242 | 0.045075218 | 0.158008981 | 0.170306264 |
| 0.021305064 | 0.063450482 | 0.01722499  | 0.01586459  |
| 0.072319155 | 0.244392622 | 0.003380328 | 0.317054734 |
| 0.267549308 | 0.146879868 | 0.182590036 | 0.290560304 |
| 0.167320782 | 0.159085375 | 0.209418706 | 0.299338156 |
| 0.01339304  | 0.19054841  | 0.129019357 | 0.204309451 |
| 0.20242677  | 0.128487917 | 0.16632473  | 0.047887592 |
| 0.003380284 | 0.089608804 | 0.01378903  | 0.289392645 |
| 0.173868231 | 0.00943939  | 0.002535489 | 0.166511904 |
| 0.113961395 | 0.013634032 | 0.276479256 | 0.07732804  |
| 0.16991608  | 0.081971899 | 0.034922004 | 0.153113407 |
| 0.013641524 | 0.072499709 | 0.002028685 | 0.096705403 |
| 0.070252258 | 0.068397199 | 0.00396861  | 0.285950459 |
| 0.250071527 | 0.124826779 | 0.114166339 | 0.002700779 |
| 0.269216274 | 0.010567879 | 0.127755379 | 0.047648421 |
| 0.258460281 | 0.16303184  | 0.197882469 | 0.162520477 |
| 0.129918159 | 0.176930046 | 0.188259549 | 0.200524697 |

|             |             |             |             |
|-------------|-------------|-------------|-------------|
| 0.005021235 | 0.184640864 | 0.225464286 | 0.012258596 |
| 0.154236091 | 0.198923223 | 0.056100703 | 0.061855381 |
| 0.230296683 | 0.002165135 | 0.097974654 | 0.256381778 |
| 0.176455441 | 0.192279356 | 0.021683545 | 0.110695634 |
| 0.163831748 | 0.059733509 | 0.029088972 | 0.112768858 |
| 0.157171772 | 0.023854174 | 0.081242659 | 0.191341233 |
| 0.208997354 | 0.109044085 | 0.214752566 | 0.009282167 |
| 0.204343644 | 0.049897093 | 0.26390892  | 0.034826788 |
| 0.180465074 | 0.118969251 | 0.229513824 | 0.089436198 |
| 0.006943256 | 0.10729507  | 0.140125491 | 0.202499069 |
| 0.031291912 | 0.123454926 | 0.051904607 | 0.060672202 |
| 0.240006306 | 0.040651572 | 0.12919689  | 0.15176622  |
| 0.198309867 | 0.004107439 | 0.278410034 | 0.174101939 |
| 0.26526582  | 0.040170896 | 0.186854839 | 0.002730851 |
| 0.130941929 | 0.017529755 | 0.23296816  | 0.045877561 |
| 0.255920377 | 0.035340046 | 0.10882549  | 0.081778444 |
| 0.015323488 | 0.011690733 | 0.25008751  | 0.033010526 |
| 0.142990619 | 0.070867524 | 0.15057021  | 0.009167474 |
| 0.273712546 | 0.159879522 | 0.245736899 | 0.042108542 |
| 0.051310339 | 0.000489223 | 0.014218328 | 0.036174035 |
| 0.274885293 | 0.207960913 | 0.198349446 | 0.158030018 |
| 1           | 0.099112385 | 0.156031038 | 0.042619762 |
| 0.176463346 | 0.015553653 | 0.2470755   | 0.120869847 |
| 0.173988657 | 0.05671547  | 0.117587157 | 0.063276307 |
| 0.028339744 | 0.037313875 | 0.038765303 | 0.163382408 |
| 0.189581473 | 0.055088005 | 0.055499952 | 0.092398578 |
| 0.011318634 | 0.049768342 | 0.216680607 | 0.14395447  |
| 0.113018152 | 0.161988355 | 0.078668096 | 0.190650076 |
| 0.073364178 | 0.15764235  | 0.001530645 | 0.001264286 |
| 0.013408688 | 0.042824885 | 0.344333225 | 0.263902963 |
| 0.253388347 | 0.082390699 | 0.034016217 | 0.098323093 |
| 0.024987967 | 0.266060462 | 0.066149482 | 0.005952526 |
| 0.122134579 | 0.065385049 | 0.002602744 | 0.156503721 |
| 0.195251471 | 0.03405147  |             |             |
| TLE1        | 0.180398649 | 0.502365544 | 0.060418096 |
| 0.033982616 | 0.15922921  | 0.191067344 | 0.216629324 |
| 0.189923084 | 0.08956174  | 0.126142753 | 0.289817854 |
| 0.0005283   | 0.345617654 | 0.008760305 | 0.066961955 |
| 0.475313125 | 0.507351751 | 0.30115813  | 0.487532038 |
| 0.17900365  | 0.138106243 | 0.244832519 | 0.258558345 |
| 0.21359137  | 0.000806655 | 0.135833028 | 0.054754834 |
| 0.20565823  | 0.463482966 | 0.156809221 | 0.19417356  |
| 0.407983969 | 0.442607826 | 0.296561915 | 0.333248539 |
| 0.207468286 | 0.460123302 | 0.133242408 | 0.381451947 |
| 0.35889993  | 0.213843865 | 0.423060806 | 0.013167844 |
| 0.006135917 | 0.111539099 | 0.17119398  | 0.248979846 |
| 0.191719721 | 0.175120718 | 0.141016731 | 0.183340498 |
| 0.090219044 | 0.315473031 | 0.301899615 | 0.098748493 |
| 0.431141406 | 0.006329755 | 0.462462382 | 0.122059926 |
| 0.064642216 | 0.225431753 | 0.199469979 | 0.265903569 |
| 0.215277932 | 0.453625434 | 0.519616994 | 0.041669125 |
| 0.073597645 | 0.264276338 | 0.337078799 | 0.307292531 |
| 0.446591684 | 0.225019127 | 0.255038258 | 0.269842189 |
| 0.331489215 | 0.343563554 | 0.220210872 | 0.152197995 |

|             |             |                    |             |
|-------------|-------------|--------------------|-------------|
| 0.000505904 | 0.157016755 | 0.316963199        | 0.206853173 |
| 0.25703213  | 0.32333866  | 0.218739421        | 0.229784525 |
| 0.255429048 | 0.016817991 | 0.250600924        | 0.51715653  |
| 0.021607179 | 0.347090792 | 0.011585978        | 0.137110541 |
| 0.364501518 | 0.422802807 | 0.26327182         | 0.074964993 |
| 0.012623482 | 0.097775594 | 0.062872419        | 0.358372778 |
| 0.256737147 | 0.306820075 | 0.414009945        | 0.08693677  |
| 0.325001528 | 0.105266754 | 0.285808971        | 0.463449961 |
| 0.452497662 | 0.006422416 | 0.10985861         | 0.190853989 |
| 0.278937481 | 0.154603135 | 0.214393778        | 0.019604595 |
| 0.009228294 | 0.008102627 | 0.426059885        | 0.112711976 |
| 0.112118776 | 0.184257414 | 0.086153926        | 0.329716886 |
| 0.187698314 | 0.381957291 | 0.176456576        | 0.230397529 |
| 0.329971306 | 0.238223031 | 0.329773075        | 0.35730972  |
| 0.34539906  | 0.159948335 | 0.111911973        | 0.482803531 |
| 0.406413521 | 0.070055152 | 0.069149408        | 0.245424247 |
| 0.328851157 | 0.459810749 | 0.520624216        | 0.189293657 |
| 0.282267287 | 0.18312831  | 0.205088537        | 0.307403313 |
| 0.221820142 | 0.213002442 | 0.051837361        | 0.302257678 |
| 0.426162252 | 0.022305113 | 0.060400155        | 0.353294236 |
| 0.099322808 | 0.246677798 | 0.421572139        | 0.410687893 |
| 0.312249917 | 0.044549844 | 0.195370737        | 0.216947963 |
| 0.201455155 | 0.21021152  | 0.271731905        | 0.178634631 |
| 0.221943616 | 0.210730161 | 0.052826 0.3322218 |             |
| 0.110708285 | 0.217861836 | 0.169868944        | 0.054174318 |
| 0.240269648 | 0.209831183 | 0.419995299        | 0.257128723 |
| 0.279589584 | 0.005307967 | 0.121840076        | 0.197560974 |
| 0.175382785 | 0.350952519 | 0.515857914        | 0.104829372 |
| 0.180444442 | 0.234539048 | 0.122423443        | 0.338147208 |
| 0.326493476 | 0.16454573  | 0.155390559        | 0.000366636 |
| 0.135907209 | 0.216187211 | 0.284548618        | 0.031079981 |
| 0.233711562 | 0.075921218 | 0.065523446        | 0.446664642 |
| 0.164621742 | 0.421684627 | 0.013830846        | 0.08972904  |
| 0.197365976 | 0.397466115 | 0.262643156        | 0.136959059 |
| 0.41851756  | 0.212793415 | 0.376987427        | 0.363454879 |
| 0.295977927 | 0.309931383 | 0.114550424        | 0.193223196 |
| 0.285198529 | 0.472103558 | 0.396310838        | 0.421916238 |
| 0.20791805  | 0.250034418 | 0.183330397        | 0.208671607 |
| 0.241087296 | 0.273127494 | 0.063183159        | 0.511497697 |
| 0.000377984 | 0.252840615 | 0.313127694        | 0.106309586 |
| 0.500091399 | 0.22293709  | 0.055251337        | 0.152544177 |
| 0.496635099 | 0.51164788  | 0.370975546        | 0.392858827 |
| 0.118211527 | 0.005793347 | 0.449155267        | 0.334655762 |
| 0.477932565 | 0.304177642 | 0.307621113        | 0.05262024  |
| 0.475522552 | 0.193478333 | 0.2718184          | 0.228173052 |
| 0.323932778 | 0.297638232 | 0.189946273        | 0.221866363 |
| 0.007758491 | 0.17180458  | 0.24890012         | 0.166143517 |
| 0.228659798 | 0.122014788 | 0.442337822        | 0.272949458 |
| 0.330010297 | 0.155296721 | 0.28922502         | 0.090303155 |
| 0.162478815 | 0.499657603 | 0.056087353        | 0.425998069 |
| 0.513848513 | 0.264511736 | 0.479495087        | 0.494971346 |
| 0.202228834 | 0.376594336 | 0.454671833        | 0.388170548 |
| 0.000401159 | 0.392912498 | 0.327398928        | 0.318307379 |
| 0.412162568 | 0.216429947 | 0.12529998         | 0.284762884 |



|             |             |             |             |
|-------------|-------------|-------------|-------------|
| 0.001394664 | 0.124012052 | 0.170672548 | 0.480389562 |
| 0.471048289 | 0.033611276 | 0.059127099 | 0.407742482 |
| 0.294430753 | 0.038068335 | 0.513669863 | 0.241006088 |
| 0.469352636 | 0.322953935 | 0.158120382 | 0.363228769 |
| 0.135866609 | 0.248506901 | 0.042594592 | 0.310075269 |
| 0.304335715 | 0.048858479 | 0.099676653 | 0.499928733 |
| 0.381923623 | 0.349983175 | 0.206939341 | 0.005751594 |
| 0.318442596 | 0.160013883 | 0.385254055 | 0.103866871 |
| 0.3645295   | 0.327115211 | 0.466011999 | 0.39094603  |
| 0.29510274  | 0.388289942 | 0.34700244  | 0.411323804 |
| 0.127665056 | 0.343055404 | 0.382470847 | 0.053437738 |
| 0.202593848 | 0.486274878 | 0.285687253 | 0.160905269 |
| 0.256308896 | 0.120475153 | 0.168769563 | 0.178198923 |
| 0.466163041 | 0.467461344 | 0.053667152 | 0.115622408 |
| 0.400536181 | 0.228945558 | 0.118390965 | 0.257098767 |
| 0.211181297 | 0.083920841 | 0.081296377 | 0.296787584 |
| 0.479044065 | 0.263728622 | 0.412379521 | 0.14039741  |
| 0.452546076 | 0.04396834  | 0.384971505 | 0.240411756 |
| 0.194925666 | 0.217263338 | 0.330699565 | 0.051068438 |
| 0.013313488 | 0.068299107 | 0.391574674 | 0.400452947 |
| 0.069891013 | 0.145747757 | 0.210647462 | 0.29336026  |
| 0.477147318 | 0.265850593 | 0.213038379 | 0.226267259 |
| 0.415620627 | 0.119761128 | 0.472482842 | 0.206395691 |
| 0.31654429  | 0.259994527 | 0.392089475 | 0.007598114 |
| 0.296363709 | 0.138890906 | 0.102063093 | 0.304962219 |
| 0.400898082 | 0.116194146 | 0.350165693 | 0.116452411 |
| 0.141529212 | 0.002329415 | 0.268012914 | 0.276458064 |
| 0.241696819 | 0.170816986 | 0.233517334 | 0.12334037  |
| 0.523299268 | 0.237696247 | 0.314490451 | 0.201590523 |
| 0.278806937 | 0.036146083 | 0.144775138 | 0.027841893 |
| 0.292192791 | 0.333527329 | 0.246380173 | 0.204285662 |
| 0.099112385 | 1           | 0.303746903 | 0.348158155 |
| 0.478342198 | 0.098683578 | 0.501161666 | 0.207692691 |
| 0.350027981 | 0.242983111 | 0.212683387 | 0.235495251 |
| 0.216045638 | 0.100043471 | 0.117836188 | 0.092396539 |
| 0.473544595 | 0.256279817 | 0.320804341 | 0.160818589 |
| 0.050508294 | 0.283270655 | 0.33287735  | 0.341303503 |
| 0.275916061 | 0.256325423 | 0.220033904 | 0.390421537 |
| 0.171951665 | 0.170754562 | 0.067633758 | 0.041940102 |
| 0.200636883 | 0.160886016 | 0.353650626 | 0.39556606  |
| 0.496500126 | 0.155487019 | 0.086200356 | 0.096027433 |
| 0.095150157 | 0.289871046 | 0.244607642 | 0.182321404 |
| 0.311530803 | 0.179294621 | 0.000373684 | 0.129973551 |
| 0.311957034 | 0.25290968  |             |             |
| TLR1        | 0.213840477 | 0.477710247 | 0.166491012 |
| 0.026396114 | 0.186974579 | 0.327019223 | 0.318027852 |
| 0.215811926 | 0.212613717 | 0.198390273 | 0.39286035  |
| 0.003990003 | 0.242954128 | 0.043394744 | 0.149072014 |
| 0.406380144 | 0.416569699 | 0.364421476 | 0.416794839 |
| 0.259647607 | 0.141736435 | 0.319719968 | 0.31445392  |
| 0.337205577 | 0.006072257 | 0.227047942 | 0.05976504  |
| 0.191522879 | 0.375521368 | 0.316978417 | 0.288230069 |
| 0.349711737 | 0.324310676 | 0.261517569 | 0.239288432 |
| 0.106397567 | 0.489266284 | 0.071281899 | 0.264035706 |

|             |             |             |             |
|-------------|-------------|-------------|-------------|
| 0.261216955 | 0.298939454 | 0.324140788 | 0.049831308 |
| 0.00168666  | 0.213062175 | 0.181003329 | 0.317205971 |
| 0.287477624 | 0.316779193 | 0.300188316 | 0.252202121 |
| 0.057315327 | 0.402801475 | 0.333113627 | 0.054238465 |
| 0.485016043 | 0.003700727 | 0.494213422 | 0.179890208 |
| 0.177462309 | 0.338891908 | 0.191962294 | 0.306869426 |
| 0.342912322 | 0.496864769 | 0.458653469 | 0.115089439 |
| 0.186584744 | 0.263595964 | 0.246785252 | 0.287026089 |
| 0.428635616 | 0.253650955 | 0.315706744 | 0.182069546 |
| 0.257611981 | 0.26315998  | 0.356285813 | 0.289507185 |
| 0.003294277 | 0.255937837 | 0.241703229 | 0.199885308 |
| 0.174125743 | 0.420611942 | 0.234937877 | 0.293491564 |
| 0.235902163 | 0.072477311 | 0.334504753 | 0.444357748 |
| 0.036460044 | 0.274078619 | 0.020209421 | 0.27313569  |
| 0.32123583  | 0.317402079 | 0.272478069 | 0.179408833 |
| 0.055450041 | 0.237155597 | 0.119623918 | 0.249516212 |
| 0.308962466 | 0.30132082  | 0.469853406 | 0.054992207 |
| 0.20932221  | 0.204736484 | 0.354516857 | 0.490521361 |
| 0.421461161 | 0.030980475 | 0.235481035 | 0.332716463 |
| 0.215961251 | 0.138730078 | 0.343672766 | 0.021407339 |
| 0.02715207  | 0.025219041 | 0.353775567 | 0.27074865  |
| 0.193056696 | 0.308214836 | 0.126989076 | 0.26335908  |
| 0.21701926  | 0.319337359 | 0.212933642 | 0.326361169 |
| 0.238543109 | 0.332979767 | 0.286920472 | 0.290931918 |
| 0.253752609 | 0.278087949 | 0.254148026 | 0.466266954 |
| 0.473511981 | 0.176193288 | 0.181349162 | 0.342082512 |
| 0.215052124 | 0.401116792 | 0.46682179  | 0.294754504 |
| 0.301326748 | 0.3372133   | 0.22324519  | 0.332948905 |
| 0.348932709 | 0.293726578 | 0.047918421 | 0.390455469 |
| 0.493637488 | 0.028250295 | 0.171509914 | 0.318361964 |
| 0.061944113 | 0.307381919 | 0.443161282 | 0.372700251 |
| 0.297519978 | 0.047283787 | 0.252012602 | 0.328937922 |
| 0.320708389 | 0.306887083 | 0.308662919 | 0.215338459 |
| 0.335979574 | 0.214909664 | 0.148482206 | 0.218867796 |
| 0.259401509 | 0.322667143 | 0.131637726 | 0.050702941 |
| 0.239640018 | 0.280805821 | 0.400859748 | 0.293347213 |
| 0.249635412 | 0.003357729 | 0.190169956 | 0.237945558 |
| 0.208345884 | 0.276601405 | 0.494674184 | 0.247944814 |
| 0.321827414 | 0.178193219 | 0.272704066 | 0.305294992 |
| 0.326190663 | 0.242983887 | 0.21391116  | 0.002983626 |
| 0.284783312 | 0.173780169 | 0.297098464 | 0.108386338 |
| 0.29965705  | 0.182324502 | 0.117764196 | 0.397708544 |
| 0.31747699  | 0.328791405 | 0.053357918 | 0.08904648  |
| 0.315739903 | 0.39043052  | 0.23429165  | 0.191801516 |
| 0.361591314 | 0.294308382 | 0.2707779   | 0.436815545 |
| 0.328016525 | 0.38973651  | 0.084398857 | 0.321566291 |
| 0.22672817  | 0.399626239 | 0.300718604 | 0.35364583  |
| 0.349803791 | 0.254359851 | 0.181299605 | 0.344284543 |
| 0.29761107  | 0.321290801 | 0.191994331 | 0.490437891 |
| 0.003170743 | 0.352771414 | 0.281989627 | 0.079373024 |
| 0.473401751 | 0.330923638 | 0.17154229  | 0.281070799 |
| 0.424782251 | 0.492528002 | 0.368792181 | 0.29809069  |
| 0.139589211 | 0.033496286 | 0.4437486   | 0.377097327 |
| 0.378515844 | 0.366245463 | 0.184699059 | 0.062407753 |

|             |             |             |             |
|-------------|-------------|-------------|-------------|
| 0.415756716 | 0.186746086 | 0.279588185 | 0.213696216 |
| 0.272782208 | 0.228610286 | 0.33811098  | 0.215962297 |
| 0.011537949 | 0.279200282 | 0.225787544 | 0.151555609 |
| 0.245960406 | 0.234808405 | 0.381307422 | 0.374078522 |
| 0.262958986 | 0.162726598 | 0.219895442 | 0.190868973 |
| 0.309229014 | 0.473871497 | 0.029493338 | 0.426561508 |
| 0.451066837 | 0.351879511 | 0.401810784 | 0.440432745 |
| 0.308217183 | 0.43705307  | 0.417367705 | 0.326802841 |
| 0.002753338 | 0.279660484 | 0.213996315 | 0.43062899  |
| 0.330096683 | 0.346853019 | 0.134490474 | 0.195031346 |
| 0.005652079 | 0.273589607 | 0.102063425 | 0.498295222 |
| 0.383997479 | 0.09980357  | 0.022337538 | 0.365569942 |
| 0.197782458 | 0.03328264  | 0.475607125 | 0.328309392 |
| 0.434112276 | 0.335769381 | 0.276627163 | 0.248302481 |
| 0.075823145 | 0.261563934 | 0.062603473 | 0.311184598 |
| 0.263655316 | 0.056095251 | 0.115624208 | 0.446374426 |
| 0.385912276 | 0.387033297 | 0.346577541 | 0.012397582 |
| 0.247619423 | 0.1216585   | 0.316737227 | 0.226883806 |
| 0.398874551 | 0.405653733 | 0.467008761 | 0.283299725 |
| 0.305718458 | 0.440769218 | 0.428154379 | 0.386118191 |
| 0.07755805  | 0.257513698 | 0.310194487 | 0.109438013 |
| 0.188159094 | 0.403470352 | 0.255024205 | 0.298973423 |
| 0.323852297 | 0.071835822 | 0.316116089 | 0.238724273 |
| 0.462135062 | 0.389561905 | 0.15057685  | 0.259927043 |
| 0.440817705 | 0.346157704 | 0.242746753 | 0.354323717 |
| 0.34897146  | 0.056720675 | 0.084587687 | 0.374106111 |
| 0.495769089 | 0.359184932 | 0.3556991   | 0.149675729 |
| 0.359978493 | 0.148388216 | 0.358411461 | 0.346464805 |
| 0.332657673 | 0.184401486 | 0.242200026 | 0.062627115 |
| 0.02882006  | 0.172339865 | 0.427962488 | 0.463806649 |
| 0.187613761 | 0.29905072  | 0.325710398 | 0.34239656  |
| 0.38772726  | 0.247114217 | 0.353570492 | 0.327262654 |
| 0.488385376 | 0.105104151 | 0.494200635 | 0.315966083 |
| 0.351835668 | 0.337605358 | 0.368657107 | 0.011551134 |
| 0.240029019 | 0.20996813  | 0.126562112 | 0.305017334 |
| 0.299971644 | 0.254882708 | 0.374698377 | 0.262848807 |
| 0.121860098 | 0.008799534 | 0.348381705 | 0.169063931 |
| 0.361454631 | 0.157660194 | 0.331686694 | 0.051368918 |
| 0.502407371 | 0.292234275 | 0.314800941 | 0.14667947  |
| 0.302984919 | 0.009596844 | 0.214689861 | 0.096904175 |
| 0.34239126  | 0.411018048 | 0.25116991  | 0.215141558 |
| 0.156031038 | 0.303746903 | 1           | 0.295450558 |
| 0.39222918  | 0.079328675 | 0.419256078 | 0.30614652  |
| 0.23135306  | 0.280837662 | 0.353232128 | 0.320253929 |
| 0.301944895 | 0.153159635 | 0.255233783 | 0.204134269 |
| 0.368664549 | 0.309867513 | 0.33050404  | 0.199207034 |
| 0.127580435 | 0.354154917 | 0.284172601 | 0.255645427 |
| 0.287488943 | 0.203276146 | 0.223675752 | 0.469425845 |
| 0.18955966  | 0.255612971 | 0.047821433 | 0.043381893 |
| 0.151136136 | 0.279042615 | 0.360652822 | 0.38291909  |
| 0.425678203 | 0.16100008  | 0.218648204 | 0.233509674 |
| 0.061596569 | 0.239256291 | 0.339416594 | 0.09639667  |
| 0.308308828 | 0.164297363 | 0.002964545 | 0.230820925 |
| 0.386650076 | 0.23876939  |             |             |

| TLR2        | 0.118185979 | 0.477517679 | 0.043097984 |
|-------------|-------------|-------------|-------------|
| 0.051872541 | 0.169275335 | 0.181710842 | 0.197418613 |
| 0.103243454 | 0.05084044  | 0.111186347 | 0.297972516 |
| 0.000132752 | 0.304366402 | 0.00344545  | 0.034304101 |
| 0.425213837 | 0.460218577 | 0.271605129 | 0.429561082 |
| 0.095485704 | 0.134982384 | 0.210212383 | 0.242897994 |
| 0.174487922 | 0.000237219 | 0.122768606 | 0.069708936 |
| 0.11378664  | 0.410317602 | 0.09477464  | 0.142793589 |
| 0.353217403 | 0.418841858 | 0.209438044 | 0.291002035 |
| 0.177766939 | 0.437356336 | 0.093095747 | 0.371687149 |
| 0.299611158 | 0.18354501  | 0.392391912 | 0.005748991 |
| 0.011440502 | 0.089750371 | 0.092734267 | 0.22578639  |
| 0.098429673 | 0.147297607 | 0.08511348  | 0.158667334 |
| 0.057339866 | 0.309142271 | 0.246008004 | 0.067559079 |
| 0.436973828 | 0.011410603 | 0.448483215 | 0.057207883 |
| 0.041146582 | 0.127740116 | 0.112540171 | 0.238741672 |
| 0.226722648 | 0.455107631 | 0.483656132 | 0.036210511 |
| 0.052625897 | 0.180826252 | 0.308380668 | 0.331411191 |
| 0.4135463   | 0.164261615 | 0.185213201 | 0.170982011 |
| 0.311953611 | 0.295628319 | 0.19265351  | 0.093234679 |
| 0.000215747 | 0.131532122 | 0.284208399 | 0.156156678 |
| 0.244663556 | 0.322228967 | 0.17206865  | 0.187966816 |
| 0.181148894 | 0.009702839 | 0.211582252 | 0.477206186 |
| 0.020421569 | 0.299274228 | 0.00998979  | 0.080287353 |
| 0.321536097 | 0.366326105 | 0.227412983 | 0.060766227 |
| 0.006402351 | 0.050490169 | 0.026271127 | 0.301063726 |
| 0.176693013 | 0.220497462 | 0.41251481  | 0.041176529 |
| 0.28381101  | 0.056317743 | 0.183149964 | 0.454734736 |
| 0.410869026 | 0.002679891 | 0.054112974 | 0.170628166 |
| 0.181817955 | 0.14219022  | 0.17721107  | 0.013746083 |
| 0.010209109 | 0.002402766 | 0.374987288 | 0.064543796 |
| 0.102077726 | 0.13816497  | 0.090634884 | 0.359533612 |
| 0.101578956 | 0.312237419 | 0.168893436 | 0.171822239 |
| 0.321936832 | 0.226624167 | 0.262226864 | 0.341583838 |
| 0.280074083 | 0.080064055 | 0.067392341 | 0.480205428 |
| 0.368227185 | 0.055123037 | 0.043925323 | 0.244159716 |
| 0.294382174 | 0.414924018 | 0.478484033 | 0.105478826 |
| 0.255523709 | 0.105469602 | 0.13911576  | 0.34082812  |
| 0.191108872 | 0.134093141 | 0.024914244 | 0.284493789 |
| 0.422171463 | 0.01526322  | 0.038910737 | 0.307540974 |
| 0.141204235 | 0.174150234 | 0.391365504 | 0.397356668 |
| 0.269908112 | 0.056780909 | 0.167309799 | 0.18387333  |
| 0.139694286 | 0.158695552 | 0.236543164 | 0.153371179 |
| 0.205118105 | 0.149367401 | 0.040373977 | 0.29369698  |
| 0.073513785 | 0.169521328 | 0.098282769 | 0.030514606 |
| 0.194907791 | 0.113651608 | 0.407406295 | 0.205921271 |
| 0.235362245 | 0.013267467 | 0.111110279 | 0.152196563 |
| 0.110784802 | 0.291775655 | 0.506805945 | 0.067279153 |
| 0.128638111 | 0.131127339 | 0.074285661 | 0.280940904 |
| 0.26154521  | 0.120501748 | 0.117028271 | 0.000236153 |
| 0.103840433 | 0.143360794 | 0.169488733 | 0.013444685 |
| 0.214918671 | 0.043873245 | 0.027560369 | 0.428205587 |
| 0.119278102 | 0.422061108 | 0.00469206  | 0.0370755   |
| 0.134218911 | 0.423918576 | 0.19883262  | 0.071353045 |

|             |             |             |             |
|-------------|-------------|-------------|-------------|
| 0.435161798 | 0.150029224 | 0.322175447 | 0.34068395  |
| 0.237108776 | 0.318513194 | 0.051821244 | 0.104807755 |
| 0.255101363 | 0.456642903 | 0.377963717 | 0.408429015 |
| 0.142849609 | 0.197130348 | 0.113258261 | 0.203092535 |
| 0.179458246 | 0.193138715 | 0.038491776 | 0.481610665 |
| 0.000152185 | 0.221038173 | 0.284032963 | 0.047176129 |
| 0.497208937 | 0.230762512 | 0.031592799 | 0.080529921 |
| 0.439959217 | 0.476978219 | 0.306568432 | 0.352808787 |
| 0.05932332  | 0.002114008 | 0.393357569 | 0.31087241  |
| 0.426024926 | 0.199429234 | 0.258070744 | 0.02023778  |
| 0.44793272  | 0.13966269  | 0.25955241  | 0.167996889 |
| 0.283977071 | 0.20207854  | 0.108859581 | 0.168725653 |
| 0.002876805 | 0.117037975 | 0.232241415 | 0.129923856 |
| 0.171718413 | 0.071912002 | 0.436557518 | 0.258898267 |
| 0.26343687  | 0.091417288 | 0.241642492 | 0.074175469 |
| 0.116077695 | 0.472660759 | 0.038909935 | 0.367594454 |
| 0.470630623 | 0.186691797 | 0.472314091 | 0.443189059 |
| 0.129512403 | 0.376704005 | 0.436197116 | 0.320993573 |
| 0.000126312 | 0.351821418 | 0.304537351 | 0.299938427 |
| 0.381764392 | 0.193486004 | 0.057307441 | 0.192677831 |
| 0.00043364  | 0.076106889 | 0.133099322 | 0.434743028 |
| 0.463747203 | 0.023866698 | 0.040839717 | 0.401082854 |
| 0.277215305 | 0.02059872  | 0.471682492 | 0.193654845 |
| 0.476582231 | 0.23937648  | 0.121486692 | 0.333900211 |
| 0.097333174 | 0.138893997 | 0.046568871 | 0.331825251 |
| 0.187289274 | 0.016825315 | 0.112532173 | 0.444811776 |
| 0.34883988  | 0.364582959 | 0.164157746 | 0.006125807 |
| 0.25711141  | 0.148965674 | 0.395264287 | 0.064581856 |
| 0.329581858 | 0.319649023 | 0.45854171  | 0.361435095 |
| 0.249137379 | 0.390217313 | 0.33900394  | 0.391687867 |
| 0.138746669 | 0.309911051 | 0.339837563 | 0.046322962 |
| 0.158119242 | 0.46321934  | 0.230033382 | 0.142664096 |
| 0.221108232 | 0.154612103 | 0.148334461 | 0.102341306 |
| 0.473867827 | 0.448661627 | 0.037263077 | 0.058479846 |
| 0.407535452 | 0.135413356 | 0.087861488 | 0.153094018 |
| 0.196880727 | 0.048762414 | 0.031869966 | 0.271056538 |
| 0.471615696 | 0.280281292 | 0.383399001 | 0.134468425 |
| 0.419240951 | 0.023971478 | 0.329356318 | 0.169331852 |
| 0.135404441 | 0.193763055 | 0.276987314 | 0.0238498   |
| 0.011767786 | 0.037351975 | 0.410417255 | 0.387862689 |
| 0.048158179 | 0.087540285 | 0.163440921 | 0.286333241 |
| 0.435737012 | 0.181672873 | 0.194716923 | 0.129747709 |
| 0.407593155 | 0.127897359 | 0.435323172 | 0.12917553  |
| 0.276712486 | 0.199018182 | 0.366070978 | 0.004393989 |
| 0.274338684 | 0.118700135 | 0.043657587 | 0.278021482 |
| 0.339504522 | 0.084443864 | 0.375268215 | 0.064610815 |
| 0.103146566 | 0.000958788 | 0.231358382 | 0.203446427 |
| 0.240367198 | 0.09031367  | 0.134790846 | 0.090713666 |
| 0.484167177 | 0.178139447 | 0.27628791  | 0.110814182 |
| 0.203480238 | 0.041980541 | 0.123968899 | 0.016038152 |
| 0.251156868 | 0.306092022 | 0.20676517  | 0.132287482 |
| 0.042619762 | 0.348158155 | 0.295450558 | 1           |
| 0.467483201 | 0.072400918 | 0.462479891 | 0.107260857 |
| 0.306160612 | 0.146666445 | 0.183777437 | 0.133690634 |

|             |             |             |             |
|-------------|-------------|-------------|-------------|
| 0.177833718 | 0.0487832   | 0.076692896 | 0.041366945 |
| 0.452810251 | 0.146028487 | 0.281340691 | 0.090115479 |
| 0.044145984 | 0.202145255 | 0.285733853 | 0.316570376 |
| 0.256638728 | 0.225452225 | 0.130349333 | 0.382916337 |
| 0.091428321 | 0.087509323 | 0.089362968 | 0.053249563 |
| 0.167001755 | 0.116753827 | 0.290854265 | 0.35079529  |
| 0.45095886  | 0.07573069  | 0.056287871 | 0.04906821  |
| 0.048050145 | 0.235126406 | 0.258244916 | 0.181140764 |
| 0.269006984 | 0.088661815 | 0.000241119 | 0.061854862 |
| 0.290818353 | 0.177135927 |             |             |
| TLR7        | 0.320799378 | 0.493735556 | 0.07045475  |
| 0.048853103 | 0.150180025 | 0.246808886 | 0.25275401  |
| 0.33573684  | 0.109030845 | 0.17198164  | 0.333762144 |
| 0.001029818 | 0.387011461 | 0.0114344   | 0.070545637 |
| 0.510062265 | 0.530285091 | 0.372009535 | 0.506893446 |
| 0.292072291 | 0.197430295 | 0.34120445  | 0.39714112  |
| 0.273363344 | 0.001203485 | 0.150405006 | 0.079162592 |
| 0.348855105 | 0.500925844 | 0.200982111 | 0.294467546 |
| 0.448743387 | 0.467335468 | 0.455109924 | 0.390890839 |
| 0.321011776 | 0.436904383 | 0.158903902 | 0.454434333 |
| 0.398524598 | 0.267405519 | 0.454948744 | 0.01365438  |
| 0.009523078 | 0.117916781 | 0.307427352 | 0.376120372 |
| 0.278003086 | 0.228125916 | 0.169406795 | 0.213651079 |
| 0.188004568 | 0.356413822 | 0.363346383 | 0.192853397 |
| 0.412482077 | 0.00961802  | 0.432947262 | 0.219943548 |
| 0.067972349 | 0.308392843 | 0.356082187 | 0.400664967 |
| 0.264728445 | 0.424391947 | 0.519513858 | 0.044546604 |
| 0.080415749 | 0.425777857 | 0.418761539 | 0.466732059 |
| 0.452352659 | 0.354342374 | 0.331146623 | 0.407343575 |
| 0.45876631  | 0.394012562 | 0.283327724 | 0.175972199 |
| 0.000903335 | 0.177264924 | 0.413014811 | 0.313659904 |
| 0.420884611 | 0.361625543 | 0.370828993 | 0.264690467 |
| 0.440404573 | 0.017955209 | 0.372103092 | 0.530514773 |
| 0.029693566 | 0.403305779 | 0.014435723 | 0.154747464 |
| 0.42581526  | 0.472930239 | 0.39618323  | 0.087347154 |
| 0.012823655 | 0.116131899 | 0.123594385 | 0.408985882 |
| 0.394358548 | 0.467163419 | 0.407497117 | 0.149634931 |
| 0.363661179 | 0.163880509 | 0.375121091 | 0.441690728 |
| 0.475065496 | 0.006275143 | 0.143840753 | 0.235212603 |
| 0.376004592 | 0.190329314 | 0.252058331 | 0.043981155 |
| 0.0156597   | 0.013947479 | 0.462278786 | 0.15085487  |
| 0.127261074 | 0.225167644 | 0.108651328 | 0.491857564 |
| 0.322433096 | 0.419935416 | 0.157918029 | 0.283572619 |
| 0.453910739 | 0.285669268 | 0.471489561 | 0.465345472 |
| 0.440350519 | 0.235067047 | 0.145228786 | 0.462429669 |
| 0.396155807 | 0.076952081 | 0.08502611  | 0.329160203 |
| 0.377741054 | 0.489942085 | 0.532397603 | 0.285924353 |
| 0.324516889 | 0.236289998 | 0.34885077  | 0.422056899 |
| 0.260598972 | 0.316904843 | 0.087830889 | 0.350927307 |
| 0.402937132 | 0.042511618 | 0.068028952 | 0.426106836 |
| 0.093756547 | 0.281442507 | 0.425884665 | 0.475495456 |
| 0.460731892 | 0.066525914 | 0.276011514 | 0.286673075 |
| 0.287129763 | 0.274833359 | 0.400241201 | 0.261928373 |
| 0.309402608 | 0.360529623 | 0.054236401 | 0.369717409 |

|             |             |             |             |
|-------------|-------------|-------------|-------------|
| 0.128050605 | 0.31815437  | 0.320474433 | 0.079585706 |
| 0.379880581 | 0.319716923 | 0.46250368  | 0.404351686 |
| 0.394149959 | 0.008982009 | 0.171361629 | 0.346591712 |
| 0.316867817 | 0.383411378 | 0.494980346 | 0.116978284 |
| 0.242608658 | 0.338928737 | 0.143156304 | 0.394646096 |
| 0.36443111  | 0.256349065 | 0.229438659 | 0.00061669  |
| 0.155051586 | 0.395908256 | 0.42005858  | 0.042973026 |
| 0.283464852 | 0.107902757 | 0.096966962 | 0.465777403 |
| 0.207959409 | 0.482209477 | 0.019786601 | 0.146680284 |
| 0.266983499 | 0.451247854 | 0.433722861 | 0.250309021 |
| 0.48486349  | 0.328416705 | 0.434573113 | 0.383154514 |
| 0.322070548 | 0.359778504 | 0.178949555 | 0.262783813 |
| 0.464070836 | 0.480413825 | 0.458286781 | 0.470133217 |
| 0.274930772 | 0.348000999 | 0.309873459 | 0.277680182 |
| 0.373786604 | 0.393334356 | 0.081135219 | 0.495106898 |
| 0.00054118  | 0.344552686 | 0.476943902 | 0.182404672 |
| 0.484633822 | 0.267272084 | 0.065607075 | 0.225368718 |
| 0.515486956 | 0.493365595 | 0.388326151 | 0.438708957 |
| 0.227844731 | 0.007408327 | 0.456911469 | 0.40680572  |
| 0.512736125 | 0.413148526 | 0.410773308 | 0.073285727 |
| 0.480413447 | 0.324350521 | 0.425098484 | 0.406902188 |
| 0.475303281 | 0.427209995 | 0.237648461 | 0.323164311 |
| 0.014927567 | 0.258597403 | 0.419946949 | 0.238186195 |
| 0.353221784 | 0.190200969 | 0.481130011 | 0.322572728 |
| 0.45960982  | 0.309657897 | 0.427207047 | 0.094557606 |
| 0.185076018 | 0.498602267 | 0.065840596 | 0.431691615 |
| 0.526625096 | 0.361060686 | 0.480884828 | 0.511624435 |
| 0.301253629 | 0.396223889 | 0.464593674 | 0.418675035 |
| 0.000634864 | 0.436830085 | 0.399440529 | 0.338436703 |
| 0.453095427 | 0.291746899 | 0.219846974 | 0.449479502 |
| 0.00109284  | 0.152324244 | 0.312399806 | 0.46397872  |
| 0.480658962 | 0.032664344 | 0.072850184 | 0.470926225 |
| 0.411633547 | 0.04793625  | 0.518983832 | 0.354073225 |
| 0.475145847 | 0.445500441 | 0.194377134 | 0.413672707 |
| 0.267840324 | 0.360546682 | 0.044637637 | 0.466226281 |
| 0.432832927 | 0.080959927 | 0.119103399 | 0.513494345 |
| 0.42553105  | 0.40707184  | 0.256612054 | 0.01286319  |
| 0.370784482 | 0.267835854 | 0.48517549  | 0.113903449 |
| 0.410108126 | 0.367398954 | 0.453292324 | 0.442212054 |
| 0.447260294 | 0.414259391 | 0.375115541 | 0.456266414 |
| 0.162287004 | 0.408469515 | 0.429113631 | 0.064855913 |
| 0.368277006 | 0.487552802 | 0.451990043 | 0.191295575 |
| 0.358585683 | 0.151633181 | 0.209511348 | 0.292512361 |
| 0.458184019 | 0.483751175 | 0.061499749 | 0.147207928 |
| 0.418333862 | 0.300783197 | 0.1226462   | 0.34053804  |
| 0.274208267 | 0.18608188  | 0.131550971 | 0.366232658 |
| 0.445327038 | 0.306285365 | 0.446744458 | 0.205563185 |
| 0.466222164 | 0.046815455 | 0.414136907 | 0.281645874 |
| 0.27003376  | 0.398714338 | 0.383918941 | 0.110421027 |
| 0.030912    | 0.114174251 | 0.414292813 | 0.401669445 |
| 0.078480704 | 0.185129648 | 0.278056472 | 0.388040267 |
| 0.505744865 | 0.429056302 | 0.277058209 | 0.322837535 |
| 0.395533232 | 0.156507196 | 0.462199214 | 0.320145682 |
| 0.393921741 | 0.363377995 | 0.456796827 | 0.010489543 |

|             |             |             |             |
|-------------|-------------|-------------|-------------|
| 0.452600368 | 0.200411007 | 0.185009893 | 0.419857159 |
| 0.452684491 | 0.141041546 | 0.408949193 | 0.154696948 |
| 0.202656436 | 0.002959893 | 0.341878467 | 0.424362892 |
| 0.283134413 | 0.286147548 | 0.347189163 | 0.213818369 |
| 0.517889178 | 0.385498561 | 0.404621836 | 0.30201501  |
| 0.406923079 | 0.040079541 | 0.187999957 | 0.031848764 |
| 0.375027276 | 0.379021957 | 0.398159095 | 0.364776881 |
| 0.176463346 | 0.478342198 | 0.39222918  | 0.467483201 |
| 1           | 0.194613088 | 0.524643155 | 0.28737568  |
| 0.395053124 | 0.381400287 | 0.26296207  | 0.327521091 |
| 0.234242029 | 0.133013772 | 0.129460699 | 0.138501773 |
| 0.495393112 | 0.31281292  | 0.43304499  | 0.298009946 |
| 0.054812214 | 0.405685127 | 0.411197154 | 0.444520226 |
| 0.446396957 | 0.385989843 | 0.36872419  | 0.384320033 |
| 0.296943589 | 0.274770099 | 0.09277216  | 0.057262534 |
| 0.33385077  | 0.205133463 | 0.382014813 | 0.427382814 |
| 0.510746363 | 0.268923025 | 0.100958922 | 0.125567267 |
| 0.141814434 | 0.354815255 | 0.300454629 | 0.237465085 |
| 0.447179744 | 0.309226108 | 0.000504204 | 0.203532948 |
| 0.375834237 | 0.423769269 |             |             |
| TMED9       | 0.082511621 | 0.184784918 | 0.00448184  |
| 0.007052381 | 0.002475146 | 0.040540899 | 0.028748158 |
| 0.076677355 | 0.001555109 | 0.015247291 | 0.076877054 |
| 5.25E-06    | 0.151441731 | 8.59E-05    | 0.00014755  |
| 0.213657942 | 0.046105017 | 0.192414615 | 0.047895502 |
| 0.00679063  | 0.082755637 | 0.108130617 | 0.037180875 |
| 5.67E-06    | 0.015052916 | 0.008406374 | 0.057837698 |
| 0.217506705 | 0.017526165 | 0.022427859 | 0.206568779 |
| 0.206676282 | 0.041433002 | 0.009217242 | 0.031511776 |
| 0.151225228 | 0.001358737 | 0.156063117 | 0.165206252 |
| 0.026478673 | 0.177943    | 1.86E-05    | 0.002754616 |
| 0.077816456 | 0.096447547 | 0.02333979  | 0.038317138 |
| 0.012671761 | 0.022100163 | 0.006121339 | 0.082109456 |
| 0.113200254 | 0.037396418 | 0.117385651 | 0.001228592 |
| 0.135077171 | 0.02814479  | 0.001826773 | 0.024516801 |
| 0.065558491 | 0.108342022 | 0.040785541 | 0.130942566 |
| 0.18954338  | 0.000722137 | 0.005170441 | 0.074420871 |
| 0.196620714 | 0.146770496 | 0.166756981 | 0.025808908 |
| 0.013787228 | 0.046926607 | 0.155280955 | 0.164258797 |
| 0.035623748 | 0.005374859 | 1.06E-05    | 0.017657714 |
| 0.039840448 | 0.097328425 | 0.142153498 | 0.091580491 |
| 0.115999465 | 0.015760698 | 0.137950317 | 8.74E-05    |
| 0.067734721 | 0.208445329 | 0.001001691 | 0.13460951  |
| 0.000123778 | 0.0025153   | 0.16093146  | 0.215601935 |
| 0.124702912 | 0.00306885  | 2.74E-05    | 0.003730105 |
| 0.005918805 | 0.192908851 | 0.070655272 | 0.090276104 |
| 0.104524965 | 0.012363268 | 0.169526866 | 0.003603394 |
| 0.020682316 | 0.167299297 | 0.206091522 | 1.62E-05    |
| 0.003587309 | 0.03742903  | 0.006663063 | 0.001918723 |
| 0.027757073 | 0.001906083 | 0.002085308 | 0.0002424   |
| 0.203698465 | 0.009623439 | 0.009043434 | 0.027484758 |
| 0.001504065 | 0.139326564 | 0.071871772 | 0.168498323 |
| 0.002779925 | 0.032838175 | 0.167012359 | 0.037530283 |
| 0.098400271 | 0.151796817 | 0.033673562 | 0.012280192 |



|             |             |             |             |
|-------------|-------------|-------------|-------------|
| 0.01039559  | 0.142410271 | 0.117066999 | 0.000951883 |
| 0.003019137 | 0.075152117 | 0.155615327 | 0.218130206 |
| 0.211293194 | 0.01611834  | 0.02468864  | 0.022158719 |
| 0.040751674 | 0.115774473 | 0.026401949 | 0.044428846 |
| 0.00163998  | 0.063849112 | 0.120976735 | 0.000906888 |
| 0.002332267 | 0.129726685 | 0.002080206 | 0.004403977 |
| 0.143312064 | 0.139924307 | 0.078306861 | 0.005328018 |
| 0.054576028 | 0.04663624  | 0.0406405   | 0.042782524 |
| 0.082461045 | 0.040823502 | 0.055557634 | 0.053803817 |
| 0.002216616 | 0.170843676 | 0.008978258 | 0.051222661 |
| 0.017144194 | 0.000721288 | 0.085046911 | 0.036372515 |
| 0.168292473 | 0.081910011 | 0.142308596 | 0.004094081 |
| 0.023686015 | 0.09378999  | 0.035982816 | 0.158656468 |
| 0.18073747  | 0.007468322 | 0.029543585 | 0.017421571 |
| 0.00920685  | 0.02512156  | 0.12579635  | 0.016364536 |
| 0.007962599 | 1.88E-05    | 0.001918845 | 0.118001666 |
| 0.052195987 | 0.000716109 | 0.019939918 | 0.002216329 |
| 0.000634594 | 0.183655257 | 0.024573772 | 0.159024928 |
| 0.000182387 | 0.00586911  | 0.021263363 | 0.114002723 |
| 0.12210158  | 0.013755195 | 0.15138527  | 0.079411198 |
| 0.214487018 | 0.09313152  | 0.008272495 | 0.100096843 |
| 0.002495183 | 0.017533733 | 0.12305648  | 0.170719633 |
| 0.20226078  | 0.150801156 | 0.028958979 | 0.080046017 |
| 0.012481375 | 0.052209034 | 0.063613549 | 0.058951055 |
| 0.005165558 | 0.17420636  | 2.32E-06    | 0.054529654 |
| 0.114186641 | 0.003432203 | 0.18618638  | 0.039857796 |
| 0.002741026 | 0.021207987 | 0.197039581 | 0.163162837 |
| 0.13467627  | 0.214758661 | 0.009832644 | 3.75E-05    |
| 0.162807903 | 0.093175445 | 0.222671863 | 0.041785511 |
| 0.032650329 | 0.000258567 | 0.194150921 | 0.064270385 |
| 0.127714834 | 0.114372341 | 0.088616401 | 0.043207124 |
| 0.018655152 | 0.086267724 | 0.00021262  | 0.038034296 |
| 0.176862681 | 0.004631327 | 0.055921734 | 0.00219845  |
| 0.164286544 | 0.052730493 | 0.039442263 | 0.027295292 |
| 0.053860073 | 0.005240629 | 0.014202175 | 0.189639917 |
| 0.000456495 | 0.149465922 | 0.210171947 | 0.041389756 |
| 0.202257724 | 0.203833147 | 0.05227803  | 0.09325079  |
| 0.177903064 | 0.15811665  | 2.63E-06    | 0.214925869 |
| 0.157645816 | 0.071972906 | 0.236184741 | 0.04667213  |
| 0.027762214 | 0.074268179 | 1.04E-06    | 0.012554227 |
| 0.055298052 | 0.151051826 | 0.196589011 | 0.000204219 |
| 0.000612347 | 0.144802754 | 0.14999191  | 0.000223612 |
| 0.197571452 | 0.07766511  | 0.17224842  | 0.066602803 |
| 0.022761507 | 0.182691855 | 0.049110662 | 0.021196686 |
| 0.000417543 | 0.149539226 | 0.050973242 | 0.000509205 |
| 0.009031345 | 0.186025516 | 0.174851125 | 0.081757802 |
| 0.026346149 | 0.000706849 | 0.167717484 | 0.033579593 |
| 0.184103976 | 0.001264368 | 0.125005872 | 0.07158969  |
| 0.141622043 | 0.158435852 | 0.094012515 | 0.121354283 |
| 0.102605185 | 0.172927608 | 0.001941034 | 0.214854206 |
| 0.228761038 | 0.000811658 | 0.127616952 | 0.187015337 |
| 0.116208159 | 0.025001423 | 0.073413419 | 0.007022271 |
| 0.028180408 | 0.051940473 | 0.152384648 | 0.212206027 |
| 0.00254567  | 0.005249903 | 0.120538761 | 0.018044832 |

|             |             |             |             |
|-------------|-------------|-------------|-------------|
| 0.00633292  | 0.02813372  | 0.04258172  | 0.040848277 |
| 0.003139935 | 0.069477066 | 0.149382392 | 0.055256209 |
| 0.218991958 | 0.02387386  | 0.189733924 | 0.000667422 |
| 0.118821759 | 0.006022219 | 0.037708238 | 0.171992999 |
| 0.18768317  | 0.007202993 | 0.001198052 | 0.004427814 |
| 0.112848639 | 0.111674094 | 0.004381472 | 0.016819578 |
| 0.047556728 | 0.069535806 | 0.220955504 | 0.041953897 |
| 0.044928419 | 0.041823869 | 0.105527087 | 0.00524081  |
| 0.158524874 | 0.057052964 | 0.122418376 | 0.055753144 |
| 0.130310309 | 5.75E-05    | 0.131863903 | 0.033245808 |
| 0.028795998 | 0.087889961 | 0.200870066 | 0.012451057 |
| 0.081210753 | 0.008359619 | 0.005021089 | 1.20E-05    |
| 0.064949267 | 0.081872079 | 0.052626141 | 0.018259841 |
| 0.053133265 | 0.015834984 | 0.185737422 | 0.106286453 |
| 0.158025128 | 0.021268981 | 0.060964971 | 0.000657036 |
| 0.018054753 | 0.000220124 | 0.099557008 | 0.075840164 |
| 0.097897401 | 0.083297105 | 0.015553653 | 0.098683578 |
| 0.079328675 | 0.072400918 | 0.194613088 | 1           |
| 0.224682159 | 0.016779246 | 0.181174911 | 0.026991894 |
| 0.031311656 | 0.010368023 | 0.017681278 | 0.000509963 |
| 0.005137464 | 0.004872809 | 0.221142705 | 0.007874195 |
| 0.076173589 | 0.029398413 | 0.001730347 | 0.052213782 |
| 0.121343589 | 0.157733724 | 0.156883064 | 0.191247225 |
| 0.057848592 | 0.094161456 | 0.008317062 | 0.029429814 |
| 0.008423543 | 0.001483987 | 0.015376705 | 0.018601775 |
| 0.126746942 | 0.149472816 | 0.192739958 | 0.009629412 |
| 0.004381666 | 0.005578831 | 0.001990708 | 0.139319449 |
| 0.048780652 | 0.009039215 | 0.074712743 | 0.021261726 |
| 2.75E-06    | 0.013151522 | 0.0811645   | 0.027750806 |
| TMEM108     | 0.406866723 | 0.50621648  | 0.076200239 |
| 0.041570975 | 0.130698311 | 0.257499995 | 0.244832338 |
| 0.421278069 | 0.120073826 | 0.166066748 | 0.351607211 |
| 0.002113156 | 0.448913155 | 0.017505401 | 0.07941759  |
| 0.511297312 | 0.521739276 | 0.366366745 | 0.505766446 |
| 0.365263512 | 0.186880539 | 0.401499786 | 0.431837319 |
| 0.28309286  | 0.002268209 | 0.139514568 | 0.069575936 |
| 0.435435448 | 0.505515984 | 0.221359878 | 0.321812754 |
| 0.485860265 | 0.508609236 | 0.460723879 | 0.36887621  |
| 0.315369178 | 0.475440055 | 0.151206868 | 0.498045174 |
| 0.435434573 | 0.254962616 | 0.514106871 | 0.016260812 |
| 0.006520326 | 0.11482232  | 0.391182559 | 0.431394425 |
| 0.337049283 | 0.239977013 | 0.185519978 | 0.198691012 |
| 0.221776759 | 0.383122676 | 0.438393861 | 0.22729879  |
| 0.435078021 | 0.007553509 | 0.46695758  | 0.298176645 |
| 0.072322762 | 0.342202719 | 0.427631488 | 0.460710691 |
| 0.268971648 | 0.451375217 | 0.515594997 | 0.04025695  |
| 0.081289077 | 0.492641718 | 0.488015485 | 0.484030131 |
| 0.502830193 | 0.399485165 | 0.330002317 | 0.435314153 |
| 0.511052202 | 0.466359371 | 0.306863922 | 0.196027632 |
| 0.001339214 | 0.167273947 | 0.381805439 | 0.395315624 |
| 0.478373414 | 0.38529491  | 0.450588785 | 0.244634846 |
| 0.506162148 | 0.021744433 | 0.4210424   | 0.517812747 |
| 0.02921822  | 0.467642076 | 0.013799777 | 0.1698854   |
| 0.496219117 | 0.482779674 | 0.466601887 | 0.082958229 |

|             |             |             |             |
|-------------|-------------|-------------|-------------|
| 0.016149848 | 0.138647851 | 0.181575138 | 0.425660574 |
| 0.453319072 | 0.510527132 | 0.429431567 | 0.186361749 |
| 0.413805261 | 0.202034495 | 0.385114143 | 0.476377708 |
| 0.504073178 | 0.009261017 | 0.178528787 | 0.243114176 |
| 0.39131295  | 0.169000949 | 0.250092631 | 0.059778587 |
| 0.015389137 | 0.026602168 | 0.492094253 | 0.179038901 |
| 0.116341994 | 0.225834227 | 0.103975203 | 0.514023867 |
| 0.401381446 | 0.450916146 | 0.134723787 | 0.283217421 |
| 0.507907193 | 0.27930835  | 0.473105092 | 0.522207415 |
| 0.420089377 | 0.288177933 | 0.168373858 | 0.492059212 |
| 0.444165308 | 0.077830298 | 0.093325667 | 0.35804338  |
| 0.433379518 | 0.506447581 | 0.519607214 | 0.3440675   |
| 0.29606562  | 0.265828368 | 0.377771421 | 0.437623878 |
| 0.262901102 | 0.381389053 | 0.116111502 | 0.379453203 |
| 0.430396597 | 0.051999265 | 0.073374553 | 0.493040011 |
| 0.067894351 | 0.268600731 | 0.477350566 | 0.512069872 |
| 0.492248204 | 0.058467363 | 0.275011627 | 0.291795292 |
| 0.329558397 | 0.284459373 | 0.455508339 | 0.260006648 |
| 0.346555265 | 0.387610346 | 0.0537154   | 0.425601538 |
| 0.135300436 | 0.368762503 | 0.385081701 | 0.089303994 |
| 0.455025149 | 0.389002234 | 0.509926396 | 0.469329661 |
| 0.468267473 | 0.006875483 | 0.168342821 | 0.424052405 |
| 0.362821328 | 0.436403029 | 0.503354148 | 0.123569996 |
| 0.279458872 | 0.371766528 | 0.156844649 | 0.368074475 |
| 0.441547154 | 0.266316355 | 0.23661856  | 0.000939492 |
| 0.150422147 | 0.459860013 | 0.469021894 | 0.061108203 |
| 0.265671352 | 0.131845106 | 0.139559634 | 0.519291836 |
| 0.22080435  | 0.519466305 | 0.032791363 | 0.19707096  |
| 0.292772805 | 0.46371785  | 0.462295162 | 0.322698344 |
| 0.508560173 | 0.359699685 | 0.450662243 | 0.417535617 |
| 0.297867257 | 0.382464332 | 0.213744109 | 0.300295821 |
| 0.515947718 | 0.522649999 | 0.519525288 | 0.512668542 |
| 0.286261428 | 0.420934234 | 0.361723619 | 0.300523593 |
| 0.439165787 | 0.444909571 | 0.095927001 | 0.504713898 |
| 0.000868608 | 0.376955679 | 0.50160653  | 0.233175817 |
| 0.507963408 | 0.262188047 | 0.076853019 | 0.278634321 |
| 0.513473512 | 0.501391438 | 0.459855348 | 0.48690436  |
| 0.286029852 | 0.012285383 | 0.488316735 | 0.443194562 |
| 0.512336238 | 0.430933851 | 0.393837029 | 0.097467689 |
| 0.519132977 | 0.400804173 | 0.477233538 | 0.484576576 |
| 0.496603035 | 0.443223252 | 0.264629149 | 0.401673648 |
| 0.02315431  | 0.286665361 | 0.4930045   | 0.233803515 |
| 0.371337692 | 0.207363554 | 0.516111201 | 0.346370623 |
| 0.447378064 | 0.389153232 | 0.417030761 | 0.091370143 |
| 0.189362223 | 0.509098068 | 0.05990686  | 0.480359443 |
| 0.517397653 | 0.395568412 | 0.527406456 | 0.509010921 |
| 0.355003311 | 0.415939339 | 0.517538151 | 0.456424159 |
| 0.001236167 | 0.467767859 | 0.45190358  | 0.366883339 |
| 0.507257242 | 0.313019444 | 0.28960038  | 0.487841254 |
| 0.001417734 | 0.167857974 | 0.338861697 | 0.482202593 |
| 0.525383661 | 0.03100442  | 0.067190423 | 0.514003424 |
| 0.464041989 | 0.057501443 | 0.51019626  | 0.372777633 |
| 0.50933152  | 0.4675723   | 0.190846202 | 0.472287254 |
| 0.300761988 | 0.417497066 | 0.035986701 | 0.491333604 |

|             |             |              |             |
|-------------|-------------|--------------|-------------|
| 0.466438799 | 0.115726054 | 0.102590805  | 0.506197574 |
| 0.490664676 | 0.418836547 | 0.272377613  | 0.014156322 |
| 0.418234264 | 0.276168112 | 0.525390344  | 0.125658705 |
| 0.468016556 | 0.389960651 | 0.488214368  | 0.499805993 |
| 0.492837927 | 0.445369191 | 0.406196788  | 0.509230091 |
| 0.154879277 | 0.483084083 | 0.486370809  | 0.068695235 |
| 0.443369216 | 0.52404738  | 0.474287664  | 0.191957859 |
| 0.41216397  | 0.121261779 | 0.219814101  | 0.372126897 |
| 0.487757317 | 0.522300614 | 0.064542688  | 0.181646994 |
| 0.441721107 | 0.325244075 | 0.118725679  | 0.372917788 |
| 0.297551194 | 0.246424839 | 0.177718058  | 0.400813125 |
| 0.477817372 | 0.31203783  | 0.511098538  | 0.197026852 |
| 0.509628569 | 0.055961035 | 0.476874482  | 0.285621281 |
| 0.309965964 | 0.473966809 | 0.428208139  | 0.166984282 |
| 0.034427617 | 0.151892219 | 0.430375744  | 0.433538784 |
| 0.08418503  | 0.209844701 | 0.282315287  | 0.383135898 |
| 0.512733569 | 0.476554825 | 0.295568245  | 0.375883071 |
| 0.421742971 | 0.130367961 | 0.485102937  | 0.374920821 |
| 0.457879902 | 0.372928838 | 0.504350477  | 0.011713911 |
| 0.512031846 | 0.201705863 | 0.257074329  | 0.412035927 |
| 0.465731873 | 0.146254458 | 0.415268506  | 0.182586768 |
| 0.220322011 | 0.004489075 | 0.390611867  | 0.441630293 |
| 0.299299242 | 0.352329768 | 0.398804624  | 0.233563366 |
| 0.504245562 | 0.447159396 | 0.477039376  | 0.340176422 |
| 0.429278232 | 0.03253959  | 0.178162936  | 0.038942294 |
| 0.438763326 | 0.412967019 | 0.469089366  | 0.446146322 |
| 0.2470755   | 0.501161666 | 0.419256078  | 0.462479891 |
| 0.524643155 | 0.224682159 | 1            | 0.33470006  |
| 0.43050705  | 0.433701908 | 0.275925587  | 0.358870883 |
| 0.217934122 | 0.150173446 | 0.131105326  | 0.185225277 |
| 0.521799289 | 0.334664238 | 0.434648102  | 0.379682423 |
| 0.054793143 | 0.423002251 | 0.475650179  | 0.499317944 |
| 0.491774298 | 0.459698809 | 0.437455628  | 0.409507031 |
| 0.362133304 | 0.339603504 | 0.077524768  | 0.045016459 |
| 0.319580747 | 0.214111607 | 0.456442982  | 0.49207384  |
| 0.51097744  | 0.338490461 | 0.106478179  | 0.15363999  |
| 0.163166989 | 0.434428271 | 0.294253516  | 0.215447047 |
| 0.481470184 | 0.372392913 | 0.000743106  | 0.263642112 |
| 0.41076873  | 0.450053794 |              |             |
| TMEM2       | 0.178038169 | 0.374801435  | 0.06291436  |
| 0.002498248 | 0.044176004 | 0.226407692  | 0.163543028 |
| 0.130169538 | 0.12332453  | 0.0444439242 | 0.303976114 |
| 0.009273357 | 0.220439032 | 0.046851433  | 0.128464469 |
| 0.338903789 | 0.344091521 | 0.204175267  | 0.374991974 |
| 0.195170425 | 0.026566818 | 0.328304412  | 0.173901357 |
| 0.20839911  | 0.011654004 | 0.057181098  | 0.007290705 |
| 0.111652671 | 0.323302323 | 0.192834107  | 0.078494129 |
| 0.30618478  | 0.247427339 | 0.07257815   | 0.062331737 |
| 0.023543641 | 0.404327265 | 0.029226866  | 0.199040418 |
| 0.251372894 | 0.072855748 | 0.258273441  | 0.049344056 |
| 0.000107462 | 0.068390641 | 0.086215706  | 0.268106906 |
| 0.204640926 | 0.193358846 | 0.199439885  | 0.071094727 |
| 0.015961106 | 0.337026713 | 0.363191519  | 0.014084599 |
| 0.373640845 | 0.000313809 | 0.39820052   | 0.113440366 |

|             |             |             |             |
|-------------|-------------|-------------|-------------|
| 0.090341494 | 0.212415694 | 0.124203057 | 0.258523527 |
| 0.254285135 | 0.382828631 | 0.375315029 | 0.029567952 |
| 0.079562847 | 0.173037259 | 0.189303854 | 0.151057096 |
| 0.349618578 | 0.070709218 | 0.100664878 | 0.077315225 |
| 0.195501957 | 0.23626006  | 0.327875699 | 0.147320292 |
| 0.002826252 | 0.094227965 | 0.051881588 | 0.237655346 |
| 0.126892553 | 0.332764032 | 0.200557169 | 0.080919406 |
| 0.110028621 | 0.047237728 | 0.250518318 | 0.361093368 |
| 0.007263185 | 0.257781085 | 0.005587449 | 0.156850668 |
| 0.282375291 | 0.277833514 | 0.244674588 | 0.051842359 |
| 0.042796895 | 0.161536943 | 0.089742036 | 0.231593474 |
| 0.217255532 | 0.161625739 | 0.37534484  | 0.039823951 |
| 0.184647179 | 0.118802724 | 0.142147746 | 0.372730753 |
| 0.344990352 | 0.036673098 | 0.174821766 | 0.209452364 |
| 0.077838254 | 0.032802175 | 0.186381251 | 0.00570952  |
| 0.003704801 | 0.037108345 | 0.299613861 | 0.134433895 |
| 0.047714958 | 0.136417453 | 0.02488428  | 0.153948254 |
| 0.104988042 | 0.321034634 | 0.06015344  | 0.135480171 |
| 0.172171772 | 0.181042254 | 0.095686634 | 0.221647265 |
| 0.06817886  | 0.165002426 | 0.118270054 | 0.360345654 |
| 0.440981005 | 0.062850428 | 0.080283981 | 0.267014943 |
| 0.183222869 | 0.330005835 | 0.382450518 | 0.14216632  |
| 0.072156644 | 0.223261547 | 0.062827726 | 0.205061235 |
| 0.230478374 | 0.271438817 | 0.030988099 | 0.370336792 |
| 0.390447091 | 0.008318563 | 0.082483557 | 0.300545454 |
| 0.007888391 | 0.109135256 | 0.376033572 | 0.287750264 |
| 0.212503513 | 0.005937854 | 0.054343725 | 0.168027352 |
| 0.252696307 | 0.133451682 | 0.288633777 | 0.046351909 |
| 0.298627913 | 0.055301316 | 0.054520215 | 0.186020004 |
| 0.126613724 | 0.302210527 | 0.048990383 | 0.023658494 |
| 0.245489803 | 0.143937809 | 0.301182724 | 0.237418829 |
| 0.225712244 | 0.000174499 | 0.039049568 | 0.214592172 |
| 0.063461219 | 0.275644955 | 0.373287214 | 0.144636583 |
| 0.292103455 | 0.083034778 | 0.174288593 | 0.0842029   |
| 0.362968159 | 0.060394459 | 0.06152499  | 0.001666079 |
| 0.096657502 | 0.050276673 | 0.178147904 | 0.098062842 |
| 0.066320935 | 0.093438949 | 0.12036144  | 0.304474437 |
| 0.184383846 | 0.239073066 | 0.068087711 | 0.088919159 |
| 0.112891445 | 0.271588267 | 0.053766586 | 0.090667237 |
| 0.247189711 | 0.080254918 | 0.239981822 | 0.385871151 |
| 0.10740554  | 0.287849807 | 0.063337839 | 0.17228637  |
| 0.145277824 | 0.303694588 | 0.222110368 | 0.278260321 |
| 0.136923956 | 0.311540648 | 0.063835661 | 0.277688049 |
| 0.242362967 | 0.241550276 | 0.089983651 | 0.402113879 |
| 0.004407013 | 0.286149597 | 0.14864861  | 0.058812971 |
| 0.347834365 | 0.19341511  | 0.095907663 | 0.159364899 |
| 0.377215062 | 0.41849742  | 0.389182411 | 0.241581816 |
| 0.063153335 | 0.04463049  | 0.411022105 | 0.327084582 |
| 0.318971569 | 0.160084777 | 0.045674318 | 0.085017395 |
| 0.331005877 | 0.19881587  | 0.2039002   | 0.130023275 |
| 0.163725527 | 0.076081184 | 0.250834502 | 0.268442946 |
| 0.009923489 | 0.090435874 | 0.160349463 | 0.040100701 |
| 0.062364893 | 0.086237738 | 0.277721512 | 0.358940776 |
| 0.064977519 | 0.057469381 | 0.048339735 | 0.061283416 |

|             |             |             |             |
|-------------|-------------|-------------|-------------|
| 0.199356477 | 0.376166456 | 0.013410893 | 0.412951689 |
| 0.373669611 | 0.281338479 | 0.29175722  | 0.381916921 |
| 0.207677957 | 0.347901178 | 0.320576589 | 0.334125985 |
| 0.003989863 | 0.226220936 | 0.171331646 | 0.39514463  |
| 0.24944052  | 0.256712667 | 0.112647324 | 0.078096988 |
| 0.008693481 | 0.171037303 | 0.022274848 | 0.448324845 |
| 0.280728106 | 0.046494691 | 0.01118407  | 0.283615128 |
| 0.15373401  | 0.024385911 | 0.397794209 | 0.145164702 |
| 0.308571052 | 0.17231265  | 0.098211157 | 0.197846288 |
| 0.018542878 | 0.137847643 | 0.01208538  | 0.180110474 |
| 0.135650142 | 0.066231099 | 0.019224634 | 0.394945444 |
| 0.319232235 | 0.29744367  | 0.261104066 | 0.002028322 |
| 0.24580645  | 0.020710164 | 0.211438108 | 0.119350831 |
| 0.362122777 | 0.349125257 | 0.368121844 | 0.231313117 |
| 0.212243774 | 0.335821186 | 0.344719198 | 0.29571837  |
| 0.014535795 | 0.20110212  | 0.250745341 | 0.032298499 |
| 0.147674634 | 0.311814156 | 0.099658652 | 0.167546591 |
| 0.32475984  | 0.009051808 | 0.221646688 | 0.218959883 |
| 0.339241927 | 0.286638659 | 0.062213083 | 0.176072065 |
| 0.328504833 | 0.156345884 | 0.100162254 | 0.224402149 |
| 0.313312333 | 0.017204252 | 0.086203202 | 0.350556239 |
| 0.384666381 | 0.278129021 | 0.271424384 | 0.027531436 |
| 0.290679744 | 0.102516005 | 0.363475848 | 0.128710963 |
| 0.264802715 | 0.121591133 | 0.220133411 | 0.035958337 |
| 0.005614658 | 0.086608794 | 0.307605037 | 0.383597674 |
| 0.079474582 | 0.211665225 | 0.119801221 | 0.159800003 |
| 0.311759337 | 0.073335751 | 0.263422341 | 0.207927177 |
| 0.403286032 | 0.017715412 | 0.427259733 | 0.207415473 |
| 0.327030273 | 0.086560194 | 0.304287604 | 0.00697081  |
| 0.182768615 | 0.046535842 | 0.125604171 | 0.115423342 |
| 0.2739671   | 0.087611837 | 0.27366925  | 0.140282685 |
| 0.033495494 | 0.010387928 | 0.377419491 | 0.059853761 |
| 0.308416957 | 0.083370389 | 0.201526057 | 0.014470425 |
| 0.41986054  | 0.186160071 | 0.272162379 | 0.076156926 |
| 0.097767754 | 0.001906435 | 0.051077638 | 0.060062048 |
| 0.341229617 | 0.389149282 | 0.236071364 | 0.144535618 |
| 0.120869847 | 0.207692691 | 0.30614652  | 0.107260857 |
| 0.28737568  | 0.016779246 | 0.33470006  | 1           |
| 0.198195928 | 0.098821682 | 0.27983069  | 0.147561694 |
| 0.107714352 | 0.098409029 | 0.116523489 | 0.163706385 |
| 0.2727406   | 0.165957904 | 0.137688447 | 0.083644044 |
| 0.038834726 | 0.100915841 | 0.278646023 | 0.197496533 |
| 0.166953323 | 0.15861088  | 0.086757337 | 0.394291085 |
| 0.093513114 | 0.156115329 | 0.005602523 | 0.005621534 |
| 0.031682978 | 0.09709656  | 0.38460717  | 0.350641376 |
| 0.358925925 | 0.102937088 | 0.094456602 | 0.152090754 |
| 0.049678896 | 0.247866254 | 0.194402922 | 0.018834769 |
| 0.23455354  | 0.087057094 | 0.001874919 | 0.156265659 |
| 0.341711626 | 0.063374501 |             |             |
| TMIE        | 0.287939428 | 0.342581843 | 0.019840989 |
| 0.020969367 | 0.054606044 | 0.104116966 | 0.100822205 |
| 0.308444524 | 0.039027401 | 0.064105823 | 0.166948096 |
| 0.000585293 | 0.432253621 | 0.003879401 | 0.028837018 |
| 0.435028343 | 0.449924954 | 0.191081664 | 0.435199597 |

|             |             |             |             |
|-------------|-------------|-------------|-------------|
| 0.219749817 | 0.095087476 | 0.227487497 | 0.239192219 |
| 0.121249063 | 0.000457208 | 0.047877112 | 0.02797521  |
| 0.360772124 | 0.45671074  | 0.085619633 | 0.152079032 |
| 0.39733578  | 0.43649872  | 0.312456167 | 0.251157678 |
| 0.331508729 | 0.290140657 | 0.203687685 | 0.441657012 |
| 0.42722967  | 0.110630282 | 0.42697978  | 0.003521646 |
| 0.008319456 | 0.034679427 | 0.315441228 | 0.247838305 |
| 0.194572497 | 0.093502224 | 0.066609261 | 0.080063479 |
| 0.266763186 | 0.192776047 | 0.301848723 | 0.28832136  |
| 0.241415309 | 0.003934633 | 0.280020981 | 0.199433472 |
| 0.018276229 | 0.177726087 | 0.352377408 | 0.290143639 |
| 0.111787017 | 0.258035494 | 0.396641106 | 0.00976328  |
| 0.020986227 | 0.367202508 | 0.428708097 | 0.313872649 |
| 0.342013303 | 0.22340595  | 0.1626491   | 0.429149225 |
| 0.414836696 | 0.420862837 | 0.141251929 | 0.074590503 |
| 0.000304384 | 0.060072001 | 0.251371587 | 0.329068002 |
| 0.450689962 | 0.194831978 | 0.337283574 | 0.109280876 |
| 0.374331756 | 0.003894024 | 0.233865881 | 0.422715873 |
| 0.011255286 | 0.410074967 | 0.00631235  | 0.064640754 |
| 0.38805755  | 0.47218977  | 0.319285236 | 0.023022342 |
| 0.003090915 | 0.047735218 | 0.117249472 | 0.462972035 |
| 0.291601474 | 0.344934528 | 0.238167593 | 0.267325175 |
| 0.433884887 | 0.087488638 | 0.21595321  | 0.285973422 |
| 0.365450348 | 0.002067273 | 0.073477161 | 0.095270457 |
| 0.298915778 | 0.092756846 | 0.102384018 | 0.044742963 |
| 0.004607264 | 0.01632544  | 0.413068584 | 0.064609291 |
| 0.038517785 | 0.086952911 | 0.042752267 | 0.380477027 |
| 0.299330135 | 0.409889629 | 0.054349926 | 0.122276555 |
| 0.434442882 | 0.121807069 | 0.314978041 | 0.405238272 |
| 0.320976062 | 0.152407587 | 0.057030718 | 0.316947383 |
| 0.262888714 | 0.021194883 | 0.026050784 | 0.171644854 |
| 0.443640158 | 0.40915189  | 0.411218353 | 0.192964491 |
| 0.152635764 | 0.115471616 | 0.232540942 | 0.24448684  |
| 0.110444486 | 0.238287284 | 0.134289412 | 0.197155922 |
| 0.236184986 | 0.038079638 | 0.018255778 | 0.384972815 |
| 0.041649245 | 0.131443159 | 0.297943525 | 0.357695712 |
| 0.368198296 | 0.022944981 | 0.125799857 | 0.128051163 |
| 0.159727571 | 0.121500924 | 0.294568449 | 0.124390318 |
| 0.166815891 | 0.238046057 | 0.012634001 | 0.438361179 |
| 0.041887971 | 0.197124925 | 0.355479565 | 0.065397473 |
| 0.35084555  | 0.245889159 | 0.342035292 | 0.315887232 |
| 0.370657893 | 0.00341307  | 0.06453406  | 0.292499317 |
| 0.222338619 | 0.40359154  | 0.327197595 | 0.037168039 |
| 0.125035897 | 0.368126954 | 0.052269943 | 0.223000011 |
| 0.33817528  | 0.1264977   | 0.109141853 | 0.000109973 |
| 0.053997887 | 0.363462623 | 0.329415002 | 0.01831858  |
| 0.12349162  | 0.043082333 | 0.083122397 | 0.367398359 |
| 0.082610606 | 0.406481378 | 0.012103153 | 0.213063914 |
| 0.127298339 | 0.278198262 | 0.317409921 | 0.199010127 |
| 0.344315502 | 0.178908237 | 0.470199244 | 0.228843331 |
| 0.162570647 | 0.190908804 | 0.263176178 | 0.146356248 |
| 0.428776487 | 0.387534747 | 0.425583235 | 0.388165608 |
| 0.123333874 | 0.32338068  | 0.288030409 | 0.130900637 |
| 0.274154167 | 0.28713184  | 0.026513593 | 0.34640081  |

|             |             |             |             |
|-------------|-------------|-------------|-------------|
| 0.000121388 | 0.193315471 | 0.343739744 | 0.274018859 |
| 0.332274061 | 0.109952113 | 0.019799933 | 0.135841732 |
| 0.43815537  | 0.347048389 | 0.342638866 | 0.42541349  |
| 0.252032445 | 0.002682996 | 0.35009913  | 0.26027225  |
| 0.465606094 | 0.256923797 | 0.354320645 | 0.098802379 |
| 0.380759099 | 0.35208469  | 0.307986987 | 0.36680087  |
| 0.387197963 | 0.391856775 | 0.117192125 | 0.330975262 |
| 0.016267379 | 0.125226152 | 0.361940788 | 0.131087453 |
| 0.20234831  | 0.098456044 | 0.371453495 | 0.168916936 |
| 0.336125932 | 0.275628815 | 0.295529515 | 0.025824945 |
| 0.068023244 | 0.351330211 | 0.082630032 | 0.339109145 |
| 0.419181162 | 0.232153623 | 0.382515122 | 0.41474757  |
| 0.178237193 | 0.224522859 | 0.360508611 | 0.400824425 |
| 0.00033115  | 0.441590785 | 0.448047086 | 0.183250492 |
| 0.408550788 | 0.141120576 | 0.272299578 | 0.444651575 |
| 0.000382896 | 0.056591952 | 0.336609161 | 0.316938763 |
| 0.396691356 | 0.006745996 | 0.128673675 | 0.358822152 |
| 0.445336351 | 0.048925114 | 0.389582042 | 0.187357906 |
| 0.335745214 | 0.300674736 | 0.069973764 | 0.446149445 |
| 0.346550189 | 0.310951042 | 0.014306904 | 0.312393692 |
| 0.371643013 | 0.117519192 | 0.040864727 | 0.413839108 |
| 0.324015547 | 0.229870835 | 0.115650696 | 0.003828197 |
| 0.403345461 | 0.181588587 | 0.378024705 | 0.045031326 |
| 0.296293945 | 0.202684672 | 0.309730462 | 0.436477903 |
| 0.342738462 | 0.250690203 | 0.212255199 | 0.340476659 |
| 0.114098731 | 0.422144191 | 0.406180201 | 0.019668744 |
| 0.379672966 | 0.394886778 | 0.32204993  | 0.068323725 |
| 0.235173952 | 0.084845957 | 0.082288026 | 0.247588159 |
| 0.30237483  | 0.393914543 | 0.015384269 | 0.074647844 |
| 0.247572409 | 0.159267816 | 0.036227368 | 0.210693093 |
| 0.13109276  | 0.274100634 | 0.193298456 | 0.217512513 |
| 0.28927372  | 0.140080095 | 0.382541237 | 0.092690266 |
| 0.418032556 | 0.013837983 | 0.364005054 | 0.134376709 |
| 0.145374906 | 0.391415065 | 0.420979306 | 0.150885101 |
| 0.012025072 | 0.057840279 | 0.237170656 | 0.240764715 |
| 0.021812696 | 0.079460739 | 0.120607275 | 0.201076127 |
| 0.433866842 | 0.324349502 | 0.12816247  | 0.210125715 |
| 0.229916622 | 0.068116678 | 0.311940581 | 0.200826406 |
| 0.290469488 | 0.189034768 | 0.356624972 | 0.005517745 |
| 0.404930831 | 0.081551026 | 0.224004108 | 0.237614743 |
| 0.468035301 | 0.046958658 | 0.227861197 | 0.067005612 |
| 0.143475823 | 0.00167211  | 0.217747274 | 0.427401131 |
| 0.130325835 | 0.323093332 | 0.23110095  | 0.325836565 |
| 0.368787132 | 0.268239924 | 0.330568929 | 0.365761566 |
| 0.239200549 | 0.056362065 | 0.07050571  | 0.008652856 |
| 0.270371405 | 0.230965642 | 0.354021511 | 0.324466411 |
| 0.173988657 | 0.350027981 | 0.23135306  | 0.306160612 |
| 0.395053124 | 0.181174911 | 0.43050705  | 0.198195928 |
| 1           | 0.26963799  | 0.117568792 | 0.213276844 |
| 0.089403782 | 0.087403103 | 0.041432172 | 0.08597848  |
| 0.418401199 | 0.2156519   | 0.25286172  | 0.239229342 |
| 0.013209787 | 0.236509203 | 0.397435892 | 0.432772982 |
| 0.3179939   | 0.399413138 | 0.341219674 | 0.218562365 |
| 0.258153971 | 0.193535153 | 0.043060659 | 0.018153077 |



|             |             |             |             |
|-------------|-------------|-------------|-------------|
| 0.232215191 | 0.080188369 | 0.332268678 | 0.350989285 |
| 0.419384672 | 0.295027889 | 0.030689266 | 0.055535317 |
| 0.228847859 | 0.388590404 | 0.131242616 | 0.225768264 |
| 0.337953934 | 0.33726132  | 0.00011539  | 0.141244542 |
| 0.222600112 | 0.333761279 |             |             |
| TNFRSF18    | 0.186928801 | 0.444979045 | 0.019638894 |
| 0.005341905 | 0.018396939 | 0.195336262 | 0.143237991 |
| 0.141665708 | 0.025223498 | 0.038915314 | 0.286562517 |
| 0.000764829 | 0.260831047 | 0.006782326 | 0.016241285 |
| 0.426721836 | 0.42620971  | 0.18353498  | 0.413639223 |
| 0.161605572 | 0.024954446 | 0.28351102  | 0.230782855 |
| 0.180823674 | 0.001061082 | 0.058046205 | 0.011231392 |
| 0.113566655 | 0.399010101 | 0.120332561 | 0.045787263 |
| 0.385963927 | 0.34189374  | 0.082902749 | 0.034101325 |
| 0.023689438 | 0.42956679  | 0.010021124 | 0.26306423  |
| 0.295697025 | 0.08133337  | 0.330763428 | 0.004791161 |
| 0.000383631 | 0.045643879 | 0.105974783 | 0.276264508 |
| 0.124970092 | 0.169869421 | 0.113471882 | 0.079570693 |
| 0.016488857 | 0.312153873 | 0.32261888  | 0.015897118 |
| 0.378326587 | 0.001120975 | 0.413272152 | 0.084971831 |
| 0.030538977 | 0.135979418 | 0.145634329 | 0.282645592 |
| 0.210140099 | 0.398374991 | 0.43061585  | 0.010349588 |
| 0.050427163 | 0.178127881 | 0.289887535 | 0.240586579 |
| 0.405754303 | 0.049772773 | 0.051294189 | 0.087397398 |
| 0.277019158 | 0.294973372 | 0.216877795 | 0.045455794 |
| 0.00063753  | 0.085978212 | 0.061433008 | 0.229037021 |
| 0.192070041 | 0.319405481 | 0.222704193 | 0.063461143 |
| 0.190079908 | 0.008200296 | 0.232682476 | 0.439694665 |
| 0.009243348 | 0.279169381 | 0.002334844 | 0.03369839  |
| 0.339573308 | 0.36095868  | 0.290941531 | 0.019990325 |
| 0.0065242   | 0.048887098 | 0.027294506 | 0.294689522 |
| 0.208289801 | 0.192923476 | 0.361309577 | 0.023338769 |
| 0.241789276 | 0.034068473 | 0.098987026 | 0.427263347 |
| 0.426652478 | 0.003065715 | 0.03943396  | 0.172929602 |
| 0.038021506 | 0.021238822 | 0.145208423 | 0.008218948 |
| 0.004145661 | 0.00500137  | 0.379885283 | 0.055144218 |
| 0.040878325 | 0.124700409 | 0.015489411 | 0.235538247 |
| 0.116784624 | 0.34684482  | 0.01986004  | 0.132666706 |
| 0.250700888 | 0.166736581 | 0.149845133 | 0.289555726 |
| 0.064663806 | 0.072434141 | 0.072640051 | 0.38754282  |
| 0.397148772 | 0.016678637 | 0.022610619 | 0.265510303 |
| 0.237615227 | 0.411319989 | 0.458058314 | 0.054327329 |
| 0.067101712 | 0.134633558 | 0.073281306 | 0.264482491 |
| 0.164488362 | 0.179607343 | 0.009744549 | 0.287337837 |
| 0.394644987 | 0.005092543 | 0.03053989  | 0.307377131 |
| 0.006635157 | 0.037602506 | 0.408436604 | 0.330970072 |
| 0.208925826 | 0.01058058  | 0.079829138 | 0.170075531 |
| 0.192455707 | 0.145537831 | 0.268967339 | 0.065442143 |
| 0.246450987 | 0.081693651 | 0.021766539 | 0.250394073 |
| 0.079989106 | 0.228628422 | 0.032307979 | 0.010205457 |
| 0.225515922 | 0.106923217 | 0.373167639 | 0.232397369 |
| 0.280522717 | 0.000878829 | 0.039284985 | 0.226662773 |
| 0.06401223  | 0.296605973 | 0.440983011 | 0.080072954 |
| 0.186896793 | 0.043516648 | 0.094189228 | 0.073880327 |

|             |             |             |             |
|-------------|-------------|-------------|-------------|
| 0.32762343  | 0.043456607 | 0.035331748 | 0.000497876 |
| 0.026073901 | 0.110971289 | 0.164954588 | 0.01655121  |
| 0.041406858 | 0.028002    | 0.023008957 | 0.383063771 |
| 0.142177196 | 0.304625408 | 0.008106543 | 0.022059221 |
| 0.083746613 | 0.307296189 | 0.083968413 | 0.042072047 |
| 0.326642397 | 0.074651875 | 0.322806165 | 0.351194666 |
| 0.036919833 | 0.311610709 | 0.014726515 | 0.101078213 |
| 0.198619747 | 0.37211311  | 0.324348461 | 0.322728892 |
| 0.122454114 | 0.242203018 | 0.03557661  | 0.237775128 |
| 0.21567246  | 0.192806861 | 0.028714046 | 0.437751145 |
| 0.000406308 | 0.237391712 | 0.219864447 | 0.017633524 |
| 0.425875967 | 0.176252212 | 0.03199275  | 0.102527966 |
| 0.424771981 | 0.435967633 | 0.360000895 | 0.341970241 |
| 0.035314909 | 0.004845214 | 0.416788338 | 0.32255569  |
| 0.405441349 | 0.143157402 | 0.044725246 | 0.008515026 |
| 0.406587757 | 0.159275113 | 0.271640578 | 0.190023856 |
| 0.192480166 | 0.082679435 | 0.138032987 | 0.219177067 |
| 0.005962644 | 0.108415945 | 0.257270348 | 0.033103735 |
| 0.092139223 | 0.038982594 | 0.353096771 | 0.265432026 |
| 0.064703761 | 0.043752309 | 0.070908804 | 0.036286375 |
| 0.1210762   | 0.442661213 | 0.00356145  | 0.404630025 |
| 0.44527027  | 0.197425048 | 0.390809534 | 0.437339732 |
| 0.188354006 | 0.332863335 | 0.39060389  | 0.341722621 |
| 0.000508237 | 0.318454133 | 0.230103382 | 0.320805923 |
| 0.374542867 | 0.218796797 | 0.072572544 | 0.109186078 |
| 0.000426712 | 0.106432242 | 0.02564955  | 0.439730159 |
| 0.374012962 | 0.008965337 | 0.003075097 | 0.328686293 |
| 0.212939136 | 0.005231353 | 0.455850409 | 0.18578017  |
| 0.386213167 | 0.184732184 | 0.095295901 | 0.275523141 |
| 0.027896484 | 0.074577229 | 0.005719054 | 0.261007081 |
| 0.132969779 | 0.011347778 | 0.015864646 | 0.436642647 |
| 0.386371514 | 0.281482915 | 0.179108629 | 0.004652706 |
| 0.291959839 | 0.029738293 | 0.315518514 | 0.02622977  |
| 0.356056691 | 0.300106076 | 0.386161373 | 0.290716031 |
| 0.239344544 | 0.351897324 | 0.347805252 | 0.377091447 |
| 0.012754335 | 0.304924439 | 0.361151669 | 0.016482412 |
| 0.193433921 | 0.387356097 | 0.175784991 | 0.135068548 |
| 0.275581455 | 0.011103942 | 0.167779231 | 0.163525211 |
| 0.385078303 | 0.393213126 | 0.024702853 | 0.045149534 |
| 0.358203253 | 0.092714472 | 0.061314392 | 0.140472261 |
| 0.233282804 | 0.018901077 | 0.015641944 | 0.293081625 |
| 0.419368303 | 0.245605975 | 0.387685287 | 0.029225186 |
| 0.354935316 | 0.015826667 | 0.330789869 | 0.039576344 |
| 0.197312226 | 0.214504175 | 0.288984264 | 0.018482867 |
| 0.008762414 | 0.030535584 | 0.336095014 | 0.373176625 |
| 0.041276646 | 0.129146714 | 0.129917149 | 0.188646946 |
| 0.405944996 | 0.06254623  | 0.217458038 | 0.16161888  |
| 0.379193684 | 0.015933246 | 0.438994626 | 0.18274514  |
| 0.336256418 | 0.1090006   | 0.337278503 | 0.002051244 |
| 0.244704645 | 0.05228959  | 0.080483449 | 0.167875265 |
| 0.34635014  | 0.060133254 | 0.274552281 | 0.066649583 |
| 0.023320086 | 0.000915941 | 0.284819938 | 0.09772673  |
| 0.253128314 | 0.04026617  | 0.169951604 | 0.013613975 |
| 0.466632996 | 0.228604071 | 0.333540513 | 0.047993276 |

|             |             |             |             |
|-------------|-------------|-------------|-------------|
| 0.139205525 | 0.001661043 | 0.052152294 | 0.013737872 |
| 0.3165586   | 0.314143913 | 0.23808775  | 0.177819126 |
| 0.05671547  | 0.242983111 | 0.280837662 | 0.146666445 |
| 0.381400287 | 0.026991894 | 0.433701908 | 0.098821682 |
| 0.26963799  | 1           | 0.191948439 | 0.061745242 |
| 0.090511089 | 0.022015862 | 0.060835053 | 0.036996192 |
| 0.381208386 | 0.041118377 | 0.174677314 | 0.054418727 |
| 0.013435731 | 0.123830255 | 0.282659312 | 0.26709088  |
| 0.251626455 | 0.258544083 | 0.097622438 | 0.358881223 |
| 0.038627985 | 0.120525406 | 0.008669067 | 0.008708579 |
| 0.033657411 | 0.087445974 | 0.35079138  | 0.356179803 |
| 0.411870246 | 0.034211931 | 0.041190992 | 0.056366986 |
| 0.010918711 | 0.271754937 | 0.18777268  | 0.014636472 |
| 0.224847316 | 0.054303583 | 0.000339205 | 0.069714673 |
| 0.315921551 | 0.043375247 |             |             |
| TNFRSF26    | 0.139115142 | 0.366180222 | 0.262029486 |
| 0.015550952 | 0.192966959 | 0.374259115 | 0.348615024 |
| 0.124774674 | 0.340223694 | 0.211561041 | 0.432528851 |
| 0.009133837 | 0.132830975 | 0.098028839 | 0.240911363 |
| 0.262244821 | 0.269383848 | 0.315271623 | 0.275930619 |
| 0.202228217 | 0.109324887 | 0.310808581 | 0.231173347 |
| 0.362473321 | 0.018229422 | 0.277362219 | 0.052396397 |
| 0.102363803 | 0.229555487 | 0.37980259  | 0.234840305 |
| 0.226777114 | 0.188803568 | 0.164673125 | 0.162368092 |
| 0.040494947 | 0.423845187 | 0.026888531 | 0.151014499 |
| 0.146996582 | 0.279251607 | 0.200713356 | 0.128045996 |
| 0.000530663 | 0.307724991 | 0.091819371 | 0.280915354 |
| 0.257802816 | 0.356749022 | 0.388219638 | 0.276461265 |
| 0.01740292  | 0.432501622 | 0.270773121 | 0.015714619 |
| 0.462548956 | 0.002701251 | 0.44163514  | 0.132468138 |
| 0.319956861 | 0.332070844 | 0.112687545 | 0.249031627 |
| 0.417691684 | 0.458057563 | 0.326221356 | 0.17692437  |
| 0.311818072 | 0.157740618 | 0.139393947 | 0.189266723 |
| 0.330869079 | 0.179763457 | 0.295359456 | 0.085711687 |
| 0.162640425 | 0.151841754 | 0.395371161 | 0.359001027 |
| 0.006699012 | 0.311478315 | 0.148335019 | 0.141877253 |
| 0.088153674 | 0.435363081 | 0.145257139 | 0.301478274 |
| 0.123253879 | 0.171486839 | 0.26729899  | 0.301662829 |
| 0.037110122 | 0.168279191 | 0.016815942 | 0.351993743 |
| 0.214363606 | 0.181939612 | 0.21049983  | 0.261205373 |
| 0.134298171 | 0.344972381 | 0.092927173 | 0.130338475 |
| 0.217456412 | 0.191405256 | 0.458988365 | 0.021195873 |
| 0.103616457 | 0.248696324 | 0.306331148 | 0.42040878  |
| 0.29950155  | 0.065753739 | 0.309179822 | 0.370470175 |
| 0.145885474 | 0.121244893 | 0.371644268 | 0.00928083  |
| 0.021256649 | 0.023710965 | 0.219264714 | 0.330623813 |
| 0.248541644 | 0.352132677 | 0.116496272 | 0.162632416 |
| 0.121640596 | 0.201329132 | 0.252938214 | 0.340114474 |
| 0.135257871 | 0.345229463 | 0.165291994 | 0.189059929 |
| 0.141735403 | 0.264276444 | 0.335416335 | 0.379708763 |
| 0.437196737 | 0.262043787 | 0.294028209 | 0.367126623 |
| 0.108982478 | 0.25972189  | 0.328155886 | 0.232717244 |
| 0.244879376 | 0.367615847 | 0.153090698 | 0.285240625 |
| 0.38360901  | 0.228855812 | 0.019477237 | 0.419588903 |

|             |             |             |             |
|-------------|-------------|-------------|-------------|
| 0.478713088 | 0.013330148 | 0.308309744 | 0.219459137 |
| 0.040398423 | 0.306103565 | 0.382043575 | 0.27632618  |
| 0.180027925 | 0.045087589 | 0.213158101 | 0.327587921 |
| 0.320203641 | 0.313375286 | 0.261248562 | 0.180091009 |
| 0.364600102 | 0.14025512  | 0.259223913 | 0.109308544 |
| 0.365631185 | 0.297340252 | 0.065153701 | 0.039715366 |
| 0.167898427 | 0.203199319 | 0.302087373 | 0.199572875 |
| 0.167457633 | 0.001788183 | 0.192514564 | 0.167771606 |
| 0.142730511 | 0.159816257 | 0.392548291 | 0.372527884 |
| 0.347950464 | 0.090655633 | 0.382897241 | 0.22795041  |
| 0.241476496 | 0.202658778 | 0.208295102 | 0.008690681 |
| 0.323355939 | 0.082179378 | 0.201012    | 0.185894097 |
| 0.248069724 | 0.260282879 | 0.121230569 | 0.286125671 |
| 0.372615324 | 0.209920471 | 0.079368714 | 0.052405054 |
| 0.319774345 | 0.338750084 | 0.120920562 | 0.139126755 |
| 0.271202172 | 0.227136574 | 0.14411033  | 0.444330225 |
| 0.278485037 | 0.408221497 | 0.041443012 | 0.337905572 |
| 0.115525761 | 0.277184781 | 0.180259591 | 0.238099203 |
| 0.343864501 | 0.195318534 | 0.085281618 | 0.395723243 |
| 0.220066561 | 0.226479228 | 0.287860076 | 0.376223346 |
| 0.011325547 | 0.332087687 | 0.17020736  | 0.04047661  |
| 0.367708595 | 0.350320628 | 0.298442503 | 0.27163247  |
| 0.282509048 | 0.383735645 | 0.277108026 | 0.170600885 |
| 0.066382746 | 0.075321803 | 0.332909313 | 0.357708778 |
| 0.231119129 | 0.267291765 | 0.084482941 | 0.043407492 |
| 0.288533407 | 0.105401834 | 0.216181473 | 0.118014273 |
| 0.151221681 | 0.110729966 | 0.374362562 | 0.15353427  |
| 0.010028695 | 0.27107229  | 0.143172517 | 0.125102718 |
| 0.183553145 | 0.219511402 | 0.269231627 | 0.431909516 |
| 0.137361679 | 0.093295994 | 0.120764731 | 0.289142519 |
| 0.40176738  | 0.360730688 | 0.010756549 | 0.330732722 |
| 0.308107111 | 0.290778804 | 0.277656976 | 0.302936597 |
| 0.281163277 | 0.437606798 | 0.303473566 | 0.208801586 |
| 0.005610937 | 0.150784483 | 0.109028836 | 0.477183295 |
| 0.201983725 | 0.361819304 | 0.074126894 | 0.088417619 |
| 0.012681608 | 0.372601759 | 0.036805072 | 0.413012935 |
| 0.252519238 | 0.214694779 | 0.006335671 | 0.26640326  |
| 0.102690683 | 0.022832737 | 0.348942949 | 0.265706192 |
| 0.329689274 | 0.221334891 | 0.327786323 | 0.133184326 |
| 0.024707746 | 0.175603762 | 0.064361193 | 0.213085244 |
| 0.151634835 | 0.038740918 | 0.119373336 | 0.313648325 |
| 0.299693342 | 0.38055961  | 0.385687934 | 0.014834419 |
| 0.139731487 | 0.060875985 | 0.214396885 | 0.28582086  |
| 0.332271388 | 0.435755464 | 0.382218461 | 0.169178589 |
| 0.193813774 | 0.403818841 | 0.435429361 | 0.294705316 |
| 0.038041729 | 0.144264649 | 0.184994515 | 0.153202801 |
| 0.097811718 | 0.275367906 | 0.146567165 | 0.362204701 |
| 0.316729779 | 0.033841013 | 0.378564077 | 0.175850853 |
| 0.380856269 | 0.258441475 | 0.274273613 | 0.309048922 |
| 0.414829448 | 0.342963075 | 0.353350626 | 0.302284284 |
| 0.415028729 | 0.018333718 | 0.048570171 | 0.387635699 |
| 0.430374068 | 0.430961371 | 0.237026236 | 0.122448307 |
| 0.222650759 | 0.275399797 | 0.263024645 | 0.329503306 |
| 0.330316629 | 0.095823336 | 0.128667906 | 0.030250325 |

|             |             |             |             |
|-------------|-------------|-------------|-------------|
| 0.028989301 | 0.19323308  | 0.408199491 | 0.451371281 |
| 0.308584667 | 0.370680259 | 0.307655989 | 0.270823468 |
| 0.244163495 | 0.142734041 | 0.376347811 | 0.263977032 |
| 0.485726984 | 0.08812348  | 0.408917167 | 0.262534544 |
| 0.301767603 | 0.25798742  | 0.27288461  | 0.016850179 |
| 0.152505533 | 0.205824979 | 0.078451782 | 0.212950602 |
| 0.170337888 | 0.335520312 | 0.367177461 | 0.339317263 |
| 0.075994698 | 0.012877477 | 0.360556229 | 0.070768351 |
| 0.452229661 | 0.079364209 | 0.250542494 | 0.016228388 |
| 0.387283218 | 0.207282728 | 0.237305003 | 0.069302734 |
| 0.225931493 | 0.002753785 | 0.23402212  | 0.198356831 |
| 0.310909779 | 0.412946121 | 0.174759418 | 0.132735637 |
| 0.117587157 | 0.212683387 | 0.353232128 | 0.183777437 |
| 0.26296207  | 0.031311656 | 0.275925587 | 0.27983069  |
| 0.117568792 | 0.191948439 | 1           | 0.254911717 |
| 0.332863719 | 0.146237456 | 0.383303617 | 0.237568443 |
| 0.228452133 | 0.245332683 | 0.232118128 | 0.137558815 |
| 0.213746482 | 0.245425623 | 0.185692027 | 0.150009121 |
| 0.183110769 | 0.114232607 | 0.115524965 | 0.479676725 |
| 0.138913986 | 0.230511666 | 0.029341569 | 0.044057899 |
| 0.07911333  | 0.330161823 | 0.278698786 | 0.283078229 |
| 0.284256427 | 0.100522527 | 0.338956239 | 0.321534393 |
| 0.026669984 | 0.14657389  | 0.342590322 | 0.035617588 |
| 0.209391527 | 0.098396991 | 0.006472872 | 0.223487329 |
| 0.393425504 | 0.118750621 |             |             |
| TNFSF10     | 0.154217662 | 0.408063579 | 0.020890411 |
| 0.001885305 | 0.020168564 | 0.220508174 | 0.170496453 |
| 0.117775601 | 0.032298667 | 0.031339996 | 0.313534805 |
| 0.00095573  | 0.229753527 | 0.008379165 | 0.028622405 |
| 0.355292987 | 0.366407227 | 0.224992117 | 0.378387644 |
| 0.159354414 | 0.013524004 | 0.296465948 | 0.188696703 |
| 0.206232473 | 0.00138123  | 0.065978725 | 0.004095399 |
| 0.097918321 | 0.335206629 | 0.159261608 | 0.035524248 |
| 0.316568685 | 0.277204432 | 0.065737781 | 0.028665651 |
| 0.015583417 | 0.41650207  | 0.014264793 | 0.226846164 |
| 0.251343745 | 0.083450622 | 0.272991679 | 0.008294795 |
| 0.000105592 | 0.055621675 | 0.087391704 | 0.256256564 |
| 0.160950359 | 0.189799046 | 0.162013589 | 0.081284446 |
| 0.007840534 | 0.339729187 | 0.320267905 | 0.00752384  |
| 0.396296259 | 0.000242369 | 0.416094228 | 0.079643464 |
| 0.046852207 | 0.172912241 | 0.119795009 | 0.26159335  |
| 0.25247068  | 0.405052383 | 0.396378655 | 0.012895476 |
| 0.068296927 | 0.165386365 | 0.207030957 | 0.186652787 |
| 0.373504966 | 0.029499664 | 0.053637055 | 0.086150475 |
| 0.219249496 | 0.241620246 | 0.285246678 | 0.063857712 |
| 0.00068163  | 0.09936133  | 0.051234386 | 0.205304586 |
| 0.143161196 | 0.344593196 | 0.19688018  | 0.072445919 |
| 0.131097007 | 0.010837826 | 0.234706762 | 0.384494679 |
| 0.005207701 | 0.262103943 | 0.003670634 | 0.048681047 |
| 0.289945898 | 0.287490649 | 0.244249145 | 0.0243358   |
| 0.009003694 | 0.07674712  | 0.023225621 | 0.235928601 |
| 0.210319625 | 0.17297351  | 0.388538639 | 0.027790244 |
| 0.193587845 | 0.030518085 | 0.134278123 | 0.398567098 |
| 0.365199552 | 0.005959139 | 0.056868765 | 0.208413391 |

|             |             |             |             |
|-------------|-------------|-------------|-------------|
| 0.031190841 | 0.016810259 | 0.19058159  | 0.002984404 |
| 0.00277831  | 0.006798244 | 0.318251858 | 0.069734311 |
| 0.044684568 | 0.141887998 | 0.01260915  | 0.189029805 |
| 0.107519574 | 0.306572046 | 0.025387487 | 0.142103043 |
| 0.196534863 | 0.192963934 | 0.125413994 | 0.240137778 |
| 0.067808862 | 0.091290979 | 0.083413924 | 0.392841678 |
| 0.42474499  | 0.019626003 | 0.02364943  | 0.264516413 |
| 0.200172178 | 0.349611507 | 0.406334229 | 0.068122063 |
| 0.075861375 | 0.186434348 | 0.048750384 | 0.236175138 |
| 0.22015026  | 0.221766345 | 0.009455882 | 0.350801072 |
| 0.407274757 | 0.00369043  | 0.042423974 | 0.289315277 |
| 0.005621166 | 0.043027246 | 0.380555422 | 0.320196221 |
| 0.230646895 | 0.003415409 | 0.05990949  | 0.177539796 |
| 0.21422303  | 0.13917187  | 0.280711154 | 0.044667074 |
| 0.263257032 | 0.050044954 | 0.032770232 | 0.204452081 |
| 0.111066939 | 0.256218616 | 0.018099814 | 0.008367567 |
| 0.216579416 | 0.121866466 | 0.325992119 | 0.235930421 |
| 0.226060248 | 0.000180238 | 0.02827768  | 0.194314583 |
| 0.040196337 | 0.269155585 | 0.406562953 | 0.118235112 |
| 0.236244625 | 0.054114529 | 0.135912815 | 0.085258357 |
| 0.322896468 | 0.027971714 | 0.024032176 | 0.000330646 |
| 0.03545842  | 0.061616513 | 0.177921272 | 0.019729846 |
| 0.043906658 | 0.023517127 | 0.027382373 | 0.329037454 |
| 0.17183319  | 0.274646748 | 0.012106057 | 0.03271246  |
| 0.08632356  | 0.304266487 | 0.054696659 | 0.02979191  |
| 0.290350239 | 0.057771285 | 0.249666515 | 0.375941724 |
| 0.05462868  | 0.30262175  | 0.017183307 | 0.131598995 |
| 0.1611346   | 0.334981134 | 0.246373657 | 0.31075079  |
| 0.138235692 | 0.266292919 | 0.026686278 | 0.266071464 |
| 0.215486142 | 0.221702865 | 0.035355424 | 0.424996938 |
| 0.000507031 | 0.271039388 | 0.181390355 | 0.015751109 |
| 0.382437511 | 0.205666911 | 0.044282146 | 0.124065825 |
| 0.384238117 | 0.431602627 | 0.360131569 | 0.259901119 |
| 0.033004251 | 0.006890088 | 0.405161652 | 0.334885359 |
| 0.338796701 | 0.174556368 | 0.040463078 | 0.01616526  |
| 0.357373302 | 0.163418879 | 0.214568874 | 0.132549207 |
| 0.191159179 | 0.089442281 | 0.202949607 | 0.223467365 |
| 0.002924765 | 0.091200276 | 0.176452238 | 0.019305769 |
| 0.061939008 | 0.040434174 | 0.318510685 | 0.335038183 |
| 0.060359683 | 0.022357678 | 0.050870816 | 0.047952227 |
| 0.174209818 | 0.394778744 | 0.006044168 | 0.394866639 |
| 0.395370521 | 0.266232163 | 0.326770265 | 0.39047062  |
| 0.181807695 | 0.365122993 | 0.339432758 | 0.317598717 |
| 0.000586547 | 0.249733314 | 0.191252459 | 0.376487987 |
| 0.280067771 | 0.243110784 | 0.083737256 | 0.088158128 |
| 0.001499972 | 0.136871087 | 0.013518159 | 0.445259262 |
| 0.32294536  | 0.014891094 | 0.004833774 | 0.308521115 |
| 0.175747739 | 0.006209002 | 0.410948925 | 0.164136545 |
| 0.350132402 | 0.202229903 | 0.105203677 | 0.218523629 |
| 0.014465116 | 0.091950866 | 0.006213051 | 0.221153105 |
| 0.145776111 | 0.013775062 | 0.010666923 | 0.403017959 |
| 0.328503753 | 0.313631071 | 0.235990071 | 0.000955116 |
| 0.237295134 | 0.011606375 | 0.249818015 | 0.039875772 |
| 0.356947876 | 0.338144846 | 0.39170374  | 0.245711715 |

|             |             |             |             |
|-------------|-------------|-------------|-------------|
| 0.236826725 | 0.352568363 | 0.351137403 | 0.316882108 |
| 0.007630215 | 0.217924249 | 0.274147424 | 0.012460529 |
| 0.154672267 | 0.339273928 | 0.126108618 | 0.164324444 |
| 0.291485895 | 0.00636074  | 0.204340433 | 0.172329157 |
| 0.371427158 | 0.323473252 | 0.030843396 | 0.070852856 |
| 0.350075852 | 0.123575772 | 0.091322722 | 0.19845564  |
| 0.283680386 | 0.007559784 | 0.020536213 | 0.331044627 |
| 0.406626122 | 0.287793745 | 0.297777222 | 0.014810783 |
| 0.31266339  | 0.024091987 | 0.345201061 | 0.046483794 |
| 0.237727514 | 0.137847567 | 0.223800729 | 0.011288101 |
| 0.002514121 | 0.024237432 | 0.334665899 | 0.390872854 |
| 0.054678125 | 0.168021188 | 0.131010542 | 0.189444715 |
| 0.333530098 | 0.046147392 | 0.260341953 | 0.192710315 |
| 0.411573737 | 0.009425467 | 0.429502374 | 0.186703298 |
| 0.305893814 | 0.099979782 | 0.329039044 | 0.002205155 |
| 0.19962799  | 0.037618565 | 0.087792733 | 0.145027087 |
| 0.279881997 | 0.073221368 | 0.296843927 | 0.085623046 |
| 0.014523318 | 0.001862095 | 0.334818173 | 0.076618485 |
| 0.294011551 | 0.040784119 | 0.196187921 | 0.006985604 |
| 0.437311121 | 0.189216257 | 0.270179612 | 0.058999062 |
| 0.112617271 | 0.001398237 | 0.045384186 | 0.015230714 |
| 0.307284286 | 0.372988083 | 0.223005527 | 0.134553652 |
| 0.063276307 | 0.235495251 | 0.320253929 | 0.133690634 |
| 0.327521091 | 0.010368023 | 0.358870883 | 0.147561694 |
| 0.213276844 | 0.061745242 | 0.254911717 | 1           |
| 0.116275419 | 0.034020106 | 0.094131408 | 0.049241613 |
| 0.305509005 | 0.068723463 | 0.16382617  | 0.036763964 |
| 0.013869886 | 0.125717683 | 0.276724186 | 0.216816602 |
| 0.195428594 | 0.179130609 | 0.088905283 | 0.400092165 |
| 0.02882604  | 0.120594456 | 0.003621528 | 0.003396427 |
| 0.017652738 | 0.089639724 | 0.344684775 | 0.344230859 |
| 0.374838369 | 0.035696607 | 0.05746616  | 0.079098851 |
| 0.015494588 | 0.229367643 | 0.211411397 | 0.011283499 |
| 0.245410496 | 0.050099664 | 0.000399055 | 0.082576578 |
| 0.337739624 | 0.030778684 |             |             |
| TNFSF14     | 0.070940182 | 0.305853474 | 0.14233085  |
| 0.028594079 | 0.265690265 | 0.340031527 | 0.370782787 |
| 0.052045246 | 0.139999887 | 0.181016425 | 0.394080749 |
| 0.000690914 | 0.101103485 | 0.019225554 | 0.094795904 |
| 0.195138813 | 0.2109967   | 0.327637032 | 0.20438962  |
| 0.082727009 | 0.112741074 | 0.200477639 | 0.209875379 |
| 0.303415987 | 0.001952589 | 0.264331931 | 0.078438546 |
| 0.042716553 | 0.168935413 | 0.18859603  | 0.137460797 |
| 0.159595617 | 0.159239963 | 0.110809856 | 0.171080469 |
| 0.038635296 | 0.345129208 | 0.024224895 | 0.13880654  |
| 0.102597825 | 0.241565061 | 0.164365382 | 0.039955934 |
| 0.001697986 | 0.243140294 | 0.033950913 | 0.199121199 |
| 0.09199043  | 0.289278523 | 0.203004681 | 0.261281252 |
| 0.009062269 | 0.370414382 | 0.164606026 | 0.00918744  |
| 0.429019522 | 0.006013497 | 0.380837178 | 0.035830334 |
| 0.160899371 | 0.154318648 | 0.055765664 | 0.179065102 |
| 0.413552837 | 0.416877042 | 0.267033877 | 0.158878488 |
| 0.18943875  | 0.100608616 | 0.108741634 | 0.20433255  |
| 0.263593342 | 0.105058758 | 0.206792414 | 0.053322889 |

|             |             |             |             |
|-------------|-------------|-------------|-------------|
| 0.135904301 | 0.107112054 | 0.305761494 | 0.171670272 |
| 0.001326834 | 0.29532895  | 0.153001792 | 0.077524146 |
| 0.0745224   | 0.378793424 | 0.091957244 | 0.275162392 |
| 0.081113415 | 0.062843565 | 0.199488267 | 0.240224162 |
| 0.034225521 | 0.125363216 | 0.012853712 | 0.161084728 |
| 0.153448105 | 0.130985328 | 0.140487218 | 0.197425496 |
| 0.045400234 | 0.121739526 | 0.019474398 | 0.090887516 |
| 0.136779519 | 0.136959821 | 0.420155382 | 0.008029286 |
| 0.078187251 | 0.08505443  | 0.177409291 | 0.360746088 |
| 0.226684235 | 0.015106429 | 0.098507769 | 0.332853796 |
| 0.100271029 | 0.133811649 | 0.332932956 | 0.003954172 |
| 0.015672556 | 0.002808758 | 0.161205746 | 0.126253031 |
| 0.241730295 | 0.281422512 | 0.116800883 | 0.176087369 |
| 0.045357541 | 0.131856667 | 0.3164099   | 0.275637945 |
| 0.119023316 | 0.379764108 | 0.149877732 | 0.160387023 |
| 0.130442556 | 0.089053643 | 0.141141906 | 0.349886703 |
| 0.327508088 | 0.172846804 | 0.137357877 | 0.308708617 |
| 0.08701811  | 0.195186805 | 0.258278765 | 0.088477528 |
| 0.252858165 | 0.175667369 | 0.087833254 | 0.299124625 |
| 0.353115127 | 0.119492174 | 0.006243882 | 0.340667618 |
| 0.423231186 | 0.00635054  | 0.149399162 | 0.155694298 |
| 0.103046027 | 0.233433306 | 0.297580599 | 0.242620561 |
| 0.15937906  | 0.067101145 | 0.172076763 | 0.291475733 |
| 0.19195275  | 0.247780892 | 0.187006792 | 0.14987612  |
| 0.27132732  | 0.084258623 | 0.172298851 | 0.084992072 |
| 0.192333651 | 0.192935098 | 0.029587998 | 0.020919462 |
| 0.106833615 | 0.077138136 | 0.253563974 | 0.139127505 |
| 0.112568693 | 0.00546724  | 0.164327995 | 0.098354297 |
| 0.069854296 | 0.10796177  | 0.346394817 | 0.199975359 |
| 0.210522052 | 0.049330882 | 0.186398787 | 0.218649656 |
| 0.146784755 | 0.126239852 | 0.141321487 | 0.002118685 |
| 0.217138347 | 0.044883572 | 0.118350141 | 0.042404543 |
| 0.236185484 | 0.097548239 | 0.028231341 | 0.240560123 |
| 0.252788843 | 0.197960288 | 0.012661655 | 0.014803058 |
| 0.173543745 | 0.353692219 | 0.080398388 | 0.045104557 |
| 0.270082226 | 0.127051866 | 0.101138167 | 0.360958595 |
| 0.25119467  | 0.37068749  | 0.01597806  | 0.137447642 |
| 0.100598245 | 0.244377785 | 0.150202198 | 0.209949039 |
| 0.20154561  | 0.117293485 | 0.039225675 | 0.32213065  |
| 0.140068169 | 0.148804564 | 0.113157139 | 0.310079149 |
| 0.00206883  | 0.263422826 | 0.16437845  | 0.013885238 |
| 0.327824905 | 0.408086207 | 0.114262984 | 0.09265739  |
| 0.210658949 | 0.311751052 | 0.179558085 | 0.128004075 |
| 0.022386254 | 0.012358823 | 0.238517558 | 0.289511936 |
| 0.175116545 | 0.162635341 | 0.083846006 | 0.011988449 |
| 0.23478272  | 0.062150476 | 0.174322969 | 0.075406123 |
| 0.147310084 | 0.073504421 | 0.192342623 | 0.08704605  |
| 0.002006418 | 0.142142504 | 0.107459403 | 0.101025074 |
| 0.123039789 | 0.099719238 | 0.246001575 | 0.354608154 |
| 0.115022961 | 0.036146292 | 0.105802862 | 0.226436951 |
| 0.289927033 | 0.294649528 | 0.009169168 | 0.230231966 |
| 0.240597289 | 0.196726318 | 0.245982342 | 0.226208252 |
| 0.151352631 | 0.403912228 | 0.253285202 | 0.139214456 |
| 0.000679347 | 0.11672609  | 0.092115158 | 0.383209362 |



|             |             |             |             |
|-------------|-------------|-------------|-------------|
| 0.158033027 | 0.300430882 | 0.022083418 | 0.05983564  |
| 0.003322831 | 0.193091798 | 0.026729111 | 0.315426928 |
| 0.225414837 | 0.133007961 | 0.006289319 | 0.234193504 |
| 0.087259177 | 0.01008885  | 0.271758023 | 0.211829698 |
| 0.30678169  | 0.172870452 | 0.237566503 | 0.109089982 |
| 0.015959305 | 0.078460421 | 0.093243034 | 0.212916798 |
| 0.097416214 | 0.009230389 | 0.168969152 | 0.235966807 |
| 0.220979802 | 0.381446797 | 0.297591874 | 0.009347039 |
| 0.088757944 | 0.054235444 | 0.201783762 | 0.137463513 |
| 0.242610072 | 0.382601744 | 0.339315841 | 0.14101966  |
| 0.157955848 | 0.360120988 | 0.368207079 | 0.241540127 |
| 0.049106557 | 0.107878674 | 0.135097216 | 0.110226023 |
| 0.063752349 | 0.235580954 | 0.126430584 | 0.335939036 |
| 0.216066694 | 0.059489153 | 0.321848278 | 0.077233863 |
| 0.355633167 | 0.22023746  | 0.149001351 | 0.102356316 |
| 0.385776881 | 0.165389406 | 0.249242124 | 0.159048862 |
| 0.32555761  | 0.007781212 | 0.013812314 | 0.302084168 |
| 0.379686312 | 0.432562838 | 0.184123963 | 0.121361776 |
| 0.181760715 | 0.100972127 | 0.186855431 | 0.220689386 |
| 0.195957605 | 0.071148372 | 0.087238443 | 0.007200269 |
| 0.017220781 | 0.059244821 | 0.403265092 | 0.383991229 |
| 0.163642692 | 0.189740193 | 0.236925171 | 0.301006046 |
| 0.190263302 | 0.079354088 | 0.316237942 | 0.124833236 |
| 0.42647712  | 0.119423334 | 0.315951814 | 0.13682884  |
| 0.206826013 | 0.178298167 | 0.223099064 | 0.007162871 |
| 0.124854557 | 0.159700752 | 0.021441673 | 0.228308977 |
| 0.118899682 | 0.198833517 | 0.390440124 | 0.128094468 |
| 0.052779937 | 0.002529626 | 0.24513182  | 0.057346755 |
| 0.393164784 | 0.030067789 | 0.124991682 | 0.012043674 |
| 0.30735494  | 0.135157059 | 0.163239932 | 0.034873921 |
| 0.14662773  | 0.005960339 | 0.204936465 | 0.072360817 |
| 0.205486635 | 0.324769977 | 0.116470219 | 0.070791224 |
| 0.028339744 | 0.216045638 | 0.301944895 | 0.177833718 |
| 0.234242029 | 0.017681278 | 0.217934122 | 0.107714352 |
| 0.089403782 | 0.090511089 | 0.332863719 | 0.116275419 |
| 1           | 0.056688504 | 0.214058038 | 0.062066137 |
| 0.194676543 | 0.125120728 | 0.234488566 | 0.048953179 |
| 0.163237916 | 0.151106363 | 0.131979689 | 0.124007447 |
| 0.157774959 | 0.081112183 | 0.050383112 | 0.420176656 |
| 0.052397756 | 0.079408632 | 0.050213966 | 0.074683606 |
| 0.065388612 | 0.206837946 | 0.176367154 | 0.20614882  |
| 0.222561222 | 0.033815291 | 0.172808514 | 0.106233484 |
| 0.01242052  | 0.090628173 | 0.40428883  | 0.044964152 |
| 0.1813139   | 0.037679254 | 0.001794409 | 0.06492209  |
| 0.311039139 | 0.070035292 |             |             |
| TNFSF8      | 0.084310993 | 0.180335597 | 0.009337492 |
| 0.00402006  | 0.115168114 | 0.083063619 | 0.048732864 |
| 0.021523443 | 0.014107631 | 0.145350199 | 0.000165479 |
| 0.090226368 | 0.002663863 | 0.004787398 | 0.155588681 |
| 0.158602821 | 0.102763596 | 0.169295334 | 0.079200962 |
| 0.002783718 | 0.149330384 | 0.080070031 | 0.114596285 |
| 0.000362199 | 0.027599143 | 0.00090287  | 0.040814706 |
| 0.141838396 | 0.09253894  | 0.014772541 | 0.148196518 |
| 0.104452434 | 0.02594758  | 0.008117226 | 0.005159707 |

|             |             |             |             |
|-------------|-------------|-------------|-------------|
| 0.186305364 | 0.002185993 | 0.089094148 | 0.111348809 |
| 0.033306641 | 0.116894552 | 0.002283496 | 8.25E-06    |
| 0.027970205 | 0.033492926 | 0.123434768 | 0.092067299 |
| 0.096688291 | 0.097090963 | 0.038110018 | 0.000705929 |
| 0.161537683 | 0.159023837 | 0.001928426 | 0.179020885 |
| 1.16E-05    | 0.195045753 | 0.040256125 | 0.031983229 |
| 0.11520565  | 0.068331261 | 0.132139342 | 0.130076947 |
| 0.18328327  | 0.180201657 | 0.00257424  | 0.041402108 |
| 0.095119497 | 0.085024042 | 0.071375891 | 0.162619448 |
| 0.010103995 | 0.023892873 | 0.045151026 | 0.096100618 |
| 0.094984907 | 0.162978577 | 0.03210125  | 9.90E-05    |
| 0.047293768 | 0.018871043 | 0.115700196 | 0.052004358 |
| 0.160326962 | 0.100436059 | 0.038898428 | 0.050288288 |
| 0.002202532 | 0.09979865  | 0.161647379 | 0.000304884 |
| 0.121653521 | 0.000140401 | 0.02523463  | 0.124687046 |
| 0.122769435 | 0.105224643 | 0.014102675 | 0.001395207 |
| 0.048353159 | 0.010922995 | 0.10287291  | 0.131497329 |
| 0.070608432 | 0.189167384 | 0.014669171 | 0.076548187 |
| 0.01593524  | 0.062791377 | 0.173558743 | 0.165783606 |
| 0.000502996 | 0.034498331 | 0.1000737   | 0.011368048 |
| 0.002678728 | 0.090637603 | 0.000100235 | 7.67E-05    |
| 0.000566695 | 0.132226316 | 0.039677899 | 0.022118783 |
| 0.067583786 | 0.00068931  | 0.071454101 | 0.044455998 |
| 0.150303785 | 0.011025182 | 0.068226371 | 0.071628417 |
| 0.093402303 | 0.040709336 | 0.110764269 | 0.02448932  |
| 0.049861899 | 0.043155648 | 0.173038263 | 0.204591621 |
| 0.006512827 | 0.012220384 | 0.122254139 | 0.078856761 |
| 0.148518775 | 0.178372985 | 0.030351504 | 0.028791634 |
| 0.115425387 | 0.024923986 | 0.092693504 | 0.113535617 |
| 0.121478956 | 0.000738112 | 0.171743805 | 0.189404388 |
| 0.000144226 | 0.027096257 | 0.12866605  | 0.000321479 |
| 0.01863612  | 0.174791627 | 0.133835749 | 0.103270074 |
| 0.000598646 | 0.02239522  | 0.09012261  | 0.124933139 |
| 0.062386487 | 0.165064151 | 0.01836086  | 0.135217973 |
| 0.019488312 | 0.017392518 | 0.0802037   | 0.057614117 |
| 0.136050536 | 0.010021216 | 0.002146863 | 0.11202157  |
| 0.056587084 | 0.135991382 | 0.106302122 | 0.104825029 |
| 6.43E-06    | 0.01128926  | 0.105346404 | 0.020708324 |
| 0.114684329 | 0.177180189 | 0.070624888 | 0.136498068 |
| 0.038296025 | 0.080184192 | 0.036002493 | 0.162739274 |
| 0.010218528 | 0.009854758 | 4.77E-05    | 0.009614794 |
| 0.022635193 | 0.117380957 | 0.010658324 | 0.0169222   |
| 0.010141935 | 0.00382378  | 0.145698193 | 0.083243222 |
| 0.107092865 | 0.001906311 | 0.019597983 | 0.041195927 |
| 0.135687374 | 0.017598867 | 0.012772332 | 0.119045134 |
| 0.021899996 | 0.101598967 | 0.200174556 | 0.026077245 |
| 0.135610333 | 0.008254316 | 0.093973772 | 0.058968275 |
| 0.143822072 | 0.096376797 | 0.122580231 | 0.076738406 |
| 0.131784598 | 0.003294682 | 0.13100782  | 0.095594424 |
| 0.100520424 | 0.019569831 | 0.187753705 | 9.19E-05    |
| 0.126897601 | 0.06825206  | 0.005943354 | 0.160041657 |
| 0.097523387 | 0.028959089 | 0.066648585 | 0.16862452  |
| 0.19227558  | 0.175762298 | 0.101348561 | 0.007859225 |
| 0.001578698 | 0.191366036 | 0.179798282 | 0.145594433 |

|             |             |             |             |
|-------------|-------------|-------------|-------------|
| 0.095507398 | 0.013868314 | 0.00236421  | 0.143617411 |
| 0.081620937 | 0.099600468 | 0.054306046 | 0.084240117 |
| 0.035354054 | 0.124321947 | 0.120027811 | 0.000182937 |
| 0.042652196 | 0.068663366 | 0.003316175 | 0.024188857 |
| 0.009901508 | 0.134308301 | 0.171567356 | 0.021915117 |
| 0.008723228 | 0.018805057 | 0.024510603 | 0.103015489 |
| 0.170954169 | 0.000545825 | 0.190217939 | 0.166366545 |
| 0.154724892 | 0.12879757  | 0.169226945 | 0.095936109 |
| 0.176981387 | 0.144960922 | 0.147262352 | 7.33E-05    |
| 0.104849951 | 0.073672694 | 0.193820077 | 0.112001643 |
| 0.137198488 | 0.042585754 | 0.032669769 | 0.000732759 |
| 0.082319369 | 0.003971037 | 0.210516203 | 0.121558483 |
| 0.005987463 | 0.000757    | 0.117352532 | 0.067050165 |
| 0.000346755 | 0.181619838 | 0.070158398 | 0.139670669 |
| 0.075293551 | 0.052225522 | 0.090347566 | 0.004336086 |
| 0.047360462 | 0.000322542 | 0.078217803 | 0.079047564 |
| 0.014287113 | 0.004263046 | 0.181703545 | 0.14197106  |
| 0.147339558 | 0.13117035  | 5.51E-05    | 0.10472025  |
| 0.001816604 | 0.099124068 | 0.007146365 | 0.152440253 |
| 0.177504223 | 0.169478631 | 0.104857855 | 0.11290234  |
| 0.161994389 | 0.16372892  | 0.13067478  | 0.000227359 |
| 0.084827208 | 0.114004553 | 0.000929328 | 0.076203009 |
| 0.142900699 | 0.047843585 | 0.083521809 | 0.155534994 |
| 0.000343514 | 0.106458836 | 0.096404267 | 0.1554679   |
| 0.134404339 | 0.020649523 | 0.040402927 | 0.157538246 |
| 0.073031294 | 0.053311686 | 0.102997177 | 0.161234266 |
| 0.001976197 | 0.014316687 | 0.179874842 | 0.183876613 |
| 0.136938089 | 0.119706163 | 0.005498639 | 0.131779192 |
| 0.016175549 | 0.163874379 | 0.02165902  | 0.123430413 |
| 0.053098919 | 0.092428522 | 0.002423575 | 0.000154614 |
| 0.007219549 | 0.149362891 | 0.1845663   | 0.028580565 |
| 0.096573858 | 0.054984832 | 0.074402111 | 0.138766306 |
| 0.014272557 | 0.122264138 | 0.083884409 | 0.198261704 |
| 0.001774668 | 0.198412134 | 0.103618945 | 0.154826981 |
| 0.042760609 | 0.141810935 | 0.008414732 | 0.084587505 |
| 0.016016432 | 0.050295542 | 0.056774851 | 0.121005113 |
| 0.035459393 | 0.136476584 | 0.054278651 | 0.001149696 |
| 0.000145221 | 0.166980111 | 0.027903791 | 0.152485588 |
| 0.014750795 | 0.092953302 | 0.00189256  | 0.193959189 |
| 0.080573788 | 0.127469503 | 0.033270813 | 0.040594907 |
| 3.91E-05    | 0.02175015  | 0.003641342 | 0.16309436  |
| 0.199955652 | 0.129936594 | 0.06128492  | 0.037313875 |
| 0.100043471 | 0.153159635 | 0.0487832   | 0.133013772 |
| 0.000509963 | 0.150173446 | 0.098409029 | 0.087403103 |
| 0.022015862 | 0.146237456 | 0.034020106 | 0.056688504 |
| 1           | 0.063036852 | 0.032793419 | 0.123475039 |
| 0.043590887 | 0.068838219 | 0.016614004 | 0.004655692 |
| 0.044729272 | 0.118089709 | 0.097569358 | 0.077752179 |
| 0.072583417 | 0.028890422 | 0.190783452 | 0.013714186 |
| 0.078936946 | 0.000363142 | 0.000377952 | 0.003409763 |
| 0.046893125 | 0.169421251 | 0.15913376  | 0.167806595 |
| 0.015920062 | 0.037325997 | 0.052173128 | 0.004278173 |
| 0.099596636 | 0.097823697 | 0.001088005 | 0.11361332  |
| 0.035444343 | 2.88E-05    | 0.045731702 | 0.16426222  |

0.007033057

| TPCN1       | 0.073981995 | 0.209140488 | 0.187170172 |
|-------------|-------------|-------------|-------------|
| 0.005072806 | 0.094774455 | 0.383044018 | 0.306038543 |
| 0.045189213 | 0.241219254 | 0.1170978   | 0.362342501 |
| 0.008032558 | 0.05030127  | 0.09003988  | 0.176275767 |
| 0.122518881 | 0.125889204 | 0.226516266 | 0.131468533 |
| 0.106602419 | 0.045435936 | 0.222654877 | 0.157880817 |
| 0.322189158 | 0.019443832 | 0.171935815 | 0.026241286 |
| 0.030267759 | 0.099878646 | 0.285811652 | 0.094345095 |
| 0.106530292 | 0.077686681 | 0.049237689 | 0.049474468 |
| 0.006650116 | 0.27114854  | 0.004877711 | 0.061011772 |
| 0.057922316 | 0.132102493 | 0.088792929 | 0.159687094 |
| 9.07E-05    | 0.204883391 | 0.02324277  | 0.194993326 |
| 0.122724258 | 0.344462952 | 0.321908466 | 0.169809822 |
| 0.002339199 | 0.344799079 | 0.159884647 | 0.001832448 |
| 0.330336667 | 0.001085684 | 0.29563088  | 0.043102094 |
| 0.266688792 | 0.191178234 | 0.046539234 | 0.157148956 |
| 0.414633069 | 0.315601251 | 0.170104141 | 0.15168625  |
| 0.282970111 | 0.072735839 | 0.055739026 | 0.10646885  |
| 0.188786438 | 0.05749814  | 0.129908038 | 0.021339516 |
| 0.075304418 | 0.061483462 | 0.36611838  | 0.191146531 |
| 0.007261569 | 0.247854685 | 0.043719576 | 0.073198364 |
| 0.031583151 | 0.343285685 | 0.073852004 | 0.14753564  |
| 0.046581154 | 0.180846593 | 0.189693857 | 0.14878363  |
| 0.020063808 | 0.074095095 | 0.007081205 | 0.198002314 |
| 0.103964187 | 0.073376561 | 0.12094787  | 0.204911998 |
| 0.148278094 | 0.212915799 | 0.03291543  | 0.046875439 |
| 0.123507393 | 0.089260702 | 0.335935956 | 0.003456944 |
| 0.034758968 | 0.13648185  | 0.121521205 | 0.269423537 |
| 0.157767415 | 0.050564188 | 0.171003786 | 0.35743557  |
| 0.044917199 | 0.052833248 | 0.307621961 | 0.001929279 |
| 0.010990288 | 0.008892574 | 0.098413063 | 0.184918    |
| 0.160296872 | 0.273938628 | 0.052164305 | 0.078597491 |
| 0.034232307 | 0.090821386 | 0.138039422 | 0.228418343 |
| 0.054363962 | 0.302867826 | 0.06339171  | 0.089564823 |
| 0.036379034 | 0.112339882 | 0.200323594 | 0.229739085 |
| 0.29829028  | 0.193631615 | 0.21983456  | 0.306828954 |
| 0.038359038 | 0.12207466  | 0.169228849 | 0.08190154  |
| 0.095880775 | 0.245865673 | 0.052401293 | 0.193235503 |
| 0.348194956 | 0.136909641 | 0.003087625 | 0.331118787 |
| 0.347827022 | 0.002883882 | 0.258789434 | 0.109887442 |
| 0.01502423  | 0.145853334 | 0.243385977 | 0.151375012 |
| 0.096211299 | 0.024247074 | 0.088848776 | 0.270302922 |
| 0.252193436 | 0.219388818 | 0.171213162 | 0.076498481 |
| 0.312707552 | 0.045074813 | 0.219800147 | 0.037878747 |
| 0.290150763 | 0.237122916 | 0.01458708  | 0.014423344 |
| 0.088313891 | 0.066454298 | 0.169382794 | 0.117550535 |
| 0.082342416 | 0.000595134 | 0.100035608 | 0.100232651 |
| 0.04909624  | 0.064728424 | 0.23137645  | 0.335919778 |
| 0.308282038 | 0.021181654 | 0.316198568 | 0.079130047 |
| 0.129341382 | 0.089868403 | 0.101744712 | 0.011282371 |
| 0.182790965 | 0.019226427 | 0.091749779 | 0.132131779 |
| 0.100677388 | 0.17081562  | 0.050743495 | 0.15096812  |
| 0.325864573 | 0.096930392 | 0.045406145 | 0.013233911 |

|             |             |             |             |
|-------------|-------------|-------------|-------------|
| 0.144660153 | 0.222195273 | 0.028524795 | 0.044921701 |
| 0.152207409 | 0.083773506 | 0.053284532 | 0.33526792  |
| 0.111531432 | 0.324783395 | 0.009113217 | 0.156843494 |
| 0.048971082 | 0.141918847 | 0.076512042 | 0.116284735 |
| 0.203737125 | 0.107844659 | 0.017610214 | 0.367645912 |
| 0.136530132 | 0.124530744 | 0.198714876 | 0.212527225 |
| 0.016514886 | 0.264303161 | 0.089839136 | 0.009108457 |
| 0.212099956 | 0.339541729 | 0.232866105 | 0.123031897 |
| 0.13520243  | 0.219440892 | 0.151530924 | 0.06910185  |
| 0.014972616 | 0.063339227 | 0.183760505 | 0.254393174 |
| 0.100802703 | 0.117945894 | 0.017469717 | 0.0125083   |
| 0.144840829 | 0.048909076 | 0.131936398 | 0.051089197 |
| 0.073533645 | 0.024659589 | 0.265982873 | 0.078006922 |
| 0.003698145 | 0.132792659 | 0.068214447 | 0.049335886 |
| 0.064726153 | 0.113192878 | 0.142335577 | 0.366211051 |
| 0.033769092 | 0.023570383 | 0.031703041 | 0.202107819 |
| 0.374739514 | 0.203213366 | 0.00185363  | 0.187342945 |
| 0.152791909 | 0.193728463 | 0.139291325 | 0.150175001 |
| 0.186316773 | 0.327441534 | 0.163185179 | 0.095489613 |
| 0.004673054 | 0.057043477 | 0.038510401 | 0.392912992 |
| 0.088935625 | 0.33635508  | 0.021546477 | 0.023033041 |
| 0.014597987 | 0.324175985 | 0.005581437 | 0.252141647 |
| 0.120469951 | 0.226798669 | 0.000860748 | 0.141802218 |
| 0.037166886 | 0.00602803  | 0.186852569 | 0.173095488 |
| 0.186441733 | 0.105592508 | 0.236055489 | 0.050197625 |
| 0.003397066 | 0.051301345 | 0.040074067 | 0.119830895 |
| 0.054868082 | 0.012176971 | 0.065376123 | 0.161135471 |
| 0.170202979 | 0.27874407  | 0.35346288  | 0.010259784 |
| 0.055704547 | 0.013931097 | 0.106420971 | 0.151379481 |
| 0.202404083 | 0.350000987 | 0.231736179 | 0.071452752 |
| 0.108038802 | 0.278638899 | 0.331510131 | 0.164838587 |
| 0.008417378 | 0.056486132 | 0.079388844 | 0.099653216 |
| 0.042668116 | 0.13610856  | 0.063850048 | 0.366911779 |
| 0.230298238 | 0.008530617 | 0.403518601 | 0.09476407  |
| 0.233666364 | 0.126067654 | 0.239858775 | 0.157410126 |
| 0.294205457 | 0.152689156 | 0.277317499 | 0.156979311 |
| 0.393515615 | 0.00237153  | 0.01263445  | 0.300818206 |
| 0.27716175  | 0.389617677 | 0.115212058 | 0.050944553 |
| 0.09854596  | 0.2174427   | 0.139738399 | 0.145997377 |
| 0.26173307  | 0.039476017 | 0.047507093 | 0.006258928 |
| 0.017940967 | 0.101589402 | 0.294731669 | 0.326278726 |
| 0.233977794 | 0.304991496 | 0.195480907 | 0.185128943 |
| 0.109937502 | 0.035827803 | 0.350160538 | 0.134326243 |
| 0.359966551 | 0.040428347 | 0.250301868 | 0.16172386  |
| 0.192933544 | 0.099979533 | 0.15103175  | 0.010929589 |
| 0.07052639  | 0.101815262 | 0.028020008 | 0.117333455 |
| 0.068262206 | 0.207588066 | 0.269726981 | 0.195356333 |
| 0.0206321   | 0.007016459 | 0.272245985 | 0.017170195 |
| 0.426536975 | 0.016795306 | 0.126635556 | 0.001951591 |
| 0.219914399 | 0.123116513 | 0.132555104 | 0.014457507 |
| 0.092049487 | 0.000373717 | 0.128161886 | 0.179361289 |
| 0.208854659 | 0.308311514 | 0.094499879 | 0.061845241 |
| 0.038765303 | 0.117836188 | 0.255233783 | 0.076692896 |
| 0.129460699 | 0.005137464 | 0.131105326 | 0.116523489 |

|             |             |             |             |
|-------------|-------------|-------------|-------------|
| 0.041432172 | 0.060835053 | 0.383303617 | 0.094131408 |
| 0.214058038 | 0.063036852 | 1           | 0.118450879 |
| 0.101897686 | 0.086633196 | 0.12613728  | 0.042147433 |
| 0.164508215 | 0.083278835 | 0.088149335 | 0.063867755 |
| 0.102422305 | 0.046347801 | 0.026159886 | 0.363740431 |
| 0.045197548 | 0.107190671 | 0.009786992 | 0.02766755  |
| 0.020902724 | 0.196985124 | 0.156086773 | 0.15092943  |
| 0.138006147 | 0.027862293 | 0.249214121 | 0.192300239 |
| 0.005340465 | 0.063085614 | 0.311995865 | 0.005967281 |
| 0.123281759 | 0.02710819  | 0.005848485 | 0.094195259 |
| 0.299013751 | 0.027325643 |             |             |
| TPPP3       | 0.196378968 | 0.218419036 | 0.052795483 |
| 0.000485932 | 0.01029642  | 0.210794654 | 0.109567833 |
| 0.130664293 | 0.089458478 | 0.021326377 | 0.233736087 |
| 0.068729563 | 0.098659988 | 0.140457501 | 0.076266149 |
| 0.19864163  | 0.182404153 | 0.106547214 | 0.210794447 |
| 0.254326396 | 0.007222148 | 0.325975387 | 0.127655235 |
| 0.174739866 | 0.094595341 | 0.041808249 | 0.002265637 |
| 0.07859553  | 0.17790129  | 0.225949453 | 0.035534771 |
| 0.191875133 | 0.112092914 | 0.025308662 | 0.010131452 |
| 0.00300361  | 0.271541537 | 0.002454272 | 0.077582311 |
| 0.128564703 | 0.044537693 | 0.125975618 | 0.057537841 |
| 1.01E-05    | 0.055008415 | 0.074325769 | 0.24457833  |
| 0.21927682  | 0.195813452 | 0.235157775 | 0.044215424 |
| 0.003370789 | 0.258270712 | 0.321471324 | 0.002438839 |
| 0.234103158 | 7.15E-05    | 0.251002501 | 0.182409456 |
| 0.095943595 | 0.187771561 | 0.093467447 | 0.204484132 |
| 0.201221598 | 0.238749792 | 0.202413202 | 0.014833427 |
| 0.106480072 | 0.105561766 | 0.097488151 | 0.073562669 |
| 0.216057252 | 0.026719284 | 0.033461329 | 0.025153623 |
| 0.097129019 | 0.129061447 | 0.287682339 | 0.087021693 |
| 0.016267792 | 0.069780734 | 0.012520843 | 0.211433577 |
| 0.052803577 | 0.249930829 | 0.157655219 | 0.035496179 |
| 0.066354157 | 0.065312947 | 0.21434212  | 0.198431306 |
| 0.002727549 | 0.129396497 | 0.001686273 | 0.080654401 |
| 0.174990314 | 0.147726641 | 0.209503488 | 0.028234254 |
| 0.060074637 | 0.178735542 | 0.109236771 | 0.11433664  |
| 0.16138979  | 0.093234236 | 0.236672624 | 0.013517348 |
| 0.07878671  | 0.107790496 | 0.07041542  | 0.24277596  |
| 0.218568765 | 0.061465649 | 0.146753003 | 0.187170557 |
| 0.016462688 | 0.006541145 | 0.133985349 | 0.003185806 |
| 0.002889063 | 0.071176287 | 0.171127942 | 0.142060314 |
| 0.031635516 | 0.113327288 | 0.007931842 | 0.062710105 |
| 0.092481726 | 0.199975681 | 0.013611302 | 0.095487257 |
| 0.076058618 | 0.116195352 | 0.038767864 | 0.110685591 |
| 0.015725339 | 0.149524524 | 0.168131601 | 0.190625263 |
| 0.329898021 | 0.03879491  | 0.069588058 | 0.23537708  |
| 0.073309391 | 0.192941821 | 0.220393856 | 0.072037832 |
| 0.02496713  | 0.23446685  | 0.030768619 | 0.119628254 |
| 0.170048232 | 0.24536408  | 0.010184605 | 0.276495339 |
| 0.263676335 | 0.003584628 | 0.096149602 | 0.183316442 |
| 0.000854908 | 0.029529237 | 0.266916375 | 0.147804489 |
| 0.096703573 | 0.002035751 | 0.033301295 | 0.130339378 |
| 0.275576059 | 0.110208938 | 0.208371661 | 0.024714077 |

|             |             |             |             |
|-------------|-------------|-------------|-------------|
| 0.296283684 | 0.02796383  | 0.046090005 | 0.077513616 |
| 0.15853104  | 0.310368685 | 0.014892016 | 0.007802356 |
| 0.177655745 | 0.132821785 | 0.180400415 | 0.173052849 |
| 0.161701509 | 3.49E-05    | 0.019299143 | 0.219797154 |
| 0.033528687 | 0.151620764 | 0.212565405 | 0.181206407 |
| 0.339028359 | 0.018284434 | 0.223413364 | 0.025416259 |
| 0.283735323 | 0.025729778 | 0.027123585 | 0.013891978 |
| 0.037762158 | 0.028999998 | 0.100835152 | 0.171707299 |
| 0.017629599 | 0.101084541 | 0.099053655 | 0.170193009 |
| 0.198671654 | 0.102016029 | 0.144292527 | 0.035326433 |
| 0.093006415 | 0.139076672 | 0.020153381 | 0.067268059 |
| 0.117802448 | 0.04216816  | 0.124653499 | 0.285750884 |
| 0.021581823 | 0.221031673 | 0.013158366 | 0.175646402 |
| 0.066163751 | 0.148892407 | 0.109453262 | 0.130614933 |
| 0.11536269  | 0.234717541 | 0.020415564 | 0.26855979  |
| 0.213188613 | 0.163376796 | 0.096980005 | 0.230952289 |
| 0.032347817 | 0.232520647 | 0.071767547 | 0.016934462 |
| 0.196140493 | 0.131994564 | 0.133514518 | 0.227799719 |
| 0.212732144 | 0.243493772 | 0.28132439  | 0.128644922 |
| 0.027172143 | 0.140771232 | 0.271814579 | 0.225666508 |
| 0.167898333 | 0.085216939 | 0.007681151 | 0.02359544  |
| 0.182726027 | 0.1328789   | 0.145714526 | 0.094339763 |
| 0.064939898 | 0.025440376 | 0.245294892 | 0.211952039 |
| 0.012711833 | 0.103038993 | 0.110949298 | 0.011358613 |
| 0.034710889 | 0.044962835 | 0.135366713 | 0.28036054  |
| 0.015326601 | 0.03108378  | 0.014164806 | 0.051142872 |
| 0.185677437 | 0.229017851 | 0.001056754 | 0.287023726 |
| 0.211545373 | 0.190416927 | 0.149465206 | 0.228040705 |
| 0.241332431 | 0.221691053 | 0.185615486 | 0.200548886 |
| 0.02021352  | 0.105220524 | 0.066579108 | 0.317613114 |
| 0.13800215  | 0.231757953 | 0.100481427 | 0.028529172 |
| 0.007567624 | 0.230141527 | 0.003910153 | 0.296073388 |
| 0.134073018 | 0.029451827 | 0.000519967 | 0.149384303 |
| 0.061396495 | 0.006603918 | 0.241152727 | 0.109600158 |
| 0.163055796 | 0.085902743 | 0.083665164 | 0.084785798 |
| 0.003633583 | 0.064274006 | 0.003160049 | 0.094284768 |
| 0.056738113 | 0.028455649 | 0.005158538 | 0.230658709 |
| 0.235838842 | 0.1699594   | 0.23146679  | 0.004105929 |
| 0.151375913 | 0.004772136 | 0.102645292 | 0.062379543 |
| 0.267729213 | 0.247609518 | 0.207746206 | 0.103879421 |
| 0.118663479 | 0.220718628 | 0.265640286 | 0.186789028 |
| 0.002354432 | 0.10988731  | 0.14677696  | 0.022641753 |
| 0.098415978 | 0.1570439   | 0.048749553 | 0.153019171 |
| 0.292428377 | 0.001164951 | 0.22630475  | 0.2480289   |
| 0.189237823 | 0.148223479 | 0.066446329 | 0.147333057 |
| 0.209939556 | 0.101090733 | 0.091437542 | 0.154644251 |
| 0.295362225 | 0.005305591 | 0.029359727 | 0.270826331 |
| 0.235673718 | 0.199978261 | 0.165742735 | 0.008239292 |
| 0.140627086 | 0.099824573 | 0.218502122 | 0.040192022 |
| 0.293710818 | 0.075709835 | 0.120488932 | 0.029976808 |
| 0.007488773 | 0.117145436 | 0.186285523 | 0.266545003 |
| 0.105177145 | 0.271959614 | 0.092925586 | 0.084545319 |
| 0.167745486 | 0.02386325  | 0.237934737 | 0.188695033 |
| 0.271034245 | 0.003660891 | 0.287452213 | 0.224928148 |

|             |             |             |             |
|-------------|-------------|-------------|-------------|
| 0.278466565 | 0.055269633 | 0.169694054 | 0.004386835 |
| 0.095185291 | 0.028178127 | 0.159112464 | 0.053370533 |
| 0.147574947 | 0.091470038 | 0.149841533 | 0.177024633 |
| 0.008423741 | 0.014920299 | 0.335785067 | 0.017744836 |
| 0.270274142 | 0.030224245 | 0.173858124 | 0.001803928 |
| 0.256396526 | 0.170647243 | 0.218587211 | 0.023418042 |
| 0.061846429 | 0.000108742 | 0.02967775  | 0.082136663 |
| 0.306444394 | 0.278036712 | 0.16389857  | 0.134566965 |
| 0.163382408 | 0.092396539 | 0.204134269 | 0.041366945 |
| 0.138501773 | 0.004872809 | 0.185225277 | 0.163706385 |
| 0.08597848  | 0.036996192 | 0.237568443 | 0.049241613 |
| 0.062066137 | 0.032793419 | 0.118450879 | 1           |
| 0.132192844 | 0.042461346 | 0.064989253 | 0.057330398 |
| 0.026542202 | 0.059781954 | 0.154784014 | 0.09163797  |
| 0.105601863 | 0.097390206 | 0.055066504 | 0.270002353 |
| 0.046276269 | 0.204886677 | 0.000980257 | 0.001638143 |
| 0.006479784 | 0.099367437 | 0.300643645 | 0.225330244 |
| 0.192310735 | 0.041415662 | 0.098372826 | 0.21077601  |
| 0.007224276 | 0.166458793 | 0.122952895 | 0.002012154 |
| 0.120876513 | 0.042744813 | 0.00518104  | 0.196730148 |
| 0.268098181 | 0.015462797 |             |             |
| TRIB2       | 0.345401486 | 0.468139924 | 0.05693404  |
| 0.047136722 | 0.123433942 | 0.214905769 | 0.21437335  |
| 0.363766775 | 0.089225148 | 0.149197166 | 0.303763015 |
| 0.001008427 | 0.425152528 | 0.009688423 | 0.056950142 |
| 0.512435199 | 0.528109575 | 0.332606206 | 0.504832351 |
| 0.297335495 | 0.185726451 | 0.335541094 | 0.388083494 |
| 0.239523693 | 0.001054892 | 0.122208247 | 0.072356426 |
| 0.385972578 | 0.509710763 | 0.173910762 | 0.281518714 |
| 0.454763049 | 0.485378807 | 0.443857243 | 0.371301416 |
| 0.347447968 | 0.422897231 | 0.165069515 | 0.483801973 |
| 0.416923619 | 0.232654393 | 0.485418084 | 0.010146111 |
| 0.010473062 | 0.093737504 | 0.341920055 | 0.370970675 |
| 0.270405188 | 0.197991521 | 0.143011747 | 0.180774183 |
| 0.227291371 | 0.33032082  | 0.375581834 | 0.238325416 |
| 0.38874152  | 0.009165331 | 0.418391583 | 0.235285553 |
| 0.052178609 | 0.284386071 | 0.382823486 | 0.40412374  |
| 0.228473716 | 0.404708257 | 0.503003507 | 0.032798143 |
| 0.061738804 | 0.445615005 | 0.462374977 | 0.463623309 |
| 0.45594658  | 0.358256638 | 0.296097081 | 0.431498665 |
| 0.484101128 | 0.43291712  | 0.252923842 | 0.151880267 |
| 0.00077777  | 0.145405068 | 0.393285648 | 0.342677235 |
| 0.46451683  | 0.334843267 | 0.396969712 | 0.225346795 |
| 0.470503689 | 0.013283247 | 0.360533546 | 0.520790756 |
| 0.026181307 | 0.433475544 | 0.012114921 | 0.129645582 |
| 0.451429158 | 0.491465801 | 0.410119507 | 0.067593612 |
| 0.009748294 | 0.09849604  | 0.134700222 | 0.436829261 |
| 0.396236372 | 0.46925278  | 0.382573256 | 0.174756108 |
| 0.398157832 | 0.153319598 | 0.339289228 | 0.428307712 |
| 0.465112447 | 0.005095567 | 0.128812393 | 0.202312494 |
| 0.374224533 | 0.169889901 | 0.213775902 | 0.05252895  |
| 0.013640529 | 0.015846189 | 0.467143452 | 0.133560795 |
| 0.102124618 | 0.191656009 | 0.09570762  | 0.501042603 |
| 0.346508576 | 0.431378992 | 0.124520322 | 0.248422069 |



|             |             |             |             |
|-------------|-------------|-------------|-------------|
| 0.488793783 | 0.24677782  | 0.463373701 | 0.490420867 |
| 0.426089462 | 0.225128084 | 0.126192394 | 0.45167151  |
| 0.38536785  | 0.060960313 | 0.069171785 | 0.30549684  |
| 0.419584868 | 0.489124763 | 0.518927394 | 0.279852406 |
| 0.285622334 | 0.211204768 | 0.349327347 | 0.402324104 |
| 0.222471568 | 0.315406619 | 0.102700018 | 0.324113099 |
| 0.38084923  | 0.046714941 | 0.052648336 | 0.44634522  |
| 0.08017354  | 0.24172081  | 0.42311062  | 0.474732388 |
| 0.458987754 | 0.059968792 | 0.254859381 | 0.254197265 |
| 0.268251152 | 0.246037765 | 0.398277112 | 0.244385749 |
| 0.288004845 | 0.361950782 | 0.040209498 | 0.411049848 |
| 0.103616462 | 0.303880719 | 0.362406068 | 0.081292249 |
| 0.401541439 | 0.323743334 | 0.466893969 | 0.41044857  |
| 0.423215079 | 0.009110979 | 0.152075897 | 0.363737954 |
| 0.325165287 | 0.40151575  | 0.463632938 | 0.093396482 |
| 0.220772302 | 0.355465983 | 0.118560981 | 0.359121386 |
| 0.384853359 | 0.239569893 | 0.209866368 | 0.000519695 |
| 0.125445532 | 0.440042918 | 0.421350793 | 0.038200252 |
| 0.250502266 | 0.096286743 | 0.099006939 | 0.478982361 |
| 0.178114167 | 0.496808177 | 0.019105563 | 0.163241609 |
| 0.244421075 | 0.430422871 | 0.448769842 | 0.264950389 |
| 0.480456683 | 0.31716014  | 0.461127428 | 0.362855445 |
| 0.279208164 | 0.334806702 | 0.198249893 | 0.241789654 |
| 0.492816602 | 0.490317223 | 0.492348923 | 0.480286947 |
| 0.244044734 | 0.363281292 | 0.330670725 | 0.249280916 |
| 0.374867939 | 0.388707602 | 0.068013206 | 0.468560324 |
| 0.000418575 | 0.319837034 | 0.476295853 | 0.207808503 |
| 0.467331931 | 0.229468081 | 0.052800709 | 0.215718326 |
| 0.512541251 | 0.466460991 | 0.404072168 | 0.456728611 |
| 0.250219324 | 0.006337378 | 0.44282534  | 0.390668316 |
| 0.520074236 | 0.389758676 | 0.417281612 | 0.077719234 |
| 0.478615205 | 0.353343629 | 0.431680125 | 0.440162923 |
| 0.478821106 | 0.437145964 | 0.21053508  | 0.348362884 |
| 0.017107752 | 0.240910409 | 0.451764956 | 0.223126101 |
| 0.34396427  | 0.172229582 | 0.485521953 | 0.29238815  |
| 0.452492674 | 0.341450987 | 0.425729246 | 0.073701255 |
| 0.152190655 | 0.476410107 | 0.067047496 | 0.425263139 |
| 0.517275405 | 0.339557436 | 0.494127876 | 0.505106085 |
| 0.291395701 | 0.369043126 | 0.475591035 | 0.425696527 |
| 0.000606298 | 0.455065181 | 0.440681208 | 0.311524761 |
| 0.474413359 | 0.26290725  | 0.24427877  | 0.484281089 |
| 0.000805307 | 0.128277053 | 0.356954376 | 0.435858875 |
| 0.495453141 | 0.022689596 | 0.079748914 | 0.474787527 |
| 0.451457204 | 0.049718749 | 0.503371994 | 0.332484347 |
| 0.47246843  | 0.429907439 | 0.162781006 | 0.455232453 |
| 0.315893801 | 0.365860711 | 0.035346463 | 0.460787802 |
| 0.43962493  | 0.092580151 | 0.102313731 | 0.502651949 |
| 0.436890092 | 0.37745533  | 0.223418206 | 0.012122552 |
| 0.392279444 | 0.281899267 | 0.498369101 | 0.09519902  |
| 0.409781072 | 0.339416901 | 0.443903596 | 0.475362849 |
| 0.449894764 | 0.397108877 | 0.353456651 | 0.463804197 |
| 0.163541647 | 0.453816032 | 0.451117572 | 0.054491824 |
| 0.404720821 | 0.490310156 | 0.457602789 | 0.159445209 |
| 0.348715671 | 0.143171785 | 0.178491076 | 0.304725399 |

|             |             |             |             |
|-------------|-------------|-------------|-------------|
| 0.446841431 | 0.49024524  | 0.047353426 | 0.132300377 |
| 0.396947487 | 0.2710207   | 0.095478117 | 0.316856173 |
| 0.24481327  | 0.239485734 | 0.147497682 | 0.34449844  |
| 0.431061216 | 0.269888281 | 0.471452363 | 0.192586764 |
| 0.479179122 | 0.036853786 | 0.427427484 | 0.248554584 |
| 0.249241232 | 0.44288479  | 0.408860756 | 0.136930611 |
| 0.029212589 | 0.110505573 | 0.389395369 | 0.381403819 |
| 0.061856899 | 0.161476352 | 0.247811733 | 0.355432828 |
| 0.508204919 | 0.441517433 | 0.245658628 | 0.311966068 |
| 0.371290965 | 0.139474879 | 0.434509254 | 0.311607821 |
| 0.398274528 | 0.340996798 | 0.460768473 | 0.009385624 |
| 0.479510087 | 0.181427614 | 0.207131009 | 0.396994428 |
| 0.472651978 | 0.11645323  | 0.37822543  | 0.135949356 |
| 0.209758668 | 0.00271037  | 0.326614506 | 0.455571532 |
| 0.251250976 | 0.312498393 | 0.337446017 | 0.255173194 |
| 0.493343464 | 0.388589163 | 0.423494485 | 0.324831626 |
| 0.392323746 | 0.043358707 | 0.161359141 | 0.025194848 |
| 0.375514247 | 0.356984655 | 0.41812143  | 0.39082677  |
| 0.189581473 | 0.473544595 | 0.368664549 | 0.452810251 |
| 0.495393112 | 0.221142705 | 0.521799289 | 0.2727406   |
| 0.418401199 | 0.381208386 | 0.228452133 | 0.305509005 |
| 0.194676543 | 0.123475039 | 0.101897686 | 0.132192844 |
| 1           | 0.2920747   | 0.411749857 | 0.318800858 |
| 0.042403898 | 0.383431725 | 0.43369415  | 0.477497547 |
| 0.452540986 | 0.428675003 | 0.392309149 | 0.358256341 |
| 0.310968389 | 0.273359911 | 0.087811919 | 0.048821575 |
| 0.330580982 | 0.178011842 | 0.39787621  | 0.440677207 |
| 0.503215618 | 0.287115273 | 0.080372891 | 0.109976879 |
| 0.15456092  | 0.391920827 | 0.262155216 | 0.246690336 |
| 0.441082293 | 0.334225323 | 0.00040576  | 0.200121837 |
| 0.354569252 | 0.43191858  |             |             |
| TRIM56      | 0.123458527 | 0.377982887 | 0.01844604  |
| 0.001637246 | 0.030242287 | 0.184395646 | 0.164611761 |
| 0.101284376 | 0.03118469  | 0.022453352 | 0.280300912 |
| 0.000507631 | 0.246875    | 0.006015795 | 0.0388439   |
| 0.328606653 | 0.353466687 | 0.240036057 | 0.376513134 |
| 0.134067364 | 0.011834229 | 0.255759792 | 0.153510523 |
| 0.178702027 | 0.000777267 | 0.059114348 | 0.003270607 |
| 0.096934117 | 0.321207361 | 0.141520245 | 0.027150659 |
| 0.282099601 | 0.272359074 | 0.056593647 | 0.041472261 |
| 0.017436971 | 0.3820915   | 0.048899657 | 0.246766246 |
| 0.254683409 | 0.076288858 | 0.270188681 | 0.009598004 |
| 0.000123148 | 0.050248285 | 0.07497371  | 0.213478976 |
| 0.156300201 | 0.152595606 | 0.151702852 | 0.075135226 |
| 0.007733243 | 0.308015422 | 0.294952886 | 0.008305745 |
| 0.376760351 | 0.000171349 | 0.385618946 | 0.061765716 |
| 0.042324205 | 0.172711398 | 0.097897242 | 0.222176601 |
| 0.230930916 | 0.383807971 | 0.388281798 | 0.011607519 |
| 0.055117749 | 0.162432239 | 0.186825797 | 0.166702106 |
| 0.340791654 | 0.025930156 | 0.048827282 | 0.113127777 |
| 0.200032054 | 0.230476602 | 0.280776177 | 0.066050715 |
| 0.000252093 | 0.091651257 | 0.056692001 | 0.181016398 |
| 0.142136888 | 0.310131564 | 0.178159154 | 0.075255421 |
| 0.106436919 | 0.008677438 | 0.208368993 | 0.367130243 |

|             |             |             |             |
|-------------|-------------|-------------|-------------|
| 0.003189567 | 0.284071901 | 0.002934886 | 0.057160946 |
| 0.259882093 | 0.272683282 | 0.197848356 | 0.018362093 |
| 0.008833889 | 0.072881736 | 0.018142454 | 0.237414749 |
| 0.201417448 | 0.165507309 | 0.374481545 | 0.043012203 |
| 0.206732206 | 0.024307239 | 0.12546947  | 0.359076854 |
| 0.324019947 | 0.008573077 | 0.052620493 | 0.185544095 |
| 0.04022585  | 0.017472259 | 0.188295501 | 0.001803659 |
| 0.001434391 | 0.00770478  | 0.296431579 | 0.057344342 |
| 0.038278607 | 0.121797791 | 0.012066941 | 0.186252651 |
| 0.092969902 | 0.29996994  | 0.038804374 | 0.130747113 |
| 0.192418735 | 0.185247968 | 0.123835402 | 0.230159436 |
| 0.089396296 | 0.077928359 | 0.064004104 | 0.395312635 |
| 0.40207544  | 0.020699691 | 0.020225142 | 0.221540936 |
| 0.214753963 | 0.324833248 | 0.381634748 | 0.054729978 |
| 0.087638658 | 0.181956899 | 0.035098091 | 0.210707353 |
| 0.223555213 | 0.230284855 | 0.016667034 | 0.350950863 |
| 0.376009717 | 0.003023367 | 0.03289538  | 0.278795332 |
| 0.010024674 | 0.054337515 | 0.334659041 | 0.313558329 |
| 0.253796903 | 0.002394796 | 0.047360944 | 0.150581463 |
| 0.181505706 | 0.116091745 | 0.254033035 | 0.03412307  |
| 0.228945285 | 0.034367195 | 0.026506495 | 0.214315152 |
| 0.094886221 | 0.228630539 | 0.016518018 | 0.010206693 |
| 0.220535751 | 0.122842455 | 0.289655838 | 0.20879376  |
| 0.198733823 | 0.000125084 | 0.01957136  | 0.154582679 |
| 0.026462772 | 0.280984133 | 0.381622129 | 0.10643347  |
| 0.214475254 | 0.084866722 | 0.124626059 | 0.107277365 |
| 0.308372082 | 0.021989593 | 0.019627543 | 0.000113901 |
| 0.042381785 | 0.047982736 | 0.1882827   | 0.016345046 |
| 0.045158133 | 0.018569214 | 0.028289124 | 0.306175526 |
| 0.143502962 | 0.291224127 | 0.012729187 | 0.046009811 |
| 0.075262679 | 0.303259304 | 0.045271298 | 0.023701038 |
| 0.27831887  | 0.042726497 | 0.235814885 | 0.348698999 |
| 0.076203102 | 0.256410032 | 0.038819722 | 0.127464624 |
| 0.158970425 | 0.328289267 | 0.231170796 | 0.326173692 |
| 0.122204686 | 0.276039437 | 0.029340615 | 0.227129028 |
| 0.193905212 | 0.245555935 | 0.025124614 | 0.41606145  |
| 0.000262603 | 0.252594356 | 0.162582616 | 0.022475282 |
| 0.354991134 | 0.195235889 | 0.033508977 | 0.108908616 |
| 0.378412468 | 0.426291187 | 0.347545563 | 0.238486494 |
| 0.024661752 | 0.005649964 | 0.385288646 | 0.301556902 |
| 0.326591542 | 0.190436697 | 0.055237923 | 0.040974694 |
| 0.340499077 | 0.18028605  | 0.174896239 | 0.106754176 |
| 0.215447373 | 0.121416133 | 0.211426622 | 0.232246499 |
| 0.001917762 | 0.063699599 | 0.140790485 | 0.016360156 |
| 0.04675982  | 0.028125159 | 0.307606046 | 0.331425969 |
| 0.071968589 | 0.016078469 | 0.049016873 | 0.043710329 |
| 0.168222598 | 0.363827549 | 0.026376153 | 0.376384757 |
| 0.377522822 | 0.285726158 | 0.307692808 | 0.374534211 |
| 0.149258424 | 0.352730967 | 0.315650848 | 0.31841618  |
| 0.000409244 | 0.244188776 | 0.209099103 | 0.354440264 |
| 0.24421161  | 0.210724974 | 0.091854432 | 0.098717988 |
| 0.00420474  | 0.115855532 | 0.011926501 | 0.428338309 |
| 0.313906803 | 0.013673477 | 0.02207429  | 0.30404007  |
| 0.185127541 | 0.01323881  | 0.385671299 | 0.13112579  |

|             |             |             |             |
|-------------|-------------|-------------|-------------|
| 0.332627968 | 0.210674332 | 0.085344366 | 0.221423205 |
| 0.012061738 | 0.112519451 | 0.008038379 | 0.198883311 |
| 0.188906488 | 0.025736802 | 0.00962987  | 0.387515061 |
| 0.282285193 | 0.321513201 | 0.221828198 | 0.000303474 |
| 0.222954844 | 0.009974645 | 0.228294785 | 0.05018534  |
| 0.331560779 | 0.323475903 | 0.392855201 | 0.256235522 |
| 0.233651424 | 0.328103761 | 0.310131919 | 0.284604515 |
| 0.009987897 | 0.1949927   | 0.240851009 | 0.010026582 |
| 0.13336984  | 0.333561212 | 0.107357103 | 0.144954658 |
| 0.26462677  | 0.008129313 | 0.175387381 | 0.156524385 |
| 0.361767448 | 0.298122746 | 0.022144056 | 0.073542716 |
| 0.319256384 | 0.110710464 | 0.089674719 | 0.226215366 |
| 0.256981477 | 0.006789029 | 0.038428392 | 0.315193551 |
| 0.383327075 | 0.26852363  | 0.253526584 | 0.011907524 |
| 0.321865691 | 0.026451599 | 0.360005733 | 0.063943707 |
| 0.204076567 | 0.111320386 | 0.21354693  | 0.009629289 |
| 0.000971325 | 0.017080648 | 0.310822412 | 0.359724537 |
| 0.043441602 | 0.148685256 | 0.113269775 | 0.180528572 |
| 0.317053378 | 0.039664627 | 0.227686942 | 0.185608791 |
| 0.390891975 | 0.009733328 | 0.396062259 | 0.155580502 |
| 0.263752294 | 0.090701585 | 0.311228497 | 0.001699913 |
| 0.192729202 | 0.026822587 | 0.085568099 | 0.13799936  |
| 0.266177044 | 0.059495079 | 0.302339108 | 0.067254982 |
| 0.017038579 | 0.002690771 | 0.31431109  | 0.090124532 |
| 0.262533784 | 0.045486192 | 0.183464302 | 0.008856664 |
| 0.4094941   | 0.149924368 | 0.22229383  | 0.098023255 |
| 0.094024485 | 0.003703958 | 0.035841061 | 0.011619325 |
| 0.265612346 | 0.365573146 | 0.20745359  | 0.104409122 |
| 0.055088005 | 0.256279817 | 0.309867513 | 0.146028487 |
| 0.31281292  | 0.007874195 | 0.334664238 | 0.165957904 |
| 0.2156519   | 0.041118377 | 0.245332683 | 0.068723463 |
| 0.125120728 | 0.043590887 | 0.086633196 | 0.042461346 |
| 0.2920747   | 1           | 0.166136613 | 0.025899977 |
| 0.012027532 | 0.109156991 | 0.274721022 | 0.210836159 |
| 0.160591854 | 0.14615562  | 0.081177796 | 0.38063411  |
| 0.026052528 | 0.097098021 | 0.003550076 | 0.002701486 |
| 0.015367317 | 0.073721965 | 0.326171683 | 0.341153504 |
| 0.370183769 | 0.031850726 | 0.046203809 | 0.06776937  |
| 0.032647418 | 0.21194568  | 0.202156532 | 0.021286894 |
| 0.266345857 | 0.050347597 | 0.000291297 | 0.06688716  |
| 0.300670884 | 0.029992186 |             |             |
| TRP53       | 0.12842611  | 0.478334218 | 0.081038372 |
| 0.057873668 | 0.192356877 | 0.240431601 | 0.240071247 |
| 0.119678621 | 0.089578549 | 0.173834446 | 0.35728247  |
| 0.000385791 | 0.252434496 | 0.008445704 | 0.052182569 |
| 0.403846278 | 0.426064156 | 0.288107939 | 0.401205756 |
| 0.120859716 | 0.181247144 | 0.242740419 | 0.274851256 |
| 0.221886753 | 0.000709824 | 0.182144937 | 0.107775671 |
| 0.119202472 | 0.375174432 | 0.14829785  | 0.208823565 |
| 0.337974458 | 0.364046685 | 0.224171596 | 0.263969078 |
| 0.144633641 | 0.460703304 | 0.064116353 | 0.310712368 |
| 0.258391866 | 0.248289195 | 0.352864347 | 0.013090912 |
| 0.008320861 | 0.142603028 | 0.102138956 | 0.256008119 |
| 0.127945774 | 0.200219513 | 0.135264723 | 0.22042023  |

|             |             |             |             |
|-------------|-------------|-------------|-------------|
| 0.050145144 | 0.359028543 | 0.258547752 | 0.055425078 |
| 0.473592003 | 0.013436898 | 0.475591621 | 0.073691155 |
| 0.075760685 | 0.17237007  | 0.119888885 | 0.264540993 |
| 0.286300583 | 0.487689839 | 0.464116061 | 0.071457459 |
| 0.096199726 | 0.179736344 | 0.276582243 | 0.326850883 |
| 0.414249168 | 0.202609525 | 0.233764576 | 0.151223259 |
| 0.284350957 | 0.261321718 | 0.236907209 | 0.135893315 |
| 0.000672753 | 0.193925773 | 0.284467395 | 0.156692199 |
| 0.199564754 | 0.376587207 | 0.17641059  | 0.245675403 |
| 0.178885124 | 0.021513935 | 0.23639541  | 0.450495299 |
| 0.032800762 | 0.268244847 | 0.01320699  | 0.116411096 |
| 0.307186067 | 0.324417771 | 0.237249679 | 0.112777638 |
| 0.014376009 | 0.082855943 | 0.038556515 | 0.25544641  |
| 0.191674955 | 0.214781211 | 0.45071127  | 0.032740501 |
| 0.228701793 | 0.090921045 | 0.219820101 | 0.48246814  |
| 0.409518963 | 0.005448988 | 0.082933779 | 0.222317933 |
| 0.182862703 | 0.167203738 | 0.21777968  | 0.016113459 |
| 0.019368367 | 0.003751947 | 0.348775597 | 0.109277984 |
| 0.160834093 | 0.202266648 | 0.12437227  | 0.322874051 |
| 0.115730886 | 0.289858095 | 0.196576264 | 0.235013808 |
| 0.280155924 | 0.268638752 | 0.27276724  | 0.320594133 |
| 0.251682104 | 0.112973643 | 0.112472144 | 0.477865044 |
| 0.400572238 | 0.098587135 | 0.081484683 | 0.294102542 |
| 0.237652386 | 0.395618947 | 0.462864136 | 0.13856911  |
| 0.288129355 | 0.155636898 | 0.176711855 | 0.362482683 |
| 0.232559618 | 0.147113183 | 0.021582508 | 0.322068556 |
| 0.466320894 | 0.018601819 | 0.073703877 | 0.292133001 |
| 0.119650926 | 0.221402044 | 0.412781464 | 0.382167379 |
| 0.248494076 | 0.089216455 | 0.231138908 | 0.233236098 |
| 0.174246773 | 0.218098058 | 0.255530472 | 0.211537853 |
| 0.250097172 | 0.182734369 | 0.07470989  | 0.238839518 |
| 0.122845251 | 0.199686797 | 0.103467251 | 0.035737294 |
| 0.190695002 | 0.13749237  | 0.410094362 | 0.213562676 |
| 0.230864683 | 0.014088018 | 0.174922093 | 0.165861144 |
| 0.147495459 | 0.256678621 | 0.510520521 | 0.113786121 |
| 0.165762737 | 0.124645363 | 0.120742978 | 0.287847469 |
| 0.261444358 | 0.180482197 | 0.170032583 | 0.000831596 |
| 0.160021757 | 0.155157573 | 0.188590826 | 0.026830847 |
| 0.272825799 | 0.079941187 | 0.037396264 | 0.418959991 |
| 0.169674462 | 0.374386384 | 0.009086862 | 0.036873971 |
| 0.191594873 | 0.432486043 | 0.21729833  | 0.095366133 |
| 0.416622534 | 0.203693273 | 0.278610357 | 0.38488108  |
| 0.260453598 | 0.372856167 | 0.046573851 | 0.150463158 |
| 0.220104595 | 0.428772073 | 0.339625773 | 0.371699938 |
| 0.212585382 | 0.193942142 | 0.113326323 | 0.257979136 |
| 0.191413155 | 0.196221558 | 0.073888159 | 0.477048136 |
| 0.000507064 | 0.250735642 | 0.269829596 | 0.043674984 |
| 0.497209467 | 0.281064418 | 0.061322711 | 0.115200778 |
| 0.411023122 | 0.471849618 | 0.305053291 | 0.315264932 |
| 0.067548048 | 0.005130179 | 0.395762054 | 0.340458962 |
| 0.386792006 | 0.24081202  | 0.213245164 | 0.020199677 |
| 0.423375418 | 0.128507299 | 0.274346932 | 0.163062904 |
| 0.252099822 | 0.183082012 | 0.155572361 | 0.165095044 |
| 0.004049591 | 0.176627823 | 0.229990841 | 0.15612425  |

|             |             |             |             |
|-------------|-------------|-------------|-------------|
| 0.215886168 | 0.115611979 | 0.415600049 | 0.303378965 |
| 0.254052103 | 0.108001776 | 0.248846065 | 0.122641227 |
| 0.164557899 | 0.473204493 | 0.025637181 | 0.369993369 |
| 0.448049767 | 0.204621711 | 0.444408007 | 0.423576532 |
| 0.16256264  | 0.416336196 | 0.431689871 | 0.294383874 |
| 0.000335812 | 0.303723788 | 0.245628796 | 0.353674089 |
| 0.355412649 | 0.246654554 | 0.060583851 | 0.175032502 |
| 0.000936094 | 0.126522369 | 0.121132674 | 0.447635842 |
| 0.423788115 | 0.046367751 | 0.023392506 | 0.380377184 |
| 0.227329675 | 0.01804833  | 0.464423609 | 0.233137451 |
| 0.46933955  | 0.237998038 | 0.188236048 | 0.281736381 |
| 0.084125422 | 0.148376253 | 0.060880295 | 0.329762131 |
| 0.190432376 | 0.021124443 | 0.158623204 | 0.425774014 |
| 0.36205349  | 0.388893738 | 0.207432982 | 0.014656212 |
| 0.230257609 | 0.163751976 | 0.372518248 | 0.094967862 |
| 0.345073009 | 0.365506057 | 0.463158749 | 0.314415462 |
| 0.248924861 | 0.428990769 | 0.389649341 | 0.392206016 |
| 0.115595599 | 0.279751908 | 0.316860492 | 0.075208501 |
| 0.150567014 | 0.431414694 | 0.232035069 | 0.196091124 |
| 0.249479993 | 0.135575775 | 0.201676411 | 0.113326628 |
| 0.481140537 | 0.423278517 | 0.0735515   | 0.089015513 |
| 0.441801642 | 0.181919494 | 0.141020514 | 0.188004297 |
| 0.250806272 | 0.048281083 | 0.033701568 | 0.310958849 |
| 0.493315657 | 0.335647958 | 0.370404932 | 0.183379558 |
| 0.378228098 | 0.045825838 | 0.315307933 | 0.221416321 |
| 0.170630614 | 0.182748099 | 0.241417538 | 0.027999664 |
| 0.025882115 | 0.067499867 | 0.445260503 | 0.428399304 |
| 0.087086769 | 0.135021003 | 0.232601766 | 0.307381139 |
| 0.402199349 | 0.192168567 | 0.244179378 | 0.163739111 |
| 0.450913384 | 0.155216409 | 0.453100069 | 0.162517603 |
| 0.29980992  | 0.263920497 | 0.360019912 | 0.006823414 |
| 0.254632851 | 0.184532889 | 0.050689536 | 0.284049569 |
| 0.299246954 | 0.13947741  | 0.39740157  | 0.108052833 |
| 0.113938306 | 0.00161155  | 0.261564211 | 0.173773141 |
| 0.303994049 | 0.086726099 | 0.170763328 | 0.063854325 |
| 0.483082532 | 0.195507669 | 0.288908994 | 0.097857431 |
| 0.242533416 | 0.021154529 | 0.186559273 | 0.032245034 |
| 0.277671394 | 0.342423164 | 0.209822584 | 0.135929423 |
| 0.055499952 | 0.320804341 | 0.33050404  | 0.281340691 |
| 0.43304499  | 0.076173589 | 0.434648102 | 0.137688447 |
| 0.25286172  | 0.174677314 | 0.232118128 | 0.16382617  |
| 0.234488566 | 0.068838219 | 0.12613728  | 0.064989253 |
| 0.411749857 | 0.166136613 | 1           | 0.112501812 |
| 0.079688029 | 0.247093029 | 0.260719565 | 0.283610713 |
| 0.264193169 | 0.210615836 | 0.136167543 | 0.426864351 |
| 0.109853163 | 0.119837232 | 0.097615645 | 0.080163768 |
| 0.175833328 | 0.180652445 | 0.294898295 | 0.34677772  |
| 0.423975649 | 0.081703908 | 0.10134411  | 0.081966089 |
| 0.036624611 | 0.214296988 | 0.304778557 | 0.133880488 |
| 0.256963497 | 0.095724536 | 0.000631382 | 0.08729912  |
| 0.330237236 | 0.18647755  |             |             |
| TRPC1       | 0.251659359 | 0.352105206 | 0.021319903 |
| 0.004448062 | 0.009964524 | 0.156166725 | 0.090527195 |
| 0.176156502 | 0.030767767 | 0.03235982  | 0.215088925 |

|             |             |             |             |
|-------------|-------------|-------------|-------------|
| 0.00482247  | 0.21795347  | 0.017560766 | 0.014855313 |
| 0.387538343 | 0.361906631 | 0.10682742  | 0.357472539 |
| 0.20251101  | 0.021579477 | 0.282027559 | 0.218543445 |
| 0.134479984 | 0.005812251 | 0.035675375 | 0.011503364 |
| 0.127562431 | 0.360976769 | 0.106277336 | 0.051000982 |
| 0.371117915 | 0.2847099   | 0.06203781  | 0.022952929 |
| 0.017234761 | 0.35124166  | 0.004774633 | 0.196751174 |
| 0.27304895  | 0.052803922 | 0.288925085 | 0.007644164 |
| 0.000250018 | 0.0306331   | 0.111849327 | 0.292205843 |
| 0.121512856 | 0.139817438 | 0.090858752 | 0.049946701 |
| 0.018818394 | 0.236813732 | 0.335821071 | 0.016216779 |
| 0.274218129 | 0.001113876 | 0.321853126 | 0.137289019 |
| 0.025527884 | 0.119055196 | 0.164561963 | 0.262426617 |
| 0.146190896 | 0.29732502  | 0.347971546 | 0.006515426 |
| 0.039973544 | 0.166200187 | 0.281150527 | 0.182195046 |
| 0.338853117 | 0.063917811 | 0.037329156 | 0.058830114 |
| 0.23941689  | 0.28068138  | 0.167349386 | 0.034081522 |
| 0.002053163 | 0.056818729 | 0.034388527 | 0.270748845 |
| 0.169681777 | 0.243371589 | 0.218398035 | 0.036086875 |
| 0.176238838 | 0.012018955 | 0.223720721 | 0.371292503 |
| 0.004765159 | 0.22433154  | 0.001253579 | 0.02619338  |
| 0.316856147 | 0.344053904 | 0.313215412 | 0.015435207 |
| 0.008626866 | 0.045949736 | 0.060796467 | 0.277062779 |
| 0.17861117  | 0.162412501 | 0.262099446 | 0.0205817   |
| 0.215208185 | 0.067377811 | 0.060626626 | 0.349105184 |
| 0.383575241 | 0.00472854  | 0.046031252 | 0.124391013 |
| 0.030401202 | 0.013417061 | 0.089809488 | 0.016970936 |
| 0.003710562 | 0.012947062 | 0.339757774 | 0.057470223 |
| 0.027722086 | 0.090623636 | 0.013804093 | 0.169570028 |
| 0.112877429 | 0.334192814 | 0.010064006 | 0.093323394 |
| 0.208061574 | 0.105689918 | 0.098027826 | 0.242837089 |
| 0.034054272 | 0.071994229 | 0.077009081 | 0.274361706 |
| 0.329908468 | 0.01588524  | 0.030509444 | 0.233775015 |
| 0.195117896 | 0.36623815  | 0.384959547 | 0.050805349 |
| 0.034138119 | 0.109949358 | 0.074035903 | 0.200335045 |
| 0.105476255 | 0.166795954 | 0.010977975 | 0.211594737 |
| 0.299447603 | 0.007909553 | 0.029932132 | 0.291338528 |
| 0.002640807 | 0.023204992 | 0.364292484 | 0.247476871 |
| 0.142761057 | 0.011363542 | 0.065810376 | 0.127429133 |
| 0.196771052 | 0.119082167 | 0.232768855 | 0.057350928 |
| 0.240406933 | 0.082370591 | 0.014192439 | 0.209046241 |
| 0.061303318 | 0.224956531 | 0.050431451 | 0.01060398  |
| 0.219302965 | 0.10567173  | 0.325752906 | 0.208034018 |
| 0.285285952 | 0.000856744 | 0.034587816 | 0.283427805 |
| 0.073957411 | 0.267101745 | 0.344714302 | 0.060866081 |
| 0.174797663 | 0.027175618 | 0.078837107 | 0.037671177 |
| 0.332162581 | 0.042528634 | 0.043206282 | 0.00400697  |
| 0.018188622 | 0.117736064 | 0.122799773 | 0.035740296 |
| 0.023584215 | 0.054998565 | 0.033877557 | 0.321357619 |
| 0.115436011 | 0.218988929 | 0.01926784  | 0.022596529 |
| 0.08273812  | 0.210294725 | 0.068265351 | 0.082945787 |
| 0.234311328 | 0.067712105 | 0.31447645  | 0.282174482 |
| 0.019504431 | 0.258951876 | 0.014520867 | 0.092139891 |
| 0.168431012 | 0.290286491 | 0.28972043  | 0.231900532 |

|             |             |             |             |
|-------------|-------------|-------------|-------------|
| 0.09065438  | 0.229188025 | 0.040171398 | 0.198801575 |
| 0.22217405  | 0.152461831 | 0.033868188 | 0.340988288 |
| 0.002969421 | 0.190882517 | 0.162730573 | 0.022736894 |
| 0.339963482 | 0.112119685 | 0.034925021 | 0.119254026 |
| 0.366184882 | 0.343550726 | 0.336486321 | 0.322375447 |
| 0.0341877   | 0.01334279  | 0.366387856 | 0.255084874 |
| 0.352587517 | 0.087995011 | 0.024488685 | 0.008996182 |
| 0.335436203 | 0.161777837 | 0.272717755 | 0.23241874  |
| 0.124370711 | 0.049923277 | 0.1068223   | 0.227074595 |
| 0.009379919 | 0.119787888 | 0.277257824 | 0.029453433 |
| 0.083323609 | 0.036700539 | 0.261337319 | 0.193453902 |
| 0.037267631 | 0.092160299 | 0.048168523 | 0.025562292 |
| 0.083375169 | 0.379238022 | 0.001754029 | 0.365359399 |
| 0.374619592 | 0.136895643 | 0.319936109 | 0.38402419  |
| 0.205847447 | 0.231982767 | 0.336296978 | 0.318366603 |
| 0.001990345 | 0.276277685 | 0.182873819 | 0.24807477  |
| 0.346008628 | 0.180916924 | 0.084458846 | 0.085394534 |
| 0.000380304 | 0.097851248 | 0.027262043 | 0.362935553 |
| 0.285809534 | 0.006817277 | 0.001479052 | 0.253294156 |
| 0.167902443 | 0.005074278 | 0.392987197 | 0.15602054  |
| 0.28948822  | 0.113197971 | 0.068825285 | 0.231936362 |
| 0.026449624 | 0.060610582 | 0.00286457  | 0.190647308 |
| 0.084013944 | 0.016711318 | 0.011687605 | 0.374023071 |
| 0.370312138 | 0.189031083 | 0.131107839 | 0.011785774 |
| 0.306710525 | 0.032342564 | 0.251309112 | 0.019379741 |
| 0.310461444 | 0.228626602 | 0.283290991 | 0.241744415 |
| 0.169223811 | 0.27144526  | 0.281495003 | 0.333474453 |
| 0.010423019 | 0.303864906 | 0.33946045  | 0.017714414 |
| 0.191594747 | 0.312322332 | 0.138144238 | 0.096262175 |
| 0.25763934  | 0.006091275 | 0.134444374 | 0.200019594 |
| 0.28436457  | 0.326778255 | 0.024894013 | 0.043712593 |
| 0.277266135 | 0.063746737 | 0.036640268 | 0.099800086 |
| 0.186257436 | 0.031098313 | 0.017689459 | 0.231761907 |
| 0.325615482 | 0.166098928 | 0.371130027 | 0.027178774 |
| 0.284742256 | 0.018300123 | 0.276189356 | 0.027266513 |
| 0.17465028  | 0.226656659 | 0.288678539 | 0.038568817 |
| 0.026900066 | 0.07070422  | 0.24482383  | 0.292100835 |
| 0.037081637 | 0.120271466 | 0.10008582  | 0.122403685 |
| 0.357279513 | 0.060098289 | 0.164538869 | 0.133073339 |
| 0.280820759 | 0.011762761 | 0.376822307 | 0.194284901 |
| 0.353272953 | 0.079883186 | 0.26011476  | 0.002706564 |
| 0.207646287 | 0.050269575 | 0.112517666 | 0.109819789 |
| 0.331224565 | 0.050848483 | 0.178928457 | 0.069570433 |
| 0.021459628 | 0.001865709 | 0.250749523 | 0.066085878 |
| 0.198072701 | 0.039362975 | 0.141194579 | 0.013650033 |
| 0.388009913 | 0.248180352 | 0.365066028 | 0.033882275 |
| 0.118814896 | 0.000658601 | 0.040599415 | 0.018594761 |
| 0.335243424 | 0.240145487 | 0.226944251 | 0.242249298 |
| 0.092398578 | 0.160818589 | 0.199207034 | 0.090115479 |
| 0.298009946 | 0.029398413 | 0.379682423 | 0.083644044 |
| 0.239229342 | 0.054418727 | 0.137558815 | 0.036763964 |
| 0.048953179 | 0.016614004 | 0.042147433 | 0.057330398 |
| 0.318800858 | 0.025899977 | 0.112501812 | 1           |
| 0.013703608 | 0.079247724 | 0.243931084 | 0.227875272 |



|             |             |             |             |
|-------------|-------------|-------------|-------------|
| 0.218872702 | 0.263532237 | 0.087677759 | 0.262824169 |
| 0.069671122 | 0.161214029 | 0.006832507 | 0.006256139 |
| 0.029454715 | 0.081438765 | 0.352280723 | 0.309474154 |
| 0.34260493  | 0.043294791 | 0.034696533 | 0.065121002 |
| 0.00840038  | 0.302080254 | 0.120432997 | 0.0085617   |
| 0.154152218 | 0.057509243 | 0.000856681 | 0.094210034 |
| 0.260370015 | 0.042190299 |             |             |
| TRPC4AP     | 0.030919733 | 0.092189253 | 0.082724763 |
| 0.004810923 | 0.037069318 | 0.260828678 | 0.227469464 |
| 0.021573329 | 0.037210292 | 0.075134451 | 0.233247085 |
| 0.001195179 | 0.016999175 | 0.017915587 | 0.020231865 |
| 0.04902731  | 0.047900331 | 0.125660537 | 0.048818972 |
| 0.048546625 | 0.013707234 | 0.110427003 | 0.110938125 |
| 0.191415511 | 0.003911652 | 0.211015653 | 0.014931604 |
| 0.013193799 | 0.038296002 | 0.17228171  | 0.037824611 |
| 0.040119769 | 0.030896718 | 0.017473474 | 0.008658687 |
| 0.001403418 | 0.134438596 | 0.000307265 | 0.022728703 |
| 0.018065137 | 0.122061034 | 0.034266591 | 0.017343343 |
| 6.36E-05    | 0.194947906 | 0.010550404 | 0.10448865  |
| 0.049001973 | 0.251244798 | 0.199536831 | 0.154066885 |
| 0.000288846 | 0.194659307 | 0.064223921 | 0.000300893 |
| 0.177857414 | 0.000981716 | 0.141369932 | 0.018052281 |
| 0.147407481 | 0.075563914 | 0.015174561 | 0.072352885 |
| 0.27111429  | 0.166130909 | 0.06832288  | 0.047084033 |
| 0.25849779  | 0.027248482 | 0.022331871 | 0.063379873 |
| 0.081146633 | 0.022019987 | 0.042897521 | 0.006166799 |
| 0.029074978 | 0.022490912 | 0.182945337 | 0.073737843 |
| 0.001585316 | 0.242690104 | 0.020473071 | 0.023461487 |
| 0.012599241 | 0.199671548 | 0.02857924  | 0.083054834 |
| 0.025102854 | 0.066389508 | 0.111353193 | 0.060828187 |
| 0.008397539 | 0.024190741 | 0.002944464 | 0.043668108 |
| 0.042287214 | 0.025878508 | 0.053835455 | 0.087888532 |
| 0.030142002 | 0.085733141 | 0.004316742 | 0.014958348 |
| 0.047577453 | 0.041060509 | 0.168182412 | 0.000621812 |
| 0.011303994 | 0.021597218 | 0.045187206 | 0.141457991 |
| 0.066767935 | 0.017454007 | 0.044717995 | 0.275197994 |
| 0.004564745 | 0.01062954  | 0.224493641 | 0.001073518 |
| 0.010550827 | 0.001353989 | 0.036793356 | 0.088283294 |
| 0.157319133 | 0.232590061 | 0.034551914 | 0.0387567   |
| 0.015113899 | 0.029431472 | 0.045103794 | 0.16913826  |
| 0.023510056 | 0.213231469 | 0.041610202 | 0.037788973 |
| 0.013479548 | 0.031487532 | 0.143592308 | 0.105164236 |
| 0.137641524 | 0.064127445 | 0.057113652 | 0.20247106  |
| 0.012266327 | 0.050132812 | 0.069748337 | 0.02110018  |
| 0.06661915  | 0.126919815 | 0.020316441 | 0.132925113 |
| 0.216148139 | 0.05472258  | 0.000314499 | 0.166692104 |
| 0.185222012 | 0.001159279 | 0.156493188 | 0.04190794  |
| 0.008308025 | 0.019604967 | 0.116144424 | 0.064703412 |
| 0.035641264 | 0.013771031 | 0.088413005 | 0.180596141 |
| 0.128878018 | 0.189146762 | 0.066148623 | 0.062263239 |
| 0.181410965 | 0.022402714 | 0.172781982 | 0.012060826 |
| 0.240616604 | 0.111390723 | 0.002026581 | 0.001254317 |
| 0.030825805 | 0.029748053 | 0.083994709 | 0.050918177 |
| 0.030273871 | 0.001092424 | 0.074995119 | 0.040889615 |

|             |             |             |             |
|-------------|-------------|-------------|-------------|
| 0.015989059 | 0.02136057  | 0.110158436 | 0.248568354 |
| 0.161585367 | 0.003194052 | 0.213418947 | 0.036873487 |
| 0.04580397  | 0.0197075   | 0.024529442 | 0.005294842 |
| 0.045495363 | 0.011588129 | 0.031073248 | 0.024712598 |
| 0.056328815 | 0.037798899 | 0.006154652 | 0.068595247 |
| 0.240970112 | 0.040513556 | 0.007345803 | 0.001735581 |
| 0.111707625 | 0.114975028 | 0.016868927 | 0.006724268 |
| 0.072026844 | 0.044972955 | 0.018507883 | 0.158973942 |
| 0.026420086 | 0.210709069 | 0.00045828  | 0.062322379 |
| 0.02115597  | 0.058310776 | 0.033598976 | 0.048142309 |
| 0.126916709 | 0.036724876 | 0.002801955 | 0.241074743 |
| 0.066269682 | 0.052641025 | 0.101788283 | 0.092148247 |
| 0.004601248 | 0.145979199 | 0.045513713 | 0.000604079 |
| 0.105551766 | 0.254265792 | 0.126581125 | 0.068785305 |
| 0.051158243 | 0.093448694 | 0.05511962  | 0.027515834 |
| 0.001485313 | 0.015462249 | 0.072860983 | 0.111362128 |
| 0.037321926 | 0.051164658 | 0.005298486 | 0.000792412 |
| 0.064155434 | 0.015881553 | 0.066955652 | 0.026570475 |
| 0.027418972 | 0.008802198 | 0.128526197 | 0.02460189  |
| 0.000376986 | 0.106217492 | 0.036490877 | 0.009604356 |
| 0.043680222 | 0.015528365 | 0.060037766 | 0.191497841 |
| 0.01204738  | 0.006149546 | 0.015333494 | 0.228404163 |
| 0.236701188 | 0.093031066 | 0.000109822 | 0.073965765 |
| 0.063109669 | 0.072872445 | 0.065058699 | 0.061046178 |
| 0.105326917 | 0.166369822 | 0.076203903 | 0.03157321  |
| 0.000933615 | 0.019879289 | 0.013215367 | 0.204111988 |
| 0.038416183 | 0.188929938 | 0.006327446 | 0.009449733 |
| 0.001164144 | 0.220395136 | 0.001634922 | 0.106751751 |
| 0.053436676 | 0.053012364 | 4.04E-05    | 0.067481914 |
| 0.013573011 | 0.000760719 | 0.080351136 | 0.120706582 |
| 0.092950291 | 0.051713133 | 0.199320507 | 0.017613435 |
| 0.00095238  | 0.014759666 | 0.013851638 | 0.071781051 |
| 0.017450691 | 0.000515019 | 0.040238564 | 0.061253442 |
| 0.084291066 | 0.14806868  | 0.199001967 | 0.005710994 |
| 0.017949783 | 0.005668072 | 0.05350794  | 0.040595793 |
| 0.097538213 | 0.176413713 | 0.110649511 | 0.025899057 |
| 0.042216552 | 0.15486313  | 0.186673918 | 0.079813206 |
| 0.003002354 | 0.023951368 | 0.031819789 | 0.079717733 |
| 0.015419347 | 0.056262605 | 0.036935602 | 0.300615371 |
| 0.10467961  | 0.003684997 | 0.289443524 | 0.037557672 |
| 0.120505085 | 0.053763123 | 0.141535629 | 0.051187884 |
| 0.161682099 | 0.056521812 | 0.217975337 | 0.06686808  |
| 0.21381382  | 0.000381158 | 0.000784803 | 0.134551594 |
| 0.138603791 | 0.254551658 | 0.052880453 | 0.025700132 |
| 0.037925656 | 0.07052242  | 0.049483943 | 0.02734379  |
| 0.139281912 | 0.01895594  | 0.016030841 | 0.000976285 |
| 0.007234198 | 0.025936496 | 0.165793962 | 0.16755483  |
| 0.222976888 | 0.194092291 | 0.181658119 | 0.130914474 |
| 0.044314248 | 0.013967006 | 0.229452768 | 0.067458591 |
| 0.184352444 | 0.011578421 | 0.114260832 | 0.084869252 |
| 0.086992365 | 0.075312841 | 0.062121591 | 0.001262462 |
| 0.028023159 | 0.081679185 | 0.008496263 | 0.080567297 |
| 0.022833987 | 0.20253746  | 0.145031459 | 0.096208689 |
| 0.004261716 | 0.002750857 | 0.124420585 | 0.006922578 |

|             |             |             |             |
|-------------|-------------|-------------|-------------|
| 0.264599359 | 0.003668874 | 0.060743195 | 0.000255746 |
| 0.094719861 | 0.067404831 | 0.059974722 | 0.002971237 |
| 0.068515543 | 5.36E-05    | 0.094924018 | 0.054117146 |
| 0.094170172 | 0.137331574 | 0.033574915 | 0.028154242 |
| 0.011318634 | 0.050508294 | 0.127580435 | 0.044145984 |
| 0.054812214 | 0.001730347 | 0.054793143 | 0.038834726 |
| 0.013209787 | 0.013435731 | 0.213746482 | 0.013869886 |
| 0.163237916 | 0.004655692 | 0.164508215 | 0.026542202 |
| 0.042403898 | 0.012027532 | 0.079688029 | 0.013703608 |
| 1           | 0.052855074 | 0.030601547 | 0.023062938 |
| 0.059075978 | 0.018644858 | 0.012664383 | 0.189396263 |
| 0.005005112 | 0.044243853 | 0.005871418 | 0.010491464 |
| 0.003904315 | 0.169855713 | 0.058969137 | 0.062847674 |
| 0.052925706 | 0.003628489 | 0.150848804 | 0.0877189   |
| 0.000296222 | 0.022411806 | 0.225044961 | 0.001161966 |
| 0.045590708 | 0.004624868 | 0.004424025 | 0.030712648 |
| 0.147667699 | 0.004766473 |             |             |
| TSPAN13     | 0.145358369 | 0.473258427 | 0.06236409  |
| 0.023889341 | 0.093166833 | 0.251767447 | 0.215770763 |
| 0.125273962 | 0.063286048 | 0.093021045 | 0.37694126  |
| 0.000761676 | 0.24639162  | 0.010257316 | 0.040200879 |
| 0.405571908 | 0.413833044 | 0.265633822 | 0.403014947 |
| 0.139938713 | 0.076727026 | 0.285927593 | 0.272423153 |
| 0.221224398 | 0.001182506 | 0.104929107 | 0.039358875 |
| 0.099816326 | 0.375588768 | 0.147202087 | 0.137291764 |
| 0.341391202 | 0.341076114 | 0.11796783  | 0.109520319 |
| 0.057831224 | 0.472797581 | 0.032798311 | 0.277347775 |
| 0.251734081 | 0.140992849 | 0.324572738 | 0.010233966 |
| 0.001850014 | 0.082150258 | 0.088132397 | 0.282388177 |
| 0.117725612 | 0.218521643 | 0.139824101 | 0.125508891 |
| 0.031757151 | 0.37524814  | 0.296904385 | 0.032440743 |
| 0.469429884 | 0.003399004 | 0.472311145 | 0.06306044  |
| 0.054138162 | 0.145735635 | 0.111742459 | 0.287509766 |
| 0.286266533 | 0.481636798 | 0.448701519 | 0.047398006 |
| 0.072409611 | 0.171393694 | 0.255716337 | 0.286849923 |
| 0.417914094 | 0.12142799  | 0.129755969 | 0.090810523 |
| 0.261003037 | 0.265827876 | 0.259702343 | 0.09957919  |
| 0.00097757  | 0.142670385 | 0.122794355 | 0.174216926 |
| 0.180364905 | 0.402120364 | 0.19476256  | 0.118753351 |
| 0.17542419  | 0.020865754 | 0.263677934 | 0.442228075 |
| 0.019275915 | 0.265128581 | 0.012264632 | 0.091420616 |
| 0.320425519 | 0.315614606 | 0.262081088 | 0.071426741 |
| 0.013990085 | 0.070359606 | 0.03932267  | 0.247936368 |
| 0.201819155 | 0.206034225 | 0.441101289 | 0.020646336 |
| 0.21467493  | 0.066449989 | 0.137660562 | 0.485863999 |
| 0.416463746 | 0.007265068 | 0.069622215 | 0.239003226 |
| 0.084158237 | 0.064209581 | 0.221238685 | 0.013567017 |
| 0.024290317 | 0.006787659 | 0.35489285  | 0.092563314 |
| 0.083628809 | 0.178183441 | 0.07357919  | 0.271357933 |
| 0.101743238 | 0.297489322 | 0.087919368 | 0.181682409 |
| 0.259903776 | 0.241485259 | 0.207358063 | 0.29476722  |
| 0.12384121  | 0.092784057 | 0.088428511 | 0.45987622  |
| 0.432843374 | 0.066455082 | 0.060132481 | 0.311315496 |
| 0.222423441 | 0.403609165 | 0.461700245 | 0.116253413 |

|             |             |             |             |
|-------------|-------------|-------------|-------------|
| 0.14633087  | 0.155643625 | 0.099482612 | 0.342741634 |
| 0.232200844 | 0.178451215 | 0.020056953 | 0.348068464 |
| 0.470663078 | 0.016703138 | 0.054938877 | 0.300751034 |
| 0.045743073 | 0.117860592 | 0.420999303 | 0.373442908 |
| 0.244850396 | 0.03150417  | 0.126617951 | 0.227542605 |
| 0.194919659 | 0.188388203 | 0.266386391 | 0.107215716 |
| 0.27252536  | 0.104371976 | 0.054962106 | 0.227600183 |
| 0.109698175 | 0.232334385 | 0.053294302 | 0.017286955 |
| 0.202343911 | 0.105034326 | 0.407787748 | 0.234382134 |
| 0.240394426 | 0.004613134 | 0.095483409 | 0.188079718 |
| 0.091260973 | 0.267808029 | 0.492882722 | 0.106430774 |
| 0.198882856 | 0.068715107 | 0.116267784 | 0.136508149 |
| 0.290491414 | 0.114656953 | 0.091837212 | 0.000970332 |
| 0.115744748 | 0.096959068 | 0.162591352 | 0.028312338 |
| 0.151442987 | 0.059203977 | 0.0357054   | 0.398078448 |
| 0.187672372 | 0.345184278 | 0.012680924 | 0.028103677 |
| 0.12412903  | 0.391664508 | 0.128800624 | 0.071865802 |
| 0.375198932 | 0.140501642 | 0.275088597 | 0.391230608 |
| 0.136458449 | 0.379508353 | 0.027700795 | 0.104340018 |
| 0.203105582 | 0.401293086 | 0.315869386 | 0.363480483 |
| 0.167786852 | 0.221179176 | 0.086790068 | 0.287192219 |
| 0.216513936 | 0.216270594 | 0.066512886 | 0.478791231 |
| 0.000677042 | 0.272627673 | 0.245481204 | 0.026698772 |
| 0.479728383 | 0.263821065 | 0.053088726 | 0.100866562 |
| 0.412891013 | 0.47466358  | 0.334221791 | 0.310465552 |
| 0.063831335 | 0.007747237 | 0.417711814 | 0.343798056 |
| 0.379638607 | 0.190284435 | 0.096258652 | 0.01717049  |
| 0.422012897 | 0.13967507  | 0.266050812 | 0.165540761 |
| 0.227387956 | 0.1050863   | 0.16123614  | 0.185481494 |
| 0.00365424  | 0.12148126  | 0.233436203 | 0.071364676 |
| 0.119468144 | 0.089933276 | 0.391539465 | 0.327073264 |
| 0.129938718 | 0.075822211 | 0.112090569 | 0.073970964 |
| 0.165165081 | 0.468614405 | 0.013221988 | 0.393819948 |
| 0.449206164 | 0.223430586 | 0.416856511 | 0.430888556 |
| 0.181616824 | 0.410770574 | 0.418683944 | 0.304887824 |
| 0.000618951 | 0.288785268 | 0.225827125 | 0.381483398 |
| 0.347344284 | 0.259271014 | 0.057944083 | 0.119168136 |
| 0.000970464 | 0.126401553 | 0.060186858 | 0.465812281 |
| 0.405550307 | 0.031833366 | 0.010106614 | 0.375903705 |
| 0.213944582 | 0.011886299 | 0.465245768 | 0.235607855 |
| 0.449079935 | 0.236250814 | 0.139658711 | 0.257440126 |
| 0.0426874   | 0.094825573 | 0.033442487 | 0.323099974 |
| 0.146726658 | 0.013737636 | 0.063592776 | 0.429660957 |
| 0.381698706 | 0.368203295 | 0.222560631 | 0.008073631 |
| 0.236903215 | 0.079549621 | 0.34019595  | 0.08053386  |
| 0.382687041 | 0.363090615 | 0.460825742 | 0.283848843 |
| 0.257432126 | 0.432533887 | 0.406219951 | 0.385543282 |
| 0.049411274 | 0.27201434  | 0.319922361 | 0.05257033  |
| 0.161487334 | 0.405601716 | 0.196859601 | 0.201655639 |
| 0.276373555 | 0.05563788  | 0.220077155 | 0.137604023 |
| 0.466110851 | 0.400579257 | 0.050435346 | 0.081418542 |
| 0.430585346 | 0.12517555  | 0.09740615  | 0.17343853  |
| 0.273007707 | 0.029048274 | 0.025497209 | 0.329210311 |
| 0.482136921 | 0.336396575 | 0.368222286 | 0.08459163  |

|             |             |             |             |
|-------------|-------------|-------------|-------------|
| 0.365523227 | 0.042217688 | 0.330689712 | 0.131180983 |
| 0.208312387 | 0.183541722 | 0.241426242 | 0.026587471 |
| 0.015772493 | 0.061216377 | 0.423266512 | 0.436225883 |
| 0.065774085 | 0.147532047 | 0.199784883 | 0.28222518  |
| 0.392133615 | 0.123430843 | 0.274638847 | 0.174546378 |
| 0.455904412 | 0.054626793 | 0.470604678 | 0.187451473 |
| 0.320584322 | 0.160547244 | 0.367439043 | 0.003561699 |
| 0.238259637 | 0.101427794 | 0.055593649 | 0.23711242  |
| 0.295864456 | 0.09874785  | 0.363838791 | 0.08675578  |
| 0.054052877 | 0.002283703 | 0.301018196 | 0.110732809 |
| 0.322354747 | 0.064683998 | 0.18699484  | 0.026473374 |
| 0.487335279 | 0.215558455 | 0.302506646 | 0.056049224 |
| 0.165314867 | 0.006939381 | 0.09469545  | 0.03012501  |
| 0.303938724 | 0.36405859  | 0.219712029 | 0.144532432 |
| 0.049768342 | 0.283270655 | 0.354154917 | 0.202145255 |
| 0.405685127 | 0.052213782 | 0.423002251 | 0.100915841 |
| 0.236509203 | 0.123830255 | 0.245425623 | 0.125717683 |
| 0.151106363 | 0.044729272 | 0.083278835 | 0.059781954 |
| 0.383431725 | 0.109156991 | 0.247093029 | 0.079247724 |
| 0.052855074 | 1           | 0.272928549 | 0.260322454 |
| 0.269792398 | 0.214233047 | 0.102793203 | 0.435472581 |
| 0.067669375 | 0.097539251 | 0.035979902 | 0.027441166 |
| 0.084499441 | 0.115065858 | 0.323547475 | 0.36264372  |
| 0.418869955 | 0.060270415 | 0.075239206 | 0.070811947 |
| 0.02356381  | 0.226727192 | 0.27980997  | 0.05974371  |
| 0.251234746 | 0.058329411 | 0.00096508  | 0.075498076 |
| 0.352448588 | 0.122528352 |             |             |
| TSPAN2      | 0.283825803 | 0.425341552 | 0.045639884 |
| 0.015549807 | 0.077549616 | 0.159086769 | 0.147845244 |
| 0.303779559 | 0.081867753 | 0.083680568 | 0.224408016 |
| 0.002309704 | 0.382400335 | 0.014091432 | 0.071884249 |
| 0.478904006 | 0.491650621 | 0.240238983 | 0.494353626 |
| 0.269457205 | 0.087251828 | 0.283389583 | 0.257692567 |
| 0.176083829 | 0.002181988 | 0.076960565 | 0.025096095 |
| 0.324913934 | 0.487734754 | 0.153148336 | 0.182562356 |
| 0.43017782  | 0.426159257 | 0.281060279 | 0.227211734 |
| 0.189824304 | 0.378734943 | 0.136175431 | 0.34890663  |
| 0.418690608 | 0.146385512 | 0.404570168 | 0.012823098 |
| 0.002114857 | 0.066260015 | 0.289291454 | 0.287010608 |
| 0.268433765 | 0.14749676  | 0.130227474 | 0.107932435 |
| 0.152650442 | 0.249466292 | 0.330188941 | 0.149537358 |
| 0.308229802 | 0.002204385 | 0.361362518 | 0.234318431 |
| 0.048053958 | 0.247701067 | 0.301271893 | 0.308381625 |
| 0.168693712 | 0.333195494 | 0.466451987 | 0.022032029 |
| 0.04897715  | 0.342790895 | 0.345888633 | 0.286364456 |
| 0.390993526 | 0.229405072 | 0.204796832 | 0.323898657 |
| 0.341500555 | 0.389173815 | 0.216138347 | 0.141807502 |
| 0.000944781 | 0.095403532 | 0.215565289 | 0.301474346 |
| 0.332684397 | 0.250428645 | 0.317899881 | 0.142251484 |
| 0.316893501 | 0.015510193 | 0.28861482  | 0.483089354 |
| 0.014028901 | 0.365625514 | 0.009832205 | 0.135037491 |
| 0.380899303 | 0.468594154 | 0.317929113 | 0.046191885 |
| 0.012034956 | 0.10950987  | 0.150734624 | 0.429995623 |
| 0.313324096 | 0.335213485 | 0.295982853 | 0.192912666 |

|             |             |             |             |
|-------------|-------------|-------------|-------------|
| 0.376320272 | 0.13597734  | 0.276523338 | 0.364680967 |
| 0.429476683 | 0.009697662 | 0.14621463  | 0.15305522  |
| 0.25640771  | 0.089019488 | 0.161167204 | 0.036412715 |
| 0.007668729 | 0.032722578 | 0.443753552 | 0.125180879 |
| 0.062152176 | 0.134128585 | 0.056110622 | 0.320550368 |
| 0.300575332 | 0.441117542 | 0.083187765 | 0.166321991 |
| 0.343995673 | 0.169011943 | 0.287509876 | 0.34733387  |
| 0.28273722  | 0.222884835 | 0.11033728  | 0.372292582 |
| 0.349765607 | 0.047788742 | 0.057158584 | 0.225963818 |
| 0.362348124 | 0.458713313 | 0.482803893 | 0.259964327 |
| 0.178393517 | 0.190993099 | 0.21162527  | 0.265534984 |
| 0.174148593 | 0.303563212 | 0.118944521 | 0.26594557  |
| 0.312374646 | 0.036228855 | 0.047356696 | 0.372206316 |
| 0.035222669 | 0.176092187 | 0.361356525 | 0.34872671  |
| 0.361383956 | 0.020583328 | 0.141522591 | 0.172747118 |
| 0.224889485 | 0.164648436 | 0.319427083 | 0.130571108 |
| 0.230092077 | 0.212614632 | 0.033287154 | 0.374431268 |
| 0.089674252 | 0.265119631 | 0.24718607  | 0.057085058 |
| 0.340356184 | 0.301100081 | 0.360494424 | 0.335923493 |
| 0.324018603 | 0.001798108 | 0.080958613 | 0.295991242 |
| 0.204108732 | 0.41548928  | 0.412156126 | 0.083275384 |
| 0.200753136 | 0.30034866  | 0.109779178 | 0.234437733 |
| 0.376655275 | 0.141887698 | 0.129402222 | 0.000405349 |
| 0.102177696 | 0.263708314 | 0.332714131 | 0.048942225 |
| 0.152209326 | 0.081843547 | 0.134071515 | 0.385926598 |
| 0.142096246 | 0.355616536 | 0.033383689 | 0.215844206 |
| 0.18251104  | 0.294669645 | 0.265794993 | 0.213922042 |
| 0.32489663  | 0.205839279 | 0.445072331 | 0.27848073  |
| 0.205908888 | 0.236444571 | 0.208693235 | 0.215876129 |
| 0.354949149 | 0.405247695 | 0.375040616 | 0.368156303 |
| 0.177274171 | 0.339826307 | 0.270735944 | 0.194165558 |
| 0.316694425 | 0.333103099 | 0.06255491  | 0.439977897 |
| 0.000712568 | 0.260046724 | 0.314687538 | 0.21561298  |
| 0.401016435 | 0.159022793 | 0.052310245 | 0.212264612 |
| 0.498632888 | 0.445901624 | 0.402239643 | 0.418869015 |
| 0.232838353 | 0.011806437 | 0.441546196 | 0.295833989 |
| 0.489661072 | 0.295788795 | 0.260513689 | 0.130064718 |
| 0.432441278 | 0.330864278 | 0.297581382 | 0.317050362 |
| 0.343757957 | 0.330649649 | 0.197526261 | 0.321847313 |
| 0.016754401 | 0.164823401 | 0.309513567 | 0.122564155 |
| 0.199993647 | 0.135667582 | 0.363785379 | 0.240735667 |
| 0.287800032 | 0.240798306 | 0.23364272  | 0.053285578 |
| 0.126481737 | 0.434387292 | 0.057165931 | 0.424177464 |
| 0.486381549 | 0.297243508 | 0.405397279 | 0.484830303 |
| 0.233289886 | 0.270912682 | 0.396422625 | 0.445461481 |
| 0.001311188 | 0.418972625 | 0.340239205 | 0.248921761 |
| 0.405266263 | 0.199649522 | 0.269036347 | 0.334392311 |
| 0.001789661 | 0.111042532 | 0.196662623 | 0.427003701 |
| 0.407069377 | 0.020291025 | 0.06730738  | 0.352220137 |
| 0.334207963 | 0.055009563 | 0.471462898 | 0.219511753 |
| 0.366356252 | 0.324916713 | 0.108815046 | 0.374740547 |
| 0.186386595 | 0.339013023 | 0.020263189 | 0.305739683 |
| 0.338767411 | 0.11308313  | 0.045191738 | 0.487699444 |
| 0.352062036 | 0.273813288 | 0.185145168 | 0.00397796  |

|             |             |             |             |
|-------------|-------------|-------------|-------------|
| 0.400092717 | 0.131644775 | 0.331695195 | 0.098620805 |
| 0.335050621 | 0.258031338 | 0.368930694 | 0.377467991 |
| 0.338756411 | 0.28972726  | 0.26066675  | 0.349705742 |
| 0.088160678 | 0.365053296 | 0.40390352  | 0.037566412 |
| 0.315853843 | 0.426532802 | 0.276351948 | 0.116120789 |
| 0.288476663 | 0.059251534 | 0.139794797 | 0.287304005 |
| 0.351645768 | 0.414432877 | 0.037674345 | 0.152262962 |
| 0.287998352 | 0.231233512 | 0.074858757 | 0.289615897 |
| 0.198054566 | 0.151400659 | 0.19309156  | 0.274694761 |
| 0.368353778 | 0.198197658 | 0.392586711 | 0.088951534 |
| 0.433419525 | 0.044026625 | 0.393548808 | 0.193553001 |
| 0.218280611 | 0.302250319 | 0.39969583  | 0.130844547 |
| 0.013161718 | 0.097417674 | 0.270657781 | 0.302542195 |
| 0.053350279 | 0.145960031 | 0.165234026 | 0.231965871 |
| 0.466332321 | 0.304257986 | 0.19469903  | 0.28163974  |
| 0.304375833 | 0.059405231 | 0.417258669 | 0.257790062 |
| 0.311747119 | 0.216324345 | 0.351755831 | 0.007357023 |
| 0.339829261 | 0.099276068 | 0.233764361 | 0.237013171 |
| 0.461949901 | 0.089789825 | 0.265312966 | 0.126736758 |
| 0.124009844 | 0.005206129 | 0.286288132 | 0.294453749 |
| 0.192449502 | 0.306030486 | 0.293786979 | 0.155863862 |
| 0.464119899 | 0.289041628 | 0.315891322 | 0.296444818 |
| 0.253402987 | 0.023944683 | 0.091897519 | 0.026682996 |
| 0.306139909 | 0.289961249 | 0.338777449 | 0.300711372 |
| 0.216680607 | 0.33287735  | 0.284172601 | 0.285733853 |
| 0.411197154 | 0.121343589 | 0.475650179 | 0.278646023 |
| 0.397435892 | 0.282659312 | 0.185692027 | 0.276724186 |
| 0.131979689 | 0.118089709 | 0.088149335 | 0.154784014 |
| 0.43369415  | 0.274721022 | 0.260719565 | 0.243931084 |
| 0.030601547 | 0.272928549 | 1           | 0.341861532 |
| 0.304709207 | 0.306691789 | 0.329453452 | 0.283453007 |
| 0.249977897 | 0.242469089 | 0.031549008 | 0.015813495 |
| 0.174117361 | 0.124577582 | 0.384565906 | 0.382570592 |
| 0.477414586 | 0.296766702 | 0.068648595 | 0.117198404 |
| 0.18926317  | 0.362016608 | 0.177485411 | 0.141057835 |
| 0.346321709 | 0.284375353 | 0.000581391 | 0.209883412 |
| 0.275931188 | 0.295801426 |             |             |
| TSPO        | 0.260144082 | 0.435501519 | 0.032239352 |
| 0.027714674 | 0.07374059  | 0.139577292 | 0.137532911 |
| 0.267486706 | 0.058220213 | 0.095892505 | 0.201876607 |
| 0.000687873 | 0.383895792 | 0.005717774 | 0.036586054 |
| 0.496514847 | 0.512308697 | 0.224634613 | 0.489204435 |
| 0.212318752 | 0.128066319 | 0.235070111 | 0.267553993 |
| 0.158350441 | 0.000629224 | 0.073391968 | 0.045874127 |
| 0.288498324 | 0.498475049 | 0.112789844 | 0.187159814 |
| 0.446946343 | 0.461072844 | 0.325270487 | 0.2576091   |
| 0.277199302 | 0.36519687  | 0.13713364  | 0.380919841 |
| 0.425801834 | 0.149794163 | 0.4372866   | 0.00666389  |
| 0.008597216 | 0.055078314 | 0.254201835 | 0.261114952 |
| 0.190411224 | 0.127080659 | 0.090365494 | 0.115246953 |
| 0.191459098 | 0.222425534 | 0.288046604 | 0.194168461 |
| 0.299078305 | 0.005925615 | 0.355391811 | 0.173463587 |
| 0.030698528 | 0.201006912 | 0.306048602 | 0.294329829 |
| 0.148237927 | 0.326964921 | 0.478349946 | 0.019543898 |

|             |             |             |             |
|-------------|-------------|-------------|-------------|
| 0.036314918 | 0.338116192 | 0.3931805   | 0.329884913 |
| 0.393521658 | 0.237885259 | 0.199515604 | 0.345208159 |
| 0.370837395 | 0.393477542 | 0.16946697  | 0.093056851 |
| 0.000537992 | 0.0900978   | 0.277174168 | 0.270926222 |
| 0.358836184 | 0.226637211 | 0.299066998 | 0.149676515 |
| 0.343439628 | 0.00700594  | 0.246982148 | 0.496049285 |
| 0.015924692 | 0.363125372 | 0.007664003 | 0.080652193 |
| 0.379080387 | 0.493269769 | 0.30145382  | 0.041702415 |
| 0.005298877 | 0.061114189 | 0.103266457 | 0.449930784 |
| 0.290342    | 0.336436787 | 0.28700161  | 0.153453284 |
| 0.400012063 | 0.107769173 | 0.237687234 | 0.366368262 |
| 0.44330415  | 0.002634569 | 0.083931033 | 0.127523119 |
| 0.286014675 | 0.12075907  | 0.135967898 | 0.03592362  |
| 0.007439431 | 0.01073112  | 0.458504223 | 0.084620553 |
| 0.063205033 | 0.120583385 | 0.057105599 | 0.366086178 |
| 0.253855941 | 0.432740289 | 0.076839095 | 0.160205755 |
| 0.371896505 | 0.160243426 | 0.323219667 | 0.369492285 |
| 0.3070308   | 0.157683136 | 0.07730717  | 0.373097754 |
| 0.314397675 | 0.035864198 | 0.041659461 | 0.203282565 |
| 0.386490748 | 0.470834255 | 0.492712935 | 0.192416695 |
| 0.187375281 | 0.139724381 | 0.259044669 | 0.273793837 |
| 0.143595717 | 0.225650076 | 0.07979555  | 0.219570286 |
| 0.300923676 | 0.033499152 | 0.030895649 | 0.355839454 |
| 0.050832879 | 0.168144251 | 0.352400272 | 0.348841112 |
| 0.340842226 | 0.038074386 | 0.164701838 | 0.16871732  |
| 0.183667527 | 0.157386779 | 0.294255095 | 0.163268078 |
| 0.193596207 | 0.26075296  | 0.022474642 | 0.401659717 |
| 0.062205018 | 0.211320955 | 0.301633389 | 0.066283467 |
| 0.302980094 | 0.227986283 | 0.373831634 | 0.298144776 |
| 0.325583053 | 0.005141351 | 0.095291716 | 0.274499288 |
| 0.242805115 | 0.397898994 | 0.425116994 | 0.056383605 |
| 0.146939191 | 0.292660227 | 0.073077753 | 0.247259897 |
| 0.335698291 | 0.165290233 | 0.144858609 | 0.000278585 |
| 0.078704894 | 0.330457086 | 0.314577372 | 0.023890189 |
| 0.16004332  | 0.061511236 | 0.068661677 | 0.408579694 |
| 0.112273672 | 0.379647029 | 0.012057252 | 0.134652097 |
| 0.15691266  | 0.302083147 | 0.316385615 | 0.194512207 |
| 0.34648997  | 0.207667653 | 0.469687    | 0.261269104 |
| 0.19078445  | 0.225049383 | 0.175848542 | 0.168833826 |
| 0.369678648 | 0.429994136 | 0.414013492 | 0.370481402 |
| 0.162881837 | 0.273487381 | 0.237094117 | 0.162635472 |
| 0.264983666 | 0.27497244  | 0.039885906 | 0.434089137 |
| 0.000254097 | 0.214514456 | 0.343764074 | 0.178119845 |
| 0.417051576 | 0.147447476 | 0.030982693 | 0.145176918 |
| 0.494392324 | 0.432563973 | 0.362142139 | 0.447874676 |
| 0.200815917 | 0.003504618 | 0.419935491 | 0.278649956 |
| 0.510733135 | 0.278130745 | 0.313148889 | 0.063434987 |
| 0.43757692  | 0.274084592 | 0.314419829 | 0.326465217 |
| 0.360525277 | 0.331021394 | 0.139364821 | 0.269750929 |
| 0.013241469 | 0.158900887 | 0.332332325 | 0.157784275 |
| 0.234113915 | 0.127168963 | 0.391606328 | 0.195816931 |
| 0.330095002 | 0.249434741 | 0.311865789 | 0.042609357 |
| 0.096141224 | 0.443236836 | 0.057639842 | 0.393963138 |
| 0.491138413 | 0.241905349 | 0.435528367 | 0.480465843 |



|             |             |             |             |
|-------------|-------------|-------------|-------------|
| 0.198004853 | 0.253638782 | 0.413621338 | 0.423150647 |
| 0.000364383 | 0.459733468 | 0.369296144 | 0.211107968 |
| 0.445360493 | 0.176963908 | 0.193738046 | 0.372643074 |
| 0.000524717 | 0.080363059 | 0.280619616 | 0.402559376 |
| 0.43035815  | 0.013189338 | 0.074619083 | 0.344147961 |
| 0.353371608 | 0.035152697 | 0.472936815 | 0.225564626 |
| 0.383898147 | 0.299123711 | 0.102981051 | 0.415064814 |
| 0.262179545 | 0.268465942 | 0.022447049 | 0.32245118  |
| 0.334476949 | 0.085462541 | 0.06456526  | 0.482721352 |
| 0.350217277 | 0.258479144 | 0.146244925 | 0.00761368  |
| 0.402596784 | 0.19167525  | 0.362920438 | 0.056004448 |
| 0.303296601 | 0.233468896 | 0.361028754 | 0.406400111 |
| 0.330586094 | 0.284753647 | 0.243140518 | 0.362999662 |
| 0.109560184 | 0.402732081 | 0.43349289  | 0.029526772 |
| 0.318030885 | 0.451047064 | 0.332280738 | 0.099519726 |
| 0.244919691 | 0.097728408 | 0.113056318 | 0.224042717 |
| 0.356498758 | 0.4530135   | 0.027852728 | 0.084235747 |
| 0.289108128 | 0.184960117 | 0.057944487 | 0.219934189 |
| 0.162497541 | 0.195957414 | 0.126802115 | 0.24105414  |
| 0.368446395 | 0.176545408 | 0.422353685 | 0.125933823 |
| 0.451504036 | 0.020892295 | 0.359106424 | 0.164915468 |
| 0.16666232  | 0.337091821 | 0.417666633 | 0.104758624 |
| 0.020232725 | 0.07218898  | 0.271883273 | 0.287546303 |
| 0.035214108 | 0.102911676 | 0.158580806 | 0.238563982 |
| 0.490705684 | 0.304909474 | 0.159132168 | 0.211964461 |
| 0.286565641 | 0.097823426 | 0.399828989 | 0.218741651 |
| 0.28914875  | 0.229149886 | 0.347991479 | 0.007168006 |
| 0.361052752 | 0.11621677  | 0.164137901 | 0.273244642 |
| 0.479246401 | 0.069919478 | 0.259221332 | 0.087676256 |
| 0.146044349 | 0.001606282 | 0.226859987 | 0.352711411 |
| 0.165229593 | 0.235269826 | 0.235690493 | 0.214954065 |
| 0.459657294 | 0.273347634 | 0.319674129 | 0.26628473  |
| 0.263791044 | 0.034555265 | 0.104888331 | 0.01374902  |
| 0.271240989 | 0.250324337 | 0.321424402 | 0.293044057 |
| 0.14395447  | 0.341303503 | 0.255645427 | 0.316570376 |
| 0.444520226 | 0.157733724 | 0.499317944 | 0.197496533 |
| 0.432772982 | 0.26709088  | 0.150009121 | 0.216816602 |
| 0.124007447 | 0.097569358 | 0.063867755 | 0.09163797  |
| 0.477497547 | 0.210836159 | 0.283610713 | 0.227875272 |
| 0.023062938 | 0.260322454 | 0.341861532 | 1           |
| 0.322146964 | 0.335206956 | 0.283549755 | 0.261808278 |
| 0.241462305 | 0.199755482 | 0.057317982 | 0.03347832  |
| 0.251369998 | 0.112985735 | 0.345502965 | 0.361870372 |
| 0.485647025 | 0.225868212 | 0.048992867 | 0.070468333 |
| 0.133218003 | 0.345417441 | 0.170928998 | 0.183417132 |
| 0.323725816 | 0.279786319 | 0.000183904 | 0.140440444 |
| 0.245525144 | 0.315521126 |             |             |
| TSR1        | 0.204714981 | 0.485940781 | 0.075933467 |
| 0.050931851 | 0.097954854 | 0.18958739  | 0.178414642 |
| 0.211369893 | 0.09079421  | 0.158919724 | 0.294961398 |
| 0.001572167 | 0.29923907  | 0.014123333 | 0.048615587 |
| 0.479861228 | 0.480008212 | 0.224606641 | 0.45617114  |
| 0.196484873 | 0.157686629 | 0.269880546 | 0.279577267 |
| 0.197857773 | 0.001855835 | 0.123752102 | 0.09172561  |

|             |             |             |             |
|-------------|-------------|-------------|-------------|
| 0.188529959 | 0.451844807 | 0.155347798 | 0.245649731 |
| 0.423798469 | 0.408426344 | 0.265802646 | 0.196440528 |
| 0.14691563  | 0.454948044 | 0.050692916 | 0.318658331 |
| 0.327054588 | 0.199087804 | 0.391549464 | 0.012414591 |
| 0.005613571 | 0.101577106 | 0.184442676 | 0.282663523 |
| 0.173934167 | 0.183054489 | 0.131816264 | 0.160281595 |
| 0.098454607 | 0.310963763 | 0.317368719 | 0.101191857 |
| 0.404524973 | 0.0111566   | 0.442810574 | 0.149703225 |
| 0.061592092 | 0.196376014 | 0.199471968 | 0.292793886 |
| 0.206583381 | 0.429702128 | 0.48245843  | 0.045526647 |
| 0.076345179 | 0.231817146 | 0.343824152 | 0.300171196 |
| 0.436402253 | 0.268317072 | 0.218963514 | 0.177419654 |
| 0.321776917 | 0.335050734 | 0.196605258 | 0.129921459 |
| 0.001509091 | 0.139082405 | 0.228885101 | 0.225273508 |
| 0.236874148 | 0.327658062 | 0.22546851  | 0.175181823 |
| 0.272302303 | 0.021161109 | 0.245896716 | 0.492258976 |
| 0.030056064 | 0.303777411 | 0.01028825  | 0.112388823 |
| 0.375361872 | 0.412224241 | 0.299358727 | 0.085741351 |
| 0.014247791 | 0.092445512 | 0.096456195 | 0.336666492 |
| 0.236812646 | 0.267267678 | 0.382393546 | 0.054863476 |
| 0.287158479 | 0.134763467 | 0.220148866 | 0.467539291 |
| 0.469494954 | 0.006371    | 0.106859405 | 0.179233463 |
| 0.185701361 | 0.120411327 | 0.177726166 | 0.039800898 |
| 0.024587957 | 0.011085632 | 0.422505788 | 0.130506022 |
| 0.110506121 | 0.174334422 | 0.093436215 | 0.29393486  |
| 0.197089778 | 0.370350292 | 0.096652564 | 0.200963694 |
| 0.310370484 | 0.196242679 | 0.274649694 | 0.341064639 |
| 0.212634009 | 0.158192801 | 0.128911975 | 0.428353228 |
| 0.396296661 | 0.072760029 | 0.084708556 | 0.26762546  |
| 0.28168843  | 0.462657072 | 0.506660173 | 0.191431559 |
| 0.198103657 | 0.16721115  | 0.250561633 | 0.311606068 |
| 0.178056974 | 0.190118507 | 0.039622486 | 0.276770619 |
| 0.413353662 | 0.030746764 | 0.066728552 | 0.338528515 |
| 0.051426443 | 0.17303833  | 0.428929659 | 0.372510784 |
| 0.237455935 | 0.080925863 | 0.228898428 | 0.212714821 |
| 0.202328705 | 0.212701715 | 0.269370068 | 0.21814879  |
| 0.237289641 | 0.266043882 | 0.053915227 | 0.294282836 |
| 0.109868425 | 0.213217504 | 0.170973064 | 0.044270455 |
| 0.231135586 | 0.191615086 | 0.429293379 | 0.238607691 |
| 0.300409114 | 0.013322921 | 0.169365682 | 0.227423117 |
| 0.240411841 | 0.322646668 | 0.493034813 | 0.098789547 |
| 0.174048096 | 0.143731562 | 0.115406107 | 0.209769352 |
| 0.327636563 | 0.218543059 | 0.186740587 | 0.001697282 |
| 0.118008281 | 0.258300872 | 0.225967249 | 0.043619655 |
| 0.198917815 | 0.105674202 | 0.063001997 | 0.434697529 |
| 0.166034339 | 0.36132332  | 0.018524839 | 0.062954737 |
| 0.204545694 | 0.353292998 | 0.295089146 | 0.184188964 |
| 0.380518876 | 0.268367049 | 0.372705447 | 0.351947575 |
| 0.174524992 | 0.330418216 | 0.067392484 | 0.176052342 |
| 0.24233082  | 0.430124292 | 0.389242533 | 0.365195246 |
| 0.205341129 | 0.233341338 | 0.171854776 | 0.223169449 |
| 0.233213559 | 0.224115906 | 0.085181149 | 0.476276719 |
| 0.000986993 | 0.227638039 | 0.280506657 | 0.074795358 |
| 0.485111829 | 0.190481081 | 0.066115744 | 0.164927862 |

|             |             |             |             |
|-------------|-------------|-------------|-------------|
| 0.466659667 | 0.471674925 | 0.362956324 | 0.39890639  |
| 0.142638575 | 0.009495227 | 0.43871455  | 0.325798279 |
| 0.45896605  | 0.240501261 | 0.185719579 | 0.030559526 |
| 0.456275407 | 0.163102692 | 0.304737948 | 0.252939829 |
| 0.24181061  | 0.194909253 | 0.160838764 | 0.21499973  |
| 0.011039103 | 0.220846142 | 0.300013689 | 0.173873624 |
| 0.271464412 | 0.152359537 | 0.407590605 | 0.250704925 |
| 0.234851317 | 0.234068604 | 0.246569215 | 0.084381038 |
| 0.137773556 | 0.494984316 | 0.02019018  | 0.41816408  |
| 0.493015912 | 0.20997399  | 0.458665834 | 0.480318883 |
| 0.219130285 | 0.345072912 | 0.447780252 | 0.364133708 |
| 0.000962559 | 0.374108279 | 0.278786745 | 0.307761525 |
| 0.434892348 | 0.20994926  | 0.109974304 | 0.217411931 |
| 0.000750854 | 0.127548769 | 0.179534897 | 0.45877414  |
| 0.434698174 | 0.031339219 | 0.017664781 | 0.373455448 |
| 0.260648351 | 0.021753294 | 0.501861735 | 0.259108016 |
| 0.441000307 | 0.252454952 | 0.159134568 | 0.330022189 |
| 0.14012357  | 0.181762048 | 0.03282082  | 0.311220923 |
| 0.211789269 | 0.03751369  | 0.106280495 | 0.475042067 |
| 0.415337441 | 0.304033673 | 0.179919499 | 0.026802795 |
| 0.319155974 | 0.214627956 | 0.378805263 | 0.085469265 |
| 0.36602329  | 0.305638284 | 0.424284417 | 0.342086161 |
| 0.255340513 | 0.383627331 | 0.356643472 | 0.416609857 |
| 0.088502276 | 0.362863902 | 0.406464224 | 0.072733018 |
| 0.212069168 | 0.447587463 | 0.281895084 | 0.15346208  |
| 0.264532868 | 0.092242567 | 0.164327058 | 0.180847387 |
| 0.433591576 | 0.456542232 | 0.064852623 | 0.108871942 |
| 0.392636771 | 0.201236467 | 0.097962708 | 0.199860292 |
| 0.210889178 | 0.112380345 | 0.056902451 | 0.285790501 |
| 0.45695592  | 0.248467643 | 0.444065578 | 0.190632879 |
| 0.412051066 | 0.044550207 | 0.345600211 | 0.177367856 |
| 0.19142212  | 0.255566526 | 0.327382607 | 0.078651273 |
| 0.047411564 | 0.114844457 | 0.373339607 | 0.388433822 |
| 0.07678479  | 0.145046563 | 0.21616711  | 0.251929567 |
| 0.464461368 | 0.279689469 | 0.200603367 | 0.205754962 |
| 0.391376605 | 0.111814167 | 0.468301759 | 0.227449575 |
| 0.345957499 | 0.259184164 | 0.368512369 | 0.007708556 |
| 0.281454241 | 0.190519915 | 0.10297886  | 0.264799714 |
| 0.389778649 | 0.126478177 | 0.302105759 | 0.129662074 |
| 0.126524727 | 0.002527445 | 0.263324411 | 0.19629209  |
| 0.245709769 | 0.142499209 | 0.223822981 | 0.086038825 |
| 0.505369877 | 0.259711535 | 0.358644369 | 0.121817962 |
| 0.277359916 | 0.011248699 | 0.159616142 | 0.036086737 |
| 0.317761229 | 0.310326486 | 0.253909481 | 0.228194065 |
| 0.113018152 | 0.275916061 | 0.287488943 | 0.256638728 |
| 0.446396957 | 0.156883064 | 0.491774298 | 0.166953323 |
| 0.3179939   | 0.251626455 | 0.183110769 | 0.195428594 |
| 0.157774959 | 0.077752179 | 0.102422305 | 0.105601863 |
| 0.452540986 | 0.160591854 | 0.264193169 | 0.218872702 |
| 0.059075978 | 0.269792398 | 0.304709207 | 0.322146964 |
| 1           | 0.293252792 | 0.212222912 | 0.364289775 |
| 0.178658195 | 0.188429528 | 0.077224186 | 0.061673369 |
| 0.214258496 | 0.1703084   | 0.354643544 | 0.37914078  |
| 0.465008689 | 0.1409983   | 0.093479591 | 0.104707569 |

|             |             |             |             |
|-------------|-------------|-------------|-------------|
| 0.048227957 | 0.296256887 | 0.207158917 | 0.102430607 |
| 0.240096559 | 0.15809123  | 0.0009274   | 0.144287256 |
| 0.312014783 | 0.249132153 |             |             |
| TTC27       | 0.276753956 | 0.386909451 | 0.028417541 |
| 0.024230346 | 0.043868255 | 0.114134398 | 0.097387703 |
| 0.276013818 | 0.049930257 | 0.083512285 | 0.162156327 |
| 0.001494422 | 0.33973209  | 0.007869364 | 0.025098837 |
| 0.469240882 | 0.464238121 | 0.156194896 | 0.44164659  |
| 0.215334065 | 0.111086151 | 0.215562031 | 0.23766367  |
| 0.126339484 | 0.001171511 | 0.052490909 | 0.042221428 |
| 0.267519037 | 0.464531466 | 0.094149762 | 0.178077455 |
| 0.43833927  | 0.410020813 | 0.268095236 | 0.161765182 |
| 0.206696729 | 0.32218058  | 0.07534721  | 0.316919881 |
| 0.398676599 | 0.110350631 | 0.38680176  | 0.005371194 |
| 0.006197891 | 0.03982981  | 0.269126639 | 0.239711176 |
| 0.16668502  | 0.107200134 | 0.07186463  | 0.082485279 |
| 0.194278832 | 0.181327294 | 0.281099557 | 0.190883771 |
| 0.247312296 | 0.005479829 | 0.303620715 | 0.199727035 |
| 0.023529441 | 0.161461922 | 0.302244013 | 0.27144988  |
| 0.112628222 | 0.273654947 | 0.418207518 | 0.015006765 |
| 0.028556295 | 0.289533726 | 0.381934057 | 0.272723118 |
| 0.356192852 | 0.222250406 | 0.151629227 | 0.248762787 |
| 0.32153993  | 0.372668093 | 0.131994131 | 0.072545469 |
| 0.001046253 | 0.063759998 | 0.190917004 | 0.272397602 |
| 0.305290418 | 0.186158361 | 0.292366325 | 0.100313484 |
| 0.329006699 | 0.00678815  | 0.212694199 | 0.445828335 |
| 0.015260604 | 0.32438275  | 0.005854632 | 0.059897132 |
| 0.358987763 | 0.470028019 | 0.294354872 | 0.033290596 |
| 0.004846075 | 0.052283597 | 0.136592277 | 0.429788682 |
| 0.253781973 | 0.281462785 | 0.235668212 | 0.123158516 |
| 0.364717796 | 0.115159833 | 0.175582683 | 0.32449183  |
| 0.420656348 | 0.002588857 | 0.075710654 | 0.100069358 |
| 0.205999101 | 0.08447913  | 0.097527258 | 0.051867055 |
| 0.00934727  | 0.016686259 | 0.436856054 | 0.080155486 |
| 0.04564911  | 0.09335969  | 0.043277603 | 0.28823515  |
| 0.258330191 | 0.414965573 | 0.042684663 | 0.121019496 |
| 0.315346341 | 0.115195237 | 0.24623119  | 0.314529899 |
| 0.198345927 | 0.152010785 | 0.072183587 | 0.306040097 |
| 0.277597356 | 0.026375459 | 0.03821713  | 0.173739781 |
| 0.341497675 | 0.441846389 | 0.446710633 | 0.18068429  |
| 0.121285212 | 0.115400351 | 0.262284788 | 0.219856488 |
| 0.102386098 | 0.194634351 | 0.075242476 | 0.171412087 |
| 0.255591486 | 0.035057924 | 0.025980971 | 0.322094257 |
| 0.026396025 | 0.111363507 | 0.321038691 | 0.294868009 |
| 0.255861816 | 0.037732047 | 0.142734262 | 0.136971464 |
| 0.164424133 | 0.128948224 | 0.254300521 | 0.144964664 |
| 0.166603267 | 0.26806681  | 0.017133979 | 0.365039355 |
| 0.049637692 | 0.186782018 | 0.294442834 | 0.058713567 |
| 0.267097139 | 0.207823063 | 0.33619783  | 0.26463323  |
| 0.314563889 | 0.005224304 | 0.087835034 | 0.282137686 |
| 0.276704337 | 0.371153632 | 0.36758927  | 0.043649861 |
| 0.126167365 | 0.213130812 | 0.05837475  | 0.156528652 |
| 0.325220312 | 0.169967761 | 0.132382394 | 0.000657512 |
| 0.054887667 | 0.343258286 | 0.251286172 | 0.028390527 |

|             |             |             |             |
|-------------|-------------|-------------|-------------|
| 0.111986456 | 0.064822841 | 0.070845581 | 0.366866364 |
| 0.092812929 | 0.313352606 | 0.016522163 | 0.118520411 |
| 0.130936578 | 0.228865513 | 0.290250548 | 0.229932352 |
| 0.286474252 | 0.204886952 | 0.458609656 | 0.225160004 |
| 0.115458354 | 0.188703433 | 0.128901542 | 0.14530616  |
| 0.307105512 | 0.36681124  | 0.378667347 | 0.309684984 |
| 0.131451998 | 0.240778439 | 0.221212303 | 0.136125375 |
| 0.234870837 | 0.22111372  | 0.040178149 | 0.375373597 |
| 0.000409172 | 0.172775516 | 0.284010431 | 0.152194459 |
| 0.36214045  | 0.107082598 | 0.029082035 | 0.138159083 |
| 0.447102297 | 0.371324245 | 0.339719066 | 0.430696615 |
| 0.221317332 | 0.005035225 | 0.384973909 | 0.230875274 |
| 0.472407521 | 0.207239609 | 0.204006608 | 0.046848372 |
| 0.389030491 | 0.240456108 | 0.291624156 | 0.320446955 |
| 0.268994612 | 0.233384536 | 0.108890401 | 0.249926935 |
| 0.021238988 | 0.156820072 | 0.331130169 | 0.139524244 |
| 0.219105427 | 0.126022365 | 0.335270346 | 0.15161809  |
| 0.231615108 | 0.299062339 | 0.241114218 | 0.030489615 |
| 0.070252184 | 0.397774514 | 0.029681956 | 0.360540921 |
| 0.444944634 | 0.186077936 | 0.382973444 | 0.439328058 |
| 0.188168832 | 0.206867835 | 0.369994282 | 0.394820157 |
| 0.000706603 | 0.429326933 | 0.320269239 | 0.175719396 |
| 0.432712384 | 0.147006005 | 0.184898297 | 0.285847076 |
| 0.000357047 | 0.067548057 | 0.259719777 | 0.354531691 |
| 0.373056334 | 0.009338357 | 0.038275227 | 0.292438812 |
| 0.293800584 | 0.02472521  | 0.42784837  | 0.197930413 |
| 0.328454781 | 0.226909151 | 0.081715953 | 0.374267714 |
| 0.256155985 | 0.207471077 | 0.013864693 | 0.268074688 |
| 0.248621944 | 0.084600792 | 0.04866105  | 0.434801829 |
| 0.338446072 | 0.191642099 | 0.11222816  | 0.015008628 |
| 0.403869716 | 0.185461196 | 0.310023571 | 0.043136519 |
| 0.275697717 | 0.182243448 | 0.300280133 | 0.353045593 |
| 0.274398925 | 0.243425731 | 0.214220377 | 0.334182849 |
| 0.074957267 | 0.398999232 | 0.432789037 | 0.026680181 |
| 0.314052666 | 0.391151763 | 0.288838305 | 0.076173423 |
| 0.213440845 | 0.064992474 | 0.090840752 | 0.221348214 |
| 0.297880099 | 0.410199991 | 0.024219339 | 0.074172984 |
| 0.244557256 | 0.147904955 | 0.03989985  | 0.1645197   |
| 0.132680451 | 0.241942031 | 0.113810257 | 0.196407597 |
| 0.314630445 | 0.133399197 | 0.410916872 | 0.115581388 |
| 0.395297464 | 0.017535819 | 0.313157142 | 0.115135482 |
| 0.147384846 | 0.342326157 | 0.412200231 | 0.143508705 |
| 0.035353614 | 0.093102899 | 0.225180657 | 0.246862413 |
| 0.029341001 | 0.087291668 | 0.126794588 | 0.177410298 |
| 0.451598007 | 0.272726841 | 0.129271701 | 0.183509902 |
| 0.238624356 | 0.070478515 | 0.357079046 | 0.205136595 |
| 0.279229731 | 0.186790759 | 0.303864835 | 0.006502943 |
| 0.313431595 | 0.108852542 | 0.176080758 | 0.207228403 |
| 0.459937133 | 0.056928075 | 0.190801536 | 0.082140284 |
| 0.120960794 | 0.001621791 | 0.192154662 | 0.261184488 |
| 0.132542757 | 0.206453227 | 0.205551324 | 0.170529965 |
| 0.409186645 | 0.267359237 | 0.326620865 | 0.192825215 |
| 0.223209144 | 0.017088247 | 0.085712081 | 0.013449065 |
| 0.247310232 | 0.198759316 | 0.288973757 | 0.301526685 |

|             |             |             |             |
|-------------|-------------|-------------|-------------|
| 0.161988355 | 0.256325423 | 0.203276146 | 0.225452225 |
| 0.385989843 | 0.191247225 | 0.459698809 | 0.15861088  |
| 0.399413138 | 0.258544083 | 0.114232607 | 0.179130609 |
| 0.081112183 | 0.072583417 | 0.046347801 | 0.097390206 |
| 0.428675003 | 0.14615562  | 0.210615836 | 0.263532237 |
| 0.018644858 | 0.214233047 | 0.306691789 | 0.335206956 |
| 0.293252792 | 1           | 0.262137811 | 0.217058824 |
| 0.235421671 | 0.20185014  | 0.043875857 | 0.030387149 |
| 0.21959979  | 0.092851933 | 0.328663754 | 0.32623218  |
| 0.430335872 | 0.214351325 | 0.039967928 | 0.065414062 |
| 0.090731691 | 0.342007056 | 0.124531508 | 0.11173157  |
| 0.248439155 | 0.256118411 | 0.000234085 | 0.147425721 |
| 0.204643452 | 0.278109272 |             |             |
| TXK         | 0.169159497 | 0.388228286 | 0.020376911 |
| 0.007930391 | 0.028021125 | 0.104783473 | 0.078501883 |
| 0.165857265 | 0.022828075 | 0.026943817 | 0.195687501 |
| 0.001169755 | 0.34819738  | 0.006004588 | 0.021741965 |
| 0.442785737 | 0.440289957 | 0.132847457 | 0.450600005 |
| 0.146034504 | 0.025425676 | 0.238795757 | 0.171524291 |
| 0.095311585 | 0.001025628 | 0.028472978 | 0.008802169 |
| 0.148060658 | 0.453256756 | 0.071257217 | 0.065203763 |
| 0.386788754 | 0.387491888 | 0.078059752 | 0.065704264 |
| 0.051934721 | 0.361764985 | 0.037681226 | 0.308084985 |
| 0.359934412 | 0.050250153 | 0.355591532 | 0.002995162 |
| 0.00067173  | 0.02220156  | 0.139878934 | 0.222819983 |
| 0.111008587 | 0.08997905  | 0.064742069 | 0.038544967 |
| 0.054851683 | 0.216942194 | 0.323677891 | 0.058529965 |
| 0.290401608 | 0.000768889 | 0.328469764 | 0.086570088 |
| 0.015800886 | 0.094167829 | 0.124971561 | 0.232809882 |
| 0.117905321 | 0.313298663 | 0.417578872 | 0.007745558 |
| 0.01857061  | 0.172793703 | 0.307429214 | 0.192055195 |
| 0.357613533 | 0.088287659 | 0.058456485 | 0.104328853 |
| 0.2662458   | 0.359689433 | 0.145474693 | 0.054034987 |
| 0.000413135 | 0.042079154 | 0.06226875  | 0.234509696 |
| 0.241458143 | 0.229872003 | 0.223187866 | 0.039331463 |
| 0.17910255  | 0.006208767 | 0.202764657 | 0.442966891 |
| 0.00619285  | 0.320064642 | 0.005204772 | 0.050002961 |
| 0.35656298  | 0.416832441 | 0.255190181 | 0.014481953 |
| 0.00522952  | 0.040020462 | 0.062528473 | 0.379481397 |
| 0.172937336 | 0.175081119 | 0.26867867  | 0.051795113 |
| 0.334704062 | 0.039569475 | 0.078239886 | 0.348070821 |
| 0.395157761 | 0.006475484 | 0.050196015 | 0.100818232 |
| 0.061497791 | 0.021770415 | 0.089881848 | 0.031628231 |
| 0.007932947 | 0.022387735 | 0.404093197 | 0.050793032 |
| 0.019041913 | 0.065867749 | 0.027143322 | 0.217717814 |
| 0.14348499  | 0.389216596 | 0.02430135  | 0.073897889 |
| 0.286136342 | 0.095260251 | 0.138194274 | 0.287775127 |
| 0.085201926 | 0.074766534 | 0.041870845 | 0.341144692 |
| 0.337226498 | 0.018261715 | 0.020283453 | 0.176579148 |
| 0.315446105 | 0.433492878 | 0.443516388 | 0.106471176 |
| 0.057333147 | 0.091867545 | 0.060521205 | 0.202761054 |
| 0.100411888 | 0.184798766 | 0.069339506 | 0.224324257 |
| 0.294550229 | 0.02505177  | 0.015694835 | 0.340211644 |
| 0.012603664 | 0.044718183 | 0.334827755 | 0.312048025 |

|             |             |             |             |
|-------------|-------------|-------------|-------------|
| 0.220756576 | 0.006765671 | 0.049317104 | 0.092853275 |
| 0.125504112 | 0.082352925 | 0.21727381  | 0.041715766 |
| 0.169269816 | 0.064977875 | 0.012953966 | 0.32951185  |
| 0.040555691 | 0.176199436 | 0.062488877 | 0.012650228 |
| 0.24138233  | 0.119557126 | 0.338391482 | 0.219686975 |
| 0.266778426 | 0.001243521 | 0.028987081 | 0.196892236 |
| 0.060405562 | 0.38715587  | 0.379368779 | 0.037814237 |
| 0.126372932 | 0.073465774 | 0.050556866 | 0.067520993 |
| 0.351062463 | 0.045060046 | 0.036566117 | 0.000255751 |
| 0.03765774  | 0.097604022 | 0.141015191 | 0.020597073 |
| 0.055239742 | 0.027550149 | 0.048281235 | 0.352233738 |
| 0.079367047 | 0.32683742  | 0.018569271 | 0.060885023 |
| 0.065906517 | 0.24337308  | 0.096378487 | 0.07518677  |
| 0.278039852 | 0.082881968 | 0.400699187 | 0.251858767 |
| 0.059533069 | 0.20949154  | 0.049432557 | 0.064562468 |
| 0.227601714 | 0.358675027 | 0.348798683 | 0.347240634 |
| 0.07141949  | 0.27714099  | 0.142271676 | 0.149056601 |
| 0.205283684 | 0.202769546 | 0.02806808  | 0.41176497  |
| 0.000264997 | 0.181015701 | 0.182401473 | 0.052685652 |
| 0.374871029 | 0.101248939 | 0.020032556 | 0.090608614 |
| 0.457473937 | 0.413986939 | 0.375304795 | 0.388632408 |
| 0.095949199 | 0.006581816 | 0.410389511 | 0.234075082 |
| 0.443211143 | 0.117716015 | 0.075969545 | 0.039275604 |
| 0.414197924 | 0.216238324 | 0.20790173  | 0.190160252 |
| 0.19152016  | 0.106236431 | 0.096863296 | 0.257847377 |
| 0.005057882 | 0.060023245 | 0.238948508 | 0.031896276 |
| 0.064673796 | 0.0407735   | 0.321566764 | 0.192442647 |
| 0.088092193 | 0.088382316 | 0.066498955 | 0.018799357 |
| 0.062589549 | 0.40101199  | 0.01557731  | 0.397607727 |
| 0.453884918 | 0.162677644 | 0.37498079  | 0.45685645  |
| 0.130573194 | 0.23982903  | 0.365848177 | 0.399204846 |
| 0.000908513 | 0.373098167 | 0.303987794 | 0.228724866 |
| 0.376396497 | 0.127601177 | 0.114537988 | 0.13446602  |
| 0.000562169 | 0.052881886 | 0.063481007 | 0.39766697  |
| 0.382114957 | 0.00586982  | 0.015396623 | 0.333288995 |
| 0.275251575 | 0.023417433 | 0.436885342 | 0.120453839 |
| 0.343850904 | 0.176705111 | 0.043980505 | 0.326502474 |
| 0.056428755 | 0.105532971 | 0.007085807 | 0.227151377 |
| 0.132630908 | 0.025013763 | 0.014075486 | 0.439492594 |
| 0.346894288 | 0.215972276 | 0.107491678 | 0.001659953 |
| 0.353610169 | 0.050677795 | 0.290448715 | 0.049168915 |
| 0.341448927 | 0.209640176 | 0.351193239 | 0.325499055 |
| 0.213880258 | 0.278823568 | 0.246613388 | 0.329781024 |
| 0.03251658  | 0.343437937 | 0.376967464 | 0.018218794 |
| 0.208347736 | 0.383406861 | 0.136057228 | 0.068738355 |
| 0.218799907 | 0.021408138 | 0.089879047 | 0.164137648 |
| 0.3340111   | 0.372487759 | 0.012133948 | 0.064958204 |
| 0.267308009 | 0.071500054 | 0.027064726 | 0.130181596 |
| 0.140547635 | 0.057714889 | 0.051268312 | 0.212677733 |
| 0.342521682 | 0.154192361 | 0.36679417  | 0.029737653 |
| 0.39836854  | 0.019211019 | 0.358855458 | 0.061001213 |
| 0.136039633 | 0.214692786 | 0.362051043 | 0.07483775  |
| 0.004844467 | 0.042620365 | 0.244289705 | 0.282155643 |
| 0.020599331 | 0.076925099 | 0.083928007 | 0.137599098 |

|             |             |             |             |
|-------------|-------------|-------------|-------------|
| 0.431107976 | 0.116202674 | 0.139463678 | 0.154191526 |
| 0.283984775 | 0.01605512  | 0.392346484 | 0.145074097 |
| 0.282958481 | 0.077587708 | 0.31709758  | 0.001509748 |
| 0.239018563 | 0.034100757 | 0.108032716 | 0.122377315 |
| 0.405994096 | 0.034489486 | 0.201694526 | 0.044269276 |
| 0.040671494 | 0.00368565  | 0.23661206  | 0.118216216 |
| 0.154080985 | 0.119861897 | 0.162511962 | 0.043013022 |
| 0.427867874 | 0.182996621 | 0.291398349 | 0.078797012 |
| 0.102927849 | 0.007267811 | 0.027548462 | 0.011225538 |
| 0.266451815 | 0.247188138 | 0.232447275 | 0.160765381 |
| 0.078668096 | 0.220033904 | 0.223675752 | 0.130349333 |
| 0.36872419  | 0.057848592 | 0.437455628 | 0.086757337 |
| 0.341219674 | 0.097622438 | 0.115524965 | 0.088905283 |
| 0.050383112 | 0.028890422 | 0.026159886 | 0.055066504 |
| 0.392309149 | 0.081177796 | 0.136167543 | 0.087677759 |
| 0.012664383 | 0.102793203 | 0.329453452 | 0.283549755 |
| 0.212222912 | 0.262137811 | 1           | 0.266445519 |
| 0.066974536 | 0.085009062 | 0.011669725 | 0.00432036  |
| 0.048717538 | 0.043886127 | 0.359461343 | 0.372213738 |
| 0.432206401 | 0.083603502 | 0.023379448 | 0.043124025 |
| 0.047916243 | 0.334363575 | 0.113118355 | 0.049111835 |
| 0.208450105 | 0.069732477 | 0.000666885 | 0.074018832 |
| 0.229980242 | 0.106366705 |             |             |
| TXNDC5      | 0.269702763 | 0.471760907 | 0.233228671 |
| 0.035593083 | 0.258352717 | 0.446746843 | 0.443676141 |
| 0.263434746 | 0.305465993 | 0.276946795 | 0.477404626 |
| 0.005314359 | 0.230203899 | 0.063669652 | 0.21643517  |
| 0.391574013 | 0.403912562 | 0.482238498 | 0.401997211 |
| 0.329591227 | 0.192535718 | 0.404723681 | 0.409002906 |
| 0.462693613 | 0.009297116 | 0.320090373 | 0.086300376 |
| 0.239135011 | 0.359913514 | 0.426778239 | 0.370712294 |
| 0.338191947 | 0.313273738 | 0.344207009 | 0.327024425 |
| 0.13239189  | 0.492359138 | 0.074886684 | 0.26416123  |
| 0.249107827 | 0.397626839 | 0.31591822  | 0.075499425 |
| 0.002171556 | 0.313008779 | 0.213039323 | 0.407883814 |
| 0.375292291 | 0.431331947 | 0.409665667 | 0.357934297 |
| 0.063968409 | 0.478593718 | 0.333986029 | 0.061556495 |
| 0.492996195 | 0.006023306 | 0.499223349 | 0.225685365 |
| 0.259544402 | 0.450338462 | 0.243976079 | 0.382540155 |
| 0.468890571 | 0.503258597 | 0.448788328 | 0.15107389  |
| 0.271080268 | 0.329426503 | 0.239045867 | 0.368741704 |
| 0.424526715 | 0.341426877 | 0.436941207 | 0.223676791 |
| 0.289967418 | 0.252071996 | 0.47676909  | 0.401991291 |
| 0.004210233 | 0.363212378 | 0.316278973 | 0.226547664 |
| 0.215653782 | 0.475269339 | 0.285510792 | 0.406459431 |
| 0.293952914 | 0.11162518  | 0.435501734 | 0.433534646 |
| 0.048762744 | 0.260130088 | 0.023355465 | 0.376223957 |
| 0.312220196 | 0.304542915 | 0.332562776 | 0.246474139 |
| 0.083240223 | 0.33180064  | 0.142097711 | 0.235209504 |
| 0.386169505 | 0.387458741 | 0.479220094 | 0.063598977 |
| 0.196994589 | 0.290139519 | 0.469957521 | 0.492113071 |
| 0.410410597 | 0.042796417 | 0.330498033 | 0.451331929 |
| 0.2927738   | 0.197378674 | 0.46445661  | 0.025639878 |
| 0.028001248 | 0.027703993 | 0.337883544 | 0.355079084 |



|             |             |             |             |
|-------------|-------------|-------------|-------------|
| 0.276500454 | 0.428731355 | 0.166921771 | 0.335897275 |
| 0.255977799 | 0.305244671 | 0.306984953 | 0.455168898 |
| 0.263818365 | 0.460818029 | 0.363736511 | 0.316310162 |
| 0.318617676 | 0.35703299  | 0.355264884 | 0.46356079  |
| 0.473362468 | 0.24126833  | 0.260658717 | 0.45829596  |
| 0.201845394 | 0.38418626  | 0.455361172 | 0.364685978 |
| 0.39565463  | 0.444040674 | 0.291709702 | 0.436547506 |
| 0.477497897 | 0.368322774 | 0.050759805 | 0.48055621  |
| 0.502726754 | 0.031155781 | 0.25266431  | 0.313222106 |
| 0.08022315  | 0.417247337 | 0.44928289  | 0.387703044 |
| 0.367221716 | 0.072862647 | 0.337957414 | 0.442724748 |
| 0.433149816 | 0.429282465 | 0.393727747 | 0.294186451 |
| 0.453473024 | 0.284459519 | 0.211938085 | 0.204369454 |
| 0.359614405 | 0.425292282 | 0.16975677  | 0.06825198  |
| 0.299712785 | 0.347273487 | 0.396929592 | 0.370613882 |
| 0.272002216 | 0.00470813  | 0.263186029 | 0.299120568 |
| 0.268595471 | 0.259336981 | 0.493576329 | 0.349712087 |
| 0.432708973 | 0.211387022 | 0.38261171  | 0.403909431 |
| 0.315077303 | 0.308969794 | 0.30185124  | 0.004553461 |
| 0.356578907 | 0.219949106 | 0.376578301 | 0.152719792 |
| 0.381766442 | 0.264343265 | 0.159805047 | 0.392884568 |
| 0.431817011 | 0.329319083 | 0.067127809 | 0.107301791 |
| 0.431951875 | 0.446278255 | 0.291189628 | 0.242480315 |
| 0.391111439 | 0.37646794  | 0.25663657  | 0.464130024 |
| 0.424119796 | 0.460671014 | 0.098491881 | 0.427368286 |
| 0.283677073 | 0.391505058 | 0.293239257 | 0.347251904 |
| 0.452323713 | 0.295902388 | 0.209377508 | 0.462234948 |
| 0.386863714 | 0.402413228 | 0.261859904 | 0.481339467 |
| 0.005198864 | 0.471596716 | 0.364833239 | 0.099963866 |
| 0.471691741 | 0.453010464 | 0.245915698 | 0.361722326 |
| 0.410985572 | 0.485818807 | 0.357558664 | 0.286473333 |
| 0.150383639 | 0.047878181 | 0.43058684  | 0.44311108  |
| 0.363804338 | 0.45259933  | 0.228457955 | 0.072450257 |
| 0.407424707 | 0.227248994 | 0.362625758 | 0.274304411 |
| 0.337730106 | 0.270985889 | 0.450778499 | 0.246601281 |
| 0.015499427 | 0.379202636 | 0.286018216 | 0.221802099 |
| 0.336203584 | 0.285718074 | 0.372888899 | 0.486545422 |
| 0.319025468 | 0.212373934 | 0.283264975 | 0.27763473  |
| 0.431473483 | 0.469797408 | 0.029732577 | 0.418218726 |
| 0.438309061 | 0.447548405 | 0.39817747  | 0.428050501 |
| 0.410484678 | 0.480141397 | 0.410832179 | 0.312670029 |
| 0.003653922 | 0.264576075 | 0.202588489 | 0.480163006 |
| 0.320593269 | 0.463658175 | 0.158856574 | 0.242652667 |
| 0.007282705 | 0.382428162 | 0.124844949 | 0.493516626 |
| 0.374466104 | 0.148150341 | 0.022383386 | 0.381330793 |
| 0.214638473 | 0.043948534 | 0.468147402 | 0.424292332 |
| 0.429760485 | 0.421798261 | 0.38474168  | 0.236526416 |
| 0.091460385 | 0.330146308 | 0.078444885 | 0.393446522 |
| 0.32396903  | 0.065574435 | 0.167375039 | 0.435070844 |
| 0.383122439 | 0.481549289 | 0.474297308 | 0.019181026 |
| 0.234096661 | 0.16094118  | 0.346649752 | 0.29965065  |
| 0.401814947 | 0.482500672 | 0.461816621 | 0.27529402  |
| 0.377413025 | 0.456487142 | 0.465273036 | 0.386340144 |
| 0.102905339 | 0.247803206 | 0.29673196  | 0.164552979 |

|             |             |             |             |
|-------------|-------------|-------------|-------------|
| 0.226190154 | 0.396596919 | 0.326353434 | 0.411251411 |
| 0.424331297 | 0.089144553 | 0.435547918 | 0.300682716 |
| 0.460961496 | 0.380429389 | 0.224131444 | 0.338861543 |
| 0.45858879  | 0.4612612   | 0.343678265 | 0.452518625 |
| 0.470368411 | 0.065842843 | 0.096523731 | 0.463779487 |
| 0.500333587 | 0.48265718  | 0.34969109  | 0.210761986 |
| 0.344134307 | 0.21114342  | 0.347929258 | 0.448144504 |
| 0.43800868  | 0.228979236 | 0.228020853 | 0.070390302 |
| 0.040163626 | 0.223608445 | 0.46315606  | 0.473711733 |
| 0.271497069 | 0.410491276 | 0.42939118  | 0.448936699 |
| 0.375387758 | 0.321314854 | 0.472540527 | 0.412768785 |
| 0.498473781 | 0.147028826 | 0.490901875 | 0.401189494 |
| 0.377508148 | 0.425834335 | 0.374966185 | 0.017700936 |
| 0.301777201 | 0.289198296 | 0.151479022 | 0.397552027 |
| 0.286697301 | 0.351887506 | 0.475423959 | 0.360328769 |
| 0.160074083 | 0.010854879 | 0.43625356  | 0.208275356 |
| 0.473039891 | 0.189635879 | 0.407761169 | 0.064828993 |
| 0.497022045 | 0.375509907 | 0.326464125 | 0.172671188 |
| 0.410046066 | 0.011303825 | 0.302873238 | 0.148165302 |
| 0.387398059 | 0.466200087 | 0.309968969 | 0.278015626 |
| 0.190650076 | 0.390421537 | 0.469425845 | 0.382916337 |
| 0.384320033 | 0.094161456 | 0.409507031 | 0.394291085 |
| 0.218562365 | 0.358881223 | 0.479676725 | 0.400092165 |
| 0.420176656 | 0.190783452 | 0.363740431 | 0.270002353 |
| 0.358256341 | 0.38063411  | 0.426864351 | 0.262824169 |
| 0.189396263 | 0.435472581 | 0.283453007 | 0.261808278 |
| 0.364289775 | 0.217058824 | 0.266445519 | 1           |
| 0.255339624 | 0.340291351 | 0.065939594 | 0.063814143 |
| 0.195732405 | 0.395827794 | 0.352753675 | 0.371356985 |
| 0.41076419  | 0.206003819 | 0.307365833 | 0.32182025  |
| 0.07094446  | 0.230684927 | 0.46100575  | 0.109875501 |
| 0.391234529 | 0.206772668 | 0.004044796 | 0.302361455 |
| 0.462198058 | 0.284578546 |             |             |
| TYROBP      | 0.218006439 | 0.340140348 | 0.007571825 |
| 0.001350558 | 0.004979509 | 0.139811206 | 0.091580226 |
| 0.130013693 | 0.021280508 | 0.026293906 | 0.189883594 |
| 0.001543653 | 0.226062294 | 0.0065607   | 0.009793752 |
| 0.364574057 | 0.363249289 | 0.11421658  | 0.35587857  |
| 0.158331663 | 0.011533021 | 0.239333099 | 0.177503217 |
| 0.130110178 | 0.002023687 | 0.030504247 | 0.004132597 |
| 0.112222416 | 0.345840782 | 0.091542661 | 0.029940786 |
| 0.358407872 | 0.282387309 | 0.063865715 | 0.014266197 |
| 0.018117032 | 0.323460158 | 0.003927024 | 0.209544746 |
| 0.29571734  | 0.046106526 | 0.298384349 | 0.005810795 |
| 0.000130143 | 0.026010397 | 0.07920211  | 0.239490812 |
| 0.120672745 | 0.117235881 | 0.079734312 | 0.04886211  |
| 0.007869693 | 0.219551961 | 0.299837569 | 0.007761015 |
| 0.261377981 | 0.000553482 | 0.316663934 | 0.102759928 |
| 0.022534356 | 0.127593394 | 0.190904769 | 0.234892187 |
| 0.140889878 | 0.281961219 | 0.351149109 | 0.003081864 |
| 0.034126417 | 0.175612352 | 0.272324169 | 0.16702392  |
| 0.330034012 | 0.027953739 | 0.035954223 | 0.075403884 |
| 0.242482079 | 0.277181402 | 0.163506107 | 0.028551328 |
| 0.000667623 | 0.051885354 | 0.037057958 | 0.270324496 |

|             |             |             |             |
|-------------|-------------|-------------|-------------|
| 0.161725301 | 0.215729714 | 0.193109534 | 0.040010851 |
| 0.140205366 | 0.004554578 | 0.186869169 | 0.361697239 |
| 0.001630755 | 0.238444854 | 0.000747852 | 0.016825215 |
| 0.297051146 | 0.344410155 | 0.273413745 | 0.012268595 |
| 0.003067553 | 0.040132218 | 0.021469182 | 0.286537891 |
| 0.172004771 | 0.157863771 | 0.261281444 | 0.027480503 |
| 0.224886841 | 0.045027303 | 0.071287172 | 0.316792343 |
| 0.356501037 | 0.001438029 | 0.042280675 | 0.105469054 |
| 0.026841597 | 0.011658645 | 0.085892562 | 0.002778811 |
| 0.000589014 | 0.003626142 | 0.328585387 | 0.039274496 |
| 0.025759299 | 0.081883916 | 0.004874643 | 0.171499539 |
| 0.082674065 | 0.341904726 | 0.008216173 | 0.09055703  |
| 0.198388628 | 0.107804721 | 0.089968449 | 0.243395709 |
| 0.03745122  | 0.065774221 | 0.05512582  | 0.27570283  |
| 0.305019951 | 0.006239416 | 0.012137554 | 0.192488178 |
| 0.211907061 | 0.33897225  | 0.368601393 | 0.040181915 |
| 0.034677256 | 0.101133345 | 0.071892592 | 0.174654371 |
| 0.106442406 | 0.152015052 | 0.004347103 | 0.202061199 |
| 0.279975051 | 0.002532843 | 0.024590769 | 0.289823476 |
| 0.001377993 | 0.016188714 | 0.344201685 | 0.252445785 |
| 0.156380491 | 0.004668419 | 0.049441535 | 0.119668465 |
| 0.182035962 | 0.098882986 | 0.247011487 | 0.045976747 |
| 0.211508689 | 0.071366879 | 0.011063991 | 0.220305414 |
| 0.049190085 | 0.201654586 | 0.056725603 | 0.007823357 |
| 0.217347937 | 0.086395706 | 0.303347706 | 0.203395094 |
| 0.271617119 | 0.000197231 | 0.024060721 | 0.252301853 |
| 0.065826879 | 0.264930024 | 0.33210896  | 0.053148099 |
| 0.155728014 | 0.039098449 | 0.069869391 | 0.043897803 |
| 0.318677444 | 0.020943726 | 0.029842683 | 0.00086333  |
| 0.008990348 | 0.094384144 | 0.141906926 | 0.013933023 |
| 0.020685602 | 0.023039544 | 0.017955225 | 0.308966435 |
| 0.094569154 | 0.221868844 | 0.006287367 | 0.028439848 |
| 0.065100479 | 0.211490778 | 0.050033334 | 0.038270234 |
| 0.234885663 | 0.042827645 | 0.309916479 | 0.28045229  |
| 0.021374482 | 0.224068443 | 0.013398176 | 0.097984826 |
| 0.156312071 | 0.29854842  | 0.271915204 | 0.230156832 |
| 0.080163617 | 0.225126929 | 0.01477646  | 0.167333616 |
| 0.200466558 | 0.141922292 | 0.019680722 | 0.329807674 |
| 0.001507026 | 0.173929195 | 0.157205426 | 0.021183984 |
| 0.318735446 | 0.107080067 | 0.025794074 | 0.089252333 |
| 0.361409491 | 0.337813895 | 0.322977911 | 0.299595452 |
| 0.014560393 | 0.00413965  | 0.353614702 | 0.263576437 |
| 0.347210412 | 0.095502238 | 0.027520467 | 0.005775619 |
| 0.311517482 | 0.1605546   | 0.248788601 | 0.191285459 |
| 0.139118708 | 0.055449197 | 0.10566074  | 0.221547001 |
| 0.004227233 | 0.09293096  | 0.225279046 | 0.022361305 |
| 0.068609161 | 0.019025156 | 0.265440939 | 0.18669119  |
| 0.038618889 | 0.051954468 | 0.050470816 | 0.02165295  |
| 0.08349069  | 0.355513747 | 0.001320488 | 0.345985479 |
| 0.357682509 | 0.149753986 | 0.305406603 | 0.362946644 |
| 0.163966847 | 0.232828392 | 0.31698561  | 0.322957356 |
| 0.000406089 | 0.277323529 | 0.190044161 | 0.232572491 |
| 0.317287202 | 0.167015165 | 0.081791595 | 0.087722619 |
| 0.000284307 | 0.082286933 | 0.019456234 | 0.350582619 |

|             |             |             |             |
|-------------|-------------|-------------|-------------|
| 0.273806367 | 0.004500241 | 0.001615728 | 0.236346386 |
| 0.168163743 | 0.00342778  | 0.375972682 | 0.127252663 |
| 0.273790605 | 0.109795007 | 0.06261632  | 0.23854901  |
| 0.023759595 | 0.06698649  | 0.001364991 | 0.165736433 |
| 0.099201197 | 0.012995413 | 0.008233863 | 0.373048241 |
| 0.320704884 | 0.190289872 | 0.132401787 | 0.00322204  |
| 0.309072668 | 0.011814401 | 0.235312333 | 0.00822717  |
| 0.275307421 | 0.228890126 | 0.271730983 | 0.260985238 |
| 0.171551491 | 0.247717355 | 0.254120154 | 0.302459667 |
| 0.00497553  | 0.276353084 | 0.307469903 | 0.005140811 |
| 0.169605945 | 0.316529004 | 0.12872091  | 0.084412748 |
| 0.238654485 | 0.002889108 | 0.116163807 | 0.176169659 |
| 0.267278276 | 0.31715302  | 0.020581738 | 0.034155491 |
| 0.259569192 | 0.062393915 | 0.036743827 | 0.101651389 |
| 0.175997742 | 0.010891863 | 0.013641476 | 0.227790953 |
| 0.313079419 | 0.156870344 | 0.335204171 | 0.016643314 |
| 0.282383331 | 0.009973701 | 0.286898682 | 0.017493264 |
| 0.151918665 | 0.186038189 | 0.28411638  | 0.010584281 |
| 0.007251987 | 0.022236867 | 0.235591331 | 0.281767042 |
| 0.026217057 | 0.100981508 | 0.078250457 | 0.116574703 |
| 0.343252141 | 0.045241904 | 0.143576663 | 0.110132389 |
| 0.271293283 | 0.006757404 | 0.355503473 | 0.153561942 |
| 0.311274092 | 0.065941019 | 0.264106442 | 0.004476747 |
| 0.215453028 | 0.035977695 | 0.099474143 | 0.104864412 |
| 0.338788608 | 0.036575179 | 0.184367882 | 0.061379461 |
| 0.009613434 | 0.00058665  | 0.233511689 | 0.070667004 |
| 0.180153647 | 0.035345165 | 0.115277791 | 0.010676715 |
| 0.374368439 | 0.18868138  | 0.326399028 | 0.044749459 |
| 0.10298303  | 0.000518358 | 0.036899325 | 0.006843154 |
| 0.304916959 | 0.24340437  | 0.224206278 | 0.224116411 |
| 0.073364178 | 0.171951665 | 0.18955966  | 0.091428321 |
| 0.296943589 | 0.008317062 | 0.362133304 | 0.093513114 |
| 0.258153971 | 0.038627985 | 0.138913986 | 0.02882604  |
| 0.052397756 | 0.013714186 | 0.045197548 | 0.046276269 |
| 0.310968389 | 0.026052528 | 0.109853163 | 0.069671122 |
| 0.005005112 | 0.067669375 | 0.249977897 | 0.241462305 |
| 0.178658195 | 0.235421671 | 0.066974536 | 0.255339624 |
| 1           | 0.154241717 | 0.002953864 | 0.003776405 |
| 0.016671337 | 0.067264776 | 0.338289656 | 0.288066526 |
| 0.34359923  | 0.04181376  | 0.029954386 | 0.052907171 |
| 0.006846089 | 0.292434999 | 0.117093473 | 0.004603016 |
| 0.166540712 | 0.077028613 | 0.000134938 | 0.08081037  |
| 0.249478493 | 0.019954637 |             |             |
| UBASH3B     | 0.241193291 | 0.362553148 | 0.073626678 |
| 0.003940903 | 0.030170197 | 0.227026325 | 0.137146953 |
| 0.151443614 | 0.146655832 | 0.065005826 | 0.278208029 |
| 0.025669372 | 0.188227886 | 0.08799144  | 0.086645562 |
| 0.349784218 | 0.33544833  | 0.148967776 | 0.346974471 |
| 0.226373104 | 0.041041511 | 0.33553124  | 0.203048526 |
| 0.20277158  | 0.035128041 | 0.054993846 | 0.015295549 |
| 0.108495099 | 0.317477656 | 0.178633048 | 0.10905517  |
| 0.3373942   | 0.236340492 | 0.088549135 | 0.050390185 |
| 0.025869216 | 0.384073157 | 0.011740259 | 0.171002084 |
| 0.242543185 | 0.073244756 | 0.253473928 | 0.057903687 |

|             |             |             |             |
|-------------|-------------|-------------|-------------|
| 0.000191691 | 0.068414912 | 0.092629263 | 0.302924283 |
| 0.176193368 | 0.200008582 | 0.168458664 | 0.067384453 |
| 0.022172415 | 0.309073439 | 0.366094152 | 0.017856742 |
| 0.328846352 | 0.000955398 | 0.370491101 | 0.168145195 |
| 0.090201745 | 0.18881476  | 0.162093181 | 0.282292611 |
| 0.224570587 | 0.344666265 | 0.349520441 | 0.029818289 |
| 0.080307453 | 0.17181554  | 0.217409698 | 0.159372134 |
| 0.345226765 | 0.099022092 | 0.105876374 | 0.057747102 |
| 0.208949394 | 0.234327662 | 0.27020509  | 0.123253736 |
| 0.008953234 | 0.084417674 | 0.049800888 | 0.278596313 |
| 0.124049283 | 0.305948498 | 0.217106954 | 0.07516818  |
| 0.131424983 | 0.061432704 | 0.24393332  | 0.348416762 |
| 0.009653547 | 0.223195262 | 0.003640653 | 0.115164223 |
| 0.288837297 | 0.288740194 | 0.293742855 | 0.061735129 |
| 0.048772863 | 0.152423464 | 0.152941823 | 0.229215841 |
| 0.213599422 | 0.156762898 | 0.329852996 | 0.026217867 |
| 0.170410913 | 0.208303757 | 0.118107109 | 0.366966955 |
| 0.366737721 | 0.027032027 | 0.181226379 | 0.185217742 |
| 0.079684054 | 0.035943627 | 0.141487481 | 0.011463473 |
| 0.005445478 | 0.04042143  | 0.305874249 | 0.154611139 |
| 0.052882114 | 0.128109946 | 0.024828997 | 0.146537136 |
| 0.106367848 | 0.321960839 | 0.039118162 | 0.125960002 |
| 0.166796963 | 0.153280225 | 0.084806749 | 0.220605192 |
| 0.050334518 | 0.181699109 | 0.148166823 | 0.305078849 |
| 0.39862022  | 0.061125377 | 0.108756883 | 0.278697986 |
| 0.161954823 | 0.331713688 | 0.37374617  | 0.138661337 |
| 0.056268267 | 0.185489891 | 0.109196735 | 0.199883408 |
| 0.174995782 | 0.221295638 | 0.020629525 | 0.29591515  |
| 0.359723742 | 0.009856546 | 0.09845795  | 0.28241902  |
| 0.005219194 | 0.090796754 | 0.386213783 | 0.253392331 |
| 0.157987702 | 0.014866711 | 0.073144238 | 0.171324704 |
| 0.26994098  | 0.141765977 | 0.284689784 | 0.070231028 |
| 0.307509832 | 0.097495873 | 0.051989165 | 0.170969379 |
| 0.111291999 | 0.299337354 | 0.086745554 | 0.032844547 |
| 0.234090724 | 0.136493525 | 0.306724032 | 0.225501026 |
| 0.265216687 | 0.000463097 | 0.060649888 | 0.28074775  |
| 0.125852474 | 0.245089872 | 0.354762627 | 0.123614582 |
| 0.272081563 | 0.059408279 | 0.150515773 | 0.062848997 |
| 0.355151524 | 0.095867817 | 0.100631142 | 0.009648022 |
| 0.070609244 | 0.07641953  | 0.153065122 | 0.147058759 |
| 0.057579323 | 0.168103134 | 0.11899297  | 0.30553898  |
| 0.176253078 | 0.202722399 | 0.083598174 | 0.060222796 |
| 0.128022837 | 0.236748586 | 0.069171671 | 0.162548688 |
| 0.231076137 | 0.109597508 | 0.25090353  | 0.36383575  |
| 0.067047844 | 0.29612155  | 0.041485682 | 0.17886782  |
| 0.137116869 | 0.281420253 | 0.230364543 | 0.227866688 |
| 0.131802715 | 0.264691625 | 0.062495255 | 0.270563058 |
| 0.238274786 | 0.184008414 | 0.118453093 | 0.359370818 |
| 0.015254855 | 0.249112744 | 0.149295577 | 0.054978532 |
| 0.335063798 | 0.163854456 | 0.11891546  | 0.173070119 |
| 0.351892666 | 0.368571461 | 0.364933949 | 0.256760002 |
| 0.072780432 | 0.070431863 | 0.388025053 | 0.316290357 |
| 0.314462485 | 0.119018011 | 0.036296307 | 0.034525031 |
| 0.31136166  | 0.166438013 | 0.253383726 | 0.169009554 |

|             |             |             |             |
|-------------|-------------|-------------|-------------|
| 0.129876109 | 0.055364934 | 0.190174508 | 0.2504102   |
| 0.024907157 | 0.136987642 | 0.207936049 | 0.06167313  |
| 0.093071389 | 0.118244807 | 0.258868458 | 0.287263488 |
| 0.055767701 | 0.116431398 | 0.056260509 | 0.058185415 |
| 0.159572192 | 0.375020147 | 0.004460526 | 0.391580007 |
| 0.35620302  | 0.206447115 | 0.286391488 | 0.366242994 |
| 0.243655881 | 0.300761659 | 0.320116796 | 0.311497692 |
| 0.008897838 | 0.227319025 | 0.149483607 | 0.345594371 |
| 0.279608283 | 0.258326747 | 0.092675888 | 0.068328492 |
| 0.004221196 | 0.170825889 | 0.031781417 | 0.408713917 |
| 0.257691609 | 0.043594149 | 0.003359398 | 0.246525414 |
| 0.136300173 | 0.013285452 | 0.38794035  | 0.163832226 |
| 0.285982059 | 0.127392646 | 0.100007517 | 0.191354126 |
| 0.027927537 | 0.104100819 | 0.00974667  | 0.173979671 |
| 0.098902255 | 0.063989063 | 0.025008102 | 0.374562556 |
| 0.348849332 | 0.240072975 | 0.21784207  | 0.013485158 |
| 0.264058325 | 0.034580756 | 0.21517014  | 0.07738247  |
| 0.33295182  | 0.310388118 | 0.312085266 | 0.214743164 |
| 0.188075697 | 0.310730091 | 0.338373172 | 0.311776256 |
| 0.01402427  | 0.22802635  | 0.280903427 | 0.042497525 |
| 0.168939743 | 0.293815844 | 0.114731222 | 0.152894918 |
| 0.321049432 | 0.008892893 | 0.210039643 | 0.232092766 |
| 0.301715912 | 0.293762399 | 0.085130691 | 0.150461593 |
| 0.313704841 | 0.145992142 | 0.078053122 | 0.149896631 |
| 0.289003189 | 0.031936972 | 0.058049734 | 0.318098087 |
| 0.358248975 | 0.236819811 | 0.310351276 | 0.044520263 |
| 0.261538349 | 0.092952045 | 0.303827335 | 0.097584992 |
| 0.251576305 | 0.159923161 | 0.232114454 | 0.057301972 |
| 0.028079165 | 0.164793815 | 0.28498075  | 0.354276935 |
| 0.088043954 | 0.199509248 | 0.11653153  | 0.138002807 |
| 0.312512197 | 0.086624501 | 0.234630843 | 0.169588221 |
| 0.355219751 | 0.023599511 | 0.407278662 | 0.229597565 |
| 0.369450868 | 0.094714023 | 0.274475813 | 0.01215972  |
| 0.186798071 | 0.074189538 | 0.129371511 | 0.108947309 |
| 0.283025066 | 0.094498885 | 0.225638363 | 0.168641958 |
| 0.039756752 | 0.007158546 | 0.333467123 | 0.050958726 |
| 0.287021013 | 0.070183887 | 0.173245323 | 0.016784725 |
| 0.400601856 | 0.229118701 | 0.336163359 | 0.050445041 |
| 0.106001719 | 0.000979216 | 0.068483902 | 0.081887624 |
| 0.372192956 | 0.326402816 | 0.243491487 | 0.201952457 |
| 0.15764235  | 0.170754562 | 0.255612971 | 0.087509323 |
| 0.274770099 | 0.029429814 | 0.339603504 | 0.156115329 |
| 0.193535153 | 0.120525406 | 0.230511666 | 0.120594456 |
| 0.079408632 | 0.078936946 | 0.107190671 | 0.204886677 |
| 0.273359911 | 0.097098021 | 0.119837232 | 0.161214029 |
| 0.044243853 | 0.097539251 | 0.242469089 | 0.199755482 |
| 0.188429528 | 0.20185014  | 0.085009062 | 0.340291351 |
| 0.154241717 | 1           | 0.008007064 | 0.011703808 |
| 0.047034417 | 0.116319473 | 0.377349811 | 0.31781081  |
| 0.332602934 | 0.106907414 | 0.103632438 | 0.171216497 |
| 0.021887261 | 0.260525571 | 0.166087626 | 0.013501744 |
| 0.18471644  | 0.111288089 | 0.002649357 | 0.197088076 |
| 0.32575698  | 0.070493733 |             |             |
| UMPS        | 0.015099678 | 0.084696476 | 0.003344375 |

|             |             |             |             |
|-------------|-------------|-------------|-------------|
| 0.20273503  | 0.01107249  | 0.048423435 | 0.065513706 |
| 0.013147198 | 0.001557923 | 0.061916783 | 0.06654304  |
| 4.41E-07    | 0.036664239 | 2.55E-05    | 0.00024665  |
| 0.070163186 | 0.057907482 | 0.054775143 | 0.010213678 |
| 0.038613488 | 0.027097315 | 0.086338384 | 0.041989933 |
| 1.11E-06    | 0.05918985  | 0.101114655 | 0.011188174 |
| 0.056924431 | 0.012504544 | 0.01985528  | 0.051848405 |
| 0.073555122 | 0.041303848 | 0.01755302  | 0.043533176 |
| 0.075012294 | 0.001121751 | 0.063950244 | 0.034614527 |
| 0.066797289 | 0.065355136 | 4.85E-05    | 0.064444128 |
| 0.023722421 | 0.008265316 | 0.038470233 | 0.00708625  |
| 0.040974703 | 0.010926624 | 0.091680464 | 0.001857872 |
| 0.05847677  | 0.026183614 | 0.007547821 | 0.086467221 |
| 0.114930235 | 0.081392389 | 0.003555262 | 0.00399247  |
| 0.012573487 | 0.016081784 | 0.038469183 | 0.055029902 |
| 0.089261373 | 0.075262848 | 0.002547392 | 0.014096247 |
| 0.023416651 | 0.058777908 | 0.139134771 | 0.070018972 |
| 0.018466729 | 0.019201458 | 0.020298639 | 0.059639103 |
| 0.040064179 | 0.02457024  | 0.004438949 | 6.10E-06    |
| 0.062262827 | 0.096053144 | 0.015358513 | 0.043466437 |
| 0.063748092 | 0.021016616 | 0.046369393 | 0.047753664 |
| 0.000170976 | 0.034996268 | 0.075263473 | 0.003741712 |
| 0.03405208  | 0.000812104 | 0.002036781 | 0.046765843 |
| 0.050706682 | 0.036918917 | 0.012748419 | 6.97E-05    |
| 0.00209952  | 0.00037378  | 0.036444147 | 0.02204588  |
| 0.042433421 | 0.077098629 | 0.001482295 | 0.036478062 |
| 0.002017782 | 0.01674537  | 0.093792852 | 0.068009538 |
| 1.23E-05    | 0.001563366 | 0.040412164 | 0.006473752 |
| 0.019435692 | 0.040535996 | 0.000551383 | 0.001604137 |
| 4.84E-06    | 0.054614591 | 0.00392813  | 0.056415813 |
| 0.050281733 | 0.017199872 | 0.112162667 | 0.008577099 |
| 0.034355187 | 0.013943618 | 0.059943209 | 0.063874714 |
| 0.071906915 | 0.103691513 | 0.062672299 | 0.037897573 |
| 0.003217818 | 0.008123421 | 0.084519943 | 0.049217715 |
| 0.002934022 | 0.00257838  | 0.055959837 | 0.039765772 |
| 0.063278963 | 0.074920904 | 0.003959329 | 0.060201256 |
| 0.011070191 | 0.04123186  | 0.113474379 | 0.035973773 |
| 0.011125636 | 0.0001435   | 0.038768371 | 0.081612299 |
| 0.000633845 | 0.0045369   | 0.037628122 | 0.032674642 |
| 0.008290369 | 0.068182336 | 0.070166681 | 0.036834834 |
| 0.084502861 | 0.119492635 | 0.066415501 | 0.019633317 |
| 0.067793272 | 0.031156132 | 0.118497093 | 0.035280488 |
| 0.058578788 | 0.006407507 | 0.039749805 | 0.012152507 |
| 0.020296511 | 0.005805839 | 0.00061666  | 0.020279106 |
| 0.007259655 | 0.085173516 | 0.027066461 | 0.035002204 |
| 0.177269181 | 0.078146052 | 0.020885352 | 0.023209287 |
| 0.030197346 | 0.099803358 | 0.010449442 | 0.014764136 |
| 0.005851516 | 0.009641437 | 0.046321553 | 0.025703895 |
| 0.020452734 | 0.022279623 | 4.45E-05    | 0.003592812 |
| 0.059401741 | 0.020453449 | 0.000195607 | 0.042702931 |
| 0.002121072 | 0.000160156 | 0.08015415  | 0.026002918 |
| 0.077366243 | 1.51E-05    | 0.000674409 | 0.021408448 |
| 0.100305574 | 0.065645277 | 0.002424704 | 0.105579169 |
| 0.028794681 | 0.043452007 | 0.056246839 | 0.015337192 |

|             |             |             |             |
|-------------|-------------|-------------|-------------|
| 0.085900986 | 0.000433363 | 0.007528002 | 0.043871811 |
| 0.082755418 | 0.075407288 | 0.063162096 | 0.030085771 |
| 0.016573281 | 0.002043938 | 0.040933191 | 0.024397371 |
| 0.020725979 | 0.002939567 | 0.074194136 | 2.10E-06    |
| 0.033819741 | 0.084695965 | 0.000575903 | 0.10319233  |
| 0.07222961  | 0.00240703  | 0.005798569 | 0.057690936 |
| 0.069843868 | 0.031721761 | 0.057204562 | 0.000832213 |
| 1.01E-05    | 0.049549874 | 0.052705838 | 0.061737006 |
| 0.028357802 | 0.037925304 | 6.18E-05    | 0.073918344 |
| 0.011258367 | 0.06532131  | 0.037269121 | 0.052409172 |
| 0.02144126  | 0.011055993 | 0.013925588 | 3.29E-05    |
| 0.040495912 | 0.06175194  | 0.017319026 | 0.088896275 |
| 0.001727232 | 0.08836132  | 0.036191874 | 0.040525353 |
| 0.010165761 | 0.105566344 | 0.020129666 | 0.020335697 |
| 0.083849627 | 0.000424935 | 0.044054603 | 0.070757688 |
| 0.019142394 | 0.099532473 | 0.062073157 | 0.021514075 |
| 0.071790299 | 0.080848773 | 0.033458255 | 3.44E-07    |
| 0.054425609 | 0.044664732 | 0.045074877 | 0.076697933 |
| 0.039143791 | 0.003081411 | 0.034926543 | 6.57E-07    |
| 0.012783278 | 0.045036789 | 0.059555536 | 0.088259929 |
| 0.000879873 | 0.000601514 | 0.068154257 | 0.043984875 |
| 0.000213964 | 0.073706292 | 0.073263383 | 0.101660107 |
| 0.040983685 | 0.051843035 | 0.052164956 | 0.026687494 |
| 0.006957626 | 0.004022533 | 0.101328749 | 0.023173487 |
| 6.39E-05    | 0.099790774 | 0.060300072 | 0.063893571 |
| 0.070586676 | 0.026297968 | 0.005073061 | 0.029148458 |
| 0.116496203 | 0.104918113 | 0.000807014 | 0.046391281 |
| 0.055130444 | 0.077107231 | 0.055957289 | 0.039077688 |
| 0.079228747 | 0.071231223 | 0.07934012  | 0.022544807 |
| 0.057949372 | 0.056247066 | 0.003625234 | 0.021694714 |
| 0.082781264 | 0.115428769 | 0.044614351 | 0.029232209 |
| 0.058846879 | 0.033242823 | 0.009051998 | 0.095415773 |
| 0.090265232 | 0.007002237 | 0.001723942 | 0.093066243 |
| 0.0092519   | 0.017907182 | 0.014341719 | 0.031066681 |
| 0.003574703 | 0.000293656 | 0.038419663 | 0.091504078 |
| 0.064873222 | 0.079651063 | 0.112688279 | 0.062724607 |
| 0.00068716  | 0.035369816 | 0.006197146 | 0.016978258 |
| 0.050047843 | 0.035284973 | 0.000296248 | 0.004893264 |
| 0.001212772 | 0.101486    | 0.070849241 | 0.007740126 |
| 0.011948471 | 0.064026788 | 0.103862483 | 0.070791344 |
| 0.025972755 | 0.036484827 | 0.01318084  | 0.071716593 |
| 0.046487916 | 0.066373242 | 0.018548727 | 0.040712112 |
| 0.057364644 | 0.057654652 | 0.000270655 | 0.053446985 |
| 0.08323886  | 0.002445442 | 0.14096827  | 0.043877072 |
| 0.016732399 | 0.084912528 | 0.005124752 | 0.004228477 |
| 5.35E-06    | 0.026198147 | 0.050985389 | 0.049174362 |
| 0.003136501 | 0.015251604 | 0.010492292 | 0.075938464 |
| 0.033958703 | 0.048417738 | 0.005320211 | 0.076927146 |
| 0.002137728 | 0.07700101  | 0.000372907 | 0.033957371 |
| 0.040927479 | 0.024548319 | 0.023264747 | 0.001530645 |
| 0.067633758 | 0.047821433 | 0.089362968 | 0.09277216  |
| 0.008423543 | 0.077524768 | 0.005602523 | 0.043060659 |
| 0.008669067 | 0.029341569 | 0.003621528 | 0.050213966 |
| 0.000363142 | 0.009786992 | 0.000980257 | 0.087811919 |



|             |             |             |             |
|-------------|-------------|-------------|-------------|
| 0.003550076 | 0.097615645 | 0.006832507 | 0.005871418 |
| 0.035979902 | 0.031549008 | 0.057317982 | 0.077224186 |
| 0.043875857 | 0.011669725 | 0.065939594 | 0.002953864 |
| 0.008007064 | 1           | 0.039673492 | 0.040780174 |
| 0.034472353 | 0.031234077 | 0.044344199 | 0.064830838 |
| 0.001897443 | 0.007092384 | 0.002517065 | 0.000394727 |
| 0.026534364 | 0.083758519 | 0.009338302 | 0.035942621 |
| 0.004478467 | 1.03E-05    | 0.002798668 | 0.049012354 |
| 0.011928078 |             |             |             |
| URB2        | 0.013513523 | 0.063562716 | 0.006229714 |
| 0.01608988  | 0.009445542 | 0.091202234 | 0.105473934 |
| 0.007413261 | 0.005124979 | 0.128963378 | 0.077371193 |
| 2.45E-06    | 0.013455521 | 0.000130168 | 0.00035307  |
| 0.037553464 | 0.039759394 | 0.054896751 | 0.028697281 |
| 0.009689046 | 0.070124157 | 0.024583266 | 0.089762805 |
| 0.080353627 | 6.60E-06    | 0.094965717 | 0.125313088 |
| 0.004542296 | 0.027693426 | 0.023410292 | 0.027170467 |
| 0.033211014 | 0.034186147 | 0.048841745 | 0.008880188 |
| 0.01927119  | 0.05859226  | 0.000190834 | 0.026902629 |
| 0.015587677 | 0.094208726 | 0.034465439 | 0.000250069 |
| 0.010265632 | 0.048529963 | 0.003809582 | 0.037869621 |
| 0.00629676  | 0.07864127  | 0.020052908 | 0.169606769 |
| 0.000438252 | 0.064238104 | 0.018099391 | 0.001272387 |
| 0.077896964 | 0.01484131  | 0.072659686 | 0.003044914 |
| 0.012184437 | 0.017723154 | 0.017361224 | 0.038292986 |
| 0.0907882   | 0.077402632 | 0.0465117   | 0.009855682 |
| 0.044987038 | 0.015120144 | 0.033378443 | 0.116867833 |
| 0.052457937 | 0.0131348   | 0.029631165 | 0.008412451 |
| 0.040709686 | 0.018241807 | 0.032770365 | 0.0056544   |
| 0.000125191 | 0.116691475 | 0.072797066 | 0.01106138  |
| 0.015817098 | 0.069652506 | 0.013982285 | 0.084062744 |
| 0.028505931 | 0.000577286 | 0.027866843 | 0.043663184 |
| 0.003274365 | 0.016608717 | 0.000158335 | 0.002800832 |
| 0.02745193  | 0.024745699 | 0.033455847 | 0.053383736 |
| 0.000196544 | 0.003998967 | 0.000414953 | 0.014785442 |
| 0.019542878 | 0.027731358 | 0.076265874 | 0.000377715 |
| 0.012714158 | 0.005357498 | 0.017486911 | 0.078410978 |
| 0.049395033 | 1.86E-05    | 0.002430741 | 0.059374273 |
| 0.007508474 | 0.023699105 | 0.052438648 | 0.000130344 |
| 0.000824476 | 3.02E-06    | 0.031760531 | 0.007196854 |
| 0.134743417 | 0.081144765 | 0.003379443 | 0.068272203 |
| 0.004347381 | 0.018524525 | 0.017718315 | 0.08837972  |
| 0.029682505 | 0.105344521 | 0.055497015 | 0.037211248 |
| 0.016228593 | 0.004457551 | 0.01506625  | 0.058114509 |
| 0.0406176   | 0.006008846 | 0.007599332 | 0.069030712 |
| 0.014977605 | 0.035458658 | 0.047431445 | 0.002919152 |
| 0.048918453 | 0.015389595 | 0.078872476 | 0.099055427 |
| 0.049833311 | 0.008130319 | 2.48E-05    | 0.036314536 |
| 0.07955237  | 9.65E-05    | 0.015928152 | 0.02036592  |
| 0.008049207 | 0.017340157 | 0.058522205 | 0.043986023 |
| 0.019315396 | 0.106445794 | 0.146679512 | 0.122715933 |
| 0.027846725 | 0.098666735 | 0.029545158 | 0.184160454 |
| 0.04340742  | 0.090923602 | 0.016701435 | 0.015533925 |
| 0.024830964 | 0.022419257 | 0.006468486 | 0.000683649 |

|             |             |             |             |
|-------------|-------------|-------------|-------------|
| 0.01187654  | 0.004681187 | 0.061032141 | 0.018340557 |
| 0.027983952 | 0.013917894 | 0.129076052 | 0.021410512 |
| 0.05371436  | 0.01255135  | 0.074152448 | 0.024568441 |
| 0.020204151 | 0.002954247 | 0.018671667 | 0.032830348 |
| 0.015772714 | 0.061746562 | 0.054957504 | 0.00023411  |
| 0.004858319 | 0.043746788 | 0.015188633 | 0.000546383 |
| 0.032659057 | 0.006076753 | 0.000104612 | 0.053134318 |
| 0.046359506 | 0.036689766 | 2.30E-05    | 0.00031315  |
| 0.022223605 | 0.084613126 | 0.033522891 | 0.002702824 |
| 0.077880915 | 0.028102781 | 0.019251368 | 0.061792431 |
| 0.012663032 | 0.103002155 | 0.000176324 | 0.012337043 |
| 0.019313316 | 0.051699096 | 0.037475541 | 0.030246043 |
| 0.054199624 | 0.009541195 | 0.000650322 | 0.056542016 |
| 0.016930411 | 0.012627566 | 0.006532336 | 0.047284172 |
| 2.53E-05    | 0.03138581  | 0.069787351 | 0.000288186 |
| 0.073139187 | 0.107672211 | 0.007187869 | 0.005883336 |
| 0.030473716 | 0.044312992 | 0.019685989 | 0.02875031  |
| 0.000458677 | 3.01E-05    | 0.032225073 | 0.058028263 |
| 0.031952282 | 0.02282647  | 0.014971701 | 2.12E-05    |
| 0.040152052 | 0.004911458 | 0.072821462 | 0.02395977  |
| 0.030178511 | 0.007699304 | 0.014388597 | 0.007796543 |
| 6.76E-05    | 0.071277912 | 0.044356961 | 0.041239171 |
| 0.117842176 | 0.005136906 | 0.062001037 | 0.038648824 |
| 0.020650247 | 0.008172802 | 0.087535495 | 0.037064261 |
| 0.039781034 | 0.06046938  | 5.77E-05    | 0.028747104 |
| 0.040170564 | 0.017256965 | 0.059505185 | 0.03422657  |
| 0.026412082 | 0.073014982 | 0.054554542 | 0.016745871 |
| 1.26E-06    | 0.025163281 | 0.016216445 | 0.050558963 |
| 0.046804132 | 0.068078808 | 0.001354625 | 0.013813809 |
| 3.40E-06    | 0.028773094 | 0.014548726 | 0.043119617 |
| 0.046338813 | 0.003837568 | 7.80E-05    | 0.036588216 |
| 0.016422675 | 3.95E-05    | 0.047026278 | 0.102553448 |
| 0.068457586 | 0.022328906 | 0.112899911 | 0.023351277 |
| 0.010488849 | 0.003520585 | 0.00488646  | 0.068982986 |
| 0.013204158 | 4.49E-05    | 0.178201389 | 0.036848996 |
| 0.046515912 | 0.06190746  | 0.038686789 | 0.007775035 |
| 0.01460284  | 0.035123496 | 0.065670454 | 0.000809954 |
| 0.030345694 | 0.064211593 | 0.050825094 | 0.02677328  |
| 0.028165015 | 0.069257857 | 0.0782808   | 0.058373237 |
| 0.002354295 | 0.02897572  | 0.033208462 | 0.00346947  |
| 0.012709394 | 0.048151858 | 0.112007562 | 0.086259066 |
| 0.027947605 | 0.012553726 | 0.061513251 | 0.00682047  |
| 0.067376595 | 0.059541875 | 0.027290813 | 0.002242862 |
| 0.092872679 | 0.012279957 | 0.043516609 | 0.011342232 |
| 0.048015934 | 0.001012354 | 0.000177863 | 0.04472198  |
| 0.073995636 | 0.084074015 | 0.055373197 | 0.151067468 |
| 0.029830936 | 0.001579438 | 0.019488055 | 0.007022818 |
| 0.021617936 | 0.03318031  | 0.015705628 | 0.00010878  |
| 0.008503231 | 0.00238025  | 0.103995654 | 0.067705731 |
| 0.017674803 | 0.019892124 | 0.076987268 | 0.097795537 |
| 0.037519114 | 0.010894755 | 0.046822584 | 0.00998421  |
| 0.069443011 | 0.056953709 | 0.048951117 | 0.020500514 |
| 0.037846206 | 0.061502105 | 0.039426774 | 0.000548917 |
| 0.033250596 | 0.140148904 | 0.001440264 | 0.132493899 |

|                      |                      |                      |             |
|----------------------|----------------------|----------------------|-------------|
| 0.021682469          | 0.028701156          | 0.080877462          | 0.010433567 |
| 0.001989566          | 2.71E-06 0.023904954 | 0.019149006          |             |
| 0.073767741          | 0.001030761          | 0.011763598          | 0.002264562 |
| 0.052526521          | 0.032757549          | 0.042768911          | 0.001959224 |
| 0.066939937          | 0.000210084          | 0.173968551          | 0.001044831 |
| 0.031203003          | 0.038943077          | 0.017475153          | 0.020706354 |
| 0.001264286          | 0.041940102          | 0.043381893          | 0.053249563 |
| 0.057262534          | 0.001483987          | 0.045016459          | 0.005621534 |
| 0.018153077          | 0.008708579          | 0.044057899          | 0.003396427 |
| 0.074683606          | 0.000377952          | 0.02766755           | 0.001638143 |
| 0.048821575          | 0.002701486          | 0.080163768          | 0.006256139 |
| 0.010491464          | 0.027441166          | 0.015813495          | 0.03347832  |
| 0.061673369          | 0.030387149          | 0.00432036           | 0.063814143 |
| 0.003776405          | 0.011703808          | 0.039673492          | 1           |
| 0.042818649          | 0.067616685          | 0.020161888          | 0.024570806 |
| 0.035875839          | 0.00122354           | 0.020640716          | 0.004866146 |
| 0.000110929          | 0.012567294          | 0.11472264           | 0.001478425 |
| 0.024526733          | 0.004282511          | 4.47E-06 0.003337112 |             |
| 0.053706547          | 0.005315142          |                      |             |
| UTP15                | 0.090391921          | 0.314749753          | 0.003633304 |
| 0.023347841          | 0.007866604          | 0.104704307          | 0.099474194 |
| 0.067310628          | 0.004841323          | 0.061753541          | 0.157952419 |
| 1.09E-05 0.186930767 | 0.000187659          | 0.001351878          |             |
| 0.297608351          | 0.313188241          | 0.126897712          | 0.265290828 |
| 0.056070805          | 0.043222677          | 0.114972605          | 0.190838917 |
| 0.101415709          | 1.40E-05 0.046192747 | 0.035178813          |             |
| 0.057951607          | 0.273827524          | 0.038277282          | 0.035990707 |
| 0.266937965          | 0.294471893          | 0.129242707          | 0.024953916 |
| 0.078502473          | 0.255235157          | 0.005074249          | 0.239437294 |
| 0.207740277          | 0.081900676          | 0.272819534          | 0.000292907 |
| 0.017548865          | 0.022661582          | 0.046150712          | 0.144333629 |
| 0.036588073          | 0.0860249            | 0.029702535          | 0.092648083 |
| 0.011023311          | 0.163721366          | 0.142145884          | 0.016995225 |
| 0.239642837          | 0.017250505          | 0.271251815          | 0.025421764 |
| 0.006909147          | 0.055902545          | 0.108507753          | 0.163255641 |
| 0.113595517          | 0.256621756          | 0.3062385            | 0.003449189 |
| 0.018988448          | 0.112044016          | 0.259859515          | 0.297844267 |
| 0.277086689          | 0.029409508          | 0.046285271          | 0.084391325 |
| 0.25621005           | 0.207141454          | 0.08148894           | 0.01085831  |
| 9.74E-05 0.065838603 | 0.133216689          | 0.11519767           |             |
| 0.172687244          | 0.175650424          | 0.114145606          | 0.066890915 |
| 0.148485483          | 0.000460328          | 0.113348584          | 0.312210387 |
| 0.003149015          | 0.181860912          | 0.00078948           | 0.005851298 |
| 0.222683502          | 0.269810021          | 0.177034138          | 0.015698765 |
| 0.00022246           | 0.007620404          | 0.003511119          | 0.215916478 |
| 0.10206223           | 0.143974305          | 0.228282838          | 0.013570083 |
| 0.194277442          | 0.009074236          | 0.058734693          | 0.288119453 |
| 0.296261922          | 4.81E-05 0.007110497 | 0.076733452          |             |
| 0.021008267          | 0.040165593          | 0.072538912          | 0.001993363 |
| 0.00148692           | 8.19E-05 0.271884702 | 0.01227362           |             |
| 0.047263876          | 0.07412168           | 0.007061295          | 0.276815654 |
| 0.045924648          | 0.210261402          | 0.012692836          | 0.093871693 |
| 0.235738372          | 0.11848259           | 0.180894199          | 0.237508871 |
| 0.076335809          | 0.018584462          | 0.018987338          | 0.270636644 |

|             |             |             |             |
|-------------|-------------|-------------|-------------|
| 0.192856707 | 0.003165842 | 0.004623015 | 0.142262768 |
| 0.202635945 | 0.281960178 | 0.315251093 | 0.016813389 |
| 0.07280257  | 0.038984052 | 0.118092802 | 0.228276872 |
| 0.07632041  | 0.05848053  | 0.001537382 | 0.12606236  |
| 0.238708155 | 0.001855403 | 0.00822635  | 0.190684343 |
| 0.013679753 | 0.019672906 | 0.251185537 | 0.249763476 |
| 0.144740679 | 0.034948133 | 0.111976344 | 0.130591748 |
| 0.076048897 | 0.102718486 | 0.14778766  | 0.124418714 |
| 0.109212976 | 0.143397251 | 0.006332431 | 0.210082757 |
| 0.022667241 | 0.088704325 | 0.032223874 | 0.004521772 |
| 0.112213948 | 0.036202501 | 0.286352085 | 0.122004768 |
| 0.191201001 | 0.017366739 | 0.061519668 | 0.121617819 |
| 0.084463263 | 0.178464994 | 0.323787421 | 0.02111471  |
| 0.05523938  | 0.03209254  | 0.023756381 | 0.078672212 |
| 0.156352882 | 0.04507231  | 0.042379872 | 8.62E-05    |
| 0.005815215 | 0.144191531 | 0.092854474 | 0.000927071 |
| 0.039899513 | 0.005510615 | 0.001646318 | 0.28770255  |
| 0.057115328 | 0.256528495 | 0.000177658 | 0.00673535  |
| 0.039224838 | 0.256660198 | 0.104699552 | 0.012115907 |
| 0.308790247 | 0.050909762 | 0.245644494 | 0.190764637 |
| 0.028019129 | 0.203795789 | 0.004275776 | 0.034819005 |
| 0.168806361 | 0.305969651 | 0.275169635 | 0.230289635 |
| 0.068104953 | 0.102577284 | 0.010130156 | 0.10298719  |
| 0.099367025 | 0.086379683 | 0.005812872 | 0.279569173 |
| 1.71E-05    | 0.104261691 | 0.24322852  | 0.005266654 |
| 0.323066519 | 0.115643041 | 0.005547105 | 0.025294045 |
| 0.272672199 | 0.27068667  | 0.178349653 | 0.267804359 |
| 0.006939795 | 7.13E-05    | 0.235802552 | 0.195939192 |
| 0.294231524 | 0.08828617  | 0.074572972 | 0.000881918 |
| 0.27856596  | 0.073703643 | 0.231661551 | 0.142885102 |
| 0.180485061 | 0.070478246 | 0.039310651 | 0.096248755 |
| 0.000560229 | 0.080967907 | 0.213018649 | 0.049809793 |
| 0.135180992 | 0.012434368 | 0.311128561 | 0.111499157 |
| 0.084930152 | 0.032851697 | 0.172880725 | 0.016997978 |
| 0.044300595 | 0.312657922 | 0.002095806 | 0.214097844 |
| 0.298833681 | 0.083091516 | 0.326004369 | 0.27537396  |
| 0.075258495 | 0.203649747 | 0.29018518  | 0.200918414 |
| 4.21E-06    | 0.265120445 | 0.201621323 | 0.144021447 |
| 0.312708362 | 0.110050738 | 0.025544488 | 0.117012398 |
| 6.57E-06    | 0.031290491 | 0.070377229 | 0.246573924 |
| 0.302766949 | 0.001504938 | 0.003084205 | 0.230410352 |
| 0.188367449 | 0.000952079 | 0.298972073 | 0.157176996 |
| 0.303590937 | 0.116791313 | 0.072620192 | 0.244488373 |
| 0.072045876 | 0.032913638 | 0.004172521 | 0.240061813 |
| 0.094466895 | 0.001576411 | 0.050982895 | 0.283636687 |
| 0.236893743 | 0.181824616 | 0.070142088 | 0.006912146 |
| 0.193890583 | 0.042785945 | 0.297444193 | 0.002431618 |
| 0.179310811 | 0.16724173  | 0.247573315 | 0.240966865 |
| 0.154266541 | 0.221354446 | 0.200023105 | 0.27039549  |
| 0.01335224  | 0.250511494 | 0.269911258 | 0.004183203 |
| 0.126807757 | 0.306706337 | 0.262508442 | 0.069298537 |
| 0.120553321 | 0.03924253  | 0.070541765 | 0.056151829 |
| 0.27423717  | 0.339574807 | 0.009976718 | 0.007152638 |
| 0.255326334 | 0.035600728 | 0.024965261 | 0.055302585 |

|             |             |             |             |
|-------------|-------------|-------------|-------------|
| 0.093601725 | 0.01219884  | 0.003405833 | 0.143936819 |
| 0.279634593 | 0.137471441 | 0.312653151 | 0.077522482 |
| 0.262949647 | 0.001507417 | 0.17929451  | 0.014502508 |
| 0.063314669 | 0.193742886 | 0.20813409  | 0.002739317 |
| 0.012028826 | 0.004281932 | 0.25664439  | 0.220401035 |
| 0.010745688 | 0.034848056 | 0.090639891 | 0.177631179 |
| 0.29930504  | 0.051148473 | 0.090983153 | 0.053397551 |
| 0.216567862 | 0.047030649 | 0.259050944 | 0.075411267 |
| 0.183857891 | 0.096205034 | 0.233871205 | 0.00121496  |
| 0.204177548 | 0.07858235  | 0.022994517 | 0.224686247 |
| 0.252553717 | 0.023348993 | 0.201867759 | 0.016677101 |
| 0.010240544 | 2.35E-05    | 0.111581086 | 0.13522175  |
| 0.12198174  | 0.017630697 | 0.064340199 | 0.022294288 |
| 0.302616478 | 0.129567463 | 0.218912024 | 0.031874405 |
| 0.131521485 | 0.004150526 | 0.084514027 | 0.000924296 |
| 0.155441407 | 0.152304286 | 0.137589065 | 0.116644749 |
| 0.013408688 | 0.200636883 | 0.151136136 | 0.167001755 |
| 0.33385077  | 0.015376705 | 0.319580747 | 0.031682978 |
| 0.232215191 | 0.033657411 | 0.07911333  | 0.017652738 |
| 0.065388612 | 0.003409763 | 0.020902724 | 0.006479784 |
| 0.330580982 | 0.015367317 | 0.175833328 | 0.029454715 |
| 0.003904315 | 0.084499441 | 0.174117361 | 0.251369998 |
| 0.214258496 | 0.21959979  | 0.048717538 | 0.195732405 |
| 0.016671337 | 0.047034417 | 0.040780174 | 0.042818649 |
| 1           | 0.053708598 | 0.171757045 | 0.194207614 |
| 0.287001071 | 0.014630001 | 0.013197376 | 0.009936395 |
| 0.003114191 | 0.163861608 | 0.139109029 | 0.015170393 |
| 0.147919182 | 0.036723872 | 5.97E-06    | 0.01706368  |
| 0.167354597 | 0.03191105  |             |             |
| VAMP8       | 0.108052916 | 0.291970478 | 0.17275697  |
| 0.02117753  | 0.108570159 | 0.385491701 | 0.310546665 |
| 0.070495692 | 0.176710797 | 0.193792353 | 0.399472844 |
| 0.005053234 | 0.086046419 | 0.057822497 | 0.086993794 |
| 0.199529676 | 0.198737514 | 0.236074139 | 0.195202869 |
| 0.122081143 | 0.10931714  | 0.251704627 | 0.247484551 |
| 0.321276749 | 0.011102206 | 0.188917527 | 0.092569774 |
| 0.049701013 | 0.166631055 | 0.237946388 | 0.163393085 |
| 0.172627261 | 0.139622007 | 0.085187462 | 0.075421128 |
| 0.019147572 | 0.348434762 | 0.005929623 | 0.105967797 |
| 0.097986415 | 0.177779454 | 0.151422743 | 0.066554443 |
| 0.000801768 | 0.20196897  | 0.038213843 | 0.250823013 |
| 0.108553526 | 0.345300154 | 0.242270838 | 0.204848133 |
| 0.007563744 | 0.376711748 | 0.197634193 | 0.006664612 |
| 0.39164468  | 0.006945839 | 0.365710243 | 0.056110545 |
| 0.179915848 | 0.169740314 | 0.07055306  | 0.210023977 |
| 0.400443101 | 0.386457148 | 0.245553001 | 0.122132697 |
| 0.211588197 | 0.104117911 | 0.112589898 | 0.184677364 |
| 0.258193717 | 0.125193218 | 0.169058183 | 0.032855051 |
| 0.129692199 | 0.106813326 | 0.318556779 | 0.162175276 |
| 0.005641683 | 0.259245255 | 0.079275666 | 0.101955572 |
| 0.065401109 | 0.38372202  | 0.106013179 | 0.174393052 |
| 0.090396654 | 0.120798255 | 0.231510413 | 0.227694775 |
| 0.034341072 | 0.110877845 | 0.006891187 | 0.1414731   |
| 0.163271547 | 0.131450655 | 0.174802361 | 0.198850602 |

|             |             |             |             |
|-------------|-------------|-------------|-------------|
| 0.075676871 | 0.148406252 | 0.040205916 | 0.087776095 |
| 0.146301227 | 0.126416331 | 0.383539688 | 0.005237187 |
| 0.06847274  | 0.151845914 | 0.124453314 | 0.360820574 |
| 0.239209307 | 0.025846157 | 0.132007332 | 0.34085246  |
| 0.063838107 | 0.083981407 | 0.2805864   | 0.008789838 |
| 0.018798701 | 0.005799275 | 0.160265342 | 0.170930203 |
| 0.196200282 | 0.280901233 | 0.085173707 | 0.137896258 |
| 0.04816561  | 0.137874937 | 0.130581374 | 0.252621723 |
| 0.104663677 | 0.317140234 | 0.108898448 | 0.151135447 |
| 0.055771386 | 0.103556838 | 0.1927554   | 0.293994547 |
| 0.339310159 | 0.171886259 | 0.192843255 | 0.362559374 |
| 0.071360049 | 0.195731568 | 0.251025465 | 0.089508513 |
| 0.125686071 | 0.199708287 | 0.102612417 | 0.280504937 |
| 0.305697519 | 0.134130387 | 0.004447216 | 0.324109896 |
| 0.410729365 | 0.007368902 | 0.19899476  | 0.158130217 |
| 0.025749245 | 0.144878009 | 0.320995939 | 0.206349002 |
| 0.119755381 | 0.087923395 | 0.164869224 | 0.305115171 |
| 0.253232917 | 0.273398841 | 0.201361237 | 0.158209725 |
| 0.334355703 | 0.09882235  | 0.159421165 | 0.071955954 |
| 0.219548181 | 0.241233747 | 0.035040074 | 0.019370267 |
| 0.115167529 | 0.07555829  | 0.254970411 | 0.148939514 |
| 0.129285018 | 0.004866851 | 0.185263973 | 0.139424776 |
| 0.096976568 | 0.102333119 | 0.322132679 | 0.235591216 |
| 0.268691444 | 0.02734881  | 0.22987396  | 0.100820826 |
| 0.166715443 | 0.144650186 | 0.175643082 | 0.013212969 |
| 0.154043278 | 0.049673371 | 0.106743035 | 0.096056737 |
| 0.140798827 | 0.196585057 | 0.042279734 | 0.233416708 |
| 0.299497859 | 0.153072997 | 0.027527867 | 0.012866336 |
| 0.183360446 | 0.289495116 | 0.068410485 | 0.067737479 |
| 0.225620161 | 0.137526447 | 0.102322439 | 0.369842301 |
| 0.111555692 | 0.400623295 | 0.010173441 | 0.141719508 |
| 0.088873819 | 0.212647179 | 0.143580654 | 0.168056418 |
| 0.213275391 | 0.124808179 | 0.032436921 | 0.37137678  |
| 0.166803435 | 0.136547465 | 0.175088481 | 0.283638241 |
| 0.012446883 | 0.271594469 | 0.145344049 | 0.01263236  |
| 0.307215858 | 0.351240859 | 0.173528201 | 0.116966405 |
| 0.201766606 | 0.286441102 | 0.192603002 | 0.130221219 |
| 0.022002862 | 0.037347952 | 0.243949808 | 0.292687708 |
| 0.16749048  | 0.127348664 | 0.034048467 | 0.008232494 |
| 0.220144682 | 0.065615801 | 0.208365938 | 0.098378697 |
| 0.104213504 | 0.037048249 | 0.204019412 | 0.097848676 |
| 0.005107572 | 0.185632172 | 0.132535182 | 0.096231854 |
| 0.129842313 | 0.119181147 | 0.210942674 | 0.34288311  |
| 0.058654184 | 0.056539292 | 0.069242912 | 0.187975719 |
| 0.288858486 | 0.29450033  | 0.002113467 | 0.242225874 |
| 0.230548255 | 0.176173531 | 0.224914202 | 0.223618989 |
| 0.214171907 | 0.363120312 | 0.250395985 | 0.139988862 |
| 0.003003792 | 0.107272181 | 0.073253218 | 0.392980626 |
| 0.163824131 | 0.34416759  | 0.025055066 | 0.045058632 |
| 0.00323182  | 0.262576443 | 0.020607319 | 0.311172301 |
| 0.192917122 | 0.123615649 | 0.001199514 | 0.205287667 |
| 0.070487484 | 0.006132333 | 0.270475612 | 0.240599289 |
| 0.271227879 | 0.129074183 | 0.248561115 | 0.095776294 |
| 0.01273342  | 0.058813963 | 0.043703378 | 0.189883343 |

|             |             |             |             |
|-------------|-------------|-------------|-------------|
| 0.068862073 | 0.010743969 | 0.127796168 | 0.229392562 |
| 0.251173661 | 0.31295062  | 0.304791099 | 0.035240299 |
| 0.096855409 | 0.054998278 | 0.183483238 | 0.110829038 |
| 0.253773144 | 0.372540708 | 0.296192774 | 0.121941481 |
| 0.139546865 | 0.350786948 | 0.389170553 | 0.247722443 |
| 0.022696543 | 0.114658009 | 0.143982533 | 0.135510303 |
| 0.072510449 | 0.209209951 | 0.121492824 | 0.34379526  |
| 0.250872538 | 0.023603171 | 0.368069878 | 0.107100984 |
| 0.31314982  | 0.206906398 | 0.204284116 | 0.117543489 |
| 0.371179241 | 0.145621358 | 0.202722625 | 0.139085631 |
| 0.363073603 | 0.009495585 | 0.011648259 | 0.311842077 |
| 0.358169835 | 0.397378261 | 0.199483471 | 0.127039697 |
| 0.158517862 | 0.1335905   | 0.175204679 | 0.147431868 |
| 0.242325931 | 0.085261867 | 0.089896704 | 0.012819873 |
| 0.05402279  | 0.12529595  | 0.369246889 | 0.378697378 |
| 0.194521968 | 0.253023402 | 0.241344837 | 0.241022904 |
| 0.183774017 | 0.071341713 | 0.336288523 | 0.135031682 |
| 0.403572287 | 0.083945771 | 0.323399474 | 0.183812559 |
| 0.254919058 | 0.148368931 | 0.204747858 | 0.009909206 |
| 0.116154995 | 0.187372259 | 0.031517133 | 0.181502247 |
| 0.11998828  | 0.205256031 | 0.312805125 | 0.170511273 |
| 0.041986831 | 0.004002267 | 0.272200313 | 0.03596681  |
| 0.422213625 | 0.025312292 | 0.134180018 | 0.006816417 |
| 0.299997039 | 0.175295004 | 0.204504628 | 0.019502996 |
| 0.144322744 | 0.000898859 | 0.192482586 | 0.128515743 |
| 0.257408422 | 0.313868107 | 0.130131926 | 0.102237764 |
| 0.042824885 | 0.160886016 | 0.279042615 | 0.116753827 |
| 0.205133463 | 0.018601775 | 0.214111607 | 0.09709656  |
| 0.080188369 | 0.087445974 | 0.330161823 | 0.089639724 |
| 0.206837946 | 0.046893125 | 0.196985124 | 0.099367437 |
| 0.178011842 | 0.073721965 | 0.180652445 | 0.081438765 |
| 0.169855713 | 0.115065858 | 0.124577582 | 0.112985735 |
| 0.1703084   | 0.092851933 | 0.043886127 | 0.395827794 |
| 0.067264776 | 0.116319473 | 0.034472353 | 0.067616685 |
| 0.053708598 | 1           | 0.199441714 | 0.203869844 |
| 0.206219843 | 0.03542907  | 0.197296178 | 0.150182222 |
| 0.005793655 | 0.103650221 | 0.33999687  | 0.014029707 |
| 0.146650086 | 0.037194764 | 0.004599282 | 0.09062292  |
| 0.327814384 | 0.053900008 |             |             |
| VIM         | 0.385525124 | 0.430795343 | 0.094792041 |
| 0.015554317 | 0.091752563 | 0.244114427 | 0.205952835 |
| 0.385470205 | 0.163818397 | 0.121229438 | 0.307383759 |
| 0.01026464  | 0.327561677 | 0.050283996 | 0.13126952  |
| 0.463643744 | 0.463896595 | 0.288971687 | 0.47388903  |
| 0.399663425 | 0.10478194  | 0.396513743 | 0.32882841  |
| 0.260819468 | 0.010681136 | 0.112871155 | 0.032260034 |
| 0.369884338 | 0.455921339 | 0.256328078 | 0.254332112 |
| 0.423002433 | 0.374461151 | 0.300500741 | 0.221347846 |
| 0.152931629 | 0.409864081 | 0.092867742 | 0.332231509 |
| 0.373163285 | 0.18871415  | 0.370564077 | 0.037117657 |
| 0.001227813 | 0.112194761 | 0.341340865 | 0.38784635  |
| 0.393943812 | 0.232914172 | 0.227366847 | 0.147517653 |
| 0.130091558 | 0.338288451 | 0.416961057 | 0.121971015 |
| 0.351501379 | 0.002366561 | 0.38808136  | 0.364043781 |

|             |             |             |             |
|-------------|-------------|-------------|-------------|
| 0.102985541 | 0.357480407 | 0.352714094 | 0.392324371 |
| 0.246680869 | 0.361765746 | 0.453625121 | 0.040240224 |
| 0.097178098 | 0.395372443 | 0.33516058  | 0.313649268 |
| 0.402174996 | 0.288453625 | 0.257463248 | 0.288878134 |
| 0.355107137 | 0.354726061 | 0.318660199 | 0.236538175 |
| 0.003595947 | 0.140528418 | 0.211717106 | 0.368497672 |
| 0.31351531  | 0.334752322 | 0.388612347 | 0.183387399 |
| 0.351828653 | 0.043788391 | 0.383637542 | 0.465705122 |
| 0.020049926 | 0.360026909 | 0.012261324 | 0.220204586 |
| 0.388310967 | 0.426066628 | 0.397269948 | 0.08181145  |
| 0.036796319 | 0.217146054 | 0.267753888 | 0.374247932 |
| 0.402284064 | 0.386020436 | 0.352498675 | 0.161963449 |
| 0.310310607 | 0.253483852 | 0.334409644 | 0.393179914 |
| 0.435052674 | 0.028190017 | 0.273720777 | 0.233361109 |
| 0.273233983 | 0.099368187 | 0.228560996 | 0.041216091 |
| 0.01147394  | 0.074348319 | 0.420532938 | 0.235025079 |
| 0.093800179 | 0.202691905 | 0.072227449 | 0.324673444 |
| 0.36768753  | 0.427172352 | 0.102882689 | 0.234198335 |
| 0.337620163 | 0.229451815 | 0.291958601 | 0.369066225 |
| 0.254643608 | 0.360055959 | 0.211989421 | 0.374813308 |
| 0.397458251 | 0.0891174   | 0.120891716 | 0.318929345 |
| 0.29841558  | 0.444489566 | 0.475219398 | 0.369574746 |
| 0.196456541 | 0.30676793  | 0.266331558 | 0.316602588 |
| 0.249449172 | 0.410732362 | 0.120269447 | 0.356529    |
| 0.356202818 | 0.041724515 | 0.102069543 | 0.402399577 |
| 0.02719569  | 0.222083645 | 0.394990907 | 0.383163734 |
| 0.376716372 | 0.026901918 | 0.186469583 | 0.245767759 |
| 0.345200713 | 0.237056283 | 0.399828174 | 0.168624393 |
| 0.340954715 | 0.258020927 | 0.066442215 | 0.307071473 |
| 0.162898601 | 0.382990035 | 0.269456202 | 0.07100694  |
| 0.406517612 | 0.404899033 | 0.384605436 | 0.408675776 |
| 0.376117311 | 0.001687002 | 0.118239835 | 0.393444283 |
| 0.274652861 | 0.378900401 | 0.419908043 | 0.155862455 |
| 0.323630089 | 0.281778543 | 0.200855822 | 0.24276745  |
| 0.405339644 | 0.200144561 | 0.183666874 | 0.002382385 |
| 0.153028775 | 0.286816698 | 0.388940908 | 0.133255414 |
| 0.183905791 | 0.17606055  | 0.231203973 | 0.3824304   |
| 0.230028725 | 0.357448752 | 0.091430884 | 0.239721703 |
| 0.277782613 | 0.338353607 | 0.281045566 | 0.335412863 |
| 0.351633823 | 0.281214327 | 0.393094805 | 0.367635645 |
| 0.228664578 | 0.318366558 | 0.202345458 | 0.340191867 |
| 0.351017298 | 0.382160636 | 0.357342687 | 0.374649119 |
| 0.259946093 | 0.405890971 | 0.2870492   | 0.293793088 |
| 0.413066445 | 0.406589041 | 0.138699051 | 0.443916944 |
| 0.00359434  | 0.355667321 | 0.335574229 | 0.224606526 |
| 0.404573596 | 0.220250683 | 0.122397386 | 0.35002502  |
| 0.479046698 | 0.451196126 | 0.421101629 | 0.38077416  |
| 0.264487473 | 0.043432151 | 0.456889826 | 0.37605308  |
| 0.453148841 | 0.350232641 | 0.213994111 | 0.144916497 |
| 0.418321702 | 0.369736354 | 0.363257437 | 0.365645379 |
| 0.341080165 | 0.299580358 | 0.309543946 | 0.385611879 |
| 0.032729638 | 0.25581455  | 0.357348744 | 0.147788187 |
| 0.25098824  | 0.206694456 | 0.366991569 | 0.334326505 |
| 0.270197656 | 0.311322297 | 0.233095008 | 0.093312518 |



|             |             |             |             |
|-------------|-------------|-------------|-------------|
| 0.20572555  | 0.442457432 | 0.037049502 | 0.446120621 |
| 0.472690828 | 0.381025133 | 0.38704787  | 0.478156508 |
| 0.358971699 | 0.344441094 | 0.395894141 | 0.425103362 |
| 0.004926176 | 0.364933946 | 0.302620666 | 0.345626306 |
| 0.382180656 | 0.296970866 | 0.319534622 | 0.306008933 |
| 0.004550962 | 0.204659348 | 0.172599762 | 0.454072527 |
| 0.37482711  | 0.04226382  | 0.035909918 | 0.382897408 |
| 0.309565257 | 0.062429545 | 0.475792401 | 0.290136166 |
| 0.369612515 | 0.355859475 | 0.167078498 | 0.319722772 |
| 0.155083613 | 0.390095346 | 0.024290052 | 0.338962412 |
| 0.347714257 | 0.154645513 | 0.05729081  | 0.478257079 |
| 0.397171256 | 0.33486738  | 0.280760081 | 0.00965691  |
| 0.373035816 | 0.139387267 | 0.354172647 | 0.166227419 |
| 0.407655751 | 0.341841135 | 0.381918414 | 0.351113755 |
| 0.385902663 | 0.359453532 | 0.349489948 | 0.387180969 |
| 0.078237599 | 0.339376139 | 0.382611002 | 0.066188716 |
| 0.34756912  | 0.404526821 | 0.298894477 | 0.184062634 |
| 0.397728444 | 0.0480428   | 0.225767715 | 0.405703073 |
| 0.368612509 | 0.393106588 | 0.082475855 | 0.275443333 |
| 0.34897126  | 0.326112658 | 0.126829828 | 0.371557289 |
| 0.302416917 | 0.152230245 | 0.220741715 | 0.3693435   |
| 0.392522984 | 0.272950145 | 0.387066457 | 0.112105806 |
| 0.395466319 | 0.104661079 | 0.405928843 | 0.254237929 |
| 0.338938383 | 0.327744333 | 0.359325638 | 0.17715116  |
| 0.026227786 | 0.208678996 | 0.33245324  | 0.365923373 |
| 0.108974381 | 0.255200018 | 0.230638478 | 0.275163767 |
| 0.440433838 | 0.336205785 | 0.288556542 | 0.385430958 |
| 0.357167077 | 0.065713588 | 0.445325078 | 0.37603854  |
| 0.403759854 | 0.274446495 | 0.391431157 | 0.012450101 |
| 0.367408443 | 0.145355937 | 0.317067658 | 0.264768113 |
| 0.418352744 | 0.155565042 | 0.320344107 | 0.242514539 |
| 0.14372229  | 0.011860403 | 0.39255757  | 0.250743919 |
| 0.28467926  | 0.32395855  | 0.390618822 | 0.117630669 |
| 0.474138877 | 0.382408231 | 0.391182426 | 0.269888036 |
| 0.309701596 | 0.01150544  | 0.131751994 | 0.070534522 |
| 0.407108128 | 0.378218872 | 0.397978322 | 0.379397993 |
| 0.344333225 | 0.353650626 | 0.360652822 | 0.290854265 |
| 0.382014813 | 0.126746942 | 0.456442982 | 0.38460717  |
| 0.332268678 | 0.35079138  | 0.278698786 | 0.344684775 |
| 0.176367154 | 0.169421251 | 0.156086773 | 0.300643645 |
| 0.39787621  | 0.326171683 | 0.294898295 | 0.352280723 |
| 0.058969137 | 0.323547475 | 0.384565906 | 0.345502965 |
| 0.354643544 | 0.328663754 | 0.359461343 | 0.352753675 |
| 0.338289656 | 0.377349811 | 0.031234077 | 0.020161888 |
| 0.171757045 | 0.199441714 | 1           | 0.408545085 |
| 0.455045189 | 0.340130777 | 0.133514714 | 0.234850996 |
| 0.143456512 | 0.359698347 | 0.236140708 | 0.101456714 |
| 0.380238683 | 0.330780587 | 0.002110836 | 0.359238763 |
| 0.369007639 | 0.30281421  |             |             |
| WBP5        | 0.342365695 | 0.469975977 | 0.095706949 |
| 0.024006928 | 0.121756707 | 0.249247034 | 0.229317447 |
| 0.360774958 | 0.139886555 | 0.134591054 | 0.326444015 |
| 0.004312781 | 0.34817312  | 0.029884117 | 0.109061232 |
| 0.490711247 | 0.497672083 | 0.328106439 | 0.50093137  |

|             |             |             |             |
|-------------|-------------|-------------|-------------|
| 0.350352665 | 0.12301339  | 0.377690546 | 0.349146168 |
| 0.267847983 | 0.004782819 | 0.133522807 | 0.041702867 |
| 0.358276881 | 0.482679458 | 0.243313363 | 0.268883933 |
| 0.435179563 | 0.414217564 | 0.328280919 | 0.277829336 |
| 0.186716637 | 0.442209839 | 0.118469068 | 0.365376498 |
| 0.381063483 | 0.220915575 | 0.402594788 | 0.025557786 |
| 0.002141937 | 0.121553788 | 0.333403452 | 0.379915478 |
| 0.350728605 | 0.236211875 | 0.21717478  | 0.171788371 |
| 0.136816247 | 0.351702347 | 0.391677427 | 0.140588997 |
| 0.379254965 | 0.003249332 | 0.422428868 | 0.289732092 |
| 0.09427184  | 0.337397872 | 0.320010599 | 0.389196621 |
| 0.260902735 | 0.403332149 | 0.493882865 | 0.045667002 |
| 0.09502428  | 0.398735663 | 0.344237901 | 0.35611047  |
| 0.43033028  | 0.314146804 | 0.27772889  | 0.317989183 |
| 0.371580189 | 0.365916563 | 0.315160187 | 0.231770798 |
| 0.001955069 | 0.159632833 | 0.267265717 | 0.325450531 |
| 0.337680493 | 0.352845082 | 0.377490348 | 0.213571381 |
| 0.373452858 | 0.034029115 | 0.382938006 | 0.503281341 |
| 0.024704693 | 0.366330957 | 0.014455844 | 0.211925477 |
| 0.38771331  | 0.443064535 | 0.37857522  | 0.085285986 |
| 0.028100966 | 0.184003305 | 0.197575503 | 0.386142556 |
| 0.400527836 | 0.410295237 | 0.376172804 | 0.148298179 |
| 0.33072398  | 0.197637094 | 0.346566525 | 0.431713992 |
| 0.459752592 | 0.02220191  | 0.218975424 | 0.24727474  |
| 0.288237037 | 0.117705195 | 0.252146565 | 0.043945952 |
| 0.015384486 | 0.049641224 | 0.44055425  | 0.214144762 |
| 0.106905447 | 0.21862392  | 0.093362345 | 0.371298119 |
| 0.360982583 | 0.427561828 | 0.129825328 | 0.257592019 |
| 0.365892021 | 0.256109574 | 0.351809775 | 0.392497877 |
| 0.318607377 | 0.305986085 | 0.190585802 | 0.421743661 |
| 0.415083797 | 0.093237235 | 0.110262558 | 0.326310012 |
| 0.318832015 | 0.474400008 | 0.51144104  | 0.354254863 |
| 0.248591804 | 0.295356851 | 0.26771936  | 0.35498273  |
| 0.265975032 | 0.385806965 | 0.117405821 | 0.367128925 |
| 0.385832542 | 0.044429457 | 0.090819828 | 0.400064985 |
| 0.045933122 | 0.239965362 | 0.414648055 | 0.41193976  |
| 0.406811133 | 0.032761126 | 0.21582685  | 0.261649565 |
| 0.320614666 | 0.253959031 | 0.391005402 | 0.191054418 |
| 0.330662409 | 0.265411083 | 0.068575572 | 0.329608103 |
| 0.160043396 | 0.356669685 | 0.251214713 | 0.068306587 |
| 0.388861568 | 0.389333844 | 0.404174689 | 0.402239638 |
| 0.361283583 | 0.003056744 | 0.134396306 | 0.355219167 |
| 0.259742711 | 0.389783402 | 0.466469051 | 0.149977624 |
| 0.29918649  | 0.292369085 | 0.187485167 | 0.298308456 |
| 0.390232571 | 0.207259241 | 0.182510982 | 0.001387827 |
| 0.171053049 | 0.301435678 | 0.397572666 | 0.091031626 |
| 0.232736165 | 0.141388565 | 0.166881876 | 0.420281855 |
| 0.229956076 | 0.398053295 | 0.061490098 | 0.19283394  |
| 0.284758013 | 0.379404908 | 0.327495275 | 0.287901994 |
| 0.390624012 | 0.305820767 | 0.405503302 | 0.374278034 |
| 0.272877552 | 0.335231873 | 0.18309376  | 0.310071122 |
| 0.381173649 | 0.424938951 | 0.380203978 | 0.409507045 |
| 0.274050529 | 0.380084625 | 0.310347181 | 0.295965766 |
| 0.393815815 | 0.416480988 | 0.123376242 | 0.486813409 |

|             |             |             |             |
|-------------|-------------|-------------|-------------|
| 0.001604656 | 0.35995159  | 0.36991498  | 0.1848865   |
| 0.452155548 | 0.246101644 | 0.102970785 | 0.311246418 |
| 0.507444573 | 0.490143614 | 0.421000821 | 0.403131402 |
| 0.250497875 | 0.025504648 | 0.474829923 | 0.381880906 |
| 0.482805235 | 0.38433062  | 0.270984508 | 0.120822349 |
| 0.45885005  | 0.347556824 | 0.367346416 | 0.359949814 |
| 0.380673362 | 0.348532026 | 0.296916215 | 0.354127357 |
| 0.020489287 | 0.249900056 | 0.361968645 | 0.155395743 |
| 0.270831284 | 0.192826804 | 0.397348899 | 0.34269025  |
| 0.332203188 | 0.280155949 | 0.277821032 | 0.102084881 |
| 0.207905445 | 0.478403762 | 0.049454892 | 0.458136572 |
| 0.509490173 | 0.382634366 | 0.433375102 | 0.508231945 |
| 0.336157389 | 0.368929139 | 0.432469671 | 0.429670715 |
| 0.002681545 | 0.392699429 | 0.325392044 | 0.352201521 |
| 0.41001124  | 0.297804262 | 0.274410004 | 0.344443734 |
| 0.00351654  | 0.189989124 | 0.200073092 | 0.480534479 |
| 0.424015066 | 0.040844516 | 0.046822259 | 0.414891464 |
| 0.334950169 | 0.06023271  | 0.509054652 | 0.31123803  |
| 0.411429342 | 0.399319415 | 0.180143953 | 0.346776872 |
| 0.170140665 | 0.387077604 | 0.032392249 | 0.381763217 |
| 0.376456739 | 0.115636402 | 0.073020504 | 0.503783862 |
| 0.401100709 | 0.370081602 | 0.280091742 | 0.008124661 |
| 0.366903671 | 0.169654858 | 0.390866756 | 0.173714626 |
| 0.412702574 | 0.355069274 | 0.423266973 | 0.369711696 |
| 0.406015335 | 0.385486973 | 0.361574241 | 0.404252254 |
| 0.10265706  | 0.356189627 | 0.402004254 | 0.069174006 |
| 0.340226603 | 0.4470924   | 0.332755919 | 0.195894807 |
| 0.382221361 | 0.072109834 | 0.227429171 | 0.357277671 |
| 0.409155456 | 0.433202488 | 0.075201036 | 0.243272448 |
| 0.373707138 | 0.323753124 | 0.134112238 | 0.377346191 |
| 0.298828769 | 0.154824974 | 0.177121822 | 0.370282872 |
| 0.433935467 | 0.294866415 | 0.41122507  | 0.13240334  |
| 0.436086551 | 0.08971638  | 0.404790752 | 0.283862635 |
| 0.319854668 | 0.331478988 | 0.366022146 | 0.152815865 |
| 0.022059127 | 0.167520749 | 0.36242605  | 0.381470714 |
| 0.103952648 | 0.236913176 | 0.258572232 | 0.318804096 |
| 0.474631532 | 0.363488268 | 0.295799937 | 0.380385733 |
| 0.376820989 | 0.084089346 | 0.472388553 | 0.357398143 |
| 0.390228376 | 0.314168968 | 0.406823447 | 0.010281788 |
| 0.383301034 | 0.160684494 | 0.252940086 | 0.314345141 |
| 0.427847043 | 0.161426274 | 0.357191381 | 0.209881884 |
| 0.169775272 | 0.009634333 | 0.377619893 | 0.297823711 |
| 0.291573357 | 0.310986401 | 0.391097322 | 0.133041515 |
| 0.508581406 | 0.376020193 | 0.379225183 | 0.276827351 |
| 0.33738833  | 0.018078522 | 0.146334744 | 0.054915605 |
| 0.386827128 | 0.384651979 | 0.385820612 | 0.34621706  |
| 0.263902963 | 0.39556606  | 0.38291909  | 0.35079529  |
| 0.427382814 | 0.149472816 | 0.49207384  | 0.350641376 |
| 0.350989285 | 0.356179803 | 0.283078229 | 0.344230859 |
| 0.20614882  | 0.15913376  | 0.15092943  | 0.225330244 |
| 0.440677207 | 0.341153504 | 0.34677772  | 0.309474154 |
| 0.062847674 | 0.36264372  | 0.382570592 | 0.361870372 |
| 0.37914078  | 0.32623218  | 0.372213738 | 0.371356985 |
| 0.288066526 | 0.31781081  | 0.044344199 | 0.024570806 |

|             |             |             |             |
|-------------|-------------|-------------|-------------|
| 0.194207614 | 0.203869844 | 0.408545085 | 1           |
| 0.490098954 | 0.284025155 | 0.126185767 | 0.194070159 |
| 0.13674217  | 0.340780326 | 0.266741167 | 0.146883085 |
| 0.401122866 | 0.289930928 | 0.001774085 | 0.28486256  |
| 0.370871045 | 0.338330432 |             |             |
| XKRX        | 0.38791738  | 0.495300611 | 0.076044394 |
| 0.033245569 | 0.133270228 | 0.254955484 | 0.245436884 |
| 0.407185554 | 0.123972503 | 0.151426294 | 0.350128315 |
| 0.002243525 | 0.446039531 | 0.017658532 | 0.090376079 |
| 0.50736698  | 0.521026455 | 0.374511943 | 0.511835402 |
| 0.361107423 | 0.162843784 | 0.399351194 | 0.407533729 |
| 0.281346969 | 0.002315176 | 0.137004966 | 0.055316235 |
| 0.422779232 | 0.504465272 | 0.2275104   | 0.299188116 |
| 0.46909973  | 0.493235924 | 0.434978643 | 0.363343965 |
| 0.294434826 | 0.467540696 | 0.175931459 | 0.490732857 |
| 0.427890326 | 0.24952854  | 0.49954954  | 0.018190491 |
| 0.004994604 | 0.114094682 | 0.378420115 | 0.419848416 |
| 0.349367708 | 0.236642462 | 0.193886036 | 0.192103897 |
| 0.207436245 | 0.380699757 | 0.437513729 | 0.210688624 |
| 0.432588961 | 0.005288531 | 0.46186952  | 0.291728148 |
| 0.075457953 | 0.354099202 | 0.408126405 | 0.450164629 |
| 0.270768825 | 0.447086923 | 0.508031488 | 0.041655508 |
| 0.081991899 | 0.485133475 | 0.460011642 | 0.456724701 |
| 0.491956195 | 0.361287877 | 0.321732175 | 0.442978276 |
| 0.490396878 | 0.454321403 | 0.317453501 | 0.203679218 |
| 0.00126705  | 0.16570297  | 0.364646366 | 0.388361327 |
| 0.459047557 | 0.384429023 | 0.44107068  | 0.245169181 |
| 0.470345026 | 0.021828641 | 0.415181152 | 0.517194934 |
| 0.026129651 | 0.467390674 | 0.014712167 | 0.184146535 |
| 0.483018912 | 0.477679618 | 0.447219426 | 0.082436491 |
| 0.017066827 | 0.147391371 | 0.181766954 | 0.424578974 |
| 0.453951979 | 0.496998647 | 0.429201492 | 0.201391738 |
| 0.405582478 | 0.193130982 | 0.396996791 | 0.464843308 |
| 0.488702307 | 0.010823635 | 0.186335081 | 0.244512721 |
| 0.382642738 | 0.15810134  | 0.257231165 | 0.049426099 |
| 0.014244436 | 0.030152926 | 0.479271851 | 0.18224768  |
| 0.113079241 | 0.222952003 | 0.098996842 | 0.491812658 |
| 0.396768069 | 0.445433413 | 0.141577025 | 0.277476251 |
| 0.489313052 | 0.278852035 | 0.454276722 | 0.505020388 |
| 0.427590087 | 0.295251686 | 0.165538492 | 0.490437015 |
| 0.445509553 | 0.080374163 | 0.09235904  | 0.348430443 |
| 0.428226486 | 0.493804667 | 0.519831751 | 0.350025137 |
| 0.298248717 | 0.277570748 | 0.341513114 | 0.420939788 |
| 0.271486206 | 0.396927072 | 0.126082512 | 0.38851951  |
| 0.426342859 | 0.049969354 | 0.073890093 | 0.489923662 |
| 0.066820901 | 0.279487271 | 0.464646212 | 0.508303832 |
| 0.505259723 | 0.044510438 | 0.251182747 | 0.285411789 |
| 0.326998422 | 0.271493106 | 0.45432175  | 0.232722917 |
| 0.342354708 | 0.342660904 | 0.055521768 | 0.418698956 |
| 0.139138919 | 0.371063555 | 0.349893216 | 0.086019453 |
| 0.455897533 | 0.396403746 | 0.494270215 | 0.464173868 |
| 0.450739761 | 0.004754833 | 0.149776051 | 0.40904863  |
| 0.322304053 | 0.435994546 | 0.492156907 | 0.128702661 |
| 0.285652995 | 0.393711839 | 0.16293655  | 0.373892762 |

|             |             |             |             |
|-------------|-------------|-------------|-------------|
| 0.442080251 | 0.243527906 | 0.215152468 | 0.000738175 |
| 0.16298     | 0.407095803 | 0.473666613 | 0.062529769 |
| 0.264439835 | 0.12425584  | 0.144037782 | 0.501938593 |
| 0.221229781 | 0.513326599 | 0.036335079 | 0.215952218 |
| 0.285913826 | 0.458266235 | 0.424632929 | 0.303784388 |
| 0.494000123 | 0.33415057  | 0.444727582 | 0.41613238  |
| 0.319452845 | 0.371349304 | 0.238504039 | 0.309879093 |
| 0.499081131 | 0.513347437 | 0.496138532 | 0.511510838 |
| 0.287612229 | 0.431134118 | 0.356335928 | 0.29908715  |
| 0.434184415 | 0.45794459  | 0.095300192 | 0.50098799  |
| 0.000845454 | 0.379364406 | 0.478050805 | 0.238656995 |
| 0.494510622 | 0.26268167  | 0.077933706 | 0.285123245 |
| 0.518048515 | 0.499379923 | 0.461377027 | 0.466352801 |
| 0.292746921 | 0.013119639 | 0.485550105 | 0.439977186 |
| 0.510752087 | 0.446282614 | 0.393181515 | 0.120329559 |
| 0.507469623 | 0.409145798 | 0.449029911 | 0.449671107 |
| 0.500284834 | 0.460301486 | 0.280215942 | 0.40834813  |
| 0.020439166 | 0.265400198 | 0.454618555 | 0.205692267 |
| 0.333014091 | 0.208758752 | 0.506169865 | 0.355491034 |
| 0.446923555 | 0.341995677 | 0.38831252  | 0.092201839 |
| 0.197187714 | 0.495958194 | 0.073587439 | 0.478586462 |
| 0.518090493 | 0.415791098 | 0.508860851 | 0.511090313 |
| 0.344300769 | 0.416376091 | 0.502211783 | 0.454956548 |
| 0.001322655 | 0.453648061 | 0.445815587 | 0.371657675 |
| 0.480879019 | 0.311658466 | 0.304182725 | 0.476250937 |
| 0.002000327 | 0.170089582 | 0.30338889  | 0.481284144 |
| 0.512202582 | 0.033255353 | 0.080387895 | 0.506679935 |
| 0.45659329  | 0.062245179 | 0.508756799 | 0.355372836 |
| 0.49675352  | 0.472644621 | 0.18642288  | 0.458676974 |
| 0.268713012 | 0.434671645 | 0.037305052 | 0.471963583 |
| 0.479262708 | 0.126908114 | 0.090910775 | 0.511274113 |
| 0.47163559  | 0.421954584 | 0.279510877 | 0.009082446 |
| 0.407496784 | 0.232668789 | 0.501242707 | 0.137107681 |
| 0.465067593 | 0.391833635 | 0.487324591 | 0.488279411 |
| 0.493135568 | 0.43987541  | 0.399347126 | 0.488958619 |
| 0.142608909 | 0.456057906 | 0.463994977 | 0.062261783 |
| 0.430071289 | 0.512287673 | 0.440001693 | 0.192856487 |
| 0.411886311 | 0.110571928 | 0.220677002 | 0.37302593  |
| 0.48098558  | 0.50370903  | 0.06308384  | 0.196298783 |
| 0.433393484 | 0.335850857 | 0.124254305 | 0.39599839  |
| 0.301124828 | 0.215044363 | 0.199448999 | 0.405460064 |
| 0.469872925 | 0.313785897 | 0.48446936  | 0.168457488 |
| 0.503234251 | 0.06075724  | 0.48344751  | 0.298474461 |
| 0.313323142 | 0.435639286 | 0.414508429 | 0.157667752 |
| 0.024991482 | 0.142158465 | 0.422686075 | 0.429874832 |
| 0.084309956 | 0.214058698 | 0.27553163  | 0.376206101 |
| 0.497057651 | 0.445861343 | 0.297571768 | 0.38424543  |
| 0.421932578 | 0.116853473 | 0.47964403  | 0.372948924 |
| 0.446189863 | 0.361120633 | 0.500596439 | 0.011225223 |
| 0.492886308 | 0.180246842 | 0.26531625  | 0.394362681 |
| 0.462845807 | 0.146287201 | 0.41522755  | 0.184617312 |
| 0.205575131 | 0.005400114 | 0.397133409 | 0.429893999 |
| 0.300291892 | 0.360968927 | 0.40921923  | 0.21580079  |
| 0.503353291 | 0.4241802   | 0.454116452 | 0.364911937 |

|             |             |             |             |
|-------------|-------------|-------------|-------------|
| 0.401259269 | 0.033526738 | 0.165856632 | 0.03833773  |
| 0.431888206 | 0.422057948 | 0.46652219  | 0.416540142 |
| 0.253388347 | 0.496500126 | 0.425678203 | 0.45095886  |
| 0.510746363 | 0.192739958 | 0.51097744  | 0.358925925 |
| 0.419384672 | 0.411870246 | 0.284256427 | 0.374838369 |
| 0.222561222 | 0.167806595 | 0.138006147 | 0.192310735 |
| 0.503215618 | 0.370183769 | 0.423975649 | 0.34260493  |
| 0.052925706 | 0.418869955 | 0.477414586 | 0.485647025 |
| 0.465008689 | 0.430335872 | 0.432206401 | 0.41076419  |
| 0.34359923  | 0.332602934 | 0.064830838 | 0.035875839 |
| 0.287001071 | 0.206219843 | 0.455045189 | 0.490098954 |
| 1           | 0.339834498 | 0.109404841 | 0.159883053 |
| 0.18599379  | 0.424411785 | 0.293221833 | 0.219338235 |
| 0.489354923 | 0.371824695 | 0.000778322 | 0.266666379 |
| 0.409101465 | 0.435336386 |             |             |
| YIPF1       | 0.174167329 | 0.296156139 | 0.005648804 |
| 0.000875572 | 0.005407362 | 0.085670161 | 0.057291568 |
| 0.13003555  | 0.014226847 | 0.011119843 | 0.139884052 |
| 0.001496951 | 0.284507277 | 0.005738039 | 0.016031451 |
| 0.35043985  | 0.352470469 | 0.092498499 | 0.369695377 |
| 0.14189497  | 0.007309948 | 0.209130991 | 0.118072599 |
| 0.080789165 | 0.001488614 | 0.016583884 | 0.001717852 |
| 0.128391066 | 0.361197927 | 0.065545565 | 0.01925898  |
| 0.335227242 | 0.288472315 | 0.044865888 | 0.016529371 |
| 0.01539889  | 0.27681655  | 0.009973968 | 0.221869261 |
| 0.338344227 | 0.029409337 | 0.280738678 | 0.003423885 |
| 8.04E-05    | 0.014230972 | 0.093224382 | 0.179142799 |
| 0.127305365 | 0.071611427 | 0.0587162   | 0.025219742 |
| 0.013621849 | 0.169833495 | 0.296892062 | 0.012250806 |
| 0.208445013 | 0.00017674  | 0.257884599 | 0.098811529 |
| 0.012876972 | 0.097510001 | 0.150314701 | 0.191824844 |
| 0.092047184 | 0.225082687 | 0.325789455 | 0.001985414 |
| 0.016984621 | 0.150493637 | 0.248002785 | 0.120651464 |
| 0.284917851 | 0.022525736 | 0.025306421 | 0.085254923 |
| 0.211928099 | 0.310572458 | 0.130267977 | 0.025425709 |
| 0.000399258 | 0.028059963 | 0.026011854 | 0.269262717 |
| 0.172833002 | 0.164838974 | 0.184939081 | 0.02297079  |
| 0.117508053 | 0.003952345 | 0.160217663 | 0.34246524  |
| 0.001127728 | 0.277166827 | 0.001364787 | 0.019435344 |
| 0.301595546 | 0.358416148 | 0.228328911 | 0.005533905 |
| 0.003035595 | 0.035645779 | 0.030722945 | 0.336787091 |
| 0.143050655 | 0.1286227   | 0.203548034 | 0.063339033 |
| 0.276725759 | 0.028302132 | 0.06955649  | 0.251495761 |
| 0.314590193 | 0.002592564 | 0.039555935 | 0.071277641 |
| 0.026639036 | 0.008109036 | 0.061738778 | 0.003988458 |
| 0.000535755 | 0.009977308 | 0.331302853 | 0.029189992 |
| 0.011876284 | 0.04778337  | 0.004448289 | 0.14189103  |
| 0.095186952 | 0.365309331 | 0.006418723 | 0.053121783 |
| 0.202533603 | 0.068710695 | 0.074973725 | 0.21914523  |
| 0.037750228 | 0.062109791 | 0.036327222 | 0.244309986 |
| 0.272201693 | 0.00526833  | 0.008067055 | 0.135313506 |
| 0.258756179 | 0.329288901 | 0.343508001 | 0.043836727 |
| 0.026325457 | 0.081387146 | 0.036066852 | 0.128853903 |
| 0.078596712 | 0.16918017  | 0.014653523 | 0.177155171 |

|             |             |             |             |
|-------------|-------------|-------------|-------------|
| 0.218161591 | 0.003883791 | 0.012946079 | 0.295828434 |
| 0.00152777  | 0.017519765 | 0.280586687 | 0.22941411  |
| 0.166883542 | 0.001693594 | 0.025895732 | 0.070342532 |
| 0.128495781 | 0.059296358 | 0.210601855 | 0.021560454 |
| 0.150504202 | 0.038537555 | 0.006396903 | 0.268030339 |
| 0.033284266 | 0.172022857 | 0.031867677 | 0.006644568 |
| 0.223402641 | 0.093950899 | 0.252445123 | 0.202064682 |
| 0.243368833 | 8.41E-05    | 0.010171383 | 0.197396921 |
| 0.03300842  | 0.329291475 | 0.276966208 | 0.03502005  |
| 0.125204195 | 0.050008048 | 0.050363075 | 0.036469586 |
| 0.33871615  | 0.013859554 | 0.015416322 | 0.000187994 |
| 0.009901595 | 0.068317093 | 0.126948571 | 0.014204747 |
| 0.01393757  | 0.014903355 | 0.054928594 | 0.264975459 |
| 0.064157723 | 0.218795429 | 0.010278037 | 0.068197378 |
| 0.042379939 | 0.164843057 | 0.03896006  | 0.032669987 |
| 0.193099563 | 0.028227789 | 0.348278097 | 0.212228485 |
| 0.019282595 | 0.153008348 | 0.028809711 | 0.072116352 |
| 0.159223594 | 0.26840158  | 0.251934026 | 0.240379634 |
| 0.051376517 | 0.275452097 | 0.025611728 | 0.11686041  |
| 0.188929338 | 0.151926903 | 0.012173074 | 0.304546185 |
| 0.000528061 | 0.147352685 | 0.130836176 | 0.041351587 |
| 0.265340866 | 0.069371358 | 0.015543992 | 0.081119629 |
| 0.371805149 | 0.318349369 | 0.342580793 | 0.308302256 |
| 0.028784806 | 0.005427636 | 0.344040428 | 0.203503928 |
| 0.355960733 | 0.085333841 | 0.028599344 | 0.026999307 |
| 0.299774206 | 0.209029315 | 0.172269561 | 0.155665928 |
| 0.13871849  | 0.066025619 | 0.091950674 | 0.259267583 |
| 0.004979461 | 0.04978726  | 0.181275595 | 0.014025512 |
| 0.038722461 | 0.01681113  | 0.235052913 | 0.156824794 |
| 0.034712802 | 0.034353722 | 0.033701014 | 0.011484681 |
| 0.056308822 | 0.306985103 | 0.003601554 | 0.33833658  |
| 0.348943264 | 0.14675999  | 0.267297175 | 0.357622564 |
| 0.116278385 | 0.18049542  | 0.273581044 | 0.367576274 |
| 0.000767391 | 0.293881018 | 0.225127418 | 0.184231928 |
| 0.289175926 | 0.108047673 | 0.128885429 | 0.091702244 |
| 0.000479645 | 0.051700042 | 0.016562661 | 0.321427751 |
| 0.263793259 | 0.002955805 | 0.005243555 | 0.232344984 |
| 0.197907825 | 0.009490641 | 0.345195379 | 0.081194829 |
| 0.234440536 | 0.114360255 | 0.032753635 | 0.2565746   |
| 0.022564559 | 0.082514908 | 0.001256815 | 0.138667589 |
| 0.106110916 | 0.022717535 | 0.003300086 | 0.366819653 |
| 0.269960904 | 0.150187684 | 0.099322806 | 0.000715259 |
| 0.341053631 | 0.01006778  | 0.195149586 | 0.012422014 |
| 0.263257621 | 0.17149725  | 0.244950735 | 0.264143854 |
| 0.162262175 | 0.196640807 | 0.189084977 | 0.245457127 |
| 0.006215924 | 0.268039734 | 0.29825157  | 0.004662427 |
| 0.172116421 | 0.287877325 | 0.091512725 | 0.050054345 |
| 0.198854156 | 0.003015069 | 0.074024871 | 0.172691541 |
| 0.225148404 | 0.276402978 | 0.008539823 | 0.036194491 |
| 0.194328126 | 0.053375213 | 0.022140524 | 0.110206697 |
| 0.1248969   | 0.015183811 | 0.036857898 | 0.182350884 |
| 0.252805984 | 0.112161414 | 0.286858292 | 0.007277201 |
| 0.291856067 | 0.008495076 | 0.31849653  | 0.017814293 |
| 0.125008268 | 0.163223884 | 0.315264167 | 0.020355431 |

|             |             |             |             |
|-------------|-------------|-------------|-------------|
| 0.00203551  | 0.017642775 | 0.175165704 | 0.22287718  |
| 0.015656809 | 0.073853654 | 0.049411504 | 0.084916254 |
| 0.329842768 | 0.040645505 | 0.107575284 | 0.117012169 |
| 0.216545584 | 0.003815185 | 0.314321847 | 0.118985471 |
| 0.246553378 | 0.044220843 | 0.258163884 | 0.001548206 |
| 0.191807181 | 0.015333074 | 0.137584974 | 0.071562406 |
| 0.367568692 | 0.021644065 | 0.141398498 | 0.04189526  |
| 0.009663715 | 0.001235601 | 0.218685124 | 0.072592481 |
| 0.123231739 | 0.055711176 | 0.114905981 | 0.01424544  |
| 0.337831272 | 0.141139421 | 0.254975607 | 0.067109109 |
| 0.070945431 | 0.00149224  | 0.015629467 | 0.006701683 |
| 0.247289693 | 0.207701311 | 0.212909547 | 0.165199981 |
| 0.082390699 | 0.155487019 | 0.16100008  | 0.07573069  |
| 0.268923025 | 0.009629412 | 0.338490461 | 0.102937088 |
| 0.295027889 | 0.034211931 | 0.100522527 | 0.035696607 |
| 0.033815291 | 0.015920062 | 0.027862293 | 0.041415662 |
| 0.287115273 | 0.031850726 | 0.081703908 | 0.043294791 |
| 0.003628489 | 0.060270415 | 0.296766702 | 0.225868212 |
| 0.1409983   | 0.214351325 | 0.083603502 | 0.206003819 |
| 0.04181376  | 0.106907414 | 0.001897443 | 0.00122354  |
| 0.014630001 | 0.03542907  | 0.340130777 | 0.284025155 |
| 0.339834498 | 1           | 0.017065032 | 0.041252551 |
| 0.032625147 | 0.324561457 | 0.075984197 | 0.007405768 |
| 0.171549473 | 0.066435739 | 0.000127701 | 0.075222338 |
| 0.194609791 | 0.025826822 |             |             |
| YPEL1       | 0.071805559 | 0.170988284 | 0.187712798 |
| 0.004352724 | 0.056716792 | 0.366780638 | 0.261720709 |
| 0.045015481 | 0.182184033 | 0.091595447 | 0.332480509 |
| 0.014305571 | 0.037449435 | 0.106016585 | 0.10885692  |
| 0.101508907 | 0.09918323  | 0.17544553  | 0.104515445 |
| 0.107335788 | 0.032377373 | 0.213085882 | 0.151060651 |
| 0.29022241  | 0.031527934 | 0.163871862 | 0.022142549 |
| 0.02619454  | 0.08093733  | 0.281989797 | 0.076653473 |
| 0.088539521 | 0.059693337 | 0.028640143 | 0.024668278 |
| 0.003302299 | 0.23208714  | 0.001852952 | 0.044052535 |
| 0.043750073 | 0.120318778 | 0.068577229 | 0.10938672  |
| 5.95E-05    | 0.176089115 | 0.022435721 | 0.185866127 |
| 0.111560404 | 0.34430134  | 0.316348952 | 0.14780586  |
| 0.001520794 | 0.30483307  | 0.143891296 | 0.001159342 |
| 0.277300944 | 0.000941762 | 0.245303888 | 0.046402051 |
| 0.204721084 | 0.161359126 | 0.03815476  | 0.143018277 |
| 0.371394262 | 0.264832508 | 0.1342882   | 0.120475619 |
| 0.299434207 | 0.058250783 | 0.044875599 | 0.088613105 |
| 0.155018914 | 0.045275733 | 0.081340844 | 0.01369694  |
| 0.058548579 | 0.049405543 | 0.32195566  | 0.137420174 |
| 0.010260222 | 0.228306987 | 0.023433042 | 0.063946981 |
| 0.024029155 | 0.310217898 | 0.065616593 | 0.098050896 |
| 0.042092378 | 0.166210897 | 0.177163296 | 0.119232759 |
| 0.017057016 | 0.055821375 | 0.005357452 | 0.139086679 |
| 0.087697629 | 0.058003535 | 0.109866889 | 0.163843958 |
| 0.126739491 | 0.164720809 | 0.033414326 | 0.036070231 |
| 0.105289126 | 0.071741277 | 0.277087032 | 0.002012332 |
| 0.025741651 | 0.112665936 | 0.081730978 | 0.232567135 |
| 0.13352139  | 0.051785017 | 0.129557448 | 0.342996624 |



|             |             |             |             |
|-------------|-------------|-------------|-------------|
| 0.022376234 | 0.029549619 | 0.272121407 | 0.002037687 |
| 0.014795838 | 0.010457734 | 0.07974382  | 0.158833259 |
| 0.138257687 | 0.260557185 | 0.045738338 | 0.05945048  |
| 0.032989714 | 0.07291056  | 0.075096107 | 0.199143116 |
| 0.042514067 | 0.255599529 | 0.05047392  | 0.071200352 |
| 0.018803948 | 0.081208688 | 0.204636789 | 0.180946369 |
| 0.25743218  | 0.161042809 | 0.198396207 | 0.291873794 |
| 0.027641397 | 0.101820321 | 0.137931872 | 0.06179153  |
| 0.063230736 | 0.230620759 | 0.036940581 | 0.169213318 |
| 0.297259391 | 0.121933866 | 0.001996417 | 0.282874118 |
| 0.29813107  | 0.002860538 | 0.213676656 | 0.089193705 |
| 0.007783499 | 0.081746732 | 0.209065587 | 0.118523387 |
| 0.070804091 | 0.020702639 | 0.082282399 | 0.248635784 |
| 0.238254811 | 0.210023646 | 0.142993275 | 0.06181063  |
| 0.295227576 | 0.032631369 | 0.184767799 | 0.027819639 |
| 0.301975118 | 0.21982927  | 0.008909564 | 0.007769446 |
| 0.073501577 | 0.060263104 | 0.144189871 | 0.100820357 |
| 0.069896065 | 0.000631371 | 0.082460552 | 0.095131943 |
| 0.03711449  | 0.050881615 | 0.189295078 | 0.338124378 |
| 0.29704525  | 0.010009356 | 0.315786826 | 0.045911154 |
| 0.110200866 | 0.069543564 | 0.075122997 | 0.018804389 |
| 0.130862109 | 0.017752452 | 0.069198888 | 0.139125642 |
| 0.068118907 | 0.155790608 | 0.038952614 | 0.123233727 |
| 0.325334712 | 0.072819642 | 0.050651963 | 0.007273222 |
| 0.128739011 | 0.175618613 | 0.02079274  | 0.03841979  |
| 0.118110142 | 0.067527254 | 0.042297612 | 0.28535415  |
| 0.057745715 | 0.299202697 | 0.004253226 | 0.138327023 |
| 0.037875504 | 0.109723179 | 0.061656124 | 0.089059576 |
| 0.192682092 | 0.089051948 | 0.011971651 | 0.356251318 |
| 0.124060631 | 0.102539097 | 0.196365542 | 0.172110682 |
| 0.021009408 | 0.234868815 | 0.071244841 | 0.004828274 |
| 0.175447805 | 0.297659431 | 0.210789317 | 0.13270727  |
| 0.107855653 | 0.17666303  | 0.12681896  | 0.056434673 |
| 0.011581171 | 0.080525493 | 0.153057889 | 0.212150815 |
| 0.079896286 | 0.092997399 | 0.008418564 | 0.006565049 |
| 0.118274911 | 0.039656139 | 0.116583116 | 0.047283915 |
| 0.052381177 | 0.016720086 | 0.237690746 | 0.065296992 |
| 0.002977305 | 0.143240238 | 0.0628858   | 0.030618492 |
| 0.052235771 | 0.090875948 | 0.110740798 | 0.316470507 |
| 0.01834324  | 0.019810891 | 0.019762514 | 0.179980177 |
| 0.339692884 | 0.169329304 | 0.000705145 | 0.157509345 |
| 0.123985032 | 0.154317108 | 0.111808559 | 0.123427544 |
| 0.186555473 | 0.270510246 | 0.135551871 | 0.075601627 |
| 0.007167305 | 0.04401691  | 0.027956966 | 0.346632232 |
| 0.074181794 | 0.310790917 | 0.018662749 | 0.016586601 |
| 0.009263612 | 0.334861412 | 0.003565059 | 0.209115527 |
| 0.094682483 | 0.168240234 | 0.000260171 | 0.113972068 |
| 0.0277921   | 0.003352018 | 0.154257164 | 0.165824904 |
| 0.151434433 | 0.082717666 | 0.228121255 | 0.037517185 |
| 0.002040536 | 0.031564667 | 0.025969241 | 0.102425314 |
| 0.038096933 | 0.006493012 | 0.045845513 | 0.129050653 |
| 0.152995537 | 0.223811892 | 0.315862691 | 0.013968066 |
| 0.04506691  | 0.011079981 | 0.086439195 | 0.1161491   |
| 0.178412575 | 0.294457378 | 0.188309528 | 0.053000194 |

|             |             |             |             |
|-------------|-------------|-------------|-------------|
| 0.086746216 | 0.242473145 | 0.297386825 | 0.139342025 |
| 0.004960059 | 0.047301699 | 0.06671222  | 0.097724436 |
| 0.037378545 | 0.106119795 | 0.053709657 | 0.354531813 |
| 0.207379057 | 0.00505482  | 0.393257951 | 0.089869512 |
| 0.19184905  | 0.100970885 | 0.205542226 | 0.122815446 |
| 0.250517635 | 0.108091589 | 0.254862413 | 0.12694884  |
| 0.360066258 | 0.00174972  | 0.006775712 | 0.257038813 |
| 0.230400599 | 0.342930769 | 0.098515738 | 0.038934081 |
| 0.076715745 | 0.186692992 | 0.110088618 | 0.08887503  |
| 0.252969929 | 0.03553992  | 0.03802495  | 0.006489172 |
| 0.020752916 | 0.110611525 | 0.246668105 | 0.278485771 |
| 0.230477937 | 0.309110348 | 0.19333725  | 0.155256695 |
| 0.088733997 | 0.024658841 | 0.330524048 | 0.123428803 |
| 0.303797041 | 0.025093045 | 0.212740999 | 0.16319815  |
| 0.174177515 | 0.093117371 | 0.120898427 | 0.007493971 |
| 0.055308852 | 0.082797726 | 0.027090528 | 0.095824935 |
| 0.053692303 | 0.209643475 | 0.213438618 | 0.174218599 |
| 0.013151515 | 0.00794364  | 0.241098712 | 0.01165287  |
| 0.394959127 | 0.010574225 | 0.118333943 | 0.000950699 |
| 0.180604859 | 0.117700566 | 0.119919091 | 0.007926081 |
| 0.08221953  | 0.000121508 | 0.099073018 | 0.180256713 |
| 0.190550719 | 0.258675714 | 0.080079855 | 0.057549059 |
| 0.034016217 | 0.086200356 | 0.218648204 | 0.056287871 |
| 0.100958922 | 0.004381666 | 0.106478179 | 0.094456602 |
| 0.030689266 | 0.041190992 | 0.338956239 | 0.05746616  |
| 0.172808514 | 0.037325997 | 0.249214121 | 0.098372826 |
| 0.080372891 | 0.046203809 | 0.10134411  | 0.034696533 |
| 0.150848804 | 0.075239206 | 0.068648595 | 0.048992867 |
| 0.093479591 | 0.039967928 | 0.023379448 | 0.307365833 |
| 0.029954386 | 0.103632438 | 0.007092384 | 0.020640716 |
| 0.013197376 | 0.197296178 | 0.133514714 | 0.126185767 |
| 0.109404841 | 0.017065032 | 1           | 0.168653857 |
| 0.002225285 | 0.052925439 | 0.267242485 | 0.003049826 |
| 0.091748148 | 0.015375764 | 0.00894857  | 0.075277618 |
| 0.261864031 | 0.018052317 |             |             |
| ZBTB2       | 0.137805132 | 0.208917362 | 0.151265063 |
| 0.001412981 | 0.031199734 | 0.299588786 | 0.176448679 |
| 0.090838626 | 0.173058276 | 0.046808273 | 0.30538555  |
| 0.073252754 | 0.068416555 | 0.23034499  | 0.164691543 |
| 0.15592191  | 0.147090056 | 0.146171014 | 0.166484637 |
| 0.201172248 | 0.015649851 | 0.311602283 | 0.144614175 |
| 0.241615044 | 0.128307049 | 0.082050194 | 0.006592713 |
| 0.055029077 | 0.133779433 | 0.292677412 | 0.066142923 |
| 0.14297829  | 0.088119204 | 0.027980428 | 0.020726864 |
| 0.00372409  | 0.281140161 | 0.00290844  | 0.062527132 |
| 0.083670948 | 0.071204487 | 0.100998887 | 0.116003873 |
| 1.78E-05    | 0.10747759  | 0.048547864 | 0.241164079 |
| 0.200215181 | 0.281296798 | 0.333151484 | 0.077536857 |
| 0.002894247 | 0.312678919 | 0.25558389  | 0.002123168 |
| 0.278172812 | 0.000210921 | 0.270563101 | 0.117153479 |
| 0.179569191 | 0.199800982 | 0.064900804 | 0.186576207 |
| 0.295471026 | 0.274808377 | 0.179903229 | 0.048017785 |
| 0.197176329 | 0.086870797 | 0.070373933 | 0.080007988 |
| 0.199299756 | 0.048741377 | 0.066293625 | 0.01987171  |

|             |             |             |             |
|-------------|-------------|-------------|-------------|
| 0.079958285 | 0.090012913 | 0.357117921 | 0.175786894 |
| 0.020328749 | 0.127441943 | 0.016729089 | 0.135266052 |
| 0.039073721 | 0.305819627 | 0.11492082  | 0.057278412 |
| 0.056991742 | 0.17107733  | 0.227009847 | 0.168984382 |
| 0.008159455 | 0.094330212 | 0.003786286 | 0.180773908 |
| 0.13962542  | 0.102173101 | 0.168388141 | 0.082468563 |
| 0.164979699 | 0.244928388 | 0.099562279 | 0.071327562 |
| 0.148698043 | 0.088281566 | 0.278485414 | 0.006343439 |
| 0.049734971 | 0.153924899 | 0.083367242 | 0.257626897 |
| 0.185102594 | 0.124010162 | 0.23214891  | 0.283017831 |
| 0.025841769 | 0.015085056 | 0.209505092 | 0.003750298 |
| 0.008024304 | 0.06063112  | 0.126970482 | 0.205037825 |
| 0.061203644 | 0.183281801 | 0.025006203 | 0.062185581 |
| 0.066607771 | 0.137072663 | 0.04142363  | 0.14509371  |
| 0.059862913 | 0.179926007 | 0.044019315 | 0.095049167 |
| 0.017738637 | 0.148493014 | 0.230357001 | 0.201905754 |
| 0.335070248 | 0.115799926 | 0.172765691 | 0.292688133 |
| 0.048724981 | 0.15372108  | 0.191268696 | 0.104807326 |
| 0.038957155 | 0.280396807 | 0.034720988 | 0.148465305 |
| 0.253344364 | 0.218426357 | 0.008046521 | 0.326582836 |
| 0.307872479 | 0.004504979 | 0.178808453 | 0.145283077 |
| 0.002568753 | 0.063393174 | 0.26352262  | 0.142785053 |
| 0.091910183 | 0.005929834 | 0.0494735   | 0.182372489 |
| 0.29602323  | 0.162515101 | 0.192462677 | 0.035247684 |
| 0.342112439 | 0.029706815 | 0.116351573 | 0.050204304 |
| 0.259078758 | 0.309526794 | 0.015208191 | 0.01013266  |
| 0.136301567 | 0.110764798 | 0.173381751 | 0.150392278 |
| 0.116220788 | 0.000116041 | 0.043227748 | 0.163334637 |
| 0.040425936 | 0.10070354  | 0.216444308 | 0.2934461   |
| 0.389258725 | 0.01634468  | 0.324441552 | 0.034816381 |
| 0.207750802 | 0.048460199 | 0.053169232 | 0.023852617 |
| 0.095595403 | 0.022464837 | 0.094469984 | 0.276726069 |
| 0.042235922 | 0.189263933 | 0.117382883 | 0.155700477 |
| 0.286778899 | 0.092376249 | 0.170561028 | 0.025319171 |
| 0.127699132 | 0.163649706 | 0.020312275 | 0.074483602 |
| 0.122627424 | 0.06471452  | 0.079860292 | 0.318765876 |
| 0.047483303 | 0.276750911 | 0.01125531  | 0.178837324 |
| 0.05433952  | 0.13682007  | 0.089085347 | 0.118378035 |
| 0.158274931 | 0.175618554 | 0.023129483 | 0.354562951 |
| 0.195982054 | 0.155134063 | 0.219231284 | 0.220892078 |
| 0.044577407 | 0.277156299 | 0.073082096 | 0.014281494 |
| 0.199532212 | 0.208152646 | 0.233140711 | 0.22332883  |
| 0.170234599 | 0.232317972 | 0.220314051 | 0.09326859  |
| 0.026357496 | 0.219233864 | 0.229786579 | 0.240915068 |
| 0.127470702 | 0.095801343 | 0.008791092 | 0.022757318 |
| 0.16398916  | 0.089216448 | 0.136177207 | 0.074995357 |
| 0.060967591 | 0.02219846  | 0.298599407 | 0.140824354 |
| 0.01004827  | 0.128113414 | 0.089288244 | 0.021687545 |
| 0.041862544 | 0.08018881  | 0.128166575 | 0.346910384 |
| 0.017667552 | 0.034589293 | 0.015291347 | 0.103785052 |
| 0.28568849  | 0.214437086 | 0.001170992 | 0.245957643 |
| 0.178987762 | 0.201183516 | 0.138681962 | 0.188837256 |
| 0.251137052 | 0.266313258 | 0.170942611 | 0.141025199 |
| 0.028560972 | 0.073234766 | 0.046502307 | 0.379887022 |

|             |             |             |             |
|-------------|-------------|-------------|-------------|
| 0.108225835 | 0.295012327 | 0.056264986 | 0.022963627 |
| 0.015017704 | 0.329807697 | 0.004357713 | 0.281525897 |
| 0.121345007 | 0.09011529  | 0.000445487 | 0.143739002 |
| 0.044374039 | 0.009085162 | 0.213788529 | 0.1359984   |
| 0.167070008 | 0.094009689 | 0.138029171 | 0.060286212 |
| 0.003037634 | 0.056092681 | 0.009548029 | 0.10136216  |
| 0.05053025  | 0.020120692 | 0.015617253 | 0.192509131 |
| 0.212520365 | 0.212585506 | 0.314427379 | 0.007966367 |
| 0.092556768 | 0.008165508 | 0.098844954 | 0.146303938 |
| 0.253732562 | 0.298443521 | 0.218462335 | 0.080484379 |
| 0.111367169 | 0.251609163 | 0.310958607 | 0.175921384 |
| 0.004174306 | 0.078012866 | 0.107010787 | 0.070667768 |
| 0.066946388 | 0.139920422 | 0.049265834 | 0.249876134 |
| 0.290776352 | 0.002405483 | 0.334722799 | 0.183528176 |
| 0.206047665 | 0.129013336 | 0.146430413 | 0.218891438 |
| 0.246758943 | 0.121155739 | 0.166120327 | 0.169098975 |
| 0.372940036 | 0.003945866 | 0.022397466 | 0.297987902 |
| 0.254976738 | 0.28564065  | 0.137066003 | 0.019532188 |
| 0.113786292 | 0.239738926 | 0.180758622 | 0.084178014 |
| 0.327659125 | 0.054956193 | 0.075076429 | 0.023567962 |
| 0.01207872  | 0.173123304 | 0.225753591 | 0.299736515 |
| 0.186829313 | 0.356619284 | 0.140127221 | 0.116016253 |
| 0.134088247 | 0.03293462  | 0.320655641 | 0.189827671 |
| 0.318528069 | 0.00932325  | 0.276578148 | 0.222147598 |
| 0.248807888 | 0.071383739 | 0.155768233 | 0.006586246 |
| 0.07755862  | 0.048190474 | 0.085713728 | 0.069128994 |
| 0.098742325 | 0.157560476 | 0.190730158 | 0.213589016 |
| 0.014406607 | 0.025333949 | 0.340244721 | 0.014639287 |
| 0.36260411  | 0.027734436 | 0.171667736 | 0.001699996 |
| 0.23822722  | 0.15721914  | 0.177004431 | 0.015455531 |
| 0.075308413 | 0.000133289 | 0.049661156 | 0.213514488 |
| 0.279199322 | 0.305999495 | 0.129235348 | 0.098988685 |
| 0.098323093 | 0.096027433 | 0.233509674 | 0.04906821  |
| 0.125567267 | 0.005578831 | 0.15363999  | 0.152090754 |
| 0.055535317 | 0.056366986 | 0.321534393 | 0.079098851 |
| 0.106233484 | 0.052173128 | 0.192300239 | 0.21077601  |
| 0.109976879 | 0.06776937  | 0.081966089 | 0.065121002 |
| 0.0877189   | 0.070811947 | 0.117198404 | 0.070468333 |
| 0.104707569 | 0.065414062 | 0.043124025 | 0.32182025  |
| 0.052907171 | 0.171216497 | 0.002517065 | 0.004866146 |
| 0.009936395 | 0.150182222 | 0.234850996 | 0.194070159 |
| 0.159883053 | 0.041252551 | 0.168653857 | 1           |
| 0.006095186 | 0.109315801 | 0.187005338 | 0.003002085 |
| 0.116839361 | 0.030819902 | 0.014101981 | 0.161060203 |
| 0.298271753 | 0.021051601 |             |             |
| ZDHC2       | 0.046847816 | 0.125731481 | 0.000489229 |
| 0.000167663 | 0.001766736 | 0.016983334 | 0.016072986 |
| 0.044935419 | 0.00110893  | 0.001883956 | 0.038863265 |
| 1.46E-05    | 0.2460133   | 9.49E-05    | 0.002971022 |
| 0.18846877  | 0.043536905 | 0.206035498 | 0.16722025  |
| 0.000883755 | 0.058251681 | 0.031064292 | 0.036706924 |
| 1.19E-05    | 0.003875053 | 0.000188194 | 0.018100551 |
| 0.200426909 | 0.013128298 | 0.067102028 |             |
| 0.182469707 | 0.018378216 | 0.003767119 | 0.148483527 |
|             |             | 0.009424399 | 0.016675801 |

|             |             |             |             |
|-------------|-------------|-------------|-------------|
| 0.101248503 | 0.032987426 | 0.182308042 | 0.234794388 |
| 0.008812117 | 0.160645244 | 0.000145384 | 6.36E-05    |
| 0.002534683 | 0.041921226 | 0.048638935 | 0.043811275 |
| 0.013022497 | 0.012203189 | 0.006478056 | 0.005512227 |
| 0.048865259 | 0.111409979 | 0.010634333 | 0.076482538 |
| 1.67E-05    | 0.095874417 | 0.023911042 | 0.001628239 |
| 0.030413566 | 0.053549105 | 0.060201233 | 0.022792132 |
| 0.083567139 | 0.164530547 | 0.000171994 | 0.002014572 |
| 0.069915607 | 0.124054443 | 0.048474317 | 0.116171721 |
| 0.005076448 | 0.007674712 | 0.112918052 | 0.107533074 |
| 0.183813121 | 0.038376109 | 0.006621828 | 2.78E-06    |
| 0.006509007 | 0.016926087 | 0.106685681 | 0.127097769 |
| 0.049599277 | 0.07298574  | 0.008212147 | 0.045678987 |
| 0.000111665 | 0.048233718 | 0.171583861 | 0.000122199 |
| 0.197867332 | 0.000219356 | 0.005588216 | 0.139667144 |
| 0.206446669 | 0.070843971 | 0.000778406 | 0.000118106 |
| 0.00639897  | 0.003860222 | 0.241219862 | 0.054481925 |
| 0.054879812 | 0.074439302 | 0.17893675  | 0.242756256 |
| 0.001861538 | 0.030416843 | 0.088008171 | 0.127427639 |
| 0.000234357 | 0.007873532 | 0.016347664 | 0.009181463 |
| 0.001576427 | 0.019184304 | 0.00057891  | 4.80E-05    |
| 0.001830815 | 0.16977203  | 0.004595083 | 0.002313776 |
| 0.009983671 | 0.000712669 | 0.079569865 | 0.041866263 |
| 0.201076878 | 0.003496719 | 0.013278134 | 0.126463973 |
| 0.020218952 | 0.042139543 | 0.112180031 | 0.044599092 |
| 0.015740228 | 0.00452708  | 0.119120172 | 0.099316404 |
| 0.000507942 | 0.000537963 | 0.032019716 | 0.240241798 |
| 0.159523508 | 0.161119284 | 0.012891754 | 0.015659875 |
| 0.02090011  | 0.008096619 | 0.04438103  | 0.024621236 |
| 0.074098442 | 0.01334078  | 0.064119058 | 0.073312225 |
| 0.000769473 | 0.00125637  | 0.153117853 | 0.001407697 |
| 0.005425742 | 0.094291546 | 0.117762563 | 0.125219136 |
| 0.00012345  | 0.005796868 | 0.015772653 | 0.027245326 |
| 0.012313942 | 0.076001416 | 0.004626756 | 0.034213731 |
| 0.008748071 | 0.0009055   | 0.233286272 | 0.005643576 |
| 0.046403336 | 0.010103714 | 0.001375445 | 0.109885159 |
| 0.038775431 | 0.098660358 | 0.076609813 | 0.096260984 |
| 1.43E-05    | 0.001640547 | 0.054278599 | 0.006074522 |
| 0.236000918 | 0.115419914 | 0.005879612 | 0.028449072 |
| 0.076551641 | 0.008860993 | 0.028443038 | 0.153733314 |
| 0.001898523 | 0.001875254 | 4.25E-07    | 0.001768821 |
| 0.023389751 | 0.069000189 | 0.000641039 | 0.006036838 |
| 0.00068566  | 0.008848248 | 0.115111555 | 0.012138913 |
| 0.150710339 | 0.00066844  | 0.096806516 | 0.008939379 |
| 0.073167751 | 0.016194441 | 0.003808744 | 0.092804364 |
| 0.006400637 | 0.214980708 | 0.066525094 | 0.016661638 |
| 0.039481643 | 0.031543006 | 0.018089007 | 0.10048433  |
| 0.143321263 | 0.133582881 | 0.158127754 | 0.01242074  |
| 0.152812214 | 0.008428678 | 0.025857562 | 0.062665579 |
| 0.079871654 | 0.001135194 | 0.144618107 | 1.99E-06    |
| 0.046194961 | 0.057670891 | 0.026037284 | 0.110706773 |
| 0.019713112 | 0.00134489  | 0.018963007 | 0.203299461 |
| 0.152824018 | 0.161599984 | 0.165347813 | 0.007630857 |
| 0.000116403 | 0.15371249  | 0.068451648 | 0.201270056 |

|             |             |             |             |
|-------------|-------------|-------------|-------------|
| 0.044456193 | 0.041065839 | 0.044529583 | 0.149998978 |
| 0.149841439 | 0.050280971 | 0.052673317 | 0.106205105 |
| 0.090042597 | 0.027960254 | 0.138968867 | 0.000364642 |
| 0.007329442 | 0.059678436 | 0.001632466 | 0.008972031 |
| 0.00164427  | 0.12038669  | 0.051770077 | 0.031844321 |
| 0.006610237 | 0.017257086 | 0.001967953 | 0.013106924 |
| 0.125446607 | 0.013331213 | 0.14951097  | 0.173549894 |
| 0.071795229 | 0.127329505 | 0.17572133  | 0.02380936  |
| 0.064519998 | 0.116525687 | 0.220902429 | 2.08E-05    |
| 0.193467848 | 0.209881139 | 0.056013569 | 0.130707587 |
| 0.024362003 | 0.094017051 | 0.078960232 | 0.000174162 |
| 0.007712665 | 0.010630631 | 0.135167307 | 0.148013131 |
| 0.000215268 | 0.026941632 | 0.121437262 | 0.170162456 |
| 0.007023191 | 0.151579602 | 0.019963963 | 0.105747595 |
| 0.068063344 | 0.006071101 | 0.185434881 | 0.015779621 |
| 0.0674749   | 0.000359698 | 0.05834725  | 0.095484149 |
| 0.009976918 | 0.000816732 | 0.184037748 | 0.090721067 |
| 0.06325547  | 0.025303901 | 6.19E-06    | 0.191645917 |
| 0.001823852 | 0.090806723 | 0.002180655 | 0.101297518 |
| 0.055526789 | 0.115011696 | 0.178074067 | 0.080561717 |
| 0.068226574 | 0.053279395 | 0.09245512  | 0.002683259 |
| 0.131772406 | 0.139571103 | 0.000294684 | 0.079231827 |
| 0.151493378 | 0.034893309 | 0.010088088 | 0.059402987 |
| 0.001541622 | 0.01422807  | 0.055511077 | 0.097872313 |
| 0.131370574 | 0.000679573 | 0.009611634 | 0.065810708 |
| 0.016860985 | 0.00489491  | 0.057784249 | 0.029294216 |
| 0.00471031  | 0.043069992 | 0.059785483 | 0.096278808 |
| 0.03262528  | 0.112778371 | 0.001493048 | 0.185593065 |
| 0.001115519 | 0.187268245 | 0.006834708 | 0.029163049 |
| 0.063148184 | 0.192861884 | 0.003759945 | 3.66E-05    |
| 0.00072922  | 0.060682047 | 0.072969572 | 0.001819942 |
| 0.01354211  | 0.012143752 | 0.032335265 | 0.171334597 |
| 0.01620847  | 0.026375074 | 0.043714177 | 0.075778079 |
| 0.000675444 | 0.121193615 | 0.029269076 | 0.075833562 |
| 0.013641657 | 0.124468595 | 8.55E-05    | 0.094791456 |
| 0.002453611 | 0.0654025   | 0.029431166 | 0.218839502 |
| 0.003587586 | 0.058689887 | 0.005509121 | 0.002200932 |
| 0.000253037 | 0.072303333 | 0.081224254 | 0.029197701 |
| 0.049519132 | 0.043763479 | 0.015745759 | 0.145415909 |
| 0.037393894 | 0.078507609 | 0.1293389   | 0.020485259 |
| 0.007418106 | 0.002932083 | 0.000213456 | 0.073889763 |
| 0.077527333 | 0.092833211 | 0.045701721 | 0.024987967 |
| 0.095150157 | 0.061596569 | 0.048050145 | 0.141814434 |
| 0.001990708 | 0.163166989 | 0.049678896 | 0.228847859 |
| 0.010918711 | 0.026669984 | 0.015494588 | 0.01242052  |
| 0.004278173 | 0.005340465 | 0.007224276 | 0.15456092  |
| 0.032647418 | 0.036624611 | 0.00840038  | 0.000296222 |
| 0.02356381  | 0.18926317  | 0.133218003 | 0.048227957 |
| 0.090731691 | 0.047916243 | 0.07094446  | 0.006846089 |
| 0.021887261 | 0.000394727 | 0.000110929 | 0.003114191 |
| 0.005793655 | 0.143456512 | 0.13674217  | 0.18599379  |
| 0.032625147 | 0.002225285 | 0.006095186 | 1           |
| 0.16786111  | 0.023175021 | 0.010432942 | 0.104246545 |
| 0.032740931 | 3.85E-06    | 0.015308209 | 0.058520274 |

0.008927821

| ZEB1        | 0.327452508 | 0.361380316 | 0.036367172 |
|-------------|-------------|-------------|-------------|
| 0.013471278 | 0.048449235 | 0.129591986 | 0.109230344 |
| 0.341044255 | 0.06852839  | 0.068682393 | 0.185963438 |
| 0.003932523 | 0.356706075 | 0.016725519 | 0.055245857 |
| 0.445863809 | 0.446846926 | 0.181422636 | 0.448663212 |
| 0.289410265 | 0.074951498 | 0.274769855 | 0.242517421 |
| 0.142354873 | 0.003305091 | 0.053486916 | 0.022007403 |
| 0.358229587 | 0.458633585 | 0.126016931 | 0.166509703 |
| 0.41326614  | 0.388157887 | 0.255780124 | 0.180196369 |
| 0.178161881 | 0.316734512 | 0.098866935 | 0.333912611 |
| 0.410451385 | 0.109473655 | 0.371492613 | 0.010304069 |
| 0.00177552  | 0.047288796 | 0.321590399 | 0.281407873 |
| 0.261142028 | 0.121057319 | 0.103171461 | 0.079633974 |
| 0.180666843 | 0.212601326 | 0.335154873 | 0.172935368 |
| 0.240775103 | 0.002194504 | 0.293121996 | 0.287030098 |
| 0.035461698 | 0.217507077 | 0.33478371  | 0.299846393 |
| 0.130971589 | 0.263175373 | 0.404232724 | 0.013366587 |
| 0.035559463 | 0.340870293 | 0.350526383 | 0.260534074 |
| 0.339683398 | 0.230670209 | 0.161783223 | 0.298330961 |
| 0.342629072 | 0.38105952  | 0.17768987  | 0.112586187 |
| 0.001243309 | 0.068369068 | 0.171682641 | 0.34347372  |
| 0.34645828  | 0.212218741 | 0.335950222 | 0.102298319 |
| 0.332330115 | 0.012437353 | 0.269454807 | 0.430978279 |
| 0.011380167 | 0.346583233 | 0.006911482 | 0.101684273 |
| 0.361593026 | 0.458658097 | 0.333882855 | 0.031980595 |
| 0.010188046 | 0.093650046 | 0.1991786   | 0.431561391 |
| 0.300954873 | 0.317689619 | 0.23861426  | 0.208910624 |
| 0.368657963 | 0.147298236 | 0.219322665 | 0.303336605 |
| 0.389183777 | 0.008220691 | 0.138768788 | 0.11915476  |
| 0.234176857 | 0.068214406 | 0.118043504 | 0.049841246 |
| 0.0059441   | 0.048428672 | 0.415741622 | 0.110649397 |
| 0.043745431 | 0.104552526 | 0.04391233  | 0.293606924 |
| 0.31815414  | 0.430160821 | 0.049995444 | 0.131975106 |
| 0.340968746 | 0.127826009 | 0.244537603 | 0.340582442 |
| 0.21815844  | 0.219311996 | 0.099444663 | 0.296065086 |
| 0.29004969  | 0.034225339 | 0.049208378 | 0.199400624 |
| 0.339654585 | 0.421240227 | 0.42737273  | 0.246940942 |
| 0.125053389 | 0.160497471 | 0.21697212  | 0.23020587  |
| 0.129993124 | 0.290441502 | 0.131719902 | 0.223085531 |
| 0.246452719 | 0.040567388 | 0.036629866 | 0.364906215 |
| 0.019910533 | 0.125028829 | 0.313664603 | 0.317852693 |
| 0.317795487 | 0.018845964 | 0.122436721 | 0.140513775 |
| 0.209237479 | 0.138428452 | 0.302997624 | 0.116421937 |
| 0.209895467 | 0.21936505  | 0.022169309 | 0.357194952 |
| 0.067718568 | 0.249197927 | 0.295600061 | 0.056057521 |
| 0.355069909 | 0.294268551 | 0.319983449 | 0.326459448 |
| 0.348743676 | 0.001691819 | 0.069216308 | 0.326936128 |
| 0.224031664 | 0.397719621 | 0.343751966 | 0.061862069 |
| 0.178780321 | 0.268597732 | 0.087058687 | 0.171547352 |
| 0.358531751 | 0.129524484 | 0.119589938 | 0.000617783 |
| 0.068327065 | 0.29863576  | 0.306768089 | 0.055530697 |
| 0.111067251 | 0.084868683 | 0.152205249 | 0.337845841 |
| 0.113877817 | 0.325496958 | 0.041125156 | 0.236543512 |

|             |             |             |             |
|-------------|-------------|-------------|-------------|
| 0.16343769  | 0.24820293  | 0.257701662 | 0.262042289 |
| 0.290075235 | 0.19321986  | 0.447180042 | 0.245728976 |
| 0.138839005 | 0.206819568 | 0.215843212 | 0.193780684 |
| 0.347089146 | 0.346140095 | 0.353674076 | 0.328293246 |
| 0.142119793 | 0.343902151 | 0.271638843 | 0.165676376 |
| 0.315824019 | 0.300876413 | 0.055543908 | 0.369648646 |
| 0.000935249 | 0.226576756 | 0.286967196 | 0.255066478 |
| 0.336424575 | 0.118943913 | 0.044918575 | 0.210388278 |
| 0.452664429 | 0.375213968 | 0.36915559  | 0.406081263 |
| 0.255019044 | 0.014246033 | 0.391963212 | 0.266930909 |
| 0.456414978 | 0.239234237 | 0.211143785 | 0.122134664 |
| 0.380230402 | 0.351803777 | 0.297150652 | 0.356239204 |
| 0.299934202 | 0.280030311 | 0.162367742 | 0.344965283 |
| 0.025422738 | 0.158417217 | 0.337017723 | 0.113203251 |
| 0.193215585 | 0.121225341 | 0.314010383 | 0.197737852 |
| 0.233529998 | 0.314208457 | 0.20752577  | 0.037371266 |
| 0.093214171 | 0.376887912 | 0.038900306 | 0.379919363 |
| 0.432969232 | 0.25182928  | 0.353592747 | 0.439238308 |
| 0.230227327 | 0.226662006 | 0.345870048 | 0.42250482  |
| 0.002038182 | 0.400808352 | 0.331084635 | 0.211387493 |
| 0.385723922 | 0.169431436 | 0.308192199 | 0.320173557 |
| 0.001116194 | 0.091742841 | 0.212203858 | 0.362642306 |
| 0.349179862 | 0.012475036 | 0.047506897 | 0.321341067 |
| 0.33356928  | 0.055358918 | 0.417218221 | 0.192963297 |
| 0.300980389 | 0.269508128 | 0.083060521 | 0.350132692 |
| 0.211997471 | 0.316591773 | 0.011697389 | 0.273251377 |
| 0.29654167  | 0.13311089  | 0.033348027 | 0.436137817 |
| 0.325985602 | 0.223501226 | 0.148188328 | 0.006091769 |
| 0.410734894 | 0.138701417 | 0.316523156 | 0.072587488 |
| 0.311929791 | 0.217551081 | 0.295995375 | 0.350143294 |
| 0.311369328 | 0.251265382 | 0.23058022  | 0.320681278 |
| 0.075711955 | 0.364093894 | 0.391332251 | 0.031747737 |
| 0.344270547 | 0.373177332 | 0.260741576 | 0.087113244 |
| 0.275168202 | 0.042514588 | 0.111332107 | 0.310429502 |
| 0.281689809 | 0.367720065 | 0.029517216 | 0.135465013 |
| 0.245704793 | 0.190238558 | 0.050056114 | 0.238466805 |
| 0.165860887 | 0.207641103 | 0.207713415 | 0.240342798 |
| 0.301145814 | 0.155314747 | 0.369192824 | 0.080568405 |
| 0.385121143 | 0.034967188 | 0.349473338 | 0.139814648 |
| 0.195993992 | 0.340096915 | 0.407315773 | 0.190934566 |
| 0.018482535 | 0.114303052 | 0.229536298 | 0.250706823 |
| 0.041086724 | 0.124345892 | 0.133374372 | 0.184804668 |
| 0.431720152 | 0.308208923 | 0.159567756 | 0.254840201 |
| 0.238566416 | 0.046512457 | 0.35688222  | 0.250809364 |
| 0.313072385 | 0.180822469 | 0.326086658 | 0.007114012 |
| 0.343184188 | 0.088268598 | 0.286521351 | 0.19603412  |
| 0.456869123 | 0.070231526 | 0.214900573 | 0.116035027 |
| 0.118709739 | 0.005344971 | 0.261471376 | 0.271726451 |
| 0.158229634 | 0.328171618 | 0.267723402 | 0.174619539 |
| 0.400731891 | 0.293179105 | 0.333703117 | 0.275703526 |
| 0.233702697 | 0.01650885  | 0.073595978 | 0.024320134 |
| 0.30571674  | 0.251271126 | 0.345037207 | 0.345133867 |
| 0.266060462 | 0.289871046 | 0.239256291 | 0.235126406 |
| 0.354815255 | 0.139319449 | 0.434428271 | 0.247866254 |



|             |             |             |             |
|-------------|-------------|-------------|-------------|
| 0.388590404 | 0.271754937 | 0.14657389  | 0.229367643 |
| 0.090628173 | 0.099596636 | 0.063085614 | 0.166458793 |
| 0.391920827 | 0.21194568  | 0.214296988 | 0.302080254 |
| 0.022411806 | 0.226727192 | 0.362016608 | 0.345417441 |
| 0.296256887 | 0.342007056 | 0.334363575 | 0.230684927 |
| 0.292434999 | 0.260525571 | 0.026534364 | 0.012567294 |
| 0.163861608 | 0.103650221 | 0.359698347 | 0.340780326 |
| 0.424411785 | 0.324561457 | 0.052925439 | 0.109315801 |
| 0.16786111  | 1           | 0.134880663 | 0.108465366 |
| 0.303098995 | 0.316173087 | 0.000663347 | 0.229077115 |
| 0.246826714 | 0.279007567 |             |             |
| ZEB2        | 0.114503204 | 0.382118294 | 0.218016776 |
| 0.048939043 | 0.297125644 | 0.353688008 | 0.397153482 |
| 0.108938174 | 0.23131291  | 0.301901786 | 0.426043424 |
| 0.001696355 | 0.14091729  | 0.034854914 | 0.131551398 |
| 0.270078621 | 0.283995809 | 0.355393457 | 0.273889081 |
| 0.149439337 | 0.199745152 | 0.250617547 | 0.264570834 |
| 0.35355588  | 0.004007777 | 0.363394911 | 0.136310259 |
| 0.094079036 | 0.236595233 | 0.294519944 | 0.270938178 |
| 0.226023406 | 0.217642707 | 0.216071022 | 0.24533966  |
| 0.077342641 | 0.416412384 | 0.035193703 | 0.180356882 |
| 0.148339977 | 0.373013304 | 0.222182147 | 0.056626787 |
| 0.003239267 | 0.330997154 | 0.082239704 | 0.253613565 |
| 0.176542426 | 0.339427946 | 0.288736178 | 0.377600478 |
| 0.024432239 | 0.408644558 | 0.220008704 | 0.023908373 |
| 0.476176953 | 0.011413645 | 0.445190879 | 0.085551682 |
| 0.228142073 | 0.263972726 | 0.105590617 | 0.232633041 |
| 0.40838962  | 0.472541912 | 0.340383701 | 0.20704471  |
| 0.273535627 | 0.155870854 | 0.158977255 | 0.248026079 |
| 0.334950917 | 0.21532791  | 0.339519444 | 0.103770931 |
| 0.184745542 | 0.155463309 | 0.320182132 | 0.266930806 |
| 0.002787665 | 0.381122058 | 0.248780133 | 0.113561634 |
| 0.106072335 | 0.422747762 | 0.129022082 | 0.392272023 |
| 0.14434067  | 0.094120435 | 0.244788614 | 0.316794091 |
| 0.05614878  | 0.168074242 | 0.019297001 | 0.242415895 |
| 0.212285902 | 0.190523076 | 0.19460096  | 0.289217346 |
| 0.062222254 | 0.198492617 | 0.04899244  | 0.135566479 |
| 0.195712307 | 0.208739756 | 0.463045648 | 0.018341631 |
| 0.114711089 | 0.170685095 | 0.296921297 | 0.435452945 |
| 0.304202313 | 0.021772542 | 0.173866355 | 0.357540564 |
| 0.17293023  | 0.199837544 | 0.38069432  | 0.011224791 |
| 0.030368259 | 0.006356035 | 0.226259609 | 0.226558332 |
| 0.338377642 | 0.376521892 | 0.175649032 | 0.214168498 |
| 0.104211781 | 0.187584424 | 0.350393245 | 0.384208661 |
| 0.162755488 | 0.393329319 | 0.238578787 | 0.211365532 |
| 0.205916868 | 0.173722383 | 0.24612985  | 0.404439259 |
| 0.390533162 | 0.242143645 | 0.225418607 | 0.34948495  |
| 0.123355778 | 0.268201497 | 0.338193132 | 0.176630984 |
| 0.355813156 | 0.274494027 | 0.189334668 | 0.33794243  |
| 0.370813899 | 0.169037584 | 0.014519059 | 0.368691081 |
| 0.478303655 | 0.015229095 | 0.22656113  | 0.209814344 |
| 0.11093159  | 0.337712766 | 0.369589219 | 0.297088944 |
| 0.189156095 | 0.118303531 | 0.305895241 | 0.35697727  |
| 0.256588193 | 0.34831998  | 0.231790321 | 0.272838895 |

|             |             |             |             |
|-------------|-------------|-------------|-------------|
| 0.309966998 | 0.185863365 | 0.2297503   | 0.122969468 |
| 0.295752001 | 0.230213916 | 0.073161545 | 0.038678228 |
| 0.143693595 | 0.157198184 | 0.324385958 | 0.179451401 |
| 0.161151526 | 0.010091476 | 0.284853014 | 0.140062347 |
| 0.160887617 | 0.153777263 | 0.420642091 | 0.287158477 |
| 0.255751717 | 0.092737069 | 0.279627979 | 0.314164697 |
| 0.200733984 | 0.250209737 | 0.25909944  | 0.004312197 |
| 0.316243722 | 0.110113805 | 0.191510528 | 0.079089194 |
| 0.354201277 | 0.183295057 | 0.056702361 | 0.308884154 |
| 0.331531054 | 0.246170735 | 0.024576878 | 0.031642603 |
| 0.305630415 | 0.388677493 | 0.174701682 | 0.108071255 |
| 0.32118984  | 0.25556006  | 0.152146094 | 0.410996815 |
| 0.337075208 | 0.418717592 | 0.033029805 | 0.247646009 |
| 0.134921532 | 0.307864659 | 0.207999761 | 0.25986088  |
| 0.344157403 | 0.154251559 | 0.090076136 | 0.349915075 |
| 0.189815376 | 0.201744105 | 0.195601444 | 0.382283671 |
| 0.003836659 | 0.290942045 | 0.213713245 | 0.031893334 |
| 0.402054827 | 0.3903615   | 0.185582102 | 0.181470129 |
| 0.282031909 | 0.3824457   | 0.238669611 | 0.185887238 |
| 0.054689055 | 0.022261537 | 0.310447712 | 0.338747899 |
| 0.242994577 | 0.276296481 | 0.139567246 | 0.021327502 |
| 0.304726584 | 0.086385289 | 0.228714789 | 0.125366331 |
| 0.181551826 | 0.135831531 | 0.275294741 | 0.12089017  |
| 0.005227402 | 0.276378597 | 0.15642602  | 0.18210977  |
| 0.243261188 | 0.1934819   | 0.30545142  | 0.374155771 |
| 0.202277688 | 0.095444925 | 0.198997303 | 0.305357628 |
| 0.347419931 | 0.374557616 | 0.013676889 | 0.298656121 |
| 0.317458154 | 0.246140971 | 0.315549852 | 0.30175999  |
| 0.231775352 | 0.43919511  | 0.325232788 | 0.193919085 |
| 0.001354868 | 0.168424836 | 0.127883667 | 0.420559002 |
| 0.224719045 | 0.32689969  | 0.051479879 | 0.116289506 |
| 0.003868304 | 0.284397587 | 0.064776995 | 0.388026083 |
| 0.288668864 | 0.170279424 | 0.009339494 | 0.287883884 |
| 0.120885857 | 0.017224953 | 0.351975128 | 0.305002574 |
| 0.37110019  | 0.243380239 | 0.369188082 | 0.153664393 |
| 0.041066595 | 0.149165801 | 0.109473804 | 0.258502469 |
| 0.163243471 | 0.019838534 | 0.239827641 | 0.310231571 |
| 0.29310804  | 0.400444863 | 0.332208642 | 0.025211253 |
| 0.134594039 | 0.12117664  | 0.258633516 | 0.203694527 |
| 0.303845005 | 0.414214737 | 0.396759641 | 0.188865756 |
| 0.195157428 | 0.414754302 | 0.421281286 | 0.31064778  |
| 0.078519054 | 0.16036005  | 0.196351799 | 0.165782969 |
| 0.094904128 | 0.302375527 | 0.202281497 | 0.366829369 |
| 0.261137845 | 0.092827335 | 0.342661828 | 0.12627722  |
| 0.414186861 | 0.291450453 | 0.227117829 | 0.176920655 |
| 0.43797232  | 0.285171673 | 0.337357401 | 0.252222653 |
| 0.346965588 | 0.023324258 | 0.028902003 | 0.342135421 |
| 0.445583353 | 0.433736135 | 0.256440435 | 0.219464214 |
| 0.241299398 | 0.148738232 | 0.238787053 | 0.330744477 |
| 0.255716418 | 0.108643023 | 0.132680723 | 0.020785015 |
| 0.045434269 | 0.128238372 | 0.44520862  | 0.438687285 |
| 0.245269414 | 0.272191572 | 0.356538301 | 0.343555575 |
| 0.261169131 | 0.170486439 | 0.334444057 | 0.211304098 |
| 0.473421307 | 0.184894265 | 0.392683907 | 0.217766773 |

|             |             |             |             |
|-------------|-------------|-------------|-------------|
| 0.27017765  | 0.32040179  | 0.279295064 | 0.012641933 |
| 0.167542283 | 0.287754917 | 0.048133949 | 0.300811467 |
| 0.174368288 | 0.313073655 | 0.404379412 | 0.228370663 |
| 0.098898253 | 0.004264532 | 0.287210658 | 0.10588948  |
| 0.413772238 | 0.068091009 | 0.21044681  | 0.027359284 |
| 0.387817646 | 0.199460997 | 0.227038864 | 0.068358569 |
| 0.275712638 | 0.007585909 | 0.326140628 | 0.112775124 |
| 0.263889159 | 0.365635438 | 0.157509342 | 0.124102504 |
| 0.066149482 | 0.244607642 | 0.339416594 | 0.258244916 |
| 0.300454629 | 0.048780652 | 0.294253516 | 0.194402922 |
| 0.131242616 | 0.18777268  | 0.342590322 | 0.211411397 |
| 0.40428883  | 0.097823697 | 0.311995865 | 0.122952895 |
| 0.262155216 | 0.202156532 | 0.304778557 | 0.120432997 |
| 0.225044961 | 0.27980997  | 0.177485411 | 0.170928998 |
| 0.207158917 | 0.124531508 | 0.113118355 | 0.46100575  |
| 0.117093473 | 0.166087626 | 0.083758519 | 0.11472264  |
| 0.139109029 | 0.33999687  | 0.236140708 | 0.266741167 |
| 0.293221833 | 0.075984197 | 0.267242485 | 0.187005338 |
| 0.023175021 | 0.134880663 | 1           | 0.072080652 |
| 0.209710797 | 0.084207095 | 0.00308526  | 0.134377425 |
| 0.359059805 | 0.153842793 |             |             |
| ZFP280C     | 0.034454526 | 0.186972931 | 0.001297919 |
| 0.007473614 | 0.015672441 | 0.032520056 | 0.046764657 |
| 0.037881751 | 0.00089825  | 0.009613398 | 0.07694932  |
| 3.75E-07    | 0.223165699 | 1.14E-05    | 0.000352803 |
| 0.225497488 | 0.101526796 | 0.206300375 | 0.023409806 |
| 0.006352942 | 0.053619008 | 0.074367684 | 0.032950731 |
| 3.67E-07    | 0.022763138 | 0.00431797  | 0.046869436 |
| 0.213752131 | 0.013412383 | 0.011146552 | 0.152624421 |
| 0.262116956 | 0.04508542  | 0.039393187 | 0.103629793 |
| 0.145507513 | 0.034280226 | 0.285975691 | 0.175153449 |
| 0.041837985 | 0.209841313 | 1.81E-05    | 0.005941508 |
| 0.008440376 | 0.034703305 | 0.060324985 | 0.019344302 |
| 0.02534131  | 0.011789835 | 0.032964428 | 0.008204123 |
| 0.079319332 | 0.079266768 | 0.052561626 | 0.142107038 |
| 0.001221688 | 0.145739816 | 0.009528704 | 0.001685214 |
| 0.023772032 | 0.037658913 | 0.073186836 | 0.04657483  |
| 0.151645982 | 0.215935632 | 0.000552783 | 0.003782674 |
| 0.070703994 | 0.166559714 | 0.15651754  | 0.154910781 |
| 0.014140406 | 0.017255869 | 0.130915871 | 0.15443065  |
| 0.163070631 | 0.039287519 | 0.006348399 | 5.56E-07    |
| 0.026332396 | 0.111262303 | 0.054488768 | 0.188313223 |
| 0.088392572 | 0.066942539 | 0.032273878 | 0.085865302 |
| 3.47E-05    | 0.058422376 | 0.219879356 | 0.000666984 |
| 0.170832818 | 0.000582859 | 0.003597913 | 0.138743685 |
| 0.200497814 | 0.071736805 | 0.002410665 | 2.50E-05    |
| 0.002773916 | 0.001118455 | 0.200455329 | 0.056459548 |
| 0.089496175 | 0.127219426 | 0.031131156 | 0.234570872 |
| 0.001298877 | 0.032854744 | 0.154288259 | 0.162377946 |
| 1.76E-05    | 0.002439076 | 0.034993488 | 0.012110598 |
| 0.005012202 | 0.044890714 | 0.00065777  | 0.000602488 |
| 5.88E-05    | 0.183713434 | 0.004219772 | 0.0115964   |
| 0.02754669  | 0.005860001 | 0.219117705 | 0.034457256 |
| 0.14585916  | 0.017790656 | 0.039225334 | 0.214204859 |

|                      |                      |                      |             |
|----------------------|----------------------|----------------------|-------------|
| 0.057664866          | 0.175979061          | 0.16943538           | 0.163477438 |
| 0.007273934          | 0.005048469          | 0.202366064          | 0.111294099 |
| 0.001556049          | 0.000815439          | 0.05608106           | 0.248500831 |
| 0.196375637          | 0.206934716          | 0.01007315           | 0.090393913 |
| 0.018618805          | 0.019057125          | 0.12615195           | 0.043129175 |
| 0.039921787          | 0.003293099          | 0.078001328          | 0.126664351 |
| 0.001144271          | 0.001381316          | 0.132271131          | 0.033840984 |
| 0.009852152          | 0.121332501          | 0.182884977          | 0.15400978  |
| 0.002348938          | 0.034795819          | 0.04044692           | 0.025988671 |
| 0.035025522          | 0.070303232          | 0.025430949          | 0.041919864 |
| 0.024004459          | 0.002164004          | 0.244840001          | 0.007974701 |
| 0.037378567          | 0.010231269          | 0.000858093          | 0.076121978 |
| 0.02617568           | 0.158210067          | 0.069741882          | 0.091598649 |
| 0.003389157          | 0.010976483          | 0.043761008          | 0.011386861 |
| 0.175771773          | 0.197707401          | 0.006903979          | 0.022377266 |
| 0.046027286          | 0.008245742          | 0.104914552          | 0.09651934  |
| 0.00648598           | 0.004840336          | 4.05E-07 0.004327424 |             |
| 0.057503761          | 0.063530872          | 0.000172941          | 0.047275282 |
| 0.000707474          | 0.000447043          | 0.180765975          | 0.019655404 |
| 0.276183222          | 4.60E-05 0.007464352 | 0.017369958          |             |
| 0.172244358          | 0.070163599          | 0.00346387           | 0.202710179 |
| 0.02093132           | 0.196509763          | 0.089580591          | 0.042621066 |
| 0.082220252          | 0.006190473          | 0.013148736          | 0.157418215 |
| 0.221325277          | 0.210697589          | 0.239067649          | 0.027074772 |
| 0.075546945          | 0.010020727          | 0.040720469          | 0.052100689 |
| 0.076531178          | 0.00138598           | 0.200825043          | 6.32E-08    |
| 0.056013149          | 0.130788122          | 0.003905406          | 0.200392768 |
| 0.058398079          | 0.001077501          | 0.011613037          | 0.208970379 |
| 0.193756917          | 0.115464684          | 0.193854973          | 0.004406768 |
| 7.38E-06 0.150762175 | 0.087902111          | 0.225779009          |             |
| 0.073166998          | 0.17667133           | 0.001139394          | 0.210220944 |
| 0.067354089          | 0.0816086            | 0.065597817          | 0.187735939 |
| 0.167603981          | 0.020689671          | 0.06824248           | 4.51E-05    |
| 0.01571938           | 0.094214673          | 0.003640643          | 0.030626299 |
| 0.001171578          | 0.210585833          | 0.063549735          | 0.138162203 |
| 0.008107481          | 0.090331401          | 0.00712757           | 0.017868677 |
| 0.181623371          | 0.020472381          | 0.13479527           | 0.215261676 |
| 0.05742174           | 0.224482717          | 0.197721726          | 0.026868677 |
| 0.11432827           | 0.179268353          | 0.154721384          | 4.98E-07    |
| 0.235126638          | 0.273906639          | 0.073121964          | 0.186936899 |
| 0.037929865          | 0.023130441          | 0.152820695          | 4.20E-06    |
| 0.008743353          | 0.061569694          | 0.153152198          | 0.254622462 |
| 0.000200285          | 0.023991607          | 0.191664882          | 0.242022977 |
| 0.001294611          | 0.190228821          | 0.054312197          | 0.209683093 |
| 0.125904069          | 0.018963828          | 0.236321262          | 0.058354711 |
| 0.034251112          | 0.003404279          | 0.157899904          | 0.110753582 |
| 0.000509062          | 0.011176588          | 0.191153253          | 0.120836097 |
| 0.127637307          | 0.030490097          | 4.88E-05 0.132097503 |             |
| 0.019026592          | 0.199047702          | 0.001533842          | 0.113976713 |
| 0.082524004          | 0.189271664          | 0.216560215          | 0.109432343 |
| 0.127686173          | 0.089883033          | 0.147077056          | 0.014321519 |
| 0.170348648          | 0.167728477          | 0.000684655          | 0.07625929  |
| 0.226086183          | 0.108459018          | 0.025820687          | 0.056253178 |
| 0.028553291          | 0.023927715          | 0.028263483          | 0.192836123 |

|             |             |             |             |
|-------------|-------------|-------------|-------------|
| 0.213704905 | 0.001130805 | 0.003947937 | 0.127881918 |
| 0.016757214 | 0.010308518 | 0.045791423 | 0.037011281 |
| 0.010384458 | 0.003725312 | 0.069548439 | 0.164019599 |
| 0.069710213 | 0.161168746 | 0.013094501 | 0.247790424 |
| 0.000519396 | 0.143488448 | 0.012579227 | 0.026411771 |
| 0.094746261 | 0.165521804 | 0.001468589 | 0.00011529  |
| 0.000689692 | 0.132534446 | 0.112545273 | 0.002809801 |
| 0.012509715 | 0.044827679 | 0.113423252 | 0.220007965 |
| 0.033687646 | 0.041246396 | 0.036872199 | 0.120392845 |
| 0.006953039 | 0.14918225  | 0.030710681 | 0.08005782  |
| 0.053111408 | 0.153363999 | 5.10E-05    | 0.133313902 |
| 0.013540714 | 0.013946491 | 0.132786916 | 0.185880179 |
| 0.008517687 | 0.133518727 | 0.004376835 | 0.005829626 |
| 1.32E-05    | 0.058378753 | 0.243368149 | 0.048877919 |
| 0.022707543 | 0.042727462 | 0.048490572 | 0.185705207 |
| 0.05118686  | 0.090313231 | 0.067490718 | 0.05598227  |
| 0.024579414 | 0.014231005 | 9.22E-05    | 0.067733135 |
| 0.086546626 | 0.077739748 | 0.04069118  | 0.005952526 |
| 0.182321404 | 0.09639667  | 0.181140764 | 0.237465085 |
| 0.009039215 | 0.215447047 | 0.018834769 | 0.225768264 |
| 0.014636472 | 0.035617588 | 0.011283499 | 0.044964152 |
| 0.001088005 | 0.005967281 | 0.002012154 | 0.246690336 |
| 0.021286894 | 0.133880488 | 0.0085617   | 0.001161966 |
| 0.05974371  | 0.141057835 | 0.183417132 | 0.102430607 |
| 0.11173157  | 0.049111835 | 0.109875501 | 0.004603016 |
| 0.013501744 | 0.009338302 | 0.001478425 | 0.015170393 |
| 0.014029707 | 0.101456714 | 0.146883085 | 0.219338235 |
| 0.007405768 | 0.003049826 | 0.003002085 | 0.010432942 |
| 0.108465366 | 0.072080652 | 1           | 0.120758701 |
| 0.015797052 | 2.59E-06    | 0.00586313  | 0.074679484 |
| 0.023876708 |             |             |             |
| ZFP281      | 0.180673735 | 0.487835324 | 0.060673781 |
| 0.017170763 | 0.117289657 | 0.180792673 | 0.187784947 |
| 0.188792534 | 0.101854661 | 0.100326231 | 0.289134898 |
| 0.001273561 | 0.34053178  | 0.013712688 | 0.086703223 |
| 0.468261586 | 0.492820544 | 0.263224678 | 0.488969999 |
| 0.191390874 | 0.094405675 | 0.268189661 | 0.222802296 |
| 0.200170905 | 0.001652574 | 0.109973237 | 0.031643907 |
| 0.194940886 | 0.457375089 | 0.167137117 | 0.170843394 |
| 0.407788861 | 0.414287355 | 0.242775944 | 0.235845844 |
| 0.140891741 | 0.456767657 | 0.113203107 | 0.351074081 |
| 0.360306332 | 0.175804654 | 0.399907406 | 0.019721742 |
| 0.002208483 | 0.098854071 | 0.16870402  | 0.257013253 |
| 0.210736412 | 0.167021365 | 0.151375975 | 0.144892402 |
| 0.076937673 | 0.318556639 | 0.331469768 | 0.077843688 |
| 0.418758473 | 0.002635477 | 0.455353792 | 0.138899804 |
| 0.070352127 | 0.236060896 | 0.192115507 | 0.273987112 |
| 0.215582853 | 0.439453706 | 0.505449619 | 0.038342889 |
| 0.07343962  | 0.24255856  | 0.314981184 | 0.257037003 |
| 0.437821947 | 0.185478977 | 0.227231317 | 0.232477068 |
| 0.311279327 | 0.342298649 | 0.231482354 | 0.159899216 |
| 0.000826759 | 0.132221981 | 0.222988778 | 0.231455108 |
| 0.235059403 | 0.325402054 | 0.21884171  | 0.188170164 |
| 0.216720654 | 0.021493331 | 0.239762739 | 0.500827958 |

|             |             |             |             |
|-------------|-------------|-------------|-------------|
| 0.016124013 | 0.35158547  | 0.010224673 | 0.156412836 |
| 0.368259112 | 0.415089814 | 0.271269788 | 0.0708428   |
| 0.016669153 | 0.11907038  | 0.08199567  | 0.35623296  |
| 0.247673503 | 0.266764072 | 0.406668266 | 0.093137931 |
| 0.314429875 | 0.117733829 | 0.274757408 | 0.447973128 |
| 0.447918084 | 0.010421121 | 0.135051064 | 0.178882014 |
| 0.229876119 | 0.109054167 | 0.19636342  | 0.016838488 |
| 0.007887564 | 0.013967496 | 0.423115807 | 0.12649252  |
| 0.092233064 | 0.162762686 | 0.063386445 | 0.28360945  |
| 0.188605623 | 0.397066464 | 0.13712062  | 0.195877118 |
| 0.305402511 | 0.205130459 | 0.254632817 | 0.335655537 |
| 0.268727041 | 0.18040341  | 0.11846862  | 0.462918394 |
| 0.424016527 | 0.068617271 | 0.073248087 | 0.246902904 |
| 0.3166956   | 0.452889802 | 0.510780727 | 0.197232016 |
| 0.217055067 | 0.19442321  | 0.172768215 | 0.278676606 |
| 0.208898552 | 0.229002748 | 0.057700442 | 0.317964854 |
| 0.419617255 | 0.020322246 | 0.066465363 | 0.361403899 |
| 0.05562862  | 0.232217798 | 0.419791093 | 0.393318261 |
| 0.284903691 | 0.025868324 | 0.150233169 | 0.19330446  |
| 0.205762447 | 0.182083091 | 0.28594912  | 0.135824428 |
| 0.234834882 | 0.171596247 | 0.052498595 | 0.322082358 |
| 0.114210077 | 0.227097808 | 0.145650743 | 0.050913333 |
| 0.256266354 | 0.216519216 | 0.402219025 | 0.247046363 |
| 0.285751901 | 0.002101974 | 0.093466919 | 0.203881818 |
| 0.154946815 | 0.362652432 | 0.491166843 | 0.111200952 |
| 0.193044108 | 0.223646179 | 0.132398514 | 0.264156867 |
| 0.356809219 | 0.1419244   | 0.132820788 | 0.000463236 |
| 0.131904243 | 0.174508966 | 0.265739131 | 0.043747247 |
| 0.180507369 | 0.08411021  | 0.084927287 | 0.422852098 |
| 0.16243598  | 0.388690953 | 0.022869143 | 0.111308182 |
| 0.181392888 | 0.366510968 | 0.206469323 | 0.137521023 |
| 0.380514278 | 0.184353991 | 0.372796673 | 0.370005967 |
| 0.25340118  | 0.300494968 | 0.124099777 | 0.20814716  |
| 0.244898269 | 0.44592035  | 0.365668665 | 0.403762749 |
| 0.195468533 | 0.281781128 | 0.16636252  | 0.217551694 |
| 0.2373411   | 0.267940911 | 0.070301638 | 0.502156768 |
| 0.000743959 | 0.245948264 | 0.261845912 | 0.110988716 |
| 0.471785797 | 0.194923587 | 0.064616387 | 0.170209242 |
| 0.4953435   | 0.507503044 | 0.399353838 | 0.38000304  |
| 0.130239659 | 0.010174639 | 0.462791032 | 0.338960103 |
| 0.467836355 | 0.280889647 | 0.22735321  | 0.077972613 |
| 0.458576504 | 0.197733755 | 0.260965474 | 0.203552725 |
| 0.281032455 | 0.255161219 | 0.203918373 | 0.250600841 |
| 0.009731896 | 0.156984751 | 0.235553161 | 0.126368069 |
| 0.182939898 | 0.12901734  | 0.416802986 | 0.289124747 |
| 0.256404492 | 0.140545001 | 0.209069358 | 0.080713543 |
| 0.162448313 | 0.486531271 | 0.050458299 | 0.444976953 |
| 0.503447556 | 0.267706947 | 0.444026135 | 0.491985854 |
| 0.201048868 | 0.36955635  | 0.435275804 | 0.405901761 |
| 0.00079162  | 0.376850543 | 0.308745809 | 0.3335986   |
| 0.390473378 | 0.208353233 | 0.141856306 | 0.235348219 |
| 0.002514037 | 0.131351419 | 0.125226644 | 0.490449217 |
| 0.439379742 | 0.036577777 | 0.049638087 | 0.390691869 |
| 0.278364128 | 0.037631193 | 0.505783691 | 0.209622158 |

|             |             |             |             |
|-------------|-------------|-------------|-------------|
| 0.437143868 | 0.287408228 | 0.138931526 | 0.343847742 |
| 0.103872057 | 0.244704064 | 0.033467333 | 0.279403244 |
| 0.277177742 | 0.06578464  | 0.065387003 | 0.502277527 |
| 0.377988363 | 0.335209267 | 0.205285165 | 0.003826914 |
| 0.328569174 | 0.105115524 | 0.345813395 | 0.112341271 |
| 0.375399486 | 0.330783165 | 0.452618575 | 0.369157999 |
| 0.272297347 | 0.378178581 | 0.346352588 | 0.391337436 |
| 0.079755557 | 0.325502534 | 0.373551689 | 0.047164131 |
| 0.196532905 | 0.459152745 | 0.227755579 | 0.148758893 |
| 0.276587313 | 0.068313776 | 0.164130497 | 0.191352072 |
| 0.441058066 | 0.438659529 | 0.055338717 | 0.140740897 |
| 0.384819756 | 0.237341161 | 0.113596263 | 0.263872238 |
| 0.226948287 | 0.070546051 | 0.105756316 | 0.313697276 |
| 0.461363648 | 0.260111856 | 0.393983729 | 0.097106791 |
| 0.436445057 | 0.055460748 | 0.403583189 | 0.225417698 |
| 0.202005924 | 0.200251339 | 0.329125504 | 0.05652239  |
| 0.010543929 | 0.076310943 | 0.370672894 | 0.398900545 |
| 0.072228082 | 0.155873453 | 0.181595011 | 0.241551713 |
| 0.458243613 | 0.224498717 | 0.205687479 | 0.231762741 |
| 0.414694819 | 0.07495882  | 0.476917776 | 0.210983404 |
| 0.329727513 | 0.217496408 | 0.390457975 | 0.007732468 |
| 0.278657928 | 0.109564152 | 0.122138712 | 0.23622931  |
| 0.400681545 | 0.11128647  | 0.328757021 | 0.129555013 |
| 0.107311398 | 0.003706602 | 0.296317664 | 0.213512666 |
| 0.24980598  | 0.172761484 | 0.238511797 | 0.086564618 |
| 0.517797965 | 0.221124849 | 0.316467384 | 0.195523965 |
| 0.228585707 | 0.020360045 | 0.11553204  | 0.033088154 |
| 0.3120858   | 0.350697304 | 0.26196558  | 0.19246193  |
| 0.122134579 | 0.311530803 | 0.308308828 | 0.269006984 |
| 0.447179744 | 0.074712743 | 0.481470184 | 0.23455354  |
| 0.337953934 | 0.224847316 | 0.209391527 | 0.245410496 |
| 0.1813139   | 0.11361332  | 0.123281759 | 0.120876513 |
| 0.441082293 | 0.266345857 | 0.256963497 | 0.154152218 |
| 0.045590708 | 0.251234746 | 0.346321709 | 0.323725816 |
| 0.240096559 | 0.248439155 | 0.208450105 | 0.391234529 |
| 0.166540712 | 0.18471644  | 0.035942621 | 0.024526733 |
| 0.147919182 | 0.146650086 | 0.380238683 | 0.401122866 |
| 0.489354923 | 0.171549473 | 0.091748148 | 0.116839361 |
| 0.104246545 | 0.303098995 | 0.209710797 | 0.120758701 |
| 1           | 0.18527769  | 0.000498895 | 0.153263734 |
| 0.321266455 | 0.212164915 |             |             |
| ZFP35       | 0.181876409 | 0.327394016 | 0.008143518 |
| 0.001793932 | 0.009271054 | 0.088478601 | 0.06195466  |
| 0.122805911 | 0.024682357 | 0.015580724 | 0.139437046 |
| 0.001216258 | 0.289309809 | 0.005466116 | 0.016799032 |
| 0.387378431 | 0.394717373 | 0.09721763  | 0.391356687 |
| 0.13018215  | 0.016655426 | 0.189641221 | 0.127900083 |
| 0.089947717 | 0.001100664 | 0.017175997 | 0.004717189 |
| 0.111441403 | 0.384028413 | 0.059583941 | 0.031339721 |
| 0.378199543 | 0.318488167 | 0.061122864 | 0.034396604 |
| 0.034320677 | 0.281765706 | 0.021422235 | 0.251566576 |
| 0.369835315 | 0.031962304 | 0.323746738 | 0.007308906 |
| 0.000319075 | 0.014116746 | 0.086334669 | 0.183357496 |
| 0.096786544 | 0.071944825 | 0.050921376 | 0.031171548 |

|             |             |             |             |
|-------------|-------------|-------------|-------------|
| 0.030228361 | 0.167669457 | 0.284426845 | 0.025076302 |
| 0.219008242 | 0.000456789 | 0.273886796 | 0.082468477 |
| 0.011198998 | 0.107558415 | 0.180699474 | 0.205772705 |
| 0.096288854 | 0.239982469 | 0.361048509 | 0.0039339   |
| 0.016300191 | 0.168089005 | 0.293555217 | 0.149148525 |
| 0.310439206 | 0.036289132 | 0.037600681 | 0.105131833 |
| 0.260586186 | 0.316679888 | 0.124898286 | 0.024003798 |
| 0.000490711 | 0.030979352 | 0.036056087 | 0.286949103 |
| 0.191714364 | 0.169208821 | 0.202254842 | 0.031126806 |
| 0.130411197 | 0.003422537 | 0.140123447 | 0.372731536 |
| 0.002215602 | 0.298588361 | 0.001012855 | 0.023005987 |
| 0.30432045  | 0.399278741 | 0.238059105 | 0.009381682 |
| 0.003032763 | 0.024073005 | 0.044406769 | 0.371690274 |
| 0.168262    | 0.145618667 | 0.221197611 | 0.052279493 |
| 0.302785964 | 0.043411728 | 0.061023694 | 0.270283062 |
| 0.352374573 | 0.001588899 | 0.034166131 | 0.068659093 |
| 0.069980861 | 0.018427678 | 0.060062477 | 0.00496515  |
| 0.000708575 | 0.007653795 | 0.368572954 | 0.024906859 |
| 0.013623531 | 0.048140876 | 0.006481583 | 0.171406434 |
| 0.088342617 | 0.403609012 | 0.012078007 | 0.059276468 |
| 0.224511603 | 0.075289392 | 0.084693476 | 0.249386347 |
| 0.044266792 | 0.052240053 | 0.028869564 | 0.263875074 |
| 0.268288636 | 0.008123643 | 0.014328753 | 0.133830741 |
| 0.283644973 | 0.357973681 | 0.378104791 | 0.04335749  |
| 0.029552362 | 0.073201353 | 0.054135092 | 0.138328605 |
| 0.076833799 | 0.143586051 | 0.020125553 | 0.167085803 |
| 0.230831684 | 0.00460935  | 0.010862659 | 0.29383849  |
| 0.003439045 | 0.038435072 | 0.287029586 | 0.249902298 |
| 0.172588681 | 0.004332026 | 0.030610428 | 0.080470677 |
| 0.122685401 | 0.060981185 | 0.220112105 | 0.027976744 |
| 0.143213643 | 0.04996522  | 0.00548712  | 0.302077498 |
| 0.027061877 | 0.159278703 | 0.07286836  | 0.028709694 |
| 0.238831032 | 0.078551244 | 0.268307674 | 0.175700137 |
| 0.293323741 | 0.000211123 | 0.014096699 | 0.215628611 |
| 0.056863299 | 0.335794635 | 0.305709867 | 0.03005007  |
| 0.10757864  | 0.065755251 | 0.040380654 | 0.042789114 |
| 0.332774299 | 0.032251993 | 0.030273434 | 0.000228968 |
| 0.014668694 | 0.088180285 | 0.145243059 | 0.015041901 |
| 0.020460145 | 0.024630062 | 0.030373324 | 0.293670223 |
| 0.057534424 | 0.24541228  | 0.008998415 | 0.049965057 |
| 0.038473196 | 0.191235861 | 0.046502175 | 0.056194732 |
| 0.227090814 | 0.035154204 | 0.377713145 | 0.227671388 |
| 0.031056963 | 0.160106172 | 0.063865794 | 0.076465451 |
| 0.173164076 | 0.30670841  | 0.284229262 | 0.25154469  |
| 0.058431463 | 0.246989236 | 0.039197816 | 0.112321583 |
| 0.159253124 | 0.144558027 | 0.012347055 | 0.324729081 |
| 0.000473408 | 0.133691918 | 0.149693987 | 0.068407257 |
| 0.29080862  | 0.074763928 | 0.012131674 | 0.062429455 |
| 0.392431705 | 0.331012561 | 0.339945206 | 0.33684187  |
| 0.04940868  | 0.003400063 | 0.352041054 | 0.224379274 |
| 0.396437028 | 0.092220661 | 0.037738139 | 0.027507258 |
| 0.315313797 | 0.1908492   | 0.203154757 | 0.160568039 |
| 0.164839635 | 0.07281995  | 0.078749297 | 0.261562595 |
| 0.011454968 | 0.049867409 | 0.198557345 | 0.03147444  |



|             |             |             |             |
|-------------|-------------|-------------|-------------|
| 0.046337705 | 0.035870697 | 0.275663591 | 0.146333607 |
| 0.044209713 | 0.053191272 | 0.04822853  | 0.010563377 |
| 0.05387022  | 0.334911473 | 0.009022727 | 0.346301367 |
| 0.370047438 | 0.141631335 | 0.297470833 | 0.376415745 |
| 0.115232607 | 0.194431092 | 0.298383407 | 0.380218814 |
| 0.000413104 | 0.345254281 | 0.251933404 | 0.182082793 |
| 0.326606091 | 0.117970884 | 0.101471658 | 0.107440124 |
| 0.000591383 | 0.047159896 | 0.035072925 | 0.333283104 |
| 0.286712115 | 0.004582022 | 0.011522429 | 0.233240496 |
| 0.21780231  | 0.009897732 | 0.3651605   | 0.091002997 |
| 0.25658992  | 0.109422918 | 0.035710437 | 0.299559885 |
| 0.036954675 | 0.069268428 | 0.002944823 | 0.151057199 |
| 0.127385582 | 0.05854197  | 0.007584749 | 0.393447863 |
| 0.277620367 | 0.163208059 | 0.089856437 | 0.001730336 |
| 0.372412651 | 0.021151274 | 0.224925831 | 0.013374316 |
| 0.244176313 | 0.181906681 | 0.257029473 | 0.299484277 |
| 0.184055638 | 0.206439528 | 0.196212262 | 0.272713579 |
| 0.010550266 | 0.296241833 | 0.33780035  | 0.005413736 |
| 0.203573239 | 0.326190203 | 0.116068394 | 0.051310145 |
| 0.198410636 | 0.007155179 | 0.071009569 | 0.151699301 |
| 0.244377041 | 0.324429645 | 0.009167387 | 0.028367354 |
| 0.213789949 | 0.053739263 | 0.022191041 | 0.093334794 |
| 0.124345526 | 0.034447943 | 0.053955325 | 0.19638345  |
| 0.272076683 | 0.114064648 | 0.317323209 | 0.016533328 |
| 0.324513347 | 0.008417942 | 0.311369806 | 0.031526466 |
| 0.106360131 | 0.190179632 | 0.348742445 | 0.028232385 |
| 0.005015579 | 0.0244687   | 0.193348403 | 0.227629879 |
| 0.011850742 | 0.06115558  | 0.051322194 | 0.091666087 |
| 0.366326057 | 0.047608224 | 0.09714177  | 0.094416643 |
| 0.225549799 | 0.012026074 | 0.318778898 | 0.120889204 |
| 0.267176966 | 0.051987054 | 0.26348386  | 0.00325202  |
| 0.225293897 | 0.018741091 | 0.113846902 | 0.088536058 |
| 0.40670727  | 0.019360411 | 0.15807212  | 0.032622172 |
| 0.023095428 | 0.000739894 | 0.191380139 | 0.091078921 |
| 0.124847864 | 0.052629228 | 0.10695154  | 0.031079523 |
| 0.358845593 | 0.148732569 | 0.280468595 | 0.07308943  |
| 0.071532298 | 0.002365975 | 0.020704849 | 0.005910787 |
| 0.248258331 | 0.208148759 | 0.240406671 | 0.168024226 |
| 0.065385049 | 0.179294621 | 0.164297363 | 0.088661815 |
| 0.309226108 | 0.021261726 | 0.372392913 | 0.087057094 |
| 0.33726132  | 0.054303583 | 0.098396991 | 0.050099664 |
| 0.037679254 | 0.035444343 | 0.02710819  | 0.042744813 |
| 0.334225323 | 0.050347597 | 0.095724536 | 0.057509243 |
| 0.004624868 | 0.058329411 | 0.284375353 | 0.279786319 |
| 0.15809123  | 0.256118411 | 0.069732477 | 0.206772668 |
| 0.077028613 | 0.111288089 | 0.004478467 | 0.004282511 |
| 0.036723872 | 0.037194764 | 0.330780587 | 0.289930928 |
| 0.371824695 | 0.066435739 | 0.015375764 | 0.030819902 |
| 0.032740931 | 0.316173087 | 0.084207095 | 0.015797052 |
| 0.18527769  | 1           | 7.35E-05    | 0.055850615 |
| 0.045659499 |             |             | 0.196385241 |
| ZFP455      | 0.001567866 | 0.001236284 | 0.007671583 |
|             |             |             | 2.78E-05    |
| 0.000288362 | 0.007140866 | 0.00324909  | 0.001297153 |
| 0.001596363 | 0.000944167 | 0.006090368 | 0.001703212 |

|                      |                      |                      |                   |
|----------------------|----------------------|----------------------|-------------------|
| 0.000219522          | 0.006342325          | 0.000863636          | 0.000789543       |
| 0.000604202          | 0.001471649          | 0.000839459          | 0.00410464        |
| 2.22E-05 0.005837639 | 0.002209209          | 0.003950734          |                   |
| 0.004185488          | 0.003496875          | 3.43E-05 0.000511667 |                   |
| 0.000650138          | 0.009177132          | 0.000757638          | 0.000657733       |
| 0.000284854          | 9.00E-05 4.52E-05    | 1.62E-06 0.002826353 | 4.65E-07          |
| 0.000155764          | 0.000245503          | 0.001452913          | 0.000366129       |
| 0.000506572          | 4.67E-09 0.005525029 | 0.000592861          |                   |
| 0.004333196          | 0.00401968           | 0.008315992          | 0.013867852       |
| 0.001341491          | 1.36E-06 0.004552414 | 0.003101326          | 1.83E-06          |
| 0.00310445           | 1.77E-07 0.002286616 | 0.002786155          |                   |
| 0.011301411          | 0.002439574          | 0.000234889          | 0.001845517       |
| 0.005931762          | 0.002905303          | 0.000878816          | 0.000402869       |
| 0.010998519          | 0.000506927          | 0.000216192          | 0.000437029       |
| 0.001254942          | 0.00067332           | 0.000387624          | 2.75E-05          |
| 0.000256983          | 0.000387282          | 0.0069487            | 0.005597219       |
| 9.77E-05 0.004011372 | 4.70E-05 0.000891784 | 0.000124824          |                   |
| 0.005164481          | 0.000899659          | 0.000578827          | 0.000466621       |
| 0.004570825          | 0.004544539          | 0.000871608          | 3.65E-05          |
| 0.000302771          | 9.45E-06 0.003832895 | 0.000854166          |                   |
| 0.000355397          | 0.001468985          | 0.001705182          | 0.005301265       |
| 0.01177787           | 0.0013282            | 0.000199143          | 0.001456997       |
| 0.00054928           | 0.002694618          | 1.42E-05 0.000116293 |                   |
| 0.00123372           | 0.000614618          | 0.002563863          | 0.001077041       |
| 0.004172552          | 0.006287762          | 0.009499801          | 1.68E-05 6.20E-06 |
| 0.005591233          | 0.000262185          | 0.000435934          | 0.000582672       |
| 0.000519552          | 0.009996051          | 0.00175783           | 0.005972702       |
| 0.000917485          | 0.000210546          | 0.001034395          | 0.000629406       |
| 0.000356658          | 0.002700279          | 0.000177701          | 0.002905633       |
| 0.000271546          | 0.000394583          | 5.15E-05 0.002671089 |                   |
| 0.014301553          | 0.00133605           | 0.004049757          | 0.003692509       |
| 0.004297935          | 0.006227389          | 0.000101298          | 0.000878306       |
| 0.001050165          | 0.00183093           | 0.000446155          | 0.007880903       |
| 0.000171876          | 0.001900865          | 0.005379476          | 0.004129154       |
| 1.44E-05 0.005286486 | 0.003631903          | 5.46E-05 0.010295426 |                   |
| 0.000982295          | 4.38E-06 0.000137389 | 0.002420016          |                   |
| 0.000796761          | 0.000470281          | 2.22E-05 0.001070407 |                   |
| 0.00277666           | 0.005556007          | 0.004065413          | 0.001407919       |
| 0.000475697          | 0.007387109          | 0.00017054           | 0.00944526        |
| 0.000105873          | 0.015370168          | 0.005192527          | 1.87E-05 7.69E-07 |
| 0.001092172          | 0.002147919          | 0.001359792          | 0.001342816       |
| 0.000526829          | 1.29E-06 0.001196449 | 0.001733043          |                   |
| 0.000218937          | 0.000474958          | 0.001479275          | 0.014692901       |
| 0.010828582          | 1.89E-05 0.015003928 | 0.000172149          |                   |
| 0.00174816           | 0.000212894          | 0.000243584          | 0.000280725       |
| 0.001208435          | 7.87E-05 0.000497748 | 0.011012383          |                   |
| 0.000898913          | 0.003038336          | 0.000473646          | 0.000848385       |
| 0.01001085           | 0.000360849          | 0.002387228          | 0.000131314       |
| 0.006075006          | 0.001132663          | 0.000150758          | 0.000602831       |
| 0.000551218          | 0.001485708          | 0.000246134          | 0.003512904       |
| 0.000210765          | 0.004817462          | 6.40E-06 0.002476787 |                   |
| 0.000211648          | 0.000599549          | 0.000400471          | 0.000582695       |
| 0.003216174          | 0.00160799           | 8.54E-05 0.01028767  |                   |
| 0.003044071          | 0.001889353          | 0.015018397          | 0.001562426       |

|             |             |             |             |
|-------------|-------------|-------------|-------------|
| 0.000695574 | 0.00554815  | 0.000278083 | 1.73E-05    |
| 0.001472356 | 0.004219957 | 0.017178209 | 0.010164317 |
| 0.00089171  | 0.001661468 | 0.001759544 | 0.000358152 |
| 7.99E-05    | 0.010663882 | 0.00168618  | 0.00205226  |
| 0.00049351  | 0.000679801 | 1.11E-05    | 3.83E-05    |
| 0.000779304 | 0.000884032 | 0.000647184 | 0.000148904 |
| 6.48E-05    | 0.007860155 | 0.001123099 | 3.75E-06    |
| 0.000573685 | 1.72E-05    | 0.000416242 | 0.000185614 |
| 0.000500192 | 0.006200816 | 5.04E-05    | 0.000228946 |
| 0.007434328 | 0.008017044 | 0.001407179 | 8.07E-08    |
| 0.002104696 | 0.000991283 | 0.002138293 | 0.000714564 |
| 0.001200691 | 0.005841959 | 0.002640508 | 0.0010653   |
| 0.000693326 | 0.005830438 | 0.000192902 | 0.000103522 |
| 0.006450423 | 0.000452264 | 0.005309276 | 0.000761609 |
| 5.14E-05    | 5.52E-05    | 0.014107978 | 4.05E-06    |
| 0.000560824 | 0.000923327 | 9.82E-09    | 0.000969183 |
| 0.000108484 | 5.59E-06    | 0.001362362 | 0.002084571 |
| 0.001076911 | 0.000739979 | 0.003556033 | 0.000132734 |
| 2.61E-06    | 0.000548338 | 1.04E-05    | 0.00074397  |
| 8.86E-06    | 0.000111    | 0.001024366 | 0.002138135 |
| 0.007055487 | 2.75E-05    | 0.000365876 | 2.59E-05    |
| 0.002688783 | 0.003311362 | 0.003531173 | 0.001858147 |
| 0.000220409 | 0.00059907  | 0.003024679 | 0.004486379 |
| 0.001276889 | 3.48E-06    | 0.000306472 | 0.000445511 |
| 0.001240295 | 0.000331824 | 0.000621946 | 0.000181747 |
| 0.008327893 | 0.00429356  | 9.70E-07    | 0.010936119 |
| 0.003002919 | 0.001745625 | 0.000529698 | 0.007309326 |
| 0.009618572 | 0.002641807 | 0.001727232 | 0.005692116 |
| 0.002554416 | 0.00747473  | 4.83E-06    | 5.79E-05    |
| 0.002269594 | 0.005464433 | 0.000733303 | 0.000124433 |
| 0.000467998 | 0.016033944 | 0.001193497 | 0.000505123 |
| 0.008497632 | 0.000227633 | 0.000271043 | 0.000201502 |
| 2.74E-05    | 0.003472078 | 0.002097456 | 0.003270432 |
| 0.016909226 | 0.014553232 | 0.004891892 | 0.001400952 |
| 0.000637297 | 0.000289291 | 0.00894985  | 0.004199294 |
| 0.003731095 | 1.06E-05    | 0.002534613 | 0.005231231 |
| 0.002705292 | 0.001047039 | 0.000827815 | 1.25E-06    |
| 0.000252922 | 0.001210756 | 0.001314414 | 0.000488311 |
| 0.000326063 | 0.012458065 | 0.001657826 | 0.009761051 |
| 9.17E-06    | 0.002670731 | 0.005424648 | 2.11E-05    |
| 0.000271834 | 0.003630772 | 5.72E-07    | 0.001612914 |
| 0.002219276 | 0.001385646 | 3.17E-05    | 0.001019197 |
| 0.000917968 | 0.010042514 | 0.003672237 | 0.003770519 |
| 0.000819135 | 0.000824927 | 0.002602744 | 0.000373684 |
| 0.002964545 | 0.000241119 | 0.000504204 | 2.75E-06    |
| 0.000743106 | 0.001874919 | 0.00011539  | 0.000339205 |
| 0.006472872 | 0.000399055 | 0.001794409 | 2.88E-05    |
| 0.005848485 | 0.00518104  | 0.00040576  | 0.000291297 |
| 0.000631382 | 0.000856681 | 0.004424025 | 0.00096508  |
| 0.000581391 | 0.000183904 | 0.0009274   | 0.000234085 |
| 0.000666885 | 0.004044796 | 0.000134938 | 0.002649357 |
| 1.03E-05    | 4.47E-06    | 5.97E-06    | 0.004599282 |
| 0.001774085 | 0.000778322 | 0.000127701 | 0.00894857  |
| 0.014101981 | 3.85E-06    | 0.000663347 | 0.00308526  |
|             |             |             | 2.59E-06    |

|             |             |             |             |
|-------------|-------------|-------------|-------------|
| 0.000498895 | 7.35E-05 1  | 0.004237696 | 0.004028152 |
| 6.12E-05    |             |             |             |
| ZFP52       | 0.223158074 | 0.287201894 | 0.058293861 |
| 0.001434952 | 0.017076588 | 0.200890601 | 0.113352896 |
| 0.155925719 | 0.09722374  | 0.028716829 | 0.248572776 |
| 0.040188753 | 0.152669457 | 0.110643867 | 0.08574225  |
| 0.276674194 | 0.261216879 | 0.124011695 | 0.287721871 |
| 0.259598403 | 0.014690709 | 0.341920697 | 0.156840954 |
| 0.171075387 | 0.05511067  | 0.042164709 | 0.004666902 |
| 0.102640552 | 0.255307175 | 0.188596345 | 0.057129703 |
| 0.264151962 | 0.176168957 | 0.037763035 | 0.02297053  |
| 0.009243912 | 0.329444691 | 0.006190357 | 0.124750637 |
| 0.192205241 | 0.049953035 | 0.188390177 | 0.045875625 |
| 4.12E-05    | 0.048153943 | 0.092798291 | 0.273056223 |
| 0.21791629  | 0.182574581 | 0.192663575 | 0.048735797 |
| 0.009631048 | 0.279074137 | 0.366138906 | 0.007627085 |
| 0.276473577 | 0.00024157  | 0.304016871 | 0.181818571 |
| 0.069617633 | 0.177750274 | 0.120151073 | 0.23952229  |
| 0.19843539  | 0.286854405 | 0.274815414 | 0.017214789 |
| 0.080212028 | 0.134119121 | 0.152081406 | 0.108512564 |
| 0.283911332 | 0.050319232 | 0.051611969 | 0.040346879 |
| 0.145112316 | 0.194145273 | 0.27045437  | 0.100930848 |
| 0.009992334 | 0.068197155 | 0.020387674 | 0.252745827 |
| 0.088762588 | 0.27226168  | 0.19472218  | 0.038918308 |
| 0.09837027  | 0.056865063 | 0.237797115 | 0.277545427 |
| 0.00469801  | 0.181757971 | 0.00358033  | 0.09911482  |
| 0.239175065 | 0.221373445 | 0.259358178 | 0.033385529 |
| 0.054363437 | 0.143851318 | 0.138600071 | 0.176973578 |
| 0.18591449  | 0.127217762 | 0.273878329 | 0.020314307 |
| 0.129239772 | 0.130387706 | 0.080252035 | 0.301999797 |
| 0.289417613 | 0.045950541 | 0.169937307 | 0.178018652 |
| 0.034046991 | 0.013469448 | 0.133519358 | 0.006418116 |
| 0.003858277 | 0.070074707 | 0.244328192 | 0.123134454 |
| 0.03026582  | 0.11394478  | 0.014629732 | 0.09961131  |
| 0.110418998 | 0.270597861 | 0.021203758 | 0.103331118 |
| 0.120394229 | 0.125289443 | 0.060117931 | 0.15949241  |
| 0.02470726  | 0.155912204 | 0.137496845 | 0.246723846 |
| 0.370630149 | 0.042847904 | 0.075355118 | 0.246196713 |
| 0.12079613  | 0.267913016 | 0.298104688 | 0.114306342 |
| 0.032055231 | 0.208137902 | 0.04490446  | 0.154014592 |
| 0.165282616 | 0.253023295 | 0.019736844 | 0.290916722 |
| 0.304890648 | 0.00726181  | 0.070900268 | 0.242559387 |
| 0.002085121 | 0.045870942 | 0.325749577 | 0.204376176 |
| 0.132255473 | 0.004271891 | 0.041728762 | 0.136349351 |
| 0.261024219 | 0.116843882 | 0.240866003 | 0.031140656 |
| 0.295123193 | 0.040818805 | 0.040148106 | 0.127498029 |
| 0.128035975 | 0.306773981 | 0.033221883 | 0.012216589 |
| 0.219922693 | 0.141142619 | 0.243175654 | 0.21126372  |
| 0.215031665 | 0.000125951 | 0.027546358 | 0.251926988 |
| 0.054747885 | 0.214481987 | 0.27971385  | 0.140305954 |
| 0.304179186 | 0.030008011 | 0.178392284 | 0.034599861 |
| 0.339642977 | 0.044375642 | 0.043374281 | 0.008832478 |
| 0.049453913 | 0.047694382 | 0.123992392 | 0.164929963 |
| 0.030436593 | 0.110714374 | 0.137879099 | 0.232511817 |

|             |             |             |             |
|-------------|-------------|-------------|-------------|
| 0.177030549 | 0.153914803 | 0.124680475 | 0.052722287 |
| 0.093760745 | 0.178899843 | 0.032144287 | 0.110329338 |
| 0.167362095 | 0.060648744 | 0.192603809 | 0.315942716 |
| 0.037414379 | 0.248582318 | 0.026093481 | 0.158878421 |
| 0.100726758 | 0.212288436 | 0.169338347 | 0.185534281 |
| 0.111768143 | 0.273538629 | 0.042167083 | 0.263821302 |
| 0.244601409 | 0.187295481 | 0.103482622 | 0.299915883 |
| 0.017334803 | 0.247269051 | 0.105119694 | 0.034640138 |
| 0.262202858 | 0.137459774 | 0.104663514 | 0.206436115 |
| 0.291913314 | 0.312681026 | 0.340209553 | 0.195354101 |
| 0.049693432 | 0.107236453 | 0.33970823  | 0.26276243  |
| 0.244691784 | 0.101434648 | 0.015509623 | 0.034282789 |
| 0.254183977 | 0.165457647 | 0.185071897 | 0.132538349 |
| 0.09551091  | 0.03933348  | 0.219666773 | 0.250564444 |
| 0.018265318 | 0.105691263 | 0.158327863 | 0.023676193 |
| 0.04719881  | 0.06405881  | 0.192052846 | 0.28322495  |
| 0.025254239 | 0.064667312 | 0.023622014 | 0.043373269 |
| 0.159170345 | 0.29911337  | 0.002381955 | 0.350882605 |
| 0.290279932 | 0.204159298 | 0.216907614 | 0.307341122 |
| 0.240391153 | 0.25514514  | 0.249288772 | 0.268792767 |
| 0.013316878 | 0.16613634  | 0.109553154 | 0.327670658 |
| 0.207047829 | 0.226153058 | 0.117379798 | 0.047090159 |
| 0.005614507 | 0.184626582 | 0.011876019 | 0.359126138 |
| 0.198370203 | 0.029038868 | 0.001478297 | 0.202684741 |
| 0.100489333 | 0.013310354 | 0.318367925 | 0.126876007 |
| 0.222508094 | 0.112832748 | 0.081583679 | 0.135166535 |
| 0.010030088 | 0.076868602 | 0.004709547 | 0.13321838  |
| 0.077361896 | 0.039002354 | 0.009506084 | 0.308265764 |
| 0.300018254 | 0.199990644 | 0.21917284  | 0.005483582 |
| 0.21696133  | 0.013562899 | 0.15422838  | 0.077647473 |
| 0.320508826 | 0.265210391 | 0.262802624 | 0.158773881 |
| 0.157033388 | 0.259901527 | 0.298040854 | 0.249891984 |
| 0.006496691 | 0.170360794 | 0.213779947 | 0.02967527  |
| 0.133347387 | 0.226387804 | 0.074575463 | 0.139676778 |
| 0.31330837  | 0.003320267 | 0.202695975 | 0.25811838  |
| 0.243845746 | 0.215645168 | 0.054980955 | 0.152518976 |
| 0.25257759  | 0.09814825  | 0.075515061 | 0.158848195 |
| 0.279220861 | 0.013607039 | 0.046554331 | 0.287004144 |
| 0.294015021 | 0.209142573 | 0.236759099 | 0.017351686 |
| 0.205217134 | 0.098176828 | 0.278454151 | 0.056960681 |
| 0.28093747  | 0.115723457 | 0.18365147  | 0.046656068 |
| 0.010741849 | 0.1357383   | 0.224653281 | 0.306974199 |
| 0.078032546 | 0.227031091 | 0.099277121 | 0.107309987 |
| 0.244544232 | 0.048219447 | 0.235505848 | 0.196902776 |
| 0.307482415 | 0.007823519 | 0.35090975  | 0.225191984 |
| 0.319715841 | 0.065710062 | 0.225683074 | 0.005136654 |
| 0.141995755 | 0.033363467 | 0.168182966 | 0.074773097 |
| 0.220417834 | 0.077944337 | 0.180692199 | 0.14514575  |
| 0.01764502  | 0.012840885 | 0.348027615 | 0.03236728  |
| 0.264123103 | 0.053351965 | 0.184437421 | 0.006320991 |
| 0.331678052 | 0.20024717  | 0.274662056 | 0.032960869 |
| 0.083591195 | 0.000401107 | 0.032150152 | 0.084463062 |
| 0.339242497 | 0.303271604 | 0.200222148 | 0.16995099  |
| 0.156503721 | 0.129973551 | 0.230820925 | 0.061854862 |

|             |             |             |             |
|-------------|-------------|-------------|-------------|
| 0.203532948 | 0.013151522 | 0.263642112 | 0.156265659 |
| 0.141244542 | 0.069714673 | 0.223487329 | 0.082576578 |
| 0.06492209  | 0.045731702 | 0.094195259 | 0.196730148 |
| 0.200121837 | 0.06688716  | 0.08729912  | 0.094210034 |
| 0.030712648 | 0.075498076 | 0.209883412 | 0.140440444 |
| 0.144287256 | 0.147425721 | 0.074018832 | 0.302361455 |
| 0.08081037  | 0.197088076 | 0.002798668 | 0.003337112 |
| 0.01706368  | 0.09062292  | 0.359238763 | 0.28486256  |
| 0.266666379 | 0.075222338 | 0.075277618 | 0.161060203 |
| 0.015308209 | 0.229077115 | 0.134377425 | 0.00586313  |
| 0.153263734 | 0.055850615 | 0.004237696 | 1           |
| 0.298386426 | 0.03613955  |             |             |
| ZHX2        | 0.257475863 | 0.465131328 | 0.193865729 |
| 0.025912078 | 0.17064116  | 0.372156507 | 0.343854238 |
| 0.245131409 | 0.269153588 | 0.227634565 | 0.391692508 |
| 0.00787243  | 0.228985702 | 0.070878656 | 0.189303312 |
| 0.398021507 | 0.40532386  | 0.371502445 | 0.403795214 |
| 0.313153888 | 0.154595714 | 0.359089494 | 0.347398613 |
| 0.383097017 | 0.012662007 | 0.239143714 | 0.069206669 |
| 0.211383673 | 0.364923142 | 0.364605307 | 0.311074577 |
| 0.35059862  | 0.309286125 | 0.289410402 | 0.235836058 |
| 0.103085839 | 0.484872561 | 0.052962644 | 0.243096283 |
| 0.256989892 | 0.305266651 | 0.31514309  | 0.0713736   |
| 0.001508848 | 0.242526955 | 0.191381051 | 0.362724655 |
| 0.338961915 | 0.361939796 | 0.346176293 | 0.273316909 |
| 0.058560566 | 0.40297581  | 0.343387407 | 0.052004338 |
| 0.469842988 | 0.005002667 | 0.487224104 | 0.231069386 |
| 0.219454547 | 0.390760048 | 0.228622052 | 0.336346274 |
| 0.378758819 | 0.482829458 | 0.442038678 | 0.115691759 |
| 0.223819077 | 0.283638531 | 0.244608962 | 0.301231516 |
| 0.425473289 | 0.286491285 | 0.347425004 | 0.180132075 |
| 0.253971321 | 0.261457528 | 0.399046137 | 0.330397953 |
| 0.005094541 | 0.277712364 | 0.23505732  | 0.21447198  |
| 0.182507159 | 0.41210726  | 0.255338248 | 0.30754967  |
| 0.256506124 | 0.100957606 | 0.376009815 | 0.432532043 |
| 0.038861099 | 0.258878389 | 0.017423201 | 0.308271227 |
| 0.321344561 | 0.313791657 | 0.304614862 | 0.200601958 |
| 0.079988035 | 0.29610472  | 0.152091937 | 0.242310543 |
| 0.337293952 | 0.327087556 | 0.458580811 | 0.056156855 |
| 0.198447876 | 0.283551301 | 0.38264728  | 0.482869174 |
| 0.416856328 | 0.037930809 | 0.309233458 | 0.364990568 |
| 0.2410823   | 0.150665113 | 0.361999789 | 0.023648567 |
| 0.022417884 | 0.030201805 | 0.346136945 | 0.314029905 |
| 0.211715727 | 0.344564271 | 0.122486254 | 0.270595649 |
| 0.228114519 | 0.319360095 | 0.206613648 | 0.361993991 |
| 0.223496429 | 0.359245722 | 0.281383602 | 0.27866457  |
| 0.232977144 | 0.336098996 | 0.318972925 | 0.440844693 |
| 0.470557041 | 0.192326209 | 0.230072046 | 0.387472027 |
| 0.200699207 | 0.388471222 | 0.454816781 | 0.318387809 |
| 0.282836763 | 0.376637131 | 0.26625119  | 0.352815148 |
| 0.377551907 | 0.322902707 | 0.04469306  | 0.397070119 |
| 0.486215794 | 0.027320647 | 0.218136878 | 0.315608285 |
| 0.04658417  | 0.325690613 | 0.452763344 | 0.355528474 |
| 0.30035662  | 0.060971903 | 0.273242241 | 0.363531894 |

|             |             |             |             |
|-------------|-------------|-------------|-------------|
| 0.38273188  | 0.350211742 | 0.342947191 | 0.242818004 |
| 0.393617784 | 0.257292277 | 0.168625926 | 0.205434729 |
| 0.299348062 | 0.377693608 | 0.159709194 | 0.058748299 |
| 0.268878728 | 0.30219248  | 0.395266413 | 0.321918533 |
| 0.257462404 | 0.003480393 | 0.216652921 | 0.283277355 |
| 0.256787528 | 0.265217872 | 0.480345555 | 0.290257872 |
| 0.37922296  | 0.172090614 | 0.324623753 | 0.293251706 |
| 0.331557639 | 0.273491903 | 0.264790307 | 0.00560775  |
| 0.273356332 | 0.195909928 | 0.317876915 | 0.159197498 |
| 0.279451402 | 0.255068951 | 0.160792927 | 0.386116469 |
| 0.361378301 | 0.301719435 | 0.069964694 | 0.099330268 |
| 0.363679307 | 0.368224741 | 0.239635929 | 0.241928223 |
| 0.344304016 | 0.319801326 | 0.266024963 | 0.44302613  |
| 0.307136004 | 0.394758247 | 0.088485451 | 0.376599313 |
| 0.235589658 | 0.382553142 | 0.292644369 | 0.32561564  |
| 0.373365276 | 0.262908422 | 0.179001223 | 0.391711822 |
| 0.34542687  | 0.336613635 | 0.236527189 | 0.470604667 |
| 0.006366565 | 0.396989574 | 0.30011454  | 0.097198333 |
| 0.458839271 | 0.353126106 | 0.223367698 | 0.332108984 |
| 0.413128924 | 0.47624721  | 0.369392049 | 0.293355892 |
| 0.140047194 | 0.053781154 | 0.435549041 | 0.382567699 |
| 0.367404689 | 0.36170647  | 0.167000394 | 0.06166897  |
| 0.402620718 | 0.202541649 | 0.31824856  | 0.250485972 |
| 0.271100682 | 0.210833088 | 0.379856191 | 0.224109268 |
| 0.01871741  | 0.337130356 | 0.255866139 | 0.191157431 |
| 0.288328189 | 0.264271522 | 0.361881946 | 0.400440535 |
| 0.24272219  | 0.213768459 | 0.224320968 | 0.213365626 |
| 0.348816236 | 0.466753065 | 0.020049187 | 0.426655819 |
| 0.436569632 | 0.374519641 | 0.38933412  | 0.430673373 |
| 0.369930528 | 0.425367797 | 0.40587499  | 0.322368145 |
| 0.004575741 | 0.267258599 | 0.195939077 | 0.431389764 |
| 0.326928901 | 0.393296049 | 0.149209434 | 0.195526746 |
| 0.006163744 | 0.330593888 | 0.104018016 | 0.491400718 |
| 0.362571595 | 0.118006852 | 0.014976992 | 0.345379525 |
| 0.180953628 | 0.037119212 | 0.467522563 | 0.356046839 |
| 0.412143991 | 0.333769343 | 0.310004913 | 0.234435978 |
| 0.079143314 | 0.277467775 | 0.054166421 | 0.320435343 |
| 0.261041273 | 0.063740261 | 0.123917363 | 0.438793032 |
| 0.392347082 | 0.383417508 | 0.393332304 | 0.021799344 |
| 0.250217837 | 0.133860575 | 0.304454407 | 0.234407867 |
| 0.3948965   | 0.405049184 | 0.441432636 | 0.271114401 |
| 0.318677879 | 0.424917502 | 0.433005817 | 0.387156656 |
| 0.07394326  | 0.255175137 | 0.305905045 | 0.134236513 |
| 0.204065771 | 0.389869751 | 0.271970618 | 0.329901271 |
| 0.374233868 | 0.060328999 | 0.361907711 | 0.27914453  |
| 0.438983516 | 0.377527223 | 0.193566424 | 0.299964151 |
| 0.436164495 | 0.385944471 | 0.266899536 | 0.369644612 |
| 0.39728599  | 0.061028598 | 0.089443535 | 0.394524675 |
| 0.485396373 | 0.386528694 | 0.358481927 | 0.173420615 |
| 0.337968482 | 0.184138539 | 0.349968387 | 0.339187405 |
| 0.384404251 | 0.20659054  | 0.239545105 | 0.070846558 |
| 0.044324019 | 0.22394023  | 0.416719313 | 0.461529746 |
| 0.228222247 | 0.355494004 | 0.343336278 | 0.350034527 |
| 0.378120423 | 0.275323443 | 0.392937558 | 0.353094714 |

|             |             |             |             |
|-------------|-------------|-------------|-------------|
| 0.480267166 | 0.112501385 | 0.489428339 | 0.360044807 |
| 0.367559426 | 0.339625258 | 0.354825869 | 0.015782931 |
| 0.259163281 | 0.241703847 | 0.149930458 | 0.309803217 |
| 0.298316404 | 0.289123503 | 0.376501818 | 0.32817143  |
| 0.126812873 | 0.009954541 | 0.378428782 | 0.162735844 |
| 0.393041905 | 0.169580081 | 0.350750513 | 0.053498453 |
| 0.49465693  | 0.33676142  | 0.328606832 | 0.141867176 |
| 0.341712036 | 0.006788936 | 0.245918668 | 0.142545654 |
| 0.361279486 | 0.406395787 | 0.275494812 | 0.264056791 |
| 0.195251471 | 0.311957034 | 0.386650076 | 0.290818353 |
| 0.375834237 | 0.0811645   | 0.41076873  | 0.341711626 |
| 0.222600112 | 0.315921551 | 0.393425504 | 0.337739624 |
| 0.311039139 | 0.16426222  | 0.299013751 | 0.268098181 |
| 0.354569252 | 0.300670884 | 0.330237236 | 0.260370015 |
| 0.147667699 | 0.352448588 | 0.275931188 | 0.245525144 |
| 0.312014783 | 0.204643452 | 0.229980242 | 0.462198058 |
| 0.249478493 | 0.32575698  | 0.049012354 | 0.053706547 |
| 0.167354597 | 0.327814384 | 0.369007639 | 0.370871045 |
| 0.409101465 | 0.194609791 | 0.261864031 | 0.298271753 |
| 0.058520274 | 0.246826714 | 0.359059805 | 0.074679484 |
| 0.321266455 | 0.196385241 | 0.004028152 | 0.298386426 |
| 1           | 0.238861523 |             |             |
| ZMYM2       | 0.142700177 | 0.424217505 | 0.006046771 |
| 0.00849231  | 0.012022365 | 0.124170935 | 0.105018814 |
| 0.129468602 | 0.006799586 | 0.030348075 | 0.220596352 |
| 6.69E-05    | 0.312772384 | 0.000638554 | 0.00347456  |
| 0.439621563 | 0.450287243 | 0.16401057  | 0.426001043 |
| 0.107676202 | 0.016549474 | 0.201485395 | 0.212978003 |
| 0.113258984 | 6.88E-05    | 0.044485223 | 0.007991006 |
| 0.110550217 | 0.429511932 | 0.064481532 | 0.037616756 |
| 0.381215858 | 0.410820315 | 0.087010115 | 0.026650677 |
| 0.042714142 | 0.370855057 | 0.011964817 | 0.333334499 |
| 0.326667066 | 0.077945541 | 0.373763081 | 0.000572723 |
| 0.001965975 | 0.023748392 | 0.097487095 | 0.220157397 |
| 0.075300858 | 0.104778785 | 0.053294369 | 0.06317654  |
| 0.017491907 | 0.230619745 | 0.260695096 | 0.020525151 |
| 0.328660888 | 0.001678533 | 0.364356498 | 0.053587223 |
| 0.010333539 | 0.086952239 | 0.125981456 | 0.237446265 |
| 0.140715371 | 0.352093913 | 0.439322911 | 0.004228644 |
| 0.021455984 | 0.171194117 | 0.325923141 | 0.270055471 |
| 0.387195665 | 0.035129399 | 0.041595141 | 0.111414605 |
| 0.301072513 | 0.327821513 | 0.133830508 | 0.021309053 |
| 7.51E-05    | 0.061774605 | 0.083158984 | 0.18877651  |
| 0.244009322 | 0.253401725 | 0.194588912 | 0.052353361 |
| 0.191357341 | 0.001151744 | 0.188577585 | 0.456502833 |
| 0.00283156  | 0.293518581 | 0.004055239 | 0.012170546 |
| 0.334451321 | 0.399657207 | 0.252179773 | 0.011365135 |
| 0.000671878 | 0.016797541 | 0.00921274  | 0.339736983 |
| 0.161886263 | 0.202016465 | 0.305887932 | 0.029164725 |
| 0.306652447 | 0.011001258 | 0.077327104 | 0.390489714 |
| 0.412957285 | 0.000398711 | 0.015406177 | 0.110986929 |
| 0.022154221 | 0.01348395  | 0.10485081  | 0.00495844  |
| 0.006823838 | 0.001143132 | 0.4044046   | 0.025161542 |
| 0.03023179  | 0.085364038 | 0.012061235 | 0.284165796 |



|             |             |             |             |
|-------------|-------------|-------------|-------------|
| 0.099895219 | 0.342145572 | 0.013059498 | 0.098456746 |
| 0.313001596 | 0.126970856 | 0.19621034  | 0.31073552  |
| 0.09001351  | 0.036965403 | 0.030959938 | 0.380787064 |
| 0.317093745 | 0.005958579 | 0.006098222 | 0.18904269  |
| 0.308572708 | 0.433426651 | 0.456191485 | 0.038097289 |
| 0.077477209 | 0.074822151 | 0.063397288 | 0.258964056 |
| 0.1088625   | 0.126655921 | 0.009282687 | 0.211431142 |
| 0.326513889 | 0.011427586 | 0.010713202 | 0.31855064  |
| 0.010318876 | 0.017350131 | 0.34617317  | 0.355466746 |
| 0.230412596 | 0.006437064 | 0.0785434   | 0.127277786 |
| 0.115399512 | 0.102926356 | 0.214246647 | 0.061542388 |
| 0.163459906 | 0.075424    | 0.009275908 | 0.318589829 |
| 0.0376672   | 0.148600682 | 0.027453759 | 0.004402293 |
| 0.196296893 | 0.083861905 | 0.382821279 | 0.203995718 |
| 0.26299592  | 0.002908675 | 0.032405587 | 0.181383056 |
| 0.049089262 | 0.324685351 | 0.428193922 | 0.034025652 |
| 0.099807427 | 0.047584675 | 0.041440728 | 0.082382145 |
| 0.284764646 | 0.02455546  | 0.01879893  | 7.96E-05    |
| 0.014965857 | 0.121136325 | 0.138135706 | 0.002600607 |
| 0.047803397 | 0.007119788 | 0.005654169 | 0.385239664 |
| 0.08305035  | 0.364643283 | 0.001352304 | 0.017319949 |
| 0.058794421 | 0.305741622 | 0.10813393  | 0.020412989 |
| 0.348426284 | 0.063808276 | 0.37277924  | 0.265494157 |
| 0.036876981 | 0.248726115 | 0.010491792 | 0.05710287  |
| 0.240070532 | 0.406226023 | 0.369810103 | 0.361079747 |
| 0.086180739 | 0.204608031 | 0.043912459 | 0.151549856 |
| 0.17232938  | 0.168288086 | 0.011018591 | 0.425959169 |
| 3.64E-05    | 0.167590933 | 0.233824432 | 0.010242455 |
| 0.427730051 | 0.13187417  | 0.009798365 | 0.057940486 |
| 0.433718967 | 0.417609669 | 0.315693272 | 0.380958835 |
| 0.019599985 | 0.000449353 | 0.387326393 | 0.253457963 |
| 0.434851214 | 0.132992234 | 0.07202577  | 0.003980339 |
| 0.417867923 | 0.152234024 | 0.245037985 | 0.186645791 |
| 0.225637064 | 0.116897553 | 0.075878717 | 0.190086459 |
| 0.000897876 | 0.074048203 | 0.255826724 | 0.016580225 |
| 0.081097351 | 0.014590919 | 0.382323749 | 0.18339251  |
| 0.094662697 | 0.036602328 | 0.095409564 | 0.020766671 |
| 0.064404593 | 0.430061304 | 0.005512551 | 0.355822721 |
| 0.454075631 | 0.146189554 | 0.423744046 | 0.436688819 |
| 0.115127531 | 0.274138004 | 0.398598578 | 0.344203211 |
| 3.80E-05    | 0.376673297 | 0.304810488 | 0.226604698 |
| 0.401905745 | 0.140893632 | 0.06522975  | 0.14928214  |
| 4.54E-05    | 0.047494921 | 0.046999187 | 0.387877874 |
| 0.420526024 | 0.002203076 | 0.005825743 | 0.348987194 |
| 0.278727399 | 0.003013019 | 0.44138565  | 0.163001416 |
| 0.401441359 | 0.18427597  | 0.065116079 | 0.335639337 |
| 0.04838703  | 0.066456745 | 0.004596595 | 0.286565325 |
| 0.136269866 | 0.003895878 | 0.014828924 | 0.430269085 |
| 0.345181204 | 0.250725464 | 0.105264444 | 0.001498036 |
| 0.313024419 | 0.027741657 | 0.348601864 | 0.008543277 |
| 0.310653292 | 0.229356671 | 0.37423631  | 0.335325816 |
| 0.221843487 | 0.310614679 | 0.268482476 | 0.359792957 |
| 0.015179723 | 0.344191439 | 0.376774111 | 0.005511941 |
| 0.192011978 | 0.41888492  | 0.196623185 | 0.085272114 |

|             |             |             |             |
|-------------|-------------|-------------|-------------|
| 0.193544556 | 0.021396466 | 0.097060082 | 0.115142172 |
| 0.380069174 | 0.427818628 | 0.009127441 | 0.019905981 |
| 0.314991177 | 0.053948008 | 0.031684563 | 0.10813516  |
| 0.139198977 | 0.016358923 | 0.00852615  | 0.212426839 |
| 0.380037522 | 0.180046777 | 0.398183944 | 0.025391867 |
| 0.401957376 | 0.003907246 | 0.312839141 | 0.022600783 |
| 0.113230689 | 0.225184432 | 0.330130232 | 0.009306032 |
| 0.003726875 | 0.009798954 | 0.302079348 | 0.308041672 |
| 0.016613181 | 0.061894759 | 0.111716292 | 0.194026684 |
| 0.436615652 | 0.069048723 | 0.141990515 | 0.113313451 |
| 0.30692547  | 0.01339045  | 0.395168229 | 0.127523459 |
| 0.272671618 | 0.108530214 | 0.33488096  | 0.00054979  |
| 0.260526623 | 0.043803284 | 0.056933391 | 0.189298048 |
| 0.37827121  | 0.034807593 | 0.247327649 | 0.028394678 |
| 0.01425672  | 0.00026121  | 0.199216373 | 0.146609094 |
| 0.168241486 | 0.04299094  | 0.129937285 | 0.018334539 |
| 0.44138589  | 0.185182641 | 0.297908996 | 0.059270931 |
| 0.130664935 | 0.003502386 | 0.04084839  | 0.001957043 |
| 0.243297858 | 0.244273569 | 0.212330881 | 0.155308857 |
| 0.03405147  | 0.25290968  | 0.23876939  | 0.177135927 |
| 0.423769269 | 0.027750806 | 0.450053794 | 0.063374501 |
| 0.333761279 | 0.043375247 | 0.118750621 | 0.030778684 |
| 0.070035292 | 0.007033057 | 0.027325643 | 0.015462797 |
| 0.43191858  | 0.029992186 | 0.18647755  | 0.042190299 |
| 0.004766473 | 0.122528352 | 0.295801426 | 0.315521126 |
| 0.249132153 | 0.278109272 | 0.106366705 | 0.284578546 |
| 0.019954637 | 0.070493733 | 0.011928078 | 0.005315142 |
| 0.03191105  | 0.053900008 | 0.30281421  | 0.338330432 |
| 0.435336386 | 0.025826822 | 0.018052317 | 0.021051601 |
| 0.008927821 | 0.279007567 | 0.153842793 | 0.023876708 |
| 0.212164915 | 0.045659499 | 6.12E-05    | 0.03613955  |
| 0.238861523 | 1           |             |             |

Table S2C

|                 |  |                     |  |                  |  |                   |  |
|-----------------|--|---------------------|--|------------------|--|-------------------|--|
| 0610031J06RIK   |  | 0610037L13RIK       |  | 1110018G07RIK    |  | 1200014J11RIK     |  |
| 1500032L24RIK   |  | 1700022C21RIK       |  | 1700040I03RIK    |  | 1700047I17RIK1    |  |
| 1700102P08RIK   |  | 1810020D17RIK       |  | 1810027010RIK    |  | 1810046J19RIK     |  |
| 2210012G02RIK   |  | 2310061C15RIK       |  | 2410091C18RIK    |  | 2610021K21RIK     |  |
| 2610029G23RIK   |  | 2610039C10RIK       |  | 2610301F02RIK    |  | 2610318N02RIK     |  |
| 2700094K13RIK   |  | 2810405K02RIK       |  | 2810422020RIK    |  | 3200002M19RIK     |  |
| 4632404H12RIK   |  | 4833442J19RIK       |  | 4930432021RIK    |  | 4930547N16RIK     |  |
| 4933421E11RIK   |  | 5830405N20RIK       |  | 5830443L24RIK    |  | 6330503K22RIK     |  |
| 6720463M24RIK   |  | 9030607L17RIK       |  | 9430023L20RIK    |  | 9930021J03RIK     |  |
| A130014H13RIK   |  | AA467197 ABCB1B     |  | ABHD12 ABHD2     |  | ACADM ACSL5       |  |
| ACSS1 ACTR1A    |  | ADI1 ADRB2          |  | AFF4 AHCY        |  | AI597468 AI847670 |  |
| AIM2 AK3        |  | AKAP8L AKR1B3       |  | AKT3 ANAPC2      |  | ANKRD12 ANLN      |  |
| ANP32E ANXA6    |  | AOAH AP1S1          |  | AP1S3 AP2A1      |  | AP2S1 APIP        |  |
| APITD1 APOBEC1  |  | APOBEC3 AREG        |  | ARHGAP19 ARHGEF2 |  | ARL6IP1 ARMC7     |  |
| ARMCX5 ARPC3    |  | ARPC4 ARRDC3        |  | ASB13 ASF1B      |  | ASNA1 ASPM        |  |
| ATIC ATP5D      |  | ATP5G2 ATP50        |  | ATP6V1A ATP8B4   |  | ATPIF1 AURKA      |  |
| AVEN AW549877   |  | BARD1 BATF          |  | BBS2 BBX         |  | BC016423 BC021614 |  |
| BC056474 BCKDK  |  | BCL2 BCL6           |  | BCLP2 BIRC3      |  | BIRC5 BLM         |  |
| BLMH BLVRA      |  | BOLA3 BRCA1         |  | BRCA2 BRIP1      |  | BRWD1 BSPRY       |  |
| BUB1 BUB1B      |  | BUB3 C330027C09RIK  |  | C430048L16RIK    |  | C79407            |  |
| CALM3 CAPNS1    |  | CAPZA2 CAPZB        |  | CAR2 CBX5        |  | CBX7 CCDC12       |  |
| CCDC25 CCDC41   |  | CCDC99 CCNA2        |  | CCNB1 CCNB2      |  | CCNC CCND2        |  |
| CCNE1 CCNE2     |  | CCNF CD28           |  | CD7 CDC20        |  | CDC25B CDC25C     |  |
| CDC27 CDC2A     |  | CDC34 CDC45L        |  | CDC6 CDC7        |  | CDCA2 CDCA3       |  |
| CDCA5 CDCA7     |  | CDCA8 CDK2          |  | CDK6 CDKN1A      |  | CENPA CENPE       |  |
| CENPH CENPI     |  | CENPK CENPM         |  | CENPN CENPP      |  | CEP55 CEP57       |  |
| CFB CFP         |  | CHAF1A CHAF1B       |  | CHCHD2 CHEK1     |  | CHEK2 CHIT1       |  |
| CIRBP CISD1     |  | CKAP2L CKAP5        |  | CKS1B CKS2       |  | CLDND1 CLIC1      |  |
| CLOCK CLSPN     |  | CNIH CNIH4          |  | COMMD10 COPS5    |  | C0Q5 COR01B       |  |
| COR01C CPOX     |  | CRCP CROT           |  | CRYZL1 CSRP1     |  | CST7 CTNNA1       |  |
| CTSC CXCL10     |  | CYB5R4 CYBA         |  | CYP20A1 CYP51    |  | D14ERTD449E       |  |
| D14ERTD668E     |  | D17H6S56E-5         |  | D2ERTD750E       |  | D5ERTD579E        |  |
| D5WSU178E       |  | D930014E17RIK       |  | DBF4 DBI         |  | DCK DCPS          |  |
| DDB1 DDOST      |  | DDX17 DDX19A        |  | DDX26B DDX28     |  | DDX39 DEPDC1A     |  |
| DEPDC1B DERA    |  | DGKH DHFR           |  | DHRS1 DHX33      |  | DHX58 DLGAP5      |  |
| DNA2 DNAJB6     |  | DNMT1 DSCC1         |  | DSCR3 DSN1       |  | DTL DTX4          |  |
| DUT DYNLT1      |  | DYNLT3 E2F1         |  | E2F3 E2F7        |  | EBP ECT2          |  |
| EFCAB2 EIF4EBP2 |  | EIF4ENIF1           |  | EIF4H EIF5       |  | ELOF1 ENO1        |  |
| ENPP5 ERH       |  | ERMP1 ESCO2         |  | ESD ESPL1        |  | EXO1              |  |
| F630043A04RIK   |  | F730047E07RIK       |  | FAM110A FAM120B  |  | FAM178A FAM20B    |  |
| FANCD2 FANCI    |  | FANCL FAR1          |  | FBXL12 FBX032    |  | FBX05 FCF1        |  |
| FEN1 FHL2       |  | FIGNL1 FIS1         |  | FKBP2 FKBP5      |  | FLNA FOSB         |  |
| FOXM1 FRMD4B    |  | FYC01 G6PDX         |  | GAPDH GARS       |  | GBP5 GBP6         |  |
| GCH1 GDA        |  | GIMAP4 GINS4        |  | GLIPR2 GLTP      |  | GM114 GM129       |  |
| GMNN GNB1       |  | GNPDA1 GOLT1B       |  | GOT2 GPD2        |  | GPR89 GPRASP1     |  |
| GPSM2 GRAMD1B   |  | GTDC1 GTF2E2        |  | GTSE1 GVIN1      |  | GYG GZMB          |  |
| GZMC H2-DMA     |  | H2-KE6 H2-OA        |  | H2-OB H2AFX      |  | H2AFZ HAT1        |  |
| HBP1 HCFC1      |  | HDGF HEXIM1         |  | HIST1H2AB        |  | HIST1H2AF         |  |
| HIST1H2AK       |  | HIST1H2AN           |  | HIST1H2A0        |  | HIST1H2BB         |  |
| HIST1H2BC       |  | HIST1H3G HIST2H2AA1 |  | HIST2H3B         |  | HIST2H3C1         |  |
| HMBS HMGA1      |  | HMGB3 HMGN2         |  | HMMR HPRT1       |  | HSD17B11 HSP90B1  |  |
| HTATIP2 ICOS    |  | IDH3A IDI1          |  | IFIH1 IFIT2      |  | IGF2BP3 IGF2R     |  |
| IL10 IL12RB2    |  | IL7R IMPA1          |  | IMPACT INCENP    |  | IN080C INTS12     |  |

|           |         |          |          |          |          |          |          |
|-----------|---------|----------|----------|----------|----------|----------|----------|
| IP05      | IQCB1   | IREB2    | IRF7     | ITGA1    | ITGA2    | ITGAM    | ITGAX    |
| ITPA      | ITPK1   | KARS     | KCNAB2   | KCTD9    | KIF11    | KIF15    | KIF18A   |
| KIF22     | KIF23   | KIF2C    | KIF3C    | KIF4     | KLHL7    | KLHL9    | KLRA2    |
| KLRC3     | KNTC1   | KPNA3    | KTELC1   | L7RN6    | LAMP2    | LBR      | LCORL    |
| LCP1      | LDHA    | LENG9    | LGALS3BP | LGALS9   | LIG1     | LIN54    | LPCAT3   |
| LPIN2     | LPXN    | LRMP     | LSM8     | LY6C1    | LY6I     | LYPLA1   | M6PR     |
| MAD2L1    | MAN2C1  | MAP2K3   | MAPK6    | MARCKSL1 | MASTL    | MATK     | MBD5     |
| MBNL3     | MCCC1   | MCM10    | MCM2     | MCM3     | MCM4     | MCM5     | MCM6     |
| MED10     | MELK    | MFSD1    | MGA      | MIB2     | MLF2     | MMD      | MND1     |
| MNS1      | MPDU1   | MPO      | MPP5     | MPP6     | MRPL14   | MRPL18   | MRPL20   |
| MRPL27    | MRPL4   | MRPS11   | MRPS18A  | MRPS23   | MS4A4B   | MT2      | MTBP     |
| MTCH1     | MTCH2   | MTERFD1  | MTHFD2   | MTPN     | MTVR2    | MXD3     | MYBL2    |
| MYCBP     | MYD88   | NANS     | NAT5     | NCAPD2   | NCAPG2   | NCAPH    | NDC80    |
| NDE1      | NDUFA9  | NDUFB7   | NDUFB8   | NDUFS8   | NDUFV2   | NEIL3    | NGFRAP1  |
| NMRAL1    | NR1D2   | NSBP1    | NSMCE2   | NT5C3    | NT5C3L   | NT5E     | NTAN1    |
| NUBP1     | NUCKS1  | NUDT1    | NUDT21   | NUP155   | NUP37    | NUP62    | NUTF2    |
| NXT1      | OAS1A   | OBFC2B   | OOSP1    | ORC1L    | ORC6L    | OSTM1    | OTUB1    |
| OXSR1     | P2RY12  | PALM     | PAQR7    | PARP12   | PARP6    | PARP8    | PASK     |
| PBK       | PCNA    | PDIA3    | PDK3     | PDPK1    | PDSS1    | PDZD11   | PEX3     |
| PEX7      | PFKP    | PFN1     | PGLYRP1  | PHF19    | PHF5A    | PIBF1    | PICALM   |
| PIGF      | PIGP    | PIGT     | PIH1D1   | PJA1     | PJA2     | PLA2G7   | PLAC8    |
| PLEKHA1   | PLEKHA2 | PLK1     | PLK4     | PLP2     | PLXNC1   | PMCH     | PMF1     |
| PMM1      | POLD3   | POLE     | POLH     | POLQ     | POLR3K   | POMP     | PON2     |
| POP4      | PPBP    | PPIL5    | PPM1K    | PPP1CA   | PPP1R11  | PPP1R8   | PPP2R1A  |
| PPP2R4    | PPP2R5C | PPP5C    | PRDX1    | PRDX2    | PREB     | PREP     | PRIM1    |
| PRIM2     | PRKAR1A | PRMT2    | PRPF39   | PRR11    | PRRG4    | PSAT1    | PSEN1    |
| PSMA4     | PSMB2   | PSMB3    | PSMB7    | PSMB9    | PSMC1    | PSMC3IP  | PSMC4    |
| PSMD1     | PSMD13  | PSMD8    | PTPN22   | PTPN7    | PUS10    | PYGB     | RAB1     |
| RAB19     | RAB27A  | RAB35    | RAB6B    | RAB7L1   | RAB8B    | RAC2     | RAD18    |
| RAD21     | RAD51   | RAD51AP1 | RAD51C   | RAD51L1  | RAD54L   | RASA1    | RASGEF1B |
| RASGRP2   | RBBP6   | RBMS1    | REEP4    | REV1     | RFC3     | RFC4     | RFC5     |
| RFWD3     | RILPL2  | RIPK3    | RNF103   | RNF167   | RPA1     | RPA3     | RPIA     |
| RPS27L    | RPS6KA1 | RPS6KA5  | RQCD1    | RRM1     | RRM2     | RRM2B    | RSAD2    |
| RUNDC3B   | SAE1    | SAMD9L   | SAP30    | SAR1B    | SASS6    | SCOC     | SDCBP    |
| SDHB      | SEC14L1 | SEC61A1  | SEMA7A   | SEPW1    | SEPX1    | SERF2    | SERHL    |
| SERPINB6B |         | SERTAD1  | SFI1     | SFRS4    | SFT2D2   | SFXN1    | SGK3     |
| SGOL1     | SH2D2A  | SHCBP1   | SIVA1    | SLA      | SLAMF1   | SLC12A2  | SLC25A11 |
| SLC25A20  | SLC31A1 | SLC35A5  | SLC35B1  | SLC3A2   | SLC43A3  | SLFN3    | SLM02    |
| SLPI      | SMARCA2 | SMYD3    | SNRPA    | SNRPD1   | SNX16    | SNX3     | SPAG5    |
| SPC25     | SPNB2   | SSNA1    | SSR2     | SSR3     | STARD4   | STAT3    | STIL     |
| STX1A     | STX4A   | SUM03    | SURF1    | SUV39H1  | SYCE2    | SYNGR2   | TACC3    |
| TADA2L    | TAGAP   | TBC1D7   | TBCB     | TCF19    | TDG      | TFDP1    | TFDP2    |
| TFG       | TGFB1   | TGIF1    | TH1L     | THG1L    | THOC4    | THOC6    | THY1     |
| TIMM17B   | TIMM50  | TIPIN    | TK1      | TMC8     | TMEM126A | TMEM147  | TMEM14C  |
| TMEM154   | TMEM192 | TMEM5    | TMEM50A  | TMEM97   | TMP0     | TNFRSF25 | TNFRSF9  |
| TNRC6A    | TOMM22  | TOMM6    | TOP2A    | TOPBP1   | TPD52    | TPI1     | TPX2     |
| TRAFD1    | TRAPPC1 | TRIM30   | TSC22D3  | TSP0     | TSR2     | TTK      | TUBA1B   |
| TUBB2C    | TUBE1   | TUBG1    | TULP4    | TXN1     | TXNIP    | UBE2C    | UBE2E3   |
| UBE2L3    | UBE2M   | UBE2T    | UBL4     | UBL7     | UBR7     | UCK2     | UHRF1    |
| UHRF2     | UQCR    | USP1     | USP5     | USP6NL   | USPL1    | UXT      | VDAC1    |
| VGLL4     | VKORC1  | VPS29    | VPS36    | VPS45    | WARS     | WDHD1    | WDR1     |
| WDR45L    | WDR76   | WFIKKN2  | XDH      | XPNPEP1  | YKT6     | YWHAE    | YWHAH    |
| ZBP1      | ZBTB32  | ZBTB41   | ZC3H6    | ZC3HAV1  | ZDHHC21  | ZFP101   | ZFP110   |
| ZFP113    | ZFP187  | ZFP318   | ZFP382   | ZFP414   | ZFP595   | ZFP623   | ZFP758   |

| ZFP85-RS1     | ZFYVE16     | ZKSCAN3     | ZMAT1       | ZMYM5       | ZRANB1      | ZRANB3 |
|---------------|-------------|-------------|-------------|-------------|-------------|--------|
| ZRSR1 ZWILCH  |             |             |             |             |             |        |
| 0610031J06RIK | 1           | 0.129093101 |             | 0.191575599 |             |        |
| 0.111719588   | 0.051575314 |             | 0.048013539 |             | 0.156804016 |        |
| 0.15176485    | 0.111391195 |             | 0.014107753 |             | 0.083127146 |        |
| 0.198405713   | 0.004301437 |             | 0.148535343 |             | 0.158182727 |        |
| 0.046563263   | 0.173643052 |             | 0.181541807 |             | 0.020942337 |        |
| 0.047183828   | 0.051511948 |             | 0.024097766 |             | 0.076875279 |        |
| 0.041933255   | 0.332945011 |             | 0.091947341 |             | 0.027528206 |        |
| 0.133068174   | 0.009466443 |             | 0.068378457 |             | 0.009472759 |        |
| 0.215157824   | 0.048735205 |             | 0.021017687 |             | 0.171976379 |        |
| 0.058697607   | 0.001246719 |             | 0.229108714 |             | 0.05413616  |        |
| 0.010493112   | 0.249844618 |             | 0.03046552  |             | 0.090631092 |        |
| 0.031402032   | 0.19276313  |             | 0.009510152 |             | 0.047949629 |        |
| 0.075977716   | 0.054823802 |             | 0.211758651 |             | 0.077010434 |        |
| 0.02588694    | 0.170847184 |             | 0.073300345 |             | 0.019701396 |        |
| 0.013821908   | 0.000605761 |             | 0.005329051 |             | 0.176812227 |        |
| 0.253107426   | 0.176745039 |             | 0.007653745 |             | 0.07272844  |        |
| 0.046594438   | 0.068109325 |             | 0.156484887 |             | 0.019119788 |        |
| 0.165172436   | 0.007773179 |             | 0.059252713 |             | 0.066282767 |        |
| 0.049330778   | 0.124683261 |             | 0.28199627  |             | 0.177659211 |        |
| 0.022958991   | 0.15781663  |             | 0.066954782 |             | 0.015424487 |        |
| 0.125611966   | 0.218528823 |             | 0.159256634 |             | 0.18396846  |        |
| 0.006450866   | 0.033001462 |             | 0.027545354 |             | 0.136396923 |        |
| 0.086585958   | 0.097393847 |             | 0.107355786 |             | 0.188743446 |        |
| 0.120688262   | 0.044647135 |             | 0.07915818  |             | 0.244164397 |        |
| 0.134429687   | 0.011586137 |             | 0.036116888 |             | 0.013775616 |        |
| 0.05434976    | 0.039867787 |             | 0.191148321 |             | 0.185500577 |        |
| 0.04290954    | 0.237140989 |             | 0.214603415 |             | 0.029842078 |        |
| 0.054853403   | 0.230108318 |             | 0.02784543  |             | 0.082983204 |        |
| 0.07090196    | 0.141026227 |             | 0.096241862 |             | 0.11576178  |        |
| 0.035360362   | 0.156596781 |             | 0.1029524   |             | 0.146379248 |        |
| 0.00489872    | 0.164683202 |             | 0.186759275 |             | 0.200962671 |        |
| 0.160150371   | 0.153570467 |             | 0.020961533 |             | 0.203050293 |        |
| 0.114529706   | 0.139558206 |             | 0.147645445 |             | 0.088732941 |        |
| 0.102446798   | 0.190865459 |             | 0.156220934 |             | 0.119285968 |        |
| 0.200514676   | 0.008611082 |             | 0.035455677 |             | 0.079456605 |        |
| 0.092653934   | 0.21044847  |             | 0.01978317  |             | 0.216686393 |        |
| 0.211543695   | 0.092070734 |             | 0.122487541 |             | 0.246342142 |        |
| 0.084487726   | 0.192466677 |             | 0.117542768 |             | 0.178007914 |        |
| 0.201870985   | 0.214224103 |             | 0.162012478 |             | 0.056743512 |        |
| 0.211795101   | 0.092858291 |             | 0.011128405 |             | 0.126625178 |        |
| 0.188912433   | 0.004935704 |             | 0.101216239 |             | 0.111877425 |        |
| 0.161337137   | 0.085782348 |             | 0.149699433 |             | 0.135764427 |        |
| 0.16360909    | 0.243706367 |             | 0.000332105 |             | 0.096850248 |        |
| 0.185260509   | 0.169617668 |             | 0.087680561 |             | 0.031570464 |        |
| 0.050306382   | 0.068616353 |             | 0.083009034 |             | 0.02392507  |        |
| 0.211767807   | 0.121490446 |             | 0.115381977 |             | 0.107284934 |        |
| 0.057232693   | 0.270788056 |             | 0.023714504 |             | 0.219228801 |        |
| 0.185279349   | 0.18307934  |             | 0.280588656 |             | 0.139825863 |        |
| 0.026475931   | 0.179038386 |             | 0.057972549 |             | 0.046842412 |        |
| 0.207397402   | 0.064890424 |             | 0.012835524 |             | 0.060950172 |        |
| 0.294431974   | 0.049147748 |             | 0.165534335 |             | 0.155858273 |        |
| 0.175250175   | 0.347533272 |             | 0.106393494 |             | 0.136238745 |        |

|             |             |             |             |
|-------------|-------------|-------------|-------------|
| 0.092134101 | 0.339597059 | 0.064601151 | 0.130293732 |
| 0.029243089 | 0.251433719 | 0.08812573  | 0.1817256   |
| 0.20468392  | 0.036799183 | 0.222436189 | 0.078561717 |
| 0.026452401 | 0.008792446 | 0.005205118 | 0.033367981 |
| 0.33935219  | 0.057984932 | 0.056458108 | 0.079520144 |
| 0.134522169 | 0.117369557 | 0.023215808 | 0.26300757  |
| 0.243304711 | 0.04831375  | 0.125573648 | 0.045206369 |
| 0.109528282 | 0.090328619 | 0.103102425 | 0.030132409 |
| 0.11228992  | 0.013614282 | 0.014191871 | 0.115090261 |
| 0.013309074 | 0.020732874 | 0.120378866 | 0.075784091 |
| 0.03597097  | 0.281198284 | 0.1546557   | 0.001230648 |
| 0.03116792  | 0.058638896 | 0.1449957   | 0.028187946 |
| 0.156568688 | 0.15176597  | 0.040278242 | 0.035816939 |
| 0.261337616 | 0.171931677 | 0.153171226 | 0.144819874 |
| 0.017110808 | 0.15976046  | 0.100373142 | 0.150376621 |
| 0.114513236 | 0.019527141 | 0.003748696 | 0.104390639 |
| 0.107599671 | 0.017471475 | 0.269711172 | 0.070192498 |
| 0.021491768 | 0.057996962 | 0.037989406 | 0.153741908 |
| 0.232528176 | 0.169814236 | 0.127710176 | 0.097858771 |
| 0.165114564 | 0.177176811 | 0.117048639 | 0.17086697  |
| 0.012986423 | 0.032662574 | 0.023790387 | 0.118491556 |
| 0.230233615 | 0.024606351 | 0.209161601 | 0.005080225 |
| 0.000318491 | 0.203850818 | 0.249541003 | 0.114029209 |
| 0.015306402 | 0.043102468 | 0.068341901 | 0.156114456 |
| 0.203986543 | 0.185246555 | 0.161421132 | 0.041015392 |
| 0.165536057 | 0.030190765 | 0.034544904 | 0.059549985 |
| 0.204194916 | 0.094450098 | 0.135180789 | 0.223762196 |
| 0.219843272 | 0.017271346 | 0.079008881 | 0.01770686  |
| 0.172604578 | 0.087891279 | 0.307819329 | 0.359838249 |
| 0.126646332 | 0.329505503 | 0.197924746 | 0.017418173 |
| 0.130190554 | 0.233981183 | 0.032801666 | 0.127013972 |
| 0.148934945 | 0.143932736 | 0.148451362 | 0.178293229 |
| 0.112569255 | 0.086542925 | 0.087335971 | 0.091428814 |
| 0.158895185 | 0.137631016 | 0.012632009 | 0.063884681 |
| 0.015182567 | 0.131607877 | 0.054341897 | 0.287667302 |
| 0.073723325 | 0.120487352 | 0.220374179 | 0.047795902 |
| 0.162128315 | 0.005983317 | 0.05197839  | 0.079057292 |
| 0.093315865 | 0.178530202 | 0.024453539 | 0.016422068 |
| 0.20227757  | 0.209963871 | 0.014470881 | 0.172956143 |
| 0.098358211 | 0.207010909 | 0.054970317 | 0.100741171 |
| 0.172799691 | 0.007196465 | 0.039949022 | 0.00290635  |
| 0.031991452 | 0.180334512 | 0.023887006 | 0.139648399 |
| 0.145050182 | 0.158622549 | 0.20067807  | 0.180150531 |
| 0.167815552 | 0.136816966 | 0.163876586 | 0.019292499 |
| 0.167923322 | 0.000732694 | 0.149152948 | 0.132071654 |
| 0.018039177 | 0.018989168 | 0.050692614 | 0.111113356 |
| 0.043931652 | 0.272091895 | 0.22998441  | 0.039879959 |
| 0.149036751 | 0.13052984  | 0.176559107 | 0.024227008 |
| 0.072255656 | 0.073454932 | 0.024716703 | 0.177080192 |
| 0.094513324 | 0.133482566 | 0.036460833 | 0.270134748 |
| 0.054718139 | 0.18551785  | 0.23392389  | 0.023829359 |
| 0.087020545 | 0.291605572 | 0.235659657 | 0.158412628 |
| 0.194364681 | 0.073247001 | 0.013127773 | 0.037425746 |
| 0.110072114 | 0.244791706 | 0.018241098 | 0.2230616   |

|             |             |             |             |
|-------------|-------------|-------------|-------------|
| 0.155106452 | 0.061412412 | 0.192648006 | 0.228155346 |
| 0.166206407 | 0.185168361 | 0.193181373 | 0.096767419 |
| 0.130600751 | 0.005795903 | 0.064041615 | 0.170419104 |
| 0.005489745 | 0.028852416 | 0.224190241 | 0.039110884 |
| 0.052347601 | 0.216596468 | 0.010659946 | 0.012582441 |
| 0.111069136 | 0.054812974 | 0.036358011 | 0.162448206 |
| 0.03476758  | 0.023681893 | 0.094414542 | 0.115702583 |
| 0.024996291 | 0.195269645 | 0.326969404 | 0.163619789 |
| 0.035396902 | 0.038396001 | 0.225043652 | 0.263921101 |
| 0.129468609 | 0.125085784 | 0.125936207 | 0.109544441 |
| 0.244066169 | 0.043447244 | 0.132943535 | 0.147830583 |
| 0.202745287 | 0.182511211 | 0.260324445 | 0.077190727 |
| 0.199540401 | 0.077217397 | 0.036293779 | 0.064332536 |
| 0.157355422 | 0.219304188 | 0.173187127 | 0.018494298 |
| 0.244891416 | 0.092299778 | 0.203266171 | 0.212810277 |
| 0.036585906 | 0.237538662 | 0.113525602 | 0.21763002  |
| 0.049615596 | 0.015352234 | 0.170214892 | 0.180990494 |
| 0.150238742 | 0.006013802 | 0.220032931 | 0.059123206 |
| 0.138254505 | 0.012103977 | 0.064478818 | 0.213274673 |
| 0.279117373 | 0.163139428 | 0.068010186 | 0.093617082 |
| 0.089031623 | 0.031264029 | 0.165007471 | 0.127222499 |
| 0.147161828 | 0.059168828 | 0.181682098 | 0.152028719 |
| 0.25954149  | 0.042286133 | 0.014566732 | 0.051524994 |
| 0.174863805 | 0.058405108 | 0.101799944 | 0.260650854 |
| 0.219666476 | 0.226103227 | 0.132032697 | 0.144525233 |
| 0.048452498 | 0.191129707 | 0.20164515  | 0.115736483 |
| 0.012248124 | 0.180251477 | 0.029600383 | 0.083686204 |
| 0.010345733 | 0.005750766 | 0.128715263 | 0.10582952  |
| 0.188253268 | 0.127541149 | 0.205833787 | 0.066508852 |
| 0.000325923 | 0.047355253 | 0.084574619 | 0.034839278 |
| 0.133821916 | 0.174502598 | 0.052491771 | 0.152758351 |
| 0.220493465 | 0.281425807 | 0.100161695 | 0.041142699 |
| 0.004738612 | 0.079390313 | 0.23537484  | 0.120410561 |
| 0.080161852 | 0.192202461 | 0.014642552 | 0.11936354  |
| 0.007691308 | 0.242554692 | 0.170829985 | 0.020106415 |
| 0.008772542 | 0.127645984 | 0.105491916 | 0.204678143 |
| 0.031485099 | 0.113890846 | 0.146938596 | 0.015490064 |
| 0.073691263 | 0.171930716 | 0.098268343 | 0.094779754 |
| 0.092619399 | 0.080092413 | 0.102632263 | 0.038824986 |
| 0.087363858 | 0.105123773 | 0.088554876 | 0.183490128 |
| 0.103063995 | 0.124497411 | 0.057391171 | 0.051760619 |
| 0.048586931 | 0.160254595 | 0.333218884 | 0.353031925 |
| 0.212541303 | 0.127283855 | 0.304384151 | 0.291324442 |
| 0.166410999 | 0.039482979 | 0.224126053 | 0.154744299 |
| 0.17560871  | 0.278772344 | 0.04991101  | 0.12722347  |
| 0.007821157 | 0.045782964 | 0.168344557 | 0.06340771  |
| 0.168570994 | 0.033159554 | 0.046389603 | 0.108491574 |
| 0.072842875 | 0.250492367 | 0.301273017 | 0.174110353 |
| 0.048572041 | 0.034288523 | 0.018703532 | 0.137489823 |
| 0.148906999 | 0.24570931  | 0.04270329  | 0.092282878 |
| 0.120417161 | 0.088154865 | 0.106363142 | 0.184911559 |
| 0.011058191 | 0.204692447 | 0.025823818 | 0.167236685 |
| 0.016228312 | 0.276352991 | 0.288291122 | 0.077645159 |
| 0.006399364 | 0.131943893 | 0.061779429 | 0.053156474 |

|               |             |             |             |
|---------------|-------------|-------------|-------------|
| 0.075533616   | 0.062800178 | 0.027680261 | 0.097246019 |
| 0.105065294   | 0.194625772 | 0.193970532 | 0.157056786 |
| 0.039668976   | 0.030698625 | 0.057943895 | 0.061591672 |
| 0.075466627   | 0.135392458 | 0.251020571 | 0.134877598 |
| 0.034953639   | 0.287045656 | 0.231210157 | 0.094835942 |
| 0.063653079   | 0.101556497 | 0.005579855 | 0.031193469 |
| 0.071782828   | 0.014870975 | 0.000421014 | 0.008919527 |
| 0.14767643    | 0.022366782 | 0.083973557 | 0.097385575 |
| 0.025970509   | 0.138764629 | 0.006215206 | 0.087609144 |
| 0.172793969   | 0.214534098 | 0.065371276 | 0.214002527 |
| 0.148554659   | 0.181864333 | 0.090327206 | 0.00409723  |
| 0.046181296   | 0.034376227 | 0.018506071 | 0.189387225 |
| 0.179212614   | 0.006267581 | 0.051576641 | 0.187207712 |
| 0.117356258   | 0.006436224 | 0.058255306 | 0.079669981 |
| 0.221794529   | 0.222446334 | 0.10458093  | 0.10037907  |
| 0.078938871   | 0.160573579 | 0.026732637 | 0.031151877 |
| 0.048698585   | 0.020785442 | 0.116920405 | 0.016952318 |
| 0.201321633   | 0.049141276 | 0.011099128 | 0.272125914 |
| 0.200182204   | 0.020992901 | 0.283916902 | 0.013410729 |
| 0.164062187   | 0.146661762 | 0.037300452 | 0.030746588 |
| 0.137569953   | 0.044327468 | 0.19044096  | 0.160562491 |
| 0.008643391   | 0.047354952 | 0.164333133 | 0.028164531 |
| 0.253555017   | 0.028813146 | 0.225099467 | 0.012388324 |
| 0.157674613   | 0.122660369 | 0.227671958 | 0.04238875  |
| 0.053205704   | 0.279005242 | 0.027329363 | 0.169475643 |
| 0.123350715   | 0.018057799 | 0.098387928 | 0.086110492 |
| 0.019164494   | 0.172001312 | 0.038026493 | 0.166062037 |
| 0.098397624   | 0.20633245  | 0.092082763 | 0.14415253  |
| 0.190449264   | 0.018290823 | 0.015996415 | 0.044523177 |
| 0.17456656    | 0.166429784 | 0.018111835 | 0.153374407 |
| 0.011008819   | 0.140975237 | 0.056981437 | 0.048031254 |
| 0.169063259   | 0.101545132 | 0.047559332 | 0.236986342 |
| 0.115410592   | 0.048328685 | 0.029263748 | 0.229243485 |
| 0.118226582   | 0.133988588 | 0.214044319 | 0.000743766 |
| 0.108233004   | 0.080168543 | 0.164101213 | 0.037406786 |
| 0.317379549   | 0.090142479 | 0.071262459 | 0.070225827 |
| 0.107937491   | 0.011273393 | 0.036846132 | 0.044414699 |
| 0.017436564   | 0.180470754 | 0.190218931 | 0.14099032  |
| 0.138971329   | 0.020922676 | 0.013842758 | 0.165187763 |
| 0.007932977   | 0.010074277 | 0.014598317 | 0.074680774 |
| 0.01130567    | 0.02280222  | 0.024120071 | 0.01819959  |
| 0.123576641   | 0.093050235 |             |             |
| 0610037L13RIK | 0.129093101 | 1           | 0.121834294 |
| 0.159231536   | 0.269778367 | 0.425166569 | 0.100483508 |
| 0.169317459   | 0.407753094 | 0.389413812 | 0.344305211 |
| 0.034854757   | 0.071925668 | 0.419779506 | 0.091407781 |
| 0.354614241   | 0.049714385 | 0.146958195 | 0.102228163 |
| 0.295414371   | 0.242692633 | 0.312856795 | 0.433194944 |
| 0.259082504   | 0.247590302 | 0.411422153 | 0.378236539 |
| 0.486928399   | 0.275947431 | 0.418967382 | 0.263029921 |
| 0.39986819    | 0.280452517 | 0.368700719 | 0.04215739  |
| 0.420851664   | 0.014334401 | 0.449084758 | 0.245600857 |
| 0.133144965   | 0.350559875 | 0.427763965 | 0.243187096 |
| 0.418644207   | 0.07523104  | 0.290122108 | 0.392815895 |



|             |             |             |             |
|-------------|-------------|-------------|-------------|
| 0.397334789 | 0.325921382 | 0.140389686 | 0.44082178  |
| 0.389318203 | 0.37977693  | 0.445965306 | 0.003054766 |
| 0.267161996 | 0.079353459 | 0.203546243 | 0.510004801 |
| 0.234971914 | 0.148350216 | 0.303077941 | 0.326630769 |
| 0.399002041 | 0.372062712 | 0.28496214  | 0.398717966 |
| 0.48041294  | 0.147123904 | 0.427072728 | 0.185765943 |
| 0.411604788 | 0.08372108  | 0.204978874 | 0.171660993 |
| 0.388666992 | 0.213522716 | 0.323263138 | 0.280628628 |
| 0.446135177 | 0.516489135 | 0.281436382 | 0.520884955 |
| 0.093520952 | 0.299868894 | 0.253422964 | 0.298838955 |
| 0.377406604 | 0.141530798 | 0.389885659 | 0.502200397 |
| 0.108258311 | 0.438431348 | 0.405550271 | 0.204966501 |
| 0.444239257 | 0.286740506 | 0.438885386 | 0.143927226 |
| 0.335394716 | 0.301947888 | 0.497311332 | 0.307365097 |
| 0.305446963 | 0.146058282 | 0.521380068 | 0.274973719 |
| 0.272405661 | 0.147634675 | 0.196129475 | 0.429113658 |
| 0.407990265 | 0.469922903 | 0.437963636 | 0.36769055  |
| 0.334487159 | 0.480210847 | 0.400918674 | 0.42283082  |
| 0.225887385 | 0.520745688 | 0.236942806 | 0.060351909 |
| 0.143108951 | 0.111014551 | 0.237621181 | 0.318973999 |
| 0.438869173 | 0.364955434 | 0.235811125 | 0.223886799 |
| 0.404877584 | 0.511504019 | 0.522670476 | 0.405099191 |
| 0.072606449 | 0.241045988 | 0.343494817 | 0.352643922 |
| 0.375659929 | 0.171632706 | 0.218472197 | 0.523202434 |
| 0.372222681 | 0.405580121 | 0.246866379 | 0.519467566 |
| 0.256128946 | 0.484236314 | 0.452303283 | 0.192707451 |
| 0.517390987 | 0.512578997 | 0.469253968 | 0.358898063 |
| 0.479338271 | 0.37380958  | 0.095471063 | 0.393062657 |
| 0.446602733 | 0.012344423 | 0.44127258  | 0.46115461  |
| 0.502633476 | 0.425110786 | 0.479886971 | 0.479060277 |
| 0.509286241 | 0.131124845 | 0.037236607 | 0.264359409 |
| 0.511512849 | 0.387832286 | 0.15266562  | 0.389786457 |
| 0.32803911  | 0.434233114 | 0.429285372 | 0.276204314 |
| 0.484067207 | 0.432265088 | 0.466763328 | 0.406330238 |
| 0.383351559 | 0.333278321 | 0.350481559 | 0.502685923 |
| 0.070241109 | 0.175167684 | 0.113777748 | 0.331562184 |
| 0.422280851 | 0.188642054 | 0.411411549 | 0.345695211 |
| 0.21294705  | 0.418048159 | 0.31457647  | 0.335811812 |
| 0.123671727 | 0.436847153 | 0.227903456 | 0.237834169 |
| 0.056758927 | 0.203658737 | 0.184375359 | 0.176840488 |
| 0.235749777 | 0.299496602 | 0.430630431 | 0.459707069 |
| 0.349972356 | 0.252002339 | 0.42978805  | 0.438551594 |
| 0.375278228 | 0.341300004 | 0.274074383 | 0.013743496 |
| 0.235577924 | 0.335661825 | 0.161779624 | 0.398377354 |
| 0.234651476 | 0.238921923 | 0.363952471 | 0.352403735 |
| 0.340213598 | 0.240636382 | 0.339541599 | 0.430833317 |
| 0.235234361 | 0.277852846 | 0.400342832 | 0.428909033 |
| 0.010108635 | 0.337550936 | 0.425958251 | 0.135087508 |
| 0.35808645  | 0.108332681 | 0.225249504 | 0.420972798 |
| 0.264135024 | 0.201360509 | 0.462134266 | 0.357861356 |
| 0.357656429 | 0.286669956 | 0.491520924 | 0.04763496  |
| 0.340804441 | 0.044610713 | 0.270253773 | 0.421031029 |
| 0.282549677 | 0.291676497 | 0.279076876 | 0.246366402 |
| 0.20888203  | 0.508389403 | 0.406158863 | 0.481657849 |

|             |             |             |             |
|-------------|-------------|-------------|-------------|
| 0.344123503 | 0.496593186 | 0.422883296 | 0.408551425 |
| 0.383440893 | 0.360981434 | 0.116117197 | 0.416447507 |
| 0.423472188 | 0.298463526 | 0.152921542 | 0.4329213   |
| 0.386386331 | 0.368653373 | 0.105663616 | 0.450519034 |
| 0.487238097 | 0.50191391  | 0.153118004 | 0.33764422  |
| 0.371606969 | 0.272991945 | 0.40979671  | 0.497743191 |
| 0.368507857 | 0.319706581 | 0.295263249 | 0.355372371 |
| 0.22464388  | 0.186547212 | 0.344252625 | 0.163380258 |
| 0.010664617 | 0.149695413 | 0.120020992 | 0.158425101 |
| 0.132672495 | 0.434627882 | 0.381602297 | 0.492442527 |
| 0.147758948 | 0.407358235 | 0.293770969 | 0.254365159 |
| 0.410253341 | 0.331839307 | 0.349703052 | 0.364891797 |
| 0.289897663 | 0.025412105 | 0.127664241 | 0.518140547 |
| 0.103362216 | 0.200475266 | 0.371761966 | 0.004345868 |
| 0.08706202  | 0.450230036 | 0.166855782 | 0.236547579 |
| 0.42085539  | 0.24794659  | 0.264093119 | 0.380320271 |
| 0.332636706 | 0.14184845  | 0.003590651 | 0.468060418 |
| 0.488066324 | 0.459297879 | 0.48986041  | 0.485901608 |
| 0.41689287  | 0.423565278 | 0.387139019 | 0.422654618 |
| 0.142932396 | 0.16583968  | 0.169612063 | 0.265554039 |
| 0.010328298 | 0.365754309 | 0.302886134 | 0.188109775 |
| 0.399392957 | 0.326112823 | 0.067452411 | 0.335209406 |
| 0.039984501 | 0.169556108 | 0.356908578 | 0.236725114 |
| 0.324678205 | 0.035925186 | 0.249200035 | 0.290548535 |
| 0.44781528  | 0.372457707 | 0.334470322 | 0.519617157 |
| 0.315275121 | 0.224946493 | 0.284238436 | 0.375802492 |
| 0.107020237 | 0.131477324 | 0.416973463 | 0.054707132 |
| 0.250533776 | 0.465730115 | 0.37625218  | 0.115468409 |
| 0.286892391 | 0.012902679 | 0.385863955 | 0.51206272  |
| 0.492685968 | 0.476671467 | 0.477201276 | 0.227376395 |
| 0.490159594 | 0.103061576 | 0.508416148 | 0.430876219 |
| 0.398080823 | 0.001664363 | 0.008518892 | 0.44079689  |
| 0.354463962 | 0.134119385 | 0.201230156 | 0.391032526 |
| 0.125504883 | 0.244326424 | 0.107826328 | 0.149925502 |
| 0.434140862 | 0.214549845 | 0.151084484 | 0.48586895  |
| 0.24909393  | 0.247823711 | 0.444409111 | 0.15947197  |
| 0.38875814  | 0.07884582  | 0.15987881  | 0.008110795 |
| 0.344784144 | 0.191687783 | 0.508382608 | 0.502142709 |
| 0.464327658 | 0.355642484 | 0.375907213 | 0.368340755 |
| 0.419029301 | 0.192638651 | 0.368271843 | 0.204288945 |
| 0.489965829 | 0.352057936 | 0.318759339 | 0.332509899 |
| 0.457943256 | 0.450118604 | 0.061325467 | 0.385948456 |
| 0.023851209 | 0.002388361 | 0.419478924 | 0.297838088 |
| 0.089336863 | 0.335554965 | 0.282415726 | 0.291552933 |
| 0.262195027 | 0.05684243  | 0.227586223 | 0.199536025 |
| 0.290765712 | 0.333040735 | 0.228489869 | 0.305582674 |
| 0.24569908  | 0.110739353 | 0.211768317 | 0.184065607 |
| 0.278868173 | 0.35533278  | 0.248243603 | 0.04522867  |
| 0.430418294 | 0.377380138 | 0.095272967 | 0.216417056 |
| 0.41253734  | 0.44608173  | 0.063563617 | 0.013055372 |
| 0.299768515 | 0.304345125 | 0.449101469 | 0.4993543   |
| 0.52807242  | 0.485032178 | 0.39420914  | 0.117298856 |
| 0.109222526 | 0.30881518  | 0.252384621 | 0.092270381 |
| 0.490670821 | 0.139858615 | 0.492838577 | 0.260074697 |

|             |             |             |             |
|-------------|-------------|-------------|-------------|
| 0.171056916 | 0.239861439 | 0.046376129 | 0.127286161 |
| 0.350203841 | 0.214654279 | 0.172945152 | 0.227330961 |
| 0.288194052 | 0.211059238 | 0.085151153 | 0.224368436 |
| 0.357997443 | 0.144387761 | 0.200678254 | 0.379471022 |
| 0.40410192  | 0.326378525 | 0.397648653 | 0.420247524 |
| 0.193979291 | 0.178091359 | 0.337813402 | 0.393587634 |
| 0.440313766 | 0.426841723 | 0.042034403 | 0.468116001 |
| 0.455709926 | 0.419833549 | 0.504611569 | 0.355016811 |
| 0.146206697 | 0.334395595 | 0.298108965 | 0.311588749 |
| 0.224209441 | 0.429127297 | 0.260050374 | 0.109968197 |
| 0.321423408 | 0.492089711 | 0.419981092 | 0.176043036 |
| 0.43619414  | 0.224565225 | 0.130465766 | 0.440688856 |
| 0.141800372 | 0.128029856 | 0.437482356 | 0.42227644  |
| 0.002039411 | 0.113906324 | 0.451565098 | 0.255823923 |
| 0.505269857 | 0.43243041  | 0.416090045 | 0.329635016 |
| 0.001267672 | 0.380040667 | 0.350083384 | 0.365626118 |
| 0.432417078 | 0.388226275 | 0.219978259 | 0.088118145 |
| 0.295227115 | 0.158678842 | 0.141173718 | 0.394443511 |
| 0.164197773 | 0.432699929 | 0.225849492 | 0.266645756 |
| 0.193968117 | 0.182898957 | 0.214352804 | 0.270124839 |
| 0.146883237 | 0.256449167 | 0.339917432 | 0.394689127 |
| 0.155999052 | 0.400829798 | 0.410041116 | 0.056012603 |
| 0.330673879 | 0.401963714 | 0.411223451 | 0.002838101 |
| 0.39234909  | 0.013349686 | 0.187622429 | 0.201469181 |
| 0.199750396 | 0.209376697 | 0.240220432 | 0.265024631 |
| 0.380623953 | 0.242559429 | 0.268922398 | 0.246092356 |
| 0.160559898 | 0.265461401 | 0.368996918 | 0.39772406  |
| 0.243340714 | 0.166935064 | 0.170920721 | 0.171519298 |
| 0.069142626 | 0.45095421  | 0.280164395 | 0.148189334 |
| 0.243538056 | 0.389141128 | 0.333035068 | 0.506914043 |
| 0.383195806 | 0.202058551 | 0.33868202  | 0.443636991 |
| 0.269707874 | 0.334937127 | 0.121297442 | 0.423049211 |
| 0.257396668 | 0.18046089  | 0.443616817 | 0.374686364 |
| 0.435560825 | 0.394455056 | 0.279768446 | 0.420144779 |
| 0.346127126 | 0.365898852 | 0.392063523 | 0.088897872 |
| 0.212150375 | 0.201089836 | 0.22403222  | 0.004571665 |
| 0.356211412 | 0.320983263 | 0.433612824 | 0.500271955 |
| 0.263998061 | 0.371730403 | 0.395118479 | 0.12361393  |
| 0.362990905 | 0.248595564 | 0.190072128 | 0.437135563 |
| 0.186905178 | 0.22270089  | 0.265771729 | 0.421732582 |
| 0.409456519 | 0.424142153 | 0.245175478 | 0.290311088 |
| 0.271260057 | 0.276315097 | 0.492693384 | 0.202728962 |
| 0.423201068 | 0.15010136  | 0.438130304 | 0.266760502 |
| 0.206219839 | 0.49215223  | 0.111318794 | 0.494901843 |
| 0.298486741 | 0.206103519 | 0.476777953 | 0.366254657 |
| 0.347381887 | 0.124752211 | 0.155904675 | 0.4391003   |
| 0.249210601 | 0.312023979 | 0.021881335 | 0.055431439 |
| 0.31163966  | 0.353963991 | 0.436311908 | 0.373660651 |
| 0.214739089 | 0.321548799 | 0.154894908 | 0.336727099 |
| 0.50983269  | 0.524549596 | 0.234945055 | 0.270268824 |
| 0.357688899 | 0.130138261 | 0.447271852 | 0.023610938 |
| 0.39376877  | 0.402136043 | 0.398582978 | 0.083956594 |
| 0.036524705 | 0.173054007 | 0.403300459 | 0.145004279 |
| 0.422912504 | 0.182399017 | 0.417894156 | 0.428098973 |

|               |             |             |             |
|---------------|-------------|-------------|-------------|
| 0.246947291   | 0.521912757 | 0.121371192 | 0.374523269 |
| 0.102960882   | 0.292133864 | 0.364418577 | 0.39646657  |
| 0.190187357   | 0.243569765 | 0.347388942 | 0.191258897 |
| 0.050248669   | 0.24664484  | 0.002374381 | 0.41525699  |
| 0.505339591   | 0.302523277 | 0.258467475 | 0.374176447 |
| 0.275297929   | 0.395484573 | 0.227621152 | 0.421747564 |
| 0.016060331   | 0.317873948 | 0.227446025 | 0.42400894  |
| 0.210842068   | 0.382464806 | 0.071078461 | 0.286828073 |
| 0.502285143   | 0.253455851 | 0.292529854 | 0.289021373 |
| 0.497654455   | 0.427232779 | 0.258123301 | 0.217540779 |
| 0.427192906   | 0.124023866 | 0.442538015 | 0.508290591 |
| 0.177296871   | 0.170881679 | 0.3946083   | 0.197909462 |
| 0.275460317   | 0.407871977 | 0.424715165 | 0.511143767 |
| 0.070106804   | 0.258080371 | 0.405207489 | 0.44057674  |
| 0.29214652    | 0.141222381 | 0.199786122 | 0.199987111 |
| 0.477055666   | 0.124609854 | 0.228998816 | 0.372074419 |
| 0.17458466    | 0.315828285 | 0.424816432 | 0.167197626 |
| 0.049359624   | 0.200959677 | 0.380565449 | 0.196063365 |
| 0.284793535   | 0.33511631  | 0.209971546 | 0.356811304 |
| 0.131199403   | 0.029479953 | 0.425515049 | 0.013588777 |
| 0.405665896   | 0.363580589 | 0.271018989 | 0.319165952 |
| 0.242328344   | 0.381202972 | 0.393266167 | 0.002999741 |
| 0.393806179   | 0.04992959  | 0.315989061 | 0.191570168 |
| 0.265057089   | 0.091441217 | 0.458443598 | 0.46474743  |
| 0.364344435   | 0.354116494 | 0.32756743  | 0.460652124 |
| 0.118069885   | 0.329812276 | 0.326792059 | 0.448254239 |
| 0.187454971   | 0.416128914 | 0.407842624 | 0.346606446 |
| 0.410033335   | 0.320839432 |             |             |
| 1110018G07RIK | 0.191575599 | 0.121834294 | 1           |
| 0.120978565   | 0.029087563 | 0.046805839 | 0.118883937 |
| 0.102808372   | 0.099312706 | 0.016542843 | 0.05748422  |
| 0.166203227   | 0.001706472 | 0.113503235 | 0.11150207  |
| 0.030216417   | 0.118051457 | 0.116567069 | 0.012521757 |
| 0.046596445   | 0.026230024 | 0.018207066 | 0.068445834 |
| 0.022012364   | 0.312310979 | 0.086970677 | 0.019150489 |
| 0.11764593    | 0.009161718 | 0.053764342 | 0.014514476 |
| 0.173496784   | 0.027026326 | 0.01584378  | 0.208361226 |
| 0.042972158   | 0.000197275 | 0.201779122 | 0.037169889 |
| 0.008274411   | 0.199583826 | 0.033615904 | 0.067596892 |
| 0.029500159   | 0.208575126 | 0.012532256 | 0.033683802 |
| 0.067811103   | 0.044155923 | 0.211783283 | 0.066289157 |
| 0.021158481   | 0.134958693 | 0.073400192 | 0.006417001 |
| 0.009195631   | 0.000246685 | 0.003631804 | 0.160564487 |
| 0.17740985    | 0.102709161 | 0.006290262 | 0.052435803 |
| 0.032640432   | 0.044489008 | 0.10123562  | 0.018842814 |
| 0.139704181   | 0.003726838 | 0.046843586 | 0.068513254 |
| 0.039641122   | 0.128264875 | 0.211155905 | 0.172327421 |
| 0.020054692   | 0.093052106 | 0.03999045  | 0.010685672 |
| 0.124265221   | 0.183495834 | 0.114664554 | 0.173393017 |
| 0.002152077   | 0.018713489 | 0.018726377 | 0.085564202 |
| 0.060300907   | 0.073483401 | 0.078757971 | 0.157922717 |
| 0.109659128   | 0.041594412 | 0.05892206  | 0.209331218 |
| 0.123130626   | 0.008197309 | 0.034955614 | 0.007614156 |
| 0.03417219    | 0.022889491 | 0.168047955 | 0.127602167 |

|             |             |             |             |
|-------------|-------------|-------------|-------------|
| 0.024457104 | 0.23213756  | 0.20877967  | 0.016700508 |
| 0.03931505  | 0.229903768 | 0.015445181 | 0.06370646  |
| 0.055718089 | 0.119290178 | 0.081137125 | 0.079341415 |
| 0.022063208 | 0.134802432 | 0.083270007 | 0.116143489 |
| 0.00572992  | 0.144695112 | 0.157624657 | 0.134913634 |
| 0.161057854 | 0.097939569 | 0.011790346 | 0.141073898 |
| 0.094622009 | 0.095597559 | 0.105679882 | 0.05128769  |
| 0.073709242 | 0.186617179 | 0.138125459 | 0.087274307 |
| 0.17482848  | 0.005648239 | 0.024182839 | 0.069691685 |
| 0.059797064 | 0.147555867 | 0.010292258 | 0.197619451 |
| 0.169585181 | 0.066941251 | 0.123642177 | 0.219734079 |
| 0.053779296 | 0.154940112 | 0.111600064 | 0.122847436 |
| 0.179837004 | 0.201462726 | 0.12692876  | 0.037416935 |
| 0.187590739 | 0.085105914 | 0.005311633 | 0.097591011 |
| 0.14196854  | 0.00381867  | 0.081092871 | 0.089136752 |
| 0.148262255 | 0.066288668 | 0.115046123 | 0.1107949   |
| 0.147899219 | 0.198426322 | 0.000353966 | 0.05140116  |
| 0.168765684 | 0.137709492 | 0.046076437 | 0.023325336 |
| 0.029481253 | 0.057991618 | 0.063549969 | 0.017890536 |
| 0.162315429 | 0.100770801 | 0.096007967 | 0.079282267 |
| 0.049962771 | 0.21356355  | 0.016229266 | 0.216052487 |
| 0.155683489 | 0.169372482 | 0.288615024 | 0.094496927 |
| 0.034226803 | 0.104764614 | 0.04664148  | 0.028100533 |
| 0.127348663 | 0.053043196 | 0.009953614 | 0.036455094 |
| 0.308185087 | 0.04062403  | 0.140996441 | 0.124963074 |
| 0.129526968 | 0.295918819 | 0.070057021 | 0.111128157 |
| 0.045884496 | 0.333518605 | 0.049034098 | 0.105879916 |
| 0.01933582  | 0.243175288 | 0.067855988 | 0.138223922 |
| 0.141944676 | 0.024960737 | 0.153595674 | 0.095610829 |
| 0.016102387 | 0.007656188 | 0.002887124 | 0.024730946 |
| 0.323077248 | 0.034135863 | 0.035870824 | 0.051320518 |
| 0.120313364 | 0.093664596 | 0.016233292 | 0.217122717 |
| 0.230661699 | 0.034227533 | 0.089613047 | 0.036984971 |
| 0.14961983  | 0.068589194 | 0.080685303 | 0.013862099 |
| 0.079467074 | 0.007419205 | 0.010903039 | 0.091841073 |
| 0.007778325 | 0.010259932 | 0.097859329 | 0.048869639 |
| 0.027559659 | 0.275985554 | 0.122105402 | 0.000346304 |
| 0.01947745  | 0.037182237 | 0.08630752  | 0.028342729 |
| 0.115763993 | 0.088352727 | 0.021751791 | 0.023493446 |
| 0.266096598 | 0.14617807  | 0.120119231 | 0.119116667 |
| 0.013288649 | 0.128076333 | 0.076417916 | 0.114724993 |
| 0.08715413  | 0.012978221 | 0.001963049 | 0.082706144 |
| 0.087104412 | 0.013103317 | 0.281170303 | 0.054064116 |
| 0.016758586 | 0.036911662 | 0.019498054 | 0.121728343 |
| 0.193463904 | 0.16942172  | 0.074095325 | 0.059869962 |
| 0.12438128  | 0.138852119 | 0.090111363 | 0.132278152 |
| 0.013202445 | 0.019080045 | 0.016637757 | 0.077971662 |
| 0.185411192 | 0.012694795 | 0.159775634 | 0.00300528  |
| 0.000444369 | 0.160681287 | 0.222198825 | 0.060923189 |
| 0.008119645 | 0.035349297 | 0.046975985 | 0.128055094 |
| 0.12616813  | 0.148086411 | 0.114409796 | 0.028534357 |
| 0.142009174 | 0.017147447 | 0.02334452  | 0.036977924 |
| 0.147010383 | 0.113907711 | 0.105167203 | 0.191730098 |
| 0.224087566 | 0.01013052  | 0.054888179 | 0.01788564  |

|              |             |             |             |
|--------------|-------------|-------------|-------------|
| 0.153309876  | 0.083391175 | 0.305656668 | 0.320251402 |
| 0.090863538  | 0.316308758 | 0.167074027 | 0.018731222 |
| 0.081897191  | 0.179733189 | 0.048013445 | 0.107167033 |
| 0.127086051  | 0.120864564 | 0.127653725 | 0.162229676 |
| 0.088803894  | 0.067338757 | 0.062005158 | 0.089963781 |
| 0.118861468  | 0.142879775 | 0.007143576 | 0.03639808  |
| 0.013539733  | 0.0919165   | 0.030259177 | 0.217723684 |
| 0.050269779  | 0.076630253 | 0.187640718 | 0.02802665  |
| 0.203186448  | 0.004136007 | 0.03977697  | 0.042562073 |
| 0.054542929  | 0.192669364 | 0.031543104 | 0.011170294 |
| 0.193016061  | 0.17072842  | 0.01191901  | 0.151126356 |
| 0.063305727  | 0.228378916 | 0.03605052  | 0.066402687 |
| 0.134249031  | 0.004851288 | 0.034254025 | 0.00632781  |
| 0.029037727  | 0.152426621 | 0.017824369 | 0.165950348 |
| 0.103736737  | 0.178470105 | 0.179570908 | 0.149966151 |
| 0.165825282  | 0.108150395 | 0.13763249  | 0.011681403 |
| 0.146888325  | 0.000157568 | 0.125982444 | 0.118595811 |
| 0.017078713  | 0.022687036 | 0.031302861 | 0.089961033 |
| 0.02979798   | 0.31099627  | 0.167217763 | 0.045398997 |
| 0.112847359  | 0.131951406 | 0.136841317 | 0.013927546 |
| 0.060021863  | 0.036186867 | 0.011145524 | 0.16086416  |
| 0.058966191  | 0.077660152 | 0.030915892 | 0.238263512 |
| 0.037802989  | 0.161750404 | 0.202484383 | 0.024582897 |
| 0.053782709  | 0.295239222 | 0.226836611 | 0.139312136 |
| 0.154390322  | 0.04855658  | 0.013447208 | 0.030166841 |
| 0.083669159  | 0.282231411 | 0.016117578 | 0.233337414 |
| 0.145271491  | 0.040199148 | 0.131110234 | 0.191281926 |
| 0.127210139  | 0.15556385  | 0.155361769 | 0.069238244 |
| 0.182504742  | 0.003313506 | 0.065167002 | 0.107559685 |
| 0.002679048  | 0.018215598 | 0.17015878  | 0.029346372 |
| 0.034429197  | 0.210050516 | 0.00678693  | 0.007062327 |
| 0.0711158788 | 0.033078263 | 0.018268597 | 0.118813529 |
| 0.02194697   | 0.01115049  | 0.065035173 | 0.067499991 |
| 0.015824554  | 0.177449717 | 0.306463759 | 0.13884858  |
| 0.031220306  | 0.026096221 | 0.176080601 | 0.207047255 |
| 0.100496708  | 0.099470471 | 0.088212039 | 0.089388505 |
| 0.184747347  | 0.022671189 | 0.099406435 | 0.134461154 |
| 0.180401465  | 0.143576383 | 0.213539044 | 0.036773077 |
| 0.172625373  | 0.048722109 | 0.01883277  | 0.036265581 |
| 0.12980285   | 0.215490364 | 0.157495761 | 0.010753409 |
| 0.178896272  | 0.082178788 | 0.150743703 | 0.146050918 |
| 0.023873441  | 0.1541014   | 0.060489384 | 0.226691588 |
| 0.029613615  | 0.009503877 | 0.136849746 | 0.119380208 |
| 0.106694903  | 0.003837389 | 0.147773268 | 0.050619027 |
| 0.120568721  | 0.013332557 | 0.04574676  | 0.163947248 |
| 0.235664516  | 0.128319789 | 0.082393169 | 0.063885657 |
| 0.073150778  | 0.026790849 | 0.18326511  | 0.122558474 |
| 0.113002529  | 0.045046477 | 0.166534581 | 0.096001255 |
| 0.216412645  | 0.027342492 | 0.00894681  | 0.029747547 |
| 0.106819731  | 0.052512312 | 0.055538714 | 0.200468716 |
| 0.159825312  | 0.1909027   | 0.115448946 | 0.089762298 |
| 0.038878157  | 0.189115064 | 0.207604649 | 0.093999796 |
| 0.006830762  | 0.15138001  | 0.030264435 | 0.061474391 |
| 0.01213784   | 0.003015187 | 0.09860079  | 0.072959522 |

|             |             |             |             |
|-------------|-------------|-------------|-------------|
| 0.154881064 | 0.100348293 | 0.168825308 | 0.054342051 |
| 0.000847898 | 0.033105115 | 0.056654948 | 0.027281422 |
| 0.115889173 | 0.136317441 | 0.038356604 | 0.106952941 |
| 0.154328017 | 0.299552634 | 0.061370956 | 0.045504453 |
| 0.003541272 | 0.062769021 | 0.151078826 | 0.084237262 |
| 0.04352957  | 0.188886944 | 0.010036231 | 0.088056331 |
| 0.003808691 | 0.158811752 | 0.117037097 | 0.023644717 |
| 0.005122224 | 0.09094883  | 0.08559193  | 0.206539394 |
| 0.019266391 | 0.086332917 | 0.113086834 | 0.011472513 |
| 0.051454356 | 0.138468692 | 0.047473979 | 0.054454672 |
| 0.055619467 | 0.039737334 | 0.052451144 | 0.027415279 |
| 0.062633385 | 0.065272452 | 0.064587282 | 0.116913241 |
| 0.071778328 | 0.082586108 | 0.038084258 | 0.044404631 |
| 0.03260492  | 0.147133933 | 0.33498403  | 0.381550158 |
| 0.163783612 | 0.108681594 | 0.24144823  | 0.318367854 |
| 0.095140657 | 0.029647728 | 0.159734626 | 0.146854549 |
| 0.126170881 | 0.323245563 | 0.029964114 | 0.117013641 |
| 0.005964577 | 0.038002819 | 0.151673633 | 0.055724219 |
| 0.100742286 | 0.017660168 | 0.040695995 | 0.104354226 |
| 0.060078932 | 0.207958071 | 0.234142891 | 0.142358598 |
| 0.032924912 | 0.02312709  | 0.023872208 | 0.091576575 |
| 0.116053286 | 0.204036025 | 0.021784447 | 0.122257958 |
| 0.079384838 | 0.100513764 | 0.085634735 | 0.175576912 |
| 0.007365703 | 0.154947496 | 0.033629633 | 0.144005744 |
| 0.023075173 | 0.303215265 | 0.21099702  | 0.063534813 |
| 0.004266803 | 0.105816175 | 0.034563047 | 0.065203498 |
| 0.055633185 | 0.049809353 | 0.016483846 | 0.057765762 |
| 0.065130846 | 0.183603024 | 0.172109998 | 0.153801789 |
| 0.032479823 | 0.018552482 | 0.056623175 | 0.036022969 |
| 0.037501251 | 0.114282907 | 0.211352052 | 0.110751493 |
| 0.01985476  | 0.261454612 | 0.185701523 | 0.069787059 |
| 0.059636225 | 0.064798729 | 0.003452161 | 0.03024211  |
| 0.04778454  | 0.011732558 | 0.000312833 | 0.003091542 |
| 0.092391915 | 0.01798536  | 0.074911335 | 0.065136106 |
| 0.015471368 | 0.08509045  | 0.003780385 | 0.058788852 |
| 0.170021371 | 0.202194792 | 0.046203184 | 0.145293135 |
| 0.100896731 | 0.135233403 | 0.085360994 | 0.001378544 |
| 0.033065679 | 0.026138495 | 0.016699553 | 0.133592948 |
| 0.146933731 | 0.003972696 | 0.039493939 | 0.177687376 |
| 0.08625837  | 0.004521558 | 0.04978603  | 0.063403343 |
| 0.169898318 | 0.207961349 | 0.055282561 | 0.06881074  |
| 0.070358879 | 0.110481553 | 0.018825549 | 0.022480561 |
| 0.032420792 | 0.011570922 | 0.07880213  | 0.010293397 |
| 0.156278256 | 0.0317969   | 0.006065657 | 0.238167834 |
| 0.198122784 | 0.012877846 | 0.225682478 | 0.013478303 |
| 0.100411107 | 0.115349656 | 0.018502788 | 0.025185572 |
| 0.130995775 | 0.027216059 | 0.115226287 | 0.140757048 |
| 0.007359203 | 0.03375151  | 0.139175652 | 0.015075349 |
| 0.248056917 | 0.016285813 | 0.156390193 | 0.010810239 |
| 0.146909498 | 0.107743169 | 0.249808412 | 0.025749927 |
| 0.044123416 | 0.24261572  | 0.028782424 | 0.138529732 |
| 0.066705339 | 0.010339404 | 0.069595772 | 0.058509074 |
| 0.010367923 | 0.144206775 | 0.031844457 | 0.13806663  |
| 0.046320396 | 0.129318794 | 0.065139994 | 0.117484073 |

|               |             |             |             |
|---------------|-------------|-------------|-------------|
| 0.11522489    | 0.008702258 | 0.009128907 | 0.024342365 |
| 0.172343068   | 0.162528317 | 0.009707885 | 0.116367491 |
| 0.00629412    | 0.085823901 | 0.056710537 | 0.023992415 |
| 0.125303674   | 0.058812516 | 0.041612601 | 0.179331313 |
| 0.066223157   | 0.03286941  | 0.01775732  | 0.174009095 |
| 0.084280253   | 0.129356989 | 0.166144695 | 5.31E-06    |
| 0.104800861   | 0.056434866 | 0.101996127 | 0.022479843 |
| 0.29066946    | 0.06386967  | 0.065709078 | 0.061426455 |
| 0.076621425   | 0.011917926 | 0.024794211 | 0.027214343 |
| 0.010019747   | 0.152566746 | 0.170370268 | 0.107705057 |
| 0.104134901   | 0.017932116 | 0.011182435 | 0.141596984 |
| 0.004498807   | 0.008591496 | 0.010275591 | 0.068165987 |
| 0.006810032   | 0.020526504 | 0.018470441 | 0.015069656 |
| 0.101952566   | 0.066402074 |             |             |
| 1200014J11RIK | 0.111719588 | 0.159231536 | 0.120978565 |
| 1             | 0.139575563 | 0.098356844 | 0.05615904  |
| 0.061140637   | 0.110151224 | 0.018189071 | 0.199640065 |
| 0.048839652   | 0.002912038 | 0.22309684  | 0.04728147  |
| 0.122972986   | 0.058176478 | 0.130888095 | 0.002457454 |
| 0.01605364    | 0.126447996 | 0.041280286 | 0.095230835 |
| 0.088008315   | 0.245837159 | 0.122229492 | 0.057306456 |
| 0.21433217    | 0.011885496 | 0.163557608 | 0.01045689  |
| 0.283437037   | 0.133074485 | 0.060364398 | 0.055457029 |
| 0.10070844    | 0.000126969 | 0.260646927 | 0.131880078 |
| 0.022692842   | 0.260718092 | 0.048093406 | 0.204013115 |
| 0.064355112   | 0.096569668 | 0.00520991  | 0.100030045 |
| 0.099192464   | 0.057579081 | 0.088349379 | 0.15809661  |
| 0.035589245   | 0.204998841 | 0.105544472 | 0.001086115 |
| 0.049626232   | 0.002645349 | 0.017447019 | 0.239494615 |
| 0.277728473   | 0.15421596  | 0.007956708 | 0.045932111 |
| 0.070278534   | 0.105311916 | 0.157124949 | 0.036040649 |
| 0.25238476    | 0.012151295 | 0.121360344 | 0.037711407 |
| 0.080872845   | 0.03393617  | 0.24634532  | 0.066351777 |
| 0.049773819   | 0.196078111 | 0.128931514 | 0.053017771 |
| 0.168058562   | 0.256990337 | 0.168329011 | 0.225991183 |
| 0.002195997   | 0.08537058  | 0.061221315 | 0.209828569 |
| 0.113229528   | 0.029097746 | 0.24321779  | 0.274814612 |
| 0.032084131   | 0.066414844 | 0.125267154 | 0.109754126 |
| 0.191208972   | 0.014803593 | 0.071749628 | 0.03469884  |
| 0.137716387   | 0.108969311 | 0.196968264 | 0.265067038 |
| 0.070982898   | 0.117243108 | 0.22910778  | 0.09119769  |
| 0.151364132   | 0.18008375  | 0.046817802 | 0.164066696 |
| 0.172650182   | 0.231871892 | 0.136028437 | 0.15862023  |
| 0.104457046   | 0.254563088 | 0.24070918  | 0.164861887 |
| 0.002019571   | 0.229261156 | 0.259300658 | 0.068117074 |
| 0.067622462   | 0.078762437 | 0.016568976 | 0.21899005  |
| 0.214592235   | 0.156137275 | 0.156320214 | 0.176816127 |
| 0.197568637   | 0.211710968 | 0.214427652 | 0.180953426 |
| 0.091443823   | 0.015599898 | 0.120527858 | 0.058939487 |
| 0.139294149   | 0.109256432 | 0.07332833  | 0.257825843 |
| 0.312047215   | 0.18504457  | 0.095184307 | 0.262987743 |
| 0.049475113   | 0.291607564 | 0.188867781 | 0.258323927 |
| 0.276461121   | 0.264073989 | 0.274883632 | 0.153030922 |
| 0.265270354   | 0.218733339 | 0.000633729 | 0.164041767 |



|             |             |             |             |
|-------------|-------------|-------------|-------------|
| 0.279512633 | 0.006546772 | 0.174277334 | 0.197201957 |
| 0.230942672 | 0.187392479 | 0.237944793 | 0.221897631 |
| 0.219021408 | 0.121117343 | 0.000141641 | 0.165807092 |
| 0.253603765 | 0.307527279 | 0.037407985 | 0.087121698 |
| 0.107059567 | 0.10489514  | 0.130495032 | 0.019777299 |
| 0.276190456 | 0.217109659 | 0.184453409 | 0.146730013 |
| 0.059958741 | 0.257392141 | 0.066595259 | 0.244169948 |
| 0.062247638 | 0.141652802 | 0.133357206 | 0.141472431 |
| 0.037134403 | 0.213927134 | 0.088117361 | 0.074015224 |
| 0.23240027  | 0.059581684 | 0.037017183 | 0.144457034 |
| 0.109073491 | 0.111367567 | 0.183034598 | 0.136745418 |
| 0.093145012 | 0.194372237 | 0.051892215 | 0.118615705 |
| 0.137163281 | 0.204462825 | 0.121459853 | 0.216882005 |
| 0.050395305 | 0.254949839 | 0.150420669 | 0.268848311 |
| 0.294837788 | 0.122833361 | 0.169003614 | 0.087294174 |
| 0.030495331 | 0.01498106  | 0.014041449 | 0.076834734 |
| 0.187695876 | 0.046604808 | 0.119965786 | 0.195992598 |
| 0.180649029 | 0.046722461 | 0.051920762 | 0.276514041 |
| 0.147264192 | 0.121012739 | 0.233514872 | 0.080101648 |
| 0.021141117 | 0.199341996 | 0.205071836 | 0.015937424 |
| 0.115694823 | 0.011341603 | 0.030741314 | 0.223977336 |
| 0.01464993  | 0.033222888 | 0.198970456 | 0.163902888 |
| 0.013202118 | 0.147652356 | 0.235270066 | 0.000520735 |
| 0.056144751 | 0.050590191 | 0.248693598 | 0.037403315 |
| 0.223409887 | 0.178647443 | 0.096674365 | 0.097092454 |
| 0.191896621 | 0.231305911 | 0.20204305  | 0.23596735  |
| 0.045108353 | 0.246195914 | 0.205165024 | 0.254325727 |
| 0.179301697 | 0.039725716 | 0.007912417 | 0.229385678 |
| 0.219157765 | 0.010285649 | 0.124159804 | 0.123598654 |
| 0.042846608 | 0.13244502  | 0.017428025 | 0.271533213 |
| 0.286775479 | 0.201547859 | 0.099785052 | 0.182747183 |
| 0.307423993 | 0.258774148 | 0.182210697 | 0.236561734 |
| 0.015885033 | 0.081600768 | 0.079722056 | 0.23262629  |
| 0.267840906 | 0.038528467 | 0.184536183 | 0.010348221 |
| 0.001507279 | 0.080459086 | 0.146980115 | 0.162363784 |
| 0.046905477 | 0.077821915 | 0.142934474 | 0.235072765 |
| 0.15812339  | 0.23529581  | 0.115973933 | 0.109842231 |
| 0.22666511  | 0.05132911  | 0.091757442 | 0.114830841 |
| 0.182210284 | 0.07043551  | 0.063933863 | 0.275297033 |
| 0.064652446 | 0.046835238 | 0.067458358 | 0.012331564 |
| 0.066168752 | 0.118695235 | 0.158427928 | 0.258462763 |
| 0.20963025  | 0.257582363 | 0.223591231 | 0.026585054 |
| 0.219266512 | 0.169006474 | 0.038902344 | 0.197226554 |
| 0.179889955 | 0.166335173 | 0.175132799 | 0.178533264 |
| 0.155946805 | 0.116954089 | 0.183263812 | 0.140157483 |
| 0.081653062 | 0.072530445 | 0.03736831  | 0.142753885 |
| 0.00109619  | 0.240112639 | 0.076377603 | 0.249908688 |
| 0.136750386 | 0.127357127 | 0.077437733 | 0.08233323  |
| 0.064889668 | 0.025745363 | 0.032031536 | 0.06955211  |
| 0.148246347 | 0.055821813 | 0.040784637 | 0.02540234  |
| 0.249901168 | 0.233262111 | 0.046149797 | 0.252621393 |
| 0.216557033 | 0.121550709 | 0.174997797 | 0.183429634 |
| 0.089274336 | 0.00290707  | 0.045052668 | 0.009537898 |
| 0.009134376 | 0.180820688 | 0.039025373 | 0.063292704 |

|             |             |             |             |
|-------------|-------------|-------------|-------------|
| 0.259103788 | 0.038844615 | 0.274202106 | 0.250531103 |
| 0.209980509 | 0.235642547 | 0.261031104 | 0.07740767  |
| 0.264781684 | 0.001689357 | 0.228844784 | 0.192838963 |
| 0.040733222 | 0.01562467  | 0.006218155 | 0.2193203   |
| 0.136273425 | 0.100933951 | 0.232101863 | 0.049072326 |
| 0.107619022 | 0.08623568  | 0.071600866 | 0.06725391  |
| 0.145064693 | 0.137113162 | 0.027856159 | 0.204496778 |
| 0.162506207 | 0.147650021 | 0.0494301   | 0.117337341 |
| 0.115208899 | 0.102004299 | 0.097634125 | 0.019871848 |
| 0.151459675 | 0.155273729 | 0.233407121 | 0.225705829 |
| 0.284004967 | 0.181504738 | 0.025567299 | 0.01374217  |
| 0.152434266 | 0.120904191 | 0.018166822 | 0.116215427 |
| 0.22449244  | 0.165213966 | 0.300293415 | 0.320445579 |
| 0.263237063 | 0.270438919 | 0.073798569 | 0.204959667 |
| 0.070126313 | 0.001781543 | 0.138385356 | 0.136543931 |
| 0.000488807 | 0.078362867 | 0.290184299 | 0.025368743 |
| 0.036634842 | 0.033884525 | 0.04073932  | 0.048790387 |
| 0.21375554  | 0.112285875 | 0.104418925 | 0.113388015 |
| 0.077902711 | 0.014899108 | 0.116999334 | 0.061195549 |
| 0.004805071 | 0.219779759 | 0.263291276 | 0.043924437 |
| 0.09016474  | 0.105387372 | 0.1428042   | 0.205253038 |
| 0.259901911 | 0.230934511 | 0.021569199 | 0.052070034 |
| 0.249439889 | 0.056925729 | 0.225670612 | 0.21197888  |
| 0.255863779 | 0.273144017 | 0.268723618 | 0.048500348 |
| 0.105308674 | 0.154323244 | 0.09660951  | 0.050223167 |
| 0.228096408 | 0.085289684 | 0.220843895 | 0.064231015 |
| 0.15294065  | 0.169519099 | 0.061736279 | 0.127201454 |
| 0.095083809 | 0.190908269 | 0.176448137 | 0.21100155  |
| 0.109216646 | 0.029144002 | 0.072722588 | 0.20469079  |
| 0.20637629  | 0.01730186  | 0.192488427 | 0.053317746 |
| 0.173302418 | 0.003514624 | 0.152778097 | 0.289443424 |
| 0.194712673 | 0.098059106 | 0.09379451  | 0.118778121 |
| 0.169165007 | 0.055986216 | 0.061454877 | 0.169293001 |
| 0.215007597 | 0.139422487 | 0.241196457 | 0.213250486 |
| 0.1356895   | 0.133802119 | 0.031935761 | 0.117932037 |
| 0.134198673 | 0.109505604 | 0.090108575 | 0.129928699 |
| 0.183957479 | 0.228183361 | 0.2078676   | 0.209483931 |
| 0.084377893 | 0.08808277  | 0.077142863 | 0.155506144 |
| 0.038708365 | 0.055955509 | 0.04385996  | 0.131210472 |
| 0.013086189 | 0.017499271 | 0.196953395 | 0.103375476 |
| 0.235623611 | 0.244525505 | 0.300635706 | 0.040050805 |
| 0.000117079 | 0.120332176 | 0.210859449 | 0.123142742 |
| 0.188520531 | 0.19647663  | 0.005802484 | 0.104794019 |
| 0.284075849 | 0.140224302 | 0.066292435 | 0.019669408 |
| 0.007125601 | 0.113780529 | 0.213596159 | 0.092899588 |
| 0.118429752 | 0.064620582 | 0.022734639 | 0.189496959 |
| 0.003776388 | 0.267113113 | 0.268262232 | 0.015972385 |
| 0.015493811 | 0.171322446 | 0.186080976 | 0.082660877 |
| 0.069012895 | 0.168324517 | 0.196675968 | 0.005390628 |
| 0.179705671 | 0.030241661 | 0.132372496 | 0.203925852 |
| 0.142152496 | 0.084575568 | 0.156382045 | 0.107694445 |
| 0.116889548 | 0.132773757 | 0.199017028 | 0.261783262 |
| 0.152882111 | 0.116409048 | 0.124112051 | 0.093602886 |
| 0.127938677 | 0.178504792 | 0.158547364 | 0.161958134 |

|             |             |             |             |
|-------------|-------------|-------------|-------------|
| 0.057760733 | 0.176439433 | 0.274157575 | 0.153330223 |
| 0.166607955 | 0.060647121 | 0.297705642 | 0.209011188 |
| 0.246217731 | 0.143248204 | 0.064202944 | 0.217603135 |
| 0.003106335 | 0.015347809 | 0.047309832 | 0.127714857 |
| 0.161698927 | 0.048419414 | 0.072058595 | 0.155576976 |
| 0.105409443 | 0.306958573 | 0.262734755 | 0.237839118 |
| 0.125109242 | 0.047733356 | 0.036559602 | 0.105294372 |
| 0.217251939 | 0.1467538   | 0.119580817 | 0.033737982 |
| 0.174511589 | 0.066537539 | 0.216002268 | 0.252987994 |
| 0.027811776 | 0.257311134 | 0.016020601 | 0.108360386 |
| 0.018526603 | 0.192750229 | 0.203333377 | 0.14171863  |
| 0.022928217 | 0.130169686 | 0.1574661   | 0.058845848 |
| 0.164004303 | 0.112867248 | 0.039252522 | 0.066819613 |
| 0.104073549 | 0.190072225 | 0.207302167 | 0.105815424 |
| 0.092172169 | 0.084881545 | 0.064896517 | 0.155387212 |
| 0.116772477 | 0.215996627 | 0.125535077 | 0.2184515   |
| 0.086934295 | 0.158562101 | 0.282541538 | 0.082508318 |
| 0.051690097 | 0.05062926  | 0.024342752 | 0.041183829 |
| 0.052771726 | 0.043238094 | 0.000186891 | 0.004487202 |
| 0.252826982 | 0.022098803 | 0.121134396 | 0.123474409 |
| 0.068014802 | 0.197723942 | 0.004369252 | 0.081545576 |
| 0.205762675 | 0.233211445 | 0.069514395 | 0.225824899 |
| 0.175354733 | 0.146700116 | 0.137585374 | 0.00017075  |
| 0.114890149 | 0.086349129 | 0.023159438 | 0.064212444 |
| 0.021351145 | 0.031327359 | 0.119506534 | 0.061958826 |
| 0.213243634 | 0.009545453 | 0.065495354 | 0.164896499 |
| 0.123587562 | 0.249798244 | 0.076261076 | 0.229098379 |
| 0.006349028 | 0.161308427 | 0.061831228 | 0.04658122  |
| 0.107540698 | 0.076328496 | 0.259986955 | 0.07071397  |
| 0.092116594 | 0.057897313 | 0.002494804 | 0.300509216 |
| 0.223579371 | 0.067376457 | 0.197466951 | 0.011533514 |
| 0.242821313 | 0.168237734 | 0.014538975 | 0.067325535 |
| 0.049783396 | 0.140272994 | 0.166347392 | 0.247518239 |
| 0.02109864  | 0.069511136 | 0.071499785 | 0.057823995 |
| 0.23937668  | 0.022937928 | 0.165077202 | 0.02895519  |
| 0.216188369 | 0.141676909 | 0.16149939  | 0.029187636 |
| 0.070661876 | 0.119294841 | 0.044483538 | 0.232661825 |
| 0.161104468 | 0.078014787 | 0.217188423 | 0.150453161 |
| 0.049534533 | 0.185413725 | 0.07359268  | 0.206320001 |
| 0.056128779 | 0.241521697 | 0.162923402 | 0.196578869 |
| 0.243783664 | 0.038607359 | 0.04766073  | 0.096042051 |
| 0.23338839  | 0.079484838 | 0.023754719 | 0.228216992 |
| 0.045417698 | 0.167400968 | 0.061520271 | 0.083084075 |
| 0.036610866 | 0.040699893 | 0.07051715  | 0.177417669 |
| 0.171153384 | 0.141937445 | 0.06167813  | 0.305877972 |
| 0.095283779 | 0.082027316 | 0.284441053 | 0.002573313 |
| 0.159209836 | 0.21212463  | 0.156917068 | 0.089570964 |
| 0.292284798 | 0.111377198 | 0.107311928 | 0.006665427 |
| 0.185624078 | 0.019764615 | 0.044243547 | 0.097248799 |
| 0.008023531 | 0.066576858 | 0.253103853 | 0.2372282   |
| 0.144216734 | 0.00847407  | 0.019313896 | 0.204622258 |
| 0.010703903 | 0.023889537 | 0.026188105 | 0.129447551 |
| 0.039038498 | 0.050336803 | 0.050452968 | 0.071715376 |
| 0.190141505 | 0.076556355 |             |             |

|               |             |             |             |
|---------------|-------------|-------------|-------------|
| 1500032L24RIK | 0.051575314 | 0.269778367 | 0.029087563 |
| 0.139575563   | 1           | 0.196901379 | 0.055497077 |
| 0.102786396   | 0.215143111 | 0.112680091 | 0.251392875 |
| 0.021358295   | 0.200425169 | 0.347625999 | 0.058027048 |
| 0.298955277   | 0.053402058 | 0.097720519 | 0.061535723 |
| 0.159462882   | 0.302207699 | 0.263723623 | 0.14525554  |
| 0.301127473   | 0.132685414 | 0.169057483 | 0.229510375 |
| 0.354783504   | 0.164207937 | 0.29972018  | 0.091842729 |
| 0.323722509   | 0.32300947  | 0.236506194 | 0.01596737  |
| 0.219746989   | 0.043048861 | 0.307803982 | 0.26316267  |
| 0.29388599    | 0.26558767  | 0.116834246 | 0.231678287 |
| 0.155712814   | 0.02800751  | 0.075850739 | 0.291128488 |
| 0.177967845   | 0.214668294 | 0.030259481 | 0.280735737 |
| 0.201552808   | 0.217271773 | 0.196714563 | 0.001552774 |
| 0.27542906    | 0.143259725 | 0.230563748 | 0.345582158 |
| 0.177199037   | 0.140994285 | 0.164032873 | 0.141418125 |
| 0.228931522   | 0.295960749 | 0.231003111 | 0.163578467 |
| 0.360861608   | 0.259531786 | 0.304429492 | 0.150254991 |
| 0.187640613   | 0.020802318 | 0.144167642 | 0.042758649 |
| 0.239767733   | 0.205405615 | 0.273397964 | 0.306929468 |
| 0.254565399   | 0.37044237  | 0.190699528 | 0.319703365 |
| 0.174405243   | 0.299213768 | 0.32579192  | 0.308828798 |
| 0.269846074   | 0.06845554  | 0.324952385 | 0.387639245 |
| 0.032839222   | 0.154316547 | 0.259249019 | 0.069585701 |
| 0.291253144   | 0.240606533 | 0.148003661 | 0.290851983 |
| 0.360263199   | 0.277228633 | 0.319222411 | 0.233058899 |
| 0.279785545   | 0.037808785 | 0.296512824 | 0.310215238 |
| 0.274296198   | 0.052804947 | 0.288692093 | 0.368119762 |
| 0.27159287    | 0.359321321 | 0.275860482 | 0.288498695 |
| 0.265542706   | 0.369531152 | 0.293084605 | 0.301954895 |
| 0.065467287   | 0.363817777 | 0.138346421 | 0.06179791  |
| 0.036820869   | 0.115585536 | 0.230522527 | 0.27916303  |
| 0.369935363   | 0.231858322 | 0.135377614 | 0.253543524 |
| 0.409252678   | 0.288616939 | 0.354943635 | 0.309648397 |
| 0.037680184   | 0.260306226 | 0.267836583 | 0.163648803 |
| 0.272020142   | 0.086027928 | 0.317521715 | 0.335146382 |
| 0.306950852   | 0.371908898 | 0.092559094 | 0.339681133 |
| 0.134671685   | 0.405439552 | 0.291664153 | 0.155799422 |
| 0.365374758   | 0.324181174 | 0.420804911 | 0.365654872 |
| 0.333756474   | 0.187464805 | 0.042345631 | 0.285874315 |
| 0.406871259   | 0.046686687 | 0.360553063 | 0.38841521  |
| 0.334791444   | 0.370522051 | 0.424542477 | 0.392099915 |
| 0.33208163    | 0.05216697  | 0.02787104  | 0.296514455 |
| 0.342000868   | 0.325853803 | 0.175154391 | 0.22076719  |
| 0.295756791   | 0.179336426 | 0.320184144 | 0.194039377 |
| 0.408089086   | 0.358260679 | 0.355183654 | 0.265786716 |
| 0.137382278   | 0.243406256 | 0.245493105 | 0.287956701 |
| 0.059445376   | 0.070150957 | 0.028800643 | 0.254626925 |
| 0.137687002   | 0.184730767 | 0.168900204 | 0.250105577 |
| 0.186125463   | 0.15118669  | 0.245623212 | 0.361184578 |
| 0.031763278   | 0.212087092 | 0.124958183 | 0.09765611  |
| 0.064567632   | 0.109394757 | 0.158222694 | 0.166406195 |
| 0.254562423   | 0.142997711 | 0.285284583 | 0.387565472 |
| 0.234709389   | 0.121160376 | 0.267525911 | 0.396164936 |

|             |             |             |             |
|-------------|-------------|-------------|-------------|
| 0.390158902 | 0.283039304 | 0.185333978 | 0.029757643 |
| 0.222040939 | 0.16695187  | 0.253965603 | 0.237654579 |
| 0.120510506 | 0.187253466 | 0.260140126 | 0.385812351 |
| 0.130895363 | 0.075564417 | 0.244217238 | 0.313282704 |
| 0.088528395 | 0.280637356 | 0.378746201 | 0.185972505 |
| 0.004640235 | 0.203876373 | 0.346747722 | 0.256939457 |
| 0.199370467 | 0.213883662 | 0.258006209 | 0.373607197 |
| 0.232702082 | 0.279574742 | 0.381043003 | 0.383061544 |
| 0.178280176 | 0.127108684 | 0.410417844 | 0.063062134 |
| 0.250736201 | 0.149822614 | 0.297985997 | 0.120930517 |
| 0.183110436 | 0.278603141 | 0.301122274 | 0.32208852  |
| 0.069696826 | 0.360067049 | 0.304903762 | 0.382755086 |
| 0.22856145  | 0.409654953 | 0.371728693 | 0.358948805 |
| 0.256726488 | 0.208918288 | 0.220159314 | 0.338111136 |
| 0.371783594 | 0.176791287 | 0.041489894 | 0.31470328  |
| 0.177809909 | 0.332013001 | 0.259840726 | 0.398751611 |
| 0.371392628 | 0.280138124 | 0.170397769 | 0.37981338  |
| 0.322722659 | 0.157899559 | 0.344483971 | 0.413033777 |
| 0.135731263 | 0.25196997  | 0.28129661  | 0.418865866 |
| 0.136986563 | 0.279460809 | 0.251344227 | 0.246536503 |
| 0.021000894 | 0.048394322 | 0.042869445 | 0.217439939 |
| 0.324906772 | 0.220917701 | 0.313388118 | 0.377697869 |
| 0.111433908 | 0.323796398 | 0.177352134 | 0.250556659 |
| 0.290852825 | 0.243993047 | 0.275309046 | 0.302572312 |
| 0.204332937 | 0.043269733 | 0.14164989  | 0.367989179 |
| 0.018539107 | 0.30562505  | 0.163258001 | 0.006875446 |
| 0.034807526 | 0.235974601 | 0.063381297 | 0.148364444 |
| 0.419370689 | 0.141714947 | 0.134320306 | 0.129065019 |
| 0.319915185 | 0.080205571 | 0.018868112 | 0.362654922 |
| 0.342910452 | 0.326994946 | 0.332129239 | 0.297589797 |
| 0.337319142 | 0.289445482 | 0.363884405 | 0.151081368 |
| 0.098226168 | 0.052512529 | 0.284971041 | 0.253559333 |
| 0.002872131 | 0.358925288 | 0.263792775 | 0.122947913 |
| 0.336966403 | 0.227405243 | 0.037135347 | 0.286310892 |
| 0.021576402 | 0.238547436 | 0.154552939 | 0.206573279 |
| 0.362464527 | 0.014481815 | 0.139731756 | 0.234638714 |
| 0.274384081 | 0.245982231 | 0.259610428 | 0.378587751 |
| 0.246577511 | 0.062471259 | 0.288816585 | 0.353808174 |
| 0.072099914 | 0.066249505 | 0.164351132 | 0.019597284 |
| 0.1196317   | 0.314464792 | 0.229381997 | 0.058249513 |
| 0.206370165 | 0.006108184 | 0.257251339 | 0.383849475 |
| 0.286903205 | 0.408600001 | 0.373072319 | 0.306068805 |
| 0.363373136 | 0.142767995 | 0.382944514 | 0.267047575 |
| 0.155778669 | 0.001387283 | 0.011688591 | 0.389338807 |
| 0.262269209 | 0.0290533   | 0.130713482 | 0.170425822 |
| 0.139323814 | 0.072841963 | 0.064794291 | 0.337308034 |
| 0.251858192 | 0.289798384 | 0.290069705 | 0.295064464 |
| 0.218257522 | 0.208277556 | 0.15588717  | 0.055339711 |
| 0.278945307 | 0.064791981 | 0.056529321 | 0.020971472 |
| 0.345379894 | 0.068153937 | 0.286817439 | 0.353257079 |
| 0.387602675 | 0.362851653 | 0.133947248 | 0.178435528 |
| 0.351810072 | 0.044445517 | 0.211262931 | 0.051420639 |
| 0.314447761 | 0.300327993 | 0.289945446 | 0.23800042  |
| 0.400926398 | 0.344366399 | 0.036272155 | 0.34432718  |

|             |             |             |             |
|-------------|-------------|-------------|-------------|
| 0.020441782 | 0.009551435 | 0.154656358 | 0.205231081 |
| 0.083599308 | 0.251003809 | 0.223895584 | 0.157648467 |
| 0.201493916 | 0.027513096 | 0.294701867 | 0.306325333 |
| 0.261811783 | 0.252019174 | 0.315148684 | 0.181555479 |
| 0.304655139 | 0.251905061 | 0.221798523 | 0.146612809 |
| 0.159815325 | 0.213960759 | 0.134023593 | 0.023696332 |
| 0.1994003   | 0.246478384 | 0.053591665 | 0.12050613  |
| 0.366938076 | 0.383031231 | 0.058518428 | 0.03132383  |
| 0.206549768 | 0.233394167 | 0.406332876 | 0.331661269 |
| 0.354272887 | 0.410152768 | 0.294300785 | 0.18993537  |
| 0.062887816 | 0.275050174 | 0.315298958 | 0.236253027 |
| 0.36931062  | 0.03096558  | 0.326268628 | 0.302181707 |
| 0.092818264 | 0.195283495 | 0.059093414 | 0.07989668  |
| 0.285914011 | 0.148195573 | 0.235041815 | 0.079578767 |
| 0.254393905 | 0.318905561 | 0.047853441 | 0.163933634 |
| 0.261226709 | 0.28553405  | 0.127581549 | 0.170526026 |
| 0.252598837 | 0.086453016 | 0.334370123 | 0.366158062 |
| 0.089667329 | 0.074761433 | 0.124795681 | 0.301556586 |
| 0.323383207 | 0.174179936 | 0.030849121 | 0.275855413 |
| 0.389959455 | 0.282844156 | 0.333551481 | 0.367777772 |
| 0.060682253 | 0.269079018 | 0.249089284 | 0.2585036   |
| 0.14362943  | 0.190280974 | 0.19887593  | 0.049399259 |
| 0.25413505  | 0.335791063 | 0.293364502 | 0.185035985 |
| 0.215897551 | 0.056101055 | 0.025222247 | 0.325671443 |
| 0.312537036 | 0.069632404 | 0.126666048 | 0.338283476 |
| 0.016260059 | 0.268670155 | 0.402761554 | 0.202397422 |
| 0.385842942 | 0.397799759 | 0.34509641  | 0.162870151 |
| 0.010833558 | 0.326563415 | 0.281163692 | 0.249651691 |
| 0.281644652 | 0.248497831 | 0.11256492  | 0.112191759 |
| 0.282416353 | 0.042028279 | 0.158463624 | 0.16659634  |
| 0.201606894 | 0.209450173 | 0.191057549 | 0.137258713 |
| 0.248833083 | 0.045280544 | 0.307081371 | 0.19646707  |
| 0.226085243 | 0.227689954 | 0.315492529 | 0.101547901 |
| 0.197461797 | 0.35192574  | 0.282010476 | 0.025710875 |
| 0.275540169 | 0.333149285 | 0.355840412 | 0.003988713 |
| 0.335566036 | 0.012999326 | 0.234535436 | 0.25417708  |
| 0.243621493 | 0.212651945 | 0.280586184 | 0.311883424 |
| 0.212405624 | 0.197946569 | 0.237722363 | 0.220238228 |
| 0.22264981  | 0.17116823  | 0.284210904 | 0.195217016 |
| 0.28399792  | 0.112033279 | 0.065680484 | 0.061684945 |
| 0.07010565  | 0.327848544 | 0.198668282 | 0.04269645  |
| 0.208232583 | 0.202356459 | 0.329803123 | 0.314587819 |
| 0.375804117 | 0.060005563 | 0.223940739 | 0.298388195 |
| 0.112317918 | 0.15133097  | 0.036120263 | 0.206414994 |
| 0.175618968 | 0.2736359   | 0.179570422 | 0.142799065 |
| 0.238735916 | 0.310942208 | 0.190125478 | 0.35328667  |
| 0.272878167 | 0.192183539 | 0.109489251 | 0.137985281 |
| 0.134922326 | 0.093466003 | 0.32008206  | 0.004093343 |
| 0.255980516 | 0.137608227 | 0.362717075 | 0.322270384 |
| 0.259358485 | 0.330838516 | 0.11352177  | 0.074689942 |
| 0.099726207 | 0.10151613  | 0.112066473 | 0.30216474  |
| 0.242673289 | 0.166952441 | 0.30357454  | 0.131502866 |
| 0.346694511 | 0.293424928 | 0.281922961 | 0.15274426  |
| 0.19307945  | 0.121348226 | 0.320550089 | 0.069075733 |

|               |             |             |             |
|---------------|-------------|-------------|-------------|
| 0.223125818   | 0.329450523 | 0.146439734 | 0.262782238 |
| 0.254455268   | 0.384764301 | 0.044766111 | 0.388831476 |
| 0.254759378   | 0.08983667  | 0.378009792 | 0.170389094 |
| 0.189305013   | 0.206499415 | 0.272445653 | 0.161856488 |
| 0.196062035   | 0.26953754  | 0.007064057 | 0.0887637   |
| 0.315722609   | 0.170505233 | 0.242338572 | 0.29137021  |
| 0.328308569   | 0.342624877 | 0.229938377 | 0.153320342 |
| 0.289847596   | 0.315143214 | 0.199715935 | 0.234679426 |
| 0.255696468   | 0.109028306 | 0.188984529 | 0.017768305 |
| 0.259746778   | 0.246176852 | 0.167887074 | 0.059030675 |
| 0.025266808   | 0.271711377 | 0.238664718 | 0.034653528 |
| 0.413061665   | 0.233066547 | 0.178663405 | 0.311401594 |
| 0.1256663     | 0.317810535 | 0.196155652 | 0.344229942 |
| 0.02942738    | 0.209021012 | 0.256589658 | 0.193515752 |
| 0.271251981   | 0.314327838 | 0.35134747  | 0.319360482 |
| 0.045799039   | 0.281946119 | 0.004688229 | 0.291664118 |
| 0.286331556   | 0.276028372 | 0.161837203 | 0.118250225 |
| 0.289583396   | 0.305146067 | 0.209124019 | 0.208810804 |
| 0.027784051   | 0.307712217 | 0.169104101 | 0.291557094 |
| 0.175296386   | 0.19105801  | 0.09948527  | 0.272161029 |
| 0.276116693   | 0.207589879 | 0.210205769 | 0.204110619 |
| 0.322991275   | 0.265321111 | 0.091767123 | 0.283065078 |
| 0.204374462   | 0.041640309 | 0.152922295 | 0.388645467 |
| 0.209229601   | 0.331325359 | 0.403682327 | 0.208355463 |
| 0.282389077   | 0.270942974 | 0.214774694 | 0.368842299 |
| 0.151175416   | 0.218897173 | 0.358724367 | 0.326966243 |
| 0.308841922   | 0.307141528 | 0.289452014 | 0.266680763 |
| 0.286255207   | 0.097332619 | 0.288578876 | 0.262226237 |
| 0.290962056   | 0.267086698 | 0.143129712 | 0.282367074 |
| 0.055898877   | 0.15174436  | 0.216100917 | 0.109581209 |
| 0.231483232   | 0.278579804 | 0.317653361 | 0.334030886 |
| 0.185708008   | 0.05121418  | 0.372371666 | 0.057726756 |
| 0.152887468   | 0.324135941 | 0.184509339 | 0.287773169 |
| 0.137487553   | 0.204776464 | 0.139309616 | 0.001035853 |
| 0.357252569   | 0.151759933 | 0.240705962 | 0.286812553 |
| 0.218151102   | 0.040608201 | 0.326780525 | 0.416549525 |
| 0.209614816   | 0.197570802 | 0.21035726  | 0.320909041 |
| 0.286891344   | 0.208323328 | 0.223215575 | 0.219937019 |
| 0.307553131   | 0.154939072 | 0.201825704 | 0.256918623 |
| 0.26723667    | 0.170756408 |             |             |
| 1700022C21RIK | 0.048013539 | 0.425166569 | 0.046805839 |
| 0.098356844   | 0.196901379 | 1           | 0.024115242 |
| 0.055484426   | 0.286078318 | 0.115051009 | 0.266097216 |
| 0.0111103548  | 0.051554433 | 0.444591546 | 0.023034671 |
| 0.249976006   | 0.017007924 | 0.051486384 | 0.026829164 |
| 0.091147975   | 0.153778828 | 0.188386272 | 0.243285712 |
| 0.137932953   | 0.197829114 | 0.235570476 | 0.213603057 |
| 0.513040588   | 0.169837369 | 0.38485995  | 0.10786537  |
| 0.392219428   | 0.213921762 | 0.214174523 | 0.013304125 |
| 0.262513858   | 0.001998565 | 0.407942875 | 0.105938883 |
| 0.093857992   | 0.339940926 | 0.176668727 | 0.128853719 |
| 0.171848523   | 0.024604514 | 0.127437579 | 0.271543673 |
| 0.206734753   | 0.12138261  | 0.049106741 | 0.366262393 |
| 0.12739517    | 0.324725542 | 0.334666167 | 0.000820248 |

|             |             |             |             |
|-------------|-------------|-------------|-------------|
| 0.154389135 | 0.050481176 | 0.100332751 | 0.532373162 |
| 0.175366001 | 0.068828698 | 0.095369141 | 0.113704307 |
| 0.227076164 | 0.253193302 | 0.188950157 | 0.123357863 |
| 0.513227633 | 0.073819898 | 0.35460938  | 0.102752116 |
| 0.169452544 | 0.014530153 | 0.134183907 | 0.057685529 |
| 0.154566714 | 0.132521197 | 0.236432549 | 0.126683534 |
| 0.419113482 | 0.505231782 | 0.163183768 | 0.495734022 |
| 0.024102178 | 0.196909038 | 0.121299018 | 0.228193441 |
| 0.250059059 | 0.027338928 | 0.373891909 | 0.510770896 |
| 0.02046973  | 0.238405643 | 0.278940949 | 0.09424832  |
| 0.461574264 | 0.108522058 | 0.237090899 | 0.106957272 |
| 0.272658206 | 0.182864538 | 0.451114258 | 0.241467221 |
| 0.171136622 | 0.056160262 | 0.495838339 | 0.197400673 |
| 0.167161781 | 0.06547185  | 0.077884927 | 0.434359124 |
| 0.301268804 | 0.516980824 | 0.371097986 | 0.271789374 |
| 0.20734371  | 0.520498463 | 0.34909878  | 0.40347024  |
| 0.082294028 | 0.531672752 | 0.138597748 | 0.026004227 |
| 0.03867222  | 0.044899276 | 0.070311484 | 0.270827001 |
| 0.494750481 | 0.262257955 | 0.098841058 | 0.117733055 |
| 0.423388179 | 0.494323613 | 0.513305208 | 0.357843384 |
| 0.02192198  | 0.090428795 | 0.214436482 | 0.153213632 |
| 0.266561501 | 0.07013063  | 0.128026209 | 0.507289625 |
| 0.396004445 | 0.396758305 | 0.085513392 | 0.494752362 |
| 0.071074816 | 0.523080685 | 0.472339559 | 0.106702785 |
| 0.5235992   | 0.515834229 | 0.512173079 | 0.340509705 |
| 0.509381184 | 0.234581323 | 0.014202472 | 0.317566312 |
| 0.499237689 | 0.01208548  | 0.464523179 | 0.487589582 |
| 0.504355316 | 0.440792528 | 0.499602075 | 0.524378151 |
| 0.514585653 | 0.04998095  | 0.004966274 | 0.181519128 |
| 0.50713074  | 0.404913525 | 0.055341676 | 0.229335302 |
| 0.224104126 | 0.235317537 | 0.383477257 | 0.153364047 |
| 0.498680457 | 0.464859321 | 0.49325775  | 0.310058658 |
| 0.152016211 | 0.318888347 | 0.218379807 | 0.49415256  |
| 0.027061    | 0.068303181 | 0.050767749 | 0.227749873 |
| 0.182914085 | 0.112313045 | 0.16962443  | 0.187343571 |
| 0.140355763 | 0.169581986 | 0.157663622 | 0.295126616 |
| 0.055725868 | 0.309150635 | 0.106005023 | 0.092132652 |
| 0.022427794 | 0.139736914 | 0.087272284 | 0.106687923 |
| 0.137813894 | 0.231071872 | 0.363698955 | 0.482920503 |
| 0.129450812 | 0.170448631 | 0.344285872 | 0.480194418 |
| 0.40669805  | 0.243975678 | 0.181304752 | 0.014986073 |
| 0.090193172 | 0.104732968 | 0.077812472 | 0.260990231 |
| 0.181288434 | 0.08102983  | 0.22911697  | 0.354293352 |
| 0.192545511 | 0.067919173 | 0.12890502  | 0.441727277 |
| 0.127681737 | 0.165046221 | 0.421997646 | 0.233143141 |
| 0.003654474 | 0.183726347 | 0.433091636 | 0.049459881 |
| 0.202434498 | 0.086299918 | 0.173462135 | 0.436722796 |
| 0.108877463 | 0.082017477 | 0.508948642 | 0.337335683 |
| 0.16213526  | 0.214595497 | 0.509869766 | 0.011581316 |
| 0.17050752  | 0.038538605 | 0.216431623 | 0.163176114 |
| 0.169517904 | 0.209143131 | 0.199292931 | 0.133711288 |
| 0.127966343 | 0.514177758 | 0.393140245 | 0.523882333 |
| 0.135470224 | 0.508952705 | 0.446865255 | 0.448243989 |
| 0.289038896 | 0.147980645 | 0.070242093 | 0.412720272 |



|             |             |             |             |
|-------------|-------------|-------------|-------------|
| 0.435819814 | 0.091052689 | 0.069969942 | 0.382834206 |
| 0.132584027 | 0.295259928 | 0.049605507 | 0.484118304 |
| 0.504155536 | 0.475993006 | 0.070923605 | 0.301143658 |
| 0.379825287 | 0.174753002 | 0.392629421 | 0.510654848 |
| 0.101867313 | 0.162416988 | 0.126972084 | 0.364834511 |
| 0.136485508 | 0.074599658 | 0.290304172 | 0.086179275 |
| 0.023516964 | 0.047883768 | 0.04800505  | 0.082552801 |
| 0.082845084 | 0.297752216 | 0.285477106 | 0.509177377 |
| 0.065305779 | 0.449812496 | 0.163535326 | 0.11934463  |
| 0.392948566 | 0.147075967 | 0.260383894 | 0.279593088 |
| 0.197585159 | 0.01884548  | 0.079075065 | 0.505435808 |
| 0.032044188 | 0.122482376 | 0.159315212 | 0.004605066 |
| 0.021352854 | 0.380902729 | 0.091473431 | 0.195475745 |
| 0.471455439 | 0.203948844 | 0.150561789 | 0.105897271 |
| 0.298897943 | 0.064065271 | 0.008123604 | 0.462714533 |
| 0.457705819 | 0.418038228 | 0.453383541 | 0.442865902 |
| 0.381160671 | 0.345037894 | 0.341355979 | 0.272779767 |
| 0.047957195 | 0.044010317 | 0.075136223 | 0.12661584  |
| 0.00215311  | 0.37001069  | 0.163796107 | 0.11871378  |
| 0.350106894 | 0.192546301 | 0.025075847 | 0.225465468 |
| 0.021595415 | 0.106630667 | 0.111405391 | 0.083604386 |
| 0.269252011 | 0.010604119 | 0.157197143 | 0.116178923 |
| 0.471176063 | 0.341420646 | 0.154802706 | 0.53805592  |
| 0.22749131  | 0.110119458 | 0.157732077 | 0.370452518 |
| 0.033473838 | 0.027557407 | 0.136177344 | 0.02942333  |
| 0.154236618 | 0.435722608 | 0.147586008 | 0.03991642  |
| 0.186185112 | 0.005186354 | 0.381893101 | 0.534871406 |
| 0.491764769 | 0.503489534 | 0.529070425 | 0.145031303 |
| 0.520026279 | 0.050210078 | 0.535994469 | 0.387454735 |
| 0.138954795 | 0.001115139 | 0.004746594 | 0.487249045 |
| 0.233589619 | 0.063030478 | 0.114227463 | 0.229334368 |
| 0.060586189 | 0.075993676 | 0.036049062 | 0.085371474 |
| 0.359427389 | 0.142415761 | 0.079251776 | 0.460728438 |
| 0.108249858 | 0.140709231 | 0.168482996 | 0.071347843 |
| 0.300891062 | 0.033056227 | 0.062943729 | 0.01009882  |
| 0.283877725 | 0.112708244 | 0.471278892 | 0.518778297 |
| 0.495265349 | 0.317098219 | 0.135867106 | 0.189160436 |
| 0.402532564 | 0.102700743 | 0.175813081 | 0.096953456 |
| 0.503053516 | 0.264184475 | 0.296644928 | 0.305564359 |
| 0.481778185 | 0.471923072 | 0.017584268 | 0.338455676 |
| 0.024864105 | 0.00161174  | 0.232551925 | 0.186175552 |
| 0.015092179 | 0.160956452 | 0.218544119 | 0.074791734 |
| 0.088657454 | 0.025734744 | 0.102123964 | 0.08973641  |
| 0.191526538 | 0.174868168 | 0.151541281 | 0.178981252 |
| 0.103594955 | 0.0416431   | 0.101271357 | 0.062355984 |
| 0.075195257 | 0.287009131 | 0.200181834 | 0.009945744 |
| 0.248256525 | 0.247514966 | 0.036137111 | 0.132821548 |
| 0.449893382 | 0.495506937 | 0.015523146 | 0.010880034 |
| 0.23808784  | 0.113598228 | 0.497842684 | 0.516657539 |
| 0.530645254 | 0.501467792 | 0.391997189 | 0.043285591 |
| 0.040402971 | 0.193223654 | 0.165407103 | 0.045843838 |
| 0.522649238 | 0.048143564 | 0.516303658 | 0.16466689  |
| 0.079408238 | 0.098729112 | 0.027246865 | 0.047400762 |
| 0.273334336 | 0.131414054 | 0.095928353 | 0.124416495 |

|             |             |             |             |
|-------------|-------------|-------------|-------------|
| 0.125861945 | 0.122811034 | 0.021907441 | 0.122868401 |
| 0.275829322 | 0.06934575  | 0.104861743 | 0.138713678 |
| 0.331503733 | 0.074979307 | 0.337809799 | 0.434396546 |
| 0.110712332 | 0.056312468 | 0.143147511 | 0.310323267 |
| 0.413944413 | 0.230345336 | 0.043257584 | 0.45552918  |
| 0.493894828 | 0.356139668 | 0.526391449 | 0.339927905 |
| 0.062360057 | 0.237662038 | 0.109983858 | 0.175762123 |
| 0.107226884 | 0.243923479 | 0.115488254 | 0.042407467 |
| 0.266305433 | 0.462787824 | 0.386273985 | 0.095800709 |
| 0.290559827 | 0.094005153 | 0.041003799 | 0.445298888 |
| 0.069365441 | 0.050855137 | 0.18167094  | 0.380741931 |
| 0.002190551 | 0.07598088  | 0.454008056 | 0.141663505 |
| 0.497476814 | 0.464885968 | 0.449386033 | 0.119046531 |
| 0.000235832 | 0.293074086 | 0.282420117 | 0.183667444 |
| 0.417534871 | 0.337320341 | 0.074919377 | 0.040141737 |
| 0.263363192 | 0.084940202 | 0.052268728 | 0.20518499  |
| 0.058216254 | 0.290255468 | 0.151129604 | 0.107057018 |
| 0.084814367 | 0.066920447 | 0.141956879 | 0.140610403 |
| 0.043177687 | 0.203081217 | 0.311249357 | 0.126678115 |
| 0.081291416 | 0.379224657 | 0.3348055   | 0.019549155 |
| 0.212012248 | 0.349991494 | 0.432319494 | 0.000635947 |
| 0.360769831 | 0.005928913 | 0.098533482 | 0.120712886 |
| 0.095303294 | 0.079304758 | 0.161526267 | 0.130371323 |
| 0.215517068 | 0.096735834 | 0.147261291 | 0.180986707 |
| 0.091184649 | 0.118025934 | 0.252976782 | 0.162419721 |
| 0.149107955 | 0.073490631 | 0.10585256  | 0.115951872 |
| 0.04452221  | 0.483045407 | 0.246270687 | 0.080206267 |
| 0.153631884 | 0.136548898 | 0.340087554 | 0.502459126 |
| 0.424852138 | 0.128639531 | 0.133148873 | 0.467328646 |
| 0.077878622 | 0.149300633 | 0.031375221 | 0.246205413 |
| 0.150728525 | 0.104582071 | 0.24274706  | 0.213014392 |
| 0.306743576 | 0.406377832 | 0.242343058 | 0.4426374   |
| 0.178461221 | 0.139123246 | 0.139275155 | 0.051297849 |
| 0.093321284 | 0.099139883 | 0.147829669 | 0.002992728 |
| 0.26683376  | 0.156474936 | 0.470551389 | 0.506063576 |
| 0.126328994 | 0.392506538 | 0.166631623 | 0.045193294 |
| 0.135142933 | 0.1836889   | 0.112432712 | 0.37893923  |
| 0.112257143 | 0.104294728 | 0.17556804  | 0.198096861 |
| 0.3622125   | 0.323246632 | 0.095243834 | 0.102147485 |
| 0.126079145 | 0.159851385 | 0.446038892 | 0.070368919 |
| 0.27235971  | 0.095023946 | 0.238617813 | 0.143217155 |
| 0.092319953 | 0.511700408 | 0.044934752 | 0.519113213 |
| 0.131393573 | 0.120866126 | 0.488846854 | 0.191642247 |
| 0.150451702 | 0.083202085 | 0.091083055 | 0.152429392 |
| 0.084104806 | 0.163946245 | 0.006421832 | 0.02199619  |
| 0.274845418 | 0.098004364 | 0.334013569 | 0.268609537 |
| 0.100835308 | 0.269791845 | 0.096939294 | 0.126160979 |
| 0.491665197 | 0.503564116 | 0.11195098  | 0.195222834 |
| 0.272684002 | 0.060682067 | 0.35000792  | 0.003665053 |
| 0.271135395 | 0.28082875  | 0.145390721 | 0.027839858 |
| 0.010830197 | 0.088524286 | 0.253511172 | 0.044428577 |
| 0.45154718  | 0.113569149 | 0.220708533 | 0.399937988 |
| 0.13373801  | 0.501982146 | 0.057467598 | 0.369188964 |
| 0.013762127 | 0.182265633 | 0.203610949 | 0.171201776 |

|               |             |             |             |
|---------------|-------------|-------------|-------------|
| 0.116156241   | 0.123413753 | 0.319575826 | 0.11759039  |
| 0.01916463    | 0.123291397 | 0.000641026 | 0.412786679 |
| 0.461643495   | 0.150028851 | 0.185538741 | 0.115534423 |
| 0.223340373   | 0.355602041 | 0.083279497 | 0.244855194 |
| 0.013058886   | 0.247330543 | 0.138243413 | 0.457468573 |
| 0.108358242   | 0.177226564 | 0.044825788 | 0.137994878 |
| 0.466202473   | 0.097299854 | 0.209516318 | 0.112808252 |
| 0.510265261   | 0.369297904 | 0.160940581 | 0.109936995 |
| 0.252218346   | 0.051003264 | 0.180132623 | 0.511767088 |
| 0.092934927   | 0.101541512 | 0.420823859 | 0.084175238 |
| 0.137549998   | 0.39208715  | 0.254951323 | 0.497395818 |
| 0.032186072   | 0.191135609 | 0.378964444 | 0.425975424 |
| 0.262147029   | 0.066060024 | 0.112374553 | 0.088667678 |
| 0.488664552   | 0.082267549 | 0.088273582 | 0.304559654 |
| 0.089695239   | 0.236036629 | 0.221121784 | 0.08048733  |
| 0.028503953   | 0.067717123 | 0.223015061 | 0.101873706 |
| 0.176792253   | 0.197248871 | 0.089779001 | 0.387805287 |
| 0.101888692   | 0.025390181 | 0.447083399 | 0.007791878 |
| 0.282673305   | 0.335762953 | 0.171286868 | 0.17107309  |
| 0.195938965   | 0.210279933 | 0.180468798 | 0.000979908 |
| 0.359445574   | 0.034037135 | 0.123813004 | 0.105541107 |
| 0.106325721   | 0.024447475 | 0.492855322 | 0.506473555 |
| 0.250959233   | 0.15282209  | 0.159578588 | 0.467073653 |
| 0.072524089   | 0.139678031 | 0.121947005 | 0.324384413 |
| 0.109528015   | 0.172824879 | 0.18633661  | 0.184350065 |
| 0.345219552   | 0.133077383 |             |             |
| 1700040I03RIK | 0.156804016 | 0.100483508 | 0.118883937 |
| 0.05615904    | 0.055497077 | 0.024115242 | 1           |
| 0.138542131   | 0.117772551 | 0.009926109 | 0.057610797 |
| 0.165581616   | 0.003671023 | 0.122973001 | 0.191037231 |
| 0.046719876   | 0.183407536 | 0.250990411 | 0.027550729 |
| 0.051663575   | 0.065122897 | 0.011184717 | 0.047612199 |
| 0.058059782   | 0.292666259 | 0.086161777 | 0.025521691 |
| 0.098021442   | 0.002835819 | 0.04290134  | 0.003624402 |
| 0.206137505   | 0.050374765 | 0.013932322 | 0.108431453 |
| 0.044034824   | 0.009233187 | 0.222091067 | 0.067240322 |
| 0.00654971    | 0.230407858 | 0.017821612 | 0.08068572  |
| 0.027895038   | 0.127988647 | 0.002542746 | 0.051611261 |
| 0.084454902   | 0.057279384 | 0.187041734 | 0.057641418 |
| 0.025324634   | 0.116988741 | 0.050787896 | 0.013060859 |
| 0.009812133   | 0.000444231 | 0.004134377 | 0.128929978 |
| 0.238636327   | 0.206512604 | 0.006341205 | 0.091954985 |
| 0.052574177   | 0.083003147 | 0.19052699  | 0.018121206 |
| 0.125234041   | 0.008344043 | 0.047602467 | 0.031920558 |
| 0.048115416   | 0.176613908 | 0.321344405 | 0.230617304 |
| 0.020453572   | 0.165816671 | 0.053164439 | 0.017208598 |
| 0.093514429   | 0.192330117 | 0.202273137 | 0.1461945   |
| 0.019328577   | 0.037206709 | 0.026868112 | 0.171117074 |
| 0.112832283   | 0.153929169 | 0.080928561 | 0.1591891   |
| 0.185993703   | 0.033868636 | 0.08614859  | 0.270102455 |
| 0.092237494   | 0.011011518 | 0.021721131 | 0.008547837 |
| 0.056288356   | 0.049333317 | 0.17642497  | 0.17456157  |
| 0.043081945   | 0.247476562 | 0.163812056 | 0.031745401 |
| 0.03839659    | 0.199158582 | 0.03777922  | 0.066936188 |

|             |             |             |             |
|-------------|-------------|-------------|-------------|
| 0.058608823 | 0.10100491  | 0.08455339  | 0.144403067 |
| 0.035527991 | 0.116343529 | 0.079240465 | 0.12651473  |
| 0.001745871 | 0.126895629 | 0.157822552 | 0.167914214 |
| 0.146797484 | 0.155601768 | 0.035418695 | 0.226145053 |
| 0.082789183 | 0.125691683 | 0.138798596 | 0.120032268 |
| 0.097227686 | 0.139065297 | 0.125674286 | 0.110192849 |
| 0.201943891 | 0.010219803 | 0.033623472 | 0.05304798  |
| 0.101369848 | 0.295644614 | 0.022255297 | 0.175982009 |
| 0.166755393 | 0.081668161 | 0.111984674 | 0.211596775 |
| 0.140253519 | 0.157576736 | 0.078031233 | 0.184861825 |
| 0.162520005 | 0.159887937 | 0.134726365 | 0.045240143 |
| 0.156384785 | 0.057901609 | 0.030198478 | 0.136328945 |
| 0.156769541 | 0.003026369 | 0.079813092 | 0.090331228 |
| 0.122174098 | 0.066188199 | 0.134418885 | 0.102568084 |
| 0.120534892 | 0.294698706 | 0.002758582 | 0.129320624 |
| 0.145937874 | 0.134826858 | 0.103964588 | 0.025239219 |
| 0.055896557 | 0.043568518 | 0.070433244 | 0.009859911 |
| 0.192283733 | 0.091530193 | 0.086575122 | 0.104748802 |
| 0.077075656 | 0.238866966 | 0.020983867 | 0.158865082 |
| 0.148559156 | 0.141883411 | 0.227848956 | 0.180900529 |
| 0.0090846   | 0.219913017 | 0.042180241 | 0.064652056 |
| 0.240926814 | 0.054667107 | 0.008790128 | 0.056560906 |
| 0.291964705 | 0.030091465 | 0.17143679  | 0.194828534 |
| 0.169194582 | 0.361637626 | 0.07216242  | 0.078509005 |
| 0.104970053 | 0.323439188 | 0.047084369 | 0.1077605   |
| 0.038948148 | 0.221689543 | 0.066831158 | 0.152724555 |
| 0.200390924 | 0.029164336 | 0.269809671 | 0.037628693 |
| 0.027600958 | 0.007992093 | 0.005154805 | 0.025600349 |
| 0.336528607 | 0.066956264 | 0.062806915 | 0.066987434 |
| 0.090327846 | 0.152810748 | 0.024926869 | 0.217566046 |
| 0.256974831 | 0.033016236 | 0.107177151 | 0.040800987 |
| 0.069771374 | 0.084858555 | 0.078320642 | 0.053787526 |
| 0.145246974 | 0.008704213 | 0.004981848 | 0.101034809 |
| 0.011231296 | 0.030815233 | 0.090071017 | 0.068959067 |
| 0.017191668 | 0.267954375 | 0.132818221 | 0.004471075 |
| 0.040665003 | 0.035564839 | 0.163802611 | 0.020834712 |
| 0.171266767 | 0.201265677 | 0.041290351 | 0.032956833 |
| 0.181018003 | 0.138072611 | 0.123046053 | 0.109931803 |
| 0.014835824 | 0.138797705 | 0.07906118  | 0.117696556 |
| 0.10133914  | 0.022219956 | 0.003292013 | 0.080215233 |
| 0.090949237 | 0.01828769  | 0.257231289 | 0.058493491 |
| 0.026051767 | 0.057172106 | 0.049150437 | 0.130336587 |
| 0.194022571 | 0.12509145  | 0.121785478 | 0.106613862 |
| 0.132111445 | 0.136439257 | 0.103305532 | 0.151877245 |
| 0.011939187 | 0.040819273 | 0.026174615 | 0.119696978 |
| 0.237345    | 0.034286125 | 0.219589286 | 0.004374635 |
| 0.000888045 | 0.229175341 | 0.241726521 | 0.135547729 |
| 0.014638902 | 0.031176233 | 0.071326487 | 0.125708398 |
| 0.237441679 | 0.140328299 | 0.231301975 | 0.035874531 |
| 0.144769913 | 0.036049252 | 0.025479518 | 0.052890402 |
| 0.238129289 | 0.055371781 | 0.08483795  | 0.194955012 |
| 0.233413944 | 0.011121586 | 0.08484307  | 0.009421446 |
| 0.180235124 | 0.064362938 | 0.327602639 | 0.355936266 |
| 0.108818351 | 0.305222421 | 0.210844319 | 0.016484274 |

|             |             |             |             |
|-------------|-------------|-------------|-------------|
| 0.115838623 | 0.257610355 | 0.013220614 | 0.112338231 |
| 0.135447062 | 0.141113583 | 0.134228997 | 0.156287388 |
| 0.118172808 | 0.078649089 | 0.088821168 | 0.049914299 |
| 0.147962293 | 0.146829537 | 0.015586293 | 0.084284777 |
| 0.011757273 | 0.110159083 | 0.066392515 | 0.310388977 |
| 0.064262882 | 0.166611847 | 0.150714433 | 0.051426006 |
| 0.071356153 | 0.003180097 | 0.047553054 | 0.121304056 |
| 0.112729743 | 0.123255837 | 0.008281694 | 0.013998134 |
| 0.136301522 | 0.176881998 | 0.010542485 | 0.134033113 |
| 0.081744888 | 0.207119312 | 0.058409435 | 0.080911368 |
| 0.184716292 | 0.01055624  | 0.042581544 | 0.000657473 |
| 0.01030479  | 0.164334873 | 0.021222791 | 0.098752856 |
| 0.15043604  | 0.089901839 | 0.153340657 | 0.14258367  |
| 0.116280356 | 0.113810049 | 0.119976908 | 0.014832859 |
| 0.126222201 | 0.0008791   | 0.114423418 | 0.105179457 |
| 0.014063187 | 0.006679177 | 0.047122907 | 0.086301384 |
| 0.038025065 | 0.226388301 | 0.266146333 | 0.01120504  |
| 0.115977362 | 0.120253118 | 0.183011307 | 0.024659627 |
| 0.043231547 | 0.08185047  | 0.025080306 | 0.140795035 |
| 0.127238927 | 0.170168213 | 0.028400415 | 0.310038208 |
| 0.039697521 | 0.150633568 | 0.310141041 | 0.010040631 |
| 0.092436841 | 0.269995688 | 0.187098001 | 0.119827299 |
| 0.162087048 | 0.065030918 | 0.007620383 | 0.015894757 |
| 0.10592342  | 0.182999243 | 0.007686778 | 0.18492097  |
| 0.109847645 | 0.060025963 | 0.17452449  | 0.1931747   |
| 0.146167948 | 0.147167537 | 0.212696348 | 0.097152643 |
| 0.041484824 | 0.007255115 | 0.036726592 | 0.212416712 |
| 0.019458817 | 0.033560482 | 0.242252943 | 0.066724794 |
| 0.069359021 | 0.104376291 | 0.013659779 | 0.01810465  |
| 0.133375781 | 0.060899432 | 0.040996038 | 0.223830991 |
| 0.052005428 | 0.042688725 | 0.097100488 | 0.146180345 |
| 0.032748772 | 0.191127082 | 0.291670333 | 0.181189923 |
| 0.024836037 | 0.028337998 | 0.231239312 | 0.267816718 |
| 0.098414148 | 0.094876713 | 0.198754913 | 0.078114285 |
| 0.24132487  | 0.061938938 | 0.106850752 | 0.105871112 |
| 0.158274192 | 0.162045413 | 0.230240143 | 0.106115357 |
| 0.16439085  | 0.096994299 | 0.043379294 | 0.078648396 |
| 0.119401705 | 0.243674571 | 0.124227884 | 0.018843326 |
| 0.323481442 | 0.093743285 | 0.136858953 | 0.28864896  |
| 0.027370308 | 0.263184549 | 0.143527616 | 0.181715572 |
| 0.059619881 | 0.009977653 | 0.225880996 | 0.212509016 |
| 0.157099305 | 0.007049085 | 0.275267147 | 0.055730984 |
| 0.123586389 | 0.011223047 | 0.057251351 | 0.200957425 |
| 0.267651438 | 0.246755874 | 0.030113323 | 0.095800791 |
| 0.069339781 | 0.024739518 | 0.045680226 | 0.091722595 |
| 0.120544948 | 0.040214911 | 0.130378755 | 0.16411642  |
| 0.328863783 | 0.031579184 | 0.02081106  | 0.069020264 |
| 0.246431797 | 0.030548608 | 0.145696796 | 0.317193114 |
| 0.249709024 | 0.207228244 | 0.115357345 | 0.144787717 |
| 0.032847709 | 0.185736229 | 0.229493044 | 0.090593272 |
| 0.015593485 | 0.125928999 | 0.018399247 | 0.076758166 |
| 0.005662184 | 0.004823657 | 0.122535976 | 0.064668941 |
| 0.169011479 | 0.109122261 | 0.170759624 | 0.056760809 |
| 0.000601258 | 0.046391883 | 0.067107442 | 0.025690744 |

|             |             |             |             |
|-------------|-------------|-------------|-------------|
| 0.102491254 | 0.14110778  | 0.050268772 | 0.146111802 |
| 0.230336218 | 0.220873798 | 0.117570403 | 0.013906826 |
| 0.007333816 | 0.063569074 | 0.296698193 | 0.197396248 |
| 0.118771495 | 0.250093261 | 0.008560914 | 0.099677112 |
| 0.017743157 | 0.260059131 | 0.170074802 | 0.00978836  |
| 0.007026964 | 0.132822813 | 0.099239477 | 0.135727762 |
| 0.027856719 | 0.123965942 | 0.128900607 | 0.039251033 |
| 0.057352843 | 0.130946194 | 0.124048314 | 0.094832203 |
| 0.110411244 | 0.123721652 | 0.135797189 | 0.035580219 |
| 0.104008053 | 0.141023854 | 0.067084433 | 0.187413796 |
| 0.082451316 | 0.140930086 | 0.053695974 | 0.053923185 |
| 0.03398215  | 0.141051342 | 0.314711812 | 0.310721262 |
| 0.114117052 | 0.091858676 | 0.282034691 | 0.230561486 |
| 0.202941334 | 0.047106108 | 0.219714102 | 0.112937728 |
| 0.152979003 | 0.224537853 | 0.063685706 | 0.084039963 |
| 0.006494282 | 0.020410749 | 0.136251354 | 0.049480477 |
| 0.161284    | 0.025547402 | 0.031068766 | 0.089785848 |
| 0.069265027 | 0.222614478 | 0.269450155 | 0.151531595 |
| 0.041191684 | 0.052282131 | 0.010310964 | 0.111870594 |
| 0.152362105 | 0.307584293 | 0.051102054 | 0.051501312 |
| 0.114629942 | 0.033969419 | 0.079001313 | 0.137213284 |
| 0.009356867 | 0.183109177 | 0.008824836 | 0.13532691  |
| 0.00602881  | 0.241418204 | 0.323255879 | 0.060092821 |
| 0.003891345 | 0.10710923  | 0.071808348 | 0.018790571 |
| 0.064513761 | 0.060611371 | 0.037182937 | 0.122529262 |
| 0.161259035 | 0.182798038 | 0.179349745 | 0.133412782 |
| 0.030000081 | 0.025526295 | 0.045727365 | 0.070491998 |
| 0.108442409 | 0.107584608 | 0.251524353 | 0.105866057 |
| 0.04674398  | 0.291320536 | 0.20278813  | 0.0832819   |
| 0.037711928 | 0.06919922  | 0.00482843  | 0.024350153 |
| 0.084420387 | 0.010317231 | 0.000479097 | 0.014590577 |
| 0.151000721 | 0.034273052 | 0.075011813 | 0.118236709 |
| 0.036334867 | 0.172610666 | 0.00385943  | 0.108034008 |
| 0.125419048 | 0.168021293 | 0.046426413 | 0.274537173 |
| 0.153991533 | 0.163809459 | 0.049556056 | 0.009382678 |
| 0.040556061 | 0.025804722 | 0.011345491 | 0.18501649  |
| 0.165224441 | 0.005940039 | 0.047840771 | 0.25646884  |
| 0.105522282 | 0.002975272 | 0.063952843 | 0.053018996 |
| 0.283149594 | 0.175248305 | 0.103162683 | 0.076856591 |
| 0.13199046  | 0.197245353 | 0.02495418  | 0.035770655 |
| 0.033312865 | 0.024250973 | 0.110292262 | 0.015578785 |
| 0.171016633 | 0.039988909 | 0.039366423 | 0.23422919  |
| 0.161453606 | 0.026041392 | 0.317671749 | 0.008165998 |
| 0.181580055 | 0.145943396 | 0.042297095 | 0.021182578 |
| 0.082013874 | 0.03972651  | 0.207988866 | 0.105294173 |
| 0.004231083 | 0.064600879 | 0.10205555  | 0.042894324 |
| 0.198872138 | 0.029375199 | 0.276664563 | 0.008953328 |
| 0.112531112 | 0.104423484 | 0.189187699 | 0.034054981 |
| 0.054229712 | 0.312719591 | 0.01473004  | 0.144181998 |
| 0.139626572 | 0.0199542   | 0.083196868 | 0.103042128 |
| 0.02150361  | 0.137298064 | 0.032953337 | 0.145303598 |
| 0.117519649 | 0.213970869 | 0.081621685 | 0.126555203 |
| 0.202086351 | 0.027564865 | 0.013607145 | 0.06441028  |
| 0.1190872   | 0.079123984 | 0.022099728 | 0.1379956   |

|                |             |             |             |
|----------------|-------------|-------------|-------------|
| 0.012193095    | 0.147912249 | 0.049906756 | 0.069737884 |
| 0.110979212    | 0.106845556 | 0.018667872 | 0.280717506 |
| 0.134240258    | 0.051377685 | 0.036573897 | 0.204573216 |
| 0.061335704    | 0.069444186 | 0.193151217 | 0.001517878 |
| 0.05803183     | 0.058845973 | 0.16335989  | 0.037741379 |
| 0.263993784    | 0.098661723 | 0.066439228 | 0.051876299 |
| 0.108346967    | 0.007973155 | 0.045382992 | 0.035343517 |
| 0.01425583     | 0.176626931 | 0.141113267 | 0.116965482 |
| 0.128520406    | 0.012090215 | 0.006674386 | 0.134020209 |
| 0.007656093    | 0.006887789 | 0.014920391 | 0.053944845 |
| 0.010456839    | 0.016250032 | 0.017496074 | 0.011393493 |
| 0.101748448    | 0.084954984 |             |             |
| 1700047I17RIK1 | 0.15176485  | 0.169317459 | 0.102808372 |
| 0.061140637    | 0.102786396 | 0.055484426 | 0.138542131 |
| 1              | 0.168120936 | 0.02005817  | 0.113547494 |
| 0.094382657    | 0.010927556 | 0.224010396 | 0.136697089 |
| 0.092420373    | 0.127548232 | 0.223932057 | 0.036252254 |
| 0.049957053    | 0.10720099  | 0.026817441 | 0.095640456 |
| 0.096485113    | 0.300088989 | 0.120494012 | 0.060427872 |
| 0.185332987    | 0.010177204 | 0.102443012 | 0.008339994 |
| 0.288566041    | 0.099403423 | 0.039150498 | 0.0643744   |
| 0.089959603    | 0.00814712  | 0.295264323 | 0.090129381 |
| 0.014224142    | 0.30469754  | 0.039290786 | 0.106822836 |
| 0.05282798     | 0.096945825 | 0.007998292 | 0.100914193 |
| 0.119161781    | 0.078197077 | 0.150801083 | 0.114000395 |
| 0.047765137    | 0.201717373 | 0.100548985 | 0.02849448  |
| 0.029516272    | 0.002684099 | 0.012578446 | 0.225709192 |
| 0.280187335    | 0.208422364 | 0.014564542 | 0.120221743 |
| 0.097963113    | 0.139648894 | 0.242323715 | 0.035875391 |
| 0.222702131    | 0.01868849  | 0.106973008 | 0.043113808 |
| 0.074598306    | 0.11390073  | 0.313937944 | 0.185124386 |
| 0.040448581    | 0.20646218  | 0.107682732 | 0.036840772 |
| 0.161644694    | 0.296676231 | 0.229374946 | 0.235292236 |
| 0.023126517    | 0.079100928 | 0.048123706 | 0.226292007 |
| 0.167373486    | 0.112794402 | 0.157024811 | 0.262538004 |
| 0.135584963    | 0.071459473 | 0.143285251 | 0.250212486 |
| 0.171149943    | 0.022129507 | 0.052405166 | 0.020343702 |
| 0.112048467    | 0.08930455  | 0.261182922 | 0.235576523 |
| 0.084357166    | 0.184359186 | 0.251670528 | 0.070988517 |
| 0.073979527    | 0.17002117  | 0.048819075 | 0.143406185 |
| 0.110746248    | 0.195831462 | 0.154386905 | 0.204986785 |
| 0.078055547    | 0.211005559 | 0.143732156 | 0.213166879 |
| 0.006189082    | 0.225009107 | 0.180165478 | 0.126118415 |
| 0.143225668    | 0.15553668  | 0.045500419 | 0.29005415  |
| 0.165982197    | 0.212746368 | 0.180135539 | 0.146569071 |
| 0.177137033    | 0.225550735 | 0.218941168 | 0.195329266 |
| 0.150522089    | 0.019547027 | 0.071346945 | 0.083950129 |
| 0.166127474    | 0.267130923 | 0.046869339 | 0.269358937 |
| 0.260087622    | 0.154927788 | 0.132285687 | 0.309148076 |
| 0.153902698    | 0.264226315 | 0.153033291 | 0.196463231 |
| 0.260775321    | 0.254439107 | 0.238735769 | 0.104473001 |
| 0.258869654    | 0.099672429 | 0.025973318 | 0.204267977 |
| 0.268206396    | 0.004001417 | 0.16369949  | 0.17897746  |
| 0.210910261    | 0.142975366 | 0.235467895 | 0.199637692 |

|             |             |             |             |
|-------------|-------------|-------------|-------------|
| 0.216344899 | 0.244022701 | 0.002368273 | 0.185666702 |
| 0.239029833 | 0.21972091  | 0.11458761  | 0.061538304 |
| 0.106512813 | 0.083589351 | 0.140012177 | 0.027128244 |
| 0.305026809 | 0.178173033 | 0.174934492 | 0.181625939 |
| 0.098830866 | 0.325675686 | 0.052854848 | 0.245673304 |
| 0.120865428 | 0.151438246 | 0.188305624 | 0.235641241 |
| 0.02140721  | 0.244807739 | 0.08560015  | 0.109744114 |
| 0.270415238 | 0.092914527 | 0.027628347 | 0.122121754 |
| 0.220313349 | 0.073734422 | 0.174762402 | 0.189768558 |
| 0.120508448 | 0.341176548 | 0.09613136  | 0.085400369 |
| 0.159495423 | 0.332588631 | 0.111281079 | 0.199395438 |
| 0.06653264  | 0.22313161  | 0.137066613 | 0.265407056 |
| 0.300958121 | 0.069261868 | 0.298640647 | 0.02457025  |
| 0.043197586 | 0.01822514  | 0.013153272 | 0.063849926 |
| 0.323809284 | 0.077779257 | 0.116561572 | 0.137636496 |
| 0.139616486 | 0.143918602 | 0.050115461 | 0.322851299 |
| 0.236304911 | 0.065716502 | 0.200930712 | 0.082298607 |
| 0.031982052 | 0.125699296 | 0.155533717 | 0.057492428 |
| 0.188201364 | 0.01852825  | 0.016070237 | 0.179390618 |
| 0.027776468 | 0.051688406 | 0.181086214 | 0.137376587 |
| 0.040460851 | 0.290337214 | 0.236330766 | 0.007828176 |
| 0.074991325 | 0.056293627 | 0.22245622  | 0.043884671 |
| 0.194693216 | 0.267355609 | 0.084622896 | 0.063629027 |
| 0.198191052 | 0.237353735 | 0.216243972 | 0.206340058 |
| 0.033489821 | 0.241428424 | 0.1603695   | 0.211671388 |
| 0.160076998 | 0.049548571 | 0.008179491 | 0.157819003 |
| 0.167698843 | 0.035133581 | 0.200352524 | 0.125134253 |
| 0.047493595 | 0.120319012 | 0.071243897 | 0.224836517 |
| 0.303852743 | 0.204432079 | 0.145715673 | 0.182539219 |
| 0.218500183 | 0.180880505 | 0.186006249 | 0.259431767 |
| 0.019428147 | 0.075758498 | 0.048980701 | 0.203853893 |
| 0.240772284 | 0.045603928 | 0.298762873 | 0.011282176 |
| 0.000285994 | 0.208542479 | 0.200407484 | 0.163252511 |
| 0.029199119 | 0.075767157 | 0.127124985 | 0.227772581 |
| 0.22795282  | 0.24201217  | 0.254647865 | 0.05692786  |
| 0.227313076 | 0.072336529 | 0.064982769 | 0.112722241 |
| 0.28321975  | 0.03555389  | 0.079248143 | 0.297909465 |
| 0.171092835 | 0.027844424 | 0.13161816  | 0.004805895 |
| 0.122741591 | 0.126211159 | 0.267251955 | 0.351824395 |
| 0.206279038 | 0.311974083 | 0.222913895 | 0.028619596 |
| 0.20352439  | 0.223282246 | 0.009056922 | 0.193343199 |
| 0.222580384 | 0.221037197 | 0.221375904 | 0.238146264 |
| 0.193210661 | 0.143792818 | 0.158932037 | 0.096151819 |
| 0.140632837 | 0.141238366 | 0.024625203 | 0.11932948  |
| 0.007971449 | 0.196918065 | 0.113674503 | 0.294123424 |
| 0.1387352   | 0.218332577 | 0.117930979 | 0.102429871 |
| 0.048093615 | 0.010313466 | 0.062364948 | 0.158901893 |
| 0.183280412 | 0.07236169  | 0.016414181 | 0.027561057 |
| 0.225205589 | 0.252381541 | 0.030763409 | 0.235130657 |
| 0.140182065 | 0.176944189 | 0.091841191 | 0.161409934 |
| 0.152931129 | 0.019256303 | 0.06584705  | 0.001614906 |
| 0.029210364 | 0.255061069 | 0.04967948  | 0.080361066 |
| 0.184120031 | 0.048140182 | 0.226521715 | 0.249057128 |
| 0.200291601 | 0.211369512 | 0.220555047 | 0.038216974 |



|             |             |             |             |
|-------------|-------------|-------------|-------------|
| 0.221954104 | 0.003404934 | 0.212353514 | 0.172516458 |
| 0.033001856 | 0.004326049 | 0.025468777 | 0.171449951 |
| 0.083156662 | 0.182073455 | 0.253470374 | 0.027997893 |
| 0.100121014 | 0.114363304 | 0.168281993 | 0.039633651 |
| 0.100182983 | 0.131417108 | 0.043019586 | 0.231267572 |
| 0.14826927  | 0.206530374 | 0.058337156 | 0.253469465 |
| 0.094725637 | 0.104624661 | 0.245646537 | 0.008215586 |
| 0.161924916 | 0.255195222 | 0.276433401 | 0.213398423 |
| 0.272169765 | 0.133014314 | 0.021251882 | 0.035759626 |
| 0.184973479 | 0.160508522 | 0.022728305 | 0.168944572 |
| 0.19635159  | 0.11475732  | 0.257564179 | 0.254654851 |
| 0.248666485 | 0.245860791 | 0.148381432 | 0.165156589 |
| 0.029344481 | 0.004112738 | 0.072758406 | 0.275544197 |
| 0.018205886 | 0.063395145 | 0.274272505 | 0.075277548 |
| 0.085198412 | 0.08564756  | 0.029114945 | 0.037787126 |
| 0.179808515 | 0.107312235 | 0.079438721 | 0.253479687 |
| 0.07551614  | 0.047936365 | 0.126641959 | 0.16614174  |
| 0.05065346  | 0.231831263 | 0.296169033 | 0.101117213 |
| 0.056926821 | 0.071621888 | 0.186765397 | 0.279044061 |
| 0.184269245 | 0.186742367 | 0.104522863 | 0.046623808 |
| 0.302730671 | 0.105399579 | 0.208328305 | 0.195420927 |
| 0.259880752 | 0.265485948 | 0.32622646  | 0.106763099 |
| 0.147360469 | 0.137219396 | 0.084595832 | 0.077529557 |
| 0.220831056 | 0.184991036 | 0.21822187  | 0.045604132 |
| 0.286997716 | 0.102681303 | 0.106877122 | 0.243523366 |
| 0.070860895 | 0.288611148 | 0.171668845 | 0.178498507 |
| 0.08993278  | 0.026139581 | 0.17088593  | 0.226096379 |
| 0.230948018 | 0.012937773 | 0.277713155 | 0.090535847 |
| 0.186433193 | 0.017151083 | 0.121012188 | 0.291666744 |
| 0.250255587 | 0.197947277 | 0.04387978  | 0.172016192 |
| 0.140326438 | 0.056774841 | 0.043169878 | 0.166613511 |
| 0.221768691 | 0.096506175 | 0.226039106 | 0.261246578 |
| 0.262581331 | 0.072780645 | 0.042325027 | 0.113561806 |
| 0.260960704 | 0.067267255 | 0.188313946 | 0.248801313 |
| 0.314660523 | 0.302157944 | 0.188804055 | 0.166155382 |
| 0.078365182 | 0.179162533 | 0.162461581 | 0.174492366 |
| 0.023586638 | 0.100019846 | 0.040345474 | 0.150674063 |
| 0.005177503 | 0.011835167 | 0.214277865 | 0.10298736  |
| 0.270398576 | 0.19833659  | 0.261545422 | 0.082233285 |
| 0.000905955 | 0.097615286 | 0.127702014 | 0.056160707 |
| 0.185706422 | 0.219461402 | 0.064715863 | 0.114364354 |
| 0.291294514 | 0.193694831 | 0.099070921 | 0.03155677  |
| 0.009919235 | 0.12046479  | 0.313743604 | 0.193310706 |
| 0.145012737 | 0.19852793  | 0.02045497  | 0.142597646 |
| 0.022858981 | 0.312688912 | 0.243235207 | 0.022431355 |
| 0.016132082 | 0.220204311 | 0.164612456 | 0.097752285 |
| 0.066781294 | 0.189774211 | 0.221954787 | 0.009545644 |
| 0.125669932 | 0.075350897 | 0.160299562 | 0.131365672 |
| 0.136511661 | 0.153045022 | 0.190914006 | 0.063154738 |
| 0.154967855 | 0.162905867 | 0.111355583 | 0.232207026 |
| 0.10336465  | 0.188166013 | 0.110110597 | 0.08093211  |
| 0.065649201 | 0.137954525 | 0.277374124 | 0.267245924 |
| 0.102775998 | 0.179403901 | 0.327671575 | 0.195019895 |
| 0.245919768 | 0.079456137 | 0.305459535 | 0.198785241 |

|               |             |             |             |
|---------------|-------------|-------------|-------------|
| 0.258325169   | 0.199346699 | 0.09974449  | 0.162097475 |
| 0.015713867   | 0.046431737 | 0.126360921 | 0.091145689 |
| 0.226884246   | 0.041420377 | 0.070866714 | 0.124826891 |
| 0.123845707   | 0.30282729  | 0.3241871   | 0.239689755 |
| 0.084152147   | 0.081139121 | 0.024581094 | 0.098687007 |
| 0.157296374   | 0.269255352 | 0.08822232  | 0.021352272 |
| 0.178491234   | 0.056366731 | 0.160641041 | 0.224210462 |
| 0.026302717   | 0.273736303 | 0.019548692 | 0.104685268 |
| 0.013905645   | 0.23600907  | 0.315740025 | 0.128810213 |
| 0.013030244   | 0.133763602 | 0.120561503 | 0.039183761 |
| 0.133377561   | 0.115108555 | 0.05593994  | 0.164313413 |
| 0.188644631   | 0.197317433 | 0.266923584 | 0.141399261 |
| 0.070100988   | 0.040659101 | 0.083370693 | 0.103257874 |
| 0.144471484   | 0.20149315  | 0.211514925 | 0.203394771 |
| 0.076001305   | 0.272443664 | 0.310173248 | 0.133195179 |
| 0.06280315    | 0.084888646 | 0.013522268 | 0.050699915 |
| 0.088545278   | 0.028614114 | 0.001256734 | 0.023338113 |
| 0.218569935   | 0.051555112 | 0.131250541 | 0.182769049 |
| 0.059461801   | 0.244405623 | 0.011504133 | 0.151382307 |
| 0.209470654   | 0.261100877 | 0.064323763 | 0.309605046 |
| 0.227899801   | 0.160812114 | 0.105323148 | 0.012930203 |
| 0.08867055    | 0.065501592 | 0.024169293 | 0.154522699 |
| 0.097678162   | 0.01572112  | 0.095557273 | 0.189987329 |
| 0.19815775    | 0.011173065 | 0.10267945  | 0.121711563 |
| 0.282122982   | 0.270954375 | 0.118505231 | 0.154510621 |
| 0.082190037   | 0.239344032 | 0.055450776 | 0.066169981 |
| 0.048943553   | 0.049952137 | 0.1848209   | 0.035949943 |
| 0.12415703    | 0.054753696 | 0.013339943 | 0.313814512 |
| 0.240255026   | 0.052213374 | 0.32210819  | 0.017826659 |
| 0.241927215   | 0.219319313 | 0.06064543  | 0.054023615 |
| 0.049976862   | 0.086594972 | 0.260444764 | 0.189891022 |
| 0.011948333   | 0.099750571 | 0.094854676 | 0.075961085 |
| 0.284703335   | 0.046047557 | 0.321735852 | 0.018697516 |
| 0.202387222   | 0.173142519 | 0.191443967 | 0.058072276 |
| 0.09757731    | 0.243776432 | 0.037970032 | 0.247586731 |
| 0.166600348   | 0.041058499 | 0.164698768 | 0.116496704 |
| 0.048156172   | 0.230142173 | 0.071207702 | 0.244164613 |
| 0.106536937   | 0.281018057 | 0.157590581 | 0.219798221 |
| 0.28771858    | 0.043572561 | 0.03119383  | 0.089038495 |
| 0.201989578   | 0.0733332   | 0.038872787 | 0.213341394 |
| 0.025520629   | 0.21689486  | 0.084785446 | 0.099613252 |
| 0.084675114   | 0.132733156 | 0.04532785  | 0.265855426 |
| 0.195621937   | 0.088191952 | 0.053045702 | 0.305139171 |
| 0.077998306   | 0.051660894 | 0.299679883 | 0.002571802 |
| 0.107732349   | 0.120709738 | 0.220174024 | 0.079777262 |
| 0.279626581   | 0.154818523 | 0.097659497 | 0.020070386 |
| 0.178244235   | 0.012488288 | 0.074326969 | 0.053300982 |
| 0.031210525   | 0.132525188 | 0.231871676 | 0.218412923 |
| 0.194243088   | 0.028176696 | 0.018574096 | 0.220354554 |
| 0.014530066   | 0.02040534  | 0.033063091 | 0.107139295 |
| 0.025384146   | 0.039301611 | 0.046291228 | 0.032232195 |
| 0.164217014   | 0.133161556 |             |             |
| 1700102P08RIK | 0.111391195 | 0.407753094 | 0.099312706 |
| 0.110151224   | 0.215143111 | 0.286078318 | 0.117772551 |

|             | 1           | 0.314382335 | 0.24313346  |
|-------------|-------------|-------------|-------------|
| 0.168120936 | 0.062434569 | 0.382259912 | 0.11103483  |
| 0.035888981 | 0.059455101 | 0.149261761 | 0.115691036 |
| 0.273304505 | 0.199114321 | 0.215609794 | 0.314685552 |
| 0.270966952 | 0.222478985 | 0.33309844  | 0.302135799 |
| 0.227829883 | 0.170172655 | 0.294497009 | 0.177352363 |
| 0.434753591 | 0.217913892 | 0.264228384 | 0.041972919 |
| 0.379114325 | 0.031965684 | 0.436325982 | 0.200569503 |
| 0.307595483 | 0.327558278 | 0.311740932 | 0.181060868 |
| 0.096663962 | 0.067384598 | 0.190354004 | 0.317979249 |
| 0.328433921 | 0.290093135 | 0.127623537 | 0.327618952 |
| 0.344743768 | 0.281897523 | 0.336677108 | 0.003660559 |
| 0.328227208 | 0.059144366 | 0.156201179 | 0.458922911 |
| 0.1896551   | 0.138099436 | 0.253404564 | 0.313705429 |
| 0.193271944 | 0.317824936 | 0.261294792 | 0.324403213 |
| 0.335034474 | 0.126627553 | 0.328871085 | 0.140346511 |
| 0.426586864 | 0.103756093 | 0.187828509 | 0.185065355 |
| 0.323859252 | 0.182060149 | 0.240914633 | 0.225737314 |
| 0.308124173 | 0.488806547 | 0.258820999 | 0.48145532  |
| 0.403339886 | 0.242762132 | 0.214633636 | 0.258387393 |
| 0.12021256  | 0.183421292 | 0.280995403 | 0.461841445 |
| 0.332066926 | 0.338828515 | 0.330939881 | 0.193871124 |
| 0.133541665 | 0.255593088 | 0.31143808  | 0.105062189 |
| 0.376203286 | 0.243381157 | 0.482684474 | 0.238554191 |
| 0.267231828 | 0.137976274 | 0.481481175 | 0.217502183 |
| 0.25051548  | 0.130419094 | 0.179116304 | 0.361888039 |
| 0.187902651 | 0.413002325 | 0.373076149 | 0.312353817 |
| 0.301186605 | 0.424612238 | 0.291577064 | 0.381147484 |
| 0.259014765 | 0.473175712 | 0.189756236 | 0.062771856 |
| 0.17062819  | 0.118449156 | 0.255946099 | 0.2761336   |
| 0.136030662 | 0.295509537 | 0.195165206 | 0.194837225 |
| 0.378241503 | 0.465998453 | 0.480265951 | 0.330489455 |
| 0.364834134 | 0.221656657 | 0.259808721 | 0.279895272 |
| 0.074493095 | 0.184942256 | 0.17016194  | 0.483008478 |
| 0.303037277 | 0.3238018   | 0.216979389 | 0.493512889 |
| 0.315487082 | 0.438660033 | 0.391545598 | 0.159121804 |
| 0.26774279  | 0.464611238 | 0.424775052 | 0.263561724 |
| 0.473779036 | 0.260176749 | 0.118600922 | 0.340428828 |
| 0.433392996 | 0.009008483 | 0.397623561 | 0.416774979 |
| 0.405787867 | 0.347041756 | 0.446442089 | 0.428412243 |
| 0.452407628 | 0.138194676 | 0.046140572 | 0.227990037 |
| 0.458581942 | 0.312902058 | 0.171704384 | 0.288537511 |
| 0.466039283 | 0.306134463 | 0.336028344 | 0.179887646 |
| 0.265558469 | 0.373657735 | 0.419163075 | 0.327981061 |
| 0.455201381 | 0.304375174 | 0.269370082 | 0.456499817 |
| 0.349831892 | 0.142124217 | 0.104182648 | 0.302473057 |
| 0.07563049  | 0.170645852 | 0.305194585 | 0.305272536 |
| 0.288854433 | 0.332844038 | 0.230535649 | 0.258526784 |
| 0.18761058  | 0.303409435 | 0.202730251 | 0.21760089  |
| 0.122041252 | 0.189464539 | 0.143471772 | 0.134848423 |
| 0.060881292 | 0.311154616 | 0.321245344 | 0.421131874 |
| 0.19790246  | 0.207884172 | 0.319620389 | 0.404142527 |
| 0.309719531 | 0.248571684 | 0.250974743 | 0.009925019 |
| 0.35433028  | 0.286660198 | 0.136239628 | 0.299908997 |
| 0.189754601 |             |             |             |

|             |             |             |             |
|-------------|-------------|-------------|-------------|
| 0.250385488 | 0.210922617 | 0.291719979 | 0.262526293 |
| 0.248858402 | 0.240309373 | 0.269243867 | 0.403601185 |
| 0.21427121  | 0.196530798 | 0.339788767 | 0.340241817 |
| 0.011280038 | 0.255588304 | 0.330082441 | 0.145068016 |
| 0.313907405 | 0.08075307  | 0.143093957 | 0.377535334 |
| 0.217825933 | 0.187578077 | 0.413737136 | 0.276101832 |
| 0.253959895 | 0.302980533 | 0.455020162 | 0.050784276 |
| 0.299082429 | 0.036272    | 0.221209401 | 0.334010035 |
| 0.233968578 | 0.261331714 | 0.218800267 | 0.194101038 |
| 0.167761096 | 0.464397295 | 0.331114822 | 0.427697348 |
| 0.266394345 | 0.459256258 | 0.347355192 | 0.345682835 |
| 0.29996192  | 0.301397111 | 0.089642615 | 0.317504704 |
| 0.366927136 | 0.266895678 | 0.143071114 | 0.342662727 |
| 0.326665625 | 0.288676102 | 0.12129766  | 0.406654943 |
| 0.453716754 | 0.456266791 | 0.139876633 | 0.274786898 |
| 0.279159181 | 0.206553544 | 0.34466069  | 0.46555415  |
| 0.31588279  | 0.259247534 | 0.226029004 | 0.298774527 |
| 0.190880712 | 0.17519767  | 0.323949439 | 0.134750634 |
| 0.004922614 | 0.15095105  | 0.112589645 | 0.139411919 |
| 0.109327437 | 0.329918453 | 0.305147495 | 0.447282424 |
| 0.138147361 | 0.363184476 | 0.287479218 | 0.189773443 |
| 0.381169504 | 0.281270823 | 0.257073792 | 0.281069926 |
| 0.262391003 | 0.02148655  | 0.092390352 | 0.486856718 |
| 0.107822765 | 0.146160384 | 0.324618887 | 0.002245334 |
| 0.09062553  | 0.369180337 | 0.161708892 | 0.237731687 |
| 0.385896351 | 0.241788793 | 0.223608004 | 0.318591336 |
| 0.26009038  | 0.137039118 | 0.002902131 | 0.437032529 |
| 0.469616511 | 0.451699228 | 0.47093473  | 0.469453398 |
| 0.410594161 | 0.342529384 | 0.308626435 | 0.294942682 |
| 0.142165029 | 0.163205729 | 0.142391096 | 0.222030653 |
| 0.009781846 | 0.28079633  | 0.267040251 | 0.168484929 |
| 0.31062243  | 0.298103858 | 0.064619715 | 0.277028799 |
| 0.02933842  | 0.116730142 | 0.307556743 | 0.234898806 |
| 0.276778386 | 0.038313381 | 0.149690823 | 0.224569476 |
| 0.394315378 | 0.305289183 | 0.253727851 | 0.471312062 |
| 0.231666242 | 0.202345187 | 0.219869127 | 0.282595799 |
| 0.112231967 | 0.133315115 | 0.345103745 | 0.029772675 |
| 0.181573635 | 0.454243506 | 0.304104604 | 0.105649842 |
| 0.225976895 | 0.012231762 | 0.320612486 | 0.465719834 |
| 0.441488384 | 0.431376275 | 0.42095747  | 0.160244598 |
| 0.435370716 | 0.086391954 | 0.456833451 | 0.349559777 |
| 0.297507864 | 0.000869222 | 0.009606906 | 0.391897714 |
| 0.262586776 | 0.125551571 | 0.179948076 | 0.242981721 |
| 0.106178314 | 0.205457986 | 0.115230656 | 0.125937074 |
| 0.307407289 | 0.17772035  | 0.135512034 | 0.44851016  |
| 0.215759813 | 0.225696746 | 0.343426389 | 0.159743199 |
| 0.287573623 | 0.075828693 | 0.171083811 | 0.005227587 |
| 0.281564679 | 0.174970373 | 0.477028697 | 0.451863333 |
| 0.425237716 | 0.272652623 | 0.273854714 | 0.253595446 |
| 0.387799986 | 0.160716791 | 0.268345913 | 0.176137412 |
| 0.433520695 | 0.267478189 | 0.246963652 | 0.257914836 |
| 0.419663185 | 0.406583159 | 0.068596303 | 0.30081578  |
| 0.016178723 | 0.003112274 | 0.287892113 | 0.274720116 |
| 0.142701633 | 0.267145385 | 0.237655285 | 0.315368332 |

|             |             |             |             |
|-------------|-------------|-------------|-------------|
| 0.264084022 | 0.046722507 | 0.185205011 | 0.168609897 |
| 0.241546992 | 0.26915621  | 0.181374311 | 0.295567097 |
| 0.220855145 | 0.117284368 | 0.188452481 | 0.192154292 |
| 0.293404412 | 0.307894127 | 0.220617832 | 0.058052035 |
| 0.313435783 | 0.270404348 | 0.092206081 | 0.194005254 |
| 0.331401704 | 0.391841703 | 0.081301596 | 0.010935834 |
| 0.251143527 | 0.275511936 | 0.402645374 | 0.445158654 |
| 0.48166881  | 0.448387623 | 0.379292431 | 0.128501077 |
| 0.102179882 | 0.259848416 | 0.207300756 | 0.098747165 |
| 0.439086007 | 0.138920353 | 0.443859445 | 0.203798882 |
| 0.174289264 | 0.200178247 | 0.043149122 | 0.137591824 |
| 0.255818712 | 0.19494285  | 0.154616606 | 0.184757014 |
| 0.231202436 | 0.163774045 | 0.100932947 | 0.196592125 |
| 0.291150086 | 0.116636373 | 0.187136519 | 0.318528617 |
| 0.327274372 | 0.309780028 | 0.303132811 | 0.39443674  |
| 0.171680616 | 0.190162345 | 0.231780965 | 0.329091332 |
| 0.349474475 | 0.331998334 | 0.025244217 | 0.42186024  |
| 0.416860775 | 0.299424225 | 0.450990334 | 0.317594516 |
| 0.152711022 | 0.234465917 | 0.264517072 | 0.261300407 |
| 0.219931659 | 0.292956628 | 0.251463575 | 0.115733902 |
| 0.306848818 | 0.476009198 | 0.368404891 | 0.145010327 |
| 0.324300342 | 0.207288517 | 0.131061174 | 0.390261593 |
| 0.121042893 | 0.104771925 | 0.321149957 | 0.352890676 |
| 0.002036243 | 0.090927396 | 0.431061055 | 0.195425219 |
| 0.479722898 | 0.39201631  | 0.378428669 | 0.293705382 |
| 0.002566549 | 0.298941957 | 0.25116942  | 0.257864015 |
| 0.375756093 | 0.298626091 | 0.227717892 | 0.08566222  |
| 0.247034189 | 0.137846391 | 0.133316363 | 0.26105557  |
| 0.142503901 | 0.329432912 | 0.209481867 | 0.272225582 |
| 0.185141776 | 0.192761211 | 0.157963651 | 0.212531639 |
| 0.170061164 | 0.217489284 | 0.267862191 | 0.31128888  |
| 0.111375795 | 0.381604103 | 0.319619103 | 0.054026165 |
| 0.257434919 | 0.358936432 | 0.382144981 | 0.003497691 |
| 0.284955171 | 0.015139628 | 0.166104399 | 0.158023275 |
| 0.172718125 | 0.200522725 | 0.211680253 | 0.209557909 |
| 0.321519741 | 0.221838673 | 0.194774057 | 0.200183715 |
| 0.133353974 | 0.244575845 | 0.292036939 | 0.326712696 |
| 0.172171668 | 0.14211791  | 0.162342904 | 0.177395716 |
| 0.056716254 | 0.406502909 | 0.238485578 | 0.131973745 |
| 0.218288755 | 0.335815008 | 0.299094485 | 0.456637751 |
| 0.350346732 | 0.176523431 | 0.296748169 | 0.366613228 |
| 0.226518366 | 0.243727065 | 0.120421314 | 0.322536719 |
| 0.215484621 | 0.132763111 | 0.340168631 | 0.284512754 |
| 0.348342565 | 0.370560145 | 0.230184743 | 0.393723474 |
| 0.264386744 | 0.33446869  | 0.276460788 | 0.076127244 |
| 0.174112954 | 0.199297311 | 0.18045743  | 0.004058715 |
| 0.280286366 | 0.222250067 | 0.36348585  | 0.449406358 |
| 0.204062554 | 0.337334917 | 0.251101358 | 0.107871232 |
| 0.250020658 | 0.239172541 | 0.176458583 | 0.335187089 |
| 0.133242184 | 0.185156503 | 0.216221607 | 0.280614554 |
| 0.31208714  | 0.341188596 | 0.230854065 | 0.270028191 |
| 0.268033265 | 0.238252964 | 0.480215572 | 0.18093687  |
| 0.315049184 | 0.118895449 | 0.352334151 | 0.208484968 |
| 0.188086883 | 0.449304351 | 0.111319426 | 0.446650032 |

|               |             |             |             |
|---------------|-------------|-------------|-------------|
| 0.243688506   | 0.193186207 | 0.44780764  | 0.303319649 |
| 0.285519993   | 0.108903748 | 0.120400576 | 0.340897434 |
| 0.242560722   | 0.228548358 | 0.02026348  | 0.049285136 |
| 0.24498157    | 0.343963597 | 0.352545127 | 0.32353103  |
| 0.187786889   | 0.277114489 | 0.122563097 | 0.299740472 |
| 0.462493255   | 0.488169956 | 0.172966511 | 0.246231884 |
| 0.2937113     | 0.114480841 | 0.311831196 | 0.037371939 |
| 0.296333278   | 0.296117319 | 0.300713132 | 0.092664398 |
| 0.043744748   | 0.134866847 | 0.312048458 | 0.162217598 |
| 0.389760654   | 0.127103474 | 0.361632725 | 0.311560144 |
| 0.241952258   | 0.483064907 | 0.121171961 | 0.272010469 |
| 0.144124911   | 0.267458249 | 0.289628603 | 0.336452229 |
| 0.136786255   | 0.193111464 | 0.265232269 | 0.141390942 |
| 0.052860874   | 0.189043612 | 0.005577262 | 0.391809103 |
| 0.472953163   | 0.246581398 | 0.234962676 | 0.306737079 |
| 0.22907369    | 0.357260124 | 0.205625838 | 0.313490296 |
| 0.014806306   | 0.235196847 | 0.206330237 | 0.334743855 |
| 0.138594561   | 0.335053189 | 0.063644133 | 0.256217608 |
| 0.472497649   | 0.203977208 | 0.26948629  | 0.21428039  |
| 0.445986592   | 0.362834909 | 0.218139306 | 0.192490156 |
| 0.356939126   | 0.126464593 | 0.314281598 | 0.471733203 |
| 0.15205457    | 0.13312119  | 0.320496084 | 0.167241106 |
| 0.221407405   | 0.359594299 | 0.336969212 | 0.483144488 |
| 0.074506674   | 0.217573451 | 0.313437866 | 0.413437301 |
| 0.243641189   | 0.134203173 | 0.152350199 | 0.172347296 |
| 0.421399891   | 0.089999307 | 0.209874155 | 0.290123039 |
| 0.13668199    | 0.262626395 | 0.354031613 | 0.153878791 |
| 0.043639874   | 0.212038551 | 0.255451402 | 0.189205953 |
| 0.239542603   | 0.261274497 | 0.188638391 | 0.336722365 |
| 0.094150787   | 0.021730792 | 0.402861858 | 0.009837287 |
| 0.283824548   | 0.259755835 | 0.231873159 | 0.259319544 |
| 0.198155073   | 0.31910135  | 0.306155667 | 0.002619736 |
| 0.319193059   | 0.045347648 | 0.28041408  | 0.144397387 |
| 0.210183464   | 0.097071082 | 0.412595984 | 0.421076476 |
| 0.303102312   | 0.285690684 | 0.227643326 | 0.423604148 |
| 0.096963093   | 0.250528629 | 0.269212732 | 0.336477237 |
| 0.146532553   | 0.30671589  | 0.307191781 | 0.239149458 |
| 0.314969778   | 0.275763867 |             |             |
| 1810020D17RIK | 0.014107753 | 0.389413812 | 0.016542843 |
| 0.018189071   | 0.112680091 | 0.115051009 | 0.009926109 |
| 0.02005817    | 0.314382335 | 1           | 0.114937826 |
| 0.001485567   | 0.027551271 | 0.317966071 | 0.008530097 |
| 0.197589839   | 0.002770864 | 0.023323195 | 0.028922016 |
| 0.067058782   | 0.09186937  | 0.077515768 | 0.174251745 |
| 0.099324853   | 0.109279477 | 0.206235004 | 0.25080944  |
| 0.414988922   | 0.116661774 | 0.247876257 | 0.14046318  |
| 0.26931443    | 0.130838077 | 0.189156058 | 0.002245596 |
| 0.17888298    | 0.009417479 | 0.320092466 | 0.052247549 |
| 0.033392704   | 0.207113939 | 0.242177774 | 0.044906344 |
| 0.235615589   | 0.005504367 | 0.179875765 | 0.299095188 |
| 0.221476095   | 0.073143041 | 0.026462814 | 0.288236834 |
| 0.128394839   | 0.164544699 | 0.387547083 | 0.000227476 |
| 0.109038044   | 0.057081745 | 0.094290487 | 0.397765985 |
| 0.067406171   | 0.021574537 | 0.177772091 | 0.105440779 |

|             |             |             |             |
|-------------|-------------|-------------|-------------|
| 0.274744763 | 0.247181224 | 0.112010098 | 0.173525809 |
| 0.366520139 | 0.052720325 | 0.350592058 | 0.030454276 |
| 0.147849106 | 0.010263484 | 0.062102889 | 0.053033528 |
| 0.131401926 | 0.047580376 | 0.115262219 | 0.108691205 |
| 0.402570886 | 0.381220852 | 0.103152764 | 0.41968351  |
| 0.042030196 | 0.168238032 | 0.0603783   | 0.141616095 |
| 0.256267143 | 0.022501851 | 0.213414017 | 0.379824529 |
| 0.01566179  | 0.327004911 | 0.280952227 | 0.065424097 |
| 0.337404385 | 0.120240351 | 0.270469075 | 0.035580823 |
| 0.203325376 | 0.148021212 | 0.397757282 | 0.117404421 |
| 0.111367615 | 0.032862664 | 0.397953739 | 0.148137447 |
| 0.056349218 | 0.026798652 | 0.045728505 | 0.377569598 |
| 0.223247835 | 0.374033361 | 0.379344841 | 0.236900795 |
| 0.175091395 | 0.372971083 | 0.214541421 | 0.319223628 |
| 0.181978273 | 0.423440414 | 0.05249589  | 0.003522856 |
| 0.020219826 | 0.010248384 | 0.080233476 | 0.16051349  |
| 0.355854378 | 0.159887139 | 0.041802042 | 0.058957052 |
| 0.337235146 | 0.404253646 | 0.441876365 | 0.27995416  |
| 0.005384319 | 0.104142584 | 0.174431611 | 0.064646478 |
| 0.210064358 | 0.041225261 | 0.082193893 | 0.390022845 |
| 0.217557525 | 0.302549496 | 0.0424478   | 0.373584867 |
| 0.066084545 | 0.34912607  | 0.394349843 | 0.036658967 |
| 0.387119659 | 0.376712156 | 0.355135589 | 0.2276571   |
| 0.337679721 | 0.111743275 | 0.042035941 | 0.277269908 |
| 0.31244812  | 0.002054366 | 0.399734227 | 0.408208441 |
| 0.409268678 | 0.355331521 | 0.386731373 | 0.39426619  |
| 0.413850197 | 0.025492165 | 0.03526672  | 0.111313463 |
| 0.39858188  | 0.23310897  | 0.022087255 | 0.229426835 |
| 0.175725144 | 0.146485043 | 0.337491279 | 0.070286523 |
| 0.34509224  | 0.33889571  | 0.413906893 | 0.268817999 |
| 0.214057375 | 0.181560467 | 0.234640228 | 0.369856041 |
| 0.004568    | 0.024458652 | 0.022794177 | 0.178006817 |
| 0.141408196 | 0.042948468 | 0.123593483 | 0.196590602 |
| 0.057473468 | 0.14524858  | 0.138071871 | 0.200969301 |
| 0.036830179 | 0.240506898 | 0.049633311 | 0.062459341 |
| 0.003232905 | 0.077407112 | 0.024653545 | 0.020160762 |
| 0.063867321 | 0.169497448 | 0.313277894 | 0.384569376 |
| 0.144699286 | 0.089222464 | 0.265316927 | 0.312512711 |
| 0.245011625 | 0.163664574 | 0.112363854 | 4.18E-05    |
| 0.058021966 | 0.183146507 | 0.069998053 | 0.246141769 |
| 0.118576619 | 0.046432684 | 0.196317776 | 0.209664664 |
| 0.099743262 | 0.057833083 | 0.115604212 | 0.274193392 |
| 0.08979799  | 0.057201944 | 0.288856178 | 0.267540756 |
| 5.40E-05    | 0.108749347 | 0.306361167 | 0.029206756 |
| 0.186529317 | 0.025774857 | 0.060742006 | 0.346016425 |
| 0.094621974 | 0.05910764  | 0.393925084 | 0.223409943 |
| 0.088331776 | 0.175019968 | 0.396002427 | 0.03197681  |
| 0.192588428 | 0.003539932 | 0.106072301 | 0.274233557 |
| 0.089668952 | 0.135913796 | 0.127303385 | 0.055204387 |
| 0.057960456 | 0.401016557 | 0.254065023 | 0.38387397  |
| 0.112708502 | 0.396899821 | 0.328624641 | 0.280583898 |
| 0.177707714 | 0.219195253 | 0.048430673 | 0.290764197 |
| 0.344015452 | 0.10699617  | 0.042906561 | 0.38307226  |
| 0.216470538 | 0.243019192 | 0.018092185 | 0.342734343 |

|             |             |             |             |
|-------------|-------------|-------------|-------------|
| 0.336736191 | 0.416613018 | 0.017722746 | 0.205583727 |
| 0.201818047 | 0.066117527 | 0.292657982 | 0.389511223 |
| 0.180673554 | 0.151097343 | 0.086882288 | 0.234047941 |
| 0.061422203 | 0.047062866 | 0.204915892 | 0.071466261 |
| 0.005003973 | 0.02670924  | 0.019854862 | 0.026141143 |
| 0.031497009 | 0.337969268 | 0.226846224 | 0.394720854 |
| 0.02271485  | 0.271817491 | 0.139209615 | 0.04979634  |
| 0.31101203  | 0.143243724 | 0.18350572  | 0.19529448  |
| 0.121718735 | 0.001139499 | 0.012821344 | 0.379118921 |
| 0.022716796 | 0.049916016 | 0.131640961 | 0.000274737 |
| 0.007729581 | 0.417702616 | 0.060573646 | 0.110266367 |
| 0.33703596  | 0.119416562 | 0.090090238 | 0.16692912  |
| 0.150075083 | 0.023376656 | 0.000666315 | 0.409485251 |
| 0.423572795 | 0.400839682 | 0.428964541 | 0.398879822 |
| 0.382972687 | 0.311388782 | 0.276501559 | 0.158439293 |
| 0.015201123 | 0.024885405 | 0.048394253 | 0.075920569 |
| 0.001460155 | 0.199274262 | 0.118328319 | 0.049672901 |
| 0.287671363 | 0.158508171 | 0.004250391 | 0.185033792 |
| 0.002029714 | 0.062775433 | 0.084537908 | 0.054431614 |
| 0.193084991 | 0.001665029 | 0.060216337 | 0.090000524 |
| 0.314561373 | 0.207224091 | 0.132146321 | 0.410481763 |
| 0.099602444 | 0.090748394 | 0.084754725 | 0.213193207 |
| 0.00970484  | 0.070817414 | 0.144840943 | 0.030941579 |
| 0.062296888 | 0.36864956  | 0.131454518 | 0.011732699 |
| 0.092118434 | 9.64E-05    | 0.22987392  | 0.393201962 |
| 0.399754481 | 0.392515757 | 0.358717491 | 0.072337875 |
| 0.375902292 | 0.083250321 | 0.417421701 | 0.305581354 |
| 0.199410273 | 0.000663204 | 0.000143911 | 0.375741909 |
| 0.17213923  | 0.040976332 | 0.049395607 | 0.086409828 |
| 0.012189389 | 0.046999824 | 0.010392696 | 0.031014656 |
| 0.231047381 | 0.060883701 | 0.034541275 | 0.386226468 |
| 0.0610317   | 0.073361795 | 0.181663157 | 0.043839043 |
| 0.199215534 | 0.005540909 | 0.04672582  | 0.000466544 |
| 0.19699621  | 0.072655289 | 0.3747011   | 0.406609835 |
| 0.331009916 | 0.204286041 | 0.190853057 | 0.085971112 |
| 0.353697205 | 0.064554735 | 0.128660524 | 0.057933933 |
| 0.397268534 | 0.190177249 | 0.141014803 | 0.160306277 |
| 0.345128871 | 0.325455789 | 0.00411168  | 0.254479719 |
| 0.001000037 | 0.000463671 | 0.162806257 | 0.126927082 |
| 0.058395157 | 0.152479748 | 0.116270534 | 0.083201407 |
| 0.057953239 | 0.003441951 | 0.090890294 | 0.071101143 |
| 0.111256044 | 0.130202219 | 0.086826954 | 0.154104823 |
| 0.065878604 | 0.02563026  | 0.033819115 | 0.025866393 |
| 0.100180255 | 0.210898466 | 0.110270823 | 0.002770272 |
| 0.240790559 | 0.186756682 | 0.010118173 | 0.060647754 |
| 0.280534353 | 0.361512668 | 0.005750272 | 0.000580065 |
| 0.129657579 | 0.101866825 | 0.359079929 | 0.41588661  |
| 0.399568667 | 0.363657928 | 0.248521535 | 0.016214592 |
| 0.009492979 | 0.127555945 | 0.109949106 | 0.011250145 |
| 0.386542325 | 0.036383557 | 0.382588293 | 0.133531528 |
| 0.042149766 | 0.038711829 | 0.002063616 | 0.020531127 |
| 0.198964808 | 0.056947453 | 0.034827453 | 0.069571064 |
| 0.079553719 | 0.057137724 | 0.00789552  | 0.056860707 |
| 0.191170724 | 0.052192804 | 0.050143115 | 0.101161871 |



|             |             |             |             |
|-------------|-------------|-------------|-------------|
| 0.249001563 | 0.202283809 | 0.283861491 | 0.283302597 |
| 0.050103388 | 0.041806022 | 0.063990726 | 0.26200782  |
| 0.359267686 | 0.323203757 | 0.002507583 | 0.421460108 |
| 0.358005066 | 0.266939593 | 0.386869356 | 0.230937599 |
| 0.035525008 | 0.133698267 | 0.148252232 | 0.143088435 |
| 0.063582066 | 0.129845897 | 0.077799291 | 0.018053112 |
| 0.181870345 | 0.360357094 | 0.323204901 | 0.027894193 |
| 0.254304069 | 0.071680802 | 0.033004631 | 0.367554635 |
| 0.038303015 | 0.012657608 | 0.242432686 | 0.357101458 |
| 0.000495119 | 0.038740382 | 0.386573619 | 0.036133831 |
| 0.392766364 | 0.348181992 | 0.278293789 | 0.066211619 |
| 0.000880234 | 0.277187276 | 0.14787028  | 0.112898804 |
| 0.339867109 | 0.197461873 | 0.046556369 | 0.007080966 |
| 0.133140259 | 0.043919882 | 0.018626663 | 0.088703958 |
| 0.0773419   | 0.242843702 | 0.074911728 | 0.095785114 |
| 0.040964891 | 0.071388574 | 0.057541405 | 0.053085415 |
| 0.06706039  | 0.09295875  | 0.17741401  | 0.181695542 |
| 0.048162783 | 0.3243866   | 0.28818956  | 0.00322346  |
| 0.167720293 | 0.309828882 | 0.308613277 | 0.00010046  |
| 0.248943511 | 0.000192706 | 0.03949373  | 0.039226719 |
| 0.036471041 | 0.047109795 | 0.087176952 | 0.056595421 |
| 0.201199787 | 0.05391254  | 0.051332212 | 0.072680904 |
| 0.019382562 | 0.063489815 | 0.187884818 | 0.153122144 |
| 0.045710394 | 0.02061132  | 0.063413853 | 0.073177295 |
| 0.004287538 | 0.381336784 | 0.122053919 | 0.039781054 |
| 0.074811874 | 0.136122045 | 0.185059577 | 0.42835477  |
| 0.254349681 | 0.084808094 | 0.112918164 | 0.343308235 |
| 0.167377509 | 0.073147302 | 0.012666528 | 0.187849762 |
| 0.06239566  | 0.034774184 | 0.225559952 | 0.164514552 |
| 0.342223454 | 0.246371127 | 0.114879833 | 0.304419427 |
| 0.101627414 | 0.202610308 | 0.192008265 | 0.007377051 |
| 0.038586516 | 0.064578266 | 0.081423987 | 0.00129572  |
| 0.153606342 | 0.052637301 | 0.349263082 | 0.383999658 |
| 0.107561363 | 0.228620223 | 0.126977052 | 0.0122449   |
| 0.168394721 | 0.133815382 | 0.051503869 | 0.341343834 |
| 0.072380327 | 0.030956239 | 0.097350174 | 0.0911931   |
| 0.294434129 | 0.352258074 | 0.064105239 | 0.07211754  |
| 0.092652194 | 0.092745357 | 0.392132417 | 0.035128274 |
| 0.292239748 | 0.027249217 | 0.314523594 | 0.076971344 |
| 0.046657035 | 0.420985712 | 0.016708874 | 0.419398391 |
| 0.107959656 | 0.072057294 | 0.328847432 | 0.120707801 |
| 0.067881855 | 0.013558527 | 0.059009836 | 0.168499374 |
| 0.046306024 | 0.113083171 | 0.015385418 | 0.012891194 |
| 0.140568336 | 0.151636838 | 0.382851247 | 0.235265409 |
| 0.059310392 | 0.181567071 | 0.064269696 | 0.10603309  |
| 0.419827327 | 0.399731374 | 0.038772225 | 0.116611885 |
| 0.184966448 | 0.013079475 | 0.232806481 | 0.01310952  |
| 0.249968557 | 0.29138962  | 0.148771981 | 0.006432733 |
| 0.001674941 | 0.065006293 | 0.249234242 | 0.042125217 |
| 0.352921622 | 0.070648639 | 0.302520466 | 0.274782046 |
| 0.094715415 | 0.388526955 | 0.013630676 | 0.203461421 |
| 0.018017243 | 0.113550073 | 0.197732116 | 0.232167143 |
| 0.031024928 | 0.08904916  | 0.183821266 | 0.055316436 |
| 0.002510614 | 0.044932055 | 0.000346351 | 0.260649094 |

|               |             |             |             |
|---------------|-------------|-------------|-------------|
| 0.39946327    | 0.154699173 | 0.110769048 | 0.19782614  |
| 0.106422131   | 0.275907682 | 0.05426145  | 0.249757704 |
| 9.42E-05      | 0.158933816 | 0.05833846  | 0.270740163 |
| 0.079293867   | 0.229767395 | 0.004539359 | 0.145907553 |
| 0.35898647    | 0.061403905 | 0.142472998 | 0.108342003 |
| 0.406570823   | 0.320504424 | 0.107319885 | 0.043115093 |
| 0.346471729   | 0.026749986 | 0.185875728 | 0.405296183 |
| 0.030413195   | 0.048149184 | 0.290554056 | 0.031799141 |
| 0.119642605   | 0.275439764 | 0.331386109 | 0.421413989 |
| 0.006292376   | 0.084319683 | 0.285454512 | 0.361330059 |
| 0.130423263   | 0.035655496 | 0.052241109 | 0.046325188 |
| 0.368349457   | 0.011561119 | 0.070230966 | 0.186229288 |
| 0.052155249   | 0.130376862 | 0.314886475 | 0.035859511 |
| 0.002967534   | 0.030533424 | 0.076687645 | 0.050011031 |
| 0.100495161   | 0.137201701 | 0.047998883 | 0.220002024 |
| 0.013439645   | 0.000965659 | 0.287473231 | 0.004655544 |
| 0.143227487   | 0.174633024 | 0.076834692 | 0.12150483  |
| 0.089940298   | 0.182820928 | 0.172517188 | 0.000440157 |
| 0.27088147    | 0.009800556 | 0.096279819 | 0.033184438 |
| 0.084659167   | 0.007965572 | 0.32846633  | 0.370601221 |
| 0.1544335     | 0.119748287 | 0.112085123 | 0.355544858 |
| 0.036723997   | 0.161437529 | 0.128019928 | 0.297816197 |
| 0.059637226   | 0.244851985 | 0.205162867 | 0.135990151 |
| 0.224813479   | 0.073281951 |             |             |
| 1810027010RIK | 0.083127146 | 0.344305211 | 0.05748422  |
| 0.199640065   | 0.251392875 | 0.266097216 | 0.057610797 |
| 0.113547494   | 0.24313346  | 0.114937826 | 1           |
| 0.033950424   | 0.096873407 | 0.426819883 | 0.057390054 |
| 0.277052774   | 0.056982028 | 0.104408908 | 0.041895416 |
| 0.130906627   | 0.226946789 | 0.268632498 | 0.204716923 |
| 0.2062198     | 0.197206535 | 0.20754128  | 0.196991458 |
| 0.443438804   | 0.186135896 | 0.353100781 | 0.102958633 |
| 0.39763052    | 0.271473934 | 0.225527412 | 0.027692577 |
| 0.243048515   | 0.006574998 | 0.384708852 | 0.222852543 |
| 0.176725846   | 0.343965239 | 0.147623136 | 0.252084254 |
| 0.165291208   | 0.049636185 | 0.102926254 | 0.268782141 |
| 0.183922475   | 0.178724845 | 0.051666761 | 0.324703069 |
| 0.173221986   | 0.306967813 | 0.257265453 | 0.003484185 |
| 0.224773549   | 0.072188715 | 0.150690206 | 0.453525327 |
| 0.223765898   | 0.14610758  | 0.120684259 | 0.135351753 |
| 0.216197968   | 0.263239962 | 0.220481482 | 0.158553708 |
| 0.466024261   | 0.145458314 | 0.316327714 | 0.169406084 |
| 0.207368345   | 0.02434214  | 0.172510921 | 0.053377153 |
| 0.212919733   | 0.203026655 | 0.267987499 | 0.204030414 |
| 0.339926117   | 0.461588427 | 0.189053361 | 0.419108388 |
| 0.062072513   | 0.229909145 | 0.217780111 | 0.286064815 |
| 0.257665311   | 0.054740444 | 0.390933008 | 0.478262174 |
| 0.034367544   | 0.18608659  | 0.277751197 | 0.096697564 |
| 0.382717239   | 0.148461691 | 0.185576015 | 0.203054656 |
| 0.303467858   | 0.228904436 | 0.39286848  | 0.291238816 |
| 0.221592719   | 0.059208136 | 0.409366113 | 0.237188954 |
| 0.297768736   | 0.07830269  | 0.181026643 | 0.401647518 |
| 0.303959027   | 0.459769825 | 0.326144977 | 0.295244619 |
| 0.238729874   | 0.467694124 | 0.351240937 | 0.360401684 |

|             |             |             |             |
|-------------|-------------|-------------|-------------|
| 0.064598708 | 0.461992613 | 0.175491322 | 0.076082964 |
| 0.057325276 | 0.108952331 | 0.126300998 | 0.299595579 |
| 0.444481204 | 0.268352121 | 0.174133072 | 0.208643151 |
| 0.424933648 | 0.400620172 | 0.444433859 | 0.358276747 |
| 0.052062406 | 0.141092293 | 0.239343838 | 0.194231088 |
| 0.289233343 | 0.089877564 | 0.216486645 | 0.4451707   |
| 0.402944433 | 0.39767868  | 0.123031321 | 0.439647447 |
| 0.117663931 | 0.498039609 | 0.388195205 | 0.181933723 |
| 0.468623183 | 0.442790801 | 0.494690535 | 0.356063427 |
| 0.447478626 | 0.252244448 | 0.024194367 | 0.314441532 |
| 0.49028343  | 0.030435738 | 0.414947117 | 0.445268733 |
| 0.434035421 | 0.417289435 | 0.479653552 | 0.470365666 |
| 0.43727051  | 0.063608193 | 0.008656156 | 0.253974139 |
| 0.446935975 | 0.408973627 | 0.124411096 | 0.224467348 |
| 0.259442884 | 0.235790061 | 0.342485651 | 0.242897203 |
| 0.48658507  | 0.421419852 | 0.428442276 | 0.305959431 |
| 0.134318402 | 0.323265431 | 0.213349768 | 0.408557149 |
| 0.067982788 | 0.114377393 | 0.052563743 | 0.248050243 |
| 0.182120552 | 0.175700825 | 0.21641234  | 0.203466198 |
| 0.201756175 | 0.175540251 | 0.207301736 | 0.331767349 |
| 0.053102922 | 0.269491957 | 0.139240113 | 0.118045512 |
| 0.071999673 | 0.149903016 | 0.202414328 | 0.211032662 |
| 0.225998801 | 0.208281331 | 0.326649786 | 0.442189065 |
| 0.183679594 | 0.177325553 | 0.323158287 | 0.468634611 |
| 0.445148156 | 0.261785135 | 0.209023586 | 0.049224404 |
| 0.191653812 | 0.126678467 | 0.13661626  | 0.235256132 |
| 0.169121132 | 0.175924438 | 0.256811884 | 0.388645997 |
| 0.196597488 | 0.08487124  | 0.209700886 | 0.4160983   |
| 0.124680546 | 0.290788299 | 0.43449     | 0.207934288 |
| 0.008924797 | 0.230499567 | 0.412355893 | 0.130448977 |
| 0.213311601 | 0.17544663  | 0.248518524 | 0.423147068 |
| 0.176203739 | 0.167726502 | 0.450674369 | 0.360568372 |
| 0.216733822 | 0.183350314 | 0.47865175  | 0.026426449 |
| 0.181747981 | 0.122794251 | 0.293517994 | 0.134148271 |
| 0.209204977 | 0.264390484 | 0.239168676 | 0.252000966 |
| 0.121798146 | 0.459190205 | 0.36456174  | 0.476205687 |
| 0.204769443 | 0.478812322 | 0.430153397 | 0.442494894 |
| 0.293752574 | 0.16819054  | 0.124096306 | 0.405623851 |
| 0.417145924 | 0.144377843 | 0.066245236 | 0.34330872  |
| 0.155927862 | 0.316264525 | 0.127423572 | 0.474024638 |
| 0.46790728  | 0.384422606 | 0.17081709  | 0.350574555 |
| 0.405478032 | 0.211850981 | 0.36897455  | 0.481454028 |
| 0.122261419 | 0.210826651 | 0.228759579 | 0.405602966 |
| 0.170932843 | 0.169229101 | 0.286800273 | 0.135327774 |
| 0.021786544 | 0.064932628 | 0.064581443 | 0.193839768 |
| 0.187973266 | 0.244819248 | 0.29954289  | 0.465882691 |
| 0.12889698  | 0.412523789 | 0.177227338 | 0.246319889 |
| 0.370545909 | 0.197905405 | 0.2558009   | 0.288231215 |
| 0.2200819   | 0.053773353 | 0.18729254  | 0.464838738 |
| 0.030476091 | 0.230030748 | 0.174959911 | 0.012531295 |
| 0.047967026 | 0.299390022 | 0.092536408 | 0.204356517 |
| 0.459195276 | 0.201119414 | 0.174577837 | 0.128254746 |
| 0.340925513 | 0.098255756 | 0.025299387 | 0.415335679 |
| 0.397937424 | 0.368426708 | 0.391230466 | 0.369646518 |

|             |             |             |             |
|-------------|-------------|-------------|-------------|
| 0.35445316  | 0.305247693 | 0.359827148 | 0.220853529 |
| 0.106041502 | 0.066960547 | 0.175191877 | 0.222453135 |
| 0.004123288 | 0.38901911  | 0.201850835 | 0.157147453 |
| 0.346785431 | 0.221461641 | 0.058577376 | 0.239572892 |
| 0.048466001 | 0.174974169 | 0.165223984 | 0.159447659 |
| 0.311035385 | 0.023509158 | 0.212689854 | 0.195866511 |
| 0.399049951 | 0.33200545  | 0.213658412 | 0.475698622 |
| 0.27523447  | 0.096466    | 0.250126268 | 0.380434077 |
| 0.080553764 | 0.043593982 | 0.174645776 | 0.028078678 |
| 0.160778357 | 0.379105178 | 0.200429719 | 0.077106877 |
| 0.23764839  | 0.014010205 | 0.35828474  | 0.484468889 |
| 0.396493185 | 0.475399928 | 0.479949264 | 0.249145329 |
| 0.468078629 | 0.068507161 | 0.475007088 | 0.345316941 |
| 0.170356337 | 0.003837763 | 0.015225264 | 0.450355874 |
| 0.261230044 | 0.051976837 | 0.154721676 | 0.262241815 |
| 0.156339855 | 0.105840884 | 0.074262499 | 0.199642052 |
| 0.310687529 | 0.231521834 | 0.171404441 | 0.394514001 |
| 0.192914858 | 0.187232994 | 0.183738699 | 0.076864797 |
| 0.287609404 | 0.085297601 | 0.068482885 | 0.03046574  |
| 0.31653525  | 0.105825263 | 0.394707756 | 0.451500908 |
| 0.47816667  | 0.346807543 | 0.148606227 | 0.231908284 |
| 0.369904332 | 0.083269583 | 0.206999833 | 0.086379927 |
| 0.42515238  | 0.30436082  | 0.350904044 | 0.324051043 |
| 0.476601522 | 0.442702461 | 0.045948844 | 0.361802814 |
| 0.051460873 | 0.005218881 | 0.217254456 | 0.213357305 |
| 0.023576897 | 0.21497652  | 0.262231767 | 0.112097747 |
| 0.145469573 | 0.055343695 | 0.184223268 | 0.18381861  |
| 0.249294934 | 0.228031234 | 0.231162915 | 0.183378207 |
| 0.199130469 | 0.123376763 | 0.196812946 | 0.131274652 |
| 0.111839447 | 0.275022584 | 0.203420173 | 0.027549365 |
| 0.217570586 | 0.250379501 | 0.074917627 | 0.155581713 |
| 0.442701154 | 0.463908582 | 0.051247877 | 0.045107173 |
| 0.264843285 | 0.186965546 | 0.475924655 | 0.434948104 |
| 0.465888427 | 0.487161704 | 0.380369177 | 0.133054476 |
| 0.085194718 | 0.237466934 | 0.220645564 | 0.136626378 |
| 0.46770091  | 0.048764899 | 0.432602414 | 0.209769093 |
| 0.10433074  | 0.190440251 | 0.081473167 | 0.082978173 |
| 0.272966906 | 0.174077836 | 0.195134411 | 0.125741878 |
| 0.231283366 | 0.215831956 | 0.052155099 | 0.172395093 |
| 0.303522293 | 0.148074962 | 0.14491393  | 0.174965128 |
| 0.295429012 | 0.070622756 | 0.342649696 | 0.441830494 |
| 0.128480413 | 0.07840019  | 0.19378087  | 0.298037612 |
| 0.374792601 | 0.185101668 | 0.081900492 | 0.365919749 |
| 0.456732765 | 0.331015997 | 0.448059557 | 0.381622078 |
| 0.076304427 | 0.276837519 | 0.164754247 | 0.221669905 |
| 0.144622454 | 0.255005461 | 0.16590243  | 0.062018028 |
| 0.276321977 | 0.417953033 | 0.356023342 | 0.201343974 |
| 0.24353446  | 0.08463064  | 0.040263444 | 0.382388542 |
| 0.172103495 | 0.10838854  | 0.159148944 | 0.352070694 |
| 0.008080576 | 0.143913147 | 0.428480277 | 0.243961609 |
| 0.454151319 | 0.452219902 | 0.439437834 | 0.15698859  |
| 0.001393785 | 0.297386761 | 0.32310048  | 0.268735885 |
| 0.371094813 | 0.317470066 | 0.096227722 | 0.117497287 |
| 0.311760625 | 0.077956659 | 0.145163736 | 0.231472984 |

|             |             |             |             |
|-------------|-------------|-------------|-------------|
| 0.107178457 | 0.264138884 | 0.201900553 | 0.124448348 |
| 0.181700741 | 0.059913306 | 0.223319553 | 0.2207267   |
| 0.084513844 | 0.260994683 | 0.360801962 | 0.117498882 |
| 0.169448306 | 0.376952248 | 0.329951538 | 0.042328993 |
| 0.224174716 | 0.344425286 | 0.400024812 | 0.004665909 |
| 0.371961756 | 0.021267149 | 0.201361125 | 0.24282348  |
| 0.204121391 | 0.172201567 | 0.23112825  | 0.246337002 |
| 0.222016212 | 0.175685504 | 0.270362852 | 0.244175338 |
| 0.211896323 | 0.16498074  | 0.265462886 | 0.190199624 |
| 0.286552657 | 0.145811349 | 0.100067479 | 0.101739461 |
| 0.112806221 | 0.406866573 | 0.266589206 | 0.073661111 |
| 0.205351382 | 0.185399677 | 0.378548751 | 0.41626719  |
| 0.427139972 | 0.103539302 | 0.193715277 | 0.402969957 |
| 0.092288746 | 0.190751715 | 0.054878262 | 0.220211085 |
| 0.200993432 | 0.233649564 | 0.201960204 | 0.202177411 |
| 0.269870121 | 0.402268596 | 0.261086194 | 0.413137179 |
| 0.25706602  | 0.153363815 | 0.142022707 | 0.152899255 |
| 0.166823476 | 0.113175641 | 0.229181303 | 0.008939532 |
| 0.294536055 | 0.206257472 | 0.439134914 | 0.432532045 |
| 0.186734936 | 0.390252546 | 0.172471996 | 0.105457793 |
| 0.126824913 | 0.161499782 | 0.144501559 | 0.335381548 |
| 0.175369184 | 0.184844815 | 0.238659961 | 0.204643679 |
| 0.354487137 | 0.291718627 | 0.172708142 | 0.158084454 |
| 0.15551445  | 0.158877309 | 0.390580001 | 0.095759762 |
| 0.242877201 | 0.224696115 | 0.179810859 | 0.243164365 |
| 0.195315343 | 0.454380915 | 0.062025632 | 0.467547375 |
| 0.212680335 | 0.12278638  | 0.466909974 | 0.188033632 |
| 0.199375108 | 0.185791261 | 0.161713717 | 0.175837751 |
| 0.161788999 | 0.227231465 | 0.007112753 | 0.060705959 |
| 0.338877311 | 0.128180715 | 0.286863309 | 0.276707095 |
| 0.201938088 | 0.322036304 | 0.137304134 | 0.163459592 |
| 0.397857341 | 0.422656827 | 0.236622433 | 0.241017288 |
| 0.297429959 | 0.137731533 | 0.278802238 | 0.006054086 |
| 0.274923686 | 0.255163672 | 0.180157072 | 0.068386989 |
| 0.030044084 | 0.167190564 | 0.25216768  | 0.043403479 |
| 0.445718523 | 0.175875839 | 0.184939314 | 0.358262604 |
| 0.142456736 | 0.429151704 | 0.155321993 | 0.395432352 |
| 0.024720641 | 0.208614338 | 0.207822637 | 0.170789316 |
| 0.265280667 | 0.22010213  | 0.371607274 | 0.230048233 |
| 0.057618715 | 0.239023001 | 0.002159165 | 0.393941105 |
| 0.385342432 | 0.198368759 | 0.199102902 | 0.116443682 |
| 0.286919523 | 0.328866702 | 0.169423869 | 0.210568406 |
| 0.04289814  | 0.289806301 | 0.179241403 | 0.406184145 |
| 0.170589058 | 0.178079236 | 0.11483203  | 0.182260045 |
| 0.38820009  | 0.192968542 | 0.229870994 | 0.17764494  |
| 0.424379201 | 0.308225125 | 0.135824103 | 0.192018997 |
| 0.212659498 | 0.060436771 | 0.187721518 | 0.468110364 |
| 0.199668056 | 0.217924774 | 0.433692689 | 0.199648387 |
| 0.204156428 | 0.345092041 | 0.216794753 | 0.442205459 |
| 0.114587742 | 0.249393679 | 0.369999498 | 0.392336446 |
| 0.323449297 | 0.158009593 | 0.220272251 | 0.207233796 |
| 0.403646093 | 0.162851051 | 0.168498333 | 0.31794968  |
| 0.187193218 | 0.272964064 | 0.165937535 | 0.191648914 |
| 0.083031768 | 0.131114358 | 0.283841379 | 0.128479493 |

|               |             |             |             |
|---------------|-------------|-------------|-------------|
| 0.235767939   | 0.240497502 | 0.192960128 | 0.405632045 |
| 0.234255192   | 0.079583046 | 0.442373426 | 0.026130501 |
| 0.232371691   | 0.357568434 | 0.204130971 | 0.235203638 |
| 0.206150643   | 0.217346978 | 0.171074607 | 0.003874789 |
| 0.368253219   | 0.068352119 | 0.186257905 | 0.242837846 |
| 0.174974239   | 0.055662966 | 0.428884488 | 0.484808028 |
| 0.243953086   | 0.182258222 | 0.20893704  | 0.409758055 |
| 0.154540556   | 0.170879321 | 0.17701644  | 0.272618644 |
| 0.196161197   | 0.170342476 | 0.204274774 | 0.245241767 |
| 0.325066488   | 0.18655013  |             |             |
| 1810046J19RIK | 0.198405713 | 0.034854757 | 0.166203227 |
| 0.048839652   | 0.021358295 | 0.011103548 | 0.165581616 |
| 0.094382657   | 0.035888981 | 0.001485567 | 0.033950424 |
| 1             | 0.000329319 | 0.050090402 | 0.16815468  |
| 0.014839281   | 0.171729829 | 0.212366755 | 0.005415393 |
| 0.012511999   | 0.028559438 | 0.003567478 | 0.0203309   |
| 0.01931968    | 0.239008559 | 0.033485992 | 0.004580717 |
| 0.034730612   | 0.000238226 | 0.015171827 | 0.000403932 |
| 0.10667937    | 0.019558324 | 0.002919114 | 0.121983599 |
| 0.016249177   | 0.000564681 | 0.104901312 | 0.039018588 |
| 0.001649699   | 0.137180855 | 0.004311641 | 0.068777282 |
| 0.006510485   | 0.206432834 | 0.000218338 | 0.01190942  |
| 0.025406228   | 0.021503384 | 0.202280572 | 0.018955196 |
| 0.005650794   | 0.071459227 | 0.014013662 | 0.010450001 |
| 0.002369211   | 0.001509425 | 0.000408912 | 0.052461024 |
| 0.205800094   | 0.192425366 | 0.000397501 | 0.031774906 |
| 0.011753631   | 0.023204658 | 0.093395908 | 0.003618945 |
| 0.053751144   | 0.001218825 | 0.011214259 | 0.017485705 |
| 0.018915865   | 0.142368331 | 0.254586665 | 0.135455576 |
| 0.005129793   | 0.125070502 | 0.024622731 | 0.003921871 |
| 0.032949255   | 0.082234633 | 0.104385694 | 0.057756858 |
| 0.002271139   | 0.009672173 | 0.008706393 | 0.083390106 |
| 0.034106344   | 0.079688734 | 0.039551569 | 0.067912738 |
| 0.128091007   | 0.007467894 | 0.027199825 | 0.201957797 |
| 0.03574476    | 0.001294013 | 0.005311364 | 0.003160407 |
| 0.016871941   | 0.016658617 | 0.067599904 | 0.127434939 |
| 0.014049059   | 0.241037786 | 0.072044299 | 0.008741644 |
| 0.026873834   | 0.215065175 | 0.011516783 | 0.018793307 |
| 0.023305878   | 0.039236807 | 0.025119138 | 0.055928967 |
| 0.010376709   | 0.048228441 | 0.03750706  | 0.047626538 |
| 0.001051397   | 0.0479212   | 0.139594756 | 0.184770608 |
| 0.133831514   | 0.138003881 | 0.005894313 | 0.117881166 |
| 0.029993329   | 0.058302995 | 0.116289039 | 0.070544557 |
| 0.032783245   | 0.05818613  | 0.044917473 | 0.04292341  |
| 0.262559752   | 0.001236474 | 0.010456693 | 0.027456115 |
| 0.040108328   | 0.196283012 | 0.00733226  | 0.07937341  |
| 0.099708559   | 0.028840664 | 0.077548297 | 0.096493807 |
| 0.06026024    | 0.071073233 | 0.02769836  | 0.175141823 |
| 0.070859504   | 0.074122606 | 0.055351592 | 0.014681135 |
| 0.073916094   | 0.038813909 | 0.004814266 | 0.051474154 |
| 0.072810702   | 0.00223992  | 0.023813837 | 0.028615664 |
| 0.048125329   | 0.020690167 | 0.049246595 | 0.036615739 |
| 0.046460769   | 0.250157423 | 9.14E-05    | 0.061781474 |
| 0.061651372   | 0.072843491 | 0.047336679 | 0.00624923  |

|             |             |             |             |
|-------------|-------------|-------------|-------------|
| 0.018332423 | 0.021046402 | 0.019818582 | 0.003566553 |
| 0.085576054 | 0.032989351 | 0.027228282 | 0.037673805 |
| 0.019966862 | 0.149978626 | 0.004047121 | 0.075180579 |
| 0.114630898 | 0.165103593 | 0.271470422 | 0.073609468 |
| 0.002325931 | 0.165809169 | 0.017920686 | 0.01590395  |
| 0.186812632 | 0.019544111 | 0.001530659 | 0.018872706 |
| 0.277316093 | 0.009336551 | 0.124743316 | 0.133476107 |
| 0.182016658 | 0.287113193 | 0.051147671 | 0.065328234 |
| 0.061798836 | 0.211716351 | 0.01268649  | 0.036827399 |
| 0.009487756 | 0.185552339 | 0.024511329 | 0.06625697  |
| 0.104098729 | 0.00955296  | 0.164529333 | 0.081089299 |
| 0.008151113 | 0.000780154 | 0.000597478 | 0.005545222 |
| 0.232889046 | 0.02990067  | 0.020463395 | 0.026696959 |
| 0.068810783 | 0.084287808 | 0.007280648 | 0.118197393 |
| 0.181863269 | 0.020706497 | 0.044357965 | 0.009646131 |
| 0.107227143 | 0.051009272 | 0.029739473 | 0.01306502  |
| 0.059630065 | 0.003379258 | 0.001166865 | 0.037175631 |
| 0.00141366  | 0.009134955 | 0.029943513 | 0.024146963 |
| 0.004280631 | 0.154762901 | 0.049059717 | 0.000182324 |
| 0.008224941 | 0.026467658 | 0.100156    | 0.00395101  |
| 0.119477139 | 0.096299136 | 0.014325757 | 0.0142136   |
| 0.182430544 | 0.05501176  | 0.051872285 | 0.042666083 |
| 0.003388278 | 0.052252235 | 0.028175934 | 0.055659397 |
| 0.049273428 | 0.003561155 | 0.000310067 | 0.032504646 |
| 0.03239049  | 0.002341683 | 0.237261755 | 0.014688539 |
| 0.004719107 | 0.016395948 | 0.011340298 | 0.055660673 |
| 0.091093894 | 0.049549374 | 0.108247636 | 0.041714774 |
| 0.076753868 | 0.121476164 | 0.035517547 | 0.057995883 |
| 0.001400387 | 0.012512026 | 0.009610078 | 0.048543166 |
| 0.196734566 | 0.012293701 | 0.101327675 | 0.000364393 |
| 0.000816728 | 0.194706936 | 0.273661192 | 0.108706565 |
| 0.005585654 | 0.006314162 | 0.022704505 | 0.047718001 |
| 0.237008786 | 0.06619335  | 0.101195059 | 0.022362354 |
| 0.064255851 | 0.009144542 | 0.006868737 | 0.016744163 |
| 0.129094472 | 0.07176997  | 0.079197149 | 0.086477745 |
| 0.215935503 | 0.004085529 | 0.031976657 | 0.018539762 |
| 0.213667681 | 0.01757764  | 0.266969132 | 0.273197712 |
| 0.039397537 | 0.224951279 | 0.15369872  | 0.003089149 |
| 0.058728954 | 0.251045716 | 0.025861672 | 0.037231062 |
| 0.044230452 | 0.04540727  | 0.043528777 | 0.057206556 |
| 0.034812526 | 0.022532665 | 0.029683994 | 0.026342803 |
| 0.107410508 | 0.108525994 | 0.004386092 | 0.043129762 |
| 0.013610664 | 0.05118793  | 0.021121528 | 0.282578831 |
| 0.018858783 | 0.067813702 | 0.222054904 | 0.014128978 |
| 0.120770967 | 0.000474772 | 0.017761109 | 0.051956087 |
| 0.040120255 | 0.181196333 | 0.004352147 | 0.002508819 |
| 0.069971996 | 0.10597081  | 0.001951748 | 0.052763212 |
| 0.052084958 | 0.146272016 | 0.029605859 | 0.033465894 |
| 0.183592966 | 0.001060546 | 0.012929776 | 0.000220695 |
| 0.002431322 | 0.060609708 | 0.00448898  | 0.068639369 |
| 0.10789865  | 0.157410475 | 0.09004428  | 0.058395843 |
| 0.047016091 | 0.041563383 | 0.051213918 | 0.005642291 |
| 0.053822122 | 0.00159178  | 0.042055328 | 0.04491084  |
| 0.002897432 | 0.025271746 | 0.058842302 | 0.029514182 |

|             |             |             |             |
|-------------|-------------|-------------|-------------|
| 0.013437728 | 0.214414639 | 0.222058112 | 0.0039343   |
| 0.101054216 | 0.105500435 | 0.17598233  | 0.010891887 |
| 0.015577848 | 0.044484441 | 0.007840447 | 0.056731401 |
| 0.075070491 | 0.098233658 | 0.007402448 | 0.253574606 |
| 0.012044193 | 0.153064289 | 0.215297494 | 0.025012258 |
| 0.034119832 | 0.21266449  | 0.085258043 | 0.04655944  |
| 0.073550668 | 0.023422793 | 0.001131188 | 0.004475261 |
| 0.031979232 | 0.177205976 | 0.000956745 | 0.168353085 |
| 0.044135586 | 0.023299032 | 0.115437761 | 0.13543261  |
| 0.062370895 | 0.068486415 | 0.270215845 | 0.037565096 |
| 0.08323845  | 0.007148006 | 0.018277485 | 0.103614758 |
| 0.001073805 | 0.009994016 | 0.164272062 | 0.016078836 |
| 0.023962088 | 0.147388681 | 0.003196499 | 0.004600446 |
| 0.070553997 | 0.023880669 | 0.016492047 | 0.092803322 |
| 0.018015459 | 0.010777119 | 0.061831662 | 0.088463863 |
| 0.003804483 | 0.103512301 | 0.245149423 | 0.200271793 |
| 0.006428358 | 0.008418737 | 0.29002158  | 0.214487852 |
| 0.044262338 | 0.036023402 | 0.125892625 | 0.137841036 |
| 0.15882093  | 0.019184236 | 0.039821966 | 0.039325638 |
| 0.068539059 | 0.069193483 | 0.124914345 | 0.053883943 |
| 0.202340055 | 0.041608587 | 0.014008007 | 0.032116118 |
| 0.046865632 | 0.216200217 | 0.050483099 | 0.004407653 |
| 0.240044792 | 0.064482786 | 0.150778772 | 0.243337912 |
| 0.0074529   | 0.207334066 | 0.101140584 | 0.162899986 |
| 0.030130149 | 0.001786496 | 0.213914935 | 0.164858722 |
| 0.077788175 | 0.001132467 | 0.208823557 | 0.01944274  |
| 0.049284757 | 0.000792265 | 0.016978486 | 0.101906201 |
| 0.254835254 | 0.163395034 | 0.021193965 | 0.028380479 |
| 0.021792892 | 0.004442852 | 0.089014309 | 0.031010469 |
| 0.044980814 | 0.012594124 | 0.05556574  | 0.071694479 |
| 0.265196854 | 0.013309438 | 0.003448857 | 0.024242334 |
| 0.152721398 | 0.014127851 | 0.066147143 | 0.31541661  |
| 0.120751925 | 0.089713311 | 0.044826256 | 0.139555901 |
| 0.008334859 | 0.129147463 | 0.205664435 | 0.028753523 |
| 0.00449587  | 0.121201674 | 0.004260969 | 0.020791387 |
| 0.00843387  | 0.000950946 | 0.039293844 | 0.052931898 |
| 0.065622292 | 0.040864942 | 0.089710285 | 0.021428104 |
| 0.000285238 | 0.011389957 | 0.036413747 | 0.010578211 |
| 0.040186689 | 0.075041128 | 0.010419685 | 0.13130602  |
| 0.144244342 | 0.23160014  | 0.072840807 | 0.004321737 |
| 0.00104253  | 0.023032057 | 0.203673346 | 0.088652087 |
| 0.062334746 | 0.14689407  | 0.001692903 | 0.07239071  |
| 0.001549042 | 0.188495625 | 0.0994546   | 0.001747273 |
| 0.001749397 | 0.04640049  | 0.038435321 | 0.216499906 |
| 0.006874053 | 0.042601863 | 0.048011478 | 0.051193154 |
| 0.021184206 | 0.186710588 | 0.083773921 | 0.073588062 |
| 0.072854564 | 0.068378564 | 0.067739743 | 0.015671197 |
| 0.037294991 | 0.081088624 | 0.051844418 | 0.143628937 |
| 0.07294394  | 0.073268036 | 0.016650193 | 0.018446191 |
| 0.022374364 | 0.153670378 | 0.260902353 | 0.26617713  |
| 0.134814413 | 0.031216492 | 0.212716859 | 0.237060393 |
| 0.12744076  | 0.012327942 | 0.125920683 | 0.042359907 |
| 0.06943777  | 0.182851007 | 0.022138784 | 0.034720845 |
| 0.000398238 | 0.006003027 | 0.137303751 | 0.017304663 |



|               |             |             |             |
|---------------|-------------|-------------|-------------|
| 0.117126804   | 0.011607835 | 0.007781723 | 0.051654948 |
| 0.018586027   | 0.12849249  | 0.207861236 | 0.065054284 |
| 0.016067272   | 0.010832982 | 0.00235689  | 0.093432519 |
| 0.14134547    | 0.215497488 | 0.022120704 | 0.12076454  |
| 0.061155762   | 0.017734572 | 0.028839488 | 0.060179297 |
| 0.001702449   | 0.093398191 | 0.002178388 | 0.156546804 |
| 0.000874476   | 0.175052057 | 0.273657962 | 0.016490435 |
| 0.000639822   | 0.088180885 | 0.030734387 | 0.009522548 |
| 0.019660341   | 0.014431482 | 0.010533752 | 0.061757558 |
| 0.065813923   | 0.122601368 | 0.068468137 | 0.111038552 |
| 0.007099578   | 0.013237197 | 0.011471772 | 0.041731071 |
| 0.057447645   | 0.036319916 | 0.267295275 | 0.03637003  |
| 0.017763237   | 0.222201188 | 0.096515784 | 0.035655293 |
| 0.012122838   | 0.04017361  | 0.000881556 | 0.00606251  |
| 0.036275279   | 0.002373228 | 0.000151982 | 0.003901476 |
| 0.090172707   | 0.005808135 | 0.021446277 | 0.037737336 |
| 0.01229521    | 0.075412717 | 0.000253838 | 0.046107879 |
| 0.049653347   | 0.071874776 | 0.027668873 | 0.156121974 |
| 0.078098561   | 0.191123322 | 0.020955841 | 0.000836803 |
| 0.011667608   | 0.005579027 | 0.002100991 | 0.202565463 |
| 0.153732996   | 0.00119742  | 0.013912465 | 0.164205775 |
| 0.036126365   | 0.000280196 | 0.014688674 | 0.017356668 |
| 0.160615487   | 0.077921846 | 0.073352165 | 0.035952131 |
| 0.043430065   | 0.098933216 | 0.005201624 | 0.007183531 |
| 0.021897581   | 0.007819311 | 0.054248223 | 0.006166358 |
| 0.243292396   | 0.015468404 | 0.032568368 | 0.135629095 |
| 0.068158322   | 0.006105074 | 0.211039934 | 0.000898094 |
| 0.108165104   | 0.054132845 | 0.012370545 | 0.004256736 |
| 0.126133795   | 0.014504097 | 0.140790402 | 0.054360554 |
| 0.000774651   | 0.016190271 | 0.092093019 | 0.010030291 |
| 0.095653251   | 0.008695248 | 0.146755797 | 0.00150272  |
| 0.042922065   | 0.034931805 | 0.132811456 | 0.008184748 |
| 0.011527678   | 0.299667691 | 0.003491626 | 0.054604211 |
| 0.115363551   | 0.00790062  | 0.031332612 | 0.079450932 |
| 0.005215387   | 0.058486559 | 0.006349227 | 0.051674093 |
| 0.082029067   | 0.150122455 | 0.02693551  | 0.045947205 |
| 0.117252472   | 0.008990817 | 0.004974848 | 0.035689917 |
| 0.052957992   | 0.085374313 | 0.003807752 | 0.071528275 |
| 0.00389225    | 0.077157429 | 0.01174128  | 0.035091133 |
| 0.138263212   | 0.05210793  | 0.00958574  | 0.212661218 |
| 0.075717384   | 0.020098859 | 0.013377751 | 0.113205389 |
| 0.052798771   | 0.11761428  | 0.090339547 | 0.000389001 |
| 0.034732758   | 0.027522608 | 0.107081422 | 0.011660986 |
| 0.235776272   | 0.037380563 | 0.028621851 | 0.134250494 |
| 0.041026049   | 0.00221209  | 0.013707053 | 0.023647683 |
| 0.002455147   | 0.199903854 | 0.064927936 | 0.044182623 |
| 0.059646514   | 0.001475408 | 0.000894886 | 0.055213781 |
| 0.001515749   | 0.000854262 | 0.002809636 | 0.016869222 |
| 0.002833627   | 0.00319556  | 0.00344444  | 0.002928213 |
| 0.047586343   | 0.042312237 |             |             |
| 2210012G02RIK | 0.004301437 | 0.071925668 | 0.001706472 |
| 0.002912038   | 0.200425169 | 0.051554433 | 0.003671023 |
| 0.010927556   | 0.062434569 | 0.027551271 | 0.096873407 |
| 0.000329319   | 1           | 0.102433625 | 0.005199909 |

|             |             |             |             |
|-------------|-------------|-------------|-------------|
| 0.145762334 | 0.003030927 | 0.012163339 | 0.010877795 |
| 0.005915728 | 0.164566253 | 0.09352572  | 0.038207269 |
| 0.173571575 | 0.017881358 | 0.036277841 | 0.169056778 |
| 0.102673815 | 0.043574727 | 0.133833537 | 0.00330207  |
| 0.069727062 | 0.210047762 | 0.146397799 | 3.53E-05    |
| 0.095302711 | 0.020319898 | 0.061214784 | 0.052601906 |
| 0.033033712 | 0.056178553 | 0.027725089 | 0.041978957 |
| 0.035701714 | 0.000781438 | 0.010988055 | 0.137222024 |
| 0.049715288 | 0.05230361  | 0.002833638 | 0.093642096 |
| 0.053987013 | 0.058353988 | 0.053951576 | 0.000163042 |
| 0.218662858 | 0.1300656   | 0.18645791  | 0.090398232 |
| 0.036587833 | 0.025956181 | 0.038266515 | 0.049332156 |
| 0.119197126 | 0.144799285 | 0.084882728 | 0.034609685 |
| 0.094447391 | 0.168435757 | 0.139987492 | 0.004799827 |
| 0.040191296 | 0.001536239 | 0.024015495 | 0.006897402 |
| 0.073951389 | 0.060065016 | 0.162940844 | 0.163625156 |
| 0.05724402  | 0.094584241 | 0.049858899 | 0.072712327 |
| 0.039295886 | 0.228708174 | 0.120660893 | 0.104207561 |
| 0.102147002 | 0.007636061 | 0.101667477 | 0.097945986 |
| 0.004397968 | 0.052445875 | 0.080217529 | 0.010639044 |
| 0.084991334 | 0.138013441 | 0.045395088 | 0.206271398 |
| 0.211885226 | 0.142630654 | 0.083380272 | 0.051032374 |
| 0.19653921  | 0.003379853 | 0.064063804 | 0.261425828 |
| 0.083809461 | 0.004321931 | 0.062199835 | 0.153309476 |
| 0.081508253 | 0.105391125 | 0.086043075 | 0.08714752  |
| 0.137042334 | 0.100228594 | 0.076371717 | 0.100430654 |
| 0.012292155 | 0.100082705 | 0.020590616 | 0.004456722 |
| 0.003230801 | 0.019803045 | 0.082894908 | 0.082625729 |
| 0.127246558 | 0.081934036 | 0.017683002 | 0.069400562 |
| 0.156197416 | 0.064901918 | 0.095633541 | 0.095371849 |
| 0.00215346  | 0.147531492 | 0.114191083 | 0.037996323 |
| 0.097229395 | 0.018759847 | 0.218990388 | 0.073577612 |
| 0.068642619 | 0.143135048 | 0.010675866 | 0.077379109 |
| 0.034351893 | 0.109778249 | 0.076587775 | 0.022366881 |
| 0.085799613 | 0.070927363 | 0.125930057 | 0.215405263 |
| 0.083255671 | 0.033945288 | 0.005485675 | 0.084044884 |
| 0.126333366 | 0.006456356 | 0.134199538 | 0.135627333 |
| 0.080422478 | 0.138610637 | 0.137903883 | 0.131939215 |
| 0.086332867 | 0.006927801 | 0.006555869 | 0.127627017 |
| 0.077079834 | 0.076639272 | 0.045134435 | 0.09756674  |
| 0.17794395  | 0.043101139 | 0.148477678 | 0.013716458 |
| 0.116080999 | 0.117351506 | 0.12213315  | 0.081076457 |
| 0.039728427 | 0.052386904 | 0.180493935 | 0.059089283 |
| 0.002856986 | 0.005945561 | 0.002458988 | 0.090123357 |
| 0.019366446 | 0.047536847 | 0.031821892 | 0.148430349 |
| 0.046308585 | 0.042060759 | 0.184059595 | 0.222378692 |
| 0.002848959 | 0.081274025 | 0.018325498 | 0.011610352 |
| 0.003102886 | 0.016917774 | 0.007236197 | 0.014999465 |
| 0.106288446 | 0.020367441 | 0.134059708 | 0.125747856 |
| 0.09567868  | 0.01470304  | 0.089465248 | 0.122481927 |
| 0.112265527 | 0.157730317 | 0.047029777 | 0.000275036 |
| 0.018979636 | 0.072641918 | 0.205782149 | 0.156551276 |
| 0.018751881 | 0.019902735 | 0.103685573 | 0.196283896 |
| 0.019345582 | 0.014258258 | 0.07580208  | 0.073904719 |

|             |             |             |             |
|-------------|-------------|-------------|-------------|
| 0.011620414 | 0.090006316 | 0.122520294 | 0.066241348 |
| 0.000457896 | 0.037144768 | 0.115289893 | 0.036617192 |
| 0.054786445 | 0.039074359 | 0.106284184 | 0.108402361 |
| 0.090532113 | 0.165631564 | 0.140751885 | 0.2149939   |
| 0.013824578 | 0.021193898 | 0.130690231 | 0.027136055 |
| 0.170948219 | 0.010122593 | 0.097460875 | 0.04137508  |
| 0.03569619  | 0.096765198 | 0.244282929 | 0.125124291 |
| 0.008077869 | 0.096420858 | 0.100691342 | 0.115147473 |
| 0.05924021  | 0.122429057 | 0.132409467 | 0.106895639 |
| 0.082269606 | 0.119877026 | 0.140547386 | 0.096554003 |
| 0.113678895 | 0.010482856 | 0.004032267 | 0.137973453 |
| 0.055225603 | 0.16892862  | 0.029135345 | 0.109643258 |
| 0.09476976  | 0.061141979 | 0.033448585 | 0.173800399 |
| 0.08045394  | 0.02764108  | 0.133117017 | 0.132231242 |
| 0.02129323  | 0.112885918 | 0.077896356 | 0.17050043  |
| 0.019529418 | 0.095950613 | 0.072142936 | 0.217004139 |
| 0.0107396   | 0.00662264  | 0.003662164 | 0.058562646 |
| 0.192655861 | 0.114964554 | 0.130469366 | 0.106654482 |
| 0.01618483  | 0.098933536 | 0.051434668 | 0.039510065 |
| 0.061806332 | 0.142311611 | 0.219060973 | 0.191749537 |
| 0.053060478 | 0.000614561 | 0.003994989 | 0.086359086 |
| 0.001760677 | 0.160371202 | 0.054813347 | 3.32E-05    |
| 0.001462224 | 0.072373572 | 0.006787925 | 0.021384105 |
| 0.172830914 | 0.019125848 | 0.017568348 | 0.020992283 |
| 0.135600393 | 0.010661166 | 0.001059078 | 0.10967692  |
| 0.10703159  | 0.103243769 | 0.100956016 | 0.081117292 |
| 0.115038847 | 0.134748672 | 0.135717475 | 0.03568604  |
| 0.007119312 | 0.004584396 | 0.072400462 | 0.066547863 |
| 0.000104107 | 0.142693893 | 0.170859498 | 0.018403112 |
| 0.170853547 | 0.074660912 | 0.002092873 | 0.223464884 |
| 9.16E-05    | 0.134941954 | 0.022822201 | 0.070293945 |
| 0.195207251 | 0.000124736 | 0.003767269 | 0.036464671 |
| 0.056886659 | 0.052522927 | 0.128707156 | 0.101728952 |
| 0.08272936  | 0.006318328 | 0.08108411  | 0.178579907 |
| 0.005062626 | 0.005162655 | 0.039224675 | 0.000608639 |
| 0.021453769 | 0.095143909 | 0.102588448 | 0.000970694 |
| 0.040790616 | 0.000909432 | 0.048744859 | 0.10724848  |
| 0.066435044 | 0.127995722 | 0.103829415 | 0.204285459 |
| 0.090548421 | 0.111938329 | 0.114107125 | 0.060990544 |
| 0.038474564 | 0.00018132  | 0.000500029 | 0.129230251 |
| 0.108156297 | 0.002776772 | 0.02091339  | 0.015593742 |
| 0.007991175 | 0.00644432  | 0.009224248 | 0.128572323 |
| 0.105440179 | 0.161446342 | 0.168091743 | 0.068201547 |
| 0.041879248 | 0.074590555 | 0.041167684 | 0.007485093 |
| 0.176352281 | 0.002529275 | 0.008570059 | 0.00071625  |
| 0.17968761  | 0.007788939 | 0.059774515 | 0.096744706 |
| 0.104858767 | 0.176412961 | 0.03905641  | 0.020846661 |
| 0.147062408 | 0.004263427 | 0.055937075 | 0.006183281 |
| 0.074018715 | 0.111337764 | 0.074759345 | 0.040956825 |
| 0.113018194 | 0.08143422  | 0.002407868 | 0.107663474 |
| 0.000137415 | 0.002446713 | 0.026215561 | 0.068370274 |
| 0.022061746 | 0.097360509 | 0.041504402 | 0.0424352   |
| 0.0640727   | 0.000264136 | 0.173952767 | 0.175180656 |
| 0.076040786 | 0.089490593 | 0.212711374 | 0.05538716  |

|             |             |             |             |
|-------------|-------------|-------------|-------------|
| 0.112212605 | 0.020428289 | 0.056203355 | 0.030334999 |
| 0.018224401 | 0.036869018 | 0.016512082 | 0.000940569 |
| 0.070040856 | 0.122337451 | 0.004525533 | 0.021841164 |
| 0.109136272 | 0.119563451 | 0.001088906 | 0.000343911 |
| 0.04143568  | 0.101673938 | 0.143842069 | 0.088805653 |
| 0.085698913 | 0.113043538 | 0.067237194 | 0.033058058 |
| 0.00507336  | 0.108414494 | 0.233627727 | 0.036074511 |
| 0.110037234 | 0.00289123  | 0.089276502 | 0.26346858  |
| 0.015681317 | 0.02010685  | 0.002083456 | 0.011657122 |
| 0.224459011 | 0.034853932 | 0.069561161 | 0.007510032 |
| 0.06460356  | 0.132458245 | 0.004176777 | 0.03243835  |
| 0.062452979 | 0.051825097 | 0.023015955 | 0.050715006 |
| 0.069191887 | 0.013658562 | 0.137332126 | 0.090060012 |
| 0.01252144  | 0.009846312 | 0.006835498 | 0.152426894 |
| 0.106341051 | 0.08883786  | 0.000579112 | 0.070287645 |
| 0.137660968 | 0.119505336 | 0.083673342 | 0.133115361 |
| 0.008027325 | 0.127696995 | 0.161676878 | 0.110420377 |
| 0.038271151 | 0.051397091 | 0.075898499 | 0.0058629   |
| 0.075664624 | 0.086881778 | 0.067615774 | 0.034796649 |
| 0.119154753 | 0.008276534 | 0.0019553   | 0.129085441 |
| 0.091593344 | 0.001885474 | 0.03589151  | 0.155730401 |
| 0.001054481 | 0.253437663 | 0.146639101 | 0.04413145  |
| 0.112337702 | 0.120156204 | 0.079310293 | 0.0396275   |
| 0.003981869 | 0.162689473 | 0.098163032 | 0.059437986 |
| 0.06943958  | 0.068572348 | 0.013689692 | 0.007533299 |
| 0.074539327 | 0.004027416 | 0.011539913 | 0.009041269 |
| 0.01606295  | 0.064394946 | 0.046722671 | 0.03623289  |
| 0.076282116 | 0.006642978 | 0.11948659  | 0.039749714 |
| 0.052696874 | 0.054364025 | 0.083753659 | 0.02809982  |
| 0.028157017 | 0.126029488 | 0.067526247 | 0.001028884 |
| 0.23747633  | 0.11080873  | 0.132526388 | 0.001345766 |
| 0.136352524 | 0.000127515 | 0.0828352   | 0.06878432  |
| 0.064121076 | 0.066018348 | 0.138172281 | 0.083267613 |
| 0.062491044 | 0.038060262 | 0.049346872 | 0.058413065 |
| 0.040346995 | 0.046009874 | 0.145688145 | 0.041368461 |
| 0.083864392 | 0.010451064 | 0.008318784 | 0.006779062 |
| 0.002478903 | 0.115661833 | 0.037208697 | 0.004148657 |
| 0.072645668 | 0.055894219 | 0.086910496 | 0.077244312 |
| 0.134115383 | 0.006405647 | 0.082049923 | 0.074546405 |
| 0.014702495 | 0.007863776 | 0.002617418 | 0.061603259 |
| 0.050269482 | 0.067480878 | 0.077319625 | 0.021249532 |
| 0.078247279 | 0.066091731 | 0.037677082 | 0.105324503 |
| 0.087968617 | 0.083299996 | 0.018739623 | 0.009503906 |
| 0.012954318 | 0.014742968 | 0.193273892 | 0.000773265 |
| 0.086839685 | 0.007182663 | 0.114663381 | 0.070559594 |
| 0.214367554 | 0.097986537 | 0.005735576 | 0.003049999 |
| 0.008916016 | 0.010795817 | 0.018230497 | 0.120594114 |
| 0.196447864 | 0.027403942 | 0.145261614 | 0.016347759 |
| 0.141862182 | 0.122677524 | 0.11603297  | 0.040759042 |
| 0.06887806  | 0.019334687 | 0.081578323 | 0.007444271 |
| 0.092207289 | 0.104311551 | 0.04791688  | 0.071583298 |
| 0.083021238 | 0.122181802 | 0.005474194 | 0.12270692  |
| 0.082982897 | 0.014191775 | 0.099407228 | 0.069256919 |
| 0.029316206 | 0.027146042 | 0.221042659 | 0.044013807 |

|               |             |             |             |
|---------------|-------------|-------------|-------------|
| 0.029993767   | 0.166968754 | 0.000847214 | 0.013594708 |
| 0.101759212   | 0.067599947 | 0.066963819 | 0.124970791 |
| 0.156727915   | 0.128139954 | 0.132336785 | 0.033502659 |
| 0.065700186   | 0.072374903 | 0.012716713 | 0.056827594 |
| 0.074654773   | 0.012289419 | 0.053788163 | 0.007361509 |
| 0.10438186    | 0.133410032 | 0.036244688 | 0.006318806 |
| 0.000508774   | 0.151594583 | 0.077305301 | 0.00485985  |
| 0.150533165   | 0.066531687 | 0.069832574 | 0.135444221 |
| 0.028534645   | 0.068907137 | 0.043085261 | 0.131772428 |
| 0.000879971   | 0.063349674 | 0.174464794 | 0.096777836 |
| 0.043688996   | 0.161667554 | 0.112467555 | 0.199333011 |
| 0.002370494   | 0.039408117 | 0.000472021 | 0.05632261  |
| 0.057782961   | 0.144366807 | 0.031046051 | 0.039530649 |
| 0.097384991   | 0.106472843 | 0.032276099 | 0.115276763 |
| 0.000391945   | 0.169288085 | 0.056093001 | 0.074000747 |
| 0.019704312   | 0.072502098 | 0.004093879 | 0.182503101 |
| 0.055281644   | 0.023000099 | 0.058004186 | 0.020687807 |
| 0.083996905   | 0.089645428 | 0.01187547  | 0.077030538 |
| 0.085182777   | 0.005045562 | 0.046644832 | 0.113715399 |
| 0.053544042   | 0.193741384 | 0.156845474 | 0.027615549 |
| 0.20791666    | 0.080876133 | 0.101355544 | 0.111858782 |
| 0.024148799   | 0.058353376 | 0.161499262 | 0.091132582 |
| 0.108295931   | 0.177710111 | 0.154822274 | 0.085932185 |
| 0.0609053     | 0.002711772 | 0.106606065 | 0.062557087 |
| 0.14348187    | 0.108458298 | 0.048731683 | 0.132191128 |
| 0.00131821    | 0.033668097 | 0.05789401  | 0.01968193  |
| 0.077700748   | 0.101403893 | 0.092853505 | 0.085439044 |
| 0.016906319   | 0.00058394  | 0.101377542 | 0.010375466 |
| 0.038797672   | 0.137961006 | 0.066100683 | 0.148152052 |
| 0.018578453   | 0.065019537 | 0.023289733 | 0.001078427 |
| 0.12965104    | 0.01337214  | 0.119367201 | 0.062487773 |
| 0.028701296   | 0.00220411  | 0.083270592 | 0.140521447 |
| 0.071846472   | 0.032590816 | 0.049006537 | 0.089463445 |
| 0.044973423   | 0.131893967 | 0.111744696 | 0.060365281 |
| 0.233654032   | 0.044697615 | 0.096084076 | 0.111235479 |
| 0.078746364   | 0.051581101 |             |             |
| 2310061C15RIK | 0.148535343 | 0.419779506 | 0.113503235 |
| 0.22309684    | 0.347625999 | 0.444591546 | 0.122973001 |
| 0.224010396   | 0.382259912 | 0.317966071 | 0.426819883 |
| 0.050090402   | 0.102433625 | 1           | 0.113201726 |
| 0.420168473   | 0.080711454 | 0.191973669 | 0.113230632 |
| 0.276763234   | 0.331813075 | 0.377185298 | 0.442143557 |
| 0.32792744    | 0.250218479 | 0.401270055 | 0.395035444 |
| 0.491058219   | 0.289394792 | 0.458677511 | 0.214082735 |
| 0.432067236   | 0.365016122 | 0.396345025 | 0.043645214 |
| 0.451491246   | 0.015956609 | 0.456939461 | 0.333992645 |
| 0.173329492   | 0.379023621 | 0.36706289  | 0.325780325 |
| 0.404583165   | 0.086054019 | 0.231158032 | 0.424093294 |
| 0.378103586   | 0.338364518 | 0.127703211 | 0.450637952 |
| 0.401261788   | 0.420089168 | 0.414523103 | 0.009695113 |
| 0.323343415   | 0.091554443 | 0.238679453 | 0.507676327 |
| 0.292644936   | 0.206318697 | 0.297258202 | 0.317691904 |
| 0.413968491   | 0.406578332 | 0.324820767 | 0.396007109 |
| 0.502971692   | 0.205840053 | 0.440946104 | 0.224585595 |

|             |             |             |             |
|-------------|-------------|-------------|-------------|
| 0.435277335 | 0.073848555 | 0.240435195 | 0.145203056 |
| 0.407197597 | 0.285350719 | 0.395128274 | 0.324856603 |
| 0.424683041 | 0.528167783 | 0.31215283  | 0.506477311 |
| 0.121437749 | 0.365014528 | 0.314035813 | 0.36149866  |
| 0.404235717 | 0.147722306 | 0.460769005 | 0.526739405 |
| 0.099869508 | 0.410245929 | 0.439530116 | 0.201151139 |
| 0.439663554 | 0.288590727 | 0.421745877 | 0.208024707 |
| 0.39451663  | 0.381935487 | 0.483030083 | 0.382155072 |
| 0.352239189 | 0.136441053 | 0.497906613 | 0.346241357 |
| 0.368522689 | 0.15101737  | 0.281103251 | 0.457169659 |
| 0.454751715 | 0.490307076 | 0.440313859 | 0.412373341 |
| 0.413992883 | 0.497857534 | 0.453274906 | 0.429347626 |
| 0.168983069 | 0.524159174 | 0.278710737 | 0.095649366 |
| 0.144261755 | 0.154800794 | 0.266251121 | 0.357809712 |
| 0.460883149 | 0.411985745 | 0.308322445 | 0.306900461 |
| 0.447007849 | 0.486872102 | 0.521242537 | 0.454379983 |
| 0.091219013 | 0.259246042 | 0.414275582 | 0.358044778 |
| 0.435970567 | 0.188496488 | 0.292090538 | 0.520987081 |
| 0.41982035  | 0.451980153 | 0.260501579 | 0.516580652 |
| 0.282397617 | 0.518431463 | 0.446334924 | 0.262873325 |
| 0.525235498 | 0.507140904 | 0.507965108 | 0.423623178 |
| 0.486407764 | 0.421985875 | 0.091790383 | 0.417586645 |
| 0.490103187 | 0.021700129 | 0.459010515 | 0.483726198 |
| 0.500736402 | 0.465321254 | 0.513050835 | 0.498450816 |
| 0.50699655  | 0.139964087 | 0.032810798 | 0.352069575 |
| 0.515849024 | 0.434857807 | 0.204303129 | 0.437542778 |
| 0.396386416 | 0.456956017 | 0.440242871 | 0.372082601 |
| 0.520736707 | 0.453153093 | 0.476645974 | 0.44727726  |
| 0.354069686 | 0.364910594 | 0.386504801 | 0.483850324 |
| 0.096513446 | 0.206669369 | 0.107500376 | 0.362076665 |
| 0.380419181 | 0.258715868 | 0.461466878 | 0.385121064 |
| 0.280922029 | 0.406707499 | 0.346984753 | 0.412211763 |
| 0.10630387  | 0.466532355 | 0.247922723 | 0.2690462   |
| 0.093352092 | 0.20804102  | 0.29746615  | 0.238013337 |
| 0.332370642 | 0.279555288 | 0.461730593 | 0.47716234  |
| 0.380806764 | 0.263560201 | 0.468182619 | 0.479797399 |
| 0.434401939 | 0.409203615 | 0.306143368 | 0.026686333 |
| 0.349541039 | 0.313611916 | 0.206592401 | 0.420460024 |
| 0.219758249 | 0.340696138 | 0.438240537 | 0.426446076 |
| 0.384572249 | 0.224118798 | 0.407942331 | 0.452323863 |
| 0.225666856 | 0.370092623 | 0.462414408 | 0.44138469  |
| 0.010647609 | 0.413887316 | 0.467761987 | 0.195479728 |
| 0.388369581 | 0.172698962 | 0.285939762 | 0.454905944 |
| 0.33647884  | 0.266436403 | 0.476848939 | 0.414913896 |
| 0.408587372 | 0.261014349 | 0.519028617 | 0.070057454 |
| 0.364534108 | 0.092155012 | 0.353744652 | 0.358163006 |
| 0.338484206 | 0.359992493 | 0.350667973 | 0.332307441 |
| 0.211989189 | 0.521191804 | 0.430579676 | 0.505991373 |
| 0.409250435 | 0.52234827  | 0.466969686 | 0.455855145 |
| 0.421316055 | 0.381987925 | 0.153215904 | 0.467874828 |
| 0.453810496 | 0.354100277 | 0.134360399 | 0.450276079 |
| 0.387931501 | 0.435966352 | 0.163445311 | 0.491273546 |
| 0.507250897 | 0.474215559 | 0.233150239 | 0.407772987 |
| 0.438440068 | 0.335072767 | 0.431983538 | 0.525098919 |

|             |             |             |             |
|-------------|-------------|-------------|-------------|
| 0.339163933 | 0.397189415 | 0.377446363 | 0.417019194 |
| 0.263745506 | 0.255858129 | 0.359453769 | 0.19108617  |
| 0.012302162 | 0.157319113 | 0.132154585 | 0.239881622 |
| 0.199234655 | 0.430517938 | 0.430709457 | 0.517453425 |
| 0.204201515 | 0.431499985 | 0.307294815 | 0.368282211 |
| 0.432373634 | 0.387865386 | 0.395856657 | 0.420981916 |
| 0.318928601 | 0.038172539 | 0.191895562 | 0.532054877 |
| 0.086685989 | 0.279781216 | 0.396411197 | 0.00603562  |
| 0.102110674 | 0.423840707 | 0.154483093 | 0.242586081 |
| 0.460444383 | 0.24717981  | 0.300228087 | 0.356611232 |
| 0.407458746 | 0.166797112 | 0.007333076 | 0.472180695 |
| 0.476970363 | 0.447904609 | 0.477543612 | 0.458897187 |
| 0.423950661 | 0.422519653 | 0.43708916  | 0.425396328 |
| 0.192431108 | 0.165085124 | 0.253325884 | 0.364707111 |
| 0.010929517 | 0.42261372  | 0.351132646 | 0.224568068 |
| 0.447920223 | 0.374007044 | 0.089602532 | 0.381378924 |
| 0.054974123 | 0.227269901 | 0.392842701 | 0.296395563 |
| 0.382208815 | 0.039213064 | 0.292066751 | 0.374220999 |
| 0.447911048 | 0.400923341 | 0.373589945 | 0.527982063 |
| 0.407514288 | 0.198068155 | 0.368263571 | 0.434611006 |
| 0.142487026 | 0.149477194 | 0.412850258 | 0.046136178 |
| 0.256174025 | 0.45537181  | 0.412395158 | 0.13405471  |
| 0.359424256 | 0.017184812 | 0.411024296 | 0.532408756 |
| 0.470680863 | 0.508447529 | 0.502431297 | 0.307754986 |
| 0.507169244 | 0.107534711 | 0.522307495 | 0.437928596 |
| 0.402832861 | 0.002942866 | 0.013783057 | 0.467906154 |
| 0.435218701 | 0.107843725 | 0.245478363 | 0.422396219 |
| 0.186707683 | 0.242534777 | 0.130190804 | 0.220482064 |
| 0.456049001 | 0.301715814 | 0.217317109 | 0.482099287 |
| 0.321382138 | 0.307664915 | 0.439818116 | 0.154204212 |
| 0.433625493 | 0.110621482 | 0.150127504 | 0.014654628 |
| 0.401744385 | 0.17986167  | 0.48732512  | 0.50640668  |
| 0.502206429 | 0.423997819 | 0.359402026 | 0.40185425  |
| 0.428422275 | 0.164599043 | 0.385160767 | 0.186022031 |
| 0.487784504 | 0.437281723 | 0.39661582  | 0.377392647 |
| 0.503450797 | 0.479780996 | 0.078832614 | 0.443736447 |
| 0.031899001 | 0.003248289 | 0.437169269 | 0.340968213 |
| 0.07073466  | 0.404792634 | 0.331576116 | 0.285522295 |
| 0.28134519  | 0.07730479  | 0.28356322  | 0.27650926  |
| 0.368292637 | 0.41965345  | 0.317498032 | 0.309082406 |
| 0.307203592 | 0.181559384 | 0.273063649 | 0.243565178 |
| 0.291154662 | 0.361220379 | 0.256570827 | 0.05419742  |
| 0.438497374 | 0.444709409 | 0.119511444 | 0.243031241 |
| 0.461900749 | 0.481763758 | 0.08924618  | 0.028723244 |
| 0.344805572 | 0.379516898 | 0.490786852 | 0.496146702 |
| 0.532067023 | 0.520798851 | 0.417610124 | 0.196672586 |
| 0.135480373 | 0.370053788 | 0.32974632  | 0.145288996 |
| 0.509993749 | 0.127503056 | 0.48535521  | 0.31729418  |
| 0.193119721 | 0.298011484 | 0.08025392  | 0.15434367  |
| 0.404509495 | 0.267206418 | 0.252219922 | 0.231733177 |
| 0.383813658 | 0.284021731 | 0.103971002 | 0.285845583 |
| 0.419271188 | 0.198849763 | 0.251090045 | 0.37237522  |
| 0.40131315  | 0.239128023 | 0.452878358 | 0.460872286 |
| 0.211436962 | 0.186948959 | 0.376912816 | 0.417093387 |

|             |             |             |             |
|-------------|-------------|-------------|-------------|
| 0.459605349 | 0.403489194 | 0.059996004 | 0.446789981 |
| 0.48231651  | 0.467177225 | 0.502458002 | 0.419305169 |
| 0.150928331 | 0.423163396 | 0.330623786 | 0.395023034 |
| 0.271868941 | 0.443088919 | 0.315312652 | 0.125478656 |
| 0.34081481  | 0.492284772 | 0.43384552  | 0.252384481 |
| 0.438214033 | 0.206332294 | 0.11365171  | 0.442436453 |
| 0.214780549 | 0.173802955 | 0.387039793 | 0.441675959 |
| 0.00351596  | 0.155532237 | 0.470702629 | 0.333754831 |
| 0.513529933 | 0.469307197 | 0.451447914 | 0.324920461 |
| 0.002732076 | 0.423631587 | 0.439115464 | 0.445654614 |
| 0.450863632 | 0.412572814 | 0.206447547 | 0.140085386 |
| 0.347899357 | 0.147007015 | 0.218188255 | 0.394707493 |
| 0.185461637 | 0.462347857 | 0.275148801 | 0.281526159 |
| 0.265674702 | 0.153657836 | 0.26584953  | 0.328204633 |
| 0.160632454 | 0.319443215 | 0.407568614 | 0.320883298 |
| 0.248451234 | 0.434914188 | 0.445980871 | 0.064823131 |
| 0.375781694 | 0.42141584  | 0.428674221 | 0.00665721  |
| 0.460716714 | 0.023207175 | 0.274692155 | 0.294086632 |
| 0.271721348 | 0.292150261 | 0.320808183 | 0.34876636  |
| 0.416001069 | 0.307280938 | 0.363906443 | 0.319522807 |
| 0.237678825 | 0.306347718 | 0.423918582 | 0.404898421 |
| 0.349425641 | 0.209294719 | 0.155332239 | 0.149018291 |
| 0.112052317 | 0.449303219 | 0.311188247 | 0.132400395 |
| 0.306693479 | 0.414823777 | 0.387517388 | 0.4926495   |
| 0.425682863 | 0.171321505 | 0.389082283 | 0.455636978 |
| 0.268235513 | 0.38458158  | 0.134773088 | 0.429298638 |
| 0.332681214 | 0.277373644 | 0.42922609  | 0.394837085 |
| 0.435672744 | 0.420835377 | 0.313319069 | 0.433779227 |
| 0.419948851 | 0.375444133 | 0.351848501 | 0.152349046 |
| 0.27406211  | 0.205308779 | 0.307741595 | 0.006542354 |
| 0.422117531 | 0.357708986 | 0.470522296 | 0.494019388 |
| 0.307678695 | 0.40357494  | 0.371118238 | 0.171549721 |
| 0.303116158 | 0.2302578   | 0.225067121 | 0.449134729 |
| 0.237699044 | 0.270969785 | 0.355139063 | 0.40134446  |
| 0.449063679 | 0.426425856 | 0.287730374 | 0.341694145 |
| 0.305582897 | 0.279706746 | 0.479288868 | 0.202614452 |
| 0.439850508 | 0.232233449 | 0.391973599 | 0.366913048 |
| 0.296152089 | 0.501511299 | 0.120314364 | 0.514588374 |
| 0.385033541 | 0.199690875 | 0.503078379 | 0.371221515 |
| 0.363653783 | 0.182888714 | 0.204348256 | 0.417608257 |
| 0.306839475 | 0.351235294 | 0.024739609 | 0.102687804 |
| 0.390537299 | 0.333180225 | 0.428056543 | 0.403386086 |
| 0.280844342 | 0.382534529 | 0.174881551 | 0.386304899 |
| 0.485275111 | 0.507162469 | 0.354422693 | 0.315806781 |
| 0.414917678 | 0.182599352 | 0.447540897 | 0.024801712 |
| 0.450503577 | 0.428553498 | 0.408810935 | 0.112899967 |
| 0.048548029 | 0.235483044 | 0.44804872  | 0.123503435 |
| 0.463422034 | 0.233973534 | 0.386583844 | 0.456444435 |
| 0.251393749 | 0.512063256 | 0.194521398 | 0.452579915 |
| 0.092796277 | 0.327656918 | 0.381893711 | 0.397231751 |
| 0.297401902 | 0.324800271 | 0.426273546 | 0.269601315 |
| 0.076388701 | 0.323538108 | 0.005238901 | 0.433490415 |
| 0.480261937 | 0.358936639 | 0.27061429  | 0.319990391 |
| 0.344851106 | 0.398467748 | 0.3135866   | 0.421329196 |



|               |             |             |             |
|---------------|-------------|-------------|-------------|
| 0.02836413    | 0.405189277 | 0.283944648 | 0.445960442 |
| 0.275202252   | 0.402297066 | 0.110216494 | 0.340897389 |
| 0.478436563   | 0.362445259 | 0.317568713 | 0.34515947  |
| 0.487177959   | 0.406791398 | 0.229184545 | 0.265607609 |
| 0.406302005   | 0.124463784 | 0.41027261  | 0.525744885 |
| 0.25712354    | 0.252125986 | 0.455066944 | 0.294008012 |
| 0.336546438   | 0.413099722 | 0.412216923 | 0.514732578 |
| 0.131233062   | 0.334752403 | 0.441571989 | 0.459597584 |
| 0.363577771   | 0.203907096 | 0.28778715  | 0.296714216 |
| 0.465349872   | 0.171399121 | 0.295668026 | 0.425078134 |
| 0.25220657    | 0.374513195 | 0.367642851 | 0.248364929 |
| 0.079915954   | 0.255671765 | 0.427444229 | 0.222129352 |
| 0.377827613   | 0.400637138 | 0.27971871  | 0.402835809 |
| 0.212314666   | 0.055409488 | 0.46146045  | 0.025103369 |
| 0.410853725   | 0.436278874 | 0.328215014 | 0.392354804 |
| 0.259648859   | 0.419364725 | 0.407618624 | 0.004778998 |
| 0.433964253   | 0.058066163 | 0.340034389 | 0.292183328 |
| 0.332623259   | 0.113704596 | 0.460485576 | 0.503668801 |
| 0.387152543   | 0.350839154 | 0.375616794 | 0.462414376 |
| 0.170288383   | 0.33205307  | 0.36163302  | 0.448258132 |
| 0.246827947   | 0.404293187 | 0.425276216 | 0.390390798 |
| 0.432146583   | 0.353756083 |             |             |
| 2410091C18RIK | 0.158182727 | 0.091407781 | 0.11150207  |
| 0.04728147    | 0.058027048 | 0.023034671 | 0.191037231 |
| 0.136697089   | 0.11103483  | 0.008530097 | 0.057390054 |
| 0.16815468    | 0.005199909 | 0.113201726 | 1           |
| 0.045034357   | 0.195279932 | 0.252465338 | 0.030502689 |
| 0.048476237   | 0.069494895 | 0.011857121 | 0.043567256 |
| 0.063309718   | 0.277500343 | 0.076082603 | 0.025133025 |
| 0.088664127   | 0.002529236 | 0.040425547 | 0.002406431 |
| 0.19064449    | 0.05293646  | 0.01313007  | 0.104869733 |
| 0.044674451   | 0.01254863  | 0.200318228 | 0.065035026 |
| 0.00624845    | 0.223865682 | 0.014280567 | 0.082987542 |
| 0.021432562   | 0.123032454 | 0.00214382  | 0.047850869 |
| 0.076664681   | 0.063197342 | 0.182622372 | 0.05250737  |
| 0.02385797    | 0.114941661 | 0.042105577 | 0.010732084 |
| 0.009969241   | 0.00049976  | 0.004217994 | 0.118165999 |
| 0.243889687   | 0.230074357 | 0.005468707 | 0.106275309 |
| 0.052716007   | 0.084712349 | 0.207790862 | 0.014827822 |
| 0.114593396   | 0.009641357 | 0.043239563 | 0.031899482 |
| 0.046662721   | 0.176861743 | 0.317558681 | 0.22350933  |
| 0.02051587    | 0.182982054 | 0.059699026 | 0.017470951 |
| 0.078523235   | 0.181244309 | 0.202066081 | 0.128767731 |
| 0.024262646   | 0.038206772 | 0.028503355 | 0.17745633  |
| 0.111734673   | 0.157569233 | 0.07424661  | 0.145642564 |
| 0.201635194   | 0.027986728 | 0.078295625 | 0.264594248 |
| 0.084992445   | 0.012517385 | 0.017497486 | 0.010026826 |
| 0.056454239   | 0.048394297 | 0.167389189 | 0.170859632 |
| 0.051241917   | 0.23391539  | 0.147665484 | 0.032723791 |
| 0.040443243   | 0.185753436 | 0.036409637 | 0.061796321 |
| 0.052436948   | 0.091843831 | 0.075919024 | 0.138946506 |
| 0.032458278   | 0.106050019 | 0.069194318 | 0.126173141 |
| 0.001447441   | 0.116201692 | 0.150700335 | 0.190116883 |
| 0.136770665   | 0.186359612 | 0.04063934  | 0.236095514 |

|             |             |             |             |
|-------------|-------------|-------------|-------------|
| 0.077297678 | 0.128158923 | 0.12979858  | 0.122746938 |
| 0.093396897 | 0.12444277  | 0.113320406 | 0.101976581 |
| 0.204650931 | 0.011214802 | 0.029385945 | 0.061268865 |
| 0.100976574 | 0.311207448 | 0.023557096 | 0.160020257 |
| 0.156223677 | 0.07863354  | 0.10281466  | 0.19713834  |
| 0.153849809 | 0.147990879 | 0.067519924 | 0.180625678 |
| 0.147001102 | 0.144461447 | 0.126021785 | 0.044281002 |
| 0.146803302 | 0.050184336 | 0.039543183 | 0.130969607 |
| 0.153938147 | 0.003079651 | 0.07317781  | 0.082688222 |
| 0.107723742 | 0.059533327 | 0.127710897 | 0.096309566 |
| 0.108184228 | 0.290407382 | 0.00259824  | 0.135948911 |
| 0.129263458 | 0.121984474 | 0.128866099 | 0.021981835 |
| 0.059456082 | 0.041471313 | 0.070229227 | 0.008532652 |
| 0.186075847 | 0.084262971 | 0.079137145 | 0.096230999 |
| 0.06955106  | 0.231009269 | 0.019872531 | 0.142349198 |
| 0.153841911 | 0.134108606 | 0.215456345 | 0.191001355 |
| 0.007260363 | 0.231206771 | 0.036020375 | 0.06752464  |
| 0.253681396 | 0.054395244 | 0.008742232 | 0.057116509 |
| 0.274510977 | 0.026555107 | 0.16542189  | 0.172094736 |
| 0.169078772 | 0.358764582 | 0.06769399  | 0.085621574 |
| 0.118057255 | 0.296583996 | 0.043676832 | 0.099747087 |
| 0.040938211 | 0.201837439 | 0.061579975 | 0.145837109 |
| 0.198345592 | 0.027224488 | 0.286758988 | 0.036597451 |
| 0.021883424 | 0.007421386 | 0.005408113 | 0.024681474 |
| 0.324698605 | 0.063972005 | 0.057337541 | 0.067217013 |
| 0.077989654 | 0.167246391 | 0.024411482 | 0.20997288  |
| 0.239391896 | 0.035834156 | 0.099695782 | 0.034828684 |
| 0.070327495 | 0.073349488 | 0.072774264 | 0.058099593 |
| 0.141634353 | 0.010237338 | 0.005011004 | 0.090925432 |
| 0.011129134 | 0.037242266 | 0.085646424 | 0.071852659 |
| 0.017713924 | 0.249816429 | 0.126101519 | 0.00442255  |
| 0.043351859 | 0.03434313  | 0.169247175 | 0.017719243 |
| 0.165772173 | 0.208272373 | 0.045687506 | 0.034266395 |
| 0.164263076 | 0.12771666  | 0.119634165 | 0.10208212  |
| 0.012200659 | 0.129424322 | 0.073198806 | 0.113031881 |
| 0.10370186  | 0.020846699 | 0.003742063 | 0.069898544 |
| 0.082113764 | 0.012908897 | 0.243053315 | 0.054373081 |
| 0.021977967 | 0.053549582 | 0.0513241   | 0.119541168 |
| 0.183702382 | 0.10892835  | 0.141310305 | 0.109432379 |
| 0.122178747 | 0.131353618 | 0.10148959  | 0.147037027 |
| 0.009146474 | 0.03946326  | 0.023783841 | 0.118886354 |
| 0.223302657 | 0.038886635 | 0.220816905 | 0.005204018 |
| 0.001415471 | 0.230981923 | 0.227908417 | 0.151344554 |
| 0.016702633 | 0.028424862 | 0.068420829 | 0.114331742 |
| 0.25168309  | 0.138264123 | 0.240770734 | 0.032010757 |
| 0.12549931  | 0.039139464 | 0.026151197 | 0.055325793 |
| 0.244227378 | 0.051861196 | 0.086574083 | 0.179021164 |
| 0.222113096 | 0.012081548 | 0.089666254 | 0.009721732 |
| 0.174226249 | 0.055850666 | 0.30407418  | 0.340126901 |
| 0.108684283 | 0.279600882 | 0.185228011 | 0.012512544 |
| 0.119999775 | 0.264834983 | 0.015762924 | 0.103239719 |
| 0.128550848 | 0.13538277  | 0.125825286 | 0.148356591 |
| 0.111659232 | 0.080938843 | 0.083955836 | 0.044337914 |
| 0.138086216 | 0.134446164 | 0.014449038 | 0.080241531 |

|             |             |             |             |
|-------------|-------------|-------------|-------------|
| 0.01431347  | 0.11152703  | 0.076915933 | 0.308257824 |
| 0.063394468 | 0.169324972 | 0.159320354 | 0.05765788  |
| 0.061822627 | 0.002777124 | 0.049436547 | 0.135756347 |
| 0.122071946 | 0.12476576  | 0.006228782 | 0.011610077 |
| 0.121401674 | 0.16788094  | 0.009629391 | 0.122287304 |
| 0.080894782 | 0.179120247 | 0.05487607  | 0.085003839 |
| 0.184217573 | 0.006830208 | 0.043428119 | 0.000139063 |
| 0.012070988 | 0.160800173 | 0.020953041 | 0.081909209 |
| 0.142766161 | 0.087171076 | 0.137300349 | 0.133478319 |
| 0.102310498 | 0.104896718 | 0.110490815 | 0.015382228 |
| 0.113412902 | 0.001102549 | 0.105427746 | 0.093177152 |
| 0.011383172 | 0.005550467 | 0.070306146 | 0.078105554 |
| 0.033433313 | 0.212428157 | 0.262768843 | 0.009289107 |
| 0.123092835 | 0.11495099  | 0.208420622 | 0.026738927 |
| 0.041264084 | 0.093965618 | 0.030996183 | 0.124750791 |
| 0.124017613 | 0.189715665 | 0.025626902 | 0.306258131 |
| 0.040342146 | 0.149026702 | 0.308084452 | 0.012688411 |
| 0.098784172 | 0.241467889 | 0.168284228 | 0.110504394 |
| 0.151707731 | 0.062841249 | 0.006045396 | 0.017593174 |
| 0.106949407 | 0.167268417 | 0.007013172 | 0.17523073  |
| 0.0959172   | 0.054090108 | 0.170695728 | 0.176198646 |
| 0.136576292 | 0.132541872 | 0.227267236 | 0.088704453 |
| 0.0416939   | 0.014041389 | 0.028983759 | 0.227417366 |
| 0.029427151 | 0.031801339 | 0.231881608 | 0.072038461 |
| 0.084535571 | 0.105003046 | 0.014239282 | 0.01793588  |
| 0.128138416 | 0.05899619  | 0.043878543 | 0.233109638 |
| 0.054538791 | 0.041013189 | 0.108753499 | 0.164821486 |
| 0.037129169 | 0.171887136 | 0.267482904 | 0.186140793 |
| 0.021304252 | 0.025311298 | 0.238345527 | 0.266787162 |
| 0.09083243  | 0.086400024 | 0.199352845 | 0.079954721 |
| 0.229906248 | 0.06599847  | 0.101778836 | 0.095015291 |
| 0.145364639 | 0.153036964 | 0.220879471 | 0.118645709 |
| 0.17521553  | 0.098289113 | 0.045920686 | 0.08862546  |
| 0.111937957 | 0.224184201 | 0.115995551 | 0.019618325 |
| 0.323119611 | 0.085474125 | 0.146753659 | 0.300599962 |
| 0.027751616 | 0.282571558 | 0.157127243 | 0.153736425 |
| 0.060240563 | 0.009908236 | 0.232109586 | 0.219245831 |
| 0.143723387 | 0.006072131 | 0.269425281 | 0.059437298 |
| 0.117369246 | 0.010398385 | 0.051311748 | 0.192762971 |
| 0.269302899 | 0.238516213 | 0.022305646 | 0.10019093  |
| 0.061970924 | 0.022234844 | 0.048075232 | 0.079339886 |
| 0.117417338 | 0.036096833 | 0.119230621 | 0.165727474 |
| 0.321105153 | 0.029996786 | 0.021911953 | 0.065571867 |
| 0.262760542 | 0.029145498 | 0.165366535 | 0.319452247 |
| 0.262170128 | 0.200893634 | 0.098594693 | 0.156805015 |
| 0.032488596 | 0.175361614 | 0.207486556 | 0.089570625 |
| 0.015167311 | 0.122109428 | 0.016084499 | 0.075722115 |
| 0.006002823 | 0.005768801 | 0.117792257 | 0.075506296 |
| 0.162099622 | 0.098765979 | 0.159488215 | 0.065119786 |
| 0.000414343 | 0.042618674 | 0.064363483 | 0.02130382  |
| 0.089498953 | 0.140515194 | 0.069141441 | 0.150409132 |
| 0.235118966 | 0.203599425 | 0.121423566 | 0.013108852 |
| 0.006827152 | 0.05903165  | 0.312687771 | 0.203552878 |
| 0.128296015 | 0.237790934 | 0.009488    | 0.09981225  |

|             |             |             |             |
|-------------|-------------|-------------|-------------|
| 0.021151289 | 0.265825174 | 0.168864936 | 0.009026531 |
| 0.005560932 | 0.130883858 | 0.084918174 | 0.141297285 |
| 0.030473584 | 0.121521994 | 0.129233025 | 0.035056689 |
| 0.05305403  | 0.144821742 | 0.142934242 | 0.099776611 |
| 0.12174993  | 0.140449122 | 0.149802847 | 0.034577496 |
| 0.096169455 | 0.14156166  | 0.06570814  | 0.196139036 |
| 0.090340899 | 0.146782875 | 0.052984986 | 0.048862231 |
| 0.035261904 | 0.144121942 | 0.298434264 | 0.28867091  |
| 0.126733588 | 0.087904453 | 0.281322188 | 0.215715025 |
| 0.226700337 | 0.042816368 | 0.217165333 | 0.099568589 |
| 0.155208854 | 0.202812109 | 0.068053842 | 0.073477619 |
| 0.005360173 | 0.017747359 | 0.132738427 | 0.044327713 |
| 0.174543377 | 0.028439974 | 0.029467062 | 0.073645073 |
| 0.061753818 | 0.21168481  | 0.270337093 | 0.147205215 |
| 0.037783294 | 0.051305425 | 0.007618746 | 0.11911075  |
| 0.138927165 | 0.304715483 | 0.055410809 | 0.048460842 |
| 0.119934889 | 0.027875299 | 0.070830504 | 0.121421674 |
| 0.010049519 | 0.1841729   | 0.006956385 | 0.124707645 |
| 0.004303339 | 0.20476544  | 0.321171675 | 0.054733361 |
| 0.003930187 | 0.118282254 | 0.071572566 | 0.016593118 |
| 0.059359001 | 0.056109483 | 0.043717403 | 0.135065587 |
| 0.172644203 | 0.170448878 | 0.166966609 | 0.128507295 |
| 0.026130584 | 0.026553046 | 0.040885522 | 0.069896879 |
| 0.113022207 | 0.099111356 | 0.257145667 | 0.09681436  |
| 0.044932695 | 0.291094077 | 0.196103017 | 0.094413637 |
| 0.036911311 | 0.084690216 | 0.005137069 | 0.022742655 |
| 0.087628052 | 0.010780776 | 0.000297086 | 0.012520381 |
| 0.155924782 | 0.03673445  | 0.064881198 | 0.121657567 |
| 0.039436627 | 0.180109774 | 0.005303167 | 0.101296623 |
| 0.110151503 | 0.153386793 | 0.040421026 | 0.274086527 |
| 0.155269705 | 0.179433166 | 0.044555661 | 0.012522745 |
| 0.035848446 | 0.023095754 | 0.010262886 | 0.210483511 |
| 0.174139776 | 0.00554426  | 0.03981774  | 0.247964372 |
| 0.099462144 | 0.002791761 | 0.060806902 | 0.049648035 |
| 0.291812602 | 0.157092212 | 0.119805974 | 0.074020916 |
| 0.123704176 | 0.20512615  | 0.025851104 | 0.036383872 |
| 0.033251318 | 0.024017758 | 0.104651023 | 0.01681529  |
| 0.178424566 | 0.041396795 | 0.030728867 | 0.217969114 |
| 0.14119272  | 0.024552426 | 0.322002131 | 0.007533238 |
| 0.191075169 | 0.148367119 | 0.050567669 | 0.019726729 |
| 0.088924977 | 0.037899814 | 0.231126247 | 0.097872086 |
| 0.002843415 | 0.06028225  | 0.106735648 | 0.045968048 |
| 0.180188793 | 0.027867724 | 0.290972919 | 0.006218929 |
| 0.10061211  | 0.101930393 | 0.170949465 | 0.040731095 |
| 0.050407084 | 0.309689319 | 0.013234396 | 0.13556836  |
| 0.158438963 | 0.020898588 | 0.078511191 | 0.098950474 |
| 0.023233729 | 0.133272053 | 0.029788935 | 0.138267051 |
| 0.136106367 | 0.218504307 | 0.081859579 | 0.113636677 |
| 0.214350749 | 0.032206297 | 0.014618431 | 0.069500755 |
| 0.103622185 | 0.080505731 | 0.022750049 | 0.12556122  |
| 0.012100509 | 0.16379639  | 0.044960919 | 0.082076585 |
| 0.133031517 | 0.123321064 | 0.019857673 | 0.286846898 |
| 0.136129698 | 0.048494898 | 0.037827795 | 0.197802944 |
| 0.066997278 | 0.069846232 | 0.183956933 | 0.00127772  |

|               |             |             |             |
|---------------|-------------|-------------|-------------|
| 0.054595102   | 0.057029118 | 0.1843602   | 0.038534143 |
| 0.249391182   | 0.095310996 | 0.053060983 | 0.053570855 |
| 0.107488371   | 0.007796225 | 0.055888297 | 0.035867246 |
| 0.015542016   | 0.175413459 | 0.132254331 | 0.111042032 |
| 0.134307658   | 0.013101389 | 0.0057864   | 0.128377638 |
| 0.008334872   | 0.006678667 | 0.015862737 | 0.045275136 |
| 0.011745901   | 0.012764597 | 0.016078103 | 0.010103557 |
| 0.099021143   | 0.09568776  |             |             |
| 2610021K21RIK | 0.046563263 | 0.354614241 | 0.030216417 |
| 0.122972986   | 0.298955277 | 0.249976006 | 0.046719876 |
| 0.092420373   | 0.273304505 | 0.197589839 | 0.277052774 |
| 0.014839281   | 0.145762334 | 0.420168473 | 0.045034357 |
| 1             | 0.032944423 | 0.086494497 | 0.06456206  |
| 0.180521791   | 0.299068007 | 0.301253687 | 0.215137365 |
| 0.293399068   | 0.142464479 | 0.215450021 | 0.300163252 |
| 0.448366877   | 0.230027673 | 0.341411213 | 0.141820292 |
| 0.376462708   | 0.317994168 | 0.3080817   | 0.010270544 |
| 0.283559016   | 0.027212397 | 0.375444306 | 0.262410931 |
| 0.210431999   | 0.2981078   | 0.191317882 | 0.218713759 |
| 0.247119911   | 0.024322386 | 0.133488235 | 0.354965246 |
| 0.210963144   | 0.214430809 | 0.03504369  | 0.337305191 |
| 0.269373214   | 0.239718899 | 0.284490306 | 0.002094125 |
| 0.303081724   | 0.148700998 | 0.272066033 | 0.42920802  |
| 0.152047406   | 0.108476284 | 0.252487237 | 0.167113698 |
| 0.28977754    | 0.329860971 | 0.201024666 | 0.265655359 |
| 0.448167912   | 0.249832361 | 0.367851306 | 0.128207193 |
| 0.273670652   | 0.019006271 | 0.123093198 | 0.046103446 |
| 0.308426111   | 0.171576589 | 0.28048135  | 0.318376763 |
| 0.353003942   | 0.447117464 | 0.172880107 | 0.41506698  |
| 0.1713193     | 0.324335808 | 0.289604221 | 0.286320915 |
| 0.319829322   | 0.065956827 | 0.365132973 | 0.470369243 |
| 0.03044449    | 0.228241183 | 0.337312219 | 0.07484723  |
| 0.35873736    | 0.267669922 | 0.243207788 | 0.23859126  |
| 0.351691624   | 0.32733915  | 0.402691857 | 0.240367408 |
| 0.276651553   | 0.042199467 | 0.385265797 | 0.322452299 |
| 0.267889267   | 0.051140095 | 0.275430667 | 0.449697399 |
| 0.323243905   | 0.445234229 | 0.371946616 | 0.340371092 |
| 0.334564994   | 0.451109921 | 0.332629461 | 0.362396256 |
| 0.102726948   | 0.459379155 | 0.13305781  | 0.038385798 |
| 0.039593284   | 0.07553453  | 0.243499794 | 0.267792642 |
| 0.440753696   | 0.23889178  | 0.142915005 | 0.232450225 |
| 0.474288054   | 0.380150775 | 0.458506387 | 0.376719235 |
| 0.02851557    | 0.282686825 | 0.330407922 | 0.177451496 |
| 0.322715215   | 0.077870131 | 0.305584871 | 0.425869482 |
| 0.339335386   | 0.435451767 | 0.099903697 | 0.413328975 |
| 0.15204858    | 0.471645285 | 0.385902259 | 0.142555598 |
| 0.447894225   | 0.407857147 | 0.486514115 | 0.382778225 |
| 0.397384884   | 0.230037505 | 0.070657483 | 0.342881118 |
| 0.455051697   | 0.031374739 | 0.448113287 | 0.479966573 |
| 0.431143748   | 0.453077222 | 0.501343253 | 0.471117334 |
| 0.428154168   | 0.046499422 | 0.04738791  | 0.270905546 |
| 0.437061661   | 0.362112956 | 0.128097019 | 0.319173719 |
| 0.316601933   | 0.24779434  | 0.376919483 | 0.27097094  |
| 0.469213529   | 0.415507732 | 0.446380274 | 0.334411335 |

|             |             |             |             |
|-------------|-------------|-------------|-------------|
| 0.201245593 | 0.263351756 | 0.318783168 | 0.370675639 |
| 0.03505631  | 0.074006474 | 0.027459678 | 0.260721363 |
| 0.20191362  | 0.152955428 | 0.243657546 | 0.290938874 |
| 0.157314055 | 0.205969649 | 0.292198448 | 0.365079187 |
| 0.033008138 | 0.290862462 | 0.115400619 | 0.119846889 |
| 0.04070293  | 0.105075662 | 0.168554295 | 0.131171514 |
| 0.240069836 | 0.170359683 | 0.35662033  | 0.458913708 |
| 0.289184381 | 0.128931055 | 0.333391115 | 0.439824615 |
| 0.416122913 | 0.326280433 | 0.182086586 | 0.015102418 |
| 0.287753122 | 0.258692406 | 0.257490239 | 0.30370753  |
| 0.127584924 | 0.235651588 | 0.309988957 | 0.391365732 |
| 0.176366159 | 0.090113839 | 0.32589612  | 0.357601289 |
| 0.099873612 | 0.275610152 | 0.440038101 | 0.270549318 |
| 0.00195082  | 0.252786993 | 0.417201608 | 0.210059357 |
| 0.242288336 | 0.201211898 | 0.258720524 | 0.453787588 |
| 0.287406823 | 0.275628315 | 0.458322104 | 0.38436864  |
| 0.240401346 | 0.15598592  | 0.492312045 | 0.087978782 |
| 0.294538011 | 0.071083271 | 0.265453882 | 0.195876525 |
| 0.192977547 | 0.265039097 | 0.309163624 | 0.282654308 |
| 0.073589157 | 0.456814037 | 0.331299009 | 0.472698799 |
| 0.319215728 | 0.492740476 | 0.447181374 | 0.415108552 |
| 0.276509564 | 0.295753339 | 0.220613102 | 0.409691856 |
| 0.444934452 | 0.24586062  | 0.042639516 | 0.405296232 |
| 0.275623297 | 0.372966603 | 0.146941286 | 0.474438236 |
| 0.426361152 | 0.377718508 | 0.136013452 | 0.381519666 |
| 0.351968828 | 0.165841559 | 0.371667227 | 0.490415959 |
| 0.238116224 | 0.328327573 | 0.330136549 | 0.416682647 |
| 0.125250771 | 0.271020977 | 0.262826571 | 0.241188529 |
| 0.017504821 | 0.04928787  | 0.041237646 | 0.166217175 |
| 0.250162137 | 0.291369759 | 0.343653234 | 0.469556775 |
| 0.096076771 | 0.35945458  | 0.182562546 | 0.29235331  |
| 0.369759988 | 0.300525239 | 0.313113811 | 0.308970985 |
| 0.191346429 | 0.020346411 | 0.113151089 | 0.4480759   |
| 0.019646982 | 0.281618524 | 0.211614179 | 0.003906374 |
| 0.032929722 | 0.328704491 | 0.06480905  | 0.150121616 |
| 0.472329659 | 0.14919752  | 0.145519426 | 0.226591743 |
| 0.298073792 | 0.066722622 | 0.004742637 | 0.449675028 |
| 0.426059155 | 0.403504272 | 0.420376723 | 0.3748215   |
| 0.414083771 | 0.336879832 | 0.407527811 | 0.205049185 |
| 0.081224099 | 0.05323055  | 0.298239026 | 0.274280661 |
| 0.004148377 | 0.348238813 | 0.263336201 | 0.104700062 |
| 0.386914891 | 0.244414034 | 0.02710764  | 0.296649753 |
| 0.017131764 | 0.255838211 | 0.22579743  | 0.189248253 |
| 0.346488406 | 0.00873909  | 0.202298568 | 0.311399099 |
| 0.346751619 | 0.288043235 | 0.304420803 | 0.465078261 |
| 0.265499314 | 0.079818172 | 0.29088851  | 0.36106353  |
| 0.057385267 | 0.09592862  | 0.246818001 | 0.030988929 |
| 0.126475139 | 0.380997896 | 0.285021515 | 0.05071367  |
| 0.216278883 | 0.00325349  | 0.305728266 | 0.471122034 |
| 0.375700745 | 0.496106664 | 0.452012831 | 0.298732734 |
| 0.450205196 | 0.164157602 | 0.47787976  | 0.345827593 |
| 0.268239803 | 0.00094221  | 0.006852098 | 0.468112169 |
| 0.327940225 | 0.03111413  | 0.119349183 | 0.230196814 |
| 0.109976545 | 0.09496933  | 0.046412297 | 0.256127898 |

|             |             |             |             |
|-------------|-------------|-------------|-------------|
| 0.285925194 | 0.244915478 | 0.227524723 | 0.389952525 |
| 0.214780964 | 0.193605378 | 0.245974463 | 0.053029218 |
| 0.298162684 | 0.045168084 | 0.052597929 | 0.013014471 |
| 0.341914296 | 0.073979222 | 0.36675767  | 0.446205688 |
| 0.450374489 | 0.361137026 | 0.233227352 | 0.238808334 |
| 0.408898852 | 0.05545648  | 0.264450305 | 0.060027965 |
| 0.412756806 | 0.342644629 | 0.288329541 | 0.261554544 |
| 0.478849014 | 0.416300696 | 0.025375131 | 0.395373423 |
| 0.010541518 | 0.003936525 | 0.231608635 | 0.201530325 |
| 0.081803141 | 0.334489113 | 0.217882442 | 0.1850822   |
| 0.194520091 | 0.021529747 | 0.321148989 | 0.304032345 |
| 0.24905454  | 0.303645988 | 0.303762983 | 0.187278275 |
| 0.274175446 | 0.202084953 | 0.17056485  | 0.127521126 |
| 0.202581827 | 0.256709948 | 0.14808865  | 0.015907337 |
| 0.289935549 | 0.3188483   | 0.041719616 | 0.105413285 |
| 0.421273566 | 0.469560269 | 0.045026151 | 0.015638608 |
| 0.21390352  | 0.269780983 | 0.482099641 | 0.428584758 |
| 0.445255357 | 0.486012032 | 0.329607833 | 0.149973469 |
| 0.04847763  | 0.279552039 | 0.304009983 | 0.13545284  |
| 0.457939097 | 0.036259882 | 0.404496622 | 0.316634528 |
| 0.079840568 | 0.182384461 | 0.03238992  | 0.063438966 |
| 0.31736702  | 0.129055713 | 0.182567032 | 0.090212601 |
| 0.293266583 | 0.27651994  | 0.035585212 | 0.159417231 |
| 0.300546113 | 0.2793408   | 0.119666681 | 0.197842801 |
| 0.283353131 | 0.145387863 | 0.395279598 | 0.416990652 |
| 0.083329932 | 0.078249346 | 0.182984171 | 0.327127542 |
| 0.409969207 | 0.261519457 | 0.020524585 | 0.374258592 |
| 0.454039219 | 0.348353    | 0.419538156 | 0.390264212 |
| 0.05246935  | 0.323599682 | 0.304340209 | 0.307094566 |
| 0.141984094 | 0.240705068 | 0.194425231 | 0.042024436 |
| 0.253825269 | 0.405643523 | 0.369152455 | 0.151793163 |
| 0.274104158 | 0.069179482 | 0.031008285 | 0.392451244 |
| 0.285453474 | 0.072475866 | 0.21463954  | 0.407443421 |
| 0.003291141 | 0.218755109 | 0.467834534 | 0.186191738 |
| 0.456570533 | 0.469419092 | 0.396613859 | 0.169066121 |
| 0.006159106 | 0.371355546 | 0.299083318 | 0.316230445 |
| 0.372752963 | 0.272227304 | 0.105779128 | 0.076280472 |
| 0.259164359 | 0.045946834 | 0.148321267 | 0.219549104 |
| 0.255136998 | 0.279257952 | 0.161546936 | 0.154138997 |
| 0.198119025 | 0.05370168  | 0.276324986 | 0.178583077 |
| 0.208989419 | 0.203440544 | 0.333182912 | 0.167361027 |
| 0.258230372 | 0.419155046 | 0.362312307 | 0.017399005 |
| 0.305799535 | 0.390711037 | 0.390444766 | 0.004476656 |
| 0.389606876 | 0.006108038 | 0.198019297 | 0.212300235 |
| 0.191795826 | 0.205665129 | 0.242634167 | 0.282184814 |
| 0.254176994 | 0.18817012  | 0.226962643 | 0.189174814 |
| 0.162838735 | 0.156905575 | 0.296706152 | 0.253207682 |
| 0.268056819 | 0.097215684 | 0.065305135 | 0.066667384 |
| 0.045533134 | 0.401877388 | 0.197582098 | 0.041561611 |
| 0.182985022 | 0.257384635 | 0.328062745 | 0.414002291 |
| 0.390084872 | 0.071184248 | 0.265956148 | 0.384820058 |
| 0.188123557 | 0.192766028 | 0.03779062  | 0.254164581 |
| 0.171007322 | 0.264210837 | 0.244378398 | 0.198012583 |
| 0.32583851  | 0.34972357  | 0.18802984  | 0.393999611 |

|               |             |             |             |
|---------------|-------------|-------------|-------------|
| 0.285090801   | 0.266197587 | 0.195997648 | 0.095092286 |
| 0.140343047   | 0.089385713 | 0.295944137 | 0.001577244 |
| 0.276025496   | 0.162484292 | 0.450460556 | 0.409786144 |
| 0.295403652   | 0.340758042 | 0.198443638 | 0.074580425 |
| 0.166911588   | 0.128849309 | 0.098691829 | 0.365105146 |
| 0.267338724   | 0.138820825 | 0.289484038 | 0.184778776 |
| 0.393265355   | 0.360703277 | 0.264374435 | 0.178320114 |
| 0.188112594   | 0.122012763 | 0.396355848 | 0.071161323 |
| 0.296953266   | 0.24544598  | 0.208286157 | 0.289596254 |
| 0.224535034   | 0.469631957 | 0.036692037 | 0.484204957 |
| 0.316412201   | 0.087561377 | 0.433262629 | 0.191885923 |
| 0.188782771   | 0.122231751 | 0.267975533 | 0.235847532 |
| 0.196816563   | 0.308206387 | 0.016558386 | 0.0988612   |
| 0.306588468   | 0.232389854 | 0.339568209 | 0.319243532 |
| 0.284948832   | 0.334450721 | 0.205891241 | 0.199568879 |
| 0.386840306   | 0.399980812 | 0.23914106  | 0.21599748  |
| 0.29222334    | 0.083714765 | 0.244833359 | 0.017352365 |
| 0.332633161   | 0.316165012 | 0.276003948 | 0.041168596 |
| 0.014342069   | 0.290319164 | 0.304416496 | 0.03676997  |
| 0.480233787   | 0.244063627 | 0.237561355 | 0.34846255  |
| 0.122969148   | 0.403060352 | 0.131858116 | 0.36761716  |
| 0.031695488   | 0.191157866 | 0.307635966 | 0.280407232 |
| 0.249410934   | 0.325891195 | 0.358474883 | 0.288863858 |
| 0.028052578   | 0.259326816 | 0.003339785 | 0.340633161 |
| 0.377023663   | 0.330917224 | 0.159430935 | 0.1986335   |
| 0.246704507   | 0.330943152 | 0.248876289 | 0.285572284 |
| 0.012041894   | 0.331601821 | 0.147352663 | 0.348541333 |
| 0.2510568     | 0.269932188 | 0.052349754 | 0.308102992 |
| 0.351405571   | 0.284365668 | 0.209571803 | 0.295143054 |
| 0.410762928   | 0.312581959 | 0.103072419 | 0.210760026 |
| 0.277525036   | 0.037230781 | 0.227977596 | 0.476364959 |
| 0.168993976   | 0.282129246 | 0.454912738 | 0.204794134 |
| 0.314245641   | 0.312972047 | 0.280528911 | 0.458012622 |
| 0.096634059   | 0.192738042 | 0.39550158  | 0.409090508 |
| 0.276474118   | 0.24937883  | 0.29665598  | 0.262824754 |
| 0.373437319   | 0.07938649  | 0.285808389 | 0.291406579 |
| 0.294265314   | 0.249447346 | 0.198608684 | 0.224696553 |
| 0.036673653   | 0.131953409 | 0.251790669 | 0.09728141  |
| 0.243649378   | 0.316300598 | 0.28422348  | 0.347700694 |
| 0.133646367   | 0.028878155 | 0.406624848 | 0.047413028 |
| 0.196134414   | 0.329832828 | 0.177623825 | 0.304830302 |
| 0.137710178   | 0.244889685 | 0.21853335  | 0.000837164 |
| 0.399439028   | 0.068856009 | 0.254068225 | 0.265665842 |
| 0.279264364   | 0.037157057 | 0.385304213 | 0.494311506 |
| 0.215823976   | 0.236493483 | 0.289514312 | 0.399759872 |
| 0.230165346   | 0.281853145 | 0.306240554 | 0.286297884 |
| 0.280040408   | 0.255662001 | 0.292227671 | 0.315299244 |
| 0.305680078   | 0.179055807 |             |             |
| 2610029G23RIK | 0.173643052 | 0.049714385 | 0.118051457 |
| 0.058176478   | 0.053402058 | 0.017007924 | 0.183407536 |
| 0.127548232   | 0.059455101 | 0.002770864 | 0.056982028 |
| 0.171729829   | 0.003030927 | 0.080711454 | 0.195279932 |
| 0.032944423   | 1           | 0.260331082 | 0.014040966 |
| 0.025361826   | 0.065596647 | 0.007973458 | 0.026822693 |



|             |                      |                      |             |
|-------------|----------------------|----------------------|-------------|
| 0.052389564 | 0.240165185          | 0.047057989          | 0.012999669 |
| 0.054888723 | 0.000884315          | 0.028848547          | 0.000869796 |
| 0.149085219 | 0.047171614          | 0.007392943          | 0.109838004 |
| 0.029317091 | 0.005617567          | 0.141083017          | 0.071182585 |
| 0.006136141 | 0.179158692          | 0.005907909          | 0.09885835  |
| 0.010776186 | 0.154838442          | 8.49E-05 0.027669838 |             |
| 0.045590594 | 0.045348063          | 0.158957588          | 0.033454184 |
| 0.01328417  | 0.096033164          | 0.019765311          | 0.010658771 |
| 0.007075861 | 1.20E-06 0.002326699 | 0.076087895          |             |
| 0.258304493 | 0.252980741          | 0.001646643          | 0.061810755 |
| 0.027386951 | 0.053313047          | 0.171492891          | 0.007294401 |
| 0.078602955 | 0.005341737          | 0.024672899          | 0.030377445 |
| 0.029554385 | 0.143018467          | 0.313925345          | 0.154058735 |
| 0.012380648 | 0.194566681          | 0.051535381          | 0.0126161   |
| 0.04307032  | 0.122176849          | 0.170909275          | 0.078731515 |
| 0.011364706 | 0.027732947          | 0.025418798          | 0.155083654 |
| 0.069002303 | 0.116011976          | 0.064334359          | 0.102651545 |
| 0.149114108 | 0.012254777          | 0.048259288          | 0.20488205  |
| 0.053684945 | 0.005510452          | 0.00809889           | 0.009558797 |
| 0.043007752 | 0.038477311          | 0.099930901          | 0.16659256  |
| 0.037462409 | 0.201874669          | 0.09075776           | 0.025606547 |
| 0.045933902 | 0.197057899          | 0.029420285          | 0.037800299 |
| 0.040074722 | 0.061248881          | 0.041728367          | 0.096766897 |
| 0.024824622 | 0.073082825          | 0.058665409          | 0.077907221 |
| 0.000671397 | 0.072818457          | 0.168909268          | 0.195949118 |
| 0.123448541 | 0.199633636          | 0.020501661          | 0.192624232 |
| 0.051773872 | 0.100645201          | 0.142200593          | 0.129998788 |
| 0.063736867 | 0.073904693          | 0.068205366          | 0.072761292 |
| 0.235528868 | 0.005643289          | 0.023408944          | 0.043624407 |
| 0.070966028 | 0.266153676          | 0.020849775          | 0.104982199 |
| 0.136548591 | 0.054964888          | 0.09357448           | 0.132421095 |
| 0.104888772 | 0.109523603          | 0.039679212          | 0.215347383 |
| 0.100755866 | 0.09660083           | 0.09237236           | 0.033603833 |
| 0.103376406 | 0.049730904          | 0.010801331          | 0.08761192  |
| 0.117587304 | 0.004287875          | 0.044074914          | 0.051773416 |
| 0.067970515 | 0.039287455          | 0.08674544           | 0.062872075 |
| 0.066812885 | 0.275712117          | 0.000444211          | 0.12397033  |
| 0.0850016   | 0.10553702           | 0.098469693          | 0.013468843 |
| 0.043903157 | 0.028560829          | 0.040824468          | 0.006460353 |
| 0.135472967 | 0.057918018          | 0.047111125          | 0.064442221 |
| 0.035152347 | 0.193878332          | 0.011275239          | 0.091380896 |
| 0.157369807 | 0.145327883          | 0.214617375          | 0.136964107 |
| 0.003417919 | 0.251525075          | 0.026138892          | 0.041355499 |
| 0.265114153 | 0.031016402          | 0.004926892          | 0.044957096 |
| 0.227564339 | 0.015764017          | 0.164847365          | 0.151417257 |
| 0.208286492 | 0.308982503          | 0.067925302          | 0.083863269 |
| 0.116638441 | 0.215607257          | 0.025685223          | 0.065538889 |
| 0.025158762 | 0.189515146          | 0.041645475          | 0.111225461 |
| 0.165326265 | 0.022287022          | 0.232453605          | 0.072769551 |
| 0.016715559 | 0.002704223          | 0.003255635          | 0.013725773 |
| 0.248623283 | 0.04425129           | 0.041483093          | 0.056022481 |
| 0.072633023 | 0.105925323          | 0.016624115          | 0.160090468 |
| 0.188404887 | 0.038544308          | 0.076666837          | 0.018177795 |
| 0.094772613 | 0.072164905          | 0.051135172          | 0.039944123 |

|             |             |             |             |
|-------------|-------------|-------------|-------------|
| 0.093997115 | 0.009503169 | 0.003384417 | 0.063172779 |
| 0.005270719 | 0.027662767 | 0.053792327 | 0.055050775 |
| 0.009105917 | 0.166456654 | 0.084463671 | 0.001295503 |
| 0.024746433 | 0.055486511 | 0.169584327 | 0.006840033 |
| 0.161548701 | 0.174427462 | 0.037062058 | 0.034726024 |
| 0.15820242  | 0.081890146 | 0.087951643 | 0.067997649 |
| 0.007688509 | 0.087598249 | 0.050694956 | 0.087457435 |
| 0.082056782 | 0.010150333 | 0.001977744 | 0.053111342 |
| 0.056976943 | 0.006740408 | 0.199205838 | 0.029660871 |
| 0.010369031 | 0.037559399 | 0.044595863 | 0.088882353 |
| 0.134492337 | 0.062570865 | 0.15960128  | 0.088740841 |
| 0.111602095 | 0.146015925 | 0.070165312 | 0.098315947 |
| 0.002900105 | 0.028260008 | 0.020973797 | 0.098052927 |
| 0.231382648 | 0.032272927 | 0.162057135 | 0.002476385 |
| 0.000549338 | 0.2012574   | 0.240785647 | 0.177809286 |
| 0.018074069 | 0.013426542 | 0.048093358 | 0.07555329  |
| 0.27635569  | 0.102756044 | 0.167027566 | 0.035987153 |
| 0.088505011 | 0.024519315 | 0.018034459 | 0.039069109 |
| 0.199424869 | 0.078428617 | 0.093609457 | 0.123791753 |
| 0.177345586 | 0.011478624 | 0.057662928 | 0.010809115 |
| 0.180010195 | 0.027042301 | 0.25647996  | 0.29607605  |
| 0.075627868 | 0.239206285 | 0.174696054 | 0.005270269 |
| 0.110386779 | 0.284129896 | 0.03307812  | 0.063168637 |
| 0.074422754 | 0.077787608 | 0.071526225 | 0.08493952  |
| 0.065637271 | 0.046291818 | 0.061065297 | 0.032493909 |
| 0.139776032 | 0.121955249 | 0.011969213 | 0.079314417 |
| 0.011651676 | 0.0961715   | 0.055007222 | 0.320568436 |
| 0.042006897 | 0.122556438 | 0.190972681 | 0.038082448 |
| 0.077791705 | 0.002083897 | 0.027499255 | 0.108786519 |
| 0.09227784  | 0.146752312 | 0.005139685 | 0.006294418 |
| 0.084353656 | 0.132136221 | 0.006141182 | 0.080724619 |
| 0.084123328 | 0.128913402 | 0.057801471 | 0.066800808 |
| 0.207498462 | 0.003065578 | 0.021700564 | 0.000212857 |
| 0.006009201 | 0.096719612 | 0.012031411 | 0.080952266 |
| 0.146448007 | 0.114739821 | 0.111016593 | 0.089602219 |
| 0.061251026 | 0.071072234 | 0.077695246 | 0.014631592 |
| 0.078314552 | 7.92E-05    | 0.067083073 | 0.061414212 |
| 0.005210182 | 0.012049547 | 0.067001301 | 0.05238938  |
| 0.027970373 | 0.168451289 | 0.268840482 | 0.005666213 |
| 0.123829409 | 0.096899213 | 0.210758136 | 0.029904094 |
| 0.028162873 | 0.095756821 | 0.024175958 | 0.076075403 |
| 0.124269309 | 0.171516341 | 0.012508879 | 0.25554553  |
| 0.028063288 | 0.157817058 | 0.240445305 | 0.027519443 |
| 0.076187914 | 0.199776847 | 0.106534225 | 0.069851675 |
| 0.113863698 | 0.05230713  | 0.002318523 | 0.008543476 |
| 0.063942318 | 0.127991222 | 0.002984302 | 0.144224685 |
| 0.05969684  | 0.044670611 | 0.167464836 | 0.163600244 |
| 0.099764955 | 0.097852471 | 0.258441974 | 0.067603743 |
| 0.06423985  | 0.0126884   | 0.021254477 | 0.175376751 |
| 0.007713745 | 0.022358125 | 0.222141332 | 0.038811638 |
| 0.055650117 | 0.116259143 | 0.010426489 | 0.015351574 |
| 0.12467916  | 0.049075445 | 0.041846621 | 0.15514316  |
| 0.047186379 | 0.035225067 | 0.113539778 | 0.144211695 |
| 0.014283008 | 0.127440743 | 0.236979068 | 0.199633899 |

|             |             |             |             |
|-------------|-------------|-------------|-------------|
| 0.011971692 | 0.017924956 | 0.28102665  | 0.257772189 |
| 0.071399848 | 0.059672914 | 0.165356574 | 0.136803335 |
| 0.207704134 | 0.046322628 | 0.070247748 | 0.057394169 |
| 0.095563469 | 0.10981826  | 0.172020191 | 0.103030863 |
| 0.203849861 | 0.084875353 | 0.039052578 | 0.083073086 |
| 0.072998599 | 0.178963674 | 0.073232356 | 0.014341017 |
| 0.297644256 | 0.095618643 | 0.168483519 | 0.305292602 |
| 0.018846888 | 0.275540731 | 0.177707112 | 0.142101725 |
| 0.054482888 | 0.006910445 | 0.24203084  | 0.222160208 |
| 0.117360049 | 0.004588281 | 0.269220425 | 0.037076048 |
| 0.078959832 | 0.002369937 | 0.035464113 | 0.1497305   |
| 0.263058907 | 0.202640404 | 0.018819285 | 0.06270108  |
| 0.038114279 | 0.009492948 | 0.064206855 | 0.043077932 |
| 0.07864804  | 0.023621274 | 0.077329079 | 0.130703315 |
| 0.290479481 | 0.026082489 | 0.011938232 | 0.052838426 |
| 0.229342735 | 0.021282231 | 0.130027108 | 0.324893897 |
| 0.195520449 | 0.130913572 | 0.066439253 | 0.190381006 |
| 0.017506811 | 0.128972651 | 0.162810656 | 0.052305688 |
| 0.013601991 | 0.107516783 | 0.006280587 | 0.043879671 |
| 0.015352155 | 0.004498339 | 0.075651583 | 0.078295791 |
| 0.106453433 | 0.070982569 | 0.126614234 | 0.04138318  |
| 0.000351231 | 0.02759046  | 0.060735804 | 0.018779874 |
| 0.056986241 | 0.106823436 | 0.028412301 | 0.167194097 |
| 0.221745748 | 0.178352887 | 0.103552233 | 0.007600105 |
| 0.003460691 | 0.035660293 | 0.293551805 | 0.146139549 |
| 0.127651921 | 0.151408227 | 0.006132876 | 0.109937677 |
| 0.00908011  | 0.262506407 | 0.150716136 | 0.003138228 |
| 0.004208209 | 0.085285689 | 0.05909219  | 0.17600392  |
| 0.019962001 | 0.07856861  | 0.087780256 | 0.03225489  |
| 0.040246499 | 0.183505912 | 0.148362666 | 0.121414557 |
| 0.128567915 | 0.125368028 | 0.139225992 | 0.036323344 |
| 0.064367696 | 0.134839092 | 0.079043843 | 0.208610555 |
| 0.118205684 | 0.129718683 | 0.039482281 | 0.033165381 |
| 0.040699512 | 0.176393432 | 0.247884853 | 0.231101991 |
| 0.142825547 | 0.052577999 | 0.255658649 | 0.195933602 |
| 0.206925161 | 0.02655849  | 0.192935005 | 0.058901693 |
| 0.122226809 | 0.151019113 | 0.047897661 | 0.048730185 |
| 0.001461076 | 0.011385665 | 0.124088482 | 0.031277179 |
| 0.170823743 | 0.023578722 | 0.015702598 | 0.054875042 |
| 0.031926256 | 0.171540139 | 0.247845308 | 0.106207503 |
| 0.034456153 | 0.026332347 | 0.003115597 | 0.133130877 |
| 0.160049276 | 0.254117741 | 0.053991356 | 0.087282234 |
| 0.098182859 | 0.02263061  | 0.048227543 | 0.079673455 |
| 0.005954336 | 0.147281416 | 0.002641067 | 0.140219289 |
| 0.00138059  | 0.15321903  | 0.315565187 | 0.033083022 |
| 0.002711886 | 0.124340241 | 0.069801693 | 0.010332807 |
| 0.041054593 | 0.030746098 | 0.031143166 | 0.10022733  |
| 0.132053887 | 0.151711412 | 0.102705123 | 0.124356066 |
| 0.014315336 | 0.031999074 | 0.017982634 | 0.071269849 |
| 0.115184705 | 0.062532569 | 0.268184721 | 0.061355558 |
| 0.036129504 | 0.245055362 | 0.144599633 | 0.063410947 |
| 0.024045537 | 0.079338458 | 0.00398502  | 0.01121073  |
| 0.069045772 | 0.006981717 | 5.68E-05    | 0.009188936 |
| 0.14589353  | 0.016166524 | 0.033542095 | 0.078824167 |

|               |             |             |             |
|---------------|-------------|-------------|-------------|
| 0.035531557   | 0.145319711 | 0.002340013 | 0.073742057 |
| 0.064045013   | 0.09603396  | 0.038984478 | 0.241417929 |
| 0.121085374   | 0.213484769 | 0.027616146 | 0.003559526 |
| 0.023331185   | 0.012519005 | 0.004063224 | 0.224574589 |
| 0.163644597   | 0.004587751 | 0.026369701 | 0.174771646 |
| 0.069094217   | 0.001640344 | 0.028399831 | 0.034106146 |
| 0.216873137   | 0.101571875 | 0.133233545 | 0.064042796 |
| 0.067182569   | 0.169381537 | 0.014846713 | 0.017325821 |
| 0.036593816   | 0.021875403 | 0.095764484 | 0.017101616 |
| 0.237922725   | 0.032709309 | 0.038243882 | 0.169943415 |
| 0.086076827   | 0.016945558 | 0.262419157 | 0.002230241 |
| 0.184139708   | 0.097540691 | 0.028913343 | 0.010036022 |
| 0.129360843   | 0.032100902 | 0.221172382 | 0.073452053 |
| 0.001871059   | 0.033118055 | 0.128529037 | 0.03004311  |
| 0.115672167   | 0.016892367 | 0.221268289 | 0.003567136 |
| 0.061840401   | 0.059581958 | 0.129522123 | 0.027190069 |
| 0.022956705   | 0.283807574 | 0.006078704 | 0.088406553 |
| 0.175942065   | 0.022523415 | 0.06001246  | 0.114455926 |
| 0.015827121   | 0.089987689 | 0.014298151 | 0.08424355  |
| 0.13143439    | 0.221692935 | 0.055519021 | 0.074123963 |
| 0.198530171   | 0.029389828 | 0.013434075 | 0.070963807 |
| 0.066161483   | 0.089102948 | 0.013096784 | 0.105410352 |
| 0.011043615   | 0.13736105  | 0.019506734 | 0.08172871  |
| 0.155407299   | 0.09794504  | 0.016104869 | 0.273133139 |
| 0.129274488   | 0.042392637 | 0.035882466 | 0.171619026 |
| 0.077543092   | 0.107352876 | 0.14338775  | 0.001459628 |
| 0.043288148   | 0.051404947 | 0.168909562 | 0.031126852 |
| 0.242002033   | 0.066687263 | 0.034401902 | 0.062592123 |
| 0.076550786   | 0.00943791  | 0.035263497 | 0.043410886 |
| 0.00757348    | 0.187519043 | 0.092318272 | 0.077150838 |
| 0.100712744   | 0.005134738 | 0.002431893 | 0.081260545 |
| 0.006172191   | 0.003003582 | 0.008029195 | 0.026415298 |
| 0.0097134     | 0.005737582 | 0.008298141 | 0.0069907   |
| 0.07446604    | 0.074986945 |             |             |
| 2610039C10RIK | 0.181541807 | 0.146958195 | 0.116567069 |
| 0.130888095   | 0.097720519 | 0.051486384 | 0.250990411 |
| 0.223932057   | 0.149261761 | 0.023323195 | 0.104408908 |
| 0.212366755   | 0.012163339 | 0.191973669 | 0.252465338 |
| 0.086494497   | 0.260331082 | 1           | 0.045464325 |
| 0.090665069   | 0.10836665  | 0.038815356 | 0.076532097 |
| 0.091058185   | 0.309299834 | 0.115456246 | 0.048405615 |
| 0.160567563   | 0.012895378 | 0.086167469 | 0.012661518 |
| 0.277607109   | 0.09366827  | 0.031659019 | 0.141726811 |
| 0.07741277    | 0.012373922 | 0.282866749 | 0.122612506 |
| 0.024339169   | 0.289787243 | 0.031099999 | 0.138006573 |
| 0.046177378   | 0.172324345 | 0.009625278 | 0.088846134 |
| 0.110144452   | 0.102760339 | 0.162901606 | 0.100792635 |
| 0.054623662   | 0.171783466 | 0.082688795 | 0.019344223 |
| 0.026007114   | 0.003247709 | 0.01513594  | 0.196003259 |
| 0.287392605   | 0.23067059  | 0.019792732 | 0.104389878 |
| 0.08305552    | 0.124952973 | 0.232104844 | 0.039082877 |
| 0.197476011   | 0.02671526  | 0.087635721 | 0.082284302 |
| 0.073927175   | 0.156618418 | 0.338629085 | 0.187917869 |
| 0.048025403   | 0.211985523 | 0.093780381 | 0.038920465 |

|             |             |             |             |
|-------------|-------------|-------------|-------------|
| 0.139738174 | 0.265681876 | 0.233397742 | 0.206878837 |
| 0.038267624 | 0.069352715 | 0.065660246 | 0.233002392 |
| 0.153918135 | 0.198638465 | 0.143243044 | 0.237289937 |
| 0.167947169 | 0.056459981 | 0.129555569 | 0.247887396 |
| 0.145770862 | 0.029942999 | 0.041951006 | 0.029617606 |
| 0.100982187 | 0.087906515 | 0.233526286 | 0.238332948 |
| 0.071275263 | 0.210941446 | 0.222967957 | 0.062838081 |
| 0.084433995 | 0.193123447 | 0.091873548 | 0.120248455 |
| 0.104770852 | 0.167852627 | 0.131019559 | 0.196129366 |
| 0.069570539 | 0.187387329 | 0.135359091 | 0.181803905 |
| 0.006460343 | 0.195082634 | 0.194500331 | 0.249210805 |
| 0.150452437 | 0.231202388 | 0.071681606 | 0.282075115 |
| 0.144523249 | 0.177449971 | 0.178696955 | 0.165963469 |
| 0.162187817 | 0.19573541  | 0.190198783 | 0.170952989 |
| 0.22454574  | 0.028349117 | 0.067330167 | 0.098530541 |
| 0.152394307 | 0.272597324 | 0.044654172 | 0.244316507 |
| 0.242711996 | 0.141564746 | 0.143651647 | 0.280056598 |
| 0.155866868 | 0.239702944 | 0.129934095 | 0.223063903 |
| 0.236056247 | 0.227529226 | 0.214629945 | 0.090742585 |
| 0.227286816 | 0.097023271 | 0.039418394 | 0.190176699 |
| 0.240471971 | 0.007558123 | 0.136609996 | 0.153096975 |
| 0.185945969 | 0.12283045  | 0.209978883 | 0.170650253 |
| 0.184353587 | 0.258437634 | 0.004029203 | 0.187034146 |
| 0.214374527 | 0.207559531 | 0.183206198 | 0.052555182 |
| 0.097640693 | 0.073093684 | 0.118025614 | 0.038186738 |
| 0.275400269 | 0.153245233 | 0.145437749 | 0.155659859 |
| 0.090881401 | 0.297080826 | 0.044119199 | 0.218984372 |
| 0.223862441 | 0.169066598 | 0.201578307 | 0.224270201 |
| 0.029119709 | 0.260159277 | 0.071657595 | 0.096250185 |
| 0.286193697 | 0.075820101 | 0.024074726 | 0.105864113 |
| 0.236987512 | 0.061113902 | 0.189742155 | 0.19966658  |
| 0.253828552 | 0.348294694 | 0.163559126 | 0.167711526 |
| 0.152986312 | 0.32519638  | 0.088709889 | 0.173125677 |
| 0.063547683 | 0.246076396 | 0.114727505 | 0.232659707 |
| 0.286395693 | 0.061663204 | 0.298760678 | 0.070926673 |
| 0.07557891  | 0.02182502  | 0.017831622 | 0.051937415 |
| 0.326254349 | 0.138177037 | 0.104857751 | 0.124477308 |
| 0.126424214 | 0.142731814 | 0.056976632 | 0.289249284 |
| 0.246542778 | 0.079134383 | 0.179090225 | 0.068402975 |
| 0.080621242 | 0.130503042 | 0.138510895 | 0.103128344 |
| 0.178578607 | 0.029987345 | 0.021619416 | 0.16568102  |
| 0.035018039 | 0.065117377 | 0.152702938 | 0.122348783 |
| 0.050188424 | 0.26947743  | 0.207476485 | 0.009282192 |
| 0.06483344  | 0.086470586 | 0.231698506 | 0.033822743 |
| 0.217289162 | 0.257067484 | 0.0759193   | 0.075337577 |
| 0.193778739 | 0.207833263 | 0.183573403 | 0.180180886 |
| 0.040523833 | 0.214117087 | 0.141069192 | 0.191564206 |
| 0.152863788 | 0.03989888  | 0.012371911 | 0.141860548 |
| 0.153499677 | 0.046318538 | 0.221810373 | 0.103301011 |
| 0.041856659 | 0.103179781 | 0.101244963 | 0.207461563 |
| 0.272126344 | 0.178475454 | 0.207700149 | 0.170552451 |
| 0.207374362 | 0.182357463 | 0.161392624 | 0.228461742 |
| 0.02926744  | 0.07256863  | 0.061351281 | 0.190939044 |
| 0.26712564  | 0.082287806 | 0.266783261 | 0.015128648 |

| 3.67E-05 0.202422041 | 0.221332103 | 0.185607655 |             |
|----------------------|-------------|-------------|-------------|
| 0.042813243          | 0.058895457 | 0.117034087 | 0.197239985 |
| 0.248367737          | 0.207612391 | 0.247370814 | 0.092389154 |
| 0.20619897           | 0.060389409 | 0.053400256 | 0.094011189 |
| 0.275603413          | 0.092458376 | 0.173615363 | 0.269832791 |
| 0.17781387           | 0.038471489 | 0.109388767 | 0.016092969 |
| 0.218344277          | 0.102533846 | 0.289765322 | 0.36581098  |
| 0.179724742          | 0.319814562 | 0.238431954 | 0.035390119 |
| 0.180510101          | 0.249334675 | 0.02436761  | 0.173093559 |
| 0.193120134          | 0.194497508 | 0.190549052 | 0.2079082   |
| 0.170980934          | 0.121297935 | 0.147123386 | 0.081792716 |
| 0.23593718           | 0.158085938 | 0.047848466 | 0.125802984 |
| 0.015981361          | 0.17705448  | 0.098199698 | 0.324582736 |
| 0.114713074          | 0.205781791 | 0.215205084 | 0.086593358 |
| 0.114464008          | 0.014631102 | 0.09671092  | 0.156815564 |
| 0.168842054          | 0.155089569 | 0.030336834 | 0.043888242 |
| 0.19782889           | 0.234854509 | 0.029665448 | 0.206055288 |
| 0.135027619          | 0.191167056 | 0.099285426 | 0.139126559 |
| 0.249642446          | 0.023603391 | 0.066849469 | 0.003096338 |
| 0.030637328          | 0.220222569 | 0.047696631 | 0.162293621 |
| 0.206201534          | 0.111339074 | 0.214977883 | 0.217931595 |
| 0.172309906          | 0.186560092 | 0.192934427 | 0.037082423 |
| 0.197966477          | 0.004283694 | 0.183810614 | 0.156985501 |
| 0.031117422          | 0.01128495  | 0.060545079 | 0.150274923 |
| 0.075974963          | 0.190548791 | 0.286631436 | 0.038924178 |
| 0.21744806           | 0.136074885 | 0.217474458 | 0.06613037  |
| 0.082352119          | 0.127140688 | 0.063278934 | 0.199103138 |
| 0.164958559          | 0.212273919 | 0.047204904 | 0.26712938  |
| 0.076045126          | 0.230839781 | 0.260462246 | 0.023563731 |
| 0.147365555          | 0.252572034 | 0.244643391 | 0.186904167 |
| 0.243546687          | 0.118080339 | 0.021270897 | 0.046333454 |
| 0.160322375          | 0.171275096 | 0.027160346 | 0.177142982 |
| 0.170823591          | 0.109340384 | 0.250144713 | 0.256833908 |
| 0.226181215          | 0.220949801 | 0.237604618 | 0.158356689 |
| 0.071842502          | 0.01043593  | 0.065168239 | 0.250389472 |
| 0.026137995          | 0.061927023 | 0.296045246 | 0.09905766  |
| 0.115465474          | 0.164314706 | 0.033858511 | 0.042408365 |
| 0.190040029          | 0.100871733 | 0.075878551 | 0.239028659 |
| 0.089575553          | 0.092742754 | 0.158686187 | 0.212474021 |
| 0.064532394          | 0.233358978 | 0.310468999 | 0.218412905 |
| 0.049719976          | 0.059211239 | 0.223700596 | 0.284141333 |
| 0.167412693          | 0.16300782  | 0.259063998 | 0.125225456 |
| 0.290012631          | 0.094224379 | 0.179322686 | 0.167208901 |
| 0.230117863          | 0.243385331 | 0.298307799 | 0.1970653   |
| 0.21854211           | 0.142042873 | 0.0772483   | 0.152595632 |
| 0.189532161          | 0.200270861 | 0.187164594 | 0.039864013 |
| 0.303588465          | 0.161390053 | 0.213465172 | 0.265479219 |
| 0.05782136           | 0.293280465 | 0.186705591 | 0.19457409  |
| 0.101961716          | 0.034353379 | 0.240965455 | 0.251148509 |
| 0.214960247          | 0.025312274 | 0.290311582 | 0.084932794 |
| 0.16922079           | 0.022556272 | 0.105620576 | 0.279839153 |
| 0.271956568          | 0.220587313 | 0.074703357 | 0.14153821  |
| 0.120649878          | 0.045286134 | 0.084260953 | 0.140740097 |
| 0.190475079          | 0.080843536 | 0.197044997 | 0.237163802 |

|             |             |             |             |
|-------------|-------------|-------------|-------------|
| 0.28692691  | 0.06613176  | 0.038883033 | 0.110315415 |
| 0.264142965 | 0.055903723 | 0.176969493 | 0.274801542 |
| 0.293361066 | 0.27180656  | 0.170542649 | 0.192558526 |
| 0.061226356 | 0.175060783 | 0.182304016 | 0.144011956 |
| 0.047586424 | 0.201738989 | 0.032519701 | 0.126694126 |
| 0.011209263 | 0.017142189 | 0.188049529 | 0.1372818   |
| 0.240681881 | 0.179329612 | 0.247448768 | 0.103842111 |
| 0.00118773  | 0.086177794 | 0.121638916 | 0.055689454 |
| 0.158762452 | 0.194957093 | 0.084589493 | 0.244000598 |
| 0.295608142 | 0.202881803 | 0.215290024 | 0.042419511 |
| 0.023047561 | 0.102512037 | 0.32858151  | 0.202354666 |
| 0.161443619 | 0.20283887  | 0.029371597 | 0.141781624 |
| 0.036426077 | 0.316082399 | 0.243686622 | 0.025137506 |
| 0.026742176 | 0.194829574 | 0.152540399 | 0.180026389 |
| 0.053881295 | 0.179280354 | 0.192277678 | 0.042293519 |
| 0.110635168 | 0.16871129  | 0.165274912 | 0.144014853 |
| 0.162621801 | 0.166435192 | 0.188854946 | 0.083685771 |
| 0.142604866 | 0.175210587 | 0.120932847 | 0.246840878 |
| 0.165900317 | 0.167695725 | 0.094246667 | 0.078957826 |
| 0.083962736 | 0.198264797 | 0.283319682 | 0.277214022 |
| 0.196307691 | 0.148400381 | 0.327906452 | 0.209839814 |
| 0.247500097 | 0.072230227 | 0.295905496 | 0.171888641 |
| 0.227160041 | 0.209046148 | 0.092310338 | 0.141253558 |
| 0.0188569   | 0.054259444 | 0.18178265  | 0.08137215  |
| 0.205552814 | 0.074340499 | 0.054396581 | 0.124038183 |
| 0.106199619 | 0.293246528 | 0.314311195 | 0.218329247 |
| 0.073974863 | 0.072078024 | 0.02420992  | 0.209933501 |
| 0.184303238 | 0.289217804 | 0.089334763 | 0.062945781 |
| 0.169868448 | 0.084165451 | 0.140926136 | 0.201695126 |
| 0.025711676 | 0.253794924 | 0.028274965 | 0.217961489 |
| 0.019200602 | 0.243807239 | 0.32625785  | 0.105374492 |
| 0.015638728 | 0.171632773 | 0.117824504 | 0.048675498 |
| 0.115158583 | 0.099534253 | 0.076300314 | 0.14915197  |
| 0.185687003 | 0.204224851 | 0.237397207 | 0.145204996 |
| 0.059177244 | 0.073132097 | 0.067990617 | 0.114347476 |
| 0.149422359 | 0.173620689 | 0.225200499 | 0.173638061 |
| 0.07789428  | 0.280249578 | 0.282874678 | 0.110969361 |
| 0.087303724 | 0.147179398 | 0.017430649 | 0.046916176 |
| 0.157344404 | 0.029400258 | 0.001115931 | 0.030634244 |
| 0.222805416 | 0.054904889 | 0.11473246  | 0.163486431 |
| 0.070124795 | 0.236902406 | 0.01356444  | 0.131715899 |
| 0.181173743 | 0.230167862 | 0.118527335 | 0.316526352 |
| 0.211497421 | 0.229424733 | 0.085647194 | 0.01236963  |
| 0.078127921 | 0.053882133 | 0.034558556 | 0.246655997 |
| 0.205666104 | 0.021419731 | 0.084642313 | 0.200056021 |
| 0.174775013 | 0.014020555 | 0.08710595  | 0.099580055 |
| 0.277692947 | 0.239714394 | 0.196213532 | 0.139245649 |
| 0.148645009 | 0.23267077  | 0.046938525 | 0.056764728 |
| 0.097051605 | 0.050494474 | 0.180450968 | 0.040501766 |
| 0.241878976 | 0.100742767 | 0.03942874  | 0.30097272  |
| 0.216310306 | 0.049462366 | 0.329542578 | 0.022254731 |
| 0.245307426 | 0.197235679 | 0.097920166 | 0.042963278 |
| 0.121245298 | 0.079669013 | 0.245924096 | 0.167974817 |
| 0.018917332 | 0.091335227 | 0.18387715  | 0.068968369 |

|               |             |             |             |
|---------------|-------------|-------------|-------------|
| 0.254620824   | 0.076170835 | 0.306474701 | 0.031277175 |
| 0.172752663   | 0.147823019 | 0.194967507 | 0.080571388 |
| 0.081754547   | 0.26456706  | 0.032508488 | 0.216676433 |
| 0.18624444    | 0.047300211 | 0.148720651 | 0.17542209  |
| 0.041611467   | 0.193050599 | 0.058898001 | 0.211959889 |
| 0.207323685   | 0.273304535 | 0.137710763 | 0.188162918 |
| 0.273844403   | 0.061781207 | 0.042012212 | 0.114373208 |
| 0.177471815   | 0.155502498 | 0.056943771 | 0.196489223 |
| 0.036071042   | 0.203421813 | 0.06960806  | 0.117320015 |
| 0.185285471   | 0.186037793 | 0.055982457 | 0.284393238 |
| 0.190075792   | 0.090211178 | 0.08454667  | 0.283489813 |
| 0.143665347   | 0.128482856 | 0.271232064 | 0.005322892 |
| 0.092412146   | 0.111163868 | 0.206891436 | 0.068672825 |
| 0.294171614   | 0.137405995 | 0.093189976 | 0.057900889 |
| 0.168422448   | 0.020979575 | 0.076490951 | 0.096629894 |
| 0.041373154   | 0.230147543 | 0.207356871 | 0.192249906 |
| 0.169011875   | 0.035184123 | 0.024734235 | 0.195601073 |
| 0.026849886   | 0.020461052 | 0.036802361 | 0.090545277 |
| 0.029729172   | 0.031649377 | 0.03543137  | 0.030212699 |
| 0.153578326   | 0.119396685 |             |             |
| 2610301F02RIK | 0.020942337 | 0.102228163 | 0.012521757 |
| 0.002457454   | 0.061535723 | 0.026829164 | 0.027550729 |
| 0.036252254   | 0.115691036 | 0.028922016 | 0.041895416 |
| 0.005415393   | 0.010877795 | 0.113230632 | 0.030502689 |
| 0.06456206    | 0.014040966 | 0.045464325 | 1           |
| 0.005983422   | 0.057252289 | 0.017481621 | 0.046137039 |
| 0.070629477   | 0.070310348 | 0.060949481 | 0.077596178 |
| 0.106934115   | 0.00545838  | 0.058767726 | 0.00115239  |
| 0.116004662   | 0.060929627 | 0.038510328 | 0.003802094 |
| 0.059790392   | 0.004425878 | 0.129583812 | 0.033182954 |
| 0.001269573   | 0.10357057  | 0.032670819 | 0.025312818 |
| 0.046181546   | 0.009938813 | 0.004296931 | 0.094424302 |
| 0.079597486   | 0.05269438  | 0.026829471 | 0.069603013 |
| 0.05763842    | 0.073293393 | 0.0734304   | 0.00036859  |
| 0.032415399   | 0.005823304 | 0.024030348 | 0.115622897 |
| 0.061266708   | 0.04376819  | 0.020215295 | 0.083561771 |
| 0.0966009     | 0.124117665 | 0.109104943 | 0.036390205 |
| 0.110325322   | 0.029624222 | 0.093199333 | 0.000558428 |
| 0.042617864   | 0.033025984 | 0.072408118 | 0.065624157 |
| 0.031822557   | 0.054362688 | 0.053552825 | 0.038477156 |
| 0.09332558    | 0.144787252 | 0.096038172 | 0.123380054 |
| 0.015753669   | 0.077669802 | 0.034753097 | 0.097842513 |
| 0.125949211   | 0.052044031 | 0.068718588 | 0.129250446 |
| 0.047987135   | 0.063049312 | 0.097965205 | 0.069925998 |
| 0.092057889   | 0.042929417 | 0.039191054 | 0.017832298 |
| 0.086100989   | 0.067065444 | 0.146291987 | 0.067354738 |
| 0.067645069   | 0.034533905 | 0.121827433 | 0.063221308 |
| 0.022763094   | 0.027204924 | 0.029754518 | 0.10501258  |
| 0.05742399    | 0.101580024 | 0.108614812 | 0.117975297 |
| 0.058238065   | 0.106880859 | 0.062919147 | 0.126025218 |
| 0.003464475   | 0.124791274 | 0.036442253 | 0.013257719 |
| 0.02746995    | 0.036541624 | 0.057851625 | 0.112293611 |
| 0.093516564   | 0.096061361 | 0.041501444 | 0.048778806 |
| 0.114083936   | 0.114461699 | 0.12739208  | 0.112035749 |



|             |             |             |             |
|-------------|-------------|-------------|-------------|
| 0.018039708 | 0.040237284 | 0.050979576 | 0.039586336 |
| 0.094470577 | 0.079587203 | 0.037899873 | 0.126102094 |
| 0.088651861 | 0.09919299  | 0.039259931 | 0.144122731 |
| 0.086756579 | 0.12277025  | 0.085779023 | 0.034927293 |
| 0.123405634 | 0.113983475 | 0.118926621 | 0.073052532 |
| 0.11298038  | 0.029708907 | 0.001473327 | 0.123775958 |
| 0.12390347  | 2.27E-05    | 0.111628765 | 0.118827875 |
| 0.112126884 | 0.093697168 | 0.13755349  | 0.118722982 |
| 0.116161268 | 0.050499493 | 0.000500264 | 0.088364162 |
| 0.117675963 | 0.082924711 | 0.053576193 | 0.048239929 |
| 0.07905371  | 0.043137328 | 0.108886028 | 0.003826029 |
| 0.145783689 | 0.101786076 | 0.115372523 | 0.104881345 |
| 0.088309898 | 0.109001413 | 0.061398008 | 0.109167177 |
| 0.011046728 | 0.023384838 | 0.026937594 | 0.131113888 |
| 0.014677645 | 0.060200719 | 0.038862604 | 0.100917392 |
| 0.069253343 | 0.069123124 | 0.03634193  | 0.09023761  |
| 0.045856977 | 0.045880881 | 0.045741718 | 0.049727815 |
| 0.01305134  | 0.083340406 | 0.009186871 | 0.011234321 |
| 0.060473682 | 0.103970493 | 0.086013778 | 0.118304191 |
| 0.065614042 | 0.049856013 | 0.077731619 | 0.12691106  |
| 0.124964559 | 0.049172152 | 0.10755122  | 5.86E-05    |
| 0.014791291 | 0.037762385 | 0.030479007 | 0.065055303 |
| 0.095441802 | 0.026648139 | 0.077823688 | 0.076188385 |
| 0.037535741 | 0.067225039 | 0.042654596 | 0.127813797 |
| 0.063628094 | 0.023326101 | 0.10354413  | 0.066926912 |
| 0.000408454 | 0.040882318 | 0.083204011 | 0.016631694 |
| 0.105421188 | 0.001383101 | 0.010016015 | 0.101477371 |
| 0.02913245  | 0.052531324 | 0.112699457 | 0.087620108 |
| 0.005968117 | 0.106631721 | 0.133538715 | 0.001581112 |
| 0.090144045 | 0.000643615 | 0.075702854 | 0.051483924 |
| 0.060958221 | 0.119114364 | 0.063583644 | 0.036327314 |
| 0.037344326 | 0.125562149 | 0.106488337 | 0.110555795 |
| 0.031389231 | 0.133436247 | 0.090594405 | 0.094561545 |
| 0.074626002 | 0.070554394 | 0.009624124 | 0.081208544 |
| 0.096371502 | 0.006395695 | 0.038979005 | 0.103958626 |
| 0.059561065 | 0.091431624 | 0.007914075 | 0.110956905 |
| 0.136949885 | 0.107508446 | 0.034949287 | 0.110455949 |
| 0.076470715 | 0.036320672 | 0.114204852 | 0.144898326 |
| 0.025516848 | 0.060486329 | 0.033623593 | 0.111432397 |
| 0.050376492 | 0.034609578 | 0.138623428 | 0.022304878 |
| 1.82E-05    | 0.044402521 | 0.030308859 | 0.039928455 |
| 0.021043235 | 0.074666091 | 0.086850564 | 0.12412028  |
| 0.042241914 | 0.108528836 | 0.127497418 | 0.020439654 |
| 0.109437882 | 0.072651518 | 0.053809746 | 0.08615008  |
| 0.111430633 | 0.000196645 | 0.003071812 | 0.140843879 |
| 0.03891772  | 0.01913635  | 0.079565123 | 1.89E-06    |
| 0.018320834 | 0.092344031 | 0.061518474 | 0.088163319 |
| 0.127632372 | 0.080843166 | 0.056930029 | 0.034019124 |
| 0.083371874 | 0.040602938 | 3.33E-06    | 0.124773562 |
| 0.145316281 | 0.149054751 | 0.14660933  | 0.141520189 |
| 0.141237688 | 0.111957291 | 0.096520524 | 0.037976773 |
| 0.026911143 | 0.034766531 | 0.017584744 | 0.048210395 |
| 6.98E-05    | 0.08815199  | 0.094386243 | 0.058337514 |
| 0.100032904 | 0.116228886 | 0.012283765 | 0.093526121 |

|             |             |             |             |
|-------------|-------------|-------------|-------------|
| 0.000764831 | 0.012066977 | 0.04066126  | 0.077873554 |
| 0.120580631 | 0.006717627 | 0.000496831 | 0.019196828 |
| 0.093223838 | 0.094684717 | 0.034315381 | 0.123119833 |
| 0.045248956 | 0.048473026 | 0.036737053 | 0.086311564 |
| 0.029617044 | 0.001408282 | 0.050749184 | 0.000268633 |
| 0.001826677 | 0.148295344 | 0.065937479 | 0.005665647 |
| 0.05065028  | 0.001238128 | 0.079822279 | 0.128248671 |
| 0.103065679 | 0.122304297 | 0.106460444 | 0.027713604 |
| 0.105762082 | 0.008196659 | 0.121196126 | 0.083490664 |
| 0.032591696 | 0.001441766 | 0.000134412 | 0.103908628 |
| 0.050283141 | 0.03644484  | 0.053699545 | 0.0072822   |
| 0.011572013 | 0.031349146 | 0.036387626 | 0.022958603 |
| 0.055609319 | 0.057916997 | 0.035451509 | 0.121675221 |
| 0.048367287 | 0.082835528 | 0.043357367 | 0.061534765 |
| 0.06639912  | 0.009285634 | 0.073924409 | 5.00E-05    |
| 0.099263879 | 0.062368991 | 0.127802298 | 0.113903841 |
| 0.124378379 | 0.082567469 | 0.026461249 | 0.008616306 |
| 0.132322583 | 0.033695046 | 0.024088798 | 0.040698658 |
| 0.100824323 | 0.06618102  | 0.080600804 | 0.072396643 |
| 0.125491291 | 0.113222892 | 0.020616372 | 0.09065914  |
| 0.000107716 | 3.89E-05    | 0.029681534 | 0.120614289 |
| 0.010490937 | 0.049094295 | 0.076985334 | 0.078124102 |
| 0.063066675 | 0.002444396 | 0.034988121 | 0.039237563 |
| 0.071391858 | 0.063658715 | 0.054872988 | 0.136262484 |
| 0.048826134 | 0.015420693 | 0.042134345 | 0.054478754 |
| 0.013264241 | 0.092943856 | 0.06824611  | 0.01536597  |
| 0.044809921 | 0.052526136 | 0.024593812 | 0.067150659 |
| 0.085511557 | 0.103315608 | 0.007156889 | 0.000362765 |
| 0.087811847 | 0.084373212 | 0.118858311 | 0.10851417  |
| 0.126772664 | 0.130462669 | 0.127611169 | 0.030085867 |
| 0.020798505 | 0.071191408 | 0.070198362 | 0.016753283 |
| 0.118115615 | 0.043584348 | 0.111728315 | 0.050641541 |
| 0.070999312 | 0.025413298 | 0.004452875 | 0.051254298 |
| 0.060917397 | 0.071775823 | 0.04707943  | 0.034737844 |
| 0.041965691 | 0.022068739 | 0.031844518 | 0.057956506 |
| 0.09883331  | 0.008008906 | 0.068058641 | 0.06507392  |
| 0.099903885 | 0.022821513 | 0.082139533 | 0.120322881 |
| 0.05103368  | 0.06198786  | 0.012595605 | 0.129858548 |
| 0.09289945  | 0.062024974 | 0.000164031 | 0.101125026 |
| 0.129689182 | 0.06525826  | 0.110757128 | 0.131778867 |
| 0.059237752 | 0.039675892 | 0.065860076 | 0.073040074 |
| 0.088161272 | 0.02861793  | 0.100059791 | 0.043652593 |
| 0.14222749  | 0.15177498  | 0.100449566 | 0.03072702  |
| 0.063570078 | 0.052667061 | 0.039736417 | 0.115926367 |
| 0.016293043 | 0.00761443  | 0.033048277 | 0.117515677 |
| 2.15E-05    | 0.018202595 | 0.140415149 | 0.027623437 |
| 0.14952891  | 0.10563056  | 0.103743214 | 0.052036113 |
| 0.000628051 | 0.084549375 | 0.052298084 | 0.026743644 |
| 0.100133639 | 0.091621559 | 0.016662969 | 0.014611856 |
| 0.094910081 | 0.035260164 | 0.01966585  | 0.004257198 |
| 0.001564224 | 0.075907806 | 0.090227285 | 0.096147677 |
| 0.060094782 | 0.075560938 | 0.014047562 | 0.038246752 |
| 0.021681533 | 0.085810232 | 0.088785305 | 0.030253691 |
| 0.005442597 | 0.145535328 | 0.091535735 | 0.009104705 |

|             |             |             |             |
|-------------|-------------|-------------|-------------|
| 0.064104875 | 0.117956261 | 0.129161463 | 1.84E-05    |
| 0.073204314 | 0.002384706 | 0.053699879 | 0.033550902 |
| 0.043036354 | 0.065063031 | 0.086567989 | 0.027532933 |
| 0.098633581 | 0.058279078 | 0.028686799 | 0.059390246 |
| 0.022278509 | 0.074620061 | 0.077017607 | 0.049585046 |
| 0.02296956  | 0.021811377 | 0.06480708  | 0.061074945 |
| 0.003643604 | 0.111997484 | 0.089085353 | 0.034926311 |
| 0.085087026 | 0.060085501 | 0.113231037 | 0.110373607 |
| 0.120496769 | 0.04758992  | 0.072771141 | 0.079613783 |
| 0.006306513 | 0.002964918 | 0.024479109 | 0.049612014 |
| 0.065950699 | 0.013623674 | 0.057130357 | 0.047665802 |
| 0.097518952 | 0.107262568 | 0.084258217 | 0.121777296 |
| 0.041936057 | 0.093708973 | 0.020750153 | 0.008080519 |
| 0.030680669 | 0.07461981  | 0.050426677 | 0.000102528 |
| 0.077310934 | 0.010622066 | 0.089946075 | 0.105650418 |
| 0.04085857  | 0.113842899 | 0.004314294 | 0.013988638 |
| 0.00762207  | 0.0658038   | 0.068507448 | 0.090881158 |
| 0.019182845 | 0.033460733 | 0.05898275  | 0.017059422 |
| 0.089587806 | 0.105291958 | 0.05042473  | 0.074798623 |
| 0.099511061 | 0.05715345  | 0.147909568 | 0.032954884 |
| 0.060753717 | 0.016549469 | 0.069954257 | 0.039770288 |
| 0.057474484 | 0.122326374 | 0.036401955 | 0.121686178 |
| 0.050476888 | 0.071570077 | 0.136865916 | 0.072980699 |
| 0.026710655 | 0.012257341 | 0.020598472 | 0.045956952 |
| 0.036392426 | 0.029766726 | 4.59E-05    | 0.000765587 |
| 0.078821507 | 0.076173074 | 0.097240102 | 0.128613111 |
| 0.043489635 | 0.118265506 | 0.011516899 | 0.07004218  |
| 0.110874944 | 0.12880188  | 0.011892911 | 0.109046242 |
| 0.101538757 | 0.023598205 | 0.05326857  | 0.016781894 |
| 0.063798953 | 0.061697821 | 0.025482643 | 0.028075558 |
| 0.006352961 | 0.019689673 | 0.070927019 | 0.064599031 |
| 0.11872058  | 0.005767097 | 0.101753091 | 0.076632631 |
| 0.104027028 | 0.127760154 | 0.030944836 | 0.070001805 |
| 0.016895327 | 0.103616236 | 0.060993396 | 0.074688595 |
| 0.011810235 | 0.038927452 | 0.07539715  | 0.023134199 |
| 0.012594286 | 0.015545327 | 0.000264229 | 0.112712246 |
| 0.118185246 | 0.056769268 | 0.100211105 | 0.030499993 |
| 0.082038367 | 0.128005775 | 0.021275004 | 0.049622639 |
| 0.000349116 | 0.054862691 | 0.079502638 | 0.0772214   |
| 0.004638402 | 0.095261384 | 0.005172832 | 0.084357552 |
| 0.124921329 | 0.015774071 | 0.131715196 | 0.010737543 |
| 0.110242998 | 0.114543165 | 0.058126797 | 0.027550735 |
| 0.100489298 | 0.04589254  | 0.030444469 | 0.135186775 |
| 0.041268776 | 0.026631391 | 0.095430308 | 0.029308453 |
| 0.0488067   | 0.116766707 | 0.073098457 | 0.146131235 |
| 0.018559173 | 0.079861205 | 0.106039514 | 0.126879029 |
| 0.10575823  | 0.04089353  | 0.025186266 | 0.040838885 |
| 0.09392044  | 0.003000527 | 0.041121115 | 0.087589412 |
| 0.024620837 | 0.092851608 | 0.079843261 | 0.05011054  |
| 0.001307354 | 0.056587569 | 0.020444154 | 0.064068802 |
| 0.079277896 | 0.048079933 | 0.036564797 | 0.112367373 |
| 0.005908003 | 0.000545444 | 0.13014274  | 0.000194604 |
| 0.038748553 | 0.055482732 | 0.075536577 | 0.058256801 |
| 0.058219384 | 0.087832185 | 0.049504438 | 3.73E-05    |

|               |             |             |             |
|---------------|-------------|-------------|-------------|
| 0.101826062   | 0.000339084 | 0.065544315 | 0.01803749  |
| 0.009310332   | 0.019047857 | 0.103885552 | 0.123714674 |
| 0.087804162   | 0.010105195 | 0.012258331 | 0.116711977 |
| 0.003413225   | 0.035437745 | 0.043151633 | 0.066550506 |
| 0.028421866   | 0.03703731  | 0.047288759 | 0.026070157 |
| 0.078239946   | 0.062602327 |             |             |
| 2610318N02RIK | 0.047183828 | 0.295414371 | 0.046596445 |
| 0.01605364    | 0.159462882 | 0.091147975 | 0.051663575 |
| 0.049957053   | 0.270966952 | 0.067058782 | 0.130906627 |
| 0.012511999   | 0.005915728 | 0.276763234 | 0.048476237 |
| 0.180521791   | 0.025361826 | 0.090665069 | 0.005983422 |
| 1             | 0.14421975  | 0.044917315 | 0.116947212 |
| 0.157082892   | 0.199077073 | 0.19932912  | 0.145877098 |
| 0.312960183   | 0.015186459 | 0.186650837 | 0.008652994 |
| 0.316164593   | 0.155586314 | 0.103441094 | 0.015679853 |
| 0.146860854   | 0.004352568 | 0.350355391 | 0.104063922 |
| 0.010722408   | 0.275751613 | 0.097854352 | 0.094548306 |
| 0.127988786   | 0.027880183 | 0.01072187  | 0.213889605 |
| 0.216446712   | 0.111630994 | 0.067494627 | 0.233884332 |
| 0.091156214   | 0.176676873 | 0.200281663 | 3.22E-05    |
| 0.069647763   | 0.00883261  | 0.042588448 | 0.332072755 |
| 0.160524879   | 0.09197306  | 0.028039488 | 0.139964655 |
| 0.191338646   | 0.236732766 | 0.225100856 | 0.08716364  |
| 0.309438887   | 0.025899399 | 0.225614172 | 0.007458966 |
| 0.123936958   | 0.053120088 | 0.178797412 | 0.137658164 |
| 0.100897364   | 0.132696143 | 0.131296219 | 0.106482006 |
| 0.274310783   | 0.37339213  | 0.218941252 | 0.348660796 |
| 0.014675547   | 0.155912722 | 0.096844781 | 0.243301331 |
| 0.257890845   | 0.075818613 | 0.208040498 | 0.353711352 |
| 0.067747383   | 0.150196831 | 0.223216935 | 0.135148156 |
| 0.275971686   | 0.067958031 | 0.118485799 | 0.034515774 |
| 0.211579904   | 0.15058648  | 0.365032894 | 0.175931488 |
| 0.134003018   | 0.096342734 | 0.342040395 | 0.142531916 |
| 0.076062234   | 0.088498146 | 0.060812913 | 0.271576342 |
| 0.19613579    | 0.295434907 | 0.263017615 | 0.26024294  |
| 0.140893221   | 0.318065851 | 0.214118829 | 0.289141744 |
| 0.004256397   | 0.341569766 | 0.126618706 | 0.02546865  |
| 0.05008461    | 0.059679116 | 0.080148354 | 0.269931696 |
| 0.28688212    | 0.190221711 | 0.081751473 | 0.14106395  |
| 0.301515202   | 0.322147021 | 0.345187736 | 0.240843268 |
| 0.040370918   | 0.070189422 | 0.142213733 | 0.08412835  |
| 0.201711721   | 0.14391765  | 0.094874669 | 0.355609758 |
| 0.254241903   | 0.262690521 | 0.080801853 | 0.376750426 |
| 0.122801989   | 0.345343579 | 0.268103794 | 0.10901835  |
| 0.361610143   | 0.340108301 | 0.337615419 | 0.19105305  |
| 0.322916256   | 0.12202733  | 0.006485062 | 0.271765218 |
| 0.323693667   | 0.001670171 | 0.290564545 | 0.310066284 |
| 0.326976021   | 0.255716346 | 0.350989338 | 0.317662231 |
| 0.319813526   | 0.103490072 | 0.003874676 | 0.185154821 |
| 0.338387624   | 0.264146342 | 0.062295236 | 0.128829865 |
| 0.171696494   | 0.115317323 | 0.253926909 | 0.007107818 |
| 0.363412805   | 0.290089962 | 0.29574419  | 0.225504744 |
| 0.194022531   | 0.252089135 | 0.134844942 | 0.323664678 |
| 0.024827322   | 0.057579397 | 0.072971816 | 0.261634302 |

|             |             |             |             |
|-------------|-------------|-------------|-------------|
| 0.049547768 | 0.144458572 | 0.092431171 | 0.195749044 |
| 0.156583682 | 0.124787512 | 0.070306143 | 0.185424157 |
| 0.106673289 | 0.140891109 | 0.137001531 | 0.11881948  |
| 0.029923479 | 0.186282913 | 0.01604362  | 0.039047808 |
| 0.117453602 | 0.256621099 | 0.194612796 | 0.329208737 |
| 0.128038643 | 0.16746928  | 0.198862265 | 0.321947464 |
| 0.30854073  | 0.138908679 | 0.212421216 | 0.002558329 |
| 0.024530994 | 0.066729532 | 0.038056519 | 0.147669038 |
| 0.22915185  | 0.044061383 | 0.169739313 | 0.209718322 |
| 0.107367986 | 0.10689096  | 0.08305268  | 0.31416071  |
| 0.168454658 | 0.071333438 | 0.259718528 | 0.157996972 |
| 0.002397488 | 0.134087622 | 0.247563425 | 0.036735333 |
| 0.208564108 | 0.004868166 | 0.023293536 | 0.300752241 |
| 0.029834268 | 0.079937327 | 0.305764643 | 0.233928544 |
| 0.013162018 | 0.230894806 | 0.347488238 | 0.002361599 |
| 0.170239564 | 0.004575011 | 0.200301621 | 0.111534562 |
| 0.167027274 | 0.225837405 | 0.141757323 | 0.085868016 |
| 0.104236906 | 0.333687005 | 0.265745735 | 0.314855845 |
| 0.068466517 | 0.358806405 | 0.261312648 | 0.2678568   |
| 0.212545695 | 0.116275955 | 0.018345526 | 0.23936645  |
| 0.2964438   | 0.011121107 | 0.112827542 | 0.241873239 |
| 0.1200181   | 0.197289826 | 0.012194217 | 0.320980752 |
| 0.358054354 | 0.316785673 | 0.058936569 | 0.247282165 |
| 0.231321038 | 0.119685611 | 0.284042284 | 0.360216591 |
| 0.058860622 | 0.126900171 | 0.090917847 | 0.28799435  |
| 0.156728431 | 0.069687916 | 0.285537207 | 0.035408171 |
| 0.001001086 | 0.078653838 | 0.072538761 | 0.096190361 |
| 0.056103654 | 0.168082554 | 0.22513072  | 0.32241465  |
| 0.084899903 | 0.28091478  | 0.238323782 | 0.061232713 |
| 0.277748336 | 0.115507123 | 0.14087757  | 0.173976513 |
| 0.227900122 | 0.006142794 | 0.01362906  | 0.372613222 |
| 0.07459889  | 0.044375381 | 0.13824937  | 0.00061881  |
| 0.037542934 | 0.239204189 | 0.156101904 | 0.228713555 |
| 0.307260884 | 0.225102876 | 0.158443166 | 0.073746867 |
| 0.205111644 | 0.103339633 | 0.001643711 | 0.338808851 |
| 0.359121707 | 0.354604446 | 0.351213217 | 0.352124631 |
| 0.330162919 | 0.263142999 | 0.264469324 | 0.129542129 |
| 0.048334368 | 0.07085902  | 0.043910844 | 0.120124286 |
| 0.000673318 | 0.24691922  | 0.160001787 | 0.152077737 |
| 0.219079557 | 0.217234838 | 0.025123529 | 0.176629405 |
| 0.00420232  | 0.027174574 | 0.062123756 | 0.121425921 |
| 0.253086481 | 0.017494634 | 0.006683694 | 0.031767667 |
| 0.274749639 | 0.242333073 | 0.077630629 | 0.350913456 |
| 0.136377928 | 0.147819957 | 0.134186049 | 0.22013353  |
| 0.051174357 | 0.004055473 | 0.110242376 | 0.001626801 |
| 0.005990229 | 0.346780634 | 0.084291531 | 0.020180849 |
| 0.159671058 | 0.004373921 | 0.24376195  | 0.340349557 |
| 0.304907717 | 0.329176298 | 0.312095408 | 0.069222936 |
| 0.324364775 | 0.010111792 | 0.332272263 | 0.264222968 |
| 0.077895281 | 0.000262929 | 0.001157585 | 0.297973144 |
| 0.141593761 | 0.098678222 | 0.146451846 | 0.028498965 |
| 0.037623656 | 0.078160408 | 0.057282155 | 0.072229002 |
| 0.171956619 | 0.121784291 | 0.04742849  | 0.307943146 |
| 0.13370201  | 0.167650544 | 0.104169554 | 0.12794548  |

|             |             |             |             |
|-------------|-------------|-------------|-------------|
| 0.164789145 | 0.030755568 | 0.144244482 | 0.001307105 |
| 0.234666444 | 0.143601497 | 0.343702604 | 0.32422344  |
| 0.331156005 | 0.211475058 | 0.055556088 | 0.018208467 |
| 0.316789009 | 0.10371016  | 0.031679611 | 0.1060996   |
| 0.300839909 | 0.171740522 | 0.206922764 | 0.220133646 |
| 0.322875515 | 0.301371175 | 0.037902878 | 0.249806342 |
| 0.002240052 | 0.000987357 | 0.113357194 | 0.206145641 |
| 0.012111792 | 0.121805458 | 0.218657403 | 0.121558785 |
| 0.110203974 | 0.004346292 | 0.084741164 | 0.076486565 |
| 0.186841534 | 0.132373582 | 0.116664633 | 0.255151322 |
| 0.131519483 | 0.015689897 | 0.097166658 | 0.076812112 |
| 0.017374167 | 0.259885177 | 0.192587177 | 0.028723101 |
| 0.139323915 | 0.123577716 | 0.058926689 | 0.15871648  |
| 0.26414721  | 0.289328874 | 0.015544236 | 0.002858943 |
| 0.212921136 | 0.107930829 | 0.298830734 | 0.309110931 |
| 0.350240042 | 0.35283853  | 0.302751909 | 0.044823691 |
| 0.0474117   | 0.209729457 | 0.138132669 | 0.046245134 |
| 0.314421518 | 0.08836875  | 0.319528146 | 0.114187857 |
| 0.147786267 | 0.098394975 | 0.012553629 | 0.104218992 |
| 0.140854599 | 0.146305539 | 0.121650614 | 0.123385571 |
| 0.097787683 | 0.035353214 | 0.055997639 | 0.142204591 |
| 0.218505701 | 0.025248016 | 0.141079896 | 0.123999751 |
| 0.268915839 | 0.02883154  | 0.215065251 | 0.327149583 |
| 0.128635007 | 0.127217134 | 0.043610269 | 0.253790527 |
| 0.260355011 | 0.149770135 | 0.002010858 | 0.284526213 |
| 0.315480485 | 0.172235129 | 0.324299783 | 0.277084692 |
| 0.130417024 | 0.11326748  | 0.11003492  | 0.158034395 |
| 0.156417703 | 0.105638917 | 0.147641592 | 0.089547245 |
| 0.288328861 | 0.368236372 | 0.286542727 | 0.091918362 |
| 0.160174829 | 0.117231816 | 0.084118135 | 0.285682741 |
| 0.049880593 | 0.017697478 | 0.098277581 | 0.267491058 |
| 0.00136247  | 0.033398348 | 0.351022041 | 0.060342832 |
| 0.378733515 | 0.314682813 | 0.301371209 | 0.092586602 |
| 0.000298394 | 0.211479572 | 0.154511436 | 0.096654106 |
| 0.250300063 | 0.22845892  | 0.021746766 | 0.038328367 |
| 0.252419326 | 0.092328343 | 0.037874929 | 0.016915071 |
| 0.010094406 | 0.166704837 | 0.198548252 | 0.191339681 |
| 0.124001042 | 0.143539166 | 0.03402984  | 0.114711212 |
| 0.029077464 | 0.202529304 | 0.239385462 | 0.053937065 |
| 0.01027592  | 0.301159663 | 0.243320517 | 0.026735022 |
| 0.133662279 | 0.310104229 | 0.315246652 | 0.000361199 |
| 0.194561712 | 0.004857946 | 0.101437867 | 0.100452806 |
| 0.109477556 | 0.101049453 | 0.179798205 | 0.088644178 |
| 0.192588406 | 0.124447884 | 0.087720018 | 0.162783716 |
| 0.069270126 | 0.136851991 | 0.173663371 | 0.152531546 |
| 0.061429076 | 0.072777321 | 0.15757172  | 0.159756944 |
| 0.010769355 | 0.289488555 | 0.216698224 | 0.104760602 |
| 0.171561188 | 0.128431665 | 0.280313362 | 0.317360312 |
| 0.302551164 | 0.143944129 | 0.130949914 | 0.255525555 |
| 0.005818863 | 0.007945718 | 0.034949272 | 0.174534517 |
| 0.117248576 | 0.032083136 | 0.139766963 | 0.144942573 |
| 0.22885623  | 0.313849742 | 0.204429501 | 0.339734202 |
| 0.116418219 | 0.162741695 | 0.062498718 | 0.028635605 |
| 0.092966364 | 0.171599696 | 0.132673094 | 0.001193962 |

|               |             |             |             |
|---------------|-------------|-------------|-------------|
| 0.18423896    | 0.030559386 | 0.267023042 | 0.330494655 |
| 0.06452638    | 0.297630336 | 0.018034491 | 0.0358862   |
| 0.030631272   | 0.187993939 | 0.144452487 | 0.242848573 |
| 0.035759582   | 0.084082124 | 0.155589778 | 0.057680568 |
| 0.243231195   | 0.25662643  | 0.103394019 | 0.106667426 |
| 0.195084383   | 0.169742998 | 0.368405164 | 0.081603987 |
| 0.159050181   | 0.056462301 | 0.165494832 | 0.114604807 |
| 0.118500929   | 0.336514883 | 0.077339113 | 0.324745169 |
| 0.110852639   | 0.169442271 | 0.358446435 | 0.149097594 |
| 0.063509789   | 0.026320767 | 0.044758055 | 0.093930978 |
| 0.077758844   | 0.074652618 | 0.000459038 | 0.003117696 |
| 0.21083774    | 0.115618703 | 0.239954783 | 0.268409383 |
| 0.115199003   | 0.267613538 | 0.014059492 | 0.119408249 |
| 0.317829113   | 0.352427475 | 0.027304408 | 0.247232146 |
| 0.212234726   | 0.057149376 | 0.16005136  | 0.002214461 |
| 0.162424065   | 0.155672943 | 0.049498575 | 0.04163104  |
| 0.009502902   | 0.045975497 | 0.172244065 | 0.120611932 |
| 0.3120751     | 0.011001155 | 0.212310843 | 0.213843885 |
| 0.202775309   | 0.350314692 | 0.055235578 | 0.196494238 |
| 0.022415073   | 0.219680629 | 0.151591382 | 0.14749407  |
| 0.039410318   | 0.101335814 | 0.224113963 | 0.066248422 |
| 0.029277695   | 0.04740597  | 0.000938128 | 0.312988658 |
| 0.343817594   | 0.128917477 | 0.226161771 | 0.048338543 |
| 0.21491845    | 0.317404871 | 0.023782471 | 0.136151261 |
| 0.003299087   | 0.146102714 | 0.149437757 | 0.244742701 |
| 0.014376868   | 0.179628095 | 0.017550388 | 0.149896841 |
| 0.340579373   | 0.023068404 | 0.250597789 | 0.032446442 |
| 0.319454535   | 0.288676624 | 0.176036147 | 0.047162118 |
| 0.207283373   | 0.100265055 | 0.081323533 | 0.35448682  |
| 0.095854049   | 0.073553109 | 0.259260561 | 0.079247249 |
| 0.098145765   | 0.271638451 | 0.182774308 | 0.358696436 |
| 0.032916839   | 0.168090906 | 0.25844853  | 0.299669456 |
| 0.226974099   | 0.076712547 | 0.048544207 | 0.086632292 |
| 0.29583162    | 0.01358842  | 0.054723317 | 0.219403516 |
| 0.051978849   | 0.20437573  | 0.185246121 | 0.09013226  |
| 0.004024467   | 0.064693072 | 0.057529046 | 0.149951862 |
| 0.152057498   | 0.168119705 | 0.099202715 | 0.289247891 |
| 0.02149856    | 0.003109942 | 0.337416089 | 0.00121514  |
| 0.133954657   | 0.18158294  | 0.150170521 | 0.121496276 |
| 0.176940489   | 0.185193218 | 0.137003468 | 0.000251135 |
| 0.28062851    | 0.012323357 | 0.121235493 | 0.057782667 |
| 0.012380403   | 0.036495293 | 0.319057662 | 0.321604069 |
| 0.208279695   | 0.021652723 | 0.027852873 | 0.313308622 |
| 0.006533772   | 0.066670141 | 0.075003476 | 0.192620638 |
| 0.059509277   | 0.098775493 | 0.103280471 | 0.085714802 |
| 0.240279503   | 0.110864411 |             |             |
| 2700094K13RIK | 0.051511948 | 0.242692633 | 0.026230024 |
| 0.126447996   | 0.302207699 | 0.153778828 | 0.065122897 |
| 0.10720099    | 0.199114321 | 0.09186937  | 0.226946789 |
| 0.028559438   | 0.164566253 | 0.331813075 | 0.069494895 |
| 0.299068007   | 0.065596647 | 0.10836665  | 0.057252289 |
| 0.14421975    | 1           | 0.226446182 | 0.124103952 |
| 0.284487122   | 0.133893246 | 0.156876868 | 0.204125333 |
| 0.320246467   | 0.126675691 | 0.26628999  | 0.064369527 |

|             |             |             |             |
|-------------|-------------|-------------|-------------|
| 0.321491191 | 0.325482026 | 0.194111888 | 0.016229808 |
| 0.194793822 | 0.04407863  | 0.298450783 | 0.266065563 |
| 0.217932767 | 0.266043107 | 0.089067401 | 0.224868751 |
| 0.131302919 | 0.030820805 | 0.053987567 | 0.282400441 |
| 0.159428988 | 0.183692406 | 0.030508896 | 0.249424515 |
| 0.176902473 | 0.202151928 | 0.173200821 | 0.003161266 |
| 0.230352806 | 0.11253378  | 0.200391461 | 0.309896106 |
| 0.185389604 | 0.149601773 | 0.141020014 | 0.129781495 |
| 0.228011475 | 0.292953697 | 0.229607628 | 0.148427243 |
| 0.337123102 | 0.242984313 | 0.269465166 | 0.122205515 |
| 0.179724943 | 0.02217006  | 0.153248541 | 0.043363202 |
| 0.210874988 | 0.20023019  | 0.241128509 | 0.261599523 |
| 0.230126288 | 0.349538816 | 0.189635098 | 0.291273309 |
| 0.197864099 | 0.292438192 | 0.278758895 | 0.319456326 |
| 0.276017359 | 0.076534127 | 0.311763935 | 0.366063928 |
| 0.035538948 | 0.1379013   | 0.264577089 | 0.075930108 |
| 0.255862189 | 0.200061969 | 0.12346788  | 0.252441383 |
| 0.336751845 | 0.288237199 | 0.301269874 | 0.248657823 |
| 0.243513036 | 0.041755351 | 0.269921492 | 0.299533423 |
| 0.250001217 | 0.049662931 | 0.292762351 | 0.339691987 |
| 0.261798717 | 0.32816887  | 0.262903078 | 0.304351866 |
| 0.264825305 | 0.338803737 | 0.272364629 | 0.28357267  |
| 0.042171749 | 0.332920524 | 0.125408507 | 0.073368506 |
| 0.035297439 | 0.120883023 | 0.226324652 | 0.277652153 |
| 0.334085264 | 0.220395051 | 0.133905761 | 0.255651814 |
| 0.395567764 | 0.25988911  | 0.327472439 | 0.306221153 |
| 0.043011532 | 0.228096466 | 0.250975706 | 0.135905783 |
| 0.287667743 | 0.092686732 | 0.28902543  | 0.314152527 |
| 0.294848628 | 0.360456258 | 0.07950856  | 0.317068296 |
| 0.142589777 | 0.381221651 | 0.258615677 | 0.159472245 |
| 0.336913798 | 0.296174664 | 0.394410109 | 0.339790979 |
| 0.302524154 | 0.157542884 | 0.060701054 | 0.283813847 |
| 0.387051745 | 0.044429766 | 0.330437487 | 0.359481985 |
| 0.305670625 | 0.34396457  | 0.402448232 | 0.355986235 |
| 0.302090591 | 0.05497329  | 0.032813879 | 0.323265126 |
| 0.316920773 | 0.306807403 | 0.178005049 | 0.207757265 |
| 0.303841367 | 0.154105432 | 0.291621339 | 0.18477878  |
| 0.393576525 | 0.317583116 | 0.320798926 | 0.26624252  |
| 0.129885585 | 0.240073263 | 0.227400954 | 0.260375588 |
| 0.058713492 | 0.068776733 | 0.030220628 | 0.259454656 |
| 0.099021421 | 0.19097899  | 0.150562973 | 0.253678283 |
| 0.20423616  | 0.12945185  | 0.196632905 | 0.347030385 |
| 0.034108073 | 0.194218867 | 0.110919557 | 0.100682513 |
| 0.07513177  | 0.114352383 | 0.179098626 | 0.158135675 |
| 0.260471862 | 0.141397398 | 0.26121111  | 0.352638496 |
| 0.218290062 | 0.121790147 | 0.255323723 | 0.369378138 |
| 0.393266423 | 0.255121204 | 0.200299932 | 0.031130523 |
| 0.243028081 | 0.145826821 | 0.222401587 | 0.211809603 |
| 0.118428566 | 0.224617532 | 0.269232591 | 0.367522269 |
| 0.118707979 | 0.075289821 | 0.24055677  | 0.297615434 |
| 0.092266188 | 0.255415671 | 0.369386274 | 0.174842291 |
| 0.004654038 | 0.196088921 | 0.325957495 | 0.269903954 |
| 0.214459117 | 0.216787162 | 0.202397075 | 0.35559996  |
| 0.216554765 | 0.284952191 | 0.343954663 | 0.362757476 |



|             |             |             |             |
|-------------|-------------|-------------|-------------|
| 0.162887523 | 0.123770356 | 0.387070959 | 0.074996142 |
| 0.222003757 | 0.12532002  | 0.317277141 | 0.094604772 |
| 0.194713136 | 0.296940348 | 0.290686718 | 0.276039592 |
| 0.066866009 | 0.338763907 | 0.274368058 | 0.356552194 |
| 0.208330291 | 0.386407618 | 0.351517961 | 0.345163851 |
| 0.247231286 | 0.188287634 | 0.201335266 | 0.319281064 |
| 0.347126463 | 0.160466413 | 0.043046432 | 0.295396444 |
| 0.161101809 | 0.322023843 | 0.207635882 | 0.382426831 |
| 0.344439856 | 0.252400231 | 0.187454894 | 0.381473358 |
| 0.313845596 | 0.146662397 | 0.307808962 | 0.393131298 |
| 0.121492225 | 0.254087412 | 0.270682967 | 0.402538311 |
| 0.142493872 | 0.297015285 | 0.240456911 | 0.208005566 |
| 0.011569126 | 0.050562837 | 0.044380937 | 0.226023698 |
| 0.292720583 | 0.19528465  | 0.299509343 | 0.35276258  |
| 0.123915118 | 0.294299022 | 0.185737414 | 0.262796769 |
| 0.280506427 | 0.232515102 | 0.244473497 | 0.281485613 |
| 0.203097876 | 0.038830152 | 0.151378235 | 0.347631238 |
| 0.020185508 | 0.272273626 | 0.153743007 | 0.008303229 |
| 0.042765606 | 0.209178885 | 0.066263549 | 0.150981845 |
| 0.396000149 | 0.137743253 | 0.142973042 | 0.115551426 |
| 0.307251191 | 0.08122764  | 0.014390783 | 0.335726282 |
| 0.316320123 | 0.305273663 | 0.306811697 | 0.271901881 |
| 0.32152797  | 0.265115058 | 0.352184218 | 0.125714028 |
| 0.099893453 | 0.048541159 | 0.291174242 | 0.258680753 |
| 0.005083789 | 0.329933478 | 0.235857432 | 0.134512004 |
| 0.320555897 | 0.241985203 | 0.04246631  | 0.275871251 |
| 0.022924362 | 0.199475885 | 0.162530806 | 0.204320819 |
| 0.360667056 | 0.015445303 | 0.118235348 | 0.224545219 |
| 0.248335008 | 0.24319042  | 0.205373185 | 0.344626872 |
| 0.237540304 | 0.063529554 | 0.264447053 | 0.332307829 |
| 0.080219968 | 0.059706155 | 0.154369289 | 0.014469831 |
| 0.0823451   | 0.291486457 | 0.191943433 | 0.05348868  |
| 0.220337743 | 0.007140503 | 0.242915438 | 0.358489659 |
| 0.25365665  | 0.385575557 | 0.343095035 | 0.266005576 |
| 0.335422437 | 0.117168044 | 0.352146131 | 0.25360857  |
| 0.139565343 | 0.001762585 | 0.016224276 | 0.355258564 |
| 0.256651295 | 0.028644025 | 0.142323198 | 0.131001956 |
| 0.155239682 | 0.073313675 | 0.066722258 | 0.305759059 |
| 0.216032572 | 0.277107748 | 0.274602352 | 0.274603656 |
| 0.220468355 | 0.213962507 | 0.136355276 | 0.060220068 |
| 0.246583478 | 0.071073412 | 0.061074911 | 0.025344491 |
| 0.340800773 | 0.067145584 | 0.262497692 | 0.32499172  |
| 0.366644088 | 0.335403914 | 0.110746893 | 0.158400528 |
| 0.328381323 | 0.044208417 | 0.157076515 | 0.052160988 |
| 0.285177036 | 0.305642218 | 0.294809288 | 0.235854532 |
| 0.390435512 | 0.323481293 | 0.043400609 | 0.340187572 |
| 0.018076232 | 0.01091475  | 0.129873433 | 0.216022908 |
| 0.07939899  | 0.248144916 | 0.232557152 | 0.150255185 |
| 0.191237727 | 0.030359664 | 0.276163283 | 0.286054881 |
| 0.270589937 | 0.245468019 | 0.299385991 | 0.183092187 |
| 0.276404743 | 0.259633775 | 0.200469748 | 0.156337526 |
| 0.156396286 | 0.208743987 | 0.137017299 | 0.029221835 |
| 0.167643589 | 0.222773312 | 0.057961091 | 0.123100986 |
| 0.344230992 | 0.359048423 | 0.076841595 | 0.039900866 |

|             |             |             |             |
|-------------|-------------|-------------|-------------|
| 0.210639402 | 0.230775046 | 0.383816368 | 0.298649356 |
| 0.328876543 | 0.395721222 | 0.282300161 | 0.224922297 |
| 0.066697167 | 0.279287801 | 0.28519703  | 0.22516728  |
| 0.34327911  | 0.035079232 | 0.291431576 | 0.262165152 |
| 0.101282429 | 0.182231857 | 0.064915964 | 0.084813389 |
| 0.262278027 | 0.16268138  | 0.237533071 | 0.080162633 |
| 0.262788664 | 0.253834393 | 0.052945518 | 0.176592528 |
| 0.269329194 | 0.258803752 | 0.140736314 | 0.141596054 |
| 0.22361693  | 0.070236904 | 0.319560687 | 0.363065676 |
| 0.096641807 | 0.078905422 | 0.110266989 | 0.281762277 |
| 0.299301859 | 0.156962077 | 0.029591881 | 0.24574741  |
| 0.361044204 | 0.260557114 | 0.301984992 | 0.376780204 |
| 0.066295471 | 0.244281674 | 0.230221827 | 0.271353194 |
| 0.161189244 | 0.14928912  | 0.197871015 | 0.053651456 |
| 0.251087038 | 0.320085614 | 0.273938503 | 0.189653205 |
| 0.189006399 | 0.05809402  | 0.028506945 | 0.293600481 |
| 0.308704716 | 0.081697731 | 0.103507246 | 0.319278008 |
| 0.009724729 | 0.227972476 | 0.37635125  | 0.189543445 |
| 0.360163705 | 0.373965987 | 0.329764347 | 0.135529292 |
| 0.009533992 | 0.305844109 | 0.280674411 | 0.217064509 |
| 0.264941083 | 0.233258406 | 0.095300941 | 0.126007253 |
| 0.285054287 | 0.042538227 | 0.196129285 | 0.132299804 |
| 0.203177509 | 0.204128641 | 0.208281102 | 0.145142808 |
| 0.240449671 | 0.04843632  | 0.24738206  | 0.169683429 |
| 0.21100052  | 0.242567553 | 0.329725463 | 0.07795265  |
| 0.208088006 | 0.349987259 | 0.27833224  | 0.02763252  |
| 0.235248638 | 0.327266201 | 0.323315935 | 0.008451138 |
| 0.323355959 | 0.016678397 | 0.246049495 | 0.246146668 |
| 0.234312577 | 0.236540114 | 0.299188371 | 0.269566108 |
| 0.214187292 | 0.195312038 | 0.215475918 | 0.23333786  |
| 0.214669765 | 0.150429799 | 0.258257132 | 0.168898457 |
| 0.262211482 | 0.11163519  | 0.064866307 | 0.060574602 |
| 0.076157324 | 0.291507992 | 0.201199519 | 0.041481422 |
| 0.225562646 | 0.174441789 | 0.326204431 | 0.283045339 |
| 0.352358123 | 0.056559237 | 0.219304667 | 0.270463633 |
| 0.098375828 | 0.124337721 | 0.039529512 | 0.170217167 |
| 0.17132251  | 0.290926933 | 0.139661096 | 0.144385527 |
| 0.229510553 | 0.302699662 | 0.192114893 | 0.326095997 |
| 0.22342628  | 0.182366805 | 0.087018414 | 0.155490627 |
| 0.138122647 | 0.100736078 | 0.305126243 | 0.004350667 |
| 0.264218508 | 0.108811051 | 0.338947072 | 0.292431727 |
| 0.22375631  | 0.311254055 | 0.095354828 | 0.087745963 |
| 0.072784414 | 0.09918879  | 0.122972413 | 0.268375857 |
| 0.208490226 | 0.152431771 | 0.285431965 | 0.099730252 |
| 0.319421742 | 0.269656783 | 0.261616122 | 0.158944428 |
| 0.183532722 | 0.114221891 | 0.297232116 | 0.061140049 |
| 0.205527223 | 0.295518367 | 0.129809937 | 0.272060366 |
| 0.259212748 | 0.348403124 | 0.044457801 | 0.358647869 |
| 0.262840144 | 0.091724498 | 0.361272384 | 0.144386401 |
| 0.140076772 | 0.183012925 | 0.237608962 | 0.134850253 |
| 0.202751459 | 0.223371487 | 0.006700204 | 0.111459914 |
| 0.330821415 | 0.156070427 | 0.229659104 | 0.288792763 |
| 0.298260434 | 0.352810823 | 0.178693873 | 0.150634769 |
| 0.26016736  | 0.286774536 | 0.219401374 | 0.244724106 |

|               |             |             |             |
|---------------|-------------|-------------|-------------|
| 0.271461481   | 0.115664643 | 0.164543887 | 0.016914489 |
| 0.258524242   | 0.228341365 | 0.153886813 | 0.067197322 |
| 0.028443524   | 0.245708533 | 0.229560738 | 0.037161429 |
| 0.393782994   | 0.187645209 | 0.167921059 | 0.26847107  |
| 0.130999215   | 0.290998842 | 0.206587408 | 0.328842985 |
| 0.03387428    | 0.207680388 | 0.215643773 | 0.178927892 |
| 0.271258192   | 0.295035471 | 0.347149211 | 0.286459628 |
| 0.053464659   | 0.266261716 | 0.00855617  | 0.281601259 |
| 0.261908705   | 0.253490725 | 0.1672051   | 0.096701856 |
| 0.295581502   | 0.281194658 | 0.248101706 | 0.167609469 |
| 0.029593993   | 0.30259261  | 0.173219472 | 0.265338602 |
| 0.156107096   | 0.197805438 | 0.090156949 | 0.260330524 |
| 0.252354741   | 0.23918752  | 0.219764648 | 0.183961074 |
| 0.286731899   | 0.233528503 | 0.083519171 | 0.229015714 |
| 0.191756564   | 0.046821954 | 0.118152343 | 0.366234536 |
| 0.21748358    | 0.298538024 | 0.387039821 | 0.227519849 |
| 0.260409225   | 0.244159999 | 0.193161629 | 0.344901551 |
| 0.182146445   | 0.23009631  | 0.33501825  | 0.308773238 |
| 0.315884351   | 0.298603706 | 0.278938677 | 0.290294761 |
| 0.256044448   | 0.095372629 | 0.265644742 | 0.253773294 |
| 0.277959767   | 0.273143775 | 0.124907661 | 0.282554692 |
| 0.0700696     | 0.153610229 | 0.17539871  | 0.116351162 |
| 0.254150029   | 0.255724104 | 0.302488161 | 0.320719498 |
| 0.179691968   | 0.055323195 | 0.350560247 | 0.061127628 |
| 0.129298138   | 0.301448302 | 0.1872111   | 0.250452167 |
| 0.13684212    | 0.209512364 | 0.132456689 | 0.002571793 |
| 0.351072146   | 0.091636042 | 0.219052796 | 0.29510296  |
| 0.220788249   | 0.048964112 | 0.293361932 | 0.394746149 |
| 0.196081422   | 0.152958695 | 0.177459874 | 0.3004161   |
| 0.243721718   | 0.170108525 | 0.213789132 | 0.193507258 |
| 0.264023776   | 0.129764084 | 0.170834341 | 0.206569885 |
| 0.251496468   | 0.151081847 |             |             |
| 2810405K02RIK | 0.024097766 | 0.312856795 | 0.018207066 |
| 0.041280286   | 0.263723623 | 0.188386272 | 0.011184717 |
| 0.026817441   | 0.215609794 | 0.077515768 | 0.268632498 |
| 0.003567478   | 0.09352572  | 0.377185298 | 0.011857121 |
| 0.301253687   | 0.007973458 | 0.038815356 | 0.017481621 |
| 0.044917315   | 0.226446182 | 1           | 0.181099014 |
| 0.198886002   | 0.114386139 | 0.170986276 | 0.253600258 |
| 0.409874512   | 0.137358613 | 0.373227304 | 0.045886826 |
| 0.304556187   | 0.302755266 | 0.265255362 | 0.002581899 |
| 0.254777902   | 0.004975806 | 0.294086991 | 0.114395881 |
| 0.092303252   | 0.254476296 | 0.123227547 | 0.127753147 |
| 0.140489654   | 0.008109071 | 0.067171885 | 0.294657673 |
| 0.156450558   | 0.092794218 | 0.02164491  | 0.313229999 |
| 0.103672506   | 0.246140062 | 0.247489228 | 0.000495922 |
| 0.249255662   | 0.091033899 | 0.153895935 | 0.395106692 |
| 0.136388021   | 0.062349122 | 0.073148    | 0.098463566 |
| 0.244507533   | 0.274085683 | 0.17259323  | 0.104118999 |
| 0.407825095   | 0.104409375 | 0.337481973 | 0.050044866 |
| 0.157154231   | 0.00528616  | 0.092788659 | 0.02756892  |
| 0.150766108   | 0.130311011 | 0.281692994 | 0.183469014 |
| 0.297950237   | 0.386236484 | 0.130649565 | 0.352718321 |
| 0.045903531   | 0.282807403 | 0.132839377 | 0.23171996  |

|             |             |             |             |
|-------------|-------------|-------------|-------------|
| 0.246059798 | 0.014205018 | 0.350092907 | 0.403513824 |
| 0.010140751 | 0.191778823 | 0.263499369 | 0.053538795 |
| 0.348288539 | 0.105041765 | 0.192881867 | 0.149181923 |
| 0.329884052 | 0.242785899 | 0.337574167 | 0.209716359 |
| 0.226539968 | 0.026261115 | 0.336289245 | 0.302693829 |
| 0.186452085 | 0.031119808 | 0.07111676  | 0.417439662 |
| 0.283170433 | 0.420528155 | 0.311452405 | 0.258035134 |
| 0.262237214 | 0.413470176 | 0.298243423 | 0.32965221  |
| 0.044785022 | 0.412787876 | 0.093783641 | 0.012731462 |
| 0.017184376 | 0.031573551 | 0.066095092 | 0.229034458 |
| 0.429979553 | 0.219727283 | 0.074131595 | 0.135640406 |
| 0.419873998 | 0.338598882 | 0.399345362 | 0.321880108 |
| 0.01003302  | 0.106412092 | 0.249622348 | 0.096928084 |
| 0.271870173 | 0.047986614 | 0.222203552 | 0.366091051 |
| 0.306876227 | 0.397368343 | 0.046210155 | 0.351909729 |
| 0.066966621 | 0.425428016 | 0.356326123 | 0.087601638 |
| 0.388632075 | 0.362230064 | 0.43674399  | 0.406219341 |
| 0.370155779 | 0.175972406 | 0.016399609 | 0.272695999 |
| 0.427248133 | 0.020200915 | 0.414268411 | 0.434726945 |
| 0.376524418 | 0.419270726 | 0.440589356 | 0.444922451 |
| 0.385811214 | 0.02651287  | 0.008583388 | 0.223496198 |
| 0.374765687 | 0.322315342 | 0.040734814 | 0.253179072 |
| 0.293306146 | 0.191742893 | 0.361063181 | 0.116015383 |
| 0.412818643 | 0.385498162 | 0.416177193 | 0.275701142 |
| 0.121554879 | 0.229311566 | 0.283865899 | 0.329834773 |
| 0.009471771 | 0.039033492 | 0.020083533 | 0.208389359 |
| 0.080817643 | 0.106429648 | 0.136738224 | 0.226904687 |
| 0.126539155 | 0.130888558 | 0.21578166  | 0.364756685 |
| 0.021708049 | 0.290475641 | 0.068035368 | 0.062307532 |
| 0.009849502 | 0.080836309 | 0.052662901 | 0.055578946 |
| 0.175384794 | 0.12809932  | 0.353722966 | 0.409154178 |
| 0.155287616 | 0.101712797 | 0.310696289 | 0.401760673 |
| 0.363778727 | 0.296543487 | 0.146797844 | 0.00583807  |
| 0.071707778 | 0.100267672 | 0.11527767  | 0.290868058 |
| 0.09824508  | 0.059053013 | 0.252394372 | 0.406290996 |
| 0.131631726 | 0.04497111  | 0.146695063 | 0.321753511 |
| 0.072874558 | 0.179260503 | 0.395582285 | 0.209926401 |
| 0.000440451 | 0.160120932 | 0.394344052 | 0.055269777 |
| 0.17990749  | 0.133977012 | 0.163702658 | 0.387236414 |
| 0.106376519 | 0.130544969 | 0.443044993 | 0.390416386 |
| 0.103295919 | 0.120128082 | 0.438853051 | 0.023977783 |
| 0.216091539 | 0.02700928  | 0.230230065 | 0.125195131 |
| 0.141228492 | 0.208955239 | 0.298767213 | 0.153984384 |
| 0.064087441 | 0.407100093 | 0.313755552 | 0.440599108 |
| 0.130897422 | 0.42845021  | 0.420286151 | 0.390336894 |
| 0.25701216  | 0.181854874 | 0.11837617  | 0.365594129 |
| 0.385106418 | 0.058839235 | 0.030106205 | 0.372084966 |
| 0.134469287 | 0.335931358 | 0.042469272 | 0.416484331 |
| 0.379849201 | 0.326483005 | 0.063003453 | 0.339902046 |
| 0.322978558 | 0.131027286 | 0.34286367  | 0.437546023 |
| 0.058828948 | 0.215511182 | 0.147760597 | 0.374941095 |
| 0.092876732 | 0.093046262 | 0.218016624 | 0.121047808 |
| 0.027456153 | 0.026375231 | 0.023352611 | 0.09728935  |
| 0.132028356 | 0.285109138 | 0.295834135 | 0.415560306 |

|             |             |             |             |
|-------------|-------------|-------------|-------------|
| 0.053641823 | 0.35374963  | 0.132909107 | 0.112244309 |
| 0.297986791 | 0.198860004 | 0.331924515 | 0.322312284 |
| 0.150770315 | 0.006651828 | 0.043520263 | 0.378955646 |
| 0.011431589 | 0.152523385 | 0.1436611   | 0.00180557  |
| 0.008821431 | 0.290541716 | 0.043340258 | 0.115660544 |
| 0.452778615 | 0.113885917 | 0.103074792 | 0.073364395 |
| 0.300122242 | 0.040704122 | 0.003969652 | 0.384738875 |
| 0.364104984 | 0.335768157 | 0.355951992 | 0.321179389 |
| 0.333899857 | 0.318949893 | 0.34222784  | 0.187008173 |
| 0.02059266  | 0.020484448 | 0.086916332 | 0.145845688 |
| 0.001453974 | 0.349269946 | 0.20324366  | 0.081278982 |
| 0.37093294  | 0.182496229 | 0.009744807 | 0.293614634 |
| 0.005148271 | 0.133431829 | 0.069108868 | 0.092091059 |
| 0.313770218 | 0.002240733 | 0.080773118 | 0.092069376 |
| 0.321270372 | 0.254502247 | 0.177206504 | 0.415726237 |
| 0.230283214 | 0.055129408 | 0.1752756   | 0.390039093 |
| 0.017413322 | 0.017034747 | 0.122617238 | 0.010732607 |
| 0.079865856 | 0.332697328 | 0.145794058 | 0.01103508  |
| 0.163325124 | 0.000854874 | 0.272928239 | 0.428526333 |
| 0.33888201  | 0.439785292 | 0.424639913 | 0.2392258   |
| 0.403599754 | 0.087578522 | 0.437786901 | 0.298576284 |
| 0.134356349 | 0.000246724 | 0.003961175 | 0.429071105 |
| 0.264905847 | 0.022675534 | 0.083959447 | 0.108650806 |
| 0.033432246 | 0.046232514 | 0.020700019 | 0.110881761 |
| 0.31622762  | 0.198749456 | 0.098550699 | 0.333782705 |
| 0.106789215 | 0.144043967 | 0.147451789 | 0.037122843 |
| 0.323876475 | 0.012799751 | 0.033181183 | 0.008693822 |
| 0.323511938 | 0.053089853 | 0.312567983 | 0.405709126 |
| 0.399926879 | 0.345832467 | 0.111537067 | 0.12487911  |
| 0.369263154 | 0.045331705 | 0.116605262 | 0.048187923 |
| 0.370463758 | 0.293655513 | 0.260957867 | 0.222430969 |
| 0.416694192 | 0.364030757 | 0.008502735 | 0.324985479 |
| 0.006600518 | 0.002122797 | 0.166896521 | 0.163759752 |
| 0.019451169 | 0.206900003 | 0.170334055 | 0.059071446 |
| 0.079541144 | 0.007547004 | 0.172629918 | 0.152844386 |
| 0.191738968 | 0.201648558 | 0.243488632 | 0.139914842 |
| 0.131796815 | 0.047836856 | 0.090649371 | 0.04951002  |
| 0.056464813 | 0.196849285 | 0.116907548 | 0.003238973 |
| 0.228107357 | 0.276233452 | 0.021008038 | 0.086160183 |
| 0.396445031 | 0.43530847  | 0.007847787 | 0.005037458 |
| 0.175537799 | 0.139202982 | 0.452999851 | 0.39298342  |
| 0.394755092 | 0.421520456 | 0.283479172 | 0.039073721 |
| 0.020359371 | 0.216138073 | 0.248659359 | 0.040042147 |
| 0.427314068 | 0.021516757 | 0.382179426 | 0.269463778 |
| 0.051905551 | 0.067347905 | 0.012094977 | 0.03241611  |
| 0.35290828  | 0.107204599 | 0.112476923 | 0.066374865 |
| 0.153430276 | 0.120720494 | 0.011183879 | 0.107082623 |
| 0.236611316 | 0.082094287 | 0.079309039 | 0.10802358  |
| 0.243791133 | 0.039069481 | 0.352533495 | 0.357883985 |
| 0.068206398 | 0.036664146 | 0.059281209 | 0.302236135 |
| 0.364960457 | 0.222239286 | 0.015333293 | 0.331472352 |
| 0.429503631 | 0.355695044 | 0.386939769 | 0.335103526 |
| 0.033728447 | 0.288923492 | 0.168662309 | 0.212325932 |
| 0.093467865 | 0.193822195 | 0.120577437 | 0.023659414 |

|             |             |             |             |
|-------------|-------------|-------------|-------------|
| 0.210856689 | 0.347743473 | 0.296240104 | 0.093855333 |
| 0.279390257 | 0.050465676 | 0.017019312 | 0.381007148 |
| 0.086094871 | 0.021498092 | 0.144164487 | 0.373382358 |
| 0.001015296 | 0.126219315 | 0.406674355 | 0.106697443 |
| 0.396237677 | 0.40879412  | 0.352522764 | 0.070602692 |
| 0.000785076 | 0.326468818 | 0.294517555 | 0.18609699  |
| 0.324378581 | 0.260211119 | 0.040721095 | 0.021584201 |
| 0.225119634 | 0.03697371  | 0.036388212 | 0.10201624  |
| 0.064087616 | 0.254487865 | 0.128280244 | 0.090836504 |
| 0.099301206 | 0.032723779 | 0.148835408 | 0.112239787 |
| 0.056455227 | 0.172097867 | 0.288111489 | 0.070534651 |
| 0.091968654 | 0.3535075   | 0.284497824 | 0.006201533 |
| 0.288688335 | 0.320217694 | 0.366385102 | 0.00042788  |
| 0.375064272 | 0.001828709 | 0.125960042 | 0.137225777 |
| 0.106133686 | 0.101880529 | 0.201948526 | 0.129210934 |
| 0.18943796  | 0.090077751 | 0.140431628 | 0.168590204 |
| 0.076132637 | 0.093387896 | 0.269242371 | 0.135284809 |
| 0.1616583   | 0.046638408 | 0.048058295 | 0.049879875 |
| 0.02087724  | 0.392834055 | 0.171480437 | 0.032895411 |
| 0.15364163  | 0.12413999  | 0.285353106 | 0.366589033 |
| 0.373850984 | 0.056411974 | 0.1517329   | 0.359934643 |
| 0.05570772  | 0.077809589 | 0.01185245  | 0.196937274 |
| 0.134089101 | 0.107646591 | 0.205272752 | 0.152108249 |
| 0.267526275 | 0.30348424  | 0.169554225 | 0.356239366 |
| 0.177051485 | 0.150780018 | 0.094258845 | 0.031986786 |
| 0.069582011 | 0.060839784 | 0.23034113  | 0.000440176 |
| 0.260799799 | 0.058080895 | 0.419368555 | 0.3608487   |
| 0.190557303 | 0.317198356 | 0.074657075 | 0.019951796 |
| 0.054904087 | 0.094211523 | 0.075786774 | 0.335134385 |
| 0.170523088 | 0.072640968 | 0.219361012 | 0.091773497 |
| 0.354816516 | 0.304895979 | 0.109823224 | 0.095437293 |
| 0.118934303 | 0.097412132 | 0.325509133 | 0.037172411 |
| 0.265626776 | 0.105618044 | 0.180550389 | 0.175141923 |
| 0.116965271 | 0.422203659 | 0.02240877  | 0.438115266 |
| 0.171494411 | 0.067315174 | 0.384034315 | 0.159474987 |
| 0.06629769  | 0.05732703  | 0.157972116 | 0.122931944 |
| 0.057764527 | 0.213445007 | 0.006350988 | 0.029903193 |
| 0.27908622  | 0.095598345 | 0.2717179   | 0.264164094 |
| 0.150380532 | 0.277048581 | 0.129919002 | 0.106041801 |
| 0.340453207 | 0.350484956 | 0.07315917  | 0.161251608 |
| 0.249609489 | 0.041527254 | 0.259663015 | 0.003472144 |
| 0.292923756 | 0.310039926 | 0.0951502   | 0.015059521 |
| 0.003282599 | 0.13870276  | 0.242112642 | 0.020310945 |
| 0.426043575 | 0.127691249 | 0.189126789 | 0.362145536 |
| 0.091453529 | 0.347091009 | 0.049676536 | 0.37194374  |
| 0.004598561 | 0.154445716 | 0.253465743 | 0.188924181 |
| 0.09327589  | 0.198614477 | 0.315219874 | 0.199510915 |
| 0.008406853 | 0.090784904 | 0.000444096 | 0.290349292 |
| 0.311318843 | 0.209727457 | 0.125891915 | 0.071921716 |
| 0.220904241 | 0.292718419 | 0.080912125 | 0.246937452 |
| 0.004889237 | 0.318545198 | 0.120880999 | 0.347969654 |
| 0.087036526 | 0.179529217 | 0.018911742 | 0.204425003 |
| 0.302087352 | 0.082028461 | 0.167001078 | 0.077035509 |
| 0.374259678 | 0.283105137 | 0.080263913 | 0.087296085 |

|               |             |             |             |
|---------------|-------------|-------------|-------------|
| 0.226927912   | 0.024914444 | 0.144411535 | 0.420051818 |
| 0.104108936   | 0.178568896 | 0.428320497 | 0.078351023 |
| 0.224718841   | 0.288412605 | 0.243979684 | 0.400712523 |
| 0.028445014   | 0.168396151 | 0.373408003 | 0.344182072 |
| 0.252445274   | 0.111453663 | 0.161239627 | 0.128160791 |
| 0.336788466   | 0.035635475 | 0.0842292   | 0.245389165 |
| 0.140802398   | 0.238415333 | 0.162919869 | 0.122769171 |
| 0.016084332   | 0.044920463 | 0.156239264 | 0.069585803 |
| 0.187756386   | 0.221810234 | 0.101179625 | 0.308380296 |
| 0.065395658   | 0.010876904 | 0.355805276 | 0.014049617 |
| 0.194830845   | 0.3515699   | 0.157885039 | 0.21252218  |
| 0.117019206   | 0.191959593 | 0.135107719 | 0.000164093 |
| 0.352794582   | 0.025160904 | 0.146676116 | 0.107104684 |
| 0.106434264   | 0.010570024 | 0.36129049  | 0.454172335 |
| 0.204343967   | 0.098917773 | 0.12702258  | 0.366036095 |
| 0.096508036   | 0.162823762 | 0.149098113 | 0.252843997 |
| 0.183206132   | 0.154921615 | 0.200145311 | 0.221248489 |
| 0.289175197   | 0.114008851 |             |             |
| 2810422020RIK | 0.076875279 | 0.433194944 | 0.068445834 |
| 0.095230835   | 0.14525554  | 0.243285712 | 0.047612199 |
| 0.095640456   | 0.314685552 | 0.174251745 | 0.204716923 |
| 0.0203309     | 0.038207269 | 0.442143557 | 0.043567256 |
| 0.215137365   | 0.026822693 | 0.076532097 | 0.046137039 |
| 0.116947212   | 0.124103952 | 0.181099014 | 1           |
| 0.122754171   | 0.227621445 | 0.243532964 | 0.191213415 |
| 0.491340713   | 0.168153345 | 0.313398418 | 0.113475598 |
| 0.402739944   | 0.166466545 | 0.191871909 | 0.02041167  |
| 0.228211756   | 0.003009354 | 0.440012793 | 0.122152247 |
| 0.060554234   | 0.353928726 | 0.21145569  | 0.13385404  |
| 0.1969942     | 0.042124571 | 0.165500624 | 0.26071877  |
| 0.211235342   | 0.144776212 | 0.074458452 | 0.321255771 |
| 0.177561826   | 0.307701869 | 0.354728553 | 0.006218565 |
| 0.144135243   | 0.037332211 | 0.099606754 | 0.520222003 |
| 0.163555076   | 0.080273599 | 0.136050264 | 0.154438478 |
| 0.233864195   | 0.242246729 | 0.176619403 | 0.188437841 |
| 0.499887685   | 0.074885881 | 0.324184237 | 0.103166311 |
| 0.208045407   | 0.035380142 | 0.140820131 | 0.085097335 |
| 0.187834732   | 0.116276787 | 0.181593531 | 0.128031653 |
| 0.44578033    | 0.518993213 | 0.159784043 | 0.517609612 |
| 0.033032042   | 0.161246672 | 0.118775163 | 0.207745383 |
| 0.262425333   | 0.057003394 | 0.323877409 | 0.507802225 |
| 0.046634567   | 0.260654908 | 0.296238597 | 0.132373186 |
| 0.43409192    | 0.12247195  | 0.235969817 | 0.08168658  |
| 0.219013038   | 0.159880865 | 0.483998042 | 0.231355621 |
| 0.152752123   | 0.077627964 | 0.526504064 | 0.15106206  |
| 0.16409651    | 0.07414252  | 0.09311874  | 0.399926942 |
| 0.269664158   | 0.49159131  | 0.39432056  | 0.287348907 |
| 0.184215515   | 0.492468407 | 0.303507827 | 0.406678475 |
| 0.113274413   | 0.528121445 | 0.127383969 | 0.036690167 |
| 0.07989389    | 0.058862119 | 0.096140205 | 0.261742939 |
| 0.440949193   | 0.260082512 | 0.138954815 | 0.112035808 |
| 0.388252377   | 0.519573397 | 0.522174459 | 0.364457975 |
| 0.039277505   | 0.0984187   | 0.180753645 | 0.191462107 |
| 0.271393877   | 0.086025136 | 0.109865036 | 0.528926809 |

|             |             |             |             |
|-------------|-------------|-------------|-------------|
| 0.376407735 | 0.358280189 | 0.131159567 | 0.519050051 |
| 0.119533058 | 0.497165259 | 0.460010016 | 0.106599587 |
| 0.521403633 | 0.524273131 | 0.479252711 | 0.269371967 |
| 0.498340789 | 0.210457852 | 0.038545658 | 0.332108601 |
| 0.466083234 | 0.006710351 | 0.442231916 | 0.461679849 |
| 0.505457857 | 0.402223931 | 0.477992167 | 0.487139646 |
| 0.521644253 | 0.066076493 | 0.010849399 | 0.164249873 |
| 0.51753707  | 0.368911338 | 0.075226526 | 0.213641418 |
| 0.195839841 | 0.241467831 | 0.355346923 | 0.181788913 |
| 0.493051467 | 0.420032688 | 0.473913107 | 0.334108888 |
| 0.172292725 | 0.33528857  | 0.184372745 | 0.515037701 |
| 0.037124404 | 0.107636096 | 0.070015883 | 0.233931235 |
| 0.218936826 | 0.100004653 | 0.238709436 | 0.181013819 |
| 0.13027781  | 0.215291502 | 0.165180731 | 0.24429381  |
| 0.087742517 | 0.277837987 | 0.109215199 | 0.122163009 |
| 0.030474914 | 0.170703716 | 0.126011832 | 0.104966522 |
| 0.131542644 | 0.294037126 | 0.340978752 | 0.453384648 |
| 0.16118845  | 0.18177282  | 0.333896764 | 0.453905741 |
| 0.387442537 | 0.18550254  | 0.198894141 | 0.008168935 |
| 0.130484841 | 0.14664969  | 0.075585692 | 0.221576828 |
| 0.223209777 | 0.130725058 | 0.225366447 | 0.283623184 |
| 0.201474827 | 0.113969989 | 0.175081393 | 0.450665493 |
| 0.16277254  | 0.164112804 | 0.397962554 | 0.244502673 |
| 0.004493853 | 0.182975937 | 0.395479745 | 0.056148508 |
| 0.230423289 | 0.068417381 | 0.13859992  | 0.410619787 |
| 0.145198351 | 0.095165049 | 0.468511981 | 0.273103985 |
| 0.229454446 | 0.282365945 | 0.494503557 | 0.023844548 |
| 0.153264369 | 0.028660496 | 0.186523842 | 0.198082275 |
| 0.160175979 | 0.210728416 | 0.150415006 | 0.129404836 |
| 0.145984965 | 0.520581995 | 0.369246746 | 0.497612569 |
| 0.175410819 | 0.496126373 | 0.409638375 | 0.416975366 |
| 0.256869902 | 0.171757697 | 0.057246143 | 0.380223742 |
| 0.401458908 | 0.146715122 | 0.097342144 | 0.372619927 |
| 0.174439359 | 0.268542153 | 0.047465803 | 0.457995908 |
| 0.496106469 | 0.503644699 | 0.090445869 | 0.264974438 |
| 0.344250468 | 0.158708113 | 0.35549741  | 0.5010544   |
| 0.16090677  | 0.162841471 | 0.148217092 | 0.311755187 |
| 0.134984667 | 0.08571583  | 0.30668403  | 0.075394376 |
| 0.007689991 | 0.079944979 | 0.065029908 | 0.087039978 |
| 0.06652367  | 0.285010545 | 0.253077124 | 0.506166951 |
| 0.083643358 | 0.419505568 | 0.188986306 | 0.143624726 |
| 0.417726986 | 0.166427411 | 0.194576861 | 0.233299066 |
| 0.203846478 | 0.011651772 | 0.076838796 | 0.520776989 |
| 0.055900157 | 0.11304387  | 0.193045996 | 0.002323597 |
| 0.044803383 | 0.400843019 | 0.125810109 | 0.225094752 |
| 0.427635266 | 0.232746906 | 0.16861414  | 0.172859494 |
| 0.252787899 | 0.072357839 | 0.002249668 | 0.450247949 |
| 0.468203007 | 0.433211324 | 0.472543062 | 0.468312133 |
| 0.389182799 | 0.322838612 | 0.314822183 | 0.249524075 |
| 0.076059463 | 0.080181167 | 0.081101783 | 0.140114172 |
| 0.005434275 | 0.305760276 | 0.14567838  | 0.123853038 |
| 0.32476362  | 0.209590344 | 0.041622489 | 0.190584634 |
| 0.026701253 | 0.093800882 | 0.18566975  | 0.11576514  |
| 0.235860191 | 0.017974543 | 0.14550367  | 0.151496608 |



|             |             |             |             |
|-------------|-------------|-------------|-------------|
| 0.476168489 | 0.351222929 | 0.168054156 | 0.524402406 |
| 0.18646626  | 0.150832698 | 0.143639068 | 0.306482472 |
| 0.054305276 | 0.06248941  | 0.205657508 | 0.03254772  |
| 0.17680444  | 0.456337368 | 0.191211019 | 0.057532711 |
| 0.170254453 | 0.008096028 | 0.376714209 | 0.527601547 |
| 0.501392419 | 0.481277002 | 0.499540722 | 0.12752559  |
| 0.503594063 | 0.044702914 | 0.518022494 | 0.391000237 |
| 0.203248211 | 0.001581297 | 0.005043204 | 0.443770718 |
| 0.202068446 | 0.094662155 | 0.114142696 | 0.242797384 |
| 0.068240383 | 0.126530377 | 0.057505412 | 0.070591966 |
| 0.298113493 | 0.115791198 | 0.076330615 | 0.497338184 |
| 0.121947553 | 0.128283706 | 0.230900099 | 0.097850191 |
| 0.242945832 | 0.042204859 | 0.088836223 | 0.004450651 |
| 0.246230263 | 0.151759244 | 0.51307633  | 0.512634075 |
| 0.482523281 | 0.257306195 | 0.194644129 | 0.229807184 |
| 0.384183998 | 0.138921916 | 0.194251201 | 0.123377722 |
| 0.504396884 | 0.237898007 | 0.271372449 | 0.298986953 |
| 0.471248911 | 0.467342732 | 0.031834465 | 0.316564707 |
| 0.015833906 | 0.000821597 | 0.234933753 | 0.204348735 |
| 0.02202585  | 0.169468324 | 0.214275942 | 0.117333651 |
| 0.114201171 | 0.039066194 | 0.105283099 | 0.096371329 |
| 0.170899425 | 0.174281245 | 0.119510634 | 0.202629056 |
| 0.110541969 | 0.047696667 | 0.109178292 | 0.097967705 |
| 0.129282302 | 0.306234582 | 0.231173149 | 0.02055557  |
| 0.218716802 | 0.213160883 | 0.052052326 | 0.141160095 |
| 0.398730583 | 0.462977087 | 0.027481838 | 0.008190741 |
| 0.252848321 | 0.155992006 | 0.467558973 | 0.510562768 |
| 0.539719072 | 0.491016392 | 0.408804814 | 0.062012098 |
| 0.060693144 | 0.162774902 | 0.125548552 | 0.040520234 |
| 0.510024778 | 0.079609229 | 0.504513623 | 0.127618396 |
| 0.093931014 | 0.11632865  | 0.02996742  | 0.061830446 |
| 0.213669744 | 0.135690068 | 0.089848917 | 0.146105028 |
| 0.152289527 | 0.112379589 | 0.041545556 | 0.119893972 |
| 0.289470921 | 0.062824534 | 0.113022992 | 0.186206679 |
| 0.316093578 | 0.126684084 | 0.309914936 | 0.428396562 |
| 0.123219971 | 0.079892573 | 0.200894037 | 0.294728396 |
| 0.391105032 | 0.228422136 | 0.035730496 | 0.470624641 |
| 0.464359347 | 0.312620211 | 0.520446498 | 0.331540505 |
| 0.081823809 | 0.190628362 | 0.133506462 | 0.165757184 |
| 0.119633069 | 0.24576246  | 0.128836922 | 0.055370205 |
| 0.276920039 | 0.488492734 | 0.391127735 | 0.099876031 |
| 0.256072969 | 0.132355603 | 0.068842029 | 0.424555219 |
| 0.065870333 | 0.080104511 | 0.226473891 | 0.367400729 |
| 0.00027624  | 0.05566412  | 0.434966203 | 0.160027552 |
| 0.495244787 | 0.434457442 | 0.430269226 | 0.158961496 |
| 0.000410445 | 0.258546727 | 0.235668714 | 0.200984415 |
| 0.437958555 | 0.322129572 | 0.104817583 | 0.046388168 |
| 0.239663297 | 0.114005039 | 0.07403977  | 0.222094556 |
| 0.063628481 | 0.299624851 | 0.151922611 | 0.122931556 |
| 0.093122189 | 0.109153584 | 0.111322479 | 0.146230143 |
| 0.048270514 | 0.196099805 | 0.29230971  | 0.194278956 |
| 0.095837011 | 0.38510865  | 0.34295063  | 0.030580305 |
| 0.169243263 | 0.344792357 | 0.401054976 | 0.001577866 |
| 0.318681199 | 0.0086767   | 0.102332856 | 0.112251235 |

|             |             |             |             |
|-------------|-------------|-------------|-------------|
| 0.100973067 | 0.108851689 | 0.137814201 | 0.134737088 |
| 0.233104134 | 0.118403245 | 0.157878417 | 0.155603602 |
| 0.087806605 | 0.133817176 | 0.215077061 | 0.183461631 |
| 0.146887884 | 0.090678086 | 0.140223941 | 0.157604125 |
| 0.049894759 | 0.458631993 | 0.252816823 | 0.100258824 |
| 0.143670491 | 0.186023937 | 0.31788931  | 0.510565976 |
| 0.384410551 | 0.167577242 | 0.167004363 | 0.446598103 |
| 0.141263044 | 0.194543395 | 0.070798611 | 0.213406535 |
| 0.150938624 | 0.107993934 | 0.225751034 | 0.237663378 |
| 0.326664226 | 0.402957779 | 0.249326712 | 0.411877855 |
| 0.183121952 | 0.162020445 | 0.201856718 | 0.05211143  |
| 0.114856394 | 0.124256138 | 0.113434539 | 0.00226852  |
| 0.247405808 | 0.190574112 | 0.434386113 | 0.50488251  |
| 0.133635869 | 0.36338751  | 0.236748809 | 0.07164418  |
| 0.178267722 | 0.236329571 | 0.127975372 | 0.35495706  |
| 0.101686697 | 0.120960904 | 0.138863258 | 0.248491684 |
| 0.323463771 | 0.306706582 | 0.105338863 | 0.157733029 |
| 0.124266852 | 0.163211852 | 0.475400052 | 0.103174295 |
| 0.25551575  | 0.078715948 | 0.262597688 | 0.142950596 |
| 0.105538729 | 0.488708279 | 0.057891566 | 0.502058032 |
| 0.15072968  | 0.147088494 | 0.486524576 | 0.191219125 |
| 0.178843567 | 0.07052683  | 0.076157157 | 0.221201439 |
| 0.119786845 | 0.162004828 | 0.012543894 | 0.033637064 |
| 0.241072686 | 0.149034944 | 0.362228961 | 0.266068894 |
| 0.098518422 | 0.253923159 | 0.077128521 | 0.178603207 |
| 0.515275317 | 0.527343503 | 0.143483556 | 0.198165941 |
| 0.286362765 | 0.076930045 | 0.326173159 | 0.009621161 |
| 0.258531554 | 0.251924335 | 0.211081682 | 0.046791734 |
| 0.018337629 | 0.085393005 | 0.248409681 | 0.07179587  |
| 0.424790743 | 0.10371108  | 0.239540331 | 0.336291303 |
| 0.162088636 | 0.528607237 | 0.066549072 | 0.310914365 |
| 0.037087946 | 0.176407116 | 0.170975876 | 0.187119454 |
| 0.113428541 | 0.121866043 | 0.278900049 | 0.103467667 |
| 0.027893394 | 0.123970404 | 0.000485223 | 0.428677188 |
| 0.497712093 | 0.140804584 | 0.206029092 | 0.180507585 |
| 0.190566397 | 0.340513429 | 0.125490969 | 0.21534115  |
| 0.009531145 | 0.197145961 | 0.130438883 | 0.421703745 |
| 0.120156792 | 0.194370238 | 0.040564764 | 0.131669661 |
| 0.508667392 | 0.145810574 | 0.232125772 | 0.142257705 |
| 0.502320756 | 0.357045244 | 0.182014754 | 0.103903556 |
| 0.270902867 | 0.072737446 | 0.238602994 | 0.511622777 |
| 0.097925686 | 0.089065801 | 0.368656133 | 0.107033059 |
| 0.13895277  | 0.394374732 | 0.246107609 | 0.507462211 |
| 0.03902495  | 0.182804604 | 0.33801271  | 0.442810709 |
| 0.238069731 | 0.063234574 | 0.113329267 | 0.104847783 |
| 0.492185395 | 0.079935268 | 0.107239628 | 0.295670469 |
| 0.088606441 | 0.214152692 | 0.240249396 | 0.085073964 |
| 0.031231879 | 0.106828274 | 0.234898805 | 0.110169081 |
| 0.172408345 | 0.164895863 | 0.0930822   | 0.369987347 |
| 0.089282436 | 0.0185779   | 0.433102545 | 0.005600001 |
| 0.244551826 | 0.259602008 | 0.156680998 | 0.164438013 |
| 0.204480733 | 0.225764755 | 0.205479963 | 0.002476026 |
| 0.329735771 | 0.0161063   | 0.147564026 | 0.104857891 |
| 0.143036706 | 0.050097085 | 0.468262178 | 0.477466111 |

|               |             |             |             |
|---------------|-------------|-------------|-------------|
| 0.239452387   | 0.185765051 | 0.182371269 | 0.465946574 |
| 0.057501856   | 0.160141198 | 0.160956109 | 0.317929097 |
| 0.094112819   | 0.20942765  | 0.213964145 | 0.181530907 |
| 0.312393803   | 0.174300204 |             |             |
| 3200002M19RIK | 0.041933255 | 0.259082504 | 0.022012364 |
| 0.088008315   | 0.301127473 | 0.137932953 | 0.058059782 |
| 0.096485113   | 0.227829883 | 0.099324853 | 0.2062198   |
| 0.01931968    | 0.173571575 | 0.32792744  | 0.063309718 |
| 0.293399068   | 0.052389564 | 0.091058185 | 0.070629477 |
| 0.157082892   | 0.284487122 | 0.198886002 | 0.122754171 |
| 1             | 0.130328953 | 0.165093235 | 0.227427783 |
| 0.329085724   | 0.113694714 | 0.26263613  | 0.063131502 |
| 0.314401709   | 0.313547139 | 0.184090052 | 0.013284898 |
| 0.195495504   | 0.073310699 | 0.303610739 | 0.2196882   |
| 0.202386106   | 0.260925744 | 0.088904709 | 0.17378306  |
| 0.1260389     | 0.022892342 | 0.055182964 | 0.297202793 |
| 0.181654939   | 0.192638692 | 0.028615455 | 0.257756928 |
| 0.180368743   | 0.194973004 | 0.183820059 | 0.00169767  |
| 0.210833327   | 0.11726119  | 0.194733295 | 0.320144683 |
| 0.168234345   | 0.123409746 | 0.147177511 | 0.14592951  |
| 0.251130508   | 0.31891435  | 0.249349643 | 0.144842096 |
| 0.333041143   | 0.229901235 | 0.28886014  | 0.098989442 |
| 0.160921135   | 0.024493228 | 0.14695757  | 0.054052831 |
| 0.205851908   | 0.177762518 | 0.234968628 | 0.25728506  |
| 0.238481629   | 0.36164994  | 0.202143715 | 0.303989091 |
| 0.224910991   | 0.303459752 | 0.276344042 | 0.317948119 |
| 0.299718675   | 0.083506573 | 0.288293286 | 0.367928563 |
| 0.040207532   | 0.149222823 | 0.267678629 | 0.078573427 |
| 0.267706574   | 0.231658168 | 0.125932476 | 0.221224185 |
| 0.350277644   | 0.276536608 | 0.323815019 | 0.21839627  |
| 0.244673865   | 0.040899516 | 0.282112293 | 0.304467345 |
| 0.194587943   | 0.045146449 | 0.257319797 | 0.351554587 |
| 0.250917172   | 0.328407355 | 0.276074447 | 0.306504252 |
| 0.256735365   | 0.338825059 | 0.257186145 | 0.30020777  |
| 0.050692713   | 0.343922965 | 0.110992618 | 0.055924988 |
| 0.032869798   | 0.109480087 | 0.257396719 | 0.286990257 |
| 0.338441069   | 0.226044826 | 0.108696657 | 0.215779675 |
| 0.399137209   | 0.27162852  | 0.340349636 | 0.302871847 |
| 0.034234068   | 0.255021426 | 0.240530992 | 0.134693932 |
| 0.279154498   | 0.10162801  | 0.257139022 | 0.319994066 |
| 0.278194339   | 0.358945763 | 0.076360109 | 0.330360968 |
| 0.147405798   | 0.378524483 | 0.264019276 | 0.122686769 |
| 0.342829783   | 0.301963746 | 0.393035077 | 0.334469831 |
| 0.308564764   | 0.133567432 | 0.069771594 | 0.295795478 |
| 0.383379209   | 0.034203771 | 0.343699668 | 0.369099691 |
| 0.311830278   | 0.342466972 | 0.411653331 | 0.365283771 |
| 0.310839802   | 0.056971261 | 0.041832865 | 0.308366821 |
| 0.32062263    | 0.291506679 | 0.180896956 | 0.203171215 |
| 0.306559794   | 0.134494452 | 0.314394591 | 0.13823724  |
| 0.397782835   | 0.327387766 | 0.333312999 | 0.268865748 |
| 0.152417013   | 0.236827507 | 0.239063191 | 0.267728068 |
| 0.051435009   | 0.054472295 | 0.029244991 | 0.283642912 |
| 0.095752388   | 0.177069118 | 0.130720847 | 0.281486342 |
| 0.187619189   | 0.129317325 | 0.193437844 | 0.343531247 |

|             |             |             |             |
|-------------|-------------|-------------|-------------|
| 0.036415708 | 0.187314074 | 0.103006145 | 0.090613429 |
| 0.056479593 | 0.116757085 | 0.121282929 | 0.121466058 |
| 0.218515804 | 0.148142103 | 0.268165485 | 0.366685693 |
| 0.222750908 | 0.114626115 | 0.251572866 | 0.372867918 |
| 0.379375766 | 0.249159281 | 0.204512835 | 0.017896168 |
| 0.182387128 | 0.159835831 | 0.222678153 | 0.226142709 |
| 0.127739234 | 0.174407692 | 0.260914325 | 0.354875836 |
| 0.105722345 | 0.079601065 | 0.211066395 | 0.299986096 |
| 0.095147439 | 0.205219239 | 0.353370484 | 0.183590942 |
| 0.003889719 | 0.166523323 | 0.31786415  | 0.265912975 |
| 0.219508339 | 0.17552145  | 0.172152451 | 0.353226376 |
| 0.205574132 | 0.275184622 | 0.357627089 | 0.370952529 |
| 0.142255974 | 0.135541998 | 0.397471588 | 0.072595407 |
| 0.255596121 | 0.093870924 | 0.292194263 | 0.101576704 |
| 0.178792883 | 0.296710832 | 0.292366461 | 0.247805284 |
| 0.063116963 | 0.344445198 | 0.286559376 | 0.356962202 |
| 0.183501385 | 0.395480637 | 0.345007934 | 0.331062795 |
| 0.249339057 | 0.190143716 | 0.186770348 | 0.30422678  |
| 0.348422039 | 0.155315806 | 0.04421107  | 0.309890906 |
| 0.159923708 | 0.3217026   | 0.227454875 | 0.374197958 |
| 0.352350645 | 0.26342885  | 0.151166377 | 0.383061442 |
| 0.287403821 | 0.127978751 | 0.331121028 | 0.405200811 |
| 0.125663757 | 0.231280745 | 0.228092008 | 0.40487816  |
| 0.129970676 | 0.271383013 | 0.261968249 | 0.219949037 |
| 0.011964327 | 0.047655868 | 0.039179845 | 0.183850004 |
| 0.264852653 | 0.212126754 | 0.307712548 | 0.355338825 |
| 0.098368461 | 0.300908643 | 0.208441387 | 0.19247639  |
| 0.276333973 | 0.227327123 | 0.254368271 | 0.289300316 |
| 0.213979414 | 0.029029612 | 0.100666672 | 0.354864383 |
| 0.022693749 | 0.231963663 | 0.154804866 | 0.004035326 |
| 0.033772376 | 0.225865512 | 0.069543682 | 0.150534115 |
| 0.405362827 | 0.13916501  | 0.13072342  | 0.114199342 |
| 0.301348297 | 0.072505043 | 0.010968816 | 0.352933513 |
| 0.345383868 | 0.336863223 | 0.334035272 | 0.299217359 |
| 0.349523334 | 0.297830503 | 0.356868504 | 0.123473843 |
| 0.086187027 | 0.048086169 | 0.241533637 | 0.212743184 |
| 0.003989281 | 0.331101392 | 0.251290631 | 0.123663272 |
| 0.330332813 | 0.252799096 | 0.032171667 | 0.301333754 |
| 0.013385584 | 0.170530722 | 0.148924565 | 0.202269258 |
| 0.381379068 | 0.012793045 | 0.087177556 | 0.183953736 |
| 0.24675061  | 0.234641415 | 0.202001618 | 0.354049899 |
| 0.211174311 | 0.066014706 | 0.223229703 | 0.331999128 |
| 0.066687445 | 0.058721995 | 0.150370643 | 0.012020347 |
| 0.086820323 | 0.319831696 | 0.192514765 | 0.044125977 |
| 0.191729853 | 0.004712661 | 0.232404555 | 0.363429469 |
| 0.264142353 | 0.38766863  | 0.341170292 | 0.225652835 |
| 0.333892674 | 0.13305042  | 0.359602939 | 0.253155354 |
| 0.128179292 | 0.000702787 | 0.012259498 | 0.358520855 |
| 0.240560705 | 0.031401592 | 0.130110692 | 0.107871746 |
| 0.112315887 | 0.063883206 | 0.063001763 | 0.275666084 |
| 0.218383877 | 0.243392232 | 0.262642539 | 0.282055133 |
| 0.185392794 | 0.215462511 | 0.132210484 | 0.063853192 |
| 0.255931966 | 0.053624877 | 0.068991621 | 0.015235172 |
| 0.354045041 | 0.06990058  | 0.275087622 | 0.331897071 |

|             |             |             |             |
|-------------|-------------|-------------|-------------|
| 0.364663162 | 0.336378242 | 0.106777156 | 0.141930329 |
| 0.360361576 | 0.043920529 | 0.159006411 | 0.052936062 |
| 0.287860536 | 0.28164784  | 0.267637079 | 0.216424361 |
| 0.382654369 | 0.317469622 | 0.035463171 | 0.328694425 |
| 0.011475517 | 0.010898782 | 0.114657018 | 0.228064865 |
| 0.138132683 | 0.217078308 | 0.217747072 | 0.177744811 |
| 0.211206703 | 0.020509268 | 0.259007994 | 0.260226315 |
| 0.25452282  | 0.222521556 | 0.268483469 | 0.211544688 |
| 0.271754892 | 0.234581127 | 0.186467303 | 0.146424947 |
| 0.186108928 | 0.208984751 | 0.129487306 | 0.025880222 |
| 0.170846545 | 0.211900639 | 0.046618766 | 0.12223951  |
| 0.329336339 | 0.352882938 | 0.061325019 | 0.022384323 |
| 0.203757439 | 0.219383859 | 0.38207438  | 0.306743239 |
| 0.335071245 | 0.394341853 | 0.285896314 | 0.187964085 |
| 0.054326909 | 0.283510783 | 0.289784464 | 0.211806281 |
| 0.346411079 | 0.035823271 | 0.304256989 | 0.254354959 |
| 0.103385236 | 0.152286905 | 0.046024143 | 0.077397147 |
| 0.26575415  | 0.154630718 | 0.199891546 | 0.072987054 |
| 0.211068412 | 0.241424887 | 0.048774841 | 0.159388762 |
| 0.256857128 | 0.22723965  | 0.132175672 | 0.151515917 |
| 0.242679204 | 0.091802531 | 0.316332749 | 0.354165721 |
| 0.09122429  | 0.077371714 | 0.085306111 | 0.31499886  |
| 0.303889301 | 0.175245853 | 0.017581601 | 0.257853834 |
| 0.371760321 | 0.252092324 | 0.308892556 | 0.373958977 |
| 0.069351382 | 0.215933987 | 0.241370034 | 0.262131117 |
| 0.162434904 | 0.13453701  | 0.194188735 | 0.052088533 |
| 0.273347427 | 0.338095221 | 0.277047581 | 0.147667168 |
| 0.204710149 | 0.062551123 | 0.029546435 | 0.316606918 |
| 0.266644503 | 0.055966958 | 0.102023307 | 0.341497965 |
| 0.009305872 | 0.220620654 | 0.401237636 | 0.15667175  |
| 0.37994847  | 0.372934231 | 0.319333749 | 0.148361995 |
| 0.010923571 | 0.317217261 | 0.248774702 | 0.179628881 |
| 0.263161119 | 0.233588964 | 0.121289359 | 0.095617556 |
| 0.279281843 | 0.041476401 | 0.143721541 | 0.123360713 |
| 0.181688796 | 0.201346251 | 0.203958602 | 0.161986601 |
| 0.221560637 | 0.057825394 | 0.240529107 | 0.149319594 |
| 0.260213236 | 0.226878583 | 0.305476783 | 0.087130402 |
| 0.147056908 | 0.364244033 | 0.271230051 | 0.021787865 |
| 0.251398393 | 0.344828563 | 0.347016617 | 0.003554766 |
| 0.304362202 | 0.01146877  | 0.204494967 | 0.194918894 |
| 0.202620342 | 0.205606786 | 0.294367794 | 0.23776003  |
| 0.21781253  | 0.17309064  | 0.169512579 | 0.209565844 |
| 0.174769001 | 0.149824922 | 0.268726858 | 0.163169192 |
| 0.200223447 | 0.090009463 | 0.069962095 | 0.064874587 |
| 0.052512405 | 0.309456029 | 0.193482281 | 0.042201499 |
| 0.220674495 | 0.176296981 | 0.318301273 | 0.293371092 |
| 0.361689536 | 0.060094155 | 0.213723517 | 0.266833248 |
| 0.098952203 | 0.111326607 | 0.035166481 | 0.179529524 |
| 0.155892548 | 0.215624081 | 0.155098549 | 0.132610735 |
| 0.242655516 | 0.297824436 | 0.184622791 | 0.342569732 |
| 0.202995447 | 0.195083165 | 0.082063229 | 0.10918211  |
| 0.105561679 | 0.105938241 | 0.278026361 | 0.002696333 |
| 0.25178061  | 0.09159363  | 0.331198805 | 0.297221742 |
| 0.220400487 | 0.317025871 | 0.081596265 | 0.061800924 |

|               |             |             |             |
|---------------|-------------|-------------|-------------|
| 0.0712281     | 0.099380743 | 0.116982902 | 0.286227296 |
| 0.189389849   | 0.133649439 | 0.2758238   | 0.089733518 |
| 0.326323012   | 0.2957061   | 0.274721447 | 0.150556766 |
| 0.206753367   | 0.11833028  | 0.321034849 | 0.058651904 |
| 0.210364484   | 0.247238198 | 0.147037758 | 0.213695771 |
| 0.227957255   | 0.364214946 | 0.042102555 | 0.366794578 |
| 0.220611488   | 0.097708771 | 0.366437296 | 0.154268101 |
| 0.146478616   | 0.162662195 | 0.223058187 | 0.134855419 |
| 0.191808007   | 0.215607112 | 0.006903555 | 0.083564961 |
| 0.302762033   | 0.182199536 | 0.240108283 | 0.316864766 |
| 0.289449792   | 0.357511837 | 0.197962809 | 0.138922527 |
| 0.271600396   | 0.301455533 | 0.151604594 | 0.24687868  |
| 0.263636863   | 0.089285786 | 0.163503447 | 0.025495385 |
| 0.248977617   | 0.233593747 | 0.143026043 | 0.058086519 |
| 0.023762623   | 0.218047326 | 0.226945944 | 0.045176798 |
| 0.399243565   | 0.170210612 | 0.197708434 | 0.27616924  |
| 0.144958389   | 0.300779983 | 0.177407358 | 0.304780694 |
| 0.040650418   | 0.223731453 | 0.232166393 | 0.191454659 |
| 0.191854176   | 0.262229789 | 0.322569579 | 0.244388424 |
| 0.039991872   | 0.222554802 | 0.005977445 | 0.278445817 |
| 0.274434898   | 0.236781073 | 0.172432716 | 0.10863159  |
| 0.284263145   | 0.312033939 | 0.211623669 | 0.18201659  |
| 0.020127477   | 0.282422337 | 0.174222674 | 0.257511084 |
| 0.118727083   | 0.21255447  | 0.071982476 | 0.267060357 |
| 0.264625122   | 0.179603187 | 0.23349175  | 0.153592049 |
| 0.298840862   | 0.263159133 | 0.088916984 | 0.243493295 |
| 0.217489342   | 0.047628718 | 0.115752309 | 0.377571249 |
| 0.175414875   | 0.256860897 | 0.376524292 | 0.171670432 |
| 0.245638514   | 0.260059044 | 0.215263106 | 0.365227062 |
| 0.140362476   | 0.21324062  | 0.346579682 | 0.317743371 |
| 0.306376514   | 0.287164672 | 0.232300315 | 0.235822135 |
| 0.259605499   | 0.065576344 | 0.263263499 | 0.24431897  |
| 0.230866291   | 0.274022217 | 0.148647446 | 0.251746297 |
| 0.04734547    | 0.154070178 | 0.152558895 | 0.117241314 |
| 0.234985227   | 0.247013763 | 0.28762404  | 0.316258628 |
| 0.127787124   | 0.031746236 | 0.356471522 | 0.041829499 |
| 0.127732889   | 0.283535737 | 0.186852269 | 0.237199566 |
| 0.128306907   | 0.215821844 | 0.126432112 | 0.00106864  |
| 0.35516233    | 0.10763739  | 0.233279486 | 0.225199128 |
| 0.200311415   | 0.039753297 | 0.30087692  | 0.396125266 |
| 0.212742172   | 0.16853066  | 0.156702008 | 0.310718146 |
| 0.214106882   | 0.176213441 | 0.210885556 | 0.198732042 |
| 0.246852909   | 0.122417862 | 0.16709911  | 0.186104211 |
| 0.256284808   | 0.152074395 |             |             |
| 4632404H12RIK | 0.332945011 | 0.247590302 | 0.312310979 |
| 0.245837159   | 0.132685414 | 0.197829114 | 0.292666259 |
| 0.300088989   | 0.222478985 | 0.109279477 | 0.197206535 |
| 0.239008559   | 0.017881358 | 0.250218479 | 0.277500343 |
| 0.142464479   | 0.240165185 | 0.309299834 | 0.070310348 |
| 0.199077073   | 0.133893246 | 0.114386139 | 0.227621445 |
| 0.130328953   | 1           | 0.241295889 | 0.115313381 |
| 0.257750756   | 0.063416855 | 0.170830659 | 0.072380574 |
| 0.314648112   | 0.127373374 | 0.106617159 | 0.24044509  |
| 0.184474725   | 0.005775834 | 0.352947216 | 0.1824537   |

|             |             |             |             |
|-------------|-------------|-------------|-------------|
| 0.047489883 | 0.317281557 | 0.152987364 | 0.231370158 |
| 0.154975437 | 0.301582884 | 0.065832403 | 0.143112434 |
| 0.214187046 | 0.206085689 | 0.316979868 | 0.191019855 |
| 0.149176574 | 0.270550465 | 0.184940677 | 0.016012032 |
| 0.075399458 | 0.009397722 | 0.041889819 | 0.308335406 |
| 0.311399612 | 0.282092097 | 0.066300479 | 0.227227236 |
| 0.151921497 | 0.167549858 | 0.251194389 | 0.135602793 |
| 0.286707833 | 0.041787902 | 0.155827427 | 0.179733877 |
| 0.205172061 | 0.258527652 | 0.328403936 | 0.289036895 |
| 0.140081207 | 0.256215719 | 0.165839336 | 0.08956763  |
| 0.248677486 | 0.351390693 | 0.27492102  | 0.327048602 |
| 0.033094573 | 0.109532214 | 0.118277505 | 0.223655106 |
| 0.193115267 | 0.251022    | 0.205226716 | 0.319467787 |
| 0.261551095 | 0.160118127 | 0.190138318 | 0.324094061 |
| 0.240849446 | 0.076017718 | 0.153605032 | 0.052777593 |
| 0.138076622 | 0.129113765 | 0.327163413 | 0.273298083 |
| 0.137964197 | 0.327440687 | 0.357657207 | 0.097920973 |
| 0.170702248 | 0.337639502 | 0.11178083  | 0.17778881  |
| 0.188652514 | 0.257390706 | 0.200294982 | 0.214693208 |
| 0.126698952 | 0.278260278 | 0.214212012 | 0.246239225 |
| 0.038152107 | 0.30013391  | 0.318455388 | 0.255013085 |
| 0.31614668  | 0.2565868   | 0.104035319 | 0.268076611 |
| 0.21880326  | 0.249193348 | 0.309378145 | 0.202752079 |
| 0.19868118  | 0.329677786 | 0.294445458 | 0.213190952 |
| 0.302063286 | 0.061131413 | 0.131286303 | 0.251424215 |
| 0.198689808 | 0.306840388 | 0.080577271 | 0.357403628 |
| 0.284108298 | 0.182648081 | 0.318088872 | 0.38307143  |
| 0.241520787 | 0.311032279 | 0.233438344 | 0.295892958 |
| 0.338518263 | 0.350068136 | 0.277862681 | 0.138556141 |
| 0.329307272 | 0.247166377 | 0.047858403 | 0.22581941  |
| 0.290618671 | 0.008970448 | 0.207573478 | 0.225312189 |
| 0.29548172  | 0.179988144 | 0.270195588 | 0.252885643 |
| 0.296234829 | 0.324169729 | 0.006206937 | 0.18331485  |
| 0.323437811 | 0.252186824 | 0.196702429 | 0.131613351 |
| 0.140652957 | 0.224697096 | 0.178742863 | 0.112585424 |
| 0.328361526 | 0.224434098 | 0.229721994 | 0.213309281 |
| 0.196930062 | 0.318097333 | 0.101665001 | 0.354684348 |
| 0.276752198 | 0.337662066 | 0.314069987 | 0.237776774 |
| 0.153825817 | 0.2657749   | 0.222611248 | 0.145597074 |
| 0.282201928 | 0.228400397 | 0.081887665 | 0.141543489 |
| 0.301721202 | 0.164522975 | 0.317218329 | 0.311127884 |
| 0.253271797 | 0.336982337 | 0.233484742 | 0.259952181 |
| 0.191337562 | 0.396051302 | 0.16438181  | 0.245491657 |
| 0.141809113 | 0.334652962 | 0.199345159 | 0.283917098 |
| 0.283899749 | 0.127398353 | 0.294021222 | 0.091554451 |
| 0.120316081 | 0.07560844  | 0.036100698 | 0.127881157 |
| 0.357481613 | 0.187972813 | 0.161878801 | 0.160395361 |
| 0.29003574  | 0.289571121 | 0.131469201 | 0.355414371 |
| 0.324871127 | 0.160991281 | 0.21579146  | 0.164826029 |
| 0.114078082 | 0.237789091 | 0.197808872 | 0.096048738 |
| 0.233973498 | 0.046267688 | 0.068637276 | 0.222101372 |
| 0.077419459 | 0.088423546 | 0.231689351 | 0.158736707 |
| 0.155267041 | 0.345546669 | 0.27840864  | 0.009420947 |
| 0.122291656 | 0.089737161 | 0.223628908 | 0.141641208 |

|             |             |             |             |
|-------------|-------------|-------------|-------------|
| 0.283785441 | 0.23262782  | 0.115435957 | 0.132907978 |
| 0.333663584 | 0.303490539 | 0.238523125 | 0.264754972 |
| 0.111319602 | 0.286930552 | 0.195131599 | 0.242426739 |
| 0.235247869 | 0.105707937 | 0.024713138 | 0.200504772 |
| 0.211702984 | 0.106411843 | 0.322221978 | 0.163667691 |
| 0.12743985  | 0.146989596 | 0.098950138 | 0.267509781 |
| 0.349984258 | 0.309546965 | 0.239115448 | 0.179256128 |
| 0.244079735 | 0.303658007 | 0.206916969 | 0.294763056 |
| 0.105713953 | 0.127359605 | 0.123873261 | 0.191485628 |
| 0.326772636 | 0.098211588 | 0.276351383 | 0.034236666 |
| 0.001760885 | 0.321430808 | 0.330601369 | 0.214260745 |
| 0.058345052 | 0.143312018 | 0.171795444 | 0.281281146 |
| 0.308305389 | 0.272239672 | 0.265888886 | 0.157019141 |
| 0.276566994 | 0.127096425 | 0.119153083 | 0.152479438 |
| 0.289400868 | 0.122295168 | 0.228332286 | 0.359462871 |
| 0.279785879 | 0.07503171  | 0.228762562 | 0.018048658 |
| 0.300387449 | 0.190897404 | 0.323119119 | 0.359496899 |
| 0.224712643 | 0.350636708 | 0.31398369  | 0.128581183 |
| 0.213376724 | 0.328903146 | 0.02844523  | 0.249176567 |
| 0.278100525 | 0.26709053  | 0.278885426 | 0.310582133 |
| 0.222328233 | 0.188123252 | 0.1808957   | 0.242148617 |
| 0.308478771 | 0.317964812 | 0.066981584 | 0.185157167 |
| 0.027699976 | 0.212439162 | 0.155144955 | 0.333903269 |
| 0.164905403 | 0.232178243 | 0.294092396 | 0.134911573 |
| 0.214968197 | 0.040226184 | 0.214414887 | 0.210059439 |
| 0.173115487 | 0.230242458 | 0.117670952 | 0.09862586  |
| 0.315091225 | 0.281205095 | 0.09533691  | 0.30736859  |
| 0.211501639 | 0.306402198 | 0.171135511 | 0.185690069 |
| 0.307594129 | 0.044166018 | 0.196060166 | 0.018180789 |
| 0.111209828 | 0.301721745 | 0.132029249 | 0.30346019  |
| 0.265437693 | 0.152323184 | 0.284302852 | 0.309277804 |
| 0.300298955 | 0.256570615 | 0.281804248 | 0.082899383 |
| 0.294397802 | 0.011836835 | 0.277770447 | 0.236141938 |
| 0.124097858 | 0.016544276 | 0.049288296 | 0.219673516 |
| 0.146086051 | 0.295467323 | 0.321425879 | 0.175874312 |
| 0.275250436 | 0.326405709 | 0.292849178 | 0.084806149 |
| 0.186860016 | 0.154832359 | 0.077712703 | 0.30797953  |
| 0.235967473 | 0.240852951 | 0.177850119 | 0.32556506  |
| 0.155044619 | 0.286245755 | 0.309870169 | 0.029811606 |
| 0.174991267 | 0.320783518 | 0.374404931 | 0.288197256 |
| 0.307834129 | 0.162767458 | 0.098736113 | 0.156311791 |
| 0.208919812 | 0.312265911 | 0.10844945  | 0.325970699 |
| 0.284845402 | 0.160782533 | 0.260886343 | 0.29565381  |
| 0.280852292 | 0.298696762 | 0.279301676 | 0.193543401 |
| 0.138113561 | 0.005686254 | 0.218137005 | 0.26306903  |
| 0.030750944 | 0.128376425 | 0.297643219 | 0.175926813 |
| 0.181211449 | 0.266050965 | 0.068338738 | 0.068754999 |
| 0.219611725 | 0.171964505 | 0.107305615 | 0.262937366 |
| 0.136324412 | 0.081309657 | 0.226334024 | 0.254598261 |
| 0.123093046 | 0.283679672 | 0.334863085 | 0.243889004 |
| 0.151613643 | 0.137932287 | 0.318316311 | 0.332494522 |
| 0.220449898 | 0.234626015 | 0.22979846  | 0.107063793 |
| 0.305576094 | 0.159281617 | 0.239997049 | 0.276898945 |
| 0.340938724 | 0.305152708 | 0.345521099 | 0.170068368 |



|             |             |             |             |
|-------------|-------------|-------------|-------------|
| 0.32000405  | 0.185545219 | 0.108888798 | 0.137517485 |
| 0.278895472 | 0.305059811 | 0.298413934 | 0.079701218 |
| 0.32306485  | 0.266360815 | 0.228496579 | 0.31118423  |
| 0.118722228 | 0.309470653 | 0.211327941 | 0.32727632  |
| 0.173879686 | 0.072270348 | 0.294302975 | 0.294255684 |
| 0.247814266 | 0.041586463 | 0.312806641 | 0.225737401 |
| 0.245778729 | 0.090163669 | 0.158566192 | 0.312442256 |
| 0.345388761 | 0.306569945 | 0.251781813 | 0.189206501 |
| 0.187799308 | 0.132044034 | 0.160753711 | 0.251499593 |
| 0.255617221 | 0.16086394  | 0.312307727 | 0.222949693 |
| 0.324633511 | 0.139235132 | 0.087948812 | 0.152229524 |
| 0.282761577 | 0.208689525 | 0.226064943 | 0.32162102  |
| 0.27464822  | 0.35338428  | 0.241012672 | 0.259726334 |
| 0.160587782 | 0.314660989 | 0.29421384  | 0.217463091 |
| 0.060443732 | 0.309972566 | 0.153039219 | 0.174444511 |
| 0.010341312 | 0.029534026 | 0.241764504 | 0.241739863 |
| 0.318171361 | 0.236823113 | 0.304607152 | 0.22888357  |
| 0.000212156 | 0.137255464 | 0.1906536   | 0.158847308 |
| 0.243027143 | 0.265429581 | 0.161856273 | 0.249958227 |
| 0.274477297 | 0.321263272 | 0.224831959 | 0.182655987 |
| 0.041646013 | 0.205057117 | 0.292699309 | 0.259201052 |
| 0.195701848 | 0.285612452 | 0.070073357 | 0.270705112 |
| 0.045688255 | 0.291705499 | 0.245901187 | 0.126457879 |
| 0.050442511 | 0.225962109 | 0.212432902 | 0.276199941 |
| 0.113670672 | 0.210036893 | 0.24273378  | 0.023258001 |
| 0.168081924 | 0.15452285  | 0.196306884 | 0.20258428  |
| 0.213095539 | 0.199023162 | 0.185319998 | 0.148375471 |
| 0.213623545 | 0.258409665 | 0.229293706 | 0.265761269 |
| 0.216935856 | 0.271226876 | 0.161108264 | 0.208125896 |
| 0.15302417  | 0.321740738 | 0.322652154 | 0.33532977  |
| 0.253366358 | 0.237020153 | 0.322824217 | 0.322441659 |
| 0.253947352 | 0.180083043 | 0.278225561 | 0.290428371 |
| 0.254668913 | 0.312365837 | 0.180266715 | 0.236573808 |
| 0.059884342 | 0.167541136 | 0.310180402 | 0.20186752  |
| 0.279162391 | 0.105917985 | 0.174042859 | 0.258667126 |
| 0.183645102 | 0.337257785 | 0.322173218 | 0.277352478 |
| 0.17472057  | 0.146346137 | 0.128267473 | 0.217278885 |
| 0.311992564 | 0.326807539 | 0.116912464 | 0.075377048 |
| 0.229716642 | 0.268042578 | 0.209101007 | 0.319378559 |
| 0.069465421 | 0.276479738 | 0.15157941  | 0.311721007 |
| 0.112139515 | 0.329405651 | 0.333436089 | 0.17934104  |
| 0.043035373 | 0.290564667 | 0.153836334 | 0.223171671 |
| 0.171143132 | 0.163658863 | 0.117899817 | 0.253855059 |
| 0.231402064 | 0.31933992  | 0.329712444 | 0.33147308  |
| 0.145953708 | 0.096568446 | 0.183185645 | 0.176803627 |
| 0.184993386 | 0.260218094 | 0.32024108  | 0.258902041 |
| 0.139081745 | 0.331943805 | 0.345010817 | 0.237110415 |
| 0.22746938  | 0.179970069 | 0.037519432 | 0.172508671 |
| 0.219852824 | 0.090589938 | 0.003498784 | 0.02760812  |
| 0.226141861 | 0.134358605 | 0.192346365 | 0.198784461 |
| 0.1055811   | 0.214862565 | 0.033895781 | 0.247649894 |
| 0.312317963 | 0.35585497  | 0.19683712  | 0.281571247 |
| 0.244973676 | 0.29914614  | 0.218939004 | 0.012908634 |
| 0.147973677 | 0.126001966 | 0.125211247 | 0.283209526 |

|               |             |             |             |
|---------------|-------------|-------------|-------------|
| 0.226239079   | 0.044479445 | 0.16483169  | 0.285787322 |
| 0.220757848   | 0.04195887  | 0.178240728 | 0.18078126  |
| 0.306292819   | 0.362728241 | 0.195823742 | 0.191005476 |
| 0.20790962    | 0.266609447 | 0.117015617 | 0.139774528 |
| 0.145009299   | 0.093914618 | 0.206008301 | 0.07460088  |
| 0.262167403   | 0.158491275 | 0.017221482 | 0.368295782 |
| 0.345158258   | 0.100065396 | 0.321697814 | 0.097216209 |
| 0.238093442   | 0.23573051  | 0.131366638 | 0.133674833 |
| 0.133172267   | 0.129533894 | 0.279273685 | 0.25172107  |
| 0.06024164    | 0.165460947 | 0.234687676 | 0.109405992 |
| 0.389654622   | 0.124600992 | 0.284747647 | 0.09034035  |
| 0.287370762   | 0.222168149 | 0.315669704 | 0.130169876 |
| 0.163065034   | 0.322076138 | 0.153757159 | 0.299511809 |
| 0.230606085   | 0.074167058 | 0.18270334  | 0.229595435 |
| 0.089627147   | 0.263873588 | 0.140955573 | 0.298858041 |
| 0.159463794   | 0.279178643 | 0.183424867 | 0.258394174 |
| 0.245334435   | 0.069874501 | 0.074764223 | 0.142253957 |
| 0.302834541   | 0.26638887  | 0.089204784 | 0.255768961 |
| 0.05954122    | 0.231959181 | 0.181781688 | 0.132073244 |
| 0.202101185   | 0.23948145  | 0.181751715 | 0.327821955 |
| 0.222589306   | 0.159328656 | 0.117960467 | 0.29887702  |
| 0.199478831   | 0.155377324 | 0.312497162 | 0.003502563 |
| 0.254074542   | 0.177236737 | 0.267289308 | 0.137817382 |
| 0.340100485   | 0.22123235  | 0.228355733 | 0.056128188 |
| 0.198355055   | 0.032099268 | 0.153227798 | 0.137372299 |
| 0.090935411   | 0.308541521 | 0.303622053 | 0.254673299 |
| 0.257388551   | 0.116469201 | 0.089499003 | 0.282850373 |
| 0.039284249   | 0.076953483 | 0.096103604 | 0.195951913 |
| 0.058157557   | 0.129062861 | 0.128853572 | 0.106502735 |
| 0.235212406   | 0.254620783 |             |             |
| 4833442J19RIK | 0.091947341 | 0.411422153 | 0.086970677 |
| 0.122229492   | 0.169057483 | 0.235570476 | 0.086161777 |
| 0.120494012   | 0.33309844  | 0.206235004 | 0.20754128  |
| 0.033485992   | 0.036277841 | 0.401270055 | 0.076082603 |
| 0.215450021   | 0.047057989 | 0.115456246 | 0.060949481 |
| 0.19932912    | 0.156876868 | 0.170986276 | 0.243532964 |
| 0.165093235   | 0.241295889 | 1           | 0.208204298 |
| 0.455783628   | 0.131585369 | 0.268382931 | 0.146582461 |
| 0.404647625   | 0.171458893 | 0.197932138 | 0.038419604 |
| 0.234547671   | 0.010091488 | 0.455133451 | 0.167432629 |
| 0.084300559   | 0.347272996 | 0.227446864 | 0.163686731 |
| 0.2457118     | 0.061563704 | 0.130909371 | 0.262764459 |
| 0.246351573   | 0.199122167 | 0.098613005 | 0.309972318 |
| 0.219888349   | 0.259977641 | 0.322934928 | 0.002140377 |
| 0.142757521   | 0.036410798 | 0.105892483 | 0.480555409 |
| 0.166552704   | 0.109357824 | 0.162969854 | 0.196908918 |
| 0.230047937   | 0.253986048 | 0.196953166 | 0.229988288 |
| 0.455684783   | 0.083837765 | 0.306516133 | 0.119678043 |
| 0.249006515   | 0.070291877 | 0.167479668 | 0.124376795 |
| 0.22618215    | 0.146512224 | 0.18671935  | 0.165705989 |
| 0.418922818   | 0.501053631 | 0.192626556 | 0.49779009  |
| 0.059104976   | 0.177295999 | 0.161561212 | 0.231595012 |
| 0.282486325   | 0.112078112 | 0.293177337 | 0.487502268 |
| 0.082132064   | 0.24131775  | 0.296078945 | 0.146926685 |

|             |             |             |             |
|-------------|-------------|-------------|-------------|
| 0.393844562 | 0.153816371 | 0.240153625 | 0.080604721 |
| 0.223431031 | 0.18868658  | 0.47808282  | 0.222126841 |
| 0.174350533 | 0.109215683 | 0.496936307 | 0.162665906 |
| 0.165701805 | 0.111470766 | 0.138697554 | 0.371605761 |
| 0.260332885 | 0.439340317 | 0.371741097 | 0.302337653 |
| 0.201433838 | 0.454589796 | 0.291864622 | 0.378183925 |
| 0.098690721 | 0.491425964 | 0.165912006 | 0.051146793 |
| 0.103676955 | 0.083486819 | 0.148270275 | 0.277854762 |
| 0.401823183 | 0.237756144 | 0.162139161 | 0.160163786 |
| 0.379747525 | 0.480630607 | 0.493282792 | 0.339936175 |
| 0.062709438 | 0.136596363 | 0.209010205 | 0.202634162 |
| 0.259081634 | 0.127103816 | 0.131289209 | 0.504714928 |
| 0.351407967 | 0.342578385 | 0.16824612  | 0.507035911 |
| 0.167102695 | 0.469159877 | 0.414661326 | 0.143247917 |
| 0.50181125  | 0.491591843 | 0.453973557 | 0.243064335 |
| 0.457694052 | 0.231158188 | 0.053678815 | 0.340087487 |
| 0.42994348  | 0.008734355 | 0.405657896 | 0.431303308 |
| 0.476065522 | 0.369166708 | 0.462025667 | 0.446462722 |
| 0.475299974 | 0.103027731 | 0.022027081 | 0.175927944 |
| 0.492585659 | 0.353768581 | 0.106321079 | 0.22324524  |
| 0.195020138 | 0.244362473 | 0.329935013 | 0.155400719 |
| 0.472244829 | 0.395986778 | 0.43000981  | 0.313919804 |
| 0.235343311 | 0.320189453 | 0.194577128 | 0.480223656 |
| 0.061955985 | 0.124072143 | 0.084318107 | 0.256935462 |
| 0.222653714 | 0.1375403   | 0.242677609 | 0.206645604 |
| 0.150537862 | 0.234640894 | 0.162854353 | 0.225602668 |
| 0.111429661 | 0.242352302 | 0.163787601 | 0.17302557  |
| 0.054799774 | 0.193026165 | 0.129151684 | 0.120465962 |
| 0.153214593 | 0.317163419 | 0.293264654 | 0.436443819 |
| 0.206990552 | 0.201672829 | 0.292905697 | 0.425587227 |
| 0.378113583 | 0.198830468 | 0.213781933 | 0.016502981 |
| 0.158245381 | 0.178737669 | 0.088595575 | 0.218607998 |
| 0.252375328 | 0.161770272 | 0.222768116 | 0.260098896 |
| 0.212479932 | 0.155670088 | 0.200947575 | 0.422134138 |
| 0.187591033 | 0.165552887 | 0.36563275  | 0.250379094 |
| 0.011149439 | 0.221066667 | 0.358608035 | 0.099642999 |
| 0.242695555 | 0.063064226 | 0.116963322 | 0.403849092 |
| 0.144306894 | 0.123475858 | 0.426215606 | 0.260456923 |
| 0.186497647 | 0.294608566 | 0.468660696 | 0.027594137 |
| 0.198694934 | 0.03698741  | 0.19632164  | 0.223680196 |
| 0.194226673 | 0.225859198 | 0.162663644 | 0.158626149 |
| 0.143032186 | 0.48198926  | 0.341930365 | 0.453243987 |
| 0.204436558 | 0.477060437 | 0.371744848 | 0.376034747 |
| 0.254022959 | 0.200970639 | 0.061280874 | 0.352197737 |
| 0.39392524  | 0.184970851 | 0.119832806 | 0.339941771 |
| 0.227400519 | 0.254322462 | 0.082942275 | 0.437649893 |
| 0.474806269 | 0.473038902 | 0.106660716 | 0.267516607 |
| 0.319210062 | 0.180578797 | 0.348188393 | 0.475429512 |
| 0.216515542 | 0.195262319 | 0.185195208 | 0.316212741 |
| 0.162697508 | 0.123495997 | 0.315551969 | 0.083774561 |
| 0.004825064 | 0.107840813 | 0.094674531 | 0.11448646  |
| 0.08529919  | 0.250501658 | 0.262080809 | 0.46837556  |
| 0.111769983 | 0.37917376  | 0.22121418  | 0.17088423  |
| 0.403966267 | 0.188655038 | 0.193508838 | 0.211182116 |

|             |             |             |             |
|-------------|-------------|-------------|-------------|
| 0.226966688 | 0.027438618 | 0.091767374 | 0.506721611 |
| 0.078371581 | 0.114224851 | 0.219468807 | 0.003657175 |
| 0.073588508 | 0.365840954 | 0.160185352 | 0.251937003 |
| 0.396695965 | 0.261524192 | 0.189550105 | 0.223712413 |
| 0.234473232 | 0.109529691 | 0.00399906  | 0.445888533 |
| 0.461691975 | 0.438426059 | 0.462674721 | 0.460329098 |
| 0.400698404 | 0.311721624 | 0.319722406 | 0.240776638 |
| 0.11212962  | 0.120148166 | 0.114067159 | 0.18421745  |
| 0.005674574 | 0.290000142 | 0.181700466 | 0.144228689 |
| 0.292352279 | 0.229121678 | 0.054894923 | 0.190812595 |
| 0.038114869 | 0.092804972 | 0.212593383 | 0.157136518 |
| 0.245013559 | 0.033161263 | 0.155807236 | 0.173125674 |
| 0.425203657 | 0.327609589 | 0.185350778 | 0.493822386 |
| 0.198331598 | 0.179360271 | 0.190109644 | 0.272254746 |
| 0.088328008 | 0.079662729 | 0.243753341 | 0.030901546 |
| 0.123751451 | 0.443386815 | 0.208725813 | 0.101858898 |
| 0.195217591 | 0.013739685 | 0.354636114 | 0.486164727 |
| 0.460576564 | 0.45273889  | 0.45287405  | 0.131330757 |
| 0.4680166   | 0.047331688 | 0.477160833 | 0.37038233  |
| 0.220893133 | 0.001796838 | 0.007065451 | 0.416814093 |
| 0.213642982 | 0.111462666 | 0.149186801 | 0.213362199 |
| 0.09870456  | 0.159465088 | 0.080582875 | 0.103805168 |
| 0.252244222 | 0.137678006 | 0.089822953 | 0.461544291 |
| 0.174722665 | 0.16634002  | 0.244393287 | 0.122203167 |
| 0.219301123 | 0.069767854 | 0.121453208 | 0.006206483 |
| 0.243047829 | 0.173571879 | 0.489759171 | 0.471045603 |
| 0.45353805  | 0.249898972 | 0.19557621  | 0.186290504 |
| 0.377888605 | 0.143468866 | 0.190920002 | 0.13539706  |
| 0.461138907 | 0.230289948 | 0.25889845  | 0.296153299 |
| 0.445901013 | 0.43733394  | 0.053898998 | 0.318611081 |
| 0.020582871 | 0.001602012 | 0.247027057 | 0.21106152  |
| 0.052855774 | 0.204838868 | 0.238020693 | 0.188440707 |
| 0.164142611 | 0.044070829 | 0.136247883 | 0.124902836 |
| 0.195398217 | 0.206797868 | 0.142326559 | 0.235234006 |
| 0.165094171 | 0.084894247 | 0.142912171 | 0.129244461 |
| 0.163790362 | 0.329088661 | 0.244684532 | 0.043583268 |
| 0.245734573 | 0.213964442 | 0.077834105 | 0.156003483 |
| 0.367610966 | 0.420296081 | 0.063964521 | 0.015408696 |
| 0.255903251 | 0.187211845 | 0.422047258 | 0.465048949 |
| 0.503397712 | 0.471836991 | 0.396102701 | 0.091774044 |
| 0.081798161 | 0.201720304 | 0.155439585 | 0.076912231 |
| 0.458205661 | 0.104895498 | 0.459663835 | 0.149572983 |
| 0.129373402 | 0.176540755 | 0.041687097 | 0.101570536 |
| 0.192522683 | 0.149181632 | 0.126261857 | 0.160502858 |
| 0.18691814  | 0.123361117 | 0.074698178 | 0.159436381 |
| 0.287760473 | 0.097367273 | 0.147180172 | 0.219366061 |
| 0.327508752 | 0.167166795 | 0.291944109 | 0.420471354 |
| 0.13684401  | 0.135591558 | 0.21451059  | 0.286659173 |
| 0.366570543 | 0.230026582 | 0.028693772 | 0.433540826 |
| 0.427370007 | 0.267614779 | 0.475297572 | 0.323586127 |
| 0.113692106 | 0.197096095 | 0.170152019 | 0.199635051 |
| 0.156336206 | 0.23885108  | 0.170034855 | 0.088969507 |
| 0.295222934 | 0.476977995 | 0.390788371 | 0.126496714 |
| 0.235396274 | 0.149305808 | 0.099083505 | 0.38574224  |

|             |             |             |             |
|-------------|-------------|-------------|-------------|
| 0.101232978 | 0.097646082 | 0.232956257 | 0.344134582 |
| 0.00245964  | 0.062513038 | 0.431080183 | 0.156073983 |
| 0.484618755 | 0.420256043 | 0.412664437 | 0.195113291 |
| 0.001359903 | 0.258753317 | 0.212837248 | 0.225988373 |
| 0.395357408 | 0.294983013 | 0.12713415  | 0.075301841 |
| 0.2547934   | 0.122210689 | 0.109811883 | 0.209415058 |
| 0.108979088 | 0.263633083 | 0.174153916 | 0.183771199 |
| 0.140541316 | 0.142124118 | 0.121296148 | 0.177672053 |
| 0.090492711 | 0.204597207 | 0.288664033 | 0.196504067 |
| 0.096121237 | 0.377137602 | 0.340848799 | 0.047508504 |
| 0.182228913 | 0.359027252 | 0.384993813 | 0.00473494  |
| 0.281587391 | 0.014479565 | 0.128351368 | 0.139521384 |
| 0.138535572 | 0.142273584 | 0.159104842 | 0.171911398 |
| 0.241055397 | 0.172047961 | 0.174197852 | 0.165670065 |
| 0.115532415 | 0.176693296 | 0.218121121 | 0.249882028 |
| 0.151255567 | 0.124275204 | 0.166377925 | 0.183489977 |
| 0.054382161 | 0.411145001 | 0.256119066 | 0.116943033 |
| 0.162142164 | 0.239665885 | 0.322491674 | 0.474226124 |
| 0.363892085 | 0.186662887 | 0.203177074 | 0.398273777 |
| 0.135896249 | 0.176905928 | 0.089297491 | 0.251384684 |
| 0.166009689 | 0.112489129 | 0.244338841 | 0.23484853  |
| 0.315359346 | 0.398666823 | 0.243047467 | 0.408147623 |
| 0.214913838 | 0.217841325 | 0.211893096 | 0.072807949 |
| 0.158142015 | 0.157556238 | 0.143586545 | 0.005937334 |
| 0.232456356 | 0.197240138 | 0.393861143 | 0.478261382 |
| 0.138901055 | 0.352452171 | 0.206617577 | 0.100708492 |
| 0.191031867 | 0.260195502 | 0.144554335 | 0.330723892 |
| 0.098076216 | 0.147959044 | 0.175146497 | 0.23021466  |
| 0.309802846 | 0.312623695 | 0.1523372   | 0.182814105 |
| 0.184632025 | 0.187030283 | 0.477412005 | 0.137377343 |
| 0.239857603 | 0.105035696 | 0.245912768 | 0.179273708 |
| 0.144887498 | 0.463104324 | 0.086041789 | 0.463958703 |
| 0.188720724 | 0.170459068 | 0.465589726 | 0.210859459 |
| 0.213919962 | 0.086101699 | 0.088107115 | 0.235168023 |
| 0.167874943 | 0.167430865 | 0.012301693 | 0.035567965 |
| 0.23762168  | 0.204331954 | 0.351684372 | 0.279089171 |
| 0.14108733  | 0.270815357 | 0.073503506 | 0.21454961  |
| 0.478458905 | 0.500763755 | 0.15956357  | 0.231196436 |
| 0.271849139 | 0.097200669 | 0.26549243  | 0.014421252 |
| 0.237106235 | 0.224077603 | 0.215450485 | 0.067154515 |
| 0.03580618  | 0.103833032 | 0.245082243 | 0.109058281 |
| 0.405005805 | 0.092926112 | 0.250430816 | 0.297820806 |
| 0.189129198 | 0.502421154 | 0.089687891 | 0.275344699 |
| 0.082700369 | 0.202383226 | 0.20403831  | 0.223852474 |
| 0.128456544 | 0.150952356 | 0.274140533 | 0.114568566 |
| 0.047153982 | 0.154534321 | 0.004636754 | 0.42189237  |
| 0.488983705 | 0.183009889 | 0.231717933 | 0.186898258 |
| 0.20161215  | 0.349483974 | 0.135812437 | 0.229796372 |
| 0.018195898 | 0.192372033 | 0.152572992 | 0.367204791 |
| 0.124710551 | 0.231096244 | 0.061318901 | 0.174138591 |
| 0.48670737  | 0.157807175 | 0.249613416 | 0.180934346 |
| 0.464529449 | 0.352564801 | 0.205639855 | 0.130278681 |
| 0.269266746 | 0.095548923 | 0.228692538 | 0.483445069 |
| 0.124292573 | 0.110093875 | 0.344290448 | 0.149970172 |

|               |             |             |             |
|---------------|-------------|-------------|-------------|
| 0.155774453   | 0.363835623 | 0.241107731 | 0.484426249 |
| 0.058387233   | 0.182539176 | 0.318962654 | 0.420231602 |
| 0.236158449   | 0.094320189 | 0.120060741 | 0.136966744 |
| 0.451767789   | 0.090951477 | 0.14315224  | 0.290054581 |
| 0.109435147   | 0.208803619 | 0.243739998 | 0.114214927 |
| 0.037601409   | 0.133877854 | 0.205687399 | 0.143920498 |
| 0.186616331   | 0.212408371 | 0.145473175 | 0.360215792 |
| 0.091589408   | 0.029026239 | 0.424058981 | 0.007989883 |
| 0.231788595   | 0.234794211 | 0.172227415 | 0.192116929 |
| 0.214034383   | 0.229422468 | 0.244696969 | 0.002892018 |
| 0.329356597   | 0.038942431 | 0.18233623  | 0.12846546  |
| 0.139346547   | 0.077078029 | 0.437175878 | 0.442039633 |
| 0.234339553   | 0.190201562 | 0.171939493 | 0.433809051 |
| 0.074740719   | 0.169230591 | 0.178428279 | 0.295153979 |
| 0.107470467   | 0.228067205 | 0.222739702 | 0.194786751 |
| 0.301462269   | 0.193047433 |             |             |
| 4930432021RIK | 0.027528206 | 0.378236539 | 0.019150489 |
| 0.057306456   | 0.229510375 | 0.213603057 | 0.025521691 |
| 0.060427872   | 0.302135799 | 0.25080944  | 0.196991458 |
| 0.004580717   | 0.169056778 | 0.395035444 | 0.025133025 |
| 0.300163252   | 0.012999669 | 0.048405615 | 0.077596178 |
| 0.145877098   | 0.204125333 | 0.253600258 | 0.191213415 |
| 0.227427783   | 0.115313381 | 0.208204298 | 1           |
| 0.45196005    | 0.250619627 | 0.333391484 | 0.149033426 |
| 0.327244301   | 0.255954489 | 0.301163744 | 0.004094877 |
| 0.248444051   | 0.041872052 | 0.346281706 | 0.159181389 |
| 0.156307832   | 0.255221902 | 0.213331426 | 0.125205409 |
| 0.237599221   | 0.010964233 | 0.19140816  | 0.371353847 |
| 0.22336071    | 0.190950258 | 0.024257015 | 0.335267319 |
| 0.270722601   | 0.214794447 | 0.324828906 | 0.001134276 |
| 0.282616978   | 0.194912878 | 0.287760018 | 0.429127045 |
| 0.107445254   | 0.059486713 | 0.310195854 | 0.162750787 |
| 0.321795907   | 0.336884797 | 0.177433821 | 0.261711557 |
| 0.424642267   | 0.233335294 | 0.404710579 | 0.088170832 |
| 0.219033254   | 0.013366766 | 0.08793408  | 0.042686926 |
| 0.281987065   | 0.106107856 | 0.222881528 | 0.284750114 |
| 0.368740493   | 0.432304849 | 0.146506406 | 0.418832643 |
| 0.170392148   | 0.291876834 | 0.229551148 | 0.232299937 |
| 0.317852003   | 0.049541981 | 0.307453245 | 0.441960877 |
| 0.023827805   | 0.273337086 | 0.325779397 | 0.064169988 |
| 0.366852853   | 0.32100913  | 0.240297822 | 0.191872483 |
| 0.335471228   | 0.249419682 | 0.41210317  | 0.177096013 |
| 0.250401818   | 0.028467152 | 0.388457    | 0.280098806 |
| 0.174474409   | 0.030660112 | 0.183733843 | 0.460477818 |
| 0.287611175   | 0.434125124 | 0.391300397 | 0.30678783  |
| 0.269257976   | 0.432512444 | 0.284790015 | 0.370996501 |
| 0.196687611   | 0.460320758 | 0.082670049 | 0.01619673  |
| 0.028173066   | 0.0442039   | 0.242184864 | 0.231663209 |
| 0.433641237   | 0.224408748 | 0.088383877 | 0.139586213 |
| 0.450262123   | 0.390102987 | 0.465340582 | 0.352882687 |
| 0.012988735   | 0.30923291  | 0.259849722 | 0.158444198 |
| 0.289787074   | 0.055506505 | 0.237722454 | 0.410555369 |
| 0.285090563   | 0.407100949 | 0.075776507 | 0.401474132 |
| 0.126292286   | 0.434566827 | 0.396048994 | 0.075024538 |

|             |             |             |             |
|-------------|-------------|-------------|-------------|
| 0.428121102 | 0.394675494 | 0.45201568  | 0.364082043 |
| 0.382420003 | 0.163292466 | 0.079015101 | 0.3289173   |
| 0.416434139 | 0.015912909 | 0.464761355 | 0.482779958 |
| 0.427347835 | 0.442167282 | 0.481702772 | 0.470874932 |
| 0.433507412 | 0.029712562 | 0.06663951  | 0.211003098 |
| 0.421971933 | 0.306747988 | 0.09556272  | 0.279001242 |
| 0.289296721 | 0.20633285  | 0.409655952 | 0.196368596 |
| 0.435332083 | 0.410169084 | 0.464871331 | 0.321584783 |
| 0.197324025 | 0.227790977 | 0.315789155 | 0.365675128 |
| 0.016742755 | 0.044364695 | 0.019355521 | 0.244458564 |
| 0.21170949  | 0.088661953 | 0.198446762 | 0.283169492 |
| 0.103337586 | 0.199691108 | 0.311505918 | 0.341228624 |
| 0.026853497 | 0.278641754 | 0.07768543  | 0.078738917 |
| 0.014720226 | 0.085428266 | 0.086597893 | 0.072992627 |
| 0.156523431 | 0.155178146 | 0.37827487  | 0.457130928 |
| 0.269938045 | 0.097970608 | 0.323448692 | 0.410280694 |
| 0.351700649 | 0.265325352 | 0.153039841 | 0.002693859 |
| 0.182576827 | 0.31933864  | 0.265362401 | 0.314030482 |
| 0.114607001 | 0.144047519 | 0.27818161  | 0.347985531 |
| 0.124047485 | 0.078060348 | 0.268981966 | 0.327986878 |
| 0.085123141 | 0.189533074 | 0.394397619 | 0.273718813 |
| 0.000201168 | 0.166061756 | 0.389911994 | 0.141076555 |
| 0.2240649   | 0.138676997 | 0.229454198 | 0.422027899 |
| 0.286579001 | 0.22806325  | 0.469014338 | 0.362060704 |
| 0.216733208 | 0.153787438 | 0.47901295  | 0.098619747 |
| 0.291155397 | 0.031539825 | 0.194121579 | 0.237848117 |
| 0.130796639 | 0.220547405 | 0.252100253 | 0.203009962 |
| 0.058429833 | 0.446303569 | 0.325095742 | 0.45524029  |
| 0.271451733 | 0.474761596 | 0.422992783 | 0.371124831 |
| 0.244093292 | 0.310782065 | 0.210936455 | 0.368208252 |
| 0.419741982 | 0.228022711 | 0.034641234 | 0.437228999 |
| 0.274413882 | 0.358053956 | 0.109074209 | 0.430188076 |
| 0.402064838 | 0.389296485 | 0.076794855 | 0.336575277 |
| 0.285841139 | 0.104135913 | 0.376970156 | 0.476804382 |
| 0.259963626 | 0.256067541 | 0.237382278 | 0.368821058 |
| 0.084794904 | 0.194221964 | 0.253329516 | 0.272182309 |
| 0.018405812 | 0.034503036 | 0.023367727 | 0.090842799 |
| 0.178513563 | 0.347523284 | 0.321222333 | 0.456454321 |
| 0.051178525 | 0.343865584 | 0.172207974 | 0.169103762 |
| 0.342379898 | 0.277006148 | 0.292688925 | 0.310985682 |
| 0.166672208 | 0.005955996 | 0.050104277 | 0.4252997   |
| 0.015626393 | 0.221280207 | 0.189436759 | 0.000973174 |
| 0.016035712 | 0.375312759 | 0.052675097 | 0.121538493 |
| 0.458958219 | 0.123927955 | 0.107635535 | 0.234945301 |
| 0.254954802 | 0.038405042 | 0.001071943 | 0.455316582 |
| 0.450915594 | 0.427901088 | 0.447201566 | 0.398816447 |
| 0.430493702 | 0.370427024 | 0.377695816 | 0.174567405 |
| 0.046346125 | 0.038968792 | 0.197024337 | 0.172118346 |
| 0.002705896 | 0.310588033 | 0.233153423 | 0.070569485 |
| 0.393389748 | 0.218836609 | 0.012205916 | 0.302099806 |
| 0.00500633  | 0.226442926 | 0.186849606 | 0.145835044 |
| 0.323408514 | 0.003497151 | 0.127926526 | 0.25091     |
| 0.330948401 | 0.251534824 | 0.302758564 | 0.457957602 |
| 0.176068858 | 0.070220495 | 0.189660385 | 0.336600351 |

|             |             |             |             |
|-------------|-------------|-------------|-------------|
| 0.029225075 | 0.117399097 | 0.227092514 | 0.027475763 |
| 0.151420381 | 0.398767302 | 0.293472804 | 0.025558943 |
| 0.141933354 | 0.000464562 | 0.267179676 | 0.456150533 |
| 0.387122035 | 0.477188091 | 0.427777489 | 0.230787323 |
| 0.426525319 | 0.237564948 | 0.474611135 | 0.328540268 |
| 0.261565621 | 1.94E-05    | 0.002612122 | 0.456705048 |
| 0.257500805 | 0.027818562 | 0.07405044  | 0.187875593 |
| 0.047758029 | 0.067282461 | 0.029305943 | 0.16586345  |
| 0.291629248 | 0.166620157 | 0.186269743 | 0.391164416 |
| 0.133434397 | 0.134933504 | 0.240299254 | 0.042663049 |
| 0.298702988 | 0.018491355 | 0.044834182 | 0.003421872 |
| 0.319415594 | 0.063566983 | 0.367571287 | 0.444321755 |
| 0.413349683 | 0.328991546 | 0.264312731 | 0.218314675 |
| 0.430465086 | 0.048100276 | 0.294015638 | 0.050120031 |
| 0.408544255 | 0.286924695 | 0.220438516 | 0.204696386 |
| 0.436022209 | 0.383421316 | 0.011412821 | 0.34727314  |
| 0.003179339 | 0.002463445 | 0.183961524 | 0.181890499 |
| 0.138689723 | 0.262741729 | 0.163051691 | 0.184804503 |
| 0.174914765 | 0.008911019 | 0.270183527 | 0.240666867 |
| 0.186097648 | 0.22693982  | 0.218545122 | 0.184849832 |
| 0.204907604 | 0.129162291 | 0.117128243 | 0.08796172  |
| 0.227870794 | 0.226183749 | 0.116476062 | 0.006969059 |
| 0.265067675 | 0.269990726 | 0.020329421 | 0.08125709  |
| 0.374387691 | 0.444872978 | 0.018374544 | 0.002644291 |
| 0.171761097 | 0.22833306  | 0.462512209 | 0.435531099 |
| 0.433210731 | 0.448789526 | 0.29871356  | 0.08228043  |
| 0.026013214 | 0.214081946 | 0.240853415 | 0.073522318 |
| 0.449322176 | 0.027805217 | 0.410716039 | 0.282781217 |
| 0.056301163 | 0.10791968  | 0.011371234 | 0.037075511 |
| 0.314526615 | 0.091512397 | 0.103446205 | 0.068047617 |
| 0.193086101 | 0.244223196 | 0.019223326 | 0.095017536 |
| 0.253179817 | 0.20427469  | 0.076346202 | 0.191464162 |
| 0.282451532 | 0.233488059 | 0.379675273 | 0.363778847 |
| 0.060476869 | 0.053309866 | 0.126003713 | 0.34946196  |
| 0.40987526  | 0.300435604 | 0.008264749 | 0.398598207 |
| 0.449737973 | 0.342245963 | 0.414586651 | 0.344595378 |
| 0.038792361 | 0.239711929 | 0.308746741 | 0.231635986 |
| 0.098674236 | 0.207653184 | 0.151583464 | 0.023776355 |
| 0.237338952 | 0.398901971 | 0.351601518 | 0.080185211 |
| 0.295978881 | 0.061540641 | 0.023116003 | 0.422336357 |
| 0.180986648 | 0.034001563 | 0.232819268 | 0.436057235 |
| 0.001010253 | 0.204075007 | 0.473722189 | 0.127193891 |
| 0.453680632 | 0.437000557 | 0.347561606 | 0.16333787  |
| 0.006761544 | 0.37515016  | 0.237598215 | 0.229517357 |
| 0.363762102 | 0.25276986  | 0.119050467 | 0.031695539 |
| 0.205119338 | 0.036573324 | 0.071151714 | 0.192371274 |
| 0.204134179 | 0.274872888 | 0.120409084 | 0.12110069  |
| 0.12787638  | 0.052709056 | 0.242959105 | 0.12020286  |
| 0.232251445 | 0.1499533   | 0.263366064 | 0.228677522 |
| 0.170237424 | 0.409267274 | 0.330417542 | 0.007628056 |
| 0.292991949 | 0.379547473 | 0.393682956 | 0.000424316 |
| 0.354291532 | 0.001411174 | 0.12007126  | 0.1195145   |
| 0.118492861 | 0.135093851 | 0.18056386  | 0.199384426 |
| 0.243448739 | 0.122535914 | 0.140210437 | 0.130070484 |



|             |             |             |             |
|-------------|-------------|-------------|-------------|
| 0.087894505 | 0.121687505 | 0.283338092 | 0.213015479 |
| 0.170722513 | 0.052538176 | 0.056044652 | 0.058225394 |
| 0.018608326 | 0.425875969 | 0.158083814 | 0.033468503 |
| 0.135156611 | 0.235136445 | 0.270471085 | 0.42508991  |
| 0.360288729 | 0.064555446 | 0.226047147 | 0.371486502 |
| 0.265488758 | 0.175906424 | 0.024652589 | 0.223139879 |
| 0.116285683 | 0.160672954 | 0.251045566 | 0.166512912 |
| 0.349926815 | 0.302028287 | 0.151324456 | 0.376755995 |
| 0.221996476 | 0.262374393 | 0.208339732 | 0.037393074 |
| 0.075970027 | 0.07155829  | 0.205108891 | 0.000605746 |
| 0.230578321 | 0.119740161 | 0.426096556 | 0.398444013 |
| 0.305699767 | 0.310530636 | 0.184919739 | 0.03333552  |
| 0.189401493 | 0.112012045 | 0.070524429 | 0.39043995  |
| 0.257208694 | 0.091913027 | 0.200966583 | 0.167301812 |
| 0.388520877 | 0.394498303 | 0.228756336 | 0.140734006 |
| 0.149152346 | 0.10338308  | 0.405872491 | 0.052298095 |
| 0.3147475   | 0.14794087  | 0.257063191 | 0.175203715 |
| 0.141537176 | 0.477290198 | 0.022343521 | 0.483351963 |
| 0.226819019 | 0.074363465 | 0.402499631 | 0.177660851 |
| 0.169807984 | 0.074670998 | 0.241329909 | 0.251721735 |
| 0.142816633 | 0.299137318 | 0.020410523 | 0.062550122 |
| 0.23577287  | 0.264806243 | 0.362811105 | 0.317431128 |
| 0.212841179 | 0.287351241 | 0.259842986 | 0.16059902  |
| 0.39959179  | 0.403694862 | 0.127702135 | 0.171770143 |
| 0.252472072 | 0.042643933 | 0.2471238   | 0.031356336 |
| 0.316935151 | 0.343048974 | 0.276052289 | 0.022159758 |
| 0.005831385 | 0.239252447 | 0.292666592 | 0.032601417 |
| 0.460736256 | 0.243942053 | 0.284258506 | 0.355928791 |
| 0.111072503 | 0.3976215   | 0.074270152 | 0.314417556 |
| 0.026384879 | 0.165948669 | 0.303607323 | 0.286318695 |
| 0.133986367 | 0.244486442 | 0.289508068 | 0.212983757 |
| 0.010233613 | 0.17205402  | 0.000489874 | 0.299439861 |
| 0.37853861  | 0.281529852 | 0.133798541 | 0.274915659 |
| 0.190346838 | 0.337730349 | 0.187393329 | 0.293738618 |
| 0.002715776 | 0.27423202  | 0.103946379 | 0.32246342  |
| 0.191357955 | 0.258456164 | 0.022577149 | 0.272577916 |
| 0.349340126 | 0.190997703 | 0.188053423 | 0.233121497 |
| 0.420419861 | 0.342193253 | 0.09470223  | 0.185736317 |
| 0.332014575 | 0.026671608 | 0.249642983 | 0.468340808 |
| 0.094917331 | 0.195018    | 0.414483197 | 0.105284611 |
| 0.28341973  | 0.316766517 | 0.331064505 | 0.467469685 |
| 0.043002078 | 0.14317899  | 0.393235417 | 0.40621593  |
| 0.223620595 | 0.184730515 | 0.219703884 | 0.158956073 |
| 0.36756796  | 0.037225508 | 0.254375981 | 0.247589532 |
| 0.214212138 | 0.215689618 | 0.250746516 | 0.147904587 |
| 0.01370609  | 0.103374227 | 0.212991185 | 0.068397776 |
| 0.173344199 | 0.232088614 | 0.195686095 | 0.299678622 |
| 0.064757568 | 0.006865495 | 0.371056956 | 0.028839471 |
| 0.164741642 | 0.281807072 | 0.1300401   | 0.2556548   |
| 0.105071825 | 0.229521181 | 0.174343755 | 0.000440561 |
| 0.370732404 | 0.048882221 | 0.240224873 | 0.148336471 |
| 0.257582383 | 0.018609694 | 0.373218497 | 0.471374277 |
| 0.205197792 | 0.273923596 | 0.278354344 | 0.395940809 |
| 0.18154934  | 0.327084284 | 0.306115545 | 0.300805748 |

|               |             |             |             |
|---------------|-------------|-------------|-------------|
| 0.243092093   | 0.261811596 | 0.295593931 | 0.27786374  |
| 0.282234512   | 0.152979787 |             |             |
| 4930547N16RIK | 0.133068174 | 0.486928399 | 0.11764593  |
| 0.21433217    | 0.354783504 | 0.513040588 | 0.098021442 |
| 0.185332987   | 0.434753591 | 0.414988922 | 0.443438804 |
| 0.034730612   | 0.102673815 | 0.491058219 | 0.088664127 |
| 0.448366877   | 0.054888723 | 0.160567563 | 0.106934115 |
| 0.312960183   | 0.320246467 | 0.409874512 | 0.491340713 |
| 0.329085724   | 0.257750756 | 0.455783628 | 0.45196005  |
| 1             | 0.353236531 | 0.517123264 | 0.308161094 |
| 0.428813836   | 0.370114111 | 0.460816888 | 0.038732429 |
| 0.498421773   | 0.014268232 | 0.455237321 | 0.318645369 |
| 0.193953824   | 0.393145497 | 0.46717568  | 0.315423103 |
| 0.478062826   | 0.074835731 | 0.321836431 | 0.467910821 |
| 0.434138421   | 0.366633915 | 0.127536415 | 0.52023498  |
| 0.445329169   | 0.44189432  | 0.494293811 | 0.003679478 |
| 0.357008036   | 0.111727251 | 0.269419342 | 0.529394624 |
| 0.275156149   | 0.172975099 | 0.356797771 | 0.339199946 |
| 0.457119095   | 0.435635179 | 0.32442677  | 0.459390722 |
| 0.510886632   | 0.202007978 | 0.506480405 | 0.237094005 |
| 0.477617517   | 0.068591356 | 0.225694023 | 0.151483316 |
| 0.467092781   | 0.260962539 | 0.40865269  | 0.361106759 |
| 0.485574012   | 0.531008907 | 0.315037656 | 0.528450111 |
| 0.110770565   | 0.384189023 | 0.329776577 | 0.360080209 |
| 0.429474668   | 0.131592995 | 0.48772103  | 0.530729049 |
| 0.091478647   | 0.486327509 | 0.470271148 | 0.19689587  |
| 0.504278217   | 0.335503022 | 0.506675198 | 0.208075429 |
| 0.42324474    | 0.388667897 | 0.495899412 | 0.371541033 |
| 0.373406759   | 0.135267428 | 0.520203443 | 0.36209649  |
| 0.367095371   | 0.150111357 | 0.260233413 | 0.512068601 |
| 0.499388898   | 0.515373142 | 0.494041592 | 0.424582747 |
| 0.432866972   | 0.512252295 | 0.492789104 | 0.472453515 |
| 0.241947124   | 0.543158397 | 0.277332801 | 0.067050252 |
| 0.136264452   | 0.123558419 | 0.271401033 | 0.363521835 |
| 0.51983397    | 0.423257773 | 0.280509428 | 0.28654686  |
| 0.485816794   | 0.51255307  | 0.541096711 | 0.478249202 |
| 0.072092872   | 0.293336178 | 0.445314399 | 0.387719657 |
| 0.445314398   | 0.172335661 | 0.297937336 | 0.533123331 |
| 0.440305537   | 0.492228745 | 0.263718142 | 0.524206801 |
| 0.267292548   | 0.518404144 | 0.517107671 | 0.236736469 |
| 0.538035879   | 0.524540984 | 0.509251202 | 0.458235662 |
| 0.496993941   | 0.460460145 | 0.083362602 | 0.447833037 |
| 0.482086216   | 0.019264842 | 0.515455676 | 0.513913092 |
| 0.522123106   | 0.516745123 | 0.515505804 | 0.513799339 |
| 0.526735751   | 0.127062839 | 0.036948332 | 0.332777169 |
| 0.53084809    | 0.464887234 | 0.17276196  | 0.48662285  |
| 0.410596182   | 0.507615064 | 0.497075213 | 0.379818306 |
| 0.511278144   | 0.510021212 | 0.518107466 | 0.470744844 |
| 0.402974991   | 0.372654159 | 0.436863791 | 0.505273585 |
| 0.076589837   | 0.191924793 | 0.105044677 | 0.372038755 |
| 0.48539163    | 0.228100883 | 0.487348636 | 0.405657295 |
| 0.253898265   | 0.451671349 | 0.399181416 | 0.429826632 |
| 0.107377668   | 0.52924449  | 0.251587725 | 0.256694254 |
| 0.066593422   | 0.203976524 | 0.246015955 | 0.220971413 |

|             |             |             |             |
|-------------|-------------|-------------|-------------|
| 0.301976033 | 0.273162579 | 0.515226389 | 0.503637061 |
| 0.41253731  | 0.273230106 | 0.509444116 | 0.474087847 |
| 0.427927004 | 0.445318379 | 0.297732503 | 0.021087804 |
| 0.317572985 | 0.381107437 | 0.219014993 | 0.483127349 |
| 0.230260403 | 0.294216094 | 0.449197241 | 0.449621875 |
| 0.398188329 | 0.228159409 | 0.425355745 | 0.443090825 |
| 0.232384196 | 0.371705915 | 0.487480648 | 0.496902116 |
| 0.008977757 | 0.419686822 | 0.514738877 | 0.170153422 |
| 0.396520109 | 0.162003663 | 0.315917862 | 0.500813968 |
| 0.338219778 | 0.255583724 | 0.515652082 | 0.445285785 |
| 0.427223526 | 0.274209678 | 0.524301201 | 0.057534525 |
| 0.402336587 | 0.071092667 | 0.338168661 | 0.450440126 |
| 0.334767331 | 0.344398952 | 0.360550449 | 0.334217277 |
| 0.217980675 | 0.530678443 | 0.468202966 | 0.516663882 |
| 0.435422084 | 0.528316423 | 0.511360834 | 0.488608409 |
| 0.454548852 | 0.42604302  | 0.162440748 | 0.509136305 |
| 0.505654623 | 0.362730668 | 0.138641779 | 0.506434342 |
| 0.443300829 | 0.45921171  | 0.143294615 | 0.491968397 |
| 0.507296181 | 0.503619507 | 0.18836987  | 0.418543657 |
| 0.455079688 | 0.329286905 | 0.478683175 | 0.526013867 |
| 0.408000951 | 0.403763439 | 0.38746081  | 0.437092233 |
| 0.254978857 | 0.24013472  | 0.376100617 | 0.213924381 |
| 0.017176311 | 0.142460745 | 0.119919549 | 0.203124625 |
| 0.193191622 | 0.504136735 | 0.464664196 | 0.523652904 |
| 0.169319426 | 0.46861385  | 0.310218104 | 0.347239202 |
| 0.462499906 | 0.402011433 | 0.442930622 | 0.448950515 |
| 0.320387597 | 0.032724906 | 0.164403152 | 0.534702737 |
| 0.085695856 | 0.280857258 | 0.410296175 | 0.004862396 |
| 0.083272907 | 0.498119154 | 0.156486973 | 0.245186211 |
| 0.488029847 | 0.257743674 | 0.296018271 | 0.422302051 |
| 0.411743848 | 0.150148901 | 0.005638962 | 0.496557173 |
| 0.495973201 | 0.463530904 | 0.496071383 | 0.480044429 |
| 0.470934934 | 0.479051168 | 0.470787496 | 0.486231968 |
| 0.160014756 | 0.160527665 | 0.241608036 | 0.343976271 |
| 0.008930785 | 0.447514754 | 0.363055842 | 0.207337653 |
| 0.483754019 | 0.371733598 | 0.069281955 | 0.406389278 |
| 0.046804223 | 0.245925245 | 0.394612474 | 0.27207799  |
| 0.392533976 | 0.032326968 | 0.34012772  | 0.377270936 |
| 0.464581225 | 0.420330881 | 0.428540541 | 0.545329462 |
| 0.405055188 | 0.214011868 | 0.375040556 | 0.461456939 |
| 0.114713753 | 0.14841261  | 0.457776227 | 0.069947047 |
| 0.29095719  | 0.466088445 | 0.449832692 | 0.128099468 |
| 0.351951659 | 0.012417929 | 0.44296783  | 0.539752158 |
| 0.500221262 | 0.514903157 | 0.511629493 | 0.318937702 |
| 0.520187523 | 0.133979553 | 0.538534318 | 0.488489947 |
| 0.470185086 | 0.002078767 | 0.00909265  | 0.516836108 |
| 0.460287777 | 0.115471962 | 0.227479235 | 0.488893775 |
| 0.157075363 | 0.248580916 | 0.108401952 | 0.212983974 |
| 0.521559729 | 0.281355625 | 0.199969123 | 0.493762676 |
| 0.304407132 | 0.291423837 | 0.498003705 | 0.149295835 |
| 0.479735353 | 0.088760284 | 0.146596683 | 0.012246269 |
| 0.419444287 | 0.184949057 | 0.503205357 | 0.52493242  |
| 0.497186819 | 0.451806582 | 0.437609247 | 0.432965198 |
| 0.477634551 | 0.179526494 | 0.453730659 | 0.196214306 |

|             |             |             |             |
|-------------|-------------|-------------|-------------|
| 0.510118622 | 0.451354451 | 0.39106384  | 0.3890452   |
| 0.495598256 | 0.479273102 | 0.059637711 | 0.47056813  |
| 0.029400447 | 0.00246839  | 0.499436629 | 0.331019733 |
| 0.081277921 | 0.423870392 | 0.328315612 | 0.302215722 |
| 0.286406851 | 0.061477302 | 0.302848085 | 0.274343416 |
| 0.361900873 | 0.420723414 | 0.311014982 | 0.319057102 |
| 0.310202867 | 0.153863784 | 0.257172995 | 0.204923802 |
| 0.301260529 | 0.390113023 | 0.261870935 | 0.04080647  |
| 0.517943801 | 0.479888279 | 0.099808871 | 0.233433423 |
| 0.500934487 | 0.5154841   | 0.066480802 | 0.018433078 |
| 0.340649464 | 0.366471609 | 0.503762141 | 0.520231328 |
| 0.544979832 | 0.517676015 | 0.405641125 | 0.14885418  |
| 0.114339681 | 0.379721726 | 0.33272295  | 0.12136441  |
| 0.519275705 | 0.125347535 | 0.507494863 | 0.343907584 |
| 0.176182208 | 0.294110442 | 0.055943111 | 0.131628341 |
| 0.444578114 | 0.242851507 | 0.221234949 | 0.240070555 |
| 0.370898109 | 0.294233649 | 0.083247018 | 0.263820918 |
| 0.422194636 | 0.210151674 | 0.225698004 | 0.410696642 |
| 0.451734196 | 0.316838933 | 0.490128206 | 0.446260486 |
| 0.20373453  | 0.176464318 | 0.407024508 | 0.451318679 |
| 0.518997366 | 0.484125527 | 0.052068645 | 0.497016714 |
| 0.495552107 | 0.517954227 | 0.522612702 | 0.422953106 |
| 0.141062276 | 0.442183255 | 0.360076421 | 0.392543122 |
| 0.247636797 | 0.509526955 | 0.297823485 | 0.107866358 |
| 0.350685037 | 0.495099431 | 0.480983192 | 0.222017754 |
| 0.509402324 | 0.214492501 | 0.113793232 | 0.500501131 |
| 0.207422855 | 0.146062087 | 0.480416687 | 0.490328371 |
| 0.003107558 | 0.163036141 | 0.48335187  | 0.315504104 |
| 0.521926612 | 0.499885493 | 0.459461859 | 0.349814461 |
| 0.001861398 | 0.468124962 | 0.450748513 | 0.478479853 |
| 0.496257915 | 0.439666408 | 0.217868363 | 0.107881846 |
| 0.346651394 | 0.150917738 | 0.175591474 | 0.465845432 |
| 0.211394061 | 0.501867665 | 0.25490528  | 0.28078432  |
| 0.242100284 | 0.160029475 | 0.29191247  | 0.328040248 |
| 0.171014538 | 0.300656884 | 0.409939216 | 0.41174743  |
| 0.230885438 | 0.462731726 | 0.481697155 | 0.053732989 |
| 0.411986915 | 0.460548479 | 0.471727469 | 0.00369555  |
| 0.492800688 | 0.014003488 | 0.238556036 | 0.26900331  |
| 0.249835015 | 0.253274527 | 0.300158603 | 0.353153208 |
| 0.434526143 | 0.289300967 | 0.353588675 | 0.300682106 |
| 0.211269462 | 0.300723141 | 0.456693705 | 0.459918144 |
| 0.337001419 | 0.193755097 | 0.159919125 | 0.157835298 |
| 0.08468602  | 0.508459372 | 0.310936546 | 0.138573915 |
| 0.284710431 | 0.447235777 | 0.39317474  | 0.520534672 |
| 0.451114005 | 0.189486611 | 0.395394568 | 0.516793519 |
| 0.303705705 | 0.398883078 | 0.115406745 | 0.495485756 |
| 0.306173896 | 0.251644793 | 0.507868666 | 0.425801276 |
| 0.488764866 | 0.416308514 | 0.310537071 | 0.464080981 |
| 0.442491822 | 0.408790894 | 0.444076316 | 0.117192257 |
| 0.255620119 | 0.200978829 | 0.301625539 | 0.004967518 |
| 0.429008565 | 0.386819786 | 0.521282315 | 0.515777322 |
| 0.33808529  | 0.427586303 | 0.452993662 | 0.14260078  |
| 0.408058233 | 0.248952926 | 0.205000433 | 0.512548501 |
| 0.26012147  | 0.259891059 | 0.349918539 | 0.475226278 |

|               |             |             |             |
|---------------|-------------|-------------|-------------|
| 0.496128869   | 0.489175352 | 0.295986794 | 0.320952254 |
| 0.303896248   | 0.297231601 | 0.49280248  | 0.207161454 |
| 0.509166197   | 0.219138087 | 0.469207298 | 0.352039683 |
| 0.262740696   | 0.52168461  | 0.108462636 | 0.528435141 |
| 0.379601514   | 0.202718155 | 0.497258213 | 0.401355116 |
| 0.401648137   | 0.159735724 | 0.221726631 | 0.48599656  |
| 0.28690599    | 0.400981705 | 0.024785579 | 0.073737629 |
| 0.385314981   | 0.377215882 | 0.488304792 | 0.427636136 |
| 0.28227128    | 0.383328077 | 0.201568367 | 0.378019164 |
| 0.513835004   | 0.526856521 | 0.318621516 | 0.307002902 |
| 0.416531155   | 0.15169394  | 0.514873851 | 0.021303721 |
| 0.487294614   | 0.490315232 | 0.464685968 | 0.085890347 |
| 0.035317233   | 0.24865268  | 0.490626553 | 0.124696625 |
| 0.4925196     | 0.258430173 | 0.447741962 | 0.517094573 |
| 0.249537746   | 0.527115815 | 0.153054353 | 0.474076553 |
| 0.084340267   | 0.329767258 | 0.440371952 | 0.44851621  |
| 0.273535277   | 0.331261975 | 0.437299854 | 0.272503611 |
| 0.054611132   | 0.316925514 | 0.002506297 | 0.425924395 |
| 0.503524126   | 0.386010314 | 0.270960427 | 0.399523076 |
| 0.33476062    | 0.440001849 | 0.277162669 | 0.500795937 |
| 0.020144004   | 0.420768796 | 0.26201538  | 0.493838821 |
| 0.300705503   | 0.43354919  | 0.089750516 | 0.352905755 |
| 0.494285744   | 0.326115183 | 0.314481599 | 0.382269067 |
| 0.513795513   | 0.468314009 | 0.256458939 | 0.268622513 |
| 0.469445824   | 0.115145698 | 0.50118508  | 0.532929502 |
| 0.222902589   | 0.247639149 | 0.488158471 | 0.258390349 |
| 0.352359042   | 0.454430189 | 0.489368422 | 0.526726881 |
| 0.090435386   | 0.311140315 | 0.483761501 | 0.483645175 |
| 0.351460564   | 0.191287458 | 0.281247811 | 0.265799216 |
| 0.490077027   | 0.156139915 | 0.292752707 | 0.441370118 |
| 0.248833487   | 0.372637746 | 0.44771481  | 0.220398069 |
| 0.057811865   | 0.221980636 | 0.469913558 | 0.209803593 |
| 0.354135387   | 0.426114282 | 0.276177737 | 0.417636136 |
| 0.182040133   | 0.041862967 | 0.451451669 | 0.020577003 |
| 0.467592657   | 0.466142071 | 0.315058505 | 0.409974542 |
| 0.263521762   | 0.436177108 | 0.444617903 | 0.002555029 |
| 0.466401166   | 0.067540605 | 0.363427915 | 0.268420914 |
| 0.330798517   | 0.090893899 | 0.477071919 | 0.505154979 |
| 0.410797403   | 0.412258662 | 0.416077002 | 0.482429727 |
| 0.174908381   | 0.401104369 | 0.392345523 | 0.516048982 |
| 0.259518197   | 0.483723662 | 0.490199311 | 0.452441172 |
| 0.476067001   | 0.359929462 |             |             |
| 4933421E11RIK | 0.009466443 | 0.275947431 | 0.009161718 |
| 0.011885496   | 0.164207937 | 0.169837369 | 0.002835819 |
| 0.010177204   | 0.170172655 | 0.116661774 | 0.186135896 |
| 0.000238226   | 0.043574727 | 0.289394792 | 0.002529236 |
| 0.230027673   | 0.000884315 | 0.012895378 | 0.00545838  |
| 0.015186459   | 0.126675691 | 0.137358613 | 0.168153345 |
| 0.113694714   | 0.063416855 | 0.131585369 | 0.250619627 |
| 0.353236531   | 1           | 0.335470884 | 0.049154655 |
| 0.202816104   | 0.201184774 | 0.290341365 | 0.000239228 |
| 0.211133832   | 0.001071886 | 0.203825449 | 0.058178612 |
| 0.041692252   | 0.158191308 | 0.168697138 | 0.064043665 |
| 0.150747826   | 0.002398674 | 0.095319366 | 0.254770399 |

|             |             |             |             |
|-------------|-------------|-------------|-------------|
| 0.120334146 | 0.054561613 | 0.010255219 | 0.271191712 |
| 0.089435076 | 0.17184181  | 0.270613429 | 0.000171539 |
| 0.250031653 | 0.086947519 | 0.181765163 | 0.323480478 |
| 0.062962425 | 0.019674295 | 0.068016181 | 0.059717517 |
| 0.211036675 | 0.194780306 | 0.085122072 | 0.112956022 |
| 0.325868095 | 0.065479159 | 0.32058613  | 0.017389206 |
| 0.119565206 | 0.001268491 | 0.038917807 | 0.013116289 |
| 0.131157384 | 0.054312608 | 0.194110457 | 0.146457602 |
| 0.277282076 | 0.282497978 | 0.064725037 | 0.290247045 |
| 0.013545948 | 0.213050079 | 0.079580426 | 0.122834044 |
| 0.169556057 | 0.004587601 | 0.258853218 | 0.304260476 |
| 0.003039211 | 0.226804462 | 0.206655017 | 0.026702622 |
| 0.294598972 | 0.097097192 | 0.245053186 | 0.110258318 |
| 0.239983906 | 0.16743595  | 0.257013202 | 0.11722867  |
| 0.15394003  | 0.011530404 | 0.271670823 | 0.230911346 |
| 0.119336891 | 0.013365914 | 0.034947898 | 0.369222753 |
| 0.226921497 | 0.354153904 | 0.277900326 | 0.169004821 |
| 0.212177475 | 0.33430528  | 0.224611079 | 0.252689111 |
| 0.069256475 | 0.339673359 | 0.046521459 | 0.001991669 |
| 0.007983989 | 0.007855441 | 0.039215199 | 0.125257755 |
| 0.362340981 | 0.144264359 | 0.036082688 | 0.060873252 |
| 0.320491235 | 0.285394995 | 0.334162329 | 0.239341585 |
| 0.002188261 | 0.090988432 | 0.204704702 | 0.064480574 |
| 0.189203803 | 0.017441554 | 0.159169208 | 0.282453287 |
| 0.204437321 | 0.305609305 | 0.025026644 | 0.256373518 |
| 0.032074285 | 0.31155095  | 0.33326918  | 0.036070361 |
| 0.298667673 | 0.285688767 | 0.328520619 | 0.333311746 |
| 0.28263011  | 0.130648008 | 0.00666579  | 0.19126658  |
| 0.303068138 | 0.006881175 | 0.36530072  | 0.368410277 |
| 0.314942905 | 0.366739388 | 0.332606078 | 0.366797499 |
| 0.328476472 | 0.009060131 | 0.005664472 | 0.114711405 |
| 0.29963818  | 0.225073997 | 0.013477268 | 0.257065834 |
| 0.207824488 | 0.15822888  | 0.308150443 | 0.066023729 |
| 0.287272719 | 0.313955419 | 0.367458136 | 0.209634398 |
| 0.09513064  | 0.138912866 | 0.287820026 | 0.265538259 |
| 0.001403946 | 0.018816093 | 0.008624859 | 0.118549054 |
| 0.105914493 | 0.040099845 | 0.116139406 | 0.161695364 |
| 0.051775232 | 0.104486447 | 0.244850776 | 0.271158859 |
| 0.009571278 | 0.299774939 | 0.031512668 | 0.032030562 |
| 0.001521831 | 0.037610339 | 0.014089742 | 0.021095865 |
| 0.084483965 | 0.078391179 | 0.336035456 | 0.329372142 |
| 0.114739259 | 0.055728372 | 0.263348204 | 0.286494041 |
| 0.226036502 | 0.247941946 | 0.072017689 | 0.000431922 |
| 0.028109503 | 0.133431053 | 0.110532518 | 0.290263569 |
| 0.052987802 | 0.026701119 | 0.189496179 | 0.297382258 |
| 0.092015675 | 0.022737763 | 0.117789175 | 0.216940907 |
| 0.039496182 | 0.118004935 | 0.294376049 | 0.205155513 |
| 0.000920812 | 0.103577378 | 0.322106318 | 0.012225882 |
| 0.115252322 | 0.047047041 | 0.138702689 | 0.303961008 |
| 0.080973009 | 0.075788829 | 0.375961825 | 0.282904439 |
| 0.062416072 | 0.076901339 | 0.339123665 | 0.016469972 |
| 0.166722963 | 0.005106963 | 0.115573673 | 0.163933543 |
| 0.071407524 | 0.10833996  | 0.208548999 | 0.09169983  |
| 0.03690449  | 0.324677805 | 0.228497119 | 0.358904014 |

|             |             |             |             |
|-------------|-------------|-------------|-------------|
| 0.126812414 | 0.330008367 | 0.348997587 | 0.289719355 |
| 0.169076598 | 0.18686217  | 0.083212509 | 0.295345568 |
| 0.308868962 | 0.032510031 | 0.014580238 | 0.348823222 |
| 0.134580172 | 0.26898487  | 0.00882031  | 0.311793359 |
| 0.269068728 | 0.285815582 | 0.02123237  | 0.214602658 |
| 0.217268199 | 0.071668431 | 0.256273063 | 0.327385608 |
| 0.073820604 | 0.160434828 | 0.106598213 | 0.244125644 |
| 0.043389157 | 0.047161145 | 0.133755273 | 0.112896851 |
| 0.036196531 | 0.010606919 | 0.008668105 | 0.034771432 |
| 0.076512808 | 0.316436457 | 0.214764473 | 0.3341088   |
| 0.01745126  | 0.255985463 | 0.070157489 | 0.067537588 |
| 0.225369268 | 0.153392332 | 0.296502431 | 0.249529594 |
| 0.078216563 | 0.000632461 | 0.009751956 | 0.277681187 |
| 0.004543058 | 0.119598427 | 0.095444455 | 0.000269313 |
| 0.002391814 | 0.29804544  | 0.020396915 | 0.05945437  |
| 0.341063044 | 0.063301574 | 0.055791863 | 0.086860088 |
| 0.185013284 | 0.013459151 | 0.000236411 | 0.312174011 |
| 0.291675551 | 0.261484116 | 0.289616436 | 0.253868881 |
| 0.260788482 | 0.257850667 | 0.253023322 | 0.165206927 |
| 0.007148734 | 0.009264339 | 0.052970303 | 0.078248625 |
| 0.000539462 | 0.232230697 | 0.12413291  | 0.032840728 |
| 0.307147592 | 0.104127331 | 0.002164268 | 0.216658526 |
| 0.000817495 | 0.161087817 | 0.047014764 | 0.041805621 |
| 0.192205315 | 2.92E-05    | 0.050554647 | 0.062491519 |
| 0.258098472 | 0.169737218 | 0.185923111 | 0.33469157  |
| 0.142495709 | 0.033508235 | 0.104274673 | 0.281636486 |
| 0.004535026 | 0.011910294 | 0.09918761  | 0.018938038 |
| 0.054221054 | 0.250723814 | 0.131470936 | 0.002475065 |
| 0.087104489 | 0.000483936 | 0.192686805 | 0.334250736 |
| 0.296391004 | 0.351346204 | 0.337955415 | 0.191938873 |
| 0.324769454 | 0.075216084 | 0.36236433  | 0.241816642 |
| 0.171059806 | 6.86E-05    | 0.00016827  | 0.358964957 |
| 0.213760571 | 0.011845557 | 0.03437068  | 0.084214073 |
| 0.008525797 | 0.025234281 | 0.00542091  | 0.054712281 |
| 0.28710311  | 0.099223493 | 0.05387334  | 0.274218403 |
| 0.051032775 | 0.064371739 | 0.150047449 | 0.015422758 |
| 0.273733427 | 0.002632839 | 0.013521286 | 0.001446067 |
| 0.212773387 | 0.028658619 | 0.24435786  | 0.336894853 |
| 0.289763495 | 0.249870481 | 0.182230151 | 0.070924209 |
| 0.286085454 | 0.028206148 | 0.093822511 | 0.026446597 |
| 0.320329355 | 0.216365548 | 0.149603724 | 0.13645195  |
| 0.305126117 | 0.272502328 | 0.001368604 | 0.235153532 |
| 0.001113538 | 0.000174338 | 0.158310568 | 0.086549416 |
| 0.006903695 | 0.161226    | 0.087769577 | 0.034604443 |
| 0.039598876 | 0.001229946 | 0.137023587 | 0.108882378 |
| 0.102994493 | 0.131764469 | 0.14961325  | 0.077285037 |
| 0.069373258 | 0.010458684 | 0.038664908 | 0.018108197 |
| 0.025039067 | 0.129956741 | 0.065332042 | 0.000161398 |
| 0.235240079 | 0.257870275 | 0.005647989 | 0.038782286 |
| 0.301811688 | 0.35750257  | 0.000704922 | 0.000124867 |
| 0.096987996 | 0.087986912 | 0.35943914  | 0.341660814 |
| 0.310191512 | 0.307460736 | 0.183602555 | 0.010505708 |
| 0.006130279 | 0.121876118 | 0.160598964 | 0.007485139 |
| 0.348059342 | 0.009820273 | 0.314753143 | 0.22547395  |

|             |             |             |             |
|-------------|-------------|-------------|-------------|
| 0.019355391 | 0.032376774 | 0.001143857 | 0.009364749 |
| 0.322098038 | 0.044134815 | 0.041708121 | 0.039445802 |
| 0.088871493 | 0.07822031  | 0.002418592 | 0.045374668 |
| 0.150496022 | 0.037114406 | 0.032232768 | 0.075045044 |
| 0.175667113 | 0.032884504 | 0.298136848 | 0.236098247 |
| 0.029750479 | 0.01455137  | 0.048343052 | 0.221898805 |
| 0.323180721 | 0.262928838 | 0.004418123 | 0.308154213 |
| 0.330883986 | 0.333500804 | 0.31716582  | 0.210262945 |
| 0.012474541 | 0.233144324 | 0.14345998  | 0.138168274 |
| 0.03947361  | 0.17541444  | 0.057191429 | 0.006893384 |
| 0.117939412 | 0.24807182  | 0.235464142 | 0.036088984 |
| 0.275941984 | 0.028439478 | 0.007721014 | 0.322088178 |
| 0.045758776 | 0.004888806 | 0.19161621  | 0.315486848 |
| 0.000369484 | 0.101683418 | 0.312065254 | 0.057200978 |
| 0.294275539 | 0.317848328 | 0.242897213 | 0.044440881 |
| 0.000132484 | 0.278309397 | 0.205359332 | 0.155044651 |
| 0.272675138 | 0.177692542 | 0.013521692 | 0.004671254 |
| 0.116372409 | 0.019270323 | 0.009674915 | 0.057714352 |
| 0.031470291 | 0.214566006 | 0.053774843 | 0.044132395 |
| 0.039349943 | 0.017018629 | 0.08201409  | 0.059263587 |
| 0.019992678 | 0.080897986 | 0.171338288 | 0.10630365  |
| 0.053052861 | 0.25453836  | 0.221541133 | 0.001199197 |
| 0.24542035  | 0.230580537 | 0.267774175 | 0.000422068 |
| 0.310167177 | 0.000388489 | 0.050949374 | 0.061787498 |
| 0.043564954 | 0.042418028 | 0.095869074 | 0.078938025 |
| 0.134266131 | 0.040011562 | 0.078566708 | 0.078828052 |
| 0.028736101 | 0.046130614 | 0.204637467 | 0.100912271 |
| 0.098777734 | 0.017965493 | 0.023620917 | 0.02631068  |
| 0.003135971 | 0.337391917 | 0.090863037 | 0.016137596 |
| 0.067708477 | 0.095070288 | 0.162976515 | 0.320737704 |
| 0.249005869 | 0.03396917  | 0.095174264 | 0.315700046 |
| 0.054547281 | 0.040972199 | 0.004537405 | 0.162006965 |
| 0.064981694 | 0.052178647 | 0.202112742 | 0.116463555 |
| 0.242758908 | 0.195830649 | 0.090724566 | 0.250367465 |
| 0.125685397 | 0.119059026 | 0.14824344  | 0.006691895 |
| 0.031423132 | 0.026888436 | 0.131156421 | 0.000941881 |
| 0.16132651  | 0.029171473 | 0.357080209 | 0.293603538 |
| 0.190597188 | 0.203600452 | 0.065562869 | 0.006874617 |
| 0.073798881 | 0.060287939 | 0.030965989 | 0.304658828 |
| 0.192950108 | 0.032487235 | 0.125145411 | 0.094412663 |
| 0.293663522 | 0.268261071 | 0.062719451 | 0.050731883 |
| 0.057692648 | 0.054242889 | 0.247676398 | 0.018624038 |
| 0.275114005 | 0.052692123 | 0.190214115 | 0.095714491 |
| 0.049598457 | 0.351666452 | 0.007112701 | 0.367706698 |
| 0.112946809 | 0.032308411 | 0.265799049 | 0.106950274 |
| 0.042501002 | 0.011742946 | 0.146792008 | 0.127079198 |
| 0.026711398 | 0.209276224 | 0.009881703 | 0.011201406 |
| 0.157733645 | 0.078567868 | 0.252640667 | 0.176217137 |
| 0.081637524 | 0.157411619 | 0.074105736 | 0.06700905  |
| 0.296283677 | 0.277044018 | 0.027442691 | 0.077989795 |
| 0.155319172 | 0.013386856 | 0.245811471 | 0.001468685 |
| 0.266051993 | 0.333555722 | 0.113002998 | 0.003115819 |
| 1.72E-05    | 0.131003302 | 0.210900248 | 0.008671599 |
| 0.330143092 | 0.095468998 | 0.167957763 | 0.317668418 |



|               |             |             |             |
|---------------|-------------|-------------|-------------|
| 0.044084263   | 0.272108132 | 0.014535465 | 0.27262023  |
| 0.000872319   | 0.077561704 | 0.224445253 | 0.171704269 |
| 0.048358044   | 0.138324187 | 0.204536725 | 0.14351317  |
| 0.001173956   | 0.038390877 | 0.003133608 | 0.191115257 |
| 0.252978164   | 0.168669708 | 0.062199277 | 0.112697984 |
| 0.110580271   | 0.201929451 | 0.026257212 | 0.270098438 |
| 0.000123011   | 0.243054176 | 0.051882298 | 0.276268059 |
| 0.071290157   | 0.139974543 | 0.002568788 | 0.140983326 |
| 0.231701201   | 0.033384002 | 0.086932615 | 0.063283134 |
| 0.320500912   | 0.225875753 | 0.050574638 | 0.033349915 |
| 0.218225935   | 0.00894467  | 0.182854294 | 0.326675835 |
| 0.039416898   | 0.111730632 | 0.327254449 | 0.032545764 |
| 0.184079401   | 0.216567081 | 0.256504762 | 0.315512915 |
| 0.005418601   | 0.080363325 | 0.288579978 | 0.272275051 |
| 0.132278882   | 0.054660667 | 0.118062331 | 0.060276974 |
| 0.286769774   | 0.008535223 | 0.051896716 | 0.16044463  |
| 0.10353205    | 0.131892191 | 0.16638321  | 0.052595698 |
| 0.001935344   | 0.018082953 | 0.135846341 | 0.027970832 |
| 0.098699961   | 0.151152988 | 0.049896747 | 0.192606268 |
| 0.016788227   | 0.001160784 | 0.238176992 | 0.006422357 |
| 0.160393389   | 0.258654861 | 0.076624731 | 0.152557759 |
| 0.062312992   | 0.132429137 | 0.111638186 | 0.00061136  |
| 0.249211907   | 0.006767701 | 0.094606831 | 0.053633368 |
| 0.055675447   | 0.002798588 | 0.277786135 | 0.35238016  |
| 0.128078574   | 0.060526728 | 0.118048897 | 0.285863728 |
| 0.037411784   | 0.207013811 | 0.14388929  | 0.239873957 |
| 0.143080368   | 0.204824252 | 0.221216953 | 0.232282253 |
| 0.206251475   | 0.065318259 |             |             |
| 5830405N20RIK | 0.068378457 | 0.418967382 | 0.053764342 |
| 0.163557608   | 0.29972018  | 0.38485995  | 0.04290134  |
| 0.102443012   | 0.294497009 | 0.247876257 | 0.353100781 |
| 0.015171827   | 0.133833537 | 0.458677511 | 0.040425547 |
| 0.341411213   | 0.028848547 | 0.086167469 | 0.058767726 |
| 0.186650837   | 0.26628999  | 0.373227304 | 0.313398418 |
| 0.26263613    | 0.170830659 | 0.268382931 | 0.333391484 |
| 0.517123264   | 0.335470884 | 1           | 0.211710071 |
| 0.399172884   | 0.313985103 | 0.377096303 | 0.015059745 |
| 0.361382028   | 0.009684041 | 0.408206492 | 0.242439528 |
| 0.219234765   | 0.328756373 | 0.285804892 | 0.246211176 |
| 0.294501919   | 0.033181742 | 0.232084228 | 0.32511924  |
| 0.254236434   | 0.2427699   | 0.052608016 | 0.376965161 |
| 0.291367041   | 0.296494337 | 0.339613736 | 0.001773108 |
| 0.342329838   | 0.142886966 | 0.262489226 | 0.514889663 |
| 0.177178284   | 0.112807596 | 0.249396785 | 0.195311149 |
| 0.303014874   | 0.295923276 | 0.208077728 | 0.289574521 |
| 0.512323198   | 0.202302457 | 0.391446071 | 0.181252197 |
| 0.30872213    | 0.021401824 | 0.1264395   | 0.058816167 |
| 0.343220757   | 0.188069036 | 0.338480619 | 0.309297178 |
| 0.417327489   | 0.501922227 | 0.1883218   | 0.487011298 |
| 0.088136369   | 0.311980016 | 0.279539899 | 0.253699411 |
| 0.287548585   | 0.055584122 | 0.388824728 | 0.519811364 |
| 0.033235728   | 0.297669825 | 0.318610587 | 0.089602654 |
| 0.440166765   | 0.266214723 | 0.333245232 | 0.243084313 |
| 0.330588498   | 0.300478448 | 0.450111501 | 0.248193251 |

|             |             |             |             |
|-------------|-------------|-------------|-------------|
| 0.304380318 | 0.055851097 | 0.469240589 | 0.31422782  |
| 0.324909366 | 0.072046056 | 0.206945777 | 0.473249713 |
| 0.352730401 | 0.517043558 | 0.397305771 | 0.307633652 |
| 0.335041512 | 0.519706079 | 0.3602601   | 0.40538072  |
| 0.167005952 | 0.52998565  | 0.175166496 | 0.039518207 |
| 0.057627242 | 0.077455858 | 0.188727669 | 0.271158901 |
| 0.502004786 | 0.277346397 | 0.172955692 | 0.212270123 |
| 0.467720615 | 0.468062177 | 0.519844172 | 0.385522148 |
| 0.032372959 | 0.242598233 | 0.343242438 | 0.256556822 |
| 0.299655451 | 0.084824943 | 0.282282832 | 0.494563134 |
| 0.385117863 | 0.434251601 | 0.140384651 | 0.478530373 |
| 0.146403824 | 0.525064724 | 0.465922955 | 0.157360869 |
| 0.515924788 | 0.492024917 | 0.528745353 | 0.381727884 |
| 0.482131488 | 0.322941306 | 0.041438857 | 0.34156285  |
| 0.501835751 | 0.025825587 | 0.490957765 | 0.516886506 |
| 0.501698011 | 0.478328625 | 0.526887695 | 0.533319574 |
| 0.507363508 | 0.055568429 | 0.021803746 | 0.244708328 |
| 0.503417371 | 0.403063288 | 0.114848486 | 0.357972889 |
| 0.316548558 | 0.344658219 | 0.4067107   | 0.323395265 |
| 0.506389608 | 0.472294439 | 0.506261854 | 0.338496665 |
| 0.221601825 | 0.300581154 | 0.343109301 | 0.460483997 |
| 0.040868435 | 0.105385031 | 0.04275138  | 0.24420361  |
| 0.327871929 | 0.1547706   | 0.31582452  | 0.2820368   |
| 0.166845942 | 0.274868273 | 0.351632801 | 0.342096299 |
| 0.041361882 | 0.383343733 | 0.144535122 | 0.13252985  |
| 0.037501937 | 0.119506783 | 0.176613909 | 0.171650564 |
| 0.23453556  | 0.20398472  | 0.389581517 | 0.503151704 |
| 0.286897384 | 0.149613094 | 0.36477454  | 0.48593334  |
| 0.42180177  | 0.367746413 | 0.178813866 | 0.018258832 |
| 0.234640508 | 0.262645544 | 0.21840947  | 0.366118563 |
| 0.153373696 | 0.193922239 | 0.315128142 | 0.38891106  |
| 0.246667397 | 0.107874786 | 0.314030421 | 0.418074463 |
| 0.113346991 | 0.329827042 | 0.453280398 | 0.318179762 |
| 0.003119843 | 0.284757086 | 0.452129751 | 0.135132333 |
| 0.233517635 | 0.189922912 | 0.34426693  | 0.469298263 |
| 0.278761694 | 0.216204611 | 0.519708971 | 0.375249833 |
| 0.325160935 | 0.189723071 | 0.531366306 | 0.045507765 |
| 0.291387955 | 0.076627767 | 0.246012912 | 0.268394158 |
| 0.211943516 | 0.232457357 | 0.31213458  | 0.291910069 |
| 0.112039059 | 0.516240107 | 0.384875717 | 0.531479668 |
| 0.322164526 | 0.530820918 | 0.476017263 | 0.456270303 |
| 0.308848485 | 0.29954581  | 0.188909471 | 0.437529882 |
| 0.46694471  | 0.237848076 | 0.056265112 | 0.422400036 |
| 0.279727332 | 0.346921597 | 0.121242559 | 0.50537613  |
| 0.490199362 | 0.458761363 | 0.135652283 | 0.344762464 |
| 0.381993224 | 0.22065806  | 0.405711824 | 0.52765915  |
| 0.243617579 | 0.301030622 | 0.308082592 | 0.400929405 |
| 0.149367842 | 0.199187002 | 0.285899247 | 0.225563323 |
| 0.03387626  | 0.062752721 | 0.053780407 | 0.158246534 |
| 0.211065209 | 0.345651561 | 0.32855638  | 0.521852549 |
| 0.100833075 | 0.428098022 | 0.170593605 | 0.274336387 |
| 0.403041215 | 0.299120931 | 0.372971411 | 0.345996489 |
| 0.19462634  | 0.024115151 | 0.131546531 | 0.502864585 |
| 0.028039724 | 0.289852965 | 0.250075626 | 0.00468412  |

|             |             |             |             |
|-------------|-------------|-------------|-------------|
| 0.034227292 | 0.387526671 | 0.075294918 | 0.171731782 |
| 0.496897945 | 0.177379673 | 0.164919636 | 0.245026574 |
| 0.309118216 | 0.079586436 | 0.007118422 | 0.484183758 |
| 0.469571012 | 0.433440514 | 0.464736593 | 0.433933052 |
| 0.416907421 | 0.361974156 | 0.389345945 | 0.320874819 |
| 0.087517071 | 0.071207212 | 0.217148806 | 0.250690509 |
| 0.004044766 | 0.375496711 | 0.271275029 | 0.116562996 |
| 0.392423044 | 0.227229256 | 0.034265707 | 0.313936808 |
| 0.025329139 | 0.265003223 | 0.235457252 | 0.179109644 |
| 0.30835058  | 0.011907353 | 0.278527259 | 0.289946581 |
| 0.436054921 | 0.326878576 | 0.354276477 | 0.536695105 |
| 0.31275046  | 0.094833519 | 0.295147822 | 0.384062798 |
| 0.05772616  | 0.082500741 | 0.279782542 | 0.055848651 |
| 0.238232473 | 0.431266549 | 0.325069508 | 0.063309923 |
| 0.23704676  | 0.004809288 | 0.360983924 | 0.534845264 |
| 0.467359351 | 0.53155239  | 0.52325694  | 0.319314038 |
| 0.518673485 | 0.148129692 | 0.542104597 | 0.390904653 |
| 0.311453528 | 0.001444984 | 0.005970179 | 0.510877945 |
| 0.353481259 | 0.044507489 | 0.132984316 | 0.380347282 |
| 0.109951687 | 0.125479709 | 0.055532632 | 0.210359755 |
| 0.382367365 | 0.240775725 | 0.195564273 | 0.453965429 |
| 0.206363832 | 0.197094986 | 0.31465407  | 0.063601537 |
| 0.374628859 | 0.049930177 | 0.060416365 | 0.014819607 |
| 0.320563011 | 0.09233613  | 0.445334276 | 0.517111535 |
| 0.499068567 | 0.354426826 | 0.296652519 | 0.340323534 |
| 0.427029494 | 0.078100381 | 0.357635008 | 0.089835511 |
| 0.492264921 | 0.334287426 | 0.297919644 | 0.291385498 |
| 0.503992132 | 0.470745734 | 0.026211084 | 0.37832657  |
| 0.022194604 | 0.002615451 | 0.328088523 | 0.199332059 |
| 0.047462007 | 0.315820645 | 0.217350792 | 0.169497355 |
| 0.188181705 | 0.032090014 | 0.272086224 | 0.248132167 |
| 0.252851181 | 0.303586544 | 0.278377481 | 0.18256448  |
| 0.243093865 | 0.124814454 | 0.189987284 | 0.12362334  |
| 0.187378962 | 0.279829113 | 0.174491206 | 0.014863763 |
| 0.363453459 | 0.373063309 | 0.050287001 | 0.129401313 |
| 0.461289216 | 0.514941114 | 0.030826878 | 0.014822934 |
| 0.229327079 | 0.252930259 | 0.520765473 | 0.50865966  |
| 0.519418897 | 0.519191601 | 0.375529771 | 0.106390756 |
| 0.061238111 | 0.274602936 | 0.284868435 | 0.102553229 |
| 0.523948683 | 0.046681223 | 0.493122075 | 0.311351925 |
| 0.088135408 | 0.195629489 | 0.037509864 | 0.066152722 |
| 0.371188122 | 0.147024395 | 0.169691829 | 0.122616055 |
| 0.275493787 | 0.289316278 | 0.03581118  | 0.166647791 |
| 0.295130619 | 0.204596829 | 0.128739105 | 0.258184686 |
| 0.32300589  | 0.169482903 | 0.387685066 | 0.440372372 |
| 0.106725224 | 0.081144423 | 0.256067525 | 0.334083796 |
| 0.442258458 | 0.321964198 | 0.044054125 | 0.448652838 |
| 0.502741915 | 0.382057977 | 0.506182155 | 0.372590779 |
| 0.06176351  | 0.368515995 | 0.274797077 | 0.284237938 |
| 0.14386794  | 0.372196353 | 0.191633074 | 0.048031705 |
| 0.263676385 | 0.45512237  | 0.401407187 | 0.164710605 |
| 0.363975464 | 0.09575712  | 0.040101631 | 0.449786968 |
| 0.199911944 | 0.082871325 | 0.301985332 | 0.418609272 |
| 0.003489632 | 0.197022711 | 0.486570656 | 0.244707441 |

|             |             |             |             |
|-------------|-------------|-------------|-------------|
| 0.504137305 | 0.494730543 | 0.442572351 | 0.217409748 |
| 0.001640468 | 0.347353593 | 0.34637088  | 0.369046331 |
| 0.422779582 | 0.318977449 | 0.13308932  | 0.071264796 |
| 0.261811289 | 0.065084311 | 0.115835723 | 0.35004965  |
| 0.173899514 | 0.323585942 | 0.155010487 | 0.152339791 |
| 0.176905241 | 0.06034269  | 0.302387316 | 0.231645918 |
| 0.135130555 | 0.200367694 | 0.327082081 | 0.246575526 |
| 0.217765071 | 0.413478391 | 0.365508084 | 0.023955871 |
| 0.342599868 | 0.382974375 | 0.434102239 | 0.001599505 |
| 0.397943459 | 0.006690792 | 0.184217926 | 0.22118176  |
| 0.190689833 | 0.175071101 | 0.226217312 | 0.293841048 |
| 0.267081143 | 0.185439698 | 0.27867471  | 0.211604645 |
| 0.172220024 | 0.186545022 | 0.339588426 | 0.290143432 |
| 0.303488312 | 0.120224578 | 0.082860786 | 0.088393433 |
| 0.060907762 | 0.476551862 | 0.222991181 | 0.059278429 |
| 0.190969761 | 0.284844495 | 0.339804381 | 0.49380304  |
| 0.426004819 | 0.097918863 | 0.269185324 | 0.459863289 |
| 0.198546365 | 0.279105372 | 0.048699173 | 0.334024575 |
| 0.205355583 | 0.241006597 | 0.340252863 | 0.249641421 |
| 0.335591571 | 0.391619125 | 0.216873308 | 0.438903411 |
| 0.338246565 | 0.255778518 | 0.277260931 | 0.092138081 |
| 0.157028328 | 0.09618202  | 0.267114168 | 0.002364778 |
| 0.296801565 | 0.256436257 | 0.492292237 | 0.489589693 |
| 0.305549652 | 0.380784678 | 0.307533727 | 0.078811017 |
| 0.260608034 | 0.158084106 | 0.110070758 | 0.40445898  |
| 0.275529019 | 0.177024465 | 0.281165784 | 0.316313813 |
| 0.403377395 | 0.362476528 | 0.23118258  | 0.191451956 |
| 0.187667968 | 0.162539848 | 0.445949583 | 0.104554862 |
| 0.35473854  | 0.220475816 | 0.273833628 | 0.271176259 |
| 0.195936407 | 0.526627615 | 0.049215543 | 0.537594758 |
| 0.281099367 | 0.102341152 | 0.483634161 | 0.2604243   |
| 0.268358766 | 0.139945629 | 0.240136647 | 0.310866697 |
| 0.184731499 | 0.360014152 | 0.016052619 | 0.06309805  |
| 0.29110929  | 0.228702776 | 0.360212494 | 0.298642227 |
| 0.244853298 | 0.301044828 | 0.227785151 | 0.219425751 |
| 0.47219056  | 0.480885487 | 0.238374866 | 0.20149105  |
| 0.287768266 | 0.098115872 | 0.342216191 | 0.010345039 |
| 0.350138139 | 0.363101962 | 0.318783029 | 0.043701411 |
| 0.014554681 | 0.246718358 | 0.330826169 | 0.04469919  |
| 0.491930145 | 0.281193634 | 0.263403964 | 0.405843739 |
| 0.12706108  | 0.481393804 | 0.117776529 | 0.387571537 |
| 0.02737996  | 0.202134226 | 0.341002081 | 0.296217019 |
| 0.25075596  | 0.292589489 | 0.349134011 | 0.281426286 |
| 0.028579762 | 0.263505975 | 0.000292532 | 0.390661971 |
| 0.44724556  | 0.302602139 | 0.170121447 | 0.25155956  |
| 0.2381028   | 0.358373725 | 0.204584994 | 0.366740451 |
| 0.014348704 | 0.346053642 | 0.170480194 | 0.429615452 |
| 0.264531166 | 0.267831141 | 0.065375139 | 0.268035296 |
| 0.432650199 | 0.240223596 | 0.208876991 | 0.28606705  |
| 0.496005821 | 0.363883725 | 0.133613522 | 0.228390867 |
| 0.287630335 | 0.047364101 | 0.341661955 | 0.524851028 |
| 0.168833388 | 0.251379452 | 0.459938235 | 0.18274165  |
| 0.303669337 | 0.374708207 | 0.326478018 | 0.506725746 |
| 0.069704025 | 0.206558425 | 0.408402579 | 0.444925759 |

|               |             |             |             |
|---------------|-------------|-------------|-------------|
| 0.270189256   | 0.180111223 | 0.273743916 | 0.21382195  |
| 0.462573801   | 0.115132845 | 0.235149545 | 0.309010227 |
| 0.239982435   | 0.259899009 | 0.254936887 | 0.187970441 |
| 0.040741286   | 0.134825134 | 0.382971571 | 0.112808735 |
| 0.245750465   | 0.324058155 | 0.226536691 | 0.382367901 |
| 0.168830181   | 0.034432925 | 0.446487646 | 0.026430087 |
| 0.313705757   | 0.368611654 | 0.21195499  | 0.324829705 |
| 0.166548664   | 0.274318972 | 0.260363158 | 0.00076935  |
| 0.392179207   | 0.069783456 | 0.266620095 | 0.240653799 |
| 0.269693104   | 0.039392034 | 0.46657773  | 0.529690867 |
| 0.261231973   | 0.313603179 | 0.348888456 | 0.458903094 |
| 0.190847862   | 0.323999646 | 0.298869528 | 0.332821727 |
| 0.26763912    | 0.319039319 | 0.354669012 | 0.384718804 |
| 0.340925826   | 0.232707443 |             |             |
| 5830443L24RIK | 0.009472759 | 0.263029921 | 0.014514476 |
| 0.01045689    | 0.091842729 | 0.10786537  | 0.003624402 |
| 0.008339994   | 0.177352363 | 0.14046318  | 0.102958633 |
| 0.000403932   | 0.00330207  | 0.214082735 | 0.002406431 |
| 0.141820292   | 0.000869796 | 0.012661518 | 0.00115239  |
| 0.008652994   | 0.064369527 | 0.045886826 | 0.113475598 |
| 0.063131502   | 0.072380574 | 0.146582461 | 0.149033426 |
| 0.308161094   | 0.049154655 | 0.211710071 | 1           |
| 0.18427073    | 0.096386083 | 0.151953348 | 0.001585899 |
| 0.1172681     | 5.49E-05    | 0.210309958 | 0.044799048 |
| 0.012316591   | 0.134038059 | 0.232334498 | 0.043540387 |
| 0.201298392   | 0.004252728 | 0.060860159 | 0.184936381 |
| 0.154548921   | 0.046042372 | 0.013648809 | 0.241300959 |
| 0.073810355   | 0.117429682 | 0.284632538 | 0.000519388 |
| 0.087209584   | 0.023065102 | 0.059997374 | 0.288531204 |
| 0.050083734   | 0.013263014 | 0.051288924 | 0.043829384 |
| 0.137245794   | 0.135912437 | 0.06611904  | 0.120017684 |
| 0.262277444   | 0.016253008 | 0.257339802 | 0.005624169 |
| 0.090772652   | 0.003614943 | 0.041714668 | 0.024310657 |
| 0.090273937   | 0.034186883 | 0.081686718 | 0.086168148 |
| 0.291730887   | 0.24503674  | 0.067146449 | 0.293724761 |
| 0.00223143    | 0.109255982 | 0.049057983 | 0.094391613 |
| 0.133846822   | 0.00590501  | 0.180453235 | 0.26828065  |
| 0.004604757   | 0.22096888  | 0.165456905 | 0.029793922 |
| 0.252782595   | 0.046831043 | 0.23015298  | 0.024425162 |
| 0.151674377   | 0.099725096 | 0.234808346 | 0.08448522  |
| 0.066050575   | 0.018425912 | 0.268139985 | 0.105221441 |
| 0.054027298   | 0.023225646 | 0.022901163 | 0.267210969 |
| 0.188909943   | 0.276524469 | 0.231719513 | 0.132637384 |
| 0.13072518    | 0.282144088 | 0.19972908  | 0.188159417 |
| 0.019919682   | 0.293098983 | 0.05038648  | 0.001099379 |
| 0.011013772   | 0.004896311 | 0.022204057 | 0.099633439 |
| 0.274374329   | 0.099512779 | 0.030655471 | 0.046202351 |
| 0.228295464   | 0.276791968 | 0.298869533 | 0.177139758 |
| 0.003189987   | 0.04401484  | 0.155854406 | 0.038706827 |
| 0.117290674   | 0.018980725 | 0.064388211 | 0.262959819 |
| 0.16929932    | 0.210301431 | 0.030123395 | 0.243256634 |
| 0.023962971   | 0.252238413 | 0.311783539 | 0.032202597 |
| 0.28094312    | 0.27196504  | 0.261108628 | 0.178294467 |
| 0.242763892   | 0.122125586 | 0.000538744 | 0.162836686 |

|             |             |             |             |
|-------------|-------------|-------------|-------------|
| 0.21575402  | 0.000624618 | 0.275238999 | 0.286621892 |
| 0.301030766 | 0.270782837 | 0.260351099 | 0.283120952 |
| 0.289252496 | 0.013775057 | 0.001116696 | 0.069580109 |
| 0.286574466 | 0.197596233 | 0.006726078 | 0.175688675 |
| 0.105412342 | 0.106654979 | 0.209111449 | 0.011959415 |
| 0.223523592 | 0.268776997 | 0.286745948 | 0.158814191 |
| 0.117038119 | 0.117505623 | 0.162657045 | 0.262930877 |
| 0.002246948 | 0.018286866 | 0.014811962 | 0.093365698 |
| 0.144777354 | 0.030648546 | 0.087772614 | 0.099207266 |
| 0.038553171 | 0.078150516 | 0.099197918 | 0.141079485 |
| 0.018623282 | 0.189388108 | 0.043005087 | 0.037821384 |
| 0.002040924 | 0.042745666 | 0.007139398 | 0.012343208 |
| 0.0399036   | 0.097285967 | 0.208121134 | 0.281962242 |
| 0.076663992 | 0.069798233 | 0.184051949 | 0.221360846 |
| 0.164037511 | 0.148880243 | 0.056473018 | 0.000509342 |
| 0.019557755 | 0.094035146 | 0.034127879 | 0.168666718 |
| 0.067008822 | 0.01568618  | 0.125773315 | 0.16322962  |
| 0.08247019  | 0.021099672 | 0.067967099 | 0.180211281 |
| 0.050797021 | 0.050438376 | 0.2062692   | 0.172950097 |
| 5.92E-05    | 0.09537537  | 0.228951715 | 0.005559664 |
| 0.092400629 | 0.002898066 | 0.039915712 | 0.260859236 |
| 0.027366197 | 0.026289794 | 0.278333112 | 0.159634163 |
| 0.012213294 | 0.090544345 | 0.265325422 | 0.001206138 |
| 0.102654875 | 0.001310369 | 0.077979328 | 0.193921038 |
| 0.066594479 | 0.076500763 | 0.083442524 | 0.050858262 |
| 0.045186474 | 0.264568925 | 0.178310306 | 0.273262255 |
| 0.085949992 | 0.272953698 | 0.240386753 | 0.203068774 |
| 0.127464741 | 0.115036459 | 0.017349008 | 0.240236992 |
| 0.269795869 | 0.012924242 | 0.024495536 | 0.238549989 |
| 0.132393339 | 0.163689931 | 0.002453706 | 0.253602692 |
| 0.233419675 | 0.294707045 | 0.009842009 | 0.136067996 |
| 0.165812739 | 0.058975991 | 0.206643965 | 0.247832529 |
| 0.088561416 | 0.09012252  | 0.071355417 | 0.173164635 |
| 0.050600077 | 0.020515193 | 0.119137288 | 0.028663206 |
| 0.008125212 | 0.011687434 | 0.012986744 | 0.019073188 |
| 0.025969243 | 0.221473125 | 0.160525375 | 0.271694254 |
| 0.013159075 | 0.190682728 | 0.064286393 | 0.043846478 |
| 0.215118336 | 0.070082564 | 0.140178068 | 0.126781738 |
| 0.072555375 | 0.001077846 | 0.003738476 | 0.254382141 |
| 0.00989766  | 0.035772579 | 0.061989313 | 0.000107155 |
| 0.003426412 | 0.281847042 | 0.034573228 | 0.069929454 |
| 0.221804301 | 0.08388066  | 0.065702609 | 0.114204321 |
| 0.110997184 | 0.015549449 | 0.000187128 | 0.281329308 |
| 0.261338086 | 0.23693729  | 0.260889598 | 0.242069251 |
| 0.230456666 | 0.185428148 | 0.198666563 | 0.138892136 |
| 0.008365665 | 0.015943824 | 0.029464876 | 0.056593411 |
| 3.15E-05    | 0.157642383 | 0.064701967 | 0.034023374 |
| 0.181937964 | 0.081052461 | 0.002069832 | 0.101585293 |
| 0.001278482 | 0.059208406 | 0.028416132 | 0.026200927 |
| 0.114214975 | 0.000981462 | 0.023624386 | 0.036904604 |
| 0.235059115 | 0.136204206 | 0.117610683 | 0.298661182 |
| 0.084285286 | 0.0538087   | 0.085977921 | 0.149695665 |
| 0.005372049 | 0.005596451 | 0.069502855 | 0.05588253  |
| 0.005828104 | 0.214593002 | 0.07340114  | 0.006229004 |

|             |             |             |             |
|-------------|-------------|-------------|-------------|
| 0.07518314  | 7.77E-05    | 0.177120161 | 0.266221686 |
| 0.295506276 | 0.277472626 | 0.267123311 | 0.067314531 |
| 0.284856398 | 0.018311971 | 0.292258074 | 0.220635199 |
| 0.147722347 | 0.000112785 | 0.000417999 | 0.290976325 |
| 0.150396099 | 0.023001309 | 0.035023292 | 0.059194192 |
| 0.006879662 | 0.026864197 | 0.004709292 | 0.027958848 |
| 0.194096359 | 0.04264317  | 0.013957909 | 0.250155728 |
| 0.046465964 | 0.041909227 | 0.10835308  | 0.021219155 |
| 0.145990793 | 0.00340322  | 0.02087021  | 0.001252248 |
| 0.124175005 | 0.044394804 | 0.247093047 | 0.282424123 |
| 0.233769034 | 0.167704077 | 0.1506556   | 0.015449862 |
| 0.211291717 | 0.038780701 | 0.054535923 | 0.033853426 |
| 0.296341775 | 0.147738407 | 0.107289186 | 0.127932683 |
| 0.235317282 | 0.237567648 | 0.001755036 | 0.186612039 |
| 0.000624371 | 0.000523405 | 0.167785007 | 0.06219756  |
| 0.001266839 | 0.098223553 | 0.085979033 | 0.031888865 |
| 0.024191199 | 0.000718797 | 0.062605656 | 0.052073453 |
| 0.08659369  | 0.086708821 | 0.06448761  | 0.073039253 |
| 0.048465331 | 0.004040351 | 0.025096287 | 0.010937092 |
| 0.006514318 | 0.14509838  | 0.074595514 | 0.00082051  |
| 0.213842661 | 0.148716514 | 0.006771446 | 0.0396643   |
| 0.22786373  | 0.267930842 | 0.000704209 | 9.06E-05    |
| 0.086256761 | 0.047457196 | 0.244832792 | 0.299262807 |
| 0.272988918 | 0.247319578 | 0.161294785 | 0.00531696  |
| 0.00597407  | 0.092451818 | 0.077706319 | 0.005612489 |
| 0.261840803 | 0.016390712 | 0.269864603 | 0.098354913 |
| 0.023272954 | 0.041404548 | 0.000861254 | 0.010995608 |
| 0.141598683 | 0.032649943 | 0.026665854 | 0.05675037  |
| 0.053822764 | 0.031491031 | 0.003642419 | 0.037822277 |
| 0.124975808 | 0.026382815 | 0.031505811 | 0.057892528 |
| 0.180567315 | 0.03705543  | 0.210254877 | 0.189520841 |
| 0.031424416 | 0.020245683 | 0.054326804 | 0.147175158 |
| 0.268038097 | 0.209577032 | 0.000717516 | 0.298930523 |
| 0.236331741 | 0.207485552 | 0.278512257 | 0.139698954 |
| 0.018873162 | 0.114350528 | 0.072762146 | 0.093125648 |
| 0.031078043 | 0.117230323 | 0.036238023 | 0.009454183 |
| 0.10023652  | 0.214549858 | 0.243931608 | 0.022957836 |
| 0.173629201 | 0.035406279 | 0.015046833 | 0.23168486  |
| 0.025599948 | 0.003965895 | 0.170939397 | 0.209706105 |
| 0.001472163 | 0.023280701 | 0.251754501 | 0.02387245  |
| 0.254030646 | 0.265501626 | 0.206283536 | 0.032793306 |
| 7.66E-06    | 0.202110345 | 0.125002786 | 0.121042738 |
| 0.230477273 | 0.132201681 | 0.004543144 | 0.004134782 |
| 0.095329506 | 0.027344017 | 0.006527273 | 0.021395986 |
| 0.008408011 | 0.146275393 | 0.043920391 | 0.044195217 |
| 0.028314465 | 0.027592029 | 0.026901499 | 0.050315339 |
| 0.007504716 | 0.062282844 | 0.123603231 | 0.098182606 |
| 0.017605187 | 0.184257895 | 0.206932466 | 0.002173521 |
| 0.104400803 | 0.189057446 | 0.202796466 | 3.67E-05    |
| 0.190722997 | 0.000676642 | 0.023924563 | 0.036916182 |
| 0.027941821 | 0.021741413 | 0.05429876  | 0.057878005 |
| 0.114877775 | 0.037096541 | 0.052589395 | 0.054734406 |
| 0.018076839 | 0.041487687 | 0.139618257 | 0.12243514  |
| 0.043724306 | 0.017900462 | 0.03723607  | 0.043382602 |

|             |             |             |             |
|-------------|-------------|-------------|-------------|
| 0.001387798 | 0.257939854 | 0.080293568 | 0.028025983 |
| 0.041841296 | 0.085523602 | 0.131394592 | 0.309349666 |
| 0.175849126 | 0.053851472 | 0.055788918 | 0.277034851 |
| 0.009907929 | 0.008097827 | 0.004995142 | 0.178356333 |
| 0.038304647 | 0.015725034 | 0.166339223 | 0.121159747 |
| 0.200444386 | 0.173234103 | 0.074863579 | 0.215899475 |
| 0.096885047 | 0.093613829 | 0.205767449 | 0.004161789 |
| 0.03430145  | 0.034055702 | 0.062574223 | 5.01E-06    |
| 0.096495101 | 0.031093346 | 0.268387158 | 0.291117919 |
| 0.062896092 | 0.157421115 | 0.044138896 | 0.007392798 |
| 0.164650341 | 0.088220371 | 0.030583206 | 0.252985807 |
| 0.054197701 | 0.023862116 | 0.081008529 | 0.075713504 |
| 0.22617821  | 0.233795399 | 0.03372216  | 0.030018305 |
| 0.050103764 | 0.072322349 | 0.244724402 | 0.02588663  |
| 0.222685082 | 0.026429265 | 0.191234262 | 0.060450141 |
| 0.030878453 | 0.303028416 | 0.009939433 | 0.294260169 |
| 0.068051428 | 0.040659073 | 0.216414434 | 0.066857845 |
| 0.040812724 | 0.00477559  | 0.04725722  | 0.099505981 |
| 0.019198017 | 0.085106392 | 0.0014036   | 0.000839341 |
| 0.099481442 | 0.059319728 | 0.241144396 | 0.127442537 |
| 0.044410646 | 0.110764713 | 0.011657307 | 0.053899603 |
| 0.295438188 | 0.267782997 | 0.017833039 | 0.073520064 |
| 0.103964197 | 0.009040058 | 0.183586468 | 9.73E-06    |
| 0.177033901 | 0.212046791 | 0.063739583 | 0.002296826 |
| 0.000196888 | 0.059462131 | 0.191407417 | 0.016838783 |
| 0.242990414 | 0.023402729 | 0.159999621 | 0.2272731   |
| 0.044515637 | 0.265994625 | 0.006974641 | 0.164619328 |
| 0.001578634 | 0.06982693  | 0.133177922 | 0.110394067 |
| 0.024355484 | 0.07142433  | 0.150587469 | 0.050635671 |
| 0.001504224 | 0.02151414  | 0.000284625 | 0.178662928 |
| 0.278226015 | 0.109280779 | 0.062005322 | 0.079210282 |
| 0.076922913 | 0.171917672 | 0.007674603 | 0.186031348 |
| 0.000147879 | 0.130813119 | 0.03492267  | 0.212496056 |
| 0.061184513 | 0.116203202 | 0.002599    | 0.075152739 |
| 0.236769956 | 0.01444582  | 0.070922926 | 0.077594788 |
| 0.302297944 | 0.211478928 | 0.079692193 | 0.016230397 |
| 0.185468921 | 0.013118051 | 0.141035354 | 0.265578392 |
| 0.020931696 | 0.046790376 | 0.219186659 | 0.026029379 |
| 0.069205547 | 0.178142049 | 0.228246465 | 0.260110481 |
| 0.002083877 | 0.057421197 | 0.189631545 | 0.236227402 |
| 0.084997611 | 0.021280132 | 0.036886093 | 0.02947963  |
| 0.284743958 | 0.004731506 | 0.026699334 | 0.139761881 |
| 0.043252202 | 0.077072625 | 0.198451747 | 0.02212619  |
| 0.000242487 | 0.010444019 | 0.056310244 | 0.030681387 |
| 0.063182921 | 0.117668235 | 0.034696599 | 0.159689511 |
| 0.007143869 | 0.000580006 | 0.201896186 | 0.000676209 |
| 0.128631257 | 0.157569785 | 0.045312727 | 0.088158142 |
| 0.068620405 | 0.103633591 | 0.121166836 | 0.000762525 |
| 0.178277278 | 0.012276717 | 0.046174067 | 0.026715015 |
| 0.009230699 | 0.00341728  | 0.244534468 | 0.254027985 |
| 0.097461275 | 0.020861742 | 0.048970502 | 0.227273751 |
| 0.005339313 | 0.106948948 | 0.059473927 | 0.23958057  |
| 0.046309355 | 0.205717961 | 0.136242667 | 0.150420725 |
| 0.164259735 | 0.040607503 |             |             |



|               |             |             |             |
|---------------|-------------|-------------|-------------|
| 6330503K22RIK | 0.215157824 | 0.39986819  | 0.173496784 |
| 0.283437037   | 0.323722509 | 0.392219428 | 0.206137505 |
| 0.288566041   | 0.379114325 | 0.26931443  | 0.39763052  |
| 0.10667937    | 0.069727062 | 0.432067236 | 0.19064449  |
| 0.376462708   | 0.149085219 | 0.277607109 | 0.116004662 |
| 0.316164593   | 0.321491191 | 0.304556187 | 0.402739944 |
| 0.314401709   | 0.314648112 | 0.404647625 | 0.327244301 |
| 0.428813836   | 0.202816104 | 0.399172884 | 0.18427073  |
| 1             | 0.330955633 | 0.315702158 | 0.095831207 |
| 0.404394248   | 0.017441874 | 0.452199587 | 0.360918345 |
| 0.152274557   | 0.406244688 | 0.31952166  | 0.362415168 |
| 0.3656881     | 0.155348484 | 0.166096931 | 0.375587914 |
| 0.381354716   | 0.352628994 | 0.193480502 | 0.413193019 |
| 0.36359425    | 0.413428595 | 0.372651228 | 0.010147511 |
| 0.249035266   | 0.055822557 | 0.173984475 | 0.456979974 |
| 0.352836302   | 0.279329602 | 0.231874341 | 0.333049209 |
| 0.369576601   | 0.381110155 | 0.360711694 | 0.350615573 |
| 0.450315379   | 0.159042562 | 0.383537994 | 0.2446695   |
| 0.418140278   | 0.137770526 | 0.320285888 | 0.21354149  |
| 0.361668796   | 0.333667383 | 0.35592433  | 0.278906608 |
| 0.39782821    | 0.493433765 | 0.367063928 | 0.466230178 |
| 0.113253752   | 0.316503115 | 0.293387509 | 0.387947831 |
| 0.394565629   | 0.225738787 | 0.430357615 | 0.484693216 |
| 0.166118579   | 0.356825972 | 0.413237263 | 0.269628537 |
| 0.411877129   | 0.235115669 | 0.35871148  | 0.163842751 |
| 0.355226626   | 0.351545015 | 0.453322385 | 0.411828446 |
| 0.316331586   | 0.212592487 | 0.467232235 | 0.294798565 |
| 0.347447191   | 0.230561366 | 0.285584736 | 0.404060754 |
| 0.424985676   | 0.426868774 | 0.407304868 | 0.413890641 |
| 0.361092987   | 0.444445366 | 0.433622192 | 0.411707434 |
| 0.1144815     | 0.467393065 | 0.344292262 | 0.16004072  |
| 0.206704827   | 0.220673738 | 0.257586743 | 0.389383871 |
| 0.420108014   | 0.409016967 | 0.3611043   | 0.348812633 |
| 0.413279816   | 0.447313586 | 0.464725443 | 0.428843732 |
| 0.164704214   | 0.213852991 | 0.367353783 | 0.358066279 |
| 0.415325043   | 0.266008131 | 0.251291551 | 0.488982885 |
| 0.427732397   | 0.415092646 | 0.315833945 | 0.49551184  |
| 0.326844697   | 0.474153312 | 0.410263063 | 0.336590846 |
| 0.487249652   | 0.473181255 | 0.455904401 | 0.364740151 |
| 0.449801566   | 0.418704717 | 0.093753609 | 0.416031947 |
| 0.446338116   | 0.019827422 | 0.41178402  | 0.417957921 |
| 0.451526415   | 0.412851725 | 0.457033592 | 0.43205932  |
| 0.451604207   | 0.22025532  | 0.028616244 | 0.363182051 |
| 0.473653021   | 0.434351325 | 0.248413884 | 0.369402288 |
| 0.358412792   | 0.42202718  | 0.394963404 | 0.304275596 |
| 0.483871614   | 0.420873206 | 0.414196457 | 0.422742394 |
| 0.359250121   | 0.394925833 | 0.315058739 | 0.455085674 |
| 0.167714678   | 0.271231999 | 0.17330963  | 0.384706159 |
| 0.325939734   | 0.324779003 | 0.424783585 | 0.35463577  |
| 0.344510938   | 0.390644205 | 0.263015789 | 0.362740263 |
| 0.172650391   | 0.39678734  | 0.323239743 | 0.338713741 |
| 0.169488406   | 0.280357012 | 0.331498595 | 0.290175455 |
| 0.342526222   | 0.32313031  | 0.394994136 | 0.420206198 |
| 0.351149068   | 0.331502945 | 0.424297693 | 0.436176759 |

|             |             |             |             |
|-------------|-------------|-------------|-------------|
| 0.424548831 | 0.353086604 | 0.359279641 | 0.055306261 |
| 0.329105583 | 0.249660842 | 0.153393502 | 0.349627106 |
| 0.284483131 | 0.358976137 | 0.399877958 | 0.382776729 |
| 0.399549896 | 0.282297349 | 0.361979194 | 0.438421669 |
| 0.293243382 | 0.342689332 | 0.430973421 | 0.389334555 |
| 0.03095152  | 0.4298662   | 0.426544297 | 0.211449517 |
| 0.401960692 | 0.139953899 | 0.211992579 | 0.428232568 |
| 0.258567676 | 0.24341067  | 0.414759343 | 0.375285832 |
| 0.338977782 | 0.303045796 | 0.461263356 | 0.048897152 |
| 0.323458059 | 0.115512996 | 0.381169384 | 0.30987607  |
| 0.394361428 | 0.385501675 | 0.307478508 | 0.310917069 |
| 0.270066885 | 0.467745489 | 0.415550715 | 0.442810436 |
| 0.341575983 | 0.46943332  | 0.422021059 | 0.434398342 |
| 0.419853805 | 0.317299938 | 0.110046063 | 0.432703796 |
| 0.424915425 | 0.307251767 | 0.205519685 | 0.392792944 |
| 0.344183134 | 0.382362923 | 0.177754762 | 0.443309425 |
| 0.478041042 | 0.434020025 | 0.282943054 | 0.390417301 |
| 0.434472317 | 0.377286829 | 0.407623474 | 0.471808498 |
| 0.293879    | 0.356616943 | 0.349436154 | 0.401843951 |
| 0.341943295 | 0.254099162 | 0.38555287  | 0.139137884 |
| 0.006597663 | 0.226821164 | 0.209751094 | 0.290866096 |
| 0.175732227 | 0.358919924 | 0.399167026 | 0.457799117 |
| 0.282471671 | 0.417535743 | 0.353865294 | 0.363404974 |
| 0.425129967 | 0.336687064 | 0.327619146 | 0.368580884 |
| 0.369625843 | 0.075859413 | 0.25181814  | 0.50119983  |
| 0.147227962 | 0.228370047 | 0.38660011  | 0.012171173 |
| 0.179988262 | 0.382380187 | 0.229846435 | 0.312663038 |
| 0.414731645 | 0.313154787 | 0.365794515 | 0.321001551 |
| 0.396055184 | 0.249986916 | 0.014373268 | 0.42074385  |
| 0.431325671 | 0.410087938 | 0.431101909 | 0.427497531 |
| 0.404559067 | 0.388794022 | 0.409988865 | 0.40122479  |
| 0.272756773 | 0.236890264 | 0.230722558 | 0.378415364 |
| 0.017381776 | 0.405532034 | 0.331440206 | 0.306533118 |
| 0.394044683 | 0.393019012 | 0.154077446 | 0.336146557 |
| 0.104684484 | 0.164356829 | 0.387090139 | 0.325510959 |
| 0.368054252 | 0.087629222 | 0.26523549  | 0.314306217 |
| 0.415005262 | 0.416271388 | 0.298073455 | 0.475036507 |
| 0.401109949 | 0.262290252 | 0.372468281 | 0.395021608 |
| 0.22848753  | 0.129124657 | 0.389362602 | 0.041178315 |
| 0.202758869 | 0.421904698 | 0.345784811 | 0.218066895 |
| 0.404960251 | 0.044594063 | 0.419634694 | 0.477464117 |
| 0.426043827 | 0.447047216 | 0.446026747 | 0.251567803 |
| 0.45696068  | 0.068160576 | 0.458209633 | 0.424750199 |
| 0.337466959 | 0.00678139  | 0.025197622 | 0.421777307 |
| 0.386951725 | 0.168066776 | 0.326936153 | 0.358226961 |
| 0.269859399 | 0.307018418 | 0.198344439 | 0.21668341  |
| 0.400833992 | 0.302968498 | 0.194648125 | 0.439807775 |
| 0.375048998 | 0.351093701 | 0.383384765 | 0.22912301  |
| 0.37214233  | 0.190581964 | 0.227503305 | 0.02456593  |
| 0.37999059  | 0.245751953 | 0.466184966 | 0.450948325 |
| 0.461767613 | 0.386107147 | 0.281130825 | 0.331788504 |
| 0.400205049 | 0.222727912 | 0.297814882 | 0.249338522 |
| 0.434914754 | 0.400437057 | 0.415275173 | 0.410728561 |
| 0.455660969 | 0.441459857 | 0.149292002 | 0.423552196 |

|             |             |             |             |
|-------------|-------------|-------------|-------------|
| 0.06014692  | 0.00511691  | 0.410392231 | 0.37306625  |
| 0.072332615 | 0.361773968 | 0.388697733 | 0.307469041 |
| 0.300796403 | 0.131398484 | 0.240541537 | 0.23702407  |
| 0.395020141 | 0.395664274 | 0.288337668 | 0.351065947 |
| 0.307506551 | 0.196997937 | 0.311396145 | 0.295710847 |
| 0.266821869 | 0.396964142 | 0.320749094 | 0.116917934 |
| 0.381740277 | 0.374223053 | 0.198262605 | 0.314332194 |
| 0.433686994 | 0.42985857  | 0.169695256 | 0.062167915 |
| 0.387966234 | 0.356831345 | 0.425708619 | 0.436252635 |
| 0.488607854 | 0.47735403  | 0.414203561 | 0.245071425 |
| 0.211831906 | 0.377777573 | 0.295673817 | 0.192438115 |
| 0.448475447 | 0.197140886 | 0.435607643 | 0.260741754 |
| 0.276705761 | 0.366158403 | 0.136931047 | 0.239522501 |
| 0.332607264 | 0.331173179 | 0.303501919 | 0.299673577 |
| 0.379701414 | 0.226475354 | 0.182646162 | 0.356323979 |
| 0.427347475 | 0.173133946 | 0.327974705 | 0.368153165 |
| 0.403944203 | 0.206862389 | 0.400103167 | 0.441086358 |
| 0.287637589 | 0.271724941 | 0.383424759 | 0.386928102 |
| 0.416900121 | 0.338945798 | 0.085290047 | 0.39971173  |
| 0.422958202 | 0.399360305 | 0.454424807 | 0.413690009 |
| 0.233287029 | 0.365848033 | 0.278796426 | 0.375158121 |
| 0.336594917 | 0.396369591 | 0.347946389 | 0.206466782 |
| 0.375333147 | 0.469098536 | 0.423940974 | 0.312074511 |
| 0.373868678 | 0.265037469 | 0.182792798 | 0.40357633  |
| 0.202770134 | 0.244783153 | 0.331349243 | 0.395628787 |
| 0.00754747  | 0.116720897 | 0.417395562 | 0.341236658 |
| 0.473754715 | 0.429217475 | 0.430714742 | 0.336972017 |
| 0.002284763 | 0.371045898 | 0.412196995 | 0.397079931 |
| 0.423292811 | 0.413956805 | 0.213832329 | 0.219935382 |
| 0.388665526 | 0.209195394 | 0.291190316 | 0.350116765 |
| 0.170268259 | 0.419891075 | 0.341566287 | 0.340026028 |
| 0.309402339 | 0.219257101 | 0.212329118 | 0.365318472 |
| 0.148677484 | 0.372785923 | 0.422030342 | 0.266027932 |
| 0.195028143 | 0.415328374 | 0.429767407 | 0.125073345 |
| 0.312539663 | 0.411377979 | 0.410258776 | 0.015656174 |
| 0.408528706 | 0.05528664  | 0.307492035 | 0.326415554 |
| 0.315779389 | 0.324767115 | 0.339115689 | 0.337996547 |
| 0.412784053 | 0.364515226 | 0.377342299 | 0.367220926 |
| 0.286687012 | 0.349675791 | 0.381953164 | 0.40475706  |
| 0.327422057 | 0.288950607 | 0.224233366 | 0.214279411 |
| 0.166605945 | 0.408747173 | 0.364465774 | 0.199090304 |
| 0.35061945  | 0.388317456 | 0.411586647 | 0.440407507 |
| 0.415126758 | 0.230265711 | 0.376163945 | 0.423693381 |
| 0.19662129  | 0.327626164 | 0.198680549 | 0.404995538 |
| 0.364915848 | 0.258586086 | 0.372352666 | 0.408133455 |
| 0.398634484 | 0.418266209 | 0.362045475 | 0.417319556 |
| 0.386955302 | 0.351208022 | 0.297179266 | 0.219080397 |
| 0.350937806 | 0.285307244 | 0.292662493 | 0.020377481 |
| 0.416288347 | 0.365940472 | 0.426786156 | 0.45519754  |
| 0.235312787 | 0.411638458 | 0.318553513 | 0.255631348 |
| 0.255718617 | 0.287541311 | 0.301355066 | 0.401025396 |
| 0.171103247 | 0.324153823 | 0.346095665 | 0.36619141  |
| 0.404616851 | 0.385856525 | 0.278558901 | 0.364776537 |
| 0.347216459 | 0.340346402 | 0.453373558 | 0.269382977 |

|               |             |             |             |
|---------------|-------------|-------------|-------------|
| 0.378037011   | 0.22865816  | 0.354836017 | 0.37355896  |
| 0.324288297   | 0.439408057 | 0.193927636 | 0.446241687 |
| 0.362087509   | 0.271433315 | 0.475952677 | 0.366268456 |
| 0.360255936   | 0.21691767  | 0.155649378 | 0.370680481 |
| 0.344284365   | 0.278970525 | 0.014012487 | 0.088286628 |
| 0.402864544   | 0.308622248 | 0.397262094 | 0.393436124 |
| 0.268100591   | 0.393251073 | 0.122269862 | 0.397836171 |
| 0.44120252    | 0.473678836 | 0.367819833 | 0.372878885 |
| 0.418799926   | 0.255330193 | 0.404732901 | 0.022942047 |
| 0.392310949   | 0.355208143 | 0.339103146 | 0.182651427 |
| 0.102594895   | 0.185772992 | 0.404993023 | 0.193562129 |
| 0.420037713   | 0.165086159 | 0.36269146  | 0.402678117 |
| 0.314713379   | 0.481097859 | 0.241450345 | 0.414600063 |
| 0.158169761   | 0.36988558  | 0.324555347 | 0.350499583 |
| 0.302428606   | 0.287864009 | 0.417745091 | 0.228091585 |
| 0.1453091     | 0.329052142 | 0.013410423 | 0.433775512 |
| 0.455241755   | 0.313073058 | 0.334911771 | 0.252378703 |
| 0.375772326   | 0.397451601 | 0.297062205 | 0.34940513  |
| 0.060745623   | 0.354222815 | 0.333482182 | 0.425840794 |
| 0.216338369   | 0.380248598 | 0.173569033 | 0.306939621 |
| 0.463479216   | 0.328343136 | 0.363212263 | 0.296824385 |
| 0.434563197   | 0.392186384 | 0.289333221 | 0.25352143  |
| 0.36587188    | 0.199590359 | 0.342122234 | 0.472099364 |
| 0.306881609   | 0.222403216 | 0.414210509 | 0.350886571 |
| 0.278218119   | 0.406150023 | 0.356940441 | 0.463257574 |
| 0.182750788   | 0.377424004 | 0.404578311 | 0.422227454 |
| 0.386341998   | 0.194395227 | 0.238543514 | 0.307434538 |
| 0.424706986   | 0.227215505 | 0.261273837 | 0.430541936 |
| 0.213047177   | 0.384727089 | 0.342827613 | 0.25967094  |
| 0.131589353   | 0.294741002 | 0.367017337 | 0.301495006 |
| 0.39425223    | 0.384398559 | 0.284861542 | 0.417719503 |
| 0.24521871    | 0.102284493 | 0.437198722 | 0.023173355 |
| 0.394488807   | 0.397513424 | 0.358638476 | 0.349232409 |
| 0.324489897   | 0.413763969 | 0.408987065 | 0.014840518 |
| 0.414376429   | 0.06364463  | 0.321276182 | 0.297775368 |
| 0.268744752   | 0.190162222 | 0.424632376 | 0.441234139 |
| 0.393007623   | 0.286529306 | 0.282105176 | 0.419897029 |
| 0.141492036   | 0.253938544 | 0.296120224 | 0.406157646 |
| 0.197262167   | 0.338294654 | 0.347919691 | 0.318018999 |
| 0.422700056   | 0.361884311 |             |             |
| 6720463M24RIK | 0.048735205 | 0.280452517 | 0.027026326 |
| 0.133074485   | 0.32300947  | 0.213921762 | 0.050374765 |
| 0.099403423   | 0.217913892 | 0.130838077 | 0.271473934 |
| 0.019558324   | 0.210047762 | 0.365016122 | 0.05293646  |
| 0.317994168   | 0.047171614 | 0.09366827  | 0.060929627 |
| 0.155586314   | 0.325482026 | 0.302755266 | 0.166466545 |
| 0.313547139   | 0.127373374 | 0.171458893 | 0.255954489 |
| 0.370114111   | 0.201184774 | 0.313985103 | 0.096386083 |
| 0.330955633   | 1           | 0.270289404 | 0.012338551 |
| 0.246050728   | 0.036406405 | 0.312608569 | 0.275017936 |
| 0.264802944   | 0.268395962 | 0.130275328 | 0.237125043 |
| 0.17432594    | 0.025938014 | 0.092143306 | 0.309564618 |
| 0.171874097   | 0.206007289 | 0.029979239 | 0.287244843 |
| 0.219876968   | 0.220608104 | 0.211102718 | 0.002508147 |

|             |             |             |             |
|-------------|-------------|-------------|-------------|
| 0.310934946 | 0.165086024 | 0.269909565 | 0.35516647  |
| 0.165889662 | 0.13280034  | 0.189767146 | 0.148026034 |
| 0.249878216 | 0.304737107 | 0.213331754 | 0.194296051 |
| 0.378638916 | 0.288776719 | 0.315272628 | 0.140392998 |
| 0.217777614 | 0.017532755 | 0.129485261 | 0.037398461 |
| 0.269079306 | 0.198477476 | 0.29372975  | 0.320132664 |
| 0.269327638 | 0.379227635 | 0.173311942 | 0.330291585 |
| 0.193933182 | 0.318450173 | 0.319287429 | 0.298905947 |
| 0.282422929 | 0.063861731 | 0.339424348 | 0.400638701 |
| 0.029475827 | 0.167879424 | 0.281673365 | 0.067050546 |
| 0.299107457 | 0.255781762 | 0.172881029 | 0.311734968 |
| 0.357622113 | 0.310687105 | 0.329582644 | 0.237919962 |
| 0.292985932 | 0.035708682 | 0.306322304 | 0.332528757 |
| 0.295554561 | 0.047664405 | 0.299021671 | 0.389118225 |
| 0.287143088 | 0.377186255 | 0.29874829  | 0.303532477 |
| 0.303979993 | 0.383419124 | 0.297591251 | 0.312020012 |
| 0.072817043 | 0.37916817  | 0.131821221 | 0.056251616 |
| 0.034871025 | 0.102378166 | 0.243252817 | 0.266235884 |
| 0.384316951 | 0.229894834 | 0.139251609 | 0.25468675  |
| 0.427383166 | 0.299796599 | 0.372184118 | 0.329573163 |
| 0.033391423 | 0.277833036 | 0.295230487 | 0.165304788 |
| 0.294334722 | 0.079331813 | 0.340249347 | 0.347860661 |
| 0.310003612 | 0.393303073 | 0.08792038  | 0.34452226  |
| 0.142205537 | 0.414826278 | 0.307366136 | 0.153230626 |
| 0.373756508 | 0.33374492  | 0.431683868 | 0.379991809 |
| 0.33889514  | 0.198417065 | 0.057530788 | 0.297418113 |
| 0.416765508 | 0.045560867 | 0.38059384  | 0.408284213 |
| 0.348690706 | 0.393094849 | 0.438875527 | 0.406028492 |
| 0.348069677 | 0.046322038 | 0.03479143  | 0.2974257   |
| 0.355532813 | 0.327596275 | 0.162585874 | 0.260475314 |
| 0.316444006 | 0.201271289 | 0.332709383 | 0.245985806 |
| 0.417857938 | 0.361573418 | 0.372570899 | 0.286339704 |
| 0.148249297 | 0.242035091 | 0.278530594 | 0.296359737 |
| 0.047182906 | 0.070618302 | 0.025322877 | 0.251268599 |
| 0.148749156 | 0.176116748 | 0.193089384 | 0.263243459 |
| 0.17343293  | 0.164846266 | 0.277161926 | 0.373101104 |
| 0.028408912 | 0.23408624  | 0.112234115 | 0.1014897   |
| 0.055847817 | 0.100440655 | 0.18103905  | 0.160457569 |
| 0.270471448 | 0.139712419 | 0.308023183 | 0.395235665 |
| 0.260819494 | 0.115709839 | 0.288716336 | 0.399754161 |
| 0.396343972 | 0.309421496 | 0.181206855 | 0.024546489 |
| 0.26280398  | 0.196750717 | 0.278952416 | 0.260724409 |
| 0.111597512 | 0.222153823 | 0.281491292 | 0.397052614 |
| 0.144678693 | 0.076843304 | 0.287918377 | 0.31572623  |
| 0.085462366 | 0.305237417 | 0.398648466 | 0.202845739 |
| 0.002996727 | 0.223399425 | 0.366928044 | 0.249200064 |
| 0.210608225 | 0.263540647 | 0.288181989 | 0.389696727 |
| 0.275710595 | 0.308369428 | 0.396209887 | 0.389910914 |
| 0.217667294 | 0.125507284 | 0.427357479 | 0.080263675 |
| 0.268574182 | 0.120735457 | 0.291587912 | 0.135272697 |
| 0.181134768 | 0.27359038  | 0.329057083 | 0.317214382 |
| 0.065745369 | 0.379414248 | 0.301716139 | 0.403247003 |
| 0.26215146  | 0.424940905 | 0.395618989 | 0.376201519 |
| 0.259474788 | 0.24167942  | 0.255809034 | 0.356255168 |

|             |             |             |             |
|-------------|-------------|-------------|-------------|
| 0.384966436 | 0.199322019 | 0.037094017 | 0.341019912 |
| 0.20340681  | 0.349276454 | 0.204139222 | 0.415639729 |
| 0.372391977 | 0.292751075 | 0.172760086 | 0.386076056 |
| 0.329499742 | 0.16160981  | 0.339319323 | 0.428600862 |
| 0.159062201 | 0.295994334 | 0.313120309 | 0.414023989 |
| 0.124587533 | 0.304550724 | 0.242614546 | 0.271960454 |
| 0.021756265 | 0.046891196 | 0.040070428 | 0.211833221 |
| 0.328804264 | 0.238202077 | 0.316702068 | 0.395114589 |
| 0.109725079 | 0.324236327 | 0.171473343 | 0.286493921 |
| 0.30423249  | 0.280915766 | 0.301891114 | 0.308330944 |
| 0.188991255 | 0.030922102 | 0.14180373  | 0.37688476  |
| 0.016099164 | 0.334630727 | 0.181689201 | 0.006283431 |
| 0.033547722 | 0.251523839 | 0.057136721 | 0.138575667 |
| 0.434593044 | 0.131548995 | 0.13185413  | 0.151593316 |
| 0.314988316 | 0.072665703 | 0.012162033 | 0.374865601 |
| 0.352654258 | 0.335010912 | 0.343351916 | 0.303574064 |
| 0.348934308 | 0.297833487 | 0.374848237 | 0.164127462 |
| 0.088406998 | 0.047415168 | 0.316051635 | 0.272287715 |
| 0.004263996 | 0.34982411  | 0.270121258 | 0.112011818 |
| 0.358794393 | 0.229870608 | 0.034122117 | 0.295177946 |
| 0.019379519 | 0.270601409 | 0.183189899 | 0.20311774  |
| 0.35992623  | 0.011096916 | 0.161126159 | 0.269451033 |
| 0.28366495  | 0.253719067 | 0.280703849 | 0.389564763 |
| 0.265707129 | 0.061374498 | 0.294463235 | 0.361786626 |
| 0.065217838 | 0.070848513 | 0.18911304  | 0.022606241 |
| 0.12672477  | 0.320179165 | 0.248798035 | 0.049032628 |
| 0.206249517 | 0.004714667 | 0.262011014 | 0.400332088 |
| 0.297085333 | 0.428659484 | 0.387715228 | 0.334214703 |
| 0.377881558 | 0.169194054 | 0.400913256 | 0.28306737  |
| 0.19073446  | 0.001377436 | 0.011425082 | 0.403717597 |
| 0.294055063 | 0.02579105  | 0.121103366 | 0.190021344 |
| 0.135404281 | 0.078414639 | 0.057029342 | 0.323584123 |
| 0.258311014 | 0.294848512 | 0.298330166 | 0.310222291 |
| 0.219350056 | 0.208406993 | 0.182429842 | 0.049697763 |
| 0.284297548 | 0.057077971 | 0.049334439 | 0.022215034 |
| 0.351562651 | 0.062534707 | 0.293496765 | 0.370454472 |
| 0.397504216 | 0.361153116 | 0.162183071 | 0.216716927 |
| 0.361134904 | 0.043716281 | 0.228523604 | 0.049825219 |
| 0.330365857 | 0.320904485 | 0.289635456 | 0.237618827 |
| 0.420151655 | 0.354844764 | 0.031901024 | 0.35726257  |
| 0.016538155 | 0.007838848 | 0.175037488 | 0.201891765 |
| 0.079825585 | 0.295023696 | 0.214119992 | 0.160612608 |
| 0.200156883 | 0.026144063 | 0.328570604 | 0.328454442 |
| 0.2532377   | 0.281638463 | 0.339103833 | 0.172971575 |
| 0.294854059 | 0.242041592 | 0.203734474 | 0.14343721  |
| 0.181204563 | 0.213825985 | 0.130516874 | 0.019751186 |
| 0.22490162  | 0.279110276 | 0.048413393 | 0.108995338 |
| 0.378903768 | 0.405119427 | 0.053385435 | 0.027566646 |
| 0.202869877 | 0.256685861 | 0.427573693 | 0.34711286  |
| 0.368204905 | 0.425466666 | 0.29359503  | 0.193174656 |
| 0.057749214 | 0.273630892 | 0.327627044 | 0.196782152 |
| 0.388577217 | 0.029209527 | 0.335720835 | 0.32782409  |
| 0.080547933 | 0.183254169 | 0.050586671 | 0.071330807 |
| 0.304021645 | 0.139201065 | 0.224878284 | 0.076858974 |

|             |             |             |             |
|-------------|-------------|-------------|-------------|
| 0.283921259 | 0.31996894  | 0.040959429 | 0.165070614 |
| 0.270021536 | 0.295489596 | 0.120813933 | 0.173381568 |
| 0.242930558 | 0.096278148 | 0.354808232 | 0.374520642 |
| 0.083574194 | 0.071858032 | 0.139888641 | 0.303887955 |
| 0.342477453 | 0.195867608 | 0.029986989 | 0.290159887 |
| 0.401241152 | 0.305438003 | 0.345995225 | 0.377934699 |
| 0.052110875 | 0.307139964 | 0.280572281 | 0.285478532 |
| 0.144566315 | 0.205287601 | 0.201600429 | 0.044529791 |
| 0.242989052 | 0.343471228 | 0.30198958  | 0.181677055 |
| 0.227916786 | 0.055601994 | 0.023831023 | 0.337591234 |
| 0.329239936 | 0.073887426 | 0.149170999 | 0.358060668 |
| 0.007751868 | 0.28327277  | 0.411513311 | 0.210680292 |
| 0.392352334 | 0.411062604 | 0.350340877 | 0.157194591 |
| 0.008080366 | 0.338346599 | 0.296041786 | 0.27495709  |
| 0.300897301 | 0.247757653 | 0.107627552 | 0.101816712 |
| 0.268023358 | 0.03928781  | 0.168266502 | 0.187536671 |
| 0.228866656 | 0.229652752 | 0.177030245 | 0.139272825 |
| 0.231672739 | 0.042609351 | 0.318783385 | 0.18648429  |
| 0.223081627 | 0.217515722 | 0.323937316 | 0.1161088   |
| 0.249900678 | 0.370104129 | 0.300192201 | 0.021674322 |
| 0.302446331 | 0.344416328 | 0.354168862 | 0.004712937 |
| 0.360269673 | 0.01056488  | 0.238670571 | 0.251366576 |
| 0.228799832 | 0.226791699 | 0.269986413 | 0.306586859 |
| 0.219479233 | 0.19172952  | 0.242000764 | 0.209313302 |
| 0.209051392 | 0.159009697 | 0.281216423 | 0.203913114 |
| 0.303279398 | 0.106696243 | 0.058152447 | 0.055982721 |
| 0.066603948 | 0.339886959 | 0.190647889 | 0.037197195 |
| 0.197847637 | 0.211416254 | 0.320453364 | 0.328829531 |
| 0.372948905 | 0.056111927 | 0.249769522 | 0.315686606 |
| 0.134916066 | 0.165273023 | 0.036084222 | 0.210680006 |
| 0.179967355 | 0.315783162 | 0.194019332 | 0.155094622 |
| 0.258707956 | 0.312479733 | 0.183554914 | 0.351723295 |
| 0.273315295 | 0.215594544 | 0.128372326 | 0.132208251 |
| 0.135878929 | 0.085402831 | 0.335669338 | 0.002702561 |
| 0.26729562  | 0.139265691 | 0.386195434 | 0.332113042 |
| 0.294859643 | 0.323029143 | 0.140569592 | 0.076984277 |
| 0.111073407 | 0.100021436 | 0.103014893 | 0.313049619 |
| 0.283914541 | 0.155524334 | 0.307779172 | 0.1423032   |
| 0.35613237  | 0.303715215 | 0.28393022  | 0.168010059 |
| 0.186129541 | 0.110764571 | 0.325352762 | 0.064698639 |
| 0.242842241 | 0.316693933 | 0.155920411 | 0.290413257 |
| 0.254857788 | 0.396833038 | 0.039221746 | 0.407941389 |
| 0.292270712 | 0.082142517 | 0.384475367 | 0.175828338 |
| 0.175546825 | 0.178948207 | 0.302124319 | 0.1824483   |
| 0.202662827 | 0.304144433 | 0.009542499 | 0.108436432 |
| 0.318856098 | 0.187964133 | 0.261857124 | 0.29595174  |
| 0.324381241 | 0.338783684 | 0.249406931 | 0.167871873 |
| 0.302404944 | 0.323195378 | 0.233342146 | 0.218909964 |
| 0.271964414 | 0.103424054 | 0.200417142 | 0.016219232 |
| 0.289289088 | 0.271391636 | 0.207963898 | 0.053366294 |
| 0.01955625  | 0.304619351 | 0.254746209 | 0.030145757 |
| 0.430897414 | 0.267587671 | 0.188028575 | 0.315664752 |
| 0.116871295 | 0.325818881 | 0.183820667 | 0.357222844 |
| 0.027100315 | 0.192778408 | 0.279103405 | 0.225616342 |

|               |             |             |             |
|---------------|-------------|-------------|-------------|
| 0.291948543   | 0.344417314 | 0.354080379 | 0.34359712  |
| 0.039069985   | 0.285506874 | 0.003979301 | 0.294085826 |
| 0.295080405   | 0.30360708  | 0.151464963 | 0.140234812 |
| 0.272754966   | 0.298570784 | 0.258633789 | 0.233828065 |
| 0.021545567   | 0.32428652  | 0.162567477 | 0.302131103 |
| 0.210683112   | 0.21255817  | 0.07824445  | 0.298044533 |
| 0.281228732   | 0.258782777 | 0.203566222 | 0.232808076 |
| 0.333071866   | 0.26364904  | 0.084385979 | 0.257392242 |
| 0.219030123   | 0.036549239 | 0.173295644 | 0.405169262 |
| 0.206401917   | 0.341240909 | 0.42255979  | 0.216951346 |
| 0.319286887   | 0.271537099 | 0.228314346 | 0.383391481 |
| 0.144561511   | 0.209714486 | 0.367817152 | 0.341643344 |
| 0.298633213   | 0.310243908 | 0.332676706 | 0.292759082 |
| 0.297227364   | 0.094535019 | 0.297426852 | 0.262429885 |
| 0.319938462   | 0.264422731 | 0.148185766 | 0.281584967 |
| 0.056261298   | 0.147811704 | 0.240012012 | 0.097221747 |
| 0.242532366   | 0.298662148 | 0.314868438 | 0.328869885 |
| 0.184073798   | 0.044776168 | 0.369101112 | 0.060657583 |
| 0.162865725   | 0.329965827 | 0.186778487 | 0.304917287 |
| 0.129457188   | 0.216123626 | 0.159903681 | 0.00125948  |
| 0.368468672   | 0.097814205 | 0.254970172 | 0.308583438 |
| 0.269365077   | 0.039348344 | 0.32929424  | 0.436917835 |
| 0.203993432   | 0.215579364 | 0.247884678 | 0.335355469 |
| 0.284779181   | 0.241305304 | 0.269883948 | 0.228033424 |
| 0.325917101   | 0.181351031 | 0.235749408 | 0.283373004 |
| 0.273602605   | 0.174736574 |             |             |
| 9030607L17RIK | 0.021017687 | 0.368700719 | 0.01584378  |
| 0.060364398   | 0.236506194 | 0.214174523 | 0.013932322 |
| 0.039150498   | 0.264228384 | 0.189156058 | 0.225527412 |
| 0.002919114   | 0.146397799 | 0.396345025 | 0.01313007  |
| 0.3080817     | 0.007392943 | 0.031659019 | 0.038510328 |
| 0.103441094   | 0.194111888 | 0.265255362 | 0.191871909 |
| 0.184090052   | 0.106617159 | 0.197932138 | 0.301163744 |
| 0.460816888   | 0.290341365 | 0.377096303 | 0.151953348 |
| 0.315702158   | 0.270289404 | 1           | 0.00275983  |
| 0.255328336   | 0.013273177 | 0.323156083 | 0.133557258 |
| 0.165443144   | 0.245606478 | 0.180076336 | 0.117390673 |
| 0.195377892   | 0.008205221 | 0.193505312 | 0.349803502 |
| 0.196200878   | 0.140321302 | 0.018507508 | 0.349759498 |
| 0.196106129   | 0.225463781 | 0.320357946 | 0.00046665  |
| 0.280607817   | 0.199803479 | 0.268272715 | 0.43354361  |
| 0.105124696   | 0.043693346 | 0.224779503 | 0.109972783 |
| 0.290007502   | 0.301500488 | 0.154668846 | 0.200189587 |
| 0.435101864   | 0.191309702 | 0.402440689 | 0.083115342 |
| 0.181090321   | 0.006010819 | 0.076563599 | 0.029365107 |
| 0.237775739   | 0.092690338 | 0.234301529 | 0.241199415 |
| 0.36239458    | 0.415487518 | 0.125004112 | 0.407127249 |
| 0.096228987   | 0.286782696 | 0.19127394  | 0.214636782 |
| 0.276761557   | 0.023558869 | 0.336627735 | 0.436618071 |
| 0.011241867   | 0.260637125 | 0.30379966  | 0.050607201 |
| 0.379056648   | 0.237204008 | 0.24745217  | 0.200225534 |
| 0.336365453   | 0.245118352 | 0.381754734 | 0.180257976 |
| 0.207654068   | 0.023284148 | 0.378886017 | 0.29262867  |
| 0.177457289   | 0.025742831 | 0.136781489 | 0.467835902 |



|             |             |             |             |
|-------------|-------------|-------------|-------------|
| 0.304383698 | 0.452530934 | 0.372370023 | 0.275974653 |
| 0.277212329 | 0.445501865 | 0.3062227   | 0.353093048 |
| 0.1609399   | 0.458717816 | 0.077189462 | 0.010772483 |
| 0.018462678 | 0.028384792 | 0.149324061 | 0.211973042 |
| 0.458646626 | 0.211960211 | 0.070355588 | 0.112823823 |
| 0.447864681 | 0.384807875 | 0.456535005 | 0.343609356 |
| 0.008111591 | 0.228350647 | 0.272040103 | 0.129106383 |
| 0.276469255 | 0.039972919 | 0.215654804 | 0.402467008 |
| 0.293930883 | 0.414480671 | 0.056441666 | 0.382288708 |
| 0.077367969 | 0.439050214 | 0.411460493 | 0.064405949 |
| 0.424876869 | 0.395293856 | 0.457459244 | 0.398489949 |
| 0.386868487 | 0.167714289 | 0.039128947 | 0.301109401 |
| 0.422523919 | 0.021093973 | 0.468210072 | 0.485263763 |
| 0.427449082 | 0.460922612 | 0.473258042 | 0.480473882 |
| 0.434344492 | 0.021325232 | 0.030388111 | 0.196176873 |
| 0.41886942  | 0.320659601 | 0.057651113 | 0.293174364 |
| 0.287968301 | 0.190434357 | 0.402148057 | 0.205866235 |
| 0.423361022 | 0.419189066 | 0.469058567 | 0.303816462 |
| 0.160399935 | 0.217005812 | 0.325906505 | 0.364551866 |
| 0.010456944 | 0.03607288  | 0.01636119  | 0.209460533 |
| 0.199640785 | 0.077822086 | 0.16719641  | 0.249422648 |
| 0.095537053 | 0.151664539 | 0.291596673 | 0.35282025  |
| 0.020126601 | 0.313714077 | 0.06053401  | 0.061230039 |
| 0.009746935 | 0.071381339 | 0.075116657 | 0.06990588  |
| 0.132760991 | 0.134529791 | 0.391710374 | 0.453929361 |
| 0.201378184 | 0.094869787 | 0.333508771 | 0.4088285   |
| 0.345691121 | 0.297352818 | 0.131499128 | 0.003541056 |
| 0.147311696 | 0.237466574 | 0.223514754 | 0.328184787 |
| 0.096464923 | 0.107119619 | 0.270732101 | 0.379151125 |
| 0.125080503 | 0.048476466 | 0.213766291 | 0.319902182 |
| 0.073144202 | 0.189284793 | 0.402942888 | 0.262476959 |
| 9.20E-05    | 0.157866926 | 0.411079281 | 0.094200187 |
| 0.194223297 | 0.160800182 | 0.268446462 | 0.425939407 |
| 0.231968684 | 0.170947211 | 0.48079088  | 0.375783401 |
| 0.198868094 | 0.13012437  | 0.473568839 | 0.059356864 |
| 0.244954466 | 0.028715431 | 0.191801609 | 0.184350345 |
| 0.125883033 | 0.1931016   | 0.265791907 | 0.179373559 |
| 0.05711234  | 0.443725374 | 0.321010205 | 0.469435222 |
| 0.232309185 | 0.467100017 | 0.444489311 | 0.386945604 |
| 0.247093899 | 0.233477093 | 0.211635544 | 0.389046184 |
| 0.425929752 | 0.167101577 | 0.028201848 | 0.432278315 |
| 0.200255846 | 0.357716507 | 0.071292807 | 0.438673993 |
| 0.393996035 | 0.382959831 | 0.059085236 | 0.326700898 |
| 0.3039254   | 0.105759638 | 0.367799091 | 0.464935735 |
| 0.187198362 | 0.226322385 | 0.202884164 | 0.366467011 |
| 0.079745693 | 0.14723906  | 0.223107397 | 0.241301103 |
| 0.037611021 | 0.021624652 | 0.017874501 | 0.072772623 |
| 0.165291039 | 0.349567436 | 0.313605023 | 0.454826695 |
| 0.036890777 | 0.349681091 | 0.135824152 | 0.155732669 |
| 0.331322912 | 0.217227187 | 0.326153982 | 0.317201668 |
| 0.14254203  | 0.00580313  | 0.050837184 | 0.410750219 |
| 0.010471895 | 0.217280513 | 0.146634467 | 0.001299998 |
| 0.009829743 | 0.365316677 | 0.041909028 | 0.107558122 |
| 0.462264844 | 0.111450492 | 0.099910626 | 0.171391159 |

|             |             |             |             |
|-------------|-------------|-------------|-------------|
| 0.263152436 | 0.028730838 | 0.001579581 | 0.442177255 |
| 0.420942299 | 0.39026021  | 0.415581206 | 0.369843386 |
| 0.39180026  | 0.354074232 | 0.37027762  | 0.191899206 |
| 0.030620838 | 0.025024905 | 0.169805857 | 0.138326788 |
| 0.001735536 | 0.324107293 | 0.19139223  | 0.06351225  |
| 0.394740144 | 0.18505591  | 0.008461162 | 0.29218622  |
| 0.005116712 | 0.244888276 | 0.135194307 | 0.096522065 |
| 0.301567584 | 0.002003024 | 0.157550282 | 0.210748922 |
| 0.341330502 | 0.24884401  | 0.271991817 | 0.45879294  |
| 0.19230162  | 0.060634291 | 0.166593848 | 0.358403443 |
| 0.018407589 | 0.063181867 | 0.171041786 | 0.03700244  |
| 0.145976434 | 0.36888097  | 0.227915431 | 0.018944712 |
| 0.143878541 | 0.000253651 | 0.275990912 | 0.457263494 |
| 0.389103791 | 0.479227942 | 0.444668831 | 0.235568623 |
| 0.43733863  | 0.212396749 | 0.48010162  | 0.331983686 |
| 0.220937756 | 0.000157109 | 0.001968171 | 0.471463983 |
| 0.276327662 | 0.022146904 | 0.066958348 | 0.207800339 |
| 0.039868522 | 0.051877334 | 0.01765004  | 0.14519851  |
| 0.324398447 | 0.148682912 | 0.150506038 | 0.378777468 |
| 0.102242255 | 0.117976392 | 0.197685396 | 0.032627309 |
| 0.319775146 | 0.014145986 | 0.031249652 | 0.005562396 |
| 0.312267828 | 0.053098658 | 0.351335947 | 0.44786367  |
| 0.412701381 | 0.34232058  | 0.229294557 | 0.216647969 |
| 0.40722508  | 0.044559837 | 0.264312913 | 0.045325138 |
| 0.417377935 | 0.298448558 | 0.22607553  | 0.209165422 |
| 0.434505581 | 0.385046499 | 0.006456509 | 0.344867185 |
| 0.004589522 | 0.001683163 | 0.185711531 | 0.15335884  |
| 0.056844047 | 0.221945594 | 0.154958016 | 0.108324144 |
| 0.116611071 | 0.007517777 | 0.229964552 | 0.19828301  |
| 0.178778445 | 0.199851281 | 0.205410581 | 0.146308969 |
| 0.15724054  | 0.086624819 | 0.09262744  | 0.055943037 |
| 0.13855548  | 0.212017034 | 0.109770802 | 0.003208153 |
| 0.273579031 | 0.290474998 | 0.01430033  | 0.071777495 |
| 0.39906299  | 0.463171588 | 0.009864295 | 0.002724187 |
| 0.161323608 | 0.16163579  | 0.472520177 | 0.442325246 |
| 0.429922513 | 0.443667642 | 0.28362102  | 0.053270551 |
| 0.018595295 | 0.205497725 | 0.228619139 | 0.051985693 |
| 0.456623606 | 0.020535285 | 0.415872914 | 0.26684374  |
| 0.043129327 | 0.088081585 | 0.009092356 | 0.023220751 |
| 0.348416465 | 0.081096094 | 0.081064592 | 0.065497056 |
| 0.160662071 | 0.221082572 | 0.010118112 | 0.085172415 |
| 0.239417986 | 0.178378838 | 0.065059492 | 0.141771906 |
| 0.267479617 | 0.141867252 | 0.388851586 | 0.357558313 |
| 0.054789704 | 0.034366066 | 0.117272013 | 0.322549451 |
| 0.415772676 | 0.292575116 | 0.011910771 | 0.395559334 |
| 0.44953209  | 0.376798314 | 0.421177275 | 0.325688067 |
| 0.028793452 | 0.263071084 | 0.230448373 | 0.219069928 |
| 0.079606102 | 0.201391362 | 0.107550698 | 0.016750215 |
| 0.205668103 | 0.373330157 | 0.341972785 | 0.069047659 |
| 0.309338379 | 0.05095758  | 0.016821648 | 0.417993146 |
| 0.15468004  | 0.027830637 | 0.197668348 | 0.419310442 |
| 0.000877404 | 0.197045871 | 0.452241274 | 0.11609448  |
| 0.432746973 | 0.442621575 | 0.353255154 | 0.11575129  |
| 0.00205895  | 0.372221433 | 0.265414588 | 0.218831685 |

|             |             |             |             |
|-------------|-------------|-------------|-------------|
| 0.36260403  | 0.251705238 | 0.076677888 | 0.02411571  |
| 0.197288021 | 0.03280648  | 0.051668189 | 0.195808196 |
| 0.165185755 | 0.275932966 | 0.104377853 | 0.092715532 |
| 0.091965134 | 0.036235378 | 0.244880918 | 0.10333898  |
| 0.135105977 | 0.140643166 | 0.264402518 | 0.17601076  |
| 0.174969153 | 0.380331709 | 0.322681686 | 0.005239821 |
| 0.287037216 | 0.353991535 | 0.382532986 | 0.000261836 |
| 0.381311386 | 0.000761553 | 0.094786359 | 0.107442538 |
| 0.094141417 | 0.094908132 | 0.166146834 | 0.17404559  |
| 0.21552806  | 0.088004119 | 0.131686221 | 0.130400652 |
| 0.077404883 | 0.086116717 | 0.282671129 | 0.164654629 |
| 0.170208552 | 0.04385029  | 0.045370846 | 0.048612533 |
| 0.017008262 | 0.430797395 | 0.150350945 | 0.029317623 |
| 0.121083665 | 0.173766919 | 0.262266928 | 0.424415548 |
| 0.359296377 | 0.057553596 | 0.169116067 | 0.394782901 |
| 0.179388759 | 0.160362721 | 0.015185854 | 0.224203395 |
| 0.102498574 | 0.153058773 | 0.239299529 | 0.16729314  |
| 0.328014548 | 0.299490571 | 0.145449794 | 0.37003934  |
| 0.19348826  | 0.190313494 | 0.183841645 | 0.033131788 |
| 0.062717811 | 0.056025152 | 0.192150228 | 0.000435744 |
| 0.233460645 | 0.110885226 | 0.450729085 | 0.402501757 |
| 0.268582252 | 0.305381878 | 0.183627418 | 0.026152973 |
| 0.173797107 | 0.10121991  | 0.06049984  | 0.390198633 |
| 0.264958325 | 0.073968352 | 0.196035362 | 0.159016525 |
| 0.392006976 | 0.371026654 | 0.16668617  | 0.097601969 |
| 0.114987519 | 0.09613154  | 0.373874458 | 0.038798169 |
| 0.32171806  | 0.138520661 | 0.238394274 | 0.152068937 |
| 0.105831058 | 0.475396868 | 0.015695949 | 0.486275115 |
| 0.184052483 | 0.061823158 | 0.392727559 | 0.151227943 |
| 0.136483033 | 0.064193044 | 0.234973253 | 0.196319333 |
| 0.10111218  | 0.287863108 | 0.020172873 | 0.049002579 |
| 0.240316017 | 0.170089861 | 0.340766713 | 0.281185825 |
| 0.171736627 | 0.263990595 | 0.238924669 | 0.113906732 |
| 0.395069628 | 0.391722034 | 0.118516891 | 0.148550561 |
| 0.239708652 | 0.033982579 | 0.272715598 | 0.009891366 |
| 0.32849208  | 0.362543944 | 0.230812151 | 0.012930663 |
| 0.002816413 | 0.225080194 | 0.287764817 | 0.020962487 |
| 0.457800614 | 0.258281806 | 0.245289498 | 0.381945387 |
| 0.086836376 | 0.386636182 | 0.053461529 | 0.346026396 |
| 0.010778386 | 0.144020336 | 0.278602587 | 0.231030555 |
| 0.134310308 | 0.213858194 | 0.299452517 | 0.210287037 |
| 0.006538966 | 0.153245101 | 0.00067425  | 0.292199027 |
| 0.363202851 | 0.234488328 | 0.115165625 | 0.20609725  |
| 0.18446871  | 0.312272475 | 0.139510699 | 0.292254678 |
| 0.002441206 | 0.301943742 | 0.092164236 | 0.348664414 |
| 0.206465963 | 0.220628152 | 0.018473741 | 0.216508812 |
| 0.334901771 | 0.1554034   | 0.157953204 | 0.20549612  |
| 0.423541399 | 0.323314998 | 0.0855193   | 0.145989775 |
| 0.295370046 | 0.019866055 | 0.219436105 | 0.458268786 |
| 0.077233226 | 0.183143769 | 0.435262674 | 0.085055341 |
| 0.241835778 | 0.304948823 | 0.316418473 | 0.446648257 |
| 0.029073916 | 0.135923895 | 0.390138235 | 0.389286114 |
| 0.214028936 | 0.141421103 | 0.210091216 | 0.129653031 |
| 0.376702553 | 0.039744541 | 0.178112771 | 0.243794443 |

|               |             |             |             |
|---------------|-------------|-------------|-------------|
| 0.194418891   | 0.205779704 | 0.222563199 | 0.115119784 |
| 0.012264091   | 0.064329873 | 0.218891522 | 0.057215791 |
| 0.164146842   | 0.225246929 | 0.150136729 | 0.295964686 |
| 0.069134992   | 0.007826261 | 0.360622431 | 0.026368119 |
| 0.186938799   | 0.320524122 | 0.123444212 | 0.214504694 |
| 0.102671367   | 0.207777955 | 0.160895136 | 0.000484294 |
| 0.364740116   | 0.044172703 | 0.1810366   | 0.139174762 |
| 0.211708714   | 0.011493512 | 0.380182611 | 0.477319171 |
| 0.19516098    | 0.229293119 | 0.277425555 | 0.393370903 |
| 0.168422684   | 0.283758737 | 0.245260041 | 0.304897333 |
| 0.229874382   | 0.22021722  | 0.252075635 | 0.27719194  |
| 0.291768745   | 0.117506746 |             |             |
| 9430023L20RIK | 0.171976379 | 0.04215739  | 0.208361226 |
| 0.055457029   | 0.01596737  | 0.013304125 | 0.108431453 |
| 0.0643744     | 0.041972919 | 0.002245596 | 0.027692577 |
| 0.121983599   | 3.53E-05    | 0.043645214 | 0.104869733 |
| 0.010270544   | 0.109838004 | 0.141726811 | 0.003802094 |
| 0.015679853   | 0.016229808 | 0.002581899 | 0.02041167  |
| 0.013284898   | 0.24044509  | 0.038419604 | 0.004094877 |
| 0.038732429   | 0.000239228 | 0.015059745 | 0.001585899 |
| 0.095831207   | 0.012338551 | 0.00275983  | 1           |
| 0.013471619   | 0.000290727 | 0.105690462 | 0.026602348 |
| 0.002793087   | 0.121279357 | 0.00728696  | 0.05312607  |
| 0.007888407   | 0.181944514 | 0.000401516 | 0.009626389 |
| 0.032246368   | 0.021877965 | 0.197745914 | 0.021643052 |
| 0.00518642    | 0.065021016 | 0.018394769 | 0.002048434 |
| 0.001689262   | 0.001935494 | 4.35E-05    | 0.060399413 |
| 0.16261737    | 0.125835799 | 0.000329675 | 0.030863192 |
| 0.009480656   | 0.018253834 | 0.080737868 | 0.003687465 |
| 0.052519233   | 0.000416668 | 0.012026463 | 0.02398689  |
| 0.015475712   | 0.134565927 | 0.214240088 | 0.157620839 |
| 0.004871303   | 0.09006782  | 0.017965132 | 0.003347393 |
| 0.040338228   | 0.082792046 | 0.095947495 | 0.067751975 |
| 0.000768914   | 0.006385172 | 0.008040704 | 0.063131788 |
| 0.027590685   | 0.057456618 | 0.032185961 | 0.067392215 |
| 0.114130925   | 0.009201629 | 0.021611061 | 0.173420701 |
| 0.043220254   | 0.001259642 | 0.006567263 | 0.001916562 |
| 0.013784288   | 0.009598467 | 0.072104656 | 0.087624779 |
| 0.01104329    | 0.229242809 | 0.085673326 | 0.005758304 |
| 0.019430303   | 0.246566018 | 0.006244452 | 0.017785413 |
| 0.021099302   | 0.040207641 | 0.024995909 | 0.040483656 |
| 0.006780216   | 0.050487296 | 0.036330933 | 0.045853403 |
| 0.000145464   | 0.05191513  | 0.145823182 | 0.111769565 |
| 0.129086628   | 0.096241417 | 0.003979618 | 0.100627235 |
| 0.031202213   | 0.049560362 | 0.08443473  | 0.048209724 |
| 0.027095753   | 0.070532291 | 0.048699551 | 0.034435426 |
| 0.196233327   | 0.000986341 | 0.008009098 | 0.027326017 |
| 0.025798155   | 0.163957891 | 0.004437147 | 0.084914512 |
| 0.091561492   | 0.02350892  | 0.084693416 | 0.103917388 |
| 0.042062408   | 0.067875767 | 0.033580627 | 0.130578292 |
| 0.077028347   | 0.085006563 | 0.052186552 | 0.011388324 |
| 0.081495444   | 0.043792658 | 0.001712593 | 0.045380461 |
| 0.064247805   | 0.004117134 | 0.023810296 | 0.027782616 |
| 0.05435717    | 0.018836913 | 0.045276211 | 0.037458928 |

|             |             |             |             |
|-------------|-------------|-------------|-------------|
| 0.051934063 | 0.229949129 | 0.001099057 | 0.036489888 |
| 0.067177472 | 0.070033778 | 0.029399122 | 0.00489019  |
| 0.01168365  | 0.019454287 | 0.019385637 | 0.001590097 |
| 0.076600395 | 0.036415483 | 0.028465895 | 0.030712734 |
| 0.022441187 | 0.133798227 | 0.003221702 | 0.090340197 |
| 0.11309087  | 0.135359947 | 0.295279318 | 0.061024138 |
| 0.00435237  | 0.116000633 | 0.015123384 | 0.011545084 |
| 0.129202795 | 0.019803776 | 0.00137799  | 0.012971801 |
| 0.295216837 | 0.008600035 | 0.140608432 | 0.103541664 |
| 0.126926336 | 0.267176068 | 0.023442039 | 0.055841074 |
| 0.03418548  | 0.225937568 | 0.011453334 | 0.038744052 |
| 0.007637931 | 0.193188935 | 0.021624187 | 0.062235758 |
| 0.080411294 | 0.007938313 | 0.124741423 | 0.110605513 |
| 0.003193076 | 0.000754977 | 0.000174631 | 0.00523276  |
| 0.251431288 | 0.012257125 | 0.013199181 | 0.020246828 |
| 0.063112945 | 0.072572351 | 0.004013944 | 0.114140566 |
| 0.185306382 | 0.01494918  | 0.034706598 | 0.00940621  |
| 0.200433077 | 0.040160436 | 0.026565949 | 0.006762211 |
| 0.043810992 | 0.001555875 | 0.0009677   | 0.034703438 |
| 0.00064924  | 0.004291458 | 0.031084669 | 0.019499369 |
| 0.002945988 | 0.171399381 | 0.046915348 | 0.001659711 |
| 0.006850452 | 0.026603383 | 0.068081765 | 0.006249218 |
| 0.093664938 | 0.06442023  | 0.009026782 | 0.01129726  |
| 0.201860717 | 0.054689939 | 0.053741505 | 0.041404027 |
| 0.002266004 | 0.050753675 | 0.024503605 | 0.047571745 |
| 0.045406802 | 0.002697271 | 0.000103154 | 0.029166191 |
| 0.031952211 | 0.001852095 | 0.259429675 | 0.013406677 |
| 0.004263431 | 0.011624461 | 0.011110432 | 0.050751709 |
| 0.093158267 | 0.061490296 | 0.059329131 | 0.030062697 |
| 0.064104124 | 0.108435844 | 0.037811384 | 0.053477521 |
| 0.001505593 | 0.006662273 | 0.005846894 | 0.039939937 |
| 0.177558031 | 0.005871596 | 0.098996839 | 0.000156879 |
| 0.000286871 | 0.160701276 | 0.238936577 | 0.066608503 |
| 0.003600238 | 0.006857681 | 0.018770814 | 0.046204657 |
| 0.146404779 | 0.066934941 | 0.085382323 | 0.011869196 |
| 0.061502195 | 0.005676772 | 0.006058047 | 0.012597778 |
| 0.114162624 | 0.143752271 | 0.054919272 | 0.087874945 |
| 0.223348522 | 0.002404505 | 0.026482472 | 0.012090424 |
| 0.137787509 | 0.022124158 | 0.285360565 | 0.267440959 |
| 0.033850083 | 0.245548093 | 0.132085564 | 0.003349655 |
| 0.047089988 | 0.22384996  | 0.083743162 | 0.039257528 |
| 0.048623101 | 0.048714172 | 0.047585225 | 0.066834741 |
| 0.034339799 | 0.023638542 | 0.025394796 | 0.03318533  |
| 0.08296191  | 0.12064944  | 0.002063081 | 0.025561633 |
| 0.006588704 | 0.047502213 | 0.016201893 | 0.230119992 |
| 0.01522694  | 0.048581682 | 0.159812686 | 0.010298873 |
| 0.115589494 | 0.000128201 | 0.010774069 | 0.034246397 |
| 0.029341084 | 0.198921082 | 0.005162224 | 0.001251051 |
| 0.079294181 | 0.091360998 | 0.002056223 | 0.057930188 |
| 0.037580066 | 0.165986327 | 0.024248789 | 0.026917708 |
| 0.128379215 | 0.000752218 | 0.010686839 | 0.000928073 |
| 0.003282942 | 0.065050783 | 0.003672617 | 0.085165218 |
| 0.080240104 | 0.162520623 | 0.091423695 | 0.057778327 |
| 0.059565218 | 0.03885335  | 0.05158663  | 0.003680474 |

|             |             |             |             |
|-------------|-------------|-------------|-------------|
| 0.056658604 | 0.002092153 | 0.04316114  | 0.046862299 |
| 0.002663024 | 0.017804783 | 0.02702057  | 0.029566097 |
| 0.009894177 | 0.273136831 | 0.17481727  | 0.004928488 |
| 0.068276103 | 0.092893223 | 0.142903302 | 0.007718251 |
| 0.01752564  | 0.027430598 | 0.004050961 | 0.060500867 |
| 0.053658811 | 0.068404147 | 0.007634495 | 0.236717714 |
| 0.011021221 | 0.128504123 | 0.206375533 | 0.02273916  |
| 0.026278425 | 0.235798639 | 0.099938819 | 0.049751502 |
| 0.068863885 | 0.020152414 | 0.001303756 | 0.003152544 |
| 0.031298611 | 0.201528785 | 0.001164004 | 0.180672087 |
| 0.050110666 | 0.015268709 | 0.085761971 | 0.122438055 |
| 0.053139953 | 0.066618877 | 0.187727005 | 0.029526449 |
| 0.154976612 | 0.004350348 | 0.021432903 | 0.077398472 |
| 0.001295868 | 0.005905469 | 0.139613589 | 0.014367645 |
| 0.018862594 | 0.109308761 | 0.00184407  | 0.00250023  |
| 0.052985332 | 0.015207296 | 0.009372367 | 0.08469524  |
| 0.014105102 | 0.005524206 | 0.052695745 | 0.052432301 |
| 0.003014265 | 0.104120068 | 0.23369992  | 0.152277134 |
| 0.00718352  | 0.00619738  | 0.236277734 | 0.195088518 |
| 0.040033374 | 0.033103054 | 0.068350217 | 0.098264236 |
| 0.13307816  | 0.010822015 | 0.034389442 | 0.044517529 |
| 0.072822321 | 0.062832859 | 0.119717366 | 0.024473071 |
| 0.166261054 | 0.032657319 | 0.009065993 | 0.024161668 |
| 0.045689374 | 0.190109754 | 0.058834906 | 0.00313516  |
| 0.198995812 | 0.062670188 | 0.111021985 | 0.194053016 |
| 0.005692727 | 0.148277235 | 0.066870641 | 0.172489336 |
| 0.016441281 | 0.001487243 | 0.163726906 | 0.115119848 |
| 0.058375158 | 0.000674823 | 0.152831122 | 0.021519737 |
| 0.058346563 | 0.001392244 | 0.013776835 | 0.086971375 |
| 0.226072517 | 0.137149961 | 0.021026167 | 0.02583354  |
| 0.021731714 | 0.005136585 | 0.098498782 | 0.038022411 |
| 0.042170883 | 0.010696161 | 0.062965358 | 0.051103392 |
| 0.243331545 | 0.008720237 | 0.002374225 | 0.014764406 |
| 0.104357245 | 0.017214033 | 0.044054316 | 0.255788508 |
| 0.110225071 | 0.0901985   | 0.047376387 | 0.097469426 |
| 0.009144521 | 0.13567113  | 0.188128757 | 0.030508155 |
| 0.002346226 | 0.065033562 | 0.005807014 | 0.01861668  |
| 0.025740329 | 0.00053985  | 0.038474052 | 0.036097052 |
| 0.067497515 | 0.038770638 | 0.084654577 | 0.02207133  |
| 0.000625957 | 0.009695348 | 0.025562471 | 0.008942385 |
| 0.039269947 | 0.069587191 | 0.011464145 | 0.090287481 |
| 0.123643311 | 0.244039592 | 0.03377863  | 0.006246704 |
| 0.000519999 | 0.019054849 | 0.15033201  | 0.072239023 |
| 0.043228429 | 0.151050456 | 0.00150949  | 0.074073195 |
| 0.001103264 | 0.138056465 | 0.072759455 | 0.002939936 |
| 0.00035462  | 0.037566678 | 0.033871105 | 0.21002605  |
| 0.00537589  | 0.038413442 | 0.048761998 | 0.011842811 |
| 0.015735058 | 0.138907392 | 0.045686333 | 0.051252774 |
| 0.051544522 | 0.033946052 | 0.04201521  | 0.013740914 |
| 0.029348789 | 0.060240463 | 0.04229281  | 0.104695088 |
| 0.058311064 | 0.069490402 | 0.014820257 | 0.021128292 |
| 0.014416999 | 0.142158363 | 0.298085366 | 0.317892521 |
| 0.093932219 | 0.034922518 | 0.186577412 | 0.293357023 |
| 0.084088547 | 0.011686421 | 0.105680587 | 0.050551855 |

|               |             |             |             |
|---------------|-------------|-------------|-------------|
| 0.063711851   | 0.234038959 | 0.015286701 | 0.03866859  |
| 9.36E-05      | 0.005788399 | 0.099790902 | 0.022878907 |
| 0.078533003   | 0.004793343 | 0.01059205  | 0.047637039 |
| 0.0177962     | 0.122621724 | 0.17882372  | 0.068808292 |
| 0.015504247   | 0.008641692 | 0.003530651 | 0.059643455 |
| 0.110594996   | 0.195670268 | 0.013429252 | 0.185659801 |
| 0.042146609   | 0.022707266 | 0.026672229 | 0.07057331  |
| 0.001072531   | 0.088154499 | 0.002678593 | 0.096607478 |
| 0.001916851   | 0.196413188 | 0.213559928 | 0.01856663  |
| 0.000185665   | 0.079621106 | 0.021849911 | 0.013097091 |
| 0.018446683   | 0.015068514 | 0.007628283 | 0.038551266 |
| 0.054623946   | 0.147756456 | 0.076582189 | 0.137046981 |
| 0.006947576   | 0.009585496 | 0.015414995 | 0.023592713 |
| 0.034302911   | 0.03964205  | 0.260101181 | 0.036504444 |
| 0.00927787    | 0.234845331 | 0.091993271 | 0.035657351 |
| 0.017112063   | 0.032914011 | 0.000418882 | 0.006868342 |
| 0.025465347   | 0.002060527 | 0.000203838 | 0.000845663 |
| 0.060932199   | 0.005447043 | 0.022449559 | 0.031110892 |
| 0.008957123   | 0.055121122 | 0.000236357 | 0.033199604 |
| 0.061106339   | 0.084201444 | 0.013123245 | 0.125494334 |
| 0.054491875   | 0.132215052 | 0.02436344  | 0.000355826 |
| 0.008437912   | 0.004886067 | 0.001609045 | 0.131474981 |
| 0.11577753    | 0.000543568 | 0.011912446 | 0.170680037 |
| 0.031681994   | 0.000160118 | 0.016840837 | 0.019029234 |
| 0.141821496   | 0.088516303 | 0.043101596 | 0.027633247 |
| 0.038450592   | 0.088661803 | 0.005080757 | 0.005980388 |
| 0.012949682   | 0.004854763 | 0.041865396 | 0.00389615  |
| 0.172940792   | 0.010424521 | 0.010137871 | 0.133079403 |
| 0.083171848   | 0.004127276 | 0.188280745 | 0.00118698  |
| 0.081286613   | 0.057306044 | 0.004369984 | 0.004919553 |
| 0.146328511   | 0.009392813 | 0.107413854 | 0.056676871 |
| 0.000293414   | 0.012501233 | 0.098564459 | 0.006225588 |
| 0.11342113    | 0.002866143 | 0.118312427 | 0.001117447 |
| 0.051955248   | 0.043501109 | 0.176651129 | 0.007987694 |
| 0.012155969   | 0.267858535 | 0.004856898 | 0.053905564 |
| 0.069546822   | 0.005010352 | 0.025355772 | 0.045245312 |
| 0.003033174   | 0.063279881 | 0.007351646 | 0.052607739 |
| 0.035739669   | 0.106574048 | 0.023397912 | 0.045036306 |
| 0.084670814   | 0.004797483 | 0.002302472 | 0.017233046 |
| 0.064650136   | 0.079233788 | 0.00224092  | 0.061611313 |
| 0.00177358    | 0.055803774 | 0.017346165 | 0.019062708 |
| 0.084519728   | 0.033976393 | 0.008854855 | 0.189717868 |
| 0.045691664   | 0.016606079 | 0.009390863 | 0.104696172 |
| 0.038793661   | 0.104061431 | 0.086714924 | 0.000103949 |
| 0.044677096   | 0.023479572 | 0.080300137 | 0.009318704 |
| 0.237967033   | 0.030512585 | 0.026271299 | 0.048247627 |
| 0.033863763   | 0.011545776 | 0.010830074 | 0.013252383 |
| 0.001068479   | 0.131833351 | 0.073963491 | 0.03938963  |
| 0.059424426   | 0.00185822  | 0.000649324 | 0.056079784 |
| 0.000880807   | 0.000860243 | 0.00165368  | 0.020152967 |
| 0.00184506    | 0.003624569 | 0.003330958 | 0.002941036 |
| 0.048418283   | 0.038432188 |             |             |
| 9930021J03RIK | 0.058697607 | 0.420851664 | 0.042972158 |
| 0.10070844    | 0.219746989 | 0.262513858 | 0.044034824 |

|             |             |             |             |
|-------------|-------------|-------------|-------------|
| 0.089959603 | 0.307595483 | 0.17888298  | 0.243048515 |
| 0.016249177 | 0.095302711 | 0.451491246 | 0.044674451 |
| 0.283559016 | 0.029317091 | 0.07741277  | 0.059790392 |
| 0.146860854 | 0.194793822 | 0.254777902 | 0.228211756 |
| 0.195495504 | 0.184474725 | 0.234547671 | 0.248444051 |
| 0.498421773 | 0.211133832 | 0.361382028 | 0.1172681   |
| 0.404394248 | 0.246050728 | 0.255328336 | 0.013471619 |
| 1           | 0.011647431 | 0.417652369 | 0.17554635  |
| 0.12402223  | 0.341077935 | 0.194919214 | 0.176101963 |
| 0.204168397 | 0.02928812  | 0.148450667 | 0.321318893 |
| 0.219213141 | 0.1935629   | 0.048520595 | 0.355802648 |
| 0.219853017 | 0.295157763 | 0.326676978 | 0.001684294 |
| 0.227949206 | 0.088766879 | 0.178730485 | 0.504678364 |
| 0.171209072 | 0.100037746 | 0.176798517 | 0.168440195 |
| 0.278230959 | 0.307362882 | 0.210970035 | 0.203820332 |
| 0.502131051 | 0.150029565 | 0.371025742 | 0.114929169 |
| 0.231114179 | 0.02363924  | 0.138374805 | 0.061499334 |
| 0.243618092 | 0.149487827 | 0.243617164 | 0.212790579 |
| 0.407673861 | 0.509860356 | 0.179755816 | 0.483469253 |
| 0.0852722   | 0.240755454 | 0.194439713 | 0.262313131 |
| 0.303660951 | 0.059001254 | 0.363228102 | 0.512371025 |
| 0.037184975 | 0.24795654  | 0.322082714 | 0.101566938 |
| 0.429188995 | 0.203233313 | 0.227318242 | 0.161775231 |
| 0.305474853 | 0.227445987 | 0.467924656 | 0.247436857 |
| 0.230444917 | 0.054299214 | 0.473334665 | 0.233998913 |
| 0.218704179 | 0.058158922 | 0.156294576 | 0.453623875 |
| 0.308316468 | 0.497879201 | 0.398738788 | 0.323646335 |
| 0.239824811 | 0.503195639 | 0.332890006 | 0.420419774 |
| 0.1125649   | 0.522158063 | 0.12856418  | 0.040557662 |
| 0.050045747 | 0.074412165 | 0.161267356 | 0.288485219 |
| 0.479286164 | 0.26979491  | 0.131407768 | 0.159198639 |
| 0.460301511 | 0.468136266 | 0.514651169 | 0.384787238 |
| 0.031467429 | 0.182565942 | 0.235598993 | 0.205963483 |
| 0.311442173 | 0.082081689 | 0.194809107 | 0.497657484 |
| 0.374572607 | 0.423150728 | 0.109988925 | 0.489173757 |
| 0.134660575 | 0.516640489 | 0.443116506 | 0.120032169 |
| 0.508585751 | 0.486336693 | 0.513381619 | 0.355830632 |
| 0.476567928 | 0.21397308  | 0.055855807 | 0.352806959 |
| 0.499609467 | 0.015427145 | 0.477494741 | 0.501695404 |
| 0.489797941 | 0.449877158 | 0.521416766 | 0.518275947 |
| 0.498867529 | 0.051933761 | 0.022649412 | 0.225505853 |
| 0.494082222 | 0.384298545 | 0.109322807 | 0.248973025 |
| 0.269920874 | 0.252140565 | 0.407536401 | 0.209668129 |
| 0.513672315 | 0.449175015 | 0.493342056 | 0.341217018 |
| 0.179820498 | 0.314336154 | 0.250646932 | 0.458658027 |
| 0.035505768 | 0.083263503 | 0.042445443 | 0.267185299 |
| 0.21060339  | 0.125751159 | 0.222756761 | 0.241528389 |
| 0.153261623 | 0.220292525 | 0.238210568 | 0.327474822 |
| 0.05236979  | 0.297567121 | 0.11259751  | 0.106803939 |
| 0.034070829 | 0.140069667 | 0.129491445 | 0.129705841 |
| 0.18107549  | 0.226699727 | 0.374957481 | 0.486767945 |
| 0.218316391 | 0.154462577 | 0.352292775 | 0.478263007 |
| 0.42876651  | 0.252331136 | 0.206268119 | 0.011022205 |
| 0.168879858 | 0.19398755  | 0.15208509  | 0.278868715 |



|             |             |             |             |
|-------------|-------------|-------------|-------------|
| 0.176011705 | 0.160104912 | 0.269317391 | 0.366179562 |
| 0.173998476 | 0.103662722 | 0.229914888 | 0.428920936 |
| 0.128377572 | 0.223503115 | 0.438447186 | 0.253090605 |
| 0.002803615 | 0.19823595  | 0.430513346 | 0.113750655 |
| 0.245033812 | 0.131070584 | 0.213732105 | 0.451151136 |
| 0.20336411  | 0.17497832  | 0.504541719 | 0.362244691 |
| 0.232431663 | 0.21350778  | 0.524359351 | 0.042515403 |
| 0.221783302 | 0.044780827 | 0.240523257 | 0.192825928 |
| 0.178277663 | 0.251167249 | 0.233223007 | 0.197476928 |
| 0.10405635  | 0.51451292  | 0.382855041 | 0.517490116 |
| 0.222892038 | 0.523318251 | 0.454819022 | 0.444589662 |
| 0.290086928 | 0.222503588 | 0.130896916 | 0.40857466  |
| 0.443871185 | 0.162463284 | 0.064730631 | 0.415594747 |
| 0.206058337 | 0.334309296 | 0.084173809 | 0.490572288 |
| 0.492586856 | 0.454340017 | 0.117338138 | 0.343579344 |
| 0.364638689 | 0.158252953 | 0.398349555 | 0.531531173 |
| 0.177446131 | 0.222821354 | 0.216052819 | 0.392314403 |
| 0.133013684 | 0.161348405 | 0.306877324 | 0.161046003 |
| 0.014357363 | 0.058899249 | 0.046856209 | 0.127619873 |
| 0.140962224 | 0.310929714 | 0.313970882 | 0.511725165 |
| 0.089035443 | 0.426379115 | 0.19747581  | 0.189005203 |
| 0.399382696 | 0.229510888 | 0.26831596  | 0.305145413 |
| 0.213819022 | 0.016381504 | 0.102857231 | 0.506281741 |
| 0.031106646 | 0.191441804 | 0.201928995 | 0.00565137  |
| 0.03450297  | 0.379557958 | 0.089083503 | 0.190493183 |
| 0.493352464 | 0.189443105 | 0.152990492 | 0.177343712 |
| 0.302215256 | 0.069634492 | 0.004607388 | 0.47969137  |
| 0.478300876 | 0.447921154 | 0.474644389 | 0.449550561 |
| 0.423988771 | 0.369694359 | 0.373842937 | 0.227749634 |
| 0.072933421 | 0.060337954 | 0.148281214 | 0.182948786 |
| 0.004841835 | 0.361048009 | 0.21222892  | 0.120077673 |
| 0.381873519 | 0.234192176 | 0.033070032 | 0.269409953 |
| 0.017741219 | 0.159728765 | 0.198626731 | 0.152515536 |
| 0.319188564 | 0.012005068 | 0.159194325 | 0.206158509 |
| 0.427727708 | 0.338865084 | 0.23043633  | 0.524015022 |
| 0.222372198 | 0.106336831 | 0.199128014 | 0.374893626 |
| 0.053932116 | 0.061864014 | 0.224355747 | 0.024873892 |
| 0.169481861 | 0.449543625 | 0.242163566 | 0.045187279 |
| 0.193243625 | 0.004494857 | 0.353963749 | 0.52987671  |
| 0.457434898 | 0.518018859 | 0.506409232 | 0.208467795 |
| 0.501122957 | 0.101872059 | 0.531036294 | 0.384701772 |
| 0.215505315 | 0.000831291 | 0.007908134 | 0.485981718 |
| 0.24983028  | 0.054180888 | 0.118708076 | 0.236991981 |
| 0.089189187 | 0.106472285 | 0.055087005 | 0.144073779 |
| 0.32612936  | 0.181198434 | 0.15262538  | 0.456635929 |
| 0.157785866 | 0.166219666 | 0.230890265 | 0.073538447 |
| 0.300496181 | 0.043618827 | 0.070228761 | 0.0095703   |
| 0.323093576 | 0.103952639 | 0.453341376 | 0.508532913 |
| 0.491955536 | 0.329720269 | 0.201120194 | 0.258333524 |
| 0.4359237   | 0.088400957 | 0.238522029 | 0.088120794 |
| 0.47722769  | 0.291528478 | 0.295561997 | 0.287083243 |
| 0.498521888 | 0.461164023 | 0.028280495 | 0.367326308 |
| 0.014500001 | 0.003485773 | 0.217760548 | 0.218166351 |
| 0.053017865 | 0.227835727 | 0.224129696 | 0.149761429 |

|             |             |             |             |
|-------------|-------------|-------------|-------------|
| 0.166485719 | 0.027895248 | 0.190945106 | 0.170719713 |
| 0.21393869  | 0.219262548 | 0.197059751 | 0.210801949 |
| 0.179663017 | 0.095757494 | 0.149739478 | 0.113583172 |
| 0.155798945 | 0.289011797 | 0.18723605  | 0.016988246 |
| 0.2475525   | 0.258724511 | 0.045763546 | 0.130431121 |
| 0.437280071 | 0.494406702 | 0.032909508 | 0.012085777 |
| 0.238509556 | 0.201787171 | 0.509480963 | 0.495787842 |
| 0.517648136 | 0.516077796 | 0.386957901 | 0.094899438 |
| 0.055864992 | 0.222588012 | 0.20368676  | 0.082266898 |
| 0.517339769 | 0.049451248 | 0.487092525 | 0.213459111 |
| 0.088292372 | 0.139627566 | 0.033538279 | 0.061748352 |
| 0.289834799 | 0.141108778 | 0.133658702 | 0.110701171 |
| 0.203821373 | 0.186302998 | 0.03619053  | 0.13652698  |
| 0.298287766 | 0.130011839 | 0.115411767 | 0.208125008 |
| 0.32410635  | 0.134804946 | 0.365359276 | 0.447224972 |
| 0.106431987 | 0.074025672 | 0.170309478 | 0.345726101 |
| 0.423106802 | 0.250851398 | 0.029772244 | 0.439933791 |
| 0.50141908  | 0.354544523 | 0.497321616 | 0.384076734 |
| 0.06590807  | 0.249178515 | 0.20873948  | 0.21841748  |
| 0.131646325 | 0.254347997 | 0.164031534 | 0.045678399 |
| 0.290264827 | 0.475366243 | 0.390769354 | 0.128068394 |
| 0.290264133 | 0.093062722 | 0.042043017 | 0.450697244 |
| 0.134591726 | 0.070621745 | 0.214683176 | 0.42093882  |
| 0.001856167 | 0.132672724 | 0.48540718  | 0.186845156 |
| 0.511430917 | 0.473088258 | 0.435892127 | 0.183053115 |
| 0.00143688  | 0.329159496 | 0.28227334  | 0.238280067 |
| 0.414692555 | 0.329381051 | 0.124697469 | 0.062358323 |
| 0.27150805  | 0.07120422  | 0.10244482  | 0.232844056 |
| 0.128401378 | 0.302937922 | 0.170992975 | 0.135735754 |
| 0.140938108 | 0.074961592 | 0.20225728  | 0.166555416 |
| 0.114692229 | 0.215240703 | 0.330297623 | 0.180550673 |
| 0.140856647 | 0.427563324 | 0.35589763  | 0.022971354 |
| 0.24581385  | 0.391578444 | 0.439219992 | 0.001629112 |
| 0.373697642 | 0.007458894 | 0.150601564 | 0.159614162 |
| 0.150944961 | 0.15135097  | 0.198723259 | 0.193995247 |
| 0.252179372 | 0.145984307 | 0.189269321 | 0.187851679 |
| 0.1273453   | 0.147879508 | 0.270351778 | 0.205899831 |
| 0.203735148 | 0.094003413 | 0.097413045 | 0.103097595 |
| 0.050288236 | 0.470548955 | 0.239133374 | 0.065763918 |
| 0.178905632 | 0.21156779  | 0.346451941 | 0.4830791   |
| 0.425637554 | 0.109459953 | 0.216221724 | 0.434675085 |
| 0.151592332 | 0.19502732  | 0.046164837 | 0.23292033  |
| 0.163499162 | 0.177058808 | 0.239187533 | 0.210343374 |
| 0.341437591 | 0.397370373 | 0.232714771 | 0.440603161 |
| 0.225022949 | 0.20416578  | 0.182413926 | 0.074538606 |
| 0.117163937 | 0.107563817 | 0.190797981 | 0.001878075 |
| 0.282334989 | 0.169358518 | 0.466873239 | 0.477960499 |
| 0.216807179 | 0.389794945 | 0.204072711 | 0.065080725 |
| 0.159988325 | 0.168845027 | 0.116464108 | 0.383983731 |
| 0.179228591 | 0.140144561 | 0.197361054 | 0.220253707 |
| 0.381393801 | 0.357709957 | 0.182681047 | 0.165353574 |
| 0.155824224 | 0.1470003   | 0.457807731 | 0.083032984 |
| 0.286178524 | 0.144618892 | 0.244507948 | 0.195660967 |
| 0.153177946 | 0.510978872 | 0.045281338 | 0.522598846 |

|               |             |             |             |
|---------------|-------------|-------------|-------------|
| 0.21025562    | 0.118928929 | 0.491485209 | 0.209345999 |
| 0.189958598   | 0.112311007 | 0.156739825 | 0.232462892 |
| 0.153306777   | 0.245541997 | 0.010785149 | 0.055476783 |
| 0.295536263   | 0.190323191 | 0.358890953 | 0.316092022 |
| 0.176970941   | 0.313608713 | 0.16241291  | 0.174093839 |
| 0.46735762    | 0.48465385  | 0.167685802 | 0.218840883 |
| 0.302788576   | 0.084794885 | 0.30654495  | 0.013116466 |
| 0.300810281   | 0.302548789 | 0.238646553 | 0.046197229 |
| 0.016332048   | 0.156461401 | 0.276198317 | 0.049516558 |
| 0.479338054   | 0.168018975 | 0.254133078 | 0.378649447 |
| 0.150661918   | 0.483336778 | 0.100555022 | 0.362706858 |
| 0.03064377    | 0.199617178 | 0.24444801  | 0.230000951 |
| 0.166725994   | 0.199541815 | 0.331228294 | 0.183598723 |
| 0.028069392   | 0.196077441 | 0.000739447 | 0.397989105 |
| 0.446953005   | 0.214178778 | 0.194396742 | 0.188538943 |
| 0.24115404    | 0.373183281 | 0.181442513 | 0.253996389 |
| 0.011694423   | 0.267369245 | 0.147878374 | 0.414306294 |
| 0.15289236    | 0.225944911 | 0.04962635  | 0.205702147 |
| 0.441767694   | 0.188784361 | 0.239503932 | 0.178350695 |
| 0.483419362   | 0.370794024 | 0.14352957  | 0.172447328 |
| 0.290915645   | 0.051607961 | 0.237145496 | 0.523048341 |
| 0.13784949    | 0.164075117 | 0.437976646 | 0.137542298 |
| 0.220749444   | 0.381909314 | 0.278259302 | 0.514215233 |
| 0.066346609   | 0.199936116 | 0.404813717 | 0.44239571  |
| 0.28344637    | 0.137682726 | 0.18895693  | 0.165972413 |
| 0.448266189   | 0.083273438 | 0.176385632 | 0.304137235 |
| 0.163496664   | 0.261176185 | 0.229738422 | 0.148525163 |
| 0.039436199   | 0.122462844 | 0.265862981 | 0.105907615 |
| 0.20540515    | 0.224454826 | 0.164712996 | 0.381347871 |
| 0.117583333   | 0.024711367 | 0.446095264 | 0.023099428 |
| 0.228089065   | 0.320553084 | 0.179254228 | 0.225080388 |
| 0.17394665    | 0.242231346 | 0.190665998 | 0.001513695 |
| 0.39378329    | 0.037662301 | 0.216917448 | 0.16850331  |
| 0.202127848   | 0.038093066 | 0.460307684 | 0.519624709 |
| 0.249731542   | 0.22472458  | 0.233650987 | 0.466636811 |
| 0.125017343   | 0.224941207 | 0.228590771 | 0.313930693 |
| 0.180981292   | 0.216952118 | 0.247034446 | 0.24587208  |
| 0.337745433   | 0.187031596 |             |             |
| A130014H13RIK | 0.001246719 | 0.014334401 | 0.000197275 |
| 0.000126969   | 0.043048861 | 0.001998565 | 0.009233187 |
| 0.00814712    | 0.031965684 | 0.009417479 | 0.006574998 |
| 0.000564681   | 0.020319898 | 0.015956609 | 0.01254863  |
| 0.027212397   | 0.005617567 | 0.012373922 | 0.004425878 |
| 0.004352568   | 0.04407863  | 0.004975806 | 0.003009354 |
| 0.073310699   | 0.005775834 | 0.010091488 | 0.041872052 |
| 0.014268232   | 0.001071886 | 0.009684041 | 5.49E-05    |
| 0.017441874   | 0.036406405 | 0.013273177 | 0.000290727 |
| 0.011647431   | 1           | 0.018617585 | 0.017557658 |
| 0.002315902   | 0.013309137 | 0.003274971 | 0.005663539 |
| 0.00954216    | 0.000319828 | 0.000227964 | 0.043178114 |
| 0.027533343   | 0.032424996 | 0.00191761  | 0.013166661 |
| 0.027787735   | 0.005805532 | 0.008053152 | 4.90E-06    |
| 0.018320061   | 0.018152854 | 0.029226255 | 0.012738343 |
| 0.009226409   | 0.014589606 | 0.014637354 | 0.041104927 |

|             |             |             |             |
|-------------|-------------|-------------|-------------|
| 0.0480343   | 0.066101515 | 0.047666787 | 0.012601921 |
| 0.012481516 | 0.040177063 | 0.026005995 | 0.000100981 |
| 0.009394924 | 0.008102626 | 0.013983772 | 0.01659471  |
| 0.017142098 | 0.018000196 | 0.017681605 | 0.044568121 |
| 0.00921231  | 0.021612426 | 0.033816335 | 0.013981258 |
| 0.103123413 | 0.059553143 | 0.034500508 | 0.0441075   |
| 0.058245662 | 0.035200377 | 0.00946144  | 0.018162849 |
| 0.018160171 | 0.010291005 | 0.02623931  | 0.009501569 |
| 0.010176478 | 0.069919295 | 0.003933438 | 0.018424338 |
| 0.050315659 | 0.039863571 | 0.025669832 | 0.008763044 |
| 0.047498274 | 0.003443539 | 0.01159835  | 0.051122526 |
| 0.004899451 | 0.002074078 | 0.036970155 | 0.024955784 |
| 0.011285438 | 0.012021114 | 0.020772599 | 0.038423055 |
| 0.025213694 | 0.012893505 | 0.008334575 | 0.02333572  |
| 0.000760799 | 0.016071756 | 0.004174168 | 0.003496769 |
| 0.001982625 | 0.019460653 | 0.129914033 | 0.032687578 |
| 0.014913302 | 0.01856131  | 0.00425903  | 0.0284201   |
| 0.032900964 | 0.010238149 | 0.017781241 | 0.019975298 |
| 0.002380779 | 0.089916088 | 0.019325558 | 0.007910859 |
| 0.025905623 | 0.027514738 | 0.041312518 | 0.013837107 |
| 0.008880591 | 0.024609362 | 0.004176366 | 0.018376616 |
| 0.048386734 | 0.017112429 | 0.008187486 | 0.006183815 |
| 0.01482581  | 0.010572527 | 0.019960519 | 0.024684579 |
| 0.011666254 | 0.001888424 | 0.004578916 | 0.031931791 |
| 0.019890214 | 8.49E-05    | 0.021793081 | 0.02243445  |
| 0.012294093 | 0.017907581 | 0.028848515 | 0.018752132 |
| 0.012644645 | 0.009505461 | 0.005277006 | 0.048158755 |
| 0.012704019 | 0.009685911 | 0.049087774 | 0.012612786 |
| 0.04443265  | 0.00327089  | 0.030922989 | 0.000387362 |
| 0.025131682 | 0.016608869 | 0.018024834 | 0.020525639 |
| 0.039678724 | 0.012081291 | 0.032550335 | 0.008700016 |
| 0.003102122 | 0.000943219 | 0.001385027 | 0.0558822   |
| 0.000948469 | 0.023240199 | 0.003428468 | 0.079420602 |
| 0.019647316 | 0.010893982 | 0.018641493 | 0.036424908 |
| 0.004293257 | 0.005405701 | 0.009519943 | 0.007587418 |
| 0.004108224 | 0.011567298 | 0.000997596 | 0.002034322 |
| 0.02628457  | 0.010333181 | 0.016608569 | 0.023075225 |
| 0.052767824 | 0.003841775 | 0.011531699 | 0.020810557 |
| 0.02482261  | 0.017772462 | 0.028551012 | 8.24E-05    |
| 0.005677339 | 0.032664519 | 0.054082606 | 0.022914073 |
| 0.012110895 | 0.008890719 | 0.026115837 | 0.023809221 |
| 0.001431911 | 0.019021913 | 0.019164088 | 0.01433476  |
| 0.008206508 | 0.006373521 | 0.017724217 | 0.015488784 |
| 1.14E-05    | 0.00581769  | 0.012958332 | 0.041489829 |
| 0.031457369 | 0.000939506 | 0.003442843 | 0.019563108 |
| 0.019572343 | 0.083826825 | 0.019948549 | 0.037129343 |
| 0.00098166  | 0.011759929 | 0.02533354  | 0.003721201 |
| 0.086755057 | 0.000665282 | 0.026492914 | 0.010619589 |
| 0.011656057 | 0.047502758 | 0.044745925 | 0.021518755 |
| 0.001141229 | 0.016308215 | 0.017149465 | 0.01514609  |
| 0.011349115 | 0.024631412 | 0.01668037  | 0.012984862 |
| 0.016095523 | 0.044902823 | 0.021253525 | 0.01101714  |
| 0.019246818 | 0.004636211 | 0.003686788 | 0.025950572 |
| 0.028610629 | 0.033753925 | 0.017800124 | 0.017562119 |

|             |             |             |             |
|-------------|-------------|-------------|-------------|
| 0.018256803 | 0.009933647 | 0.012323319 | 0.046000478 |
| 0.008871324 | 0.003038956 | 0.029937103 | 0.028216161 |
| 0.012181578 | 0.031865272 | 0.018049731 | 0.039440416 |
| 0.007328312 | 0.059344265 | 0.032572455 | 0.047860299 |
| 5.69E-05    | 0.006672458 | 0.002353661 | 0.021299042 |
| 0.037462072 | 0.017589849 | 0.033162555 | 0.017076721 |
| 0.00846696  | 0.014231475 | 0.05259381  | 0.00550044  |
| 0.012608005 | 0.046821278 | 0.023382798 | 0.033026821 |
| 0.030441769 | 4.94E-05    | 0.00043665  | 0.018915927 |
| 0.004161823 | 0.016541898 | 0.021885647 | 0.000447161 |
| 0.002675801 | 0.012736496 | 0.007808377 | 0.010451199 |
| 0.030326075 | 0.007733369 | 0.006553852 | 0.011409904 |
| 0.022172288 | 0.008288152 | 1.90E-05    | 0.025877623 |
| 0.031470052 | 0.037694521 | 0.029535274 | 0.024311383 |
| 0.044307321 | 0.037874413 | 0.033345331 | 0.001781007 |
| 0.006083103 | 0.004937595 | 0.024702808 | 0.020553358 |
| 1.95E-05    | 0.021458762 | 0.070193999 | 0.009377294 |
| 0.030344972 | 0.045940547 | 0.001111629 | 0.062498337 |
| 0.001052593 | 0.009808204 | 0.0102931   | 0.055709291 |
| 0.071617794 | 0.000761317 | 9.14E-05    | 0.007882964 |
| 0.005919242 | 0.009168197 | 0.017142785 | 0.016227235 |
| 0.008605294 | 0.004629363 | 0.016302265 | 0.022591982 |
| 0.006632887 | 0.002106984 | 0.014720723 | 0.000300389 |
| 0.000317408 | 0.028815722 | 0.024704403 | 0.000602833 |
| 0.008999677 | 0.000893131 | 0.006081401 | 0.016909581 |
| 0.008908491 | 0.021595201 | 0.012160605 | 0.015692868 |
| 0.011843353 | 0.027480897 | 0.016918853 | 0.009700816 |
| 0.00608737  | 0.000174545 | 8.67E-05    | 0.018101541 |
| 0.014017344 | 0.002682157 | 0.01074006  | 0.000367057 |
| 0.002853638 | 0.002561175 | 0.010877235 | 0.036251827 |
| 0.007712346 | 0.03840969  | 0.05548689  | 0.012510125 |
| 0.021063192 | 0.03871327  | 0.007263666 | 0.009656297 |
| 0.019347714 | 0.001926826 | 0.018027096 | 1.73E-05    |
| 0.048452951 | 0.004852661 | 0.012387219 | 0.014316956 |
| 0.017366506 | 0.02851698  | 0.004616225 | 0.001212898 |
| 0.043344091 | 0.001122821 | 0.004710472 | 0.002608624 |
| 0.009069493 | 0.017882993 | 0.011977768 | 0.006303078 |
| 0.0200858   | 0.012111569 | 0.004563657 | 0.023149025 |
| 0.000442112 | 0.000925718 | 0.001208002 | 0.039641413 |
| 0.083016257 | 0.023883399 | 0.014026224 | 0.090672297 |
| 0.06715841  | 7.20E-05    | 0.048828793 | 0.057314722 |
| 0.025396642 | 0.021914841 | 0.041495834 | 0.055787095 |
| 0.056469494 | 0.025388797 | 0.021595227 | 0.025387416 |
| 0.017044104 | 0.012298308 | 0.004876034 | 0.004982231 |
| 0.008327041 | 0.012360782 | 0.003391986 | 0.010268407 |
| 0.011900027 | 0.014589902 | 0.004866769 | 0.000125504 |
| 0.011647429 | 0.049123003 | 0.020690936 | 0.01178227  |
| 0.014104905 | 0.022086822 | 0.015946779 | 0.028767292 |
| 0.003276644 | 0.040869786 | 0.060663331 | 0.032841293 |
| 0.015306794 | 0.00412506  | 0.012483379 | 0.048588339 |
| 0.018345091 | 0.007482961 | 0.000764843 | 0.01662832  |
| 0.023697488 | 0.015538335 | 0.029196324 | 0.001636484 |
| 0.015061117 | 0.018153718 | 0.009045132 | 0.014000049 |
| 0.016515023 | 0.016428826 | 0.015008151 | 0.018871004 |

|             |             |                      |             |
|-------------|-------------|----------------------|-------------|
| 0.019088938 | 0.0166217   | 0.022815604          | 0.019334713 |
| 0.005644013 | 0.01993353  | 1.19E-05 0.050796632 |             |
| 0.016324557 | 0.019082315 | 0.000621691          | 0.010615696 |
| 0.023435319 | 0.01031598  | 0.01096955           | 0.037907964 |
| 0.012310344 | 0.009485885 | 0.082117857          | 0.039230414 |
| 0.033042329 | 0.002257805 | 0.055484537          | 0.008036984 |
| 0.041411447 | 0.024770777 | 0.014505868          | 0.00834392  |
| 0.015074149 | 0.005354199 | 0.004139524          | 0.023386824 |
| 0.029876719 | 0.000343681 | 0.004246726          | 0.037122849 |
| 0.00016007  | 0.041887337 | 0.039569205          | 0.004882846 |
| 0.028443165 | 0.020005859 | 0.012190734          | 0.022443214 |
| 0.004803739 | 0.037257343 | 0.009035301          | 0.004654105 |
| 0.009929256 | 0.011693299 | 0.01305453           | 0.006355663 |
| 0.023654654 | 0.001164524 | 0.008420576          | 0.000312933 |
| 0.004005992 | 0.00978928  | 0.029091325          | 0.052140293 |
| 0.049305291 | 0.015563495 | 0.010918702          | 0.007454317 |
| 0.121476927 | 0.017942617 | 0.017485833          | 0.005710355 |
| 0.002760094 | 0.039727995 | 0.014879171          | 0.000826943 |
| 0.04010748  | 0.040184554 | 0.029879595          | 4.96E-05    |
| 0.01452754  | 0.000423282 | 0.029868193          | 0.012770859 |
| 0.02518712  | 0.039713402 | 0.057323051          | 0.017090113 |
| 0.027973912 | 0.022472456 | 0.004449293          | 0.014472499 |
| 0.009830198 | 0.02553136  | 0.03083002           | 0.015283791 |
| 0.006078143 | 0.00323846  | 0.006753274          | 0.004734052 |
| 0.000275449 | 0.016790209 | 0.010713916          | 0.001979237 |
| 0.033029566 | 0.025085862 | 0.021306816          | 0.011589119 |
| 0.02560668  | 0.002590794 | 0.038130974          | 0.006809845 |
| 0.002513843 | 0.000291362 | 0.002115102          | 0.010270053 |
| 0.012334955 | 0.007629277 | 0.010912682          | 0.003177648 |
| 0.022797112 | 0.013811977 | 0.009426088          | 0.023191365 |
| 0.012713832 | 0.0730546   | 0.001547827          | 0.003186191 |
| 0.003557292 | 0.016385817 | 0.045094094          | 0.000329525 |
| 0.015952717 | 0.000215643 | 0.0128715            | 0.010154349 |
| 0.034248993 | 0.021102565 | 8.00E-05 0.001276162 |             |
| 0.000497253 | 0.003746026 | 0.010752874          | 0.020316826 |
| 0.016780354 | 0.007496561 | 0.035328599          | 0.000284288 |
| 0.025276291 | 0.038603345 | 0.084166849          | 0.022024816 |
| 0.066165038 | 0.007681658 | 0.026250081          | 0.003687404 |
| 0.013338816 | 0.01777416  | 0.012506943          | 0.013743194 |
| 0.038942467 | 0.021302166 | 0.005308009          | 0.019172907 |
| 0.025743703 | 0.011107391 | 0.020781343          | 0.019283944 |
| 0.006577519 | 0.007742091 | 0.031832428          | 0.009891947 |
| 0.023372734 | 0.016737185 | 3.37E-05 0.00084849  |             |
| 0.020402402 | 0.080608118 | 0.017571774          | 0.059011856 |
| 0.058636091 | 0.052124367 | 0.018162004          | 0.01584935  |
| 0.010177817 | 0.01388186  | 0.001476455          | 0.03476499  |
| 0.019875571 | 0.004381441 | 0.002955034          | 0.006233498 |
| 0.016029344 | 0.017504002 | 0.006079296          | 0.00775658  |
| 0.001251137 | 0.026091785 | 0.016193255          | 0.01523377  |
| 0.028936807 | 0.004912475 | 0.040437024          | 0.013372239 |
| 0.027710654 | 0.012726847 | 0.02378603           | 0.012385837 |
| 0.01411588  | 0.038016315 | 0.041317827          | 0.042969234 |
| 0.004142593 | 0.034887718 | 0.01794089           | 0.021816686 |
| 0.00273525  | 0.009460885 | 0.000788549          | 0.011366245 |

|             |             |             |             |
|-------------|-------------|-------------|-------------|
| 0.012445831 | 0.046609445 | 0.019287073 | 0.011258494 |
| 0.029738565 | 0.037842282 | 0.01369658  | 0.014648008 |
| 5.89E-05    | 0.020389568 | 0.024952507 | 0.006133516 |
| 0.001188603 | 0.046903116 | 0.001400513 | 0.096754946 |
| 0.011298506 | 0.005214148 | 0.03821714  | 0.003893093 |
| 0.011750078 | 0.025438393 | 0.004849277 | 0.027706704 |
| 0.035627181 | 0.006455503 | 0.00372256  | 0.022507316 |
| 0.017408829 | 0.029818194 | 0.021855517 | 0.009096716 |
| 0.045816188 | 0.016286493 | 0.026493834 | 0.026527166 |
| 0.018986695 | 0.016063351 | 0.031442475 | 0.020183685 |
| 0.030931529 | 0.092064351 | 0.018701539 | 0.029435364 |
| 0.00691437  | 7.71E-06    | 0.056599017 | 0.011539306 |
| 0.028157849 | 0.030580099 | 0.019599572 | 0.055089069 |
| 0.00024333  | 0.028380497 | 0.00224568  | 0.015120927 |
| 0.022799759 | 0.022646342 | 0.049228861 | 0.017440039 |
| 0.00111495  | 0.000135286 | 0.021738962 | 0.001344438 |
| 0.002002479 | 0.011470528 | 0.019719751 | 0.031798426 |
| 0.00425355  | 0.024070032 | 0.005402697 | 0.000101141 |
| 0.031710007 | 0.001294462 | 0.057327026 | 0.0091704   |
| 0.005879413 | 0.002678301 | 0.011650527 | 0.022366486 |
| 0.019962919 | 0.005327896 | 0.003462778 | 0.016655882 |
| 0.005427849 | 0.020663236 | 0.032731872 | 0.008256606 |
| 0.034914582 | 0.00643632  | 0.012888289 | 0.0075992   |
| 0.013404201 | 0.01502708  |             |             |
| AA467197    | 0.229108714 | 0.449084758 | 0.201779122 |
| 0.260646927 | 0.307803982 | 0.407942875 | 0.222091067 |
| 0.295264323 | 0.436325982 | 0.320092466 | 0.384708852 |
| 0.104901312 | 0.061214784 | 0.456939461 | 0.200318228 |
| 0.375444306 | 0.141083017 | 0.282866749 | 0.129583812 |
| 0.350355391 | 0.298450783 | 0.294086991 | 0.440012793 |
| 0.303610739 | 0.352947216 | 0.455133451 | 0.346281706 |
| 0.455237321 | 0.203825449 | 0.408206492 | 0.210309958 |
| 0.452199587 | 0.312608569 | 0.323156083 | 0.105690462 |
| 0.417652369 | 0.018617585 | 1           | 0.337016553 |
| 0.134446919 | 0.43447656  | 0.37105324  | 0.335287967 |
| 0.411323776 | 0.166268131 | 0.191198663 | 0.396399185 |
| 0.433680032 | 0.373700771 | 0.229645481 | 0.439906262 |
| 0.39310794  | 0.433323842 | 0.424840406 | 0.008941939 |
| 0.238621667 | 0.052436672 | 0.168802249 | 0.45696686  |
| 0.350997362 | 0.264598039 | 0.255522081 | 0.374324296 |
| 0.397607228 | 0.400826963 | 0.374447885 | 0.389178232 |
| 0.461241708 | 0.14588877  | 0.410501213 | 0.242802656 |
| 0.443674173 | 0.173524424 | 0.335651494 | 0.268604757 |
| 0.377134411 | 0.31752835  | 0.344335958 | 0.275267902 |
| 0.449722948 | 0.486989147 | 0.389980868 | 0.471279421 |
| 0.109691726 | 0.311463275 | 0.284233341 | 0.388474055 |
| 0.424582651 | 0.260399071 | 0.431962198 | 0.470342573 |
| 0.200799571 | 0.406416863 | 0.442342556 | 0.313042101 |
| 0.451078944 | 0.248064819 | 0.39661837  | 0.142460394 |
| 0.354139027 | 0.341604329 | 0.458835124 | 0.409439198 |
| 0.313364344 | 0.251339696 | 0.476302504 | 0.28312527  |
| 0.318019525 | 0.257761301 | 0.265623421 | 0.42618726  |
| 0.435778103 | 0.456162616 | 0.448055137 | 0.436321578 |
| 0.356899405 | 0.459130104 | 0.444961129 | 0.447697223 |

|             |             |             |             |
|-------------|-------------|-------------|-------------|
| 0.137918381 | 0.461181764 | 0.351506367 | 0.148172318 |
| 0.243610173 | 0.211805059 | 0.268732801 | 0.407416203 |
| 0.443674743 | 0.427928053 | 0.362989035 | 0.328425071 |
| 0.429057636 | 0.455799529 | 0.461803373 | 0.451713853 |
| 0.172629867 | 0.219232292 | 0.365816699 | 0.382575263 |
| 0.426538735 | 0.292687485 | 0.230812519 | 0.487931875 |
| 0.44520392  | 0.428274545 | 0.352610547 | 0.4968418   |
| 0.354744072 | 0.457701885 | 0.450999805 | 0.32197777  |
| 0.480270125 | 0.472219608 | 0.453566833 | 0.361324397 |
| 0.453124927 | 0.428661018 | 0.104855166 | 0.449141465 |
| 0.447110624 | 0.01581851  | 0.440846145 | 0.445687278 |
| 0.460666772 | 0.431012784 | 0.450809819 | 0.449858811 |
| 0.457661875 | 0.249679479 | 0.033936299 | 0.349184097 |
| 0.469808583 | 0.450125308 | 0.242897285 | 0.380795256 |
| 0.353500457 | 0.446183004 | 0.422602281 | 0.28730432  |
| 0.464038678 | 0.448146694 | 0.447705793 | 0.452168969 |
| 0.418354287 | 0.422728198 | 0.323121288 | 0.461462301 |
| 0.167481835 | 0.28624854  | 0.204370985 | 0.41022716  |
| 0.364129098 | 0.309780489 | 0.451104886 | 0.369000545 |
| 0.334353797 | 0.434931696 | 0.264977001 | 0.356725628 |
| 0.215246716 | 0.414443762 | 0.345205617 | 0.372258593 |
| 0.15839087  | 0.316156356 | 0.302519585 | 0.266260316 |
| 0.319401204 | 0.360377453 | 0.416656022 | 0.450418692 |
| 0.367987231 | 0.365254362 | 0.445330566 | 0.449916579 |
| 0.434663176 | 0.345898189 | 0.381007094 | 0.044405471 |
| 0.312287597 | 0.277960341 | 0.145664798 | 0.364383553 |
| 0.334055421 | 0.345643688 | 0.405785011 | 0.375818579 |
| 0.422448554 | 0.329720448 | 0.363412527 | 0.442996009 |
| 0.341783025 | 0.315629172 | 0.44279755  | 0.426264922 |
| 0.033494116 | 0.431340507 | 0.444162988 | 0.194960572 |
| 0.433842499 | 0.118726396 | 0.195765254 | 0.451511804 |
| 0.255269019 | 0.229630927 | 0.442741069 | 0.374487975 |
| 0.343317014 | 0.362550457 | 0.453272918 | 0.046812215 |
| 0.339438149 | 0.090837915 | 0.365457325 | 0.364779141 |
| 0.400267935 | 0.390384029 | 0.293005071 | 0.290110339 |
| 0.305002392 | 0.460858125 | 0.44383751  | 0.456093844 |
| 0.348661918 | 0.456376412 | 0.437612219 | 0.448974333 |
| 0.434395719 | 0.338496872 | 0.099354535 | 0.448369486 |
| 0.447896856 | 0.326709962 | 0.249601488 | 0.42056299  |
| 0.381401143 | 0.387505061 | 0.166726327 | 0.456222243 |
| 0.466163315 | 0.449216497 | 0.258504237 | 0.389709543 |
| 0.440331077 | 0.377002171 | 0.434283449 | 0.454820435 |
| 0.340395152 | 0.352719547 | 0.334656774 | 0.404638618 |
| 0.35446259  | 0.234565436 | 0.421512218 | 0.132790874 |
| 0.005653357 | 0.258511018 | 0.233356624 | 0.260297318 |
| 0.152288381 | 0.391182867 | 0.411538807 | 0.460634863 |
| 0.275516383 | 0.444527578 | 0.391879886 | 0.33521139  |
| 0.462887249 | 0.341121899 | 0.32695184  | 0.370973875 |
| 0.395125082 | 0.067268464 | 0.217309049 | 0.494420188 |
| 0.187895496 | 0.20456826  | 0.419584511 | 0.009015259 |
| 0.195834413 | 0.43274792  | 0.275439713 | 0.349709128 |
| 0.431285699 | 0.356305259 | 0.392546733 | 0.371114021 |
| 0.391193426 | 0.261398595 | 0.010383538 | 0.453107972 |
| 0.449459291 | 0.446606187 | 0.450483798 | 0.445194007 |



|             |             |             |             |
|-------------|-------------|-------------|-------------|
| 0.442938171 | 0.420998028 | 0.423175676 | 0.434878571 |
| 0.27773477  | 0.277535239 | 0.207996946 | 0.361744086 |
| 0.018204723 | 0.409630924 | 0.334321757 | 0.31697544  |
| 0.407026982 | 0.415313455 | 0.155332601 | 0.339653119 |
| 0.10314855  | 0.15151544  | 0.412976961 | 0.328064407 |
| 0.370502939 | 0.096536357 | 0.258106161 | 0.310430557 |
| 0.450402264 | 0.444415439 | 0.303612293 | 0.465801758 |
| 0.383073245 | 0.321043759 | 0.354232519 | 0.396287974 |
| 0.233632408 | 0.14851756  | 0.429231362 | 0.044125798 |
| 0.213441979 | 0.445769673 | 0.363683201 | 0.236924071 |
| 0.399322578 | 0.045269989 | 0.451455471 | 0.464225656 |
| 0.449643981 | 0.452968068 | 0.458553452 | 0.229412614 |
| 0.461959807 | 0.067606825 | 0.457225023 | 0.462075865 |
| 0.367829198 | 0.005647517 | 0.021778678 | 0.445622599 |
| 0.383024388 | 0.21351575  | 0.333860252 | 0.368912521 |
| 0.243229887 | 0.345929895 | 0.207164246 | 0.190357985 |
| 0.418923165 | 0.276598051 | 0.174682439 | 0.457534064 |
| 0.365782159 | 0.347420967 | 0.424043149 | 0.268635873 |
| 0.378663625 | 0.184533268 | 0.271188112 | 0.0173086   |
| 0.381543416 | 0.294522767 | 0.477148452 | 0.458394244 |
| 0.457532865 | 0.384827157 | 0.312265016 | 0.335774035 |
| 0.431365883 | 0.27190426  | 0.314303222 | 0.295359443 |
| 0.459095376 | 0.39690844  | 0.412424087 | 0.429762048 |
| 0.456767707 | 0.462546161 | 0.154115047 | 0.43489293  |
| 0.054263838 | 0.003970762 | 0.440044108 | 0.393514748 |
| 0.087438764 | 0.361379285 | 0.4013548   | 0.348734264 |
| 0.315919778 | 0.129375023 | 0.228664213 | 0.220646905 |
| 0.389290573 | 0.394090635 | 0.264797384 | 0.393045089 |
| 0.299281558 | 0.179682614 | 0.299895935 | 0.296910996 |
| 0.295679305 | 0.439645094 | 0.357468064 | 0.126900576 |
| 0.406874219 | 0.375722849 | 0.203183992 | 0.335659797 |
| 0.446413103 | 0.451637034 | 0.171542221 | 0.0482664   |
| 0.409709204 | 0.361254459 | 0.44496552  | 0.456794203 |
| 0.483307348 | 0.457453773 | 0.43955758  | 0.221467499 |
| 0.214848236 | 0.375288309 | 0.280851307 | 0.169749538 |
| 0.456986852 | 0.242970095 | 0.45293491  | 0.2512405   |
| 0.300552335 | 0.363155394 | 0.121107954 | 0.252008291 |
| 0.330283434 | 0.335443161 | 0.277007671 | 0.338238948 |
| 0.364255242 | 0.212247643 | 0.196916974 | 0.352919697 |
| 0.446325043 | 0.158244632 | 0.336666813 | 0.40487653  |
| 0.445945245 | 0.262664732 | 0.411728901 | 0.451104222 |
| 0.310975727 | 0.308095672 | 0.40826354  | 0.412066893 |
| 0.444448797 | 0.376076233 | 0.074406461 | 0.449453423 |
| 0.447481093 | 0.411697503 | 0.457109174 | 0.422015414 |
| 0.266486495 | 0.35092189  | 0.287036001 | 0.370908731 |
| 0.346560953 | 0.416327091 | 0.354528715 | 0.225676757 |
| 0.406356587 | 0.467982227 | 0.461969049 | 0.285361454 |
| 0.398386433 | 0.319787498 | 0.22952129  | 0.437992926 |
| 0.178747368 | 0.241725587 | 0.378409561 | 0.422238338 |
| 0.006175039 | 0.103033576 | 0.44168739  | 0.324882316 |
| 0.465592702 | 0.451062593 | 0.455605085 | 0.368256603 |
| 0.00223686  | 0.383559082 | 0.399560754 | 0.393595773 |
| 0.461849082 | 0.4395979   | 0.239406993 | 0.198056597 |
| 0.394426757 | 0.250246623 | 0.266541186 | 0.364561686 |

|             |             |             |             |
|-------------|-------------|-------------|-------------|
| 0.16701847  | 0.450440029 | 0.346709606 | 0.374504779 |
| 0.294054195 | 0.279251332 | 0.198402355 | 0.360943185 |
| 0.152541362 | 0.37254758  | 0.423700739 | 0.317393441 |
| 0.174275644 | 0.441473674 | 0.458615868 | 0.131943021 |
| 0.312649369 | 0.4402765   | 0.438945396 | 0.014203363 |
| 0.410702068 | 0.05091711  | 0.280479227 | 0.292969953 |
| 0.294236448 | 0.310047931 | 0.322611211 | 0.31987176  |
| 0.443137053 | 0.365949555 | 0.354001082 | 0.353094911 |
| 0.256056963 | 0.365854077 | 0.388814635 | 0.440766664 |
| 0.295987887 | 0.285805589 | 0.269366192 | 0.263021481 |
| 0.148213725 | 0.445004013 | 0.38645097  | 0.239228406 |
| 0.345857771 | 0.421143478 | 0.423235391 | 0.455299582 |
| 0.431128488 | 0.28530734  | 0.38749436  | 0.456936931 |
| 0.223069118 | 0.342216107 | 0.22507666  | 0.435908664 |
| 0.360196423 | 0.223436019 | 0.410074211 | 0.44695182  |
| 0.439852467 | 0.442603128 | 0.382195656 | 0.447787458 |
| 0.386194163 | 0.384620367 | 0.340472577 | 0.18471587  |
| 0.350471985 | 0.323257036 | 0.268028759 | 0.019240734 |
| 0.419854935 | 0.385429218 | 0.447053096 | 0.458505068 |
| 0.231908294 | 0.432978541 | 0.347865496 | 0.25250451  |
| 0.296530771 | 0.344024737 | 0.318139701 | 0.431241764 |
| 0.159825744 | 0.32088273  | 0.328967494 | 0.402973705 |
| 0.420598347 | 0.419081273 | 0.275139897 | 0.382438978 |
| 0.365928913 | 0.379626604 | 0.459279357 | 0.304817643 |
| 0.403085608 | 0.197596841 | 0.413252854 | 0.349644327 |
| 0.304295896 | 0.452237618 | 0.214513065 | 0.453987124 |
| 0.352625966 | 0.312193241 | 0.460554043 | 0.394904453 |
| 0.386907033 | 0.191619032 | 0.142394308 | 0.41278135  |
| 0.349268061 | 0.275509535 | 0.016089874 | 0.075438204 |
| 0.392608387 | 0.350575642 | 0.444387088 | 0.417977462 |
| 0.25250087  | 0.398279111 | 0.116429228 | 0.430109852 |
| 0.450337845 | 0.480287892 | 0.338171916 | 0.387925674 |
| 0.434498333 | 0.240811609 | 0.438388449 | 0.027532189 |
| 0.402606949 | 0.370876736 | 0.36245539  | 0.183758729 |
| 0.107425779 | 0.171799805 | 0.426978571 | 0.245616705 |
| 0.439146302 | 0.15291455  | 0.415026597 | 0.420818948 |
| 0.355629707 | 0.485433969 | 0.216592729 | 0.410908204 |
| 0.199183224 | 0.390079908 | 0.336563152 | 0.381628448 |
| 0.261342837 | 0.269462113 | 0.413604881 | 0.203068    |
| 0.138929152 | 0.30172217  | 0.014221188 | 0.442323415 |
| 0.466849043 | 0.312631058 | 0.368461246 | 0.294523458 |
| 0.367199785 | 0.433376615 | 0.281791903 | 0.373918192 |
| 0.052146982 | 0.341032031 | 0.333324577 | 0.451763867 |
| 0.208232142 | 0.414492472 | 0.157237405 | 0.307811319 |
| 0.476237016 | 0.311446995 | 0.391625606 | 0.301221811 |
| 0.455085508 | 0.437547496 | 0.343224374 | 0.245310228 |
| 0.412777413 | 0.231199247 | 0.379810354 | 0.460489347 |
| 0.278935668 | 0.196789741 | 0.420880331 | 0.325970301 |
| 0.270378202 | 0.444829255 | 0.392524666 | 0.458345624 |
| 0.154638873 | 0.373130796 | 0.420005074 | 0.459355654 |
| 0.38229407  | 0.174918282 | 0.214893048 | 0.278211594 |
| 0.453424022 | 0.210408158 | 0.256171047 | 0.45018918  |
| 0.192278345 | 0.386506162 | 0.404284813 | 0.233537713 |
| 0.112840457 | 0.301482539 | 0.366976561 | 0.322132286 |

|             |             |             |             |
|-------------|-------------|-------------|-------------|
| 0.384957139 | 0.378812725 | 0.268278626 | 0.435752722 |
| 0.206622288 | 0.083290524 | 0.448754004 | 0.01613125  |
| 0.422508732 | 0.390520871 | 0.359913441 | 0.345139753 |
| 0.352069318 | 0.440799235 | 0.452183387 | 0.012801777 |
| 0.429617402 | 0.060212677 | 0.330274049 | 0.260389201 |
| 0.261713051 | 0.204061876 | 0.453229923 | 0.448768538 |
| 0.420411187 | 0.306367536 | 0.285177757 | 0.455593514 |
| 0.126720064 | 0.266851606 | 0.303158381 | 0.447223316 |
| 0.181694052 | 0.374510161 | 0.369818283 | 0.317750198 |
| 0.446737395 | 0.382502205 |             |             |
| ABC1B       | 0.05413616  | 0.245600857 | 0.037169889 |
| 0.131880078 | 0.26316267  | 0.105938883 | 0.067240322 |
| 0.090129381 | 0.200569503 | 0.052247549 | 0.222852543 |
| 0.039018588 | 0.052601906 | 0.333992645 | 0.065035026 |
| 0.262410931 | 0.071182585 | 0.122612506 | 0.033182954 |
| 0.104063922 | 0.266065563 | 0.114395881 | 0.122152247 |
| 0.2196882   | 0.1824537   | 0.167432629 | 0.159181389 |
| 0.318645369 | 0.058178612 | 0.242439528 | 0.044799048 |
| 0.360918345 | 0.275017936 | 0.133557258 | 0.026602348 |
| 0.17554635  | 0.017557658 | 0.337016553 | 1           |
| 0.121151275 | 0.301091893 | 0.073954483 | 0.187361126 |
| 0.119667991 | 0.041621896 | 0.027917363 | 0.247861281 |
| 0.165985024 | 0.118983795 | 0.047181197 | 0.241938591 |
| 0.105565149 | 0.214845863 | 0.170524115 | 0.002368943 |
| 0.12013441  | 0.036627883 | 0.084621806 | 0.319171215 |
| 0.232933349 | 0.147523478 | 0.068917178 | 0.097989781 |
| 0.192992788 | 0.260961954 | 0.238073353 | 0.090868781 |
| 0.34666678  | 0.099527349 | 0.241216643 | 0.097459106 |
| 0.145545817 | 0.02547802  | 0.208748289 | 0.062570831 |
| 0.118902065 | 0.211381161 | 0.205660661 | 0.143415856 |
| 0.239696617 | 0.366204067 | 0.218915484 | 0.309509462 |
| 0.084445883 | 0.232557403 | 0.154886629 | 0.332120476 |
| 0.26050158  | 0.065207096 | 0.315413864 | 0.384113173 |
| 0.034703984 | 0.129210303 | 0.258763661 | 0.102856105 |
| 0.256975455 | 0.088584681 | 0.11620527  | 0.109928609 |
| 0.291475818 | 0.255985583 | 0.310226528 | 0.287242995 |
| 0.16481834  | 0.069680952 | 0.291191558 | 0.233914994 |
| 0.163119248 | 0.083635716 | 0.18001847  | 0.310193887 |
| 0.264933907 | 0.327312977 | 0.254049115 | 0.306487866 |
| 0.232712432 | 0.346783347 | 0.290336767 | 0.27494496  |
| 0.019410998 | 0.335998139 | 0.165704796 | 0.070939178 |
| 0.038478204 | 0.095956986 | 0.114483815 | 0.296468736 |
| 0.322523874 | 0.2192832   | 0.130311656 | 0.249303003 |
| 0.370998203 | 0.275543655 | 0.331186843 | 0.306722197 |
| 0.050158375 | 0.102085095 | 0.232581406 | 0.085557857 |
| 0.274567714 | 0.119971816 | 0.181327413 | 0.338554463 |
| 0.329431973 | 0.336084209 | 0.072299215 | 0.343561855 |
| 0.108874318 | 0.394629811 | 0.261479021 | 0.195381313 |
| 0.359206735 | 0.320107026 | 0.396958662 | 0.290196429 |
| 0.319821621 | 0.171461538 | 0.028472761 | 0.288299161 |
| 0.390571831 | 0.025647797 | 0.310194247 | 0.342397788 |
| 0.319264857 | 0.321966377 | 0.395027916 | 0.344862248 |
| 0.309713676 | 0.085913062 | 0.01218667  | 0.314494088 |
| 0.337606964 | 0.338519133 | 0.110805021 | 0.182760413 |

|             |             |             |             |
|-------------|-------------|-------------|-------------|
| 0.257843901 | 0.137564658 | 0.259541424 | 0.108718148 |
| 0.404570204 | 0.312947299 | 0.306047802 | 0.264087427 |
| 0.131543074 | 0.276811165 | 0.179461675 | 0.285156354 |
| 0.063978174 | 0.072659168 | 0.05469461  | 0.259543335 |
| 0.064748502 | 0.2299058   | 0.116590374 | 0.214192364 |
| 0.246943496 | 0.103286076 | 0.095661815 | 0.29594144  |
| 0.059573744 | 0.177647913 | 0.13858787  | 0.131532222 |
| 0.086934046 | 0.15824623  | 0.14182852  | 0.132063346 |
| 0.225358588 | 0.185915283 | 0.230384191 | 0.345739293 |
| 0.144181387 | 0.172633399 | 0.247683437 | 0.374379658 |
| 0.412988071 | 0.224589988 | 0.227816011 | 0.046164078 |
| 0.161297285 | 0.0713368   | 0.091439003 | 0.1728479   |
| 0.158753893 | 0.156580478 | 0.252850283 | 0.330322819 |
| 0.143522639 | 0.068645194 | 0.134947708 | 0.32612794  |
| 0.129510566 | 0.15473878  | 0.364085987 | 0.162917306 |
| 0.01057144  | 0.220433415 | 0.312167167 | 0.158138878 |
| 0.223578269 | 0.099757957 | 0.093118281 | 0.357726006 |
| 0.101556195 | 0.138706695 | 0.324746028 | 0.314900201 |
| 0.088440715 | 0.154359424 | 0.381053258 | 0.027656443 |
| 0.175001031 | 0.098112206 | 0.340417968 | 0.076577325 |
| 0.240087752 | 0.305256622 | 0.229997775 | 0.160571535 |
| 0.098690839 | 0.344238531 | 0.274514147 | 0.352443627 |
| 0.122681271 | 0.387104389 | 0.334065107 | 0.346948598 |
| 0.24994012  | 0.129651431 | 0.077207905 | 0.323977525 |
| 0.344287017 | 0.102305408 | 0.070310915 | 0.262540517 |
| 0.117902376 | 0.284312664 | 0.124093649 | 0.39437335  |
| 0.366959629 | 0.267728195 | 0.136775576 | 0.35339865  |
| 0.340930133 | 0.183455642 | 0.29571539  | 0.386841182 |
| 0.071258988 | 0.212231159 | 0.166674368 | 0.388545647 |
| 0.20069224  | 0.163291892 | 0.25838364  | 0.07893001  |
| 0.003911885 | 0.063421274 | 0.0736842   | 0.188918285 |
| 0.141107928 | 0.166615953 | 0.27733982  | 0.354417802 |
| 0.137514396 | 0.30031055  | 0.199663224 | 0.184573994 |
| 0.30682589  | 0.15567263  | 0.191858461 | 0.237430059 |
| 0.230517643 | 0.053877787 | 0.143864484 | 0.373161778 |
| 0.035731783 | 0.130462536 | 0.133375359 | 0.011841579 |
| 0.050793906 | 0.202249813 | 0.1061237   | 0.207329896 |
| 0.367685261 | 0.190708513 | 0.196045594 | 0.073756987 |
| 0.300254956 | 0.113113789 | 0.017012235 | 0.333612654 |
| 0.311344701 | 0.30047197  | 0.303087802 | 0.278283053 |
| 0.309654645 | 0.238427352 | 0.336174098 | 0.133194906 |
| 0.096433372 | 0.051249897 | 0.167619648 | 0.225868247 |
| 0.005250631 | 0.322985181 | 0.185296062 | 0.191049604 |
| 0.280935773 | 0.2437493   | 0.047093497 | 0.218583044 |
| 0.036466871 | 0.090598075 | 0.102472534 | 0.142288852 |
| 0.321362194 | 0.02360943  | 0.089681945 | 0.131357991 |
| 0.272241313 | 0.271714481 | 0.107322356 | 0.353782456 |
| 0.245515332 | 0.094321085 | 0.235764292 | 0.298168873 |
| 0.084405918 | 0.037288774 | 0.100363399 | 0.011550657 |
| 0.041417631 | 0.291626991 | 0.102342719 | 0.067836719 |
| 0.2686304   | 0.013991899 | 0.28031175  | 0.362994505 |
| 0.267481477 | 0.379962185 | 0.348346154 | 0.147893577 |
| 0.349543419 | 0.037842718 | 0.348569799 | 0.269498771 |
| 0.090131986 | 0.00354156  | 0.015280822 | 0.345561838 |

|             |             |             |             |
|-------------|-------------|-------------|-------------|
| 0.241281075 | 0.048890319 | 0.195440404 | 0.086424142 |
| 0.144844961 | 0.074350459 | 0.059626634 | 0.171259625 |
| 0.200070627 | 0.229641228 | 0.128353825 | 0.288526272 |
| 0.215453145 | 0.223692075 | 0.098795977 | 0.091052621 |
| 0.205466376 | 0.084146403 | 0.089768415 | 0.030862916 |
| 0.305077981 | 0.10214027  | 0.288393819 | 0.327806893 |
| 0.380425851 | 0.308122894 | 0.062514839 | 0.084736981 |
| 0.301336251 | 0.067384504 | 0.080595429 | 0.077289738 |
| 0.29727682  | 0.293384286 | 0.328192662 | 0.288309937 |
| 0.397114058 | 0.345833974 | 0.049644502 | 0.339462223 |
| 0.029239976 | 0.006675706 | 0.135761633 | 0.224055797 |
| 0.030904703 | 0.194434016 | 0.2913805   | 0.090544481 |
| 0.11171059  | 0.039026836 | 0.136709596 | 0.148348789 |
| 0.299521704 | 0.222226484 | 0.232009448 | 0.194933544 |
| 0.170086167 | 0.167343284 | 0.14120062  | 0.109173426 |
| 0.07733741  | 0.250068739 | 0.191510873 | 0.037782565 |
| 0.156390007 | 0.195239256 | 0.075145258 | 0.163945826 |
| 0.348742393 | 0.352440771 | 0.083505043 | 0.054515195 |
| 0.251886763 | 0.152152344 | 0.366990979 | 0.301946343 |
| 0.345017684 | 0.406135675 | 0.313970555 | 0.152376599 |
| 0.068686434 | 0.276617489 | 0.231998293 | 0.155652176 |
| 0.340285131 | 0.057040302 | 0.297161587 | 0.180014723 |
| 0.141617327 | 0.161123317 | 0.070073844 | 0.110229228 |
| 0.206159376 | 0.195389793 | 0.220638319 | 0.12167124  |
| 0.195611468 | 0.120645746 | 0.05621785  | 0.218775545 |
| 0.29410012  | 0.135760517 | 0.188210311 | 0.091692686 |
| 0.234865955 | 0.036979726 | 0.295459948 | 0.39007018  |
| 0.138736955 | 0.104780098 | 0.090673993 | 0.251658471 |
| 0.287829023 | 0.13367186  | 0.035270469 | 0.249381881 |
| 0.347757936 | 0.236918226 | 0.313087485 | 0.371303062 |
| 0.102972791 | 0.213949309 | 0.126889784 | 0.256879031 |
| 0.186901894 | 0.116718267 | 0.177273196 | 0.086958136 |
| 0.269178908 | 0.335018456 | 0.293893562 | 0.178323446 |
| 0.161513165 | 0.078187376 | 0.049510865 | 0.272168063 |
| 0.168192342 | 0.08098832  | 0.078711451 | 0.282061461 |
| 0.011092232 | 0.089595376 | 0.360162495 | 0.124264971 |
| 0.366135502 | 0.374098151 | 0.36032963  | 0.084330416 |
| 0.004147368 | 0.268715624 | 0.28063283  | 0.161186509 |
| 0.272046142 | 0.246232342 | 0.051468464 | 0.127117952 |
| 0.326337584 | 0.068265653 | 0.163397698 | 0.083785328 |
| 0.109299864 | 0.197691217 | 0.250039087 | 0.16288226  |
| 0.187898127 | 0.06796892  | 0.112347152 | 0.155635955 |
| 0.094164736 | 0.286845964 | 0.357259136 | 0.043701306 |
| 0.113781094 | 0.335523229 | 0.29336841  | 0.035842435 |
| 0.174844521 | 0.318877491 | 0.312157551 | 0.012727823 |
| 0.299559176 | 0.024538086 | 0.200692853 | 0.212860823 |
| 0.182174973 | 0.171575062 | 0.286460566 | 0.172921668 |
| 0.219501278 | 0.177372554 | 0.17294771  | 0.272582905 |
| 0.165071572 | 0.142148268 | 0.233053758 | 0.148727063 |
| 0.163096867 | 0.108663759 | 0.099253501 | 0.095260071 |
| 0.073673054 | 0.278495682 | 0.250699918 | 0.06999369  |
| 0.238654887 | 0.123866801 | 0.360263132 | 0.292644814 |
| 0.3499108   | 0.084848009 | 0.157172928 | 0.278974642 |
| 0.04664385  | 0.083135085 | 0.039331674 | 0.1733244   |

|             |             |             |             |
|-------------|-------------|-------------|-------------|
| 0.180660484 | 0.159940545 | 0.124050694 | 0.170558839 |
| 0.219040929 | 0.345195319 | 0.235352453 | 0.335654734 |
| 0.17004903  | 0.14889451  | 0.056378635 | 0.143553894 |
| 0.157487022 | 0.137509602 | 0.248357033 | 0.010964823 |
| 0.261611387 | 0.08802636  | 0.330407872 | 0.315109006 |
| 0.098324128 | 0.327830515 | 0.061668356 | 0.094676411 |
| 0.048294881 | 0.140054481 | 0.169790508 | 0.249320703 |
| 0.087862504 | 0.117542817 | 0.267607394 | 0.067311733 |
| 0.297604696 | 0.245768522 | 0.140342725 | 0.121518258 |
| 0.188047859 | 0.154110296 | 0.312112163 | 0.068402473 |
| 0.183823197 | 0.172858678 | 0.123648187 | 0.238539026 |
| 0.201568952 | 0.341930859 | 0.068640036 | 0.3503224   |
| 0.202440887 | 0.127838491 | 0.380888606 | 0.127861621 |
| 0.093677825 | 0.12547632  | 0.101888806 | 0.083880498 |
| 0.14173986  | 0.107807137 | 0.003573914 | 0.0624264   |
| 0.345322583 | 0.083263105 | 0.226189633 | 0.266094873 |
| 0.16592397  | 0.350091593 | 0.061967785 | 0.137338573 |
| 0.274182815 | 0.30589745  | 0.170273972 | 0.286906853 |
| 0.278602852 | 0.104867179 | 0.163695113 | 0.00621395  |
| 0.236452029 | 0.193319963 | 0.085263971 | 0.062216401 |
| 0.034774618 | 0.117970432 | 0.223615095 | 0.056667921 |
| 0.374543528 | 0.081513977 | 0.156083249 | 0.247636656 |
| 0.155578909 | 0.315503187 | 0.141996693 | 0.316852353 |
| 0.035933682 | 0.227988553 | 0.162535868 | 0.13936275  |
| 0.18545836  | 0.188017833 | 0.355802049 | 0.14540083  |
| 0.062216927 | 0.180218779 | 0.014422859 | 0.323897319 |
| 0.287530052 | 0.190524662 | 0.209057418 | 0.049089918 |
| 0.31680179  | 0.277830191 | 0.134046151 | 0.138250481 |
| 0.038614747 | 0.264849375 | 0.191152674 | 0.279019543 |
| 0.092513042 | 0.183936371 | 0.090823351 | 0.194055115 |
| 0.281090962 | 0.143865417 | 0.242389436 | 0.117122799 |
| 0.294873792 | 0.23072857  | 0.116536198 | 0.123399507 |
| 0.172243305 | 0.075438327 | 0.073317268 | 0.366333452 |
| 0.185265701 | 0.161385859 | 0.36712291  | 0.1818242   |
| 0.15342857  | 0.249428748 | 0.168511508 | 0.34092795  |
| 0.133282427 | 0.263494133 | 0.302111041 | 0.315136493 |
| 0.330554726 | 0.149258307 | 0.137202057 | 0.190734092 |
| 0.275491538 | 0.096769877 | 0.132108291 | 0.278237116 |
| 0.142053186 | 0.266032579 | 0.119702413 | 0.170541117 |
| 0.074220734 | 0.09933207  | 0.101744817 | 0.156989073 |
| 0.264748564 | 0.245598346 | 0.179743692 | 0.354786949 |
| 0.138769147 | 0.072433267 | 0.371163623 | 0.039269032 |
| 0.139208584 | 0.28580811  | 0.196126273 | 0.185200762 |
| 0.191250579 | 0.209466183 | 0.147327666 | 0.005711295 |
| 0.338011444 | 0.061361558 | 0.119832899 | 0.193548709 |
| 0.106780976 | 0.05413541  | 0.308828629 | 0.382275819 |
| 0.198425318 | 0.074913558 | 0.091259292 | 0.305194979 |
| 0.112078824 | 0.079339163 | 0.104346466 | 0.195157577 |
| 0.119804009 | 0.100558085 | 0.114304147 | 0.126597245 |
| 0.2607571   | 0.108648047 |             |             |
| ABHD12      | 0.010493112 | 0.133144965 | 0.008274411 |
| 0.022692842 | 0.29388599  | 0.093857992 | 0.00654971  |
| 0.014224142 | 0.096663962 | 0.033392704 | 0.176725846 |
| 0.001649699 | 0.033033712 | 0.173329492 | 0.00624845  |

|             |             |             |             |
|-------------|-------------|-------------|-------------|
| 0.210431999 | 0.006136141 | 0.024339169 | 0.001269573 |
| 0.010722408 | 0.217932767 | 0.092303252 | 0.060554234 |
| 0.202386106 | 0.047489883 | 0.084300559 | 0.156307832 |
| 0.193953824 | 0.041692252 | 0.219234765 | 0.012316591 |
| 0.152274557 | 0.264802944 | 0.165443144 | 0.002793087 |
| 0.12402223  | 0.002315902 | 0.134446919 | 0.121151275 |
| 1           | 0.113650675 | 0.055933624 | 0.11204479  |
| 0.076997642 | 0.00459151  | 0.011915279 | 0.178514922 |
| 0.102664515 | 0.07665909  | 0.006495084 | 0.187379564 |
| 0.062839289 | 0.104049327 | 0.097101769 | 0.000555978 |
| 0.197701122 | 0.064985436 | 0.128197665 | 0.176208326 |
| 0.085238613 | 0.04616256  | 0.028953348 | 0.042342428 |
| 0.118673515 | 0.166847116 | 0.121480541 | 0.052158303 |
| 0.182873922 | 0.077832982 | 0.200931582 | 0.010044446 |
| 0.070851282 | 0.002133608 | 0.059270647 | 0.011369728 |
| 0.104182225 | 0.106895882 | 0.19245321  | 0.21069061  |
| 0.120015509 | 0.171227143 | 0.096148942 | 0.150320782 |
| 0.014582471 | 0.237987268 | 0.174103536 | 0.184436189 |
| 0.129286207 | 0.007762165 | 0.204717315 | 0.194983612 |
| 0.003792137 | 0.076757517 | 0.123273682 | 0.017031252 |
| 0.157318548 | 0.08701875  | 0.080536238 | 0.161367698 |
| 0.295949901 | 0.191458981 | 0.138039032 | 0.110442536 |
| 0.175760561 | 0.010279981 | 0.130117566 | 0.279912014 |
| 0.147630487 | 0.020296687 | 0.085039434 | 0.226177384 |
| 0.17983883  | 0.195385076 | 0.129238186 | 0.132362976 |
| 0.189434354 | 0.201090445 | 0.194571381 | 0.141246185 |
| 0.004237369 | 0.18125563  | 0.073412923 | 0.007547003 |
| 0.00593165  | 0.025359565 | 0.057259596 | 0.139253772 |
| 0.228168636 | 0.113302226 | 0.039552275 | 0.147022951 |
| 0.245866371 | 0.129394661 | 0.173173596 | 0.147884214 |
| 0.005926393 | 0.106294113 | 0.208405661 | 0.044654215 |
| 0.129277838 | 0.026516932 | 0.252098613 | 0.151333159 |
| 0.158511057 | 0.221776584 | 0.024388359 | 0.150131799 |
| 0.030076322 | 0.214345355 | 0.157275239 | 0.071122199 |
| 0.18285811  | 0.153838138 | 0.23835784  | 0.290811892 |
| 0.166325159 | 0.112611697 | 0.000702481 | 0.130976322 |
| 0.216823804 | 0.008398521 | 0.204716146 | 0.218964121 |
| 0.16766059  | 0.229660158 | 0.229930223 | 0.221282708 |
| 0.161679052 | 0.014426833 | 0.00101973  | 0.177520213 |
| 0.164712067 | 0.190791829 | 0.033465857 | 0.14226471  |
| 0.197745712 | 0.076283663 | 0.186780101 | 0.012646174 |
| 0.198620745 | 0.221439971 | 0.192883556 | 0.118672181 |
| 0.061323433 | 0.099435579 | 0.195001467 | 0.130115273 |
| 0.009186775 | 0.016447436 | 0.008137071 | 0.116738634 |
| 0.04531719  | 0.096610941 | 0.055539731 | 0.149094186 |
| 0.090517015 | 0.048757253 | 0.150975222 | 0.263694716 |
| 0.006956672 | 0.130710966 | 0.059843267 | 0.029597137 |
| 0.010953571 | 0.033586734 | 0.013139031 | 0.039865309 |
| 0.127806036 | 0.045227469 | 0.165850129 | 0.227188988 |
| 0.104196098 | 0.050844528 | 0.144130591 | 0.21483454  |
| 0.198916729 | 0.245993409 | 0.067147689 | 0.003865059 |
| 0.02845404  | 0.055951334 | 0.120670264 | 0.172674851 |
| 0.038202043 | 0.025411171 | 0.146397192 | 0.291829328 |
| 0.053949466 | 0.01435002  | 0.08595276  | 0.137542993 |

|             |             |             |             |
|-------------|-------------|-------------|-------------|
| 0.028195973 | 0.141533393 | 0.209303993 | 0.096163721 |
| 0.00068466  | 0.106206617 | 0.203266459 | 0.040102904 |
| 0.077701979 | 0.014986252 | 0.105441346 | 0.217871651 |
| 0.050246623 | 0.112990958 | 0.221464855 | 0.287510272 |
| 0.013500203 | 0.037470311 | 0.217485478 | 0.002653293 |
| 0.162586193 | 0.019065723 | 0.183799369 | 0.053848779 |
| 0.090191225 | 0.134001957 | 0.246066294 | 0.186098686 |
| 0.025901933 | 0.1708486   | 0.166703208 | 0.205005199 |
| 0.085007332 | 0.217450499 | 0.222836058 | 0.195031792 |
| 0.147321663 | 0.103107363 | 0.082266137 | 0.20143626  |
| 0.228569193 | 0.010146484 | 0.011653454 | 0.174464873 |
| 0.073648937 | 0.217752139 | 0.02281288  | 0.220004141 |
| 0.182172184 | 0.128653349 | 0.040020913 | 0.240223647 |
| 0.18407577  | 0.080768981 | 0.213051148 | 0.208539074 |
| 0.028590202 | 0.135815769 | 0.132992439 | 0.284864657 |
| 0.06751322  | 0.093754393 | 0.109671585 | 0.11343985  |
| 0.01756235  | 0.008912077 | 0.010974643 | 0.097845834 |
| 0.20469097  | 0.132391544 | 0.207939524 | 0.190256787 |
| 0.029676079 | 0.170733318 | 0.065604975 | 0.085435309 |
| 0.131015885 | 0.115077702 | 0.244088176 | 0.213579462 |
| 0.089525046 | 0.008221563 | 0.014571936 | 0.170902463 |
| 0.003283815 | 0.161286616 | 0.054813474 | 0.00052464  |
| 0.003795047 | 0.115905808 | 0.018175289 | 0.052942919 |
| 0.242137957 | 0.054567269 | 0.055404616 | 0.033610949 |
| 0.211240026 | 0.027308051 | 0.007432862 | 0.196134733 |
| 0.167160934 | 0.156030846 | 0.156173497 | 0.133106013 |
| 0.172300471 | 0.164426848 | 0.234556368 | 0.082133786 |
| 0.017167258 | 0.011239565 | 0.104840325 | 0.123073711 |
| 3.18E-05    | 0.250040518 | 0.157891158 | 0.049093493 |
| 0.205258705 | 0.097261229 | 0.004639992 | 0.199586161 |
| 0.002023485 | 0.141073064 | 0.022505918 | 0.070877587 |
| 0.233144388 | 0.002116631 | 0.010326757 | 0.047840705 |
| 0.127871705 | 0.103243661 | 0.153314134 | 0.198963179 |
| 0.160155628 | 0.019244742 | 0.204962146 | 0.237360403 |
| 0.011437722 | 0.002372712 | 0.046363845 | 0.004284986 |
| 0.006463861 | 0.140557407 | 0.084776059 | 0.007615666 |
| 0.114211244 | 0.000716719 | 0.123581433 | 0.189472807 |
| 0.139191106 | 0.224501155 | 0.20022516  | 0.229471724 |
| 0.192457725 | 0.04187199  | 0.200349637 | 0.132529173 |
| 0.056070042 | 0.000257529 | 0.000254423 | 0.237638342 |
| 0.192392915 | 0.007455214 | 0.05746826  | 0.038402134 |
| 0.025548973 | 0.015038224 | 0.011340402 | 0.198545165 |
| 0.177150345 | 0.194621194 | 0.106667306 | 0.126627239 |
| 0.103426799 | 0.102510687 | 0.054314603 | 0.014055844 |
| 0.210238392 | 0.011146526 | 0.014466524 | 0.002167408 |
| 0.227787334 | 0.020164378 | 0.121436556 | 0.178075423 |
| 0.197604609 | 0.282270519 | 0.045767067 | 0.017681457 |
| 0.193771442 | 0.012577075 | 0.048682612 | 0.014719041 |
| 0.155863052 | 0.192542082 | 0.154218792 | 0.115100106 |
| 0.202724938 | 0.169373786 | 0.004858073 | 0.205047632 |
| 0.002381121 | 0.000943066 | 0.078759876 | 0.080445702 |
| 0.003596983 | 0.132588474 | 0.110432057 | 0.037727129 |
| 0.058022469 | 0.001187048 | 0.179063118 | 0.187334818 |
| 0.166889277 | 0.130388025 | 0.238992122 | 0.070137984 |



|             |             |             |             |
|-------------|-------------|-------------|-------------|
| 0.174456385 | 0.024607104 | 0.094762336 | 0.028318662 |
| 0.007458678 | 0.093626667 | 0.047593705 | 0.002255965 |
| 0.129285786 | 0.171453853 | 0.013139989 | 0.047109504 |
| 0.224528845 | 0.214410612 | 0.002736143 | 0.002860835 |
| 0.086141559 | 0.082684814 | 0.224015829 | 0.168314297 |
| 0.166269772 | 0.209885388 | 0.12579745  | 0.033274898 |
| 0.012218202 | 0.195974753 | 0.259352625 | 0.070119071 |
| 0.186685994 | 0.005978348 | 0.164721059 | 0.264853136 |
| 0.031683348 | 0.083504008 | 0.007133684 | 0.022788037 |
| 0.233331525 | 0.056476677 | 0.128649352 | 0.032158347 |
| 0.105171989 | 0.121807325 | 0.007270893 | 0.070740815 |
| 0.117342405 | 0.085955842 | 0.050266204 | 0.055538774 |
| 0.138394299 | 0.008630168 | 0.218452223 | 0.177102104 |
| 0.030415463 | 0.019558561 | 0.026330793 | 0.16865793  |
| 0.187362437 | 0.103398627 | 0.002106023 | 0.133367581 |
| 0.209328832 | 0.181501074 | 0.164813866 | 0.187743198 |
| 0.017742102 | 0.190376944 | 0.125269054 | 0.161826022 |
| 0.052915931 | 0.099517517 | 0.075685441 | 0.012504648 |
| 0.109312463 | 0.144024718 | 0.153272529 | 0.08053246  |
| 0.141258415 | 0.014215105 | 0.004897309 | 0.17567389  |
| 0.130596969 | 0.005056712 | 0.052377371 | 0.188354758 |
| 0.018089723 | 0.165132861 | 0.227223764 | 0.058440358 |
| 0.191923321 | 0.236793282 | 0.176039329 | 0.041466893 |
| 0.000631911 | 0.236284397 | 0.187614478 | 0.138419599 |
| 0.127303388 | 0.120662966 | 0.007467161 | 0.02279833  |
| 0.154498108 | 0.01135947  | 0.0209632   | 0.015314607 |
| 0.014753754 | 0.093512082 | 0.083051371 | 0.052128159 |
| 0.121963922 | 0.009511589 | 0.106547736 | 0.102856624 |
| 0.03298726  | 0.105814865 | 0.164926428 | 0.024854745 |
| 0.032398294 | 0.167707858 | 0.141766443 | 0.004516003 |
| 0.209963546 | 0.178253264 | 0.197847374 | 0.000221572 |
| 0.216094558 | 0.000958762 | 0.103233181 | 0.147206576 |
| 0.118520126 | 0.065635969 | 0.180260259 | 0.180691288 |
| 0.096893441 | 0.076886367 | 0.119527752 | 0.12502371  |
| 0.093452176 | 0.073244655 | 0.214637141 | 0.098098677 |
| 0.137383326 | 0.035532424 | 0.019412755 | 0.017542688 |
| 0.006610563 | 0.175553651 | 0.0804594   | 0.014055914 |
| 0.098875795 | 0.082224402 | 0.170391851 | 0.154489036 |
| 0.21461256  | 0.018551389 | 0.083228857 | 0.1615287   |
| 0.003820998 | 0.00637062  | 0.003186426 | 0.152016944 |
| 0.069970901 | 0.07137859  | 0.104083564 | 0.05885307  |
| 0.113228421 | 0.148261378 | 0.076416559 | 0.193517018 |
| 0.173363299 | 0.084017645 | 0.039644581 | 0.028138624 |
| 0.04835631  | 0.029411685 | 0.25625984  | 0.000652401 |
| 0.128337576 | 0.022947416 | 0.211512258 | 0.161918133 |
| 0.139116333 | 0.17595554  | 0.012385063 | 0.010815797 |
| 0.02626134  | 0.032799838 | 0.037958902 | 0.188334958 |
| 0.142777104 | 0.055830626 | 0.243737117 | 0.037227524 |
| 0.236804644 | 0.178294065 | 0.120087742 | 0.035643638 |
| 0.095575076 | 0.05850282  | 0.145299957 | 0.020202268 |
| 0.138689879 | 0.184621758 | 0.067834103 | 0.135597094 |
| 0.116858803 | 0.215553585 | 0.012152798 | 0.209433275 |
| 0.118371637 | 0.028878332 | 0.180548925 | 0.074419569 |
| 0.052916782 | 0.042711279 | 0.180154392 | 0.053305276 |

|             |             |             |             |
|-------------|-------------|-------------|-------------|
| 0.042204668 | 0.156809114 | 0.000276054 | 0.003772942 |
| 0.182631058 | 0.049947026 | 0.112329504 | 0.150393947 |
| 0.204126709 | 0.193444683 | 0.051653317 | 0.044700104 |
| 0.13365229  | 0.141534049 | 0.028292134 | 0.110822314 |
| 0.106197129 | 0.027544285 | 0.100639365 | 0.000298039 |
| 0.156331384 | 0.168013085 | 0.035767979 | 0.007438728 |
| 0.00121515  | 0.166066889 | 0.139570775 | 0.007363654 |
| 0.240950723 | 0.059563064 | 0.084405064 | 0.219399334 |
| 0.039769714 | 0.142503393 | 0.053103589 | 0.230019253 |
| 0.000972043 | 0.105313893 | 0.188189042 | 0.089460529 |
| 0.092991451 | 0.209919592 | 0.233690644 | 0.235914802 |
| 0.007645658 | 0.076428354 | 9.14E-05    | 0.125461092 |
| 0.128664902 | 0.188480818 | 0.058205981 | 0.026556979 |
| 0.180814194 | 0.162870597 | 0.018719195 | 0.140912248 |
| 0.002487642 | 0.245357835 | 0.07996306  | 0.157394587 |
| 0.041341648 | 0.08871225  | 0.018609336 | 0.166817348 |
| 0.114882893 | 0.022734622 | 0.078363386 | 0.050276176 |
| 0.166282253 | 0.141909333 | 0.037385463 | 0.079837355 |
| 0.099080497 | 0.009896161 | 0.062358471 | 0.193367472 |
| 0.087761902 | 0.251414561 | 0.26012581  | 0.066974741 |
| 0.177036037 | 0.128377434 | 0.134867797 | 0.175219098 |
| 0.027471005 | 0.104764793 | 0.222085558 | 0.15622679  |
| 0.167339823 | 0.155614202 | 0.137189597 | 0.109991595 |
| 0.140294352 | 0.011696548 | 0.083193964 | 0.132923045 |
| 0.162453284 | 0.14130103  | 0.069343096 | 0.138816799 |
| 0.001764791 | 0.025074085 | 0.075649624 | 0.042969627 |
| 0.113864275 | 0.206911161 | 0.143887865 | 0.174456149 |
| 0.039390163 | 0.004119834 | 0.193154625 | 0.00729675  |
| 0.090274428 | 0.252485516 | 0.086891117 | 0.185542508 |
| 0.057142551 | 0.093151864 | 0.056318903 | 0.000322455 |
| 0.211285569 | 0.105326712 | 0.098152391 | 0.110297608 |
| 0.017345829 | 0.004202525 | 0.17250164  | 0.227341066 |
| 0.10669178  | 0.023470626 | 0.051882033 | 0.152413087 |
| 0.03072623  | 0.100483848 | 0.079986215 | 0.125975314 |
| 0.207379416 | 0.072928173 | 0.097644864 | 0.176532082 |
| 0.150309365 | 0.054128365 |             |             |
| ABHD2       | 0.249844618 | 0.350559875 | 0.199583826 |
| 0.260718092 | 0.26558767  | 0.339940926 | 0.230407858 |
| 0.30469754  | 0.327558278 | 0.207113939 | 0.343965239 |
| 0.137180855 | 0.056178553 | 0.379023621 | 0.223865682 |
| 0.2981078   | 0.179158692 | 0.289787243 | 0.10357057  |
| 0.275751613 | 0.266043107 | 0.254476296 | 0.353928726 |
| 0.260925744 | 0.317281557 | 0.347272996 | 0.255221902 |
| 0.393145497 | 0.158191308 | 0.328756373 | 0.134038059 |
| 0.406244688 | 0.268395962 | 0.245606478 | 0.121279357 |
| 0.341077935 | 0.013309137 | 0.43447656  | 0.301091893 |
| 0.113650675 | 1           | 0.256991724 | 0.32994516  |
| 0.278858773 | 0.182053319 | 0.132993664 | 0.29293995  |
| 0.319793516 | 0.315564594 | 0.219024229 | 0.339283567 |
| 0.286484955 | 0.382096773 | 0.305021223 | 0.013032171 |
| 0.19172752  | 0.037570265 | 0.124935639 | 0.43202529  |
| 0.3523075   | 0.300043368 | 0.164575587 | 0.317724968 |
| 0.299047034 | 0.313450256 | 0.343161594 | 0.264408502 |
| 0.419561556 | 0.119403071 | 0.304694646 | 0.225999853 |

|             |             |             |             |
|-------------|-------------|-------------|-------------|
| 0.350189143 | 0.161505631 | 0.324472828 | 0.226650695 |
| 0.287375048 | 0.332080943 | 0.313354299 | 0.21219217  |
| 0.347742507 | 0.474195889 | 0.34164529  | 0.438524884 |
| 0.087935634 | 0.247853983 | 0.240377267 | 0.34284398  |
| 0.330234174 | 0.23310313  | 0.359617085 | 0.452691532 |
| 0.192356846 | 0.285362664 | 0.336566124 | 0.282451281 |
| 0.355820021 | 0.183864075 | 0.284558068 | 0.134685596 |
| 0.283928905 | 0.272645447 | 0.435249674 | 0.375998234 |
| 0.274527849 | 0.233631309 | 0.450957128 | 0.22925211  |
| 0.304088242 | 0.24811837  | 0.220640692 | 0.327403877 |
| 0.342590835 | 0.394209178 | 0.335902811 | 0.349713494 |
| 0.277038381 | 0.411561319 | 0.358247988 | 0.362417025 |
| 0.084268351 | 0.436202321 | 0.336225993 | 0.201122942 |
| 0.230007054 | 0.256050541 | 0.211388233 | 0.364690957 |
| 0.353831232 | 0.371958356 | 0.349812267 | 0.306571528 |
| 0.338958189 | 0.428711452 | 0.430084962 | 0.359464919 |
| 0.199624832 | 0.160103355 | 0.277887613 | 0.350429979 |
| 0.350788216 | 0.285086039 | 0.19423209  | 0.467584035 |
| 0.382260461 | 0.340366842 | 0.312191963 | 0.482229985 |
| 0.313854057 | 0.447683343 | 0.349617295 | 0.328123922 |
| 0.46009199  | 0.45441578  | 0.422129603 | 0.292505437 |
| 0.436850478 | 0.36085716  | 0.086558565 | 0.353056066 |
| 0.425958904 | 0.018546483 | 0.346259222 | 0.371879232 |
| 0.418595691 | 0.332680955 | 0.420561294 | 0.397825988 |
| 0.422376797 | 0.245067413 | 0.018838006 | 0.313644527 |
| 0.443430633 | 0.374368422 | 0.2602327   | 0.283363443 |
| 0.291117128 | 0.365922879 | 0.32859843  | 0.239983672 |
| 0.463389392 | 0.352890381 | 0.368841325 | 0.35588567  |
| 0.297907477 | 0.372736839 | 0.23912328  | 0.44142685  |
| 0.200081021 | 0.288486864 | 0.199309073 | 0.347426944 |
| 0.263552687 | 0.32095387  | 0.36158809  | 0.289760092 |
| 0.339234911 | 0.345828359 | 0.202992231 | 0.293073266 |
| 0.19480884  | 0.321451919 | 0.318278276 | 0.319672845 |
| 0.19312179  | 0.296368433 | 0.305596724 | 0.298450038 |
| 0.31542208  | 0.346850475 | 0.321198473 | 0.383776956 |
| 0.28109871  | 0.323126593 | 0.354308356 | 0.413701096 |
| 0.400006033 | 0.274406543 | 0.35168728  | 0.062342436 |
| 0.243163023 | 0.182579134 | 0.110336074 | 0.274800202 |
| 0.294776761 | 0.306561371 | 0.317385615 | 0.316033838 |
| 0.364041453 | 0.292445285 | 0.281209971 | 0.438945159 |
| 0.295383877 | 0.297833542 | 0.359849224 | 0.308456077 |
| 0.043430556 | 0.358820146 | 0.35436155  | 0.183132864 |
| 0.350074912 | 0.115060473 | 0.169551756 | 0.355033433 |
| 0.196917328 | 0.200592626 | 0.374320113 | 0.312478236 |
| 0.299523095 | 0.31274909  | 0.427289351 | 0.034499643 |
| 0.258662456 | 0.110946686 | 0.341788556 | 0.247399214 |
| 0.358972535 | 0.347506018 | 0.252469278 | 0.257783455 |
| 0.280322425 | 0.439220951 | 0.367395971 | 0.409522506 |
| 0.252657681 | 0.433302072 | 0.346761369 | 0.373341974 |
| 0.369803269 | 0.239811521 | 0.081131378 | 0.352863062 |
| 0.34720757  | 0.220218229 | 0.226190436 | 0.317395052 |
| 0.257299475 | 0.303092683 | 0.158931088 | 0.406626338 |
| 0.463550065 | 0.408990152 | 0.297857359 | 0.32766589  |
| 0.376902961 | 0.362572322 | 0.347128531 | 0.442981824 |

|             |             |             |             |
|-------------|-------------|-------------|-------------|
| 0.214817518 | 0.275121547 | 0.262669921 | 0.338045105 |
| 0.333024161 | 0.20668446  | 0.357161686 | 0.104821186 |
| 0.005616716 | 0.254868655 | 0.2323471   | 0.287181562 |
| 0.141256617 | 0.28725325  | 0.325077196 | 0.42307981  |
| 0.302423265 | 0.377543121 | 0.333595823 | 0.288109979 |
| 0.375018263 | 0.273098322 | 0.263921692 | 0.306453234 |
| 0.351822415 | 0.08557231  | 0.254140026 | 0.478133793 |
| 0.171052652 | 0.183021761 | 0.35288119  | 0.013591326 |
| 0.204971144 | 0.317071881 | 0.243220433 | 0.315350222 |
| 0.369246697 | 0.309633525 | 0.338610231 | 0.236472833 |
| 0.352785005 | 0.276317551 | 0.019992789 | 0.382094858 |
| 0.403322647 | 0.383926675 | 0.402298788 | 0.411130096 |
| 0.344308665 | 0.331069406 | 0.332871425 | 0.353542429 |
| 0.284443067 | 0.251074427 | 0.165248376 | 0.313463698 |
| 0.021354763 | 0.354710144 | 0.289168479 | 0.316492754 |
| 0.322921101 | 0.349202872 | 0.195473317 | 0.279824223 |
| 0.118916745 | 0.116933905 | 0.343387776 | 0.310576163 |
| 0.315421173 | 0.115166006 | 0.206562183 | 0.228767803 |
| 0.401692552 | 0.378544701 | 0.224204114 | 0.443127331 |
| 0.34944778  | 0.259148946 | 0.301807859 | 0.341630286 |
| 0.250798075 | 0.086081274 | 0.333369778 | 0.028552229 |
| 0.190260584 | 0.409044475 | 0.275259157 | 0.219072079 |
| 0.359508803 | 0.062133506 | 0.373523422 | 0.449807817 |
| 0.402377512 | 0.405991314 | 0.417585961 | 0.198469944 |
| 0.425196297 | 0.045922096 | 0.423238613 | 0.361653268 |
| 0.255096917 | 0.007421462 | 0.037638459 | 0.360394978 |
| 0.299931103 | 0.189517272 | 0.327658821 | 0.305191348 |
| 0.281225624 | 0.306671475 | 0.238792832 | 0.176788557 |
| 0.338192109 | 0.272682504 | 0.170962832 | 0.415781326 |
| 0.329727847 | 0.333694716 | 0.320845434 | 0.252203918 |
| 0.310099457 | 0.217042466 | 0.24489027  | 0.028138291 |
| 0.322956154 | 0.254098818 | 0.454363453 | 0.420899638 |
| 0.436998147 | 0.31414308  | 0.211885747 | 0.299718659 |
| 0.340076411 | 0.236137565 | 0.237174247 | 0.262919673 |
| 0.404150511 | 0.315936088 | 0.375149907 | 0.373491365 |
| 0.422254229 | 0.414884938 | 0.185093134 | 0.343783941 |
| 0.076409406 | 0.006815676 | 0.338628369 | 0.354278698 |
| 0.061727504 | 0.27762705  | 0.360451319 | 0.268866772 |
| 0.283573604 | 0.16108307  | 0.17793813  | 0.173978698 |
| 0.337734482 | 0.322989596 | 0.2324234   | 0.330848113 |
| 0.256802216 | 0.153510522 | 0.30590525  | 0.309777709 |
| 0.232145181 | 0.353039772 | 0.317074789 | 0.14595087  |
| 0.296758159 | 0.293597051 | 0.231753007 | 0.323286426 |
| 0.365099552 | 0.378025206 | 0.183162219 | 0.073412629 |
| 0.367523752 | 0.299653519 | 0.389220106 | 0.40542729  |
| 0.464861906 | 0.446614391 | 0.414640893 | 0.238419571 |
| 0.246685204 | 0.31993811  | 0.236503922 | 0.188962333 |
| 0.419800776 | 0.213362103 | 0.416190519 | 0.198541397 |
| 0.291628725 | 0.326437665 | 0.172648504 | 0.264891077 |
| 0.26597093  | 0.341942152 | 0.29126457  | 0.28989853  |
| 0.315465996 | 0.175824873 | 0.21304257  | 0.345270458 |
| 0.370210769 | 0.114580802 | 0.326701424 | 0.337186123 |
| 0.35474501  | 0.162120544 | 0.316522468 | 0.424872605 |
| 0.305569838 | 0.275049983 | 0.325619834 | 0.333435366 |

|             |             |             |             |
|-------------|-------------|-------------|-------------|
| 0.339555615 | 0.26646045  | 0.110493412 | 0.361639064 |
| 0.396335739 | 0.320777078 | 0.431591284 | 0.359763894 |
| 0.253267523 | 0.29250746  | 0.212137728 | 0.296691968 |
| 0.332175168 | 0.347520128 | 0.326885199 | 0.236411177 |
| 0.355517553 | 0.458737482 | 0.352776826 | 0.314722217 |
| 0.311182846 | 0.274058895 | 0.197052707 | 0.346745519 |
| 0.14767328  | 0.265592788 | 0.271647354 | 0.327245719 |
| 0.007481638 | 0.089345016 | 0.382226052 | 0.344015612 |
| 0.449132769 | 0.375419069 | 0.410207813 | 0.321493276 |
| 0.001182038 | 0.287493903 | 0.344199619 | 0.311342592 |
| 0.358201045 | 0.379023535 | 0.225483217 | 0.236187109 |
| 0.36352444  | 0.229770403 | 0.27430397  | 0.30875363  |
| 0.110873352 | 0.353871126 | 0.339683367 | 0.318332481 |
| 0.285329542 | 0.228068045 | 0.172342752 | 0.346822587 |
| 0.113338998 | 0.360174412 | 0.37306818  | 0.220442439 |
| 0.136107343 | 0.352492424 | 0.350604203 | 0.160551195 |
| 0.254071922 | 0.346422309 | 0.36024131  | 0.014903246 |
| 0.329190313 | 0.078548732 | 0.294360354 | 0.300389018 |
| 0.301169107 | 0.304447943 | 0.305361437 | 0.275409819 |
| 0.34275175  | 0.337284876 | 0.34010441  | 0.349461832 |
| 0.283168854 | 0.337900719 | 0.311169564 | 0.332716461 |
| 0.280674597 | 0.302980426 | 0.242247049 | 0.23132792  |
| 0.207611991 | 0.362917871 | 0.358383426 | 0.221253183 |
| 0.342438298 | 0.316909915 | 0.37452221  | 0.409259352 |
| 0.370445789 | 0.241644689 | 0.320999602 | 0.357185778 |
| 0.142787216 | 0.285655897 | 0.228134948 | 0.336082851 |
| 0.362325438 | 0.218906719 | 0.312620031 | 0.347553717 |
| 0.324044884 | 0.414472237 | 0.359971592 | 0.387809717 |
| 0.318766472 | 0.278740023 | 0.229108938 | 0.232434738 |
| 0.33183294  | 0.294415331 | 0.240561302 | 0.027693401 |
| 0.371422893 | 0.330543814 | 0.350467242 | 0.42909103  |
| 0.181944663 | 0.373310447 | 0.259936953 | 0.264770024 |
| 0.196084271 | 0.277912499 | 0.31496792  | 0.327251097 |
| 0.126019838 | 0.334709078 | 0.286561798 | 0.325968386 |
| 0.326239165 | 0.308254789 | 0.236022324 | 0.351433356 |
| 0.320921271 | 0.328118454 | 0.432422304 | 0.28290291  |
| 0.294054844 | 0.189496791 | 0.297016987 | 0.311487931 |
| 0.292744915 | 0.402043765 | 0.226342197 | 0.407562915 |
| 0.282910379 | 0.286546995 | 0.462492503 | 0.348046622 |
| 0.326422037 | 0.23287558  | 0.112397548 | 0.304417751 |
| 0.317517953 | 0.21799172  | 0.01075046  | 0.067694813 |
| 0.357168723 | 0.252033086 | 0.323061349 | 0.337564878 |
| 0.220468249 | 0.345875168 | 0.098426734 | 0.35333781  |
| 0.416583796 | 0.4572003   | 0.308818391 | 0.349657084 |
| 0.373279475 | 0.284121692 | 0.350298346 | 0.021981597 |
| 0.305122202 | 0.274478448 | 0.263160498 | 0.223848373 |
| 0.132628399 | 0.128450842 | 0.313763139 | 0.209384837 |
| 0.364772263 | 0.120670358 | 0.300126882 | 0.333774059 |
| 0.31877069  | 0.462574451 | 0.255424313 | 0.348122403 |
| 0.161683342 | 0.348967096 | 0.257489291 | 0.281191959 |
| 0.254287843 | 0.218444958 | 0.350717341 | 0.179989879 |
| 0.178833128 | 0.281136322 | 0.011555217 | 0.432457518 |
| 0.433149143 | 0.232457114 | 0.336414746 | 0.199362562 |
| 0.346909645 | 0.3525545   | 0.258828997 | 0.27749088  |

|             |             |             |             |
|-------------|-------------|-------------|-------------|
| 0.082307863 | 0.279082135 | 0.340069495 | 0.373717743 |
| 0.148733874 | 0.302675413 | 0.198235441 | 0.242082318 |
| 0.457633728 | 0.26089265  | 0.350936627 | 0.204064536 |
| 0.406796281 | 0.341608964 | 0.28412594  | 0.233869339 |
| 0.295438931 | 0.227770709 | 0.282362916 | 0.442177811 |
| 0.306649437 | 0.17375605  | 0.338989921 | 0.313250827 |
| 0.218144311 | 0.363857572 | 0.27932708  | 0.435426881 |
| 0.195202152 | 0.360617609 | 0.337559111 | 0.379974528 |
| 0.358136005 | 0.158450631 | 0.185050816 | 0.25973832  |
| 0.401822185 | 0.248108449 | 0.203175473 | 0.376200645 |
| 0.154725361 | 0.357465147 | 0.285945105 | 0.234501595 |
| 0.164103808 | 0.306840576 | 0.327276018 | 0.314372134 |
| 0.347483282 | 0.304691924 | 0.231379646 | 0.385293277 |
| 0.253270268 | 0.113812103 | 0.422764831 | 0.012247078 |
| 0.358423806 | 0.331475029 | 0.356736401 | 0.281269505 |
| 0.325870065 | 0.354589233 | 0.33499072  | 0.021423714 |
| 0.349061038 | 0.052051087 | 0.284868861 | 0.251949364 |
| 0.219572816 | 0.220749907 | 0.409413934 | 0.405087429 |
| 0.367839139 | 0.238390162 | 0.218023316 | 0.400191033 |
| 0.10335616  | 0.191171346 | 0.230634257 | 0.332258642 |
| 0.15257243  | 0.25793409  | 0.274549063 | 0.242341323 |
| 0.368368452 | 0.354451618 |             |             |
| ACADM       | 0.03046552  | 0.427763965 | 0.033615904 |
| 0.048093406 | 0.116834246 | 0.176668727 | 0.017821612 |
| 0.039290786 | 0.311740932 | 0.242177774 | 0.147623136 |
| 0.004311641 | 0.027725089 | 0.36706289  | 0.014280567 |
| 0.191317882 | 0.005907909 | 0.031099999 | 0.032670819 |
| 0.097854352 | 0.089067401 | 0.123227547 | 0.21145569  |
| 0.088904709 | 0.152987364 | 0.227446864 | 0.213331426 |
| 0.46717568  | 0.168697138 | 0.285804892 | 0.232334498 |
| 0.31952166  | 0.130275328 | 0.180076336 | 0.00728696  |
| 0.194919214 | 0.003274971 | 0.37105324  | 0.073954483 |
| 0.055933624 | 0.256991724 | 1           | 0.070786275 |
| 0.227324731 | 0.015454685 | 0.24637645  | 0.267899258 |
| 0.223741227 | 0.106843867 | 0.040169407 | 0.318793389 |
| 0.166652743 | 0.220625986 | 0.404684717 | 0.000643951 |
| 0.11809567  | 0.051545565 | 0.10088617  | 0.470042821 |
| 0.093863828 | 0.030345403 | 0.182652381 | 0.102817917 |
| 0.232701558 | 0.223475353 | 0.122593728 | 0.198983713 |
| 0.431411441 | 0.055362637 | 0.34890914  | 0.065685523 |
| 0.152982373 | 0.016503645 | 0.082643592 | 0.062438558 |
| 0.160332366 | 0.060406832 | 0.130674523 | 0.113698009 |
| 0.450774109 | 0.438263675 | 0.116892759 | 0.484233329 |
| 0.025223351 | 0.148812481 | 0.086417432 | 0.151174826 |
| 0.233890237 | 0.029096173 | 0.259974739 | 0.439657949 |
| 0.021675324 | 0.315335674 | 0.273293281 | 0.083277799 |
| 0.398490234 | 0.125446652 | 0.281078877 | 0.051156627 |
| 0.200287991 | 0.136314302 | 0.43127328  | 0.15028781  |
| 0.106153375 | 0.047060383 | 0.472240662 | 0.134762187 |
| 0.090975033 | 0.043513752 | 0.059481154 | 0.389236358 |
| 0.248176454 | 0.437113654 | 0.384215214 | 0.235297283 |
| 0.168367375 | 0.438905645 | 0.264129358 | 0.349289062 |
| 0.219220099 | 0.480746317 | 0.078026752 | 0.007990014 |
| 0.037825019 | 0.019091536 | 0.07608935  | 0.184710774 |

|             |             |             |             |
|-------------|-------------|-------------|-------------|
| 0.404068565 | 0.190527103 | 0.066901739 | 0.064383851 |
| 0.347065852 | 0.477504486 | 0.488856165 | 0.30537567  |
| 0.012312681 | 0.100619552 | 0.176422391 | 0.1155777   |
| 0.213003321 | 0.04827535  | 0.079129555 | 0.459204428 |
| 0.282863411 | 0.315426534 | 0.075102494 | 0.440349124 |
| 0.068429406 | 0.413889366 | 0.455092885 | 0.05170633  |
| 0.458611678 | 0.458610979 | 0.409604513 | 0.239475547 |
| 0.417511834 | 0.157756113 | 0.025694386 | 0.2855005   |
| 0.368980549 | 0.003741844 | 0.423902684 | 0.436497093 |
| 0.473570041 | 0.380898372 | 0.420181208 | 0.443670945 |
| 0.479096748 | 0.035450853 | 0.017318972 | 0.112640724 |
| 0.466585302 | 0.296638493 | 0.031035928 | 0.220653721 |
| 0.162204989 | 0.179453094 | 0.338879473 | 0.120059798 |
| 0.396459596 | 0.390448792 | 0.451302554 | 0.283778012 |
| 0.190097053 | 0.235024916 | 0.203935658 | 0.454760991 |
| 0.011621152 | 0.047465981 | 0.038967017 | 0.178304168 |
| 0.250113074 | 0.053718652 | 0.165485214 | 0.165364655 |
| 0.072158608 | 0.159190737 | 0.152622492 | 0.205309701 |
| 0.054314536 | 0.265284021 | 0.067739739 | 0.077349928 |
| 0.007788757 | 0.104638847 | 0.050846573 | 0.044934181 |
| 0.070176389 | 0.219282881 | 0.323697162 | 0.424988202 |
| 0.131849956 | 0.12569997  | 0.296384765 | 0.369449624 |
| 0.285945934 | 0.173504505 | 0.126999142 | 0.001710553 |
| 0.084784494 | 0.186345141 | 0.071715737 | 0.232206054 |
| 0.155748477 | 0.067622689 | 0.193448149 | 0.23076607  |
| 0.143118308 | 0.064936808 | 0.13321811  | 0.343189815 |
| 0.115019018 | 0.093907306 | 0.327733161 | 0.256966578 |
| 0.001107649 | 0.13441001  | 0.344454478 | 0.032270772 |
| 0.184865273 | 0.03475643  | 0.102010558 | 0.377806167 |
| 0.113586154 | 0.060831235 | 0.433753348 | 0.231341578 |
| 0.145804175 | 0.21649091  | 0.434866603 | 0.020821032 |
| 0.155092787 | 0.010132126 | 0.12298607  | 0.250619513 |
| 0.109583664 | 0.143808844 | 0.120777389 | 0.08295444  |
| 0.094359303 | 0.454856079 | 0.304315632 | 0.437701306 |
| 0.15371255  | 0.439675112 | 0.361535098 | 0.332970625 |
| 0.203421356 | 0.171402007 | 0.048954765 | 0.337687162 |
| 0.376317928 | 0.14073508  | 0.062605682 | 0.372144328 |
| 0.183228157 | 0.241266288 | 0.027474356 | 0.392973175 |
| 0.407078534 | 0.483116187 | 0.032363478 | 0.210604439 |
| 0.258172057 | 0.097564718 | 0.320937233 | 0.427543572 |
| 0.202823829 | 0.133047191 | 0.110693491 | 0.2555349   |
| 0.08568449  | 0.052286408 | 0.235590296 | 0.071128828 |
| 0.010040817 | 0.036575247 | 0.031826704 | 0.035544387 |
| 0.042092774 | 0.320313292 | 0.229236226 | 0.447790438 |
| 0.030940469 | 0.33539969  | 0.139242634 | 0.08469134  |
| 0.362199585 | 0.122933489 | 0.183530697 | 0.200861003 |
| 0.142404835 | 0.004141295 | 0.029628597 | 0.44295125  |
| 0.033355887 | 0.074718825 | 0.133876551 | 0.000764686 |
| 0.016346304 | 0.433609985 | 0.083236914 | 0.149324189 |
| 0.363292818 | 0.165486561 | 0.117653659 | 0.203776906 |
| 0.180295297 | 0.033385945 | 6.65E-05    | 0.433662661 |
| 0.44377527  | 0.409737757 | 0.449426609 | 0.434677392 |
| 0.376016644 | 0.307746613 | 0.283638032 | 0.21459884  |
| 0.032218693 | 0.044587693 | 0.059637948 | 0.081973321 |

|             |             |             |             |
|-------------|-------------|-------------|-------------|
| 0.001951971 | 0.23898939  | 0.109888741 | 0.068777773 |
| 0.29020063  | 0.156936267 | 0.011306118 | 0.16629899  |
| 0.008444739 | 0.085968308 | 0.117986146 | 0.062316588 |
| 0.18740903  | 0.005361709 | 0.12330896  | 0.124010309 |
| 0.403631746 | 0.260399272 | 0.162836846 | 0.475675842 |
| 0.126313273 | 0.117075658 | 0.097209336 | 0.240505001 |
| 0.020005798 | 0.077222956 | 0.157340122 | 0.065762623 |
| 0.113349029 | 0.400650608 | 0.160562047 | 0.029941494 |
| 0.115775084 | 0.001490567 | 0.298992409 | 0.453163614 |
| 0.475714043 | 0.432732097 | 0.428446687 | 0.08780695  |
| 0.446440621 | 0.064581219 | 0.46997101  | 0.353111388 |
| 0.212430794 | 0.00025828  | 0.000171024 | 0.416988289 |
| 0.183159574 | 0.063326113 | 0.065632758 | 0.185747866 |
| 0.025490748 | 0.071432287 | 0.019761193 | 0.04460882  |
| 0.274912019 | 0.065861964 | 0.04325831  | 0.445121899 |
| 0.071025694 | 0.079133615 | 0.197171657 | 0.05840892  |
| 0.214797562 | 0.013480753 | 0.056534799 | 0.001318702 |
| 0.197968902 | 0.104731107 | 0.45019129  | 0.463431133 |
| 0.39313052  | 0.22345756  | 0.236174286 | 0.142162652 |
| 0.353618457 | 0.096059381 | 0.192700138 | 0.082500323 |
| 0.468370619 | 0.200777044 | 0.181191076 | 0.215062204 |
| 0.390881666 | 0.393455883 | 0.008846089 | 0.27285176  |
| 0.004902583 | 0.000878438 | 0.21062966  | 0.136758758 |
| 0.029480513 | 0.135230526 | 0.14630561  | 0.093100445 |
| 0.072594893 | 0.011189285 | 0.088813867 | 0.074701978 |
| 0.126112072 | 0.13224488  | 0.084208312 | 0.156053187 |
| 0.076521133 | 0.02975644  | 0.054807929 | 0.040778394 |
| 0.102548237 | 0.252803836 | 0.155089284 | 0.005826051 |
| 0.245638795 | 0.199311191 | 0.017955636 | 0.083561503 |
| 0.336420079 | 0.410728015 | 0.008555614 | 0.000802171 |
| 0.167520635 | 0.100817274 | 0.400200084 | 0.478190456 |
| 0.469754399 | 0.412222933 | 0.307803111 | 0.022287483 |
| 0.021687843 | 0.129883531 | 0.103507927 | 0.017149274 |
| 0.44322654  | 0.049134277 | 0.451973376 | 0.115422549 |
| 0.053388515 | 0.070823246 | 0.006239446 | 0.026406951 |
| 0.196970147 | 0.072403276 | 0.040742475 | 0.103612029 |
| 0.092486998 | 0.085476319 | 0.014309569 | 0.069882024 |
| 0.22057979  | 0.060978349 | 0.064441454 | 0.133536276 |
| 0.287066746 | 0.203902519 | 0.292101939 | 0.332320009 |
| 0.070711858 | 0.046849798 | 0.138392302 | 0.260582354 |
| 0.384657771 | 0.283833461 | 0.010580127 | 0.470991033 |
| 0.400049696 | 0.291600381 | 0.46190134  | 0.249646389 |
| 0.046968439 | 0.149967971 | 0.121365978 | 0.136578132 |
| 0.06993441  | 0.177854941 | 0.076457438 | 0.025788546 |
| 0.203379611 | 0.406851069 | 0.367954853 | 0.041798198 |
| 0.26007073  | 0.091756762 | 0.044321814 | 0.392854624 |
| 0.046295912 | 0.029123599 | 0.234803162 | 0.347054982 |
| 0.000104784 | 0.043725222 | 0.401683236 | 0.07268334  |
| 0.436101088 | 0.38958021  | 0.34292826  | 0.105978914 |
| 0.000380574 | 0.262939735 | 0.178372177 | 0.150738793 |
| 0.389943151 | 0.246837737 | 0.063135619 | 0.01479918  |
| 0.163327374 | 0.06995692  | 0.029550306 | 0.172194123 |
| 0.069019333 | 0.260855602 | 0.089088453 | 0.091050999 |
| 0.048774928 | 0.080175106 | 0.082357834 | 0.081933338 |



|             |             |             |             |
|-------------|-------------|-------------|-------------|
| 0.050110099 | 0.11807072  | 0.208855028 | 0.23870667  |
| 0.067571629 | 0.328776502 | 0.31363806  | 0.00940612  |
| 0.154176585 | 0.308876231 | 0.343395699 | 0.000118463 |
| 0.274217792 | 0.000845542 | 0.045455187 | 0.05475331  |
| 0.050562418 | 0.051433446 | 0.089667125 | 0.09222959  |
| 0.203763515 | 0.066411365 | 0.085577056 | 0.093153903 |
| 0.038603133 | 0.077219593 | 0.197014326 | 0.158150328 |
| 0.080425535 | 0.040123382 | 0.091997153 | 0.10745501  |
| 0.012094293 | 0.425254023 | 0.163428418 | 0.064340311 |
| 0.084261289 | 0.152218965 | 0.227069853 | 0.490819917 |
| 0.299358446 | 0.122712655 | 0.111123752 | 0.411539408 |
| 0.17186947  | 0.142598843 | 0.027907338 | 0.218070762 |
| 0.081080335 | 0.053946218 | 0.237538271 | 0.200073362 |
| 0.330593571 | 0.30680306  | 0.156572019 | 0.351505241 |
| 0.131465212 | 0.158304123 | 0.252334325 | 0.015982619 |
| 0.058256968 | 0.078808899 | 0.079570298 | 3.78E-06    |
| 0.173797413 | 0.125418306 | 0.393377665 | 0.461334771 |
| 0.116332847 | 0.277043274 | 0.219265372 | 0.027446702 |
| 0.270797322 | 0.182078576 | 0.069973187 | 0.359554519 |
| 0.088897842 | 0.058690568 | 0.105060335 | 0.189377496 |
| 0.311570787 | 0.331754519 | 0.076463406 | 0.081908923 |
| 0.091122987 | 0.123729799 | 0.432506831 | 0.058278876 |
| 0.282542548 | 0.045057182 | 0.303755915 | 0.083746118 |
| 0.054134421 | 0.463502006 | 0.026208705 | 0.463560606 |
| 0.103324028 | 0.095787534 | 0.38822134  | 0.13610758  |
| 0.128039489 | 0.026887226 | 0.067104147 | 0.203130918 |
| 0.067205661 | 0.136446043 | 0.015359197 | 0.016428585 |
| 0.164111378 | 0.14223955  | 0.378888564 | 0.225437635 |
| 0.067390393 | 0.189053245 | 0.068643138 | 0.113691616 |
| 0.489042475 | 0.470518538 | 0.073716019 | 0.134648292 |
| 0.204192548 | 0.026624092 | 0.291765633 | 0.008226717 |
| 0.246245117 | 0.273994258 | 0.190172485 | 0.01309889  |
| 0.004364351 | 0.077224222 | 0.251882074 | 0.049198233 |
| 0.376276859 | 0.096697016 | 0.266584832 | 0.316213707 |
| 0.107639734 | 0.465614777 | 0.023376731 | 0.243115443 |
| 0.022776858 | 0.127133302 | 0.173595864 | 0.185345135 |
| 0.057976439 | 0.089367381 | 0.215696698 | 0.069229838 |
| 0.006577229 | 0.0760867   | 0.000936959 | 0.328024291 |
| 0.465478437 | 0.130328571 | 0.136437293 | 0.224816054 |
| 0.126209137 | 0.29657556  | 0.064404974 | 0.23997807  |
| 0.001395386 | 0.166107279 | 0.072754484 | 0.346694709 |
| 0.1216668   | 0.194304488 | 0.012821089 | 0.113431986 |
| 0.438354796 | 0.085049859 | 0.158038095 | 0.15220012  |
| 0.475777091 | 0.346899055 | 0.14826615  | 0.066862709 |
| 0.30330137  | 0.038237919 | 0.234016149 | 0.45003074  |
| 0.041106142 | 0.058590672 | 0.31829212  | 0.051707308 |
| 0.105742754 | 0.328026196 | 0.297064469 | 0.455044854 |
| 0.010145398 | 0.10808557  | 0.298468218 | 0.399484752 |
| 0.15469047  | 0.039850366 | 0.071551577 | 0.054810855 |
| 0.451999194 | 0.030754606 | 0.082199025 | 0.230065378 |
| 0.065570032 | 0.145052984 | 0.295769162 | 0.042423014 |
| 0.006731704 | 0.04759225  | 0.147556355 | 0.064366534 |
| 0.111912565 | 0.142178316 | 0.063741185 | 0.275287222 |
| 0.032101387 | 0.004314528 | 0.344512827 | 0.004955798 |

|             |             |             |             |
|-------------|-------------|-------------|-------------|
| 0.200778953 | 0.209371471 | 0.093253379 | 0.12156342  |
| 0.132318849 | 0.188253486 | 0.191138858 | 9.35E-05    |
| 0.282436882 | 0.019837697 | 0.102891345 | 0.056212886 |
| 0.104251155 | 0.016994996 | 0.402691905 | 0.410356644 |
| 0.181049382 | 0.161245885 | 0.16287432  | 0.402345551 |
| 0.044409417 | 0.177341615 | 0.136268527 | 0.332641234 |
| 0.071863071 | 0.232010363 | 0.195925794 | 0.164631907 |
| 0.26135462  | 0.09820482  |             |             |
| ACSL5       | 0.090631092 | 0.243187096 | 0.067596892 |
| 0.204013115 | 0.231678287 | 0.128853719 | 0.08068572  |
| 0.106822836 | 0.181060868 | 0.044906344 | 0.252084254 |
| 0.068777282 | 0.041978957 | 0.325780325 | 0.082987542 |
| 0.218713759 | 0.09885835  | 0.138006573 | 0.025312818 |
| 0.094548306 | 0.224868751 | 0.127753147 | 0.13385404  |
| 0.17378306  | 0.231370158 | 0.163686731 | 0.125205409 |
| 0.315423103 | 0.064043665 | 0.246211176 | 0.043540387 |
| 0.362415168 | 0.237125043 | 0.117390673 | 0.05312607  |
| 0.176101963 | 0.005663539 | 0.335287967 | 0.187361126 |
| 0.11204479  | 0.32994516  | 0.070786275 | 1           |
| 0.096232615 | 0.074043152 | 0.031664394 | 0.191930915 |
| 0.145347572 | 0.122085141 | 0.069862774 | 0.233953811 |
| 0.085799206 | 0.256633385 | 0.16068409  | 0.002412642 |
| 0.103161915 | 0.02481504  | 0.06229934  | 0.333499071 |
| 0.293517772 | 0.187289092 | 0.047495396 | 0.09215168  |
| 0.150688181 | 0.210837017 | 0.243035947 | 0.071240952 |
| 0.353675073 | 0.072801728 | 0.20866272  | 0.139664488 |
| 0.133902041 | 0.03299225  | 0.249738556 | 0.068355066 |
| 0.106247597 | 0.252735071 | 0.217589953 | 0.109051831 |
| 0.233786093 | 0.369179738 | 0.220912862 | 0.309833325 |
| 0.043296439 | 0.17842767  | 0.138164801 | 0.313315041 |
| 0.211364999 | 0.061499781 | 0.320630034 | 0.380020426 |
| 0.04063358  | 0.11154374  | 0.213411923 | 0.119738801 |
| 0.272009024 | 0.066330186 | 0.108921052 | 0.109991799 |
| 0.243431423 | 0.198545714 | 0.303411792 | 0.318257972 |
| 0.151008977 | 0.094213543 | 0.307157826 | 0.182840899 |
| 0.198365683 | 0.121449505 | 0.137687535 | 0.277415049 |
| 0.242822656 | 0.331505676 | 0.225297055 | 0.262378564 |
| 0.180824001 | 0.353151128 | 0.291525464 | 0.273760074 |
| 0.01767717  | 0.336401148 | 0.216735867 | 0.117644641 |
| 0.051956916 | 0.133860122 | 0.077819586 | 0.312042712 |
| 0.321671395 | 0.228394584 | 0.152295311 | 0.235240379 |
| 0.331799985 | 0.289948588 | 0.320884465 | 0.280226517 |
| 0.080191437 | 0.068892816 | 0.186576558 | 0.114697742 |
| 0.24293096  | 0.133432349 | 0.143704046 | 0.34881442  |
| 0.365730035 | 0.307552603 | 0.092032428 | 0.35705176  |
| 0.093594799 | 0.404534986 | 0.264224025 | 0.239195235 |
| 0.367704847 | 0.341215111 | 0.391953707 | 0.263151916 |
| 0.349258253 | 0.202521325 | 0.01506728  | 0.26005552  |
| 0.404839075 | 0.028885158 | 0.285915975 | 0.31710213  |
| 0.319381756 | 0.294337135 | 0.372617829 | 0.34108488  |
| 0.312500124 | 0.1074624   | 0.004325088 | 0.277269185 |
| 0.340348677 | 0.359345731 | 0.118562296 | 0.149441311 |
| 0.211935287 | 0.153007761 | 0.238947469 | 0.116403531 |
| 0.40561638  | 0.310583988 | 0.293688569 | 0.233219931 |

|             |             |             |             |
|-------------|-------------|-------------|-------------|
| 0.103818724 | 0.312177997 | 0.138634625 | 0.310265158 |
| 0.100488528 | 0.106250515 | 0.085343412 | 0.239367908 |
| 0.07422856  | 0.257953366 | 0.115207394 | 0.160860367 |
| 0.283165911 | 0.103452854 | 0.082929492 | 0.258446037 |
| 0.081763812 | 0.174303375 | 0.168472505 | 0.13452952  |
| 0.122921319 | 0.198117502 | 0.171905437 | 0.214973566 |
| 0.225861922 | 0.213191763 | 0.211365873 | 0.328829288 |
| 0.107376159 | 0.216955632 | 0.234237863 | 0.379646713 |
| 0.418231947 | 0.19630953  | 0.243214933 | 0.107207955 |
| 0.124316955 | 0.050078649 | 0.062017231 | 0.149246225 |
| 0.19423388  | 0.137846381 | 0.20239391  | 0.313591118 |
| 0.170155662 | 0.073783902 | 0.112434741 | 0.360137592 |
| 0.148421733 | 0.186883305 | 0.346385769 | 0.135041733 |
| 0.025456049 | 0.215224843 | 0.306315532 | 0.118415912 |
| 0.193826549 | 0.099382274 | 0.107892123 | 0.329719687 |
| 0.075424098 | 0.107595818 | 0.318202773 | 0.288753911 |
| 0.096869377 | 0.171356429 | 0.364332725 | 0.011356297 |
| 0.130204012 | 0.13209292  | 0.344088236 | 0.066025745 |
| 0.258471967 | 0.282657779 | 0.19759725  | 0.162709639 |
| 0.141407323 | 0.342846911 | 0.287609504 | 0.351721421 |
| 0.097242092 | 0.369007671 | 0.315660165 | 0.358367196 |
| 0.260747631 | 0.090247049 | 0.057723644 | 0.310044423 |
| 0.319453405 | 0.066254502 | 0.097316357 | 0.227662069 |
| 0.082836591 | 0.233769689 | 0.104453463 | 0.382410372 |
| 0.386900375 | 0.273993135 | 0.175705844 | 0.313460671 |
| 0.366055745 | 0.236674136 | 0.284404592 | 0.374017615 |
| 0.051678253 | 0.15868774  | 0.13945726  | 0.36044191  |
| 0.240771358 | 0.128411186 | 0.26330804  | 0.058336894 |
| 0.005978214 | 0.079406993 | 0.104228935 | 0.213308464 |
| 0.123564603 | 0.146454768 | 0.240209948 | 0.345593165 |
| 0.173439643 | 0.329848611 | 0.186195884 | 0.178318887 |
| 0.296581537 | 0.118683272 | 0.174269989 | 0.216570552 |
| 0.244310732 | 0.106153021 | 0.227505196 | 0.375971217 |
| 0.048503757 | 0.124876469 | 0.123761243 | 0.029243244 |
| 0.070673421 | 0.189669539 | 0.131795881 | 0.253280738 |
| 0.352089048 | 0.233003185 | 0.210606299 | 0.056279409 |
| 0.312568322 | 0.15378172  | 0.053483207 | 0.309084435 |
| 0.292779701 | 0.277016799 | 0.284160673 | 0.276095666 |
| 0.267264346 | 0.219140326 | 0.289442568 | 0.159388901 |
| 0.117557462 | 0.063418983 | 0.119551657 | 0.196097417 |
| 0.007734361 | 0.337597405 | 0.161334428 | 0.240507548 |
| 0.246437064 | 0.21379871  | 0.086475045 | 0.182708141 |
| 0.082037597 | 0.075595372 | 0.096537035 | 0.128046246 |
| 0.280685907 | 0.046619613 | 0.115480772 | 0.101474428 |
| 0.304242276 | 0.298618114 | 0.09167996  | 0.355751454 |
| 0.26654934  | 0.108064823 | 0.216326393 | 0.302764346 |
| 0.110616644 | 0.019361811 | 0.089591723 | 0.013111701 |
| 0.059506143 | 0.288482992 | 0.089903865 | 0.096516256 |
| 0.286512713 | 0.034401402 | 0.311821418 | 0.366952284 |
| 0.280931308 | 0.35846062  | 0.361597961 | 0.136046364 |
| 0.356161066 | 0.023234266 | 0.344766872 | 0.265714662 |
| 0.071604604 | 0.008766271 | 0.031261718 | 0.328156729 |
| 0.203488024 | 0.071664713 | 0.234477102 | 0.118604735 |
| 0.207652889 | 0.090719387 | 0.090028573 | 0.155468545 |

|             |             |             |             |
|-------------|-------------|-------------|-------------|
| 0.213381627 | 0.22833505  | 0.113481103 | 0.288465513 |
| 0.202687606 | 0.231237551 | 0.088266901 | 0.114095376 |
| 0.199603614 | 0.134288592 | 0.10243257  | 0.06008886  |
| 0.272769167 | 0.127335411 | 0.304110421 | 0.330513059 |
| 0.387703719 | 0.279682502 | 0.054880859 | 0.102776408 |
| 0.275254771 | 0.096121245 | 0.080169589 | 0.10476516  |
| 0.304587806 | 0.251056721 | 0.362057239 | 0.330007969 |
| 0.384873326 | 0.354592603 | 0.077405781 | 0.302080828 |
| 0.091964098 | 0.010451562 | 0.145050091 | 0.219166732 |
| 0.014465411 | 0.147654039 | 0.317934286 | 0.070830474 |
| 0.105657648 | 0.080260747 | 0.101083183 | 0.106069913 |
| 0.279774843 | 0.187086444 | 0.194830828 | 0.183684096 |
| 0.143233826 | 0.115322705 | 0.174733714 | 0.121285161 |
| 0.054578355 | 0.259356889 | 0.238577283 | 0.054026777 |
| 0.141054033 | 0.172892682 | 0.112953768 | 0.205900288 |
| 0.354480808 | 0.342908546 | 0.094152138 | 0.101099481 |
| 0.279873228 | 0.118173363 | 0.355151666 | 0.306385653 |
| 0.355790349 | 0.397398191 | 0.341233125 | 0.145703071 |
| 0.110643818 | 0.244029797 | 0.186817798 | 0.164378026 |
| 0.343368364 | 0.070708421 | 0.314720649 | 0.137681897 |
| 0.162597593 | 0.18295518  | 0.131133044 | 0.132099537 |
| 0.184312568 | 0.235556298 | 0.235715217 | 0.151790037 |
| 0.174705143 | 0.106348925 | 0.07515795  | 0.24541385  |
| 0.278709322 | 0.091097951 | 0.209738348 | 0.095289726 |
| 0.240885087 | 0.026906822 | 0.249669883 | 0.398410409 |
| 0.185906928 | 0.107751177 | 0.113895791 | 0.225185551 |
| 0.265124377 | 0.110120391 | 0.106533571 | 0.246973429 |
| 0.344357157 | 0.223778037 | 0.330794231 | 0.344747162 |
| 0.124744156 | 0.20422769  | 0.083465287 | 0.198794123 |
| 0.190546266 | 0.140592964 | 0.16535818  | 0.11450811  |
| 0.276891867 | 0.340046967 | 0.276188987 | 0.227465561 |
| 0.154611745 | 0.091406624 | 0.061238565 | 0.266755769 |
| 0.124017241 | 0.125589453 | 0.075347255 | 0.247333666 |
| 0.017664535 | 0.072397942 | 0.326219275 | 0.179581833 |
| 0.358684723 | 0.350973963 | 0.383622096 | 0.09493771  |
| 0.000934682 | 0.214390911 | 0.284986412 | 0.151410643 |
| 0.267005798 | 0.274944032 | 0.056538535 | 0.173893242 |
| 0.357150327 | 0.101797777 | 0.175608714 | 0.107448997 |
| 0.067184912 | 0.187985287 | 0.276024109 | 0.146019607 |
| 0.17838593  | 0.071464464 | 0.110867417 | 0.191254599 |
| 0.053528954 | 0.324809004 | 0.364933449 | 0.042850561 |
| 0.087990881 | 0.299148698 | 0.26155101  | 0.070441529 |
| 0.149306209 | 0.282879825 | 0.312110778 | 0.013198547 |
| 0.277985845 | 0.05037534  | 0.210394909 | 0.241137019 |
| 0.199002771 | 0.156471104 | 0.266256824 | 0.167559725 |
| 0.186303356 | 0.175236663 | 0.20624676  | 0.315723917 |
| 0.219286738 | 0.151387733 | 0.204624598 | 0.131682628 |
| 0.194558158 | 0.164520404 | 0.132186754 | 0.129938746 |
| 0.149682721 | 0.281927584 | 0.305801737 | 0.106598633 |
| 0.257518567 | 0.10000068  | 0.385895988 | 0.29464153  |
| 0.36359524  | 0.116505877 | 0.129745827 | 0.288644999 |
| 0.032351829 | 0.090960802 | 0.055290624 | 0.168091089 |
| 0.214435566 | 0.166737552 | 0.120736622 | 0.171727117 |
| 0.185485786 | 0.376305716 | 0.292421346 | 0.343108501 |

|             |             |             |             |
|-------------|-------------|-------------|-------------|
| 0.16139586  | 0.104644825 | 0.055491601 | 0.208309281 |
| 0.185785013 | 0.156729032 | 0.213374914 | 0.030630061 |
| 0.271001319 | 0.125010421 | 0.318288904 | 0.328265765 |
| 0.080948584 | 0.355192    | 0.070558861 | 0.13125885  |
| 0.048967172 | 0.166313578 | 0.207547862 | 0.226432315 |
| 0.073318432 | 0.169498303 | 0.23569564  | 0.092860472 |
| 0.262240457 | 0.204352361 | 0.11543445  | 0.11715753  |
| 0.171029881 | 0.181922843 | 0.303552287 | 0.089988355 |
| 0.15749646  | 0.175383343 | 0.112445191 | 0.221964006 |
| 0.181600606 | 0.328273503 | 0.101154575 | 0.335453235 |
| 0.155926153 | 0.159738863 | 0.3952287   | 0.141567536 |
| 0.111173119 | 0.189418867 | 0.077664865 | 0.077461167 |
| 0.133480699 | 0.100556997 | 0.001786319 | 0.040101951 |
| 0.357343344 | 0.062528502 | 0.19735492  | 0.22954845  |
| 0.139499959 | 0.321434756 | 0.054012965 | 0.121413668 |
| 0.28242812  | 0.319621579 | 0.184081107 | 0.291047546 |
| 0.270995012 | 0.164591671 | 0.18581232  | 0.002887678 |
| 0.1945487   | 0.16132629  | 0.075167418 | 0.094276951 |
| 0.058205542 | 0.083977116 | 0.182910102 | 0.062341301 |
| 0.340259669 | 0.069710391 | 0.126902827 | 0.248126438 |
| 0.16712188  | 0.329239936 | 0.169106205 | 0.322572711 |
| 0.029359755 | 0.231224068 | 0.132394205 | 0.10666283  |
| 0.214355139 | 0.14151016  | 0.345025673 | 0.134369747 |
| 0.101538234 | 0.189303814 | 0.007505802 | 0.35850896  |
| 0.291910445 | 0.13492185  | 0.241185883 | 0.041361046 |
| 0.334905285 | 0.272307538 | 0.113991297 | 0.123835794 |
| 0.091013529 | 0.230482979 | 0.224569552 | 0.314182919 |
| 0.077507674 | 0.136600171 | 0.160098683 | 0.1364827   |
| 0.304289654 | 0.119306702 | 0.248344528 | 0.088273745 |
| 0.302555039 | 0.227547918 | 0.145634554 | 0.127449243 |
| 0.139300266 | 0.101610483 | 0.074237727 | 0.355245484 |
| 0.21842122  | 0.138928927 | 0.339794934 | 0.19620165  |
| 0.116288992 | 0.264754811 | 0.137167844 | 0.328646309 |
| 0.153838859 | 0.295645728 | 0.281583399 | 0.293126881 |
| 0.349537991 | 0.115928465 | 0.121487273 | 0.169692697 |
| 0.294763138 | 0.189667296 | 0.09611506  | 0.285716968 |
| 0.111013422 | 0.276521349 | 0.105955592 | 0.160419288 |
| 0.138584198 | 0.106990781 | 0.138023978 | 0.188137405 |
| 0.250689367 | 0.208534058 | 0.148096278 | 0.380815281 |
| 0.230056427 | 0.146901161 | 0.381784196 | 0.023826396 |
| 0.177217831 | 0.294060275 | 0.229798138 | 0.154888948 |
| 0.253707877 | 0.182438492 | 0.133802105 | 0.013448886 |
| 0.309764722 | 0.062566131 | 0.108873095 | 0.201248034 |
| 0.085865699 | 0.076297505 | 0.335859119 | 0.368161209 |
| 0.2129863   | 0.072525755 | 0.084284957 | 0.311329395 |
| 0.093705099 | 0.066137889 | 0.080511056 | 0.18462874  |
| 0.102694572 | 0.083142432 | 0.097030064 | 0.114527438 |
| 0.270291442 | 0.12162455  |             |             |
| ACSS1       | 0.031402032 | 0.418644207 | 0.029500159 |
| 0.064355112 | 0.155712814 | 0.171848523 | 0.027895038 |
| 0.05282798  | 0.328433921 | 0.235615589 | 0.165291208 |
| 0.006510485 | 0.035701714 | 0.404583165 | 0.021432562 |
| 0.247119911 | 0.010776186 | 0.046177378 | 0.046181546 |
| 0.127988786 | 0.131302919 | 0.140489654 | 0.1969942   |

|             |             |             |             |
|-------------|-------------|-------------|-------------|
| 0.1260389   | 0.154975437 | 0.2457118   | 0.237599221 |
| 0.478062826 | 0.150747826 | 0.294501919 | 0.201298392 |
| 0.3656881   | 0.17432594  | 0.195377892 | 0.007888407 |
| 0.204168397 | 0.00954216  | 0.411323776 | 0.119667991 |
| 0.076997642 | 0.278858773 | 0.227324731 | 0.096232615 |
| 1           | 0.01769096  | 0.163268736 | 0.32976982  |
| 0.247566393 | 0.129653807 | 0.036257429 | 0.33528664  |
| 0.212177227 | 0.2187076   | 0.385900003 | 0.000994914 |
| 0.143510847 | 0.061173367 | 0.131987615 | 0.466507955 |
| 0.108467854 | 0.04228299  | 0.226591327 | 0.115207658 |
| 0.27164277  | 0.278032606 | 0.145431943 | 0.249644183 |
| 0.453702962 | 0.087717154 | 0.375288923 | 0.072564081 |
| 0.189896812 | 0.020084378 | 0.099725664 | 0.0645414   |
| 0.194916187 | 0.075058533 | 0.144491599 | 0.158102988 |
| 0.44933621  | 0.463416472 | 0.143876684 | 0.491420843 |
| 0.056507741 | 0.197919756 | 0.123853849 | 0.198299879 |
| 0.292597406 | 0.046527939 | 0.300886698 | 0.478302616 |
| 0.026003626 | 0.308992124 | 0.335163964 | 0.087399443 |
| 0.385132987 | 0.152223795 | 0.266326741 | 0.068615021 |
| 0.252367133 | 0.197017375 | 0.447260973 | 0.18246544  |
| 0.126796168 | 0.048588458 | 0.460317323 | 0.17909395  |
| 0.114118493 | 0.044899086 | 0.114352369 | 0.42855134  |
| 0.291006787 | 0.450415666 | 0.414651639 | 0.301696348 |
| 0.226209002 | 0.45767365  | 0.303622407 | 0.359281557 |
| 0.147577394 | 0.492688075 | 0.086995496 | 0.011644002 |
| 0.038869578 | 0.025975506 | 0.121096696 | 0.212727679 |
| 0.420331019 | 0.205611692 | 0.086984358 | 0.098482902 |
| 0.409525956 | 0.458525077 | 0.507642846 | 0.356585429 |
| 0.016127898 | 0.143188399 | 0.234220775 | 0.112373516 |
| 0.26424714  | 0.057826456 | 0.119442316 | 0.472428096 |
| 0.308220813 | 0.369149519 | 0.08302053  | 0.45352843  |
| 0.094597377 | 0.447635569 | 0.445445415 | 0.069191961 |
| 0.479355405 | 0.456463849 | 0.452024385 | 0.28080553  |
| 0.413657808 | 0.166225864 | 0.040937184 | 0.335175947 |
| 0.400359899 | 0.006022296 | 0.451051491 | 0.475543254 |
| 0.485904777 | 0.426562715 | 0.471228082 | 0.462811169 |
| 0.479885693 | 0.040469079 | 0.036151665 | 0.162562756 |
| 0.486582853 | 0.331588748 | 0.045485043 | 0.259561143 |
| 0.20909761  | 0.18029007  | 0.355878336 | 0.151561958 |
| 0.436868165 | 0.410335003 | 0.466039743 | 0.330163835 |
| 0.223450993 | 0.250395606 | 0.239565412 | 0.438380346 |
| 0.015628893 | 0.052098687 | 0.035390939 | 0.215294736 |
| 0.214012852 | 0.073286525 | 0.190707754 | 0.213400524 |
| 0.093742761 | 0.167547962 | 0.168650992 | 0.255169231 |
| 0.051523965 | 0.271061445 | 0.077225039 | 0.099526088 |
| 0.014385969 | 0.109071355 | 0.077522934 | 0.053163278 |
| 0.095368902 | 0.220193734 | 0.342017839 | 0.457004275 |
| 0.178143039 | 0.135146275 | 0.320025583 | 0.402930341 |
| 0.337914879 | 0.210891857 | 0.14820464  | 0.003778163 |
| 0.159792964 | 0.221327153 | 0.10750515  | 0.247793663 |
| 0.153800905 | 0.117855083 | 0.257976931 | 0.27508839  |
| 0.149480473 | 0.072247624 | 0.190340548 | 0.354005444 |
| 0.121205685 | 0.117152825 | 0.383110215 | 0.289042367 |
| 0.001282288 | 0.173097726 | 0.377780988 | 0.066627171 |

|             |             |             |             |
|-------------|-------------|-------------|-------------|
| 0.230656868 | 0.051852888 | 0.110130355 | 0.435951173 |
| 0.155649894 | 0.09927545  | 0.446512843 | 0.27135408  |
| 0.147743209 | 0.210034516 | 0.474153072 | 0.042881474 |
| 0.192027989 | 0.017879519 | 0.1645315   | 0.227663695 |
| 0.139985606 | 0.190537289 | 0.153475469 | 0.118234207 |
| 0.08736632  | 0.476253999 | 0.31342877  | 0.462071022 |
| 0.221276011 | 0.483330663 | 0.402976531 | 0.363872049 |
| 0.226137358 | 0.216475893 | 0.071053614 | 0.386922772 |
| 0.426809673 | 0.218487469 | 0.05933794  | 0.404094346 |
| 0.246754119 | 0.303275917 | 0.049204284 | 0.444800893 |
| 0.426600677 | 0.469711645 | 0.04681944  | 0.269725593 |
| 0.296259471 | 0.107428098 | 0.345126397 | 0.465805107 |
| 0.261109253 | 0.189731222 | 0.174182854 | 0.313934822 |
| 0.103508127 | 0.094233108 | 0.25474538  | 0.091671174 |
| 0.006430167 | 0.039302715 | 0.034900064 | 0.054746365 |
| 0.069129474 | 0.31815331  | 0.284233764 | 0.480724683 |
| 0.043501177 | 0.337528926 | 0.167506809 | 0.139832389 |
| 0.405499097 | 0.165042231 | 0.199838456 | 0.229589709 |
| 0.16481006  | 0.006919493 | 0.040907083 | 0.473936087 |
| 0.031374928 | 0.101806922 | 0.146285118 | 0.000840023 |
| 0.023031348 | 0.41819561  | 0.086503179 | 0.158415278 |
| 0.402792508 | 0.171892055 | 0.145384724 | 0.259827903 |
| 0.208749503 | 0.038658212 | 0.000301315 | 0.471648706 |
| 0.463348774 | 0.436626463 | 0.468870922 | 0.433296048 |
| 0.427690861 | 0.31944434  | 0.348086541 | 0.19352034  |
| 0.046630458 | 0.050601858 | 0.119550529 | 0.133754516 |
| 0.002215461 | 0.266150413 | 0.133946537 | 0.082250153 |
| 0.328498294 | 0.203050049 | 0.013211381 | 0.196732479 |
| 0.010621698 | 0.117016448 | 0.152184092 | 0.089448113 |
| 0.236544463 | 0.006004358 | 0.144549926 | 0.195430425 |
| 0.390763417 | 0.278365812 | 0.194454847 | 0.491848264 |
| 0.152995885 | 0.119843402 | 0.144256579 | 0.264365917 |
| 0.030202242 | 0.127270488 | 0.185605853 | 0.050128603 |
| 0.084253726 | 0.408056016 | 0.194407682 | 0.04048056  |
| 0.150675873 | 0.001853121 | 0.314259735 | 0.474632192 |
| 0.45420806  | 0.479303605 | 0.445497494 | 0.118261441 |
| 0.466685165 | 0.076598788 | 0.489975849 | 0.373016506 |
| 0.249125856 | 0.000492607 | 0.000547087 | 0.455421723 |
| 0.236259662 | 0.052986023 | 0.082652562 | 0.172496189 |
| 0.038982066 | 0.079695133 | 0.023012846 | 0.077038576 |
| 0.264829811 | 0.088839955 | 0.065820974 | 0.455104598 |
| 0.1098463   | 0.101755967 | 0.211848539 | 0.061318736 |
| 0.226773121 | 0.019641467 | 0.062755096 | 0.002084687 |
| 0.239596846 | 0.103774629 | 0.44268656  | 0.471953375 |
| 0.428645018 | 0.27163702  | 0.241792139 | 0.137389889 |
| 0.38270702  | 0.082747981 | 0.192848026 | 0.076217606 |
| 0.469908536 | 0.268200024 | 0.216985478 | 0.242154348 |
| 0.444880271 | 0.424782328 | 0.012300572 | 0.342159614 |
| 0.004437377 | 0.000491239 | 0.211738927 | 0.16217726  |
| 0.045532647 | 0.191016929 | 0.179867479 | 0.130976907 |
| 0.095445661 | 0.012026384 | 0.138969311 | 0.128429487 |
| 0.173688832 | 0.17906985  | 0.121480672 | 0.180195866 |
| 0.118975771 | 0.07178873  | 0.07123607  | 0.057714439 |
| 0.132507788 | 0.283059075 | 0.162894649 | 0.008958341 |

|             |             |             |             |
|-------------|-------------|-------------|-------------|
| 0.261154882 | 0.232493623 | 0.022428578 | 0.091829185 |
| 0.373626022 | 0.447939943 | 0.018805567 | 0.002919407 |
| 0.19155935  | 0.147888041 | 0.438624368 | 0.476580601 |
| 0.480061881 | 0.459596353 | 0.326685454 | 0.044712828 |
| 0.025477348 | 0.175009747 | 0.144541295 | 0.032814286 |
| 0.45856324  | 0.051878342 | 0.438141364 | 0.148857898 |
| 0.065684328 | 0.102829223 | 0.009132833 | 0.034387795 |
| 0.21917512  | 0.085914056 | 0.063807833 | 0.110138128 |
| 0.142431406 | 0.116194858 | 0.020466349 | 0.091668102 |
| 0.273639376 | 0.120067372 | 0.084172691 | 0.141575556 |
| 0.298537063 | 0.194789235 | 0.351445273 | 0.377272766 |
| 0.075521705 | 0.060969236 | 0.158879683 | 0.287201966 |
| 0.417810767 | 0.282869759 | 0.008088775 | 0.460239221 |
| 0.425036913 | 0.317617764 | 0.456234891 | 0.306359803 |
| 0.054254029 | 0.183084304 | 0.17207736  | 0.199534683 |
| 0.090856484 | 0.170559609 | 0.099155099 | 0.030648906 |
| 0.225546609 | 0.424388506 | 0.410915662 | 0.058107121 |
| 0.250437328 | 0.089188094 | 0.047153457 | 0.391557457 |
| 0.094942128 | 0.038474394 | 0.217702032 | 0.380053038 |
| 0.000768221 | 0.062231428 | 0.447677726 | 0.081538614 |
| 0.463626742 | 0.443172107 | 0.374598904 | 0.112560562 |
| 0.002320695 | 0.323658936 | 0.216770121 | 0.199480602 |
| 0.412068939 | 0.252178732 | 0.062171683 | 0.025264556 |
| 0.193711461 | 0.063031824 | 0.055641026 | 0.155715406 |
| 0.131348958 | 0.282161963 | 0.111980863 | 0.11840712  |
| 0.077751385 | 0.084211477 | 0.101663421 | 0.097464256 |
| 0.089418111 | 0.144444888 | 0.255225565 | 0.19713177  |
| 0.120434333 | 0.384210982 | 0.376223925 | 0.010232717 |
| 0.172674632 | 0.360542626 | 0.361217359 | 0.001634752 |
| 0.321156984 | 0.001615715 | 0.069295438 | 0.08021565  |
| 0.073147622 | 0.082523719 | 0.125679158 | 0.133107735 |
| 0.254176904 | 0.098572855 | 0.110217083 | 0.116066501 |
| 0.055545127 | 0.093819125 | 0.231996001 | 0.198206601 |
| 0.109329757 | 0.049996563 | 0.087229235 | 0.097880186 |
| 0.014551288 | 0.416481566 | 0.175993508 | 0.057143766 |
| 0.105900646 | 0.198275427 | 0.265597275 | 0.486519558 |
| 0.325140801 | 0.108125016 | 0.150491825 | 0.414312884 |
| 0.192954503 | 0.148397726 | 0.031329553 | 0.227356873 |
| 0.093206418 | 0.083841815 | 0.220395124 | 0.225176446 |
| 0.366995194 | 0.332437785 | 0.164982851 | 0.373757818 |
| 0.168701473 | 0.204689761 | 0.241634179 | 0.026659556 |
| 0.082490897 | 0.090366761 | 0.115698926 | 0.000495601 |
| 0.204156596 | 0.129093111 | 0.430618968 | 0.464304857 |
| 0.144635509 | 0.296791118 | 0.194016523 | 0.040896517 |
| 0.228916888 | 0.183941741 | 0.082405084 | 0.376121202 |
| 0.114130829 | 0.067678057 | 0.148184454 | 0.163262501 |
| 0.356553589 | 0.372783352 | 0.112571106 | 0.10450965  |
| 0.117783294 | 0.130564268 | 0.451173702 | 0.06014429  |
| 0.309139661 | 0.074983994 | 0.283774002 | 0.130545257 |
| 0.089184447 | 0.486108945 | 0.026911714 | 0.492749032 |
| 0.166302811 | 0.096347387 | 0.414987387 | 0.130396997 |
| 0.134380971 | 0.034160783 | 0.098890404 | 0.209303555 |
| 0.099420121 | 0.15795448  | 0.018756864 | 0.037000284 |
| 0.206023788 | 0.179815329 | 0.410655608 | 0.270842022 |



|             |             |             |             |
|-------------|-------------|-------------|-------------|
| 0.106676661 | 0.241912807 | 0.072791816 | 0.147784973 |
| 0.473627786 | 0.46415336  | 0.11757953  | 0.17119075  |
| 0.242751946 | 0.034202444 | 0.265644774 | 0.012335188 |
| 0.300378686 | 0.301276659 | 0.21919142  | 0.017274786 |
| 0.006500327 | 0.126868765 | 0.312192739 | 0.053103955 |
| 0.431828095 | 0.113948353 | 0.284997187 | 0.322262678 |
| 0.119781215 | 0.467676213 | 0.037414732 | 0.281191729 |
| 0.037216067 | 0.152273286 | 0.194358301 | 0.212395565 |
| 0.091038122 | 0.141042792 | 0.270264611 | 0.10074351  |
| 0.01028886  | 0.109254891 | 0.002429243 | 0.347982852 |
| 0.467375637 | 0.186629103 | 0.149812654 | 0.209585115 |
| 0.15835173  | 0.314583031 | 0.100905391 | 0.236701388 |
| 0.00253771  | 0.217485035 | 0.08454467  | 0.342778206 |
| 0.176937636 | 0.252113379 | 0.017517532 | 0.160977772 |
| 0.425214138 | 0.142244035 | 0.181625265 | 0.23676252  |
| 0.467499956 | 0.341612137 | 0.140086351 | 0.082945534 |
| 0.326380398 | 0.040310301 | 0.209382745 | 0.480326207 |
| 0.05950214  | 0.094968545 | 0.375267138 | 0.088667342 |
| 0.145511689 | 0.325059778 | 0.314010456 | 0.478328463 |
| 0.021108421 | 0.133516345 | 0.333268235 | 0.437893476 |
| 0.187822031 | 0.07316361  | 0.109203459 | 0.096006091 |
| 0.43899261  | 0.034837177 | 0.133765992 | 0.268012134 |
| 0.114809883 | 0.16925845  | 0.280068748 | 0.070101151 |
| 0.009371402 | 0.063040819 | 0.14381839  | 0.075418166 |
| 0.152493299 | 0.188845969 | 0.110201461 | 0.306274892 |
| 0.041181879 | 0.007676626 | 0.379098992 | 0.014802519 |
| 0.177472959 | 0.240413361 | 0.104365141 | 0.160674177 |
| 0.136586988 | 0.223941324 | 0.224943924 | 7.40E-05    |
| 0.332614628 | 0.025992063 | 0.12602346  | 0.092621347 |
| 0.138304308 | 0.023322774 | 0.399111291 | 0.453545992 |
| 0.188199861 | 0.15876509  | 0.187460223 | 0.411358274 |
| 0.07457708  | 0.193368086 | 0.17732251  | 0.339481754 |
| 0.10157371  | 0.254164269 | 0.218003636 | 0.19422186  |
| 0.278712309 | 0.106767378 |             |             |
| ACTR1A      | 0.19276313  | 0.07523104  | 0.208575126 |
| 0.096569668 | 0.02800751  | 0.024604514 | 0.127988647 |
| 0.096945825 | 0.067384598 | 0.005504367 | 0.049636185 |
| 0.206432834 | 0.000781438 | 0.086054019 | 0.123032454 |
| 0.024322386 | 0.154838442 | 0.172324345 | 0.009938813 |
| 0.027880183 | 0.030820805 | 0.008109071 | 0.042124571 |
| 0.022892342 | 0.301582884 | 0.061563704 | 0.010964233 |
| 0.074835731 | 0.002398674 | 0.033181742 | 0.004252728 |
| 0.155348484 | 0.025938014 | 0.008205221 | 0.181944514 |
| 0.02928812  | 0.000319828 | 0.166268131 | 0.041621896 |
| 0.00459151  | 0.182053319 | 0.015454685 | 0.074043152 |
| 0.01769096  | 1           | 0.002635084 | 0.023376482 |
| 0.048013645 | 0.028901893 | 0.22091693  | 0.041579948 |
| 0.011131475 | 0.10845152  | 0.039486782 | 0.010231291 |
| 0.005234424 | 0.000969228 | 0.001408043 | 0.105755486 |
| 0.20931679  | 0.149959987 | 0.002299875 | 0.042252474 |
| 0.022144197 | 0.036109015 | 0.104700943 | 0.009456378 |
| 0.099909186 | 0.002372307 | 0.027544218 | 0.042444721 |
| 0.030898506 | 0.128431269 | 0.254574937 | 0.163574064 |
| 0.010352403 | 0.115542089 | 0.033226378 | 0.006949872 |

|             |             |             |             |
|-------------|-------------|-------------|-------------|
| 0.076514067 | 0.138277119 | 0.121808612 | 0.116627868 |
| 0.00246314  | 0.015281719 | 0.012008929 | 0.094506682 |
| 0.050749685 | 0.070466182 | 0.064947221 | 0.119737897 |
| 0.113154576 | 0.02187992  | 0.046336059 | 0.220054899 |
| 0.076240193 | 0.00322773  | 0.017380035 | 0.00458131  |
| 0.027355363 | 0.022700344 | 0.119844421 | 0.143226497 |
| 0.019374649 | 0.252965264 | 0.141123048 | 0.013650331 |
| 0.033794748 | 0.249057265 | 0.014819893 | 0.040646309 |
| 0.042973613 | 0.079161696 | 0.053084577 | 0.074726266 |
| 0.01812155  | 0.093657987 | 0.066360767 | 0.082153976 |
| 0.000989102 | 0.096214517 | 0.167701964 | 0.15654916  |
| 0.150718632 | 0.100346139 | 0.008234833 | 0.138791878 |
| 0.061482352 | 0.081862236 | 0.124400902 | 0.068932019 |
| 0.056010046 | 0.12049232  | 0.09152438  | 0.070805126 |
| 0.200938347 | 0.002604318 | 0.019411764 | 0.038040015 |
| 0.054181602 | 0.179892124 | 0.009728918 | 0.143430604 |
| 0.148345026 | 0.050507958 | 0.102609543 | 0.164898736 |
| 0.058928968 | 0.119245191 | 0.066332441 | 0.165295593 |
| 0.130127785 | 0.14073106  | 0.095933662 | 0.026832203 |
| 0.133187588 | 0.068301427 | 0.004762346 | 0.081006047 |
| 0.113687914 | 0.002576361 | 0.051292745 | 0.058978323 |
| 0.099204499 | 0.043957978 | 0.085878779 | 0.07338918  |
| 0.096513059 | 0.239321176 | 0.000143445 | 0.06345537  |
| 0.11897848  | 0.116231841 | 0.043819875 | 0.01487502  |
| 0.026059935 | 0.039536292 | 0.04010107  | 0.010534269 |
| 0.131824411 | 0.067157655 | 0.05958666  | 0.062719821 |
| 0.036437031 | 0.198600346 | 0.009712604 | 0.146804059 |
| 0.151536237 | 0.175305293 | 0.307088433 | 0.090865682 |
| 0.01053166  | 0.145049235 | 0.033365351 | 0.023173745 |
| 0.170115563 | 0.035728362 | 0.004404031 | 0.029908114 |
| 0.31679344  | 0.023231503 | 0.148565008 | 0.144674303 |
| 0.16095623  | 0.31341585  | 0.074738274 | 0.091873477 |
| 0.057926261 | 0.295037557 | 0.029336008 | 0.072100117 |
| 0.015194027 | 0.240570033 | 0.047573601 | 0.108240254 |
| 0.135880458 | 0.018408085 | 0.170539165 | 0.098636872 |
| 0.015159193 | 0.002670093 | 0.001394464 | 0.013876418 |
| 0.29733123  | 0.035905582 | 0.031481249 | 0.04173483  |
| 0.105959084 | 0.091516934 | 0.011484754 | 0.178398724 |
| 0.225436027 | 0.026664202 | 0.072682693 | 0.022741303 |
| 0.140767905 | 0.07101088  | 0.05639256  | 0.015218258 |
| 0.076105801 | 0.005697819 | 0.004218906 | 0.068404062 |
| 0.003971204 | 0.00889571  | 0.0620807   | 0.038108707 |
| 0.012235128 | 0.228380955 | 0.088413296 | 9.87E-05    |
| 0.013939971 | 0.03689393  | 0.104789999 | 0.013389869 |
| 0.134873824 | 0.101571894 | 0.019183413 | 0.018689584 |
| 0.248856174 | 0.102497115 | 0.08803444  | 0.081831707 |
| 0.007009988 | 0.094062393 | 0.053648456 | 0.090587806 |
| 0.073264886 | 0.008091779 | 0.000945113 | 0.06188632  |
| 0.062502998 | 0.007447851 | 0.276658996 | 0.033060793 |
| 0.010936842 | 0.028405831 | 0.017521594 | 0.095374456 |
| 0.149765592 | 0.107531126 | 0.081275069 | 0.056543375 |
| 0.112137862 | 0.145366182 | 0.063948449 | 0.098482688 |
| 0.005141634 | 0.017814048 | 0.013907862 | 0.069698379 |
| 0.215068138 | 0.011990786 | 0.140040807 | 0.00117414  |

|             |             |             |             |
|-------------|-------------|-------------|-------------|
| 0.000243532 | 0.185536393 | 0.271002109 | 0.087142853 |
| 0.006154551 | 0.01809314  | 0.037065095 | 0.090212808 |
| 0.186934945 | 0.109413488 | 0.115518731 | 0.025670105 |
| 0.112189531 | 0.013800828 | 0.01425186  | 0.027341562 |
| 0.150723667 | 0.09772866  | 0.10475548  | 0.147008334 |
| 0.233719128 | 0.006092214 | 0.044894865 | 0.018037849 |
| 0.162981808 | 0.046011546 | 0.315147442 | 0.325766579 |
| 0.06711414  | 0.299137979 | 0.185113499 | 0.008424182 |
| 0.07658356  | 0.228163248 | 0.032198393 | 0.073363969 |
| 0.085354846 | 0.083806681 | 0.085231147 | 0.108887103 |
| 0.063705272 | 0.043396667 | 0.049672423 | 0.056268725 |
| 0.115672553 | 0.129443209 | 0.006531206 | 0.046217132 |
| 0.017411638 | 0.076196086 | 0.026872371 | 0.272470643 |
| 0.035201917 | 0.078817923 | 0.186795553 | 0.021431208 |
| 0.188162478 | 0.001758146 | 0.025522034 | 0.047767636 |
| 0.050949433 | 0.180079455 | 0.015718866 | 0.006689811 |
| 0.134131959 | 0.149902516 | 0.005467254 | 0.103427596 |
| 0.06489932  | 0.204862694 | 0.038935929 | 0.051320019 |
| 0.145996375 | 0.003162298 | 0.021729459 | 0.002101319 |
| 0.009086376 | 0.106661198 | 0.009266955 | 0.134148425 |
| 0.12214464  | 0.190173241 | 0.145982995 | 0.106642329 |
| 0.103653216 | 0.077896545 | 0.09624966  | 0.008858196 |
| 0.103271851 | 0.001019585 | 0.084026835 | 0.08486372  |
| 0.008717332 | 0.027754283 | 0.042726045 | 0.060525534 |
| 0.02439343  | 0.281560494 | 0.21142363  | 0.016724603 |
| 0.121237694 | 0.127701819 | 0.142173019 | 0.011824839 |
| 0.035046231 | 0.043518722 | 0.00884305  | 0.110392068 |
| 0.077040294 | 0.09461787  | 0.017568889 | 0.261845356 |
| 0.023720223 | 0.167102929 | 0.222867985 | 0.030584877 |
| 0.047276914 | 0.281184673 | 0.159400978 | 0.092853006 |
| 0.121366033 | 0.039156833 | 0.004796186 | 0.012671648 |
| 0.057463911 | 0.246154434 | 0.005168123 | 0.219667566 |
| 0.094112099 | 0.036286431 | 0.138854452 | 0.184087054 |
| 0.101981404 | 0.11969471  | 0.188475616 | 0.059240974 |
| 0.137993694 | 0.004132266 | 0.042835353 | 0.113307944 |
| 0.001682573 | 0.01570998  | 0.18929101  | 0.019689897 |
| 0.024722413 | 0.216337786 | 0.004926975 | 0.006108305 |
| 0.082675882 | 0.03278458  | 0.019731229 | 0.112375344 |
| 0.020471133 | 0.01434863  | 0.06126121  | 0.068689042 |
| 0.008427577 | 0.155297485 | 0.306000358 | 0.159710752 |
| 0.017701085 | 0.017705984 | 0.240847563 | 0.229693715 |
| 0.076913148 | 0.069681237 | 0.120968034 | 0.125249731 |
| 0.19008034  | 0.02257055  | 0.071686677 | 0.084753792 |
| 0.127424171 | 0.113411494 | 0.18290087  | 0.047185086 |
| 0.17421103  | 0.050823379 | 0.018192221 | 0.038465223 |
| 0.088878029 | 0.233220986 | 0.101640306 | 0.007819557 |
| 0.223283866 | 0.075003979 | 0.162073195 | 0.202252402 |
| 0.015164204 | 0.190955871 | 0.086089447 | 0.221892618 |
| 0.033594632 | 0.004850153 | 0.163363697 | 0.156148605 |
| 0.104434752 | 0.002751645 | 0.195099886 | 0.031531013 |
| 0.087030116 | 0.004327471 | 0.032930334 | 0.144438701 |
| 0.267048952 | 0.159329122 | 0.046920751 | 0.046474937 |
| 0.047454558 | 0.013482807 | 0.132671757 | 0.072990375 |
| 0.080020146 | 0.028267845 | 0.110704231 | 0.092427348 |

|             |             |             |             |
|-------------|-------------|-------------|-------------|
| 0.257623293 | 0.022077494 | 0.006090983 | 0.031086706 |
| 0.138386299 | 0.030219426 | 0.065066859 | 0.26868299  |
| 0.150139576 | 0.145573787 | 0.085371128 | 0.120682586 |
| 0.020784801 | 0.17113205  | 0.224926065 | 0.058299912 |
| 0.006327372 | 0.153731716 | 0.013949007 | 0.040374655 |
| 0.011116393 | 0.001613433 | 0.070741556 | 0.053047077 |
| 0.113976204 | 0.074504711 | 0.139749353 | 0.029188815 |
| 0.000425953 | 0.022898363 | 0.052707427 | 0.020170387 |
| 0.079928763 | 0.110360566 | 0.019303598 | 0.12727903  |
| 0.165804349 | 0.286759239 | 0.079030427 | 0.01704753  |
| 0.002408174 | 0.043526448 | 0.190011629 | 0.09366533  |
| 0.056693885 | 0.178294775 | 0.004626976 | 0.089016933 |
| 0.002705594 | 0.190490075 | 0.121596589 | 0.006817203 |
| 0.003960735 | 0.073082902 | 0.068354039 | 0.188028868 |
| 0.012548601 | 0.068098443 | 0.081559376 | 0.031245007 |
| 0.038687581 | 0.179040742 | 0.068202176 | 0.071390152 |
| 0.066436755 | 0.054740824 | 0.065409456 | 0.02108373  |
| 0.055284988 | 0.082347883 | 0.06391672  | 0.143468683 |
| 0.066868496 | 0.085239129 | 0.028882638 | 0.033822743 |
| 0.027166028 | 0.151673851 | 0.322020192 | 0.349956593 |
| 0.157999471 | 0.066441185 | 0.248693685 | 0.301284176 |
| 0.117178844 | 0.021083299 | 0.158534941 | 0.092886869 |
| 0.103069959 | 0.267994434 | 0.028463372 | 0.075503574 |
| 0.002118353 | 0.018628961 | 0.129246682 | 0.036348457 |
| 0.116571437 | 0.015790315 | 0.020915189 | 0.087326981 |
| 0.039100421 | 0.183045745 | 0.239142918 | 0.108282931 |
| 0.026699377 | 0.017899168 | 0.009328919 | 0.106473293 |
| 0.148752303 | 0.226149308 | 0.024654771 | 0.137198095 |
| 0.075745776 | 0.054349697 | 0.058353192 | 0.119864041 |
| 0.003583851 | 0.132028295 | 0.011272457 | 0.154159356 |
| 0.006708814 | 0.263107571 | 0.261289185 | 0.038415935 |
| 0.001748082 | 0.091477124 | 0.037239819 | 0.02395583  |
| 0.038773606 | 0.03157097  | 0.011750005 | 0.06215117  |
| 0.070555173 | 0.17082379  | 0.123769479 | 0.145519827 |
| 0.01886837  | 0.015571878 | 0.030311279 | 0.045153713 |
| 0.051588034 | 0.074984387 | 0.25366787  | 0.073753409 |
| 0.021752432 | 0.262364396 | 0.149679531 | 0.051449776 |
| 0.029017374 | 0.054845127 | 0.001743115 | 0.014997607 |
| 0.040929242 | 0.005494174 | 2.83E-05    | 0.004001236 |
| 0.101496338 | 0.010102017 | 0.047913404 | 0.054237122 |
| 0.014037043 | 0.088163343 | 0.001228975 | 0.057477614 |
| 0.107575031 | 0.137996146 | 0.04619433  | 0.167025839 |
| 0.098112507 | 0.151401453 | 0.049071722 | 0.000992711 |
| 0.023618368 | 0.014853181 | 0.006583053 | 0.141533462 |
| 0.164415554 | 0.002278212 | 0.028874792 | 0.181890753 |
| 0.064075322 | 0.001729357 | 0.031277747 | 0.03855886  |
| 0.1742522   | 0.146363811 | 0.059007117 | 0.056749854 |
| 0.064327153 | 0.114546958 | 0.011244173 | 0.014365408 |
| 0.029634119 | 0.011098357 | 0.075458412 | 0.008257992 |
| 0.1807953   | 0.026276823 | 0.018592124 | 0.201969734 |
| 0.135720331 | 0.010450505 | 0.234352059 | 0.004043029 |
| 0.114364969 | 0.086509386 | 0.016882975 | 0.012461059 |
| 0.131127013 | 0.023128578 | 0.135187622 | 0.099489537 |
| 0.003606333 | 0.026930477 | 0.126401234 | 0.013581707 |

|             |             |             |             |
|-------------|-------------|-------------|-------------|
| 0.175614489 | 0.014049512 | 0.162243434 | 0.005698809 |
| 0.092784774 | 0.069305679 | 0.207554156 | 0.015811548 |
| 0.026411164 | 0.285216327 | 0.011582292 | 0.098982519 |
| 0.093510811 | 0.009631113 | 0.054038593 | 0.071077782 |
| 0.00798325  | 0.102737718 | 0.017405774 | 0.09565035  |
| 0.063822699 | 0.154598967 | 0.046958002 | 0.085482118 |
| 0.127426289 | 0.008143878 | 0.006320776 | 0.031476927 |
| 0.112094913 | 0.13046312  | 0.00650916  | 0.104674022 |
| 0.004962765 | 0.086686243 | 0.03089741  | 0.029256873 |
| 0.151649115 | 0.050043907 | 0.017936367 | 0.211396813 |
| 0.080874635 | 0.030245422 | 0.014881437 | 0.158616409 |
| 0.073632053 | 0.147096702 | 0.137665073 | 0.00046043  |
| 0.068326104 | 0.044981488 | 0.110259798 | 0.018589616 |
| 0.291540138 | 0.055615633 | 0.052036975 | 0.118162807 |
| 0.062603791 | 0.006135144 | 0.01776471  | 0.025815335 |
| 0.005731239 | 0.158023969 | 0.11878929  | 0.078870493 |
| 0.084416799 | 0.006005337 | 0.004042557 | 0.099430201 |
| 0.003103207 | 0.003156171 | 0.005237507 | 0.04087535  |
| 0.004200646 | 0.010559473 | 0.009795843 | 0.007911289 |
| 0.078736688 | 0.053963487 |             |             |
| ADI1        | 0.009510152 | 0.290122108 | 0.012532256 |
| 0.00520991  | 0.075850739 | 0.127437579 | 0.002542746 |
| 0.007998292 | 0.190354004 | 0.179875765 | 0.102926254 |
| 0.000218338 | 0.010988055 | 0.231158032 | 0.00214382  |
| 0.133488235 | 8.49E-05    | 0.009625278 | 0.004296931 |
| 0.01072187  | 0.053987567 | 0.067171885 | 0.165500624 |
| 0.055182964 | 0.065832403 | 0.130909371 | 0.19140816  |
| 0.321836431 | 0.095319366 | 0.232084228 | 0.060860159 |
| 0.166096931 | 0.092143306 | 0.193505312 | 0.000401516 |
| 0.148450667 | 0.000227964 | 0.191198663 | 0.027917363 |
| 0.011915279 | 0.132993664 | 0.24637645  | 0.031664394 |
| 0.163268736 | 0.002635084 | 1           | 0.19032648  |
| 0.125398425 | 0.040683726 | 0.015348074 | 0.2245218   |
| 0.075963526 | 0.137109353 | 0.327812658 | 6.34E-05    |
| 0.118334376 | 0.035880337 | 0.08943263  | 0.30676515  |
| 0.042837983 | 0.01134518  | 0.065202413 | 0.059411554 |
| 0.175533039 | 0.140018244 | 0.060794509 | 0.115268584 |
| 0.276183449 | 0.024203701 | 0.271659742 | 0.009547104 |
| 0.096381869 | 0.002644026 | 0.031308633 | 0.020758132 |
| 0.095912873 | 0.029410863 | 0.101282138 | 0.074635989 |
| 0.303705723 | 0.257055111 | 0.050259998 | 0.297739418 |
| 0.004277393 | 0.110706746 | 0.037866391 | 0.075632866 |
| 0.136339906 | 0.004753001 | 0.165381878 | 0.260096668 |
| 0.004765313 | 0.273759053 | 0.168568759 | 0.031943864 |
| 0.276893596 | 0.066492564 | 0.270566957 | 0.033495393 |
| 0.137032405 | 0.086992843 | 0.258724745 | 0.075914098 |
| 0.083436877 | 0.015223175 | 0.290511838 | 0.109119726 |
| 0.052903473 | 0.014554682 | 0.014776228 | 0.289422162 |
| 0.159560207 | 0.300571651 | 0.266026437 | 0.126368171 |
| 0.120758267 | 0.283102371 | 0.157446325 | 0.224445298 |
| 0.116509345 | 0.315452588 | 0.034480056 | 0.00087875  |
| 0.011140971 | 0.004662115 | 0.024403159 | 0.093974702 |
| 0.288142953 | 0.110780832 | 0.025787908 | 0.029824772 |
| 0.226390053 | 0.308108831 | 0.31906998  | 0.186321657 |

|             |             |             |             |
|-------------|-------------|-------------|-------------|
| 0.001949496 | 0.051689499 | 0.119463794 | 0.053422166 |
| 0.130428994 | 0.016777586 | 0.061742426 | 0.272502349 |
| 0.155967832 | 0.211588161 | 0.026082105 | 0.249430126 |
| 0.02726905  | 0.248179878 | 0.329639143 | 0.021305646 |
| 0.272535483 | 0.279284747 | 0.252928904 | 0.187831862 |
| 0.258750044 | 0.095327672 | 0.005279523 | 0.162236264 |
| 0.226903788 | 0.001193266 | 0.307757471 | 0.301715324 |
| 0.3007842   | 0.27565706  | 0.263185735 | 0.304258466 |
| 0.318638531 | 0.010292294 | 0.003539333 | 0.058665172 |
| 0.283514279 | 0.166187584 | 0.007433444 | 0.185800331 |
| 0.116356793 | 0.126039581 | 0.254094495 | 0.027977268 |
| 0.230894746 | 0.258599965 | 0.325609465 | 0.174070412 |
| 0.105367177 | 0.118939689 | 0.18935808  | 0.27928     |
| 0.000972297 | 0.017166324 | 0.012865955 | 0.092890315 |
| 0.134578206 | 0.022324951 | 0.097713785 | 0.109827499 |
| 0.031439927 | 0.10215526  | 0.15159121  | 0.148101803 |
| 0.01659645  | 0.235340838 | 0.026706495 | 0.028933577 |
| 0.000223093 | 0.040673509 | 0.006110536 | 0.011201101 |
| 0.039288386 | 0.094910823 | 0.269707296 | 0.275451929 |
| 0.082213779 | 0.053091453 | 0.207006164 | 0.22196108  |
| 0.156696518 | 0.135102236 | 0.059158396 | 0.000507806 |
| 0.013450442 | 0.132943356 | 0.04571436  | 0.214922848 |
| 0.064348308 | 0.014607419 | 0.122723255 | 0.164947443 |
| 0.078098676 | 0.027100978 | 0.071637426 | 0.191463867 |
| 0.046299428 | 0.053182878 | 0.204511592 | 0.195357068 |
| 0.000621607 | 0.06761346  | 0.238796886 | 0.003792372 |
| 0.095826145 | 0.010901882 | 0.058408119 | 0.235227078 |
| 0.046805629 | 0.031703866 | 0.313559517 | 0.164989823 |
| 0.037437142 | 0.101037785 | 0.279129233 | 0.006713292 |
| 0.114235642 | 0.000807664 | 0.061909798 | 0.243138404 |
| 0.048705115 | 0.070179094 | 0.095752829 | 0.040123686 |
| 0.041567086 | 0.292348561 | 0.188008105 | 0.295081818 |
| 0.081745678 | 0.273130623 | 0.255234137 | 0.211161368 |
| 0.121981164 | 0.14941811  | 0.027430108 | 0.216734466 |
| 0.240046253 | 0.021965711 | 0.021429879 | 0.293854643 |
| 0.12663279  | 0.169552666 | 0.002926197 | 0.238343178 |
| 0.233795354 | 0.313795681 | 0.010309305 | 0.126154966 |
| 0.147016149 | 0.049307709 | 0.206334897 | 0.268757957 |
| 0.086926541 | 0.09072658  | 0.052951206 | 0.150610443 |
| 0.033271253 | 0.018865907 | 0.120921588 | 0.04795537  |
| 0.010774942 | 0.012977456 | 0.009625589 | 0.014794643 |
| 0.022260488 | 0.304607335 | 0.143814295 | 0.286580262 |
| 0.01144236  | 0.211265988 | 0.063665603 | 0.030437104 |
| 0.202107815 | 0.095813786 | 0.170485945 | 0.150431197 |
| 0.064216615 | 2.60E-05    | 0.003556513 | 0.252536291 |
| 0.009232876 | 0.043316493 | 0.08472857  | 3.74E-05    |
| 0.002484871 | 0.34236273  | 0.027561833 | 0.060486547 |
| 0.24558574  | 0.067458536 | 0.046990002 | 0.105432685 |
| 0.110373718 | 0.011598977 | 0.000556073 | 0.277749411 |
| 0.283744798 | 0.25428398  | 0.287837166 | 0.270115371 |
| 0.232817466 | 0.22340585  | 0.176143695 | 0.153616818 |
| 0.005308048 | 0.011482969 | 0.018665004 | 0.040237442 |
| 0.000425521 | 0.149658173 | 0.073315188 | 0.026052583 |
| 0.217870925 | 0.078644009 | 0.001868438 | 0.129151928 |

|             |             |             |             |
|-------------|-------------|-------------|-------------|
| 0.00041883  | 0.063911391 | 0.039104238 | 0.025748563 |
| 0.114723185 | 0.000104368 | 0.026634334 | 0.034124006 |
| 0.251317432 | 0.141467734 | 0.122188369 | 0.302479296 |
| 0.076953297 | 0.046278362 | 0.0522016   | 0.172848613 |
| 0.003447811 | 0.011002339 | 0.092422541 | 0.021139596 |
| 0.046009379 | 0.248162638 | 0.09867846  | 0.002043929 |
| 0.053897019 | 0.000888907 | 0.166470884 | 0.289590213 |
| 0.31688246  | 0.279377534 | 0.279695179 | 0.073158999 |
| 0.281644361 | 0.03601232  | 0.315793541 | 0.218388491 |
| 0.171587862 | 0.000391943 | 0.000270687 | 0.283556339 |
| 0.124630618 | 0.022484038 | 0.025182868 | 0.064872009 |
| 0.004083728 | 0.026982035 | 0.004953706 | 0.017147503 |
| 0.222536394 | 0.040926302 | 0.017994875 | 0.277113276 |
| 0.029237465 | 0.038815082 | 0.152638399 | 0.019743112 |
| 0.176865962 | 0.00166197  | 0.017654469 | 0.00027797  |
| 0.128781861 | 0.038570649 | 0.26299164  | 0.3085934   |
| 0.232820599 | 0.147364168 | 0.210400871 | 0.040373068 |
| 0.239550987 | 0.042776202 | 0.075615364 | 0.035305701 |
| 0.310623091 | 0.126276168 | 0.095089233 | 0.106590084 |
| 0.234680501 | 0.230027559 | 0.001082488 | 0.160128257 |
| 0.00056095  | 0.000574362 | 0.145016475 | 0.068048511 |
| 0.00519587  | 0.094918657 | 0.064492668 | 0.032097414 |
| 0.027110353 | 0.000878181 | 0.059677327 | 0.043458732 |
| 0.060091994 | 0.077198397 | 0.058976437 | 0.073348649 |
| 0.034049677 | 0.002808786 | 0.021298976 | 0.012129443 |
| 0.019036245 | 0.121978172 | 0.066169056 | 1.29E-05    |
| 0.203522193 | 0.159396707 | 0.004892046 | 0.034120312 |
| 0.213279925 | 0.276532607 | 9.89E-05    | 0.002025542 |
| 0.078677415 | 0.055073105 | 0.270899941 | 0.328576969 |
| 0.290468553 | 0.245265232 | 0.162806941 | 0.004022736 |
| 0.005168925 | 0.069914222 | 0.071511134 | 0.002325009 |
| 0.297928974 | 0.015129823 | 0.303477551 | 0.105651061 |
| 0.017657574 | 0.020230181 | 0.000278424 | 0.007908622 |
| 0.184145756 | 0.031915204 | 0.018420868 | 0.041203027 |
| 0.04553859  | 0.032417356 | 0.002325827 | 0.029069798 |
| 0.112263021 | 0.012937612 | 0.023959491 | 0.067705854 |
| 0.164106145 | 0.056792099 | 0.204818134 | 0.182896946 |
| 0.028331834 | 0.01485168  | 0.041732793 | 0.175058087 |
| 0.268721187 | 0.277007978 | 0.002187703 | 0.332051194 |
| 0.264587943 | 0.236331419 | 0.301121862 | 0.140698289 |
| 0.014260607 | 0.11892837  | 0.090148369 | 0.078394593 |
| 0.029140759 | 0.140063737 | 0.037650672 | 0.007175799 |
| 0.101577392 | 0.23529743  | 0.211505034 | 0.017916322 |
| 0.236207167 | 0.039132099 | 0.012841365 | 0.288735481 |
| 0.014234996 | 0.003495898 | 0.251750725 | 0.255120053 |
| 0.00204665  | 0.03125166  | 0.255623364 | 0.031407762 |
| 0.261737111 | 0.243090236 | 0.193321693 | 0.03941442  |
| 0.000524286 | 0.189258981 | 0.114075133 | 0.091928956 |
| 0.252824595 | 0.144023685 | 0.0109434   | 0.002088348 |
| 0.079823399 | 0.027497379 | 0.004547156 | 0.038480158 |
| 0.012921472 | 0.184350454 | 0.037811005 | 0.038446112 |
| 0.019252341 | 0.027867214 | 0.032358609 | 0.038113129 |
| 0.007996992 | 0.053799507 | 0.111611002 | 0.180282044 |
| 0.016672488 | 0.200984067 | 0.180936446 | 0.001290921 |

|             |             |             |             |
|-------------|-------------|-------------|-------------|
| 0.141060442 | 0.184982508 | 0.218979219 | 0.0019775   |
| 0.196831735 | 0.001484479 | 0.022522478 | 0.02635916  |
| 0.020670255 | 0.021863911 | 0.046919292 | 0.037816746 |
| 0.109300877 | 0.025005295 | 0.040199228 | 0.045356933 |
| 0.012290102 | 0.03542113  | 0.133738469 | 0.08746824  |
| 0.040064358 | 0.012687644 | 0.033043618 | 0.040095368 |
| 0.001273541 | 0.31047407  | 0.076807523 | 0.023361811 |
| 0.041115701 | 0.080438526 | 0.115303986 | 0.328010504 |
| 0.181556472 | 0.052125296 | 0.063635541 | 0.284336991 |
| 0.053253635 | 0.026364746 | 0.005798723 | 0.139231028 |
| 0.042027031 | 0.017297158 | 0.206787194 | 0.107968864 |
| 0.23112253  | 0.163344764 | 0.076124958 | 0.207301886 |
| 0.075765136 | 0.100987563 | 0.20831123  | 0.002397571 |
| 0.021106075 | 0.028122518 | 0.051540009 | 0.002072738 |
| 0.105080483 | 0.02450979  | 0.274586553 | 0.2850532   |
| 0.098718447 | 0.156932994 | 0.062174806 | 0.004777102 |
| 0.117679585 | 0.0764923   | 0.026617604 | 0.266428383 |
| 0.081183085 | 0.02108343  | 0.059209512 | 0.096691641 |
| 0.211157763 | 0.233161544 | 0.032192864 | 0.04004925  |
| 0.042002396 | 0.054096613 | 0.251509716 | 0.02122831  |
| 0.234537492 | 0.01628055  | 0.250175547 | 0.045141721 |
| 0.023038463 | 0.310769194 | 0.00823458  | 0.314450739 |
| 0.059643087 | 0.037675365 | 0.223211009 | 0.091335484 |
| 0.037100272 | 0.004575261 | 0.053607438 | 0.134567385 |
| 0.017329442 | 0.11545151  | 0.009759323 | 0.00292924  |
| 0.090457646 | 0.078630134 | 0.260340315 | 0.133737402 |
| 0.033761749 | 0.1008518   | 0.026662779 | 0.057175466 |
| 0.321264507 | 0.287654768 | 0.013099145 | 0.057347256 |
| 0.114793206 | 0.008202164 | 0.230988912 | 0.001539334 |
| 0.18580918  | 0.253484306 | 0.105148885 | 0.002459315 |
| 0.000167043 | 0.051146698 | 0.163875863 | 0.014457196 |
| 0.244251779 | 0.035268402 | 0.187164198 | 0.240508899 |
| 0.044676167 | 0.275779815 | 0.005748539 | 0.163514814 |
| 0.001159216 | 0.059535226 | 0.151128112 | 0.150569349 |
| 0.017267766 | 0.058860039 | 0.121926059 | 0.049590656 |
| 0.000222177 | 0.017028924 | 0.009104638 | 0.172022667 |
| 0.275385135 | 0.09307536  | 0.058587576 | 0.163668335 |
| 0.063835127 | 0.17548264  | 0.012264263 | 0.233599211 |
| 0.000619917 | 0.121532855 | 0.034608967 | 0.229570107 |
| 0.037720788 | 0.118266528 | 0.001011967 | 0.078322095 |
| 0.253704967 | 0.016710283 | 0.074305687 | 0.041443336 |
| 0.316857031 | 0.226764371 | 0.063544013 | 0.016151147 |
| 0.231215142 | 0.011654348 | 0.208187827 | 0.284333877 |
| 0.018179802 | 0.036416462 | 0.212605609 | 0.015611387 |
| 0.090604186 | 0.203106864 | 0.251286058 | 0.291596589 |
| 0.001170009 | 0.051160396 | 0.203774638 | 0.244337071 |
| 0.081312706 | 0.017796273 | 0.043862848 | 0.024442477 |
| 0.291589286 | 0.004007924 | 0.025246964 | 0.12006356  |
| 0.036146786 | 0.08288392  | 0.229188181 | 0.019687557 |
| 0.000623691 | 0.012856249 | 0.087217829 | 0.024395658 |
| 0.057102187 | 0.085767637 | 0.021047268 | 0.147245881 |
| 0.006343665 | 9.26E-05    | 0.191201746 | 0.001018494 |
| 0.143140813 | 0.146061804 | 0.050776805 | 0.08664237  |
| 0.058098495 | 0.105723793 | 0.104747773 | 0.000637468 |



|             |             |             |             |
|-------------|-------------|-------------|-------------|
| 0.174181137 | 0.002570605 | 0.060282668 | 0.018743423 |
| 0.023680382 | 0.002784507 | 0.250898106 | 0.269737472 |
| 0.106543895 | 0.044778678 | 0.073397489 | 0.260505451 |
| 0.009670785 | 0.159771795 | 0.09598485  | 0.235865826 |
| 0.05300091  | 0.218333164 | 0.188290596 | 0.138111035 |
| 0.163116016 | 0.05203326  |             |             |
| ADRB2       | 0.047949629 | 0.392815895 | 0.033683802 |
| 0.100030045 | 0.291128488 | 0.271543673 | 0.051611261 |
| 0.100914193 | 0.317979249 | 0.299095188 | 0.268782141 |
| 0.01190942  | 0.137222024 | 0.424093294 | 0.047850869 |
| 0.354965246 | 0.027669838 | 0.088846134 | 0.094424302 |
| 0.213889605 | 0.282400441 | 0.294657673 | 0.26071877  |
| 0.297202793 | 0.143112434 | 0.262764459 | 0.371353847 |
| 0.467910821 | 0.254770399 | 0.32511924  | 0.184936381 |
| 0.375587914 | 0.309564618 | 0.349803502 | 0.009626389 |
| 0.321318893 | 0.043178114 | 0.396399185 | 0.247861281 |
| 0.178514922 | 0.29293995  | 0.267899258 | 0.191930915 |
| 0.32976982  | 0.023376482 | 0.19032648  | 1           |
| 0.27618485  | 0.250732687 | 0.043450506 | 0.340018754 |
| 0.352174513 | 0.230015777 | 0.329091961 | 0.002180153 |
| 0.309900442 | 0.158728332 | 0.298600673 | 0.450095367 |
| 0.142382942 | 0.097966151 | 0.354362889 | 0.216312783 |
| 0.359410918 | 0.340817016 | 0.206645607 | 0.354703154 |
| 0.454535438 | 0.250961646 | 0.391068644 | 0.125275173 |
| 0.315997197 | 0.026799771 | 0.114920647 | 0.066399899 |
| 0.357966459 | 0.158599086 | 0.279311301 | 0.339597982 |
| 0.393521448 | 0.468521494 | 0.192121062 | 0.451827172 |
| 0.201659107 | 0.347304438 | 0.286185726 | 0.259183237 |
| 0.339400645 | 0.08757911  | 0.331095047 | 0.480727387 |
| 0.042583628 | 0.314711263 | 0.356210457 | 0.089595338 |
| 0.375343207 | 0.337921405 | 0.311459217 | 0.20167451  |
| 0.337712766 | 0.341960793 | 0.442102749 | 0.216059884 |
| 0.293953404 | 0.051087878 | 0.420181715 | 0.330531833 |
| 0.236435108 | 0.055329925 | 0.270305045 | 0.45976836  |
| 0.330943963 | 0.452912289 | 0.409282068 | 0.345515514 |
| 0.359652335 | 0.457284166 | 0.311370384 | 0.382793215 |
| 0.174384487 | 0.48337408  | 0.132438967 | 0.031011452 |
| 0.049469441 | 0.069816017 | 0.30107149  | 0.256281059 |
| 0.440372972 | 0.24975736  | 0.145641416 | 0.217007897 |
| 0.467560836 | 0.416175268 | 0.491638474 | 0.383067045 |
| 0.027252967 | 0.338121031 | 0.35592973  | 0.203199749 |
| 0.316819073 | 0.091246373 | 0.29073046  | 0.450471754 |
| 0.320167485 | 0.421267561 | 0.118413568 | 0.439729834 |
| 0.190306944 | 0.467646121 | 0.410186303 | 0.129024236 |
| 0.464687836 | 0.428178461 | 0.480225265 | 0.350316311 |
| 0.407396666 | 0.239432991 | 0.107742907 | 0.359293016 |
| 0.442013845 | 0.020020229 | 0.469250348 | 0.494942278 |
| 0.45697954  | 0.451204908 | 0.507056684 | 0.48060311  |
| 0.457034629 | 0.054290977 | 0.078214435 | 0.265786335 |
| 0.459604801 | 0.34126231  | 0.132172504 | 0.368253325 |
| 0.338865354 | 0.28205177  | 0.397232229 | 0.261880067 |
| 0.471120002 | 0.419445355 | 0.470673075 | 0.350483137 |
| 0.280600475 | 0.260692905 | 0.371977235 | 0.397288314 |
| 0.031311827 | 0.076060174 | 0.032668533 | 0.265095556 |

|             |             |             |             |
|-------------|-------------|-------------|-------------|
| 0.259240962 | 0.142439549 | 0.284794888 | 0.346708053 |
| 0.150909229 | 0.265501893 | 0.332613001 | 0.333939452 |
| 0.038325735 | 0.33375934  | 0.123942044 | 0.139303084 |
| 0.032322666 | 0.107904243 | 0.149366869 | 0.110998217 |
| 0.224604195 | 0.190151017 | 0.36812947  | 0.472161212 |
| 0.350345957 | 0.123934669 | 0.337186165 | 0.434925813 |
| 0.391192216 | 0.339488237 | 0.179342646 | 0.007260744 |
| 0.295485103 | 0.3652934   | 0.275127406 | 0.360218199 |
| 0.139716647 | 0.243467346 | 0.3489892   | 0.348289171 |
| 0.192884982 | 0.119791012 | 0.364764291 | 0.361486057 |
| 0.10890458  | 0.249759096 | 0.423424085 | 0.345333636 |
| 0.001481315 | 0.262953157 | 0.405561204 | 0.199754856 |
| 0.269928945 | 0.160434857 | 0.23901029  | 0.45320652  |
| 0.334796291 | 0.282483633 | 0.469951049 | 0.352553502 |
| 0.271187524 | 0.182294091 | 0.502616376 | 0.112165015 |
| 0.355970294 | 0.047333701 | 0.232071008 | 0.289482535 |
| 0.197856431 | 0.249568581 | 0.309782443 | 0.261407853 |
| 0.081538152 | 0.476354349 | 0.335497202 | 0.476694989 |
| 0.370801456 | 0.503827883 | 0.438250281 | 0.396706453 |
| 0.274539906 | 0.383181026 | 0.210210788 | 0.396595412 |
| 0.443257576 | 0.325894174 | 0.049815415 | 0.431948382 |
| 0.370512822 | 0.36312175  | 0.13828341  | 0.467112025 |
| 0.434557954 | 0.416880315 | 0.120621815 | 0.35077639  |
| 0.320325937 | 0.163110012 | 0.37935298  | 0.501794238 |
| 0.345968191 | 0.358616683 | 0.337027836 | 0.385374605 |
| 0.128656968 | 0.264537575 | 0.276383061 | 0.257793682 |
| 0.012303313 | 0.060422855 | 0.04482078  | 0.140577949 |
| 0.208869694 | 0.347021409 | 0.33990579  | 0.484920585 |
| 0.090204305 | 0.358137949 | 0.196946628 | 0.270269568 |
| 0.386561611 | 0.349139825 | 0.336029201 | 0.331001991 |
| 0.189639029 | 0.012915516 | 0.087203185 | 0.467787814 |
| 0.027778384 | 0.255593412 | 0.261587451 | 0.002159529 |
| 0.035139098 | 0.377375338 | 0.071752375 | 0.151986351 |
| 0.464948704 | 0.153567689 | 0.156583785 | 0.326866891 |
| 0.265141993 | 0.067201438 | 0.001891676 | 0.476627275 |
| 0.467191596 | 0.445756881 | 0.465293649 | 0.418685866 |
| 0.449652531 | 0.359459165 | 0.397810059 | 0.239030328 |
| 0.083145868 | 0.067366158 | 0.279825806 | 0.268644611 |
| 0.004849709 | 0.318148843 | 0.289219597 | 0.101135823 |
| 0.387519936 | 0.261041289 | 0.024156952 | 0.333220861 |
| 0.012413966 | 0.247309316 | 0.274208396 | 0.206653716 |
| 0.326236767 | 0.008325634 | 0.186581175 | 0.350706438 |
| 0.359930407 | 0.285440806 | 0.349528351 | 0.483725881 |
| 0.254604758 | 0.092422458 | 0.277672687 | 0.331527525 |
| 0.056815062 | 0.161965937 | 0.310961335 | 0.036050656 |
| 0.152075908 | 0.416646009 | 0.353998222 | 0.05034781  |
| 0.214171445 | 0.002252549 | 0.303103497 | 0.483734542 |
| 0.408498184 | 0.502362468 | 0.451950636 | 0.271736753 |
| 0.457920933 | 0.197070181 | 0.494406411 | 0.360031963 |
| 0.345453502 | 0.000538932 | 0.004525878 | 0.471095056 |
| 0.347344415 | 0.037341624 | 0.119966143 | 0.24411308  |
| 0.08656338  | 0.11304441  | 0.048459445 | 0.213579252 |
| 0.30685793  | 0.222157544 | 0.212043309 | 0.424228276 |
| 0.215005754 | 0.197693335 | 0.318088633 | 0.062080855 |

|             |             |             |             |
|-------------|-------------|-------------|-------------|
| 0.32741828  | 0.037944716 | 0.066670772 | 0.006431346 |
| 0.320552536 | 0.082651222 | 0.40266415  | 0.46660216  |
| 0.447556411 | 0.330206523 | 0.3175231   | 0.262223515 |
| 0.430391426 | 0.06269838  | 0.31859999  | 0.075136177 |
| 0.435665229 | 0.339266597 | 0.252827088 | 0.243237029 |
| 0.474314707 | 0.420572898 | 0.02418658  | 0.380304372 |
| 0.006311581 | 0.00292558  | 0.265991351 | 0.209345035 |
| 0.138100354 | 0.366097647 | 0.199205281 | 0.251992701 |
| 0.226715069 | 0.018092712 | 0.326783586 | 0.3045637   |
| 0.254182812 | 0.32524518  | 0.282899312 | 0.205552259 |
| 0.274727958 | 0.192413147 | 0.163560109 | 0.135796902 |
| 0.279227966 | 0.266169879 | 0.147701474 | 0.016450387 |
| 0.345904869 | 0.351102188 | 0.039113426 | 0.11089929  |
| 0.398803036 | 0.466634505 | 0.042410851 | 0.007866484 |
| 0.204573149 | 0.311501009 | 0.478820304 | 0.454285571 |
| 0.46644631  | 0.486803369 | 0.334132983 | 0.134849894 |
| 0.046962139 | 0.288002119 | 0.303349767 | 0.107851176 |
| 0.469851419 | 0.048281906 | 0.426321501 | 0.327564662 |
| 0.089631478 | 0.177971618 | 0.022646525 | 0.066721069 |
| 0.342277345 | 0.131934443 | 0.15867157  | 0.102259688 |
| 0.290630259 | 0.270006409 | 0.037940807 | 0.156803675 |
| 0.294252894 | 0.264707457 | 0.125139437 | 0.245967003 |
| 0.297531022 | 0.258344955 | 0.391241533 | 0.407720148 |
| 0.089097919 | 0.09553428  | 0.199518513 | 0.342773288 |
| 0.422133612 | 0.348992748 | 0.013540965 | 0.41516635  |
| 0.461139233 | 0.344689722 | 0.4382789   | 0.374369643 |
| 0.062376648 | 0.319814625 | 0.368429739 | 0.331370868 |
| 0.15540564  | 0.267299988 | 0.216009116 | 0.045485036 |
| 0.260510504 | 0.432010066 | 0.388095528 | 0.128694786 |
| 0.33027852  | 0.091954923 | 0.042650231 | 0.41652144  |
| 0.247603844 | 0.064822312 | 0.289867813 | 0.430099718 |
| 0.001904405 | 0.198415261 | 0.487372476 | 0.174173217 |
| 0.479915413 | 0.465755125 | 0.386267721 | 0.208973719 |
| 0.007839598 | 0.372301482 | 0.295699915 | 0.324610209 |
| 0.393096806 | 0.270337966 | 0.138107615 | 0.060790198 |
| 0.233921067 | 0.050740496 | 0.131907406 | 0.2398908   |
| 0.277566883 | 0.313071315 | 0.150943653 | 0.18845712  |
| 0.18770892  | 0.072111606 | 0.254864943 | 0.175158882 |
| 0.2571456   | 0.178755238 | 0.301426976 | 0.256003494 |
| 0.240836885 | 0.433309114 | 0.371424335 | 0.015901655 |
| 0.337132004 | 0.403313941 | 0.399297694 | 0.002769877 |
| 0.365412168 | 0.004111503 | 0.177818939 | 0.179297363 |
| 0.173563628 | 0.205507595 | 0.236067753 | 0.27249615  |
| 0.301502571 | 0.192966784 | 0.206189682 | 0.180095419 |
| 0.132932999 | 0.174744854 | 0.331764573 | 0.302687609 |
| 0.233651311 | 0.089582913 | 0.072336612 | 0.07566707  |
| 0.033116475 | 0.424820845 | 0.187481077 | 0.045621701 |
| 0.185272141 | 0.323575887 | 0.304337281 | 0.448196864 |
| 0.375002177 | 0.081150832 | 0.309009593 | 0.392869168 |
| 0.295450634 | 0.231766571 | 0.045419787 | 0.300439956 |
| 0.172787553 | 0.220796179 | 0.307697717 | 0.233813087 |
| 0.365423937 | 0.343124459 | 0.177765862 | 0.397343427 |
| 0.298820915 | 0.352130023 | 0.268408405 | 0.068558045 |
| 0.134595979 | 0.09837956  | 0.271258453 | 0.00059795  |

|             |             |             |             |
|-------------|-------------|-------------|-------------|
| 0.271776437 | 0.174579503 | 0.445570392 | 0.43097077  |
| 0.326722763 | 0.332308951 | 0.243812071 | 0.067456852 |
| 0.233260918 | 0.142606099 | 0.099719272 | 0.385796596 |
| 0.266289489 | 0.134507316 | 0.279665549 | 0.21982322  |
| 0.392614009 | 0.392051939 | 0.283415526 | 0.207941957 |
| 0.214787922 | 0.140910699 | 0.436685713 | 0.084059629 |
| 0.359572151 | 0.196655323 | 0.28494162  | 0.26918562  |
| 0.212336198 | 0.49096841  | 0.040107993 | 0.501359676 |
| 0.334023622 | 0.092532053 | 0.437874102 | 0.228448629 |
| 0.218872374 | 0.098049363 | 0.255529993 | 0.317594137 |
| 0.216760277 | 0.330275796 | 0.025106682 | 0.096020341 |
| 0.264532511 | 0.329398695 | 0.383516187 | 0.328806101 |
| 0.270854703 | 0.313436221 | 0.217677504 | 0.245593838 |
| 0.425154925 | 0.433882887 | 0.215134185 | 0.204176391 |
| 0.284389496 | 0.072905211 | 0.267955209 | 0.031639324 |
| 0.364608644 | 0.367943177 | 0.350572606 | 0.039964463 |
| 0.013085353 | 0.284591064 | 0.353870155 | 0.053705548 |
| 0.479402566 | 0.246325242 | 0.310710849 | 0.3448637   |
| 0.133672546 | 0.433613972 | 0.112063096 | 0.328793956 |
| 0.052244003 | 0.202658312 | 0.357268401 | 0.363269247 |
| 0.201780172 | 0.31803508  | 0.319024196 | 0.254170907 |
| 0.022432771 | 0.241217685 | 0.003385481 | 0.342503306 |
| 0.415657245 | 0.366764017 | 0.16075319  | 0.303510336 |
| 0.217816666 | 0.347634792 | 0.263887749 | 0.350113083 |
| 0.006552495 | 0.331906982 | 0.150537554 | 0.342450054 |
| 0.257971951 | 0.347164316 | 0.039032031 | 0.347253025 |
| 0.384436562 | 0.294575811 | 0.214782027 | 0.335201444 |
| 0.438712135 | 0.343946472 | 0.113560705 | 0.211529507 |
| 0.336230306 | 0.044432154 | 0.297499573 | 0.495671897 |
| 0.14581441  | 0.243143029 | 0.430529683 | 0.181841004 |
| 0.33706407  | 0.329859052 | 0.356089129 | 0.489424891 |
| 0.074177898 | 0.182506734 | 0.390837401 | 0.436387709 |
| 0.246273792 | 0.228277291 | 0.27200463  | 0.239414633 |
| 0.395184584 | 0.06274453  | 0.314513724 | 0.279614687 |
| 0.274724564 | 0.243473317 | 0.27575836  | 0.200533284 |
| 0.026360669 | 0.148266724 | 0.260443838 | 0.105131601 |
| 0.248702148 | 0.326459523 | 0.26828264  | 0.333086671 |
| 0.097101032 | 0.01610909  | 0.403859155 | 0.040580438 |
| 0.22071072  | 0.303828439 | 0.183322491 | 0.325648492 |
| 0.13023138  | 0.295056324 | 0.269946166 | 0.000377731 |
| 0.390392737 | 0.057253612 | 0.289912513 | 0.219785596 |
| 0.310528093 | 0.038623442 | 0.394870742 | 0.492244493 |
| 0.23265348  | 0.295866816 | 0.328620981 | 0.4184894   |
| 0.206160966 | 0.349295178 | 0.36784752  | 0.311506202 |
| 0.265933377 | 0.337995313 | 0.35746536  | 0.335154322 |
| 0.299627216 | 0.204221692 |             |             |
| AFF4        | 0.075977716 | 0.397334789 | 0.067811103 |
| 0.099192464 | 0.177967845 | 0.206734753 | 0.084454902 |
| 0.119161781 | 0.344743768 | 0.221476095 | 0.183922475 |
| 0.025406228 | 0.049715288 | 0.378103586 | 0.076664681 |
| 0.210963144 | 0.045590594 | 0.110144452 | 0.079597486 |
| 0.216446712 | 0.159428988 | 0.156450558 | 0.211235342 |
| 0.181654939 | 0.214187046 | 0.246351573 | 0.22336071  |
| 0.434138421 | 0.120334146 | 0.254236434 | 0.154548921 |

|             |             |             |             |
|-------------|-------------|-------------|-------------|
| 0.381354716 | 0.171874097 | 0.196200878 | 0.032246368 |
| 0.219213141 | 0.027533343 | 0.433680032 | 0.165985024 |
| 0.102664515 | 0.319793516 | 0.223741227 | 0.145347572 |
| 0.247566393 | 0.048013645 | 0.125398425 | 0.27618485  |
| 1           | 0.22298235  | 0.081361208 | 0.301313854 |
| 0.24454585  | 0.232855586 | 0.311192873 | 0.001653193 |
| 0.146360395 | 0.048435824 | 0.119734878 | 0.452545066 |
| 0.15217672  | 0.103538966 | 0.189745868 | 0.210615617 |
| 0.243099803 | 0.273435794 | 0.209480636 | 0.238562906 |
| 0.422200993 | 0.098213734 | 0.317131938 | 0.119803979 |
| 0.22803071  | 0.070450724 | 0.159672594 | 0.126049305 |
| 0.231543735 | 0.140507155 | 0.178724472 | 0.18785748  |
| 0.394740877 | 0.479047768 | 0.202225263 | 0.472844813 |
| 0.089839727 | 0.189761802 | 0.182066994 | 0.238412533 |
| 0.296513449 | 0.130320915 | 0.267993111 | 0.463258571 |
| 0.088007492 | 0.237768295 | 0.293660021 | 0.137218486 |
| 0.371269474 | 0.193051477 | 0.221507751 | 0.085492622 |
| 0.238990134 | 0.190007564 | 0.465489743 | 0.198255315 |
| 0.187560508 | 0.092890755 | 0.462942139 | 0.172618238 |
| 0.146949081 | 0.096626173 | 0.152527122 | 0.367686027 |
| 0.249400274 | 0.4102341   | 0.363558902 | 0.301584287 |
| 0.2000371   | 0.427026721 | 0.272411085 | 0.368512581 |
| 0.118774966 | 0.465829627 | 0.148473801 | 0.044772464 |
| 0.090432537 | 0.087095155 | 0.192110005 | 0.277012234 |
| 0.383431868 | 0.233631224 | 0.143131513 | 0.160860845 |
| 0.375192439 | 0.447277589 | 0.472077187 | 0.327682994 |
| 0.053470354 | 0.174383378 | 0.208931046 | 0.192671247 |
| 0.249697881 | 0.131347627 | 0.14074859  | 0.470252986 |
| 0.31986196  | 0.331560783 | 0.156684216 | 0.481940239 |
| 0.182425425 | 0.442072855 | 0.387820342 | 0.125571567 |
| 0.473145457 | 0.454802127 | 0.433944695 | 0.242032666 |
| 0.425947613 | 0.199842576 | 0.06636704  | 0.339096641 |
| 0.406253239 | 0.008910228 | 0.39785891  | 0.420288012 |
| 0.449234892 | 0.356219022 | 0.450737731 | 0.429813601 |
| 0.447682807 | 0.098824928 | 0.033296335 | 0.181220846 |
| 0.461213797 | 0.326654719 | 0.125950106 | 0.214548292 |
| 0.197389717 | 0.214272068 | 0.335265803 | 0.129448946 |
| 0.451833243 | 0.385905616 | 0.415770007 | 0.305270027 |
| 0.253347705 | 0.296701705 | 0.203804714 | 0.44068151  |
| 0.061451719 | 0.098957478 | 0.070083264 | 0.269984769 |
| 0.21501723  | 0.134566275 | 0.215373838 | 0.224205192 |
| 0.141881131 | 0.227967707 | 0.172150957 | 0.230021206 |
| 0.098950744 | 0.216362981 | 0.159869517 | 0.15682205  |
| 0.05065964  | 0.180377317 | 0.105926482 | 0.104466868 |
| 0.14866203  | 0.292122233 | 0.284496782 | 0.430822708 |
| 0.229604697 | 0.176689579 | 0.278633726 | 0.40978925  |
| 0.359192562 | 0.197372717 | 0.210644159 | 0.011966083 |
| 0.149542717 | 0.206644113 | 0.109672378 | 0.221144903 |
| 0.237036857 | 0.149652813 | 0.217802081 | 0.253881168 |
| 0.17591234  | 0.155271465 | 0.200191312 | 0.392349576 |
| 0.174209734 | 0.151931801 | 0.346152008 | 0.2438061   |
| 0.009562341 | 0.198530616 | 0.334722443 | 0.120678437 |
| 0.242958966 | 0.060470432 | 0.111451551 | 0.389573502 |
| 0.155699843 | 0.141214606 | 0.413277481 | 0.264689397 |

|             |             |             |             |
|-------------|-------------|-------------|-------------|
| 0.167711778 | 0.277562938 | 0.454409662 | 0.033900433 |
| 0.225430417 | 0.04189843  | 0.191746038 | 0.235860626 |
| 0.178219253 | 0.232435188 | 0.167968531 | 0.164378449 |
| 0.120769766 | 0.452159342 | 0.334060911 | 0.424409747 |
| 0.20314623  | 0.462378541 | 0.352265871 | 0.347270593 |
| 0.242088174 | 0.219810075 | 0.070192031 | 0.329023654 |
| 0.382655197 | 0.209082879 | 0.105971333 | 0.338526562 |
| 0.2431482   | 0.257731345 | 0.119491481 | 0.41415061  |
| 0.451799415 | 0.442085262 | 0.100971403 | 0.273273958 |
| 0.289053165 | 0.15463013  | 0.35618625  | 0.460601349 |
| 0.23234587  | 0.19348882  | 0.184155242 | 0.320390535 |
| 0.147408509 | 0.137663917 | 0.320760437 | 0.104830641 |
| 0.004549359 | 0.099045604 | 0.079713244 | 0.111585091 |
| 0.097745517 | 0.253604072 | 0.265597063 | 0.444192118 |
| 0.100133687 | 0.358620928 | 0.235505789 | 0.151528594 |
| 0.379354461 | 0.200145122 | 0.195480899 | 0.217157794 |
| 0.231866781 | 0.024609648 | 0.073458676 | 0.481179315 |
| 0.069506891 | 0.118143851 | 0.216657182 | 0.002090096 |
| 0.062130955 | 0.357211751 | 0.148747985 | 0.232574413 |
| 0.388504676 | 0.240009561 | 0.17272532  | 0.233705662 |
| 0.229857155 | 0.100815201 | 0.003394118 | 0.44112378  |
| 0.46227314  | 0.444898808 | 0.46095453  | 0.453250254 |
| 0.412944221 | 0.322492938 | 0.323456007 | 0.21014232  |
| 0.110407283 | 0.117586918 | 0.123109742 | 0.176671372 |
| 0.005056303 | 0.28460177  | 0.199982409 | 0.132315225 |
| 0.29472285  | 0.236153166 | 0.044067207 | 0.203754639 |
| 0.024596292 | 0.097166567 | 0.200267616 | 0.174019511 |
| 0.261512782 | 0.028330691 | 0.11972177  | 0.173616243 |
| 0.382432505 | 0.295941811 | 0.201174296 | 0.471080774 |
| 0.176924456 | 0.16081177  | 0.187357684 | 0.263947386 |
| 0.084252363 | 0.106449595 | 0.23292851  | 0.028649479 |
| 0.121376424 | 0.437955836 | 0.22266592  | 0.091321222 |
| 0.175356363 | 0.009598883 | 0.318689993 | 0.457573267 |
| 0.430358709 | 0.436396693 | 0.419624368 | 0.129692992 |
| 0.436229836 | 0.065500852 | 0.452715786 | 0.345290424 |
| 0.211750239 | 0.000988052 | 0.005592147 | 0.403014881 |
| 0.205655058 | 0.098796009 | 0.136400907 | 0.177321552 |
| 0.085618219 | 0.13643345  | 0.079897642 | 0.117006409 |
| 0.240779584 | 0.140890809 | 0.106373641 | 0.431427464 |
| 0.175098906 | 0.169034278 | 0.232134562 | 0.114968673 |
| 0.214734344 | 0.059766965 | 0.123237589 | 0.004826409 |
| 0.252933486 | 0.15802235  | 0.459093014 | 0.444137319 |
| 0.427072632 | 0.254542857 | 0.19250058  | 0.161439658 |
| 0.386223063 | 0.117999967 | 0.198482007 | 0.114985787 |
| 0.425935736 | 0.220620677 | 0.236551077 | 0.262608336 |
| 0.420938078 | 0.407255933 | 0.048291198 | 0.309325703 |
| 0.014323358 | 0.00226668  | 0.211912792 | 0.217686845 |
| 0.103561769 | 0.201092795 | 0.224717954 | 0.22850541  |
| 0.190764793 | 0.032276504 | 0.15076585  | 0.142618143 |
| 0.193342154 | 0.203958439 | 0.146714937 | 0.252767991 |
| 0.185388939 | 0.108020552 | 0.149680099 | 0.134639931 |
| 0.199035256 | 0.308344984 | 0.212837737 | 0.041979235 |
| 0.235037143 | 0.204269838 | 0.066684623 | 0.147246089 |
| 0.342145562 | 0.394874413 | 0.063318911 | 0.011289868 |

|             |             |             |             |
|-------------|-------------|-------------|-------------|
| 0.236394278 | 0.199225621 | 0.402354988 | 0.436611314 |
| 0.470343682 | 0.449742435 | 0.372603344 | 0.099239646 |
| 0.072973386 | 0.205429659 | 0.168472517 | 0.093599198 |
| 0.429835626 | 0.090521909 | 0.432687029 | 0.163881835 |
| 0.127476876 | 0.171882643 | 0.034258816 | 0.10183662  |
| 0.190866956 | 0.139029407 | 0.127445881 | 0.136828919 |
| 0.176263056 | 0.140140229 | 0.073600858 | 0.148817732 |
| 0.273252694 | 0.113389448 | 0.139801742 | 0.226706652 |
| 0.326933334 | 0.214418294 | 0.290813496 | 0.394259412 |
| 0.121676947 | 0.136846156 | 0.171038427 | 0.303017175 |
| 0.355279858 | 0.235245055 | 0.018063936 | 0.410633251 |
| 0.414027598 | 0.251857073 | 0.441378668 | 0.320873836 |
| 0.108448029 | 0.178145152 | 0.197794298 | 0.201986537 |
| 0.157688881 | 0.211973084 | 0.18308844  | 0.081880145 |
| 0.303070931 | 0.459096272 | 0.376908    | 0.113246029 |
| 0.230421828 | 0.134363026 | 0.085827498 | 0.380819062 |
| 0.111751255 | 0.072144207 | 0.218259387 | 0.35021665  |
| 0.004224215 | 0.077166086 | 0.438121105 | 0.138203555 |
| 0.476970869 | 0.40582399  | 0.38117143  | 0.209371474 |
| 0.003264819 | 0.271204823 | 0.193060249 | 0.204382896 |
| 0.365484644 | 0.277262182 | 0.148813535 | 0.070067836 |
| 0.24871572  | 0.100185799 | 0.102214609 | 0.186050334 |
| 0.123247537 | 0.244123443 | 0.17348061  | 0.196157164 |
| 0.153671988 | 0.141116992 | 0.127995043 | 0.168873076 |
| 0.140534548 | 0.193951857 | 0.269381953 | 0.207024976 |
| 0.086959839 | 0.376475862 | 0.325701923 | 0.038581705 |
| 0.192686626 | 0.363451105 | 0.384369231 | 0.002865846 |
| 0.266348282 | 0.011471686 | 0.126488593 | 0.130538523 |
| 0.141434434 | 0.145417856 | 0.164914518 | 0.182475189 |
| 0.24547097  | 0.175978946 | 0.156422196 | 0.15343376  |
| 0.111709657 | 0.186420454 | 0.226472402 | 0.25458986  |
| 0.137423449 | 0.108556906 | 0.153437415 | 0.163936723 |
| 0.041426911 | 0.397407485 | 0.234159414 | 0.101780299 |
| 0.160022688 | 0.252177014 | 0.308685179 | 0.447832965 |
| 0.354954463 | 0.16172144  | 0.212048318 | 0.364602418 |
| 0.153953725 | 0.169924805 | 0.07695524  | 0.252153002 |
| 0.153355147 | 0.102308124 | 0.243101609 | 0.201270572 |
| 0.314402202 | 0.368527111 | 0.220010697 | 0.399177971 |
| 0.215223145 | 0.242647301 | 0.19870738  | 0.0626778   |
| 0.136156819 | 0.154033448 | 0.149233995 | 0.004329604 |
| 0.214305123 | 0.170236815 | 0.368150253 | 0.44562057  |
| 0.152169672 | 0.341171831 | 0.171746349 | 0.079707232 |
| 0.190548772 | 0.226740101 | 0.134289676 | 0.334252121 |
| 0.103296688 | 0.14143724  | 0.179668187 | 0.196226611 |
| 0.315035988 | 0.329471181 | 0.181710423 | 0.178960201 |
| 0.203622153 | 0.179550036 | 0.471687192 | 0.129596922 |
| 0.233779638 | 0.110889863 | 0.249724945 | 0.163945692 |
| 0.150479852 | 0.453349251 | 0.078325607 | 0.445820696 |
| 0.185408367 | 0.162924313 | 0.442635258 | 0.208518914 |
| 0.22251463  | 0.08890181  | 0.100674311 | 0.23973365  |
| 0.179244623 | 0.173018104 | 0.011732569 | 0.035313871 |
| 0.223641784 | 0.242236593 | 0.345933078 | 0.292678899 |
| 0.159617442 | 0.278531239 | 0.092612552 | 0.209355338 |
| 0.447351167 | 0.472412722 | 0.131821988 | 0.234662606 |

|             |             |             |             |
|-------------|-------------|-------------|-------------|
| 0.256392694 | 0.084018817 | 0.235549879 | 0.024351589 |
| 0.229747481 | 0.224023194 | 0.204341919 | 0.063522887 |
| 0.033215834 | 0.1157294   | 0.243752932 | 0.109155601 |
| 0.399163399 | 0.1023503   | 0.27090857  | 0.292072912 |
| 0.192289701 | 0.470415001 | 0.095371588 | 0.255870572 |
| 0.102588908 | 0.212010619 | 0.219317279 | 0.235500642 |
| 0.114672599 | 0.160170238 | 0.262724206 | 0.118977613 |
| 0.041081156 | 0.153996463 | 0.005748988 | 0.38450476  |
| 0.461884841 | 0.197428844 | 0.223318971 | 0.203751162 |
| 0.201058787 | 0.359466074 | 0.135459179 | 0.230388144 |
| 0.013721783 | 0.183509296 | 0.151415761 | 0.330387621 |
| 0.115095839 | 0.241489811 | 0.05815232  | 0.19557791  |
| 0.452086785 | 0.142873998 | 0.253524776 | 0.180801071 |
| 0.440677157 | 0.360453479 | 0.19163915  | 0.157307554 |
| 0.285255532 | 0.085358073 | 0.220181354 | 0.465646953 |
| 0.117124111 | 0.117741304 | 0.333072281 | 0.135753547 |
| 0.167080666 | 0.351131634 | 0.25561767  | 0.471754194 |
| 0.05951628  | 0.173814919 | 0.320144499 | 0.409816047 |
| 0.233380585 | 0.114203554 | 0.118640817 | 0.134594493 |
| 0.413098339 | 0.068256351 | 0.170028007 | 0.271498699 |
| 0.115658658 | 0.207820011 | 0.257834984 | 0.123855138 |
| 0.02980621  | 0.146980666 | 0.179614693 | 0.138333161 |
| 0.178102022 | 0.211526529 | 0.163910028 | 0.343517599 |
| 0.075670295 | 0.021616433 | 0.409113522 | 0.010316311 |
| 0.201653776 | 0.220830327 | 0.164771958 | 0.203578898 |
| 0.187349882 | 0.228289352 | 0.220633474 | 0.001265403 |
| 0.32700416  | 0.060215075 | 0.201602325 | 0.120318072 |
| 0.144409802 | 0.065888335 | 0.410341165 | 0.422703297 |
| 0.230713027 | 0.204511845 | 0.164284499 | 0.408909967 |
| 0.089256784 | 0.184091061 | 0.187908072 | 0.287496684 |
| 0.120828872 | 0.223971723 | 0.219806018 | 0.189993801 |
| 0.285588533 | 0.190625288 |             |             |
| AHCY        | 0.054823802 | 0.325921382 | 0.044155923 |
| 0.057579081 | 0.214668294 | 0.12138261  | 0.057279384 |
| 0.078197077 | 0.290093135 | 0.073143041 | 0.178724845 |
| 0.021503384 | 0.05230361  | 0.338364518 | 0.063197342 |
| 0.214430809 | 0.045348063 | 0.102760339 | 0.05269438  |
| 0.111630994 | 0.183692406 | 0.092794218 | 0.144776212 |
| 0.192638692 | 0.206085689 | 0.199122167 | 0.190950258 |
| 0.366633915 | 0.054561613 | 0.2427699   | 0.046042372 |
| 0.352628994 | 0.206007289 | 0.140321302 | 0.021877965 |
| 0.1935629   | 0.032424996 | 0.373700771 | 0.118983795 |
| 0.07665909  | 0.315564594 | 0.106843867 | 0.122085141 |
| 0.129653807 | 0.028901893 | 0.040683726 | 0.250732687 |
| 0.22298235  | 1           | 0.062066214 | 0.267052193 |
| 0.111717301 | 0.232471169 | 0.219616495 | 0.000651807 |
| 0.107411069 | 0.033772027 | 0.069340343 | 0.387990547 |
| 0.200401042 | 0.124588187 | 0.072607084 | 0.168285331 |
| 0.224894856 | 0.288022739 | 0.283800533 | 0.089487526 |
| 0.368002236 | 0.072655752 | 0.276636645 | 0.077559461 |
| 0.141633463 | 0.042131384 | 0.199941664 | 0.113121409 |
| 0.120091359 | 0.18285465  | 0.196539661 | 0.134630567 |
| 0.291312063 | 0.431088033 | 0.24465851  | 0.379291045 |
| 0.079413603 | 0.205216541 | 0.126819052 | 0.297813277 |



|             |             |             |             |
|-------------|-------------|-------------|-------------|
| 0.287447923 | 0.081160306 | 0.258105512 | 0.407935911 |
| 0.062967143 | 0.165729946 | 0.250987635 | 0.134156529 |
| 0.323027317 | 0.118113091 | 0.132525758 | 0.073909951 |
| 0.271192222 | 0.185814456 | 0.404220066 | 0.220345576 |
| 0.194565236 | 0.082601346 | 0.375469784 | 0.192376997 |
| 0.110718247 | 0.086225193 | 0.099580472 | 0.328319098 |
| 0.224875475 | 0.35467366  | 0.291479016 | 0.291556119 |
| 0.172960272 | 0.374820104 | 0.249180822 | 0.349864449 |
| 0.038083762 | 0.396182493 | 0.14416462  | 0.04918391  |
| 0.05006836  | 0.091852729 | 0.128926308 | 0.329698596 |
| 0.350159882 | 0.248672683 | 0.101441379 | 0.170524744 |
| 0.364070796 | 0.358207992 | 0.390978494 | 0.296450939 |
| 0.040317317 | 0.110263894 | 0.174388727 | 0.118867808 |
| 0.248394311 | 0.156198633 | 0.131838212 | 0.395723657 |
| 0.309616994 | 0.320559371 | 0.088993435 | 0.423697069 |
| 0.140513932 | 0.413483049 | 0.305818199 | 0.129097868 |
| 0.407152559 | 0.380868242 | 0.404351629 | 0.258666716 |
| 0.382106507 | 0.14421303  | 0.04127616  | 0.313198085 |
| 0.405564233 | 0.010134325 | 0.347207146 | 0.369878006 |
| 0.367397122 | 0.312579018 | 0.420623817 | 0.390265194 |
| 0.368361805 | 0.103595759 | 0.015370702 | 0.239509227 |
| 0.379263899 | 0.308019679 | 0.125391028 | 0.157121831 |
| 0.224803111 | 0.149855775 | 0.322639785 | 0.057477908 |
| 0.436309598 | 0.349833496 | 0.357258205 | 0.264841237 |
| 0.181651034 | 0.298682652 | 0.178482467 | 0.358416215 |
| 0.053327743 | 0.063537615 | 0.066412193 | 0.308133903 |
| 0.077800359 | 0.182281419 | 0.110151246 | 0.231349394 |
| 0.201779853 | 0.150031348 | 0.106372713 | 0.257545815 |
| 0.087206988 | 0.175084242 | 0.149429374 | 0.115011754 |
| 0.047550564 | 0.196800605 | 0.061937609 | 0.088570078 |
| 0.170842333 | 0.247477283 | 0.249760413 | 0.388521682 |
| 0.158762484 | 0.168633455 | 0.246292117 | 0.397986845 |
| 0.382425969 | 0.182942679 | 0.255785934 | 0.013351469 |
| 0.067896556 | 0.083599794 | 0.073226888 | 0.195552401 |
| 0.228650469 | 0.081813342 | 0.202070879 | 0.282069478 |
| 0.1242997   | 0.116776449 | 0.106418576 | 0.375547874 |
| 0.15912212  | 0.107225202 | 0.326400659 | 0.176121772 |
| 0.008131025 | 0.150201415 | 0.303432585 | 0.108915897 |
| 0.232675668 | 0.050756047 | 0.069434711 | 0.345052868 |
| 0.080002233 | 0.110957788 | 0.377431958 | 0.304389124 |
| 0.079413844 | 0.231235247 | 0.4155453   | 0.017379627 |
| 0.212425686 | 0.042478822 | 0.255358901 | 0.122206744 |
| 0.194123135 | 0.284776917 | 0.199695681 | 0.120456628 |
| 0.110129231 | 0.389137412 | 0.329971994 | 0.376656384 |
| 0.084831059 | 0.416236201 | 0.319602168 | 0.332338688 |
| 0.257784033 | 0.142725122 | 0.054823942 | 0.285440553 |
| 0.339383978 | 0.071787967 | 0.097806973 | 0.293349497 |
| 0.126656626 | 0.25118935  | 0.110796558 | 0.377880012 |
| 0.424237522 | 0.340322759 | 0.093377626 | 0.315765428 |
| 0.284231778 | 0.146503226 | 0.356014973 | 0.432829365 |
| 0.073791293 | 0.156372339 | 0.105773288 | 0.359608359 |
| 0.169111452 | 0.107326777 | 0.334598816 | 0.079554156 |
| 0.003326866 | 0.081204948 | 0.070660821 | 0.131727104 |
| 0.085731403 | 0.209330751 | 0.267504706 | 0.383155435 |

|             |             |             |             |
|-------------|-------------|-------------|-------------|
| 0.1085571   | 0.356284449 | 0.262121206 | 0.079989389 |
| 0.310837176 | 0.158225327 | 0.197462688 | 0.247523487 |
| 0.273730686 | 0.025763911 | 0.06548729  | 0.422047583 |
| 0.05850756  | 0.082444345 | 0.170904507 | 0.003578186 |
| 0.036931482 | 0.267380039 | 0.137593747 | 0.237592837 |
| 0.393093791 | 0.224593669 | 0.162035632 | 0.072083671 |
| 0.27680498  | 0.112494435 | 0.008489565 | 0.385281324 |
| 0.406020091 | 0.396520682 | 0.395222414 | 0.391333925 |
| 0.368293844 | 0.320747695 | 0.311066225 | 0.156206116 |
| 0.072874871 | 0.067596711 | 0.075617008 | 0.142581253 |
| 0.003804007 | 0.322481454 | 0.221669979 | 0.169331742 |
| 0.287124079 | 0.253608575 | 0.035761703 | 0.244898197 |
| 0.015081219 | 0.054018635 | 0.096323192 | 0.158261813 |
| 0.328292227 | 0.021468944 | 0.046587282 | 0.078427276 |
| 0.316953794 | 0.280849845 | 0.106934335 | 0.407079898 |
| 0.17734788  | 0.12136812  | 0.157379263 | 0.300349091 |
| 0.063185702 | 0.0308117   | 0.126334899 | 0.006845554 |
| 0.066985969 | 0.399346724 | 0.119296939 | 0.045923255 |
| 0.18868888  | 0.007724221 | 0.283359424 | 0.406971408 |
| 0.34095348  | 0.390511341 | 0.372923811 | 0.105170934 |
| 0.373208887 | 0.043077694 | 0.393979104 | 0.286647285 |
| 0.087958007 | 0.000502479 | 0.011621515 | 0.357883261 |
| 0.1751342   | 0.083167729 | 0.166360211 | 0.073917368 |
| 0.076430727 | 0.080489602 | 0.072146362 | 0.102206617 |
| 0.228442679 | 0.18093548  | 0.103496217 | 0.344835888 |
| 0.15462504  | 0.220297736 | 0.120382474 | 0.122866949 |
| 0.224887592 | 0.050432752 | 0.13276339  | 0.007749132 |
| 0.301631714 | 0.135283736 | 0.373551447 | 0.380172    |
| 0.39458184  | 0.274457347 | 0.065552577 | 0.086599177 |
| 0.378887273 | 0.094081764 | 0.09237071  | 0.103284523 |
| 0.340655612 | 0.210786072 | 0.264881187 | 0.252637975 |
| 0.387427676 | 0.357491303 | 0.0407794   | 0.290392781 |
| 0.014657636 | 0.008960156 | 0.124993367 | 0.25982689  |
| 0.090283911 | 0.145950837 | 0.251554067 | 0.126841043 |
| 0.147099519 | 0.024246506 | 0.105534135 | 0.100838106 |
| 0.227033127 | 0.17235038  | 0.161795106 | 0.278588435 |
| 0.152526987 | 0.088649916 | 0.137704242 | 0.105015422 |
| 0.103276435 | 0.269762537 | 0.19745678  | 0.032634959 |
| 0.162612718 | 0.166091444 | 0.064861511 | 0.177324537 |
| 0.323040139 | 0.350418474 | 0.051608897 | 0.015043702 |
| 0.242796379 | 0.146852746 | 0.375998996 | 0.360014909 |
| 0.402347951 | 0.416889254 | 0.357281021 | 0.091458313 |
| 0.05669335  | 0.237358483 | 0.19108467  | 0.110588055 |
| 0.380974064 | 0.073638918 | 0.376073535 | 0.158592672 |
| 0.156409297 | 0.106088776 | 0.039713088 | 0.114868288 |
| 0.200446303 | 0.18985898  | 0.160522498 | 0.112843303 |
| 0.130516656 | 0.091548538 | 0.057043882 | 0.175367611 |
| 0.257992351 | 0.067586755 | 0.164894886 | 0.146900564 |
| 0.308793019 | 0.074750341 | 0.263601806 | 0.386236466 |
| 0.143574893 | 0.118495509 | 0.061531315 | 0.322502017 |
| 0.30184532  | 0.172801644 | 0.016823745 | 0.315691641 |
| 0.398210215 | 0.224258802 | 0.374679429 | 0.34907622  |
| 0.123837543 | 0.153422623 | 0.137339237 | 0.190272413 |
| 0.189654848 | 0.137052239 | 0.200537805 | 0.091118369 |

|             |             |             |             |
|-------------|-------------|-------------|-------------|
| 0.348006136 | 0.42145274  | 0.306675367 | 0.122579908 |
| 0.207139584 | 0.111792817 | 0.065575182 | 0.355274387 |
| 0.078504439 | 0.045312391 | 0.109617323 | 0.330241048 |
| 0.007515557 | 0.069210851 | 0.414193105 | 0.102754773 |
| 0.442481835 | 0.364487298 | 0.360621755 | 0.131279306 |
| 0.002404622 | 0.256259542 | 0.202867393 | 0.114985074 |
| 0.292055261 | 0.287150082 | 0.117865539 | 0.069292412 |
| 0.309180516 | 0.087311204 | 0.080923234 | 0.086072404 |
| 0.065023717 | 0.207940039 | 0.241194319 | 0.198818033 |
| 0.161828872 | 0.117825516 | 0.095791198 | 0.143191017 |
| 0.113278381 | 0.249937969 | 0.294578038 | 0.072776522 |
| 0.040577566 | 0.362770706 | 0.26743586  | 0.029631488 |
| 0.192104053 | 0.350089624 | 0.389481457 | 0.001826531 |
| 0.251140581 | 0.013790917 | 0.151258286 | 0.136697288 |
| 0.15106115  | 0.139876821 | 0.238821226 | 0.114963159 |
| 0.223000441 | 0.154825334 | 0.11946377  | 0.213951189 |
| 0.102164498 | 0.174835146 | 0.234509482 | 0.161396679 |
| 0.095379989 | 0.084155786 | 0.145562638 | 0.143586861 |
| 0.042538953 | 0.35697446  | 0.261851632 | 0.09722951  |
| 0.231222982 | 0.141849619 | 0.34688039  | 0.357266007 |
| 0.383492357 | 0.130579067 | 0.163916793 | 0.297624666 |
| 0.053145888 | 0.079600095 | 0.039390422 | 0.200505087 |
| 0.16993784  | 0.077103263 | 0.175480317 | 0.150375938 |
| 0.252538888 | 0.357369336 | 0.246941056 | 0.395062436 |
| 0.149991788 | 0.177268407 | 0.065728987 | 0.064893883 |
| 0.103988158 | 0.167332645 | 0.174981994 | 0.004576167 |
| 0.239062528 | 0.075088674 | 0.31985651  | 0.366964232 |
| 0.09763511  | 0.370346375 | 0.056857004 | 0.048148245 |
| 0.055724635 | 0.169858632 | 0.164945832 | 0.288424719 |
| 0.062542095 | 0.116082607 | 0.197764446 | 0.07979766  |
| 0.295801797 | 0.29181068  | 0.138688311 | 0.137432681 |
| 0.227943624 | 0.181219437 | 0.405217627 | 0.088615258 |
| 0.188484085 | 0.092389695 | 0.18570508  | 0.142324776 |
| 0.147755648 | 0.396354321 | 0.082117219 | 0.386054228 |
| 0.136457804 | 0.173732892 | 0.425243798 | 0.197954772 |
| 0.118021905 | 0.107668174 | 0.069280913 | 0.115875362 |
| 0.119134217 | 0.108060045 | 0.002798357 | 0.022099966 |
| 0.272956591 | 0.128976181 | 0.262192141 | 0.309250774 |
| 0.139276956 | 0.333273874 | 0.079669276 | 0.140165426 |
| 0.349736157 | 0.394287989 | 0.06947961  | 0.28292831  |
| 0.262998102 | 0.076747929 | 0.195469759 | 0.016671274 |
| 0.19682659  | 0.193213683 | 0.080068956 | 0.058252936 |
| 0.031009734 | 0.066141305 | 0.196981819 | 0.098584671 |
| 0.374533465 | 0.057078811 | 0.226291563 | 0.276544438 |
| 0.217266203 | 0.388078929 | 0.101997287 | 0.263057104 |
| 0.049659202 | 0.265191942 | 0.19250438  | 0.173287392 |
| 0.079320999 | 0.127096192 | 0.277562964 | 0.096766293 |
| 0.039414548 | 0.114430513 | 0.003023066 | 0.352052754 |
| 0.36073299  | 0.156516108 | 0.254338667 | 0.073934583 |
| 0.277285497 | 0.373198694 | 0.09269944  | 0.170240485 |
| 0.018517092 | 0.191296142 | 0.20561691  | 0.299019643 |
| 0.04303705  | 0.195476637 | 0.061202862 | 0.186249412 |
| 0.370236337 | 0.071830185 | 0.296660912 | 0.064510307 |
| 0.364662277 | 0.336147181 | 0.167828944 | 0.141875012 |

|             |             |             |             |
|-------------|-------------|-------------|-------------|
| 0.232124194 | 0.093185714 | 0.103516004 | 0.415341892 |
| 0.137495789 | 0.101289276 | 0.327655808 | 0.094195969 |
| 0.138444447 | 0.326649737 | 0.207858027 | 0.417910375 |
| 0.072598085 | 0.223986185 | 0.328105558 | 0.347563226 |
| 0.3057514   | 0.103100671 | 0.07710523  | 0.114233241 |
| 0.32778343  | 0.05409348  | 0.106399385 | 0.259667479 |
| 0.073797627 | 0.274118883 | 0.192981774 | 0.132004756 |
| 0.037988791 | 0.114184867 | 0.09787653  | 0.169999756 |
| 0.199915658 | 0.187607597 | 0.119475971 | 0.35584837  |
| 0.07036956  | 0.025060979 | 0.401305245 | 0.010707792 |
| 0.166723987 | 0.237907153 | 0.211511846 | 0.168417609 |
| 0.193285125 | 0.215764646 | 0.135939218 | 0.00158126  |
| 0.337581509 | 0.059244405 | 0.164207876 | 0.089018824 |
| 0.081827128 | 0.041035928 | 0.373229593 | 0.393565545 |
| 0.253584536 | 0.102077396 | 0.074512607 | 0.367540623 |
| 0.071510095 | 0.090267354 | 0.097939045 | 0.224309425 |
| 0.092653158 | 0.109575124 | 0.12797868  | 0.112919542 |
| 0.281840853 | 0.149999296 |             |             |
| AI597468    | 0.211758651 | 0.140389686 | 0.211783283 |
| 0.088349379 | 0.030259481 | 0.049106741 | 0.187041734 |
| 0.150801083 | 0.127623537 | 0.026462814 | 0.051666761 |
| 0.202280572 | 0.002833638 | 0.127703211 | 0.182622372 |
| 0.03504369  | 0.158957588 | 0.162901606 | 0.026829471 |
| 0.067494627 | 0.030508896 | 0.02164491  | 0.074458452 |
| 0.028615455 | 0.316979868 | 0.098613005 | 0.024257015 |
| 0.127536415 | 0.010255219 | 0.052608016 | 0.013648809 |
| 0.193480502 | 0.029979239 | 0.018507508 | 0.197745914 |
| 0.048520595 | 0.00191761  | 0.229645481 | 0.047181197 |
| 0.006495084 | 0.219024229 | 0.040169407 | 0.069862774 |
| 0.036257429 | 0.22091693  | 0.015348074 | 0.043450506 |
| 0.081361208 | 0.062066214 | 1           | 0.069488663 |
| 0.034205564 | 0.133611343 | 0.084172495 | 0.014777538 |
| 0.011606453 | 0.000178383 | 0.005604126 | 0.171426524 |
| 0.173000512 | 0.133325696 | 0.010797174 | 0.087198105 |
| 0.046388736 | 0.059193526 | 0.119074101 | 0.029997858 |
| 0.151145529 | 0.006580756 | 0.053612864 | 0.054359805 |
| 0.056408814 | 0.194245271 | 0.221876502 | 0.215083145 |
| 0.029220834 | 0.093395299 | 0.041177621 | 0.014529077 |
| 0.139457913 | 0.209671611 | 0.130481652 | 0.193426634 |
| 0.007763017 | 0.022899703 | 0.023582441 | 0.0988593   |
| 0.083387608 | 0.141084999 | 0.077226871 | 0.173816267 |
| 0.184528348 | 0.05110142  | 0.076603095 | 0.25313253  |
| 0.129168984 | 0.014207224 | 0.038123098 | 0.008819303 |
| 0.038454134 | 0.028428078 | 0.203258033 | 0.13199375  |
| 0.031876783 | 0.248718919 | 0.231214686 | 0.019546044 |
| 0.039683601 | 0.202149264 | 0.024347995 | 0.073047566 |
| 0.058368249 | 0.127449082 | 0.101384433 | 0.104314483 |
| 0.025849516 | 0.14193835  | 0.079050193 | 0.138410705 |
| 0.008173327 | 0.16068125  | 0.133290857 | 0.171702238 |
| 0.203681416 | 0.134270955 | 0.026290598 | 0.161807361 |
| 0.099682428 | 0.107882102 | 0.127776671 | 0.058693624 |
| 0.085918521 | 0.205471783 | 0.157935706 | 0.103455218 |
| 0.213603401 | 0.010147319 | 0.025714493 | 0.090239126 |
| 0.077510263 | 0.184942417 | 0.013445772 | 0.220172985 |

|             |             |             |             |
|-------------|-------------|-------------|-------------|
| 0.166632051 | 0.075970029 | 0.151837154 | 0.246414756 |
| 0.101911715 | 0.164992404 | 0.117871401 | 0.120960943 |
| 0.193636443 | 0.214090778 | 0.136359575 | 0.039400305 |
| 0.196336218 | 0.06932785  | 0.023420239 | 0.122031832 |
| 0.153811026 | 0.001986694 | 0.093298848 | 0.100992662 |
| 0.160759004 | 0.072419617 | 0.131923691 | 0.1204922   |
| 0.163612174 | 0.218089492 | 0.001175871 | 0.062721881 |
| 0.183745494 | 0.133516577 | 0.080050154 | 0.02682052  |
| 0.037508934 | 0.062298339 | 0.07609096  | 0.020535899 |
| 0.184545743 | 0.104535758 | 0.108193718 | 0.098736703 |
| 0.069396341 | 0.229096625 | 0.019507164 | 0.230007257 |
| 0.168653039 | 0.186852116 | 0.273139244 | 0.123389997 |
| 0.036937362 | 0.111456875 | 0.060614288 | 0.040556041 |
| 0.137659734 | 0.073770847 | 0.013397111 | 0.041071992 |
| 0.334176531 | 0.042922468 | 0.138554384 | 0.145210498 |
| 0.152105932 | 0.326034177 | 0.083916925 | 0.108485514 |
| 0.054707825 | 0.375711834 | 0.056720507 | 0.116331258 |
| 0.032898602 | 0.231288369 | 0.07599454  | 0.148326779 |
| 0.158219598 | 0.025096447 | 0.19199288  | 0.046188303 |
| 0.024041971 | 0.013838945 | 0.004751985 | 0.028848209 |
| 0.357424921 | 0.059063109 | 0.045358686 | 0.053525363 |
| 0.110774951 | 0.155311188 | 0.025572302 | 0.2346085   |
| 0.261901163 | 0.036780042 | 0.097947498 | 0.046643625 |
| 0.11931924  | 0.067087954 | 0.085783861 | 0.025548672 |
| 0.109590391 | 0.009330422 | 0.010606967 | 0.101413814 |
| 0.013771074 | 0.01930646  | 0.107929335 | 0.05376556  |
| 0.039065467 | 0.32580735  | 0.139600266 | 0.001644749 |
| 0.026921627 | 0.025535431 | 0.091964619 | 0.037233223 |
| 0.119425512 | 0.111949297 | 0.025353605 | 0.027101141 |
| 0.23679263  | 0.166355528 | 0.127583356 | 0.130272897 |
| 0.019515109 | 0.145399424 | 0.084167973 | 0.121230831 |
| 0.092788436 | 0.020224755 | 0.003134237 | 0.085135174 |
| 0.094048811 | 0.022506874 | 0.294359599 | 0.066457565 |
| 0.027190749 | 0.044254541 | 0.025779438 | 0.131836921 |
| 0.208278026 | 0.187585682 | 0.101658959 | 0.069645979 |
| 0.120626899 | 0.120049711 | 0.09944441  | 0.154255911 |
| 0.02304442  | 0.025567164 | 0.022674273 | 0.084856086 |
| 0.177139432 | 0.022789466 | 0.189993131 | 0.004890798 |
| 0.000195064 | 0.205553639 | 0.217238039 | 0.076991716 |
| 0.009950517 | 0.042431228 | 0.05442962  | 0.1431124   |
| 0.157628383 | 0.154914144 | 0.156580992 | 0.034526986 |
| 0.158809707 | 0.027946308 | 0.024596907 | 0.042532283 |
| 0.170193935 | 0.066664464 | 0.103068449 | 0.214979237 |
| 0.253600961 | 0.012383978 | 0.077326914 | 0.013591577 |
| 0.216201905 | 0.09854032  | 0.332960142 | 0.338126683 |
| 0.103510362 | 0.319829341 | 0.173718266 | 0.031242203 |
| 0.084755486 | 0.186019855 | 0.017591143 | 0.124355321 |
| 0.153301029 | 0.150056547 | 0.155246078 | 0.193378887 |
| 0.112172713 | 0.082843027 | 0.071563409 | 0.081647397 |
| 0.15320103  | 0.181643425 | 0.010489293 | 0.047172319 |
| 0.022586812 | 0.091641261 | 0.039090607 | 0.222947658 |
| 0.060112058 | 0.103961254 | 0.216351713 | 0.03618808  |
| 0.148623685 | 0.004799396 | 0.071826297 | 0.07177109  |
| 0.068023887 | 0.197913249 | 0.024060698 | 0.016721241 |

|             |             |             |             |
|-------------|-------------|-------------|-------------|
| 0.196408818 | 0.185542489 | 0.015384344 | 0.163707184 |
| 0.060745659 | 0.256421229 | 0.037421137 | 0.070853487 |
| 0.178055437 | 0.010024263 | 0.057676398 | 0.003842586 |
| 0.034711764 | 0.184134912 | 0.027498158 | 0.154724647 |
| 0.102402934 | 0.152466009 | 0.178558482 | 0.166437975 |
| 0.177274301 | 0.121118986 | 0.144466236 | 0.013328209 |
| 0.154982889 | 0.000853669 | 0.139599004 | 0.131202786 |
| 0.025606889 | 0.014545025 | 0.043709686 | 0.096470502 |
| 0.031099907 | 0.318931606 | 0.172695734 | 0.040115343 |
| 0.123190165 | 0.175545845 | 0.184361374 | 0.01616895  |
| 0.057976363 | 0.040325154 | 0.017504204 | 0.18430621  |
| 0.074256757 | 0.09301972  | 0.046921566 | 0.274579735 |
| 0.039774801 | 0.176887316 | 0.24866507  | 0.018342776 |
| 0.064128207 | 0.309005344 | 0.252392578 | 0.153867936 |
| 0.166823791 | 0.050077604 | 0.019486288 | 0.042746533 |
| 0.103165603 | 0.286719881 | 0.019599399 | 0.243358488 |
| 0.155463036 | 0.044466567 | 0.131700934 | 0.185061651 |
| 0.142759747 | 0.16430399  | 0.208055386 | 0.078265025 |
| 0.101462256 | 0.00391482  | 0.058669519 | 0.140847608 |
| 0.010965437 | 0.024825262 | 0.175552368 | 0.059873396 |
| 0.06122639  | 0.203107154 | 0.01033183  | 0.010703878 |
| 0.075554154 | 0.038788098 | 0.020472638 | 0.160853794 |
| 0.030979172 | 0.017839711 | 0.07867855  | 0.113320441 |
| 0.03555964  | 0.196561698 | 0.31220916  | 0.193984907 |
| 0.033437895 | 0.027712454 | 0.207336452 | 0.214555141 |
| 0.101026968 | 0.107066477 | 0.143610294 | 0.071570109 |
| 0.199021973 | 0.040678    | 0.111362853 | 0.146623604 |
| 0.198777745 | 0.161330405 | 0.232722041 | 0.063444456 |
| 0.20313075  | 0.055272518 | 0.021850993 | 0.044649197 |
| 0.144435929 | 0.250113816 | 0.169714721 | 0.012618238 |
| 0.206942518 | 0.087926979 | 0.148376675 | 0.176208948 |
| 0.026273518 | 0.171729611 | 0.070258248 | 0.212115156 |
| 0.041383822 | 0.011275578 | 0.194164977 | 0.128136491 |
| 0.122837269 | 0.004903824 | 0.16504509  | 0.073021261 |
| 0.130419386 | 0.025135348 | 0.052071408 | 0.182462288 |
| 0.2397641   | 0.165412789 | 0.081207059 | 0.080905568 |
| 0.081408812 | 0.033929925 | 0.11619592  | 0.137595446 |
| 0.127208317 | 0.0477885   | 0.177565888 | 0.116229886 |
| 0.246687332 | 0.027379647 | 0.016295765 | 0.038000415 |
| 0.139228809 | 0.054132726 | 0.078487155 | 0.220811618 |
| 0.193658917 | 0.225560962 | 0.127781229 | 0.101549106 |
| 0.043934169 | 0.218903598 | 0.241487271 | 0.109279343 |
| 0.009326339 | 0.17978924  | 0.040122176 | 0.076761643 |
| 0.003594858 | 0.004078722 | 0.11685396  | 0.084596867 |
| 0.17852381  | 0.108792316 | 0.17421678  | 0.082347236 |
| 0.000369082 | 0.038848196 | 0.055310241 | 0.030215554 |
| 0.129985094 | 0.145185215 | 0.069648217 | 0.128620443 |
| 0.16145861  | 0.291235926 | 0.092688259 | 0.047204214 |
| 0.006144658 | 0.075353752 | 0.17567624  | 0.118150891 |
| 0.060627441 | 0.248397296 | 0.01155769  | 0.092069628 |
| 0.009091816 | 0.170252443 | 0.127626085 | 0.035738596 |
| 0.007076452 | 0.11547115  | 0.098274797 | 0.216963111 |
| 0.022797846 | 0.107362743 | 0.127945511 | 0.020046518 |
| 0.055014155 | 0.146626799 | 0.065032354 | 0.059477044 |

|             |             |             |             |
|-------------|-------------|-------------|-------------|
| 0.068144902 | 0.067770548 | 0.06297209  | 0.030829941 |
| 0.081355772 | 0.087501658 | 0.063146938 | 0.116574714 |
| 0.07407294  | 0.101025666 | 0.042154755 | 0.054415147 |
| 0.033823278 | 0.157353523 | 0.3513577   | 0.394905797 |
| 0.15559871  | 0.12084045  | 0.250631895 | 0.295782753 |
| 0.113101478 | 0.046217741 | 0.167913278 | 0.161202076 |
| 0.135949937 | 0.327772408 | 0.049890238 | 0.119476307 |
| 0.011698179 | 0.045590896 | 0.212965459 | 0.054496522 |
| 0.109091705 | 0.023062792 | 0.044623799 | 0.111315485 |
| 0.07828516  | 0.221337573 | 0.242867377 | 0.15408483  |
| 0.037377174 | 0.036467746 | 0.030528361 | 0.100850055 |
| 0.127481317 | 0.240120891 | 0.023683971 | 0.075952662 |
| 0.090672596 | 0.087295859 | 0.091662928 | 0.185267914 |
| 0.011066332 | 0.165338416 | 0.039867651 | 0.173698255 |
| 0.025954901 | 0.31752087  | 0.230881655 | 0.071075781 |
| 0.005695737 | 0.115932355 | 0.036172001 | 0.069002494 |
| 0.060909379 | 0.061138022 | 0.027777227 | 0.099721545 |
| 0.085654188 | 0.180429435 | 0.203920705 | 0.177282036 |
| 0.036957173 | 0.019270278 | 0.070515521 | 0.04228914  |
| 0.054020161 | 0.126725274 | 0.21254017  | 0.124139135 |
| 0.02964975  | 0.285202506 | 0.206283833 | 0.082083951 |
| 0.06924571  | 0.067931675 | 0.00475055  | 0.045154001 |
| 0.077802056 | 0.015416349 | 0.000824757 | 0.006765492 |
| 0.099603576 | 0.036240974 | 0.093198187 | 0.086290075 |
| 0.021245856 | 0.10419596  | 0.005548119 | 0.085748296 |
| 0.187432291 | 0.224205172 | 0.054067456 | 0.169048608 |
| 0.124065031 | 0.159413539 | 0.084647129 | 0.005800058 |
| 0.039340656 | 0.03048096  | 0.027688924 | 0.189380978 |
| 0.175695639 | 0.005494246 | 0.045477146 | 0.225996209 |
| 0.098707764 | 0.00537897  | 0.068847575 | 0.06335434  |
| 0.214715562 | 0.228519638 | 0.075457121 | 0.068462923 |
| 0.135865667 | 0.128449568 | 0.022508884 | 0.032934882 |
| 0.033299836 | 0.01573417  | 0.079932338 | 0.012051213 |
| 0.181131158 | 0.039226989 | 0.012554808 | 0.252402088 |
| 0.220883444 | 0.016877954 | 0.258993003 | 0.023390672 |
| 0.106330421 | 0.135456856 | 0.03830644  | 0.028169285 |
| 0.0940173   | 0.028809047 | 0.127709084 | 0.138912791 |
| 0.007875419 | 0.049164927 | 0.116056041 | 0.022086314 |
| 0.272823205 | 0.028201503 | 0.199285139 | 0.013634266 |
| 0.157222382 | 0.124102687 | 0.248277819 | 0.032580069 |
| 0.060573251 | 0.269781224 | 0.036907746 | 0.159069627 |
| 0.084891229 | 0.012169895 | 0.074938111 | 0.073350359 |
| 0.015955998 | 0.160642927 | 0.039318942 | 0.164141882 |
| 0.070131459 | 0.136506319 | 0.074419332 | 0.13714134  |
| 0.128011184 | 0.01400995  | 0.012774801 | 0.036577236 |
| 0.178411481 | 0.133336214 | 0.016602889 | 0.120721716 |
| 0.008748436 | 0.099411609 | 0.071434723 | 0.035733525 |
| 0.143296059 | 0.100800782 | 0.045487894 | 0.195111641 |
| 0.078001864 | 0.034814762 | 0.024605679 | 0.180797124 |
| 0.07397904  | 0.086637747 | 0.179141335 | 0.000300033 |
| 0.091976013 | 0.052441419 | 0.112662359 | 0.028001612 |
| 0.272638467 | 0.080967153 | 0.075840516 | 0.087490738 |
| 0.089564143 | 0.006068927 | 0.041259812 | 0.0308085   |
| 0.017512469 | 0.213006229 | 0.176273533 | 0.120831782 |

|             |             |             |             |
|-------------|-------------|-------------|-------------|
| 0.116700387 | 0.02679274  | 0.014775138 | 0.16312013  |
| 0.005590489 | 0.01262496  | 0.018722892 | 0.0733793   |
| 0.008962983 | 0.026589788 | 0.025386282 | 0.016963299 |
| 0.108865934 | 0.091911596 |             |             |
| AI847670    | 0.077010434 | 0.44082178  | 0.066289157 |
| 0.15809661  | 0.280735737 | 0.366262393 | 0.057641418 |
| 0.114000395 | 0.327618952 | 0.288236834 | 0.324703069 |
| 0.018955196 | 0.093642096 | 0.450637952 | 0.05250737  |
| 0.337305191 | 0.033454184 | 0.100792635 | 0.069603013 |
| 0.233884332 | 0.249424515 | 0.313229999 | 0.321255771 |
| 0.257756928 | 0.191019855 | 0.309972318 | 0.335267319 |
| 0.52023498  | 0.271191712 | 0.376965161 | 0.241300959 |
| 0.413193019 | 0.287244843 | 0.349759498 | 0.021643052 |
| 0.355802648 | 0.013166661 | 0.439906262 | 0.241938591 |
| 0.187379564 | 0.339283567 | 0.318793389 | 0.233953811 |
| 0.33528664  | 0.041579948 | 0.2245218   | 0.340018754 |
| 0.301313854 | 0.267052193 | 0.069488663 | 1           |
| 0.317789144 | 0.293895754 | 0.356116302 | 0.001370411 |
| 0.286215644 | 0.10421497  | 0.222759399 | 0.524223217 |
| 0.184447991 | 0.117146638 | 0.265942739 | 0.22402536  |
| 0.322508315 | 0.313641322 | 0.226204284 | 0.320593009 |
| 0.509831659 | 0.168797681 | 0.384581931 | 0.169045343 |
| 0.331465951 | 0.03593392  | 0.146248559 | 0.086735342 |
| 0.348377321 | 0.185711592 | 0.303924434 | 0.29557264  |
| 0.441026516 | 0.519919811 | 0.216979498 | 0.514915447 |
| 0.091687628 | 0.297861054 | 0.268190229 | 0.259773834 |
| 0.301747697 | 0.07987765  | 0.361506102 | 0.529102024 |
| 0.050094652 | 0.328370462 | 0.326803999 | 0.11370921  |
| 0.441744254 | 0.265433707 | 0.350592776 | 0.179251731 |
| 0.325406929 | 0.295766363 | 0.480678797 | 0.252769591 |
| 0.285483067 | 0.076582892 | 0.497965016 | 0.286781967 |
| 0.277412021 | 0.091068366 | 0.207483775 | 0.459546072 |
| 0.360491435 | 0.506962732 | 0.409507498 | 0.318466569 |
| 0.323744949 | 0.516903338 | 0.353700757 | 0.411646098 |
| 0.172904702 | 0.539497402 | 0.188178595 | 0.041066534 |
| 0.074534203 | 0.081901916 | 0.20635441  | 0.278378113 |
| 0.485590983 | 0.286554887 | 0.181021425 | 0.215112346 |
| 0.456801597 | 0.492296266 | 0.53578756  | 0.380872586 |
| 0.040981289 | 0.241414597 | 0.337706986 | 0.263721787 |
| 0.308863854 | 0.106451197 | 0.246887499 | 0.517083566 |
| 0.378523628 | 0.418091444 | 0.165499944 | 0.50616009  |
| 0.172362236 | 0.522263673 | 0.470338974 | 0.163360139 |
| 0.532471188 | 0.510152764 | 0.521097192 | 0.346056315 |
| 0.488133426 | 0.323940464 | 0.053467931 | 0.356544135 |
| 0.488035044 | 0.018406768 | 0.483129553 | 0.510869158 |
| 0.516655492 | 0.458772371 | 0.526850241 | 0.524481034 |
| 0.5172858   | 0.073767448 | 0.028860071 | 0.243843388 |
| 0.52129945  | 0.396893454 | 0.12097845  | 0.353349335 |
| 0.305511356 | 0.346489163 | 0.398177202 | 0.272537468 |
| 0.50947987  | 0.467451675 | 0.502205227 | 0.34026369  |
| 0.273260183 | 0.308293437 | 0.331773883 | 0.484227834 |
| 0.048275622 | 0.115540506 | 0.056877347 | 0.256805479 |
| 0.341827948 | 0.160849896 | 0.324168292 | 0.296277282 |
| 0.174680489 | 0.299199968 | 0.310047697 | 0.322086237 |



|             |             |             |             |
|-------------|-------------|-------------|-------------|
| 0.057422772 | 0.374796173 | 0.170290234 | 0.160027955 |
| 0.042652096 | 0.138707035 | 0.161649905 | 0.157671939 |
| 0.218781943 | 0.240323114 | 0.367713015 | 0.504937388 |
| 0.300738059 | 0.173407045 | 0.351186321 | 0.477923682 |
| 0.414182941 | 0.343077422 | 0.193092187 | 0.01683234  |
| 0.230068534 | 0.282309416 | 0.186781507 | 0.358219286 |
| 0.183130385 | 0.199651096 | 0.321600886 | 0.34679295  |
| 0.257286011 | 0.137274706 | 0.309628978 | 0.427123166 |
| 0.13896318  | 0.280935249 | 0.432949704 | 0.344658336 |
| 0.004985457 | 0.293877322 | 0.432085738 | 0.141718753 |
| 0.263477846 | 0.131702    | 0.257135963 | 0.469328548 |
| 0.25036189  | 0.201874255 | 0.507932122 | 0.342937043 |
| 0.289708388 | 0.223718678 | 0.53065468  | 0.044813429 |
| 0.303723009 | 0.0610974   | 0.245463888 | 0.306534783 |
| 0.230515879 | 0.238816691 | 0.281147742 | 0.268235529 |
| 0.129892162 | 0.523668111 | 0.380447536 | 0.522803464 |
| 0.322752868 | 0.53511179  | 0.453540458 | 0.436861182 |
| 0.322020513 | 0.310400102 | 0.143914498 | 0.42248949  |
| 0.464908785 | 0.257024149 | 0.077756893 | 0.413358304 |
| 0.316595575 | 0.3362812   | 0.121948283 | 0.49988677  |
| 0.50065394  | 0.486521033 | 0.127725449 | 0.326464799 |
| 0.364136688 | 0.221925233 | 0.404129375 | 0.529081799 |
| 0.289885384 | 0.29785452  | 0.300665944 | 0.384502831 |
| 0.169405786 | 0.192134096 | 0.304087009 | 0.185766203 |
| 0.019055361 | 0.079631966 | 0.06822954  | 0.150025601 |
| 0.171976457 | 0.356098812 | 0.342653707 | 0.522982884 |
| 0.107945833 | 0.420593224 | 0.202870505 | 0.257579852 |
| 0.418592515 | 0.292299719 | 0.340473397 | 0.33200016  |
| 0.214213901 | 0.026629165 | 0.119040644 | 0.523331717 |
| 0.043710973 | 0.230408666 | 0.269389588 | 0.004224258 |
| 0.045977598 | 0.403832591 | 0.097333022 | 0.195277134 |
| 0.476832607 | 0.204292821 | 0.190399793 | 0.290367569 |
| 0.296025024 | 0.094365167 | 0.005148141 | 0.49932285  |
| 0.493439967 | 0.461053018 | 0.490303072 | 0.466266687 |
| 0.437695168 | 0.363779849 | 0.382510167 | 0.326795553 |
| 0.101701215 | 0.093906369 | 0.200358766 | 0.253307268 |
| 0.004290582 | 0.352145597 | 0.271972106 | 0.132964743 |
| 0.367248941 | 0.252799274 | 0.038862158 | 0.303693567 |
| 0.028241066 | 0.207342123 | 0.25794167  | 0.191541537 |
| 0.295376064 | 0.017214075 | 0.263135371 | 0.281105169 |
| 0.443831938 | 0.331568828 | 0.332180983 | 0.545378464 |
| 0.294284493 | 0.12478028  | 0.291470257 | 0.347568245 |
| 0.069961895 | 0.0987624   | 0.31142791  | 0.054650772 |
| 0.201273315 | 0.454521036 | 0.325612485 | 0.08211369  |
| 0.24685732  | 0.006443296 | 0.365703494 | 0.535998414 |
| 0.486513832 | 0.525819024 | 0.515000861 | 0.260590836 |
| 0.52085005  | 0.119375579 | 0.541821488 | 0.400291456 |
| 0.328373735 | 0.001328173 | 0.005621641 | 0.500857758 |
| 0.341122101 | 0.061417371 | 0.150498518 | 0.345478286 |
| 0.110669467 | 0.14909357  | 0.064836515 | 0.18846429  |
| 0.37323688  | 0.216798915 | 0.164220559 | 0.474561564 |
| 0.219944317 | 0.205738341 | 0.335119792 | 0.085270341 |
| 0.355452363 | 0.056495336 | 0.084817745 | 0.010398747 |
| 0.307769183 | 0.11428525  | 0.477126453 | 0.521573808 |

|             |             |             |             |
|-------------|-------------|-------------|-------------|
| 0.497332528 | 0.339110636 | 0.306932689 | 0.299310755 |
| 0.431852718 | 0.100539597 | 0.336177764 | 0.112570373 |
| 0.502527247 | 0.330391096 | 0.283603444 | 0.295665307 |
| 0.499481579 | 0.474103463 | 0.03375076  | 0.373043931 |
| 0.020112477 | 0.002334852 | 0.340919243 | 0.218070315 |
| 0.065226611 | 0.31394543  | 0.226221643 | 0.210892161 |
| 0.207160581 | 0.034034179 | 0.251605364 | 0.22629241  |
| 0.262415108 | 0.301312243 | 0.247864413 | 0.209708842 |
| 0.24900937  | 0.125890761 | 0.188468934 | 0.133943836 |
| 0.206642582 | 0.308107584 | 0.194421293 | 0.022188008 |
| 0.377036657 | 0.352805694 | 0.059698491 | 0.148195187 |
| 0.441425173 | 0.499059145 | 0.041693273 | 0.013704381 |
| 0.237174619 | 0.258794292 | 0.501204306 | 0.515984786 |
| 0.533180088 | 0.5208831   | 0.389000481 | 0.105980254 |
| 0.068714463 | 0.285773914 | 0.265101486 | 0.103086653 |
| 0.5182503   | 0.067025224 | 0.500615856 | 0.279949691 |
| 0.109786426 | 0.21469099  | 0.036409039 | 0.081586043 |
| 0.337156976 | 0.157505632 | 0.166173486 | 0.147505783 |
| 0.270207677 | 0.244223687 | 0.048414682 | 0.178845278 |
| 0.29906504  | 0.191258645 | 0.146605968 | 0.282569419 |
| 0.34359441  | 0.215380303 | 0.368090842 | 0.444540963 |
| 0.124641442 | 0.107607108 | 0.26858615  | 0.332233078 |
| 0.43890392  | 0.342210599 | 0.03378003  | 0.4674339   |
| 0.493606186 | 0.37135427  | 0.514267085 | 0.362989517 |
| 0.083082123 | 0.332515292 | 0.276753257 | 0.289591504 |
| 0.162444244 | 0.358945476 | 0.205329901 | 0.062389655 |
| 0.280863892 | 0.479216032 | 0.420220391 | 0.158531246 |
| 0.364802596 | 0.121840899 | 0.06033281  | 0.446317669 |
| 0.182909906 | 0.088700861 | 0.325962003 | 0.41082314  |
| 0.003787988 | 0.149564215 | 0.492149863 | 0.218510332 |
| 0.520329046 | 0.489548259 | 0.443623522 | 0.241838244 |
| 0.002009742 | 0.349019873 | 0.327841539 | 0.357476616 |
| 0.42794478  | 0.316977457 | 0.147883271 | 0.074913339 |
| 0.262259258 | 0.083768079 | 0.12099118  | 0.33190846  |
| 0.184112773 | 0.337379762 | 0.171009889 | 0.186183484 |
| 0.18384443  | 0.088692595 | 0.249193472 | 0.234427826 |
| 0.147911203 | 0.203499627 | 0.317706231 | 0.27402524  |
| 0.179245242 | 0.417884899 | 0.374832067 | 0.030162416 |
| 0.315306788 | 0.394894033 | 0.43414543  | 0.002181638 |
| 0.363758938 | 0.007730658 | 0.174414833 | 0.204660142 |
| 0.188491261 | 0.177372948 | 0.223556954 | 0.278546641 |
| 0.296291964 | 0.203404433 | 0.257788338 | 0.211649148 |
| 0.159784669 | 0.205818059 | 0.338329442 | 0.329488889 |
| 0.256234476 | 0.12872106  | 0.10470391  | 0.113105072 |
| 0.053875797 | 0.47308596  | 0.232371637 | 0.078422864 |
| 0.197214194 | 0.317603381 | 0.339325499 | 0.511419473 |
| 0.413976939 | 0.122395795 | 0.277776304 | 0.455009795 |
| 0.206450925 | 0.264895882 | 0.061414053 | 0.357770977 |
| 0.203675273 | 0.196274231 | 0.356669434 | 0.276760006 |
| 0.349057506 | 0.402554062 | 0.222137451 | 0.446950124 |
| 0.332081107 | 0.289697267 | 0.304182063 | 0.085691275 |
| 0.171083323 | 0.123009595 | 0.243116439 | 0.003187677 |
| 0.298975101 | 0.259634202 | 0.474938538 | 0.507508113 |
| 0.267379213 | 0.37929885  | 0.30394866  | 0.088237554 |

|             |             |             |             |
|-------------|-------------|-------------|-------------|
| 0.287518546 | 0.189648191 | 0.127359578 | 0.399257481 |
| 0.216278237 | 0.17969392  | 0.271117019 | 0.319481703 |
| 0.388670563 | 0.372019581 | 0.235630978 | 0.205875931 |
| 0.214531483 | 0.192897956 | 0.479769257 | 0.126013236 |
| 0.365761455 | 0.189224601 | 0.310550903 | 0.262550696 |
| 0.195433186 | 0.530606021 | 0.062521397 | 0.53510113  |
| 0.28067996  | 0.121456866 | 0.490269342 | 0.272710759 |
| 0.286065108 | 0.123653704 | 0.195086991 | 0.330423059 |
| 0.198561209 | 0.31611576  | 0.016853465 | 0.055632423 |
| 0.275875259 | 0.265920586 | 0.380259056 | 0.306156843 |
| 0.23466828  | 0.298606512 | 0.17483753  | 0.243587878 |
| 0.496658373 | 0.507395248 | 0.223341285 | 0.215213745 |
| 0.284503475 | 0.09935809  | 0.348533413 | 0.014363527 |
| 0.349443682 | 0.358539416 | 0.325364755 | 0.050523749 |
| 0.019931802 | 0.211644259 | 0.349327321 | 0.068646585 |
| 0.479845074 | 0.214025523 | 0.305166393 | 0.381007493 |
| 0.155570777 | 0.507657666 | 0.111002867 | 0.350085457 |
| 0.046736918 | 0.227019286 | 0.338277369 | 0.317532016 |
| 0.212636609 | 0.26643638  | 0.329162922 | 0.228617907 |
| 0.03332732  | 0.249251045 | 0.001391544 | 0.408660656 |
| 0.48383697  | 0.302052068 | 0.190278002 | 0.274018318 |
| 0.241661856 | 0.373023848 | 0.192006753 | 0.366271916 |
| 0.014242869 | 0.321563971 | 0.17722763  | 0.416204509 |
| 0.234433514 | 0.301358258 | 0.064544368 | 0.271013783 |
| 0.465764961 | 0.229428407 | 0.22455043  | 0.293767406 |
| 0.508733894 | 0.382733383 | 0.160311786 | 0.214795932 |
| 0.32257042  | 0.064064078 | 0.345628381 | 0.53119835  |
| 0.161618271 | 0.211844486 | 0.43159965  | 0.186238282 |
| 0.274635323 | 0.383137602 | 0.35132394  | 0.521874397 |
| 0.06609807  | 0.210744728 | 0.391864124 | 0.455267902 |
| 0.257935505 | 0.164978843 | 0.225496568 | 0.202117532 |
| 0.477782881 | 0.105739104 | 0.232135409 | 0.310753326 |
| 0.208830364 | 0.261360456 | 0.301216392 | 0.1741518   |
| 0.036444071 | 0.144640059 | 0.336082932 | 0.133896281 |
| 0.246181724 | 0.325936456 | 0.228119071 | 0.380993645 |
| 0.136044273 | 0.030904283 | 0.451456805 | 0.022483237 |
| 0.317083418 | 0.347184234 | 0.21391491  | 0.309811874 |
| 0.178907115 | 0.294217852 | 0.29488604  | 0.001002646 |
| 0.385726293 | 0.074375406 | 0.269791727 | 0.211589697 |
| 0.239933372 | 0.050213809 | 0.472696949 | 0.516267657 |
| 0.279803015 | 0.303863964 | 0.310403545 | 0.467721507 |
| 0.156859414 | 0.307713801 | 0.290588843 | 0.354836544 |
| 0.221281614 | 0.339604602 | 0.352322354 | 0.353850189 |
| 0.339128244 | 0.239997519 |             |             |
| AIM2        | 0.02588694  | 0.389318203 | 0.021158481 |
| 0.035589245 | 0.201552808 | 0.12739517  | 0.025324634 |
| 0.047765137 | 0.328227208 | 0.128394839 | 0.173221986 |
| 0.005650794 | 0.053987013 | 0.401261788 | 0.02385797  |
| 0.269373214 | 0.01328417  | 0.054623662 | 0.05763842  |
| 0.091156214 | 0.176902473 | 0.103672506 | 0.177561826 |
| 0.180368743 | 0.149176574 | 0.219888349 | 0.270722601 |
| 0.445329169 | 0.089435076 | 0.291367041 | 0.073810355 |
| 0.36359425  | 0.219876968 | 0.196106129 | 0.00518642  |
| 0.219853017 | 0.027787735 | 0.39310794  | 0.105565149 |

|             |             |             |             |
|-------------|-------------|-------------|-------------|
| 0.062839289 | 0.286484955 | 0.166652743 | 0.085799206 |
| 0.212177227 | 0.011131475 | 0.075963526 | 0.352174513 |
| 0.24454585  | 0.111717301 | 0.034205564 | 0.317789144 |
| 1           | 0.220596351 | 0.322875526 | 0.001173927 |
| 0.142627035 | 0.058301289 | 0.110280218 | 0.435680234 |
| 0.126129139 | 0.056085834 | 0.150694175 | 0.135128224 |
| 0.307019552 | 0.335667373 | 0.194313488 | 0.157353011 |
| 0.429827735 | 0.095005607 | 0.375709897 | 0.049078185 |
| 0.169658059 | 0.017519744 | 0.116035844 | 0.069196971 |
| 0.144730362 | 0.103188311 | 0.179853424 | 0.155091786 |
| 0.384710613 | 0.459298418 | 0.174132636 | 0.446814439 |
| 0.086791832 | 0.253654932 | 0.107764375 | 0.245130853 |
| 0.333373942 | 0.045971727 | 0.296057845 | 0.462570042 |
| 0.028371188 | 0.26838114  | 0.341075979 | 0.094585274 |
| 0.359269587 | 0.142842361 | 0.214235602 | 0.070003673 |
| 0.30124414  | 0.232626501 | 0.442749108 | 0.195165979 |
| 0.173288276 | 0.046181752 | 0.417672949 | 0.229696405 |
| 0.097875506 | 0.04292184  | 0.099610738 | 0.430993243 |
| 0.281285692 | 0.424163553 | 0.397423732 | 0.332219712 |
| 0.24454944  | 0.432657299 | 0.284550884 | 0.379773439 |
| 0.081411109 | 0.465479777 | 0.08915864  | 0.013739006 |
| 0.030057496 | 0.032360289 | 0.130367213 | 0.251165202 |
| 0.408382887 | 0.233550659 | 0.078961026 | 0.124462058 |
| 0.432098352 | 0.412212751 | 0.476784443 | 0.365814726 |
| 0.014123113 | 0.137658436 | 0.238969728 | 0.085657419 |
| 0.294625958 | 0.080534644 | 0.145258097 | 0.440313881 |
| 0.302803731 | 0.384083469 | 0.062660365 | 0.438851631 |
| 0.112788417 | 0.443127578 | 0.390572359 | 0.077484517 |
| 0.449182481 | 0.417195224 | 0.450345254 | 0.311723633 |
| 0.395058778 | 0.145454283 | 0.050516134 | 0.351780686 |
| 0.417084949 | 0.005755    | 0.444945468 | 0.468350959 |
| 0.442947539 | 0.4139497   | 0.482661455 | 0.457473501 |
| 0.444071631 | 0.048668238 | 0.037249822 | 0.215660897 |
| 0.444990651 | 0.317842817 | 0.061021148 | 0.24812434  |
| 0.260130821 | 0.170603688 | 0.381442358 | 0.092102095 |
| 0.453665204 | 0.399855642 | 0.449637817 | 0.337209221 |
| 0.228659393 | 0.261775052 | 0.264774708 | 0.391560864 |
| 0.015703275 | 0.039986364 | 0.032512363 | 0.265841957 |
| 0.107329454 | 0.101796894 | 0.147685147 | 0.272298092 |
| 0.122588665 | 0.165656369 | 0.150599475 | 0.303326845 |
| 0.047853564 | 0.246098328 | 0.08448856  | 0.098044972 |
| 0.01454974  | 0.119599931 | 0.055095919 | 0.041768292 |
| 0.134660398 | 0.20724042  | 0.341361328 | 0.453645938 |
| 0.188223769 | 0.12314302  | 0.319160997 | 0.415149591 |
| 0.368752487 | 0.228183569 | 0.183892462 | 0.002427182 |
| 0.106447977 | 0.151438767 | 0.106903403 | 0.264661682 |
| 0.154852498 | 0.092729922 | 0.274967144 | 0.307932744 |
| 0.131183489 | 0.079316092 | 0.154786349 | 0.357721373 |
| 0.11856891  | 0.097467986 | 0.390553343 | 0.266261416 |
| 0.000929306 | 0.164715403 | 0.365583997 | 0.079150167 |
| 0.258463667 | 0.049664926 | 0.082889582 | 0.422188622 |
| 0.13103693  | 0.11098775  | 0.445263074 | 0.320116872 |
| 0.104402064 | 0.201994984 | 0.479372344 | 0.046842649 |
| 0.249599892 | 0.018427903 | 0.203564671 | 0.195405697 |

|             |             |             |             |
|-------------|-------------|-------------|-------------|
| 0.15179037  | 0.243804297 | 0.208472374 | 0.106017873 |
| 0.077292552 | 0.456685789 | 0.326419047 | 0.445835111 |
| 0.138567546 | 0.481972116 | 0.396830423 | 0.365063922 |
| 0.24199679  | 0.234424045 | 0.072426628 | 0.362246461 |
| 0.411687895 | 0.13402357  | 0.054857173 | 0.408603478 |
| 0.214663961 | 0.332315753 | 0.061200339 | 0.435922247 |
| 0.426014765 | 0.411580305 | 0.048596333 | 0.325234131 |
| 0.291205752 | 0.10851742  | 0.368683043 | 0.481657496 |
| 0.142153525 | 0.217082484 | 0.138481741 | 0.359076409 |
| 0.108675852 | 0.096781497 | 0.28821321  | 0.098468938 |
| 0.003562694 | 0.045063333 | 0.035082165 | 0.070371865 |
| 0.07213084  | 0.309316106 | 0.307801075 | 0.462501586 |
| 0.054483059 | 0.347099495 | 0.208640697 | 0.092259414 |
| 0.376939199 | 0.199851529 | 0.232208723 | 0.277995314 |
| 0.198156659 | 0.004989002 | 0.031359074 | 0.458633167 |
| 0.030326884 | 0.090863164 | 0.172873158 | 0.000702091 |
| 0.01690451  | 0.372105147 | 0.083450803 | 0.161460836 |
| 0.436150845 | 0.162920737 | 0.139596649 | 0.137065373 |
| 0.246012606 | 0.04838577  | 0.000596931 | 0.461643291 |
| 0.466225623 | 0.448744567 | 0.466067441 | 0.426512832 |
| 0.445991149 | 0.3540515   | 0.367324061 | 0.168372631 |
| 0.039223739 | 0.040676213 | 0.09647257  | 0.142079263 |
| 0.003211477 | 0.295379033 | 0.194522015 | 0.094590433 |
| 0.361594497 | 0.245410204 | 0.011400287 | 0.263715711 |
| 0.0049191   | 0.084871002 | 0.114770227 | 0.113240032 |
| 0.309447956 | 0.004676143 | 0.061829219 | 0.13198829  |
| 0.348595068 | 0.276861989 | 0.151168608 | 0.466711142 |
| 0.165537418 | 0.100801318 | 0.149109571 | 0.302683388 |
| 0.027342543 | 0.082928531 | 0.154779145 | 0.011713084 |
| 0.061350256 | 0.419663208 | 0.162239171 | 0.022744524 |
| 0.158460513 | 0.001208604 | 0.288460989 | 0.462169051 |
| 0.40134576  | 0.474362014 | 0.423447487 | 0.119589965 |
| 0.433489059 | 0.076520559 | 0.469963449 | 0.343839451 |
| 0.165041844 | 0.000126758 | 0.001845215 | 0.439653311 |
| 0.238962061 | 0.046370379 | 0.095599397 | 0.089687186 |
| 0.033690044 | 0.062290872 | 0.026026175 | 0.075768191 |
| 0.26003493  | 0.132776263 | 0.082861268 | 0.418214005 |
| 0.121513405 | 0.143568718 | 0.174103415 | 0.067836624 |
| 0.25243899  | 0.015982612 | 0.073603078 | 0.002144491 |
| 0.298120219 | 0.095285526 | 0.40599865  | 0.445937049 |
| 0.42474319  | 0.302742136 | 0.13188348  | 0.099448857 |
| 0.418115315 | 0.067672425 | 0.131775171 | 0.070028233 |
| 0.417204507 | 0.274777581 | 0.233584936 | 0.229789325 |
| 0.445530491 | 0.403715146 | 0.012509617 | 0.346618997 |
| 0.002583231 | 0.001211336 | 0.166701102 | 0.209457379 |
| 0.077552474 | 0.2031068   | 0.192088392 | 0.117273358 |
| 0.099218963 | 0.008558603 | 0.136328574 | 0.129147586 |
| 0.200907356 | 0.205276506 | 0.166527119 | 0.222610926 |
| 0.124753533 | 0.077658205 | 0.073375775 | 0.060423781 |
| 0.123039757 | 0.266331404 | 0.151133565 | 0.009060556 |
| 0.232294907 | 0.237932767 | 0.023939156 | 0.104377867 |
| 0.365689223 | 0.432567568 | 0.018789931 | 0.00272853  |
| 0.200590309 | 0.168659632 | 0.447275035 | 0.436634441 |
| 0.452914984 | 0.462117327 | 0.332007868 | 0.053649335 |

|             |             |             |             |
|-------------|-------------|-------------|-------------|
| 0.022177495 | 0.212523777 | 0.198868927 | 0.042951295 |
| 0.446615545 | 0.048093457 | 0.413859583 | 0.194217913 |
| 0.083345562 | 0.072779476 | 0.009565659 | 0.049333298 |
| 0.253769245 | 0.111249152 | 0.089372954 | 0.091114986 |
| 0.138523463 | 0.102277783 | 0.021188084 | 0.113305613 |
| 0.283806189 | 0.090731607 | 0.103213318 | 0.129701699 |
| 0.299061981 | 0.131456124 | 0.356943969 | 0.386258869 |
| 0.081910895 | 0.072835339 | 0.075752205 | 0.342319162 |
| 0.399832751 | 0.270775889 | 0.00514522  | 0.405399796 |
| 0.441765379 | 0.306572004 | 0.421988357 | 0.358197126 |
| 0.062514188 | 0.191221723 | 0.189397774 | 0.230950839 |
| 0.125261627 | 0.141912725 | 0.148075954 | 0.038722125 |
| 0.2718462   | 0.431725889 | 0.378518873 | 0.064814035 |
| 0.260623033 | 0.086008951 | 0.042156611 | 0.405109072 |
| 0.082467957 | 0.025887788 | 0.167977976 | 0.410822278 |
| 0.001012387 | 0.071090437 | 0.472540718 | 0.066546353 |
| 0.474371343 | 0.43250907  | 0.36573478  | 0.094904816 |
| 0.003955535 | 0.343083146 | 0.225635575 | 0.149857629 |
| 0.376080058 | 0.26666133  | 0.065346303 | 0.025112907 |
| 0.2264632   | 0.053999117 | 0.050891273 | 0.093861372 |
| 0.092043829 | 0.274619014 | 0.147307886 | 0.151388686 |
| 0.099253278 | 0.085618303 | 0.091092749 | 0.095036845 |
| 0.116975016 | 0.174166135 | 0.278739155 | 0.115465909 |
| 0.076952292 | 0.4220727   | 0.353033397 | 0.007936794 |
| 0.22204175  | 0.385997391 | 0.388638259 | 0.000830076 |
| 0.325670273 | 0.00207443  | 0.095846696 | 0.089627793 |
| 0.085682772 | 0.105449589 | 0.182472926 | 0.10489551  |
| 0.271248529 | 0.110026089 | 0.09610718  | 0.142253828 |
| 0.050596583 | 0.115914808 | 0.265365552 | 0.182077162 |
| 0.087016406 | 0.040678633 | 0.085127106 | 0.088613801 |
| 0.012955316 | 0.411244452 | 0.188823077 | 0.051276867 |
| 0.148813734 | 0.172592989 | 0.293155173 | 0.437313662 |
| 0.3592362   | 0.089888151 | 0.170100687 | 0.367306921 |
| 0.129236648 | 0.102447679 | 0.022676211 | 0.217662295 |
| 0.119023271 | 0.073606286 | 0.215724802 | 0.188313981 |
| 0.356447058 | 0.330457453 | 0.177813309 | 0.386503173 |
| 0.156292665 | 0.242367516 | 0.121784683 | 0.025279692 |
| 0.072817897 | 0.102124285 | 0.160633004 | 0.000281461 |
| 0.228278334 | 0.071159031 | 0.406603069 | 0.417877282 |
| 0.137002411 | 0.32171238  | 0.090414306 | 0.027384157 |
| 0.096675895 | 0.150859006 | 0.096929667 | 0.369550293 |
| 0.093423502 | 0.060776628 | 0.183736858 | 0.087087911 |
| 0.369948318 | 0.384040666 | 0.116152887 | 0.11813848  |
| 0.162128395 | 0.12878426  | 0.443338582 | 0.052623799 |
| 0.287218209 | 0.067086586 | 0.258569239 | 0.140598735 |
| 0.110438319 | 0.472234709 | 0.032546183 | 0.477115304 |
| 0.173833148 | 0.104308472 | 0.424131863 | 0.157443572 |
| 0.093218212 | 0.039527387 | 0.089514571 | 0.161486535 |
| 0.088463181 | 0.134111233 | 0.008667172 | 0.035087155 |
| 0.238661401 | 0.162574135 | 0.375774478 | 0.321844114 |
| 0.117229096 | 0.299012405 | 0.08532191  | 0.154644791 |
| 0.41929263  | 0.431466559 | 0.076230815 | 0.206867259 |
| 0.269498248 | 0.032058421 | 0.2341684   | 0.019762218 |
| 0.295191693 | 0.297682476 | 0.135456492 | 0.019478577 |

|             |             |             |             |
|-------------|-------------|-------------|-------------|
| 0.007143125 | 0.098560959 | 0.293777007 | 0.057648585 |
| 0.446944752 | 0.090112431 | 0.297744595 | 0.322491608 |
| 0.145152471 | 0.430363248 | 0.046094159 | 0.29189191  |
| 0.032813393 | 0.191112975 | 0.231022517 | 0.240383954 |
| 0.068018205 | 0.151256516 | 0.286267599 | 0.101241579 |
| 0.010555462 | 0.092419561 | 0.002012266 | 0.333055585 |
| 0.416137076 | 0.215727012 | 0.170618117 | 0.131981305 |
| 0.19987326  | 0.348143303 | 0.101022803 | 0.233345301 |
| 0.002525924 | 0.238958503 | 0.118645623 | 0.320011281 |
| 0.086552372 | 0.274396169 | 0.016656051 | 0.222512444 |
| 0.388112738 | 0.106706073 | 0.225632228 | 0.122519068 |
| 0.428511254 | 0.352142076 | 0.125995025 | 0.091142939 |
| 0.33105989  | 0.044502029 | 0.14713645  | 0.477725092 |
| 0.075030809 | 0.099176571 | 0.390693591 | 0.071747806 |
| 0.17318236  | 0.330155145 | 0.305978787 | 0.478922655 |
| 0.029224099 | 0.161856028 | 0.367293039 | 0.428979277 |
| 0.236279024 | 0.085473653 | 0.091970459 | 0.101247407 |
| 0.381940962 | 0.022978886 | 0.127687803 | 0.26841784  |
| 0.095045215 | 0.217450083 | 0.260368529 | 0.090326269 |
| 0.010510732 | 0.068699149 | 0.096200417 | 0.091948019 |
| 0.186154643 | 0.204577211 | 0.101630428 | 0.322230963 |
| 0.033812458 | 0.005991688 | 0.390808945 | 0.016707695 |
| 0.160905971 | 0.250976971 | 0.137919051 | 0.186592715 |
| 0.131243442 | 0.248971228 | 0.190847729 | 0.00019274  |
| 0.364132167 | 0.023113325 | 0.141154754 | 0.076124257 |
| 0.127150241 | 0.018155709 | 0.380479105 | 0.459061945 |
| 0.212319549 | 0.116523774 | 0.120508683 | 0.40423883  |
| 0.069839518 | 0.145188618 | 0.146807993 | 0.300799471 |
| 0.100104841 | 0.19678336  | 0.196196392 | 0.153334462 |
| 0.281868043 | 0.110634108 |             |             |
| AK3         | 0.170847184 | 0.37977693  | 0.134958693 |
| 0.204998841 | 0.217271773 | 0.324725542 | 0.116988741 |
| 0.201717373 | 0.281897523 | 0.164544699 | 0.306967813 |
| 0.071459227 | 0.058353988 | 0.420089168 | 0.114941661 |
| 0.239718899 | 0.096033164 | 0.171783466 | 0.073293393 |
| 0.176676873 | 0.202151928 | 0.246140062 | 0.307701869 |
| 0.194973004 | 0.270550465 | 0.259977641 | 0.214794447 |
| 0.44189432  | 0.17184181  | 0.296494337 | 0.117429682 |
| 0.413428595 | 0.220608104 | 0.225463781 | 0.065021016 |
| 0.295157763 | 0.005805532 | 0.433323842 | 0.214845863 |
| 0.104049327 | 0.382096773 | 0.220625986 | 0.256633385 |
| 0.2187076   | 0.10845152  | 0.137109353 | 0.230015777 |
| 0.232855586 | 0.232471169 | 0.133611343 | 0.293895754 |
| 0.220596351 | 1           | 0.280511378 | 0.011263741 |
| 0.184363731 | 0.039338137 | 0.113079743 | 0.481915325 |
| 0.256586076 | 0.199458136 | 0.132794017 | 0.223559346 |
| 0.22941469  | 0.236790688 | 0.244051057 | 0.201753637 |
| 0.467767598 | 0.103164451 | 0.280414401 | 0.189869727 |
| 0.264971095 | 0.076998402 | 0.21057303  | 0.125500616 |
| 0.230495094 | 0.244743567 | 0.277420159 | 0.173992255 |
| 0.378036543 | 0.500916388 | 0.2319726   | 0.469246258 |
| 0.049284968 | 0.201290443 | 0.191524904 | 0.247343698 |
| 0.249212117 | 0.113994751 | 0.32723052  | 0.486774061 |
| 0.096645591 | 0.233988545 | 0.265227817 | 0.174501187 |

|             |             |             |             |
|-------------|-------------|-------------|-------------|
| 0.398156787 | 0.149386704 | 0.248024361 | 0.132905102 |
| 0.232202005 | 0.210534201 | 0.44850793  | 0.285196866 |
| 0.230273614 | 0.133238644 | 0.481997393 | 0.192649829 |
| 0.274981446 | 0.15563125  | 0.153618118 | 0.355911004 |
| 0.277091635 | 0.450358339 | 0.336140288 | 0.283906688 |
| 0.225574652 | 0.461619719 | 0.304116537 | 0.385202083 |
| 0.087054157 | 0.4819007   | 0.246340866 | 0.123321348 |
| 0.147088188 | 0.164563554 | 0.137706126 | 0.306879407 |
| 0.407960238 | 0.29884229  | 0.259103294 | 0.211975302 |
| 0.36758449  | 0.466648129 | 0.467871319 | 0.346156527 |
| 0.111240196 | 0.122946644 | 0.228430953 | 0.293942744 |
| 0.26785124  | 0.1678912   | 0.163673026 | 0.495879652 |
| 0.402456957 | 0.339285756 | 0.225721719 | 0.503545966 |
| 0.194574337 | 0.490671908 | 0.399200938 | 0.227670687 |
| 0.495908117 | 0.49289258  | 0.466044918 | 0.259851357 |
| 0.483973085 | 0.309681413 | 0.042405779 | 0.31980189  |
| 0.471607548 | 0.015383806 | 0.39164766  | 0.416843202 |
| 0.458590595 | 0.361656026 | 0.456232014 | 0.452331406 |
| 0.469041877 | 0.139747186 | 0.008916246 | 0.226989079 |
| 0.47839499  | 0.384291125 | 0.171026331 | 0.238776037 |
| 0.230694469 | 0.318406583 | 0.319953629 | 0.233407681 |
| 0.493789145 | 0.397835313 | 0.420312254 | 0.308084924 |
| 0.20352376  | 0.373615976 | 0.204079128 | 0.477421835 |
| 0.119957053 | 0.208103927 | 0.121676345 | 0.255744652 |
| 0.246444132 | 0.218318077 | 0.302980077 | 0.214640424 |
| 0.234659025 | 0.278306969 | 0.193658668 | 0.248887088 |
| 0.114372783 | 0.287213106 | 0.214607898 | 0.201241993 |
| 0.107903662 | 0.222748025 | 0.2388039   | 0.237288773 |
| 0.240206437 | 0.314451539 | 0.293409683 | 0.424087251 |
| 0.209288202 | 0.221225299 | 0.304714892 | 0.457347326 |
| 0.419616467 | 0.240997819 | 0.242437955 | 0.040652514 |
| 0.181582924 | 0.143581098 | 0.096104083 | 0.241835423 |
| 0.261211206 | 0.205345412 | 0.247342263 | 0.289734842 |
| 0.294963791 | 0.181283969 | 0.220607495 | 0.467555764 |
| 0.186759732 | 0.267874425 | 0.387695129 | 0.247899434 |
| 0.020768552 | 0.273356919 | 0.367142528 | 0.111590134 |
| 0.243070474 | 0.11036342  | 0.188529043 | 0.384638085 |
| 0.170044138 | 0.146380042 | 0.428444422 | 0.277323203 |
| 0.273096356 | 0.287841964 | 0.466187752 | 0.022237218 |
| 0.198971555 | 0.095433004 | 0.252105548 | 0.203790029 |
| 0.251639026 | 0.249395188 | 0.212044256 | 0.219858326 |
| 0.203133714 | 0.479378886 | 0.371727315 | 0.460680585 |
| 0.207721579 | 0.468917353 | 0.376605919 | 0.41143772  |
| 0.292195755 | 0.19079027  | 0.073960668 | 0.358122793 |
| 0.374748322 | 0.16577217  | 0.132550639 | 0.316068393 |
| 0.192641005 | 0.25015773  | 0.11507134  | 0.442951271 |
| 0.499317273 | 0.442328892 | 0.212236841 | 0.282571731 |
| 0.366473081 | 0.283709859 | 0.349462173 | 0.47894847  |
| 0.157885578 | 0.210784569 | 0.20694407  | 0.333311338 |
| 0.223162885 | 0.140932985 | 0.33260078  | 0.095158198 |
| 0.009907594 | 0.153823049 | 0.140551927 | 0.204407309 |
| 0.118719296 | 0.248042672 | 0.256723452 | 0.467627746 |
| 0.19547648  | 0.42583726  | 0.216508573 | 0.223859716 |
| 0.394423927 | 0.21582372  | 0.239504507 | 0.262462263 |



|             |             |             |             |
|-------------|-------------|-------------|-------------|
| 0.248904769 | 0.052432678 | 0.189526204 | 0.503574102 |
| 0.092359973 | 0.169965133 | 0.265835307 | 0.009238992 |
| 0.106927423 | 0.325395778 | 0.160148174 | 0.278692419 |
| 0.414321889 | 0.276574612 | 0.226638107 | 0.175435994 |
| 0.291073663 | 0.17067642  | 0.015926369 | 0.410621999 |
| 0.426605407 | 0.397633748 | 0.425709422 | 0.429976421 |
| 0.355219558 | 0.297404424 | 0.303244773 | 0.314369181 |
| 0.178400431 | 0.153390038 | 0.120918821 | 0.227414791 |
| 0.010590758 | 0.333407268 | 0.22594036  | 0.20501677  |
| 0.297966656 | 0.24172844  | 0.120985597 | 0.22813993  |
| 0.078731657 | 0.116434728 | 0.245420038 | 0.211273561 |
| 0.255502336 | 0.061047545 | 0.195493991 | 0.186850916 |
| 0.448865129 | 0.364553639 | 0.20341752  | 0.488819532 |
| 0.29237273  | 0.158702657 | 0.234165925 | 0.315549332 |
| 0.143804941 | 0.06019908  | 0.249812436 | 0.027825    |
| 0.215970014 | 0.429776734 | 0.236446891 | 0.132897966 |
| 0.26075085  | 0.034382903 | 0.382121447 | 0.496262921 |
| 0.446781958 | 0.448134934 | 0.472743392 | 0.188177907 |
| 0.471104153 | 0.043128771 | 0.473461389 | 0.358282367 |
| 0.210321128 | 0.004812992 | 0.021841329 | 0.408736414 |
| 0.249936356 | 0.115267899 | 0.212485846 | 0.310080401 |
| 0.182612047 | 0.202963122 | 0.148494578 | 0.137063047 |
| 0.306932132 | 0.217177473 | 0.13840766  | 0.447581946 |
| 0.221825613 | 0.234296133 | 0.261961859 | 0.146545245 |
| 0.278643106 | 0.12805534  | 0.135394181 | 0.019650063 |
| 0.258101654 | 0.180938105 | 0.478080168 | 0.466498189 |
| 0.4772831   | 0.264802822 | 0.186893719 | 0.286066845 |
| 0.358507796 | 0.154769844 | 0.231208697 | 0.17237069  |
| 0.450962093 | 0.25472168  | 0.320225294 | 0.335131817 |
| 0.457010851 | 0.454061974 | 0.098087563 | 0.308316949 |
| 0.060102839 | 0.004121496 | 0.29105569  | 0.24868746  |
| 0.030586602 | 0.214344181 | 0.265685919 | 0.167429081 |
| 0.191419681 | 0.11310347  | 0.140973314 | 0.137602818 |
| 0.245516155 | 0.249568177 | 0.190596915 | 0.224286258 |
| 0.186316013 | 0.096626281 | 0.230110895 | 0.201638858 |
| 0.158481323 | 0.314226111 | 0.271579529 | 0.066900402 |
| 0.254246218 | 0.260231031 | 0.139656517 | 0.21989018  |
| 0.39327599  | 0.429060333 | 0.081821501 | 0.043178976 |
| 0.296298782 | 0.222805765 | 0.440335455 | 0.455658409 |
| 0.504717415 | 0.477899278 | 0.431305595 | 0.145615983 |
| 0.156365859 | 0.23347418  | 0.192779075 | 0.120224089 |
| 0.471349107 | 0.119039681 | 0.466309262 | 0.171420666 |
| 0.1731263   | 0.222767262 | 0.113892456 | 0.151019337 |
| 0.240793748 | 0.234669417 | 0.203070924 | 0.194757356 |
| 0.235769268 | 0.167217593 | 0.112269669 | 0.230884863 |
| 0.302187556 | 0.088905899 | 0.210806695 | 0.267263723 |
| 0.315942757 | 0.118148886 | 0.281059299 | 0.44214037  |
| 0.199539827 | 0.151884812 | 0.271674716 | 0.286800424 |
| 0.347951981 | 0.220953448 | 0.101110753 | 0.401691072 |
| 0.444135178 | 0.283937986 | 0.480827846 | 0.351755288 |
| 0.142916782 | 0.261578031 | 0.162664027 | 0.221272082 |
| 0.212664321 | 0.324249388 | 0.225692171 | 0.132721188 |
| 0.315855282 | 0.474541634 | 0.36342402  | 0.22809669  |
| 0.273365161 | 0.174463787 | 0.10629573  | 0.385563807 |

|             |             |             |             |
|-------------|-------------|-------------|-------------|
| 0.107727793 | 0.176648526 | 0.230935386 | 0.327119063 |
| 0.005114403 | 0.084181361 | 0.409940529 | 0.296174415 |
| 0.476695184 | 0.411897761 | 0.441096473 | 0.245869235 |
| 0.000643438 | 0.234344206 | 0.290861465 | 0.270168371 |
| 0.391307393 | 0.338544884 | 0.166817008 | 0.143710186 |
| 0.300367521 | 0.149446284 | 0.166127539 | 0.291839387 |
| 0.074185472 | 0.289887475 | 0.224792703 | 0.193572222 |
| 0.195287796 | 0.126133631 | 0.166661692 | 0.275912073 |
| 0.070969934 | 0.261809951 | 0.326343684 | 0.189883051 |
| 0.119540458 | 0.368292218 | 0.316951358 | 0.09338737  |
| 0.222633007 | 0.328770727 | 0.396824122 | 0.005206785 |
| 0.298893128 | 0.042903086 | 0.213146327 | 0.233534984 |
| 0.217531747 | 0.203565106 | 0.221459074 | 0.222805829 |
| 0.252019987 | 0.225716766 | 0.287721754 | 0.257618849 |
| 0.211909615 | 0.245435844 | 0.258889568 | 0.246512169 |
| 0.252266477 | 0.205984823 | 0.178011511 | 0.190040847 |
| 0.154289763 | 0.415489887 | 0.311430411 | 0.139636677 |
| 0.241611391 | 0.241499114 | 0.369756298 | 0.451702096 |
| 0.407819892 | 0.184385563 | 0.237868539 | 0.402226268 |
| 0.120451409 | 0.264421845 | 0.140038006 | 0.276420578 |
| 0.279878431 | 0.183086299 | 0.272535902 | 0.261616649 |
| 0.273633262 | 0.427772931 | 0.306583272 | 0.416428736 |
| 0.272869725 | 0.196975751 | 0.198975422 | 0.155784305 |
| 0.225509561 | 0.175343483 | 0.189527302 | 0.014297311 |
| 0.29261269  | 0.296698328 | 0.395471589 | 0.467520267 |
| 0.164031136 | 0.393980501 | 0.236944283 | 0.163991603 |
| 0.174672965 | 0.245984159 | 0.203978159 | 0.313141025 |
| 0.123450124 | 0.253346755 | 0.224622738 | 0.306656577 |
| 0.301671942 | 0.268104848 | 0.168623167 | 0.247701144 |
| 0.213385001 | 0.227359415 | 0.445638868 | 0.19184241  |
| 0.247894107 | 0.15566217  | 0.236761807 | 0.233771962 |
| 0.205115205 | 0.446862319 | 0.137234407 | 0.455848122 |
| 0.210131406 | 0.187752661 | 0.49093533  | 0.28197174  |
| 0.27653334  | 0.189379138 | 0.101800012 | 0.252431452 |
| 0.206803626 | 0.202794617 | 0.00869924  | 0.048808699 |
| 0.282486675 | 0.176657089 | 0.300420189 | 0.264622779 |
| 0.166974468 | 0.285848884 | 0.100882708 | 0.251873506 |
| 0.455011627 | 0.489200404 | 0.2423203   | 0.251402886 |
| 0.297873494 | 0.195562387 | 0.313865454 | 0.01295159  |
| 0.25064755  | 0.236668048 | 0.221182386 | 0.132815552 |
| 0.068766644 | 0.110017992 | 0.251106674 | 0.109904418 |
| 0.400513903 | 0.124472591 | 0.222887334 | 0.314197227 |
| 0.202495714 | 0.494075159 | 0.175120674 | 0.31789089  |
| 0.069831504 | 0.243106715 | 0.215384503 | 0.214765043 |
| 0.21150165  | 0.176223046 | 0.300847884 | 0.161484978 |
| 0.100387626 | 0.220349542 | 0.003188482 | 0.44530577  |
| 0.452198648 | 0.181913229 | 0.255674122 | 0.167166508 |
| 0.257558785 | 0.343182631 | 0.185524728 | 0.245515162 |
| 0.050146337 | 0.237603866 | 0.246419613 | 0.408126158 |
| 0.137420253 | 0.216725722 | 0.140775    | 0.17954128  |
| 0.479521515 | 0.196638009 | 0.272497319 | 0.164631939 |
| 0.45474179  | 0.334910384 | 0.202469174 | 0.194849865 |
| 0.227907056 | 0.129132741 | 0.258302769 | 0.478195236 |
| 0.220941414 | 0.148381897 | 0.35752361  | 0.212348057 |

|             |             |             |             |
|-------------|-------------|-------------|-------------|
| 0.181666981 | 0.385502231 | 0.227087479 | 0.467304754 |
| 0.120786491 | 0.267779258 | 0.32468012  | 0.408184062 |
| 0.29601041  | 0.114539473 | 0.163178909 | 0.185822789 |
| 0.446453347 | 0.194810186 | 0.154563015 | 0.31411423  |
| 0.128027914 | 0.273234249 | 0.220895687 | 0.171596662 |
| 0.107189911 | 0.208891028 | 0.324738018 | 0.197895052 |
| 0.257974996 | 0.237188259 | 0.1629861   | 0.408577488 |
| 0.218836054 | 0.078202394 | 0.450663963 | 0.009902273 |
| 0.320472794 | 0.290385889 | 0.271042557 | 0.234658459 |
| 0.257592484 | 0.262912285 | 0.249576848 | 0.010751368 |
| 0.325661679 | 0.042467105 | 0.218253722 | 0.196418669 |
| 0.17896671  | 0.120691129 | 0.453922626 | 0.451658888 |
| 0.286510089 | 0.215790008 | 0.205368321 | 0.434712913 |
| 0.090934413 | 0.171962042 | 0.184338706 | 0.276530042 |
| 0.137870828 | 0.217183202 | 0.239879199 | 0.226209826 |
| 0.31288249  | 0.28172085  |             |             |
| AKAP8L      | 0.073300345 | 0.445965306 | 0.073400192 |
| 0.105544472 | 0.196714563 | 0.334666167 | 0.050787896 |
| 0.100548985 | 0.336677108 | 0.387547083 | 0.257265453 |
| 0.014013662 | 0.053951576 | 0.414523103 | 0.042105577 |
| 0.284490306 | 0.019765311 | 0.082688795 | 0.0734304   |
| 0.200281663 | 0.173200821 | 0.247489228 | 0.354728553 |
| 0.183820059 | 0.184940677 | 0.322934928 | 0.324828906 |
| 0.494293811 | 0.270613429 | 0.339613736 | 0.284632538 |
| 0.372651228 | 0.211102718 | 0.320357946 | 0.018394769 |
| 0.326676978 | 0.008053152 | 0.424840406 | 0.170524115 |
| 0.097101769 | 0.305021223 | 0.404684717 | 0.16068409  |
| 0.385900003 | 0.039486782 | 0.327812658 | 0.329091961 |
| 0.311192873 | 0.219616495 | 0.084172495 | 0.356116302 |
| 0.322875526 | 0.280511378 | 1           | 0.002548607 |
| 0.224373258 | 0.079663155 | 0.184555219 | 0.503197749 |
| 0.147908157 | 0.07880462  | 0.311764016 | 0.222375716 |
| 0.327723629 | 0.287198588 | 0.183707704 | 0.372245302 |
| 0.475079642 | 0.1183968   | 0.36298771  | 0.128091612 |
| 0.323132513 | 0.043374028 | 0.124552658 | 0.105406996 |
| 0.313995977 | 0.128450386 | 0.233734022 | 0.221924748 |
| 0.468382319 | 0.492306203 | 0.184538998 | 0.519838224 |
| 0.063410603 | 0.238155369 | 0.181180064 | 0.204836862 |
| 0.290017234 | 0.077910994 | 0.305800794 | 0.489933735 |
| 0.055951527 | 0.40323309  | 0.330484483 | 0.130474503 |
| 0.419853626 | 0.231807044 | 0.410730588 | 0.105272653 |
| 0.259749533 | 0.238115065 | 0.477980873 | 0.21641025  |
| 0.216459892 | 0.086996861 | 0.510493046 | 0.217227865 |
| 0.196105557 | 0.087209038 | 0.141940063 | 0.414801862 |
| 0.328561445 | 0.471878275 | 0.414601742 | 0.282441979 |
| 0.280395033 | 0.475444736 | 0.316451869 | 0.386667624 |
| 0.272907941 | 0.519514386 | 0.152814364 | 0.024872497 |
| 0.089373614 | 0.051765861 | 0.169201719 | 0.223583056 |
| 0.430770611 | 0.26552588  | 0.159490887 | 0.146414106 |
| 0.388682357 | 0.508593729 | 0.52677221  | 0.350815594 |
| 0.034501819 | 0.194497215 | 0.288908803 | 0.238354752 |
| 0.28836305  | 0.096454872 | 0.166192667 | 0.507842449 |
| 0.326440332 | 0.354063803 | 0.166211601 | 0.491959085 |
| 0.165106586 | 0.463941211 | 0.468343317 | 0.119077353 |

|             |             |             |             |
|-------------|-------------|-------------|-------------|
| 0.503590542 | 0.498960836 | 0.456092    | 0.287377672 |
| 0.457521509 | 0.288163997 | 0.065065457 | 0.329736932 |
| 0.419811365 | 0.00772241  | 0.451379625 | 0.470202513 |
| 0.5062985   | 0.409541322 | 0.469025607 | 0.477041529 |
| 0.512486853 | 0.072530353 | 0.035678578 | 0.183949102 |
| 0.508896128 | 0.335609866 | 0.080695606 | 0.347815845 |
| 0.251868846 | 0.341535036 | 0.360753    | 0.249026017 |
| 0.454905879 | 0.415385053 | 0.478299084 | 0.326297341 |
| 0.306179596 | 0.280003945 | 0.305628472 | 0.490684636 |
| 0.031334036 | 0.112213875 | 0.066425203 | 0.23057355  |
| 0.389422005 | 0.110820803 | 0.342255833 | 0.265448297 |
| 0.129742717 | 0.320734256 | 0.275185273 | 0.264003989 |
| 0.073828305 | 0.375609116 | 0.141162894 | 0.164195523 |
| 0.024286174 | 0.132513516 | 0.1303912   | 0.103332369 |
| 0.15663955  | 0.260032532 | 0.364152085 | 0.456601769 |
| 0.273500058 | 0.170670182 | 0.348919174 | 0.417012995 |
| 0.341308172 | 0.277978668 | 0.176657985 | 0.005089694 |
| 0.200583555 | 0.324345553 | 0.138792322 | 0.338062946 |
| 0.188067487 | 0.173671989 | 0.296414209 | 0.271326742 |
| 0.260950869 | 0.150768196 | 0.283362008 | 0.394638058 |
| 0.155394852 | 0.20077487  | 0.37404603  | 0.377023104 |
| 0.00325672  | 0.259053781 | 0.37932428  | 0.082203285 |
| 0.265928424 | 0.080119395 | 0.186975655 | 0.416505337 |
| 0.233439235 | 0.14152165  | 0.462037634 | 0.270991811 |
| 0.291417539 | 0.25334343  | 0.482030189 | 0.046510577 |
| 0.267049615 | 0.023966618 | 0.182414005 | 0.395672797 |
| 0.191944396 | 0.200299523 | 0.207417419 | 0.178124977 |
| 0.140766952 | 0.502397832 | 0.336475604 | 0.478977801 |
| 0.308567853 | 0.487094292 | 0.397861097 | 0.377159698 |
| 0.280119351 | 0.32203777  | 0.095410601 | 0.372322818 |
| 0.409089342 | 0.281092108 | 0.092656881 | 0.394722528 |
| 0.351256843 | 0.30157162  | 0.062918822 | 0.4409699   |
| 0.457130469 | 0.508762491 | 0.085683299 | 0.251121611 |
| 0.299939932 | 0.185730025 | 0.348439957 | 0.479949301 |
| 0.364250131 | 0.260339507 | 0.237319942 | 0.294202483 |
| 0.143190497 | 0.126343567 | 0.275311408 | 0.132365903 |
| 0.01075617  | 0.087460389 | 0.069513143 | 0.090387004 |
| 0.092017568 | 0.384970183 | 0.298684976 | 0.4928955   |
| 0.082341449 | 0.372594818 | 0.196473366 | 0.197157738 |
| 0.408469585 | 0.261421986 | 0.280772126 | 0.281617783 |
| 0.191294774 | 0.009842535 | 0.072299768 | 0.497424829 |
| 0.060062684 | 0.153641154 | 0.272950458 | 0.001532037 |
| 0.045817284 | 0.435936943 | 0.104746686 | 0.183884619 |
| 0.406512009 | 0.197948377 | 0.185038844 | 0.372168769 |
| 0.237727705 | 0.076417991 | 0.000594616 | 0.467490748 |
| 0.479428627 | 0.446990899 | 0.485558158 | 0.469278813 |
| 0.413070272 | 0.329066162 | 0.319073539 | 0.335248942 |
| 0.082176069 | 0.101896245 | 0.135352952 | 0.19414459  |
| 0.005268043 | 0.270247447 | 0.212130282 | 0.1121568   |
| 0.32269351  | 0.233496882 | 0.031528069 | 0.25283084  |
| 0.021268942 | 0.156838655 | 0.268807639 | 0.148991258 |
| 0.232974966 | 0.014682536 | 0.223468506 | 0.257827492 |
| 0.4383283   | 0.305175574 | 0.295071741 | 0.513677261 |
| 0.229166634 | 0.156102525 | 0.208934551 | 0.280966989 |

|             |             |             |             |
|-------------|-------------|-------------|-------------|
| 0.055106019 | 0.143166467 | 0.328017557 | 0.068780621 |
| 0.198393276 | 0.442626464 | 0.315077384 | 0.070100591 |
| 0.199758243 | 0.004684982 | 0.33863708  | 0.50144813  |
| 0.497271552 | 0.475993097 | 0.469651414 | 0.179011676 |
| 0.485751035 | 0.103184691 | 0.508745265 | 0.385731224 |
| 0.387418322 | 0.000801325 | 0.002297368 | 0.447350947 |
| 0.295937548 | 0.082349341 | 0.121715441 | 0.332581734 |
| 0.066634294 | 0.163171649 | 0.05202642  | 0.099560013 |
| 0.348040493 | 0.140282061 | 0.0984663   | 0.487179678 |
| 0.165878989 | 0.154647319 | 0.379591845 | 0.093698135 |
| 0.307023228 | 0.037115447 | 0.093113954 | 0.003188018 |
| 0.252431777 | 0.127129619 | 0.492123779 | 0.500057    |
| 0.445486714 | 0.276690892 | 0.390848943 | 0.285914734 |
| 0.387373036 | 0.129320049 | 0.332146136 | 0.133100481 |
| 0.498536185 | 0.286295047 | 0.226823762 | 0.255310264 |
| 0.446262367 | 0.440170123 | 0.026422915 | 0.313219151 |
| 0.010505822 | 7.44E-05    | 0.358973564 | 0.200010013 |
| 0.058673004 | 0.27710959  | 0.190980712 | 0.20379278  |
| 0.163480381 | 0.029029655 | 0.183238263 | 0.160081096 |
| 0.205795736 | 0.260106261 | 0.168990853 | 0.205489001 |
| 0.168649194 | 0.07535667  | 0.125929055 | 0.106043357 |
| 0.21695759  | 0.292596297 | 0.189374314 | 0.018249641 |
| 0.378415786 | 0.321514267 | 0.047679672 | 0.133461575 |
| 0.373365885 | 0.449922554 | 0.028258556 | 0.003995683 |
| 0.208052469 | 0.229828687 | 0.444799641 | 0.506443007 |
| 0.516009443 | 0.466720316 | 0.359012025 | 0.065113709 |
| 0.055393852 | 0.218243393 | 0.18858788  | 0.044491651 |
| 0.485445841 | 0.088024105 | 0.482517637 | 0.209523401 |
| 0.098169896 | 0.158227252 | 0.018682455 | 0.065663141 |
| 0.285856561 | 0.129675611 | 0.101116749 | 0.159030562 |
| 0.213920455 | 0.168745669 | 0.040674695 | 0.139818771 |
| 0.271374377 | 0.122964302 | 0.123168429 | 0.27035584  |
| 0.311385443 | 0.31801604  | 0.330607551 | 0.388705729 |
| 0.117587501 | 0.106752992 | 0.283049605 | 0.297620107 |
| 0.40746762  | 0.386951841 | 0.022179767 | 0.487570094 |
| 0.441787466 | 0.354805563 | 0.497348275 | 0.299582362 |
| 0.083094795 | 0.270141743 | 0.245355536 | 0.242735473 |
| 0.137515539 | 0.335910739 | 0.167567089 | 0.057423252 |
| 0.243396819 | 0.460514516 | 0.401463897 | 0.102886467 |
| 0.359559112 | 0.151339965 | 0.081562911 | 0.417687015 |
| 0.106571018 | 0.076820299 | 0.403789785 | 0.376474602 |
| 0.000253123 | 0.085467028 | 0.44090553  | 0.165321102 |
| 0.482481552 | 0.430142843 | 0.39131264  | 0.218943795 |
| 0.001151457 | 0.316858699 | 0.269396604 | 0.305988428 |
| 0.428391431 | 0.280990415 | 0.132927741 | 0.041801646 |
| 0.199140689 | 0.101879722 | 0.082748403 | 0.311522062 |
| 0.140032434 | 0.354775601 | 0.137084276 | 0.173406258 |
| 0.117918806 | 0.118468687 | 0.161349634 | 0.177332927 |
| 0.10436532  | 0.165380502 | 0.253255387 | 0.377645463 |
| 0.147260916 | 0.378463982 | 0.352593105 | 0.024925701 |
| 0.260354557 | 0.34945644  | 0.379357175 | 0.001500057 |
| 0.320710603 | 0.003900345 | 0.113996298 | 0.128639756 |
| 0.119176774 | 0.132107115 | 0.157259295 | 0.193447698 |
| 0.297442259 | 0.156977034 | 0.188407652 | 0.157227416 |

|             |             |             |             |
|-------------|-------------|-------------|-------------|
| 0.092533104 | 0.170719636 | 0.28933131  | 0.31347158  |
| 0.177325696 | 0.096334399 | 0.112609295 | 0.129307965 |
| 0.032831516 | 0.448776988 | 0.200366337 | 0.090200815 |
| 0.150652066 | 0.311058423 | 0.272659401 | 0.516292564 |
| 0.341730531 | 0.142733384 | 0.247436207 | 0.4358467   |
| 0.294883735 | 0.272634562 | 0.071875195 | 0.334547429 |
| 0.167267133 | 0.12788072  | 0.370986382 | 0.302800621 |
| 0.365052079 | 0.356921966 | 0.192114716 | 0.390635832 |
| 0.267731765 | 0.296584259 | 0.403656713 | 0.044084686 |
| 0.139627914 | 0.122916914 | 0.158669124 | 0.000991966 |
| 0.258200784 | 0.247789222 | 0.427477706 | 0.49469     |
| 0.222850623 | 0.318279147 | 0.373787614 | 0.073397079 |
| 0.381318858 | 0.214381969 | 0.114830266 | 0.372181997 |
| 0.166401795 | 0.132674325 | 0.192720588 | 0.342596956 |
| 0.333484034 | 0.351148768 | 0.165673601 | 0.196772982 |
| 0.17529961  | 0.186096878 | 0.474990369 | 0.127157385 |
| 0.37721133  | 0.101067105 | 0.380375125 | 0.194160465 |
| 0.133333824 | 0.494174997 | 0.058588497 | 0.50060194  |
| 0.233931226 | 0.127130528 | 0.443265992 | 0.253254603 |
| 0.250559278 | 0.064091361 | 0.130163006 | 0.373440954 |
| 0.160933254 | 0.257282591 | 0.02690495  | 0.043564774 |
| 0.21842303  | 0.283025494 | 0.400320607 | 0.277585478 |
| 0.148340922 | 0.229993537 | 0.121458153 | 0.253797564 |
| 0.515684851 | 0.510481298 | 0.178413251 | 0.176998696 |
| 0.262870407 | 0.068846969 | 0.365726561 | 0.017760145 |
| 0.338502601 | 0.356543221 | 0.364954024 | 0.038047883 |
| 0.013880123 | 0.153195138 | 0.349117609 | 0.086755073 |
| 0.419054323 | 0.168251816 | 0.343113716 | 0.345197719 |
| 0.155877514 | 0.508921295 | 0.062799826 | 0.290778138 |
| 0.058418331 | 0.192113513 | 0.293500763 | 0.329915367 |
| 0.134397204 | 0.191447536 | 0.261585338 | 0.144604602 |
| 0.020331508 | 0.166281207 | 0.000903609 | 0.38135495  |
| 0.500733286 | 0.251272069 | 0.169907922 | 0.369080978 |
| 0.180790372 | 0.329123688 | 0.161612198 | 0.367352424 |
| 0.004879013 | 0.255937642 | 0.137118209 | 0.377958569 |
| 0.21918333  | 0.313730319 | 0.032406401 | 0.220907309 |
| 0.481090775 | 0.205015834 | 0.196824063 | 0.285158607 |
| 0.499818283 | 0.363383958 | 0.176779102 | 0.138029555 |
| 0.364064153 | 0.069270652 | 0.396911254 | 0.497701574 |
| 0.102781142 | 0.126748197 | 0.356592079 | 0.13097325  |
| 0.218672944 | 0.361752839 | 0.374778051 | 0.500766838 |
| 0.03206229  | 0.170236505 | 0.329020973 | 0.441453741 |
| 0.196231682 | 0.093548235 | 0.157891128 | 0.136479666 |
| 0.478929515 | 0.071851276 | 0.177980097 | 0.280633356 |
| 0.141447068 | 0.213262416 | 0.364330771 | 0.103955744 |
| 0.0202405   | 0.118966602 | 0.29036643  | 0.115689524 |
| 0.202023076 | 0.256967971 | 0.144683309 | 0.321534879 |
| 0.076727858 | 0.012169664 | 0.394603192 | 0.010539663 |
| 0.308573046 | 0.279613355 | 0.172146524 | 0.248657856 |
| 0.160258172 | 0.291386791 | 0.32964537  | 0.000814152 |
| 0.321166739 | 0.029224766 | 0.217764673 | 0.132272961 |
| 0.217954839 | 0.048091602 | 0.436613446 | 0.457959744 |
| 0.256226399 | 0.292877205 | 0.299687794 | 0.444123974 |
| 0.091306588 | 0.306309751 | 0.275765303 | 0.381180181 |

|             |             |             |             |
|-------------|-------------|-------------|-------------|
| 0.144428913 | 0.403438334 | 0.366203552 | 0.30100674  |
| 0.306732041 | 0.215604103 |             |             |
| AKR1B3      | 0.019701396 | 0.003054766 | 0.006417001 |
| 0.001086115 | 0.001552774 | 0.000820248 | 0.013060859 |
| 0.02849448  | 0.003660559 | 0.000227476 | 0.003484185 |
| 0.010450001 | 0.000163042 | 0.009695113 | 0.010732084 |
| 0.002094125 | 0.010658771 | 0.019344223 | 0.00036859  |
| 3.22E-05    | 0.003161266 | 0.000495922 | 0.006218565 |
| 0.00169767  | 0.016012032 | 0.002140377 | 0.001134276 |
| 0.003679478 | 0.000171539 | 0.001773108 | 0.000519388 |
| 0.010147511 | 0.002508147 | 0.00046665  | 0.002048434 |
| 0.001684294 | 4.90E-06    | 0.008941939 | 0.002368943 |
| 0.000555978 | 0.013032171 | 0.000643951 | 0.002412642 |
| 0.000994914 | 0.010231291 | 6.34E-05    | 0.002180153 |
| 0.001653193 | 0.000651807 | 0.014777538 | 0.001370411 |
| 0.001173927 | 0.011263741 | 0.002548607 | 1           |
| 0.000582026 | 0.000465007 | 0.000295916 | 0.005136354 |
| 0.014503729 | 0.010178374 | 0.000372477 | 0.003070809 |
| 0.002630664 | 0.002828986 | 0.005343577 | 0.000862523 |
| 0.006391422 | 0.000965217 | 0.001903899 | 2.72E-05    |
| 0.001618391 | 0.009358754 | 0.014602814 | 0.009499346 |
| 0.000335451 | 0.006447745 | 0.002390154 | 0.000137154 |
| 0.004233284 | 0.008692311 | 0.005074361 | 0.006163845 |
| 0.000307598 | 0.001746018 | 0.000257387 | 0.004762705 |
| 0.004301344 | 0.006032595 | 0.00541624  | 0.007308484 |
| 0.010525544 | 0.002365042 | 0.005077481 | 0.026979235 |
| 0.003047774 | 0.000181208 | 0.00150957  | 0.00043917  |
| 0.001637424 | 0.002896857 | 0.006573596 | 0.013814916 |
| 0.001137197 | 0.011360701 | 0.007002348 | 0.001483304 |
| 0.002716611 | 0.007175078 | 0.001438475 | 0.003131164 |
| 0.00210516  | 0.005212064 | 0.004638642 | 0.007298423 |
| 0.0029642   | 0.004586057 | 0.00333952  | 0.005891851 |
| 0.00010141  | 0.005440577 | 0.00549102  | 0.011317963 |
| 0.033951254 | 0.007803742 | 0.00088178  | 0.007688087 |
| 0.002735181 | 0.012102987 | 0.025015502 | 0.00343654  |
| 0.003418749 | 0.0061701   | 0.005334671 | 0.008563242 |
| 0.017971432 | 6.82E-05    | 0.001553923 | 0.001986697 |
| 0.00795887  | 0.015385518 | 0.000841972 | 0.007589976 |
| 0.010711407 | 0.003097678 | 0.011071084 | 0.009017161 |
| 0.008657624 | 0.006718677 | 0.003337107 | 0.009948895 |
| 0.006336443 | 0.006808008 | 0.005824055 | 0.001991508 |
| 0.007347006 | 0.002768976 | 0.000253102 | 0.005728777 |
| 0.007663315 | 5.38E-06    | 0.003686033 | 0.003944808 |
| 0.004879956 | 0.003515828 | 0.005532285 | 0.004206925 |
| 0.006153235 | 0.018968388 | 1.43E-05    | 0.00670675  |
| 0.006500104 | 0.00648883  | 0.004776401 | 0.002109288 |
| 0.00280818  | 0.002066284 | 0.002294903 | 0.00211555  |
| 0.009398148 | 0.003426968 | 0.004171733 | 0.009242813 |
| 0.001778769 | 0.019564317 | 0.000990865 | 0.006944001 |
| 0.005868177 | 0.024061383 | 0.019297107 | 0.005898636 |
| 0.000229614 | 0.0101928   | 0.009487337 | 0.002703643 |
| 0.012485292 | 0.003204781 | 0.000567643 | 0.003553525 |
| 0.020331913 | 0.002109101 | 0.003516412 | 0.016025711 |
| 0.008479592 | 0.022417085 | 0.017063644 | 0.001685324 |

|                   |                      |                      |                   |
|-------------------|----------------------|----------------------|-------------------|
| 0.008570523       | 0.020941563          | 0.003567191          | 0.003904842       |
| 0.001062277       | 0.008013221          | 0.004950079          | 0.008115501       |
| 0.010501246       | 0.001105589          | 0.012931323          | 3.79E-05          |
| 0.004135907       | 0.000326442          | 0.000464387          | 0.000985511       |
| 0.01588386        | 0.009640027          | 0.005767666          | 0.002983988       |
| 0.013857673       | 0.007569133          | 0.002459513          | 0.013675589       |
| 0.011409775       | 0.002128401          | 0.007611762          | 0.002923641       |
| 0.000161085       | 0.006166204          | 0.003783964          | 0.00083643        |
| 0.008292501       | 0.000111603          | 0.000279769          | 0.003652953       |
| 0.002407627       | 0.001692777          | 0.003497446          | 0.002097016       |
| 0.001721923       | 0.021369668          | 0.005872472          | 0.001264103       |
| 0.001051622       | 0.000491762          | 0.006809102          | 0.000840358       |
| 0.005411123       | 0.011776445          | 0.001657045          | 0.00126357        |
| 0.018528795       | 0.006991549          | 0.005926412          | 0.005072299       |
| 0.00154136        | 0.005906036          | 0.004098908          | 0.00663965        |
| 0.002778986       | 0.001699125          | 0.000118555          | 0.004891267       |
| 0.002955658       | 0.00077053           | 0.010975337          | 0.003122467       |
| 0.001117505       | 0.004280967          | 0.000451889          | 0.005558727       |
| 0.008830418       | 0.005212352          | 0.010997711          | 0.004306642       |
| 0.008708557       | 0.00948332           | 0.003139626          | 0.006794521       |
| 0.0003909         | 0.003502017          | 0.001448525          | 0.003832221       |
| 0.009328948       | 0.001102405          | 0.01172789           | 5.88E-05 3.07E-05 |
| 0.033791965       | 0.022521201          | 0.006861479          | 0.000352584       |
| 0.001818678       | 0.002378532          | 0.0071979            | 0.02039108        |
| 0.0071009         | 0.008772439          | 0.004652494          | 0.009570143       |
| 0.002706935       | 0.00081146           | 0.002691635          | 0.00987042        |
| 0.000122552       | 0.001107931          | 0.00912487           | 0.024450894       |
| 0.001070611       | 0.006588941          | 2.79E-05 0.016547611 |                   |
| 0.003303243       | 0.015326204          | 0.017327873          | 0.004480073       |
| 0.014794359       | 0.012735435          | 0.000752318          | 0.006862948       |
| 0.010158566       | 0.000281421          | 0.003260254          | 0.004519353       |
| 0.004419752       | 0.005181979          | 0.005357017          | 0.00398902        |
| 0.002060986       | 0.003349724          | 0.002557695          | 0.016915642       |
| 0.012790421       | 0.000840289          | 0.006231271          | 1.67E-05          |
| 0.003943711       | 0.002110306          | 0.015121003          | 0.004223182       |
| 0.009644476       | 0.017587809          | 0.001934509          | 0.002069982       |
| 0.000343547       | 0.005424129          | 0.007867143          | 0.003561956       |
| 0.004451738       | 3.83E-05 0.001657229 | 0.007952555          |                   |
| 0.011598554       | 0.000473442          | 0.005412549          | 0.006304162       |
| 0.00780184        | 0.001569537          | 0.003570141          | 0.01255806        |
| 0.00050903        | 0.002065684          | 6.54E-05 0.00051613  |                   |
| 0.006768568       | 0.001852774          | 0.002241266          | 0.006275064       |
| 0.003581003       | 0.007538195          | 0.007001842          | 0.004925661       |
| 0.005111603       | 0.00586515           | 0.000935608          | 0.005530362       |
| 0.000339385       | 0.00493333           | 0.003944538          | 0.001188986       |
| 4.46E-05 2.84E-05 | 0.003286366          | 0.002807183          | 0.012756157       |
| 0.010049623       | 0.00069165           | 0.003254831          | 0.005595232       |
| 0.014101558       | 0.00025454           | 0.00164917           | 0.003666966       |
| 0.001261107       | 0.009097148          | 0.004203024          | 0.0050591         |
| 0.002320433       | 0.018424899          | 0.001828192          | 0.004142151       |
| 0.013804042       | 0.000106225          | 0.0029889            | 0.023652481       |
| 0.009441065       | 0.00487126           | 0.00903213           | 0.002667317       |
| 0.00084484        | 0.000838036          | 0.003101043          | 0.010019506       |
| 0.000488404       | 0.009264737          | 0.005238705          | 0.004669774       |



|             |             |             |             |
|-------------|-------------|-------------|-------------|
| 0.01333566  | 0.011282125 | 0.008016323 | 0.008455008 |
| 0.014809386 | 0.004356014 | 8.06E-05    | 0.001121915 |
| 0.002744543 | 0.015326493 | 4.50E-05    | 0.002039844 |
| 0.008786047 | 0.001507301 | 0.001136444 | 0.005262938 |
| 0.000408609 | 0.00120434  | 0.004739852 | 0.00440544  |
| 0.002339878 | 0.008114282 | 0.000765708 | 0.000469387 |
| 0.002455697 | 0.014898451 | 0.000827419 | 0.006779729 |
| 0.018218689 | 0.007822349 | 0.000671812 | 0.00288723  |
| 0.014999046 | 0.015479952 | 0.004541858 | 0.004936569 |
| 0.001925659 | 0.000879354 | 0.020395748 | 0.006898567 |
| 0.006218632 | 0.004740397 | 0.007312216 | 0.007119749 |
| 0.014531559 | 0.007620297 | 0.011412553 | 0.001774659 |
| 0.001790102 | 0.000575406 | 0.006352906 | 0.024824759 |
| 0.004903113 | 0.000602171 | 0.016672507 | 0.001849321 |
| 0.004810845 | 0.013896128 | 0.001492085 | 0.017247195 |
| 0.004920169 | 0.010817181 | 0.00406285  | 0.000528381 |
| 0.016645773 | 0.008948636 | 0.013577455 | 9.67E-05    |
| 0.018607434 | 0.001972199 | 0.003144878 | 0.00016828  |
| 0.003298429 | 0.008661445 | 0.012979575 | 0.008800574 |
| 0.003895631 | 0.004271321 | 0.003025527 | 0.000964925 |
| 0.000493361 | 0.004107224 | 0.005334087 | 0.002680605 |
| 0.005544995 | 0.010605373 | 0.016250585 | 0.00284082  |
| 0.000919278 | 0.004525325 | 0.014857205 | 0.00113616  |
| 0.007283173 | 0.021766692 | 0.00975291  | 0.008856659 |
| 0.005222313 | 0.006563954 | 0.001426646 | 0.014874642 |
| 0.017149456 | 0.003508768 | 0.000386288 | 0.010360114 |
| 0.000791616 | 0.003272132 | 0.000392213 | 5.34E-05    |
| 0.004043042 | 0.005256182 | 0.005955069 | 0.004465046 |
| 0.007341961 | 0.001994006 | 1.67E-06    | 0.001679342 |
| 0.00529306  | 0.001781194 | 0.008177391 | 0.006976685 |
| 0.000680245 | 0.004577373 | 0.007452252 | 0.02015092  |
| 0.005676222 | 0.000142598 | 0.000237984 | 0.005406114 |
| 0.012323152 | 0.004837397 | 0.003462647 | 0.015947707 |
| 5.92E-05    | 0.004375989 | 0.000102883 | 0.015564877 |
| 0.008602747 | 0.000756992 | 0.002240497 | 0.006928575 |
| 0.005538373 | 0.007321613 | 0.001168291 | 0.003164082 |
| 0.004248829 | 9.12E-05    | 0.004491894 | 0.00560166  |
| 0.00693325  | 0.004470693 | 0.002559996 | 0.00907289  |
| 0.005662498 | 0.0011195   | 0.006292269 | 0.005291893 |
| 0.005490721 | 0.007536832 | 0.002448387 | 0.00859491  |
| 0.002415239 | 0.000930945 | 0.003353812 | 0.004724796 |
| 0.018955597 | 0.016727454 | 0.004815944 | 0.003654011 |
| 0.015730097 | 0.009959088 | 0.008321395 | 0.002759787 |
| 0.009836014 | 0.004641878 | 0.006715185 | 0.009320845 |
| 0.002666315 | 0.004002029 | 0.000629246 | 0.000650481 |
| 0.045063339 | 0.000933539 | 0.018985698 | 0.003668783 |
| 0.001415026 | 0.006319058 | 0.003433011 | 0.009148902 |
| 0.019115736 | 0.003919446 | 0.002389233 | 0.00203865  |
| 0.000668595 | 0.003941632 | 0.008752508 | 0.012890214 |
| 0.00171509  | 0.000112988 | 0.006499402 | 0.002378396 |
| 0.004048554 | 0.005009637 | 0.000772587 | 0.006307471 |
| 0.000344016 | 0.013840089 | 1.01E-06    | 0.014378103 |
| 0.025751811 | 0.002599924 | 0.000445776 | 0.003572884 |
| 0.002999254 | 0.001203782 | 0.002544284 | 0.001559149 |

|             |             |             |             |
|-------------|-------------|-------------|-------------|
| 0.000658843 | 0.016464728 | 0.00406169  | 0.004900878 |
| 0.006986826 | 0.007100389 | 0.001462275 | 0.000590106 |
| 0.00186011  | 0.004516899 | 0.006602473 | 0.003955739 |
| 0.016624619 | 0.00518117  | 0.00349645  | 0.012262131 |
| 0.00893483  | 0.003135754 | 0.001542305 | 0.000761667 |
| 0.000116202 | 0.001177906 | 0.002619971 | 0.000282559 |
| 2.28E-05    | 0.001744176 | 0.006927672 | 0.001003363 |
| 0.00346523  | 0.00429668  | 0.000538454 | 0.006570101 |
| 1.17E-05    | 0.015266434 | 0.005501903 | 0.006992406 |
| 0.007347933 | 0.010945827 | 0.012257662 | 0.011014914 |
| 0.003194099 | 0.001331908 | 0.003309086 | 0.001424811 |
| 0.001191291 | 0.017502159 | 0.003711625 | 0.000344643 |
| 0.003073766 | 0.012829399 | 0.004734956 | 0.000275326 |
| 0.001891556 | 0.002111289 | 0.013758168 | 0.008597893 |
| 0.00610089  | 0.005325309 | 0.002474548 | 0.006092932 |
| 0.000410891 | 0.001418083 | 0.003244565 | 0.001026579 |
| 0.005655787 | 0.000751231 | 0.011322836 | 0.000671626 |
| 0.000116521 | 0.011386455 | 0.00636733  | 0.000897654 |
| 0.012513859 | 0.000699652 | 0.005911226 | 0.003294428 |
| 0.003401898 | 0.000716254 | 0.00020111  | 0.002812493 |
| 0.012644993 | 0.005145552 | 0.000571287 | 0.002955398 |
| 0.001528302 | 0.001817327 | 0.009753085 | 0.006228909 |
| 0.014228047 | 0.00048321  | 0.00448032  | 0.002530285 |
| 0.00530838  | 0.000502676 | 0.00210442  | 0.02337156  |
| 0.000824365 | 0.006484784 | 0.00649386  | 0.000804867 |
| 0.003781818 | 0.007523457 | 0.001343555 | 0.008288034 |
| 0.001016554 | 0.006211007 | 0.007973816 | 0.01768701  |
| 0.002808449 | 0.007952029 | 0.011180352 | 0.000747051 |
| 0.001820002 | 0.00430017  | 0.005267905 | 0.001253681 |
| 0.001354831 | 0.009439017 | 0.00103014  | 0.005749541 |
| 0.001484179 | 0.002999868 | 0.000768125 | 0.012357645 |
| 0.00119509  | 0.011038656 | 0.012769534 | 0.001088581 |
| 0.000592324 | 0.011177709 | 0.00263109  | 0.000706166 |
| 0.009272303 | 2.34E-05    | 0.002635637 | 0.002297102 |
| 0.007987581 | 0.002001233 | 0.013401944 | 0.005976909 |
| 0.004601532 | 0.000606284 | 0.002987754 | 0.001770685 |
| 0.00098213  | 0.002226213 | 0.000995516 | 0.021301315 |
| 0.004601559 | 0.005571321 | 0.005669729 | 0.000240423 |
| 0.000615153 | 0.00515469  | 1.78E-06    | 0.00027715  |
| 0.001439171 | 0.00250241  | 0.000308423 | 0.001092406 |
| 0.001427992 | 0.000259454 | 0.002482021 | 0.005469678 |
| AKT3        | 0.013821908 | 0.267161996 | 0.009195631 |
| 0.049626232 | 0.27542906  | 0.154389135 | 0.009812133 |
| 0.029516272 | 0.1896551   | 0.109038044 | 0.224773549 |
| 0.002369211 | 0.218662858 | 0.323343415 | 0.009969241 |
| 0.303081724 | 0.007075861 | 0.026007114 | 0.032415399 |
| 0.069647763 | 0.230352806 | 0.249255662 | 0.144135243 |
| 0.210833327 | 0.075399458 | 0.142757521 | 0.282616978 |
| 0.357008036 | 0.250031653 | 0.342329838 | 0.087209584 |
| 0.249035266 | 0.310934946 | 0.280607817 | 0.001689262 |
| 0.227949206 | 0.018320061 | 0.238621667 | 0.12013441  |
| 0.197701122 | 0.19172752  | 0.11809567  | 0.103161915 |
| 0.143510847 | 0.005234424 | 0.118334376 | 0.309900442 |
| 0.146360395 | 0.107411069 | 0.011606453 | 0.286215644 |

|             |             |             |             |
|-------------|-------------|-------------|-------------|
| 0.142627035 | 0.184363731 | 0.224373258 | 0.000582026 |
| 1           | 0.242744124 | 0.275291795 | 0.327114226 |
| 0.094505746 | 0.0409506   | 0.168783785 | 0.081336308 |
| 0.248109061 | 0.273953285 | 0.141635199 | 0.129533525 |
| 0.342077506 | 0.232863176 | 0.342405506 | 0.068348885 |
| 0.135754792 | 0.0031611   | 0.063534869 | 0.018106165 |
| 0.181172197 | 0.097764332 | 0.253434703 | 0.228797822 |
| 0.255226758 | 0.317139964 | 0.106731304 | 0.293604222 |
| 0.110517791 | 0.316868267 | 0.188078311 | 0.205756503 |
| 0.232004525 | 0.015753423 | 0.303877617 | 0.342311924 |
| 0.006510614 | 0.18705912  | 0.246122058 | 0.034707677 |
| 0.289039735 | 0.213025013 | 0.182993945 | 0.257201733 |
| 0.348594537 | 0.258646153 | 0.280103483 | 0.160229044 |
| 0.226515054 | 0.014992182 | 0.267455631 | 0.341271895 |
| 0.170648768 | 0.018280307 | 0.139451136 | 0.399938962 |
| 0.26333576  | 0.359712454 | 0.284124868 | 0.23243905  |
| 0.279776428 | 0.352274862 | 0.262136054 | 0.279468494 |
| 0.102207012 | 0.349886121 | 0.065304827 | 0.010240415 |
| 0.010376964 | 0.026291313 | 0.13350537  | 0.182501012 |
| 0.380760232 | 0.183407777 | 0.052915968 | 0.12238484  |
| 0.394560034 | 0.271840156 | 0.343468654 | 0.285394578 |
| 0.005834701 | 0.218437448 | 0.268314827 | 0.091967837 |
| 0.244169381 | 0.032243951 | 0.256809976 | 0.295321061 |
| 0.241175211 | 0.367763485 | 0.034879991 | 0.281763648 |
| 0.055481237 | 0.355911554 | 0.306446201 | 0.06155031  |
| 0.321579696 | 0.28931296  | 0.380710383 | 0.407929636 |
| 0.294955207 | 0.139384077 | 0.028738508 | 0.241303288 |
| 0.357182411 | 0.030374234 | 0.383191519 | 0.398739118 |
| 0.318657298 | 0.396274867 | 0.39207427  | 0.392225196 |
| 0.324448043 | 0.015854408 | 0.025760246 | 0.209484199 |
| 0.311443519 | 0.266665768 | 0.056337687 | 0.262803173 |
| 0.297335098 | 0.154128607 | 0.341700356 | 0.183175507 |
| 0.344050107 | 0.344815773 | 0.373538257 | 0.245005616 |
| 0.115674393 | 0.170076892 | 0.322635876 | 0.258034772 |
| 0.00886812  | 0.023549135 | 0.010510106 | 0.179335458 |
| 0.122974781 | 0.080892593 | 0.116241765 | 0.237268765 |
| 0.093066583 | 0.111515774 | 0.264603412 | 0.371463205 |
| 0.011883683 | 0.264089648 | 0.048947922 | 0.04587558  |
| 0.009176695 | 0.051366871 | 0.066605637 | 0.061965039 |
| 0.151723137 | 0.088746397 | 0.336394327 | 0.369315205 |
| 0.165237391 | 0.068475464 | 0.27777223  | 0.342073995 |
| 0.301977707 | 0.309874055 | 0.108247084 | 0.004348582 |
| 0.130882505 | 0.172061995 | 0.255612143 | 0.305086209 |
| 0.064789927 | 0.088416087 | 0.249314614 | 0.385871158 |
| 0.095818183 | 0.031042545 | 0.176016519 | 0.247154263 |
| 0.048692323 | 0.183167146 | 0.352666113 | 0.20480515  |
| 0.000394794 | 0.137845238 | 0.349160298 | 0.105352176 |
| 0.155030229 | 0.200148932 | 0.289783345 | 0.35147082  |
| 0.220392886 | 0.181527557 | 0.395338845 | 0.378779576 |
| 0.156825933 | 0.084159958 | 0.385331048 | 0.068972449 |
| 0.240213489 | 0.043960287 | 0.195793507 | 0.127832005 |
| 0.109186188 | 0.18182438  | 0.31132834  | 0.183236251 |
| 0.039458461 | 0.340490656 | 0.264306809 | 0.377729877 |
| 0.183461212 | 0.376746179 | 0.382630836 | 0.328838093 |

|             |             |             |             |
|-------------|-------------|-------------|-------------|
| 0.213389038 | 0.212253804 | 0.261399403 | 0.328633253 |
| 0.354120703 | 0.123830101 | 0.017416375 | 0.360197821 |
| 0.149251888 | 0.343825923 | 0.088063422 | 0.361787492 |
| 0.307885083 | 0.268337259 | 0.057003135 | 0.323370585 |
| 0.263961754 | 0.091975508 | 0.312701513 | 0.378021036 |
| 0.114522752 | 0.226537844 | 0.181376335 | 0.350961348 |
| 0.065779177 | 0.154479343 | 0.17662805  | 0.275946138 |
| 0.049346956 | 0.015468334 | 0.013063266 | 0.07670414  |
| 0.213157078 | 0.285987045 | 0.287413693 | 0.359143454 |
| 0.033559212 | 0.284104777 | 0.107934056 | 0.139423899 |
| 0.251041528 | 0.209723964 | 0.343619986 | 0.320001362 |
| 0.118610206 | 0.005873394 | 0.047730136 | 0.311475014 |
| 0.006010184 | 0.25169911  | 0.118643406 | 0.001479193 |
| 0.006347371 | 0.262599071 | 0.026891782 | 0.077578422 |
| 0.407920208 | 0.078030385 | 0.076606807 | 0.102348971 |
| 0.259293988 | 0.023971906 | 0.002751631 | 0.346792601 |
| 0.320131658 | 0.297175339 | 0.312518716 | 0.267825254 |
| 0.311704579 | 0.294834741 | 0.331610314 | 0.145390792 |
| 0.023421662 | 0.014541509 | 0.183608662 | 0.137310738 |
| 0.001469896 | 0.304175629 | 0.202170342 | 0.052842809 |
| 0.361573896 | 0.159389098 | 0.006439565 | 0.303587791 |
| 0.003793696 | 0.271092746 | 0.092331081 | 0.083351558 |
| 0.303194873 | 0.001286972 | 0.115155509 | 0.181947976 |
| 0.249340681 | 0.193609319 | 0.23450449  | 0.353995135 |
| 0.193094746 | 0.036695768 | 0.171517338 | 0.347595922 |
| 0.013982655 | 0.045897739 | 0.111235314 | 0.02077985  |
| 0.117086511 | 0.277428665 | 0.182012092 | 0.012457069 |
| 0.130317041 | 3.69E-05    | 0.209624146 | 0.358579751 |
| 0.277907992 | 0.394425597 | 0.354810588 | 0.256651088 |
| 0.339477305 | 0.236884216 | 0.377952639 | 0.249584045 |
| 0.144045963 | 0.000127146 | 0.00210141  | 0.392307284 |
| 0.269441934 | 0.012526692 | 0.057564871 | 0.148089631 |
| 0.036564686 | 0.030022237 | 0.013349535 | 0.175664696 |
| 0.281158866 | 0.185963835 | 0.186723349 | 0.27464525  |
| 0.094547675 | 0.117469877 | 0.133035229 | 0.022037439 |
| 0.312317528 | 0.011313016 | 0.021218113 | 0.006898421 |
| 0.309023382 | 0.034080625 | 0.247050259 | 0.343323646 |
| 0.334371854 | 0.341873012 | 0.148321859 | 0.171776365 |
| 0.338845245 | 0.026452633 | 0.213949418 | 0.028758103 |
| 0.30846949  | 0.285889229 | 0.20602883  | 0.166523332 |
| 0.358458189 | 0.301872688 | 0.004930651 | 0.303997084 |
| 0.003919785 | 0.002660691 | 0.139494079 | 0.132203357 |
| 0.050245719 | 0.215827947 | 0.129996738 | 0.076394092 |
| 0.095517192 | 0.005699755 | 0.234535287 | 0.214251642 |
| 0.173470457 | 0.195057521 | 0.259139015 | 0.114426038 |
| 0.149800259 | 0.101650127 | 0.084262727 | 0.046495716 |
| 0.104996076 | 0.155096521 | 0.077583641 | 0.002308819 |
| 0.224827772 | 0.281742663 | 0.010798808 | 0.057287928 |
| 0.343042814 | 0.384016316 | 0.008194623 | 0.003705419 |
| 0.129562018 | 0.14205579  | 0.402227338 | 0.332388306 |
| 0.322571518 | 0.360079505 | 0.219276565 | 0.05795302  |
| 0.013743258 | 0.203364286 | 0.276087305 | 0.064329862 |
| 0.361819947 | 0.012600565 | 0.312715814 | 0.318399221 |
| 0.034674821 | 0.068273679 | 0.009387919 | 0.020249121 |

|             |             |             |             |
|-------------|-------------|-------------|-------------|
| 0.36616162  | 0.072601484 | 0.093526916 | 0.045002728 |
| 0.142095167 | 0.248114326 | 0.007282346 | 0.078885127 |
| 0.199185917 | 0.200361478 | 0.056550395 | 0.098149142 |
| 0.205929691 | 0.080783989 | 0.351050251 | 0.290748097 |
| 0.041480688 | 0.025602642 | 0.073857939 | 0.283679723 |
| 0.338332841 | 0.230867865 | 0.010610092 | 0.283672174 |
| 0.373516798 | 0.334482207 | 0.315594237 | 0.296244174 |
| 0.020763728 | 0.275680755 | 0.203792694 | 0.218825406 |
| 0.071127515 | 0.156180443 | 0.105091681 | 0.013141264 |
| 0.167286992 | 0.280615954 | 0.261012615 | 0.065846009 |
| 0.265891498 | 0.032325954 | 0.009885379 | 0.336748446 |
| 0.181948136 | 0.02032988  | 0.133606593 | 0.357681684 |
| 0.001890202 | 0.259168339 | 0.375279737 | 0.102130477 |
| 0.338800607 | 0.369357328 | 0.282662954 | 0.08273739  |
| 0.003989063 | 0.347280082 | 0.259623998 | 0.177141731 |
| 0.273969897 | 0.203791108 | 0.05713174  | 0.023039971 |
| 0.176162376 | 0.02051289  | 0.047464942 | 0.138748989 |
| 0.15101922  | 0.218255551 | 0.094251848 | 0.07479519  |
| 0.091455356 | 0.021617687 | 0.271554824 | 0.086660524 |
| 0.141374017 | 0.127938933 | 0.236069518 | 0.101835568 |
| 0.183586356 | 0.318447944 | 0.25597638  | 0.003646823 |
| 0.309992954 | 0.292014131 | 0.318599767 | 3.07E-05    |
| 0.355216654 | 0.000840262 | 0.104785053 | 0.113951312 |
| 0.090579883 | 0.087743324 | 0.186287145 | 0.165976894 |
| 0.176533685 | 0.075614504 | 0.115815727 | 0.128421808 |
| 0.078457572 | 0.076177585 | 0.274404159 | 0.127634268 |
| 0.172960435 | 0.032742068 | 0.029178396 | 0.029579749 |
| 0.016361934 | 0.339286207 | 0.11890092  | 0.018377585 |
| 0.119497035 | 0.12373916  | 0.227884612 | 0.309592497 |
| 0.313890996 | 0.034069388 | 0.14314867  | 0.302469347 |
| 0.127372108 | 0.11660195  | 0.009148682 | 0.182705253 |
| 0.097650396 | 0.174887124 | 0.190793519 | 0.121071654 |
| 0.251137088 | 0.233792211 | 0.115800521 | 0.298600422 |
| 0.17294145  | 0.161830392 | 0.104902164 | 0.035120529 |
| 0.049262267 | 0.040942238 | 0.241379549 | 0.0004632   |
| 0.211090952 | 0.074443033 | 0.374949166 | 0.295447481 |
| 0.265900611 | 0.255844634 | 0.110439062 | 0.019224345 |
| 0.09700599  | 0.06404593  | 0.048960533 | 0.321433241 |
| 0.290040612 | 0.059769882 | 0.221537737 | 0.098576445 |
| 0.349710666 | 0.306528402 | 0.15971151  | 0.074600093 |
| 0.105502811 | 0.069974334 | 0.274712832 | 0.023982566 |
| 0.268306229 | 0.168805552 | 0.164957317 | 0.158167184 |
| 0.107775915 | 0.377394454 | 0.011920637 | 0.388979419 |
| 0.175261415 | 0.043079849 | 0.311371423 | 0.127251812 |
| 0.098448046 | 0.072370183 | 0.273497963 | 0.128174464 |
| 0.080653188 | 0.266180436 | 0.012203427 | 0.059039179 |
| 0.233201116 | 0.118735068 | 0.250868704 | 0.245475104 |
| 0.180580413 | 0.248761771 | 0.282852333 | 0.090165374 |
| 0.279302412 | 0.281410162 | 0.101980483 | 0.129074632 |
| 0.203032803 | 0.028642436 | 0.208144443 | 0.009909791 |
| 0.292599368 | 0.324107512 | 0.160132811 | 0.010508474 |
| 0.002345797 | 0.246151934 | 0.242503678 | 0.012766699 |
| 0.395030867 | 0.286517103 | 0.182364344 | 0.335533652 |
| 0.065169536 | 0.278943891 | 0.059355957 | 0.329833867 |

|             |             |             |             |
|-------------|-------------|-------------|-------------|
| 0.006016081 | 0.125020185 | 0.274059497 | 0.195437608 |
| 0.143412453 | 0.226617479 | 0.284330019 | 0.243351783 |
| 0.005907092 | 0.148361185 | 0.000640336 | 0.219140903 |
| 0.253610624 | 0.246003125 | 0.087358369 | 0.129548902 |
| 0.183598035 | 0.25241347  | 0.130239458 | 0.25343575  |
| 0.002873746 | 0.323389481 | 0.088725072 | 0.275639655 |
| 0.180424426 | 0.181002559 | 0.018808405 | 0.232800844 |
| 0.233131093 | 0.136834607 | 0.128344681 | 0.160152166 |
| 0.314659924 | 0.246681922 | 0.055529    | 0.152436903 |
| 0.22536646  | 0.013725161 | 0.14189886  | 0.360561288 |
| 0.078432356 | 0.217587358 | 0.398707891 | 0.075406305 |
| 0.255981805 | 0.235747452 | 0.255507256 | 0.344522315 |
| 0.036708406 | 0.1280675   | 0.352256943 | 0.302556395 |
| 0.207112007 | 0.171887776 | 0.233007236 | 0.130970774 |
| 0.271192155 | 0.032567434 | 0.181370879 | 0.202361011 |
| 0.219532174 | 0.196772105 | 0.152912186 | 0.129731784 |
| 0.012199954 | 0.053476104 | 0.176858766 | 0.04641119  |
| 0.16144926  | 0.222647374 | 0.153318972 | 0.247502696 |
| 0.075115247 | 0.009274678 | 0.294164063 | 0.043177603 |
| 0.145137712 | 0.316549374 | 0.11626708  | 0.224869417 |
| 0.07630462  | 0.172423641 | 0.11745535  | 0.000853697 |
| 0.321017051 | 0.052588833 | 0.154073119 | 0.14905267  |
| 0.201053143 | 0.007685354 | 0.291012595 | 0.401279492 |
| 0.161150721 | 0.179141388 | 0.233932812 | 0.300865697 |
| 0.21127566  | 0.234472495 | 0.205464542 | 0.230339155 |
| 0.264086931 | 0.161998325 | 0.206549114 | 0.235528115 |
| 0.23784715  | 0.087189481 |             |             |
| ANAPC2      | 0.000605761 | 0.079353459 | 0.000246685 |
| 0.002645349 | 0.143259725 | 0.050481176 | 0.000444231 |
| 0.002684099 | 0.059144366 | 0.057081745 | 0.072188715 |
| 0.001509425 | 0.1300656   | 0.091554443 | 0.00049976  |
| 0.148700998 | 1.20E-06    | 0.003247709 | 0.005823304 |
| 0.00883261  | 0.11253378  | 0.091033899 | 0.037332211 |
| 0.11726119  | 0.009397722 | 0.036410798 | 0.194912878 |
| 0.111727251 | 0.086947519 | 0.142886966 | 0.023065102 |
| 0.055822557 | 0.165086024 | 0.199803479 | 0.001935494 |
| 0.088766879 | 0.018152854 | 0.052436672 | 0.036627883 |
| 0.064985436 | 0.037570265 | 0.051545565 | 0.02481504  |
| 0.061173367 | 0.000969228 | 0.035880337 | 0.158728332 |
| 0.048435824 | 0.033772027 | 0.000178383 | 0.10421497  |
| 0.058301289 | 0.039338137 | 0.079663155 | 0.000465007 |
| 0.242744124 | 1           | 0.261670487 | 0.087821013 |
| 0.015342253 | 0.006762039 | 0.067156731 | 0.027720021 |
| 0.126647117 | 0.12630334  | 0.040747906 | 0.057634366 |
| 0.092106127 | 0.122240476 | 0.163503164 | 0.006288928 |
| 0.043344291 | 0.001131285 | 0.009036433 | 0.002139748 |
| 0.084776674 | 0.023297836 | 0.112097577 | 0.1705445   |
| 0.071290109 | 0.080098702 | 0.025597856 | 0.074831614 |
| 0.051690154 | 0.208177057 | 0.086611533 | 0.064124918 |
| 0.087435443 | 0.002057592 | 0.092438712 | 0.09067863  |
| 0.000198354 | 0.081887867 | 0.086077115 | 0.003999277 |
| 0.083984598 | 0.136090763 | 0.080832112 | 0.149634209 |
| 0.184549443 | 0.129657942 | 0.074857534 | 0.03162706  |
| 0.134237566 | 0.000671451 | 0.061748457 | 0.234875073 |

|             |             |             |             |
|-------------|-------------|-------------|-------------|
| 0.056815171 | 0.001241418 | 0.039910702 | 0.169628439 |
| 0.09255176  | 0.10728628  | 0.0976706   | 0.071505926 |
| 0.147201445 | 0.100103706 | 0.075617811 | 0.08450511  |
| 0.041625198 | 0.100053465 | 0.010131261 | 0.000203381 |
| 0.000403352 | 0.003398011 | 0.05832784  | 0.045206976 |
| 0.131698288 | 0.049343846 | 0.007798533 | 0.038566792 |
| 0.152226968 | 0.065989987 | 0.100547128 | 0.086142259 |
| 0.000704656 | 0.156189718 | 0.134867624 | 0.019895076 |
| 0.0806078   | 0.00482332  | 0.190545011 | 0.069344424 |
| 0.051515662 | 0.141113019 | 0.00453206  | 0.064695522 |
| 0.015675321 | 0.095329646 | 0.092900751 | 0.009588951 |
| 0.080442108 | 0.067072165 | 0.11344065  | 0.211301574 |
| 0.070497334 | 0.031251736 | 0.007135098 | 0.071406305 |
| 0.099615654 | 0.01034619  | 0.145195114 | 0.144881994 |
| 0.086533622 | 0.156442914 | 0.126574937 | 0.129875609 |
| 0.089306288 | 0.001087153 | 0.021880082 | 0.076399107 |
| 0.078297595 | 0.064113452 | 0.011646247 | 0.139351817 |
| 0.152489748 | 0.042737652 | 0.145700219 | 0.030079023 |
| 0.091573074 | 0.112943501 | 0.130284155 | 0.074481242 |
| 0.042377084 | 0.031230968 | 0.235988549 | 0.056636317 |
| 8.02E-05    | 0.001950391 | 0.000711493 | 0.054585773 |
| 0.031826234 | 0.017224739 | 0.030582389 | 0.126340024 |
| 0.01796157  | 0.034195366 | 0.21742013  | 0.185780903 |
| 0.000644642 | 0.109417514 | 0.008166138 | 0.006605777 |
| 0.000153751 | 0.005967619 | 0.003945971 | 0.005779779 |
| 0.051816518 | 0.012242087 | 0.147257807 | 0.124047693 |
| 0.090034401 | 0.00892066  | 0.094200945 | 0.096431828 |
| 0.078299528 | 0.16820303  | 0.021669854 | 0.000529754 |
| 0.018376802 | 0.12473247  | 0.214122309 | 0.181874207 |
| 0.008374754 | 0.012194613 | 0.099191797 | 0.168348227 |
| 0.015395133 | 0.005629643 | 0.079948626 | 0.05183275  |
| 0.006361211 | 0.063380123 | 0.111354309 | 0.083898079 |
| 0.006391977 | 0.03265175  | 0.117494437 | 0.023015727 |
| 0.042551754 | 0.057067165 | 0.109580464 | 0.115177601 |
| 0.080660775 | 0.110080118 | 0.141341077 | 0.180178878 |
| 0.024184881 | 0.012780954 | 0.121565942 | 0.044986249 |
| 0.158876486 | 0.005302172 | 0.056138058 | 0.066458773 |
| 0.021811315 | 0.052161252 | 0.192687674 | 0.076702082 |
| 0.0037893   | 0.093407485 | 0.075311721 | 0.115097683 |
| 0.08247735  | 0.114961954 | 0.137026542 | 0.09255903  |
| 0.062246475 | 0.150854556 | 0.164833751 | 0.103151489 |
| 0.120872588 | 0.023403129 | 0.000849895 | 0.162230431 |
| 0.083332185 | 0.16216097  | 0.017941652 | 0.105158558 |
| 0.074440271 | 0.067725903 | 0.009503578 | 0.129833981 |
| 0.063395376 | 0.015149076 | 0.110667286 | 0.11543558  |
| 0.043799694 | 0.113851082 | 0.079412716 | 0.130265302 |
| 0.009548357 | 0.063725371 | 0.042276987 | 0.220849494 |
| 0.037851805 | 0.001182758 | 0.000225454 | 0.02053768  |
| 0.128746279 | 0.152132453 | 0.119087968 | 0.104254403 |
| 0.004161428 | 0.074284419 | 0.027127402 | 0.034125888 |
| 0.059898755 | 0.123959075 | 0.219820586 | 0.159009179 |
| 0.025457851 | 5.87E-05    | 0.002620402 | 0.07534794  |
| 0.001601158 | 0.129259124 | 0.036516895 | 4.61E-06    |
| 0.000395909 | 0.093377886 | 0.002238408 | 0.010063422 |

|             |             |             |             |
|-------------|-------------|-------------|-------------|
| 0.149603226 | 0.010204067 | 0.011594118 | 0.040528108 |
| 0.084199357 | 0.002499534 | 0.000151688 | 0.114831655 |
| 0.102285434 | 0.095906626 | 0.097978624 | 0.073944393 |
| 0.112706425 | 0.124015293 | 0.128487993 | 0.034794573 |
| 0.001804523 | 0.001364961 | 0.074314319 | 0.04368921  |
| 0.000150745 | 0.10067382  | 0.105722787 | 0.006649185 |
| 0.161866006 | 0.046430897 | 0.000572897 | 0.180371573 |
| 0.001315605 | 0.193254802 | 0.017127533 | 0.028937564 |
| 0.134126596 | 0.0033838   | 0.015301298 | 0.045571634 |
| 0.053360264 | 0.038489796 | 0.155137541 | 0.099425239 |
| 0.054950321 | 0.004391915 | 0.06394607  | 0.137342999 |
| 0.000845873 | 0.011468493 | 0.039013871 | 0.006723179 |
| 0.021097904 | 0.078412576 | 0.090927414 | 0.000307604 |
| 0.027213094 | 0.00629461  | 0.041783327 | 0.099205141 |
| 0.071002901 | 0.12832572  | 0.098281154 | 0.181786499 |
| 0.091049674 | 0.197302711 | 0.115670023 | 0.065935756 |
| 0.077281698 | 0.00094461  | 0.000111042 | 0.137679556 |
| 0.120966857 | 0.000292466 | 0.008345407 | 0.020654587 |
| 0.002630596 | 0.003748349 | 0.000972166 | 0.080562454 |
| 0.106923838 | 0.081010608 | 0.087705597 | 0.067998987 |
| 0.025085344 | 0.033246673 | 0.053098321 | 0.001823884 |
| 0.153472097 | 0.000277423 | 0.002212303 | 0.000607528 |
| 0.13433983  | 0.003230926 | 0.053989218 | 0.098472907 |
| 0.086862763 | 0.148882679 | 0.087797908 | 0.027383895 |
| 0.13164408  | 0.002087371 | 0.061783786 | 0.002806733 |
| 0.081560535 | 0.111320226 | 0.045460458 | 0.029181742 |
| 0.10130874  | 0.073897057 | 0.000802827 | 0.101540222 |
| 0.000814406 | 0.001113383 | 0.035380157 | 0.03318768  |
| 0.031808027 | 0.110260329 | 0.024380948 | 0.027587458 |
| 0.033848797 | 0.000633289 | 0.190914863 | 0.15588345  |
| 0.051027143 | 0.075584769 | 0.151692982 | 0.02965826  |
| 0.073014456 | 0.022052493 | 0.022083882 | 0.008266687 |
| 0.024605233 | 0.030063255 | 0.009351618 | 0.001536791 |
| 0.103431609 | 0.140071221 | 0.000230947 | 0.007881822 |
| 0.103136029 | 0.12401465  | 0.000187394 | 0.000666169 |
| 0.022555494 | 0.063349645 | 0.134265452 | 0.095528904 |
| 0.080783065 | 0.100481313 | 0.044906429 | 0.009785446 |
| 0.0007164   | 0.078848167 | 0.169823286 | 0.011321056 |
| 0.105899835 | 0.000221375 | 0.08471164  | 0.263973179 |
| 0.004527119 | 0.012446345 | 7.39E-06    | 0.002312601 |
| 0.229489396 | 0.011935156 | 0.027319462 | 0.005075851 |
| 0.049825148 | 0.095438604 | 3.05E-05    | 0.014501789 |
| 0.047399587 | 0.072297912 | 0.008541101 | 0.031730074 |
| 0.055650835 | 0.025482664 | 0.153180474 | 0.070176967 |
| 0.004557361 | 0.003692188 | 0.007902172 | 0.118009959 |
| 0.124617979 | 0.135962    | 5.48E-05    | 0.083249807 |
| 0.14313114  | 0.081483376 | 0.092529411 | 0.001804569 |
| 0.125956891 | 0.170512872 | 0.091971316 | 0.014460518 |
| 0.048870856 | 0.03345229  | 0.000468058 | 0.040675243 |
| 0.06940267  | 0.070934744 | 0.013043232 | 0.13052798  |
| 0.003982246 | 0.000234908 | 0.122195517 | 0.077338251 |
| 0.00049855  | 0.062301707 | 0.155777143 | 0.000275069 |
| 0.214307118 | 0.135583366 | 0.019004025 | 0.09751453  |
| 0.119212631 | 0.065563311 | 0.019770276 | 0.00380928  |



|             |             |             |             |
|-------------|-------------|-------------|-------------|
| 0.182998478 | 0.084190951 | 0.068449123 | 0.073017169 |
| 0.048029564 | 0.009128345 | 0.001673996 | 0.040643144 |
| 0.000892898 | 0.004411632 | 0.018491675 | 0.053860793 |
| 0.067805906 | 0.018373689 | 0.019304082 | 0.031456437 |
| 0.002535338 | 0.09677313  | 0.019284012 | 0.064583003 |
| 0.024720586 | 0.058967284 | 0.042550057 | 0.049442327 |
| 0.107472301 | 0.07416545  | 0.001535296 | 0.21276607  |
| 0.10132427  | 0.103277984 | 0.003158866 | 0.140263794 |
| 0.002736251 | 0.032767317 | 0.03279284  | 0.02737893  |
| 0.027902941 | 0.070346083 | 0.060156485 | 0.053787296 |
| 0.018606006 | 0.028647763 | 0.028238662 | 0.015802016 |
| 0.018419968 | 0.125228429 | 0.043332601 | 0.054753894 |
| 0.003727716 | 0.002360285 | 0.002122414 | 0.000399735 |
| 0.11323708  | 0.018519262 | 0.000728716 | 0.030504271 |
| 0.048059802 | 0.052912426 | 0.085698867 | 0.093309471 |
| 0.003175527 | 0.05933279  | 0.084815176 | 0.04461925  |
| 0.014349736 | 5.92E-05    | 0.0633306   | 0.019811891 |
| 0.042322662 | 0.082783772 | 0.023652799 | 0.094189149 |
| 0.048374424 | 0.017920314 | 0.084936533 | 0.066667065 |
| 0.084856033 | 0.046812031 | 0.002582139 | 0.006959345 |
| 0.005523495 | 0.133339326 | 0.007520709 | 0.058906229 |
| 0.005404234 | 0.12635922  | 0.072666836 | 0.22723635  |
| 0.065243013 | 0.015532512 | 0.000900809 | 0.023807043 |
| 0.007775039 | 0.005945847 | 0.130858109 | 0.246852837 |
| 0.010096791 | 0.095498397 | 0.017062559 | 0.147985592 |
| 0.141878217 | 0.079080053 | 0.018453523 | 0.033829544 |
| 0.011355818 | 0.072502574 | 0.002913059 | 0.132890808 |
| 0.061119814 | 0.063953749 | 0.052482689 | 0.03780385  |
| 0.124746385 | 0.000210727 | 0.126962108 | 0.077158359 |
| 0.005329517 | 0.076998857 | 0.039887377 | 0.016186428 |
| 0.00848547  | 0.250280368 | 0.052354787 | 0.015852323 |
| 0.186123292 | 0.005454166 | 0.01309791  | 0.06493827  |
| 0.065317442 | 0.086730141 | 0.093387032 | 0.105099273 |
| 0.081854592 | 0.14768718  | 0.021779694 | 0.071077896 |
| 0.06740395  | 0.009123899 | 0.028182444 | 0.051459506 |
| 0.002820993 | 0.058066434 | 0.00442973  | 0.132283816 |
| 0.191804941 | 0.05323549  | 0.000355145 | 0.001234747 |
| 0.196473067 | 0.096562878 | 0.000913713 | 0.142875658 |
| 0.115376175 | 0.078574887 | 0.13350626  | 0.011550282 |
| 0.063894145 | 0.011432634 | 0.111905513 | 0.000246683 |
| 0.031887458 | 0.189446784 | 0.110773794 | 0.028345043 |
| 0.148855556 | 0.088321319 | 0.16587263  | 0.000543277 |
| 0.026344307 | 0.001775429 | 0.041728507 | 0.05936392  |
| 0.16668015  | 0.014014788 | 0.063609744 | 0.051364518 |
| 0.080284682 | 0.021253789 | 0.147420739 | 0.000769826 |
| 0.163659742 | 0.019213613 | 0.06772386  | 0.053397817 |
| 0.077704348 | 0.000802991 | 0.15528499  | 0.048223582 |
| 0.01905638  | 0.028148874 | 0.04382523  | 0.087774957 |
| 0.080466519 | 0.007567557 | 0.037023377 | 0.10437728  |
| 0.000273293 | 0.065212455 | 0.106443426 | 0.019377565 |
| 0.14445124  | 0.15241088  | 0.014331021 | 0.197583942 |
| 0.060544909 | 0.139346982 | 0.103548064 | 0.004898252 |
| 0.026045056 | 0.142561285 | 0.088071985 | 0.055397918 |
| 0.10564243  | 0.12545836  | 0.049555313 | 0.064717913 |

|             |             |             |             |
|-------------|-------------|-------------|-------------|
| 0.001282855 | 0.073396417 | 0.046932497 | 0.140847369 |
| 0.060867767 | 0.0616993   | 0.05857372  | 0.000351683 |
| 0.00944052  | 0.046804201 | 0.006662979 | 0.044403968 |
| 0.095211612 | 0.062103307 | 0.056811492 | 0.00600911  |
| 0.0002221   | 0.074138732 | 0.019189389 | 0.033135216 |
| 0.120584554 | 0.028139198 | 0.116944002 | 0.009430057 |
| 0.05386261  | 0.028433173 | 0.009480478 | 0.116226689 |
| 0.01569323  | 0.080901785 | 0.041058369 | 0.054479265 |
| 0.000127036 | 0.073048944 | 0.13076353  | 0.04303406  |
| 0.042875975 | 0.077033637 | 0.082323334 | 0.073853392 |
| 0.191996688 | 0.128852316 | 0.076706768 | 0.207890279 |
| 0.089235586 | 0.124156009 | 0.155389597 | 0.068110684 |
| 0.024245191 |             |             |             |
| ANKRD12     | 0.005329051 | 0.203546243 | 0.003631804 |
| 0.017447019 | 0.230563748 | 0.100332751 | 0.004134377 |
| 0.012578446 | 0.156201179 | 0.094290487 | 0.150690206 |
| 0.000408912 | 0.18645791  | 0.238679453 | 0.004217994 |
| 0.272066033 | 0.002326699 | 0.01513594  | 0.024030348 |
| 0.042588448 | 0.200391461 | 0.153895935 | 0.099606754 |
| 0.194733295 | 0.041889819 | 0.105892483 | 0.287760018 |
| 0.269419342 | 0.181765163 | 0.262489226 | 0.059997374 |
| 0.173984475 | 0.269909565 | 0.268272715 | 4.35E-05    |
| 0.178730485 | 0.029226255 | 0.168802249 | 0.084621806 |
| 0.128197665 | 0.124935639 | 0.10088617  | 0.06229934  |
| 0.131987615 | 0.001408043 | 0.08943263  | 0.298600673 |
| 0.119734878 | 0.069340343 | 0.005604126 | 0.222759399 |
| 0.110280218 | 0.113079743 | 0.184555219 | 0.000295916 |
| 0.275291795 | 0.261670487 | 1           | 0.231497679 |
| 0.052623511 | 0.022809231 | 0.162885572 | 0.06770331  |
| 0.245604775 | 0.253416098 | 0.101883871 | 0.114397174 |
| 0.245524047 | 0.199648827 | 0.300678884 | 0.029228859 |
| 0.113659055 | 0.001379742 | 0.036069914 | 0.011296609 |
| 0.145609205 | 0.059805695 | 0.191645878 | 0.221645754 |
| 0.192786701 | 0.227887752 | 0.074004162 | 0.212575801 |
| 0.126620854 | 0.310400663 | 0.126319422 | 0.157118786 |
| 0.209287865 | 0.00923356  | 0.21697435  | 0.24837626  |
| 0.0036251   | 0.169683074 | 0.21634283  | 0.020568938 |
| 0.205398093 | 0.185029524 | 0.157281139 | 0.174130393 |
| 0.308535798 | 0.242369065 | 0.211249581 | 0.102556659 |
| 0.199311827 | 0.007775723 | 0.185658241 | 0.328901923 |
| 0.105608634 | 0.008532231 | 0.097424893 | 0.337779864 |
| 0.208589108 | 0.262832352 | 0.237781622 | 0.194222032 |
| 0.259935153 | 0.253730386 | 0.185701317 | 0.211124993 |
| 0.090252408 | 0.258361384 | 0.034732778 | 0.003072095 |
| 0.004770371 | 0.010759289 | 0.116118091 | 0.125891582 |
| 0.288242984 | 0.12611997  | 0.029931297 | 0.091666834 |
| 0.327739244 | 0.190847306 | 0.261195724 | 0.223412098 |
| 0.001906125 | 0.201147702 | 0.240663316 | 0.046713786 |
| 0.20308932  | 0.019709537 | 0.248469947 | 0.207828007 |
| 0.154259195 | 0.301197814 | 0.01778538  | 0.195502919 |
| 0.047454509 | 0.251822187 | 0.227431421 | 0.034296152 |
| 0.226391072 | 0.197284439 | 0.279482636 | 0.345866372 |
| 0.197536422 | 0.084991423 | 0.036073808 | 0.193308236 |
| 0.252933766 | 0.02029526  | 0.311632927 | 0.320497591 |

|             |             |             |             |
|-------------|-------------|-------------|-------------|
| 0.232500895 | 0.323321431 | 0.30486113  | 0.296843161 |
| 0.236585089 | 0.008067287 | 0.042596154 | 0.171102585 |
| 0.223202439 | 0.177302224 | 0.031683782 | 0.245580243 |
| 0.274007209 | 0.106387425 | 0.288072431 | 0.108250514 |
| 0.248463119 | 0.255516166 | 0.292978798 | 0.197233694 |
| 0.107264239 | 0.105789638 | 0.332358802 | 0.173266213 |
| 0.002544477 | 0.010651233 | 0.004471496 | 0.142298905 |
| 0.069360501 | 0.050066989 | 0.083125641 | 0.234913336 |
| 0.057414232 | 0.084257737 | 0.251072911 | 0.318522983 |
| 0.005851388 | 0.212775628 | 0.027787483 | 0.029731498 |
| 0.002898487 | 0.028381794 | 0.029188199 | 0.023136387 |
| 0.112741034 | 0.053826727 | 0.283370703 | 0.284983482 |
| 0.165836183 | 0.038398439 | 0.217172915 | 0.242785623 |
| 0.214477215 | 0.266788779 | 0.07404624  | 0.000755418 |
| 0.089138346 | 0.16326153  | 0.235469812 | 0.283443718 |
| 0.037248416 | 0.056031751 | 0.221176684 | 0.307690137 |
| 0.056295334 | 0.021851146 | 0.150408051 | 0.160804116 |
| 0.029769806 | 0.111869557 | 0.267581829 | 0.184308951 |
| 0.002418311 | 0.096195195 | 0.265657798 | 0.080235908 |
| 0.128837032 | 0.134271893 | 0.180100168 | 0.276883021 |
| 0.177930765 | 0.158680799 | 0.306611342 | 0.315350574 |
| 0.092507236 | 0.053378094 | 0.296396471 | 0.092544244 |
| 0.248773656 | 0.016343099 | 0.1396696   | 0.122168158 |
| 0.071883578 | 0.13902616  | 0.283441241 | 0.122666195 |
| 0.019167111 | 0.251745553 | 0.183502278 | 0.28146698  |
| 0.144256691 | 0.2871265   | 0.301074568 | 0.233790562 |
| 0.153521312 | 0.2352256   | 0.242681551 | 0.247077    |
| 0.27787867  | 0.094566103 | 0.008833176 | 0.320392947 |
| 0.160020606 | 0.3053063   | 0.05180443  | 0.269311297 |
| 0.210217883 | 0.193114068 | 0.027064683 | 0.266601447 |
| 0.174637819 | 0.050305839 | 0.240164564 | 0.28823126  |
| 0.099605972 | 0.221931381 | 0.146580826 | 0.27424198  |
| 0.037054654 | 0.118604665 | 0.122889151 | 0.251856662 |
| 0.031897078 | 0.008161167 | 0.005915908 | 0.049231    |
| 0.147851912 | 0.263979676 | 0.243853544 | 0.268145252 |
| 0.018158103 | 0.191347446 | 0.083451497 | 0.082168432 |
| 0.181863266 | 0.210979112 | 0.306274324 | 0.271891525 |
| 0.078818454 | 0.001528442 | 0.017584927 | 0.221118458 |
| 0.002790989 | 0.167264855 | 0.095724984 | 0.000446589 |
| 0.002328795 | 0.21559078  | 0.014729893 | 0.044015396 |
| 0.320877097 | 0.043895697 | 0.0478897   | 0.085555667 |
| 0.182611437 | 0.011972209 | 0.000515849 | 0.276607345 |
| 0.253386377 | 0.239661512 | 0.247432416 | 0.201107171 |
| 0.265388008 | 0.250161279 | 0.277121393 | 0.090786889 |
| 0.009263254 | 0.007182148 | 0.146119589 | 0.108819244 |
| 0.001297865 | 0.215060593 | 0.17943443  | 0.028727056 |
| 0.310135595 | 0.129787659 | 0.001673429 | 0.285293733 |
| 0.000584681 | 0.213326556 | 0.059706814 | 0.066353402 |
| 0.259668677 | 0.000187089 | 0.0597994   | 0.135197333 |
| 0.162012843 | 0.125817904 | 0.201631779 | 0.257271737 |
| 0.129407935 | 0.022565438 | 0.131134289 | 0.264110563 |
| 0.005368186 | 0.042841732 | 0.096500693 | 0.013645863 |
| 0.06013695  | 0.208356576 | 0.149126033 | 0.004267742 |
| 0.08560578  | 0.001799735 | 0.134309456 | 0.260870149 |

|             |             |             |             |
|-------------|-------------|-------------|-------------|
| 0.195553404 | 0.305626601 | 0.251161965 | 0.224532671 |
| 0.242095485 | 0.275160193 | 0.28399039  | 0.183503341 |
| 0.141873157 | 0.000283804 | 0.000742426 | 0.305320749 |
| 0.229281729 | 0.005983657 | 0.03296173  | 0.069592024 |
| 0.014228725 | 0.017828519 | 0.005313215 | 0.113769513 |
| 0.206314813 | 0.142539848 | 0.132719876 | 0.199047405 |
| 0.068934635 | 0.084625616 | 0.116633769 | 0.012107614 |
| 0.252058558 | 0.003547199 | 0.012609001 | 0.002422329 |
| 0.258769047 | 0.018350069 | 0.168704415 | 0.253106639 |
| 0.235178288 | 0.274416088 | 0.130288177 | 0.099197144 |
| 0.282512251 | 0.013789343 | 0.143507824 | 0.01546417  |
| 0.221357754 | 0.239514897 | 0.132151853 | 0.101851547 |
| 0.267083241 | 0.210076762 | 0.001593265 | 0.243046686 |
| 0.000429823 | 0.002158248 | 0.09493044  | 0.097018945 |
| 0.067944732 | 0.210638728 | 0.083019885 | 0.060856612 |
| 0.066475795 | 0.001272761 | 0.2368864   | 0.206297613 |
| 0.128854049 | 0.165318169 | 0.230839675 | 0.08774623  |
| 0.124041415 | 0.076826044 | 0.047559913 | 0.025421791 |
| 0.088098497 | 0.105238874 | 0.043442125 | 0.000566437 |
| 0.194646731 | 0.240933629 | 0.004577005 | 0.031238232 |
| 0.246548431 | 0.291171344 | 0.003881793 | 0.000644796 |
| 0.080160151 | 0.132360943 | 0.308610694 | 0.2443021   |
| 0.228437547 | 0.266637099 | 0.142927704 | 0.034045429 |
| 0.004823268 | 0.167371114 | 0.253936563 | 0.034525785 |
| 0.266618241 | 0.006932755 | 0.220772182 | 0.324644517 |
| 0.020021193 | 0.035851111 | 0.002268067 | 0.011023261 |
| 0.330275376 | 0.042802803 | 0.062963579 | 0.024541508 |
| 0.117418446 | 0.165928833 | 0.003004521 | 0.049679153 |
| 0.145110617 | 0.169814206 | 0.033894632 | 0.06922605  |
| 0.1462825   | 0.07710183  | 0.302885266 | 0.204946812 |
| 0.022008189 | 0.016967651 | 0.032902838 | 0.239553859 |
| 0.273995767 | 0.230124485 | 0.002118422 | 0.21436819  |
| 0.28216906  | 0.273003575 | 0.220649991 | 0.229448209 |
| 0.011298808 | 0.22158658  | 0.236878653 | 0.198015913 |
| 0.049439039 | 0.102217059 | 0.083104061 | 0.006359032 |
| 0.118067793 | 0.202425647 | 0.195176444 | 0.037395965 |
| 0.226483468 | 0.01952246  | 0.005454292 | 0.265470165 |
| 0.138880834 | 0.007283029 | 0.119998251 | 0.31219169  |
| 0.000434972 | 0.212880589 | 0.304913214 | 0.044269213 |
| 0.253243965 | 0.283288517 | 0.191076054 | 0.044734015 |
| 0.005405846 | 0.321831272 | 0.188299557 | 0.136554253 |
| 0.202473395 | 0.134018108 | 0.034459988 | 0.00881463  |
| 0.115722838 | 0.009771274 | 0.025196424 | 0.069919019 |
| 0.149563468 | 0.17331461  | 0.06070897  | 0.060588577 |
| 0.068418241 | 0.014357432 | 0.183718059 | 0.049957407 |
| 0.147253168 | 0.079354793 | 0.166845592 | 0.07412765  |
| 0.142015458 | 0.262754311 | 0.202423036 | 0.000727737 |
| 0.292250356 | 0.243274335 | 0.23757674  | 0.000266279 |
| 0.284341284 | 0.000620179 | 0.075448457 | 0.073011532 |
| 0.060314583 | 0.071859494 | 0.147263214 | 0.104855559 |
| 0.146106284 | 0.052985734 | 0.06799194  | 0.080039859 |
| 0.034999451 | 0.049294991 | 0.229283476 | 0.103707813 |
| 0.099464905 | 0.01458017  | 0.014947279 | 0.015216029 |
| 0.00426424  | 0.2567342   | 0.069352817 | 0.00848336  |

|             |             |             |             |
|-------------|-------------|-------------|-------------|
| 0.082308184 | 0.107411453 | 0.15132616  | 0.2275838   |
| 0.222207664 | 0.018090816 | 0.128466328 | 0.216424832 |
| 0.123741394 | 0.06314732  | 0.003284023 | 0.136439804 |
| 0.059006097 | 0.104659817 | 0.155741631 | 0.084453987 |
| 0.222030672 | 0.153567305 | 0.066231543 | 0.214313513 |
| 0.127646276 | 0.171364636 | 0.08560722  | 0.013345996 |
| 0.028186214 | 0.024857105 | 0.210294277 | 0.0029952   |
| 0.15326254  | 0.02943874  | 0.28863515  | 0.206296164 |
| 0.250255288 | 0.172580489 | 0.064017406 | 0.007263569 |
| 0.063578972 | 0.037566115 | 0.027079253 | 0.263680606 |
| 0.237072626 | 0.027854344 | 0.177130386 | 0.04405282  |
| 0.290200849 | 0.278728198 | 0.121599841 | 0.056864328 |
| 0.083416998 | 0.041668448 | 0.204552621 | 0.012584975 |
| 0.243876073 | 0.097737562 | 0.14415     | 0.12384163  |
| 0.083465494 | 0.290995123 | 0.00518982  | 0.30052472  |
| 0.164771663 | 0.024337863 | 0.217199408 | 0.09035723  |
| 0.047100117 | 0.030692044 | 0.234799878 | 0.104891582 |
| 0.048947028 | 0.226245616 | 0.015028676 | 0.046549946 |
| 0.165475722 | 0.117654354 | 0.215182532 | 0.20960743  |
| 0.15294306  | 0.19660792  | 0.238806327 | 0.069398949 |
| 0.200195568 | 0.196970803 | 0.051707046 | 0.08822553  |
| 0.151416983 | 0.011478932 | 0.141317235 | 0.011418576 |
| 0.264318249 | 0.309409717 | 0.119481998 | 0.003549821 |
| 0.000294208 | 0.211627457 | 0.211685386 | 0.007824313 |
| 0.316921987 | 0.220333618 | 0.172785192 | 0.254792217 |
| 0.042850956 | 0.192528602 | 0.028612905 | 0.240313959 |
| 0.003755872 | 0.088519944 | 0.270635991 | 0.203391584 |
| 0.07338113  | 0.217568495 | 0.207826834 | 0.201350088 |
| 0.001536682 | 0.084407606 | 0.000465233 | 0.140986019 |
| 0.180345502 | 0.256911955 | 0.054127566 | 0.110482436 |
| 0.126147578 | 0.191902142 | 0.096169793 | 0.230563924 |
| 0.000276579 | 0.278441172 | 0.054302013 | 0.18149993  |
| 0.136208115 | 0.178952071 | 0.005300418 | 0.247122162 |
| 0.15566694  | 0.095265537 | 0.09021524  | 0.122006116 |
| 0.226678164 | 0.189241547 | 0.031538603 | 0.091246992 |
| 0.217020714 | 0.006739815 | 0.113981181 | 0.272651782 |
| 0.049515815 | 0.183571002 | 0.318015708 | 0.04389952  |
| 0.264675864 | 0.162239082 | 0.246543502 | 0.265077164 |
| 0.01775981  | 0.079497931 | 0.285333942 | 0.232263776 |
| 0.141847545 | 0.136828544 | 0.167397038 | 0.105511033 |
| 0.185460892 | 0.009959869 | 0.141402753 | 0.137080023 |
| 0.181324886 | 0.143059901 | 0.136148726 | 0.101512437 |
| 0.003912223 | 0.028405511 | 0.087104202 | 0.026846371 |
| 0.120013902 | 0.186993652 | 0.104432164 | 0.163172748 |
| 0.027196916 | 0.002034012 | 0.202993126 | 0.041097909 |
| 0.086773237 | 0.231954545 | 0.074888707 | 0.195606261 |
| 0.040451144 | 0.140137342 | 0.090132422 | 0.002226564 |
| 0.26088682  | 0.028485914 | 0.133821659 | 0.084217175 |
| 0.159932518 | 0.002790369 | 0.196954591 | 0.307520571 |
| 0.111020154 | 0.121903052 | 0.171220544 | 0.22091566  |
| 0.16133621  | 0.219886462 | 0.188951186 | 0.179734363 |
| 0.22274742  | 0.15666997  | 0.196294985 | 0.210213808 |
| 0.171524983 | 0.058754866 |             |             |
| ANLN        | 0.176812227 | 0.510004801 | 0.160564487 |

|             |             |             |             |
|-------------|-------------|-------------|-------------|
| 0.239494615 | 0.345582158 | 0.532373162 | 0.128929978 |
| 0.225709192 | 0.458922911 | 0.397765985 | 0.453525327 |
| 0.052461024 | 0.090398232 | 0.507676327 | 0.118165999 |
| 0.42920802  | 0.076087895 | 0.196003259 | 0.115622897 |
| 0.332072755 | 0.309896106 | 0.395106692 | 0.520222003 |
| 0.320144683 | 0.308335406 | 0.480555409 | 0.429127045 |
| 0.529394624 | 0.323480478 | 0.514889663 | 0.288531204 |
| 0.456979974 | 0.35516647  | 0.43354361  | 0.060399413 |
| 0.504678364 | 0.012738343 | 0.45696686  | 0.319171215 |
| 0.176208326 | 0.43202529  | 0.470042821 | 0.333499071 |
| 0.466507955 | 0.105755486 | 0.30676515  | 0.450095367 |
| 0.452545066 | 0.387990547 | 0.171426524 | 0.524223217 |
| 0.435680234 | 0.481915325 | 0.503197749 | 0.005136354 |
| 0.327114226 | 0.087821013 | 0.231497679 | 1           |
| 0.316328056 | 0.207148096 | 0.316562595 | 0.373540005 |
| 0.447157912 | 0.432377758 | 0.356713239 | 0.437743799 |
| 0.520309685 | 0.177724033 | 0.497171124 | 0.257569386 |
| 0.481296595 | 0.098935817 | 0.268674848 | 0.195379975 |
| 0.450177279 | 0.292099003 | 0.413858115 | 0.333326665 |
| 0.505887854 | 0.526730484 | 0.350114782 | 0.521665798 |
| 0.096399956 | 0.361051295 | 0.320019298 | 0.375633621 |
| 0.434885115 | 0.162118428 | 0.493337356 | 0.516954782 |
| 0.125325947 | 0.484143276 | 0.469351012 | 0.24449511  |
| 0.529843403 | 0.311959575 | 0.499333568 | 0.191479804 |
| 0.409629533 | 0.367931053 | 0.492816656 | 0.399187744 |
| 0.372928922 | 0.177778617 | 0.523472402 | 0.337613929 |
| 0.371793165 | 0.194247703 | 0.247440915 | 0.506768819 |
| 0.494898797 | 0.531357472 | 0.502027154 | 0.434254352 |
| 0.407337352 | 0.524180722 | 0.500962255 | 0.497596132 |
| 0.224617955 | 0.52796205  | 0.320599641 | 0.092489643 |
| 0.181525466 | 0.156484781 | 0.261471991 | 0.397521679 |
| 0.528523404 | 0.455511282 | 0.320269824 | 0.29636641  |
| 0.483885566 | 0.512180109 | 0.523677556 | 0.488681249 |
| 0.102084451 | 0.263073967 | 0.420211176 | 0.433738548 |
| 0.449595576 | 0.214486563 | 0.273778643 | 0.53046075  |
| 0.471525284 | 0.4894312   | 0.315837195 | 0.528527358 |
| 0.296813944 | 0.505427664 | 0.532937409 | 0.269089204 |
| 0.530249868 | 0.523897437 | 0.507692475 | 0.442855051 |
| 0.504829758 | 0.484965043 | 0.082303806 | 0.464543696 |
| 0.495840089 | 0.0177419   | 0.519082035 | 0.517603786 |
| 0.516907509 | 0.510720332 | 0.501710185 | 0.525596143 |
| 0.519839551 | 0.168298253 | 0.029369123 | 0.336602323 |
| 0.520440303 | 0.487747255 | 0.198961607 | 0.459720808 |
| 0.396731717 | 0.528983605 | 0.501070194 | 0.360582569 |
| 0.502263544 | 0.522968689 | 0.527707534 | 0.482128016 |
| 0.415685322 | 0.416720911 | 0.404954544 | 0.510137755 |
| 0.106564115 | 0.238754849 | 0.14567034  | 0.397506076 |
| 0.490078817 | 0.25816558  | 0.504246144 | 0.396609114 |
| 0.286693717 | 0.483183756 | 0.369595667 | 0.41729504  |
| 0.147838614 | 0.521864119 | 0.296328615 | 0.294642857 |
| 0.089316365 | 0.253313041 | 0.266016341 | 0.254792925 |
| 0.3133383   | 0.315108666 | 0.510214326 | 0.514750036 |
| 0.40067686  | 0.320042611 | 0.515242476 | 0.496607363 |
| 0.449741855 | 0.424226024 | 0.337582742 | 0.027882297 |

|             |             |             |             |
|-------------|-------------|-------------|-------------|
| 0.297143692 | 0.344633815 | 0.187797046 | 0.464479035 |
| 0.282327296 | 0.297110859 | 0.437169535 | 0.44307108  |
| 0.436975428 | 0.274377659 | 0.401850869 | 0.464002941 |
| 0.280039631 | 0.373058994 | 0.493293623 | 0.489670278 |
| 0.015949914 | 0.431484453 | 0.518932629 | 0.165438662 |
| 0.415429633 | 0.148333809 | 0.294686411 | 0.504286647 |
| 0.309449655 | 0.240138137 | 0.525749276 | 0.440004403 |
| 0.431838134 | 0.325334412 | 0.507984871 | 0.045885199 |
| 0.386752393 | 0.079888337 | 0.353210278 | 0.449394759 |
| 0.363862114 | 0.3648564   | 0.345741169 | 0.329011598 |
| 0.269828968 | 0.516451366 | 0.497623668 | 0.525546472 |
| 0.403637989 | 0.507383625 | 0.511667063 | 0.505046934 |
| 0.474870921 | 0.397504487 | 0.136232938 | 0.51158892  |
| 0.508396225 | 0.340120934 | 0.183727486 | 0.499441453 |
| 0.419676503 | 0.444382972 | 0.150362969 | 0.504064376 |
| 0.506961679 | 0.499902391 | 0.216285545 | 0.418640746 |
| 0.475320558 | 0.369144257 | 0.494048439 | 0.508426427 |
| 0.380503804 | 0.38017678  | 0.363743925 | 0.441848832 |
| 0.295849889 | 0.226456675 | 0.4161648   | 0.185970408 |
| 0.014873923 | 0.186681389 | 0.160002025 | 0.224343587 |
| 0.177005034 | 0.492958381 | 0.459067994 | 0.51735514  |
| 0.205367548 | 0.50116636  | 0.345510723 | 0.336142472 |
| 0.485328923 | 0.386725743 | 0.425071208 | 0.443685375 |
| 0.360953283 | 0.043668655 | 0.187749934 | 0.530243412 |
| 0.122171703 | 0.260187818 | 0.43750515  | 0.006323444 |
| 0.113256749 | 0.509792326 | 0.201673849 | 0.29456223  |
| 0.495892827 | 0.307950275 | 0.333515222 | 0.403315133 |
| 0.42928778  | 0.19170608  | 0.008138799 | 0.507673036 |
| 0.496280825 | 0.483839692 | 0.496074212 | 0.482858475 |
| 0.479680304 | 0.489364561 | 0.466862095 | 0.521486525 |
| 0.197112499 | 0.206277064 | 0.212154349 | 0.343886096 |
| 0.011471657 | 0.464115188 | 0.367390507 | 0.249738744 |
| 0.478338423 | 0.391252457 | 0.099108056 | 0.397616947 |
| 0.065654325 | 0.211947783 | 0.409682752 | 0.2945199   |
| 0.395704143 | 0.052011001 | 0.328610983 | 0.345495645 |
| 0.501269559 | 0.457662234 | 0.398695529 | 0.530665409 |
| 0.417474798 | 0.259960759 | 0.37039458  | 0.468761208 |
| 0.148063228 | 0.136679295 | 0.466959227 | 0.064510944 |
| 0.315444982 | 0.482406485 | 0.438428749 | 0.163142256 |
| 0.374248741 | 0.021710273 | 0.477918788 | 0.525737792 |
| 0.511077333 | 0.512529306 | 0.525511266 | 0.296404705 |
| 0.520530011 | 0.106198171 | 0.525350454 | 0.508804596 |
| 0.443516458 | 0.002990426 | 0.013030262 | 0.520547124 |
| 0.440138006 | 0.158878398 | 0.266737801 | 0.500823495 |
| 0.184011107 | 0.2954663   | 0.146562967 | 0.201345398 |
| 0.530606735 | 0.287213702 | 0.193006195 | 0.499095576 |
| 0.320622167 | 0.318286285 | 0.501491893 | 0.194060758 |
| 0.476816149 | 0.117675115 | 0.189423829 | 0.014152415 |
| 0.42153527  | 0.233660389 | 0.51156105  | 0.521958678 |
| 0.499206542 | 0.445798318 | 0.409391771 | 0.443073771 |
| 0.488293244 | 0.228719959 | 0.436857467 | 0.246848802 |
| 0.523172    | 0.437008039 | 0.41746712  | 0.425221267 |
| 0.497927586 | 0.503770083 | 0.085907805 | 0.469866825 |
| 0.042745338 | 0.00302377  | 0.514144054 | 0.365255272 |

|             |             |             |             |
|-------------|-------------|-------------|-------------|
| 0.077128595 | 0.397903587 | 0.362622451 | 0.31640284  |
| 0.304987795 | 0.087941092 | 0.269220391 | 0.245571328 |
| 0.373272908 | 0.413483107 | 0.29496677  | 0.356325849 |
| 0.305644845 | 0.144746238 | 0.286633193 | 0.238156194 |
| 0.301218248 | 0.426079736 | 0.310384748 | 0.061418473 |
| 0.502961522 | 0.460564775 | 0.134987819 | 0.281866944 |
| 0.510970741 | 0.522621638 | 0.085247326 | 0.025414375 |
| 0.382211433 | 0.365213598 | 0.512310582 | 0.52792698  |
| 0.538226478 | 0.500862882 | 0.446243919 | 0.161197811 |
| 0.152308034 | 0.382273431 | 0.316754264 | 0.132974985 |
| 0.523404737 | 0.165813561 | 0.519825846 | 0.314557416 |
| 0.218180809 | 0.318610142 | 0.077888912 | 0.168878637 |
| 0.424657611 | 0.284283946 | 0.240242271 | 0.285418462 |
| 0.365227447 | 0.274222325 | 0.114809058 | 0.296298883 |
| 0.442329844 | 0.177340826 | 0.264013226 | 0.445979151 |
| 0.482492644 | 0.308427868 | 0.47666859  | 0.468779401 |
| 0.250941543 | 0.215094046 | 0.43313994  | 0.462830877 |
| 0.519151555 | 0.467834487 | 0.070475192 | 0.517481048 |
| 0.511857096 | 0.507889952 | 0.518638538 | 0.436894217 |
| 0.183039787 | 0.42590361  | 0.331222461 | 0.379981245 |
| 0.282583337 | 0.53331987  | 0.322738046 | 0.14515907  |
| 0.389795405 | 0.497066704 | 0.497658811 | 0.250574227 |
| 0.508070561 | 0.264492568 | 0.152234384 | 0.516507298 |
| 0.182889578 | 0.179700987 | 0.479943261 | 0.490172781 |
| 0.004009004 | 0.141933565 | 0.492913366 | 0.349966268 |
| 0.511800709 | 0.506567454 | 0.486991035 | 0.389047071 |
| 0.001445161 | 0.448125645 | 0.450903025 | 0.464125858 |
| 0.515056927 | 0.47653862  | 0.251084087 | 0.132512118 |
| 0.379243452 | 0.198007004 | 0.191842454 | 0.484792307 |
| 0.177235508 | 0.5114089   | 0.291567258 | 0.31141641  |
| 0.258269645 | 0.203263112 | 0.273079842 | 0.365012931 |
| 0.152860181 | 0.336607361 | 0.429047737 | 0.414588937 |
| 0.199407248 | 0.47329465  | 0.48773963  | 0.080633404 |
| 0.395257894 | 0.469888819 | 0.494476503 | 0.00438335  |
| 0.483868699 | 0.023465979 | 0.254710935 | 0.284003861 |
| 0.270499614 | 0.267350234 | 0.310006809 | 0.347830461 |
| 0.445900121 | 0.314428993 | 0.373996696 | 0.329769346 |
| 0.233561347 | 0.341163407 | 0.451446963 | 0.467004362 |
| 0.336716136 | 0.233732603 | 0.208467016 | 0.206170561 |
| 0.11276692  | 0.527532103 | 0.357838735 | 0.185196446 |
| 0.314719421 | 0.451389202 | 0.423826378 | 0.517544187 |
| 0.475690736 | 0.240456589 | 0.400808279 | 0.533877415 |
| 0.275355813 | 0.413852977 | 0.155417639 | 0.507051776 |
| 0.344520861 | 0.24186311  | 0.516197346 | 0.450798872 |
| 0.490775183 | 0.452334984 | 0.358879839 | 0.490511642 |
| 0.444319904 | 0.398933399 | 0.432755618 | 0.137689813 |
| 0.289076121 | 0.246017618 | 0.289337291 | 0.008680288 |
| 0.44676751  | 0.428460409 | 0.52382166  | 0.509452287 |
| 0.307475623 | 0.46079997  | 0.454072124 | 0.174270638 |
| 0.397638584 | 0.296823698 | 0.249117221 | 0.514363512 |
| 0.226408022 | 0.302709847 | 0.345625761 | 0.51282968  |
| 0.490361806 | 0.482792817 | 0.288930688 | 0.353827025 |
| 0.330150767 | 0.344996552 | 0.490536083 | 0.258443941 |
| 0.490614173 | 0.211062155 | 0.481766061 | 0.347905161 |



|             |             |             |             |
|-------------|-------------|-------------|-------------|
| 0.27311692  | 0.520532097 | 0.148920631 | 0.522964419 |
| 0.361409065 | 0.252656365 | 0.495271893 | 0.440753039 |
| 0.439035848 | 0.185386707 | 0.190211544 | 0.491824759 |
| 0.306132886 | 0.374061968 | 0.021140633 | 0.06717259  |
| 0.400592832 | 0.372333844 | 0.493291621 | 0.43882472  |
| 0.270580685 | 0.397001326 | 0.181237164 | 0.404032383 |
| 0.508721717 | 0.528553821 | 0.32250713  | 0.340519568 |
| 0.438998702 | 0.188085988 | 0.540179098 | 0.022244995 |
| 0.467031992 | 0.465023222 | 0.443273574 | 0.117750031 |
| 0.054395029 | 0.212048256 | 0.477137525 | 0.165007371 |
| 0.495782128 | 0.2258322   | 0.454729273 | 0.521821043 |
| 0.29594865  | 0.528842963 | 0.174736078 | 0.476903024 |
| 0.10903667  | 0.363588365 | 0.420226316 | 0.435075896 |
| 0.27011152  | 0.304902009 | 0.442972575 | 0.250725559 |
| 0.077789819 | 0.317877742 | 0.003202725 | 0.447523932 |
| 0.50367324  | 0.354503342 | 0.317980774 | 0.383009775 |
| 0.357938427 | 0.467152968 | 0.272682173 | 0.485801538 |
| 0.030202103 | 0.400068897 | 0.302037933 | 0.522450286 |
| 0.2628419   | 0.426384545 | 0.117538955 | 0.332507651 |
| 0.507127379 | 0.309609769 | 0.354458348 | 0.342144891 |
| 0.522486024 | 0.494570253 | 0.308438942 | 0.279204917 |
| 0.467509421 | 0.155885119 | 0.503799952 | 0.516228095 |
| 0.246889794 | 0.227903523 | 0.484551581 | 0.271980346 |
| 0.326293694 | 0.490934125 | 0.474250653 | 0.512606437 |
| 0.104798581 | 0.345004419 | 0.486942706 | 0.501041357 |
| 0.378096256 | 0.177854481 | 0.257209267 | 0.26114477  |
| 0.511808684 | 0.188953861 | 0.273429685 | 0.466553742 |
| 0.219561527 | 0.396947363 | 0.461544594 | 0.222998803 |
| 0.076798294 | 0.25665351  | 0.487419174 | 0.253744539 |
| 0.368501464 | 0.41450215  | 0.265129203 | 0.450266057 |
| 0.205155677 | 0.054547898 | 0.475212565 | 0.015941236 |
| 0.508266969 | 0.465469026 | 0.352701695 | 0.398678798 |
| 0.31323384  | 0.450992557 | 0.459148603 | 0.004714428 |
| 0.471371691 | 0.068291058 | 0.368820833 | 0.262336799 |
| 0.307102275 | 0.122941035 | 0.509416303 | 0.5102822   |
| 0.447784363 | 0.408573714 | 0.384628878 | 0.50834058  |
| 0.153383834 | 0.365896309 | 0.363181122 | 0.524137937 |
| 0.234446642 | 0.462292263 | 0.470484613 | 0.423653855 |
| 0.498267814 | 0.402472047 |             |             |
| ANP32E      | 0.253107426 | 0.234971914 | 0.17740985  |
| 0.277728473 | 0.177199037 | 0.175366001 | 0.238636327 |
| 0.280187335 | 0.193271944 | 0.067406171 | 0.223765898 |
| 0.205800094 | 0.036587833 | 0.292644936 | 0.243889687 |
| 0.152047406 | 0.258304493 | 0.287392605 | 0.061266708 |
| 0.160524879 | 0.185389604 | 0.136388021 | 0.163555076 |
| 0.168234345 | 0.311399612 | 0.166552704 | 0.107445254 |
| 0.275156149 | 0.062962425 | 0.177178284 | 0.050083734 |
| 0.352836302 | 0.165889662 | 0.105124696 | 0.16261737  |
| 0.171209072 | 0.009226409 | 0.350997362 | 0.232933349 |
| 0.085238613 | 0.3523075   | 0.093863828 | 0.293517772 |
| 0.108467854 | 0.20931679  | 0.042837983 | 0.142382942 |
| 0.15217672  | 0.200401042 | 0.173000512 | 0.184447991 |
| 0.126129139 | 0.256586076 | 0.147908157 | 0.014503729 |
| 0.094505746 | 0.015342253 | 0.052623511 | 0.316328056 |

| 1           | 0.333680197 | 0.056366364 | 0.175187796 |
|-------------|-------------|-------------|-------------|
| 0.128265997 | 0.173195148 | 0.254108207 | 0.09920661  |
| 0.315966041 | 0.066605999 | 0.161551447 | 0.190354189 |
| 0.167381983 | 0.139621196 | 0.307238048 | 0.14887943  |
| 0.130878801 | 0.317499404 | 0.200798602 | 0.110209743 |
| 0.225550841 | 0.369631172 | 0.248355866 | 0.309982877 |
| 0.050013451 | 0.130040828 | 0.158627694 | 0.27073949  |
| 0.191693233 | 0.184272956 | 0.242554848 | 0.35054898  |
| 0.158003865 | 0.106251666 | 0.181303889 | 0.200400432 |
| 0.25136709  | 0.080426428 | 0.10841034  | 0.095604431 |
| 0.165444438 | 0.151202458 | 0.317210247 | 0.291077494 |
| 0.165380129 | 0.1861056   | 0.325227755 | 0.125158764 |
| 0.230765421 | 0.225782405 | 0.159186922 | 0.215756533 |
| 0.177283927 | 0.28755865  | 0.20462968  | 0.236980733 |
| 0.137428334 | 0.309224344 | 0.225360146 | 0.268297188 |
| 0.025448015 | 0.312545369 | 0.293687295 | 0.293940786 |
| 0.182803043 | 0.304448007 | 0.114686122 | 0.322158583 |
| 0.259840835 | 0.234566223 | 0.289422032 | 0.259373574 |
| 0.25731759  | 0.300215545 | 0.299397971 | 0.246716947 |
| 0.24252913  | 0.072206069 | 0.140121384 | 0.220418586 |
| 0.204741933 | 0.244592038 | 0.119522838 | 0.350597926 |
| 0.342251211 | 0.233699208 | 0.226758065 | 0.378102437 |
| 0.203493348 | 0.363520897 | 0.233893006 | 0.324072254 |
| 0.35188678  | 0.341951697 | 0.335784498 | 0.172404897 |
| 0.345670496 | 0.220318116 | 0.036210018 | 0.245348652 |
| 0.361172996 | 0.021733561 | 0.237892779 | 0.26155091  |
| 0.297140083 | 0.22269196  | 0.321210751 | 0.291532395 |
| 0.297147136 | 0.225264143 | 0.005129223 | 0.224948581 |
| 0.32471538  | 0.311336497 | 0.246666911 | 0.120823685 |
| 0.157469665 | 0.184316344 | 0.199548313 | 0.124687773 |
| 0.384042737 | 0.262773787 | 0.253539605 | 0.215762669 |
| 0.128987059 | 0.35388146  | 0.102110841 | 0.325393208 |
| 0.267303916 | 0.25810936  | 0.174873524 | 0.247062188 |
| 0.106341191 | 0.318020224 | 0.176835371 | 0.144122962 |
| 0.313580874 | 0.166820277 | 0.088190703 | 0.177396008 |
| 0.171909026 | 0.140294409 | 0.2699273   | 0.225145426 |
| 0.279109812 | 0.301627245 | 0.275052334 | 0.332941087 |
| 0.254485418 | 0.315003551 | 0.166545782 | 0.282575483 |
| 0.135833505 | 0.258810402 | 0.194460035 | 0.346483838 |
| 0.376575737 | 0.143912247 | 0.288440016 | 0.131716526 |
| 0.14267122  | 0.061678424 | 0.052884536 | 0.119532773 |
| 0.300099949 | 0.208209843 | 0.159383786 | 0.215650861 |
| 0.220401376 | 0.185787277 | 0.135838971 | 0.383839786 |
| 0.218508255 | 0.215512332 | 0.28018216  | 0.125826132 |
| 0.081143941 | 0.22618412  | 0.241202752 | 0.151928323 |
| 0.196117933 | 0.085056255 | 0.095059497 | 0.264666466 |
| 0.08826562  | 0.126082574 | 0.26818956  | 0.206594889 |
| 0.143371441 | 0.263730062 | 0.321016473 | 0.012536294 |
| 0.123033539 | 0.173602033 | 0.280600925 | 0.08784292  |
| 0.271461517 | 0.273465516 | 0.150846472 | 0.187156487 |
| 0.207204129 | 0.320369847 | 0.277047851 | 0.3017062   |
| 0.110092934 | 0.327159026 | 0.244639513 | 0.302943655 |
| 0.224620136 | 0.094975689 | 0.041394807 | 0.241195367 |
| 0.253643289 | 0.092571179 | 0.1768272   | 0.182247286 |

|             |             |             |             |
|-------------|-------------|-------------|-------------|
| 0.099076883 | 0.168126329 | 0.158615793 | 0.320634884 |
| 0.384718608 | 0.277523163 | 0.319006    | 0.241219886 |
| 0.308067709 | 0.292680876 | 0.250117005 | 0.340342684 |
| 0.072299901 | 0.138475287 | 0.148436693 | 0.280682028 |
| 0.285130791 | 0.145055813 | 0.304919793 | 0.050053338 |
| 0.003360842 | 0.212325055 | 0.222742712 | 0.310483169 |
| 0.110190228 | 0.116334323 | 0.18124481  | 0.310808642 |
| 0.319668614 | 0.317670041 | 0.229371795 | 0.197896806 |
| 0.285738295 | 0.133229335 | 0.131227596 | 0.16336429  |
| 0.282939738 | 0.15988801  | 0.32038409  | 0.374206188 |
| 0.130966653 | 0.116678209 | 0.185692636 | 0.030069767 |
| 0.214876355 | 0.177585454 | 0.226669054 | 0.345673548 |
| 0.290033233 | 0.316907245 | 0.239381064 | 0.083318997 |
| 0.262024871 | 0.285214574 | 0.058540042 | 0.270768057 |
| 0.284377756 | 0.273055655 | 0.279581357 | 0.292766884 |
| 0.243154085 | 0.193736889 | 0.222606249 | 0.179696032 |
| 0.288098629 | 0.196708541 | 0.102563912 | 0.221048191 |
| 0.018188437 | 0.276792232 | 0.177326757 | 0.294489648 |
| 0.192102782 | 0.21713507  | 0.254288415 | 0.147748578 |
| 0.167690786 | 0.057580753 | 0.172777704 | 0.236146153 |
| 0.226129076 | 0.161160057 | 0.112837049 | 0.108312721 |
| 0.306865287 | 0.308021041 | 0.099881018 | 0.327263826 |
| 0.246795683 | 0.16863263  | 0.211231484 | 0.235216822 |
| 0.279253058 | 0.032718973 | 0.146902553 | 0.012590973 |
| 0.102247806 | 0.304145643 | 0.125717905 | 0.219762112 |
| 0.27267275  | 0.114788774 | 0.303768739 | 0.338828452 |
| 0.278966347 | 0.301060544 | 0.319123615 | 0.121604808 |
| 0.318785384 | 0.016444819 | 0.304508828 | 0.242665464 |
| 0.093160804 | 0.015386409 | 0.068994375 | 0.262041493 |
| 0.154219498 | 0.15238332  | 0.300652634 | 0.151957302 |
| 0.339630873 | 0.207320406 | 0.263115126 | 0.151319017 |
| 0.166712197 | 0.229585183 | 0.133560771 | 0.293572817 |
| 0.264008011 | 0.273164561 | 0.127872659 | 0.201302119 |
| 0.15872502  | 0.290022425 | 0.187360372 | 0.055447838 |
| 0.213586919 | 0.217160966 | 0.337043259 | 0.30238148  |
| 0.358151597 | 0.198553841 | 0.072425494 | 0.146647187 |
| 0.244206798 | 0.162290027 | 0.101070419 | 0.178728995 |
| 0.282744814 | 0.171725922 | 0.324002742 | 0.323938577 |
| 0.335430424 | 0.329481175 | 0.237402681 | 0.2338884   |
| 0.143795324 | 0.013828485 | 0.159807815 | 0.253017222 |
| 0.028469547 | 0.134763076 | 0.318529738 | 0.141759025 |
| 0.188415048 | 0.21710733  | 0.091725531 | 0.10029515  |
| 0.24268662  | 0.184124527 | 0.156377345 | 0.229954898 |
| 0.179212999 | 0.13188345  | 0.289001012 | 0.275101545 |
| 0.105431809 | 0.276063897 | 0.310805336 | 0.186803885 |
| 0.12496389  | 0.140235421 | 0.273084546 | 0.273518546 |
| 0.281697177 | 0.279589605 | 0.220957638 | 0.161552275 |
| 0.316635701 | 0.17027183  | 0.295425493 | 0.28144533  |
| 0.346796457 | 0.355235475 | 0.372760733 | 0.245072676 |
| 0.283897027 | 0.208918549 | 0.148330938 | 0.234385461 |
| 0.308869747 | 0.153212517 | 0.303628576 | 0.102841344 |
| 0.259413691 | 0.279078645 | 0.288646851 | 0.272793626 |
| 0.129854735 | 0.303052964 | 0.297659458 | 0.201931672 |
| 0.205443729 | 0.106619508 | 0.237194781 | 0.302956946 |

|             |             |             |             |
|-------------|-------------|-------------|-------------|
| 0.263551873 | 0.066398974 | 0.290225326 | 0.184541488 |
| 0.239460108 | 0.050495957 | 0.180743201 | 0.372237141 |
| 0.260213338 | 0.216524252 | 0.180823258 | 0.205439393 |
| 0.213203654 | 0.099041492 | 0.18130829  | 0.235623855 |
| 0.304006876 | 0.160591142 | 0.316672229 | 0.306473157 |
| 0.220131075 | 0.161697367 | 0.093601507 | 0.168610007 |
| 0.268959366 | 0.179199172 | 0.239229098 | 0.241515083 |
| 0.318367622 | 0.359549564 | 0.252316103 | 0.336296992 |
| 0.135449138 | 0.167493007 | 0.140024262 | 0.241367861 |
| 0.103767725 | 0.277159136 | 0.098136882 | 0.206107297 |
| 0.021399717 | 0.055730998 | 0.284620098 | 0.295538785 |
| 0.345364461 | 0.286995394 | 0.353631843 | 0.196269828 |
| 0.000877215 | 0.148515142 | 0.209626901 | 0.164611856 |
| 0.249265148 | 0.275494035 | 0.14010262  | 0.317642566 |
| 0.345028547 | 0.178979065 | 0.27918691  | 0.152372925 |
| 0.051274214 | 0.164769768 | 0.308893779 | 0.20925479  |
| 0.260114716 | 0.143961915 | 0.103780818 | 0.291749472 |
| 0.061350412 | 0.337212908 | 0.31407525  | 0.075453013 |
| 0.071506019 | 0.26954715  | 0.22239091  | 0.213345537 |
| 0.12763801  | 0.247027207 | 0.289768695 | 0.022160145 |
| 0.197526259 | 0.158193491 | 0.277743737 | 0.290274022 |
| 0.292377525 | 0.247535871 | 0.240803541 | 0.195517188 |
| 0.176227857 | 0.273863743 | 0.280425229 | 0.306469424 |
| 0.31540368  | 0.259571656 | 0.165896284 | 0.166266409 |
| 0.218117135 | 0.315663739 | 0.236757645 | 0.236862421 |
| 0.312045395 | 0.255982001 | 0.355373937 | 0.185669678 |
| 0.286447246 | 0.152888388 | 0.369139365 | 0.280013776 |
| 0.331976051 | 0.197338938 | 0.179988673 | 0.24971353  |
| 0.045926839 | 0.146175459 | 0.200030173 | 0.168502545 |
| 0.298634719 | 0.172700017 | 0.134088032 | 0.175814279 |
| 0.164021346 | 0.377996366 | 0.345873265 | 0.320498432 |
| 0.191746863 | 0.121632471 | 0.080528659 | 0.323795905 |
| 0.293157813 | 0.232887833 | 0.173002724 | 0.069091355 |
| 0.233296955 | 0.215624424 | 0.250339308 | 0.314532609 |
| 0.083055575 | 0.344443119 | 0.099694624 | 0.279079206 |
| 0.069294815 | 0.240757338 | 0.280401982 | 0.187573581 |
| 0.059523606 | 0.316111886 | 0.201130734 | 0.155128002 |
| 0.198620893 | 0.16459468  | 0.149191433 | 0.228938643 |
| 0.226537281 | 0.227070055 | 0.319377252 | 0.220014832 |
| 0.121323589 | 0.172779619 | 0.113853266 | 0.221501511 |
| 0.24909942  | 0.287184342 | 0.231829592 | 0.28977687  |
| 0.158917174 | 0.246399816 | 0.38883949  | 0.203628075 |
| 0.202514995 | 0.292776479 | 0.058816364 | 0.125201231 |
| 0.232757962 | 0.103123978 | 0.002505709 | 0.046236688 |
| 0.290470276 | 0.104831044 | 0.178080298 | 0.211187075 |
| 0.155202785 | 0.282649266 | 0.050341796 | 0.199392428 |
| 0.284748988 | 0.334859785 | 0.234780949 | 0.31311163  |
| 0.260110435 | 0.337279149 | 0.166371465 | 0.011234913 |
| 0.136774914 | 0.113039657 | 0.099782158 | 0.272952281 |
| 0.194869804 | 0.064937197 | 0.141870318 | 0.144426846 |
| 0.277071635 | 0.0573781   | 0.123134404 | 0.193567302 |
| 0.241141693 | 0.344193242 | 0.293739528 | 0.237272995 |
| 0.115328265 | 0.247490149 | 0.117333764 | 0.115020154 |
| 0.222862417 | 0.128458352 | 0.263078098 | 0.119917367 |

|             |             |             |             |
|-------------|-------------|-------------|-------------|
| 0.265242154 | 0.222847926 | 0.016914722 | 0.382015605 |
| 0.307318343 | 0.112803716 | 0.312547655 | 0.064944838 |
| 0.294517678 | 0.269009796 | 0.162331891 | 0.114580283 |
| 0.175579855 | 0.153621631 | 0.29978027  | 0.28217265  |
| 0.066990921 | 0.133741632 | 0.302049367 | 0.125898345 |
| 0.345162851 | 0.145420356 | 0.301251661 | 0.088673476 |
| 0.286435952 | 0.224957056 | 0.205661386 | 0.182690837 |
| 0.125539979 | 0.202656342 | 0.111064234 | 0.328284545 |
| 0.317963113 | 0.125319685 | 0.25074825  | 0.282635703 |
| 0.110784651 | 0.278615789 | 0.110258653 | 0.314995336 |
| 0.262208825 | 0.2998138   | 0.225467702 | 0.276313181 |
| 0.327051643 | 0.1211395   | 0.112981687 | 0.20524366  |
| 0.287273107 | 0.304490351 | 0.116124337 | 0.26652197  |
| 0.092773907 | 0.255933344 | 0.110582351 | 0.209467583 |
| 0.259280129 | 0.251922842 | 0.185679177 | 0.273333905 |
| 0.247275115 | 0.176722509 | 0.168206266 | 0.370657093 |
| 0.316913693 | 0.21069826  | 0.370378135 | 0.011608256 |
| 0.19632998  | 0.20289333  | 0.284209266 | 0.158587261 |
| 0.312238363 | 0.185835414 | 0.155469907 | 0.043656209 |
| 0.249376178 | 0.060221597 | 0.163259174 | 0.214507014 |
| 0.102864387 | 0.23307582  | 0.322792955 | 0.309278114 |
| 0.223681576 | 0.105480116 | 0.090403581 | 0.296862337 |
| 0.071330317 | 0.073091695 | 0.095878214 | 0.159271269 |
| 0.090358964 | 0.094607298 | 0.11076371  | 0.112817934 |
| 0.236351291 | 0.235356213 |             |             |
| ANXA6       | 0.176745039 | 0.148350216 | 0.102709161 |
| 0.15421596  | 0.140994285 | 0.068828698 | 0.206512604 |
| 0.208422364 | 0.138099436 | 0.021574537 | 0.14610758  |
| 0.192425366 | 0.025956181 | 0.206318697 | 0.230074357 |
| 0.108476284 | 0.252980741 | 0.23067059  | 0.04376819  |
| 0.09197306  | 0.149601773 | 0.062349122 | 0.080273599 |
| 0.123409746 | 0.282092097 | 0.109357824 | 0.059486713 |
| 0.172975099 | 0.019674295 | 0.112807596 | 0.013263014 |
| 0.279329602 | 0.13280034  | 0.043693346 | 0.125835799 |
| 0.100037746 | 0.014589606 | 0.264598039 | 0.147523478 |
| 0.04616256  | 0.300043368 | 0.030345403 | 0.187289092 |
| 0.04228299  | 0.149959987 | 0.01134518  | 0.097966151 |
| 0.103538966 | 0.124588187 | 0.133325696 | 0.117146638 |
| 0.056085834 | 0.199458136 | 0.07880462  | 0.010178374 |
| 0.0409506   | 0.006762039 | 0.022809231 | 0.207148096 |
| 0.333680197 | 1           | 0.020360988 | 0.110427188 |
| 0.089479367 | 0.142370888 | 0.272252723 | 0.034982254 |
| 0.212390477 | 0.041258252 | 0.099738374 | 0.104041131 |
| 0.078924248 | 0.110245232 | 0.338794148 | 0.138684785 |
| 0.05681989  | 0.283480474 | 0.142043769 | 0.055109144 |
| 0.131038864 | 0.271791988 | 0.245201613 | 0.19975571  |
| 0.046901675 | 0.093318092 | 0.095046207 | 0.272873811 |
| 0.157227008 | 0.155272409 | 0.174302535 | 0.246557544 |
| 0.130147969 | 0.053352285 | 0.128402591 | 0.203979127 |
| 0.161098175 | 0.041247568 | 0.04346538  | 0.058349886 |
| 0.133282483 | 0.107517605 | 0.228354409 | 0.270904853 |
| 0.107748291 | 0.169167819 | 0.213955109 | 0.089459062 |
| 0.12853228  | 0.175023858 | 0.107562261 | 0.138853538 |
| 0.11950697  | 0.185295845 | 0.129531148 | 0.199293098 |

|             |             |             |             |
|-------------|-------------|-------------|-------------|
| 0.082843793 | 0.205114012 | 0.155704053 | 0.198975263 |
| 0.00723589  | 0.204614294 | 0.217454162 | 0.285408231 |
| 0.113585204 | 0.279457259 | 0.080070013 | 0.317329598 |
| 0.170256646 | 0.199987753 | 0.176328964 | 0.203177228 |
| 0.188943797 | 0.190418459 | 0.193430113 | 0.179342373 |
| 0.201773292 | 0.039185061 | 0.080025812 | 0.126002323 |
| 0.168118574 | 0.252996405 | 0.06975469  | 0.240965204 |
| 0.26705584  | 0.168212134 | 0.128286602 | 0.276146874 |
| 0.145767139 | 0.265626355 | 0.135667778 | 0.25441544  |
| 0.24157463  | 0.228402433 | 0.2408908   | 0.124467241 |
| 0.242661017 | 0.11248683  | 0.033351167 | 0.19057406  |
| 0.279279407 | 0.016984799 | 0.152250631 | 0.170616402 |
| 0.188532396 | 0.141203088 | 0.232303482 | 0.194537565 |
| 0.188458995 | 0.218693394 | 0.003277704 | 0.229704369 |
| 0.213136768 | 0.231692404 | 0.223462313 | 0.059480901 |
| 0.124935118 | 0.087580845 | 0.138570074 | 0.047499827 |
| 0.299298945 | 0.1748405   | 0.160109103 | 0.155051584 |
| 0.078571996 | 0.306102911 | 0.056151838 | 0.212848329 |
| 0.224063887 | 0.158675265 | 0.163280561 | 0.23898077  |
| 0.031654401 | 0.312887016 | 0.070002197 | 0.110634758 |
| 0.335656462 | 0.080809082 | 0.03474756  | 0.140573434 |
| 0.173262282 | 0.072987924 | 0.197736765 | 0.162774533 |
| 0.251626618 | 0.314870007 | 0.171104336 | 0.240453472 |
| 0.206843685 | 0.265198725 | 0.103208847 | 0.191859511 |
| 0.069873391 | 0.228147988 | 0.127965896 | 0.262032057 |
| 0.32654875  | 0.084001151 | 0.309419613 | 0.101915212 |
| 0.07280045  | 0.023105496 | 0.027841615 | 0.065940663 |
| 0.281181951 | 0.136181014 | 0.113562223 | 0.169159589 |
| 0.124310156 | 0.127068169 | 0.063651467 | 0.303711005 |
| 0.202573157 | 0.11993959  | 0.203707039 | 0.067162635 |
| 0.073016742 | 0.135529355 | 0.161285485 | 0.13355092  |
| 0.170882568 | 0.054154402 | 0.039748518 | 0.18062055  |
| 0.041352998 | 0.089842483 | 0.177081596 | 0.166940796 |
| 0.061118417 | 0.216451498 | 0.226899302 | 0.008824191 |
| 0.080136558 | 0.127575946 | 0.291846235 | 0.03228211  |
| 0.235756078 | 0.283711653 | 0.114430149 | 0.110122417 |
| 0.172853761 | 0.216774742 | 0.209719986 | 0.201291925 |
| 0.043487429 | 0.23018647  | 0.163618307 | 0.222382612 |
| 0.184251116 | 0.04339917  | 0.022994177 | 0.157490104 |
| 0.170084197 | 0.036520459 | 0.174584034 | 0.115079394 |
| 0.039594272 | 0.122142444 | 0.129245783 | 0.227957652 |
| 0.289851691 | 0.169529767 | 0.266667456 | 0.21230614  |
| 0.23927439  | 0.21189188  | 0.186992921 | 0.25065242  |
| 0.024879466 | 0.083379169 | 0.07365041  | 0.238017312 |
| 0.269888385 | 0.10853916  | 0.271281317 | 0.027215188 |
| 0.001069549 | 0.169631464 | 0.186949225 | 0.250227285 |
| 0.075170499 | 0.066649516 | 0.13900654  | 0.208391571 |
| 0.268738192 | 0.240949221 | 0.23532487  | 0.106581299 |
| 0.196240751 | 0.073850597 | 0.078783739 | 0.127044125 |
| 0.28606903  | 0.127106257 | 0.24476695  | 0.27039912  |
| 0.124799382 | 0.06366093  | 0.115575052 | 0.028198421 |
| 0.172869323 | 0.100506553 | 0.224042011 | 0.333280717 |
| 0.217290168 | 0.281124192 | 0.211392928 | 0.028136105 |
| 0.235988908 | 0.254992085 | 0.054650599 | 0.18258304  |

|             |             |             |             |
|-------------|-------------|-------------|-------------|
| 0.197703437 | 0.196473158 | 0.191257118 | 0.204747989 |
| 0.174638638 | 0.14138643  | 0.165702263 | 0.091224737 |
| 0.213244715 | 0.123538095 | 0.060168874 | 0.141911063 |
| 0.015575875 | 0.23029258  | 0.133337011 | 0.330089813 |
| 0.136253958 | 0.207985279 | 0.215546628 | 0.117413242 |
| 0.108213785 | 0.023217996 | 0.094430339 | 0.177251919 |
| 0.214928156 | 0.1371243   | 0.037575956 | 0.047440946 |
| 0.200322487 | 0.24647604  | 0.03838869  | 0.217773119 |
| 0.177738214 | 0.138383908 | 0.126433853 | 0.189902741 |
| 0.228810509 | 0.013407254 | 0.067808832 | 0.002729178 |
| 0.044915518 | 0.224912906 | 0.055636824 | 0.131051476 |
| 0.230933775 | 0.100803243 | 0.220999086 | 0.234176884 |
| 0.170453495 | 0.205258237 | 0.21475031  | 0.061207162 |
| 0.210289021 | 0.007638385 | 0.200027999 | 0.159487201 |
| 0.030184551 | 0.010503997 | 0.092409728 | 0.170572165 |
| 0.090292677 | 0.140115285 | 0.298292058 | 0.049961626 |
| 0.269043923 | 0.119476775 | 0.225228086 | 0.107824507 |
| 0.105691487 | 0.191771728 | 0.104177142 | 0.19088964  |
| 0.182950694 | 0.261294652 | 0.047430317 | 0.221301304 |
| 0.104828565 | 0.240571226 | 0.208221719 | 0.048259606 |
| 0.189163455 | 0.193911882 | 0.228783653 | 0.197898848 |
| 0.263364239 | 0.152840246 | 0.021650852 | 0.065475106 |
| 0.18201276  | 0.134016465 | 0.036286639 | 0.149766071 |
| 0.173523455 | 0.126596302 | 0.293643586 | 0.266043132 |
| 0.245379286 | 0.230311452 | 0.218226784 | 0.17479643  |
| 0.102579174 | 0.022533658 | 0.065868609 | 0.262067734 |
| 0.02992422  | 0.071213549 | 0.308095231 | 0.092069589 |
| 0.139987754 | 0.162978903 | 0.048162047 | 0.056350916 |
| 0.217647563 | 0.115942643 | 0.112862054 | 0.229659864 |
| 0.118521105 | 0.106519551 | 0.215072093 | 0.226911711 |
| 0.062218334 | 0.2163272   | 0.2770352   | 0.178062145 |
| 0.05640354  | 0.073916241 | 0.217823865 | 0.286450322 |
| 0.198462516 | 0.184495117 | 0.21662033  | 0.157548905 |
| 0.290324227 | 0.101839204 | 0.206872097 | 0.1750875   |
| 0.235525246 | 0.262544387 | 0.303079019 | 0.224207887 |
| 0.224832497 | 0.177054487 | 0.111098017 | 0.21801049  |
| 0.208048131 | 0.141068605 | 0.20028995  | 0.060058263 |
| 0.279194468 | 0.172387966 | 0.266449844 | 0.253890213 |
| 0.082549172 | 0.324963097 | 0.251639512 | 0.159826315 |
| 0.120209058 | 0.054456762 | 0.204078734 | 0.278751764 |
| 0.215854764 | 0.034766168 | 0.286924601 | 0.097129815 |
| 0.179344928 | 0.019247239 | 0.120770601 | 0.30193117  |
| 0.266460366 | 0.181708612 | 0.067164978 | 0.16580153  |
| 0.133261643 | 0.048816928 | 0.129077794 | 0.138599815 |
| 0.219777923 | 0.098350033 | 0.206728466 | 0.270764987 |
| 0.239942708 | 0.090861203 | 0.047052422 | 0.123307933 |
| 0.269897686 | 0.073341222 | 0.201614587 | 0.24259602  |
| 0.309250269 | 0.274484379 | 0.166749907 | 0.252729034 |
| 0.076663651 | 0.136603098 | 0.124347281 | 0.164904807 |
| 0.066267291 | 0.199809892 | 0.033343415 | 0.14439481  |
| 0.020264104 | 0.034593156 | 0.207351091 | 0.19759233  |
| 0.254521201 | 0.197905529 | 0.268884307 | 0.119853842 |
| 0.001005488 | 0.10159584  | 0.156403685 | 0.06572208  |
| 0.157626412 | 0.224486395 | 0.103467434 | 0.280245944 |

|             |             |             |             |
|-------------|-------------|-------------|-------------|
| 0.345305241 | 0.163291833 | 0.229675534 | 0.056768669 |
| 0.026541543 | 0.108645821 | 0.36014842  | 0.188681979 |
| 0.200206824 | 0.140615412 | 0.055548409 | 0.176891335 |
| 0.047853843 | 0.359804612 | 0.28143525  | 0.024690797 |
| 0.031629438 | 0.209498223 | 0.149960325 | 0.175303699 |
| 0.078081445 | 0.192039978 | 0.223067633 | 0.023549428 |
| 0.134479164 | 0.170960195 | 0.226650296 | 0.201819212 |
| 0.222860028 | 0.193754593 | 0.248633489 | 0.110099109 |
| 0.137693397 | 0.187223239 | 0.160034229 | 0.311151406 |
| 0.23862905  | 0.184793702 | 0.1167457   | 0.080422302 |
| 0.124778921 | 0.221321588 | 0.229298733 | 0.216161374 |
| 0.261524083 | 0.167512389 | 0.343558342 | 0.175074162 |
| 0.30559957  | 0.07125631  | 0.337392972 | 0.171872703 |
| 0.274546631 | 0.162298559 | 0.104886188 | 0.15099834  |
| 0.016304222 | 0.060945574 | 0.141200738 | 0.092305638 |
| 0.247855188 | 0.114761    | 0.063156759 | 0.108884363 |
| 0.10445828  | 0.308327276 | 0.335086173 | 0.246262728 |
| 0.091632487 | 0.071093513 | 0.022411916 | 0.279677257 |
| 0.183532985 | 0.250838295 | 0.133715509 | 0.064742587 |
| 0.207403576 | 0.089637463 | 0.159857799 | 0.203195366 |
| 0.038435903 | 0.295269781 | 0.02861488  | 0.198855418 |
| 0.01831513  | 0.184607428 | 0.314723543 | 0.117185985 |
| 0.025800049 | 0.22123027  | 0.15599611  | 0.054507631 |
| 0.135324953 | 0.108693077 | 0.103239701 | 0.150914132 |
| 0.201056341 | 0.193948955 | 0.228347647 | 0.130539433 |
| 0.065718277 | 0.118009107 | 0.063997415 | 0.14361566  |
| 0.182777696 | 0.188509854 | 0.20859807  | 0.188901521 |
| 0.089869805 | 0.24963235  | 0.303257625 | 0.137207446 |
| 0.101391181 | 0.249251297 | 0.029792236 | 0.047727959 |
| 0.166542687 | 0.044259955 | 0.000811185 | 0.034994458 |
| 0.28007379  | 0.053970803 | 0.107955286 | 0.181283655 |
| 0.103327869 | 0.275132286 | 0.028086785 | 0.11877864  |
| 0.175006881 | 0.225534305 | 0.130014264 | 0.328365896 |
| 0.227036582 | 0.273073579 | 0.09724731  | 0.011211209 |
| 0.086558912 | 0.064341829 | 0.036126694 | 0.252629025 |
| 0.190326107 | 0.030332532 | 0.086595058 | 0.142115336 |
| 0.197952502 | 0.022432922 | 0.083387527 | 0.124965109 |
| 0.256836149 | 0.231988646 | 0.263622689 | 0.178129198 |
| 0.092691667 | 0.255048327 | 0.063964896 | 0.061327662 |
| 0.137127077 | 0.068564615 | 0.216454371 | 0.067184691 |
| 0.244752641 | 0.147304706 | 0.021057469 | 0.300000726 |
| 0.198857098 | 0.061339066 | 0.322297528 | 0.022257091 |
| 0.312792395 | 0.219738579 | 0.116506307 | 0.052818406 |
| 0.166127601 | 0.106877422 | 0.296986499 | 0.191447709 |
| 0.021672173 | 0.087565728 | 0.24251703  | 0.085978392 |
| 0.237456744 | 0.080994814 | 0.311740913 | 0.030904818 |
| 0.179495472 | 0.159379964 | 0.166306882 | 0.129332583 |
| 0.080329635 | 0.218392863 | 0.036307394 | 0.22987634  |
| 0.252489428 | 0.075592086 | 0.180949962 | 0.193097619 |
| 0.058766165 | 0.205066501 | 0.063310237 | 0.220693921 |
| 0.268087735 | 0.314383414 | 0.168936719 | 0.188252363 |
| 0.336994455 | 0.09422209  | 0.062670249 | 0.146374201 |
| 0.176813296 | 0.211429807 | 0.070422411 | 0.209895206 |
| 0.051597297 | 0.260251374 | 0.064377473 | 0.16804025  |



|             |             |             |             |
|-------------|-------------|-------------|-------------|
| 0.24864697  | 0.201205593 | 0.082687868 | 0.279970402 |
| 0.21686237  | 0.111415025 | 0.113503577 | 0.312370427 |
| 0.231417346 | 0.170656388 | 0.294224188 | 0.010299192 |
| 0.11001412  | 0.152826627 | 0.263541381 | 0.088459564 |
| 0.288265546 | 0.139397381 | 0.07969169  | 0.046940133 |
| 0.198481026 | 0.043212002 | 0.102174567 | 0.141021654 |
| 0.052535262 | 0.188145675 | 0.226198676 | 0.218422211 |
| 0.195078212 | 0.044861342 | 0.032490681 | 0.20879698  |
| 0.044345984 | 0.026994647 | 0.044194055 | 0.092211482 |
| 0.050801413 | 0.03186328  | 0.041783424 | 0.041610578 |
| 0.178355531 | 0.142550236 |             |             |
| AOAH        | 0.007653745 | 0.303077941 | 0.006290262 |
| 0.007956708 | 0.164032873 | 0.095369141 | 0.006341205 |
| 0.014564542 | 0.253404564 | 0.177772091 | 0.120684259 |
| 0.000397501 | 0.038266515 | 0.297258202 | 0.005468707 |
| 0.252487237 | 0.001646643 | 0.019792732 | 0.020215295 |
| 0.028039488 | 0.141020014 | 0.073148    | 0.136050264 |
| 0.147177511 | 0.066300479 | 0.162969854 | 0.310195854 |
| 0.356797771 | 0.068016181 | 0.249396785 | 0.051288924 |
| 0.231874341 | 0.189767146 | 0.224779503 | 0.000329675 |
| 0.176798517 | 0.014637354 | 0.255522081 | 0.068917178 |
| 0.028953348 | 0.164575587 | 0.182652381 | 0.047495396 |
| 0.226591327 | 0.002299875 | 0.065202413 | 0.354362889 |
| 0.189745868 | 0.072607084 | 0.010797174 | 0.265942739 |
| 0.150694175 | 0.132794017 | 0.311764016 | 0.000372477 |
| 0.168783785 | 0.067156731 | 0.162885572 | 0.316562595 |
| 0.056366364 | 0.020360988 | 1           | 0.086083745 |
| 0.302644412 | 0.28790793  | 0.107063249 | 0.181751345 |
| 0.316176599 | 0.074828757 | 0.366601295 | 0.013587345 |
| 0.138421722 | 0.004202339 | 0.047382615 | 0.026279674 |
| 0.141276499 | 0.049105449 | 0.134418963 | 0.164942906 |
| 0.31445976  | 0.313388236 | 0.092637985 | 0.326296874 |
| 0.047659215 | 0.255989882 | 0.08540916  | 0.156111959 |
| 0.268498774 | 0.015702031 | 0.220914394 | 0.331116612 |
| 0.007998603 | 0.288896437 | 0.291259553 | 0.038480562 |
| 0.265586212 | 0.136990571 | 0.237771401 | 0.058334482 |
| 0.267768116 | 0.216375783 | 0.314205545 | 0.111455122 |
| 0.140938283 | 0.015278375 | 0.287256208 | 0.231490312 |
| 0.067481122 | 0.013893334 | 0.059972929 | 0.390398613 |
| 0.230375892 | 0.32662337  | 0.343766365 | 0.24720689  |
| 0.242497811 | 0.3217275   | 0.210525546 | 0.275801026 |
| 0.078891848 | 0.353331197 | 0.039778556 | 0.00196305  |
| 0.01011867  | 0.009192726 | 0.091258787 | 0.143420196 |
| 0.325826854 | 0.149228154 | 0.037201549 | 0.07501057  |
| 0.360068303 | 0.294466255 | 0.371012871 | 0.279004931 |
| 0.002983121 | 0.142429331 | 0.234121269 | 0.04977389  |
| 0.22913487  | 0.029500234 | 0.145105331 | 0.302322491 |
| 0.187177785 | 0.3224099   | 0.028045324 | 0.28690863  |
| 0.06346217  | 0.309458906 | 0.320421243 | 0.034019253 |
| 0.314219038 | 0.284135266 | 0.332970589 | 0.28516082  |
| 0.262506351 | 0.094277382 | 0.02440631  | 0.259834849 |
| 0.286076746 | 0.002345327 | 0.381535304 | 0.39561566  |
| 0.33437865  | 0.371022383 | 0.371501462 | 0.360113386 |
| 0.334489937 | 0.014616386 | 0.037734611 | 0.14921065  |

|             |             |             |             |
|-------------|-------------|-------------|-------------|
| 0.323377074 | 0.209992269 | 0.021880705 | 0.273677776 |
| 0.229105981 | 0.124651866 | 0.329806727 | 0.04631134  |
| 0.308220965 | 0.31192579  | 0.37645965  | 0.262053217 |
| 0.190034492 | 0.141645342 | 0.314380907 | 0.263307488 |
| 0.001790958 | 0.015194283 | 0.008999234 | 0.170319104 |
| 0.083670126 | 0.045401244 | 0.115815791 | 0.244602542 |
| 0.056386572 | 0.120323384 | 0.188454661 | 0.269110511 |
| 0.014258769 | 0.234675769 | 0.036032038 | 0.049016633 |
| 0.002180539 | 0.046175147 | 0.014377462 | 0.011221964 |
| 0.084733365 | 0.099981152 | 0.322199464 | 0.358322281 |
| 0.17212201  | 0.057048376 | 0.257723005 | 0.287790665 |
| 0.238175557 | 0.213337386 | 0.09229062  | 3.59E-05    |
| 0.048323966 | 0.213449811 | 0.127169047 | 0.279377921 |
| 0.066209481 | 0.042102231 | 0.242700451 | 0.251254342 |
| 0.076988705 | 0.03709122  | 0.160160232 | 0.214464199 |
| 0.05232194  | 0.07000344  | 0.301722742 | 0.267367638 |
| 0.000701275 | 0.111478412 | 0.298977839 | 0.02820249  |
| 0.179231685 | 0.022691832 | 0.055389526 | 0.340034404 |
| 0.093547635 | 0.104287767 | 0.361206946 | 0.264384675 |
| 0.044433737 | 0.102662071 | 0.365980886 | 0.051269866 |
| 0.248531606 | 0.003972533 | 0.122348844 | 0.224428309 |
| 0.082559668 | 0.151537018 | 0.185633208 | 0.082798263 |
| 0.031500734 | 0.339036975 | 0.220719496 | 0.343927812 |
| 0.156250531 | 0.364273917 | 0.330442686 | 0.262283324 |
| 0.163846766 | 0.287077386 | 0.059337839 | 0.291882091 |
| 0.337221642 | 0.070456413 | 0.018367805 | 0.392306865 |
| 0.250496741 | 0.308373715 | 0.018892501 | 0.322807155 |
| 0.276792812 | 0.307849275 | 0.019908924 | 0.249384799 |
| 0.191696648 | 0.053869623 | 0.277499889 | 0.356107376 |
| 0.143791151 | 0.211683205 | 0.129578665 | 0.265127428 |
| 0.047839035 | 0.068848754 | 0.167900495 | 0.100869379 |
| 0.004218521 | 0.014911454 | 0.010424659 | 0.03295239  |
| 0.061807098 | 0.335908033 | 0.261759624 | 0.355284059 |
| 0.019707293 | 0.226595721 | 0.118923335 | 0.067784827 |
| 0.26953144  | 0.189540793 | 0.228384687 | 0.239749258 |
| 0.103869509 | 0.000384236 | 0.005912653 | 0.311445973 |
| 0.008199003 | 0.079142544 | 0.117348134 | 6.02E-05    |
| 0.004159349 | 0.341340918 | 0.029862936 | 0.069315118 |
| 0.340598249 | 0.073468012 | 0.071373813 | 0.168264525 |
| 0.160466012 | 0.015132346 | 0.000394566 | 0.369537103 |
| 0.359543148 | 0.344052101 | 0.362745253 | 0.305586778 |
| 0.366406771 | 0.288942728 | 0.305789914 | 0.115078418 |
| 0.010730126 | 0.014268246 | 0.072896262 | 0.102051613 |
| 0.000686585 | 0.201365253 | 0.149898861 | 0.036400193 |
| 0.31996801  | 0.165510116 | 0.001950846 | 0.235872719 |
| 0.000420602 | 0.102137198 | 0.06893947  | 0.066662419 |
| 0.234331522 | 0.000259846 | 0.02915401  | 0.083631997 |
| 0.231494313 | 0.165104364 | 0.175203772 | 0.34530383  |
| 0.108298356 | 0.046554064 | 0.109577429 | 0.227954692 |
| 0.00735798  | 0.066015939 | 0.134341401 | 0.009682449 |
| 0.025610698 | 0.295482065 | 0.166674505 | 0.003718479 |
| 0.091042572 | 0.000520437 | 0.17896303  | 0.337236042 |
| 0.296235364 | 0.375321393 | 0.310124874 | 0.120282606 |
| 0.318240383 | 0.085477574 | 0.366023086 | 0.251064043 |

|             |             |             |             |
|-------------|-------------|-------------|-------------|
| 0.211158368 | 0.000261597 | 0.000144326 | 0.363629185 |
| 0.22022246  | 0.014452658 | 0.03988693  | 0.038597873 |
| 0.007637868 | 0.027727058 | 0.006686384 | 0.054690896 |
| 0.21171287  | 0.087819484 | 0.052731994 | 0.306212559 |
| 0.07016714  | 0.077109838 | 0.162465069 | 0.022926273 |
| 0.222237123 | 0.002553465 | 0.025628894 | 0.000156168 |
| 0.227291671 | 0.03783283  | 0.268490202 | 0.338242479 |
| 0.294172446 | 0.248521928 | 0.196745857 | 0.039860895 |
| 0.335688215 | 0.027100767 | 0.079582335 | 0.027423702 |
| 0.317802086 | 0.24009546  | 0.137927032 | 0.130434783 |
| 0.327909189 | 0.281682023 | 0.002334936 | 0.278358687 |
| 8.46E-05    | 0.000120875 | 0.133268719 | 0.118525904 |
| 0.043591832 | 0.203295925 | 0.100859342 | 0.08703193  |
| 0.061623613 | 0.000832844 | 0.161807067 | 0.143046094 |
| 0.129039172 | 0.167014838 | 0.145943114 | 0.12782027  |
| 0.095468901 | 0.030397485 | 0.035768195 | 0.027367875 |
| 0.058563781 | 0.161976838 | 0.068603242 | 0.001069482 |
| 0.238891215 | 0.235687104 | 0.005963871 | 0.041932426 |
| 0.272206709 | 0.345648793 | 0.002491915 | 0.000141354 |
| 0.105248081 | 0.14117956  | 0.352611455 | 0.339831299 |
| 0.319381507 | 0.332041023 | 0.196255012 | 0.01893534  |
| 0.005818024 | 0.150938748 | 0.180086496 | 0.010454944 |
| 0.336968762 | 0.01686836  | 0.297199347 | 0.21641808  |
| 0.030380293 | 0.038271424 | 0.000807347 | 0.014974394 |
| 0.255628565 | 0.047799436 | 0.044755575 | 0.041784636 |
| 0.106138403 | 0.065385128 | 0.005082137 | 0.053766996 |
| 0.189632705 | 0.059513613 | 0.043872104 | 0.085833448 |
| 0.203567965 | 0.087358219 | 0.327060651 | 0.251296682 |
| 0.030931532 | 0.028987329 | 0.040823931 | 0.268032756 |
| 0.349349265 | 0.31475082  | 0.000590443 | 0.331130496 |
| 0.332347663 | 0.285122814 | 0.302678238 | 0.248275675 |
| 0.020353069 | 0.17072011  | 0.219278613 | 0.196300699 |
| 0.059358938 | 0.104301827 | 0.087613575 | 0.010475938 |
| 0.151980526 | 0.285667312 | 0.286026463 | 0.028421405 |
| 0.244875001 | 0.037819013 | 0.014230713 | 0.323642704 |
| 0.060735594 | 0.004599693 | 0.190745018 | 0.364688128 |
| 8.67E-05    | 0.072046877 | 0.373597645 | 0.032916392 |
| 0.337057673 | 0.339728035 | 0.238356213 | 0.052544235 |
| 0.003920918 | 0.340377575 | 0.168110303 | 0.133097573 |
| 0.293167928 | 0.162485529 | 0.01844871  | 0.005112646 |
| 0.121343245 | 0.019102739 | 0.01498367  | 0.034091649 |
| 0.064095723 | 0.22668352  | 0.067173731 | 0.084435047 |
| 0.055950211 | 0.036070437 | 0.048494287 | 0.047792898 |
| 0.066500395 | 0.085447517 | 0.17610879  | 0.126232414 |
| 0.049997711 | 0.326021517 | 0.281405003 | 0.001121902 |
| 0.22161675  | 0.299031886 | 0.277363476 | 2.46E-05    |
| 0.28390567  | 0.000340121 | 0.052668065 | 0.049462379 |
| 0.044459321 | 0.062953803 | 0.116867159 | 0.078716361 |
| 0.208151031 | 0.059834832 | 0.055968533 | 0.071880611 |
| 0.021887429 | 0.05871909  | 0.224770487 | 0.147084705 |
| 0.062465173 | 0.014959693 | 0.029866182 | 0.031784687 |
| 0.001541997 | 0.322461444 | 0.089981514 | 0.016443635 |
| 0.07664919  | 0.145478141 | 0.171602226 | 0.337897663 |
| 0.237335894 | 0.036878513 | 0.127283309 | 0.284904752 |

|             |             |             |             |
|-------------|-------------|-------------|-------------|
| 0.123158279 | 0.035725785 | 0.006340066 | 0.169183482 |
| 0.059459504 | 0.03748571  | 0.195969724 | 0.131254839 |
| 0.322450845 | 0.195654189 | 0.083788712 | 0.259835082 |
| 0.12044458  | 0.236191559 | 0.158562607 | 0.004931129 |
| 0.033829785 | 0.041367775 | 0.131818955 | 0.001535807 |
| 0.153253178 | 0.020696632 | 0.337820045 | 0.296963177 |
| 0.176202469 | 0.196128661 | 0.046573643 | 0.007656482 |
| 0.071398901 | 0.074578731 | 0.037536378 | 0.327412105 |
| 0.126641026 | 0.026263081 | 0.139577864 | 0.056900251 |
| 0.321451331 | 0.361931577 | 0.091801923 | 0.068854994 |
| 0.095683752 | 0.061705477 | 0.311914756 | 0.019936996 |
| 0.311126493 | 0.042727369 | 0.246730295 | 0.102517443 |
| 0.067089808 | 0.376964205 | 0.008396365 | 0.384879828 |
| 0.153523467 | 0.040323658 | 0.275271094 | 0.097284377 |
| 0.040321751 | 0.007906814 | 0.117868788 | 0.152920359 |
| 0.040043859 | 0.14909703  | 0.009646892 | 0.016921381 |
| 0.151389266 | 0.164280522 | 0.343965766 | 0.245765491 |
| 0.097514323 | 0.201029928 | 0.058135065 | 0.103311499 |
| 0.312276594 | 0.29679147  | 0.02541149  | 0.108698878 |
| 0.176658244 | 0.010493993 | 0.179807295 | 0.01515109  |
| 0.292517454 | 0.334554548 | 0.125994792 | 0.004245593 |
| 0.000389792 | 0.131270946 | 0.281118109 | 0.020129392 |
| 0.361894649 | 0.064112504 | 0.26999734  | 0.268526217 |
| 0.066803761 | 0.292914231 | 0.016093215 | 0.222512584 |
| 0.005696248 | 0.104579156 | 0.238107338 | 0.252026832 |
| 0.034153214 | 0.148350652 | 0.205786391 | 0.09976537  |
| 0.001517926 | 0.034274241 | 0.000196453 | 0.197227186 |
| 0.293607048 | 0.23603704  | 0.077972414 | 0.150033081 |
| 0.113433141 | 0.237538836 | 0.039083547 | 0.253724626 |
| 0.000101951 | 0.221721939 | 0.053904958 | 0.217150007 |
| 0.064805085 | 0.25568248  | 0.001989306 | 0.221197204 |
| 0.248597578 | 0.04731359  | 0.118653855 | 0.088982396 |
| 0.32193827  | 0.258312786 | 0.058252098 | 0.032101218 |
| 0.329606816 | 0.012912666 | 0.154462105 | 0.356321604 |
| 0.0354742   | 0.09410685  | 0.319230758 | 0.040465702 |
| 0.185696458 | 0.219342169 | 0.334872658 | 0.361771603 |
| 0.007436366 | 0.082758224 | 0.301945032 | 0.326048728 |
| 0.135381983 | 0.075312303 | 0.091499988 | 0.072498181 |
| 0.274419483 | 0.004001182 | 0.09421881  | 0.175097923 |
| 0.110313662 | 0.132530366 | 0.24601919  | 0.060704719 |
| 0.001086141 | 0.027782386 | 0.064529801 | 0.03615975  |
| 0.118041841 | 0.167407323 | 0.074613672 | 0.192886141 |
| 0.007230506 | 0.000450184 | 0.252825126 | 0.010731607 |
| 0.101566021 | 0.193500732 | 0.069895579 | 0.162292649 |
| 0.057202039 | 0.180741289 | 0.152092854 | 0.000722248 |
| 0.278904558 | 0.006833656 | 0.110733464 | 0.045123248 |
| 0.067565108 | 0.004435988 | 0.255441456 | 0.356724746 |
| 0.128531631 | 0.058936021 | 0.083104728 | 0.288338743 |
| 0.040366032 | 0.20864654  | 0.173842791 | 0.260507966 |
| 0.111917603 | 0.245025894 | 0.22478621  | 0.169678755 |
| 0.191157834 | 0.06175548  |             |             |
| AP1S1       | 0.07272844  | 0.326630769 | 0.052435803 |
| 0.045932111 | 0.141418125 | 0.113704307 | 0.091954985 |
| 0.120221743 | 0.313705429 | 0.105440779 | 0.135351753 |

|             |             |             |             |
|-------------|-------------|-------------|-------------|
| 0.031774906 | 0.049332156 | 0.317691904 | 0.106275309 |
| 0.167113698 | 0.061810755 | 0.104389878 | 0.083561771 |
| 0.139964655 | 0.129781495 | 0.098463566 | 0.154438478 |
| 0.14592951  | 0.227227236 | 0.196908918 | 0.162750787 |
| 0.339199946 | 0.059717517 | 0.195311149 | 0.043829384 |
| 0.333049209 | 0.148026034 | 0.109972783 | 0.030863192 |
| 0.168440195 | 0.041104927 | 0.374324296 | 0.097989781 |
| 0.042342428 | 0.317724968 | 0.102817917 | 0.09215168  |
| 0.115207658 | 0.042252474 | 0.059411554 | 0.216312783 |
| 0.210615617 | 0.168285331 | 0.087198105 | 0.22402536  |
| 0.135128224 | 0.223559346 | 0.222375716 | 0.003070809 |
| 0.081336308 | 0.027720021 | 0.06770331  | 0.373540005 |
| 0.175187796 | 0.110427188 | 0.086083745 | 1           |
| 0.224316262 | 0.257120909 | 0.264561322 | 0.111104289 |
| 0.342325344 | 0.069884123 | 0.236304095 | 0.066951556 |
| 0.134859422 | 0.07887202  | 0.189149509 | 0.161129563 |
| 0.133080554 | 0.144894639 | 0.1557261   | 0.102105026 |
| 0.294398473 | 0.43044528  | 0.220977976 | 0.381134034 |
| 0.100012485 | 0.15221823  | 0.116290537 | 0.244713475 |
| 0.285603156 | 0.145465377 | 0.20518827  | 0.381193072 |
| 0.116093054 | 0.169620414 | 0.240591471 | 0.177429962 |
| 0.308398476 | 0.136959239 | 0.124933431 | 0.060946178 |
| 0.198002257 | 0.138455533 | 0.428901747 | 0.189170595 |
| 0.159469459 | 0.104220737 | 0.395186389 | 0.136608969 |
| 0.088905727 | 0.084274334 | 0.092566415 | 0.287134704 |
| 0.180030196 | 0.327471145 | 0.295723844 | 0.27874626  |
| 0.133959758 | 0.338932424 | 0.19239569  | 0.351358011 |
| 0.053935048 | 0.383883003 | 0.116420187 | 0.06803056  |
| 0.077493923 | 0.124428135 | 0.170860718 | 0.311560684 |
| 0.304700724 | 0.241938242 | 0.100991114 | 0.120764385 |
| 0.309233652 | 0.374024781 | 0.383658385 | 0.27811155  |
| 0.058166558 | 0.117062603 | 0.121894022 | 0.167964863 |
| 0.23348193  | 0.183405114 | 0.082046445 | 0.399403703 |
| 0.274982601 | 0.27176285  | 0.111739605 | 0.432964756 |
| 0.185966965 | 0.372989422 | 0.288679189 | 0.098386134 |
| 0.387599305 | 0.379369646 | 0.355401212 | 0.191999337 |
| 0.37216233  | 0.111756932 | 0.098268744 | 0.307856687 |
| 0.366987942 | 0.005601464 | 0.318333405 | 0.331305992 |
| 0.350253825 | 0.264205219 | 0.380374934 | 0.351089997 |
| 0.364122568 | 0.121576004 | 0.023471624 | 0.189100052 |
| 0.367085063 | 0.256553814 | 0.174629799 | 0.131210073 |
| 0.187921612 | 0.134012148 | 0.29603203  | 0.062442439 |
| 0.414590102 | 0.300491193 | 0.33237045  | 0.266424646 |
| 0.191894481 | 0.304175926 | 0.139152352 | 0.370100069 |
| 0.067214987 | 0.076059307 | 0.085869158 | 0.312060865 |
| 0.091115091 | 0.144882674 | 0.114225026 | 0.213736059 |
| 0.170437213 | 0.158786746 | 0.096395464 | 0.195982274 |
| 0.126873703 | 0.152982605 | 0.126152189 | 0.122407846 |
| 0.052277646 | 0.231111122 | 0.072441376 | 0.088848371 |
| 0.13798936  | 0.302757546 | 0.228339941 | 0.344400416 |
| 0.153169687 | 0.166805245 | 0.22558628  | 0.359702132 |
| 0.339221391 | 0.126519702 | 0.27601565  | 0.006861137 |
| 0.068611912 | 0.110281592 | 0.066264181 | 0.16315345  |
| 0.277717605 | 0.105735228 | 0.174164213 | 0.213357964 |

|             |             |             |             |
|-------------|-------------|-------------|-------------|
| 0.11990297  | 0.161662409 | 0.110967565 | 0.378059474 |
| 0.193307302 | 0.096186499 | 0.279531843 | 0.17115769  |
| 0.010763979 | 0.118634928 | 0.262966786 | 0.105346005 |
| 0.243338435 | 0.052828454 | 0.06040287  | 0.295117008 |
| 0.097963248 | 0.122589636 | 0.342901415 | 0.239378188 |
| 0.11647797  | 0.301754483 | 0.387946287 | 0.024637276 |
| 0.181446094 | 0.024563208 | 0.194136656 | 0.12684011  |
| 0.15964078  | 0.259743279 | 0.147752193 | 0.096222432 |
| 0.121436938 | 0.383358261 | 0.306666334 | 0.346808746 |
| 0.09025936  | 0.38536515  | 0.277262518 | 0.294899404 |
| 0.226926841 | 0.129601802 | 0.047871333 | 0.236601142 |
| 0.286509984 | 0.090670296 | 0.127425938 | 0.273832951 |
| 0.11529961  | 0.204365376 | 0.094124292 | 0.330964521 |
| 0.404306711 | 0.351634972 | 0.116037592 | 0.255684997 |
| 0.234839203 | 0.123611079 | 0.31254087  | 0.412344988 |
| 0.10157704  | 0.128866841 | 0.088525892 | 0.280233985 |
| 0.143788237 | 0.111765131 | 0.349080162 | 0.07682877  |
| 0.002230178 | 0.112467084 | 0.079822727 | 0.10309787  |
| 0.065927191 | 0.196717812 | 0.214588497 | 0.359712312 |
| 0.103862867 | 0.33510045  | 0.295579067 | 0.074597554 |
| 0.298963726 | 0.146186795 | 0.14951292  | 0.197368455 |
| 0.266068374 | 0.015524442 | 0.056706931 | 0.414335683 |
| 0.092525291 | 0.071910732 | 0.199015948 | 0.001817934 |
| 0.061556545 | 0.274963155 | 0.173453833 | 0.257811402 |
| 0.347657392 | 0.239591984 | 0.153397462 | 0.099027487 |
| 0.228290315 | 0.112541987 | 0.004268701 | 0.354893987 |
| 0.407997011 | 0.40228177  | 0.40239709  | 0.414457102 |
| 0.355178838 | 0.309290301 | 0.259434409 | 0.145959415 |
| 0.092617115 | 0.093745801 | 0.06112266  | 0.107499936 |
| 0.009522033 | 0.259103907 | 0.188777313 | 0.160280355 |
| 0.256775748 | 0.255978189 | 0.055253874 | 0.209564722 |
| 0.014608738 | 0.042764433 | 0.152333048 | 0.168473666 |
| 0.275558542 | 0.032359455 | 0.041668944 | 0.076292864 |
| 0.314887921 | 0.278224551 | 0.097135822 | 0.382055581 |
| 0.135751731 | 0.156419992 | 0.099095572 | 0.250600182 |
| 0.083165931 | 0.038841793 | 0.15348745  | 0.006535393 |
| 0.108681838 | 0.423697814 | 0.13023615  | 0.050548801 |
| 0.144734071 | 0.010243998 | 0.264088629 | 0.390884205 |
| 0.34273252  | 0.349414183 | 0.341993683 | 0.071380466 |
| 0.344008855 | 0.043723612 | 0.368819425 | 0.275434726 |
| 0.094074001 | 0.000397861 | 0.018794053 | 0.304703744 |
| 0.12955248  | 0.121567748 | 0.145889407 | 0.081014605 |
| 0.07387284  | 0.104125911 | 0.112537365 | 0.072874772 |
| 0.190943021 | 0.128780343 | 0.102496939 | 0.358076024 |
| 0.114697839 | 0.19466386  | 0.132569312 | 0.159141428 |
| 0.183146243 | 0.057972608 | 0.172276024 | 0.00506014  |
| 0.256048111 | 0.167284334 | 0.399370604 | 0.36654322  |
| 0.36581486  | 0.202226915 | 0.083743953 | 0.125781134 |
| 0.361711941 | 0.127714781 | 0.101864794 | 0.132587209 |
| 0.328999303 | 0.161634981 | 0.220961006 | 0.225109171 |
| 0.352399906 | 0.328671369 | 0.063270581 | 0.237950803 |
| 0.011563379 | 0.009281115 | 0.109193179 | 0.280123952 |
| 0.151798918 | 0.118918018 | 0.217615576 | 0.195924379 |
| 0.202585623 | 0.032487689 | 0.085979734 | 0.077509331 |

|             |             |             |             |
|-------------|-------------|-------------|-------------|
| 0.168272595 | 0.13941884  | 0.107320116 | 0.313082681 |
| 0.123955883 | 0.069676563 | 0.135761778 | 0.158851401 |
| 0.192544707 | 0.263658451 | 0.212996256 | 0.0555605   |
| 0.133581417 | 0.126376681 | 0.069549655 | 0.181772447 |
| 0.265184825 | 0.308024056 | 0.068389494 | 0.010433323 |
| 0.24383157  | 0.146887289 | 0.336921014 | 0.34708879  |
| 0.398460371 | 0.384132316 | 0.3615154   | 0.109717129 |
| 0.08046319  | 0.180872592 | 0.128678452 | 0.08980865  |
| 0.363090293 | 0.106675071 | 0.371080038 | 0.107317869 |
| 0.165629817 | 0.095382504 | 0.042505606 | 0.120836118 |
| 0.155434432 | 0.190079431 | 0.112798275 | 0.116647575 |
| 0.105601406 | 0.076852172 | 0.085234207 | 0.149600949 |
| 0.237787012 | 0.043921803 | 0.152710426 | 0.175719454 |
| 0.283303526 | 0.125369309 | 0.216087742 | 0.357618082 |
| 0.153533812 | 0.136469248 | 0.07324372  | 0.307672943 |
| 0.265053814 | 0.168054323 | 0.01762432  | 0.317139909 |
| 0.365238421 | 0.185321374 | 0.367031129 | 0.316183468 |
| 0.146577323 | 0.111560006 | 0.128737282 | 0.150926185 |
| 0.197495129 | 0.118366353 | 0.19611126  | 0.105305749 |
| 0.360266603 | 0.441580603 | 0.280293423 | 0.096324014 |
| 0.189015406 | 0.158015272 | 0.09495438  | 0.345093725 |
| 0.058660958 | 0.060935969 | 0.116204776 | 0.310813556 |
| 0.001789411 | 0.055000698 | 0.378858178 | 0.12743753  |
| 0.426542754 | 0.313385715 | 0.323764861 | 0.188576411 |
| 0.001441444 | 0.201507581 | 0.15216481  | 0.087574295 |
| 0.287874458 | 0.269786152 | 0.23007271  | 0.069458279 |
| 0.26540327  | 0.114083811 | 0.088490738 | 0.10821566  |
| 0.056245305 | 0.20527414  | 0.227196755 | 0.216625765 |
| 0.125431443 | 0.179094126 | 0.083808198 | 0.114323583 |
| 0.119318804 | 0.222817684 | 0.252374211 | 0.11738138  |
| 0.036612432 | 0.349998587 | 0.240600614 | 0.044065079 |
| 0.154315423 | 0.327371386 | 0.361807462 | 0.001687873 |
| 0.2016249   | 0.018593313 | 0.117709904 | 0.090069832 |
| 0.115381584 | 0.140489059 | 0.185949845 | 0.096422237 |
| 0.20975242  | 0.126690869 | 0.091682895 | 0.167618565 |
| 0.091732936 | 0.162101863 | 0.181295656 | 0.135070709 |
| 0.080401272 | 0.089784396 | 0.185933403 | 0.190068407 |
| 0.05175302  | 0.343778848 | 0.258657553 | 0.117788101 |
| 0.208958459 | 0.141517106 | 0.300901007 | 0.351719422 |
| 0.34472516  | 0.17074805  | 0.163712306 | 0.274061486 |
| 0.075298297 | 0.097078726 | 0.080090564 | 0.159273926 |
| 0.161411349 | 0.071936437 | 0.166259368 | 0.148950699 |
| 0.252422359 | 0.341873638 | 0.25136465  | 0.361571676 |
| 0.108981184 | 0.175415579 | 0.077689668 | 0.059362758 |
| 0.083653265 | 0.196336018 | 0.112956295 | 0.003523488 |
| 0.217636682 | 0.083946949 | 0.277420749 | 0.352389981 |
| 0.095469287 | 0.337079571 | 0.078463071 | 0.061094112 |
| 0.067756405 | 0.203181064 | 0.172464623 | 0.259466133 |
| 0.057480957 | 0.124508046 | 0.132911855 | 0.10346711  |
| 0.239048801 | 0.258092742 | 0.148894357 | 0.173969464 |
| 0.214913629 | 0.175222929 | 0.418704238 | 0.102567846 |
| 0.162322221 | 0.064336088 | 0.20386942  | 0.100601228 |
| 0.117640535 | 0.363643777 | 0.095405692 | 0.356581202 |
| 0.105414603 | 0.209291686 | 0.412651607 | 0.210863866 |

|             |             |             |             |
|-------------|-------------|-------------|-------------|
| 0.143042311 | 0.101909296 | 0.057293126 | 0.135362775 |
| 0.159316732 | 0.102749084 | 0.006485614 | 0.024773328 |
| 0.218672757 | 0.177683782 | 0.262022781 | 0.29920192  |
| 0.10834634  | 0.289835281 | 0.081872726 | 0.152744275 |
| 0.359827412 | 0.408858758 | 0.070190169 | 0.258793613 |
| 0.265815294 | 0.088566079 | 0.187501368 | 0.037738795 |
| 0.16775109  | 0.16295165  | 0.109820052 | 0.094371998 |
| 0.043548916 | 0.053794217 | 0.164394198 | 0.144430795 |
| 0.329375451 | 0.051021451 | 0.242413009 | 0.226744206 |
| 0.259686348 | 0.396484902 | 0.112591739 | 0.205980142 |
| 0.102443811 | 0.246145674 | 0.154367309 | 0.175998068 |
| 0.063220833 | 0.088200861 | 0.21111384  | 0.069108588 |
| 0.048882955 | 0.096974344 | 0.002951696 | 0.352327823 |
| 0.37488702  | 0.110778393 | 0.273069101 | 0.117304275 |
| 0.217088317 | 0.358401455 | 0.133547934 | 0.148371932 |
| 0.016183981 | 0.135347201 | 0.194941947 | 0.274187976 |
| 0.036694767 | 0.191602485 | 0.053518533 | 0.152724319 |
| 0.401272969 | 0.086033918 | 0.323069915 | 0.058616827 |
| 0.35150116  | 0.327678126 | 0.181193998 | 0.140772389 |
| 0.239463413 | 0.12290495  | 0.114038072 | 0.40172655  |
| 0.108919288 | 0.065672284 | 0.264076331 | 0.086376148 |
| 0.108749756 | 0.332031263 | 0.190914126 | 0.418739237 |
| 0.075301007 | 0.196274436 | 0.279769854 | 0.337376277 |
| 0.262890123 | 0.091341068 | 0.073508839 | 0.098616526 |
| 0.32258134  | 0.054113517 | 0.1078597   | 0.225459758 |
| 0.058113434 | 0.248442317 | 0.209739152 | 0.10989777  |
| 0.04789561  | 0.181982038 | 0.11678792  | 0.173480394 |
| 0.173211314 | 0.134706198 | 0.104846698 | 0.32182564  |
| 0.063777996 | 0.015472648 | 0.370618935 | 0.003534855 |
| 0.153643562 | 0.173930237 | 0.202750153 | 0.129532701 |
| 0.191952812 | 0.215214756 | 0.132961021 | 0.00309908  |
| 0.289945575 | 0.026377292 | 0.182570222 | 0.072974253 |
| 0.102622075 | 0.070890965 | 0.352356191 | 0.355167729 |
| 0.256834727 | 0.144303651 | 0.08016734  | 0.367260536 |
| 0.048336391 | 0.099429094 | 0.124507414 | 0.202259721 |
| 0.075385776 | 0.099137781 | 0.118619291 | 0.084355826 |
| 0.256041356 | 0.179188026 |             |             |
| AP1S3       | 0.046594438 | 0.399002041 | 0.032640432 |
| 0.070278534 | 0.228931522 | 0.227076164 | 0.052574177 |
| 0.097963113 | 0.335034474 | 0.274744763 | 0.216197968 |
| 0.011753631 | 0.119197126 | 0.413968491 | 0.052716007 |
| 0.28977754  | 0.027386951 | 0.08305552  | 0.0966009   |
| 0.191338646 | 0.228011475 | 0.244507533 | 0.233864195 |
| 0.251130508 | 0.151921497 | 0.230047937 | 0.321795907 |
| 0.457119095 | 0.211036675 | 0.303014874 | 0.137245794 |
| 0.369576601 | 0.249878216 | 0.290007502 | 0.009480656 |
| 0.278230959 | 0.0480343   | 0.397607228 | 0.192992788 |
| 0.118673515 | 0.299047034 | 0.232701558 | 0.150688181 |
| 0.27164277  | 0.022144197 | 0.175533039 | 0.359410918 |
| 0.243099803 | 0.224894856 | 0.046388736 | 0.322508315 |
| 0.307019552 | 0.22941469  | 0.327723629 | 0.002630664 |
| 0.248109061 | 0.126647117 | 0.245604775 | 0.447157912 |
| 0.128265997 | 0.089479367 | 0.302644412 | 0.224316262 |
| 1           | 0.341205857 | 0.199664403 | 0.306218449 |



|             |             |             |             |
|-------------|-------------|-------------|-------------|
| 0.443481149 | 0.207385029 | 0.374402739 | 0.09733156  |
| 0.278556466 | 0.031623645 | 0.115090611 | 0.072383455 |
| 0.309427058 | 0.137060183 | 0.236952625 | 0.269782166 |
| 0.390763839 | 0.474076228 | 0.171733998 | 0.452554504 |
| 0.199524442 | 0.28566361  | 0.228974384 | 0.251451419 |
| 0.348552187 | 0.095892944 | 0.303002501 | 0.470643955 |
| 0.051804248 | 0.278432819 | 0.351847098 | 0.096580579 |
| 0.372809572 | 0.308759517 | 0.264470751 | 0.157496696 |
| 0.300926776 | 0.274599913 | 0.46054599  | 0.201859824 |
| 0.261273384 | 0.051772005 | 0.430070532 | 0.26651671  |
| 0.184713672 | 0.050542196 | 0.207605854 | 0.442849873 |
| 0.285298663 | 0.44026364  | 0.413028271 | 0.34512209  |
| 0.288273979 | 0.442599646 | 0.280646711 | 0.395170813 |
| 0.162757227 | 0.480742703 | 0.11071719  | 0.031177721 |
| 0.050703907 | 0.07040922  | 0.288406412 | 0.262447324 |
| 0.423373531 | 0.239480533 | 0.125361227 | 0.174464647 |
| 0.447986575 | 0.424271481 | 0.490312188 | 0.374626858 |
| 0.027052997 | 0.296780608 | 0.272760022 | 0.193046707 |
| 0.314902466 | 0.094040826 | 0.224702473 | 0.453836795 |
| 0.307641079 | 0.402471985 | 0.108460376 | 0.448593163 |
| 0.195797643 | 0.45439647  | 0.399911864 | 0.105293376 |
| 0.457605822 | 0.428634696 | 0.461365775 | 0.320576818 |
| 0.407504572 | 0.189572944 | 0.139456601 | 0.36270961  |
| 0.43361034  | 0.013069806 | 0.458893738 | 0.479178655 |
| 0.448809542 | 0.424102313 | 0.495582011 | 0.468566664 |
| 0.456014145 | 0.055009142 | 0.078172309 | 0.223411428 |
| 0.452913371 | 0.31832433  | 0.134113482 | 0.301812593 |
| 0.29121978  | 0.242081358 | 0.397823944 | 0.206440382 |
| 0.469889935 | 0.400458204 | 0.461977784 | 0.350907301 |
| 0.258757893 | 0.267213588 | 0.308113492 | 0.402634838 |
| 0.029508226 | 0.069102729 | 0.033534897 | 0.280082664 |
| 0.214991763 | 0.122292045 | 0.243099684 | 0.311550225 |
| 0.132108033 | 0.247716474 | 0.279251368 | 0.309095258 |
| 0.047219147 | 0.278954351 | 0.107869827 | 0.124518029 |
| 0.027846984 | 0.121089746 | 0.120920336 | 0.092874982 |
| 0.192552092 | 0.208611062 | 0.359027257 | 0.457406154 |
| 0.314706418 | 0.124431796 | 0.328669229 | 0.423788644 |
| 0.381621829 | 0.264603109 | 0.195736217 | 0.004247159 |
| 0.218296703 | 0.33082655  | 0.222342554 | 0.306332607 |
| 0.157028059 | 0.209638245 | 0.289683559 | 0.320906535 |
| 0.163835567 | 0.130396982 | 0.305595056 | 0.368302614 |
| 0.120614694 | 0.199879562 | 0.400230946 | 0.297771521 |
| 0.001533229 | 0.208255778 | 0.385488644 | 0.168946239 |
| 0.267742058 | 0.132379642 | 0.183367474 | 0.428496262 |
| 0.290125865 | 0.251883102 | 0.461696064 | 0.335591696 |
| 0.251970885 | 0.206072916 | 0.496630703 | 0.102749637 |
| 0.315486232 | 0.029821127 | 0.208395358 | 0.263577417 |
| 0.16655667  | 0.250377141 | 0.258446897 | 0.199582724 |
| 0.076219027 | 0.47654826  | 0.3328363   | 0.465496467 |
| 0.288707559 | 0.494554087 | 0.417003789 | 0.382851918 |
| 0.255110221 | 0.335210799 | 0.169871881 | 0.365506398 |
| 0.417667463 | 0.262816687 | 0.055027829 | 0.427624135 |
| 0.315529026 | 0.338563088 | 0.107550071 | 0.446178473 |
| 0.432955132 | 0.420966932 | 0.111210849 | 0.33522718  |

|             |             |             |             |
|-------------|-------------|-------------|-------------|
| 0.297490291 | 0.136483188 | 0.371532179 | 0.501898709 |
| 0.299065673 | 0.296915994 | 0.255954729 | 0.36121735  |
| 0.109359866 | 0.226194192 | 0.291371929 | 0.222102893 |
| 0.008478496 | 0.064823172 | 0.042949812 | 0.118106876 |
| 0.158081752 | 0.321637448 | 0.312102114 | 0.474179291 |
| 0.08346192  | 0.357840543 | 0.217393679 | 0.200321734 |
| 0.376609621 | 0.315012754 | 0.278878129 | 0.282879485 |
| 0.197371576 | 0.008481927 | 0.067751422 | 0.467309253 |
| 0.031800419 | 0.199271609 | 0.254168262 | 0.001405255 |
| 0.035363939 | 0.381941552 | 0.081852285 | 0.161939617 |
| 0.45575719  | 0.160112296 | 0.136389658 | 0.27909315  |
| 0.254210774 | 0.064168324 | 0.001262638 | 0.468503183 |
| 0.478472677 | 0.459954398 | 0.476974537 | 0.437856521 |
| 0.453086242 | 0.371560571 | 0.376130457 | 0.20464306  |
| 0.074039862 | 0.065947535 | 0.202533227 | 0.212582319 |
| 0.007243103 | 0.301753659 | 0.259977621 | 0.094839239 |
| 0.379742832 | 0.255690981 | 0.024643975 | 0.296035861 |
| 0.0091303   | 0.178085888 | 0.265015283 | 0.193682764 |
| 0.322614321 | 0.008666463 | 0.131515496 | 0.263149904 |
| 0.357625243 | 0.287257241 | 0.280045115 | 0.475468741 |
| 0.205047506 | 0.102016978 | 0.208377951 | 0.320881549 |
| 0.053177287 | 0.127817954 | 0.291833855 | 0.024801449 |
| 0.146131489 | 0.437233578 | 0.304650669 | 0.040300862 |
| 0.173152077 | 0.002079742 | 0.293950592 | 0.480480323 |
| 0.40922655  | 0.485474393 | 0.439041068 | 0.205972191 |
| 0.444214554 | 0.173706182 | 0.4860677   | 0.354796562 |
| 0.292535364 | 0.000291148 | 0.005764846 | 0.445729843 |
| 0.271164094 | 0.045966955 | 0.105045959 | 0.193755056 |
| 0.071541441 | 0.108862484 | 0.052566935 | 0.156303791 |
| 0.267765537 | 0.183824218 | 0.183001995 | 0.428719917 |
| 0.174781594 | 0.179210745 | 0.28972215  | 0.068004715 |
| 0.275956862 | 0.033228141 | 0.07203926  | 0.004724367 |
| 0.316004627 | 0.091345532 | 0.414125539 | 0.463836369 |
| 0.437210983 | 0.30028291  | 0.271760721 | 0.247519883 |
| 0.43882502  | 0.071069269 | 0.267143714 | 0.075694664 |
| 0.427710689 | 0.280640454 | 0.239070457 | 0.232468075 |
| 0.460030849 | 0.406821105 | 0.025540309 | 0.352505405 |
| 0.004814593 | 0.003407779 | 0.215664004 | 0.219914376 |
| 0.163775118 | 0.300954722 | 0.192753286 | 0.251231346 |
| 0.224977427 | 0.01680291  | 0.26114871  | 0.232328932 |
| 0.204561894 | 0.268206902 | 0.222850228 | 0.228103302 |
| 0.222754885 | 0.142115546 | 0.142054316 | 0.13532673  |
| 0.294334594 | 0.264995519 | 0.153220451 | 0.018264261 |
| 0.283273359 | 0.279395826 | 0.037701577 | 0.105440187 |
| 0.372189887 | 0.445630693 | 0.040147317 | 0.005194226 |
| 0.206828696 | 0.278155528 | 0.464734531 | 0.449387623 |
| 0.467464317 | 0.477219513 | 0.340327021 | 0.121760446 |
| 0.045983095 | 0.239351482 | 0.241491372 | 0.086078005 |
| 0.465770168 | 0.051063712 | 0.429524477 | 0.262554507 |
| 0.08658155  | 0.13734077  | 0.019732046 | 0.066071984 |
| 0.284844158 | 0.123859598 | 0.130985123 | 0.089542856 |
| 0.23462627  | 0.204513298 | 0.039620018 | 0.1368191   |
| 0.284817331 | 0.175470884 | 0.111742502 | 0.232228179 |
| 0.295514346 | 0.262360215 | 0.363189316 | 0.401536093 |

|             |             |             |             |
|-------------|-------------|-------------|-------------|
| 0.08508963  | 0.094625639 | 0.157029539 | 0.352654232 |
| 0.404537195 | 0.31175817  | 0.011415643 | 0.414664276 |
| 0.456025393 | 0.317407352 | 0.437218473 | 0.370396632 |
| 0.062963015 | 0.250493974 | 0.326535681 | 0.26924424  |
| 0.148854818 | 0.226235753 | 0.203990237 | 0.046249646 |
| 0.278810941 | 0.449393784 | 0.372031776 | 0.107692016 |
| 0.292429978 | 0.095439002 | 0.045183722 | 0.424478491 |
| 0.177048099 | 0.057662456 | 0.263882288 | 0.432730898 |
| 0.000766382 | 0.156971581 | 0.482507306 | 0.155302157 |
| 0.483935283 | 0.440758321 | 0.373797275 | 0.202657149 |
| 0.00478223  | 0.344750606 | 0.235530726 | 0.243934016 |
| 0.386609982 | 0.272060103 | 0.156985731 | 0.051188398 |
| 0.230648514 | 0.055084308 | 0.111814088 | 0.20976987  |
| 0.20752213  | 0.29024237  | 0.151748157 | 0.183135676 |
| 0.156783968 | 0.086387592 | 0.203265255 | 0.145140582 |
| 0.235913397 | 0.178195517 | 0.29052216  | 0.248655303 |
| 0.169010318 | 0.437909184 | 0.352455988 | 0.016096597 |
| 0.290672274 | 0.404258649 | 0.400767402 | 0.001864112 |
| 0.336813769 | 0.004098327 | 0.153459438 | 0.139354906 |
| 0.14304702  | 0.18840159  | 0.20174047  | 0.204943408 |
| 0.266874821 | 0.163647188 | 0.159932577 | 0.151870032 |
| 0.106691819 | 0.1587738   | 0.273398946 | 0.253970299 |
| 0.176869575 | 0.078472782 | 0.083581713 | 0.087942934 |
| 0.03000718  | 0.427619222 | 0.193125975 | 0.049970527 |
| 0.169170901 | 0.277701322 | 0.296282406 | 0.44584908  |
| 0.371379432 | 0.091960641 | 0.283596148 | 0.37854504  |
| 0.264232703 | 0.196750804 | 0.049086923 | 0.246830806 |
| 0.156260069 | 0.174245438 | 0.273123148 | 0.199175631 |
| 0.367685384 | 0.342117361 | 0.184711708 | 0.394953095 |
| 0.232034947 | 0.32135638  | 0.224372675 | 0.054988884 |
| 0.108872782 | 0.104044931 | 0.213494926 | 0.000302258 |
| 0.249158561 | 0.139873823 | 0.421470651 | 0.424566147 |
| 0.278274793 | 0.331096535 | 0.210271083 | 0.057826809 |
| 0.190822824 | 0.150503018 | 0.097575281 | 0.374954069 |
| 0.210825099 | 0.119204021 | 0.217427524 | 0.18915833  |
| 0.367742832 | 0.383771654 | 0.251878594 | 0.207202491 |
| 0.198645416 | 0.126467447 | 0.448875987 | 0.080575333 |
| 0.300474494 | 0.139048254 | 0.266145286 | 0.211225269 |
| 0.176568909 | 0.480790244 | 0.041174414 | 0.489779092 |
| 0.269408944 | 0.105732951 | 0.44049837  | 0.219721837 |
| 0.189303322 | 0.084407101 | 0.197277532 | 0.287480681 |
| 0.200161488 | 0.276418353 | 0.02280034  | 0.076127444 |
| 0.250908181 | 0.322228723 | 0.382597425 | 0.337810706 |
| 0.216551822 | 0.309996457 | 0.196256428 | 0.22358649  |
| 0.429308412 | 0.443143843 | 0.163501543 | 0.205852109 |
| 0.290819225 | 0.066216021 | 0.246376143 | 0.036513392 |
| 0.308761275 | 0.309518368 | 0.312768078 | 0.043287457 |
| 0.013309538 | 0.208340638 | 0.287675418 | 0.05977183  |
| 0.462041359 | 0.191917645 | 0.302775324 | 0.325313917 |
| 0.150586497 | 0.437733417 | 0.100362043 | 0.301888605 |
| 0.060212694 | 0.19088432  | 0.307862716 | 0.336715034 |
| 0.146216605 | 0.246181036 | 0.28978901  | 0.19247078  |
| 0.020853431 | 0.188111087 | 0.002255363 | 0.344562134 |
| 0.42099424  | 0.290721003 | 0.174458883 | 0.294181427 |

|             |             |             |             |
|-------------|-------------|-------------|-------------|
| 0.203346412 | 0.357635907 | 0.253516626 | 0.300720629 |
| 0.005239261 | 0.259035756 | 0.140013514 | 0.333191154 |
| 0.174246369 | 0.309192225 | 0.03121238  | 0.300929315 |
| 0.398031557 | 0.24314472  | 0.234718616 | 0.236096418 |
| 0.434905691 | 0.35384355  | 0.120201429 | 0.182849499 |
| 0.340478965 | 0.047089715 | 0.263494236 | 0.495477628 |
| 0.124737648 | 0.177365671 | 0.401252699 | 0.141887523 |
| 0.285572886 | 0.338371375 | 0.311806142 | 0.497993784 |
| 0.064896888 | 0.164844938 | 0.379627561 | 0.432002483 |
| 0.243206687 | 0.186029002 | 0.214139733 | 0.194991746 |
| 0.390542913 | 0.051178204 | 0.257941705 | 0.265274316 |
| 0.199060124 | 0.232849919 | 0.25962317  | 0.167842313 |
| 0.025986296 | 0.151981078 | 0.223283886 | 0.099803996 |
| 0.212139221 | 0.258179379 | 0.211276461 | 0.326188814 |
| 0.07625391  | 0.010600278 | 0.397267268 | 0.022261119 |
| 0.190935893 | 0.258846375 | 0.170174674 | 0.2679183   |
| 0.132471397 | 0.265247153 | 0.22834637  | 0.00058652  |
| 0.38005058  | 0.035460818 | 0.276140018 | 0.164368279 |
| 0.284015558 | 0.039756666 | 0.391692229 | 0.478757099 |
| 0.224227152 | 0.275929949 | 0.264517911 | 0.425880151 |
| 0.145231137 | 0.303278699 | 0.335130656 | 0.297192607 |
| 0.208191518 | 0.282588422 | 0.311254301 | 0.257299895 |
| 0.296086307 | 0.19723289  |             |             |
| AP2A1       | 0.068109325 | 0.372062712 | 0.044489008 |
| 0.105311916 | 0.295960749 | 0.253193302 | 0.083003147 |
| 0.139648894 | 0.317824936 | 0.247181224 | 0.263239962 |
| 0.023204658 | 0.144799285 | 0.406578332 | 0.084712349 |
| 0.329860971 | 0.053313047 | 0.124952973 | 0.124117665 |
| 0.236732766 | 0.292953697 | 0.274085683 | 0.242246729 |
| 0.31891435  | 0.167549858 | 0.253986048 | 0.336884797 |
| 0.435635179 | 0.194780306 | 0.295923276 | 0.135912437 |
| 0.381110155 | 0.304737107 | 0.301500488 | 0.018253834 |
| 0.307362882 | 0.066101515 | 0.400826963 | 0.260961954 |
| 0.166847116 | 0.313450256 | 0.223475353 | 0.210837017 |
| 0.278032606 | 0.036109015 | 0.140018244 | 0.340817016 |
| 0.273435794 | 0.288022739 | 0.059193526 | 0.313641322 |
| 0.335667373 | 0.236790688 | 0.287198588 | 0.002828986 |
| 0.273953285 | 0.12630334  | 0.253416098 | 0.432377758 |
| 0.173195148 | 0.142370888 | 0.28790793  | 0.257120909 |
| 0.341205857 | 1           | 0.251970079 | 0.301341761 |
| 0.43195978  | 0.244045575 | 0.352201444 | 0.133695197 |
| 0.301068063 | 0.047350352 | 0.148549227 | 0.09211692  |
| 0.329900373 | 0.20068843  | 0.285887682 | 0.319324604 |
| 0.358420798 | 0.469162947 | 0.230157459 | 0.432298948 |
| 0.237030335 | 0.333372856 | 0.300370273 | 0.286861387 |
| 0.344082809 | 0.134643221 | 0.312016593 | 0.466695938 |
| 0.073231323 | 0.269376341 | 0.334938275 | 0.114886162 |
| 0.357772005 | 0.332171172 | 0.256639993 | 0.200413818 |
| 0.327679249 | 0.324468304 | 0.443238272 | 0.2308902   |
| 0.314647796 | 0.069258721 | 0.410683612 | 0.313085033 |
| 0.236558112 | 0.074125811 | 0.277805465 | 0.420892144 |
| 0.303067171 | 0.422760443 | 0.378385776 | 0.349124489 |
| 0.323727829 | 0.432970705 | 0.290693416 | 0.384733292 |
| 0.129406891 | 0.460716621 | 0.155046504 | 0.057630399 |

|             |             |             |             |
|-------------|-------------|-------------|-------------|
| 0.066955733 | 0.118187603 | 0.339072949 | 0.292648824 |
| 0.410881182 | 0.266166    | 0.169168056 | 0.245572661 |
| 0.444711654 | 0.400360055 | 0.464810603 | 0.369076862 |
| 0.046848098 | 0.329740751 | 0.314560205 | 0.230966595 |
| 0.312970537 | 0.134197643 | 0.27811703  | 0.440772907 |
| 0.324341393 | 0.398793551 | 0.141074533 | 0.445364682 |
| 0.240597277 | 0.458779856 | 0.371859858 | 0.156115602 |
| 0.451341647 | 0.416919451 | 0.463165364 | 0.323607362 |
| 0.4038037   | 0.226725367 | 0.128422709 | 0.361109998 |
| 0.442217707 | 0.020946946 | 0.432869636 | 0.459571557 |
| 0.430011695 | 0.40734816  | 0.49174198  | 0.455792451 |
| 0.431674059 | 0.082251639 | 0.072465922 | 0.290008493 |
| 0.438525117 | 0.33409021  | 0.200835011 | 0.313071642 |
| 0.333361261 | 0.268292638 | 0.378824716 | 0.222459187 |
| 0.476331523 | 0.397486938 | 0.436226431 | 0.337263217 |
| 0.279186091 | 0.285309227 | 0.325633572 | 0.387486832 |
| 0.056513587 | 0.093548294 | 0.046267721 | 0.299287158 |
| 0.217759004 | 0.185034413 | 0.262284221 | 0.349563483 |
| 0.190781212 | 0.269741985 | 0.289684534 | 0.320617847 |
| 0.05455677  | 0.288433646 | 0.155317995 | 0.157857053 |
| 0.056581359 | 0.141031099 | 0.163039009 | 0.139004439 |
| 0.257715138 | 0.216693738 | 0.33154024  | 0.449356285 |
| 0.348658537 | 0.140206467 | 0.313320364 | 0.433394133 |
| 0.406592749 | 0.307323038 | 0.219051267 | 0.011625598 |
| 0.262157131 | 0.309242289 | 0.251606874 | 0.322160127 |
| 0.172608036 | 0.255503314 | 0.324468331 | 0.333684614 |
| 0.191067118 | 0.158049558 | 0.334622091 | 0.378314638 |
| 0.12986175  | 0.25033282  | 0.402576278 | 0.30393096  |
| 0.004118535 | 0.253071531 | 0.375468735 | 0.24447899  |
| 0.282040911 | 0.160018698 | 0.207975874 | 0.423116495 |
| 0.301021469 | 0.306454611 | 0.443441193 | 0.347121455 |
| 0.250469304 | 0.207042908 | 0.486127307 | 0.097886813 |
| 0.353749673 | 0.060193839 | 0.25749598  | 0.249859764 |
| 0.221516331 | 0.282052533 | 0.309649844 | 0.270522594 |
| 0.095279774 | 0.457575135 | 0.339257015 | 0.449993909 |
| 0.311059554 | 0.486170686 | 0.403158657 | 0.384357072 |
| 0.284192184 | 0.339916227 | 0.188666619 | 0.362124693 |
| 0.412122139 | 0.273106613 | 0.066568769 | 0.391719162 |
| 0.322514148 | 0.335065906 | 0.182808035 | 0.446284908 |
| 0.440985611 | 0.392929758 | 0.166858446 | 0.358739935 |
| 0.314878175 | 0.179217373 | 0.377236709 | 0.494531759 |
| 0.282825223 | 0.331454663 | 0.307163693 | 0.389632597 |
| 0.153778143 | 0.288167411 | 0.308992931 | 0.243580722 |
| 0.009016192 | 0.086644219 | 0.063395048 | 0.183417178 |
| 0.217939664 | 0.304094789 | 0.327695919 | 0.459456815 |
| 0.127120734 | 0.364084653 | 0.236206381 | 0.251900389 |
| 0.370901999 | 0.344312732 | 0.311082139 | 0.323236742 |
| 0.227127049 | 0.020773622 | 0.106960688 | 0.464450263 |
| 0.042366097 | 0.241901005 | 0.282349982 | 0.003120761 |
| 0.054439499 | 0.338921674 | 0.094581427 | 0.184451871 |
| 0.454803783 | 0.179421683 | 0.171611125 | 0.269451907 |
| 0.279098683 | 0.099337305 | 0.004073531 | 0.452851293 |
| 0.458108171 | 0.442894776 | 0.453448389 | 0.419274401 |
| 0.437564827 | 0.356525836 | 0.37899505  | 0.224205586 |

|             |             |             |             |
|-------------|-------------|-------------|-------------|
| 0.116701404 | 0.091197459 | 0.256338445 | 0.274234059 |
| 0.007810779 | 0.325372585 | 0.321414343 | 0.132158157 |
| 0.365103987 | 0.287007522 | 0.042283544 | 0.337951669 |
| 0.017436098 | 0.19775025  | 0.287095817 | 0.260232723 |
| 0.346947761 | 0.017477529 | 0.14961495  | 0.295039465 |
| 0.347809941 | 0.294952122 | 0.302971719 | 0.463000354 |
| 0.256762423 | 0.104502524 | 0.274394671 | 0.330630419 |
| 0.089550241 | 0.128974617 | 0.30460739  | 0.021902739 |
| 0.148050622 | 0.424382843 | 0.33177766  | 0.065685368 |
| 0.227766846 | 0.005301707 | 0.300291087 | 0.468202429 |
| 0.385620452 | 0.474033529 | 0.430504559 | 0.251192837 |
| 0.433238498 | 0.164199086 | 0.467019873 | 0.339887151 |
| 0.279895579 | 0.00055391  | 0.010982018 | 0.435124806 |
| 0.309800538 | 0.050701198 | 0.152511063 | 0.209637287 |
| 0.119890076 | 0.132101753 | 0.083872946 | 0.232083151 |
| 0.283864072 | 0.253695066 | 0.244641224 | 0.40604355  |
| 0.240782569 | 0.244896077 | 0.287711914 | 0.087965212 |
| 0.310373594 | 0.060329397 | 0.09648164  | 0.009396778 |
| 0.330436958 | 0.101688518 | 0.399782862 | 0.442794811 |
| 0.441156573 | 0.31825684  | 0.246512911 | 0.251109491 |
| 0.426634363 | 0.073703948 | 0.281451022 | 0.092145186 |
| 0.404997841 | 0.310817244 | 0.267951492 | 0.252488465 |
| 0.459703336 | 0.407504329 | 0.045929096 | 0.359136883 |
| 0.010291229 | 0.006494078 | 0.232095595 | 0.247990477 |
| 0.186799236 | 0.33152354  | 0.223789382 | 0.294699481 |
| 0.285338986 | 0.029219124 | 0.303694338 | 0.285190047 |
| 0.269908239 | 0.318713999 | 0.285521149 | 0.245008813 |
| 0.300398162 | 0.218991257 | 0.209952436 | 0.190232925 |
| 0.30115465  | 0.274953038 | 0.168425154 | 0.034177441 |
| 0.297245248 | 0.30741172  | 0.062807052 | 0.142501593 |
| 0.377722484 | 0.433463348 | 0.071450291 | 0.014125416 |
| 0.22810561  | 0.326560159 | 0.455027614 | 0.424641258 |
| 0.453353631 | 0.476972829 | 0.354600299 | 0.185219817 |
| 0.073426552 | 0.304794705 | 0.305661311 | 0.158539575 |
| 0.448254343 | 0.064880882 | 0.412672228 | 0.304451331 |
| 0.12658524  | 0.198376927 | 0.041174458 | 0.10468995  |
| 0.312929032 | 0.172368027 | 0.202240318 | 0.111483502 |
| 0.291741375 | 0.256650602 | 0.066946817 | 0.193033984 |
| 0.298133175 | 0.226182385 | 0.160790744 | 0.270389657 |
| 0.303992506 | 0.234828777 | 0.352406761 | 0.414980164 |
| 0.116401095 | 0.130230475 | 0.179419337 | 0.351476573 |
| 0.384812579 | 0.301559096 | 0.018484466 | 0.38120522  |
| 0.450754509 | 0.304463907 | 0.420729597 | 0.389354715 |
| 0.090813729 | 0.288440824 | 0.351703288 | 0.320325738 |
| 0.201360348 | 0.249475786 | 0.267360931 | 0.072261084 |
| 0.304254644 | 0.444451067 | 0.365260138 | 0.163643682 |
| 0.305227802 | 0.111282887 | 0.057794517 | 0.40297768  |
| 0.239639566 | 0.084099979 | 0.245240457 | 0.408202307 |
| 0.003526862 | 0.193999251 | 0.475352999 | 0.20422043  |
| 0.480021425 | 0.437686431 | 0.385950202 | 0.247263982 |
| 0.008098195 | 0.337020929 | 0.282390887 | 0.282260563 |
| 0.365897151 | 0.282558533 | 0.186158808 | 0.093907769 |
| 0.267954262 | 0.06426125  | 0.168116314 | 0.224971231 |
| 0.230467729 | 0.292572631 | 0.193692489 | 0.230929899 |

|             |             |             |             |
|-------------|-------------|-------------|-------------|
| 0.236692062 | 0.094643132 | 0.250809456 | 0.20098965  |
| 0.289942523 | 0.213039279 | 0.314130468 | 0.222742652 |
| 0.187750783 | 0.432417424 | 0.344871462 | 0.02915292  |
| 0.323594818 | 0.40022637  | 0.405043857 | 0.003788538 |
| 0.331674577 | 0.010405625 | 0.221597092 | 0.206319439 |
| 0.21730776  | 0.252567631 | 0.274188204 | 0.272195358 |
| 0.297864634 | 0.232618937 | 0.217708999 | 0.211311342 |
| 0.170156506 | 0.217261483 | 0.320844771 | 0.293410862 |
| 0.233636522 | 0.118099416 | 0.096122469 | 0.097489415 |
| 0.052599153 | 0.406143822 | 0.219055126 | 0.060819847 |
| 0.23134507  | 0.312558254 | 0.331278549 | 0.419216905 |
| 0.389923319 | 0.096577057 | 0.327609648 | 0.359925949 |
| 0.230179372 | 0.218737348 | 0.065790313 | 0.283120647 |
| 0.208654039 | 0.223582315 | 0.286003639 | 0.219041924 |
| 0.334523356 | 0.357521176 | 0.207585548 | 0.404909273 |
| 0.287314418 | 0.343978339 | 0.208474488 | 0.097036933 |
| 0.155104623 | 0.130399487 | 0.281356079 | 0.002092194 |
| 0.283717257 | 0.172546897 | 0.405934556 | 0.411144935 |
| 0.298340191 | 0.352663788 | 0.193461309 | 0.087630627 |
| 0.177431504 | 0.155116935 | 0.131875746 | 0.353911014 |
| 0.225517478 | 0.173762109 | 0.28705003  | 0.201168054 |
| 0.363566624 | 0.363731482 | 0.319719311 | 0.246964633 |
| 0.262637331 | 0.162742861 | 0.437495317 | 0.107869166 |
| 0.310074637 | 0.207945132 | 0.259910142 | 0.271908148 |
| 0.250907104 | 0.463906564 | 0.063819638 | 0.469378651 |
| 0.316734535 | 0.121292883 | 0.447109158 | 0.255815592 |
| 0.234786179 | 0.142746425 | 0.229211819 | 0.290453165 |
| 0.257592694 | 0.298230704 | 0.016354904 | 0.090690115 |
| 0.280422903 | 0.335947667 | 0.347024298 | 0.342822228 |
| 0.292514364 | 0.339951354 | 0.214555794 | 0.257887455 |
| 0.401906533 | 0.427139325 | 0.211650262 | 0.242733142 |
| 0.297610249 | 0.105639131 | 0.246317715 | 0.041503677 |
| 0.319257291 | 0.31549819  | 0.297456891 | 0.072543989 |
| 0.028659386 | 0.241101227 | 0.312897994 | 0.07811447  |
| 0.455462272 | 0.201781365 | 0.300228267 | 0.319650265 |
| 0.171737504 | 0.424931224 | 0.164327289 | 0.312666975 |
| 0.081446885 | 0.24334435  | 0.33715301  | 0.34168602  |
| 0.202927112 | 0.300112722 | 0.313306775 | 0.242348887 |
| 0.042425964 | 0.256439383 | 0.005563909 | 0.355853776 |
| 0.401996444 | 0.333274548 | 0.199180336 | 0.256922824 |
| 0.249677151 | 0.365479043 | 0.288119763 | 0.305934813 |
| 0.013753252 | 0.30454164  | 0.197114424 | 0.329086949 |
| 0.185342223 | 0.331822772 | 0.06338666  | 0.348607891 |
| 0.386283255 | 0.274221702 | 0.258338692 | 0.257194436 |
| 0.414958654 | 0.345281008 | 0.129940612 | 0.256307425 |
| 0.310623322 | 0.066743803 | 0.255708923 | 0.481051238 |
| 0.188888363 | 0.238177862 | 0.404497031 | 0.205053214 |
| 0.318225087 | 0.336427671 | 0.314710064 | 0.478856945 |
| 0.115744988 | 0.214477357 | 0.379227301 | 0.417787222 |
| 0.280404183 | 0.257063942 | 0.25417178  | 0.259852748 |
| 0.372440278 | 0.079253593 | 0.317124167 | 0.282548564 |
| 0.247496246 | 0.275258727 | 0.257912411 | 0.242265341 |
| 0.045773023 | 0.207380853 | 0.249357737 | 0.142266104 |
| 0.270236502 | 0.311667048 | 0.293007586 | 0.351060716 |

|             |             |             |             |
|-------------|-------------|-------------|-------------|
| 0.119055711 | 0.025403841 | 0.414375812 | 0.03355493  |
| 0.21587554  | 0.28903514  | 0.224996973 | 0.318778475 |
| 0.152016894 | 0.299075884 | 0.245877046 | 0.001444485 |
| 0.385232047 | 0.068018293 | 0.324747384 | 0.2298223   |
| 0.296608298 | 0.060785646 | 0.389240278 | 0.470709175 |
| 0.256595813 | 0.27702644  | 0.267135926 | 0.410787683 |
| 0.19438309  | 0.297707665 | 0.337944244 | 0.277685934 |
| 0.254677272 | 0.272579133 | 0.311168185 | 0.283825894 |
| 0.299722602 | 0.241224804 |             |             |
| AP2S1       | 0.156484887 | 0.28496214  | 0.10123562  |
| 0.157124949 | 0.231003111 | 0.188950157 | 0.19052699  |
| 0.242323715 | 0.261294792 | 0.112010098 | 0.220481482 |
| 0.093395908 | 0.084882728 | 0.324820767 | 0.207790862 |
| 0.201024666 | 0.171492891 | 0.232104844 | 0.109104943 |
| 0.225100856 | 0.229607628 | 0.17259323  | 0.176619403 |
| 0.249349643 | 0.251194389 | 0.196953166 | 0.177433821 |
| 0.32442677  | 0.085122072 | 0.208077728 | 0.06611904  |
| 0.360711694 | 0.213331754 | 0.154668846 | 0.080737868 |
| 0.210970035 | 0.047666787 | 0.374447885 | 0.238073353 |
| 0.121480541 | 0.343161594 | 0.122593728 | 0.243035947 |
| 0.145431943 | 0.104700943 | 0.060794509 | 0.206645607 |
| 0.209480636 | 0.283800533 | 0.119074101 | 0.226204284 |
| 0.194313488 | 0.244051057 | 0.183707704 | 0.005343577 |
| 0.141635199 | 0.040747906 | 0.101883871 | 0.356713239 |
| 0.254108207 | 0.272252723 | 0.107063249 | 0.264561322 |
| 0.199664403 | 0.251970079 | 1           | 0.14659409  |
| 0.344040827 | 0.12471462  | 0.223694325 | 0.165555986 |
| 0.202926567 | 0.122237742 | 0.255231476 | 0.155844219 |
| 0.198335633 | 0.293698675 | 0.237758818 | 0.185404919 |
| 0.259773681 | 0.417300789 | 0.2782403   | 0.351020461 |
| 0.137584122 | 0.198937569 | 0.240382741 | 0.307470364 |
| 0.267400095 | 0.224254775 | 0.247400707 | 0.387897324 |
| 0.163525439 | 0.144973168 | 0.228914902 | 0.173956141 |
| 0.290602842 | 0.179292877 | 0.135137458 | 0.135219969 |
| 0.230167671 | 0.200269106 | 0.381782913 | 0.2506504   |
| 0.250448833 | 0.133463877 | 0.356443278 | 0.188001485 |
| 0.21234205  | 0.151746803 | 0.211913964 | 0.279849584 |
| 0.200289457 | 0.323824929 | 0.259334131 | 0.286680976 |
| 0.182539049 | 0.343384605 | 0.231316461 | 0.325986328 |
| 0.048900574 | 0.36285551  | 0.229386678 | 0.184069136 |
| 0.13242284  | 0.275838058 | 0.240371027 | 0.353611622 |
| 0.307318021 | 0.259946494 | 0.224381432 | 0.26840485  |
| 0.323204413 | 0.333288837 | 0.3544388   | 0.28357158  |
| 0.143386632 | 0.166925768 | 0.179253698 | 0.258140122 |
| 0.242009457 | 0.24594382  | 0.172411184 | 0.379858589 |
| 0.322697841 | 0.287135377 | 0.20164694  | 0.414888768 |
| 0.27142026  | 0.395444527 | 0.268112727 | 0.238242115 |
| 0.38545523  | 0.364285901 | 0.378766337 | 0.219319198 |
| 0.369150652 | 0.194550104 | 0.083750893 | 0.300168397 |
| 0.394419986 | 0.021458012 | 0.300870488 | 0.323835504 |
| 0.334405008 | 0.271480239 | 0.386223653 | 0.347490293 |
| 0.337706945 | 0.181778241 | 0.020436455 | 0.26199686  |
| 0.355837378 | 0.305160509 | 0.321684805 | 0.159935188 |
| 0.219339946 | 0.195592539 | 0.27263283  | 0.119543653 |



|             |             |             |             |
|-------------|-------------|-------------|-------------|
| 0.42871131  | 0.310718807 | 0.312008567 | 0.256363884 |
| 0.192064427 | 0.334033016 | 0.160705772 | 0.343123766 |
| 0.183681031 | 0.16324789  | 0.109158747 | 0.315728458 |
| 0.12871242  | 0.285119719 | 0.184225612 | 0.230319548 |
| 0.276718208 | 0.211923252 | 0.143823085 | 0.228317433 |
| 0.123923196 | 0.165896952 | 0.242931121 | 0.19333817  |
| 0.171084309 | 0.253365851 | 0.187537929 | 0.240156239 |
| 0.269720822 | 0.286422995 | 0.214205764 | 0.344932348 |
| 0.222957656 | 0.201891467 | 0.224147354 | 0.386096195 |
| 0.394037545 | 0.184815609 | 0.297597828 | 0.047579541 |
| 0.150021705 | 0.124321655 | 0.111387727 | 0.177471903 |
| 0.273444313 | 0.208869729 | 0.200344146 | 0.255346014 |
| 0.178992746 | 0.21594707  | 0.185120834 | 0.390054016 |
| 0.191963859 | 0.214752535 | 0.310018675 | 0.170742761 |
| 0.033668117 | 0.20830367  | 0.276222402 | 0.232629102 |
| 0.234356525 | 0.107961875 | 0.118445621 | 0.309885709 |
| 0.144772951 | 0.212886575 | 0.330690837 | 0.269306489 |
| 0.166906185 | 0.260911145 | 0.383636645 | 0.03006051  |
| 0.217905728 | 0.120054077 | 0.277082267 | 0.132746872 |
| 0.248155243 | 0.309834638 | 0.212094603 | 0.228478734 |
| 0.145392681 | 0.364563648 | 0.317069003 | 0.344783932 |
| 0.150196052 | 0.385528272 | 0.287294495 | 0.321653708 |
| 0.251313139 | 0.161726657 | 0.082387443 | 0.261878176 |
| 0.3015157   | 0.13601327  | 0.130212542 | 0.246647287 |
| 0.155707285 | 0.220210113 | 0.246913448 | 0.354190004 |
| 0.416120476 | 0.311533412 | 0.275491155 | 0.300159619 |
| 0.291137722 | 0.226716811 | 0.318675196 | 0.405735298 |
| 0.120837361 | 0.187779367 | 0.182698691 | 0.336124334 |
| 0.226045902 | 0.218017962 | 0.350122237 | 0.115254882 |
| 0.004893548 | 0.172444277 | 0.141904932 | 0.277480225 |
| 0.164220547 | 0.165674393 | 0.236097948 | 0.355343574 |
| 0.240325764 | 0.346022932 | 0.284803693 | 0.181863756 |
| 0.302496458 | 0.209446765 | 0.189048808 | 0.220488702 |
| 0.302903651 | 0.078841409 | 0.187387582 | 0.410194808 |
| 0.097706522 | 0.154298437 | 0.244515691 | 0.009734608 |
| 0.132720231 | 0.226693274 | 0.180591596 | 0.290730522 |
| 0.357532618 | 0.267069712 | 0.198987193 | 0.123228429 |
| 0.282822328 | 0.217373931 | 0.027293794 | 0.337975398 |
| 0.364735521 | 0.35739662  | 0.35597061  | 0.360025076 |
| 0.327020848 | 0.274268901 | 0.281271786 | 0.180298345 |
| 0.225127253 | 0.166386923 | 0.142414245 | 0.233313504 |
| 0.012415545 | 0.309968666 | 0.270967219 | 0.226851129 |
| 0.253824953 | 0.266971916 | 0.138295421 | 0.230175815 |
| 0.056608931 | 0.085638054 | 0.213865266 | 0.3065669   |
| 0.306573655 | 0.082554851 | 0.090373983 | 0.139837512 |
| 0.307596376 | 0.296323228 | 0.157545022 | 0.373714439 |
| 0.232511549 | 0.143160521 | 0.226505864 | 0.279039828 |
| 0.203213799 | 0.052576853 | 0.202395071 | 0.011039784 |
| 0.133718841 | 0.376918217 | 0.193158329 | 0.138899054 |
| 0.237875571 | 0.037559991 | 0.287174798 | 0.382928622 |
| 0.310687921 | 0.354372653 | 0.349064159 | 0.154852557 |
| 0.347319313 | 0.051401688 | 0.356282782 | 0.266219752 |
| 0.126297689 | 0.002628588 | 0.042587921 | 0.31313464  |
| 0.184239523 | 0.111054841 | 0.243715527 | 0.141930581 |

|             |             |             |             |
|-------------|-------------|-------------|-------------|
| 0.228724933 | 0.169499798 | 0.218966877 | 0.202205253 |
| 0.197279427 | 0.261207292 | 0.20744418  | 0.326688579 |
| 0.26217204  | 0.303657928 | 0.169940447 | 0.166425382 |
| 0.211250532 | 0.172273705 | 0.177201173 | 0.024685552 |
| 0.28052607  | 0.171690717 | 0.363526576 | 0.347421389 |
| 0.386956372 | 0.244954513 | 0.103800807 | 0.173144099 |
| 0.33391855  | 0.116848587 | 0.150993483 | 0.140614521 |
| 0.311254289 | 0.195552447 | 0.293647399 | 0.278173467 |
| 0.371842284 | 0.345395667 | 0.149698284 | 0.269981241 |
| 0.050044734 | 0.01652254  | 0.155114145 | 0.291739438 |
| 0.132072377 | 0.183687602 | 0.286032313 | 0.256332345 |
| 0.303877391 | 0.09223415  | 0.156932247 | 0.159783746 |
| 0.255564696 | 0.222888938 | 0.203240718 | 0.293371541 |
| 0.260466543 | 0.187123726 | 0.306086344 | 0.297139013 |
| 0.214193532 | 0.275712976 | 0.241387599 | 0.124405007 |
| 0.163020655 | 0.172591192 | 0.170706424 | 0.233116946 |
| 0.300515178 | 0.317953299 | 0.171328782 | 0.061434511 |
| 0.287413252 | 0.24137808  | 0.34512889  | 0.323428012 |
| 0.381734908 | 0.398269457 | 0.379310765 | 0.261271188 |
| 0.187001686 | 0.260572032 | 0.213112131 | 0.268449515 |
| 0.352132402 | 0.115664079 | 0.345911332 | 0.168581413 |
| 0.230872068 | 0.246035712 | 0.150492618 | 0.230944934 |
| 0.181767955 | 0.270204675 | 0.286292168 | 0.145484912 |
| 0.222930815 | 0.163573064 | 0.182748664 | 0.265817926 |
| 0.27047047  | 0.109189551 | 0.247602459 | 0.253460098 |
| 0.284607959 | 0.109624394 | 0.228183098 | 0.390008534 |
| 0.20014011  | 0.208801236 | 0.139415338 | 0.289091045 |
| 0.260435252 | 0.152672051 | 0.061176809 | 0.278135962 |
| 0.363791645 | 0.191045669 | 0.349404089 | 0.352659502 |
| 0.183723597 | 0.180224428 | 0.181197286 | 0.215315151 |
| 0.27879227  | 0.193194708 | 0.304341287 | 0.176222523 |
| 0.368933422 | 0.412869728 | 0.282858723 | 0.261862904 |
| 0.188687578 | 0.153722032 | 0.104704212 | 0.311422934 |
| 0.151978896 | 0.154044332 | 0.13249946  | 0.284520216 |
| 0.015261483 | 0.109146648 | 0.36930272  | 0.266546068 |
| 0.412390543 | 0.333129456 | 0.358221374 | 0.27391991  |
| 0.003924243 | 0.209716891 | 0.210268262 | 0.176078794 |
| 0.27460969  | 0.286053527 | 0.252549024 | 0.217894962 |
| 0.339185822 | 0.119515137 | 0.230092409 | 0.167452962 |
| 0.095673226 | 0.191163948 | 0.292802355 | 0.264642736 |
| 0.299439652 | 0.145655942 | 0.164325408 | 0.263164531 |
| 0.17310186  | 0.300544933 | 0.310287141 | 0.118860409 |
| 0.079461708 | 0.34023129  | 0.249056473 | 0.111471061 |
| 0.200136867 | 0.319497372 | 0.359392171 | 0.00824178  |
| 0.225899221 | 0.066189277 | 0.279187616 | 0.253460698 |
| 0.293634523 | 0.281395799 | 0.283208064 | 0.229449751 |
| 0.217215349 | 0.283092608 | 0.234965043 | 0.271194073 |
| 0.26716171  | 0.291311715 | 0.223032554 | 0.213657879 |
| 0.203464421 | 0.223632495 | 0.189452488 | 0.183974441 |
| 0.160971623 | 0.314939274 | 0.308049461 | 0.128426201 |
| 0.299687841 | 0.216755667 | 0.369801334 | 0.321142572 |
| 0.376807205 | 0.15722866  | 0.253764278 | 0.270159962 |
| 0.081751932 | 0.156220945 | 0.139105346 | 0.208683687 |
| 0.275097456 | 0.175714594 | 0.187018384 | 0.165218069 |

|             |             |             |             |
|-------------|-------------|-------------|-------------|
| 0.21698399  | 0.372795169 | 0.296415099 | 0.372175793 |
| 0.224219682 | 0.203525984 | 0.100114543 | 0.206096068 |
| 0.212111594 | 0.213403775 | 0.220179943 | 0.019764397 |
| 0.247896493 | 0.171984884 | 0.286198092 | 0.340352    |
| 0.146446955 | 0.371559809 | 0.105284616 | 0.162648045 |
| 0.088108962 | 0.197820313 | 0.224117807 | 0.245709054 |
| 0.09893166  | 0.281618288 | 0.240383597 | 0.155243935 |
| 0.253199052 | 0.236863508 | 0.257215263 | 0.267973122 |
| 0.301571711 | 0.211704487 | 0.381685269 | 0.183807733 |
| 0.164026624 | 0.19499327  | 0.159395357 | 0.222081713 |
| 0.276047696 | 0.350918369 | 0.165487359 | 0.346050429 |
| 0.197460476 | 0.216925452 | 0.423201136 | 0.261814678 |
| 0.248581238 | 0.273930367 | 0.10887044  | 0.175174114 |
| 0.285595455 | 0.162491844 | 0.005085481 | 0.052617321 |
| 0.288127206 | 0.206458712 | 0.226418824 | 0.291335099 |
| 0.235289468 | 0.337379891 | 0.116101305 | 0.227338185 |
| 0.320217836 | 0.373836251 | 0.178318533 | 0.320683921 |
| 0.280321648 | 0.230469491 | 0.17669992  | 0.033867703 |
| 0.173971856 | 0.159188408 | 0.140684564 | 0.203265583 |
| 0.11726503  | 0.108232175 | 0.178286618 | 0.142466515 |
| 0.340496828 | 0.090287202 | 0.189548547 | 0.236042459 |
| 0.257716192 | 0.372547615 | 0.287765662 | 0.250221681 |
| 0.138718364 | 0.286406304 | 0.195811624 | 0.190425931 |
| 0.186288731 | 0.182418303 | 0.274247294 | 0.158596807 |
| 0.149882786 | 0.233933454 | 0.011283834 | 0.371870304 |
| 0.339748612 | 0.17587392  | 0.298160784 | 0.116055071 |
| 0.29880104  | 0.345642307 | 0.214074919 | 0.169173988 |
| 0.075309315 | 0.187418833 | 0.298873432 | 0.285325612 |
| 0.075043503 | 0.19789288  | 0.192737149 | 0.213735391 |
| 0.365254351 | 0.159942274 | 0.332948615 | 0.111546673 |
| 0.32829059  | 0.293038006 | 0.181598389 | 0.276593058 |
| 0.189000414 | 0.15110312  | 0.147345588 | 0.387056478 |
| 0.280240844 | 0.166789037 | 0.295105761 | 0.23633385  |
| 0.1788978   | 0.317494568 | 0.169110162 | 0.385425325 |
| 0.224789302 | 0.27096838  | 0.289777199 | 0.324148647 |
| 0.335765407 | 0.200883698 | 0.150519455 | 0.22754412  |
| 0.304926336 | 0.164540714 | 0.199047933 | 0.266245912 |
| 0.131377616 | 0.2878231   | 0.163184827 | 0.25807184  |
| 0.138616794 | 0.308005252 | 0.197428265 | 0.244759513 |
| 0.256596039 | 0.218771203 | 0.241346729 | 0.373055084 |
| 0.206993195 | 0.084391347 | 0.402330796 | 0.013249401 |
| 0.191689898 | 0.21900434  | 0.292713922 | 0.222008861 |
| 0.237407854 | 0.230324722 | 0.164149021 | 0.009438427 |
| 0.307250872 | 0.094986523 | 0.268623787 | 0.204476404 |
| 0.154203312 | 0.15121611  | 0.351394752 | 0.363239714 |
| 0.261218055 | 0.180124413 | 0.123754672 | 0.342323078 |
| 0.116901924 | 0.131105767 | 0.165324833 | 0.190223759 |
| 0.149636394 | 0.128570191 | 0.162391983 | 0.150445858 |
| 0.265277231 | 0.281959936 |             |             |
| APIP        | 0.019119788 | 0.398717966 | 0.018842814 |
| 0.036040649 | 0.163578467 | 0.123357863 | 0.018121206 |
| 0.035875391 | 0.324403213 | 0.173525809 | 0.158553708 |
| 0.003618945 | 0.034609685 | 0.396007109 | 0.014827822 |
| 0.265655359 | 0.007294401 | 0.039082877 | 0.036390205 |

|             |             |             |             |
|-------------|-------------|-------------|-------------|
| 0.08716364  | 0.148427243 | 0.104118999 | 0.188437841 |
| 0.144842096 | 0.135602793 | 0.229988288 | 0.261711557 |
| 0.459390722 | 0.112956022 | 0.289574521 | 0.120017684 |
| 0.350615573 | 0.194296051 | 0.200189587 | 0.003687465 |
| 0.203820332 | 0.012601921 | 0.389178232 | 0.090868781 |
| 0.052158303 | 0.264408502 | 0.198983713 | 0.071240952 |
| 0.249644183 | 0.009456378 | 0.115268584 | 0.354703154 |
| 0.238562906 | 0.089487526 | 0.029997858 | 0.320593009 |
| 0.157353011 | 0.201753637 | 0.372245302 | 0.000862523 |
| 0.129533525 | 0.057634366 | 0.114397174 | 0.437743799 |
| 0.09920661  | 0.034982254 | 0.181751345 | 0.111104289 |
| 0.306218449 | 0.301341761 | 0.14659409  | 1           |
| 0.433440673 | 0.07796248  | 0.380440316 | 0.045809592 |
| 0.177426021 | 0.012438218 | 0.089915471 | 0.057639168 |
| 0.149921277 | 0.072743989 | 0.149096393 | 0.13508113  |
| 0.42498889  | 0.444836357 | 0.137915913 | 0.461616378 |
| 0.063769352 | 0.224187634 | 0.093629606 | 0.204195008 |
| 0.316115551 | 0.034624799 | 0.291016712 | 0.460572757 |
| 0.018592607 | 0.311219794 | 0.351708783 | 0.0804601   |
| 0.361126768 | 0.128028968 | 0.260436528 | 0.055518187 |
| 0.265071259 | 0.217801477 | 0.436236391 | 0.174885987 |
| 0.13314667  | 0.040102714 | 0.428030165 | 0.20339678  |
| 0.08496664  | 0.03503933  | 0.089656716 | 0.435804818 |
| 0.291546088 | 0.432841277 | 0.423046562 | 0.315633529 |
| 0.250525292 | 0.436026246 | 0.283178585 | 0.35498305  |
| 0.105791109 | 0.473476352 | 0.074696267 | 0.007577683 |
| 0.024935813 | 0.018061832 | 0.109481799 | 0.207316946 |
| 0.407673021 | 0.202375498 | 0.066669329 | 0.100655085 |
| 0.418379283 | 0.426655395 | 0.491750164 | 0.361534417 |
| 0.009216423 | 0.12458259  | 0.243650426 | 0.073201204 |
| 0.279741781 | 0.055639604 | 0.11970634  | 0.445754183 |
| 0.286894466 | 0.378734998 | 0.052819291 | 0.426513219 |
| 0.086952411 | 0.427544099 | 0.421023729 | 0.06194171  |
| 0.450315337 | 0.42394676  | 0.438670593 | 0.290839365 |
| 0.384200208 | 0.146945914 | 0.044247102 | 0.341717948 |
| 0.388645369 | 0.004191314 | 0.451679975 | 0.472964065 |
| 0.459832576 | 0.428221997 | 0.46707819  | 0.449456829 |
| 0.45783537  | 0.035007555 | 0.038940299 | 0.177443559 |
| 0.459644602 | 0.307030198 | 0.036180742 | 0.280226226 |
| 0.23882043  | 0.166825116 | 0.36412065  | 0.114801953 |
| 0.426299589 | 0.390383393 | 0.455906371 | 0.34212194  |
| 0.228397275 | 0.234161261 | 0.264679149 | 0.401605431 |
| 0.008983737 | 0.034566571 | 0.027701865 | 0.225932495 |
| 0.133249955 | 0.071139927 | 0.157107955 | 0.243616188 |
| 0.090369883 | 0.152030757 | 0.142324593 | 0.271362633 |
| 0.042072486 | 0.269379801 | 0.065426261 | 0.092190046 |
| 0.008735756 | 0.096796081 | 0.055267548 | 0.033191645 |
| 0.103939683 | 0.19580088  | 0.351304935 | 0.444769154 |
| 0.175365027 | 0.116687589 | 0.324216874 | 0.389002887 |
| 0.332563861 | 0.217901852 | 0.148582497 | 0.001610579 |
| 0.120377775 | 0.182548158 | 0.094252742 | 0.26165748  |
| 0.13454235  | 0.092011038 | 0.27492829  | 0.281700574 |
| 0.134656003 | 0.062323378 | 0.156419378 | 0.331097745 |
| 0.109336929 | 0.084323379 | 0.38267741  | 0.295820851 |

|             |             |             |             |
|-------------|-------------|-------------|-------------|
| 0.000423035 | 0.168424721 | 0.373932264 | 0.055093115 |
| 0.240409372 | 0.049356717 | 0.079908287 | 0.428749558 |
| 0.132314674 | 0.089528125 | 0.43880635  | 0.285028703 |
| 0.115047788 | 0.191322292 | 0.471273427 | 0.041859004 |
| 0.217275852 | 0.0107109   | 0.166602712 | 0.223016605 |
| 0.132539762 | 0.198597982 | 0.172985954 | 0.082951134 |
| 0.071254911 | 0.462022672 | 0.29845004  | 0.449728415 |
| 0.159997201 | 0.476431547 | 0.404353807 | 0.356328647 |
| 0.221908895 | 0.238062229 | 0.065176659 | 0.375833557 |
| 0.419731062 | 0.16869605  | 0.048232178 | 0.422830643 |
| 0.236769225 | 0.319245411 | 0.035698487 | 0.434114454 |
| 0.40027404  | 0.438589358 | 0.034745479 | 0.286823916 |
| 0.279388701 | 0.096424002 | 0.33720056  | 0.462552742 |
| 0.194624258 | 0.216167319 | 0.133467106 | 0.31537065  |
| 0.090577393 | 0.08264055  | 0.246887137 | 0.083156194 |
| 0.004237756 | 0.034627675 | 0.028496985 | 0.046901081 |
| 0.057560265 | 0.329331806 | 0.287115149 | 0.466253756 |
| 0.038251865 | 0.316667519 | 0.173034059 | 0.101414086 |
| 0.387325677 | 0.179402662 | 0.212573308 | 0.237579581 |
| 0.157091551 | 0.002985599 | 0.025175198 | 0.450498374 |
| 0.025399663 | 0.080831066 | 0.155896869 | 0.000352142 |
| 0.013977987 | 0.408967837 | 0.073597141 | 0.139659574 |
| 0.407317176 | 0.147243986 | 0.132749198 | 0.18886862  |
| 0.207996105 | 0.033743672 | 2.30E-05    | 0.462215939 |
| 0.457885163 | 0.434997956 | 0.462153757 | 0.416489966 |
| 0.437517802 | 0.329337467 | 0.36052707  | 0.173610243 |
| 0.028913058 | 0.032032631 | 0.098323163 | 0.129481284 |
| 0.002568973 | 0.256905816 | 0.146366323 | 0.073614972 |
| 0.351403113 | 0.214245283 | 0.007600772 | 0.222154469 |
| 0.004610652 | 0.091742507 | 0.115713432 | 0.077807352 |
| 0.254981479 | 0.002852452 | 0.086417995 | 0.141345104 |
| 0.355569373 | 0.261609546 | 0.149472059 | 0.468228633 |
| 0.14955492  | 0.103996061 | 0.134254285 | 0.267174591 |
| 0.018860813 | 0.09561686  | 0.152953131 | 0.032275418 |
| 0.05817319  | 0.398775388 | 0.144164973 | 0.021347491 |
| 0.142980738 | 0.000673358 | 0.285963442 | 0.458942864 |
| 0.420479235 | 0.475235013 | 0.423669074 | 0.102654534 |
| 0.442867263 | 0.077126528 | 0.474799258 | 0.359657654 |
| 0.207611203 | 0.000278321 | 0.000565685 | 0.443262611 |
| 0.248605428 | 0.042055184 | 0.074260885 | 0.105648718 |
| 0.025413282 | 0.058675791 | 0.014873482 | 0.058452246 |
| 0.252630993 | 0.095629307 | 0.05671268  | 0.43233157  |
| 0.099976304 | 0.105962588 | 0.187291    | 0.053594525 |
| 0.230425919 | 0.011366596 | 0.056552367 | 0.001686954 |
| 0.25983012  | 0.086228564 | 0.410061553 | 0.455901948 |
| 0.412190469 | 0.2744961   | 0.176417826 | 0.101730542 |
| 0.392051715 | 0.06804888  | 0.136085604 | 0.065419372 |
| 0.440846035 | 0.277844715 | 0.206608408 | 0.218900358 |
| 0.43853229  | 0.400356517 | 0.007397952 | 0.342401572 |
| 0.001792133 | 0.000177264 | 0.193711432 | 0.169078276 |
| 0.05015425  | 0.211959613 | 0.167902122 | 0.103233646 |
| 0.075349599 | 0.006256177 | 0.123198881 | 0.111165747 |
| 0.173419757 | 0.194804563 | 0.137046211 | 0.181965202 |
| 0.094912325 | 0.05844717  | 0.048678247 | 0.042676443 |

|             |             |             |             |
|-------------|-------------|-------------|-------------|
| 0.123478644 | 0.25859707  | 0.141326598 | 0.005475851 |
| 0.257701851 | 0.237597845 | 0.015813308 | 0.082271702 |
| 0.357177257 | 0.439041913 | 0.01297662  | 0.00149549  |
| 0.179977827 | 0.141139187 | 0.436427075 | 0.452009493 |
| 0.455881907 | 0.450864942 | 0.3071633   | 0.038045657 |
| 0.01556067  | 0.182118484 | 0.158296086 | 0.024059942 |
| 0.445227019 | 0.044498566 | 0.412255324 | 0.170032675 |
| 0.059804918 | 0.064363336 | 0.00508553  | 0.031695374 |
| 0.236276561 | 0.083322517 | 0.060892692 | 0.092258539 |
| 0.125833444 | 0.087455939 | 0.012704797 | 0.089339911 |
| 0.269425817 | 0.093384686 | 0.07793703  | 0.106262688 |
| 0.274033    | 0.154320802 | 0.364186849 | 0.364223859 |
| 0.066843324 | 0.058379006 | 0.095678216 | 0.298602944 |
| 0.414347075 | 0.30232522  | 0.003982493 | 0.435331666 |
| 0.416033962 | 0.317301458 | 0.429079486 | 0.31756941  |
| 0.047328828 | 0.18780416  | 0.171831203 | 0.215815376 |
| 0.093462432 | 0.13915609  | 0.107982064 | 0.026552144 |
| 0.222037488 | 0.410594263 | 0.389503667 | 0.046846841 |
| 0.255303461 | 0.082381825 | 0.039550025 | 0.389225431 |
| 0.079459583 | 0.023344829 | 0.203859641 | 0.400807261 |
| 0.000181708 | 0.054621068 | 0.451271243 | 0.055316751 |
| 0.451184216 | 0.43492098  | 0.350710391 | 0.075871955 |
| 0.001987092 | 0.340027771 | 0.215406136 | 0.158720888 |
| 0.397212455 | 0.234581565 | 0.047019932 | 0.016192328 |
| 0.18576624  | 0.05007711  | 0.041493866 | 0.104060308 |
| 0.10941681  | 0.282656644 | 0.109531288 | 0.123972244 |
| 0.066058453 | 0.077588586 | 0.077056583 | 0.07441345  |
| 0.084770825 | 0.13874291  | 0.253589975 | 0.143071198 |
| 0.095689061 | 0.398575062 | 0.371542258 | 0.005284384 |
| 0.193435152 | 0.371782027 | 0.351556442 | 0.001037361 |
| 0.328026348 | 0.000772766 | 0.065989316 | 0.067048914 |
| 0.056830116 | 0.077361063 | 0.135770971 | 0.093624961 |
| 0.256564079 | 0.083495807 | 0.081166626 | 0.111514225 |
| 0.03744148  | 0.084041966 | 0.236306031 | 0.181340419 |
| 0.075870611 | 0.031575749 | 0.072205967 | 0.079920897 |
| 0.008776701 | 0.4042049   | 0.159458311 | 0.044451874 |
| 0.108516288 | 0.16179488  | 0.252124929 | 0.459902297 |
| 0.316541746 | 0.087548993 | 0.149386608 | 0.391945412 |
| 0.154145309 | 0.097346617 | 0.019531076 | 0.21054281  |
| 0.09081305  | 0.067033884 | 0.215435585 | 0.212728712 |
| 0.375766087 | 0.310632046 | 0.150147262 | 0.357332628 |
| 0.139266187 | 0.231334065 | 0.165608496 | 0.017531948 |
| 0.064092364 | 0.083643386 | 0.12882428  | 0.000124243 |
| 0.206000617 | 0.074907881 | 0.422648058 | 0.430428427 |
| 0.120134912 | 0.280836148 | 0.134023562 | 0.02537282  |
| 0.145803751 | 0.156143464 | 0.074698593 | 0.377973911 |
| 0.09630649  | 0.042824505 | 0.153221177 | 0.097698608 |
| 0.361062146 | 0.383085307 | 0.091230037 | 0.097290837 |
| 0.121656821 | 0.113763459 | 0.433735258 | 0.043080738 |
| 0.320994398 | 0.05408059  | 0.28441956  | 0.129270395 |
| 0.081423844 | 0.473865376 | 0.022165892 | 0.483291147 |
| 0.165295852 | 0.08624273  | 0.39998391  | 0.128291503 |
| 0.083828834 | 0.022559717 | 0.085453289 | 0.164374487 |
| 0.077545406 | 0.125728093 | 0.014006963 | 0.029616473 |

|             |             |             |             |
|-------------|-------------|-------------|-------------|
| 0.205834559 | 0.148992064 | 0.413114755 | 0.287236546 |
| 0.08788569  | 0.251899466 | 0.065884965 | 0.143795326 |
| 0.442382501 | 0.434294401 | 0.082527285 | 0.165790896 |
| 0.252043219 | 0.021447155 | 0.244886722 | 0.011392871 |
| 0.321257854 | 0.321669684 | 0.167759863 | 0.011389477 |
| 0.003453429 | 0.106258125 | 0.31756332  | 0.047397225 |
| 0.439827373 | 0.094984876 | 0.300420183 | 0.310207795 |
| 0.115547063 | 0.434000298 | 0.028349356 | 0.27649317  |
| 0.027148704 | 0.148701114 | 0.212204271 | 0.243758594 |
| 0.064493392 | 0.139206299 | 0.267044504 | 0.08468285  |
| 0.005866907 | 0.074995804 | 0.00200833  | 0.321084789 |
| 0.435124475 | 0.205004847 | 0.138144603 | 0.164157469 |
| 0.155286077 | 0.308175121 | 0.091609206 | 0.245880119 |
| 0.001177374 | 0.228708933 | 0.082543584 | 0.317234595 |
| 0.126188306 | 0.275728412 | 0.009574616 | 0.190737831 |
| 0.390119896 | 0.111472124 | 0.181861407 | 0.16738517  |
| 0.438242397 | 0.32743437  | 0.115815911 | 0.059748302 |
| 0.345364648 | 0.034499581 | 0.161906054 | 0.473384817 |
| 0.050352562 | 0.079970494 | 0.379703976 | 0.061645437 |
| 0.15269155  | 0.307222499 | 0.331506597 | 0.471550911 |
| 0.016373636 | 0.129298375 | 0.339661804 | 0.430827694 |
| 0.187171072 | 0.063593834 | 0.090190588 | 0.083037392 |
| 0.402841975 | 0.019638958 | 0.107964963 | 0.250451204 |
| 0.090645091 | 0.174939351 | 0.278951796 | 0.059690653 |
| 0.006677371 | 0.047948218 | 0.096026363 | 0.06913773  |
| 0.161590862 | 0.196923847 | 0.085955986 | 0.290068241 |
| 0.026396006 | 0.003657846 | 0.360575178 | 0.010495057 |
| 0.156292186 | 0.234649503 | 0.10373266  | 0.166181276 |
| 0.116810472 | 0.238733889 | 0.216516358 | 8.22E-06    |
| 0.339894666 | 0.013756157 | 0.108819245 | 0.069200793 |
| 0.123134913 | 0.014672131 | 0.368863934 | 0.451893765 |
| 0.182196324 | 0.122644057 | 0.136351026 | 0.397201127 |
| 0.059409302 | 0.155238468 | 0.151656113 | 0.321003153 |
| 0.081838973 | 0.240909453 | 0.214500039 | 0.157679494 |
| 0.269051575 | 0.088040282 |             |             |
| APITD1      | 0.165172436 | 0.48041294  | 0.139704181 |
| 0.25238476  | 0.360861608 | 0.513227633 | 0.125234041 |
| 0.222702131 | 0.426586864 | 0.366520139 | 0.466024261 |
| 0.053751144 | 0.094447391 | 0.502971692 | 0.114593396 |
| 0.448167912 | 0.078602955 | 0.197476011 | 0.110325322 |
| 0.309438887 | 0.337123102 | 0.407825095 | 0.499887685 |
| 0.333041143 | 0.286707833 | 0.455684783 | 0.424642267 |
| 0.510886632 | 0.325868095 | 0.512323198 | 0.262277444 |
| 0.450315379 | 0.378638916 | 0.435101864 | 0.052519233 |
| 0.502131051 | 0.012481516 | 0.461241708 | 0.34666678  |
| 0.182873922 | 0.419561556 | 0.431411441 | 0.353675073 |
| 0.453702962 | 0.099909186 | 0.276183449 | 0.454535438 |
| 0.422200993 | 0.368002236 | 0.151145529 | 0.509831659 |
| 0.429827735 | 0.467767598 | 0.475079642 | 0.006391422 |
| 0.342077506 | 0.092106127 | 0.245524047 | 0.520309685 |
| 0.315966041 | 0.212390477 | 0.316176599 | 0.342325344 |
| 0.443481149 | 0.43195978  | 0.344040827 | 0.433440673 |
| 1           | 0.196782809 | 0.485758675 | 0.251720941 |
| 0.48327543  | 0.083033803 | 0.260623961 | 0.165550904 |

|             |             |             |             |
|-------------|-------------|-------------|-------------|
| 0.446777092 | 0.297762942 | 0.421401533 | 0.341709264 |
| 0.480219836 | 0.530903121 | 0.336898512 | 0.519074084 |
| 0.106799143 | 0.37733939  | 0.324450565 | 0.382030776 |
| 0.430773365 | 0.151055414 | 0.505295772 | 0.529861384 |
| 0.108056209 | 0.4607301   | 0.473159479 | 0.22427881  |
| 0.501700626 | 0.301567633 | 0.482859701 | 0.20828268  |
| 0.41789245  | 0.396329823 | 0.489317529 | 0.412371225 |
| 0.370483583 | 0.159624634 | 0.515240392 | 0.356252299 |
| 0.395802959 | 0.176806914 | 0.275633429 | 0.502150033 |
| 0.50314775  | 0.518260429 | 0.488707945 | 0.439682983 |
| 0.432029445 | 0.510444196 | 0.504617872 | 0.477480854 |
| 0.194189613 | 0.532746027 | 0.311734763 | 0.095265987 |
| 0.160997403 | 0.153858132 | 0.262065969 | 0.386017165 |
| 0.516964406 | 0.443630565 | 0.324932834 | 0.316375882 |
| 0.486873495 | 0.504264915 | 0.528587404 | 0.490604244 |
| 0.097932937 | 0.26447068  | 0.441661104 | 0.401775864 |
| 0.462800057 | 0.198685568 | 0.29745581  | 0.532614924 |
| 0.466110187 | 0.494490877 | 0.289452357 | 0.52569192  |
| 0.288342866 | 0.520264715 | 0.510354979 | 0.280785363 |
| 0.534955599 | 0.522317085 | 0.506890273 | 0.455500925 |
| 0.49696144  | 0.481257581 | 0.086394872 | 0.456344201 |
| 0.489127824 | 0.02043267  | 0.507908283 | 0.509330135 |
| 0.512516818 | 0.511942308 | 0.508829581 | 0.511688267 |
| 0.517154709 | 0.152502986 | 0.031529149 | 0.358403389 |
| 0.526090288 | 0.484724639 | 0.196742338 | 0.473537809 |
| 0.414072223 | 0.519970425 | 0.486321624 | 0.397834485 |
| 0.516451249 | 0.507230958 | 0.511810069 | 0.480485605 |
| 0.390912468 | 0.401962841 | 0.413136601 | 0.502687665 |
| 0.100378768 | 0.230185546 | 0.127226162 | 0.386114348 |
| 0.4516431   | 0.266408057 | 0.503079941 | 0.399620683 |
| 0.294140948 | 0.455821883 | 0.371256158 | 0.433439033 |
| 0.126259375 | 0.522809954 | 0.277508469 | 0.289885103 |
| 0.093930256 | 0.232474092 | 0.300004785 | 0.260392206 |
| 0.335037259 | 0.289574384 | 0.505860709 | 0.500184729 |
| 0.400594105 | 0.302990927 | 0.514056604 | 0.486227631 |
| 0.452789467 | 0.44027542  | 0.328017042 | 0.031412881 |
| 0.345070816 | 0.336785275 | 0.20162602  | 0.460881407 |
| 0.25226521  | 0.335016386 | 0.458180089 | 0.456900671 |
| 0.431441036 | 0.248273126 | 0.427699021 | 0.455300751 |
| 0.25623392  | 0.395080622 | 0.501218843 | 0.482175841 |
| 0.013209929 | 0.4501815   | 0.518545877 | 0.181482297 |
| 0.414558981 | 0.169306532 | 0.308355096 | 0.502973178 |
| 0.329966758 | 0.259242069 | 0.510337242 | 0.445380093 |
| 0.436063947 | 0.291999185 | 0.516767298 | 0.056946381 |
| 0.38292038  | 0.088788864 | 0.370785889 | 0.410127138 |
| 0.369741439 | 0.371608128 | 0.363048168 | 0.344199934 |
| 0.246764812 | 0.525884919 | 0.476590883 | 0.515474802 |
| 0.426788149 | 0.521699075 | 0.513755243 | 0.504664173 |
| 0.46761821  | 0.401408003 | 0.151155791 | 0.516867041 |
| 0.504377693 | 0.351267336 | 0.159921031 | 0.493509238 |
| 0.418913748 | 0.458823918 | 0.148316417 | 0.502170642 |
| 0.511115206 | 0.492283586 | 0.229781901 | 0.42994163  |
| 0.481745414 | 0.368844692 | 0.475569081 | 0.521758278 |
| 0.371129765 | 0.410082073 | 0.396622712 | 0.447135647 |



|             |             |             |             |
|-------------|-------------|-------------|-------------|
| 0.291292674 | 0.25090198  | 0.39272105  | 0.192053256 |
| 0.014062832 | 0.169812065 | 0.148845379 | 0.241103776 |
| 0.194468284 | 0.476924037 | 0.46337649  | 0.517982667 |
| 0.211045275 | 0.480840376 | 0.32789197  | 0.38103533  |
| 0.476184568 | 0.397838624 | 0.427841359 | 0.448501047 |
| 0.345394292 | 0.043681055 | 0.207681078 | 0.536405363 |
| 0.102109375 | 0.28358246  | 0.420725438 | 0.007858743 |
| 0.110430261 | 0.481030651 | 0.17864433  | 0.274015002 |
| 0.491759373 | 0.283184501 | 0.330399662 | 0.394971883 |
| 0.432757151 | 0.181448936 | 0.008272107 | 0.491823019 |
| 0.480783183 | 0.459198858 | 0.481413136 | 0.468804071 |
| 0.465031612 | 0.467179455 | 0.471340166 | 0.493880694 |
| 0.195526817 | 0.182822801 | 0.247303853 | 0.37346717  |
| 0.011775419 | 0.459708894 | 0.364080891 | 0.244614769 |
| 0.480199727 | 0.390787911 | 0.096069872 | 0.399806355 |
| 0.067097032 | 0.232671851 | 0.415433732 | 0.294407275 |
| 0.399771056 | 0.045575825 | 0.345618057 | 0.381298792 |
| 0.476769716 | 0.44742926  | 0.398877861 | 0.536316359 |
| 0.436937925 | 0.232882987 | 0.392317132 | 0.4701133   |
| 0.147413253 | 0.142171451 | 0.455864449 | 0.061073515 |
| 0.284848373 | 0.458479876 | 0.4354838   | 0.153465579 |
| 0.390217425 | 0.020354687 | 0.464043748 | 0.536062407 |
| 0.488781757 | 0.507242476 | 0.512709173 | 0.320333875 |
| 0.515767339 | 0.108636457 | 0.527980312 | 0.494756909 |
| 0.446190325 | 0.003598411 | 0.013821843 | 0.513694262 |
| 0.463755223 | 0.131913603 | 0.265415941 | 0.490368109 |
| 0.199067472 | 0.279089909 | 0.135220757 | 0.220045077 |
| 0.514909877 | 0.305171436 | 0.206580157 | 0.489769871 |
| 0.336922111 | 0.320824635 | 0.484283058 | 0.173455196 |
| 0.4722271   | 0.118522486 | 0.167682009 | 0.016641709 |
| 0.42558805  | 0.207620249 | 0.502130193 | 0.515759493 |
| 0.501321827 | 0.453893302 | 0.40040671  | 0.442105881 |
| 0.470981206 | 0.200917082 | 0.4207715   | 0.220089526 |
| 0.502337318 | 0.463639294 | 0.427101644 | 0.421158943 |
| 0.498633605 | 0.49325732  | 0.083049103 | 0.480742413 |
| 0.040627285 | 0.003172575 | 0.505724974 | 0.356522783 |
| 0.067211608 | 0.424700756 | 0.361595013 | 0.297402393 |
| 0.291546154 | 0.087080326 | 0.290935587 | 0.27107766  |
| 0.388442635 | 0.435787381 | 0.321638636 | 0.333046756 |
| 0.313579933 | 0.16621521  | 0.283244879 | 0.238018157 |
| 0.287215406 | 0.409322734 | 0.293087348 | 0.057193049 |
| 0.4966134   | 0.477853565 | 0.129983242 | 0.266302599 |
| 0.512313343 | 0.519840859 | 0.090032741 | 0.030614598 |
| 0.373691489 | 0.379419321 | 0.509779526 | 0.507681605 |
| 0.542191834 | 0.518952637 | 0.427632755 | 0.180796111 |
| 0.146438413 | 0.391732842 | 0.335124421 | 0.139754612 |
| 0.513829763 | 0.147412621 | 0.498130192 | 0.329171123 |
| 0.206192701 | 0.324283097 | 0.081389635 | 0.161143005 |
| 0.434216389 | 0.281204742 | 0.255346744 | 0.269479255 |
| 0.398021848 | 0.284973765 | 0.107662513 | 0.304023683 |
| 0.448318066 | 0.201006554 | 0.263823792 | 0.411675834 |
| 0.452978704 | 0.267709081 | 0.486527862 | 0.463922687 |
| 0.237057664 | 0.20189714  | 0.435085268 | 0.447557977 |
| 0.512462082 | 0.449537041 | 0.070635233 | 0.489697335 |

|             |             |             |             |
|-------------|-------------|-------------|-------------|
| 0.499519719 | 0.514178366 | 0.516164983 | 0.443364238 |
| 0.166355702 | 0.453552882 | 0.338421712 | 0.405228875 |
| 0.281218615 | 0.509968071 | 0.321968394 | 0.135371907 |
| 0.369507015 | 0.496239437 | 0.485379973 | 0.264293317 |
| 0.489340878 | 0.235332593 | 0.133804888 | 0.493385374 |
| 0.210908281 | 0.188354974 | 0.449574739 | 0.481205612 |
| 0.003826186 | 0.15250243  | 0.479977037 | 0.353268967 |
| 0.515858944 | 0.503281634 | 0.478276789 | 0.355691171 |
| 0.001738031 | 0.454374069 | 0.474791483 | 0.485007993 |
| 0.503081446 | 0.459812288 | 0.217499623 | 0.142463389 |
| 0.37574658  | 0.174740577 | 0.218720738 | 0.459958625 |
| 0.197443048 | 0.508424828 | 0.289637701 | 0.298891917 |
| 0.267553397 | 0.175666442 | 0.279590127 | 0.357898234 |
| 0.154172819 | 0.339394931 | 0.439931135 | 0.368862213 |
| 0.24182009  | 0.469593206 | 0.490195756 | 0.073788815 |
| 0.397692114 | 0.461743895 | 0.474068769 | 0.00644625  |
| 0.499864423 | 0.023897975 | 0.274384932 | 0.305947805 |
| 0.281042128 | 0.286817285 | 0.325323558 | 0.362885531 |
| 0.446427473 | 0.320313463 | 0.390849673 | 0.339985503 |
| 0.245891715 | 0.323624378 | 0.452331443 | 0.45243745  |
| 0.36641027  | 0.230730388 | 0.181136463 | 0.177451732 |
| 0.116826631 | 0.502788431 | 0.344764209 | 0.159416645 |
| 0.318361054 | 0.440135586 | 0.420557598 | 0.507083327 |
| 0.464519708 | 0.207072553 | 0.404620952 | 0.518610423 |
| 0.275859049 | 0.40703269  | 0.143556766 | 0.483804752 |
| 0.346781219 | 0.279589756 | 0.482271955 | 0.447515814 |
| 0.480120553 | 0.438926348 | 0.345348176 | 0.470626723 |
| 0.447520384 | 0.395802325 | 0.410771917 | 0.154788266 |
| 0.298528355 | 0.227228585 | 0.313787204 | 0.008294664 |
| 0.454559341 | 0.411447642 | 0.523053263 | 0.509535778 |
| 0.317985456 | 0.445610331 | 0.442114576 | 0.183715802 |
| 0.363234378 | 0.270265102 | 0.241171863 | 0.497806947 |
| 0.244183648 | 0.293576257 | 0.365053354 | 0.477445688 |
| 0.489601637 | 0.470045939 | 0.292177    | 0.350622697 |
| 0.319127225 | 0.31826985  | 0.485644312 | 0.230631869 |
| 0.488768084 | 0.233272461 | 0.445076608 | 0.38302438  |
| 0.291982496 | 0.505849776 | 0.133716821 | 0.516078036 |
| 0.395376475 | 0.226803119 | 0.503547691 | 0.409378707 |
| 0.401409397 | 0.186328758 | 0.206599575 | 0.46809712  |
| 0.309694294 | 0.379210189 | 0.02122583  | 0.086439074 |
| 0.416849274 | 0.352913704 | 0.478689507 | 0.430809695 |
| 0.283244307 | 0.402039345 | 0.179227333 | 0.401721052 |
| 0.502516184 | 0.521153317 | 0.366844263 | 0.336091729 |
| 0.442991317 | 0.192008831 | 0.516716075 | 0.020471051 |
| 0.484452577 | 0.469435388 | 0.449306687 | 0.114261552 |
| 0.051202546 | 0.236198746 | 0.485827473 | 0.140449741 |
| 0.494429561 | 0.239950646 | 0.427487629 | 0.508967933 |
| 0.273035375 | 0.525051007 | 0.184969485 | 0.490577392 |
| 0.096427544 | 0.350016195 | 0.414067951 | 0.428247216 |
| 0.309122769 | 0.331392252 | 0.458215912 | 0.274815116 |
| 0.079111718 | 0.340850806 | 0.004234889 | 0.439794771 |
| 0.496480485 | 0.374165572 | 0.298900835 | 0.354067222 |
| 0.364416581 | 0.44133426  | 0.303631972 | 0.470031524 |
| 0.030945743 | 0.426892445 | 0.29564494  | 0.507011072 |

|             |             |             |             |
|-------------|-------------|-------------|-------------|
| 0.293250885 | 0.428194532 | 0.116467354 | 0.346100592 |
| 0.49503938  | 0.35709754  | 0.339931612 | 0.36908963  |
| 0.500799398 | 0.459862384 | 0.273574358 | 0.269747406 |
| 0.447638503 | 0.139555876 | 0.472195    | 0.526168175 |
| 0.262953959 | 0.252126372 | 0.493697174 | 0.301681192 |
| 0.343750729 | 0.463029738 | 0.457529925 | 0.5168658   |
| 0.120553621 | 0.350779819 | 0.483006621 | 0.488172115 |
| 0.382615284 | 0.194842357 | 0.288082894 | 0.294635491 |
| 0.485010613 | 0.19309823  | 0.288840124 | 0.464777805 |
| 0.251028137 | 0.396875821 | 0.419770697 | 0.241875948 |
| 0.08329791  | 0.249733874 | 0.480108424 | 0.240357831 |
| 0.388720746 | 0.430730858 | 0.282228962 | 0.44122172  |
| 0.222158951 | 0.062513769 | 0.461462589 | 0.023635389 |
| 0.478338347 | 0.47688202  | 0.34671915  | 0.407544556 |
| 0.295919831 | 0.448050929 | 0.457182318 | 0.005685085 |
| 0.472198801 | 0.060658324 | 0.359120434 | 0.298313098 |
| 0.331106057 | 0.119309939 | 0.48394058  | 0.505903358 |
| 0.423297556 | 0.381588515 | 0.398833033 | 0.488211489 |
| 0.16947894  | 0.361417637 | 0.375786148 | 0.504602752 |
| 0.249849801 | 0.453088534 | 0.464342954 | 0.431894413 |
| 0.484434806 | 0.378226981 |             |             |
| APOBEC1     | 0.007773179 | 0.147123904 | 0.003726838 |
| 0.012151295 | 0.259531786 | 0.073819898 | 0.008344043 |
| 0.01868849  | 0.126627553 | 0.052720325 | 0.145458314 |
| 0.001218825 | 0.168435757 | 0.205840053 | 0.009641357 |
| 0.249832361 | 0.005341737 | 0.02671526  | 0.029624222 |
| 0.025899399 | 0.242984313 | 0.104409375 | 0.074885881 |
| 0.229901235 | 0.041787902 | 0.083837765 | 0.233335294 |
| 0.202007978 | 0.065479159 | 0.202302457 | 0.016253008 |
| 0.159042562 | 0.288776719 | 0.191309702 | 0.000416668 |
| 0.150029565 | 0.040177063 | 0.14588877  | 0.099527349 |
| 0.077832982 | 0.119403071 | 0.055362637 | 0.072801728 |
| 0.087717154 | 0.002372307 | 0.024203701 | 0.250961646 |
| 0.098213734 | 0.072655752 | 0.006580756 | 0.168797681 |
| 0.095005607 | 0.103164451 | 0.1183968   | 0.000965217 |
| 0.232863176 | 0.122240476 | 0.199648827 | 0.177724033 |
| 0.066605999 | 0.041258252 | 0.074828757 | 0.069884123 |
| 0.207385029 | 0.244045575 | 0.12471462  | 0.07796248  |
| 0.196782809 | 1           | 0.230885789 | 0.018131628 |
| 0.093396607 | 0.003010831 | 0.04873642  | 0.013429175 |
| 0.113831616 | 0.086274371 | 0.195757961 | 0.203715455 |
| 0.133933238 | 0.193445786 | 0.08842861  | 0.160664626 |
| 0.117710222 | 0.311467771 | 0.139292592 | 0.182124696 |
| 0.199832404 | 0.015123556 | 0.192527289 | 0.206661184 |
| 0.006932191 | 0.109388455 | 0.184669777 | 0.02465253  |
| 0.153319177 | 0.138785799 | 0.094169577 | 0.172286212 |
| 0.301875357 | 0.253806667 | 0.172729023 | 0.112483634 |
| 0.208241834 | 0.009232476 | 0.140507141 | 0.33064275  |
| 0.112657989 | 0.009962098 | 0.103828473 | 0.267380038 |
| 0.166636257 | 0.203571298 | 0.182109961 | 0.19265245  |
| 0.237017292 | 0.199148942 | 0.156090459 | 0.1799777   |
| 0.031058317 | 0.200702224 | 0.038503768 | 0.006774398 |
| 0.006563482 | 0.023847015 | 0.110280516 | 0.140423802 |
| 0.223636372 | 0.130350673 | 0.038034533 | 0.121419632 |

|             |             |             |             |
|-------------|-------------|-------------|-------------|
| 0.287027558 | 0.140356709 | 0.200077973 | 0.199823848 |
| 0.004507729 | 0.16382629  | 0.209540299 | 0.046164023 |
| 0.199858856 | 0.031727984 | 0.267032846 | 0.164614167 |
| 0.141079984 | 0.261129853 | 0.019788464 | 0.163351262 |
| 0.062131805 | 0.215652357 | 0.158035054 | 0.046992957 |
| 0.181430505 | 0.152149284 | 0.239301264 | 0.307159248 |
| 0.160129668 | 0.068750095 | 0.029288988 | 0.177249423 |
| 0.228531609 | 0.014394422 | 0.241947807 | 0.254460411 |
| 0.174332449 | 0.256388622 | 0.263104126 | 0.237213416 |
| 0.178097177 | 0.013354102 | 0.025629547 | 0.216973711 |
| 0.173018732 | 0.156691254 | 0.050828631 | 0.18312278  |
| 0.272094233 | 0.083067992 | 0.2347021   | 0.059548768 |
| 0.225514071 | 0.206468162 | 0.225244266 | 0.173545114 |
| 0.088065159 | 0.105361604 | 0.261843454 | 0.130244316 |
| 0.004097512 | 0.013111775 | 0.0056456   | 0.156104238 |
| 0.032359809 | 0.078162642 | 0.068933886 | 0.233126545 |
| 0.083634852 | 0.071719729 | 0.194191808 | 0.318433826 |
| 0.007202524 | 0.149046324 | 0.032727999 | 0.034365742 |
| 0.006153232 | 0.034582881 | 0.027503243 | 0.020943107 |
| 0.155608102 | 0.050257276 | 0.221672572 | 0.230775955 |
| 0.152810242 | 0.037124077 | 0.172047654 | 0.219242653 |
| 0.21775546  | 0.230986636 | 0.090103238 | 0.001191183 |
| 0.06703265  | 0.110627039 | 0.201946225 | 0.219627363 |
| 0.038916305 | 0.053546427 | 0.211850166 | 0.291679054 |
| 0.048542394 | 0.026280628 | 0.141467813 | 0.146045673 |
| 0.029388552 | 0.116311776 | 0.240133954 | 0.139816759 |
| 0.000648474 | 0.091153984 | 0.216355569 | 0.08332116  |
| 0.128657725 | 0.097318483 | 0.096109876 | 0.226758591 |
| 0.116007969 | 0.201714427 | 0.240848173 | 0.29795508  |
| 0.047833177 | 0.048968845 | 0.248222912 | 0.087884738 |
| 0.234735492 | 0.022398123 | 0.170633564 | 0.073919742 |
| 0.081149707 | 0.174603256 | 0.297002182 | 0.15064343  |
| 0.018505571 | 0.201280542 | 0.163094599 | 0.223805834 |
| 0.120007321 | 0.239907057 | 0.245887138 | 0.203508856 |
| 0.1431709   | 0.193301844 | 0.143089731 | 0.201732926 |
| 0.224773421 | 0.053941399 | 0.009717773 | 0.246512739 |
| 0.122015298 | 0.284826439 | 0.064032776 | 0.227024457 |
| 0.183466848 | 0.137967884 | 0.048667648 | 0.280366569 |
| 0.162965621 | 0.052918219 | 0.211367148 | 0.248980634 |
| 0.050597104 | 0.218543537 | 0.147126996 | 0.276607903 |
| 0.043820973 | 0.140497805 | 0.125703586 | 0.176508006 |
| 0.011550049 | 0.012625863 | 0.008842208 | 0.083045696 |
| 0.184507053 | 0.185095198 | 0.22901343  | 0.218255971 |
| 0.032258411 | 0.167117729 | 0.096787623 | 0.091086028 |
| 0.151498534 | 0.206869709 | 0.257109707 | 0.260701344 |
| 0.094286491 | 0.001852277 | 0.016217787 | 0.186217913 |
| 0.004129376 | 0.165273889 | 0.093775139 | 0.000580674 |
| 0.004573429 | 0.146606664 | 0.016729409 | 0.047694172 |
| 0.285247965 | 0.043982562 | 0.049795399 | 0.056544625 |
| 0.195122502 | 0.018914576 | 0.000932644 | 0.219343658 |
| 0.203688938 | 0.197954167 | 0.198001939 | 0.159448916 |
| 0.224078596 | 0.205921892 | 0.249290261 | 0.065155705 |
| 0.013567666 | 0.00894775  | 0.124819104 | 0.135087397 |
| 0.000787604 | 0.20977215  | 0.205669224 | 0.039031438 |

|             |             |             |             |
|-------------|-------------|-------------|-------------|
| 0.269399334 | 0.148421056 | 0.003707785 | 0.280321371 |
| 0.000746507 | 0.14766533  | 0.05270566  | 0.098196256 |
| 0.283789539 | 0.000577011 | 0.023764076 | 0.082303437 |
| 0.123720698 | 0.114937515 | 0.15786252  | 0.202246105 |
| 0.138211397 | 0.019410678 | 0.14037307  | 0.249135714 |
| 0.010933851 | 0.029984795 | 0.081624835 | 0.002812886 |
| 0.032731302 | 0.175648324 | 0.140298087 | 0.003604448 |
| 0.094291489 | 0.000320391 | 0.111840684 | 0.212957906 |
| 0.140260312 | 0.250786279 | 0.2015952   | 0.226178404 |
| 0.188868698 | 0.129790283 | 0.2227189   | 0.138332165 |
| 0.089007023 | 0.000139076 | 0.001590665 | 0.242478373 |
| 0.198885764 | 0.006208013 | 0.04493218  | 0.028558451 |
| 0.015803257 | 0.017374342 | 0.011509444 | 0.146856909 |
| 0.155812612 | 0.195982491 | 0.15228283  | 0.154827304 |
| 0.085432044 | 0.115254377 | 0.08162706  | 0.016111547 |
| 0.220426972 | 0.005025081 | 0.017563236 | 0.001877579 |
| 0.260406378 | 0.019153852 | 0.131847839 | 0.194205732 |
| 0.206633086 | 0.263717643 | 0.073142584 | 0.050298397 |
| 0.241792269 | 0.011782462 | 0.069682396 | 0.014735684 |
| 0.162341443 | 0.226172616 | 0.144806026 | 0.09688037  |
| 0.234849013 | 0.176329287 | 0.00470639  | 0.224095802 |
| 0.000507928 | 0.003241899 | 0.064142986 | 0.117948109 |
| 0.053004159 | 0.191573871 | 0.091910233 | 0.068797763 |
| 0.080958104 | 0.001692572 | 0.229296986 | 0.233343144 |
| 0.147247853 | 0.169196209 | 0.275402172 | 0.098337855 |
| 0.151929684 | 0.081909831 | 0.067126984 | 0.045706884 |
| 0.058966763 | 0.093781332 | 0.043092729 | 0.002026786 |
| 0.133682124 | 0.200998221 | 0.008821259 | 0.039769543 |
| 0.208532742 | 0.233761496 | 0.006283133 | 0.001734401 |
| 0.08710538  | 0.162301741 | 0.262501576 | 0.181076295 |
| 0.180889384 | 0.230750973 | 0.135322261 | 0.052245181 |
| 0.008585731 | 0.181274176 | 0.295482762 | 0.043869131 |
| 0.213323781 | 0.008772697 | 0.168406082 | 0.30656016  |
| 0.030782866 | 0.04111306  | 0.004153294 | 0.020665411 |
| 0.281085925 | 0.061524812 | 0.100474825 | 0.022349309 |
| 0.133249202 | 0.120776203 | 0.007615839 | 0.067067429 |
| 0.145635005 | 0.11085234  | 0.049324647 | 0.066099497 |
| 0.126531993 | 0.031345899 | 0.252452188 | 0.19022286  |
| 0.026991679 | 0.023320541 | 0.021098916 | 0.224971308 |
| 0.208675816 | 0.150756055 | 0.001736782 | 0.150774074 |
| 0.241189655 | 0.210074338 | 0.168254719 | 0.241023515 |
| 0.016956152 | 0.202810719 | 0.219481751 | 0.214212848 |
| 0.072087922 | 0.074896153 | 0.115670999 | 0.011911471 |
| 0.128718915 | 0.175021498 | 0.155903286 | 0.055857344 |
| 0.167310925 | 0.019247337 | 0.006649685 | 0.210271895 |
| 0.131129795 | 0.007250534 | 0.068794823 | 0.258573709 |
| 0.000929114 | 0.196221803 | 0.260608741 | 0.054922612 |
| 0.214419685 | 0.236122347 | 0.167689652 | 0.047695548 |
| 0.010383511 | 0.273491899 | 0.179859021 | 0.114619411 |
| 0.15847005  | 0.122505107 | 0.025870614 | 0.013942339 |
| 0.130765941 | 0.010195805 | 0.029607315 | 0.029835138 |
| 0.082118376 | 0.140200501 | 0.084469219 | 0.072751366 |
| 0.108611064 | 0.016188419 | 0.116663476 | 0.057278592 |
| 0.113234294 | 0.100999553 | 0.171972805 | 0.040920331 |

|             |             |             |             |
|-------------|-------------|-------------|-------------|
| 0.088751946 | 0.242684053 | 0.167267428 | 0.001834908 |
| 0.265847357 | 0.214180187 | 0.21170989  | 0.00036625  |
| 0.24458633  | 0.000524568 | 0.120781448 | 0.102077048 |
| 0.089267555 | 0.11172786  | 0.201135194 | 0.115068564 |
| 0.141186345 | 0.071733881 | 0.07738074  | 0.10139254  |
| 0.05245172  | 0.064622049 | 0.215753795 | 0.085856551 |
| 0.116164224 | 0.019364422 | 0.016914303 | 0.015415776 |
| 0.005633476 | 0.19714856  | 0.075944886 | 0.008928012 |
| 0.114168074 | 0.10134785  | 0.161921902 | 0.165182431 |
| 0.212704543 | 0.015745016 | 0.13400648  | 0.15664591  |
| 0.062323194 | 0.032399485 | 0.005498487 | 0.105655825 |
| 0.079504971 | 0.093403615 | 0.11259055  | 0.066519174 |
| 0.169964143 | 0.13982937  | 0.072671345 | 0.186264559 |
| 0.126946804 | 0.156782784 | 0.043765123 | 0.016638213 |
| 0.034187478 | 0.031769494 | 0.254822702 | 0.000855285 |
| 0.159344144 | 0.015839786 | 0.22626771  | 0.154574111 |
| 0.222284514 | 0.165972818 | 0.021216249 | 0.009591558 |
| 0.018595374 | 0.032441121 | 0.038317359 | 0.201499893 |
| 0.19438026  | 0.036834443 | 0.212571756 | 0.028531736 |
| 0.241026475 | 0.219464669 | 0.142334116 | 0.072785462 |
| 0.107570737 | 0.040204239 | 0.168418123 | 0.013462303 |
| 0.173297357 | 0.120827053 | 0.095283186 | 0.144623651 |
| 0.126001487 | 0.227967228 | 0.00902001  | 0.237115271 |
| 0.174325055 | 0.02769044  | 0.193103821 | 0.087196214 |
| 0.034218015 | 0.034812184 | 0.218777432 | 0.075472396 |
| 0.051582027 | 0.180429239 | 0.004984621 | 0.053391925 |
| 0.185613969 | 0.105518433 | 0.157310979 | 0.209500003 |
| 0.187879761 | 0.22130577  | 0.145806037 | 0.075708695 |
| 0.144333617 | 0.152504844 | 0.039434382 | 0.109892907 |
| 0.155058393 | 0.020465662 | 0.099458098 | 0.018734518 |
| 0.211474796 | 0.22182041  | 0.070893735 | 0.009453382 |
| 0.001485622 | 0.19463744  | 0.171149888 | 0.010497302 |
| 0.273168918 | 0.111380246 | 0.132567678 | 0.202108678 |
| 0.052726631 | 0.15120779  | 0.051008246 | 0.223139151 |
| 0.003883726 | 0.105380876 | 0.221531248 | 0.16447818  |
| 0.072337001 | 0.225644619 | 0.208315697 | 0.216848538 |
| 0.00440363  | 0.063454938 | 0.000596396 | 0.12616565  |
| 0.13484462  | 0.237904778 | 0.06254323  | 0.057938257 |
| 0.154812493 | 0.173258062 | 0.082497242 | 0.161334619 |
| 0.001102395 | 0.267956338 | 0.078623823 | 0.142488166 |
| 0.056989083 | 0.159386688 | 0.007179117 | 0.264087373 |
| 0.122166339 | 0.073811817 | 0.105848792 | 0.056977219 |
| 0.167439627 | 0.150606043 | 0.027183757 | 0.075559262 |
| 0.163380771 | 0.010502614 | 0.070228611 | 0.223716778 |
| 0.07998278  | 0.221469205 | 0.278399693 | 0.063247214 |
| 0.256423261 | 0.140386647 | 0.17396367  | 0.217513259 |
| 0.034187626 | 0.103866463 | 0.254555917 | 0.191587723 |
| 0.173054223 | 0.195912007 | 0.189152926 | 0.1479448   |
| 0.134274948 | 0.008097608 | 0.133219917 | 0.13231003  |
| 0.203242838 | 0.162324674 | 0.092509393 | 0.161972223 |
| 0.005425025 | 0.0437755   | 0.069247752 | 0.037146162 |
| 0.148546408 | 0.17682119  | 0.130791879 | 0.159850352 |
| 0.026267399 | 0.00297256  | 0.189155657 | 0.039965319 |
| 0.064942322 | 0.210867613 | 0.094312193 | 0.198354076 |

|             |             |             |             |
|-------------|-------------|-------------|-------------|
| 0.041459136 | 0.130097759 | 0.070932712 | 0.00054659  |
| 0.235290487 | 0.022223171 | 0.139007156 | 0.097343756 |
| 0.097551679 | 0.005615214 | 0.156795532 | 0.261386141 |
| 0.10920839  | 0.061886711 | 0.076510235 | 0.177478062 |
| 0.123653123 | 0.153162239 | 0.161773184 | 0.126865783 |
| 0.230851119 | 0.094574832 | 0.142187842 | 0.153524732 |
| 0.143900269 | 0.064869039 |             |             |
| APOBEC3     | 0.059252713 | 0.427072728 | 0.046843586 |
| 0.121360344 | 0.304429492 | 0.35460938  | 0.047602467 |
| 0.106973008 | 0.328871085 | 0.350592058 | 0.316327714 |
| 0.011214259 | 0.139987492 | 0.440946104 | 0.043239563 |
| 0.367851306 | 0.024672899 | 0.087635721 | 0.093199333 |
| 0.225614172 | 0.269465166 | 0.337481973 | 0.324184237 |
| 0.28886014  | 0.155827427 | 0.306516133 | 0.404710579 |
| 0.506480405 | 0.32058613  | 0.391446071 | 0.257339802 |
| 0.383537994 | 0.315272628 | 0.402440689 | 0.012026463 |
| 0.371025742 | 0.026005995 | 0.410501213 | 0.241216643 |
| 0.200931582 | 0.304694646 | 0.34890914  | 0.20866272  |
| 0.375288923 | 0.027544218 | 0.271659742 | 0.391068644 |
| 0.317131938 | 0.276636645 | 0.053612864 | 0.384581931 |
| 0.375709897 | 0.280414401 | 0.36298771  | 0.001903899 |
| 0.342405506 | 0.163503164 | 0.300678884 | 0.497171124 |
| 0.161551447 | 0.099738374 | 0.366601295 | 0.236304095 |
| 0.374402739 | 0.352201444 | 0.223694325 | 0.380440316 |
| 0.485758675 | 0.230885789 | 1           | 0.155845074 |
| 0.338855037 | 0.028078147 | 0.126511443 | 0.076096169 |
| 0.387623653 | 0.169641136 | 0.315873128 | 0.34879242  |
| 0.429325536 | 0.494726982 | 0.208563302 | 0.491341541 |
| 0.139455945 | 0.350545164 | 0.296959964 | 0.261026007 |
| 0.327838107 | 0.077717667 | 0.348785934 | 0.505696489 |
| 0.043277335 | 0.372880867 | 0.352371539 | 0.100887944 |
| 0.419973263 | 0.347718902 | 0.382023935 | 0.210951007 |
| 0.361139861 | 0.332166049 | 0.463786974 | 0.236617226 |
| 0.317876697 | 0.059140493 | 0.464912547 | 0.336589528 |
| 0.268418565 | 0.068539771 | 0.236723533 | 0.473335145 |
| 0.37091305  | 0.489771995 | 0.418810089 | 0.319328421 |
| 0.369548692 | 0.493032404 | 0.349486156 | 0.401947167 |
| 0.24948269  | 0.521207283 | 0.159131068 | 0.029911213 |
| 0.061601773 | 0.070382548 | 0.264616625 | 0.256367713 |
| 0.473048754 | 0.291144889 | 0.164964145 | 0.210404844 |
| 0.460749769 | 0.463576786 | 0.523554735 | 0.382619289 |
| 0.028721421 | 0.321269444 | 0.376239882 | 0.253109343 |
| 0.32806317  | 0.095802649 | 0.286785352 | 0.48420882  |
| 0.34255179  | 0.418666889 | 0.148511237 | 0.473038908 |
| 0.182958005 | 0.493920425 | 0.455335797 | 0.13813768  |
| 0.500917523 | 0.472749283 | 0.5021664   | 0.378173592 |
| 0.452188433 | 0.299021911 | 0.073700696 | 0.354394977 |
| 0.463345916 | 0.017877821 | 0.491275043 | 0.514314999 |
| 0.494961794 | 0.465834537 | 0.519300211 | 0.514553109 |
| 0.498946007 | 0.060215919 | 0.051457886 | 0.256682641 |
| 0.494620933 | 0.363401682 | 0.125552618 | 0.401980264 |
| 0.342940041 | 0.341899792 | 0.411415008 | 0.294876725 |
| 0.486612496 | 0.455112019 | 0.503285927 | 0.34641722  |
| 0.300006548 | 0.276948367 | 0.398332932 | 0.445333881 |

|             |             |             |             |
|-------------|-------------|-------------|-------------|
| 0.03517649  | 0.093613668 | 0.041900735 | 0.263619893 |
| 0.359332763 | 0.145535015 | 0.335054617 | 0.344337548 |
| 0.157794282 | 0.313423809 | 0.38178367  | 0.358499966 |
| 0.043818659 | 0.395593114 | 0.146127628 | 0.147370466 |
| 0.030143516 | 0.113186005 | 0.152069099 | 0.129093279 |
| 0.223142413 | 0.205753824 | 0.400230977 | 0.498380201 |
| 0.353375584 | 0.147118677 | 0.369803628 | 0.459251054 |
| 0.38993149  | 0.376906696 | 0.184125633 | 0.00764592  |
| 0.264352014 | 0.377067018 | 0.262300509 | 0.411027011 |
| 0.15215817  | 0.212155713 | 0.356640152 | 0.354135678 |
| 0.236697846 | 0.129800026 | 0.359969668 | 0.390740963 |
| 0.122376924 | 0.280835947 | 0.427138529 | 0.386620712 |
| 0.001955014 | 0.286047845 | 0.422420156 | 0.159677498 |
| 0.276294233 | 0.153140439 | 0.290625622 | 0.460734491 |
| 0.334779606 | 0.247383929 | 0.503345954 | 0.357690403 |
| 0.316432659 | 0.198304526 | 0.521719147 | 0.079651194 |
| 0.362723776 | 0.053968487 | 0.238758677 | 0.357952176 |
| 0.21188104  | 0.246104345 | 0.317215486 | 0.284012503 |
| 0.106812353 | 0.50463681  | 0.364707765 | 0.505557914 |
| 0.380184089 | 0.522924592 | 0.450889606 | 0.41451143  |
| 0.314973834 | 0.392238247 | 0.194699521 | 0.411819755 |
| 0.456890662 | 0.332365838 | 0.060713658 | 0.437422092 |
| 0.380876326 | 0.378529059 | 0.142074772 | 0.480828111 |
| 0.467959866 | 0.461643488 | 0.118069448 | 0.331028878 |
| 0.334150219 | 0.194687369 | 0.401545492 | 0.517781136 |
| 0.358772404 | 0.342667522 | 0.331811311 | 0.37932052  |
| 0.144718956 | 0.222162122 | 0.287705192 | 0.256156392 |
| 0.020398946 | 0.068043882 | 0.052129922 | 0.137655132 |
| 0.199748458 | 0.407659144 | 0.366119226 | 0.511159152 |
| 0.091466771 | 0.393470973 | 0.205378987 | 0.262075995 |
| 0.401635717 | 0.349689368 | 0.382570644 | 0.366652868 |
| 0.205509811 | 0.014317514 | 0.091886048 | 0.494841282 |
| 0.033476036 | 0.267535673 | 0.286623398 | 0.001891786 |
| 0.034392966 | 0.412281786 | 0.076061458 | 0.161122212 |
| 0.475567947 | 0.168438442 | 0.172559043 | 0.348840373 |
| 0.298403507 | 0.074800692 | 0.002265725 | 0.494735117 |
| 0.489862456 | 0.459859816 | 0.488204084 | 0.450303498 |
| 0.448167804 | 0.371784992 | 0.388709031 | 0.312579307 |
| 0.088549242 | 0.080649467 | 0.239715967 | 0.260672687 |
| 0.003848846 | 0.33492784  | 0.302912066 | 0.111317563 |
| 0.388047141 | 0.265363811 | 0.026808081 | 0.349554147 |
| 0.015241783 | 0.263799571 | 0.275443506 | 0.203100083 |
| 0.313599604 | 0.009760407 | 0.234949781 | 0.339197879 |
| 0.405951198 | 0.300503795 | 0.401800993 | 0.523178681 |
| 0.285033705 | 0.107862122 | 0.292189322 | 0.346977921 |
| 0.056474809 | 0.154614517 | 0.332476713 | 0.054347728 |
| 0.222288445 | 0.441870317 | 0.391822766 | 0.060532034 |
| 0.228167488 | 0.002703958 | 0.329329399 | 0.515063328 |
| 0.460116654 | 0.519236822 | 0.488666802 | 0.292771056 |
| 0.493500883 | 0.194077282 | 0.527680381 | 0.3798064   |
| 0.383394413 | 0.000551448 | 0.00351848  | 0.495868246 |
| 0.372867993 | 0.047293382 | 0.128544133 | 0.330937502 |
| 0.085789505 | 0.129588661 | 0.053236397 | 0.202740533 |
| 0.383049868 | 0.225035654 | 0.198739353 | 0.456422975 |



|             |             |             |             |
|-------------|-------------|-------------|-------------|
| 0.213099736 | 0.20149262  | 0.367802364 | 0.070575739 |
| 0.384576082 | 0.039166037 | 0.072860854 | 0.006071474 |
| 0.330910032 | 0.092254916 | 0.44434877  | 0.5025158   |
| 0.472110943 | 0.362312796 | 0.375181043 | 0.312566189 |
| 0.437943859 | 0.080742728 | 0.401181708 | 0.093308405 |
| 0.478401556 | 0.354056369 | 0.257535058 | 0.257206666 |
| 0.483569336 | 0.448173931 | 0.023694794 | 0.369694231 |
| 0.009656313 | 0.001839539 | 0.332207594 | 0.22204763  |
| 0.105791104 | 0.356868318 | 0.203814086 | 0.242397675 |
| 0.223294805 | 0.022291217 | 0.307115393 | 0.282690905 |
| 0.262467659 | 0.330079144 | 0.277782512 | 0.212305538 |
| 0.269065627 | 0.153156033 | 0.179101289 | 0.132408708 |
| 0.268819061 | 0.277211205 | 0.158915471 | 0.015058996 |
| 0.406814242 | 0.392732786 | 0.043281881 | 0.128847452 |
| 0.419245727 | 0.488652687 | 0.032275446 | 0.006662067 |
| 0.210568946 | 0.303241975 | 0.496171861 | 0.49782123  |
| 0.503937428 | 0.500422311 | 0.356786486 | 0.109501874 |
| 0.052570408 | 0.292858437 | 0.304381329 | 0.097008313 |
| 0.501639246 | 0.054624429 | 0.474023877 | 0.337345239 |
| 0.095238896 | 0.19201592  | 0.023742269 | 0.068054098 |
| 0.382882631 | 0.141994883 | 0.155193553 | 0.123747036 |
| 0.281685829 | 0.298861231 | 0.037945618 | 0.161302246 |
| 0.287885079 | 0.236183919 | 0.131425821 | 0.292097784 |
| 0.323552309 | 0.292693826 | 0.39067128  | 0.414488415 |
| 0.102934126 | 0.096502259 | 0.246567139 | 0.347663004 |
| 0.440151343 | 0.400503845 | 0.020177197 | 0.457100205 |
| 0.484882647 | 0.398851531 | 0.484153883 | 0.35949991  |
| 0.068446884 | 0.351237674 | 0.354353623 | 0.322457764 |
| 0.15609925  | 0.348199265 | 0.215968589 | 0.048643952 |
| 0.263100842 | 0.454272794 | 0.40622064  | 0.135518836 |
| 0.397732021 | 0.108979042 | 0.048145338 | 0.446267779 |
| 0.212286258 | 0.068736224 | 0.357705789 | 0.431292904 |
| 0.002221704 | 0.195822445 | 0.496408645 | 0.203295383 |
| 0.503675036 | 0.47960423  | 0.408150098 | 0.246187343 |
| 0.004674887 | 0.396074372 | 0.328193926 | 0.367758541 |
| 0.417679176 | 0.291509825 | 0.157580141 | 0.057482435 |
| 0.234162819 | 0.065426764 | 0.110978913 | 0.319437482 |
| 0.22627354  | 0.355342559 | 0.157306043 | 0.186897408 |
| 0.183331203 | 0.079926676 | 0.283343532 | 0.211765749 |
| 0.210242618 | 0.187617613 | 0.293786759 | 0.329628796 |
| 0.219627317 | 0.423666483 | 0.369959985 | 0.018738377 |
| 0.368446256 | 0.393814166 | 0.423360798 | 0.001275869 |
| 0.378974386 | 0.003935547 | 0.171022589 | 0.18866057  |
| 0.177193148 | 0.185187479 | 0.231091695 | 0.293618431 |
| 0.318784437 | 0.196432453 | 0.239146368 | 0.193511859 |
| 0.140505714 | 0.200828758 | 0.372411781 | 0.340050659 |
| 0.256161539 | 0.102088736 | 0.081431914 | 0.086822311 |
| 0.037555943 | 0.465336429 | 0.197911772 | 0.059772552 |
| 0.190007352 | 0.353245683 | 0.30986597  | 0.492467978 |
| 0.393918179 | 0.095220198 | 0.309604999 | 0.432571525 |
| 0.30778638  | 0.287357351 | 0.05140539  | 0.365461882 |
| 0.193217139 | 0.20696216  | 0.386425937 | 0.267562633 |
| 0.366752891 | 0.361819347 | 0.189389261 | 0.421775    |
| 0.347460244 | 0.346331453 | 0.339907091 | 0.065596665 |

|             |             |             |             |
|-------------|-------------|-------------|-------------|
| 0.14571493  | 0.107585848 | 0.263714738 | 0.000745813 |
| 0.296151904 | 0.234984395 | 0.466461705 | 0.474091879 |
| 0.341434643 | 0.351287714 | 0.310951452 | 0.068803794 |
| 0.319352577 | 0.15741727  | 0.109945626 | 0.411288008 |
| 0.279455893 | 0.157678377 | 0.286914304 | 0.301791289 |
| 0.399662249 | 0.393231451 | 0.27030785  | 0.213591017 |
| 0.219983298 | 0.17121451  | 0.463133922 | 0.106776163 |
| 0.4092683   | 0.195762056 | 0.342868268 | 0.262494992 |
| 0.201010461 | 0.524046287 | 0.047669853 | 0.529669693 |
| 0.312518254 | 0.1041626   | 0.460421476 | 0.274019364 |
| 0.285531805 | 0.109430066 | 0.251804673 | 0.374145578 |
| 0.206733326 | 0.370961448 | 0.025327366 | 0.07211396  |
| 0.269074764 | 0.328976294 | 0.391310655 | 0.325087438 |
| 0.260993607 | 0.292875056 | 0.240134833 | 0.258783007 |
| 0.472290317 | 0.477197386 | 0.215390557 | 0.199650592 |
| 0.282717419 | 0.078877228 | 0.343624661 | 0.02617914  |
| 0.389717444 | 0.41136547  | 0.381008185 | 0.040123649 |
| 0.012867932 | 0.272299171 | 0.385726148 | 0.059083176 |
| 0.483405464 | 0.281804856 | 0.343984713 | 0.391354777 |
| 0.146199893 | 0.475322631 | 0.105343624 | 0.348565487 |
| 0.045789276 | 0.22131832  | 0.390553252 | 0.375452345 |
| 0.204851525 | 0.309367211 | 0.31974791  | 0.259712573 |
| 0.021977467 | 0.247617462 | 0.001178742 | 0.366270449 |
| 0.454586401 | 0.359021638 | 0.163346929 | 0.354752353 |
| 0.232512191 | 0.361772263 | 0.225603556 | 0.415608429 |
| 0.006753093 | 0.350014745 | 0.166091081 | 0.38178747  |
| 0.276764736 | 0.346666369 | 0.045700531 | 0.327424915 |
| 0.427815231 | 0.261156254 | 0.208928612 | 0.344448529 |
| 0.486937474 | 0.374453685 | 0.136852283 | 0.235528032 |
| 0.370726291 | 0.050338166 | 0.381896447 | 0.5183928   |
| 0.146230598 | 0.239723265 | 0.431703264 | 0.172519328 |
| 0.334241713 | 0.363977339 | 0.404880207 | 0.512997331 |
| 0.059548021 | 0.199156734 | 0.396807277 | 0.453185277 |
| 0.241999086 | 0.197352533 | 0.264797174 | 0.213042814 |
| 0.444086546 | 0.076417681 | 0.294427401 | 0.296581964 |
| 0.252097262 | 0.261869233 | 0.332244412 | 0.185742862 |
| 0.024909876 | 0.150441247 | 0.332540767 | 0.115814178 |
| 0.251986803 | 0.341697741 | 0.248478874 | 0.350689981 |
| 0.111214447 | 0.016862356 | 0.425084779 | 0.029293561 |
| 0.294129212 | 0.350261709 | 0.203856704 | 0.352329354 |
| 0.143439933 | 0.315105854 | 0.300195884 | 0.000173322 |
| 0.381415079 | 0.06981557  | 0.300772707 | 0.210340837 |
| 0.301282247 | 0.038679765 | 0.437620057 | 0.508324601 |
| 0.274868245 | 0.360588152 | 0.368570689 | 0.445765401 |
| 0.196102427 | 0.391283245 | 0.362112336 | 0.374360563 |
| 0.270062415 | 0.393216781 | 0.411161109 | 0.391754134 |
| 0.325958875 | 0.23997652  |             |             |
| AREG        | 0.066282767 | 0.185765943 | 0.068513254 |
| 0.037711407 | 0.150254991 | 0.102752116 | 0.031920558 |
| 0.043113808 | 0.140346511 | 0.030454276 | 0.169406084 |
| 0.017485705 | 0.004799827 | 0.224585595 | 0.031899482 |
| 0.128207193 | 0.030377445 | 0.082284302 | 0.000558428 |
| 0.007458966 | 0.122205515 | 0.050044866 | 0.103166311 |
| 0.098989442 | 0.179733877 | 0.119678043 | 0.088170832 |

|             |             |             |             |
|-------------|-------------|-------------|-------------|
| 0.237094005 | 0.017389206 | 0.181252197 | 0.005624169 |
| 0.2446695   | 0.140392998 | 0.083115342 | 0.02398689  |
| 0.114929169 | 0.000100981 | 0.242802656 | 0.097459106 |
| 0.010044446 | 0.225999853 | 0.065685523 | 0.139664488 |
| 0.072564081 | 0.042444721 | 0.009547104 | 0.125275173 |
| 0.119803979 | 0.077559461 | 0.054359805 | 0.169045343 |
| 0.049078185 | 0.189869727 | 0.128091612 | 2.72E-05    |
| 0.068348885 | 0.006288928 | 0.029228859 | 0.257569386 |
| 0.190354189 | 0.104041131 | 0.013587345 | 0.066951556 |
| 0.097333156 | 0.133695197 | 0.165555986 | 0.045809592 |
| 0.251720941 | 0.018131628 | 0.155845074 | 1           |
| 0.085813116 | 0.023407424 | 0.168684139 | 0.057634603 |
| 0.06886099  | 0.156468826 | 0.146730669 | 0.073782944 |
| 0.179875547 | 0.268462915 | 0.15081592  | 0.236301116 |
| 0.003367937 | 0.1082353   | 0.073898865 | 0.199652651 |
| 0.133328333 | 0.026103428 | 0.208468377 | 0.272143335 |
| 0.028158511 | 0.087624313 | 0.136299662 | 0.085176986 |
| 0.211506127 | 0.029820782 | 0.08287799  | 0.044172864 |
| 0.15967887  | 0.109369222 | 0.222913996 | 0.193540422 |
| 0.0984832   | 0.068824613 | 0.239360453 | 0.112022873 |
| 0.130265924 | 0.104916517 | 0.040675298 | 0.19002367  |
| 0.165403422 | 0.242833404 | 0.155391456 | 0.157397086 |
| 0.110356086 | 0.259671851 | 0.20233412  | 0.193910261 |
| 0.002007333 | 0.248895543 | 0.167928297 | 0.036091386 |
| 0.044403177 | 0.063638177 | 0.027869095 | 0.212249534 |
| 0.235445327 | 0.163928555 | 0.099189891 | 0.140801013 |
| 0.216121397 | 0.2281154   | 0.235602014 | 0.187150762 |
| 0.044013365 | 0.028750927 | 0.125297968 | 0.073149342 |
| 0.142101215 | 0.092145803 | 0.084008825 | 0.257500243 |
| 0.26423923  | 0.197775518 | 0.070487226 | 0.268786994 |
| 0.056383915 | 0.287571386 | 0.205527159 | 0.144816283 |
| 0.273979093 | 0.26289422  | 0.276582498 | 0.174033858 |
| 0.269508315 | 0.161930473 | 0.000193948 | 0.175550963 |
| 0.278894465 | 0.000624687 | 0.202707239 | 0.221247389 |
| 0.240839149 | 0.203283037 | 0.25544429  | 0.248513653 |
| 0.236222038 | 0.084146547 | 4.28E-05    | 0.156640817 |
| 0.254313476 | 0.252129519 | 0.043943255 | 0.101056086 |
| 0.126124553 | 0.110509097 | 0.173418903 | 0.010458127 |
| 0.278446149 | 0.233677344 | 0.214158298 | 0.15661199  |
| 0.073901536 | 0.220741864 | 0.094263478 | 0.245921422 |
| 0.037245098 | 0.07519299  | 0.077354256 | 0.157339675 |
| 0.04849534  | 0.149504237 | 0.081399655 | 0.097105962 |
| 0.164621128 | 0.07500209  | 0.058587762 | 0.163671292 |
| 0.069653766 | 0.120878939 | 0.134537382 | 0.087878689 |
| 0.044224942 | 0.148049076 | 0.030218305 | 0.078360667 |
| 0.128830338 | 0.166120516 | 0.147023768 | 0.2425954   |
| 0.074126306 | 0.167594614 | 0.164519799 | 0.273169405 |
| 0.266240563 | 0.131638957 | 0.155177765 | 0.006905551 |
| 0.022163189 | 0.026349726 | 0.023340556 | 0.104844381 |
| 0.156098285 | 0.033862287 | 0.117487324 | 0.204194698 |
| 0.126268423 | 0.051128108 | 0.062553587 | 0.261442173 |
| 0.115193995 | 0.119608484 | 0.230938068 | 0.092606791 |
| 0.005232559 | 0.143275429 | 0.213253072 | 0.014575654 |
| 0.118111403 | 0.00344285  | 0.039694672 | 0.224930821 |

|             |             |             |             |
|-------------|-------------|-------------|-------------|
| 0.021125153 | 0.045058908 | 0.233143068 | 0.188263973 |
| 0.013807597 | 0.141024063 | 0.256882488 | 9.35E-05    |
| 0.085834153 | 0.005853916 | 0.202198493 | 0.057726289 |
| 0.163027582 | 0.171212219 | 0.116076257 | 0.092185414 |
| 0.125664092 | 0.243832963 | 0.219589687 | 0.247098153 |
| 0.048138406 | 0.257862849 | 0.214304899 | 0.245785076 |
| 0.174673276 | 0.059099849 | 0.013144587 | 0.212624144 |
| 0.224076838 | 0.006540736 | 0.082313357 | 0.155708679 |
| 0.055199614 | 0.146396832 | 0.009396422 | 0.2619187   |
| 0.285529594 | 0.213771778 | 0.075858972 | 0.193902961 |
| 0.248045454 | 0.173515482 | 0.217844811 | 0.25835087  |
| 0.020481095 | 0.087168233 | 0.069674288 | 0.233519004 |
| 0.168069746 | 0.042232219 | 0.192862808 | 0.020366761 |
| 0.000166813 | 0.057947418 | 0.078470951 | 0.113099924 |
| 0.054215816 | 0.108948709 | 0.152231521 | 0.247124047 |
| 0.099674384 | 0.247329849 | 0.125974192 | 0.075986156 |
| 0.210427663 | 0.071743631 | 0.122964985 | 0.143002961 |
| 0.172214712 | 0.006192279 | 0.027148614 | 0.272410464 |
| 0.040524389 | 0.057233987 | 0.083176151 | 0.000438755 |
| 0.030153451 | 0.147858449 | 0.109537371 | 0.190822159 |
| 0.237349968 | 0.18639827  | 0.146044542 | 0.032165311 |
| 0.208840942 | 0.104636387 | 0.003043105 | 0.221220012 |
| 0.216191071 | 0.201402266 | 0.208523198 | 0.210898257 |
| 0.186206387 | 0.157203228 | 0.1964113   | 0.138972353 |
| 0.049686954 | 0.053991211 | 0.036706244 | 0.108592376 |
| 0.000159864 | 0.239254457 | 0.100499858 | 0.156436376 |
| 0.170065882 | 0.132368823 | 0.039222455 | 0.116849808 |
| 0.014956148 | 0.033212807 | 0.035203013 | 0.075833171 |
| 0.173857895 | 0.026821977 | 0.00470145  | 0.027095627 |
| 0.23840257  | 0.198355129 | 0.066559499 | 0.266954209 |
| 0.163698826 | 0.087431724 | 0.141349028 | 0.201436405 |
| 0.053110491 | 0.000694483 | 0.056301108 | 0.001070959 |
| 0.003394679 | 0.214537311 | 0.056048289 | 0.028490469 |
| 0.179958291 | 0.010910802 | 0.235318094 | 0.264761765 |
| 0.225657906 | 0.248479758 | 0.260777288 | 0.085353793 |
| 0.262014218 | 0.004985035 | 0.248637213 | 0.189364348 |
| 0.04870627  | 0.00023183  | 0.000472294 | 0.234414793 |
| 0.13472842  | 0.073189155 | 0.14908156  | 0.046215837 |
| 0.060450191 | 0.06368839  | 0.055020938 | 0.06397408  |
| 0.173524094 | 0.131968505 | 0.036615816 | 0.21253217  |
| 0.124906679 | 0.137360105 | 0.062794543 | 0.085412056 |
| 0.142226512 | 0.047398646 | 0.077667557 | 0.001609467 |
| 0.175373411 | 0.110365186 | 0.238584978 | 0.247502072 |
| 0.273274719 | 0.189955002 | 0.034520422 | 0.016941522 |
| 0.192123369 | 0.084188175 | 0.027237992 | 0.087096463 |
| 0.229701817 | 0.151148653 | 0.230084097 | 0.230414097 |
| 0.258046921 | 0.257326959 | 0.038324701 | 0.191389765 |
| 0.007497411 | 0.000206328 | 0.114456451 | 0.144936404 |
| 0.000721614 | 0.08625346  | 0.218027681 | 0.036145949 |
| 0.052134619 | 0.011870032 | 0.052088882 | 0.058629482 |
| 0.180484765 | 0.121037454 | 0.108195777 | 0.126578884 |
| 0.081915345 | 0.012160257 | 0.106833376 | 0.056775512 |
| 0.005872953 | 0.180744126 | 0.174838804 | 0.022845918 |
| 0.101688467 | 0.11568762  | 0.074321714 | 0.146077394 |

|             |             |             |             |
|-------------|-------------|-------------|-------------|
| 0.243790437 | 0.237165178 | 0.011879251 | 0.009052262 |
| 0.189394278 | 0.069613048 | 0.242566398 | 0.232105066 |
| 0.263720296 | 0.274630528 | 0.250537526 | 0.040939253 |
| 0.064649743 | 0.145022228 | 0.110637986 | 0.041575112 |
| 0.245589798 | 0.05326108  | 0.244854036 | 0.087837059 |
| 0.109993322 | 0.113561893 | 0.026100804 | 0.089176867 |
| 0.122827231 | 0.152111783 | 0.133692939 | 0.120484675 |
| 0.102421299 | 0.036776488 | 0.043745226 | 0.152135417 |
| 0.178812574 | 0.018684055 | 0.130380675 | 0.06784104  |
| 0.187025627 | 0.007538816 | 0.169057413 | 0.266626398 |
| 0.135799014 | 0.073407486 | 0.055701725 | 0.155662616 |
| 0.18448006  | 0.082115206 | 0.005363054 | 0.190684016 |
| 0.243948053 | 0.153414163 | 0.252743133 | 0.213568818 |
| 0.090982856 | 0.12441321  | 0.050048874 | 0.113819951 |
| 0.113823027 | 0.120108589 | 0.102720995 | 0.07824482  |
| 0.197565454 | 0.245431446 | 0.196172721 | 0.132435749 |
| 0.11507154  | 0.07806385  | 0.045890354 | 0.199299702 |
| 0.036726607 | 0.024753318 | 0.061221939 | 0.172036373 |
| 0.002588942 | 0.028397304 | 0.23139089  | 0.09339865  |
| 0.261980025 | 0.244896225 | 0.275075792 | 0.052877873 |
| 6.21E-05    | 0.145026459 | 0.180219588 | 0.100064146 |
| 0.19202611  | 0.195418574 | 0.009507706 | 0.052962134 |
| 0.237945521 | 0.087117575 | 0.041962251 | 0.015606773 |
| 0.002709461 | 0.125725327 | 0.168564147 | 0.094413558 |
| 0.10368776  | 0.056827934 | 0.028023006 | 0.139019069 |
| 0.007602615 | 0.198334511 | 0.22547854  | 0.028739768 |
| 0.012632182 | 0.192760116 | 0.173057697 | 0.038236373 |
| 0.102189324 | 0.190636222 | 0.226357921 | 0.000168098 |
| 0.182407196 | 0.011234563 | 0.110917828 | 0.140225189 |
| 0.117954485 | 0.080336849 | 0.148121332 | 0.106885296 |
| 0.121555494 | 0.115372728 | 0.144796253 | 0.196310406 |
| 0.107940175 | 0.113052288 | 0.151479079 | 0.103101291 |
| 0.11472699  | 0.106099765 | 0.114216778 | 0.117833268 |
| 0.027209688 | 0.215187039 | 0.215773868 | 0.102968419 |
| 0.151476333 | 0.068696792 | 0.257000314 | 0.228166901 |
| 0.253429061 | 0.109435108 | 0.078074631 | 0.219600652 |
| 0.002746389 | 0.005880969 | 0.027753002 | 0.145133697 |
| 0.13855534  | 0.043064982 | 0.099637117 | 0.120037504 |
| 0.124941416 | 0.263078738 | 0.203084894 | 0.247279865 |
| 0.120490249 | 0.065926677 | 0.042195853 | 0.048661733 |
| 0.121552153 | 0.112291538 | 0.120256539 | 0.003779024 |
| 0.161893996 | 0.048477838 | 0.218535751 | 0.253057538 |
| 0.044624481 | 0.254494213 | 0.017139556 | 0.046290093 |
| 0.024009566 | 0.134551169 | 0.136147342 | 0.172921158 |
| 0.033494404 | 0.111638146 | 0.146987648 | 0.062353632 |
| 0.187992479 | 0.144162261 | 0.053098692 | 0.070421518 |
| 0.112408769 | 0.157161936 | 0.229318325 | 0.088074565 |
| 0.111415284 | 0.074936832 | 0.094614043 | 0.120811067 |
| 0.095434848 | 0.245315583 | 0.079881037 | 0.240094375 |
| 0.083134998 | 0.131978926 | 0.283321678 | 0.10613662  |
| 0.055667054 | 0.040243606 | 0.035508846 | 0.061386671 |
| 0.053870263 | 0.063294054 | 3.33E-05    | 0.000350567 |
| 0.211238188 | 0.038697344 | 0.142439856 | 0.144136502 |
| 0.074850327 | 0.201148869 | 0.010105157 | 0.081617657 |

|             |             |             |             |
|-------------|-------------|-------------|-------------|
| 0.221575175 | 0.250025812 | 0.039545665 | 0.186532798 |
| 0.168358608 | 0.084353448 | 0.144060677 | 1.59E-05    |
| 0.123953273 | 0.108661215 | 0.029042754 | 0.041819565 |
| 0.011541158 | 0.040652547 | 0.122691676 | 0.051168229 |
| 0.232442722 | 0.014771599 | 0.092534223 | 0.190768061 |
| 0.117917201 | 0.252079036 | 0.06481421  | 0.21644721  |
| 0.005332851 | 0.159188971 | 0.090639396 | 0.070243964 |
| 0.0822093   | 0.083895734 | 0.227542581 | 0.081425112 |
| 0.042191656 | 0.045784263 | 0.000112136 | 0.26031588  |
| 0.227773932 | 0.081626011 | 0.169042805 | 0.021314762 |
| 0.207272529 | 0.201396959 | 0.017342325 | 0.096306159 |
| 0.007389454 | 0.137423144 | 0.148332365 | 0.236979631 |
| 0.018013591 | 0.085330118 | 0.039221709 | 0.077377993 |
| 0.241861666 | 0.019772456 | 0.164325653 | 0.025602018 |
| 0.235754561 | 0.179402701 | 0.129425896 | 0.038005845 |
| 0.100348784 | 0.074787618 | 0.067609299 | 0.255067327 |
| 0.116444125 | 0.081679942 | 0.225303528 | 0.091486611 |
| 0.070522111 | 0.20100214  | 0.102981935 | 0.236504048 |
| 0.036099731 | 0.190523892 | 0.192343414 | 0.211236933 |
| 0.219131995 | 0.045428905 | 0.052169195 | 0.078717495 |
| 0.231516668 | 0.038724487 | 0.031310453 | 0.191283654 |
| 0.049938041 | 0.175053536 | 0.087108454 | 0.079941218 |
| 0.007792526 | 0.047678315 | 0.079318396 | 0.137067414 |
| 0.146727742 | 0.131858718 | 0.059595339 | 0.274767985 |
| 0.052725368 | 0.015000342 | 0.274429371 | 0.000167148 |
| 0.153059198 | 0.199685885 | 0.150752025 | 0.110578419 |
| 0.197284857 | 0.124656613 | 0.08925741  | 0.000187583 |
| 0.202715667 | 0.00289175  | 0.066162368 | 0.073327705 |
| 0.009196623 | 0.034827805 | 0.26111738  | 0.25137227  |
| 0.15288508  | 0.014037027 | 0.025005143 | 0.221401675 |
| 0.014105788 | 0.040093608 | 0.038913752 | 0.149577624 |
| 0.056540481 | 0.063111353 | 0.067386    | 0.083284981 |
| 0.187968883 | 0.089813157 |             |             |
| ARHGAP19    | 0.049330778 | 0.411604788 | 0.039641122 |
| 0.080872845 | 0.187640613 | 0.169452544 | 0.048115416 |
| 0.074598306 | 0.323859252 | 0.147849106 | 0.207368345 |
| 0.018915865 | 0.040191296 | 0.435277335 | 0.046662721 |
| 0.273670652 | 0.029554385 | 0.073927175 | 0.042617864 |
| 0.123936958 | 0.179724943 | 0.157154231 | 0.208045407 |
| 0.160921135 | 0.205172061 | 0.249006515 | 0.219033254 |
| 0.477617517 | 0.119565206 | 0.30872213  | 0.090772652 |
| 0.418140278 | 0.217777614 | 0.181090321 | 0.015475712 |
| 0.231114179 | 0.009394924 | 0.443674173 | 0.145545817 |
| 0.070851282 | 0.350189143 | 0.152982373 | 0.133902041 |
| 0.189896812 | 0.030898506 | 0.096381869 | 0.315997197 |
| 0.22803071  | 0.141633463 | 0.056408814 | 0.331465951 |
| 0.169658059 | 0.264971095 | 0.323132513 | 0.001618391 |
| 0.135754792 | 0.043344291 | 0.113659055 | 0.481296595 |
| 0.167381983 | 0.078924248 | 0.138421722 | 0.134859422 |
| 0.278556466 | 0.301068063 | 0.202926567 | 0.177426021 |
| 0.48327543  | 0.093396607 | 0.338855037 | 0.085813116 |
| 1           | 0.028683919 | 0.151299368 | 0.079934446 |
| 0.188841848 | 0.126521738 | 0.191564242 | 0.145591067 |
| 0.410639836 | 0.507439547 | 0.183807995 | 0.484406559 |

|             |             |             |             |
|-------------|-------------|-------------|-------------|
| 0.074161941 | 0.214320791 | 0.132218803 | 0.265696998 |
| 0.321702216 | 0.064616478 | 0.33737781  | 0.507282744 |
| 0.040029445 | 0.244890453 | 0.345704007 | 0.120622805 |
| 0.394507899 | 0.132176676 | 0.214672549 | 0.084794446 |
| 0.271698136 | 0.224895944 | 0.476932472 | 0.251079262 |
| 0.154616152 | 0.072737767 | 0.4743136   | 0.200183304 |
| 0.143298952 | 0.065841124 | 0.12583071  | 0.423081589 |
| 0.304560597 | 0.467214875 | 0.400071481 | 0.347527645 |
| 0.232529273 | 0.476803948 | 0.316370306 | 0.397289031 |
| 0.065401597 | 0.505106663 | 0.120497286 | 0.033924985 |
| 0.047709607 | 0.056407895 | 0.130063233 | 0.285349815 |
| 0.439359276 | 0.24399528  | 0.108017669 | 0.143895832 |
| 0.444082236 | 0.462700365 | 0.508056858 | 0.383660845 |
| 0.03203229  | 0.127260222 | 0.22614391  | 0.135214005 |
| 0.319224215 | 0.093758559 | 0.129461656 | 0.5028792   |
| 0.363863642 | 0.405261628 | 0.08975424  | 0.491156366 |
| 0.121644182 | 0.494909373 | 0.423511858 | 0.111360488 |
| 0.501123624 | 0.480049311 | 0.488300143 | 0.303857717 |
| 0.452408159 | 0.182755882 | 0.065775835 | 0.367415948 |
| 0.466466504 | 0.009857626 | 0.445211738 | 0.474975262 |
| 0.481369954 | 0.422714495 | 0.506284408 | 0.479568697 |
| 0.482282857 | 0.064496731 | 0.024128974 | 0.22590345  |
| 0.495969054 | 0.367965684 | 0.080067973 | 0.242459004 |
| 0.255955949 | 0.197904141 | 0.368855058 | 0.148139805 |
| 0.500569073 | 0.412116068 | 0.459333176 | 0.349434066 |
| 0.200425017 | 0.310320898 | 0.224240296 | 0.456398724 |
| 0.031281623 | 0.069966217 | 0.053502645 | 0.273481317 |
| 0.14609072  | 0.123936683 | 0.172861565 | 0.237243593 |
| 0.155966906 | 0.161297786 | 0.14404601  | 0.285426657 |
| 0.072090415 | 0.26880483  | 0.103291281 | 0.123689873 |
| 0.034024389 | 0.158216292 | 0.109280152 | 0.089913414 |
| 0.151393627 | 0.258546151 | 0.337142315 | 0.461628542 |
| 0.175616571 | 0.17530897  | 0.335240932 | 0.446016624 |
| 0.421002126 | 0.217027693 | 0.22040709  | 0.011090277 |
| 0.150092177 | 0.152609861 | 0.093877143 | 0.238374317 |
| 0.197757854 | 0.154924547 | 0.274885586 | 0.32270236  |
| 0.171739841 | 0.095012597 | 0.185252613 | 0.416413347 |
| 0.156538327 | 0.147534315 | 0.420503425 | 0.256222498 |
| 0.003825001 | 0.197310436 | 0.405615381 | 0.094293944 |
| 0.272783607 | 0.078822133 | 0.109378987 | 0.449247971 |
| 0.141099076 | 0.129756453 | 0.462884983 | 0.317450114 |
| 0.159403994 | 0.241239933 | 0.509042509 | 0.038407822 |
| 0.199325147 | 0.02557932  | 0.237008251 | 0.159702764 |
| 0.192288238 | 0.255505264 | 0.194144867 | 0.129732086 |
| 0.11152873  | 0.50731027  | 0.34231918  | 0.492580931 |
| 0.17730105  | 0.509951459 | 0.428200092 | 0.41894942  |
| 0.280218877 | 0.181610707 | 0.077163979 | 0.393668157 |
| 0.432263815 | 0.13994801  | 0.083168912 | 0.393465995 |
| 0.177187835 | 0.312276446 | 0.054545458 | 0.482176086 |
| 0.472990519 | 0.455175059 | 0.089088816 | 0.325420928 |
| 0.348623954 | 0.148915514 | 0.364071344 | 0.514143067 |
| 0.159854782 | 0.215118729 | 0.166497052 | 0.363041348 |
| 0.14490758  | 0.13181308  | 0.300312664 | 0.089926301 |
| 0.004016798 | 0.060533654 | 0.055404527 | 0.094081033 |

|             |             |             |             |
|-------------|-------------|-------------|-------------|
| 0.086378646 | 0.282103654 | 0.303758576 | 0.496143399 |
| 0.079234494 | 0.387207465 | 0.216892545 | 0.160654675 |
| 0.412849511 | 0.177075514 | 0.214518513 | 0.25760873  |
| 0.21589899  | 0.014474031 | 0.076317722 | 0.508666284 |
| 0.043805691 | 0.114676632 | 0.180107764 | 0.003177446 |
| 0.040284567 | 0.369817014 | 0.115342986 | 0.212248362 |
| 0.451917177 | 0.210288621 | 0.178879069 | 0.161429476 |
| 0.265569863 | 0.070678862 | 0.002923315 | 0.472416408 |
| 0.470730545 | 0.447410002 | 0.46919471  | 0.447334738 |
| 0.428414205 | 0.341787122 | 0.370174589 | 0.200236942 |
| 0.064952649 | 0.056601025 | 0.126054632 | 0.159578639 |
| 0.006495754 | 0.317275488 | 0.169791921 | 0.132852761 |
| 0.349726155 | 0.253730031 | 0.030577587 | 0.232735505 |
| 0.0190607   | 0.094979002 | 0.180029886 | 0.117912207 |
| 0.295665141 | 0.013509437 | 0.125327514 | 0.16316203  |
| 0.412359448 | 0.333619927 | 0.15188776  | 0.504593495 |
| 0.200723485 | 0.138551694 | 0.160746056 | 0.321229218 |
| 0.052973625 | 0.055423899 | 0.190978116 | 0.02010775  |
| 0.08314505  | 0.44032131  | 0.164145082 | 0.046924288 |
| 0.204255288 | 0.005331371 | 0.353900268 | 0.511849829 |
| 0.443953451 | 0.497902137 | 0.476698995 | 0.126044649 |
| 0.485674114 | 0.057072387 | 0.506247345 | 0.388171123 |
| 0.180108807 | 0.000865515 | 0.007237595 | 0.456038291 |
| 0.239566951 | 0.069834127 | 0.131014869 | 0.154400801 |
| 0.078284041 | 0.100033327 | 0.044794869 | 0.096139713 |
| 0.274697659 | 0.136735724 | 0.090520982 | 0.458317836 |
| 0.136071149 | 0.16046533  | 0.184500976 | 0.092862915 |
| 0.24363777  | 0.042134342 | 0.08983911  | 0.007874283 |
| 0.29499643  | 0.124572748 | 0.45656598  | 0.491728708 |
| 0.473386964 | 0.29237898  | 0.15245199  | 0.163439623 |
| 0.412910546 | 0.108088321 | 0.145429172 | 0.103616413 |
| 0.466136727 | 0.290756178 | 0.285481022 | 0.296595126 |
| 0.491941421 | 0.450729613 | 0.029544236 | 0.366752979 |
| 0.011152149 | 0.002138774 | 0.197136543 | 0.221887791 |
| 0.043973186 | 0.207198392 | 0.242164448 | 0.130908392 |
| 0.127006409 | 0.025070164 | 0.139068033 | 0.123489171 |
| 0.217965381 | 0.207479925 | 0.156410833 | 0.223287971 |
| 0.133883198 | 0.081794735 | 0.102355295 | 0.093124964 |
| 0.128294623 | 0.313513461 | 0.211666896 | 0.021169993 |
| 0.231759098 | 0.226633092 | 0.043410152 | 0.134284312 |
| 0.408561482 | 0.467321817 | 0.04351413  | 0.011460838 |
| 0.247140596 | 0.159735272 | 0.475509654 | 0.476293046 |
| 0.509428867 | 0.510931802 | 0.383658104 | 0.084985628 |
| 0.047849256 | 0.221606181 | 0.169739786 | 0.059312121 |
| 0.490572771 | 0.070253115 | 0.460065374 | 0.159013232 |
| 0.102459126 | 0.120129285 | 0.02589888  | 0.064047562 |
| 0.235649055 | 0.145399201 | 0.10511141  | 0.130069463 |
| 0.174106085 | 0.1046572   | 0.037877174 | 0.147659488 |
| 0.313691008 | 0.096398781 | 0.127809116 | 0.141729358 |
| 0.311874344 | 0.109260626 | 0.349118849 | 0.451162535 |
| 0.121211435 | 0.087561065 | 0.140791019 | 0.315827356 |
| 0.404998719 | 0.238661591 | 0.018673288 | 0.42957594  |
| 0.463737526 | 0.317954266 | 0.476578049 | 0.374865807 |
| 0.083694963 | 0.210278458 | 0.157142521 | 0.225860363 |



|             |             |             |             |
|-------------|-------------|-------------|-------------|
| 0.144198498 | 0.167314087 | 0.145262544 | 0.056914876 |
| 0.29071461  | 0.477741504 | 0.394936058 | 0.098733423 |
| 0.251006055 | 0.113387026 | 0.062128797 | 0.412483025 |
| 0.105955405 | 0.067069454 | 0.171660585 | 0.394522038 |
| 0.00108911  | 0.069148923 | 0.466133803 | 0.12141885  |
| 0.498321325 | 0.458659287 | 0.431303933 | 0.124638415 |
| 0.000854254 | 0.30958904  | 0.26277497  | 0.179128989 |
| 0.412618082 | 0.301063991 | 0.082134783 | 0.055767088 |
| 0.268147196 | 0.087011274 | 0.102027307 | 0.151196961 |
| 0.121603357 | 0.302306728 | 0.179442421 | 0.159240553 |
| 0.107892123 | 0.102234829 | 0.109892711 | 0.117049568 |
| 0.08524801  | 0.21451702  | 0.335940279 | 0.131580369 |
| 0.111481028 | 0.427265244 | 0.374170156 | 0.022331741 |
| 0.191659074 | 0.399998923 | 0.399152897 | 0.004972771 |
| 0.34289374  | 0.007629628 | 0.114064284 | 0.115337406 |
| 0.108501801 | 0.128527249 | 0.186942507 | 0.137823201 |
| 0.263048171 | 0.124338059 | 0.132585071 | 0.180849779 |
| 0.091476106 | 0.115085924 | 0.241727247 | 0.17984271  |
| 0.135254803 | 0.080583458 | 0.115130574 | 0.126294551 |
| 0.036466604 | 0.429998533 | 0.245479523 | 0.078641535 |
| 0.17265575  | 0.167125473 | 0.337344125 | 0.473682914 |
| 0.387810283 | 0.132592219 | 0.169258709 | 0.416653359 |
| 0.114654559 | 0.133867475 | 0.045000125 | 0.214878428 |
| 0.143506272 | 0.122443778 | 0.204869751 | 0.235378037 |
| 0.347573564 | 0.402373013 | 0.231854338 | 0.416649435 |
| 0.156503835 | 0.197707901 | 0.144369075 | 0.060826137 |
| 0.107823069 | 0.130410758 | 0.156520512 | 0.002357838 |
| 0.276802249 | 0.118585899 | 0.442498841 | 0.472285915 |
| 0.134460436 | 0.360343762 | 0.154074858 | 0.066733542 |
| 0.121187765 | 0.203353982 | 0.130272609 | 0.352772224 |
| 0.104584862 | 0.097769682 | 0.180266369 | 0.145808845 |
| 0.351026573 | 0.344753865 | 0.134169446 | 0.138112703 |
| 0.156529494 | 0.159711901 | 0.463582377 | 0.072033044 |
| 0.273753654 | 0.095101568 | 0.247014012 | 0.171927945 |
| 0.119675412 | 0.486225834 | 0.048330833 | 0.499032492 |
| 0.179522544 | 0.13657566  | 0.479194604 | 0.166069131 |
| 0.126505092 | 0.064109774 | 0.095778471 | 0.169400714 |
| 0.132970499 | 0.152605773 | 0.011040921 | 0.043215333 |
| 0.286529505 | 0.157044912 | 0.374867478 | 0.309176779 |
| 0.123842693 | 0.314310182 | 0.074950955 | 0.159432199 |
| 0.463040507 | 0.481696586 | 0.144745624 | 0.231479302 |
| 0.313099504 | 0.066854012 | 0.271396419 | 0.009865561 |
| 0.299331417 | 0.276691756 | 0.186596283 | 0.040367682 |
| 0.016742467 | 0.110133393 | 0.280211574 | 0.069105124 |
| 0.456473188 | 0.094098138 | 0.262726054 | 0.321507332 |
| 0.165544088 | 0.481454108 | 0.073016334 | 0.327419906 |
| 0.039946018 | 0.202824407 | 0.198291248 | 0.215243815 |
| 0.125054732 | 0.144484249 | 0.318025687 | 0.115106094 |
| 0.026972271 | 0.136770706 | 0.002613273 | 0.408634883 |
| 0.461883632 | 0.181535453 | 0.212098756 | 0.140941595 |
| 0.226770424 | 0.352831148 | 0.153955257 | 0.214116315 |
| 0.010299049 | 0.243545623 | 0.136132268 | 0.381694791 |
| 0.115845939 | 0.247391228 | 0.034765635 | 0.18265239  |
| 0.448265132 | 0.168848522 | 0.249028292 | 0.150931727 |

|             |             |             |             |
|-------------|-------------|-------------|-------------|
| 0.460640958 | 0.347395911 | 0.156591562 | 0.097971303 |
| 0.293779115 | 0.066427622 | 0.161981306 | 0.512071924 |
| 0.103192269 | 0.1069745   | 0.409670823 | 0.124853067 |
| 0.152278373 | 0.352586478 | 0.267854445 | 0.50441923  |
| 0.053273567 | 0.194755959 | 0.362516921 | 0.438778273 |
| 0.264029833 | 0.095521598 | 0.128022839 | 0.138109707 |
| 0.438261221 | 0.064014536 | 0.125218297 | 0.299092109 |
| 0.117528222 | 0.240082435 | 0.23262797  | 0.106587017 |
| 0.033770922 | 0.094583027 | 0.160456545 | 0.12024785  |
| 0.209076157 | 0.211417051 | 0.126699197 | 0.368697287 |
| 0.074262158 | 0.021445738 | 0.428625771 | 0.012343056 |
| 0.198102896 | 0.278624031 | 0.163731852 | 0.168042725 |
| 0.186185492 | 0.248317243 | 0.210202449 | 0.002481278 |
| 0.384746661 | 0.020553558 | 0.152127539 | 0.126894578 |
| 0.150346531 | 0.043156664 | 0.432470094 | 0.491972113 |
| 0.234234995 | 0.141357814 | 0.155838881 | 0.454933528 |
| 0.078630291 | 0.147858621 | 0.174868654 | 0.303031766 |
| 0.108583818 | 0.175747371 | 0.177375842 | 0.16238208  |
| 0.324957281 | 0.130561736 |             |             |
| ARHGEF2     | 0.124683261 | 0.08372108  | 0.128264875 |
| 0.03393617  | 0.020802318 | 0.014530153 | 0.176613908 |
| 0.11390073  | 0.103756093 | 0.010263484 | 0.02434214  |
| 0.142368331 | 0.001536239 | 0.073848555 | 0.176861743 |
| 0.019006271 | 0.143018467 | 0.156618418 | 0.033025984 |
| 0.053120088 | 0.02217006  | 0.00528616  | 0.035380142 |
| 0.024493228 | 0.258527652 | 0.070291877 | 0.013366766 |
| 0.068591356 | 0.001268491 | 0.021401824 | 0.003614943 |
| 0.137770526 | 0.017532755 | 0.006010819 | 0.134565927 |
| 0.02363924  | 0.008102626 | 0.173524424 | 0.02547802  |
| 0.002133608 | 0.161505631 | 0.016503645 | 0.03299225  |
| 0.020084378 | 0.128431269 | 0.002644026 | 0.026799771 |
| 0.070450724 | 0.042131384 | 0.194245271 | 0.03593392  |
| 0.017519744 | 0.076998402 | 0.043374028 | 0.009358754 |
| 0.0031611   | 0.001131285 | 0.001379742 | 0.098935817 |
| 0.139621196 | 0.110245232 | 0.004202339 | 0.07887202  |
| 0.031623645 | 0.047350352 | 0.122237742 | 0.012438218 |
| 0.083033803 | 0.003010831 | 0.028078147 | 0.023407424 |
| 0.028683919 | 1           | 0.221593284 | 0.272107136 |
| 0.011109436 | 0.081642229 | 0.022231614 | 0.006618407 |
| 0.079857175 | 0.14222865  | 0.140171217 | 0.121755972 |
| 0.010492136 | 0.014438017 | 0.01330905  | 0.088799304 |
| 0.072288875 | 0.172346334 | 0.038042049 | 0.108828734 |
| 0.202822429 | 0.026556664 | 0.050891869 | 0.252990725 |
| 0.070414684 | 0.008024821 | 0.015073573 | 0.002821652 |
| 0.024477113 | 0.018114765 | 0.145629202 | 0.090054807 |
| 0.020861644 | 0.241021135 | 0.146101232 | 0.010970552 |
| 0.013196613 | 0.179205476 | 0.017014918 | 0.037336539 |
| 0.029370128 | 0.065316927 | 0.060372963 | 0.084733072 |
| 0.013180831 | 0.077823734 | 0.041788607 | 0.091170909 |
| 0.002080303 | 0.093582209 | 0.103247826 | 0.124295317 |
| 0.145906248 | 0.110683005 | 0.026588462 | 0.143849804 |
| 0.049771641 | 0.079200523 | 0.081511523 | 0.050488453 |
| 0.05109893  | 0.12341711  | 0.094008649 | 0.063886095 |
| 0.160893615 | 0.006156366 | 0.012852167 | 0.044273733 |

|             |             |             |             |
|-------------|-------------|-------------|-------------|
| 0.051144299 | 0.238312143 | 0.006302904 | 0.139611761 |
| 0.103740046 | 0.042288546 | 0.097268276 | 0.172552909 |
| 0.101411713 | 0.100375143 | 0.058647346 | 0.093868782 |
| 0.121295852 | 0.130045287 | 0.08083427  | 0.018079759 |
| 0.118540147 | 0.033646305 | 0.027533278 | 0.092904312 |
| 0.093505828 | 0.00060962  | 0.0492256   | 0.054926604 |
| 0.093099735 | 0.034890143 | 0.08231883  | 0.065528305 |
| 0.092167249 | 0.260461145 | 0.002575833 | 0.054276508 |
| 0.111184479 | 0.079746579 | 0.077249693 | 0.011060977 |
| 0.023296301 | 0.027581859 | 0.044015163 | 0.003971424 |
| 0.124357404 | 0.058696038 | 0.057189697 | 0.064493636 |
| 0.06855718  | 0.17239722  | 0.008782901 | 0.140251391 |
| 0.138578049 | 0.106516106 | 0.240229876 | 0.121974287 |
| 0.00955984  | 0.110732652 | 0.025745479 | 0.034209293 |
| 0.12708201  | 0.04490971  | 0.003579607 | 0.022714214 |
| 0.343129838 | 0.015530177 | 0.128116994 | 0.141403148 |
| 0.123143366 | 0.317839234 | 0.037450068 | 0.048253844 |
| 0.041543695 | 0.326875098 | 0.025914556 | 0.069451134 |
| 0.021718334 | 0.182831565 | 0.037873302 | 0.094560416 |
| 0.110889458 | 0.010963813 | 0.185398953 | 0.02139275  |
| 0.010603737 | 0.005661048 | 0.001867479 | 0.012942997 |
| 0.339384776 | 0.034598809 | 0.027484658 | 0.027169767 |
| 0.062790813 | 0.147406056 | 0.010179674 | 0.161071793 |
| 0.241233365 | 0.011832025 | 0.054711094 | 0.025837783 |
| 0.098020266 | 0.042037199 | 0.042780571 | 0.025189464 |
| 0.095296293 | 0.002767013 | 0.001862164 | 0.058358985 |
| 0.004926468 | 0.012319212 | 0.057049259 | 0.031266102 |
| 0.010709934 | 0.286210821 | 0.084681319 | 0.00096535  |
| 0.022128891 | 0.015374021 | 0.072327663 | 0.019658793 |
| 0.099116817 | 0.10764271  | 0.014841395 | 0.012622284 |
| 0.172860513 | 0.097687585 | 0.083546723 | 0.069303093 |
| 0.00614572  | 0.090057181 | 0.041390063 | 0.066488621 |
| 0.061061149 | 0.011264414 | 0.000721122 | 0.042639444 |
| 0.053273848 | 0.01097517  | 0.278149367 | 0.034212281 |
| 0.016336034 | 0.024525524 | 0.029519353 | 0.076417081 |
| 0.139875678 | 0.11169128  | 0.063021221 | 0.050037027 |
| 0.06937735  | 0.078660903 | 0.066533004 | 0.098195635 |
| 0.011190533 | 0.015223278 | 0.008768646 | 0.058530891 |
| 0.156401613 | 0.015286208 | 0.169165461 | 0.00185635  |
| 0.003062884 | 0.202938086 | 0.208178485 | 0.055624082 |
| 0.004765208 | 0.019361458 | 0.035748788 | 0.082736283 |
| 0.135920152 | 0.09484624  | 0.179099751 | 0.012808085 |
| 0.103019217 | 0.01629804  | 0.010772873 | 0.023895173 |
| 0.170341404 | 0.037524009 | 0.041452121 | 0.14480141  |
| 0.290210536 | 0.003800555 | 0.059142792 | 0.004208178 |
| 0.163712738 | 0.053203344 | 0.338905156 | 0.304932803 |
| 0.060691106 | 0.280244271 | 0.147944596 | 0.014563709 |
| 0.055680461 | 0.188480506 | 0.007596327 | 0.077662255 |
| 0.105594073 | 0.110753085 | 0.106241827 | 0.136833537 |
| 0.082671446 | 0.054198463 | 0.045963634 | 0.038652039 |
| 0.120457153 | 0.144438455 | 0.004692588 | 0.033242076 |
| 0.012443819 | 0.057418081 | 0.034822457 | 0.20924766  |
| 0.032631194 | 0.102650148 | 0.139119825 | 0.024658259 |
| 0.064419376 | 0.000655378 | 0.038220155 | 0.066548809 |

|             |             |             |             |
|-------------|-------------|-------------|-------------|
| 0.055835738 | 0.153193531 | 0.004400229 | 0.005489454 |
| 0.110631558 | 0.123244051 | 0.004517416 | 0.096482982 |
| 0.033634743 | 0.22542372  | 0.022304944 | 0.038716309 |
| 0.146712876 | 0.007479399 | 0.029938827 | 0.000409661 |
| 0.01021163  | 0.133405299 | 0.011332786 | 0.104961613 |
| 0.0748493   | 0.099623254 | 0.108749812 | 0.097653999 |
| 0.100956869 | 0.068801155 | 0.078059107 | 0.004096856 |
| 0.086490985 | 0.000236455 | 0.077299965 | 0.075326686 |
| 0.008021949 | 0.004184742 | 0.033448997 | 0.05055631  |
| 0.014598734 | 0.294851266 | 0.165570356 | 0.007961574 |
| 0.071590841 | 0.106383161 | 0.152031497 | 0.009131383 |
| 0.02504354  | 0.030213418 | 0.010710373 | 0.113694373 |
| 0.060942038 | 0.092230252 | 0.019475726 | 0.299378845 |
| 0.019487795 | 0.116524259 | 0.31168258  | 0.004119796 |
| 0.045399023 | 0.287058677 | 0.169238848 | 0.086510508 |
| 0.104385264 | 0.029056391 | 0.004853462 | 0.010460188 |
| 0.070351754 | 0.213808852 | 0.005328706 | 0.198117374 |
| 0.084056444 | 0.023631289 | 0.089130222 | 0.125130002 |
| 0.086870068 | 0.099365427 | 0.172351837 | 0.048771275 |
| 0.037248806 | 0.004469931 | 0.025515999 | 0.138961739 |
| 0.028546705 | 0.012934811 | 0.148598168 | 0.06215209  |
| 0.053153906 | 0.097472546 | 0.004228041 | 0.005123147 |
| 0.062858518 | 0.026101721 | 0.012875469 | 0.182269172 |
| 0.022397647 | 0.018752464 | 0.050998419 | 0.093750001 |
| 0.0301057   | 0.152422014 | 0.246660228 | 0.195375826 |
| 0.014287268 | 0.011171858 | 0.166305189 | 0.202699271 |
| 0.052515627 | 0.054616303 | 0.151625276 | 0.04074583  |
| 0.162518314 | 0.029309177 | 0.060085563 | 0.079271574 |
| 0.120588687 | 0.101736502 | 0.172576127 | 0.055282845 |
| 0.129875542 | 0.045957413 | 0.015468898 | 0.041778972 |
| 0.079116279 | 0.262282075 | 0.097223874 | 0.006452465 |
| 0.246363484 | 0.053359205 | 0.092236337 | 0.209120091 |
| 0.010978119 | 0.162166699 | 0.060659621 | 0.161185266 |
| 0.022166245 | 0.004345937 | 0.183792776 | 0.118599694 |
| 0.091105942 | 0.002069781 | 0.171660848 | 0.045332177 |
| 0.097031633 | 0.016950787 | 0.026489961 | 0.124791038 |
| 0.211296922 | 0.205936435 | 0.027347167 | 0.060130979 |
| 0.042114193 | 0.016529831 | 0.032417963 | 0.076282665 |
| 0.075158687 | 0.019056703 | 0.101025419 | 0.086354055 |
| 0.290515178 | 0.010643341 | 0.009653636 | 0.027919374 |
| 0.154512251 | 0.019271498 | 0.085298152 | 0.255757809 |
| 0.184753811 | 0.163200022 | 0.081689533 | 0.06496227  |
| 0.020129787 | 0.201185623 | 0.257864175 | 0.062935911 |
| 0.00497774  | 0.096616729 | 0.015450205 | 0.045967866 |
| 0.003872399 | 0.001536506 | 0.07835644  | 0.036650842 |
| 0.122497058 | 0.062932949 | 0.109705082 | 0.05542931  |
| 0.000202458 | 0.021804892 | 0.026669029 | 0.009961357 |
| 0.07257406  | 0.095134594 | 0.063308114 | 0.090219102 |
| 0.134333012 | 0.238220155 | 0.065231299 | 0.01223767  |
| 0.003050005 | 0.039289544 | 0.179297365 | 0.147705765 |
| 0.055171798 | 0.296920911 | 0.003834014 | 0.056584634 |
| 0.012233499 | 0.147416246 | 0.087300182 | 0.01276137  |
| 0.00136615  | 0.081720637 | 0.060842526 | 0.143568961 |
| 0.012269548 | 0.079046176 | 0.086569667 | 0.02045925  |

|             |             |             |             |
|-------------|-------------|-------------|-------------|
| 0.024874108 | 0.114368604 | 0.049373907 | 0.035376585 |
| 0.048333419 | 0.055287197 | 0.058565428 | 0.014525342 |
| 0.064889945 | 0.07748043  | 0.028405135 | 0.09117386  |
| 0.040802266 | 0.096226504 | 0.026000619 | 0.037639963 |
| 0.011427787 | 0.088707363 | 0.344761375 | 0.36315843  |
| 0.077042805 | 0.066015776 | 0.200590641 | 0.25920388  |
| 0.108036304 | 0.029260729 | 0.129962808 | 0.091421256 |
| 0.091482678 | 0.2717322   | 0.034719631 | 0.058246312 |
| 0.004249667 | 0.014269537 | 0.149553135 | 0.032682894 |
| 0.087174649 | 0.008303087 | 0.0229125   | 0.06726589  |
| 0.047427767 | 0.153970129 | 0.189338904 | 0.10559664  |
| 0.018664839 | 0.033869895 | 0.00835737  | 0.056032721 |
| 0.087132035 | 0.267103214 | 0.01654157  | 0.05155553  |
| 0.058682879 | 0.032901179 | 0.04398557  | 0.108856081 |
| 0.003504507 | 0.118104951 | 0.00827001  | 0.103909125 |
| 0.006853614 | 0.257833691 | 0.227446774 | 0.038509596 |
| 0.001121422 | 0.067669598 | 0.027238061 | 0.019930541 |
| 0.033611349 | 0.038987536 | 0.020598369 | 0.077224508 |
| 0.105304176 | 0.156341022 | 0.149736874 | 0.127841123 |
| 0.016788487 | 0.009197007 | 0.042265935 | 0.024900827 |
| 0.044766306 | 0.073411289 | 0.224443369 | 0.068319818 |
| 0.016780839 | 0.279929737 | 0.140055804 | 0.062333239 |
| 0.037053704 | 0.040301347 | 0.001376426 | 0.018378023 |
| 0.058521449 | 0.004155486 | 0.00019916  | 0.003357653 |
| 0.068362189 | 0.027041121 | 0.056472407 | 0.0742171   |
| 0.013533959 | 0.09015827  | 0.002169913 | 0.069328724 |
| 0.110119077 | 0.144783579 | 0.020717419 | 0.173511541 |
| 0.089270681 | 0.093962142 | 0.036673305 | 0.012398866 |
| 0.017896824 | 0.012247209 | 0.00786878  | 0.156234119 |
| 0.175775404 | 0.001575728 | 0.025315617 | 0.300937432 |
| 0.058611893 | 0.000873615 | 0.053668219 | 0.030105613 |
| 0.241798662 | 0.147409713 | 0.057127343 | 0.033399415 |
| 0.184292341 | 0.131917138 | 0.01266313  | 0.022454318 |
| 0.011856712 | 0.007517706 | 0.049654444 | 0.004044739 |
| 0.13928713  | 0.017607377 | 0.028924383 | 0.178510376 |
| 0.145733828 | 0.009841257 | 0.251022174 | 0.008418585 |
| 0.088736293 | 0.107303414 | 0.020355068 | 0.012254331 |
| 0.059773029 | 0.013385735 | 0.123855285 | 0.070390369 |
| 0.000928541 | 0.040893259 | 0.074982377 | 0.018792335 |
| 0.184474101 | 0.011088575 | 0.199590407 | 0.004013058 |
| 0.089202595 | 0.085962263 | 0.208773083 | 0.022299076 |
| 0.040829324 | 0.294285053 | 0.011009018 | 0.098706118 |
| 0.059234073 | 0.005205027 | 0.039127479 | 0.044066855 |
| 0.007465345 | 0.107560032 | 0.021802546 | 0.106651927 |
| 0.056592208 | 0.114334913 | 0.044849911 | 0.087383898 |
| 0.103821077 | 0.010251453 | 0.004098961 | 0.021177769 |
| 0.099459857 | 0.052204309 | 0.011191957 | 0.083568721 |
| 0.003127472 | 0.079059107 | 0.050194712 | 0.024892321 |
| 0.068668887 | 0.085273187 | 0.011691437 | 0.206630929 |
| 0.061990907 | 0.021686953 | 0.01729492  | 0.128623113 |
| 0.028742635 | 0.039376609 | 0.127260738 | 0.000118255 |
| 0.044413913 | 0.024720534 | 0.094178063 | 0.016321572 |
| 0.210450703 | 0.062355562 | 0.049211982 | 0.042097889 |
| 0.058336325 | 0.005058026 | 0.026699644 | 0.012783605 |

|             |             |             |             |
|-------------|-------------|-------------|-------------|
| 0.006229759 | 0.161318973 | 0.105943104 | 0.068429886 |
| 0.09102275  | 0.010359633 | 0.002977609 | 0.098070715 |
| 0.002596806 | 0.003526703 | 0.006949204 | 0.037866279 |
| 0.003243287 | 0.010146286 | 0.009582419 | 0.004378248 |
| 0.06568574  | 0.060141634 |             |             |
| ARL6IP1     | 0.28199627  | 0.204978874 | 0.211155905 |
| 0.24634532  | 0.144167642 | 0.134183907 | 0.321344405 |
| 0.313937944 | 0.187828509 | 0.062102889 | 0.172510921 |
| 0.254586665 | 0.024015495 | 0.240435195 | 0.317558681 |
| 0.123093198 | 0.313925345 | 0.338629085 | 0.072408118 |
| 0.178797412 | 0.153248541 | 0.092788659 | 0.140820131 |
| 0.14695757  | 0.328403936 | 0.167479668 | 0.08793408  |
| 0.225694023 | 0.038917807 | 0.1264395   | 0.041714668 |
| 0.320285888 | 0.129485261 | 0.076563599 | 0.214240088 |
| 0.138374805 | 0.013983772 | 0.335651494 | 0.208748289 |
| 0.059270647 | 0.324472828 | 0.082643592 | 0.249738556 |
| 0.099725664 | 0.254574937 | 0.031308633 | 0.114920647 |
| 0.159672594 | 0.199941664 | 0.221876502 | 0.146248559 |
| 0.116035844 | 0.21057303  | 0.124552658 | 0.014602814 |
| 0.063534869 | 0.009036433 | 0.036069914 | 0.268674848 |
| 0.307238048 | 0.338794148 | 0.047382615 | 0.189149509 |
| 0.115090611 | 0.148549227 | 0.255231476 | 0.089915471 |
| 0.260623961 | 0.04873642  | 0.126511443 | 0.168684139 |
| 0.151299368 | 0.221593284 | 1           | 0.216158722 |
| 0.109762807 | 0.29578973  | 0.154247471 | 0.087511333 |
| 0.197298501 | 0.330048872 | 0.270861577 | 0.277354324 |
| 0.051026926 | 0.104404877 | 0.134330183 | 0.242970911 |
| 0.175294357 | 0.267584405 | 0.1836188   | 0.30184229  |
| 0.234223488 | 0.094955039 | 0.155772946 | 0.247437344 |
| 0.20784087  | 0.06817759  | 0.088926817 | 0.06119224  |
| 0.128666769 | 0.126033173 | 0.293592424 | 0.249520572 |
| 0.135463275 | 0.246173797 | 0.296301569 | 0.095950387 |
| 0.168551835 | 0.274297806 | 0.146865785 | 0.167327865 |
| 0.14444026  | 0.23023151  | 0.174033303 | 0.214328447 |
| 0.109237786 | 0.253805106 | 0.178575675 | 0.230790934 |
| 0.020333685 | 0.264450113 | 0.296278213 | 0.317096003 |
| 0.234974942 | 0.324034633 | 0.118948699 | 0.300670586 |
| 0.202914392 | 0.209024199 | 0.289511405 | 0.245304919 |
| 0.206629017 | 0.267503361 | 0.256628123 | 0.206052222 |
| 0.303171062 | 0.061203851 | 0.112714558 | 0.201985911 |
| 0.169831089 | 0.306486343 | 0.088397273 | 0.313857589 |
| 0.290665809 | 0.183730234 | 0.257322654 | 0.349240629 |
| 0.235353011 | 0.304661086 | 0.190521283 | 0.320386678 |
| 0.308036999 | 0.301699437 | 0.275848693 | 0.122295497 |
| 0.297495743 | 0.18717771  | 0.046025446 | 0.223301849 |
| 0.297003482 | 0.014076897 | 0.189204442 | 0.209528646 |
| 0.254354803 | 0.170336192 | 0.267854354 | 0.234205897 |
| 0.251669018 | 0.297004194 | 0.006173702 | 0.204758349 |
| 0.283455897 | 0.259130693 | 0.260539824 | 0.094690014 |
| 0.129705597 | 0.153135574 | 0.160418279 | 0.083321209 |
| 0.33192717  | 0.212617171 | 0.203837843 | 0.18490401  |
| 0.142126604 | 0.328240467 | 0.078906494 | 0.293134264 |
| 0.318841283 | 0.275872079 | 0.225956246 | 0.23778313  |
| 0.086265595 | 0.317955294 | 0.152716223 | 0.131809642 |

|             |             |             |             |
|-------------|-------------|-------------|-------------|
| 0.31302683  | 0.158267251 | 0.062197017 | 0.130794186 |
| 0.22661826  | 0.107710091 | 0.301905301 | 0.266274635 |
| 0.326968584 | 0.337624734 | 0.241420595 | 0.288253113 |
| 0.219106952 | 0.352054371 | 0.125209575 | 0.233472455 |
| 0.12513818  | 0.267919778 | 0.151495343 | 0.289824258 |
| 0.321673899 | 0.108578333 | 0.288907845 | 0.118288214 |
| 0.122388711 | 0.052881564 | 0.038035042 | 0.093831484 |
| 0.342943051 | 0.19827539  | 0.136897772 | 0.157350461 |
| 0.204111679 | 0.231240964 | 0.112284652 | 0.344511235 |
| 0.250683686 | 0.157480957 | 0.221988752 | 0.111482774 |
| 0.115232389 | 0.205788136 | 0.18682735  | 0.148348028 |
| 0.192146082 | 0.054118274 | 0.056561006 | 0.216907262 |
| 0.067262468 | 0.107151845 | 0.21277423  | 0.155743201 |
| 0.106477012 | 0.29590546  | 0.267414562 | 0.0107971   |
| 0.109907612 | 0.139701282 | 0.241453441 | 0.081056572 |
| 0.273257053 | 0.252345522 | 0.115906078 | 0.149630226 |
| 0.23156502  | 0.271649275 | 0.234186041 | 0.242754321 |
| 0.088166361 | 0.275573031 | 0.188291858 | 0.241513287 |
| 0.194862301 | 0.080751961 | 0.026475323 | 0.188692412 |
| 0.206054022 | 0.086015062 | 0.227028832 | 0.142919079 |
| 0.09192788  | 0.128524224 | 0.162293516 | 0.263901182 |
| 0.339016271 | 0.247483752 | 0.296772538 | 0.195825137 |
| 0.249036959 | 0.270596462 | 0.210426816 | 0.287501023 |
| 0.068898636 | 0.11541344  | 0.120357197 | 0.228288589 |
| 0.308586435 | 0.128549095 | 0.295968925 | 0.034792831 |
| 0.001253637 | 0.269789519 | 0.279016783 | 0.282651595 |
| 0.080434793 | 0.093198266 | 0.147233592 | 0.258627835 |
| 0.341160642 | 0.264930517 | 0.245331727 | 0.161329354 |
| 0.254592157 | 0.111902913 | 0.097064075 | 0.130930885 |
| 0.284327922 | 0.160588537 | 0.271548282 | 0.335715304 |
| 0.194885972 | 0.078299012 | 0.1805747   | 0.023162562 |
| 0.284233354 | 0.149930785 | 0.28303708  | 0.374247876 |
| 0.230702595 | 0.34515196  | 0.264072317 | 0.081047901 |
| 0.207137583 | 0.331442596 | 0.045048851 | 0.231360444 |
| 0.253018943 | 0.248468349 | 0.249666809 | 0.270834878 |
| 0.216001874 | 0.1619989   | 0.182309421 | 0.154016257 |
| 0.336795589 | 0.257098301 | 0.082055352 | 0.201630948 |
| 0.020522822 | 0.219575466 | 0.158786672 | 0.324911386 |
| 0.147693767 | 0.215396487 | 0.290943113 | 0.122836205 |
| 0.181641685 | 0.035905489 | 0.167868275 | 0.242271533 |
| 0.188798544 | 0.217132213 | 0.08045704  | 0.085892963 |
| 0.264956937 | 0.273610291 | 0.075197714 | 0.277123851 |
| 0.200527251 | 0.20476849  | 0.180695091 | 0.176116856 |
| 0.34142385  | 0.036240715 | 0.138949066 | 0.009495309 |
| 0.075559262 | 0.277479768 | 0.105228969 | 0.275471666 |
| 0.258720695 | 0.145964959 | 0.26676437  | 0.284273174 |
| 0.242719876 | 0.245100073 | 0.259019595 | 0.081589483 |
| 0.26535836  | 0.010921336 | 0.250070644 | 0.207161492 |
| 0.076848416 | 0.01425561  | 0.069410328 | 0.207654478 |
| 0.121842057 | 0.197199021 | 0.328480793 | 0.107879768 |
| 0.329623582 | 0.236593486 | 0.309322286 | 0.121340866 |
| 0.130699642 | 0.189686678 | 0.105079649 | 0.260321855 |
| 0.263336998 | 0.269758614 | 0.110870386 | 0.261991928 |
| 0.12331765  | 0.326821795 | 0.259215913 | 0.038618706 |

|             |             |             |             |
|-------------|-------------|-------------|-------------|
| 0.171791896 | 0.259944993 | 0.315079615 | 0.253156491 |
| 0.303336428 | 0.151323284 | 0.057452767 | 0.105519322 |
| 0.207117792 | 0.188384748 | 0.075126811 | 0.217729128 |
| 0.237955632 | 0.139079989 | 0.271760344 | 0.292062876 |
| 0.279535623 | 0.281064838 | 0.302837696 | 0.192206839 |
| 0.13091403  | 0.012107611 | 0.135555926 | 0.247069113 |
| 0.040609187 | 0.111504149 | 0.305855456 | 0.169060317 |
| 0.195924949 | 0.232861137 | 0.070232793 | 0.078960922 |
| 0.229689239 | 0.159489961 | 0.121093258 | 0.24538518  |
| 0.164310386 | 0.1331478   | 0.271274237 | 0.296516126 |
| 0.109841232 | 0.271654683 | 0.326114484 | 0.268301678 |
| 0.101860484 | 0.105821384 | 0.320613492 | 0.304308651 |
| 0.220016743 | 0.219822633 | 0.302737265 | 0.156214663 |
| 0.302081314 | 0.158030798 | 0.233277143 | 0.234315301 |
| 0.301155962 | 0.301502516 | 0.345423107 | 0.249879542 |
| 0.318104196 | 0.191604315 | 0.119735717 | 0.229828195 |
| 0.252198109 | 0.215861499 | 0.257309975 | 0.076606568 |
| 0.319967926 | 0.285106114 | 0.289476527 | 0.336918593 |
| 0.095291348 | 0.315867423 | 0.277766354 | 0.23328336  |
| 0.177327802 | 0.076571681 | 0.31889979  | 0.311132312 |
| 0.235101369 | 0.051661186 | 0.323872439 | 0.179241522 |
| 0.219279932 | 0.054345437 | 0.13843481  | 0.32595723  |
| 0.295345916 | 0.286798502 | 0.163808601 | 0.173979551 |
| 0.169097989 | 0.083727425 | 0.140632787 | 0.201608016 |
| 0.248153145 | 0.115780709 | 0.268889469 | 0.260123968 |
| 0.291875936 | 0.117743949 | 0.079824886 | 0.149552907 |
| 0.29735022  | 0.140692401 | 0.246189582 | 0.310728331 |
| 0.312650092 | 0.330909296 | 0.221465459 | 0.306702455 |
| 0.10868499  | 0.211136346 | 0.204234235 | 0.19729278  |
| 0.083669668 | 0.290299119 | 0.083970056 | 0.166580866 |
| 0.020944122 | 0.03671697  | 0.24140622  | 0.242413452 |
| 0.304550163 | 0.234024467 | 0.303830561 | 0.199633359 |
| 0.001349367 | 0.11522173  | 0.165485507 | 0.127488805 |
| 0.209786694 | 0.236108913 | 0.149510115 | 0.333608702 |
| 0.313219404 | 0.213390763 | 0.287959231 | 0.114757911 |
| 0.044637817 | 0.140020198 | 0.309623648 | 0.249343382 |
| 0.257316799 | 0.198822623 | 0.071127746 | 0.268298765 |
| 0.062931031 | 0.310825172 | 0.265899414 | 0.067911274 |
| 0.048007393 | 0.232031203 | 0.190345573 | 0.25912594  |
| 0.097999973 | 0.217463224 | 0.24612149  | 0.034016158 |
| 0.144837058 | 0.192497795 | 0.249430556 | 0.245630485 |
| 0.269596302 | 0.240520307 | 0.219595061 | 0.162826833 |
| 0.173568556 | 0.286241181 | 0.230229531 | 0.284801068 |
| 0.276693528 | 0.272887125 | 0.139547095 | 0.162730289 |
| 0.160487856 | 0.325601217 | 0.287703234 | 0.290878589 |
| 0.284699258 | 0.208423435 | 0.342820224 | 0.223264083 |
| 0.279865521 | 0.146935931 | 0.327935019 | 0.2403771   |
| 0.276056271 | 0.235826778 | 0.167277636 | 0.200588539 |
| 0.039381263 | 0.117030985 | 0.253483104 | 0.150436306 |
| 0.2791111   | 0.124423061 | 0.114032343 | 0.172184975 |
| 0.139954288 | 0.342080925 | 0.32752602  | 0.278493617 |
| 0.158942765 | 0.120352439 | 0.06815095  | 0.29589666  |
| 0.304696251 | 0.283655943 | 0.138293083 | 0.086550615 |
| 0.201658024 | 0.1913682   | 0.193734769 | 0.273816375 |



|             |             |             |             |
|-------------|-------------|-------------|-------------|
| 0.059517852 | 0.300280703 | 0.077477596 | 0.30958771  |
| 0.058278887 | 0.274070984 | 0.316309936 | 0.149735471 |
| 0.037754632 | 0.302211096 | 0.171348105 | 0.128686201 |
| 0.15509474  | 0.137162608 | 0.137053277 | 0.234158728 |
| 0.247422365 | 0.255509824 | 0.298782424 | 0.258379226 |
| 0.099185358 | 0.133489771 | 0.108198797 | 0.187983279 |
| 0.233677113 | 0.238017519 | 0.289942029 | 0.23568744  |
| 0.136128931 | 0.28137116  | 0.342039109 | 0.190842827 |
| 0.191782344 | 0.248394244 | 0.039555545 | 0.111113676 |
| 0.242633806 | 0.07326877  | 0.00212116  | 0.0362684   |
| 0.238023164 | 0.108788252 | 0.154930385 | 0.188513008 |
| 0.131876611 | 0.249650035 | 0.033357489 | 0.207174389 |
| 0.251481366 | 0.303494782 | 0.196163078 | 0.31259938  |
| 0.227107225 | 0.337139932 | 0.13421604  | 0.015367694 |
| 0.110364599 | 0.087765667 | 0.080827883 | 0.321621036 |
| 0.262368725 | 0.045859535 | 0.122910213 | 0.217848732 |
| 0.223731759 | 0.035157213 | 0.121488346 | 0.145274078 |
| 0.269598082 | 0.312041186 | 0.27751547  | 0.175446662 |
| 0.194524864 | 0.25993187  | 0.094898266 | 0.103659729 |
| 0.168716431 | 0.099640155 | 0.21049003  | 0.082516705 |
| 0.312390668 | 0.18178245  | 0.031974986 | 0.355374959 |
| 0.286163493 | 0.092941266 | 0.330512518 | 0.056790891 |
| 0.255193714 | 0.243691086 | 0.140731084 | 0.090877373 |
| 0.175935679 | 0.116585206 | 0.299427085 | 0.226452537 |
| 0.04568589  | 0.130416516 | 0.297522526 | 0.11067903  |
| 0.32641297  | 0.119218446 | 0.304189702 | 0.071261553 |
| 0.242989451 | 0.20002452  | 0.230087668 | 0.156816633 |
| 0.109954461 | 0.269235933 | 0.089348137 | 0.279162402 |
| 0.288186195 | 0.091560103 | 0.191879703 | 0.271455761 |
| 0.084446375 | 0.245554783 | 0.095629644 | 0.273994595 |
| 0.255183518 | 0.285583052 | 0.178888827 | 0.238829608 |
| 0.282079089 | 0.10261755  | 0.07924608  | 0.177443342 |
| 0.247842065 | 0.267427473 | 0.102109253 | 0.23156977  |
| 0.06800519  | 0.226360939 | 0.110328327 | 0.182730942 |
| 0.241296694 | 0.269172897 | 0.133615424 | 0.317986033 |
| 0.227879297 | 0.150133581 | 0.151661567 | 0.326003949 |
| 0.242532836 | 0.192882099 | 0.325701531 | 0.007293064 |
| 0.167557208 | 0.151474238 | 0.267921602 | 0.130532015 |
| 0.314301949 | 0.178025133 | 0.15274959  | 0.052509    |
| 0.205649675 | 0.053716519 | 0.147537039 | 0.167148095 |
| 0.077214742 | 0.299763791 | 0.276524955 | 0.249185383 |
| 0.211518229 | 0.086071493 | 0.062761592 | 0.254507315 |
| 0.052689198 | 0.054676015 | 0.076747673 | 0.130689629 |
| 0.063561199 | 0.078440508 | 0.08747678  | 0.080590696 |
| 0.19764992  | 0.223980243 |             |             |
| ARMC7       | 0.177659211 | 0.171660993 | 0.172327421 |
| 0.066351777 | 0.042758649 | 0.057685529 | 0.230617304 |
| 0.185124386 | 0.185065355 | 0.053033528 | 0.053377153 |
| 0.135455576 | 0.006897402 | 0.145203056 | 0.22350933  |
| 0.046103446 | 0.154058735 | 0.187917869 | 0.065624157 |
| 0.137658164 | 0.043363202 | 0.02756892  | 0.085097335 |
| 0.054052831 | 0.289036895 | 0.124376795 | 0.042686926 |
| 0.151483316 | 0.013116289 | 0.058816167 | 0.024310657 |
| 0.21354149  | 0.037398461 | 0.029365107 | 0.157620839 |

|             |             |             |             |
|-------------|-------------|-------------|-------------|
| 0.061499334 | 0.01659471  | 0.268604757 | 0.062570831 |
| 0.011369728 | 0.226650695 | 0.062438558 | 0.068355066 |
| 0.0645414   | 0.163574064 | 0.020758132 | 0.066399899 |
| 0.126049305 | 0.113121409 | 0.215083145 | 0.086735342 |
| 0.069196971 | 0.125500616 | 0.105406996 | 0.009499346 |
| 0.018106165 | 0.002139748 | 0.011296609 | 0.195379975 |
| 0.14887943  | 0.138684785 | 0.026279674 | 0.161129563 |
| 0.072383455 | 0.09211692  | 0.155844219 | 0.057639168 |
| 0.165550904 | 0.013429175 | 0.076096169 | 0.057634603 |
| 0.079934446 | 0.272107136 | 0.216158722 | 1           |
| 0.051265184 | 0.106903366 | 0.050881621 | 0.029635354 |
| 0.166082469 | 0.246361948 | 0.168863383 | 0.228917743 |
| 0.028608189 | 0.036447713 | 0.045099295 | 0.123475412 |
| 0.12727147  | 0.264397318 | 0.079520461 | 0.201238367 |
| 0.278661306 | 0.070131822 | 0.103017713 | 0.254298037 |
| 0.147843421 | 0.037879956 | 0.051417537 | 0.012369496 |
| 0.055594644 | 0.041452315 | 0.253877741 | 0.118191763 |
| 0.055223444 | 0.227644185 | 0.259409523 | 0.029585418 |
| 0.040070945 | 0.195644926 | 0.044619635 | 0.09541728  |
| 0.067615069 | 0.142807813 | 0.131730084 | 0.138379565 |
| 0.037255323 | 0.159539194 | 0.085492851 | 0.169560325 |
| 0.016928614 | 0.189317106 | 0.136832595 | 0.137745999 |
| 0.217395155 | 0.157993145 | 0.076066079 | 0.191896581 |
| 0.116136955 | 0.125433324 | 0.133794416 | 0.07992445  |
| 0.110431976 | 0.230891932 | 0.191498434 | 0.123104297 |
| 0.191030023 | 0.029171033 | 0.037144692 | 0.120148705 |
| 0.09342589  | 0.237038073 | 0.021957842 | 0.246110758 |
| 0.164451866 | 0.093714274 | 0.187230104 | 0.284048705 |
| 0.18257381  | 0.184934432 | 0.134963244 | 0.11761849  |
| 0.221451695 | 0.234128957 | 0.159089898 | 0.048384482 |
| 0.212905016 | 0.075044874 | 0.059020039 | 0.159335233 |
| 0.169597668 | 0.001832935 | 0.118412205 | 0.127146041 |
| 0.186373424 | 0.089002274 | 0.164100895 | 0.143951989 |
| 0.187738628 | 0.241759417 | 0.008008259 | 0.077155799 |
| 0.209410824 | 0.138566845 | 0.136887899 | 0.037899303 |
| 0.050175896 | 0.073942581 | 0.102079439 | 0.021279361 |
| 0.213746747 | 0.1277372   | 0.133175195 | 0.123203116 |
| 0.129356011 | 0.231567019 | 0.031249235 | 0.247645828 |
| 0.172995433 | 0.159099652 | 0.208936391 | 0.172606472 |
| 0.051424525 | 0.123806613 | 0.078723094 | 0.069482723 |
| 0.13016434  | 0.111933414 | 0.023085195 | 0.052437211 |
| 0.305813919 | 0.046649063 | 0.175684022 | 0.18179135  |
| 0.137633839 | 0.316646032 | 0.069080298 | 0.087489998 |
| 0.069155084 | 0.390036168 | 0.070447613 | 0.147956496 |
| 0.0669661   | 0.207308965 | 0.086821184 | 0.171975391 |
| 0.17302936  | 0.03388762  | 0.212969345 | 0.022611538 |
| 0.034188044 | 0.033971664 | 0.011490587 | 0.041627168 |
| 0.372599546 | 0.076528407 | 0.059347992 | 0.061706282 |
| 0.10763126  | 0.23064972  | 0.042199427 | 0.247445924 |
| 0.267151389 | 0.039696488 | 0.111175282 | 0.066021289 |
| 0.086208428 | 0.079361127 | 0.097540909 | 0.055193764 |
| 0.142914288 | 0.010432822 | 0.012987869 | 0.124165149 |
| 0.025424609 | 0.038272032 | 0.131503296 | 0.069274927 |
| 0.047556847 | 0.357307624 | 0.170592603 | 0.004994078 |

|             |             |             |             |
|-------------|-------------|-------------|-------------|
| 0.057201729 | 0.02592109  | 0.096058017 | 0.068529721 |
| 0.122044114 | 0.141109142 | 0.035981938 | 0.040803479 |
| 0.187377018 | 0.191177551 | 0.151062326 | 0.148321178 |
| 0.033152101 | 0.178050845 | 0.097949723 | 0.128483244 |
| 0.105393461 | 0.042452455 | 0.006182992 | 0.095361856 |
| 0.116887932 | 0.04864374  | 0.264357662 | 0.088892316 |
| 0.057627233 | 0.059679858 | 0.062767756 | 0.150232144 |
| 0.23552115  | 0.215731248 | 0.103152045 | 0.090477574 |
| 0.118053275 | 0.111504785 | 0.131932561 | 0.187773933 |
| 0.053257454 | 0.041650808 | 0.0349876   | 0.107421395 |
| 0.162550636 | 0.041457331 | 0.238350897 | 0.011759638 |
| 0.000601179 | 0.234989628 | 0.201504367 | 0.084379342 |
| 0.016710144 | 0.058398739 | 0.07555227  | 0.168098097 |
| 0.155069332 | 0.169552662 | 0.220931009 | 0.038626665 |
| 0.180964817 | 0.050626964 | 0.03458143  | 0.055175221 |
| 0.205899595 | 0.046495139 | 0.065688833 | 0.248593532 |
| 0.245395151 | 0.017514394 | 0.121944045 | 0.004016415 |
| 0.203270096 | 0.126224251 | 0.328598837 | 0.327838981 |
| 0.126943086 | 0.316561033 | 0.169817437 | 0.062775013 |
| 0.093175538 | 0.198750788 | 0.008158529 | 0.161255272 |
| 0.204324838 | 0.206526296 | 0.205750001 | 0.245418237 |
| 0.162234227 | 0.116264988 | 0.096229442 | 0.086085533 |
| 0.183175914 | 0.236593376 | 0.018092595 | 0.065817004 |
| 0.017154796 | 0.104948237 | 0.073550073 | 0.195872206 |
| 0.078392934 | 0.144046867 | 0.161254226 | 0.053873904 |
| 0.074245335 | 0.007655083 | 0.106167787 | 0.126930444 |
| 0.096517239 | 0.161437036 | 0.021847219 | 0.026895369 |
| 0.198779924 | 0.184323239 | 0.028419215 | 0.192074236 |
| 0.061970018 | 0.258837122 | 0.051827194 | 0.080949865 |
| 0.193231587 | 0.027836366 | 0.093583522 | 0.00397809  |
| 0.043715027 | 0.235009413 | 0.050768557 | 0.163379277 |
| 0.097123619 | 0.082856723 | 0.175363655 | 0.189970828 |
| 0.199777436 | 0.14613868  | 0.158883793 | 0.0181694   |
| 0.17275088  | 0.004139479 | 0.164211286 | 0.147078164 |
| 0.041086929 | 0.003882183 | 0.027336517 | 0.117479757 |
| 0.039829118 | 0.284682903 | 0.164286512 | 0.040863864 |
| 0.103884596 | 0.183633474 | 0.20882496  | 0.026331653 |
| 0.064674595 | 0.053624091 | 0.030913238 | 0.211753894 |
| 0.102109754 | 0.120028072 | 0.072234767 | 0.273826046 |
| 0.050273623 | 0.146437733 | 0.28599077  | 0.005737201 |
| 0.085208903 | 0.299045704 | 0.284462211 | 0.176898458 |
| 0.18750776  | 0.064076917 | 0.032252251 | 0.047070384 |
| 0.143575252 | 0.232675378 | 0.033263417 | 0.210411743 |
| 0.173174245 | 0.052484666 | 0.124945424 | 0.171944953 |
| 0.163488231 | 0.179880415 | 0.192814957 | 0.096492737 |
| 0.045054798 | 0.004318182 | 0.068633561 | 0.176396409 |
| 0.067942592 | 0.040547255 | 0.177643813 | 0.154382206 |
| 0.126351116 | 0.112816218 | 0.020565404 | 0.02122787  |
| 0.08787883  | 0.058770094 | 0.030911787 | 0.232215765 |
| 0.060526748 | 0.03852261  | 0.104781655 | 0.161911185 |
| 0.094764263 | 0.21833576  | 0.275139903 | 0.207655443 |
| 0.048120011 | 0.036540473 | 0.183199202 | 0.20533821  |
| 0.109436425 | 0.122300079 | 0.171060071 | 0.033999154 |
| 0.200956165 | 0.074001426 | 0.129837528 | 0.168733322 |

|             |             |             |             |
|-------------|-------------|-------------|-------------|
| 0.223226811 | 0.187278105 | 0.252156953 | 0.089334922 |
| 0.17902404  | 0.075855669 | 0.036224749 | 0.07035932  |
| 0.163570031 | 0.235656088 | 0.192344481 | 0.023457445 |
| 0.223259787 | 0.110476937 | 0.099674005 | 0.217958023 |
| 0.033224035 | 0.162360174 | 0.08653002  | 0.180765906 |
| 0.054906815 | 0.020584172 | 0.231031114 | 0.135940335 |
| 0.13943438  | 0.010555906 | 0.172283401 | 0.125089863 |
| 0.166812289 | 0.071741257 | 0.067465914 | 0.199756046 |
| 0.203969812 | 0.239309238 | 0.079451854 | 0.117449101 |
| 0.101744681 | 0.052159722 | 0.042388646 | 0.16430733  |
| 0.15251085  | 0.054521495 | 0.196849545 | 0.141004927 |
| 0.254195483 | 0.032909121 | 0.038525896 | 0.056079089 |
| 0.172275718 | 0.064834251 | 0.130494229 | 0.226348847 |
| 0.244184019 | 0.268409577 | 0.156277889 | 0.095895009 |
| 0.056842499 | 0.224236756 | 0.235214707 | 0.13798857  |
| 0.017090817 | 0.129600155 | 0.060010498 | 0.10584953  |
| 0.004219043 | 0.008359497 | 0.158760572 | 0.0830502   |
| 0.221998653 | 0.13230849  | 0.18350112  | 0.143714732 |
| 0.000503678 | 0.057302419 | 0.053739327 | 0.039776301 |
| 0.146548066 | 0.152720605 | 0.149421913 | 0.117661527 |
| 0.17147776  | 0.231431063 | 0.098147811 | 0.056394405 |
| 0.014364346 | 0.084999152 | 0.186208294 | 0.189277884 |
| 0.095471085 | 0.302678979 | 0.019349437 | 0.107656532 |
| 0.038137615 | 0.165491924 | 0.130770403 | 0.062755234 |
| 0.009003473 | 0.151761048 | 0.119240415 | 0.16710224  |
| 0.038008474 | 0.146477781 | 0.162346598 | 0.011861547 |
| 0.062023889 | 0.088925795 | 0.077795456 | 0.062726244 |
| 0.086689205 | 0.097102059 | 0.07821595  | 0.046575181 |
| 0.109968368 | 0.127951879 | 0.064828557 | 0.105496884 |
| 0.076172108 | 0.155752708 | 0.058156598 | 0.095164383 |
| 0.035189205 | 0.14593594  | 0.339810226 | 0.368271948 |
| 0.093464404 | 0.145351743 | 0.233649366 | 0.248638987 |
| 0.123308951 | 0.089014925 | 0.181344374 | 0.187743072 |
| 0.158559908 | 0.302134206 | 0.085495371 | 0.128531302 |
| 0.024852542 | 0.055921815 | 0.215880582 | 0.078780879 |
| 0.119485667 | 0.024354629 | 0.069831316 | 0.109858459 |
| 0.106604827 | 0.22974928  | 0.221260155 | 0.186195173 |
| 0.056521796 | 0.081959108 | 0.045231252 | 0.077108835 |
| 0.128216994 | 0.263749931 | 0.035626142 | 0.037079763 |
| 0.094822229 | 0.090247235 | 0.104588938 | 0.20636949  |
| 0.020855991 | 0.184477356 | 0.043635015 | 0.14244643  |
| 0.040231798 | 0.307292743 | 0.213204252 | 0.095525187 |
| 0.009521242 | 0.129457577 | 0.051514317 | 0.076890036 |
| 0.081008802 | 0.093068736 | 0.061609878 | 0.144420467 |
| 0.14908193  | 0.190045568 | 0.259146626 | 0.206179113 |
| 0.049404912 | 0.025636732 | 0.096791711 | 0.051663935 |
| 0.080228836 | 0.158783896 | 0.218960716 | 0.150568339 |
| 0.045674047 | 0.288775461 | 0.232178143 | 0.122192872 |
| 0.110973871 | 0.072173508 | 0.00937855  | 0.074165274 |
| 0.126419327 | 0.02518738  | 0.001906158 | 0.009845347 |
| 0.10029156  | 0.092646525 | 0.123576936 | 0.128460912 |
| 0.040913488 | 0.134649451 | 0.012319421 | 0.131422438 |
| 0.214362507 | 0.257471488 | 0.049706959 | 0.201482487 |
| 0.136590339 | 0.13467842  | 0.084628358 | 0.024221118 |

|             |             |             |             |
|-------------|-------------|-------------|-------------|
| 0.049098327 | 0.040620601 | 0.042371422 | 0.190733341 |
| 0.166434205 | 0.010517685 | 0.061146179 | 0.27674555  |
| 0.125265871 | 0.008737519 | 0.111088438 | 0.076563167 |
| 0.262151883 | 0.258012398 | 0.093371913 | 0.071160628 |
| 0.275808228 | 0.166069792 | 0.043093693 | 0.064543216 |
| 0.031321123 | 0.026563443 | 0.088043834 | 0.017263589 |
| 0.147770102 | 0.048889244 | 0.020418776 | 0.261243179 |
| 0.257984776 | 0.033047009 | 0.276449617 | 0.046847145 |
| 0.115076143 | 0.182902032 | 0.053970101 | 0.045016983 |
| 0.055087625 | 0.03403497  | 0.144255467 | 0.137215332 |
| 0.010547687 | 0.082871113 | 0.099208055 | 0.047541799 |
| 0.300891917 | 0.03671061  | 0.241307068 | 0.023346284 |
| 0.183196245 | 0.165868577 | 0.252675195 | 0.063327424 |
| 0.094275342 | 0.244923969 | 0.053950258 | 0.192288562 |
| 0.08947058  | 0.018647518 | 0.088563259 | 0.082246826 |
| 0.028646675 | 0.187881378 | 0.061162873 | 0.205492787 |
| 0.074465084 | 0.132263135 | 0.096635371 | 0.169704636 |
| 0.137793562 | 0.028997367 | 0.017997065 | 0.04832147  |
| 0.19264003  | 0.082448453 | 0.038706038 | 0.132333563 |
| 0.014249084 | 0.113282638 | 0.108852491 | 0.053332044 |
| 0.078935401 | 0.161079716 | 0.049562875 | 0.202603306 |
| 0.086873454 | 0.051956509 | 0.048007681 | 0.193635058 |
| 0.051656627 | 0.04181939  | 0.207961192 | 0.000518731 |
| 0.091192726 | 0.055387191 | 0.124047894 | 0.04775379  |
| 0.231906875 | 0.106194351 | 0.098544606 | 0.024992671 |
| 0.113007709 | 0.01530711  | 0.079414068 | 0.033682457 |
| 0.028686663 | 0.20482187  | 0.194454502 | 0.142964067 |
| 0.141374097 | 0.050707401 | 0.021816719 | 0.186048691 |
| 0.0103715   | 0.024759577 | 0.03534117  | 0.090324633 |
| 0.015936462 | 0.044235008 | 0.042772278 | 0.025574323 |
| 0.121609306 | 0.132416188 |             |             |
| ARMCX5      | 0.022958991 | 0.388666992 | 0.020054692 |
| 0.049773819 | 0.239767733 | 0.154566714 | 0.020453572 |
| 0.040448581 | 0.308124173 | 0.131401926 | 0.212919733 |
| 0.005129793 | 0.073951389 | 0.407197597 | 0.02051587  |
| 0.308426111 | 0.012380648 | 0.048025403 | 0.031822557 |
| 0.100897364 | 0.210874988 | 0.150766108 | 0.187834732 |
| 0.205851908 | 0.140081207 | 0.22618215  | 0.281987065 |
| 0.467092781 | 0.131157384 | 0.343220757 | 0.090273937 |
| 0.361668796 | 0.269079306 | 0.237775739 | 0.004871303 |
| 0.243618092 | 0.017142098 | 0.377134411 | 0.118902065 |
| 0.104182225 | 0.287375048 | 0.160332366 | 0.106247597 |
| 0.194916187 | 0.010352403 | 0.095912873 | 0.357966459 |
| 0.231543735 | 0.120091359 | 0.029220834 | 0.348377321 |
| 0.144730362 | 0.230495094 | 0.313995977 | 0.000335451 |
| 0.181172197 | 0.084776674 | 0.145609205 | 0.450177279 |
| 0.130878801 | 0.05681989  | 0.141276499 | 0.133080554 |
| 0.309427058 | 0.329900373 | 0.198335633 | 0.149921277 |
| 0.446777092 | 0.113831616 | 0.387623653 | 0.06886099  |
| 0.188841848 | 0.011109436 | 0.109762807 | 0.051265184 |
| 1           | 0.115257974 | 0.223067102 | 0.185966036 |
| 0.375350591 | 0.458709688 | 0.165806104 | 0.436401799 |
| 0.089323016 | 0.278049036 | 0.145121015 | 0.264430032 |
| 0.324497717 | 0.034682823 | 0.328157255 | 0.468656396 |

|             |             |             |             |
|-------------|-------------|-------------|-------------|
| 0.019152541 | 0.251558298 | 0.329568136 | 0.075024612 |
| 0.384086082 | 0.16443619  | 0.221223671 | 0.108794491 |
| 0.336866447 | 0.254349902 | 0.432137565 | 0.203864117 |
| 0.205784311 | 0.038133847 | 0.412084249 | 0.275045311 |
| 0.128808291 | 0.038635761 | 0.115705528 | 0.455339672 |
| 0.310526867 | 0.452341159 | 0.389717313 | 0.322410123 |
| 0.269411354 | 0.456315832 | 0.306550542 | 0.377876035 |
| 0.080790055 | 0.47726745  | 0.096047662 | 0.01463503  |
| 0.022768581 | 0.033788314 | 0.136695813 | 0.262229289 |
| 0.453299526 | 0.2329274   | 0.072758868 | 0.144698699 |
| 0.464630991 | 0.408072482 | 0.478814797 | 0.360443843 |
| 0.011513256 | 0.161729711 | 0.262161284 | 0.100576287 |
| 0.300553399 | 0.067675275 | 0.182380826 | 0.439586605 |
| 0.316381908 | 0.42163235  | 0.055675757 | 0.429310505 |
| 0.09503218  | 0.463577863 | 0.40700062  | 0.083812157 |
| 0.457289005 | 0.424237574 | 0.478076177 | 0.363303821 |
| 0.410565329 | 0.167373718 | 0.042363995 | 0.346017294 |
| 0.444623031 | 0.011207705 | 0.464212986 | 0.484664166 |
| 0.444982256 | 0.444280606 | 0.498742711 | 0.481128836 |
| 0.447950511 | 0.038234486 | 0.025803589 | 0.230719052 |
| 0.445619209 | 0.337739011 | 0.062166942 | 0.271893857 |
| 0.299849777 | 0.181107983 | 0.407081236 | 0.112880765 |
| 0.463049567 | 0.421632929 | 0.463331153 | 0.327451849 |
| 0.193545299 | 0.251483299 | 0.291337858 | 0.392526593 |
| 0.014869082 | 0.037789661 | 0.026769793 | 0.265652848 |
| 0.122958106 | 0.105827856 | 0.144550553 | 0.278145551 |
| 0.125864893 | 0.153451659 | 0.1808232   | 0.335433437 |
| 0.035428343 | 0.278511024 | 0.083154882 | 0.084378041 |
| 0.014405351 | 0.104069905 | 0.060995143 | 0.059024252 |
| 0.15056106  | 0.177613058 | 0.364626186 | 0.468876439 |
| 0.201267034 | 0.122972634 | 0.328860801 | 0.431835151 |
| 0.384555774 | 0.268112533 | 0.177643282 | 0.004691521 |
| 0.107580915 | 0.159418033 | 0.126431491 | 0.297731944 |
| 0.135727793 | 0.09331004  | 0.279677185 | 0.364253434 |
| 0.131753764 | 0.065983609 | 0.161331528 | 0.3553588   |
| 0.103829045 | 0.129149455 | 0.408232108 | 0.262855318 |
| 0.000990623 | 0.175735228 | 0.408921089 | 0.088094049 |
| 0.234977924 | 0.091170012 | 0.12774488  | 0.44278723  |
| 0.142358767 | 0.133879606 | 0.478061605 | 0.375311837 |
| 0.128902369 | 0.170463179 | 0.499295702 | 0.034528341 |
| 0.259599179 | 0.024030877 | 0.224582159 | 0.177294861 |
| 0.156501405 | 0.2387773   | 0.253833633 | 0.126103998 |
| 0.0709796   | 0.466181933 | 0.339372789 | 0.475245746 |
| 0.150219816 | 0.496238439 | 0.440323389 | 0.398994783 |
| 0.271391657 | 0.224726154 | 0.109295382 | 0.384026933 |
| 0.440726702 | 0.124699156 | 0.045660253 | 0.422265089 |
| 0.191950689 | 0.348038443 | 0.065268848 | 0.459618874 |
| 0.429108612 | 0.405448978 | 0.056021919 | 0.352062595 |
| 0.316385437 | 0.120232849 | 0.388945503 | 0.496516938 |
| 0.135771567 | 0.234927166 | 0.151526369 | 0.389301835 |
| 0.106890905 | 0.126929177 | 0.271328745 | 0.135977337 |
| 0.008860673 | 0.035570409 | 0.029220659 | 0.081246771 |
| 0.110893435 | 0.320645012 | 0.326260997 | 0.468674657 |
| 0.052728702 | 0.364169947 | 0.189696243 | 0.115724308 |

|             |             |             |             |
|-------------|-------------|-------------|-------------|
| 0.358061164 | 0.211518596 | 0.287036953 | 0.299978916 |
| 0.185923159 | 0.00785638  | 0.043305873 | 0.452584151 |
| 0.020150675 | 0.129403911 | 0.169277514 | 0.001444998 |
| 0.013781015 | 0.364984038 | 0.067681059 | 0.147369478 |
| 0.470638448 | 0.14785999  | 0.12860384  | 0.126620645 |
| 0.276234847 | 0.046268041 | 0.001985117 | 0.468574075 |
| 0.459968214 | 0.436387051 | 0.451548536 | 0.412182622 |
| 0.433264748 | 0.373921658 | 0.397879636 | 0.187088801 |
| 0.033460809 | 0.029741566 | 0.123386787 | 0.155067449 |
| 0.0020108   | 0.335105123 | 0.207643576 | 0.091066586 |
| 0.391140235 | 0.231458324 | 0.010939411 | 0.295363209 |
| 0.005838085 | 0.118716288 | 0.111862373 | 0.105225644 |
| 0.335432342 | 0.003972314 | 0.088948154 | 0.134046042 |
| 0.354548672 | 0.275001877 | 0.173693765 | 0.479684452 |
| 0.196455954 | 0.086217202 | 0.176838838 | 0.350490899 |
| 0.023212577 | 0.047067958 | 0.154723643 | 0.024985136 |
| 0.089274223 | 0.412747914 | 0.154033538 | 0.021901306 |
| 0.171240183 | 0.001111783 | 0.297229946 | 0.478023213 |
| 0.403828965 | 0.492851964 | 0.451570536 | 0.157463477 |
| 0.453472068 | 0.103590836 | 0.489506442 | 0.352840488 |
| 0.16256823  | 0.000312809 | 0.002777194 | 0.468034947 |
| 0.265401974 | 0.036523866 | 0.09464465  | 0.117738456 |
| 0.041661968 | 0.057235118 | 0.022497654 | 0.107886144 |
| 0.29977546  | 0.159685871 | 0.104974767 | 0.401425271 |
| 0.125046611 | 0.153841561 | 0.171541039 | 0.053669133 |
| 0.294414422 | 0.018445509 | 0.055308266 | 0.004878063 |
| 0.339241744 | 0.075464357 | 0.389736895 | 0.46610648  |
| 0.440490982 | 0.336485439 | 0.132310336 | 0.129719073 |
| 0.438534921 | 0.061009672 | 0.145644907 | 0.062604767 |
| 0.42560826  | 0.297728443 | 0.248631658 | 0.236869803 |
| 0.459438251 | 0.404062289 | 0.01051841  | 0.366212888 |
| 0.004629111 | 0.002388678 | 0.178473365 | 0.19761391  |
| 0.063335324 | 0.230443591 | 0.196528824 | 0.108128363 |
| 0.111439505 | 0.008079641 | 0.165491826 | 0.145563344 |
| 0.211210115 | 0.213167803 | 0.199229916 | 0.198804609 |
| 0.141985216 | 0.076827054 | 0.083624113 | 0.05872485  |
| 0.12509398  | 0.252197804 | 0.141346512 | 0.007070218 |
| 0.25477326  | 0.253779449 | 0.021884309 | 0.099149895 |
| 0.397372521 | 0.458606802 | 0.018102558 | 0.00441126  |
| 0.196963205 | 0.157358489 | 0.473206907 | 0.448474264 |
| 0.458288067 | 0.479099014 | 0.326144753 | 0.059226127 |
| 0.021841505 | 0.239748762 | 0.223937895 | 0.055837748 |
| 0.465199983 | 0.034849196 | 0.43183     | 0.238014439 |
| 0.069649571 | 0.082132459 | 0.011145942 | 0.042296815 |
| 0.301987424 | 0.111391304 | 0.102833783 | 0.084827184 |
| 0.151888369 | 0.129640901 | 0.015982536 | 0.115728452 |
| 0.268236242 | 0.118844447 | 0.091675995 | 0.125144511 |
| 0.296973342 | 0.106492445 | 0.380815211 | 0.400477711 |
| 0.078010558 | 0.058616949 | 0.083054509 | 0.344148226 |
| 0.410945425 | 0.277889421 | 0.008533896 | 0.402240368 |
| 0.459419157 | 0.337315631 | 0.438510329 | 0.361937366 |
| 0.050511458 | 0.232054716 | 0.197906325 | 0.23993635  |
| 0.115768518 | 0.172182483 | 0.14153133  | 0.031125841 |
| 0.260149485 | 0.424119995 | 0.364870858 | 0.076781788 |

|             |             |             |             |
|-------------|-------------|-------------|-------------|
| 0.286404204 | 0.073061648 | 0.029527712 | 0.425742948 |
| 0.117247043 | 0.026736746 | 0.178930152 | 0.430918889 |
| 0.001390576 | 0.108875475 | 0.484838991 | 0.087063596 |
| 0.474630754 | 0.459983739 | 0.381315214 | 0.098837724 |
| 0.001756216 | 0.367167943 | 0.258114079 | 0.172857909 |
| 0.369836022 | 0.268608009 | 0.07406777  | 0.02871619  |
| 0.240364536 | 0.04654307  | 0.055537909 | 0.123288397 |
| 0.138248248 | 0.274352753 | 0.145507115 | 0.137902268 |
| 0.103672825 | 0.061327107 | 0.137768511 | 0.104190181 |
| 0.116401947 | 0.176220852 | 0.298963556 | 0.115730824 |
| 0.095394719 | 0.414882136 | 0.342764783 | 0.007591045 |
| 0.264310931 | 0.404575985 | 0.408539751 | 0.000860414 |
| 0.361073335 | 0.002045747 | 0.107218674 | 0.1075978   |
| 0.095617317 | 0.106088304 | 0.198036438 | 0.131980763 |
| 0.24382253  | 0.103836903 | 0.110653247 | 0.157806026 |
| 0.067877339 | 0.107883295 | 0.282406705 | 0.182802349 |
| 0.111614414 | 0.045663131 | 0.069521131 | 0.072982529 |
| 0.017144625 | 0.43227856  | 0.185752312 | 0.044097925 |
| 0.155872235 | 0.160942674 | 0.300378449 | 0.439042533 |
| 0.384298622 | 0.0801992   | 0.177090813 | 0.39187679  |
| 0.107158981 | 0.097557291 | 0.017714777 | 0.232341633 |
| 0.120140911 | 0.104445255 | 0.227738131 | 0.184874852 |
| 0.341921882 | 0.342907602 | 0.176986065 | 0.404560846 |
| 0.171519986 | 0.218635388 | 0.11762951  | 0.034151973 |
| 0.073190615 | 0.089093844 | 0.19882678  | 0.00048317  |
| 0.253342953 | 0.07740332  | 0.440814535 | 0.425638218 |
| 0.156183813 | 0.340365954 | 0.115105397 | 0.027808742 |
| 0.106179954 | 0.131083423 | 0.086922346 | 0.388626867 |
| 0.133228312 | 0.06568852  | 0.210079546 | 0.103931664 |
| 0.389878777 | 0.382878394 | 0.138902132 | 0.11046424  |
| 0.157571214 | 0.124785711 | 0.423514388 | 0.046675325 |
| 0.302248612 | 0.10000769  | 0.246667339 | 0.164256    |
| 0.114688613 | 0.489777732 | 0.027416511 | 0.49195134  |
| 0.184310673 | 0.092425177 | 0.436499417 | 0.16893795  |
| 0.106195224 | 0.053609996 | 0.131668152 | 0.154462091 |
| 0.100776257 | 0.177431117 | 0.008712968 | 0.030668273 |
| 0.26810223  | 0.147604295 | 0.357676693 | 0.323701747 |
| 0.142056502 | 0.31393733  | 0.126081428 | 0.134763733 |
| 0.414862228 | 0.42660584  | 0.087312319 | 0.197433705 |
| 0.274933764 | 0.034748791 | 0.254581271 | 0.009003205 |
| 0.317049809 | 0.323981491 | 0.150789537 | 0.017912332 |
| 0.005529407 | 0.134216817 | 0.286566072 | 0.039745273 |
| 0.475636171 | 0.127248286 | 0.273249937 | 0.357417365 |
| 0.127079621 | 0.419639247 | 0.053607012 | 0.333035314 |
| 0.018336836 | 0.185052705 | 0.26729883  | 0.24742665  |
| 0.096725663 | 0.185483456 | 0.318224615 | 0.140197448 |
| 0.010075116 | 0.113359732 | 0.000509635 | 0.335359746 |
| 0.401224361 | 0.23095964  | 0.157397069 | 0.133158932 |
| 0.218584164 | 0.356658998 | 0.115211588 | 0.26771328  |
| 0.004075103 | 0.278582429 | 0.11996128  | 0.349859638 |
| 0.106133667 | 0.249724169 | 0.020423759 | 0.233240764 |
| 0.375024886 | 0.111529568 | 0.209035477 | 0.131683122 |
| 0.434353232 | 0.349368923 | 0.110831907 | 0.108191759 |
| 0.312398749 | 0.035711278 | 0.158605188 | 0.488384819 |



|             |             |             |             |
|-------------|-------------|-------------|-------------|
| 0.084994119 | 0.13200205  | 0.429930501 | 0.077598601 |
| 0.206675199 | 0.32878977  | 0.31404945  | 0.480895025 |
| 0.033189252 | 0.164588931 | 0.39763896  | 0.411948668 |
| 0.248840525 | 0.110338813 | 0.131435863 | 0.118687105 |
| 0.390076066 | 0.03317493  | 0.131100205 | 0.262146198 |
| 0.122914323 | 0.237449092 | 0.237869735 | 0.104708031 |
| 0.014633294 | 0.065293583 | 0.133988596 | 0.086996124 |
| 0.191466926 | 0.243232658 | 0.125346325 | 0.332594288 |
| 0.051959564 | 0.008817266 | 0.398948671 | 0.01349197  |
| 0.182220176 | 0.302617388 | 0.148353468 | 0.212991579 |
| 0.130335209 | 0.238706941 | 0.175739864 | 0.000134572 |
| 0.39481667  | 0.036486993 | 0.159335133 | 0.102680232 |
| 0.133931405 | 0.015850739 | 0.402845947 | 0.489561348 |
| 0.222694857 | 0.159125491 | 0.145748412 | 0.419364115 |
| 0.106635817 | 0.166229301 | 0.167979185 | 0.300129615 |
| 0.137268858 | 0.191038536 | 0.211641495 | 0.189548473 |
| 0.312659498 | 0.115917795 |             |             |
| ARPC3       | 0.15781663  | 0.213522716 | 0.093052106 |
| 0.196078111 | 0.205405615 | 0.132521197 | 0.165816671 |
| 0.20646218  | 0.182060149 | 0.047580376 | 0.203026655 |
| 0.125070502 | 0.060065016 | 0.285350719 | 0.182982054 |
| 0.171576589 | 0.194566681 | 0.211985523 | 0.054362688 |
| 0.132696143 | 0.20023019  | 0.130311011 | 0.116276787 |
| 0.177762518 | 0.256215719 | 0.146512224 | 0.106107856 |
| 0.260962539 | 0.054312608 | 0.188069036 | 0.034186883 |
| 0.333667383 | 0.198477476 | 0.092690338 | 0.09006782  |
| 0.149487827 | 0.018000196 | 0.31752835  | 0.211381161 |
| 0.106895882 | 0.332080943 | 0.060406832 | 0.252735071 |
| 0.075058533 | 0.115542089 | 0.029410863 | 0.158599086 |
| 0.140507155 | 0.18285465  | 0.093395299 | 0.185711592 |
| 0.103188311 | 0.244743567 | 0.128450386 | 0.006447745 |
| 0.097764332 | 0.023297836 | 0.059805695 | 0.292099003 |
| 0.317499404 | 0.283480474 | 0.049105449 | 0.144894639 |
| 0.137060183 | 0.20068843  | 0.293698675 | 0.072743989 |
| 0.297762942 | 0.086274371 | 0.169641136 | 0.156468826 |
| 0.126521738 | 0.081642229 | 0.29578973  | 0.106903366 |
| 0.115257974 | 1           | 0.199801275 | 0.119083448 |
| 0.19415325  | 0.34936191  | 0.255002736 | 0.274330733 |
| 0.072887467 | 0.151933453 | 0.17432385  | 0.316233941 |
| 0.207340036 | 0.139535058 | 0.25012897  | 0.33276399  |
| 0.103645039 | 0.090233466 | 0.181470805 | 0.16259506  |
| 0.236271483 | 0.088880205 | 0.078582742 | 0.121526173 |
| 0.20817767  | 0.159056997 | 0.294595935 | 0.293619115 |
| 0.171020052 | 0.120054325 | 0.28094064  | 0.150278005 |
| 0.211062386 | 0.13658941  | 0.168475481 | 0.224702603 |
| 0.181389666 | 0.274842326 | 0.193103696 | 0.248093702 |
| 0.13662025  | 0.294964164 | 0.224286591 | 0.265826447 |
| 0.019530213 | 0.292669477 | 0.215266953 | 0.230485452 |
| 0.101363259 | 0.271395611 | 0.127243049 | 0.347972583 |
| 0.261906317 | 0.244358234 | 0.202946692 | 0.241581862 |
| 0.279111105 | 0.25951283  | 0.277958369 | 0.245163248 |
| 0.154033876 | 0.086081551 | 0.134171023 | 0.180662989 |
| 0.219389444 | 0.202755878 | 0.134624291 | 0.31367504  |
| 0.326992376 | 0.251995814 | 0.146884555 | 0.343821372 |

|             |             |             |             |
|-------------|-------------|-------------|-------------|
| 0.167442897 | 0.357115341 | 0.211075492 | 0.249610237 |
| 0.324952845 | 0.303291665 | 0.338188011 | 0.205934428 |
| 0.320054488 | 0.155351512 | 0.034650816 | 0.245020524 |
| 0.368351381 | 0.028541128 | 0.238731227 | 0.262820462 |
| 0.269541204 | 0.228699917 | 0.327368994 | 0.290099145 |
| 0.269700288 | 0.158843222 | 0.006405654 | 0.272572349 |
| 0.292559055 | 0.302696455 | 0.252390151 | 0.10650566  |
| 0.183762477 | 0.133173307 | 0.213314684 | 0.097097174 |
| 0.382636993 | 0.262782092 | 0.247406424 | 0.211177834 |
| 0.103131378 | 0.329437691 | 0.104950682 | 0.278840833 |
| 0.194309626 | 0.158423964 | 0.112297486 | 0.2725252   |
| 0.070804503 | 0.295087243 | 0.12131519  | 0.158185546 |
| 0.314967287 | 0.1221217   | 0.085452374 | 0.217149296 |
| 0.116906705 | 0.126116009 | 0.1982522   | 0.146315788 |
| 0.206281449 | 0.258601853 | 0.205366033 | 0.282574394 |
| 0.24449749  | 0.246469998 | 0.171479129 | 0.283889131 |
| 0.124588555 | 0.215738339 | 0.191535429 | 0.350959771 |
| 0.394116754 | 0.143709592 | 0.294950835 | 0.097649475 |
| 0.120562335 | 0.0541251   | 0.068051501 | 0.118274324 |
| 0.246721711 | 0.172744884 | 0.165561709 | 0.255298893 |
| 0.145326151 | 0.130164137 | 0.120160001 | 0.358047999 |
| 0.174753945 | 0.201625986 | 0.288903603 | 0.109252515 |
| 0.04424436  | 0.169836936 | 0.245697135 | 0.182267965 |
| 0.196000885 | 0.103549685 | 0.098360965 | 0.26551027  |
| 0.086679379 | 0.148588354 | 0.270708243 | 0.2517838   |
| 0.113769284 | 0.207037895 | 0.320856679 | 0.01536368  |
| 0.12544223  | 0.172453498 | 0.328995425 | 0.059963859 |
| 0.244598328 | 0.311931862 | 0.17386933  | 0.192045501 |
| 0.152917208 | 0.300343084 | 0.280891451 | 0.29398244  |
| 0.092152366 | 0.323310266 | 0.251748379 | 0.305016371 |
| 0.237501139 | 0.082903473 | 0.057651491 | 0.237512229 |
| 0.256726272 | 0.072059458 | 0.128056914 | 0.187591251 |
| 0.077312006 | 0.192207347 | 0.190687283 | 0.317617004 |
| 0.367615047 | 0.237609727 | 0.29049745  | 0.287897432 |
| 0.307486162 | 0.222520284 | 0.266466625 | 0.342336636 |
| 0.053486115 | 0.125388027 | 0.136578381 | 0.324815515 |
| 0.249536229 | 0.166355899 | 0.302981816 | 0.067899854 |
| 0.004524639 | 0.133010474 | 0.132842885 | 0.296996764 |
| 0.145026765 | 0.118199079 | 0.205693437 | 0.297449005 |
| 0.245621075 | 0.314689639 | 0.237755389 | 0.168902531 |
| 0.257100711 | 0.125468682 | 0.140017945 | 0.193021537 |
| 0.291921149 | 0.125713696 | 0.262835087 | 0.346808835 |
| 0.079085862 | 0.131453041 | 0.14555704  | 0.023687253 |
| 0.128397808 | 0.159368259 | 0.170769703 | 0.295488459 |
| 0.31312576  | 0.260484982 | 0.20456958  | 0.057076177 |
| 0.301092489 | 0.203017114 | 0.060821067 | 0.265693428 |
| 0.275280356 | 0.267128762 | 0.266321966 | 0.269560758 |
| 0.246881086 | 0.207611857 | 0.244150163 | 0.132110152 |
| 0.206138312 | 0.118373688 | 0.113420382 | 0.194940623 |
| 0.010506935 | 0.310903513 | 0.178220031 | 0.277294396 |
| 0.212304679 | 0.235146479 | 0.164752222 | 0.176225678 |
| 0.087709233 | 0.063839063 | 0.131383842 | 0.224160331 |
| 0.283531978 | 0.092470047 | 0.076793255 | 0.094957566 |
| 0.265431267 | 0.285046485 | 0.092799323 | 0.308500865 |

|             |             |             |             |
|-------------|-------------|-------------|-------------|
| 0.224947033 | 0.119544404 | 0.191496578 | 0.271768411 |
| 0.196843779 | 0.024380709 | 0.111852629 | 0.007560758 |
| 0.0862471   | 0.291889827 | 0.110096257 | 0.130619685 |
| 0.25106567  | 0.0597775   | 0.272408    | 0.323974896 |
| 0.242446431 | 0.300295007 | 0.306042139 | 0.130078842 |
| 0.297891163 | 0.024037724 | 0.292981695 | 0.221292936 |
| 0.066368518 | 0.00743031  | 0.062191549 | 0.263922388 |
| 0.147210386 | 0.099934872 | 0.26165113  | 0.10553862  |
| 0.277150106 | 0.125737325 | 0.198543475 | 0.185036761 |
| 0.171757906 | 0.239659249 | 0.169553953 | 0.258385516 |
| 0.225496402 | 0.2699349   | 0.090560308 | 0.16223851  |
| 0.172106982 | 0.206470095 | 0.154676225 | 0.048621509 |
| 0.260060739 | 0.158621339 | 0.289022824 | 0.283769383 |
| 0.349119634 | 0.233070181 | 0.051595271 | 0.119504412 |
| 0.260843633 | 0.108508004 | 0.085811047 | 0.122857087 |
| 0.251917961 | 0.189499053 | 0.335910171 | 0.296511289 |
| 0.332903359 | 0.307458096 | 0.158934165 | 0.247560748 |
| 0.092011307 | 0.0197577   | 0.102451963 | 0.271871558 |
| 0.040951442 | 0.120026266 | 0.315159301 | 0.126512172 |
| 0.188836307 | 0.122263302 | 0.103959837 | 0.114744238 |
| 0.256476447 | 0.160153329 | 0.167378058 | 0.236753789 |
| 0.191685852 | 0.153586638 | 0.275892793 | 0.242407756 |
| 0.099382837 | 0.243609187 | 0.25114066  | 0.119892691 |
| 0.100310968 | 0.127410395 | 0.181638257 | 0.253494921 |
| 0.285399263 | 0.276833396 | 0.167685042 | 0.123698503 |
| 0.298615748 | 0.156927699 | 0.302108615 | 0.25804321  |
| 0.316921923 | 0.351248337 | 0.348528555 | 0.248748655 |
| 0.196422531 | 0.226096658 | 0.167045005 | 0.270383963 |
| 0.296885284 | 0.097647648 | 0.281056931 | 0.112194628 |
| 0.22287681  | 0.222136414 | 0.223189694 | 0.201754864 |
| 0.145196115 | 0.291890602 | 0.288125414 | 0.146765413 |
| 0.183541285 | 0.121960429 | 0.162166716 | 0.262838118 |
| 0.25809838  | 0.081674348 | 0.248546465 | 0.14994767  |
| 0.233841891 | 0.03786459  | 0.19500465  | 0.36866302  |
| 0.218738353 | 0.147468755 | 0.107189876 | 0.230226388 |
| 0.210323384 | 0.087841339 | 0.119314003 | 0.208140587 |
| 0.310701406 | 0.166078413 | 0.288711319 | 0.336421839 |
| 0.176605216 | 0.146229851 | 0.09630222  | 0.169488478 |
| 0.243635526 | 0.134251719 | 0.21839254  | 0.165934417 |
| 0.330175629 | 0.338633869 | 0.232346254 | 0.291044198 |
| 0.129386265 | 0.117287689 | 0.0834531   | 0.244184255 |
| 0.126963103 | 0.17885072  | 0.066191527 | 0.221370485 |
| 0.025579958 | 0.082040613 | 0.297406821 | 0.261115404 |
| 0.338253334 | 0.290177271 | 0.33968376  | 0.167445305 |
| 0.002095616 | 0.170690108 | 0.21825115  | 0.131195785 |
| 0.22485948  | 0.271915396 | 0.134889655 | 0.261007646 |
| 0.370173779 | 0.124055822 | 0.238847285 | 0.111480207 |
| 0.057564028 | 0.15693188  | 0.33213747  | 0.182893897 |
| 0.258427213 | 0.107706746 | 0.123236827 | 0.236941827 |
| 0.085863637 | 0.355035243 | 0.330255722 | 0.051693117 |
| 0.068081802 | 0.280752356 | 0.21046428  | 0.130289179 |
| 0.132410321 | 0.260450673 | 0.303848384 | 0.013122259 |
| 0.21185092  | 0.103673564 | 0.27252521  | 0.270169243 |
| 0.284729522 | 0.236365413 | 0.284532021 | 0.190458477 |

|             |             |             |             |
|-------------|-------------|-------------|-------------|
| 0.175238052 | 0.232430873 | 0.23379643  | 0.31933904  |
| 0.297270695 | 0.214080874 | 0.178470127 | 0.127389683 |
| 0.205456296 | 0.231394399 | 0.179059671 | 0.168206802 |
| 0.238557688 | 0.249803366 | 0.332771617 | 0.13324001  |
| 0.306182862 | 0.122906673 | 0.384357697 | 0.249663457 |
| 0.354675832 | 0.137307514 | 0.161344621 | 0.227504148 |
| 0.036785933 | 0.105166704 | 0.115768318 | 0.141362463 |
| 0.249303961 | 0.182727891 | 0.104936415 | 0.136489042 |
| 0.157542722 | 0.356882841 | 0.325132143 | 0.323492686 |
| 0.166097267 | 0.103393933 | 0.05073315  | 0.281932751 |
| 0.205724802 | 0.206826067 | 0.186922206 | 0.039011403 |
| 0.253265469 | 0.139306405 | 0.247829624 | 0.280100786 |
| 0.089151083 | 0.357060147 | 0.062270018 | 0.179665065 |
| 0.043844136 | 0.172923937 | 0.258682824 | 0.19028128  |
| 0.068054111 | 0.266260802 | 0.211969554 | 0.101042495 |
| 0.214737134 | 0.173663682 | 0.167029414 | 0.184957877 |
| 0.215069933 | 0.192676765 | 0.294547157 | 0.137351436 |
| 0.11666963  | 0.199110568 | 0.099527058 | 0.198453454 |
| 0.242767434 | 0.281344687 | 0.147742827 | 0.282472045 |
| 0.143918517 | 0.208027074 | 0.378787738 | 0.167902634 |
| 0.16309485  | 0.30795818  | 0.075542402 | 0.091983522 |
| 0.209795777 | 0.102894953 | 0.001852266 | 0.048777322 |
| 0.32861978  | 0.092661702 | 0.163397937 | 0.237469259 |
| 0.179218977 | 0.328309968 | 0.069742066 | 0.146789305 |
| 0.245977746 | 0.29677444  | 0.180070067 | 0.329579315 |
| 0.266318659 | 0.264698884 | 0.149456585 | 0.012841392 |
| 0.143043705 | 0.118124577 | 0.075412396 | 0.205623444 |
| 0.131264834 | 0.075552742 | 0.138665882 | 0.101349674 |
| 0.29209889  | 0.062620224 | 0.121148457 | 0.203390607 |
| 0.231387558 | 0.302295031 | 0.298713658 | 0.25801222  |
| 0.072842535 | 0.269768614 | 0.111965909 | 0.096874146 |
| 0.209703009 | 0.13616785  | 0.289493222 | 0.137679289 |
| 0.187158956 | 0.217299452 | 0.012008069 | 0.345130272 |
| 0.26232802  | 0.110224057 | 0.293967988 | 0.048908769 |
| 0.346241524 | 0.282732178 | 0.160634181 | 0.098276002 |
| 0.135803181 | 0.171703227 | 0.287656124 | 0.26374331  |
| 0.054958568 | 0.123482753 | 0.251021894 | 0.130228616 |
| 0.292837821 | 0.126115162 | 0.308817729 | 0.071038269 |
| 0.260490908 | 0.220743518 | 0.158895533 | 0.20691233  |
| 0.124909522 | 0.150040508 | 0.079516567 | 0.31896347  |
| 0.296594191 | 0.147887136 | 0.272474603 | 0.237811984 |
| 0.117495954 | 0.265077703 | 0.11106872  | 0.304297411 |
| 0.2686413   | 0.32077206  | 0.250941775 | 0.261481496 |
| 0.372711355 | 0.157797045 | 0.124321583 | 0.206372494 |
| 0.248358219 | 0.224456967 | 0.129219481 | 0.25987356  |
| 0.106089352 | 0.300335133 | 0.097901045 | 0.23364058  |
| 0.204276928 | 0.22751956  | 0.153214601 | 0.238132242 |
| 0.245565568 | 0.164505468 | 0.186038165 | 0.369583057 |
| 0.28624671  | 0.153930345 | 0.369227424 | 0.015872566 |
| 0.150850876 | 0.229771388 | 0.272668593 | 0.150867374 |
| 0.266250873 | 0.17806519  | 0.10724995  | 0.019318122 |
| 0.273947984 | 0.084350553 | 0.164299337 | 0.213916909 |
| 0.099578727 | 0.145113697 | 0.303876904 | 0.315314945 |
| 0.233584089 | 0.095260624 | 0.077844572 | 0.281230103 |

|             |             |             |             |
|-------------|-------------|-------------|-------------|
| 0.097133456 | 0.067701274 | 0.090496256 | 0.146839543 |
| 0.111467728 | 0.066917957 | 0.089041779 | 0.099694208 |
| 0.237450488 | 0.196258151 |             |             |
| ARPC4       | 0.066954782 | 0.323263138 | 0.03999045  |
| 0.128931514 | 0.273397964 | 0.236432549 | 0.053164439 |
| 0.107682732 | 0.240914633 | 0.115262219 | 0.267987499 |
| 0.024622731 | 0.162940844 | 0.395128274 | 0.059699026 |
| 0.28048135  | 0.051535381 | 0.093780381 | 0.053552825 |
| 0.131296219 | 0.241128509 | 0.281692994 | 0.181593531 |
| 0.234968628 | 0.165839336 | 0.18671935  | 0.222881528 |
| 0.40865269  | 0.194110457 | 0.338480619 | 0.081686718 |
| 0.35592433  | 0.29372975  | 0.234301529 | 0.017965132 |
| 0.243617164 | 0.017681605 | 0.344335958 | 0.205660661 |
| 0.19245321  | 0.313354299 | 0.130674523 | 0.217589953 |
| 0.144491599 | 0.033226378 | 0.101282138 | 0.279311301 |
| 0.178724472 | 0.196539661 | 0.041177621 | 0.303924434 |
| 0.179853424 | 0.277420159 | 0.233734022 | 0.002390154 |
| 0.253434703 | 0.112097577 | 0.191645878 | 0.413858115 |
| 0.200798602 | 0.142043769 | 0.134418963 | 0.1557261   |
| 0.236952625 | 0.285887682 | 0.237758818 | 0.149096393 |
| 0.421401533 | 0.195757961 | 0.315873128 | 0.146730669 |
| 0.191564242 | 0.022231614 | 0.154247471 | 0.050881621 |
| 0.223067102 | 0.199801275 | 1           | 0.234198176 |
| 0.301510045 | 0.431159057 | 0.186418845 | 0.376856892 |
| 0.110347416 | 0.261875681 | 0.245110957 | 0.29093704  |
| 0.269007976 | 0.060593489 | 0.348641146 | 0.434916394 |
| 0.036896546 | 0.177046688 | 0.267768397 | 0.088723243 |
| 0.354174495 | 0.20373181  | 0.165552769 | 0.251206996 |
| 0.324645891 | 0.236811782 | 0.375769584 | 0.256706691 |
| 0.264965574 | 0.047771319 | 0.366947487 | 0.271675302 |
| 0.274980506 | 0.057586864 | 0.190186835 | 0.393387682 |
| 0.277215026 | 0.421234834 | 0.311050502 | 0.290567924 |
| 0.238978477 | 0.424957096 | 0.304312679 | 0.358009462 |
| 0.073647179 | 0.426462717 | 0.140742961 | 0.072182692 |
| 0.046041326 | 0.120433953 | 0.173997368 | 0.301210004 |
| 0.419577979 | 0.265738347 | 0.141025272 | 0.200792235 |
| 0.419712772 | 0.359894508 | 0.411247818 | 0.33661136  |
| 0.041704084 | 0.193569038 | 0.229447675 | 0.202870382 |
| 0.288074538 | 0.093240259 | 0.245847536 | 0.400053208 |
| 0.351792029 | 0.387003381 | 0.101741269 | 0.402754723 |
| 0.132829844 | 0.458303147 | 0.347470005 | 0.14766275  |
| 0.421474635 | 0.393116907 | 0.460710824 | 0.365929008 |
| 0.406618747 | 0.197595286 | 0.043706265 | 0.303209333 |
| 0.46421285  | 0.034164707 | 0.401852536 | 0.425075488 |
| 0.389468092 | 0.393411996 | 0.459475678 | 0.446214957 |
| 0.39837244  | 0.057188528 | 0.015967788 | 0.267416954 |
| 0.397337874 | 0.35483678  | 0.161309657 | 0.21689571  |
| 0.2851493   | 0.208878945 | 0.355786423 | 0.203824517 |
| 0.461278567 | 0.393374947 | 0.407581688 | 0.291623477 |
| 0.13518282  | 0.292766311 | 0.234325194 | 0.359606607 |
| 0.058304772 | 0.08594908  | 0.039956083 | 0.263447786 |
| 0.155971595 | 0.170098482 | 0.18432774  | 0.235234352 |
| 0.19219329  | 0.173188518 | 0.237650379 | 0.348220043 |
| 0.042836742 | 0.249740245 | 0.119036599 | 0.095555032 |

|             |             |             |             |
|-------------|-------------|-------------|-------------|
| 0.057918613 | 0.135541771 | 0.158527561 | 0.184546472 |
| 0.235400262 | 0.180036504 | 0.322213973 | 0.421254892 |
| 0.204814035 | 0.141207713 | 0.304883342 | 0.441646449 |
| 0.420541123 | 0.261672136 | 0.21137881  | 0.026703665 |
| 0.164869231 | 0.147417658 | 0.185258897 | 0.250649909 |
| 0.151821192 | 0.164496693 | 0.249730108 | 0.390744115 |
| 0.150718799 | 0.089327081 | 0.212653278 | 0.380375905 |
| 0.108467152 | 0.281129645 | 0.404773505 | 0.197832304 |
| 0.0050525   | 0.186807884 | 0.384298452 | 0.166168619 |
| 0.211768146 | 0.204401492 | 0.265732862 | 0.390230284 |
| 0.20690551  | 0.220908459 | 0.436421899 | 0.383679721 |
| 0.223865326 | 0.16554241  | 0.457026836 | 0.041975216 |
| 0.213021633 | 0.10437967  | 0.286542433 | 0.129658398 |
| 0.184103843 | 0.273280433 | 0.279150602 | 0.255042753 |
| 0.093693337 | 0.42411085  | 0.351892699 | 0.441972879 |
| 0.1929757   | 0.450990635 | 0.406444129 | 0.408782427 |
| 0.281162046 | 0.184551333 | 0.175978232 | 0.359206328 |
| 0.386525126 | 0.135871934 | 0.05457031  | 0.345061125 |
| 0.152705407 | 0.320704556 | 0.15373388  | 0.432890979 |
| 0.431479612 | 0.341927634 | 0.176497288 | 0.363082064 |
| 0.35379763  | 0.171702611 | 0.368128707 | 0.46568299  |
| 0.118334886 | 0.212655824 | 0.216964263 | 0.405362391 |
| 0.142421283 | 0.206824103 | 0.284388404 | 0.201976239 |
| 0.022550891 | 0.059206926 | 0.048328974 | 0.19391088  |
| 0.230741709 | 0.249745504 | 0.299123328 | 0.429631034 |
| 0.116396164 | 0.39090816  | 0.188306316 | 0.206868487 |
| 0.324518342 | 0.22605727  | 0.283174799 | 0.312797729 |
| 0.21741313  | 0.034970871 | 0.148712776 | 0.423072523 |
| 0.025357464 | 0.263645033 | 0.181251677 | 0.008252536 |
| 0.037388787 | 0.2811541   | 0.076763881 | 0.176969787 |
| 0.459239592 | 0.167312273 | 0.141359325 | 0.116114985 |
| 0.340096966 | 0.085159255 | 0.01903287  | 0.394872215 |
| 0.389302249 | 0.36529228  | 0.379544451 | 0.355366794 |
| 0.353480292 | 0.324483041 | 0.352653561 | 0.191160453 |
| 0.090628218 | 0.056010114 | 0.183223586 | 0.203126373 |
| 0.004536881 | 0.38133083  | 0.236901266 | 0.136348649 |
| 0.358305351 | 0.228179679 | 0.048010021 | 0.286276867 |
| 0.023767793 | 0.192240586 | 0.165778043 | 0.184377853 |
| 0.347514559 | 0.016914392 | 0.140823567 | 0.187356649 |
| 0.345225333 | 0.296826416 | 0.225256295 | 0.436134509 |
| 0.251245128 | 0.078054169 | 0.225953501 | 0.391456213 |
| 0.069185639 | 0.043676352 | 0.175365201 | 0.018169372 |
| 0.178840362 | 0.373299631 | 0.215692615 | 0.049114956 |
| 0.204888183 | 0.007667067 | 0.305401969 | 0.449502907 |
| 0.353000822 | 0.446431465 | 0.436299067 | 0.265168145 |
| 0.41941627  | 0.113816513 | 0.442494083 | 0.309823161 |
| 0.154099831 | 0.001473582 | 0.016830542 | 0.4202527   |
| 0.245074895 | 0.042119733 | 0.136470445 | 0.210712955 |
| 0.131435757 | 0.087215096 | 0.076471142 | 0.224735916 |
| 0.298383576 | 0.252304966 | 0.235499827 | 0.355390134 |
| 0.177533526 | 0.201976616 | 0.1751203   | 0.069162653 |
| 0.302750562 | 0.065860003 | 0.065140405 | 0.022365312 |
| 0.344825649 | 0.085655668 | 0.353438523 | 0.417448515 |
| 0.437965908 | 0.344709814 | 0.139601467 | 0.242638421 |

|             |             |             |             |
|-------------|-------------|-------------|-------------|
| 0.38482727  | 0.065629103 | 0.214635722 | 0.071684893 |
| 0.376121703 | 0.282980372 | 0.313594561 | 0.268820536 |
| 0.4405218   | 0.392650465 | 0.040122687 | 0.337329774 |
| 0.028470684 | 0.008568753 | 0.168844602 | 0.226323169 |
| 0.055455744 | 0.21318281  | 0.231117477 | 0.134687704 |
| 0.18662688  | 0.037172014 | 0.216563291 | 0.210199237 |
| 0.235283503 | 0.219989331 | 0.24994519  | 0.195883147 |
| 0.221618305 | 0.138951984 | 0.206343035 | 0.1473894   |
| 0.148717393 | 0.23740108  | 0.164883605 | 0.023720386 |
| 0.198839803 | 0.243525836 | 0.06020984  | 0.140311353 |
| 0.401545105 | 0.427935807 | 0.046210035 | 0.029049916 |
| 0.235137568 | 0.205440615 | 0.455163272 | 0.396348448 |
| 0.42313268  | 0.454417892 | 0.346795653 | 0.151280474 |
| 0.073693543 | 0.24477048  | 0.245764436 | 0.158205792 |
| 0.437067836 | 0.039586213 | 0.400534029 | 0.243035233 |
| 0.098521545 | 0.157145295 | 0.067025778 | 0.078462866 |
| 0.298307007 | 0.170548175 | 0.196663094 | 0.093463551 |
| 0.219135995 | 0.246482901 | 0.047347544 | 0.160689165 |
| 0.27407179  | 0.159016485 | 0.131294894 | 0.185767389 |
| 0.278921767 | 0.083796711 | 0.332998864 | 0.408152384 |
| 0.110886532 | 0.071207048 | 0.135036543 | 0.324616286 |
| 0.351068043 | 0.192173665 | 0.052929015 | 0.331850165 |
| 0.444990488 | 0.312869545 | 0.405495017 | 0.382687948 |
| 0.068017472 | 0.256771256 | 0.202245446 | 0.223388467 |
| 0.149459865 | 0.229072181 | 0.185179582 | 0.053452249 |
| 0.284021789 | 0.398477294 | 0.315337956 | 0.181770406 |
| 0.253020155 | 0.075368129 | 0.031800355 | 0.385260932 |
| 0.187882128 | 0.080579526 | 0.148391058 | 0.367857057 |
| 0.007217049 | 0.204684635 | 0.427481285 | 0.241489622 |
| 0.436545595 | 0.419057649 | 0.392004888 | 0.177001495 |
| 0.002533168 | 0.304271792 | 0.293499532 | 0.225485008 |
| 0.330702346 | 0.301405082 | 0.138080173 | 0.101265061 |
| 0.297236334 | 0.059935716 | 0.132994535 | 0.207696887 |
| 0.120855796 | 0.247198696 | 0.200876677 | 0.132362989 |
| 0.192471238 | 0.056282027 | 0.26622393  | 0.194118428 |
| 0.137097577 | 0.24504241  | 0.334567584 | 0.120968536 |
| 0.154439615 | 0.377351798 | 0.293028286 | 0.032030937 |
| 0.259766294 | 0.345941183 | 0.400638444 | 0.002118189 |
| 0.351905978 | 0.015954409 | 0.212547376 | 0.222693573 |
| 0.209125173 | 0.1902312   | 0.255519766 | 0.241090909 |
| 0.214340495 | 0.167008266 | 0.229307811 | 0.230513456 |
| 0.199722118 | 0.164143234 | 0.274164688 | 0.173526984 |
| 0.265524588 | 0.118036336 | 0.084849717 | 0.083422307 |
| 0.092844307 | 0.394117429 | 0.238152612 | 0.057881095 |
| 0.219881612 | 0.18168385  | 0.352706953 | 0.375285473 |
| 0.420330871 | 0.083401076 | 0.211411983 | 0.354355576 |
| 0.105153309 | 0.175533721 | 0.046305298 | 0.206482962 |
| 0.192285374 | 0.244276053 | 0.196299375 | 0.163362559 |
| 0.262768172 | 0.360122826 | 0.235374524 | 0.39525409  |
| 0.237740665 | 0.167244721 | 0.118355336 | 0.130355084 |
| 0.126110757 | 0.104781707 | 0.249053415 | 0.004138999 |
| 0.286164901 | 0.153200151 | 0.402011262 | 0.382025109 |
| 0.232307471 | 0.376839819 | 0.142830184 | 0.075213269 |
| 0.105687036 | 0.126543417 | 0.128888784 | 0.327387973 |

|             |             |             |             |
|-------------|-------------|-------------|-------------|
| 0.211369918 | 0.177299221 | 0.243833024 | 0.172327876 |
| 0.34886214  | 0.296629186 | 0.220181441 | 0.166778045 |
| 0.169980322 | 0.136295704 | 0.368411359 | 0.079556763 |
| 0.232755817 | 0.233019322 | 0.176100001 | 0.221050061 |
| 0.202606521 | 0.429744613 | 0.052492744 | 0.438821785 |
| 0.208171761 | 0.111831099 | 0.438247604 | 0.200973399 |
| 0.190408573 | 0.201040614 | 0.203367801 | 0.17558179  |
| 0.175109774 | 0.257472083 | 0.007689146 | 0.066716059 |
| 0.325573639 | 0.155074746 | 0.268241324 | 0.296390421 |
| 0.235364592 | 0.334793064 | 0.216246156 | 0.153762099 |
| 0.355593211 | 0.384500135 | 0.181672217 | 0.232809036 |
| 0.287618014 | 0.122042624 | 0.247685038 | 0.012978218 |
| 0.263044127 | 0.257750098 | 0.176869292 | 0.068836987 |
| 0.026014323 | 0.187810733 | 0.230700538 | 0.040911032 |
| 0.434112959 | 0.206602118 | 0.193841493 | 0.346383486 |
| 0.145485906 | 0.383518141 | 0.17578471  | 0.368919434 |
| 0.025782319 | 0.21278023  | 0.233071739 | 0.1873455   |
| 0.232342606 | 0.23561992  | 0.344129879 | 0.257014962 |
| 0.047170446 | 0.238231154 | 0.001149864 | 0.345856819 |
| 0.340974471 | 0.209618231 | 0.189067951 | 0.129578434 |
| 0.287907749 | 0.33786052  | 0.202602592 | 0.213551178 |
| 0.030077217 | 0.287025573 | 0.187613879 | 0.360638605 |
| 0.140002255 | 0.184093895 | 0.094574728 | 0.214689077 |
| 0.345520101 | 0.18442306  | 0.237312876 | 0.148607768 |
| 0.385725783 | 0.307253212 | 0.112914442 | 0.241394051 |
| 0.221138509 | 0.052584385 | 0.180327201 | 0.443928512 |
| 0.198292879 | 0.239058837 | 0.416490624 | 0.169158    |
| 0.244024395 | 0.328418235 | 0.222065636 | 0.425930898 |
| 0.126817085 | 0.234531991 | 0.379132339 | 0.365197951 |
| 0.325357926 | 0.20638307  | 0.242050014 | 0.212652689 |
| 0.350725263 | 0.119774999 | 0.203430042 | 0.280759017 |
| 0.203870298 | 0.291783887 | 0.164233521 | 0.222753006 |
| 0.072831931 | 0.155951186 | 0.271587854 | 0.12012355  |
| 0.228904079 | 0.228351549 | 0.212517723 | 0.371494136 |
| 0.201506516 | 0.049786064 | 0.412791586 | 0.028116077 |
| 0.20233926  | 0.33800054  | 0.214098826 | 0.246009652 |
| 0.16828248  | 0.217115143 | 0.142350069 | 0.001981101 |
| 0.369980198 | 0.075638916 | 0.232335101 | 0.231017679 |
| 0.210467227 | 0.045464975 | 0.392839602 | 0.461512959 |
| 0.245911224 | 0.213292648 | 0.213185398 | 0.386509458 |
| 0.186928751 | 0.196996266 | 0.208645035 | 0.247106802 |
| 0.242694149 | 0.15458506  | 0.204862805 | 0.235682361 |
| 0.305196965 | 0.197025741 |             |             |
| ARRDC3      | 0.015424487 | 0.280628628 | 0.010685672 |
| 0.053017771 | 0.306929468 | 0.126683534 | 0.017208598 |
| 0.036840772 | 0.225737314 | 0.108691205 | 0.204030414 |
| 0.003921871 | 0.163625156 | 0.324856603 | 0.017470951 |
| 0.318376763 | 0.0126161   | 0.038920465 | 0.038477156 |
| 0.106482006 | 0.261599523 | 0.183469014 | 0.128031653 |
| 0.25728506  | 0.08956763  | 0.165705989 | 0.284750114 |
| 0.361106759 | 0.146457602 | 0.309297178 | 0.086168148 |
| 0.278906608 | 0.320132664 | 0.241199415 | 0.003347393 |
| 0.212790579 | 0.044568121 | 0.275267902 | 0.143415856 |
| 0.21069061  | 0.21219217  | 0.113698009 | 0.109051831 |



|             |             |             |             |
|-------------|-------------|-------------|-------------|
| 0.158102988 | 0.006949872 | 0.074635989 | 0.339597982 |
| 0.18785748  | 0.134630567 | 0.014529077 | 0.29557264  |
| 0.155091786 | 0.173992255 | 0.221924748 | 0.000137154 |
| 0.228797822 | 0.1705445   | 0.221645754 | 0.333326665 |
| 0.110209743 | 0.055109144 | 0.164942906 | 0.102105026 |
| 0.269782166 | 0.319324604 | 0.185404919 | 0.13508113  |
| 0.341709264 | 0.203715455 | 0.34879242  | 0.073782944 |
| 0.145591067 | 0.006618407 | 0.087511333 | 0.029635354 |
| 0.185966036 | 0.119083448 | 0.234198176 | 1           |
| 0.263232237 | 0.342873791 | 0.149034685 | 0.31225913  |
| 0.153642066 | 0.336577771 | 0.218925074 | 0.260935145 |
| 0.280137764 | 0.02971492  | 0.294185945 | 0.363844873 |
| 0.011924055 | 0.185477537 | 0.270793252 | 0.044889927 |
| 0.287720242 | 0.223265203 | 0.16483857  | 0.198816401 |
| 0.382386261 | 0.285114605 | 0.310816245 | 0.170370237 |
| 0.234654467 | 0.021263564 | 0.28018501  | 0.345573415 |
| 0.143765696 | 0.025565586 | 0.17700595  | 0.399482888 |
| 0.274053257 | 0.351411095 | 0.29520522  | 0.274009601 |
| 0.285014579 | 0.356749772 | 0.271225331 | 0.2930048   |
| 0.072756369 | 0.358630408 | 0.079618592 | 0.014335836 |
| 0.012742458 | 0.037758906 | 0.180462778 | 0.223553096 |
| 0.375408992 | 0.194290942 | 0.058535104 | 0.163255178 |
| 0.421067375 | 0.278679037 | 0.35771496  | 0.295188307 |
| 0.009104084 | 0.242930092 | 0.283311636 | 0.089232735 |
| 0.25837179  | 0.051152415 | 0.258930439 | 0.312277065 |
| 0.249906269 | 0.37950871  | 0.040344116 | 0.308373414 |
| 0.077187319 | 0.372046334 | 0.300219421 | 0.076594747 |
| 0.342501312 | 0.300259898 | 0.398498569 | 0.386640691 |
| 0.301545432 | 0.136400764 | 0.036895307 | 0.275504388 |
| 0.365855203 | 0.027852462 | 0.383434397 | 0.405552832 |
| 0.33016927  | 0.389557651 | 0.41743769  | 0.393122411 |
| 0.326607027 | 0.025850514 | 0.039543029 | 0.252471196 |
| 0.326545609 | 0.28060215  | 0.07817687  | 0.249079883 |
| 0.310577327 | 0.140102643 | 0.349197256 | 0.120235741 |
| 0.369115222 | 0.355549045 | 0.369999849 | 0.258362177 |
| 0.152157824 | 0.185397822 | 0.311091686 | 0.266255561 |
| 0.015203795 | 0.024726564 | 0.013927275 | 0.227282495 |
| 0.10423218  | 0.109493689 | 0.109753257 | 0.279743802 |
| 0.117635656 | 0.115889231 | 0.208128394 | 0.367405777 |
| 0.017354517 | 0.22784379  | 0.070243755 | 0.059926512 |
| 0.015920822 | 0.067505475 | 0.06029316  | 0.062081071 |
| 0.165765099 | 0.107390183 | 0.310078131 | 0.392471562 |
| 0.194912446 | 0.082995797 | 0.267601685 | 0.359235364 |
| 0.329327852 | 0.297883034 | 0.135883514 | 0.006423238 |
| 0.134087533 | 0.171033039 | 0.228743399 | 0.285508905 |
| 0.083754351 | 0.096156532 | 0.263741651 | 0.376565368 |
| 0.091962757 | 0.042253008 | 0.174457494 | 0.260730948 |
| 0.063200081 | 0.154892303 | 0.355920869 | 0.210140744 |
| 0.000555185 | 0.152688906 | 0.342959796 | 0.15590275  |
| 0.184723593 | 0.139772455 | 0.186303678 | 0.375606561 |
| 0.18247598  | 0.197173257 | 0.392239954 | 0.390961478 |
| 0.114830984 | 0.100275634 | 0.403556047 | 0.061647458 |
| 0.281585428 | 0.052538693 | 0.231371085 | 0.130424738 |
| 0.135043539 | 0.225659953 | 0.308677416 | 0.188779125 |

|             |             |             |             |
|-------------|-------------|-------------|-------------|
| 0.042944434 | 0.347584839 | 0.27777388  | 0.3752323   |
| 0.173604119 | 0.400708784 | 0.375090936 | 0.326358309 |
| 0.230942316 | 0.221761695 | 0.20376662  | 0.327607465 |
| 0.378084186 | 0.133958447 | 0.024473493 | 0.356045305 |
| 0.17259395  | 0.350696805 | 0.13543901  | 0.378615372 |
| 0.330029389 | 0.277856525 | 0.063312303 | 0.361707192 |
| 0.268145015 | 0.097036718 | 0.341662195 | 0.398981821 |
| 0.126107119 | 0.240757054 | 0.189712973 | 0.393860839 |
| 0.086986392 | 0.184230754 | 0.210995499 | 0.234844465 |
| 0.020480567 | 0.021112537 | 0.018170926 | 0.096181693 |
| 0.214515335 | 0.267666693 | 0.32229819  | 0.366735155 |
| 0.043948568 | 0.287200467 | 0.14829704  | 0.137424894 |
| 0.268290797 | 0.214466592 | 0.313126816 | 0.313382247 |
| 0.15395498  | 0.012185284 | 0.047870405 | 0.337567317 |
| 0.009479407 | 0.205757015 | 0.12929886  | 0.001711171 |
| 0.009619922 | 0.262462253 | 0.038880467 | 0.098566837 |
| 0.415352841 | 0.097955998 | 0.095281463 | 0.110580398 |
| 0.269517764 | 0.035456216 | 0.004173251 | 0.376800081 |
| 0.352854793 | 0.33721457  | 0.341640378 | 0.295432962 |
| 0.357725908 | 0.315123045 | 0.370604269 | 0.133426929 |
| 0.033259317 | 0.020476262 | 0.201951935 | 0.16463211  |
| 0.001166264 | 0.31956116  | 0.232862612 | 0.070509065 |
| 0.356565454 | 0.199669814 | 0.008284654 | 0.316500699 |
| 0.004566908 | 0.198657102 | 0.094217571 | 0.111656136 |
| 0.352945381 | 0.002781506 | 0.086694379 | 0.171283125 |
| 0.245925964 | 0.201586789 | 0.209892932 | 0.367893862 |
| 0.189303789 | 0.047325667 | 0.204238854 | 0.335646636 |
| 0.021654519 | 0.055203283 | 0.117504463 | 0.018700915 |
| 0.076962244 | 0.304896449 | 0.1714313   | 0.019635227 |
| 0.153143162 | 0.00064697  | 0.217128739 | 0.365287229 |
| 0.28154206  | 0.407445439 | 0.352108847 | 0.217098044 |
| 0.346700644 | 0.182665323 | 0.381421795 | 0.260368328 |
| 0.129922883 | 0.000176886 | 0.002711252 | 0.39859586  |
| 0.270465957 | 0.017131552 | 0.078783904 | 0.10496752  |
| 0.04646693  | 0.034686433 | 0.019299745 | 0.206437339 |
| 0.256097659 | 0.202769163 | 0.185156386 | 0.28279361  |
| 0.128616153 | 0.1509916   | 0.127121954 | 0.032046163 |
| 0.29195243  | 0.017266468 | 0.034656991 | 0.006618734 |
| 0.340400561 | 0.04376216  | 0.263964858 | 0.348392122 |
| 0.34952239  | 0.358559398 | 0.119453246 | 0.117077644 |
| 0.370809576 | 0.029968977 | 0.1678887   | 0.034027659 |
| 0.30814615  | 0.294723585 | 0.218047286 | 0.180563738 |
| 0.373968268 | 0.312174346 | 0.008450395 | 0.334063585 |
| 0.003957423 | 0.004982616 | 0.130767528 | 0.162018416 |
| 0.099472756 | 0.23003695  | 0.162702329 | 0.111451098 |
| 0.127212793 | 0.005842574 | 0.23863448  | 0.22535005  |
| 0.216497844 | 0.21363054  | 0.26868006  | 0.155811887 |
| 0.193902985 | 0.1497975   | 0.102823684 | 0.060329575 |
| 0.125721206 | 0.18223991  | 0.090288098 | 0.005395516 |
| 0.218579671 | 0.255069579 | 0.015782012 | 0.073790026 |
| 0.34263008  | 0.378470467 | 0.017515632 | 0.005905574 |
| 0.149079622 | 0.160778516 | 0.397502247 | 0.33150537  |
| 0.333498111 | 0.383960005 | 0.240531635 | 0.079558203 |
| 0.01798631  | 0.257276265 | 0.301205596 | 0.107309138 |

|             |             |             |             |
|-------------|-------------|-------------|-------------|
| 0.358031937 | 0.01777963  | 0.315221903 | 0.314264926 |
| 0.053842206 | 0.092944254 | 0.012620825 | 0.034180197 |
| 0.32329054  | 0.090455206 | 0.125153298 | 0.053746113 |
| 0.15652447  | 0.222034049 | 0.013270607 | 0.102585268 |
| 0.221392828 | 0.231569524 | 0.077256299 | 0.106313542 |
| 0.237681303 | 0.093686685 | 0.357445319 | 0.318060705 |
| 0.052267599 | 0.041763986 | 0.066165641 | 0.31076872  |
| 0.342850079 | 0.22668213  | 0.00684012  | 0.286462776 |
| 0.380102532 | 0.300000358 | 0.31816432  | 0.327310043 |
| 0.033432554 | 0.241479029 | 0.226945428 | 0.25292286  |
| 0.097043108 | 0.136639132 | 0.13648072  | 0.021230536 |
| 0.208245707 | 0.308818404 | 0.286308408 | 0.077920319 |
| 0.245399346 | 0.039986274 | 0.014627021 | 0.339070145 |
| 0.215036798 | 0.021193469 | 0.122896893 | 0.371253027 |
| 0.006057053 | 0.219464268 | 0.414433754 | 0.089160011 |
| 0.371794617 | 0.392089925 | 0.299294142 | 0.095172643 |
| 0.008651076 | 0.372784708 | 0.24725652  | 0.170772447 |
| 0.271895702 | 0.210881792 | 0.068683743 | 0.033921977 |
| 0.213688808 | 0.024118051 | 0.061738414 | 0.108393855 |
| 0.195205275 | 0.208748472 | 0.126833502 | 0.11173067  |
| 0.130934861 | 0.032711134 | 0.227134445 | 0.099788769 |
| 0.210438662 | 0.153947039 | 0.258577778 | 0.089904374 |
| 0.137744396 | 0.348013759 | 0.277191474 | 0.005568025 |
| 0.294784155 | 0.339758666 | 0.342458125 | 0.000695806 |
| 0.335388195 | 0.001775222 | 0.123097813 | 0.128484055 |
| 0.116232849 | 0.110249347 | 0.229900542 | 0.185488858 |
| 0.205270552 | 0.105551103 | 0.114285388 | 0.150394968 |
| 0.092059109 | 0.099903254 | 0.291769975 | 0.159723253 |
| 0.147761186 | 0.039903246 | 0.039803035 | 0.038803141 |
| 0.016400886 | 0.334878338 | 0.136324483 | 0.024260207 |
| 0.148747335 | 0.146976556 | 0.260595964 | 0.31612023  |
| 0.333581708 | 0.041748155 | 0.164815606 | 0.292665536 |
| 0.10991874  | 0.092655135 | 0.011081317 | 0.205038412 |
| 0.104345235 | 0.149800025 | 0.184331489 | 0.126442212 |
| 0.265945749 | 0.257329726 | 0.128746852 | 0.330041342 |
| 0.185510261 | 0.201208441 | 0.089978502 | 0.042731545 |
| 0.061394606 | 0.060287282 | 0.269219247 | 0.000316412 |
| 0.217179082 | 0.067759223 | 0.36512344  | 0.307766682 |
| 0.221177572 | 0.281359745 | 0.083056068 | 0.023205755 |
| 0.08626073  | 0.075850833 | 0.064110112 | 0.328477669 |
| 0.210776138 | 0.068598088 | 0.260335605 | 0.080136489 |
| 0.367595885 | 0.340577707 | 0.198616555 | 0.085570639 |
| 0.153093595 | 0.090048639 | 0.309770957 | 0.030854258 |
| 0.262172502 | 0.183786902 | 0.171772701 | 0.17551722  |
| 0.140726258 | 0.393369074 | 0.017889736 | 0.393684557 |
| 0.194963422 | 0.058157282 | 0.335541049 | 0.135100423 |
| 0.106718257 | 0.08110069  | 0.233942562 | 0.122564745 |
| 0.106014897 | 0.218813181 | 0.007489549 | 0.050697397 |
| 0.254042219 | 0.144909881 | 0.26721619  | 0.291660812 |
| 0.216557994 | 0.301536382 | 0.214796703 | 0.104549359 |
| 0.286163834 | 0.297901159 | 0.093288819 | 0.174049466 |
| 0.217686918 | 0.033384924 | 0.182827477 | 0.014080236 |
| 0.28482516  | 0.299239776 | 0.134991088 | 0.015521728 |
| 0.005181273 | 0.225831067 | 0.257259055 | 0.022079472 |

|             |             |             |             |
|-------------|-------------|-------------|-------------|
| 0.416615367 | 0.196077718 | 0.212193329 | 0.320499376 |
| 0.090415516 | 0.294921818 | 0.076494624 | 0.312766022 |
| 0.013124463 | 0.166227468 | 0.284313674 | 0.213599939 |
| 0.132085021 | 0.243720579 | 0.30848188  | 0.214850108 |
| 0.009960351 | 0.15738816  | 0.001203262 | 0.239623545 |
| 0.275459844 | 0.276603874 | 0.113377603 | 0.114675642 |
| 0.222043907 | 0.295057815 | 0.125648635 | 0.238295452 |
| 0.005073851 | 0.312204543 | 0.10985454  | 0.262400389 |
| 0.138368805 | 0.216546584 | 0.027225823 | 0.275077784 |
| 0.249202711 | 0.124111245 | 0.162596314 | 0.161715816 |
| 0.320464769 | 0.272727206 | 0.069651995 | 0.170716049 |
| 0.24757861  | 0.020748757 | 0.119717196 | 0.379426634 |
| 0.09385302  | 0.214274314 | 0.401674636 | 0.091468332 |
| 0.249304754 | 0.245787702 | 0.268887645 | 0.366481717 |
| 0.050579434 | 0.14786822  | 0.367168427 | 0.320424453 |
| 0.235884621 | 0.204967389 | 0.195316269 | 0.144752514 |
| 0.272842139 | 0.030210139 | 0.207770718 | 0.220046206 |
| 0.210350097 | 0.221094642 | 0.170821358 | 0.149819456 |
| 0.013478081 | 0.067109446 | 0.12922418  | 0.066742384 |
| 0.181913274 | 0.257977938 | 0.20261137  | 0.27189374  |
| 0.065266183 | 0.011221696 | 0.324817166 | 0.040655791 |
| 0.131709899 | 0.302889592 | 0.13091068  | 0.237136465 |
| 0.088706322 | 0.196188187 | 0.127812347 | 0.000708892 |
| 0.355280917 | 0.099096846 | 0.168715    | 0.151262566 |
| 0.165065472 | 0.011100174 | 0.302001177 | 0.407514382 |
| 0.1798881   | 0.157907045 | 0.170481714 | 0.309264635 |
| 0.212667873 | 0.196827681 | 0.188759524 | 0.233858948 |
| 0.235047008 | 0.154566355 | 0.187419243 | 0.207003801 |
| 0.250500978 | 0.09504114  |             |             |
| ASB13       | 0.125611966 | 0.446135177 | 0.124265221 |
| 0.168058562 | 0.254565399 | 0.419113482 | 0.093514429 |
| 0.161644694 | 0.403339886 | 0.402570886 | 0.339926117 |
| 0.032949255 | 0.05724402  | 0.424683041 | 0.078523235 |
| 0.353003942 | 0.04307032  | 0.139738174 | 0.09332558  |
| 0.274310783 | 0.230126288 | 0.297950237 | 0.44578033  |
| 0.238481629 | 0.248677486 | 0.418922818 | 0.368740493 |
| 0.485574012 | 0.277282076 | 0.417327489 | 0.291730887 |
| 0.39782821  | 0.269327638 | 0.36239458  | 0.040338228 |
| 0.407673861 | 0.00921231  | 0.449722948 | 0.239696617 |
| 0.120015509 | 0.347742507 | 0.450774109 | 0.233786093 |
| 0.44933621  | 0.076514067 | 0.303705723 | 0.393521448 |
| 0.394740877 | 0.291312063 | 0.139457913 | 0.441026516 |
| 0.384710613 | 0.378036543 | 0.468382319 | 0.004233284 |
| 0.255226758 | 0.071290109 | 0.192786701 | 0.505887854 |
| 0.225550841 | 0.131038864 | 0.31445976  | 0.294398473 |
| 0.390763839 | 0.358420798 | 0.259773681 | 0.42498889  |
| 0.480219836 | 0.133933238 | 0.429325536 | 0.179875547 |
| 0.410639836 | 0.079857175 | 0.197298501 | 0.166082469 |
| 0.375350591 | 0.19415325  | 0.301510045 | 0.263232237 |
| 1           | 0.507629202 | 0.266476233 | 0.524137484 |
| 0.074809119 | 0.288561321 | 0.232022283 | 0.283772594 |
| 0.369381347 | 0.127410919 | 0.397661655 | 0.501204275 |
| 0.096826463 | 0.460836639 | 0.413961326 | 0.202365132 |
| 0.444485047 | 0.254468472 | 0.46796281  | 0.127251755 |

|             |             |             |             |
|-------------|-------------|-------------|-------------|
| 0.322893618 | 0.299705646 | 0.486583235 | 0.30766954  |
| 0.27151742  | 0.146221911 | 0.521464099 | 0.263006926 |
| 0.264431545 | 0.147413355 | 0.190074409 | 0.431104814 |
| 0.416376917 | 0.468987274 | 0.447840167 | 0.36628573  |
| 0.342209826 | 0.478469642 | 0.412037955 | 0.413466714 |
| 0.231999999 | 0.518227238 | 0.233355394 | 0.050931596 |
| 0.146851956 | 0.090595271 | 0.207991555 | 0.301195745 |
| 0.438037494 | 0.356066908 | 0.241078679 | 0.212445091 |
| 0.401452555 | 0.512681761 | 0.522380296 | 0.412723911 |
| 0.069124449 | 0.215314386 | 0.353792793 | 0.320011918 |
| 0.37278427  | 0.156320443 | 0.204329513 | 0.522545552 |
| 0.376914151 | 0.404497277 | 0.247276719 | 0.512772514 |
| 0.234152379 | 0.477586063 | 0.466011153 | 0.188856506 |
| 0.516231984 | 0.512694115 | 0.463458799 | 0.35239431  |
| 0.472034094 | 0.387343022 | 0.077663495 | 0.39269977  |
| 0.433898875 | 0.010551232 | 0.44381801  | 0.457907759 |
| 0.50660806  | 0.43397943  | 0.470739745 | 0.471060643 |
| 0.510432825 | 0.125894727 | 0.034961983 | 0.252527923 |
| 0.516386089 | 0.394763238 | 0.123725617 | 0.406905539 |
| 0.31471353  | 0.436110694 | 0.417486952 | 0.300529532 |
| 0.47220017  | 0.433630177 | 0.463279296 | 0.415312594 |
| 0.382867214 | 0.331500027 | 0.34679979  | 0.50432753  |
| 0.062746836 | 0.180494381 | 0.115585736 | 0.31279143  |
| 0.439679283 | 0.1737668   | 0.437172673 | 0.327859109 |
| 0.199217366 | 0.408329556 | 0.301505261 | 0.328590115 |
| 0.125497043 | 0.449510788 | 0.217272518 | 0.248281023 |
| 0.051953804 | 0.197238335 | 0.196976877 | 0.160671603 |
| 0.220342416 | 0.299223522 | 0.435225321 | 0.452424225 |
| 0.332765657 | 0.257494414 | 0.436669781 | 0.429638889 |
| 0.363852258 | 0.339432321 | 0.257286777 | 0.013419992 |
| 0.260594073 | 0.333494662 | 0.14922678  | 0.390648763 |
| 0.230473996 | 0.243121367 | 0.372124638 | 0.34420746  |
| 0.361954381 | 0.221207695 | 0.344388704 | 0.421380192 |
| 0.235078848 | 0.266005035 | 0.407029149 | 0.446575765 |
| 0.009175382 | 0.355280365 | 0.431545909 | 0.115259273 |
| 0.354166184 | 0.099369739 | 0.214806873 | 0.427923996 |
| 0.261615097 | 0.177435948 | 0.451245259 | 0.341598268 |
| 0.353811829 | 0.284191748 | 0.482903368 | 0.046223845 |
| 0.317720762 | 0.042101438 | 0.258636026 | 0.433530051 |
| 0.27933209  | 0.27909277  | 0.258828572 | 0.233841528 |
| 0.216486707 | 0.505565866 | 0.398965723 | 0.477610035 |
| 0.360957251 | 0.490537182 | 0.427302349 | 0.410158794 |
| 0.371729059 | 0.360958411 | 0.102512154 | 0.431966159 |
| 0.429738718 | 0.32769574  | 0.152759011 | 0.435359334 |
| 0.402285758 | 0.37022123  | 0.090660229 | 0.448866971 |
| 0.477359365 | 0.508203208 | 0.136118143 | 0.326974343 |
| 0.378388952 | 0.273340046 | 0.398895124 | 0.485061927 |
| 0.394858639 | 0.321391879 | 0.300050262 | 0.345141169 |
| 0.222966886 | 0.165973443 | 0.331909262 | 0.140046673 |
| 0.009763748 | 0.144646745 | 0.12250953  | 0.14170718  |
| 0.117362665 | 0.437996399 | 0.376340914 | 0.493091607 |
| 0.138341646 | 0.399060298 | 0.276569796 | 0.267331206 |
| 0.421847347 | 0.315026254 | 0.333374522 | 0.348243493 |
| 0.275283069 | 0.02251044  | 0.119010506 | 0.515093671 |

|             |             |             |             |
|-------------|-------------|-------------|-------------|
| 0.104630571 | 0.187559926 | 0.355597056 | 0.003368092 |
| 0.086565966 | 0.463143366 | 0.167906254 | 0.234175831 |
| 0.405214747 | 0.250964485 | 0.275343578 | 0.416825915 |
| 0.319406725 | 0.131250186 | 0.002368501 | 0.46150975  |
| 0.475690202 | 0.445291391 | 0.480689851 | 0.473091645 |
| 0.414270152 | 0.4041151   | 0.386894106 | 0.43224581  |
| 0.139256485 | 0.165384315 | 0.169551895 | 0.267734266 |
| 0.008966445 | 0.352649357 | 0.271646051 | 0.181320255 |
| 0.39516066  | 0.316427271 | 0.062647581 | 0.309461558 |
| 0.045303277 | 0.170695356 | 0.349219516 | 0.21156689  |
| 0.302817428 | 0.033461747 | 0.277187662 | 0.305853897 |
| 0.452125017 | 0.374415755 | 0.331995978 | 0.516401977 |
| 0.312559302 | 0.234249974 | 0.282111258 | 0.359827399 |
| 0.100626348 | 0.154369806 | 0.406551733 | 0.070334428 |
| 0.230619568 | 0.449141382 | 0.36801428  | 0.124370721 |
| 0.287940123 | 0.01310285  | 0.39514473  | 0.506805843 |
| 0.496209453 | 0.473890636 | 0.474599212 | 0.218031919 |
| 0.491533305 | 0.090782929 | 0.504575725 | 0.440167876 |
| 0.430121874 | 0.002219445 | 0.005545503 | 0.438824374 |
| 0.367697331 | 0.135465231 | 0.19350872  | 0.408514462 |
| 0.115549262 | 0.244918175 | 0.0927659   | 0.134142763 |
| 0.428741591 | 0.193905551 | 0.126728244 | 0.491471232 |
| 0.241794834 | 0.224239375 | 0.45048795  | 0.154050992 |
| 0.375342341 | 0.072850427 | 0.152439143 | 0.006417749 |
| 0.325527912 | 0.197828998 | 0.509194008 | 0.498927096 |
| 0.460498443 | 0.350545198 | 0.406068696 | 0.347605319 |
| 0.404323835 | 0.19836573  | 0.365136556 | 0.205003556 |
| 0.496715034 | 0.363380613 | 0.31782365  | 0.340504674 |
| 0.455860828 | 0.453487326 | 0.054822456 | 0.392234816 |
| 0.022177143 | 0.00078924  | 0.454415566 | 0.280695141 |
| 0.063208291 | 0.339210495 | 0.279357541 | 0.26417174  |
| 0.220781191 | 0.056919576 | 0.21519349  | 0.193410788 |
| 0.286549573 | 0.335932055 | 0.217036215 | 0.286104804 |
| 0.223861783 | 0.104621566 | 0.185938948 | 0.163150408 |
| 0.257846257 | 0.361940883 | 0.253849614 | 0.040534617 |
| 0.443774245 | 0.386816914 | 0.089252749 | 0.208232466 |
| 0.41682487  | 0.446401802 | 0.057212916 | 0.01179527  |
| 0.300307525 | 0.29355436  | 0.442476237 | 0.499911776 |
| 0.525905696 | 0.478494223 | 0.387305383 | 0.10397215  |
| 0.100014532 | 0.293083169 | 0.237321851 | 0.073781595 |
| 0.485298267 | 0.145673922 | 0.484580032 | 0.245153343 |
| 0.161268494 | 0.237011157 | 0.040382995 | 0.115439879 |
| 0.338581083 | 0.200317179 | 0.15560883  | 0.242954837 |
| 0.28611491  | 0.200547898 | 0.078088414 | 0.214340985 |
| 0.366884256 | 0.144894119 | 0.194264738 | 0.352324212 |
| 0.396611888 | 0.320780831 | 0.405181628 | 0.411549209 |
| 0.187772773 | 0.171747219 | 0.382068059 | 0.373619818 |
| 0.448901162 | 0.431110864 | 0.039895843 | 0.474030348 |
| 0.442012676 | 0.428871873 | 0.502357948 | 0.347147481 |
| 0.140692851 | 0.337577255 | 0.280255069 | 0.312157975 |
| 0.207826431 | 0.42362124  | 0.235827775 | 0.104139898 |
| 0.302458888 | 0.478211663 | 0.434693338 | 0.162310347 |
| 0.424185207 | 0.226861626 | 0.136389273 | 0.430144601 |
| 0.136869762 | 0.130816017 | 0.451742441 | 0.414302002 |

|             |             |             |             |
|-------------|-------------|-------------|-------------|
| 0.001440888 | 0.096303272 | 0.437431239 | 0.235355195 |
| 0.49123883  | 0.431391312 | 0.412086899 | 0.292836288 |
| 0.00125171  | 0.380543832 | 0.353778853 | 0.384898706 |
| 0.450071693 | 0.377859081 | 0.176461508 | 0.078055533 |
| 0.281103146 | 0.163988485 | 0.133865933 | 0.387250898 |
| 0.15902134  | 0.441795189 | 0.209028559 | 0.248686066 |
| 0.173977756 | 0.182384907 | 0.191502204 | 0.257749228 |
| 0.120059588 | 0.245967618 | 0.335631459 | 0.397218258 |
| 0.172898175 | 0.395968338 | 0.428447689 | 0.051950649 |
| 0.308258665 | 0.393468215 | 0.397407465 | 0.003721124 |
| 0.399899563 | 0.011446553 | 0.168396264 | 0.189854796 |
| 0.177817069 | 0.190919235 | 0.220236982 | 0.256666727 |
| 0.385184211 | 0.231561307 | 0.26756297  | 0.232708752 |
| 0.144373096 | 0.246889784 | 0.359912109 | 0.400291347 |
| 0.238938001 | 0.158308434 | 0.16992454  | 0.173104455 |
| 0.062705194 | 0.441731112 | 0.273214546 | 0.148770943 |
| 0.220938979 | 0.387735885 | 0.325793735 | 0.510753274 |
| 0.370251349 | 0.206523525 | 0.319898756 | 0.457797826 |
| 0.287765444 | 0.33795552  | 0.122518505 | 0.421174476 |
| 0.244128002 | 0.171627653 | 0.437106584 | 0.404619999 |
| 0.443296426 | 0.386002897 | 0.272328325 | 0.403820968 |
| 0.345408265 | 0.357103311 | 0.436838007 | 0.079426781 |
| 0.218225528 | 0.194063924 | 0.208861434 | 0.004353524 |
| 0.346195441 | 0.341604887 | 0.443408281 | 0.502647692 |
| 0.247071014 | 0.358586815 | 0.430708907 | 0.128339372 |
| 0.400952385 | 0.264276301 | 0.183894456 | 0.440055363 |
| 0.179340494 | 0.201823209 | 0.257469124 | 0.430321697 |
| 0.410235043 | 0.421521614 | 0.211662122 | 0.274315457 |
| 0.246772135 | 0.272760512 | 0.484718986 | 0.197858599 |
| 0.43897383  | 0.139009288 | 0.445028148 | 0.266151113 |
| 0.192825705 | 0.486406874 | 0.104650526 | 0.492596519 |
| 0.299322902 | 0.198334322 | 0.464527338 | 0.334331133 |
| 0.330971259 | 0.100842805 | 0.144342394 | 0.439209463 |
| 0.228961974 | 0.293669193 | 0.023904097 | 0.05660141  |
| 0.301569424 | 0.330245664 | 0.452715109 | 0.357732458 |
| 0.193213562 | 0.305930587 | 0.126427036 | 0.342545968 |
| 0.514585483 | 0.521304717 | 0.252865053 | 0.258805269 |
| 0.354190228 | 0.117921427 | 0.456604209 | 0.019442951 |
| 0.408188955 | 0.409143478 | 0.409383789 | 0.072061061 |
| 0.032239933 | 0.172712822 | 0.425830892 | 0.141708876 |
| 0.416369777 | 0.178341812 | 0.411207055 | 0.424941836 |
| 0.23248939  | 0.523199925 | 0.102421808 | 0.375556112 |
| 0.097774742 | 0.272647297 | 0.342431757 | 0.384930218 |
| 0.189170167 | 0.237667449 | 0.348784953 | 0.179405954 |
| 0.044927713 | 0.227418479 | 0.003260286 | 0.412762129 |
| 0.51078319  | 0.299122851 | 0.246111572 | 0.374687621 |
| 0.257546622 | 0.376594199 | 0.210607895 | 0.418689229 |
| 0.013463749 | 0.319018932 | 0.206032581 | 0.427291814 |
| 0.243590349 | 0.384792263 | 0.062815887 | 0.269000118 |
| 0.501849598 | 0.262483686 | 0.275109281 | 0.327551947 |
| 0.496873166 | 0.413546915 | 0.259827427 | 0.18226716  |
| 0.427020174 | 0.120653067 | 0.448424504 | 0.500882481 |
| 0.158605264 | 0.161367992 | 0.395421253 | 0.198891014 |
| 0.258187996 | 0.402536812 | 0.428432507 | 0.500769147 |

|             |             |             |             |
|-------------|-------------|-------------|-------------|
| 0.058114861 | 0.250092937 | 0.394637372 | 0.442344326 |
| 0.276197723 | 0.121717667 | 0.192840311 | 0.189530779 |
| 0.483812318 | 0.119149636 | 0.216587906 | 0.379587704 |
| 0.171088151 | 0.293007303 | 0.427504018 | 0.146380529 |
| 0.0405166   | 0.176304    | 0.365244047 | 0.184103176 |
| 0.281213234 | 0.331591327 | 0.193862657 | 0.353231249 |
| 0.121392856 | 0.027965863 | 0.415640655 | 0.0125258   |
| 0.404523076 | 0.359918662 | 0.247558342 | 0.309162194 |
| 0.243066025 | 0.380215485 | 0.426650033 | 0.002824576 |
| 0.383461198 | 0.040293317 | 0.275180031 | 0.185444321 |
| 0.254723157 | 0.089697909 | 0.448774626 | 0.457975668 |
| 0.345396804 | 0.330274006 | 0.332063883 | 0.449431826 |
| 0.108074223 | 0.321318086 | 0.312285132 | 0.464409045 |
| 0.169431371 | 0.447268911 | 0.414507706 | 0.348793601 |
| 0.40143915  | 0.295630691 |             |             |
| ASF1B       | 0.218528823 | 0.516489135 | 0.183495834 |
| 0.256990337 | 0.37044237  | 0.505231782 | 0.192330117 |
| 0.296676231 | 0.488806547 | 0.381220852 | 0.461588427 |
| 0.082234633 | 0.094584241 | 0.528167783 | 0.181244309 |
| 0.447117464 | 0.122176849 | 0.265681876 | 0.144787252 |
| 0.37339213  | 0.349538816 | 0.386236484 | 0.518993213 |
| 0.36164994  | 0.351390693 | 0.501053631 | 0.432304849 |
| 0.531008907 | 0.282497978 | 0.501922227 | 0.24503674  |
| 0.493433765 | 0.379227635 | 0.415487518 | 0.082792046 |
| 0.509860356 | 0.021612426 | 0.486989147 | 0.366204067 |
| 0.171227143 | 0.474195889 | 0.438263675 | 0.369179738 |
| 0.463416472 | 0.138277119 | 0.257055111 | 0.468521494 |
| 0.479047768 | 0.431088033 | 0.209671611 | 0.519919811 |
| 0.459298418 | 0.500916388 | 0.492306203 | 0.008692311 |
| 0.317139964 | 0.080098702 | 0.227887752 | 0.526730484 |
| 0.369631172 | 0.271791988 | 0.313388236 | 0.43044528  |
| 0.474076228 | 0.469162947 | 0.417300789 | 0.444836357 |
| 0.530903121 | 0.193445786 | 0.494726982 | 0.268462915 |
| 0.507439547 | 0.14222865  | 0.330048872 | 0.246361948 |
| 0.458709688 | 0.34936191  | 0.431159057 | 0.342873791 |
| 0.507629202 | 1           | 0.410192974 | 0.512781015 |
| 0.133556981 | 0.381977596 | 0.345572807 | 0.430160658 |
| 0.481277398 | 0.236842753 | 0.503451064 | 0.522363643 |
| 0.179769752 | 0.476723263 | 0.501683165 | 0.30074194  |
| 0.529109305 | 0.324680263 | 0.473116129 | 0.1958259   |
| 0.427811002 | 0.398458849 | 0.506894579 | 0.445147374 |
| 0.398390128 | 0.222448132 | 0.50111612  | 0.353333127 |
| 0.383986218 | 0.233071437 | 0.293807622 | 0.510841555 |
| 0.503594699 | 0.534713142 | 0.516641123 | 0.483900252 |
| 0.424383239 | 0.530514997 | 0.507680482 | 0.52134301  |
| 0.188965918 | 0.529704936 | 0.360412405 | 0.139535238 |
| 0.223884513 | 0.219730195 | 0.317570821 | 0.451527486 |
| 0.528239088 | 0.493291491 | 0.374044788 | 0.352595275 |
| 0.503678106 | 0.507490993 | 0.526565969 | 0.517241313 |
| 0.146358528 | 0.281334187 | 0.42892178  | 0.459938378 |
| 0.491027558 | 0.284628115 | 0.289228959 | 0.51207381  |
| 0.496878078 | 0.504920291 | 0.358776946 | 0.518034545 |
| 0.378079698 | 0.524156397 | 0.525116528 | 0.323206331 |
| 0.519617297 | 0.51216481  | 0.524103549 | 0.446085508 |



|             |             |             |             |
|-------------|-------------|-------------|-------------|
| 0.518184335 | 0.482916505 | 0.119441953 | 0.502320232 |
| 0.518780933 | 0.019945135 | 0.524216986 | 0.525098004 |
| 0.524006243 | 0.512246635 | 0.522526085 | 0.531246317 |
| 0.526750098 | 0.224122031 | 0.037701227 | 0.392648027 |
| 0.520020801 | 0.505413302 | 0.271657329 | 0.457699221 |
| 0.427153761 | 0.527439879 | 0.510706275 | 0.351163526 |
| 0.516341648 | 0.525946318 | 0.530327493 | 0.515141647 |
| 0.453622546 | 0.459511526 | 0.404003275 | 0.499936618 |
| 0.150401593 | 0.27894088  | 0.179418992 | 0.456652898 |
| 0.441992993 | 0.322893835 | 0.516770009 | 0.438413    |
| 0.350756902 | 0.50541972  | 0.354144863 | 0.434697788 |
| 0.18596107  | 0.505401247 | 0.345316977 | 0.355666919 |
| 0.134874445 | 0.308057652 | 0.314463243 | 0.292020381 |
| 0.368320187 | 0.357895086 | 0.508575943 | 0.52552686  |
| 0.436651164 | 0.359984836 | 0.52544029  | 0.519314995 |
| 0.490041983 | 0.423440785 | 0.405124908 | 0.035538171 |
| 0.335651892 | 0.345673198 | 0.195219989 | 0.457041172 |
| 0.329277931 | 0.366486865 | 0.468876298 | 0.456270566 |
| 0.456295941 | 0.338119825 | 0.427549611 | 0.494962756 |
| 0.330982629 | 0.386641548 | 0.513599974 | 0.497733019 |
| 0.023752641 | 0.463006221 | 0.524287643 | 0.219439483 |
| 0.473119621 | 0.158578083 | 0.270468075 | 0.518648128 |
| 0.327381703 | 0.283543116 | 0.529149825 | 0.457200399 |
| 0.436726711 | 0.367880754 | 0.526693169 | 0.059039561 |
| 0.414548444 | 0.09568547  | 0.405020554 | 0.433346057 |
| 0.416302388 | 0.429605642 | 0.367694449 | 0.349657157 |
| 0.299432332 | 0.529648042 | 0.517076264 | 0.533828944 |
| 0.413511548 | 0.525253035 | 0.518869266 | 0.521472266 |
| 0.501309045 | 0.411989949 | 0.139356849 | 0.517677574 |
| 0.517706698 | 0.366514142 | 0.2239155   | 0.505639408 |
| 0.435681201 | 0.463459941 | 0.190005742 | 0.522168402 |
| 0.512721605 | 0.505474379 | 0.282052199 | 0.455203751 |
| 0.497459786 | 0.404924106 | 0.511475434 | 0.524873331 |
| 0.386467318 | 0.412708618 | 0.38516825  | 0.471242551 |
| 0.348292704 | 0.274704269 | 0.464530378 | 0.188701094 |
| 0.010115014 | 0.243303207 | 0.204321611 | 0.282529531 |
| 0.194524947 | 0.48258147  | 0.482123296 | 0.531240789 |
| 0.270915416 | 0.519176466 | 0.415057705 | 0.368544273 |
| 0.509486282 | 0.420403217 | 0.419742483 | 0.459159263 |
| 0.420334167 | 0.056615543 | 0.224615164 | 0.518430624 |
| 0.158736222 | 0.26722547  | 0.487956838 | 0.007993242 |
| 0.162125304 | 0.505966808 | 0.248284497 | 0.344796133 |
| 0.514051801 | 0.35035428  | 0.385089216 | 0.40969934  |
| 0.461836194 | 0.24824481  | 0.010550212 | 0.521909519 |
| 0.516663213 | 0.509887529 | 0.516133751 | 0.504343939 |
| 0.507030916 | 0.506550367 | 0.490567291 | 0.507606058 |
| 0.260870672 | 0.255704006 | 0.23911766  | 0.394093762 |
| 0.0170119   | 0.485056089 | 0.408478807 | 0.308631516 |
| 0.493511974 | 0.455490649 | 0.138912581 | 0.424193567 |
| 0.079871366 | 0.201255012 | 0.466720857 | 0.367537936 |
| 0.438548937 | 0.075509496 | 0.296689725 | 0.36311173  |
| 0.508043126 | 0.490761581 | 0.386408619 | 0.528231702 |
| 0.443634438 | 0.299964935 | 0.397484892 | 0.484916768 |
| 0.208575404 | 0.154208169 | 0.498542584 | 0.049124074 |

|             |             |             |             |
|-------------|-------------|-------------|-------------|
| 0.296009111 | 0.509845683 | 0.450174482 | 0.198017992 |
| 0.420756554 | 0.032148184 | 0.498167795 | 0.53087565  |
| 0.512222926 | 0.526012795 | 0.533056251 | 0.296098784 |
| 0.528987269 | 0.101299873 | 0.533199358 | 0.522405533 |
| 0.433897233 | 0.003752379 | 0.021926486 | 0.523846814 |
| 0.449816316 | 0.189977693 | 0.328192345 | 0.455521907 |
| 0.236981043 | 0.341697313 | 0.202949896 | 0.227157552 |
| 0.515146503 | 0.329669817 | 0.226340184 | 0.515085301 |
| 0.3805585   | 0.383589687 | 0.507747155 | 0.247629026 |
| 0.475380912 | 0.163084135 | 0.247046668 | 0.017587376 |
| 0.455909399 | 0.274478178 | 0.494691028 | 0.530279988 |
| 0.521340914 | 0.459799512 | 0.384023149 | 0.44048758  |
| 0.510965287 | 0.257360982 | 0.41011841  | 0.28449927  |
| 0.525245463 | 0.458263311 | 0.457683384 | 0.458697675 |
| 0.521829304 | 0.521406948 | 0.130871464 | 0.49478293  |
| 0.048507577 | 0.005021867 | 0.496961287 | 0.433107498 |
| 0.106567275 | 0.42358115  | 0.416048937 | 0.38268973  |
| 0.36892387  | 0.113542486 | 0.284432134 | 0.268134644 |
| 0.422190464 | 0.451709603 | 0.321485676 | 0.42094475  |
| 0.348037679 | 0.189166176 | 0.339752311 | 0.318142053 |
| 0.355195959 | 0.462061547 | 0.352893863 | 0.099820394 |
| 0.48573272  | 0.458034076 | 0.182777466 | 0.33776527  |
| 0.519911188 | 0.529297955 | 0.138785624 | 0.038527696 |
| 0.4336788   | 0.420913486 | 0.525793506 | 0.529961648 |
| 0.522090724 | 0.521427849 | 0.482871678 | 0.23098532  |
| 0.202297981 | 0.426070403 | 0.34297454  | 0.181009842 |
| 0.534108969 | 0.210203422 | 0.526012398 | 0.321334651 |
| 0.284669722 | 0.365748724 | 0.112327293 | 0.234063337 |
| 0.421855749 | 0.351013988 | 0.298958184 | 0.319707492 |
| 0.409805296 | 0.277064864 | 0.170168429 | 0.361048769 |
| 0.487395705 | 0.185721826 | 0.331528516 | 0.477087972 |
| 0.50346184  | 0.311158072 | 0.487904282 | 0.504226368 |
| 0.303644884 | 0.28280665  | 0.430646577 | 0.493778441 |
| 0.521439012 | 0.459233596 | 0.076919242 | 0.516991029 |
| 0.528100543 | 0.50040015  | 0.525191408 | 0.482675854 |
| 0.240455094 | 0.4283136   | 0.356592243 | 0.421880843 |
| 0.35882234  | 0.511083766 | 0.394610541 | 0.199935207 |
| 0.446438228 | 0.504785394 | 0.514045158 | 0.30409386  |
| 0.49845142  | 0.311180889 | 0.193724337 | 0.525611235 |
| 0.206844822 | 0.226121457 | 0.456841927 | 0.506814943 |
| 0.005175567 | 0.14597996  | 0.51502822  | 0.38860162  |
| 0.518514589 | 0.520640902 | 0.511324631 | 0.431991986 |
| 0.002291252 | 0.458520033 | 0.466974524 | 0.460769563 |
| 0.526408572 | 0.503916392 | 0.297194394 | 0.186155912 |
| 0.430826266 | 0.230956652 | 0.25946528  | 0.455369378 |
| 0.190698325 | 0.526869899 | 0.360887891 | 0.385586819 |
| 0.319644247 | 0.254801632 | 0.26934945  | 0.400090363 |
| 0.186799667 | 0.396511787 | 0.472204732 | 0.393385888 |
| 0.207976375 | 0.508758575 | 0.510179007 | 0.111656221 |
| 0.402961087 | 0.503041255 | 0.516030004 | 0.00819052  |
| 0.490045902 | 0.039806001 | 0.315228881 | 0.326030346 |
| 0.325061926 | 0.341737555 | 0.367357945 | 0.372223763 |
| 0.489060343 | 0.38019251  | 0.399679201 | 0.383138911 |
| 0.280131431 | 0.398878059 | 0.467552009 | 0.488392732 |

|             |             |             |             |
|-------------|-------------|-------------|-------------|
| 0.353819831 | 0.282957649 | 0.250154871 | 0.242831364 |
| 0.147998433 | 0.530549298 | 0.407151624 | 0.217927718 |
| 0.38166325  | 0.483413304 | 0.467869429 | 0.520772375 |
| 0.504179435 | 0.270902588 | 0.452738769 | 0.529642069 |
| 0.276453359 | 0.418228371 | 0.205327847 | 0.506805341 |
| 0.402219478 | 0.26968686  | 0.504533883 | 0.472396614 |
| 0.50807165  | 0.486685518 | 0.407459278 | 0.51346093  |
| 0.456409543 | 0.440866516 | 0.397928561 | 0.18412607  |
| 0.340183981 | 0.307974825 | 0.320417037 | 0.012731654 |
| 0.485949418 | 0.423296926 | 0.525935851 | 0.51723395  |
| 0.309165593 | 0.493840207 | 0.415013725 | 0.22550424  |
| 0.350412817 | 0.33008882  | 0.311505103 | 0.51451889  |
| 0.218564669 | 0.351266809 | 0.380497294 | 0.481003407 |
| 0.498856264 | 0.493613712 | 0.333491838 | 0.426641782 |
| 0.397975192 | 0.386461776 | 0.50257407  | 0.300381355 |
| 0.481785712 | 0.233716057 | 0.482652541 | 0.389088428 |
| 0.335124279 | 0.528029294 | 0.195363283 | 0.531229129 |
| 0.401710115 | 0.304141846 | 0.511219451 | 0.473899339 |
| 0.454115738 | 0.225496415 | 0.190888644 | 0.492774933 |
| 0.380021986 | 0.363721776 | 0.022111279 | 0.0866323   |
| 0.444178999 | 0.412990636 | 0.504952891 | 0.48299186  |
| 0.304199947 | 0.450392749 | 0.176771137 | 0.464802018 |
| 0.509895724 | 0.507318681 | 0.360135154 | 0.405185383 |
| 0.488589593 | 0.242847849 | 0.522971311 | 0.032475677 |
| 0.476401151 | 0.456390164 | 0.441835157 | 0.173625279 |
| 0.086253056 | 0.216017586 | 0.488182339 | 0.216139778 |
| 0.514337789 | 0.211402381 | 0.478590822 | 0.512790486 |
| 0.362287758 | 0.508280611 | 0.237241605 | 0.488514892 |
| 0.164274537 | 0.423886763 | 0.424181555 | 0.458802784 |
| 0.295580706 | 0.325130008 | 0.470847523 | 0.259396674 |
| 0.118034783 | 0.351238326 | 0.007521808 | 0.480064306 |
| 0.494264996 | 0.372865293 | 0.377560855 | 0.371898053 |
| 0.410045766 | 0.499252095 | 0.334557295 | 0.468382286 |
| 0.044237198 | 0.411690815 | 0.365834782 | 0.525272514 |
| 0.247026785 | 0.46667336  | 0.151692215 | 0.370518648 |
| 0.491513954 | 0.354788598 | 0.420549837 | 0.338510182 |
| 0.524723103 | 0.509403081 | 0.338525718 | 0.311128867 |
| 0.483455915 | 0.205449166 | 0.472626608 | 0.52783299  |
| 0.305625324 | 0.2432967   | 0.49812494  | 0.33048615  |
| 0.344617782 | 0.511470234 | 0.471236395 | 0.524332691 |
| 0.158070307 | 0.403202313 | 0.502570334 | 0.522723069 |
| 0.431349649 | 0.213076484 | 0.272078967 | 0.312931451 |
| 0.513127511 | 0.215918619 | 0.308498267 | 0.498005424 |
| 0.234418028 | 0.448086732 | 0.465510297 | 0.273217516 |
| 0.110643302 | 0.335003375 | 0.470701057 | 0.317458212 |
| 0.425802538 | 0.436895906 | 0.306491776 | 0.486162686 |
| 0.234304286 | 0.071065285 | 0.506269111 | 0.018464157 |
| 0.497124258 | 0.469746171 | 0.40985197  | 0.420027152 |
| 0.353744447 | 0.495789509 | 0.48080315  | 0.008456962 |
| 0.500203885 | 0.070696833 | 0.409686909 | 0.296050816 |
| 0.332685202 | 0.175753833 | 0.520143071 | 0.525767137 |
| 0.4859765   | 0.402548626 | 0.369617913 | 0.525876199 |
| 0.161113209 | 0.349814882 | 0.382705879 | 0.519410447 |
| 0.241022441 | 0.443922701 | 0.460744875 | 0.399878698 |

|             |             |             |             |
|-------------|-------------|-------------|-------------|
| 0.517037171 | 0.449785483 |             |             |
| ASNA1       | 0.159256634 | 0.281436382 | 0.114664554 |
| 0.168329011 | 0.190699528 | 0.163183768 | 0.202273137 |
| 0.229374946 | 0.258820999 | 0.103152764 | 0.189053361 |
| 0.104385694 | 0.049858899 | 0.31215283  | 0.202066081 |
| 0.172880107 | 0.170909275 | 0.233397742 | 0.096038172 |
| 0.218941252 | 0.189635098 | 0.130649565 | 0.159784043 |
| 0.202143715 | 0.27492102  | 0.192626556 | 0.146506406 |
| 0.315037656 | 0.064725037 | 0.1883218   | 0.067146449 |
| 0.367063928 | 0.173311942 | 0.125004112 | 0.095947495 |
| 0.179755816 | 0.033816335 | 0.389980868 | 0.218915484 |
| 0.096148942 | 0.34164529  | 0.116892759 | 0.220912862 |
| 0.143876684 | 0.121808612 | 0.050259998 | 0.192121062 |
| 0.202225263 | 0.24465851  | 0.130481652 | 0.216979498 |
| 0.174132636 | 0.2319726   | 0.184538998 | 0.005074361 |
| 0.106731304 | 0.025597856 | 0.074004162 | 0.350114782 |
| 0.248355866 | 0.245201613 | 0.092637985 | 0.220977976 |
| 0.171733998 | 0.230157459 | 0.2782403   | 0.137915913 |
| 0.336898512 | 0.08842861  | 0.208563302 | 0.15081592  |
| 0.183807995 | 0.140171217 | 0.270861577 | 0.168863383 |
| 0.165806104 | 0.255002736 | 0.186418845 | 0.149034685 |
| 0.266476233 | 0.410192974 | 1           | 0.356655554 |
| 0.097137413 | 0.161614761 | 0.194439955 | 0.29057761  |
| 0.252970829 | 0.227559323 | 0.236591543 | 0.384996221 |
| 0.166297457 | 0.135340477 | 0.222638166 | 0.190290467 |
| 0.280208238 | 0.133458135 | 0.125660806 | 0.092414124 |
| 0.204418022 | 0.173591477 | 0.377086222 | 0.2479473   |
| 0.189849955 | 0.151608155 | 0.362346269 | 0.148951307 |
| 0.175636598 | 0.170859968 | 0.188686697 | 0.260008177 |
| 0.194111525 | 0.311117363 | 0.253022847 | 0.279297468 |
| 0.157604776 | 0.335936536 | 0.230810329 | 0.307021091 |
| 0.040428164 | 0.354640335 | 0.229875692 | 0.168369204 |
| 0.144550144 | 0.23385418  | 0.190051643 | 0.335318727 |
| 0.288896726 | 0.242019345 | 0.221077862 | 0.24353473  |
| 0.302056677 | 0.336102626 | 0.349081331 | 0.273406969 |
| 0.155598403 | 0.125535468 | 0.161030997 | 0.21323182  |
| 0.225097334 | 0.238246982 | 0.134177447 | 0.383459442 |
| 0.320850697 | 0.267745021 | 0.207154827 | 0.418014252 |
| 0.240279023 | 0.384607497 | 0.264657789 | 0.235163803 |
| 0.386816001 | 0.367283118 | 0.36488056  | 0.19262589  |
| 0.361628896 | 0.187819711 | 0.063372337 | 0.294607737 |
| 0.3726651   | 0.01533832  | 0.283053846 | 0.308057607 |
| 0.335629375 | 0.256290052 | 0.368660169 | 0.32925464  |
| 0.33274588  | 0.194180471 | 0.017490185 | 0.228457313 |
| 0.359706081 | 0.306230536 | 0.253933834 | 0.140542435 |
| 0.178988609 | 0.176737639 | 0.247375111 | 0.10314975  |
| 0.412849083 | 0.298682741 | 0.296620754 | 0.247160979 |
| 0.187680159 | 0.334437136 | 0.13242977  | 0.349894225 |
| 0.185322587 | 0.170367196 | 0.124589127 | 0.296733039 |
| 0.119558418 | 0.261591526 | 0.172133133 | 0.191776459 |
| 0.255006199 | 0.191508653 | 0.109236076 | 0.200374586 |
| 0.152558394 | 0.145987117 | 0.247275058 | 0.208323981 |
| 0.179801042 | 0.272614893 | 0.177862637 | 0.210563718 |
| 0.220787955 | 0.319658152 | 0.195317282 | 0.330786028 |

|             |             |             |             |
|-------------|-------------|-------------|-------------|
| 0.186399267 | 0.226806929 | 0.210861556 | 0.3690569   |
| 0.377634663 | 0.156940166 | 0.287700358 | 0.052409485 |
| 0.145520345 | 0.10372125  | 0.079941281 | 0.14774078  |
| 0.299508635 | 0.191846328 | 0.179154585 | 0.225816133 |
| 0.177945144 | 0.203311267 | 0.159863946 | 0.384677146 |
| 0.213995    | 0.17273302  | 0.295283789 | 0.157050522 |
| 0.041354327 | 0.205764612 | 0.260738223 | 0.188038084 |
| 0.230640233 | 0.073515222 | 0.086265058 | 0.302874865 |
| 0.110995264 | 0.158153979 | 0.307899656 | 0.234429268 |
| 0.130729088 | 0.282893104 | 0.365141765 | 0.021972039 |
| 0.177513351 | 0.109132597 | 0.260312982 | 0.123248449 |
| 0.243984824 | 0.291963306 | 0.164129436 | 0.190067804 |
| 0.159292823 | 0.35505983  | 0.300033612 | 0.329538098 |
| 0.134455546 | 0.373037061 | 0.269153536 | 0.305763294 |
| 0.23612258  | 0.137081767 | 0.054406808 | 0.25706438  |
| 0.293569419 | 0.128978692 | 0.155503091 | 0.227694499 |
| 0.14622718  | 0.200602101 | 0.204616858 | 0.345573611 |
| 0.409608874 | 0.318290152 | 0.227889185 | 0.27239369  |
| 0.286157786 | 0.215866509 | 0.297567486 | 0.384760648 |
| 0.116604653 | 0.161816832 | 0.165016381 | 0.311793611 |
| 0.234516317 | 0.172090357 | 0.341718944 | 0.075990508 |
| 0.00283341  | 0.17494838  | 0.160291224 | 0.237865977 |
| 0.12049974  | 0.150796364 | 0.220455807 | 0.346118888 |
| 0.228549582 | 0.325547726 | 0.278946906 | 0.169805928 |
| 0.312233098 | 0.165697208 | 0.14902692  | 0.183337972 |
| 0.301223028 | 0.085401598 | 0.174072642 | 0.411461241 |
| 0.115151224 | 0.113355507 | 0.207542767 | 0.009744361 |
| 0.151164061 | 0.222322079 | 0.214594216 | 0.317917302 |
| 0.326684755 | 0.300388074 | 0.2170591   | 0.123939327 |
| 0.253223596 | 0.218216607 | 0.021108141 | 0.329800159 |
| 0.353061816 | 0.346683115 | 0.347254477 | 0.355000818 |
| 0.315833149 | 0.246841767 | 0.265452341 | 0.167900641 |
| 0.232208269 | 0.182520188 | 0.121091599 | 0.21526158  |
| 0.011423163 | 0.282721275 | 0.214492329 | 0.239113261 |
| 0.226219132 | 0.255276207 | 0.139325777 | 0.180178354 |
| 0.07269015  | 0.065176664 | 0.188558624 | 0.256472569 |
| 0.268918359 | 0.095383539 | 0.089236857 | 0.125866496 |
| 0.311272604 | 0.297140948 | 0.128770598 | 0.366968585 |
| 0.204639178 | 0.172114135 | 0.207894354 | 0.242890196 |
| 0.213494869 | 0.055460963 | 0.179330623 | 0.011733154 |
| 0.095861569 | 0.362406999 | 0.161704227 | 0.172450143 |
| 0.232054564 | 0.04701162  | 0.293848554 | 0.369960489 |
| 0.313152119 | 0.341097707 | 0.337413834 | 0.119069067 |
| 0.343325767 | 0.032320601 | 0.343453293 | 0.266391428 |
| 0.116711286 | 0.003682263 | 0.032608388 | 0.300300564 |
| 0.164354066 | 0.135194115 | 0.244708712 | 0.126017899 |
| 0.219161597 | 0.176706022 | 0.200617884 | 0.162551    |
| 0.177373075 | 0.207873875 | 0.144872993 | 0.329559478 |
| 0.251484749 | 0.26341439  | 0.149900558 | 0.18582024  |
| 0.172825974 | 0.179388515 | 0.19399497  | 0.02034805  |
| 0.2455058   | 0.203468067 | 0.373488795 | 0.337806691 |
| 0.377733841 | 0.223541022 | 0.09327198  | 0.131239504 |
| 0.306228184 | 0.138023412 | 0.123013612 | 0.150900795 |
| 0.311681469 | 0.186301044 | 0.28579482  | 0.290651007 |

|             |             |             |             |
|-------------|-------------|-------------|-------------|
| 0.361057823 | 0.346105803 | 0.156385364 | 0.263600481 |
| 0.052302093 | 0.009784822 | 0.153173504 | 0.271693932 |
| 0.09160741  | 0.159281451 | 0.297053913 | 0.227557405 |
| 0.241494922 | 0.099784553 | 0.12331525  | 0.128574112 |
| 0.239439119 | 0.196557797 | 0.163015642 | 0.286688386 |
| 0.218892083 | 0.169328532 | 0.257707144 | 0.251884076 |
| 0.166031383 | 0.296614246 | 0.269828132 | 0.138222361 |
| 0.148999446 | 0.149452053 | 0.177279945 | 0.236776329 |
| 0.288682251 | 0.304465157 | 0.186384596 | 0.064697061 |
| 0.292766411 | 0.202016332 | 0.322825543 | 0.316919257 |
| 0.378506703 | 0.386761626 | 0.379814085 | 0.219998645 |
| 0.184285597 | 0.229487253 | 0.171788475 | 0.226182484 |
| 0.336392387 | 0.135522978 | 0.334968112 | 0.130421076 |
| 0.235279536 | 0.25155299  | 0.142378525 | 0.230286078 |
| 0.144400182 | 0.246305385 | 0.249458744 | 0.166493831 |
| 0.19717281  | 0.125300664 | 0.192610649 | 0.253432074 |
| 0.272053165 | 0.094901843 | 0.247216371 | 0.219362975 |
| 0.282803621 | 0.099281526 | 0.21311476  | 0.382505305 |
| 0.202333918 | 0.221905915 | 0.149199322 | 0.257157763 |
| 0.251084164 | 0.133173677 | 0.055370755 | 0.27813291  |
| 0.33971455  | 0.176470491 | 0.344073193 | 0.327972785 |
| 0.197655393 | 0.152568725 | 0.143120437 | 0.191690059 |
| 0.256566595 | 0.16716776  | 0.259637904 | 0.186968542 |
| 0.352918084 | 0.404895258 | 0.291320927 | 0.233287117 |
| 0.157351502 | 0.160553259 | 0.127203612 | 0.285460836 |
| 0.127267055 | 0.160667684 | 0.119599052 | 0.258131027 |
| 0.015166436 | 0.071793279 | 0.34843697  | 0.211960694 |
| 0.399879543 | 0.323022881 | 0.355322958 | 0.230689987 |
| 0.003959955 | 0.193370195 | 0.186318983 | 0.162024783 |
| 0.273832766 | 0.273398672 | 0.180053856 | 0.211149453 |
| 0.328088359 | 0.141725862 | 0.220493783 | 0.141734372 |
| 0.084612435 | 0.182031969 | 0.285992682 | 0.250657777 |
| 0.262934543 | 0.1697924   | 0.118547544 | 0.241993216 |
| 0.130075645 | 0.294668563 | 0.298769801 | 0.103888543 |
| 0.068099028 | 0.320598711 | 0.253869453 | 0.120626973 |
| 0.153405914 | 0.304310407 | 0.334482829 | 0.012609279 |
| 0.209551537 | 0.069846067 | 0.230239412 | 0.222297383 |
| 0.254027416 | 0.23519744  | 0.237706842 | 0.199115217 |
| 0.211725266 | 0.268791738 | 0.212691306 | 0.245469536 |
| 0.230617219 | 0.264863368 | 0.190671298 | 0.205691269 |
| 0.169591097 | 0.219682701 | 0.219307679 | 0.217511673 |
| 0.143391929 | 0.294594128 | 0.312995344 | 0.152922171 |
| 0.25820129  | 0.19807908  | 0.36138819  | 0.321211787 |
| 0.347574206 | 0.185166628 | 0.212770232 | 0.266355793 |
| 0.070377378 | 0.134378006 | 0.146802122 | 0.193328973 |
| 0.238374145 | 0.137602474 | 0.161226039 | 0.170598854 |
| 0.211109128 | 0.373534999 | 0.296115968 | 0.358543236 |
| 0.19873239  | 0.180871275 | 0.097808602 | 0.187173223 |
| 0.224011045 | 0.23271548  | 0.17828832  | 0.025915993 |
| 0.226889114 | 0.174087413 | 0.274105384 | 0.344691142 |
| 0.107741417 | 0.353520866 | 0.097891159 | 0.178567595 |
| 0.086126025 | 0.236164276 | 0.234667932 | 0.231067661 |
| 0.071023572 | 0.249761    | 0.207681073 | 0.143646767 |
| 0.237061808 | 0.22458472  | 0.199744826 | 0.228686139 |

|             |             |             |             |
|-------------|-------------|-------------|-------------|
| 0.269874461 | 0.216683497 | 0.382822073 | 0.188895219 |
| 0.147658821 | 0.159431591 | 0.148911949 | 0.199633763 |
| 0.239387496 | 0.337700714 | 0.172852249 | 0.331979952 |
| 0.174671656 | 0.233580078 | 0.411168938 | 0.215717034 |
| 0.221757313 | 0.213543517 | 0.078384541 | 0.156292112 |
| 0.247663749 | 0.123133729 | 0.00387392  | 0.043348348 |
| 0.269147037 | 0.174609119 | 0.227063075 | 0.268529664 |
| 0.188249481 | 0.311754279 | 0.070803315 | 0.213523617 |
| 0.324260277 | 0.375647777 | 0.172867937 | 0.323229564 |
| 0.264797357 | 0.212383091 | 0.16966     | 0.024730355 |
| 0.15970074  | 0.138360299 | 0.122645555 | 0.189272083 |
| 0.128566045 | 0.085364575 | 0.169958623 | 0.159346732 |
| 0.320193357 | 0.064793104 | 0.180294459 | 0.217115952 |
| 0.261550323 | 0.379371561 | 0.231996561 | 0.230265496 |
| 0.158819981 | 0.271915305 | 0.157224016 | 0.160797347 |
| 0.162518297 | 0.149685627 | 0.26299241  | 0.119786234 |
| 0.155912214 | 0.19951105  | 0.018566398 | 0.381218297 |
| 0.353078658 | 0.150548627 | 0.305990818 | 0.09749831  |
| 0.278240485 | 0.325329837 | 0.163694931 | 0.142787475 |
| 0.074682796 | 0.158883942 | 0.259392374 | 0.276137052 |
| 0.069532524 | 0.182102616 | 0.184827998 | 0.173019972 |
| 0.376261707 | 0.139297727 | 0.321381876 | 0.10999129  |
| 0.324699025 | 0.279836631 | 0.209211026 | 0.207363479 |
| 0.179753259 | 0.163740723 | 0.128166152 | 0.372568608 |
| 0.238856617 | 0.130922192 | 0.274117572 | 0.230210532 |
| 0.135733915 | 0.306360108 | 0.151677416 | 0.37108261  |
| 0.188568215 | 0.260011496 | 0.264297711 | 0.319510532 |
| 0.309451947 | 0.152455248 | 0.114435793 | 0.192108629 |
| 0.310024773 | 0.155083461 | 0.161719032 | 0.268867369 |
| 0.10620128  | 0.255099574 | 0.155940148 | 0.203289765 |
| 0.11887302  | 0.25060668  | 0.157208283 | 0.240347626 |
| 0.229403869 | 0.195614838 | 0.205538793 | 0.365020515 |
| 0.172283979 | 0.08969586  | 0.39277457  | 0.012401632 |
| 0.174742486 | 0.199284959 | 0.246324239 | 0.1828645   |
| 0.257818735 | 0.209069489 | 0.169818308 | 0.011645573 |
| 0.285408497 | 0.08003835  | 0.205414745 | 0.174693565 |
| 0.115746166 | 0.162095582 | 0.343863786 | 0.343160204 |
| 0.239060204 | 0.137493957 | 0.09988107  | 0.329623265 |
| 0.088929726 | 0.103257988 | 0.128761508 | 0.188701405 |
| 0.108238845 | 0.119864913 | 0.13723459  | 0.127051448 |
| 0.252364596 | 0.232793345 |             |             |
| ASPM        | 0.18396846  | 0.520884955 | 0.173393017 |
| 0.225991183 | 0.319703365 | 0.495734022 | 0.1461945   |
| 0.235292236 | 0.48145532  | 0.41968351  | 0.419108388 |
| 0.057756858 | 0.072712327 | 0.506477311 | 0.128767731 |
| 0.41506698  | 0.078731515 | 0.206878837 | 0.123380054 |
| 0.348660796 | 0.291273309 | 0.352718321 | 0.517609612 |
| 0.303989091 | 0.327048602 | 0.49779009  | 0.418832643 |
| 0.528450111 | 0.290247045 | 0.487011298 | 0.293724761 |
| 0.466230178 | 0.330291585 | 0.407127249 | 0.067751975 |
| 0.483469253 | 0.013981258 | 0.471279421 | 0.309509462 |
| 0.150320782 | 0.438524884 | 0.484233329 | 0.309833325 |
| 0.491420843 | 0.116627868 | 0.297739418 | 0.451827172 |
| 0.472844813 | 0.379291045 | 0.193426634 | 0.514915447 |

|             |             |             |             |
|-------------|-------------|-------------|-------------|
| 0.446814439 | 0.469246258 | 0.519838224 | 0.006163845 |
| 0.293604222 | 0.074831614 | 0.212575801 | 0.521665798 |
| 0.309982877 | 0.19975571  | 0.326296874 | 0.381134034 |
| 0.452554504 | 0.432298948 | 0.351020461 | 0.461616378 |
| 0.519074084 | 0.160664626 | 0.491341541 | 0.236301116 |
| 0.484406559 | 0.121755972 | 0.277354324 | 0.228917743 |
| 0.436401799 | 0.274330733 | 0.376856892 | 0.31225913  |
| 0.524137484 | 0.512781015 | 0.356655554 | 1           |
| 0.097524055 | 0.343889978 | 0.295552262 | 0.368491284 |
| 0.446588026 | 0.18824585  | 0.475841547 | 0.506823162 |
| 0.147237369 | 0.503507159 | 0.483372063 | 0.272693358 |
| 0.525478642 | 0.298385151 | 0.504729233 | 0.159617284 |
| 0.390195333 | 0.35772851  | 0.494404163 | 0.393329618 |
| 0.343005429 | 0.203625293 | 0.517039637 | 0.314513891 |
| 0.332726374 | 0.209697593 | 0.241661482 | 0.499247561 |
| 0.487552915 | 0.525740428 | 0.515385437 | 0.445717594 |
| 0.396816357 | 0.520725504 | 0.490793038 | 0.49867301  |
| 0.223923808 | 0.523434764 | 0.316535953 | 0.090192155 |
| 0.204539801 | 0.149883385 | 0.264047998 | 0.394317696 |
| 0.515396989 | 0.44793275  | 0.323331434 | 0.285354984 |
| 0.476261323 | 0.51209683  | 0.5234396   | 0.49179541  |
| 0.111891541 | 0.252743608 | 0.408794387 | 0.412719179 |
| 0.449492001 | 0.229815168 | 0.248780644 | 0.520684417 |
| 0.466293859 | 0.478417782 | 0.330591168 | 0.519703385 |
| 0.315100548 | 0.50112701  | 0.535367861 | 0.263911632 |
| 0.514698142 | 0.510456113 | 0.501369961 | 0.415901854 |
| 0.504113069 | 0.468426715 | 0.095611036 | 0.475084455 |
| 0.485681443 | 0.014489997 | 0.515440706 | 0.514351876 |
| 0.524851038 | 0.501293424 | 0.499279865 | 0.51779674  |
| 0.525862775 | 0.187401844 | 0.0356547   | 0.326466882 |
| 0.516688913 | 0.481092062 | 0.190462558 | 0.452881922 |
| 0.380437098 | 0.51475614  | 0.491493235 | 0.337478924 |
| 0.485385372 | 0.514096858 | 0.52485488  | 0.49234355  |
| 0.451281518 | 0.42282485  | 0.390480569 | 0.501226619 |
| 0.108234983 | 0.247078858 | 0.164871569 | 0.402158999 |
| 0.481605352 | 0.250309272 | 0.50864501  | 0.396005633 |
| 0.280239733 | 0.489716038 | 0.339905661 | 0.394731274 |
| 0.175387693 | 0.50605805  | 0.301682308 | 0.32341349  |
| 0.091271079 | 0.272530825 | 0.259138389 | 0.229863005 |
| 0.293880952 | 0.346010993 | 0.498812383 | 0.511869424 |
| 0.399008984 | 0.336323105 | 0.510499769 | 0.489588131 |
| 0.443770638 | 0.398319063 | 0.345503513 | 0.024434263 |
| 0.303415882 | 0.35404965  | 0.172231781 | 0.445391018 |
| 0.307029906 | 0.306713042 | 0.437617996 | 0.416121128 |
| 0.441949761 | 0.298303435 | 0.39688395  | 0.467246372 |
| 0.309691996 | 0.334007126 | 0.485183118 | 0.502151819 |
| 0.017903963 | 0.432059466 | 0.506265419 | 0.161237857 |
| 0.435458654 | 0.124638337 | 0.249303523 | 0.503574287 |
| 0.29838001  | 0.226021516 | 0.515830361 | 0.415353695 |
| 0.410650213 | 0.357630455 | 0.506158007 | 0.04975348  |
| 0.379673585 | 0.067411253 | 0.339562083 | 0.469526673 |
| 0.365154394 | 0.36429253  | 0.318204973 | 0.298876059 |
| 0.285543145 | 0.518081661 | 0.489128975 | 0.520109222 |
| 0.403352858 | 0.507148636 | 0.500174163 | 0.493413837 |



|             |             |             |             |
|-------------|-------------|-------------|-------------|
| 0.461728776 | 0.401992734 | 0.118379498 | 0.505017154 |
| 0.504630495 | 0.364894138 | 0.210227087 | 0.497577123 |
| 0.442860466 | 0.43428502  | 0.138232028 | 0.501200692 |
| 0.489813345 | 0.516045954 | 0.202971828 | 0.404861906 |
| 0.463684102 | 0.358678343 | 0.484514837 | 0.499806672 |
| 0.414445587 | 0.375815092 | 0.353314216 | 0.4268441   |
| 0.303560723 | 0.215157313 | 0.424865141 | 0.163949121 |
| 0.010385648 | 0.207439742 | 0.177362367 | 0.207585298 |
| 0.152750545 | 0.488724253 | 0.450693622 | 0.519061426 |
| 0.205941279 | 0.490834111 | 0.363682791 | 0.324910212 |
| 0.50069927  | 0.376888903 | 0.391930125 | 0.419943485 |
| 0.367020476 | 0.04042143  | 0.171712188 | 0.518628933 |
| 0.148765443 | 0.228305575 | 0.443411613 | 0.00530563  |
| 0.131022889 | 0.523151677 | 0.230684959 | 0.313762161 |
| 0.48227687  | 0.32981487  | 0.354668624 | 0.441641772 |
| 0.406263719 | 0.19827899  | 0.005672642 | 0.512665291 |
| 0.505855011 | 0.495964756 | 0.508164768 | 0.497206027 |
| 0.490738316 | 0.483647367 | 0.461362451 | 0.50979162  |
| 0.207426195 | 0.23212289  | 0.20343111  | 0.338022868 |
| 0.013158182 | 0.440626883 | 0.348681656 | 0.257223556 |
| 0.465431395 | 0.401714207 | 0.102919774 | 0.377454442 |
| 0.068510447 | 0.188751238 | 0.424970297 | 0.291663062 |
| 0.38165476  | 0.058446567 | 0.308252977 | 0.34389617  |
| 0.506350324 | 0.462766557 | 0.376356125 | 0.519971475 |
| 0.392440117 | 0.29832029  | 0.35249796  | 0.44101707  |
| 0.158134986 | 0.160982084 | 0.477992526 | 0.063525958 |
| 0.278182901 | 0.491678441 | 0.428110318 | 0.178487032 |
| 0.37013688  | 0.024147234 | 0.481561612 | 0.515108688 |
| 0.520620696 | 0.510018299 | 0.519292629 | 0.261491406 |
| 0.520894966 | 0.094920684 | 0.523739799 | 0.517880999 |
| 0.456513584 | 0.003206264 | 0.011603889 | 0.512959198 |
| 0.426967892 | 0.185406455 | 0.272004879 | 0.465214938 |
| 0.175276775 | 0.318558413 | 0.14989516  | 0.1788031   |
| 0.503484334 | 0.260559043 | 0.170710952 | 0.514349152 |
| 0.319994346 | 0.308231045 | 0.511215092 | 0.218566557 |
| 0.446274158 | 0.119388276 | 0.216966956 | 0.01124027  |
| 0.404248442 | 0.263371151 | 0.509051551 | 0.523227065 |
| 0.497070587 | 0.424288581 | 0.417730238 | 0.410522552 |
| 0.485119295 | 0.25615443  | 0.411367122 | 0.271425016 |
| 0.529444471 | 0.427711026 | 0.405812341 | 0.42796831  |
| 0.496767799 | 0.506501048 | 0.093585772 | 0.466868567 |
| 0.03768193  | 0.002215119 | 0.515305162 | 0.370508084 |
| 0.083898858 | 0.392443144 | 0.366874474 | 0.338062953 |
| 0.299480913 | 0.090009399 | 0.25241104  | 0.231785034 |
| 0.367339682 | 0.406757875 | 0.27091238  | 0.374429694 |
| 0.29106916  | 0.142526075 | 0.265781247 | 0.238650754 |
| 0.31393608  | 0.446437272 | 0.330637971 | 0.071450896 |
| 0.495951828 | 0.442106711 | 0.141193523 | 0.289956102 |
| 0.497567503 | 0.515371076 | 0.095333803 | 0.023129085 |
| 0.389750079 | 0.364184983 | 0.502679018 | 0.530681529 |
| 0.5226054   | 0.496798633 | 0.452768335 | 0.156987862 |
| 0.15603404  | 0.371812871 | 0.2947144   | 0.120184032 |
| 0.520262454 | 0.197959034 | 0.519704353 | 0.289347234 |
| 0.234405293 | 0.31697828  | 0.072990027 | 0.179255293 |

|             |             |             |             |
|-------------|-------------|-------------|-------------|
| 0.394546145 | 0.282860446 | 0.22446801  | 0.310697083 |
| 0.354639348 | 0.244072262 | 0.127482055 | 0.295506122 |
| 0.451246824 | 0.166754029 | 0.273303918 | 0.442639045 |
| 0.486205093 | 0.341101723 | 0.469248035 | 0.469640446 |
| 0.262498472 | 0.24194768  | 0.442081482 | 0.456669549 |
| 0.517714888 | 0.47293569  | 0.060731441 | 0.529444521 |
| 0.503717146 | 0.490497323 | 0.520722914 | 0.432279246 |
| 0.204963476 | 0.396915969 | 0.326083118 | 0.37757058  |
| 0.290052027 | 0.501349327 | 0.3198401   | 0.160094485 |
| 0.395765001 | 0.487244708 | 0.511357135 | 0.233722644 |
| 0.490300274 | 0.296316876 | 0.185301108 | 0.509938044 |
| 0.169656434 | 0.185172431 | 0.487777076 | 0.485615192 |
| 0.003330571 | 0.118820601 | 0.492369801 | 0.317361707 |
| 0.498338814 | 0.502823563 | 0.485089188 | 0.383167896 |
| 0.001608924 | 0.439938524 | 0.428214026 | 0.445936198 |
| 0.524094103 | 0.470467445 | 0.243646545 | 0.128459205 |
| 0.372322787 | 0.220998216 | 0.192148505 | 0.455350153 |
| 0.175744241 | 0.514049446 | 0.292862078 | 0.331825667 |
| 0.24654056  | 0.242539648 | 0.234915368 | 0.346557916 |
| 0.151934195 | 0.3328878   | 0.422140977 | 0.427139985 |
| 0.190317393 | 0.477014351 | 0.500674254 | 0.086481946 |
| 0.366752901 | 0.474012002 | 0.486107847 | 0.005643953 |
| 0.466515124 | 0.02402738  | 0.237163577 | 0.260043196 |
| 0.251634973 | 0.262146124 | 0.295059765 | 0.324453823 |
| 0.462325046 | 0.315045601 | 0.346931937 | 0.315731853 |
| 0.211257566 | 0.338510276 | 0.434070161 | 0.476985588 |
| 0.301821136 | 0.229997658 | 0.23377108  | 0.23376374  |
| 0.102988207 | 0.521295674 | 0.362194242 | 0.20615655  |
| 0.304984864 | 0.462536945 | 0.418137343 | 0.526778551 |
| 0.462097102 | 0.26914213  | 0.398070623 | 0.531714594 |
| 0.289850913 | 0.403568624 | 0.175972906 | 0.500218372 |
| 0.331710322 | 0.216608787 | 0.506468112 | 0.473693554 |
| 0.506928786 | 0.455896519 | 0.361220929 | 0.487062964 |
| 0.422518335 | 0.417638107 | 0.450274496 | 0.12639493  |
| 0.294198708 | 0.269181005 | 0.265616309 | 0.009040116 |
| 0.432922801 | 0.418656525 | 0.515403066 | 0.517356609 |
| 0.283564554 | 0.452275748 | 0.452663474 | 0.184147391 |
| 0.409123267 | 0.331195498 | 0.260423272 | 0.509691712 |
| 0.200688702 | 0.285778606 | 0.326319754 | 0.496785479 |
| 0.480852105 | 0.486797696 | 0.275052171 | 0.360182777 |
| 0.333151564 | 0.35938987  | 0.49239688  | 0.273582454 |
| 0.487916065 | 0.184971404 | 0.501483822 | 0.333680345 |
| 0.263430484 | 0.519359344 | 0.160492813 | 0.521566238 |
| 0.358041176 | 0.273293197 | 0.482278219 | 0.427134491 |
| 0.423019372 | 0.158138941 | 0.167775269 | 0.497906786 |
| 0.308627069 | 0.33973158  | 0.023524127 | 0.068849456 |
| 0.38487383  | 0.389590406 | 0.513387447 | 0.440473531 |
| 0.250212932 | 0.391014275 | 0.151353267 | 0.424740571 |
| 0.518419504 | 0.519520199 | 0.31481982  | 0.347075284 |
| 0.44060837  | 0.180571081 | 0.528814964 | 0.025522258 |
| 0.463041604 | 0.454828527 | 0.445543542 | 0.120869192 |
| 0.059354489 | 0.195765398 | 0.484318481 | 0.198274424 |
| 0.489743791 | 0.198476297 | 0.476978045 | 0.499643253 |
| 0.31594211  | 0.521186638 | 0.160867488 | 0.452713568 |

|             |             |             |             |
|-------------|-------------|-------------|-------------|
| 0.141578367 | 0.365115921 | 0.400776974 | 0.441026283 |
| 0.243465044 | 0.285542512 | 0.428480113 | 0.220129931 |
| 0.080105798 | 0.294842044 | 0.005292874 | 0.456829753 |
| 0.50361347  | 0.346456903 | 0.33234045  | 0.395411202 |
| 0.343131114 | 0.466964754 | 0.266535085 | 0.469653779 |
| 0.027287358 | 0.377389503 | 0.291975099 | 0.511681981 |
| 0.253677804 | 0.447412476 | 0.107108719 | 0.32543599  |
| 0.504883965 | 0.310104817 | 0.365028592 | 0.348925706 |
| 0.526907312 | 0.498203734 | 0.334417181 | 0.250320222 |
| 0.484905802 | 0.176623453 | 0.493858222 | 0.510872928 |
| 0.228978174 | 0.202210199 | 0.469547931 | 0.267630149 |
| 0.305402781 | 0.491814922 | 0.478639279 | 0.509480019 |
| 0.097396368 | 0.337034319 | 0.472092219 | 0.511157804 |
| 0.364649067 | 0.162222769 | 0.231744361 | 0.248037216 |
| 0.519879986 | 0.172978664 | 0.264968216 | 0.467487149 |
| 0.202513668 | 0.381565524 | 0.485936774 | 0.203888939 |
| 0.070712546 | 0.255011622 | 0.43992332  | 0.263557709 |
| 0.362027348 | 0.400517554 | 0.252154874 | 0.445957324 |
| 0.176142109 | 0.04876474  | 0.473969662 | 0.014813859 |
| 0.489510356 | 0.434931031 | 0.337502424 | 0.377092065 |
| 0.323335103 | 0.461587322 | 0.488752118 | 0.005443977 |
| 0.464112483 | 0.059026299 | 0.350965197 | 0.240423096 |
| 0.296664081 | 0.137979516 | 0.506868564 | 0.502849722 |
| 0.441283174 | 0.384860142 | 0.364168928 | 0.510647819 |
| 0.13270557  | 0.349489458 | 0.355508727 | 0.530177388 |
| 0.205943949 | 0.474614941 | 0.460957767 | 0.393487879 |
| 0.490085745 | 0.389909672 |             |             |
| ATIC        | 0.006450866 | 0.093520952 | 0.002152077 |
| 0.002195997 | 0.174405243 | 0.024102178 | 0.019328577 |
| 0.023126517 | 0.12021256  | 0.042030196 | 0.062072513 |
| 0.002271139 | 0.039295886 | 0.121437749 | 0.024262646 |
| 0.1713193   | 0.011364706 | 0.038267624 | 0.015753669 |
| 0.014675547 | 0.197864099 | 0.045903531 | 0.033032042 |
| 0.224910991 | 0.033094573 | 0.059104976 | 0.170392148 |
| 0.110770565 | 0.013545948 | 0.088136369 | 0.00223143  |
| 0.113253752 | 0.193933182 | 0.096228987 | 0.000768914 |
| 0.0852722   | 0.103123413 | 0.109691726 | 0.084445883 |
| 0.014582471 | 0.087935634 | 0.025223351 | 0.043296439 |
| 0.056507741 | 0.00246314  | 0.004277393 | 0.201659107 |
| 0.089839727 | 0.079413603 | 0.007763017 | 0.091687628 |
| 0.086791832 | 0.049284968 | 0.063410603 | 0.000307598 |
| 0.110517791 | 0.051690154 | 0.126620854 | 0.096399956 |
| 0.050013451 | 0.046901675 | 0.047659215 | 0.100012485 |
| 0.199524442 | 0.237030335 | 0.137584122 | 0.063769352 |
| 0.106799143 | 0.117710222 | 0.139455945 | 0.003367937 |
| 0.074161941 | 0.010492136 | 0.051026926 | 0.028608189 |
| 0.089323016 | 0.072887467 | 0.110347416 | 0.153642066 |
| 0.074809119 | 0.133556981 | 0.097137413 | 0.097524055 |
| 1           | 0.235849539 | 0.111430634 | 0.173159071 |
| 0.215537284 | 0.046313609 | 0.092271323 | 0.128208168 |
| 0.02325415  | 0.066699586 | 0.154617294 | 0.032715157 |
| 0.079249205 | 0.144705883 | 0.040820613 | 0.085371276 |
| 0.211518584 | 0.196510767 | 0.136538871 | 0.074361552 |
| 0.166711603 | 0.012437103 | 0.083978898 | 0.225219734 |

|             |             |             |             |
|-------------|-------------|-------------|-------------|
| 0.047536357 | 0.008872704 | 0.101778648 | 0.162153769 |
| 0.096682875 | 0.104407398 | 0.129790436 | 0.184533782 |
| 0.154556815 | 0.106240606 | 0.074885573 | 0.129063622 |
| 0.004717026 | 0.117472186 | 0.024257524 | 0.01016571  |
| 0.006814669 | 0.036830741 | 0.194673053 | 0.129715731 |
| 0.118129057 | 0.08828398  | 0.026003914 | 0.113822348 |
| 0.200054512 | 0.079294977 | 0.124854439 | 0.136428564 |
| 0.007098685 | 0.184570064 | 0.122540288 | 0.031083656 |
| 0.164072192 | 0.056569136 | 0.17641923  | 0.102838702 |
| 0.075796114 | 0.169685924 | 0.014402165 | 0.111106954 |
| 0.110570712 | 0.126926531 | 0.076237433 | 0.035883935 |
| 0.107217316 | 0.084677608 | 0.140856122 | 0.164436012 |
| 0.086909762 | 0.024963973 | 0.046762854 | 0.152705389 |
| 0.138465422 | 0.003576949 | 0.146166912 | 0.153821646 |
| 0.098006043 | 0.13887593  | 0.176815199 | 0.132934254 |
| 0.09917517  | 0.02197243  | 0.039374847 | 0.202253783 |
| 0.100354932 | 0.080506362 | 0.081337457 | 0.103290136 |
| 0.223303052 | 0.037478752 | 0.16154763  | 0.007336465 |
| 0.156093667 | 0.109301735 | 0.127136549 | 0.130989198 |
| 0.108911732 | 0.073844042 | 0.16969169  | 0.070852684 |
| 0.00540098  | 0.007916918 | 0.005911699 | 0.179549232 |
| 0.010091257 | 0.079016573 | 0.033009065 | 0.254503287 |
| 0.079971611 | 0.052008669 | 0.098236924 | 0.194868916 |
| 0.011465727 | 0.064092703 | 0.030115439 | 0.035273227 |
| 0.009864157 | 0.039916187 | 0.010262224 | 0.01255812  |
| 0.129061692 | 0.046025756 | 0.120064639 | 0.142040842 |
| 0.168004814 | 0.026490436 | 0.098893282 | 0.132030149 |
| 0.155617414 | 0.118312733 | 0.107518684 | 0.00024672  |
| 0.033700983 | 0.106699979 | 0.148870938 | 0.128713979 |
| 0.041257577 | 0.056207832 | 0.156857316 | 0.163716687 |
| 0.020880658 | 0.045156769 | 0.107683251 | 0.093032031 |
| 0.034161005 | 0.054639617 | 0.140065646 | 0.093173311 |
| 6.98E-05    | 0.053604041 | 0.114765757 | 0.080500125 |
| 0.140381738 | 0.021405858 | 0.028134192 | 0.141935934 |
| 0.076646198 | 0.231741973 | 0.137714488 | 0.198176279 |
| 0.009880741 | 0.047951479 | 0.163555467 | 0.041521447 |
| 0.242477326 | 0.003894157 | 0.137967793 | 0.049213501 |
| 0.066768916 | 0.17753468  | 0.211184376 | 0.085004181 |
| 0.010136805 | 0.123978772 | 0.09676413  | 0.125240682 |
| 0.073507032 | 0.157335585 | 0.137077952 | 0.1124115   |
| 0.09774404  | 0.166779229 | 0.08615453  | 0.101280651 |
| 0.13481516  | 0.016455099 | 0.012242657 | 0.164343966 |
| 0.11084927  | 0.186795076 | 0.02729882  | 0.137416404 |
| 0.114281297 | 0.077880295 | 0.051237834 | 0.220057629 |
| 0.083010058 | 0.028077629 | 0.141056935 | 0.172716896 |
| 0.047907839 | 0.179930286 | 0.097935494 | 0.194465253 |
| 0.036066174 | 0.174010414 | 0.115152896 | 0.132597101 |
| 0.000504096 | 0.019210022 | 0.00959617  | 0.077052115 |
| 0.125973597 | 0.108414578 | 0.165710919 | 0.127417707 |
| 0.036745357 | 0.094057173 | 0.138678806 | 0.054110324 |
| 0.094486032 | 0.192402888 | 0.138387847 | 0.164425787 |
| 0.095272397 | 0.000728687 | 0.004555256 | 0.123140892 |
| 0.008303073 | 0.083760044 | 0.0965126   | 0.000124643 |
| 0.008549014 | 0.086354428 | 0.022986652 | 0.04497201  |

|             |             |             |             |
|-------------|-------------|-------------|-------------|
| 0.185638614 | 0.035331954 | 0.040721186 | 0.047714108 |
| 0.122394992 | 0.024051956 | 0.000246059 | 0.151314481 |
| 0.156136024 | 0.166912935 | 0.14943311  | 0.121049058 |
| 0.193262093 | 0.167094732 | 0.180034918 | 0.023238964 |
| 0.01594129  | 0.011513709 | 0.102029977 | 0.106599095 |
| 0.000920894 | 0.122154431 | 0.199675274 | 0.039656309 |
| 0.178116349 | 0.165712622 | 0.004586888 | 0.238611238 |
| 6.02E-05    | 0.058837151 | 0.056847643 | 0.128735464 |
| 0.262044303 | 0.001381943 | 0.002128411 | 0.046473274 |
| 0.058302976 | 0.072983492 | 0.082614275 | 0.116118011 |
| 0.071493142 | 0.020657176 | 0.088281288 | 0.145831634 |
| 0.017193966 | 0.010355027 | 0.076677324 | 9.47E-05    |
| 0.003874273 | 0.138171898 | 0.093228205 | 0.001899609 |
| 0.066191689 | 0.000377945 | 0.058979176 | 0.127020025 |
| 0.072333948 | 0.153552804 | 0.104391798 | 0.100914232 |
| 0.101442416 | 0.063600978 | 0.127882439 | 0.084950233 |
| 0.052863424 | 0.000275612 | 0.00213632  | 0.133020559 |
| 0.109382465 | 0.007772625 | 0.0450605   | 0.005340121 |
| 0.014825284 | 0.016833599 | 0.019276048 | 0.111553563 |
| 0.065499176 | 0.149010964 | 0.138009498 | 0.093541319 |
| 0.082705555 | 0.12722693  | 0.054881789 | 0.025786617 |
| 0.113563295 | 0.006543082 | 0.035318152 | 0.000521714 |
| 0.21590578  | 0.018194236 | 0.082102954 | 0.112232677 |
| 0.12287089  | 0.15335509  | 0.036093125 | 0.013395678 |
| 0.196285856 | 0.009004585 | 0.024697689 | 0.01375418  |
| 0.082751014 | 0.137078292 | 0.087663507 | 0.055200286 |
| 0.148912259 | 0.09751224  | 0.009997649 | 0.148542378 |
| 0.000163934 | 0.007178973 | 0.022457065 | 0.134762564 |
| 0.100505987 | 0.151124023 | 0.076059019 | 0.135294591 |
| 0.131899135 | 0.00044971  | 0.184426653 | 0.180766176 |
| 0.118648997 | 0.128094155 | 0.187593216 | 0.136939759 |
| 0.154017177 | 0.041124813 | 0.061151278 | 0.066067751 |
| 0.03831594  | 0.069574226 | 0.032043345 | 0.007312072 |
| 0.067154597 | 0.094461167 | 0.011090345 | 0.037967901 |
| 0.105786915 | 0.125859554 | 0.009016009 | 0.000777158 |
| 0.066701659 | 0.16131102  | 0.152903963 | 0.096343905 |
| 0.107355891 | 0.152693689 | 0.092622424 | 0.076180085 |
| 0.010532035 | 0.168021194 | 0.215811076 | 0.053531102 |
| 0.121341167 | 0.013475963 | 0.092788588 | 0.201928828 |
| 0.045981025 | 0.032543293 | 0.002918087 | 0.03653236  |
| 0.150369992 | 0.064501829 | 0.09675574  | 0.014167508 |
| 0.102712469 | 0.059018077 | 0.016514288 | 0.066481683 |
| 0.107311147 | 0.053869345 | 0.054053307 | 0.056959068 |
| 0.085978993 | 0.028373689 | 0.155074297 | 0.133567273 |
| 0.027048761 | 0.044222601 | 0.006731057 | 0.192664401 |
| 0.120706602 | 0.105894646 | 1.58E-05    | 0.082576205 |
| 0.14972235  | 0.097649177 | 0.090043092 | 0.196349577 |
| 0.028660508 | 0.091957944 | 0.231981209 | 0.179939048 |
| 0.098441687 | 0.026204622 | 0.144986778 | 0.020209322 |
| 0.13634388  | 0.135075123 | 0.096201355 | 0.043976618 |
| 0.093983737 | 0.022826665 | 0.01140193  | 0.136516709 |
| 0.106143141 | 0.004398963 | 0.037284298 | 0.194134783 |
| 0.000492849 | 0.125370287 | 0.196013079 | 0.03180457  |
| 0.15455678  | 0.141787445 | 0.098282498 | 0.048849234 |

|             |             |             |             |
|-------------|-------------|-------------|-------------|
| 0.0083664   | 0.187463532 | 0.089466653 | 0.047454584 |
| 0.087080692 | 0.074927617 | 0.018175192 | 0.018001584 |
| 0.1096112   | 0.008037267 | 0.037356037 | 0.00416019  |
| 0.034491438 | 0.086275541 | 0.098921729 | 0.122109509 |
| 0.117976795 | 0.032753651 | 0.051462526 | 0.033578952 |
| 0.119145419 | 0.087167167 | 0.125329954 | 0.026232375 |
| 0.024632093 | 0.202639433 | 0.110710002 | 0.002506883 |
| 0.177083503 | 0.190181295 | 0.14548076  | 0.000580352 |
| 0.125522183 | 0.000872697 | 0.115581242 | 0.065153443 |
| 0.080514407 | 0.139765143 | 0.196184137 | 0.070576358 |
| 0.121767382 | 0.074205745 | 0.03493914  | 0.07868235  |
| 0.039766777 | 0.061958185 | 0.137728946 | 0.067525615 |
| 0.049906809 | 0.016446054 | 0.019420425 | 0.01643325  |
| 0.002326928 | 0.11304084  | 0.058607612 | 0.00818767  |
| 0.121730925 | 0.085612028 | 0.116232148 | 0.091244343 |
| 0.140476467 | 0.013008566 | 0.147541689 | 0.072796815 |
| 0.015879078 | 0.005432915 | 0.007547461 | 0.058415801 |
| 0.060917745 | 0.056850982 | 0.061083256 | 0.038444483 |
| 0.131872523 | 0.09452505  | 0.053968474 | 0.12796178  |
| 0.063069777 | 0.194658951 | 0.01745545  | 0.014756538 |
| 0.025017349 | 0.046333164 | 0.189480357 | 0.000330671 |
| 0.114046917 | 0.003872014 | 0.117151225 | 0.084028705 |
| 0.14278457  | 0.113415972 | 0.00419256  | 0.009068313 |
| 0.006138821 | 0.023672377 | 0.041895181 | 0.119011973 |
| 0.093959144 | 0.028135224 | 0.14798947  | 0.007893037 |
| 0.147683484 | 0.171298396 | 0.181215207 | 0.087077878 |
| 0.145804088 | 0.033063066 | 0.128568831 | 0.01235186  |
| 0.097929528 | 0.070843492 | 0.069023179 | 0.10283195  |
| 0.126955324 | 0.137335533 | 0.012485043 | 0.138598526 |
| 0.146967607 | 0.034392237 | 0.131902763 | 0.07138837  |
| 0.018871084 | 0.018538802 | 0.132023397 | 0.050759264 |
| 0.073530791 | 0.098713579 | 0.00115145  | 0.017866088 |
| 0.133104849 | 0.158738496 | 0.112111929 | 0.210118683 |
| 0.171644855 | 0.210081058 | 0.048458845 | 0.071599964 |
| 0.080056827 | 0.094314964 | 0.018498492 | 0.117088628 |
| 0.130623755 | 0.019048548 | 0.037027633 | 0.015839391 |
| 0.130529463 | 0.12676187  | 0.04626199  | 0.01683326  |
| 0.001990834 | 0.117430039 | 0.106363192 | 0.025650716 |
| 0.180696722 | 0.023804056 | 0.139616698 | 0.093248292 |
| 0.074858835 | 0.089883894 | 0.060349684 | 0.1083665   |
| 0.010568778 | 0.114622309 | 0.169132331 | 0.168363758 |
| 0.035437448 | 0.158754841 | 0.124268145 | 0.115601124 |
| 0.007035387 | 0.042251156 | 0.00235759  | 0.081689084 |
| 0.08475835  | 0.189246682 | 0.069854964 | 0.045608349 |
| 0.128215462 | 0.148706306 | 0.066000667 | 0.088323325 |
| 0.000495006 | 0.146685844 | 0.077663796 | 0.064331713 |
| 0.013543036 | 0.171508935 | 0.003488864 | 0.281087664 |
| 0.075648418 | 0.042204321 | 0.1266223   | 0.026896644 |
| 0.089550463 | 0.11137285  | 0.020474332 | 0.055850451 |
| 0.147809742 | 0.017193708 | 0.030266592 | 0.149038155 |
| 0.071765682 | 0.128898795 | 0.163475667 | 0.052657132 |
| 0.197049498 | 0.086473196 | 0.126348003 | 0.154120405 |
| 0.047498518 | 0.081122456 | 0.167829115 | 0.127565231 |
| 0.139501753 | 0.2105288   | 0.110631853 | 0.138571785 |

|             |             |             |             |
|-------------|-------------|-------------|-------------|
| 0.065257033 | 0.00212278  | 0.124434106 | 0.07895096  |
| 0.128972717 | 0.14200284  | 0.076756564 | 0.158661864 |
| 0.002739928 | 0.061980072 | 0.023933129 | 0.046525914 |
| 0.124249326 | 0.125203614 | 0.133733922 | 0.10410341  |
| 0.008903952 | 0.000658831 | 0.12479615  | 0.010050426 |
| 0.023087474 | 0.098506921 | 0.083885413 | 0.133701218 |
| 0.027965546 | 0.119208301 | 0.045333297 | 0.000193178 |
| 0.18231692  | 0.007162923 | 0.157965115 | 0.062487819 |
| 0.030130786 | 0.009772096 | 0.085902288 | 0.159634442 |
| 0.086516828 | 0.019090635 | 0.030270655 | 0.115982559 |
| 0.028468979 | 0.095328368 | 0.146910865 | 0.064809835 |
| 0.141540107 | 0.050533798 | 0.081722157 | 0.062690891 |
| 0.093963308 | 0.055919135 |             |             |
| ATP5D       | 0.033001462 | 0.299868894 | 0.018713489 |
| 0.08537058  | 0.299213768 | 0.196909038 | 0.037206709 |
| 0.079100928 | 0.242762132 | 0.168238032 | 0.229909145 |
| 0.009672173 | 0.228708174 | 0.365014528 | 0.038206772 |
| 0.324335808 | 0.027732947 | 0.069352715 | 0.077669802 |
| 0.155912722 | 0.292438192 | 0.282807403 | 0.161246672 |
| 0.303459752 | 0.109532214 | 0.177295999 | 0.291876834 |
| 0.384189023 | 0.213050079 | 0.311980016 | 0.109255982 |
| 0.316503115 | 0.318450173 | 0.286782696 | 0.006385172 |
| 0.240755454 | 0.059553143 | 0.311463275 | 0.232557403 |
| 0.237987268 | 0.247853983 | 0.148812481 | 0.17842767  |
| 0.197919756 | 0.015281719 | 0.110706746 | 0.347304438 |
| 0.189761802 | 0.205216541 | 0.022899703 | 0.297861054 |
| 0.253654932 | 0.201290443 | 0.238155369 | 0.001746018 |
| 0.316868267 | 0.208177057 | 0.310400663 | 0.361051295 |
| 0.130040828 | 0.093318092 | 0.255989882 | 0.15221823  |
| 0.28566361  | 0.333372856 | 0.198937569 | 0.224187634 |
| 0.37733939  | 0.311467771 | 0.350545164 | 0.1082353   |
| 0.214320791 | 0.014438017 | 0.104404877 | 0.036447713 |
| 0.278049036 | 0.151933453 | 0.261875681 | 0.336577771 |
| 0.288561321 | 0.381977596 | 0.161614761 | 0.343889978 |
| 0.235849539 | 1           | 0.306387582 | 0.276125025 |
| 0.305263418 | 0.059670106 | 0.31858621  | 0.401154548 |
| 0.025573519 | 0.198274029 | 0.302429793 | 0.06007219  |
| 0.304631395 | 0.312711772 | 0.187825735 | 0.281694362 |
| 0.368883127 | 0.304727143 | 0.345111097 | 0.202381229 |
| 0.28790652  | 0.027897167 | 0.313276451 | 0.332051347 |
| 0.233750629 | 0.034754818 | 0.279287635 | 0.415514092 |
| 0.284861996 | 0.379994969 | 0.325495941 | 0.309653176 |
| 0.30469791  | 0.38382986  | 0.285065706 | 0.323058565 |
| 0.104090981 | 0.390957158 | 0.100188461 | 0.031626719 |
| 0.027915511 | 0.071909994 | 0.279574383 | 0.245539998 |
| 0.388986587 | 0.220250242 | 0.109687452 | 0.209339848 |
| 0.439761849 | 0.309840509 | 0.390545151 | 0.335163082 |
| 0.020482705 | 0.335632036 | 0.295249091 | 0.150651577 |
| 0.29483747  | 0.066032904 | 0.326258758 | 0.35007055  |
| 0.283007413 | 0.399888359 | 0.075664926 | 0.345953025 |
| 0.139838264 | 0.406059034 | 0.320943631 | 0.109386762 |
| 0.374574891 | 0.332937183 | 0.427382638 | 0.382703493 |
| 0.332012041 | 0.169906891 | 0.074309869 | 0.307027391 |
| 0.401041497 | 0.034344852 | 0.404316249 | 0.43021921  |

|             |             |             |             |
|-------------|-------------|-------------|-------------|
| 0.359846641 | 0.408987289 | 0.449128574 | 0.417301667 |
| 0.35939836  | 0.035666747 | 0.061670287 | 0.274065725 |
| 0.361571195 | 0.305044326 | 0.140211626 | 0.272806783 |
| 0.320364173 | 0.19113883  | 0.357961429 | 0.222709535 |
| 0.41093235  | 0.369341354 | 0.394560357 | 0.297002469 |
| 0.170056204 | 0.221086037 | 0.307489757 | 0.297522695 |
| 0.029195163 | 0.050646471 | 0.018744529 | 0.250348034 |
| 0.158079856 | 0.133734703 | 0.18707046  | 0.28776358  |
| 0.137852983 | 0.171134173 | 0.302730665 | 0.375676193 |
| 0.023700881 | 0.241188659 | 0.091183402 | 0.087603201 |
| 0.032152857 | 0.085172991 | 0.129818677 | 0.105413838 |
| 0.22496041  | 0.13229022  | 0.329419208 | 0.410764081 |
| 0.28012306  | 0.097540935 | 0.294886078 | 0.391101998 |
| 0.369796089 | 0.301420387 | 0.163066571 | 0.009585855 |
| 0.247925128 | 0.257906908 | 0.323814514 | 0.279767388 |
| 0.101570609 | 0.196149656 | 0.290446891 | 0.381452822 |
| 0.124241588 | 0.073202763 | 0.296885137 | 0.300355954 |
| 0.077661002 | 0.248630159 | 0.392544246 | 0.227030791 |
| 0.000988753 | 0.194337422 | 0.365479917 | 0.238340705 |
| 0.217088796 | 0.216070848 | 0.266326542 | 0.397997141 |
| 0.307132465 | 0.310456667 | 0.410983174 | 0.387710623 |
| 0.206521032 | 0.124094784 | 0.436574177 | 0.115604348 |
| 0.300794908 | 0.075886672 | 0.251281588 | 0.164684629 |
| 0.153327103 | 0.256740856 | 0.315310742 | 0.283811355 |
| 0.053991088 | 0.386861304 | 0.297574099 | 0.406866641 |
| 0.282392458 | 0.433349551 | 0.397998558 | 0.359239619 |
| 0.246412748 | 0.286755831 | 0.274583163 | 0.353562071 |
| 0.393484974 | 0.226465568 | 0.030871756 | 0.376157712 |
| 0.242845027 | 0.366679166 | 0.190147469 | 0.410565264 |
| 0.365066041 | 0.306565643 | 0.123953131 | 0.379319709 |
| 0.298155358 | 0.123950736 | 0.349162826 | 0.435980559 |
| 0.203137965 | 0.297860126 | 0.301092001 | 0.403496424 |
| 0.099907423 | 0.287520927 | 0.238257221 | 0.312784734 |
| 0.020531931 | 0.037211063 | 0.028142653 | 0.154533444 |
| 0.295592292 | 0.274253986 | 0.32894883  | 0.404372007 |
| 0.076604974 | 0.313691158 | 0.171159539 | 0.239717008 |
| 0.307368731 | 0.29741881  | 0.303565467 | 0.317982213 |
| 0.17506621  | 0.015121631 | 0.084974117 | 0.37776334  |
| 0.013607555 | 0.305560352 | 0.182073143 | 0.0024924   |
| 0.022552281 | 0.28176195  | 0.049119498 | 0.119475483 |
| 0.439878183 | 0.116416185 | 0.115117729 | 0.185284144 |
| 0.286246708 | 0.05134793  | 0.004291569 | 0.397287623 |
| 0.378625447 | 0.362213063 | 0.370870968 | 0.322817628 |
| 0.381077778 | 0.322324112 | 0.382707583 | 0.151749167 |
| 0.066754158 | 0.040441042 | 0.304068565 | 0.237436849 |
| 0.003799588 | 0.32775612  | 0.271185191 | 0.086111592 |
| 0.375383258 | 0.230647591 | 0.019424009 | 0.313742142 |
| 0.009146686 | 0.277442028 | 0.18612621  | 0.188756869 |
| 0.361034014 | 0.005820187 | 0.137059671 | 0.285371678 |
| 0.277437378 | 0.236845932 | 0.303732747 | 0.396982949 |
| 0.219364634 | 0.057835016 | 0.257065782 | 0.347777976 |
| 0.045737345 | 0.099947663 | 0.202215075 | 0.020864069 |
| 0.119531927 | 0.335395367 | 0.278818123 | 0.034632691 |
| 0.171660142 | 0.001675572 | 0.245609715 | 0.403248375 |



|             |             |             |             |
|-------------|-------------|-------------|-------------|
| 0.307266458 | 0.438424969 | 0.383394663 | 0.306990074 |
| 0.377140075 | 0.229676789 | 0.412289419 | 0.28603016  |
| 0.217157875 | 0.000381323 | 0.005845937 | 0.415868989 |
| 0.284752391 | 0.022022228 | 0.092724644 | 0.170807186 |
| 0.086201987 | 0.066319297 | 0.040162421 | 0.2845408   |
| 0.258125493 | 0.247378889 | 0.28146321  | 0.322167339 |
| 0.184440694 | 0.176848116 | 0.198499705 | 0.042171895 |
| 0.289486303 | 0.032797288 | 0.044136946 | 0.010105445 |
| 0.347260051 | 0.055927035 | 0.298715075 | 0.378590242 |
| 0.387553948 | 0.358026398 | 0.195611656 | 0.203706681 |
| 0.38531032  | 0.038039624 | 0.257685491 | 0.043089851 |
| 0.338608779 | 0.316105256 | 0.250273106 | 0.209113742 |
| 0.416175822 | 0.349803371 | 0.019287684 | 0.356013809 |
| 0.006161957 | 0.005534845 | 0.165856311 | 0.191820726 |
| 0.131442297 | 0.297440462 | 0.184396986 | 0.184175383 |
| 0.20090443  | 0.013969255 | 0.344352641 | 0.334349798 |
| 0.229417003 | 0.270242077 | 0.311616833 | 0.176453712 |
| 0.282458804 | 0.232641137 | 0.16351493  | 0.119699652 |
| 0.215797809 | 0.207452299 | 0.111665221 | 0.012126615 |
| 0.236952255 | 0.280674983 | 0.030243798 | 0.088875367 |
| 0.366099272 | 0.409015457 | 0.035522077 | 0.010602043 |
| 0.178955196 | 0.263137046 | 0.431467252 | 0.359941453 |
| 0.371238458 | 0.422020683 | 0.278460301 | 0.15136908  |
| 0.037040339 | 0.256839144 | 0.319414613 | 0.152271983 |
| 0.393618945 | 0.025321934 | 0.341098441 | 0.339277532 |
| 0.066638006 | 0.147006835 | 0.025327909 | 0.052622804 |
| 0.316268034 | 0.111556598 | 0.171701015 | 0.064918856 |
| 0.253797635 | 0.318339482 | 0.028779958 | 0.129172876 |
| 0.260600214 | 0.305545691 | 0.095887131 | 0.176473685 |
| 0.248952767 | 0.144542553 | 0.371017207 | 0.356680791 |
| 0.065772232 | 0.061770579 | 0.122903244 | 0.325554283 |
| 0.362657789 | 0.228337156 | 0.012847359 | 0.311158878 |
| 0.408887421 | 0.314973825 | 0.348491672 | 0.36697593  |
| 0.042556714 | 0.280545374 | 0.32515871  | 0.278271199 |
| 0.122358357 | 0.188641745 | 0.186242062 | 0.0315989   |
| 0.234571909 | 0.347770078 | 0.312089051 | 0.126268785 |
| 0.247728683 | 0.051893687 | 0.020496239 | 0.357147471 |
| 0.306141307 | 0.048450696 | 0.167194982 | 0.388299243 |
| 0.004231355 | 0.287820012 | 0.433563627 | 0.160117253 |
| 0.40281081  | 0.414435413 | 0.332583961 | 0.156315851 |
| 0.012911364 | 0.368182231 | 0.267988477 | 0.256218279 |
| 0.310224245 | 0.235645308 | 0.110251743 | 0.062833736 |
| 0.234039727 | 0.032039325 | 0.123171046 | 0.173666206 |
| 0.251069896 | 0.239700404 | 0.148081799 | 0.133550823 |
| 0.196782971 | 0.042844774 | 0.309409012 | 0.148724617 |
| 0.285615519 | 0.180832099 | 0.292008145 | 0.144731345 |
| 0.235737397 | 0.386879134 | 0.30911214  | 0.011793907 |
| 0.31258222  | 0.358040924 | 0.359528292 | 0.002267033 |
| 0.356979435 | 0.004292724 | 0.188090236 | 0.189046382 |
| 0.181437819 | 0.195047585 | 0.243594239 | 0.272233148 |
| 0.231599626 | 0.165299778 | 0.188400784 | 0.167601199 |
| 0.148498236 | 0.141517544 | 0.290669015 | 0.209369951 |
| 0.242278386 | 0.072610416 | 0.050054127 | 0.048894985 |
| 0.034162507 | 0.35524266  | 0.163082323 | 0.029927491 |

|             |             |             |             |
|-------------|-------------|-------------|-------------|
| 0.169213906 | 0.227473184 | 0.291233054 | 0.344154283 |
| 0.357920166 | 0.050659386 | 0.24880795  | 0.31730185  |
| 0.18989211  | 0.164395759 | 0.027416378 | 0.210752369 |
| 0.144516237 | 0.253872661 | 0.20799801  | 0.15005587  |
| 0.289691741 | 0.28990217  | 0.15536317  | 0.349167699 |
| 0.255864613 | 0.249992417 | 0.147291098 | 0.077673622 |
| 0.10216358  | 0.074346891 | 0.301335922 | 0.000588846 |
| 0.246448683 | 0.119040013 | 0.39060131  | 0.335420318 |
| 0.327934022 | 0.303765109 | 0.140432094 | 0.050635951 |
| 0.127500691 | 0.093587838 | 0.082276241 | 0.336512546 |
| 0.299411511 | 0.118430419 | 0.277171151 | 0.134127716 |
| 0.372837445 | 0.34356818  | 0.291459867 | 0.154931911 |
| 0.176650665 | 0.099546161 | 0.341137341 | 0.053092377 |
| 0.270152267 | 0.258954592 | 0.182600744 | 0.246326458 |
| 0.217582307 | 0.414813992 | 0.027349791 | 0.424169167 |
| 0.282520381 | 0.071138116 | 0.373395895 | 0.167715792 |
| 0.166266719 | 0.125963683 | 0.316086197 | 0.202493805 |
| 0.181872962 | 0.313032195 | 0.013706549 | 0.101576407 |
| 0.279756851 | 0.232004216 | 0.292696908 | 0.311610643 |
| 0.30929587  | 0.324459956 | 0.281771004 | 0.16449809  |
| 0.315835978 | 0.330884458 | 0.183111872 | 0.197250011 |
| 0.25838524  | 0.065922009 | 0.19970261  | 0.028480079 |
| 0.304855079 | 0.302372923 | 0.232333136 | 0.034853681 |
| 0.011360122 | 0.317419862 | 0.275096397 | 0.028763642 |
| 0.440766054 | 0.276682374 | 0.223525198 | 0.322490687 |
| 0.109216651 | 0.330743748 | 0.13542354  | 0.333680693 |
| 0.02765959  | 0.181742848 | 0.30332368  | 0.257065792 |
| 0.21807907  | 0.331419665 | 0.326812119 | 0.309458761 |
| 0.021330035 | 0.243123997 | 0.00297541  | 0.276353684 |
| 0.306074763 | 0.325174889 | 0.135191775 | 0.183855876 |
| 0.23627272  | 0.307019948 | 0.242233445 | 0.253688163 |
| 0.008539761 | 0.317134514 | 0.130985117 | 0.287320955 |
| 0.214154411 | 0.236687743 | 0.044522241 | 0.320336736 |
| 0.28326425  | 0.243824211 | 0.191890977 | 0.25103054  |
| 0.345247605 | 0.282549986 | 0.079056006 | 0.244712114 |
| 0.260634015 | 0.028314259 | 0.188020909 | 0.415329306 |
| 0.151741061 | 0.30634095  | 0.420541222 | 0.167122511 |
| 0.330480498 | 0.272425232 | 0.267548294 | 0.401398884 |
| 0.096978496 | 0.174703637 | 0.378258999 | 0.357163829 |
| 0.263137305 | 0.298497128 | 0.305889156 | 0.247876168 |
| 0.300218762 | 0.054837289 | 0.324679403 | 0.249766332 |
| 0.31181955  | 0.241761335 | 0.177866448 | 0.240722346 |
| 0.028306    | 0.130972161 | 0.210407868 | 0.079559627 |
| 0.212960608 | 0.280429809 | 0.297484357 | 0.303134708 |
| 0.112218408 | 0.019536197 | 0.356673661 | 0.058286004 |
| 0.145775372 | 0.306397312 | 0.15488737  | 0.299072144 |
| 0.10599764  | 0.222007588 | 0.160522153 | 7.50E-05    |
| 0.370742626 | 0.086414035 | 0.261101892 | 0.245847912 |
| 0.289685002 | 0.026509158 | 0.323925484 | 0.44024618  |
| 0.196439117 | 0.232960841 | 0.266404339 | 0.340127974 |
| 0.275232364 | 0.287422153 | 0.304036609 | 0.245518473 |
| 0.324331978 | 0.208363718 | 0.259739493 | 0.286916168 |
| 0.265345228 | 0.158586744 |             |             |
| ATP5G2      | 0.027545354 | 0.253422964 | 0.018726377 |

|             |             |             |             |
|-------------|-------------|-------------|-------------|
| 0.061221315 | 0.32579192  | 0.121299018 | 0.026868112 |
| 0.048123706 | 0.214633636 | 0.0603783   | 0.217780111 |
| 0.008706393 | 0.120660893 | 0.314035813 | 0.028503355 |
| 0.289604221 | 0.025418798 | 0.065660246 | 0.034753097 |
| 0.096844781 | 0.278758895 | 0.132839377 | 0.118775163 |
| 0.276344042 | 0.118277505 | 0.161561212 | 0.229551148 |
| 0.329776577 | 0.079580426 | 0.279539899 | 0.049057983 |
| 0.293387509 | 0.319287429 | 0.19127394  | 0.008040704 |
| 0.194439713 | 0.034500508 | 0.284233341 | 0.154886629 |
| 0.174103536 | 0.240377267 | 0.086417432 | 0.138164801 |
| 0.123853849 | 0.012008929 | 0.037866391 | 0.286185726 |
| 0.182066994 | 0.126819052 | 0.023582441 | 0.268190229 |
| 0.107764375 | 0.191524904 | 0.181180064 | 0.000257387 |
| 0.188078311 | 0.086611533 | 0.126319422 | 0.320019298 |
| 0.158627694 | 0.095046207 | 0.08540916  | 0.116290537 |
| 0.228974384 | 0.300370273 | 0.240382741 | 0.093629606 |
| 0.324450565 | 0.139292592 | 0.296959964 | 0.073898865 |
| 0.132218803 | 0.01330905  | 0.134330183 | 0.045099295 |
| 0.145121015 | 0.17432385  | 0.245110957 | 0.218925074 |
| 0.232022283 | 0.345572807 | 0.194439955 | 0.295552262 |
| 0.111430634 | 0.306387582 | 1           | 0.304838502 |
| 0.270530201 | 0.037963399 | 0.289440239 | 0.355903333 |
| 0.02173331  | 0.143964932 | 0.240893438 | 0.06267592  |
| 0.274724324 | 0.146169716 | 0.126614155 | 0.156417842 |
| 0.36776355  | 0.26359953  | 0.30376443  | 0.199394077 |
| 0.240684809 | 0.033937691 | 0.272545268 | 0.318672999 |
| 0.155377316 | 0.043540692 | 0.152189306 | 0.350573347 |
| 0.249987904 | 0.327763246 | 0.257475934 | 0.271565805 |
| 0.25199957  | 0.338469467 | 0.26515086  | 0.284591726 |
| 0.035622795 | 0.33752911  | 0.114755593 | 0.028258899 |
| 0.021280669 | 0.059647198 | 0.14105698  | 0.27375747  |
| 0.347322125 | 0.216488177 | 0.080580876 | 0.205911527 |
| 0.390631523 | 0.264563969 | 0.330026329 | 0.281919646 |
| 0.018588953 | 0.160118103 | 0.249055706 | 0.086578173 |
| 0.24718104  | 0.085647179 | 0.24299979  | 0.305678758 |
| 0.271767417 | 0.35210977  | 0.055541298 | 0.315950921 |
| 0.094886746 | 0.372701053 | 0.266445366 | 0.114079792 |
| 0.337194228 | 0.295932063 | 0.390344664 | 0.351766796 |
| 0.306610731 | 0.143550706 | 0.024529768 | 0.272387222 |
| 0.374785838 | 0.028088853 | 0.341104993 | 0.365062751 |
| 0.30674504  | 0.343752652 | 0.40034338  | 0.366743522 |
| 0.303947437 | 0.048441852 | 0.01796126  | 0.286185378 |
| 0.3113801   | 0.293432828 | 0.096488227 | 0.199500486 |
| 0.292961906 | 0.130831698 | 0.313956292 | 0.081045045 |
| 0.379369767 | 0.338741744 | 0.331933779 | 0.244439005 |
| 0.138180865 | 0.219616304 | 0.245175489 | 0.261774711 |
| 0.030152465 | 0.038634528 | 0.025523707 | 0.259727429 |
| 0.066901245 | 0.166433797 | 0.102811906 | 0.261497726 |
| 0.170972702 | 0.111432375 | 0.160464266 | 0.34809997  |
| 0.029518641 | 0.188959058 | 0.105026983 | 0.076482433 |
| 0.030140325 | 0.101505215 | 0.062384203 | 0.078109859 |
| 0.20230778  | 0.13038693  | 0.266334223 | 0.369175314 |
| 0.17863829  | 0.109041622 | 0.241509528 | 0.370563501 |
| 0.35789568  | 0.268909984 | 0.176524718 | 0.013921201 |

|             |             |             |             |
|-------------|-------------|-------------|-------------|
| 0.096800654 | 0.092934808 | 0.143362647 | 0.235098314 |
| 0.114986236 | 0.081877962 | 0.240086093 | 0.367525541 |
| 0.100183464 | 0.055391089 | 0.13660894  | 0.285381987 |
| 0.082515835 | 0.150870861 | 0.341530965 | 0.174402727 |
| 0.002763573 | 0.159651666 | 0.317713931 | 0.151356988 |
| 0.185770447 | 0.116615381 | 0.127929683 | 0.347591906 |
| 0.116317878 | 0.166161706 | 0.361064568 | 0.383109263 |
| 0.080477572 | 0.118320005 | 0.386126245 | 0.030505882 |
| 0.252917987 | 0.073623329 | 0.279533177 | 0.098714963 |
| 0.167462532 | 0.267308406 | 0.299419716 | 0.191976402 |
| 0.059836933 | 0.329656321 | 0.291404454 | 0.351104695 |
| 0.113565562 | 0.384224744 | 0.342210032 | 0.322626964 |
| 0.246181171 | 0.169721169 | 0.124310683 | 0.303116053 |
| 0.349978972 | 0.08916298  | 0.038158525 | 0.29936253  |
| 0.13180141  | 0.315287078 | 0.166186834 | 0.365525191 |
| 0.345395625 | 0.256429013 | 0.081664305 | 0.374174286 |
| 0.284303372 | 0.127376261 | 0.341905169 | 0.388889736 |
| 0.070529894 | 0.210541944 | 0.160386536 | 0.410809541 |
| 0.123744833 | 0.152964057 | 0.245743283 | 0.147669282 |
| 0.014394668 | 0.036102664 | 0.033580413 | 0.145496446 |
| 0.18603014  | 0.212797907 | 0.307643524 | 0.3447645   |
| 0.075309443 | 0.301807242 | 0.180528808 | 0.110973109 |
| 0.259075306 | 0.191657965 | 0.278098457 | 0.293262629 |
| 0.198855232 | 0.024663512 | 0.059787128 | 0.339233376 |
| 0.017534429 | 0.153656299 | 0.137062922 | 0.002457561 |
| 0.015104175 | 0.221049302 | 0.059888867 | 0.136383312 |
| 0.400690416 | 0.13059741  | 0.117458992 | 0.065468354 |
| 0.305983508 | 0.066395969 | 0.013091812 | 0.346595372 |
| 0.332857977 | 0.320606655 | 0.319127676 | 0.286296641 |
| 0.331253199 | 0.294123411 | 0.352953848 | 0.130914872 |
| 0.046000805 | 0.032084867 | 0.147378315 | 0.18283789  |
| 0.001238204 | 0.348135403 | 0.249929879 | 0.111300769 |
| 0.323699539 | 0.220381453 | 0.016009986 | 0.298627271 |
| 0.008324763 | 0.121066749 | 0.071711948 | 0.143798154 |
| 0.372542514 | 0.007115251 | 0.059618677 | 0.105913086 |
| 0.243441795 | 0.21761682  | 0.162217728 | 0.351640069 |
| 0.211677426 | 0.057579407 | 0.222122154 | 0.339134225 |
| 0.033739879 | 0.030439876 | 0.103631885 | 0.010347713 |
| 0.062447956 | 0.304531071 | 0.133827509 | 0.028082912 |
| 0.181543964 | 0.002675114 | 0.228202335 | 0.353053316 |
| 0.263174066 | 0.378887518 | 0.339948822 | 0.202975858 |
| 0.330414974 | 0.089913324 | 0.354482502 | 0.243350187 |
| 0.093415731 | 0.000416057 | 0.006013661 | 0.364143657 |
| 0.243411785 | 0.027287733 | 0.119387877 | 0.075113192 |
| 0.062655799 | 0.043829131 | 0.036638507 | 0.193246675 |
| 0.235407479 | 0.246784275 | 0.162238351 | 0.266605221 |
| 0.157789544 | 0.200844529 | 0.105499331 | 0.052423044 |
| 0.273705916 | 0.030771329 | 0.056262428 | 0.010740709 |
| 0.34992918  | 0.061903487 | 0.263379051 | 0.325578124 |
| 0.355206673 | 0.355726589 | 0.069384718 | 0.083704281 |
| 0.3518797   | 0.038755969 | 0.109179174 | 0.046955166 |
| 0.283845091 | 0.272544733 | 0.25626268  | 0.207698401 |
| 0.364747337 | 0.308753832 | 0.017704606 | 0.318792747 |
| 0.009739351 | 0.006703627 | 0.117000964 | 0.198841433 |

|             |             |             |             |
|-------------|-------------|-------------|-------------|
| 0.068647953 | 0.198306688 | 0.205702213 | 0.095853486 |
| 0.120471333 | 0.010668795 | 0.194076652 | 0.196512897 |
| 0.249383388 | 0.209739559 | 0.275411062 | 0.187161387 |
| 0.215905259 | 0.141172896 | 0.137663755 | 0.076475265 |
| 0.095085052 | 0.19484655  | 0.116851517 | 0.011847376 |
| 0.177718903 | 0.215221648 | 0.033969918 | 0.113792446 |
| 0.331929505 | 0.348632027 | 0.028305563 | 0.013341    |
| 0.187417325 | 0.16041843  | 0.373178166 | 0.30402279  |
| 0.323750147 | 0.378109017 | 0.270516785 | 0.09421532  |
| 0.030540854 | 0.283996953 | 0.302830778 | 0.141774878 |
| 0.337063739 | 0.027421218 | 0.304092328 | 0.275927295 |
| 0.089127818 | 0.105361419 | 0.026920518 | 0.064864707 |
| 0.278928204 | 0.136639286 | 0.182537396 | 0.067946308 |
| 0.159373722 | 0.174848018 | 0.026747964 | 0.142712608 |
| 0.232556646 | 0.158303901 | 0.115761719 | 0.114246629 |
| 0.246897214 | 0.051373366 | 0.314806789 | 0.33473453  |
| 0.080943615 | 0.063833229 | 0.051548603 | 0.305819351 |
| 0.299925456 | 0.17246042  | 0.012177608 | 0.254165231 |
| 0.366825443 | 0.256110115 | 0.305973017 | 0.345362993 |
| 0.058682576 | 0.221337034 | 0.188097872 | 0.244773471 |
| 0.135850181 | 0.131989267 | 0.171205135 | 0.042611859 |
| 0.252565024 | 0.316574514 | 0.268989678 | 0.119878396 |
| 0.209913514 | 0.052699527 | 0.022700813 | 0.314414105 |
| 0.174245467 | 0.027439978 | 0.093181282 | 0.330613966 |
| 0.012893225 | 0.157776893 | 0.394605947 | 0.094914397 |
| 0.367896969 | 0.372085603 | 0.312065687 | 0.088509706 |
| 0.007002441 | 0.323893736 | 0.246346184 | 0.15723906  |
| 0.249949374 | 0.227003891 | 0.069191766 | 0.053153565 |
| 0.271508306 | 0.036593176 | 0.06975605  | 0.082186183 |
| 0.113356151 | 0.18582717  | 0.182622717 | 0.13873964  |
| 0.180928589 | 0.044796846 | 0.17783752  | 0.136217157 |
| 0.151992877 | 0.208564091 | 0.284093214 | 0.053082498 |
| 0.084637872 | 0.334928418 | 0.253922434 | 0.011943436 |
| 0.263471433 | 0.327367742 | 0.349160251 | 0.001245698 |
| 0.301923488 | 0.005724529 | 0.166397911 | 0.172449497 |
| 0.16286279  | 0.138864715 | 0.280000698 | 0.174400969 |
| 0.195745011 | 0.138864017 | 0.141007346 | 0.201543721 |
| 0.113272482 | 0.138435717 | 0.28010363  | 0.152878437 |
| 0.14315665  | 0.062260048 | 0.062371642 | 0.057822596 |
| 0.030635542 | 0.311265588 | 0.179001082 | 0.039759139 |
| 0.201051833 | 0.140206786 | 0.308231572 | 0.28913585  |
| 0.361475043 | 0.055890975 | 0.168682966 | 0.268019741 |
| 0.053039351 | 0.068510429 | 0.015934985 | 0.196918519 |
| 0.14224085  | 0.124836201 | 0.163726981 | 0.12073855  |
| 0.224402028 | 0.28507837  | 0.17095166  | 0.343624205 |
| 0.195018986 | 0.17273874  | 0.05986061  | 0.062125392 |
| 0.085141773 | 0.090195218 | 0.288111985 | 0.002132313 |
| 0.234292748 | 0.061504485 | 0.329611885 | 0.294582685 |
| 0.157769585 | 0.315796618 | 0.049930991 | 0.030819032 |
| 0.049127835 | 0.089797706 | 0.101037327 | 0.293195672 |
| 0.128262672 | 0.093001555 | 0.289597673 | 0.05938227  |
| 0.333643259 | 0.293160092 | 0.166401283 | 0.103448729 |
| 0.19423722  | 0.117889236 | 0.305458321 | 0.047157265 |
| 0.209971654 | 0.177299186 | 0.142103057 | 0.188823659 |

|             |             |             |             |
|-------------|-------------|-------------|-------------|
| 0.182374816 | 0.364992175 | 0.037361157 | 0.360806664 |
| 0.179651284 | 0.086698721 | 0.352144381 | 0.152569379 |
| 0.102432981 | 0.113224919 | 0.154422847 | 0.098943201 |
| 0.105673127 | 0.16816773  | 0.003447493 | 0.038591255 |
| 0.287590122 | 0.114331478 | 0.224214325 | 0.296266692 |
| 0.231058279 | 0.335866049 | 0.140680599 | 0.111774863 |
| 0.265575448 | 0.292850159 | 0.082012766 | 0.226887571 |
| 0.232840427 | 0.054843704 | 0.167351307 | 0.010230269 |
| 0.237165817 | 0.234098415 | 0.079073811 | 0.028092279 |
| 0.012220031 | 0.145922419 | 0.219828648 | 0.035615179 |
| 0.392649911 | 0.11932415  | 0.182818001 | 0.296808111 |
| 0.12494772  | 0.290694998 | 0.101216078 | 0.309335557 |
| 0.016807677 | 0.213135678 | 0.245485459 | 0.175171618 |
| 0.119958259 | 0.231870091 | 0.322750901 | 0.200628323 |
| 0.020578418 | 0.138226962 | 0.002360231 | 0.264503303 |
| 0.264128346 | 0.235238051 | 0.153765856 | 0.062799896 |
| 0.27964797  | 0.309377677 | 0.099839304 | 0.193756413 |
| 0.01428426  | 0.288536671 | 0.163464195 | 0.259859356 |
| 0.077840689 | 0.186976494 | 0.051412958 | 0.253247065 |
| 0.253592184 | 0.087164161 | 0.204147291 | 0.096053159 |
| 0.299739458 | 0.264326476 | 0.086288236 | 0.168535123 |
| 0.202800831 | 0.038704532 | 0.094751479 | 0.363724234 |
| 0.138410237 | 0.218945749 | 0.377651541 | 0.106222247 |
| 0.215701219 | 0.254931626 | 0.21542808  | 0.349334538 |
| 0.071782315 | 0.198722124 | 0.347269675 | 0.302265116 |
| 0.291690779 | 0.182339193 | 0.144756281 | 0.161074458 |
| 0.258571602 | 0.042495303 | 0.157030847 | 0.235805045 |
| 0.152720138 | 0.260191735 | 0.144169732 | 0.184211153 |
| 0.024820192 | 0.078730285 | 0.101575951 | 0.105812918 |
| 0.21122658  | 0.2555848   | 0.183907252 | 0.309672038 |
| 0.084283362 | 0.020821871 | 0.351047869 | 0.023230102 |
| 0.136745528 | 0.302969475 | 0.177043645 | 0.235413876 |
| 0.122327356 | 0.194884161 | 0.114099416 | 0.000169474 |
| 0.345111875 | 0.119964549 | 0.169038021 | 0.138143623 |
| 0.105766969 | 0.018047723 | 0.304819919 | 0.387717368 |
| 0.209073235 | 0.111442184 | 0.099861264 | 0.298535101 |
| 0.161702152 | 0.123919346 | 0.125651701 | 0.202619069 |
| 0.186459983 | 0.11235827  | 0.150238665 | 0.170784379 |
| 0.25633721  | 0.120137487 |             |             |

|             |             |             |             |
|-------------|-------------|-------------|-------------|
| ATP50       | 0.136396923 | 0.298838955 | 0.085564202 |
| 0.209828569 | 0.308828798 | 0.228193441 | 0.171117074 |
| 0.226292007 | 0.258387393 | 0.141616095 | 0.286064815 |
| 0.083390106 | 0.104207561 | 0.36149866  | 0.17745633  |
| 0.286320915 | 0.155083654 | 0.233002392 | 0.097842513 |
| 0.243301331 | 0.319456326 | 0.23171996  | 0.207745383 |
| 0.317948119 | 0.223655106 | 0.231595012 | 0.232299937 |
| 0.360080209 | 0.122834044 | 0.253699411 | 0.094391613 |
| 0.387947831 | 0.298905947 | 0.214636782 | 0.063131788 |
| 0.262313131 | 0.0441075   | 0.388474055 | 0.332120476 |
| 0.184436189 | 0.34284398  | 0.151174826 | 0.313315041 |
| 0.198299879 | 0.094506682 | 0.075632866 | 0.259183237 |
| 0.238412533 | 0.297813277 | 0.0988593   | 0.259773834 |
| 0.245130853 | 0.247343698 | 0.204836862 | 0.004762705 |
| 0.205756503 | 0.064124918 | 0.157118786 | 0.375633621 |

|             |             |             |             |
|-------------|-------------|-------------|-------------|
| 0.27073949  | 0.272873811 | 0.156111959 | 0.244713475 |
| 0.251451419 | 0.286861387 | 0.307470364 | 0.204195008 |
| 0.382030776 | 0.182124696 | 0.261026007 | 0.199652651 |
| 0.265696998 | 0.088799304 | 0.242970911 | 0.123475412 |
| 0.264430032 | 0.316233941 | 0.29093704  | 0.260935145 |
| 0.283772594 | 0.430160658 | 0.29057761  | 0.368491284 |
| 0.173159071 | 0.276125025 | 0.304838502 | 1           |
| 0.290156337 | 0.194523936 | 0.299492192 | 0.424183948 |
| 0.119649037 | 0.183041279 | 0.27047798  | 0.156529707 |
| 0.303955341 | 0.214560819 | 0.18030229  | 0.189507439 |
| 0.293001381 | 0.294851664 | 0.384175813 | 0.291202163 |
| 0.288307458 | 0.117597757 | 0.360246346 | 0.267447786 |
| 0.287422742 | 0.140514932 | 0.307393008 | 0.328126811 |
| 0.27483762  | 0.361365879 | 0.290252676 | 0.322138114 |
| 0.271592767 | 0.381243969 | 0.278559571 | 0.332202679 |
| 0.057328505 | 0.390048385 | 0.246931514 | 0.161815696 |
| 0.110257049 | 0.240585714 | 0.274181342 | 0.340544033 |
| 0.348019573 | 0.278199358 | 0.24799984  | 0.344976427 |
| 0.380201709 | 0.340484392 | 0.383944096 | 0.322899957 |
| 0.123813171 | 0.218751313 | 0.271280896 | 0.246412656 |
| 0.288375999 | 0.214055709 | 0.256474037 | 0.39743307  |
| 0.347504941 | 0.341303212 | 0.189691002 | 0.415957903 |
| 0.264960921 | 0.430823075 | 0.298792792 | 0.277683476 |
| 0.410451075 | 0.378264993 | 0.424107761 | 0.272642657 |
| 0.377591446 | 0.250281679 | 0.083418156 | 0.323655559 |
| 0.424765007 | 0.031047907 | 0.34098339  | 0.370744324 |
| 0.364776647 | 0.328736541 | 0.42972725  | 0.383894189 |
| 0.361712604 | 0.154510261 | 0.029271304 | 0.335904194 |
| 0.385340704 | 0.343202354 | 0.294180522 | 0.235874793 |
| 0.295067271 | 0.240383395 | 0.297461465 | 0.189552306 |
| 0.452757481 | 0.344017432 | 0.346603196 | 0.287032885 |
| 0.21814327  | 0.321304176 | 0.229507538 | 0.348437521 |
| 0.155149787 | 0.160626121 | 0.089587141 | 0.306509419 |
| 0.160540884 | 0.310955035 | 0.233758123 | 0.285638765 |
| 0.302460779 | 0.227197682 | 0.196216305 | 0.2859875   |
| 0.088756088 | 0.226183494 | 0.242011306 | 0.212586827 |
| 0.16918109  | 0.206466487 | 0.250765246 | 0.260514201 |
| 0.328832438 | 0.248401772 | 0.249727707 | 0.381896406 |
| 0.280529132 | 0.196000077 | 0.260056256 | 0.412016045 |
| 0.428161047 | 0.266452544 | 0.271875307 | 0.058617785 |
| 0.25381357  | 0.169262834 | 0.165992653 | 0.234907647 |
| 0.221278809 | 0.289785661 | 0.280678902 | 0.309522645 |
| 0.214281805 | 0.186038599 | 0.271779042 | 0.384993263 |
| 0.164969003 | 0.288741497 | 0.366009942 | 0.224412221 |
| 0.023227111 | 0.288270883 | 0.325439427 | 0.288797571 |
| 0.267652601 | 0.157351142 | 0.171354655 | 0.366410162 |
| 0.205768922 | 0.277022271 | 0.364480096 | 0.311607807 |
| 0.207674964 | 0.219646407 | 0.421800739 | 0.049259772 |
| 0.269538699 | 0.148119631 | 0.333294731 | 0.157353085 |
| 0.29634464  | 0.321523828 | 0.283318048 | 0.301767303 |
| 0.138715055 | 0.394059547 | 0.320423904 | 0.386287676 |
| 0.231385822 | 0.425559656 | 0.342102876 | 0.363846438 |
| 0.292053928 | 0.221275491 | 0.129128181 | 0.319272176 |
| 0.355475587 | 0.198812688 | 0.107489678 | 0.287378406 |

|             |             |             |             |
|-------------|-------------|-------------|-------------|
| 0.215816656 | 0.274772806 | 0.258460871 | 0.407383824 |
| 0.425007601 | 0.326140882 | 0.288828363 | 0.345431379 |
| 0.334418434 | 0.258427574 | 0.335338807 | 0.436097012 |
| 0.167786367 | 0.279469863 | 0.285594548 | 0.382359791 |
| 0.246493512 | 0.2988803   | 0.322663938 | 0.15667037  |
| 0.006009065 | 0.143726251 | 0.128657792 | 0.316878844 |
| 0.234151403 | 0.209707216 | 0.291901912 | 0.394368567 |
| 0.244280708 | 0.349127344 | 0.263235227 | 0.292400887 |
| 0.335574318 | 0.269366605 | 0.250693053 | 0.279094718 |
| 0.277968239 | 0.082398933 | 0.230199507 | 0.429664846 |
| 0.072378931 | 0.227609142 | 0.257571753 | 0.012767712 |
| 0.122176784 | 0.246123181 | 0.142821064 | 0.254284949 |
| 0.396339221 | 0.236177656 | 0.22945771  | 0.171271795 |
| 0.307425783 | 0.197615067 | 0.024071527 | 0.373786415 |
| 0.377060614 | 0.366257374 | 0.368833104 | 0.354611876 |
| 0.354555204 | 0.283387032 | 0.335312603 | 0.210099613 |
| 0.220877278 | 0.141824791 | 0.246453314 | 0.325997753 |
| 0.011037946 | 0.333495878 | 0.303936528 | 0.229321436 |
| 0.294417698 | 0.29758514  | 0.116568386 | 0.281692257 |
| 0.062235972 | 0.145322827 | 0.253154701 | 0.316035626 |
| 0.332011425 | 0.061607704 | 0.147371193 | 0.229309015 |
| 0.319861573 | 0.304459986 | 0.220611433 | 0.40314029  |
| 0.303526458 | 0.12565324  | 0.322849034 | 0.308244775 |
| 0.192908407 | 0.07876     | 0.241571689 | 0.019257662 |
| 0.124539345 | 0.368769225 | 0.242149184 | 0.143755361 |
| 0.305788489 | 0.029277829 | 0.305721276 | 0.41247555  |
| 0.324142494 | 0.405174925 | 0.384337093 | 0.231074533 |
| 0.385100846 | 0.075603636 | 0.392656119 | 0.295760526 |
| 0.183631715 | 0.003711979 | 0.033014248 | 0.364131686 |
| 0.274778842 | 0.07744135  | 0.25822563  | 0.187250862 |
| 0.264069689 | 0.170588665 | 0.172109995 | 0.282466502 |
| 0.244646935 | 0.319760598 | 0.250509423 | 0.344095287 |
| 0.331433057 | 0.326996199 | 0.208803531 | 0.140249633 |
| 0.26408306  | 0.167954073 | 0.147697146 | 0.031335714 |
| 0.310405068 | 0.138707566 | 0.360409074 | 0.377072041 |
| 0.418366515 | 0.294584687 | 0.145179824 | 0.203280954 |
| 0.351479633 | 0.098001    | 0.190002499 | 0.125593557 |
| 0.341004198 | 0.287013299 | 0.321545125 | 0.297401005 |
| 0.4205468   | 0.378731621 | 0.125459778 | 0.329293459 |
| 0.046351456 | 0.013269429 | 0.207827763 | 0.285914213 |
| 0.107459335 | 0.276183814 | 0.296369286 | 0.256811656 |
| 0.296825291 | 0.083409018 | 0.240721621 | 0.247886674 |
| 0.32878345  | 0.306357566 | 0.289174962 | 0.25748053  |
| 0.325588694 | 0.266099387 | 0.313969732 | 0.282710876 |
| 0.220723658 | 0.283885342 | 0.223575541 | 0.099187934 |
| 0.224937465 | 0.248678926 | 0.152674992 | 0.22189016  |
| 0.351224429 | 0.369830982 | 0.177104234 | 0.072050085 |
| 0.280539675 | 0.297128911 | 0.392184036 | 0.351001533 |
| 0.402666502 | 0.440061458 | 0.372150662 | 0.303753857 |
| 0.165624014 | 0.330166813 | 0.290185465 | 0.295095261 |
| 0.384455653 | 0.099748974 | 0.356921844 | 0.24235634  |
| 0.213416045 | 0.305384944 | 0.138032334 | 0.207237012 |
| 0.247410352 | 0.270047177 | 0.332903503 | 0.156547166 |
| 0.318845583 | 0.224599576 | 0.153180538 | 0.299752971 |



|             |             |             |             |
|-------------|-------------|-------------|-------------|
| 0.302069713 | 0.19752171  | 0.258322536 | 0.248959199 |
| 0.283732452 | 0.116933056 | 0.285570377 | 0.41991419  |
| 0.190841828 | 0.196647179 | 0.188554921 | 0.294320938 |
| 0.306036009 | 0.196660191 | 0.059156869 | 0.299244818 |
| 0.391450451 | 0.244943041 | 0.36820127  | 0.38541853  |
| 0.159811862 | 0.265764466 | 0.242233811 | 0.304321423 |
| 0.284029873 | 0.22962988  | 0.318261307 | 0.151911572 |
| 0.334907357 | 0.409773766 | 0.318164498 | 0.296579064 |
| 0.230223143 | 0.136810291 | 0.089217473 | 0.325212085 |
| 0.251968768 | 0.1672497   | 0.164683762 | 0.316894134 |
| 0.015209847 | 0.155606004 | 0.401789905 | 0.282176415 |
| 0.427864683 | 0.387136553 | 0.387725871 | 0.252398235 |
| 0.005982836 | 0.265825431 | 0.293465484 | 0.263116577 |
| 0.306435953 | 0.284722377 | 0.186948356 | 0.232529913 |
| 0.339471956 | 0.100298387 | 0.293290178 | 0.195827806 |
| 0.174962208 | 0.240660899 | 0.289563223 | 0.269180267 |
| 0.340772471 | 0.116098018 | 0.215208682 | 0.285724355 |
| 0.206487194 | 0.296547739 | 0.349192878 | 0.131389445 |
| 0.155865111 | 0.371350137 | 0.297805139 | 0.088947885 |
| 0.255978942 | 0.351053897 | 0.365782217 | 0.015413493 |
| 0.284901462 | 0.05244524  | 0.326292199 | 0.319622126 |
| 0.334327175 | 0.326996564 | 0.339152962 | 0.314362902 |
| 0.26951051  | 0.323812005 | 0.298170067 | 0.313462343 |
| 0.30548929  | 0.283872023 | 0.286557841 | 0.267761193 |
| 0.2855142   | 0.229795111 | 0.142627378 | 0.138692388 |
| 0.150321688 | 0.331049824 | 0.287202594 | 0.102016426 |
| 0.318957262 | 0.261641954 | 0.38139818  | 0.345125692 |
| 0.387314369 | 0.123738078 | 0.299996735 | 0.306078025 |
| 0.115667873 | 0.185996024 | 0.115720398 | 0.256095839 |
| 0.288881877 | 0.263196135 | 0.216937517 | 0.212847592 |
| 0.246941523 | 0.382193001 | 0.272173355 | 0.382310158 |
| 0.290866034 | 0.252836185 | 0.135512304 | 0.239310517 |
| 0.255440575 | 0.194152041 | 0.307331083 | 0.016728686 |
| 0.300828957 | 0.198856344 | 0.340900762 | 0.363585499 |
| 0.202403894 | 0.371076569 | 0.143972035 | 0.182823407 |
| 0.116777616 | 0.179618268 | 0.21744796  | 0.276681182 |
| 0.154807448 | 0.278324527 | 0.323528603 | 0.177741429 |
| 0.301056524 | 0.270580018 | 0.303326137 | 0.274593191 |
| 0.310952293 | 0.212802836 | 0.383942748 | 0.16231667  |
| 0.227165646 | 0.278924202 | 0.184062601 | 0.322989713 |
| 0.33480147  | 0.385781075 | 0.134342986 | 0.387926482 |
| 0.295524619 | 0.172373099 | 0.435665913 | 0.253866426 |
| 0.2496977   | 0.264638059 | 0.17117772  | 0.210078763 |
| 0.31613868  | 0.222321177 | 0.006937478 | 0.083932016 |
| 0.32676849  | 0.229382989 | 0.258877214 | 0.30311233  |
| 0.306288179 | 0.362054353 | 0.138229688 | 0.259451099 |
| 0.3341214   | 0.376841912 | 0.27075956  | 0.312450881 |
| 0.299819034 | 0.227366748 | 0.209352049 | 0.025551667 |
| 0.252874275 | 0.224170201 | 0.19589326  | 0.167637339 |
| 0.092187121 | 0.186141518 | 0.25158221  | 0.112186624 |
| 0.39211372  | 0.142480791 | 0.217313946 | 0.266217543 |
| 0.220424004 | 0.380861518 | 0.29773935  | 0.301684813 |
| 0.111330853 | 0.295865632 | 0.251349397 | 0.239196766 |
| 0.287147501 | 0.276794112 | 0.330456944 | 0.239624313 |

|             |             |             |             |
|-------------|-------------|-------------|-------------|
| 0.135373193 | 0.312488052 | 0.015717462 | 0.374592056 |
| 0.349744157 | 0.262727088 | 0.260147838 | 0.138437704 |
| 0.328061226 | 0.337339058 | 0.276613185 | 0.218736262 |
| 0.067999917 | 0.27727449  | 0.292112601 | 0.308263403 |
| 0.140851609 | 0.255192966 | 0.181786099 | 0.283605357 |
| 0.356011991 | 0.251866746 | 0.299736005 | 0.19579572  |
| 0.347792471 | 0.288361818 | 0.154907178 | 0.281915706 |
| 0.217423431 | 0.124940284 | 0.179787689 | 0.416878206 |
| 0.316230206 | 0.252376277 | 0.356799971 | 0.319045818 |
| 0.250322695 | 0.30973462  | 0.21895696  | 0.404410527 |
| 0.250036472 | 0.301254776 | 0.325041761 | 0.353842549 |
| 0.341847022 | 0.267734799 | 0.232611457 | 0.318607902 |
| 0.323874783 | 0.178397726 | 0.267051831 | 0.291003872 |
| 0.221410904 | 0.315231791 | 0.182330203 | 0.315443099 |
| 0.13361814  | 0.279551505 | 0.235187883 | 0.232765986 |
| 0.320439733 | 0.309054488 | 0.324047712 | 0.38401805  |
| 0.240382626 | 0.10178591  | 0.415692651 | 0.031611428 |
| 0.214806546 | 0.28766711  | 0.296743996 | 0.291497475 |
| 0.217644722 | 0.275793509 | 0.216344851 | 0.008717701 |
| 0.349264005 | 0.103286616 | 0.28975284  | 0.302792898 |
| 0.215593121 | 0.135868818 | 0.361613204 | 0.410123235 |
| 0.269271461 | 0.201067316 | 0.182229984 | 0.358150103 |
| 0.184758424 | 0.179017686 | 0.226969921 | 0.221796175 |
| 0.2150639   | 0.179762619 | 0.214712002 | 0.221752545 |
| 0.28288869  | 0.267573865 |             |             |
| ATP6V1A     | 0.086585958 | 0.377406604 | 0.060300907 |
| 0.113229528 | 0.269846074 | 0.250059059 | 0.112832283 |
| 0.167373486 | 0.332066926 | 0.256267143 | 0.257665311 |
| 0.034106344 | 0.102147002 | 0.404235717 | 0.111734673 |
| 0.319829322 | 0.069002303 | 0.153918135 | 0.125949211 |
| 0.257890845 | 0.276017359 | 0.246059798 | 0.262425333 |
| 0.299718675 | 0.193115267 | 0.282486325 | 0.317852003 |
| 0.429474668 | 0.169556057 | 0.287548585 | 0.133846822 |
| 0.394565629 | 0.282422929 | 0.276761557 | 0.027590685 |
| 0.303660951 | 0.058245662 | 0.424582651 | 0.26050158  |
| 0.129286207 | 0.330234174 | 0.233890237 | 0.211364999 |
| 0.292597406 | 0.050749685 | 0.136339906 | 0.339400645 |
| 0.296513449 | 0.287447923 | 0.083387608 | 0.301747697 |
| 0.333373942 | 0.249212117 | 0.290017234 | 0.004301344 |
| 0.232004525 | 0.087435443 | 0.209287865 | 0.434885115 |
| 0.191693233 | 0.157227008 | 0.268498774 | 0.285603156 |
| 0.348552187 | 0.344082809 | 0.267400095 | 0.316115551 |
| 0.430773365 | 0.199832404 | 0.327838107 | 0.133328333 |
| 0.321702216 | 0.072288875 | 0.175294357 | 0.12727147  |
| 0.324497717 | 0.207340036 | 0.269007976 | 0.280137764 |
| 0.369381347 | 0.481277398 | 0.252970829 | 0.446588026 |
| 0.215537284 | 0.305263418 | 0.270530201 | 0.290156337 |
| 1           | 0.176800413 | 0.296210687 | 0.470121893 |
| 0.103503562 | 0.285386988 | 0.335251723 | 0.149722441 |
| 0.355114288 | 0.293207274 | 0.265591851 | 0.156987776 |
| 0.307310846 | 0.312209287 | 0.461167128 | 0.248994603 |
| 0.288895733 | 0.096517593 | 0.431099161 | 0.281286242 |
| 0.22202801  | 0.095334766 | 0.265923632 | 0.397319487 |
| 0.307449538 | 0.416156216 | 0.380922113 | 0.353327902 |

|             |             |             |             |
|-------------|-------------|-------------|-------------|
| 0.312712309 | 0.427291008 | 0.285092077 | 0.383630861 |
| 0.119228185 | 0.462300109 | 0.172845977 | 0.070976985 |
| 0.091994382 | 0.1324081   | 0.331179453 | 0.298058052 |
| 0.393245416 | 0.281223538 | 0.192460609 | 0.249687626 |
| 0.422299928 | 0.416369266 | 0.469250654 | 0.366595961 |
| 0.064455573 | 0.287116267 | 0.300526826 | 0.240344604 |
| 0.327945548 | 0.166997748 | 0.239605534 | 0.457756241 |
| 0.327152514 | 0.377181488 | 0.168580364 | 0.464773363 |
| 0.277867419 | 0.454744977 | 0.370138165 | 0.173252763 |
| 0.459448558 | 0.430637822 | 0.452511664 | 0.294206793 |
| 0.410214135 | 0.236312259 | 0.14922981  | 0.367224372 |
| 0.43379061  | 0.016385323 | 0.417290105 | 0.442957871 |
| 0.434495876 | 0.384853658 | 0.480803329 | 0.440580269 |
| 0.436886871 | 0.109820261 | 0.069398501 | 0.290884352 |
| 0.44864897  | 0.3304236   | 0.209891512 | 0.308542674 |
| 0.322781599 | 0.275871688 | 0.35831727  | 0.212647359 |
| 0.478337794 | 0.381907462 | 0.42420078  | 0.34162665  |
| 0.310570928 | 0.30144264  | 0.301194516 | 0.406024415 |
| 0.070460932 | 0.115745934 | 0.065950072 | 0.306004837 |
| 0.21860264  | 0.198382087 | 0.281695077 | 0.349030057 |
| 0.207923621 | 0.287095744 | 0.252864468 | 0.301843989 |
| 0.075863802 | 0.289072086 | 0.176810643 | 0.195998929 |
| 0.070609836 | 0.167125198 | 0.178991572 | 0.144401905 |
| 0.255768764 | 0.255812193 | 0.312451378 | 0.43599777  |
| 0.347778966 | 0.168099745 | 0.308316258 | 0.42611833  |
| 0.403629461 | 0.283717741 | 0.242702752 | 0.013039787 |
| 0.265723407 | 0.297354586 | 0.201356772 | 0.305679164 |
| 0.204849719 | 0.280533801 | 0.331289706 | 0.300409294 |
| 0.214869563 | 0.196106134 | 0.32724872  | 0.392063111 |
| 0.162653803 | 0.233788535 | 0.388222801 | 0.319834948 |
| 0.006999204 | 0.269650419 | 0.360469947 | 0.231302272 |
| 0.31410837  | 0.137315587 | 0.168699873 | 0.411987166 |
| 0.277761358 | 0.280557429 | 0.426083361 | 0.311627992 |
| 0.253528963 | 0.244386279 | 0.479191539 | 0.088764935 |
| 0.33719487  | 0.053197387 | 0.262342829 | 0.261264155 |
| 0.242187949 | 0.291843293 | 0.280276279 | 0.24324352  |
| 0.118573399 | 0.462642165 | 0.333485809 | 0.441877989 |
| 0.303158399 | 0.481335299 | 0.385774316 | 0.375418289 |
| 0.294698533 | 0.330108363 | 0.145274682 | 0.349410133 |
| 0.397770153 | 0.288796919 | 0.092791111 | 0.373533583 |
| 0.331035687 | 0.322227513 | 0.164513192 | 0.439133214 |
| 0.44707125  | 0.408697078 | 0.177921865 | 0.333418832 |
| 0.309515092 | 0.196157567 | 0.36148301  | 0.490087765 |
| 0.298930794 | 0.327494192 | 0.291411541 | 0.362722443 |
| 0.177619459 | 0.271391188 | 0.322703144 | 0.190489507 |
| 0.005591711 | 0.11700946  | 0.086039378 | 0.185679497 |
| 0.177586304 | 0.303306855 | 0.325704825 | 0.457108271 |
| 0.149592135 | 0.360306868 | 0.272323775 | 0.252684161 |
| 0.383006364 | 0.334761845 | 0.282051462 | 0.305351037 |
| 0.245960498 | 0.023208366 | 0.112379058 | 0.478181191 |
| 0.064942327 | 0.20300601  | 0.309765227 | 0.003141796 |
| 0.078219581 | 0.341201689 | 0.121725254 | 0.212736645 |
| 0.431729055 | 0.206701158 | 0.203389858 | 0.291140534 |
| 0.277394118 | 0.122744343 | 0.003910155 | 0.447255452 |

|             |             |             |             |
|-------------|-------------|-------------|-------------|
| 0.461611189 | 0.448380016 | 0.459370732 | 0.433775546 |
| 0.434767804 | 0.342204055 | 0.361262606 | 0.237982538 |
| 0.140228868 | 0.118998431 | 0.231415679 | 0.281784846 |
| 0.010463375 | 0.304751563 | 0.306894769 | 0.157623557 |
| 0.341406484 | 0.313925385 | 0.056526824 | 0.318838831 |
| 0.0236371   | 0.159075061 | 0.31799975  | 0.272431872 |
| 0.320993896 | 0.026470893 | 0.148118722 | 0.279866129 |
| 0.359274813 | 0.30667946  | 0.273254467 | 0.462679466 |
| 0.257930525 | 0.138732951 | 0.265319891 | 0.303585834 |
| 0.112241591 | 0.135438219 | 0.327350407 | 0.022691954 |
| 0.14335146  | 0.435745523 | 0.315752786 | 0.084183147 |
| 0.243906986 | 0.008719801 | 0.310529478 | 0.46871739  |
| 0.395745332 | 0.462022638 | 0.425436855 | 0.21248939  |
| 0.433195309 | 0.122388141 | 0.460974014 | 0.346225393 |
| 0.287398505 | 0.000902897 | 0.012979584 | 0.416471638 |
| 0.301159155 | 0.071166068 | 0.177062679 | 0.207273591 |
| 0.130840908 | 0.164355684 | 0.104156246 | 0.196274985 |
| 0.279569365 | 0.236585099 | 0.207554952 | 0.421663054 |
| 0.25365689  | 0.257126909 | 0.305290518 | 0.118611078 |
| 0.293857612 | 0.076206257 | 0.130078513 | 0.009077053 |
| 0.316626364 | 0.126654531 | 0.424308713 | 0.443447251 |
| 0.441421655 | 0.299533965 | 0.246050103 | 0.247991307 |
| 0.41357478  | 0.099878061 | 0.253709482 | 0.12068284  |
| 0.410329853 | 0.309362074 | 0.265944881 | 0.263647292 |
| 0.455751215 | 0.410363042 | 0.063357152 | 0.346611081 |
| 0.012449189 | 0.005420765 | 0.247083149 | 0.275756841 |
| 0.177613326 | 0.327735437 | 0.235015013 | 0.322546889 |
| 0.291853486 | 0.038326655 | 0.264724874 | 0.249949611 |
| 0.277161762 | 0.319134826 | 0.255943895 | 0.269987539 |
| 0.282127787 | 0.200441524 | 0.210572511 | 0.21526424  |
| 0.32116641  | 0.294957608 | 0.194688152 | 0.051352418 |
| 0.295786115 | 0.292438008 | 0.081568935 | 0.169270005 |
| 0.361905604 | 0.419358797 | 0.095973541 | 0.016831034 |
| 0.245183017 | 0.330776899 | 0.438529303 | 0.425260677 |
| 0.463226848 | 0.475697151 | 0.371382485 | 0.196629264 |
| 0.091784866 | 0.303982796 | 0.273947012 | 0.148714936 |
| 0.444122602 | 0.09436616  | 0.415746755 | 0.263454515 |
| 0.156984336 | 0.211682472 | 0.048863488 | 0.13124826  |
| 0.286136626 | 0.196878561 | 0.203066728 | 0.139796575 |
| 0.292478278 | 0.211643125 | 0.091090854 | 0.213984159 |
| 0.304877486 | 0.186622887 | 0.187636792 | 0.281517557 |
| 0.305079695 | 0.244751153 | 0.329751058 | 0.421036804 |
| 0.143510461 | 0.168314744 | 0.198749616 | 0.335632567 |
| 0.370092606 | 0.304135726 | 0.021110701 | 0.387538852 |
| 0.43714839  | 0.299634757 | 0.426110412 | 0.380869861 |
| 0.121415576 | 0.27307632  | 0.327837192 | 0.321467949 |
| 0.231594829 | 0.250884178 | 0.283241697 | 0.097287678 |
| 0.317145551 | 0.461801969 | 0.369779588 | 0.172136089 |
| 0.299721787 | 0.147112244 | 0.086039486 | 0.391379521 |
| 0.20846843  | 0.103809387 | 0.258435537 | 0.389347438 |
| 0.002762777 | 0.144750074 | 0.462161087 | 0.207288652 |
| 0.48199502  | 0.425576384 | 0.388982797 | 0.259096312 |
| 0.005986996 | 0.323812965 | 0.279338487 | 0.276893507 |
| 0.371899735 | 0.282370704 | 0.19935345  | 0.106875271 |

|             |             |             |             |
|-------------|-------------|-------------|-------------|
| 0.269783306 | 0.087929824 | 0.186520625 | 0.224383055 |
| 0.210360084 | 0.30982997  | 0.217883184 | 0.268688193 |
| 0.235588985 | 0.132928222 | 0.203421654 | 0.207916556 |
| 0.251417743 | 0.226431652 | 0.312279305 | 0.231507807 |
| 0.172724783 | 0.427458031 | 0.346733208 | 0.040906854 |
| 0.293512688 | 0.396430129 | 0.394364689 | 0.006227331 |
| 0.307720564 | 0.015242624 | 0.221841986 | 0.200990905 |
| 0.2131834   | 0.26531673  | 0.270503644 | 0.253576112 |
| 0.319974909 | 0.247611635 | 0.215418843 | 0.221868255 |
| 0.16797968  | 0.234198396 | 0.308931954 | 0.307009548 |
| 0.215787393 | 0.137010676 | 0.121318988 | 0.125365817 |
| 0.061291905 | 0.397014369 | 0.235779643 | 0.082535408 |
| 0.245351809 | 0.32663726  | 0.33150589  | 0.42574173  |
| 0.378553987 | 0.12185448  | 0.33693353  | 0.357758725 |
| 0.222591121 | 0.219566923 | 0.092143409 | 0.286624024 |
| 0.224439721 | 0.203688318 | 0.289087161 | 0.249965181 |
| 0.334813648 | 0.371678741 | 0.223528051 | 0.401036893 |
| 0.277123823 | 0.356462627 | 0.218892759 | 0.104357073 |
| 0.177202172 | 0.16584447  | 0.254133269 | 0.00328932  |
| 0.296096816 | 0.182636713 | 0.391195835 | 0.420282717 |
| 0.254803413 | 0.350686544 | 0.20514939  | 0.110427833 |
| 0.182622619 | 0.187335134 | 0.160529992 | 0.338055795 |
| 0.182519504 | 0.18270186  | 0.272372494 | 0.210955243 |
| 0.337845224 | 0.345522633 | 0.296450138 | 0.279685855 |
| 0.282298475 | 0.190581616 | 0.454531047 | 0.13291958  |
| 0.308782757 | 0.178691541 | 0.281529809 | 0.271402902 |
| 0.251556502 | 0.454222404 | 0.084909261 | 0.459852628 |
| 0.315083168 | 0.146422246 | 0.45466774  | 0.268753706 |
| 0.241061097 | 0.133633001 | 0.181883821 | 0.298288333 |
| 0.280783241 | 0.262287381 | 0.018740214 | 0.089282954 |
| 0.275667993 | 0.347620708 | 0.35159393  | 0.335806279 |
| 0.261014902 | 0.331191376 | 0.160426268 | 0.292662608 |
| 0.415952308 | 0.444647737 | 0.221557473 | 0.253931568 |
| 0.304713246 | 0.121194474 | 0.25817292  | 0.04206918  |
| 0.320722545 | 0.305248409 | 0.301805044 | 0.092151714 |
| 0.039485566 | 0.202139764 | 0.319518551 | 0.111933511 |
| 0.437738089 | 0.162650454 | 0.321854075 | 0.294935032 |
| 0.208059019 | 0.443258519 | 0.166580907 | 0.291005408 |
| 0.120369134 | 0.263853193 | 0.312487893 | 0.347643673 |
| 0.191062967 | 0.270383217 | 0.297256535 | 0.203687378 |
| 0.054970452 | 0.238400022 | 0.009094139 | 0.376809744 |
| 0.424524448 | 0.309052657 | 0.221908258 | 0.259959391 |
| 0.255302637 | 0.362952372 | 0.294498727 | 0.295911814 |
| 0.016934144 | 0.285958605 | 0.213215869 | 0.327001892 |
| 0.169723061 | 0.350847586 | 0.068583918 | 0.329827461 |
| 0.413335734 | 0.281194617 | 0.276742736 | 0.248432074 |
| 0.4170329   | 0.342827535 | 0.150235912 | 0.224809905 |
| 0.326522263 | 0.093389173 | 0.256792229 | 0.481455973 |
| 0.192525346 | 0.200818759 | 0.378047923 | 0.217907887 |
| 0.286909094 | 0.341454302 | 0.316387399 | 0.482533933 |
| 0.120511019 | 0.231525057 | 0.353610496 | 0.421375067 |
| 0.273956187 | 0.221442561 | 0.224351924 | 0.255239713 |
| 0.382730683 | 0.088030567 | 0.286134018 | 0.283118129 |
| 0.211490246 | 0.282963423 | 0.279731265 | 0.225666405 |

|             |             |             |             |
|-------------|-------------|-------------|-------------|
| 0.054306808 | 0.229758275 | 0.240627844 | 0.17114081  |
| 0.283494216 | 0.304475821 | 0.269430624 | 0.354539949 |
| 0.117331344 | 0.027893542 | 0.416712311 | 0.023703926 |
| 0.227838574 | 0.278225321 | 0.238882102 | 0.301503327 |
| 0.170523747 | 0.321131282 | 0.276111257 | 0.002745426 |
| 0.369388618 | 0.052555347 | 0.313654914 | 0.213437041 |
| 0.275338683 | 0.085830848 | 0.391683605 | 0.457085919 |
| 0.275296863 | 0.267101576 | 0.244509079 | 0.415880364 |
| 0.152380345 | 0.266239134 | 0.322790368 | 0.289725294 |
| 0.206987988 | 0.277216643 | 0.304607422 | 0.255970552 |
| 0.296279371 | 0.257807907 |             |             |
| ATP8B4      | 0.097393847 | 0.141530798 | 0.073483401 |
| 0.029097746 | 0.06845554  | 0.027338928 | 0.153929169 |
| 0.112794402 | 0.183421292 | 0.022501851 | 0.054740444 |
| 0.079688734 | 0.007636061 | 0.147722306 | 0.157569233 |
| 0.065956827 | 0.116011976 | 0.198638465 | 0.052044031 |
| 0.075818613 | 0.076534127 | 0.014205018 | 0.057003394 |
| 0.083506573 | 0.251022    | 0.112078112 | 0.049541981 |
| 0.131592995 | 0.004587601 | 0.055584122 | 0.00590501  |
| 0.225738787 | 0.063861731 | 0.023558869 | 0.057456618 |
| 0.059001254 | 0.035200377 | 0.260399071 | 0.065207096 |
| 0.007762165 | 0.23310313  | 0.029096173 | 0.061499781 |
| 0.046527939 | 0.070466182 | 0.004753001 | 0.08757911  |
| 0.130320915 | 0.081160306 | 0.141084999 | 0.07987765  |
| 0.045971727 | 0.113994751 | 0.077910994 | 0.006032595 |
| 0.015753423 | 0.002057592 | 0.00923356  | 0.162118428 |
| 0.184272956 | 0.155272409 | 0.015702031 | 0.145465377 |
| 0.095892944 | 0.134643221 | 0.224254775 | 0.034624799 |
| 0.151055414 | 0.015123556 | 0.077717667 | 0.026103428 |
| 0.064616478 | 0.172346334 | 0.267584405 | 0.264397318 |
| 0.034682823 | 0.139535058 | 0.060593489 | 0.02971492  |
| 0.127410919 | 0.236842753 | 0.227559323 | 0.18824585  |
| 0.046313609 | 0.059670106 | 0.037963399 | 0.194523936 |
| 0.176800413 | 1           | 0.086138411 | 0.194395271 |
| 0.204550968 | 0.057460808 | 0.125036271 | 0.255359306 |
| 0.118839105 | 0.027081711 | 0.033521635 | 0.010468017 |
| 0.081880575 | 0.068373991 | 0.240153145 | 0.149223894 |
| 0.064666736 | 0.194516739 | 0.202797374 | 0.048388585 |
| 0.032838003 | 0.140313024 | 0.04677391  | 0.099834091 |
| 0.072985258 | 0.126317422 | 0.128274439 | 0.190862214 |
| 0.051033141 | 0.143474513 | 0.085572405 | 0.171408065 |
| 0.004705229 | 0.166632826 | 0.118774978 | 0.096401158 |
| 0.112368266 | 0.128137258 | 0.073268689 | 0.248192835 |
| 0.108454524 | 0.144634386 | 0.104287942 | 0.11622383  |
| 0.134351153 | 0.175582652 | 0.170331213 | 0.139545647 |
| 0.123825682 | 0.025435272 | 0.046108375 | 0.061998972 |
| 0.12934819  | 0.295570891 | 0.030498108 | 0.212304287 |
| 0.162128068 | 0.111314545 | 0.099481952 | 0.255419297 |
| 0.190567775 | 0.183733855 | 0.103580117 | 0.127543607 |
| 0.19614322  | 0.188706586 | 0.164249571 | 0.061299594 |
| 0.180367878 | 0.051025537 | 0.064754401 | 0.187638824 |
| 0.180856077 | 0.00189991  | 0.1158727   | 0.127551081 |
| 0.156438413 | 0.091738579 | 0.178027594 | 0.136641392 |
| 0.155658909 | 0.245556798 | 0.013096383 | 0.145246234 |

|             |             |             |             |
|-------------|-------------|-------------|-------------|
| 0.17947671  | 0.137245815 | 0.121047405 | 0.039207897 |
| 0.081772555 | 0.050108536 | 0.110003935 | 0.010570796 |
| 0.229386792 | 0.119648783 | 0.122161532 | 0.138810108 |
| 0.137252425 | 0.233068322 | 0.03821946  | 0.186806065 |
| 0.095851437 | 0.090008795 | 0.15740795  | 0.243422772 |
| 0.012916485 | 0.182379423 | 0.047871215 | 0.110849099 |
| 0.200394591 | 0.078725871 | 0.016251437 | 0.076632875 |
| 0.245370622 | 0.040836468 | 0.151394974 | 0.173862776 |
| 0.098165609 | 0.318682987 | 0.046774428 | 0.049742081 |
| 0.103203053 | 0.325517895 | 0.07052938  | 0.146219231 |
| 0.070609361 | 0.182054922 | 0.086706072 | 0.180012088 |
| 0.215315264 | 0.039379562 | 0.28429906  | 0.01193516  |
| 0.029333907 | 0.021305854 | 0.011176593 | 0.044171662 |
| 0.330337761 | 0.065196987 | 0.084734667 | 0.081082641 |
| 0.075093445 | 0.187745329 | 0.038457741 | 0.233466864 |
| 0.244968343 | 0.03114898  | 0.127418217 | 0.06555427  |
| 0.031059753 | 0.079539457 | 0.098864798 | 0.06783654  |
| 0.190592486 | 0.010048131 | 0.006264826 | 0.131226058 |
| 0.019493061 | 0.049459199 | 0.124728051 | 0.09357905  |
| 0.021532532 | 0.29442515  | 0.175832159 | 0.008437796 |
| 0.078635052 | 0.020480867 | 0.155697508 | 0.040487997 |
| 0.156367838 | 0.227610386 | 0.056899837 | 0.037277707 |
| 0.13297359  | 0.175757039 | 0.149017892 | 0.139556836 |
| 0.0225014   | 0.18185388  | 0.102743272 | 0.13392803  |
| 0.119246067 | 0.045868279 | 0.006434937 | 0.095782756 |
| 0.120884018 | 0.029105209 | 0.212388808 | 0.094026391 |
| 0.052015781 | 0.081441589 | 0.059814565 | 0.156216868 |
| 0.224194252 | 0.162633314 | 0.094064313 | 0.137451165 |
| 0.126777877 | 0.100169953 | 0.14198691  | 0.198841205 |
| 0.02659871  | 0.059777913 | 0.03372052  | 0.146659257 |
| 0.186315953 | 0.04729597  | 0.266450065 | 0.010423747 |
| 0.001363601 | 0.191469144 | 0.16414457  | 0.107950289 |
| 0.018560007 | 0.054336982 | 0.099460801 | 0.160230351 |
| 0.170024142 | 0.159671879 | 0.302661968 | 0.031757675 |
| 0.171011056 | 0.060900034 | 0.039000025 | 0.073919692 |
| 0.261156302 | 0.02254803  | 0.042775169 | 0.23416999  |
| 0.201929081 | 0.013712133 | 0.117090203 | 0.002846196 |
| 0.120414955 | 0.099730889 | 0.291888734 | 0.315696077 |
| 0.145720185 | 0.274691871 | 0.181733221 | 0.033163693 |
| 0.122007692 | 0.192772358 | 0.004085033 | 0.160211574 |
| 0.199179474 | 0.21185143  | 0.197487018 | 0.219169183 |
| 0.183437909 | 0.126270624 | 0.12220785  | 0.053539065 |
| 0.109325679 | 0.131354328 | 0.020082535 | 0.085868849 |
| 0.010544852 | 0.123174956 | 0.100635538 | 0.237204563 |
| 0.094899294 | 0.214279532 | 0.081319413 | 0.083639959 |
| 0.02582197  | 0.004959267 | 0.063741056 | 0.147247014 |
| 0.155458691 | 0.067694471 | 0.006957375 | 0.019260861 |
| 0.149753368 | 0.179763231 | 0.018661995 | 0.170696511 |
| 0.073268095 | 0.20081223  | 0.059707303 | 0.098197745 |
| 0.134040192 | 0.02042371  | 0.067417007 | 0.000662974 |
| 0.013905398 | 0.22704782  | 0.036650793 | 0.06526906  |
| 0.128372902 | 0.032746745 | 0.151542739 | 0.177795891 |
| 0.14798058  | 0.150147607 | 0.143255445 | 0.018230917 |
| 0.152101066 | 0.004164315 | 0.15080914  | 0.129415909 |

|             |             |             |             |
|-------------|-------------|-------------|-------------|
| 0.024575925 | 0.001431062 | 0.02625632  | 0.115441319 |
| 0.048512245 | 0.192275261 | 0.209257244 | 0.011101078 |
| 0.072429869 | 0.106361562 | 0.14748862  | 0.028056903 |
| 0.055697328 | 0.084001648 | 0.032953153 | 0.178075218 |
| 0.123217624 | 0.181723088 | 0.043851952 | 0.27568313  |
| 0.055963424 | 0.084705286 | 0.315606039 | 0.003747106 |
| 0.125875539 | 0.236567718 | 0.226305522 | 0.155513269 |
| 0.188133395 | 0.083297534 | 0.014254811 | 0.019796489 |
| 0.162308132 | 0.149720045 | 0.012987758 | 0.159085241 |
| 0.137429629 | 0.072748969 | 0.155786145 | 0.168889428 |
| 0.1763661   | 0.167909275 | 0.138137844 | 0.121037769 |
| 0.012955369 | 0.006558067 | 0.039913301 | 0.249598583 |
| 0.074096456 | 0.050066802 | 0.218458969 | 0.127188646 |
| 0.108302477 | 0.04668504  | 0.024507408 | 0.027964592 |
| 0.136854385 | 0.076204474 | 0.050693016 | 0.302465045 |
| 0.069493143 | 0.052113591 | 0.092053601 | 0.144377799 |
| 0.068760723 | 0.2090306   | 0.240017    | 0.127186279 |
| 0.03863649  | 0.038438568 | 0.144651645 | 0.226279078 |
| 0.111455733 | 0.120004821 | 0.150502324 | 0.02668713  |
| 0.221172982 | 0.089703988 | 0.137239734 | 0.138492728 |
| 0.194006445 | 0.197505406 | 0.247952041 | 0.09860916  |
| 0.10795941  | 0.11829347  | 0.059912211 | 0.074527956 |
| 0.151455838 | 0.210435293 | 0.157293562 | 0.032000964 |
| 0.288093281 | 0.078858199 | 0.062803555 | 0.240781062 |
| 0.041486682 | 0.224007512 | 0.124032193 | 0.140827045 |
| 0.063892172 | 0.014289939 | 0.175438546 | 0.182039649 |
| 0.169210763 | 0.011079231 | 0.228640815 | 0.081585489 |
| 0.15892871  | 0.032323912 | 0.080309321 | 0.220366129 |
| 0.20915181  | 0.252194185 | 0.024373003 | 0.146138925 |
| 0.098544282 | 0.047905013 | 0.013647449 | 0.126925532 |
| 0.15722517  | 0.054334758 | 0.160659107 | 0.196179346 |
| 0.285939542 | 0.036191439 | 0.045313212 | 0.089986514 |
| 0.251330855 | 0.034425841 | 0.182348755 | 0.237787334 |
| 0.29979131  | 0.2617375   | 0.146233122 | 0.101316604 |
| 0.052537166 | 0.186310073 | 0.201449657 | 0.131857003 |
| 0.020401814 | 0.068056913 | 0.031244405 | 0.121485021 |
| 0.002873084 | 0.00848558  | 0.176880229 | 0.052538368 |
| 0.223088457 | 0.138499012 | 0.180914165 | 0.080531816 |
| 0.001969877 | 0.073935399 | 0.067573175 | 0.028228319 |
| 0.12841338  | 0.151610117 | 0.085574366 | 0.090674494 |
| 0.222597701 | 0.163152181 | 0.091864657 | 0.016484436 |
| 0.015218365 | 0.084098    | 0.275357296 | 0.257975603 |
| 0.124690065 | 0.291181758 | 0.012622758 | 0.083857937 |
| 0.047246213 | 0.226394203 | 0.170467267 | 0.01977574  |
| 0.007951302 | 0.186783214 | 0.126039353 | 0.07408451  |
| 0.046273296 | 0.178220785 | 0.171998896 | 0.018775596 |
| 0.07215403  | 0.055437349 | 0.112295936 | 0.073593225 |
| 0.099445859 | 0.132270069 | 0.149484957 | 0.038526132 |
| 0.140935292 | 0.140638305 | 0.052243137 | 0.154983529 |
| 0.060919049 | 0.15273636  | 0.075117387 | 0.077117681 |
| 0.029286238 | 0.095922041 | 0.277169556 | 0.271209048 |
| 0.051941851 | 0.127771255 | 0.246513727 | 0.17666771  |
| 0.200653109 | 0.071546939 | 0.220786091 | 0.149375305 |
| 0.17825464  | 0.199302224 | 0.093847717 | 0.102522215 |



|             |             |             |             |
|-------------|-------------|-------------|-------------|
| 0.014127961 | 0.021283572 | 0.100173235 | 0.065135212 |
| 0.139478389 | 0.023488285 | 0.049414158 | 0.093591657 |
| 0.110034814 | 0.227757536 | 0.230085435 | 0.18844901  |
| 0.046711159 | 0.102404575 | 0.016515536 | 0.061569026 |
| 0.108420032 | 0.299872614 | 0.060378366 | 0.01489519  |
| 0.123562491 | 0.027461614 | 0.101200627 | 0.165772557 |
| 0.018105284 | 0.201613462 | 0.011438451 | 0.078866706 |
| 0.009588727 | 0.224221238 | 0.25699908  | 0.091221235 |
| 0.007083733 | 0.08888587  | 0.080233844 | 0.020630997 |
| 0.091376839 | 0.103831914 | 0.061142973 | 0.143656379 |
| 0.211198386 | 0.173594271 | 0.242359132 | 0.115043353 |
| 0.049249546 | 0.0238766   | 0.077485974 | 0.068059251 |
| 0.108959772 | 0.148898569 | 0.183826334 | 0.143050354 |
| 0.059746236 | 0.274783916 | 0.235265891 | 0.109025206 |
| 0.045241657 | 0.053258561 | 0.009201574 | 0.041370192 |
| 0.096417107 | 0.017861517 | 0.000828915 | 0.013314642 |
| 0.147113959 | 0.078362966 | 0.116495975 | 0.177432491 |
| 0.049843393 | 0.207830031 | 0.00913853  | 0.126822115 |
| 0.162355432 | 0.209927736 | 0.033469092 | 0.282978482 |
| 0.174445486 | 0.103100551 | 0.059639573 | 0.023411159 |
| 0.0588965   | 0.043534294 | 0.019895094 | 0.133054878 |
| 0.100548133 | 0.010323638 | 0.069195414 | 0.282090714 |
| 0.142852126 | 0.005087911 | 0.119543523 | 0.071342491 |
| 0.314702978 | 0.21145636  | 0.085386693 | 0.083230567 |
| 0.18087371  | 0.225187931 | 0.046470533 | 0.070821066 |
| 0.025187838 | 0.034243133 | 0.116191978 | 0.019101986 |
| 0.093551627 | 0.037468646 | 0.031098981 | 0.241022771 |
| 0.204076242 | 0.044076673 | 0.311579636 | 0.018707131 |
| 0.175555659 | 0.201532909 | 0.054531694 | 0.037006173 |
| 0.03110439  | 0.049485874 | 0.194247274 | 0.113665537 |
| 0.005380313 | 0.112424656 | 0.056433935 | 0.076181101 |
| 0.234147501 | 0.03242733  | 0.315131019 | 0.01288652  |
| 0.146301031 | 0.153151124 | 0.185707708 | 0.045478701 |
| 0.101280185 | 0.24817754  | 0.023726264 | 0.188995712 |
| 0.110021931 | 0.023654943 | 0.10498416  | 0.081113102 |
| 0.035687597 | 0.170856055 | 0.062266108 | 0.200751002 |
| 0.084712101 | 0.185513247 | 0.115372566 | 0.166995303 |
| 0.201823393 | 0.040136342 | 0.017668402 | 0.06645692  |
| 0.142340966 | 0.037341859 | 0.036671566 | 0.143087966 |
| 0.016626664 | 0.164412786 | 0.090857188 | 0.07558296  |
| 0.054439904 | 0.118906336 | 0.020180892 | 0.247345484 |
| 0.136975216 | 0.064834926 | 0.048654117 | 0.209978448 |
| 0.033177187 | 0.024974828 | 0.218888443 | 0.001670216 |
| 0.058556363 | 0.064199483 | 0.158477294 | 0.053782738 |
| 0.205696388 | 0.133005999 | 0.081724542 | 0.01581103  |
| 0.1424011   | 0.00928837  | 0.07634509  | 0.029738544 |
| 0.022805579 | 0.118318484 | 0.165390029 | 0.151399536 |
| 0.152414321 | 0.022858242 | 0.010104034 | 0.171445591 |
| 0.011173711 | 0.015454922 | 0.029668021 | 0.074140964 |
| 0.016335078 | 0.028062199 | 0.031087806 | 0.01686806  |
| 0.12096337  | 0.100384631 |             |             |
| ATPIF1      | 0.107355786 | 0.389885659 | 0.078757971 |
| 0.24321779  | 0.324952385 | 0.373891909 | 0.080928561 |
| 0.157024811 | 0.280995403 | 0.213414017 | 0.390933008 |

|             |             |             |             |
|-------------|-------------|-------------|-------------|
| 0.039551569 | 0.101667477 | 0.460769005 | 0.07424661  |
| 0.365132973 | 0.064334359 | 0.143243044 | 0.068718588 |
| 0.208040498 | 0.311763935 | 0.350092907 | 0.323877409 |
| 0.288293286 | 0.205226716 | 0.293177337 | 0.307453245 |
| 0.48772103  | 0.258853218 | 0.388824728 | 0.180453235 |
| 0.430357615 | 0.339424348 | 0.336627735 | 0.032185961 |
| 0.363228102 | 0.00946144  | 0.431962198 | 0.315413864 |
| 0.204717315 | 0.359617085 | 0.259974739 | 0.320630034 |
| 0.300886698 | 0.064947221 | 0.165381878 | 0.331095047 |
| 0.267993111 | 0.258105512 | 0.077226871 | 0.361506102 |
| 0.296057845 | 0.32723052  | 0.305800794 | 0.00541624  |
| 0.303877617 | 0.092438712 | 0.21697435  | 0.493337356 |
| 0.242554848 | 0.174302535 | 0.220914394 | 0.20518827  |
| 0.303002501 | 0.312016593 | 0.247400707 | 0.291016712 |
| 0.505295772 | 0.192527289 | 0.348785934 | 0.208468377 |
| 0.33737781  | 0.038042049 | 0.1836188   | 0.079520461 |
| 0.328157255 | 0.25012897  | 0.348641146 | 0.294185945 |
| 0.397661655 | 0.503451064 | 0.236591543 | 0.475841547 |
| 0.092271323 | 0.31858621  | 0.289440239 | 0.299492192 |
| 0.296210687 | 0.086138411 | 1           | 0.523631404 |
| 0.051929442 | 0.286949121 | 0.329902668 | 0.124112287 |
| 0.409268724 | 0.221090578 | 0.318979542 | 0.225561376 |
| 0.341963076 | 0.33853246  | 0.441088719 | 0.321409004 |
| 0.294551642 | 0.086371445 | 0.459366203 | 0.315138055 |
| 0.368899916 | 0.110933196 | 0.26133049  | 0.43763189  |
| 0.382952614 | 0.494600894 | 0.377310454 | 0.328417166 |
| 0.360782494 | 0.504702965 | 0.387063982 | 0.389395499 |
| 0.108276794 | 0.509202862 | 0.235876148 | 0.078241801 |
| 0.087199035 | 0.120537691 | 0.193723213 | 0.294310928 |
| 0.468179304 | 0.311747074 | 0.248494005 | 0.282593561 |
| 0.454730513 | 0.450657865 | 0.499674667 | 0.394043331 |
| 0.06607974  | 0.211704156 | 0.369466842 | 0.26341391  |
| 0.340364696 | 0.123150107 | 0.288036184 | 0.495214765 |
| 0.413519207 | 0.422293373 | 0.181931963 | 0.483581588 |
| 0.183449283 | 0.527897085 | 0.434017147 | 0.237827753 |
| 0.513804295 | 0.486602657 | 0.524654607 | 0.373443682 |
| 0.474269512 | 0.368840686 | 0.045628696 | 0.349136845 |
| 0.503885831 | 0.029921193 | 0.454810507 | 0.489167048 |
| 0.48727464  | 0.452937142 | 0.518003095 | 0.503823847 |
| 0.486336889 | 0.090178476 | 0.020119784 | 0.304635274 |
| 0.500501075 | 0.424083492 | 0.150961428 | 0.362315193 |
| 0.334453064 | 0.362865174 | 0.364831634 | 0.358327744 |
| 0.516039707 | 0.448447275 | 0.470325083 | 0.344330327 |
| 0.236805278 | 0.333291772 | 0.321569669 | 0.453321111 |
| 0.076551368 | 0.157676483 | 0.067695548 | 0.264168389 |
| 0.293490102 | 0.223933715 | 0.354092541 | 0.293375631 |
| 0.236639353 | 0.283063638 | 0.295686933 | 0.358878603 |
| 0.059932018 | 0.38016962  | 0.193689656 | 0.191941493 |
| 0.082978293 | 0.15131045  | 0.276135969 | 0.229269937 |
| 0.295378677 | 0.234363381 | 0.360017441 | 0.480300725 |
| 0.290191423 | 0.198501989 | 0.366177275 | 0.48764034  |
| 0.454106923 | 0.373693124 | 0.219003511 | 0.042269891 |
| 0.317723993 | 0.224549074 | 0.191153638 | 0.338707319 |
| 0.179674355 | 0.277826987 | 0.356187582 | 0.377208594 |

|             |             |             |             |
|-------------|-------------|-------------|-------------|
| 0.304678005 | 0.133330696 | 0.339862449 | 0.436048683 |
| 0.145899056 | 0.361686446 | 0.461510036 | 0.325711267 |
| 0.00841653  | 0.358409146 | 0.436444906 | 0.175181674 |
| 0.276878362 | 0.18981018  | 0.295806419 | 0.465358553 |
| 0.269122006 | 0.22955924  | 0.480098433 | 0.355356727 |
| 0.315887791 | 0.208943343 | 0.517459993 | 0.04913129  |
| 0.282147469 | 0.118528897 | 0.313942963 | 0.240174281 |
| 0.282935945 | 0.281226517 | 0.317001648 | 0.324751349 |
| 0.150794866 | 0.50583891  | 0.374413816 | 0.512760988 |
| 0.341475806 | 0.521801291 | 0.456743797 | 0.458570998 |
| 0.342168467 | 0.286227919 | 0.156349551 | 0.439048931 |
| 0.454974856 | 0.26015266  | 0.081416395 | 0.38359581  |
| 0.285116007 | 0.359937396 | 0.148171696 | 0.51018999  |
| 0.496340007 | 0.440437592 | 0.200038123 | 0.353025301 |
| 0.410621146 | 0.287007237 | 0.383436446 | 0.51761805  |
| 0.236819989 | 0.335392707 | 0.351707109 | 0.406884805 |
| 0.213852616 | 0.231496246 | 0.299627849 | 0.174427411 |
| 0.018546159 | 0.094956525 | 0.091947903 | 0.22699668  |
| 0.217975147 | 0.321066868 | 0.354356389 | 0.512580828 |
| 0.164367544 | 0.420052279 | 0.20673292  | 0.361147285 |
| 0.421277849 | 0.302295463 | 0.34530907  | 0.349229665 |
| 0.233961974 | 0.048341278 | 0.203482865 | 0.51171564  |
| 0.045266329 | 0.284436906 | 0.272571088 | 0.009211458 |
| 0.068982134 | 0.34866018  | 0.100246228 | 0.210592864 |
| 0.475778052 | 0.212835655 | 0.229911255 | 0.249380447 |
| 0.345033956 | 0.125545278 | 0.012651195 | 0.463148198 |
| 0.445125799 | 0.414012057 | 0.442146012 | 0.414797715 |
| 0.401718353 | 0.324780211 | 0.385298683 | 0.330284666 |
| 0.146215617 | 0.104060623 | 0.257897795 | 0.327444528 |
| 0.006516546 | 0.372760858 | 0.281068843 | 0.174996795 |
| 0.36467007  | 0.274664104 | 0.06722848  | 0.307502578 |
| 0.057109808 | 0.236385848 | 0.275063995 | 0.222092673 |
| 0.310908454 | 0.027072651 | 0.311189621 | 0.32407297  |
| 0.433618076 | 0.350898664 | 0.319463962 | 0.519831395 |
| 0.37212391  | 0.122563224 | 0.353954027 | 0.365079311 |
| 0.107508061 | 0.093250899 | 0.292253321 | 0.045801993 |
| 0.188050796 | 0.415483265 | 0.314593291 | 0.111242482 |
| 0.315449789 | 0.01438644  | 0.381047427 | 0.524180171 |
| 0.444042935 | 0.518322758 | 0.510877128 | 0.316381926 |
| 0.510107109 | 0.094576701 | 0.5184478   | 0.386906097 |
| 0.307160175 | 0.003871729 | 0.012214299 | 0.486530978 |
| 0.386813146 | 0.059788141 | 0.197245277 | 0.372879905 |
| 0.185361408 | 0.166738819 | 0.088197535 | 0.241006934 |
| 0.371892955 | 0.283785439 | 0.202259637 | 0.44916487  |
| 0.279444341 | 0.248742258 | 0.312128326 | 0.094479492 |
| 0.362302013 | 0.096339351 | 0.088749454 | 0.024206084 |
| 0.330223091 | 0.116937921 | 0.443913572 | 0.494946688 |
| 0.507336089 | 0.370255076 | 0.266142084 | 0.317489879 |
| 0.396385137 | 0.101608801 | 0.31108803  | 0.118485992 |
| 0.47544088  | 0.382650171 | 0.340588291 | 0.333833064 |
| 0.514310003 | 0.481765534 | 0.05554313  | 0.390464467 |
| 0.039345395 | 0.00353444  | 0.355745073 | 0.242409912 |
| 0.037867846 | 0.344036122 | 0.267078816 | 0.184648734 |
| 0.202627311 | 0.064075302 | 0.268269518 | 0.263372489 |

|             |             |             |             |
|-------------|-------------|-------------|-------------|
| 0.319817398 | 0.353596085 | 0.308930371 | 0.205602689 |
| 0.274309685 | 0.175102952 | 0.234732477 | 0.173548459 |
| 0.183025431 | 0.306728713 | 0.214077468 | 0.034954117 |
| 0.356026856 | 0.382986595 | 0.091575963 | 0.178370763 |
| 0.46123774  | 0.500578445 | 0.068745844 | 0.039015971 |
| 0.269099693 | 0.288726789 | 0.504862083 | 0.48186169  |
| 0.512528774 | 0.524899415 | 0.400229915 | 0.168113575 |
| 0.10243291  | 0.319021149 | 0.303643909 | 0.147392842 |
| 0.505115014 | 0.073343084 | 0.466500617 | 0.293014303 |
| 0.134128946 | 0.269060322 | 0.076880307 | 0.109537795 |
| 0.350915293 | 0.204954503 | 0.237264047 | 0.169738143 |
| 0.343084542 | 0.275810538 | 0.068825288 | 0.237868425 |
| 0.331112172 | 0.217669431 | 0.193320892 | 0.263015331 |
| 0.316947761 | 0.137813004 | 0.372418906 | 0.465857943 |
| 0.153622666 | 0.122285994 | 0.316516887 | 0.311809989 |
| 0.418257181 | 0.293377123 | 0.066437293 | 0.419203358 |
| 0.482398339 | 0.3872788   | 0.48787759  | 0.394330149 |
| 0.097124852 | 0.394453286 | 0.259959628 | 0.333568209 |
| 0.198434157 | 0.362322156 | 0.23496176  | 0.084496026 |
| 0.281903966 | 0.456717207 | 0.405855378 | 0.238175839 |
| 0.338168206 | 0.123604033 | 0.063975996 | 0.408358293 |
| 0.234693907 | 0.146310738 | 0.273806523 | 0.382713513 |
| 0.005894809 | 0.164971418 | 0.464946287 | 0.288662115 |
| 0.494056429 | 0.488850564 | 0.462533266 | 0.224594106 |
| 0.002289247 | 0.348701464 | 0.398670046 | 0.408995098 |
| 0.419935684 | 0.324053923 | 0.125564775 | 0.132200926 |
| 0.297590324 | 0.093213244 | 0.197132001 | 0.328784857 |
| 0.175972692 | 0.346923456 | 0.213027119 | 0.192202848 |
| 0.234956578 | 0.081758771 | 0.267816436 | 0.286089524 |
| 0.126695963 | 0.259475333 | 0.363898945 | 0.204894468 |
| 0.256087274 | 0.413335586 | 0.379275758 | 0.048000998 |
| 0.315648753 | 0.376623731 | 0.41353188  | 0.007524458 |
| 0.393376604 | 0.019360836 | 0.248068299 | 0.295459051 |
| 0.250924675 | 0.236539685 | 0.27964297  | 0.332232768 |
| 0.307168275 | 0.253536483 | 0.350208801 | 0.28033154  |
| 0.2385678   | 0.229303467 | 0.351153323 | 0.315801858 |
| 0.356757298 | 0.180077162 | 0.105224372 | 0.11031983  |
| 0.106911536 | 0.435900344 | 0.262148359 | 0.084347755 |
| 0.246123601 | 0.304625703 | 0.376974267 | 0.469928431 |
| 0.425840521 | 0.114282121 | 0.294552859 | 0.441250407 |
| 0.174587244 | 0.290835554 | 0.081081261 | 0.341034292 |
| 0.265839132 | 0.289256967 | 0.317503125 | 0.299725763 |
| 0.316720042 | 0.418945146 | 0.252820689 | 0.432504753 |
| 0.36897117  | 0.265876313 | 0.259395714 | 0.160900736 |
| 0.239400896 | 0.136008201 | 0.301870304 | 0.007652205 |
| 0.344622477 | 0.30255798  | 0.474457498 | 0.479945186 |
| 0.266326887 | 0.389212371 | 0.288391878 | 0.14613461  |
| 0.22638408  | 0.187239634 | 0.164389263 | 0.36660403  |
| 0.233578879 | 0.227244358 | 0.329742017 | 0.308205877 |
| 0.380602986 | 0.330334029 | 0.239515227 | 0.235627689 |
| 0.225909823 | 0.203700886 | 0.439525359 | 0.138697473 |
| 0.350085345 | 0.261392943 | 0.262401426 | 0.348157846 |
| 0.262463046 | 0.497184909 | 0.080540295 | 0.513365619 |
| 0.333718902 | 0.129687919 | 0.492703336 | 0.2651898   |

|             |             |             |             |
|-------------|-------------|-------------|-------------|
| 0.278088052 | 0.179211155 | 0.210855003 | 0.294855312 |
| 0.231769858 | 0.312318649 | 0.014228656 | 0.090767129 |
| 0.338810355 | 0.218918419 | 0.342679365 | 0.301036673 |
| 0.266367984 | 0.32325477  | 0.158924862 | 0.269287698 |
| 0.451934723 | 0.470324752 | 0.345054731 | 0.242909441 |
| 0.316054423 | 0.156744855 | 0.344495791 | 0.010892222 |
| 0.369536345 | 0.347249634 | 0.306494085 | 0.079119208 |
| 0.034747262 | 0.239428642 | 0.359757446 | 0.065518524 |
| 0.478026637 | 0.230198657 | 0.260925153 | 0.371918988 |
| 0.163014644 | 0.479382938 | 0.17336901  | 0.395378109 |
| 0.045202352 | 0.247028667 | 0.31198448  | 0.28606241  |
| 0.327338555 | 0.312453172 | 0.373143624 | 0.284575018 |
| 0.064032585 | 0.313062932 | 0.004410079 | 0.420034818 |
| 0.442680182 | 0.313449812 | 0.201883963 | 0.206477547 |
| 0.295582852 | 0.344816932 | 0.245147107 | 0.329922564 |
| 0.033618373 | 0.374901044 | 0.221382285 | 0.420271206 |
| 0.27777628  | 0.291129732 | 0.112168627 | 0.278861617 |
| 0.433694943 | 0.308396897 | 0.234889776 | 0.314815646 |
| 0.469797343 | 0.334895519 | 0.153595486 | 0.230015134 |
| 0.281393086 | 0.076829658 | 0.30165563  | 0.512345846 |
| 0.237898192 | 0.271366651 | 0.4515167   | 0.278959536 |
| 0.291246966 | 0.364864259 | 0.307703804 | 0.4883036   |
| 0.12456872  | 0.275241297 | 0.383748958 | 0.441709541 |
| 0.302280871 | 0.199914251 | 0.286665249 | 0.280302032 |
| 0.449113842 | 0.172070579 | 0.250721243 | 0.339954529 |
| 0.260139762 | 0.299729519 | 0.24401341  | 0.233562476 |
| 0.075992918 | 0.174614375 | 0.367427342 | 0.161584005 |
| 0.315883798 | 0.359527578 | 0.267773562 | 0.409991404 |
| 0.23370727  | 0.074504627 | 0.461363434 | 0.03448871  |
| 0.324680961 | 0.395452781 | 0.25792923  | 0.336568384 |
| 0.203467588 | 0.309368881 | 0.304285284 | 0.004092851 |
| 0.38756494  | 0.068610053 | 0.260728459 | 0.311802544 |
| 0.269913704 | 0.07672879  | 0.452834118 | 0.516300557 |
| 0.287004053 | 0.259155339 | 0.319419594 | 0.4439317   |
| 0.18689543  | 0.267241884 | 0.280906227 | 0.337048497 |
| 0.246231578 | 0.304795456 | 0.33066681  | 0.359789963 |
| 0.339878822 | 0.255763185 |             |             |
| AURKA       | 0.188743446 | 0.502200397 | 0.157922717 |
| 0.274814612 | 0.387639245 | 0.510770896 | 0.1591891   |
| 0.262538004 | 0.461841445 | 0.379824529 | 0.478262174 |
| 0.067912738 | 0.097945986 | 0.526739405 | 0.145642564 |
| 0.470369243 | 0.102651545 | 0.237289937 | 0.129250446 |
| 0.353711352 | 0.366063928 | 0.403513824 | 0.507802225 |
| 0.367928563 | 0.319467787 | 0.487502268 | 0.441960877 |
| 0.530729049 | 0.304260476 | 0.519811364 | 0.26828065  |
| 0.484693216 | 0.400638701 | 0.436618071 | 0.067392215 |
| 0.512371025 | 0.018162849 | 0.470342573 | 0.384113173 |
| 0.194983612 | 0.452691532 | 0.439657949 | 0.380020426 |
| 0.478302616 | 0.119737897 | 0.260096668 | 0.480727387 |
| 0.463258571 | 0.407935911 | 0.173816267 | 0.529102024 |
| 0.462570042 | 0.486774061 | 0.489933735 | 0.007308484 |
| 0.342311924 | 0.09067863  | 0.24837626  | 0.516954782 |
| 0.35054898  | 0.246557544 | 0.331116612 | 0.381193072 |
| 0.470643955 | 0.466695938 | 0.387897324 | 0.460572757 |

|             |             |             |             |
|-------------|-------------|-------------|-------------|
| 0.529861384 | 0.206661184 | 0.505696489 | 0.272143335 |
| 0.507282744 | 0.108828734 | 0.30184229  | 0.201238367 |
| 0.468656396 | 0.33276399  | 0.434916394 | 0.363844873 |
| 0.501204275 | 0.522363643 | 0.384996221 | 0.506823162 |
| 0.128208168 | 0.401154548 | 0.355903333 | 0.424183948 |
| 0.470121893 | 0.194395271 | 0.523631404 | 1           |
| 0.138076087 | 0.476454949 | 0.504056703 | 0.258541024 |
| 0.519597436 | 0.322277563 | 0.486988872 | 0.21117894  |
| 0.444468773 | 0.423258522 | 0.483750503 | 0.442916287 |
| 0.392630883 | 0.187955538 | 0.502355226 | 0.375216956 |
| 0.405833164 | 0.206927311 | 0.311318856 | 0.521218372 |
| 0.526164895 | 0.5357627   | 0.512914281 | 0.477836702 |
| 0.45479173  | 0.531519583 | 0.527678164 | 0.503114099 |
| 0.188919806 | 0.522442718 | 0.346911185 | 0.116241174 |
| 0.188347577 | 0.186107973 | 0.302589928 | 0.425945779 |
| 0.533662576 | 0.475720231 | 0.361067749 | 0.357469794 |
| 0.512157154 | 0.489677489 | 0.519052815 | 0.518592035 |
| 0.121911422 | 0.287477149 | 0.464566938 | 0.422108518 |
| 0.490741363 | 0.240826368 | 0.312914173 | 0.520473227 |
| 0.493758066 | 0.51704041  | 0.325919748 | 0.519424494 |
| 0.335160241 | 0.520898616 | 0.525783173 | 0.316423265 |
| 0.522688819 | 0.507994149 | 0.526656123 | 0.468767431 |
| 0.503802954 | 0.498812579 | 0.098132726 | 0.492471794 |
| 0.513922689 | 0.021594763 | 0.527364453 | 0.530587081 |
| 0.519535979 | 0.529509276 | 0.521714402 | 0.531690876 |
| 0.518428524 | 0.187624337 | 0.037253405 | 0.396172227 |
| 0.513276544 | 0.511734517 | 0.235809272 | 0.487085979 |
| 0.438967322 | 0.527975887 | 0.506705844 | 0.391740149 |
| 0.508015098 | 0.529935076 | 0.530038406 | 0.510870199 |
| 0.433230158 | 0.435370605 | 0.42614026  | 0.488386853 |
| 0.128039503 | 0.2556805   | 0.149888245 | 0.430156748 |
| 0.452829511 | 0.306723268 | 0.522317937 | 0.434124506 |
| 0.332977527 | 0.480097528 | 0.372071045 | 0.45361043  |
| 0.151485627 | 0.524015115 | 0.319844909 | 0.332204053 |
| 0.120130071 | 0.267868886 | 0.32555274  | 0.281629899 |
| 0.366137434 | 0.32041417  | 0.517558535 | 0.526003457 |
| 0.435709671 | 0.337318623 | 0.532533383 | 0.514270037 |
| 0.484947129 | 0.454866296 | 0.368758209 | 0.037918189 |
| 0.371844881 | 0.352932248 | 0.211721189 | 0.471036721 |
| 0.287042297 | 0.369563523 | 0.485782728 | 0.474376112 |
| 0.453411718 | 0.2847844   | 0.451326796 | 0.473793782 |
| 0.292116315 | 0.406062136 | 0.524862816 | 0.503691089 |
| 0.018380925 | 0.483421957 | 0.535788441 | 0.214737666 |
| 0.45384643  | 0.171395805 | 0.296253975 | 0.528999022 |
| 0.341616267 | 0.28495682  | 0.528646365 | 0.467519067 |
| 0.435626981 | 0.325078108 | 0.523456578 | 0.060351246 |
| 0.413462044 | 0.104177479 | 0.406780661 | 0.426277132 |
| 0.40989222  | 0.41469375  | 0.380815718 | 0.369028649 |
| 0.272194176 | 0.521208756 | 0.503825059 | 0.534723436 |
| 0.442752879 | 0.523263415 | 0.531251441 | 0.525735494 |
| 0.496654203 | 0.422855652 | 0.152537075 | 0.537345335 |
| 0.529841563 | 0.385300117 | 0.187270571 | 0.511037416 |
| 0.447886384 | 0.481233441 | 0.184424553 | 0.527932271 |
| 0.502604059 | 0.491874243 | 0.260752091 | 0.462560914 |

|             |             |             |             |
|-------------|-------------|-------------|-------------|
| 0.506463486 | 0.397472266 | 0.504910859 | 0.516540728 |
| 0.395309338 | 0.434597375 | 0.421243124 | 0.478675408 |
| 0.331238265 | 0.280163056 | 0.432989897 | 0.197832875 |
| 0.011829111 | 0.201366405 | 0.177241609 | 0.27402267  |
| 0.210715752 | 0.487213099 | 0.492511246 | 0.529566138 |
| 0.245638552 | 0.504003355 | 0.375231805 | 0.404297119 |
| 0.506165523 | 0.421924977 | 0.436586079 | 0.466232203 |
| 0.389844964 | 0.054806081 | 0.224409832 | 0.528356414 |
| 0.125221865 | 0.290428286 | 0.453985789 | 0.007875434 |
| 0.136241383 | 0.498329819 | 0.211649304 | 0.310623742 |
| 0.514477966 | 0.319326396 | 0.371083476 | 0.421084422 |
| 0.460588894 | 0.216066255 | 0.009759477 | 0.518946898 |
| 0.500574232 | 0.491422889 | 0.499983225 | 0.479314236 |
| 0.498826797 | 0.492533564 | 0.502699555 | 0.502989154 |
| 0.236351318 | 0.219528122 | 0.270090656 | 0.410782878 |
| 0.013819106 | 0.485801923 | 0.396436412 | 0.282116395 |
| 0.501135112 | 0.435353558 | 0.115232298 | 0.42329567  |
| 0.077400463 | 0.231393728 | 0.444554099 | 0.338764489 |
| 0.433951139 | 0.059308499 | 0.338881176 | 0.395850531 |
| 0.496069286 | 0.474887055 | 0.411683584 | 0.52289722  |
| 0.458174612 | 0.264492168 | 0.425090683 | 0.487631499 |
| 0.182267626 | 0.161032967 | 0.479850776 | 0.059381459 |
| 0.276764361 | 0.483659479 | 0.454395981 | 0.187702909 |
| 0.426133063 | 0.026272415 | 0.489552284 | 0.523593948 |
| 0.500070239 | 0.531146298 | 0.532398357 | 0.324691975 |
| 0.528578058 | 0.109551535 | 0.530939061 | 0.518625354 |
| 0.456148538 | 0.004148474 | 0.016521777 | 0.534156609 |
| 0.485070817 | 0.154680688 | 0.305287747 | 0.47697372  |
| 0.229918466 | 0.308976921 | 0.164820435 | 0.244373529 |
| 0.52258163  | 0.331912638 | 0.22563162  | 0.501194878 |
| 0.382017118 | 0.361696923 | 0.498945007 | 0.206349878 |
| 0.484508276 | 0.14439546  | 0.204386021 | 0.018665652 |
| 0.456021326 | 0.239171762 | 0.493501736 | 0.524159881 |
| 0.517011994 | 0.479101762 | 0.401177284 | 0.430746527 |
| 0.49908678  | 0.222093435 | 0.423575567 | 0.246654958 |
| 0.521349494 | 0.487170017 | 0.457731137 | 0.452427873 |
| 0.523396958 | 0.519203371 | 0.105597434 | 0.510064694 |
| 0.045289945 | 0.003810588 | 0.516793702 | 0.399405994 |
| 0.086770054 | 0.448221651 | 0.402790517 | 0.346501074 |
| 0.332028243 | 0.100039364 | 0.309403537 | 0.293650327 |
| 0.429733763 | 0.468506681 | 0.343170458 | 0.379108674 |
| 0.351513266 | 0.200366439 | 0.319441808 | 0.278776214 |
| 0.325517805 | 0.445358595 | 0.325002183 | 0.077653924 |
| 0.508350724 | 0.487441133 | 0.156684897 | 0.304475451 |
| 0.532266919 | 0.53852203  | 0.118945232 | 0.037866584 |
| 0.411695615 | 0.415307747 | 0.529817696 | 0.524333969 |
| 0.526902904 | 0.518258388 | 0.461091217 | 0.217775124 |
| 0.173682737 | 0.43021186  | 0.359862576 | 0.172777799 |
| 0.529372106 | 0.175531684 | 0.512047253 | 0.343895291 |
| 0.247901977 | 0.3689158   | 0.097958837 | 0.199396155 |
| 0.44116806  | 0.319342709 | 0.292457828 | 0.300534383 |
| 0.427298353 | 0.29887984  | 0.138824555 | 0.345219959 |
| 0.484742117 | 0.218970743 | 0.306422548 | 0.443775788 |
| 0.486075108 | 0.291613403 | 0.508131981 | 0.494993664 |

|             |             |             |             |
|-------------|-------------|-------------|-------------|
| 0.270334998 | 0.245637236 | 0.449671896 | 0.478044427 |
| 0.53251718  | 0.463065285 | 0.071761981 | 0.508441678 |
| 0.52205576  | 0.521405047 | 0.515111455 | 0.477667591 |
| 0.202721014 | 0.460225687 | 0.363848127 | 0.43902842  |
| 0.325909679 | 0.51158208  | 0.366494289 | 0.166870534 |
| 0.411328933 | 0.491117793 | 0.515525601 | 0.294869828 |
| 0.499001133 | 0.26779586  | 0.160620338 | 0.513251289 |
| 0.234554234 | 0.21060393  | 0.453495501 | 0.504262222 |
| 0.005554747 | 0.158132678 | 0.510141702 | 0.370948808 |
| 0.508041907 | 0.529486741 | 0.505956187 | 0.389615993 |
| 0.002496145 | 0.478362166 | 0.492047348 | 0.499105073 |
| 0.524107999 | 0.484875297 | 0.243682693 | 0.172105135 |
| 0.414767095 | 0.197715429 | 0.254434969 | 0.459556062 |
| 0.21387647  | 0.52483633  | 0.331981173 | 0.348576895 |
| 0.31039837  | 0.209798254 | 0.284648188 | 0.391463532 |
| 0.182881264 | 0.378089741 | 0.471998166 | 0.376689888 |
| 0.243692173 | 0.501173696 | 0.520113461 | 0.090848537 |
| 0.411695998 | 0.495826357 | 0.501911694 | 0.008453853 |
| 0.514499198 | 0.031400189 | 0.306108016 | 0.334405566 |
| 0.316609657 | 0.325549831 | 0.362727106 | 0.394658968 |
| 0.483925449 | 0.368354081 | 0.415228496 | 0.374302137 |
| 0.276653854 | 0.368896267 | 0.479276794 | 0.492207518 |
| 0.378752936 | 0.263607723 | 0.211603826 | 0.205018147 |
| 0.132314978 | 0.520651657 | 0.379116513 | 0.184592392 |
| 0.356883778 | 0.476848832 | 0.456843588 | 0.51300064  |
| 0.493385417 | 0.232714488 | 0.440620474 | 0.534150155 |
| 0.281307313 | 0.41493346  | 0.170146244 | 0.511333121 |
| 0.379297825 | 0.289902502 | 0.497279948 | 0.473660533 |
| 0.504249828 | 0.470563465 | 0.377765588 | 0.501031952 |
| 0.474672471 | 0.433722081 | 0.413862759 | 0.178318323 |
| 0.336532434 | 0.268436068 | 0.338934047 | 0.011126919 |
| 0.480235922 | 0.429804189 | 0.53947378  | 0.50902166  |
| 0.324559315 | 0.476515702 | 0.430899472 | 0.213408739 |
| 0.366468446 | 0.300551094 | 0.278966902 | 0.519707685 |
| 0.242359937 | 0.32692076  | 0.397802961 | 0.47408197  |
| 0.513954428 | 0.497367541 | 0.326680619 | 0.389153292 |
| 0.368431227 | 0.357656219 | 0.482325261 | 0.265220993 |
| 0.503444917 | 0.25440306  | 0.465133344 | 0.411839722 |
| 0.332258099 | 0.526675372 | 0.161888469 | 0.532357577 |
| 0.423224179 | 0.2626175   | 0.496123391 | 0.435383793 |
| 0.434365862 | 0.208972762 | 0.213333305 | 0.486157658 |
| 0.355365653 | 0.382783493 | 0.020725701 | 0.091622142 |
| 0.446585446 | 0.389701271 | 0.503247393 | 0.46842817  |
| 0.313942555 | 0.441607965 | 0.180168572 | 0.442972545 |
| 0.496034154 | 0.509437161 | 0.389541867 | 0.382599414 |
| 0.475595386 | 0.219430019 | 0.520673845 | 0.025501884 |
| 0.50153817  | 0.478636982 | 0.453375676 | 0.14076565  |
| 0.068141962 | 0.247603214 | 0.512153004 | 0.173845931 |
| 0.52067607  | 0.238162751 | 0.459730366 | 0.52277491  |
| 0.315756256 | 0.513683223 | 0.21816984  | 0.506885105 |
| 0.130088147 | 0.395689071 | 0.432605724 | 0.453324428 |
| 0.32578541  | 0.354676936 | 0.487655727 | 0.285367466 |
| 0.100233725 | 0.364252194 | 0.007108618 | 0.460904776 |
| 0.487918267 | 0.399073096 | 0.338365177 | 0.361906369 |



|             |             |             |             |
|-------------|-------------|-------------|-------------|
| 0.40121835  | 0.475825891 | 0.326781132 | 0.478898372 |
| 0.038911154 | 0.442622383 | 0.334360353 | 0.522016975 |
| 0.293384394 | 0.464647894 | 0.140497222 | 0.377420644 |
| 0.487046514 | 0.373832676 | 0.382311323 | 0.387530661 |
| 0.516388645 | 0.488143671 | 0.305626762 | 0.298257983 |
| 0.473664545 | 0.168963553 | 0.472950663 | 0.519584122 |
| 0.294027078 | 0.268839019 | 0.514757994 | 0.340256486 |
| 0.35889099  | 0.489930079 | 0.478604346 | 0.510452301 |
| 0.145808014 | 0.388629614 | 0.506351644 | 0.516972935 |
| 0.418345814 | 0.22037523  | 0.296661764 | 0.324280945 |
| 0.504619029 | 0.207510904 | 0.319309134 | 0.497432073 |
| 0.263895962 | 0.430000813 | 0.446383215 | 0.271605362 |
| 0.096167985 | 0.291526089 | 0.472845446 | 0.28194751  |
| 0.426217929 | 0.461580833 | 0.320146072 | 0.474996449 |
| 0.236196847 | 0.072796135 | 0.494460351 | 0.024367681 |
| 0.487664571 | 0.491611041 | 0.380191544 | 0.435022558 |
| 0.327762931 | 0.4861248   | 0.48633501  | 0.006706863 |
| 0.500989869 | 0.073756902 | 0.388901748 | 0.320750771 |
| 0.343398014 | 0.146891383 | 0.507011832 | 0.528633152 |
| 0.456644148 | 0.392682806 | 0.392287307 | 0.51088077  |
| 0.180371621 | 0.366172874 | 0.390019899 | 0.52350536  |
| 0.259309549 | 0.463320734 | 0.474536289 | 0.434615666 |
| 0.509670738 | 0.411098275 |             |             |
| AVEN        | 0.120688262 | 0.108258311 | 0.109659128 |
| 0.032084131 | 0.032839222 | 0.02046973  | 0.185993703 |
| 0.135584963 | 0.133541665 | 0.01566179  | 0.034367544 |
| 0.128091007 | 0.004397968 | 0.099869508 | 0.201635194 |
| 0.03044449  | 0.149114108 | 0.167947169 | 0.047987135 |
| 0.067747383 | 0.035538948 | 0.010140751 | 0.046634567 |
| 0.040207532 | 0.261551095 | 0.082132064 | 0.023827805 |
| 0.091478647 | 0.003039211 | 0.033235728 | 0.004604757 |
| 0.166118579 | 0.029475827 | 0.011241867 | 0.114130925 |
| 0.037184975 | 0.018160171 | 0.200799571 | 0.034703984 |
| 0.003792137 | 0.192356846 | 0.021675324 | 0.04063358  |
| 0.026003626 | 0.113154576 | 0.004765313 | 0.042583628 |
| 0.088007492 | 0.062967143 | 0.184528348 | 0.050094652 |
| 0.028371188 | 0.096645591 | 0.055951527 | 0.010525544 |
| 0.006510614 | 0.000198354 | 0.0036251   | 0.125325947 |
| 0.158003865 | 0.130147969 | 0.007998603 | 0.116093054 |
| 0.051804248 | 0.073231323 | 0.163525439 | 0.018592607 |
| 0.108056209 | 0.006932191 | 0.043277335 | 0.028158511 |
| 0.040029445 | 0.202822429 | 0.234223488 | 0.278661306 |
| 0.019152541 | 0.103645039 | 0.036896546 | 0.011924055 |
| 0.096826463 | 0.179769752 | 0.166297457 | 0.147237369 |
| 0.02325415  | 0.025573519 | 0.02173331  | 0.119649037 |
| 0.103503562 | 0.204550968 | 0.051929442 | 0.138076087 |
| 1           | 0.037141356 | 0.07177291  | 0.265203908 |
| 0.09161727  | 0.01701396  | 0.021319066 | 0.006021513 |
| 0.039503406 | 0.029222903 | 0.184727926 | 0.108744199 |
| 0.037548294 | 0.223934211 | 0.172757569 | 0.020074138 |
| 0.019403166 | 0.161858677 | 0.025823096 | 0.056995786 |
| 0.041386513 | 0.088283814 | 0.083403478 | 0.115008865 |
| 0.021860828 | 0.101497202 | 0.053086602 | 0.126236715 |
| 0.00401668  | 0.121540364 | 0.106238025 | 0.136490546 |

|             |             |             |             |
|-------------|-------------|-------------|-------------|
| 0.136367425 | 0.143497322 | 0.048705147 | 0.184535021 |
| 0.070786688 | 0.107479647 | 0.087869054 | 0.065590064 |
| 0.075578609 | 0.148255567 | 0.122069495 | 0.088000053 |
| 0.153272744 | 0.013026678 | 0.019810329 | 0.064701552 |
| 0.075949526 | 0.269572284 | 0.011761271 | 0.168925681 |
| 0.124473924 | 0.062461202 | 0.098385765 | 0.207329161 |
| 0.139488865 | 0.129897781 | 0.075851154 | 0.100073628 |
| 0.148519359 | 0.155414028 | 0.108434186 | 0.030291524 |
| 0.147080263 | 0.038274739 | 0.054689918 | 0.122714069 |
| 0.126690624 | 0.001083239 | 0.072199498 | 0.078510387 |
| 0.116064449 | 0.05164537  | 0.113823305 | 0.091550821 |
| 0.118239404 | 0.256165848 | 0.004497646 | 0.078849768 |
| 0.135510526 | 0.096699577 | 0.121888527 | 0.018263014 |
| 0.040178246 | 0.037200251 | 0.06823357  | 0.006769428 |
| 0.16342098  | 0.07942902  | 0.080788127 | 0.088939418 |
| 0.086960445 | 0.201315667 | 0.016302873 | 0.163077165 |
| 0.13966594  | 0.100435553 | 0.214190896 | 0.165828525 |
| 0.013257924 | 0.132824673 | 0.033284724 | 0.057019724 |
| 0.151896044 | 0.061224508 | 0.007386239 | 0.037672298 |
| 0.311638395 | 0.024107061 | 0.13331835  | 0.143011568 |
| 0.121064853 | 0.330747866 | 0.044312731 | 0.058978188 |
| 0.062178873 | 0.333799349 | 0.041104052 | 0.095381082 |
| 0.036166702 | 0.177761329 | 0.055483515 | 0.125347856 |
| 0.145765182 | 0.018113192 | 0.230829794 | 0.016856721 |
| 0.015135349 | 0.011013581 | 0.004580066 | 0.022607134 |
| 0.348425676 | 0.048616502 | 0.041807541 | 0.043074144 |
| 0.066861565 | 0.178607553 | 0.017674351 | 0.195309732 |
| 0.247737027 | 0.019181137 | 0.076666453 | 0.037137677 |
| 0.075126996 | 0.049410874 | 0.060625441 | 0.041634723 |
| 0.126442605 | 0.005857162 | 0.003963504 | 0.07905394  |
| 0.010778703 | 0.024727667 | 0.082574036 | 0.050708372 |
| 0.019977541 | 0.303480266 | 0.116965948 | 0.002970952 |
| 0.038389203 | 0.018086053 | 0.096211852 | 0.027597936 |
| 0.112029426 | 0.145485979 | 0.02703318  | 0.019506466 |
| 0.160734637 | 0.127778176 | 0.110879512 | 0.094829241 |
| 0.010514797 | 0.121285825 | 0.060873506 | 0.090456299 |
| 0.081932121 | 0.020176817 | 0.002485084 | 0.057299422 |
| 0.072565867 | 0.017082874 | 0.259969294 | 0.053696163 |
| 0.024011072 | 0.039586052 | 0.043323062 | 0.101358025 |
| 0.173744405 | 0.133202369 | 0.086601224 | 0.074961165 |
| 0.086463192 | 0.086710841 | 0.093501836 | 0.135354752 |
| 0.016327683 | 0.025522295 | 0.014034044 | 0.083771301 |
| 0.159922056 | 0.027703035 | 0.212637829 | 0.004995561 |
| 0.002184055 | 0.211283342 | 0.186532787 | 0.072622254 |
| 0.009040739 | 0.031492123 | 0.052482741 | 0.109697442 |
| 0.149026894 | 0.125168889 | 0.22722646  | 0.017714153 |
| 0.123183618 | 0.030363448 | 0.019604692 | 0.040511813 |
| 0.205007782 | 0.031879324 | 0.04801357  | 0.177688212 |
| 0.262769052 | 0.007768815 | 0.086357113 | 0.003893982 |
| 0.15589799  | 0.071416777 | 0.321649408 | 0.312832139 |
| 0.090389615 | 0.276088664 | 0.150049431 | 0.019627124 |
| 0.079878026 | 0.192811714 | 0.007085696 | 0.10468814  |
| 0.14144466  | 0.148416269 | 0.14094378  | 0.173718098 |
| 0.114629753 | 0.083155516 | 0.066696909 | 0.046744857 |

|             |             |             |             |
|-------------|-------------|-------------|-------------|
| 0.128647108 | 0.140666916 | 0.008355255 | 0.043951067 |
| 0.017000663 | 0.080560512 | 0.058516043 | 0.217539857 |
| 0.053196611 | 0.138002141 | 0.136664192 | 0.044513003 |
| 0.047360889 | 0.001940115 | 0.057831331 | 0.097682786 |
| 0.087541701 | 0.132664099 | 0.005126607 | 0.009618    |
| 0.129454751 | 0.146991964 | 0.008503905 | 0.124245618 |
| 0.045638981 | 0.213656541 | 0.029673886 | 0.060790936 |
| 0.150919044 | 0.010784649 | 0.043706788 | 0.000265568 |
| 0.01918486  | 0.175325401 | 0.020082493 | 0.087896895 |
| 0.086609278 | 0.073215189 | 0.124254808 | 0.128620746 |
| 0.122120009 | 0.095226462 | 0.102450778 | 0.007555377 |
| 0.110069965 | 0.001251035 | 0.104274506 | 0.095035628 |
| 0.012325926 | 0.003243156 | 0.041738283 | 0.070764058 |
| 0.022388844 | 0.269934722 | 0.175245602 | 0.01115544  |
| 0.080348673 | 0.109722428 | 0.176344414 | 0.014753663 |
| 0.037508231 | 0.047328807 | 0.022098826 | 0.139226277 |
| 0.075185454 | 0.124690577 | 0.029215456 | 0.30009364  |
| 0.032283844 | 0.114493176 | 0.320586616 | 0.005285196 |
| 0.072014697 | 0.268150712 | 0.196433392 | 0.113705634 |
| 0.133861785 | 0.043709244 | 0.008255784 | 0.019979727 |
| 0.104300044 | 0.197940105 | 0.009707742 | 0.192405136 |
| 0.104389362 | 0.034667564 | 0.109799429 | 0.136619287 |
| 0.115603205 | 0.122438228 | 0.172474443 | 0.066768921 |
| 0.030451802 | 0.009204218 | 0.029508779 | 0.187004619 |
| 0.062485045 | 0.021323484 | 0.166384776 | 0.093069459 |
| 0.088523414 | 0.087562443 | 0.00837738  | 0.009551061 |
| 0.07973257  | 0.038756774 | 0.021818729 | 0.2325938   |
| 0.033666884 | 0.026760727 | 0.070625497 | 0.12991758  |
| 0.056074428 | 0.167394337 | 0.24364816  | 0.188782953 |
| 0.021058546 | 0.018550568 | 0.159331889 | 0.215103661 |
| 0.071072623 | 0.076026741 | 0.155860547 | 0.035768147 |
| 0.183207117 | 0.047855421 | 0.086874144 | 0.10277647  |
| 0.150559592 | 0.134446302 | 0.204238299 | 0.079837323 |
| 0.138987431 | 0.064586989 | 0.026285347 | 0.058184784 |
| 0.107693519 | 0.238693522 | 0.125132432 | 0.01246687  |
| 0.260751841 | 0.059267859 | 0.092836603 | 0.223261125 |
| 0.020291206 | 0.191691984 | 0.07883195  | 0.146777963 |
| 0.032182234 | 0.008104198 | 0.187707752 | 0.137534137 |
| 0.112750599 | 0.003674951 | 0.186270559 | 0.064069494 |
| 0.119714769 | 0.026636927 | 0.040986898 | 0.157710591 |
| 0.216784483 | 0.215805966 | 0.026958703 | 0.093506856 |
| 0.05976588  | 0.026882364 | 0.031311896 | 0.096207814 |
| 0.106362896 | 0.029899198 | 0.126719426 | 0.122881008 |
| 0.287997658 | 0.017333042 | 0.018613663 | 0.042082118 |
| 0.192652354 | 0.026829597 | 0.122646515 | 0.250024293 |
| 0.237065223 | 0.206169546 | 0.099933503 | 0.077739643 |
| 0.033299973 | 0.205445638 | 0.229570117 | 0.092525406 |
| 0.008352035 | 0.093230209 | 0.022205513 | 0.072101153 |
| 0.003408558 | 0.003906075 | 0.111461526 | 0.053363899 |
| 0.161218055 | 0.085328691 | 0.13430335  | 0.083820417 |
| 0.000317873 | 0.034785362 | 0.038124795 | 0.013867126 |
| 0.091960981 | 0.122420289 | 0.117530814 | 0.099423799 |
| 0.165719657 | 0.212351045 | 0.079956685 | 0.018376001 |
| 0.005484258 | 0.055429341 | 0.216019117 | 0.184540975 |

|             |             |             |             |
|-------------|-------------|-------------|-------------|
| 0.073751918 | 0.300567216 | 0.007621298 | 0.066686418 |
| 0.024856493 | 0.175583111 | 0.113815862 | 0.01994285  |
| 0.002872438 | 0.116917468 | 0.077376648 | 0.132186803 |
| 0.023305572 | 0.110662035 | 0.120611094 | 0.013276879 |
| 0.038329635 | 0.100415048 | 0.070874719 | 0.045544242 |
| 0.06405975  | 0.081319867 | 0.086277348 | 0.021682823 |
| 0.086228182 | 0.093229762 | 0.035075882 | 0.112825519 |
| 0.05269047  | 0.119971787 | 0.040692968 | 0.047277184 |
| 0.017376065 | 0.095023646 | 0.329285924 | 0.338523814 |
| 0.081817729 | 0.092828291 | 0.22387395  | 0.233563127 |
| 0.145015053 | 0.041177138 | 0.159752847 | 0.114334618 |
| 0.126035434 | 0.25045069  | 0.054721564 | 0.074685116 |
| 0.008262927 | 0.021919909 | 0.150472337 | 0.043042005 |
| 0.11225979  | 0.014679775 | 0.034295593 | 0.072415072 |
| 0.067386675 | 0.182860761 | 0.213882067 | 0.137162161 |
| 0.02601935  | 0.052428333 | 0.011187617 | 0.06544512  |
| 0.086365802 | 0.280899746 | 0.027013623 | 0.034119479 |
| 0.08189939  | 0.034113827 | 0.061953585 | 0.131029304 |
| 0.007865759 | 0.152567241 | 0.011726825 | 0.099141793 |
| 0.009124312 | 0.238122188 | 0.239682573 | 0.056429154 |
| 0.00295251  | 0.08417024  | 0.039428502 | 0.025044718 |
| 0.050514161 | 0.057966787 | 0.037738577 | 0.108542049 |
| 0.141045951 | 0.162619931 | 0.186198661 | 0.129920251 |
| 0.025717802 | 0.014058399 | 0.057170918 | 0.034148847 |
| 0.06150117  | 0.100096312 | 0.217319003 | 0.094431577 |
| 0.026236753 | 0.293252893 | 0.178520969 | 0.09154192  |
| 0.048946358 | 0.057475988 | 0.00334856  | 0.027721938 |
| 0.084565764 | 0.008561271 | 0.000488398 | 0.006530541 |
| 0.092796594 | 0.045548821 | 0.074814736 | 0.108376451 |
| 0.022093964 | 0.12749531  | 0.006022403 | 0.088242338 |
| 0.132842457 | 0.174413176 | 0.025262496 | 0.206406329 |
| 0.120579495 | 0.106778592 | 0.048085379 | 0.023393278 |
| 0.028551618 | 0.021102811 | 0.013915571 | 0.175511562 |
| 0.158835512 | 0.003454623 | 0.0353061   | 0.298459924 |
| 0.084804247 | 0.002407477 | 0.076666054 | 0.044795613 |
| 0.280142126 | 0.174463031 | 0.081984349 | 0.048652213 |
| 0.203902523 | 0.166385005 | 0.022783761 | 0.037596007 |
| 0.016958334 | 0.013029588 | 0.066908932 | 0.007564753 |
| 0.134948557 | 0.027310585 | 0.020059546 | 0.202345009 |
| 0.16862598  | 0.016823212 | 0.282255339 | 0.015157502 |
| 0.117181446 | 0.145825609 | 0.039497536 | 0.020543932 |
| 0.05178847  | 0.021897584 | 0.158665423 | 0.089686364 |
| 0.001884022 | 0.059171348 | 0.075877479 | 0.033301988 |
| 0.210572505 | 0.019042489 | 0.25259481  | 0.006036333 |
| 0.112725532 | 0.115995311 | 0.20293682  | 0.039827728 |
| 0.060560294 | 0.283394152 | 0.016920122 | 0.132476704 |
| 0.077645533 | 0.008899336 | 0.058215761 | 0.051966436 |
| 0.015017978 | 0.138192302 | 0.033904468 | 0.143112161 |
| 0.076456966 | 0.138878576 | 0.068168703 | 0.114686192 |
| 0.139955495 | 0.019021286 | 0.008161732 | 0.032045235 |
| 0.117531006 | 0.053703788 | 0.020275468 | 0.100004076 |
| 0.006009639 | 0.113902047 | 0.066013372 | 0.039787109 |
| 0.081933132 | 0.127359579 | 0.019264554 | 0.224463812 |
| 0.08372426  | 0.031463024 | 0.026563062 | 0.158737367 |

|             |             |             |             |
|-------------|-------------|-------------|-------------|
| 0.036183714 | 0.035060469 | 0.160008966 | 0.000192509 |
| 0.054022842 | 0.036292217 | 0.126898814 | 0.026823024 |
| 0.210198184 | 0.086528927 | 0.055420887 | 0.032195329 |
| 0.085011555 | 0.006478105 | 0.047580102 | 0.019098038 |
| 0.014043329 | 0.15871095  | 0.132222194 | 0.096426348 |
| 0.121374075 | 0.019909262 | 0.006106141 | 0.129634207 |
| 0.004910156 | 0.007395742 | 0.014630419 | 0.049953828 |
| 0.006849062 | 0.015133805 | 0.016335002 | 0.007549427 |
| 0.087032679 | 0.084671528 |             |             |
| AW549877    | 0.044647135 | 0.438431348 | 0.041594412 |
| 0.066414844 | 0.154316547 | 0.238405643 | 0.033868636 |
| 0.071459473 | 0.338828515 | 0.327004911 | 0.18608659  |
| 0.007467894 | 0.052445875 | 0.410245929 | 0.027986728 |
| 0.228241183 | 0.012254777 | 0.056459981 | 0.063049312 |
| 0.150196831 | 0.1379013   | 0.191778823 | 0.260654908 |
| 0.149222823 | 0.160118127 | 0.24131775  | 0.273337086 |
| 0.486327509 | 0.226804462 | 0.297669825 | 0.22096888  |
| 0.356825972 | 0.167879424 | 0.260637125 | 0.009201629 |
| 0.24795654  | 0.010291005 | 0.406416863 | 0.129210303 |
| 0.076757517 | 0.285362664 | 0.315335674 | 0.11154374  |
| 0.308992124 | 0.02187992  | 0.273759053 | 0.314711263 |
| 0.237768295 | 0.165729946 | 0.05110142  | 0.328370462 |
| 0.26838114  | 0.233988545 | 0.40323309  | 0.002365042 |
| 0.18705912  | 0.081887867 | 0.169683074 | 0.484143276 |
| 0.106251666 | 0.053352285 | 0.288896437 | 0.169620414 |
| 0.278432819 | 0.269376341 | 0.144973168 | 0.311219794 |
| 0.4607301   | 0.109388455 | 0.372880867 | 0.087624313 |
| 0.244890453 | 0.026556664 | 0.094955039 | 0.070131822 |
| 0.251558298 | 0.090233466 | 0.177046688 | 0.185477537 |
| 0.460836639 | 0.476723263 | 0.135340477 | 0.503507159 |
| 0.066699586 | 0.198274029 | 0.143964932 | 0.183041279 |
| 0.285386988 | 0.057460808 | 0.286949121 | 0.476454949 |
| 0.037141356 | 1           | 0.323971656 | 0.094570373 |
| 0.404414587 | 0.207609701 | 0.322095983 | 0.087097315 |
| 0.233033126 | 0.193304878 | 0.467677933 | 0.174887208 |
| 0.172014078 | 0.053557843 | 0.484982873 | 0.18035919  |
| 0.142266334 | 0.052418735 | 0.117872482 | 0.427316382 |
| 0.271531664 | 0.462082195 | 0.424870961 | 0.288522998 |
| 0.228949627 | 0.461158511 | 0.281090236 | 0.382154882 |
| 0.249257831 | 0.507688801 | 0.100389826 | 0.015273053 |
| 0.056202261 | 0.035125388 | 0.151882345 | 0.213113381 |
| 0.424833963 | 0.216365838 | 0.110003613 | 0.108980602 |
| 0.395983813 | 0.486135348 | 0.520090354 | 0.3534078   |
| 0.02023012  | 0.178096969 | 0.230927565 | 0.168976061 |
| 0.261457703 | 0.066302385 | 0.138006484 | 0.485865996 |
| 0.305320613 | 0.357866261 | 0.110902679 | 0.468680515 |
| 0.128693875 | 0.448142945 | 0.458645284 | 0.079912493 |
| 0.48336567  | 0.472548363 | 0.447163383 | 0.270491381 |
| 0.432851142 | 0.199794086 | 0.065748115 | 0.32980422  |
| 0.406662857 | 0.006312327 | 0.45969287  | 0.475500565 |
| 0.4922727   | 0.417003479 | 0.467464024 | 0.471761653 |
| 0.499966343 | 0.046121458 | 0.041903154 | 0.147169099 |
| 0.491249457 | 0.317404256 | 0.061824834 | 0.282705768 |
| 0.203298043 | 0.247594005 | 0.370426358 | 0.193154025 |

|             |             |             |             |
|-------------|-------------|-------------|-------------|
| 0.442889233 | 0.408127103 | 0.480339736 | 0.333015067 |
| 0.24297458  | 0.259771418 | 0.257318682 | 0.460887719 |
| 0.018659804 | 0.070690574 | 0.038836647 | 0.215495356 |
| 0.292035985 | 0.078017255 | 0.257811524 | 0.220724979 |
| 0.090609561 | 0.241990239 | 0.233486539 | 0.243844074 |
| 0.055168597 | 0.288726607 | 0.093425279 | 0.115108385 |
| 0.014613572 | 0.114816834 | 0.092944259 | 0.067515864 |
| 0.118983875 | 0.231865398 | 0.356176291 | 0.455102272 |
| 0.226639596 | 0.130678569 | 0.326712301 | 0.406036236 |
| 0.330575388 | 0.218658601 | 0.152917451 | 0.002147075 |
| 0.165630171 | 0.295736363 | 0.131175864 | 0.273574148 |
| 0.163706223 | 0.138421218 | 0.239745792 | 0.263863537 |
| 0.179850063 | 0.106499186 | 0.23474431  | 0.37017952  |
| 0.124728167 | 0.148642627 | 0.373411485 | 0.302193811 |
| 0.001201248 | 0.189206668 | 0.376032014 | 0.070663105 |
| 0.227622975 | 0.06557413  | 0.148189414 | 0.41581068  |
| 0.211183294 | 0.123420811 | 0.460675561 | 0.265096947 |
| 0.232591414 | 0.230203516 | 0.479012946 | 0.055000227 |
| 0.224576884 | 0.016576858 | 0.149754178 | 0.322018784 |
| 0.134442044 | 0.182525309 | 0.167836882 | 0.136194818 |
| 0.092136677 | 0.491442512 | 0.325891018 | 0.47056518  |
| 0.258189377 | 0.482573099 | 0.399973769 | 0.366029693 |
| 0.223506508 | 0.281728261 | 0.08926974  | 0.368214697 |
| 0.407952952 | 0.249217232 | 0.062841938 | 0.414761967 |
| 0.297643591 | 0.288305678 | 0.05150414  | 0.432640385 |
| 0.435823449 | 0.490189852 | 0.061298819 | 0.254384105 |
| 0.284625084 | 0.125450829 | 0.34646567  | 0.475606843 |
| 0.316656241 | 0.215322598 | 0.190774619 | 0.294434071 |
| 0.095521382 | 0.107000252 | 0.26460052  | 0.123723184 |
| 0.008740629 | 0.057421489 | 0.042008049 | 0.064794426 |
| 0.076716215 | 0.338151868 | 0.264926526 | 0.486860933 |
| 0.055130817 | 0.355216201 | 0.170154556 | 0.150298708 |
| 0.397825011 | 0.219877494 | 0.224098636 | 0.231068069 |
| 0.163761617 | 0.005059683 | 0.046967488 | 0.479392514 |
| 0.036022466 | 0.127069809 | 0.209761884 | 0.000720236 |
| 0.028236014 | 0.443372437 | 0.08761217  | 0.160635279 |
| 0.407720803 | 0.171865922 | 0.133411407 | 0.312695771 |
| 0.207006372 | 0.048364974 | 0.000275918 | 0.467479124 |
| 0.478946931 | 0.44857561  | 0.485790081 | 0.45817902  |
| 0.42415231  | 0.336059506 | 0.326922701 | 0.236140824 |
| 0.055696966 | 0.066595583 | 0.11660283  | 0.14897715  |
| 0.003998887 | 0.262012889 | 0.168742875 | 0.07855415  |
| 0.334477667 | 0.197965844 | 0.018117148 | 0.206286656 |
| 0.010323711 | 0.137394575 | 0.210609997 | 0.116479681 |
| 0.229258354 | 0.007302621 | 0.154149556 | 0.219361219 |
| 0.409767055 | 0.286047602 | 0.245996989 | 0.499747136 |
| 0.166609478 | 0.121452714 | 0.156542514 | 0.270150104 |
| 0.035493574 | 0.142940486 | 0.256279432 | 0.050991376 |
| 0.151275123 | 0.434367098 | 0.261594785 | 0.041690287 |
| 0.141442285 | 0.00186396  | 0.314412168 | 0.488674131 |
| 0.476476494 | 0.475118393 | 0.45403907  | 0.143188055 |
| 0.469753451 | 0.108073206 | 0.501047103 | 0.375462007 |
| 0.320365979 | 0.000368921 | 0.001107841 | 0.44646385  |
| 0.233335896 | 0.059663636 | 0.081567768 | 0.236033819 |

|             |             |             |             |
|-------------|-------------|-------------|-------------|
| 0.043116895 | 0.10821291  | 0.033427754 | 0.079091401 |
| 0.276495908 | 0.107344512 | 0.084481346 | 0.474158111 |
| 0.122775912 | 0.113461741 | 0.300977745 | 0.064484937 |
| 0.238136513 | 0.021987412 | 0.064174577 | 0.001813292 |
| 0.235951319 | 0.107579973 | 0.466353845 | 0.488268076 |
| 0.430724026 | 0.252726613 | 0.332125871 | 0.219461606 |
| 0.394217536 | 0.092187278 | 0.270968485 | 0.084269463 |
| 0.482115951 | 0.240345863 | 0.207980544 | 0.232679557 |
| 0.43923035  | 0.423257277 | 0.015552277 | 0.315723499 |
| 0.004759422 | 0.000355646 | 0.258346665 | 0.169019226 |
| 0.062727271 | 0.227105015 | 0.166727503 | 0.168033281 |
| 0.128992364 | 0.015678478 | 0.158659053 | 0.140195113 |
| 0.153380225 | 0.205307927 | 0.136121634 | 0.185242612 |
| 0.134016751 | 0.065398678 | 0.090041154 | 0.079069172 |
| 0.195663014 | 0.272797001 | 0.164137766 | 0.01052537  |
| 0.293945606 | 0.256246122 | 0.028422634 | 0.092973507 |
| 0.363166904 | 0.446203393 | 0.018508803 | 0.001830628 |
| 0.191442841 | 0.19027391  | 0.444298616 | 0.494333887 |
| 0.496490242 | 0.457285949 | 0.336641538 | 0.051385081 |
| 0.034286317 | 0.166704568 | 0.154013564 | 0.032946698 |
| 0.476313453 | 0.055415941 | 0.46373219  | 0.176704294 |
| 0.066028254 | 0.110103522 | 0.01070454  | 0.043302465 |
| 0.230310108 | 0.089507642 | 0.073179892 | 0.105613429 |
| 0.165192743 | 0.141246313 | 0.025505084 | 0.097578381 |
| 0.261127872 | 0.107806021 | 0.08506017  | 0.202626496 |
| 0.298226576 | 0.287076686 | 0.334343223 | 0.373628386 |
| 0.077043862 | 0.073453521 | 0.193957786 | 0.29909565  |
| 0.412400323 | 0.31979209  | 0.011801125 | 0.480324942 |
| 0.437450274 | 0.316725361 | 0.476353532 | 0.301380482 |
| 0.053427502 | 0.208072124 | 0.217928915 | 0.195979163 |
| 0.099943876 | 0.240725442 | 0.128492556 | 0.03576418  |
| 0.233339555 | 0.444502923 | 0.395018259 | 0.070053459 |
| 0.281286085 | 0.101324197 | 0.050630971 | 0.41880281  |
| 0.090078278 | 0.048189835 | 0.318114727 | 0.393045011 |
| 0.000131008 | 0.076977336 | 0.446870011 | 0.116131833 |
| 0.473251185 | 0.427990295 | 0.370630596 | 0.162729427 |
| 0.001698117 | 0.301607277 | 0.202786684 | 0.231702814 |
| 0.421516797 | 0.264730993 | 0.102610206 | 0.026940775 |
| 0.186323931 | 0.068635744 | 0.060028265 | 0.223998524 |
| 0.124526689 | 0.292984618 | 0.10872793  | 0.129858104 |
| 0.088304055 | 0.089860936 | 0.129532941 | 0.12197158  |
| 0.102795739 | 0.140018415 | 0.243887819 | 0.311982947 |
| 0.128028535 | 0.385541539 | 0.35341611  | 0.01338078  |
| 0.214014608 | 0.353854106 | 0.372965276 | 0.000840151 |
| 0.310387653 | 0.001738454 | 0.084849659 | 0.091489008 |
| 0.085999185 | 0.103178483 | 0.120926055 | 0.14897906  |
| 0.242857801 | 0.114405918 | 0.132332483 | 0.11058827  |
| 0.063970354 | 0.122718069 | 0.227204106 | 0.237580801 |
| 0.130837847 | 0.061359051 | 0.093137419 | 0.105694143 |
| 0.019501254 | 0.443231127 | 0.179369518 | 0.060706157 |
| 0.109759856 | 0.248531988 | 0.257442147 | 0.502695552 |
| 0.331426271 | 0.117478475 | 0.197931879 | 0.421358999 |
| 0.285940447 | 0.21011482  | 0.046232235 | 0.249834661 |
| 0.118787207 | 0.100579383 | 0.286040329 | 0.217410631 |

|             |             |             |             |
|-------------|-------------|-------------|-------------|
| 0.371157608 | 0.333241362 | 0.17229424  | 0.376299314 |
| 0.203011785 | 0.251201982 | 0.320328403 | 0.028845926 |
| 0.093166427 | 0.090389799 | 0.126062722 | 0.000172548 |
| 0.204713535 | 0.165999416 | 0.425473452 | 0.472068564 |
| 0.19584581  | 0.302418224 | 0.282229241 | 0.046569645 |
| 0.300017313 | 0.18584429  | 0.081932092 | 0.381285782 |
| 0.147434104 | 0.089637378 | 0.149422776 | 0.239572668 |
| 0.343380224 | 0.363983496 | 0.137662421 | 0.149579286 |
| 0.132619281 | 0.127213532 | 0.463933817 | 0.081934811 |
| 0.302637212 | 0.07756006  | 0.308655384 | 0.146363295 |
| 0.102855218 | 0.491300829 | 0.035317504 | 0.499568191 |
| 0.189881075 | 0.102056244 | 0.425510119 | 0.185751632 |
| 0.180527146 | 0.043924047 | 0.115612903 | 0.298759671 |
| 0.124874738 | 0.211140902 | 0.027972871 | 0.04167913  |
| 0.194844371 | 0.243973976 | 0.411769467 | 0.270614887 |
| 0.120167084 | 0.230960975 | 0.111019076 | 0.195472024 |
| 0.496822122 | 0.487577323 | 0.130107624 | 0.160982715 |
| 0.246583552 | 0.044275828 | 0.287780675 | 0.019936443 |
| 0.286463303 | 0.300415747 | 0.303046782 | 0.024196832 |
| 0.007496352 | 0.135988659 | 0.285403924 | 0.056836703 |
| 0.42513648  | 0.149808027 | 0.294615098 | 0.326865957 |
| 0.126290861 | 0.485091548 | 0.046173075 | 0.272218736 |
| 0.043464132 | 0.148146493 | 0.240193994 | 0.276199647 |
| 0.098411374 | 0.158535842 | 0.248151907 | 0.117695581 |
| 0.011608442 | 0.125467168 | 0.00070826  | 0.35300298  |
| 0.479125366 | 0.211903619 | 0.153544071 | 0.324873439 |
| 0.149118577 | 0.323513423 | 0.136716896 | 0.295456243 |
| 0.002169141 | 0.201885965 | 0.09687435  | 0.355974733 |
| 0.182974402 | 0.257968793 | 0.019241258 | 0.189083343 |
| 0.450730187 | 0.170316672 | 0.188867516 | 0.238574813 |
| 0.484372277 | 0.357912742 | 0.142466377 | 0.108206509 |
| 0.337458291 | 0.042892028 | 0.311405728 | 0.491951689 |
| 0.07274699  | 0.102993897 | 0.359800309 | 0.094377529 |
| 0.187391996 | 0.347248209 | 0.315697327 | 0.496479173 |
| 0.023531146 | 0.129628186 | 0.334185465 | 0.441419016 |
| 0.184685951 | 0.080705316 | 0.131269414 | 0.107460056 |
| 0.454042603 | 0.043243313 | 0.157029648 | 0.256761349 |
| 0.120935345 | 0.173074974 | 0.296654761 | 0.08202433  |
| 0.012219806 | 0.090417219 | 0.210454891 | 0.077352119 |
| 0.152404064 | 0.198549977 | 0.116454064 | 0.303931627 |
| 0.050672717 | 0.00614243  | 0.379222549 | 0.010563284 |
| 0.212760434 | 0.228533276 | 0.122790152 | 0.199093754 |
| 0.137073412 | 0.22645079  | 0.247139343 | 0.000169228 |
| 0.323770539 | 0.021447246 | 0.174586095 | 0.10007619  |
| 0.193433779 | 0.029974042 | 0.413569989 | 0.455391173 |
| 0.199479942 | 0.241269901 | 0.252729735 | 0.430953218 |
| 0.077821863 | 0.267364809 | 0.241495653 | 0.339805988 |
| 0.122585957 | 0.331235385 | 0.300692781 | 0.237670357 |
| 0.27991128  | 0.15691994  |             |             |
| BARD1       | 0.07915818  | 0.405550271 | 0.05892206  |
| 0.125267154 | 0.259249019 | 0.278940949 | 0.08614859  |
| 0.143285251 | 0.330939881 | 0.280952227 | 0.277751197 |
| 0.027199825 | 0.080217529 | 0.439530116 | 0.078295625 |
| 0.337312219 | 0.048259288 | 0.129555569 | 0.097965205 |



|             |             |             |             |
|-------------|-------------|-------------|-------------|
| 0.223216935 | 0.264577089 | 0.263499369 | 0.296238597 |
| 0.267678629 | 0.190138318 | 0.296078945 | 0.325779397 |
| 0.470271148 | 0.206655017 | 0.318610587 | 0.165456905 |
| 0.413237263 | 0.281673365 | 0.30379966  | 0.021611061 |
| 0.322082714 | 0.02623931  | 0.442342556 | 0.258763661 |
| 0.123273682 | 0.336566124 | 0.273293281 | 0.213411923 |
| 0.335163964 | 0.046336059 | 0.168568759 | 0.356210457 |
| 0.293660021 | 0.250987635 | 0.076603095 | 0.326803999 |
| 0.341075979 | 0.265227817 | 0.330484483 | 0.005077481 |
| 0.246122058 | 0.086077115 | 0.21634283  | 0.469351012 |
| 0.181303889 | 0.128402591 | 0.291259553 | 0.240591471 |
| 0.351847098 | 0.334938275 | 0.228914902 | 0.351708783 |
| 0.473159479 | 0.184669777 | 0.352371539 | 0.136299662 |
| 0.345704007 | 0.050891869 | 0.155772946 | 0.103017713 |
| 0.329568136 | 0.181470805 | 0.267768397 | 0.270793252 |
| 0.413961326 | 0.501683165 | 0.222638166 | 0.483372063 |
| 0.154617294 | 0.302429793 | 0.240893438 | 0.27047798  |
| 0.335251723 | 0.125036271 | 0.329902668 | 0.504056703 |
| 0.07177291  | 0.323971656 | 1           | 0.136460587 |
| 0.381972063 | 0.257537582 | 0.316528564 | 0.148516226 |
| 0.306128568 | 0.321807089 | 0.473298414 | 0.260694272 |
| 0.259807223 | 0.087805663 | 0.462738656 | 0.279705878 |
| 0.236257718 | 0.088370346 | 0.245826842 | 0.430232278 |
| 0.34246878  | 0.459232635 | 0.412244008 | 0.357441012 |
| 0.339500372 | 0.466732799 | 0.318374721 | 0.39364994  |
| 0.133838308 | 0.498783223 | 0.167906707 | 0.051572615 |
| 0.084271356 | 0.093066447 | 0.261611986 | 0.274920487 |
| 0.427255015 | 0.277763111 | 0.194384164 | 0.229888295 |
| 0.443926268 | 0.452478518 | 0.50777425  | 0.394913615 |
| 0.051431646 | 0.250874617 | 0.332535    | 0.223119165 |
| 0.342804573 | 0.128648477 | 0.236072766 | 0.491757134 |
| 0.350807386 | 0.400606309 | 0.159436746 | 0.483023053 |
| 0.231055882 | 0.484528277 | 0.417351108 | 0.166835641 |
| 0.49260195  | 0.465683045 | 0.482802225 | 0.314087284 |
| 0.436313706 | 0.269020755 | 0.121810874 | 0.372453693 |
| 0.453842732 | 0.015713551 | 0.451703845 | 0.480242252 |
| 0.477694139 | 0.427130251 | 0.505814199 | 0.474214348 |
| 0.478632512 | 0.088253693 | 0.05780529  | 0.275221314 |
| 0.490619527 | 0.358133718 | 0.145635669 | 0.353525075 |
| 0.321474463 | 0.309621112 | 0.368951105 | 0.267407899 |
| 0.494683788 | 0.409410328 | 0.461954878 | 0.365152496 |
| 0.30434004  | 0.304246256 | 0.32229614  | 0.44050602  |
| 0.050855458 | 0.115756815 | 0.060237131 | 0.275529045 |
| 0.258551387 | 0.170962815 | 0.323473701 | 0.330011118 |
| 0.186625088 | 0.289965069 | 0.267089548 | 0.311937375 |
| 0.066791095 | 0.337465372 | 0.157253313 | 0.194674682 |
| 0.0544988   | 0.149345814 | 0.19549764  | 0.133371789 |
| 0.238755233 | 0.251924992 | 0.343624759 | 0.463601623 |
| 0.329720228 | 0.169590227 | 0.343488296 | 0.44429104  |
| 0.412063169 | 0.307358456 | 0.217425049 | 0.012185961 |
| 0.307212824 | 0.305962885 | 0.19175802  | 0.324267696 |
| 0.187370165 | 0.292665963 | 0.357204291 | 0.315958261 |
| 0.24584466  | 0.164152071 | 0.349807336 | 0.404417046 |
| 0.155403059 | 0.244628123 | 0.423861443 | 0.353760676 |

|             |             |             |             |
|-------------|-------------|-------------|-------------|
| 0.004630534 | 0.299389811 | 0.39625413  | 0.181343045 |
| 0.314143591 | 0.131242518 | 0.187113442 | 0.448791926 |
| 0.290375049 | 0.241590617 | 0.456266054 | 0.312460098 |
| 0.284954274 | 0.2384356   | 0.506592676 | 0.091207774 |
| 0.313506052 | 0.04618625  | 0.253682044 | 0.285626889 |
| 0.238922208 | 0.270515088 | 0.271542725 | 0.233161653 |
| 0.12214967  | 0.500016393 | 0.340240815 | 0.482231273 |
| 0.349088933 | 0.510030177 | 0.423750948 | 0.40558865  |
| 0.296835925 | 0.343178781 | 0.140592309 | 0.394677072 |
| 0.430822475 | 0.319910599 | 0.084090976 | 0.404339223 |
| 0.356204667 | 0.34368014  | 0.115363035 | 0.476396192 |
| 0.464423204 | 0.449074686 | 0.150208084 | 0.328776804 |
| 0.337603619 | 0.203622534 | 0.364195655 | 0.510588342 |
| 0.328167777 | 0.346451101 | 0.312713965 | 0.363242887 |
| 0.170401173 | 0.235844252 | 0.30304639  | 0.170004731 |
| 0.006192041 | 0.098990702 | 0.077408977 | 0.157604393 |
| 0.155654169 | 0.33295023  | 0.334894243 | 0.497880739 |
| 0.128870963 | 0.374329926 | 0.235791006 | 0.28673283  |
| 0.420884788 | 0.328390561 | 0.291614255 | 0.311449877 |
| 0.220226807 | 0.01851021  | 0.111630201 | 0.505132538 |
| 0.054335969 | 0.206731759 | 0.297090177 | 0.002904809 |
| 0.067007913 | 0.377625736 | 0.109194948 | 0.20041214  |
| 0.447324742 | 0.200364115 | 0.20990838  | 0.329914941 |
| 0.275235129 | 0.100343904 | 0.00248367  | 0.473682465 |
| 0.47422566  | 0.452939396 | 0.47586916  | 0.443915413 |
| 0.443099505 | 0.339589728 | 0.375985707 | 0.267968844 |
| 0.120977519 | 0.10459956  | 0.240020627 | 0.284827399 |
| 0.010059885 | 0.307129406 | 0.269106177 | 0.142348485 |
| 0.358638178 | 0.295238514 | 0.045907232 | 0.301571832 |
| 0.025446558 | 0.181734643 | 0.32508744  | 0.223718078 |
| 0.298597964 | 0.019335293 | 0.196146445 | 0.327673503 |
| 0.397807185 | 0.323228162 | 0.2908753   | 0.49842095  |
| 0.272315775 | 0.138864462 | 0.272413762 | 0.310629393 |
| 0.091187974 | 0.153847862 | 0.335668041 | 0.032069214 |
| 0.141338469 | 0.438118348 | 0.323082263 | 0.079160175 |
| 0.252408128 | 0.006925475 | 0.339786161 | 0.503275001 |
| 0.435034726 | 0.499415076 | 0.4645126   | 0.223412957 |
| 0.476013321 | 0.113040403 | 0.500059641 | 0.381761453 |
| 0.343222748 | 0.00122406  | 0.00791222  | 0.455264602 |
| 0.338198985 | 0.064591359 | 0.160695371 | 0.257249474 |
| 0.117118234 | 0.164571768 | 0.074544522 | 0.170897769 |
| 0.306757585 | 0.212183571 | 0.17036529  | 0.460600401 |
| 0.241593473 | 0.218980503 | 0.340585799 | 0.101095891 |
| 0.304335175 | 0.0625995   | 0.104545067 | 0.008410395 |
| 0.304184072 | 0.12144845  | 0.450756514 | 0.481132253 |
| 0.467971308 | 0.310159587 | 0.298076003 | 0.271131438 |
| 0.412456308 | 0.10194815  | 0.276677478 | 0.117088127 |
| 0.458441919 | 0.342718708 | 0.27494244  | 0.281575536 |
| 0.489412425 | 0.447812705 | 0.046151776 | 0.370979647 |
| 0.011577104 | 0.002390795 | 0.298362624 | 0.247491689 |
| 0.097773872 | 0.350953277 | 0.23051621  | 0.258996221 |
| 0.225874916 | 0.036254908 | 0.258346289 | 0.245577298 |
| 0.273865076 | 0.334069046 | 0.248828998 | 0.233614485 |
| 0.246085377 | 0.171708304 | 0.173708684 | 0.170810184 |

|             |             |             |             |
|-------------|-------------|-------------|-------------|
| 0.267734439 | 0.30605848  | 0.197388078 | 0.03421467  |
| 0.335472605 | 0.334010522 | 0.06699265  | 0.150549365 |
| 0.398526408 | 0.46415218  | 0.070117691 | 0.014008659 |
| 0.242687346 | 0.314713233 | 0.473332212 | 0.468582848 |
| 0.498998331 | 0.504194963 | 0.376311133 | 0.155804082 |
| 0.075629088 | 0.288073036 | 0.260993062 | 0.102081274 |
| 0.482257619 | 0.086256257 | 0.445304773 | 0.260239145 |
| 0.129115681 | 0.205633081 | 0.037792284 | 0.100121879 |
| 0.302943522 | 0.172669586 | 0.172198139 | 0.14845998  |
| 0.306843588 | 0.205936109 | 0.065398329 | 0.197052728 |
| 0.322652249 | 0.18955822  | 0.169127265 | 0.257794396 |
| 0.306646375 | 0.233197516 | 0.36248353  | 0.438232541 |
| 0.13190696  | 0.139638912 | 0.246509905 | 0.324835122 |
| 0.409233317 | 0.33090446  | 0.022260575 | 0.429803188 |
| 0.45923202  | 0.342300344 | 0.462442144 | 0.381221648 |
| 0.099226687 | 0.307540789 | 0.309106562 | 0.329918468 |
| 0.196994433 | 0.277934558 | 0.237588244 | 0.077553968 |
| 0.287150654 | 0.469659582 | 0.40440814  | 0.156445621 |
| 0.319523041 | 0.139320835 | 0.078297648 | 0.407270958 |
| 0.196528601 | 0.104948161 | 0.295420504 | 0.402232626 |
| 0.001698028 | 0.127204602 | 0.473154005 | 0.196965558 |
| 0.495672723 | 0.459761052 | 0.415894057 | 0.221607287 |
| 0.003735165 | 0.342217093 | 0.310229808 | 0.322825503 |
| 0.416855258 | 0.290629663 | 0.143222679 | 0.086723259 |
| 0.254787152 | 0.086182872 | 0.170708576 | 0.249790337 |
| 0.209763829 | 0.345991343 | 0.188906367 | 0.227013869 |
| 0.193467288 | 0.114368346 | 0.190346371 | 0.198432546 |
| 0.181554748 | 0.21219914  | 0.322424682 | 0.249278676 |
| 0.219278528 | 0.436479245 | 0.385330117 | 0.032145757 |
| 0.288193552 | 0.398354533 | 0.393925441 | 0.006764843 |
| 0.344014933 | 0.01024844  | 0.194028461 | 0.191643415 |
| 0.183135778 | 0.23148577  | 0.240398071 | 0.251458455 |
| 0.330935346 | 0.224105479 | 0.226040721 | 0.210423132 |
| 0.146934088 | 0.201061471 | 0.316251653 | 0.315870495 |
| 0.230310872 | 0.124021233 | 0.108167549 | 0.116268749 |
| 0.052147606 | 0.422218048 | 0.229096855 | 0.076417242 |
| 0.21308613  | 0.328530056 | 0.32801481  | 0.468769512 |
| 0.379039151 | 0.119271157 | 0.315224108 | 0.405642705 |
| 0.25469149  | 0.257154566 | 0.0811949   | 0.303881528 |
| 0.210310969 | 0.208122541 | 0.306297798 | 0.28844616  |
| 0.36218803  | 0.38380842  | 0.217256445 | 0.405960344 |
| 0.289977089 | 0.344067784 | 0.272780384 | 0.090943578 |
| 0.18087167  | 0.141650356 | 0.239993917 | 0.002477159 |
| 0.301553899 | 0.20761975  | 0.437846199 | 0.460373538 |
| 0.255818247 | 0.347358959 | 0.261541098 | 0.108959675 |
| 0.226580376 | 0.195314568 | 0.14385942  | 0.361975823 |
| 0.194590733 | 0.159842906 | 0.264837204 | 0.24367037  |
| 0.361724418 | 0.359080595 | 0.245986311 | 0.253228443 |
| 0.232515764 | 0.183005613 | 0.466379679 | 0.121937252 |
| 0.347862053 | 0.165099506 | 0.3034635   | 0.283625658 |
| 0.222758219 | 0.485900118 | 0.067792076 | 0.500370057 |
| 0.333301124 | 0.128919783 | 0.468167066 | 0.246597818 |
| 0.226580291 | 0.100596907 | 0.177555013 | 0.319125    |
| 0.24276559  | 0.26850836  | 0.0254633   | 0.099549618 |

|             |             |             |             |
|-------------|-------------|-------------|-------------|
| 0.277233179 | 0.310102749 | 0.387801335 | 0.318059287 |
| 0.226722595 | 0.313437834 | 0.136292838 | 0.294887389 |
| 0.456412037 | 0.472343747 | 0.257327682 | 0.229895788 |
| 0.309994407 | 0.103404193 | 0.294279635 | 0.026999496 |
| 0.363287613 | 0.342460192 | 0.343048228 | 0.065612959 |
| 0.026222906 | 0.213266608 | 0.359759891 | 0.08916745  |
| 0.462561592 | 0.180160266 | 0.322014852 | 0.318683463 |
| 0.176710658 | 0.475677106 | 0.127254065 | 0.3187488   |
| 0.086072819 | 0.23337175  | 0.307789386 | 0.34710381  |
| 0.205977416 | 0.27070215  | 0.314083197 | 0.203597093 |
| 0.041086588 | 0.234831818 | 0.006862273 | 0.392259296 |
| 0.457691087 | 0.318150384 | 0.200806083 | 0.276601856 |
| 0.237582746 | 0.348460391 | 0.279854543 | 0.318257269 |
| 0.01203225  | 0.311122344 | 0.180242011 | 0.361456695 |
| 0.226741498 | 0.357484357 | 0.052941365 | 0.306459856 |
| 0.437035788 | 0.320390411 | 0.247430069 | 0.305992611 |
| 0.454718897 | 0.344661498 | 0.147525686 | 0.179893946 |
| 0.3387293   | 0.077212704 | 0.290656895 | 0.510099134 |
| 0.168177141 | 0.194334756 | 0.408820629 | 0.216033607 |
| 0.283354564 | 0.348722808 | 0.336829875 | 0.503382187 |
| 0.090339577 | 0.21983667  | 0.36205686  | 0.453391491 |
| 0.257774997 | 0.179654018 | 0.230369967 | 0.242855388 |
| 0.425776859 | 0.088220532 | 0.260481604 | 0.3006376   |
| 0.220893642 | 0.262974704 | 0.289724938 | 0.188847154 |
| 0.043934463 | 0.178360806 | 0.261780028 | 0.145349484 |
| 0.279752826 | 0.31280193  | 0.235440275 | 0.360391376 |
| 0.111793245 | 0.026429704 | 0.425473776 | 0.026946683 |
| 0.250846327 | 0.30048734  | 0.213182633 | 0.298468741 |
| 0.169540465 | 0.32598201  | 0.31571787  | 0.002513845 |
| 0.378573163 | 0.037021242 | 0.268162167 | 0.217248691 |
| 0.292844742 | 0.071915152 | 0.414897179 | 0.488138911 |
| 0.26161832  | 0.255323    | 0.292154965 | 0.439753088 |
| 0.142039193 | 0.279860845 | 0.327583093 | 0.328113251 |
| 0.197034833 | 0.329170956 | 0.333094869 | 0.289217904 |
| 0.307683515 | 0.229622604 |             |             |
| BATF        | 0.244164397 | 0.204966501 | 0.209331218 |
| 0.109754126 | 0.069585701 | 0.09424832  | 0.270102455 |
| 0.250212486 | 0.193871124 | 0.065424097 | 0.096697564 |
| 0.201957797 | 0.010639044 | 0.201151139 | 0.264594248 |
| 0.07484723  | 0.20488205  | 0.247887396 | 0.069925998 |
| 0.135148156 | 0.075930108 | 0.053538795 | 0.132373186 |
| 0.078573427 | 0.324094061 | 0.146926685 | 0.064169988 |
| 0.19689587  | 0.026702622 | 0.089602654 | 0.029793922 |
| 0.269628537 | 0.067050546 | 0.050607201 | 0.173420701 |
| 0.101566938 | 0.009501569 | 0.313042101 | 0.102856105 |
| 0.017031252 | 0.282451281 | 0.083277799 | 0.119738801 |
| 0.087399443 | 0.220054899 | 0.031943864 | 0.089595338 |
| 0.137218486 | 0.134156529 | 0.25313253  | 0.11370921  |
| 0.094585274 | 0.174501187 | 0.130474503 | 0.026979235 |
| 0.034707677 | 0.003999277 | 0.020568938 | 0.24449511  |
| 0.200400432 | 0.203979127 | 0.038480562 | 0.177429962 |
| 0.096580579 | 0.114886162 | 0.173956141 | 0.0804601   |
| 0.22427881  | 0.02465253  | 0.100887944 | 0.085176986 |
| 0.120622805 | 0.252990725 | 0.247437344 | 0.254298037 |

|              |             |             |             |
|--------------|-------------|-------------|-------------|
| 0.075024612  | 0.16259506  | 0.088723243 | 0.044889927 |
| 0.202365132  | 0.30074194  | 0.190290467 | 0.272693358 |
| 0.032715157  | 0.06007219  | 0.06267592  | 0.156529707 |
| 0.149722441  | 0.255359306 | 0.124112287 | 0.258541024 |
| 0.265203908  | 0.094570373 | 0.136460587 | 1           |
| 0.185785008  | 0.046558676 | 0.080031824 | 0.024709724 |
| 0.0777130103 | 0.071968583 | 0.292606984 | 0.17480764  |
| 0.081027759  | 0.259851471 | 0.304878153 | 0.05092345  |
| 0.080779589  | 0.231156295 | 0.069276638 | 0.132627628 |
| 0.098861258  | 0.195224676 | 0.168095124 | 0.17639343  |
| 0.066475473  | 0.212697039 | 0.122953206 | 0.212468488 |
| 0.020989522  | 0.24017187  | 0.187083162 | 0.207796342 |
| 0.255678628  | 0.206533676 | 0.083907078 | 0.226725249 |
| 0.159675035  | 0.163011571 | 0.204859611 | 0.12195392  |
| 0.153205148  | 0.275867152 | 0.239666183 | 0.171196387 |
| 0.248056848  | 0.036686157 | 0.064726335 | 0.160837421 |
| 0.135240727  | 0.261444962 | 0.04020882  | 0.301141667 |
| 0.224182908  | 0.134327891 | 0.221339957 | 0.3337638   |
| 0.212735445  | 0.245509768 | 0.175788539 | 0.181659849 |
| 0.274200199  | 0.286390397 | 0.214606898 | 0.076707906 |
| 0.266368741  | 0.119836956 | 0.06802099  | 0.193833698 |
| 0.231653987  | 0.003486843 | 0.159747044 | 0.172458501 |
| 0.234901022  | 0.129694747 | 0.215792253 | 0.193034737 |
| 0.238608563  | 0.268133523 | 0.007487226 | 0.115871161 |
| 0.261976244  | 0.189566798 | 0.169275638 | 0.066935003 |
| 0.08110044   | 0.122124886 | 0.133060589 | 0.052059358 |
| 0.275983101  | 0.166968832 | 0.177430998 | 0.164855542 |
| 0.140892562  | 0.288274105 | 0.052155573 | 0.295514282 |
| 0.207084357  | 0.230089934 | 0.240029876 | 0.193157313 |
| 0.073434079  | 0.179330712 | 0.128722348 | 0.095481974 |
| 0.190389329  | 0.15121427  | 0.039713122 | 0.08191366  |
| 0.29068833   | 0.082076368 | 0.205878002 | 0.230555571 |
| 0.191017561  | 0.336763382 | 0.144403481 | 0.14479683  |
| 0.120731205  | 0.405890901 | 0.103121619 | 0.190072559 |
| 0.090110824  | 0.235668338 | 0.12695746  | 0.226999712 |
| 0.236752913  | 0.060242628 | 0.247772091 | 0.036303353 |
| 0.070554577  | 0.045405902 | 0.0193015   | 0.066448541 |
| 0.373143159  | 0.13631807  | 0.094696266 | 0.096574003 |
| 0.167522727  | 0.253157524 | 0.075799748 | 0.308151584 |
| 0.27465772   | 0.078164632 | 0.165137622 | 0.096096825 |
| 0.080222301  | 0.130394259 | 0.14201733  | 0.071914501 |
| 0.17340685   | 0.023472467 | 0.027645793 | 0.168375529 |
| 0.047403841  | 0.06002602  | 0.175934791 | 0.099450589 |
| 0.090078313  | 0.363901396 | 0.223104136 | 0.010270968 |
| 0.075416208  | 0.044396716 | 0.138630849 | 0.085035892 |
| 0.175627069  | 0.179900412 | 0.062682446 | 0.066910529 |
| 0.222089114  | 0.247735576 | 0.190194108 | 0.203066861 |
| 0.058615883  | 0.23039517  | 0.143481469 | 0.185487697 |
| 0.137220728  | 0.064002407 | 0.01216477  | 0.140543602 |
| 0.157207655  | 0.069006474 | 0.260453987 | 0.123092384 |
| 0.078243847  | 0.089687754 | 0.068384309 | 0.206193052 |
| 0.291558368  | 0.256701114 | 0.172466007 | 0.126829517 |
| 0.173735724  | 0.173611224 | 0.16202029  | 0.243292123 |
| 0.066064812  | 0.073925409 | 0.063960679 | 0.146643295 |

|             |             |             |             |
|-------------|-------------|-------------|-------------|
| 0.211950891 | 0.064842035 | 0.264591189 | 0.018096089 |
| 7.21E-06    | 0.278144657 | 0.251529803 | 0.137903704 |
| 0.028870831 | 0.079299324 | 0.101285469 | 0.223853595 |
| 0.230553395 | 0.219330305 | 0.226423179 | 0.0799965   |
| 0.231686491 | 0.080249815 | 0.058229348 | 0.084387619 |
| 0.228746291 | 0.05683252  | 0.126636357 | 0.30469455  |
| 0.250031476 | 0.035852296 | 0.162595149 | 0.009224675 |
| 0.262217921 | 0.154726688 | 0.317897653 | 0.356391924 |
| 0.175454831 | 0.335332193 | 0.209516785 | 0.080944116 |
| 0.132821741 | 0.243399352 | 0.00976663  | 0.200068472 |
| 0.238679886 | 0.235645196 | 0.241283265 | 0.275778314 |
| 0.191856643 | 0.13971349  | 0.129618146 | 0.128370677 |
| 0.238243811 | 0.253187393 | 0.034802369 | 0.109421544 |
| 0.027204219 | 0.143189675 | 0.099574897 | 0.235674802 |
| 0.113111434 | 0.170833926 | 0.232967274 | 0.080562749 |
| 0.120660604 | 0.016530214 | 0.159496681 | 0.164194351 |
| 0.125163974 | 0.182306996 | 0.043081358 | 0.053646682 |
| 0.252960395 | 0.241808961 | 0.045510906 | 0.243163662 |
| 0.11143031  | 0.25432746  | 0.085294178 | 0.119391401 |
| 0.248813356 | 0.037408713 | 0.129881559 | 0.005865971 |
| 0.062993003 | 0.2698288   | 0.077951356 | 0.189128103 |
| 0.154168397 | 0.11119974  | 0.227422015 | 0.248690932 |
| 0.241932063 | 0.199062843 | 0.215229915 | 0.037063506 |
| 0.227628487 | 0.006192258 | 0.216869105 | 0.189673929 |
| 0.067407962 | 0.009125634 | 0.043563458 | 0.161423245 |
| 0.07248856  | 0.265947803 | 0.221126933 | 0.075070589 |
| 0.170779022 | 0.237746085 | 0.248989275 | 0.042449944 |
| 0.093441156 | 0.091311052 | 0.050535584 | 0.262162802 |
| 0.149368476 | 0.166353016 | 0.106498074 | 0.271527133 |
| 0.07987451  | 0.199582697 | 0.270703914 | 0.012119011 |
| 0.115312796 | 0.300289292 | 0.328408901 | 0.228706029 |
| 0.247535502 | 0.092641613 | 0.052222216 | 0.088773647 |
| 0.174700701 | 0.245791045 | 0.05300941  | 0.242341418 |
| 0.222954291 | 0.08457568  | 0.181902112 | 0.226247781 |
| 0.224642139 | 0.238252022 | 0.245401965 | 0.136166179 |
| 0.063293344 | 0.004638322 | 0.10925977  | 0.207629096 |
| 0.039803238 | 0.070865659 | 0.219710547 | 0.150017703 |
| 0.140968436 | 0.186665284 | 0.035087226 | 0.037075028 |
| 0.129691859 | 0.099653125 | 0.057023398 | 0.231926153 |
| 0.080578949 | 0.055232447 | 0.143031852 | 0.216418442 |
| 0.105482733 | 0.250399663 | 0.317142798 | 0.229276133 |
| 0.075171506 | 0.068628343 | 0.241045584 | 0.237154987 |
| 0.15958628  | 0.175036394 | 0.208403642 | 0.062632315 |
| 0.247935164 | 0.112860949 | 0.185091378 | 0.216946533 |
| 0.280439038 | 0.247364302 | 0.305748178 | 0.137402035 |
| 0.242996758 | 0.108334926 | 0.059718034 | 0.08987617  |
| 0.220712571 | 0.260525253 | 0.238973735 | 0.039597064 |
| 0.259556617 | 0.151090817 | 0.159000866 | 0.256127296 |
| 0.059328863 | 0.223846874 | 0.133347509 | 0.215700691 |
| 0.099875306 | 0.034723088 | 0.26204913  | 0.197960322 |
| 0.187769372 | 0.018351567 | 0.229799073 | 0.151308413 |
| 0.187177707 | 0.068062408 | 0.100270776 | 0.261666662 |
| 0.248084203 | 0.258128655 | 0.12968922  | 0.142803476 |
| 0.139833067 | 0.074510798 | 0.08243361  | 0.202331561 |

|             |             |             |             |
|-------------|-------------|-------------|-------------|
| 0.203529462 | 0.086666638 | 0.248678057 | 0.193557151 |
| 0.267971839 | 0.066072994 | 0.054392492 | 0.090957212 |
| 0.222970671 | 0.102690746 | 0.172096666 | 0.267895416 |
| 0.269150622 | 0.316414204 | 0.194718687 | 0.157574951 |
| 0.086213198 | 0.24927273  | 0.253265695 | 0.175359074 |
| 0.030028744 | 0.219602456 | 0.085585139 | 0.1399553   |
| 0.00370999  | 0.014217038 | 0.197643169 | 0.144995073 |
| 0.269110115 | 0.179216485 | 0.242373171 | 0.164842649 |
| 0.000319355 | 0.079964741 | 0.096332969 | 0.072667615 |
| 0.196297495 | 0.198697899 | 0.140036373 | 0.17365864  |
| 0.214229628 | 0.246594581 | 0.1635567   | 0.087826588 |
| 0.021701242 | 0.121904024 | 0.222009332 | 0.208808736 |
| 0.130349149 | 0.268069856 | 0.031833953 | 0.15342057  |
| 0.036450594 | 0.216928398 | 0.186311563 | 0.078339367 |
| 0.024289422 | 0.196513861 | 0.160028747 | 0.210554144 |
| 0.06122086  | 0.17870362  | 0.199451235 | 0.021618433 |
| 0.100662696 | 0.128437937 | 0.13048272  | 0.110077532 |
| 0.131269369 | 0.150677269 | 0.119846998 | 0.074713812 |
| 0.141724975 | 0.173807959 | 0.116196676 | 0.162496342 |
| 0.121820249 | 0.18978376  | 0.087731589 | 0.120447022 |
| 0.073380864 | 0.20215444  | 0.328662252 | 0.355982631 |
| 0.164897844 | 0.186441265 | 0.285308378 | 0.247682681 |
| 0.177944485 | 0.114367289 | 0.234489265 | 0.232573074 |
| 0.206367307 | 0.29500428  | 0.122109204 | 0.175002085 |
| 0.040948065 | 0.095521597 | 0.274410553 | 0.10625621  |
| 0.1880797   | 0.056817818 | 0.09509265  | 0.15574357  |
| 0.135509983 | 0.285691043 | 0.274941357 | 0.22581938  |
| 0.088486421 | 0.102889961 | 0.066528893 | 0.134647542 |
| 0.190562016 | 0.264964965 | 0.06254586  | 0.044762006 |
| 0.137483012 | 0.136021145 | 0.15198393  | 0.254667508 |
| 0.036539004 | 0.231381907 | 0.075366551 | 0.219813839 |
| 0.054027842 | 0.321189341 | 0.250283551 | 0.123806763 |
| 0.019460101 | 0.182490116 | 0.083711257 | 0.115988233 |
| 0.112859905 | 0.114301    | 0.07777711  | 0.201645625 |
| 0.171521778 | 0.209047699 | 0.293159513 | 0.233997326 |
| 0.075819675 | 0.04566789  | 0.114292065 | 0.095881758 |
| 0.12257296  | 0.202510439 | 0.25318143  | 0.201141233 |
| 0.081443738 | 0.290583393 | 0.292038212 | 0.157103548 |
| 0.132010634 | 0.107939963 | 0.017071485 | 0.105093568 |
| 0.163687572 | 0.043170256 | 0.002515786 | 0.023290574 |
| 0.149474422 | 0.101242318 | 0.154152396 | 0.152188345 |
| 0.058929653 | 0.172472545 | 0.017985231 | 0.181616036 |
| 0.257568226 | 0.302712665 | 0.10617529  | 0.2316174   |
| 0.187038122 | 0.208506786 | 0.118144671 | 0.019966414 |
| 0.078940492 | 0.064479393 | 0.072392651 | 0.249931554 |
| 0.199210884 | 0.02028347  | 0.090199473 | 0.26218569  |
| 0.171715543 | 0.01788062  | 0.119666792 | 0.107163208 |
| 0.264978783 | 0.307887857 | 0.142490213 | 0.113922845 |
| 0.23230241  | 0.184166493 | 0.062104189 | 0.089273865 |
| 0.068447346 | 0.047661589 | 0.131142928 | 0.034242299 |
| 0.206778059 | 0.085681227 | 0.020917683 | 0.317606699 |
| 0.295584626 | 0.053448509 | 0.300993939 | 0.061621637 |
| 0.154295647 | 0.20608551  | 0.102144106 | 0.068367732 |
| 0.077717722 | 0.06360859  | 0.197638614 | 0.189301974 |

|             |             |             |             |
|-------------|-------------|-------------|-------------|
| 0.024364488 | 0.111485361 | 0.137542539 | 0.069071171 |
| 0.343433008 | 0.080746984 | 0.270392955 | 0.042193112 |
| 0.227052215 | 0.185847371 | 0.25105607  | 0.079594458 |
| 0.110401156 | 0.270474093 | 0.081307637 | 0.245853186 |
| 0.14856965  | 0.034879315 | 0.132730994 | 0.138770261 |
| 0.049770595 | 0.226189869 | 0.078876064 | 0.25279391  |
| 0.125036087 | 0.181480944 | 0.132368155 | 0.216409046 |
| 0.187214497 | 0.043353533 | 0.037801767 | 0.087440213 |
| 0.239162185 | 0.140216487 | 0.057256801 | 0.176738971 |
| 0.029140555 | 0.151581184 | 0.116558262 | 0.085590912 |
| 0.143705136 | 0.206339081 | 0.089365128 | 0.242970841 |
| 0.142234575 | 0.082185111 | 0.067745528 | 0.248341044 |
| 0.101580359 | 0.07815081  | 0.25991802  | 0.001835761 |
| 0.133920249 | 0.087541462 | 0.179308731 | 0.075125729 |
| 0.272264034 | 0.146350585 | 0.141039866 | 0.0545116   |
| 0.15206107  | 0.011924996 | 0.102544001 | 0.069396348 |
| 0.057627704 | 0.265745475 | 0.241287796 | 0.197726619 |
| 0.164533726 | 0.066569466 | 0.042848051 | 0.234957139 |
| 0.018311071 | 0.039170456 | 0.058343945 | 0.117074921 |
| 0.028036146 | 0.068569948 | 0.068469278 | 0.04584713  |
| 0.155928074 | 0.173770719 |             |             |
| BBS2        | 0.134429687 | 0.444239257 | 0.123130626 |
| 0.191208972 | 0.291253144 | 0.461574264 | 0.092237494 |
| 0.171149943 | 0.376203286 | 0.337404385 | 0.382717239 |
| 0.03574476  | 0.084991334 | 0.439663554 | 0.084992445 |
| 0.35873736  | 0.053684945 | 0.145770862 | 0.092057889 |
| 0.275971686 | 0.255862189 | 0.348288539 | 0.43409192  |
| 0.267706574 | 0.240849446 | 0.393844562 | 0.366852853 |
| 0.504278217 | 0.294598972 | 0.440166765 | 0.252782595 |
| 0.411877129 | 0.299107457 | 0.379056648 | 0.043220254 |
| 0.429188995 | 0.010176478 | 0.451078944 | 0.256975455 |
| 0.157318548 | 0.355820021 | 0.398490234 | 0.272009024 |
| 0.385132987 | 0.076240193 | 0.276893596 | 0.375343207 |
| 0.371269474 | 0.323027317 | 0.129168984 | 0.441744254 |
| 0.359269587 | 0.398156787 | 0.419853626 | 0.003047774 |
| 0.289039735 | 0.083984598 | 0.205398093 | 0.529843403 |
| 0.25136709  | 0.161098175 | 0.265586212 | 0.308398476 |
| 0.372809572 | 0.357772005 | 0.290602842 | 0.361126768 |
| 0.501700626 | 0.153319177 | 0.419973263 | 0.211506127 |
| 0.394507899 | 0.070414684 | 0.20784087  | 0.147843421 |
| 0.384086082 | 0.236271483 | 0.354174495 | 0.287720242 |
| 0.444485047 | 0.529109305 | 0.280208238 | 0.525478642 |
| 0.079249205 | 0.304631395 | 0.274724324 | 0.303955341 |
| 0.355114288 | 0.118839105 | 0.409268724 | 0.519597436 |
| 0.09161727  | 0.404414587 | 0.381972063 | 0.185785008 |
| 1           | 0.274043333 | 0.422082172 | 0.171993554 |
| 0.345507602 | 0.302924122 | 0.494954984 | 0.319052924 |
| 0.322456446 | 0.132110523 | 0.526716755 | 0.288431861 |
| 0.31407506  | 0.147131601 | 0.200167472 | 0.425914747 |
| 0.410076807 | 0.494838125 | 0.415210551 | 0.350224568 |
| 0.338564904 | 0.504168056 | 0.414388945 | 0.414148005 |
| 0.204297882 | 0.536575117 | 0.256521507 | 0.068642765 |
| 0.134895143 | 0.121329721 | 0.216812937 | 0.322887832 |
| 0.45881495  | 0.373972134 | 0.248917246 | 0.237076516 |



|             |             |             |             |
|-------------|-------------|-------------|-------------|
| 0.410778486 | 0.517695023 | 0.530795033 | 0.399752881 |
| 0.072823892 | 0.229119146 | 0.349510607 | 0.366901554 |
| 0.366236208 | 0.16348279  | 0.234444508 | 0.532035457 |
| 0.384032954 | 0.408203505 | 0.249832162 | 0.528657343 |
| 0.232648217 | 0.511064103 | 0.46342408  | 0.209847419 |
| 0.534642319 | 0.528148205 | 0.496120617 | 0.377202469 |
| 0.50386973  | 0.402391866 | 0.063575968 | 0.378005757 |
| 0.477076929 | 0.015904579 | 0.45521155  | 0.477659002 |
| 0.514208578 | 0.427461503 | 0.498068569 | 0.503076796 |
| 0.522335529 | 0.124379904 | 0.023623638 | 0.271576346 |
| 0.523224377 | 0.400561643 | 0.157865009 | 0.38490158  |
| 0.332048889 | 0.443211553 | 0.423848961 | 0.300399678 |
| 0.505040657 | 0.442699338 | 0.483181681 | 0.393311716 |
| 0.337130025 | 0.335439959 | 0.346016689 | 0.513490534 |
| 0.078341629 | 0.183940028 | 0.108082329 | 0.322963138 |
| 0.422232666 | 0.203257495 | 0.411567528 | 0.330228522 |
| 0.225359836 | 0.402487996 | 0.327229489 | 0.35088321  |
| 0.108722975 | 0.443163806 | 0.235043606 | 0.2239429   |
| 0.063646857 | 0.195080339 | 0.204059016 | 0.209811657 |
| 0.253891716 | 0.289547481 | 0.431601617 | 0.477650028 |
| 0.334559104 | 0.251090912 | 0.427689772 | 0.46818888  |
| 0.399708553 | 0.361367356 | 0.267510726 | 0.021057767 |
| 0.233230802 | 0.295232053 | 0.164376733 | 0.400162404 |
| 0.227516589 | 0.228638427 | 0.357626583 | 0.373927706 |
| 0.350444814 | 0.214048471 | 0.329751463 | 0.451745418 |
| 0.216423547 | 0.315959615 | 0.406338165 | 0.406365319 |
| 0.011228105 | 0.345949257 | 0.43376857  | 0.133081805 |
| 0.331419387 | 0.13480571  | 0.267355916 | 0.43049698  |
| 0.261443038 | 0.201623506 | 0.485083388 | 0.373181809 |
| 0.365425952 | 0.274126712 | 0.509912534 | 0.036014017 |
| 0.327650827 | 0.063362055 | 0.28510734  | 0.380654121 |
| 0.288380337 | 0.291828951 | 0.296067506 | 0.277134981 |
| 0.210175455 | 0.522103625 | 0.41553361  | 0.50479251  |
| 0.335024469 | 0.513615186 | 0.428141928 | 0.419830823 |
| 0.393154086 | 0.333964746 | 0.123881821 | 0.423088961 |
| 0.424440091 | 0.275423612 | 0.138095645 | 0.41976692  |
| 0.34513634  | 0.370396729 | 0.122961701 | 0.472807011 |
| 0.510429477 | 0.503551532 | 0.170726289 | 0.346166672 |
| 0.389421169 | 0.297624743 | 0.413970032 | 0.515164669 |
| 0.315404014 | 0.312430372 | 0.300258178 | 0.366915316 |
| 0.230189236 | 0.186723167 | 0.337638604 | 0.169805017 |
| 0.017194514 | 0.139599417 | 0.117772266 | 0.179423602 |
| 0.154310115 | 0.420093102 | 0.381191796 | 0.509787801 |
| 0.155835432 | 0.428978008 | 0.274235377 | 0.269863279 |
| 0.416657393 | 0.324468155 | 0.370428532 | 0.375703667 |
| 0.287539217 | 0.034333134 | 0.150717904 | 0.530563821 |
| 0.088527239 | 0.225104487 | 0.359965791 | 0.005339317 |
| 0.07988335  | 0.426197272 | 0.151546884 | 0.23046924  |
| 0.446728893 | 0.240594677 | 0.257773346 | 0.329079535 |
| 0.357541399 | 0.146762151 | 0.007308358 | 0.475292826 |
| 0.489322761 | 0.456257053 | 0.488662894 | 0.483440617 |
| 0.413444054 | 0.413732484 | 0.386064306 | 0.440497011 |
| 0.146176688 | 0.155665269 | 0.173217987 | 0.274321432 |
| 0.00838637  | 0.389348151 | 0.31003177  | 0.192395407 |

|             |             |             |             |
|-------------|-------------|-------------|-------------|
| 0.401851613 | 0.311972582 | 0.071995467 | 0.339141908 |
| 0.046851342 | 0.187213671 | 0.325844942 | 0.23578939  |
| 0.329522631 | 0.036488217 | 0.277459581 | 0.281831584 |
| 0.467858809 | 0.371925911 | 0.345982451 | 0.538778271 |
| 0.345456757 | 0.199758708 | 0.303956971 | 0.397192547 |
| 0.107499668 | 0.103765838 | 0.383858762 | 0.058223821 |
| 0.288082628 | 0.469647634 | 0.370793973 | 0.120033489 |
| 0.297669093 | 0.01468295  | 0.390040459 | 0.532839475 |
| 0.503290635 | 0.49572661  | 0.505549496 | 0.257939104 |
| 0.511622088 | 0.099924036 | 0.527831628 | 0.419544099 |
| 0.368855316 | 0.002071468 | 0.010140835 | 0.463679277 |
| 0.365254398 | 0.119358497 | 0.206386062 | 0.432468504 |
| 0.140384877 | 0.230792822 | 0.111646097 | 0.170702481 |
| 0.454098544 | 0.239427994 | 0.166134659 | 0.489423911 |
| 0.252693074 | 0.257644074 | 0.41900751  | 0.145481247 |
| 0.41043957  | 0.087766693 | 0.141509553 | 0.012363982 |
| 0.353733661 | 0.177539845 | 0.511687443 | 0.518298936 |
| 0.490439257 | 0.374119816 | 0.348472116 | 0.386175054 |
| 0.410548774 | 0.176543955 | 0.381533196 | 0.191938582 |
| 0.504053632 | 0.358652524 | 0.337606282 | 0.340920299 |
| 0.47834519  | 0.470991171 | 0.060679121 | 0.385639886 |
| 0.034500459 | 0.002728761 | 0.425415533 | 0.292001076 |
| 0.065413877 | 0.329022187 | 0.286901295 | 0.256036235 |
| 0.253775222 | 0.063540356 | 0.230073469 | 0.205798671 |
| 0.300052633 | 0.336108574 | 0.247833707 | 0.285160014 |
| 0.25517971  | 0.112700888 | 0.23735594  | 0.185045554 |
| 0.250057442 | 0.340566471 | 0.241813277 | 0.042030752 |
| 0.42587898  | 0.387410846 | 0.099757838 | 0.221609577 |
| 0.424544763 | 0.470277292 | 0.058644248 | 0.018497673 |
| 0.304183653 | 0.295581937 | 0.473943268 | 0.514268809 |
| 0.54284687  | 0.50385802  | 0.412190111 | 0.121945239 |
| 0.114990609 | 0.315161043 | 0.267006007 | 0.106994519 |
| 0.511233176 | 0.120837492 | 0.512223563 | 0.272822122 |
| 0.164927825 | 0.252242555 | 0.058628371 | 0.125839265 |
| 0.36702569  | 0.223065185 | 0.19208076  | 0.220222598 |
| 0.292916053 | 0.239727416 | 0.081894362 | 0.230784667 |
| 0.353356379 | 0.14977581  | 0.201908283 | 0.376231462 |
| 0.398456418 | 0.261962629 | 0.397610049 | 0.439126906 |
| 0.193566537 | 0.161251537 | 0.34735555  | 0.387790801 |
| 0.432717055 | 0.398622911 | 0.058060624 | 0.471530371 |
| 0.478678173 | 0.429333429 | 0.52421504  | 0.356337109 |
| 0.136268781 | 0.360005125 | 0.281778842 | 0.308714694 |
| 0.219202214 | 0.460033206 | 0.258370971 | 0.106029899 |
| 0.314924344 | 0.497962797 | 0.40694652  | 0.199720083 |
| 0.435731993 | 0.204363775 | 0.110505812 | 0.438358034 |
| 0.152261065 | 0.133816323 | 0.408474747 | 0.4118627   |
| 0.003207264 | 0.129878203 | 0.463685431 | 0.292564552 |
| 0.517134821 | 0.4538377   | 0.440600296 | 0.32503936  |
| 0.001097421 | 0.376691555 | 0.372430177 | 0.387367569 |
| 0.42677075  | 0.393309633 | 0.214891901 | 0.099515869 |
| 0.306960655 | 0.150184646 | 0.142956687 | 0.423884284 |
| 0.149552142 | 0.421403047 | 0.229244181 | 0.244503728 |
| 0.206554338 | 0.152251713 | 0.247887114 | 0.299977617 |
| 0.129538507 | 0.267666082 | 0.347103    | 0.356692072 |

|             |             |             |             |
|-------------|-------------|-------------|-------------|
| 0.16394597  | 0.397333307 | 0.396044765 | 0.058766504 |
| 0.343136109 | 0.387480683 | 0.426258373 | 0.002467653 |
| 0.404135314 | 0.015958748 | 0.204210999 | 0.230751819 |
| 0.219501038 | 0.210168038 | 0.252105951 | 0.289593207 |
| 0.358729691 | 0.245522154 | 0.306422793 | 0.265338673 |
| 0.189808448 | 0.274440659 | 0.377883977 | 0.381345504 |
| 0.28120971  | 0.18327348  | 0.158976732 | 0.157233423 |
| 0.088159155 | 0.469860815 | 0.284471983 | 0.141252169 |
| 0.253152318 | 0.372151161 | 0.343785334 | 0.515428587 |
| 0.40504606  | 0.186614056 | 0.332521655 | 0.447133846 |
| 0.228580159 | 0.344589321 | 0.113714735 | 0.426162701 |
| 0.276301228 | 0.201332186 | 0.441150589 | 0.36001609  |
| 0.406029816 | 0.414163745 | 0.286980587 | 0.44173788  |
| 0.372015539 | 0.327118448 | 0.364813873 | 0.10626462  |
| 0.222156503 | 0.187560224 | 0.242387416 | 0.006104589 |
| 0.366734875 | 0.352112766 | 0.441169298 | 0.514283084 |
| 0.269477603 | 0.383600587 | 0.387251036 | 0.127900865 |
| 0.341537604 | 0.22982277  | 0.190527    | 0.433653914 |
| 0.202833672 | 0.246118753 | 0.285381571 | 0.437877442 |
| 0.410792102 | 0.40464988  | 0.243068365 | 0.281672379 |
| 0.265805592 | 0.274404926 | 0.491423046 | 0.201827476 |
| 0.41244617  | 0.177835416 | 0.402393247 | 0.280089332 |
| 0.218666816 | 0.509329805 | 0.111498722 | 0.512544386 |
| 0.293203658 | 0.195602393 | 0.498117909 | 0.372845228 |
| 0.370997185 | 0.156997033 | 0.169735903 | 0.413752372 |
| 0.245891797 | 0.33210453  | 0.018179814 | 0.053220991 |
| 0.326582572 | 0.310525185 | 0.405306717 | 0.362671036 |
| 0.229629356 | 0.322709573 | 0.17125906  | 0.319161358 |
| 0.514715882 | 0.532632259 | 0.253371603 | 0.268878286 |
| 0.355078567 | 0.14595114  | 0.456780325 | 0.017158967 |
| 0.387870141 | 0.395715217 | 0.372743275 | 0.086997133 |
| 0.03767845  | 0.182268735 | 0.391599598 | 0.121768936 |
| 0.442789872 | 0.201241176 | 0.377307306 | 0.444747156 |
| 0.231925382 | 0.53062815  | 0.138057388 | 0.397674868 |
| 0.07698636  | 0.292280612 | 0.363986986 | 0.365355183 |
| 0.219243991 | 0.257631989 | 0.363150359 | 0.216904193 |
| 0.055201953 | 0.263686461 | 0.001504467 | 0.432091012 |
| 0.503761328 | 0.296775108 | 0.249886651 | 0.329812846 |
| 0.291476556 | 0.388978567 | 0.219731415 | 0.420600107 |
| 0.023059905 | 0.335288933 | 0.242581803 | 0.435986544 |
| 0.220117048 | 0.346404518 | 0.092478218 | 0.277500292 |
| 0.506449501 | 0.244547124 | 0.282406228 | 0.279796366 |
| 0.512751926 | 0.414071191 | 0.243474676 | 0.24167255  |
| 0.38963423  | 0.115118123 | 0.434566111 | 0.522577125 |
| 0.197206654 | 0.194538564 | 0.40447975  | 0.209894191 |
| 0.280233477 | 0.406583719 | 0.401100451 | 0.519222443 |
| 0.078842554 | 0.274806735 | 0.409488171 | 0.447869931 |
| 0.307540423 | 0.150207716 | 0.219955182 | 0.21005133  |
| 0.492013988 | 0.15245258  | 0.226429584 | 0.377782674 |
| 0.184306533 | 0.32764661  | 0.385008169 | 0.182468858 |
| 0.059276105 | 0.202150042 | 0.425902761 | 0.195529929 |
| 0.294550587 | 0.345371055 | 0.21915615  | 0.38367866  |
| 0.170415416 | 0.040397196 | 0.450850531 | 0.012873593 |
| 0.429807614 | 0.393600734 | 0.288788397 | 0.335781353 |

|             |             |             |             |
|-------------|-------------|-------------|-------------|
| 0.246704702 | 0.366459281 | 0.367343966 | 0.002938533 |
| 0.391202781 | 0.062586473 | 0.31491319  | 0.214462527 |
| 0.254887485 | 0.087421908 | 0.482769445 | 0.489454243 |
| 0.371230236 | 0.362788653 | 0.33278117  | 0.47287708  |
| 0.133537952 | 0.321925186 | 0.30866585  | 0.436695542 |
| 0.206872348 | 0.388339148 | 0.402602692 | 0.36840481  |
| 0.416064934 | 0.336244801 |             |             |
| BBX         | 0.011586137 | 0.286740506 | 0.008197309 |
| 0.014803593 | 0.240606533 | 0.108522058 | 0.011011518 |
| 0.022129507 | 0.255593088 | 0.120240351 | 0.148461691 |
| 0.001294013 | 0.138013441 | 0.288590727 | 0.012517385 |
| 0.267669922 | 0.005510452 | 0.029942999 | 0.042929417 |
| 0.067958031 | 0.200061969 | 0.105041765 | 0.12247195  |
| 0.231658168 | 0.076017718 | 0.153816371 | 0.32100913  |
| 0.335503022 | 0.097097192 | 0.266214723 | 0.046831043 |
| 0.235115669 | 0.255781762 | 0.237204008 | 0.001259642 |
| 0.203233313 | 0.069919295 | 0.248064819 | 0.088584681 |
| 0.08701875  | 0.183864075 | 0.125446652 | 0.066330186 |
| 0.152223795 | 0.00322773  | 0.066492564 | 0.337921405 |
| 0.193051477 | 0.118113091 | 0.014207224 | 0.265433707 |
| 0.142842361 | 0.149386704 | 0.231807044 | 0.000181208 |
| 0.213025013 | 0.136090763 | 0.185029524 | 0.311959575 |
| 0.080426428 | 0.041247568 | 0.136990571 | 0.136959239 |
| 0.308759517 | 0.332171172 | 0.179292877 | 0.128028968 |
| 0.301567633 | 0.138785799 | 0.347718902 | 0.029820782 |
| 0.132176676 | 0.008024821 | 0.06817759  | 0.037879956 |
| 0.16443619  | 0.088880205 | 0.20373181  | 0.223265203 |
| 0.254468472 | 0.324680263 | 0.133458135 | 0.298385151 |
| 0.144705883 | 0.312711772 | 0.146169716 | 0.214560819 |
| 0.293207274 | 0.027081711 | 0.221090578 | 0.322277563 |
| 0.01701396  | 0.207609701 | 0.257537582 | 0.046558676 |
| 0.274043333 | 1           | 0.1631435   | 0.111291005 |
| 0.336183451 | 0.232643269 | 0.320969356 | 0.122488084 |
| 0.246090464 | 0.018964148 | 0.272374968 | 0.304825853 |
| 0.092608668 | 0.018515111 | 0.085480478 | 0.379619637 |
| 0.216894644 | 0.315098808 | 0.30188683  | 0.253887037 |
| 0.23457509  | 0.314046528 | 0.201390483 | 0.301244284 |
| 0.085637243 | 0.339691477 | 0.053694507 | 0.006516685 |
| 0.012383101 | 0.027368078 | 0.154066213 | 0.203176979 |
| 0.337089577 | 0.18240023  | 0.041706579 | 0.110663702 |
| 0.378572559 | 0.272845776 | 0.344672608 | 0.265297656 |
| 0.005624691 | 0.201694376 | 0.216761513 | 0.080677658 |
| 0.235704534 | 0.053924581 | 0.209551832 | 0.289455198 |
| 0.195386851 | 0.334190512 | 0.035178449 | 0.293786695 |
| 0.094151918 | 0.321762946 | 0.278412514 | 0.045821698 |
| 0.307393128 | 0.274374923 | 0.343803309 | 0.32902884  |
| 0.275214352 | 0.093081557 | 0.052285599 | 0.265710423 |
| 0.320724781 | 0.009333916 | 0.371380984 | 0.379515701 |
| 0.302970665 | 0.342539953 | 0.383195219 | 0.365441138 |
| 0.31057029  | 0.023896513 | 0.050257322 | 0.200841201 |
| 0.294639611 | 0.214501272 | 0.057549292 | 0.220959371 |
| 0.28749483  | 0.122415756 | 0.365208754 | 0.056066275 |
| 0.335474001 | 0.318296907 | 0.358892118 | 0.244335244 |
| 0.178373933 | 0.162403794 | 0.312105755 | 0.249312543 |

|             |             |             |             |
|-------------|-------------|-------------|-------------|
| 0.006889846 | 0.017845257 | 0.012039103 | 0.233517566 |
| 0.065602876 | 0.078233368 | 0.093874272 | 0.304791209 |
| 0.087156734 | 0.131066304 | 0.220106642 | 0.318071167 |
| 0.018182283 | 0.202258284 | 0.054509445 | 0.047612887 |
| 0.005347683 | 0.06380983  | 0.022525541 | 0.025697235 |
| 0.129149757 | 0.105335166 | 0.305665774 | 0.362659475 |
| 0.211830763 | 0.062588207 | 0.24147476  | 0.316447393 |
| 0.273540076 | 0.237821505 | 0.131739628 | 0.000664661 |
| 0.05699515  | 0.178992642 | 0.163263667 | 0.295282602 |
| 0.084894671 | 0.047889665 | 0.227143575 | 0.30577368  |
| 0.067687031 | 0.055155813 | 0.145801124 | 0.236846684 |
| 0.059895248 | 0.099787769 | 0.294660659 | 0.213250241 |
| 9.55E-05    | 0.101397237 | 0.29253634  | 0.091054293 |
| 0.183885147 | 0.070396936 | 0.100374477 | 0.320654089 |
| 0.13185642  | 0.174448122 | 0.37553746  | 0.348936049 |
| 0.075383651 | 0.108802303 | 0.375846167 | 0.059570401 |
| 0.321076472 | 0.014175775 | 0.167833897 | 0.168384697 |
| 0.097250312 | 0.199344919 | 0.278355025 | 0.124524102 |
| 0.03423603  | 0.325995448 | 0.259340236 | 0.338058283 |
| 0.122585261 | 0.367252856 | 0.325635142 | 0.272830904 |
| 0.200130673 | 0.258602336 | 0.133678782 | 0.26034196  |
| 0.32384029  | 0.082952667 | 0.023517438 | 0.365777425 |
| 0.186783547 | 0.312904554 | 0.072271927 | 0.318084547 |
| 0.299417754 | 0.270132569 | 0.039259805 | 0.311547276 |
| 0.197606384 | 0.065324527 | 0.326901001 | 0.37889642  |
| 0.097640858 | 0.208990986 | 0.12879671  | 0.328593787 |
| 0.059764009 | 0.11488457  | 0.214127793 | 0.183835666 |
| 0.011071301 | 0.022207522 | 0.013705955 | 0.065262528 |
| 0.122105145 | 0.296960477 | 0.284519066 | 0.334020921 |
| 0.031713801 | 0.263995241 | 0.163418964 | 0.062901592 |
| 0.233023651 | 0.234057614 | 0.296481394 | 0.299031438 |
| 0.144037969 | 0.002554867 | 0.015363913 | 0.309058684 |
| 0.011277272 | 0.117367054 | 0.147076959 | 0.000324465 |
| 0.005605917 | 0.282023124 | 0.037037836 | 0.085855445 |
| 0.387886491 | 0.083920555 | 0.069224124 | 0.099455193 |
| 0.22137082  | 0.028109716 | 0.000780146 | 0.36166111  |
| 0.369081523 | 0.359595086 | 0.359278087 | 0.315561891 |
| 0.368676248 | 0.348206735 | 0.320642159 | 0.114419484 |
| 0.01586914  | 0.018993129 | 0.089431188 | 0.113245968 |
| 0.001011708 | 0.2657276   | 0.248131361 | 0.052214955 |
| 0.344952565 | 0.195061601 | 0.004044547 | 0.3375895   |
| 0.00076473  | 0.104407879 | 0.067151661 | 0.114695159 |
| 0.336589557 | 0.001189968 | 0.03061251  | 0.088589343 |
| 0.217731281 | 0.173776795 | 0.18696927  | 0.338043074 |
| 0.132215403 | 0.045085147 | 0.132158107 | 0.2990235   |
| 0.012310956 | 0.042473063 | 0.131984653 | 0.00736554  |
| 0.067856209 | 0.324951485 | 0.174085302 | 0.007021158 |
| 0.100728692 | 0.00026627  | 0.175256512 | 0.336805335 |
| 0.269759301 | 0.365367693 | 0.308538145 | 0.165760417 |
| 0.302156944 | 0.173013865 | 0.355229499 | 0.232039261 |
| 0.130525194 | 0.00038363  | 0.001829726 | 0.351511131 |
| 0.203455448 | 0.018569049 | 0.056332002 | 0.050752035 |
| 0.016231335 | 0.0304851   | 0.017944589 | 0.104202127 |
| 0.231012942 | 0.158765972 | 0.118299787 | 0.272351992 |

|             |             |             |             |
|-------------|-------------|-------------|-------------|
| 0.089292029 | 0.133795266 | 0.139049118 | 0.032964084 |
| 0.27590504  | 0.006154045 | 0.038856582 | 0.001399052 |
| 0.316752918 | 0.041161383 | 0.257049811 | 0.3263474   |
| 0.303583969 | 0.292628925 | 0.117270353 | 0.080974616 |
| 0.39068006  | 0.02821809  | 0.119955625 | 0.032465178 |
| 0.280645729 | 0.2220376   | 0.159471864 | 0.132775687 |
| 0.323026562 | 0.266282872 | 0.005608811 | 0.270752653 |
| 0.000721222 | 0.004192209 | 0.099542061 | 0.165254584 |
| 0.163775406 | 0.196022371 | 0.120325887 | 0.125181398 |
| 0.126185453 | 0.002025101 | 0.205082352 | 0.176893758 |
| 0.155614662 | 0.172566873 | 0.208396422 | 0.178495799 |
| 0.159140584 | 0.070313074 | 0.076745052 | 0.050773675 |
| 0.127376583 | 0.157518284 | 0.073029252 | 0.003040153 |
| 0.19856797  | 0.214173313 | 0.011083759 | 0.062681198 |
| 0.274235177 | 0.328259629 | 0.007646644 | 0.000740817 |
| 0.122323837 | 0.165918718 | 0.35854654  | 0.313132865 |
| 0.309541288 | 0.338770767 | 0.216951236 | 0.040215147 |
| 0.011394299 | 0.209455455 | 0.256156966 | 0.047962564 |
| 0.332755478 | 0.017905402 | 0.303629361 | 0.290667604 |
| 0.048069037 | 0.048599044 | 0.004096879 | 0.029517353 |
| 0.30585871  | 0.075628729 | 0.085318938 | 0.039078828 |
| 0.113401498 | 0.123599014 | 0.010780111 | 0.074087911 |
| 0.181450843 | 0.100917394 | 0.059313346 | 0.123475509 |
| 0.227507715 | 0.115329684 | 0.309292717 | 0.270488632 |
| 0.042675189 | 0.040240437 | 0.028249029 | 0.338724511 |
| 0.314050137 | 0.266238631 | 0.001899052 | 0.284242234 |
| 0.360413903 | 0.260743253 | 0.295365021 | 0.291287933 |
| 0.031466498 | 0.179730839 | 0.266556587 | 0.206881835 |
| 0.090566563 | 0.118493258 | 0.140292651 | 0.018186976 |
| 0.21296305  | 0.308242337 | 0.251102124 | 0.049190805 |
| 0.263100604 | 0.042735188 | 0.014898413 | 0.354900635 |
| 0.091916753 | 0.008269366 | 0.141985716 | 0.388297109 |
| 0.001135251 | 0.140013691 | 0.405122612 | 0.056057472 |
| 0.36103608  | 0.333773615 | 0.245990827 | 0.089097882 |
| 0.006328023 | 0.341292949 | 0.175843641 | 0.116823753 |
| 0.247804617 | 0.192198653 | 0.077047125 | 0.012324022 |
| 0.171529269 | 0.021474504 | 0.025177975 | 0.064592833 |
| 0.103023835 | 0.198323073 | 0.10707068  | 0.119649358 |
| 0.102310854 | 0.042205841 | 0.134415604 | 0.072571198 |
| 0.191682374 | 0.119112822 | 0.200244777 | 0.099206595 |
| 0.056700905 | 0.343928703 | 0.234056794 | 0.002773533 |
| 0.30697139  | 0.329387044 | 0.33751107  | 0.000871533 |
| 0.272940137 | 0.000449841 | 0.094162627 | 0.078831296 |
| 0.08452756  | 0.097609978 | 0.189725209 | 0.10866356  |
| 0.194448616 | 0.080790212 | 0.071039926 | 0.106348723 |
| 0.044533267 | 0.093954721 | 0.261769485 | 0.141561718 |
| 0.082004373 | 0.02409506  | 0.040043507 | 0.038988035 |
| 0.005882169 | 0.33739968  | 0.113525351 | 0.021787834 |
| 0.129884246 | 0.149178137 | 0.21135634  | 0.302093595 |
| 0.301048801 | 0.041027615 | 0.171698701 | 0.253663643 |
| 0.106149159 | 0.055369055 | 0.008295742 | 0.178440326 |
| 0.08654884  | 0.066152043 | 0.201328581 | 0.099182576 |
| 0.279197153 | 0.217614072 | 0.108666724 | 0.305654722 |
| 0.140901013 | 0.240067564 | 0.085357837 | 0.013794322 |

|             |             |             |             |
|-------------|-------------|-------------|-------------|
| 0.036491544 | 0.057851341 | 0.20301714  | 0.000881817 |
| 0.18413952  | 0.03110226  | 0.312487951 | 0.277116173 |
| 0.22056577  | 0.25158087  | 0.049004952 | 0.008498593 |
| 0.056545219 | 0.06709211  | 0.052460577 | 0.321407807 |
| 0.152719297 | 0.048402845 | 0.188945325 | 0.053745773 |
| 0.326967144 | 0.353472836 | 0.167486245 | 0.092663484 |
| 0.155494278 | 0.076141064 | 0.314379178 | 0.027808957 |
| 0.250129507 | 0.076297425 | 0.205825719 | 0.114846329 |
| 0.106662301 | 0.372322179 | 0.016074849 | 0.366899934 |
| 0.154515941 | 0.057719514 | 0.305261065 | 0.154299822 |
| 0.066267555 | 0.040715302 | 0.166480109 | 0.138921425 |
| 0.064356595 | 0.200522711 | 0.007175409 | 0.027792393 |
| 0.19188     | 0.192360673 | 0.271810638 | 0.304880694 |
| 0.172761501 | 0.266577725 | 0.189217404 | 0.100754563 |
| 0.278661433 | 0.290314568 | 0.033834472 | 0.147385441 |
| 0.195283706 | 0.020036251 | 0.167393798 | 0.026966149 |
| 0.247485427 | 0.293114846 | 0.097547842 | 0.011136506 |
| 0.002425908 | 0.141316416 | 0.220345118 | 0.028228112 |
| 0.375329988 | 0.117799769 | 0.263111362 | 0.290054918 |
| 0.098363669 | 0.278248924 | 0.040102442 | 0.240261989 |
| 0.012942535 | 0.155831202 | 0.304150047 | 0.258759121 |
| 0.04589908  | 0.188832413 | 0.225390112 | 0.152847202 |
| 0.00398308  | 0.073396343 | 6.88E-05    | 0.206132552 |
| 0.264218602 | 0.246199642 | 0.107242468 | 0.116374975 |
| 0.172454515 | 0.304725399 | 0.084586477 | 0.252386934 |
| 0.001054409 | 0.237941926 | 0.098106281 | 0.222405843 |
| 0.056007526 | 0.232499907 | 0.009139648 | 0.286681436 |
| 0.242272222 | 0.063205805 | 0.166641632 | 0.072937118 |
| 0.304517391 | 0.293639725 | 0.064996981 | 0.112429349 |
| 0.296490316 | 0.020107508 | 0.132988192 | 0.359399781 |
| 0.066118824 | 0.145449362 | 0.333705639 | 0.047138744 |
| 0.248079493 | 0.244982323 | 0.296196288 | 0.367917158 |
| 0.021698915 | 0.112286822 | 0.347074549 | 0.302939207 |
| 0.195631668 | 0.145844514 | 0.122320137 | 0.102451565 |
| 0.246956369 | 0.010144263 | 0.134985882 | 0.175338568 |
| 0.127379464 | 0.201626723 | 0.213794644 | 0.118726077 |
| 0.005094803 | 0.05326001  | 0.085053874 | 0.057160656 |
| 0.141544732 | 0.195098473 | 0.119248609 | 0.225540376 |
| 0.022730116 | 0.001774546 | 0.285021165 | 0.015100117 |
| 0.11246622  | 0.22769673  | 0.119227836 | 0.208825414 |
| 0.06820567  | 0.189311359 | 0.107781143 | 0.001299785 |
| 0.320023137 | 0.037688589 | 0.196614324 | 0.062850741 |
| 0.116892528 | 0.006580519 | 0.274710606 | 0.366881576 |
| 0.17865792  | 0.132358569 | 0.104365057 | 0.300389002 |
| 0.101833105 | 0.206592891 | 0.189625913 | 0.21659623  |
| 0.181526018 | 0.157145243 | 0.201988286 | 0.170319253 |
| 0.2228738   | 0.102221889 |             |             |
| BC016423    | 0.036116888 | 0.438885386 | 0.034955614 |
| 0.071749628 | 0.148003661 | 0.237090899 | 0.021721131 |
| 0.052405166 | 0.31143808  | 0.270469075 | 0.185576015 |
| 0.005311364 | 0.045395088 | 0.421745877 | 0.017497486 |
| 0.243207788 | 0.00809889  | 0.041951006 | 0.039191054 |
| 0.118485799 | 0.12346788  | 0.192881867 | 0.235969817 |
| 0.125932476 | 0.153605032 | 0.240153625 | 0.240297822 |

|             |             |             |             |
|-------------|-------------|-------------|-------------|
| 0.506675198 | 0.245053186 | 0.333245232 | 0.23015298  |
| 0.35871148  | 0.172881029 | 0.24745217  | 0.006567263 |
| 0.227318242 | 0.003933438 | 0.39661837  | 0.11620527  |
| 0.080536238 | 0.284558068 | 0.281078877 | 0.108921052 |
| 0.266326741 | 0.017380035 | 0.270566957 | 0.311459217 |
| 0.221507751 | 0.132525758 | 0.038123098 | 0.350592776 |
| 0.214235602 | 0.248024361 | 0.410730588 | 0.00150957  |
| 0.182993945 | 0.080832112 | 0.157281139 | 0.499333568 |
| 0.10841034  | 0.04346538  | 0.237771401 | 0.124933431 |
| 0.264470751 | 0.256639993 | 0.135137458 | 0.260436528 |
| 0.482859701 | 0.094169577 | 0.382023935 | 0.08287799  |
| 0.214672549 | 0.015073573 | 0.088926817 | 0.051417537 |
| 0.221223671 | 0.078582742 | 0.165552769 | 0.16483857  |
| 0.46796281  | 0.473116129 | 0.125660806 | 0.504729233 |
| 0.040820613 | 0.187825735 | 0.126614155 | 0.18030229  |
| 0.265591851 | 0.033521635 | 0.318979542 | 0.486988872 |
| 0.021319066 | 0.322095983 | 0.316528564 | 0.080031824 |
| 0.422082172 | 0.1631435   | 1           | 0.087594632 |
| 0.241832015 | 0.179490039 | 0.450578721 | 0.184212128 |
| 0.148591138 | 0.042480779 | 0.485229969 | 0.174988247 |
| 0.145315322 | 0.042428093 | 0.098830838 | 0.444887573 |
| 0.293218285 | 0.488120583 | 0.421127371 | 0.276734913 |
| 0.217527874 | 0.485586082 | 0.309389352 | 0.377770874 |
| 0.214578527 | 0.519782272 | 0.090402165 | 0.011234225 |
| 0.040862971 | 0.025540926 | 0.105465874 | 0.205980609 |
| 0.453238022 | 0.214596524 | 0.094997475 | 0.09502533  |
| 0.408174208 | 0.490299527 | 0.525518566 | 0.355756007 |
| 0.014424014 | 0.140395256 | 0.219966211 | 0.14544623  |
| 0.260736508 | 0.047599359 | 0.12878601  | 0.489747726 |
| 0.323220224 | 0.376531403 | 0.089417327 | 0.462259585 |
| 0.089124616 | 0.465675003 | 0.484097556 | 0.072071415 |
| 0.494172904 | 0.484211548 | 0.466725687 | 0.296457746 |
| 0.446446739 | 0.197027948 | 0.036489137 | 0.318869253 |
| 0.423079643 | 0.007004833 | 0.473015363 | 0.491698241 |
| 0.506145967 | 0.444818073 | 0.476046662 | 0.49194134  |
| 0.511735695 | 0.032461621 | 0.024581712 | 0.145747719 |
| 0.502180596 | 0.34139347  | 0.043117933 | 0.268251352 |
| 0.205668945 | 0.231359145 | 0.372762257 | 0.205104949 |
| 0.446040543 | 0.428880453 | 0.495526086 | 0.326789365 |
| 0.18913734  | 0.256917123 | 0.242678221 | 0.468985339 |
| 0.013538908 | 0.061370376 | 0.033117654 | 0.198107228 |
| 0.279214226 | 0.065353166 | 0.232306135 | 0.194676086 |
| 0.0868178   | 0.199243403 | 0.217333625 | 0.258219334 |
| 0.044361917 | 0.312166683 | 0.077137565 | 0.090157473 |
| 0.010959945 | 0.101609809 | 0.086727586 | 0.065162332 |
| 0.103897454 | 0.210498211 | 0.374040054 | 0.46637744  |
| 0.181111184 | 0.130437936 | 0.341324939 | 0.417197011 |
| 0.338022977 | 0.215573942 | 0.139526243 | 0.00290755  |
| 0.14825151  | 0.238528744 | 0.113700706 | 0.266052427 |
| 0.145336758 | 0.113185625 | 0.243517379 | 0.288343661 |
| 0.166845032 | 0.074306634 | 0.204933289 | 0.372072743 |
| 0.110485961 | 0.148024711 | 0.393013157 | 0.287322561 |
| 0.000609828 | 0.174814894 | 0.40477238  | 0.052944205 |
| 0.20945088  | 0.067318004 | 0.161816562 | 0.43359633  |



|             |             |             |             |
|-------------|-------------|-------------|-------------|
| 0.178776622 | 0.098789242 | 0.479674482 | 0.280060635 |
| 0.213706486 | 0.203410564 | 0.487571832 | 0.038663175 |
| 0.180590476 | 0.016710287 | 0.155003882 | 0.265919536 |
| 0.128757208 | 0.172200241 | 0.156563631 | 0.128474823 |
| 0.091724631 | 0.501046852 | 0.331176162 | 0.494559575 |
| 0.232223499 | 0.491576669 | 0.426908786 | 0.390653473 |
| 0.233978877 | 0.230602223 | 0.085159541 | 0.398822387 |
| 0.428820002 | 0.196773411 | 0.053617455 | 0.421414256 |
| 0.242149836 | 0.29755517  | 0.038075595 | 0.452676709 |
| 0.440777015 | 0.495741937 | 0.050479252 | 0.258861038 |
| 0.309591769 | 0.116691017 | 0.348608738 | 0.479052952 |
| 0.256710992 | 0.187751975 | 0.176870435 | 0.304788845 |
| 0.093936429 | 0.087187811 | 0.246820692 | 0.108364028 |
| 0.015514269 | 0.039881416 | 0.032025804 | 0.056567732 |
| 0.072152069 | 0.346142532 | 0.271818117 | 0.500054848 |
| 0.044231608 | 0.366609129 | 0.146218513 | 0.145601133 |
| 0.400938492 | 0.181267535 | 0.22053141  | 0.239816371 |
| 0.152077912 | 0.005082045 | 0.047317028 | 0.479267451 |
| 0.025898946 | 0.124200744 | 0.165604296 | 0.001060097 |
| 0.019544062 | 0.444240135 | 0.073791923 | 0.149195976 |
| 0.421101752 | 0.162424605 | 0.130134293 | 0.255460729 |
| 0.21731399  | 0.037444841 | 0.000213331 | 0.470185075 |
| 0.465593084 | 0.428919239 | 0.471166719 | 0.441053851 |
| 0.407619177 | 0.329423306 | 0.334391064 | 0.227851078 |
| 0.042157976 | 0.047445507 | 0.10573233  | 0.132141945 |
| 0.002517699 | 0.278258853 | 0.138367292 | 0.074853578 |
| 0.342163492 | 0.18163733  | 0.01373268  | 0.198127614 |
| 0.010833658 | 0.143789822 | 0.167216594 | 0.08740892  |
| 0.224337891 | 0.004767319 | 0.187341299 | 0.196564821 |
| 0.428758747 | 0.291853262 | 0.225202806 | 0.51391075  |
| 0.162353729 | 0.107594487 | 0.147847658 | 0.288737186 |
| 0.025605551 | 0.094622279 | 0.210429536 | 0.067693391 |
| 0.139992484 | 0.417300986 | 0.219195197 | 0.034861849 |
| 0.141927421 | 0.001381817 | 0.328895769 | 0.501657456 |
| 0.488640024 | 0.492165052 | 0.480628973 | 0.145229351 |
| 0.492784099 | 0.094881239 | 0.519028271 | 0.386732774 |
| 0.289199733 | 0.000570451 | 0.00074471  | 0.471756934 |
| 0.232191473 | 0.049485686 | 0.073538532 | 0.251754608 |
| 0.039169173 | 0.087430902 | 0.023072454 | 0.073852144 |
| 0.304108882 | 0.096129383 | 0.070257004 | 0.473890285 |
| 0.104122371 | 0.093988157 | 0.257038328 | 0.052935997 |
| 0.252285738 | 0.017716718 | 0.049776948 | 0.00240908  |
| 0.237426147 | 0.094593463 | 0.459630821 | 0.503146273 |
| 0.444658841 | 0.27011623  | 0.303672295 | 0.209253773 |
| 0.386933829 | 0.085784292 | 0.248786671 | 0.075975344 |
| 0.503037021 | 0.258834646 | 0.220925125 | 0.245019845 |
| 0.453209744 | 0.43860402  | 0.010265246 | 0.328929981 |
| 0.005646606 | 0.00036907  | 0.251231651 | 0.152543786 |
| 0.03005227  | 0.201427354 | 0.166402831 | 0.114072641 |
| 0.094707003 | 0.013703174 | 0.142572959 | 0.122817861 |
| 0.154146169 | 0.178790405 | 0.125596345 | 0.159485226 |
| 0.112750411 | 0.049762759 | 0.076086688 | 0.057209259 |
| 0.133621105 | 0.268577862 | 0.159539257 | 0.005972214 |
| 0.274312441 | 0.246471248 | 0.021906488 | 0.087126354 |

|             |             |             |             |
|-------------|-------------|-------------|-------------|
| 0.394486745 | 0.474317734 | 0.011727652 | 0.001936608 |
| 0.188258546 | 0.150107072 | 0.464475841 | 0.512042048 |
| 0.505813302 | 0.467351843 | 0.333252893 | 0.037914638 |
| 0.026447163 | 0.158009139 | 0.136488914 | 0.026225398 |
| 0.493774372 | 0.043469532 | 0.476451521 | 0.161498646 |
| 0.053834584 | 0.097971796 | 0.009022272 | 0.03034765  |
| 0.242825215 | 0.082471922 | 0.063300985 | 0.104992046 |
| 0.147935573 | 0.131688477 | 0.01632782  | 0.083072029 |
| 0.259976108 | 0.102857096 | 0.07240595  | 0.163823158 |
| 0.295754327 | 0.200039829 | 0.34979605  | 0.37968453  |
| 0.072384501 | 0.05074054  | 0.192255763 | 0.286868554 |
| 0.432251494 | 0.298031039 | 0.014273977 | 0.488881073 |
| 0.447687792 | 0.348332007 | 0.493566362 | 0.298709723 |
| 0.04351294  | 0.206442052 | 0.174499864 | 0.17566938  |
| 0.079203225 | 0.234193694 | 0.098041848 | 0.024960376 |
| 0.214846746 | 0.431856232 | 0.401285955 | 0.064006737 |
| 0.282797905 | 0.084893244 | 0.037898372 | 0.421852702 |
| 0.083596071 | 0.042549054 | 0.283848192 | 0.390320842 |
| 0.000116928 | 0.072313893 | 0.443187819 | 0.107643025 |
| 0.468353691 | 0.447227382 | 0.386145652 | 0.127304998 |
| 0.000761164 | 0.310047474 | 0.22857756  | 0.229738205 |
| 0.433075443 | 0.270157996 | 0.071773637 | 0.022221862 |
| 0.186734267 | 0.062999132 | 0.049035198 | 0.223955711 |
| 0.109205093 | 0.300138888 | 0.10111285  | 0.096177719 |
| 0.072285365 | 0.068288432 | 0.128612457 | 0.111416121 |
| 0.067756567 | 0.138917037 | 0.253263876 | 0.254931426 |
| 0.132243245 | 0.376197781 | 0.360818806 | 0.009880207 |
| 0.190096814 | 0.34596697  | 0.374071534 | 0.000663677 |
| 0.339793685 | 0.001028926 | 0.072619428 | 0.08734589  |
| 0.074908494 | 0.080839837 | 0.114146258 | 0.137066553 |
| 0.230316577 | 0.093294612 | 0.129923316 | 0.113395113 |
| 0.059163679 | 0.097394748 | 0.227821173 | 0.202355239 |
| 0.132058435 | 0.053778751 | 0.079949387 | 0.091672277 |
| 0.017925425 | 0.454379827 | 0.17684288  | 0.054454944 |
| 0.100468195 | 0.201059534 | 0.261587208 | 0.514301081 |
| 0.339392792 | 0.106471602 | 0.158663059 | 0.452698055 |
| 0.220732198 | 0.185016467 | 0.032229032 | 0.227106053 |
| 0.101441826 | 0.098865822 | 0.250379174 | 0.225121037 |
| 0.362077915 | 0.33874049  | 0.170564404 | 0.381207231 |
| 0.18727086  | 0.191009987 | 0.30054819  | 0.026782391 |
| 0.083340966 | 0.077198021 | 0.115630662 | 0.000111408 |
| 0.213226389 | 0.162245156 | 0.457953393 | 0.487427582 |
| 0.175361344 | 0.306202916 | 0.287056111 | 0.039763691 |
| 0.287508252 | 0.174616998 | 0.074929869 | 0.390938339 |
| 0.147232645 | 0.077999843 | 0.135536208 | 0.232935502 |
| 0.357031105 | 0.35900728  | 0.108946654 | 0.114373297 |
| 0.100577084 | 0.122041864 | 0.44644962  | 0.064383802 |
| 0.320671935 | 0.076276532 | 0.294977952 | 0.136871223 |
| 0.085528347 | 0.503250222 | 0.02550815  | 0.515923089 |
| 0.165680854 | 0.089263885 | 0.427857883 | 0.153849546 |
| 0.155213544 | 0.039480472 | 0.11161768  | 0.248710181 |
| 0.094872498 | 0.200471727 | 0.023542645 | 0.034361263 |
| 0.205583951 | 0.175137354 | 0.405457479 | 0.256190026 |
| 0.104307435 | 0.22484283  | 0.099522032 | 0.152484517 |

|             |             |             |             |
|-------------|-------------|-------------|-------------|
| 0.503335792 | 0.485609228 | 0.127042009 | 0.150989354 |
| 0.243159815 | 0.037764387 | 0.316663242 | 0.009003475 |
| 0.303447159 | 0.320999688 | 0.269305749 | 0.016418852 |
| 0.004578047 | 0.130390116 | 0.295187256 | 0.040057597 |
| 0.436677702 | 0.151445864 | 0.268091336 | 0.352946528 |
| 0.107321077 | 0.486007299 | 0.036472299 | 0.301620067 |
| 0.022124172 | 0.137956913 | 0.209946192 | 0.222430141 |
| 0.101288897 | 0.145494984 | 0.266604589 | 0.116401183 |
| 0.0085051   | 0.116975297 | 0.000318038 | 0.355817655 |
| 0.475199151 | 0.185116695 | 0.139979742 | 0.261155796 |
| 0.151580517 | 0.31178676  | 0.108149244 | 0.266952338 |
| 0.002036219 | 0.219665489 | 0.082457424 | 0.385297082 |
| 0.20093243  | 0.220258644 | 0.01714696  | 0.153020726 |
| 0.444245882 | 0.149223078 | 0.169567463 | 0.229876636 |
| 0.498491002 | 0.34848832  | 0.134179962 | 0.090167877 |
| 0.316144714 | 0.034326478 | 0.282199108 | 0.495787405 |
| 0.064130482 | 0.0998738   | 0.384169439 | 0.085000981 |
| 0.164101696 | 0.346029981 | 0.314334923 | 0.491363835 |
| 0.018087505 | 0.12975226  | 0.3444387   | 0.438224408 |
| 0.185052262 | 0.066645073 | 0.126491727 | 0.094417501 |
| 0.474200386 | 0.044170686 | 0.125503558 | 0.265682848 |
| 0.114668146 | 0.171550568 | 0.277230141 | 0.069402609 |
| 0.010305622 | 0.064103829 | 0.210332767 | 0.066464243 |
| 0.142909764 | 0.181953769 | 0.09979408  | 0.309754384 |
| 0.053248966 | 0.006988392 | 0.382660787 | 0.010570065 |
| 0.211963529 | 0.259157611 | 0.107620076 | 0.17533134  |
| 0.1372292   | 0.213301911 | 0.214302969 | 3.79E-05    |
| 0.328827367 | 0.019671601 | 0.140280049 | 0.097913231 |
| 0.164163662 | 0.020814057 | 0.428300361 | 0.473637461 |
| 0.195671991 | 0.206662622 | 0.244680472 | 0.436333251 |
| 0.07352623  | 0.239379787 | 0.202843006 | 0.350806162 |
| 0.115123942 | 0.298076308 | 0.269814976 | 0.238309024 |
| 0.291621404 | 0.12814555  |             |             |
| BC021614    | 0.013775616 | 0.143927226 | 0.007614156 |
| 0.03469884  | 0.290851983 | 0.106957272 | 0.008547837 |
| 0.020343702 | 0.105062189 | 0.035580823 | 0.203054656 |
| 0.003160407 | 0.206271398 | 0.208024707 | 0.010026826 |
| 0.23859126  | 0.009558797 | 0.029617606 | 0.017832298 |
| 0.034515774 | 0.252441383 | 0.149181923 | 0.08168658  |
| 0.221224185 | 0.052777593 | 0.080604721 | 0.191872483 |
| 0.208075429 | 0.110258318 | 0.243084313 | 0.024425162 |
| 0.163842751 | 0.311734968 | 0.200225534 | 0.001916562 |
| 0.161775231 | 0.018424338 | 0.142460394 | 0.109928609 |
| 0.161367698 | 0.134685596 | 0.051156627 | 0.109991799 |
| 0.068615021 | 0.00458131  | 0.033495393 | 0.20167451  |
| 0.085492622 | 0.073909951 | 0.008819303 | 0.179251731 |
| 0.070003673 | 0.132905102 | 0.105272653 | 0.00043917  |
| 0.257201733 | 0.149634209 | 0.174130393 | 0.191479804 |
| 0.095604431 | 0.058349886 | 0.058334482 | 0.060946178 |
| 0.157496696 | 0.200413818 | 0.135219969 | 0.055518187 |
| 0.20828268  | 0.172286212 | 0.210951007 | 0.044172864 |
| 0.084794446 | 0.002821652 | 0.06119224  | 0.012369496 |
| 0.108794491 | 0.121526173 | 0.251206996 | 0.198816401 |
| 0.127251755 | 0.1958259   | 0.092414124 | 0.159617284 |

|             |             |             |             |
|-------------|-------------|-------------|-------------|
| 0.085371276 | 0.281694362 | 0.156417842 | 0.189507439 |
| 0.156987776 | 0.010468017 | 0.225561376 | 0.21117894  |
| 0.006021513 | 0.087097315 | 0.148516226 | 0.024709724 |
| 0.171993554 | 0.111291005 | 0.087594632 | 1           |
| 0.29965992  | 0.220639367 | 0.161869613 | 0.13497352  |
| 0.224552945 | 0.011519582 | 0.145186341 | 0.326032627 |
| 0.174757359 | 0.016046641 | 0.097859637 | 0.255654464 |
| 0.175399279 | 0.219688081 | 0.155605626 | 0.160589192 |
| 0.215745118 | 0.215988375 | 0.180104597 | 0.177459626 |
| 0.028200752 | 0.204041029 | 0.060834268 | 0.014096233 |
| 0.007762636 | 0.033711435 | 0.078743501 | 0.155174702 |
| 0.246299088 | 0.140441207 | 0.047226781 | 0.137267255 |
| 0.27553407  | 0.145243749 | 0.193941207 | 0.184431727 |
| 0.007327244 | 0.123459868 | 0.199882643 | 0.059795234 |
| 0.175753975 | 0.03302828  | 0.281000098 | 0.169186327 |
| 0.171480601 | 0.258088169 | 0.023871185 | 0.167794047 |
| 0.046681888 | 0.23563605  | 0.165821858 | 0.068401976 |
| 0.191615688 | 0.165860525 | 0.255148692 | 0.334867739 |
| 0.183081188 | 0.098291417 | 0.013492231 | 0.153920572 |
| 0.254422054 | 0.040664489 | 0.234318923 | 0.246898776 |
| 0.178051495 | 0.254289798 | 0.257958527 | 0.24822569  |
| 0.18212587  | 0.016032068 | 0.010398574 | 0.212835363 |
| 0.176501573 | 0.186212506 | 0.051588839 | 0.164343915 |
| 0.254127738 | 0.098037229 | 0.223476116 | 0.091125678 |
| 0.233325081 | 0.221960539 | 0.221942451 | 0.15171435  |
| 0.062566827 | 0.1219974   | 0.229103246 | 0.141745018 |
| 0.010198682 | 0.020459433 | 0.008799908 | 0.141770647 |
| 0.03896521  | 0.100920903 | 0.06903845  | 0.184501609 |
| 0.104282652 | 0.066832608 | 0.195081177 | 0.320631001 |
| 0.00846667  | 0.160241998 | 0.044894347 | 0.032453778 |
| 0.011429973 | 0.041473228 | 0.045844675 | 0.052882834 |
| 0.177862857 | 0.052537227 | 0.211760659 | 0.234036641 |
| 0.122040567 | 0.048505598 | 0.175049204 | 0.238881169 |
| 0.234186046 | 0.253640757 | 0.091975844 | 0.007891673 |
| 0.067563273 | 0.069879357 | 0.164728865 | 0.207078919 |
| 0.044086003 | 0.049928962 | 0.177499548 | 0.333075183 |
| 0.061599829 | 0.022758951 | 0.113570418 | 0.164444811 |
| 0.031789518 | 0.171256106 | 0.246488407 | 0.110542448 |
| 0.0002782   | 0.100709844 | 0.231741168 | 0.094835693 |
| 0.102125858 | 0.180337301 | 0.190805629 | 0.223494953 |
| 0.115239603 | 0.167323198 | 0.251622157 | 0.325317728 |
| 0.073925217 | 0.047660693 | 0.247426582 | 0.04040519  |
| 0.188297512 | 0.061346247 | 0.199969788 | 0.056945242 |
| 0.092788743 | 0.164375451 | 0.316182719 | 0.179371483 |
| 0.027438066 | 0.201897709 | 0.183824937 | 0.236105715 |
| 0.095446635 | 0.238611239 | 0.254560174 | 0.229146755 |
| 0.16252321  | 0.133161031 | 0.191631503 | 0.211782739 |
| 0.226581168 | 0.046241566 | 0.012411765 | 0.217140236 |
| 0.079414868 | 0.256493742 | 0.090245949 | 0.237013381 |
| 0.200423748 | 0.138385284 | 0.064504902 | 0.27897485  |
| 0.197893039 | 0.08286599  | 0.218815174 | 0.247112674 |
| 0.032968328 | 0.175807262 | 0.135039674 | 0.293461449 |
| 0.058770967 | 0.119387764 | 0.126315672 | 0.183726393 |
| 0.0389625   | 0.013971625 | 0.012448942 | 0.113280326 |

|             |             |             |             |
|-------------|-------------|-------------|-------------|
| 0.221780896 | 0.162138197 | 0.215095952 | 0.217354915 |
| 0.042461031 | 0.197409635 | 0.082382295 | 0.096779931 |
| 0.144641398 | 0.168184215 | 0.28878346  | 0.265099249 |
| 0.098173285 | 0.009663337 | 0.043999091 | 0.188695924 |
| 0.004495709 | 0.201017244 | 0.083319145 | 0.002302876 |
| 0.00534827  | 0.130848069 | 0.01900209  | 0.057625499 |
| 0.293435577 | 0.053108192 | 0.054262857 | 0.03465164  |
| 0.239816902 | 0.028533341 | 0.010636802 | 0.206901263 |
| 0.188043614 | 0.176273854 | 0.178858811 | 0.151455578 |
| 0.190315491 | 0.195815162 | 0.237501283 | 0.087250746 |
| 0.017010348 | 0.010519096 | 0.123687367 | 0.130210945 |
| 0.000862071 | 0.258301716 | 0.195838957 | 0.05288105  |
| 0.257008121 | 0.122870983 | 0.007136784 | 0.26365637  |
| 0.003447016 | 0.16444788  | 0.038667623 | 0.089807508 |
| 0.274676187 | 0.001710216 | 0.047671731 | 0.083915172 |
| 0.142511524 | 0.128931869 | 0.154855645 | 0.211494135 |
| 0.181219242 | 0.019949698 | 0.164220505 | 0.293761753 |
| 0.013675886 | 0.014066753 | 0.063999397 | 0.00547177  |
| 0.059370566 | 0.168387528 | 0.111414778 | 0.007510359 |
| 0.11292581  | 0.000596155 | 0.132198528 | 0.221499506 |
| 0.148064207 | 0.249894172 | 0.223771145 | 0.280994705 |
| 0.204041234 | 0.131985485 | 0.227771993 | 0.143086201 |
| 0.067156497 | 0.00022618  | 0.004099535 | 0.24887005  |
| 0.201247781 | 0.008071741 | 0.058181348 | 0.062355788 |
| 0.034090995 | 0.019900975 | 0.01658782  | 0.176435825 |
| 0.191853718 | 0.237485252 | 0.168698342 | 0.149179947 |
| 0.091776024 | 0.126312952 | 0.071116623 | 0.018082555 |
| 0.248666252 | 0.011897436 | 0.017280085 | 0.010736069 |
| 0.268374281 | 0.021681491 | 0.135236834 | 0.201278943 |
| 0.221344395 | 0.285037544 | 0.05599935  | 0.085124265 |
| 0.226435881 | 0.015164609 | 0.094110966 | 0.01863304  |
| 0.169447466 | 0.216068974 | 0.177398036 | 0.118917853 |
| 0.236164111 | 0.186748492 | 0.006952057 | 0.213299676 |
| 0.005732995 | 0.00695085  | 0.075081566 | 0.111044762 |
| 0.029275591 | 0.16058914  | 0.10784383  | 0.044359992 |
| 0.072947122 | 0.005261148 | 0.20299143  | 0.202931373 |
| 0.157069217 | 0.157485315 | 0.291311345 | 0.084934693 |
| 0.153564131 | 0.086201025 | 0.093481397 | 0.044633302 |
| 0.049230169 | 0.09394372  | 0.052858242 | 0.002744398 |
| 0.128511166 | 0.202266823 | 0.01499248  | 0.052456983 |
| 0.238516436 | 0.244487675 | 0.008303245 | 0.007849644 |
| 0.099979244 | 0.120448323 | 0.269329121 | 0.186930653 |
| 0.188711596 | 0.235652302 | 0.147428899 | 0.057323301 |
| 0.014941186 | 0.187954624 | 0.290689925 | 0.079428642 |
| 0.222631453 | 0.008470549 | 0.184337788 | 0.301819762 |
| 0.034703566 | 0.053747375 | 0.014647517 | 0.025515771 |
| 0.299619719 | 0.076991588 | 0.130848506 | 0.028494276 |
| 0.129185147 | 0.176278722 | 0.008851161 | 0.080614793 |
| 0.138367631 | 0.130917625 | 0.055871283 | 0.067435467 |
| 0.131697912 | 0.022020585 | 0.238740089 | 0.202389354 |
| 0.036974127 | 0.021695933 | 0.026665992 | 0.207316163 |
| 0.202213544 | 0.122182296 | 0.012100319 | 0.146295084 |
| 0.249472788 | 0.219645734 | 0.18341803  | 0.235162002 |
| 0.019269738 | 0.235135546 | 0.160739782 | 0.180083404 |

|             |             |             |             |
|-------------|-------------|-------------|-------------|
| 0.069838347 | 0.10777472  | 0.103922132 | 0.015402269 |
| 0.130669822 | 0.173155937 | 0.14956753  | 0.088395569 |
| 0.171525101 | 0.019838906 | 0.006384392 | 0.212151895 |
| 0.143477553 | 0.014139734 | 0.061598436 | 0.233443647 |
| 0.0062178   | 0.217328101 | 0.2469803   | 0.087886944 |
| 0.21332351  | 0.241803547 | 0.190307585 | 0.048666686 |
| 0.004153958 | 0.244174403 | 0.21613344  | 0.130279196 |
| 0.152670445 | 0.144471191 | 0.034697073 | 0.025542957 |
| 0.160123757 | 0.014000466 | 0.03799096  | 0.060971431 |
| 0.075770369 | 0.128408838 | 0.097263773 | 0.05993376  |
| 0.116922185 | 0.012911007 | 0.200111567 | 0.087307976 |
| 0.094109159 | 0.124451841 | 0.191189395 | 0.031714665 |
| 0.106752231 | 0.213012393 | 0.150895908 | 0.004459621 |
| 0.269437507 | 0.194895747 | 0.22244868  | 8.33E-05    |
| 0.255790286 | 0.002198195 | 0.140124656 | 0.147042768 |
| 0.117108952 | 0.101321716 | 0.212272006 | 0.140384863 |
| 0.111800207 | 0.075320043 | 0.118764612 | 0.137582072 |
| 0.086763679 | 0.072127383 | 0.216012432 | 0.080024008 |
| 0.166608434 | 0.033372657 | 0.020941039 | 0.019189025 |
| 0.021003816 | 0.206494449 | 0.095416109 | 0.013593144 |
| 0.130589432 | 0.081338067 | 0.186633492 | 0.166632804 |
| 0.243931519 | 0.019673164 | 0.116113849 | 0.173364156 |
| 0.038779489 | 0.049653237 | 0.005988521 | 0.118171088 |
| 0.100444971 | 0.144805521 | 0.113852671 | 0.065350682 |
| 0.136449777 | 0.160784333 | 0.094933133 | 0.204112061 |
| 0.148031105 | 0.102587814 | 0.037888903 | 0.040757396 |
| 0.044998304 | 0.033389006 | 0.281381097 | 0.000329639 |
| 0.173453798 | 0.032523778 | 0.236084987 | 0.166294694 |
| 0.201485853 | 0.194666146 | 0.032502504 | 0.013252201 |
| 0.02499917  | 0.034753919 | 0.04687859  | 0.196656278 |
| 0.201488561 | 0.058698806 | 0.233263377 | 0.039625415 |
| 0.240060946 | 0.186386733 | 0.127965351 | 0.062572289 |
| 0.098822962 | 0.049911434 | 0.158135683 | 0.018796339 |
| 0.153740538 | 0.163601413 | 0.078794507 | 0.155011657 |
| 0.131709994 | 0.228840433 | 0.013844266 | 0.235797854 |
| 0.144786006 | 0.03325081  | 0.208399426 | 0.100114179 |
| 0.049851668 | 0.08379728  | 0.219519227 | 0.064762133 |
| 0.05059906  | 0.197514377 | 0.00324461  | 0.048636748 |
| 0.215111522 | 0.065837635 | 0.127908285 | 0.181972862 |
| 0.197297493 | 0.217442274 | 0.199236908 | 0.060332093 |
| 0.146249942 | 0.15763228  | 0.0601988   | 0.114284967 |
| 0.149983908 | 0.035189116 | 0.119996764 | 0.005853864 |
| 0.187364964 | 0.201410012 | 0.055044096 | 0.013023746 |
| 0.003412603 | 0.178940537 | 0.144719881 | 0.009073622 |
| 0.268928221 | 0.168455549 | 0.098811435 | 0.230281184 |
| 0.051849294 | 0.156229065 | 0.067226321 | 0.264874007 |
| 0.00299886  | 0.110431333 | 0.210102147 | 0.120755857 |
| 0.113687136 | 0.225924117 | 0.235030246 | 0.268102907 |
| 0.008315429 | 0.10481855  | 0.000398037 | 0.14132475  |
| 0.133631153 | 0.196214165 | 0.069700749 | 0.038889317 |
| 0.189303852 | 0.175923869 | 0.083494465 | 0.157601625 |
| 0.006929815 | 0.282179501 | 0.099619977 | 0.176783517 |
| 0.075363132 | 0.109113389 | 0.025180138 | 0.205304915 |
| 0.128390239 | 0.073069583 | 0.103578328 | 0.060575821 |

|             |             |             |             |
|-------------|-------------|-------------|-------------|
| 0.176689536 | 0.150032926 | 0.032818957 | 0.122715225 |
| 0.120477484 | 0.013001893 | 0.072271447 | 0.222785127 |
| 0.108868561 | 0.260853799 | 0.292570825 | 0.070874232 |
| 0.237215891 | 0.149414365 | 0.142860265 | 0.206980507 |
| 0.049470842 | 0.127096798 | 0.25624278  | 0.17835875  |
| 0.201085405 | 0.182866264 | 0.197776801 | 0.144063404 |
| 0.147322135 | 0.02841173  | 0.115746896 | 0.142416577 |
| 0.189227183 | 0.185429491 | 0.073455615 | 0.171332471 |
| 0.016792186 | 0.040423051 | 0.105307276 | 0.045516694 |
| 0.149197645 | 0.18516259  | 0.129019109 | 0.186244293 |
| 0.079020103 | 0.013454929 | 0.206634349 | 0.039476524 |
| 0.095258909 | 0.268743741 | 0.120050393 | 0.1992701   |
| 0.058729101 | 0.115638996 | 0.060476173 | 0.00034512  |
| 0.235107375 | 0.060821451 | 0.131641887 | 0.125328335 |
| 0.108733107 | 0.006638921 | 0.181880352 | 0.266788955 |
| 0.124905865 | 0.081832312 | 0.104790164 | 0.182379016 |
| 0.17374796  | 0.130387181 | 0.122142193 | 0.123855037 |
| 0.250596775 | 0.076870881 | 0.126207488 | 0.176076998 |
| 0.164054163 | 0.076764028 |             |             |
| BC056474    | 0.05434976  | 0.335394716 | 0.03417219  |
| 0.137716387 | 0.360263199 | 0.272658206 | 0.056288356 |
| 0.112048467 | 0.267231828 | 0.203325376 | 0.303467858 |
| 0.016871941 | 0.211885226 | 0.39451663  | 0.056454239 |
| 0.351691624 | 0.043007752 | 0.100982187 | 0.086100989 |
| 0.211579904 | 0.336751845 | 0.329884052 | 0.219013038 |
| 0.350277644 | 0.138076622 | 0.223431031 | 0.335471228 |
| 0.42324474  | 0.239983906 | 0.330588498 | 0.151674377 |
| 0.355226626 | 0.357622113 | 0.336365453 | 0.013784288 |
| 0.305474853 | 0.050315659 | 0.354139027 | 0.291475818 |
| 0.295949901 | 0.283928905 | 0.200287991 | 0.243431423 |
| 0.252367133 | 0.027355363 | 0.137032405 | 0.337712766 |
| 0.238990134 | 0.271192222 | 0.038454134 | 0.325406929 |
| 0.30124414  | 0.232202005 | 0.259749533 | 0.001637424 |
| 0.348594537 | 0.184549443 | 0.308535798 | 0.409629533 |
| 0.165444438 | 0.133282483 | 0.267768116 | 0.198002257 |
| 0.300926776 | 0.327679249 | 0.230167671 | 0.265071259 |
| 0.41789245  | 0.301875357 | 0.361139861 | 0.15967887  |
| 0.271698136 | 0.024477113 | 0.128666769 | 0.055594644 |
| 0.336866447 | 0.20817767  | 0.324645891 | 0.382386261 |
| 0.322893618 | 0.427811002 | 0.204418022 | 0.390195333 |
| 0.211518584 | 0.368883127 | 0.36776355  | 0.293001381 |
| 0.307310846 | 0.081880575 | 0.341963076 | 0.444468773 |
| 0.039503406 | 0.233033126 | 0.306128568 | 0.077130103 |
| 0.345507602 | 0.336183451 | 0.241832015 | 0.29965992  |
| 1           | 0.349055394 | 0.383757328 | 0.224868065 |
| 0.34120617  | 0.045986332 | 0.362222653 | 0.372150843 |
| 0.298218342 | 0.059795823 | 0.318029114 | 0.428640226 |
| 0.311010328 | 0.418601311 | 0.341903031 | 0.317681987 |
| 0.351481929 | 0.426494897 | 0.315531107 | 0.350594425 |
| 0.123225942 | 0.43344553  | 0.15444103  | 0.048949245 |
| 0.045862288 | 0.103907158 | 0.299774751 | 0.276544105 |
| 0.42294923  | 0.248436995 | 0.156391664 | 0.268223688 |
| 0.452699426 | 0.356209828 | 0.429498961 | 0.351203202 |
| 0.034459253 | 0.348155896 | 0.353356916 | 0.212152667 |

|             |             |             |             |
|-------------|-------------|-------------|-------------|
| 0.296572215 | 0.097562911 | 0.360667578 | 0.397839718 |
| 0.323702457 | 0.410568638 | 0.118693678 | 0.396448364 |
| 0.174694416 | 0.450582733 | 0.358344378 | 0.159532069 |
| 0.425066352 | 0.384145433 | 0.46653716  | 0.379384302 |
| 0.383063119 | 0.244534718 | 0.068094643 | 0.32676271  |
| 0.440263618 | 0.037776409 | 0.426580783 | 0.454380257 |
| 0.402796301 | 0.425066934 | 0.480365973 | 0.453014896 |
| 0.401669719 | 0.057641667 | 0.047576096 | 0.297273762 |
| 0.407141935 | 0.346570611 | 0.17714312  | 0.32177272  |
| 0.345622716 | 0.255861309 | 0.372236895 | 0.255456636 |
| 0.451312392 | 0.40756949  | 0.424352961 | 0.308658555 |
| 0.217184407 | 0.256780978 | 0.347945987 | 0.34807349  |
| 0.050587092 | 0.080117833 | 0.031547114 | 0.266454799 |
| 0.221081238 | 0.185171154 | 0.244894425 | 0.32555587  |
| 0.18278242  | 0.225628608 | 0.339140207 | 0.36617308  |
| 0.033328689 | 0.292982518 | 0.142572634 | 0.124895953 |
| 0.051749208 | 0.108001133 | 0.166584927 | 0.157934565 |
| 0.272605333 | 0.163987424 | 0.336790889 | 0.445663121 |
| 0.325913717 | 0.12343123  | 0.309118321 | 0.431475217 |
| 0.401611826 | 0.363778689 | 0.183463968 | 0.018553062 |
| 0.275706095 | 0.276044065 | 0.314704647 | 0.335667753 |
| 0.129875545 | 0.226435763 | 0.318816634 | 0.387757524 |
| 0.177787664 | 0.103298326 | 0.331367296 | 0.346305433 |
| 0.096582903 | 0.310918799 | 0.412061512 | 0.276564917 |
| 0.003183696 | 0.25825764  | 0.388905505 | 0.265111405 |
| 0.228943374 | 0.219136708 | 0.30378605  | 0.424850709 |
| 0.317600862 | 0.323982754 | 0.442684546 | 0.390048398 |
| 0.247388009 | 0.151424064 | 0.470084548 | 0.089227975 |
| 0.344531039 | 0.110022286 | 0.269446753 | 0.210549685 |
| 0.20863349  | 0.268627415 | 0.358263158 | 0.350962552 |
| 0.077799625 | 0.425663914 | 0.334305937 | 0.44257393  |
| 0.32645664  | 0.469514403 | 0.418557204 | 0.390314153 |
| 0.277671972 | 0.316930198 | 0.257201031 | 0.379031015 |
| 0.421610613 | 0.265477414 | 0.043778806 | 0.379479405 |
| 0.282871202 | 0.359792561 | 0.243932475 | 0.445304257 |
| 0.415884837 | 0.350427941 | 0.161564412 | 0.380614825 |
| 0.332354679 | 0.181666849 | 0.380961881 | 0.469942472 |
| 0.235255181 | 0.334459283 | 0.350028295 | 0.422229287 |
| 0.141424631 | 0.310829274 | 0.271399166 | 0.306535956 |
| 0.022910507 | 0.057545747 | 0.046891142 | 0.202910893 |
| 0.321649744 | 0.288135741 | 0.336943735 | 0.44057683  |
| 0.109976516 | 0.356207174 | 0.187721446 | 0.289076902 |
| 0.340392429 | 0.332098993 | 0.360176789 | 0.34334437  |
| 0.202429518 | 0.029940352 | 0.125987185 | 0.425496171 |
| 0.022875801 | 0.335306706 | 0.231555382 | 0.004401539 |
| 0.03578578  | 0.306113534 | 0.065744424 | 0.150347341 |
| 0.460809388 | 0.148891308 | 0.147167111 | 0.222495171 |
| 0.307646799 | 0.082014438 | 0.00891415  | 0.429690076 |
| 0.41258087  | 0.39246108  | 0.403965363 | 0.36321951  |
| 0.39943209  | 0.337912614 | 0.394638122 | 0.218055968 |
| 0.100805901 | 0.065067514 | 0.322418345 | 0.293007623 |
| 0.003510958 | 0.359165646 | 0.325052709 | 0.11353568  |
| 0.375885443 | 0.244944869 | 0.032588744 | 0.345793183 |
| 0.01800656  | 0.289083867 | 0.22374409  | 0.235226316 |



|             |             |             |             |
|-------------|-------------|-------------|-------------|
| 0.360524153 | 0.012079952 | 0.189887193 | 0.317211206 |
| 0.324000134 | 0.269523781 | 0.356734688 | 0.443794423 |
| 0.288347911 | 0.073952537 | 0.329793724 | 0.36237249  |
| 0.06991721  | 0.107170065 | 0.250887703 | 0.030027675 |
| 0.164075171 | 0.372809044 | 0.327976513 | 0.060950263 |
| 0.229367946 | 0.004177129 | 0.286320079 | 0.444806246 |
| 0.35380329  | 0.468098107 | 0.426516294 | 0.346080917 |
| 0.421716364 | 0.20108796  | 0.450583855 | 0.317065933 |
| 0.25621374  | 0.000869738 | 0.008262426 | 0.446607691 |
| 0.343007139 | 0.031955176 | 0.136518861 | 0.238410559 |
| 0.124601254 | 0.097741656 | 0.062855917 | 0.329905099 |
| 0.299082019 | 0.299489676 | 0.299237961 | 0.360712256 |
| 0.243028135 | 0.231161595 | 0.249497845 | 0.057736998 |
| 0.340169905 | 0.055398529 | 0.061129675 | 0.014328309 |
| 0.349080299 | 0.074127196 | 0.347483501 | 0.419075969 |
| 0.430259274 | 0.368284521 | 0.229602527 | 0.248364573 |
| 0.404911539 | 0.051303495 | 0.308925186 | 0.064450295 |
| 0.381482704 | 0.330098169 | 0.279188791 | 0.246050147 |
| 0.447645441 | 0.391445313 | 0.031972277 | 0.371820373 |
| 0.014125597 | 0.006599712 | 0.229815483 | 0.207054565 |
| 0.124661966 | 0.338121432 | 0.214779066 | 0.222861283 |
| 0.246711233 | 0.02454386  | 0.362356824 | 0.356239023 |
| 0.279495278 | 0.321111953 | 0.350592628 | 0.196117461 |
| 0.34214037  | 0.25358326  | 0.225784149 | 0.15687332  |
| 0.234404167 | 0.242475454 | 0.140313052 | 0.02093116  |
| 0.301810116 | 0.336842109 | 0.050573654 | 0.119856099 |
| 0.398686424 | 0.437628883 | 0.052251207 | 0.018793974 |
| 0.208576194 | 0.301884879 | 0.457172548 | 0.401644276 |
| 0.418244417 | 0.459560999 | 0.321510934 | 0.178503337 |
| 0.059872168 | 0.317878703 | 0.364977317 | 0.199290392 |
| 0.430504913 | 0.038450166 | 0.387924891 | 0.373552838 |
| 0.096867029 | 0.213130572 | 0.042773934 | 0.080507612 |
| 0.354320384 | 0.149536306 | 0.225127827 | 0.092056544 |
| 0.30305188  | 0.360176135 | 0.046473672 | 0.178005339 |
| 0.28010354  | 0.322396105 | 0.138057431 | 0.236699829 |
| 0.287247035 | 0.164620336 | 0.373574532 | 0.395126954 |
| 0.092364667 | 0.090446559 | 0.175645967 | 0.336294141 |
| 0.382659817 | 0.27395602  | 0.023923866 | 0.34779037  |
| 0.441118402 | 0.323326891 | 0.395872763 | 0.380373313 |
| 0.063171246 | 0.33862967  | 0.346562164 | 0.328553721 |
| 0.16508806  | 0.263519886 | 0.234077722 | 0.051118353 |
| 0.264609568 | 0.39005946  | 0.346072306 | 0.177281696 |
| 0.301283015 | 0.074075147 | 0.032916253 | 0.384330052 |
| 0.327315223 | 0.071496243 | 0.214823469 | 0.393935575 |
| 0.008667435 | 0.288527279 | 0.459586634 | 0.216499386 |
| 0.444531627 | 0.445903826 | 0.376351466 | 0.214972439 |
| 0.010451437 | 0.363153493 | 0.311493772 | 0.32774081  |
| 0.339366097 | 0.268294811 | 0.146675836 | 0.094816507 |
| 0.266684222 | 0.044799134 | 0.155740024 | 0.237019621 |
| 0.262502804 | 0.261622931 | 0.170321856 | 0.176934109 |
| 0.253785742 | 0.053833721 | 0.348301525 | 0.218081345 |
| 0.282821826 | 0.206064885 | 0.315538189 | 0.181850863 |
| 0.239867202 | 0.399477857 | 0.328478981 | 0.02220353  |
| 0.358941325 | 0.37605356  | 0.395218887 | 0.002972361 |

|             |             |             |             |
|-------------|-------------|-------------|-------------|
| 0.363197061 | 0.008414949 | 0.234380954 | 0.250813688 |
| 0.241117456 | 0.231619419 | 0.28747356  | 0.346070334 |
| 0.259959351 | 0.220809949 | 0.257710789 | 0.216263425 |
| 0.204895454 | 0.200739321 | 0.344625179 | 0.276862864 |
| 0.300976964 | 0.113494886 | 0.068375218 | 0.067359539 |
| 0.054750218 | 0.38983959  | 0.196569517 | 0.043035014 |
| 0.215259648 | 0.290480445 | 0.327746704 | 0.387048259 |
| 0.393859979 | 0.069305733 | 0.295345239 | 0.354688815 |
| 0.194002304 | 0.214607298 | 0.042340998 | 0.289465284 |
| 0.196940363 | 0.279657725 | 0.274579717 | 0.190560788 |
| 0.299028206 | 0.335430186 | 0.187181818 | 0.391185636 |
| 0.336462109 | 0.288055793 | 0.190931568 | 0.112698578 |
| 0.149159996 | 0.094755373 | 0.346756374 | 0.002302208 |
| 0.27345047  | 0.1790728   | 0.416675722 | 0.384717089 |
| 0.342505759 | 0.345091129 | 0.184576055 | 0.075874779 |
| 0.173092144 | 0.118964283 | 0.106733768 | 0.356899936 |
| 0.302778663 | 0.173633302 | 0.34021852  | 0.196144202 |
| 0.385179068 | 0.351255039 | 0.334135202 | 0.195632326 |
| 0.232401929 | 0.139368198 | 0.383827795 | 0.085804991 |
| 0.304653526 | 0.311762354 | 0.213647523 | 0.299438212 |
| 0.266555197 | 0.452254842 | 0.046750414 | 0.457159041 |
| 0.323427599 | 0.091212824 | 0.418666186 | 0.228351378 |
| 0.24421626  | 0.177134471 | 0.319526105 | 0.25494394  |
| 0.228935741 | 0.35597947  | 0.014388675 | 0.09793928  |
| 0.298072467 | 0.265039023 | 0.307990199 | 0.318868645 |
| 0.357556747 | 0.338338564 | 0.281339664 | 0.211400494 |
| 0.360741661 | 0.380231849 | 0.227874939 | 0.223596895 |
| 0.272176747 | 0.100435675 | 0.235318413 | 0.025982027 |
| 0.319563731 | 0.320916749 | 0.269410087 | 0.053497808 |
| 0.020245919 | 0.326629224 | 0.305264788 | 0.04383093  |
| 0.460276847 | 0.291202747 | 0.242754822 | 0.348314663 |
| 0.128599231 | 0.380903038 | 0.173738239 | 0.352350992 |
| 0.039504518 | 0.217055682 | 0.355450855 | 0.296125981 |
| 0.270585678 | 0.368344592 | 0.347687242 | 0.343084838 |
| 0.036063295 | 0.306205067 | 0.003496355 | 0.322727607 |
| 0.352888751 | 0.36374661  | 0.162594643 | 0.211219354 |
| 0.258891387 | 0.339493769 | 0.253939331 | 0.312836503 |
| 0.016731826 | 0.355031362 | 0.182848012 | 0.328990484 |
| 0.239087067 | 0.279228863 | 0.076383755 | 0.351390262 |
| 0.333470508 | 0.264432055 | 0.214694923 | 0.290974335 |
| 0.390652334 | 0.316282312 | 0.103963705 | 0.304406732 |
| 0.263018796 | 0.043681439 | 0.24390614  | 0.451882997 |
| 0.201246416 | 0.342987525 | 0.434061236 | 0.216452559 |
| 0.357131145 | 0.311122637 | 0.294137708 | 0.437356959 |
| 0.121386596 | 0.206883101 | 0.391584057 | 0.386399813 |
| 0.28638171  | 0.317501728 | 0.327327532 | 0.285438174 |
| 0.347364477 | 0.089060062 | 0.348456326 | 0.278727125 |
| 0.328522336 | 0.264069161 | 0.209293634 | 0.281616106 |
| 0.042652423 | 0.169219791 | 0.279321061 | 0.116374738 |
| 0.263137092 | 0.347721846 | 0.345272309 | 0.345745192 |
| 0.159791824 | 0.034864839 | 0.401648904 | 0.056865973 |
| 0.213881668 | 0.331773122 | 0.2100362   | 0.359615606 |
| 0.135583509 | 0.260275117 | 0.211759741 | 0.000574199 |
| 0.385738435 | 0.131129191 | 0.308879768 | 0.290182057 |

|             |             |             |             |
|-------------|-------------|-------------|-------------|
| 0.292012713 | 0.041312169 | 0.373961948 | 0.468996333 |
| 0.233604264 | 0.286873962 | 0.300892462 | 0.378060148 |
| 0.294279936 | 0.313840448 | 0.323250061 | 0.270132318 |
| 0.347769204 | 0.254720628 | 0.307143856 | 0.346865097 |
| 0.295639903 | 0.214889792 |             |             |
| BCKDK       | 0.039867787 | 0.301947888 | 0.022889491 |
| 0.108969311 | 0.277228633 | 0.182864538 | 0.049333317 |
| 0.08930455  | 0.243381157 | 0.148021212 | 0.228904436 |
| 0.016658617 | 0.142630654 | 0.381935487 | 0.048394297 |
| 0.32733915  | 0.038477311 | 0.087906515 | 0.067065444 |
| 0.15058648  | 0.288237199 | 0.242785899 | 0.159880865 |
| 0.276536608 | 0.129113765 | 0.18868658  | 0.249419682 |
| 0.388667897 | 0.16743595  | 0.300478448 | 0.099725096 |
| 0.351545015 | 0.310687105 | 0.245118352 | 0.009598467 |
| 0.227445987 | 0.039863571 | 0.341604329 | 0.255985583 |
| 0.191458981 | 0.272645447 | 0.136314302 | 0.198545714 |
| 0.197017375 | 0.022700344 | 0.086992843 | 0.341960793 |
| 0.190007564 | 0.185814456 | 0.028428078 | 0.295766363 |
| 0.232626501 | 0.210534201 | 0.238115065 | 0.002896857 |
| 0.258646153 | 0.129657942 | 0.242369065 | 0.367931053 |
| 0.151202458 | 0.107517605 | 0.216375783 | 0.138455533 |
| 0.274599913 | 0.324468304 | 0.200269106 | 0.217801477 |
| 0.396329823 | 0.253806667 | 0.332166049 | 0.109369222 |
| 0.224895944 | 0.018114765 | 0.126033173 | 0.041452315 |
| 0.254349902 | 0.159056997 | 0.236811782 | 0.285114605 |
| 0.299705646 | 0.398458849 | 0.173591477 | 0.35772851  |
| 0.196510767 | 0.304727143 | 0.26359953  | 0.294851664 |
| 0.312209287 | 0.068373991 | 0.33853246  | 0.423258522 |
| 0.029222903 | 0.193304878 | 0.321807089 | 0.071968583 |
| 0.302924122 | 0.232643269 | 0.179490039 | 0.220639367 |
| 0.349055394 | 1           | 0.355386942 | 0.237320241 |
| 0.239701429 | 0.036597502 | 0.327420938 | 0.30198484  |
| 0.232345069 | 0.043211115 | 0.295030926 | 0.406667553 |
| 0.300226822 | 0.388365014 | 0.332760313 | 0.337266948 |
| 0.298353611 | 0.39645447  | 0.304927936 | 0.32195154  |
| 0.07369224  | 0.399436568 | 0.112815607 | 0.041177781 |
| 0.033096428 | 0.076827373 | 0.239202537 | 0.258292338 |
| 0.387386049 | 0.22280293  | 0.127951821 | 0.228853936 |
| 0.446691513 | 0.320049118 | 0.40055334  | 0.355180485 |
| 0.028485426 | 0.259813488 | 0.292127989 | 0.137056909 |
| 0.317343689 | 0.072949258 | 0.290833142 | 0.371808248 |
| 0.308837858 | 0.407190107 | 0.081911616 | 0.363896612 |
| 0.142966075 | 0.424095158 | 0.325688493 | 0.134292773 |
| 0.393228042 | 0.349469198 | 0.441669582 | 0.364383835 |
| 0.342523671 | 0.179880501 | 0.074418506 | 0.325670659 |
| 0.415020041 | 0.028634126 | 0.39891911  | 0.430688223 |
| 0.373438437 | 0.411561488 | 0.459456548 | 0.415904016 |
| 0.368594279 | 0.043027062 | 0.049015108 | 0.294475655 |
| 0.381908823 | 0.330637775 | 0.132930027 | 0.263570174 |
| 0.314830401 | 0.189873362 | 0.34005274  | 0.2297783   |
| 0.429873687 | 0.367324363 | 0.391072102 | 0.313196587 |
| 0.166104583 | 0.241825959 | 0.272298245 | 0.312816204 |
| 0.035582726 | 0.062027489 | 0.024602783 | 0.257341278 |
| 0.142632841 | 0.14924144  | 0.192141865 | 0.274227282 |

|             |             |             |             |
|-------------|-------------|-------------|-------------|
| 0.161932933 | 0.161216228 | 0.238970766 | 0.362587275 |
| 0.030629632 | 0.241278162 | 0.099844521 | 0.107742363 |
| 0.046303423 | 0.100396048 | 0.167773677 | 0.117614871 |
| 0.229264483 | 0.152115768 | 0.318797596 | 0.409660847 |
| 0.257313498 | 0.118246365 | 0.299977467 | 0.400490679 |
| 0.400039099 | 0.280128082 | 0.182125359 | 0.015822445 |
| 0.299345565 | 0.21523686  | 0.247365094 | 0.254410806 |
| 0.115421135 | 0.242441808 | 0.311019479 | 0.376221488 |
| 0.138382006 | 0.076973288 | 0.294676512 | 0.318997887 |
| 0.092070547 | 0.239960713 | 0.412902811 | 0.23107048  |
| 0.00194575  | 0.22111154  | 0.375044754 | 0.227692221 |
| 0.239579465 | 0.190794367 | 0.210809119 | 0.416792985 |
| 0.266492632 | 0.276590812 | 0.402303253 | 0.367044655 |
| 0.187470339 | 0.137481906 | 0.444735984 | 0.102543751 |
| 0.258627481 | 0.077836991 | 0.277715902 | 0.144992988 |
| 0.182171938 | 0.277839293 | 0.279401294 | 0.261442775 |
| 0.06423814  | 0.402240208 | 0.294772037 | 0.417121064 |
| 0.283285783 | 0.445838432 | 0.407310007 | 0.377496753 |
| 0.254269773 | 0.256031199 | 0.20687727  | 0.375091835 |
| 0.405415108 | 0.228545054 | 0.038841952 | 0.366022477 |
| 0.235579844 | 0.365942915 | 0.157895384 | 0.43485011  |
| 0.379899829 | 0.318322216 | 0.137014853 | 0.382260174 |
| 0.32776267  | 0.137887811 | 0.338290283 | 0.444801005 |
| 0.195093076 | 0.305893109 | 0.312873964 | 0.406939158 |
| 0.122804352 | 0.283271499 | 0.245659254 | 0.218446324 |
| 0.010653586 | 0.043760286 | 0.037227367 | 0.168309128 |
| 0.246818924 | 0.253645165 | 0.330348559 | 0.418668477 |
| 0.095079361 | 0.315354331 | 0.181951574 | 0.28365012  |
| 0.336690843 | 0.269693136 | 0.258492463 | 0.29616176  |
| 0.188739702 | 0.020088468 | 0.110776615 | 0.400543336 |
| 0.01757701  | 0.259344272 | 0.175008314 | 0.004736171 |
| 0.033699451 | 0.277963171 | 0.061431684 | 0.141003    |
| 0.435152083 | 0.135982404 | 0.143393153 | 0.187402925 |
| 0.287025227 | 0.061371735 | 0.004547627 | 0.403708599 |
| 0.377113333 | 0.361820109 | 0.371758424 | 0.324970733 |
| 0.382224229 | 0.301700406 | 0.391019735 | 0.149299795 |
| 0.080516829 | 0.04553069  | 0.313080476 | 0.266580258 |
| 0.0040176   | 0.324045166 | 0.235818443 | 0.107447091 |
| 0.362454539 | 0.247667307 | 0.02639143  | 0.281149632 |
| 0.016143579 | 0.228844238 | 0.197774704 | 0.181759042 |
| 0.349371453 | 0.008730508 | 0.154782449 | 0.29926984  |
| 0.293731288 | 0.261036296 | 0.254273615 | 0.406831697 |
| 0.230804665 | 0.070674434 | 0.267671706 | 0.334596243 |
| 0.059909979 | 0.101798685 | 0.199959863 | 0.021384124 |
| 0.091328065 | 0.335514404 | 0.244048194 | 0.046381116 |
| 0.207141704 | 0.003390447 | 0.270423143 | 0.416141947 |
| 0.315150465 | 0.450421591 | 0.395758053 | 0.267693426 |
| 0.394231335 | 0.145162432 | 0.41949685  | 0.303227904 |
| 0.213358825 | 0.001027724 | 0.007414319 | 0.420353497 |
| 0.289286951 | 0.026902487 | 0.115255802 | 0.163530995 |
| 0.110842656 | 0.078206074 | 0.044483792 | 0.256900551 |
| 0.245068856 | 0.235803574 | 0.228632787 | 0.338731427 |
| 0.208402789 | 0.182104715 | 0.187505497 | 0.051611249 |
| 0.263129713 | 0.045843723 | 0.053041613 | 0.012636574 |

|             |             |             |             |
|-------------|-------------|-------------|-------------|
| 0.335941939 | 0.067393747 | 0.31430991  | 0.387884772 |
| 0.407739428 | 0.349421635 | 0.17660611  | 0.181393944 |
| 0.371664225 | 0.046520781 | 0.204238414 | 0.051460924 |
| 0.352744273 | 0.342647812 | 0.28130887  | 0.242296047 |
| 0.442307939 | 0.373353328 | 0.027233921 | 0.383249171 |
| 0.008955684 | 0.004712293 | 0.174132932 | 0.202424137 |
| 0.085362601 | 0.303091061 | 0.216602243 | 0.169227035 |
| 0.177200933 | 0.020747452 | 0.303288772 | 0.304447789 |
| 0.25607746  | 0.275394694 | 0.291651384 | 0.182424042 |
| 0.259869032 | 0.239783887 | 0.157833836 | 0.12605143  |
| 0.179151081 | 0.235893936 | 0.136116152 | 0.017934112 |
| 0.227525287 | 0.266840475 | 0.040180631 | 0.102978002 |
| 0.381939894 | 0.42092747  | 0.054976201 | 0.019324491 |
| 0.203636704 | 0.256389133 | 0.438393853 | 0.366784265 |
| 0.387746192 | 0.444707438 | 0.299525524 | 0.171718877 |
| 0.046045129 | 0.264692459 | 0.287917161 | 0.147182855 |
| 0.402409415 | 0.03375268  | 0.343609465 | 0.285637318 |
| 0.080433427 | 0.16869415  | 0.033647522 | 0.062920938 |
| 0.284816029 | 0.128720242 | 0.183110619 | 0.08225193  |
| 0.278398581 | 0.253299778 | 0.037201025 | 0.150335431 |
| 0.292621468 | 0.288985725 | 0.117066979 | 0.156570379 |
| 0.250878463 | 0.112934802 | 0.374602516 | 0.38771857  |
| 0.080595612 | 0.07393848  | 0.142711315 | 0.305138692 |
| 0.365502757 | 0.210425884 | 0.016432162 | 0.31620171  |
| 0.407750754 | 0.313800353 | 0.358320424 | 0.384692311 |
| 0.053571692 | 0.277691133 | 0.277144731 | 0.291085179 |
| 0.13653572  | 0.17526827  | 0.1851109   | 0.040428404 |
| 0.242284935 | 0.361526    | 0.332967119 | 0.144201576 |
| 0.224715935 | 0.059609472 | 0.028015476 | 0.341999071 |
| 0.299395285 | 0.068172288 | 0.153684805 | 0.373061405 |
| 0.004157959 | 0.20798881  | 0.4292295   | 0.158128091 |
| 0.409625763 | 0.42922842  | 0.358717042 | 0.138666901 |
| 0.010750075 | 0.357622745 | 0.289082227 | 0.263683565 |
| 0.328318868 | 0.243134179 | 0.086619128 | 0.083417481 |
| 0.254658691 | 0.040181428 | 0.166725581 | 0.15507999  |
| 0.263201462 | 0.25130453  | 0.169541565 | 0.141486812 |
| 0.199918578 | 0.050704467 | 0.236674001 | 0.151713675 |
| 0.216226421 | 0.206651949 | 0.326421589 | 0.11910378  |
| 0.259774096 | 0.396887521 | 0.338705217 | 0.016405233 |
| 0.259082393 | 0.366939466 | 0.351595751 | 0.007333909 |
| 0.367056034 | 0.00736708  | 0.19962286  | 0.203269764 |
| 0.185996149 | 0.209892911 | 0.251060316 | 0.260369418 |
| 0.25112512  | 0.179345715 | 0.198689386 | 0.191011694 |
| 0.156497837 | 0.13882287  | 0.277031236 | 0.207470016 |
| 0.244552694 | 0.08738696  | 0.059401338 | 0.058544097 |
| 0.04275562  | 0.345307537 | 0.186415152 | 0.036549775 |
| 0.18260252  | 0.218815493 | 0.315136184 | 0.353218444 |
| 0.357640224 | 0.059463034 | 0.239291556 | 0.329268077 |
| 0.163622698 | 0.15256064  | 0.034125919 | 0.19855171  |
| 0.15228384  | 0.262718972 | 0.182468864 | 0.177217905 |
| 0.295964977 | 0.317840876 | 0.175374397 | 0.352823929 |
| 0.242379379 | 0.236017433 | 0.141404528 | 0.100916262 |
| 0.129296096 | 0.088919486 | 0.284697861 | 0.001733454 |
| 0.264644421 | 0.123563088 | 0.403229267 | 0.351554433 |

|             |             |             |             |
|-------------|-------------|-------------|-------------|
| 0.256883502 | 0.312729665 | 0.139298674 | 0.073978512 |
| 0.116120234 | 0.112921771 | 0.100947352 | 0.323340577 |
| 0.235067287 | 0.12082327  | 0.271356669 | 0.128667973 |
| 0.36492167  | 0.33095213  | 0.250120791 | 0.160743193 |
| 0.173602088 | 0.111499147 | 0.351610266 | 0.057634296 |
| 0.265160792 | 0.244395801 | 0.175308388 | 0.275347509 |
| 0.22503339  | 0.414403292 | 0.03318657  | 0.429145758 |
| 0.304341918 | 0.081907594 | 0.391434715 | 0.150905441 |
| 0.148596619 | 0.117483137 | 0.250069446 | 0.18392745  |
| 0.188131166 | 0.255319743 | 0.012894324 | 0.119815903 |
| 0.30901076  | 0.200930315 | 0.303087639 | 0.3080828   |
| 0.272685753 | 0.339042376 | 0.176476117 | 0.175891576 |
| 0.326140619 | 0.342360813 | 0.231597596 | 0.221434728 |
| 0.283316005 | 0.080619156 | 0.200897527 | 0.020381742 |
| 0.316847215 | 0.287610512 | 0.225293536 | 0.042744324 |
| 0.016110662 | 0.28000992  | 0.289307935 | 0.034623908 |
| 0.445578246 | 0.211350879 | 0.214360194 | 0.306337111 |
| 0.119727237 | 0.347722052 | 0.138077905 | 0.345579651 |
| 0.033443614 | 0.189104323 | 0.254797108 | 0.234218765 |
| 0.245374263 | 0.309421425 | 0.351620994 | 0.269670508 |
| 0.030791606 | 0.247006678 | 0.007682078 | 0.304846219 |
| 0.323215127 | 0.305302481 | 0.152959894 | 0.150089623 |
| 0.251970529 | 0.299836498 | 0.255102532 | 0.220029965 |
| 0.012354228 | 0.320126291 | 0.134377843 | 0.299390629 |
| 0.220472789 | 0.24530682  | 0.051516603 | 0.289600426 |
| 0.299286446 | 0.287454626 | 0.206350548 | 0.265429687 |
| 0.349207535 | 0.271553316 | 0.089147176 | 0.190979962 |
| 0.251384506 | 0.036569368 | 0.16429596  | 0.424783499 |
| 0.166212532 | 0.27498777  | 0.428342074 | 0.206983325 |
| 0.285297087 | 0.273957162 | 0.25032836  | 0.406729748 |
| 0.115530553 | 0.197487029 | 0.367408572 | 0.370231661 |
| 0.279553688 | 0.260592824 | 0.285259752 | 0.27216065  |
| 0.313967875 | 0.068299418 | 0.28420222  | 0.272339265 |
| 0.29851235  | 0.244901831 | 0.168255369 | 0.232357045 |
| 0.038565559 | 0.127674313 | 0.190195662 | 0.09359916  |
| 0.239876419 | 0.280981593 | 0.280020586 | 0.324297594 |
| 0.123190223 | 0.031708389 | 0.372033405 | 0.071255334 |
| 0.142399577 | 0.307595782 | 0.154753659 | 0.271619525 |
| 0.126168229 | 0.230729464 | 0.178424482 | 0.001445122 |
| 0.377843868 | 0.062380558 | 0.22091585  | 0.261525002 |
| 0.251199048 | 0.037221102 | 0.331281711 | 0.45011228  |
| 0.193841731 | 0.183609744 | 0.232937194 | 0.35029665  |
| 0.236611543 | 0.226950019 | 0.268540315 | 0.247917118 |
| 0.260406871 | 0.196729454 | 0.229357652 | 0.255051969 |
| 0.273090732 | 0.146022958 |             |             |
| BCL2        | 0.191148321 | 0.497311332 | 0.168047955 |
| 0.196968264 | 0.319222411 | 0.451114258 | 0.17642497  |
| 0.261182922 | 0.482684474 | 0.397757282 | 0.39286848  |
| 0.067599904 | 0.083380272 | 0.483030083 | 0.167389189 |
| 0.402691857 | 0.099930901 | 0.233526286 | 0.146291987 |
| 0.365032894 | 0.301269874 | 0.337574167 | 0.483998042 |
| 0.323815019 | 0.327163413 | 0.47808282  | 0.41210317  |
| 0.495899412 | 0.257013202 | 0.450111501 | 0.234808346 |
| 0.453322385 | 0.329582644 | 0.381754734 | 0.072104656 |

|             |             |             |             |
|-------------|-------------|-------------|-------------|
| 0.467924656 | 0.025669832 | 0.458835124 | 0.310226528 |
| 0.138039032 | 0.435249674 | 0.43127328  | 0.303411792 |
| 0.447260973 | 0.119844421 | 0.258724745 | 0.442102749 |
| 0.465489743 | 0.404220066 | 0.203258033 | 0.480678797 |
| 0.442749108 | 0.44850793  | 0.477980873 | 0.006573596 |
| 0.280103483 | 0.074857534 | 0.211249581 | 0.492816656 |
| 0.317210247 | 0.228354409 | 0.314205545 | 0.428901747 |
| 0.46054599  | 0.443238272 | 0.381782913 | 0.436236391 |
| 0.489317529 | 0.172729023 | 0.463786974 | 0.222913996 |
| 0.476932472 | 0.145629202 | 0.293592424 | 0.253877741 |
| 0.432137565 | 0.294595935 | 0.375769584 | 0.310816245 |
| 0.486583235 | 0.506894579 | 0.377086222 | 0.494404163 |
| 0.136538871 | 0.345111097 | 0.30376443  | 0.384175813 |
| 0.461167128 | 0.240153145 | 0.441088719 | 0.483750503 |
| 0.184727926 | 0.467677933 | 0.473298414 | 0.292606984 |
| 0.494954984 | 0.320969356 | 0.450578721 | 0.161869613 |
| 0.383757328 | 0.355386942 | 1           | 0.386246636 |
| 0.362630667 | 0.214338426 | 0.499918416 | 0.31327471  |
| 0.315079562 | 0.210204478 | 0.25453776  | 0.473608149 |
| 0.454207593 | 0.492360581 | 0.495384089 | 0.452171836 |
| 0.378840926 | 0.4887838   | 0.449088027 | 0.493369315 |
| 0.200293062 | 0.497121358 | 0.308939698 | 0.112749801 |
| 0.210996125 | 0.188117536 | 0.315893872 | 0.411972689 |
| 0.484745508 | 0.448213376 | 0.318955536 | 0.299328197 |
| 0.462674426 | 0.484595873 | 0.498012451 | 0.475163196 |
| 0.126722073 | 0.274824391 | 0.379947143 | 0.427339255 |
| 0.451214877 | 0.26876946  | 0.249118457 | 0.505260705 |
| 0.442394023 | 0.461182398 | 0.328646694 | 0.512467787 |
| 0.369575196 | 0.478900929 | 0.492577764 | 0.266667891 |
| 0.495544611 | 0.489563181 | 0.477785856 | 0.395477441 |
| 0.480296892 | 0.418303967 | 0.139626468 | 0.474186066 |
| 0.470840294 | 0.014545695 | 0.489605694 | 0.48773246  |
| 0.49186958  | 0.467787943 | 0.483126279 | 0.4910998   |
| 0.495599036 | 0.208985298 | 0.046431441 | 0.343453975 |
| 0.48683174  | 0.449425441 | 0.245618971 | 0.419921178 |
| 0.387736863 | 0.480946528 | 0.481921704 | 0.297560503 |
| 0.47870063  | 0.482513589 | 0.495966578 | 0.480607836 |
| 0.458134708 | 0.419168958 | 0.37537704  | 0.479899817 |
| 0.124193779 | 0.242305007 | 0.168748107 | 0.431100031 |
| 0.416206102 | 0.272281567 | 0.469074341 | 0.416926476 |
| 0.3001876   | 0.488268059 | 0.325329177 | 0.384895156 |
| 0.185497685 | 0.461762576 | 0.308569682 | 0.327461473 |
| 0.105817425 | 0.289944508 | 0.251693302 | 0.235904178 |
| 0.313101592 | 0.348010302 | 0.471382351 | 0.487382757 |
| 0.418111241 | 0.327979985 | 0.482089672 | 0.47206355  |
| 0.439539305 | 0.371556097 | 0.37681303  | 0.022402105 |
| 0.286951412 | 0.354145071 | 0.178067356 | 0.426488674 |
| 0.319197191 | 0.32300111  | 0.425356192 | 0.400193809 |
| 0.40387004  | 0.341679581 | 0.392228494 | 0.456609111 |
| 0.319829536 | 0.321974445 | 0.461105828 | 0.474858103 |
| 0.019799752 | 0.402761616 | 0.476039483 | 0.194046002 |
| 0.450780895 | 0.131163809 | 0.226864392 | 0.476034454 |
| 0.300564786 | 0.259583718 | 0.491295081 | 0.410231685 |
| 0.397916733 | 0.363972264 | 0.488819995 | 0.058858814 |

|             |             |             |             |
|-------------|-------------|-------------|-------------|
| 0.397344147 | 0.064386679 | 0.347390603 | 0.439256426 |
| 0.366682701 | 0.386941601 | 0.325044914 | 0.292940591 |
| 0.27286326  | 0.495756327 | 0.474533697 | 0.492276278 |
| 0.37493382  | 0.487567581 | 0.472078663 | 0.470118096 |
| 0.455211046 | 0.399858199 | 0.124658028 | 0.464842975 |
| 0.475063101 | 0.343140454 | 0.219345894 | 0.478048939 |
| 0.42818998  | 0.418982167 | 0.157086444 | 0.475656202 |
| 0.478347468 | 0.484362986 | 0.233575096 | 0.40774373  |
| 0.435345547 | 0.343766734 | 0.472999442 | 0.488482859 |
| 0.394604021 | 0.375156479 | 0.337207179 | 0.420260598 |
| 0.304394174 | 0.246432616 | 0.437397895 | 0.176470345 |
| 0.007955074 | 0.231066026 | 0.184232997 | 0.230007703 |
| 0.160639037 | 0.462072894 | 0.439578791 | 0.492193113 |
| 0.23014289  | 0.474609458 | 0.402109125 | 0.305471692 |
| 0.473160128 | 0.393530581 | 0.377765425 | 0.414210424 |
| 0.387871297 | 0.039893789 | 0.173084612 | 0.507202864 |
| 0.161194023 | 0.22410823  | 0.466464038 | 0.005554419 |
| 0.147432676 | 0.490890199 | 0.241713512 | 0.321397444 |
| 0.471017987 | 0.32764197  | 0.346903597 | 0.412362106 |
| 0.402661367 | 0.219161907 | 0.006344306 | 0.492498418 |
| 0.496259886 | 0.492573456 | 0.496885234 | 0.488967997 |
| 0.485646379 | 0.484666483 | 0.447807256 | 0.462950945 |
| 0.222704073 | 0.242138228 | 0.20328779  | 0.338062214 |
| 0.017351833 | 0.42846249  | 0.375867695 | 0.271328946 |
| 0.453759236 | 0.425930253 | 0.116723844 | 0.393058307 |
| 0.060195319 | 0.170977817 | 0.448502382 | 0.334841622 |
| 0.399438381 | 0.06589485  | 0.248020513 | 0.32212097  |
| 0.471635092 | 0.44985026  | 0.351511599 | 0.492142082 |
| 0.375477968 | 0.297979925 | 0.336532426 | 0.432220749 |
| 0.180069749 | 0.152975619 | 0.488221752 | 0.044526507 |
| 0.271716885 | 0.489799851 | 0.421516563 | 0.168868095 |
| 0.361955449 | 0.025031346 | 0.452517974 | 0.49281912  |
| 0.486057971 | 0.4850783   | 0.488289916 | 0.248289825 |
| 0.488014458 | 0.102099932 | 0.496471141 | 0.488879783 |
| 0.41696764  | 0.002454214 | 0.018239999 | 0.480393063 |
| 0.395411645 | 0.191139352 | 0.286337124 | 0.395337217 |
| 0.188998791 | 0.324588038 | 0.182247368 | 0.186271841 |
| 0.466685154 | 0.277261139 | 0.195794186 | 0.488679904 |
| 0.329797635 | 0.341874452 | 0.489337855 | 0.239803798 |
| 0.428577246 | 0.132103539 | 0.245113244 | 0.0119554   |
| 0.413917698 | 0.264280663 | 0.494908007 | 0.496689165 |
| 0.476224993 | 0.405511044 | 0.374131079 | 0.403982767 |
| 0.485244883 | 0.253162006 | 0.378219011 | 0.275780075 |
| 0.491774408 | 0.40377916  | 0.395366733 | 0.406733927 |
| 0.476987225 | 0.477318453 | 0.114507257 | 0.446922689 |
| 0.034491606 | 0.00446451  | 0.449754917 | 0.402908014 |
| 0.13139047  | 0.386349173 | 0.368598857 | 0.392181445 |
| 0.356612761 | 0.091204192 | 0.257351115 | 0.233880132 |
| 0.367005594 | 0.401486499 | 0.274238195 | 0.410538451 |
| 0.308375538 | 0.159414146 | 0.290098436 | 0.285730676 |
| 0.36478724  | 0.43366568  | 0.325895009 | 0.090909281 |
| 0.452298335 | 0.407074277 | 0.156563347 | 0.304414931 |
| 0.464584186 | 0.483124576 | 0.122600079 | 0.025002782 |
| 0.389965442 | 0.387895389 | 0.480508549 | 0.497554232 |



|             |             |             |             |
|-------------|-------------|-------------|-------------|
| 0.505405411 | 0.480040193 | 0.445844434 | 0.194843712 |
| 0.174350233 | 0.380750287 | 0.299439748 | 0.146263631 |
| 0.495413442 | 0.209257879 | 0.494176237 | 0.287460194 |
| 0.261675367 | 0.310313036 | 0.08340081  | 0.210388427 |
| 0.379422277 | 0.309432248 | 0.246656228 | 0.293466792 |
| 0.35542347  | 0.234971882 | 0.153966676 | 0.31368229  |
| 0.440271279 | 0.159095065 | 0.291410885 | 0.457668524 |
| 0.473017959 | 0.350761676 | 0.443191439 | 0.460201216 |
| 0.275652705 | 0.272126109 | 0.378289354 | 0.465600669 |
| 0.484471531 | 0.451282695 | 0.055692724 | 0.494348505 |
| 0.487801571 | 0.452119159 | 0.491377253 | 0.436873335 |
| 0.227504325 | 0.368525703 | 0.344343693 | 0.377303227 |
| 0.327848019 | 0.459331184 | 0.363226145 | 0.181900523 |
| 0.419773021 | 0.49072566  | 0.479250667 | 0.246878492 |
| 0.469083023 | 0.308366596 | 0.195461291 | 0.496928329 |
| 0.173733476 | 0.189143077 | 0.452355776 | 0.479293975 |
| 0.003225284 | 0.126248065 | 0.482816981 | 0.327896139 |
| 0.491725312 | 0.475285572 | 0.46327936  | 0.414838708 |
| 0.002057312 | 0.421856175 | 0.401132132 | 0.397209876 |
| 0.490825249 | 0.460856545 | 0.300661942 | 0.146872087 |
| 0.381319336 | 0.220019235 | 0.217263896 | 0.413363918 |
| 0.18236232  | 0.491599602 | 0.321744381 | 0.374529647 |
| 0.273955146 | 0.266527425 | 0.233182221 | 0.339957302 |
| 0.19014608  | 0.345964159 | 0.418033366 | 0.407237045 |
| 0.17188384  | 0.477152188 | 0.47140997  | 0.095940099 |
| 0.368914056 | 0.475183939 | 0.479991721 | 0.006228883 |
| 0.4360444   | 0.030052361 | 0.264310056 | 0.262186906 |
| 0.272196199 | 0.302023428 | 0.319507449 | 0.313318017 |
| 0.45954607  | 0.333401977 | 0.326128192 | 0.325205665 |
| 0.222926657 | 0.359755074 | 0.420846912 | 0.459131117 |
| 0.286183087 | 0.238624067 | 0.243026227 | 0.238812846 |
| 0.112351007 | 0.498873669 | 0.367120564 | 0.20804798  |
| 0.337443024 | 0.4562697   | 0.416331934 | 0.493506028 |
| 0.456327328 | 0.267264553 | 0.42449017  | 0.488320736 |
| 0.281372701 | 0.370916942 | 0.191738024 | 0.465771234 |
| 0.347393281 | 0.221193282 | 0.479439512 | 0.437884793 |
| 0.4906836   | 0.445088414 | 0.366208971 | 0.475970295 |
| 0.394416314 | 0.437213079 | 0.387115704 | 0.139062141 |
| 0.286927099 | 0.294310504 | 0.272937587 | 0.008894611 |
| 0.434627177 | 0.364742363 | 0.479380078 | 0.484552089 |
| 0.28494306  | 0.449280459 | 0.392021042 | 0.187957294 |
| 0.34167347  | 0.319139603 | 0.278298413 | 0.481401298 |
| 0.192963599 | 0.301114447 | 0.324398583 | 0.442676216 |
| 0.45558015  | 0.472127987 | 0.309742465 | 0.399702153 |
| 0.372299498 | 0.357270391 | 0.483549091 | 0.278253737 |
| 0.451802577 | 0.184888427 | 0.481778858 | 0.329755354 |
| 0.28504916  | 0.49338748  | 0.177571478 | 0.49378262  |
| 0.358203169 | 0.291368689 | 0.473156261 | 0.447469699 |
| 0.412044531 | 0.180111923 | 0.167843888 | 0.480481056 |
| 0.347616517 | 0.330515899 | 0.022022846 | 0.072715843 |
| 0.386184486 | 0.427175457 | 0.488518755 | 0.457129869 |
| 0.265629096 | 0.407350185 | 0.164815059 | 0.433994282 |
| 0.486997432 | 0.50502757  | 0.293088818 | 0.366662662 |
| 0.446958891 | 0.199465287 | 0.482932479 | 0.037042887 |

|             |             |             |             |
|-------------|-------------|-------------|-------------|
| 0.435558548 | 0.425508749 | 0.426992299 | 0.151811992 |
| 0.073513324 | 0.187895896 | 0.449245276 | 0.22385408  |
| 0.472174954 | 0.183155715 | 0.480911775 | 0.4651198   |
| 0.349962027 | 0.503149873 | 0.193679551 | 0.425519298 |
| 0.177057373 | 0.388973963 | 0.399363167 | 0.453557866 |
| 0.232035741 | 0.282716441 | 0.409916379 | 0.21613441  |
| 0.094662096 | 0.296001183 | 0.006646556 | 0.443245953 |
| 0.484585454 | 0.34069364  | 0.353634902 | 0.387825755 |
| 0.355550904 | 0.473055219 | 0.306579822 | 0.442670282 |
| 0.030891767 | 0.357061649 | 0.321199004 | 0.477002092 |
| 0.21007967  | 0.454361589 | 0.114167156 | 0.346658407 |
| 0.491973694 | 0.311616533 | 0.396032184 | 0.302052372 |
| 0.493874534 | 0.489559139 | 0.327261551 | 0.2732681   |
| 0.480229995 | 0.195519004 | 0.453505954 | 0.493689031 |
| 0.251767966 | 0.199936881 | 0.446301207 | 0.271757296 |
| 0.313584137 | 0.479647749 | 0.457437505 | 0.497292594 |
| 0.124385259 | 0.34689141  | 0.461994636 | 0.48956605  |
| 0.378016706 | 0.185728965 | 0.231231084 | 0.265485924 |
| 0.481453416 | 0.168435583 | 0.280281136 | 0.445472822 |
| 0.198805608 | 0.402177654 | 0.471111252 | 0.230571064 |
| 0.086649947 | 0.306865406 | 0.412958631 | 0.287981465 |
| 0.371258067 | 0.387015034 | 0.267347305 | 0.436099882 |
| 0.175710626 | 0.047448952 | 0.462028135 | 0.014134826 |
| 0.449347775 | 0.406600198 | 0.363031582 | 0.373122476 |
| 0.318186817 | 0.465058851 | 0.45350788  | 0.006760859 |
| 0.459688008 | 0.05622426  | 0.390241233 | 0.238452638 |
| 0.306414953 | 0.15722348  | 0.482477052 | 0.482357437 |
| 0.449727946 | 0.387405776 | 0.33318456  | 0.495509555 |
| 0.13524258  | 0.33728119  | 0.368330089 | 0.486698048 |
| 0.208877849 | 0.426846191 | 0.435571954 | 0.354417124 |
| 0.475124649 | 0.414834553 |             |             |
| BCL6        | 0.185500577 | 0.307365097 | 0.127602167 |
| 0.265067038 | 0.233058899 | 0.241467221 | 0.17456157  |
| 0.235576523 | 0.238554191 | 0.117404421 | 0.291238816 |
| 0.127434939 | 0.051032374 | 0.382155072 | 0.170859632 |
| 0.240367408 | 0.16659256  | 0.238332948 | 0.067354738 |
| 0.175931488 | 0.248657823 | 0.209716359 | 0.231355621 |
| 0.21839627  | 0.273298083 | 0.222126841 | 0.177096013 |
| 0.371541033 | 0.11722867  | 0.248193251 | 0.08448522  |
| 0.411828446 | 0.237919962 | 0.180257976 | 0.087624779 |
| 0.247436857 | 0.008763044 | 0.409439198 | 0.287242995 |
| 0.110442536 | 0.375998234 | 0.15028781  | 0.318257972 |
| 0.18246544  | 0.143226497 | 0.075914098 | 0.216059884 |
| 0.198255315 | 0.220345576 | 0.13199375  | 0.252769591 |
| 0.195165979 | 0.285196866 | 0.21641025  | 0.013814916 |
| 0.160229044 | 0.03162706  | 0.102556659 | 0.399187744 |
| 0.291077494 | 0.270904853 | 0.111455122 | 0.189170595 |
| 0.201859824 | 0.2308902   | 0.2506504   | 0.174885987 |
| 0.412371225 | 0.112483634 | 0.236617226 | 0.193540422 |
| 0.251079262 | 0.090054807 | 0.249520572 | 0.118191763 |
| 0.203864117 | 0.293619115 | 0.256706691 | 0.170370237 |
| 0.30766954  | 0.445147374 | 0.2479473   | 0.393329618 |
| 0.074361552 | 0.202381229 | 0.199394077 | 0.291202163 |
| 0.248994603 | 0.149223894 | 0.321409004 | 0.442916287 |

|             |             |             |             |
|-------------|-------------|-------------|-------------|
| 0.108744199 | 0.174887208 | 0.260694272 | 0.17480764  |
| 0.319052924 | 0.122488084 | 0.184212128 | 0.13497352  |
| 0.224868065 | 0.237320241 | 0.386246636 | 1           |
| 0.2086063   | 0.14640121  | 0.395761303 | 0.194667966 |
| 0.289149192 | 0.173271187 | 0.215418068 | 0.312064172 |
| 0.261392019 | 0.383940355 | 0.289417896 | 0.302283784 |
| 0.229179892 | 0.402380044 | 0.295048982 | 0.330745724 |
| 0.044855681 | 0.406929068 | 0.268974225 | 0.189982124 |
| 0.141654875 | 0.216451649 | 0.15014989  | 0.319689268 |
| 0.350435767 | 0.264998902 | 0.290346898 | 0.287210233 |
| 0.353762539 | 0.375315548 | 0.397111387 | 0.33057319  |
| 0.159119084 | 0.116536121 | 0.230863363 | 0.230391734 |
| 0.274421281 | 0.19297321  | 0.181972681 | 0.43151127  |
| 0.390609423 | 0.324947608 | 0.20659905  | 0.440201069 |
| 0.211508574 | 0.44970796  | 0.322302864 | 0.303710951 |
| 0.435085832 | 0.416665724 | 0.429243897 | 0.247047357 |
| 0.409541636 | 0.281100421 | 0.05385751  | 0.308493566 |
| 0.437560399 | 0.023587318 | 0.333928548 | 0.365406398 |
| 0.389705215 | 0.325094688 | 0.419958285 | 0.387411541 |
| 0.388361083 | 0.164009581 | 0.012056382 | 0.278033502 |
| 0.41607303  | 0.372859557 | 0.207576141 | 0.213898497 |
| 0.234989058 | 0.260404223 | 0.270662152 | 0.224086584 |
| 0.461284318 | 0.342204683 | 0.349997111 | 0.290238211 |
| 0.178217548 | 0.360902278 | 0.179030947 | 0.392208219 |
| 0.163780003 | 0.220961658 | 0.124081381 | 0.263351306 |
| 0.16432887  | 0.287974176 | 0.257925824 | 0.208874397 |
| 0.295597031 | 0.216165519 | 0.150480607 | 0.24583532  |
| 0.118325079 | 0.231168503 | 0.233479827 | 0.232481848 |
| 0.190558854 | 0.237345544 | 0.321161037 | 0.283851163 |
| 0.290496203 | 0.292610849 | 0.245967201 | 0.372001786 |
| 0.200698731 | 0.234583716 | 0.272104697 | 0.418043794 |
| 0.435802253 | 0.226614412 | 0.268352872 | 0.083861407 |
| 0.247116087 | 0.116373571 | 0.095504005 | 0.194861228 |
| 0.249320888 | 0.286992623 | 0.251813753 | 0.288421458 |
| 0.269418607 | 0.171375988 | 0.229015035 | 0.422563926 |
| 0.191236369 | 0.276242874 | 0.37673971  | 0.206309115 |
| 0.032224526 | 0.301281403 | 0.332941048 | 0.172833011 |
| 0.245731592 | 0.126066264 | 0.151923826 | 0.363804379 |
| 0.158336664 | 0.176199107 | 0.360601429 | 0.269147487 |
| 0.215219014 | 0.250911524 | 0.418558833 | 0.033136817 |
| 0.182121277 | 0.136534942 | 0.30394038  | 0.140026386 |
| 0.296626999 | 0.290758206 | 0.215238303 | 0.235270885 |
| 0.185193861 | 0.416584818 | 0.320374693 | 0.403191917 |
| 0.20254729  | 0.424396685 | 0.343814905 | 0.385380372 |
| 0.272029102 | 0.167551706 | 0.076918081 | 0.337379279 |
| 0.347323338 | 0.16151728  | 0.131658998 | 0.271803747 |
| 0.174183391 | 0.246714288 | 0.138546303 | 0.420036213 |
| 0.445821236 | 0.357384241 | 0.283035946 | 0.302403481 |
| 0.370535357 | 0.298015759 | 0.306625449 | 0.43226917  |
| 0.134115432 | 0.232053407 | 0.237876753 | 0.343551244 |
| 0.264881933 | 0.195985459 | 0.310100623 | 0.084006077 |
| 0.00471845  | 0.163329404 | 0.167180825 | 0.285720844 |
| 0.144980752 | 0.187296739 | 0.245863217 | 0.412031985 |
| 0.266397687 | 0.366936599 | 0.223258305 | 0.295499745 |

|             |             |             |             |
|-------------|-------------|-------------|-------------|
| 0.366775413 | 0.206296352 | 0.201412081 | 0.234737187 |
| 0.262972886 | 0.092022543 | 0.281941514 | 0.453225393 |
| 0.091240648 | 0.175405981 | 0.230999389 | 0.021708868 |
| 0.158508688 | 0.25235063  | 0.171260766 | 0.293458458 |
| 0.378059619 | 0.276700482 | 0.255717387 | 0.150270393 |
| 0.291585348 | 0.211614648 | 0.026138847 | 0.36213418  |
| 0.36186265  | 0.343441587 | 0.359211547 | 0.354411856 |
| 0.322060859 | 0.249944754 | 0.301957972 | 0.235560764 |
| 0.232471136 | 0.154719049 | 0.175430338 | 0.289826983 |
| 0.015668217 | 0.31842912  | 0.216658712 | 0.250481854 |
| 0.270460143 | 0.254065286 | 0.163373119 | 0.20882307  |
| 0.118698976 | 0.110471894 | 0.242793839 | 0.239205351 |
| 0.269010559 | 0.084542016 | 0.184435259 | 0.20395173  |
| 0.372789905 | 0.346568043 | 0.167043525 | 0.41906254  |
| 0.307517827 | 0.153313094 | 0.275568603 | 0.293140731 |
| 0.210444208 | 0.061606072 | 0.217012223 | 0.020907602 |
| 0.118757425 | 0.361715234 | 0.195105408 | 0.170989897 |
| 0.314280619 | 0.055339393 | 0.353718479 | 0.433175033 |
| 0.355878439 | 0.406915735 | 0.411277006 | 0.188167611 |
| 0.412942764 | 0.034528855 | 0.405697614 | 0.318376523 |
| 0.175454484 | 0.009595728 | 0.03987959  | 0.362347245 |
| 0.249826208 | 0.104958292 | 0.268211744 | 0.226240728 |
| 0.289055917 | 0.204619574 | 0.174639422 | 0.182887977 |
| 0.237559621 | 0.256808431 | 0.159407135 | 0.377267094 |
| 0.29214714  | 0.273018126 | 0.203373626 | 0.155682814 |
| 0.228026643 | 0.199750656 | 0.145995894 | 0.040147129 |
| 0.261723087 | 0.17558472  | 0.397102178 | 0.395591254 |
| 0.438643245 | 0.261438487 | 0.137782699 | 0.213704094 |
| 0.31384091  | 0.135086003 | 0.163222716 | 0.157148084 |
| 0.375470495 | 0.266731392 | 0.352064374 | 0.348737667 |
| 0.435028687 | 0.413123838 | 0.15014026  | 0.317647914 |
| 0.078833568 | 0.008014486 | 0.239664363 | 0.252048802 |
| 0.029999503 | 0.229177317 | 0.312803669 | 0.164042068 |
| 0.195418972 | 0.146606535 | 0.15631578  | 0.163354971 |
| 0.291280656 | 0.269749809 | 0.221308902 | 0.223081013 |
| 0.216028285 | 0.165677915 | 0.25842848  | 0.243319116 |
| 0.139098622 | 0.308020262 | 0.282172206 | 0.109867053 |
| 0.208015399 | 0.233191534 | 0.188472183 | 0.23384075  |
| 0.36943323  | 0.385171797 | 0.167595292 | 0.100915468 |
| 0.311703161 | 0.234758677 | 0.397495501 | 0.374771005 |
| 0.43367174  | 0.449109397 | 0.400887684 | 0.239268023 |
| 0.19793926  | 0.261443402 | 0.208430046 | 0.190660041 |
| 0.405383243 | 0.125294723 | 0.378680609 | 0.166062405 |
| 0.209168898 | 0.285135161 | 0.178273261 | 0.200649936 |
| 0.207007579 | 0.271498068 | 0.282088194 | 0.198635241 |
| 0.290909684 | 0.154398738 | 0.157925303 | 0.295835264 |
| 0.319896445 | 0.117916227 | 0.263605318 | 0.209456581 |
| 0.274388274 | 0.079155962 | 0.26869842  | 0.438205142 |
| 0.22029455  | 0.185519633 | 0.250164212 | 0.253913544 |
| 0.305809515 | 0.167899392 | 0.115153717 | 0.319829785 |
| 0.389581484 | 0.243130277 | 0.39890902  | 0.367709006 |
| 0.167162484 | 0.255699414 | 0.155733997 | 0.251345118 |
| 0.254948512 | 0.240535925 | 0.249850335 | 0.171100566 |
| 0.311436624 | 0.419246972 | 0.331166262 | 0.304328635 |

|             |             |             |             |
|-------------|-------------|-------------|-------------|
| 0.206064713 | 0.155515041 | 0.112860033 | 0.314474338 |
| 0.159555148 | 0.244523086 | 0.161427067 | 0.286491606 |
| 0.009101158 | 0.084981264 | 0.369508319 | 0.293626897 |
| 0.421979356 | 0.384127182 | 0.420031604 | 0.200470289 |
| 0.00139847  | 0.222458016 | 0.297488925 | 0.26058653  |
| 0.33852008  | 0.305364993 | 0.123790285 | 0.242769081 |
| 0.335420713 | 0.139043334 | 0.288511949 | 0.206976353 |
| 0.101191355 | 0.246759861 | 0.269391194 | 0.215186111 |
| 0.256501363 | 0.118320629 | 0.147153159 | 0.281799554 |
| 0.083433132 | 0.311866722 | 0.362615464 | 0.117796058 |
| 0.153540027 | 0.351056296 | 0.30961407  | 0.124269949 |
| 0.191140228 | 0.316687284 | 0.344855686 | 0.024001395 |
| 0.287497447 | 0.078599293 | 0.284095304 | 0.302546204 |
| 0.280273857 | 0.271658729 | 0.269583587 | 0.246861457 |
| 0.245017995 | 0.282215307 | 0.314930628 | 0.308856846 |
| 0.282497276 | 0.242924976 | 0.235768988 | 0.22834491  |
| 0.281983447 | 0.257376501 | 0.173759586 | 0.178289328 |
| 0.208547672 | 0.334132686 | 0.326811428 | 0.131204249 |
| 0.28192389  | 0.214783549 | 0.389266765 | 0.369784237 |
| 0.378517666 | 0.16153457  | 0.237892742 | 0.338618588 |
| 0.094100101 | 0.205530468 | 0.152215165 | 0.22881122  |
| 0.296454259 | 0.239496509 | 0.195509855 | 0.245358807 |
| 0.239457658 | 0.414573484 | 0.314713181 | 0.374259967 |
| 0.254868522 | 0.186594824 | 0.142141158 | 0.26207851  |
| 0.293885335 | 0.192742537 | 0.229360113 | 0.028891215 |
| 0.29235779  | 0.246498166 | 0.354522606 | 0.396473157 |
| 0.142426706 | 0.370998036 | 0.169528425 | 0.24555911  |
| 0.116752995 | 0.230615752 | 0.237973519 | 0.260796353 |
| 0.111620729 | 0.271056967 | 0.257329085 | 0.208023931 |
| 0.277596168 | 0.235747296 | 0.184781204 | 0.25139253  |
| 0.23042103  | 0.218487613 | 0.384084635 | 0.180334598 |
| 0.206325734 | 0.205392494 | 0.171858899 | 0.301047052 |
| 0.270735701 | 0.381679089 | 0.156340013 | 0.394390309 |
| 0.252075171 | 0.191856261 | 0.451199874 | 0.223363115 |
| 0.214323717 | 0.224469161 | 0.104114932 | 0.190115683 |
| 0.248184046 | 0.168001402 | 0.006320077 | 0.081011051 |
| 0.326996888 | 0.151589466 | 0.259543931 | 0.256844556 |
| 0.195349545 | 0.318502922 | 0.074501528 | 0.249273638 |
| 0.365959466 | 0.40507228  | 0.325443541 | 0.295919474 |
| 0.308526293 | 0.259976573 | 0.23150611  | 0.011609452 |
| 0.234172756 | 0.197740699 | 0.182378027 | 0.181059048 |
| 0.109241206 | 0.123032332 | 0.232983047 | 0.111124943 |
| 0.373571366 | 0.105194339 | 0.17920285  | 0.260352986 |
| 0.204971704 | 0.416866174 | 0.246914527 | 0.312716096 |
| 0.088617159 | 0.251760558 | 0.182026161 | 0.185099135 |
| 0.287735011 | 0.200611566 | 0.326429337 | 0.177843666 |
| 0.166378783 | 0.268442378 | 0.014597315 | 0.418757934 |
| 0.379236244 | 0.19096066  | 0.272795347 | 0.112252847 |
| 0.292383015 | 0.304261909 | 0.232089601 | 0.185191298 |
| 0.089721602 | 0.243569292 | 0.267802262 | 0.349037378 |
| 0.139917015 | 0.209263824 | 0.192954923 | 0.190722333 |
| 0.39704305  | 0.252407676 | 0.285839798 | 0.17321996  |
| 0.369692186 | 0.271545864 | 0.181640594 | 0.182948399 |
| 0.183419962 | 0.146269324 | 0.174538584 | 0.422059517 |

|             |             |             |             |
|-------------|-------------|-------------|-------------|
| 0.297654436 | 0.178199776 | 0.346843824 | 0.317561316 |
| 0.178881623 | 0.320046168 | 0.180573272 | 0.402484772 |
| 0.218075809 | 0.30205197  | 0.296372834 | 0.362901021 |
| 0.330186178 | 0.154115356 | 0.183533224 | 0.264250789 |
| 0.365127235 | 0.243555599 | 0.169639678 | 0.313550429 |
| 0.160685933 | 0.277866267 | 0.160363781 | 0.229463721 |
| 0.175404827 | 0.225600261 | 0.246862138 | 0.228851017 |
| 0.300802898 | 0.252818532 | 0.21119201  | 0.40183417  |
| 0.276105566 | 0.147815498 | 0.422208858 | 0.022674413 |
| 0.241328045 | 0.27276722  | 0.277841903 | 0.225157855 |
| 0.270053463 | 0.249620448 | 0.231573534 | 0.027434581 |
| 0.322355836 | 0.044945788 | 0.200012088 | 0.274160975 |
| 0.178332792 | 0.170416266 | 0.383843604 | 0.410803767 |
| 0.246866369 | 0.148840762 | 0.168344629 | 0.373189787 |
| 0.109851906 | 0.131821051 | 0.169663255 | 0.225723395 |
| 0.139426824 | 0.170092708 | 0.187310853 | 0.191301228 |
| 0.285818363 | 0.239905871 |             |             |
| BCLP2       | 0.04290954  | 0.305446963 | 0.024457104 |
| 0.070982898 | 0.279785545 | 0.171136622 | 0.043081945 |
| 0.084357166 | 0.25051548  | 0.111367615 | 0.221592719 |
| 0.014049059 | 0.19653921  | 0.352239189 | 0.051241917 |
| 0.276651553 | 0.037462409 | 0.071275263 | 0.067645069 |
| 0.134003018 | 0.243513036 | 0.226539968 | 0.152752123 |
| 0.244673865 | 0.137964197 | 0.174350533 | 0.250401818 |
| 0.373406759 | 0.15394003  | 0.304380318 | 0.066050575 |
| 0.316331586 | 0.292985932 | 0.207654068 | 0.01104329  |
| 0.230444917 | 0.047498274 | 0.313364344 | 0.16481834  |
| 0.175760561 | 0.274527849 | 0.106153375 | 0.151008977 |
| 0.126796168 | 0.019374649 | 0.083436877 | 0.293953404 |
| 0.187560508 | 0.194565236 | 0.031876783 | 0.285483067 |
| 0.173288276 | 0.230273614 | 0.216459892 | 0.001137197 |
| 0.226515054 | 0.134237566 | 0.199311827 | 0.372928922 |
| 0.165380129 | 0.107748291 | 0.140938283 | 0.159469459 |
| 0.261273384 | 0.314647796 | 0.250448833 | 0.13314667  |
| 0.370483583 | 0.208241834 | 0.317876697 | 0.0984832   |
| 0.154616152 | 0.020861644 | 0.135463275 | 0.055223444 |
| 0.205784311 | 0.171020052 | 0.264965574 | 0.234654467 |
| 0.27151742  | 0.398390128 | 0.189849955 | 0.343005429 |
| 0.166711603 | 0.28790652  | 0.240684809 | 0.288307458 |
| 0.288895733 | 0.064666736 | 0.294551642 | 0.392630883 |
| 0.037548294 | 0.172014078 | 0.259807223 | 0.081027759 |
| 0.322456446 | 0.246090464 | 0.148591138 | 0.224552945 |
| 0.34120617  | 0.239701429 | 0.362630667 | 0.2086063   |
| 1           | 0.040034041 | 0.329860147 | 0.292490282 |
| 0.190486894 | 0.043929954 | 0.178180394 | 0.380824571 |
| 0.249110737 | 0.373548988 | 0.299690233 | 0.286076892 |
| 0.233688676 | 0.378534265 | 0.259622148 | 0.345943663 |
| 0.076883908 | 0.390328278 | 0.1089161   | 0.048860764 |
| 0.032802774 | 0.101780658 | 0.218838856 | 0.292382312 |
| 0.384492438 | 0.248067638 | 0.095589638 | 0.169327287 |
| 0.407248177 | 0.322611736 | 0.380869127 | 0.309118401 |
| 0.027756904 | 0.238471798 | 0.218754938 | 0.170853345 |
| 0.273135709 | 0.096502514 | 0.225911424 | 0.357633012 |
| 0.29287502  | 0.368331679 | 0.077284259 | 0.36913395  |

|             |             |             |             |
|-------------|-------------|-------------|-------------|
| 0.132260635 | 0.409799598 | 0.308325384 | 0.10322568  |
| 0.378138121 | 0.346154441 | 0.418414775 | 0.352276687 |
| 0.359426736 | 0.143027506 | 0.06210455  | 0.29756918  |
| 0.41885805  | 0.026457745 | 0.38382142  | 0.401735629 |
| 0.34960469  | 0.363226147 | 0.435143919 | 0.413695801 |
| 0.358713195 | 0.052592657 | 0.029082618 | 0.264663563 |
| 0.353021423 | 0.300548654 | 0.165834144 | 0.204670616 |
| 0.297876533 | 0.158413454 | 0.362186201 | 0.134148046 |
| 0.425376961 | 0.364012569 | 0.381602277 | 0.273226182 |
| 0.151171709 | 0.254463892 | 0.251632499 | 0.314886459 |
| 0.04272261  | 0.053259321 | 0.030949478 | 0.28102023  |
| 0.119297178 | 0.1539936   | 0.132283255 | 0.272462689 |
| 0.169502371 | 0.149154966 | 0.222812709 | 0.344067032 |
| 0.037576725 | 0.217655769 | 0.098208054 | 0.077923823 |
| 0.038608043 | 0.121266438 | 0.094871042 | 0.121331086 |
| 0.200393971 | 0.16044188  | 0.305982047 | 0.399249553 |
| 0.206708608 | 0.114121424 | 0.274652827 | 0.403054904 |
| 0.379567784 | 0.251075032 | 0.204945097 | 0.011778879 |
| 0.123462743 | 0.161999937 | 0.206621335 | 0.260257736 |
| 0.140340112 | 0.126700308 | 0.239004185 | 0.364943536 |
| 0.112335609 | 0.083756775 | 0.183851454 | 0.336250807 |
| 0.097095046 | 0.20416537  | 0.360061933 | 0.19226445  |
| 0.002907157 | 0.147215988 | 0.343111046 | 0.18406211  |
| 0.210007868 | 0.169317422 | 0.206932998 | 0.359369083 |
| 0.197915971 | 0.235885683 | 0.411728437 | 0.386643757 |
| 0.168204549 | 0.153473543 | 0.429534333 | 0.05272815  |
| 0.258887614 | 0.068861437 | 0.26051318  | 0.121403703 |
| 0.160039524 | 0.270845128 | 0.295567604 | 0.216720473 |
| 0.070771747 | 0.384457034 | 0.328339683 | 0.398029791 |
| 0.160812396 | 0.421881423 | 0.369241369 | 0.356791899 |
| 0.262606424 | 0.184279366 | 0.186515055 | 0.311354059 |
| 0.358849063 | 0.122273745 | 0.046945974 | 0.342086631 |
| 0.143685766 | 0.315557668 | 0.169771115 | 0.387870847 |
| 0.391100743 | 0.307131923 | 0.133519791 | 0.363990374 |
| 0.291596298 | 0.130100254 | 0.365238925 | 0.440911094 |
| 0.114259659 | 0.204220588 | 0.18114193  | 0.395628633 |
| 0.117486078 | 0.210954818 | 0.282234693 | 0.236703822 |
| 0.019212436 | 0.046929919 | 0.036234272 | 0.150534389 |
| 0.220662793 | 0.251970306 | 0.299170103 | 0.38838224  |
| 0.082731967 | 0.352312492 | 0.204089155 | 0.143456937 |
| 0.285003341 | 0.219115463 | 0.290506902 | 0.31643343  |
| 0.213935627 | 0.020779928 | 0.087154016 | 0.383987079 |
| 0.023381778 | 0.22347778  | 0.1702101   | 0.003690039 |
| 0.025510876 | 0.267464976 | 0.068637974 | 0.15405317  |
| 0.442138153 | 0.143933188 | 0.116130706 | 0.103930714 |
| 0.312841858 | 0.06839731  | 0.010972777 | 0.381339049 |
| 0.386880054 | 0.370994384 | 0.374447925 | 0.347431424 |
| 0.362956811 | 0.344416261 | 0.344891683 | 0.156096694 |
| 0.067555667 | 0.044645326 | 0.165679003 | 0.159778601 |
| 0.003559777 | 0.353858203 | 0.260672943 | 0.113982731 |
| 0.35442775  | 0.233783625 | 0.029625489 | 0.323331018 |
| 0.010059187 | 0.165004691 | 0.140882713 | 0.17797329  |
| 0.374402921 | 0.010893347 | 0.083229494 | 0.152349982 |
| 0.290716673 | 0.254589226 | 0.207013554 | 0.397026274 |

|             |             |             |             |
|-------------|-------------|-------------|-------------|
| 0.207809361 | 0.068105702 | 0.178257566 | 0.369827671 |
| 0.051190408 | 0.042792169 | 0.155023814 | 0.011814698 |
| 0.146486786 | 0.367890984 | 0.202043088 | 0.032214322 |
| 0.168890087 | 0.003497108 | 0.252978013 | 0.406656208 |
| 0.314389083 | 0.412869034 | 0.383849871 | 0.218342374 |
| 0.369129611 | 0.152658308 | 0.405055277 | 0.275767537 |
| 0.126300757 | 0.000378866 | 0.012607408 | 0.387672659 |
| 0.223136573 | 0.036664046 | 0.116046505 | 0.133419719 |
| 0.08681513  | 0.063346822 | 0.06306532  | 0.211179898 |
| 0.268144629 | 0.229200055 | 0.24272     | 0.318538903 |
| 0.14218854  | 0.204725816 | 0.145090365 | 0.064030986 |
| 0.296932427 | 0.042045969 | 0.066585837 | 0.011640556 |
| 0.35853754  | 0.07338344  | 0.318136316 | 0.378733611 |
| 0.390854635 | 0.333349609 | 0.117785567 | 0.1870402   |
| 0.399527302 | 0.052330745 | 0.191009108 | 0.060371745 |
| 0.32958415  | 0.25502356  | 0.261033302 | 0.216610594 |
| 0.396591776 | 0.341541802 | 0.028688659 | 0.311997973 |
| 0.01214341  | 0.011287045 | 0.126375293 | 0.229200326 |
| 0.126933349 | 0.189242784 | 0.200165501 | 0.158922016 |
| 0.208004235 | 0.019210598 | 0.219071674 | 0.204072705 |
| 0.218285054 | 0.199568534 | 0.239632969 | 0.215888478 |
| 0.219973724 | 0.142585298 | 0.176663416 | 0.130272993 |
| 0.176604487 | 0.211765812 | 0.13313029  | 0.018555393 |
| 0.187262366 | 0.221850234 | 0.040262599 | 0.123693092 |
| 0.348982337 | 0.382384029 | 0.03691072  | 0.013769395 |
| 0.202226724 | 0.192212186 | 0.416987017 | 0.356440587 |
| 0.378943178 | 0.414719038 | 0.309818183 | 0.132452328 |
| 0.050683221 | 0.252118379 | 0.266230009 | 0.153541221 |
| 0.394329153 | 0.034342967 | 0.36365954  | 0.25381297  |
| 0.093358771 | 0.117696574 | 0.039558055 | 0.066669406 |
| 0.299641226 | 0.151377781 | 0.15929089  | 0.071562319 |
| 0.170674601 | 0.229305653 | 0.038276349 | 0.140206617 |
| 0.24224133  | 0.155795963 | 0.11546953  | 0.174419288 |
| 0.269847995 | 0.103321198 | 0.316315263 | 0.364944897 |
| 0.092036707 | 0.066147775 | 0.08256377  | 0.348142627 |
| 0.327468985 | 0.203374959 | 0.021699246 | 0.302673412 |
| 0.418902429 | 0.280036416 | 0.360532893 | 0.366764289 |
| 0.063578499 | 0.218947898 | 0.222687118 | 0.222637167 |
| 0.14798129  | 0.16630673  | 0.185810157 | 0.046542136 |
| 0.288700858 | 0.377436459 | 0.286124787 | 0.127067593 |
| 0.252990603 | 0.068449959 | 0.027947386 | 0.377920299 |
| 0.178942802 | 0.046881121 | 0.122394489 | 0.376616751 |
| 0.006699183 | 0.218607695 | 0.427610432 | 0.17270187  |
| 0.418647739 | 0.384423396 | 0.338734241 | 0.17328767  |
| 0.004620564 | 0.312992629 | 0.244700109 | 0.162618103 |
| 0.289343444 | 0.269878797 | 0.16399953  | 0.070505753 |
| 0.272832481 | 0.046489103 | 0.098466803 | 0.155278899 |
| 0.130364756 | 0.221918369 | 0.189504433 | 0.147342961 |
| 0.174985966 | 0.058667876 | 0.254510811 | 0.144513157 |
| 0.208638162 | 0.214946215 | 0.293127427 | 0.113901763 |
| 0.110644071 | 0.374473938 | 0.263616629 | 0.019981654 |
| 0.283698509 | 0.350438484 | 0.394257518 | 0.000619465 |
| 0.313511131 | 0.008827987 | 0.17293935  | 0.162342205 |
| 0.173286372 | 0.166856896 | 0.261573337 | 0.199607441 |



|             |             |             |             |
|-------------|-------------|-------------|-------------|
| 0.209478899 | 0.138451326 | 0.155011719 | 0.197518728 |
| 0.148356519 | 0.143712695 | 0.275840746 | 0.149066039 |
| 0.184685981 | 0.080020267 | 0.076018925 | 0.07263013  |
| 0.051471329 | 0.372585741 | 0.202901321 | 0.047398567 |
| 0.213504562 | 0.164982089 | 0.317383857 | 0.33902966  |
| 0.395471115 | 0.070708476 | 0.199975447 | 0.304294186 |
| 0.103898485 | 0.128656805 | 0.032989152 | 0.196066593 |
| 0.161400325 | 0.18361162  | 0.193212984 | 0.132117873 |
| 0.259838683 | 0.315260366 | 0.198703583 | 0.377021526 |
| 0.189646277 | 0.185950368 | 0.091215493 | 0.082984233 |
| 0.083043982 | 0.100264785 | 0.243169393 | 0.001699433 |
| 0.257808245 | 0.098601996 | 0.357342334 | 0.337104034 |
| 0.233612942 | 0.349405558 | 0.097818386 | 0.04551148  |
| 0.082889653 | 0.104840155 | 0.110266068 | 0.319671032 |
| 0.197891923 | 0.135374081 | 0.238659824 | 0.118687404 |
| 0.338425983 | 0.312564019 | 0.244267611 | 0.14441055  |
| 0.192686722 | 0.122025541 | 0.355248706 | 0.060285411 |
| 0.224488007 | 0.192927793 | 0.177308583 | 0.166497184 |
| 0.175403175 | 0.40562223  | 0.042630872 | 0.40564007  |
| 0.175197564 | 0.103798361 | 0.400205543 | 0.19654748  |
| 0.162978621 | 0.164339772 | 0.207108454 | 0.154127213 |
| 0.161511654 | 0.239272272 | 0.006776981 | 0.056891989 |
| 0.288531594 | 0.179297658 | 0.256843292 | 0.319538255 |
| 0.23646446  | 0.33633809  | 0.25548614  | 0.125289345 |
| 0.319209526 | 0.350051112 | 0.114051597 | 0.224546519 |
| 0.263426502 | 0.081769037 | 0.208021286 | 0.023347988 |
| 0.245289633 | 0.255091177 | 0.151299237 | 0.053140163 |
| 0.018889656 | 0.178327038 | 0.216124642 | 0.043851064 |
| 0.414244733 | 0.183173416 | 0.216463765 | 0.322211788 |
| 0.148810594 | 0.342907354 | 0.147292802 | 0.317040771 |
| 0.029523764 | 0.218212196 | 0.255471343 | 0.203520701 |
| 0.153440466 | 0.214092236 | 0.303508142 | 0.220244035 |
| 0.03052025  | 0.194482755 | 0.000893575 | 0.298997713 |
| 0.308745165 | 0.20750708  | 0.177185981 | 0.131562569 |
| 0.269426711 | 0.348285402 | 0.184523382 | 0.218133532 |
| 0.015993619 | 0.266846802 | 0.178366101 | 0.302834642 |
| 0.098550403 | 0.199348045 | 0.062811278 | 0.243231943 |
| 0.308780098 | 0.139771766 | 0.238559269 | 0.117076153 |
| 0.349630728 | 0.311976463 | 0.100498259 | 0.250352996 |
| 0.239198737 | 0.046313304 | 0.146928741 | 0.414398933 |
| 0.150948562 | 0.209510096 | 0.384487882 | 0.12049072  |
| 0.236301618 | 0.30687577  | 0.236122145 | 0.408400358 |
| 0.100544906 | 0.202693165 | 0.375584604 | 0.339433087 |
| 0.302589891 | 0.222932561 | 0.205997164 | 0.177864221 |
| 0.303077196 | 0.065094521 | 0.213924192 | 0.243491022 |
| 0.181664817 | 0.285154638 | 0.175068998 | 0.205344119 |
| 0.043101296 | 0.147266565 | 0.195702027 | 0.110720565 |
| 0.208384765 | 0.220874949 | 0.211656469 | 0.329192854 |
| 0.121232482 | 0.023397243 | 0.377890241 | 0.02575109  |
| 0.164794963 | 0.29654832  | 0.201356078 | 0.22017117  |
| 0.134178513 | 0.213929306 | 0.122730165 | 0.000655965 |
| 0.361991895 | 0.086549798 | 0.245394241 | 0.172998452 |
| 0.194492023 | 0.031265123 | 0.351635861 | 0.426741595 |
| 0.240408137 | 0.211710442 | 0.173125299 | 0.35749138  |

|             |             |             |             |
|-------------|-------------|-------------|-------------|
| 0.180268892 | 0.198370248 | 0.209346911 | 0.224028072 |
| 0.236966925 | 0.127037733 | 0.179927531 | 0.193009953 |
| 0.282098302 | 0.17140681  |             |             |
| BIRC3       | 0.237140989 | 0.146058282 | 0.23213756  |
| 0.117243108 | 0.037808785 | 0.056160262 | 0.247476562 |
| 0.184359186 | 0.137976274 | 0.032862664 | 0.059208136 |
| 0.241037786 | 0.003379853 | 0.136441053 | 0.23391539  |
| 0.042199467 | 0.201874669 | 0.210941446 | 0.034533905 |
| 0.096342734 | 0.041755351 | 0.026261115 | 0.077627964 |
| 0.040899516 | 0.327440687 | 0.109215683 | 0.028467152 |
| 0.135267428 | 0.011530404 | 0.055851097 | 0.018425912 |
| 0.212592487 | 0.035708682 | 0.023284148 | 0.229242809 |
| 0.054299214 | 0.003443539 | 0.251339696 | 0.069680952 |
| 0.010279981 | 0.233631309 | 0.047060383 | 0.094213543 |
| 0.048588458 | 0.252965264 | 0.015223175 | 0.051087878 |
| 0.092890755 | 0.082601346 | 0.248718919 | 0.076582892 |
| 0.046181752 | 0.133238644 | 0.086996861 | 0.011360701 |
| 0.014992182 | 0.000671451 | 0.007775723 | 0.177778617 |
| 0.1861056   | 0.169167819 | 0.015278375 | 0.104220737 |
| 0.051772005 | 0.069258721 | 0.133463877 | 0.040102714 |
| 0.159624634 | 0.009232476 | 0.059140493 | 0.068824613 |
| 0.072737767 | 0.241021135 | 0.246173797 | 0.227644185 |
| 0.038133847 | 0.120054325 | 0.047771319 | 0.021263564 |
| 0.146221911 | 0.222448132 | 0.151608155 | 0.203625293 |
| 0.012437103 | 0.027897167 | 0.033937691 | 0.117597757 |
| 0.096517593 | 0.194516739 | 0.086371445 | 0.187955538 |
| 0.223934211 | 0.053557843 | 0.087805663 | 0.259851471 |
| 0.132110523 | 0.018964148 | 0.042480779 | 0.011519582 |
| 0.045986332 | 0.036597502 | 0.214338426 | 0.14640121  |
| 0.040034041 | 1           | 0.236427815 | 0.023498009 |
| 0.050541203 | 0.240890454 | 0.038161259 | 0.080341143 |
| 0.067097669 | 0.133401329 | 0.108220353 | 0.121339465 |
| 0.031992008 | 0.150959369 | 0.090535296 | 0.144617879 |
| 0.008450618 | 0.168832994 | 0.165638172 | 0.202285017 |
| 0.231261504 | 0.164762324 | 0.038029081 | 0.178854488 |
| 0.106250109 | 0.112358994 | 0.158405405 | 0.085201823 |
| 0.097966715 | 0.209019347 | 0.16736901  | 0.113124793 |
| 0.260631991 | 0.014933333 | 0.033343793 | 0.10115848  |
| 0.087015651 | 0.20895206  | 0.019486889 | 0.230798727 |
| 0.179242409 | 0.085868873 | 0.1804595   | 0.258903949 |
| 0.131962535 | 0.178451119 | 0.122435107 | 0.159905938 |
| 0.206498586 | 0.221725713 | 0.149336929 | 0.044751135 |
| 0.201763006 | 0.086951189 | 0.030614485 | 0.135260283 |
| 0.164045406 | 0.00319462  | 0.099835931 | 0.110276616 |
| 0.170594961 | 0.08034293  | 0.145470945 | 0.128272954 |
| 0.168964447 | 0.246230513 | 0.002815181 | 0.076325074 |
| 0.195511879 | 0.147789462 | 0.101814685 | 0.032027787 |
| 0.043117888 | 0.073985396 | 0.080761072 | 0.025243144 |
| 0.198843171 | 0.113303673 | 0.11418917  | 0.107433284 |
| 0.084789582 | 0.238861046 | 0.023157918 | 0.234348242 |
| 0.208234214 | 0.21389294  | 0.263299148 | 0.13830988  |
| 0.042134908 | 0.138771339 | 0.073658637 | 0.047602397 |
| 0.15518616  | 0.086409216 | 0.016557003 | 0.047097669 |
| 0.334470139 | 0.04492647  | 0.180258787 | 0.189050582 |

|             |             |             |             |
|-------------|-------------|-------------|-------------|
| 0.200216125 | 0.337672275 | 0.104061825 | 0.127917984 |
| 0.072227709 | 0.386899154 | 0.059457304 | 0.127661072 |
| 0.044102744 | 0.247994645 | 0.080870067 | 0.159542156 |
| 0.175733663 | 0.030523101 | 0.206369679 | 0.065418858 |
| 0.037030793 | 0.018697163 | 0.007055594 | 0.031098205 |
| 0.367364497 | 0.082927876 | 0.053402037 | 0.060589536 |
| 0.125502806 | 0.18595103  | 0.035460667 | 0.242731462 |
| 0.274912827 | 0.046212735 | 0.109198836 | 0.051293209 |
| 0.137074822 | 0.089788063 | 0.093517346 | 0.041478619 |
| 0.124098186 | 0.011043958 | 0.012619379 | 0.115270326 |
| 0.017532419 | 0.027094233 | 0.113951052 | 0.060960029 |
| 0.042194799 | 0.328425888 | 0.150713742 | 0.002851065 |
| 0.035266633 | 0.035708297 | 0.109093443 | 0.044282199 |
| 0.139485841 | 0.129737146 | 0.030512594 | 0.037902276 |
| 0.232737188 | 0.174977853 | 0.133438229 | 0.138507833 |
| 0.027590958 | 0.158308531 | 0.091682305 | 0.129933514 |
| 0.10194729  | 0.027156618 | 0.004602793 | 0.095325273 |
| 0.106411803 | 0.031197793 | 0.297554816 | 0.071814965 |
| 0.038412077 | 0.051265674 | 0.038678316 | 0.145905799 |
| 0.220639613 | 0.193289036 | 0.124689223 | 0.081619335 |
| 0.133438338 | 0.140774056 | 0.108063515 | 0.165756277 |
| 0.032630751 | 0.035813597 | 0.033665614 | 0.099093365 |
| 0.200431305 | 0.03378884  | 0.20157204  | 0.006651041 |
| 0.000380624 | 0.238217546 | 0.252576443 | 0.102105833 |
| 0.014763278 | 0.044440254 | 0.064897109 | 0.153367595 |
| 0.197192955 | 0.159681291 | 0.175206405 | 0.050717433 |
| 0.173212475 | 0.035973344 | 0.027586173 | 0.047059372 |
| 0.188338867 | 0.093702195 | 0.125979392 | 0.229935782 |
| 0.253239739 | 0.016614353 | 0.092117783 | 0.016012773 |
| 0.269113606 | 0.101218315 | 0.346756489 | 0.355949864 |
| 0.112199339 | 0.338176865 | 0.196845447 | 0.042518439 |
| 0.092206368 | 0.23011443  | 0.021436941 | 0.136560759 |
| 0.163719943 | 0.162056135 | 0.165252815 | 0.201351569 |
| 0.12581447  | 0.087713116 | 0.083448565 | 0.083967002 |
| 0.200805977 | 0.22308955  | 0.017656729 | 0.068455127 |
| 0.023525201 | 0.100666736 | 0.051067468 | 0.242999713 |
| 0.064990339 | 0.120408294 | 0.244666145 | 0.040157621 |
| 0.17466142  | 0.006764261 | 0.089882004 | 0.096166006 |
| 0.078874117 | 0.22706449  | 0.032131019 | 0.024594916 |
| 0.198828169 | 0.194409564 | 0.020119475 | 0.173593343 |
| 0.071218472 | 0.267623997 | 0.05546346  | 0.075984141 |
| 0.232396006 | 0.014860839 | 0.072392329 | 0.004387617 |
| 0.029434626 | 0.191769655 | 0.03468022  | 0.206807772 |
| 0.12079866  | 0.169241616 | 0.188977319 | 0.175249673 |
| 0.18054898  | 0.132539725 | 0.15242887  | 0.018012271 |
| 0.165157291 | 0.001423397 | 0.147919169 | 0.140151605 |
| 0.032921001 | 0.014677018 | 0.048776671 | 0.106159021 |
| 0.037669837 | 0.305321633 | 0.19564808  | 0.045473559 |
| 0.16404682  | 0.206370714 | 0.214376323 | 0.02560917  |
| 0.059485527 | 0.053545948 | 0.023339962 | 0.191659521 |
| 0.107228864 | 0.111198337 | 0.056123015 | 0.286750887 |
| 0.042347016 | 0.220801603 | 0.267132412 | 0.017932739 |
| 0.072135609 | 0.315748776 | 0.258690146 | 0.160711215 |
| 0.179026567 | 0.058265999 | 0.023853586 | 0.043947063 |

|             |             |             |             |
|-------------|-------------|-------------|-------------|
| 0.111724236 | 0.274716652 | 0.023626608 | 0.238083825 |
| 0.162110945 | 0.053613559 | 0.145938498 | 0.202452258 |
| 0.156835732 | 0.176721396 | 0.253110587 | 0.091965543 |
| 0.109037731 | 0.004440803 | 0.071431626 | 0.151961957 |
| 0.016272395 | 0.035082831 | 0.200735492 | 0.083615982 |
| 0.080545682 | 0.213125598 | 0.015700323 | 0.016488002 |
| 0.092953307 | 0.053624021 | 0.029151887 | 0.178106203 |
| 0.046691508 | 0.031905211 | 0.100700809 | 0.143687126 |
| 0.04478273  | 0.216679884 | 0.324578197 | 0.244220391 |
| 0.040030363 | 0.033055132 | 0.248497612 | 0.225651828 |
| 0.111973896 | 0.116215325 | 0.207948197 | 0.09134731  |
| 0.214040521 | 0.054101493 | 0.119716965 | 0.152355847 |
| 0.207534026 | 0.176260493 | 0.244053039 | 0.088856941 |
| 0.233642135 | 0.068351905 | 0.029524661 | 0.067325184 |
| 0.150850856 | 0.259024949 | 0.173057312 | 0.017647517 |
| 0.231113559 | 0.12777247  | 0.176249421 | 0.22595448  |
| 0.02867427  | 0.183348305 | 0.097584097 | 0.224379464 |
| 0.059476556 | 0.015196038 | 0.246937185 | 0.156327269 |
| 0.139905727 | 0.008940149 | 0.187610729 | 0.087391961 |
| 0.142284444 | 0.031981587 | 0.059794149 | 0.200352263 |
| 0.248922343 | 0.218527723 | 0.101428488 | 0.087422054 |
| 0.089882843 | 0.036160843 | 0.111050338 | 0.142249837 |
| 0.135388147 | 0.051754166 | 0.182783493 | 0.1304867   |
| 0.266846709 | 0.034560061 | 0.022795609 | 0.048431618 |
| 0.159225415 | 0.061711126 | 0.102211068 | 0.256863853 |
| 0.209227906 | 0.236841082 | 0.142193403 | 0.130899509 |
| 0.045063411 | 0.219150757 | 0.251620002 | 0.112702294 |
| 0.016048679 | 0.22004185  | 0.045972021 | 0.08304489  |
| 0.006107408 | 0.005782333 | 0.129210847 | 0.096050043 |
| 0.191585122 | 0.121972869 | 0.189593617 | 0.098070864 |
| 4.96E-05    | 0.046048937 | 0.06303498  | 0.041551022 |
| 0.136962962 | 0.151128652 | 0.075396892 | 0.170207017 |
| 0.180858013 | 0.284322547 | 0.130644996 | 0.05205047  |
| 0.010808095 | 0.079304462 | 0.196890223 | 0.144686275 |
| 0.087307521 | 0.26137897  | 0.015179727 | 0.116217801 |
| 0.015203404 | 0.188638773 | 0.144170554 | 0.038862751 |
| 0.010562748 | 0.127776064 | 0.112491535 | 0.246904572 |
| 0.027501268 | 0.121437546 | 0.135803188 | 0.03527612  |
| 0.061449616 | 0.164787423 | 0.086128946 | 0.081350909 |
| 0.094494859 | 0.091442618 | 0.075319004 | 0.044405072 |
| 0.093451922 | 0.125010474 | 0.082454021 | 0.130883445 |
| 0.098592349 | 0.128279512 | 0.048159738 | 0.075575121 |
| 0.044591297 | 0.19390464  | 0.353912771 | 0.39271957  |
| 0.171222967 | 0.123558247 | 0.26324141  | 0.292504225 |
| 0.125978156 | 0.061838416 | 0.187744647 | 0.16758599  |
| 0.145864262 | 0.324038939 | 0.064231931 | 0.124788222 |
| 0.014649539 | 0.051345679 | 0.241560832 | 0.064530461 |
| 0.127686296 | 0.031362617 | 0.050401049 | 0.12083223  |
| 0.085381264 | 0.23679657  | 0.250091471 | 0.166583394 |
| 0.050250343 | 0.050608585 | 0.0366895   | 0.130568328 |
| 0.172117076 | 0.261342624 | 0.034402907 | 0.093063288 |
| 0.098952379 | 0.104009454 | 0.099820827 | 0.194731173 |
| 0.014545927 | 0.176317513 | 0.043353281 | 0.221377687 |
| 0.030767882 | 0.330311996 | 0.247904726 | 0.076250578 |

|             |             |             |             |
|-------------|-------------|-------------|-------------|
| 0.007612708 | 0.142906861 | 0.048399067 | 0.075208873 |
| 0.069395021 | 0.069653756 | 0.039952649 | 0.120067509 |
| 0.109494851 | 0.194664653 | 0.216650246 | 0.207157859 |
| 0.041307386 | 0.029154096 | 0.07191279  | 0.061592932 |
| 0.077364764 | 0.136068255 | 0.247503335 | 0.133099562 |
| 0.043278003 | 0.2923335   | 0.218678708 | 0.093291928 |
| 0.08256783  | 0.081733418 | 0.006993486 | 0.053261465 |
| 0.105063992 | 0.019278242 | 0.00096545  | 0.009808307 |
| 0.113700716 | 0.048281019 | 0.101708022 | 0.09770881  |
| 0.032048132 | 0.121389871 | 0.006434226 | 0.109664196 |
| 0.192082847 | 0.231112323 | 0.074821261 | 0.195904181 |
| 0.13376633  | 0.190204779 | 0.082720866 | 0.007473701 |
| 0.044903099 | 0.033803938 | 0.033432318 | 0.224105728 |
| 0.219510119 | 0.008503954 | 0.053645571 | 0.241573776 |
| 0.109863131 | 0.006875484 | 0.075287094 | 0.067191175 |
| 0.231263487 | 0.237451966 | 0.09917207  | 0.075858575 |
| 0.185268915 | 0.146657878 | 0.029415998 | 0.042244459 |
| 0.047116088 | 0.023138517 | 0.093894    | 0.017012244 |
| 0.225134616 | 0.055447252 | 0.024820116 | 0.267553551 |
| 0.231619036 | 0.025249529 | 0.278598761 | 0.026943816 |
| 0.122901166 | 0.146499309 | 0.047744361 | 0.032677751 |
| 0.117371742 | 0.034565015 | 0.139368161 | 0.141791416 |
| 0.011470068 | 0.05864149  | 0.145322702 | 0.031759717 |
| 0.27788967  | 0.039554641 | 0.215286824 | 0.021190594 |
| 0.163251793 | 0.130116504 | 0.256879896 | 0.042262766 |
| 0.066014174 | 0.276761416 | 0.041216425 | 0.169951245 |
| 0.11121345  | 0.018251901 | 0.084939302 | 0.107920962 |
| 0.021510833 | 0.163107958 | 0.043591486 | 0.173768207 |
| 0.095546251 | 0.150039854 | 0.082126622 | 0.147781504 |
| 0.141351517 | 0.021625177 | 0.017313578 | 0.052564852 |
| 0.183543205 | 0.154736102 | 0.024822084 | 0.136141321 |
| 0.013725241 | 0.108385895 | 0.075107534 | 0.049984174 |
| 0.152018296 | 0.123331571 | 0.049255449 | 0.214034191 |
| 0.089354283 | 0.047609661 | 0.039333494 | 0.194999102 |
| 0.087463207 | 0.109804958 | 0.194537494 | 0.000877232 |
| 0.091617064 | 0.059113615 | 0.121262491 | 0.037034531 |
| 0.283164165 | 0.089792955 | 0.092069296 | 0.084909983 |
| 0.10214866  | 0.010516428 | 0.051907309 | 0.045730628 |
| 0.022888953 | 0.260782151 | 0.183073977 | 0.130718764 |
| 0.122290163 | 0.029683094 | 0.018756341 | 0.168928426 |
| 0.008712215 | 0.016099432 | 0.024332843 | 0.078698209 |
| 0.012596463 | 0.033957085 | 0.031241994 | 0.022512398 |
| 0.116348792 | 0.105494548 |             |             |
| BIRC5       | 0.214603415 | 0.521380068 | 0.20877967  |
| 0.22910778  | 0.296512824 | 0.495838339 | 0.163812056 |
| 0.251670528 | 0.481481175 | 0.397953739 | 0.409366113 |
| 0.072044299 | 0.064063804 | 0.497906613 | 0.147665484 |
| 0.385265797 | 0.09075776  | 0.222967957 | 0.121827433 |
| 0.342040395 | 0.269921492 | 0.336289245 | 0.526504064 |
| 0.282112293 | 0.357657207 | 0.496936307 | 0.388457    |
| 0.520203443 | 0.271670823 | 0.469240589 | 0.268139985 |
| 0.467232235 | 0.306322304 | 0.378886017 | 0.085673326 |
| 0.473334665 | 0.01159835  | 0.476302504 | 0.291191558 |
| 0.130117566 | 0.450957128 | 0.472240662 | 0.307157826 |

|             |             |             |             |
|-------------|-------------|-------------|-------------|
| 0.460317323 | 0.141123048 | 0.290511838 | 0.420181715 |
| 0.462942139 | 0.375469784 | 0.231214686 | 0.497965016 |
| 0.417672949 | 0.481997393 | 0.510493046 | 0.007002348 |
| 0.267455631 | 0.061748457 | 0.185658241 | 0.523472402 |
| 0.325227755 | 0.213955109 | 0.287256208 | 0.395186389 |
| 0.430070532 | 0.410683612 | 0.356443278 | 0.428030165 |
| 0.515240392 | 0.140507141 | 0.464912547 | 0.239360453 |
| 0.4743136   | 0.146101232 | 0.296301569 | 0.259409523 |
| 0.412084249 | 0.28094064  | 0.366947487 | 0.28018501  |
| 0.521464099 | 0.50111612  | 0.362346269 | 0.517039637 |
| 0.083978898 | 0.313276451 | 0.272545268 | 0.360246346 |
| 0.431099161 | 0.202797374 | 0.459366203 | 0.502355226 |
| 0.172757569 | 0.484982873 | 0.462738656 | 0.304878153 |
| 0.526716755 | 0.272374968 | 0.485229969 | 0.145186341 |
| 0.362222653 | 0.327420938 | 0.499918416 | 0.395761303 |
| 0.329860147 | 0.236427815 | 1           | 0.285510779 |
| 0.322441404 | 0.238719415 | 0.216784907 | 0.476422001 |
| 0.464405648 | 0.518647232 | 0.503167357 | 0.432538616 |
| 0.362008488 | 0.514908354 | 0.473310421 | 0.499895697 |
| 0.209564463 | 0.520719333 | 0.332270787 | 0.106085601 |
| 0.23746539  | 0.165880262 | 0.243839848 | 0.401031601 |
| 0.503291188 | 0.451000604 | 0.335042291 | 0.274716363 |
| 0.455575622 | 0.52182355  | 0.518664643 | 0.478779963 |
| 0.132921868 | 0.223349105 | 0.372097752 | 0.434528209 |
| 0.435092481 | 0.252399789 | 0.223003618 | 0.511825812 |
| 0.469277095 | 0.458428336 | 0.35599212  | 0.51432271  |
| 0.323337513 | 0.496956622 | 0.529293882 | 0.272243599 |
| 0.510591793 | 0.515821735 | 0.49104777  | 0.389442539 |
| 0.511929024 | 0.465796147 | 0.094794536 | 0.468295891 |
| 0.482612744 | 0.012685114 | 0.498740807 | 0.496982025 |
| 0.52168182  | 0.477574004 | 0.487091847 | 0.507743046 |
| 0.525435764 | 0.21380349  | 0.02889009  | 0.311378089 |
| 0.516125555 | 0.47544176  | 0.19784411  | 0.418854654 |
| 0.357259455 | 0.515445759 | 0.477592268 | 0.316655824 |
| 0.483884517 | 0.501767559 | 0.512789619 | 0.48020886  |
| 0.439360678 | 0.438751942 | 0.356029109 | 0.514262076 |
| 0.124751796 | 0.275833018 | 0.198342784 | 0.402900547 |
| 0.471180416 | 0.255839724 | 0.49955491  | 0.371986165 |
| 0.28893629  | 0.496717581 | 0.312558836 | 0.369195576 |
| 0.209620138 | 0.486954055 | 0.318904593 | 0.336887078 |
| 0.102207098 | 0.303754044 | 0.259541357 | 0.244050251 |
| 0.286922146 | 0.376933369 | 0.478841311 | 0.498262695 |
| 0.375283169 | 0.361024417 | 0.495976568 | 0.484395903 |
| 0.439845497 | 0.367746352 | 0.36253566  | 0.027133478 |
| 0.27044364  | 0.318966644 | 0.147025737 | 0.419113067 |
| 0.340817588 | 0.292868444 | 0.408806779 | 0.394767299 |
| 0.454256685 | 0.329227738 | 0.365955617 | 0.480051014 |
| 0.339570278 | 0.322824525 | 0.468424247 | 0.477453181 |
| 0.024180844 | 0.418182679 | 0.49095154  | 0.145782664 |
| 0.431284583 | 0.115564372 | 0.231881094 | 0.484825788 |
| 0.268766155 | 0.207201378 | 0.50492407  | 0.394954251 |
| 0.406315699 | 0.390110144 | 0.496832106 | 0.040129133 |
| 0.352683018 | 0.064406976 | 0.331814666 | 0.453965128 |
| 0.368656395 | 0.359179147 | 0.29648277  | 0.278180893 |

|             |             |             |             |
|-------------|-------------|-------------|-------------|
| 0.319768298 | 0.516224141 | 0.48934623  | 0.511900421 |
| 0.362725621 | 0.497489439 | 0.481999081 | 0.486882121 |
| 0.459199989 | 0.366761275 | 0.101951423 | 0.485253387 |
| 0.485364173 | 0.32355583  | 0.246055559 | 0.475740769 |
| 0.405780226 | 0.404242508 | 0.126807645 | 0.489379011 |
| 0.494230078 | 0.521782424 | 0.212308718 | 0.385807473 |
| 0.457180301 | 0.371053136 | 0.474210563 | 0.493691998 |
| 0.376570506 | 0.344771103 | 0.319584319 | 0.408782718 |
| 0.31833098  | 0.196999464 | 0.436019037 | 0.144194422 |
| 0.009435038 | 0.238618849 | 0.205425242 | 0.209160833 |
| 0.135420448 | 0.466168378 | 0.425437081 | 0.510759739 |
| 0.223347902 | 0.495923696 | 0.374348326 | 0.300761949 |
| 0.49656717  | 0.353421783 | 0.367606494 | 0.399282872 |
| 0.379242469 | 0.044261081 | 0.179888334 | 0.505912112 |
| 0.180541216 | 0.207307763 | 0.448421857 | 0.006325496 |
| 0.152910665 | 0.515378494 | 0.262925612 | 0.341866305 |
| 0.469485121 | 0.357424866 | 0.365983096 | 0.408918944 |
| 0.398784859 | 0.222414165 | 0.006934579 | 0.500673898 |
| 0.502157075 | 0.492218511 | 0.504774763 | 0.504226771 |
| 0.47635529  | 0.474685686 | 0.437550893 | 0.520099501 |
| 0.220714602 | 0.25882704  | 0.173998764 | 0.318188915 |
| 0.016221191 | 0.4317223   | 0.335552035 | 0.278135093 |
| 0.444296502 | 0.396386664 | 0.125435322 | 0.357708529 |
| 0.081885034 | 0.162894261 | 0.424332324 | 0.289602789 |
| 0.365885383 | 0.075198739 | 0.2927631   | 0.305311088 |
| 0.517631054 | 0.473776352 | 0.341762158 | 0.516261861 |
| 0.382976687 | 0.330112583 | 0.328658867 | 0.429379751 |
| 0.175513554 | 0.138217426 | 0.472639366 | 0.059577302 |
| 0.292545934 | 0.49762598  | 0.401752107 | 0.194697592 |
| 0.367290699 | 0.032521732 | 0.489227158 | 0.512876409 |
| 0.526524382 | 0.495842221 | 0.514935425 | 0.238253666 |
| 0.516388294 | 0.079666769 | 0.516496995 | 0.514498958 |
| 0.424814293 | 0.003824742 | 0.015086063 | 0.494985532 |
| 0.393720858 | 0.223387842 | 0.287597413 | 0.460828426 |
| 0.185538234 | 0.350702544 | 0.174391927 | 0.16011326  |
| 0.493256689 | 0.25084653  | 0.15801879  | 0.517663602 |
| 0.311154534 | 0.312098655 | 0.498685936 | 0.250651791 |
| 0.427659887 | 0.135975421 | 0.245824455 | 0.012392    |
| 0.388570479 | 0.296435301 | 0.508172086 | 0.520994404 |
| 0.493964827 | 0.399320771 | 0.387331172 | 0.41545151  |
| 0.474773008 | 0.298027564 | 0.385586007 | 0.310921059 |
| 0.52817752  | 0.398117585 | 0.405109822 | 0.436348856 |
| 0.487221544 | 0.503791488 | 0.112803814 | 0.444511015 |
| 0.047301127 | 0.002550749 | 0.507938818 | 0.379100649 |
| 0.077077682 | 0.360264366 | 0.37398104  | 0.330644144 |
| 0.299609015 | 0.111026646 | 0.222058195 | 0.201030153 |
| 0.353477272 | 0.381934515 | 0.247832676 | 0.385968211 |
| 0.269431429 | 0.12368584  | 0.270181511 | 0.249841037 |
| 0.300652772 | 0.455902486 | 0.35893836  | 0.087136122 |
| 0.469167029 | 0.410907618 | 0.16472335  | 0.314524084 |
| 0.483956426 | 0.500848234 | 0.104914395 | 0.026441892 |
| 0.402967323 | 0.344971411 | 0.489773681 | 0.528026147 |
| 0.516672165 | 0.49022639  | 0.465334606 | 0.154917654 |
| 0.180971602 | 0.354014009 | 0.268982831 | 0.11672193  |

|             |             |             |             |
|-------------|-------------|-------------|-------------|
| 0.516155003 | 0.230297533 | 0.524579638 | 0.259998969 |
| 0.255565707 | 0.312754975 | 0.085027193 | 0.19931031  |
| 0.369276837 | 0.301345715 | 0.222697475 | 0.336030706 |
| 0.334632436 | 0.21806747  | 0.147375238 | 0.304410048 |
| 0.443534053 | 0.137199543 | 0.286621296 | 0.449500132 |
| 0.487589682 | 0.322988384 | 0.439434957 | 0.469283414 |
| 0.292362644 | 0.261999424 | 0.443952025 | 0.445547864 |
| 0.497814495 | 0.448041668 | 0.074389529 | 0.527261012 |
| 0.49632942  | 0.466801115 | 0.524676687 | 0.422018353 |
| 0.231782555 | 0.371898935 | 0.294322636 | 0.348921064 |
| 0.302081542 | 0.503473006 | 0.321488364 | 0.185007968 |
| 0.407905319 | 0.491779082 | 0.500383424 | 0.24124703  |
| 0.475642565 | 0.332429902 | 0.216899095 | 0.504873836 |
| 0.145009509 | 0.205940835 | 0.479896771 | 0.468149953 |
| 0.003169369 | 0.103451329 | 0.478389368 | 0.329839075 |
| 0.496718125 | 0.485646086 | 0.485573372 | 0.395625323 |
| 0.000996418 | 0.406434562 | 0.410439345 | 0.414914778 |
| 0.519053568 | 0.479404101 | 0.261249848 | 0.137986073 |
| 0.377534605 | 0.258970339 | 0.193539455 | 0.458361413 |
| 0.149479453 | 0.505208941 | 0.30522224  | 0.339472624 |
| 0.240213814 | 0.274431749 | 0.216028308 | 0.35263678  |
| 0.131063309 | 0.342076953 | 0.417552846 | 0.422066744 |
| 0.163335338 | 0.465474642 | 0.48272437  | 0.107965744 |
| 0.343753525 | 0.46188906  | 0.482903237 | 0.00591877  |
| 0.442307279 | 0.031569951 | 0.235671348 | 0.254502554 |
| 0.249766173 | 0.258706286 | 0.285093395 | 0.300193539 |
| 0.448020125 | 0.31263442  | 0.341305572 | 0.32017271  |
| 0.212961789 | 0.347518432 | 0.409419955 | 0.458577716 |
| 0.28777739  | 0.250093376 | 0.269248427 | 0.271507833 |
| 0.119848902 | 0.518297042 | 0.384097627 | 0.242733081 |
| 0.311580936 | 0.439213217 | 0.419896349 | 0.526242687 |
| 0.45968326  | 0.309118953 | 0.385510423 | 0.526414459 |
| 0.261122827 | 0.39596578  | 0.20561301  | 0.483774183 |
| 0.343834279 | 0.202760976 | 0.495749786 | 0.476305793 |
| 0.489839921 | 0.465039549 | 0.384331148 | 0.486310452 |
| 0.398347733 | 0.391473119 | 0.42960035  | 0.13283439  |
| 0.30281951  | 0.295402158 | 0.244392976 | 0.011872103 |
| 0.430049789 | 0.428150469 | 0.498164764 | 0.51997165  |
| 0.256470201 | 0.457186005 | 0.450400428 | 0.200617443 |
| 0.389154129 | 0.361619664 | 0.283238923 | 0.490533436 |
| 0.17698482  | 0.30203021  | 0.303457713 | 0.512560225 |
| 0.454816769 | 0.461818866 | 0.256593561 | 0.371229385 |
| 0.333023031 | 0.381113483 | 0.496344123 | 0.304877798 |
| 0.458371386 | 0.168033643 | 0.497061729 | 0.314858947 |
| 0.252283297 | 0.508594962 | 0.189308649 | 0.50959534  |
| 0.329113714 | 0.306362485 | 0.486373923 | 0.442424584 |
| 0.42625364  | 0.16552865  | 0.144852587 | 0.48642611  |
| 0.305912816 | 0.315254656 | 0.020148075 | 0.059381401 |
| 0.378254653 | 0.370960368 | 0.498926515 | 0.428747882 |
| 0.22801073  | 0.381313871 | 0.138232299 | 0.422748208 |
| 0.524249621 | 0.514089739 | 0.301214545 | 0.352545697 |
| 0.440436188 | 0.199671435 | 0.533588251 | 0.024234569 |
| 0.432046736 | 0.423430277 | 0.422540002 | 0.141878149 |
| 0.073037167 | 0.166169779 | 0.451810307 | 0.22800555  |



|             |             |             |             |
|-------------|-------------|-------------|-------------|
| 0.471377066 | 0.174626586 | 0.464708855 | 0.483224951 |
| 0.339906014 | 0.514519999 | 0.164381178 | 0.435951433 |
| 0.154875898 | 0.370737837 | 0.373677864 | 0.418733296 |
| 0.229415942 | 0.255293347 | 0.410814157 | 0.198268938 |
| 0.094530495 | 0.279588983 | 0.004856171 | 0.470249995 |
| 0.507144026 | 0.309336835 | 0.356452808 | 0.376461936 |
| 0.340666897 | 0.467413364 | 0.256765246 | 0.445397006 |
| 0.033209631 | 0.347625326 | 0.305875737 | 0.515812423 |
| 0.219702615 | 0.42250945  | 0.118177257 | 0.296903714 |
| 0.508158979 | 0.286054581 | 0.379853839 | 0.302745799 |
| 0.526569025 | 0.498970539 | 0.366457139 | 0.241329487 |
| 0.46662816  | 0.20729333  | 0.484818954 | 0.505662074 |
| 0.233172057 | 0.179571407 | 0.447518521 | 0.259996875 |
| 0.278371657 | 0.5007497   | 0.45098258  | 0.506861441 |
| 0.099985087 | 0.343343384 | 0.455490014 | 0.502431331 |
| 0.365140253 | 0.144616395 | 0.209536477 | 0.23276518  |
| 0.525611007 | 0.191029659 | 0.235677459 | 0.462213051 |
| 0.175435155 | 0.382379564 | 0.480177312 | 0.19385895  |
| 0.084645598 | 0.266696584 | 0.442645678 | 0.285721461 |
| 0.353595752 | 0.373097238 | 0.228383489 | 0.449357403 |
| 0.182348216 | 0.054601255 | 0.473701336 | 0.011056716 |
| 0.505331941 | 0.416357317 | 0.350455786 | 0.351641811 |
| 0.35080325  | 0.451829023 | 0.479124859 | 0.008379438 |
| 0.448672997 | 0.051494657 | 0.343016632 | 0.223553183 |
| 0.272492442 | 0.160650563 | 0.512533916 | 0.490832562 |
| 0.450485053 | 0.372864166 | 0.333364796 | 0.513924234 |
| 0.114758479 | 0.318879759 | 0.327757454 | 0.514766329 |
| 0.18369781  | 0.442674754 | 0.433715506 | 0.361593183 |
| 0.488913929 | 0.405774144 |             |             |
| BLM         | 0.029842078 | 0.274973719 | 0.016700508 |
| 0.09119769  | 0.310215238 | 0.197400673 | 0.031745401 |
| 0.070988517 | 0.217502183 | 0.148137447 | 0.237188954 |
| 0.008741644 | 0.261425828 | 0.346241357 | 0.032723791 |
| 0.322452299 | 0.025606547 | 0.062838081 | 0.063221308 |
| 0.142531916 | 0.299533423 | 0.302693829 | 0.15106206  |
| 0.304467345 | 0.097920973 | 0.162665906 | 0.280098806 |
| 0.36209649  | 0.230911346 | 0.31422782  | 0.105221441 |
| 0.294798565 | 0.332528757 | 0.29262867  | 0.005758304 |
| 0.233998913 | 0.051122526 | 0.28312527  | 0.233914994 |
| 0.279912014 | 0.22925211  | 0.134762187 | 0.182840899 |
| 0.17909395  | 0.013650331 | 0.109119726 | 0.330531833 |
| 0.172618238 | 0.192376997 | 0.019546044 | 0.286781967 |
| 0.229696405 | 0.192649829 | 0.217227865 | 0.001483304 |
| 0.341271895 | 0.234875073 | 0.328901923 | 0.337613929 |
| 0.125158764 | 0.089459062 | 0.231490312 | 0.136608969 |
| 0.26651671  | 0.313085033 | 0.188001485 | 0.20339678  |
| 0.356252299 | 0.33064275  | 0.336589528 | 0.112022873 |
| 0.200183304 | 0.010970552 | 0.095950387 | 0.029585418 |
| 0.275045311 | 0.150278005 | 0.271675302 | 0.345573415 |
| 0.263006926 | 0.353333127 | 0.148951307 | 0.314513891 |
| 0.225219734 | 0.332051347 | 0.318672999 | 0.267447786 |
| 0.281286242 | 0.048388585 | 0.315138055 | 0.375216956 |
| 0.020074138 | 0.18035919  | 0.279705878 | 0.05092345  |
| 0.288431861 | 0.304825853 | 0.174988247 | 0.326032627 |

|             |             |             |             |
|-------------|-------------|-------------|-------------|
| 0.372150843 | 0.30198484  | 0.31327471  | 0.194667966 |
| 0.292490282 | 0.023498009 | 0.285510779 | 1           |
| 0.250966847 | 0.030782386 | 0.283501856 | 0.3999513   |
| 0.277619663 | 0.363037519 | 0.300035555 | 0.286806443 |
| 0.303162436 | 0.364000125 | 0.277908102 | 0.298743844 |
| 0.100163666 | 0.364677866 | 0.096208753 | 0.030369213 |
| 0.023548617 | 0.067998762 | 0.260724021 | 0.232058692 |
| 0.377533208 | 0.209002236 | 0.102496184 | 0.209605519 |
| 0.423797978 | 0.282961345 | 0.36159751  | 0.315684095 |
| 0.017919915 | 0.330869111 | 0.293739221 | 0.142986573 |
| 0.279882112 | 0.057216523 | 0.350570297 | 0.321839511 |
| 0.269625834 | 0.387046924 | 0.068348481 | 0.316172874 |
| 0.122051525 | 0.384876037 | 0.301133574 | 0.106938167 |
| 0.348762775 | 0.308030023 | 0.408995507 | 0.391899026 |
| 0.311665715 | 0.167319931 | 0.062151163 | 0.283793781 |
| 0.38503489  | 0.042375467 | 0.385646575 | 0.408354233 |
| 0.333221386 | 0.396286608 | 0.425107968 | 0.39753069  |
| 0.334229713 | 0.030222051 | 0.048054863 | 0.270556818 |
| 0.334178449 | 0.29386656  | 0.131960359 | 0.264837073 |
| 0.321731283 | 0.180161856 | 0.343032104 | 0.228466157 |
| 0.386269513 | 0.353770655 | 0.373207387 | 0.276449175 |
| 0.146639215 | 0.203945214 | 0.304183219 | 0.272773139 |
| 0.02708632  | 0.046656483 | 0.016190862 | 0.232048825 |
| 0.151242096 | 0.129870578 | 0.173917498 | 0.275007895 |
| 0.133111136 | 0.153565683 | 0.3163054   | 0.380705572 |
| 0.019281718 | 0.236961616 | 0.084251021 | 0.077426355 |
| 0.030463406 | 0.074705985 | 0.128788142 | 0.111022939 |
| 0.225468241 | 0.114520146 | 0.319795513 | 0.388948006 |
| 0.267620782 | 0.089090284 | 0.281347713 | 0.373700658 |
| 0.353808518 | 0.309981245 | 0.149151565 | 0.011141115 |
| 0.242454662 | 0.238105905 | 0.340235577 | 0.277932784 |
| 0.088146739 | 0.184783943 | 0.281574632 | 0.391053878 |
| 0.11579781  | 0.061270581 | 0.283561977 | 0.278665052 |
| 0.067550518 | 0.267247587 | 0.37828692  | 0.212346778 |
| 0.000918011 | 0.187073867 | 0.354808889 | 0.237485584 |
| 0.195990587 | 0.257146054 | 0.305651792 | 0.378719029 |
| 0.310265095 | 0.314715005 | 0.394017624 | 0.391514563 |
| 0.20626717  | 0.106555811 | 0.41311229  | 0.108344255 |
| 0.287432225 | 0.089768631 | 0.249321994 | 0.146517438 |
| 0.144772682 | 0.243130894 | 0.327646643 | 0.299820648 |
| 0.04863721  | 0.360652699 | 0.283783278 | 0.387285511 |
| 0.276407269 | 0.408498963 | 0.388780334 | 0.346996638 |
| 0.237425932 | 0.268570762 | 0.308548815 | 0.341675488 |
| 0.376624583 | 0.21823016  | 0.02606201  | 0.356965594 |
| 0.218166643 | 0.361749087 | 0.199090639 | 0.391906512 |
| 0.340935103 | 0.279296694 | 0.122968708 | 0.372293507 |
| 0.290919411 | 0.120820954 | 0.335520506 | 0.410513911 |
| 0.178902454 | 0.291515034 | 0.302183192 | 0.397298799 |
| 0.093344562 | 0.294211911 | 0.218160056 | 0.337686313 |
| 0.029078549 | 0.031643383 | 0.024496608 | 0.158090278 |
| 0.333706345 | 0.261421097 | 0.318408881 | 0.379428913 |
| 0.071443511 | 0.299014521 | 0.152316832 | 0.24535596  |
| 0.282262574 | 0.290278113 | 0.313923147 | 0.317891734 |
| 0.160066162 | 0.016774577 | 0.091103551 | 0.348758966 |

|             |             |             |             |
|-------------|-------------|-------------|-------------|
| 0.010678068 | 0.340629563 | 0.166938687 | 0.00298737  |
| 0.019198173 | 0.258630382 | 0.041622749 | 0.106545525 |
| 0.425656718 | 0.103511545 | 0.104771492 | 0.162653818 |
| 0.288315394 | 0.046929442 | 0.006164042 | 0.371016166 |
| 0.347694904 | 0.330654377 | 0.338782769 | 0.292354636 |
| 0.350640205 | 0.305508841 | 0.371468153 | 0.14506196  |
| 0.060178944 | 0.033930656 | 0.320349109 | 0.235239117 |
| 0.002718845 | 0.327491865 | 0.265258652 | 0.079721155 |
| 0.367827562 | 0.211490704 | 0.017724755 | 0.31335643  |
| 0.009048243 | 0.311483516 | 0.16502789  | 0.176388576 |
| 0.354259148 | 0.005045929 | 0.143090036 | 0.280218404 |
| 0.257947376 | 0.219787143 | 0.31245556  | 0.372317638 |
| 0.224033757 | 0.049390341 | 0.262450246 | 0.350083802 |
| 0.040184461 | 0.085342646 | 0.181582799 | 0.022913197 |
| 0.13074216  | 0.306913815 | 0.266399739 | 0.031348843 |
| 0.166706293 | 0.001550481 | 0.230619804 | 0.378887617 |
| 0.283394546 | 0.416338547 | 0.365465681 | 0.338902054 |
| 0.355726007 | 0.245467691 | 0.388687367 | 0.26636333  |
| 0.200151726 | 0.000493373 | 0.005818926 | 0.399912583 |
| 0.28349531  | 0.018177131 | 0.086716763 | 0.173572756 |
| 0.084731011 | 0.058098895 | 0.035807523 | 0.310130064 |
| 0.256973466 | 0.259103559 | 0.301365569 | 0.293724642 |
| 0.177327199 | 0.169691003 | 0.182158243 | 0.035498868 |
| 0.293523618 | 0.031883786 | 0.036431852 | 0.012141668 |
| 0.345170196 | 0.047605675 | 0.270529481 | 0.35492437  |
| 0.3671685   | 0.360862283 | 0.181841772 | 0.206833396 |
| 0.363863592 | 0.032776243 | 0.254839054 | 0.037429806 |
| 0.315057221 | 0.313039846 | 0.244195097 | 0.197412845 |
| 0.39380075  | 0.327181333 | 0.016833541 | 0.343635507 |
| 0.007375308 | 0.006093622 | 0.156570857 | 0.176560632 |
| 0.108163354 | 0.291639015 | 0.173782114 | 0.160264386 |
| 0.18756747  | 0.013115711 | 0.355510697 | 0.349978743 |
| 0.224391428 | 0.260200063 | 0.326953493 | 0.15652207  |
| 0.284099066 | 0.231187367 | 0.165158879 | 0.109956702 |
| 0.194599381 | 0.187918296 | 0.100501738 | 0.010091978 |
| 0.227411599 | 0.278428527 | 0.027620488 | 0.081772315 |
| 0.355722389 | 0.391810313 | 0.031530476 | 0.012059209 |
| 0.166756078 | 0.248369972 | 0.414835602 | 0.336136922 |
| 0.344005362 | 0.398078296 | 0.257144021 | 0.14833985  |
| 0.034204721 | 0.253270498 | 0.329120973 | 0.159042972 |
| 0.371753759 | 0.020512463 | 0.319515864 | 0.356156929 |
| 0.058651594 | 0.143107822 | 0.025979949 | 0.046553138 |
| 0.327268211 | 0.104683069 | 0.173781783 | 0.058476999 |
| 0.248740749 | 0.347205173 | 0.024474787 | 0.120884186 |
| 0.242156131 | 0.324699773 | 0.087414282 | 0.161643291 |
| 0.230304209 | 0.118696165 | 0.3633467   | 0.33602758  |
| 0.059398956 | 0.052491218 | 0.114778565 | 0.308935584 |
| 0.342635898 | 0.214250799 | 0.015263007 | 0.28606685  |
| 0.3889223   | 0.311016354 | 0.325570588 | 0.350405503 |
| 0.036512376 | 0.290981306 | 0.315150337 | 0.271869421 |
| 0.111355622 | 0.187626304 | 0.172636239 | 0.027193837 |
| 0.214471243 | 0.317827961 | 0.288653861 | 0.128047603 |
| 0.241214662 | 0.044161747 | 0.016385645 | 0.338112505 |
| 0.328759953 | 0.044577728 | 0.153244342 | 0.36937739  |

|             |             |             |             |
|-------------|-------------|-------------|-------------|
| 0.005387195 | 0.329528439 | 0.409521644 | 0.164222643 |
| 0.373787029 | 0.397620725 | 0.314121822 | 0.143724832 |
| 0.011705861 | 0.360985682 | 0.270818339 | 0.258672156 |
| 0.287102705 | 0.22139053  | 0.102326062 | 0.062575505 |
| 0.225164063 | 0.027646189 | 0.117961526 | 0.17322249  |
| 0.255257384 | 0.223590075 | 0.138846619 | 0.117812507 |
| 0.193801805 | 0.034140116 | 0.343551172 | 0.147621891 |
| 0.267769276 | 0.172367792 | 0.281720473 | 0.129273061 |
| 0.255116939 | 0.360223753 | 0.287322673 | 0.010720928 |
| 0.319228311 | 0.336008295 | 0.34258475  | 0.002068367 |
| 0.354663487 | 0.004165752 | 0.189963976 | 0.197552552 |
| 0.182176354 | 0.186436694 | 0.242921873 | 0.28567567  |
| 0.212040075 | 0.153033687 | 0.193038614 | 0.166200678 |
| 0.155732693 | 0.131536009 | 0.289026278 | 0.191710718 |
| 0.26085848  | 0.070446157 | 0.042619361 | 0.041326155 |
| 0.035745923 | 0.336196652 | 0.150984421 | 0.02579829  |
| 0.162819353 | 0.211744496 | 0.276984419 | 0.317718802 |
| 0.345873297 | 0.043473652 | 0.236621547 | 0.300946678 |
| 0.167917529 | 0.158249274 | 0.023036936 | 0.201281851 |
| 0.138455934 | 0.27564296  | 0.197514579 | 0.137358688 |
| 0.266105483 | 0.272298188 | 0.144969281 | 0.329607286 |
| 0.258769157 | 0.224597227 | 0.134105423 | 0.082443742 |
| 0.096002365 | 0.064627819 | 0.315826186 | 0.000633338 |
| 0.239231541 | 0.113116592 | 0.377160103 | 0.311101377 |
| 0.337794926 | 0.290384885 | 0.134045947 | 0.046905852 |
| 0.118625974 | 0.081032333 | 0.074593063 | 0.322651065 |
| 0.330767719 | 0.114556651 | 0.283181291 | 0.127637722 |
| 0.362045095 | 0.321528634 | 0.287935837 | 0.14073659  |
| 0.162898128 | 0.090869457 | 0.309763636 | 0.047098084 |
| 0.257289625 | 0.290135679 | 0.164240204 | 0.246693744 |
| 0.21531577  | 0.391586746 | 0.023980252 | 0.400708179 |
| 0.276858008 | 0.062147017 | 0.350165522 | 0.158616233 |
| 0.162002395 | 0.136055445 | 0.350088643 | 0.185139114 |
| 0.173502283 | 0.332331307 | 0.014066166 | 0.106785142 |
| 0.277252421 | 0.205628304 | 0.265435448 | 0.291717761 |
| 0.320668078 | 0.312283393 | 0.312324542 | 0.147535624 |
| 0.288835087 | 0.302498886 | 0.182715144 | 0.182857584 |
| 0.243120749 | 0.06468062  | 0.190955237 | 0.021604219 |
| 0.297237171 | 0.296011945 | 0.218832664 | 0.031225977 |
| 0.009587097 | 0.343591813 | 0.260018979 | 0.022683567 |
| 0.424058945 | 0.31431001  | 0.199984961 | 0.318812044 |
| 0.095425854 | 0.302346448 | 0.136652233 | 0.336241252 |
| 0.020632608 | 0.16849607  | 0.300400926 | 0.23731283  |
| 0.237891519 | 0.346633719 | 0.32437799  | 0.345522632 |
| 0.019788646 | 0.25184934  | 0.002161396 | 0.254994539 |
| 0.2768995   | 0.320928833 | 0.120773955 | 0.16596555  |
| 0.233354545 | 0.286775229 | 0.236829156 | 0.247892978 |
| 0.009365532 | 0.327293091 | 0.1246045   | 0.2762528   |
| 0.223665965 | 0.21433499  | 0.046421569 | 0.311216103 |
| 0.256213794 | 0.237308075 | 0.173686325 | 0.244369943 |
| 0.321015849 | 0.261134579 | 0.06882422  | 0.252754184 |
| 0.236505869 | 0.024073897 | 0.178431615 | 0.388365188 |
| 0.152750622 | 0.339498559 | 0.414187423 | 0.163617661 |
| 0.341193464 | 0.253777649 | 0.251493639 | 0.371651059 |

|             |             |             |             |
|-------------|-------------|-------------|-------------|
| 0.098574152 | 0.168696801 | 0.366716911 | 0.330637651 |
| 0.25720339  | 0.313540747 | 0.335792355 | 0.253914639 |
| 0.278184906 | 0.057730999 | 0.318348142 | 0.234314773 |
| 0.334869962 | 0.234957819 | 0.157649624 | 0.250260341 |
| 0.029609015 | 0.119511037 | 0.219680227 | 0.072238437 |
| 0.207088068 | 0.280973267 | 0.299764301 | 0.289280326 |
| 0.126941608 | 0.021671015 | 0.336919537 | 0.066909702 |
| 0.140827043 | 0.314720924 | 0.14891898  | 0.304575214 |
| 0.097753701 | 0.205112942 | 0.14359526  | 3.30E-05    |
| 0.356439967 | 0.1008662   | 0.253363341 | 0.26004129  |
| 0.281582963 | 0.02291226  | 0.305489955 | 0.42201544  |
| 0.185833468 | 0.237885729 | 0.2733995   | 0.317775649 |
| 0.31055836  | 0.284423671 | 0.296384543 | 0.230134733 |
| 0.357927584 | 0.191770414 | 0.249773005 | 0.297931258 |
| 0.255181689 | 0.14994904  |             |             |
| BLMH        | 0.054853403 | 0.272405661 | 0.03931505  |
| 0.151364132 | 0.274296198 | 0.167161781 | 0.03839659  |
| 0.073979527 | 0.187902651 | 0.056349218 | 0.297768736 |
| 0.026873834 | 0.083809461 | 0.368522689 | 0.040443243 |
| 0.267889267 | 0.045933902 | 0.084433995 | 0.022763094 |
| 0.076062234 | 0.250001217 | 0.186452085 | 0.16409651  |
| 0.194587943 | 0.170702248 | 0.165701805 | 0.174474409 |
| 0.367095371 | 0.119336891 | 0.324909366 | 0.054027298 |
| 0.347447191 | 0.295554561 | 0.177457289 | 0.019430303 |
| 0.218704179 | 0.004899451 | 0.318019525 | 0.163119248 |
| 0.147630487 | 0.304088242 | 0.090975033 | 0.198365683 |
| 0.114118493 | 0.033794748 | 0.052903473 | 0.236435108 |
| 0.146949081 | 0.110718247 | 0.039683601 | 0.277412021 |
| 0.097875506 | 0.274981446 | 0.196105557 | 0.002716611 |
| 0.170648768 | 0.056815171 | 0.105608634 | 0.371793165 |
| 0.230765421 | 0.12853228  | 0.067481122 | 0.088905727 |
| 0.184713672 | 0.236558112 | 0.21234205  | 0.08496664  |
| 0.395802959 | 0.112657989 | 0.268418565 | 0.130265924 |
| 0.143298952 | 0.013196613 | 0.168551835 | 0.040070945 |
| 0.128808291 | 0.211062386 | 0.274980506 | 0.143765696 |
| 0.264431545 | 0.383986218 | 0.175636598 | 0.332726374 |
| 0.047536357 | 0.233750629 | 0.155377316 | 0.287422742 |
| 0.22202801  | 0.032838003 | 0.368899916 | 0.405833164 |
| 0.019403166 | 0.142266334 | 0.236257718 | 0.080779589 |
| 0.31407506  | 0.092608668 | 0.145315322 | 0.174757359 |
| 0.298218342 | 0.232345069 | 0.315079562 | 0.289149192 |
| 0.190486894 | 0.050541203 | 0.322441404 | 0.250966847 |
| 1           | 0.068216153 | 0.134148839 | 0.347066285 |
| 0.277733911 | 0.389818595 | 0.263163125 | 0.262822067 |
| 0.232132855 | 0.39838026  | 0.320169055 | 0.303099603 |
| 0.031079036 | 0.37924307  | 0.164318428 | 0.063221234 |
| 0.032479506 | 0.084971612 | 0.081688852 | 0.280092523 |
| 0.386190218 | 0.243066875 | 0.124604627 | 0.202219812 |
| 0.383247343 | 0.314434345 | 0.360442352 | 0.311615863 |
| 0.036973756 | 0.093112353 | 0.2315997   | 0.116778171 |
| 0.265344889 | 0.084004438 | 0.195792078 | 0.362659247 |
| 0.3666129   | 0.360812138 | 0.068268122 | 0.358811874 |
| 0.076375347 | 0.435392015 | 0.313697658 | 0.17353092  |
| 0.388919733 | 0.360570854 | 0.436370526 | 0.350606659 |

|             |             |             |             |
|-------------|-------------|-------------|-------------|
| 0.374642048 | 0.213399898 | 0.013744133 | 0.266797951 |
| 0.440795468 | 0.032717122 | 0.350162521 | 0.379041609 |
| 0.353627078 | 0.366471219 | 0.415676627 | 0.401868929 |
| 0.354410142 | 0.058398328 | 0.005464076 | 0.271612097 |
| 0.365442076 | 0.370683113 | 0.091914821 | 0.201573117 |
| 0.258580672 | 0.1792651   | 0.29419246  | 0.165496067 |
| 0.424479423 | 0.361841284 | 0.355772534 | 0.259949126 |
| 0.103707608 | 0.285441854 | 0.198336227 | 0.324916713 |
| 0.051133653 | 0.076159283 | 0.045537609 | 0.22300882  |
| 0.09576636  | 0.193903902 | 0.13697999  | 0.187073956 |
| 0.215966004 | 0.115797975 | 0.134317836 | 0.331257445 |
| 0.041668636 | 0.234564607 | 0.115788762 | 0.09639412  |
| 0.058332062 | 0.131821365 | 0.152833598 | 0.16740595  |
| 0.227947515 | 0.163920972 | 0.280622754 | 0.37728714  |
| 0.125046283 | 0.15704937  | 0.282633977 | 0.414416107 |
| 0.416435842 | 0.260562872 | 0.194123341 | 0.05010211  |
| 0.131973052 | 0.069198194 | 0.101097217 | 0.209343719 |
| 0.137217699 | 0.120275082 | 0.235948742 | 0.38888523  |
| 0.167555305 | 0.053680171 | 0.135242969 | 0.356132211 |
| 0.102230607 | 0.221640376 | 0.396796766 | 0.166860573 |
| 0.006830516 | 0.208628554 | 0.367232302 | 0.102472842 |
| 0.183919692 | 0.152840159 | 0.189489213 | 0.368810039 |
| 0.114561486 | 0.1255576   | 0.384630925 | 0.354669854 |
| 0.137884385 | 0.139152175 | 0.410343263 | 0.018026736 |
| 0.161026356 | 0.121680599 | 0.314889251 | 0.084929834 |
| 0.205657388 | 0.258869678 | 0.258907313 | 0.185198738 |
| 0.104563251 | 0.380543707 | 0.317273146 | 0.407437294 |
| 0.12291108  | 0.409220081 | 0.383308919 | 0.402211103 |
| 0.269533827 | 0.123294167 | 0.10193455  | 0.360511251 |
| 0.364332406 | 0.080315046 | 0.054275242 | 0.289946298 |
| 0.100060924 | 0.294425748 | 0.097429984 | 0.417829737 |
| 0.398195207 | 0.299585559 | 0.135552418 | 0.34476955  |
| 0.382363981 | 0.206150511 | 0.32132139  | 0.413434891 |
| 0.0616731   | 0.190799826 | 0.156551868 | 0.391188136 |
| 0.168279743 | 0.130060317 | 0.245218149 | 0.101078339 |
| 0.017485801 | 0.048862523 | 0.056928431 | 0.174529587 |
| 0.162885558 | 0.200373704 | 0.273812885 | 0.392170952 |
| 0.114720413 | 0.359593124 | 0.153889309 | 0.17952414  |
| 0.307723895 | 0.152086246 | 0.252247285 | 0.277997586 |
| 0.200960964 | 0.049071875 | 0.158917977 | 0.386202837 |
| 0.023218505 | 0.18667341  | 0.130385712 | 0.013745883 |
| 0.0315399   | 0.230580421 | 0.075585423 | 0.178653621 |
| 0.413056123 | 0.169302404 | 0.158205094 | 0.064450136 |
| 0.341231217 | 0.090105843 | 0.028986116 | 0.344628547 |
| 0.321965002 | 0.298007331 | 0.313392411 | 0.29132527  |
| 0.294114118 | 0.258052968 | 0.328673361 | 0.186646721 |
| 0.071444417 | 0.037293584 | 0.136446624 | 0.189923889 |
| 0.003322005 | 0.374010543 | 0.182462578 | 0.157399285 |
| 0.314400254 | 0.200095259 | 0.04364302  | 0.233387515 |
| 0.037668143 | 0.133320763 | 0.094463325 | 0.11484854  |
| 0.305893906 | 0.016681008 | 0.132752865 | 0.127169771 |
| 0.326407637 | 0.289730335 | 0.13308987  | 0.395558397 |
| 0.287303462 | 0.072983616 | 0.220997348 | 0.368649367 |
| 0.056511183 | 0.023303582 | 0.099203453 | 0.016880195 |

|             |             |             |             |
|-------------|-------------|-------------|-------------|
| 0.096314901 | 0.306312976 | 0.11701103  | 0.049251845 |
| 0.242669328 | 0.01126037  | 0.308082524 | 0.408394297 |
| 0.312815187 | 0.411433206 | 0.411189135 | 0.20572436  |
| 0.39546986  | 0.049243741 | 0.397792006 | 0.287077167 |
| 0.095161282 | 0.004000858 | 0.014521993 | 0.389486134 |
| 0.253727935 | 0.039377779 | 0.157383415 | 0.158518501 |
| 0.129541392 | 0.064306413 | 0.051717721 | 0.16755784  |
| 0.277639011 | 0.244341538 | 0.141760715 | 0.313719713 |
| 0.164135717 | 0.195696768 | 0.110473737 | 0.065283321 |
| 0.271115535 | 0.066129556 | 0.057395573 | 0.034659192 |
| 0.310378119 | 0.083392601 | 0.310813701 | 0.374615893 |
| 0.416236432 | 0.336996283 | 0.077485369 | 0.144660374 |
| 0.315342045 | 0.064286404 | 0.120596183 | 0.069753579 |
| 0.344201503 | 0.293548721 | 0.346643693 | 0.295229655 |
| 0.418935341 | 0.377918888 | 0.033602882 | 0.330923124 |
| 0.046112702 | 0.006189339 | 0.168857006 | 0.196656069 |
| 0.013846049 | 0.179132365 | 0.252112016 | 0.062268328 |
| 0.093773222 | 0.041101038 | 0.133432166 | 0.13746987  |
| 0.254512001 | 0.208450447 | 0.242515863 | 0.155343486 |
| 0.140637154 | 0.100002989 | 0.144497076 | 0.0904853   |
| 0.063625012 | 0.228282297 | 0.175367952 | 0.019482947 |
| 0.18079392  | 0.237084545 | 0.059628669 | 0.146273559 |
| 0.402963632 | 0.404690601 | 0.039376567 | 0.04681488  |
| 0.24024716  | 0.13254144  | 0.42030138  | 0.353291779 |
| 0.383384076 | 0.425033365 | 0.32605104  | 0.10989106  |
| 0.061675122 | 0.238765333 | 0.233069179 | 0.120365387 |
| 0.395654076 | 0.038486117 | 0.353442971 | 0.200947971 |
| 0.09930264  | 0.131735873 | 0.071640637 | 0.074539535 |
| 0.268688533 | 0.177766037 | 0.192925588 | 0.108025093 |
| 0.179208331 | 0.160023642 | 0.034798937 | 0.182344052 |
| 0.272501915 | 0.115798893 | 0.143844022 | 0.099675664 |
| 0.24428006  | 0.032747954 | 0.310797399 | 0.3942942   |
| 0.12126385  | 0.062945206 | 0.111691546 | 0.260228316 |
| 0.318595137 | 0.14839971  | 0.07285281  | 0.285836286 |
| 0.395633124 | 0.296493486 | 0.367551655 | 0.359262751 |
| 0.068156774 | 0.271183181 | 0.112142074 | 0.21740023  |
| 0.142302596 | 0.179823199 | 0.147298003 | 0.059082544 |
| 0.244674885 | 0.344060782 | 0.294178669 | 0.177951757 |
| 0.208598928 | 0.065781923 | 0.030981548 | 0.31984675  |
| 0.141304312 | 0.076742504 | 0.099605069 | 0.30393658  |
| 0.009998122 | 0.122524078 | 0.367772385 | 0.179128526 |
| 0.381167673 | 0.397081758 | 0.388045544 | 0.090737336 |
| 0.001138389 | 0.270593378 | 0.327297331 | 0.187269338 |
| 0.303325624 | 0.281294405 | 0.055728434 | 0.096609006 |
| 0.306371646 | 0.063101724 | 0.114673911 | 0.136750123 |
| 0.075173709 | 0.220912718 | 0.204682742 | 0.11094013  |
| 0.148996559 | 0.043707643 | 0.166563367 | 0.170402872 |
| 0.060013663 | 0.264463567 | 0.350618035 | 0.056529307 |
| 0.128469206 | 0.326694627 | 0.281006758 | 0.03095409  |
| 0.214773891 | 0.29977932  | 0.345749984 | 0.0042152   |
| 0.350655505 | 0.018592458 | 0.187426444 | 0.220597689 |
| 0.167153847 | 0.136918517 | 0.254755633 | 0.17951729  |
| 0.190742194 | 0.137807432 | 0.208114913 | 0.264971935 |
| 0.174004105 | 0.129479773 | 0.250016245 | 0.13442335  |

|             |             |             |             |
|-------------|-------------|-------------|-------------|
| 0.225345957 | 0.104455097 | 0.080791774 | 0.079149048 |
| 0.097899147 | 0.336702499 | 0.245512058 | 0.061312309 |
| 0.216829153 | 0.111773029 | 0.356929963 | 0.331975316 |
| 0.390161175 | 0.077812863 | 0.139262125 | 0.336423671 |
| 0.049127364 | 0.111761    | 0.032028273 | 0.189961122 |
| 0.194685887 | 0.199273029 | 0.156224339 | 0.168217568 |
| 0.216947821 | 0.353089217 | 0.241551048 | 0.356946715 |
| 0.191038215 | 0.117773832 | 0.070838906 | 0.134960758 |
| 0.131292704 | 0.099840967 | 0.247432549 | 0.008363886 |
| 0.281361515 | 0.123993394 | 0.382948587 | 0.352056853 |
| 0.127483267 | 0.35363579  | 0.093820863 | 0.074421046 |
| 0.063659235 | 0.124115115 | 0.138495305 | 0.28245077  |
| 0.130749466 | 0.132339163 | 0.257204553 | 0.112062544 |
| 0.319797404 | 0.244345051 | 0.120565247 | 0.10888597  |
| 0.144493219 | 0.136519162 | 0.312443505 | 0.061394982 |
| 0.206260305 | 0.192850261 | 0.134529867 | 0.221243403 |
| 0.164118591 | 0.380034777 | 0.054382721 | 0.393590427 |
| 0.170952988 | 0.105246164 | 0.404235844 | 0.151943018 |
| 0.11487475  | 0.157239779 | 0.125908197 | 0.095315179 |
| 0.108365258 | 0.15135254  | 0.003052243 | 0.048251338 |
| 0.348676614 | 0.068978393 | 0.227097931 | 0.244791185 |
| 0.151211446 | 0.313407274 | 0.103721493 | 0.117686114 |
| 0.311312791 | 0.336372639 | 0.170779961 | 0.230111673 |
| 0.271272048 | 0.105927109 | 0.230362169 | 0.003095324 |
| 0.247540322 | 0.224498343 | 0.098921417 | 0.050329216 |
| 0.02262499  | 0.126049375 | 0.217614212 | 0.03299786  |
| 0.396518623 | 0.132976704 | 0.143274341 | 0.317928132 |
| 0.123308839 | 0.34355887  | 0.130924914 | 0.385896509 |
| 0.013013188 | 0.193941585 | 0.178337007 | 0.132869796 |
| 0.222578416 | 0.18261866  | 0.367906447 | 0.187944784 |
| 0.046491752 | 0.180473095 | 0.001857645 | 0.33494297  |
| 0.301209525 | 0.170263191 | 0.177438245 | 0.057757958 |
| 0.301514652 | 0.280993255 | 0.121510086 | 0.175246372 |
| 0.042055037 | 0.297012322 | 0.185345452 | 0.352669933 |
| 0.113848448 | 0.149756409 | 0.097999509 | 0.165114687 |
| 0.304848713 | 0.13250442  | 0.206974863 | 0.10889303  |
| 0.342445927 | 0.249041678 | 0.107094166 | 0.139606474 |
| 0.16730046  | 0.05374757  | 0.104586313 | 0.394085299 |
| 0.178494435 | 0.180177382 | 0.404220926 | 0.149460796 |
| 0.166903351 | 0.285576753 | 0.177164263 | 0.363463206 |
| 0.105046231 | 0.255162992 | 0.336928454 | 0.324628573 |
| 0.328332662 | 0.129399711 | 0.17154419  | 0.160810221 |
| 0.323516385 | 0.130091299 | 0.117180888 | 0.284782036 |
| 0.147305546 | 0.273740234 | 0.122162367 | 0.154819005 |
| 0.076325238 | 0.087253308 | 0.184470915 | 0.123355263 |
| 0.240458019 | 0.229933967 | 0.143985364 | 0.369616134 |
| 0.204392432 | 0.077417027 | 0.388403536 | 0.025596468 |
| 0.201066538 | 0.356893121 | 0.207042298 | 0.196021491 |
| 0.187283857 | 0.19155241  | 0.138114135 | 0.003511503 |
| 0.338031655 | 0.056980198 | 0.119767501 | 0.200672918 |
| 0.121063633 | 0.036747582 | 0.360576514 | 0.425350768 |
| 0.214336894 | 0.104819481 | 0.130626222 | 0.33924588  |
| 0.13223512  | 0.102093179 | 0.109065909 | 0.220560596 |
| 0.152927738 | 0.111971728 | 0.138490265 | 0.168150331 |



|             |             |             |             |
|-------------|-------------|-------------|-------------|
| 0.285023447 | 0.123137369 |             |             |
| BLVRA       | 0.230108318 | 0.147634675 | 0.229903768 |
| 0.18008375  | 0.052804947 | 0.06547185  | 0.199158582 |
| 0.17002117  | 0.130419094 | 0.026798652 | 0.07830269  |
| 0.215065175 | 0.004321931 | 0.15101737  | 0.185753436 |
| 0.051140095 | 0.197057899 | 0.193123447 | 0.027204924 |
| 0.088498146 | 0.049662931 | 0.031119808 | 0.07414252  |
| 0.045146449 | 0.337639502 | 0.111470766 | 0.030660112 |
| 0.150111357 | 0.013365914 | 0.072046056 | 0.023225646 |
| 0.230561366 | 0.047664405 | 0.025742831 | 0.246566018 |
| 0.058158922 | 0.002074078 | 0.257761301 | 0.083635716 |
| 0.020296687 | 0.24811837  | 0.043513752 | 0.121449505 |
| 0.044899086 | 0.249057265 | 0.014554682 | 0.055329925 |
| 0.096626173 | 0.086225193 | 0.202149264 | 0.091068366 |
| 0.04292184  | 0.15563125  | 0.087209038 | 0.007175078 |
| 0.018280307 | 0.001241418 | 0.008532231 | 0.194247703 |
| 0.225782405 | 0.175023858 | 0.013893334 | 0.084274334 |
| 0.050542196 | 0.074125811 | 0.151746803 | 0.03503933  |
| 0.176806914 | 0.009962098 | 0.068539771 | 0.104916517 |
| 0.065841124 | 0.179205476 | 0.274297806 | 0.195644926 |
| 0.038635761 | 0.13658941  | 0.057586864 | 0.025565586 |
| 0.147413355 | 0.233071437 | 0.170859968 | 0.209697593 |
| 0.008872704 | 0.034754818 | 0.043540692 | 0.140514932 |
| 0.095334766 | 0.140313024 | 0.110933196 | 0.206927311 |
| 0.161858677 | 0.052418735 | 0.088370346 | 0.231156295 |
| 0.147131601 | 0.018515111 | 0.042428093 | 0.016046641 |
| 0.059795823 | 0.043211115 | 0.210204478 | 0.173271187 |
| 0.043929954 | 0.240890454 | 0.238719415 | 0.030782386 |
| 0.068216153 | 1           | 0.042861156 | 0.091787762 |
| 0.082207266 | 0.15069206  | 0.107628004 | 0.123059858 |
| 0.038467082 | 0.172052741 | 0.117242789 | 0.149215964 |
| 0.008015009 | 0.181178711 | 0.193461979 | 0.195687095 |
| 0.19691318  | 0.165254768 | 0.031618904 | 0.19909064  |
| 0.125394212 | 0.127135672 | 0.166053357 | 0.099130041 |
| 0.112245554 | 0.212000185 | 0.174939562 | 0.123170241 |
| 0.237489981 | 0.014884421 | 0.042282643 | 0.09958616  |
| 0.090807574 | 0.195813349 | 0.024311    | 0.238420047 |
| 0.214453517 | 0.100204736 | 0.176103417 | 0.267614858 |
| 0.101969527 | 0.203968291 | 0.134146116 | 0.181424223 |
| 0.224974027 | 0.236102231 | 0.173791787 | 0.058804068 |
| 0.222861607 | 0.106695576 | 0.012309673 | 0.139616914 |
| 0.189357507 | 0.006156278 | 0.110534421 | 0.12362951  |
| 0.183354519 | 0.09508252  | 0.162270671 | 0.146499735 |
| 0.178874576 | 0.23335138  | 0.000772692 | 0.09201252  |
| 0.20857313  | 0.183009743 | 0.095618668 | 0.035816304 |
| 0.050348284 | 0.074777218 | 0.088812033 | 0.030166537 |
| 0.217318068 | 0.135628509 | 0.125611136 | 0.110423335 |
| 0.073007525 | 0.25851601  | 0.027115406 | 0.242698323 |
| 0.233314495 | 0.209856475 | 0.267529492 | 0.142518314 |
| 0.046420294 | 0.159572332 | 0.071377787 | 0.04912713  |
| 0.185221096 | 0.075224701 | 0.018701834 | 0.060388435 |
| 0.30047067  | 0.052274274 | 0.196343502 | 0.164203646 |
| 0.216345043 | 0.333190723 | 0.115396136 | 0.163988409 |
| 0.079271112 | 0.360867189 | 0.067036271 | 0.145650955 |

|             |             |             |             |
|-------------|-------------|-------------|-------------|
| 0.041412194 | 0.274671777 | 0.090730032 | 0.185971909 |
| 0.202386903 | 0.040873897 | 0.206531086 | 0.127927877 |
| 0.038990088 | 0.015946204 | 0.007998912 | 0.036782093 |
| 0.352150119 | 0.0731543   | 0.05946628  | 0.079774911 |
| 0.132004066 | 0.137302448 | 0.034909845 | 0.262059194 |
| 0.258403165 | 0.060674634 | 0.128744891 | 0.052319608 |
| 0.17135965  | 0.099780827 | 0.110212039 | 0.041460781 |
| 0.116615108 | 0.014064528 | 0.018043194 | 0.132364261 |
| 0.016911026 | 0.026368816 | 0.129435052 | 0.077214211 |
| 0.040244468 | 0.295272414 | 0.166160873 | 0.001067488 |
| 0.034907201 | 0.07123247  | 0.139002981 | 0.038116127 |
| 0.166763026 | 0.142724829 | 0.037721817 | 0.051592039 |
| 0.255831149 | 0.184301529 | 0.154686723 | 0.154913907 |
| 0.028401962 | 0.174595533 | 0.107074848 | 0.15222167  |
| 0.121026998 | 0.024498784 | 0.005274793 | 0.115804606 |
| 0.125070937 | 0.028837683 | 0.278118437 | 0.076540247 |
| 0.033141792 | 0.060661869 | 0.053956395 | 0.168235994 |
| 0.244453724 | 0.194939891 | 0.130549375 | 0.099500239 |
| 0.167336258 | 0.165785791 | 0.127424717 | 0.179094512 |
| 0.025757635 | 0.035201181 | 0.039050317 | 0.12506807  |
| 0.238514003 | 0.034357924 | 0.210535525 | 0.007439554 |
| 0.000376474 | 0.192244491 | 0.232759578 | 0.118924148 |
| 0.020786911 | 0.047820774 | 0.076918842 | 0.16762329  |
| 0.191096764 | 0.183396022 | 0.164684344 | 0.061054319 |
| 0.183395559 | 0.033671256 | 0.035501887 | 0.05763826  |
| 0.204279849 | 0.160661476 | 0.157598505 | 0.243357727 |
| 0.217241228 | 0.021730432 | 0.078093708 | 0.019007785 |
| 0.216501863 | 0.101129146 | 0.329099372 | 0.366319515 |
| 0.129596285 | 0.354664952 | 0.214103011 | 0.034165046 |
| 0.119227556 | 0.226336174 | 0.052345677 | 0.147229106 |
| 0.16683124  | 0.162144804 | 0.165981661 | 0.198608183 |
| 0.128871978 | 0.093386532 | 0.098404131 | 0.095169598 |
| 0.20321937  | 0.201277604 | 0.021464008 | 0.075373798 |
| 0.016616859 | 0.131549284 | 0.052882505 | 0.271628282 |
| 0.074555645 | 0.120568568 | 0.232020629 | 0.046247814 |
| 0.219962089 | 0.009224747 | 0.06942449  | 0.089949785 |
| 0.092207808 | 0.229326984 | 0.046275457 | 0.025796854 |
| 0.215447646 | 0.207140617 | 0.023980465 | 0.191756228 |
| 0.091008764 | 0.239397499 | 0.072400538 | 0.094775344 |
| 0.22113876  | 0.01174776  | 0.05798853  | 0.007049035 |
| 0.032736136 | 0.191693264 | 0.034625734 | 0.244907587 |
| 0.151733636 | 0.189466171 | 0.214453598 | 0.190672144 |
| 0.189659766 | 0.149484331 | 0.173931733 | 0.02428685  |
| 0.185142933 | 0.001500438 | 0.162469681 | 0.148292994 |
| 0.029779137 | 0.01999894  | 0.041399865 | 0.125189836 |
| 0.048854139 | 0.281985952 | 0.223400421 | 0.057323786 |
| 0.190791889 | 0.174909983 | 0.197398408 | 0.036782633 |
| 0.075297595 | 0.064736109 | 0.02670691  | 0.192528099 |
| 0.117510949 | 0.121289402 | 0.048204908 | 0.264529705 |
| 0.053947971 | 0.238763238 | 0.239719544 | 0.031184907 |
| 0.086100409 | 0.306327922 | 0.259148304 | 0.173154614 |
| 0.202661847 | 0.078529719 | 0.022090115 | 0.041329591 |
| 0.118780558 | 0.253229986 | 0.027248814 | 0.227391673 |
| 0.173876854 | 0.066663259 | 0.181703636 | 0.238278706 |

|             |             |              |             |
|-------------|-------------|--------------|-------------|
| 0.17531257  | 0.198766843 | 0.22199135   | 0.108149111 |
| 0.180683974 | 0.004950743 | 0.075867452  | 0.153686459 |
| 0.009251714 | 0.035140047 | 0.235498253  | 0.063652764 |
| 0.071349624 | 0.230778068 | 0.01775097   | 0.019563696 |
| 0.119532695 | 0.057013229 | 0.035711005  | 0.167759337 |
| 0.054313314 | 0.038444665 | 0.120745603  | 0.126404724 |
| 0.032708406 | 0.224613551 | 0.334575794  | 0.206583017 |
| 0.044059588 | 0.039829013 | 0.243030602  | 0.248709648 |
| 0.138019706 | 0.134311682 | 0.171379358  | 0.125958477 |
| 0.234642822 | 0.049642423 | 0.136594513  | 0.163768612 |
| 0.219578118 | 0.194991681 | 0.263270938  | 0.086602654 |
| 0.232250028 | 0.085047757 | 0.036434913  | 0.087166971 |
| 0.164454947 | 0.221661951 | 0.186737029  | 0.020975161 |
| 0.234902418 | 0.157201594 | 0.203483852  | 0.20830861  |
| 0.0364931   | 0.201753037 | 0.115406481  | 0.239679512 |
| 0.064323723 | 0.021273652 | 0.215039926  | 0.171303396 |
| 0.153287159 | 0.012591744 | 0.206352172  | 0.081659965 |
| 0.158621043 | 0.02275776  | 0.0711108955 | 0.220978324 |
| 0.264615228 | 0.18077894  | 0.109809356  | 0.094216947 |
| 0.101348726 | 0.036939495 | 0.154094107  | 0.145624915 |
| 0.151825594 | 0.062682696 | 0.197610921  | 0.146054181 |
| 0.258783638 | 0.041965696 | 0.021292962  | 0.054992451 |
| 0.157458591 | 0.069750458 | 0.09523404   | 0.234958842 |
| 0.217530098 | 0.238669949 | 0.154607162  | 0.154296028 |
| 0.051149771 | 0.195280142 | 0.212955144  | 0.121135109 |
| 0.021087371 | 0.202459872 | 0.039543871  | 0.08855181  |
| 0.02119688  | 0.007826412 | 0.142031811  | 0.109420758 |
| 0.204477898 | 0.142563369 | 0.218309704  | 0.090131093 |
| 0.000114436 | 0.055259802 | 0.084004164  | 0.051088267 |
| 0.143873976 | 0.168611934 | 0.060643308  | 0.191396325 |
| 0.21877702  | 0.276030876 | 0.128162619  | 0.059593106 |
| 0.011072469 | 0.081559678 | 0.216293833  | 0.129088156 |
| 0.099323001 | 0.208917951 | 0.020564536  | 0.144750198 |
| 0.01363197  | 0.219961166 | 0.169411748  | 0.032095035 |
| 0.012239553 | 0.13297708  | 0.121897897  | 0.245281498 |
| 0.030706938 | 0.12789388  | 0.153082357  | 0.022336594 |
| 0.076193846 | 0.173250355 | 0.094156074  | 0.106239027 |
| 0.113120293 | 0.085692689 | 0.092726159  | 0.06054812  |
| 0.095117102 | 0.132723663 | 0.110831381  | 0.167143143 |
| 0.132272449 | 0.133950332 | 0.061441563  | 0.076583808 |
| 0.061047594 | 0.219022243 | 0.342082798  | 0.371986785 |
| 0.19749675  | 0.135190669 | 0.290628391  | 0.301066628 |
| 0.142569109 | 0.057866605 | 0.223751453  | 0.176161538 |
| 0.172734896 | 0.305809195 | 0.059130598  | 0.141595872 |
| 0.011371553 | 0.056271452 | 0.192034793  | 0.07721904  |
| 0.132867172 | 0.037315055 | 0.051377914  | 0.124326865 |
| 0.082927488 | 0.261664156 | 0.274795573  | 0.189371136 |
| 0.063475093 | 0.041272399 | 0.034105649  | 0.157653336 |
| 0.189495465 | 0.250930779 | 0.042572694  | 0.140109256 |
| 0.112568557 | 0.131855709 | 0.116413521  | 0.210339316 |
| 0.015642289 | 0.204530967 | 0.040757867  | 0.214447107 |
| 0.031704736 | 0.313670982 | 0.261539291  | 0.08739971  |
| 0.009227513 | 0.165350726 | 0.063155262  | 0.07744826  |
| 0.084364987 | 0.075429444 | 0.041066932  | 0.099164676 |

|             |             |             |             |
|-------------|-------------|-------------|-------------|
| 0.107913695 | 0.221100273 | 0.217779013 | 0.205807185 |
| 0.047013335 | 0.044066206 | 0.06778782  | 0.071068864 |
| 0.085134941 | 0.151974297 | 0.231476292 | 0.147196992 |
| 0.044033186 | 0.289849486 | 0.238279413 | 0.087903396 |
| 0.096049805 | 0.110977444 | 0.008941985 | 0.047692467 |
| 0.098048943 | 0.022378439 | 0.000554438 | 0.008171138 |
| 0.140174837 | 0.036955648 | 0.099421075 | 0.10130158  |
| 0.039309105 | 0.138118592 | 0.007626919 | 0.093545032 |
| 0.195728579 | 0.236830713 | 0.087229669 | 0.216757436 |
| 0.139959512 | 0.200633674 | 0.093190311 | 0.003652158 |
| 0.051075012 | 0.038948902 | 0.028768943 | 0.198119709 |
| 0.207209772 | 0.010777258 | 0.06141205  | 0.201593925 |
| 0.125907166 | 0.009262126 | 0.069459823 | 0.08526396  |
| 0.216174799 | 0.245008098 | 0.110565054 | 0.098996782 |
| 0.124899522 | 0.164310582 | 0.031112861 | 0.035380471 |
| 0.066013847 | 0.028288541 | 0.122038874 | 0.023286022 |
| 0.227532715 | 0.069066183 | 0.01730177  | 0.286734718 |
| 0.232612133 | 0.027379015 | 0.280696443 | 0.02141435  |
| 0.155026539 | 0.157797037 | 0.039473724 | 0.034763827 |
| 0.163339537 | 0.046210218 | 0.15879861  | 0.16536165  |
| 0.015019443 | 0.05522723  | 0.207037402 | 0.030844394 |
| 0.277960784 | 0.035943885 | 0.21270864  | 0.024563336 |
| 0.176809162 | 0.137968743 | 0.263485611 | 0.054105775 |
| 0.062233465 | 0.259638307 | 0.040148259 | 0.181703946 |
| 0.125312433 | 0.025663718 | 0.104716438 | 0.12193894  |
| 0.022591269 | 0.175101361 | 0.046570251 | 0.17937923  |
| 0.098225438 | 0.181643614 | 0.096193274 | 0.156196298 |
| 0.170608571 | 0.02521818  | 0.020588364 | 0.057774018 |
| 0.196846525 | 0.200788204 | 0.02611599  | 0.159710848 |
| 0.017061585 | 0.124957574 | 0.070666481 | 0.057188249 |
| 0.163468606 | 0.109409516 | 0.057640702 | 0.231248895 |
| 0.10543354  | 0.056987435 | 0.047692377 | 0.23094052  |
| 0.12457312  | 0.173512972 | 0.222076998 | 0.001469462 |
| 0.110045455 | 0.082380746 | 0.136898368 | 0.043029476 |
| 0.31926399  | 0.092449324 | 0.084793266 | 0.061669186 |
| 0.115881604 | 0.027860461 | 0.049341299 | 0.060414773 |
| 0.021046193 | 0.217250057 | 0.205199774 | 0.148516304 |
| 0.135205068 | 0.029632377 | 0.020209084 | 0.175826518 |
| 0.012575592 | 0.016611325 | 0.021452491 | 0.087378523 |
| 0.016205908 | 0.031985957 | 0.030875841 | 0.028338582 |
| 0.134157366 | 0.103266605 |             |             |
| BOLA3       | 0.02784543  | 0.196129475 | 0.015445181 |
| 0.046817802 | 0.288692093 | 0.077884927 | 0.03777922  |
| 0.048819075 | 0.179116304 | 0.045728505 | 0.181026643 |
| 0.011516783 | 0.062199835 | 0.281103251 | 0.036409637 |
| 0.275430667 | 0.029420285 | 0.091873548 | 0.029754518 |
| 0.060812913 | 0.292762351 | 0.07111676  | 0.09311874  |
| 0.257319797 | 0.11178083  | 0.138697554 | 0.183733843 |
| 0.260233413 | 0.034947898 | 0.206945777 | 0.022901163 |
| 0.285584736 | 0.299021671 | 0.136781489 | 0.006244452 |
| 0.156294576 | 0.036970155 | 0.265623421 | 0.18001847  |
| 0.085039434 | 0.220640692 | 0.059481154 | 0.137687535 |
| 0.114352369 | 0.014819893 | 0.014776228 | 0.270305045 |
| 0.152527122 | 0.099580472 | 0.024347995 | 0.207483775 |

|             |             |             |             |
|-------------|-------------|-------------|-------------|
| 0.099610738 | 0.153618118 | 0.141940063 | 0.001438475 |
| 0.139451136 | 0.039910702 | 0.097424893 | 0.247440915 |
| 0.159186922 | 0.107562261 | 0.059972929 | 0.092566415 |
| 0.207605854 | 0.277805465 | 0.211913964 | 0.089656716 |
| 0.275633429 | 0.103828473 | 0.236723533 | 0.040675298 |
| 0.12583071  | 0.017014918 | 0.146865785 | 0.044619635 |
| 0.115705528 | 0.168475481 | 0.190186835 | 0.17700595  |
| 0.190074409 | 0.293807622 | 0.188686697 | 0.241661482 |
| 0.101778648 | 0.279287635 | 0.152189306 | 0.307393008 |
| 0.265923632 | 0.04677391  | 0.26133049  | 0.311318856 |
| 0.025823096 | 0.117872482 | 0.245826842 | 0.069276638 |
| 0.200167472 | 0.085480478 | 0.098830838 | 0.097859637 |
| 0.318029114 | 0.295030926 | 0.25453776  | 0.215418068 |
| 0.178180394 | 0.038161259 | 0.216784907 | 0.283501856 |
| 0.134148839 | 0.042861156 | 1           | 0.289822262 |
| 0.226612664 | 0.264044874 | 0.228392432 | 0.293412904 |
| 0.253761337 | 0.276489518 | 0.235679465 | 0.230968023 |
| 0.015299804 | 0.271945064 | 0.105238394 | 0.027160926 |
| 0.022974082 | 0.060747324 | 0.107887068 | 0.248711703 |
| 0.269681083 | 0.187734316 | 0.091865752 | 0.234947198 |
| 0.351931451 | 0.205498401 | 0.272440988 | 0.272637047 |
| 0.025438385 | 0.109349736 | 0.245739432 | 0.059038363 |
| 0.261115583 | 0.093810432 | 0.224455141 | 0.258245823 |
| 0.241801094 | 0.313417197 | 0.050116786 | 0.264973203 |
| 0.105573681 | 0.317112169 | 0.204457071 | 0.134461898 |
| 0.280862445 | 0.236775374 | 0.334768915 | 0.291661283 |
| 0.239226272 | 0.117853679 | 0.027324157 | 0.263218636 |
| 0.31978694  | 0.014389078 | 0.278109514 | 0.305080703 |
| 0.2507386   | 0.294140915 | 0.348051421 | 0.290585477 |
| 0.243537261 | 0.055811476 | 0.018882745 | 0.320710575 |
| 0.262757791 | 0.261423908 | 0.079139299 | 0.182949779 |
| 0.277542827 | 0.103090405 | 0.245817021 | 0.060479316 |
| 0.334938862 | 0.265156793 | 0.264604219 | 0.238037761 |
| 0.128868952 | 0.200470025 | 0.204887544 | 0.205300868 |
| 0.023989809 | 0.041119207 | 0.026072157 | 0.24597546  |
| 0.033337954 | 0.186287733 | 0.095139313 | 0.246862029 |
| 0.19115549  | 0.089223083 | 0.110469958 | 0.314709325 |
| 0.031736859 | 0.151171893 | 0.095466682 | 0.099363186 |
| 0.034608288 | 0.102087289 | 0.070184319 | 0.051751506 |
| 0.213245667 | 0.1235966   | 0.216967494 | 0.29855161  |
| 0.162380723 | 0.105565741 | 0.20661471  | 0.313067201 |
| 0.3456892   | 0.228052388 | 0.181929718 | 0.010600603 |
| 0.123402678 | 0.075961808 | 0.103479742 | 0.181590554 |
| 0.104830215 | 0.09951542  | 0.26483417  | 0.314944402 |
| 0.093183377 | 0.054313387 | 0.148561016 | 0.242425302 |
| 0.082424318 | 0.126627152 | 0.319633693 | 0.161606759 |
| 0.001952894 | 0.178691899 | 0.269185945 | 0.13103222  |
| 0.204253832 | 0.074985841 | 0.060701837 | 0.312480753 |
| 0.087516498 | 0.170485813 | 0.27778718  | 0.310842249 |
| 0.046565052 | 0.106832626 | 0.326689758 | 0.042643638 |
| 0.212852775 | 0.054827776 | 0.294278677 | 0.071182902 |
| 0.183423403 | 0.292320921 | 0.257732943 | 0.168065084 |
| 0.052829763 | 0.277743983 | 0.227230698 | 0.289111998 |
| 0.123756632 | 0.330832033 | 0.29672793  | 0.281609218 |

|             |             |             |             |
|-------------|-------------|-------------|-------------|
| 0.204859487 | 0.16090647  | 0.073212676 | 0.275669763 |
| 0.303418541 | 0.082273856 | 0.038474959 | 0.252258456 |
| 0.135488167 | 0.304211371 | 0.108889813 | 0.32793633  |
| 0.286811548 | 0.202981378 | 0.093635471 | 0.352967432 |
| 0.265340764 | 0.117418796 | 0.267195033 | 0.332116524 |
| 0.054216888 | 0.244152114 | 0.186825917 | 0.3692595   |
| 0.13412198  | 0.155192476 | 0.215913664 | 0.076191346 |
| 0.002777322 | 0.041482287 | 0.041133268 | 0.163124986 |
| 0.149430271 | 0.161585263 | 0.279996252 | 0.296245134 |
| 0.09642255  | 0.231733756 | 0.182248321 | 0.147018789 |
| 0.247479445 | 0.178763768 | 0.198887474 | 0.241819952 |
| 0.191945825 | 0.01495705  | 0.053105835 | 0.295748915 |
| 0.019839213 | 0.115033831 | 0.119589333 | 0.003135454 |
| 0.024499928 | 0.171785905 | 0.063673449 | 0.134729586 |
| 0.333622018 | 0.123005659 | 0.137326593 | 0.069723606 |
| 0.261240092 | 0.069973151 | 0.003937517 | 0.291829931 |
| 0.26984683  | 0.266688482 | 0.2629467   | 0.226082672 |
| 0.292611113 | 0.220903408 | 0.326281424 | 0.092157706 |
| 0.047431731 | 0.032390139 | 0.137606851 | 0.23189825  |
| 0.001277098 | 0.277350181 | 0.206162094 | 0.124531455 |
| 0.27559509  | 0.236843615 | 0.017270914 | 0.243185025 |
| 0.008221131 | 0.082633024 | 0.066650009 | 0.148186247 |
| 0.336370635 | 0.006692555 | 0.037884236 | 0.10208227  |
| 0.19280072  | 0.200377326 | 0.120840852 | 0.283807123 |
| 0.204550821 | 0.057670833 | 0.224180989 | 0.267494391 |
| 0.046305904 | 0.041677728 | 0.09479229  | 0.005242625 |
| 0.023289543 | 0.244023039 | 0.116015974 | 0.024238791 |
| 0.206558063 | 0.002726294 | 0.198209934 | 0.292854343 |
| 0.200569256 | 0.329040271 | 0.275948324 | 0.166717172 |
| 0.273607048 | 0.043383584 | 0.288379179 | 0.207830804 |
| 0.087778735 | 0.000680832 | 0.005137253 | 0.302257308 |
| 0.237046007 | 0.024558726 | 0.136667063 | 0.036118906 |
| 0.057110633 | 0.044886789 | 0.03733626  | 0.163781172 |
| 0.163036917 | 0.235819922 | 0.112152553 | 0.227325614 |
| 0.188956827 | 0.203851854 | 0.08500224  | 0.056258575 |
| 0.200087381 | 0.028488992 | 0.062762415 | 0.006320539 |
| 0.303422131 | 0.061627754 | 0.21471557  | 0.262011777 |
| 0.310228897 | 0.304226864 | 0.056691    | 0.043114032 |
| 0.282424946 | 0.034372918 | 0.051990761 | 0.042316123 |
| 0.22883027  | 0.292158277 | 0.256977657 | 0.201348277 |
| 0.336741365 | 0.271903098 | 0.025816511 | 0.322759071 |
| 0.004647572 | 0.004116096 | 0.097460163 | 0.199555451 |
| 0.04377114  | 0.216151997 | 0.216843652 | 0.094024911 |
| 0.101462348 | 0.010002299 | 0.182427445 | 0.208746903 |
| 0.271875076 | 0.221185965 | 0.27139938  | 0.177464373 |
| 0.197757598 | 0.151205818 | 0.117381802 | 0.088338034 |
| 0.064104389 | 0.189286477 | 0.118180538 | 0.015783309 |
| 0.144221776 | 0.193739718 | 0.040747948 | 0.112121513 |
| 0.284185335 | 0.297105439 | 0.041353234 | 0.016827605 |
| 0.187755025 | 0.180135684 | 0.319869009 | 0.238790709 |
| 0.266727278 | 0.337645875 | 0.23994084  | 0.102884217 |
| 0.033955913 | 0.27078705  | 0.283924248 | 0.104331894 |
| 0.276118662 | 0.034417301 | 0.227941138 | 0.227103801 |
| 0.102905679 | 0.112522108 | 0.022908458 | 0.077951531 |

|             |             |             |             |
|-------------|-------------|-------------|-------------|
| 0.215595463 | 0.144228979 | 0.197844603 | 0.07154991  |
| 0.189181007 | 0.101198945 | 0.037051611 | 0.165442349 |
| 0.249612674 | 0.133408643 | 0.140732818 | 0.083056894 |
| 0.193638859 | 0.02860379  | 0.289883975 | 0.312683599 |
| 0.082047327 | 0.07942871  | 0.041501775 | 0.246632272 |
| 0.251682998 | 0.132711278 | 0.006695522 | 0.199418366 |
| 0.298050922 | 0.214277497 | 0.238408349 | 0.341238114 |
| 0.068254874 | 0.205638271 | 0.170930193 | 0.286929607 |
| 0.159671951 | 0.085321899 | 0.178783369 | 0.053521218 |
| 0.224639595 | 0.268053421 | 0.244683884 | 0.126846777 |
| 0.145083658 | 0.049699411 | 0.029044681 | 0.234407448 |
| 0.147817527 | 0.029012705 | 0.065985229 | 0.27426202  |
| 0.005381548 | 0.094596753 | 0.331237034 | 0.07626683  |
| 0.305352381 | 0.326683898 | 0.273880476 | 0.063043974 |
| 0.013583936 | 0.290956882 | 0.236743267 | 0.14745366  |
| 0.220706938 | 0.185427463 | 0.033079956 | 0.053361085 |
| 0.253903742 | 0.034817406 | 0.08883793  | 0.035705233 |
| 0.110290679 | 0.168476446 | 0.197247483 | 0.150316607 |
| 0.193445999 | 0.049161827 | 0.085730053 | 0.113181712 |
| 0.106193652 | 0.219256639 | 0.288628747 | 0.031080243 |
| 0.091850901 | 0.313180277 | 0.255203206 | 0.012209642 |
| 0.196610506 | 0.295901448 | 0.273418412 | 0.006090708 |
| 0.27806895  | 0.006772441 | 0.188240179 | 0.177901524 |
| 0.161091764 | 0.173839446 | 0.290373158 | 0.157369246 |
| 0.213378291 | 0.154111903 | 0.13025713  | 0.207282952 |
| 0.104220627 | 0.123176891 | 0.234882025 | 0.13286718  |
| 0.135860296 | 0.062205207 | 0.058656185 | 0.052459621 |
| 0.022920454 | 0.229739855 | 0.169957793 | 0.034777081 |
| 0.205462309 | 0.132268661 | 0.288515256 | 0.228663068 |
| 0.292520457 | 0.046439214 | 0.163744274 | 0.212625515 |
| 0.043474759 | 0.039536007 | 0.019325528 | 0.146244597 |
| 0.140396651 | 0.107796234 | 0.108572751 | 0.125878713 |
| 0.206230121 | 0.254322173 | 0.158568813 | 0.273732087 |
| 0.163515539 | 0.175661647 | 0.046658151 | 0.059573284 |
| 0.104600396 | 0.098386818 | 0.280536499 | 0.001771755 |
| 0.222508651 | 0.035018712 | 0.282085448 | 0.236199294 |
| 0.121002635 | 0.262399082 | 0.027593981 | 0.039394268 |
| 0.024036531 | 0.087564176 | 0.11456376  | 0.227973458 |
| 0.093719318 | 0.078052095 | 0.286196898 | 0.035832185 |
| 0.281441235 | 0.245529622 | 0.143586867 | 0.111506727 |
| 0.189658528 | 0.101440919 | 0.257098466 | 0.0394209   |
| 0.177477352 | 0.143663757 | 0.106641541 | 0.22469363  |
| 0.208301161 | 0.291455017 | 0.038910805 | 0.298384735 |
| 0.223899364 | 0.080859851 | 0.301865189 | 0.10751484  |
| 0.051216578 | 0.065279873 | 0.121831191 | 0.077361909 |
| 0.092941665 | 0.116586735 | 0.0034443   | 0.061575917 |
| 0.294726464 | 0.100963404 | 0.202923592 | 0.270434671 |
| 0.203647659 | 0.332679265 | 0.057607572 | 0.12734754  |
| 0.20808814  | 0.231926449 | 0.088522207 | 0.241526033 |
| 0.238013569 | 0.061695007 | 0.11949141  | 0.011243897 |
| 0.234034538 | 0.194804403 | 0.060316413 | 0.033892582 |
| 0.012721041 | 0.140500721 | 0.22001827  | 0.039992861 |
| 0.3454307   | 0.06327562  | 0.152361063 | 0.216845681 |
| 0.123800721 | 0.238839802 | 0.093452612 | 0.273870273 |

|             |             |             |             |
|-------------|-------------|-------------|-------------|
| 0.020056987 | 0.194602375 | 0.179446879 | 0.154435435 |
| 0.104372097 | 0.227852652 | 0.316179517 | 0.170431057 |
| 0.025988967 | 0.103306801 | 0.014876957 | 0.235760435 |
| 0.21739667  | 0.236185993 | 0.149371071 | 0.037536515 |
| 0.269754874 | 0.242978518 | 0.097818503 | 0.13703574  |
| 0.009842427 | 0.275874069 | 0.15388103  | 0.202188771 |
| 0.063855796 | 0.199646107 | 0.033545657 | 0.250177892 |
| 0.203907955 | 0.103185389 | 0.201368812 | 0.085460301 |
| 0.229018093 | 0.193256455 | 0.071503704 | 0.086121658 |
| 0.174625092 | 0.044911336 | 0.061629242 | 0.305260155 |
| 0.150822218 | 0.201563679 | 0.335410722 | 0.149122415 |
| 0.190426379 | 0.200027033 | 0.171037167 | 0.290049362 |
| 0.080425769 | 0.20916003  | 0.28882948  | 0.268932951 |
| 0.283536574 | 0.182518662 | 0.145554522 | 0.207607791 |
| 0.201409809 | 0.028328024 | 0.124270832 | 0.224482857 |
| 0.172279313 | 0.232433898 | 0.107216831 | 0.195879871 |
| 0.02186737  | 0.070725187 | 0.062037718 | 0.109388635 |
| 0.24472027  | 0.245571278 | 0.173856082 | 0.275806773 |
| 0.057343893 | 0.019536214 | 0.303090473 | 0.043517753 |
| 0.091077859 | 0.248686603 | 0.155411293 | 0.203372935 |
| 0.114096471 | 0.189204645 | 0.123998747 | 0.001066821 |
| 0.30753141  | 0.042364677 | 0.12975072  | 0.134970677 |
| 0.074634727 | 0.025732078 | 0.232928142 | 0.333727535 |
| 0.160677927 | 0.051754284 | 0.05953998  | 0.242852519 |
| 0.109687747 | 0.087317983 | 0.11539605  | 0.1627952   |
| 0.14613395  | 0.095380019 | 0.1163415   | 0.12733678  |
| 0.205008687 | 0.090730412 |             |             |
| BRCA1       | 0.082983204 | 0.429113658 | 0.06370646  |
| 0.164066696 | 0.368119762 | 0.434359124 | 0.066936188 |
| 0.143406185 | 0.361888039 | 0.377569598 | 0.401647518 |
| 0.018793307 | 0.153309476 | 0.457169659 | 0.061796321 |
| 0.449697399 | 0.037800299 | 0.120248455 | 0.10501258  |
| 0.271576342 | 0.339691987 | 0.417439662 | 0.399926942 |
| 0.351554587 | 0.17778881  | 0.371605761 | 0.460477818 |
| 0.512068601 | 0.369222753 | 0.473249713 | 0.267210969 |
| 0.404060754 | 0.389118225 | 0.467835902 | 0.017785413 |
| 0.453623875 | 0.024955784 | 0.42618726  | 0.310193887 |
| 0.226177384 | 0.327403877 | 0.389236358 | 0.277415049 |
| 0.42855134  | 0.040646309 | 0.289422162 | 0.45976836  |
| 0.367686027 | 0.328319098 | 0.073047566 | 0.459546072 |
| 0.430993243 | 0.355911004 | 0.414801862 | 0.003131164 |
| 0.399938962 | 0.169628439 | 0.337779864 | 0.506768819 |
| 0.215756533 | 0.138853538 | 0.390398613 | 0.287134704 |
| 0.442849873 | 0.420892144 | 0.279849584 | 0.435804818 |
| 0.502150033 | 0.267380038 | 0.473335145 | 0.19002367  |
| 0.423081589 | 0.037336539 | 0.167327865 | 0.09541728  |
| 0.455339672 | 0.224702603 | 0.393387682 | 0.399482888 |
| 0.431104814 | 0.510841555 | 0.260008177 | 0.499247561 |
| 0.162153769 | 0.415514092 | 0.350573347 | 0.328126811 |
| 0.397319487 | 0.099834091 | 0.43763189  | 0.521218372 |
| 0.056995786 | 0.427316382 | 0.430232278 | 0.132627628 |
| 0.425914747 | 0.379619637 | 0.444887573 | 0.255654464 |
| 0.428640226 | 0.406667553 | 0.473608149 | 0.312064172 |
| 0.380824571 | 0.080341143 | 0.476422001 | 0.3999513   |



|             |             |             |             |
|-------------|-------------|-------------|-------------|
| 0.347066285 | 0.091787762 | 0.289822262 | 1           |
| 0.454819333 | 0.501718001 | 0.432745519 | 0.384261592 |
| 0.447093282 | 0.505254113 | 0.431418419 | 0.411820308 |
| 0.236079158 | 0.530943441 | 0.207674711 | 0.046467893 |
| 0.08164371  | 0.097576148 | 0.305288831 | 0.30488788  |
| 0.480465142 | 0.360601206 | 0.220053577 | 0.271370736 |
| 0.470015115 | 0.47294755  | 0.531270867 | 0.424860461 |
| 0.04265707  | 0.35412727  | 0.448338461 | 0.313463689 |
| 0.412483526 | 0.125195542 | 0.344058364 | 0.500741066 |
| 0.364290317 | 0.456463366 | 0.187166459 | 0.488098218 |
| 0.231959079 | 0.512432051 | 0.458738949 | 0.188773455 |
| 0.514592935 | 0.487530736 | 0.516700582 | 0.455836871 |
| 0.467412335 | 0.375567565 | 0.094169587 | 0.389571724 |
| 0.483694253 | 0.024438937 | 0.493173024 | 0.519190989 |
| 0.503727929 | 0.475464737 | 0.531276653 | 0.52207451  |
| 0.508171853 | 0.080441777 | 0.053738278 | 0.326910458 |
| 0.507513161 | 0.390909518 | 0.16078517  | 0.47838066  |
| 0.420352074 | 0.425795357 | 0.453175025 | 0.376885731 |
| 0.506953917 | 0.458088288 | 0.505871636 | 0.417043171 |
| 0.34947554  | 0.297121035 | 0.459108762 | 0.458619416 |
| 0.049223619 | 0.12842291  | 0.057143006 | 0.325818533 |
| 0.402818107 | 0.194358132 | 0.416090777 | 0.410828675 |
| 0.211415133 | 0.376831384 | 0.432469533 | 0.433868007 |
| 0.058572016 | 0.480599813 | 0.185369145 | 0.192739974 |
| 0.045677874 | 0.138236014 | 0.21228823  | 0.176407339 |
| 0.292568903 | 0.219499702 | 0.477699791 | 0.502267535 |
| 0.414507849 | 0.192086059 | 0.453885815 | 0.473916993 |
| 0.414476115 | 0.450214332 | 0.238976245 | 0.01285138  |
| 0.33436931  | 0.409254547 | 0.292066949 | 0.476002227 |
| 0.162964543 | 0.285835534 | 0.438872533 | 0.435996762 |
| 0.30677582  | 0.165706982 | 0.436016815 | 0.411874678 |
| 0.158749636 | 0.358680884 | 0.444226873 | 0.455172055 |
| 0.003195999 | 0.364446993 | 0.459017694 | 0.201831622 |
| 0.346267194 | 0.199503599 | 0.344935432 | 0.471021611 |
| 0.390510905 | 0.302431102 | 0.508351095 | 0.434662623 |
| 0.396760578 | 0.208701053 | 0.533970357 | 0.09190575  |
| 0.417878438 | 0.068534882 | 0.3099471   | 0.392317371 |
| 0.275885641 | 0.311654763 | 0.386878037 | 0.344473904 |
| 0.140452022 | 0.520218594 | 0.394875729 | 0.520372251 |
| 0.450212809 | 0.534960524 | 0.464184418 | 0.434460882 |
| 0.393824072 | 0.445871632 | 0.226791818 | 0.453102346 |
| 0.463325152 | 0.374911115 | 0.080264388 | 0.471131956 |
| 0.433525004 | 0.455628626 | 0.159180878 | 0.498309021 |
| 0.484547413 | 0.468021516 | 0.165343501 | 0.403699442 |
| 0.389117365 | 0.257447619 | 0.422807439 | 0.532594844 |
| 0.39756957  | 0.421322512 | 0.404902306 | 0.409006382 |
| 0.190578986 | 0.277953966 | 0.305262939 | 0.283966324 |
| 0.022541346 | 0.091760387 | 0.072004339 | 0.187159804 |
| 0.24123423  | 0.470346221 | 0.44225336  | 0.523497776 |
| 0.128977765 | 0.40829789  | 0.255614236 | 0.342666332 |
| 0.415552637 | 0.420441006 | 0.451088655 | 0.4406503   |
| 0.257603604 | 0.020969742 | 0.133498408 | 0.511495466 |
| 0.044759695 | 0.324406167 | 0.356608907 | 0.003190702 |
| 0.050515751 | 0.422055941 | 0.096152275 | 0.1756375   |

|             |             |             |             |
|-------------|-------------|-------------|-------------|
| 0.48700262  | 0.18074231  | 0.224850571 | 0.390879372 |
| 0.3744332   | 0.102630521 | 0.003780786 | 0.497695401 |
| 0.491787326 | 0.461332077 | 0.4900071   | 0.454687016 |
| 0.448207303 | 0.431424618 | 0.441403536 | 0.383148791 |
| 0.118833099 | 0.103368441 | 0.293098762 | 0.333563231 |
| 0.006443073 | 0.400561089 | 0.363805123 | 0.150734666 |
| 0.461158605 | 0.332005213 | 0.040937389 | 0.416586219 |
| 0.023824871 | 0.302368165 | 0.352550457 | 0.255315415 |
| 0.383181875 | 0.014702247 | 0.297427153 | 0.40466843  |
| 0.421741933 | 0.336993963 | 0.450330726 | 0.532881642 |
| 0.367599076 | 0.138340858 | 0.362464153 | 0.429120767 |
| 0.079684626 | 0.155906803 | 0.406341903 | 0.055793625 |
| 0.252582409 | 0.449202652 | 0.448876896 | 0.079733566 |
| 0.298253263 | 0.004772007 | 0.351245224 | 0.531004845 |
| 0.465798446 | 0.530358104 | 0.504718419 | 0.355463599 |
| 0.50786525  | 0.198936992 | 0.538077034 | 0.406761147 |
| 0.446183555 | 0.001001044 | 0.006568541 | 0.500937259 |
| 0.453723312 | 0.061617561 | 0.172346674 | 0.407652263 |
| 0.124595638 | 0.172262145 | 0.073478965 | 0.248017561 |
| 0.459211146 | 0.286477822 | 0.242564252 | 0.468045662 |
| 0.273417435 | 0.259295899 | 0.441932396 | 0.094124341 |
| 0.45843827  | 0.058121904 | 0.094440196 | 0.010545274 |
| 0.405070686 | 0.116158436 | 0.456080513 | 0.513235569 |
| 0.490338972 | 0.436668553 | 0.420181178 | 0.398392216 |
| 0.439817209 | 0.106423084 | 0.448670564 | 0.122948269 |
| 0.488623509 | 0.438831958 | 0.333584902 | 0.307223068 |
| 0.503222551 | 0.464755446 | 0.03573342  | 0.433016623 |
| 0.014975714 | 0.002787911 | 0.407580888 | 0.281041177 |
| 0.105898612 | 0.436147867 | 0.263691206 | 0.283063247 |
| 0.272331469 | 0.034305417 | 0.36093004  | 0.331427081 |
| 0.330586158 | 0.409667793 | 0.343289191 | 0.261097616 |
| 0.324460723 | 0.184985731 | 0.227726128 | 0.17582184  |
| 0.310428187 | 0.305101459 | 0.181979418 | 0.022589888 |
| 0.475643854 | 0.471684852 | 0.062728334 | 0.168887783 |
| 0.440304929 | 0.502257933 | 0.047619332 | 0.012012231 |
| 0.268332643 | 0.369721213 | 0.51027909  | 0.505438264 |
| 0.519568291 | 0.519122737 | 0.375189948 | 0.149630259 |
| 0.074756497 | 0.364310378 | 0.364375333 | 0.124861535 |
| 0.516259115 | 0.073176598 | 0.483680537 | 0.391544135 |
| 0.125925713 | 0.244538943 | 0.037579676 | 0.09270522  |
| 0.455567145 | 0.190498642 | 0.205918446 | 0.161460035 |
| 0.362061869 | 0.340024901 | 0.053064681 | 0.215640477 |
| 0.364104881 | 0.267520826 | 0.174970639 | 0.348786513 |
| 0.370950817 | 0.297107642 | 0.469587462 | 0.438184001 |
| 0.139286756 | 0.125997292 | 0.313858198 | 0.415621685 |
| 0.464454674 | 0.455621164 | 0.031428332 | 0.458084557 |
| 0.4959635   | 0.482667816 | 0.496637941 | 0.385058058 |
| 0.090952652 | 0.43836714  | 0.405712364 | 0.396734908 |
| 0.204499919 | 0.424985595 | 0.270986158 | 0.067850959 |
| 0.286740425 | 0.470061638 | 0.413007864 | 0.18738726  |
| 0.468426478 | 0.140834706 | 0.06429362  | 0.448734229 |
| 0.258290515 | 0.101845671 | 0.412313956 | 0.45471564  |
| 0.00250283  | 0.223554136 | 0.499405503 | 0.270067957 |
| 0.513820026 | 0.489981045 | 0.429456348 | 0.294081383 |

|             |             |             |             |
|-------------|-------------|-------------|-------------|
| 0.004000902 | 0.464521643 | 0.417633269 | 0.451918191 |
| 0.429370601 | 0.359718523 | 0.187218225 | 0.084316572 |
| 0.290263299 | 0.087714272 | 0.157091445 | 0.394111067 |
| 0.256328121 | 0.439074023 | 0.207406404 | 0.234174911 |
| 0.23189422  | 0.10120196  | 0.334223946 | 0.269586878 |
| 0.227011191 | 0.247392363 | 0.358048911 | 0.357181352 |
| 0.276634741 | 0.435506919 | 0.422641778 | 0.028223521 |
| 0.431702543 | 0.412095622 | 0.429287064 | 0.002573876 |
| 0.465260382 | 0.00702414  | 0.228532409 | 0.2499874   |
| 0.230026067 | 0.24525682  | 0.294784359 | 0.353395741 |
| 0.387071703 | 0.251190359 | 0.310265965 | 0.255979273 |
| 0.189063979 | 0.248015191 | 0.440364027 | 0.402553757 |
| 0.329454416 | 0.140576511 | 0.097130014 | 0.094553666 |
| 0.058263664 | 0.468966076 | 0.234853937 | 0.078744834 |
| 0.248706232 | 0.414096159 | 0.330852684 | 0.497859219 |
| 0.409586983 | 0.113799517 | 0.381056371 | 0.443350594 |
| 0.323467093 | 0.350198526 | 0.071475657 | 0.428537506 |
| 0.25490445  | 0.274532042 | 0.44718341  | 0.338297031 |
| 0.43715427  | 0.384567686 | 0.234727801 | 0.43313107  |
| 0.41594993  | 0.402906989 | 0.382154218 | 0.098141005 |
| 0.196907537 | 0.140232108 | 0.32782363  | 0.001684034 |
| 0.380939323 | 0.292837225 | 0.478169855 | 0.485600735 |
| 0.392252267 | 0.366681124 | 0.374581926 | 0.100460164 |
| 0.342957109 | 0.168450951 | 0.148226725 | 0.461795777 |
| 0.322780951 | 0.205811353 | 0.35338323  | 0.365917764 |
| 0.464200145 | 0.45497445  | 0.321788561 | 0.276317198 |
| 0.269764383 | 0.215373261 | 0.469094948 | 0.137110017 |
| 0.478898253 | 0.243297004 | 0.394838636 | 0.342789597 |
| 0.26002444  | 0.526985406 | 0.065253232 | 0.537734624 |
| 0.391091035 | 0.135170157 | 0.48032344  | 0.335647501 |
| 0.333519109 | 0.144721542 | 0.288344809 | 0.429896868 |
| 0.263678263 | 0.430591628 | 0.030114712 | 0.096776422 |
| 0.347749391 | 0.371786354 | 0.423873057 | 0.394393294 |
| 0.314769321 | 0.353067679 | 0.261756931 | 0.32335178  |
| 0.478980126 | 0.488137492 | 0.293405991 | 0.254675105 |
| 0.361916704 | 0.112789677 | 0.42070178  | 0.026039708 |
| 0.472426558 | 0.482406454 | 0.450300046 | 0.05831969  |
| 0.01936048  | 0.312876882 | 0.459626845 | 0.075382721 |
| 0.492226583 | 0.31595841  | 0.398414445 | 0.465292845 |
| 0.186274947 | 0.488088943 | 0.143763136 | 0.435707247 |
| 0.0573434   | 0.277297821 | 0.450589153 | 0.438612274 |
| 0.271481868 | 0.3723797   | 0.400238677 | 0.315729104 |
| 0.034122643 | 0.314881662 | 0.001885771 | 0.388305047 |
| 0.462949517 | 0.419745202 | 0.201156893 | 0.383627126 |
| 0.298256153 | 0.375069208 | 0.296503545 | 0.475724717 |
| 0.011660046 | 0.430926664 | 0.216205279 | 0.404497658 |
| 0.324767832 | 0.412366054 | 0.063950407 | 0.387669629 |
| 0.44110671  | 0.34219024  | 0.254783856 | 0.396821074 |
| 0.492471837 | 0.392177443 | 0.170499467 | 0.277020992 |
| 0.42795947  | 0.068746949 | 0.43570523  | 0.531395564 |
| 0.199891904 | 0.290693731 | 0.455563492 | 0.233831262 |
| 0.39674676  | 0.372003569 | 0.460823539 | 0.521965282 |
| 0.087078931 | 0.260821752 | 0.44760432  | 0.461368422 |
| 0.309872238 | 0.239149556 | 0.327636273 | 0.279816885 |

|             |             |             |             |
|-------------|-------------|-------------|-------------|
| 0.454760926 | 0.110570416 | 0.33917486  | 0.372300387 |
| 0.302684331 | 0.333375167 | 0.37687374  | 0.237418855 |
| 0.041135101 | 0.19298866  | 0.414321432 | 0.152812456 |
| 0.325866504 | 0.416875043 | 0.303616629 | 0.369655167 |
| 0.157410975 | 0.027476435 | 0.441246623 | 0.034315961 |
| 0.364941028 | 0.434631816 | 0.265402099 | 0.417430191 |
| 0.184418552 | 0.387938175 | 0.369319519 | 0.000866967 |
| 0.42682086  | 0.072314562 | 0.361349362 | 0.278765279 |
| 0.37169819  | 0.056767922 | 0.4499422   | 0.522410098 |
| 0.342034775 | 0.402826633 | 0.436223173 | 0.460077578 |
| 0.22190601  | 0.43308835  | 0.428204606 | 0.441814704 |
| 0.314905534 | 0.447734162 | 0.477505132 | 0.456550367 |
| 0.404667415 | 0.300359216 |             |             |
| BRCA2       | 0.07090196  | 0.407990265 | 0.055718089 |
| 0.172650182 | 0.27159287  | 0.301268804 | 0.058608823 |
| 0.110746248 | 0.301186605 | 0.223247835 | 0.303959027 |
| 0.023305878 | 0.081508253 | 0.454751715 | 0.052436948 |
| 0.323243905 | 0.040074722 | 0.104770852 | 0.05742399  |
| 0.19613579  | 0.261798717 | 0.283170433 | 0.269664158 |
| 0.250917172 | 0.188652514 | 0.260332885 | 0.287611175 |
| 0.499388898 | 0.226921497 | 0.352730401 | 0.188909943 |
| 0.424985676 | 0.287143088 | 0.304383698 | 0.021099302 |
| 0.308316468 | 0.011285438 | 0.435778103 | 0.264933907 |
| 0.17983883  | 0.342590835 | 0.248176454 | 0.242822656 |
| 0.291006787 | 0.042973613 | 0.159560207 | 0.330943963 |
| 0.249400274 | 0.224875475 | 0.058368249 | 0.360491435 |
| 0.281285692 | 0.277091635 | 0.328561445 | 0.00210516  |
| 0.26333576  | 0.09255176  | 0.208589108 | 0.494898797 |
| 0.177283927 | 0.11950697  | 0.230375892 | 0.180030196 |
| 0.285298663 | 0.303067171 | 0.200289457 | 0.291546088 |
| 0.50314775  | 0.166636257 | 0.37091305  | 0.165403422 |
| 0.304560597 | 0.029370128 | 0.14444026  | 0.067615069 |
| 0.310526867 | 0.181389666 | 0.277215026 | 0.274053257 |
| 0.416376917 | 0.503594699 | 0.194111525 | 0.487552915 |
| 0.096682875 | 0.284861996 | 0.249987904 | 0.27483762  |
| 0.307449538 | 0.072985258 | 0.382952614 | 0.526164895 |
| 0.041386513 | 0.271531664 | 0.34246878  | 0.098861258 |
| 0.410076807 | 0.216894644 | 0.293218285 | 0.175399279 |
| 0.311010328 | 0.300226822 | 0.454207593 | 0.261392019 |
| 0.249110737 | 0.067097669 | 0.464405648 | 0.277619663 |
| 0.277733911 | 0.082207266 | 0.226612664 | 0.454819333 |
| 1           | 0.494854044 | 0.399939179 | 0.338203315 |
| 0.323138954 | 0.506244293 | 0.363144001 | 0.391580563 |
| 0.111062867 | 0.516267201 | 0.17630782  | 0.045480541 |
| 0.062804201 | 0.079531994 | 0.189105732 | 0.278904233 |
| 0.473032337 | 0.253677803 | 0.180063543 | 0.229697061 |
| 0.467773082 | 0.456922376 | 0.514556383 | 0.395947636 |
| 0.042247607 | 0.212684535 | 0.332480026 | 0.20637429  |
| 0.314062068 | 0.094497325 | 0.249229178 | 0.498887714 |
| 0.389060452 | 0.429961707 | 0.138059938 | 0.482642391 |
| 0.158174479 | 0.519677107 | 0.446120355 | 0.17257446  |
| 0.515630082 | 0.48594664  | 0.522250437 | 0.352111597 |
| 0.4637216   | 0.296016261 | 0.049909213 | 0.359695054 |
| 0.488340256 | 0.021910241 | 0.470625016 | 0.503391344 |

|             |             |             |             |
|-------------|-------------|-------------|-------------|
| 0.497984444 | 0.464402291 | 0.524921139 | 0.507775243 |
| 0.493724108 | 0.066414536 | 0.027302464 | 0.251761286 |
| 0.507104789 | 0.407384086 | 0.112053912 | 0.332892404 |
| 0.29566449  | 0.300311524 | 0.379270957 | 0.282939155 |
| 0.507880539 | 0.450594181 | 0.481075178 | 0.351872093 |
| 0.229442965 | 0.30876438  | 0.300879055 | 0.453015962 |
| 0.048231296 | 0.108011666 | 0.049045567 | 0.257241015 |
| 0.266645691 | 0.164304978 | 0.294479002 | 0.270983946 |
| 0.175202962 | 0.24347648  | 0.266320042 | 0.325266089 |
| 0.053270863 | 0.330459078 | 0.150782612 | 0.155243298 |
| 0.052594132 | 0.135831755 | 0.191656216 | 0.156514295 |
| 0.226697133 | 0.226765211 | 0.359971162 | 0.491697712 |
| 0.276563379 | 0.169189136 | 0.357722057 | 0.474501667 |
| 0.434822711 | 0.324871024 | 0.195636051 | 0.025137854 |
| 0.270488859 | 0.237207605 | 0.178705745 | 0.306795405 |
| 0.16867105  | 0.228835278 | 0.314221867 | 0.367051379 |
| 0.238397437 | 0.111793178 | 0.309640087 | 0.415400635 |
| 0.133054566 | 0.279920132 | 0.455288261 | 0.299829738 |
| 0.005184104 | 0.299171682 | 0.436547831 | 0.150283578 |
| 0.24976736  | 0.145253703 | 0.232295006 | 0.479202825 |
| 0.241000206 | 0.203720452 | 0.487596406 | 0.352324552 |
| 0.264477066 | 0.205283411 | 0.525127873 | 0.048050004 |
| 0.265522917 | 0.072841535 | 0.255676486 | 0.235560104 |
| 0.226872689 | 0.253479986 | 0.269543923 | 0.256760485 |
| 0.112125841 | 0.510224144 | 0.362779014 | 0.514701071 |
| 0.312654646 | 0.530598611 | 0.461769514 | 0.446555158 |
| 0.288606292 | 0.278056342 | 0.143078932 | 0.439346845 |
| 0.469203624 | 0.253408653 | 0.065219778 | 0.406373388 |
| 0.28347696  | 0.344073886 | 0.113297822 | 0.512353951 |
| 0.484452442 | 0.453615448 | 0.136968046 | 0.350578045 |
| 0.385948513 | 0.213260507 | 0.386636891 | 0.521035234 |
| 0.247362134 | 0.304022003 | 0.312260782 | 0.401350254 |
| 0.164077183 | 0.206819371 | 0.291056187 | 0.164175167 |
| 0.012817284 | 0.06998519  | 0.064595271 | 0.161333007 |
| 0.178887035 | 0.295301696 | 0.325308565 | 0.515708772 |
| 0.11335144  | 0.401885835 | 0.189270205 | 0.294907123 |
| 0.424083905 | 0.274155148 | 0.300242108 | 0.296812594 |
| 0.207519094 | 0.031168167 | 0.136802364 | 0.511744796 |
| 0.034767259 | 0.232682138 | 0.233420113 | 0.005447867 |
| 0.048564661 | 0.371587821 | 0.093960978 | 0.19354352  |
| 0.474697193 | 0.197564602 | 0.186204859 | 0.254900464 |
| 0.295288714 | 0.088753573 | 0.00629617  | 0.484117604 |
| 0.464427834 | 0.434629857 | 0.461116568 | 0.428438735 |
| 0.427302444 | 0.340380846 | 0.400165543 | 0.271522039 |
| 0.102915503 | 0.08049271  | 0.236879487 | 0.269849672 |
| 0.006043873 | 0.353785745 | 0.238761228 | 0.129066287 |
| 0.374128466 | 0.237870249 | 0.040054824 | 0.271748083 |
| 0.034195625 | 0.207700075 | 0.239940332 | 0.178537332 |
| 0.306823056 | 0.016805512 | 0.253000263 | 0.291325568 |
| 0.423075829 | 0.333282087 | 0.293407878 | 0.525436532 |
| 0.288849855 | 0.114326554 | 0.297508896 | 0.35017684  |
| 0.074234701 | 0.097814671 | 0.265934228 | 0.050780719 |
| 0.14267843  | 0.42237934  | 0.278409635 | 0.081794026 |
| 0.252373948 | 0.007596937 | 0.366377887 | 0.523169719 |

|             |             |             |             |
|-------------|-------------|-------------|-------------|
| 0.451470654 | 0.528045113 | 0.504052559 | 0.256303219 |
| 0.51205269  | 0.101825151 | 0.524954509 | 0.397679007 |
| 0.296375795 | 0.002460815 | 0.006551835 | 0.496080053 |
| 0.339902282 | 0.052902477 | 0.147891168 | 0.296159454 |
| 0.128877249 | 0.13544097  | 0.058119581 | 0.196770677 |
| 0.314808581 | 0.217777637 | 0.161959734 | 0.454435642 |
| 0.231744843 | 0.195782092 | 0.284953425 | 0.073175108 |
| 0.305369203 | 0.063201092 | 0.071624565 | 0.016837751 |
| 0.313429214 | 0.107714369 | 0.445974623 | 0.502906925 |
| 0.49628674  | 0.34199207  | 0.25781204  | 0.256261784 |
| 0.412009665 | 0.086547676 | 0.270663692 | 0.094320987 |
| 0.481623511 | 0.329843364 | 0.308091804 | 0.30987283  |
| 0.511559692 | 0.473685574 | 0.035350675 | 0.396303447 |
| 0.021690665 | 0.00238173  | 0.304461717 | 0.205415894 |
| 0.046732595 | 0.316656456 | 0.245706857 | 0.175993478 |
| 0.177247969 | 0.036823039 | 0.252313497 | 0.238496965 |
| 0.265541969 | 0.305483968 | 0.255622765 | 0.196736164 |
| 0.236929885 | 0.15139926  | 0.174222702 | 0.127946421 |
| 0.177891431 | 0.305266328 | 0.196271485 | 0.023495044 |
| 0.326118469 | 0.330757949 | 0.059878491 | 0.13265624  |
| 0.451848959 | 0.502603796 | 0.051386464 | 0.022211554 |
| 0.245918084 | 0.248657296 | 0.503110515 | 0.489644432 |
| 0.513839685 | 0.526162388 | 0.38130636  | 0.12631459  |
| 0.068281075 | 0.275344702 | 0.257881709 | 0.108990692 |
| 0.505012488 | 0.058066911 | 0.467200166 | 0.263919151 |
| 0.101508631 | 0.218411816 | 0.041902094 | 0.079326197 |
| 0.304087407 | 0.15060723  | 0.175997696 | 0.135372806 |
| 0.287710334 | 0.225837306 | 0.046956499 | 0.182909217 |
| 0.321950399 | 0.208821524 | 0.144959197 | 0.221866671 |
| 0.317614484 | 0.153411841 | 0.387771127 | 0.455263665 |
| 0.114882114 | 0.100599889 | 0.253274709 | 0.318219451 |
| 0.435315982 | 0.283655647 | 0.035044263 | 0.434923974 |
| 0.480073718 | 0.353918067 | 0.487844519 | 0.385476283 |
| 0.074047974 | 0.324724932 | 0.253636277 | 0.29405528  |
| 0.156456334 | 0.295569091 | 0.191084025 | 0.059425745 |
| 0.2725406   | 0.457906476 | 0.417670436 | 0.167269569 |
| 0.30066407  | 0.102253447 | 0.05170177  | 0.417286491 |
| 0.209719566 | 0.096246348 | 0.258889368 | 0.401998353 |
| 0.004335665 | 0.142405487 | 0.481902127 | 0.202528106 |
| 0.501539192 | 0.49686801  | 0.448166594 | 0.186091709 |
| 0.002025616 | 0.344536024 | 0.323684714 | 0.344151921 |
| 0.422386303 | 0.306980679 | 0.104786643 | 0.088548329 |
| 0.276020559 | 0.071224249 | 0.149705915 | 0.274216851 |
| 0.19423712  | 0.30021018  | 0.16924656  | 0.168792214 |
| 0.182818149 | 0.073105597 | 0.217953216 | 0.21360937  |
| 0.133542171 | 0.217591564 | 0.347781663 | 0.19940645  |
| 0.216313378 | 0.422797967 | 0.39267804  | 0.029446782 |
| 0.278176127 | 0.396311586 | 0.410649542 | 0.005031073 |
| 0.386774513 | 0.009708789 | 0.183560012 | 0.215920718 |
| 0.188107401 | 0.187656983 | 0.2240756   | 0.278462069 |
| 0.272528059 | 0.202641113 | 0.258599347 | 0.211883612 |
| 0.168891352 | 0.177985084 | 0.305532635 | 0.290830106 |
| 0.266190235 | 0.128555407 | 0.095504643 | 0.102131243 |
| 0.05948076  | 0.441280394 | 0.235745165 | 0.06626722  |

|             |             |             |             |
|-------------|-------------|-------------|-------------|
| 0.189115873 | 0.273681119 | 0.351263298 | 0.483114856 |
| 0.408287021 | 0.108225285 | 0.260400554 | 0.444537337 |
| 0.175856727 | 0.238101369 | 0.055951671 | 0.302606325 |
| 0.192791507 | 0.221288747 | 0.282330761 | 0.258699151 |
| 0.341837149 | 0.403633282 | 0.224021168 | 0.430163637 |
| 0.30357657  | 0.259118174 | 0.248823919 | 0.10480569  |
| 0.180396869 | 0.109572156 | 0.251096691 | 0.00428007  |
| 0.27870135  | 0.227750228 | 0.479413721 | 0.485591961 |
| 0.241134033 | 0.371121159 | 0.262688264 | 0.101029196 |
| 0.224891577 | 0.180842561 | 0.120616404 | 0.383791823 |
| 0.207002661 | 0.16295636  | 0.271316834 | 0.250387968 |
| 0.395149838 | 0.359642143 | 0.217005988 | 0.189802069 |
| 0.190444402 | 0.166174031 | 0.452429725 | 0.107213659 |
| 0.323365372 | 0.201941489 | 0.247591722 | 0.28439366  |
| 0.205173707 | 0.511003669 | 0.055241144 | 0.523527727 |
| 0.296321204 | 0.115974752 | 0.48336601  | 0.217065053 |
| 0.223258297 | 0.114859188 | 0.192134519 | 0.273826528 |
| 0.198132033 | 0.278932486 | 0.014167914 | 0.069606648 |
| 0.302626487 | 0.218877129 | 0.370953194 | 0.303510201 |
| 0.228309479 | 0.318302569 | 0.140491535 | 0.227246584 |
| 0.462625363 | 0.474540205 | 0.260640648 | 0.227318236 |
| 0.302635952 | 0.101870994 | 0.287614976 | 0.009864806 |
| 0.334402162 | 0.320485736 | 0.286382686 | 0.049715498 |
| 0.020459448 | 0.224036422 | 0.326890579 | 0.054995048 |
| 0.488181049 | 0.205417366 | 0.251091583 | 0.365090771 |
| 0.13978387  | 0.480447356 | 0.119220845 | 0.371273584 |
| 0.042265916 | 0.201728544 | 0.289895465 | 0.27610714  |
| 0.246407747 | 0.278034872 | 0.360584235 | 0.235535084 |
| 0.03828723  | 0.253011958 | 0.003324815 | 0.403185304 |
| 0.455628194 | 0.29471951  | 0.187686318 | 0.208109791 |
| 0.241900388 | 0.349609628 | 0.207897232 | 0.30284966  |
| 0.017666581 | 0.317779078 | 0.162281377 | 0.405353652 |
| 0.251633906 | 0.277005438 | 0.067103779 | 0.25864131  |
| 0.432578285 | 0.258193141 | 0.224520177 | 0.302492663 |
| 0.477273522 | 0.346801756 | 0.144766829 | 0.181673354 |
| 0.281393974 | 0.056430606 | 0.273779286 | 0.520427228 |
| 0.168959572 | 0.222681803 | 0.452796185 | 0.213301885 |
| 0.263168805 | 0.35597734  | 0.29551033  | 0.499387191 |
| 0.081533834 | 0.205946376 | 0.388086125 | 0.45133635  |
| 0.275233061 | 0.171164454 | 0.236643149 | 0.2275999   |
| 0.451153368 | 0.109944588 | 0.223152024 | 0.320524624 |
| 0.227292509 | 0.241414905 | 0.233703842 | 0.180809127 |
| 0.046274263 | 0.131284026 | 0.284232521 | 0.123216071 |
| 0.252742332 | 0.31906934  | 0.233264301 | 0.38759646  |
| 0.146424755 | 0.043778554 | 0.446805165 | 0.030835322 |
| 0.260408991 | 0.326792957 | 0.194305891 | 0.291015381 |
| 0.180840183 | 0.273947741 | 0.27186064  | 0.00189491  |
| 0.396988112 | 0.059598873 | 0.230750106 | 0.243522732 |
| 0.244443519 | 0.052477355 | 0.446657848 | 0.517468834 |
| 0.234394047 | 0.233869068 | 0.282401486 | 0.44748715  |
| 0.160838131 | 0.257860649 | 0.268241832 | 0.324719871 |
| 0.212143985 | 0.293179425 | 0.302143114 | 0.317895593 |
| 0.333747547 | 0.199995239 |             |             |
| BRIP1       | 0.141026227 | 0.469922903 | 0.119290178 |

|             |             |             |             |
|-------------|-------------|-------------|-------------|
| 0.231871892 | 0.359321321 | 0.516980824 | 0.10100491  |
| 0.195831462 | 0.413002325 | 0.374033361 | 0.459769825 |
| 0.039236807 | 0.105391125 | 0.490307076 | 0.091843831 |
| 0.445234229 | 0.061248881 | 0.167852627 | 0.101580024 |
| 0.295434907 | 0.32816887  | 0.420528155 | 0.49159131  |
| 0.328407355 | 0.257390706 | 0.439340317 | 0.434125124 |
| 0.515373142 | 0.354153904 | 0.517043558 | 0.276524469 |
| 0.426868774 | 0.377186255 | 0.452530934 | 0.040207641 |
| 0.497879201 | 0.012021114 | 0.456162616 | 0.327312977 |
| 0.195385076 | 0.394209178 | 0.437113654 | 0.331505676 |
| 0.450415666 | 0.079161696 | 0.300571651 | 0.452912289 |
| 0.4102341   | 0.35467366  | 0.127449082 | 0.506962732 |
| 0.424163553 | 0.450358339 | 0.471878275 | 0.005212064 |
| 0.359712454 | 0.10728628  | 0.262832352 | 0.531357472 |
| 0.28755865  | 0.185295845 | 0.32662337  | 0.327471145 |
| 0.44026364  | 0.422760443 | 0.323824929 | 0.432841277 |
| 0.518260429 | 0.203571298 | 0.489771995 | 0.242833404 |
| 0.467214875 | 0.065316927 | 0.23023151  | 0.142807813 |
| 0.452341159 | 0.274842326 | 0.421234834 | 0.351411095 |
| 0.468987274 | 0.534713142 | 0.311117363 | 0.525740428 |
| 0.104407398 | 0.379994969 | 0.327763246 | 0.361365879 |
| 0.416156216 | 0.126317422 | 0.494600894 | 0.5357627   |
| 0.088283814 | 0.462082195 | 0.459232635 | 0.195224676 |
| 0.494838125 | 0.315098808 | 0.488120583 | 0.219688081 |
| 0.418601311 | 0.388365014 | 0.492360581 | 0.383940355 |
| 0.373548988 | 0.133401329 | 0.518647232 | 0.363037519 |
| 0.389818595 | 0.15069206  | 0.264044874 | 0.501718001 |
| 0.494854044 | 1           | 0.479418209 | 0.418723174 |
| 0.432123848 | 0.517813313 | 0.492659387 | 0.463962614 |
| 0.216016957 | 0.544441943 | 0.285405773 | 0.076698124 |
| 0.137517976 | 0.132786876 | 0.257302441 | 0.36402933  |
| 0.513431066 | 0.427354797 | 0.294616366 | 0.29495163  |
| 0.479027559 | 0.510711431 | 0.539875905 | 0.475785494 |
| 0.077124532 | 0.275126719 | 0.441033597 | 0.389242694 |
| 0.445835172 | 0.172396134 | 0.30278714  | 0.535174068 |
| 0.445024827 | 0.486846505 | 0.264170109 | 0.525593365 |
| 0.263006719 | 0.52751978  | 0.50443191  | 0.250801517 |
| 0.541031476 | 0.52722775  | 0.517609779 | 0.459958183 |
| 0.503619011 | 0.467590723 | 0.077902674 | 0.437562382 |
| 0.49461522  | 0.021419101 | 0.505338496 | 0.503881701 |
| 0.521946341 | 0.509860567 | 0.519604829 | 0.517862469 |
| 0.528454107 | 0.127557683 | 0.030643422 | 0.339806039 |
| 0.532237231 | 0.467124657 | 0.178182189 | 0.47800222  |
| 0.41054925  | 0.507730265 | 0.484936982 | 0.396674167 |
| 0.520324602 | 0.501229988 | 0.507455475 | 0.466248979 |
| 0.375343027 | 0.376218448 | 0.424137099 | 0.505938361 |
| 0.082311657 | 0.20238705  | 0.105804357 | 0.365752175 |
| 0.462817061 | 0.239925585 | 0.490783611 | 0.3950428   |
| 0.265118876 | 0.441391297 | 0.393457769 | 0.432816866 |
| 0.104198105 | 0.52660145  | 0.25079861  | 0.257543444 |
| 0.074127083 | 0.204052289 | 0.270898924 | 0.239933738 |
| 0.317153943 | 0.272995456 | 0.508826689 | 0.492942775 |
| 0.397626677 | 0.273092171 | 0.506900552 | 0.483436908 |
| 0.431896856 | 0.445991886 | 0.299384857 | 0.025171685 |



|             |             |             |             |
|-------------|-------------|-------------|-------------|
| 0.327402493 | 0.349549914 | 0.214245482 | 0.47138521  |
| 0.22510177  | 0.305931529 | 0.448483743 | 0.455563627 |
| 0.406837942 | 0.220791022 | 0.420681888 | 0.452879396 |
| 0.227951277 | 0.391806942 | 0.489230362 | 0.480029954 |
| 0.00947774  | 0.426803467 | 0.51231124  | 0.171475208 |
| 0.389596348 | 0.176151264 | 0.329807125 | 0.492255311 |
| 0.340056469 | 0.256292043 | 0.506892631 | 0.445107055 |
| 0.442121139 | 0.265959463 | 0.528670665 | 0.056874926 |
| 0.385212093 | 0.083011437 | 0.348615878 | 0.415978759 |
| 0.338441647 | 0.34828162  | 0.36585918  | 0.342310528 |
| 0.220667259 | 0.53473387  | 0.466036411 | 0.523322459 |
| 0.429276134 | 0.532149376 | 0.509129098 | 0.491241059 |
| 0.451873241 | 0.407022082 | 0.163393252 | 0.507274478 |
| 0.496090045 | 0.353634721 | 0.135363921 | 0.493462475 |
| 0.415372068 | 0.45732932  | 0.145847211 | 0.498250644 |
| 0.514288962 | 0.499425869 | 0.206090865 | 0.418985349 |
| 0.463555947 | 0.344245676 | 0.469395    | 0.531362886 |
| 0.373013674 | 0.402678696 | 0.389111977 | 0.436856449 |
| 0.260197984 | 0.242168059 | 0.37124189  | 0.208799325 |
| 0.018327251 | 0.144837896 | 0.123283742 | 0.219474647 |
| 0.200376631 | 0.485676268 | 0.456414339 | 0.528876046 |
| 0.181278496 | 0.468231728 | 0.302488607 | 0.363256153 |
| 0.455775554 | 0.397713129 | 0.441345208 | 0.449041722 |
| 0.318447801 | 0.03640285  | 0.184746547 | 0.538490159 |
| 0.082686704 | 0.293467381 | 0.406331032 | 0.006066021 |
| 0.086736748 | 0.477769253 | 0.152558595 | 0.244472064 |
| 0.484698739 | 0.254604179 | 0.297839608 | 0.389959108 |
| 0.422448734 | 0.155323746 | 0.007265551 | 0.487196575 |
| 0.490547462 | 0.457040823 | 0.49047425  | 0.47389935  |
| 0.453979237 | 0.464042562 | 0.463825846 | 0.486840398 |
| 0.167920215 | 0.158431306 | 0.244362468 | 0.353070768 |
| 0.009326938 | 0.451884881 | 0.359417971 | 0.214008167 |
| 0.480156083 | 0.367527819 | 0.076580355 | 0.401989322 |
| 0.052461179 | 0.250054877 | 0.390024985 | 0.275311759 |
| 0.390780528 | 0.033967846 | 0.344081818 | 0.377493797 |
| 0.467343828 | 0.422652419 | 0.417996531 | 0.547665654 |
| 0.422881493 | 0.205903145 | 0.380466241 | 0.467182315 |
| 0.120377108 | 0.138635161 | 0.441131817 | 0.066464127 |
| 0.302710259 | 0.464110419 | 0.439595098 | 0.129157959 |
| 0.360956796 | 0.014285313 | 0.44290777  | 0.545932952 |
| 0.498364996 | 0.519928494 | 0.520298783 | 0.330323865 |
| 0.525783249 | 0.124067049 | 0.54189401  | 0.480088211 |
| 0.448829015 | 0.002775927 | 0.01061631  | 0.508475004 |
| 0.461658299 | 0.111375427 | 0.234069888 | 0.49926641  |
| 0.170128863 | 0.247653613 | 0.114176216 | 0.218522654 |
| 0.519169759 | 0.295319943 | 0.208012824 | 0.494599991 |
| 0.309997751 | 0.297457234 | 0.483594743 | 0.147199081 |
| 0.479799857 | 0.096964345 | 0.141856262 | 0.014669926 |
| 0.419459728 | 0.18122846  | 0.502445201 | 0.527446026 |
| 0.507205871 | 0.45188734  | 0.41406986  | 0.447824747 |
| 0.464548079 | 0.175784772 | 0.440549165 | 0.193430621 |
| 0.511657403 | 0.454130059 | 0.403265892 | 0.393825884 |
| 0.504707492 | 0.486942275 | 0.063937487 | 0.467436387 |
| 0.034176897 | 0.002748343 | 0.495584649 | 0.332523282 |

|             |             |             |             |
|-------------|-------------|-------------|-------------|
| 0.066657326 | 0.419741754 | 0.331999869 | 0.282003938 |
| 0.278737217 | 0.068988551 | 0.296899486 | 0.275110171 |
| 0.366432258 | 0.422748191 | 0.319294076 | 0.309327705 |
| 0.307577254 | 0.154873268 | 0.267365923 | 0.213638374 |
| 0.287241715 | 0.381524852 | 0.26260866  | 0.042441704 |
| 0.499841439 | 0.481500903 | 0.106320548 | 0.238259987 |
| 0.501758984 | 0.511658736 | 0.068911765 | 0.023259157 |
| 0.346361265 | 0.366495555 | 0.501573792 | 0.520936945 |
| 0.548499664 | 0.524998721 | 0.413384472 | 0.159533223 |
| 0.122575368 | 0.377989476 | 0.335226741 | 0.127456645 |
| 0.526038881 | 0.122003992 | 0.509692613 | 0.340692605 |
| 0.177564326 | 0.29806482  | 0.066206887 | 0.13540732  |
| 0.445242759 | 0.252521627 | 0.234040752 | 0.240083173 |
| 0.378186153 | 0.299657442 | 0.085937944 | 0.272109226 |
| 0.42380036  | 0.205143267 | 0.232272092 | 0.401098955 |
| 0.437856754 | 0.27353255  | 0.485390149 | 0.456360797 |
| 0.207313465 | 0.17288615  | 0.411584287 | 0.442087535 |
| 0.507016518 | 0.45844245  | 0.063109442 | 0.481064898 |
| 0.492735124 | 0.516327834 | 0.525954196 | 0.425767069 |
| 0.140117728 | 0.454137437 | 0.344688485 | 0.393254672 |
| 0.251853248 | 0.513455321 | 0.299336864 | 0.110806508 |
| 0.346417664 | 0.49656076  | 0.469610683 | 0.239436223 |
| 0.496947591 | 0.209447238 | 0.109454748 | 0.489455374 |
| 0.209486677 | 0.158087838 | 0.455358896 | 0.478893787 |
| 0.003301075 | 0.165465967 | 0.478295481 | 0.3383713   |
| 0.522672541 | 0.494043327 | 0.458686437 | 0.342326403 |
| 0.001740892 | 0.456635685 | 0.46288608  | 0.483551783 |
| 0.489180089 | 0.441026212 | 0.212588297 | 0.118860293 |
| 0.351787752 | 0.150140242 | 0.186677539 | 0.467529647 |
| 0.196901395 | 0.496342546 | 0.261025196 | 0.272127191 |
| 0.247679883 | 0.150733814 | 0.295689682 | 0.339153072 |
| 0.155364004 | 0.310978741 | 0.416575179 | 0.379585476 |
| 0.243675089 | 0.45496003  | 0.473134331 | 0.057787782 |
| 0.409075318 | 0.44848243  | 0.46475651  | 0.004171945 |
| 0.496119858 | 0.01693092  | 0.253299352 | 0.286958726 |
| 0.260548977 | 0.262597552 | 0.308147162 | 0.359991415 |
| 0.425779839 | 0.291768187 | 0.373562584 | 0.314291865 |
| 0.227435888 | 0.30226049  | 0.451881416 | 0.43887993  |
| 0.359011873 | 0.203781137 | 0.156513439 | 0.153313191 |
| 0.099833299 | 0.498047145 | 0.315495463 | 0.136454678 |
| 0.293648987 | 0.433576815 | 0.397128462 | 0.51807589  |
| 0.452276839 | 0.18296516  | 0.392848244 | 0.509941034 |
| 0.284691985 | 0.407012041 | 0.119866464 | 0.481275145 |
| 0.321887236 | 0.271383996 | 0.489380715 | 0.421437312 |
| 0.471809487 | 0.419911862 | 0.317669743 | 0.45669863  |
| 0.446537171 | 0.386981996 | 0.417156513 | 0.133450185 |
| 0.264958327 | 0.198056752 | 0.309133102 | 0.005755091 |
| 0.435699108 | 0.394500341 | 0.517061937 | 0.516567077 |
| 0.33354681  | 0.428336825 | 0.447345984 | 0.153074371 |
| 0.376903993 | 0.242028188 | 0.211031206 | 0.499155322 |
| 0.262500674 | 0.27069598  | 0.357001723 | 0.474442745 |
| 0.488127322 | 0.467852727 | 0.288742158 | 0.325987102 |
| 0.29837759  | 0.292207215 | 0.488399378 | 0.206279752 |
| 0.491718296 | 0.231006415 | 0.44241998  | 0.362939283 |

|             |             |             |             |
|-------------|-------------|-------------|-------------|
| 0.273191335 | 0.52142952  | 0.111340307 | 0.531447307 |
| 0.381754428 | 0.199941071 | 0.505875795 | 0.399270125 |
| 0.39726443  | 0.174757273 | 0.22062092  | 0.467178627 |
| 0.290021873 | 0.397907326 | 0.024355387 | 0.082213637 |
| 0.395858196 | 0.349174139 | 0.468266391 | 0.418280031 |
| 0.282342593 | 0.383859106 | 0.199180112 | 0.377706794 |
| 0.510703956 | 0.525798452 | 0.339758956 | 0.307900619 |
| 0.420433944 | 0.166181994 | 0.511937635 | 0.019213046 |
| 0.482441776 | 0.477975765 | 0.45083946  | 0.092973648 |
| 0.037824401 | 0.247173674 | 0.478683571 | 0.117508094 |
| 0.487289095 | 0.262512219 | 0.420560574 | 0.512276288 |
| 0.245631816 | 0.52793428  | 0.166864585 | 0.483412324 |
| 0.078109925 | 0.326651953 | 0.424527836 | 0.427454511 |
| 0.29496571  | 0.333999954 | 0.443780894 | 0.282783979 |
| 0.061113827 | 0.32779925  | 0.002597411 | 0.433561396 |
| 0.498686298 | 0.375520911 | 0.269401801 | 0.368136163 |
| 0.343566954 | 0.42868642  | 0.287196819 | 0.484319553 |
| 0.02426384  | 0.426586923 | 0.272056137 | 0.494943929 |
| 0.301928532 | 0.414759827 | 0.100459314 | 0.344012059 |
| 0.493653427 | 0.338657067 | 0.313334057 | 0.370251018 |
| 0.513114368 | 0.450904015 | 0.247057474 | 0.271279824 |
| 0.444080136 | 0.115624528 | 0.484232838 | 0.536381982 |
| 0.238980305 | 0.256311358 | 0.487914735 | 0.271629014 |
| 0.352198333 | 0.448592897 | 0.463268823 | 0.5263838   |
| 0.102255732 | 0.324131382 | 0.478115603 | 0.474782033 |
| 0.36142301  | 0.193096043 | 0.293040769 | 0.277363395 |
| 0.491249292 | 0.173012591 | 0.288261914 | 0.442708798 |
| 0.253135302 | 0.379382808 | 0.415705936 | 0.230278364 |
| 0.068038377 | 0.228523242 | 0.48688863  | 0.211796449 |
| 0.365072399 | 0.424250292 | 0.274365542 | 0.420771421 |
| 0.208249669 | 0.049807815 | 0.460395628 | 0.022117284 |
| 0.469959918 | 0.474324464 | 0.325515454 | 0.410218449 |
| 0.267064273 | 0.430977767 | 0.434001017 | 0.003308911 |
| 0.461077073 | 0.064665234 | 0.355859916 | 0.284868747 |
| 0.333456547 | 0.095732253 | 0.480558705 | 0.513138503 |
| 0.408808783 | 0.401853714 | 0.416947015 | 0.476853794 |
| 0.17571566  | 0.381349472 | 0.382086877 | 0.500848403 |
| 0.262095664 | 0.459980573 | 0.47603828  | 0.447259961 |
| 0.471627713 | 0.364386795 |             |             |
| BRWD1       | 0.096241862 | 0.437963636 | 0.081137125 |
| 0.136028437 | 0.275860482 | 0.371097986 | 0.08455339  |
| 0.154386905 | 0.373076149 | 0.379344841 | 0.326144977 |
| 0.025119138 | 0.086043075 | 0.440313859 | 0.075919024 |
| 0.371946616 | 0.041728367 | 0.131019559 | 0.108614812 |
| 0.263017615 | 0.262903078 | 0.311452405 | 0.39432056  |
| 0.276074447 | 0.200294982 | 0.371741097 | 0.391300397 |
| 0.494041592 | 0.277900326 | 0.397305771 | 0.231719513 |
| 0.407304868 | 0.29874829  | 0.372370023 | 0.024995909 |
| 0.398738788 | 0.020772599 | 0.448055137 | 0.254049115 |
| 0.129238186 | 0.335902811 | 0.384215214 | 0.225297055 |
| 0.414651639 | 0.053084577 | 0.266026437 | 0.409282068 |
| 0.363558902 | 0.291479016 | 0.101384433 | 0.409507498 |
| 0.397423732 | 0.336140288 | 0.414601742 | 0.004638642 |
| 0.284124868 | 0.0976706   | 0.237781622 | 0.502027154 |

|             |             |             |             |
|-------------|-------------|-------------|-------------|
| 0.20462968  | 0.129531148 | 0.343766365 | 0.295723844 |
| 0.413028271 | 0.378385776 | 0.259334131 | 0.423046562 |
| 0.488707945 | 0.182109961 | 0.418810089 | 0.155391456 |
| 0.400071481 | 0.060372963 | 0.174033303 | 0.131730084 |
| 0.389717313 | 0.193103696 | 0.311050502 | 0.29520522  |
| 0.447840167 | 0.516641123 | 0.253022847 | 0.515385437 |
| 0.129790436 | 0.325495941 | 0.257475934 | 0.290252676 |
| 0.380922113 | 0.128274439 | 0.377310454 | 0.512914281 |
| 0.083403478 | 0.424870961 | 0.412244008 | 0.168095124 |
| 0.415210551 | 0.30188683  | 0.421127371 | 0.155605626 |
| 0.341903031 | 0.332760313 | 0.495384089 | 0.289417896 |
| 0.299690233 | 0.108220353 | 0.503167357 | 0.300035555 |
| 0.263163125 | 0.107628004 | 0.228392432 | 0.432745519 |
| 0.399939179 | 0.479418209 | 1           | 0.369616002 |
| 0.367714641 | 0.485566489 | 0.378581456 | 0.4090143   |
| 0.218212721 | 0.525261368 | 0.197059478 | 0.048525653 |
| 0.108526644 | 0.093338939 | 0.267281783 | 0.288539438 |
| 0.44201118  | 0.338993914 | 0.216712344 | 0.225268699 |
| 0.427466146 | 0.494944929 | 0.531802206 | 0.400082202 |
| 0.053891052 | 0.270284765 | 0.364087896 | 0.293599195 |
| 0.382114999 | 0.143919639 | 0.240267295 | 0.516740754 |
| 0.350497217 | 0.401214866 | 0.202717968 | 0.507504568 |
| 0.249458418 | 0.490851464 | 0.45041919  | 0.172922166 |
| 0.514283597 | 0.498493553 | 0.485030344 | 0.362587748 |
| 0.465142865 | 0.3327553   | 0.114928998 | 0.380307557 |
| 0.45594591  | 0.012199789 | 0.464696605 | 0.487404592 |
| 0.503971785 | 0.425899559 | 0.502952694 | 0.490796885 |
| 0.510366305 | 0.101336845 | 0.054526412 | 0.276824694 |
| 0.512639058 | 0.357355294 | 0.145807086 | 0.412561361 |
| 0.349033477 | 0.393066827 | 0.410072858 | 0.304044682 |
| 0.494887522 | 0.424578791 | 0.483104694 | 0.404228703 |
| 0.367119608 | 0.308215343 | 0.372310691 | 0.480464097 |
| 0.052207515 | 0.141726758 | 0.079232109 | 0.315746832 |
| 0.36697861  | 0.173775461 | 0.399399656 | 0.364370082 |
| 0.19497225  | 0.379654226 | 0.327533674 | 0.348656277 |
| 0.088043877 | 0.424039477 | 0.18433019  | 0.216666379 |
| 0.04672819  | 0.162685613 | 0.193809013 | 0.147779219 |
| 0.241066061 | 0.269616685 | 0.426213367 | 0.47315638  |
| 0.367962687 | 0.207180131 | 0.416929365 | 0.44852824  |
| 0.391510157 | 0.349846783 | 0.247156136 | 0.009247621 |
| 0.288128098 | 0.3693951   | 0.196096782 | 0.400071104 |
| 0.20041541  | 0.271856618 | 0.389384416 | 0.351256687 |
| 0.3045206   | 0.200942488 | 0.376920392 | 0.419491831 |
| 0.191604878 | 0.271925367 | 0.408638575 | 0.433043067 |
| 0.004956561 | 0.332338922 | 0.409389898 | 0.153159741 |
| 0.352515381 | 0.130364917 | 0.226401285 | 0.440524346 |
| 0.31523652  | 0.233329199 | 0.474481476 | 0.354036324 |
| 0.355841979 | 0.259534403 | 0.511299729 | 0.076147795 |
| 0.354000467 | 0.041888529 | 0.264049567 | 0.394346048 |
| 0.260530588 | 0.288957024 | 0.293405725 | 0.249011811 |
| 0.160919831 | 0.51754141  | 0.367501394 | 0.495436657 |
| 0.37877025  | 0.515623757 | 0.421919385 | 0.405967288 |
| 0.354071576 | 0.396556284 | 0.140099665 | 0.405168463 |
| 0.429044662 | 0.351044887 | 0.109946412 | 0.430891346 |

|             |             |             |             |
|-------------|-------------|-------------|-------------|
| 0.412238214 | 0.38637078  | 0.108497587 | 0.470832437 |
| 0.48051644  | 0.490611056 | 0.146582091 | 0.342620286 |
| 0.3490546   | 0.238174087 | 0.380560044 | 0.514903481 |
| 0.395839735 | 0.359517796 | 0.324856632 | 0.346969925 |
| 0.191253968 | 0.215858259 | 0.308265363 | 0.186225794 |
| 0.009604506 | 0.11913892  | 0.091431798 | 0.152498176 |
| 0.148775307 | 0.426880739 | 0.379898779 | 0.509306353 |
| 0.131030664 | 0.391180392 | 0.270977327 | 0.279201451 |
| 0.424057121 | 0.360045221 | 0.348808138 | 0.361777475 |
| 0.257329004 | 0.016236217 | 0.110972782 | 0.519174135 |
| 0.07232539  | 0.21801184  | 0.355221971 | 0.00252007  |
| 0.069287024 | 0.418769021 | 0.127317065 | 0.203419885 |
| 0.444333788 | 0.209169122 | 0.237482345 | 0.401597088 |
| 0.316897632 | 0.111603594 | 0.001937885 | 0.483400686 |
| 0.495072377 | 0.468007894 | 0.498291141 | 0.475565272 |
| 0.441876293 | 0.397439192 | 0.387987587 | 0.36399584  |
| 0.124718454 | 0.128704881 | 0.210306774 | 0.283805447 |
| 0.009540599 | 0.339635175 | 0.300382306 | 0.15786546  |
| 0.403442991 | 0.323599014 | 0.049241609 | 0.342998988 |
| 0.026659971 | 0.195749087 | 0.360482833 | 0.23294449  |
| 0.325295873 | 0.021480764 | 0.234389233 | 0.332526616 |
| 0.431235674 | 0.335674249 | 0.348519864 | 0.521897989 |
| 0.306052971 | 0.17902592  | 0.2854105   | 0.359210505 |
| 0.089356939 | 0.165234086 | 0.402388585 | 0.049168985 |
| 0.216757233 | 0.461892621 | 0.386768373 | 0.088584351 |
| 0.270896822 | 0.007154932 | 0.348820471 | 0.519908374 |
| 0.478227118 | 0.501916931 | 0.482458375 | 0.241691126 |
| 0.49449052  | 0.129504444 | 0.519807756 | 0.397373314 |
| 0.419392107 | 0.001247924 | 0.006467456 | 0.461542448 |
| 0.374428519 | 0.091569682 | 0.17304519  | 0.342874652 |
| 0.109909926 | 0.20241433  | 0.083601478 | 0.159758356 |
| 0.395624084 | 0.217134225 | 0.166481944 | 0.48762665  |
| 0.24409749  | 0.234284746 | 0.428651231 | 0.122476463 |
| 0.375216916 | 0.060673874 | 0.125167242 | 0.006718344 |
| 0.344007569 | 0.148260936 | 0.489098309 | 0.506184725 |
| 0.474481169 | 0.354275031 | 0.389411467 | 0.348250454 |
| 0.41803875  | 0.141480853 | 0.359893842 | 0.155494103 |
| 0.489182345 | 0.371411351 | 0.299971311 | 0.297226904 |
| 0.481977615 | 0.456625991 | 0.045810374 | 0.385940583 |
| 0.0132044   | 0.001671857 | 0.385361474 | 0.28094464  |
| 0.100575367 | 0.371143569 | 0.254772073 | 0.289474333 |
| 0.247636063 | 0.040322181 | 0.262164063 | 0.237670854 |
| 0.287408005 | 0.353393271 | 0.251018749 | 0.276196244 |
| 0.250252879 | 0.136615536 | 0.188874244 | 0.174475062 |
| 0.307382746 | 0.315972419 | 0.204589183 | 0.032933134 |
| 0.41933791  | 0.388815761 | 0.072042319 | 0.17959034  |
| 0.395638239 | 0.468548949 | 0.056411226 | 0.009859529 |
| 0.270191778 | 0.331486438 | 0.474166767 | 0.499832053 |
| 0.525021074 | 0.5017799   | 0.386427209 | 0.13045832  |
| 0.083823654 | 0.306447499 | 0.270934713 | 0.087732423 |
| 0.500476437 | 0.107822738 | 0.480906566 | 0.282967883 |
| 0.142328606 | 0.21608081  | 0.034962988 | 0.104503151 |
| 0.357916568 | 0.189707294 | 0.16645191  | 0.185412248 |
| 0.304780617 | 0.227467654 | 0.067120023 | 0.205734559 |

|             |             |             |             |
|-------------|-------------|-------------|-------------|
| 0.349662219 | 0.175608559 | 0.179180209 | 0.335276195 |
| 0.355478967 | 0.320498116 | 0.406781297 | 0.428478274 |
| 0.15537943  | 0.152932252 | 0.307537899 | 0.377876105 |
| 0.424295705 | 0.424512428 | 0.027389421 | 0.46752803  |
| 0.467763642 | 0.415113099 | 0.496267081 | 0.354095418 |
| 0.114504808 | 0.345295838 | 0.335745824 | 0.339852321 |
| 0.20928327  | 0.371943984 | 0.254488746 | 0.085000894 |
| 0.286918012 | 0.487048102 | 0.41126712  | 0.1589298   |
| 0.411454003 | 0.18095467  | 0.098503381 | 0.429700559 |
| 0.173597037 | 0.109539412 | 0.406733153 | 0.415038169 |
| 0.001053195 | 0.129907383 | 0.473607937 | 0.229063793 |
| 0.509099664 | 0.456059349 | 0.415894872 | 0.282551496 |
| 0.00248191  | 0.392579744 | 0.347259052 | 0.368333137 |
| 0.431745742 | 0.342671548 | 0.184825172 | 0.07648537  |
| 0.266906359 | 0.115461099 | 0.146584322 | 0.343012687 |
| 0.19825491  | 0.419526789 | 0.203069844 | 0.248762246 |
| 0.189820863 | 0.145657351 | 0.217428274 | 0.233769531 |
| 0.173682848 | 0.234065662 | 0.325750323 | 0.36331129  |
| 0.203042484 | 0.422559413 | 0.403527984 | 0.036424375 |
| 0.338286157 | 0.387557074 | 0.40661353  | 0.00338444  |
| 0.396420539 | 0.008742402 | 0.187477258 | 0.193323696 |
| 0.184902015 | 0.220528087 | 0.243403422 | 0.266001594 |
| 0.378802147 | 0.229540295 | 0.251175747 | 0.225686661 |
| 0.146090758 | 0.234938398 | 0.365429647 | 0.374311782 |
| 0.244058769 | 0.136611597 | 0.126530858 | 0.130198075 |
| 0.054104197 | 0.451762624 | 0.239009301 | 0.1031202   |
| 0.227290402 | 0.38537921  | 0.31324056  | 0.504104887 |
| 0.378911426 | 0.14772978  | 0.34917562  | 0.429296967 |
| 0.311746016 | 0.31206402  | 0.097653432 | 0.38107561  |
| 0.236381791 | 0.200778959 | 0.406075662 | 0.350636255 |
| 0.428328359 | 0.386291815 | 0.238636693 | 0.416703495 |
| 0.335221232 | 0.387359626 | 0.374979229 | 0.080204403 |
| 0.190465841 | 0.166225622 | 0.239641302 | 0.002051617 |
| 0.342446765 | 0.271996875 | 0.442003052 | 0.49015637  |
| 0.290319433 | 0.351056822 | 0.365977717 | 0.108967802 |
| 0.327467581 | 0.211021972 | 0.161009125 | 0.419111082 |
| 0.215655839 | 0.184947252 | 0.274550475 | 0.348498563 |
| 0.402817681 | 0.41600838  | 0.2528596   | 0.283712301 |
| 0.255140977 | 0.225818984 | 0.48938315  | 0.15552551  |
| 0.42737981  | 0.156940961 | 0.40418562  | 0.280711749 |
| 0.21487008  | 0.504464537 | 0.080987273 | 0.514275013 |
| 0.332075347 | 0.161567891 | 0.476803968 | 0.318361249 |
| 0.297287234 | 0.105974525 | 0.183224401 | 0.418079973 |
| 0.248258596 | 0.32154694  | 0.027125922 | 0.07937283  |
| 0.301640562 | 0.364461481 | 0.422646896 | 0.367400731 |
| 0.226468028 | 0.315629256 | 0.165176358 | 0.333741929 |
| 0.498436781 | 0.50878811  | 0.252252237 | 0.248335481 |
| 0.349115246 | 0.108283127 | 0.396913866 | 0.028032381 |
| 0.415368941 | 0.414404934 | 0.42099441  | 0.067301405 |
| 0.025076485 | 0.211332406 | 0.416398659 | 0.110892539 |
| 0.454962182 | 0.207890417 | 0.401975415 | 0.399614427 |
| 0.2108275   | 0.508939162 | 0.116876491 | 0.365220631 |
| 0.09047324  | 0.263748882 | 0.365384784 | 0.411166951 |
| 0.198320503 | 0.275496058 | 0.341526009 | 0.208797275 |

|             |             |             |             |
|-------------|-------------|-------------|-------------|
| 0.037794743 | 0.240729365 | 0.003436281 | 0.402712098 |
| 0.492250628 | 0.3345617   | 0.217196892 | 0.377285816 |
| 0.257191678 | 0.357316372 | 0.267049619 | 0.410905891 |
| 0.010188502 | 0.336540211 | 0.201936261 | 0.382888656 |
| 0.244871718 | 0.401526663 | 0.053472564 | 0.318821271 |
| 0.476648234 | 0.301449774 | 0.264116667 | 0.328592793 |
| 0.490549984 | 0.378958481 | 0.198491187 | 0.201706466 |
| 0.421475617 | 0.093021127 | 0.405073653 | 0.521698348 |
| 0.166055033 | 0.189763449 | 0.39134323  | 0.202301204 |
| 0.304382892 | 0.374639301 | 0.422449811 | 0.521395829 |
| 0.071471751 | 0.240751079 | 0.391931483 | 0.460269113 |
| 0.275889538 | 0.163486784 | 0.232175707 | 0.223475204 |
| 0.463396598 | 0.096817537 | 0.263004525 | 0.348020928 |
| 0.207630972 | 0.297502069 | 0.388440622 | 0.176925338 |
| 0.03985947  | 0.19062872  | 0.341525753 | 0.16282078  |
| 0.292516126 | 0.341913583 | 0.226307736 | 0.356352253 |
| 0.117115708 | 0.02150165  | 0.427920857 | 0.019714575 |
| 0.339755004 | 0.350212154 | 0.243482985 | 0.332696274 |
| 0.196188879 | 0.377653869 | 0.38178921  | 0.001977074 |
| 0.381319673 | 0.038198888 | 0.307969457 | 0.204134685 |
| 0.305424645 | 0.074033721 | 0.442652679 | 0.489454939 |
| 0.32350486  | 0.343913212 | 0.343179382 | 0.459807646 |
| 0.135009503 | 0.349192431 | 0.365286829 | 0.417506291 |
| 0.20524244  | 0.419499442 | 0.419039197 | 0.347282068 |
| 0.373337729 | 0.285735416 |             |             |
| BSPRY       | 0.11576178  | 0.36769055  | 0.079341415 |
| 0.15862023  | 0.288498695 | 0.271789374 | 0.144403067 |
| 0.204986785 | 0.312353817 | 0.236900795 | 0.295244619 |
| 0.055928967 | 0.08714752  | 0.412373341 | 0.138946506 |
| 0.340371092 | 0.096766897 | 0.196129366 | 0.117975297 |
| 0.26024294  | 0.304351866 | 0.258035134 | 0.287348907 |
| 0.306504252 | 0.214693208 | 0.302337653 | 0.30678783  |
| 0.424582747 | 0.169004821 | 0.307633652 | 0.132637384 |
| 0.413890641 | 0.303532477 | 0.275974653 | 0.040483656 |
| 0.323646335 | 0.038423055 | 0.436321578 | 0.306487866 |
| 0.132362976 | 0.349713494 | 0.235297283 | 0.262378564 |
| 0.301696348 | 0.074726266 | 0.126368171 | 0.345515514 |
| 0.301584287 | 0.291556119 | 0.104314483 | 0.318466569 |
| 0.332219712 | 0.283906688 | 0.282441979 | 0.007298423 |
| 0.23243905  | 0.071505926 | 0.194222032 | 0.434254352 |
| 0.236980733 | 0.199293098 | 0.24720689  | 0.27874626  |
| 0.34512209  | 0.349124489 | 0.286680976 | 0.315633529 |
| 0.439682983 | 0.19265245  | 0.319328421 | 0.157397086 |
| 0.347527645 | 0.084733072 | 0.214328447 | 0.138379565 |
| 0.322410123 | 0.248093702 | 0.290567924 | 0.274009601 |
| 0.36628573  | 0.483900252 | 0.279297468 | 0.445717594 |
| 0.184533782 | 0.309653176 | 0.271565805 | 0.322138114 |
| 0.353327902 | 0.190862214 | 0.328417166 | 0.477836702 |
| 0.115008865 | 0.288522998 | 0.357441012 | 0.17639343  |
| 0.350224568 | 0.253887037 | 0.276734913 | 0.160589192 |
| 0.317681987 | 0.337266948 | 0.452171836 | 0.302283784 |
| 0.286076892 | 0.121339465 | 0.432538616 | 0.286806443 |
| 0.262822067 | 0.123059858 | 0.293412904 | 0.384261592 |
| 0.338203315 | 0.418723174 | 0.369616002 | 1           |

|             |             |             |             |
|-------------|-------------|-------------|-------------|
| 0.333167123 | 0.432311783 | 0.322620335 | 0.376846194 |
| 0.099033296 | 0.459117089 | 0.21359318  | 0.100597472 |
| 0.114805884 | 0.160228346 | 0.300145744 | 0.3052697   |
| 0.389607564 | 0.308577471 | 0.242344143 | 0.292969314 |
| 0.417177812 | 0.415728981 | 0.463635645 | 0.3718494   |
| 0.091892533 | 0.250942577 | 0.32439739  | 0.255359995 |
| 0.360071463 | 0.190546938 | 0.25019819  | 0.464898914 |
| 0.350710376 | 0.374499875 | 0.195742361 | 0.469433659 |
| 0.29129759  | 0.465376448 | 0.367442555 | 0.226716355 |
| 0.465766392 | 0.43761876  | 0.458870829 | 0.311830598 |
| 0.416820842 | 0.27743671  | 0.139152729 | 0.363346996 |
| 0.443772193 | 0.019094945 | 0.405265609 | 0.434687579 |
| 0.436101256 | 0.381304929 | 0.477839586 | 0.435642841 |
| 0.435911456 | 0.135163808 | 0.055341985 | 0.327124687 |
| 0.454780836 | 0.350641424 | 0.223924771 | 0.324137667 |
| 0.33600331  | 0.307069828 | 0.33867206  | 0.247175625 |
| 0.486069594 | 0.378451578 | 0.414473317 | 0.346099104 |
| 0.308858057 | 0.321500597 | 0.298393776 | 0.412131812 |
| 0.09461771  | 0.152888869 | 0.085766419 | 0.321159346 |
| 0.224687453 | 0.243029588 | 0.317570648 | 0.346111482 |
| 0.254087683 | 0.299659702 | 0.242676408 | 0.320666187 |
| 0.092990474 | 0.311212231 | 0.207965081 | 0.238721038 |
| 0.103941678 | 0.184407132 | 0.242501084 | 0.184969689 |
| 0.295634875 | 0.272059708 | 0.324255195 | 0.428864523 |
| 0.33901836  | 0.204190292 | 0.334269929 | 0.432485289 |
| 0.423185031 | 0.301609882 | 0.273535349 | 0.023938301 |
| 0.321023749 | 0.265475329 | 0.184751562 | 0.304646311 |
| 0.21705707  | 0.340722421 | 0.360249954 | 0.318974645 |
| 0.259305789 | 0.210367919 | 0.348065686 | 0.406713764 |
| 0.189105464 | 0.268459692 | 0.400216158 | 0.32987451  |
| 0.010946353 | 0.322634223 | 0.364134898 | 0.241799323 |
| 0.341677181 | 0.143820324 | 0.176206485 | 0.414713469 |
| 0.275154708 | 0.277861661 | 0.415710965 | 0.321066938 |
| 0.272895493 | 0.251609273 | 0.47508367  | 0.087171632 |
| 0.320689314 | 0.074087362 | 0.30737378  | 0.249600403 |
| 0.289627049 | 0.325770889 | 0.29027784  | 0.265027928 |
| 0.147467346 | 0.464239433 | 0.333057924 | 0.443864764 |
| 0.322592285 | 0.479874303 | 0.387110299 | 0.388623349 |
| 0.321125618 | 0.318743962 | 0.135729108 | 0.360569373 |
| 0.39722947  | 0.295927026 | 0.113556163 | 0.355723001 |
| 0.328489248 | 0.341445017 | 0.166373741 | 0.449389544 |
| 0.455381748 | 0.407113838 | 0.220737782 | 0.339567852 |
| 0.334311412 | 0.243085729 | 0.349443534 | 0.486690311 |
| 0.285990784 | 0.351126344 | 0.323854955 | 0.364707922 |
| 0.222373465 | 0.282956205 | 0.322333931 | 0.165306724 |
| 0.004875548 | 0.142109325 | 0.115046445 | 0.229348735 |
| 0.18211033  | 0.301773227 | 0.344266277 | 0.460111102 |
| 0.195046006 | 0.364913453 | 0.288122846 | 0.311577842 |
| 0.396406266 | 0.333373744 | 0.284487811 | 0.318698384 |
| 0.27407418  | 0.035788951 | 0.160998344 | 0.485948538 |
| 0.07920074  | 0.215517608 | 0.320056948 | 0.006175352 |
| 0.109133487 | 0.325246373 | 0.135403571 | 0.234631736 |
| 0.425193451 | 0.226428786 | 0.249262836 | 0.290373928 |
| 0.308065978 | 0.154292886 | 0.005944315 | 0.436489507 |



|             |             |             |             |
|-------------|-------------|-------------|-------------|
| 0.443480761 | 0.428633062 | 0.442559197 | 0.41993936  |
| 0.415333804 | 0.320749793 | 0.35669582  | 0.264461243 |
| 0.18104559  | 0.141638568 | 0.25392045  | 0.330186099 |
| 0.013035255 | 0.309774278 | 0.305391002 | 0.198630485 |
| 0.336564286 | 0.338988052 | 0.082215693 | 0.315627006 |
| 0.041824094 | 0.162664523 | 0.346014129 | 0.291914541 |
| 0.330335797 | 0.03910429  | 0.178506828 | 0.311225521 |
| 0.371717541 | 0.326007644 | 0.267040411 | 0.46247356  |
| 0.303681693 | 0.161412346 | 0.304594335 | 0.317485282 |
| 0.149297895 | 0.138870682 | 0.337783721 | 0.024576333 |
| 0.139845091 | 0.422159816 | 0.314278783 | 0.114295388 |
| 0.299015696 | 0.015980748 | 0.330228303 | 0.471421007 |
| 0.394451615 | 0.462163987 | 0.432403701 | 0.227592566 |
| 0.440957739 | 0.094811758 | 0.458371887 | 0.351717129 |
| 0.295384181 | 0.002201183 | 0.017607687 | 0.413746143 |
| 0.330775257 | 0.085442459 | 0.221883857 | 0.235081041 |
| 0.18103715  | 0.196802493 | 0.126856221 | 0.210966043 |
| 0.297150432 | 0.264819237 | 0.208377765 | 0.42467907  |
| 0.302134862 | 0.287374295 | 0.313535242 | 0.141476943 |
| 0.303975119 | 0.109161701 | 0.149288272 | 0.013736972 |
| 0.330691264 | 0.142347798 | 0.428308173 | 0.442187504 |
| 0.452599854 | 0.320638245 | 0.243159736 | 0.262713777 |
| 0.390980493 | 0.120755396 | 0.24700771  | 0.143423743 |
| 0.413992864 | 0.346267173 | 0.30465021  | 0.291879499 |
| 0.466787157 | 0.424825784 | 0.088610146 | 0.355001523 |
| 0.020537257 | 0.005406368 | 0.281304822 | 0.300822996 |
| 0.119842481 | 0.348795266 | 0.277643189 | 0.302843975 |
| 0.283283803 | 0.060225275 | 0.26172562  | 0.256697214 |
| 0.320161957 | 0.351760037 | 0.276443686 | 0.2816389   |
| 0.291577627 | 0.220719227 | 0.236713936 | 0.24617646  |
| 0.28624419  | 0.309583448 | 0.219998915 | 0.069877146 |
| 0.307513533 | 0.316705038 | 0.112035459 | 0.202580246 |
| 0.374795916 | 0.424106124 | 0.129694535 | 0.031793522 |
| 0.271615181 | 0.347067371 | 0.440170722 | 0.422869939 |
| 0.468095632 | 0.483782635 | 0.385846779 | 0.235479066 |
| 0.122734623 | 0.328420792 | 0.28537366  | 0.169582716 |
| 0.445729813 | 0.116264397 | 0.412476254 | 0.25976464  |
| 0.188711184 | 0.25908369  | 0.075356351 | 0.161873115 |
| 0.29307884  | 0.236364416 | 0.244612955 | 0.175491492 |
| 0.339892885 | 0.212220476 | 0.11679136  | 0.262818783 |
| 0.335088667 | 0.193631362 | 0.232035948 | 0.284650575 |
| 0.300381699 | 0.202855449 | 0.341763862 | 0.438775286 |
| 0.177435722 | 0.195021971 | 0.245046149 | 0.328076568 |
| 0.365018676 | 0.294923401 | 0.034019651 | 0.380438131 |
| 0.432997314 | 0.322471479 | 0.428360178 | 0.388926732 |
| 0.146905554 | 0.305970026 | 0.305213674 | 0.351606565 |
| 0.266242547 | 0.272991691 | 0.304005789 | 0.125437102 |
| 0.316797482 | 0.460525874 | 0.375096823 | 0.220458849 |
| 0.301503023 | 0.167177498 | 0.105986072 | 0.374467841 |
| 0.223590678 | 0.149790846 | 0.258339336 | 0.368608907 |
| 0.003853283 | 0.133771606 | 0.446542443 | 0.244225806 |
| 0.476108463 | 0.428676971 | 0.407558679 | 0.261989597 |
| 0.00529981  | 0.332645746 | 0.323733744 | 0.313980696 |
| 0.378050614 | 0.297597102 | 0.181523753 | 0.148411922 |

|             |             |             |             |
|-------------|-------------|-------------|-------------|
| 0.287169527 | 0.110117232 | 0.245719295 | 0.238220374 |
| 0.208820341 | 0.335839967 | 0.255928857 | 0.285347834 |
| 0.266096123 | 0.14638184  | 0.198116684 | 0.24455456  |
| 0.207697682 | 0.27122348  | 0.335263135 | 0.213250119 |
| 0.204307159 | 0.419943172 | 0.355500061 | 0.059668085 |
| 0.288529923 | 0.385507225 | 0.384036299 | 0.012916873 |
| 0.334964927 | 0.026233826 | 0.263080983 | 0.248315365 |
| 0.251439196 | 0.303121919 | 0.301290949 | 0.281072889 |
| 0.347428244 | 0.289362894 | 0.264284298 | 0.269552428 |
| 0.207873865 | 0.257595329 | 0.322568835 | 0.323116603 |
| 0.258035669 | 0.176255667 | 0.133437279 | 0.138078479 |
| 0.090743821 | 0.384863102 | 0.25917108  | 0.101981677 |
| 0.281102976 | 0.335021058 | 0.351251555 | 0.422591174 |
| 0.38100089  | 0.132051146 | 0.346143717 | 0.363265973 |
| 0.210833188 | 0.241963653 | 0.118200123 | 0.302413753 |
| 0.266419389 | 0.242932268 | 0.287467854 | 0.291109268 |
| 0.335095926 | 0.390743965 | 0.245878784 | 0.398652367 |
| 0.303378987 | 0.347642081 | 0.224976156 | 0.149087513 |
| 0.231923244 | 0.192606556 | 0.276729045 | 0.006524905 |
| 0.332636391 | 0.218430428 | 0.395073735 | 0.425783992 |
| 0.242384569 | 0.35859215  | 0.224206896 | 0.158405073 |
| 0.182986208 | 0.205124201 | 0.198796705 | 0.322809886 |
| 0.177664556 | 0.21754232  | 0.302489008 | 0.233727717 |
| 0.33366195  | 0.331427607 | 0.286777728 | 0.30600098  |
| 0.295750511 | 0.217937694 | 0.446564829 | 0.155992547 |
| 0.318354456 | 0.203773999 | 0.27933618  | 0.322833347 |
| 0.288763444 | 0.444674736 | 0.107895522 | 0.45532584  |
| 0.350837973 | 0.169256077 | 0.463393964 | 0.276450018 |
| 0.250783588 | 0.156782883 | 0.173132666 | 0.300360117 |
| 0.304570083 | 0.255173292 | 0.017023833 | 0.112321732 |
| 0.320392678 | 0.314792162 | 0.341066607 | 0.343016265 |
| 0.265993806 | 0.335199369 | 0.134365838 | 0.32568371  |
| 0.413958993 | 0.444065128 | 0.28913842  | 0.28493257  |
| 0.336642264 | 0.162516029 | 0.281497112 | 0.034060041 |
| 0.343646747 | 0.311322935 | 0.307786028 | 0.119566759 |
| 0.057178932 | 0.203201207 | 0.342951938 | 0.125101687 |
| 0.433363609 | 0.158601587 | 0.313019516 | 0.307834266 |
| 0.229454807 | 0.448691601 | 0.200384891 | 0.324094256 |
| 0.128301532 | 0.287115935 | 0.299892745 | 0.335718278 |
| 0.24258522  | 0.283954767 | 0.330870407 | 0.216797655 |
| 0.082729068 | 0.276634273 | 0.013923944 | 0.396702804 |
| 0.425554305 | 0.314710004 | 0.236264953 | 0.23339355  |
| 0.293855787 | 0.348757096 | 0.321610401 | 0.292125612 |
| 0.028202448 | 0.313505751 | 0.245534974 | 0.338939341 |
| 0.191840968 | 0.357817223 | 0.09550566  | 0.324556926 |
| 0.418652689 | 0.335403401 | 0.282563819 | 0.271836017 |
| 0.41358544  | 0.325070434 | 0.171938298 | 0.221758    |
| 0.320857709 | 0.116556179 | 0.258534449 | 0.478373255 |
| 0.238362694 | 0.216151272 | 0.381436414 | 0.27998485  |
| 0.285295466 | 0.339629451 | 0.309516737 | 0.472278881 |
| 0.159222387 | 0.277252789 | 0.344539935 | 0.420483396 |
| 0.301311944 | 0.221954984 | 0.240608135 | 0.296196248 |
| 0.388440629 | 0.12392385  | 0.284486756 | 0.3185217   |
| 0.228507629 | 0.311115576 | 0.271602652 | 0.249689756 |

|             |             |             |             |
|-------------|-------------|-------------|-------------|
| 0.079398076 | 0.24936417  | 0.262842569 | 0.203247078 |
| 0.328471561 | 0.330340769 | 0.282553396 | 0.371864326 |
| 0.157598843 | 0.04968175  | 0.426156019 | 0.030559444 |
| 0.253808687 | 0.309593891 | 0.269528658 | 0.310786773 |
| 0.196025837 | 0.344044055 | 0.312183116 | 0.006436166 |
| 0.3669188   | 0.049442572 | 0.301546755 | 0.259236231 |
| 0.282094615 | 0.116796095 | 0.395576143 | 0.457325389 |
| 0.29277553  | 0.245927677 | 0.253724367 | 0.413983556 |
| 0.154079237 | 0.245532843 | 0.311608693 | 0.307658677 |
| 0.203476568 | 0.282803978 | 0.302204059 | 0.265903728 |
| 0.316548873 | 0.271546124 |             |             |
| BUB1        | 0.035360362 | 0.334487159 | 0.022063208 |
| 0.104457046 | 0.265542706 | 0.20734371  | 0.035527991 |
| 0.078055547 | 0.259014765 | 0.175091395 | 0.238729874 |
| 0.010376709 | 0.137042334 | 0.413992883 | 0.032458278 |
| 0.334564994 | 0.024824622 | 0.069570539 | 0.058238065 |
| 0.140893221 | 0.264825305 | 0.262237214 | 0.184215515 |
| 0.256735365 | 0.126698952 | 0.201433838 | 0.269257976 |
| 0.432866972 | 0.212177475 | 0.335041512 | 0.13072518  |
| 0.361092987 | 0.303979993 | 0.277212329 | 0.006780216 |
| 0.239824811 | 0.025213694 | 0.356899405 | 0.232712432 |
| 0.189434354 | 0.277038381 | 0.168367375 | 0.180824001 |
| 0.226209002 | 0.01812155  | 0.120758267 | 0.359652335 |
| 0.2000371   | 0.172960272 | 0.025849516 | 0.323744949 |
| 0.24454944  | 0.225574652 | 0.280395033 | 0.0029642   |
| 0.279776428 | 0.147201445 | 0.259935153 | 0.407337352 |
| 0.137428334 | 0.082843793 | 0.242497811 | 0.133959758 |
| 0.288273979 | 0.323727829 | 0.182539049 | 0.250525292 |
| 0.432029445 | 0.237017292 | 0.369548692 | 0.110356086 |
| 0.232529273 | 0.013180831 | 0.109237786 | 0.037255323 |
| 0.269411354 | 0.13662025  | 0.238978477 | 0.285014579 |
| 0.342209826 | 0.424383239 | 0.157604776 | 0.396816357 |
| 0.154556815 | 0.30469791  | 0.25199957  | 0.271592767 |
| 0.312712309 | 0.051033141 | 0.360782494 | 0.45479173  |
| 0.021860828 | 0.228949627 | 0.339500372 | 0.066475473 |
| 0.338564904 | 0.23457509  | 0.217527874 | 0.215745118 |
| 0.351481929 | 0.298353611 | 0.378840926 | 0.229179892 |
| 0.233688676 | 0.031992008 | 0.362008488 | 0.303162436 |
| 0.232132855 | 0.038467082 | 0.253761337 | 0.447093282 |
| 0.323138954 | 0.432123848 | 0.367714641 | 0.333167123 |
| 1           | 0.434166759 | 0.326872134 | 0.341052669 |
| 0.098532064 | 0.440447772 | 0.106637458 | 0.027317261 |
| 0.03133196  | 0.055556794 | 0.212762732 | 0.244604047 |
| 0.425648152 | 0.228987448 | 0.12347205  | 0.198548649 |
| 0.464083358 | 0.358612145 | 0.442537132 | 0.378249398 |
| 0.020610562 | 0.252553355 | 0.30857342  | 0.137006669 |
| 0.318194331 | 0.059600143 | 0.278917828 | 0.403556682 |
| 0.324219032 | 0.426548012 | 0.081460092 | 0.388195402 |
| 0.126609887 | 0.450893304 | 0.373899256 | 0.116368825 |
| 0.426653987 | 0.385143477 | 0.470875308 | 0.384688748 |
| 0.373466118 | 0.197132773 | 0.058200925 | 0.333859047 |
| 0.434233699 | 0.02615401  | 0.44175103  | 0.47170874  |
| 0.415199895 | 0.454104852 | 0.486124516 | 0.455041847 |
| 0.412896091 | 0.035150106 | 0.043298388 | 0.266551072 |

|             |             |             |             |
|-------------|-------------|-------------|-------------|
| 0.420479962 | 0.348690538 | 0.10114912  | 0.297768336 |
| 0.313223395 | 0.207759024 | 0.364204872 | 0.265166472 |
| 0.447807634 | 0.401875491 | 0.435465455 | 0.337191853 |
| 0.172488617 | 0.246638839 | 0.295287128 | 0.347434264 |
| 0.025734078 | 0.059404431 | 0.022309803 | 0.244164837 |
| 0.17775604  | 0.12343139  | 0.219309528 | 0.27074323  |
| 0.137652845 | 0.171277093 | 0.269491577 | 0.370814335 |
| 0.027429147 | 0.277224826 | 0.089773241 | 0.101853656 |
| 0.03110392  | 0.091387531 | 0.157194739 | 0.101608559 |
| 0.206301886 | 0.153858609 | 0.358044762 | 0.445037355 |
| 0.259070858 | 0.115908903 | 0.333677928 | 0.424414549 |
| 0.398244662 | 0.298412016 | 0.165089332 | 0.010823796 |
| 0.288412236 | 0.239235553 | 0.248214907 | 0.278963738 |
| 0.110615871 | 0.216363508 | 0.320653847 | 0.388294843 |
| 0.15264592  | 0.068308831 | 0.300545756 | 0.334634606 |
| 0.089542289 | 0.24133015  | 0.438273629 | 0.259426275 |
| 0.001024393 | 0.226273176 | 0.407575759 | 0.177725174 |
| 0.235052649 | 0.188192214 | 0.237181377 | 0.445941036 |
| 0.285144859 | 0.243712254 | 0.442489851 | 0.374468425 |
| 0.218528212 | 0.142032425 | 0.477873362 | 0.093112376 |
| 0.257508474 | 0.065485542 | 0.253220272 | 0.173924542 |
| 0.167411182 | 0.25518229  | 0.273086517 | 0.24968547  |
| 0.06616402  | 0.439035476 | 0.314515537 | 0.456343202 |
| 0.305441624 | 0.478075705 | 0.442529023 | 0.400742708 |
| 0.257773921 | 0.274991368 | 0.204792183 | 0.410419337 |
| 0.436396404 | 0.262415125 | 0.035137118 | 0.404379277 |
| 0.253769    | 0.383517459 | 0.133467426 | 0.463424395 |
| 0.402398492 | 0.359074801 | 0.11098948  | 0.375628785 |
| 0.341759861 | 0.137528311 | 0.35732693  | 0.471047287 |
| 0.220204708 | 0.303473039 | 0.305582146 | 0.405184202 |
| 0.110900163 | 0.237551202 | 0.24524635  | 0.219799185 |
| 0.015848144 | 0.038357341 | 0.031746596 | 0.135371786 |
| 0.22575192  | 0.291883391 | 0.336119785 | 0.457834243 |
| 0.075771262 | 0.337277423 | 0.167566733 | 0.273170892 |
| 0.364191455 | 0.273426589 | 0.277943893 | 0.304419404 |
| 0.17409747  | 0.013912429 | 0.089156382 | 0.427927942 |
| 0.015183616 | 0.261779369 | 0.18095827  | 0.002262946 |
| 0.025097326 | 0.321752784 | 0.056061769 | 0.133253419 |
| 0.45688801  | 0.133433034 | 0.139187329 | 0.21334686  |
| 0.288460625 | 0.049598614 | 0.002965012 | 0.43428456  |
| 0.405932393 | 0.383361577 | 0.402054786 | 0.350384668 |
| 0.402919091 | 0.319976224 | 0.406865426 | 0.172038849 |
| 0.067199938 | 0.042539466 | 0.290109534 | 0.246641801 |
| 0.003827523 | 0.332215572 | 0.222669221 | 0.092328034 |
| 0.391031702 | 0.2353317   | 0.019435569 | 0.28081332  |
| 0.01292263  | 0.25600248  | 0.193592427 | 0.157557346 |
| 0.333832308 | 0.005609979 | 0.181686082 | 0.303677014 |
| 0.328113006 | 0.270278149 | 0.288114309 | 0.446615131 |
| 0.230440522 | 0.071389924 | 0.257470677 | 0.346892665 |
| 0.044702848 | 0.11088901  | 0.204775511 | 0.031928296 |
| 0.109305852 | 0.357085442 | 0.258699346 | 0.040731038 |
| 0.193388511 | 0.002064654 | 0.290623987 | 0.452333302 |
| 0.357178413 | 0.486526176 | 0.433920561 | 0.273771401 |
| 0.433738596 | 0.158804285 | 0.460797044 | 0.33357624  |

|             |             |              |             |
|-------------|-------------|--------------|-------------|
| 0.251929725 | 0.000904796 | 0.003995061  | 0.459626021 |
| 0.311315916 | 0.025584688 | 0.097817033  | 0.200117144 |
| 0.084617369 | 0.075781528 | 0.033557277  | 0.222489051 |
| 0.275726269 | 0.2095052   | 0.200562848  | 0.375710042 |
| 0.183933102 | 0.156630783 | 0.217258636  | 0.044862505 |
| 0.283640177 | 0.033244586 | 0.0444405913 | 0.010106159 |
| 0.332979772 | 0.066188863 | 0.345126515  | 0.427768645 |
| 0.433891902 | 0.362121711 | 0.220703063  | 0.202760633 |
| 0.389325348 | 0.047294915 | 0.241469784  | 0.05076457  |
| 0.397281118 | 0.353518904 | 0.276419552  | 0.246942322 |
| 0.467073582 | 0.403302167 | 0.017735588  | 0.392837769 |
| 0.007093291 | 0.002194024 | 0.204386358  | 0.189944699 |
| 0.065157687 | 0.307456488 | 0.203002365  | 0.153211794 |
| 0.153278851 | 0.016500534 | 0.294442497  | 0.292508418 |
| 0.239371073 | 0.277851984 | 0.274902918  | 0.170338414 |
| 0.233175621 | 0.192441447 | 0.136524648  | 0.103143878 |
| 0.183532411 | 0.239769401 | 0.133895274  | 0.010912649 |
| 0.25741862  | 0.294030043 | 0.030537108  | 0.093292569 |
| 0.409298434 | 0.46101899  | 0.033457516  | 0.011313319 |
| 0.201531055 | 0.24492441  | 0.471927379  | 0.41148169  |
| 0.423768467 | 0.468795444 | 0.309761586  | 0.12919935  |
| 0.036163614 | 0.24800251  | 0.273601621  | 0.106008228 |
| 0.440820688 | 0.030262298 | 0.381174613  | 0.2898887   |
| 0.066269807 | 0.15235789  | 0.022995989  | 0.047935871 |
| 0.306436125 | 0.111878547 | 0.148988574  | 0.08306772  |
| 0.260600735 | 0.262459426 | 0.026144989  | 0.129160352 |
| 0.297984891 | 0.269607813 | 0.100319742  | 0.159547719 |
| 0.262342593 | 0.128969248 | 0.406050148  | 0.395581802 |
| 0.072242284 | 0.061987542 | 0.162003308  | 0.315274336 |
| 0.404333166 | 0.242845125 | 0.015045436  | 0.360519136 |
| 0.435548756 | 0.351012909 | 0.3976215    | 0.381735193 |
| 0.044156696 | 0.293140841 | 0.277924054  | 0.282090799 |
| 0.116015724 | 0.19973457  | 0.161770243  | 0.031248548 |
| 0.232030448 | 0.37958863  | 0.362015567  | 0.120939399 |
| 0.253013908 | 0.060336365 | 0.024708915  | 0.373887676 |
| 0.266001299 | 0.057230154 | 0.185027791  | 0.399474877 |
| 0.002496893 | 0.200332913 | 0.453842376  | 0.150766795 |
| 0.433697189 | 0.461555302 | 0.376689356  | 0.132346998 |
| 0.00710988  | 0.378635586 | 0.298196779  | 0.288868053 |
| 0.366916005 | 0.251706493 | 0.079421276  | 0.058871152 |
| 0.239121994 | 0.039187357 | 0.124865963  | 0.184387764 |
| 0.229343995 | 0.275162574 | 0.145008891  | 0.124993624 |
| 0.163554917 | 0.046567206 | 0.238744871  | 0.146207133 |
| 0.181744743 | 0.18760157  | 0.319506784  | 0.147112505 |
| 0.272314121 | 0.409140531 | 0.363712025  | 0.011679261 |
| 0.270648241 | 0.374371986 | 0.367817234  | 0.003918333 |
| 0.39495206  | 0.003950479 | 0.164432973  | 0.178344282 |
| 0.153542095 | 0.174706386 | 0.219950835  | 0.255540944 |
| 0.253004335 | 0.156636847 | 0.19592466   | 0.170463022 |
| 0.13182853  | 0.128597631 | 0.28945005   | 0.217039384 |
| 0.239102902 | 0.075306555 | 0.055475223  | 0.056508647 |
| 0.033621917 | 0.383336104 | 0.178550526  | 0.034442725 |
| 0.157279657 | 0.228595688 | 0.307878854  | 0.397703048 |
| 0.368865815 | 0.060453539 | 0.232937031  | 0.373904608 |

|             |             |             |             |
|-------------|-------------|-------------|-------------|
| 0.186725544 | 0.180257515 | 0.030457921 | 0.217720058 |
| 0.141873528 | 0.235282481 | 0.21074581  | 0.192823022 |
| 0.322947838 | 0.326499068 | 0.170102105 | 0.368636539 |
| 0.255455583 | 0.236546828 | 0.180244901 | 0.074626805 |
| 0.117215131 | 0.07775792  | 0.260684949 | 0.000828421 |
| 0.260907696 | 0.139508525 | 0.444525445 | 0.389571839 |
| 0.271662667 | 0.316072081 | 0.176302808 | 0.061388852 |
| 0.153809758 | 0.117240604 | 0.088311692 | 0.363204328 |
| 0.256724407 | 0.107043578 | 0.257219408 | 0.151107202 |
| 0.394127455 | 0.355133079 | 0.222655918 | 0.15098844  |
| 0.152935472 | 0.110148888 | 0.3758898   | 0.056358957 |
| 0.30053846  | 0.216661671 | 0.203044824 | 0.255054081 |
| 0.194051204 | 0.455502293 | 0.026754935 | 0.473026199 |
| 0.290124347 | 0.075707547 | 0.409598466 | 0.152923728 |
| 0.157467123 | 0.092714002 | 0.25343432  | 0.207509783 |
| 0.168058789 | 0.276900932 | 0.018642802 | 0.103155151 |
| 0.291618889 | 0.200461167 | 0.336644252 | 0.30518282  |
| 0.245681986 | 0.320165155 | 0.182717058 | 0.178019693 |
| 0.368133806 | 0.376556405 | 0.223634303 | 0.199628703 |
| 0.283823371 | 0.0633215   | 0.23221373  | 0.015827981 |
| 0.346485592 | 0.324538266 | 0.250559586 | 0.029637684 |
| 0.009340377 | 0.28817727  | 0.316693704 | 0.029516362 |
| 0.474446464 | 0.24956302  | 0.231038921 | 0.340469949 |
| 0.108194761 | 0.381656858 | 0.106511648 | 0.364073791 |
| 0.025766308 | 0.174630228 | 0.267609722 | 0.245914685 |
| 0.224996846 | 0.304530611 | 0.354015488 | 0.265619187 |
| 0.019806354 | 0.220089952 | 0.004140937 | 0.31744628  |
| 0.357817818 | 0.305306168 | 0.140201738 | 0.179596711 |
| 0.228809901 | 0.306107168 | 0.224298844 | 0.251580337 |
| 0.007520124 | 0.329638727 | 0.117820122 | 0.330069631 |
| 0.263590073 | 0.249613013 | 0.038698163 | 0.275929972 |
| 0.327686525 | 0.270055822 | 0.191488031 | 0.296932788 |
| 0.392274503 | 0.291833036 | 0.090019789 | 0.175121078 |
| 0.274005229 | 0.03031295  | 0.198733303 | 0.45934015  |
| 0.134784266 | 0.259686501 | 0.453297949 | 0.176941162 |
| 0.2867831   | 0.294255293 | 0.281680597 | 0.437852162 |
| 0.077100824 | 0.182432417 | 0.38207442  | 0.404698094 |
| 0.260798403 | 0.219090269 | 0.278724062 | 0.233118969 |
| 0.354872376 | 0.060146311 | 0.264420128 | 0.28159081  |
| 0.280175592 | 0.231318437 | 0.191331334 | 0.191433939 |
| 0.026689048 | 0.108653049 | 0.211190881 | 0.08032175  |
| 0.22565153  | 0.280620424 | 0.246421632 | 0.331524755 |
| 0.108785409 | 0.02143101  | 0.387118441 | 0.049384514 |
| 0.160974194 | 0.322982725 | 0.142604691 | 0.280180338 |
| 0.122896835 | 0.239618281 | 0.193893771 | 0.000497887 |
| 0.383874892 | 0.055050416 | 0.208689601 | 0.235545764 |
| 0.265688573 | 0.028826774 | 0.359635339 | 0.481838823 |
| 0.198070699 | 0.207632577 | 0.27189344  | 0.37672483  |
| 0.213033248 | 0.258170571 | 0.279073063 | 0.28432358  |
| 0.255358613 | 0.236684359 | 0.265906219 | 0.2866907   |
| 0.287487471 | 0.145732857 |             |             |
| BUB1B       | 0.156596781 | 0.480210847 | 0.134802432 |
| 0.254563088 | 0.369531152 | 0.520498463 | 0.116343529 |
| 0.211005559 | 0.424612238 | 0.372971083 | 0.467694124 |

|             |             |             |             |
|-------------|-------------|-------------|-------------|
| 0.048228441 | 0.100228594 | 0.497857534 | 0.106050019 |
| 0.451109921 | 0.073082825 | 0.187387329 | 0.106880859 |
| 0.318065851 | 0.338803737 | 0.413470176 | 0.492468407 |
| 0.338825059 | 0.278260278 | 0.454589796 | 0.432512444 |
| 0.512252295 | 0.33430528  | 0.519706079 | 0.282144088 |
| 0.444445366 | 0.383419124 | 0.445501865 | 0.050487296 |
| 0.503195639 | 0.012893505 | 0.459130104 | 0.346783347 |
| 0.201090445 | 0.411561319 | 0.438905645 | 0.353151128 |
| 0.45767365  | 0.093657987 | 0.283102371 | 0.457284166 |
| 0.427026721 | 0.374820104 | 0.14193835  | 0.516903338 |
| 0.432657299 | 0.461619719 | 0.475444736 | 0.004586057 |
| 0.352274862 | 0.100103706 | 0.253730386 | 0.524180722 |
| 0.309224344 | 0.205114012 | 0.3217275   | 0.338932424 |
| 0.442599646 | 0.432970705 | 0.343384605 | 0.436026246 |
| 0.510444196 | 0.199148942 | 0.493032404 | 0.259671851 |
| 0.476803948 | 0.077823734 | 0.253805106 | 0.159539194 |
| 0.456315832 | 0.294964164 | 0.424957096 | 0.356749772 |
| 0.478469642 | 0.530514997 | 0.335936536 | 0.520725504 |
| 0.106240606 | 0.38382986  | 0.338469467 | 0.381243969 |
| 0.427291008 | 0.143474513 | 0.504702965 | 0.531519583 |
| 0.101497202 | 0.461158511 | 0.466732799 | 0.212697039 |
| 0.504168056 | 0.314046528 | 0.485586082 | 0.215988375 |
| 0.426494897 | 0.39645447  | 0.4887838   | 0.402380044 |
| 0.378534265 | 0.150959369 | 0.514908354 | 0.364000125 |
| 0.39838026  | 0.172052741 | 0.276489518 | 0.505254113 |
| 0.506244293 | 0.517813313 | 0.485566489 | 0.432311783 |
| 0.434166759 | 1           | 0.507533666 | 0.474481127 |
| 0.202521585 | 0.535773988 | 0.310650072 | 0.08847681  |
| 0.151368001 | 0.148550964 | 0.265005152 | 0.382721703 |
| 0.520830472 | 0.439838731 | 0.313206673 | 0.316005666 |
| 0.488110555 | 0.504712396 | 0.530973337 | 0.484229182 |
| 0.09107592  | 0.275910937 | 0.448157402 | 0.401334237 |
| 0.453412293 | 0.191467213 | 0.305087327 | 0.531671787 |
| 0.46177086  | 0.495668447 | 0.283299027 | 0.525019612 |
| 0.277883342 | 0.522934225 | 0.51173878  | 0.274181235 |
| 0.537621412 | 0.523523657 | 0.511355305 | 0.462241808 |
| 0.498944235 | 0.48449799  | 0.076596087 | 0.451755397 |
| 0.489061795 | 0.021464695 | 0.509773857 | 0.510731867 |
| 0.515752122 | 0.514420424 | 0.512104375 | 0.513358768 |
| 0.519092517 | 0.145605627 | 0.031276492 | 0.354819016 |
| 0.527252687 | 0.484328956 | 0.192477293 | 0.476020706 |
| 0.414924715 | 0.517104642 | 0.490129326 | 0.390373532 |
| 0.516214854 | 0.512058732 | 0.512696113 | 0.472985482 |
| 0.390167734 | 0.393841015 | 0.420953768 | 0.502664785 |
| 0.097468736 | 0.219580895 | 0.120514124 | 0.382823656 |
| 0.464978558 | 0.261756777 | 0.494574286 | 0.400568563 |
| 0.286656782 | 0.45302366  | 0.382450371 | 0.436864297 |
| 0.118917201 | 0.52363459  | 0.277713246 | 0.277635044 |
| 0.08899306  | 0.223619422 | 0.283919661 | 0.2587737   |
| 0.329405145 | 0.282365567 | 0.506602721 | 0.503319219 |
| 0.40458406  | 0.296607302 | 0.511498793 | 0.485590645 |
| 0.44747079  | 0.449834119 | 0.318240665 | 0.032276632 |
| 0.333918513 | 0.343240693 | 0.208908103 | 0.469010662 |
| 0.244835861 | 0.315469609 | 0.452572795 | 0.46079305  |

|             |             |             |             |
|-------------|-------------|-------------|-------------|
| 0.421264928 | 0.23762036  | 0.425606882 | 0.452592254 |
| 0.246926353 | 0.398174154 | 0.498178687 | 0.479934178 |
| 0.012940032 | 0.446274696 | 0.519333384 | 0.180864243 |
| 0.403165841 | 0.171520671 | 0.319445776 | 0.503649811 |
| 0.326659486 | 0.259699063 | 0.512976548 | 0.452028132 |
| 0.428436829 | 0.28211177  | 0.519807742 | 0.051278724 |
| 0.39027604  | 0.092708091 | 0.367617818 | 0.41643855  |
| 0.364078157 | 0.364983417 | 0.368580739 | 0.35258768  |
| 0.238896626 | 0.525666026 | 0.478346554 | 0.514350823 |
| 0.425273983 | 0.525205584 | 0.514205356 | 0.502289856 |
| 0.467914294 | 0.403773184 | 0.156993376 | 0.516867436 |
| 0.507894528 | 0.349252378 | 0.152604084 | 0.494184981 |
| 0.420114178 | 0.459203159 | 0.155953846 | 0.500796146 |
| 0.512575513 | 0.49362581  | 0.220438784 | 0.43120379  |
| 0.47849598  | 0.36400498  | 0.480775967 | 0.523369578 |
| 0.372983218 | 0.405926854 | 0.399802233 | 0.450781539 |
| 0.286122426 | 0.250539521 | 0.388859555 | 0.202193004 |
| 0.016235514 | 0.159262774 | 0.140852827 | 0.237476108 |
| 0.203659722 | 0.480872655 | 0.466265728 | 0.519357328 |
| 0.200416737 | 0.479530363 | 0.32119196  | 0.37450893  |
| 0.469848078 | 0.395912354 | 0.439255415 | 0.452030705 |
| 0.340940258 | 0.045950689 | 0.202357605 | 0.535905971 |
| 0.095281068 | 0.290267973 | 0.411874097 | 0.007664933 |
| 0.100948322 | 0.48096007  | 0.171206637 | 0.266227163 |
| 0.492622534 | 0.276866312 | 0.321074775 | 0.394308363 |
| 0.433355704 | 0.175460154 | 0.008909947 | 0.493091132 |
| 0.484423384 | 0.458470438 | 0.483858232 | 0.470255567 |
| 0.465116305 | 0.470973441 | 0.474260887 | 0.496381941 |
| 0.187321999 | 0.177004077 | 0.249365849 | 0.368205063 |
| 0.01045239  | 0.464160984 | 0.36818995  | 0.236720533 |
| 0.481577105 | 0.382399353 | 0.088594672 | 0.404742903 |
| 0.063916845 | 0.241381918 | 0.396315166 | 0.289676948 |
| 0.401942707 | 0.042916771 | 0.350050664 | 0.376005552 |
| 0.472677695 | 0.439044639 | 0.413319013 | 0.540696356 |
| 0.434719689 | 0.223894328 | 0.399003019 | 0.472640708 |
| 0.139134279 | 0.138404802 | 0.447326097 | 0.067632275 |
| 0.288828265 | 0.459261128 | 0.438123407 | 0.151973558 |
| 0.384744797 | 0.018760838 | 0.459058108 | 0.537265465 |
| 0.491731214 | 0.511290036 | 0.511800909 | 0.328447353 |
| 0.519112491 | 0.116318906 | 0.531645393 | 0.492189177 |
| 0.444772534 | 0.003464405 | 0.012394279 | 0.516971873 |
| 0.46741785  | 0.125756706 | 0.258231799 | 0.496410266 |
| 0.193413008 | 0.267706821 | 0.12893073  | 0.229597386 |
| 0.522688029 | 0.30654902  | 0.210132821 | 0.487459557 |
| 0.334502916 | 0.317461151 | 0.479063118 | 0.164546541 |
| 0.480670275 | 0.113594516 | 0.160310205 | 0.017327317 |
| 0.429186244 | 0.199252365 | 0.500723125 | 0.518743955 |
| 0.502569548 | 0.46103799  | 0.402590883 | 0.434326953 |
| 0.473108456 | 0.191530369 | 0.432182102 | 0.211203061 |
| 0.503277218 | 0.461558644 | 0.420705987 | 0.414335595 |
| 0.498524182 | 0.489614354 | 0.076425273 | 0.479946337 |
| 0.041099531 | 0.003245616 | 0.506397461 | 0.348010646 |
| 0.070025081 | 0.423474369 | 0.355959763 | 0.296435998 |
| 0.292772992 | 0.08006862  | 0.299590637 | 0.277070006 |



|             |             |             |             |
|-------------|-------------|-------------|-------------|
| 0.38778436  | 0.432883573 | 0.325759858 | 0.327828027 |
| 0.321701277 | 0.167246586 | 0.285764441 | 0.227319302 |
| 0.2858376   | 0.403001835 | 0.283220595 | 0.052721884 |
| 0.50423491  | 0.480520627 | 0.122786021 | 0.25994025  |
| 0.513073877 | 0.519451836 | 0.083480414 | 0.029596557 |
| 0.364904846 | 0.37172971  | 0.508214567 | 0.510796045 |
| 0.542640553 | 0.520018783 | 0.421571705 | 0.172713013 |
| 0.139552507 | 0.395390367 | 0.34144935  | 0.143983329 |
| 0.515260498 | 0.137435679 | 0.501631527 | 0.340189385 |
| 0.198678963 | 0.326925803 | 0.077212857 | 0.154548756 |
| 0.441532639 | 0.271892208 | 0.25411396  | 0.261857805 |
| 0.39086775  | 0.297456984 | 0.100887101 | 0.29650137  |
| 0.438792344 | 0.212058842 | 0.254402253 | 0.415261548 |
| 0.455516664 | 0.274593505 | 0.488803438 | 0.458426502 |
| 0.228126593 | 0.193907737 | 0.428181532 | 0.448878488 |
| 0.514701068 | 0.454938592 | 0.068232742 | 0.488684282 |
| 0.498902313 | 0.515763088 | 0.518904406 | 0.438084442 |
| 0.158931491 | 0.454586946 | 0.343942472 | 0.401929039 |
| 0.271280539 | 0.517389473 | 0.316413721 | 0.127538576 |
| 0.365046955 | 0.494456812 | 0.484211459 | 0.259254739 |
| 0.495314087 | 0.225310848 | 0.124771683 | 0.494840852 |
| 0.217813403 | 0.174574446 | 0.451781981 | 0.482825519 |
| 0.004704231 | 0.162005193 | 0.482175782 | 0.347846491 |
| 0.518901373 | 0.504953465 | 0.474598554 | 0.35700621  |
| 0.001811645 | 0.461224751 | 0.472813514 | 0.489089224 |
| 0.496942505 | 0.45587914  | 0.217625669 | 0.136820115 |
| 0.37309993  | 0.165632605 | 0.20670292  | 0.469534801 |
| 0.204427145 | 0.499125762 | 0.282403393 | 0.292563435 |
| 0.267983834 | 0.166581237 | 0.293440236 | 0.360743524 |
| 0.161883655 | 0.332131768 | 0.433425076 | 0.373406744 |
| 0.235621192 | 0.46487002  | 0.485714013 | 0.069488989 |
| 0.406934365 | 0.461672442 | 0.476335182 | 0.005296195 |
| 0.50026589  | 0.021495786 | 0.268049313 | 0.305265932 |
| 0.281689778 | 0.276321581 | 0.323873451 | 0.373478015 |
| 0.439561292 | 0.316559913 | 0.391563354 | 0.335587274 |
| 0.24687666  | 0.32274135  | 0.458903774 | 0.458959568 |
| 0.367263189 | 0.226236193 | 0.174444929 | 0.170347099 |
| 0.111283456 | 0.504274106 | 0.336182153 | 0.153930506 |
| 0.312322934 | 0.440492548 | 0.416835471 | 0.510160414 |
| 0.464750745 | 0.199828751 | 0.402037727 | 0.518628806 |
| 0.271395525 | 0.401300514 | 0.131891329 | 0.495643271 |
| 0.336955836 | 0.275932629 | 0.489247545 | 0.437468562 |
| 0.476481642 | 0.433696185 | 0.336414257 | 0.472598945 |
| 0.456095014 | 0.394686778 | 0.414961537 | 0.149319058 |
| 0.290560669 | 0.219324039 | 0.319270896 | 0.00825507  |
| 0.446810905 | 0.414079912 | 0.523422637 | 0.512466364 |
| 0.32571665  | 0.444905844 | 0.442791937 | 0.172125826 |
| 0.376942339 | 0.261021641 | 0.230909867 | 0.504159761 |
| 0.252251289 | 0.293085421 | 0.369986624 | 0.480179057 |
| 0.496122436 | 0.475924816 | 0.298622314 | 0.336153945 |
| 0.318528205 | 0.315746586 | 0.486603469 | 0.226401487 |
| 0.493873559 | 0.241381618 | 0.445060964 | 0.378143221 |
| 0.288906616 | 0.512385196 | 0.127571026 | 0.520042348 |
| 0.389468359 | 0.219880461 | 0.503722652 | 0.409250674 |

|             |             |             |             |
|-------------|-------------|-------------|-------------|
| 0.411154088 | 0.188704914 | 0.216901823 | 0.471237217 |
| 0.305069191 | 0.391899139 | 0.019342926 | 0.078555778 |
| 0.412107328 | 0.354549157 | 0.475640768 | 0.430134867 |
| 0.292784121 | 0.399337076 | 0.191091089 | 0.388379984 |
| 0.503915828 | 0.521753177 | 0.353061484 | 0.330824526 |
| 0.432119507 | 0.183826726 | 0.516063192 | 0.019077988 |
| 0.482870604 | 0.474547406 | 0.443107068 | 0.106232443 |
| 0.047631513 | 0.244833808 | 0.486197927 | 0.133469125 |
| 0.495834067 | 0.250015156 | 0.427883654 | 0.517410483 |
| 0.265157948 | 0.524714191 | 0.181156772 | 0.4903954   |
| 0.090582045 | 0.347599903 | 0.426249032 | 0.428692806 |
| 0.307443382 | 0.339561908 | 0.458683971 | 0.283591589 |
| 0.073929963 | 0.342916386 | 0.00367823  | 0.436610623 |
| 0.496840216 | 0.380864562 | 0.290577396 | 0.356376537 |
| 0.363204704 | 0.44381321  | 0.287908774 | 0.481085653 |
| 0.030618619 | 0.42953273  | 0.290529437 | 0.505555884 |
| 0.297508839 | 0.423598878 | 0.117727159 | 0.349081816 |
| 0.492935776 | 0.337347099 | 0.33168403  | 0.374812674 |
| 0.505512108 | 0.463377675 | 0.26986885  | 0.280643038 |
| 0.447660566 | 0.131486887 | 0.479938358 | 0.528123559 |
| 0.257163844 | 0.260617299 | 0.495448979 | 0.293484503 |
| 0.348640841 | 0.460899912 | 0.465258059 | 0.518317198 |
| 0.114318629 | 0.34323914  | 0.487224042 | 0.484565246 |
| 0.378309661 | 0.200243084 | 0.289347721 | 0.288734868 |
| 0.485727133 | 0.189035121 | 0.292833999 | 0.460073618 |
| 0.254551269 | 0.394100174 | 0.422861566 | 0.241138017 |
| 0.077738102 | 0.240806665 | 0.483308753 | 0.23361974  |
| 0.380094807 | 0.4384722   | 0.290263369 | 0.438042837 |
| 0.220387698 | 0.061410952 | 0.459751527 | 0.023258617 |
| 0.480567067 | 0.482580157 | 0.34123949  | 0.414467419 |
| 0.288910591 | 0.443320602 | 0.449011251 | 0.004338702 |
| 0.472855645 | 0.072031301 | 0.363809882 | 0.298315798 |
| 0.325207607 | 0.109232659 | 0.484526036 | 0.505131108 |
| 0.421730453 | 0.392509248 | 0.400504135 | 0.484514275 |
| 0.178603712 | 0.372958374 | 0.374660194 | 0.507042232 |
| 0.259913571 | 0.457398682 | 0.469428261 | 0.446057711 |
| 0.485051773 | 0.375904483 |             |             |
| BUB3        | 0.1029524   | 0.400918674 | 0.083270007 |
| 0.24070918  | 0.293084605 | 0.34909878  | 0.079240465 |
| 0.143732156 | 0.291577064 | 0.214541421 | 0.351240937 |
| 0.03750706  | 0.076371717 | 0.453274906 | 0.069194318 |
| 0.332629461 | 0.058665409 | 0.135359091 | 0.062919147 |
| 0.214118829 | 0.272364629 | 0.298243423 | 0.303507827 |
| 0.257186145 | 0.214212012 | 0.291864622 | 0.284790015 |
| 0.492789104 | 0.224611079 | 0.3602601   | 0.19972908  |
| 0.433622192 | 0.297591251 | 0.3062227   | 0.036330933 |
| 0.332890006 | 0.008334575 | 0.444961129 | 0.290336767 |
| 0.194571381 | 0.358247988 | 0.264129358 | 0.291525464 |
| 0.303622407 | 0.066360767 | 0.157446325 | 0.311370384 |
| 0.272411085 | 0.249180822 | 0.079050193 | 0.353700757 |
| 0.284550884 | 0.304116537 | 0.316451869 | 0.00333952  |
| 0.262136054 | 0.075617811 | 0.185701317 | 0.500962255 |
| 0.225360146 | 0.155704053 | 0.210525546 | 0.19239569  |
| 0.280646711 | 0.290693416 | 0.231316461 | 0.283178585 |

|             |             |             |             |
|-------------|-------------|-------------|-------------|
| 0.504617872 | 0.156090459 | 0.349486156 | 0.20233412  |
| 0.316370306 | 0.041788607 | 0.178575675 | 0.085492851 |
| 0.306550542 | 0.224286591 | 0.304312679 | 0.271225331 |
| 0.412037955 | 0.507680482 | 0.230810329 | 0.490793038 |
| 0.074885573 | 0.285065706 | 0.26515086  | 0.278559571 |
| 0.285092077 | 0.085572405 | 0.387063982 | 0.527678164 |
| 0.053086602 | 0.281090236 | 0.318374721 | 0.122953206 |
| 0.414388945 | 0.201390483 | 0.309389352 | 0.180104597 |
| 0.315531107 | 0.304927936 | 0.449088027 | 0.295048982 |
| 0.259622148 | 0.090535296 | 0.473310421 | 0.277908102 |
| 0.320169055 | 0.117242789 | 0.235679465 | 0.431418419 |
| 0.363144001 | 0.492659387 | 0.378581456 | 0.322620335 |
| 0.326872134 | 0.507533666 | 1           | 0.386265396 |
| 0.107008758 | 0.513914055 | 0.231334877 | 0.067373107 |
| 0.088669558 | 0.106024369 | 0.174438816 | 0.290329301 |
| 0.465138354 | 0.289024371 | 0.230604969 | 0.259315817 |
| 0.445795515 | 0.463420347 | 0.506578515 | 0.385777912 |
| 0.064739312 | 0.191581854 | 0.345645021 | 0.24385416  |
| 0.309459776 | 0.119616086 | 0.250056889 | 0.50480082  |
| 0.410777246 | 0.411002188 | 0.182219174 | 0.494337272 |
| 0.16893631  | 0.526581525 | 0.442450319 | 0.22263877  |
| 0.524062371 | 0.497732155 | 0.521810878 | 0.337960721 |
| 0.478893806 | 0.356048172 | 0.036609523 | 0.348830035 |
| 0.493612873 | 0.024310795 | 0.451681121 | 0.486579561 |
| 0.498083918 | 0.446075692 | 0.514193187 | 0.501582672 |
| 0.492565943 | 0.092154756 | 0.018211519 | 0.271658045 |
| 0.51094514  | 0.425683281 | 0.130390784 | 0.334979749 |
| 0.296384722 | 0.339611483 | 0.359358903 | 0.302680494 |
| 0.510987896 | 0.452077122 | 0.469668907 | 0.337758682 |
| 0.238817809 | 0.331747519 | 0.294597062 | 0.467181038 |
| 0.075586542 | 0.150684559 | 0.071375772 | 0.252778718 |
| 0.295448672 | 0.204857201 | 0.331361423 | 0.268459381 |
| 0.216088442 | 0.269736324 | 0.261969787 | 0.321467366 |
| 0.06615486  | 0.352420118 | 0.197259732 | 0.189750634 |
| 0.079100351 | 0.157167797 | 0.235586725 | 0.205073634 |
| 0.252859286 | 0.249341384 | 0.341368386 | 0.483825399 |
| 0.26846908  | 0.199933009 | 0.34417967  | 0.482876376 |
| 0.441796647 | 0.341956782 | 0.204199287 | 0.04383955  |
| 0.283284381 | 0.212238718 | 0.162357578 | 0.312848992 |
| 0.191667345 | 0.241136853 | 0.326204049 | 0.355662537 |
| 0.290364917 | 0.129360554 | 0.304971978 | 0.435955161 |
| 0.148195426 | 0.312033315 | 0.448762337 | 0.311754837 |
| 0.010337615 | 0.340627186 | 0.427723051 | 0.15355555  |
| 0.260783933 | 0.141037634 | 0.247552568 | 0.466415968 |
| 0.228306194 | 0.191838306 | 0.476096448 | 0.335187054 |
| 0.271346158 | 0.220919883 | 0.513686584 | 0.037722895 |
| 0.261250107 | 0.108084217 | 0.284732996 | 0.241442255 |
| 0.269795351 | 0.257611905 | 0.274572588 | 0.291729387 |
| 0.151909967 | 0.50589341  | 0.373330086 | 0.508326775 |
| 0.317065613 | 0.521758262 | 0.446120345 | 0.447349471 |
| 0.320518969 | 0.264961343 | 0.124618269 | 0.435631092 |
| 0.457390112 | 0.25068725  | 0.086992296 | 0.376348299 |
| 0.278264254 | 0.329479561 | 0.139898628 | 0.507538231 |
| 0.500522869 | 0.456048037 | 0.167669325 | 0.336858324 |

|             |             |             |             |
|-------------|-------------|-------------|-------------|
| 0.402636988 | 0.269292419 | 0.384243525 | 0.512086915 |
| 0.236857388 | 0.299478753 | 0.322273519 | 0.396845006 |
| 0.211424304 | 0.197682986 | 0.302127339 | 0.14507204  |
| 0.014673485 | 0.092575498 | 0.093583697 | 0.196942892 |
| 0.182436257 | 0.303024079 | 0.333060323 | 0.512116964 |
| 0.148290138 | 0.415969947 | 0.198226615 | 0.32172358  |
| 0.428018639 | 0.266073335 | 0.309955805 | 0.315422066 |
| 0.225206964 | 0.05328326  | 0.180367633 | 0.519239087 |
| 0.049496462 | 0.236833575 | 0.249913043 | 0.008599342 |
| 0.068316061 | 0.357056409 | 0.111229774 | 0.220556215 |
| 0.461872763 | 0.22760698  | 0.227456399 | 0.251296138 |
| 0.312574291 | 0.122212984 | 0.011371732 | 0.47011143  |
| 0.452253368 | 0.421208108 | 0.449653087 | 0.42591217  |
| 0.405768536 | 0.321577107 | 0.380337081 | 0.318990753 |
| 0.141566939 | 0.109337563 | 0.227120607 | 0.297548486 |
| 0.005292167 | 0.362675214 | 0.252446435 | 0.168671803 |
| 0.349311249 | 0.255589525 | 0.061990578 | 0.273849356 |
| 0.06148698  | 0.202498871 | 0.247886701 | 0.199771857 |
| 0.291734175 | 0.029500248 | 0.299584889 | 0.294838455 |
| 0.441437324 | 0.348504961 | 0.296383445 | 0.526729659 |
| 0.334014435 | 0.129705722 | 0.332372383 | 0.345031394 |
| 0.103804259 | 0.095284023 | 0.273948029 | 0.051687242 |
| 0.164337624 | 0.419798584 | 0.289674334 | 0.124156427 |
| 0.297352678 | 0.015628867 | 0.386399597 | 0.522566607 |
| 0.45788761  | 0.515221911 | 0.508989678 | 0.269284273 |
| 0.514829448 | 0.077930247 | 0.518687187 | 0.392343428 |
| 0.292344223 | 0.004280937 | 0.00901532  | 0.486285067 |
| 0.356368671 | 0.065668454 | 0.19019294  | 0.34930992  |
| 0.168277802 | 0.163909211 | 0.08157479  | 0.212723215 |
| 0.349228402 | 0.243350484 | 0.164053814 | 0.456788387 |
| 0.264768818 | 0.225061145 | 0.294503227 | 0.096257006 |
| 0.330013411 | 0.093500287 | 0.092239517 | 0.019954276 |
| 0.299360205 | 0.128468304 | 0.458925003 | 0.497904329 |
| 0.504707831 | 0.342755965 | 0.254144666 | 0.269461712 |
| 0.392812976 | 0.105971102 | 0.287635598 | 0.120740644 |
| 0.48419319  | 0.350694826 | 0.328355483 | 0.336513537 |
| 0.507448168 | 0.484724624 | 0.05311841  | 0.385856025 |
| 0.040182637 | 0.002704996 | 0.347844175 | 0.223230914 |
| 0.03512531  | 0.310973206 | 0.265256886 | 0.178523918 |
| 0.184913923 | 0.060077266 | 0.236120771 | 0.231986309 |
| 0.300728127 | 0.320714542 | 0.266021211 | 0.199155363 |
| 0.254121295 | 0.158357484 | 0.213732375 | 0.152658465 |
| 0.163879352 | 0.31970928  | 0.223351132 | 0.03563682  |
| 0.343376043 | 0.349607863 | 0.088328562 | 0.172864189 |
| 0.454966636 | 0.494245377 | 0.067114832 | 0.036464192 |
| 0.267643814 | 0.256313859 | 0.492732874 | 0.488021146 |
| 0.518398375 | 0.521947307 | 0.402295659 | 0.140823695 |
| 0.096683439 | 0.297025288 | 0.269126743 | 0.13405234  |
| 0.500775591 | 0.077233748 | 0.472000515 | 0.259053769 |
| 0.132489172 | 0.269031138 | 0.068345963 | 0.106319587 |
| 0.311587229 | 0.187157413 | 0.21141663  | 0.175370733 |
| 0.305959641 | 0.24191137  | 0.068135355 | 0.221232705 |
| 0.326508319 | 0.20224672  | 0.184383166 | 0.251041919 |
| 0.328445725 | 0.141384634 | 0.363948605 | 0.4619632   |

|             |             |             |             |
|-------------|-------------|-------------|-------------|
| 0.14942505  | 0.123764315 | 0.311410862 | 0.304455352 |
| 0.418759924 | 0.280596832 | 0.058048292 | 0.430739389 |
| 0.475425056 | 0.357599662 | 0.494177364 | 0.378409122 |
| 0.099693804 | 0.349037417 | 0.234016851 | 0.304684847 |
| 0.183103154 | 0.34094245  | 0.212101057 | 0.083972083 |
| 0.281458344 | 0.460664071 | 0.417867831 | 0.211635311 |
| 0.315263398 | 0.124737536 | 0.069294227 | 0.404751502 |
| 0.206112568 | 0.132826281 | 0.26565258  | 0.374243197 |
| 0.007538961 | 0.133754922 | 0.464735979 | 0.246676795 |
| 0.498543745 | 0.488550338 | 0.463068639 | 0.213982116 |
| 0.002273808 | 0.327823237 | 0.360350039 | 0.382852233 |
| 0.421058971 | 0.320843255 | 0.114496486 | 0.121113994 |
| 0.293185924 | 0.096523761 | 0.173648395 | 0.305873255 |
| 0.166793722 | 0.322825153 | 0.198307472 | 0.185943645 |
| 0.214987249 | 0.08664437  | 0.228507341 | 0.271046423 |
| 0.115473418 | 0.239643132 | 0.351638882 | 0.200972847 |
| 0.212658759 | 0.404571419 | 0.382537672 | 0.048299108 |
| 0.27953084  | 0.375921024 | 0.411401766 | 0.006924078 |
| 0.371926291 | 0.017940592 | 0.211665333 | 0.262321895 |
| 0.227019336 | 0.202980193 | 0.247630165 | 0.309624905 |
| 0.293887759 | 0.240395204 | 0.318490308 | 0.255753085 |
| 0.212585048 | 0.21907829  | 0.327759398 | 0.315499222 |
| 0.307308178 | 0.171700036 | 0.115914012 | 0.123003709 |
| 0.090879517 | 0.435117691 | 0.262172283 | 0.090397574 |
| 0.220529405 | 0.295289194 | 0.371844673 | 0.48163858  |
| 0.416246604 | 0.127444404 | 0.265661607 | 0.445016065 |
| 0.161559709 | 0.268116141 | 0.07770277  | 0.339030756 |
| 0.236004782 | 0.233153648 | 0.304938515 | 0.292832148 |
| 0.31840734  | 0.421433353 | 0.25007998  | 0.43594822  |
| 0.348325365 | 0.25226018  | 0.260849592 | 0.13989183  |
| 0.231606708 | 0.136353225 | 0.263389473 | 0.009456705 |
| 0.310617254 | 0.298191449 | 0.468548126 | 0.493445677 |
| 0.228941658 | 0.386280988 | 0.275265652 | 0.137799115 |
| 0.23703415  | 0.204352663 | 0.157104569 | 0.368002264 |
| 0.194069025 | 0.210632187 | 0.300055564 | 0.299126249 |
| 0.377647602 | 0.334395691 | 0.215871853 | 0.209229978 |
| 0.214814252 | 0.207505121 | 0.452190002 | 0.141540234 |
| 0.332471129 | 0.229046005 | 0.258637686 | 0.310303488 |
| 0.232867206 | 0.50152376  | 0.080873123 | 0.512413943 |
| 0.299611937 | 0.132240898 | 0.491531271 | 0.245986661 |
| 0.273044183 | 0.15345172  | 0.177869882 | 0.283317482 |
| 0.211997613 | 0.274995946 | 0.012443023 | 0.069892109 |
| 0.307452483 | 0.208071499 | 0.349787873 | 0.289035485 |
| 0.238587922 | 0.312183836 | 0.128236087 | 0.252484607 |
| 0.46595149  | 0.482895702 | 0.30276522  | 0.242018402 |
| 0.2983209   | 0.140011043 | 0.327566239 | 0.009548532 |
| 0.340441087 | 0.321873494 | 0.280298212 | 0.070835697 |
| 0.034946189 | 0.20928547  | 0.344373158 | 0.070891177 |
| 0.470234596 | 0.194086478 | 0.255114816 | 0.362734348 |
| 0.158808607 | 0.492675698 | 0.146521738 | 0.37212615  |
| 0.049271901 | 0.235712063 | 0.288511399 | 0.265407036 |
| 0.281933867 | 0.276360745 | 0.363078325 | 0.240591674 |
| 0.060589752 | 0.282158576 | 0.004827781 | 0.426302102 |
| 0.461688837 | 0.289444576 | 0.205864547 | 0.196440389 |

|               |             |             |             |
|---------------|-------------|-------------|-------------|
| 0.271346764   | 0.348210043 | 0.19746473  | 0.31082111  |
| 0.032000932   | 0.335036836 | 0.200757725 | 0.418180249 |
| 0.256349026   | 0.276607263 | 0.10756966  | 0.249875734 |
| 0.449119565   | 0.260619565 | 0.231974452 | 0.3072934   |
| 0.480458075   | 0.343646909 | 0.165759693 | 0.206418748 |
| 0.271780596   | 0.078232837 | 0.289009898 | 0.511838186 |
| 0.206387498   | 0.233543773 | 0.437811853 | 0.25373734  |
| 0.25186497    | 0.366872934 | 0.297321283 | 0.489977939 |
| 0.101932883   | 0.251098327 | 0.374281111 | 0.444349929 |
| 0.28743787    | 0.169592974 | 0.235933113 | 0.239504397 |
| 0.462032465   | 0.157339985 | 0.224225573 | 0.33691927  |
| 0.224223214   | 0.269704356 | 0.245422925 | 0.198050632 |
| 0.062449376   | 0.153481762 | 0.324399853 | 0.157483122 |
| 0.282418325   | 0.336975965 | 0.244490236 | 0.407360109 |
| 0.196382761   | 0.071893849 | 0.461926961 | 0.030137013 |
| 0.311360463   | 0.361392835 | 0.230917743 | 0.305029313 |
| 0.210765687   | 0.290099121 | 0.299709818 | 0.003281413 |
| 0.379823111   | 0.077817333 | 0.232917737 | 0.268382652 |
| 0.224654881   | 0.073566804 | 0.45978866  | 0.507040502 |
| 0.269907204   | 0.236724968 | 0.283883063 | 0.444080133 |
| 0.161274946   | 0.243221725 | 0.245905629 | 0.330658535 |
| 0.209159873   | 0.29731669  | 0.304836827 | 0.333175394 |
| 0.33391746    | 0.232868084 |             |             |
| C330027C09RIK | 0.146379248 | 0.42283082  | 0.116143489 |
| 0.164861887   | 0.301954895 | 0.40347024  | 0.12651473  |
| 0.213166879   | 0.381147484 | 0.319223628 | 0.360401684 |
| 0.047626538   | 0.100430654 | 0.429347626 | 0.126173141 |
| 0.362396256   | 0.077907221 | 0.181803905 | 0.126025218 |
| 0.289141744   | 0.28357267  | 0.32965221  | 0.406678475 |
| 0.30020777    | 0.246239225 | 0.378183925 | 0.370996501 |
| 0.472453515   | 0.252689111 | 0.40538072  | 0.188159417 |
| 0.411707434   | 0.312020012 | 0.353093048 | 0.045853403 |
| 0.420419774   | 0.02333572  | 0.447697223 | 0.27494496  |
| 0.141246185   | 0.362417025 | 0.349289062 | 0.273760074 |
| 0.359281557   | 0.082153976 | 0.224445298 | 0.382793215 |
| 0.368512581   | 0.349864449 | 0.138410705 | 0.411646098 |
| 0.379773439   | 0.385202083 | 0.386667624 | 0.005891851 |
| 0.279468494   | 0.08450511  | 0.211124993 | 0.497596132 |
| 0.268297188   | 0.198975263 | 0.275801026 | 0.351358011 |
| 0.395170813   | 0.384733292 | 0.325986328 | 0.35498305  |
| 0.477480854   | 0.1799777   | 0.401947167 | 0.193910261 |
| 0.397289031   | 0.091170909 | 0.230790934 | 0.169560325 |
| 0.377876035   | 0.265826447 | 0.358009462 | 0.2930048   |
| 0.413466714   | 0.52134301  | 0.307021091 | 0.49867301  |
| 0.129063622   | 0.323058565 | 0.284591726 | 0.332202679 |
| 0.383630861   | 0.171408065 | 0.389395499 | 0.503114099 |
| 0.126236715   | 0.382154882 | 0.39364994  | 0.212468488 |
| 0.414148005   | 0.301244284 | 0.377770874 | 0.177459626 |
| 0.350594425   | 0.32195154  | 0.493369315 | 0.330745724 |
| 0.345943663   | 0.144617879 | 0.499895697 | 0.298743844 |
| 0.303099603   | 0.149215964 | 0.230968023 | 0.411820308 |
| 0.391580563   | 0.463962614 | 0.4090143   | 0.376846194 |
| 0.341052669   | 0.474481127 | 0.386265396 | 1           |
| 0.174034309   | 0.510619311 | 0.251535436 | 0.094696835 |

|             |             |             |             |
|-------------|-------------|-------------|-------------|
| 0.147358798 | 0.165213367 | 0.278891357 | 0.346573282 |
| 0.429174287 | 0.387778002 | 0.263794682 | 0.264023524 |
| 0.408661115 | 0.48702936  | 0.508077277 | 0.402126896 |
| 0.091461103 | 0.258742719 | 0.338853972 | 0.377484851 |
| 0.390267874 | 0.204609775 | 0.246240845 | 0.512027321 |
| 0.37292215  | 0.403300289 | 0.250963159 | 0.51755355  |
| 0.298082938 | 0.494299466 | 0.423170802 | 0.223528653 |
| 0.509131397 | 0.497868651 | 0.479300291 | 0.366804599 |
| 0.47818358  | 0.355468657 | 0.116004267 | 0.389469451 |
| 0.469268142 | 0.016055292 | 0.436057066 | 0.459178665 |
| 0.483730979 | 0.407165831 | 0.49098085  | 0.479431564 |
| 0.493215505 | 0.148087704 | 0.039425869 | 0.308828284 |
| 0.496436536 | 0.380867278 | 0.223998901 | 0.369834914 |
| 0.353312247 | 0.418006702 | 0.418940022 | 0.280763219 |
| 0.505115215 | 0.416089727 | 0.458837832 | 0.400999667 |
| 0.354941516 | 0.343320386 | 0.343096198 | 0.481231388 |
| 0.096379513 | 0.187625396 | 0.112840928 | 0.358536266 |
| 0.349537576 | 0.237033251 | 0.397182942 | 0.365756104 |
| 0.257571933 | 0.411166731 | 0.313936561 | 0.35701034  |
| 0.119073823 | 0.406790087 | 0.241749135 | 0.243119059 |
| 0.08244076  | 0.215754713 | 0.22169625  | 0.21315997  |
| 0.292677071 | 0.297587336 | 0.414103404 | 0.459194296 |
| 0.361403409 | 0.246545376 | 0.416361168 | 0.457638936 |
| 0.409608429 | 0.343507861 | 0.306033321 | 0.018168668 |
| 0.251898934 | 0.305298365 | 0.182786679 | 0.384981923 |
| 0.239220373 | 0.277212533 | 0.369685327 | 0.367761822 |
| 0.329097942 | 0.258311842 | 0.352432354 | 0.447467473 |
| 0.229318303 | 0.310004005 | 0.401146999 | 0.39425377  |
| 0.011480727 | 0.338207161 | 0.413268566 | 0.181316195 |
| 0.366378199 | 0.137462727 | 0.237840871 | 0.414787946 |
| 0.285840484 | 0.250573085 | 0.46190124  | 0.376122716 |
| 0.368810052 | 0.283998383 | 0.499114943 | 0.058564521 |
| 0.354804859 | 0.066599469 | 0.309387223 | 0.354850704 |
| 0.302139662 | 0.332426153 | 0.313754336 | 0.280637186 |
| 0.202701728 | 0.504541154 | 0.40566344  | 0.481055893 |
| 0.329879533 | 0.501378664 | 0.410771537 | 0.40695448  |
| 0.391648701 | 0.351520185 | 0.135010195 | 0.399236277 |
| 0.404613442 | 0.279872024 | 0.147052905 | 0.412695873 |
| 0.352542252 | 0.374527004 | 0.148978874 | 0.456504348 |
| 0.497699731 | 0.470800852 | 0.214266713 | 0.364630907 |
| 0.375444035 | 0.290411117 | 0.405908189 | 0.511686817 |
| 0.31287061  | 0.334343986 | 0.306328887 | 0.372925046 |
| 0.240443108 | 0.230952994 | 0.35701551  | 0.186150614 |
| 0.01018042  | 0.167183752 | 0.128997285 | 0.21384928  |
| 0.167911132 | 0.400268389 | 0.384655232 | 0.491238132 |
| 0.190198023 | 0.415165498 | 0.318275166 | 0.273068761 |
| 0.405240503 | 0.356856913 | 0.357242169 | 0.383795117 |
| 0.316916007 | 0.031365791 | 0.156539012 | 0.518464853 |
| 0.101289596 | 0.232006281 | 0.389428222 | 0.005204294 |
| 0.100731326 | 0.400869799 | 0.163234596 | 0.241452649 |
| 0.44267899  | 0.243001107 | 0.265625961 | 0.321303408 |
| 0.363571007 | 0.167898783 | 0.006035391 | 0.460219703 |
| 0.483493685 | 0.45825805  | 0.482766125 | 0.476106176 |
| 0.418991864 | 0.415882176 | 0.386483247 | 0.389317611 |

|             |             |             |             |
|-------------|-------------|-------------|-------------|
| 0.175735334 | 0.17099851  | 0.190291013 | 0.295998593 |
| 0.01314827  | 0.382085476 | 0.345885542 | 0.212948016 |
| 0.402706958 | 0.353689277 | 0.08899093  | 0.36387808  |
| 0.041811897 | 0.17511978  | 0.375781067 | 0.296015343 |
| 0.359062628 | 0.042748107 | 0.215795359 | 0.291588766 |
| 0.433787109 | 0.371635063 | 0.324331603 | 0.511078094 |
| 0.340071758 | 0.201569061 | 0.30143457  | 0.39505236  |
| 0.136876556 | 0.120291932 | 0.406690901 | 0.034678754 |
| 0.257653266 | 0.470357288 | 0.381213571 | 0.116785776 |
| 0.305639967 | 0.015895583 | 0.369163858 | 0.513828801 |
| 0.464939329 | 0.47991221  | 0.476622898 | 0.251268313 |
| 0.481651705 | 0.108275949 | 0.502768597 | 0.400964788 |
| 0.349616671 | 0.001696146 | 0.01639438  | 0.43736985  |
| 0.353234602 | 0.123394209 | 0.228549429 | 0.354144044 |
| 0.163770432 | 0.240431271 | 0.145581477 | 0.186217433 |
| 0.415351656 | 0.268469521 | 0.204818937 | 0.471038724 |
| 0.28076259  | 0.299278916 | 0.409561685 | 0.167867888 |
| 0.395974573 | 0.100341547 | 0.169665724 | 0.011327501 |
| 0.372352431 | 0.183352013 | 0.491183213 | 0.492452866 |
| 0.47689512  | 0.367120061 | 0.31904699  | 0.380170039 |
| 0.414266681 | 0.173414471 | 0.351849589 | 0.194869077 |
| 0.467928436 | 0.356978109 | 0.342995466 | 0.332003825 |
| 0.471187766 | 0.451560312 | 0.083310195 | 0.383744636 |
| 0.026607977 | 0.005047181 | 0.371996205 | 0.33657394  |
| 0.111640195 | 0.341337038 | 0.299152525 | 0.314026707 |
| 0.312191423 | 0.069048099 | 0.247560866 | 0.225007134 |
| 0.316690816 | 0.354981811 | 0.266567984 | 0.325736747 |
| 0.28134379  | 0.146587357 | 0.263051395 | 0.245890485 |
| 0.309199313 | 0.338691322 | 0.24391175  | 0.06030848  |
| 0.387741452 | 0.372625916 | 0.117303007 | 0.239217765 |
| 0.404294702 | 0.447377928 | 0.087181554 | 0.020892517 |
| 0.315693912 | 0.345046811 | 0.461760573 | 0.481196473 |
| 0.520281442 | 0.49662316  | 0.412618677 | 0.176441058 |
| 0.136254152 | 0.334392758 | 0.286838894 | 0.139025142 |
| 0.491150633 | 0.136174122 | 0.4820058   | 0.278715078 |
| 0.197805736 | 0.255182345 | 0.071649854 | 0.160284835 |
| 0.359086755 | 0.257965795 | 0.22622963  | 0.212298466 |
| 0.31799016  | 0.238078432 | 0.110458801 | 0.262394371 |
| 0.366362017 | 0.153060294 | 0.233033009 | 0.393378233 |
| 0.388527697 | 0.275007659 | 0.388417893 | 0.440299526 |
| 0.209510056 | 0.193928112 | 0.304147327 | 0.405364336 |
| 0.414079465 | 0.383028796 | 0.049383027 | 0.438507046 |
| 0.468745893 | 0.402445879 | 0.491949833 | 0.380010917 |
| 0.159725268 | 0.343727286 | 0.312877963 | 0.331184913 |
| 0.268424595 | 0.40665416  | 0.315735276 | 0.130384003 |
| 0.344679125 | 0.500416649 | 0.391128448 | 0.221540149 |
| 0.416367571 | 0.217321565 | 0.123273228 | 0.426540438 |
| 0.167492492 | 0.150031941 | 0.373086269 | 0.415428006 |
| 0.003030909 | 0.14031966  | 0.461292652 | 0.307849257 |
| 0.512007832 | 0.435539085 | 0.42637148  | 0.35848814  |
| 0.00218066  | 0.372233475 | 0.362867795 | 0.352677747 |
| 0.407311855 | 0.393154822 | 0.264178854 | 0.123153435 |
| 0.323356839 | 0.151003601 | 0.185116788 | 0.368890251 |
| 0.159889983 | 0.415978377 | 0.266943104 | 0.291434781 |



|             |             |             |             |
|-------------|-------------|-------------|-------------|
| 0.246916259 | 0.176278905 | 0.240876945 | 0.297338114 |
| 0.17840554  | 0.293770483 | 0.359469559 | 0.334205029 |
| 0.164747907 | 0.412277447 | 0.388854784 | 0.067832249 |
| 0.350982038 | 0.397878546 | 0.421134971 | 0.003602646 |
| 0.39069672  | 0.022106465 | 0.247079953 | 0.244911907 |
| 0.251520056 | 0.270670559 | 0.29347708  | 0.289066466 |
| 0.379418948 | 0.282217861 | 0.298470776 | 0.285771989 |
| 0.207059734 | 0.304050454 | 0.377526748 | 0.375826324 |
| 0.277330949 | 0.191946984 | 0.168262498 | 0.161648398 |
| 0.099348892 | 0.446313637 | 0.296448706 | 0.141740638 |
| 0.296998971 | 0.380683323 | 0.353821162 | 0.481663362 |
| 0.404483284 | 0.182097317 | 0.369396118 | 0.408945158 |
| 0.246098479 | 0.329466397 | 0.136915139 | 0.394243718 |
| 0.306829377 | 0.223287378 | 0.410251719 | 0.343273269 |
| 0.404985439 | 0.408109416 | 0.298596856 | 0.43149273  |
| 0.354748811 | 0.3646765   | 0.312826984 | 0.125715233 |
| 0.229204778 | 0.21511536  | 0.263701449 | 0.005530005 |
| 0.380771878 | 0.306549006 | 0.414794432 | 0.47999828  |
| 0.282388105 | 0.383190825 | 0.328939704 | 0.142998849 |
| 0.27478863  | 0.224471277 | 0.216455142 | 0.412093236 |
| 0.199523013 | 0.266116043 | 0.299050424 | 0.377660638 |
| 0.399783606 | 0.400700058 | 0.287796788 | 0.336404788 |
| 0.311027667 | 0.271704621 | 0.486379409 | 0.206336208 |
| 0.39007875  | 0.184772962 | 0.385628159 | 0.296803088 |
| 0.259105759 | 0.48536454  | 0.128075234 | 0.490695175 |
| 0.317827126 | 0.212943195 | 0.493757968 | 0.388146891 |
| 0.35285125  | 0.179216952 | 0.173604577 | 0.407147579 |
| 0.291812235 | 0.318151458 | 0.017803301 | 0.071207568 |
| 0.342874571 | 0.353890922 | 0.396222484 | 0.390369694 |
| 0.25366302  | 0.353633048 | 0.183228885 | 0.351744295 |
| 0.481008367 | 0.508855118 | 0.258259131 | 0.300276005 |
| 0.377487082 | 0.170322868 | 0.411398948 | 0.032957111 |
| 0.380316017 | 0.378508957 | 0.37024993  | 0.121394194 |
| 0.052655399 | 0.184010089 | 0.380387738 | 0.145469202 |
| 0.435813767 | 0.190109234 | 0.388033296 | 0.412751586 |
| 0.26878473  | 0.506798513 | 0.18373986  | 0.38360365  |
| 0.111352813 | 0.323083789 | 0.363772203 | 0.387594163 |
| 0.221945535 | 0.267855874 | 0.361571437 | 0.220506689 |
| 0.073153735 | 0.280392542 | 0.003372934 | 0.423079652 |
| 0.478359682 | 0.308684895 | 0.275591032 | 0.326230558 |
| 0.315617804 | 0.396270805 | 0.283993732 | 0.391984903 |
| 0.025126843 | 0.33146754  | 0.280028353 | 0.404995318 |
| 0.192451908 | 0.374520166 | 0.099712203 | 0.315846279 |
| 0.485292572 | 0.282403996 | 0.321855727 | 0.259576093 |
| 0.477845639 | 0.405460243 | 0.237579424 | 0.270114635 |
| 0.39512111  | 0.134527627 | 0.391796318 | 0.511467224 |
| 0.233103271 | 0.201421374 | 0.39473414  | 0.234818984 |
| 0.300836431 | 0.399421012 | 0.387356175 | 0.51194812  |
| 0.118587318 | 0.299240252 | 0.409633884 | 0.439290653 |
| 0.334097779 | 0.185618184 | 0.229920156 | 0.245344794 |
| 0.451718543 | 0.143814045 | 0.265373554 | 0.375095962 |
| 0.196065285 | 0.358374906 | 0.372538749 | 0.223678576 |
| 0.074631481 | 0.267594815 | 0.387369578 | 0.222840025 |
| 0.324848624 | 0.342207898 | 0.247755442 | 0.381683447 |

|               |             |             |             |
|---------------|-------------|-------------|-------------|
| 0.171352487   | 0.040691592 | 0.445752209 | 0.016329777 |
| 0.381576125   | 0.371477403 | 0.31972158  | 0.341313144 |
| 0.245204786   | 0.388792301 | 0.357824357 | 0.004278909 |
| 0.398295397   | 0.05343361  | 0.356946022 | 0.229447435 |
| 0.297283284   | 0.110735617 | 0.454626514 | 0.476180624 |
| 0.38049324    | 0.350447533 | 0.3137608   | 0.459292751 |
| 0.139221671   | 0.313699304 | 0.33667856  | 0.403500351 |
| 0.214496356   | 0.358164582 | 0.385687237 | 0.329495137 |
| 0.401130429   | 0.360035965 |             |             |
| C430048L16RIK | 0.00489872  | 0.225887385 | 0.00572992  |
| 0.002019571   | 0.065467287 | 0.082294028 | 0.001745871 |
| 0.006189082   | 0.17062819  | 0.181978273 | 0.064598708 |
| 0.001051397   | 0.012292155 | 0.168983069 | 0.001447441 |
| 0.102726948   | 0.000671397 | 0.006460343 | 0.003464475 |
| 0.004256397   | 0.042171749 | 0.044785022 | 0.113274413 |
| 0.050692713   | 0.038152107 | 0.098690721 | 0.196687611 |
| 0.241947124   | 0.069256475 | 0.167005952 | 0.019919682 |
| 0.1144815     | 0.072817043 | 0.1609399   | 0.000145464 |
| 0.1125649     | 0.000760799 | 0.137918381 | 0.019410998 |
| 0.004237369   | 0.084268351 | 0.219220099 | 0.01767717  |
| 0.147577394   | 0.000989102 | 0.116509345 | 0.174384487 |
| 0.118774966   | 0.038083762 | 0.008173327 | 0.172904702 |
| 0.081411109   | 0.087054157 | 0.272907941 | 0.00010141  |
| 0.102207012   | 0.041625198 | 0.090252408 | 0.224617955 |
| 0.025448015   | 0.00723589  | 0.078891848 | 0.053935048 |
| 0.162757227   | 0.129406891 | 0.048900574 | 0.105791109 |
| 0.194189613   | 0.031058317 | 0.24948269  | 0.002007333 |
| 0.065401597   | 0.002080303 | 0.020333685 | 0.016928614 |
| 0.080790055   | 0.019530213 | 0.073647179 | 0.072756369 |
| 0.231999999   | 0.188965918 | 0.040428164 | 0.223923808 |
| 0.004717026   | 0.104090981 | 0.035622795 | 0.057328505 |
| 0.119228185   | 0.004705229 | 0.108276794 | 0.188919806 |
| 0.00401668    | 0.249257831 | 0.133838308 | 0.020989522 |
| 0.204297882   | 0.085637243 | 0.214578527 | 0.028200752 |
| 0.123225942   | 0.07369224  | 0.200293062 | 0.044855681 |
| 0.076883908   | 0.008450618 | 0.209564463 | 0.100163666 |
| 0.031079036   | 0.008015009 | 0.015299804 | 0.236079158 |
| 0.111062867   | 0.216016957 | 0.218212721 | 0.099033296 |
| 0.098532064   | 0.202521585 | 0.107008758 | 0.174034309 |
| 1             | 0.235814187 | 0.020179189 | 0.000113969 |
| 0.007269907   | 0.003525412 | 0.031944386 | 0.0689882   |
| 0.212406076   | 0.087105121 | 0.015937461 | 0.021422217 |
| 0.17685424    | 0.223898933 | 0.243671092 | 0.14218921  |
| 0.0007303     | 0.064917536 | 0.097552649 | 0.039684939 |
| 0.097232562   | 0.013100346 | 0.054920902 | 0.191691905 |
| 0.098410495   | 0.159110747 | 0.019767281 | 0.181985088 |
| 0.024034746   | 0.17435175  | 0.242698397 | 0.011962134 |
| 0.196161715   | 0.193616203 | 0.18470779  | 0.148521734 |
| 0.180334443   | 0.055845653 | 0.002275    | 0.131255922 |
| 0.160088562   | 0.000132084 | 0.249022437 | 0.238054797 |
| 0.220597615   | 0.213090091 | 0.202694726 | 0.232456807 |
| 0.236489296   | 0.007064163 | 0.002163658 | 0.045649188 |
| 0.203328654   | 0.110023692 | 0.007990963 | 0.146576919 |
| 0.09586036    | 0.081579416 | 0.221462644 | 0.008916262 |

|             |             |             |             |
|-------------|-------------|-------------|-------------|
| 0.167428871 | 0.202380204 | 0.260046847 | 0.13497389  |
| 0.103240382 | 0.077962458 | 0.176062732 | 0.193289763 |
| 0.000580118 | 0.008970389 | 0.006813682 | 0.077514347 |
| 0.114127395 | 0.015386697 | 0.068242159 | 0.106171619 |
| 0.020475393 | 0.088826535 | 0.148988498 | 0.126396909 |
| 0.009877601 | 0.163920496 | 0.018771525 | 0.019351778 |
| 0.000729781 | 0.025912028 | 0.003303178 | 0.005866794 |
| 0.027744748 | 0.063139453 | 0.224416011 | 0.216895826 |
| 0.080541526 | 0.029927303 | 0.149257927 | 0.165113271 |
| 0.108404211 | 0.108512563 | 0.041249447 | 0.000988387 |
| 0.011008609 | 0.150934434 | 0.056126842 | 0.200209752 |
| 0.043465698 | 0.010211453 | 0.099773039 | 0.12217075  |
| 0.04314775  | 0.02083976  | 0.060655314 | 0.130231946 |
| 0.028853476 | 0.033304342 | 0.146960609 | 0.173506959 |
| 0.000772615 | 0.042446985 | 0.168782762 | 0.00411748  |
| 0.074703003 | 0.002340155 | 0.042278352 | 0.174248352 |
| 0.053938041 | 0.032642736 | 0.243214345 | 0.130554069 |
| 0.016760165 | 0.071923614 | 0.21173525  | 0.003894411 |
| 0.121702555 | 0.000276    | 0.041525551 | 0.255052716 |
| 0.030631986 | 0.05636974  | 0.080634628 | 0.03548381  |
| 0.022384383 | 0.211303697 | 0.145880616 | 0.210485003 |
| 0.071908044 | 0.207276893 | 0.187299368 | 0.141832822 |
| 0.083804251 | 0.162275262 | 0.024760049 | 0.153407968 |
| 0.18153104  | 0.012941386 | 0.012537559 | 0.248388147 |
| 0.12842656  | 0.146828145 | 0.002239581 | 0.168167422 |
| 0.168988979 | 0.23184444  | 0.006518554 | 0.100529519 |
| 0.092766382 | 0.026588624 | 0.175786014 | 0.20362047  |
| 0.088947903 | 0.075288217 | 0.043363697 | 0.118762404 |
| 0.020165567 | 0.017617549 | 0.098455083 | 0.056447645 |
| 0.003802355 | 0.008537414 | 0.00534516  | 0.010056577 |
| 0.020648969 | 0.278946961 | 0.118843604 | 0.214046759 |
| 0.00667686  | 0.149587634 | 0.053637502 | 0.018752362 |
| 0.146689596 | 0.090757383 | 0.143071089 | 0.130724639 |
| 0.050526549 | 0.000335882 | 0.001244351 | 0.183671318 |
| 0.005994263 | 0.035675592 | 0.067646628 | 4.26E-05    |
| 0.001194578 | 0.291117114 | 0.017616232 | 0.038049216 |
| 0.190725878 | 0.043439621 | 0.028933151 | 0.105522528 |
| 0.080344482 | 0.007016248 | 0.001206586 | 0.223316879 |
| 0.235580603 | 0.216001901 | 0.240729482 | 0.217669339 |
| 0.202302461 | 0.194035682 | 0.14163598  | 0.098622991 |
| 0.003912599 | 0.008441616 | 0.016049609 | 0.029954248 |
| 1.01E-05    | 0.110058648 | 0.071998889 | 0.015423209 |
| 0.183240907 | 0.064439739 | 0.000675915 | 0.120925433 |
| 0.000308727 | 0.05359815  | 0.029411002 | 0.024300729 |
| 0.099470054 | 0.000474731 | 0.004331748 | 0.031884001 |
| 0.166282096 | 0.090363243 | 0.123953893 | 0.225291558 |
| 0.048758443 | 0.02865296  | 0.037895316 | 0.126562082 |
| 0.002088497 | 0.009244102 | 0.074058186 | 0.003919422 |
| 0.028931922 | 0.19966521  | 0.113753003 | 0.001233538 |
| 0.032596704 | 0.00243121  | 0.104457293 | 0.209026271 |
| 0.23406718  | 0.210864895 | 0.195022184 | 0.056556381 |
| 0.196950741 | 0.048683638 | 0.235491262 | 0.148944536 |
| 0.141853403 | 0.000719187 | 0.000382964 | 0.21829085  |
| 0.093145543 | 0.013374043 | 0.015522909 | 0.036115448 |

|             |             |             |             |
|-------------|-------------|-------------|-------------|
| 0.001892737 | 0.014787466 | 0.00359682  | 0.015214595 |
| 0.164314616 | 0.032891191 | 0.019624058 | 0.20550454  |
| 0.021058386 | 0.029821258 | 0.120237286 | 0.012600703 |
| 0.147385051 | 0.000485308 | 0.013193931 | 0.000157639 |
| 0.105028289 | 0.025375865 | 0.191890464 | 0.224782057 |
| 0.166444554 | 0.120979731 | 0.192203094 | 0.022385857 |
| 0.20366405  | 0.022016457 | 0.078762389 | 0.01947531  |
| 0.22167547  | 0.092973263 | 0.06020062  | 0.063582044 |
| 0.16798478  | 0.161847119 | 0.000261256 | 0.122225798 |
| 7.75E-05    | 0.000498637 | 0.09068235  | 0.054126097 |
| 0.004407432 | 0.075063184 | 0.041172861 | 0.038222998 |
| 0.026308345 | 0.000172795 | 0.055919807 | 0.045776295 |
| 0.044349578 | 0.05921472  | 0.049704127 | 0.064526128 |
| 0.032192309 | 0.002433583 | 0.016919879 | 0.010068244 |
| 0.013071114 | 0.085380363 | 0.038097101 | 0.000533537 |
| 0.165796581 | 0.126781399 | 0.002459005 | 0.022434824 |
| 0.144498883 | 0.198524713 | 0.000211753 | 0.002840473 |
| 0.051172519 | 0.056730857 | 0.202158401 | 0.243351948 |
| 0.206524058 | 0.17589889  | 0.114076393 | 0.0033526   |
| 0.002810103 | 0.053590495 | 0.069308555 | 0.002286394 |
| 0.215447835 | 0.009237094 | 0.221255722 | 0.10154443  |
| 0.012638217 | 0.013511256 | 0.000349668 | 0.005471014 |
| 0.1538151   | 0.020260873 | 0.01312926  | 0.022921563 |
| 0.031353343 | 0.036949885 | 0.001595002 | 0.018014186 |
| 0.079577215 | 0.013080694 | 0.016276876 | 0.062882359 |
| 0.13355509  | 0.079495662 | 0.164358852 | 0.123751738 |
| 0.01563223  | 0.01093045  | 0.022845671 | 0.159591132 |
| 0.207469419 | 0.258583829 | 0.000150966 | 0.25863355  |
| 0.203128873 | 0.175921898 | 0.213174395 | 0.106928494 |
| 0.009800419 | 0.081169732 | 0.100561741 | 0.067356044 |
| 0.021911537 | 0.089961994 | 0.0341406   | 0.004386283 |
| 0.079513103 | 0.174561616 | 0.162157514 | 0.010025755 |
| 0.198763363 | 0.0244168   | 0.00792081  | 0.23374368  |
| 0.012769742 | 0.001504339 | 0.203153857 | 0.219426975 |
| 0.000464747 | 0.033663834 | 0.212922629 | 0.018596531 |
| 0.203243898 | 0.181343325 | 0.127202868 | 0.03909092  |
| 0.000141542 | 0.170182179 | 0.072117373 | 0.062690502 |
| 0.184314248 | 0.098804823 | 0.010023543 | 0.000924374 |
| 0.053648816 | 0.014553417 | 0.002781573 | 0.015218723 |
| 0.004415718 | 0.134362233 | 0.026071673 | 0.032208759 |
| 0.017274982 | 0.021476583 | 0.028316312 | 0.025715978 |
| 0.01222239  | 0.034765232 | 0.071275228 | 0.195505786 |
| 0.011654725 | 0.162441593 | 0.133793728 | 0.000301231 |
| 0.132304456 | 0.147691552 | 0.178560375 | 0.001839309 |
| 0.143820986 | 0.002732079 | 0.016358619 | 0.016826227 |
| 0.015375145 | 0.017106095 | 0.037756447 | 0.031619752 |
| 0.096058969 | 0.01883773  | 0.02417309  | 0.028186285 |
| 0.00756735  | 0.031372952 | 0.120595156 | 0.072032387 |
| 0.025647357 | 0.006654945 | 0.021598378 | 0.024507597 |
| 0.00035269  | 0.243528239 | 0.04727321  | 0.013116985 |
| 0.029519145 | 0.081470577 | 0.079363428 | 0.246222835 |
| 0.13340378  | 0.030845893 | 0.055145538 | 0.19439213  |
| 0.029716172 | 0.00691332  | 0.003623415 | 0.113231774 |
| 0.027993029 | 0.011327848 | 0.187190717 | 0.066227759 |

|             |             |             |             |
|-------------|-------------|-------------|-------------|
| 0.197098195 | 0.105887692 | 0.04619547  | 0.154534191 |
| 0.063694497 | 0.107525143 | 0.173181438 | 0.00091022  |
| 0.011581133 | 0.019245661 | 0.041803474 | 0.002263889 |
| 0.068979262 | 0.015017063 | 0.196822578 | 0.20080097  |
| 0.099653282 | 0.113081492 | 0.0367771   | 0.00216356  |
| 0.101454372 | 0.047515484 | 0.016671046 | 0.230106212 |
| 0.071317451 | 0.013643055 | 0.048998385 | 0.062255149 |
| 0.173805651 | 0.214658421 | 0.033102401 | 0.030885353 |
| 0.039318285 | 0.036449061 | 0.202697112 | 0.013645235 |
| 0.195449792 | 0.013064267 | 0.225992804 | 0.028724416 |
| 0.018759763 | 0.245856434 | 0.005155556 | 0.240899928 |
| 0.047133046 | 0.024284324 | 0.157646024 | 0.074174749 |
| 0.037056816 | 0.003553754 | 0.051537259 | 0.128838629 |
| 0.013738724 | 0.10170173  | 0.002845964 | 0.001116863 |
| 0.059428149 | 0.094509578 | 0.21631907  | 0.117922561 |
| 0.031803574 | 0.078959492 | 0.032224562 | 0.047159872 |
| 0.238104967 | 0.210961081 | 0.007110879 | 0.042870732 |
| 0.078507722 | 0.004463023 | 0.155176727 | 0.00221122  |
| 0.143218672 | 0.212320752 | 0.092880737 | 0.001568726 |
| 0.000409465 | 0.048242464 | 0.136221444 | 0.011469444 |
| 0.191136315 | 0.032488924 | 0.182798233 | 0.192815894 |
| 0.034037276 | 0.200228225 | 0.00440296  | 0.111104882 |
| 0.001215081 | 0.046689262 | 0.141917676 | 0.143765515 |
| 0.010147473 | 0.050830986 | 0.085020402 | 0.039451768 |
| 0.000716949 | 0.012469805 | 0.002820115 | 0.111626603 |
| 0.203612511 | 0.088394658 | 0.039332639 | 0.186932621 |
| 0.045026686 | 0.145314762 | 0.010107873 | 0.210799274 |
| 0.000856107 | 0.090919273 | 0.025524126 | 0.146802488 |
| 0.026041014 | 0.111041864 | 0.00051641  | 0.080868939 |
| 0.180447998 | 0.012654046 | 0.056320654 | 0.03463431  |
| 0.237802644 | 0.19433922  | 0.043122679 | 0.017790396 |
| 0.225641545 | 0.007123224 | 0.17846946  | 0.212537372 |
| 0.011630755 | 0.031288043 | 0.156568486 | 0.009509044 |
| 0.084631969 | 0.159599742 | 0.23930132  | 0.229220507 |
| 0.000703953 | 0.034253921 | 0.168021309 | 0.193021397 |
| 0.059002465 | 0.019548777 | 0.036372343 | 0.018196189 |
| 0.202193403 | 0.001455474 | 0.032928994 | 0.083605814 |
| 0.032870323 | 0.059512064 | 0.225845676 | 0.017844117 |
| 2.18E-05    | 0.012113782 | 0.055893001 | 0.016085594 |
| 0.040904157 | 0.065669979 | 0.019237893 | 0.101982442 |
| 0.003011434 | 0.000528027 | 0.140266041 | 0.000644082 |
| 0.088054457 | 0.098378076 | 0.034467963 | 0.08156263  |
| 0.032587324 | 0.083437137 | 0.075377718 | 0.000617302 |
| 0.130222831 | 0.001236586 | 0.056750667 | 0.011489045 |
| 0.013106089 | 0.001369294 | 0.176108223 | 0.201378936 |
| 0.078889002 | 0.047183455 | 0.056643162 | 0.188328076 |
| 0.004654317 | 0.163999044 | 0.091431812 | 0.18938901  |
| 0.050641181 | 0.188821783 | 0.168647711 | 0.108002309 |
| 0.111818026 | 0.04061365  |             |             |
| C79407      | 0.164683202 | 0.520745688 | 0.144695112 |
| 0.229261156 | 0.363817777 | 0.531672752 | 0.126895629 |
| 0.225009107 | 0.473175712 | 0.423440414 | 0.461992613 |
| 0.0479212   | 0.100082705 | 0.524159174 | 0.116201692 |
| 0.459379155 | 0.072818457 | 0.195082634 | 0.124791274 |

|             |             |             |             |
|-------------|-------------|-------------|-------------|
| 0.341569766 | 0.332920524 | 0.412787876 | 0.528121445 |
| 0.343922965 | 0.30013391  | 0.491425964 | 0.460320758 |
| 0.543158397 | 0.339673359 | 0.52998565  | 0.293098983 |
| 0.467393065 | 0.37916817  | 0.458717816 | 0.05191513  |
| 0.522158063 | 0.016071756 | 0.461181764 | 0.335998139 |
| 0.18125563  | 0.436202321 | 0.480746317 | 0.336401148 |
| 0.492688075 | 0.096214517 | 0.315452588 | 0.48337408  |
| 0.465829627 | 0.396182493 | 0.16068125  | 0.539497402 |
| 0.465479777 | 0.4819007   | 0.519514386 | 0.005440577 |
| 0.349886121 | 0.100053465 | 0.258361384 | 0.52796205  |
| 0.312545369 | 0.204614294 | 0.353331197 | 0.383883003 |
| 0.480742703 | 0.460716621 | 0.36285551  | 0.473476352 |
| 0.532746027 | 0.200702224 | 0.521207283 | 0.248895543 |
| 0.505106663 | 0.093582209 | 0.264450113 | 0.189317106 |
| 0.47726745  | 0.292669477 | 0.426462717 | 0.358630408 |
| 0.518227238 | 0.529704936 | 0.354640335 | 0.523434764 |
| 0.117472186 | 0.390957158 | 0.33752911  | 0.390048385 |
| 0.462300109 | 0.166632826 | 0.509202862 | 0.522442718 |
| 0.121540364 | 0.507688801 | 0.498783223 | 0.24017187  |
| 0.536575117 | 0.339691477 | 0.519782272 | 0.204041029 |
| 0.43344553  | 0.399436568 | 0.497121358 | 0.406929068 |
| 0.390328278 | 0.168832994 | 0.520719333 | 0.364677866 |
| 0.37924307  | 0.181178711 | 0.271945064 | 0.530943441 |
| 0.516267201 | 0.544441943 | 0.525261368 | 0.459117089 |
| 0.440447772 | 0.535773988 | 0.513914055 | 0.510619311 |
| 0.235814187 | 1           | 0.311321563 | 0.087563991 |
| 0.171307037 | 0.152520306 | 0.291133755 | 0.403439218 |
| 0.542983055 | 0.463924269 | 0.319811557 | 0.308943938 |
| 0.507948793 | 0.510100522 | 0.530612782 | 0.510585048 |
| 0.095024293 | 0.293156654 | 0.449072651 | 0.428951643 |
| 0.476110602 | 0.211808569 | 0.296119887 | 0.531307739 |
| 0.476150442 | 0.513505335 | 0.306659511 | 0.527350985 |
| 0.311385719 | 0.516322731 | 0.544354644 | 0.267080567 |
| 0.531518326 | 0.521258865 | 0.522249663 | 0.465923256 |
| 0.508422028 | 0.483995241 | 0.097925915 | 0.484286744 |
| 0.507307637 | 0.018449735 | 0.539897522 | 0.538510839 |
| 0.528134362 | 0.53422727  | 0.520116243 | 0.540390045 |
| 0.530645472 | 0.160678435 | 0.038480232 | 0.357390933 |
| 0.523381988 | 0.495384914 | 0.204574571 | 0.49280405  |
| 0.426043584 | 0.537687315 | 0.521504649 | 0.38382478  |
| 0.507738045 | 0.535461967 | 0.545142396 | 0.505774883 |
| 0.437619473 | 0.41774853  | 0.437014226 | 0.505013517 |
| 0.097925613 | 0.228258969 | 0.133623571 | 0.412432025 |
| 0.491460062 | 0.259843476 | 0.520907171 | 0.428151466 |
| 0.288615629 | 0.494573352 | 0.394094689 | 0.442301914 |
| 0.138327215 | 0.542988613 | 0.287616617 | 0.297977148 |
| 0.084701361 | 0.245735913 | 0.274231466 | 0.245830652 |
| 0.327868038 | 0.309947595 | 0.534672633 | 0.530642749 |
| 0.431814685 | 0.312556786 | 0.535552879 | 0.50793083  |
| 0.462848453 | 0.447380841 | 0.342389948 | 0.023911505 |
| 0.329949455 | 0.382365816 | 0.211901436 | 0.490858161 |
| 0.274099578 | 0.323903281 | 0.469488527 | 0.462954168 |
| 0.436360173 | 0.274602709 | 0.438527023 | 0.466991732 |
| 0.274930974 | 0.382957213 | 0.513732106 | 0.51888015  |

|             |             |             |             |
|-------------|-------------|-------------|-------------|
| 0.012745545 | 0.44618634  | 0.537697579 | 0.182896476 |
| 0.437033743 | 0.162346943 | 0.305483233 | 0.524757628 |
| 0.343899801 | 0.267012662 | 0.541457671 | 0.460770383 |
| 0.449489969 | 0.321224689 | 0.525040612 | 0.058685676 |
| 0.416823818 | 0.076219178 | 0.365207339 | 0.46813538  |
| 0.369750432 | 0.380747137 | 0.369103619 | 0.342523769 |
| 0.255890215 | 0.52752376  | 0.504411483 | 0.540801401 |
| 0.438827549 | 0.52294422  | 0.532844968 | 0.518727353 |
| 0.485793554 | 0.435955003 | 0.153988396 | 0.530740976 |
| 0.527918396 | 0.374626632 | 0.172828768 | 0.527108    |
| 0.457086659 | 0.47405099  | 0.15480989  | 0.520572643 |
| 0.505930575 | 0.50732771  | 0.219036207 | 0.441432369 |
| 0.484819746 | 0.363779356 | 0.507031169 | 0.517221453 |
| 0.417882191 | 0.416497995 | 0.393417096 | 0.459760434 |
| 0.291056211 | 0.251286183 | 0.42116837  | 0.206640572 |
| 0.014549799 | 0.180066302 | 0.150664027 | 0.228046069 |
| 0.191325574 | 0.518562358 | 0.483565421 | 0.533134772 |
| 0.203256848 | 0.505470333 | 0.355532356 | 0.358943722 |
| 0.499234814 | 0.419577503 | 0.446315143 | 0.465166093 |
| 0.36352931  | 0.037826885 | 0.182911505 | 0.532969538 |
| 0.113782735 | 0.277833729 | 0.454293807 | 0.005513353 |
| 0.108818946 | 0.526428121 | 0.193030597 | 0.287674346 |
| 0.514809542 | 0.299730923 | 0.335211778 | 0.43737742  |
| 0.439551826 | 0.183299532 | 0.006475028 | 0.525535993 |
| 0.511334992 | 0.499891007 | 0.511537418 | 0.491769856 |
| 0.502173915 | 0.507606928 | 0.491324461 | 0.517891704 |
| 0.19316841  | 0.197243602 | 0.238768023 | 0.365666817 |
| 0.011743976 | 0.473073346 | 0.386435927 | 0.244304633 |
| 0.504201945 | 0.411161731 | 0.091018709 | 0.423160045 |
| 0.05721296  | 0.231445856 | 0.435655949 | 0.307379175 |
| 0.417065979 | 0.044885761 | 0.332804959 | 0.379708106 |
| 0.502976524 | 0.463170837 | 0.423892697 | 0.53397949  |
| 0.428093364 | 0.253995624 | 0.386126691 | 0.483806271 |
| 0.143712842 | 0.155181252 | 0.492183837 | 0.063690933 |
| 0.308594756 | 0.492689225 | 0.466374969 | 0.152444146 |
| 0.382042805 | 0.017792654 | 0.480630223 | 0.53068149  |
| 0.516464052 | 0.531572861 | 0.536508966 | 0.314543383 |
| 0.531575905 | 0.12339313  | 0.540110856 | 0.52181066  |
| 0.477759157 | 0.002532764 | 0.012416694 | 0.53881875  |
| 0.468187214 | 0.146592308 | 0.26366857  | 0.496818619 |
| 0.180811489 | 0.291242422 | 0.139181014 | 0.214522628 |
| 0.539240822 | 0.299328968 | 0.208543606 | 0.510059583 |
| 0.332123575 | 0.326737637 | 0.524893537 | 0.186496406 |
| 0.494216227 | 0.110051425 | 0.183973294 | 0.013152491 |
| 0.44267717  | 0.223906714 | 0.507840437 | 0.534156886 |
| 0.510675901 | 0.465609105 | 0.438906253 | 0.456044878 |
| 0.507686121 | 0.216583887 | 0.455309792 | 0.23618419  |
| 0.533263343 | 0.465497713 | 0.42478391  | 0.426621532 |
| 0.515396188 | 0.51428861  | 0.080398209 | 0.493456189 |
| 0.03460634  | 0.00296214  | 0.521749181 | 0.37554896  |
| 0.090321941 | 0.434039315 | 0.36540607  | 0.338299074 |
| 0.318942381 | 0.078719565 | 0.298940872 | 0.272733579 |
| 0.387822823 | 0.441509292 | 0.317504937 | 0.364665037 |
| 0.324047544 | 0.161892907 | 0.28609613  | 0.243691746 |

|             |             |             |             |
|-------------|-------------|-------------|-------------|
| 0.331169713 | 0.431076703 | 0.303590076 | 0.057237663 |
| 0.526106677 | 0.487094125 | 0.12627675  | 0.274984035 |
| 0.525051392 | 0.54084141  | 0.085539236 | 0.022735733 |
| 0.384207088 | 0.394748099 | 0.531061271 | 0.539163777 |
| 0.539864621 | 0.51189215  | 0.449664211 | 0.172435574 |
| 0.143115194 | 0.401415079 | 0.339814194 | 0.135378251 |
| 0.53710442  | 0.159480725 | 0.526120808 | 0.3405589   |
| 0.21421518  | 0.319495929 | 0.071131617 | 0.164204275 |
| 0.449169859 | 0.283247218 | 0.245361674 | 0.277264592 |
| 0.389623156 | 0.291277724 | 0.10974299  | 0.299486525 |
| 0.45912104  | 0.199251717 | 0.263824154 | 0.452267864 |
| 0.487663529 | 0.332781238 | 0.504656931 | 0.480191826 |
| 0.242568928 | 0.214883735 | 0.434647412 | 0.482221407 |
| 0.540674032 | 0.496616569 | 0.060306064 | 0.529271614 |
| 0.526712753 | 0.53104672  | 0.525762456 | 0.456381769 |
| 0.176332291 | 0.448602174 | 0.367224945 | 0.410290387 |
| 0.288636277 | 0.531468    | 0.336216959 | 0.138180137 |
| 0.394935656 | 0.499037476 | 0.512677113 | 0.249147434 |
| 0.526302698 | 0.258519584 | 0.145776453 | 0.531021144 |
| 0.204792766 | 0.175344579 | 0.497843405 | 0.515271667 |
| 0.003262302 | 0.155820052 | 0.512299968 | 0.348129651 |
| 0.516759364 | 0.525061924 | 0.494684629 | 0.39082668  |
| 0.001926117 | 0.477876585 | 0.468163966 | 0.484779132 |
| 0.530606151 | 0.479767108 | 0.252023689 | 0.129024969 |
| 0.382805513 | 0.185561182 | 0.201196013 | 0.483315336 |
| 0.20365421  | 0.533316083 | 0.2937165   | 0.322490681 |
| 0.26708785  | 0.199863356 | 0.28760582  | 0.359245447 |
| 0.17581215  | 0.339308789 | 0.442345218 | 0.429770631 |
| 0.225219712 | 0.496402314 | 0.510264348 | 0.071581451 |
| 0.419512833 | 0.491242406 | 0.505575385 | 0.004710721 |
| 0.508083238 | 0.020306594 | 0.264112246 | 0.288422855 |
| 0.274349978 | 0.284437069 | 0.325432552 | 0.361291068 |
| 0.469250601 | 0.322399807 | 0.375623342 | 0.332364133 |
| 0.232107468 | 0.340962424 | 0.471883174 | 0.484166239 |
| 0.347009107 | 0.22479557  | 0.197250307 | 0.194326795 |
| 0.104134416 | 0.539268743 | 0.353873838 | 0.171109527 |
| 0.321447056 | 0.474833391 | 0.43032561  | 0.527781622 |
| 0.484999688 | 0.227677838 | 0.42705313  | 0.544615227 |
| 0.308274115 | 0.419990048 | 0.149205846 | 0.515478986 |
| 0.34631603  | 0.25978375  | 0.528928654 | 0.462062841 |
| 0.517393228 | 0.45633445  | 0.354335201 | 0.499128102 |
| 0.457162641 | 0.43405622  | 0.450612781 | 0.135022967 |
| 0.287775089 | 0.242332651 | 0.309357964 | 0.006719101 |
| 0.462204482 | 0.416870392 | 0.543349848 | 0.51614007  |
| 0.3354952   | 0.465497157 | 0.464476422 | 0.17102341  |
| 0.405699199 | 0.290228285 | 0.244555611 | 0.533950102 |
| 0.248943327 | 0.294749249 | 0.36387882  | 0.503356659 |
| 0.51300447  | 0.508898937 | 0.31032597  | 0.367976678 |
| 0.341030395 | 0.337245012 | 0.493539457 | 0.245482916 |
| 0.519641118 | 0.221005285 | 0.498496162 | 0.368985424 |
| 0.287742343 | 0.535905744 | 0.138399616 | 0.540472822 |
| 0.393956762 | 0.243999163 | 0.496763068 | 0.443080597 |
| 0.433892538 | 0.179840097 | 0.211146074 | 0.512059772 |
| 0.320953182 | 0.397405771 | 0.02443467  | 0.078568299 |



|             |             |             |             |
|-------------|-------------|-------------|-------------|
| 0.413740512 | 0.404020144 | 0.517008737 | 0.461502292 |
| 0.289840404 | 0.414492532 | 0.195695581 | 0.422071637 |
| 0.511977747 | 0.526605911 | 0.33913727  | 0.346446885 |
| 0.45641257  | 0.181275235 | 0.544323029 | 0.025690247 |
| 0.499887879 | 0.495969411 | 0.478206092 | 0.112686316 |
| 0.049334557 | 0.237429814 | 0.507146913 | 0.159731351 |
| 0.517741966 | 0.24433191  | 0.478810772 | 0.534811384 |
| 0.295867107 | 0.527117348 | 0.177395775 | 0.493125487 |
| 0.111004874 | 0.369076009 | 0.446452545 | 0.46982314  |
| 0.280768008 | 0.33231037  | 0.45947522  | 0.268368792 |
| 0.071958403 | 0.329706655 | 0.003675888 | 0.450032018 |
| 0.502961468 | 0.387900468 | 0.315276873 | 0.411097414 |
| 0.36514111  | 0.477045232 | 0.302417094 | 0.508878482 |
| 0.025852751 | 0.426288094 | 0.301277949 | 0.526392836 |
| 0.286556681 | 0.46094744  | 0.10712956  | 0.365454924 |
| 0.501057944 | 0.343388911 | 0.360326597 | 0.374455456 |
| 0.530810409 | 0.503017194 | 0.297024912 | 0.284818503 |
| 0.495678899 | 0.147704431 | 0.516056998 | 0.523870128 |
| 0.249929942 | 0.245028833 | 0.506713802 | 0.283086774 |
| 0.355875671 | 0.495769757 | 0.502545695 | 0.520189578 |
| 0.107994441 | 0.348785226 | 0.507225144 | 0.518297036 |
| 0.386360099 | 0.196725657 | 0.281149386 | 0.282297969 |
| 0.516516381 | 0.176411625 | 0.301778786 | 0.476899658 |
| 0.243584977 | 0.407956788 | 0.477265998 | 0.236599697 |
| 0.072373722 | 0.262699955 | 0.488687535 | 0.248641041 |
| 0.386361463 | 0.437757335 | 0.286067295 | 0.455384481 |
| 0.199069383 | 0.048546265 | 0.48350671  | 0.018868426 |
| 0.499611106 | 0.479597464 | 0.354689286 | 0.421893507 |
| 0.303340349 | 0.473081416 | 0.478454728 | 0.004114468 |
| 0.492229631 | 0.065011621 | 0.388454271 | 0.277447197 |
| 0.339766968 | 0.118181547 | 0.512976299 | 0.528762728 |
| 0.451960118 | 0.425569804 | 0.411209656 | 0.519356454 |
| 0.16771262  | 0.396161318 | 0.40097506  | 0.539305034 |
| 0.253564715 | 0.490813495 | 0.500740434 | 0.444642878 |
| 0.507996337 | 0.404646506 |             |             |
| CALM3       | 0.186759275 | 0.236942806 | 0.157624657 |
| 0.259300658 | 0.138346421 | 0.138597748 | 0.157822552 |
| 0.180165478 | 0.189756236 | 0.05249589  | 0.175491322 |
| 0.139594756 | 0.020590616 | 0.278710737 | 0.150700335 |
| 0.13305781  | 0.168909268 | 0.194500331 | 0.036442253 |
| 0.126618706 | 0.125408507 | 0.093783641 | 0.127383969 |
| 0.110992618 | 0.318455388 | 0.165912006 | 0.082670049 |
| 0.277332801 | 0.046521459 | 0.175166496 | 0.05038648  |
| 0.344292262 | 0.131821221 | 0.077189462 | 0.145823182 |
| 0.12856418  | 0.004174168 | 0.351506367 | 0.165704796 |
| 0.073412923 | 0.336225993 | 0.078026752 | 0.216735867 |
| 0.086995496 | 0.167701964 | 0.034480056 | 0.132438967 |
| 0.148473801 | 0.14416462  | 0.133290857 | 0.188178595 |
| 0.08915864  | 0.246340866 | 0.152814364 | 0.00549102  |
| 0.065304827 | 0.010131261 | 0.034732778 | 0.320599641 |
| 0.293687295 | 0.217454162 | 0.039778556 | 0.116420187 |
| 0.11071719  | 0.155046504 | 0.229386678 | 0.074696267 |
| 0.311734763 | 0.038503768 | 0.159131068 | 0.167928297 |
| 0.120497286 | 0.103247826 | 0.296278213 | 0.136832595 |

|             |             |             |             |
|-------------|-------------|-------------|-------------|
| 0.096047662 | 0.215266953 | 0.140742961 | 0.079618592 |
| 0.233355394 | 0.360412405 | 0.229875692 | 0.316535953 |
| 0.024257524 | 0.100188461 | 0.114755593 | 0.246931514 |
| 0.172845977 | 0.118774978 | 0.235876148 | 0.346911185 |
| 0.106238025 | 0.100389826 | 0.167906707 | 0.187083162 |
| 0.256521507 | 0.053694507 | 0.090402165 | 0.060834268 |
| 0.15444103  | 0.112815607 | 0.308939698 | 0.268974225 |
| 0.1089161   | 0.165638172 | 0.332270787 | 0.096208753 |
| 0.164318428 | 0.193461979 | 0.105238394 | 0.207674711 |
| 0.17630782  | 0.285405773 | 0.197059478 | 0.21359318  |
| 0.106637458 | 0.310650072 | 0.231334877 | 0.251535436 |
| 0.020179189 | 0.311321563 | 1           | 0.18352121  |
| 0.138569174 | 0.190457725 | 0.069350745 | 0.297120272 |
| 0.258336522 | 0.214570338 | 0.207061656 | 0.1813759   |
| 0.242460846 | 0.307019102 | 0.297786319 | 0.230392925 |
| 0.171938188 | 0.047759661 | 0.113751638 | 0.154284909 |
| 0.178591972 | 0.184268742 | 0.079811998 | 0.351472462 |
| 0.338901895 | 0.220803773 | 0.179241778 | 0.376772763 |
| 0.125432707 | 0.356532005 | 0.241472285 | 0.239170326 |
| 0.356571143 | 0.349835349 | 0.328510564 | 0.161144154 |
| 0.347264632 | 0.184294869 | 0.014841435 | 0.231687961 |
| 0.343337769 | 0.016306149 | 0.230952869 | 0.254435128 |
| 0.302799621 | 0.217119011 | 0.307984537 | 0.286084702 |
| 0.297962335 | 0.180829181 | 0.002404846 | 0.186151507 |
| 0.329467715 | 0.315695872 | 0.142538154 | 0.095959727 |
| 0.127562916 | 0.137425042 | 0.188837777 | 0.086125079 |
| 0.364596627 | 0.265149223 | 0.248712313 | 0.199713002 |
| 0.105166161 | 0.337832248 | 0.080830047 | 0.33635878  |
| 0.202728297 | 0.195730285 | 0.172860327 | 0.221513248 |
| 0.092210997 | 0.229036163 | 0.129920164 | 0.110946783 |
| 0.255695194 | 0.119236114 | 0.062239546 | 0.159414096 |
| 0.18024299  | 0.125309755 | 0.219640891 | 0.16770099  |
| 0.198702074 | 0.291600863 | 0.181729724 | 0.245701185 |
| 0.158877161 | 0.320688675 | 0.15769087  | 0.279769114 |
| 0.092912482 | 0.278386757 | 0.184826927 | 0.335137044 |
| 0.348602881 | 0.116135577 | 0.253986714 | 0.139909257 |
| 0.09471765  | 0.043321759 | 0.033357573 | 0.099043964 |
| 0.304093093 | 0.125910974 | 0.136359983 | 0.200008338 |
| 0.178237085 | 0.123966646 | 0.090457577 | 0.371934728 |
| 0.22084485  | 0.150584409 | 0.264432928 | 0.109245896 |
| 0.083475499 | 0.174289761 | 0.234806382 | 0.08926814  |
| 0.173693271 | 0.051270716 | 0.068185992 | 0.261160855 |
| 0.054120587 | 0.072592694 | 0.261859403 | 0.18989436  |
| 0.093823048 | 0.263601558 | 0.309199718 | 0.004898668 |
| 0.08623399  | 0.142074731 | 0.252144298 | 0.069300358 |
| 0.234210896 | 0.236411087 | 0.107506728 | 0.133704828 |
| 0.22047909  | 0.312461372 | 0.270500774 | 0.294824058 |
| 0.078566965 | 0.318383566 | 0.235489517 | 0.29025445  |
| 0.215656029 | 0.064775056 | 0.024952274 | 0.240099075 |
| 0.253487316 | 0.067053849 | 0.187067978 | 0.171735542 |
| 0.072374549 | 0.153322033 | 0.112792432 | 0.314156066 |
| 0.37966519  | 0.286906115 | 0.192963481 | 0.217061864 |
| 0.302279469 | 0.231923744 | 0.244948567 | 0.322854736 |
| 0.054398815 | 0.0914375   | 0.10515615  | 0.263829675 |

|             |             |             |             |
|-------------|-------------|-------------|-------------|
| 0.271312487 | 0.086994006 | 0.287488957 | 0.031364486 |
| 0.003088215 | 0.146901779 | 0.174574793 | 0.201072476 |
| 0.072627675 | 0.112258913 | 0.170990927 | 0.303607132 |
| 0.210943907 | 0.308114959 | 0.204659939 | 0.139805902 |
| 0.284200563 | 0.084570321 | 0.104324121 | 0.143133446 |
| 0.264410383 | 0.167899312 | 0.230567977 | 0.37020882  |
| 0.120476734 | 0.076242812 | 0.123409991 | 0.023183897 |
| 0.149213356 | 0.179088913 | 0.238002196 | 0.348095975 |
| 0.270853119 | 0.335131985 | 0.239890771 | 0.064101355 |
| 0.240326433 | 0.210821115 | 0.065479758 | 0.268107669 |
| 0.277485764 | 0.263974304 | 0.272535167 | 0.289379662 |
| 0.232353517 | 0.182586407 | 0.212864596 | 0.158220621 |
| 0.20382442  | 0.155530696 | 0.068544968 | 0.152164883 |
| 0.010696704 | 0.265962588 | 0.115687173 | 0.283179745 |
| 0.176052391 | 0.189315899 | 0.174012683 | 0.116751977 |
| 0.161328544 | 0.040837924 | 0.10793719  | 0.145209117 |
| 0.197783771 | 0.131689558 | 0.103602534 | 0.073491983 |
| 0.31581015  | 0.295233472 | 0.075305424 | 0.329038588 |
| 0.189194517 | 0.182428488 | 0.160506364 | 0.214934552 |
| 0.194018009 | 0.022436117 | 0.100591128 | 0.015967985 |
| 0.073648249 | 0.292427566 | 0.086453829 | 0.210939804 |
| 0.236861392 | 0.098411982 | 0.311379592 | 0.330693557 |
| 0.289905235 | 0.292557678 | 0.316735436 | 0.083631081 |
| 0.32155225  | 0.010262711 | 0.30006925  | 0.243663172 |
| 0.069401309 | 0.015851713 | 0.037461403 | 0.260653304 |
| 0.127408313 | 0.168192743 | 0.254153525 | 0.126985332 |
| 0.240304532 | 0.156835323 | 0.173933422 | 0.104835053 |
| 0.167389883 | 0.147250854 | 0.076551027 | 0.291475804 |
| 0.1888809   | 0.193585046 | 0.092453018 | 0.194488435 |
| 0.138724914 | 0.220127301 | 0.177978938 | 0.045957034 |
| 0.190907241 | 0.230421587 | 0.343424262 | 0.300741395 |
| 0.349233821 | 0.190329433 | 0.054641589 | 0.095314931 |
| 0.229485787 | 0.176110362 | 0.075657021 | 0.173860828 |
| 0.288978062 | 0.160361236 | 0.303948909 | 0.328302452 |
| 0.320652528 | 0.328034692 | 0.158740617 | 0.22415218  |
| 0.150857965 | 0.007780601 | 0.1333498   | 0.216930424 |
| 0.014739941 | 0.092334471 | 0.313250676 | 0.093134187 |
| 0.118512313 | 0.161871097 | 0.061192431 | 0.06643608  |
| 0.214891226 | 0.12614629  | 0.10227585  | 0.207908533 |
| 0.124663254 | 0.085479091 | 0.201445256 | 0.1629032   |
| 0.063085156 | 0.281400904 | 0.319183569 | 0.130044996 |
| 0.103474914 | 0.108979097 | 0.198832282 | 0.262874527 |
| 0.277308642 | 0.272800676 | 0.146159387 | 0.127161502 |
| 0.302647384 | 0.104912368 | 0.279650227 | 0.283756668 |
| 0.345436256 | 0.342480545 | 0.362902533 | 0.139932182 |
| 0.201791986 | 0.171638304 | 0.10290479  | 0.158826934 |
| 0.299382004 | 0.140690079 | 0.305587237 | 0.070777571 |
| 0.219896899 | 0.227700713 | 0.200865045 | 0.189789272 |
| 0.107774704 | 0.246083099 | 0.198771732 | 0.217453571 |
| 0.137049454 | 0.07550987  | 0.163489328 | 0.226552899 |
| 0.245953907 | 0.04971318  | 0.232038843 | 0.131728975 |
| 0.243928893 | 0.037286804 | 0.172317418 | 0.355347745 |
| 0.244741782 | 0.157500437 | 0.155282029 | 0.185820508 |
| 0.210108392 | 0.084771958 | 0.150480758 | 0.241032335 |

|             |             |             |             |
|-------------|-------------|-------------|-------------|
| 0.289374863 | 0.15486945  | 0.320475792 | 0.271998545 |
| 0.202878267 | 0.117068424 | 0.061068027 | 0.126719752 |
| 0.19393789  | 0.141604486 | 0.150404045 | 0.180421876 |
| 0.292151566 | 0.345893441 | 0.256644794 | 0.232141985 |
| 0.117642544 | 0.154613965 | 0.127905597 | 0.231142129 |
| 0.070868866 | 0.190049993 | 0.076191463 | 0.190981234 |
| 0.028125639 | 0.035342034 | 0.273044107 | 0.194062057 |
| 0.335913358 | 0.283518711 | 0.35035562  | 0.134784319 |
| 0.000524342 | 0.142065822 | 0.188574782 | 0.128208587 |
| 0.245510156 | 0.261767812 | 0.086058679 | 0.219878404 |
| 0.326693607 | 0.191008004 | 0.175922795 | 0.12153333  |
| 0.037103611 | 0.153596503 | 0.274678463 | 0.155452979 |
| 0.174006527 | 0.141196505 | 0.072413181 | 0.224899443 |
| 0.037151155 | 0.306532607 | 0.290015101 | 0.057610261 |
| 0.045885693 | 0.245445977 | 0.218576308 | 0.164305368 |
| 0.089073367 | 0.233361363 | 0.278158625 | 0.014631737 |
| 0.186333772 | 0.109195961 | 0.170693923 | 0.203089905 |
| 0.19808354  | 0.145358262 | 0.183263657 | 0.147055196 |
| 0.16106288  | 0.192447077 | 0.210242802 | 0.261671574 |
| 0.225102652 | 0.185215344 | 0.144943561 | 0.131722084 |
| 0.15232613  | 0.244281733 | 0.248889474 | 0.255779621 |
| 0.216355967 | 0.251373711 | 0.341513019 | 0.207605032 |
| 0.218986137 | 0.111112937 | 0.350640755 | 0.286479821 |
| 0.31312307  | 0.220040458 | 0.117362275 | 0.256337624 |
| 0.029941355 | 0.105368214 | 0.135951007 | 0.148204737 |
| 0.197702206 | 0.104439663 | 0.105506738 | 0.170713895 |
| 0.156117748 | 0.372797241 | 0.327946959 | 0.31671444  |
| 0.146695945 | 0.082113966 | 0.066828796 | 0.219465117 |
| 0.228219026 | 0.224521    | 0.114742089 | 0.075314317 |
| 0.207582667 | 0.189186388 | 0.246203058 | 0.325352163 |
| 0.05399328  | 0.330733883 | 0.080891581 | 0.202890871 |
| 0.062424555 | 0.263061626 | 0.260221152 | 0.186588611 |
| 0.039494185 | 0.228194669 | 0.150400181 | 0.127624123 |
| 0.193372061 | 0.160224832 | 0.09552456  | 0.140224731 |
| 0.162118808 | 0.235278048 | 0.316609696 | 0.179568403 |
| 0.113454819 | 0.122778536 | 0.111621588 | 0.151819202 |
| 0.160284208 | 0.285987303 | 0.174687015 | 0.283679113 |
| 0.105237365 | 0.246451471 | 0.37551707  | 0.141191645 |
| 0.16199673  | 0.198914705 | 0.039431988 | 0.092355885 |
| 0.152317062 | 0.073046799 | 0.001484688 | 0.022315657 |
| 0.261554082 | 0.069742168 | 0.175374872 | 0.189426287 |
| 0.10525905  | 0.250949112 | 0.03135232  | 0.134840544 |
| 0.29305418  | 0.339541054 | 0.163306556 | 0.29053459  |
| 0.230538065 | 0.228143022 | 0.169546277 | 0.004591726 |
| 0.127481602 | 0.105014669 | 0.06922071  | 0.170320361 |
| 0.136683261 | 0.045152051 | 0.13551553  | 0.130515052 |
| 0.26407313  | 0.040179414 | 0.11748617  | 0.193622364 |
| 0.220251974 | 0.349500042 | 0.177841264 | 0.22455609  |
| 0.079270781 | 0.229667701 | 0.084173301 | 0.078415962 |
| 0.156932179 | 0.088441763 | 0.251818903 | 0.081124448 |
| 0.183793703 | 0.151946466 | 0.011379495 | 0.382126458 |
| 0.318547475 | 0.079190987 | 0.294813988 | 0.046353295 |
| 0.267125652 | 0.258485936 | 0.086042729 | 0.089826381 |
| 0.150118761 | 0.129911342 | 0.221751552 | 0.284300161 |

|             |             |             |             |
|-------------|-------------|-------------|-------------|
| 0.052306795 | 0.105724196 | 0.246393367 | 0.080847038 |
| 0.35348611  | 0.085868492 | 0.266564702 | 0.070327527 |
| 0.293284736 | 0.223924648 | 0.229456396 | 0.12362314  |
| 0.118956298 | 0.182853496 | 0.086417796 | 0.317831813 |
| 0.20394474  | 0.085929977 | 0.238461513 | 0.19693675  |
| 0.071195174 | 0.271775156 | 0.105966829 | 0.303809328 |
| 0.147769933 | 0.270576107 | 0.211226371 | 0.268477817 |
| 0.289738717 | 0.073831355 | 0.071358079 | 0.127818962 |
| 0.30029044  | 0.245213255 | 0.073654087 | 0.260001973 |
| 0.060984743 | 0.222129958 | 0.110458502 | 0.127160401 |
| 0.16849539  | 0.148241676 | 0.134803597 | 0.235446511 |
| 0.189890773 | 0.13524516  | 0.115792291 | 0.360348004 |
| 0.226349163 | 0.18230231  | 0.361079291 | 0.006230701 |
| 0.175937952 | 0.197289273 | 0.208432774 | 0.111586369 |
| 0.325565509 | 0.158564529 | 0.127506467 | 0.025555336 |
| 0.232655994 | 0.066033044 | 0.104563622 | 0.144478731 |
| 0.060085834 | 0.159105257 | 0.328051468 | 0.295888583 |
| 0.210118043 | 0.075729481 | 0.063644288 | 0.288235059 |
| 0.049504007 | 0.052157635 | 0.06082659  | 0.164536328 |
| 0.06005493  | 0.073365915 | 0.080307793 | 0.087561938 |
| 0.233369879 | 0.160009021 |             |             |
| CAPNS1      | 0.200962671 | 0.060351909 | 0.134913634 |
| 0.068117074 | 0.06179791  | 0.026004227 | 0.167914214 |
| 0.126118415 | 0.062771856 | 0.003522856 | 0.076082964 |
| 0.184770608 | 0.004456722 | 0.095649366 | 0.190116883 |
| 0.038385798 | 0.195949118 | 0.249210805 | 0.013257719 |
| 0.02546865  | 0.073368506 | 0.012731462 | 0.036690167 |
| 0.055924988 | 0.255013085 | 0.051146793 | 0.01619673  |
| 0.067050252 | 0.001991669 | 0.039518207 | 0.001099379 |
| 0.16004072  | 0.056251616 | 0.010772483 | 0.111769565 |
| 0.040557662 | 0.003496769 | 0.148172318 | 0.070939178 |
| 0.007547003 | 0.201122942 | 0.007990014 | 0.117644641 |
| 0.011644002 | 0.15654916  | 0.00087875  | 0.031011452 |
| 0.044772464 | 0.04918391  | 0.171702238 | 0.041066534 |
| 0.013739006 | 0.123321348 | 0.024872497 | 0.011317963 |
| 0.010240415 | 0.000203381 | 0.003072095 | 0.092489643 |
| 0.293940786 | 0.285408231 | 0.00196305  | 0.06803056  |
| 0.031177721 | 0.057630399 | 0.184069136 | 0.007577683 |
| 0.095265987 | 0.006774398 | 0.029911213 | 0.036091386 |
| 0.033924985 | 0.124295317 | 0.317096003 | 0.137745999 |
| 0.01463503  | 0.230485452 | 0.072182692 | 0.014335836 |
| 0.050931596 | 0.139535238 | 0.168369204 | 0.090192155 |
| 0.01016571  | 0.031626719 | 0.028258899 | 0.161815696 |
| 0.070976985 | 0.096401158 | 0.078241801 | 0.116241174 |
| 0.136490546 | 0.015273053 | 0.051572615 | 0.207796342 |
| 0.068642765 | 0.006516685 | 0.011234225 | 0.014096233 |
| 0.048949245 | 0.041177781 | 0.112749801 | 0.189982124 |
| 0.048860764 | 0.202285017 | 0.106085601 | 0.030369213 |
| 0.063221234 | 0.195687095 | 0.027160926 | 0.046467893 |
| 0.045480541 | 0.076698124 | 0.048525653 | 0.100597472 |
| 0.027317261 | 0.08847681  | 0.067373107 | 0.094696835 |
| 0.000113969 | 0.087563991 | 0.18352121  | 1           |
| 0.123771445 | 0.220325137 | 0.018960635 | 0.21239193  |
| 0.065821451 | 0.117700682 | 0.147421058 | 0.131273221 |

|             |             |             |             |
|-------------|-------------|-------------|-------------|
| 0.074643291 | 0.08872208  | 0.080434552 | 0.081863694 |
| 0.238271964 | 0.006016558 | 0.025283694 | 0.060314299 |
| 0.081257038 | 0.255240711 | 0.02498469  | 0.12083457  |
| 0.157189721 | 0.065700619 | 0.094849768 | 0.148939221 |
| 0.101619649 | 0.129422285 | 0.049930217 | 0.229639767 |
| 0.115800734 | 0.113395933 | 0.108589523 | 0.043410211 |
| 0.124813573 | 0.059467746 | 0.011502433 | 0.092404022 |
| 0.142609389 | 0.006831164 | 0.054636968 | 0.062761628 |
| 0.079938624 | 0.048032101 | 0.100384622 | 0.07796214  |
| 0.080797752 | 0.257238361 | 0.000294994 | 0.132018765 |
| 0.097467131 | 0.120681426 | 0.105474566 | 0.016261957 |
| 0.050979197 | 0.039198895 | 0.051416192 | 0.008740714 |
| 0.156528087 | 0.069531846 | 0.059190481 | 0.071110407 |
| 0.033096535 | 0.217800164 | 0.01404676  | 0.107942529 |
| 0.155867901 | 0.166347283 | 0.220069084 | 0.142575061 |
| 0.004845781 | 0.266957153 | 0.030940075 | 0.044366356 |
| 0.285897394 | 0.03865099  | 0.007282003 | 0.054490993 |
| 0.218839398 | 0.022430662 | 0.164119189 | 0.140423216 |
| 0.188326757 | 0.318866945 | 0.078213429 | 0.117517699 |
| 0.13786502  | 0.219727856 | 0.033948508 | 0.076786564 |
| 0.026024622 | 0.195703526 | 0.050979008 | 0.130665719 |
| 0.188145314 | 0.027215538 | 0.248329929 | 0.081989468 |
| 0.01638197  | 0.003182776 | 0.00375238  | 0.018378265 |
| 0.256057626 | 0.047073557 | 0.04489052  | 0.070619451 |
| 0.082789083 | 0.110965253 | 0.018339505 | 0.186025296 |
| 0.185222533 | 0.052327463 | 0.090143316 | 0.021064067 |
| 0.087602979 | 0.074181476 | 0.063957907 | 0.039697486 |
| 0.096220116 | 0.014983017 | 0.006245438 | 0.071639373 |
| 0.006660126 | 0.031043462 | 0.068194658 | 0.068364001 |
| 0.014256894 | 0.170918392 | 0.098774759 | 0.001395046 |
| 0.027269132 | 0.057044616 | 0.18734415  | 0.008628819 |
| 0.166411755 | 0.181961881 | 0.047336407 | 0.040429547 |
| 0.172635523 | 0.097875447 | 0.106587702 | 0.084258494 |
| 0.008695414 | 0.100699053 | 0.062832753 | 0.107218602 |
| 0.095945339 | 0.011500425 | 0.002921698 | 0.061987173 |
| 0.065169202 | 0.006002002 | 0.203063187 | 0.037177696 |
| 0.010655937 | 0.04363669  | 0.038880153 | 0.102346914 |
| 0.155374959 | 0.074003771 | 0.188036199 | 0.099548518 |
| 0.131102431 | 0.171249549 | 0.081612889 | 0.11583372  |
| 0.003057086 | 0.030724374 | 0.022079156 | 0.111117378 |
| 0.234504573 | 0.033490377 | 0.172569385 | 0.003318895 |
| 0.000195779 | 0.204893557 | 0.239416248 | 0.202978823 |
| 0.021459736 | 0.018213327 | 0.054000593 | 0.089540612 |
| 0.297805434 | 0.12810603  | 0.163673219 | 0.038051709 |
| 0.095532179 | 0.028543656 | 0.025045842 | 0.050227992 |
| 0.205462663 | 0.092753476 | 0.132359296 | 0.138594041 |
| 0.168458454 | 0.015349417 | 0.066355523 | 0.020814684 |
| 0.172397477 | 0.033793499 | 0.240741408 | 0.304229985 |
| 0.093458874 | 0.241403168 | 0.166885727 | 0.005332274 |
| 0.134057185 | 0.291725971 | 0.046358756 | 0.072392186 |
| 0.085093912 | 0.086675414 | 0.081777077 | 0.097265066 |
| 0.070975799 | 0.056382374 | 0.066214499 | 0.04385754  |
| 0.126501396 | 0.109581244 | 0.01112221  | 0.079184139 |
| 0.013266054 | 0.117492258 | 0.06416779  | 0.331966782 |

|             |             |             |             |
|-------------|-------------|-------------|-------------|
| 0.05125033  | 0.123252933 | 0.215480638 | 0.047043694 |
| 0.09195058  | 0.002853844 | 0.030717103 | 0.113198497 |
| 0.104741658 | 0.143344437 | 0.006958513 | 0.007309332 |
| 0.102788465 | 0.155405058 | 0.007658216 | 0.095251857 |
| 0.103983397 | 0.124424782 | 0.060200264 | 0.088516154 |
| 0.19234098  | 0.002235482 | 0.025955871 | 0.000119215 |
| 0.011947325 | 0.111800583 | 0.0147558   | 0.070573094 |
| 0.155637344 | 0.121825311 | 0.128000664 | 0.107803687 |
| 0.07416573  | 0.083643804 | 0.096035438 | 0.02009128  |
| 0.093165658 | 0.000277753 | 0.082188867 | 0.071585783 |
| 0.006455418 | 0.014222833 | 0.098095219 | 0.063253876 |
| 0.031155691 | 0.170623589 | 0.277930368 | 0.009510355 |
| 0.142052451 | 0.103198844 | 0.227312143 | 0.032888389 |
| 0.039236223 | 0.117197641 | 0.030104089 | 0.088706837 |
| 0.120326381 | 0.189822161 | 0.01603679  | 0.249547234 |
| 0.038558834 | 0.16827032  | 0.22143474  | 0.038264318 |
| 0.089152544 | 0.19300689  | 0.121178782 | 0.084977249 |
| 0.132253213 | 0.060608205 | 0.003345447 | 0.015668389 |
| 0.075685487 | 0.141854747 | 0.004665875 | 0.154116606 |
| 0.072560528 | 0.049424248 | 0.192307094 | 0.179401029 |
| 0.115060621 | 0.112496038 | 0.257231221 | 0.074163958 |
| 0.088887664 | 0.018541573 | 0.025695424 | 0.185945951 |
| 0.006751273 | 0.02449161  | 0.226913801 | 0.034657365 |
| 0.060540547 | 0.139450615 | 0.011452157 | 0.015609611 |
| 0.125712755 | 0.052242862 | 0.049022814 | 0.154269328 |
| 0.048626288 | 0.028580777 | 0.131992555 | 0.154050013 |
| 0.015093401 | 0.131363841 | 0.249892138 | 0.173156682 |
| 0.015134696 | 0.022946338 | 0.291581004 | 0.273084691 |
| 0.086932647 | 0.073384327 | 0.146648161 | 0.148116021 |
| 0.221702106 | 0.048915278 | 0.086768979 | 0.0710232   |
| 0.112820493 | 0.125857471 | 0.19163089  | 0.100533352 |
| 0.22175292  | 0.089749219 | 0.044576568 | 0.086460879 |
| 0.0907831   | 0.169361557 | 0.09103473  | 0.017422696 |
| 0.283930089 | 0.091267345 | 0.216089834 | 0.289068015 |
| 0.026091864 | 0.304554827 | 0.193702222 | 0.143478322 |
| 0.059064996 | 0.009107014 | 0.219410721 | 0.232060412 |
| 0.122295546 | 0.004355914 | 0.264039459 | 0.044900642 |
| 0.087836006 | 0.002671125 | 0.04126479  | 0.170070642 |
| 0.27890592  | 0.176743984 | 0.021043029 | 0.073532624 |
| 0.045938238 | 0.012368172 | 0.116870328 | 0.053010636 |
| 0.097256039 | 0.031667381 | 0.094644939 | 0.146242382 |
| 0.270303809 | 0.034318214 | 0.012906317 | 0.053590524 |
| 0.229474345 | 0.031834832 | 0.136959499 | 0.313112081 |
| 0.208417219 | 0.148754422 | 0.07179153  | 0.224035233 |
| 0.024344002 | 0.129291471 | 0.150849525 | 0.066849673 |
| 0.012718483 | 0.132915542 | 0.009085395 | 0.053588377 |
| 0.012617235 | 0.005980584 | 0.086182862 | 0.111644366 |
| 0.121467823 | 0.081461359 | 0.145917692 | 0.048792814 |
| 4.37E-05    | 0.031378794 | 0.073884789 | 0.022192024 |
| 0.067518694 | 0.132257678 | 0.037288373 | 0.166813481 |
| 0.242067143 | 0.191858893 | 0.107232307 | 0.011861406 |
| 0.00327604  | 0.044476004 | 0.307711032 | 0.13471216  |
| 0.128924454 | 0.137856188 | 0.00958608  | 0.126001824 |
| 0.008081318 | 0.288849595 | 0.169199544 | 0.004499491 |

|             |             |             |             |
|-------------|-------------|-------------|-------------|
| 0.004946475 | 0.095681794 | 0.062707419 | 0.191564333 |
| 0.026612133 | 0.085836268 | 0.105804418 | 0.023702932 |
| 0.049927952 | 0.195379671 | 0.172542465 | 0.142097081 |
| 0.147713667 | 0.13424391  | 0.15375722  | 0.03882004  |
| 0.065607832 | 0.130063346 | 0.09476638  | 0.240102763 |
| 0.136063272 | 0.132628025 | 0.04486437  | 0.03269335  |
| 0.053339168 | 0.189366191 | 0.247370935 | 0.233119634 |
| 0.205311288 | 0.067717347 | 0.28395489  | 0.204414155 |
| 0.236831062 | 0.027351483 | 0.214554247 | 0.070630897 |
| 0.146885568 | 0.159101561 | 0.053221754 | 0.060614769 |
| 0.001893245 | 0.014985174 | 0.127270349 | 0.035656703 |
| 0.204109821 | 0.033228491 | 0.020726608 | 0.058302745 |
| 0.037023634 | 0.192858515 | 0.28504636  | 0.123370871 |
| 0.039130987 | 0.025988102 | 0.004280266 | 0.160590506 |
| 0.157741207 | 0.242193301 | 0.062342756 | 0.085330795 |
| 0.120017766 | 0.028005292 | 0.059809832 | 0.093314942 |
| 0.008107569 | 0.174840117 | 0.004286614 | 0.139052949 |
| 0.002016173 | 0.153459415 | 0.322424683 | 0.039911445 |
| 0.003914941 | 0.150023548 | 0.075767298 | 0.015663949 |
| 0.047923658 | 0.034973241 | 0.032835368 | 0.111185284 |
| 0.129316335 | 0.149893294 | 0.112117243 | 0.122084422 |
| 0.017703336 | 0.037141517 | 0.021891714 | 0.077622891 |
| 0.119027548 | 0.07422412  | 0.273055713 | 0.074166697 |
| 0.038039912 | 0.24584555  | 0.167225121 | 0.082492538 |
| 0.027903823 | 0.112537202 | 0.004882784 | 0.01404735  |
| 0.068413922 | 0.010015765 | 9.65E-07    | 0.010439391 |
| 0.171178423 | 0.016278981 | 0.038032665 | 0.086260604 |
| 0.038695537 | 0.155667022 | 0.003955775 | 0.074148566 |
| 0.076572474 | 0.111759801 | 0.043483883 | 0.239389749 |
| 0.136856915 | 0.25349444  | 0.03916426  | 0.003713806 |
| 0.027375469 | 0.016439029 | 0.005441354 | 0.242611956 |
| 0.16999983  | 0.004913642 | 0.028158451 | 0.154006054 |
| 0.080640317 | 0.002444244 | 0.03051782  | 0.044892555 |
| 0.219594886 | 0.116750482 | 0.147427547 | 0.080505281 |
| 0.050776106 | 0.172456415 | 0.018607733 | 0.02006071  |
| 0.042970749 | 0.023818821 | 0.107481626 | 0.021795805 |
| 0.239969208 | 0.041735664 | 0.020363169 | 0.189925358 |
| 0.095629208 | 0.017890668 | 0.274900514 | 0.003111043 |
| 0.209152777 | 0.111266835 | 0.036354181 | 0.013976242 |
| 0.160082454 | 0.038658158 | 0.251259951 | 0.094494111 |
| 0.002314065 | 0.033199893 | 0.150280774 | 0.031603013 |
| 0.131736046 | 0.019990603 | 0.233462402 | 0.003651556 |
| 0.075192723 | 0.069865356 | 0.132666648 | 0.035312689 |
| 0.026274909 | 0.280230995 | 0.009229113 | 0.103546694 |
| 0.209654375 | 0.026267685 | 0.072098973 | 0.113143134 |
| 0.019728277 | 0.107257651 | 0.017023364 | 0.098653061 |
| 0.146441806 | 0.24503116  | 0.068218032 | 0.082985161 |
| 0.227969148 | 0.030913122 | 0.017049202 | 0.076145372 |
| 0.079820564 | 0.130137469 | 0.013439851 | 0.115650742 |
| 0.012248583 | 0.1664397   | 0.022037207 | 0.092014543 |
| 0.203813087 | 0.104807512 | 0.026714684 | 0.269418462 |
| 0.13796663  | 0.045293544 | 0.034737253 | 0.191197464 |
| 0.116394061 | 0.127094546 | 0.161766257 | 0.00127992  |
| 0.058678222 | 0.066164977 | 0.20608351  | 0.034997345 |



|             |             |             |             |
|-------------|-------------|-------------|-------------|
| 0.263002799 | 0.070398119 | 0.035694661 | 0.070598291 |
| 0.088848234 | 0.010155551 | 0.042717545 | 0.050151987 |
| 0.009850276 | 0.179927896 | 0.112689113 | 0.093236019 |
| 0.118199288 | 0.007679259 | 0.003968725 | 0.098973145 |
| 0.007553982 | 0.004227256 | 0.009864348 | 0.031781566 |
| 0.012582555 | 0.00737722  | 0.011096173 | 0.009571122 |
| 0.088955623 | 0.093199544 |             |             |
| CAPZA2      | 0.160150371 | 0.143108951 | 0.161057854 |
| 0.067622462 | 0.036820869 | 0.03867222  | 0.146797484 |
| 0.143225668 | 0.136030662 | 0.020219826 | 0.057325276 |
| 0.133831514 | 0.003230801 | 0.144261755 | 0.136770665 |
| 0.039593284 | 0.123448541 | 0.150452437 | 0.02746995  |
| 0.05008461  | 0.035297439 | 0.017184376 | 0.07989389  |
| 0.032869798 | 0.31614668  | 0.103676955 | 0.028173066 |
| 0.136264452 | 0.007983989 | 0.057627242 | 0.011013772 |
| 0.206704827 | 0.034871025 | 0.018462678 | 0.129086628 |
| 0.050045747 | 0.001982625 | 0.243610173 | 0.038478204 |
| 0.00593165  | 0.230007054 | 0.037825019 | 0.051956916 |
| 0.038869578 | 0.150718632 | 0.011140971 | 0.049469441 |
| 0.090432537 | 0.05006836  | 0.203681416 | 0.074534203 |
| 0.030057496 | 0.147088188 | 0.089373614 | 0.033951254 |
| 0.010376964 | 0.000403352 | 0.004770371 | 0.181525466 |
| 0.182803043 | 0.113585204 | 0.01011867  | 0.077493923 |
| 0.050703907 | 0.066955733 | 0.13242284  | 0.024935813 |
| 0.160997403 | 0.006563482 | 0.061601773 | 0.044403177 |
| 0.047709607 | 0.145906248 | 0.234974942 | 0.217395155 |
| 0.022768581 | 0.101363259 | 0.046041326 | 0.012742458 |
| 0.146851956 | 0.223884513 | 0.144550144 | 0.204539801 |
| 0.006814669 | 0.027915511 | 0.021280669 | 0.110257049 |
| 0.091994382 | 0.112368266 | 0.087199035 | 0.188347577 |
| 0.136367425 | 0.056202261 | 0.084271356 | 0.255678628 |
| 0.134895143 | 0.012383101 | 0.040862971 | 0.007762636 |
| 0.045862288 | 0.033096428 | 0.210996125 | 0.141654875 |
| 0.032802774 | 0.231261504 | 0.23746539  | 0.023548617 |
| 0.032479506 | 0.19691318  | 0.022974082 | 0.08164371  |
| 0.062804201 | 0.137517976 | 0.108526644 | 0.114805884 |
| 0.03133196  | 0.151368001 | 0.088669558 | 0.147358798 |
| 0.007269907 | 0.171307037 | 0.138569174 | 0.123771445 |
| 1           | 0.107224892 | 0.023486341 | 0.176542171 |
| 0.106418329 | 0.128848866 | 0.122774785 | 0.061354166 |
| 0.094334352 | 0.211727138 | 0.167891308 | 0.117063827 |
| 0.159818615 | 0.008868975 | 0.030813118 | 0.070183511 |
| 0.085272422 | 0.198791873 | 0.013383048 | 0.228057501 |
| 0.18361594  | 0.082791514 | 0.129722086 | 0.259586762 |
| 0.086592568 | 0.178914992 | 0.124595326 | 0.119920666 |
| 0.206210045 | 0.222966512 | 0.151002304 | 0.045347019 |
| 0.208566062 | 0.074043169 | 0.015455583 | 0.132283838 |
| 0.167256375 | 0.001333026 | 0.102282459 | 0.111340022 |
| 0.17030895  | 0.081891055 | 0.145266517 | 0.131370055 |
| 0.173646712 | 0.232330277 | 0.000848788 | 0.073266573 |
| 0.19547277  | 0.147643343 | 0.07254305  | 0.030799112 |
| 0.041696577 | 0.059917643 | 0.082171128 | 0.019209937 |
| 0.200606937 | 0.117576703 | 0.118403856 | 0.112269205 |
| 0.07430387  | 0.248810989 | 0.022403964 | 0.236316764 |

|             |             |             |             |
|-------------|-------------|-------------|-------------|
| 0.141359381 | 0.150580093 | 0.262517721 | 0.134989768 |
| 0.029583754 | 0.123506424 | 0.059866545 | 0.046510419 |
| 0.148059274 | 0.068932976 | 0.011615522 | 0.049680911 |
| 0.319047719 | 0.045650014 | 0.13862225  | 0.160367121 |
| 0.119101631 | 0.329893535 | 0.078154786 | 0.074131631 |
| 0.061860145 | 0.380298668 | 0.06404199  | 0.129446049 |
| 0.02937886  | 0.228845848 | 0.083610581 | 0.168108796 |
| 0.173727536 | 0.02901853  | 0.197124177 | 0.027347408 |
| 0.024487028 | 0.011353529 | 0.004704087 | 0.031921825 |
| 0.357928763 | 0.051113972 | 0.053798796 | 0.060856621 |
| 0.12336107  | 0.126111332 | 0.022483994 | 0.251103538 |
| 0.254733268 | 0.030010156 | 0.112379678 | 0.053079327 |
| 0.070748462 | 0.075749372 | 0.094096705 | 0.023445059 |
| 0.116730351 | 0.006799842 | 0.00923698  | 0.110808597 |
| 0.014118559 | 0.016713576 | 0.116777478 | 0.060524891 |
| 0.033347644 | 0.333529396 | 0.152204505 | 0.002104111 |
| 0.031066703 | 0.03249201  | 0.101284023 | 0.03748557  |
| 0.123374514 | 0.131722482 | 0.028667307 | 0.026033876 |
| 0.244887408 | 0.176115758 | 0.144050178 | 0.139190153 |
| 0.017809007 | 0.158684795 | 0.092363895 | 0.131381575 |
| 0.097329641 | 0.022022951 | 0.002522269 | 0.096349891 |
| 0.1035866   | 0.024827783 | 0.276137521 | 0.072689371 |
| 0.026584954 | 0.05359803  | 0.035683729 | 0.142628691 |
| 0.225817058 | 0.19380571  | 0.081753373 | 0.080471885 |
| 0.134866014 | 0.127860626 | 0.11272215  | 0.166997097 |
| 0.019141782 | 0.029073023 | 0.019675647 | 0.097628439 |
| 0.186050314 | 0.018253456 | 0.211201567 | 0.004203875 |
| 0.000105687 | 0.201471298 | 0.221513751 | 0.066474611 |
| 0.009044417 | 0.046845081 | 0.062921224 | 0.158154213 |
| 0.144698632 | 0.168761476 | 0.169073784 | 0.029461321 |
| 0.17536069  | 0.028078779 | 0.027761964 | 0.049776671 |
| 0.190099393 | 0.039737411 | 0.06362754  | 0.230545197 |
| 0.249793056 | 0.011441248 | 0.080306365 | 0.004898277 |
| 0.153878303 | 0.104898901 | 0.326877249 | 0.342053883 |
| 0.113933095 | 0.332201935 | 0.186486283 | 0.025812461 |
| 0.09909504  | 0.179628394 | 0.007637959 | 0.132535763 |
| 0.163337433 | 0.159690591 | 0.166140718 | 0.200733788 |
| 0.123186421 | 0.087130603 | 0.082096206 | 0.08530828  |
| 0.145381677 | 0.15188758  | 0.009464107 | 0.050543269 |
| 0.00973306  | 0.104476004 | 0.045794057 | 0.225594143 |
| 0.069277163 | 0.120221333 | 0.156683164 | 0.040947844 |
| 0.102455659 | 0.004601022 | 0.056301724 | 0.069199504 |
| 0.077939103 | 0.135862242 | 0.018168635 | 0.01599883  |
| 0.205496549 | 0.192411671 | 0.014251518 | 0.176147837 |
| 0.068001256 | 0.242821739 | 0.038988623 | 0.078922095 |
| 0.142898784 | 0.014759886 | 0.04373345  | 0.002849807 |
| 0.030729621 | 0.195264002 | 0.025835371 | 0.132745295 |
| 0.107813455 | 0.10028839  | 0.187254522 | 0.178398696 |
| 0.184795007 | 0.132693238 | 0.155843235 | 0.012224304 |
| 0.165622479 | 0.000814469 | 0.149569003 | 0.133816543 |
| 0.020777244 | 0.00882102  | 0.020623513 | 0.106722606 |
| 0.037212493 | 0.299412172 | 0.178221344 | 0.033172226 |
| 0.085906126 | 0.120128708 | 0.143207566 | 0.014267803 |
| 0.063306703 | 0.045447098 | 0.016582611 | 0.197043758 |

|             |             |             |             |
|-------------|-------------|-------------|-------------|
| 0.072243885 | 0.099317274 | 0.040936671 | 0.271215393 |
| 0.046461404 | 0.120997656 | 0.250505753 | 0.004876814 |
| 0.071406741 | 0.324070167 | 0.26356636  | 0.161553046 |
| 0.184767363 | 0.0604716   | 0.016260337 | 0.030528697 |
| 0.110934986 | 0.257678574 | 0.018438526 | 0.221201    |
| 0.164064423 | 0.052342143 | 0.148523572 | 0.197874409 |
| 0.156886617 | 0.180905369 | 0.1494542   | 0.08880121  |
| 0.054919555 | 0.001487309 | 0.063474412 | 0.159972579 |
| 0.008717726 | 0.025792927 | 0.186526123 | 0.049987574 |
| 0.048157999 | 0.143436059 | 0.008786814 | 0.010620902 |
| 0.086859202 | 0.046738861 | 0.024405234 | 0.173869223 |
| 0.027743397 | 0.019319608 | 0.065149964 | 0.102051535 |
| 0.033890031 | 0.203432115 | 0.311262656 | 0.138832321 |
| 0.035795575 | 0.033517164 | 0.163231468 | 0.225149834 |
| 0.111461155 | 0.117355619 | 0.103533677 | 0.042089302 |
| 0.221438284 | 0.042564566 | 0.123651226 | 0.15530384  |
| 0.208981092 | 0.174110508 | 0.253723332 | 0.058314628 |
| 0.145550876 | 0.060316473 | 0.027399898 | 0.039289771 |
| 0.154512031 | 0.247901866 | 0.177178808 | 0.014661408 |
| 0.222837108 | 0.072159366 | 0.108016994 | 0.176688076 |
| 0.029840731 | 0.182985597 | 0.069924545 | 0.214525896 |
| 0.03700243  | 0.012406431 | 0.157163589 | 0.133849053 |
| 0.143030391 | 0.004712635 | 0.184582747 | 0.060214855 |
| 0.142775312 | 0.020545291 | 0.060483674 | 0.193611831 |
| 0.231194093 | 0.1649571   | 0.068137096 | 0.092233069 |
| 0.089249259 | 0.035891072 | 0.069320832 | 0.144875928 |
| 0.139192802 | 0.053334601 | 0.185804345 | 0.133160326 |
| 0.252889193 | 0.031069835 | 0.014743187 | 0.045857516 |
| 0.152068123 | 0.048632336 | 0.088863031 | 0.225420808 |
| 0.20965867  | 0.235522775 | 0.141158698 | 0.083352217 |
| 0.047161847 | 0.216159974 | 0.231526428 | 0.116462318 |
| 0.008423198 | 0.130301467 | 0.03529184  | 0.084298637 |
| 0.003784905 | 0.003685268 | 0.129170851 | 0.068289168 |
| 0.191197441 | 0.121467703 | 0.186576998 | 0.068313699 |
| 3.94E-05    | 0.045472274 | 0.061999381 | 0.028686364 |
| 0.143086197 | 0.154112192 | 0.05617273  | 0.093677729 |
| 0.171872543 | 0.283310375 | 0.069697592 | 0.035012896 |
| 0.004342859 | 0.080656509 | 0.185999369 | 0.123498211 |
| 0.058402237 | 0.247574746 | 0.009880422 | 0.085081791 |
| 0.008521018 | 0.184812971 | 0.135882641 | 0.027949338 |
| 0.007005051 | 0.12724359  | 0.108982654 | 0.146256871 |
| 0.026375651 | 0.113613517 | 0.140301733 | 0.011365225 |
| 0.063039056 | 0.100366593 | 0.061567605 | 0.054294982 |
| 0.057037405 | 0.060470503 | 0.073347761 | 0.029003004 |
| 0.093435917 | 0.085877142 | 0.056358908 | 0.121854818 |
| 0.057806292 | 0.112646776 | 0.051643282 | 0.054552594 |
| 0.029600422 | 0.111512423 | 0.35116391  | 0.381771823 |
| 0.108360804 | 0.128352211 | 0.259081408 | 0.281667248 |
| 0.121477929 | 0.044768561 | 0.186577695 | 0.169254629 |
| 0.151807082 | 0.311463569 | 0.044769052 | 0.126271928 |
| 0.012336107 | 0.043785917 | 0.17521598  | 0.061437013 |
| 0.126891629 | 0.018629522 | 0.049653015 | 0.114824614 |
| 0.083129015 | 0.228864774 | 0.25270705  | 0.163282529 |
| 0.040618371 | 0.040477838 | 0.024498291 | 0.070538508 |

|             |             |             |             |
|-------------|-------------|-------------|-------------|
| 0.113319493 | 0.24477846  | 0.027408597 | 0.04248507  |
| 0.096393658 | 0.078750903 | 0.100060629 | 0.192987952 |
| 0.009812588 | 0.177314285 | 0.028030367 | 0.128809956 |
| 0.020915203 | 0.320458889 | 0.246262938 | 0.080604944 |
| 0.005005632 | 0.092313428 | 0.045477781 | 0.053678423 |
| 0.070516539 | 0.067399937 | 0.023766642 | 0.092405844 |
| 0.098724439 | 0.1859975   | 0.217488131 | 0.146805583 |
| 0.041235759 | 0.01715793  | 0.073361045 | 0.04199088  |
| 0.054552499 | 0.138421854 | 0.212707887 | 0.136144066 |
| 0.02885075  | 0.28021104  | 0.219537842 | 0.085917987 |
| 0.064930324 | 0.053069132 | 0.004182048 | 0.036344634 |
| 0.063088593 | 0.012419826 | 0.000901672 | 0.007770541 |
| 0.106724156 | 0.029650813 | 0.099473953 | 0.096817028 |
| 0.019015378 | 0.11825613  | 0.004833708 | 0.095971888 |
| 0.194567588 | 0.233577752 | 0.046663241 | 0.188957383 |
| 0.13376251  | 0.117256078 | 0.08806217  | 0.008781693 |
| 0.044262116 | 0.033534964 | 0.02132268  | 0.144499332 |
| 0.135854585 | 0.005168482 | 0.053884448 | 0.228217362 |
| 0.111065876 | 0.005234993 | 0.072255859 | 0.072166005 |
| 0.225647684 | 0.24150251  | 0.06724761  | 0.078651536 |
| 0.106988323 | 0.143512863 | 0.02450196  | 0.034670743 |
| 0.027337039 | 0.015285795 | 0.092798931 | 0.010646463 |
| 0.13447629  | 0.030633506 | 0.010943104 | 0.264250463 |
| 0.229784106 | 0.018869517 | 0.263220952 | 0.01876315  |
| 0.117207663 | 0.144630282 | 0.03057454  | 0.031032214 |
| 0.057533825 | 0.034100159 | 0.144568458 | 0.14454692  |
| 0.007617095 | 0.054459637 | 0.092134388 | 0.026038417 |
| 0.282128615 | 0.025555727 | 0.212636863 | 0.013041306 |
| 0.166801787 | 0.130561972 | 0.245193297 | 0.031783628 |
| 0.064790102 | 0.266261142 | 0.029323001 | 0.171365952 |
| 0.072371345 | 0.011330526 | 0.084059854 | 0.062284198 |
| 0.015594083 | 0.176369164 | 0.043324803 | 0.175460354 |
| 0.05866131  | 0.157730128 | 0.083373198 | 0.153435015 |
| 0.145020098 | 0.012801082 | 0.011292399 | 0.029983889 |
| 0.185919    | 0.085381923 | 0.018153578 | 0.140445375 |
| 0.008014719 | 0.107404779 | 0.075504825 | 0.031779078 |
| 0.07496302  | 0.09575655  | 0.035752353 | 0.204506409 |
| 0.091410967 | 0.038550911 | 0.022183775 | 0.201429334 |
| 0.054610207 | 0.055560988 | 0.201018101 | 0.000262615 |
| 0.0943849   | 0.058783416 | 0.120286696 | 0.032082038 |
| 0.273697141 | 0.090505885 | 0.082319577 | 0.038721939 |
| 0.095288312 | 0.006374707 | 0.032578617 | 0.024863881 |
| 0.015705595 | 0.161701563 | 0.184143336 | 0.132406598 |
| 0.127795736 | 0.023064108 | 0.012722256 | 0.166026603 |
| 0.005281442 | 0.010489895 | 0.015023199 | 0.081363885 |
| 0.007972597 | 0.02657717  | 0.025096628 | 0.014888454 |
| 0.109584441 | 0.080213969 |             |             |
| CAPZB       | 0.153570467 | 0.111014551 | 0.097939569 |
| 0.078762437 | 0.115585536 | 0.044899276 | 0.155601768 |
| 0.15553668  | 0.118449156 | 0.010248384 | 0.108952331 |
| 0.138003881 | 0.019803045 | 0.154800794 | 0.186359612 |
| 0.07553453  | 0.199633636 | 0.231202388 | 0.036541624 |
| 0.059679116 | 0.120883023 | 0.031573551 | 0.058862119 |
| 0.109480087 | 0.2565868   | 0.083486819 | 0.0442039   |

|             |             |             |             |
|-------------|-------------|-------------|-------------|
| 0.123558419 | 0.007855441 | 0.077455858 | 0.004896311 |
| 0.220673738 | 0.102378166 | 0.028384792 | 0.096241417 |
| 0.074412165 | 0.019460653 | 0.211805059 | 0.095956986 |
| 0.025359565 | 0.256050541 | 0.019091536 | 0.133860122 |
| 0.025975506 | 0.100346139 | 0.004662115 | 0.069816017 |
| 0.087095155 | 0.091852729 | 0.134270955 | 0.081901916 |
| 0.032360289 | 0.164563554 | 0.051765861 | 0.007803742 |
| 0.026291313 | 0.003398011 | 0.010759289 | 0.156484781 |
| 0.304448007 | 0.279457259 | 0.009192726 | 0.124428135 |
| 0.07040922  | 0.118187603 | 0.275838058 | 0.018061832 |
| 0.153858132 | 0.023847015 | 0.070382548 | 0.063638177 |
| 0.056407895 | 0.110683005 | 0.324034633 | 0.157993145 |
| 0.033788314 | 0.271395611 | 0.120433953 | 0.037758906 |
| 0.090595271 | 0.219730195 | 0.23385418  | 0.149883385 |
| 0.036830741 | 0.071909994 | 0.059647198 | 0.240585714 |
| 0.1324081   | 0.128137258 | 0.120537691 | 0.186107973 |
| 0.143497322 | 0.035125388 | 0.093066447 | 0.206533676 |
| 0.121329721 | 0.027368078 | 0.025540926 | 0.033711435 |
| 0.103907158 | 0.076827373 | 0.188117536 | 0.216451649 |
| 0.101780658 | 0.164762324 | 0.165880262 | 0.067998762 |
| 0.084971612 | 0.165254768 | 0.060747324 | 0.097576148 |
| 0.079531994 | 0.132786876 | 0.093338939 | 0.160228346 |
| 0.055556794 | 0.148550964 | 0.106024369 | 0.165213367 |
| 0.003525412 | 0.152520306 | 0.190457725 | 0.220325137 |
| 0.107224892 | 1           | 0.060273427 | 0.298809459 |
| 0.122095918 | 0.181478287 | 0.147849883 | 0.173885141 |
| 0.139177843 | 0.144299828 | 0.142656688 | 0.134144395 |
| 0.166221401 | 0.024253131 | 0.051318786 | 0.094382769 |
| 0.130515073 | 0.285349892 | 0.052616277 | 0.18468065  |
| 0.208834734 | 0.120835916 | 0.105809243 | 0.225730282 |
| 0.150084688 | 0.203436548 | 0.092313081 | 0.217848061 |
| 0.183476353 | 0.174234367 | 0.181325811 | 0.088206589 |
| 0.192618685 | 0.077758048 | 0.02978112  | 0.153886669 |
| 0.221761269 | 0.010230624 | 0.109350517 | 0.121619368 |
| 0.135713364 | 0.094959486 | 0.177223848 | 0.143906841 |
| 0.138673927 | 0.237656751 | 0.001969953 | 0.196759909 |
| 0.15645259  | 0.171630117 | 0.192327132 | 0.036339764 |
| 0.098121335 | 0.061793304 | 0.10839355  | 0.018257068 |
| 0.242612081 | 0.129697095 | 0.115354813 | 0.118978308 |
| 0.066124591 | 0.268974057 | 0.037661622 | 0.16309792  |
| 0.181029281 | 0.131411269 | 0.165954771 | 0.228611264 |
| 0.013794127 | 0.298207924 | 0.048167198 | 0.095736696 |
| 0.312511842 | 0.069246615 | 0.021578129 | 0.10621946  |
| 0.180723076 | 0.044901552 | 0.187357752 | 0.141777071 |
| 0.180792295 | 0.318166022 | 0.093030717 | 0.152496713 |
| 0.187114086 | 0.24383795  | 0.071738376 | 0.144363711 |
| 0.058100272 | 0.193557306 | 0.090682886 | 0.210097378 |
| 0.266203025 | 0.056449659 | 0.303991151 | 0.060772413 |
| 0.031279988 | 0.011221733 | 0.015192029 | 0.046129985 |
| 0.279238409 | 0.075098378 | 0.080185294 | 0.125766501 |
| 0.09159904  | 0.141388127 | 0.036530411 | 0.256425226 |
| 0.191715295 | 0.07541045  | 0.14753092  | 0.045243661 |
| 0.065051035 | 0.094778893 | 0.112858463 | 0.092703531 |
| 0.144853651 | 0.029670096 | 0.018765788 | 0.126591002 |

|             |             |             |             |
|-------------|-------------|-------------|-------------|
| 0.02209752  | 0.063196154 | 0.13176478  | 0.132583484 |
| 0.033961475 | 0.206506453 | 0.173865864 | 0.004901983 |
| 0.069536473 | 0.087410017 | 0.246149802 | 0.022626056 |
| 0.193151573 | 0.261103446 | 0.092930388 | 0.072702181 |
| 0.154892416 | 0.162446565 | 0.177028107 | 0.145638903 |
| 0.019239958 | 0.174670588 | 0.11400197  | 0.165994099 |
| 0.149983132 | 0.031124678 | 0.011866872 | 0.104658817 |
| 0.119571711 | 0.017771539 | 0.175094657 | 0.08084932  |
| 0.026266962 | 0.087716521 | 0.107983688 | 0.165224349 |
| 0.236419735 | 0.123955809 | 0.193292533 | 0.172684035 |
| 0.177240172 | 0.177321361 | 0.154962005 | 0.198237114 |
| 0.010877373 | 0.057828333 | 0.039989979 | 0.190785914 |
| 0.2369975   | 0.066712129 | 0.259070253 | 0.016475872 |
| 0.000423297 | 0.186504945 | 0.182330432 | 0.227893728 |
| 0.045236233 | 0.045587213 | 0.104827537 | 0.153210664 |
| 0.263607626 | 0.200483161 | 0.240766696 | 0.048037446 |
| 0.143560514 | 0.061412028 | 0.058755619 | 0.101579652 |
| 0.278785043 | 0.085051344 | 0.139345933 | 0.212755672 |
| 0.138288815 | 0.034232992 | 0.109879866 | 0.013652878 |
| 0.119432957 | 0.070439921 | 0.223677193 | 0.313361339 |
| 0.169688197 | 0.25616668  | 0.173167819 | 0.012561631 |
| 0.202906972 | 0.261937445 | 0.044846118 | 0.135561886 |
| 0.159482226 | 0.162268959 | 0.152513748 | 0.170240151 |
| 0.138754249 | 0.118904447 | 0.124210496 | 0.066354978 |
| 0.151109108 | 0.112464871 | 0.028290122 | 0.109546407 |
| 0.011067165 | 0.191157006 | 0.130086704 | 0.310738972 |
| 0.10370974  | 0.190624775 | 0.160678949 | 0.102651383 |
| 0.061237197 | 0.009659756 | 0.05612824  | 0.177157083 |
| 0.191432518 | 0.110906523 | 0.012438961 | 0.019817142 |
| 0.149377327 | 0.198089461 | 0.02199668  | 0.163185886 |
| 0.136094482 | 0.122852154 | 0.093146013 | 0.153780238 |
| 0.162724575 | 0.007000932 | 0.048926556 | 0.000605481 |
| 0.033579651 | 0.193804467 | 0.035771385 | 0.082623934 |
| 0.179012724 | 0.076412873 | 0.16712557  | 0.178040564 |
| 0.125284546 | 0.148765398 | 0.157566304 | 0.04021887  |
| 0.1520614   | 0.004208264 | 0.146193474 | 0.114102186 |
| 0.015338102 | 0.005736109 | 0.079394851 | 0.119336536 |
| 0.05820534  | 0.147518238 | 0.27420035  | 0.021159228 |
| 0.16779295  | 0.097043211 | 0.213805577 | 0.063926607 |
| 0.076610033 | 0.174476552 | 0.073772706 | 0.142984983 |
| 0.154477391 | 0.254305315 | 0.033395605 | 0.233735617 |
| 0.081692273 | 0.164791017 | 0.229080218 | 0.028228332 |
| 0.16174937  | 0.186227437 | 0.182882532 | 0.146396018 |
| 0.204587929 | 0.115465719 | 0.009327038 | 0.036208815 |
| 0.151011975 | 0.121089246 | 0.018025443 | 0.140833127 |
| 0.121927973 | 0.083894334 | 0.237422723 | 0.207498577 |
| 0.183002298 | 0.171049626 | 0.182735387 | 0.124697267 |
| 0.066648185 | 0.024951446 | 0.039766517 | 0.264038859 |
| 0.042125875 | 0.047697482 | 0.262922354 | 0.073420743 |
| 0.113513578 | 0.108291666 | 0.029366944 | 0.036048831 |
| 0.176191296 | 0.087610442 | 0.088358377 | 0.237911088 |
| 0.092705572 | 0.06563536  | 0.176830863 | 0.188050543 |
| 0.051278475 | 0.172126686 | 0.240014024 | 0.146281045 |
| 0.034406081 | 0.047312046 | 0.218500906 | 0.281205635 |

|             |             |             |             |
|-------------|-------------|-------------|-------------|
| 0.140793261 | 0.128664874 | 0.155562718 | 0.102624423 |
| 0.25675716  | 0.089839178 | 0.152839726 | 0.125952892 |
| 0.179521292 | 0.201218188 | 0.260577053 | 0.162187612 |
| 0.176754091 | 0.146967043 | 0.090922495 | 0.163680092 |
| 0.154846223 | 0.139631065 | 0.15480416  | 0.044942044 |
| 0.290757483 | 0.10846533  | 0.194139016 | 0.27778505  |
| 0.05922809  | 0.32374107  | 0.23649758  | 0.129988656 |
| 0.085775177 | 0.031039637 | 0.185965815 | 0.25172027  |
| 0.169335103 | 0.015406658 | 0.271654586 | 0.085279106 |
| 0.150601415 | 0.012107226 | 0.082276173 | 0.240803754 |
| 0.255701608 | 0.185402519 | 0.028264203 | 0.148459372 |
| 0.090705998 | 0.032933974 | 0.081152183 | 0.097850019 |
| 0.172107923 | 0.062894614 | 0.155199806 | 0.227331545 |
| 0.253285929 | 0.058961993 | 0.036222027 | 0.092711264 |
| 0.274238103 | 0.05432753  | 0.209134207 | 0.259278646 |
| 0.30568406  | 0.231945926 | 0.11946271  | 0.224454674 |
| 0.057064312 | 0.135809894 | 0.121639749 | 0.131834006 |
| 0.033520964 | 0.119418239 | 0.021433916 | 0.112252458 |
| 0.020357482 | 0.020875049 | 0.164792865 | 0.131424114 |
| 0.206944926 | 0.14271894  | 0.20724387  | 0.092994917 |
| 0.000816393 | 0.071144396 | 0.108652418 | 0.038217774 |
| 0.111178085 | 0.189836747 | 0.112236794 | 0.189079483 |
| 0.309738486 | 0.154322746 | 0.139249531 | 0.029251268 |
| 0.011356383 | 0.07642205  | 0.352968645 | 0.191513555 |
| 0.186271657 | 0.151475369 | 0.03181676  | 0.157338699 |
| 0.03795953  | 0.327666016 | 0.224023664 | 0.013175321 |
| 0.011211237 | 0.168523519 | 0.102706225 | 0.132643791 |
| 0.064095283 | 0.154482891 | 0.189211748 | 0.010949979 |
| 0.089997876 | 0.141364599 | 0.213608021 | 0.169870547 |
| 0.192067825 | 0.17737571  | 0.229301916 | 0.06716437  |
| 0.109010421 | 0.171394736 | 0.116103178 | 0.273991828 |
| 0.154296683 | 0.192511284 | 0.09250218  | 0.061629578 |
| 0.073079357 | 0.169376412 | 0.236223423 | 0.215950386 |
| 0.184279458 | 0.128985487 | 0.311722947 | 0.174026899 |
| 0.299262162 | 0.055615954 | 0.288076551 | 0.123861724 |
| 0.234901494 | 0.15243209  | 0.093369228 | 0.102606871 |
| 0.007582467 | 0.032976377 | 0.105289657 | 0.069634426 |
| 0.237995792 | 0.060900321 | 0.04867001  | 0.073013967 |
| 0.074190792 | 0.252743388 | 0.308176832 | 0.20268741  |
| 0.070898834 | 0.059266162 | 0.01018085  | 0.178284057 |
| 0.147662976 | 0.256128039 | 0.108288359 | 0.048902768 |
| 0.169230641 | 0.046739966 | 0.107555495 | 0.149092757 |
| 0.023407297 | 0.256302778 | 0.011016084 | 0.11831618  |
| 0.007218097 | 0.154693051 | 0.307966062 | 0.08580048  |
| 0.011850501 | 0.174782132 | 0.126789924 | 0.026908487 |
| 0.097613843 | 0.080013918 | 0.072581201 | 0.151382244 |
| 0.207808984 | 0.176902333 | 0.188400895 | 0.128350892 |
| 0.041168583 | 0.067558332 | 0.047683322 | 0.104378093 |
| 0.164718343 | 0.140259064 | 0.228432012 | 0.136831309 |
| 0.063144602 | 0.257844569 | 0.249964552 | 0.139655541 |
| 0.069157908 | 0.185961001 | 0.014854409 | 0.031460677 |
| 0.115747283 | 0.026234373 | 0.000370267 | 0.018415924 |
| 0.227393359 | 0.042726058 | 0.074427244 | 0.160455017 |
| 0.078063704 | 0.244026823 | 0.019887632 | 0.105882803 |

|             |             |             |             |
|-------------|-------------|-------------|-------------|
| 0.128790635 | 0.178151961 | 0.059472904 | 0.307019138 |
| 0.18983949  | 0.212491239 | 0.067077855 | 0.015349332 |
| 0.05466078  | 0.040299821 | 0.015581146 | 0.204816248 |
| 0.155958077 | 0.013558203 | 0.05558995  | 0.16118222  |
| 0.148120601 | 0.010365126 | 0.068552998 | 0.091067896 |
| 0.272098092 | 0.180170385 | 0.198947934 | 0.128258579 |
| 0.079750573 | 0.249755183 | 0.049828507 | 0.048211255 |
| 0.068263961 | 0.048782288 | 0.162358258 | 0.043080993 |
| 0.18274117  | 0.081828062 | 0.013484563 | 0.245087882 |
| 0.151420509 | 0.042442695 | 0.315289729 | 0.011523929 |
| 0.280338851 | 0.197576634 | 0.073036889 | 0.036611463 |
| 0.124428725 | 0.072080941 | 0.308642916 | 0.14116445  |
| 0.006843227 | 0.067071482 | 0.177758724 | 0.072594987 |
| 0.192559947 | 0.038307273 | 0.311981954 | 0.011002488 |
| 0.132432389 | 0.135158758 | 0.150186281 | 0.100407513 |
| 0.060867126 | 0.233659659 | 0.022301227 | 0.177831027 |
| 0.232110142 | 0.050716912 | 0.128552014 | 0.12132894  |
| 0.046080849 | 0.175241237 | 0.044163445 | 0.174908728 |
| 0.195147213 | 0.285912235 | 0.1323165   | 0.142538372 |
| 0.306894797 | 0.063106318 | 0.031812109 | 0.104072505 |
| 0.127155918 | 0.126882008 | 0.043813516 | 0.162724546 |
| 0.025478939 | 0.24208331  | 0.050691965 | 0.140120744 |
| 0.176676653 | 0.168944791 | 0.045212135 | 0.285389182 |
| 0.182424244 | 0.080493143 | 0.067810453 | 0.263331211 |
| 0.14272898  | 0.101806935 | 0.244570395 | 0.003497544 |
| 0.084847358 | 0.109667905 | 0.261575911 | 0.072053024 |
| 0.255438792 | 0.116242731 | 0.052528297 | 0.029344594 |
| 0.154902282 | 0.035368926 | 0.09065472  | 0.073695797 |
| 0.028795462 | 0.136105354 | 0.178058592 | 0.162492909 |
| 0.184684013 | 0.029200723 | 0.013585558 | 0.162601746 |
| 0.024007352 | 0.014244227 | 0.025115662 | 0.062142063 |
| 0.031200878 | 0.018436377 | 0.028218783 | 0.023568132 |
| 0.139651244 | 0.141453942 |             |             |
| CAR2        | 0.020961533 | 0.237621181 | 0.011790346 |
| 0.016568976 | 0.230522527 | 0.070311484 | 0.035418695 |
| 0.045500419 | 0.255946099 | 0.080233476 | 0.126300998 |
| 0.005894313 | 0.082894908 | 0.266251121 | 0.04063934  |
| 0.243499794 | 0.020501661 | 0.071681606 | 0.057851625 |
| 0.080148354 | 0.226324652 | 0.066095092 | 0.096140205 |
| 0.257396719 | 0.104035319 | 0.148270275 | 0.242184864 |
| 0.271401033 | 0.039215199 | 0.188727669 | 0.022204057 |
| 0.257586743 | 0.243252817 | 0.149324061 | 0.003979618 |
| 0.161267356 | 0.129914033 | 0.268732801 | 0.114483815 |
| 0.057259596 | 0.211388233 | 0.07608935  | 0.077819586 |
| 0.121096696 | 0.008234833 | 0.024403159 | 0.30107149  |
| 0.192110005 | 0.128926308 | 0.026290598 | 0.20635441  |
| 0.130367213 | 0.137706126 | 0.169201719 | 0.00088178  |
| 0.13350537  | 0.05832784  | 0.116118091 | 0.261471991 |
| 0.114686122 | 0.080070013 | 0.091258787 | 0.170860718 |
| 0.288406412 | 0.339072949 | 0.240371027 | 0.109481799 |
| 0.262065969 | 0.110280516 | 0.264616625 | 0.027869095 |
| 0.130063233 | 0.026588462 | 0.118948699 | 0.076066079 |
| 0.136695813 | 0.127243049 | 0.173997368 | 0.180462778 |
| 0.207991555 | 0.317570821 | 0.190051643 | 0.264047998 |



|             |             |             |             |
|-------------|-------------|-------------|-------------|
| 0.194673053 | 0.279574383 | 0.14105698  | 0.274181342 |
| 0.331179453 | 0.073268689 | 0.193723213 | 0.302589928 |
| 0.048705147 | 0.151882345 | 0.261611986 | 0.083907078 |
| 0.216812937 | 0.154066213 | 0.105465874 | 0.078743501 |
| 0.299774751 | 0.239202537 | 0.315893872 | 0.15014989  |
| 0.218838856 | 0.038029081 | 0.243839848 | 0.260724021 |
| 0.081688852 | 0.031618904 | 0.107887068 | 0.305288831 |
| 0.189105732 | 0.257302441 | 0.267281783 | 0.300145744 |
| 0.212762732 | 0.265005152 | 0.174438816 | 0.278891357 |
| 0.031944386 | 0.291133755 | 0.069350745 | 0.018960635 |
| 0.023486341 | 0.060273427 | 1           | 0.255771908 |
| 0.266465878 | 0.192136357 | 0.061185733 | 0.159061568 |
| 0.346005901 | 0.232637566 | 0.299456396 | 0.262106309 |
| 0.017608884 | 0.171491072 | 0.186380098 | 0.075628493 |
| 0.254897711 | 0.116298076 | 0.180305575 | 0.270702579 |
| 0.194971895 | 0.298633681 | 0.046760385 | 0.290111111 |
| 0.160595791 | 0.297279311 | 0.211147523 | 0.073598642 |
| 0.280070511 | 0.243728528 | 0.311133583 | 0.256429512 |
| 0.243809478 | 0.077382145 | 0.086708769 | 0.288061164 |
| 0.302150104 | 0.008033995 | 0.30145281  | 0.316315768 |
| 0.257621631 | 0.274854779 | 0.35494214  | 0.300175828 |
| 0.260751451 | 0.057415744 | 0.058855123 | 0.261949166 |
| 0.263721199 | 0.201941085 | 0.10202327  | 0.171041611 |
| 0.28204529  | 0.095831632 | 0.300011514 | 0.038814753 |
| 0.33699584  | 0.259407588 | 0.286574023 | 0.249105071 |
| 0.194653159 | 0.189562891 | 0.228047773 | 0.218830115 |
| 0.017903849 | 0.02689406  | 0.023546384 | 0.301693582 |
| 0.03548697  | 0.132608725 | 0.08295854  | 0.320477103 |
| 0.141574485 | 0.118705596 | 0.131899985 | 0.278700516 |
| 0.039138124 | 0.140270346 | 0.079190963 | 0.080402975 |
| 0.017577167 | 0.109213122 | 0.033773292 | 0.031544558 |
| 0.168948007 | 0.14175094  | 0.231795854 | 0.310766179 |
| 0.216211304 | 0.082887077 | 0.204381484 | 0.298177776 |
| 0.301606953 | 0.183032938 | 0.202585512 | 0.002011011 |
| 0.067120447 | 0.131976569 | 0.119043399 | 0.208833056 |
| 0.126076499 | 0.073775043 | 0.231368571 | 0.26248002  |
| 0.066823826 | 0.092773079 | 0.140037544 | 0.243200658 |
| 0.093150344 | 0.087252183 | 0.273655957 | 0.179274016 |
| 0.00106948  | 0.112141411 | 0.243810499 | 0.133892333 |
| 0.233007025 | 0.057400634 | 0.049291087 | 0.288195368 |
| 0.103071337 | 0.197319829 | 0.300796316 | 0.30497632  |
| 0.054838935 | 0.142429144 | 0.34264103  | 0.059170942 |
| 0.298294212 | 0.019092604 | 0.21503269  | 0.113213716 |
| 0.132835283 | 0.2765573   | 0.247184233 | 0.118265944 |
| 0.04275163  | 0.29249617  | 0.235547884 | 0.286019582 |
| 0.102462136 | 0.338068316 | 0.272849251 | 0.247870988 |
| 0.198095498 | 0.215330335 | 0.082359346 | 0.222314907 |
| 0.281399483 | 0.079469797 | 0.042779931 | 0.294861852 |
| 0.167093945 | 0.279820052 | 0.098819342 | 0.294268061 |
| 0.288736521 | 0.227122194 | 0.071294589 | 0.327235461 |
| 0.192230314 | 0.076081611 | 0.291693727 | 0.356961675 |
| 0.07719951  | 0.215216898 | 0.126362294 | 0.326536317 |
| 0.091176919 | 0.147560572 | 0.256173414 | 0.114269197 |
| 0.002221434 | 0.049002878 | 0.030173517 | 0.106012111 |

|             |             |             |             |
|-------------|-------------|-------------|-------------|
| 0.112792147 | 0.206710502 | 0.267768082 | 0.294832371 |
| 0.068263716 | 0.236767025 | 0.248035171 | 0.073089636 |
| 0.229338139 | 0.226032756 | 0.207442366 | 0.249082251 |
| 0.202008384 | 0.005239245 | 0.022063688 | 0.302763006 |
| 0.027760781 | 0.08933175  | 0.167994241 | 0.000608052 |
| 0.018179864 | 0.214823689 | 0.070541589 | 0.129050103 |
| 0.345131594 | 0.114979592 | 0.100080017 | 0.085703947 |
| 0.223641885 | 0.058180472 | 0.001385343 | 0.320539543 |
| 0.339125938 | 0.345484766 | 0.329487682 | 0.294557335 |
| 0.35794717  | 0.302853912 | 0.307758294 | 0.084094031 |
| 0.034203428 | 0.03504633  | 0.092169795 | 0.149173122 |
| 0.002590763 | 0.245123901 | 0.258241745 | 0.093360429 |
| 0.29621982  | 0.264292437 | 0.011548246 | 0.304826341 |
| 0.002006498 | 0.06054795  | 0.082938266 | 0.173800869 |
| 0.362538577 | 0.00462866  | 0.018480143 | 0.074926355 |
| 0.185717208 | 0.183169328 | 0.124553999 | 0.291783086 |
| 0.13340516  | 0.065684313 | 0.139365535 | 0.25728567  |
| 0.033750501 | 0.043369974 | 0.129286379 | 0.003379151 |
| 0.035355487 | 0.314997142 | 0.139396355 | 0.012834148 |
| 0.129131973 | 0.000888478 | 0.167971781 | 0.300910046 |
| 0.218678704 | 0.322191734 | 0.261380799 | 0.119537775 |
| 0.260081396 | 0.085291362 | 0.299184418 | 0.207821326 |
| 0.095408112 | 0.000182025 | 0.005053685 | 0.287316181 |
| 0.177270095 | 0.032340771 | 0.097960724 | 0.02751014  |
| 0.030349015 | 0.043991824 | 0.042491472 | 0.111160226 |
| 0.160281097 | 0.183412894 | 0.116574655 | 0.246007982 |
| 0.131058077 | 0.195310268 | 0.110550885 | 0.068492623 |
| 0.204472077 | 0.015657435 | 0.086473513 | 0.002132332 |
| 0.318928746 | 0.064429255 | 0.241232006 | 0.277409846 |
| 0.289157207 | 0.256684983 | 0.069829753 | 0.053960329 |
| 0.357767985 | 0.037221576 | 0.064455726 | 0.046790413 |
| 0.229962559 | 0.21350752  | 0.18272513  | 0.147362057 |
| 0.31086452  | 0.246324355 | 0.020545089 | 0.266327444 |
| 0.001256416 | 0.007690356 | 0.074356757 | 0.236651506 |
| 0.213090935 | 0.191751059 | 0.165337865 | 0.174465936 |
| 0.166062859 | 0.004714146 | 0.176497148 | 0.169028527 |
| 0.195114561 | 0.186441328 | 0.205918575 | 0.254865819 |
| 0.183089834 | 0.105473648 | 0.102019463 | 0.09881428  |
| 0.145922091 | 0.178078604 | 0.099428096 | 0.0144879   |
| 0.1403233   | 0.160253744 | 0.027956568 | 0.100095662 |
| 0.235478386 | 0.275134628 | 0.030320634 | 0.003501962 |
| 0.161032127 | 0.199008514 | 0.310958541 | 0.253279451 |
| 0.278810715 | 0.327216125 | 0.238126156 | 0.083371803 |
| 0.025830922 | 0.241118803 | 0.245158943 | 0.080192433 |
| 0.284454342 | 0.039510342 | 0.252232556 | 0.223818935 |
| 0.101459056 | 0.066831797 | 0.010817145 | 0.074235294 |
| 0.218020469 | 0.128448006 | 0.134209902 | 0.051278525 |
| 0.134517272 | 0.085947605 | 0.035263145 | 0.122237069 |
| 0.211573396 | 0.084526389 | 0.109230664 | 0.119638008 |
| 0.214311127 | 0.083726592 | 0.264339302 | 0.286989284 |
| 0.07210534  | 0.089738226 | 0.024193791 | 0.322877169 |
| 0.254259318 | 0.189338321 | 0.002195972 | 0.225468168 |
| 0.31606946  | 0.191668389 | 0.249087109 | 0.327779304 |
| 0.072392668 | 0.143545412 | 0.242051328 | 0.234157023 |

|             |             |             |             |
|-------------|-------------|-------------|-------------|
| 0.164880945 | 0.079747447 | 0.208887245 | 0.048753396 |
| 0.2752975   | 0.31507197  | 0.2318715   | 0.07617809  |
| 0.183668995 | 0.066630292 | 0.034013769 | 0.291333806 |
| 0.096350328 | 0.015364164 | 0.091501286 | 0.335909012 |
| 0.001871054 | 0.095815206 | 0.374695795 | 0.061689463 |
| 0.34415249  | 0.298573588 | 0.240117454 | 0.09668291  |
| 0.010475709 | 0.287680492 | 0.161485873 | 0.093766069 |
| 0.216869007 | 0.185205059 | 0.08787344  | 0.029270134 |
| 0.218290653 | 0.033021316 | 0.053317877 | 0.038601409 |
| 0.093407641 | 0.174544474 | 0.179683406 | 0.199013921 |
| 0.156040614 | 0.084128462 | 0.084813618 | 0.081537077 |
| 0.208261302 | 0.172627047 | 0.230820207 | 0.060230482 |
| 0.046646214 | 0.352697006 | 0.227630696 | 0.008017159 |
| 0.23386425  | 0.336303147 | 0.309185474 | 0.001007    |
| 0.226540337 | 0.003156026 | 0.141886396 | 0.099955286 |
| 0.11756863  | 0.161921774 | 0.251176918 | 0.107395527 |
| 0.216642446 | 0.12480654  | 0.073766015 | 0.144382686 |
| 0.063076147 | 0.129062643 | 0.227877249 | 0.137429338 |
| 0.076060897 | 0.040176994 | 0.068082653 | 0.062168356 |
| 0.011653245 | 0.268430904 | 0.149859393 | 0.03458254  |
| 0.192834121 | 0.149115843 | 0.245566135 | 0.248396548 |
| 0.29278511  | 0.054368995 | 0.198833074 | 0.199756373 |
| 0.068433627 | 0.039663097 | 0.019836546 | 0.142859475 |
| 0.118689108 | 0.066930781 | 0.141134219 | 0.100828749 |
| 0.248796813 | 0.233690161 | 0.140897048 | 0.290085639 |
| 0.122666867 | 0.256353221 | 0.050570421 | 0.027420146 |
| 0.056782764 | 0.110967645 | 0.211834203 | 0.000249233 |
| 0.199326415 | 0.024153996 | 0.254648045 | 0.238144888 |
| 0.150605611 | 0.25771047  | 0.027741727 | 0.018941445 |
| 0.027930554 | 0.085277794 | 0.097371601 | 0.252655812 |
| 0.090113628 | 0.064231776 | 0.204887167 | 0.034117362 |
| 0.272855952 | 0.299740777 | 0.187091147 | 0.139125746 |
| 0.227498946 | 0.096951402 | 0.309017196 | 0.040625163 |
| 0.185275272 | 0.079700048 | 0.160405304 | 0.138596553 |
| 0.158291745 | 0.31260431  | 0.036679004 | 0.308732953 |
| 0.173695497 | 0.096398745 | 0.307495228 | 0.151341187 |
| 0.056160616 | 0.05073394  | 0.113645634 | 0.106300856 |
| 0.100533979 | 0.130356263 | 0.004488057 | 0.036194877 |
| 0.222062853 | 0.200423836 | 0.237001182 | 0.333625263 |
| 0.183636061 | 0.325123674 | 0.09972553  | 0.13338503  |
| 0.23260917  | 0.262870911 | 0.041050931 | 0.221960286 |
| 0.232796804 | 0.039075729 | 0.117626628 | 0.038264567 |
| 0.211067534 | 0.208668102 | 0.071864275 | 0.032396321 |
| 0.009613907 | 0.10764634  | 0.194710394 | 0.06637145  |
| 0.340829123 | 0.060368076 | 0.245727427 | 0.211051344 |
| 0.164088089 | 0.255002144 | 0.074396291 | 0.208246992 |
| 0.040683664 | 0.212786058 | 0.232723301 | 0.234711967 |
| 0.048292375 | 0.177263415 | 0.228782964 | 0.122778333 |
| 0.014275649 | 0.073482815 | 0.004085789 | 0.221119047 |
| 0.241719645 | 0.221218913 | 0.163128837 | 0.075608824 |
| 0.217035025 | 0.304630335 | 0.110467589 | 0.16728295  |
| 0.003589696 | 0.204750574 | 0.14796855  | 0.182615369 |
| 0.034663511 | 0.249755086 | 0.017051683 | 0.297497198 |
| 0.229943722 | 0.073375516 | 0.243175286 | 0.055834347 |

|             |             |             |             |
|-------------|-------------|-------------|-------------|
| 0.247218794 | 0.25624448  | 0.077170285 | 0.104302449 |
| 0.25771985  | 0.048206948 | 0.079442693 | 0.330001817 |
| 0.102964657 | 0.13182973  | 0.292171862 | 0.077354389 |
| 0.208276588 | 0.226350607 | 0.225266318 | 0.339236198 |
| 0.051372956 | 0.158388056 | 0.301799588 | 0.283265044 |
| 0.244358093 | 0.169584587 | 0.106701171 | 0.142129752 |
| 0.202571979 | 0.013087354 | 0.133547669 | 0.182556328 |
| 0.11372826  | 0.236160037 | 0.173021514 | 0.159747493 |
| 0.012901003 | 0.094358157 | 0.056649969 | 0.1053527   |
| 0.189833455 | 0.191446512 | 0.144029542 | 0.243224138 |
| 0.026853796 | 0.004477239 | 0.290348784 | 0.014412376 |
| 0.083626475 | 0.186708634 | 0.155507626 | 0.190967063 |
| 0.089975845 | 0.211514553 | 0.107653136 | 0.000116598 |
| 0.31155847  | 0.031924244 | 0.19997291  | 0.073268113 |
| 0.096620983 | 0.020643146 | 0.238088103 | 0.326693604 |
| 0.189430513 | 0.085360502 | 0.059591939 | 0.271136092 |
| 0.077884838 | 0.125752164 | 0.16067903  | 0.166038383 |
| 0.134734875 | 0.106142036 | 0.141434487 | 0.106145498 |
| 0.206041567 | 0.116356619 |             |             |
| CBX5        | 0.203050293 | 0.318973999 | 0.141073898 |
| 0.21899005  | 0.27916303  | 0.270827001 | 0.226145053 |
| 0.29005415  | 0.2761336   | 0.16051349  | 0.299595579 |
| 0.117881166 | 0.082625729 | 0.357809712 | 0.236095514 |
| 0.267792642 | 0.192624232 | 0.282075115 | 0.112293611 |
| 0.269931696 | 0.277652153 | 0.229034458 | 0.261742939 |
| 0.286990257 | 0.268076611 | 0.277854762 | 0.231663209 |
| 0.363521835 | 0.125257755 | 0.271158901 | 0.099633439 |
| 0.389383871 | 0.266235884 | 0.211973042 | 0.100627235 |
| 0.288485219 | 0.032687578 | 0.407416203 | 0.296468736 |
| 0.139253772 | 0.364690957 | 0.184710774 | 0.312042712 |
| 0.212727679 | 0.138791878 | 0.093974702 | 0.256281059 |
| 0.277012234 | 0.329698596 | 0.161807361 | 0.278378113 |
| 0.251165202 | 0.306879407 | 0.223583056 | 0.007688087 |
| 0.182501012 | 0.045206976 | 0.125891582 | 0.397521679 |
| 0.322158583 | 0.317329598 | 0.143420196 | 0.311560684 |
| 0.262447324 | 0.292648824 | 0.353611622 | 0.207316946 |
| 0.386017165 | 0.140423802 | 0.256367713 | 0.212249534 |
| 0.285349815 | 0.143849804 | 0.300670586 | 0.191896581 |
| 0.262229289 | 0.347972583 | 0.301210004 | 0.223553096 |
| 0.301195745 | 0.451527486 | 0.335318727 | 0.394317696 |
| 0.129715731 | 0.245539998 | 0.27375747  | 0.340544033 |
| 0.298058052 | 0.248192835 | 0.294310928 | 0.425945779 |
| 0.184535021 | 0.213113381 | 0.274920487 | 0.226725249 |
| 0.322887832 | 0.203176979 | 0.205980609 | 0.155174702 |
| 0.276544105 | 0.258292338 | 0.411972689 | 0.319689268 |
| 0.292382312 | 0.178854488 | 0.401031601 | 0.232058692 |
| 0.280092523 | 0.19909064  | 0.248711703 | 0.30488788  |
| 0.278904233 | 0.36402933  | 0.288539438 | 0.3052697   |
| 0.244604047 | 0.382721703 | 0.290329301 | 0.346573282 |
| 0.0689882   | 0.403439218 | 0.297120272 | 0.21239193  |
| 0.176542171 | 0.298809459 | 0.255771908 | 1           |
| 0.339015973 | 0.329528191 | 0.295201881 | 0.323458537 |
| 0.343492124 | 0.3780127   | 0.395257145 | 0.307546057 |
| 0.177287195 | 0.185220258 | 0.243931678 | 0.324683052 |

|             |             |             |             |
|-------------|-------------|-------------|-------------|
| 0.30144162  | 0.285555967 | 0.2081248   | 0.424177773 |
| 0.351402802 | 0.307402587 | 0.262317578 | 0.450999898 |
| 0.314328341 | 0.430195086 | 0.309250771 | 0.304702397 |
| 0.42687236  | 0.409027413 | 0.41108114  | 0.262584931 |
| 0.406613807 | 0.281654334 | 0.091213776 | 0.315244096 |
| 0.421203406 | 0.023270787 | 0.330527627 | 0.355382551 |
| 0.377431138 | 0.301258127 | 0.414243438 | 0.380424837 |
| 0.380728187 | 0.221379685 | 0.02126462  | 0.318507983 |
| 0.4006486   | 0.334409384 | 0.332973514 | 0.228535599 |
| 0.277418542 | 0.281666923 | 0.287790068 | 0.177743875 |
| 0.456057376 | 0.338348552 | 0.346237867 | 0.288302332 |
| 0.251851499 | 0.350889684 | 0.213992387 | 0.389102441 |
| 0.20852377  | 0.223748435 | 0.146965943 | 0.335847457 |
| 0.193327445 | 0.336915183 | 0.269990989 | 0.282879931 |
| 0.336637078 | 0.284052838 | 0.18790617  | 0.272838206 |
| 0.143254044 | 0.245935917 | 0.299280578 | 0.260796013 |
| 0.199396061 | 0.254481571 | 0.254803958 | 0.297424835 |
| 0.3244175   | 0.308770638 | 0.261093724 | 0.373234463 |
| 0.274071723 | 0.25436397  | 0.279149867 | 0.410455267 |
| 0.410294589 | 0.24647533  | 0.3279245   | 0.059624096 |
| 0.207483029 | 0.162728383 | 0.126055653 | 0.240181952 |
| 0.281178132 | 0.273875668 | 0.272630458 | 0.286851572 |
| 0.263372995 | 0.262876632 | 0.247451063 | 0.417972829 |
| 0.23147464  | 0.27928656  | 0.337903611 | 0.244772836 |
| 0.039323971 | 0.292477593 | 0.307108667 | 0.242228095 |
| 0.299565142 | 0.125267648 | 0.157671552 | 0.340895305 |
| 0.184820659 | 0.235978632 | 0.360824945 | 0.294191887 |
| 0.235509432 | 0.279302093 | 0.41444821  | 0.035913075 |
| 0.262291873 | 0.133133886 | 0.333228634 | 0.189429196 |
| 0.321504657 | 0.341142935 | 0.257982544 | 0.274633416 |
| 0.203806384 | 0.405492033 | 0.332931727 | 0.383441723 |
| 0.212152438 | 0.417874202 | 0.318132981 | 0.352309848 |
| 0.324867672 | 0.213053128 | 0.093902932 | 0.294833626 |
| 0.330544025 | 0.186415614 | 0.171012463 | 0.270025697 |
| 0.214146127 | 0.26786884  | 0.238914735 | 0.38864776  |
| 0.446596745 | 0.35692918  | 0.319012133 | 0.311292693 |
| 0.318693676 | 0.305059435 | 0.329104978 | 0.434129815 |
| 0.171594872 | 0.248946842 | 0.241513726 | 0.338396268 |
| 0.293003722 | 0.245295935 | 0.349228915 | 0.1262521   |
| 0.005706076 | 0.216975639 | 0.186447423 | 0.320308424 |
| 0.179101322 | 0.232005864 | 0.294068236 | 0.394703657 |
| 0.293367777 | 0.368993611 | 0.319709771 | 0.251133373 |
| 0.339206796 | 0.260517112 | 0.245592084 | 0.284201935 |
| 0.334056887 | 0.09256128  | 0.242550239 | 0.448306833 |
| 0.127199153 | 0.189966517 | 0.311261488 | 0.013574288 |
| 0.170667069 | 0.259109012 | 0.191263572 | 0.300181806 |
| 0.375877932 | 0.281917514 | 0.271625252 | 0.179343365 |
| 0.330056427 | 0.262633353 | 0.02780095  | 0.367594456 |
| 0.39018843  | 0.37748907  | 0.383972583 | 0.388031411 |
| 0.343908782 | 0.291499038 | 0.295237667 | 0.264756163 |
| 0.27168287  | 0.207927016 | 0.174519748 | 0.300273724 |
| 0.014519837 | 0.324714736 | 0.311717817 | 0.285952721 |
| 0.280186288 | 0.326995507 | 0.171996617 | 0.279605167 |
| 0.082983146 | 0.112218748 | 0.285570823 | 0.344861698 |

|             |             |             |             |
|-------------|-------------|-------------|-------------|
| 0.318707192 | 0.100128897 | 0.145172424 | 0.196067809 |
| 0.351773457 | 0.322653005 | 0.206836502 | 0.413473279 |
| 0.311055524 | 0.185211926 | 0.291143152 | 0.308828165 |
| 0.241525695 | 0.072489577 | 0.276972313 | 0.018755865 |
| 0.174759299 | 0.398581194 | 0.250915269 | 0.1815108   |
| 0.316890638 | 0.048411466 | 0.321801187 | 0.421914081 |
| 0.354571401 | 0.388165709 | 0.389060604 | 0.196405573 |
| 0.390118854 | 0.055774395 | 0.395525523 | 0.300678474 |
| 0.188657753 | 0.004400354 | 0.044245638 | 0.345525146 |
| 0.254128634 | 0.13461617  | 0.306097401 | 0.219392053 |
| 0.278618862 | 0.231286463 | 0.246586996 | 0.221872502 |
| 0.27727974  | 0.303075316 | 0.218365587 | 0.36946928  |
| 0.324841445 | 0.354711233 | 0.244338604 | 0.210030886 |
| 0.279465294 | 0.210482602 | 0.2159017   | 0.027898486 |
| 0.313053126 | 0.190133363 | 0.405731665 | 0.388039244 |
| 0.420188384 | 0.28921484  | 0.155693028 | 0.240363551 |
| 0.344973541 | 0.159098411 | 0.203046165 | 0.192356548 |
| 0.357341985 | 0.269845476 | 0.327175915 | 0.30455714  |
| 0.405511124 | 0.383649823 | 0.177452185 | 0.294277331 |
| 0.065165663 | 0.013394022 | 0.238927165 | 0.339031899 |
| 0.106660576 | 0.247226163 | 0.320570748 | 0.288179599 |
| 0.328955658 | 0.122137209 | 0.18820173  | 0.190026688 |
| 0.322865508 | 0.290705877 | 0.24420078  | 0.315325313 |
| 0.295600368 | 0.197457299 | 0.345956395 | 0.337914393 |
| 0.242450246 | 0.30039482  | 0.262898656 | 0.142835278 |
| 0.235912604 | 0.242948626 | 0.210647044 | 0.291739817 |
| 0.331512372 | 0.354402548 | 0.198896328 | 0.075254777 |
| 0.312141454 | 0.295548581 | 0.37646528  | 0.366365358 |
| 0.425108669 | 0.431563052 | 0.401796508 | 0.288517747 |
| 0.227153522 | 0.319622117 | 0.253318511 | 0.270856717 |
| 0.391024254 | 0.156648733 | 0.383930519 | 0.205559724 |
| 0.277850794 | 0.311828616 | 0.178001252 | 0.268316878 |
| 0.240379731 | 0.329847561 | 0.328817692 | 0.209664897 |
| 0.291854723 | 0.192902107 | 0.212567214 | 0.330068699 |
| 0.306835888 | 0.130442531 | 0.306528729 | 0.312637733 |
| 0.302485885 | 0.138550983 | 0.266545673 | 0.417336546 |
| 0.257842661 | 0.253171684 | 0.219457731 | 0.307026813 |
| 0.290171199 | 0.214436739 | 0.085977493 | 0.319116077 |
| 0.389688457 | 0.256413814 | 0.392086545 | 0.358008372 |
| 0.226302919 | 0.250691648 | 0.216637096 | 0.278628953 |
| 0.332307123 | 0.277091833 | 0.350040546 | 0.214916099 |
| 0.357735032 | 0.440420181 | 0.315655449 | 0.318980639 |
| 0.259079321 | 0.206551609 | 0.142211643 | 0.333733357 |
| 0.174651879 | 0.210360609 | 0.198885253 | 0.300117712 |
| 0.013108198 | 0.116494996 | 0.387320164 | 0.331946335 |
| 0.438749282 | 0.364140245 | 0.390970931 | 0.323914059 |
| 0.003093649 | 0.256555261 | 0.290584481 | 0.254363812 |
| 0.31398782  | 0.315988219 | 0.265577606 | 0.254003787 |
| 0.341852157 | 0.162454843 | 0.280062011 | 0.236092961 |
| 0.120655953 | 0.273465303 | 0.337601075 | 0.314774232 |
| 0.334766522 | 0.180315154 | 0.190915704 | 0.328397293 |
| 0.164774629 | 0.336863012 | 0.325220599 | 0.168008209 |
| 0.114377109 | 0.355219713 | 0.278759836 | 0.138385485 |
| 0.249222676 | 0.332440884 | 0.371761711 | 0.012350735 |

|             |             |             |             |
|-------------|-------------|-------------|-------------|
| 0.272412856 | 0.077534182 | 0.324639023 | 0.309351345 |
| 0.337660084 | 0.327654924 | 0.330253885 | 0.283329966 |
| 0.291770965 | 0.339922386 | 0.307191312 | 0.338099453 |
| 0.310090788 | 0.342687673 | 0.288385934 | 0.286120129 |
| 0.265061401 | 0.279939932 | 0.194813482 | 0.19544524  |
| 0.198017426 | 0.344348488 | 0.3170957   | 0.164854366 |
| 0.354758541 | 0.284498661 | 0.376153026 | 0.364935401 |
| 0.386191863 | 0.174251852 | 0.310008605 | 0.311404261 |
| 0.116166104 | 0.218620888 | 0.180593237 | 0.285191642 |
| 0.341980919 | 0.220810359 | 0.257578639 | 0.248112863 |
| 0.256998172 | 0.399862154 | 0.30622541  | 0.389318939 |
| 0.293968314 | 0.25700585  | 0.156888224 | 0.2475472   |
| 0.282654306 | 0.261798486 | 0.261048082 | 0.024313543 |
| 0.327980898 | 0.246162204 | 0.322478631 | 0.38495882  |
| 0.180168316 | 0.381657544 | 0.170441509 | 0.217407511 |
| 0.13666585  | 0.224951431 | 0.281876465 | 0.270601451 |
| 0.124554572 | 0.336026073 | 0.294745358 | 0.235345901 |
| 0.27929395  | 0.264059503 | 0.280585187 | 0.329681391 |
| 0.346469704 | 0.276382493 | 0.410728373 | 0.233312447 |
| 0.234417991 | 0.225032701 | 0.227373958 | 0.290403712 |
| 0.319662218 | 0.383908397 | 0.202017342 | 0.383075254 |
| 0.259912897 | 0.241330824 | 0.451084539 | 0.325151693 |
| 0.310574328 | 0.293086333 | 0.126542175 | 0.243564872 |
| 0.333958306 | 0.208082772 | 0.007829935 | 0.06526095  |
| 0.330385583 | 0.24714413  | 0.256419786 | 0.316104509 |
| 0.261859466 | 0.336257381 | 0.123273139 | 0.301131308 |
| 0.365629629 | 0.415073152 | 0.250057499 | 0.336035756 |
| 0.31948639  | 0.280836176 | 0.259333989 | 0.031230442 |
| 0.247192193 | 0.224281366 | 0.204803065 | 0.232391103 |
| 0.133971824 | 0.133792805 | 0.252343821 | 0.175636475 |
| 0.36403146  | 0.116222756 | 0.251595795 | 0.280174427 |
| 0.294589619 | 0.416517166 | 0.311496394 | 0.296133867 |
| 0.153979091 | 0.343521978 | 0.246540085 | 0.249157923 |
| 0.244284629 | 0.223507541 | 0.310947818 | 0.192387816 |
| 0.177524014 | 0.28719028  | 0.012431643 | 0.404818566 |
| 0.383361961 | 0.223974464 | 0.29842227  | 0.160478027 |
| 0.346897848 | 0.348321044 | 0.258775466 | 0.234605005 |
| 0.087626318 | 0.251085595 | 0.35083824  | 0.321895973 |
| 0.114110673 | 0.261754055 | 0.218273675 | 0.253482916 |
| 0.407517119 | 0.221734902 | 0.327300837 | 0.163599607 |
| 0.368666601 | 0.307124745 | 0.215821078 | 0.290394816 |
| 0.244164758 | 0.191003312 | 0.215581901 | 0.421146575 |
| 0.329833332 | 0.196330862 | 0.316832305 | 0.300861237 |
| 0.220403265 | 0.338496864 | 0.232860398 | 0.416878882 |
| 0.24534084  | 0.339657941 | 0.301596429 | 0.355385784 |
| 0.347452874 | 0.210082937 | 0.188551305 | 0.274687217 |
| 0.350907604 | 0.218112887 | 0.228574425 | 0.310601438 |
| 0.163045294 | 0.348322799 | 0.225731664 | 0.285239561 |
| 0.163010516 | 0.341412275 | 0.274558853 | 0.298051964 |
| 0.325013726 | 0.284744878 | 0.269634486 | 0.389007746 |
| 0.256236957 | 0.107237109 | 0.423106077 | 0.01550801  |
| 0.275072675 | 0.290305477 | 0.352605851 | 0.276840245 |
| 0.261500531 | 0.30275041  | 0.24420845  | 0.013323756 |
| 0.319824241 | 0.087629119 | 0.306594894 | 0.253099571 |

|             |             |             |             |
|-------------|-------------|-------------|-------------|
| 0.195123434 | 0.191037145 | 0.385601783 | 0.394150322 |
| 0.331854537 | 0.229168921 | 0.177556283 | 0.375618927 |
| 0.132078288 | 0.1718022   | 0.212300066 | 0.255131067 |
| 0.17361451  | 0.191927594 | 0.225549241 | 0.209063374 |
| 0.308667823 | 0.340139721 |             |             |
| CBX7        | 0.114529706 | 0.438869173 | 0.094622009 |
| 0.214592235 | 0.369935363 | 0.494750481 | 0.082789183 |
| 0.165982197 | 0.378241503 | 0.355854378 | 0.444481204 |
| 0.029993329 | 0.127246558 | 0.460883149 | 0.077297678 |
| 0.440753696 | 0.051773872 | 0.144523249 | 0.093516564 |
| 0.28688212  | 0.334085264 | 0.429979553 | 0.440949193 |
| 0.338441069 | 0.21880326  | 0.401823183 | 0.433641237 |
| 0.51983397  | 0.362340981 | 0.502004786 | 0.274374329 |
| 0.420108014 | 0.384316951 | 0.458646626 | 0.031202213 |
| 0.479286164 | 0.014913302 | 0.443674743 | 0.322523874 |
| 0.228168636 | 0.353831232 | 0.404068565 | 0.321671395 |
| 0.420331019 | 0.061482352 | 0.288142953 | 0.440372972 |
| 0.383431868 | 0.350159882 | 0.099682428 | 0.485590983 |
| 0.408382887 | 0.407960238 | 0.430770611 | 0.002735181 |
| 0.380760232 | 0.131698288 | 0.288242984 | 0.528523404 |
| 0.259840835 | 0.170256646 | 0.325826854 | 0.304700724 |
| 0.423373531 | 0.410881182 | 0.307318021 | 0.407673021 |
| 0.516964406 | 0.223636372 | 0.473048754 | 0.235445327 |
| 0.439359276 | 0.049771641 | 0.202914392 | 0.116136955 |
| 0.453299526 | 0.261906317 | 0.419577979 | 0.375408992 |
| 0.438037494 | 0.528239088 | 0.288896726 | 0.515396989 |
| 0.118129057 | 0.388986587 | 0.347322125 | 0.348019573 |
| 0.393245416 | 0.108454524 | 0.468179304 | 0.533662576 |
| 0.070786688 | 0.424833963 | 0.427255015 | 0.159675035 |
| 0.45881495  | 0.337089577 | 0.453238022 | 0.246299088 |
| 0.42294923  | 0.387386049 | 0.484745508 | 0.350435767 |
| 0.384492438 | 0.106250109 | 0.503291188 | 0.377533208 |
| 0.386190218 | 0.125394212 | 0.269681083 | 0.480465142 |
| 0.473032337 | 0.513431066 | 0.44201118  | 0.389607564 |
| 0.425648152 | 0.520830472 | 0.465138354 | 0.429174287 |
| 0.212406076 | 0.542983055 | 0.258336522 | 0.065821451 |
| 0.106418329 | 0.122095918 | 0.266465878 | 0.339015973 |
| 1           | 0.393211015 | 0.256229547 | 0.289852316 |
| 0.460578185 | 0.497100095 | 0.537246468 | 0.439509608 |
| 0.061036655 | 0.301737351 | 0.436803433 | 0.364546013 |
| 0.417854398 | 0.149131427 | 0.32449197  | 0.523520523 |
| 0.406105469 | 0.468189927 | 0.226616995 | 0.513399093 |
| 0.238157207 | 0.529976618 | 0.469504777 | 0.228467445 |
| 0.535882795 | 0.516208197 | 0.52545851  | 0.459265446 |
| 0.497483189 | 0.434157796 | 0.072502524 | 0.405074665 |
| 0.500130371 | 0.025097485 | 0.483877867 | 0.510241217 |
| 0.517412008 | 0.486252477 | 0.529060712 | 0.527472917 |
| 0.522387401 | 0.104135657 | 0.032620457 | 0.331289112 |
| 0.524175824 | 0.433044659 | 0.172444514 | 0.462072024 |
| 0.40940163  | 0.47089063  | 0.466159137 | 0.376209089 |
| 0.520325705 | 0.473567491 | 0.503795626 | 0.426797186 |
| 0.346367141 | 0.333992404 | 0.429147708 | 0.490444143 |
| 0.07030178  | 0.166845564 | 0.081534448 | 0.343085629 |
| 0.437393333 | 0.224950373 | 0.43954344  | 0.389151866 |



|             |             |             |             |
|-------------|-------------|-------------|-------------|
| 0.244886209 | 0.403578029 | 0.408884284 | 0.429958448 |
| 0.079409285 | 0.499400073 | 0.227783678 | 0.218470878 |
| 0.063861624 | 0.171573164 | 0.238118437 | 0.228829196 |
| 0.307945609 | 0.247763524 | 0.483930211 | 0.502671061 |
| 0.395161434 | 0.236226371 | 0.472752839 | 0.487417366 |
| 0.426182007 | 0.449971353 | 0.269396686 | 0.024229517 |
| 0.30773463  | 0.351408085 | 0.239337299 | 0.468576865 |
| 0.190111497 | 0.278849777 | 0.426682749 | 0.450186886 |
| 0.354956906 | 0.190023482 | 0.41009561  | 0.441442471 |
| 0.191138063 | 0.391632294 | 0.459090608 | 0.447631979 |
| 0.007323815 | 0.393895008 | 0.48471221  | 0.182154115 |
| 0.354653641 | 0.193625638 | 0.352035331 | 0.466137294 |
| 0.338979627 | 0.271384721 | 0.510656983 | 0.443896348 |
| 0.411094881 | 0.232002365 | 0.535348445 | 0.056868394 |
| 0.391167586 | 0.084279413 | 0.335211943 | 0.387683859 |
| 0.312060793 | 0.326321826 | 0.378423935 | 0.352558906 |
| 0.181984525 | 0.530897056 | 0.433697397 | 0.528510894 |
| 0.417615845 | 0.537416545 | 0.483519739 | 0.458773303 |
| 0.429407767 | 0.400113823 | 0.190683569 | 0.476048386 |
| 0.470934879 | 0.3300568   | 0.107544406 | 0.469585562 |
| 0.397123799 | 0.444410602 | 0.155623858 | 0.50427266  |
| 0.509684349 | 0.486719092 | 0.191884799 | 0.409360924 |
| 0.430046499 | 0.310918972 | 0.448231784 | 0.536390471 |
| 0.353334414 | 0.395119345 | 0.389240883 | 0.425400083 |
| 0.231233919 | 0.256251296 | 0.336967414 | 0.241377847 |
| 0.023039383 | 0.115724948 | 0.097869639 | 0.213628742 |
| 0.227111594 | 0.464930051 | 0.444487726 | 0.528338986 |
| 0.158808198 | 0.433243334 | 0.274255181 | 0.349445774 |
| 0.422857466 | 0.394111629 | 0.451365684 | 0.444159428 |
| 0.290079133 | 0.035686385 | 0.174684439 | 0.529852405 |
| 0.061131452 | 0.313069508 | 0.372263904 | 0.006306513 |
| 0.067397452 | 0.438382935 | 0.123095435 | 0.209067957 |
| 0.483782426 | 0.217155467 | 0.258769459 | 0.360395168 |
| 0.405566868 | 0.134481789 | 0.008258243 | 0.494911491 |
| 0.492415468 | 0.45909973  | 0.489488663 | 0.467521476 |
| 0.432802266 | 0.445755912 | 0.447110163 | 0.443859231 |
| 0.14324874  | 0.129118486 | 0.258811122 | 0.338757871 |
| 0.007332207 | 0.436055066 | 0.362497058 | 0.187049673 |
| 0.462657969 | 0.33990638  | 0.060885135 | 0.406238148 |
| 0.041206247 | 0.271407717 | 0.352715752 | 0.26254454  |
| 0.386440567 | 0.025835207 | 0.332451404 | 0.368310449 |
| 0.453639526 | 0.379071108 | 0.428406712 | 0.547809453 |
| 0.404113311 | 0.168245956 | 0.379307759 | 0.454908355 |
| 0.101574538 | 0.123144047 | 0.411063444 | 0.064399375 |
| 0.290044517 | 0.460097669 | 0.429293339 | 0.107866751 |
| 0.3352751   | 0.010176182 | 0.39901237  | 0.544786591 |
| 0.488599869 | 0.52821869  | 0.522135584 | 0.349683697 |
| 0.524778233 | 0.149607009 | 0.545568318 | 0.439405831 |
| 0.421626842 | 0.00203366  | 0.009933379 | 0.498764322 |
| 0.449815023 | 0.085489087 | 0.208996556 | 0.469115706 |
| 0.158572828 | 0.209380479 | 0.097163237 | 0.242430009 |
| 0.498779599 | 0.300186857 | 0.226499628 | 0.480526608 |
| 0.294930077 | 0.284970583 | 0.445777409 | 0.119486502 |
| 0.474040009 | 0.084012498 | 0.116439258 | 0.016203366 |

|             |             |             |             |
|-------------|-------------|-------------|-------------|
| 0.413643026 | 0.145982129 | 0.483651421 | 0.52688865  |
| 0.506247537 | 0.446121646 | 0.391285109 | 0.426372957 |
| 0.443412303 | 0.140194803 | 0.438331528 | 0.158225093 |
| 0.50503861  | 0.437269796 | 0.372782476 | 0.353601984 |
| 0.507177853 | 0.481426159 | 0.051316403 | 0.444378704 |
| 0.030811607 | 0.003560138 | 0.450079239 | 0.302956848 |
| 0.076542367 | 0.413519444 | 0.302195961 | 0.270157953 |
| 0.278184161 | 0.053638767 | 0.320862986 | 0.292494068 |
| 0.350912678 | 0.406062962 | 0.331637049 | 0.281134547 |
| 0.319657618 | 0.163224224 | 0.262524196 | 0.193328527 |
| 0.275495055 | 0.34085298  | 0.222493955 | 0.033105383 |
| 0.48285726  | 0.467919716 | 0.088147994 | 0.207779523 |
| 0.473506079 | 0.503608785 | 0.059667532 | 0.021452385 |
| 0.306814351 | 0.350686964 | 0.509214274 | 0.518604031 |
| 0.540503044 | 0.527702355 | 0.401518483 | 0.153231221 |
| 0.103242713 | 0.374618727 | 0.348318102 | 0.137004565 |
| 0.526942992 | 0.093345775 | 0.506925745 | 0.363635874 |
| 0.152622182 | 0.282185086 | 0.057750488 | 0.116598366 |
| 0.4500751   | 0.225979866 | 0.230484622 | 0.200384547 |
| 0.366032672 | 0.320427346 | 0.069906407 | 0.249211597 |
| 0.384711689 | 0.230219159 | 0.20463962  | 0.377152776 |
| 0.407055947 | 0.260619717 | 0.467429337 | 0.45497796  |
| 0.176900067 | 0.147235408 | 0.359705561 | 0.423800251 |
| 0.478545061 | 0.440402089 | 0.054851956 | 0.46617332  |
| 0.50130464  | 0.494783542 | 0.520530433 | 0.400300301 |
| 0.115501905 | 0.447873631 | 0.356295151 | 0.382350352 |
| 0.227253632 | 0.486528768 | 0.283448292 | 0.090070472 |
| 0.317297655 | 0.48809472  | 0.430558283 | 0.22651142  |
| 0.481271918 | 0.1706691   | 0.083098921 | 0.461159631 |
| 0.231012054 | 0.13095265  | 0.422818799 | 0.458302673 |
| 0.004155571 | 0.196941083 | 0.491225271 | 0.319466444 |
| 0.524270724 | 0.488889385 | 0.452590497 | 0.323682435 |
| 0.002048131 | 0.450782316 | 0.443981313 | 0.467037354 |
| 0.442800334 | 0.404660827 | 0.20439628  | 0.109627518 |
| 0.328838547 | 0.118115153 | 0.172998221 | 0.445986319 |
| 0.219525365 | 0.455634963 | 0.23858003  | 0.249085093 |
| 0.246170358 | 0.120078873 | 0.327481158 | 0.319370021 |
| 0.178125608 | 0.283926424 | 0.389025575 | 0.352853729 |
| 0.242445154 | 0.425852987 | 0.435745104 | 0.045613467 |
| 0.420137843 | 0.425393328 | 0.43912761  | 0.003190315 |
| 0.47632097  | 0.013147185 | 0.247550227 | 0.282433187 |
| 0.258496959 | 0.250400849 | 0.304587893 | 0.365845449 |
| 0.392192436 | 0.273666531 | 0.355821975 | 0.295896222 |
| 0.225008769 | 0.279343655 | 0.444627944 | 0.417351821 |
| 0.357089735 | 0.183032562 | 0.126436964 | 0.122378699 |
| 0.086910639 | 0.478180693 | 0.279447215 | 0.109193379 |
| 0.277087438 | 0.409651357 | 0.36811441  | 0.511953871 |
| 0.42662261  | 0.148109422 | 0.379055006 | 0.469819306 |
| 0.267555111 | 0.372171871 | 0.091286951 | 0.461070371 |
| 0.29262041  | 0.276886017 | 0.466326945 | 0.370904952 |
| 0.43784717  | 0.413032733 | 0.280415225 | 0.450032835 |
| 0.43593632  | 0.3724482   | 0.382622234 | 0.126598068 |
| 0.235434429 | 0.168623427 | 0.323053077 | 0.004704992 |
| 0.409904555 | 0.352031102 | 0.487041504 | 0.509380143 |

|             |             |             |             |
|-------------|-------------|-------------|-------------|
| 0.352702328 | 0.39925644  | 0.406193188 | 0.127574962 |
| 0.352944121 | 0.199532098 | 0.180784671 | 0.474834715 |
| 0.287090161 | 0.252982401 | 0.358189429 | 0.431102979 |
| 0.471714988 | 0.451088241 | 0.30504813  | 0.292268926 |
| 0.284796585 | 0.258996986 | 0.480610782 | 0.175044545 |
| 0.472049767 | 0.249636408 | 0.405429183 | 0.353695972 |
| 0.266817084 | 0.529352149 | 0.09065618  | 0.537132661 |
| 0.373327803 | 0.168782343 | 0.502519415 | 0.375242065 |
| 0.376513151 | 0.178365479 | 0.251553958 | 0.437318723 |
| 0.275735173 | 0.418867212 | 0.021809589 | 0.077917144 |
| 0.377482079 | 0.34057589  | 0.430098553 | 0.39902029  |
| 0.302696831 | 0.367671992 | 0.233255361 | 0.334420162 |
| 0.498626109 | 0.513240973 | 0.312050601 | 0.282505241 |
| 0.384765946 | 0.148163692 | 0.469472739 | 0.017848182 |
| 0.46180085  | 0.467270296 | 0.427793961 | 0.07796346  |
| 0.030135845 | 0.270395955 | 0.451988406 | 0.092997519 |
| 0.482547684 | 0.284550965 | 0.393816276 | 0.493819648 |
| 0.214375057 | 0.513204126 | 0.162620803 | 0.463423998 |
| 0.062047503 | 0.305034433 | 0.435927187 | 0.414860259 |
| 0.294883698 | 0.349368386 | 0.424544732 | 0.305980899 |
| 0.050848494 | 0.332874133 | 0.001791766 | 0.419623884 |
| 0.483470987 | 0.384647314 | 0.237018916 | 0.350617677 |
| 0.329983366 | 0.404152746 | 0.277039711 | 0.476105948 |
| 0.022134729 | 0.425544713 | 0.251322462 | 0.455542314 |
| 0.299320963 | 0.391208766 | 0.093672566 | 0.351935507 |
| 0.473255374 | 0.317208732 | 0.282406476 | 0.361880618 |
| 0.509866808 | 0.421978115 | 0.210780001 | 0.286193536 |
| 0.417827269 | 0.091598288 | 0.45681079  | 0.537387486 |
| 0.230379928 | 0.278415435 | 0.469971355 | 0.254765165 |
| 0.366639588 | 0.409167477 | 0.447896074 | 0.526231944 |
| 0.098878123 | 0.296540759 | 0.462538372 | 0.459853322 |
| 0.340955599 | 0.214898137 | 0.307447604 | 0.277336102 |
| 0.480710925 | 0.157418016 | 0.297822092 | 0.405101424 |
| 0.271405777 | 0.362101383 | 0.383577435 | 0.23838497  |
| 0.061336361 | 0.208369699 | 0.470732429 | 0.186283375 |
| 0.34158161  | 0.422876389 | 0.289840314 | 0.39265485  |
| 0.201918434 | 0.046342273 | 0.459883646 | 0.026450091 |
| 0.4315019   | 0.46488588  | 0.304000509 | 0.411694741 |
| 0.230663685 | 0.397876331 | 0.385957927 | 0.00207803  |
| 0.442978261 | 0.080256634 | 0.361321083 | 0.289337757 |
| 0.329933021 | 0.07506536  | 0.479191231 | 0.522853846 |
| 0.379643352 | 0.402482389 | 0.41408672  | 0.475305767 |
| 0.203061681 | 0.393584817 | 0.384369565 | 0.464295609 |
| 0.291655936 | 0.432561621 | 0.46094836  | 0.45659698  |
| 0.444031043 | 0.337653345 |             |             |
| CCDC12      | 0.139558206 | 0.364955434 | 0.095597559 |
| 0.156137275 | 0.231858322 | 0.262257955 | 0.125691683 |
| 0.212746368 | 0.295509537 | 0.159887139 | 0.268352121 |
| 0.058302995 | 0.081934036 | 0.411985745 | 0.128158923 |
| 0.23889178  | 0.100645201 | 0.177449971 | 0.096061361 |
| 0.190221711 | 0.220395051 | 0.219727283 | 0.260082512 |
| 0.226044826 | 0.249193348 | 0.237756144 | 0.224408748 |
| 0.423257773 | 0.144264359 | 0.277346397 | 0.099512779 |
| 0.409016967 | 0.229894834 | 0.211960211 | 0.049560362 |

|             |             |             |             |
|-------------|-------------|-------------|-------------|
| 0.26979491  | 0.01856131  | 0.427928053 | 0.2192832   |
| 0.113302226 | 0.371958356 | 0.190527103 | 0.228394584 |
| 0.205611692 | 0.081862236 | 0.110780832 | 0.24975736  |
| 0.233631224 | 0.248672683 | 0.107882102 | 0.286554887 |
| 0.233550659 | 0.29884229  | 0.26552588  | 0.012102987 |
| 0.183407777 | 0.049343846 | 0.12611997  | 0.455511282 |
| 0.234566223 | 0.199987753 | 0.149228154 | 0.241938242 |
| 0.239480533 | 0.266166    | 0.259946494 | 0.202375498 |
| 0.443630565 | 0.130350673 | 0.291144889 | 0.163928555 |
| 0.24399528  | 0.079200523 | 0.209024199 | 0.125433324 |
| 0.2329274   | 0.244358234 | 0.265738347 | 0.194290942 |
| 0.356066908 | 0.493291491 | 0.242019345 | 0.44793275  |
| 0.08828398  | 0.220250242 | 0.216488177 | 0.278199358 |
| 0.281223538 | 0.144634386 | 0.311747074 | 0.475720231 |
| 0.107479647 | 0.216365838 | 0.277763111 | 0.163011571 |
| 0.373972134 | 0.18240023  | 0.214596524 | 0.140441207 |
| 0.248436995 | 0.22280293  | 0.448213376 | 0.264998902 |
| 0.248067638 | 0.112358994 | 0.451000604 | 0.209002236 |
| 0.243066875 | 0.127135672 | 0.187734316 | 0.360601206 |
| 0.253677803 | 0.427354797 | 0.338993914 | 0.308577471 |
| 0.228987448 | 0.439838731 | 0.289024371 | 0.387778002 |
| 0.087105121 | 0.463924269 | 0.214570338 | 0.117700682 |
| 0.128848866 | 0.181478287 | 0.192136357 | 0.329528191 |
| 0.393211015 | 1           | 0.234659778 | 0.225845137 |
| 0.381149201 | 0.433438129 | 0.454296589 | 0.350068141 |
| 0.09991682  | 0.157749411 | 0.225811796 | 0.273846063 |
| 0.27793844  | 0.182644464 | 0.179398132 | 0.470787532 |
| 0.379636501 | 0.345402643 | 0.204501505 | 0.489059221 |
| 0.226303287 | 0.476805248 | 0.37044664  | 0.206323527 |
| 0.475659845 | 0.459821192 | 0.46125945  | 0.268480307 |
| 0.455997049 | 0.252328674 | 0.062633563 | 0.336664175 |
| 0.464462423 | 0.014560661 | 0.391159824 | 0.415260502 |
| 0.434954417 | 0.358728909 | 0.461555156 | 0.441505365 |
| 0.444764882 | 0.137167776 | 0.0172737   | 0.245390539 |
| 0.454162165 | 0.365474524 | 0.222365318 | 0.227299215 |
| 0.241499725 | 0.266655768 | 0.33193638  | 0.193575032 |
| 0.494506254 | 0.390758255 | 0.411136778 | 0.317349269 |
| 0.210791796 | 0.363605193 | 0.208203438 | 0.438290562 |
| 0.119887401 | 0.168474784 | 0.096547424 | 0.292459997 |
| 0.202019772 | 0.225435555 | 0.269017503 | 0.240144117 |
| 0.232008637 | 0.263712937 | 0.194785827 | 0.265238024 |
| 0.103801369 | 0.247646833 | 0.202291093 | 0.190423204 |
| 0.104472325 | 0.220106804 | 0.213003813 | 0.202172511 |
| 0.250975593 | 0.298558297 | 0.292766756 | 0.424847565 |
| 0.232810439 | 0.198113739 | 0.296907265 | 0.456779611 |
| 0.426178853 | 0.231974709 | 0.261605582 | 0.025940577 |
| 0.187833693 | 0.159431831 | 0.120671312 | 0.235820364 |
| 0.254042875 | 0.214740889 | 0.247473058 | 0.296890787 |
| 0.238644533 | 0.184901085 | 0.230369746 | 0.449499864 |
| 0.178918911 | 0.243767413 | 0.38613841  | 0.236887467 |
| 0.015042264 | 0.2486572   | 0.356590505 | 0.153032689 |
| 0.246567396 | 0.109639833 | 0.167004122 | 0.382242985 |
| 0.191395784 | 0.184321994 | 0.420535306 | 0.29668478  |
| 0.247768365 | 0.277815142 | 0.466617971 | 0.03597818  |

|             |             |             |             |
|-------------|-------------|-------------|-------------|
| 0.225565847 | 0.10002733  | 0.25402517  | 0.192418183 |
| 0.234851464 | 0.286607716 | 0.224064542 | 0.229700454 |
| 0.159398447 | 0.461631716 | 0.372579349 | 0.44237979  |
| 0.205040712 | 0.469458844 | 0.370978534 | 0.397754011 |
| 0.271554436 | 0.207679754 | 0.086263767 | 0.344599043 |
| 0.374142824 | 0.186860102 | 0.111860508 | 0.323679742 |
| 0.200623055 | 0.269607834 | 0.171120573 | 0.433217567 |
| 0.486859506 | 0.412498541 | 0.217399784 | 0.311581721 |
| 0.347861811 | 0.240478444 | 0.363394165 | 0.482414926 |
| 0.163714065 | 0.2207059   | 0.212683028 | 0.356168736 |
| 0.203082781 | 0.175145408 | 0.355267436 | 0.117838577 |
| 0.007006972 | 0.14769806  | 0.120016595 | 0.213622432 |
| 0.141509858 | 0.2336406   | 0.264543971 | 0.456046367 |
| 0.189416956 | 0.409876694 | 0.247704222 | 0.209393986 |
| 0.38209315  | 0.23401651  | 0.234321935 | 0.261380948 |
| 0.273155117 | 0.040232866 | 0.152777926 | 0.49140685  |
| 0.080844165 | 0.177682797 | 0.265278761 | 0.005497006 |
| 0.096449424 | 0.314904485 | 0.153086496 | 0.269057013 |
| 0.422760658 | 0.261340109 | 0.20406512  | 0.17447255  |
| 0.299603593 | 0.159679579 | 0.010377981 | 0.412177438 |
| 0.434638715 | 0.412831034 | 0.431887979 | 0.427040131 |
| 0.378462141 | 0.312561629 | 0.32376198  | 0.255564954 |
| 0.18280518  | 0.144895202 | 0.139828376 | 0.235994378 |
| 0.008916163 | 0.338554162 | 0.252882944 | 0.188910336 |
| 0.314485024 | 0.257941051 | 0.101184354 | 0.245446816 |
| 0.047182007 | 0.118424324 | 0.24308926  | 0.252647816 |
| 0.295185175 | 0.049255846 | 0.1374859   | 0.189597135 |
| 0.404644053 | 0.345423131 | 0.208559722 | 0.471555682 |
| 0.265572461 | 0.143510113 | 0.232263298 | 0.320034966 |
| 0.141876303 | 0.081593139 | 0.241481535 | 0.020132434 |
| 0.192183057 | 0.435638619 | 0.247145516 | 0.114115911 |
| 0.239453058 | 0.022652951 | 0.348752843 | 0.479264056 |
| 0.413331592 | 0.445342619 | 0.447720648 | 0.184739059 |
| 0.446429474 | 0.058002785 | 0.457556425 | 0.339293482 |
| 0.193712735 | 0.002717378 | 0.018722902 | 0.401593881 |
| 0.23962736  | 0.100237173 | 0.200773268 | 0.229288615 |
| 0.165573518 | 0.169603781 | 0.153083391 | 0.159851732 |
| 0.269087884 | 0.232705894 | 0.172936746 | 0.426107676 |
| 0.23117978  | 0.251297475 | 0.237780571 | 0.135193429 |
| 0.267286368 | 0.111069983 | 0.136050896 | 0.012496545 |
| 0.287647017 | 0.167220769 | 0.452282821 | 0.446562691 |
| 0.468233356 | 0.280125563 | 0.170820045 | 0.240421827 |
| 0.378998407 | 0.122865151 | 0.218254392 | 0.139231936 |
| 0.418404198 | 0.24443961  | 0.314145982 | 0.310136469 |
| 0.452400245 | 0.433460962 | 0.0933743   | 0.318824208 |
| 0.03243033  | 0.004921702 | 0.235687067 | 0.270383689 |
| 0.064551639 | 0.219645258 | 0.26720174  | 0.2104061   |
| 0.229632045 | 0.07841343  | 0.162618608 | 0.165625167 |
| 0.248227852 | 0.253498928 | 0.205822127 | 0.259309755 |
| 0.216859402 | 0.133905505 | 0.241530599 | 0.233510605 |
| 0.208894662 | 0.303972631 | 0.245742124 | 0.068017897 |
| 0.229786407 | 0.2438704   | 0.122447083 | 0.206491897 |
| 0.376261116 | 0.414298913 | 0.091879716 | 0.032569038 |
| 0.29509501  | 0.254340758 | 0.435909861 | 0.429165254 |

|             |             |             |             |
|-------------|-------------|-------------|-------------|
| 0.480119983 | 0.474422738 | 0.424254333 | 0.185213363 |
| 0.140288249 | 0.243676613 | 0.215028163 | 0.153977046 |
| 0.452813383 | 0.104104277 | 0.439553728 | 0.187869015 |
| 0.177186644 | 0.213823063 | 0.097017217 | 0.159043313 |
| 0.234342275 | 0.230642013 | 0.218111132 | 0.158658507 |
| 0.234776222 | 0.187394431 | 0.119015298 | 0.226439671 |
| 0.307600484 | 0.108720826 | 0.208648944 | 0.270963107 |
| 0.317455929 | 0.134268853 | 0.29109147  | 0.436968401 |
| 0.173888137 | 0.157806103 | 0.208370454 | 0.315035789 |
| 0.342832627 | 0.213146864 | 0.056297495 | 0.378630694 |
| 0.441604214 | 0.265568317 | 0.450295109 | 0.377569696 |
| 0.139206865 | 0.237642627 | 0.192349463 | 0.235462927 |
| 0.229943547 | 0.267495978 | 0.259928981 | 0.126909685 |
| 0.343855827 | 0.472235236 | 0.356813085 | 0.213004751 |
| 0.253010652 | 0.154752449 | 0.09135338  | 0.384945066 |
| 0.132151339 | 0.14037403  | 0.20158157  | 0.345898275 |
| 0.005955199 | 0.103511362 | 0.429126826 | 0.268320365 |
| 0.480244499 | 0.41132348  | 0.419855035 | 0.261835278 |
| 0.00288173  | 0.253532876 | 0.260738767 | 0.240466996 |
| 0.371401896 | 0.326579783 | 0.200255474 | 0.138455253 |
| 0.310702669 | 0.116922942 | 0.173657092 | 0.233659409 |
| 0.091255085 | 0.258954337 | 0.234634758 | 0.215511487 |
| 0.226815683 | 0.124936433 | 0.171753204 | 0.255059667 |
| 0.117261167 | 0.271523752 | 0.327407093 | 0.176742712 |
| 0.116153825 | 0.389017605 | 0.314651715 | 0.074567454 |
| 0.233364119 | 0.350259025 | 0.407417005 | 0.004194657 |
| 0.296833459 | 0.035267792 | 0.227275582 | 0.224346562 |
| 0.228790992 | 0.232985087 | 0.244934754 | 0.233064229 |
| 0.253923675 | 0.239454704 | 0.255057085 | 0.24477941  |
| 0.205562672 | 0.261614477 | 0.261826232 | 0.241882024 |
| 0.229754043 | 0.178810995 | 0.167665115 | 0.16973083  |
| 0.122730469 | 0.402415073 | 0.29919072  | 0.11367953  |
| 0.252686668 | 0.251893374 | 0.375155025 | 0.425532557 |
| 0.41431144  | 0.157776517 | 0.256336854 | 0.368996678 |
| 0.135608556 | 0.22400487  | 0.128291264 | 0.256923503 |
| 0.269598336 | 0.1831565   | 0.250207678 | 0.221625469 |
| 0.280013553 | 0.410604893 | 0.293538888 | 0.415927516 |
| 0.266056309 | 0.221727081 | 0.168089341 | 0.142479948 |
| 0.197143631 | 0.173362183 | 0.207201669 | 0.008515028 |
| 0.273225065 | 0.233712398 | 0.379955978 | 0.435805267 |
| 0.178353167 | 0.395873324 | 0.184240046 | 0.138358026 |
| 0.14696338  | 0.218475487 | 0.192108381 | 0.319071487 |
| 0.129002507 | 0.240973595 | 0.238927019 | 0.238004709 |
| 0.313560122 | 0.286089468 | 0.207521938 | 0.262874723 |
| 0.246613596 | 0.203044584 | 0.448363856 | 0.168209382 |
| 0.232480256 | 0.168182168 | 0.217879595 | 0.227713393 |
| 0.2309161   | 0.442246559 | 0.124355294 | 0.446926396 |
| 0.21803521  | 0.185489349 | 0.485007239 | 0.274374587 |
| 0.272430227 | 0.192867981 | 0.117273414 | 0.242478289 |
| 0.233272222 | 0.201841598 | 0.008371451 | 0.058275707 |
| 0.28978081  | 0.207971125 | 0.300490348 | 0.299676147 |
| 0.196853266 | 0.32129946  | 0.12174343  | 0.257312455 |
| 0.423925429 | 0.464256223 | 0.210297218 | 0.278239032 |
| 0.30669247  | 0.177461036 | 0.257007769 | 0.026801846 |

|             |             |             |             |
|-------------|-------------|-------------|-------------|
| 0.238250801 | 0.224634613 | 0.208239807 | 0.136078204 |
| 0.066279941 | 0.12559214  | 0.240525573 | 0.110115499 |
| 0.412997539 | 0.130196692 | 0.224979793 | 0.307562402 |
| 0.217942824 | 0.467615346 | 0.201508794 | 0.309160688 |
| 0.087827162 | 0.251846296 | 0.223387667 | 0.226226201 |
| 0.193601653 | 0.194066737 | 0.30752385  | 0.169981691 |
| 0.092589531 | 0.21815538  | 0.004587705 | 0.421981192 |
| 0.428229592 | 0.198311107 | 0.261270424 | 0.168449662 |
| 0.265999475 | 0.362522741 | 0.21017457  | 0.234257466 |
| 0.037799259 | 0.230249339 | 0.254385147 | 0.369872365 |
| 0.123228283 | 0.228766923 | 0.128473288 | 0.211934097 |
| 0.448749299 | 0.1985662   | 0.300473396 | 0.161484695 |
| 0.428945223 | 0.338526217 | 0.184581811 | 0.228451866 |
| 0.235291134 | 0.118398958 | 0.227206443 | 0.474178923 |
| 0.221776808 | 0.163767196 | 0.359770742 | 0.209367308 |
| 0.200314799 | 0.380781646 | 0.224603744 | 0.467886561 |
| 0.142687943 | 0.259921446 | 0.340816554 | 0.408105913 |
| 0.317690721 | 0.152085003 | 0.171418406 | 0.201796158 |
| 0.406724673 | 0.139534059 | 0.197996954 | 0.308501091 |
| 0.142314222 | 0.275213442 | 0.210707574 | 0.202080166 |
| 0.085885717 | 0.250700696 | 0.26863638  | 0.194363098 |
| 0.261319928 | 0.238619394 | 0.194925067 | 0.405757216 |
| 0.183235141 | 0.054299228 | 0.45274833  | 0.012760291 |
| 0.256396285 | 0.262425857 | 0.266195689 | 0.248731195 |
| 0.231965731 | 0.264382108 | 0.224377753 | 0.005431985 |
| 0.339533542 | 0.054041279 | 0.244722197 | 0.192600715 |
| 0.191802031 | 0.111742741 | 0.42860329  | 0.449409171 |
| 0.274363608 | 0.226204229 | 0.187197516 | 0.418255056 |
| 0.109323381 | 0.177510415 | 0.198980279 | 0.261750159 |
| 0.153962221 | 0.199971042 | 0.231108895 | 0.207635722 |
| 0.301729649 | 0.280843678 |             |             |
| CCDC25      | 0.147645445 | 0.235811125 | 0.105679882 |
| 0.156320214 | 0.135377614 | 0.098841058 | 0.138798596 |
| 0.180135539 | 0.195165206 | 0.041802042 | 0.174133072 |
| 0.116289039 | 0.017683002 | 0.308322445 | 0.12979858  |
| 0.142915005 | 0.142200593 | 0.178696955 | 0.041501444 |
| 0.081751473 | 0.133905761 | 0.074131595 | 0.138954815 |
| 0.108696657 | 0.309378145 | 0.162139161 | 0.088383877 |
| 0.280509428 | 0.036082688 | 0.172955692 | 0.030655471 |
| 0.3611043   | 0.139251609 | 0.070355588 | 0.08443473  |
| 0.131407768 | 0.00425903  | 0.362989035 | 0.130311656 |
| 0.039552275 | 0.349812267 | 0.066901739 | 0.152295311 |
| 0.086984358 | 0.124400902 | 0.025787908 | 0.145641416 |
| 0.143131513 | 0.101441379 | 0.127776671 | 0.181021425 |
| 0.078961026 | 0.259103294 | 0.159490887 | 0.025015502 |
| 0.052915968 | 0.007798533 | 0.029931297 | 0.320269824 |
| 0.289422032 | 0.176328964 | 0.037201549 | 0.100991114 |
| 0.125361227 | 0.169168056 | 0.224381432 | 0.066669329 |
| 0.324932834 | 0.038034533 | 0.164964145 | 0.099189891 |
| 0.108017669 | 0.081511523 | 0.289511405 | 0.133794416 |
| 0.072758868 | 0.202946692 | 0.141025272 | 0.058535104 |
| 0.241078679 | 0.374044788 | 0.221077862 | 0.323331434 |
| 0.026003914 | 0.109687452 | 0.080580876 | 0.24799984  |
| 0.192460609 | 0.104287942 | 0.248494005 | 0.361067749 |

|             |             |             |             |
|-------------|-------------|-------------|-------------|
| 0.087869054 | 0.110003613 | 0.194384164 | 0.204859611 |
| 0.248917246 | 0.041706579 | 0.094997475 | 0.047226781 |
| 0.156391664 | 0.127951821 | 0.318955536 | 0.290346898 |
| 0.095589638 | 0.158405405 | 0.335042291 | 0.102496184 |
| 0.124604627 | 0.166053357 | 0.091865752 | 0.220053577 |
| 0.180063543 | 0.294616366 | 0.216712344 | 0.242344143 |
| 0.12347205  | 0.313206673 | 0.230604969 | 0.263794682 |
| 0.015937461 | 0.319811557 | 0.207061656 | 0.147421058 |
| 0.122774785 | 0.147849883 | 0.061185733 | 0.295201881 |
| 0.256229547 | 0.234659778 | 1           | 0.163639389 |
| 0.254099731 | 0.310372623 | 0.309611295 | 0.264273778 |
| 0.138286357 | 0.037705541 | 0.121472977 | 0.112924083 |
| 0.209331043 | 0.190592869 | 0.068463525 | 0.36037452  |
| 0.348423738 | 0.232169758 | 0.142995243 | 0.383587614 |
| 0.116908236 | 0.364028516 | 0.243210954 | 0.215281818 |
| 0.35893711  | 0.350167158 | 0.3372264   | 0.166764437 |
| 0.346512304 | 0.165279696 | 0.021134157 | 0.251292406 |
| 0.355223482 | 0.008633385 | 0.24282426  | 0.26780901  |
| 0.308422911 | 0.231218544 | 0.323470292 | 0.292619817 |
| 0.30895197  | 0.182267433 | 0.003091366 | 0.206119776 |
| 0.339364496 | 0.315290329 | 0.122771134 | 0.108451674 |
| 0.141430495 | 0.130221399 | 0.192916619 | 0.092314942 |
| 0.383745855 | 0.263574609 | 0.259963341 | 0.234302683 |
| 0.110968371 | 0.359238478 | 0.087095264 | 0.335079867 |
| 0.14444088  | 0.162287485 | 0.162996854 | 0.23177071  |
| 0.065573031 | 0.227370095 | 0.12373425  | 0.124060516 |
| 0.261508094 | 0.109153938 | 0.050361739 | 0.175102947 |
| 0.176191876 | 0.132450886 | 0.17426396  | 0.187538661 |
| 0.155196241 | 0.292537024 | 0.196486793 | 0.156784983 |
| 0.168955258 | 0.328106332 | 0.173099605 | 0.283822517 |
| 0.079745382 | 0.256343925 | 0.204182651 | 0.347774206 |
| 0.370407756 | 0.118020832 | 0.268995284 | 0.05701955  |
| 0.107538148 | 0.037738943 | 0.030127963 | 0.10204611  |
| 0.293325766 | 0.13878185  | 0.164014257 | 0.206159148 |
| 0.195788042 | 0.108056266 | 0.085555308 | 0.386564932 |
| 0.219810282 | 0.115736495 | 0.291856214 | 0.123774798 |
| 0.036939997 | 0.184412945 | 0.243755328 | 0.076497167 |
| 0.202216831 | 0.044843051 | 0.051591323 | 0.270834276 |
| 0.059073495 | 0.066038063 | 0.266075845 | 0.190456101 |
| 0.089159311 | 0.27724228  | 0.3245645   | 0.010740422 |
| 0.089853008 | 0.096322378 | 0.257452885 | 0.065178024 |
| 0.230248738 | 0.264937368 | 0.112226551 | 0.102117513 |
| 0.215216442 | 0.329870871 | 0.27106451  | 0.305891534 |
| 0.073776814 | 0.332201675 | 0.248657868 | 0.303367975 |
| 0.210710623 | 0.06936183  | 0.020877843 | 0.255672266 |
| 0.256855022 | 0.072640774 | 0.171475211 | 0.187621    |
| 0.070025681 | 0.174813496 | 0.086667706 | 0.326883055 |
| 0.38507326  | 0.290189045 | 0.167251609 | 0.231659034 |
| 0.313371892 | 0.222879409 | 0.241641922 | 0.340233771 |
| 0.048339084 | 0.109220536 | 0.089968662 | 0.266869608 |
| 0.254192634 | 0.074312455 | 0.29851602  | 0.024646307 |
| 0.001453991 | 0.151489705 | 0.175941713 | 0.15607203  |
| 0.053520044 | 0.119659931 | 0.178181222 | 0.32425416  |
| 0.196643031 | 0.310068675 | 0.217893603 | 0.126427168 |



|             |             |             |             |
|-------------|-------------|-------------|-------------|
| 0.311477483 | 0.087702184 | 0.102649831 | 0.152307574 |
| 0.267264063 | 0.064272435 | 0.152782425 | 0.384970125 |
| 0.123602407 | 0.063169454 | 0.133709814 | 0.009434093 |
| 0.130922281 | 0.187659393 | 0.228853992 | 0.338883065 |
| 0.282918215 | 0.320200168 | 0.251131715 | 0.058330642 |
| 0.24732619  | 0.186445071 | 0.016526755 | 0.272763372 |
| 0.284420452 | 0.271673665 | 0.283898496 | 0.29224723  |
| 0.246138912 | 0.18283985  | 0.223406788 | 0.149504    |
| 0.183235896 | 0.125343559 | 0.061702281 | 0.149901372 |
| 0.009371567 | 0.258254758 | 0.117138067 | 0.275736426 |
| 0.194792334 | 0.217914006 | 0.140951725 | 0.12360472  |
| 0.100832731 | 0.034702246 | 0.108837556 | 0.129234003 |
| 0.206130742 | 0.085151522 | 0.072845778 | 0.074181581 |
| 0.319650947 | 0.312055543 | 0.060030685 | 0.333338666 |
| 0.19535678  | 0.177227593 | 0.134371792 | 0.21920313  |
| 0.164093757 | 0.031569097 | 0.086700013 | 0.008149406 |
| 0.055706342 | 0.301013748 | 0.077518803 | 0.139560106 |
| 0.235474253 | 0.063253145 | 0.31272316  | 0.345260301 |
| 0.289055871 | 0.307997237 | 0.323971068 | 0.067070496 |
| 0.326946443 | 0.008444763 | 0.309947943 | 0.249503756 |
| 0.063428154 | 0.00915095  | 0.02627693  | 0.266370729 |
| 0.140737014 | 0.152556136 | 0.244621099 | 0.093979523 |
| 0.170193808 | 0.122914131 | 0.137405107 | 0.072633361 |
| 0.160878542 | 0.143022259 | 0.065447603 | 0.313260941 |
| 0.161652965 | 0.193430642 | 0.084296365 | 0.197198207 |
| 0.139153645 | 0.148915796 | 0.178611533 | 0.018975233 |
| 0.196286231 | 0.234863545 | 0.35034591  | 0.306966956 |
| 0.365413158 | 0.194492485 | 0.048913964 | 0.082462632 |
| 0.233857779 | 0.164649853 | 0.061835745 | 0.164737954 |
| 0.296158275 | 0.182338542 | 0.322257417 | 0.331830372 |
| 0.345509242 | 0.345206489 | 0.129210059 | 0.239461518 |
| 0.060327314 | 0.003547155 | 0.133094011 | 0.244843867 |
| 0.011969563 | 0.097827987 | 0.307341155 | 0.078298133 |
| 0.090466852 | 0.13546247  | 0.050264468 | 0.05900127  |
| 0.218211152 | 0.145320566 | 0.107956938 | 0.217042099 |
| 0.09167059  | 0.07791418  | 0.14056646  | 0.152872274 |
| 0.063395094 | 0.283419277 | 0.318589537 | 0.102781042 |
| 0.103464416 | 0.122267674 | 0.153008906 | 0.255797661 |
| 0.283211766 | 0.287919811 | 0.11982356  | 0.074698373 |
| 0.323908572 | 0.107331058 | 0.3002145   | 0.290067415 |
| 0.355506187 | 0.358627739 | 0.378268907 | 0.13473207  |
| 0.151784315 | 0.166544127 | 0.108767752 | 0.103060225 |
| 0.314495033 | 0.151996734 | 0.303457211 | 0.069625229 |
| 0.224532794 | 0.153894665 | 0.141441227 | 0.177426407 |
| 0.113074006 | 0.25688732  | 0.167419125 | 0.208432432 |
| 0.121942251 | 0.06078306  | 0.136610862 | 0.227890004 |
| 0.284667625 | 0.037593436 | 0.249304105 | 0.100501839 |
| 0.232473551 | 0.030854669 | 0.188806632 | 0.369052799 |
| 0.235553572 | 0.155565616 | 0.128740228 | 0.197312113 |
| 0.220329276 | 0.089161326 | 0.084055788 | 0.247187968 |
| 0.301093265 | 0.166689129 | 0.321653817 | 0.305091388 |
| 0.201528788 | 0.127143942 | 0.053979822 | 0.147806323 |
| 0.214760814 | 0.108413602 | 0.159776659 | 0.185103537 |
| 0.298310175 | 0.358428345 | 0.26841255  | 0.173624038 |

|             |             |             |             |
|-------------|-------------|-------------|-------------|
| 0.118874046 | 0.160485002 | 0.133698358 | 0.23532366  |
| 0.056650935 | 0.170255056 | 0.06721675  | 0.203871543 |
| 0.007908537 | 0.026370322 | 0.28136027  | 0.153333684 |
| 0.342631545 | 0.292553093 | 0.355216504 | 0.101774045 |
| 0.000839536 | 0.149898318 | 0.201674287 | 0.104541125 |
| 0.271579179 | 0.265250476 | 0.065417341 | 0.162558692 |
| 0.315634125 | 0.18674838  | 0.157764859 | 0.085859232 |
| 0.027352151 | 0.176354547 | 0.27889648  | 0.16153406  |
| 0.134341185 | 0.149065164 | 0.050779042 | 0.162579035 |
| 0.029496394 | 0.31699214  | 0.306261033 | 0.046531517 |
| 0.053979957 | 0.273949558 | 0.242273313 | 0.110928093 |
| 0.091537142 | 0.2393024   | 0.276423233 | 0.017208463 |
| 0.204472443 | 0.082362117 | 0.154114747 | 0.157713586 |
| 0.142344416 | 0.136495373 | 0.193129006 | 0.107894617 |
| 0.185267213 | 0.160963199 | 0.160404698 | 0.25368073  |
| 0.152648903 | 0.166871852 | 0.150768622 | 0.111340406 |
| 0.122764234 | 0.164934158 | 0.236258319 | 0.239017373 |
| 0.153456568 | 0.253631063 | 0.342945525 | 0.1803713   |
| 0.225593307 | 0.095684707 | 0.356455576 | 0.291164589 |
| 0.316732882 | 0.199148806 | 0.10760275  | 0.260012569 |
| 0.034102797 | 0.100368384 | 0.134615827 | 0.134711256 |
| 0.22128136  | 0.093288873 | 0.104426726 | 0.186050313 |
| 0.173130951 | 0.37231206  | 0.333998728 | 0.306545175 |
| 0.119758523 | 0.091922107 | 0.054782277 | 0.157801551 |
| 0.186367038 | 0.223009153 | 0.11412876  | 0.030751722 |
| 0.224181387 | 0.141441195 | 0.258577795 | 0.322818255 |
| 0.046734109 | 0.322795843 | 0.063921171 | 0.175435138 |
| 0.044990085 | 0.263130564 | 0.276078979 | 0.191172496 |
| 0.033909315 | 0.157826598 | 0.153447569 | 0.092459735 |
| 0.199772714 | 0.164557802 | 0.073625697 | 0.140496092 |
| 0.162370724 | 0.211251235 | 0.32525944  | 0.130563628 |
| 0.12131204  | 0.085820788 | 0.116128257 | 0.146320202 |
| 0.141368764 | 0.290622938 | 0.16278135  | 0.298442705 |
| 0.106227604 | 0.23413747  | 0.384699993 | 0.134676964 |
| 0.114717508 | 0.125938094 | 0.031428135 | 0.076521235 |
| 0.126332203 | 0.055817722 | 0.002374478 | 0.035785131 |
| 0.270655685 | 0.060137283 | 0.1916483   | 0.202565633 |
| 0.077595262 | 0.265435459 | 0.022916189 | 0.152517688 |
| 0.297222103 | 0.342425093 | 0.163449323 | 0.297667072 |
| 0.264748162 | 0.173398195 | 0.170157498 | 0.007507794 |
| 0.146888035 | 0.113635704 | 0.064306319 | 0.144496933 |
| 0.104623598 | 0.038930965 | 0.153545465 | 0.132446204 |
| 0.279413394 | 0.034285597 | 0.12474251  | 0.19023408  |
| 0.227264103 | 0.357653544 | 0.14555696  | 0.237461442 |
| 0.073558899 | 0.228369049 | 0.080920845 | 0.085502865 |
| 0.125324355 | 0.074999223 | 0.260413831 | 0.063219983 |
| 0.141366945 | 0.11292582  | 0.014624042 | 0.387139809 |
| 0.32193402  | 0.079838835 | 0.293526823 | 0.040525982 |
| 0.260549739 | 0.249665692 | 0.095959705 | 0.088550612 |
| 0.071225309 | 0.142413834 | 0.226260008 | 0.281967276 |
| 0.048580525 | 0.123959943 | 0.143009638 | 0.089064814 |
| 0.356676631 | 0.101677965 | 0.284979888 | 0.0628498   |
| 0.293266616 | 0.215934072 | 0.203472602 | 0.086821758 |
| 0.129452117 | 0.184381334 | 0.066689687 | 0.333221185 |

|             |             |             |             |
|-------------|-------------|-------------|-------------|
| 0.162262018 | 0.066669542 | 0.251723427 | 0.167367737 |
| 0.065559044 | 0.278999198 | 0.109373518 | 0.318262759 |
| 0.130225573 | 0.290939193 | 0.216100598 | 0.294495293 |
| 0.303391698 | 0.059498796 | 0.065320117 | 0.114172836 |
| 0.299153696 | 0.148207102 | 0.068403542 | 0.279116879 |
| 0.054038409 | 0.227631252 | 0.111492777 | 0.105372582 |
| 0.117040042 | 0.141667286 | 0.101625408 | 0.227667173 |
| 0.222044398 | 0.131575975 | 0.087436884 | 0.367900491 |
| 0.153471576 | 0.102472919 | 0.369182159 | 0.006456478 |
| 0.161235576 | 0.193636948 | 0.211225675 | 0.106512362 |
| 0.305279322 | 0.179998525 | 0.143588614 | 0.028994896 |
| 0.237488871 | 0.023016446 | 0.081150833 | 0.115771669 |
| 0.064731053 | 0.14322227  | 0.315935641 | 0.312249988 |
| 0.209454852 | 0.057732944 | 0.056335589 | 0.294817147 |
| 0.036510225 | 0.042423999 | 0.056957767 | 0.169063906 |
| 0.046523205 | 0.070318778 | 0.075160336 | 0.065892417 |
| 0.225263497 | 0.128265666 |             |             |
| CCDC41      | 0.088732941 | 0.223886799 | 0.05128769  |
| 0.176816127 | 0.253543524 | 0.117733055 | 0.120032268 |
| 0.146569071 | 0.194837225 | 0.058957052 | 0.208643151 |
| 0.070544557 | 0.069400562 | 0.306900461 | 0.122746938 |
| 0.232450225 | 0.129998788 | 0.165963469 | 0.048778806 |
| 0.14106395  | 0.255651814 | 0.135640406 | 0.112035808 |
| 0.215779675 | 0.202752079 | 0.160163786 | 0.139586213 |
| 0.28654686  | 0.060873252 | 0.212270123 | 0.046202351 |
| 0.348812633 | 0.25468675  | 0.112823823 | 0.048209724 |
| 0.159198639 | 0.0284201   | 0.328425071 | 0.249303003 |
| 0.147022951 | 0.306571528 | 0.064383851 | 0.235240379 |
| 0.098482902 | 0.068932019 | 0.029824772 | 0.217007897 |
| 0.160860845 | 0.170524744 | 0.058693624 | 0.215112346 |
| 0.124462058 | 0.211975302 | 0.146414106 | 0.00343654  |
| 0.12238484  | 0.038566792 | 0.091666834 | 0.29636641  |
| 0.259373574 | 0.203177228 | 0.07501057  | 0.120764385 |
| 0.174464647 | 0.245572661 | 0.26840485  | 0.100655085 |
| 0.316375882 | 0.121419632 | 0.210404844 | 0.140801013 |
| 0.143895832 | 0.050488453 | 0.245304919 | 0.07992445  |
| 0.144698699 | 0.241581862 | 0.200792235 | 0.163255178 |
| 0.212445091 | 0.352595275 | 0.24353473  | 0.285354984 |
| 0.113822348 | 0.209339848 | 0.205911527 | 0.344976427 |
| 0.249687626 | 0.11622383  | 0.282593561 | 0.357469794 |
| 0.065590064 | 0.108980602 | 0.229888295 | 0.12195392  |
| 0.237076516 | 0.110663702 | 0.09502533  | 0.137267255 |
| 0.268223688 | 0.228853936 | 0.299328197 | 0.287210233 |
| 0.169327287 | 0.085201823 | 0.274716363 | 0.209605519 |
| 0.202219812 | 0.099130041 | 0.234947198 | 0.271370736 |
| 0.229697061 | 0.29495163  | 0.225268699 | 0.292969314 |
| 0.198548649 | 0.316005666 | 0.259315817 | 0.264023524 |
| 0.021422217 | 0.308943938 | 0.1813759   | 0.131273221 |
| 0.061354166 | 0.173885141 | 0.159061568 | 0.323458537 |
| 0.289852316 | 0.225845137 | 0.163639389 | 1           |
| 0.337691142 | 0.255828048 | 0.301328639 | 0.279654622 |
| 0.090869974 | 0.124640177 | 0.197592891 | 0.127685108 |
| 0.256175037 | 0.156016277 | 0.179069121 | 0.318322755 |
| 0.31965893  | 0.30367958  | 0.107182936 | 0.335114214 |

|             |             |             |             |
|-------------|-------------|-------------|-------------|
| 0.148504523 | 0.372140178 | 0.22977382  | 0.21252997  |
| 0.336977531 | 0.300690651 | 0.369494839 | 0.255909943 |
| 0.306616041 | 0.157533001 | 0.039378503 | 0.276774289 |
| 0.374143545 | 0.030676052 | 0.274632679 | 0.304416788 |
| 0.288927158 | 0.279943573 | 0.366333043 | 0.313831825 |
| 0.281305843 | 0.113408931 | 0.014015052 | 0.317113079 |
| 0.31026475  | 0.318129946 | 0.194567331 | 0.15074344  |
| 0.23681611  | 0.124200563 | 0.239124063 | 0.115479263 |
| 0.391239818 | 0.28672278  | 0.273493112 | 0.241761917 |
| 0.123562041 | 0.286761842 | 0.150478008 | 0.268869532 |
| 0.118349821 | 0.103370212 | 0.069176246 | 0.277316114 |
| 0.072353937 | 0.262991739 | 0.121480972 | 0.202003118 |
| 0.277898957 | 0.106917072 | 0.103963587 | 0.268914046 |
| 0.075999518 | 0.148721959 | 0.159388889 | 0.141664481 |
| 0.148073321 | 0.190674943 | 0.192602106 | 0.200444164 |
| 0.236775344 | 0.202030659 | 0.200684445 | 0.316694525 |
| 0.155827347 | 0.186031073 | 0.216881667 | 0.359630317 |
| 0.406670528 | 0.192042158 | 0.257677562 | 0.068862017 |
| 0.183857771 | 0.079078345 | 0.104408548 | 0.149347369 |
| 0.186785634 | 0.201443951 | 0.222427712 | 0.301470937 |
| 0.135542974 | 0.093961981 | 0.160079248 | 0.326083053 |
| 0.144043625 | 0.198133696 | 0.331124922 | 0.140322063 |
| 0.020945026 | 0.203847315 | 0.281468337 | 0.221133526 |
| 0.21771727  | 0.12135997  | 0.106433699 | 0.319586582 |
| 0.116321801 | 0.184033974 | 0.294569676 | 0.293928785 |
| 0.106483133 | 0.167942341 | 0.352715749 | 0.029480804 |
| 0.164098903 | 0.146537518 | 0.346661526 | 0.065606236 |
| 0.24836451  | 0.323874576 | 0.213682328 | 0.212046279 |
| 0.109154614 | 0.317037035 | 0.269995165 | 0.319207339 |
| 0.133278335 | 0.357587958 | 0.296693103 | 0.323370206 |
| 0.244862976 | 0.112636861 | 0.086765432 | 0.283729101 |
| 0.308788031 | 0.112294391 | 0.08756096  | 0.228436742 |
| 0.108272152 | 0.250890807 | 0.198136582 | 0.359245048 |
| 0.357785613 | 0.244190998 | 0.216641416 | 0.338959261 |
| 0.322044346 | 0.19096876  | 0.284674276 | 0.364686606 |
| 0.078165874 | 0.185255185 | 0.193005108 | 0.371726515 |
| 0.221574794 | 0.21706399  | 0.275716226 | 0.093288068 |
| 0.003925398 | 0.083363308 | 0.092361591 | 0.250810137 |
| 0.183923789 | 0.142424306 | 0.255816513 | 0.323769518 |
| 0.178341207 | 0.292961028 | 0.225965725 | 0.22004967  |
| 0.281718151 | 0.15062434  | 0.170176227 | 0.219192588 |
| 0.261156248 | 0.08544969  | 0.201502208 | 0.35549806  |
| 0.04820366  | 0.158250829 | 0.134281448 | 0.015067516 |
| 0.086785888 | 0.177334585 | 0.128494042 | 0.236437226 |
| 0.343023873 | 0.212899816 | 0.202057515 | 0.080563974 |
| 0.298948746 | 0.142193474 | 0.030370218 | 0.30371035  |
| 0.293455898 | 0.286585456 | 0.284041174 | 0.267871323 |
| 0.288051357 | 0.224279326 | 0.308405126 | 0.122852949 |
| 0.156131263 | 0.081043875 | 0.192342698 | 0.232974739 |
| 0.006713845 | 0.316345466 | 0.189861954 | 0.222651004 |
| 0.25321922  | 0.253588431 | 0.086305293 | 0.207333956 |
| 0.055841437 | 0.096362066 | 0.132760933 | 0.199109088 |
| 0.320497297 | 0.046190334 | 0.092940479 | 0.142919533 |
| 0.253855782 | 0.26628511  | 0.122171926 | 0.326257833 |

|             |             |             |             |
|-------------|-------------|-------------|-------------|
| 0.235303384 | 0.101566058 | 0.231239279 | 0.282860708 |
| 0.141828539 | 0.041624741 | 0.117718998 | 0.011853003 |
| 0.057168321 | 0.286281869 | 0.124269804 | 0.106372839 |
| 0.268251532 | 0.026522852 | 0.267069822 | 0.337594336 |
| 0.244573059 | 0.342895804 | 0.319877509 | 0.157784275 |
| 0.318652151 | 0.040910679 | 0.316768361 | 0.241706681 |
| 0.088799235 | 0.004999308 | 0.029428926 | 0.307376015 |
| 0.204956973 | 0.061842332 | 0.225028693 | 0.097676636 |
| 0.219758839 | 0.096250957 | 0.112805969 | 0.228151814 |
| 0.179797162 | 0.239837241 | 0.177334992 | 0.265694311 |
| 0.238850049 | 0.252508016 | 0.096336388 | 0.114517478 |
| 0.189310127 | 0.140329927 | 0.115762286 | 0.036282527 |
| 0.295693002 | 0.118194964 | 0.276817255 | 0.300610878 |
| 0.361878344 | 0.28258382  | 0.065194315 | 0.101698787 |
| 0.286294544 | 0.07547508  | 0.09194426  | 0.087445736 |
| 0.266814601 | 0.256521877 | 0.329080386 | 0.286229641 |
| 0.368167185 | 0.321744126 | 0.093534243 | 0.309541081 |
| 0.045885627 | 0.012629753 | 0.115456371 | 0.248955839 |
| 0.04930002  | 0.16854295  | 0.307929898 | 0.133151363 |
| 0.171328416 | 0.063883877 | 0.158334956 | 0.174877192 |
| 0.297556279 | 0.204915968 | 0.216291479 | 0.219493722 |
| 0.2244621   | 0.223654679 | 0.220090088 | 0.183818311 |
| 0.107972606 | 0.246754733 | 0.207060031 | 0.074303703 |
| 0.130634681 | 0.164075999 | 0.111921732 | 0.194400278 |
| 0.315724073 | 0.313385871 | 0.147965063 | 0.08596733  |
| 0.267835742 | 0.175270399 | 0.334113441 | 0.272560617 |
| 0.32235258  | 0.381122193 | 0.32106403  | 0.242401662 |
| 0.118101658 | 0.271037575 | 0.218613    | 0.252636124 |
| 0.311590599 | 0.070585849 | 0.277663766 | 0.158456301 |
| 0.176605735 | 0.225601371 | 0.123183706 | 0.143972193 |
| 0.179433104 | 0.232222674 | 0.259470913 | 0.127986743 |
| 0.218244749 | 0.149448142 | 0.106400974 | 0.243498288 |
| 0.281774206 | 0.154904483 | 0.216251285 | 0.122926864 |
| 0.232857995 | 0.044148009 | 0.255444156 | 0.379868551 |
| 0.163138581 | 0.126312507 | 0.107770041 | 0.243965276 |
| 0.250313406 | 0.112491931 | 0.053603162 | 0.222402897 |
| 0.325379803 | 0.200810018 | 0.290384517 | 0.36268442  |
| 0.132284488 | 0.184203665 | 0.134653154 | 0.235185035 |
| 0.218420539 | 0.117858452 | 0.202439633 | 0.114961382 |
| 0.296284348 | 0.330034671 | 0.264919125 | 0.230286688 |
| 0.142460335 | 0.089376524 | 0.060780905 | 0.253111349 |
| 0.206612648 | 0.123910106 | 0.070702608 | 0.257706789 |
| 0.018623191 | 0.10997232  | 0.336445613 | 0.185468469 |
| 0.350450251 | 0.339205462 | 0.345273419 | 0.128886861 |
| 0.005790567 | 0.234754435 | 0.252431066 | 0.161936803 |
| 0.244179121 | 0.244544112 | 0.088876891 | 0.201990147 |
| 0.346697981 | 0.081424531 | 0.239592114 | 0.097479882 |
| 0.123968337 | 0.175215973 | 0.28899236  | 0.18420944  |
| 0.249900117 | 0.083684317 | 0.139215223 | 0.190293801 |
| 0.126668708 | 0.314057318 | 0.348873104 | 0.051209595 |
| 0.115940432 | 0.315766001 | 0.258702586 | 0.066188223 |
| 0.160162685 | 0.303350471 | 0.305448691 | 0.020050248 |
| 0.261114904 | 0.049470214 | 0.243365642 | 0.249825034 |
| 0.249608478 | 0.226885366 | 0.302464207 | 0.223931132 |

|             |             |             |             |
|-------------|-------------|-------------|-------------|
| 0.20704516  | 0.220979204 | 0.211476884 | 0.29245723  |
| 0.245445523 | 0.170903673 | 0.215503066 | 0.146451165 |
| 0.209028631 | 0.168713833 | 0.122759465 | 0.114739032 |
| 0.126453379 | 0.256234706 | 0.274594766 | 0.085968876 |
| 0.271409387 | 0.138713622 | 0.370583559 | 0.264233294 |
| 0.34635156  | 0.097842829 | 0.172808913 | 0.246412092 |
| 0.05152464  | 0.095345155 | 0.068378425 | 0.159786497 |
| 0.202280227 | 0.203926951 | 0.111668896 | 0.153622503 |
| 0.191504956 | 0.343017959 | 0.258745551 | 0.325933568 |
| 0.180191629 | 0.136904276 | 0.059650578 | 0.218344161 |
| 0.185922432 | 0.16800778  | 0.238544395 | 0.019393048 |
| 0.25821822  | 0.113135952 | 0.289554668 | 0.28957068  |
| 0.113559372 | 0.334426234 | 0.066473575 | 0.142075439 |
| 0.051209726 | 0.147660395 | 0.201522626 | 0.222011837 |
| 0.096015373 | 0.186729405 | 0.261410736 | 0.082600011 |
| 0.264008915 | 0.218142729 | 0.191854015 | 0.155221371 |
| 0.214881053 | 0.167646035 | 0.301228715 | 0.092962455 |
| 0.15425773  | 0.232618208 | 0.11019583  | 0.233938285 |
| 0.24606975  | 0.311557474 | 0.092034412 | 0.31491466  |
| 0.194857911 | 0.154037799 | 0.373432743 | 0.137572441 |
| 0.134558939 | 0.207152591 | 0.116213218 | 0.096247805 |
| 0.207200191 | 0.125274748 | 0.00313701  | 0.067136419 |
| 0.344120768 | 0.108618073 | 0.198083057 | 0.263802504 |
| 0.217535392 | 0.357768273 | 0.077284151 | 0.143452326 |
| 0.250606167 | 0.290745341 | 0.204986814 | 0.316661504 |
| 0.274941345 | 0.17318426  | 0.145500716 | 0.011052042 |
| 0.197823038 | 0.159057343 | 0.094335846 | 0.118767745 |
| 0.070888749 | 0.130201099 | 0.18955597  | 0.074723168 |
| 0.342327725 | 0.087717095 | 0.142483771 | 0.222457954 |
| 0.187762246 | 0.29839691  | 0.233287225 | 0.28914895  |
| 0.061411714 | 0.252126095 | 0.144965616 | 0.125749381 |
| 0.236182878 | 0.192141848 | 0.336500746 | 0.174552697 |
| 0.112819441 | 0.22805108  | 0.019933159 | 0.324785277 |
| 0.268320059 | 0.163633502 | 0.240649928 | 0.056016067 |
| 0.336078436 | 0.280576629 | 0.178114507 | 0.120145026 |
| 0.070315416 | 0.230649294 | 0.227635801 | 0.257943043 |
| 0.090741373 | 0.165860311 | 0.155793733 | 0.180910362 |
| 0.273271401 | 0.167736154 | 0.27206983  | 0.121236837 |
| 0.268595868 | 0.221006347 | 0.126772584 | 0.18094388  |
| 0.153409673 | 0.099980428 | 0.079510088 | 0.340974513 |
| 0.241309213 | 0.194375106 | 0.327760353 | 0.252201294 |
| 0.15197278  | 0.246264737 | 0.145338724 | 0.320842017 |
| 0.221600949 | 0.28774012  | 0.28287976  | 0.287888631 |
| 0.350993446 | 0.202026914 | 0.164624697 | 0.243175397 |
| 0.251180872 | 0.145236135 | 0.171047733 | 0.268060557 |
| 0.164499275 | 0.281629317 | 0.108521729 | 0.238408591 |
| 0.119825746 | 0.169138609 | 0.127895299 | 0.191100528 |
| 0.266657645 | 0.223003576 | 0.238051294 | 0.356608563 |
| 0.204093861 | 0.107263314 | 0.367237635 | 0.03311456  |
| 0.131381445 | 0.259998247 | 0.22174125  | 0.178468478 |
| 0.211145943 | 0.199381159 | 0.130018523 | 0.009114902 |
| 0.316624359 | 0.089864792 | 0.160780554 | 0.243773198 |
| 0.122096262 | 0.095401097 | 0.295171546 | 0.35083439  |
| 0.207878841 | 0.096239306 | 0.096731159 | 0.286051134 |

|             |             |             |             |
|-------------|-------------|-------------|-------------|
| 0.145145687 | 0.088059974 | 0.120555055 | 0.169647819 |
| 0.145965216 | 0.084492845 | 0.10505577  | 0.126608645 |
| 0.245787809 | 0.145710141 |             |             |
| CCDC99      | 0.102446798 | 0.404877584 | 0.073709242 |
| 0.197568637 | 0.409252678 | 0.423388179 | 0.097227686 |
| 0.177137033 | 0.364834134 | 0.337235146 | 0.424933648 |
| 0.032783245 | 0.156197416 | 0.447007849 | 0.093396897 |
| 0.474288054 | 0.063736867 | 0.162187817 | 0.114083936 |
| 0.301515202 | 0.395567764 | 0.419873998 | 0.388252377 |
| 0.399137209 | 0.19868118  | 0.379747525 | 0.450262123 |
| 0.485816794 | 0.320491235 | 0.467720615 | 0.228295464 |
| 0.413279816 | 0.427383166 | 0.447864681 | 0.027095753 |
| 0.460301511 | 0.032900964 | 0.429057636 | 0.370998203 |
| 0.245866371 | 0.338958189 | 0.347065852 | 0.331799985 |
| 0.409525956 | 0.056010046 | 0.226390053 | 0.467560836 |
| 0.375192439 | 0.364070796 | 0.085918521 | 0.456801597 |
| 0.432098352 | 0.36758449  | 0.388682357 | 0.003418749 |
| 0.394560034 | 0.152226968 | 0.327739244 | 0.483885566 |
| 0.25731759  | 0.188943797 | 0.360068303 | 0.309233652 |
| 0.447986575 | 0.444711654 | 0.323204413 | 0.418379283 |
| 0.486873495 | 0.287027558 | 0.460749769 | 0.216121397 |
| 0.444082236 | 0.05109893  | 0.206629017 | 0.110431976 |
| 0.464630991 | 0.279111105 | 0.419712772 | 0.421067375 |
| 0.401452555 | 0.503678106 | 0.302056677 | 0.476261323 |
| 0.200054512 | 0.439761849 | 0.390631523 | 0.380201709 |
| 0.422299928 | 0.134351153 | 0.454730513 | 0.512157154 |
| 0.075578609 | 0.395983813 | 0.443926268 | 0.153205148 |
| 0.410778486 | 0.378572559 | 0.408174208 | 0.27553407  |
| 0.452699426 | 0.446691513 | 0.462674426 | 0.353762539 |
| 0.407248177 | 0.097966715 | 0.455575622 | 0.423797978 |
| 0.383247343 | 0.112245554 | 0.351931451 | 0.470015115 |
| 0.467773082 | 0.479027559 | 0.427466146 | 0.417177812 |
| 0.464083358 | 0.488110555 | 0.445795515 | 0.408661115 |
| 0.17685424  | 0.507948793 | 0.242460846 | 0.074643291 |
| 0.094334352 | 0.139177843 | 0.346005901 | 0.343492124 |
| 0.460578185 | 0.381149201 | 0.254099731 | 0.337691142 |
| 1           | 0.447207776 | 0.507083999 | 0.438509969 |
| 0.063208717 | 0.3674855   | 0.465734028 | 0.330386319 |
| 0.442137472 | 0.159227765 | 0.37809592  | 0.487440196 |
| 0.381673667 | 0.472318703 | 0.204995697 | 0.48051253  |
| 0.272401914 | 0.507931358 | 0.42617688  | 0.238499864 |
| 0.501455776 | 0.469963198 | 0.510227468 | 0.46708916  |
| 0.453674026 | 0.388024768 | 0.110674717 | 0.409681249 |
| 0.484040244 | 0.031011879 | 0.467459612 | 0.497286232 |
| 0.480665489 | 0.473959908 | 0.523832445 | 0.500864158 |
| 0.481287655 | 0.104387112 | 0.057315111 | 0.385719517 |
| 0.489583345 | 0.409938123 | 0.21249895  | 0.469672029 |
| 0.451428525 | 0.428022876 | 0.453257791 | 0.370778063 |
| 0.508996519 | 0.443679603 | 0.477235333 | 0.427687679 |
| 0.356544988 | 0.314773168 | 0.452059533 | 0.43871262  |
| 0.073043178 | 0.149685306 | 0.068792989 | 0.363043092 |
| 0.359405709 | 0.250468338 | 0.412925519 | 0.437034463 |
| 0.264346109 | 0.378784246 | 0.4082813   | 0.455197615 |
| 0.069696929 | 0.463819412 | 0.220466093 | 0.224471002 |

|             |             |             |             |
|-------------|-------------|-------------|-------------|
| 0.075554255 | 0.162463468 | 0.257082566 | 0.220556547 |
| 0.349868738 | 0.226870237 | 0.464857961 | 0.485341492 |
| 0.437614154 | 0.216898325 | 0.45360206  | 0.470912074 |
| 0.433284846 | 0.460536149 | 0.279047279 | 0.023676432 |
| 0.378647066 | 0.381014267 | 0.296873428 | 0.462789349 |
| 0.17473094  | 0.344312878 | 0.461686344 | 0.45861567  |
| 0.318072232 | 0.190738409 | 0.460763083 | 0.412965819 |
| 0.1785971   | 0.392857983 | 0.456237392 | 0.442002171 |
| 0.006087217 | 0.399717316 | 0.465609114 | 0.263566686 |
| 0.376940432 | 0.223171378 | 0.333379057 | 0.463151227 |
| 0.385978649 | 0.351685087 | 0.484471896 | 0.457280343 |
| 0.383868569 | 0.211138396 | 0.521758991 | 0.095231889 |
| 0.435267079 | 0.093057919 | 0.366196367 | 0.351801885 |
| 0.324118793 | 0.360987249 | 0.418828974 | 0.383180012 |
| 0.153079034 | 0.502829317 | 0.40468209  | 0.502208611 |
| 0.452666657 | 0.523706449 | 0.469714173 | 0.439132991 |
| 0.419508416 | 0.43744682  | 0.235513698 | 0.460003664 |
| 0.459446624 | 0.36597174  | 0.094683845 | 0.462688933 |
| 0.427858869 | 0.469351403 | 0.197693186 | 0.494017558 |
| 0.480530508 | 0.439993928 | 0.219139752 | 0.440993985 |
| 0.414139451 | 0.29026157  | 0.432533259 | 0.524936666 |
| 0.374092143 | 0.455178289 | 0.442858243 | 0.441290744 |
| 0.229729333 | 0.342198175 | 0.327807038 | 0.284405165 |
| 0.016558988 | 0.112020872 | 0.092072442 | 0.248091161 |
| 0.28096836  | 0.442144481 | 0.464742946 | 0.505917408 |
| 0.173656041 | 0.401263809 | 0.291457983 | 0.395115748 |
| 0.408250815 | 0.438753737 | 0.450704044 | 0.455057472 |
| 0.294664873 | 0.035267869 | 0.17973152  | 0.504367594 |
| 0.05414002  | 0.345676817 | 0.373048888 | 0.006421589 |
| 0.072254947 | 0.399949821 | 0.113363167 | 0.196022835 |
| 0.481178937 | 0.197910896 | 0.25723924  | 0.370407703 |
| 0.405817675 | 0.134986233 | 0.007241435 | 0.481712586 |
| 0.474228496 | 0.449015321 | 0.470476394 | 0.437706266 |
| 0.43879745  | 0.433742435 | 0.462065831 | 0.374917306 |
| 0.154289688 | 0.12054518  | 0.342408973 | 0.390805848 |
| 0.008243708 | 0.424598135 | 0.397949141 | 0.188728715 |
| 0.465892964 | 0.371782268 | 0.059906699 | 0.43758396  |
| 0.03526694  | 0.294496178 | 0.379365761 | 0.30581932  |
| 0.422609165 | 0.02385076  | 0.291331621 | 0.423953146 |
| 0.403830641 | 0.356660702 | 0.431706794 | 0.512737719 |
| 0.404447816 | 0.150946603 | 0.410977761 | 0.447589113 |
| 0.113906196 | 0.150931689 | 0.417835809 | 0.046438597 |
| 0.228290546 | 0.43770229  | 0.443394302 | 0.102062003 |
| 0.348786961 | 0.008835347 | 0.36492     | 0.515668575 |
| 0.436663152 | 0.516518378 | 0.488054036 | 0.37357102  |
| 0.490770342 | 0.179711522 | 0.515929175 | 0.410417473 |
| 0.416856445 | 0.001678827 | 0.012383181 | 0.48194166  |
| 0.469253551 | 0.06966464  | 0.217357741 | 0.383316876 |
| 0.177427925 | 0.194413272 | 0.10038272  | 0.302290696 |
| 0.449497535 | 0.340972366 | 0.283566938 | 0.446931009 |
| 0.334017594 | 0.315574502 | 0.421187368 | 0.114303303 |
| 0.458813022 | 0.088229253 | 0.116527053 | 0.01651999  |
| 0.437614583 | 0.129267445 | 0.439299869 | 0.49196267  |
| 0.486356526 | 0.456880305 | 0.36842619  | 0.386665805 |



|             |             |             |             |
|-------------|-------------|-------------|-------------|
| 0.437922293 | 0.115129538 | 0.407650756 | 0.136387862 |
| 0.461979248 | 0.466008085 | 0.371851099 | 0.334355204 |
| 0.501416019 | 0.45662602  | 0.056806559 | 0.458392844 |
| 0.021971874 | 0.005483947 | 0.39674163  | 0.318900648 |
| 0.120638691 | 0.465781607 | 0.30655273  | 0.314736428 |
| 0.318239129 | 0.047608651 | 0.389503942 | 0.365631868 |
| 0.38321359  | 0.446819339 | 0.387462358 | 0.29175772  |
| 0.377854179 | 0.244037455 | 0.278058605 | 0.223998851 |
| 0.319546634 | 0.325354971 | 0.203456105 | 0.038348708 |
| 0.458952854 | 0.469869603 | 0.088160197 | 0.200449816 |
| 0.453092265 | 0.485558228 | 0.082597179 | 0.02484697  |
| 0.298611343 | 0.406425769 | 0.497563978 | 0.476960609 |
| 0.502727585 | 0.517427638 | 0.381150214 | 0.213277668 |
| 0.101910953 | 0.414336004 | 0.402332159 | 0.182693916 |
| 0.497049955 | 0.087285394 | 0.460367374 | 0.406839584 |
| 0.160743683 | 0.296712242 | 0.061001557 | 0.128027041 |
| 0.454749058 | 0.234682148 | 0.270045276 | 0.17956777  |
| 0.418320949 | 0.348905516 | 0.078231649 | 0.270000164 |
| 0.393097612 | 0.301672813 | 0.218503272 | 0.359579023 |
| 0.381349221 | 0.26096099  | 0.476422366 | 0.449764787 |
| 0.168082668 | 0.158848247 | 0.318546906 | 0.427393639 |
| 0.46025299  | 0.425394852 | 0.039520574 | 0.425140917 |
| 0.484129261 | 0.475369224 | 0.474542818 | 0.41888097  |
| 0.115967443 | 0.455227252 | 0.418538133 | 0.438657071 |
| 0.252459234 | 0.415713411 | 0.322051859 | 0.092739029 |
| 0.317817457 | 0.466231869 | 0.411321459 | 0.241863274 |
| 0.448985418 | 0.154014753 | 0.077190452 | 0.432285679 |
| 0.311834515 | 0.132972542 | 0.375352033 | 0.457430776 |
| 0.004714923 | 0.238011212 | 0.490146998 | 0.307771838 |
| 0.505657642 | 0.481284312 | 0.432755261 | 0.314865096 |
| 0.005361838 | 0.472483775 | 0.446385566 | 0.462137631 |
| 0.413801212 | 0.376976918 | 0.20381996  | 0.128723091 |
| 0.333242455 | 0.09886076  | 0.223399027 | 0.371325524 |
| 0.296184246 | 0.439592074 | 0.256341841 | 0.27690644  |
| 0.294791213 | 0.115344126 | 0.344911889 | 0.304578515 |
| 0.260545594 | 0.293565181 | 0.398401732 | 0.308406369 |
| 0.292543478 | 0.435997671 | 0.434172587 | 0.042111098 |
| 0.437810621 | 0.433831598 | 0.423452291 | 0.00593525  |
| 0.475356573 | 0.014293096 | 0.291678437 | 0.307426562 |
| 0.292056567 | 0.309497809 | 0.354423739 | 0.394993852 |
| 0.410520625 | 0.307362882 | 0.35009914  | 0.309039972 |
| 0.244475998 | 0.283280898 | 0.454345737 | 0.418547013 |
| 0.370371451 | 0.178729769 | 0.111311581 | 0.104298209 |
| 0.083794075 | 0.442733275 | 0.265633039 | 0.090877482 |
| 0.30349741  | 0.423099734 | 0.36681883  | 0.468708203 |
| 0.413779763 | 0.122746425 | 0.41693979  | 0.425072099 |
| 0.289805124 | 0.336419724 | 0.087365051 | 0.429988514 |
| 0.295939398 | 0.32711715  | 0.421570135 | 0.349716228 |
| 0.432957259 | 0.39400703  | 0.263583982 | 0.431453367 |
| 0.433933596 | 0.419116309 | 0.335113578 | 0.145618595 |
| 0.241229603 | 0.169666792 | 0.380564259 | 0.004048929 |
| 0.416409542 | 0.296450663 | 0.464858762 | 0.465699425 |
| 0.386841235 | 0.381603356 | 0.339324502 | 0.134814882 |
| 0.291587796 | 0.17618609  | 0.182305584 | 0.451149315 |

|             |             |             |             |
|-------------|-------------|-------------|-------------|
| 0.314066694 | 0.247794229 | 0.401883813 | 0.346953296 |
| 0.469845495 | 0.453252616 | 0.368320942 | 0.313012028 |
| 0.317331628 | 0.238519518 | 0.457226508 | 0.154408378 |
| 0.462499731 | 0.295636276 | 0.371538255 | 0.402357399 |
| 0.321791144 | 0.503991412 | 0.085288157 | 0.514316887 |
| 0.43867229  | 0.156703991 | 0.482054676 | 0.350999407 |
| 0.339925199 | 0.189426407 | 0.298174826 | 0.412026852 |
| 0.31828756  | 0.423565021 | 0.023030085 | 0.114120439 |
| 0.39615781  | 0.379527436 | 0.416602748 | 0.420829189 |
| 0.36569691  | 0.398403512 | 0.252279705 | 0.34961548  |
| 0.450118513 | 0.468906436 | 0.340970472 | 0.300208622 |
| 0.393752326 | 0.153060169 | 0.404520072 | 0.028084875 |
| 0.475748857 | 0.464949737 | 0.429578511 | 0.086577377 |
| 0.034066814 | 0.327101153 | 0.461914307 | 0.091075393 |
| 0.484951366 | 0.29326333  | 0.39234005  | 0.458289238 |
| 0.21676434  | 0.470542881 | 0.199653913 | 0.455453188 |
| 0.075108983 | 0.31758552  | 0.451739187 | 0.440710908 |
| 0.326782492 | 0.409146287 | 0.435907598 | 0.345924963 |
| 0.05709103  | 0.368245769 | 0.00475009  | 0.394161799 |
| 0.442912486 | 0.44417256  | 0.232956987 | 0.334993538 |
| 0.350254965 | 0.392199383 | 0.349707855 | 0.450934294 |
| 0.022386912 | 0.454668428 | 0.2606954   | 0.407663026 |
| 0.312050425 | 0.42976821  | 0.093848923 | 0.422539052 |
| 0.426159923 | 0.386604088 | 0.290478771 | 0.39497693  |
| 0.464403454 | 0.391678758 | 0.182388477 | 0.309744704 |
| 0.417678207 | 0.087695719 | 0.396896873 | 0.517499931 |
| 0.260253721 | 0.330573216 | 0.471612084 | 0.299180173 |
| 0.416581308 | 0.374584938 | 0.440927098 | 0.505875264 |
| 0.138494145 | 0.306824371 | 0.461347082 | 0.446328799 |
| 0.355388697 | 0.292411571 | 0.357601747 | 0.346846549 |
| 0.429789822 | 0.14103517  | 0.373297163 | 0.395624574 |
| 0.339123549 | 0.376628576 | 0.355051407 | 0.298782049 |
| 0.065995902 | 0.235715294 | 0.410682907 | 0.189668176 |
| 0.376255682 | 0.453517863 | 0.363353272 | 0.380999607 |
| 0.198652162 | 0.047441922 | 0.445471932 | 0.043971408 |
| 0.360556419 | 0.454576191 | 0.307716188 | 0.438563385 |
| 0.208780944 | 0.409987703 | 0.376615377 | 0.002260153 |
| 0.452858579 | 0.086312152 | 0.392667152 | 0.339179714 |
| 0.378123822 | 0.079912541 | 0.437386324 | 0.512070712 |
| 0.361568466 | 0.378438406 | 0.409875793 | 0.447088415 |
| 0.255030801 | 0.399996438 | 0.430795961 | 0.427815826 |
| 0.335579261 | 0.411784109 | 0.449473629 | 0.444197873 |
| 0.419727833 | 0.324204179 |             |             |
| CCNA2       | 0.190865459 | 0.511504019 | 0.186617179 |
| 0.211710968 | 0.288616939 | 0.494323613 | 0.139065297 |
| 0.225550735 | 0.465998453 | 0.404253646 | 0.400620172 |
| 0.05818613  | 0.064901918 | 0.486872102 | 0.12444277  |
| 0.380150775 | 0.073904693 | 0.19573541  | 0.114461699 |
| 0.322147021 | 0.25988911  | 0.338598882 | 0.519573397 |
| 0.27162852  | 0.329677786 | 0.480630607 | 0.390102987 |
| 0.51255307  | 0.285394995 | 0.468062177 | 0.276791968 |
| 0.447313586 | 0.299796599 | 0.384807875 | 0.070532291 |
| 0.468136266 | 0.010238149 | 0.455799529 | 0.275543655 |
| 0.129394661 | 0.428711452 | 0.477504486 | 0.289948588 |

|             |             |             |             |
|-------------|-------------|-------------|-------------|
| 0.458525077 | 0.12049232  | 0.308108831 | 0.416175268 |
| 0.447277589 | 0.358207992 | 0.205471783 | 0.492296266 |
| 0.412212751 | 0.466648129 | 0.508593729 | 0.0061701   |
| 0.271840156 | 0.065989987 | 0.190847306 | 0.512180109 |
| 0.300215545 | 0.190418459 | 0.294466255 | 0.374024781 |
| 0.424271481 | 0.400360055 | 0.333288837 | 0.426655395 |
| 0.504264915 | 0.140356709 | 0.463576786 | 0.2281154   |
| 0.462700365 | 0.12341711  | 0.267503361 | 0.230891932 |
| 0.408072482 | 0.25951283  | 0.359894508 | 0.278679037 |
| 0.512681761 | 0.507490993 | 0.336102626 | 0.51209683  |
| 0.079294977 | 0.309840509 | 0.264563969 | 0.340484392 |
| 0.416369266 | 0.175582652 | 0.450657865 | 0.489677489 |
| 0.148255567 | 0.486135348 | 0.452478518 | 0.275867152 |
| 0.517695023 | 0.272845776 | 0.490299527 | 0.145243749 |
| 0.356209828 | 0.320049118 | 0.484595873 | 0.375315548 |
| 0.322611736 | 0.209019347 | 0.52182355  | 0.282961345 |
| 0.314434345 | 0.212000185 | 0.205498401 | 0.47294755  |
| 0.456922376 | 0.510711431 | 0.494944929 | 0.415728981 |
| 0.358612145 | 0.504712396 | 0.463420347 | 0.48702936  |
| 0.223898933 | 0.510100522 | 0.307019102 | 0.08872208  |
| 0.211727138 | 0.144299828 | 0.232637566 | 0.3780127   |
| 0.497100095 | 0.433438129 | 0.310372623 | 0.255828048 |
| 0.447207776 | 1           | 0.508258385 | 0.467092179 |
| 0.111834934 | 0.222805639 | 0.36893526  | 0.417976544 |
| 0.422626015 | 0.223319008 | 0.220446435 | 0.519232315 |
| 0.451818762 | 0.450762057 | 0.328502771 | 0.518557569 |
| 0.297941971 | 0.483550369 | 0.523746282 | 0.248059143 |
| 0.508856797 | 0.511746559 | 0.479519577 | 0.387562356 |
| 0.497354113 | 0.453525535 | 0.088945029 | 0.45141314  |
| 0.468977979 | 0.012473223 | 0.493668491 | 0.490827687 |
| 0.510914871 | 0.474004454 | 0.475945573 | 0.500070875 |
| 0.515242211 | 0.186087462 | 0.028649215 | 0.295572745 |
| 0.503372761 | 0.460404211 | 0.177268912 | 0.420376539 |
| 0.349866899 | 0.508819499 | 0.47180469  | 0.319080768 |
| 0.471814082 | 0.493495746 | 0.507231584 | 0.467990256 |
| 0.423879092 | 0.41564279  | 0.359112674 | 0.507105349 |
| 0.104722794 | 0.250708891 | 0.1741127   | 0.380805733 |
| 0.478038538 | 0.232273643 | 0.491145639 | 0.362666713 |
| 0.264318126 | 0.483879904 | 0.319259048 | 0.364273857 |
| 0.184002869 | 0.489122219 | 0.290944392 | 0.308478643 |
| 0.084397857 | 0.274499405 | 0.24174723  | 0.224766559 |
| 0.271470159 | 0.349238415 | 0.477962862 | 0.489335713 |
| 0.36623264  | 0.333338882 | 0.489914967 | 0.470695805 |
| 0.42220088  | 0.366264478 | 0.335445465 | 0.022222939 |
| 0.262515312 | 0.324798078 | 0.149361661 | 0.420913654 |
| 0.311739721 | 0.275907452 | 0.400700219 | 0.388862348 |
| 0.436367386 | 0.301009528 | 0.361398849 | 0.460475493 |
| 0.310601023 | 0.31544908  | 0.458889824 | 0.474081304 |
| 0.018759682 | 0.401384382 | 0.484280341 | 0.135061807 |
| 0.41162221  | 0.114139303 | 0.237786183 | 0.47550372  |
| 0.270527285 | 0.19996413  | 0.498696476 | 0.388254342 |
| 0.406657252 | 0.363566172 | 0.485793372 | 0.04054046  |
| 0.347233253 | 0.057667971 | 0.313519417 | 0.457280351 |
| 0.344257023 | 0.338131496 | 0.291862117 | 0.269899348 |

|             |             |             |             |
|-------------|-------------|-------------|-------------|
| 0.294636866 | 0.504484943 | 0.475513993 | 0.503198935 |
| 0.363613061 | 0.485630154 | 0.475941392 | 0.475295492 |
| 0.443407578 | 0.36772336  | 0.104415785 | 0.47780428  |
| 0.47674317  | 0.319342279 | 0.218789862 | 0.473504567 |
| 0.403478463 | 0.399778895 | 0.11572699  | 0.477701938 |
| 0.483116704 | 0.50993414  | 0.192171385 | 0.373875533 |
| 0.442668711 | 0.3492946   | 0.462981241 | 0.48119212  |
| 0.378066226 | 0.338644737 | 0.313333679 | 0.396687362 |
| 0.290810459 | 0.187073897 | 0.412660183 | 0.147035938 |
| 0.010544071 | 0.211185951 | 0.17944017  | 0.190342586 |
| 0.13193382  | 0.469573114 | 0.416853355 | 0.500559334 |
| 0.197977124 | 0.482135484 | 0.347563613 | 0.290373641 |
| 0.481304777 | 0.348174506 | 0.368638824 | 0.394884442 |
| 0.352530813 | 0.036766806 | 0.163493336 | 0.511898269 |
| 0.156885527 | 0.206814071 | 0.431537398 | 0.005355533 |
| 0.129877933 | 0.511609871 | 0.234041254 | 0.312710098 |
| 0.460501886 | 0.328903472 | 0.339006621 | 0.407267117 |
| 0.384935004 | 0.195315309 | 0.005571989 | 0.490497533 |
| 0.489732    | 0.478424291 | 0.492518335 | 0.489058541 |
| 0.464564592 | 0.466143873 | 0.427699526 | 0.511804813 |
| 0.194785675 | 0.231126875 | 0.169767781 | 0.302233601 |
| 0.014202802 | 0.419424049 | 0.324121876 | 0.250013779 |
| 0.439347998 | 0.375261832 | 0.106319944 | 0.351871227 |
| 0.06972244  | 0.167885786 | 0.408424073 | 0.269029243 |
| 0.353192365 | 0.06118259  | 0.293426566 | 0.30513099  |
| 0.503875495 | 0.454107817 | 0.345797084 | 0.504876516 |
| 0.369700235 | 0.302369198 | 0.316435146 | 0.42160527  |
| 0.150795854 | 0.13669959  | 0.461958258 | 0.06185485  |
| 0.293371594 | 0.481912259 | 0.400547729 | 0.170226989 |
| 0.34587711  | 0.025617167 | 0.471881744 | 0.501055178 |
| 0.515643451 | 0.48664412  | 0.50473009  | 0.238553846 |
| 0.505260329 | 0.084260451 | 0.507598031 | 0.502448385 |
| 0.429663851 | 0.003111731 | 0.01226704  | 0.488627405 |
| 0.389878654 | 0.198577488 | 0.259926329 | 0.466039708 |
| 0.164101244 | 0.323185308 | 0.150782218 | 0.153302239 |
| 0.49132882  | 0.238496137 | 0.152399422 | 0.504644583 |
| 0.289490983 | 0.28932913  | 0.497370098 | 0.222168092 |
| 0.425493353 | 0.115302502 | 0.216651335 | 0.010678496 |
| 0.377217858 | 0.268659834 | 0.513530548 | 0.510734292 |
| 0.479372812 | 0.392291122 | 0.398798271 | 0.416581515 |
| 0.464443441 | 0.272775617 | 0.394285641 | 0.283729512 |
| 0.518663402 | 0.391073019 | 0.38608399  | 0.414553808 |
| 0.474481262 | 0.489950338 | 0.093233486 | 0.433384233 |
| 0.040381735 | 0.002115215 | 0.502243461 | 0.354898251 |
| 0.07211023  | 0.355151606 | 0.348494715 | 0.310643376 |
| 0.281169766 | 0.095295881 | 0.220762812 | 0.198163337 |
| 0.335042434 | 0.371591252 | 0.241698258 | 0.359930152 |
| 0.257569416 | 0.114604621 | 0.250237145 | 0.225718273 |
| 0.290395339 | 0.432658733 | 0.331283635 | 0.070115372 |
| 0.469968454 | 0.411944485 | 0.141264125 | 0.285754233 |
| 0.474910548 | 0.493765359 | 0.085935832 | 0.020858803 |
| 0.377626493 | 0.332549682 | 0.481682822 | 0.51960242  |
| 0.520592972 | 0.476375833 | 0.44362771  | 0.137526295 |
| 0.157143218 | 0.338961944 | 0.26310676  | 0.102964249 |

|             |             |             |             |
|-------------|-------------|-------------|-------------|
| 0.506602611 | 0.203478638 | 0.513409622 | 0.260004534 |
| 0.226422759 | 0.289630523 | 0.071125235 | 0.172459304 |
| 0.370653437 | 0.274653309 | 0.203569142 | 0.309359835 |
| 0.322307623 | 0.218037829 | 0.123662784 | 0.278581223 |
| 0.425350958 | 0.136145676 | 0.258975995 | 0.433542089 |
| 0.471060396 | 0.325892075 | 0.435647054 | 0.451422807 |
| 0.263945541 | 0.231974899 | 0.431536368 | 0.434904363 |
| 0.492934107 | 0.451758578 | 0.067117801 | 0.519758743 |
| 0.486493658 | 0.467140881 | 0.512939551 | 0.406319311 |
| 0.202921688 | 0.369724019 | 0.292320463 | 0.338155959 |
| 0.27465367  | 0.500493698 | 0.299044708 | 0.159070372 |
| 0.383472269 | 0.485362867 | 0.487469392 | 0.220377335 |
| 0.476249686 | 0.304469494 | 0.190728857 | 0.497489691 |
| 0.140043897 | 0.183949246 | 0.484563084 | 0.462210842 |
| 0.002514898 | 0.104353117 | 0.467685353 | 0.313733064 |
| 0.486853025 | 0.475906516 | 0.46932344  | 0.376311887 |
| 0.000925374 | 0.403504903 | 0.401696454 | 0.411730947 |
| 0.509225406 | 0.462811155 | 0.245574004 | 0.118314419 |
| 0.35456571  | 0.233571691 | 0.172605403 | 0.458100454 |
| 0.147232302 | 0.498248819 | 0.278534236 | 0.311972641 |
| 0.220873915 | 0.246067524 | 0.216854544 | 0.331859299 |
| 0.12631622  | 0.317362122 | 0.399384224 | 0.428994527 |
| 0.164695581 | 0.452532911 | 0.471051667 | 0.090322114 |
| 0.342963873 | 0.447931792 | 0.469843581 | 0.004591569 |
| 0.438230973 | 0.024327117 | 0.218212859 | 0.238440639 |
| 0.231244673 | 0.239376869 | 0.268564083 | 0.290448923 |
| 0.432212429 | 0.2889398   | 0.326488429 | 0.298490575 |
| 0.195267999 | 0.322644419 | 0.402847839 | 0.444995393 |
| 0.280210689 | 0.224429004 | 0.241239482 | 0.244386716 |
| 0.104155594 | 0.51106734  | 0.357788613 | 0.21693212  |
| 0.288860326 | 0.428221131 | 0.399094261 | 0.516501722 |
| 0.444930934 | 0.282806292 | 0.371252352 | 0.519143147 |
| 0.269894609 | 0.395543018 | 0.180804278 | 0.475707015 |
| 0.32168601  | 0.196476353 | 0.494862036 | 0.459206654 |
| 0.483054793 | 0.444163625 | 0.358661903 | 0.470841387 |
| 0.390259963 | 0.381893227 | 0.437926898 | 0.116258933 |
| 0.277293002 | 0.264709274 | 0.23633776  | 0.009039778 |
| 0.414524875 | 0.414620063 | 0.492539751 | 0.507100254 |
| 0.260456366 | 0.438810419 | 0.45713047  | 0.176596862 |
| 0.399639319 | 0.335124238 | 0.254830522 | 0.48620359  |
| 0.182052506 | 0.279056556 | 0.292353606 | 0.510132357 |
| 0.449740235 | 0.456723643 | 0.246396734 | 0.347989693 |
| 0.309128834 | 0.353650085 | 0.481407621 | 0.277248469 |
| 0.459620186 | 0.160840268 | 0.493312051 | 0.301630478 |
| 0.235086677 | 0.499962433 | 0.164037451 | 0.501853298 |
| 0.320223184 | 0.276862894 | 0.47044252  | 0.425832193 |
| 0.410306623 | 0.150750486 | 0.146806019 | 0.483920149 |
| 0.284111573 | 0.318550214 | 0.021679204 | 0.057422162 |
| 0.361370066 | 0.362053143 | 0.491728771 | 0.41370391  |
| 0.21977882  | 0.363386781 | 0.14169623  | 0.40207655  |
| 0.512780425 | 0.522138825 | 0.287483067 | 0.326263404 |
| 0.421955213 | 0.17682208  | 0.529569623 | 0.022673449 |
| 0.429919175 | 0.427062734 | 0.425515382 | 0.120259853 |
| 0.05880627  | 0.167560571 | 0.446892058 | 0.200289155 |

|             |             |             |             |
|-------------|-------------|-------------|-------------|
| 0.462454323 | 0.180468129 | 0.455658084 | 0.480235621 |
| 0.310546731 | 0.521957412 | 0.146997714 | 0.428402458 |
| 0.132234393 | 0.346346988 | 0.373102636 | 0.414457905 |
| 0.219544112 | 0.25108235  | 0.397916574 | 0.196545012 |
| 0.07756706  | 0.268550577 | 0.003540721 | 0.448684329 |
| 0.503550156 | 0.306779512 | 0.327782089 | 0.385120073 |
| 0.321002772 | 0.45091344  | 0.245591407 | 0.449193358 |
| 0.026483014 | 0.344335766 | 0.281373603 | 0.504896068 |
| 0.225109849 | 0.412016031 | 0.10163663  | 0.290182821 |
| 0.512170157 | 0.279098596 | 0.353530492 | 0.30443156  |
| 0.516868732 | 0.486707935 | 0.339552327 | 0.231684746 |
| 0.461667324 | 0.180463827 | 0.491245763 | 0.493679892 |
| 0.213748476 | 0.176029143 | 0.440805029 | 0.239766575 |
| 0.277320455 | 0.484871834 | 0.451154935 | 0.494410238 |
| 0.086151574 | 0.320124082 | 0.447562003 | 0.490555349 |
| 0.345089228 | 0.138011706 | 0.207636429 | 0.219759292 |
| 0.514030903 | 0.173881641 | 0.230134921 | 0.4450957   |
| 0.174009156 | 0.364306638 | 0.473849374 | 0.18141119  |
| 0.071650852 | 0.2432653   | 0.441121474 | 0.256494228 |
| 0.334897746 | 0.363309873 | 0.217543208 | 0.429615196 |
| 0.16867906  | 0.045699398 | 0.456174366 | 0.010797464 |
| 0.495041593 | 0.410183217 | 0.328520475 | 0.344942099 |
| 0.32369338  | 0.43601208  | 0.464856411 | 0.006301004 |
| 0.437319367 | 0.048725186 | 0.331761591 | 0.213817051 |
| 0.273321696 | 0.137034548 | 0.49874765  | 0.481265988 |
| 0.431478264 | 0.373061028 | 0.342674243 | 0.500909103 |
| 0.113655231 | 0.327017719 | 0.328254127 | 0.510748289 |
| 0.183893588 | 0.449060827 | 0.437711552 | 0.366386825 |
| 0.474938404 | 0.385642892 |             |             |
| CCNB1       | 0.156220934 | 0.522670476 | 0.138125459 |
| 0.214427652 | 0.354943635 | 0.513305208 | 0.125674286 |
| 0.218941168 | 0.480265951 | 0.441876365 | 0.444433859 |
| 0.044917473 | 0.095633541 | 0.521242537 | 0.113320406 |
| 0.458506387 | 0.068205366 | 0.190198783 | 0.12739208  |
| 0.345187736 | 0.327472439 | 0.399345362 | 0.522174459 |
| 0.340349636 | 0.294445458 | 0.493282792 | 0.465340582 |
| 0.541096711 | 0.334162329 | 0.519844172 | 0.298869533 |
| 0.464725443 | 0.372184118 | 0.456535005 | 0.048699551 |
| 0.514651169 | 0.017781241 | 0.461803373 | 0.331186843 |
| 0.173173596 | 0.430084962 | 0.488856165 | 0.320884465 |
| 0.507642846 | 0.09152438  | 0.31906998  | 0.491638474 |
| 0.472077187 | 0.390978494 | 0.157935706 | 0.53578756  |
| 0.476784443 | 0.467871319 | 0.52677221  | 0.005334671 |
| 0.343468654 | 0.100547128 | 0.261195724 | 0.523677556 |
| 0.299397971 | 0.193430113 | 0.371012871 | 0.383658385 |
| 0.490312188 | 0.464810603 | 0.3544388   | 0.491750164 |
| 0.528587404 | 0.200077973 | 0.523554735 | 0.235602014 |
| 0.508056858 | 0.094008649 | 0.256628123 | 0.191498434 |
| 0.478814797 | 0.277958369 | 0.411247818 | 0.35771496  |
| 0.522380296 | 0.526565969 | 0.349081331 | 0.5234396   |
| 0.124854439 | 0.390545151 | 0.330026329 | 0.383944096 |
| 0.469250654 | 0.170331213 | 0.499674667 | 0.519052815 |
| 0.122069495 | 0.520090354 | 0.50777425  | 0.239666183 |
| 0.530795033 | 0.344672608 | 0.525518566 | 0.193941207 |

|             |             |             |             |
|-------------|-------------|-------------|-------------|
| 0.429498961 | 0.40055334  | 0.498012451 | 0.397111387 |
| 0.380869127 | 0.16736901  | 0.518664643 | 0.36159751  |
| 0.360442352 | 0.174939562 | 0.272440988 | 0.531270867 |
| 0.514556383 | 0.539875905 | 0.531802206 | 0.463635645 |
| 0.442537132 | 0.530973337 | 0.506578515 | 0.508077277 |
| 0.243671092 | 0.530612782 | 0.297786319 | 0.080434552 |
| 0.167891308 | 0.142656688 | 0.299456396 | 0.395257145 |
| 0.537246468 | 0.454296589 | 0.309611295 | 0.301328639 |
| 0.507083999 | 0.508258385 | 1           | 0.511185579 |
| 0.090440375 | 0.299924553 | 0.449931095 | 0.412824286 |
| 0.477505799 | 0.20801815  | 0.291438317 | 0.528993514 |
| 0.465960966 | 0.510719884 | 0.298975449 | 0.523956952 |
| 0.31518689  | 0.510327654 | 0.543123559 | 0.255467591 |
| 0.527466599 | 0.516574804 | 0.516965966 | 0.459042117 |
| 0.501184374 | 0.469402357 | 0.108502434 | 0.48652178  |
| 0.499104687 | 0.017430025 | 0.540249716 | 0.53830718  |
| 0.527516375 | 0.532781888 | 0.518160069 | 0.536000175 |
| 0.529386809 | 0.157182333 | 0.044734769 | 0.352777316 |
| 0.521505848 | 0.486242879 | 0.196534458 | 0.497552369 |
| 0.424670631 | 0.528301339 | 0.520347318 | 0.375783577 |
| 0.502343621 | 0.529623523 | 0.544159533 | 0.509732232 |
| 0.452878642 | 0.409961264 | 0.441227146 | 0.501013419 |
| 0.090517296 | 0.218326559 | 0.12989291  | 0.410577624 |
| 0.488563468 | 0.248925871 | 0.518463959 | 0.43440062  |
| 0.277686764 | 0.493231763 | 0.391165883 | 0.436518254 |
| 0.137809538 | 0.539717407 | 0.278157131 | 0.298966169 |
| 0.079031919 | 0.241132222 | 0.26388074  | 0.227746735 |
| 0.317339822 | 0.30968689  | 0.533716594 | 0.528577468 |
| 0.438494043 | 0.30608163  | 0.534408503 | 0.500717644 |
| 0.455803217 | 0.441395708 | 0.337622944 | 0.020480009 |
| 0.336404687 | 0.401243626 | 0.214044954 | 0.49028328  |
| 0.271058622 | 0.328351531 | 0.474144094 | 0.453763058 |
| 0.427106731 | 0.275199916 | 0.443492627 | 0.459627283 |
| 0.275208975 | 0.365768752 | 0.509604623 | 0.528682999 |
| 0.011588143 | 0.441433388 | 0.53219639  | 0.183721329 |
| 0.443826298 | 0.155109942 | 0.290610262 | 0.524598383 |
| 0.349478933 | 0.267357053 | 0.537410296 | 0.453110343 |
| 0.443320369 | 0.322325291 | 0.522951161 | 0.065158345 |
| 0.421923397 | 0.067620667 | 0.355702769 | 0.481399517 |
| 0.3621482   | 0.376786277 | 0.362505418 | 0.329483444 |
| 0.247959112 | 0.526067345 | 0.495613043 | 0.536822276 |
| 0.448399128 | 0.521305846 | 0.529357661 | 0.510548385 |
| 0.476012227 | 0.44955462  | 0.153458973 | 0.527064353 |
| 0.526295784 | 0.393356903 | 0.171166503 | 0.531567064 |
| 0.476353319 | 0.475065677 | 0.147659023 | 0.517344787 |
| 0.49884033  | 0.508436428 | 0.207531798 | 0.436548665 |
| 0.474199283 | 0.348717998 | 0.501634705 | 0.514744051 |
| 0.44307154  | 0.42229126  | 0.393877548 | 0.453009371 |
| 0.282645136 | 0.251693466 | 0.416765121 | 0.205939841 |
| 0.012875645 | 0.177231392 | 0.145911743 | 0.215670072 |
| 0.184067392 | 0.52361671  | 0.482539799 | 0.53144782  |
| 0.194172886 | 0.495334938 | 0.35663528  | 0.354877405 |
| 0.500443956 | 0.423729505 | 0.438411009 | 0.458943573 |
| 0.356662281 | 0.033620078 | 0.17039853  | 0.530145274 |

|             |             |             |             |
|-------------|-------------|-------------|-------------|
| 0.113779704 | 0.268874284 | 0.454957787 | 0.004813673 |
| 0.10730322  | 0.53242168  | 0.192271694 | 0.282712549 |
| 0.509421335 | 0.294916867 | 0.332923852 | 0.461013215 |
| 0.426535274 | 0.175282913 | 0.005077074 | 0.527272622 |
| 0.513445297 | 0.503220204 | 0.514528911 | 0.493003492 |
| 0.507673716 | 0.507196845 | 0.491051563 | 0.505580505 |
| 0.186879388 | 0.195192539 | 0.241958814 | 0.361972801 |
| 0.012106535 | 0.460080923 | 0.380556146 | 0.23611872  |
| 0.502826707 | 0.412688641 | 0.084670121 | 0.420493447 |
| 0.052247933 | 0.228785482 | 0.442434543 | 0.302972724 |
| 0.412793673 | 0.041950916 | 0.322400991 | 0.38829255  |
| 0.496923514 | 0.456834298 | 0.423068894 | 0.530005545 |
| 0.413574583 | 0.257201997 | 0.377790834 | 0.47224647  |
| 0.138685216 | 0.170341663 | 0.499134423 | 0.063614917 |
| 0.291494468 | 0.492162871 | 0.468515947 | 0.146568604 |
| 0.373538257 | 0.015999279 | 0.473866891 | 0.526109388 |
| 0.514710094 | 0.529966254 | 0.530124337 | 0.303979314 |
| 0.527698578 | 0.12688775  | 0.537554863 | 0.522345035 |
| 0.492075404 | 0.002297252 | 0.011086943 | 0.535981853 |
| 0.466853865 | 0.145305998 | 0.255383231 | 0.479108839 |
| 0.16949053  | 0.289295655 | 0.131554119 | 0.206552142 |
| 0.527759051 | 0.287001303 | 0.202240863 | 0.51122685  |
| 0.327435746 | 0.317298945 | 0.53334541  | 0.184756154 |
| 0.483782462 | 0.10312389  | 0.184011525 | 0.011560071 |
| 0.437226677 | 0.222332061 | 0.506038552 | 0.531701064 |
| 0.50472371  | 0.457958759 | 0.452465327 | 0.444982131 |
| 0.507471423 | 0.214661716 | 0.450733856 | 0.233278958 |
| 0.531631155 | 0.464562596 | 0.412657295 | 0.41759693  |
| 0.512377517 | 0.509910495 | 0.076414489 | 0.492580446 |
| 0.029561225 | 0.002643053 | 0.516798673 | 0.371680731 |
| 0.098248008 | 0.439704322 | 0.358126716 | 0.348420975 |
| 0.316772079 | 0.072264332 | 0.300537221 | 0.274126063 |
| 0.382091847 | 0.44115433  | 0.310614984 | 0.365520394 |
| 0.319876484 | 0.163097527 | 0.271580936 | 0.237448203 |
| 0.342641536 | 0.430316996 | 0.298731576 | 0.055429709 |
| 0.527688887 | 0.484520368 | 0.119292008 | 0.26595464  |
| 0.517191631 | 0.537226261 | 0.084442226 | 0.019821309 |
| 0.376715257 | 0.397618127 | 0.526752435 | 0.537295031 |
| 0.536110528 | 0.508919197 | 0.443012822 | 0.168033465 |
| 0.135180366 | 0.397205129 | 0.334724252 | 0.127053002 |
| 0.533343313 | 0.160577334 | 0.521295307 | 0.337789571 |
| 0.20997855  | 0.311073807 | 0.063615111 | 0.158938386 |
| 0.442995031 | 0.272976713 | 0.233771849 | 0.273859383 |
| 0.386653372 | 0.282531818 | 0.106106221 | 0.290671261 |
| 0.458088479 | 0.201068702 | 0.257541963 | 0.445878987 |
| 0.483096281 | 0.355442418 | 0.506459097 | 0.475432157 |
| 0.235239654 | 0.215916274 | 0.427636824 | 0.481008743 |
| 0.541480083 | 0.507616941 | 0.052348933 | 0.531498365 |
| 0.521912829 | 0.527513783 | 0.521277631 | 0.452757624 |
| 0.173879914 | 0.439477922 | 0.376593161 | 0.413409083 |
| 0.284141641 | 0.514528778 | 0.331084141 | 0.134062524 |
| 0.390007735 | 0.49658153  | 0.514767066 | 0.23474226  |
| 0.523000266 | 0.259049906 | 0.147665007 | 0.528292152 |
| 0.203505095 | 0.167543182 | 0.505242854 | 0.517316087 |



|             |             |             |             |
|-------------|-------------|-------------|-------------|
| 0.002768442 | 0.151092069 | 0.5125187   | 0.327661865 |
| 0.51408393  | 0.52272082  | 0.487709543 | 0.382807944 |
| 0.002107223 | 0.481103581 | 0.457552265 | 0.478362809 |
| 0.53100762  | 0.470312519 | 0.246246215 | 0.120968025 |
| 0.372534382 | 0.181699577 | 0.196875079 | 0.468102005 |
| 0.212601885 | 0.534931832 | 0.285922121 | 0.325480167 |
| 0.258128308 | 0.204563082 | 0.275603327 | 0.342044155 |
| 0.183289439 | 0.328864213 | 0.435141941 | 0.440298641 |
| 0.227959738 | 0.498182532 | 0.514680551 | 0.06668967  |
| 0.41434513  | 0.493467208 | 0.499217168 | 0.004844724 |
| 0.503192078 | 0.018014795 | 0.253380857 | 0.273416639 |
| 0.261682515 | 0.280475075 | 0.317497686 | 0.351933105 |
| 0.475450376 | 0.315983476 | 0.357323596 | 0.319465578 |
| 0.217001328 | 0.330580524 | 0.467392332 | 0.486879676 |
| 0.33072472  | 0.212816742 | 0.194317391 | 0.192333587 |
| 0.093255544 | 0.535238962 | 0.344326265 | 0.166814236 |
| 0.311530748 | 0.481496989 | 0.420600777 | 0.527812456 |
| 0.47508096  | 0.225696539 | 0.428819984 | 0.540473333 |
| 0.327065706 | 0.416563537 | 0.14646163  | 0.511208782 |
| 0.332303501 | 0.250591841 | 0.526599516 | 0.464270763 |
| 0.527698451 | 0.449732931 | 0.343850265 | 0.49304438  |
| 0.446892817 | 0.449532942 | 0.461616284 | 0.124851799 |
| 0.279161676 | 0.240056792 | 0.301812671 | 0.005823473 |
| 0.453253454 | 0.399935974 | 0.540131327 | 0.513683529 |
| 0.335127105 | 0.455622732 | 0.464802952 | 0.165066524 |
| 0.413930505 | 0.290497913 | 0.237754249 | 0.533884756 |
| 0.246189768 | 0.277911109 | 0.355935176 | 0.489155729 |
| 0.511967818 | 0.515390721 | 0.309278079 | 0.36548791  |
| 0.337658797 | 0.331109555 | 0.494210065 | 0.238707108 |
| 0.524335993 | 0.210076735 | 0.508532058 | 0.362576761 |
| 0.281160083 | 0.534321641 | 0.132385342 | 0.53924389  |
| 0.398404648 | 0.240003411 | 0.490447049 | 0.432369066 |
| 0.419275627 | 0.163181198 | 0.208809763 | 0.51810012  |
| 0.320475471 | 0.391222611 | 0.027395701 | 0.08188104  |
| 0.40365959  | 0.419429949 | 0.526963927 | 0.462480979 |
| 0.284388522 | 0.410289346 | 0.189515973 | 0.42622831  |
| 0.512192323 | 0.524068291 | 0.332007429 | 0.341052227 |
| 0.453463166 | 0.169246504 | 0.534997471 | 0.027682669 |
| 0.504691573 | 0.500234055 | 0.488397818 | 0.106186469 |
| 0.04594424  | 0.238655838 | 0.513868948 | 0.16225725  |
| 0.516165368 | 0.24025368  | 0.491753066 | 0.525882396 |
| 0.293737131 | 0.524542887 | 0.166928358 | 0.48212076  |
| 0.118072586 | 0.36268563  | 0.446557704 | 0.481359844 |
| 0.267936226 | 0.330101306 | 0.451196004 | 0.259571734 |
| 0.066489623 | 0.32032592  | 0.004189881 | 0.444246913 |
| 0.503764314 | 0.3936005   | 0.310335053 | 0.427446217 |
| 0.353881031 | 0.473565892 | 0.305020094 | 0.508898601 |
| 0.022149277 | 0.42101836  | 0.288367874 | 0.516126317 |
| 0.289140842 | 0.475593832 | 0.095646989 | 0.370464026 |
| 0.498227905 | 0.349222217 | 0.356987994 | 0.385103694 |
| 0.528444823 | 0.501772021 | 0.293779208 | 0.272233787 |
| 0.508746221 | 0.144927136 | 0.515415883 | 0.522066612 |
| 0.236715379 | 0.237336924 | 0.502253441 | 0.275680632 |
| 0.356116009 | 0.489196145 | 0.511625695 | 0.519363124 |

|             |             |             |             |
|-------------|-------------|-------------|-------------|
| 0.10140511  | 0.336944837 | 0.502234066 | 0.520347201 |
| 0.375177537 | 0.193772808 | 0.275679703 | 0.277978364 |
| 0.513306918 | 0.161772281 | 0.304220282 | 0.470349908 |
| 0.242731319 | 0.397872829 | 0.488052756 | 0.228322856 |
| 0.06603452  | 0.255888046 | 0.46696798  | 0.241684086 |
| 0.380226487 | 0.434335024 | 0.282736517 | 0.446108705 |
| 0.180641771 | 0.042510698 | 0.476796114 | 0.019473046 |
| 0.483306385 | 0.466415899 | 0.341212007 | 0.416527919 |
| 0.294243713 | 0.476649031 | 0.486393589 | 0.003788195 |
| 0.49044885  | 0.060824673 | 0.384396837 | 0.268052043 |
| 0.345006297 | 0.115268039 | 0.505760406 | 0.524852209 |
| 0.442645099 | 0.421042498 | 0.413131946 | 0.516788013 |
| 0.163199041 | 0.400984464 | 0.410006238 | 0.54207562  |
| 0.247785507 | 0.503648118 | 0.504097038 | 0.438370733 |
| 0.501177318 | 0.392226351 |             |             |
| CCNB2       | 0.119285968 | 0.405099191 | 0.087274307 |
| 0.180953426 | 0.309648397 | 0.357843384 | 0.110192849 |
| 0.195329266 | 0.330489455 | 0.27995416  | 0.358276747 |
| 0.04292341  | 0.095371849 | 0.454379983 | 0.101976581 |
| 0.376719235 | 0.072761292 | 0.170952989 | 0.112035749 |
| 0.240843268 | 0.306221153 | 0.321880108 | 0.364457975 |
| 0.302871847 | 0.213190952 | 0.339936175 | 0.352882687 |
| 0.478249202 | 0.239341585 | 0.385522148 | 0.177139758 |
| 0.428843732 | 0.329573163 | 0.343609356 | 0.034435426 |
| 0.384787238 | 0.019975298 | 0.451713853 | 0.306722197 |
| 0.147884214 | 0.359464919 | 0.30537567  | 0.280226517 |
| 0.356585429 | 0.070805126 | 0.186321657 | 0.383067045 |
| 0.327682994 | 0.296450939 | 0.103455218 | 0.380872586 |
| 0.365814726 | 0.346156527 | 0.350815594 | 0.008563242 |
| 0.285394578 | 0.086142259 | 0.223412098 | 0.488681249 |
| 0.246716947 | 0.179342373 | 0.279004931 | 0.27811155  |
| 0.374626858 | 0.369076862 | 0.28357158  | 0.361534417 |
| 0.490604244 | 0.199823848 | 0.382619289 | 0.187150762 |
| 0.383660845 | 0.063886095 | 0.206052222 | 0.123104297 |
| 0.360443843 | 0.245163248 | 0.33661136  | 0.295188307 |
| 0.412723911 | 0.517241313 | 0.273406969 | 0.49179541  |
| 0.136428564 | 0.335163082 | 0.281919646 | 0.322899957 |
| 0.366595961 | 0.139545647 | 0.394043331 | 0.518592035 |
| 0.088000053 | 0.3534078   | 0.394913615 | 0.171196387 |
| 0.399752881 | 0.265297656 | 0.355756007 | 0.184431727 |
| 0.351203202 | 0.355180485 | 0.475163196 | 0.33057319  |
| 0.309118401 | 0.113124793 | 0.478779963 | 0.315684095 |
| 0.311615863 | 0.123170241 | 0.272637047 | 0.424860461 |
| 0.395947636 | 0.475785494 | 0.400082202 | 0.3718494   |
| 0.378249398 | 0.484229182 | 0.385777912 | 0.402126896 |
| 0.14218921  | 0.510585048 | 0.230392925 | 0.081863694 |
| 0.117063827 | 0.134144395 | 0.262106309 | 0.307546057 |
| 0.439509608 | 0.350068141 | 0.264273778 | 0.279654622 |
| 0.438509969 | 0.467092179 | 0.511185579 | 1           |
| 0.076519295 | 0.247814753 | 0.374069119 | 0.290429561 |
| 0.390158417 | 0.1645174   | 0.267889105 | 0.506544627 |
| 0.38269178  | 0.399724856 | 0.21482996  | 0.50228789  |
| 0.26137215  | 0.50679121  | 0.425481853 | 0.226304909 |
| 0.510307505 | 0.487229697 | 0.499439607 | 0.369608405 |

|              |             |             |             |
|--------------|-------------|-------------|-------------|
| 0.465057194  | 0.347007211 | 0.097612954 | 0.369553074 |
| 0.479942027  | 0.018634592 | 0.451121692 | 0.480161098 |
| 0.48740149   | 0.427392021 | 0.510948966 | 0.487268005 |
| 0.491600314  | 0.118897613 | 0.038362287 | 0.324375228 |
| 0.50299583   | 0.38391684  | 0.186887953 | 0.389705593 |
| 0.361990587  | 0.381778667 | 0.379885959 | 0.329689312 |
| 0.514059425  | 0.424031381 | 0.467142194 | 0.394613632 |
| 0.317813117  | 0.335568585 | 0.348125699 | 0.461874245 |
| 0.08012294   | 0.167654354 | 0.085922218 | 0.322322983 |
| 0.309137739  | 0.227181885 | 0.391475706 | 0.354163921 |
| 0.245917542  | 0.345708707 | 0.303292397 | 0.366970264 |
| 0.087310133  | 0.394680006 | 0.208055382 | 0.236294424 |
| 0.082952614  | 0.174374515 | 0.268242562 | 0.195470838 |
| 0.299329444  | 0.269028819 | 0.397796817 | 0.469258436 |
| 0.353964196  | 0.21955144  | 0.403580095 | 0.470043779 |
| 0.434188066  | 0.360394774 | 0.268335982 | 0.021359865 |
| 0.340271846  | 0.292119336 | 0.198613576 | 0.366778215 |
| 0.206162804  | 0.327709112 | 0.398304155 | 0.370804184 |
| 0.318846486  | 0.194596282 | 0.379531986 | 0.437025374 |
| 0.190963612  | 0.316500472 | 0.436024469 | 0.387474884 |
| 0.008236966  | 0.363143663 | 0.405883788 | 0.191102448 |
| 0.350607598  | 0.163748114 | 0.239208989 | 0.44698702  |
| 0.315648489  | 0.258825648 | 0.465742402 | 0.361997144 |
| 0.343225548  | 0.251775001 | 0.514108475 | 0.075368061 |
| 0.333708709  | 0.076144812 | 0.314111423 | 0.307076133 |
| 0.297720653  | 0.324299483 | 0.315572168 | 0.291564847 |
| 0.169653973  | 0.510555526 | 0.364924489 | 0.494747975 |
| 0.373690533  | 0.517146789 | 0.42940499  | 0.426805386 |
| 0.360040735  | 0.353110755 | 0.14592427  | 0.404623674 |
| 0.431430065  | 0.333740246 | 0.10929576  | 0.393618374 |
| 0.358410539  | 0.389616184 | 0.148662516 | 0.487563548 |
| 0.492241961  | 0.456695308 | 0.207879118 | 0.365570437 |
| 0.372355795  | 0.277084017 | 0.375914627 | 0.519947933 |
| 0.311771216  | 0.372831214 | 0.348868961 | 0.373831043 |
| 0.224053367  | 0.251648804 | 0.321404714 | 0.178286373 |
| 0.008651212  | 0.132310836 | 0.109914209 | 0.212837946 |
| 0.183855119  | 0.370921726 | 0.379748492 | 0.508893084 |
| 0.178877931  | 0.4043191   | 0.273938086 | 0.339354118 |
| 0.429516928  | 0.359210624 | 0.341969964 | 0.367261105 |
| 0.275682412  | 0.029950735 | 0.161635999 | 0.52155328  |
| 0.0711110485 | 0.248507975 | 0.34795265  | 0.004740407 |
| 0.08956531   | 0.36995234  | 0.129518836 | 0.223897552 |
| 0.458112998  | 0.223387305 | 0.26067142  | 0.327377318 |
| 0.348660441  | 0.140477827 | 0.005317019 | 0.469081647 |
| 0.471192938  | 0.445681557 | 0.472029766 | 0.447459871 |
| 0.427177548  | 0.364464121 | 0.386623301 | 0.342940795 |
| 0.167053285  | 0.13810158  | 0.25181687  | 0.334884077 |
| 0.011188282  | 0.357474201 | 0.314251767 | 0.191655425 |
| 0.393730015  | 0.337971588 | 0.073492397 | 0.342338966 |
| 0.042950021  | 0.205325818 | 0.35696016  | 0.26812062  |
| 0.342691493  | 0.031531008 | 0.240927984 | 0.351253339 |
| 0.425953233  | 0.347073342 | 0.329660245 | 0.513561937 |
| 0.34860332   | 0.16602491  | 0.326721726 | 0.370577806 |
| 0.126879975  | 0.150200257 | 0.363115084 | 0.036663142 |

|             |             |             |             |
|-------------|-------------|-------------|-------------|
| 0.197340207 | 0.445645728 | 0.366806605 | 0.111501911 |
| 0.314992331 | 0.013247119 | 0.365806462 | 0.520320939 |
| 0.450350638 | 0.505087667 | 0.486383092 | 0.271122774 |
| 0.492604667 | 0.10536417  | 0.51071557  | 0.385926025 |
| 0.360328541 | 0.00220168  | 0.012455149 | 0.461536857 |
| 0.389638287 | 0.085825015 | 0.211585555 | 0.334195679 |
| 0.163766507 | 0.207077181 | 0.109542533 | 0.202591734 |
| 0.377059226 | 0.269248788 | 0.202420937 | 0.470060686 |
| 0.291354137 | 0.27447573  | 0.378000339 | 0.130107499 |
| 0.367333107 | 0.093940745 | 0.129424427 | 0.013002076 |
| 0.35659665  | 0.148430652 | 0.468967223 | 0.492970648 |
| 0.491895407 | 0.370564476 | 0.313972159 | 0.333207822 |
| 0.407806849 | 0.13202554  | 0.327305366 | 0.152945963 |
| 0.471193981 | 0.393279965 | 0.340346792 | 0.318348255 |
| 0.501618166 | 0.469627929 | 0.068130405 | 0.391588153 |
| 0.022822548 | 0.002960151 | 0.362932574 | 0.301522584 |
| 0.077028834 | 0.376474234 | 0.287351769 | 0.266883302 |
| 0.255232079 | 0.062738948 | 0.26947258  | 0.265135966 |
| 0.330892594 | 0.384841797 | 0.292575099 | 0.272082261 |
| 0.279497705 | 0.189410225 | 0.234328912 | 0.217996552 |
| 0.273646994 | 0.315684411 | 0.220515724 | 0.048077559 |
| 0.378181814 | 0.388602638 | 0.099965545 | 0.203968839 |
| 0.416741409 | 0.47484115  | 0.086116247 | 0.024367266 |
| 0.2935052   | 0.353984846 | 0.48550519  | 0.479940424 |
| 0.516591382 | 0.516191049 | 0.406627752 | 0.191770144 |
| 0.113158797 | 0.332157986 | 0.301473894 | 0.13240755  |
| 0.497327408 | 0.108020246 | 0.465018829 | 0.289254924 |
| 0.167425218 | 0.259359031 | 0.06526247  | 0.134887213 |
| 0.352956074 | 0.230582624 | 0.225074615 | 0.191572727 |
| 0.353930107 | 0.251195396 | 0.090702238 | 0.252754591 |
| 0.369641469 | 0.194315186 | 0.22035423  | 0.313320819 |
| 0.337390684 | 0.218112441 | 0.400365438 | 0.456241982 |
| 0.1775494   | 0.167825423 | 0.313142493 | 0.363696223 |
| 0.405433895 | 0.352786043 | 0.042163538 | 0.432374425 |
| 0.47383949  | 0.401651557 | 0.482844052 | 0.391232656 |
| 0.128990722 | 0.36914784  | 0.314023048 | 0.366643587 |
| 0.244062337 | 0.354713399 | 0.28705978  | 0.107139566 |
| 0.303063409 | 0.482730277 | 0.406090439 | 0.216435303 |
| 0.370396249 | 0.173298355 | 0.096590016 | 0.413536767 |
| 0.211052395 | 0.148329694 | 0.324789901 | 0.3927665   |
| 0.0028692   | 0.143796377 | 0.470737904 | 0.275861909 |
| 0.505716803 | 0.465590433 | 0.440583968 | 0.272335765 |
| 0.003369411 | 0.378524359 | 0.380951562 | 0.38384167  |
| 0.425479749 | 0.344400388 | 0.173020648 | 0.124727649 |
| 0.299557589 | 0.117592409 | 0.21033456  | 0.315726874 |
| 0.188760782 | 0.400640554 | 0.241255301 | 0.25637625  |
| 0.241186982 | 0.132383929 | 0.230002351 | 0.270999149 |
| 0.165532266 | 0.276181198 | 0.356210452 | 0.271062799 |
| 0.23952614  | 0.431366313 | 0.392414843 | 0.051659088 |
| 0.331161632 | 0.387570288 | 0.410117747 | 0.007572455 |
| 0.4015359   | 0.019264168 | 0.248769234 | 0.255771607 |
| 0.238607444 | 0.274841773 | 0.291219409 | 0.307345316 |
| 0.373282751 | 0.276269267 | 0.306834028 | 0.276351365 |
| 0.204805482 | 0.26188436  | 0.371459135 | 0.35391515  |

|             |             |             |             |
|-------------|-------------|-------------|-------------|
| 0.302845811 | 0.175430416 | 0.126697068 | 0.131617927 |
| 0.089341025 | 0.434860962 | 0.261693062 | 0.105382706 |
| 0.270603499 | 0.365457992 | 0.356168936 | 0.477227655 |
| 0.404786346 | 0.137352742 | 0.357527728 | 0.420546669 |
| 0.249852837 | 0.324585553 | 0.113001342 | 0.36020416  |
| 0.284403445 | 0.254036006 | 0.35904392  | 0.340238626 |
| 0.383014088 | 0.409518904 | 0.261262371 | 0.423424121 |
| 0.35820507  | 0.350727498 | 0.29760668  | 0.132352095 |
| 0.238189896 | 0.176798267 | 0.281607735 | 0.005020996 |
| 0.366613718 | 0.286921712 | 0.44499415  | 0.476187519 |
| 0.279440167 | 0.375314749 | 0.30356156  | 0.150576336 |
| 0.250110554 | 0.209084008 | 0.192575857 | 0.384608144 |
| 0.216396996 | 0.224189192 | 0.317992229 | 0.314176093 |
| 0.39087392  | 0.375586924 | 0.266938972 | 0.305603572 |
| 0.273834701 | 0.233770702 | 0.470988477 | 0.166148987 |
| 0.385407441 | 0.207583844 | 0.335235834 | 0.334981312 |
| 0.272155048 | 0.492131725 | 0.098974686 | 0.506360957 |
| 0.36306167  | 0.167068766 | 0.492316562 | 0.308819133 |
| 0.295557068 | 0.151998966 | 0.192084757 | 0.360635977 |
| 0.282998778 | 0.308465609 | 0.021609762 | 0.104181485 |
| 0.341979398 | 0.310370973 | 0.374171306 | 0.358460688 |
| 0.257926013 | 0.341229655 | 0.155769691 | 0.34483944  |
| 0.467027501 | 0.489083233 | 0.324271871 | 0.277879343 |
| 0.366339356 | 0.153427864 | 0.364775708 | 0.025166131 |
| 0.403431388 | 0.377354503 | 0.365147312 | 0.097403993 |
| 0.041583183 | 0.225831569 | 0.400296016 | 0.106334559 |
| 0.464642872 | 0.208285942 | 0.342686442 | 0.382835716 |
| 0.217024034 | 0.494183385 | 0.174611937 | 0.387785895 |
| 0.089147456 | 0.28601769  | 0.338022957 | 0.361460573 |
| 0.26575615  | 0.303727608 | 0.371524465 | 0.242459406 |
| 0.065088688 | 0.286000733 | 0.006763249 | 0.420138025 |
| 0.465258509 | 0.335705693 | 0.230735463 | 0.281219241 |
| 0.299883057 | 0.356128105 | 0.307819896 | 0.359697697 |
| 0.022031807 | 0.361335098 | 0.243010604 | 0.389836765 |
| 0.250164451 | 0.372711725 | 0.088778785 | 0.322638554 |
| 0.45817468  | 0.348016871 | 0.277533719 | 0.319602166 |
| 0.468987819 | 0.349473225 | 0.187100296 | 0.228626723 |
| 0.36049138  | 0.104043657 | 0.339094333 | 0.518150838 |
| 0.225772164 | 0.230440653 | 0.415455392 | 0.269309543 |
| 0.309688647 | 0.37179917  | 0.362177131 | 0.507469909 |
| 0.123017176 | 0.290365464 | 0.382172785 | 0.457492194 |
| 0.316400858 | 0.198096399 | 0.266840518 | 0.282546351 |
| 0.444365115 | 0.136370769 | 0.280554199 | 0.364052703 |
| 0.240975254 | 0.325863155 | 0.315396256 | 0.230265869 |
| 0.069965244 | 0.228489418 | 0.344712376 | 0.190319086 |
| 0.342906191 | 0.358119215 | 0.262950892 | 0.392170423 |
| 0.172646622 | 0.045840557 | 0.451519577 | 0.027386761 |
| 0.32776075  | 0.371231159 | 0.280731537 | 0.351602663 |
| 0.213595667 | 0.374515649 | 0.356454698 | 0.00452134  |
| 0.380329244 | 0.047119588 | 0.304074828 | 0.267349442 |
| 0.312364031 | 0.098973399 | 0.439857329 | 0.49938012  |
| 0.324859735 | 0.296242863 | 0.325859358 | 0.450818724 |
| 0.162223772 | 0.296587252 | 0.336825896 | 0.380056983 |
| 0.225183593 | 0.352196554 | 0.371097515 | 0.335944629 |

|             |             |             |             |
|-------------|-------------|-------------|-------------|
| 0.36672947  | 0.298128921 |             |             |
| CCNC        | 0.200514676 | 0.072606449 | 0.17482848  |
| 0.091443823 | 0.037680184 | 0.02192198  | 0.201943891 |
| 0.150522089 | 0.074493095 | 0.005384319 | 0.052062406 |
| 0.262559752 | 0.00215346  | 0.091219013 | 0.204650931 |
| 0.02851557  | 0.235528868 | 0.22454574  | 0.018039708 |
| 0.040370918 | 0.043011532 | 0.01003302  | 0.039277505 |
| 0.034234068 | 0.302063286 | 0.062709438 | 0.012988735 |
| 0.072092872 | 0.002188261 | 0.032372959 | 0.003189987 |
| 0.164704214 | 0.033391423 | 0.008111591 | 0.196233327 |
| 0.031467429 | 0.002380779 | 0.172629867 | 0.050158375 |
| 0.005926393 | 0.199624832 | 0.012312681 | 0.080191437 |
| 0.016127898 | 0.200938347 | 0.001949496 | 0.027252967 |
| 0.053470354 | 0.040317317 | 0.213603401 | 0.040981289 |
| 0.014123113 | 0.111240196 | 0.034501819 | 0.017971432 |
| 0.005834701 | 0.000704656 | 0.001906125 | 0.102084451 |
| 0.24252913  | 0.201773292 | 0.002983121 | 0.058166558 |
| 0.027052997 | 0.046848098 | 0.143386632 | 0.009216423 |
| 0.097932937 | 0.004507729 | 0.028721421 | 0.044013365 |
| 0.03203229  | 0.160893615 | 0.303171062 | 0.191030023 |
| 0.011513256 | 0.154033876 | 0.041704084 | 0.009104084 |
| 0.069124449 | 0.146358528 | 0.155598403 | 0.111891541 |
| 0.007098685 | 0.020482705 | 0.018588953 | 0.123813171 |
| 0.064455573 | 0.123825682 | 0.06607974  | 0.121911422 |
| 0.153272744 | 0.02023012  | 0.051431646 | 0.248056848 |
| 0.072823892 | 0.005624691 | 0.014424014 | 0.007327244 |
| 0.034459253 | 0.028485426 | 0.126722073 | 0.159119084 |
| 0.027756904 | 0.260631991 | 0.132921868 | 0.017919915 |
| 0.036973756 | 0.237489981 | 0.025438385 | 0.04265707  |
| 0.042247607 | 0.077124532 | 0.053891052 | 0.091892533 |
| 0.020610562 | 0.09107592  | 0.064739312 | 0.091461103 |
| 0.0007303   | 0.095024293 | 0.171938188 | 0.238271964 |
| 0.159818615 | 0.166221401 | 0.017608884 | 0.177287195 |
| 0.061036655 | 0.09991682  | 0.138286357 | 0.090869974 |
| 0.063208717 | 0.111834934 | 0.090440375 | 0.076519295 |
| 1           | 0.004722673 | 0.020642981 | 0.048848537 |
| 0.065835911 | 0.245986006 | 0.013086983 | 0.140016135 |
| 0.151407538 | 0.055040954 | 0.108603642 | 0.168695092 |
| 0.087969477 | 0.12461417  | 0.059421492 | 0.187670239 |
| 0.128717078 | 0.133295685 | 0.101695558 | 0.030128887 |
| 0.131972911 | 0.058997424 | 0.012339814 | 0.091033298 |
| 0.124054217 | 0.004012892 | 0.052775875 | 0.060934812 |
| 0.093858073 | 0.04445241  | 0.093798604 | 0.074929523 |
| 0.092128892 | 0.287842149 | 0.000415321 | 0.08842299  |
| 0.114101044 | 0.116970455 | 0.088926977 | 0.014681538 |
| 0.033105119 | 0.037115853 | 0.0445149   | 0.010003827 |
| 0.146258629 | 0.068455253 | 0.059893506 | 0.069496081 |
| 0.042274051 | 0.216290148 | 0.010749678 | 0.135241786 |
| 0.214098305 | 0.174241712 | 0.285978453 | 0.120942003 |
| 0.008829164 | 0.195053116 | 0.033422052 | 0.032913675 |
| 0.217303392 | 0.03939265  | 0.004795739 | 0.036614485 |
| 0.31436457  | 0.021096949 | 0.164799735 | 0.164006943 |
| 0.226935132 | 0.351598801 | 0.091091698 | 0.112669366 |
| 0.082041034 | 0.297284037 | 0.030138922 | 0.076078069 |

|             |             |             |             |
|-------------|-------------|-------------|-------------|
| 0.019689527 | 0.230458511 | 0.047969061 | 0.118835469 |
| 0.157735724 | 0.019391475 | 0.215892909 | 0.094513227 |
| 0.019956276 | 0.00342691  | 0.002470549 | 0.014676829 |
| 0.316860138 | 0.054283341 | 0.037055783 | 0.047959647 |
| 0.094582838 | 0.116732744 | 0.013824602 | 0.188021591 |
| 0.233576692 | 0.029638755 | 0.078592768 | 0.023210669 |
| 0.15030526  | 0.071514763 | 0.05750301  | 0.033451985 |
| 0.093375788 | 0.007728995 | 0.004756155 | 0.070407815 |
| 0.00616733  | 0.015820183 | 0.063827146 | 0.046625003 |
| 0.015437633 | 0.233382289 | 0.094282745 | 0.000975821 |
| 0.019726683 | 0.055729667 | 0.132503328 | 0.012182    |
| 0.149745816 | 0.14130616  | 0.0259851   | 0.024463113 |
| 0.221454319 | 0.103123165 | 0.097489737 | 0.082139258 |
| 0.007970177 | 0.099523923 | 0.055265108 | 0.094536436 |
| 0.080891185 | 0.009819368 | 0.001661847 | 0.060300117 |
| 0.06391352  | 0.009867613 | 0.276293006 | 0.034807674 |
| 0.011987081 | 0.033788711 | 0.037523362 | 0.097827315 |
| 0.157716692 | 0.098080122 | 0.12318451  | 0.071753147 |
| 0.11598807  | 0.148621842 | 0.072427868 | 0.108295039 |
| 0.006030754 | 0.02180476  | 0.016024858 | 0.084855995 |
| 0.235126011 | 0.021858111 | 0.168430604 | 0.00216372  |
| 0.000464601 | 0.222715988 | 0.279055161 | 0.121709572 |
| 0.010783159 | 0.018036595 | 0.044683105 | 0.092233793 |
| 0.237252131 | 0.116978707 | 0.156665127 | 0.03058632  |
| 0.111064909 | 0.018544137 | 0.016235771 | 0.034253866 |
| 0.190903986 | 0.110006636 | 0.124085154 | 0.151377641 |
| 0.246060764 | 0.009106    | 0.056258394 | 0.018364962 |
| 0.212178485 | 0.042777062 | 0.322505949 | 0.346026056 |
| 0.075935657 | 0.302251937 | 0.191587824 | 0.008459204 |
| 0.093822958 | 0.268915658 | 0.035782007 | 0.075772679 |
| 0.091529431 | 0.092650774 | 0.090517564 | 0.112993793 |
| 0.072516403 | 0.049551192 | 0.057034214 | 0.048076935 |
| 0.169766599 | 0.142686296 | 0.00962981  | 0.059088504 |
| 0.015853666 | 0.088488899 | 0.040326489 | 0.311784112 |
| 0.040273139 | 0.107879597 | 0.241248914 | 0.029476684 |
| 0.16059964  | 0.002058355 | 0.036371345 | 0.079668236 |
| 0.071160864 | 0.213820336 | 0.010991646 | 0.008644895 |
| 0.121781581 | 0.155651662 | 0.005819003 | 0.102395231 |
| 0.072396077 | 0.191330767 | 0.044640632 | 0.060807106 |
| 0.203497152 | 0.004793802 | 0.025283691 | 0.000976006 |
| 0.010759326 | 0.117400566 | 0.011558462 | 0.143313528 |
| 0.133588756 | 0.200787101 | 0.138466528 | 0.108668594 |
| 0.093772579 | 0.080729466 | 0.095395097 | 0.01042687  |
| 0.099873681 | 0.000632797 | 0.08398284  | 0.08077786  |
| 0.007623349 | 0.021485398 | 0.069447739 | 0.060916957 |
| 0.025282821 | 0.259460334 | 0.251949251 | 0.014122593 |
| 0.158976307 | 0.119889304 | 0.189868019 | 0.019820036 |
| 0.033940936 | 0.062753881 | 0.018351429 | 0.107387894 |
| 0.0976379   | 0.131276654 | 0.01749264  | 0.297175986 |
| 0.027486453 | 0.21250519  | 0.268760714 | 0.021829501 |
| 0.061007691 | 0.275283801 | 0.153441329 | 0.090645551 |
| 0.128160836 | 0.045398094 | 0.004143702 | 0.015040919 |
| 0.067176456 | 0.210475183 | 0.005953498 | 0.200429992 |
| 0.086401304 | 0.039756508 | 0.156591348 | 0.183827105 |

|             |             |             |             |
|-------------|-------------|-------------|-------------|
| 0.108559749 | 0.119107455 | 0.244442416 | 0.065956587 |
| 0.113915394 | 0.008213975 | 0.033469236 | 0.154626317 |
| 0.006189498 | 0.018178189 | 0.212753161 | 0.034465389 |
| 0.044436214 | 0.206440028 | 0.006579533 | 0.008853307 |
| 0.100603709 | 0.039768125 | 0.026809577 | 0.151332628 |
| 0.031132603 | 0.027079402 | 0.083483874 | 0.117364662 |
| 0.017206959 | 0.157192998 | 0.29858527  | 0.231367896 |
| 0.01583448  | 0.018457332 | 0.271733337 | 0.263958362 |
| 0.078345829 | 0.069851402 | 0.195759765 | 0.151579293 |
| 0.215640599 | 0.03423596  | 0.07662179  | 0.080243436 |
| 0.125190887 | 0.120993325 | 0.196455044 | 0.090158337 |
| 0.204066017 | 0.065649071 | 0.025992676 | 0.072748835 |
| 0.089921658 | 0.241590462 | 0.098631382 | 0.010058472 |
| 0.286799131 | 0.085005059 | 0.228785224 | 0.267120761 |
| 0.017114041 | 0.24391279  | 0.121575248 | 0.197893156 |
| 0.041362118 | 0.007570129 | 0.218325445 | 0.191396276 |
| 0.118771851 | 0.00403046  | 0.244361593 | 0.039927166 |
| 0.094109032 | 0.005700906 | 0.035459274 | 0.158697983 |
| 0.283536664 | 0.19673571  | 0.040138279 | 0.059549636 |
| 0.047172664 | 0.013193912 | 0.122855547 | 0.067140451 |
| 0.08724941  | 0.027445382 | 0.105484626 | 0.11596838  |
| 0.306581565 | 0.02306297  | 0.008639079 | 0.040112617 |
| 0.190860565 | 0.027839383 | 0.098658535 | 0.324323772 |
| 0.189709401 | 0.157034718 | 0.084602355 | 0.14839969  |
| 0.021399106 | 0.173391143 | 0.226016506 | 0.062431672 |
| 0.010216209 | 0.186952579 | 0.011855844 | 0.046346107 |
| 0.013909198 | 0.003002851 | 0.080162645 | 0.07479365  |
| 0.123118252 | 0.078027021 | 0.143477641 | 0.046314283 |
| 1.03E-05    | 0.026084468 | 0.055246986 | 0.019328533 |
| 0.076978904 | 0.121053599 | 0.037874039 | 0.179858743 |
| 0.197546474 | 0.26305509  | 0.117094604 | 0.016291739 |
| 0.00326267  | 0.043899128 | 0.250064793 | 0.128675073 |
| 0.086162021 | 0.201965009 | 0.006896747 | 0.100484036 |
| 0.007060618 | 0.234622948 | 0.138345328 | 0.007052573 |
| 0.004500816 | 0.085921591 | 0.068831546 | 0.226323277 |
| 0.016242696 | 0.079225459 | 0.093304688 | 0.037986494 |
| 0.040279361 | 0.238075288 | 0.099345274 | 0.08835703  |
| 0.093239829 | 0.084957622 | 0.096662862 | 0.026955456 |
| 0.065596541 | 0.110348282 | 0.06887647  | 0.173330819 |
| 0.092954897 | 0.114656596 | 0.034692392 | 0.036482664 |
| 0.030791224 | 0.159871563 | 0.328905754 | 0.334063162 |
| 0.20700639  | 0.066962854 | 0.271705002 | 0.278362028 |
| 0.164053707 | 0.026656939 | 0.185000549 | 0.086053209 |
| 0.120313972 | 0.241528628 | 0.037821433 | 0.067640858 |
| 0.002908059 | 0.020593559 | 0.169351398 | 0.036811236 |
| 0.149233728 | 0.024035766 | 0.02084236  | 0.07651112  |
| 0.040649204 | 0.19151139  | 0.264541046 | 0.117158325 |
| 0.030975617 | 0.024043962 | 0.006889498 | 0.149108559 |
| 0.15437885  | 0.269891128 | 0.034436724 | 0.135161064 |
| 0.089878062 | 0.050428106 | 0.057157571 | 0.111535069 |
| 0.004660656 | 0.150533404 | 0.008779104 | 0.183596988 |
| 0.005272794 | 0.237903319 | 0.311169225 | 0.039482551 |
| 0.00226476  | 0.112203047 | 0.05012715  | 0.022204433 |
| 0.042336722 | 0.034665899 | 0.021569704 | 0.087579278 |



|             |             |             |             |
|-------------|-------------|-------------|-------------|
| 0.105452521 | 0.17226453  | 0.130039907 | 0.143610529 |
| 0.018066622 | 0.024015653 | 0.028712908 | 0.053625    |
| 0.077554128 | 0.076224143 | 0.28431047  | 0.074912525 |
| 0.026917691 | 0.282646121 | 0.161403671 | 0.064041433 |
| 0.038261833 | 0.087444906 | 0.002548595 | 0.015137279 |
| 0.066941554 | 0.006002444 | 8.23E-06    | 0.008151834 |
| 0.122653001 | 0.014602328 | 0.046810054 | 0.072064566 |
| 0.021668157 | 0.118352832 | 0.002342807 | 0.073480535 |
| 0.098562819 | 0.133955625 | 0.052131361 | 0.215595217 |
| 0.115236143 | 0.184427625 | 0.042722015 | 0.003954278 |
| 0.024063747 | 0.014628588 | 0.007197704 | 0.221037387 |
| 0.244129493 | 0.003036305 | 0.029322877 | 0.215028449 |
| 0.071119895 | 0.002006783 | 0.034774995 | 0.03916638  |
| 0.225095411 | 0.141789343 | 0.107224272 | 0.060901915 |
| 0.101745648 | 0.149866037 | 0.013420547 | 0.017366647 |
| 0.036701909 | 0.014100899 | 0.085806775 | 0.010571804 |
| 0.253994632 | 0.037774499 | 0.032833769 | 0.205816849 |
| 0.127383107 | 0.012950082 | 0.277327074 | 0.004684525 |
| 0.149051411 | 0.102653014 | 0.029074986 | 0.012548713 |
| 0.172678072 | 0.026272631 | 0.184358126 | 0.093356084 |
| 0.003163152 | 0.032801502 | 0.169299099 | 0.020484965 |
| 0.16782446  | 0.020398922 | 0.210815754 | 0.005944418 |
| 0.087586255 | 0.073742246 | 0.191894343 | 0.029304745 |
| 0.028757725 | 0.323407325 | 0.010181778 | 0.104275768 |
| 0.128274275 | 0.013116952 | 0.058259987 | 0.08747197  |
| 0.011001604 | 0.109482377 | 0.017868008 | 0.101877541 |
| 0.120990037 | 0.191744114 | 0.054873725 | 0.089070189 |
| 0.164783747 | 0.015848968 | 0.009026495 | 0.043450006 |
| 0.100183252 | 0.139396607 | 0.012827413 | 0.114098308 |
| 0.006865419 | 0.11509368  | 0.030452535 | 0.047399114 |
| 0.179028937 | 0.094209947 | 0.020213958 | 0.258082124 |
| 0.101998984 | 0.034424091 | 0.02533688  | 0.174219691 |
| 0.095579355 | 0.146216756 | 0.153517542 | 0.000657906 |
| 0.059424701 | 0.047634481 | 0.143262051 | 0.023472781 |
| 0.286738208 | 0.065669518 | 0.048744394 | 0.10249731  |
| 0.073025497 | 0.008845482 | 0.026496076 | 0.035695427 |
| 0.008921143 | 0.214421295 | 0.117601143 | 0.08390761  |
| 0.101943665 | 0.008323302 | 0.004548713 | 0.100902616 |
| 0.005076118 | 0.00333534  | 0.006807803 | 0.03782547  |
| 0.005926467 | 0.009292774 | 0.010007653 | 0.007409836 |
| 0.080336152 | 0.069627642 |             |             |
| CCND2       | 0.008611082 | 0.241045988 | 0.005648239 |
| 0.015599898 | 0.260306226 | 0.090428795 | 0.010219803 |
| 0.019547027 | 0.221656657 | 0.104142584 | 0.141092293 |
| 0.001236474 | 0.147531492 | 0.259246042 | 0.011214802 |
| 0.282686825 | 0.005643289 | 0.028349117 | 0.040237284 |
| 0.070189422 | 0.228096466 | 0.106412092 | 0.0984187   |
| 0.255021426 | 0.061131413 | 0.136596363 | 0.30923291  |
| 0.293336178 | 0.090988432 | 0.242598233 | 0.04401484  |
| 0.213852991 | 0.277833036 | 0.228350647 | 0.000986341 |
| 0.182565942 | 0.089916088 | 0.219232292 | 0.102085095 |
| 0.106294113 | 0.160103355 | 0.100619552 | 0.068892816 |
| 0.143188399 | 0.002604318 | 0.051689499 | 0.338121031 |
| 0.174383378 | 0.110263894 | 0.010147319 | 0.241414597 |

|             |             |             |             |
|-------------|-------------|-------------|-------------|
| 0.137658436 | 0.122946644 | 0.194497215 | 6.82E-05    |
| 0.218437448 | 0.156189718 | 0.201147702 | 0.263073967 |
| 0.072206069 | 0.039185061 | 0.142429331 | 0.117062603 |
| 0.296780608 | 0.329740751 | 0.166925768 | 0.12458259  |
| 0.26447068  | 0.16382629  | 0.321269444 | 0.028750927 |
| 0.127260222 | 0.006156366 | 0.061203851 | 0.029171033 |
| 0.161729711 | 0.086081551 | 0.193569038 | 0.242930092 |
| 0.215314386 | 0.281334187 | 0.125535468 | 0.252743608 |
| 0.184570064 | 0.335632036 | 0.160118103 | 0.218751313 |
| 0.287116267 | 0.025435272 | 0.211704156 | 0.287477149 |
| 0.013026678 | 0.178096969 | 0.250874617 | 0.036686157 |
| 0.229119146 | 0.201694376 | 0.140395256 | 0.123459868 |
| 0.348155896 | 0.259813488 | 0.274824391 | 0.116536121 |
| 0.238471798 | 0.014933333 | 0.223349105 | 0.330869111 |
| 0.093112353 | 0.014884421 | 0.109349736 | 0.35412727  |
| 0.212684535 | 0.275126719 | 0.270284765 | 0.250942577 |
| 0.252553355 | 0.275910937 | 0.191581854 | 0.258742719 |
| 0.064917536 | 0.293156654 | 0.047759661 | 0.006016558 |
| 0.008868975 | 0.024253131 | 0.171491072 | 0.185220258 |
| 0.301737351 | 0.157749411 | 0.037705541 | 0.124640177 |
| 0.3674855   | 0.222805639 | 0.299924553 | 0.247814753 |
| 0.004722673 | 1           | 0.23371379  | 0.062627501 |
| 0.231001002 | 0.045994088 | 0.239324475 | 0.246657914 |
| 0.173275507 | 0.324348682 | 0.027817866 | 0.248133796 |
| 0.088400095 | 0.287244037 | 0.236791167 | 0.045801106 |
| 0.266290565 | 0.229471356 | 0.31353895  | 0.328673581 |
| 0.229318139 | 0.08337776  | 0.056221611 | 0.247802078 |
| 0.286971338 | 0.01366924  | 0.334661155 | 0.347092217 |
| 0.261523908 | 0.323021661 | 0.353414843 | 0.323439999 |
| 0.262987943 | 0.019371812 | 0.063189585 | 0.218320758 |
| 0.25525035  | 0.195914965 | 0.056957561 | 0.220450088 |
| 0.29944192  | 0.104476501 | 0.328430389 | 0.058758087 |
| 0.300268129 | 0.283369104 | 0.315107409 | 0.22662773  |
| 0.165569547 | 0.137115013 | 0.316372673 | 0.203215179 |
| 0.006102481 | 0.01408443  | 0.008538836 | 0.219735887 |
| 0.054168011 | 0.079008157 | 0.082303143 | 0.310071568 |
| 0.085041626 | 0.107282765 | 0.211443171 | 0.32374924  |
| 0.013124497 | 0.182493061 | 0.048273707 | 0.044199371 |
| 0.005832416 | 0.050693798 | 0.024225656 | 0.02439614  |
| 0.135330114 | 0.083017162 | 0.276361791 | 0.327491995 |
| 0.214572112 | 0.053414493 | 0.219065967 | 0.282649393 |
| 0.257494928 | 0.245749233 | 0.117756974 | 0.001024427 |
| 0.072413057 | 0.175521251 | 0.188590718 | 0.277315826 |
| 0.065530918 | 0.056182505 | 0.235524792 | 0.305742161 |
| 0.057530219 | 0.044069261 | 0.154096648 | 0.198776928 |
| 0.049059043 | 0.100038387 | 0.279859218 | 0.197800721 |
| 0.00022842  | 0.102434427 | 0.270473905 | 0.118009343 |
| 0.175586998 | 0.085582029 | 0.102246588 | 0.304918448 |
| 0.140610259 | 0.196788837 | 0.331906936 | 0.345464794 |
| 0.066736546 | 0.083781823 | 0.340039523 | 0.076106662 |
| 0.324649132 | 0.017056388 | 0.175117251 | 0.1382685   |
| 0.095992612 | 0.198093355 | 0.293098344 | 0.134778103 |
| 0.025685882 | 0.284267071 | 0.221818108 | 0.300804744 |
| 0.131204272 | 0.332994566 | 0.304397638 | 0.247534243 |

|             |             |             |             |
|-------------|-------------|-------------|-------------|
| 0.18545253  | 0.257732177 | 0.162160902 | 0.246212612 |
| 0.305892012 | 0.090293083 | 0.017372058 | 0.337427139 |
| 0.187703346 | 0.316530336 | 0.08466476  | 0.295806244 |
| 0.25730053  | 0.223394441 | 0.038805982 | 0.318676729 |
| 0.184082481 | 0.058065389 | 0.294460953 | 0.340380211 |
| 0.099975947 | 0.229924403 | 0.147345322 | 0.327376274 |
| 0.054976241 | 0.137103935 | 0.183011637 | 0.203895997 |
| 0.011222061 | 0.016864534 | 0.010976274 | 0.069960035 |
| 0.147227128 | 0.263199243 | 0.286178112 | 0.296440831 |
| 0.029669873 | 0.222847119 | 0.14854031  | 0.07421429  |
| 0.208686801 | 0.236914168 | 0.288229565 | 0.287316429 |
| 0.127707821 | 0.003217714 | 0.016333918 | 0.269313117 |
| 0.007818579 | 0.127647796 | 0.129811858 | 0.000420979 |
| 0.004995615 | 0.236864944 | 0.029123104 | 0.070404103 |
| 0.358767164 | 0.068003883 | 0.064350376 | 0.096209734 |
| 0.209600012 | 0.024182386 | 0.000965785 | 0.327748784 |
| 0.321908936 | 0.316883543 | 0.311782055 | 0.263767858 |
| 0.341669745 | 0.31084062  | 0.319224489 | 0.091106674 |
| 0.015111669 | 0.014792504 | 0.123110767 | 0.127895163 |
| 0.000929524 | 0.247457321 | 0.244901101 | 0.046768674 |
| 0.326311935 | 0.190392439 | 0.003180901 | 0.33321272  |
| 0.000701477 | 0.121039686 | 0.064678551 | 0.11313187  |
| 0.339332134 | 0.000904566 | 0.032581997 | 0.103052258 |
| 0.177941574 | 0.149479466 | 0.185160234 | 0.293466451 |
| 0.13038923  | 0.036183965 | 0.147317468 | 0.279086762 |
| 0.011519611 | 0.044827213 | 0.120530996 | 0.007285285 |
| 0.047423856 | 0.274808463 | 0.163101948 | 0.006728905 |
| 0.101886857 | 0.000402956 | 0.15111281  | 0.294037136 |
| 0.221056688 | 0.335486573 | 0.26978798  | 0.180630904 |
| 0.264914679 | 0.192741259 | 0.312199487 | 0.205058877 |
| 0.124696004 | 0.000355502 | 0.001725926 | 0.32336443  |
| 0.214318684 | 0.012443824 | 0.052847042 | 0.043721331 |
| 0.01793724  | 0.025279365 | 0.013699516 | 0.129119308 |
| 0.19942433  | 0.169128885 | 0.134729162 | 0.230037267 |
| 0.096044026 | 0.131309321 | 0.121130307 | 0.025844882 |
| 0.254050629 | 0.006142383 | 0.031204038 | 0.001921801 |
| 0.313704923 | 0.031222953 | 0.209600805 | 0.281708086 |
| 0.270238085 | 0.294143884 | 0.104905646 | 0.070607871 |
| 0.354808487 | 0.020242779 | 0.109699973 | 0.024313829 |
| 0.238829377 | 0.235540502 | 0.150914967 | 0.119148762 |
| 0.298540847 | 0.234823831 | 0.0047905   | 0.270630783 |
| 0.000543957 | 0.005350901 | 0.086765953 | 0.149505203 |
| 0.176054337 | 0.214513431 | 0.114297101 | 0.122004952 |
| 0.121504012 | 0.001612389 | 0.238357453 | 0.211852907 |
| 0.164344599 | 0.182047633 | 0.237114318 | 0.158037459 |
| 0.178572294 | 0.0983687   | 0.073800587 | 0.047130683 |
| 0.125571522 | 0.139339671 | 0.060080101 | 0.002739938 |
| 0.185830012 | 0.210323805 | 0.009353824 | 0.052278568 |
| 0.254365639 | 0.299860709 | 0.009062106 | 0.001127201 |
| 0.108057756 | 0.169499535 | 0.326951323 | 0.266416915 |
| 0.263984411 | 0.308901156 | 0.184343782 | 0.048729546 |
| 0.009254171 | 0.223936154 | 0.282489236 | 0.060241843 |
| 0.289590267 | 0.013904936 | 0.252283453 | 0.315073462 |
| 0.04215368  | 0.051044517 | 0.003924029 | 0.026315316 |

|             |             |             |             |
|-------------|-------------|-------------|-------------|
| 0.298509473 | 0.067583447 | 0.093317384 | 0.032525584 |
| 0.125512611 | 0.136123853 | 0.009288689 | 0.072902577 |
| 0.173285786 | 0.141149555 | 0.055661743 | 0.102147747 |
| 0.196178604 | 0.100735449 | 0.306313505 | 0.247199629 |
| 0.035410079 | 0.036807438 | 0.025925194 | 0.309212493 |
| 0.288721745 | 0.239492104 | 0.001380047 | 0.238086813 |
| 0.320164634 | 0.243883595 | 0.247938446 | 0.281390871 |
| 0.026113943 | 0.184814538 | 0.281683191 | 0.227356644 |
| 0.085369237 | 0.097050608 | 0.135355841 | 0.015152626 |
| 0.186220959 | 0.263323155 | 0.227386166 | 0.049660126 |
| 0.22970279  | 0.032787881 | 0.011599873 | 0.305383392 |
| 0.128875609 | 0.007853512 | 0.117011723 | 0.358034273 |
| 0.00153931  | 0.162944255 | 0.373380134 | 0.048817648 |
| 0.317073526 | 0.313178525 | 0.219850075 | 0.072495574 |
| 0.009735024 | 0.346228051 | 0.176081285 | 0.120039908 |
| 0.216045168 | 0.161819276 | 0.060674041 | 0.013854166 |
| 0.161361185 | 0.015459978 | 0.030602107 | 0.05476661  |
| 0.139727858 | 0.178024224 | 0.100760289 | 0.114624956 |
| 0.111467339 | 0.032874487 | 0.146157586 | 0.065629842 |
| 0.227744049 | 0.111571462 | 0.194771801 | 0.076204866 |
| 0.075099624 | 0.322756201 | 0.224084075 | 0.002089581 |
| 0.299707167 | 0.312828375 | 0.296260551 | 9.84E-05    |
| 0.265863521 | 0.000388442 | 0.100306518 | 0.085272507 |
| 0.0884875   | 0.104327173 | 0.202440109 | 0.118276522 |
| 0.185782993 | 0.082743461 | 0.069801908 | 0.103815677 |
| 0.047355346 | 0.082658316 | 0.255350437 | 0.136248885 |
| 0.086501824 | 0.022004031 | 0.029320201 | 0.028112912 |
| 0.005188954 | 0.286015015 | 0.096213349 | 0.01552669  |
| 0.124711206 | 0.142183839 | 0.195867424 | 0.255166722 |
| 0.270140175 | 0.029593057 | 0.170386898 | 0.219426634 |
| 0.099883152 | 0.048116992 | 0.006191948 | 0.160877317 |
| 0.076797128 | 0.079226802 | 0.16919848  | 0.089860331 |
| 0.255354258 | 0.191142777 | 0.090396723 | 0.270596806 |
| 0.138678998 | 0.240230852 | 0.072351675 | 0.016043761 |
| 0.03622967  | 0.049291204 | 0.232913706 | 0.000895955 |
| 0.17512944  | 0.026245474 | 0.288130942 | 0.235342984 |
| 0.225808089 | 0.220390956 | 0.041664522 | 0.008682092 |
| 0.047708984 | 0.053407481 | 0.04546632  | 0.288328058 |
| 0.165837968 | 0.041863284 | 0.208678453 | 0.040206477 |
| 0.313505196 | 0.333619673 | 0.179839861 | 0.08363907  |
| 0.151158721 | 0.064283962 | 0.268892574 | 0.021384944 |
| 0.236675723 | 0.093532485 | 0.170632764 | 0.131026843 |
| 0.119423221 | 0.330146359 | 0.012147865 | 0.327494806 |
| 0.175247881 | 0.045302478 | 0.266788709 | 0.12514078  |
| 0.056508679 | 0.04036117  | 0.193560486 | 0.11757458  |
| 0.068252891 | 0.198483527 | 0.007279259 | 0.036325888 |
| 0.191759795 | 0.183913637 | 0.24488601  | 0.291483604 |
| 0.198891848 | 0.266257652 | 0.19034524  | 0.092910342 |
| 0.229836515 | 0.240174586 | 0.039446871 | 0.140829811 |
| 0.183000259 | 0.017891153 | 0.135239387 | 0.025418768 |
| 0.248661581 | 0.282124646 | 0.094283427 | 0.00911085  |
| 0.002114944 | 0.172672268 | 0.219542554 | 0.021921096 |
| 0.354641666 | 0.126391287 | 0.235931185 | 0.257892132 |
| 0.082395859 | 0.23162858  | 0.042239124 | 0.231137707 |

|             |             |             |             |
|-------------|-------------|-------------|-------------|
| 0.012196582 | 0.145242352 | 0.299587641 | 0.248052104 |
| 0.055558142 | 0.21939036  | 0.226898635 | 0.174577838 |
| 0.00370923  | 0.082459489 | 0.000598703 | 0.176526591 |
| 0.221098132 | 0.275291314 | 0.090896612 | 0.101471997 |
| 0.170800281 | 0.268288004 | 0.094674704 | 0.227248247 |
| 0.001171077 | 0.255859057 | 0.087077859 | 0.187860592 |
| 0.067956201 | 0.232812134 | 0.008940034 | 0.311753934 |
| 0.195466818 | 0.074590416 | 0.146837805 | 0.088159319 |
| 0.255825736 | 0.247927405 | 0.049757174 | 0.113298453 |
| 0.268573566 | 0.015515452 | 0.106815553 | 0.31845727  |
| 0.068183668 | 0.175216377 | 0.326194196 | 0.054580378 |
| 0.263429659 | 0.201256022 | 0.273897038 | 0.321333189 |
| 0.026507223 | 0.105627503 | 0.324295398 | 0.270015427 |
| 0.18602457  | 0.177008555 | 0.140190945 | 0.122071613 |
| 0.204678986 | 0.009343846 | 0.156460241 | 0.161571973 |
| 0.158669949 | 0.189284718 | 0.178363083 | 0.134980868 |
| 0.005085412 | 0.047271027 | 0.071078547 | 0.050244444 |
| 0.145527937 | 0.210351514 | 0.143566908 | 0.201588278 |
| 0.023517473 | 0.002166515 | 0.253505875 | 0.024857717 |
| 0.088687922 | 0.223068245 | 0.106125308 | 0.213687149 |
| 0.055987227 | 0.178120785 | 0.100082917 | 0.001722933 |
| 0.309788435 | 0.046139436 | 0.188182505 | 0.075877794 |
| 0.124936365 | 0.005747717 | 0.230704494 | 0.336272392 |
| 0.153314788 | 0.116156997 | 0.10603876  | 0.258033369 |
| 0.130580403 | 0.198576291 | 0.193131825 | 0.189228606 |
| 0.20290863  | 0.143450552 | 0.185827737 | 0.171099979 |
| 0.20056917  | 0.08465684  |             |             |
| CCNE1       | 0.035455677 | 0.343494817 | 0.024182839 |
| 0.120527858 | 0.267836583 | 0.214436482 | 0.033623472 |
| 0.071346945 | 0.259808721 | 0.174431611 | 0.239343838 |
| 0.010456693 | 0.114191083 | 0.414275582 | 0.029385945 |
| 0.330407922 | 0.023408944 | 0.067330167 | 0.050979576 |
| 0.142213733 | 0.250975706 | 0.249622348 | 0.180753645 |
| 0.240530992 | 0.131286303 | 0.209010205 | 0.259849722 |
| 0.445314399 | 0.204704702 | 0.343242438 | 0.155854406 |
| 0.367353783 | 0.295230487 | 0.272040103 | 0.008009098 |
| 0.235598993 | 0.019325558 | 0.365816699 | 0.232581406 |
| 0.208405661 | 0.277887613 | 0.176422391 | 0.186576558 |
| 0.234220775 | 0.019411764 | 0.119463794 | 0.35592973  |
| 0.208931046 | 0.174388727 | 0.025714493 | 0.337706986 |
| 0.238969728 | 0.228430953 | 0.288908803 | 0.001553923 |
| 0.268314827 | 0.134867624 | 0.240663316 | 0.420211176 |
| 0.140121384 | 0.080025812 | 0.234121269 | 0.121894022 |
| 0.272760022 | 0.314560205 | 0.179253698 | 0.243650426 |
| 0.441661104 | 0.209540299 | 0.376239882 | 0.125297968 |
| 0.22614391  | 0.012852167 | 0.112714558 | 0.037144692 |
| 0.262161284 | 0.134171023 | 0.229447675 | 0.283311636 |
| 0.353792793 | 0.42892178  | 0.161030997 | 0.408794387 |
| 0.122540288 | 0.295249091 | 0.249055706 | 0.271280896 |
| 0.300526826 | 0.046108375 | 0.369466842 | 0.464566938 |
| 0.019810329 | 0.230927565 | 0.332535    | 0.064726335 |
| 0.349510607 | 0.216761513 | 0.219966211 | 0.199882643 |
| 0.353356916 | 0.292127989 | 0.379947143 | 0.230863363 |
| 0.218754938 | 0.033343793 | 0.372097752 | 0.293739221 |

|             |             |             |             |
|-------------|-------------|-------------|-------------|
| 0.2315997   | 0.042282643 | 0.245739432 | 0.448338461 |
| 0.332480026 | 0.441033597 | 0.364087896 | 0.32439739  |
| 0.30857342  | 0.448157402 | 0.345645021 | 0.338853972 |
| 0.097552649 | 0.449072651 | 0.113751638 | 0.025283694 |
| 0.030813118 | 0.051318786 | 0.186380098 | 0.243931678 |
| 0.436803433 | 0.225811796 | 0.121472977 | 0.197592891 |
| 0.465734028 | 0.36893526  | 0.449931095 | 0.374069119 |
| 0.020642981 | 0.23371379  | 1           | 0.134623184 |
| 0.30539285  | 0.05718669  | 0.268992489 | 0.412773217 |
| 0.334392232 | 0.427106587 | 0.083313086 | 0.39649278  |
| 0.111353035 | 0.461684019 | 0.387888413 | 0.119848002 |
| 0.440759264 | 0.397771984 | 0.481096513 | 0.386307071 |
| 0.384093828 | 0.21019769  | 0.039172016 | 0.330914061 |
| 0.437920251 | 0.025779577 | 0.444110902 | 0.477291092 |
| 0.429334952 | 0.460861917 | 0.489968132 | 0.464103403 |
| 0.421410449 | 0.035211825 | 0.035216224 | 0.257616836 |
| 0.433319565 | 0.365075901 | 0.088865389 | 0.290735721 |
| 0.297026796 | 0.2104225   | 0.363378082 | 0.250207934 |
| 0.449095283 | 0.417251942 | 0.441635019 | 0.327767552 |
| 0.169947246 | 0.247535539 | 0.291754474 | 0.360034227 |
| 0.026765525 | 0.059887638 | 0.023560403 | 0.235504746 |
| 0.192372084 | 0.121678417 | 0.214322862 | 0.254359483 |
| 0.137209327 | 0.167149226 | 0.25710006  | 0.365114674 |
| 0.028159613 | 0.280246195 | 0.096511601 | 0.10092199  |
| 0.032336082 | 0.0921292   | 0.149007747 | 0.104909031 |
| 0.191527178 | 0.156933128 | 0.353766434 | 0.456148841 |
| 0.242706595 | 0.123728083 | 0.331973845 | 0.430663106 |
| 0.398147816 | 0.300625044 | 0.158843283 | 0.014597221 |
| 0.279354882 | 0.223695034 | 0.227286873 | 0.277669453 |
| 0.113436192 | 0.194590024 | 0.311764191 | 0.388599725 |
| 0.154673739 | 0.063365111 | 0.28445854  | 0.338479571 |
| 0.090763003 | 0.236734832 | 0.440694521 | 0.257544564 |
| 0.001471682 | 0.231325213 | 0.413885809 | 0.160426177 |
| 0.225763226 | 0.160717229 | 0.233183484 | 0.457324606 |
| 0.249831466 | 0.212915374 | 0.448236583 | 0.370468978 |
| 0.194672055 | 0.142083753 | 0.479678878 | 0.069757424 |
| 0.243599469 | 0.072726809 | 0.253212232 | 0.174706898 |
| 0.173632043 | 0.246724026 | 0.257108894 | 0.250725907 |
| 0.070261442 | 0.442498998 | 0.320496748 | 0.462586014 |
| 0.30213079  | 0.483116914 | 0.445504237 | 0.405018168 |
| 0.260129883 | 0.258130669 | 0.183734627 | 0.423161469 |
| 0.449964334 | 0.248395713 | 0.037174594 | 0.398400647 |
| 0.249985851 | 0.377849961 | 0.132972585 | 0.473012954 |
| 0.412134746 | 0.3709977   | 0.100479232 | 0.368841877 |
| 0.352561537 | 0.141108675 | 0.365167698 | 0.470147138 |
| 0.216321192 | 0.285382653 | 0.305056645 | 0.410287498 |
| 0.118862171 | 0.21493116  | 0.243781794 | 0.196683429 |
| 0.015785759 | 0.035717017 | 0.032794442 | 0.129768711 |
| 0.213534939 | 0.289818831 | 0.339548235 | 0.464487387 |
| 0.072582248 | 0.343070217 | 0.160568815 | 0.271390146 |
| 0.372379324 | 0.246197549 | 0.275502204 | 0.300284341 |
| 0.175621657 | 0.018676343 | 0.093349209 | 0.436183776 |
| 0.01522746  | 0.246379428 | 0.164589141 | 0.003001296 |
| 0.024468999 | 0.326412006 | 0.058384921 | 0.137820999 |

|             |             |             |             |
|-------------|-------------|-------------|-------------|
| 0.454765453 | 0.141057246 | 0.145019297 | 0.213596447 |
| 0.28635091  | 0.050009911 | 0.003622715 | 0.443858136 |
| 0.408279002 | 0.383869884 | 0.403997851 | 0.354449659 |
| 0.401477978 | 0.315202849 | 0.409028621 | 0.178781867 |
| 0.067129227 | 0.043314985 | 0.282302874 | 0.240660978 |
| 0.002450048 | 0.339048354 | 0.208045258 | 0.095064712 |
| 0.380281218 | 0.224673681 | 0.018846332 | 0.265732902 |
| 0.016482596 | 0.251921735 | 0.173540231 | 0.143610279 |
| 0.323012015 | 0.006357602 | 0.202748667 | 0.303371035 |
| 0.340746003 | 0.272765939 | 0.286299368 | 0.459299194 |
| 0.228319449 | 0.074263577 | 0.26704601  | 0.342894054 |
| 0.044706004 | 0.111232546 | 0.193624942 | 0.04054243  |
| 0.102906118 | 0.355914784 | 0.249160648 | 0.048045543 |
| 0.202013119 | 0.002523934 | 0.303325549 | 0.457626202 |
| 0.371065208 | 0.492954022 | 0.444215074 | 0.26651064  |
| 0.447259519 | 0.139090925 | 0.468896203 | 0.340744757 |
| 0.246546927 | 0.001155088 | 0.003170222 | 0.473357951 |
| 0.315371423 | 0.027008596 | 0.102005451 | 0.212149742 |
| 0.086896595 | 0.075290134 | 0.031162272 | 0.221811323 |
| 0.285671524 | 0.198636906 | 0.176533878 | 0.380972062 |
| 0.186585231 | 0.149188264 | 0.206883248 | 0.044732672 |
| 0.283131173 | 0.035416241 | 0.044371242 | 0.010336815 |
| 0.322540828 | 0.06923412  | 0.354249531 | 0.436214387 |
| 0.440660947 | 0.368890374 | 0.216380751 | 0.182858058 |
| 0.384902388 | 0.049642598 | 0.239459593 | 0.052216742 |
| 0.410588845 | 0.35523026  | 0.280230271 | 0.257993326 |
| 0.470452701 | 0.415511695 | 0.017239089 | 0.399928776 |
| 0.009291601 | 0.00192074  | 0.214502379 | 0.179429603 |
| 0.051222106 | 0.293350563 | 0.210911368 | 0.139664611 |
| 0.139415024 | 0.017156606 | 0.279151111 | 0.279629032 |
| 0.24639905  | 0.267775046 | 0.261461707 | 0.16479154  |
| 0.229393212 | 0.189853254 | 0.135304888 | 0.091224071 |
| 0.150335566 | 0.249973763 | 0.139393399 | 0.010777903 |
| 0.264250519 | 0.291862805 | 0.030896978 | 0.095002315 |
| 0.422471508 | 0.468813084 | 0.033582415 | 0.013314562 |
| 0.201629581 | 0.22216415  | 0.472752924 | 0.422711375 |
| 0.43244961  | 0.473877528 | 0.313596058 | 0.113694685 |
| 0.03592192  | 0.248472786 | 0.263889406 | 0.106141741 |
| 0.444872908 | 0.030330732 | 0.390734779 | 0.278597969 |
| 0.066782656 | 0.166324762 | 0.023370191 | 0.046883377 |
| 0.299767648 | 0.108859851 | 0.146058898 | 0.090032938 |
| 0.25333426  | 0.255916215 | 0.025297329 | 0.128398395 |
| 0.297230594 | 0.283978906 | 0.101369737 | 0.155018555 |
| 0.274974736 | 0.121864811 | 0.407791169 | 0.39997945  |
| 0.073808548 | 0.060601448 | 0.173525262 | 0.305954212 |
| 0.412358432 | 0.239671696 | 0.016253381 | 0.371210809 |
| 0.438585435 | 0.355723489 | 0.408707728 | 0.371205095 |
| 0.044983998 | 0.288201153 | 0.253723166 | 0.276116133 |
| 0.110161982 | 0.205963032 | 0.149226898 | 0.030842186 |
| 0.228509761 | 0.379899327 | 0.375644677 | 0.120066507 |
| 0.251206105 | 0.059124456 | 0.02530256  | 0.373381458 |
| 0.25998918  | 0.0562224   | 0.183203388 | 0.391314661 |
| 0.004168184 | 0.184144139 | 0.455730233 | 0.143344304 |
| 0.439195947 | 0.472478067 | 0.38878575  | 0.128501273 |

|             |             |             |             |
|-------------|-------------|-------------|-------------|
| 0.007448005 | 0.38244817  | 0.302561193 | 0.298402278 |
| 0.371449244 | 0.256196481 | 0.069891797 | 0.059913036 |
| 0.242789359 | 0.041078853 | 0.119539564 | 0.183599399 |
| 0.238811958 | 0.27133454  | 0.142875996 | 0.118160043 |
| 0.160745074 | 0.045416381 | 0.229056641 | 0.151682705 |
| 0.163182621 | 0.18708056  | 0.319532774 | 0.142340905 |
| 0.258041018 | 0.398984961 | 0.370417638 | 0.012316052 |
| 0.255055152 | 0.372574514 | 0.371332077 | 0.004123008 |
| 0.39704262  | 0.004053891 | 0.153496041 | 0.179795713 |
| 0.154140563 | 0.156020456 | 0.21154502  | 0.263421551 |
| 0.252627788 | 0.157418066 | 0.202044352 | 0.173391751 |
| 0.133164478 | 0.127229564 | 0.293268405 | 0.224730976 |
| 0.239544776 | 0.077910441 | 0.057756271 | 0.059333679 |
| 0.032681288 | 0.388124243 | 0.182085568 | 0.037495451 |
| 0.151501369 | 0.224636204 | 0.31346358  | 0.410473127 |
| 0.369742324 | 0.064471029 | 0.213239957 | 0.387350766 |
| 0.174402292 | 0.178013804 | 0.027558384 | 0.230170838 |
| 0.134767052 | 0.217429978 | 0.209990445 | 0.198955596 |
| 0.319734261 | 0.333690715 | 0.171278615 | 0.377243031 |
| 0.263158046 | 0.221362803 | 0.187759468 | 0.074514526 |
| 0.123052047 | 0.077892973 | 0.251133789 | 0.001482634 |
| 0.254323183 | 0.151783255 | 0.453176803 | 0.405935191 |
| 0.249422059 | 0.32228229  | 0.177746733 | 0.061638981 |
| 0.168366393 | 0.123811644 | 0.088104906 | 0.368312496 |
| 0.238491129 | 0.108650584 | 0.255669903 | 0.159648746 |
| 0.402073816 | 0.359293893 | 0.206933795 | 0.132825621 |
| 0.147092409 | 0.117764296 | 0.381564385 | 0.058091681 |
| 0.304745496 | 0.220386611 | 0.204125982 | 0.250172665 |
| 0.183203242 | 0.465760301 | 0.026984928 | 0.479287389 |
| 0.277988438 | 0.076744592 | 0.41343571  | 0.146510535 |
| 0.163212619 | 0.091059938 | 0.238861241 | 0.204223368 |
| 0.155406153 | 0.265001111 | 0.014875242 | 0.083115368 |
| 0.291182006 | 0.182657841 | 0.339840023 | 0.294274494 |
| 0.237199112 | 0.313529463 | 0.160889923 | 0.167222381 |
| 0.379773544 | 0.386184385 | 0.21883534  | 0.200850242 |
| 0.271982803 | 0.062274273 | 0.239788729 | 0.011774965 |
| 0.342087304 | 0.322480557 | 0.235089098 | 0.02694761  |
| 0.00992101  | 0.280203574 | 0.323405196 | 0.029320492 |
| 0.475149049 | 0.233805478 | 0.225900105 | 0.352167531 |
| 0.105217641 | 0.392823797 | 0.097519475 | 0.369246875 |
| 0.023299213 | 0.174292159 | 0.259354262 | 0.227914031 |
| 0.228242061 | 0.293548287 | 0.363022782 | 0.255597909 |
| 0.020345644 | 0.222325178 | 0.004302757 | 0.325634323 |
| 0.370073815 | 0.300323373 | 0.14098402  | 0.166240624 |
| 0.230775903 | 0.308749881 | 0.185407591 | 0.249035666 |
| 0.00862309  | 0.328870521 | 0.11460444  | 0.341441142 |
| 0.278466292 | 0.241526531 | 0.04299338  | 0.254631754 |
| 0.336923725 | 0.244156266 | 0.184611146 | 0.315446457 |
| 0.405939259 | 0.298472511 | 0.098056147 | 0.168916971 |
| 0.269022957 | 0.030263404 | 0.199804808 | 0.461503524 |
| 0.129667636 | 0.254354468 | 0.457752882 | 0.176620707 |
| 0.263942774 | 0.297556508 | 0.282631595 | 0.438375209 |
| 0.069416566 | 0.181472752 | 0.383122945 | 0.407102527 |
| 0.257107039 | 0.200782251 | 0.256544641 | 0.216846505 |



|             |             |             |             |
|-------------|-------------|-------------|-------------|
| 0.370216859 | 0.064791414 | 0.247525605 | 0.289693125 |
| 0.274280369 | 0.223679798 | 0.193602293 | 0.177207408 |
| 0.024759514 | 0.095038254 | 0.208328245 | 0.08148249  |
| 0.217613793 | 0.282229941 | 0.240232844 | 0.338110521 |
| 0.108401963 | 0.026745405 | 0.39438811  | 0.05265708  |
| 0.170065266 | 0.332349446 | 0.13727306  | 0.270728564 |
| 0.129935851 | 0.231840111 | 0.196114142 | 0.00036855  |
| 0.384007746 | 0.069401401 | 0.190219668 | 0.231017963 |
| 0.227015032 | 0.027038421 | 0.373447085 | 0.483900564 |
| 0.195305013 | 0.193160003 | 0.263278849 | 0.379423211 |
| 0.220322693 | 0.24523507  | 0.248022915 | 0.297746494 |
| 0.243749661 | 0.238823782 | 0.253124146 | 0.295426205 |
| 0.292356896 | 0.136399956 |             |             |
| CCNE2       | 0.079456605 | 0.352643922 | 0.069691685 |
| 0.058939487 | 0.163648803 | 0.153213632 | 0.05304798  |
| 0.083950129 | 0.279895272 | 0.064646478 | 0.194231088 |
| 0.027456115 | 0.037996323 | 0.358044778 | 0.061268865 |
| 0.177451496 | 0.043624407 | 0.098530541 | 0.039586336 |
| 0.08412835  | 0.135905783 | 0.096928084 | 0.191462107 |
| 0.134693932 | 0.251424215 | 0.202634162 | 0.158444198 |
| 0.387719657 | 0.064480574 | 0.256556822 | 0.038706827 |
| 0.358066279 | 0.165304788 | 0.129106383 | 0.027326017 |
| 0.205963483 | 0.007910859 | 0.382575263 | 0.085557857 |
| 0.044654215 | 0.350429979 | 0.1155777   | 0.114697742 |
| 0.112373516 | 0.038040015 | 0.053422166 | 0.203199749 |
| 0.192671247 | 0.118867808 | 0.090239126 | 0.263721787 |
| 0.085657419 | 0.293942744 | 0.238354752 | 0.001986697 |
| 0.091967837 | 0.019895076 | 0.046713786 | 0.433738548 |
| 0.220418586 | 0.126002323 | 0.04977389  | 0.167964863 |
| 0.193046707 | 0.230966595 | 0.258140122 | 0.073201204 |
| 0.401775864 | 0.046164023 | 0.253109343 | 0.073149342 |
| 0.135214005 | 0.044273733 | 0.201985911 | 0.120148705 |
| 0.100576287 | 0.180662989 | 0.202870382 | 0.089232735 |
| 0.320011918 | 0.459938378 | 0.21323182  | 0.412719179 |
| 0.031083656 | 0.150651577 | 0.086578173 | 0.246412656 |
| 0.240344604 | 0.061998972 | 0.26341391  | 0.422108518 |
| 0.064701552 | 0.168976061 | 0.223119165 | 0.160837421 |
| 0.366901554 | 0.080677658 | 0.14544623  | 0.059795234 |
| 0.212152667 | 0.137056909 | 0.427339255 | 0.230391734 |
| 0.170853345 | 0.10115848  | 0.434528209 | 0.142986573 |
| 0.116778171 | 0.09958616  | 0.059038363 | 0.313463689 |
| 0.20637429  | 0.389242694 | 0.293599195 | 0.255359995 |
| 0.137006669 | 0.401334237 | 0.24385416  | 0.377484851 |
| 0.039684939 | 0.428951643 | 0.154284909 | 0.060314299 |
| 0.070183511 | 0.094382769 | 0.075628493 | 0.324683052 |
| 0.364546013 | 0.273846063 | 0.112924083 | 0.127685108 |
| 0.330386319 | 0.417976544 | 0.412824286 | 0.290429561 |
| 0.048848537 | 0.062627501 | 0.134623184 | 1           |
| 0.233076712 | 0.15421306  | 0.091170201 | 0.438138985 |
| 0.341421148 | 0.298772632 | 0.10395317  | 0.464631376 |
| 0.121103409 | 0.434841459 | 0.339862913 | 0.126366591 |
| 0.437099737 | 0.435281098 | 0.410709617 | 0.232966147 |
| 0.442364005 | 0.161673839 | 0.029594523 | 0.292186921 |
| 0.431519479 | 0.006254923 | 0.348495746 | 0.365125486 |

|             |             |             |             |
|-------------|-------------|-------------|-------------|
| 0.394701632 | 0.302786221 | 0.410248204 | 0.407196517 |
| 0.410526548 | 0.11152345  | 0.005101812 | 0.187743753 |
| 0.409038329 | 0.32088388  | 0.108233455 | 0.140424685 |
| 0.182996788 | 0.177164682 | 0.315238936 | 0.063259755 |
| 0.453033665 | 0.356815496 | 0.374335992 | 0.2608743   |
| 0.14845163  | 0.343755289 | 0.14163467  | 0.424204072 |
| 0.056618398 | 0.089966061 | 0.095061933 | 0.275977136 |
| 0.087610287 | 0.164541155 | 0.127597122 | 0.177200767 |
| 0.192996155 | 0.169804779 | 0.094616664 | 0.221937256 |
| 0.114598737 | 0.193088746 | 0.142316393 | 0.114124231 |
| 0.043148732 | 0.231058333 | 0.067484354 | 0.102467993 |
| 0.154567015 | 0.296580386 | 0.257553568 | 0.382658157 |
| 0.116705782 | 0.19052835  | 0.255024807 | 0.415135495 |
| 0.379263037 | 0.153529682 | 0.259556344 | 0.012661345 |
| 0.048255294 | 0.058903558 | 0.042275813 | 0.179686157 |
| 0.272933257 | 0.066474991 | 0.171083708 | 0.260056352 |
| 0.156320593 | 0.128236762 | 0.085413443 | 0.432754959 |
| 0.178097915 | 0.109361211 | 0.322320476 | 0.167192424 |
| 0.009895655 | 0.139789026 | 0.313938923 | 0.056535919 |
| 0.210654398 | 0.043845039 | 0.073530311 | 0.324404498 |
| 0.063028812 | 0.0727227   | 0.393520479 | 0.271036849 |
| 0.10209113  | 0.28195849  | 0.418857275 | 0.008546833 |
| 0.154235268 | 0.035265365 | 0.221111405 | 0.120362942 |
| 0.17705011  | 0.24818812  | 0.161941917 | 0.095322741 |
| 0.15404637  | 0.422113865 | 0.359972187 | 0.402277873 |
| 0.065828522 | 0.417038556 | 0.32139901  | 0.357126105 |
| 0.25847269  | 0.109376582 | 0.034036502 | 0.283509295 |
| 0.320727759 | 0.050305335 | 0.126094331 | 0.282096365 |
| 0.095014304 | 0.215271751 | 0.063859825 | 0.37493377  |
| 0.460193736 | 0.387659024 | 0.095650324 | 0.265259994 |
| 0.300152401 | 0.170537174 | 0.342422217 | 0.441941654 |
| 0.055561033 | 0.119152534 | 0.076898184 | 0.312077699 |
| 0.168223423 | 0.064609797 | 0.346116126 | 0.051232994 |
| 0.004756584 | 0.103040251 | 0.08787343  | 0.117718733 |
| 0.053610566 | 0.208011792 | 0.225703206 | 0.40342208  |
| 0.116424778 | 0.406238352 | 0.238704581 | 0.064265197 |
| 0.321566552 | 0.126846892 | 0.180102297 | 0.227120733 |
| 0.266747311 | 0.021823565 | 0.070177448 | 0.447447212 |
| 0.078613693 | 0.067254832 | 0.177278205 | 0.004555854 |
| 0.040918367 | 0.288580703 | 0.157461301 | 0.269854024 |
| 0.388382543 | 0.257710799 | 0.160688408 | 0.057531943 |
| 0.276729004 | 0.121766296 | 0.010044777 | 0.371344186 |
| 0.408770259 | 0.387973657 | 0.402449892 | 0.419756455 |
| 0.333478471 | 0.309023681 | 0.267081946 | 0.203215245 |
| 0.069296257 | 0.073336008 | 0.039568367 | 0.111736965 |
| 0.004209126 | 0.320781929 | 0.181067453 | 0.178469094 |
| 0.27087961  | 0.221589962 | 0.051186694 | 0.204609167 |
| 0.020940262 | 0.039938028 | 0.094960112 | 0.132764636 |
| 0.269955834 | 0.027572105 | 0.051032028 | 0.05724188  |
| 0.385554311 | 0.322641653 | 0.086063425 | 0.433515496 |
| 0.182271403 | 0.141680327 | 0.11954944  | 0.306924302 |
| 0.059128223 | 0.017753372 | 0.125367577 | 0.007559193 |
| 0.118774256 | 0.427873718 | 0.105311241 | 0.043358079 |
| 0.173419342 | 0.012200652 | 0.319631405 | 0.440957487 |

|             |             |             |             |
|-------------|-------------|-------------|-------------|
| 0.394211198 | 0.388158268 | 0.411502953 | 0.088676277 |
| 0.403051687 | 0.023923043 | 0.418758765 | 0.303670473 |
| 0.081175798 | 0.000996414 | 0.014851377 | 0.352739339 |
| 0.147353693 | 0.119556271 | 0.162800037 | 0.100531946 |
| 0.071782693 | 0.095283723 | 0.087302022 | 0.060486467 |
| 0.255336728 | 0.153178291 | 0.073717085 | 0.387378879 |
| 0.118672738 | 0.196455976 | 0.12738011  | 0.141875132 |
| 0.228295767 | 0.051904591 | 0.137227086 | 0.006950515 |
| 0.261862558 | 0.166908928 | 0.432774642 | 0.414523327 |
| 0.419935899 | 0.236785238 | 0.064149202 | 0.118562096 |
| 0.361743556 | 0.139293544 | 0.090204044 | 0.137716232 |
| 0.382515081 | 0.179775345 | 0.275157054 | 0.275745223 |
| 0.391427374 | 0.382910014 | 0.046594926 | 0.258627544 |
| 0.0234085   | 0.005703438 | 0.145073016 | 0.255583046 |
| 0.039146759 | 0.112202068 | 0.238868772 | 0.089821632 |
| 0.115532028 | 0.037797228 | 0.064960483 | 0.05941829  |
| 0.181087754 | 0.140411054 | 0.119321004 | 0.259058857 |
| 0.099775081 | 0.038658213 | 0.126168925 | 0.102155806 |
| 0.082500521 | 0.275922203 | 0.237437093 | 0.032277809 |
| 0.153683982 | 0.155770412 | 0.077425296 | 0.199628367 |
| 0.331264193 | 0.361903151 | 0.037053909 | 0.015331552 |
| 0.266426016 | 0.118810592 | 0.387523201 | 0.399402432 |
| 0.447315539 | 0.42178053  | 0.399440653 | 0.066761991 |
| 0.069721535 | 0.180977989 | 0.136657656 | 0.068846882 |
| 0.418231754 | 0.091657349 | 0.4306062   | 0.11291094  |
| 0.152920733 | 0.083706991 | 0.050000172 | 0.110963782 |
| 0.185480719 | 0.205331691 | 0.131686041 | 0.134314187 |
| 0.104797044 | 0.068912804 | 0.057800238 | 0.163444922 |
| 0.248451657 | 0.031390205 | 0.157128057 | 0.158176679 |
| 0.311442747 | 0.057154486 | 0.23300631  | 0.395404295 |
| 0.168464487 | 0.104662615 | 0.074068749 | 0.301374184 |
| 0.296318184 | 0.160649607 | 0.037073655 | 0.350912345 |
| 0.413778109 | 0.228242818 | 0.428637874 | 0.3255026   |
| 0.129409004 | 0.147375873 | 0.090402349 | 0.142319474 |
| 0.175878568 | 0.175485052 | 0.17391361  | 0.100618594 |
| 0.345829303 | 0.454820784 | 0.302810519 | 0.123351569 |
| 0.216575871 | 0.140638201 | 0.079175578 | 0.377734066 |
| 0.039741144 | 0.05837551  | 0.124783092 | 0.313173146 |
| 0.00338959  | 0.043446774 | 0.387165    | 0.131334735 |
| 0.450316625 | 0.351983753 | 0.382409414 | 0.140217543 |
| 0.000405828 | 0.206120208 | 0.198822982 | 0.107172975 |
| 0.321833141 | 0.327747506 | 0.141670342 | 0.060055877 |
| 0.29628476  | 0.128552731 | 0.062388591 | 0.110580797 |
| 0.029712482 | 0.222934162 | 0.228893708 | 0.162223209 |
| 0.118971306 | 0.130135172 | 0.078540298 | 0.149280939 |
| 0.0468328   | 0.253042267 | 0.284978781 | 0.08004848  |
| 0.030032545 | 0.340531147 | 0.250782819 | 0.041136077 |
| 0.167392387 | 0.314095908 | 0.399866806 | 0.000838954 |
| 0.244049234 | 0.019076161 | 0.1321292   | 0.121278011 |
| 0.125810211 | 0.114822129 | 0.19096969  | 0.085908857 |
| 0.197368477 | 0.123911715 | 0.122655006 | 0.20801357  |
| 0.090802294 | 0.169348523 | 0.199919735 | 0.134397768 |
| 0.092324027 | 0.091118286 | 0.184359092 | 0.189720131 |
| 0.065000165 | 0.39230723  | 0.297941622 | 0.132177756 |

|             |             |             |             |
|-------------|-------------|-------------|-------------|
| 0.219910985 | 0.120662066 | 0.344851236 | 0.393905963 |
| 0.397808199 | 0.178649241 | 0.13725243  | 0.333227499 |
| 0.043842166 | 0.088377621 | 0.05507241  | 0.188144539 |
| 0.194099405 | 0.067503004 | 0.185543858 | 0.163889501 |
| 0.240927204 | 0.386167076 | 0.295781472 | 0.40142604  |
| 0.134172025 | 0.130492846 | 0.070615787 | 0.062039108 |
| 0.099538444 | 0.172818847 | 0.12605673  | 0.005298255 |
| 0.246566639 | 0.09456882  | 0.328523602 | 0.405616071 |
| 0.076477109 | 0.391655259 | 0.075338374 | 0.051735998 |
| 0.057839012 | 0.208510899 | 0.180253992 | 0.282650021 |
| 0.048200129 | 0.128599613 | 0.150890654 | 0.115780908 |
| 0.265582259 | 0.250806168 | 0.089158131 | 0.145422711 |
| 0.184077807 | 0.187125578 | 0.420208036 | 0.103479749 |
| 0.17510023  | 0.0625892   | 0.193531894 | 0.115237018 |
| 0.112290873 | 0.401939774 | 0.101822924 | 0.398373649 |
| 0.10031524  | 0.200781849 | 0.455747922 | 0.23191381  |
| 0.126245131 | 0.109692993 | 0.042786358 | 0.118114039 |
| 0.092762015 | 0.094123214 | 0.002581179 | 0.014969367 |
| 0.258439135 | 0.095319779 | 0.255723292 | 0.273506924 |
| 0.088686816 | 0.284997351 | 0.0644953   | 0.137090299 |
| 0.400431034 | 0.446532627 | 0.064289242 | 0.253286613 |
| 0.267985624 | 0.091111503 | 0.251454641 | 0.012829579 |
| 0.176121599 | 0.176056813 | 0.078191342 | 0.069176855 |
| 0.034148471 | 0.038520785 | 0.16999463  | 0.103656705 |
| 0.355377482 | 0.046332659 | 0.200389549 | 0.287652077 |
| 0.226242482 | 0.439379812 | 0.08907541  | 0.266855062 |
| 0.035177808 | 0.236890729 | 0.153957067 | 0.145437697 |
| 0.067329721 | 0.085640741 | 0.253610316 | 0.072746905 |
| 0.043622027 | 0.088784504 | 0.000662282 | 0.396265367 |
| 0.397725854 | 0.103486352 | 0.2699345   | 0.070507131 |
| 0.25130458  | 0.364951674 | 0.077012645 | 0.166512647 |
| 0.023189803 | 0.161133622 | 0.216649167 | 0.355580623 |
| 0.034610433 | 0.153469883 | 0.065152375 | 0.124667236 |
| 0.437699513 | 0.059630993 | 0.297152766 | 0.04492617  |
| 0.404518687 | 0.34292106  | 0.197300556 | 0.114215278 |
| 0.209217802 | 0.114284139 | 0.121631368 | 0.431126408 |
| 0.129853271 | 0.067721623 | 0.30475164  | 0.075753738 |
| 0.104652582 | 0.376028069 | 0.182608824 | 0.435686054 |
| 0.059365736 | 0.22846179  | 0.313398804 | 0.351791451 |
| 0.297457215 | 0.057154587 | 0.059936143 | 0.0830408   |
| 0.382248604 | 0.071812942 | 0.066988465 | 0.26400302  |
| 0.045090296 | 0.270552617 | 0.189667785 | 0.096243202 |
| 0.047736636 | 0.11326373  | 0.131390226 | 0.171385849 |
| 0.179215602 | 0.145321706 | 0.069729122 | 0.371486544 |
| 0.085881643 | 0.02594301  | 0.415733082 | 0.003297951 |
| 0.221326142 | 0.233833951 | 0.229511449 | 0.135740345 |
| 0.232795571 | 0.19925888  | 0.137137105 | 0.003123908 |
| 0.30476251  | 0.027289461 | 0.139131991 | 0.067495636 |
| 0.066626914 | 0.047385032 | 0.421601209 | 0.399500274 |
| 0.275887338 | 0.108472268 | 0.070654049 | 0.403238951 |
| 0.039629613 | 0.07451507  | 0.077171698 | 0.229348819 |
| 0.06376639  | 0.103928956 | 0.124242421 | 0.100673245 |
| 0.289783848 | 0.17502385  |             |             |

CCNF

0.092653934

0.375659929

0.059797064

|             |             |             |             |
|-------------|-------------|-------------|-------------|
| 0.139294149 | 0.272020142 | 0.266561501 | 0.101369848 |
| 0.166127474 | 0.303037277 | 0.210064358 | 0.289233343 |
| 0.040108328 | 0.097229395 | 0.435970567 | 0.100976574 |
| 0.322715215 | 0.070966028 | 0.152394307 | 0.094470577 |
| 0.201711721 | 0.287667743 | 0.271870173 | 0.271393877 |
| 0.279154498 | 0.198689808 | 0.259081634 | 0.289787074 |
| 0.445314398 | 0.189203803 | 0.299655451 | 0.117290674 |
| 0.415325043 | 0.294334722 | 0.276469255 | 0.025798155 |
| 0.311442173 | 0.025905623 | 0.426538735 | 0.274567714 |
| 0.129277838 | 0.350788216 | 0.213003321 | 0.24293096  |
| 0.26424714  | 0.054181602 | 0.130428994 | 0.316819073 |
| 0.249697881 | 0.248394311 | 0.077510263 | 0.308863854 |
| 0.294625958 | 0.26785124  | 0.28836305  | 0.00795887  |
| 0.244169381 | 0.0806078   | 0.20308932  | 0.449595576 |
| 0.204741933 | 0.168118574 | 0.22913487  | 0.23348193  |
| 0.314902466 | 0.312970537 | 0.242009457 | 0.279741781 |
| 0.462800057 | 0.199858856 | 0.32806317  | 0.142101215 |
| 0.319224215 | 0.051144299 | 0.169831089 | 0.09342589  |
| 0.300553399 | 0.219389444 | 0.288074538 | 0.25837179  |
| 0.37278427  | 0.491027558 | 0.225097334 | 0.449492001 |
| 0.164072192 | 0.29483747  | 0.24718104  | 0.288375999 |
| 0.327945548 | 0.12934819  | 0.340364696 | 0.490741363 |
| 0.075949526 | 0.261457703 | 0.342804573 | 0.135240727 |
| 0.366236208 | 0.235704534 | 0.260736508 | 0.175753975 |
| 0.296572215 | 0.317343689 | 0.451214877 | 0.274421281 |
| 0.273135709 | 0.087015651 | 0.435092481 | 0.279882112 |
| 0.265344889 | 0.090807574 | 0.261115583 | 0.412483526 |
| 0.314062068 | 0.445835172 | 0.382114999 | 0.360071463 |
| 0.318194331 | 0.453412293 | 0.309459776 | 0.390267874 |
| 0.097232562 | 0.476110602 | 0.178591972 | 0.081257038 |
| 0.085272422 | 0.130515073 | 0.254897711 | 0.30144162  |
| 0.417854398 | 0.27793844  | 0.209331043 | 0.256175037 |
| 0.442137472 | 0.422626015 | 0.477505799 | 0.390158417 |
| 0.065835911 | 0.231001002 | 0.30539285  | 0.233076712 |
| 1           | 0.141635477 | 0.249406787 | 0.471331136 |
| 0.363842631 | 0.400954662 | 0.156206283 | 0.468151188 |
| 0.236574791 | 0.484652834 | 0.386365156 | 0.193409062 |
| 0.474328481 | 0.445796896 | 0.480994441 | 0.314297522 |
| 0.430218731 | 0.256532354 | 0.128138341 | 0.364731216 |
| 0.468289534 | 0.020131954 | 0.430843114 | 0.460117427 |
| 0.448326582 | 0.412013699 | 0.498336233 | 0.461933496 |
| 0.452463325 | 0.095286754 | 0.044585699 | 0.296599058 |
| 0.46459462  | 0.364075059 | 0.187421268 | 0.31217351  |
| 0.320269357 | 0.292257636 | 0.359982113 | 0.26367267  |
| 0.500891447 | 0.397163988 | 0.439513682 | 0.35513643  |
| 0.25031799  | 0.320507817 | 0.289475855 | 0.416947164 |
| 0.068193294 | 0.126972156 | 0.061408062 | 0.289286796 |
| 0.210770561 | 0.205558136 | 0.296019122 | 0.311815985 |
| 0.218076122 | 0.266597784 | 0.249474215 | 0.309575054 |
| 0.06724971  | 0.305258869 | 0.162343083 | 0.188405538 |
| 0.076637207 | 0.163598339 | 0.229145669 | 0.169726378 |
| 0.278448349 | 0.245577793 | 0.331822036 | 0.446295335 |
| 0.303866624 | 0.165941659 | 0.330573381 | 0.450358057 |
| 0.438983617 | 0.293645296 | 0.237923738 | 0.018941207 |

|             |             |             |             |
|-------------|-------------|-------------|-------------|
| 0.302089136 | 0.244021342 | 0.187743678 | 0.294357795 |
| 0.191020416 | 0.314671145 | 0.335529273 | 0.336685915 |
| 0.234474454 | 0.163971675 | 0.331110385 | 0.412888884 |
| 0.149326505 | 0.271845362 | 0.428914777 | 0.300795118 |
| 0.00610413  | 0.289419155 | 0.393407413 | 0.209554835 |
| 0.295640081 | 0.159176439 | 0.19808734  | 0.433507046 |
| 0.280158689 | 0.265250244 | 0.44368564  | 0.330122559 |
| 0.283551063 | 0.22866558  | 0.496377804 | 0.095356362 |
| 0.290030229 | 0.067071795 | 0.277594502 | 0.220912898 |
| 0.247023841 | 0.292178577 | 0.285764248 | 0.25173056  |
| 0.119516151 | 0.483392012 | 0.344576071 | 0.471857247 |
| 0.30888191  | 0.49710654  | 0.419505003 | 0.416076736 |
| 0.291376965 | 0.296367399 | 0.149119783 | 0.385374579 |
| 0.415307695 | 0.260153319 | 0.080890099 | 0.38209067  |
| 0.288612945 | 0.329812613 | 0.134992628 | 0.470982113 |
| 0.463416513 | 0.412177671 | 0.200100498 | 0.350307607 |
| 0.354393902 | 0.217149429 | 0.360941586 | 0.5066073   |
| 0.246028893 | 0.333652356 | 0.304568599 | 0.38204207  |
| 0.179665713 | 0.263406549 | 0.311982545 | 0.172327657 |
| 0.006621611 | 0.106808031 | 0.084024236 | 0.205065494 |
| 0.181410402 | 0.286034373 | 0.314653691 | 0.481520904 |
| 0.161826524 | 0.382775282 | 0.231452115 | 0.298756698 |
| 0.401478337 | 0.318322775 | 0.282750242 | 0.307608637 |
| 0.232469687 | 0.026005639 | 0.149525533 | 0.490828015 |
| 0.051663473 | 0.228605971 | 0.28523396  | 0.005916885 |
| 0.077553868 | 0.337109572 | 0.110231019 | 0.21223219  |
| 0.45469328  | 0.203595441 | 0.203036222 | 0.248410527 |
| 0.290050044 | 0.117624732 | 0.005213149 | 0.447728725 |
| 0.448011961 | 0.428399137 | 0.44683224  | 0.418179246 |
| 0.418221216 | 0.330743258 | 0.372475632 | 0.245845897 |
| 0.139161942 | 0.101096727 | 0.243404956 | 0.298308884 |
| 0.011428174 | 0.328628482 | 0.278481441 | 0.158896173 |
| 0.35816623  | 0.290830768 | 0.063808777 | 0.299475074 |
| 0.031619319 | 0.17642086  | 0.317129593 | 0.249032842 |
| 0.32327892  | 0.024904892 | 0.178172258 | 0.304362089 |
| 0.384018128 | 0.333047846 | 0.259747438 | 0.478111329 |
| 0.29023317  | 0.121824947 | 0.277485618 | 0.334014098 |
| 0.110748422 | 0.115230809 | 0.30612937  | 0.022906698 |
| 0.145675251 | 0.424110032 | 0.297016534 | 0.079538195 |
| 0.263681716 | 0.010296479 | 0.33787173  | 0.492646326 |
| 0.403834969 | 0.486231735 | 0.457444698 | 0.238649988 |
| 0.459852481 | 0.101362128 | 0.481922895 | 0.362650108 |
| 0.278274556 | 0.001730566 | 0.015465762 | 0.439135964 |
| 0.315385633 | 0.061538866 | 0.179118957 | 0.238376918 |
| 0.154392319 | 0.15961244  | 0.096907306 | 0.197327735 |
| 0.28640839  | 0.252014226 | 0.206555529 | 0.433218984 |
| 0.256815171 | 0.248084343 | 0.29290015  | 0.102495404 |
| 0.295412945 | 0.082589536 | 0.103644222 | 0.013004438 |
| 0.314597051 | 0.119731509 | 0.425355531 | 0.461633098 |
| 0.469383644 | 0.306404118 | 0.234211302 | 0.278343691 |
| 0.40447869  | 0.093270053 | 0.244975323 | 0.111061924 |
| 0.430481487 | 0.327478148 | 0.306469979 | 0.294014339 |
| 0.488829353 | 0.439167567 | 0.062995852 | 0.371384409 |
| 0.016879168 | 0.004841906 | 0.26038369  | 0.256859369 |

|             |             |             |             |
|-------------|-------------|-------------|-------------|
| 0.085844345 | 0.330471619 | 0.251250652 | 0.236935716 |
| 0.239104984 | 0.048717946 | 0.253757481 | 0.246878574 |
| 0.280613258 | 0.326006823 | 0.269740163 | 0.234911301 |
| 0.256376    | 0.187065349 | 0.20627892  | 0.207028034 |
| 0.245586451 | 0.297932615 | 0.204760642 | 0.044059236 |
| 0.288217545 | 0.311876542 | 0.08459782  | 0.161967389 |
| 0.402148349 | 0.454355336 | 0.089613961 | 0.025263195 |
| 0.26105288  | 0.317359937 | 0.473122199 | 0.442247357 |
| 0.481145807 | 0.501743279 | 0.384503008 | 0.204674115 |
| 0.096064071 | 0.291159222 | 0.271993289 | 0.138523399 |
| 0.472283333 | 0.081196034 | 0.428544773 | 0.256395144 |
| 0.140788222 | 0.212963792 | 0.061617025 | 0.119022588 |
| 0.294246899 | 0.199721015 | 0.214245427 | 0.138594641 |
| 0.320340532 | 0.212868093 | 0.08025174  | 0.221956559 |
| 0.329298571 | 0.181224769 | 0.186648901 | 0.247239814 |
| 0.297570175 | 0.165227699 | 0.35204807  | 0.450005915 |
| 0.141578403 | 0.139721627 | 0.221878954 | 0.326891132 |
| 0.38672713  | 0.27378447  | 0.033509622 | 0.392019292 |
| 0.458095219 | 0.314321835 | 0.444223599 | 0.405102502 |
| 0.103826131 | 0.308356086 | 0.283345233 | 0.322222189 |
| 0.218608043 | 0.264417853 | 0.259996089 | 0.08982791  |
| 0.305163821 | 0.461685161 | 0.378518831 | 0.197302901 |
| 0.289395606 | 0.128210575 | 0.071500257 | 0.395982651 |
| 0.209502624 | 0.127913895 | 0.24136187  | 0.390965405 |
| 0.00244179  | 0.142951081 | 0.459817354 | 0.237274913 |
| 0.483655069 | 0.448799749 | 0.420740457 | 0.22422198  |
| 0.00375144  | 0.311959903 | 0.313601707 | 0.301798077 |
| 0.395119095 | 0.303397909 | 0.153685667 | 0.119947103 |
| 0.285485362 | 0.083311751 | 0.212533896 | 0.232869461 |
| 0.190163181 | 0.315185063 | 0.212155771 | 0.223487528 |
| 0.22589642  | 0.101231103 | 0.204106842 | 0.215167082 |
| 0.173429652 | 0.241959424 | 0.349859022 | 0.194676979 |
| 0.220059523 | 0.434150016 | 0.364874779 | 0.042380647 |
| 0.283887083 | 0.391405162 | 0.39680111  | 0.009246961 |
| 0.348639189 | 0.01857446  | 0.242684046 | 0.230399446 |
| 0.221822728 | 0.272019201 | 0.27157784  | 0.259354431 |
| 0.303187874 | 0.240393769 | 0.248866206 | 0.239980432 |
| 0.186540303 | 0.212794732 | 0.300572559 | 0.276004739 |
| 0.260819614 | 0.144985002 | 0.110941261 | 0.114937329 |
| 0.080560711 | 0.407074071 | 0.252861414 | 0.073925557 |
| 0.245814683 | 0.291995824 | 0.354890224 | 0.434804393 |
| 0.398218395 | 0.113686918 | 0.31131254  | 0.385264193 |
| 0.204345502 | 0.237846046 | 0.089354929 | 0.269946266 |
| 0.241078444 | 0.253755318 | 0.266972965 | 0.255623359 |
| 0.33247428  | 0.39349813  | 0.242599046 | 0.40550107  |
| 0.28171609  | 0.300559314 | 0.207244308 | 0.131965924 |
| 0.19308766  | 0.143613467 | 0.264614258 | 0.003931057 |
| 0.310575054 | 0.1967888   | 0.425914595 | 0.434957976 |
| 0.248272359 | 0.366399543 | 0.22012154  | 0.127527141 |
| 0.166412042 | 0.18290469  | 0.158652874 | 0.340114125 |
| 0.193462029 | 0.188373425 | 0.278488259 | 0.222165314 |
| 0.351431458 | 0.331677701 | 0.256559827 | 0.269032876 |
| 0.240261273 | 0.173875261 | 0.441147027 | 0.12040275  |
| 0.298711241 | 0.19586215  | 0.247648065 | 0.303423381 |

|             |             |             |             |
|-------------|-------------|-------------|-------------|
| 0.254905317 | 0.462961765 | 0.078159885 | 0.480062741 |
| 0.329835158 | 0.135427018 | 0.473265665 | 0.248521057 |
| 0.218406461 | 0.143707658 | 0.179894878 | 0.274343845 |
| 0.257560026 | 0.259784229 | 0.018342409 | 0.1202243   |
| 0.309258869 | 0.266789927 | 0.348397635 | 0.322734731 |
| 0.243017496 | 0.341274943 | 0.146050362 | 0.280867926 |
| 0.421460709 | 0.447182754 | 0.276680702 | 0.25441774  |
| 0.328501692 | 0.138695837 | 0.267210539 | 0.027148084 |
| 0.32813432  | 0.301176387 | 0.300163566 | 0.09219552  |
| 0.037667811 | 0.204488711 | 0.312577158 | 0.081927329 |
| 0.457239424 | 0.175538036 | 0.269331743 | 0.314072258 |
| 0.178568859 | 0.451468629 | 0.176408523 | 0.337308544 |
| 0.076280051 | 0.238602801 | 0.283153962 | 0.306026728 |
| 0.241888254 | 0.272634812 | 0.333824261 | 0.223934943 |
| 0.060880678 | 0.262403853 | 0.006744497 | 0.394896092 |
| 0.421544034 | 0.293557536 | 0.21833327  | 0.217583824 |
| 0.26124657  | 0.34816412  | 0.319752553 | 0.279221918 |
| 0.021412128 | 0.307795228 | 0.210693086 | 0.361971456 |
| 0.19571748  | 0.312532324 | 0.076147707 | 0.298012153 |
| 0.414237357 | 0.337264871 | 0.269672205 | 0.251440714 |
| 0.427011231 | 0.327497994 | 0.140905014 | 0.203389333 |
| 0.284500826 | 0.082535008 | 0.247830385 | 0.495546059 |
| 0.21624187  | 0.215001056 | 0.413284023 | 0.245700482 |
| 0.283659498 | 0.346568087 | 0.281479693 | 0.484765691 |
| 0.140002311 | 0.243876316 | 0.367253893 | 0.431393835 |
| 0.29891086  | 0.206598772 | 0.251344961 | 0.279112967 |
| 0.399217426 | 0.112536002 | 0.261045064 | 0.307021188 |
| 0.230319122 | 0.282446151 | 0.232379327 | 0.232452604 |
| 0.070538663 | 0.210921075 | 0.270090238 | 0.158331129 |
| 0.2977091   | 0.302186606 | 0.248352026 | 0.378225973 |
| 0.15512891  | 0.041800433 | 0.432748476 | 0.032768424 |
| 0.237119681 | 0.299768184 | 0.240895436 | 0.293099229 |
| 0.182863414 | 0.303556669 | 0.271156137 | 0.004953993 |
| 0.384760046 | 0.038409813 | 0.275319704 | 0.251464148 |
| 0.292242666 | 0.085670103 | 0.407664821 | 0.485518611 |
| 0.258292629 | 0.236170411 | 0.266245558 | 0.429765338 |
| 0.155036531 | 0.242521121 | 0.305494825 | 0.281505713 |
| 0.209370085 | 0.262830607 | 0.290710445 | 0.264908725 |
| 0.309555152 | 0.240923833 |             |             |
| CD28        | 0.21044847  | 0.171632706 | 0.147555867 |
| 0.109256432 | 0.086027928 | 0.07013063  | 0.295644614 |
| 0.267130923 | 0.184942256 | 0.041225261 | 0.089877564 |
| 0.196283012 | 0.018759847 | 0.188496488 | 0.311207448 |
| 0.077870131 | 0.266153676 | 0.272597324 | 0.079587203 |
| 0.14391765  | 0.092686732 | 0.047986614 | 0.086025136 |
| 0.10162801  | 0.306840388 | 0.127103816 | 0.055506505 |
| 0.172335661 | 0.017441554 | 0.084824943 | 0.018980725 |
| 0.266008131 | 0.079331813 | 0.039972919 | 0.163957891 |
| 0.082081689 | 0.027514738 | 0.292687485 | 0.119971816 |
| 0.026516932 | 0.285086039 | 0.04827535  | 0.133432349 |
| 0.057826456 | 0.179892124 | 0.016777586 | 0.091246373 |
| 0.131347627 | 0.156198633 | 0.184942417 | 0.106451197 |
| 0.080534644 | 0.1678912   | 0.096454872 | 0.015385518 |
| 0.032243951 | 0.00482332  | 0.019709537 | 0.214486563 |



|             |             |             |             |
|-------------|-------------|-------------|-------------|
| 0.244592038 | 0.252996405 | 0.029500234 | 0.183405114 |
| 0.094040826 | 0.134197643 | 0.24594382  | 0.055639604 |
| 0.198685568 | 0.031727984 | 0.095802649 | 0.092145803 |
| 0.093758559 | 0.238312143 | 0.306486343 | 0.237038073 |
| 0.067675275 | 0.202755878 | 0.093240259 | 0.051152415 |
| 0.156320443 | 0.284628115 | 0.238246982 | 0.229815168 |
| 0.056569136 | 0.066032904 | 0.085647179 | 0.214055709 |
| 0.166997748 | 0.295570891 | 0.123150107 | 0.240826368 |
| 0.269572284 | 0.066302385 | 0.128648477 | 0.261444962 |
| 0.16348279  | 0.053924581 | 0.047599359 | 0.03302828  |
| 0.097562911 | 0.072949258 | 0.26876946  | 0.19297321  |
| 0.096502514 | 0.20895206  | 0.252399789 | 0.057216523 |
| 0.084004438 | 0.195813349 | 0.093810432 | 0.125195542 |
| 0.094497325 | 0.172396134 | 0.143919639 | 0.190546938 |
| 0.059600143 | 0.191467213 | 0.119616086 | 0.204609775 |
| 0.013100346 | 0.211808569 | 0.184268742 | 0.255240711 |
| 0.198791873 | 0.285349892 | 0.116298076 | 0.285555967 |
| 0.149131427 | 0.182644464 | 0.190592869 | 0.156016277 |
| 0.159227765 | 0.223319008 | 0.20801815  | 0.1645174   |
| 0.245986006 | 0.045994088 | 0.05718669  | 0.15421306  |
| 0.141635477 | 1           | 0.048370379 | 0.261069145 |
| 0.222692878 | 0.136841066 | 0.192843748 | 0.306405952 |
| 0.23162125  | 0.23854881  | 0.141183021 | 0.197038124 |
| 0.24789858  | 0.245272868 | 0.212179909 | 0.083795412 |
| 0.242981466 | 0.093520754 | 0.070146069 | 0.19822405  |
| 0.236916332 | 0.006625325 | 0.145966487 | 0.159556196 |
| 0.198840327 | 0.120144512 | 0.21496798  | 0.180173695 |
| 0.200889712 | 0.261926754 | 0.007514726 | 0.157467316 |
| 0.225121802 | 0.188525202 | 0.257072011 | 0.049406296 |
| 0.091112583 | 0.086137131 | 0.132960019 | 0.035312457 |
| 0.279442376 | 0.160836051 | 0.1576245   | 0.155772451 |
| 0.114548852 | 0.29250304  | 0.044700275 | 0.24268889  |
| 0.25891635  | 0.185845591 | 0.197056664 | 0.244003287 |
| 0.044891741 | 0.22478134  | 0.089236331 | 0.104686117 |
| 0.239113423 | 0.116001375 | 0.034334562 | 0.096497555 |
| 0.2578097   | 0.059861875 | 0.21527336  | 0.196802523 |
| 0.24183868  | 0.356142491 | 0.135113616 | 0.170410081 |
| 0.146550385 | 0.356923848 | 0.092765899 | 0.18379864  |
| 0.09196776  | 0.228178367 | 0.113154752 | 0.233772667 |
| 0.263426277 | 0.05479802  | 0.299929442 | 0.049912599 |
| 0.062510248 | 0.035939526 | 0.023330933 | 0.056136809 |
| 0.364284939 | 0.132837237 | 0.092273568 | 0.111054732 |
| 0.116856809 | 0.230375013 | 0.06611457  | 0.29838365  |
| 0.259668351 | 0.082174564 | 0.163606456 | 0.072970656 |
| 0.092227635 | 0.111054372 | 0.133792291 | 0.120952302 |
| 0.180989331 | 0.029176813 | 0.025031048 | 0.160750966 |
| 0.043414651 | 0.081679898 | 0.164923292 | 0.119939155 |
| 0.06631251  | 0.316074484 | 0.216142211 | 0.009775602 |
| 0.080766555 | 0.074732803 | 0.189315029 | 0.054156839 |
| 0.182877863 | 0.23957017  | 0.070416172 | 0.084928006 |
| 0.185916148 | 0.219483826 | 0.197284745 | 0.18415867  |
| 0.04595443  | 0.221555573 | 0.135747122 | 0.180883398 |
| 0.152152251 | 0.053049234 | 0.0147644   | 0.128904483 |
| 0.151565416 | 0.055491913 | 0.235782637 | 0.111319876 |

|             |             |              |             |
|-------------|-------------|--------------|-------------|
| 0.059166574 | 0.095832619 | 0.136071771  | 0.1981711   |
| 0.284677811 | 0.203070581 | 0.219514677  | 0.158993415 |
| 0.177602245 | 0.160104865 | 0.176652132  | 0.240071349 |
| 0.045275993 | 0.067920159 | 0.061893765  | 0.179336179 |
| 0.227809248 | 0.091791846 | 0.296340262  | 0.02319319  |
| 3.68E-05    | 0.246951329 | 0.212935609  | 0.189771298 |
| 0.046376736 | 0.067996912 | 0.114564795  | 0.202448344 |
| 0.254606146 | 0.219045436 | 0.279452177  | 0.076689378 |
| 0.202935138 | 0.078785244 | 0.054769848  | 0.09400135  |
| 0.284830589 | 0.083351297 | 0.143176724  | 0.282395414 |
| 0.20089923  | 0.041170905 | 0.146287095  | 0.009936008 |
| 0.235132001 | 0.121573113 | 0.305269094  | 0.364304903 |
| 0.183699646 | 0.325057116 | 0.205375385  | 0.051573459 |
| 0.166480864 | 0.259972652 | 0.022013355  | 0.187351178 |
| 0.225099467 | 0.228468602 | 0.221863158  | 0.24975602  |
| 0.191712662 | 0.145410424 | 0.141722203  | 0.087105286 |
| 0.262957015 | 0.221078909 | 0.042291307  | 0.120449488 |
| 0.019490962 | 0.171052441 | 0.122063724  | 0.281353729 |
| 0.116600527 | 0.20837949  | 0.227428754  | 0.093534923 |
| 0.091901368 | 0.015317242 | 0.129878364  | 0.212793316 |
| 0.170140296 | 0.180214871 | 0.027681919  | 0.043656237 |
| 0.20745376  | 0.227431715 | 0.04056944   | 0.219655728 |
| 0.109469907 | 0.207657971 | 0.095230922  | 0.136138302 |
| 0.273331923 | 0.027683418 | 0.100769574  | 0.003133501 |
| 0.055388552 | 0.259912047 | 0.069070925  | 0.176346094 |
| 0.159924295 | 0.10264001  | 0.205095789  | 0.2277461   |
| 0.194845183 | 0.187529174 | 0.195658178  | 0.039354147 |
| 0.20144067  | 0.007352342 | 0.194444092  | 0.161422779 |
| 0.041412446 | 0.005928939 | 0.06218943   | 0.151343483 |
| 0.06272093  | 0.220863202 | 0.243248114  | 0.047595161 |
| 0.203598785 | 0.17468481  | 0.287935998  | 0.06919547  |
| 0.086494923 | 0.122878662 | 0.078844782  | 0.216738421 |
| 0.171445575 | 0.204650049 | 0.0711157947 | 0.282327665 |
| 0.079833176 | 0.228139904 | 0.291556359  | 0.016568134 |
| 0.146758408 | 0.266650846 | 0.276148434  | 0.200384412 |
| 0.241727311 | 0.10951944  | 0.030842744  | 0.064701273 |
| 0.183902312 | 0.18411616  | 0.041611117  | 0.188701368 |
| 0.181723136 | 0.088553646 | 0.208831485  | 0.224511454 |
| 0.217772747 | 0.217222686 | 0.264109797  | 0.142407592 |
| 0.064566166 | 0.013241491 | 0.067481467  | 0.260771172 |
| 0.079651426 | 0.063162606 | 0.258528447  | 0.174937972 |
| 0.187817988 | 0.151497407 | 0.039991393  | 0.045619944 |
| 0.157085958 | 0.09587623  | 0.069073593  | 0.282326289 |
| 0.112796392 | 0.091536935 | 0.196008857  | 0.271052605 |
| 0.118813656 | 0.234354662 | 0.292377427  | 0.256371065 |
| 0.053270081 | 0.053736357 | 0.245805567  | 0.272199067 |
| 0.154920723 | 0.159569407 | 0.263181882  | 0.085145908 |
| 0.269363926 | 0.121043253 | 0.178043721  | 0.182231969 |
| 0.245817841 | 0.241829909 | 0.305721132  | 0.204080982 |
| 0.247910808 | 0.130214588 | 0.073179392  | 0.171952    |
| 0.197997932 | 0.206193721 | 0.209743839  | 0.043394116 |
| 0.294304101 | 0.169290119 | 0.198677445  | 0.293924664 |
| 0.056801118 | 0.265826984 | 0.186956039  | 0.175698786 |
| 0.102317564 | 0.042687223 | 0.294134479  | 0.215389537 |

|             |             |             |             |
|-------------|-------------|-------------|-------------|
| 0.193247918 | 0.023970883 | 0.250788023 | 0.144034696 |
| 0.191454748 | 0.050610123 | 0.098763835 | 0.267915234 |
| 0.253198606 | 0.256000832 | 0.078402593 | 0.163389723 |
| 0.124241727 | 0.05434929  | 0.07059266  | 0.160388154 |
| 0.200663069 | 0.076684914 | 0.213919682 | 0.224160242 |
| 0.28785894  | 0.056786109 | 0.057228465 | 0.092793117 |
| 0.251679039 | 0.076833496 | 0.209440083 | 0.267216176 |
| 0.323388726 | 0.302263066 | 0.173216364 | 0.192856701 |
| 0.071295982 | 0.199224828 | 0.190053587 | 0.166589771 |
| 0.044107477 | 0.18629224  | 0.050592407 | 0.139868179 |
| 0.011238946 | 0.02181042  | 0.20398553  | 0.159214246 |
| 0.263609706 | 0.17500851  | 0.236686592 | 0.177460034 |
| 0.001328684 | 0.085030968 | 0.096329452 | 0.058653437 |
| 0.162260671 | 0.20003833  | 0.186242593 | 0.230192151 |
| 0.27253816  | 0.204317137 | 0.195961268 | 0.062464503 |
| 0.024212887 | 0.103265259 | 0.302047607 | 0.224845332 |
| 0.188362551 | 0.250419151 | 0.039411119 | 0.167588691 |
| 0.064092544 | 0.275380578 | 0.209938335 | 0.048465911 |
| 0.019544723 | 0.202871139 | 0.143653379 | 0.202065716 |
| 0.061862906 | 0.190140169 | 0.213356751 | 0.021081471 |
| 0.097573832 | 0.153882932 | 0.173726438 | 0.139531117 |
| 0.180050353 | 0.189247488 | 0.166255722 | 0.090756162 |
| 0.14115954  | 0.204287078 | 0.121289189 | 0.201363627 |
| 0.168795697 | 0.218460567 | 0.093532805 | 0.104444998 |
| 0.079393627 | 0.214670756 | 0.312035349 | 0.309897073 |
| 0.184843528 | 0.168964671 | 0.30914346  | 0.221541507 |
| 0.228075531 | 0.104070512 | 0.274819087 | 0.19074614  |
| 0.232224472 | 0.238160523 | 0.125965306 | 0.144092606 |
| 0.026749756 | 0.069204767 | 0.224513407 | 0.088977326 |
| 0.199527915 | 0.065987097 | 0.072280893 | 0.112440065 |
| 0.116673733 | 0.286321589 | 0.296955137 | 0.23453277  |
| 0.088772669 | 0.094601079 | 0.035661897 | 0.180775226 |
| 0.182101196 | 0.300210602 | 0.080721678 | 0.051755287 |
| 0.15493266  | 0.100070946 | 0.136304807 | 0.215529986 |
| 0.035640553 | 0.257982929 | 0.038220312 | 0.200640955 |
| 0.029987818 | 0.25456488  | 0.29398164  | 0.116264202 |
| 0.01855492  | 0.211295691 | 0.101364306 | 0.071373968 |
| 0.114790923 | 0.11234106  | 0.10990159  | 0.202443018 |
| 0.211687059 | 0.209647993 | 0.272047313 | 0.202195545 |
| 0.060978986 | 0.069923198 | 0.087159583 | 0.101714834 |
| 0.162969741 | 0.188012637 | 0.244831878 | 0.182131112 |
| 0.079004509 | 0.304173913 | 0.291502984 | 0.152351977 |
| 0.135859238 | 0.171787806 | 0.020637996 | 0.074113671 |
| 0.198932375 | 0.040282074 | 0.001644558 | 0.02388819  |
| 0.185420303 | 0.100149722 | 0.126116287 | 0.180665926 |
| 0.086052291 | 0.225910409 | 0.024347415 | 0.158837404 |
| 0.205788243 | 0.260384703 | 0.094041205 | 0.300414873 |
| 0.199305225 | 0.237616459 | 0.092175743 | 0.02944374  |
| 0.07044393  | 0.054686944 | 0.047125029 | 0.291216442 |
| 0.231437697 | 0.022116676 | 0.078950891 | 0.242515224 |
| 0.174340672 | 0.016474974 | 0.111925224 | 0.104389974 |
| 0.310793415 | 0.262964348 | 0.21722923  | 0.119962784 |
| 0.237691679 | 0.242523065 | 0.059699175 | 0.074943165 |
| 0.078566051 | 0.054199613 | 0.151327927 | 0.041845492 |

|             |             |             |             |
|-------------|-------------|-------------|-------------|
| 0.241409926 | 0.102661006 | 0.027605755 | 0.301062018 |
| 0.243565895 | 0.053092194 | 0.339346964 | 0.040938681 |
| 0.215980087 | 0.229158183 | 0.109362368 | 0.052444644 |
| 0.109690517 | 0.065030692 | 0.236485368 | 0.16722888  |
| 0.016682795 | 0.09743638  | 0.191044879 | 0.079106133 |
| 0.288571533 | 0.068890222 | 0.325227253 | 0.031202026 |
| 0.192577315 | 0.181287359 | 0.219910472 | 0.122545569 |
| 0.09955233  | 0.263735674 | 0.052014115 | 0.230568491 |
| 0.193247026 | 0.047430144 | 0.136751786 | 0.159330525 |
| 0.052460411 | 0.217700201 | 0.069101159 | 0.236184109 |
| 0.196121095 | 0.233467963 | 0.142703033 | 0.196996286 |
| 0.2480984   | 0.072554384 | 0.041824098 | 0.110041838 |
| 0.192172126 | 0.142818104 | 0.073504976 | 0.180823093 |
| 0.033756456 | 0.198272    | 0.094478309 | 0.12950287  |
| 0.165925107 | 0.262370825 | 0.072996043 | 0.274487805 |
| 0.157088501 | 0.08328672  | 0.098049557 | 0.270935876 |
| 0.129000602 | 0.092777538 | 0.274068001 | 0.00267642  |
| 0.09703298  | 0.096608001 | 0.200594909 | 0.080738055 |
| 0.272085975 | 0.14061635  | 0.091884496 | 0.03598316  |
| 0.166093447 | 0.030882328 | 0.122389305 | 0.084586605 |
| 0.050642643 | 0.252547711 | 0.223125494 | 0.192471984 |
| 0.189211019 | 0.062929517 | 0.03073851  | 0.212836444 |
| 0.027853496 | 0.031657582 | 0.051161672 | 0.096657098 |
| 0.035730505 | 0.042477347 | 0.050779217 | 0.03724565  |
| 0.157158059 | 0.180854238 |             |             |
| CD7         | 0.01978317  | 0.218472197 | 0.010292258 |
| 0.07332833  | 0.317521715 | 0.128026209 | 0.022255297 |
| 0.046869339 | 0.17016194  | 0.082193893 | 0.216486645 |
| 0.00733226  | 0.218990388 | 0.292090538 | 0.023557096 |
| 0.305584871 | 0.020849775 | 0.044654172 | 0.037899873 |
| 0.094874669 | 0.28902543  | 0.222203552 | 0.109865036 |
| 0.257139022 | 0.080577271 | 0.131289209 | 0.237722454 |
| 0.297937336 | 0.159169208 | 0.282282832 | 0.064388211 |
| 0.251291551 | 0.340249347 | 0.215654804 | 0.004437147 |
| 0.194809107 | 0.041312518 | 0.230812519 | 0.181327413 |
| 0.252098613 | 0.19423209  | 0.079129555 | 0.143704046 |
| 0.119442316 | 0.009728918 | 0.061742426 | 0.29073046  |
| 0.14074859  | 0.131838212 | 0.013445772 | 0.246887499 |
| 0.145258097 | 0.163673026 | 0.166192667 | 0.000841972 |
| 0.256809976 | 0.190545011 | 0.248469947 | 0.273778643 |
| 0.119522838 | 0.06975469  | 0.145105331 | 0.082046445 |
| 0.224702473 | 0.27811703  | 0.172411184 | 0.11970634  |
| 0.29745581  | 0.267032846 | 0.286785352 | 0.084008825 |
| 0.129461656 | 0.006302904 | 0.088397273 | 0.021957842 |
| 0.182380826 | 0.134624291 | 0.245847536 | 0.258930439 |
| 0.204329513 | 0.289228959 | 0.134177447 | 0.248780644 |
| 0.17641923  | 0.326258758 | 0.24299979  | 0.256474037 |
| 0.239605534 | 0.030498108 | 0.288036184 | 0.312914173 |
| 0.011761271 | 0.138006484 | 0.236072766 | 0.04020882  |
| 0.234444508 | 0.209551832 | 0.12878601  | 0.281000098 |
| 0.360667578 | 0.290833142 | 0.249118457 | 0.181972681 |
| 0.225911424 | 0.019486889 | 0.223003618 | 0.350570297 |
| 0.195792078 | 0.024311    | 0.224455141 | 0.344058364 |
| 0.249229178 | 0.30278714  | 0.240267295 | 0.25019819  |

|             |             |             |             |
|-------------|-------------|-------------|-------------|
| 0.278917828 | 0.305087327 | 0.250056889 | 0.246240845 |
| 0.054920902 | 0.296119887 | 0.079811998 | 0.02498469  |
| 0.013383048 | 0.052616277 | 0.180305575 | 0.2081248   |
| 0.32449197  | 0.179398132 | 0.068463525 | 0.179069121 |
| 0.37809592  | 0.220446435 | 0.291438317 | 0.267889105 |
| 0.013086983 | 0.239324475 | 0.268992489 | 0.091170201 |
| 0.249406787 | 0.048370379 | 1           | 0.258918952 |
| 0.234732052 | 0.344959872 | 0.040999856 | 0.254079197 |
| 0.076743644 | 0.328819158 | 0.24194004  | 0.090144183 |
| 0.285920608 | 0.2470618   | 0.353325218 | 0.376141121 |
| 0.255285475 | 0.128588584 | 0.039321403 | 0.237359452 |
| 0.335435752 | 0.044968908 | 0.323261743 | 0.345181498 |
| 0.269238865 | 0.344197491 | 0.36422984  | 0.335692    |
| 0.267799351 | 0.024715437 | 0.030968048 | 0.271070534 |
| 0.270276651 | 0.259365972 | 0.098180012 | 0.223351352 |
| 0.307226551 | 0.125497795 | 0.292465857 | 0.159534303 |
| 0.328415914 | 0.301485219 | 0.308175061 | 0.228295243 |
| 0.111246023 | 0.170809329 | 0.27664161  | 0.214484404 |
| 0.020789738 | 0.029993432 | 0.013134904 | 0.201447347 |
| 0.089286067 | 0.125234664 | 0.104568709 | 0.248639782 |
| 0.133089848 | 0.093101564 | 0.22130886  | 0.366995935 |
| 0.014586843 | 0.203266614 | 0.064108672 | 0.057515153 |
| 0.025884956 | 0.061987511 | 0.095342281 | 0.089168014 |
| 0.194079439 | 0.088030386 | 0.270799545 | 0.329477777 |
| 0.176272145 | 0.075729418 | 0.238897494 | 0.321018367 |
| 0.31851576  | 0.290649676 | 0.130698293 | 0.012601364 |
| 0.178586752 | 0.147003311 | 0.267749268 | 0.247115543 |
| 0.069168869 | 0.132736478 | 0.255264805 | 0.37813556  |
| 0.0878665   | 0.035846718 | 0.193326558 | 0.230393065 |
| 0.053819705 | 0.206599106 | 0.334640067 | 0.171992662 |
| 0.000816406 | 0.152201843 | 0.308509178 | 0.199619419 |
| 0.166005702 | 0.212863576 | 0.241093109 | 0.3284139   |
| 0.215335333 | 0.243596737 | 0.332898631 | 0.372807061 |
| 0.133065011 | 0.079124705 | 0.348553817 | 0.08231111  |
| 0.239132857 | 0.087014684 | 0.251204484 | 0.088420705 |
| 0.136247017 | 0.225963812 | 0.322749293 | 0.235442688 |
| 0.03924032  | 0.294784626 | 0.23969113  | 0.326175545 |
| 0.189294379 | 0.34416242  | 0.340134071 | 0.303575614 |
| 0.21178431  | 0.184919664 | 0.262487385 | 0.298408565 |
| 0.326462845 | 0.135257038 | 0.020711138 | 0.299403834 |
| 0.13474413  | 0.332816771 | 0.160810583 | 0.33936252  |
| 0.283936339 | 0.216941269 | 0.095997651 | 0.351559329 |
| 0.262992607 | 0.102339943 | 0.289728583 | 0.346325272 |
| 0.103741974 | 0.242075975 | 0.225271785 | 0.374281149 |
| 0.087554281 | 0.235927128 | 0.180660716 | 0.265387386 |
| 0.025638754 | 0.020568554 | 0.018937238 | 0.129857613 |
| 0.290275107 | 0.214575713 | 0.292079259 | 0.314587424 |
| 0.054255718 | 0.253440087 | 0.127424191 | 0.188508251 |
| 0.230673461 | 0.20386805  | 0.294938369 | 0.300009509 |
| 0.140186223 | 0.017320724 | 0.081440011 | 0.285491107 |
| 0.007806952 | 0.279730916 | 0.113217357 | 0.004375116 |
| 0.01334473  | 0.199780732 | 0.032974605 | 0.08892857  |
| 0.374676483 | 0.084296017 | 0.091261574 | 0.093095334 |
| 0.273271047 | 0.037797474 | 0.007924691 | 0.309039358 |

|             |             |             |             |
|-------------|-------------|-------------|-------------|
| 0.280454335 | 0.267241645 | 0.270783243 | 0.230081601 |
| 0.290518988 | 0.257613139 | 0.333691846 | 0.112621531 |
| 0.042444049 | 0.020061822 | 0.265298586 | 0.180823368 |
| 0.001773063 | 0.304414161 | 0.219759343 | 0.07483419  |
| 0.323626422 | 0.1847326   | 0.013171716 | 0.295344898 |
| 0.007733917 | 0.250346202 | 0.102443848 | 0.124662115 |
| 0.336655426 | 0.003840593 | 0.101769849 | 0.204809203 |
| 0.206490263 | 0.18457462  | 0.214592112 | 0.306284861 |
| 0.208296842 | 0.037438084 | 0.211104914 | 0.326269549 |
| 0.029414713 | 0.051320149 | 0.110306862 | 0.01433471  |
| 0.080249208 | 0.245306053 | 0.173178733 | 0.021889641 |
| 0.162018045 | 0.001371619 | 0.193003652 | 0.313478175 |
| 0.222238758 | 0.354676475 | 0.30704744  | 0.272885545 |
| 0.295678382 | 0.186199586 | 0.321966148 | 0.218610019 |
| 0.119573562 | 0.00052599  | 0.005339138 | 0.344103202 |
| 0.263340424 | 0.013349014 | 0.083599393 | 0.112921108 |
| 0.071369312 | 0.035131806 | 0.024570572 | 0.270277268 |
| 0.224643476 | 0.236382692 | 0.250254355 | 0.231110796 |
| 0.134826079 | 0.15651856  | 0.10662952  | 0.028825042 |
| 0.26923274  | 0.02609764  | 0.029353529 | 0.013228208 |
| 0.323748164 | 0.036495143 | 0.210386028 | 0.289989173 |
| 0.310960774 | 0.342935367 | 0.106123078 | 0.136171381 |
| 0.308444753 | 0.024747493 | 0.164498211 | 0.02896708  |
| 0.252983447 | 0.295030417 | 0.227983734 | 0.172981715 |
| 0.338038273 | 0.27318982  | 0.01273137  | 0.310660579 |
| 0.007433779 | 0.007557092 | 0.111872457 | 0.152975056 |
| 0.070587135 | 0.22329967  | 0.159853399 | 0.099550622 |
| 0.129702124 | 0.010039149 | 0.275115342 | 0.27715432  |
| 0.219524311 | 0.212028595 | 0.301593824 | 0.129500485 |
| 0.218572835 | 0.194757104 | 0.125697383 | 0.07701588  |
| 0.115303314 | 0.155680868 | 0.083271794 | 0.007444369 |
| 0.180515825 | 0.245393705 | 0.020262317 | 0.071710859 |
| 0.316642276 | 0.335636546 | 0.025812793 | 0.013846763 |
| 0.143116614 | 0.168346442 | 0.358488351 | 0.271243076 |
| 0.278552017 | 0.339832784 | 0.212114895 | 0.119934196 |
| 0.024855154 | 0.248246633 | 0.314912199 | 0.142591896 |
| 0.308808531 | 0.015597198 | 0.257971044 | 0.31065895  |
| 0.052742371 | 0.107021802 | 0.02341237  | 0.036365884 |
| 0.31223016  | 0.097515672 | 0.148233793 | 0.048424774 |
| 0.184810001 | 0.270761608 | 0.016940391 | 0.111628235 |
| 0.210245964 | 0.274642419 | 0.082149409 | 0.098775114 |
| 0.191643421 | 0.062224211 | 0.325148395 | 0.291637953 |
| 0.052258149 | 0.03806989  | 0.071018697 | 0.26675198  |
| 0.289476783 | 0.172635526 | 0.013812929 | 0.223660689 |
| 0.3316788   | 0.274898799 | 0.262865598 | 0.316163345 |
| 0.031207876 | 0.258415965 | 0.217028239 | 0.255247787 |
| 0.100121813 | 0.120457001 | 0.134802014 | 0.022758594 |
| 0.182823747 | 0.257109785 | 0.23840506  | 0.10241794  |
| 0.205355675 | 0.032577043 | 0.012422082 | 0.279972212 |
| 0.279882611 | 0.032403617 | 0.089962784 | 0.3141176   |
| 0.007287742 | 0.284348726 | 0.348835524 | 0.120093504 |
| 0.309765274 | 0.344577389 | 0.27024917  | 0.091151053 |
| 0.010097868 | 0.328707509 | 0.261337296 | 0.180163982 |
| 0.230761935 | 0.189888052 | 0.063674498 | 0.054545425 |

|             |             |             |             |
|-------------|-------------|-------------|-------------|
| 0.210530613 | 0.021441316 | 0.095920617 | 0.109352871 |
| 0.20451479  | 0.184616237 | 0.131925951 | 0.097570602 |
| 0.152094645 | 0.024595359 | 0.27372081  | 0.105538617 |
| 0.202176554 | 0.162823353 | 0.261247442 | 0.069063365 |
| 0.204951798 | 0.30666033  | 0.242758872 | 0.008139693 |
| 0.277226199 | 0.289380742 | 0.292199572 | 0.002280268 |
| 0.323922944 | 0.003898095 | 0.152641442 | 0.161694405 |
| 0.146773968 | 0.138966216 | 0.2497323   | 0.220380017 |
| 0.180993509 | 0.110127521 | 0.145256952 | 0.167487419 |
| 0.129676976 | 0.092788539 | 0.268341721 | 0.127864574 |
| 0.209069772 | 0.051825251 | 0.033084872 | 0.031283981 |
| 0.02979125  | 0.275457063 | 0.131843197 | 0.020538325 |
| 0.158839449 | 0.133402722 | 0.250570333 | 0.252149802 |
| 0.305741174 | 0.032365726 | 0.156527226 | 0.247169148 |
| 0.09896238  | 0.101184676 | 0.013424197 | 0.165862003 |
| 0.115214584 | 0.233144342 | 0.144828464 | 0.111679668 |
| 0.215482303 | 0.232408355 | 0.125897499 | 0.28069863  |
| 0.182192589 | 0.162707457 | 0.074985735 | 0.075170357 |
| 0.06878555  | 0.054200571 | 0.299031585 | 0.000846814 |
| 0.218865873 | 0.071044878 | 0.324459349 | 0.251265366 |
| 0.246518282 | 0.254537671 | 0.077827417 | 0.034513303 |
| 0.066691721 | 0.061667464 | 0.066923531 | 0.269261813 |
| 0.258491973 | 0.083151285 | 0.274260428 | 0.075843173 |
| 0.321968497 | 0.272322247 | 0.217012511 | 0.088426747 |
| 0.138238826 | 0.076489012 | 0.246611168 | 0.028564056 |
| 0.216973095 | 0.25596416  | 0.123565187 | 0.199714198 |
| 0.166205904 | 0.325271495 | 0.018345545 | 0.333847351 |
| 0.204924986 | 0.050430711 | 0.29421437  | 0.116301572 |
| 0.102788617 | 0.116924279 | 0.285969423 | 0.108692887 |
| 0.121077614 | 0.238584308 | 0.008375749 | 0.091170353 |
| 0.270550143 | 0.124063585 | 0.210458615 | 0.25342956  |
| 0.255401455 | 0.292442815 | 0.241087078 | 0.095989165 |
| 0.224969743 | 0.238259929 | 0.136991253 | 0.167594096 |
| 0.210670184 | 0.05052534  | 0.15464793  | 0.012822164 |
| 0.26314059  | 0.258981373 | 0.13426156  | 0.022751087 |
| 0.007541261 | 0.275040914 | 0.223875746 | 0.016869735 |
| 0.369368866 | 0.242487378 | 0.157034151 | 0.27925351  |
| 0.0783564   | 0.239404651 | 0.113008468 | 0.315346438 |
| 0.011784375 | 0.151836503 | 0.243139285 | 0.172381451 |
| 0.202532679 | 0.266642826 | 0.308251675 | 0.287456597 |
| 0.016666054 | 0.206938256 | 0.002090496 | 0.210388265 |
| 0.215888412 | 0.258643312 | 0.103252851 | 0.092334846 |
| 0.231898379 | 0.242501054 | 0.172055954 | 0.193130567 |
| 0.009715308 | 0.325785299 | 0.115672815 | 0.233127221 |
| 0.163315422 | 0.180321204 | 0.040486344 | 0.258864292 |
| 0.198708617 | 0.174630608 | 0.148712671 | 0.169188907 |
| 0.257374548 | 0.212295099 | 0.053986792 | 0.195148745 |
| 0.187931997 | 0.019994112 | 0.104472673 | 0.321277306 |
| 0.123707513 | 0.287762975 | 0.377472511 | 0.127599402 |
| 0.252626101 | 0.205449877 | 0.206806909 | 0.302392361 |
| 0.089590702 | 0.159637513 | 0.326697352 | 0.26975916  |
| 0.245342609 | 0.263478965 | 0.27001103  | 0.203595695 |
| 0.220748014 | 0.047009668 | 0.23724399  | 0.204146594 |
| 0.28090392  | 0.220066884 | 0.118089498 | 0.207441563 |

|             |             |             |             |
|-------------|-------------|-------------|-------------|
| 0.026591733 | 0.080280402 | 0.149635817 | 0.065356242 |
| 0.196762833 | 0.24716302  | 0.237250161 | 0.253175046 |
| 0.110029096 | 0.02347485  | 0.28786927  | 0.079002636 |
| 0.114774693 | 0.302962307 | 0.13536324  | 0.230117746 |
| 0.084073122 | 0.172591243 | 0.108130038 | 5.23E-05    |
| 0.321271163 | 0.096444303 | 0.174684419 | 0.218509205 |
| 0.198865506 | 0.015475516 | 0.252605206 | 0.362684658 |
| 0.15816753  | 0.148542449 | 0.190578316 | 0.260688325 |
| 0.273828118 | 0.187619328 | 0.199552308 | 0.187056613 |
| 0.293182204 | 0.118813617 | 0.156553728 | 0.211123529 |
| 0.220594328 | 0.094306452 |             |             |
| CDC20       | 0.216686393 | 0.523202434 | 0.197619451 |
| 0.257825843 | 0.335146382 | 0.507289625 | 0.175982009 |
| 0.269358937 | 0.483008478 | 0.390022845 | 0.4451707   |
| 0.07937341  | 0.073577612 | 0.520987081 | 0.160020257 |
| 0.425869482 | 0.104982199 | 0.244316507 | 0.126102094 |
| 0.355609758 | 0.314152527 | 0.366091051 | 0.528926809 |
| 0.319994066 | 0.357403628 | 0.504714928 | 0.410555369 |
| 0.533123331 | 0.282453287 | 0.494563134 | 0.262959819 |
| 0.488982885 | 0.347860661 | 0.402467008 | 0.084914512 |
| 0.497657484 | 0.013837107 | 0.487931875 | 0.338554463 |
| 0.151333159 | 0.467584035 | 0.459204428 | 0.34881442  |
| 0.472428096 | 0.143430604 | 0.272502349 | 0.450471754 |
| 0.470252986 | 0.395723657 | 0.220172985 | 0.517083566 |
| 0.440313881 | 0.495879652 | 0.507842449 | 0.007589976 |
| 0.295321061 | 0.069344424 | 0.207828007 | 0.53046075  |
| 0.350597926 | 0.240965204 | 0.302322491 | 0.399403703 |
| 0.453836795 | 0.440772907 | 0.379858589 | 0.445754183 |
| 0.532614924 | 0.164614167 | 0.48420882  | 0.257500243 |
| 0.5028792   | 0.139611761 | 0.313857589 | 0.246110758 |
| 0.439586605 | 0.31367504  | 0.400053208 | 0.312277065 |
| 0.522545552 | 0.51207381  | 0.383459442 | 0.520684417 |
| 0.102838702 | 0.35007055  | 0.305678758 | 0.39743307  |
| 0.457756241 | 0.212304287 | 0.495214765 | 0.520473227 |
| 0.168925681 | 0.485865996 | 0.491757134 | 0.301141667 |
| 0.532035457 | 0.289455198 | 0.489747726 | 0.169186327 |
| 0.397839718 | 0.371808248 | 0.505260705 | 0.43151127  |
| 0.357633012 | 0.230798727 | 0.511825812 | 0.321839511 |
| 0.362659247 | 0.238420047 | 0.258245823 | 0.500741066 |
| 0.498887714 | 0.535174068 | 0.516740754 | 0.464898914 |
| 0.403556682 | 0.531671787 | 0.50480082  | 0.512027321 |
| 0.191691905 | 0.531307739 | 0.351472462 | 0.12083457  |
| 0.228057501 | 0.18468065  | 0.270702579 | 0.424177773 |
| 0.523520523 | 0.470787532 | 0.36037452  | 0.318322755 |
| 0.487440196 | 0.519232315 | 0.528993514 | 0.506544627 |
| 0.140016135 | 0.246657914 | 0.412773217 | 0.438138985 |
| 0.471331136 | 0.261069145 | 0.258918952 | 1           |
| 0.492485506 | 0.490848249 | 0.354479475 | 0.519015815 |
| 0.34276503  | 0.518183249 | 0.535946295 | 0.305533999 |
| 0.522054859 | 0.520363177 | 0.515538669 | 0.424814249 |
| 0.51951009  | 0.489443172 | 0.103748548 | 0.489982138 |
| 0.506691664 | 0.016445082 | 0.517682557 | 0.51861578  |
| 0.531102225 | 0.505299232 | 0.511161984 | 0.525709858 |
| 0.532585652 | 0.215570101 | 0.032855208 | 0.355449433 |



|             |             |             |             |
|-------------|-------------|-------------|-------------|
| 0.526437905 | 0.50174738  | 0.221016755 | 0.45096078  |
| 0.396536207 | 0.532034386 | 0.495539864 | 0.351046624 |
| 0.50502169  | 0.519865263 | 0.527397278 | 0.504711408 |
| 0.446300324 | 0.451927197 | 0.384979863 | 0.512464688 |
| 0.134491479 | 0.281715015 | 0.188900834 | 0.425756026 |
| 0.461610764 | 0.28918717  | 0.519439648 | 0.403732154 |
| 0.321428661 | 0.498902715 | 0.333362538 | 0.406890686 |
| 0.196335008 | 0.509113635 | 0.33150137  | 0.352587775 |
| 0.119626197 | 0.303796851 | 0.299559364 | 0.271120146 |
| 0.328828817 | 0.367904545 | 0.499899583 | 0.517532505 |
| 0.405005833 | 0.36717172  | 0.520866921 | 0.506433731 |
| 0.471630849 | 0.404522476 | 0.381521709 | 0.034574223 |
| 0.31895183  | 0.331768874 | 0.169018578 | 0.441407518 |
| 0.331983217 | 0.340548826 | 0.449295932 | 0.432748121 |
| 0.468529088 | 0.325765952 | 0.406952749 | 0.490741181 |
| 0.336173358 | 0.362276125 | 0.501761006 | 0.494864162 |
| 0.024067249 | 0.458235274 | 0.518248453 | 0.178032085 |
| 0.456855275 | 0.138028698 | 0.254521656 | 0.512842633 |
| 0.29832872  | 0.241632612 | 0.522063913 | 0.429266316 |
| 0.426163245 | 0.376408535 | 0.51774714  | 0.049345309 |
| 0.379608177 | 0.080110763 | 0.374307478 | 0.441986369 |
| 0.401450984 | 0.394262958 | 0.333256538 | 0.315071716 |
| 0.312594001 | 0.529990247 | 0.503589321 | 0.531532067 |
| 0.399591179 | 0.518201884 | 0.510771798 | 0.514165936 |
| 0.485540886 | 0.391562363 | 0.120242444 | 0.515606729 |
| 0.511840748 | 0.35035117  | 0.234390307 | 0.496745912 |
| 0.427814223 | 0.440889664 | 0.146869958 | 0.516507479 |
| 0.507313773 | 0.519701596 | 0.244555889 | 0.424505413 |
| 0.489688733 | 0.396364113 | 0.492932803 | 0.51394507  |
| 0.387369678 | 0.388795804 | 0.365140688 | 0.444617512 |
| 0.339334124 | 0.235549177 | 0.446143275 | 0.16180839  |
| 0.009601185 | 0.236785655 | 0.206685667 | 0.245451932 |
| 0.163187298 | 0.47737492  | 0.459726345 | 0.528860338 |
| 0.248039946 | 0.509568334 | 0.388548603 | 0.3525941   |
| 0.513406346 | 0.386715211 | 0.395826183 | 0.430889915 |
| 0.396229712 | 0.05245052  | 0.211199743 | 0.517455146 |
| 0.166738459 | 0.239539456 | 0.463208312 | 0.008053094 |
| 0.160047047 | 0.5147173   | 0.254881613 | 0.344288637 |
| 0.49621802  | 0.355517159 | 0.385379512 | 0.418536887 |
| 0.432205186 | 0.233677315 | 0.008756663 | 0.517380897 |
| 0.510789495 | 0.501578995 | 0.512237864 | 0.504251953 |
| 0.494549875 | 0.488722303 | 0.471592975 | 0.521175243 |
| 0.239796266 | 0.253724383 | 0.213842444 | 0.365784783 |
| 0.017225707 | 0.461079673 | 0.364327447 | 0.295886208 |
| 0.473227913 | 0.425766277 | 0.13229539  | 0.387928555 |
| 0.087722895 | 0.186504465 | 0.450274514 | 0.319306459 |
| 0.400558629 | 0.075065705 | 0.316134598 | 0.346587991 |
| 0.520385258 | 0.489755644 | 0.365874311 | 0.528719494 |
| 0.42363681  | 0.317794311 | 0.373664268 | 0.46024939  |
| 0.191955162 | 0.147427562 | 0.489052337 | 0.058210803 |
| 0.282267347 | 0.50240829  | 0.424159562 | 0.201716941 |
| 0.406951041 | 0.033564926 | 0.503534655 | 0.528384056 |
| 0.524872284 | 0.519804551 | 0.532420816 | 0.271910397 |
| 0.53221445  | 0.087564205 | 0.532038371 | 0.529109799 |

|             |             |             |             |
|-------------|-------------|-------------|-------------|
| 0.442417776 | 0.00448715  | 0.017961079 | 0.518441537 |
| 0.435642677 | 0.204110262 | 0.311221646 | 0.471649138 |
| 0.217744235 | 0.351668006 | 0.181223362 | 0.193266009 |
| 0.509827249 | 0.288804133 | 0.185368021 | 0.522625316 |
| 0.3528575   | 0.344203817 | 0.508043886 | 0.246314284 |
| 0.452973425 | 0.15185919  | 0.241733501 | 0.016266183 |
| 0.422884989 | 0.284911527 | 0.504190432 | 0.532637766 |
| 0.514671618 | 0.435219371 | 0.392822619 | 0.430803136 |
| 0.492706908 | 0.279544731 | 0.396064032 | 0.298316741 |
| 0.535687432 | 0.44233935  | 0.440076443 | 0.458511676 |
| 0.513965945 | 0.521902745 | 0.120843915 | 0.48108236  |
| 0.05023558  | 0.003359849 | 0.520584735 | 0.400957704 |
| 0.080722928 | 0.403291408 | 0.401680148 | 0.345173046 |
| 0.321318138 | 0.115655163 | 0.25655501  | 0.236816851 |
| 0.395307404 | 0.425734826 | 0.288000244 | 0.39577002  |
| 0.305875464 | 0.155554601 | 0.298079956 | 0.274791789 |
| 0.314443676 | 0.466609541 | 0.361319712 | 0.09210355  |
| 0.488752138 | 0.44576748  | 0.174233726 | 0.324406214 |
| 0.513673071 | 0.525761271 | 0.122775323 | 0.034996689 |
| 0.421797779 | 0.381288881 | 0.51556     | 0.535956689 |
| 0.525866563 | 0.513812047 | 0.476671056 | 0.189453    |
| 0.190942572 | 0.393823984 | 0.306364166 | 0.14283042  |
| 0.532216846 | 0.220556713 | 0.529092743 | 0.291842956 |
| 0.266965134 | 0.347918815 | 0.098782751 | 0.212768972 |
| 0.399802724 | 0.324218061 | 0.260365019 | 0.336629203 |
| 0.383834571 | 0.244833037 | 0.155201933 | 0.337240234 |
| 0.474868894 | 0.166347414 | 0.310471098 | 0.453219432 |
| 0.495693616 | 0.306297464 | 0.473695078 | 0.494357453 |
| 0.299527832 | 0.270659611 | 0.458747084 | 0.465613433 |
| 0.519720987 | 0.456616438 | 0.078795823 | 0.528125472 |
| 0.516270003 | 0.495158037 | 0.531136765 | 0.456469729 |
| 0.233431004 | 0.413026339 | 0.32335617  | 0.39343006  |
| 0.327157102 | 0.512789663 | 0.350599566 | 0.19076601  |
| 0.422001832 | 0.499999446 | 0.517215722 | 0.276182782 |
| 0.488648731 | 0.319511377 | 0.205966825 | 0.515957227 |
| 0.17983835  | 0.224523341 | 0.47297303  | 0.489951694 |
| 0.004095698 | 0.1214209   | 0.499620242 | 0.357530083 |
| 0.510560125 | 0.51272684  | 0.507346704 | 0.399954323 |
| 0.001386011 | 0.438942609 | 0.453328845 | 0.454592208 |
| 0.532381734 | 0.494441125 | 0.258115788 | 0.163820556 |
| 0.406215412 | 0.245738479 | 0.233280345 | 0.462674009 |
| 0.17662773  | 0.525607395 | 0.331438889 | 0.35799592  |
| 0.275934376 | 0.260024587 | 0.240137833 | 0.37757017  |
| 0.150299521 | 0.371826917 | 0.454661689 | 0.400626871 |
| 0.197203889 | 0.491222376 | 0.510075597 | 0.109982286 |
| 0.371571306 | 0.486761399 | 0.498832501 | 0.008250764 |
| 0.478805921 | 0.035808179 | 0.27460111  | 0.295599597 |
| 0.286108008 | 0.298529675 | 0.325085931 | 0.34031811  |
| 0.474837814 | 0.347830444 | 0.380071788 | 0.356152606 |
| 0.247486323 | 0.364799012 | 0.44095973  | 0.480155314 |
| 0.329648785 | 0.27016336  | 0.256766276 | 0.255293434 |
| 0.134970932 | 0.526889671 | 0.39801224  | 0.229480878 |
| 0.343560388 | 0.460937007 | 0.447967653 | 0.530301157 |
| 0.48315908  | 0.289016662 | 0.417778469 | 0.539274037 |

|             |             |             |             |
|-------------|-------------|-------------|-------------|
| 0.268470225 | 0.410141849 | 0.203382424 | 0.49979571  |
| 0.371643714 | 0.243225207 | 0.498071232 | 0.491474996 |
| 0.505696234 | 0.482188127 | 0.397340547 | 0.50248466  |
| 0.431894574 | 0.416056697 | 0.423790497 | 0.16233588  |
| 0.333269751 | 0.299378131 | 0.285308093 | 0.013181113 |
| 0.464422664 | 0.435250163 | 0.523985195 | 0.526524475 |
| 0.281929268 | 0.476634381 | 0.448720004 | 0.222162914 |
| 0.375952325 | 0.350267509 | 0.297401644 | 0.506666393 |
| 0.199922116 | 0.323273404 | 0.345710165 | 0.502385446 |
| 0.484152204 | 0.481440606 | 0.288160435 | 0.393688592 |
| 0.357335152 | 0.384623692 | 0.501133326 | 0.299867391 |
| 0.480439198 | 0.202676072 | 0.489532373 | 0.365068216 |
| 0.293111821 | 0.523857702 | 0.18919958  | 0.527813533 |
| 0.376773227 | 0.30202002  | 0.502979099 | 0.448129989 |
| 0.430620531 | 0.188020988 | 0.168351459 | 0.490826537 |
| 0.339329058 | 0.340882181 | 0.020767219 | 0.075080283 |
| 0.419102722 | 0.383235662 | 0.510259695 | 0.454164232 |
| 0.263420217 | 0.417101722 | 0.149817844 | 0.445558839 |
| 0.522657857 | 0.513766565 | 0.350136398 | 0.378878143 |
| 0.470243756 | 0.221719089 | 0.536357508 | 0.024810791 |
| 0.467727546 | 0.448969212 | 0.441517272 | 0.153016961 |
| 0.078144781 | 0.195422383 | 0.483038625 | 0.216723304 |
| 0.499893493 | 0.194811042 | 0.469809105 | 0.502929782 |
| 0.344459495 | 0.515774126 | 0.194436058 | 0.473159003 |
| 0.154724086 | 0.392847481 | 0.398237781 | 0.439310501 |
| 0.274777386 | 0.295603667 | 0.451626053 | 0.23194464  |
| 0.106676223 | 0.321535008 | 0.006619127 | 0.481079875 |
| 0.506220378 | 0.347393078 | 0.365085531 | 0.368897573 |
| 0.376848228 | 0.480144298 | 0.296948583 | 0.459358534 |
| 0.039560993 | 0.390189136 | 0.329301691 | 0.529655735 |
| 0.248485912 | 0.449799965 | 0.133905166 | 0.332787873 |
| 0.50205723  | 0.333784631 | 0.395824665 | 0.337845876 |
| 0.531204278 | 0.501900217 | 0.35285259  | 0.263428251 |
| 0.475950559 | 0.204247489 | 0.48064922  | 0.522265596 |
| 0.269850378 | 0.213704341 | 0.482836539 | 0.306088354 |
| 0.312344965 | 0.505572396 | 0.464370051 | 0.518788391 |
| 0.126426349 | 0.375354229 | 0.482727747 | 0.518899245 |
| 0.398608218 | 0.174794727 | 0.24517346  | 0.278225106 |
| 0.527324853 | 0.210384921 | 0.268729452 | 0.489005529 |
| 0.21040196  | 0.41363125  | 0.469959434 | 0.229949826 |
| 0.099369197 | 0.287311587 | 0.460379662 | 0.299066909 |
| 0.395543951 | 0.414895683 | 0.267532937 | 0.472112905 |
| 0.212209417 | 0.067902747 | 0.49341818  | 0.015881044 |
| 0.50649979  | 0.453092606 | 0.375384817 | 0.38658293  |
| 0.356630217 | 0.478005029 | 0.49608098  | 0.009454453 |
| 0.480789268 | 0.05736951  | 0.367105861 | 0.26921771  |
| 0.306233221 | 0.168890578 | 0.520804051 | 0.515895047 |
| 0.463500004 | 0.377801444 | 0.359200913 | 0.52481162  |
| 0.137425096 | 0.334551263 | 0.357293928 | 0.525315549 |
| 0.211225364 | 0.453637305 | 0.451425061 | 0.390012373 |
| 0.509045577 | 0.416997832 |             |             |
| CDC25B      | 0.211543695 | 0.372222681 | 0.169585181 |
| 0.312047215 | 0.306950852 | 0.396004445 | 0.166755393 |
| 0.260087622 | 0.315487082 | 0.217557525 | 0.402944433 |

|             |             |             |             |
|-------------|-------------|-------------|-------------|
| 0.099708559 | 0.068642619 | 0.41982035  | 0.156223677 |
| 0.339335386 | 0.136548591 | 0.242711996 | 0.088651861 |
| 0.254241903 | 0.294848628 | 0.306876227 | 0.376407735 |
| 0.278194339 | 0.284108298 | 0.351407967 | 0.285090563 |
| 0.440305537 | 0.204437321 | 0.385117863 | 0.16929932  |
| 0.427732397 | 0.310003612 | 0.293930883 | 0.091561492 |
| 0.374572607 | 0.008880591 | 0.44520392  | 0.329431973 |
| 0.158511057 | 0.382260461 | 0.282863411 | 0.365730035 |
| 0.308220813 | 0.148345026 | 0.155967832 | 0.320167485 |
| 0.31986196  | 0.309616994 | 0.166632051 | 0.378523628 |
| 0.302803731 | 0.402456957 | 0.326440332 | 0.010711407 |
| 0.241175211 | 0.051515662 | 0.154259195 | 0.471525284 |
| 0.342251211 | 0.26705584  | 0.187177785 | 0.274982601 |
| 0.307641079 | 0.324341393 | 0.322697841 | 0.286894466 |
| 0.466110187 | 0.141079984 | 0.34255179  | 0.26423923  |
| 0.363863642 | 0.103740046 | 0.290665809 | 0.164451866 |
| 0.316381908 | 0.326992376 | 0.351792029 | 0.249906269 |
| 0.376914151 | 0.496878078 | 0.320850697 | 0.466293859 |
| 0.075796114 | 0.283007413 | 0.271767417 | 0.347504941 |
| 0.327152514 | 0.162128068 | 0.413519207 | 0.493758066 |
| 0.124473924 | 0.305320613 | 0.350807386 | 0.224182908 |
| 0.384032954 | 0.195386851 | 0.323220224 | 0.171480601 |
| 0.323702457 | 0.308837858 | 0.442394023 | 0.390609423 |
| 0.29287502  | 0.179242409 | 0.469277095 | 0.269625834 |
| 0.3666129   | 0.214453517 | 0.241801094 | 0.364290317 |
| 0.389060452 | 0.445024827 | 0.350497217 | 0.350710376 |
| 0.324219032 | 0.46177086  | 0.410777246 | 0.37292215  |
| 0.098410495 | 0.476150442 | 0.338901895 | 0.157189721 |
| 0.18361594  | 0.208834734 | 0.194971895 | 0.351402802 |
| 0.406105469 | 0.379636501 | 0.348423738 | 0.31965893  |
| 0.381673667 | 0.451818762 | 0.465960966 | 0.38269178  |
| 0.151407538 | 0.173275507 | 0.334392232 | 0.341421148 |
| 0.363842631 | 0.222692878 | 0.234732052 | 0.492485506 |
| 1           | 0.376421682 | 0.288806938 | 0.497281397 |
| 0.25766221  | 0.493429307 | 0.394279851 | 0.328066512 |
| 0.497257567 | 0.485177161 | 0.473394476 | 0.345398235 |
| 0.470016682 | 0.419001253 | 0.053652831 | 0.357130137 |
| 0.468210888 | 0.023026477 | 0.390681736 | 0.420942297 |
| 0.458903996 | 0.378471603 | 0.463709497 | 0.448074896 |
| 0.460079164 | 0.188939377 | 0.014965293 | 0.326169775 |
| 0.480769624 | 0.410748658 | 0.217560874 | 0.332173903 |
| 0.318321035 | 0.402120458 | 0.351898905 | 0.310406502 |
| 0.493983879 | 0.399071493 | 0.414315289 | 0.369245182 |
| 0.281561781 | 0.366315492 | 0.279724362 | 0.464461369 |
| 0.164733168 | 0.266643663 | 0.156025008 | 0.327699218 |
| 0.310831234 | 0.306101528 | 0.396075583 | 0.294907021 |
| 0.323538728 | 0.342299261 | 0.24623929  | 0.338132368 |
| 0.141693742 | 0.372581345 | 0.298390043 | 0.287746812 |
| 0.162048831 | 0.245301993 | 0.334865001 | 0.308831386 |
| 0.326938191 | 0.310093213 | 0.360288317 | 0.429037943 |
| 0.290890041 | 0.303843137 | 0.38862505  | 0.456076355 |
| 0.430254137 | 0.334566674 | 0.311755931 | 0.07117475  |
| 0.285377595 | 0.196416643 | 0.134654163 | 0.315510564 |
| 0.254677392 | 0.303118405 | 0.349085636 | 0.365244612 |

|             |             |             |             |
|-------------|-------------|-------------|-------------|
| 0.387984575 | 0.225261638 | 0.315155076 | 0.454787849 |
| 0.246443049 | 0.355088644 | 0.398979367 | 0.333743503 |
| 0.030694616 | 0.399535992 | 0.396731776 | 0.173030987 |
| 0.332516164 | 0.141457689 | 0.230843389 | 0.402793451 |
| 0.224699455 | 0.205364587 | 0.421549442 | 0.349472991 |
| 0.32643045  | 0.275897065 | 0.468901922 | 0.032151427 |
| 0.271617071 | 0.141772718 | 0.357736813 | 0.260495776 |
| 0.360909102 | 0.339171045 | 0.286076171 | 0.307512552 |
| 0.258273512 | 0.474720022 | 0.38600402  | 0.458706633 |
| 0.297926727 | 0.475419123 | 0.388084328 | 0.413406303 |
| 0.389309495 | 0.261439028 | 0.100651403 | 0.402268002 |
| 0.391345991 | 0.245065315 | 0.173433162 | 0.345740794 |
| 0.275911946 | 0.343092614 | 0.166827292 | 0.456619246 |
| 0.493355961 | 0.434445779 | 0.275409771 | 0.354143789 |
| 0.417184342 | 0.379633007 | 0.370713128 | 0.477665887 |
| 0.226200985 | 0.305480868 | 0.311401676 | 0.369911283 |
| 0.318005187 | 0.211621991 | 0.338305465 | 0.123811605 |
| 0.009596731 | 0.193324325 | 0.190244116 | 0.284194296 |
| 0.172152693 | 0.318370592 | 0.357147491 | 0.468323441 |
| 0.264891259 | 0.408665982 | 0.289379149 | 0.342628384 |
| 0.405312755 | 0.288129429 | 0.311657999 | 0.342638547 |
| 0.326872442 | 0.086677639 | 0.265208498 | 0.505179998 |
| 0.117632879 | 0.229904361 | 0.332710498 | 0.013286929 |
| 0.150995012 | 0.334106938 | 0.191067235 | 0.281506108 |
| 0.412898944 | 0.280822195 | 0.325477665 | 0.251244363 |
| 0.38204143  | 0.230203949 | 0.021589324 | 0.417852316 |
| 0.422990093 | 0.396595021 | 0.421325347 | 0.418502947 |
| 0.364656944 | 0.3411361   | 0.365456442 | 0.390307085 |
| 0.250251602 | 0.203896041 | 0.20030423  | 0.341348415 |
| 0.013464456 | 0.389745915 | 0.295257038 | 0.28234311  |
| 0.356293991 | 0.332389196 | 0.152352549 | 0.298872377 |
| 0.118522339 | 0.162600748 | 0.321693389 | 0.281820692 |
| 0.327332021 | 0.082600643 | 0.280775305 | 0.274510342 |
| 0.435019444 | 0.380851482 | 0.275336979 | 0.486985077 |
| 0.39636328  | 0.213741764 | 0.352924889 | 0.377677194 |
| 0.204349111 | 0.092362207 | 0.326131692 | 0.042150983 |
| 0.211465525 | 0.416153679 | 0.305267164 | 0.208057993 |
| 0.379255376 | 0.047228017 | 0.391344592 | 0.490610337 |
| 0.434670856 | 0.456292096 | 0.46821633  | 0.254966613 |
| 0.473281113 | 0.056368074 | 0.469826596 | 0.379352341 |
| 0.289352419 | 0.008030529 | 0.025192206 | 0.416317554 |
| 0.358905694 | 0.141085346 | 0.300105938 | 0.382220829 |
| 0.270355964 | 0.265969852 | 0.181906739 | 0.208967039 |
| 0.388145631 | 0.29420948  | 0.1817376   | 0.440128471 |
| 0.33534509  | 0.31615021  | 0.334583978 | 0.191353683 |
| 0.355561192 | 0.184577088 | 0.180979359 | 0.030221881 |
| 0.342957769 | 0.211487158 | 0.465889415 | 0.461014614 |
| 0.479113181 | 0.363708742 | 0.244729605 | 0.322456463 |
| 0.355805882 | 0.193458303 | 0.285945937 | 0.217121982 |
| 0.446427791 | 0.365912263 | 0.39953341  | 0.387589659 |
| 0.466895879 | 0.457956802 | 0.132576712 | 0.379545198 |
| 0.079567966 | 0.005056171 | 0.391275849 | 0.323647611 |
| 0.040994094 | 0.312278102 | 0.355505068 | 0.228973129 |
| 0.248791549 | 0.141318714 | 0.20978195  | 0.208989484 |

|             |             |             |             |
|-------------|-------------|-------------|-------------|
| 0.360239298 | 0.35672146  | 0.271953804 | 0.287862151 |
| 0.272893162 | 0.165173993 | 0.302087574 | 0.259311476 |
| 0.204051346 | 0.346257999 | 0.2888655   | 0.096200146 |
| 0.345097808 | 0.352421226 | 0.187696295 | 0.28812195  |
| 0.40999671  | 0.433608365 | 0.13454189  | 0.069904384 |
| 0.355837208 | 0.303051058 | 0.439941382 | 0.447392361 |
| 0.498060744 | 0.486602905 | 0.425358697 | 0.214072701 |
| 0.202348269 | 0.33701212  | 0.272215046 | 0.182201274 |
| 0.462934341 | 0.158469402 | 0.449760748 | 0.238843979 |
| 0.237906983 | 0.342945255 | 0.149016056 | 0.208723477 |
| 0.314007018 | 0.307541446 | 0.291256862 | 0.270959028 |
| 0.346461286 | 0.225010634 | 0.155381529 | 0.328088146 |
| 0.382681908 | 0.1518166   | 0.294778533 | 0.326116618 |
| 0.362528796 | 0.151299631 | 0.360698554 | 0.451405565 |
| 0.263581055 | 0.216477028 | 0.375709263 | 0.340459551 |
| 0.375945223 | 0.289328854 | 0.115331177 | 0.393646709 |
| 0.436685289 | 0.37463854  | 0.469382041 | 0.371350571 |
| 0.195223495 | 0.356373625 | 0.22689679  | 0.324570558 |
| 0.288765514 | 0.396727038 | 0.3001876   | 0.179998951 |
| 0.328235679 | 0.465607992 | 0.377349101 | 0.31471215  |
| 0.343614549 | 0.221236128 | 0.14336885  | 0.370812731 |
| 0.180123752 | 0.239836466 | 0.290849307 | 0.347451164 |
| 0.009641398 | 0.113000739 | 0.415903988 | 0.355907969 |
| 0.475031902 | 0.426895836 | 0.447590247 | 0.296442014 |
| 0.001369949 | 0.327963839 | 0.401283871 | 0.383679775 |
| 0.389844647 | 0.386217949 | 0.180820751 | 0.21180426  |
| 0.361227285 | 0.188124105 | 0.256906993 | 0.351934411 |
| 0.128065633 | 0.376464548 | 0.306248777 | 0.270428944 |
| 0.282134583 | 0.164763848 | 0.213325926 | 0.366626813 |
| 0.107826504 | 0.348386306 | 0.389954941 | 0.226374651 |
| 0.181471811 | 0.374008803 | 0.377640607 | 0.121593242 |
| 0.288022767 | 0.354095226 | 0.387449202 | 0.012157338 |
| 0.38297366  | 0.056426158 | 0.291874394 | 0.331459373 |
| 0.304477313 | 0.283265243 | 0.309892771 | 0.326228061 |
| 0.348511742 | 0.328888292 | 0.394525457 | 0.354217484 |
| 0.296651122 | 0.320165174 | 0.351886177 | 0.352716605 |
| 0.344583376 | 0.284504208 | 0.192372574 | 0.18421456  |
| 0.189686423 | 0.399089318 | 0.338473652 | 0.178857571 |
| 0.32093264  | 0.329044373 | 0.383345423 | 0.445854451 |
| 0.401594343 | 0.198886599 | 0.318516156 | 0.400332537 |
| 0.15623381  | 0.320975903 | 0.173135251 | 0.373833818 |
| 0.354495119 | 0.255769956 | 0.34067277  | 0.362303522 |
| 0.336396742 | 0.431441011 | 0.339645671 | 0.415169846 |
| 0.375022621 | 0.27526033  | 0.263125949 | 0.225754584 |
| 0.334368717 | 0.238609639 | 0.275169375 | 0.023226964 |
| 0.386792114 | 0.383340651 | 0.402029225 | 0.465846956 |
| 0.214087886 | 0.388029863 | 0.299378384 | 0.240544826 |
| 0.231730002 | 0.249434723 | 0.2728482   | 0.361241671 |
| 0.163900612 | 0.325120408 | 0.325645371 | 0.363725956 |
| 0.36797053  | 0.331402869 | 0.236721359 | 0.312927959 |
| 0.293154997 | 0.307363806 | 0.443244857 | 0.247467565 |
| 0.337345311 | 0.233191204 | 0.301265873 | 0.349191689 |
| 0.295702833 | 0.4476111   | 0.176468669 | 0.456151609 |
| 0.312140583 | 0.234605351 | 0.48730197  | 0.334598234 |

|             |             |             |             |
|-------------|-------------|-------------|-------------|
| 0.345326412 | 0.233653429 | 0.144819097 | 0.321079319 |
| 0.289914581 | 0.262333758 | 0.010441334 | 0.070217295 |
| 0.378712926 | 0.235214821 | 0.337832017 | 0.336010212 |
| 0.243521152 | 0.349065212 | 0.116929613 | 0.338239142 |
| 0.444332192 | 0.477040341 | 0.359475555 | 0.328436837 |
| 0.373174993 | 0.255040341 | 0.38690419  | 0.014326364 |
| 0.349058394 | 0.318127463 | 0.288704005 | 0.166570479 |
| 0.094149906 | 0.168208495 | 0.356239206 | 0.14615924  |
| 0.410974627 | 0.164673654 | 0.294026961 | 0.38295044  |
| 0.262682438 | 0.485703186 | 0.235037693 | 0.402308241 |
| 0.101951437 | 0.32809559  | 0.287491263 | 0.286817673 |
| 0.314266198 | 0.261758159 | 0.394078537 | 0.22778865  |
| 0.140640425 | 0.313614422 | 0.008321626 | 0.445599521 |
| 0.450716892 | 0.269242011 | 0.292856971 | 0.205675629 |
| 0.353699419 | 0.350170948 | 0.247742946 | 0.316896979 |
| 0.071750708 | 0.335022646 | 0.314853223 | 0.405851188 |
| 0.208279821 | 0.305243428 | 0.193868831 | 0.255918898 |
| 0.464876791 | 0.283810471 | 0.31180017  | 0.260594676 |
| 0.445613893 | 0.345715228 | 0.253190425 | 0.245671334 |
| 0.300967577 | 0.169336327 | 0.316350898 | 0.477265652 |
| 0.301232395 | 0.218821907 | 0.383898049 | 0.328688568 |
| 0.247457736 | 0.36935391  | 0.305678882 | 0.461475171 |
| 0.17220635  | 0.359606315 | 0.368209367 | 0.411457642 |
| 0.362055059 | 0.170667711 | 0.226965572 | 0.276512566 |
| 0.438472228 | 0.256981226 | 0.222969783 | 0.400010763 |
| 0.195236115 | 0.355551703 | 0.284826364 | 0.241443538 |
| 0.13665126  | 0.258589828 | 0.380740588 | 0.26932273  |
| 0.360052157 | 0.347956696 | 0.252047393 | 0.412150214 |
| 0.283805567 | 0.122787886 | 0.452501447 | 0.017734787 |
| 0.392159672 | 0.391249215 | 0.340606408 | 0.322075902 |
| 0.305536331 | 0.356230629 | 0.350409179 | 0.013632989 |
| 0.369943765 | 0.067231265 | 0.278231319 | 0.294927121 |
| 0.238013342 | 0.165416895 | 0.443066651 | 0.454442207 |
| 0.360851208 | 0.257907757 | 0.266188536 | 0.424454462 |
| 0.136432186 | 0.223940809 | 0.246813169 | 0.366279936 |
| 0.189029132 | 0.29463686  | 0.311811837 | 0.307407958 |
| 0.387566767 | 0.336664262 |             |             |
| CDC25C      | 0.092070734 | 0.405580121 | 0.066941251 |
| 0.18504457  | 0.371908898 | 0.396758305 | 0.081668161 |
| 0.154927788 | 0.3238018   | 0.302549496 | 0.39767868  |
| 0.028840664 | 0.143135048 | 0.451980153 | 0.07863354  |
| 0.435451767 | 0.054964888 | 0.141564746 | 0.09919299  |
| 0.262690521 | 0.360456258 | 0.397368343 | 0.358280189 |
| 0.358945763 | 0.182648081 | 0.342578385 | 0.407100949 |
| 0.492228745 | 0.305609305 | 0.434251601 | 0.210301431 |
| 0.415092646 | 0.393303073 | 0.414480671 | 0.02350892  |
| 0.423150728 | 0.024609362 | 0.428274545 | 0.336084209 |
| 0.221776584 | 0.340366842 | 0.315426534 | 0.307552603 |
| 0.369149519 | 0.050507958 | 0.211588161 | 0.421267561 |
| 0.331560783 | 0.320559371 | 0.075970029 | 0.418091444 |
| 0.384083469 | 0.339285756 | 0.354063803 | 0.003097678 |
| 0.367763485 | 0.141113019 | 0.301197814 | 0.4894312   |
| 0.233699208 | 0.168212134 | 0.3224099   | 0.27176285  |
| 0.402471985 | 0.398793551 | 0.287135377 | 0.378734998 |

|             |             |             |             |
|-------------|-------------|-------------|-------------|
| 0.494490877 | 0.261129853 | 0.418666889 | 0.197775518 |
| 0.405261628 | 0.042288546 | 0.183730234 | 0.093714274 |
| 0.42163235  | 0.251995814 | 0.387003381 | 0.37950871  |
| 0.404497277 | 0.504920291 | 0.267745021 | 0.478417782 |
| 0.169685924 | 0.399888359 | 0.35210977  | 0.341303212 |
| 0.377181488 | 0.111314545 | 0.422293373 | 0.51704041  |
| 0.062461202 | 0.357866261 | 0.400606309 | 0.134327891 |
| 0.408203505 | 0.334190512 | 0.376531403 | 0.258088169 |
| 0.410568638 | 0.407190107 | 0.461182398 | 0.324947608 |
| 0.368331679 | 0.085868873 | 0.458428336 | 0.387046924 |
| 0.360812138 | 0.100204736 | 0.313417197 | 0.456463366 |
| 0.429961707 | 0.486846505 | 0.401214866 | 0.374499875 |
| 0.426548012 | 0.495668447 | 0.411002188 | 0.403300289 |
| 0.159110747 | 0.513505335 | 0.220803773 | 0.065700619 |
| 0.082791514 | 0.120835916 | 0.298633681 | 0.307402587 |
| 0.468189927 | 0.345402643 | 0.232169758 | 0.30367958  |
| 0.472318703 | 0.450762057 | 0.510719884 | 0.399724856 |
| 0.055040954 | 0.324348682 | 0.427106587 | 0.298772632 |
| 0.400954662 | 0.136841066 | 0.344959872 | 0.490848249 |
| 0.376421682 | 1           | 0.183430256 | 0.481492018 |
| 0.235856731 | 0.513985315 | 0.433012548 | 0.216996415 |
| 0.505658466 | 0.474987107 | 0.516292669 | 0.430795052 |
| 0.458779047 | 0.361727861 | 0.09080201  | 0.369900464 |
| 0.490306288 | 0.028349973 | 0.471835838 | 0.502940866 |
| 0.485776875 | 0.458404919 | 0.52778306  | 0.507577022 |
| 0.486331705 | 0.089864388 | 0.04794906  | 0.348041159 |
| 0.494484741 | 0.39031836  | 0.183171478 | 0.433800605 |
| 0.411847278 | 0.39729292  | 0.410966529 | 0.36198354  |
| 0.511964907 | 0.445482722 | 0.482484953 | 0.387697631 |
| 0.312899281 | 0.308673024 | 0.412372617 | 0.44297684  |
| 0.063234754 | 0.137221802 | 0.060860336 | 0.323211326 |
| 0.331863182 | 0.223430207 | 0.380453593 | 0.38860225  |
| 0.237845143 | 0.341906522 | 0.375968465 | 0.417881054 |
| 0.060573902 | 0.431360479 | 0.195873861 | 0.199095101 |
| 0.066108395 | 0.143434119 | 0.24221759  | 0.203478138 |
| 0.31895167  | 0.223503996 | 0.427271352 | 0.48838555  |
| 0.390853267 | 0.196951586 | 0.416161151 | 0.475432258 |
| 0.437000823 | 0.425904875 | 0.248094435 | 0.022585656 |
| 0.34693716  | 0.339478901 | 0.268179353 | 0.423694828 |
| 0.17104502  | 0.309955529 | 0.41941634  | 0.422694403 |
| 0.29565801  | 0.165502125 | 0.422236767 | 0.416179549 |
| 0.157495324 | 0.368092317 | 0.4499376   | 0.400281746 |
| 0.005181038 | 0.367677466 | 0.432023169 | 0.225928217 |
| 0.335423586 | 0.218316394 | 0.31893776  | 0.468112142 |
| 0.349621546 | 0.314082969 | 0.490512167 | 0.418211889 |
| 0.354808858 | 0.20715577  | 0.526206208 | 0.080461133 |
| 0.386917339 | 0.084092686 | 0.332628415 | 0.315656884 |
| 0.29493381  | 0.322065353 | 0.38299534  | 0.351554129 |
| 0.139593704 | 0.508052259 | 0.368200715 | 0.510244307 |
| 0.410102512 | 0.52780719  | 0.456851336 | 0.440936458 |
| 0.38495573  | 0.391794102 | 0.217180684 | 0.424565373 |
| 0.458461632 | 0.321982116 | 0.082656959 | 0.421413341 |
| 0.381866348 | 0.426887717 | 0.168376304 | 0.500634438 |
| 0.483548861 | 0.44334151  | 0.197567056 | 0.401597491 |



|             |             |             |             |
|-------------|-------------|-------------|-------------|
| 0.382336837 | 0.267597474 | 0.394519468 | 0.528126363 |
| 0.332127515 | 0.414337852 | 0.405688373 | 0.406318082 |
| 0.206295487 | 0.304732275 | 0.302491594 | 0.257347553 |
| 0.017523789 | 0.097031232 | 0.081835395 | 0.22367488  |
| 0.257093352 | 0.402827023 | 0.421080786 | 0.511362279 |
| 0.155509872 | 0.405386291 | 0.255181675 | 0.367335813 |
| 0.411466339 | 0.395455039 | 0.415346411 | 0.413933211 |
| 0.261909338 | 0.031070927 | 0.165809818 | 0.506553921 |
| 0.046321146 | 0.32004249  | 0.334140074 | 0.005768423 |
| 0.062642211 | 0.370226081 | 0.09899731  | 0.190662607 |
| 0.486922701 | 0.191353129 | 0.231785561 | 0.331525605 |
| 0.370769359 | 0.119199281 | 0.006805732 | 0.483238015 |
| 0.472987174 | 0.446011035 | 0.469318572 | 0.435869958 |
| 0.43614229  | 0.391097414 | 0.419512482 | 0.347332181 |
| 0.13453474  | 0.104398555 | 0.310726845 | 0.355060796 |
| 0.00749917  | 0.38809163  | 0.355778001 | 0.168802194 |
| 0.425388867 | 0.330711667 | 0.053387406 | 0.394951643 |
| 0.03320177  | 0.276207277 | 0.3408262   | 0.266415937 |
| 0.379616166 | 0.020427475 | 0.284570808 | 0.382731515 |
| 0.41055522  | 0.330584433 | 0.394843439 | 0.517793171 |
| 0.375375521 | 0.133246493 | 0.375454509 | 0.411227286 |
| 0.099368033 | 0.126507242 | 0.375721692 | 0.044705883 |
| 0.210523409 | 0.435844938 | 0.399073837 | 0.091271719 |
| 0.318656489 | 0.007843689 | 0.352035638 | 0.52173452  |
| 0.441305091 | 0.522733332 | 0.496505836 | 0.35040008  |
| 0.497776122 | 0.164069117 | 0.522505561 | 0.384131358 |
| 0.383921015 | 0.001560865 | 0.011370925 | 0.488835269 |
| 0.433972397 | 0.060734094 | 0.193893206 | 0.36399801  |
| 0.162371004 | 0.175773909 | 0.086857037 | 0.273754054 |
| 0.414914019 | 0.310099828 | 0.253545002 | 0.449814949 |
| 0.297941041 | 0.282108922 | 0.381414909 | 0.099266028 |
| 0.421791843 | 0.077996184 | 0.099516177 | 0.016539451 |
| 0.396526422 | 0.114249555 | 0.440400715 | 0.497839138 |
| 0.492254281 | 0.418714362 | 0.338666651 | 0.361690034 |
| 0.429758897 | 0.103472025 | 0.376943571 | 0.122520087 |
| 0.468714781 | 0.429219883 | 0.341978013 | 0.30690888  |
| 0.507788186 | 0.462860767 | 0.048790317 | 0.417726972 |
| 0.021084821 | 0.00443966  | 0.370460435 | 0.282852136 |
| 0.095574403 | 0.425640931 | 0.276538487 | 0.269264456 |
| 0.276228385 | 0.0442696   | 0.355375857 | 0.329391809 |
| 0.346051625 | 0.408257006 | 0.356776592 | 0.254975048 |
| 0.334674161 | 0.213791129 | 0.24774976  | 0.194300488 |
| 0.277264528 | 0.297202431 | 0.187872321 | 0.031909192 |
| 0.423420606 | 0.433859902 | 0.078201215 | 0.179072649 |
| 0.439262815 | 0.494578952 | 0.069636888 | 0.022668301 |
| 0.27024903  | 0.362091181 | 0.504885836 | 0.482952001 |
| 0.507752559 | 0.521910658 | 0.383117616 | 0.187075612 |
| 0.090166284 | 0.373127108 | 0.364437691 | 0.15788953  |
| 0.503693558 | 0.076173968 | 0.465223935 | 0.371797063 |
| 0.139362604 | 0.265623109 | 0.054379645 | 0.110149817 |
| 0.420175813 | 0.210169402 | 0.242066136 | 0.162478785 |
| 0.382530217 | 0.319525123 | 0.066291108 | 0.243152016 |
| 0.356693469 | 0.273994944 | 0.193567551 | 0.321146486 |
| 0.343356917 | 0.225675359 | 0.434753058 | 0.452626439 |

|             |             |             |             |
|-------------|-------------|-------------|-------------|
| 0.15103263  | 0.136971327 | 0.299909204 | 0.382903827 |
| 0.427750118 | 0.385296251 | 0.038234012 | 0.428606754 |
| 0.488430645 | 0.440419722 | 0.480997209 | 0.395602504 |
| 0.099988375 | 0.42643616  | 0.372959212 | 0.395175943 |
| 0.222000075 | 0.385868577 | 0.284480339 | 0.080244131 |
| 0.287966939 | 0.465870349 | 0.402912807 | 0.220656821 |
| 0.410995645 | 0.136354785 | 0.067005863 | 0.429023614 |
| 0.285186386 | 0.123224178 | 0.343736052 | 0.416967984 |
| 0.003793145 | 0.21786962  | 0.489815845 | 0.284647296 |
| 0.50607533  | 0.486496191 | 0.438256374 | 0.276339973 |
| 0.00405093  | 0.428431228 | 0.415949328 | 0.429989579 |
| 0.415363705 | 0.342582849 | 0.17421591  | 0.113971362 |
| 0.300771165 | 0.08880868  | 0.2007151   | 0.349996904 |
| 0.264571563 | 0.402956492 | 0.22722679  | 0.240597755 |
| 0.260589232 | 0.09852429  | 0.322177285 | 0.277392909 |
| 0.220274038 | 0.265125967 | 0.364045521 | 0.277771769 |
| 0.275697038 | 0.436518138 | 0.395596231 | 0.036985046 |
| 0.398989708 | 0.403735446 | 0.424318144 | 0.005469668 |
| 0.440078374 | 0.012392999 | 0.262987381 | 0.282500269 |
| 0.261112499 | 0.275165124 | 0.318016243 | 0.356795667 |
| 0.366678089 | 0.273423911 | 0.326206897 | 0.280659964 |
| 0.222724248 | 0.250575044 | 0.411275886 | 0.37666724  |
| 0.348079666 | 0.162557645 | 0.097721536 | 0.099328303 |
| 0.077536585 | 0.447356683 | 0.240402639 | 0.080651309 |
| 0.271162211 | 0.373805143 | 0.353379236 | 0.473449552 |
| 0.416880011 | 0.109324399 | 0.3738389   | 0.427959272 |
| 0.254988378 | 0.305355652 | 0.076592183 | 0.388243365 |
| 0.268970206 | 0.306499634 | 0.383797689 | 0.321542471 |
| 0.389727461 | 0.396591072 | 0.238807501 | 0.43360509  |
| 0.394881614 | 0.369051506 | 0.309323028 | 0.131907705 |
| 0.220529433 | 0.148399308 | 0.347590895 | 0.003598753 |
| 0.382483284 | 0.277893353 | 0.469155025 | 0.470631092 |
| 0.354068186 | 0.377416843 | 0.319244393 | 0.123260219 |
| 0.267503439 | 0.171705097 | 0.162025894 | 0.410654514 |
| 0.294883372 | 0.223689835 | 0.364392465 | 0.322156317 |
| 0.427565172 | 0.408113225 | 0.32312602  | 0.278873515 |
| 0.277195511 | 0.213494844 | 0.454961056 | 0.137420827 |
| 0.426012746 | 0.270597491 | 0.333882613 | 0.371489579 |
| 0.287460267 | 0.508265623 | 0.074558342 | 0.520182499 |
| 0.397545765 | 0.138173016 | 0.48473137  | 0.315111623 |
| 0.305132086 | 0.17099223  | 0.276702467 | 0.371345274 |
| 0.278253944 | 0.392828297 | 0.01930569  | 0.100181162 |
| 0.36227047  | 0.330546625 | 0.376880754 | 0.376483002 |
| 0.327810731 | 0.357022018 | 0.231475322 | 0.310602435 |
| 0.453939483 | 0.471112643 | 0.322324233 | 0.266590762 |
| 0.358239001 | 0.137915842 | 0.375855152 | 0.021758386 |
| 0.437433039 | 0.42784672  | 0.394524277 | 0.074970692 |
| 0.028908986 | 0.302055339 | 0.421871711 | 0.076800086 |
| 0.489195184 | 0.274530016 | 0.34819336  | 0.421269977 |
| 0.189221972 | 0.47307556  | 0.176006826 | 0.422149424 |
| 0.059769366 | 0.282016436 | 0.409208511 | 0.395070047 |
| 0.307064282 | 0.375645964 | 0.399559629 | 0.32132891  |
| 0.049789999 | 0.332459394 | 0.003783076 | 0.397440528 |
| 0.444159414 | 0.401185889 | 0.20645612  | 0.299426762 |

|             |             |             |             |
|-------------|-------------|-------------|-------------|
| 0.31547649  | 0.363887937 | 0.315434463 | 0.412526236 |
| 0.020259326 | 0.421303483 | 0.232557993 | 0.394420889 |
| 0.296490599 | 0.382722883 | 0.084185605 | 0.376965017 |
| 0.42749024  | 0.352658889 | 0.256796452 | 0.363104808 |
| 0.469252187 | 0.354715978 | 0.162957177 | 0.273830986 |
| 0.37297791  | 0.076058567 | 0.363996947 | 0.520797274 |
| 0.235492298 | 0.30453296  | 0.449040168 | 0.273217729 |
| 0.377410961 | 0.362885349 | 0.398780129 | 0.507351487 |
| 0.121222109 | 0.278340757 | 0.420275422 | 0.44782186  |
| 0.321277502 | 0.260779834 | 0.333751503 | 0.315702793 |
| 0.436198463 | 0.132569142 | 0.329968903 | 0.361528986 |
| 0.310793812 | 0.340259907 | 0.317220595 | 0.267370522 |
| 0.060548945 | 0.204513044 | 0.386161082 | 0.167115127 |
| 0.342967306 | 0.413813649 | 0.325935432 | 0.383798462 |
| 0.187383649 | 0.044542157 | 0.447324869 | 0.038190618 |
| 0.334787696 | 0.422549339 | 0.278003802 | 0.399114993 |
| 0.189588363 | 0.368820793 | 0.342975428 | 0.002192448 |
| 0.410089617 | 0.07290236  | 0.349985225 | 0.315593336 |
| 0.345031505 | 0.069689199 | 0.441592211 | 0.519347493 |
| 0.326203982 | 0.341918522 | 0.377415181 | 0.450529095 |
| 0.23333507  | 0.367186693 | 0.389525381 | 0.388681675 |
| 0.307522124 | 0.37596316  | 0.41452345  | 0.414558904 |
| 0.383967064 | 0.29237877  |             |             |
| CDC27       | 0.122487541 | 0.246866379 | 0.123642177 |
| 0.095184307 | 0.092559094 | 0.085513392 | 0.111984674 |
| 0.132285687 | 0.216979389 | 0.0424478   | 0.123031321 |
| 0.077548297 | 0.010675866 | 0.260501579 | 0.10281466  |
| 0.099903697 | 0.09357448  | 0.143651647 | 0.039259931 |
| 0.080801853 | 0.07950856  | 0.046210155 | 0.131159567 |
| 0.076360109 | 0.318088872 | 0.16824612  | 0.075776507 |
| 0.263718142 | 0.025026644 | 0.140384651 | 0.030123395 |
| 0.315833945 | 0.08792038  | 0.056441666 | 0.084693416 |
| 0.109988925 | 0.004176366 | 0.352610547 | 0.072299215 |
| 0.024388359 | 0.312191963 | 0.075102494 | 0.092032428 |
| 0.08302053  | 0.102609543 | 0.026082105 | 0.118413568 |
| 0.156684216 | 0.088993435 | 0.151837154 | 0.165499944 |
| 0.062660365 | 0.225721719 | 0.166211601 | 0.011071084 |
| 0.034879991 | 0.00453206  | 0.01778538  | 0.315837195 |
| 0.226758065 | 0.128286602 | 0.028045324 | 0.111739605 |
| 0.108460376 | 0.141074533 | 0.20164694  | 0.052819291 |
| 0.289452357 | 0.019788464 | 0.148511237 | 0.070487226 |
| 0.08975424  | 0.097268276 | 0.257322654 | 0.187230104 |
| 0.055675757 | 0.146884555 | 0.101741269 | 0.040344116 |
| 0.247276719 | 0.358776946 | 0.207154827 | 0.330591168 |
| 0.014402165 | 0.075664926 | 0.055541298 | 0.189691002 |
| 0.168580364 | 0.099481952 | 0.181931963 | 0.325919748 |
| 0.098385765 | 0.110902679 | 0.159436746 | 0.221339957 |
| 0.249832162 | 0.035178449 | 0.089417327 | 0.023871185 |
| 0.118693678 | 0.081911616 | 0.328646694 | 0.20659905  |
| 0.077284259 | 0.1804595   | 0.35599212  | 0.068348481 |
| 0.068268122 | 0.176103417 | 0.050116786 | 0.187166459 |
| 0.138059938 | 0.264170109 | 0.202717968 | 0.195742361 |
| 0.081460092 | 0.283299027 | 0.182219174 | 0.250963159 |
| 0.019767281 | 0.306659511 | 0.179241778 | 0.094849768 |

|             |             |             |             |
|-------------|-------------|-------------|-------------|
| 0.129722086 | 0.105809243 | 0.046760385 | 0.262317578 |
| 0.226616995 | 0.204501505 | 0.142995243 | 0.107182936 |
| 0.204995697 | 0.328502771 | 0.298975449 | 0.21482996  |
| 0.108603642 | 0.027817866 | 0.083313086 | 0.10395317  |
| 0.156206283 | 0.192843748 | 0.040999856 | 0.354479475 |
| 0.288806938 | 0.183430256 | 1           | 0.388010979 |
| 0.10511396  | 0.318537577 | 0.235746313 | 0.151294318 |
| 0.344467698 | 0.350045008 | 0.288374972 | 0.120735865 |
| 0.337534726 | 0.134597351 | 0.016217196 | 0.2268599   |
| 0.301009328 | 0.003286014 | 0.217394354 | 0.234318668 |
| 0.297253357 | 0.187751038 | 0.281093397 | 0.263661137 |
| 0.30079658  | 0.192824259 | 0.002034741 | 0.134082032 |
| 0.324757409 | 0.260815026 | 0.089254192 | 0.079559328 |
| 0.098513245 | 0.111868608 | 0.177983643 | 0.043827269 |
| 0.338351754 | 0.240534233 | 0.240269633 | 0.196107071 |
| 0.121300716 | 0.325358526 | 0.066440767 | 0.351801496 |
| 0.116223499 | 0.135635809 | 0.190531012 | 0.212080057 |
| 0.063419724 | 0.164134503 | 0.099985544 | 0.100736869 |
| 0.192288184 | 0.112341844 | 0.03656481  | 0.122944232 |
| 0.229593913 | 0.107542763 | 0.173855109 | 0.167528649 |
| 0.099388365 | 0.308274935 | 0.092204403 | 0.10129085  |
| 0.104004856 | 0.379620184 | 0.146954005 | 0.257836477 |
| 0.066705264 | 0.251709337 | 0.165848475 | 0.303184606 |
| 0.292218536 | 0.083301654 | 0.240388843 | 0.029788639 |
| 0.04885126  | 0.031269542 | 0.017185078 | 0.087327915 |
| 0.349529988 | 0.070963843 | 0.116185206 | 0.146844447 |
| 0.162290934 | 0.124941945 | 0.050523368 | 0.363969287 |
| 0.244769415 | 0.064271362 | 0.222527869 | 0.112156561 |
| 0.04079232  | 0.129189564 | 0.198592941 | 0.042682629 |
| 0.173574381 | 0.019146834 | 0.030054381 | 0.226280904 |
| 0.035092405 | 0.03710834  | 0.242116059 | 0.145186902 |
| 0.05906034  | 0.336691819 | 0.287814268 | 0.004353972 |
| 0.077547094 | 0.048594758 | 0.173019467 | 0.07559565  |
| 0.178655356 | 0.20284142  | 0.074695024 | 0.063118109 |
| 0.226688808 | 0.305873932 | 0.255020251 | 0.268812382 |
| 0.046687611 | 0.296238991 | 0.200665417 | 0.2446411   |
| 0.179234229 | 0.056613199 | 0.010175523 | 0.201228923 |
| 0.21826032  | 0.051797853 | 0.215203199 | 0.162764792 |
| 0.061496562 | 0.128665596 | 0.068721695 | 0.271801018 |
| 0.364311808 | 0.306888679 | 0.095815593 | 0.169662672 |
| 0.238063964 | 0.17182912  | 0.226826975 | 0.304054423 |
| 0.042454867 | 0.070046429 | 0.050026117 | 0.206815261 |
| 0.21643095  | 0.039615946 | 0.299136709 | 0.015882177 |
| 0.00111236  | 0.158099524 | 0.17381203  | 0.098140349 |
| 0.026985637 | 0.111616266 | 0.142427821 | 0.28940299  |
| 0.143834304 | 0.287178678 | 0.217184418 | 0.05971701  |
| 0.279609117 | 0.064986362 | 0.079786346 | 0.117623713 |
| 0.252580852 | 0.046694367 | 0.08135723  | 0.36618624  |
| 0.167954267 | 0.032088822 | 0.124553884 | 0.004616504 |
| 0.103757398 | 0.19552194  | 0.27585096  | 0.350045873 |
| 0.236909831 | 0.347677003 | 0.215462358 | 0.050829384 |
| 0.187717589 | 0.173380649 | 0.010836704 | 0.257097528 |
| 0.287658952 | 0.276522076 | 0.288158397 | 0.316382925 |
| 0.231910345 | 0.178341249 | 0.177557778 | 0.146061952 |

|             |             |             |             |
|-------------|-------------|-------------|-------------|
| 0.134819357 | 0.128922801 | 0.027138495 | 0.093783858 |
| 0.005898871 | 0.211047026 | 0.097394459 | 0.236155531 |
| 0.155642654 | 0.181706473 | 0.103865976 | 0.097739875 |
| 0.068946885 | 0.017823717 | 0.079111166 | 0.099287845 |
| 0.160712069 | 0.082387814 | 0.043637607 | 0.040571181 |
| 0.314808208 | 0.275891017 | 0.043948396 | 0.316398517 |
| 0.13122571  | 0.2215741   | 0.088748132 | 0.170769687 |
| 0.12087587  | 0.022560793 | 0.076810121 | 0.006556958 |
| 0.059469376 | 0.312695352 | 0.060046984 | 0.122515992 |
| 0.165824544 | 0.051213469 | 0.283386957 | 0.315547986 |
| 0.303202501 | 0.263499179 | 0.288813878 | 0.038401521 |
| 0.297014135 | 0.005542927 | 0.284472251 | 0.229690631 |
| 0.049356577 | 0.004205864 | 0.014807385 | 0.230146863 |
| 0.093747022 | 0.218562689 | 0.201828778 | 0.069334107 |
| 0.095629127 | 0.119572534 | 0.11743755  | 0.038484519 |
| 0.142587926 | 0.090881044 | 0.036137243 | 0.309947573 |
| 0.112760965 | 0.151370224 | 0.078990486 | 0.224104686 |
| 0.115120753 | 0.106371118 | 0.213308197 | 0.007778946 |
| 0.152208135 | 0.282290931 | 0.375206565 | 0.289948689 |
| 0.320040429 | 0.146649069 | 0.039556923 | 0.059392645 |
| 0.220772593 | 0.209739935 | 0.050409472 | 0.196043246 |
| 0.285764533 | 0.120868411 | 0.23595058  | 0.277568849 |
| 0.286169437 | 0.305550145 | 0.100662363 | 0.18387799  |
| 0.04690097  | 0.001836867 | 0.11521059  | 0.213735506 |
| 0.015596654 | 0.064659414 | 0.252593939 | 0.076532153 |
| 0.076706167 | 0.093466702 | 0.027954469 | 0.031054183 |
| 0.1552188   | 0.096452905 | 0.063230968 | 0.228337868 |
| 0.062125375 | 0.038672095 | 0.102297475 | 0.108187142 |
| 0.054273213 | 0.279215665 | 0.317617281 | 0.088085833 |
| 0.090972601 | 0.086357673 | 0.133770738 | 0.24476733  |
| 0.225424096 | 0.239466192 | 0.081806154 | 0.034956225 |
| 0.281284532 | 0.077927611 | 0.248801493 | 0.281196685 |
| 0.342281426 | 0.309197407 | 0.358265753 | 0.070283561 |
| 0.117577967 | 0.124375008 | 0.072299716 | 0.063933894 |
| 0.283441235 | 0.18103869  | 0.305051241 | 0.047844425 |
| 0.215358454 | 0.106913617 | 0.087301983 | 0.161548136 |
| 0.083560334 | 0.207785301 | 0.109125804 | 0.209903489 |
| 0.072743157 | 0.038642121 | 0.117085718 | 0.168148006 |
| 0.222703379 | 0.018527968 | 0.203469741 | 0.100170784 |
| 0.242057589 | 0.037919208 | 0.143722716 | 0.313201136 |
| 0.222888709 | 0.159299481 | 0.093140532 | 0.181458528 |
| 0.190264437 | 0.08584756  | 0.051655592 | 0.254735669 |
| 0.267962953 | 0.129873263 | 0.315336034 | 0.233935007 |
| 0.218078296 | 0.081037463 | 0.041353802 | 0.099225449 |
| 0.178244882 | 0.099923723 | 0.130298622 | 0.179074794 |
| 0.290026641 | 0.356978431 | 0.247747127 | 0.113942684 |
| 0.110052195 | 0.192746352 | 0.167831038 | 0.2272405   |
| 0.025677406 | 0.10457502  | 0.070893325 | 0.179782847 |
| 0.005906841 | 0.014311474 | 0.256073131 | 0.098440079 |
| 0.328471679 | 0.246007375 | 0.307061776 | 0.101759594 |
| 0.000613673 | 0.118546116 | 0.131981179 | 0.07220085  |
| 0.245937217 | 0.240667805 | 0.074956504 | 0.09856403  |
| 0.259133285 | 0.222036926 | 0.081327826 | 0.071407707 |
| 0.015525452 | 0.149526518 | 0.228628318 | 0.15742333  |

|             |             |             |             |
|-------------|-------------|-------------|-------------|
| 0.097470051 | 0.203427566 | 0.033220468 | 0.134919829 |
| 0.022134909 | 0.244502432 | 0.225128673 | 0.051636252 |
| 0.020168605 | 0.233786228 | 0.200158287 | 0.096535198 |
| 0.071554428 | 0.21339568  | 0.26363648  | 0.006201733 |
| 0.146823765 | 0.055850203 | 0.095666647 | 0.096831302 |
| 0.094599986 | 0.086321058 | 0.130468013 | 0.066521845 |
| 0.158231942 | 0.121977543 | 0.100629268 | 0.180223094 |
| 0.089819015 | 0.157660336 | 0.120986258 | 0.103553881 |
| 0.062855116 | 0.121416309 | 0.297267893 | 0.313962107 |
| 0.090856378 | 0.247391746 | 0.31039027  | 0.227502143 |
| 0.171014635 | 0.088745212 | 0.293334523 | 0.29263191  |
| 0.274205709 | 0.270595594 | 0.08582154  | 0.236653906 |
| 0.025833748 | 0.074137895 | 0.11850723  | 0.129540378 |
| 0.166092511 | 0.039578022 | 0.108555986 | 0.162483154 |
| 0.161035883 | 0.33816993  | 0.299909413 | 0.290828504 |
| 0.093718512 | 0.0821282   | 0.04973363  | 0.081749313 |
| 0.136742021 | 0.235613594 | 0.067973181 | 0.024844334 |
| 0.168809676 | 0.112956469 | 0.213245744 | 0.319300764 |
| 0.029835613 | 0.292561211 | 0.05204085  | 0.110598534 |
| 0.04476333  | 0.30991894  | 0.244138017 | 0.176937419 |
| 0.018473356 | 0.118063696 | 0.101811143 | 0.086767823 |
| 0.16301856  | 0.152529106 | 0.05172528  | 0.116400382 |
| 0.150442164 | 0.225963859 | 0.339255832 | 0.14620916  |
| 0.101663201 | 0.043563741 | 0.129957238 | 0.084158953 |
| 0.091209127 | 0.272027054 | 0.172544957 | 0.267525384 |
| 0.065088631 | 0.265436916 | 0.352417965 | 0.139154948 |
| 0.115173058 | 0.084460715 | 0.016771861 | 0.069550117 |
| 0.089109229 | 0.038599902 | 0.00220889  | 0.013067507 |
| 0.188111677 | 0.056727385 | 0.182950175 | 0.180155551 |
| 0.04792671  | 0.205957124 | 0.016962827 | 0.129167281 |
| 0.312259872 | 0.358714331 | 0.075112275 | 0.254734372 |
| 0.208274982 | 0.114734246 | 0.162889957 | 0.007710769 |
| 0.106524609 | 0.09051672  | 0.048179641 | 0.109375836 |
| 0.086341011 | 0.019489557 | 0.120581641 | 0.180565892 |
| 0.231044669 | 0.019227813 | 0.133357665 | 0.167936983 |
| 0.241361874 | 0.366244452 | 0.083753428 | 0.16968488  |
| 0.082414308 | 0.208813669 | 0.06987843  | 0.076737578 |
| 0.055700881 | 0.044899023 | 0.184815552 | 0.031634353 |
| 0.096717854 | 0.064143832 | 0.007062543 | 0.367544834 |
| 0.343056652 | 0.055150717 | 0.292090627 | 0.040115375 |
| 0.193468996 | 0.251535698 | 0.049306585 | 0.081887061 |
| 0.046254525 | 0.090614577 | 0.187094754 | 0.25308462  |
| 0.024011458 | 0.10590087  | 0.101222401 | 0.064379769 |
| 0.388569806 | 0.046979456 | 0.266735168 | 0.036662782 |
| 0.294331378 | 0.232864351 | 0.255455745 | 0.068014506 |
| 0.129878869 | 0.203092558 | 0.063689957 | 0.305464783 |
| 0.103608421 | 0.033616979 | 0.190113563 | 0.088421318 |
| 0.043959916 | 0.282570635 | 0.104069069 | 0.307148431 |
| 0.064112483 | 0.216805153 | 0.181628956 | 0.268713594 |
| 0.230239073 | 0.031865365 | 0.031623492 | 0.056996135 |
| 0.302316272 | 0.094221148 | 0.042712164 | 0.229278581 |
| 0.025120466 | 0.177862501 | 0.133213373 | 0.058610023 |
| 0.06393847  | 0.107037844 | 0.074575719 | 0.214849613 |
| 0.148942071 | 0.094137421 | 0.051723481 | 0.316979648 |

|             |             |             |             |
|-------------|-------------|-------------|-------------|
| 0.080510827 | 0.052215795 | 0.332678254 | 0.001901036 |
| 0.158166911 | 0.139597499 | 0.17156084  | 0.079620222 |
| 0.294375735 | 0.150562011 | 0.126838867 | 0.014175518 |
| 0.192609617 | 0.024798567 | 0.065017652 | 0.052140642 |
| 0.034190769 | 0.111219581 | 0.310744    | 0.263935632 |
| 0.20229617  | 0.055676874 | 0.036366588 | 0.283951078 |
| 0.018740214 | 0.032495314 | 0.037968722 | 0.161074237 |
| 0.02645344  | 0.062833976 | 0.064286674 | 0.048169874 |
| 0.20361141  | 0.120554965 |             |             |
| CDC2A       | 0.246342142 | 0.519467566 | 0.219734079 |
| 0.262987743 | 0.339681133 | 0.494752362 | 0.211596775 |
| 0.309148076 | 0.493512889 | 0.373584867 | 0.439647447 |
| 0.096493807 | 0.077379109 | 0.516580652 | 0.19713834  |
| 0.413328975 | 0.132421095 | 0.280056598 | 0.144122731 |
| 0.376750426 | 0.317068296 | 0.351909729 | 0.519050051 |
| 0.330360968 | 0.38307143  | 0.507035911 | 0.401474132 |
| 0.524206801 | 0.256373518 | 0.478530373 | 0.243256634 |
| 0.49551184  | 0.34452226  | 0.382288708 | 0.103917388 |
| 0.489173757 | 0.018376616 | 0.4968418   | 0.343561855 |
| 0.150131799 | 0.482229985 | 0.440349124 | 0.35705176  |
| 0.45352843  | 0.164898736 | 0.249430126 | 0.439729834 |
| 0.481940239 | 0.423697069 | 0.246414756 | 0.50616009  |
| 0.438851631 | 0.503545966 | 0.491959085 | 0.009017161 |
| 0.281763648 | 0.064695522 | 0.195502919 | 0.528527358 |
| 0.378102437 | 0.276146874 | 0.28690863  | 0.432964756 |
| 0.448593163 | 0.445364682 | 0.414888768 | 0.426513219 |
| 0.52569192  | 0.163351262 | 0.473038908 | 0.268786994 |
| 0.491156366 | 0.172552909 | 0.349240629 | 0.284048705 |
| 0.429310505 | 0.343821372 | 0.402754723 | 0.308373414 |
| 0.512772514 | 0.518034545 | 0.418014252 | 0.519703385 |
| 0.111106954 | 0.345953025 | 0.315950921 | 0.415957903 |
| 0.464773363 | 0.255419297 | 0.483581588 | 0.519424494 |
| 0.207329161 | 0.468680515 | 0.483023053 | 0.3337638   |
| 0.528657343 | 0.293786695 | 0.462259585 | 0.167794047 |
| 0.396448364 | 0.363896612 | 0.512467787 | 0.440201069 |
| 0.36913395  | 0.258903949 | 0.51432271  | 0.316172874 |
| 0.358811874 | 0.267614858 | 0.264973203 | 0.488098218 |
| 0.482642391 | 0.525593365 | 0.507504568 | 0.469433659 |
| 0.388195402 | 0.525019612 | 0.494337272 | 0.51755355  |
| 0.181985088 | 0.527350985 | 0.376772763 | 0.148939221 |
| 0.259586762 | 0.225730282 | 0.290111111 | 0.450999898 |
| 0.513399093 | 0.489059221 | 0.383587614 | 0.335114214 |
| 0.48051253  | 0.518557569 | 0.523956952 | 0.50228789  |
| 0.168695092 | 0.248133796 | 0.39649278  | 0.464631376 |
| 0.468151188 | 0.306405952 | 0.254079197 | 0.519015815 |
| 0.497281397 | 0.481492018 | 0.388010979 | 1           |
| 0.378943555 | 0.518142687 | 0.522503138 | 0.327772752 |
| 0.522489191 | 0.520958713 | 0.512720962 | 0.412983959 |
| 0.523332997 | 0.481503947 | 0.109770717 | 0.495928758 |
| 0.509170877 | 0.016436595 | 0.507326475 | 0.508659865 |
| 0.524994471 | 0.489443835 | 0.509058406 | 0.519581843 |
| 0.527158105 | 0.254605876 | 0.032533578 | 0.367716058 |
| 0.522928699 | 0.501041923 | 0.265021337 | 0.426083068 |
| 0.392490394 | 0.520843063 | 0.492240667 | 0.323679553 |

|             |             |             |             |
|-------------|-------------|-------------|-------------|
| 0.510882701 | 0.51575774  | 0.518214599 | 0.501629181 |
| 0.45582432  | 0.471710685 | 0.36872925  | 0.514054436 |
| 0.168333477 | 0.305898833 | 0.215436225 | 0.45163166  |
| 0.44158755  | 0.321146615 | 0.508501283 | 0.408430786 |
| 0.351090457 | 0.509373849 | 0.319650115 | 0.401653716 |
| 0.224754813 | 0.482537913 | 0.367472771 | 0.375640203 |
| 0.145830342 | 0.339353121 | 0.306290165 | 0.292622227 |
| 0.344664745 | 0.393053237 | 0.484761972 | 0.513999279 |
| 0.408135136 | 0.388485122 | 0.507781786 | 0.51113268  |
| 0.479730428 | 0.390281598 | 0.413540647 | 0.038716361 |
| 0.305195609 | 0.317573558 | 0.164839195 | 0.42740748  |
| 0.365472929 | 0.342954281 | 0.43823316  | 0.425435407 |
| 0.468113051 | 0.364078877 | 0.393615117 | 0.503570913 |
| 0.3636968   | 0.358780404 | 0.493927077 | 0.479392872 |
| 0.031543249 | 0.452964156 | 0.505603385 | 0.194285516 |
| 0.466728057 | 0.134287556 | 0.240852605 | 0.502862069 |
| 0.28850014  | 0.249063357 | 0.515029122 | 0.427568953 |
| 0.4116882   | 0.402484862 | 0.515205348 | 0.046490228 |
| 0.383876789 | 0.091874074 | 0.388161551 | 0.431377489 |
| 0.418983189 | 0.417193079 | 0.331990786 | 0.321922947 |
| 0.335342564 | 0.525897297 | 0.51370604  | 0.522789289 |
| 0.377518279 | 0.515852297 | 0.497089002 | 0.509039067 |
| 0.491797578 | 0.379725451 | 0.114160711 | 0.500647118 |
| 0.502208962 | 0.339852466 | 0.263556869 | 0.482869113 |
| 0.413687413 | 0.430728689 | 0.17657947  | 0.510006827 |
| 0.515924075 | 0.515736808 | 0.274312496 | 0.429217621 |
| 0.487615906 | 0.411564751 | 0.499693083 | 0.514927557 |
| 0.369184671 | 0.375911695 | 0.352326157 | 0.449249245 |
| 0.366410604 | 0.242514474 | 0.473891608 | 0.159503358 |
| 0.00859488  | 0.273219371 | 0.236124091 | 0.27121999  |
| 0.166572077 | 0.460911667 | 0.456493698 | 0.523210049 |
| 0.280985492 | 0.517147071 | 0.423519648 | 0.339618217 |
| 0.5110114   | 0.384395121 | 0.38596297  | 0.428847042 |
| 0.431370329 | 0.062030978 | 0.222367635 | 0.516640735 |
| 0.195375708 | 0.233590123 | 0.479687399 | 0.008392566 |
| 0.186052313 | 0.503458012 | 0.286551031 | 0.375047513 |
| 0.494373973 | 0.383822158 | 0.403083366 | 0.399692341 |
| 0.44286918  | 0.270957836 | 0.010857732 | 0.513278895 |
| 0.514499728 | 0.50803241  | 0.515049652 | 0.512411689 |
| 0.496397545 | 0.492019609 | 0.467027933 | 0.514357059 |
| 0.277303412 | 0.290936745 | 0.205576752 | 0.369866461 |
| 0.018666073 | 0.468377741 | 0.382820218 | 0.328235668 |
| 0.465802483 | 0.445890387 | 0.158479259 | 0.391726524 |
| 0.095939269 | 0.172399228 | 0.454077238 | 0.35483948  |
| 0.412772612 | 0.094701758 | 0.286027703 | 0.326989145 |
| 0.518761096 | 0.497678655 | 0.353236398 | 0.525952603 |
| 0.423326726 | 0.338640415 | 0.373315591 | 0.459986436 |
| 0.227187562 | 0.145730756 | 0.486422471 | 0.049677047 |
| 0.289421879 | 0.51335341  | 0.42179326  | 0.227639347 |
| 0.415853952 | 0.041954143 | 0.505426916 | 0.525940365 |
| 0.521063089 | 0.512154345 | 0.526344313 | 0.26229399  |
| 0.525603144 | 0.082890761 | 0.525147343 | 0.520870911 |
| 0.41237203  | 0.004580489 | 0.022717469 | 0.507599383 |
| 0.417826794 | 0.2312737   | 0.342548699 | 0.445312835 |



|             |             |             |             |
|-------------|-------------|-------------|-------------|
| 0.240856181 | 0.371746115 | 0.222543339 | 0.200613177 |
| 0.498830573 | 0.304102112 | 0.197513431 | 0.520588025 |
| 0.370948462 | 0.375600109 | 0.492539174 | 0.281894123 |
| 0.447889414 | 0.178092543 | 0.28102358  | 0.017048491 |
| 0.429529739 | 0.314146527 | 0.506381848 | 0.52700523  |
| 0.51649453  | 0.432315457 | 0.364333331 | 0.416613123 |
| 0.496404152 | 0.298877563 | 0.384891656 | 0.323488635 |
| 0.526588096 | 0.42760825  | 0.450100461 | 0.467209288 |
| 0.510357463 | 0.520248605 | 0.14967271  | 0.473933791 |
| 0.057091735 | 0.004483593 | 0.497732179 | 0.432522459 |
| 0.097685701 | 0.387247732 | 0.422794671 | 0.377048172 |
| 0.355542469 | 0.132938963 | 0.248556338 | 0.232837887 |
| 0.407161384 | 0.422593125 | 0.28773222  | 0.43146295  |
| 0.320782492 | 0.168038626 | 0.332281637 | 0.316203148 |
| 0.333810471 | 0.477968187 | 0.383042823 | 0.117907793 |
| 0.466118121 | 0.425789297 | 0.205205064 | 0.361083484 |
| 0.504421099 | 0.513662823 | 0.148934044 | 0.041058342 |
| 0.444342324 | 0.392304926 | 0.508158449 | 0.52808462  |
| 0.525205153 | 0.513024319 | 0.493434645 | 0.216099194 |
| 0.223805935 | 0.403222079 | 0.309195823 | 0.170453328 |
| 0.526239942 | 0.247962034 | 0.52838857  | 0.28505151  |
| 0.308029335 | 0.367450884 | 0.12033441  | 0.253891695 |
| 0.386792334 | 0.359645314 | 0.286685445 | 0.353154132 |
| 0.380721504 | 0.245523916 | 0.192300705 | 0.364640843 |
| 0.480150591 | 0.159081105 | 0.344345954 | 0.479502435 |
| 0.508966663 | 0.309431187 | 0.458727992 | 0.499953364 |
| 0.330916523 | 0.308289224 | 0.44246786  | 0.475906482 |
| 0.505528177 | 0.439055169 | 0.08457176  | 0.519372192 |
| 0.515669251 | 0.473726307 | 0.528337467 | 0.465000899 |
| 0.271526901 | 0.394270432 | 0.320253287 | 0.390234727 |
| 0.363778389 | 0.50308545  | 0.38540921  | 0.226476146 |
| 0.453595168 | 0.510792177 | 0.512562206 | 0.299726144 |
| 0.477633834 | 0.348040024 | 0.231907514 | 0.514837318 |
| 0.177596752 | 0.24239535  | 0.451125773 | 0.485175389 |
| 0.005544748 | 0.121151565 | 0.500946734 | 0.378022596 |
| 0.516510104 | 0.505341096 | 0.509883168 | 0.43625632  |
| 0.001759876 | 0.4276963   | 0.441725568 | 0.432943989 |
| 0.5231845   | 0.50588118  | 0.297780265 | 0.190500896 |
| 0.429825827 | 0.27016126  | 0.252558196 | 0.44892019  |
| 0.165743705 | 0.512700381 | 0.366280129 | 0.392723749 |
| 0.306332915 | 0.293121005 | 0.238516577 | 0.402265139 |
| 0.163052754 | 0.398738657 | 0.460112361 | 0.392417797 |
| 0.177419759 | 0.49364708  | 0.499532896 | 0.133578225 |
| 0.368258898 | 0.489607163 | 0.50809217  | 0.008716685 |
| 0.461956295 | 0.047170183 | 0.297083838 | 0.309941227 |
| 0.313010174 | 0.32243778  | 0.345258199 | 0.345193406 |
| 0.479200983 | 0.377421269 | 0.387474736 | 0.377610422 |
| 0.270877698 | 0.405980318 | 0.440680097 | 0.482598951 |
| 0.326917758 | 0.298701848 | 0.290107244 | 0.284565597 |
| 0.156419722 | 0.523494987 | 0.424210944 | 0.258099242 |
| 0.374746722 | 0.466479156 | 0.465512216 | 0.523802402 |
| 0.493945057 | 0.313763568 | 0.428777064 | 0.525407686 |
| 0.254251545 | 0.403936391 | 0.234526455 | 0.498597571 |
| 0.400062287 | 0.239287884 | 0.492869573 | 0.481658449 |

|             |             |             |             |
|-------------|-------------|-------------|-------------|
| 0.494843975 | 0.492811709 | 0.423611548 | 0.511093364 |
| 0.433114043 | 0.41880332  | 0.394670823 | 0.181216264 |
| 0.351490402 | 0.337186763 | 0.288443119 | 0.016585045 |
| 0.469038078 | 0.439812508 | 0.50813196  | 0.523135046 |
| 0.273117944 | 0.492391262 | 0.411749549 | 0.242163217 |
| 0.351028735 | 0.368386789 | 0.332304933 | 0.498513115 |
| 0.187225297 | 0.358746822 | 0.352270504 | 0.491618581 |
| 0.475290192 | 0.4749463   | 0.304252293 | 0.422214856 |
| 0.394458666 | 0.413018368 | 0.510016088 | 0.334565739 |
| 0.458852332 | 0.20833816  | 0.483024561 | 0.361975853 |
| 0.314627688 | 0.519016943 | 0.224997893 | 0.519536599 |
| 0.367185275 | 0.338115404 | 0.511412198 | 0.473455537 |
| 0.458008949 | 0.218454193 | 0.161358098 | 0.483954688 |
| 0.366287508 | 0.328511688 | 0.018259303 | 0.072328686 |
| 0.426597011 | 0.394981465 | 0.498401097 | 0.466950265 |
| 0.273427669 | 0.432882753 | 0.15148335  | 0.461653346 |
| 0.519014927 | 0.517933645 | 0.341419156 | 0.409895517 |
| 0.478171237 | 0.252422074 | 0.522407584 | 0.030717107 |
| 0.445369942 | 0.42603209  | 0.41607511  | 0.189188181 |
| 0.102060735 | 0.184175002 | 0.466137159 | 0.253184163 |
| 0.494444748 | 0.182141852 | 0.472007519 | 0.494468506 |
| 0.384936145 | 0.516748414 | 0.226777064 | 0.463802921 |
| 0.187417472 | 0.42619675  | 0.392426589 | 0.433087723 |
| 0.270874463 | 0.28911494  | 0.450211903 | 0.226569435 |
| 0.132083569 | 0.326043369 | 0.008244766 | 0.492688045 |
| 0.507922625 | 0.337019504 | 0.399326283 | 0.356321144 |
| 0.398330568 | 0.496872255 | 0.301293778 | 0.44383942  |
| 0.049393004 | 0.376044727 | 0.36834506  | 0.523835882 |
| 0.221640024 | 0.44692525  | 0.161689175 | 0.335239443 |
| 0.500354142 | 0.31939049  | 0.429155156 | 0.311235495 |
| 0.526992771 | 0.510912398 | 0.378814435 | 0.290643649 |
| 0.47018256  | 0.238216081 | 0.46312267  | 0.521099459 |
| 0.295167813 | 0.212306834 | 0.472341523 | 0.318837956 |
| 0.305598798 | 0.517306287 | 0.451294184 | 0.520340952 |
| 0.149819889 | 0.401207421 | 0.481361167 | 0.516896389 |
| 0.42075778  | 0.184664875 | 0.236510125 | 0.283906777 |
| 0.521809816 | 0.224747043 | 0.275804642 | 0.494993697 |
| 0.201639374 | 0.434115052 | 0.470276897 | 0.248131194 |
| 0.115120503 | 0.332555906 | 0.451620328 | 0.338253062 |
| 0.408057028 | 0.408861085 | 0.278480363 | 0.486047096 |
| 0.225978485 | 0.076301108 | 0.504526877 | 0.014457109 |
| 0.505247615 | 0.443809575 | 0.406317861 | 0.387870721 |
| 0.381277123 | 0.484566802 | 0.484477465 | 0.010871005 |
| 0.479631299 | 0.066408609 | 0.385303393 | 0.268629798 |
| 0.295155948 | 0.198099743 | 0.523885559 | 0.510165545 |
| 0.485881052 | 0.379579673 | 0.333672118 | 0.524370175 |
| 0.137183796 | 0.318895799 | 0.344495192 | 0.511850926 |
| 0.208260885 | 0.426540268 | 0.433304539 | 0.368508358 |
| 0.510036318 | 0.449955877 |             |             |
| CDC34       | 0.084487726 | 0.256128946 | 0.053779296 |
| 0.049475113 | 0.134671685 | 0.071074816 | 0.140253519 |
| 0.153902698 | 0.26774279  | 0.066084545 | 0.117663931 |
| 0.06026024  | 0.034351893 | 0.282397617 | 0.153849809 |
| 0.15204858  | 0.104888772 | 0.155866868 | 0.086756579 |

|             |             |             |             |
|-------------|-------------|-------------|-------------|
| 0.122801989 | 0.142589777 | 0.066966621 | 0.119533058 |
| 0.147405798 | 0.241520787 | 0.167102695 | 0.126292286 |
| 0.267292548 | 0.032074285 | 0.146403824 | 0.023962971 |
| 0.326844697 | 0.142205537 | 0.077367969 | 0.042062408 |
| 0.134660575 | 0.048386734 | 0.354744072 | 0.108874318 |
| 0.030076322 | 0.313854057 | 0.068429406 | 0.093594799 |
| 0.094597377 | 0.058928968 | 0.02726905  | 0.190306944 |
| 0.182425425 | 0.140513932 | 0.101911715 | 0.172362236 |
| 0.112788417 | 0.194574337 | 0.165106586 | 0.008657624 |
| 0.055481237 | 0.015675321 | 0.047454509 | 0.296813944 |
| 0.203493348 | 0.145767139 | 0.06346217  | 0.185966965 |
| 0.195797643 | 0.240597277 | 0.27142026  | 0.086952411 |
| 0.288342866 | 0.062131805 | 0.182958005 | 0.056383915 |
| 0.121644182 | 0.101411713 | 0.235353011 | 0.18257381  |
| 0.09503218  | 0.167442897 | 0.132829844 | 0.077187319 |
| 0.234152379 | 0.378079698 | 0.240279023 | 0.315100548 |
| 0.110570712 | 0.139838264 | 0.094886746 | 0.264960921 |
| 0.277867419 | 0.190567775 | 0.183449283 | 0.335160241 |
| 0.139488865 | 0.128693875 | 0.231055882 | 0.212735445 |
| 0.232648217 | 0.094151918 | 0.089124616 | 0.046681888 |
| 0.174694416 | 0.142966075 | 0.369575196 | 0.211508574 |
| 0.132260635 | 0.131962535 | 0.323337513 | 0.122051525 |
| 0.076375347 | 0.101969527 | 0.105573681 | 0.231959079 |
| 0.158174479 | 0.263006719 | 0.249458418 | 0.29129759  |
| 0.126609887 | 0.277883342 | 0.16893631  | 0.298082938 |
| 0.024034746 | 0.311385719 | 0.125432707 | 0.101619649 |
| 0.086592568 | 0.150084688 | 0.160595791 | 0.314328341 |
| 0.238157207 | 0.226303287 | 0.116908236 | 0.148504523 |
| 0.272401914 | 0.297941971 | 0.31518689  | 0.26137215  |
| 0.087969477 | 0.088400095 | 0.111353035 | 0.121103409 |
| 0.236574791 | 0.23162125  | 0.076743644 | 0.34276503  |
| 0.25766221  | 0.235856731 | 0.10511396  | 0.378943555 |
| 1           | 0.32521762  | 0.21919027  | 0.129830053 |
| 0.328465616 | 0.313197808 | 0.307304841 | 0.158930287 |
| 0.305931739 | 0.094378757 | 0.118385766 | 0.291433207 |
| 0.32413369  | 0.005983672 | 0.254938716 | 0.272070089 |
| 0.286670964 | 0.21681383  | 0.331742865 | 0.281942874 |
| 0.293548966 | 0.16405407  | 0.025704096 | 0.221340606 |
| 0.310277878 | 0.232890083 | 0.192596799 | 0.109462833 |
| 0.177599045 | 0.107521266 | 0.232963143 | 0.052078569 |
| 0.377628454 | 0.239763388 | 0.261994918 | 0.252049905 |
| 0.179565497 | 0.303581997 | 0.110598451 | 0.30063855  |
| 0.091285106 | 0.083541193 | 0.104666717 | 0.315170412 |
| 0.051918671 | 0.188809851 | 0.096682858 | 0.20294417  |
| 0.215488025 | 0.131607826 | 0.060802451 | 0.17734919  |
| 0.155071408 | 0.115388519 | 0.137976507 | 0.157553791 |
| 0.09012878  | 0.268100343 | 0.095424363 | 0.089544391 |
| 0.162313979 | 0.311809218 | 0.178461768 | 0.28393067  |
| 0.132332999 | 0.177471943 | 0.193413814 | 0.31607982  |
| 0.338353535 | 0.105397033 | 0.31102251  | 0.01150401  |
| 0.084698367 | 0.076750806 | 0.052438208 | 0.120797518 |
| 0.288716321 | 0.141203095 | 0.175149143 | 0.186578865 |
| 0.114868373 | 0.17131568  | 0.100730921 | 0.344051594 |
| 0.215761361 | 0.081046459 | 0.257125899 | 0.141959878 |

|             |             |              |             |
|-------------|-------------|--------------|-------------|
| 0.015987348 | 0.126486971 | 0.217129835  | 0.130003635 |
| 0.26301179  | 0.045497622 | 0.037018661  | 0.25792103  |
| 0.084443903 | 0.119417535 | 0.268251662  | 0.204171445 |
| 0.087764806 | 0.296872579 | 0.331771831  | 0.033037496 |
| 0.156251441 | 0.033400289 | 0.222821562  | 0.087679812 |
| 0.183472282 | 0.298266205 | 0.133797868  | 0.083798668 |
| 0.125210812 | 0.323332083 | 0.255981174  | 0.285085539 |
| 0.076438183 | 0.332998563 | 0.231615822  | 0.259021163 |
| 0.20084537  | 0.111480339 | 0.035966976  | 0.205516817 |
| 0.242320868 | 0.086411375 | 0.147382512  | 0.220987858 |
| 0.103430275 | 0.186726621 | 0.10139235   | 0.294133757 |
| 0.354127059 | 0.279724473 | 0.143289435  | 0.250026669 |
| 0.222184343 | 0.129851677 | 0.257125977  | 0.358517538 |
| 0.078081856 | 0.133085473 | 0.083547672  | 0.262651203 |
| 0.174886838 | 0.119170659 | 0.336174454  | 0.051544501 |
| 0.000483074 | 0.144779825 | 0.10987581   | 0.12677163  |
| 0.058813449 | 0.142939543 | 0.193465295  | 0.306041926 |
| 0.149567828 | 0.279298576 | 0.321157025  | 0.082349184 |
| 0.277787209 | 0.136313482 | 0.111060269  | 0.168399683 |
| 0.284756629 | 0.021354365 | 0.071863414  | 0.368872253 |
| 0.117288486 | 0.058845423 | 0.18495047   | 0.003018202 |
| 0.097153638 | 0.206750724 | 0.207426446  | 0.286489061 |
| 0.295257434 | 0.25258168  | 0.184344858  | 0.079183419 |
| 0.215210931 | 0.146061272 | 0.004519465  | 0.296025811 |
| 0.338594349 | 0.342324872 | 0.335514168  | 0.341916574 |
| 0.312897047 | 0.244299906 | 0.235878297  | 0.10740922  |
| 0.128276205 | 0.105129125 | 0.067152135  | 0.129922875 |
| 0.015030174 | 0.225245292 | 0.172939445  | 0.205669828 |
| 0.217909479 | 0.281669051 | 0.07916332   | 0.180291508 |
| 0.022373571 | 0.03051501  | 0.151415037  | 0.180948522 |
| 0.265699431 | 0.047244936 | 0.0294440484 | 0.073856587 |
| 0.25701724  | 0.265213667 | 0.064882586  | 0.313282543 |
| 0.134487201 | 0.167436848 | 0.102648055  | 0.211002531 |
| 0.123636368 | 0.045449905 | 0.123669926  | 0.00330272  |
| 0.053561755 | 0.356883943 | 0.098672666  | 0.063159756 |
| 0.167568881 | 0.01906308  | 0.237060649  | 0.328785176 |
| 0.26585015  | 0.299133226 | 0.280613736  | 0.055235073 |
| 0.285971696 | 0.025995322 | 0.299592373  | 0.235032586 |
| 0.069548494 | 0.001087247 | 0.02590511   | 0.24794206  |
| 0.119563884 | 0.130000435 | 0.187829674  | 0.050010667 |
| 0.100680143 | 0.105615082 | 0.131789184  | 0.071262894 |
| 0.13785899  | 0.139392281 | 0.09717623   | 0.303759525 |
| 0.145317272 | 0.219185765 | 0.101092612  | 0.197840974 |
| 0.138725191 | 0.08431684  | 0.21664326   | 0.007024268 |
| 0.235418216 | 0.186875542 | 0.337474807  | 0.296648357 |
| 0.324260807 | 0.177769071 | 0.054559055  | 0.085422191 |
| 0.299109111 | 0.12722642  | 0.061825495  | 0.137943824 |
| 0.263028686 | 0.159111825 | 0.232720161  | 0.227080235 |
| 0.321131177 | 0.290902654 | 0.098926823  | 0.225706177 |
| 0.012956883 | 0.008298581 | 0.086263985  | 0.306204154 |
| 0.12354119  | 0.115892589 | 0.246714364  | 0.184767295 |
| 0.181059291 | 0.047398886 | 0.072077622  | 0.073559804 |
| 0.190689409 | 0.14653363  | 0.110081748  | 0.325052551 |
| 0.116093739 | 0.095999919 | 0.131060943  | 0.18942795  |

|             |             |             |             |
|-------------|-------------|-------------|-------------|
| 0.163793073 | 0.258603009 | 0.232338379 | 0.092080406 |
| 0.099497585 | 0.107056384 | 0.097441935 | 0.207313918 |
| 0.22852733  | 0.25793277  | 0.123702736 | 0.0223905   |
| 0.26218592  | 0.15220841  | 0.2871571   | 0.272968551 |
| 0.334606279 | 0.345512686 | 0.340201571 | 0.158603316 |
| 0.102727699 | 0.184418479 | 0.125364903 | 0.109731189 |
| 0.299561909 | 0.138436804 | 0.289760516 | 0.088855309 |
| 0.220211748 | 0.103984559 | 0.065368061 | 0.172189393 |
| 0.120835284 | 0.230280796 | 0.144814871 | 0.128663502 |
| 0.113560872 | 0.057828179 | 0.123019205 | 0.190954108 |
| 0.253889106 | 0.040493522 | 0.206025995 | 0.130837683 |
| 0.237550062 | 0.081889073 | 0.189094148 | 0.341959244 |
| 0.18253388  | 0.183860977 | 0.0610352   | 0.264238068 |
| 0.216767749 | 0.122244245 | 0.019107094 | 0.24486813  |
| 0.305198805 | 0.147231156 | 0.292996594 | 0.322684437 |
| 0.194056329 | 0.098118527 | 0.104410183 | 0.164376708 |
| 0.250814771 | 0.081896311 | 0.222960366 | 0.154007824 |
| 0.360675057 | 0.391658622 | 0.24843216  | 0.115873125 |
| 0.134981844 | 0.166499069 | 0.124728546 | 0.267632733 |
| 0.061413744 | 0.084517546 | 0.077988943 | 0.256503039 |
| 0.002387144 | 0.03986897  | 0.324009289 | 0.113826456 |
| 0.368212409 | 0.270956757 | 0.294554155 | 0.146912076 |
| 0.002492874 | 0.171582661 | 0.145540689 | 0.070406044 |
| 0.245521743 | 0.240455617 | 0.158737015 | 0.105485791 |
| 0.280719262 | 0.12484833  | 0.13483054  | 0.065277701 |
| 0.049562535 | 0.178042442 | 0.278516605 | 0.251581793 |
| 0.14333412  | 0.20819798  | 0.055112542 | 0.108883821 |
| 0.109269834 | 0.261324891 | 0.264854591 | 0.0675663   |
| 0.0391013   | 0.326887021 | 0.227076765 | 0.060376985 |
| 0.120506458 | 0.296755426 | 0.299334731 | 0.008053582 |
| 0.176027968 | 0.036977823 | 0.149583714 | 0.103944045 |
| 0.125055765 | 0.169992577 | 0.21444389  | 0.087263375 |
| 0.215051591 | 0.153264733 | 0.087459637 | 0.194685953 |
| 0.10132955  | 0.170399115 | 0.157343922 | 0.120398415 |
| 0.074512062 | 0.100638557 | 0.205114884 | 0.202658053 |
| 0.06692516  | 0.262342993 | 0.275693442 | 0.127160141 |
| 0.241846629 | 0.119030524 | 0.30534531  | 0.278366396 |
| 0.304134145 | 0.164544061 | 0.158203145 | 0.215722035 |
| 0.057866205 | 0.076605824 | 0.102511651 | 0.124218067 |
| 0.181741954 | 0.076681078 | 0.115008435 | 0.14326763  |
| 0.216204671 | 0.322604919 | 0.264108398 | 0.307819757 |
| 0.093184548 | 0.169076107 | 0.048994389 | 0.087057192 |
| 0.107236102 | 0.237935855 | 0.117967612 | 0.007146002 |
| 0.212325962 | 0.065138508 | 0.228347034 | 0.287675272 |
| 0.068288285 | 0.30442874  | 0.049076129 | 0.090382323 |
| 0.038398186 | 0.206792237 | 0.22232102  | 0.201092149 |
| 0.039735559 | 0.120016815 | 0.139467969 | 0.063659988 |
| 0.201450859 | 0.210992746 | 0.133043332 | 0.186317083 |
| 0.233373398 | 0.175514306 | 0.36309105  | 0.101470134 |
| 0.126748887 | 0.063775631 | 0.151077565 | 0.117473882 |
| 0.142860494 | 0.292767142 | 0.123259981 | 0.292754894 |
| 0.118443761 | 0.230464481 | 0.370825793 | 0.169852998 |
| 0.101501648 | 0.097886668 | 0.042262283 | 0.095339431 |
| 0.172744702 | 0.066431617 | 0.004672227 | 0.040952452 |

|             |             |             |             |
|-------------|-------------|-------------|-------------|
| 0.23248115  | 0.142627901 | 0.221198857 | 0.280520057 |
| 0.098452114 | 0.305044367 | 0.046330425 | 0.170515312 |
| 0.28461575  | 0.336383221 | 0.084463164 | 0.301659124 |
| 0.273907175 | 0.110762411 | 0.135603606 | 0.037409751 |
| 0.149275353 | 0.12630742  | 0.081324878 | 0.128665643 |
| 0.071453808 | 0.044536729 | 0.148967294 | 0.178506594 |
| 0.286875411 | 0.033440471 | 0.2017539   | 0.169663008 |
| 0.289002754 | 0.334389098 | 0.141513964 | 0.183415087 |
| 0.149001045 | 0.259895002 | 0.116340889 | 0.147793203 |
| 0.069244411 | 0.081927743 | 0.208303554 | 0.057433009 |
| 0.081549957 | 0.096474309 | 0.01308952  | 0.328887419 |
| 0.313932085 | 0.103625468 | 0.302314883 | 0.07225822  |
| 0.236751422 | 0.306321862 | 0.153337514 | 0.102183584 |
| 0.025467257 | 0.125072103 | 0.218573751 | 0.220872636 |
| 0.029546778 | 0.188974106 | 0.066010522 | 0.150232943 |
| 0.338380076 | 0.104780975 | 0.351773228 | 0.050734287 |
| 0.274847687 | 0.257727183 | 0.172343936 | 0.112092751 |
| 0.195433603 | 0.162544854 | 0.067770048 | 0.343019704 |
| 0.132571784 | 0.059563638 | 0.232112454 | 0.112580214 |
| 0.095002865 | 0.275897993 | 0.144353504 | 0.352455446 |
| 0.120023694 | 0.228693543 | 0.234842678 | 0.298362881 |
| 0.282324074 | 0.092714857 | 0.065499743 | 0.115466239 |
| 0.254835628 | 0.058482393 | 0.104025932 | 0.220739557 |
| 0.055726902 | 0.248362525 | 0.156989139 | 0.12121924  |
| 0.070341802 | 0.197896685 | 0.075406764 | 0.211615148 |
| 0.203452683 | 0.126728139 | 0.105960291 | 0.308612449 |
| 0.068289179 | 0.026605742 | 0.338194181 | 0.005902914 |
| 0.112704514 | 0.14716847  | 0.208981369 | 0.115853594 |
| 0.204260958 | 0.214030699 | 0.128459603 | 0.008915466 |
| 0.263494579 | 0.018555066 | 0.143596545 | 0.081488585 |
| 0.096477347 | 0.106146312 | 0.284108433 | 0.303252861 |
| 0.22507286  | 0.084142948 | 0.055585731 | 0.304800618 |
| 0.040241809 | 0.062281431 | 0.09894705  | 0.157960678 |
| 0.057287928 | 0.074997361 | 0.087824069 | 0.055385835 |
| 0.215531489 | 0.144975531 |             |             |
| CDC45L      | 0.192466677 | 0.484236314 | 0.154940112 |
| 0.291607564 | 0.405439552 | 0.523080685 | 0.157576736 |
| 0.264226315 | 0.438660033 | 0.34912607  | 0.498039609 |
| 0.071073233 | 0.109778249 | 0.518431463 | 0.147990879 |
| 0.471645285 | 0.109523603 | 0.239702944 | 0.12277025  |
| 0.345343579 | 0.381221651 | 0.425428016 | 0.497165259 |
| 0.378524483 | 0.311032279 | 0.469159877 | 0.434566827 |
| 0.518404144 | 0.31155095  | 0.525064724 | 0.252238413 |
| 0.474153312 | 0.414826278 | 0.439050214 | 0.067875767 |
| 0.516640489 | 0.017112429 | 0.457701885 | 0.394629811 |
| 0.214345355 | 0.447683343 | 0.413889366 | 0.404534986 |
| 0.447635569 | 0.119245191 | 0.248179878 | 0.467646121 |
| 0.442072855 | 0.413483049 | 0.164992404 | 0.522263673 |
| 0.443127578 | 0.490671908 | 0.463941211 | 0.006718677 |
| 0.355911554 | 0.095329646 | 0.251822187 | 0.505427664 |
| 0.363520897 | 0.265626355 | 0.309458906 | 0.372989422 |
| 0.45439647  | 0.458779856 | 0.395444527 | 0.427544099 |
| 0.520264715 | 0.215652357 | 0.493920425 | 0.287571386 |
| 0.494909373 | 0.100375143 | 0.304661086 | 0.184934432 |

|             |             |             |             |
|-------------|-------------|-------------|-------------|
| 0.463577863 | 0.357115341 | 0.458303147 | 0.372046334 |
| 0.477586063 | 0.524156397 | 0.384607497 | 0.50112701  |
| 0.126926531 | 0.406059034 | 0.372701053 | 0.430823075 |
| 0.454744977 | 0.183733855 | 0.527897085 | 0.520898616 |
| 0.129897781 | 0.448142945 | 0.484528277 | 0.245509768 |
| 0.511064103 | 0.321762946 | 0.465675003 | 0.23563605  |
| 0.450582733 | 0.424095158 | 0.478900929 | 0.44970796  |
| 0.409799598 | 0.178451119 | 0.496956622 | 0.384876037 |
| 0.435392015 | 0.203968291 | 0.317112169 | 0.512432051 |
| 0.519677107 | 0.52751978  | 0.490851464 | 0.465376448 |
| 0.450893304 | 0.522934225 | 0.526581525 | 0.494299466 |
| 0.17435175  | 0.516322731 | 0.356532005 | 0.129422285 |
| 0.178914992 | 0.203436548 | 0.297279311 | 0.430195086 |
| 0.529976618 | 0.476805248 | 0.364028516 | 0.372140178 |
| 0.507931358 | 0.483550369 | 0.510327654 | 0.50679121  |
| 0.12461417  | 0.287244037 | 0.461684019 | 0.434841459 |
| 0.484652834 | 0.23854881  | 0.328819158 | 0.518183249 |
| 0.493429307 | 0.513985315 | 0.318537577 | 0.518142687 |
| 0.32521762  | 1           | 0.510273056 | 0.330823274 |
| 0.524141887 | 0.507619632 | 0.522073028 | 0.477967163 |
| 0.496071621 | 0.503511345 | 0.08919604  | 0.476528837 |
| 0.514027355 | 0.026620141 | 0.516441006 | 0.520301426 |
| 0.503464699 | 0.522064952 | 0.513748215 | 0.525025651 |
| 0.50287459  | 0.183152414 | 0.032450483 | 0.406223933 |
| 0.510073871 | 0.510784995 | 0.250464402 | 0.475185587 |
| 0.442075634 | 0.528315508 | 0.500295939 | 0.394705407 |
| 0.516207205 | 0.524228395 | 0.51871688  | 0.494316984 |
| 0.403352325 | 0.431276413 | 0.421903588 | 0.485271967 |
| 0.13589066  | 0.256836592 | 0.143078214 | 0.425063525 |
| 0.438465175 | 0.324219614 | 0.50920071  | 0.427367308 |
| 0.347103872 | 0.468279556 | 0.377712991 | 0.461455089 |
| 0.139492794 | 0.519064208 | 0.323285591 | 0.318089873 |
| 0.129140162 | 0.261570289 | 0.334722643 | 0.310709006 |
| 0.386526061 | 0.302410012 | 0.509591082 | 0.517225418 |
| 0.42524881  | 0.330397179 | 0.523409278 | 0.511942026 |
| 0.48664987  | 0.462010917 | 0.367322562 | 0.045556593 |
| 0.363688611 | 0.331076646 | 0.217417638 | 0.467556388 |
| 0.275048573 | 0.365168518 | 0.476298918 | 0.486300614 |
| 0.446286094 | 0.272845228 | 0.443939429 | 0.467550653 |
| 0.277196946 | 0.433084112 | 0.521917349 | 0.480261861 |
| 0.019062016 | 0.479501483 | 0.532831281 | 0.226483885 |
| 0.437128043 | 0.188799747 | 0.320896051 | 0.519089902 |
| 0.337649586 | 0.294883916 | 0.52254777  | 0.477688717 |
| 0.438085274 | 0.304814034 | 0.514139577 | 0.056745869 |
| 0.409484358 | 0.121752403 | 0.421892815 | 0.396865969 |
| 0.413092683 | 0.41750534  | 0.397103293 | 0.390683733 |
| 0.265337733 | 0.510450502 | 0.502818071 | 0.527139229 |
| 0.431864923 | 0.513429594 | 0.526847611 | 0.525229029 |
| 0.499334371 | 0.405574872 | 0.163519815 | 0.530285431 |
| 0.520875187 | 0.354985736 | 0.176586122 | 0.497726669 |
| 0.419147581 | 0.478284034 | 0.19866042  | 0.52081783  |
| 0.509476257 | 0.470893746 | 0.283040854 | 0.467826971 |
| 0.510507324 | 0.409595605 | 0.501761293 | 0.515711658 |
| 0.360522354 | 0.429068202 | 0.42241536  | 0.484986274 |

|             |             |             |             |
|-------------|-------------|-------------|-------------|
| 0.334216109 | 0.290223166 | 0.425011735 | 0.207942244 |
| 0.014398074 | 0.194600545 | 0.173277901 | 0.299632198 |
| 0.232076897 | 0.472685008 | 0.490872699 | 0.517898584 |
| 0.256797834 | 0.504538747 | 0.3644471   | 0.411869154 |
| 0.487788485 | 0.41848413  | 0.448258457 | 0.475080945 |
| 0.388479775 | 0.064309151 | 0.250314943 | 0.52844758  |
| 0.114002507 | 0.311494346 | 0.444286291 | 0.010358837 |
| 0.132687846 | 0.47481757  | 0.198520497 | 0.302993309 |
| 0.514291257 | 0.3086217   | 0.360615898 | 0.381502472 |
| 0.475226096 | 0.221735029 | 0.013799559 | 0.504407447 |
| 0.484131226 | 0.474150235 | 0.481742091 | 0.461370048 |
| 0.481366812 | 0.484843504 | 0.49656953  | 0.500014018 |
| 0.239124505 | 0.20911023  | 0.27485396  | 0.415772562 |
| 0.013022539 | 0.497922064 | 0.406832748 | 0.2864344   |
| 0.496973196 | 0.426891233 | 0.121490016 | 0.429735867 |
| 0.081370542 | 0.241142905 | 0.428940394 | 0.347124535 |
| 0.441267124 | 0.06034719  | 0.342033689 | 0.389601366 |
| 0.484135469 | 0.468960017 | 0.410724853 | 0.523008819 |
| 0.475102816 | 0.243533525 | 0.437285499 | 0.500679154 |
| 0.185816363 | 0.139526206 | 0.463722052 | 0.055513655 |
| 0.288476101 | 0.469722375 | 0.44872659  | 0.184020883 |
| 0.433011436 | 0.027680816 | 0.482400194 | 0.523918179 |
| 0.482523832 | 0.52167568  | 0.526359715 | 0.346351636 |
| 0.518043512 | 0.110430578 | 0.520372879 | 0.503236719 |
| 0.429116268 | 0.004378643 | 0.020091521 | 0.526807966 |
| 0.482964344 | 0.142445198 | 0.312004356 | 0.487425299 |
| 0.250264512 | 0.297276737 | 0.171969013 | 0.267651647 |
| 0.527088251 | 0.357623141 | 0.246645703 | 0.481842446 |
| 0.388679184 | 0.375245619 | 0.479075278 | 0.197285395 |
| 0.494680759 | 0.15451662  | 0.193103319 | 0.023070996 |
| 0.462747516 | 0.224335841 | 0.487108057 | 0.511788276 |
| 0.510731405 | 0.486064696 | 0.377438739 | 0.442551417 |
| 0.491170249 | 0.207918659 | 0.423739217 | 0.23453459  |
| 0.505606883 | 0.485330511 | 0.466950637 | 0.450211436 |
| 0.515781704 | 0.509245436 | 0.108944259 | 0.504250249 |
| 0.053015682 | 0.005265344 | 0.502414205 | 0.397078089 |
| 0.081127672 | 0.441954356 | 0.404140759 | 0.329957573 |
| 0.338859065 | 0.104470786 | 0.315301631 | 0.299936448 |
| 0.435895237 | 0.467416668 | 0.360160681 | 0.36793914  |
| 0.365332589 | 0.20688114  | 0.343916266 | 0.288077883 |
| 0.309338512 | 0.42902256  | 0.315362829 | 0.077389108 |
| 0.494974398 | 0.48819022  | 0.162026255 | 0.306135262 |
| 0.533015779 | 0.531963637 | 0.12091307  | 0.045504404 |
| 0.408835808 | 0.4112046   | 0.525668839 | 0.51029844  |
| 0.527458697 | 0.514173642 | 0.453319034 | 0.230663039 |
| 0.181001173 | 0.438009378 | 0.373701421 | 0.195865557 |
| 0.520629896 | 0.160671943 | 0.501493452 | 0.353873894 |
| 0.246276947 | 0.377614728 | 0.113300182 | 0.202525199 |
| 0.45023251  | 0.329094994 | 0.316554462 | 0.287854581 |
| 0.434607861 | 0.316087673 | 0.138858247 | 0.354701769 |
| 0.475534635 | 0.224337401 | 0.309163338 | 0.442260584 |
| 0.477184023 | 0.260041663 | 0.501267323 | 0.490794602 |
| 0.269812945 | 0.234723939 | 0.437255807 | 0.474115519 |
| 0.520073689 | 0.442120096 | 0.084276446 | 0.488199194 |



|             |             |             |             |
|-------------|-------------|-------------|-------------|
| 0.518221811 | 0.519187928 | 0.503248241 | 0.477616441 |
| 0.196093843 | 0.472323073 | 0.357033602 | 0.43553625  |
| 0.326947158 | 0.521846602 | 0.371518855 | 0.16579473  |
| 0.40780167  | 0.49115821  | 0.497113547 | 0.320044011 |
| 0.494815431 | 0.250295818 | 0.145301399 | 0.5057182   |
| 0.245425168 | 0.217008979 | 0.43109452  | 0.495227604 |
| 0.006997066 | 0.174244594 | 0.500699573 | 0.400895001 |
| 0.510905275 | 0.522002124 | 0.502244833 | 0.392705369 |
| 0.002500424 | 0.472036576 | 0.502534278 | 0.502215757 |
| 0.506853278 | 0.486498612 | 0.248945918 | 0.188097671 |
| 0.423479285 | 0.187919812 | 0.264247325 | 0.464782558 |
| 0.209218858 | 0.511354045 | 0.339742878 | 0.337718268 |
| 0.327971463 | 0.189439247 | 0.308890103 | 0.409353974 |
| 0.182580205 | 0.387996186 | 0.475933247 | 0.351681154 |
| 0.245564295 | 0.490212097 | 0.501548751 | 0.094586096 |
| 0.421495225 | 0.485041038 | 0.499624633 | 0.008219769 |
| 0.514950784 | 0.035137839 | 0.329179379 | 0.361930109 |
| 0.342892643 | 0.336346213 | 0.379551472 | 0.411021505 |
| 0.466254136 | 0.375430194 | 0.438783749 | 0.392908724 |
| 0.306045885 | 0.37423908  | 0.481292048 | 0.476724536 |
| 0.406678077 | 0.275708724 | 0.200544638 | 0.19206318  |
| 0.151641161 | 0.512179797 | 0.380031536 | 0.176754665 |
| 0.372361365 | 0.461596352 | 0.461683523 | 0.494947648 |
| 0.498084712 | 0.218001973 | 0.437441686 | 0.522538355 |
| 0.259688997 | 0.414192176 | 0.163112755 | 0.506178004 |
| 0.39432916  | 0.313711507 | 0.486975387 | 0.451494756 |
| 0.48137604  | 0.465547631 | 0.380445799 | 0.496962204 |
| 0.484529382 | 0.411782167 | 0.385315869 | 0.201205658 |
| 0.340874314 | 0.259376019 | 0.358535172 | 0.012598336 |
| 0.487256215 | 0.432318991 | 0.532460093 | 0.49417977  |
| 0.331866701 | 0.480071476 | 0.414117412 | 0.215843338 |
| 0.341722165 | 0.280395098 | 0.279685285 | 0.50779619  |
| 0.252683763 | 0.349095417 | 0.413032837 | 0.473480502 |
| 0.509165623 | 0.481810379 | 0.33672187  | 0.385318773 |
| 0.369604184 | 0.350143186 | 0.476621626 | 0.259010016 |
| 0.487703629 | 0.281094924 | 0.438195552 | 0.423876087 |
| 0.347898693 | 0.515089084 | 0.161893617 | 0.521092403 |
| 0.42140221  | 0.253978517 | 0.503638748 | 0.440976721 |
| 0.439024488 | 0.242515441 | 0.224194115 | 0.466851565 |
| 0.358495544 | 0.393166272 | 0.018726474 | 0.092520821 |
| 0.459543001 | 0.368571787 | 0.476913629 | 0.461787297 |
| 0.331801645 | 0.445474408 | 0.195016434 | 0.426760858 |
| 0.479840483 | 0.506076079 | 0.396281037 | 0.383142309 |
| 0.470702719 | 0.237608142 | 0.51460747  | 0.0235647   |
| 0.489873705 | 0.468854425 | 0.43369138  | 0.148673057 |
| 0.071894965 | 0.252301824 | 0.493765201 | 0.158468804 |
| 0.514575649 | 0.24608401  | 0.433377668 | 0.524555859 |
| 0.307849802 | 0.510050783 | 0.242709046 | 0.516490599 |
| 0.113900647 | 0.397719296 | 0.433669083 | 0.435949893 |
| 0.350425429 | 0.363660522 | 0.494389192 | 0.306649425 |
| 0.108480667 | 0.386927566 | 0.006319373 | 0.451848685 |
| 0.478683218 | 0.396227055 | 0.334251294 | 0.337003272 |
| 0.418230982 | 0.470699475 | 0.32992206  | 0.472213539 |
| 0.04746913  | 0.451504087 | 0.349633456 | 0.51998396  |

|             |             |             |             |
|-------------|-------------|-------------|-------------|
| 0.288786155 | 0.440919029 | 0.160558443 | 0.376550966 |
| 0.481071644 | 0.370812632 | 0.378128881 | 0.370406339 |
| 0.502076847 | 0.476133283 | 0.290752006 | 0.322935795 |
| 0.448682013 | 0.16279706  | 0.460958821 | 0.515896987 |
| 0.320417357 | 0.289261724 | 0.515608539 | 0.352432369 |
| 0.366675742 | 0.481194295 | 0.458534782 | 0.505145844 |
| 0.165041414 | 0.400272854 | 0.506982993 | 0.500153324 |
| 0.431377876 | 0.236137254 | 0.311438682 | 0.338108769 |
| 0.488841815 | 0.230017819 | 0.322847176 | 0.493895019 |
| 0.274555359 | 0.443437678 | 0.417309763 | 0.293520865 |
| 0.109938206 | 0.298940231 | 0.495420981 | 0.283259645 |
| 0.431434978 | 0.464950621 | 0.333230411 | 0.475169659 |
| 0.270600391 | 0.085504622 | 0.490877367 | 0.025767302 |
| 0.490575097 | 0.506479148 | 0.396717435 | 0.440501216 |
| 0.325769727 | 0.472299911 | 0.458648378 | 0.006857771 |
| 0.499769433 | 0.084376927 | 0.397258819 | 0.344420685 |
| 0.343088688 | 0.1450285   | 0.50085335  | 0.523086541 |
| 0.458378187 | 0.391472492 | 0.39519868  | 0.499893142 |
| 0.195440684 | 0.360254363 | 0.382552953 | 0.506072857 |
| 0.277016904 | 0.438256175 | 0.46258251  | 0.441260236 |
| 0.507303394 | 0.419329023 |             |             |
| CDC6        | 0.117542768 | 0.452303283 | 0.111600064 |
| 0.188867781 | 0.291664153 | 0.472339559 | 0.078031233 |
| 0.153033291 | 0.391545598 | 0.394349843 | 0.388195205 |
| 0.02769836  | 0.076587775 | 0.446334924 | 0.067519924 |
| 0.385902259 | 0.039679212 | 0.129934095 | 0.085779023 |
| 0.268103794 | 0.258615677 | 0.356326123 | 0.460010016 |
| 0.264019276 | 0.233438344 | 0.414661326 | 0.396048994 |
| 0.517107671 | 0.33326918  | 0.465922955 | 0.311783539 |
| 0.410263063 | 0.307366136 | 0.411460493 | 0.033580627 |
| 0.443116506 | 0.008187486 | 0.450999805 | 0.261479021 |
| 0.157275239 | 0.349617295 | 0.455092885 | 0.264224025 |
| 0.445445415 | 0.066332441 | 0.329639143 | 0.410186303 |
| 0.387820342 | 0.305818199 | 0.117871401 | 0.470338974 |
| 0.390572359 | 0.399200938 | 0.468343317 | 0.003337107 |
| 0.306446201 | 0.092900751 | 0.227431421 | 0.532937409 |
| 0.233893006 | 0.135667778 | 0.320421243 | 0.288679189 |
| 0.399911864 | 0.371859858 | 0.268112727 | 0.421023729 |
| 0.510354979 | 0.158035054 | 0.455335797 | 0.205527159 |
| 0.423511858 | 0.058647346 | 0.190521283 | 0.134963244 |
| 0.40700062  | 0.211075492 | 0.347470005 | 0.300219421 |
| 0.466011153 | 0.525116528 | 0.264657789 | 0.535367861 |
| 0.076237433 | 0.320943631 | 0.266445366 | 0.298792792 |
| 0.370138165 | 0.103580117 | 0.434017147 | 0.525783173 |
| 0.075851154 | 0.458645284 | 0.417351108 | 0.175788539 |
| 0.46342408  | 0.278412514 | 0.484097556 | 0.165821858 |
| 0.358344378 | 0.325688493 | 0.492577764 | 0.322302864 |
| 0.308325384 | 0.122435107 | 0.529293882 | 0.301133574 |
| 0.313697658 | 0.134146116 | 0.204457071 | 0.458738949 |
| 0.446120355 | 0.50443191  | 0.45041919  | 0.367442555 |
| 0.373899256 | 0.51173878  | 0.442450319 | 0.423170802 |
| 0.242698397 | 0.544354644 | 0.241472285 | 0.049930217 |
| 0.124595326 | 0.092313081 | 0.211147523 | 0.309250771 |
| 0.469504777 | 0.37044664  | 0.243210954 | 0.22977382  |

|             |             |             |             |
|-------------|-------------|-------------|-------------|
| 0.42617688  | 0.523746282 | 0.543123559 | 0.425481853 |
| 0.059421492 | 0.236791167 | 0.387888413 | 0.339862913 |
| 0.386365156 | 0.141183021 | 0.24194004  | 0.535946295 |
| 0.394279851 | 0.433012548 | 0.235746313 | 0.522503138 |
| 0.21919027  | 0.510273056 | 1           | 0.197414314 |
| 0.538003095 | 0.530607456 | 0.499354823 | 0.398194263 |
| 0.497675068 | 0.421138524 | 0.064529302 | 0.394330016 |
| 0.469418989 | 0.014786926 | 0.467811896 | 0.491716626 |
| 0.527714691 | 0.464523804 | 0.502631101 | 0.509002741 |
| 0.532949679 | 0.107881085 | 0.028862808 | 0.270714155 |
| 0.534703177 | 0.416685017 | 0.127379205 | 0.437811184 |
| 0.345309198 | 0.46481019  | 0.441636505 | 0.344590023 |
| 0.498127252 | 0.459812826 | 0.495281138 | 0.420367188 |
| 0.359474893 | 0.33196039  | 0.382111945 | 0.515682509 |
| 0.059621419 | 0.173023418 | 0.097251098 | 0.314114679 |
| 0.471463446 | 0.182239117 | 0.449174967 | 0.341213524 |
| 0.20717282  | 0.408419215 | 0.350194456 | 0.366796199 |
| 0.099479015 | 0.488063092 | 0.215112772 | 0.22609748  |
| 0.04971806  | 0.179347972 | 0.208882305 | 0.183190261 |
| 0.243673875 | 0.275693871 | 0.465539642 | 0.48452626  |
| 0.34806773  | 0.246622455 | 0.460823057 | 0.461633675 |
| 0.39000313  | 0.386922972 | 0.251826556 | 0.016351947 |
| 0.269908634 | 0.340113422 | 0.175990484 | 0.428883223 |
| 0.207531166 | 0.243057427 | 0.390275084 | 0.387712325 |
| 0.368929032 | 0.19699798  | 0.365686788 | 0.437404389 |
| 0.210034248 | 0.31561635  | 0.432324352 | 0.452913959 |
| 0.007435592 | 0.371157993 | 0.462363374 | 0.123533151 |
| 0.344713075 | 0.128454593 | 0.276034132 | 0.447958926 |
| 0.287524841 | 0.197241499 | 0.490134713 | 0.380920071 |
| 0.38881406  | 0.260863427 | 0.51454106  | 0.04497156  |
| 0.337603375 | 0.053731677 | 0.279912414 | 0.428308861 |
| 0.28559014  | 0.285824362 | 0.297911458 | 0.273643014 |
| 0.203473895 | 0.529626119 | 0.418072523 | 0.513531501 |
| 0.384761594 | 0.519645166 | 0.45795588  | 0.4365528   |
| 0.396579758 | 0.373377014 | 0.12929362  | 0.459411585 |
| 0.452823742 | 0.322684288 | 0.127591083 | 0.455812366 |
| 0.396899423 | 0.399040953 | 0.103090531 | 0.481440439 |
| 0.500484206 | 0.516758375 | 0.146587965 | 0.353359693 |
| 0.404509745 | 0.290183758 | 0.42193191  | 0.514205283 |
| 0.376579591 | 0.342618702 | 0.32886649  | 0.373850969 |
| 0.219888075 | 0.183132472 | 0.328883485 | 0.171184732 |
| 0.016820626 | 0.124246973 | 0.106053936 | 0.157264528 |
| 0.147502979 | 0.461538096 | 0.40173905  | 0.520971456 |
| 0.136585266 | 0.420280815 | 0.26221542  | 0.294781274 |
| 0.429655886 | 0.338630403 | 0.384230089 | 0.386187204 |
| 0.272267196 | 0.025282805 | 0.13504481  | 0.530865022 |
| 0.079282664 | 0.230934373 | 0.357631287 | 0.00391529  |
| 0.070484547 | 0.465691241 | 0.141521192 | 0.2180363   |
| 0.443799816 | 0.233159441 | 0.262682539 | 0.39391703  |
| 0.35205896  | 0.124369557 | 0.003789506 | 0.484738465 |
| 0.490642494 | 0.45563736  | 0.49272256  | 0.479554452 |
| 0.420080473 | 0.423120684 | 0.41020255  | 0.457369546 |
| 0.131283053 | 0.142924707 | 0.192205337 | 0.28509886  |
| 0.007630415 | 0.388031491 | 0.296736611 | 0.175532689 |

|             |             |             |             |
|-------------|-------------|-------------|-------------|
| 0.425135696 | 0.314092891 | 0.057148446 | 0.340862598 |
| 0.042964552 | 0.211491055 | 0.342612652 | 0.216196357 |
| 0.326210845 | 0.027108608 | 0.323080023 | 0.327173153 |
| 0.470683509 | 0.378539919 | 0.376509815 | 0.545029252 |
| 0.349314945 | 0.200501145 | 0.315177306 | 0.400436623 |
| 0.091468583 | 0.133949484 | 0.405979024 | 0.079391356 |
| 0.267669173 | 0.46004895  | 0.392387244 | 0.11290812  |
| 0.301743296 | 0.0107191   | 0.404217324 | 0.536301492 |
| 0.512662323 | 0.507380968 | 0.510284678 | 0.267299445 |
| 0.521442251 | 0.110248416 | 0.537060255 | 0.447928359 |
| 0.439409285 | 0.002091407 | 0.005919526 | 0.476730018 |
| 0.403961925 | 0.109733967 | 0.190475725 | 0.467823951 |
| 0.123666065 | 0.225627226 | 0.086241053 | 0.162606826 |
| 0.474079545 | 0.223526932 | 0.151037473 | 0.500293961 |
| 0.250627693 | 0.235068071 | 0.459586844 | 0.131234735 |
| 0.421228637 | 0.07066562  | 0.126702886 | 0.009235995 |
| 0.354196788 | 0.170913699 | 0.511167589 | 0.52644979  |
| 0.489101527 | 0.389313256 | 0.419312185 | 0.391801796 |
| 0.420548863 | 0.172247375 | 0.411219744 | 0.182211891 |
| 0.519355052 | 0.392685005 | 0.338627206 | 0.348150322 |
| 0.485014564 | 0.477116882 | 0.046739312 | 0.412633055 |
| 0.025824162 | 0.001259914 | 0.474388207 | 0.278859837 |
| 0.056787649 | 0.363259261 | 0.28235781  | 0.247969963 |
| 0.227304754 | 0.053774888 | 0.2464694   | 0.220435039 |
| 0.303360331 | 0.358416793 | 0.251695857 | 0.271851145 |
| 0.247026103 | 0.111978769 | 0.205386497 | 0.161039641 |
| 0.2508699   | 0.351746672 | 0.238039618 | 0.031529233 |
| 0.474348011 | 0.427683597 | 0.082382956 | 0.20097333  |
| 0.448494585 | 0.483843901 | 0.048308694 | 0.013203741 |
| 0.299033299 | 0.3034659   | 0.480731886 | 0.526478107 |
| 0.546903149 | 0.506905879 | 0.397575907 | 0.10767742  |
| 0.094738724 | 0.315328741 | 0.270539079 | 0.084206602 |
| 0.517413043 | 0.115187855 | 0.511178495 | 0.285718919 |
| 0.14653017  | 0.247554535 | 0.042391727 | 0.105131127 |
| 0.386913816 | 0.201273452 | 0.171601505 | 0.223406426 |
| 0.309417297 | 0.242541517 | 0.065784937 | 0.217886616 |
| 0.371154778 | 0.168440049 | 0.187895059 | 0.359845965 |
| 0.404005108 | 0.294745448 | 0.434127294 | 0.433245985 |
| 0.177528137 | 0.148510182 | 0.388490607 | 0.391213093 |
| 0.470741246 | 0.445164466 | 0.04778609  | 0.488633019 |
| 0.476368174 | 0.468492786 | 0.527828549 | 0.362977923 |
| 0.120548448 | 0.386424069 | 0.299465969 | 0.330063525 |
| 0.202026746 | 0.470739917 | 0.23981578  | 0.08986624  |
| 0.300754122 | 0.488244471 | 0.438199971 | 0.179009012 |
| 0.460251861 | 0.197398908 | 0.105328716 | 0.450591435 |
| 0.159816572 | 0.125806892 | 0.459926851 | 0.434151141 |
| 0.001978677 | 0.125810463 | 0.464727838 | 0.266385855 |
| 0.512731321 | 0.464509444 | 0.437834336 | 0.298565445 |
| 0.001091828 | 0.408916782 | 0.394007198 | 0.427865409 |
| 0.456740331 | 0.392586674 | 0.178502706 | 0.081182284 |
| 0.294074357 | 0.141946568 | 0.135343109 | 0.436303644 |
| 0.170736086 | 0.455368567 | 0.209310485 | 0.233064013 |
| 0.187186088 | 0.145055811 | 0.240094053 | 0.280841847 |
| 0.12540414  | 0.253134684 | 0.353992159 | 0.395831783 |

|             |             |             |             |
|-------------|-------------|-------------|-------------|
| 0.198657139 | 0.40557949  | 0.43432347  | 0.045382189 |
| 0.350449241 | 0.40302886  | 0.41680271  | 0.002744455 |
| 0.437423752 | 0.010196683 | 0.186054052 | 0.217755901 |
| 0.197014211 | 0.198193835 | 0.239573373 | 0.293377524 |
| 0.38148906  | 0.236145388 | 0.303484097 | 0.250164552 |
| 0.16644015  | 0.251248977 | 0.394091727 | 0.407323007 |
| 0.283674632 | 0.162660378 | 0.145876374 | 0.147062876 |
| 0.068220752 | 0.470400109 | 0.272534066 | 0.128810355 |
| 0.231017033 | 0.391944932 | 0.339709054 | 0.529723046 |
| 0.394505019 | 0.179562886 | 0.33212672  | 0.478557889 |
| 0.280915383 | 0.366355421 | 0.102375664 | 0.446891379 |
| 0.257547877 | 0.203074473 | 0.464385589 | 0.395716832 |
| 0.443646337 | 0.402271751 | 0.273033811 | 0.429496432 |
| 0.384101228 | 0.351132775 | 0.439606685 | 0.089149314 |
| 0.219575061 | 0.172996459 | 0.241685459 | 0.004006638 |
| 0.369773943 | 0.362545069 | 0.472013182 | 0.522596836 |
| 0.285799609 | 0.375234156 | 0.452121689 | 0.121011596 |
| 0.412250608 | 0.234437191 | 0.174189238 | 0.46365497  |
| 0.220584634 | 0.216397348 | 0.28796491  | 0.457758161 |
| 0.439777997 | 0.435547651 | 0.232378712 | 0.270141792 |
| 0.246994278 | 0.264585308 | 0.489879482 | 0.185522851 |
| 0.463870841 | 0.170851972 | 0.43866119  | 0.292696825 |
| 0.207203203 | 0.518124483 | 0.092505887 | 0.525533874 |
| 0.318523068 | 0.179314535 | 0.487227979 | 0.34995625  |
| 0.353243805 | 0.121007318 | 0.179130923 | 0.446625845 |
| 0.231989947 | 0.345795106 | 0.024064594 | 0.058737827 |
| 0.326290181 | 0.321641291 | 0.448773465 | 0.366204261 |
| 0.221634986 | 0.320863015 | 0.161961425 | 0.330636437 |
| 0.526254775 | 0.532387562 | 0.273816419 | 0.257338953 |
| 0.362302339 | 0.122300764 | 0.483564043 | 0.015745482 |
| 0.434731281 | 0.442456984 | 0.424436136 | 0.066112913 |
| 0.026718786 | 0.204841884 | 0.44069336  | 0.110512332 |
| 0.44987918  | 0.223386883 | 0.402210245 | 0.465720147 |
| 0.213731328 | 0.533177781 | 0.112743316 | 0.416828907 |
| 0.069840448 | 0.276100892 | 0.379128594 | 0.392554929 |
| 0.22481829  | 0.27227724  | 0.378346701 | 0.221487636 |
| 0.041522454 | 0.259843899 | 0.001510588 | 0.422067381 |
| 0.512783915 | 0.325520883 | 0.234360787 | 0.374622745 |
| 0.27747019  | 0.386012439 | 0.221509292 | 0.454552774 |
| 0.014716148 | 0.361067241 | 0.214376695 | 0.452622946 |
| 0.277221558 | 0.378154442 | 0.069500219 | 0.288052489 |
| 0.502574204 | 0.275025938 | 0.267670793 | 0.346045396 |
| 0.520867487 | 0.421903061 | 0.237881043 | 0.212135987 |
| 0.423809682 | 0.100671743 | 0.475522981 | 0.526816763 |
| 0.175290317 | 0.197014766 | 0.429476854 | 0.209829131 |
| 0.292899096 | 0.41062407  | 0.44342077  | 0.520971869 |
| 0.062511899 | 0.261461325 | 0.423638138 | 0.458378736 |
| 0.294383922 | 0.141406523 | 0.229946818 | 0.209458235 |
| 0.502310171 | 0.134073721 | 0.234224431 | 0.391761958 |
| 0.200812708 | 0.312844239 | 0.415795742 | 0.166856034 |
| 0.04366867  | 0.175310808 | 0.424082483 | 0.175612257 |
| 0.296007536 | 0.363581047 | 0.215819243 | 0.36938606  |
| 0.148354992 | 0.032541784 | 0.439174411 | 0.015085158 |
| 0.435284644 | 0.408046346 | 0.262741229 | 0.34555322  |

|             |             |             |             |
|-------------|-------------|-------------|-------------|
| 0.23662034  | 0.382487551 | 0.411778093 | 0.002108284 |
| 0.405748349 | 0.051664274 | 0.298024396 | 0.216555972 |
| 0.280458706 | 0.075796232 | 0.475655269 | 0.49469061  |
| 0.358642257 | 0.364278831 | 0.377126937 | 0.471257722 |
| 0.135010929 | 0.35694613  | 0.335584818 | 0.478339901 |
| 0.208674954 | 0.457459591 | 0.444552629 | 0.404020013 |
| 0.423942482 | 0.308537187 |             |             |
| CDC7        | 0.178007914 | 0.192707451 | 0.122847436 |
| 0.258323927 | 0.155799422 | 0.106702785 | 0.184861825 |
| 0.196463231 | 0.159121804 | 0.036658967 | 0.181933723 |
| 0.175141823 | 0.022366881 | 0.262873325 | 0.180625678 |
| 0.142555598 | 0.215347383 | 0.223063903 | 0.034927293 |
| 0.10901835  | 0.159472245 | 0.087601638 | 0.106599587 |
| 0.122686769 | 0.295892958 | 0.143247917 | 0.075024538 |
| 0.236736469 | 0.036070361 | 0.157360869 | 0.032202597 |
| 0.336590846 | 0.153230626 | 0.064405949 | 0.130578292 |
| 0.120032169 | 0.006183815 | 0.32197777  | 0.195381313 |
| 0.071122199 | 0.328123922 | 0.05170633  | 0.239195235 |
| 0.069191961 | 0.165295593 | 0.021305646 | 0.129024236 |
| 0.125571567 | 0.129097868 | 0.120960943 | 0.163360139 |
| 0.077484517 | 0.227670687 | 0.119077353 | 0.009948895 |
| 0.06155031  | 0.009588951 | 0.034296152 | 0.269089204 |
| 0.324072254 | 0.25441544  | 0.034019253 | 0.098386134 |
| 0.105293376 | 0.156115602 | 0.238242115 | 0.06194171  |
| 0.280785363 | 0.046992957 | 0.13813768  | 0.144816283 |
| 0.111360488 | 0.093868782 | 0.320386678 | 0.11761849  |
| 0.083812157 | 0.249610237 | 0.14766275  | 0.076594747 |
| 0.188856506 | 0.323206331 | 0.235163803 | 0.263911632 |
| 0.035883935 | 0.109386762 | 0.114079792 | 0.277683476 |
| 0.173252763 | 0.127543607 | 0.237827753 | 0.316423265 |
| 0.100073628 | 0.079912493 | 0.166835641 | 0.181659849 |
| 0.209847419 | 0.045821698 | 0.072071415 | 0.068401976 |
| 0.159532069 | 0.134292773 | 0.266667891 | 0.303710951 |
| 0.10322568  | 0.159905938 | 0.272243599 | 0.106938167 |
| 0.17353092  | 0.181424223 | 0.134461898 | 0.188773455 |
| 0.17257446  | 0.250801517 | 0.172922166 | 0.226716355 |
| 0.116368825 | 0.274181235 | 0.22263877  | 0.223528653 |
| 0.011962134 | 0.267080567 | 0.239170326 | 0.229639767 |
| 0.119920666 | 0.217848061 | 0.073598642 | 0.304702397 |
| 0.228467445 | 0.206323527 | 0.215281818 | 0.21252997  |
| 0.238499864 | 0.248059143 | 0.255467591 | 0.226304909 |
| 0.187670239 | 0.045801106 | 0.119848002 | 0.126366591 |
| 0.193409062 | 0.197038124 | 0.090144183 | 0.305533999 |
| 0.328066512 | 0.216996415 | 0.151294318 | 0.327772752 |
| 0.129830053 | 0.330823274 | 0.197414314 | 1           |
| 0.311778779 | 0.295428483 | 0.307135942 | 0.162182252 |
| 0.298605253 | 0.165419827 | 0.019973846 | 0.223064551 |
| 0.328388562 | 0.020976778 | 0.20364571  | 0.228894327 |
| 0.257223422 | 0.201378419 | 0.288978843 | 0.252332287 |
| 0.250969883 | 0.185135811 | 0.003168828 | 0.231652197 |
| 0.28573459  | 0.303208137 | 0.1639963   | 0.092817056 |
| 0.14160813  | 0.114039717 | 0.166740897 | 0.090095059 |
| 0.346736088 | 0.231573779 | 0.214237952 | 0.193346062 |
| 0.091509242 | 0.325464438 | 0.077918184 | 0.275539813 |

|             |             |             |             |
|-------------|-------------|-------------|-------------|
| 0.206483505 | 0.187028128 | 0.155458033 | 0.225529868 |
| 0.060417971 | 0.280515512 | 0.112212283 | 0.116030926 |
| 0.308063394 | 0.093287932 | 0.052488456 | 0.169488545 |
| 0.158337062 | 0.111329233 | 0.1998189   | 0.179693835 |
| 0.245654678 | 0.284058154 | 0.229811346 | 0.261027774 |
| 0.191071515 | 0.279535618 | 0.140963246 | 0.248428134 |
| 0.087465329 | 0.263953326 | 0.171657028 | 0.31305755  |
| 0.365021278 | 0.117932516 | 0.273043326 | 0.152117767 |
| 0.124079464 | 0.035696642 | 0.036025176 | 0.088468926 |
| 0.268138049 | 0.167679942 | 0.14930297  | 0.209183184 |
| 0.168758587 | 0.110522837 | 0.093995399 | 0.340715499 |
| 0.204821553 | 0.158115676 | 0.264574491 | 0.097500125 |
| 0.072382178 | 0.189180588 | 0.219741879 | 0.123577846 |
| 0.182217037 | 0.064932101 | 0.062287289 | 0.247501767 |
| 0.056343023 | 0.089085666 | 0.228576364 | 0.192440425 |
| 0.082782803 | 0.220881482 | 0.283788946 | 0.009375643 |
| 0.084844892 | 0.154807053 | 0.302221353 | 0.046882636 |
| 0.260693274 | 0.271520366 | 0.121624967 | 0.140308401 |
| 0.192971713 | 0.277617709 | 0.23942769  | 0.265644326 |
| 0.077458623 | 0.29180973  | 0.223127631 | 0.27999469  |
| 0.210228451 | 0.058064969 | 0.029106279 | 0.229335416 |
| 0.234955762 | 0.064648634 | 0.165430341 | 0.15426803  |
| 0.063027207 | 0.158772742 | 0.119402809 | 0.300221143 |
| 0.341461009 | 0.230679837 | 0.239466869 | 0.235551203 |
| 0.306905779 | 0.240677249 | 0.218865981 | 0.299146743 |
| 0.044304803 | 0.106963093 | 0.116409559 | 0.273844111 |
| 0.288499772 | 0.114393619 | 0.266992014 | 0.031003717 |
| 0.002000255 | 0.140310658 | 0.178997551 | 0.247187958 |
| 0.087035686 | 0.093422968 | 0.172610616 | 0.27363268  |
| 0.246058186 | 0.27553894  | 0.207050142 | 0.172156204 |
| 0.262323015 | 0.084654554 | 0.098544246 | 0.143365772 |
| 0.266654421 | 0.163586484 | 0.285133374 | 0.332903443 |
| 0.105907057 | 0.084291229 | 0.111511829 | 0.033598035 |
| 0.170502277 | 0.141778017 | 0.217045449 | 0.333009791 |
| 0.257896746 | 0.302874502 | 0.251167241 | 0.051898256 |
| 0.251540305 | 0.220250407 | 0.061414599 | 0.237152241 |
| 0.237287951 | 0.228844856 | 0.232240677 | 0.239235728 |
| 0.211090768 | 0.15898322  | 0.212829338 | 0.126404132 |
| 0.22179287  | 0.132105249 | 0.092045305 | 0.179575275 |
| 0.012320498 | 0.260721808 | 0.119199396 | 0.313072077 |
| 0.169016098 | 0.205630378 | 0.191540576 | 0.119158474 |
| 0.160416207 | 0.041830206 | 0.108966231 | 0.159007011 |
| 0.213334722 | 0.125194811 | 0.092729063 | 0.081385625 |
| 0.264979915 | 0.283241614 | 0.063371854 | 0.284668556 |
| 0.211509349 | 0.156345294 | 0.171336091 | 0.21337257  |
| 0.221574259 | 0.0226368   | 0.087690653 | 0.010375967 |
| 0.049446348 | 0.250585091 | 0.074913259 | 0.187121119 |
| 0.272247173 | 0.100647075 | 0.285142143 | 0.295638715 |
| 0.231586186 | 0.270522775 | 0.282612008 | 0.088617384 |
| 0.284071888 | 0.009610536 | 0.263281614 | 0.215881599 |
| 0.057764096 | 0.0188896   | 0.05557271  | 0.235508856 |
| 0.134454752 | 0.132444551 | 0.288523951 | 0.096035879 |
| 0.290438978 | 0.140967588 | 0.17834288  | 0.126115973 |
| 0.141960044 | 0.175248477 | 0.09297     | 0.248794316 |

|             |             |             |             |
|-------------|-------------|-------------|-------------|
| 0.212960086 | 0.22487178  | 0.073321624 | 0.189752869 |
| 0.127157903 | 0.249026771 | 0.172174229 | 0.057536554 |
| 0.199530286 | 0.200503867 | 0.283344898 | 0.25935826  |
| 0.325851157 | 0.192364344 | 0.041715915 | 0.082275603 |
| 0.206772567 | 0.143972492 | 0.057129341 | 0.150279117 |
| 0.242914334 | 0.177809357 | 0.331920992 | 0.327955716 |
| 0.310565403 | 0.300244234 | 0.184021114 | 0.231225664 |
| 0.135344777 | 0.011612496 | 0.111658309 | 0.230229367 |
| 0.014054249 | 0.097514155 | 0.336644549 | 0.085950881 |
| 0.117715713 | 0.170928374 | 0.067508106 | 0.078156604 |
| 0.247269001 | 0.141293382 | 0.124400521 | 0.201219594 |
| 0.134265403 | 0.120584245 | 0.208328428 | 0.188517222 |
| 0.05748159  | 0.262165356 | 0.305231094 | 0.148234649 |
| 0.089293865 | 0.107910559 | 0.211482521 | 0.266152977 |
| 0.265713725 | 0.25191332  | 0.199568777 | 0.174602608 |
| 0.309331286 | 0.113326309 | 0.263441927 | 0.237860398 |
| 0.299786873 | 0.325163973 | 0.336442687 | 0.199259927 |
| 0.209613002 | 0.1923137   | 0.120017027 | 0.194670475 |
| 0.266529707 | 0.133159424 | 0.253470732 | 0.073191159 |
| 0.238949462 | 0.233751935 | 0.241318603 | 0.202628308 |
| 0.105209101 | 0.279728888 | 0.237786194 | 0.200792547 |
| 0.161355589 | 0.073530578 | 0.178474958 | 0.268483121 |
| 0.259189646 | 0.059411881 | 0.269072687 | 0.103543889 |
| 0.209005801 | 0.024622386 | 0.169521401 | 0.352423205 |
| 0.25051231  | 0.161936297 | 0.132863128 | 0.172671416 |
| 0.187826033 | 0.069525433 | 0.152789552 | 0.193838015 |
| 0.26386979  | 0.144011403 | 0.269559999 | 0.291051283 |
| 0.208186332 | 0.12737714  | 0.059632682 | 0.150360809 |
| 0.227335787 | 0.10788945  | 0.164032251 | 0.199901363 |
| 0.284374727 | 0.308135146 | 0.230085199 | 0.269397142 |
| 0.098492411 | 0.133272176 | 0.118966545 | 0.196996206 |
| 0.0939491   | 0.225018063 | 0.053508913 | 0.174400454 |
| 0.022022316 | 0.039196443 | 0.249743331 | 0.200095614 |
| 0.299533463 | 0.266340749 | 0.332969071 | 0.111531383 |
| 0.001013311 | 0.138539183 | 0.206386638 | 0.121437824 |
| 0.217311264 | 0.243289907 | 0.069671667 | 0.279226767 |
| 0.348033805 | 0.166907141 | 0.245760719 | 0.088585274 |
| 0.044363511 | 0.143164479 | 0.316113104 | 0.165913269 |
| 0.200869365 | 0.123088965 | 0.069175277 | 0.211349202 |
| 0.041195354 | 0.346526945 | 0.319183349 | 0.037083373 |
| 0.06284023  | 0.240262443 | 0.211527015 | 0.162864322 |
| 0.086813356 | 0.224273148 | 0.248935275 | 0.033293066 |
| 0.187657123 | 0.136910742 | 0.213327161 | 0.236605947 |
| 0.225646219 | 0.183455182 | 0.226732283 | 0.151896371 |
| 0.162816478 | 0.208523526 | 0.215740532 | 0.305971291 |
| 0.255561937 | 0.171793712 | 0.14188417  | 0.111594646 |
| 0.169650727 | 0.249079508 | 0.215076234 | 0.212135833 |
| 0.24681272  | 0.209997091 | 0.344529259 | 0.173565597 |
| 0.258230871 | 0.097400891 | 0.362288571 | 0.235582681 |
| 0.299648524 | 0.173785481 | 0.117055581 | 0.218873096 |
| 0.025934499 | 0.088146785 | 0.134833684 | 0.125109329 |
| 0.222664535 | 0.138614595 | 0.082625879 | 0.160638853 |
| 0.139333624 | 0.356531477 | 0.330265641 | 0.284962066 |
| 0.134513612 | 0.07893607  | 0.046800502 | 0.290026786 |



|             |             |             |             |
|-------------|-------------|-------------|-------------|
| 0.243732372 | 0.225638034 | 0.141989573 | 0.075081809 |
| 0.224366938 | 0.146672123 | 0.227153897 | 0.274085822 |
| 0.051159246 | 0.314773927 | 0.058236782 | 0.239162364 |
| 0.03976475  | 0.223610947 | 0.286555289 | 0.159055776 |
| 0.039864369 | 0.221315213 | 0.175922668 | 0.088130935 |
| 0.181009553 | 0.141806798 | 0.102138528 | 0.14494805  |
| 0.173073557 | 0.212111578 | 0.270960943 | 0.146127421 |
| 0.100528222 | 0.147045313 | 0.08556388  | 0.1819026   |
| 0.19396518  | 0.247813664 | 0.172389318 | 0.251781714 |
| 0.122905119 | 0.226566387 | 0.348477005 | 0.122326044 |
| 0.123067745 | 0.215493129 | 0.042641235 | 0.069615814 |
| 0.168203492 | 0.064361912 | 0.001534275 | 0.040370943 |
| 0.301646554 | 0.059177428 | 0.151723731 | 0.187311268 |
| 0.116842998 | 0.277740535 | 0.027513758 | 0.131320615 |
| 0.236072164 | 0.281259343 | 0.205332346 | 0.317260605 |
| 0.244853358 | 0.261107017 | 0.136786629 | 0.005136226 |
| 0.128520865 | 0.095916301 | 0.059657787 | 0.197149745 |
| 0.152645489 | 0.050897597 | 0.1311683   | 0.117482939 |
| 0.251976757 | 0.037996579 | 0.098480088 | 0.167321634 |
| 0.216868882 | 0.294360624 | 0.22291203  | 0.231083008 |
| 0.078117038 | 0.236459899 | 0.076816242 | 0.071841081 |
| 0.196157251 | 0.098414527 | 0.271336562 | 0.091460348 |
| 0.21929893  | 0.176485318 | 0.023611249 | 0.353109209 |
| 0.261742282 | 0.08140364  | 0.295299931 | 0.033074939 |
| 0.304124968 | 0.230400237 | 0.113432421 | 0.074129088 |
| 0.163890026 | 0.145007053 | 0.244858633 | 0.250389379 |
| 0.053042519 | 0.106097008 | 0.246700878 | 0.08992561  |
| 0.290219893 | 0.114143117 | 0.274780166 | 0.069374782 |
| 0.240482304 | 0.182966598 | 0.184298264 | 0.117092015 |
| 0.101470111 | 0.184251773 | 0.059864462 | 0.285641669 |
| 0.247820927 | 0.101150044 | 0.238281579 | 0.247204018 |
| 0.073895617 | 0.232246632 | 0.089074791 | 0.26699588  |
| 0.221014325 | 0.30732163  | 0.199989496 | 0.241985549 |
| 0.323393839 | 0.094432281 | 0.08592836  | 0.169969921 |
| 0.245430152 | 0.256543872 | 0.081392068 | 0.257906928 |
| 0.076677514 | 0.240260103 | 0.082857918 | 0.161686337 |
| 0.217852872 | 0.15957853  | 0.112576861 | 0.249443932 |
| 0.228381865 | 0.146074927 | 0.134214499 | 0.352472656 |
| 0.259885975 | 0.216425883 | 0.339478395 | 0.014098263 |
| 0.142518636 | 0.1996496   | 0.225793081 | 0.108039283 |
| 0.31145192  | 0.157152946 | 0.119073461 | 0.043664558 |
| 0.233275679 | 0.050792967 | 0.098372921 | 0.183770839 |
| 0.065340193 | 0.18058     | 0.279920876 | 0.277570323 |
| 0.193838335 | 0.056283064 | 0.056587964 | 0.253699894 |
| 0.05863438  | 0.042112371 | 0.059280148 | 0.136804119 |
| 0.064333086 | 0.056725514 | 0.06490725  | 0.075135668 |
| 0.215384991 | 0.139640775 |             |             |
| CDCA2       | 0.201870985 | 0.517390987 | 0.179837004 |
| 0.276461121 | 0.365374758 | 0.5235992   | 0.162520005 |
| 0.260775321 | 0.473779036 | 0.387119659 | 0.468623183 |
| 0.070859504 | 0.085799613 | 0.525235498 | 0.147001102 |
| 0.447894225 | 0.100755866 | 0.236056247 | 0.123405634 |
| 0.361610143 | 0.336913798 | 0.388632075 | 0.521403633 |
| 0.342829783 | 0.338518263 | 0.50181125  | 0.428121102 |

|             |             |             |             |
|-------------|-------------|-------------|-------------|
| 0.538035879 | 0.298667673 | 0.515924788 | 0.28094312  |
| 0.487249652 | 0.373756508 | 0.424876869 | 0.077028347 |
| 0.508585751 | 0.01482581  | 0.480270125 | 0.359206735 |
| 0.18285811  | 0.46009199  | 0.458611678 | 0.367704847 |
| 0.479355405 | 0.130127785 | 0.272535483 | 0.464687836 |
| 0.473145457 | 0.407152559 | 0.193636443 | 0.532471188 |
| 0.449182481 | 0.495908117 | 0.503590542 | 0.006336443 |
| 0.321579696 | 0.080442108 | 0.226391072 | 0.530249868 |
| 0.35188678  | 0.24157463  | 0.314219038 | 0.387599305 |
| 0.457605822 | 0.451341647 | 0.38545523  | 0.450315337 |
| 0.534955599 | 0.181430505 | 0.500917523 | 0.273979093 |
| 0.501123624 | 0.121295852 | 0.308036999 | 0.221451695 |
| 0.457289005 | 0.324952845 | 0.421474635 | 0.342501312 |
| 0.516231984 | 0.519617297 | 0.386816001 | 0.514698142 |
| 0.107217316 | 0.374574891 | 0.337194228 | 0.410451075 |
| 0.459448558 | 0.19614322  | 0.513804295 | 0.522688819 |
| 0.148519359 | 0.48336567  | 0.49260195  | 0.274200199 |
| 0.534642319 | 0.307393128 | 0.494172904 | 0.191615688 |
| 0.425066352 | 0.393228042 | 0.495544611 | 0.435085832 |
| 0.378138121 | 0.206498586 | 0.510591793 | 0.348762775 |
| 0.388919733 | 0.224974027 | 0.280862445 | 0.514592935 |
| 0.515630082 | 0.541031476 | 0.514283597 | 0.465766392 |
| 0.426653987 | 0.537621412 | 0.524062371 | 0.509131397 |
| 0.196161715 | 0.531518326 | 0.356571143 | 0.115800734 |
| 0.206210045 | 0.183476353 | 0.280070511 | 0.42687236  |
| 0.535882795 | 0.475659845 | 0.35893711  | 0.336977531 |
| 0.501455776 | 0.508856797 | 0.527466599 | 0.510307505 |
| 0.128717078 | 0.266290565 | 0.440759264 | 0.437099737 |
| 0.474328481 | 0.24789858  | 0.285920608 | 0.522054859 |
| 0.497257567 | 0.505658466 | 0.344467698 | 0.522489191 |
| 0.328465616 | 0.524141887 | 0.538003095 | 0.311778779 |
| 1           | 0.51466957  | 0.526022066 | 0.45096494  |
| 0.517869952 | 0.506174003 | 0.089170827 | 0.489314232 |
| 0.513768289 | 0.019486287 | 0.526601601 | 0.528464172 |
| 0.530362374 | 0.521444704 | 0.519032004 | 0.53444961  |
| 0.529816377 | 0.19992012  | 0.032080848 | 0.370918571 |
| 0.523798363 | 0.513480542 | 0.224276965 | 0.468526242 |
| 0.413641374 | 0.534642638 | 0.505117719 | 0.366794603 |
| 0.506851394 | 0.533766353 | 0.5337394   | 0.503947825 |
| 0.438170663 | 0.444250383 | 0.406424085 | 0.502127712 |
| 0.1326828   | 0.268818963 | 0.168370693 | 0.425917709 |
| 0.472673647 | 0.29757631  | 0.521407327 | 0.414713803 |
| 0.325323364 | 0.491041282 | 0.35684288  | 0.43109034  |
| 0.17104728  | 0.521104178 | 0.33263462  | 0.338026636 |
| 0.118505641 | 0.283912299 | 0.304688108 | 0.281219854 |
| 0.342749528 | 0.342485325 | 0.51153797  | 0.527879853 |
| 0.416624956 | 0.354810618 | 0.526995221 | 0.51535046  |
| 0.478264786 | 0.434626065 | 0.370266045 | 0.038591771 |
| 0.334881422 | 0.33977552  | 0.188309165 | 0.460811583 |
| 0.309330435 | 0.338810163 | 0.462474691 | 0.457058205 |
| 0.463060029 | 0.298445198 | 0.421840332 | 0.484721886 |
| 0.311139882 | 0.387244203 | 0.514226326 | 0.499652637 |
| 0.021873628 | 0.471605359 | 0.531678058 | 0.191584207 |
| 0.446748676 | 0.151701384 | 0.282141609 | 0.524232232 |

|             |             |             |             |
|-------------|-------------|-------------|-------------|
| 0.3124897   | 0.256045208 | 0.531251835 | 0.452227394 |
| 0.426439637 | 0.348136945 | 0.523215246 | 0.049115461 |
| 0.396478643 | 0.096452273 | 0.389349638 | 0.439430468 |
| 0.405470782 | 0.400328037 | 0.356625411 | 0.34816047  |
| 0.29455114  | 0.527706104 | 0.511384549 | 0.537220702 |
| 0.418995278 | 0.523841752 | 0.524326614 | 0.523001371 |
| 0.49510719  | 0.403169459 | 0.13436976  | 0.530702381 |
| 0.526226853 | 0.363226237 | 0.209327778 | 0.504533348 |
| 0.434870587 | 0.460603125 | 0.170958533 | 0.525129048 |
| 0.507502604 | 0.510345038 | 0.24723445  | 0.443017165 |
| 0.502379439 | 0.401781494 | 0.506442419 | 0.517072669 |
| 0.389698827 | 0.403769885 | 0.391396842 | 0.465460602 |
| 0.337813855 | 0.250527801 | 0.441053098 | 0.179652004 |
| 0.01198947  | 0.21440194  | 0.19063647  | 0.258424397 |
| 0.188117826 | 0.48604366  | 0.479148327 | 0.532340209 |
| 0.242468154 | 0.513087574 | 0.377627131 | 0.373515578 |
| 0.510311699 | 0.397187405 | 0.422379993 | 0.450982119 |
| 0.394017424 | 0.058064592 | 0.218533996 | 0.525572779 |
| 0.142916408 | 0.265373162 | 0.453195232 | 0.008252055 |
| 0.142861217 | 0.510603209 | 0.23139857  | 0.327401983 |
| 0.508281796 | 0.339720968 | 0.376708143 | 0.416956935 |
| 0.450375951 | 0.224971286 | 0.010241366 | 0.522130444 |
| 0.508676549 | 0.4984339   | 0.50848261  | 0.494719023 |
| 0.497371085 | 0.494056271 | 0.489099301 | 0.52408217  |
| 0.236480431 | 0.236633935 | 0.236277421 | 0.384455375 |
| 0.013468188 | 0.481318472 | 0.381073902 | 0.288225589 |
| 0.487493613 | 0.424590599 | 0.12127934  | 0.40500633  |
| 0.084525511 | 0.210438746 | 0.432397845 | 0.324879949 |
| 0.416928735 | 0.067100673 | 0.336928325 | 0.36521685  |
| 0.51383825  | 0.482658825 | 0.395572259 | 0.531529019 |
| 0.443946416 | 0.288637686 | 0.404277321 | 0.478338796 |
| 0.183498573 | 0.149327446 | 0.478914225 | 0.063190148 |
| 0.289154216 | 0.495345729 | 0.440525115 | 0.200241095 |
| 0.416662917 | 0.030019479 | 0.501111777 | 0.529312017 |
| 0.518909222 | 0.528506128 | 0.538253391 | 0.301109502 |
| 0.535828822 | 0.097444125 | 0.536049099 | 0.526391758 |
| 0.446417999 | 0.004436892 | 0.016122219 | 0.53250359  |
| 0.461097549 | 0.178086707 | 0.308202086 | 0.489271788 |
| 0.222099379 | 0.325198053 | 0.171099336 | 0.221565308 |
| 0.527329187 | 0.310208163 | 0.203025818 | 0.513576652 |
| 0.365818504 | 0.351278754 | 0.501711628 | 0.222741398 |
| 0.476864123 | 0.148244325 | 0.219615505 | 0.017417596 |
| 0.439999014 | 0.261228616 | 0.502447999 | 0.532729991 |
| 0.519685534 | 0.462842533 | 0.398036793 | 0.428194273 |
| 0.498749427 | 0.248668431 | 0.418790064 | 0.270235252 |
| 0.533845668 | 0.463108108 | 0.450192917 | 0.458539681 |
| 0.519662919 | 0.524286318 | 0.109917784 | 0.496891547 |
| 0.050976561 | 0.003544661 | 0.527144845 | 0.39530362  |
| 0.080459169 | 0.419940133 | 0.403154017 | 0.341190788 |
| 0.32449418  | 0.105999599 | 0.280641001 | 0.262556571 |
| 0.412937669 | 0.442269933 | 0.31392203  | 0.385043048 |
| 0.331943535 | 0.173159863 | 0.313838193 | 0.270263347 |
| 0.311885406 | 0.457308395 | 0.342652765 | 0.082147104 |
| 0.505768354 | 0.468886645 | 0.164003131 | 0.315857415 |

|             |             |             |             |
|-------------|-------------|-------------|-------------|
| 0.52866757  | 0.536001718 | 0.116012067 | 0.036904371 |
| 0.416895534 | 0.389605934 | 0.525176484 | 0.535641448 |
| 0.526423551 | 0.517859435 | 0.471059244 | 0.195031473 |
| 0.180567839 | 0.413372645 | 0.333654755 | 0.160145889 |
| 0.53411145  | 0.193111691 | 0.52699021  | 0.319522536 |
| 0.255371394 | 0.364989094 | 0.098850086 | 0.203631228 |
| 0.423510109 | 0.319031254 | 0.276335493 | 0.320171933 |
| 0.39874978  | 0.277728269 | 0.144199667 | 0.338416563 |
| 0.476532723 | 0.193684084 | 0.305746183 | 0.454942531 |
| 0.499448009 | 0.298740097 | 0.492303789 | 0.495536365 |
| 0.283215958 | 0.253492226 | 0.459917903 | 0.473415478 |
| 0.530116303 | 0.461935275 | 0.077625013 | 0.523559504 |
| 0.523064763 | 0.512213243 | 0.528968688 | 0.464182377 |
| 0.215958793 | 0.438352906 | 0.339152041 | 0.411159446 |
| 0.320324232 | 0.526915206 | 0.353457748 | 0.17597723  |
| 0.416528383 | 0.491153981 | 0.520343715 | 0.285871671 |
| 0.499690361 | 0.289501272 | 0.178671017 | 0.519220574 |
| 0.20525579  | 0.212587705 | 0.467230319 | 0.498081328 |
| 0.005620637 | 0.140621513 | 0.50823976  | 0.366411838 |
| 0.510759915 | 0.525882145 | 0.510576858 | 0.399903126 |
| 0.001904994 | 0.461550433 | 0.473902878 | 0.483995625 |
| 0.529625626 | 0.493619376 | 0.252104242 | 0.166246663 |
| 0.412754206 | 0.220547936 | 0.234101319 | 0.472562278 |
| 0.19262873  | 0.52227804  | 0.329291531 | 0.347892492 |
| 0.293623025 | 0.229522304 | 0.269056167 | 0.394134563 |
| 0.163466342 | 0.3740928   | 0.461507808 | 0.392282423 |
| 0.213445711 | 0.49342217  | 0.514342197 | 0.100116989 |
| 0.394346265 | 0.491527828 | 0.506614556 | 0.00747195  |
| 0.498316114 | 0.032843683 | 0.285838663 | 0.31720624  |
| 0.303550623 | 0.301894462 | 0.341289621 | 0.374224764 |
| 0.47536026  | 0.356963819 | 0.403994485 | 0.365890709 |
| 0.265294391 | 0.371074655 | 0.46486044  | 0.492275145 |
| 0.356672489 | 0.269079531 | 0.233943496 | 0.229417289 |
| 0.134061007 | 0.529876886 | 0.388954211 | 0.20807456  |
| 0.347501932 | 0.47180005  | 0.455085579 | 0.526834385 |
| 0.493267308 | 0.261347564 | 0.423281862 | 0.543141825 |
| 0.268845795 | 0.41331388  | 0.181256023 | 0.519316229 |
| 0.373603025 | 0.261232765 | 0.507069236 | 0.480708675 |
| 0.503195525 | 0.478998839 | 0.38811265  | 0.508107751 |
| 0.463874736 | 0.418510129 | 0.425008846 | 0.169045954 |
| 0.335073613 | 0.281287016 | 0.311672644 | 0.012868746 |
| 0.470290285 | 0.446544276 | 0.53607912  | 0.523753884 |
| 0.302378214 | 0.482024788 | 0.443882118 | 0.21343235  |
| 0.383727727 | 0.325059259 | 0.285547514 | 0.520013444 |
| 0.220944096 | 0.330678815 | 0.374509165 | 0.502552339 |
| 0.504145261 | 0.492943293 | 0.306177836 | 0.381405281 |
| 0.362965112 | 0.376157913 | 0.493887626 | 0.284956356 |
| 0.495101992 | 0.232478288 | 0.479499117 | 0.384185486 |
| 0.309506808 | 0.531110179 | 0.175029515 | 0.534077299 |
| 0.39181141  | 0.281137078 | 0.502121956 | 0.446445849 |
| 0.448988582 | 0.203662409 | 0.190901673 | 0.49054856  |
| 0.341687376 | 0.366194061 | 0.019890098 | 0.077133167 |
| 0.431967795 | 0.381657676 | 0.506194763 | 0.460407872 |
| 0.290964022 | 0.427547886 | 0.167289937 | 0.437046783 |

|             |             |             |             |
|-------------|-------------|-------------|-------------|
| 0.514109097 | 0.515821585 | 0.36249898  | 0.380067375 |
| 0.467017337 | 0.219481191 | 0.537040329 | 0.023597768 |
| 0.48195008  | 0.465395229 | 0.441636554 | 0.143026675 |
| 0.07224841  | 0.22021091  | 0.498023875 | 0.191552925 |
| 0.51293429  | 0.217760456 | 0.463540978 | 0.523579401 |
| 0.327287421 | 0.518988467 | 0.20374814  | 0.493887743 |
| 0.135825339 | 0.395453285 | 0.419997837 | 0.441676106 |
| 0.299259995 | 0.323996493 | 0.472708974 | 0.259927018 |
| 0.10208416  | 0.343973663 | 0.006272991 | 0.473540851 |
| 0.495518881 | 0.371884301 | 0.350150487 | 0.364506127 |
| 0.390935604 | 0.483193033 | 0.294337638 | 0.47731068  |
| 0.040929753 | 0.416944643 | 0.332213619 | 0.532881804 |
| 0.271817293 | 0.450063019 | 0.143121023 | 0.350222553 |
| 0.498297074 | 0.33776294  | 0.385283046 | 0.363784493 |
| 0.530745043 | 0.501721019 | 0.333150092 | 0.288132363 |
| 0.47360763  | 0.183695717 | 0.485696004 | 0.523347523 |
| 0.279946712 | 0.242909298 | 0.501430114 | 0.319046647 |
| 0.332743245 | 0.502996811 | 0.475352562 | 0.516742578 |
| 0.131416822 | 0.381314947 | 0.498813151 | 0.519048885 |
| 0.408463095 | 0.195098988 | 0.267446993 | 0.293553433 |
| 0.52260331  | 0.213261326 | 0.291394608 | 0.496403527 |
| 0.234302359 | 0.421320136 | 0.462065034 | 0.247721958 |
| 0.09414101  | 0.283475408 | 0.47635466  | 0.289830568 |
| 0.404998451 | 0.44171038  | 0.294255258 | 0.477304839 |
| 0.228247079 | 0.072166846 | 0.498729688 | 0.018908637 |
| 0.509426384 | 0.479791017 | 0.377725051 | 0.413167322 |
| 0.344833211 | 0.477493687 | 0.489143406 | 0.006931999 |
| 0.491909537 | 0.074596824 | 0.377225594 | 0.292456444 |
| 0.312500895 | 0.152624959 | 0.521823379 | 0.525169392 |
| 0.464548136 | 0.393157278 | 0.376745131 | 0.520251755 |
| 0.160394356 | 0.352700406 | 0.365739567 | 0.531481554 |
| 0.236782571 | 0.461611869 | 0.465372543 | 0.421547454 |
| 0.514380644 | 0.416780137 |             |             |
| CDCA3       | 0.214224103 | 0.512578997 | 0.201462726 |
| 0.264073989 | 0.324181174 | 0.515834229 | 0.159887937 |
| 0.254439107 | 0.464611238 | 0.376712156 | 0.442790801 |
| 0.074122606 | 0.070927363 | 0.507140904 | 0.144461447 |
| 0.407857147 | 0.09660083  | 0.227529226 | 0.113983475 |
| 0.340108301 | 0.296174664 | 0.362230064 | 0.524273131 |
| 0.301963746 | 0.350068136 | 0.491591843 | 0.394675494 |
| 0.524540984 | 0.285688767 | 0.492024917 | 0.27196504  |
| 0.473181255 | 0.33374492  | 0.395293856 | 0.085006563 |
| 0.486336693 | 0.010572527 | 0.472219608 | 0.320107026 |
| 0.153838138 | 0.45441578  | 0.458610979 | 0.341215111 |
| 0.456463849 | 0.14073106  | 0.279284747 | 0.428178461 |
| 0.454802127 | 0.380868242 | 0.214090778 | 0.510152764 |
| 0.417195224 | 0.49289258  | 0.498960836 | 0.006808008 |
| 0.28931296  | 0.067072165 | 0.197284439 | 0.523897437 |
| 0.341951697 | 0.228402433 | 0.284135266 | 0.379369646 |
| 0.428634696 | 0.416919451 | 0.364285901 | 0.42394676  |
| 0.522317085 | 0.152149284 | 0.472749283 | 0.26289422  |
| 0.480049311 | 0.130045287 | 0.301699437 | 0.234128957 |
| 0.424237574 | 0.303291665 | 0.393116907 | 0.300259898 |
| 0.512694115 | 0.51216481  | 0.367283118 | 0.510456113 |

|             |             |             |             |
|-------------|-------------|-------------|-------------|
| 0.084677608 | 0.332937183 | 0.295932063 | 0.378264993 |
| 0.430637822 | 0.188706586 | 0.486602657 | 0.507994149 |
| 0.155414028 | 0.472548363 | 0.465683045 | 0.286390397 |
| 0.528148205 | 0.274374923 | 0.484211548 | 0.165860525 |
| 0.384145433 | 0.349469198 | 0.489563181 | 0.416665724 |
| 0.346154441 | 0.221725713 | 0.515821735 | 0.308030023 |
| 0.360570854 | 0.236102231 | 0.236775374 | 0.487530736 |
| 0.48594664  | 0.52722775  | 0.498493553 | 0.43761876  |
| 0.385143477 | 0.523523657 | 0.497732155 | 0.497868651 |
| 0.193616203 | 0.521258865 | 0.349835349 | 0.113395933 |
| 0.222966512 | 0.174234367 | 0.243728528 | 0.409027413 |
| 0.516208197 | 0.459821192 | 0.350167158 | 0.300690651 |
| 0.469963198 | 0.511746559 | 0.516574804 | 0.487229697 |
| 0.133295685 | 0.229471356 | 0.397771984 | 0.435281098 |
| 0.445796896 | 0.245272868 | 0.2470618   | 0.520363177 |
| 0.485177161 | 0.474987107 | 0.350045008 | 0.520958713 |
| 0.313197808 | 0.507619632 | 0.530607456 | 0.295428483 |
| 0.51466957  | 1           | 0.504473309 | 0.414800264 |
| 0.514042304 | 0.493354612 | 0.082297309 | 0.468428865 |
| 0.495622417 | 0.01611392  | 0.505137929 | 0.505472222 |
| 0.52168437  | 0.493441808 | 0.49603358  | 0.516455515 |
| 0.523568815 | 0.205759133 | 0.025829937 | 0.333214747 |
| 0.515956826 | 0.494770691 | 0.203818158 | 0.435580027 |
| 0.375941403 | 0.526053907 | 0.481914333 | 0.34483075  |
| 0.490479204 | 0.513592311 | 0.516828191 | 0.483218111 |
| 0.420773421 | 0.441225324 | 0.369985566 | 0.506497159 |
| 0.131626248 | 0.279232416 | 0.186791844 | 0.403651204 |
| 0.472167025 | 0.27538812  | 0.509207057 | 0.377971133 |
| 0.30651048  | 0.485062393 | 0.327187998 | 0.39283136  |
| 0.189867142 | 0.502036716 | 0.32564084  | 0.333275352 |
| 0.112322285 | 0.293138511 | 0.286458729 | 0.270052466 |
| 0.311607489 | 0.356879485 | 0.488113999 | 0.506699662 |
| 0.380475489 | 0.360712946 | 0.507591749 | 0.496299324 |
| 0.455370888 | 0.395768647 | 0.3611412   | 0.036399012 |
| 0.292628052 | 0.311159823 | 0.158178136 | 0.430301814 |
| 0.322768629 | 0.307080129 | 0.424841287 | 0.422107253 |
| 0.465534834 | 0.30544466  | 0.382485475 | 0.481195377 |
| 0.322897072 | 0.358272157 | 0.486943651 | 0.475987342 |
| 0.02461711  | 0.443976952 | 0.507938991 | 0.158250772 |
| 0.42704264  | 0.131946918 | 0.258587818 | 0.497955703 |
| 0.278936751 | 0.220051292 | 0.512984642 | 0.417393941 |
| 0.418290064 | 0.364476788 | 0.503881417 | 0.039433713 |
| 0.358595673 | 0.082805454 | 0.357663959 | 0.433152997 |
| 0.385119157 | 0.371266852 | 0.319293167 | 0.308658378 |
| 0.313590599 | 0.517160191 | 0.497003919 | 0.520970676 |
| 0.378470833 | 0.504427582 | 0.498434827 | 0.503740103 |
| 0.474570795 | 0.367959716 | 0.112651137 | 0.504861069 |
| 0.49959878  | 0.326860229 | 0.227891879 | 0.479896309 |
| 0.401399882 | 0.422366546 | 0.141384955 | 0.503035199 |
| 0.497789482 | 0.511569901 | 0.230063344 | 0.406290543 |
| 0.481149968 | 0.394063059 | 0.483062222 | 0.498897602 |
| 0.363014282 | 0.362110299 | 0.346085527 | 0.430442444 |
| 0.329746297 | 0.212634064 | 0.431777199 | 0.153671431 |
| 0.011457564 | 0.225395287 | 0.200734362 | 0.233091502 |

|             |             |             |             |
|-------------|-------------|-------------|-------------|
| 0.156538577 | 0.465859748 | 0.442323143 | 0.516358917 |
| 0.234137851 | 0.50371569  | 0.364608237 | 0.334143409 |
| 0.498081228 | 0.362480905 | 0.38942672  | 0.41775069  |
| 0.380865816 | 0.054377043 | 0.205586523 | 0.518050774 |
| 0.160317039 | 0.233226871 | 0.441293907 | 0.007812668 |
| 0.148013135 | 0.504231772 | 0.245682525 | 0.334363263 |
| 0.482642093 | 0.348692404 | 0.370334159 | 0.394428926 |
| 0.423133904 | 0.225411432 | 0.009725933 | 0.502613542 |
| 0.495908079 | 0.484402337 | 0.49684957  | 0.491373596 |
| 0.474411556 | 0.474317647 | 0.454397333 | 0.527619727 |
| 0.228302343 | 0.246452263 | 0.195677568 | 0.344290659 |
| 0.015047874 | 0.454805151 | 0.347537994 | 0.284696907 |
| 0.457726383 | 0.399046516 | 0.127840312 | 0.370542057 |
| 0.090411597 | 0.182400903 | 0.417152878 | 0.2975127   |
| 0.381300582 | 0.073772287 | 0.323748228 | 0.323262047 |
| 0.516638764 | 0.4773405   | 0.359513591 | 0.519733959 |
| 0.41539297  | 0.306305301 | 0.362352317 | 0.451207564 |
| 0.179292132 | 0.13171881  | 0.462919748 | 0.064003157 |
| 0.293695853 | 0.488428514 | 0.407506599 | 0.201674041 |
| 0.391707833 | 0.033949944 | 0.496248999 | 0.517118005 |
| 0.51978173  | 0.506201223 | 0.524873758 | 0.266902106 |
| 0.523710416 | 0.082077322 | 0.52140794  | 0.516597386 |
| 0.424790023 | 0.004746071 | 0.016068486 | 0.508210422 |
| 0.421587673 | 0.201283598 | 0.297962452 | 0.487948538 |
| 0.208120964 | 0.337886756 | 0.17318371  | 0.184821493 |
| 0.510673846 | 0.276660157 | 0.173624281 | 0.510221819 |
| 0.332915822 | 0.325793317 | 0.491485914 | 0.234905434 |
| 0.447826727 | 0.145830242 | 0.227875245 | 0.0164548   |
| 0.406187239 | 0.278251895 | 0.508525811 | 0.522779516 |
| 0.503696372 | 0.425208035 | 0.382528077 | 0.424219045 |
| 0.476475481 | 0.275487594 | 0.395864076 | 0.29179523  |
| 0.528121102 | 0.423650578 | 0.428690603 | 0.449884953 |
| 0.498465654 | 0.511419819 | 0.112443516 | 0.46278616  |
| 0.055296404 | 0.002959658 | 0.52154146  | 0.379445902 |
| 0.067524587 | 0.378564601 | 0.387242888 | 0.315887117 |
| 0.299363232 | 0.115329478 | 0.240702534 | 0.221103325 |
| 0.377380054 | 0.403685312 | 0.274149374 | 0.373884549 |
| 0.289821509 | 0.138259232 | 0.28999486  | 0.254254027 |
| 0.288908817 | 0.451775933 | 0.352580625 | 0.08442303  |
| 0.480183265 | 0.434517718 | 0.167939232 | 0.315723407 |
| 0.505112393 | 0.514619335 | 0.107412035 | 0.034059929 |
| 0.409301537 | 0.353513212 | 0.502658025 | 0.527920598 |
| 0.52261689  | 0.499060165 | 0.465844765 | 0.169017229 |
| 0.184684895 | 0.375172936 | 0.29201718  | 0.134137517 |
| 0.521439704 | 0.209512711 | 0.523129487 | 0.280508303 |
| 0.252425631 | 0.337839928 | 0.096398092 | 0.199880885 |
| 0.390518483 | 0.310020291 | 0.24722709  | 0.331325663 |
| 0.360320468 | 0.241450132 | 0.144540204 | 0.320329738 |
| 0.454405573 | 0.156075253 | 0.294173334 | 0.44341954  |
| 0.487152602 | 0.28983037  | 0.457379929 | 0.47866425  |
| 0.290422298 | 0.251345031 | 0.459397619 | 0.448654673 |
| 0.507409943 | 0.442143885 | 0.085244467 | 0.519404648 |
| 0.504221865 | 0.485439287 | 0.52468526  | 0.435985173 |
| 0.221635953 | 0.403348028 | 0.300270237 | 0.368262704 |

|             |             |             |             |
|-------------|-------------|-------------|-------------|
| 0.305100462 | 0.521287317 | 0.327556619 | 0.180679532 |
| 0.405332627 | 0.48694127  | 0.503678438 | 0.267144418 |
| 0.481830407 | 0.308395611 | 0.195120895 | 0.505347061 |
| 0.16665042  | 0.214787962 | 0.466256358 | 0.472456517 |
| 0.004509756 | 0.116833036 | 0.483827514 | 0.353716475 |
| 0.496893342 | 0.50014536  | 0.496970154 | 0.388942605 |
| 0.001066855 | 0.422243844 | 0.442669889 | 0.44776709  |
| 0.51968553  | 0.485555421 | 0.248046649 | 0.153717991 |
| 0.393462204 | 0.242865553 | 0.21022156  | 0.474762708 |
| 0.158736367 | 0.507400338 | 0.314033592 | 0.331471079 |
| 0.259952238 | 0.244410292 | 0.238328496 | 0.377274351 |
| 0.132799538 | 0.357553802 | 0.437357165 | 0.395400779 |
| 0.183402293 | 0.469211349 | 0.490780427 | 0.108163121 |
| 0.360503645 | 0.466011624 | 0.488266338 | 0.006586963 |
| 0.466306578 | 0.034101962 | 0.257570766 | 0.287202487 |
| 0.27394756  | 0.272475514 | 0.30635942  | 0.332499198 |
| 0.44892644  | 0.329117868 | 0.378535673 | 0.343899749 |
| 0.241719246 | 0.354624462 | 0.429000853 | 0.465585201 |
| 0.324548776 | 0.265258096 | 0.25132835  | 0.250645657 |
| 0.134593528 | 0.519234997 | 0.387826815 | 0.228386082 |
| 0.325414087 | 0.440540413 | 0.435258467 | 0.521951665 |
| 0.473458079 | 0.285746455 | 0.391814874 | 0.534110165 |
| 0.249049857 | 0.405697443 | 0.193838383 | 0.496547792 |
| 0.359870527 | 0.229887557 | 0.494784639 | 0.476633594 |
| 0.483653399 | 0.470891434 | 0.388400597 | 0.492468975 |
| 0.427315487 | 0.385037461 | 0.42113793  | 0.154568254 |
| 0.322143149 | 0.284538714 | 0.271520327 | 0.013761414 |
| 0.447266204 | 0.448282454 | 0.51332985  | 0.519316419 |
| 0.270136183 | 0.466885974 | 0.451942138 | 0.210913693 |
| 0.382941588 | 0.34220284  | 0.284604833 | 0.497474167 |
| 0.193598164 | 0.319808129 | 0.332383002 | 0.515180759 |
| 0.471785276 | 0.464058847 | 0.268893953 | 0.368294294 |
| 0.336501638 | 0.378390954 | 0.48695479  | 0.297670542 |
| 0.467693943 | 0.196967747 | 0.476600647 | 0.345576672 |
| 0.274215516 | 0.51357974  | 0.184167855 | 0.51605203  |
| 0.349223397 | 0.292815044 | 0.490642801 | 0.439711444 |
| 0.435016542 | 0.186303275 | 0.161139203 | 0.477503863 |
| 0.314251378 | 0.334302467 | 0.018732225 | 0.064106942 |
| 0.402831499 | 0.354709279 | 0.491064733 | 0.431922447 |
| 0.250023621 | 0.396137335 | 0.146968319 | 0.419664405 |
| 0.514974372 | 0.518092758 | 0.333445363 | 0.360463343 |
| 0.448235664 | 0.213914147 | 0.538030155 | 0.020681574 |
| 0.448378766 | 0.435415965 | 0.420250854 | 0.142883114 |
| 0.073503932 | 0.185028343 | 0.464478683 | 0.203694356 |
| 0.484722426 | 0.192924786 | 0.447616704 | 0.500455319 |
| 0.326760532 | 0.520314474 | 0.182280283 | 0.464446528 |
| 0.136063117 | 0.376512676 | 0.385373919 | 0.41359778  |
| 0.266195393 | 0.280875669 | 0.438798215 | 0.225390764 |
| 0.100996598 | 0.308213026 | 0.004961464 | 0.470729418 |
| 0.497844742 | 0.327079618 | 0.350160757 | 0.354632714 |
| 0.362940066 | 0.466729037 | 0.265354284 | 0.452798826 |
| 0.040212329 | 0.376828428 | 0.317696902 | 0.52691433  |
| 0.24268708  | 0.418407191 | 0.136044816 | 0.308530579 |
| 0.507307573 | 0.30277906  | 0.37548549  | 0.323226519 |



|             |             |             |             |
|-------------|-------------|-------------|-------------|
| 0.525016577 | 0.492145284 | 0.349281106 | 0.258537571 |
| 0.453742044 | 0.195294276 | 0.481254892 | 0.508522489 |
| 0.256676924 | 0.205994116 | 0.46924036  | 0.287507743 |
| 0.295297816 | 0.498000215 | 0.44984203  | 0.504090842 |
| 0.113737564 | 0.362086256 | 0.469497128 | 0.503174925 |
| 0.383840914 | 0.160618905 | 0.232830475 | 0.256259078 |
| 0.522992792 | 0.213290109 | 0.249453435 | 0.47683234  |
| 0.196812264 | 0.397518239 | 0.45739782  | 0.214397312 |
| 0.093737866 | 0.268081098 | 0.466551842 | 0.286696916 |
| 0.374179272 | 0.399874922 | 0.251037766 | 0.462170722 |
| 0.213910716 | 0.068575332 | 0.482475703 | 0.013358752 |
| 0.515421992 | 0.448141751 | 0.363164262 | 0.373848106 |
| 0.352240986 | 0.454937398 | 0.47652864  | 0.008322006 |
| 0.462393515 | 0.060886912 | 0.348745219 | 0.256481904 |
| 0.284702153 | 0.157485747 | 0.515784597 | 0.502614638 |
| 0.454099948 | 0.373831449 | 0.349608206 | 0.512243681 |
| 0.131039686 | 0.324605036 | 0.333007748 | 0.516833641 |
| 0.20352627  | 0.441859377 | 0.440181095 | 0.387630907 |
| 0.498897559 | 0.40815311  |             |             |
| CDCA5       | 0.162012478 | 0.469253968 | 0.12692876  |
| 0.274883632 | 0.420804911 | 0.512173079 | 0.134726365 |
| 0.238735769 | 0.424775052 | 0.355135589 | 0.494690535 |
| 0.055351592 | 0.125930057 | 0.507965108 | 0.126021785 |
| 0.486514115 | 0.09237236  | 0.214629945 | 0.118926621 |
| 0.337615419 | 0.394410109 | 0.43674399  | 0.479252711 |
| 0.393035077 | 0.277862681 | 0.453973557 | 0.45201568  |
| 0.509251202 | 0.328520619 | 0.528745353 | 0.261108628 |
| 0.455904401 | 0.431683868 | 0.457459244 | 0.052186552 |
| 0.513381619 | 0.019960519 | 0.453566833 | 0.396958662 |
| 0.23835784  | 0.422129603 | 0.409604513 | 0.391953707 |
| 0.452024385 | 0.095933662 | 0.252928904 | 0.480225265 |
| 0.433944695 | 0.404351629 | 0.136359575 | 0.521097192 |
| 0.450345254 | 0.466044918 | 0.456092    | 0.005824055 |
| 0.380710383 | 0.11344065  | 0.279482636 | 0.507692475 |
| 0.335784498 | 0.2408908   | 0.332970589 | 0.355401212 |
| 0.461365775 | 0.463165364 | 0.378766337 | 0.438670593 |
| 0.506890273 | 0.239301264 | 0.5021664   | 0.276582498 |
| 0.488300143 | 0.08083427  | 0.275848693 | 0.159089898 |
| 0.478076177 | 0.338188011 | 0.460710824 | 0.398498569 |
| 0.463458799 | 0.524103549 | 0.36488056  | 0.501369961 |
| 0.140856122 | 0.427382638 | 0.390344664 | 0.424107761 |
| 0.452511664 | 0.164249571 | 0.524654607 | 0.526656123 |
| 0.108434186 | 0.447163383 | 0.482802225 | 0.214606898 |
| 0.496120617 | 0.343803309 | 0.466725687 | 0.255148692 |
| 0.46653716  | 0.441669582 | 0.477785856 | 0.429243897 |
| 0.418414775 | 0.149336929 | 0.49104777  | 0.408995507 |
| 0.436370526 | 0.173791787 | 0.334768915 | 0.516700582 |
| 0.522250437 | 0.517609779 | 0.485030344 | 0.458870829 |
| 0.470875308 | 0.511355305 | 0.521810878 | 0.479300291 |
| 0.18470779  | 0.522249663 | 0.328510564 | 0.108589523 |
| 0.151002304 | 0.181325811 | 0.311133583 | 0.41108114  |
| 0.52545851  | 0.46125945  | 0.3372264   | 0.369494839 |
| 0.510227468 | 0.479519577 | 0.516965966 | 0.499439607 |
| 0.101695558 | 0.31353895  | 0.481096513 | 0.410709617 |

|             |             |             |             |
|-------------|-------------|-------------|-------------|
| 0.480994441 | 0.212179909 | 0.353325218 | 0.515538669 |
| 0.473394476 | 0.516292669 | 0.288374972 | 0.512720962 |
| 0.307304841 | 0.522073028 | 0.499354823 | 0.307135942 |
| 0.526022066 | 0.504473309 | 1           | 0.492049712 |
| 0.486310104 | 0.488265681 | 0.088051431 | 0.466633053 |
| 0.501280543 | 0.028008542 | 0.514913584 | 0.518088611 |
| 0.498953901 | 0.526303825 | 0.516180747 | 0.517787446 |
| 0.501177689 | 0.155996434 | 0.036831607 | 0.40718586  |
| 0.51221984  | 0.497051901 | 0.238311007 | 0.491467934 |
| 0.455139811 | 0.511239832 | 0.500204135 | 0.404287617 |
| 0.520106179 | 0.518623653 | 0.51295149  | 0.48666969  |
| 0.395210913 | 0.40341355  | 0.444181353 | 0.478427922 |
| 0.115425715 | 0.224990727 | 0.116759657 | 0.41214442  |
| 0.435124476 | 0.305264685 | 0.498461569 | 0.437511645 |
| 0.324906288 | 0.450293786 | 0.401474683 | 0.474954491 |
| 0.113779674 | 0.52128726  | 0.295545758 | 0.291819264 |
| 0.110219619 | 0.229505781 | 0.319293049 | 0.287632023 |
| 0.381969786 | 0.270893178 | 0.513641362 | 0.511788742 |
| 0.436974987 | 0.298511392 | 0.518495024 | 0.500154726 |
| 0.473123194 | 0.480532595 | 0.341375576 | 0.0388416   |
| 0.378030483 | 0.352145192 | 0.244510223 | 0.482378569 |
| 0.242981217 | 0.360172967 | 0.485090208 | 0.494706179 |
| 0.419434232 | 0.243694097 | 0.460100413 | 0.447985828 |
| 0.245639012 | 0.437081783 | 0.518331224 | 0.484231157 |
| 0.013740338 | 0.471552955 | 0.530558056 | 0.235727375 |
| 0.423065554 | 0.201805081 | 0.340620901 | 0.516398144 |
| 0.361332037 | 0.311826592 | 0.517356303 | 0.486481799 |
| 0.437155454 | 0.273692788 | 0.51985029  | 0.065025695 |
| 0.424879271 | 0.122084507 | 0.413415532 | 0.396373815 |
| 0.391762376 | 0.406968386 | 0.413497362 | 0.404965974 |
| 0.232080153 | 0.515115168 | 0.488472046 | 0.517873035 |
| 0.451618046 | 0.524568826 | 0.527450366 | 0.51526385  |
| 0.487811442 | 0.424886007 | 0.18463076  | 0.528363178 |
| 0.520112076 | 0.375090526 | 0.147609641 | 0.50160569  |
| 0.431739009 | 0.491105505 | 0.20863971  | 0.512710384 |
| 0.50820814  | 0.468039302 | 0.263280501 | 0.471691405 |
| 0.497661226 | 0.382971378 | 0.496711925 | 0.524646369 |
| 0.373490761 | 0.445667055 | 0.442539594 | 0.486307128 |
| 0.306096565 | 0.305360717 | 0.403406809 | 0.232881867 |
| 0.016322537 | 0.166151721 | 0.145557844 | 0.287460754 |
| 0.254039866 | 0.47924303  | 0.497282151 | 0.513299182 |
| 0.22978546  | 0.485868965 | 0.344119198 | 0.419268606 |
| 0.471917731 | 0.431354562 | 0.465591505 | 0.48300649  |
| 0.365298552 | 0.055416274 | 0.230162129 | 0.528144225 |
| 0.091327356 | 0.334417318 | 0.428081067 | 0.008583318 |
| 0.109301704 | 0.466651286 | 0.169521617 | 0.270888391 |
| 0.511250587 | 0.277028993 | 0.333859305 | 0.388951923 |
| 0.46914395  | 0.192802417 | 0.01165425  | 0.497497919 |
| 0.476571724 | 0.462524173 | 0.474254805 | 0.455536661 |
| 0.476958116 | 0.480883611 | 0.502459849 | 0.479545885 |
| 0.214449523 | 0.180854246 | 0.300179853 | 0.419716024 |
| 0.010382662 | 0.492415614 | 0.411458196 | 0.256421725 |
| 0.503574868 | 0.415963813 | 0.098292569 | 0.441197675 |
| 0.065470641 | 0.268306799 | 0.414786921 | 0.337818395 |

|             |             |             |             |
|-------------|-------------|-------------|-------------|
| 0.444658087 | 0.045686122 | 0.344232642 | 0.409893631 |
| 0.460601118 | 0.443775964 | 0.436785536 | 0.529380324 |
| 0.470189056 | 0.213556174 | 0.44642817  | 0.499846606 |
| 0.160110784 | 0.148959504 | 0.454906548 | 0.058602414 |
| 0.284824228 | 0.451974387 | 0.460810179 | 0.160755878 |
| 0.416559556 | 0.019954325 | 0.45850302  | 0.529317684 |
| 0.466774124 | 0.516628476 | 0.513827664 | 0.36850589  |
| 0.508356924 | 0.130206088 | 0.521922815 | 0.488371999 |
| 0.439228996 | 0.003640609 | 0.015832501 | 0.525233325 |
| 0.498271332 | 0.116347341 | 0.28401568  | 0.478394352 |
| 0.227280892 | 0.263248991 | 0.146662384 | 0.285772783 |
| 0.524262707 | 0.360789928 | 0.260302655 | 0.470047228 |
| 0.379581575 | 0.360471723 | 0.473184228 | 0.167631124 |
| 0.503042494 | 0.131098103 | 0.165822158 | 0.02055863  |
| 0.466919084 | 0.193978602 | 0.478961371 | 0.505250033 |
| 0.503021526 | 0.496024152 | 0.388956435 | 0.434690445 |
| 0.486994137 | 0.176317139 | 0.437275263 | 0.201295209 |
| 0.490276486 | 0.495482282 | 0.450107458 | 0.425251509 |
| 0.506115973 | 0.493152552 | 0.088268443 | 0.506165572 |
| 0.042354613 | 0.004781387 | 0.490934186 | 0.377712944 |
| 0.086866755 | 0.459400723 | 0.380821631 | 0.325648308 |
| 0.331603456 | 0.083428438 | 0.343707394 | 0.328486749 |
| 0.430870253 | 0.473290421 | 0.378350106 | 0.347209228 |
| 0.377371121 | 0.219225181 | 0.329891452 | 0.268019524 |
| 0.316213451 | 0.405086737 | 0.282544808 | 0.061392201 |
| 0.503132425 | 0.502076628 | 0.135697062 | 0.275481897 |
| 0.526713419 | 0.526835082 | 0.104583058 | 0.0382867   |
| 0.382657121 | 0.41677406  | 0.520879408 | 0.496783329 |
| 0.52775378  | 0.522110438 | 0.428862776 | 0.224861942 |
| 0.153474114 | 0.44023841  | 0.393188442 | 0.194105446 |
| 0.508436297 | 0.134000069 | 0.484451691 | 0.380979438 |
| 0.218385249 | 0.362734454 | 0.094831877 | 0.176913786 |
| 0.467419432 | 0.301279896 | 0.307035563 | 0.257428106 |
| 0.437438561 | 0.342819878 | 0.116744363 | 0.33134197  |
| 0.461379954 | 0.254860772 | 0.282560658 | 0.426449171 |
| 0.460647659 | 0.264120812 | 0.511263998 | 0.47371527  |
| 0.236610758 | 0.208592806 | 0.41674505  | 0.471042857 |
| 0.519211896 | 0.450544142 | 0.069889337 | 0.474443255 |
| 0.508869435 | 0.524554738 | 0.500990498 | 0.470408704 |
| 0.168361547 | 0.485091675 | 0.380168044 | 0.447538596 |
| 0.304895995 | 0.509865651 | 0.359621435 | 0.139423509 |
| 0.385375694 | 0.487393301 | 0.486422224 | 0.299860937 |
| 0.49729015  | 0.218887995 | 0.119844347 | 0.497219393 |
| 0.271412852 | 0.188228848 | 0.427712425 | 0.497049269 |
| 0.006725154 | 0.196939513 | 0.496942417 | 0.3805056   |
| 0.515387787 | 0.519053703 | 0.483742522 | 0.37558679  |
| 0.003348106 | 0.488234691 | 0.502767368 | 0.513296186 |
| 0.493216568 | 0.463471796 | 0.235988103 | 0.167861783 |
| 0.403475005 | 0.157400011 | 0.249380163 | 0.45458143  |
| 0.234249214 | 0.501259687 | 0.315680424 | 0.319087312 |
| 0.323245913 | 0.162959607 | 0.330253786 | 0.389969677 |
| 0.201884192 | 0.364398879 | 0.462515551 | 0.349101787 |
| 0.267319343 | 0.48370054  | 0.495510626 | 0.074409078 |
| 0.439484334 | 0.480312478 | 0.48910359  | 0.006978957 |

|             |             |             |             |
|-------------|-------------|-------------|-------------|
| 0.521869492 | 0.026511428 | 0.32034588  | 0.354868638 |
| 0.332142223 | 0.328123499 | 0.377993791 | 0.425230939 |
| 0.459440093 | 0.359847827 | 0.428176776 | 0.373603305 |
| 0.293001339 | 0.354741237 | 0.491101971 | 0.473914617 |
| 0.411066761 | 0.246982299 | 0.170814614 | 0.162142431 |
| 0.12916126  | 0.501270905 | 0.348722293 | 0.147159851 |
| 0.353832009 | 0.464036974 | 0.442879579 | 0.488802661 |
| 0.485756734 | 0.186517199 | 0.436744767 | 0.510463291 |
| 0.2751488   | 0.402568063 | 0.136679064 | 0.503074792 |
| 0.370444642 | 0.324133497 | 0.484500489 | 0.43131842  |
| 0.478096065 | 0.4422425   | 0.348821351 | 0.48218092  |
| 0.492263342 | 0.41932326  | 0.386551702 | 0.184433584 |
| 0.314818496 | 0.23046282  | 0.37460428  | 0.009129267 |
| 0.475133362 | 0.407752712 | 0.530247781 | 0.493573506 |
| 0.356342449 | 0.461461561 | 0.408693764 | 0.189467956 |
| 0.344960414 | 0.249476019 | 0.24926348  | 0.509849928 |
| 0.279093843 | 0.322902875 | 0.424303283 | 0.451893255 |
| 0.515831457 | 0.486983867 | 0.349213827 | 0.365596223 |
| 0.358287984 | 0.320250407 | 0.47618798  | 0.227447648 |
| 0.498010595 | 0.296925688 | 0.428829005 | 0.426898489 |
| 0.345753895 | 0.508235899 | 0.134960144 | 0.514435847 |
| 0.433636539 | 0.222483806 | 0.503251492 | 0.421427977 |
| 0.427743252 | 0.229674896 | 0.252051722 | 0.464240352 |
| 0.348242018 | 0.416003682 | 0.020080834 | 0.098351296 |
| 0.45025308  | 0.374116489 | 0.471113379 | 0.458484078 |
| 0.349493465 | 0.439868301 | 0.216355211 | 0.411012191 |
| 0.478564441 | 0.501580858 | 0.389450598 | 0.362932849 |
| 0.45527222  | 0.210482215 | 0.498237558 | 0.024215691 |
| 0.501588522 | 0.483855736 | 0.44295306  | 0.125274606 |
| 0.056610055 | 0.283240235 | 0.501632059 | 0.133663656 |
| 0.514622232 | 0.274482187 | 0.428863251 | 0.525564106 |
| 0.279516923 | 0.505540088 | 0.23042709  | 0.516622888 |
| 0.098176948 | 0.378435754 | 0.45097145  | 0.444376292 |
| 0.355794538 | 0.389303972 | 0.493736805 | 0.330421092 |
| 0.089258105 | 0.389518825 | 0.005543383 | 0.430894754 |
| 0.474646883 | 0.420639615 | 0.303297365 | 0.344827279 |
| 0.405744143 | 0.45705022  | 0.332475175 | 0.484435102 |
| 0.038306698 | 0.468562251 | 0.326506165 | 0.501684726 |
| 0.31190832  | 0.444181539 | 0.141681239 | 0.395604209 |
| 0.470134384 | 0.37869291  | 0.353656051 | 0.395739278 |
| 0.486755716 | 0.462150832 | 0.258994628 | 0.328026499 |
| 0.449076964 | 0.135688391 | 0.459813582 | 0.523427902 |
| 0.304303572 | 0.312910098 | 0.518961305 | 0.342100969 |
| 0.389650439 | 0.461766345 | 0.468654476 | 0.51120128  |
| 0.155016223 | 0.379138918 | 0.508708857 | 0.48917973  |
| 0.416931612 | 0.254631257 | 0.334274545 | 0.34426771  |
| 0.469233029 | 0.203341219 | 0.345846758 | 0.477773417 |
| 0.300493648 | 0.430186781 | 0.409080392 | 0.298664415 |
| 0.091869206 | 0.280802508 | 0.487946307 | 0.254271883 |
| 0.423422911 | 0.47791081  | 0.349223406 | 0.456183994 |
| 0.256267668 | 0.073169523 | 0.474593443 | 0.030582323 |
| 0.46682986  | 0.510226189 | 0.373806286 | 0.457022341 |
| 0.29250109  | 0.463599024 | 0.446237025 | 0.004458227 |
| 0.497268385 | 0.091377946 | 0.39982155  | 0.350842376 |

|             |             |             |             |
|-------------|-------------|-------------|-------------|
| 0.357735827 | 0.120674241 | 0.481708506 | 0.517613451 |
| 0.438660929 | 0.404570976 | 0.412723644 | 0.482976135 |
| 0.218684975 | 0.383522    | 0.401680434 | 0.500057344 |
| 0.302215558 | 0.447275206 | 0.47580991  | 0.462443478 |
| 0.493241902 | 0.397632169 |             |             |
| CDCA7       | 0.056743512 | 0.358898063 | 0.037416935 |
| 0.153030922 | 0.365654872 | 0.340509705 | 0.045240143 |
| 0.104473001 | 0.263561724 | 0.2276571   | 0.356063427 |
| 0.014681135 | 0.215405263 | 0.423623178 | 0.044281002 |
| 0.382778225 | 0.033603833 | 0.090742585 | 0.073052532 |
| 0.19105305  | 0.339790979 | 0.406219341 | 0.269371967 |
| 0.334469831 | 0.138556141 | 0.243064335 | 0.364082043 |
| 0.458235662 | 0.333311746 | 0.381727884 | 0.178294467 |
| 0.364740151 | 0.379991809 | 0.398489949 | 0.011388324 |
| 0.355830632 | 0.024684579 | 0.361324397 | 0.290196429 |
| 0.290811892 | 0.292505437 | 0.239475547 | 0.263151916 |
| 0.28080553  | 0.026832203 | 0.187831862 | 0.350316311 |
| 0.242032666 | 0.258666716 | 0.039400305 | 0.346056315 |
| 0.311723633 | 0.259851357 | 0.287377672 | 0.001991508 |
| 0.407929636 | 0.211301574 | 0.345866372 | 0.442855051 |
| 0.172404897 | 0.124467241 | 0.28516082  | 0.191999337 |
| 0.320576818 | 0.323607362 | 0.219319198 | 0.290839365 |
| 0.455500925 | 0.307159248 | 0.378173592 | 0.174033858 |
| 0.303857717 | 0.018079759 | 0.122295497 | 0.048384482 |
| 0.363303821 | 0.205934428 | 0.365929008 | 0.386640691 |
| 0.35239431  | 0.446085508 | 0.19262589  | 0.415901854 |
| 0.164436012 | 0.382703493 | 0.351766796 | 0.272642657 |
| 0.294206793 | 0.061299594 | 0.373443682 | 0.468767431 |
| 0.030291524 | 0.270491381 | 0.314087284 | 0.076707906 |
| 0.377202469 | 0.32902884  | 0.296457746 | 0.334867739 |
| 0.379384302 | 0.364383835 | 0.395477441 | 0.247047357 |
| 0.352276687 | 0.044751135 | 0.389442539 | 0.391899026 |
| 0.350606659 | 0.058804068 | 0.291661283 | 0.455836871 |
| 0.352111597 | 0.459958183 | 0.362587748 | 0.311830598 |
| 0.384688748 | 0.462241808 | 0.337960721 | 0.366804599 |
| 0.148521734 | 0.465923256 | 0.161144154 | 0.043410211 |
| 0.045347019 | 0.088206589 | 0.256429512 | 0.262584931 |
| 0.459265446 | 0.268480307 | 0.166764437 | 0.255909943 |
| 0.46708916  | 0.387562356 | 0.459042117 | 0.369608405 |
| 0.030128887 | 0.328673581 | 0.386307071 | 0.232966147 |
| 0.314297522 | 0.083795412 | 0.376141121 | 0.424814249 |
| 0.345398235 | 0.430795052 | 0.120735865 | 0.412983959 |
| 0.158930287 | 0.477967163 | 0.398194263 | 0.162182252 |
| 0.45096494  | 0.414800264 | 0.492049712 | 1           |
| 0.412286742 | 0.290088858 | 0.058194575 | 0.32628688  |
| 0.46566311  | 0.040592316 | 0.457123283 | 0.484513066 |
| 0.435238537 | 0.459231663 | 0.498903101 | 0.486745824 |
| 0.43734152  | 0.050001123 | 0.037674208 | 0.295044879 |
| 0.437061942 | 0.367785456 | 0.145874654 | 0.373798883 |
| 0.367049819 | 0.311947364 | 0.388756523 | 0.338488723 |
| 0.468088785 | 0.431552633 | 0.459166932 | 0.322280052 |
| 0.216437081 | 0.264438136 | 0.386721013 | 0.378327607 |
| 0.040569874 | 0.088454221 | 0.031454803 | 0.245782412 |
| 0.272121766 | 0.173859425 | 0.291193406 | 0.325148758 |

|             |             |             |             |
|-------------|-------------|-------------|-------------|
| 0.178850769 | 0.251568738 | 0.394827098 | 0.387288119 |
| 0.029623378 | 0.362105123 | 0.135344409 | 0.12564024  |
| 0.042547947 | 0.100255536 | 0.190655005 | 0.17097145  |
| 0.279914916 | 0.162653377 | 0.370278498 | 0.465940502 |
| 0.326472279 | 0.126851729 | 0.339204323 | 0.450625569 |
| 0.409607031 | 0.408378641 | 0.171327211 | 0.018137389 |
| 0.297696639 | 0.292424545 | 0.321665556 | 0.381505004 |
| 0.122946741 | 0.234923425 | 0.346558269 | 0.407910984 |
| 0.212983875 | 0.097887985 | 0.361801939 | 0.363832728 |
| 0.093070886 | 0.361278973 | 0.440044734 | 0.310763695 |
| 0.002128669 | 0.28622358  | 0.423975837 | 0.214131929 |
| 0.237699303 | 0.262175869 | 0.390167213 | 0.446048257 |
| 0.349173445 | 0.308146323 | 0.476098565 | 0.396572682 |
| 0.311062101 | 0.150369994 | 0.493333909 | 0.084682811 |
| 0.341162236 | 0.100319746 | 0.2754602   | 0.238035183 |
| 0.214912185 | 0.248855118 | 0.381652374 | 0.355973665 |
| 0.087047705 | 0.45806104  | 0.348219982 | 0.481195362 |
| 0.36583291  | 0.490903696 | 0.453630191 | 0.422663464 |
| 0.30193291  | 0.337761582 | 0.285463057 | 0.411926953 |
| 0.442012093 | 0.270080707 | 0.042962584 | 0.405991167 |
| 0.298110987 | 0.373979993 | 0.181653817 | 0.472284966 |
| 0.434343842 | 0.380829559 | 0.1587951   | 0.372970318 |
| 0.357186082 | 0.203862038 | 0.384979724 | 0.490387673 |
| 0.249777171 | 0.358561116 | 0.371229643 | 0.417304548 |
| 0.141922118 | 0.288149632 | 0.261228002 | 0.320061669 |
| 0.034905544 | 0.054204264 | 0.045266811 | 0.193256539 |
| 0.314506381 | 0.334239667 | 0.352590677 | 0.472790118 |
| 0.105839929 | 0.379579138 | 0.171936086 | 0.322792865 |
| 0.36064129  | 0.34988072  | 0.408500282 | 0.377325987 |
| 0.185368525 | 0.024661291 | 0.139190571 | 0.444990664 |
| 0.020441806 | 0.375105076 | 0.245497354 | 0.005020691 |
| 0.032008469 | 0.333304864 | 0.059018429 | 0.144229501 |
| 0.482518181 | 0.144750427 | 0.154057081 | 0.241440025 |
| 0.31907916  | 0.075135657 | 0.007713157 | 0.446173414 |
| 0.423380948 | 0.395691948 | 0.41668738  | 0.374752308 |
| 0.398647071 | 0.343532263 | 0.396172785 | 0.267753411 |
| 0.089916456 | 0.060164558 | 0.320129517 | 0.296628814 |
| 0.003871401 | 0.367495989 | 0.317620833 | 0.111321803 |
| 0.394689093 | 0.242306771 | 0.030974371 | 0.361271234 |
| 0.019740455 | 0.344778879 | 0.241172275 | 0.212210362 |
| 0.340667254 | 0.009537516 | 0.251635526 | 0.354522008 |
| 0.359973536 | 0.287566497 | 0.394664804 | 0.473775404 |
| 0.325586326 | 0.073909704 | 0.338376191 | 0.383400204 |
| 0.060370275 | 0.101515076 | 0.274003258 | 0.039974442 |
| 0.204116858 | 0.38165461  | 0.3545876   | 0.055261659 |
| 0.243969085 | 0.00353614  | 0.310574877 | 0.477725625 |
| 0.387275057 | 0.497077308 | 0.465260922 | 0.396400797 |
| 0.457146095 | 0.217201719 | 0.486419138 | 0.343035756 |
| 0.304593978 | 0.001041131 | 0.007395587 | 0.477697281 |
| 0.386074238 | 0.029788903 | 0.132494443 | 0.321567273 |
| 0.121619011 | 0.106341254 | 0.054067473 | 0.305979577 |
| 0.355804796 | 0.300754089 | 0.287418878 | 0.38939577  |
| 0.234357799 | 0.220771431 | 0.291968267 | 0.053767604 |
| 0.386134923 | 0.049987501 | 0.053088385 | 0.016311745 |

|             |             |             |             |
|-------------|-------------|-------------|-------------|
| 0.342570717 | 0.070759206 | 0.369348557 | 0.453975627 |
| 0.454272667 | 0.377136754 | 0.281752932 | 0.32157026  |
| 0.40904958  | 0.056228765 | 0.363622057 | 0.069306474 |
| 0.420349544 | 0.367291723 | 0.288629393 | 0.25867886  |
| 0.473154279 | 0.419980786 | 0.026112007 | 0.380698917 |
| 0.016043594 | 0.004621465 | 0.28308988  | 0.20430852  |
| 0.078189715 | 0.366715717 | 0.207229291 | 0.191655904 |
| 0.219734305 | 0.026426913 | 0.368659427 | 0.351966349 |
| 0.281265106 | 0.343120723 | 0.363035767 | 0.174537794 |
| 0.312108649 | 0.208290384 | 0.213059378 | 0.140755971 |
| 0.216517678 | 0.245004898 | 0.142738885 | 0.014866203 |
| 0.350847893 | 0.395513283 | 0.046505946 | 0.118545996 |
| 0.431729107 | 0.47718254  | 0.038845279 | 0.01710464  |
| 0.208105643 | 0.301139895 | 0.491592191 | 0.439650432 |
| 0.449712211 | 0.481449661 | 0.330347742 | 0.152659366 |
| 0.056805354 | 0.313878789 | 0.36669985  | 0.153023355 |
| 0.468501498 | 0.036950555 | 0.420721724 | 0.394541298 |
| 0.086021343 | 0.205929524 | 0.039612154 | 0.06764303  |
| 0.408423411 | 0.147915221 | 0.208994707 | 0.100571097 |
| 0.323228677 | 0.37597795  | 0.036025899 | 0.175759697 |
| 0.285539112 | 0.310532861 | 0.131494489 | 0.245475536 |
| 0.28778361  | 0.16310641  | 0.393732549 | 0.409166149 |
| 0.093995437 | 0.079059268 | 0.218360319 | 0.331978448 |
| 0.411329057 | 0.312099434 | 0.032676806 | 0.380528941 |
| 0.467140053 | 0.378923407 | 0.431672523 | 0.379551062 |
| 0.055466552 | 0.40163668  | 0.345039069 | 0.336898225 |
| 0.153434707 | 0.325013557 | 0.218121717 | 0.044453633 |
| 0.248167938 | 0.40167541  | 0.361888629 | 0.179779779 |
| 0.349380574 | 0.076923522 | 0.031090691 | 0.408270335 |
| 0.30759097  | 0.078388132 | 0.260708089 | 0.4086261   |
| 0.00503635  | 0.298930615 | 0.466116812 | 0.246099854 |
| 0.457370325 | 0.468125526 | 0.398909304 | 0.211168308 |
| 0.005622097 | 0.374929131 | 0.360957199 | 0.381784689 |
| 0.372449747 | 0.283852757 | 0.133391315 | 0.08361004  |
| 0.255956115 | 0.048079205 | 0.146791452 | 0.297493937 |
| 0.250933949 | 0.307107377 | 0.162171584 | 0.159969781 |
| 0.223349536 | 0.04931962  | 0.380248638 | 0.226474156 |
| 0.219714927 | 0.197615716 | 0.322646258 | 0.211747285 |
| 0.293214162 | 0.404719687 | 0.344885277 | 0.019936945 |
| 0.3914129   | 0.373480738 | 0.403604726 | 0.0026225   |
| 0.397267491 | 0.006682206 | 0.228417182 | 0.257163593 |
| 0.227708389 | 0.219272325 | 0.276569945 | 0.348101798 |
| 0.273195572 | 0.206998572 | 0.287929313 | 0.223510245 |
| 0.200053729 | 0.188979969 | 0.366277578 | 0.286223139 |
| 0.347394553 | 0.113879289 | 0.062686966 | 0.064004325 |
| 0.058697699 | 0.421607994 | 0.196636897 | 0.043672577 |
| 0.210209357 | 0.295958829 | 0.325959502 | 0.420935168 |
| 0.403238656 | 0.069510138 | 0.300844925 | 0.396839152 |
| 0.219712893 | 0.262601899 | 0.041108023 | 0.315655362 |
| 0.208111073 | 0.315625509 | 0.31269628  | 0.222380173 |
| 0.313868828 | 0.347607858 | 0.18975391  | 0.400256634 |
| 0.359355937 | 0.284924476 | 0.236652175 | 0.109064763 |
| 0.154913864 | 0.087752061 | 0.348754133 | 0.001751434 |
| 0.30251166  | 0.21465281  | 0.4572659   | 0.416092045 |

|             |             |             |             |
|-------------|-------------|-------------|-------------|
| 0.37994291  | 0.351122756 | 0.248844822 | 0.07731814  |
| 0.212367931 | 0.121688407 | 0.104169475 | 0.37650377  |
| 0.358039377 | 0.1750178   | 0.340596908 | 0.250873016 |
| 0.399899096 | 0.354733597 | 0.302340931 | 0.197858825 |
| 0.208045413 | 0.1419882   | 0.391409613 | 0.085925152 |
| 0.351545316 | 0.305000555 | 0.242095914 | 0.318841075 |
| 0.248664086 | 0.478202217 | 0.042067479 | 0.490781127 |
| 0.341105976 | 0.083730123 | 0.435618779 | 0.24420984  |
| 0.249887035 | 0.166319831 | 0.341797517 | 0.290216822 |
| 0.213416318 | 0.408567666 | 0.018173593 | 0.102406984 |
| 0.301029918 | 0.252614563 | 0.326384787 | 0.304719609 |
| 0.332038773 | 0.319325339 | 0.305363502 | 0.220420518 |
| 0.392997751 | 0.405116832 | 0.26448177  | 0.2018315   |
| 0.279248871 | 0.09963114  | 0.291864495 | 0.017402683 |
| 0.367356475 | 0.374316278 | 0.320070251 | 0.04545803  |
| 0.014885668 | 0.347010324 | 0.339506861 | 0.037022738 |
| 0.478855969 | 0.348531327 | 0.25441525  | 0.377928498 |
| 0.119142941 | 0.406632242 | 0.153911404 | 0.383168961 |
| 0.027572419 | 0.207611558 | 0.378246735 | 0.314458128 |
| 0.303152719 | 0.380200343 | 0.355911407 | 0.372376068 |
| 0.030088762 | 0.315667268 | 0.00157037  | 0.337448373 |
| 0.373979594 | 0.374252729 | 0.15189751  | 0.23993183  |
| 0.25901398  | 0.333687158 | 0.264856177 | 0.360904768 |
| 0.014454268 | 0.397593481 | 0.177126707 | 0.368566254 |
| 0.30122278  | 0.287806897 | 0.06794502  | 0.341988241 |
| 0.354569248 | 0.298119874 | 0.199189276 | 0.324727285 |
| 0.423784825 | 0.32226736  | 0.102445182 | 0.282309022 |
| 0.281731698 | 0.039725073 | 0.29908329  | 0.476584824 |
| 0.197926373 | 0.350222472 | 0.460164671 | 0.21563171  |
| 0.38157823  | 0.325496852 | 0.323527548 | 0.456994379 |
| 0.102958745 | 0.213446921 | 0.404191712 | 0.406024903 |
| 0.277360885 | 0.282378601 | 0.363786323 | 0.283547806 |
| 0.383349138 | 0.103668296 | 0.325161861 | 0.288520703 |
| 0.344461888 | 0.274843701 | 0.226691759 | 0.260625128 |
| 0.043504962 | 0.151387062 | 0.354759866 | 0.108163573 |
| 0.273523451 | 0.363020585 | 0.310341471 | 0.352625194 |
| 0.180856347 | 0.035857578 | 0.410330576 | 0.05503373  |
| 0.260680894 | 0.381014674 | 0.216318793 | 0.374559758 |
| 0.137429668 | 0.277026305 | 0.240454889 | 0.000538344 |
| 0.391698856 | 0.095870134 | 0.304283241 | 0.307919657 |
| 0.33006847  | 0.037159846 | 0.401030625 | 0.498957574 |
| 0.24684541  | 0.314764215 | 0.377769222 | 0.404240154 |
| 0.293490577 | 0.357452704 | 0.351537793 | 0.301343543 |
| 0.366978661 | 0.301906482 | 0.356840663 | 0.409735247 |
| 0.310713031 | 0.224334018 |             |             |
| CDCA8       | 0.211795101 | 0.479338271 | 0.187590739 |
| 0.265270354 | 0.333756474 | 0.509381184 | 0.156384785 |
| 0.258869654 | 0.433392996 | 0.337679721 | 0.447478626 |
| 0.073916094 | 0.083255671 | 0.486407764 | 0.146803302 |
| 0.397384884 | 0.103376406 | 0.227286816 | 0.11298038  |
| 0.322916256 | 0.302524154 | 0.370155779 | 0.498340789 |
| 0.308564764 | 0.329307272 | 0.457694052 | 0.382420003 |
| 0.496993941 | 0.28263011  | 0.482131488 | 0.242763892 |
| 0.449801566 | 0.33889514  | 0.386868487 | 0.081495444 |



|             |             |             |             |
|-------------|-------------|-------------|-------------|
| 0.476567928 | 0.011666254 | 0.453124927 | 0.319821621 |
| 0.166325159 | 0.436850478 | 0.417511834 | 0.349258253 |
| 0.413657808 | 0.133187588 | 0.258750044 | 0.407396666 |
| 0.425947613 | 0.382106507 | 0.196336218 | 0.488133426 |
| 0.395058778 | 0.483973085 | 0.457521509 | 0.007347006 |
| 0.294955207 | 0.070497334 | 0.197536422 | 0.504829758 |
| 0.345670496 | 0.242661017 | 0.262506351 | 0.37216233  |
| 0.407504572 | 0.4038037   | 0.369150652 | 0.384200208 |
| 0.49696144  | 0.160129668 | 0.452188433 | 0.269508315 |
| 0.452408159 | 0.118540147 | 0.297495743 | 0.212905016 |
| 0.410565329 | 0.320054488 | 0.406618747 | 0.301545432 |
| 0.472034094 | 0.518184335 | 0.361628896 | 0.504113069 |
| 0.086909762 | 0.332012041 | 0.306610731 | 0.377591446 |
| 0.410214135 | 0.180367878 | 0.474269512 | 0.503802954 |
| 0.147080263 | 0.432851142 | 0.436313706 | 0.266368741 |
| 0.50386973  | 0.275214352 | 0.446446739 | 0.183081188 |
| 0.383063119 | 0.342523671 | 0.480296892 | 0.409541636 |
| 0.359426736 | 0.201763006 | 0.511929024 | 0.311665715 |
| 0.374642048 | 0.222861607 | 0.239226272 | 0.467412335 |
| 0.4637216   | 0.503619011 | 0.465142865 | 0.416820842 |
| 0.373466118 | 0.498944235 | 0.478893806 | 0.47818358  |
| 0.180334443 | 0.508422028 | 0.347264632 | 0.124813573 |
| 0.208566062 | 0.192618685 | 0.243809478 | 0.406613807 |
| 0.497483189 | 0.455997049 | 0.346512304 | 0.306616041 |
| 0.453674026 | 0.497354113 | 0.501184374 | 0.465057194 |
| 0.131972911 | 0.229318139 | 0.384093828 | 0.442364005 |
| 0.430218731 | 0.242981466 | 0.255285475 | 0.51951009  |
| 0.470016682 | 0.458779047 | 0.337534726 | 0.523332997 |
| 0.305931739 | 0.496071621 | 0.497675068 | 0.298605253 |
| 0.517869952 | 0.514042304 | 0.486310104 | 0.412286742 |
| 1           | 0.47759363  | 0.076779215 | 0.444423666 |
| 0.483150239 | 0.018428502 | 0.48214767  | 0.482117153 |
| 0.489194139 | 0.472644386 | 0.476306062 | 0.496231353 |
| 0.495555562 | 0.197794394 | 0.022108804 | 0.336391432 |
| 0.504408077 | 0.477697238 | 0.224396886 | 0.412836045 |
| 0.372795099 | 0.505765007 | 0.466354746 | 0.335714898 |
| 0.496656328 | 0.494803815 | 0.492360183 | 0.457698361 |
| 0.384362977 | 0.42679669  | 0.358732188 | 0.501277171 |
| 0.139802515 | 0.271079857 | 0.172189252 | 0.395504871 |
| 0.442201365 | 0.287061432 | 0.482812094 | 0.368940392 |
| 0.314095584 | 0.463449175 | 0.328120382 | 0.392648683 |
| 0.169487544 | 0.479344526 | 0.32066122  | 0.309920191 |
| 0.118383107 | 0.279811204 | 0.288088487 | 0.288852061 |
| 0.324922888 | 0.327344367 | 0.469643692 | 0.485351637 |
| 0.368867261 | 0.338607925 | 0.485062057 | 0.482677054 |
| 0.44576507  | 0.391794518 | 0.354902841 | 0.039452438 |
| 0.278043078 | 0.288442029 | 0.162800006 | 0.418956397 |
| 0.301705249 | 0.297288599 | 0.407617806 | 0.422101096 |
| 0.44121476  | 0.290073271 | 0.367551844 | 0.463061124 |
| 0.296998449 | 0.372431481 | 0.470656722 | 0.443633478 |
| 0.024228362 | 0.424346745 | 0.489290192 | 0.167290658 |
| 0.403145663 | 0.142714756 | 0.273138361 | 0.473407825 |
| 0.277189773 | 0.228134511 | 0.494048378 | 0.417704369 |
| 0.414273253 | 0.33432287  | 0.485047014 | 0.038022676 |

|             |             |             |             |
|-------------|-------------|-------------|-------------|
| 0.35249312  | 0.098433774 | 0.362016321 | 0.395195163 |
| 0.375012528 | 0.370230689 | 0.327638523 | 0.323196094 |
| 0.29454951  | 0.49982999  | 0.485904794 | 0.498108225 |
| 0.359223048 | 0.489964753 | 0.480164902 | 0.488407029 |
| 0.46498614  | 0.348811289 | 0.118567416 | 0.481925978 |
| 0.476389435 | 0.302793435 | 0.206841093 | 0.45612185  |
| 0.367111585 | 0.411553329 | 0.161981534 | 0.48107046  |
| 0.504058899 | 0.479863382 | 0.24876274  | 0.403327549 |
| 0.46904985  | 0.392236942 | 0.47169538  | 0.494004203 |
| 0.322478412 | 0.349385414 | 0.337029744 | 0.426748821 |
| 0.321103204 | 0.218792435 | 0.419486149 | 0.162162664 |
| 0.013195428 | 0.215834735 | 0.189492446 | 0.251978637 |
| 0.171399064 | 0.442109982 | 0.43029556  | 0.490927682 |
| 0.240412715 | 0.492194742 | 0.352095721 | 0.327296407 |
| 0.465508739 | 0.357543286 | 0.391794018 | 0.418568874 |
| 0.375542085 | 0.058942787 | 0.217706039 | 0.521443379 |
| 0.142541985 | 0.247047419 | 0.428352786 | 0.00863491  |
| 0.138911601 | 0.467591068 | 0.223762081 | 0.316778577 |
| 0.471492096 | 0.326577656 | 0.346941026 | 0.348014049 |
| 0.429695007 | 0.226060083 | 0.012946186 | 0.475320141 |
| 0.468955021 | 0.457724994 | 0.467990485 | 0.465003642 |
| 0.44854395  | 0.458990065 | 0.438968067 | 0.50543957  |
| 0.230244194 | 0.231173754 | 0.194400064 | 0.341109775 |
| 0.013470565 | 0.456433303 | 0.356756026 | 0.280776194 |
| 0.446328608 | 0.387302005 | 0.130933215 | 0.372995787 |
| 0.086039453 | 0.185783504 | 0.395697418 | 0.307977953 |
| 0.383329331 | 0.072113109 | 0.30587679  | 0.309348527 |
| 0.487112368 | 0.456508587 | 0.354817486 | 0.513192582 |
| 0.419124283 | 0.270842141 | 0.361956141 | 0.453231044 |
| 0.179614034 | 0.116702188 | 0.435986482 | 0.055210547 |
| 0.312422872 | 0.464963795 | 0.39984221  | 0.189349125 |
| 0.383302196 | 0.033408043 | 0.471305962 | 0.511068361 |
| 0.485756303 | 0.483363709 | 0.503062002 | 0.277992189 |
| 0.496801433 | 0.083727968 | 0.496393371 | 0.483638905 |
| 0.386640484 | 0.004476463 | 0.018737802 | 0.48665083  |
| 0.407656024 | 0.179759343 | 0.295302672 | 0.475982225 |
| 0.217449866 | 0.311582564 | 0.181697248 | 0.199178894 |
| 0.500755093 | 0.295649838 | 0.192077077 | 0.47619563  |
| 0.330445112 | 0.335068828 | 0.459672596 | 0.219521904 |
| 0.448598594 | 0.149872385 | 0.21221387  | 0.018541902 |
| 0.406282998 | 0.253861526 | 0.504514145 | 0.495291758 |
| 0.484570056 | 0.422739255 | 0.349586539 | 0.425112851 |
| 0.460254085 | 0.246374272 | 0.390545645 | 0.266921597 |
| 0.494974979 | 0.40940843  | 0.425660783 | 0.431636825 |
| 0.477406804 | 0.486282927 | 0.113730123 | 0.444516811 |
| 0.059428099 | 0.004065703 | 0.484587387 | 0.376321726 |
| 0.067999447 | 0.362995324 | 0.376969371 | 0.303785994 |
| 0.30693672  | 0.115629953 | 0.240604577 | 0.224213145 |
| 0.37349198  | 0.393744921 | 0.282982886 | 0.361070251 |
| 0.297753657 | 0.143081022 | 0.310912094 | 0.266578767 |
| 0.281863726 | 0.421169757 | 0.32944366  | 0.082821663 |
| 0.45231396  | 0.422968113 | 0.168838489 | 0.311317191 |
| 0.489067339 | 0.492505349 | 0.106419702 | 0.038084148 |
| 0.397445745 | 0.350927883 | 0.485820854 | 0.49800514  |

|             |             |             |             |
|-------------|-------------|-------------|-------------|
| 0.525274246 | 0.48914217  | 0.447666699 | 0.181907459 |
| 0.188283056 | 0.372965712 | 0.300159659 | 0.153208879 |
| 0.498339209 | 0.185651582 | 0.497848531 | 0.284774058 |
| 0.247257602 | 0.333492299 | 0.108244838 | 0.201432831 |
| 0.39034747  | 0.315166527 | 0.264074816 | 0.302517942 |
| 0.355555349 | 0.255919127 | 0.144333078 | 0.320542538 |
| 0.43459126  | 0.155417339 | 0.291519662 | 0.437835995 |
| 0.467153812 | 0.258329892 | 0.439509811 | 0.460746204 |
| 0.280610122 | 0.23605975  | 0.422882926 | 0.440651448 |
| 0.480538842 | 0.412529447 | 0.093311819 | 0.483051105 |
| 0.488335571 | 0.467932329 | 0.501402059 | 0.428290209 |
| 0.210367629 | 0.400737589 | 0.29340424  | 0.35897018  |
| 0.305367655 | 0.513645777 | 0.334071022 | 0.176026675 |
| 0.397677997 | 0.492002775 | 0.470943568 | 0.282463701 |
| 0.467816829 | 0.281013366 | 0.17016527  | 0.487116261 |
| 0.170563883 | 0.210087146 | 0.428317156 | 0.454793097 |
| 0.005651437 | 0.129081553 | 0.464937844 | 0.376137152 |
| 0.499215592 | 0.47890919  | 0.477411004 | 0.39325862  |
| 0.001230051 | 0.407357498 | 0.437163183 | 0.433773153 |
| 0.487257624 | 0.474049192 | 0.262096999 | 0.164415591 |
| 0.392967785 | 0.221576509 | 0.213013473 | 0.46431191  |
| 0.149225537 | 0.479765183 | 0.316867536 | 0.318598388 |
| 0.274330828 | 0.217098023 | 0.254374333 | 0.386894595 |
| 0.135625049 | 0.359290342 | 0.428341502 | 0.364106999 |
| 0.178517586 | 0.449965966 | 0.458244173 | 0.107818714 |
| 0.365186777 | 0.445328886 | 0.476943107 | 0.005631189 |
| 0.453119611 | 0.037368745 | 0.274706379 | 0.303313699 |
| 0.291441599 | 0.280916543 | 0.317530176 | 0.34089834  |
| 0.424371792 | 0.329753235 | 0.388244116 | 0.351640127 |
| 0.262039974 | 0.361237044 | 0.425228387 | 0.4384976   |
| 0.338390033 | 0.268417476 | 0.232235341 | 0.227358498 |
| 0.14907666  | 0.498094539 | 0.378615294 | 0.210096927 |
| 0.335527558 | 0.422090863 | 0.429344226 | 0.487873354 |
| 0.468578417 | 0.257310537 | 0.38514595  | 0.504143124 |
| 0.228994065 | 0.397788491 | 0.183962788 | 0.47783834  |
| 0.370690747 | 0.241498286 | 0.476136252 | 0.434812089 |
| 0.4498154   | 0.452042267 | 0.381517942 | 0.476014338 |
| 0.428405346 | 0.361926222 | 0.376457726 | 0.169469959 |
| 0.312655066 | 0.269738039 | 0.281728252 | 0.013926379 |
| 0.442247908 | 0.433857596 | 0.490348945 | 0.494234665 |
| 0.273251077 | 0.459713629 | 0.412379878 | 0.203923306 |
| 0.343218075 | 0.306414073 | 0.279822448 | 0.475816233 |
| 0.198336307 | 0.335166269 | 0.339193134 | 0.493883612 |
| 0.455838683 | 0.439446815 | 0.277410849 | 0.365283925 |
| 0.337910281 | 0.36015768  | 0.478624548 | 0.285196666 |
| 0.439733325 | 0.213596196 | 0.438426768 | 0.34350929  |
| 0.284885598 | 0.4893508   | 0.180988955 | 0.491372355 |
| 0.338367849 | 0.277262909 | 0.493432645 | 0.441482892 |
| 0.439677009 | 0.216844518 | 0.16732843  | 0.449607802 |
| 0.315065131 | 0.33750123  | 0.017019448 | 0.064655937 |
| 0.403329656 | 0.335833194 | 0.45188181  | 0.42039783  |
| 0.261191179 | 0.393828915 | 0.161982903 | 0.400026305 |
| 0.490084019 | 0.517255189 | 0.325859921 | 0.355489327 |
| 0.434334606 | 0.226697191 | 0.513054458 | 0.021397207 |

|             |             |             |             |
|-------------|-------------|-------------|-------------|
| 0.425453872 | 0.414728219 | 0.392298106 | 0.151250965 |
| 0.075742761 | 0.185429596 | 0.435219652 | 0.183184731 |
| 0.467412611 | 0.199452038 | 0.415348468 | 0.489725624 |
| 0.315147771 | 0.518761586 | 0.204623323 | 0.459661686 |
| 0.121046359 | 0.374539632 | 0.379686889 | 0.391419682 |
| 0.276706113 | 0.282519059 | 0.432350185 | 0.237785514 |
| 0.106503068 | 0.318266031 | 0.004158551 | 0.447112001 |
| 0.489718547 | 0.317510699 | 0.338330665 | 0.327352109 |
| 0.37071936  | 0.453350775 | 0.267388627 | 0.436411391 |
| 0.045811754 | 0.373691101 | 0.331637364 | 0.507129263 |
| 0.228343232 | 0.38949742  | 0.152345577 | 0.305679838 |
| 0.503393126 | 0.292825614 | 0.367668419 | 0.29728762  |
| 0.495040919 | 0.4703086   | 0.32074668  | 0.283878293 |
| 0.421815724 | 0.18372237  | 0.45634034  | 0.499657663 |
| 0.274861223 | 0.21801446  | 0.456605446 | 0.288133325 |
| 0.298046471 | 0.480099554 | 0.422125702 | 0.494835435 |
| 0.129551565 | 0.367122623 | 0.459850951 | 0.475082537 |
| 0.390406657 | 0.172440385 | 0.240736211 | 0.262559844 |
| 0.489029085 | 0.223078685 | 0.253512075 | 0.459732634 |
| 0.200060933 | 0.403199061 | 0.419557744 | 0.232156564 |
| 0.10304688  | 0.282720505 | 0.475794234 | 0.283363632 |
| 0.37302594  | 0.391655767 | 0.257205964 | 0.45211395  |
| 0.238538298 | 0.074603169 | 0.467964821 | 0.014128229 |
| 0.501165384 | 0.447152173 | 0.374685327 | 0.376631746 |
| 0.337423524 | 0.433979039 | 0.432046652 | 0.007828677 |
| 0.448711674 | 0.069764481 | 0.355679039 | 0.265359328 |
| 0.281361815 | 0.151925092 | 0.494128988 | 0.48427955  |
| 0.449416821 | 0.375737041 | 0.340964023 | 0.487229855 |
| 0.140417927 | 0.31444051  | 0.322747868 | 0.484133128 |
| 0.215201538 | 0.404059302 | 0.420575702 | 0.380753198 |
| 0.481915757 | 0.415254008 |             |             |
| CDK2        | 0.092858291 | 0.37380958  | 0.085105914 |
| 0.218733339 | 0.187464805 | 0.234581323 | 0.057901609 |
| 0.099672429 | 0.260176749 | 0.111743275 | 0.252244448 |
| 0.038813909 | 0.033945288 | 0.421985875 | 0.050184336 |
| 0.230037505 | 0.049730904 | 0.097023271 | 0.029708907 |
| 0.12202733  | 0.157542884 | 0.175972406 | 0.210457852 |
| 0.133567432 | 0.247166377 | 0.231158188 | 0.163292466 |
| 0.460460145 | 0.130648008 | 0.322941306 | 0.122125586 |
| 0.418704717 | 0.198417065 | 0.167714289 | 0.043792658 |
| 0.21397308  | 0.001888424 | 0.428661018 | 0.171461538 |
| 0.112611697 | 0.36085716  | 0.157756113 | 0.202521325 |
| 0.166225864 | 0.068301427 | 0.095327672 | 0.239432991 |
| 0.199842576 | 0.14421303  | 0.06932785  | 0.323940464 |
| 0.145454283 | 0.309681413 | 0.288163997 | 0.002768976 |
| 0.139384077 | 0.031251736 | 0.084991423 | 0.484965043 |
| 0.220318116 | 0.11248683  | 0.094277382 | 0.111756932 |
| 0.189572944 | 0.226725367 | 0.194550104 | 0.146945914 |
| 0.481257581 | 0.068750095 | 0.299021911 | 0.161930473 |
| 0.182755882 | 0.033646305 | 0.18717771  | 0.075044874 |
| 0.167373718 | 0.155351512 | 0.197595286 | 0.136400764 |
| 0.387343022 | 0.482916505 | 0.187819711 | 0.468426715 |
| 0.024963973 | 0.169906891 | 0.143550706 | 0.250281679 |
| 0.236312259 | 0.051025537 | 0.368840686 | 0.498812579 |

|             |             |             |             |
|-------------|-------------|-------------|-------------|
| 0.038274739 | 0.199794086 | 0.269020755 | 0.119836956 |
| 0.402391866 | 0.093081557 | 0.197027948 | 0.098291417 |
| 0.244534718 | 0.179880501 | 0.418303967 | 0.281100421 |
| 0.143027506 | 0.086951189 | 0.465796147 | 0.167319931 |
| 0.213399898 | 0.106695576 | 0.117853679 | 0.375567565 |
| 0.296016261 | 0.467590723 | 0.3327553   | 0.27743671  |
| 0.197132773 | 0.48449799  | 0.356048172 | 0.355468657 |
| 0.055845653 | 0.483995241 | 0.184294869 | 0.059467746 |
| 0.074043169 | 0.077758048 | 0.077382145 | 0.281654334 |
| 0.434157796 | 0.252328674 | 0.165279696 | 0.157533001 |
| 0.388024768 | 0.453525535 | 0.469402357 | 0.347007211 |
| 0.058997424 | 0.08337776  | 0.21019769  | 0.161673839 |
| 0.256532354 | 0.093520754 | 0.128588584 | 0.489443172 |
| 0.419001253 | 0.361727861 | 0.134597351 | 0.481503947 |
| 0.094378757 | 0.503511345 | 0.421138524 | 0.165419827 |
| 0.506174003 | 0.493354612 | 0.488265681 | 0.290088858 |
| 0.47759363  | 1           | 0.012726577 | 0.311507805 |
| 0.471328298 | 0.015389726 | 0.402495732 | 0.434142838 |
| 0.473111293 | 0.39599174  | 0.464840683 | 0.46424713  |
| 0.469049579 | 0.081266492 | 0.004387834 | 0.199285779 |
| 0.489890775 | 0.423384031 | 0.076172816 | 0.203350806 |
| 0.199336876 | 0.215565245 | 0.314830069 | 0.183076112 |
| 0.481269922 | 0.422539552 | 0.427140682 | 0.299809494 |
| 0.14410524  | 0.342358936 | 0.172369798 | 0.469526203 |
| 0.069730534 | 0.127501507 | 0.08374278  | 0.226222558 |
| 0.189904599 | 0.150546261 | 0.204670541 | 0.163308673 |
| 0.180748144 | 0.160653822 | 0.137885107 | 0.261908374 |
| 0.087295196 | 0.257247191 | 0.145654311 | 0.130811661 |
| 0.069234454 | 0.18059488  | 0.167263184 | 0.168509531 |
| 0.151244774 | 0.270338168 | 0.299842582 | 0.441166443 |
| 0.137728562 | 0.225444881 | 0.313707257 | 0.459502026 |
| 0.41875443  | 0.215845757 | 0.20090031  | 0.062823506 |
| 0.14677716  | 0.09699556  | 0.069732142 | 0.199898288 |
| 0.215572733 | 0.131783263 | 0.225012552 | 0.319487189 |
| 0.21992665  | 0.082900619 | 0.15681191  | 0.438518321 |
| 0.161494419 | 0.202004824 | 0.409941136 | 0.206368506 |
| 0.016325373 | 0.223622468 | 0.395342257 | 0.071100853 |
| 0.207320425 | 0.079760788 | 0.14988331  | 0.42033682  |
| 0.108759521 | 0.089653858 | 0.436941886 | 0.292640983 |
| 0.164697371 | 0.233716731 | 0.470185716 | 0.010878631 |
| 0.137290598 | 0.090743471 | 0.2489836   | 0.133912342 |
| 0.212240147 | 0.228909034 | 0.165096658 | 0.169643107 |
| 0.167923289 | 0.475040603 | 0.360792079 | 0.475106784 |
| 0.161706262 | 0.478679953 | 0.404765433 | 0.427872001 |
| 0.276968327 | 0.127715895 | 0.054989815 | 0.40397666  |
| 0.413990219 | 0.123504144 | 0.101711743 | 0.320145984 |
| 0.137338623 | 0.267871091 | 0.077157873 | 0.472821684 |
| 0.488773616 | 0.440654011 | 0.114916945 | 0.291370556 |
| 0.401619816 | 0.214262491 | 0.351909153 | 0.469200049 |
| 0.113673207 | 0.155365796 | 0.170356749 | 0.354824719 |
| 0.195400682 | 0.095368782 | 0.29124022  | 0.064252836 |
| 0.01074219  | 0.071533988 | 0.085256924 | 0.131285965 |
| 0.094539222 | 0.230267855 | 0.266284647 | 0.475324201 |
| 0.110286257 | 0.410646706 | 0.173434515 | 0.191118218 |

|             |             |             |             |
|-------------|-------------|-------------|-------------|
| 0.404551581 | 0.135043882 | 0.197897384 | 0.231538466 |
| 0.219853622 | 0.064439158 | 0.150801964 | 0.49708235  |
| 0.051693641 | 0.1297584   | 0.145786544 | 0.010851247 |
| 0.056906219 | 0.322955115 | 0.135083632 | 0.249515203 |
| 0.415615711 | 0.259438472 | 0.208461671 | 0.127541528 |
| 0.290634413 | 0.098896238 | 0.020170505 | 0.422488356 |
| 0.408996404 | 0.37631774  | 0.40604548  | 0.398644762 |
| 0.349428003 | 0.281839684 | 0.330290092 | 0.245455941 |
| 0.104228865 | 0.084164319 | 0.108395613 | 0.171375069 |
| 0.004020337 | 0.348193784 | 0.137152592 | 0.171942083 |
| 0.301343205 | 0.201966836 | 0.06080217  | 0.178713368 |
| 0.082113016 | 0.103111904 | 0.136247545 | 0.111951001 |
| 0.246861506 | 0.034593934 | 0.216570175 | 0.146185081 |
| 0.450832033 | 0.349270879 | 0.157503096 | 0.50000895  |
| 0.238716909 | 0.142512815 | 0.198992243 | 0.318434045 |
| 0.080210988 | 0.040789385 | 0.150730804 | 0.043975151 |
| 0.117098334 | 0.390846845 | 0.151263592 | 0.113828139 |
| 0.236001253 | 0.023787341 | 0.397930717 | 0.494546585 |
| 0.448747967 | 0.468437464 | 0.489543288 | 0.150771937 |
| 0.494430471 | 0.030049123 | 0.482630966 | 0.371998026 |
| 0.155373889 | 0.007678235 | 0.008796106 | 0.442812563 |
| 0.231335248 | 0.089430577 | 0.163414834 | 0.249647241 |
| 0.131407497 | 0.119321441 | 0.065522635 | 0.11419069  |
| 0.295810385 | 0.144044171 | 0.082054366 | 0.434011291 |
| 0.162416427 | 0.153138202 | 0.166858851 | 0.100614132 |
| 0.239906883 | 0.087360837 | 0.088868022 | 0.022248556 |
| 0.256903653 | 0.154020775 | 0.454444999 | 0.471454603 |
| 0.483768156 | 0.29673133  | 0.134365685 | 0.166660617 |
| 0.344176229 | 0.128245135 | 0.160108116 | 0.12023402  |
| 0.466003821 | 0.268572452 | 0.332125315 | 0.356282856 |
| 0.469627888 | 0.468293827 | 0.047168654 | 0.341240092 |
| 0.066358306 | 0.002147378 | 0.233267264 | 0.193950295 |
| 0.010828999 | 0.161005567 | 0.275174127 | 0.088924257 |
| 0.099472437 | 0.067060709 | 0.110974919 | 0.109951111 |
| 0.22777625  | 0.180778187 | 0.142651294 | 0.181758755 |
| 0.134593709 | 0.07406473  | 0.142846347 | 0.094559544 |
| 0.077751519 | 0.316366087 | 0.256848564 | 0.032209683 |
| 0.212530394 | 0.217321871 | 0.079425069 | 0.170949653 |
| 0.431587637 | 0.45593553  | 0.048575079 | 0.04408442  |
| 0.279081131 | 0.131921828 | 0.449807634 | 0.463007279 |
| 0.499905653 | 0.486588355 | 0.404693512 | 0.080589791 |
| 0.084814855 | 0.200337245 | 0.149611546 | 0.08220944  |
| 0.470679079 | 0.075346444 | 0.459132185 | 0.130366275 |
| 0.115729226 | 0.184938146 | 0.069481083 | 0.079810162 |
| 0.210434472 | 0.162898818 | 0.136262419 | 0.178513186 |
| 0.173068127 | 0.128209616 | 0.054611865 | 0.164710853 |
| 0.303618222 | 0.091995344 | 0.149095199 | 0.149939055 |
| 0.313209913 | 0.066378491 | 0.311575558 | 0.442629602 |
| 0.150976868 | 0.084318319 | 0.224196311 | 0.262507248 |
| 0.372944455 | 0.177665724 | 0.08296597  | 0.404390634 |
| 0.437801581 | 0.304312877 | 0.482498731 | 0.338807352 |
| 0.097308475 | 0.214823139 | 0.107774744 | 0.183661123 |
| 0.131813229 | 0.230445497 | 0.121624565 | 0.07390539  |
| 0.2699099   | 0.437988213 | 0.386829767 | 0.155231549 |

|             |             |             |             |
|-------------|-------------|-------------|-------------|
| 0.221613782 | 0.113220301 | 0.066216871 | 0.369147767 |
| 0.09886986  | 0.109542405 | 0.155183169 | 0.320029334 |
| 0.008401967 | 0.062865449 | 0.410929336 | 0.175569439 |
| 0.463118754 | 0.446534325 | 0.456605355 | 0.12904754  |
| 0.000436551 | 0.260347911 | 0.285720135 | 0.229458763 |
| 0.39515292  | 0.317894821 | 0.067467954 | 0.096213768 |
| 0.296060038 | 0.118574858 | 0.109817886 | 0.207709749 |
| 0.071059233 | 0.259671613 | 0.18739976  | 0.121377622 |
| 0.126833195 | 0.085453656 | 0.124321106 | 0.193991332 |
| 0.043111234 | 0.245808131 | 0.337143838 | 0.112981668 |
| 0.107020145 | 0.352070812 | 0.343121262 | 0.052210385 |
| 0.158031828 | 0.328976739 | 0.382002241 | 0.005565843 |
| 0.332646905 | 0.022297151 | 0.130128288 | 0.176030376 |
| 0.14475026  | 0.114061005 | 0.172536015 | 0.183378338 |
| 0.218718042 | 0.148583787 | 0.222907453 | 0.21777758  |
| 0.153706751 | 0.141854112 | 0.228949796 | 0.182154324 |
| 0.198507428 | 0.142109493 | 0.143811879 | 0.155499604 |
| 0.093951109 | 0.406860533 | 0.285564073 | 0.115743414 |
| 0.168707751 | 0.160292999 | 0.366933529 | 0.458511347 |
| 0.397100717 | 0.158827645 | 0.143719389 | 0.431760942 |
| 0.072584647 | 0.168881576 | 0.06321215  | 0.229494385 |
| 0.165920719 | 0.13387227  | 0.18995377  | 0.239224976 |
| 0.27088575  | 0.42539156  | 0.274824248 | 0.414876032 |
| 0.20980551  | 0.123496062 | 0.152496837 | 0.113189915 |
| 0.171264395 | 0.134477266 | 0.145218371 | 0.017036677 |
| 0.259132409 | 0.228978093 | 0.430473482 | 0.482611424 |
| 0.11127267  | 0.380248178 | 0.180202068 | 0.112204929 |
| 0.145175354 | 0.231802454 | 0.157206866 | 0.32796087  |
| 0.095752155 | 0.154960047 | 0.186740713 | 0.211381909 |
| 0.329759746 | 0.27894325  | 0.106913105 | 0.124384172 |
| 0.133701238 | 0.193880181 | 0.423174946 | 0.113239664 |
| 0.233868734 | 0.135100297 | 0.196174273 | 0.182081081 |
| 0.133660101 | 0.460531067 | 0.072044658 | 0.468383863 |
| 0.155841946 | 0.153370522 | 0.475628928 | 0.156298658 |
| 0.179914864 | 0.114342674 | 0.083530786 | 0.160505143 |
| 0.122965398 | 0.148679168 | 0.004913369 | 0.02992251  |
| 0.293248862 | 0.099926037 | 0.304935594 | 0.245225406 |
| 0.122924049 | 0.27749631  | 0.061362806 | 0.147727316 |
| 0.451046183 | 0.471490781 | 0.195269145 | 0.235454664 |
| 0.277050927 | 0.114462609 | 0.295528098 | 0.002864145 |
| 0.24917568  | 0.227074186 | 0.147511339 | 0.057392891 |
| 0.033435845 | 0.098397134 | 0.248286807 | 0.063498386 |
| 0.418030611 | 0.10113658  | 0.18638539  | 0.337732509 |
| 0.15191747  | 0.482439714 | 0.095599965 | 0.351390277 |
| 0.030181186 | 0.197266895 | 0.154169406 | 0.13680856  |
| 0.18497042  | 0.142104081 | 0.339728598 | 0.131698346 |
| 0.05677406  | 0.166380539 | 0.002770174 | 0.435512848 |
| 0.448222676 | 0.141827562 | 0.21649178  | 0.099316681 |
| 0.246256069 | 0.320769136 | 0.099546349 | 0.185593106 |
| 0.04284493  | 0.230512136 | 0.154896055 | 0.423654249 |
| 0.139693764 | 0.166360202 | 0.104937083 | 0.119905708 |
| 0.452159131 | 0.1334412   | 0.222796033 | 0.158010558 |
| 0.46101957  | 0.317887317 | 0.189604705 | 0.117497979 |
| 0.20912598  | 0.081401008 | 0.17443593  | 0.473398068 |

|             |             |             |             |
|-------------|-------------|-------------|-------------|
| 0.138238936 | 0.12518518  | 0.391569452 | 0.162569405 |
| 0.125390029 | 0.357227276 | 0.208679453 | 0.449090932 |
| 0.065568607 | 0.229028973 | 0.330065747 | 0.405676388 |
| 0.278464302 | 0.079221223 | 0.123951674 | 0.131822893 |
| 0.459466541 | 0.155636416 | 0.103735631 | 0.325785884 |
| 0.108850429 | 0.227822372 | 0.183356037 | 0.109325785 |
| 0.062340558 | 0.092823355 | 0.219377792 | 0.139088394 |
| 0.20146404  | 0.201062714 | 0.125038094 | 0.407793216 |
| 0.16581894  | 0.086236936 | 0.446519809 | 0.010769339 |
| 0.252046929 | 0.311498161 | 0.173587445 | 0.168174646 |
| 0.251657118 | 0.209010037 | 0.19521072  | 0.005071846 |
| 0.335565207 | 0.050716513 | 0.124300399 | 0.1607357   |
| 0.109412531 | 0.061662518 | 0.456433751 | 0.463877204 |
| 0.232833731 | 0.132957073 | 0.151886407 | 0.420379827 |
| 0.079755522 | 0.120971955 | 0.118207865 | 0.293765252 |
| 0.105353735 | 0.161877225 | 0.165040091 | 0.188864258 |
| 0.32128753  | 0.150189393 |             |             |
| CDK6        | 0.011128405 | 0.095471063 | 0.005311633 |
| 0.000633729 | 0.042345631 | 0.014202472 | 0.030198478 |
| 0.025973318 | 0.118600922 | 0.042035941 | 0.024194367 |
| 0.004814266 | 0.005485675 | 0.091790383 | 0.039543183 |
| 0.070657483 | 0.010801331 | 0.039418394 | 0.001473327 |
| 0.006485062 | 0.060701054 | 0.016399609 | 0.038545658 |
| 0.069771594 | 0.047858403 | 0.053678815 | 0.079015101 |
| 0.083362602 | 0.00666579  | 0.041438857 | 0.000538744 |
| 0.093753609 | 0.057530788 | 0.039128947 | 0.001712593 |
| 0.055855807 | 0.004578916 | 0.104855166 | 0.028472761 |
| 0.000702481 | 0.086558565 | 0.025694386 | 0.01506728  |
| 0.040937184 | 0.004762346 | 0.005279523 | 0.107742907 |
| 0.06636704  | 0.04127616  | 0.023420239 | 0.053467931 |
| 0.050516134 | 0.042405779 | 0.065065457 | 0.000253102 |
| 0.028738508 | 0.007135098 | 0.036073808 | 0.082303806 |
| 0.036210018 | 0.033351167 | 0.02440631  | 0.098268744 |
| 0.139456601 | 0.128422709 | 0.083750893 | 0.044247102 |
| 0.086394872 | 0.029288988 | 0.073700696 | 0.000193948 |
| 0.065775835 | 0.027533278 | 0.046025446 | 0.059020039 |
| 0.042363995 | 0.034650816 | 0.043706265 | 0.036895307 |
| 0.077663495 | 0.119441953 | 0.063372337 | 0.095611036 |
| 0.046762854 | 0.074309869 | 0.024529768 | 0.083418156 |
| 0.14922981  | 0.064754401 | 0.045628696 | 0.098132726 |
| 0.054689918 | 0.065748115 | 0.121810874 | 0.06802099  |
| 0.063575968 | 0.052285599 | 0.036489137 | 0.013492231 |
| 0.068094643 | 0.074418506 | 0.139626468 | 0.05385751  |
| 0.06210455  | 0.030614485 | 0.094794536 | 0.062151163 |
| 0.013744133 | 0.012309673 | 0.027324157 | 0.094169587 |
| 0.049909213 | 0.077902674 | 0.114928998 | 0.139152729 |
| 0.058200925 | 0.076596087 | 0.036609523 | 0.116004267 |
| 0.002275    | 0.097925915 | 0.014841435 | 0.011502433 |
| 0.015455583 | 0.02978112  | 0.086708769 | 0.091213776 |
| 0.072502524 | 0.062633563 | 0.021134157 | 0.039378503 |
| 0.110674717 | 0.088945029 | 0.108502434 | 0.097612954 |
| 0.012339814 | 0.056221611 | 0.039172016 | 0.029594523 |
| 0.128138341 | 0.070146069 | 0.039321403 | 0.103748548 |
| 0.053652831 | 0.09080201  | 0.016217196 | 0.109770717 |



|             |             |             |             |
|-------------|-------------|-------------|-------------|
| 0.118385766 | 0.08919604  | 0.064529302 | 0.019973846 |
| 0.089170827 | 0.082297309 | 0.088051431 | 0.058194575 |
| 0.076779215 | 0.012726577 | 1           | 0.115205585 |
| 0.093956788 | 6.82E-05    | 0.097863078 | 0.099250173 |
| 0.084290229 | 0.076014328 | 0.116512826 | 0.088992385 |
| 0.091001001 | 0.034262456 | 0.012732833 | 0.086177132 |
| 0.08934576  | 0.047787041 | 0.048872513 | 0.052768286 |
| 0.099609071 | 0.031837901 | 0.102096991 | 0.003100778 |
| 0.119229332 | 0.063694058 | 0.092820132 | 0.105059682 |
| 0.10123092  | 0.072307126 | 0.067872035 | 0.079084547 |
| 0.004768848 | 0.010961113 | 0.015191791 | 0.125730729 |
| 0.007033687 | 0.040699768 | 0.028880282 | 0.134156022 |
| 0.050543768 | 0.052137339 | 0.033702372 | 0.069708925 |
| 0.034282197 | 0.044936313 | 0.02160209  | 0.042631558 |
| 0.006840599 | 0.063104975 | 0.006968996 | 0.005997278 |
| 0.057357752 | 0.081547721 | 0.076215662 | 0.089796313 |
| 0.082769017 | 0.028699952 | 0.071495136 | 0.083816898 |
| 0.101739151 | 0.034295766 | 0.110636158 | 5.36E-05    |
| 0.014932296 | 0.064548138 | 0.03175689  | 0.061346771 |
| 0.069405453 | 0.051921322 | 0.088364484 | 0.061658323 |
| 0.020533747 | 0.087410858 | 0.054633944 | 0.08876557  |
| 0.05874823  | 0.016893609 | 0.082292403 | 0.07176478  |
| 2.12E-05    | 0.02788647  | 0.06847013  | 0.027108756 |
| 0.142647634 | 0.001977318 | 0.00531826  | 0.086710226 |
| 0.036130824 | 0.086454273 | 0.091579157 | 0.076498539 |
| 0.010061447 | 0.089221651 | 0.114824801 | 0.020180415 |
| 0.103903059 | 3.76E-05    | 0.06097921  | 0.047679521 |
| 0.041232765 | 0.1081934   | 0.067821667 | 0.016791147 |
| 0.016217484 | 0.110642597 | 0.064858634 | 0.092573139 |
| 0.034104982 | 0.110433226 | 0.081664315 | 0.074427831 |
| 0.058091141 | 0.091654668 | 0.018626914 | 0.05661723  |
| 0.075614141 | 0.006453327 | 0.031612104 | 0.112830332 |
| 0.072559417 | 0.085419223 | 0.003007238 | 0.088856099 |
| 0.092171461 | 0.086025435 | 0.032800497 | 0.092177489 |
| 0.047558699 | 0.017973829 | 0.077848259 | 0.128946368 |
| 0.039410879 | 0.089092612 | 0.03075829  | 0.080268535 |
| 0.027964454 | 0.06175224  | 0.101354505 | 0.030744144 |
| 9.17E-05    | 0.040260163 | 0.016134015 | 0.029276574 |
| 0.017685182 | 0.076125386 | 0.077342059 | 0.098551941 |
| 0.034085504 | 0.0718831   | 0.133558412 | 0.020097241 |
| 0.083052705 | 0.104153904 | 0.04622212  | 0.072262553 |
| 0.076634826 | 3.53E-05    | 0.002243302 | 0.10908214  |
| 0.028785253 | 0.017972396 | 0.091511398 | 1.54E-05    |
| 0.018840409 | 0.085879496 | 0.045342293 | 0.059858588 |
| 0.10731932  | 0.045721772 | 0.039274964 | 0.041959743 |
| 0.055018532 | 0.026119623 | 3.54E-05    | 0.109062742 |
| 0.131791504 | 0.142027838 | 0.13276064  | 0.125506621 |
| 0.139321704 | 0.113334347 | 0.086718678 | 0.019739369 |
| 0.014276327 | 0.01842607  | 0.022322776 | 0.042734102 |
| 0.000718273 | 0.053694525 | 0.083300314 | 0.038488457 |
| 0.095731193 | 0.125680411 | 0.008425457 | 0.103581221 |
| 0.000119139 | 0.0094775   | 0.085863403 | 0.076813272 |
| 0.115896554 | 0.003377118 | 0.00023798  | 0.020719945 |
| 0.060114456 | 0.072663087 | 0.023986682 | 0.0901985   |

|             |             |             |             |
|-------------|-------------|-------------|-------------|
| 0.030231235 | 0.045408941 | 0.022705897 | 0.069762515 |
| 0.018704589 | 0.001046552 | 0.093011696 | 4.98E-05    |
| 0.001034924 | 0.13212055  | 0.044978357 | 0.001390701 |
| 0.036112814 | 0.000216771 | 0.050887673 | 0.102963059 |
| 0.073242977 | 0.100636179 | 0.076922214 | 0.019520075 |
| 0.078480446 | 0.01465562  | 0.097759727 | 0.076149965 |
| 0.043215588 | 1.45E-05    | 0.000475552 | 0.077062534 |
| 0.038891467 | 0.025652048 | 0.036626852 | 0.0031642   |
| 0.007612041 | 0.029073593 | 0.027497267 | 0.015648498 |
| 0.035769487 | 0.044327023 | 0.034910637 | 0.100408348 |
| 0.03868615  | 0.070444312 | 0.05882441  | 0.053167256 |
| 0.04686899  | 0.005626015 | 0.066748998 | 6.70E-06    |
| 0.096035677 | 0.035746686 | 0.095426227 | 0.094279179 |
| 0.087781264 | 0.050685604 | 0.030334988 | 0.015551913 |
| 0.13196155  | 0.027796492 | 0.009179801 | 0.030083304 |
| 0.076032533 | 0.059496802 | 0.050752715 | 0.043185163 |
| 0.104477552 | 0.075362615 | 0.018160842 | 0.078192441 |
| 5.76E-05    | 0.000586567 | 0.016660489 | 0.116542606 |
| 0.020210013 | 0.070644419 | 0.052535287 | 0.099712007 |
| 0.081506226 | 0.000845645 | 0.047208545 | 0.039270958 |
| 0.048605304 | 0.056932193 | 0.04554578  | 0.13462057  |
| 0.042831948 | 0.007945515 | 0.024962395 | 0.05915525  |
| 0.021807109 | 0.071205346 | 0.04575967  | 0.014099627 |
| 0.036962368 | 0.040875876 | 0.015067259 | 0.038797633 |
| 0.059820799 | 0.081740628 | 0.010282516 | 0.000187232 |
| 0.05903745  | 0.091731704 | 0.100406736 | 0.084937445 |
| 0.099826581 | 0.111276058 | 0.084085614 | 0.036889327 |
| 0.013960456 | 0.065445493 | 0.054436601 | 0.011275537 |
| 0.099599752 | 0.038042018 | 0.083717772 | 0.049456168 |
| 0.054164628 | 0.012863365 | 0.002197063 | 0.040820297 |
| 0.057031801 | 0.057227005 | 0.033012346 | 0.019780608 |
| 0.049731173 | 0.009117389 | 0.024272074 | 0.045175477 |
| 0.081375062 | 0.006407173 | 0.047374536 | 0.044050011 |
| 0.064236684 | 0.02784457  | 0.075354211 | 0.103494781 |
| 0.036285877 | 0.058621487 | 0.005498166 | 0.119480012 |
| 0.079113096 | 0.079462482 | 5.24E-05    | 0.082377329 |
| 0.103510544 | 0.053753344 | 0.081056746 | 0.12201353  |
| 0.045559556 | 0.03434913  | 0.09581685  | 0.07923846  |
| 0.089675299 | 0.016958342 | 0.092668718 | 0.032790611 |
| 0.11839024  | 0.134853159 | 0.074387245 | 0.02049792  |
| 0.061016491 | 0.046521631 | 0.034966977 | 0.10484959  |
| 0.016108542 | 0.006516707 | 0.044161    | 0.125646616 |
| 0.000700691 | 0.018006699 | 0.123161398 | 0.019119051 |
| 0.122415215 | 0.082357379 | 0.073022466 | 0.042318113 |
| 0.000220826 | 0.07694613  | 0.039734318 | 0.016620012 |
| 0.080359461 | 0.065232429 | 0.021724771 | 0.00989408  |
| 0.065478755 | 0.020902809 | 0.025343661 | 0.002630544 |
| 0.003757906 | 0.084241387 | 0.077506183 | 0.113296888 |
| 0.040165667 | 0.082105369 | 0.00901774  | 0.015065331 |
| 0.034413027 | 0.060404199 | 0.080583562 | 0.031305906 |
| 0.008772633 | 0.148324753 | 0.081048264 | 0.005233146 |
| 0.064639941 | 0.128957154 | 0.095386266 | 0.000163839 |
| 0.061402789 | 0.001453464 | 0.051855311 | 0.018505522 |
| 0.028136866 | 0.089117368 | 0.07770925  | 0.015683938 |

|              |             |             |             |
|--------------|-------------|-------------|-------------|
| 0.094682237  | 0.038753011 | 0.011060566 | 0.041053785 |
| 0.011357498  | 0.040020377 | 0.053598463 | 0.038012268 |
| 0.012577181  | 0.011693102 | 0.040410912 | 0.039747001 |
| 0.001902114  | 0.088505865 | 0.059735734 | 0.01848852  |
| 0.077954903  | 0.052906526 | 0.071669704 | 0.085446148 |
| 0.08440294   | 0.031768921 | 0.087420804 | 0.057121842 |
| 0.008395186  | 0.001630622 | 0.018852618 | 0.029671491 |
| 0.045256661  | 0.020303974 | 0.041353688 | 0.04131233  |
| 0.119214396  | 0.081250652 | 0.056759843 | 0.086431594 |
| 0.019568622  | 0.130948896 | 0.017055308 | 0.006326683 |
| 0.016078489  | 0.064541996 | 0.045228345 | 0.000210379 |
| 0.07901377   | 0.002241889 | 0.073857832 | 0.076558343 |
| 0.046266114  | 0.077740901 | 0.005259303 | 0.009790403 |
| 0.004888725  | 0.043481114 | 0.048774629 | 0.0696851   |
| 0.021380609  | 0.016646325 | 0.039065807 | 0.008807528 |
| 0.068852684  | 0.100721593 | 0.064177369 | 0.094636744 |
| 0.087462282  | 0.031538403 | 0.123530829 | 0.016256188 |
| 0.055543038  | 0.00912702  | 0.075756322 | 0.040121168 |
| 0.047051205  | 0.094152317 | 0.021057065 | 0.099889237 |
| 0.070751669  | 0.054317501 | 0.106851517 | 0.061806223 |
| 0.010415667  | 0.005668456 | 0.022273375 | 0.043051175 |
| 0.046068978  | 0.031145681 | 0.000474005 | 0.004959336 |
| 0.069831929  | 0.111877723 | 0.105177111 | 0.131677914 |
| 0.038246385  | 0.114678519 | 0.010281748 | 0.069196629 |
| 0.086096802  | 0.098227286 | 0.009793064 | 0.082824705 |
| 0.109747708  | 0.016211612 | 0.03527016  | 0.00533501  |
| 0.074260019  | 0.068079747 | 0.047018833 | 0.025269322 |
| 0.003333038  | 0.020356061 | 0.057143061 | 0.060137718 |
| 0.102370316  | 0.004940967 | 0.124627085 | 0.045212187 |
| 0.096409506  | 0.093557058 | 0.024988668 | 0.049581337 |
| 0.021079912  | 0.076735693 | 0.066255356 | 0.12074506  |
| 0.008436263  | 0.036586495 | 0.052437358 | 0.020261423 |
| 0.007824709  | 0.013714899 | 0.000257177 | 0.078838263 |
| 0.092977528  | 0.060690043 | 0.084977679 | 0.047999702 |
| 0.060104466  | 0.106583103 | 0.062967917 | 0.046674938 |
| 0.000128813  | 0.047943247 | 0.053800451 | 0.051788802 |
| 0.003122285  | 0.127147982 | 0.001244853 | 0.110306942 |
| 0.092198694  | 0.039549447 | 0.127854451 | 0.008203729 |
| 0.07777228   | 0.090756952 | 0.032441712 | 0.015416453 |
| 0.125718044  | 0.036750767 | 0.025363814 | 0.117977913 |
| 0.033469128  | 0.018859712 | 0.077519759 | 0.022502458 |
| 0.0711133322 | 0.077333169 | 0.077537925 | 0.131916712 |
| 0.02127218   | 0.049667774 | 0.087250106 | 0.102508253 |
| 0.077457946  | 0.044836727 | 0.030207656 | 0.053161062 |
| 0.064306223  | 0.001323678 | 0.035026216 | 0.05215432  |
| 0.025736961  | 0.084302207 | 0.077653767 | 0.046822282 |
| 0.001584471  | 0.05286462  | 0.013797686 | 0.047166542 |
| 0.067782023  | 0.04110582  | 0.030203624 | 0.06971628  |
| 0.002571862  | 0.00010471  | 0.085976456 | 0.000226053 |
| 0.019334697  | 0.034678282 | 0.058256762 | 0.042452812 |
| 0.03152838   | 0.088644235 | 0.046737675 | 7.83E-05    |
| 0.105956492  | 0.000113081 | 0.082275653 | 0.014942827 |
| 0.020257069  | 0.018244873 | 0.070878907 | 0.102271319 |
| 0.066338293  | 0.010725556 | 0.015222448 | 0.108993535 |

|             |             |             |             |
|-------------|-------------|-------------|-------------|
| 0.002233995 | 0.039733492 | 0.091852856 | 0.049131642 |
| 0.02633582  | 0.037854399 | 0.046408065 | 0.01722683  |
| 0.063106304 | 0.043697402 |             |             |
| CDKN1A      | 0.126625178 | 0.393062657 | 0.097591011 |
| 0.164041767 | 0.285874315 | 0.317566312 | 0.136328945 |
| 0.204267977 | 0.340428828 | 0.277269908 | 0.314441532 |
| 0.051474154 | 0.084044884 | 0.417586645 | 0.130969607 |
| 0.342881118 | 0.08761192  | 0.190176699 | 0.123775958 |
| 0.271765218 | 0.283813847 | 0.272695999 | 0.332108601 |
| 0.295795478 | 0.22581941  | 0.340087487 | 0.3289173   |
| 0.447833037 | 0.19126658  | 0.34156285  | 0.162836686 |
| 0.416031947 | 0.297418113 | 0.301109401 | 0.045380461 |
| 0.352806959 | 0.031931791 | 0.449141465 | 0.288299161 |
| 0.130976322 | 0.353056066 | 0.2855005   | 0.26005552  |
| 0.335175947 | 0.081006047 | 0.162236264 | 0.359293016 |
| 0.339096641 | 0.313198085 | 0.122031832 | 0.356544135 |
| 0.351780686 | 0.31980189  | 0.329736932 | 0.005728777 |
| 0.241303288 | 0.071406305 | 0.193308236 | 0.464543696 |
| 0.245348652 | 0.19057406  | 0.259834849 | 0.307856687 |
| 0.36270961  | 0.361109998 | 0.300168397 | 0.341717948 |
| 0.456344201 | 0.177249423 | 0.354394977 | 0.175550963 |
| 0.367415948 | 0.092904312 | 0.223301849 | 0.159335233 |
| 0.346017294 | 0.245020524 | 0.303209333 | 0.275504388 |
| 0.39269977  | 0.502320232 | 0.294607737 | 0.475084455 |
| 0.152705389 | 0.307027391 | 0.272387222 | 0.323655559 |
| 0.367224372 | 0.187638824 | 0.349136845 | 0.492471794 |
| 0.122714069 | 0.32980422  | 0.372453693 | 0.193833698 |
| 0.378005757 | 0.265710423 | 0.318869253 | 0.153920572 |
| 0.32676271  | 0.325670659 | 0.474186066 | 0.308493566 |
| 0.29756918  | 0.135260283 | 0.468295891 | 0.283793781 |
| 0.266797951 | 0.139616914 | 0.263218636 | 0.389571724 |
| 0.359695054 | 0.437562382 | 0.380307557 | 0.363346996 |
| 0.333859047 | 0.451755397 | 0.348830035 | 0.389469451 |
| 0.131255922 | 0.484286744 | 0.231687961 | 0.092404022 |
| 0.132283838 | 0.153886669 | 0.288061164 | 0.315244096 |
| 0.405074665 | 0.336664175 | 0.251292406 | 0.276774289 |
| 0.409681249 | 0.45141314  | 0.48652178  | 0.369553074 |
| 0.091033298 | 0.247802078 | 0.330914061 | 0.292186921 |
| 0.364731216 | 0.19822405  | 0.237359452 | 0.489982138 |
| 0.357130137 | 0.369900464 | 0.2268599   | 0.495928758 |
| 0.291433207 | 0.476528837 | 0.394330016 | 0.223064551 |
| 0.489314232 | 0.468428865 | 0.466633053 | 0.32628688  |
| 0.444423666 | 0.311507805 | 0.115205585 | 1           |
| 0.450433145 | 0.014424882 | 0.417335242 | 0.444398873 |
| 0.461003638 | 0.385382485 | 0.483027392 | 0.45326335  |
| 0.463493548 | 0.144814355 | 0.045340493 | 0.311026228 |
| 0.478486451 | 0.356151722 | 0.214736727 | 0.342097569 |
| 0.336570061 | 0.344546598 | 0.361154852 | 0.256727108 |
| 0.492398332 | 0.395986262 | 0.43321008  | 0.368959837 |
| 0.336100573 | 0.328907657 | 0.312155008 | 0.447842422 |
| 0.096217823 | 0.168065762 | 0.101467125 | 0.338206371 |
| 0.279267145 | 0.233871702 | 0.346876375 | 0.348251978 |
| 0.250542742 | 0.340177066 | 0.263720409 | 0.328657262 |
| 0.109708902 | 0.344009674 | 0.227924352 | 0.246405539 |

|             |             |             |             |
|-------------|-------------|-------------|-------------|
| 0.094333102 | 0.195849145 | 0.230540119 | 0.189704515 |
| 0.280082543 | 0.291739195 | 0.357829727 | 0.441944351 |
| 0.351906248 | 0.228761493 | 0.363200101 | 0.442203103 |
| 0.412757683 | 0.315593515 | 0.285595647 | 0.02162122  |
| 0.287910891 | 0.282589624 | 0.174975104 | 0.33465645  |
| 0.233701926 | 0.301494453 | 0.361017914 | 0.331097114 |
| 0.289336882 | 0.230551466 | 0.344174711 | 0.42442026  |
| 0.21141673  | 0.27394514  | 0.394112917 | 0.360538729 |
| 0.012400873 | 0.331564625 | 0.369151787 | 0.199135988 |
| 0.350327962 | 0.135302187 | 0.189428053 | 0.415644179 |
| 0.271299779 | 0.252819724 | 0.433361131 | 0.334945456 |
| 0.292146625 | 0.273705036 | 0.485681473 | 0.064168439 |
| 0.33047186  | 0.067233231 | 0.299836637 | 0.298325293 |
| 0.297269157 | 0.324056921 | 0.286441831 | 0.266107912 |
| 0.174299402 | 0.482481911 | 0.348444904 | 0.457917183 |
| 0.322760845 | 0.490372003 | 0.38939967  | 0.392509933 |
| 0.348797707 | 0.329906668 | 0.123581181 | 0.363033185 |
| 0.402478405 | 0.301231653 | 0.132278976 | 0.363124282 |
| 0.344462674 | 0.350036726 | 0.159110126 | 0.452705887 |
| 0.475229527 | 0.441033664 | 0.205484084 | 0.345044353 |
| 0.338337132 | 0.259576302 | 0.362381649 | 0.495510959 |
| 0.304968674 | 0.338587171 | 0.312356265 | 0.352352287 |
| 0.232194491 | 0.25059151  | 0.332202294 | 0.162599753 |
| 0.005795369 | 0.153635721 | 0.125645686 | 0.211264704 |
| 0.165735484 | 0.339832413 | 0.357429932 | 0.474049647 |
| 0.188801577 | 0.382345298 | 0.303916105 | 0.290352637 |
| 0.405969471 | 0.335789385 | 0.304829775 | 0.333839468 |
| 0.294136594 | 0.033714347 | 0.149691285 | 0.50458298  |
| 0.093210307 | 0.207997738 | 0.345031246 | 0.00483702  |
| 0.106962295 | 0.350749606 | 0.155030308 | 0.243102801 |
| 0.427677833 | 0.240849018 | 0.262170013 | 0.317212593 |
| 0.322975573 | 0.161252045 | 0.005774611 | 0.450583335 |
| 0.464181358 | 0.445308832 | 0.463791697 | 0.448729841 |
| 0.419982822 | 0.356995398 | 0.363705572 | 0.313632311 |
| 0.178668161 | 0.159224542 | 0.22125079  | 0.313014507 |
| 0.012013415 | 0.333914471 | 0.313368048 | 0.205426338 |
| 0.359982889 | 0.343928816 | 0.082951505 | 0.325547502 |
| 0.043618126 | 0.161232584 | 0.348039309 | 0.282133791 |
| 0.334617319 | 0.042411979 | 0.197597184 | 0.295548115 |
| 0.401289417 | 0.332530345 | 0.291745692 | 0.486780841 |
| 0.311484067 | 0.187200915 | 0.301671061 | 0.338105595 |
| 0.144898478 | 0.138621314 | 0.359935294 | 0.031370294 |
| 0.179151485 | 0.444773768 | 0.337682965 | 0.125412013 |
| 0.300527341 | 0.016559575 | 0.344414942 | 0.489977049 |
| 0.430650751 | 0.469594624 | 0.450426971 | 0.22597933  |
| 0.460140904 | 0.096097953 | 0.477875911 | 0.36372537  |
| 0.321648883 | 0.001945797 | 0.015222367 | 0.424683969 |
| 0.339183853 | 0.106630738 | 0.224630264 | 0.275276112 |
| 0.167606293 | 0.219323002 | 0.131499984 | 0.190461748 |
| 0.339311172 | 0.253180245 | 0.189475794 | 0.448541235 |
| 0.290384556 | 0.287153974 | 0.34693152  | 0.156364306 |
| 0.332064492 | 0.105794675 | 0.163707559 | 0.011912096 |
| 0.341316149 | 0.167053434 | 0.462599901 | 0.465650973 |
| 0.463953403 | 0.337084072 | 0.274891947 | 0.287596886 |

|             |             |             |             |
|-------------|-------------|-------------|-------------|
| 0.398902917 | 0.147395275 | 0.284560108 | 0.170264746 |
| 0.440911666 | 0.34807421  | 0.316561296 | 0.303582673 |
| 0.46791392  | 0.439002351 | 0.085778273 | 0.3638527   |
| 0.023719123 | 0.004012192 | 0.322654697 | 0.3127435   |
| 0.115781628 | 0.342470349 | 0.289141354 | 0.311622896 |
| 0.286354705 | 0.064620147 | 0.247674612 | 0.236889333 |
| 0.318133954 | 0.349769712 | 0.262057088 | 0.30251894  |
| 0.279693646 | 0.185880985 | 0.240710622 | 0.235325128 |
| 0.29206684  | 0.319577901 | 0.22939531  | 0.067537833 |
| 0.345109805 | 0.331845068 | 0.11498259  | 0.220164653 |
| 0.377368188 | 0.431768753 | 0.112124549 | 0.025581071 |
| 0.291086411 | 0.339704631 | 0.444945044 | 0.450182959 |
| 0.493490051 | 0.488918321 | 0.401395003 | 0.200384108 |
| 0.126669227 | 0.325983698 | 0.276866959 | 0.147994845 |
| 0.462799557 | 0.13120818  | 0.443578938 | 0.260171043 |
| 0.194406571 | 0.260748848 | 0.068711063 | 0.161792697 |
| 0.309865458 | 0.241185869 | 0.226931378 | 0.198069521 |
| 0.322117194 | 0.216011386 | 0.116308808 | 0.259613142 |
| 0.347714054 | 0.174050875 | 0.23240893  | 0.321831558 |
| 0.337908824 | 0.237795892 | 0.358687818 | 0.437398778 |
| 0.192968102 | 0.202148149 | 0.275694275 | 0.354473498 |
| 0.373077035 | 0.331163161 | 0.03674952  | 0.409879443 |
| 0.444279486 | 0.350222052 | 0.458170634 | 0.371347604 |
| 0.157749742 | 0.312961298 | 0.303626307 | 0.340139293 |
| 0.265452177 | 0.318077904 | 0.304574254 | 0.129656911 |
| 0.319322223 | 0.479943665 | 0.385769444 | 0.211587871 |
| 0.341165842 | 0.194126514 | 0.120745309 | 0.3933762   |
| 0.194460404 | 0.145922657 | 0.30448795  | 0.37142987  |
| 0.003524284 | 0.126065872 | 0.453039435 | 0.254181317 |
| 0.493292132 | 0.432101115 | 0.415708539 | 0.29321031  |
| 0.003643097 | 0.348112292 | 0.33270719  | 0.328445892 |
| 0.393264468 | 0.329065213 | 0.203597636 | 0.134309708 |
| 0.299662882 | 0.13182272  | 0.214211257 | 0.281167913 |
| 0.189879965 | 0.365422063 | 0.25694862  | 0.292673953 |
| 0.252312233 | 0.166953973 | 0.203459783 | 0.263061973 |
| 0.188577004 | 0.275626734 | 0.336086443 | 0.263085891 |
| 0.179945571 | 0.414637523 | 0.365151118 | 0.063088894 |
| 0.303210615 | 0.382532932 | 0.398595723 | 0.008354675 |
| 0.352816203 | 0.024068202 | 0.243108742 | 0.237277264 |
| 0.239635247 | 0.276807492 | 0.286444153 | 0.281105409 |
| 0.362951078 | 0.284118902 | 0.271692693 | 0.268907077 |
| 0.199021801 | 0.277217988 | 0.343253008 | 0.35219178  |
| 0.255501111 | 0.18424838  | 0.150232783 | 0.155226434 |
| 0.087736193 | 0.410052863 | 0.265743552 | 0.123505626 |
| 0.277705979 | 0.355788465 | 0.346165977 | 0.453471094 |
| 0.385792074 | 0.156944143 | 0.352134139 | 0.385061394 |
| 0.22190974  | 0.268297214 | 0.126864496 | 0.341775474 |
| 0.274278959 | 0.216281132 | 0.337689188 | 0.319900393 |
| 0.364350968 | 0.3998003   | 0.262262304 | 0.413316136 |
| 0.322309281 | 0.355658247 | 0.267177142 | 0.130664646 |
| 0.233968586 | 0.207819698 | 0.259407544 | 0.006516206 |
| 0.344763217 | 0.256926382 | 0.402222371 | 0.454288477 |
| 0.245683571 | 0.366357082 | 0.263145834 | 0.153143936 |
| 0.226959881 | 0.224016014 | 0.20692074  | 0.358718295 |

|             |             |             |             |
|-------------|-------------|-------------|-------------|
| 0.177429901 | 0.228993117 | 0.294261414 | 0.284165348 |
| 0.358013328 | 0.361330601 | 0.276019971 | 0.31204823  |
| 0.302792998 | 0.249033804 | 0.471246041 | 0.182898723 |
| 0.349800886 | 0.186969493 | 0.32738319  | 0.304089793 |
| 0.265426925 | 0.46497855  | 0.11930999  | 0.470487097 |
| 0.329869856 | 0.192539674 | 0.476463986 | 0.313201342 |
| 0.296096805 | 0.154593252 | 0.166661264 | 0.342823541 |
| 0.294987655 | 0.274320731 | 0.016162919 | 0.080594923 |
| 0.321377303 | 0.33327169  | 0.357263518 | 0.359649669 |
| 0.250507088 | 0.337084461 | 0.142151187 | 0.336563167 |
| 0.448951055 | 0.477848342 | 0.272549481 | 0.292060168 |
| 0.350268299 | 0.159585987 | 0.330210194 | 0.031249272 |
| 0.35716757  | 0.335331722 | 0.33110725  | 0.116678686 |
| 0.05539797  | 0.192425571 | 0.363126168 | 0.141381589 |
| 0.432284147 | 0.166222034 | 0.348346325 | 0.347149198 |
| 0.247524511 | 0.479586562 | 0.17919385  | 0.341870099 |
| 0.128467703 | 0.302193753 | 0.320626691 | 0.355143022 |
| 0.226179258 | 0.271987167 | 0.339775311 | 0.207233118 |
| 0.076708801 | 0.262775332 | 0.009014288 | 0.412821423 |
| 0.457909679 | 0.308711836 | 0.251406472 | 0.270115787 |
| 0.294091911 | 0.360425546 | 0.288565099 | 0.330354816 |
| 0.025546994 | 0.313262184 | 0.252946924 | 0.358410407 |
| 0.193049554 | 0.36723297  | 0.095006477 | 0.313584968 |
| 0.45508734  | 0.295355072 | 0.295627085 | 0.272836136 |
| 0.444501701 | 0.348355756 | 0.206874811 | 0.227630466 |
| 0.354272978 | 0.127734198 | 0.308182385 | 0.492571576 |
| 0.222718142 | 0.201049044 | 0.374507654 | 0.256164982 |
| 0.279248571 | 0.363080277 | 0.345148606 | 0.491098513 |
| 0.1285727   | 0.282450007 | 0.359514405 | 0.431604703 |
| 0.30774028  | 0.19496634  | 0.226881208 | 0.26481668  |
| 0.420767116 | 0.128326036 | 0.267143237 | 0.341170956 |
| 0.206126155 | 0.31919545  | 0.320338162 | 0.225857113 |
| 0.072943802 | 0.248185471 | 0.299070096 | 0.214205112 |
| 0.323457416 | 0.334720426 | 0.260509039 | 0.377185058 |
| 0.152428788 | 0.044755501 | 0.435222743 | 0.021773154 |
| 0.302516611 | 0.327947815 | 0.281149799 | 0.323705684 |
| 0.2200425   | 0.361564479 | 0.337723534 | 0.005390813 |
| 0.361438797 | 0.050936831 | 0.313142872 | 0.233170818 |
| 0.266610589 | 0.115502839 | 0.421514146 | 0.46376631  |
| 0.324604123 | 0.286381743 | 0.264176401 | 0.433413798 |
| 0.145124832 | 0.268822388 | 0.311781279 | 0.34974188  |
| 0.197929726 | 0.315499134 | 0.334275984 | 0.288680387 |
| 0.351069113 | 0.301296134 |             |             |
| CENPA       | 0.188912433 | 0.446602733 | 0.14196854  |
| 0.279512633 | 0.406871259 | 0.499237689 | 0.156769541 |
| 0.268206396 | 0.405787867 | 0.31244812  | 0.49028343  |
| 0.072810702 | 0.126333366 | 0.490103187 | 0.153938147 |
| 0.455051697 | 0.117587304 | 0.240471971 | 0.12390347  |
| 0.323693667 | 0.387051745 | 0.427248133 | 0.466083234 |
| 0.383379209 | 0.290618671 | 0.42994348  | 0.416434139 |
| 0.482086216 | 0.303068138 | 0.501835751 | 0.21575402  |
| 0.446338116 | 0.416765508 | 0.422523919 | 0.064247805 |
| 0.499609467 | 0.019890214 | 0.447110624 | 0.390571831 |
| 0.216823804 | 0.425958904 | 0.368980549 | 0.404839075 |

|             |             |             |             |
|-------------|-------------|-------------|-------------|
| 0.400359899 | 0.113687914 | 0.226903788 | 0.442013845 |
| 0.406253239 | 0.405564233 | 0.153811026 | 0.488035044 |
| 0.417084949 | 0.471607548 | 0.419811365 | 0.007663315 |
| 0.357182411 | 0.099615654 | 0.252933766 | 0.495840089 |
| 0.361172996 | 0.279279407 | 0.286076746 | 0.366987942 |
| 0.43361034  | 0.442217707 | 0.394419986 | 0.388645369 |
| 0.489127824 | 0.228531609 | 0.463345916 | 0.278894465 |
| 0.466466504 | 0.093505828 | 0.297003482 | 0.169597668 |
| 0.444623031 | 0.368351381 | 0.46421285  | 0.365855203 |
| 0.433898875 | 0.518780933 | 0.3726651   | 0.485681443 |
| 0.138465422 | 0.401041497 | 0.374785838 | 0.424765007 |
| 0.43379061  | 0.180856077 | 0.503885831 | 0.513922689 |
| 0.126690624 | 0.406662857 | 0.453842732 | 0.231653987 |
| 0.477076929 | 0.320724781 | 0.423079643 | 0.254422054 |
| 0.440263618 | 0.415020041 | 0.470840294 | 0.437560399 |
| 0.41885805  | 0.164045406 | 0.482612744 | 0.38503489  |
| 0.440795468 | 0.189357507 | 0.31978694  | 0.483694253 |
| 0.488340256 | 0.49461522  | 0.45594591  | 0.443772193 |
| 0.434233699 | 0.489061795 | 0.493612873 | 0.469268142 |
| 0.160088562 | 0.507307637 | 0.343337769 | 0.142609389 |
| 0.167256375 | 0.221761269 | 0.302150104 | 0.421203406 |
| 0.500130371 | 0.464462423 | 0.355223482 | 0.374143545 |
| 0.484040244 | 0.468977979 | 0.499104687 | 0.479942027 |
| 0.124054217 | 0.286971338 | 0.437920251 | 0.431519479 |
| 0.468289534 | 0.236916332 | 0.335435752 | 0.506691664 |
| 0.468210888 | 0.490306288 | 0.301009328 | 0.509170877 |
| 0.32413369  | 0.514027355 | 0.469418989 | 0.328388562 |
| 0.513768289 | 0.495622417 | 0.501280543 | 0.46566311  |
| 0.483150239 | 0.471328298 | 0.093956788 | 0.450433145 |
| 1           | 0.02846276  | 0.485508377 | 0.488386408 |
| 0.481081923 | 0.491351194 | 0.502075306 | 0.494725139 |
| 0.486641829 | 0.175939332 | 0.030775116 | 0.408142811 |
| 0.496818576 | 0.481670497 | 0.273782676 | 0.446423376 |
| 0.438503152 | 0.498632861 | 0.477359893 | 0.383477854 |
| 0.517997297 | 0.49233831  | 0.485651976 | 0.466368525 |
| 0.368415742 | 0.412081291 | 0.404776338 | 0.471093892 |
| 0.13992478  | 0.246958562 | 0.132174825 | 0.415077327 |
| 0.396612566 | 0.33215125  | 0.475425758 | 0.417785335 |
| 0.3517696   | 0.443595567 | 0.372764214 | 0.454256195 |
| 0.126207855 | 0.487695149 | 0.309233074 | 0.296425122 |
| 0.134076214 | 0.249641313 | 0.336636271 | 0.323481945 |
| 0.399867813 | 0.281248797 | 0.483653276 | 0.485179676 |
| 0.413561578 | 0.306196191 | 0.494181848 | 0.487767316 |
| 0.470557755 | 0.447744744 | 0.362209624 | 0.045891816 |
| 0.348647719 | 0.309696421 | 0.223118321 | 0.448849691 |
| 0.256293896 | 0.362505748 | 0.455878136 | 0.476887674 |
| 0.415756855 | 0.26383818  | 0.428234549 | 0.455588357 |
| 0.255982077 | 0.44067237  | 0.496828457 | 0.444172225 |
| 0.018242691 | 0.451749863 | 0.504030029 | 0.239245404 |
| 0.415981593 | 0.207452629 | 0.32822333  | 0.4856726   |
| 0.3387118   | 0.31024611  | 0.493768298 | 0.469506187 |
| 0.433006364 | 0.280127482 | 0.506587258 | 0.059450356 |
| 0.399725811 | 0.131569033 | 0.421264906 | 0.357820137 |
| 0.397859904 | 0.413923965 | 0.403793919 | 0.395188121 |



|             |             |             |             |
|-------------|-------------|-------------|-------------|
| 0.245336911 | 0.503597977 | 0.47984646  | 0.49591055  |
| 0.405997541 | 0.50954668  | 0.499839458 | 0.501186795 |
| 0.481265221 | 0.385481264 | 0.173241126 | 0.496684277 |
| 0.48752646  | 0.329208921 | 0.160907172 | 0.468954806 |
| 0.383539957 | 0.460432734 | 0.211473603 | 0.490476353 |
| 0.506630278 | 0.45228469  | 0.305036814 | 0.45902374  |
| 0.487113033 | 0.397427306 | 0.478479311 | 0.516085673 |
| 0.321811216 | 0.417123952 | 0.408846805 | 0.471190379 |
| 0.319512964 | 0.303585359 | 0.408116723 | 0.218957438 |
| 0.015317817 | 0.188902657 | 0.163789934 | 0.318636139 |
| 0.247944098 | 0.44263324  | 0.468945352 | 0.497776316 |
| 0.263686201 | 0.481907205 | 0.353181278 | 0.401364186 |
| 0.450914097 | 0.415888563 | 0.441414198 | 0.467464271 |
| 0.37799635  | 0.064161333 | 0.261420241 | 0.52020195  |
| 0.103123784 | 0.324307506 | 0.432136237 | 0.011576046 |
| 0.12825731  | 0.434862062 | 0.181730394 | 0.285358823 |
| 0.494805616 | 0.285483728 | 0.335511728 | 0.338716254 |
| 0.471803873 | 0.220512756 | 0.016524239 | 0.47024126  |
| 0.463325449 | 0.443684535 | 0.46034318  | 0.448158494 |
| 0.451173917 | 0.463668636 | 0.472855215 | 0.465482149 |
| 0.237014983 | 0.194090697 | 0.273911434 | 0.408913202 |
| 0.013331813 | 0.485895377 | 0.412221138 | 0.280407595 |
| 0.479444996 | 0.414399961 | 0.125251757 | 0.42960832  |
| 0.075012899 | 0.240719932 | 0.414981194 | 0.356551336 |
| 0.438832883 | 0.058685292 | 0.31305355  | 0.371011651 |
| 0.448132213 | 0.444297306 | 0.395460156 | 0.514248409 |
| 0.47017995  | 0.216706371 | 0.425411121 | 0.492959317 |
| 0.186057669 | 0.124848612 | 0.438454525 | 0.04660428  |
| 0.296781116 | 0.448637937 | 0.434067654 | 0.166492467 |
| 0.417904253 | 0.027028143 | 0.449537669 | 0.519339443 |
| 0.452692942 | 0.492741945 | 0.494700489 | 0.352879075 |
| 0.493306596 | 0.114858048 | 0.505919492 | 0.46580839  |
| 0.39088353  | 0.004088559 | 0.024493906 | 0.494253072 |
| 0.459937119 | 0.127666649 | 0.305528442 | 0.455809324 |
| 0.258312282 | 0.277636477 | 0.180096655 | 0.279300763 |
| 0.501838001 | 0.375614567 | 0.270378363 | 0.458255691 |
| 0.381242131 | 0.383134019 | 0.445359073 | 0.186160347 |
| 0.482944589 | 0.156943833 | 0.18194085  | 0.025999858 |
| 0.458153521 | 0.203948563 | 0.473088717 | 0.491358545 |
| 0.496407583 | 0.471298447 | 0.34297898  | 0.443768649 |
| 0.468750921 | 0.187009531 | 0.405017247 | 0.215889442 |
| 0.466517041 | 0.463906863 | 0.45545837  | 0.424245883 |
| 0.491477069 | 0.475743731 | 0.112121158 | 0.477856091 |
| 0.053880841 | 0.006890013 | 0.456492604 | 0.393487421 |
| 0.085663095 | 0.425251695 | 0.387742961 | 0.32047867  |
| 0.346989378 | 0.105096779 | 0.315200808 | 0.301937868 |
| 0.424180634 | 0.452621517 | 0.367951819 | 0.355092695 |
| 0.366572575 | 0.211779004 | 0.357403429 | 0.302170819 |
| 0.30772657  | 0.396338248 | 0.293280606 | 0.077720922 |
| 0.457891013 | 0.46636323  | 0.162751398 | 0.298398179 |
| 0.504744121 | 0.500488642 | 0.122487063 | 0.049364341 |
| 0.392376056 | 0.409884392 | 0.500324397 | 0.476536902 |
| 0.518081729 | 0.512276639 | 0.429652893 | 0.250297615 |
| 0.184439286 | 0.429366067 | 0.377619405 | 0.213399688 |

|             |             |             |             |
|-------------|-------------|-------------|-------------|
| 0.495687687 | 0.145387605 | 0.476078728 | 0.354339099 |
| 0.240423514 | 0.36090849  | 0.123554218 | 0.203737939 |
| 0.443214614 | 0.332454729 | 0.330997164 | 0.260278936 |
| 0.427425268 | 0.32242788  | 0.139483314 | 0.35236879  |
| 0.450801239 | 0.21904078  | 0.303977079 | 0.428594794 |
| 0.446297574 | 0.233424886 | 0.474745914 | 0.466661052 |
| 0.260166642 | 0.223254155 | 0.39374692  | 0.459667502 |
| 0.484702289 | 0.409909903 | 0.089131931 | 0.447088879 |
| 0.493181662 | 0.491548386 | 0.490509634 | 0.465623942 |
| 0.186863138 | 0.461968694 | 0.351540852 | 0.423478551 |
| 0.329010249 | 0.496503842 | 0.378430739 | 0.16257972  |
| 0.396338318 | 0.48745603  | 0.457591805 | 0.331973716 |
| 0.471961654 | 0.230267256 | 0.129626793 | 0.479681223 |
| 0.249468956 | 0.214010534 | 0.39268244  | 0.472190477 |
| 0.007248235 | 0.188945034 | 0.474042836 | 0.417252251 |
| 0.507227799 | 0.490597783 | 0.473425985 | 0.389258265 |
| 0.002614876 | 0.448252468 | 0.487884051 | 0.473058641 |
| 0.469359609 | 0.466043979 | 0.260571211 | 0.198691441 |
| 0.41564117  | 0.171331205 | 0.272451616 | 0.443165005 |
| 0.200601466 | 0.480485043 | 0.340687244 | 0.327367221 |
| 0.338272577 | 0.171801027 | 0.320019119 | 0.404557312 |
| 0.188204163 | 0.385288046 | 0.46180058  | 0.321301948 |
| 0.241495038 | 0.467873863 | 0.464153571 | 0.094186852 |
| 0.421039095 | 0.460109994 | 0.478461779 | 0.007713013 |
| 0.492935144 | 0.038600162 | 0.348623502 | 0.372275192 |
| 0.355110281 | 0.350467532 | 0.38930094  | 0.406633318 |
| 0.43933458  | 0.369360501 | 0.434974298 | 0.395065994 |
| 0.321059397 | 0.371341603 | 0.465764087 | 0.439527556 |
| 0.413075209 | 0.274358085 | 0.184960497 | 0.174150282 |
| 0.164586835 | 0.482336335 | 0.366690806 | 0.161062383 |
| 0.381029215 | 0.434925456 | 0.446865387 | 0.470936933 |
| 0.482676214 | 0.195194124 | 0.432826326 | 0.483798635 |
| 0.24105892  | 0.395071218 | 0.1580372   | 0.470165536 |
| 0.400511235 | 0.330584489 | 0.457157046 | 0.410637951 |
| 0.44646476  | 0.44074279  | 0.36931507  | 0.471084509 |
| 0.467176522 | 0.390454401 | 0.339750114 | 0.217099697 |
| 0.325614145 | 0.247015335 | 0.366918978 | 0.012071998 |
| 0.477931535 | 0.4000992   | 0.500010835 | 0.47951439  |
| 0.333842649 | 0.463158411 | 0.3756031   | 0.210228465 |
| 0.297842712 | 0.250329407 | 0.274013129 | 0.476198316 |
| 0.257459372 | 0.354448529 | 0.411127826 | 0.438517281 |
| 0.481902186 | 0.450321893 | 0.344836621 | 0.386873322 |
| 0.367001558 | 0.32644134  | 0.467035443 | 0.244028839 |
| 0.452650005 | 0.29320423  | 0.39956675  | 0.418667254 |
| 0.357015735 | 0.486397796 | 0.15866299  | 0.494828237 |
| 0.410530609 | 0.240456098 | 0.504059716 | 0.435615874 |
| 0.423863452 | 0.26963437  | 0.230977193 | 0.435682724 |
| 0.360568981 | 0.391783936 | 0.017255223 | 0.09817004  |
| 0.454820698 | 0.35276432  | 0.436531383 | 0.446808871 |
| 0.339160217 | 0.438646095 | 0.211934824 | 0.406842671 |
| 0.463772788 | 0.493560737 | 0.386759984 | 0.373729261 |
| 0.456365951 | 0.249179378 | 0.480053676 | 0.025223472 |
| 0.462550457 | 0.44223416  | 0.409009515 | 0.158917885 |
| 0.073618897 | 0.25109682  | 0.457060764 | 0.144874228 |

|             |             |             |             |
|-------------|-------------|-------------|-------------|
| 0.4889653   | 0.250545558 | 0.401921246 | 0.498605481 |
| 0.297430611 | 0.496666166 | 0.266648974 | 0.500206845 |
| 0.105989852 | 0.389322757 | 0.421151043 | 0.415465454 |
| 0.357765385 | 0.362910691 | 0.477109683 | 0.317373592 |
| 0.113562164 | 0.392603156 | 0.005627531 | 0.434968277 |
| 0.460912026 | 0.381745962 | 0.321516546 | 0.312306256 |
| 0.41880238  | 0.449415691 | 0.346647883 | 0.446246757 |
| 0.051301971 | 0.440886248 | 0.358718773 | 0.489797434 |
| 0.266958089 | 0.413477803 | 0.169057974 | 0.374228755 |
| 0.467210654 | 0.366841413 | 0.370140429 | 0.335384083 |
| 0.470877557 | 0.446593633 | 0.263172111 | 0.339734914 |
| 0.416443768 | 0.155029072 | 0.427769816 | 0.511341028 |
| 0.338230558 | 0.298561114 | 0.493310024 | 0.349860509 |
| 0.369779369 | 0.455754769 | 0.425457836 | 0.50013546  |
| 0.186665782 | 0.399471126 | 0.488124976 | 0.466539241 |
| 0.432248614 | 0.251865622 | 0.322200562 | 0.349063898 |
| 0.448822712 | 0.233243565 | 0.324662273 | 0.466464492 |
| 0.277252351 | 0.444757089 | 0.379088218 | 0.314322487 |
| 0.123813548 | 0.314486753 | 0.491434388 | 0.277427546 |
| 0.428835623 | 0.448217268 | 0.335700629 | 0.455854591 |
| 0.291353305 | 0.088853538 | 0.466632568 | 0.02826239  |
| 0.462372104 | 0.491917052 | 0.403848585 | 0.435664579 |
| 0.3073232   | 0.449883139 | 0.414897661 | 0.007546999 |
| 0.479224099 | 0.084145988 | 0.403979725 | 0.3520022   |
| 0.345250233 | 0.142956461 | 0.469312915 | 0.496686052 |
| 0.445049764 | 0.386857385 | 0.379259788 | 0.470205412 |
| 0.203242061 | 0.346689966 | 0.376711649 | 0.463541404 |
| 0.287480617 | 0.396001047 | 0.437575207 | 0.421141145 |
| 0.482351657 | 0.41995315  |             |             |
| CENPE       | 0.004935704 | 0.012344423 | 0.00381867  |
| 0.006546772 | 0.046686687 | 0.01208548  | 0.003026369 |
| 0.004001417 | 0.009008483 | 0.002054366 | 0.030435738 |
| 0.00223992  | 0.006456356 | 0.021700129 | 0.003079651 |
| 0.031374739 | 0.004287875 | 0.007558123 | 2.27E-05    |
| 0.001670171 | 0.044429766 | 0.020200915 | 0.006710351 |
| 0.034203771 | 0.008970448 | 0.008734355 | 0.015912909 |
| 0.019264842 | 0.006881175 | 0.025825587 | 0.000624618 |
| 0.019827422 | 0.045560867 | 0.021093973 | 0.004117134 |
| 0.015427145 | 8.49E-05    | 0.01581851  | 0.025647797 |
| 0.008398521 | 0.018546483 | 0.003741844 | 0.028885158 |
| 0.006022296 | 0.002576361 | 0.001193266 | 0.020020229 |
| 0.008910228 | 0.010134325 | 0.001986694 | 0.018406768 |
| 0.005755    | 0.015383806 | 0.00772241  | 5.38E-06    |
| 0.01034619  | 0.02029526  | 0.0177419   | 0.030374234 |
| 0.016984799 | 0.002345327 | 0.0177419   | 0.021733561 |
| 0.020946946 | 0.021458012 | 0.005601464 | 0.013069806 |
| 0.014394422 | 0.017877821 | 0.004191314 | 0.02043267  |
| 0.00060962  | 0.014076897 | 0.000624687 | 0.009857626 |
| 0.028541128 | 0.034164707 | 0.001832935 | 0.011207705 |
| 0.019945135 | 0.01533832  | 0.027852462 | 0.010551232 |
| 0.034344852 | 0.028088853 | 0.014489997 | 0.003576949 |
| 0.00189991  | 0.029921193 | 0.031047907 | 0.016385323 |
| 0.006312327 | 0.015713551 | 0.021594763 | 0.001083239 |
| 0.009333916 | 0.007004833 | 0.003486843 | 0.015904579 |
|             |             | 0.040664489 | 0.037776409 |

|             |             |             |             |
|-------------|-------------|-------------|-------------|
| 0.028634126 | 0.014545695 | 0.023587318 | 0.026457745 |
| 0.00319462  | 0.012685114 | 0.042375467 | 0.032717122 |
| 0.006156278 | 0.014389078 | 0.024438937 | 0.021910241 |
| 0.021419101 | 0.012199789 | 0.019094945 | 0.02615401  |
| 0.021464695 | 0.024310795 | 0.016055292 | 0.000132084 |
| 0.018449735 | 0.016306149 | 0.006831164 | 0.001333026 |
| 0.010230624 | 0.008033995 | 0.023270787 | 0.025097485 |
| 0.014560661 | 0.008633385 | 0.030676052 | 0.031011879 |
| 0.012473223 | 0.017430025 | 0.018634592 | 0.004012892 |
| 0.01366924  | 0.025779577 | 0.006254923 | 0.020131954 |
| 0.006625325 | 0.044968908 | 0.016445082 | 0.023026477 |
| 0.028349973 | 0.003286014 | 0.016436595 | 0.005983672 |
| 0.026620141 | 0.014786926 | 0.020976778 | 0.019486287 |
| 0.01611392  | 0.028008542 | 0.040592316 | 0.018428502 |
| 0.015389726 | 6.82E-05    | 0.014424882 | 0.02846276  |
| 0.021308484 | 0.023717051 | 0.016719431 | 1           |
| 0.026820747 | 0.023684479 | 0.015987033 | 0.025503187 |
| 2.92E-05    | 0.035868292 | 0.017150416 | 0.004184686 |
| 0.008032461 | 0.016343928 | 0.029676313 | 0.02466735  |
| 0.01887006  | 0.002236234 | 0.025728973 | 0.010482239 |
| 0.01954743  | 0.014804983 | 0.005947572 | 0.02202559  |
| 0.023182238 | 0.013111118 | 0.003912221 | 0.015849392 |
| 0.002678754 | 0.016791738 | 0.003059051 | 0.004918637 |
| 0.006757808 | 0.020398228 | 0.02328359  | 0.025693862 |
| 0.01805214  | 0.037042328 | 0.00167414  | 0.004741172 |
| 0.011371359 | 0.005689055 | 0.006966622 | 0.016402603 |
| 0.003992598 | 0.013699493 | 0.032473944 | 0.00761882  |
| 0.017735918 | 0.024059776 | 0.011833859 | 0.006168643 |
| 0.018034132 | 0.026346985 | 0.031372455 | 0.010085239 |
| 0.013657131 | 0.007854271 | 0.005519144 | 0.031595439 |
| 0.019696458 | 0.01688668  | 0.0061475   | 0.005061149 |
| 0.020655318 | 0.044606976 | 0.008551037 | 0.007249855 |
| 0.011597916 | 0.018097811 | 0.005648794 | 0.002501772 |
| 0.02861106  | 0.009051829 | 0.003145277 | 0.028840201 |
| 0.024773333 | 0.013129128 | 0.011862661 | 0.016002308 |
| 0.019709799 | 0.025554174 | 0.007190181 | 0.00365303  |
| 0.023652511 | 0.041090299 | 0.002193391 | 0.023471454 |
| 0.024680104 | 0.000302773 | 0.019595424 | 0.004654089 |
| 0.040203816 | 0.003226049 | 0.018103601 | 0.001766773 |
| 0.04397631  | 0.029201869 | 0.005186813 | 0.024037181 |
| 0.019059808 | 0.023806573 | 0.012682201 | 0.019203287 |
| 0.02661101  | 0.025566997 | 0.020391917 | 0.02392363  |
| 0.025415344 | 0.023701005 | 0.024515181 | 0.010463698 |
| 0.002862062 | 0.0187499   | 0.00671314  | 0.000831965 |
| 0.003418875 | 0.02738159  | 0.021540635 | 0.028648304 |
| 0.016759466 | 0.037087437 | 0.02826974  | 0.011620002 |
| 0.022339393 | 0.024842427 | 0.002447201 | 0.019457714 |
| 0.018772775 | 0.040392965 | 0.014927207 | 0.0215386   |
| 0.013482147 | 0.019179798 | 0.000678838 | 0.020518766 |
| 0.003575235 | 0.02992336  | 0.047261371 | 0.002748801 |
| 0.027376105 | 0.021022474 | 0.011644613 | 0.012589351 |
| 0.010190634 | 0.020164558 | 0.014516216 | 0.021835735 |
| 0.0324983   | 0.029243456 | 0.013385682 | 0.016657439 |
| 0.007978172 | 0.019346612 | 0.000784333 | 0.016151845 |
|             |             |             | 0.031950422 |

|             |             |             |             |
|-------------|-------------|-------------|-------------|
| 0.008332946 | 0.000104384 | 0.002028353 | 0.009560966 |
| 0.003710766 | 0.010066128 | 0.030456564 | 0.008431485 |
| 0.010205798 | 0.002341806 | 0.034921026 | 0.010336846 |
| 0.006448632 | 0.019750218 | 0.01631924  | 0.015423576 |
| 0.014887658 | 0.012720189 | 0.017692786 | 0.017280469 |
| 0.027707311 | 0.008824851 | 0.004411779 | 0.002178209 |
| 0.023404313 | 0.022185852 | 3.84E-05    | 0.035622212 |
| 0.02343032  | 0.01421847  | 0.024073998 | 0.015312533 |
| 0.004160571 | 0.028051992 | 0.00222023  | 0.024956845 |
| 0.003735746 | 0.014743642 | 0.036240092 | 0.002371604 |
| 0.000969073 | 0.00781899  | 0.013931973 | 0.015438043 |
| 0.014782832 | 0.020263493 | 0.029210542 | 0.003112761 |
| 0.03156897  | 0.036297674 | 0.00463234  | 1.78E-05    |
| 0.005768263 | 2.42E-05    | 0.000289334 | 0.014801896 |
| 0.00840289  | 0.001623205 | 0.022942235 | 0.002215583 |
| 0.017227887 | 0.021706118 | 0.012509256 | 0.024982258 |
| 0.023113444 | 0.044504744 | 0.021001772 | 0.005799696 |
| 0.021390807 | 0.015527703 | 0.005544093 | 2.49E-05    |
| 0.000398549 | 0.025261757 | 0.026080947 | 0.001438293 |
| 0.015605571 | 0.0067962   | 0.011776225 | 0.003432813 |
| 0.004715652 | 0.042908254 | 0.019161627 | 0.042465817 |
| 0.025749185 | 0.013011945 | 0.019595789 | 0.02128534  |
| 0.007700728 | 0.003790788 | 0.025538269 | 0.009083371 |
| 0.003092379 | 0.002265504 | 0.033324905 | 0.003167015 |
| 0.011942992 | 0.018446502 | 0.023546917 | 0.03615343  |
| 0.004692077 | 0.003576093 | 0.02131642  | 0.002482724 |
| 0.00491118  | 0.003134145 | 0.015593441 | 0.028895174 |
| 0.028348061 | 0.018919631 | 0.025700677 | 0.019681317 |
| 0.003319105 | 0.025689554 | 0.004024093 | 0.001378736 |
| 0.007898165 | 0.013862094 | 0.000271449 | 0.020404398 |
| 0.021079932 | 0.004838894 | 0.010499206 | 0.000853921 |
| 0.028796473 | 0.030314739 | 0.028513287 | 0.021847555 |
| 0.046498553 | 0.009932341 | 0.031087716 | 0.005526472 |
| 0.020810227 | 0.008625069 | 0.000889725 | 0.011115141 |
| 0.009041268 | 0.001582433 | 0.011140841 | 0.02249874  |
| 0.007071303 | 0.010412805 | 0.029736207 | 0.025608952 |
| 0.001387604 | 0.00604179  | 0.015340115 | 0.012109547 |
| 0.027205966 | 0.01676151  | 0.017948965 | 0.025876976 |
| 0.016134559 | 0.011452779 | 0.005753298 | 0.03474203  |
| 0.041662479 | 0.018668921 | 0.021248591 | 0.001331906 |
| 0.016894195 | 0.037879227 | 0.008203274 | 0.015595055 |
| 0.009171553 | 0.007821404 | 0.031712999 | 0.015934015 |
| 0.034185091 | 0.005520616 | 0.022387659 | 0.017364979 |
| 0.002856498 | 0.018003775 | 0.01801701  | 0.012473234 |
| 0.012488324 | 0.006013752 | 0.013907975 | 0.000433018 |
| 0.027089455 | 0.026137288 | 0.009158999 | 0.00453066  |
| 0.003430255 | 0.020166264 | 0.01942257  | 0.009013677 |
| 0.002410513 | 0.011983599 | 0.025103288 | 0.023169043 |
| 0.016979011 | 0.029505649 | 0.00473382  | 0.032147467 |
| 0.015940551 | 0.024484274 | 0.011657774 | 0.012348063 |
| 0.0133046   | 0.005035826 | 0.016424288 | 0.016792801 |
| 0.01518969  | 0.028234641 | 0.014294136 | 0.002594893 |
| 0.001054157 | 0.01855476  | 0.026925875 | 0.002884274 |
| 0.004374222 | 0.020856012 | 0.000480046 | 0.034736205 |

|                      |                      |                      |             |
|----------------------|----------------------|----------------------|-------------|
| 0.024900056          | 0.016167983          | 0.021023171          | 0.027262204 |
| 0.024568655          | 0.004701338          | 7.94E-06 0.026633817 |             |
| 0.032102265          | 0.019400889          | 0.013760718          | 0.01734352  |
| 0.001015867          | 0.011853132          | 0.029810931          | 0.002974267 |
| 0.007493338          | 0.001937085          | 0.001273014          | 0.012418274 |
| 0.020362929          | 0.009131019          | 0.024293915          | 0.001452844 |
| 0.019646029          | 0.018161577          | 0.004651409          | 0.024423202 |
| 0.030106528          | 0.001553686          | 0.008948567          | 0.021020875 |
| 0.016473221          | 0.00488023           | 0.027716051          | 0.021280735 |
| 0.022107602          | 2.03E-05 0.028113334 | 0.002070652          |             |
| 0.028923978          | 0.037026491          | 0.028503577          | 0.017752353 |
| 0.038075142          | 0.026132418          | 0.010901494          | 0.015364205 |
| 0.024597257          | 0.030851437          | 0.029805186          | 0.010635522 |
| 0.024038257          | 0.009715545          | 0.031331253          | 0.013181013 |
| 0.00356769           | 0.003249338          | 0.007397785          | 0.017823701 |
| 0.015966584          | 0.003697534          | 0.024091657          | 0.008781266 |
| 0.028442491          | 0.014317981          | 0.030041933          | 0.003141543 |
| 0.01306982           | 0.017061309          | 0.000436041          | 0.001141871 |
| 0.001145584          | 0.01441105           | 0.016541309          | 0.022326772 |
| 0.009066358          | 0.007348229          | 0.011707014          | 0.021749976 |
| 0.016109107          | 0.023365523          | 0.021294978          | 0.008998396 |
| 0.002947459          | 0.017133024          | 0.012570173          | 0.00603085  |
| 0.050997188          | 0.003946288          | 0.02355024           | 0.002775922 |
| 0.024529177          | 0.016466149          | 0.021752158          | 0.024763272 |
| 0.001217551          | 0.004774654          | 0.001473269          | 0.004315466 |
| 0.010631466          | 0.016805347          | 0.026358473          | 0.013615512 |
| 0.041115359          | 0.003749831          | 0.026184745          | 0.016877025 |
| 0.019960956          | 0.006931229          | 0.015100066          | 0.009141916 |
| 0.013965732          | 0.003846431          | 0.012804154          | 0.041373947 |
| 0.005573773          | 0.031150217          | 0.028788653          | 0.021196626 |
| 0.004464241          | 0.022283674          | 0.022230703          | 0.005849246 |
| 0.023141986          | 0.00980493           | 0.004782819          | 0.01187685  |
| 0.031871405          | 0.004097992          | 0.01019814           | 0.020337552 |
| 0.000119434          | 0.000431536          | 0.035695372          | 0.004822562 |
| 0.010275271          | 0.019413316          | 0.038982978          | 0.031743297 |
| 0.007501948          | 0.00657218           | 0.012272319          | 0.014299991 |
| 0.008383302          | 0.019858881          | 0.017969562          | 0.012748284 |
| 0.010627768          | 1.00E-06 0.019624367 | 0.018523367          |             |
| 0.00353922           | 0.004207534          | 0.000919466          | 0.026538735 |
| 0.014425795          | 0.001367913          | 0.028513649          | 0.007611034 |
| 0.007460638          | 0.022472991          | 0.00749495           | 0.014459059 |
| 0.020021779          | 0.034775935          | 0.000218287          | 0.018113477 |
| 0.022027123          | 0.009567771          | 0.023562421          | 0.034702307 |
| 0.035052712          | 0.048191085          | 0.006039435          | 0.015462494 |
| 1.22E-05 0.017254487 | 0.011998329          | 0.025408147          |             |
| 0.011781664          | 0.002135085          | 0.036969238          | 0.019079753 |
| 0.004923663          | 0.012675479          | 0.010591704          | 0.040465471 |
| 0.018307587          | 0.019469864          | 0.005903776          | 0.01022634  |
| 0.008724134          | 0.024630778          | 0.011635094          | 0.005901153 |
| 0.013944062          | 0.00520245           | 0.015881168          | 0.013232278 |
| 0.004330226          | 0.012667064          | 0.008701362          | 0.003372497 |
| 0.005035803          | 0.022038175          | 0.027840382          | 0.051668871 |
| 0.035922707          | 0.018336742          | 0.030025887          | 0.012777618 |
| 0.01080871           | 0.018474185          | 0.013908975          | 0.022878958 |

|             |             |             |             |
|-------------|-------------|-------------|-------------|
| 0.025553239 | 0.016689837 | 0.031647967 | 0.034261867 |
| 0.029310424 | 0.028174571 | 0.013695654 | 0.010757498 |
| 0.011641548 | 0.018721473 | 0.032487595 | 0.027856344 |
| 0.004701776 | 0.03293753  | 0.002587496 | 0.006004196 |
| 0.011891677 | 0.010812228 | 0.022381624 | 0.028186715 |
| 0.027432621 | 0.024799224 | 0.017047445 | 0.004228854 |
| 0.02478176  | 0.000209299 | 0.010955228 | 0.039227725 |
| 0.020467769 | 0.023047276 | 0.012430869 | 0.012490521 |
| 0.005784821 | 1.76E-05    | 0.030342666 | 0.002689116 |
| 0.01417011  | 0.036465681 | 0.004025883 | 0.002518785 |
| 0.019219506 | 0.026942981 | 0.015711866 | 0.001837556 |
| 0.013190493 | 0.017277736 | 0.005640624 | 0.009930692 |
| 0.0116843   | 0.011963744 | 0.039034329 | 0.006584918 |
| 0.00956346  | 0.020996821 | 0.020156838 | 0.009038627 |
| CENPH       | 0.101216239 | 0.44127258  | 0.081092871 |
| 0.174277334 | 0.360553063 | 0.464523179 | 0.079813092 |
| 0.16369949  | 0.397623561 | 0.399734227 | 0.414947117 |
| 0.023813837 | 0.134199538 | 0.459010515 | 0.07317781  |
| 0.448113287 | 0.044074914 | 0.136609996 | 0.111628765 |
| 0.290564545 | 0.330437487 | 0.414268411 | 0.442231916 |
| 0.343699668 | 0.207573478 | 0.405657896 | 0.464761355 |
| 0.515455676 | 0.36530072  | 0.490957765 | 0.275238999 |
| 0.41178402  | 0.38059384  | 0.468210072 | 0.023810296 |
| 0.477494741 | 0.021793081 | 0.440846145 | 0.310194247 |
| 0.204716146 | 0.346259222 | 0.423902684 | 0.285915975 |
| 0.451051491 | 0.051292745 | 0.307757471 | 0.469250348 |
| 0.39785891  | 0.347207146 | 0.093298848 | 0.483129553 |
| 0.444945468 | 0.39164766  | 0.451379625 | 0.003686033 |
| 0.383191519 | 0.145195114 | 0.311632927 | 0.519082035 |
| 0.237892779 | 0.152250631 | 0.381535304 | 0.318333405 |
| 0.458893738 | 0.432869636 | 0.300870488 | 0.451679975 |
| 0.507908283 | 0.241947807 | 0.491275043 | 0.202707239 |
| 0.445211738 | 0.0492256   | 0.189204442 | 0.118412205 |
| 0.464212986 | 0.238731227 | 0.401852536 | 0.383434397 |
| 0.44381801  | 0.524216986 | 0.283053846 | 0.515440706 |
| 0.146166912 | 0.404316249 | 0.341104993 | 0.34098339  |
| 0.417290105 | 0.1158727   | 0.454810507 | 0.527364453 |
| 0.072199498 | 0.45969287  | 0.451703845 | 0.159747044 |
| 0.45521155  | 0.371380984 | 0.473015363 | 0.234318923 |
| 0.426580783 | 0.39891911  | 0.489605694 | 0.333928548 |
| 0.38382142  | 0.099835931 | 0.498740807 | 0.385646575 |
| 0.350162521 | 0.110534421 | 0.278109514 | 0.493173024 |
| 0.470625016 | 0.505338496 | 0.464696605 | 0.405265609 |
| 0.44175103  | 0.509773857 | 0.451681121 | 0.436057066 |
| 0.249022437 | 0.539897522 | 0.230952869 | 0.054636968 |
| 0.102282459 | 0.109350517 | 0.30145281  | 0.330527627 |
| 0.483877867 | 0.391159824 | 0.24282426  | 0.274632679 |
| 0.467459612 | 0.493668491 | 0.540249716 | 0.451121692 |
| 0.052775875 | 0.334661155 | 0.444110902 | 0.348495746 |
| 0.430843114 | 0.145966487 | 0.323261743 | 0.517682557 |
| 0.390681736 | 0.471835838 | 0.217394354 | 0.507326475 |
| 0.254938716 | 0.516441006 | 0.467811896 | 0.20364571  |
| 0.526601601 | 0.505137929 | 0.514913584 | 0.457123283 |
| 0.48214767  | 0.402495732 | 0.097863078 | 0.417335242 |

|             |             |             |             |
|-------------|-------------|-------------|-------------|
| 0.485508377 | 0.021308484 | 1           | 0.513463723 |
| 0.513961658 | 0.493337667 | 0.527414215 | 0.521416122 |
| 0.520587856 | 0.098107869 | 0.049030677 | 0.330172378 |
| 0.519276325 | 0.417975915 | 0.170518659 | 0.483018107 |
| 0.420199783 | 0.459699367 | 0.478350082 | 0.37253078  |
| 0.512874256 | 0.470717309 | 0.506527805 | 0.445781346 |
| 0.378038392 | 0.326346141 | 0.453468246 | 0.480390276 |
| 0.058220469 | 0.151165991 | 0.073700644 | 0.350097531 |
| 0.43428455  | 0.207132097 | 0.447901328 | 0.417919383 |
| 0.227177878 | 0.417441028 | 0.424720753 | 0.433667759 |
| 0.076190626 | 0.502470308 | 0.208509016 | 0.218101786 |
| 0.052128585 | 0.164340078 | 0.223419972 | 0.191209835 |
| 0.296981708 | 0.24320424  | 0.4994625   | 0.50008674  |
| 0.422183167 | 0.220261297 | 0.480467213 | 0.476550983 |
| 0.413248159 | 0.446038832 | 0.266155277 | 0.013687208 |
| 0.327338292 | 0.408419009 | 0.262784765 | 0.485094405 |
| 0.184683286 | 0.292572872 | 0.446954943 | 0.440891895 |
| 0.339806473 | 0.195027187 | 0.434319111 | 0.427850816 |
| 0.188247588 | 0.360487972 | 0.460163931 | 0.478775211 |
| 0.004677366 | 0.382695084 | 0.482071317 | 0.189297915 |
| 0.373029601 | 0.185406286 | 0.330539084 | 0.468222765 |
| 0.379690409 | 0.288108959 | 0.506470166 | 0.440412931 |
| 0.419622563 | 0.232317748 | 0.533657449 | 0.080446706 |
| 0.419025158 | 0.066297266 | 0.319392249 | 0.424766792 |
| 0.295717925 | 0.328675383 | 0.378757079 | 0.334874977 |
| 0.16771583  | 0.528822265 | 0.429045355 | 0.521230399 |
| 0.446738992 | 0.535576493 | 0.48554957  | 0.45051054  |
| 0.416257098 | 0.448531166 | 0.200039521 | 0.474185704 |
| 0.472751618 | 0.381491279 | 0.101403157 | 0.492795132 |
| 0.443841632 | 0.461031912 | 0.151978787 | 0.49550866  |
| 0.497047429 | 0.486525444 | 0.17667683  | 0.411033633 |
| 0.413076082 | 0.282433193 | 0.448949521 | 0.534931488 |
| 0.409306066 | 0.417514646 | 0.395386447 | 0.420521163 |
| 0.212626362 | 0.26454397  | 0.338859389 | 0.258566116 |
| 0.019281785 | 0.113151293 | 0.088638188 | 0.192858746 |
| 0.217926883 | 0.492207221 | 0.451080881 | 0.527112038 |
| 0.144603337 | 0.423527748 | 0.283374143 | 0.339016929 |
| 0.423490498 | 0.422791585 | 0.450314311 | 0.448345039 |
| 0.284373135 | 0.023123989 | 0.14279124  | 0.524804925 |
| 0.059786417 | 0.304840597 | 0.3892358   | 0.003638077 |
| 0.062443394 | 0.459197563 | 0.11865305  | 0.199676258 |
| 0.479158302 | 0.20747208  | 0.25082383  | 0.409733795 |
| 0.391108147 | 0.119989453 | 0.004009956 | 0.498298173 |
| 0.500312924 | 0.469156715 | 0.499699024 | 0.471810616 |
| 0.446742648 | 0.458366032 | 0.454341084 | 0.425367285 |
| 0.134382171 | 0.125632427 | 0.26722765  | 0.335295135 |
| 0.007707358 | 0.419399222 | 0.369044536 | 0.171446431 |
| 0.476896798 | 0.352629352 | 0.050721773 | 0.420141493 |
| 0.028967668 | 0.275642189 | 0.37626213  | 0.268046728 |
| 0.391319388 | 0.020011946 | 0.296766448 | 0.395214567 |
| 0.439538852 | 0.372487991 | 0.444041457 | 0.540869188 |
| 0.380207962 | 0.167426468 | 0.36024942  | 0.444806983 |
| 0.09234958  | 0.160504194 | 0.43347206  | 0.058983973 |
| 0.280349625 | 0.463763261 | 0.459557103 | 0.092666909 |



|             |             |             |             |
|-------------|-------------|-------------|-------------|
| 0.315352127 | 0.006758672 | 0.387024131 | 0.538469468 |
| 0.483337947 | 0.526641031 | 0.509207784 | 0.336465219 |
| 0.514267721 | 0.174285319 | 0.541826085 | 0.442132761 |
| 0.458938524 | 0.001291789 | 0.007541378 | 0.493904391 |
| 0.454057617 | 0.081055175 | 0.192065294 | 0.433906409 |
| 0.132464015 | 0.202599606 | 0.088511336 | 0.227566534 |
| 0.485660813 | 0.284683275 | 0.228749208 | 0.483911758 |
| 0.284141849 | 0.275060267 | 0.473608519 | 0.115424069 |
| 0.470845228 | 0.06800474  | 0.115521947 | 0.010429029 |
| 0.415737612 | 0.141906331 | 0.48041104  | 0.521855988 |
| 0.49541584  | 0.441287469 | 0.433550948 | 0.422909735 |
| 0.455455039 | 0.133087622 | 0.45411665  | 0.15090851  |
| 0.49972573  | 0.441790029 | 0.354553568 | 0.336104858 |
| 0.501915875 | 0.471825177 | 0.044312101 | 0.448180377 |
| 0.018160602 | 0.002761813 | 0.439709883 | 0.307698013 |
| 0.102331701 | 0.43291854  | 0.287004732 | 0.300729705 |
| 0.28614925  | 0.042453521 | 0.334963595 | 0.307173291 |
| 0.341202643 | 0.415003703 | 0.327950798 | 0.290625952 |
| 0.317714674 | 0.170274127 | 0.241007674 | 0.192643867 |
| 0.323760907 | 0.337983968 | 0.21159859  | 0.029057584 |
| 0.491609304 | 0.476135268 | 0.075307198 | 0.194786861 |
| 0.463016625 | 0.497663915 | 0.053981864 | 0.013266519 |
| 0.29800201  | 0.376887194 | 0.505101937 | 0.514860501 |
| 0.533721794 | 0.520908466 | 0.390314426 | 0.150911965 |
| 0.089774318 | 0.369469535 | 0.351106534 | 0.121118795 |
| 0.521667426 | 0.092528497 | 0.49754065  | 0.372169075 |
| 0.146001971 | 0.258072556 | 0.04360017  | 0.10813932  |
| 0.45451602  | 0.21238904  | 0.21017976  | 0.188918191 |
| 0.362295777 | 0.32068843  | 0.064408793 | 0.232940481 |
| 0.388725537 | 0.236039701 | 0.194655468 | 0.383374503 |
| 0.403942379 | 0.31892601  | 0.480982992 | 0.443162091 |
| 0.162853383 | 0.146897754 | 0.342794984 | 0.438707333 |
| 0.488069308 | 0.476483936 | 0.037197932 | 0.470619913 |
| 0.496432728 | 0.498785044 | 0.51042939  | 0.404674657 |
| 0.110070544 | 0.437048722 | 0.395684705 | 0.397107664 |
| 0.224899227 | 0.459520648 | 0.28763797  | 0.082645112 |
| 0.316661985 | 0.48641327  | 0.437673181 | 0.198147958 |
| 0.490636415 | 0.171336094 | 0.082402788 | 0.468771067 |
| 0.230786595 | 0.1159859   | 0.445729435 | 0.477495672 |
| 0.002373672 | 0.197584859 | 0.495925136 | 0.290206053 |
| 0.522330194 | 0.483738182 | 0.435300023 | 0.32464942  |
| 0.003116909 | 0.468680681 | 0.426607171 | 0.455827474 |
| 0.451512373 | 0.394839445 | 0.210512587 | 0.091514409 |
| 0.312382778 | 0.109812504 | 0.162722969 | 0.422339781 |
| 0.234952745 | 0.469011924 | 0.227543206 | 0.257248181 |
| 0.234706127 | 0.125867209 | 0.314544174 | 0.290103559 |
| 0.208040909 | 0.268903379 | 0.377911721 | 0.390900101 |
| 0.25490109  | 0.441134477 | 0.447265832 | 0.03645755  |
| 0.430017249 | 0.436046821 | 0.438953895 | 0.002651279 |
| 0.476819393 | 0.009169534 | 0.232732588 | 0.252450194 |
| 0.236227923 | 0.252079512 | 0.298026796 | 0.349379552 |
| 0.412138321 | 0.264095071 | 0.32154633  | 0.272457154 |
| 0.194106443 | 0.271432771 | 0.448398426 | 0.422427867 |
| 0.326997427 | 0.157957343 | 0.120695794 | 0.116822446 |

|             |             |             |             |
|-------------|-------------|-------------|-------------|
| 0.06740933  | 0.475152465 | 0.264379848 | 0.099475677 |
| 0.266031235 | 0.435082279 | 0.35533195  | 0.510771319 |
| 0.41828954  | 0.141285831 | 0.39792811  | 0.466019596 |
| 0.33013102  | 0.376776924 | 0.089569811 | 0.454918048 |
| 0.277548989 | 0.263494777 | 0.476644244 | 0.371711105 |
| 0.466664653 | 0.396120884 | 0.265416421 | 0.438669395 |
| 0.424476332 | 0.416121234 | 0.407898659 | 0.102859645 |
| 0.214241334 | 0.164309844 | 0.314226655 | 0.002380438 |
| 0.400897644 | 0.323888229 | 0.487951288 | 0.499597112 |
| 0.374955066 | 0.388066284 | 0.4081255   | 0.113720253 |
| 0.368023939 | 0.196065785 | 0.170315294 | 0.487477261 |
| 0.296981095 | 0.226388435 | 0.349271284 | 0.40969986  |
| 0.479644723 | 0.474206249 | 0.314354945 | 0.303126798 |
| 0.287495481 | 0.245314734 | 0.484761701 | 0.1632024   |
| 0.492674385 | 0.226594133 | 0.433075471 | 0.340614942 |
| 0.261763367 | 0.528098261 | 0.081033691 | 0.537450356 |
| 0.387554939 | 0.161755271 | 0.491574839 | 0.370896703 |
| 0.362767274 | 0.150382386 | 0.257873614 | 0.464671097 |
| 0.280161258 | 0.422042431 | 0.029582362 | 0.091222026 |
| 0.361771807 | 0.388000524 | 0.455171169 | 0.415146335 |
| 0.299592225 | 0.367634253 | 0.242037527 | 0.353082431 |
| 0.497495035 | 0.508785189 | 0.297550536 | 0.276191316 |
| 0.388566404 | 0.127163215 | 0.460104262 | 0.026388413 |
| 0.481212326 | 0.489868804 | 0.465039549 | 0.069962799 |
| 0.024568793 | 0.282150076 | 0.472872666 | 0.095194423 |
| 0.483481998 | 0.291822566 | 0.428440451 | 0.488148755 |
| 0.215240867 | 0.508218068 | 0.148605771 | 0.449201385 |
| 0.070901609 | 0.299396401 | 0.4508949   | 0.454067929 |
| 0.263864135 | 0.354028348 | 0.412407543 | 0.293822372 |
| 0.040703703 | 0.313010402 | 0.00207221  | 0.404584668 |
| 0.482842732 | 0.406021124 | 0.229689968 | 0.405277151 |
| 0.312635927 | 0.406772552 | 0.298449248 | 0.492525166 |
| 0.013636909 | 0.423284147 | 0.237069059 | 0.44058485  |
| 0.306930856 | 0.429079987 | 0.071305307 | 0.37860006  |
| 0.46699745  | 0.338576895 | 0.28389651  | 0.383931815 |
| 0.504663595 | 0.428175349 | 0.202023142 | 0.276711286 |
| 0.455535073 | 0.086257683 | 0.470122314 | 0.537065581 |
| 0.207633382 | 0.267468667 | 0.469266692 | 0.238080022 |
| 0.384355112 | 0.408731695 | 0.478605501 | 0.53037691  |
| 0.088545846 | 0.281284994 | 0.466375467 | 0.466905927 |
| 0.328664002 | 0.218702625 | 0.307784063 | 0.272976721 |
| 0.470719923 | 0.123388999 | 0.323385362 | 0.398610715 |
| 0.276012124 | 0.353650958 | 0.412269073 | 0.23003721  |
| 0.047404452 | 0.211725555 | 0.43935848  | 0.174305564 |
| 0.338877328 | 0.417885038 | 0.288286185 | 0.375763809 |
| 0.163520042 | 0.029675396 | 0.44805596  | 0.027881978 |
| 0.404232593 | 0.443606051 | 0.2887613   | 0.416589552 |
| 0.212675244 | 0.415215501 | 0.400421746 | 0.001376435 |
| 0.445641406 | 0.066851746 | 0.370923476 | 0.268382497 |
| 0.361555364 | 0.069301913 | 0.463031689 | 0.518344799 |
| 0.373350781 | 0.42059868  | 0.432523898 | 0.470622081 |
| 0.197802626 | 0.426318971 | 0.423662145 | 0.474668097 |
| 0.290548724 | 0.466899083 | 0.489657258 | 0.450478523 |
| 0.43453599  | 0.332386346 |             |             |

| CENPI       | 0.111877425 | 0.46115461  | 0.089136752 |
|-------------|-------------|-------------|-------------|
| 0.197201957 | 0.38841521  | 0.487589582 | 0.090331228 |
| 0.17897746  | 0.416774979 | 0.408208441 | 0.445268733 |
| 0.028615664 | 0.135627333 | 0.483726198 | 0.082688222 |
| 0.479966573 | 0.051773416 | 0.153096975 | 0.118827875 |
| 0.310066284 | 0.359481985 | 0.434726945 | 0.461679849 |
| 0.369099691 | 0.225312189 | 0.431303308 | 0.482779958 |
| 0.513913092 | 0.368410277 | 0.516886506 | 0.286621892 |
| 0.417957921 | 0.408284213 | 0.485263763 | 0.027782616 |
| 0.501695404 | 0.02243445  | 0.445687278 | 0.342397788 |
| 0.218964121 | 0.371879232 | 0.436497093 | 0.31710213  |
| 0.475543254 | 0.058978323 | 0.301715324 | 0.494942278 |
| 0.420288012 | 0.369878006 | 0.100992662 | 0.510869158 |
| 0.468350959 | 0.416843202 | 0.470202513 | 0.003944808 |
| 0.398739118 | 0.144881994 | 0.320497591 | 0.517603786 |
| 0.26155091  | 0.170616402 | 0.39561566  | 0.331305992 |
| 0.479178655 | 0.459571557 | 0.323835504 | 0.472964065 |
| 0.509330135 | 0.254460411 | 0.514314999 | 0.221247389 |
| 0.474975262 | 0.054926604 | 0.209528646 | 0.127146041 |
| 0.484664166 | 0.262820462 | 0.425075488 | 0.405552832 |
| 0.457907759 | 0.525098004 | 0.308057607 | 0.514351876 |
| 0.153821646 | 0.43021921  | 0.365062751 | 0.370744324 |
| 0.442957871 | 0.127551081 | 0.489167048 | 0.530587081 |
| 0.078510387 | 0.475500565 | 0.480242252 | 0.172458501 |
| 0.477659002 | 0.379515701 | 0.491698241 | 0.246898776 |
| 0.454380257 | 0.430688223 | 0.48773246  | 0.365406398 |
| 0.401735629 | 0.110276616 | 0.496982025 | 0.408354233 |
| 0.379041609 | 0.12362951  | 0.305080703 | 0.519190989 |
| 0.503391344 | 0.503881701 | 0.487404592 | 0.434687579 |
| 0.47170874  | 0.510731867 | 0.486579561 | 0.459178665 |
| 0.238054797 | 0.538510839 | 0.254435128 | 0.062761628 |
| 0.111340022 | 0.121619368 | 0.316315768 | 0.355382551 |
| 0.510241217 | 0.415260502 | 0.26780901  | 0.304416788 |
| 0.497286232 | 0.490827687 | 0.53830718  | 0.480161098 |
| 0.060934812 | 0.347092217 | 0.477291092 | 0.365125486 |
| 0.460117427 | 0.159556196 | 0.345181498 | 0.51861578  |
| 0.420942297 | 0.502940866 | 0.234318668 | 0.508659865 |
| 0.272070089 | 0.520301426 | 0.491716626 | 0.228894327 |
| 0.528464172 | 0.505472222 | 0.518088611 | 0.484513066 |
| 0.482117153 | 0.434142838 | 0.099250173 | 0.444398873 |
| 0.488386408 | 0.023717051 | 0.513463723 | 1           |
| 0.514002945 | 0.522583708 | 0.529633608 | 0.520320886 |
| 0.517786341 | 0.109106827 | 0.051376627 | 0.360642068 |
| 0.520938803 | 0.450020441 | 0.18502752  | 0.509991417 |
| 0.445825286 | 0.488151337 | 0.499604335 | 0.401066872 |
| 0.516053902 | 0.498507066 | 0.508444145 | 0.472038687 |
| 0.398837055 | 0.350218346 | 0.474293641 | 0.479690009 |
| 0.067018546 | 0.16659012  | 0.081034115 | 0.373705285 |
| 0.448762926 | 0.230570931 | 0.475707433 | 0.439681684 |
| 0.251921583 | 0.43629361  | 0.434590586 | 0.461922677 |
| 0.083345987 | 0.527097243 | 0.229589191 | 0.239783043 |
| 0.06223109  | 0.178652789 | 0.250700582 | 0.210345441 |
| 0.324555672 | 0.24637154  | 0.521740602 | 0.500123899 |
| 0.442763799 | 0.241358875 | 0.507413035 | 0.479039043 |

|             |             |             |             |
|-------------|-------------|-------------|-------------|
| 0.425994816 | 0.474370098 | 0.286983027 | 0.017706235 |
| 0.361882128 | 0.416728105 | 0.273833767 | 0.50354291  |
| 0.198608247 | 0.322348766 | 0.477576821 | 0.470134655 |
| 0.367263326 | 0.207630003 | 0.465009949 | 0.430856937 |
| 0.202940665 | 0.387122371 | 0.492317235 | 0.501241086 |
| 0.005717963 | 0.418261388 | 0.512000621 | 0.208619611 |
| 0.398837837 | 0.1952423   | 0.343388625 | 0.499716398 |
| 0.391542051 | 0.306163875 | 0.507042078 | 0.46717172  |
| 0.430478895 | 0.239746544 | 0.533898766 | 0.082986937 |
| 0.438929038 | 0.076218195 | 0.350666881 | 0.43409405  |
| 0.327054817 | 0.356146869 | 0.401145813 | 0.363567146 |
| 0.18237011  | 0.52841112  | 0.452913249 | 0.521282335 |
| 0.474449771 | 0.53676704  | 0.513816363 | 0.480408626 |
| 0.446403294 | 0.465784205 | 0.207072917 | 0.507343842 |
| 0.503619487 | 0.396516886 | 0.110564462 | 0.515332845 |
| 0.467922436 | 0.489145256 | 0.166087186 | 0.500037993 |
| 0.499680177 | 0.48384754  | 0.195393673 | 0.441964604 |
| 0.446199037 | 0.308550742 | 0.473783628 | 0.535183203 |
| 0.426113864 | 0.44693225  | 0.428891171 | 0.451631002 |
| 0.236274918 | 0.285871563 | 0.359874255 | 0.262967709 |
| 0.018847373 | 0.122611855 | 0.099542806 | 0.214979949 |
| 0.234720401 | 0.508486181 | 0.482927697 | 0.527884666 |
| 0.162567468 | 0.448117114 | 0.303141576 | 0.375378476 |
| 0.445642838 | 0.441820326 | 0.469969413 | 0.473005876 |
| 0.307801439 | 0.028105639 | 0.16081364  | 0.527413279 |
| 0.065425707 | 0.322344168 | 0.407247893 | 0.004332991 |
| 0.071365843 | 0.477213384 | 0.129593973 | 0.217150046 |
| 0.492421852 | 0.225522783 | 0.276312618 | 0.429646302 |
| 0.418170408 | 0.133850665 | 0.00481686  | 0.497794515 |
| 0.496887652 | 0.466403878 | 0.496183602 | 0.468199433 |
| 0.47112043  | 0.477877419 | 0.484662874 | 0.446785211 |
| 0.15129041  | 0.13724275  | 0.293691806 | 0.36922204  |
| 0.008316596 | 0.447563933 | 0.390326505 | 0.190595183 |
| 0.50057772  | 0.379609751 | 0.058049388 | 0.439652222 |
| 0.035359699 | 0.288957025 | 0.401233527 | 0.288898725 |
| 0.417292986 | 0.023550863 | 0.325703765 | 0.425050835 |
| 0.43998457  | 0.398792535 | 0.460676581 | 0.540647759 |
| 0.411269966 | 0.180146922 | 0.395362136 | 0.470789052 |
| 0.106195322 | 0.167584208 | 0.45667259  | 0.05991195  |
| 0.27380642  | 0.460286736 | 0.478686168 | 0.107330338 |
| 0.348597957 | 0.008394366 | 0.414727972 | 0.538662205 |
| 0.480210472 | 0.528048512 | 0.510142845 | 0.358572905 |
| 0.515784169 | 0.172329066 | 0.540727016 | 0.468273379 |
| 0.480795026 | 0.001532785 | 0.008814904 | 0.513157588 |
| 0.487542882 | 0.08721979  | 0.214252263 | 0.457191705 |
| 0.153561331 | 0.21939889  | 0.097453733 | 0.251138925 |
| 0.508682459 | 0.308665792 | 0.242187318 | 0.482850223 |
| 0.3146663   | 0.299030989 | 0.491068225 | 0.126303394 |
| 0.493035015 | 0.078714321 | 0.126235413 | 0.012184486 |
| 0.440740087 | 0.154031908 | 0.479282612 | 0.520158151 |
| 0.498895909 | 0.472121561 | 0.445022813 | 0.432898144 |
| 0.477910638 | 0.142791203 | 0.469025909 | 0.162402762 |
| 0.498924774 | 0.477445211 | 0.386309087 | 0.365942548 |
| 0.506723099 | 0.476356717 | 0.051327944 | 0.481696611 |

|             |             |             |             |
|-------------|-------------|-------------|-------------|
| 0.021236146 | 0.003027178 | 0.46893628  | 0.328922195 |
| 0.10322902  | 0.46303085  | 0.315196719 | 0.316878394 |
| 0.302244813 | 0.049226826 | 0.357261079 | 0.329379116 |
| 0.374449242 | 0.449081612 | 0.355022778 | 0.309320171 |
| 0.344229688 | 0.193210686 | 0.26130954  | 0.209450724 |
| 0.329581388 | 0.364485717 | 0.230353365 | 0.034033498 |
| 0.517937451 | 0.504790319 | 0.085773972 | 0.212434218 |
| 0.495496436 | 0.51045481  | 0.064345488 | 0.01688938  |
| 0.32253372  | 0.401439836 | 0.505617844 | 0.512407415 |
| 0.533943919 | 0.524693965 | 0.394376238 | 0.169716574 |
| 0.100229659 | 0.400568267 | 0.376840569 | 0.137684595 |
| 0.520427549 | 0.101799731 | 0.494236895 | 0.391769896 |
| 0.161803927 | 0.288212876 | 0.051077899 | 0.121199311 |
| 0.475135824 | 0.232827684 | 0.234699644 | 0.206991972 |
| 0.398354513 | 0.337824753 | 0.073461093 | 0.259436806 |
| 0.420716216 | 0.259606693 | 0.216560985 | 0.400315023 |
| 0.429422094 | 0.319583795 | 0.509795124 | 0.449274458 |
| 0.17930916  | 0.162075804 | 0.374342564 | 0.459626039 |
| 0.516568937 | 0.490099341 | 0.041132267 | 0.470168783 |
| 0.495760989 | 0.526462463 | 0.509034655 | 0.433663536 |
| 0.121830228 | 0.467670906 | 0.411832869 | 0.428330445 |
| 0.245404981 | 0.480429751 | 0.310116159 | 0.093024844 |
| 0.338197365 | 0.486505147 | 0.466420104 | 0.221405079 |
| 0.508270502 | 0.182781443 | 0.090869455 | 0.489372498 |
| 0.255736527 | 0.132755804 | 0.45745615  | 0.499540326 |
| 0.003018277 | 0.205200366 | 0.494785661 | 0.31109755  |
| 0.52239515  | 0.497564537 | 0.441658111 | 0.339175159 |
| 0.003529195 | 0.496000308 | 0.461816252 | 0.491654283 |
| 0.478312873 | 0.419978934 | 0.212796339 | 0.106233739 |
| 0.339373362 | 0.119769526 | 0.186857677 | 0.438403437 |
| 0.253530281 | 0.496053366 | 0.249562151 | 0.277591835 |
| 0.260387925 | 0.135000352 | 0.329984494 | 0.315306241 |
| 0.219322581 | 0.29462976  | 0.409966089 | 0.391978599 |
| 0.276390613 | 0.468295619 | 0.479444252 | 0.041915352 |
| 0.446608401 | 0.462612207 | 0.462511936 | 0.003743405 |
| 0.507954063 | 0.011258366 | 0.256915193 | 0.280950835 |
| 0.261853113 | 0.276436652 | 0.325187928 | 0.378090856 |
| 0.440414383 | 0.294190814 | 0.353514555 | 0.299591682 |
| 0.21690549  | 0.292744796 | 0.475443814 | 0.454067124 |
| 0.357231895 | 0.176301796 | 0.130774872 | 0.126255653 |
| 0.076483329 | 0.490792675 | 0.287052931 | 0.108659982 |
| 0.289696638 | 0.458218603 | 0.385223054 | 0.508292997 |
| 0.444721134 | 0.151707572 | 0.419837853 | 0.49282572  |
| 0.334053958 | 0.393191941 | 0.09789384  | 0.481365357 |
| 0.301194164 | 0.287823777 | 0.493054841 | 0.400559949 |
| 0.488848196 | 0.401310258 | 0.286687201 | 0.449060835 |
| 0.454580173 | 0.437284519 | 0.422856608 | 0.118550213 |
| 0.242031283 | 0.179746293 | 0.341687425 | 0.003234909 |
| 0.431345332 | 0.350954312 | 0.517550884 | 0.500161261 |
| 0.387701596 | 0.413374711 | 0.420657657 | 0.130912273 |
| 0.377445981 | 0.212087262 | 0.188065521 | 0.509879285 |
| 0.307197083 | 0.247608895 | 0.380312733 | 0.427385571 |
| 0.507955186 | 0.498411197 | 0.334223148 | 0.322424331 |
| 0.309943891 | 0.265816608 | 0.483612914 | 0.176592187 |

|             |             |             |             |
|-------------|-------------|-------------|-------------|
| 0.518806523 | 0.250669294 | 0.447073107 | 0.377331406 |
| 0.288806432 | 0.526312269 | 0.089983323 | 0.536278191 |
| 0.420172122 | 0.174855071 | 0.493917776 | 0.385948506 |
| 0.381104808 | 0.164790675 | 0.270708806 | 0.479402091 |
| 0.300587475 | 0.435543902 | 0.028178605 | 0.097494643 |
| 0.393391086 | 0.400699148 | 0.479088485 | 0.439665047 |
| 0.324113272 | 0.396147257 | 0.241272465 | 0.377171489 |
| 0.494469413 | 0.50717431  | 0.333671139 | 0.301993081 |
| 0.416070246 | 0.142467099 | 0.48213808  | 0.026932821 |
| 0.510058036 | 0.511847154 | 0.481625406 | 0.078670009 |
| 0.029565501 | 0.300679786 | 0.505294393 | 0.103477887 |
| 0.498554678 | 0.297865538 | 0.445141348 | 0.512924739 |
| 0.231348173 | 0.508184261 | 0.165720945 | 0.481507495 |
| 0.077210945 | 0.324281308 | 0.46957641  | 0.471408306 |
| 0.294536944 | 0.38033638  | 0.446876065 | 0.314284425 |
| 0.04838637  | 0.34120159  | 0.003027674 | 0.410199711 |
| 0.482476266 | 0.434171936 | 0.249058195 | 0.405025363 |
| 0.340753315 | 0.428940685 | 0.317539503 | 0.508047889 |
| 0.016881743 | 0.455263996 | 0.257226705 | 0.466750556 |
| 0.331166941 | 0.455057386 | 0.082430426 | 0.401808531 |
| 0.46633023  | 0.368609504 | 0.304215224 | 0.416395438 |
| 0.502114698 | 0.448110016 | 0.217641874 | 0.292307225 |
| 0.472897005 | 0.095195393 | 0.480640235 | 0.536544327 |
| 0.231345246 | 0.290484655 | 0.500689529 | 0.27072516  |
| 0.401554132 | 0.43011792  | 0.497327111 | 0.528114369 |
| 0.102213202 | 0.307998594 | 0.493112543 | 0.47344632  |
| 0.355462434 | 0.237513148 | 0.327935825 | 0.301119955 |
| 0.47008861  | 0.13875591  | 0.345882046 | 0.43159971  |
| 0.299835763 | 0.378772492 | 0.426444016 | 0.252206205 |
| 0.054018867 | 0.22695262  | 0.457501965 | 0.192201192 |
| 0.369647875 | 0.450194988 | 0.317557537 | 0.403012838 |
| 0.181390694 | 0.037096919 | 0.452074722 | 0.031055647 |
| 0.425852988 | 0.475451804 | 0.310517858 | 0.441017594 |
| 0.232254451 | 0.440838192 | 0.429936247 | 0.001778764 |
| 0.474776537 | 0.072837806 | 0.387125419 | 0.299459048 |
| 0.378655905 | 0.078704758 | 0.462641296 | 0.519398437 |
| 0.39516544  | 0.420652244 | 0.447929485 | 0.468766629 |
| 0.214072188 | 0.435867317 | 0.438013574 | 0.499019217 |
| 0.306082605 | 0.486101482 | 0.507106715 | 0.474991455 |
| 0.461239606 | 0.34931593  |             |             |
| CENPK       | 0.161337137 | 0.502633476 | 0.148262255 |
| 0.230942672 | 0.334791444 | 0.504355316 | 0.122174098 |
| 0.210910261 | 0.452407628 | 0.409268678 | 0.434035421 |
| 0.048125329 | 0.080422478 | 0.500736402 | 0.107723742 |
| 0.431143748 | 0.067970515 | 0.185945969 | 0.112126884 |
| 0.326976021 | 0.305670625 | 0.376524418 | 0.505457857 |
| 0.311830278 | 0.29548172  | 0.476065522 | 0.427347835 |
| 0.522123106 | 0.314942905 | 0.501698011 | 0.301030766 |
| 0.451526415 | 0.348690706 | 0.427449082 | 0.05435717  |
| 0.489797941 | 0.012294093 | 0.460666772 | 0.319264857 |
| 0.16766059  | 0.418595691 | 0.473570041 | 0.319381756 |
| 0.485904777 | 0.099204499 | 0.3007842   | 0.45697954  |
| 0.449234892 | 0.367397122 | 0.160759004 | 0.516655492 |
| 0.442947539 | 0.458590595 | 0.5062985   | 0.004879956 |

|             |             |             |             |
|-------------|-------------|-------------|-------------|
| 0.318657298 | 0.086533622 | 0.232500895 | 0.516907509 |
| 0.297140083 | 0.188532396 | 0.33437865  | 0.350253825 |
| 0.448809542 | 0.430011695 | 0.334405008 | 0.459832576 |
| 0.512516818 | 0.174332449 | 0.494961794 | 0.240839149 |
| 0.481369954 | 0.093099735 | 0.254354803 | 0.186373424 |
| 0.444982256 | 0.269541204 | 0.389468092 | 0.33016927  |
| 0.50660806  | 0.524006243 | 0.335629375 | 0.524851038 |
| 0.098006043 | 0.359846641 | 0.30674504  | 0.364776647 |
| 0.434495876 | 0.156438413 | 0.48727464  | 0.519535979 |
| 0.116064449 | 0.4922727   | 0.477694139 | 0.234901022 |
| 0.514208578 | 0.302970665 | 0.506145967 | 0.178051495 |
| 0.402796301 | 0.373438437 | 0.49186958  | 0.389705215 |
| 0.34960469  | 0.170594961 | 0.52168182  | 0.333221386 |
| 0.353627078 | 0.183354519 | 0.2507386   | 0.503727929 |
| 0.497984444 | 0.521946341 | 0.503971785 | 0.436101256 |
| 0.415199895 | 0.515752122 | 0.498083918 | 0.483730979 |
| 0.220597615 | 0.528134362 | 0.302799621 | 0.079938624 |
| 0.17030895  | 0.135713364 | 0.257621631 | 0.377431138 |
| 0.517412008 | 0.434954417 | 0.308422911 | 0.288927158 |
| 0.480665489 | 0.510914871 | 0.527516375 | 0.48740149  |
| 0.093858073 | 0.261523908 | 0.429334952 | 0.394701632 |
| 0.448326582 | 0.198840327 | 0.269238865 | 0.531102225 |
| 0.458903996 | 0.485776875 | 0.297253357 | 0.524994471 |
| 0.286670964 | 0.503464699 | 0.527714691 | 0.257223422 |
| 0.530362374 | 0.52168437  | 0.498953901 | 0.435238537 |
| 0.489194139 | 0.473111293 | 0.084290229 | 0.461003638 |
| 0.481081923 | 0.016719431 | 0.513961658 | 0.514002945 |
| 1           | 0.509808271 | 0.494756462 | 0.515090708 |
| 0.515499943 | 0.157188607 | 0.034856731 | 0.330991413 |
| 0.524370786 | 0.478820921 | 0.17664201  | 0.470218989 |
| 0.392117771 | 0.516129404 | 0.489323519 | 0.365453373 |
| 0.498806078 | 0.512007408 | 0.520352786 | 0.482720396 |
| 0.422822168 | 0.400826566 | 0.407962315 | 0.507113821 |
| 0.09334647  | 0.224613983 | 0.136144819 | 0.383336918 |
| 0.482232031 | 0.241958096 | 0.503526637 | 0.394206364 |
| 0.270122299 | 0.468930824 | 0.359453179 | 0.410419373 |
| 0.141012683 | 0.519002262 | 0.278723105 | 0.294297948 |
| 0.081885162 | 0.238715784 | 0.26282169  | 0.229171506 |
| 0.299093752 | 0.306188036 | 0.504266496 | 0.507270256 |
| 0.398853726 | 0.310007016 | 0.512512553 | 0.482886508 |
| 0.438625882 | 0.421006466 | 0.320925437 | 0.025396005 |
| 0.319056163 | 0.356727032 | 0.187651952 | 0.457439825 |
| 0.267922604 | 0.305761255 | 0.444486278 | 0.432067943 |
| 0.429287919 | 0.258812207 | 0.41249407  | 0.447228469 |
| 0.271823092 | 0.354301001 | 0.490080959 | 0.496578766 |
| 0.013673913 | 0.436327151 | 0.51233931  | 0.161751851 |
| 0.416205754 | 0.140155746 | 0.277054806 | 0.50457289  |
| 0.310795281 | 0.234315431 | 0.513803848 | 0.426946583 |
| 0.416741812 | 0.314597122 | 0.50302557  | 0.050725092 |
| 0.381671453 | 0.07154847  | 0.342589455 | 0.452960813 |
| 0.356313679 | 0.354468168 | 0.334744572 | 0.314029909 |
| 0.255946391 | 0.517418033 | 0.477822748 | 0.517054884 |
| 0.418986396 | 0.509674531 | 0.506667084 | 0.494418123 |
| 0.458004324 | 0.407336162 | 0.133978047 | 0.512227322 |

|             |             |             |             |
|-------------|-------------|-------------|-------------|
| 0.506915422 | 0.361016032 | 0.174711364 | 0.499104253 |
| 0.440471283 | 0.445237384 | 0.134910354 | 0.499936691 |
| 0.500490166 | 0.501784392 | 0.197391858 | 0.411280058 |
| 0.465989417 | 0.351198854 | 0.477980528 | 0.506780318 |
| 0.406222036 | 0.389818164 | 0.373965753 | 0.431928867 |
| 0.285257806 | 0.2237405   | 0.398170255 | 0.178149187 |
| 0.012631979 | 0.173948653 | 0.15147055  | 0.207571806 |
| 0.16819268  | 0.490087498 | 0.455743685 | 0.511628882 |
| 0.191081534 | 0.479402481 | 0.333054202 | 0.344986235 |
| 0.486394747 | 0.382548971 | 0.410749103 | 0.430296932 |
| 0.342988508 | 0.038861441 | 0.17498041  | 0.530526527 |
| 0.115983988 | 0.250357647 | 0.421159908 | 0.005666308 |
| 0.109193584 | 0.507884917 | 0.193868125 | 0.281606945 |
| 0.483614662 | 0.296233836 | 0.332533594 | 0.431287878 |
| 0.408769286 | 0.17553818  | 0.005837067 | 0.503804081 |
| 0.487855947 | 0.476164864 | 0.489075091 | 0.475436993 |
| 0.478065353 | 0.474435131 | 0.465638405 | 0.502085945 |
| 0.18639998  | 0.196568595 | 0.222754928 | 0.345036642 |
| 0.011553633 | 0.443259404 | 0.347704001 | 0.236087026 |
| 0.471523085 | 0.384917997 | 0.0879899   | 0.384205037 |
| 0.062895502 | 0.213190611 | 0.408385967 | 0.277654171 |
| 0.382897123 | 0.046083435 | 0.332809198 | 0.363240423 |
| 0.489115476 | 0.446187256 | 0.394612177 | 0.530398116 |
| 0.403175772 | 0.257191294 | 0.367795736 | 0.448908029 |
| 0.139103131 | 0.154519137 | 0.463128624 | 0.06927437  |
| 0.273105862 | 0.4679303   | 0.431895806 | 0.158849421 |
| 0.369461579 | 0.019294623 | 0.467855608 | 0.524213176 |
| 0.501746556 | 0.508675871 | 0.514349624 | 0.287042535 |
| 0.513463602 | 0.105429823 | 0.518361142 | 0.506810551 |
| 0.46391299  | 0.003108558 | 0.010369682 | 0.515728365 |
| 0.447641564 | 0.149663614 | 0.253932269 | 0.482696439 |
| 0.172647613 | 0.287848537 | 0.127973809 | 0.193372944 |
| 0.511003656 | 0.269448138 | 0.179270838 | 0.494098623 |
| 0.317619002 | 0.298938638 | 0.500757969 | 0.18321607  |
| 0.457822355 | 0.107308959 | 0.180010459 | 0.012647887 |
| 0.408467531 | 0.22506189  | 0.509577701 | 0.513116303 |
| 0.488547457 | 0.437229756 | 0.424103232 | 0.416914159 |
| 0.476045071 | 0.219370337 | 0.423983027 | 0.235342203 |
| 0.517547311 | 0.443732534 | 0.40407743  | 0.415567944 |
| 0.492991433 | 0.497218554 | 0.077433258 | 0.471708788 |
| 0.03565353  | 0.002209689 | 0.517204546 | 0.348362031 |
| 0.073870462 | 0.408309174 | 0.352586548 | 0.310126307 |
| 0.28400794  | 0.079385782 | 0.272498004 | 0.249362952 |
| 0.369315373 | 0.41704622  | 0.289444356 | 0.341808413 |
| 0.29599661  | 0.148724017 | 0.259598454 | 0.21898937  |
| 0.295036367 | 0.421739299 | 0.300516567 | 0.056161965 |
| 0.506276359 | 0.462602045 | 0.122656065 | 0.263358477 |
| 0.503388801 | 0.51811604  | 0.082319164 | 0.022941383 |
| 0.368400195 | 0.361426747 | 0.503867469 | 0.519667735 |
| 0.537387324 | 0.502366636 | 0.430930854 | 0.153150276 |
| 0.137538753 | 0.375233025 | 0.309683575 | 0.11948474  |
| 0.513196965 | 0.16202848  | 0.504490308 | 0.309626946 |
| 0.205702171 | 0.312466872 | 0.066820849 | 0.155717863 |
| 0.414384837 | 0.264292124 | 0.224770055 | 0.282046729 |



|             |             |             |             |
|-------------|-------------|-------------|-------------|
| 0.367278234 | 0.262256686 | 0.105005578 | 0.284674457 |
| 0.441762618 | 0.187103694 | 0.252858133 | 0.420351894 |
| 0.466860262 | 0.316375144 | 0.480300273 | 0.459298765 |
| 0.235890816 | 0.209155561 | 0.439621521 | 0.447319203 |
| 0.519682659 | 0.471669513 | 0.059156683 | 0.513228388 |
| 0.498612783 | 0.505380208 | 0.512371343 | 0.428521573 |
| 0.172666122 | 0.421481753 | 0.333624665 | 0.385632751 |
| 0.268323408 | 0.505444357 | 0.30552498  | 0.13466905  |
| 0.370433505 | 0.4922111   | 0.499721692 | 0.232087467 |
| 0.493058375 | 0.254777153 | 0.149860326 | 0.500814911 |
| 0.18732447  | 0.172370047 | 0.479614132 | 0.483730412 |
| 0.003429648 | 0.133342222 | 0.485375436 | 0.316852971 |
| 0.509289743 | 0.503304211 | 0.476344921 | 0.357712861 |
| 0.001584525 | 0.451297734 | 0.445436002 | 0.467487591 |
| 0.513323304 | 0.456737039 | 0.21778596  | 0.121523984 |
| 0.361464425 | 0.187402761 | 0.189492156 | 0.46052328  |
| 0.190616454 | 0.509222922 | 0.27484294  | 0.302953687 |
| 0.243403775 | 0.198237756 | 0.254469359 | 0.340115414 |
| 0.152651582 | 0.320480926 | 0.420655091 | 0.40865917  |
| 0.213242209 | 0.468698606 | 0.496346561 | 0.071534669 |
| 0.380780781 | 0.465320168 | 0.47544955  | 0.005211705 |
| 0.482600579 | 0.019649706 | 0.238460497 | 0.268573979 |
| 0.252115259 | 0.257437324 | 0.296985128 | 0.339040591 |
| 0.449799627 | 0.305413286 | 0.357733437 | 0.312735643 |
| 0.214092336 | 0.317074815 | 0.441869248 | 0.468958869 |
| 0.323410579 | 0.21623309  | 0.196423103 | 0.195629063 |
| 0.097151269 | 0.512144606 | 0.339507574 | 0.173475924 |
| 0.294871704 | 0.449233904 | 0.40859551  | 0.511677818 |
| 0.455494568 | 0.229209648 | 0.393206506 | 0.527894495 |
| 0.290375108 | 0.402816295 | 0.145935345 | 0.497243182 |
| 0.320747859 | 0.236146941 | 0.498822981 | 0.459054983 |
| 0.496185024 | 0.43890335  | 0.338482886 | 0.475050004 |
| 0.432293661 | 0.407246351 | 0.448611896 | 0.125855933 |
| 0.284233436 | 0.234731599 | 0.282336262 | 0.007692051 |
| 0.431923146 | 0.413522363 | 0.520834961 | 0.510058579 |
| 0.301990918 | 0.440043171 | 0.459309247 | 0.170360227 |
| 0.408460814 | 0.293052595 | 0.234881504 | 0.508249506 |
| 0.223546523 | 0.274757073 | 0.338386584 | 0.489045469 |
| 0.488524427 | 0.484106091 | 0.277083416 | 0.337449557 |
| 0.313706008 | 0.329838281 | 0.490160519 | 0.241196255 |
| 0.498079573 | 0.201211886 | 0.479668936 | 0.348587992 |
| 0.263952054 | 0.512705732 | 0.134663061 | 0.517159871 |
| 0.371234748 | 0.237560902 | 0.489456028 | 0.406917517 |
| 0.405474576 | 0.157087954 | 0.187757317 | 0.488931077 |
| 0.295726701 | 0.361238842 | 0.022128918 | 0.071383506 |
| 0.388620452 | 0.371336391 | 0.501030896 | 0.429458381 |
| 0.261198374 | 0.386063855 | 0.16408385  | 0.401894001 |
| 0.510283302 | 0.525583208 | 0.329004719 | 0.328214199 |
| 0.430407877 | 0.169142008 | 0.523836143 | 0.021200585 |
| 0.476857661 | 0.469946887 | 0.451196645 | 0.103217585 |
| 0.048011879 | 0.218207807 | 0.490917313 | 0.158627783 |
| 0.491236129 | 0.221125511 | 0.455250917 | 0.50658421  |
| 0.280168877 | 0.528036213 | 0.156811602 | 0.466391013 |
| 0.109900176 | 0.34532183  | 0.411220642 | 0.436982141 |

|             |             |             |             |
|-------------|-------------|-------------|-------------|
| 0.264580583 | 0.306846348 | 0.437467137 | 0.242866366 |
| 0.069473279 | 0.307729772 | 0.004213244 | 0.435335409 |
| 0.507197391 | 0.363505458 | 0.30165865  | 0.384609656 |
| 0.34055665  | 0.449167485 | 0.269671484 | 0.477972232 |
| 0.025095562 | 0.399672191 | 0.276099147 | 0.506258182 |
| 0.282428564 | 0.438364889 | 0.101438611 | 0.332698708 |
| 0.502875709 | 0.322211372 | 0.337952085 | 0.371692302 |
| 0.512915993 | 0.478469678 | 0.297011768 | 0.251076535 |
| 0.47099309  | 0.14572983  | 0.493209981 | 0.516803233 |
| 0.228290458 | 0.222209391 | 0.480542768 | 0.270819555 |
| 0.321962538 | 0.471327507 | 0.477892678 | 0.511802487 |
| 0.09514024  | 0.327790058 | 0.475846053 | 0.498612976 |
| 0.359049074 | 0.171834168 | 0.252933035 | 0.258255834 |
| 0.503434324 | 0.17051838  | 0.273088622 | 0.459814959 |
| 0.223931595 | 0.376149795 | 0.459546182 | 0.209347629 |
| 0.066716279 | 0.233499876 | 0.452465676 | 0.237051268 |
| 0.361834723 | 0.414599006 | 0.262142709 | 0.434305776 |
| 0.182958954 | 0.049713985 | 0.461047234 | 0.017901348 |
| 0.480781798 | 0.452535197 | 0.325198136 | 0.388577163 |
| 0.297909096 | 0.450120179 | 0.4746952   | 0.004345999 |
| 0.464957313 | 0.060548798 | 0.347073321 | 0.25952756  |
| 0.310816433 | 0.115761558 | 0.492760286 | 0.502242914 |
| 0.421766893 | 0.382288663 | 0.386046475 | 0.495863642 |
| 0.149251484 | 0.365040601 | 0.365359035 | 0.524107274 |
| 0.225302257 | 0.479387618 | 0.469706277 | 0.420351016 |
| 0.483191171 | 0.369808812 |             |             |
| CENPM       | 0.085782348 | 0.425110786 | 0.066288668 |
| 0.187392479 | 0.370522051 | 0.440792528 | 0.066188199 |
| 0.142975366 | 0.347041756 | 0.355331521 | 0.417289435 |
| 0.020690167 | 0.138610637 | 0.465321254 | 0.059533327 |
| 0.453077222 | 0.039287455 | 0.12283045  | 0.093697168 |
| 0.255716346 | 0.34396457  | 0.419270726 | 0.402223931 |
| 0.342466972 | 0.179988144 | 0.369166708 | 0.442167282 |
| 0.516745123 | 0.366739388 | 0.478328625 | 0.270782837 |
| 0.412851725 | 0.393094849 | 0.460922612 | 0.018836913 |
| 0.449877158 | 0.017907581 | 0.431012784 | 0.321966377 |
| 0.229660158 | 0.332680955 | 0.380898372 | 0.294337135 |
| 0.426562715 | 0.043957978 | 0.27565706  | 0.451204908 |
| 0.356219022 | 0.312579018 | 0.072419617 | 0.458772371 |
| 0.4139497   | 0.361656026 | 0.409541322 | 0.003515828 |
| 0.396274867 | 0.156442914 | 0.323321431 | 0.510720332 |
| 0.22269196  | 0.141203088 | 0.371022383 | 0.264205219 |
| 0.424102313 | 0.40734816  | 0.271480239 | 0.428221997 |
| 0.511942308 | 0.256388622 | 0.465834537 | 0.203283037 |
| 0.422714495 | 0.034890143 | 0.170336192 | 0.089002274 |
| 0.444280606 | 0.228699917 | 0.393411996 | 0.389557651 |
| 0.43397943  | 0.512246635 | 0.256290052 | 0.501293424 |
| 0.13887593  | 0.408987289 | 0.343752652 | 0.328736541 |
| 0.384853658 | 0.091738579 | 0.452937142 | 0.529509276 |
| 0.05164537  | 0.417003479 | 0.427130251 | 0.129694747 |
| 0.427461503 | 0.342539953 | 0.444818073 | 0.254289798 |
| 0.425066934 | 0.411561488 | 0.467787943 | 0.325094688 |
| 0.363226147 | 0.08034293  | 0.477574004 | 0.396286608 |
| 0.366471219 | 0.09508252  | 0.294140915 | 0.475464737 |

|             |             |              |             |
|-------------|-------------|--------------|-------------|
| 0.464402291 | 0.509860567 | 0.425899559  | 0.381304929 |
| 0.454104852 | 0.514420424 | 0.446075692  | 0.407165831 |
| 0.213090091 | 0.53422727  | 0.217119011  | 0.048032101 |
| 0.081891055 | 0.094959486 | 0.274854779  | 0.301258127 |
| 0.486252477 | 0.358728909 | 0.231218544  | 0.279943573 |
| 0.473959908 | 0.474004454 | 0.532781888  | 0.427392021 |
| 0.04445241  | 0.323021661 | 0.460861917  | 0.302786221 |
| 0.412013699 | 0.120144512 | 0.344197491  | 0.505299232 |
| 0.378471603 | 0.458404919 | 0.187751038  | 0.489443835 |
| 0.21681383  | 0.522064952 | 0.464523804  | 0.201378419 |
| 0.521444704 | 0.493441808 | 0.526303825  | 0.459231663 |
| 0.472644386 | 0.39599174  | 0.076014328  | 0.385382485 |
| 0.491351194 | 0.025503187 | 0.493337667  | 0.522583708 |
| 0.509808271 | 1           | 0.534980216  | 0.526064255 |
| 0.511638674 | 0.079747521 | 0.0444498703 | 0.330352126 |
| 0.515153782 | 0.402353328 | 0.149967951  | 0.484033521 |
| 0.415125387 | 0.432236576 | 0.441471749  | 0.405235314 |
| 0.511429157 | 0.46367553  | 0.507133484  | 0.415714932 |
| 0.331438603 | 0.302361756 | 0.4500663    | 0.462913749 |
| 0.050782528 | 0.13571441  | 0.058076463  | 0.315183828 |
| 0.402564903 | 0.198811189 | 0.42644215   | 0.3916841   |
| 0.216460952 | 0.364398169 | 0.418053244  | 0.435859917 |
| 0.057395281 | 0.486911777 | 0.187270491  | 0.197647244 |
| 0.049774049 | 0.13681234  | 0.236260076  | 0.185956307 |
| 0.29757176  | 0.219176071 | 0.474190114  | 0.5047601   |
| 0.396326572 | 0.198363987 | 0.456085316  | 0.480994308 |
| 0.423862146 | 0.457896487 | 0.234330614  | 0.016937855 |
| 0.359364497 | 0.378766003 | 0.2765651    | 0.465181273 |
| 0.16123515  | 0.295065157 | 0.442880969  | 0.441965957 |
| 0.322297813 | 0.154540982 | 0.439223275  | 0.416679817 |
| 0.156733546 | 0.373273638 | 0.457476518  | 0.449341703 |
| 0.003504778 | 0.385408511 | 0.46554827   | 0.190897835 |
| 0.339469427 | 0.203314048 | 0.35214069   | 0.480255208 |
| 0.377763104 | 0.286519736 | 0.509073769  | 0.431040035 |
| 0.393037014 | 0.205171114 | 0.536825733  | 0.082434229 |
| 0.393971269 | 0.078008288 | 0.318041256  | 0.372394034 |
| 0.285404176 | 0.310205723 | 0.381073084  | 0.351668123 |
| 0.145257517 | 0.524265471 | 0.392266099  | 0.527639353 |
| 0.45632206  | 0.539099273 | 0.471554933  | 0.446379223 |
| 0.394421419 | 0.426680129 | 0.216036392  | 0.46549002  |
| 0.47208636  | 0.371670123 | 0.079388809  | 0.46267363  |
| 0.421636274 | 0.456251865 | 0.153596818  | 0.510027901 |
| 0.489356524 | 0.469773396 | 0.168287054  | 0.403655893 |
| 0.404066379 | 0.271085866 | 0.416369625  | 0.533381885 |
| 0.380803564 | 0.424022212 | 0.417763262  | 0.410513278 |
| 0.19841348  | 0.270156577 | 0.297659817  | 0.259548019 |
| 0.022432556 | 0.089641326 | 0.075117247  | 0.192688684 |
| 0.240333467 | 0.457003666 | 0.440674075  | 0.530705457 |
| 0.133771477 | 0.411255675 | 0.244287059  | 0.371351051 |
| 0.425453653 | 0.403316928 | 0.444236258  | 0.434246425 |
| 0.254102438 | 0.024032364 | 0.146519944  | 0.516394134 |
| 0.04306826  | 0.327714134 | 0.341293766  | 0.003818178 |
| 0.052222249 | 0.413070273 | 0.095171427  | 0.178244957 |
| 0.488660463 | 0.184398026 | 0.233837298  | 0.382820991 |

|             |             |             |             |
|-------------|-------------|-------------|-------------|
| 0.377654282 | 0.103628125 | 0.004366812 | 0.49715014  |
| 0.484010515 | 0.451897441 | 0.482719023 | 0.446305742 |
| 0.441358321 | 0.413685523 | 0.442376845 | 0.390529796 |
| 0.122499214 | 0.101863823 | 0.303966755 | 0.347783032 |
| 0.005865843 | 0.403012805 | 0.34574154  | 0.154923438 |
| 0.456108634 | 0.325574726 | 0.04304613  | 0.398932053 |
| 0.029876582 | 0.309870075 | 0.342887597 | 0.243970399 |
| 0.373673872 | 0.015402804 | 0.331098386 | 0.417671942 |
| 0.43087284  | 0.340802528 | 0.443637051 | 0.537972259 |
| 0.383678058 | 0.137117094 | 0.378619336 | 0.428067786 |
| 0.082270385 | 0.154087165 | 0.391564391 | 0.062820241 |
| 0.24084188  | 0.44071566  | 0.434058211 | 0.087357094 |
| 0.313897944 | 0.005685821 | 0.359940416 | 0.536467468 |
| 0.468769847 | 0.53756184  | 0.51445472  | 0.364023308 |
| 0.517929704 | 0.175959377 | 0.542733026 | 0.408059876 |
| 0.445697316 | 0.001493067 | 0.006333015 | 0.509023248 |
| 0.469222658 | 0.06006257  | 0.177808919 | 0.428598776 |
| 0.134658942 | 0.173323709 | 0.070950934 | 0.250730922 |
| 0.460631806 | 0.288297743 | 0.229942471 | 0.471047047 |
| 0.281765015 | 0.255880137 | 0.429229144 | 0.091664564 |
| 0.453812102 | 0.062443551 | 0.090206677 | 0.011828869 |
| 0.397809564 | 0.116122452 | 0.456994379 | 0.517514733 |
| 0.499971198 | 0.441342476 | 0.411982122 | 0.388689844 |
| 0.430278844 | 0.106508407 | 0.436654061 | 0.122232603 |
| 0.496264998 | 0.453918414 | 0.346199268 | 0.319242383 |
| 0.513851509 | 0.476800229 | 0.036368711 | 0.44066014  |
| 0.017923679 | 0.002278437 | 0.425851272 | 0.273410286 |
| 0.07748949  | 0.440368268 | 0.271267613 | 0.255535875 |
| 0.248255157 | 0.038428478 | 0.353953703 | 0.331281325 |
| 0.340408103 | 0.418015712 | 0.34792632  | 0.247479919 |
| 0.316944499 | 0.188111518 | 0.225535154 | 0.16974128  |
| 0.27649803  | 0.307274556 | 0.18623929  | 0.02252322  |
| 0.477855336 | 0.481235817 | 0.065266735 | 0.169929437 |
| 0.45015106  | 0.513184817 | 0.049466545 | 0.015177995 |
| 0.27289294  | 0.360329441 | 0.517357266 | 0.509549622 |
| 0.524553589 | 0.526789089 | 0.380260553 | 0.150925375 |
| 0.076580862 | 0.363065787 | 0.361898404 | 0.123417139 |
| 0.521267165 | 0.072649673 | 0.484659428 | 0.383825128 |
| 0.124695582 | 0.257234667 | 0.041048502 | 0.091920785 |
| 0.451097522 | 0.192013862 | 0.211084973 | 0.16895077  |
| 0.375949711 | 0.338462499 | 0.052671061 | 0.222465383 |
| 0.371367845 | 0.276872552 | 0.178821526 | 0.330179546 |
| 0.365424191 | 0.259134782 | 0.473339936 | 0.446706463 |
| 0.141469164 | 0.123146125 | 0.340490259 | 0.398835424 |
| 0.464693167 | 0.43721911  | 0.036189996 | 0.458686093 |
| 0.497275077 | 0.489704986 | 0.501701141 | 0.384519136 |
| 0.089630422 | 0.455192305 | 0.380111291 | 0.401143507 |
| 0.201146076 | 0.42998813  | 0.261684621 | 0.068150856 |
| 0.278084133 | 0.466793714 | 0.420031273 | 0.196716774 |
| 0.45474821  | 0.137465664 | 0.063567425 | 0.441984941 |
| 0.266289838 | 0.111165285 | 0.400732937 | 0.443011818 |
| 0.002824119 | 0.212468783 | 0.495583518 | 0.275253345 |
| 0.511855609 | 0.499735924 | 0.441429751 | 0.274581577 |
| 0.0037161   | 0.461489094 | 0.436309589 | 0.475789933 |

|             |             |             |             |
|-------------|-------------|-------------|-------------|
| 0.437620114 | 0.358830565 | 0.162289361 | 0.089638738 |
| 0.292656621 | 0.089044189 | 0.166917045 | 0.39235028  |
| 0.25516951  | 0.439504377 | 0.206871894 | 0.223475388 |
| 0.231442252 | 0.095186786 | 0.325672322 | 0.276460148 |
| 0.196138262 | 0.252228202 | 0.366314535 | 0.331066669 |
| 0.301072069 | 0.433052865 | 0.42917607  | 0.029471703 |
| 0.416542969 | 0.404409341 | 0.425426143 | 0.003631969 |
| 0.476389115 | 0.00785275  | 0.23182317  | 0.263741498 |
| 0.233073673 | 0.243041401 | 0.293583708 | 0.363609496 |
| 0.384562239 | 0.255298127 | 0.330909493 | 0.264336579 |
| 0.197375139 | 0.243058906 | 0.437794941 | 0.400864509 |
| 0.351569136 | 0.14722156  | 0.095451623 | 0.094103383 |
| 0.063670849 | 0.466219943 | 0.237971439 | 0.079072121 |
| 0.246631061 | 0.402349049 | 0.338226495 | 0.501045766 |
| 0.411581734 | 0.112749057 | 0.367528655 | 0.454254184 |
| 0.30661449  | 0.35128405  | 0.071397839 | 0.427826181 |
| 0.258933933 | 0.288377012 | 0.432854876 | 0.350766801 |
| 0.427331856 | 0.391957663 | 0.23736379  | 0.433251729 |
| 0.425137374 | 0.380663907 | 0.382907103 | 0.106779711 |
| 0.212099409 | 0.137737216 | 0.331545212 | 0.002288412 |
| 0.38470189  | 0.311384108 | 0.489860863 | 0.492409594 |
| 0.374541161 | 0.369201667 | 0.383986303 | 0.110295528 |
| 0.342055567 | 0.172438173 | 0.150386714 | 0.455799024 |
| 0.318274207 | 0.208129807 | 0.361330903 | 0.371787976 |
| 0.464051321 | 0.442537479 | 0.300242023 | 0.267494862 |
| 0.258397464 | 0.216187313 | 0.464527044 | 0.136574691 |
| 0.478734032 | 0.254716018 | 0.378945797 | 0.360995833 |
| 0.262367304 | 0.52873632  | 0.065211506 | 0.542135654 |
| 0.398700575 | 0.132312293 | 0.484430585 | 0.319835553 |
| 0.326727201 | 0.144292203 | 0.282207742 | 0.415591063 |
| 0.256110915 | 0.419480841 | 0.026975298 | 0.097846868 |
| 0.35650593  | 0.336508119 | 0.418572607 | 0.380790942 |
| 0.307599192 | 0.350079914 | 0.235011215 | 0.321483141 |
| 0.480778269 | 0.488482798 | 0.324102675 | 0.254409475 |
| 0.362984033 | 0.117720727 | 0.424442871 | 0.020334478 |
| 0.478635631 | 0.478320682 | 0.440868848 | 0.057618087 |
| 0.020060573 | 0.317468153 | 0.466765114 | 0.070681724 |
| 0.497061713 | 0.314086287 | 0.375563637 | 0.465563556 |
| 0.178828044 | 0.491549903 | 0.143764876 | 0.449104052 |
| 0.051058393 | 0.271161413 | 0.430910041 | 0.415450238 |
| 0.29839744  | 0.37707672  | 0.413734036 | 0.32188091  |
| 0.036618205 | 0.320379818 | 0.002409753 | 0.396636151 |
| 0.464614526 | 0.416719641 | 0.198099349 | 0.351354556 |
| 0.301343006 | 0.362925046 | 0.288617945 | 0.46389297  |
| 0.013491784 | 0.443020145 | 0.214114139 | 0.410814981 |
| 0.355494579 | 0.399882193 | 0.069154683 | 0.371138612 |
| 0.442067656 | 0.355441512 | 0.247176915 | 0.420159013 |
| 0.49512215  | 0.37841696  | 0.169307436 | 0.260585831 |
| 0.408365678 | 0.067951057 | 0.426268505 | 0.533094242 |
| 0.205417616 | 0.298615516 | 0.461826991 | 0.251769177 |
| 0.384611186 | 0.370469476 | 0.445787034 | 0.518629614 |
| 0.089781196 | 0.268183977 | 0.44300504  | 0.464234085 |
| 0.311830203 | 0.230026729 | 0.334187272 | 0.287541616 |
| 0.462237081 | 0.122167273 | 0.32749178  | 0.381249404 |

|             |             |             |             |
|-------------|-------------|-------------|-------------|
| 0.311712844 | 0.329226235 | 0.357003913 | 0.235483652 |
| 0.043681837 | 0.182762774 | 0.419342996 | 0.152512902 |
| 0.334164587 | 0.424081225 | 0.300901653 | 0.378197174 |
| 0.171713336 | 0.034475015 | 0.447035951 | 0.036307346 |
| 0.370464509 | 0.447402395 | 0.262598517 | 0.415273613 |
| 0.189950237 | 0.382955841 | 0.377957913 | 0.001107449 |
| 0.423852328 | 0.069802099 | 0.335122165 | 0.29662733  |
| 0.358404174 | 0.058486316 | 0.454156286 | 0.529236083 |
| 0.333432256 | 0.375868098 | 0.435633361 | 0.459580588 |
| 0.226368618 | 0.411094165 | 0.405782161 | 0.442353149 |
| 0.308578099 | 0.445072763 | 0.466862609 | 0.464451874 |
| 0.403469767 | 0.28949966  |             |             |
| CENPN       | 0.149699433 | 0.479886971 | 0.115046123 |
| 0.237944793 | 0.424542477 | 0.499602075 | 0.134418885 |
| 0.235467895 | 0.446442089 | 0.386731373 | 0.479653552 |
| 0.049246595 | 0.137903883 | 0.513050835 | 0.127710897 |
| 0.501343253 | 0.08674544  | 0.209978883 | 0.13755349  |
| 0.350989338 | 0.402448232 | 0.440589356 | 0.477992167 |
| 0.411653331 | 0.270195588 | 0.462025667 | 0.481702772 |
| 0.515505804 | 0.332606078 | 0.526887695 | 0.260351099 |
| 0.457033592 | 0.438875527 | 0.473258042 | 0.045276211 |
| 0.521416766 | 0.028848515 | 0.450809819 | 0.395027916 |
| 0.229930223 | 0.420561294 | 0.420181208 | 0.372617829 |
| 0.471228082 | 0.085878779 | 0.263185735 | 0.507056684 |
| 0.450737731 | 0.420623817 | 0.131923691 | 0.526850241 |
| 0.482661455 | 0.456232014 | 0.469025607 | 0.005532285 |
| 0.39207427  | 0.126574937 | 0.30486113  | 0.501710185 |
| 0.321210751 | 0.232303482 | 0.371501462 | 0.380374934 |
| 0.495582011 | 0.49174198  | 0.386223653 | 0.46707819  |
| 0.508829581 | 0.263104126 | 0.519300211 | 0.25544429  |
| 0.506284408 | 0.08231883  | 0.267854354 | 0.164100895 |
| 0.498742711 | 0.327368994 | 0.459475678 | 0.41743769  |
| 0.470739745 | 0.522526085 | 0.368660169 | 0.499279865 |
| 0.176815199 | 0.449128574 | 0.40034338  | 0.42972725  |
| 0.480803329 | 0.178027594 | 0.518003095 | 0.521714402 |
| 0.113823305 | 0.467464024 | 0.505814199 | 0.215792253 |
| 0.498068569 | 0.383195219 | 0.476046662 | 0.257958527 |
| 0.480365973 | 0.459456548 | 0.483126279 | 0.419958285 |
| 0.435143919 | 0.145470945 | 0.487091847 | 0.425107968 |
| 0.415676627 | 0.162270671 | 0.348051421 | 0.531276653 |
| 0.524921139 | 0.519604829 | 0.502952694 | 0.477839586 |
| 0.486124516 | 0.512104375 | 0.514193187 | 0.49098085  |
| 0.202694726 | 0.520116243 | 0.307984537 | 0.100384622 |
| 0.145266517 | 0.177223848 | 0.35494214  | 0.414243438 |
| 0.529060712 | 0.461555156 | 0.323470292 | 0.366333043 |
| 0.523832445 | 0.475945573 | 0.518160069 | 0.510948966 |
| 0.093798604 | 0.353414843 | 0.489968132 | 0.410248204 |
| 0.498336233 | 0.21496798  | 0.36422984  | 0.511161984 |
| 0.463709497 | 0.52778306  | 0.281093397 | 0.509058406 |
| 0.331742865 | 0.513748215 | 0.502631101 | 0.288978843 |
| 0.519032004 | 0.49603358  | 0.516180747 | 0.498903101 |
| 0.476306062 | 0.464840683 | 0.116512826 | 0.483027392 |
| 0.502075306 | 0.026820747 | 0.527414215 | 0.529633608 |
| 0.494756462 | 0.534980216 | 1           | 0.524229082 |

|             |             |             |             |
|-------------|-------------|-------------|-------------|
| 0.497862909 | 0.152067325 | 0.050152216 | 0.416236554 |
| 0.507203329 | 0.487485013 | 0.249356122 | 0.507011465 |
| 0.475818924 | 0.508833545 | 0.517747176 | 0.399557182 |
| 0.516944794 | 0.521153719 | 0.52328029  | 0.501719738 |
| 0.425456239 | 0.39900333  | 0.469330536 | 0.470612419 |
| 0.104789343 | 0.208491797 | 0.109122393 | 0.42921952  |
| 0.43323093  | 0.29632904  | 0.49627764  | 0.470804174 |
| 0.317751629 | 0.463128973 | 0.420163354 | 0.48580101  |
| 0.111377848 | 0.525277429 | 0.285363913 | 0.29025224  |
| 0.100184299 | 0.226166851 | 0.301447464 | 0.264231685 |
| 0.382936393 | 0.270858223 | 0.527488624 | 0.519798428 |
| 0.470756456 | 0.28740289  | 0.525873161 | 0.500944387 |
| 0.474653923 | 0.485254953 | 0.34790256  | 0.029009864 |
| 0.387915377 | 0.396545167 | 0.270454565 | 0.50209902  |
| 0.241874181 | 0.375928472 | 0.503803148 | 0.497452079 |
| 0.403360026 | 0.257001534 | 0.482473849 | 0.44138084  |
| 0.245889286 | 0.422658362 | 0.521882018 | 0.506756069 |
| 0.011192062 | 0.460049831 | 0.533065995 | 0.257141847 |
| 0.444896983 | 0.206109027 | 0.334309097 | 0.52446756  |
| 0.392134614 | 0.341621224 | 0.525961502 | 0.495872125 |
| 0.439956325 | 0.277806091 | 0.520685476 | 0.083355767 |
| 0.460351723 | 0.101935129 | 0.409919225 | 0.420487225 |
| 0.386302372 | 0.416676076 | 0.427257764 | 0.401982187 |
| 0.218639835 | 0.51407567  | 0.488135525 | 0.522754381 |
| 0.474345322 | 0.523913119 | 0.533215452 | 0.513146633 |
| 0.490746007 | 0.462778199 | 0.202104094 | 0.528104395 |
| 0.52622924  | 0.400382185 | 0.143392107 | 0.522674808 |
| 0.467911696 | 0.507867362 | 0.211402072 | 0.516059843 |
| 0.500430751 | 0.465306039 | 0.257620997 | 0.483485865 |
| 0.486460889 | 0.360448408 | 0.505539747 | 0.526363674 |
| 0.411505617 | 0.470209279 | 0.451296812 | 0.491998709 |
| 0.292198681 | 0.329413065 | 0.41006444  | 0.25817539  |
| 0.015043625 | 0.164238704 | 0.136082798 | 0.277507256 |
| 0.258716022 | 0.501469395 | 0.512858607 | 0.513753785 |
| 0.220868172 | 0.484660821 | 0.360833719 | 0.413031944 |
| 0.476245113 | 0.465152336 | 0.476163542 | 0.496612522 |
| 0.367969282 | 0.044400586 | 0.207257576 | 0.52433015  |
| 0.090112398 | 0.336101009 | 0.450424675 | 0.006684516 |
| 0.105161059 | 0.481800228 | 0.166930185 | 0.265372042 |
| 0.52153661  | 0.270052753 | 0.326507423 | 0.420310944 |
| 0.465002403 | 0.184200705 | 0.008653186 | 0.510970889 |
| 0.488100977 | 0.480799861 | 0.485489751 | 0.460771376 |
| 0.498404386 | 0.502241264 | 0.514433542 | 0.464695172 |
| 0.205564507 | 0.176882708 | 0.315505236 | 0.421645447 |
| 0.011262236 | 0.488564757 | 0.434305965 | 0.246354953 |
| 0.519378867 | 0.435155496 | 0.089192605 | 0.466200709 |
| 0.051936259 | 0.274199435 | 0.4447085   | 0.352794643 |
| 0.462323414 | 0.040281037 | 0.324470061 | 0.43026323  |
| 0.455900117 | 0.441006617 | 0.452354504 | 0.524523898 |
| 0.455996698 | 0.21379631  | 0.438521195 | 0.502882064 |
| 0.154481877 | 0.165909626 | 0.484583716 | 0.05155881  |
| 0.278960039 | 0.465117661 | 0.48746098  | 0.144338051 |
| 0.405074134 | 0.015701454 | 0.451423504 | 0.525730457 |
| 0.466226951 | 0.52427082  | 0.513537706 | 0.368562533 |

|             |             |             |             |
|-------------|-------------|-------------|-------------|
| 0.50509462  | 0.153150933 | 0.51989877  | 0.492632326 |
| 0.463393996 | 0.002311002 | 0.015704125 | 0.531374159 |
| 0.502616705 | 0.112708399 | 0.274267739 | 0.454155635 |
| 0.210641945 | 0.261562646 | 0.14233444  | 0.287576243 |
| 0.52083909  | 0.360233084 | 0.275218827 | 0.470252942 |
| 0.376206026 | 0.364909709 | 0.49604871  | 0.167323218 |
| 0.508237369 | 0.11858491  | 0.168628314 | 0.017265326 |
| 0.480196612 | 0.189916684 | 0.474338295 | 0.503890248 |
| 0.497239751 | 0.500073393 | 0.412015001 | 0.442122003 |
| 0.506444049 | 0.171471448 | 0.452813828 | 0.197539312 |
| 0.492739752 | 0.502786569 | 0.439560998 | 0.413522178 |
| 0.511545003 | 0.492691433 | 0.083469702 | 0.513439436 |
| 0.032094592 | 0.005052942 | 0.47773637  | 0.388934655 |
| 0.119416107 | 0.481993452 | 0.373836848 | 0.364433    |
| 0.358973559 | 0.072622098 | 0.367602952 | 0.346636316 |
| 0.429477874 | 0.485790252 | 0.386572896 | 0.364246381 |
| 0.391570368 | 0.233527505 | 0.323458123 | 0.275225435 |
| 0.357548131 | 0.407186258 | 0.274503856 | 0.058910314 |
| 0.514659881 | 0.508247313 | 0.125888671 | 0.266763169 |
| 0.523425659 | 0.530888321 | 0.104133884 | 0.029996567 |
| 0.376604384 | 0.444904448 | 0.527809322 | 0.502149071 |
| 0.522774595 | 0.518879388 | 0.427726963 | 0.230957889 |
| 0.142705622 | 0.450381055 | 0.40704793  | 0.19094628  |
| 0.513891935 | 0.133322935 | 0.487162221 | 0.399463728 |
| 0.21632236  | 0.346826321 | 0.081898314 | 0.173267973 |
| 0.479752407 | 0.296001792 | 0.299043904 | 0.244562024 |
| 0.44552634  | 0.34755724  | 0.113677663 | 0.324397824 |
| 0.466212462 | 0.265268393 | 0.277437959 | 0.438477391 |
| 0.466461627 | 0.305233908 | 0.523762861 | 0.475929455 |
| 0.228974346 | 0.213118457 | 0.395247281 | 0.492683174 |
| 0.529493743 | 0.478525833 | 0.055074164 | 0.482838891 |
| 0.517416778 | 0.530869169 | 0.493768952 | 0.480415335 |
| 0.166273867 | 0.483284908 | 0.421744787 | 0.465328709 |
| 0.310944932 | 0.495143554 | 0.374935012 | 0.134550683 |
| 0.394297694 | 0.489030709 | 0.491885575 | 0.283136462 |
| 0.512805907 | 0.220349863 | 0.119692902 | 0.510592843 |
| 0.281036619 | 0.175476902 | 0.444115838 | 0.517929203 |
| 0.005124995 | 0.209222435 | 0.511965126 | 0.365303412 |
| 0.516704301 | 0.523609284 | 0.480898534 | 0.387888814 |
| 0.004084678 | 0.507436904 | 0.495083551 | 0.50537817  |
| 0.499203321 | 0.461594643 | 0.254264008 | 0.156879277 |
| 0.399195885 | 0.150590156 | 0.24876591  | 0.443863213 |
| 0.258344899 | 0.516157851 | 0.314663206 | 0.337536802 |
| 0.325726787 | 0.170190146 | 0.33803923  | 0.370509198 |
| 0.240893107 | 0.356922439 | 0.461525737 | 0.374187821 |
| 0.274411385 | 0.503150752 | 0.505119903 | 0.066060665 |
| 0.458369491 | 0.498093161 | 0.497429083 | 0.006581205 |
| 0.524826029 | 0.022412908 | 0.320277034 | 0.338469552 |
| 0.32529823  | 0.341765599 | 0.384724063 | 0.417601602 |
| 0.477574618 | 0.360224827 | 0.402536348 | 0.361723591 |
| 0.276020642 | 0.353979829 | 0.502067189 | 0.485305372 |
| 0.394014716 | 0.230334893 | 0.166716554 | 0.158458231 |
| 0.111472771 | 0.510098033 | 0.341754979 | 0.139577227 |
| 0.355697373 | 0.486649282 | 0.439557162 | 0.486286441 |



|             |             |             |             |
|-------------|-------------|-------------|-------------|
| 0.487500532 | 0.182685865 | 0.462453231 | 0.509129037 |
| 0.308889314 | 0.405006613 | 0.132879542 | 0.5029128   |
| 0.362850809 | 0.321291992 | 0.499261495 | 0.429225546 |
| 0.501976408 | 0.439586601 | 0.340365057 | 0.486598911 |
| 0.485496297 | 0.460611023 | 0.396442711 | 0.1679866   |
| 0.298298215 | 0.23092615  | 0.380079915 | 0.006629143 |
| 0.480079252 | 0.379071582 | 0.534152599 | 0.486027316 |
| 0.38218635  | 0.460104321 | 0.401660377 | 0.176415228 |
| 0.347724243 | 0.245910132 | 0.243164859 | 0.521013129 |
| 0.293263123 | 0.307543355 | 0.424443567 | 0.435225637 |
| 0.525087222 | 0.510913882 | 0.377583278 | 0.381604918 |
| 0.373187226 | 0.314542354 | 0.479616899 | 0.219553684 |
| 0.514563471 | 0.287991465 | 0.45126852  | 0.426216515 |
| 0.349584212 | 0.516883597 | 0.12793146  | 0.523121185 |
| 0.453600941 | 0.220338132 | 0.497260167 | 0.429753912 |
| 0.421497793 | 0.217069477 | 0.268023741 | 0.482660307 |
| 0.362357488 | 0.431669033 | 0.024762863 | 0.107615402 |
| 0.447311888 | 0.422225098 | 0.49071269  | 0.480951996 |
| 0.363231995 | 0.451109369 | 0.23549295  | 0.424790644 |
| 0.475601469 | 0.498301548 | 0.377418137 | 0.364818306 |
| 0.464643728 | 0.196037235 | 0.493050702 | 0.03194079  |
| 0.517737139 | 0.503308805 | 0.472336098 | 0.12114689  |
| 0.052053204 | 0.298214014 | 0.516362857 | 0.13820125  |
| 0.524414472 | 0.281422818 | 0.461783613 | 0.526209515 |
| 0.286110588 | 0.500081918 | 0.226193486 | 0.511434257 |
| 0.108756151 | 0.385934261 | 0.477304661 | 0.48289231  |
| 0.337289471 | 0.400839504 | 0.48838925  | 0.331336435 |
| 0.08019327  | 0.387206627 | 0.005657425 | 0.422973262 |
| 0.47220061  | 0.446262671 | 0.304558535 | 0.381691757 |
| 0.401522184 | 0.469265742 | 0.36283751  | 0.500113945 |
| 0.030384194 | 0.47452997  | 0.322004956 | 0.494127077 |
| 0.310620818 | 0.479514648 | 0.121750233 | 0.42988045  |
| 0.464597494 | 0.399702383 | 0.362829507 | 0.405092422 |
| 0.490534257 | 0.475562355 | 0.254239037 | 0.335606724 |
| 0.481348597 | 0.132016572 | 0.467121163 | 0.523871147 |
| 0.295584488 | 0.314117478 | 0.525090918 | 0.332670714 |
| 0.413895739 | 0.464841006 | 0.494545859 | 0.515806937 |
| 0.151521295 | 0.37036311  | 0.519351642 | 0.499720785 |
| 0.415102419 | 0.272744461 | 0.343996619 | 0.35332663  |
| 0.468027793 | 0.179009347 | 0.372482677 | 0.474465286 |
| 0.312861299 | 0.434696539 | 0.43371915  | 0.306486216 |
| 0.083610813 | 0.29184061  | 0.474412813 | 0.250402199 |
| 0.426695989 | 0.48250846  | 0.362743465 | 0.451540326 |
| 0.227746833 | 0.058282758 | 0.474771673 | 0.032746563 |
| 0.45115077  | 0.502393259 | 0.37228861  | 0.469228881 |
| 0.279541366 | 0.479123689 | 0.451995276 | 0.003855563 |
| 0.509914968 | 0.085953468 | 0.428152667 | 0.342896708 |
| 0.387442777 | 0.116210755 | 0.479954069 | 0.524795659 |
| 0.44376759  | 0.423096457 | 0.427912025 | 0.491519314 |
| 0.226113121 | 0.412867671 | 0.441570084 | 0.507302494 |
| 0.315720557 | 0.465158242 | 0.497303849 | 0.465655869 |
| 0.496989072 | 0.401705758 |             |             |
| CENPP       | 0.135764427 | 0.479060277 | 0.1107949   |
| 0.221897631 | 0.392099915 | 0.524378151 | 0.102568084 |

|             |             |             |             |
|-------------|-------------|-------------|-------------|
| 0.199637692 | 0.428412243 | 0.39426619  | 0.470365666 |
| 0.036615739 | 0.131939215 | 0.498450816 | 0.096309566 |
| 0.471117334 | 0.062872075 | 0.170650253 | 0.118722982 |
| 0.317662231 | 0.355986235 | 0.444922451 | 0.487139646 |
| 0.365283771 | 0.252885643 | 0.446462722 | 0.470874932 |
| 0.513799339 | 0.366797499 | 0.533319574 | 0.283120952 |
| 0.43205932  | 0.406028492 | 0.480473882 | 0.037458928 |
| 0.518275947 | 0.018752132 | 0.449858811 | 0.344862248 |
| 0.221282708 | 0.397825988 | 0.443670945 | 0.34108488  |
| 0.462811169 | 0.07338918  | 0.304258466 | 0.48060311  |
| 0.429813601 | 0.390265194 | 0.1204922   | 0.524481034 |
| 0.457473501 | 0.452331406 | 0.477041529 | 0.004206925 |
| 0.392225196 | 0.129875609 | 0.296843161 | 0.525596143 |
| 0.291532395 | 0.194537565 | 0.360113386 | 0.351089997 |
| 0.468566664 | 0.455792451 | 0.347490293 | 0.449456829 |
| 0.511688267 | 0.237213416 | 0.514553109 | 0.248513653 |
| 0.479568697 | 0.065528305 | 0.234205897 | 0.143951989 |
| 0.481128836 | 0.290099145 | 0.446214957 | 0.393122411 |
| 0.471060643 | 0.531246317 | 0.32925464  | 0.51779674  |
| 0.132934254 | 0.417301667 | 0.366743522 | 0.383894189 |
| 0.440580269 | 0.136641392 | 0.503823847 | 0.531690876 |
| 0.091550821 | 0.471761653 | 0.474214348 | 0.193034737 |
| 0.503076796 | 0.365441138 | 0.49194134  | 0.24822569  |
| 0.453014896 | 0.415904016 | 0.4910998   | 0.387411541 |
| 0.413695801 | 0.128272954 | 0.507743046 | 0.39753069  |
| 0.401868929 | 0.146499735 | 0.290585477 | 0.52207451  |
| 0.507775243 | 0.517862469 | 0.490796885 | 0.435642841 |
| 0.455041847 | 0.513358768 | 0.501582672 | 0.479431564 |
| 0.232456807 | 0.540390045 | 0.286084702 | 0.07796214  |
| 0.131370055 | 0.143906841 | 0.300175828 | 0.380424837 |
| 0.527472917 | 0.441505365 | 0.292619817 | 0.313831825 |
| 0.500864158 | 0.500070875 | 0.536000175 | 0.487268005 |
| 0.074929523 | 0.323439999 | 0.464103403 | 0.407196517 |
| 0.461933496 | 0.180173695 | 0.335692    | 0.525709858 |
| 0.448074896 | 0.507577022 | 0.263661137 | 0.519581843 |
| 0.281942874 | 0.525025651 | 0.509002741 | 0.252332287 |
| 0.53444961  | 0.516455515 | 0.517787446 | 0.486745824 |
| 0.496231353 | 0.46424713  | 0.088992385 | 0.45326335  |
| 0.494725139 | 0.023684479 | 0.521416122 | 0.520320886 |
| 0.515090708 | 0.526064255 | 0.524229082 | 1           |
| 0.52078425  | 0.127789526 | 0.039041749 | 0.363811582 |
| 0.523635783 | 0.472798581 | 0.203168831 | 0.494966328 |
| 0.440241029 | 0.51427867  | 0.509802653 | 0.397949441 |
| 0.520313537 | 0.517006754 | 0.521165508 | 0.476246722 |
| 0.39587948  | 0.378873978 | 0.457277652 | 0.493055976 |
| 0.084242295 | 0.19310792  | 0.099090547 | 0.388392896 |
| 0.468897015 | 0.25242382  | 0.488382112 | 0.429378324 |
| 0.275618998 | 0.457486205 | 0.427879451 | 0.461832242 |
| 0.099095252 | 0.533919652 | 0.258355402 | 0.254230667 |
| 0.074803193 | 0.203530422 | 0.264728439 | 0.2437289   |
| 0.337780705 | 0.262172966 | 0.525874326 | 0.509727106 |
| 0.432713464 | 0.267907911 | 0.517137985 | 0.48598315  |
| 0.444610618 | 0.472381567 | 0.309935245 | 0.023297785 |
| 0.335820698 | 0.384287417 | 0.251200189 | 0.50123316  |

|             |             |             |             |
|-------------|-------------|-------------|-------------|
| 0.224303485 | 0.313815641 | 0.46599847  | 0.478613291 |
| 0.39499234  | 0.22907572  | 0.446475903 | 0.446468633 |
| 0.224322102 | 0.407791162 | 0.501696092 | 0.49332371  |
| 0.008640419 | 0.428019596 | 0.524303501 | 0.200197814 |
| 0.403191821 | 0.191872571 | 0.352524089 | 0.506370596 |
| 0.368162879 | 0.29340018  | 0.523341578 | 0.475111601 |
| 0.44472807  | 0.263213424 | 0.530658853 | 0.06573362  |
| 0.428104744 | 0.088041478 | 0.365892285 | 0.432894231 |
| 0.347095174 | 0.368043582 | 0.400071663 | 0.373059098 |
| 0.211037269 | 0.529330944 | 0.479865434 | 0.520361823 |
| 0.448360436 | 0.533192769 | 0.522271168 | 0.500298176 |
| 0.469483922 | 0.439759456 | 0.190814694 | 0.515959061 |
| 0.511648391 | 0.365323911 | 0.130040306 | 0.51352792  |
| 0.440817005 | 0.481397551 | 0.173744671 | 0.498957922 |
| 0.511199229 | 0.488704339 | 0.216675624 | 0.446486731 |
| 0.468026996 | 0.341111499 | 0.492307298 | 0.534114073 |
| 0.392651003 | 0.426242105 | 0.41274809  | 0.462135901 |
| 0.261259384 | 0.273699423 | 0.384835914 | 0.248323176 |
| 0.01989448  | 0.142328155 | 0.117909209 | 0.234141144 |
| 0.230608226 | 0.506780787 | 0.483433735 | 0.525311928 |
| 0.1841628   | 0.478731473 | 0.3191403   | 0.369185618 |
| 0.458893843 | 0.430687607 | 0.474158497 | 0.480410261 |
| 0.333313845 | 0.036059339 | 0.182816712 | 0.53279577  |
| 0.078705388 | 0.320967725 | 0.422383838 | 0.005638775 |
| 0.083070561 | 0.48627027  | 0.148610174 | 0.2431514   |
| 0.505917008 | 0.251927213 | 0.294534323 | 0.403160872 |
| 0.440868017 | 0.157132237 | 0.00727631  | 0.497866488 |
| 0.494929495 | 0.46400661  | 0.493403637 | 0.473999826 |
| 0.475065994 | 0.490747153 | 0.485666595 | 0.482194322 |
| 0.170667469 | 0.157404585 | 0.268230448 | 0.368129838 |
| 0.009106279 | 0.471940128 | 0.399318488 | 0.21508164  |
| 0.503104256 | 0.387023289 | 0.073665838 | 0.440163504 |
| 0.045353186 | 0.272473129 | 0.404070643 | 0.302009072 |
| 0.423499149 | 0.03217143  | 0.334737651 | 0.397026832 |
| 0.457752206 | 0.424421331 | 0.451171408 | 0.543954961 |
| 0.431670887 | 0.198200351 | 0.400698174 | 0.489864589 |
| 0.122705822 | 0.146669437 | 0.460312311 | 0.060009444 |
| 0.308874721 | 0.466192597 | 0.474042809 | 0.124842404 |
| 0.366607875 | 0.012285727 | 0.441335567 | 0.541831966 |
| 0.488218061 | 0.520976801 | 0.514620647 | 0.35773952  |
| 0.518568069 | 0.1522538   | 0.539744524 | 0.483698711 |
| 0.45953425  | 0.001956018 | 0.011474942 | 0.523809408 |
| 0.479008048 | 0.105265191 | 0.237880106 | 0.490310436 |
| 0.174516273 | 0.242323467 | 0.118750956 | 0.249913316 |
| 0.533965901 | 0.322007332 | 0.242231065 | 0.485073521 |
| 0.325196626 | 0.319363488 | 0.493333923 | 0.145933464 |
| 0.507210948 | 0.095246226 | 0.14380857  | 0.014655421 |
| 0.448692164 | 0.175553472 | 0.491227025 | 0.522489693 |
| 0.503493579 | 0.478732766 | 0.42568069  | 0.455955986 |
| 0.489204945 | 0.165486518 | 0.473215324 | 0.186575036 |
| 0.501559273 | 0.470169923 | 0.410200809 | 0.392318142 |
| 0.503096854 | 0.481084395 | 0.063759926 | 0.483591631 |
| 0.030608685 | 0.003678745 | 0.486750073 | 0.348608494 |
| 0.092934709 | 0.442600026 | 0.337823083 | 0.31508427  |

|             |             |             |             |
|-------------|-------------|-------------|-------------|
| 0.314731628 | 0.06361999  | 0.334537636 | 0.307547951 |
| 0.384158472 | 0.444213778 | 0.350086158 | 0.327297556 |
| 0.344010643 | 0.180328445 | 0.288999722 | 0.228343035 |
| 0.317789623 | 0.384696222 | 0.256048045 | 0.042414814 |
| 0.51710197  | 0.500495777 | 0.104526467 | 0.240542053 |
| 0.512688602 | 0.522668526 | 0.071772281 | 0.021773804 |
| 0.347874664 | 0.395299789 | 0.515939102 | 0.514647499 |
| 0.540675413 | 0.523968699 | 0.409433399 | 0.17527269  |
| 0.121632406 | 0.40554073  | 0.371478344 | 0.149045597 |
| 0.522171858 | 0.11641398  | 0.504230712 | 0.379216004 |
| 0.182394901 | 0.307230433 | 0.065418293 | 0.140175822 |
| 0.475306205 | 0.259587702 | 0.252315898 | 0.229314942 |
| 0.396571931 | 0.3350663   | 0.087711631 | 0.281018053 |
| 0.431465506 | 0.233642962 | 0.237504104 | 0.427021197 |
| 0.454211488 | 0.303579055 | 0.504360642 | 0.4537509   |
| 0.205559982 | 0.177023909 | 0.394156636 | 0.471021587 |
| 0.522289461 | 0.480628082 | 0.05578278  | 0.485882962 |
| 0.506957473 | 0.530454557 | 0.51773076  | 0.444411603 |
| 0.140380493 | 0.469619997 | 0.386718091 | 0.415977528 |
| 0.264222744 | 0.51795721  | 0.325516703 | 0.110267257 |
| 0.362972731 | 0.494824115 | 0.477209224 | 0.246887462 |
| 0.520871104 | 0.204177066 | 0.104064882 | 0.507772887 |
| 0.236667698 | 0.151287061 | 0.462045374 | 0.502962061 |
| 0.004017334 | 0.197489696 | 0.493222405 | 0.348051064 |
| 0.525560698 | 0.507484755 | 0.464801039 | 0.369662722 |
| 0.002595118 | 0.485379454 | 0.473961991 | 0.492308459 |
| 0.491961841 | 0.450781766 | 0.237193009 | 0.12276985  |
| 0.365090158 | 0.141508619 | 0.194831004 | 0.471911195 |
| 0.222617406 | 0.504452888 | 0.272516849 | 0.289406343 |
| 0.27408621  | 0.149681658 | 0.333681648 | 0.349701004 |
| 0.19820808  | 0.319648296 | 0.427099208 | 0.395978944 |
| 0.249673912 | 0.47468795  | 0.481292516 | 0.054992326 |
| 0.446919917 | 0.469305579 | 0.484903998 | 0.003660718 |
| 0.511085807 | 0.015967172 | 0.272716285 | 0.301311931 |
| 0.282937895 | 0.283532465 | 0.335179387 | 0.385332594 |
| 0.441890851 | 0.310469428 | 0.38104706  | 0.324961258 |
| 0.241009066 | 0.321112946 | 0.481586389 | 0.460409502 |
| 0.373316305 | 0.203689231 | 0.152900089 | 0.147711946 |
| 0.09639311  | 0.512015655 | 0.317706026 | 0.13062499  |
| 0.312087721 | 0.456757774 | 0.409706929 | 0.510493045 |
| 0.46970512  | 0.175363567 | 0.420423732 | 0.512296156 |
| 0.304179679 | 0.411318607 | 0.114527714 | 0.499701174 |
| 0.331140707 | 0.288296732 | 0.510185825 | 0.412899752 |
| 0.486076336 | 0.419983598 | 0.318532046 | 0.47245157  |
| 0.467831671 | 0.419233684 | 0.417069842 | 0.13579293  |
| 0.262936988 | 0.200637024 | 0.340075282 | 0.00501169  |
| 0.449847758 | 0.38763076  | 0.527379503 | 0.50707693  |
| 0.372883623 | 0.441976932 | 0.430930685 | 0.146748628 |
| 0.378269029 | 0.233260616 | 0.211879843 | 0.517930815 |
| 0.291182469 | 0.28317934  | 0.383510666 | 0.467609603 |
| 0.510949776 | 0.495247244 | 0.331785275 | 0.33909168  |
| 0.325188757 | 0.294552481 | 0.487555742 | 0.204914142 |
| 0.510913905 | 0.255186817 | 0.454182    | 0.378368744 |
| 0.295508025 | 0.523441605 | 0.110137164 | 0.53105004  |

|             |             |             |             |
|-------------|-------------|-------------|-------------|
| 0.403155365 | 0.199976995 | 0.503198328 | 0.419792771 |
| 0.417190544 | 0.192832044 | 0.253688761 | 0.485779911 |
| 0.309062411 | 0.432933001 | 0.023593012 | 0.085798957 |
| 0.410648257 | 0.387350283 | 0.478870044 | 0.445586437 |
| 0.32051586  | 0.407204825 | 0.239303381 | 0.38524401  |
| 0.500303854 | 0.517506296 | 0.337237496 | 0.321785561 |
| 0.430220728 | 0.167756319 | 0.511320826 | 0.024827763 |
| 0.497503485 | 0.500390476 | 0.46628043  | 0.095903767 |
| 0.038515846 | 0.275401449 | 0.494342764 | 0.117746228 |
| 0.505396228 | 0.287150582 | 0.443858411 | 0.531570353 |
| 0.253996124 | 0.51778874  | 0.183447897 | 0.496667299 |
| 0.081812176 | 0.346942514 | 0.464890516 | 0.458007403 |
| 0.304285186 | 0.364880487 | 0.458432396 | 0.310994273 |
| 0.060872019 | 0.352108118 | 0.002609504 | 0.423979932 |
| 0.488500549 | 0.410499512 | 0.275272951 | 0.391310276 |
| 0.362561286 | 0.450493693 | 0.308654227 | 0.509376231 |
| 0.023426463 | 0.44943594  | 0.286795217 | 0.496641964 |
| 0.306490406 | 0.439196569 | 0.103462328 | 0.383775647 |
| 0.481436925 | 0.348724346 | 0.326441318 | 0.383022392 |
| 0.507323989 | 0.470120897 | 0.244977646 | 0.311843943 |
| 0.466745552 | 0.112765595 | 0.495142531 | 0.535561389 |
| 0.253613507 | 0.284867691 | 0.506542021 | 0.279570834 |
| 0.387418394 | 0.458521335 | 0.489018336 | 0.527571645 |
| 0.112345349 | 0.333164446 | 0.50383935  | 0.484605631 |
| 0.378613363 | 0.228129464 | 0.317201137 | 0.297991346 |
| 0.478693666 | 0.166463661 | 0.327970148 | 0.450921214 |
| 0.280178334 | 0.400972175 | 0.432863139 | 0.258486137 |
| 0.06716266  | 0.247850425 | 0.495590801 | 0.217115245 |
| 0.379424539 | 0.448145805 | 0.310324104 | 0.429434378 |
| 0.209392056 | 0.047488997 | 0.460181331 | 0.026232043 |
| 0.468032254 | 0.491660566 | 0.341107594 | 0.441619956 |
| 0.262327061 | 0.446468447 | 0.43194245  | 0.002592425 |
| 0.482904103 | 0.078816494 | 0.396933028 | 0.302166302 |
| 0.361053438 | 0.092323184 | 0.477710981 | 0.514918029 |
| 0.424806634 | 0.431004954 | 0.434579878 | 0.483175029 |
| 0.204995305 | 0.418376876 | 0.415309517 | 0.509084834 |
| 0.298360011 | 0.471172757 | 0.499018813 | 0.47237625  |
| 0.4841234   | 0.382150667 |             |             |

|             |             |             |             |
|-------------|-------------|-------------|-------------|
| CEP55       | 0.16360909  | 0.509286241 | 0.147899219 |
| 0.219021408 | 0.33208163  | 0.514585653 | 0.120534892 |
| 0.216344899 | 0.458581942 | 0.413850197 | 0.43727051  |
| 0.046460769 | 0.086332867 | 0.50699655  | 0.108184228 |
| 0.428154168 | 0.066812885 | 0.184353587 | 0.116161268 |
| 0.319813526 | 0.302090591 | 0.385811214 | 0.521644253 |
| 0.310839802 | 0.296234829 | 0.475299974 | 0.433507412 |
| 0.526735751 | 0.328476472 | 0.507363508 | 0.289252496 |
| 0.451604207 | 0.348069677 | 0.434344492 | 0.051934063 |
| 0.498867529 | 0.012644645 | 0.457661875 | 0.309713676 |
| 0.161679052 | 0.422376797 | 0.479096748 | 0.312500124 |
| 0.479885693 | 0.096513059 | 0.318638531 | 0.457034629 |
| 0.447682807 | 0.368361805 | 0.163612174 | 0.5172858   |
| 0.444071631 | 0.469041877 | 0.512486853 | 0.006153235 |
| 0.324448043 | 0.089306288 | 0.236585089 | 0.519839551 |
| 0.297147136 | 0.188458995 | 0.334489937 | 0.364122568 |

|             |             |             |             |
|-------------|-------------|-------------|-------------|
| 0.456014145 | 0.431674059 | 0.337706945 | 0.45783537  |
| 0.517154709 | 0.178097177 | 0.498946007 | 0.236222038 |
| 0.482282857 | 0.092167249 | 0.251669018 | 0.187738628 |
| 0.447950511 | 0.269700288 | 0.39837244  | 0.326607027 |
| 0.510432825 | 0.526750098 | 0.33274588  | 0.525862775 |
| 0.09917517  | 0.35939836  | 0.303947437 | 0.361712604 |
| 0.436886871 | 0.155658909 | 0.486336889 | 0.518428524 |
| 0.118239404 | 0.499966343 | 0.478632512 | 0.238608563 |
| 0.522335529 | 0.31057029  | 0.511735695 | 0.18212587  |
| 0.401669719 | 0.368594279 | 0.495599036 | 0.388361083 |
| 0.358713195 | 0.168964447 | 0.525435764 | 0.334229713 |
| 0.354410142 | 0.178874576 | 0.243537261 | 0.508171853 |
| 0.493724108 | 0.528454107 | 0.510366305 | 0.435911456 |
| 0.412896091 | 0.519092517 | 0.492565943 | 0.493215505 |
| 0.236489296 | 0.530645472 | 0.297962335 | 0.080797752 |
| 0.173646712 | 0.138673927 | 0.260751451 | 0.380728187 |
| 0.522387401 | 0.444764882 | 0.30895197  | 0.281305843 |
| 0.481287655 | 0.515242211 | 0.529386809 | 0.491600314 |
| 0.092128892 | 0.262987943 | 0.421410449 | 0.410526548 |
| 0.452463325 | 0.200889712 | 0.267799351 | 0.532585652 |
| 0.460079164 | 0.486331705 | 0.30079658  | 0.527158105 |
| 0.293548966 | 0.50287459  | 0.532949679 | 0.250969883 |
| 0.529816377 | 0.523568815 | 0.501177689 | 0.43734152  |
| 0.495555562 | 0.469049579 | 0.091001001 | 0.463493548 |
| 0.486641829 | 0.015987033 | 0.520587856 | 0.517786341 |
| 0.515499943 | 0.511638674 | 0.497862909 | 0.52078425  |
| 1           | 0.156321773 | 0.033621048 | 0.328252882 |
| 0.523722944 | 0.476712198 | 0.18267972  | 0.4704929   |
| 0.3955081   | 0.522414169 | 0.498176059 | 0.368620389 |
| 0.500576429 | 0.514843433 | 0.527637977 | 0.488802312 |
| 0.421422718 | 0.406222067 | 0.410338102 | 0.510205886 |
| 0.091828659 | 0.22610437  | 0.136514622 | 0.387543418 |
| 0.487972026 | 0.239337582 | 0.510522332 | 0.398656021 |
| 0.268771025 | 0.48101111  | 0.370499869 | 0.412761036 |
| 0.141188838 | 0.526065353 | 0.273311527 | 0.290299484 |
| 0.077915202 | 0.240950743 | 0.261488776 | 0.229591354 |
| 0.301010055 | 0.309011025 | 0.514433659 | 0.510082233 |
| 0.402446416 | 0.305796492 | 0.518954543 | 0.487729519 |
| 0.440292656 | 0.419316061 | 0.325806359 | 0.021461038 |
| 0.309169874 | 0.361901659 | 0.189780691 | 0.465428032 |
| 0.270674391 | 0.304088638 | 0.4445288   | 0.434158543 |
| 0.431233277 | 0.266369632 | 0.41048093  | 0.454201929 |
| 0.272880942 | 0.357445126 | 0.491506163 | 0.50174252  |
| 0.012645413 | 0.427095269 | 0.515149628 | 0.158459826 |
| 0.419025543 | 0.144509799 | 0.284946638 | 0.502653706 |
| 0.322885465 | 0.237347765 | 0.521325199 | 0.430014328 |
| 0.440580312 | 0.321153708 | 0.504895087 | 0.053441714 |
| 0.38502354  | 0.068481247 | 0.338752837 | 0.461823814 |
| 0.348759294 | 0.355694962 | 0.338422392 | 0.311466544 |
| 0.257484372 | 0.520545875 | 0.485758095 | 0.522458441 |
| 0.416229161 | 0.509661087 | 0.510616322 | 0.498351623 |
| 0.459970041 | 0.412262285 | 0.136310346 | 0.510441931 |
| 0.504975099 | 0.362733464 | 0.174426886 | 0.506384041 |
| 0.436125779 | 0.447279418 | 0.134210639 | 0.500323752 |

|             |             |             |             |
|-------------|-------------|-------------|-------------|
| 0.502199488 | 0.503967946 | 0.201237813 | 0.410841188 |
| 0.464914652 | 0.350477397 | 0.483160461 | 0.509637008 |
| 0.402435626 | 0.388019645 | 0.364662124 | 0.430551041 |
| 0.278569412 | 0.221931117 | 0.405127324 | 0.184196325 |
| 0.013502476 | 0.178604657 | 0.149363068 | 0.206190512 |
| 0.166771882 | 0.501044059 | 0.453440933 | 0.516394097 |
| 0.19074419  | 0.488578255 | 0.337040634 | 0.334940668 |
| 0.486831159 | 0.392067219 | 0.417606563 | 0.437118724 |
| 0.344577943 | 0.034059854 | 0.171034573 | 0.53097688  |
| 0.116646837 | 0.25387369  | 0.436585422 | 0.004999838 |
| 0.106944342 | 0.51704845  | 0.192872842 | 0.281698398 |
| 0.489667435 | 0.294966766 | 0.325978341 | 0.426343106 |
| 0.414175499 | 0.174390337 | 0.005466959 | 0.506001748 |
| 0.494347386 | 0.482007245 | 0.495844208 | 0.480129452 |
| 0.480842597 | 0.484438796 | 0.464088171 | 0.510821043 |
| 0.184279934 | 0.196212198 | 0.213829138 | 0.338000363 |
| 0.012077352 | 0.446817454 | 0.354482228 | 0.233522639 |
| 0.479708923 | 0.387234758 | 0.088570828 | 0.392439058 |
| 0.057283737 | 0.213444523 | 0.418124119 | 0.282512348 |
| 0.385752024 | 0.044493747 | 0.321049594 | 0.358077521 |
| 0.495583378 | 0.450674849 | 0.398791872 | 0.531416367 |
| 0.40391653  | 0.256272863 | 0.35658963  | 0.456786093 |
| 0.135831315 | 0.153329076 | 0.471079499 | 0.066019164 |
| 0.303369266 | 0.477551812 | 0.441675169 | 0.148177281 |
| 0.360903223 | 0.018067632 | 0.469244704 | 0.527229684 |
| 0.50846883  | 0.511263941 | 0.519575714 | 0.288101323 |
| 0.516481537 | 0.110008932 | 0.522827022 | 0.509304418 |
| 0.464871498 | 0.002757875 | 0.010723021 | 0.517303011 |
| 0.442478938 | 0.151368188 | 0.249214972 | 0.489904356 |
| 0.165591467 | 0.288907154 | 0.131809648 | 0.186859946 |
| 0.519934578 | 0.271129582 | 0.184227212 | 0.500838543 |
| 0.308421454 | 0.300482864 | 0.514228284 | 0.18432024  |
| 0.466880825 | 0.103478012 | 0.180074344 | 0.011781663 |
| 0.412770225 | 0.225626268 | 0.513257603 | 0.519339961 |
| 0.492465604 | 0.436142628 | 0.431360013 | 0.443549274 |
| 0.483568341 | 0.22210491  | 0.435558575 | 0.238115634 |
| 0.522294291 | 0.438536351 | 0.403734908 | 0.412814275 |
| 0.495145927 | 0.499186864 | 0.07659328  | 0.467694933 |
| 0.033826232 | 0.002251182 | 0.51459351  | 0.35617505  |
| 0.076400255 | 0.404825378 | 0.347528527 | 0.313379692 |
| 0.290374205 | 0.079082221 | 0.268599018 | 0.245769227 |
| 0.361419881 | 0.413851361 | 0.287387529 | 0.346893346 |
| 0.290959764 | 0.140214006 | 0.261808105 | 0.225788496 |
| 0.309817858 | 0.419075744 | 0.300096576 | 0.05454696  |
| 0.505162715 | 0.46419412  | 0.121396682 | 0.264721963 |
| 0.503386884 | 0.521106796 | 0.077114732 | 0.020334801 |
| 0.37080028  | 0.367764162 | 0.509802152 | 0.526249271 |
| 0.539919669 | 0.501589701 | 0.436126361 | 0.152596745 |
| 0.13830094  | 0.369736784 | 0.308566505 | 0.114835701 |
| 0.520872989 | 0.161462189 | 0.51336194  | 0.310522925 |
| 0.204305758 | 0.298575591 | 0.065818875 | 0.154610565 |
| 0.421884075 | 0.26737294  | 0.220915483 | 0.27695418  |
| 0.361142642 | 0.265235787 | 0.103983032 | 0.280114141 |
| 0.440866512 | 0.175219266 | 0.250216881 | 0.43206926  |

|             |             |             |             |
|-------------|-------------|-------------|-------------|
| 0.468829617 | 0.324247615 | 0.480594341 | 0.461004476 |
| 0.23601224  | 0.206213499 | 0.431091894 | 0.457453457 |
| 0.520994797 | 0.480295273 | 0.060695478 | 0.519883348 |
| 0.505883399 | 0.509858508 | 0.515657938 | 0.432009211 |
| 0.171471438 | 0.422227519 | 0.337431306 | 0.381912936 |
| 0.270911629 | 0.516729821 | 0.310392468 | 0.133725878 |
| 0.376229783 | 0.49649877  | 0.497972063 | 0.229877151 |
| 0.506043246 | 0.259737351 | 0.148235001 | 0.512306128 |
| 0.178043097 | 0.16965285  | 0.491102416 | 0.491814627 |
| 0.002690835 | 0.1360246   | 0.489393154 | 0.328021825 |
| 0.511126155 | 0.503165038 | 0.477249488 | 0.370330782 |
| 0.001455644 | 0.449671879 | 0.44340869  | 0.46040223  |
| 0.518727823 | 0.464109505 | 0.235631583 | 0.11739724  |
| 0.360990377 | 0.18881957  | 0.182995923 | 0.473816848 |
| 0.179494674 | 0.517599505 | 0.275151656 | 0.30294897  |
| 0.239382996 | 0.2001253   | 0.258632776 | 0.33977146  |
| 0.150740595 | 0.320511772 | 0.419667339 | 0.427153493 |
| 0.210174376 | 0.473696345 | 0.492769711 | 0.070460287 |
| 0.389977737 | 0.466778365 | 0.483278072 | 0.004251414 |
| 0.483957373 | 0.019204633 | 0.239319203 | 0.263979543 |
| 0.248388084 | 0.259432003 | 0.296267091 | 0.333001166 |
| 0.449841786 | 0.298344667 | 0.353969082 | 0.310748879 |
| 0.210658582 | 0.320988887 | 0.444171018 | 0.460182377 |
| 0.321969803 | 0.21315364  | 0.197736012 | 0.196923134 |
| 0.098294936 | 0.522784983 | 0.342016678 | 0.173152864 |
| 0.297609215 | 0.45249253  | 0.408447769 | 0.517097564 |
| 0.46203685  | 0.23095568  | 0.399910877 | 0.531906408 |
| 0.300971125 | 0.41783712  | 0.150260358 | 0.495061939 |
| 0.328139469 | 0.235794769 | 0.512059939 | 0.455276194 |
| 0.501586661 | 0.441374298 | 0.34341557  | 0.478540895 |
| 0.430717955 | 0.408913964 | 0.449858554 | 0.12246466  |
| 0.274163453 | 0.234210471 | 0.278427834 | 0.006487063 |
| 0.436682508 | 0.410991426 | 0.523236709 | 0.509730806 |
| 0.309540305 | 0.445185548 | 0.468358806 | 0.164725665 |
| 0.407903636 | 0.291675733 | 0.235416454 | 0.514239174 |
| 0.228160026 | 0.276254622 | 0.333233748 | 0.501159172 |
| 0.488584489 | 0.48509113  | 0.278120214 | 0.350174658 |
| 0.31449415  | 0.3278188   | 0.492394628 | 0.243083529 |
| 0.498410256 | 0.195197537 | 0.490444609 | 0.340047157 |
| 0.261200034 | 0.5172509   | 0.13539243  | 0.522355479 |
| 0.365876539 | 0.239896475 | 0.49179061  | 0.42365296  |
| 0.414187196 | 0.160249169 | 0.187854947 | 0.500140197 |
| 0.29790406  | 0.369477957 | 0.024896203 | 0.073415515 |
| 0.387626237 | 0.378947631 | 0.503551626 | 0.434210213 |
| 0.257243832 | 0.386724929 | 0.174817769 | 0.407922678 |
| 0.51345451  | 0.529358536 | 0.320887805 | 0.325969281 |
| 0.436484948 | 0.170025339 | 0.535414913 | 0.023200106 |
| 0.477377911 | 0.473968536 | 0.461979026 | 0.105628516 |
| 0.046156374 | 0.214093869 | 0.485772461 | 0.158688979 |
| 0.493956509 | 0.228182308 | 0.462204152 | 0.512794358 |
| 0.284328552 | 0.53037733  | 0.15813256  | 0.468293185 |
| 0.108558736 | 0.346161178 | 0.415711048 | 0.444703654 |
| 0.25763071  | 0.302197237 | 0.43313499  | 0.242243921 |
| 0.067196669 | 0.30345128  | 0.003207362 | 0.437808458 |



|             |             |             |             |
|-------------|-------------|-------------|-------------|
| 0.507488424 | 0.357168212 | 0.303702536 | 0.402372891 |
| 0.339280217 | 0.455175184 | 0.279047487 | 0.486900845 |
| 0.023114044 | 0.397120969 | 0.281582849 | 0.513093166 |
| 0.27308897  | 0.437721509 | 0.097884872 | 0.33315523  |
| 0.506961456 | 0.322841658 | 0.343783713 | 0.355107466 |
| 0.518889644 | 0.486376686 | 0.295723247 | 0.257113803 |
| 0.478185049 | 0.146235709 | 0.5081207   | 0.519266188 |
| 0.227604043 | 0.218282447 | 0.480879575 | 0.260168783 |
| 0.327290443 | 0.481972483 | 0.481777803 | 0.515889886 |
| 0.094075212 | 0.329029214 | 0.48012809  | 0.503417795 |
| 0.362290743 | 0.169593876 | 0.255340831 | 0.254740716 |
| 0.508202782 | 0.168158934 | 0.272243679 | 0.457881376 |
| 0.218627584 | 0.381921663 | 0.467090897 | 0.209413431 |
| 0.067458888 | 0.243994153 | 0.470362158 | 0.236425242 |
| 0.361844439 | 0.406951428 | 0.253219808 | 0.437134536 |
| 0.18397181  | 0.044544734 | 0.464448616 | 0.016653878 |
| 0.490921818 | 0.452233842 | 0.333089364 | 0.392003316 |
| 0.297153623 | 0.454096773 | 0.46908434  | 0.004326002 |
| 0.465747348 | 0.055855476 | 0.357049096 | 0.251686443 |
| 0.320471537 | 0.115235092 | 0.498617357 | 0.506891077 |
| 0.431783037 | 0.404027269 | 0.394530563 | 0.504198652 |
| 0.145509351 | 0.37310566  | 0.375002615 | 0.526952818 |
| 0.227045863 | 0.480205886 | 0.479664786 | 0.418840148 |
| 0.487314406 | 0.384905    |             |             |
| CEP57       | 0.243706367 | 0.131124845 | 0.198426322 |
| 0.121117343 | 0.05216697  | 0.04998095  | 0.294698706 |
| 0.244022701 | 0.138194676 | 0.025492165 | 0.063608193 |
| 0.250157423 | 0.006927801 | 0.139964087 | 0.290407382 |
| 0.046499422 | 0.275712117 | 0.258437634 | 0.050499493 |
| 0.103490072 | 0.05497329  | 0.02651287  | 0.066076493 |
| 0.056971261 | 0.324169729 | 0.103027731 | 0.029712562 |
| 0.127062839 | 0.009060131 | 0.055568429 | 0.013775057 |
| 0.22025532  | 0.046322038 | 0.021325232 | 0.229949129 |
| 0.051933761 | 0.009505461 | 0.249679479 | 0.085913062 |
| 0.014426833 | 0.245067413 | 0.035450853 | 0.1074624   |
| 0.040469079 | 0.239321176 | 0.010292294 | 0.054290977 |
| 0.098824928 | 0.103595759 | 0.218089492 | 0.073767448 |
| 0.048668238 | 0.139747186 | 0.072530353 | 0.018968388 |
| 0.015854408 | 0.001087153 | 0.008067287 | 0.168298253 |
| 0.225264143 | 0.218693394 | 0.014616386 | 0.121576004 |
| 0.055009142 | 0.082251639 | 0.181778241 | 0.035007555 |
| 0.152502986 | 0.013354102 | 0.060215919 | 0.084146547 |
| 0.064496731 | 0.260461145 | 0.297004194 | 0.241759417 |
| 0.038234486 | 0.158843222 | 0.057188528 | 0.025850514 |
| 0.125894727 | 0.224122031 | 0.194180471 | 0.187401844 |
| 0.02197243  | 0.035666747 | 0.048441852 | 0.154510261 |
| 0.109820261 | 0.245556798 | 0.090178476 | 0.187624337 |
| 0.256165848 | 0.046121458 | 0.088253693 | 0.268133523 |
| 0.124379904 | 0.023896513 | 0.032461621 | 0.016032068 |
| 0.057641667 | 0.043027062 | 0.208985298 | 0.164009581 |
| 0.052592657 | 0.246230513 | 0.21380349  | 0.030222051 |
| 0.058398328 | 0.23335138  | 0.055811476 | 0.080441777 |
| 0.066414536 | 0.127557683 | 0.101336845 | 0.135163808 |
| 0.035150106 | 0.145605627 | 0.092154756 | 0.148087704 |

|             |             |             |             |
|-------------|-------------|-------------|-------------|
| 0.007064163 | 0.160678435 | 0.180829181 | 0.257238361 |
| 0.232330277 | 0.237656751 | 0.057415744 | 0.221379685 |
| 0.104135657 | 0.137167776 | 0.182267433 | 0.113408931 |
| 0.104387112 | 0.186087462 | 0.157182333 | 0.118897613 |
| 0.287842149 | 0.019371812 | 0.035211825 | 0.11152345  |
| 0.095286754 | 0.261926754 | 0.024715437 | 0.215570101 |
| 0.188939377 | 0.089864388 | 0.192824259 | 0.254605876 |
| 0.16405407  | 0.183152414 | 0.107881085 | 0.185135811 |
| 0.19992012  | 0.205759133 | 0.155996434 | 0.050001123 |
| 0.197794394 | 0.081266492 | 0.034262456 | 0.144814355 |
| 0.175939332 | 0.004184686 | 0.098107869 | 0.109106827 |
| 0.157188607 | 0.079747521 | 0.152067325 | 0.127789526 |
| 0.156321773 | 1           | 0.002694132 | 0.105838597 |
| 0.182576114 | 0.154221184 | 0.168600635 | 0.029440691 |
| 0.052268086 | 0.064134205 | 0.084429099 | 0.023007582 |
| 0.211859524 | 0.116209266 | 0.110031291 | 0.112217377 |
| 0.082281708 | 0.258976848 | 0.023714608 | 0.210489878 |
| 0.282900005 | 0.211180689 | 0.255291126 | 0.173591059 |
| 0.033106535 | 0.184819489 | 0.0689135   | 0.059476166 |
| 0.203819489 | 0.08312439  | 0.016828815 | 0.057706785 |
| 0.316993647 | 0.039366057 | 0.205025724 | 0.193468263 |
| 0.262854074 | 0.36566792  | 0.122960956 | 0.150512628 |
| 0.098337343 | 0.368406744 | 0.058633236 | 0.130869335 |
| 0.051312937 | 0.244290085 | 0.079312047 | 0.175319129 |
| 0.200325042 | 0.032546551 | 0.246581384 | 0.070125069 |
| 0.04223237  | 0.017217057 | 0.009290529 | 0.031729354 |
| 0.373417853 | 0.095757257 | 0.059088565 | 0.070175013 |
| 0.112964988 | 0.192973674 | 0.037853902 | 0.251255953 |
| 0.269748511 | 0.054281024 | 0.11653259  | 0.048313311 |
| 0.147786055 | 0.091761642 | 0.093198305 | 0.067214354 |
| 0.134357301 | 0.014482576 | 0.01327469  | 0.115004164 |
| 0.02098906  | 0.039561386 | 0.113239879 | 0.072888399 |
| 0.041202818 | 0.314220244 | 0.154642421 | 0.003378933 |
| 0.042302617 | 0.068981893 | 0.141850715 | 0.036359005 |
| 0.159857706 | 0.174431003 | 0.038168568 | 0.052649345 |
| 0.222097914 | 0.166902579 | 0.148226542 | 0.133830347 |
| 0.026452222 | 0.161506467 | 0.09182506  | 0.134115708 |
| 0.111771155 | 0.027655952 | 0.005447346 | 0.09437396  |
| 0.107231354 | 0.034805743 | 0.280482238 | 0.06977647  |
| 0.035387873 | 0.058216402 | 0.086775302 | 0.147581891 |
| 0.228988911 | 0.168670756 | 0.171854265 | 0.10286047  |
| 0.143100303 | 0.149787928 | 0.122539671 | 0.172435044 |
| 0.027039637 | 0.03847096  | 0.03714198  | 0.121276319 |
| 0.228814617 | 0.048105334 | 0.236325341 | 0.008595992 |
| 0.00047196  | 0.255460567 | 0.254329021 | 0.143753969 |
| 0.023147121 | 0.041415997 | 0.073643441 | 0.151002025 |
| 0.238823015 | 0.169030973 | 0.215558959 | 0.055263854 |
| 0.167653358 | 0.041648899 | 0.030284123 | 0.056114941 |
| 0.235510982 | 0.10526553  | 0.134766419 | 0.228437348 |
| 0.247375492 | 0.021297582 | 0.099658713 | 0.011560818 |
| 0.270979569 | 0.088553393 | 0.346882406 | 0.373660964 |
| 0.122218217 | 0.343846914 | 0.2071049   | 0.034496729 |
| 0.117999443 | 0.263142875 | 0.02601089  | 0.134132541 |
| 0.163526145 | 0.164869802 | 0.162688638 | 0.194220398 |

|             |             |             |             |
|-------------|-------------|-------------|-------------|
| 0.131783854 | 0.093042584 | 0.093883616 | 0.072514425 |
| 0.263175026 | 0.240586505 | 0.022491317 | 0.085113232 |
| 0.019305579 | 0.121390952 | 0.069445617 | 0.282759182 |
| 0.071963735 | 0.150102119 | 0.267914051 | 0.051284748 |
| 0.149350778 | 0.007186076 | 0.088354131 | 0.141701139 |
| 0.10516163  | 0.24516662  | 0.023003771 | 0.025218199 |
| 0.180344056 | 0.194342721 | 0.021494279 | 0.168593733 |
| 0.080214033 | 0.233585207 | 0.066742133 | 0.088197991 |
| 0.283291146 | 0.018793937 | 0.065576963 | 0.003007302 |
| 0.034070401 | 0.195673102 | 0.03882127  | 0.223058349 |
| 0.137993056 | 0.17039331  | 0.182239029 | 0.1723461   |
| 0.160492371 | 0.133340682 | 0.148540175 | 0.021123498 |
| 0.157285617 | 0.001849371 | 0.142282638 | 0.127633838 |
| 0.025666597 | 0.011800422 | 0.055725311 | 0.105576387 |
| 0.040447885 | 0.278155687 | 0.234224527 | 0.03680698  |
| 0.192862978 | 0.179411703 | 0.274558661 | 0.039167004 |
| 0.059147108 | 0.077141442 | 0.039342395 | 0.176060388 |
| 0.134055547 | 0.146782395 | 0.047054011 | 0.303334471 |
| 0.0482822   | 0.252392275 | 0.297377112 | 0.016457712 |
| 0.091260031 | 0.30922304  | 0.239551269 | 0.15167359  |
| 0.187076312 | 0.07064868  | 0.018378714 | 0.038854681 |
| 0.120399717 | 0.225803536 | 0.023548225 | 0.215023193 |
| 0.144935528 | 0.058684444 | 0.171396816 | 0.208461984 |
| 0.161740563 | 0.175419785 | 0.292777493 | 0.099629645 |
| 0.099364349 | 0.007436004 | 0.056915828 | 0.196715895 |
| 0.030086984 | 0.036022582 | 0.232071041 | 0.106753711 |
| 0.111341555 | 0.208139104 | 0.018562764 | 0.02265016  |
| 0.119911619 | 0.062324215 | 0.038686668 | 0.216585115 |
| 0.066784757 | 0.056582106 | 0.144054395 | 0.204319497 |
| 0.061867321 | 0.211152992 | 0.314035066 | 0.290409618 |
| 0.033953986 | 0.032501377 | 0.275030705 | 0.266008358 |
| 0.114122049 | 0.113796788 | 0.25621053  | 0.107494732 |
| 0.243098504 | 0.07173895  | 0.123321236 | 0.139327518 |
| 0.196671966 | 0.181458528 | 0.260776999 | 0.142582734 |
| 0.265347618 | 0.087326138 | 0.040154367 | 0.11795714  |
| 0.146024582 | 0.245367886 | 0.163344248 | 0.021097394 |
| 0.286624931 | 0.151229155 | 0.220645404 | 0.282390124 |
| 0.031410328 | 0.234086611 | 0.139213528 | 0.206517241 |
| 0.068589169 | 0.022158334 | 0.306833616 | 0.185133283 |
| 0.155079715 | 0.011671889 | 0.236379044 | 0.098353417 |
| 0.15023489  | 0.029484946 | 0.062917018 | 0.211551835 |
| 0.265978549 | 0.242193726 | 0.080688403 | 0.103756876 |
| 0.085607427 | 0.032488382 | 0.097532426 | 0.124647008 |
| 0.141330449 | 0.049485617 | 0.170271856 | 0.157436018 |
| 0.305097297 | 0.034855359 | 0.026821998 | 0.058771879 |
| 0.205231549 | 0.055927973 | 0.141580296 | 0.287761587 |
| 0.253315161 | 0.238946508 | 0.137251267 | 0.163272247 |
| 0.043840585 | 0.21063331  | 0.231068286 | 0.113368868 |
| 0.022845219 | 0.210067792 | 0.03410074  | 0.087579291 |
| 0.014098622 | 0.008679766 | 0.139118383 | 0.119597681 |
| 0.197762941 | 0.125674799 | 0.193686529 | 0.120050561 |
| 0.000508342 | 0.050563574 | 0.068757557 | 0.040151816 |
| 0.126897819 | 0.159807623 | 0.107384966 | 0.219738937 |
| 0.222457879 | 0.256473149 | 0.162120104 | 0.044572327 |

|             |             |             |             |
|-------------|-------------|-------------|-------------|
| 0.011050549 | 0.073604181 | 0.254907763 | 0.171393374 |
| 0.131661049 | 0.258463997 | 0.019079125 | 0.141733729 |
| 0.026327416 | 0.235644738 | 0.162738696 | 0.03146463  |
| 0.0106382   | 0.138758374 | 0.109234203 | 0.256691959 |
| 0.032011941 | 0.130531105 | 0.150526427 | 0.028016112 |
| 0.063894998 | 0.204420748 | 0.120742861 | 0.106130562 |
| 0.131623636 | 0.126975819 | 0.110883473 | 0.059879274 |
| 0.102834146 | 0.163134596 | 0.098663724 | 0.166466972 |
| 0.134752747 | 0.172359952 | 0.059007946 | 0.076339416 |
| 0.054537343 | 0.215680157 | 0.355698708 | 0.367422332 |
| 0.1999881   | 0.120077493 | 0.289350005 | 0.276797537 |
| 0.171974967 | 0.068123444 | 0.222231605 | 0.150677207 |
| 0.169039749 | 0.283062971 | 0.0765118   | 0.112193242 |
| 0.014105243 | 0.052427212 | 0.251886228 | 0.064321735 |
| 0.160224208 | 0.039123328 | 0.046931694 | 0.104222242 |
| 0.079321325 | 0.243998129 | 0.276544281 | 0.177179801 |
| 0.06058927  | 0.054705419 | 0.025939919 | 0.164617712 |
| 0.183574687 | 0.294294172 | 0.046525208 | 0.096001546 |
| 0.111543509 | 0.100883671 | 0.095700201 | 0.178047078 |
| 0.016248256 | 0.200292859 | 0.028637288 | 0.22545265  |
| 0.022339228 | 0.289544602 | 0.293137212 | 0.077565693 |
| 0.008072875 | 0.179686543 | 0.065173914 | 0.059626505 |
| 0.074900446 | 0.071109593 | 0.057653147 | 0.145363351 |
| 0.147743835 | 0.207929487 | 0.215295751 | 0.215358353 |
| 0.038367059 | 0.043197461 | 0.063039534 | 0.070754941 |
| 0.11237739  | 0.134982515 | 0.272508086 | 0.130028306 |
| 0.047933992 | 0.31204898  | 0.22957535  | 0.104636845 |
| 0.102007422 | 0.125661884 | 0.008533287 | 0.048422812 |
| 0.138782875 | 0.019961238 | 0.000747017 | 0.013090657 |
| 0.137127383 | 0.054423399 | 0.091353684 | 0.117561639 |
| 0.047025834 | 0.1567768   | 0.009169137 | 0.122638593 |
| 0.169415291 | 0.215919866 | 0.078621473 | 0.249175823 |
| 0.149306011 | 0.227935468 | 0.071526929 | 0.013935685 |
| 0.043910591 | 0.031687976 | 0.027028562 | 0.28442359  |
| 0.277386241 | 0.010038271 | 0.053703243 | 0.256167285 |
| 0.117898679 | 0.007574491 | 0.074155771 | 0.069958618 |
| 0.272356761 | 0.221980623 | 0.15895773  | 0.083581222 |
| 0.218078292 | 0.189788758 | 0.031114366 | 0.041503757 |
| 0.056761945 | 0.029022115 | 0.110538023 | 0.021928703 |
| 0.275102654 | 0.067671605 | 0.032648834 | 0.267381385 |
| 0.20877872  | 0.028165444 | 0.311560438 | 0.022718824 |
| 0.16313832  | 0.164688421 | 0.060399118 | 0.030161234 |
| 0.139522682 | 0.039270111 | 0.190734473 | 0.134272512 |
| 0.010003338 | 0.062162551 | 0.201371135 | 0.040553965 |
| 0.255931751 | 0.042111638 | 0.260809705 | 0.019503591 |
| 0.150905047 | 0.132304733 | 0.239209916 | 0.070418796 |
| 0.063577479 | 0.298237277 | 0.034052466 | 0.170306159 |
| 0.147977215 | 0.02560694  | 0.091057503 | 0.132572037 |
| 0.025519758 | 0.170271681 | 0.042033619 | 0.173103364 |
| 0.148970348 | 0.196087522 | 0.091868757 | 0.148390799 |
| 0.186571208 | 0.035814001 | 0.021283063 | 0.069400554 |
| 0.16213426  | 0.155388465 | 0.037762327 | 0.148657036 |
| 0.016985898 | 0.139577959 | 0.068277497 | 0.077866819 |
| 0.167591398 | 0.185584812 | 0.048484273 | 0.262024945 |

|             |             |             |             |
|-------------|-------------|-------------|-------------|
| 0.116382735 | 0.053084805 | 0.057263685 | 0.221992274 |
| 0.11020222  | 0.120083776 | 0.215777952 | 0.001050445 |
| 0.083217543 | 0.065707857 | 0.154413697 | 0.047082265 |
| 0.289505215 | 0.100996313 | 0.076929587 | 0.059054071 |
| 0.111773325 | 0.020677759 | 0.066596854 | 0.056909638 |
| 0.025351732 | 0.282156446 | 0.179004641 | 0.134871859 |
| 0.142759691 | 0.033240393 | 0.016467363 | 0.161154477 |
| 0.013451853 | 0.015159228 | 0.024516891 | 0.072062291 |
| 0.016624109 | 0.02713416  | 0.028833615 | 0.021116401 |
| 0.117871702 | 0.129774886 |             |             |
| CFB         | 0.000332105 | 0.037236607 | 0.000353966 |
| 0.000141641 | 0.02787104  | 0.004966274 | 0.002758582 |
| 0.002368273 | 0.046140572 | 0.03526672  | 0.008656156 |
| 9.14E-05    | 0.006555869 | 0.032810798 | 0.00259824  |
| 0.04738791  | 0.000444211 | 0.004029203 | 0.000500264 |
| 0.003874676 | 0.032813879 | 0.008583388 | 0.010849399 |
| 0.041832865 | 0.006206937 | 0.022027081 | 0.06663951  |
| 0.036948332 | 0.005664472 | 0.021803746 | 0.001116696 |
| 0.028616244 | 0.03479143  | 0.030388111 | 0.001099057 |
| 0.022649412 | 0.005277006 | 0.033936299 | 0.01218667  |
| 0.00101973  | 0.018838006 | 0.017318972 | 0.004325088 |
| 0.036151665 | 0.000143445 | 0.003539333 | 0.078214435 |
| 0.033296335 | 0.015370702 | 0.001175871 | 0.028860071 |
| 0.037249822 | 0.008916246 | 0.035678578 | 1.43E-05    |
| 0.025760246 | 0.021880082 | 0.042596154 | 0.029369123 |
| 0.005129223 | 0.003277704 | 0.037734611 | 0.023471624 |
| 0.078172309 | 0.072465922 | 0.020436455 | 0.038940299 |
| 0.031529149 | 0.025629547 | 0.051457886 | 4.28E-05    |
| 0.024128974 | 0.002575833 | 0.006173702 | 0.008008259 |
| 0.025803589 | 0.006405654 | 0.015967788 | 0.039543029 |
| 0.034961983 | 0.037701227 | 0.017490185 | 0.0356547   |
| 0.039374847 | 0.061670287 | 0.01796126  | 0.029271304 |
| 0.069398501 | 0.013096383 | 0.020119784 | 0.037253405 |
| 0.004497646 | 0.041903154 | 0.05780529  | 0.007487226 |
| 0.023623638 | 0.050257322 | 0.024581712 | 0.010398574 |
| 0.047576096 | 0.049015108 | 0.046431441 | 0.012056382 |
| 0.029082618 | 0.002815181 | 0.02889009  | 0.048054863 |
| 0.005464076 | 0.000772692 | 0.018882745 | 0.053738278 |
| 0.027302464 | 0.030643422 | 0.054526412 | 0.055341985 |
| 0.043298388 | 0.031276492 | 0.018211519 | 0.039425869 |
| 0.002163658 | 0.038480232 | 0.002404846 | 0.000294994 |
| 0.000848788 | 0.001969953 | 0.058855123 | 0.02126462  |
| 0.032620457 | 0.0172737   | 0.003091366 | 0.014015052 |
| 0.057315111 | 0.028649215 | 0.044734769 | 0.038362287 |
| 0.000415321 | 0.063189585 | 0.035216224 | 0.005101812 |
| 0.044585699 | 0.007514726 | 0.030968048 | 0.032855208 |
| 0.014965293 | 0.04794906  | 0.002034741 | 0.032533578 |
| 0.025704096 | 0.032450483 | 0.028862808 | 0.003168828 |
| 0.032080848 | 0.025829937 | 0.036831607 | 0.037674208 |
| 0.022108804 | 0.004387834 | 0.012732833 | 0.045340493 |
| 0.030775116 | 2.92E-05    | 0.049030677 | 0.051376627 |
| 0.034856731 | 0.044498703 | 0.050152216 | 0.039041749 |
| 0.033621048 | 0.002694132 | 1           | 0.033766401 |
| 0.03349039  | 0.017467026 | 0.008395627 | 0.040887664 |

|             |             |             |             |
|-------------|-------------|-------------|-------------|
| 0.049342753 | 0.011085628 | 0.049833071 | 0.001582651 |
| 0.038588653 | 0.030621652 | 0.043389278 | 0.041050351 |
| 0.055953016 | 0.014201109 | 0.061201029 | 0.022849621 |
| 1.44E-05    | 0.000804584 | 0.00046201  | 0.039143899 |
| 0.004340797 | 0.007151197 | 0.010989808 | 0.074635929 |
| 0.007947974 | 0.01916972  | 0.028717466 | 0.042060056 |
| 0.002646383 | 0.022995909 | 0.003539836 | 0.008546367 |
| 0.000251403 | 0.006163774 | 0.001196796 | 0.000378848 |
| 0.015759735 | 0.013043927 | 0.040006558 | 0.043203033 |
| 0.047526465 | 0.004805896 | 0.030089782 | 0.030241256 |
| 0.030805507 | 0.026177358 | 0.017753495 | 0.000513222 |
| 0.009659618 | 0.066354864 | 0.045317979 | 0.041748556 |
| 0.008625623 | 0.012234314 | 0.045229708 | 0.030697091 |
| 0.004348608 | 0.011305484 | 0.038824993 | 0.020646724 |
| 0.008264166 | 0.006348501 | 0.036262989 | 0.042668279 |
| 0.001728188 | 0.011781479 | 0.032714888 | 0.013417735 |
| 0.043842152 | 0.000784326 | 0.004737864 | 0.044003931 |
| 0.022572294 | 0.046540058 | 0.04047959  | 0.041076882 |
| 0.002675668 | 0.0140563   | 0.046367714 | 0.012974235 |
| 0.075068672 | 2.27E-05    | 0.018789338 | 0.034321345 |
| 0.011112751 | 0.031628582 | 0.038103574 | 0.010814845 |
| 0.001406604 | 0.039049835 | 0.021998218 | 0.037048397 |
| 0.027998269 | 0.046411399 | 0.03833225  | 0.027080796 |
| 0.019716138 | 0.078961947 | 0.020728341 | 0.029112652 |
| 0.041698969 | 0.005231248 | 0.00262241  | 0.063517428 |
| 0.067715866 | 0.051985684 | 0.001706106 | 0.036934505 |
| 0.027999735 | 0.031553376 | 0.003583904 | 0.045711496 |
| 0.01606044  | 0.003080235 | 0.033909783 | 0.047985146 |
| 0.043478315 | 0.051400889 | 0.025559665 | 0.039121464 |
| 0.004777934 | 0.030347481 | 0.024575437 | 0.034410512 |
| 5.99E-07    | 0.002466194 | 0.001058955 | 0.005759303 |
| 0.015039643 | 0.048163315 | 0.045128088 | 0.040083169 |
| 0.003007352 | 0.019782368 | 0.032671564 | 0.009254632 |
| 0.031433087 | 0.048951975 | 0.031520292 | 0.036912744 |
| 0.016349397 | 0.000370861 | 7.40E-05    | 0.035802576 |
| 0.001978467 | 0.012777512 | 0.02273813  | 4.19E-06    |
| 0.001398025 | 0.041803134 | 0.005085492 | 0.007937375 |
| 0.04624635  | 0.007081936 | 0.008828497 | 0.038916179 |
| 0.017270437 | 0.001877535 | 0.00064888  | 0.051730462 |
| 0.054398303 | 0.058522593 | 0.054881787 | 0.042246155 |
| 0.069844164 | 0.048988208 | 0.048270532 | 0.005952813 |
| 0.001447389 | 0.002010598 | 0.020682458 | 0.018215725 |
| 9.51E-05    | 0.019849476 | 0.036961028 | 0.004346036 |
| 0.048151147 | 0.040174834 | 4.10E-06    | 0.054278601 |
| 0.000785582 | 0.01612127  | 0.019360368 | 0.020294386 |
| 0.052061731 | 0.00085663  | 0.000166422 | 0.016471986 |
| 0.016908822 | 0.017696062 | 0.024486592 | 0.035315343 |
| 0.009685576 | 0.007906172 | 0.013927093 | 0.027057467 |
| 0.001499011 | 0.001389505 | 0.032751526 | 0.000142715 |
| 0.000149917 | 0.042223497 | 0.030637783 | 0.00013925  |
| 0.010520069 | 0.002769538 | 0.013715499 | 0.036527202 |
| 0.025977059 | 0.046934207 | 0.028595838 | 0.01614981  |
| 0.030498992 | 0.028165796 | 0.040590061 | 0.028896233 |
| 0.034024921 | 4.79E-05    | 7.97E-06    | 0.040351919 |
|             |             |             | 0.028893062 |

|             |             |             |             |
|-------------|-------------|-------------|-------------|
| 0.001527779 | 0.005157259 | 0.001212756 | 0.000932541 |
| 0.003982649 | 0.001175301 | 0.0131275   | 0.01596602  |
| 0.015684274 | 0.018026333 | 0.034425024 | 0.013011707 |
| 0.016290135 | 0.0241756   | 0.004551049 | 0.026211173 |
| 0.000125742 | 0.007789678 | 3.81E-05    | 0.042660674 |
| 0.004018676 | 0.027546572 | 0.036101946 | 0.030727581 |
| 0.031406834 | 0.028118556 | 0.00308345  | 0.057887914 |
| 0.002393147 | 0.008850049 | 0.002879794 | 0.02944304  |
| 0.035250898 | 0.013101135 | 0.010296623 | 0.040709126 |
| 0.027291484 | 0.000565325 | 0.041178243 | 0.002783636 |
| 6.94E-05    | 0.008116104 | 0.023990247 | 0.020305563 |
| 0.04562214  | 0.011863098 | 0.045999526 | 0.025359447 |
| 0.000287643 | 0.049663555 | 0.041015448 | 0.019859913 |
| 0.030495157 | 0.030130447 | 0.033343114 | 0.025983815 |
| 0.006818822 | 0.004865558 | 0.007263244 | 0.011843878 |
| 0.020583737 | 0.006271045 | 0.000644207 | 0.027448201 |
| 0.029233859 | 0.000429523 | 0.00456174  | 0.025935222 |
| 0.037706012 | 0.001362249 | 0.000390486 | 0.011184074 |
| 0.038786489 | 0.041794118 | 0.03333433  | 0.033259941 |
| 0.041326008 | 0.020251886 | 0.00766583  | 0.00051496  |
| 0.031365834 | 0.039496227 | 0.003719986 | 0.036189049 |
| 0.004346469 | 0.027427684 | 0.046630674 | 0.006223378 |
| 0.004117474 | 0.000347205 | 0.003375266 | 0.036835197 |
| 0.006595791 | 0.008249367 | 0.00337864  | 0.019809043 |
| 0.010408176 | 0.001462215 | 0.008413312 | 0.02652534  |
| 0.015845875 | 0.00671689  | 0.01502114  | 0.023138439 |
| 0.027645002 | 0.047296727 | 0.031085298 | 0.003247458 |
| 0.010128126 | 0.002126183 | 0.049578725 | 0.044893381 |
| 0.055954061 | 0.001239445 | 0.035225906 | 0.039890533 |
| 0.030233308 | 0.027786611 | 0.042060915 | 0.004362286 |
| 0.0185093   | 0.078807621 | 0.04270272  | 0.013951044 |
| 0.005643664 | 0.023961032 | 0.002007396 | 0.026003925 |
| 0.038780549 | 0.034665767 | 0.003021337 | 0.03023858  |
| 0.0057954   | 0.004584584 | 0.041261019 | 0.018739582 |
| 0.00051305  | 0.023992986 | 0.064134761 | 8.68E-05    |
| 0.02076061  | 0.05809688  | 0.002721936 | 0.044762085 |
| 0.04052434  | 0.022591413 | 0.009565955 | 0.000401667 |
| 0.06123382  | 0.016648397 | 0.011557318 | 0.031324106 |
| 0.016108918 | 0.003094414 | 0.000655275 | 0.014944634 |
| 0.001303375 | 0.004272223 | 0.000933206 | 0.005542006 |
| 0.029900242 | 0.011980332 | 0.029477689 | 0.013222967 |
| 0.013028032 | 0.008031149 | 0.003254792 | 0.045502673 |
| 0.011098385 | 0.02299351  | 0.018811644 | 0.006657114 |
| 0.059973445 | 0.039895475 | 0.000466289 | 0.041554264 |
| 0.056973022 | 0.034912681 | 6.38E-06    | 0.033503173 |
| 0.000929956 | 0.010695279 | 0.00540435  | 0.007459436 |
| 0.020121937 | 0.027247191 | 0.009650075 | 0.041048489 |
| 0.011259716 | 0.003672012 | 0.008277631 | 0.002351246 |
| 0.008115396 | 0.030871336 | 0.023830436 | 0.005500597 |
| 0.000920979 | 0.003493593 | 0.003434856 | 0.000152028 |
| 0.034403399 | 0.008417177 | 0.00107141  | 0.014910917 |
| 0.028038238 | 0.019696891 | 0.03416439  | 0.026678633 |
| 0.00315254  | 0.03387755  | 0.02346579  | 0.008230901 |
| 0.000409896 | 0.000965434 | 0.016197172 | 0.00633881  |

|             |             |             |             |
|-------------|-------------|-------------|-------------|
| 0.007818263 | 0.01996833  | 0.014397733 | 0.059384613 |
| 0.019721623 | 0.007432616 | 0.030990996 | 0.011114318 |
| 0.084746317 | 0.015227077 | 0.000402371 | 0.003160987 |
| 0.008776221 | 0.028765132 | 0.001849921 | 0.021346606 |
| 0.000698714 | 0.035954729 | 0.027361291 | 0.043017097 |
| 0.021056336 | 0.002544888 | 0.000978119 | 0.005085742 |
| 0.008065197 | 0.004821348 | 0.040157143 | 0.025123817 |
| 0.002355045 | 0.023095203 | 0.00249711  | 0.044674587 |
| 0.068753851 | 0.036159692 | 0.016183252 | 0.026762303 |
| 0.005473972 | 0.042832149 | 0.001431078 | 0.045091802 |
| 0.006633227 | 0.036401402 | 0.017222278 | 0.01614641  |
| 0.043628199 | 0.000787406 | 0.044887731 | 0.036440946 |
| 0.0055103   | 0.031512377 | 0.013069971 | 0.002899331 |
| 0.000746298 | 0.02978027  | 0.023724639 | 0.011440584 |
| 0.022809423 | 0.000109508 | 0.001703451 | 0.020608801 |
| 0.068246776 | 0.056130768 | 0.057886811 | 0.027580623 |
| 0.039306667 | 0.010759065 | 0.019011192 | 0.030807486 |
| 0.030692839 | 0.002857833 | 0.019430436 | 0.028448152 |
| 0.000874412 | 0.011796036 | 0.002343267 | 0.045382327 |
| 0.05198517  | 0.023111021 | 0.000942644 | 1.27E-05    |
| 0.031167545 | 0.04317053  | 0.008180194 | 0.051256699 |
| 0.005915791 | 0.064313792 | 0.02403031  | 0.014867621 |
| 0.029391529 | 0.003832006 | 0.020764079 | 0.005412525 |
| 0.018569111 | 0.049307125 | 0.070628623 | 0.003504722 |
| 0.032484019 | 0.023904508 | 0.016653283 | 2.75E-05    |
| 0.005307878 | 0.000182761 | 0.019285538 | 0.032095576 |
| 0.060858896 | 0.011974108 | 0.031969632 | 0.016287761 |
| 0.037277672 | 0.013267708 | 0.034024271 | 0.000421485 |
| 0.031748461 | 0.007415758 | 0.015320893 | 0.006157178 |
| 0.075583894 | 0.000214174 | 0.078039827 | 0.024119511 |
| 0.011474217 | 0.023864951 | 0.015111159 | 0.030501998 |
| 0.034249038 | 0.005466997 | 0.00675047  | 0.07258741  |
| 0.002369337 | 0.014524391 | 0.045106902 | 0.005634619 |
| 0.017431888 | 0.040165562 | 0.006637668 | 0.046749087 |
| 0.02207175  | 0.060067562 | 0.049697329 | 0.002911372 |
| 0.009347794 | 0.045501189 | 0.042074444 | 0.018510182 |
| 0.033575997 | 0.017443077 | 0.018523941 | 0.022307916 |
| 0.0007672   | 0.035552743 | 0.018429583 | 0.026417668 |
| 0.022362829 | 0.042425421 | 0.016646709 | 0.000108464 |
| 0.007202946 | 0.003758882 | 0.005185791 | 0.019706816 |
| 0.027035597 | 0.024046267 | 0.018257258 | 0.000205172 |
| 0.000742316 | 0.027440924 | 0.000220827 | 0.004389587 |
| 0.017606778 | 0.009267745 | 0.024944571 | 0.003847408 |
| 0.035129816 | 0.022876237 | 0.00015699  | 0.046661886 |
| 6.08E-05    | 0.032920282 | 0.007507341 | 0.01027205  |
| 0.00096514  | 0.022217799 | 0.043798537 | 0.015624658 |
| 0.005192642 | 0.011050186 | 0.034084606 | 0.002956135 |
| 0.042819053 | 0.051406309 | 0.025699726 | 0.024001825 |
| 0.035819508 | 0.03467609  | 0.017846602 | 0.02077382  |
| 0.008239595 |             |             |             |
| CFP         | 0.096850248 | 0.264359409 | 0.05140116  |
| 0.165807092 | 0.296514455 | 0.181519128 | 0.129320624 |
| 0.185666702 | 0.227990037 | 0.111313463 | 0.253974139 |
| 0.061781474 | 0.127627017 | 0.352069575 | 0.135948911 |



|             |             |             |             |
|-------------|-------------|-------------|-------------|
| 0.270905546 | 0.12397033  | 0.187034146 | 0.088364162 |
| 0.185154821 | 0.323265126 | 0.223496198 | 0.164249873 |
| 0.308366821 | 0.18331485  | 0.175927944 | 0.211003098 |
| 0.332777169 | 0.114711405 | 0.244708328 | 0.069580109 |
| 0.363182051 | 0.2974257   | 0.196176873 | 0.036489888 |
| 0.225505853 | 0.048158755 | 0.349184097 | 0.314494088 |
| 0.177520213 | 0.313644527 | 0.112640724 | 0.277269185 |
| 0.162562756 | 0.06345537  | 0.058665172 | 0.265786335 |
| 0.181220846 | 0.239509227 | 0.062721881 | 0.243843388 |
| 0.215660897 | 0.226989079 | 0.183949102 | 0.00670675  |
| 0.209484199 | 0.076399107 | 0.171102585 | 0.336602323 |
| 0.224948581 | 0.229704369 | 0.14921065  | 0.189100052 |
| 0.223411428 | 0.290008493 | 0.26199686  | 0.177443559 |
| 0.358403389 | 0.216973711 | 0.256682641 | 0.156640817 |
| 0.22590345  | 0.054276508 | 0.204758349 | 0.077155799 |
| 0.230719052 | 0.272572349 | 0.267416954 | 0.252471196 |
| 0.252527923 | 0.392648027 | 0.228457313 | 0.326466882 |
| 0.202253783 | 0.274065725 | 0.286185378 | 0.335904194 |
| 0.290884352 | 0.145246234 | 0.304635274 | 0.396172227 |
| 0.078849768 | 0.147169099 | 0.275221314 | 0.115871161 |
| 0.271576346 | 0.200841201 | 0.145747719 | 0.212835363 |
| 0.297273762 | 0.294475655 | 0.343453975 | 0.278033502 |
| 0.264663563 | 0.076325074 | 0.311378089 | 0.270556818 |
| 0.271612097 | 0.09201252  | 0.320710575 | 0.326910458 |
| 0.251761286 | 0.339806039 | 0.276824694 | 0.327124687 |
| 0.266551072 | 0.354819016 | 0.271658045 | 0.308828284 |
| 0.045649188 | 0.357390933 | 0.186151507 | 0.132018765 |
| 0.073266573 | 0.196759909 | 0.261949166 | 0.318507983 |
| 0.331289112 | 0.245390539 | 0.206119776 | 0.317113079 |
| 0.385719517 | 0.295572745 | 0.352777316 | 0.324375228 |
| 0.08842299  | 0.218320758 | 0.257616836 | 0.187743753 |
| 0.296599058 | 0.157467316 | 0.271070534 | 0.355449433 |
| 0.326169775 | 0.348041159 | 0.134082032 | 0.367716058 |
| 0.221340606 | 0.406223933 | 0.270714155 | 0.231652197 |
| 0.370918571 | 0.333214747 | 0.40718586  | 0.295044879 |
| 0.336391432 | 0.199285779 | 0.086177132 | 0.311026228 |
| 0.408142811 | 0.035868292 | 0.330172378 | 0.360642068 |
| 0.330991413 | 0.330352126 | 0.416236554 | 0.363811582 |
| 0.328252882 | 0.105838597 | 0.033766401 | 1           |
| 0.34945603  | 0.324822936 | 0.259432645 | 0.218093647 |
| 0.284252803 | 0.196492357 | 0.288291975 | 0.195463191 |
| 0.429596706 | 0.32240897  | 0.328377393 | 0.286519646 |
| 0.170852449 | 0.291833086 | 0.21795736  | 0.299851137 |
| 0.109911098 | 0.118878433 | 0.055258328 | 0.293309042 |
| 0.119501852 | 0.26703044  | 0.197748748 | 0.263583902 |
| 0.256831976 | 0.178393466 | 0.187682556 | 0.309266475 |
| 0.062036828 | 0.19447288  | 0.17433136  | 0.166255627 |
| 0.134772609 | 0.168567866 | 0.247949855 | 0.214218168 |
| 0.319259842 | 0.199012501 | 0.251184109 | 0.361159708 |
| 0.254269353 | 0.159976658 | 0.258269362 | 0.392611576 |
| 0.423608471 | 0.250976412 | 0.252484852 | 0.043511179 |
| 0.281375972 | 0.155632594 | 0.190019638 | 0.208684648 |
| 0.172767392 | 0.299144898 | 0.265827675 | 0.331320051 |
| 0.169830158 | 0.133627169 | 0.268870369 | 0.347237141 |

|             |             |             |             |
|-------------|-------------|-------------|-------------|
| 0.132890155 | 0.274344178 | 0.373025036 | 0.190931613 |
| 0.011878696 | 0.251272365 | 0.321070961 | 0.301263248 |
| 0.246193761 | 0.18947535  | 0.174403047 | 0.358489455 |
| 0.222634457 | 0.296492691 | 0.346040192 | 0.327599363 |
| 0.188811532 | 0.175465461 | 0.403572282 | 0.072730793 |
| 0.246440332 | 0.139619509 | 0.327418128 | 0.120319897 |
| 0.245536713 | 0.330107734 | 0.282588697 | 0.289400765 |
| 0.095351193 | 0.366596482 | 0.295740237 | 0.367600171 |
| 0.227555223 | 0.404827707 | 0.342320135 | 0.355135277 |
| 0.256331076 | 0.209194446 | 0.155992605 | 0.317603542 |
| 0.344879898 | 0.190875168 | 0.071438043 | 0.28782832  |
| 0.192235244 | 0.297775314 | 0.23954691  | 0.395473388 |
| 0.386182428 | 0.283751702 | 0.267887214 | 0.367775363 |
| 0.328626303 | 0.207056313 | 0.316019073 | 0.416473342 |
| 0.144933086 | 0.281966497 | 0.286268388 | 0.391706927 |
| 0.188652715 | 0.316655155 | 0.289173875 | 0.171254388 |
| 0.006264819 | 0.101356598 | 0.088321261 | 0.293992703 |
| 0.257395177 | 0.18649302  | 0.286485203 | 0.37420758  |
| 0.203091021 | 0.320518801 | 0.233208875 | 0.2991031   |
| 0.314678437 | 0.26188569  | 0.231392674 | 0.258126149 |
| 0.251123678 | 0.056663146 | 0.202703403 | 0.391711181 |
| 0.042722248 | 0.245601823 | 0.214445544 | 0.010950401 |
| 0.089448475 | 0.22232946  | 0.107035729 | 0.209948302 |
| 0.394129816 | 0.190086228 | 0.182018271 | 0.145124244 |
| 0.307618006 | 0.14320079  | 0.016917947 | 0.35037027  |
| 0.343775469 | 0.334595006 | 0.336222247 | 0.31021989  |
| 0.338598509 | 0.268091084 | 0.341494887 | 0.158618814 |
| 0.174165002 | 0.09482118  | 0.280160075 | 0.313691638 |
| 0.00937008  | 0.327270957 | 0.275377286 | 0.18124037  |
| 0.305509916 | 0.274558624 | 0.085323991 | 0.262673162 |
| 0.042432314 | 0.163108616 | 0.226594751 | 0.281276909 |
| 0.349723154 | 0.037115821 | 0.126312438 | 0.243093551 |
| 0.281401622 | 0.281638391 | 0.204719904 | 0.368923545 |
| 0.274402049 | 0.094248102 | 0.296572376 | 0.315447117 |
| 0.149544075 | 0.080276112 | 0.20152178  | 0.014122057 |
| 0.09675809  | 0.330102768 | 0.221187527 | 0.096061207 |
| 0.2627186   | 0.017824358 | 0.276698757 | 0.385136218 |
| 0.282035594 | 0.393548451 | 0.359688282 | 0.242931432 |
| 0.356110937 | 0.086675029 | 0.368098928 | 0.272964136 |
| 0.162696579 | 0.002778961 | 0.028545801 | 0.35255455  |
| 0.260421778 | 0.051214454 | 0.202655631 | 0.151212618 |
| 0.22529331  | 0.124060994 | 0.126165092 | 0.292260157 |
| 0.206990399 | 0.312622552 | 0.272870084 | 0.310966933 |
| 0.292354853 | 0.282440276 | 0.172864787 | 0.098046396 |
| 0.232130195 | 0.125627225 | 0.100083443 | 0.027922169 |
| 0.324604443 | 0.105341675 | 0.309999548 | 0.346567434 |
| 0.395133089 | 0.306880469 | 0.126013551 | 0.181048306 |
| 0.335757545 | 0.068256701 | 0.167040615 | 0.082301309 |
| 0.308332816 | 0.285455854 | 0.320793021 | 0.273826736 |
| 0.411245809 | 0.354214891 | 0.091119192 | 0.337369705 |
| 0.028477462 | 0.012504217 | 0.16451147  | 0.260761114 |
| 0.094537319 | 0.272146576 | 0.276360306 | 0.20964871  |
| 0.250950407 | 0.060752704 | 0.255395805 | 0.271718334 |
| 0.292763749 | 0.292540411 | 0.302493361 | 0.229594854 |

|             |             |             |             |
|-------------|-------------|-------------|-------------|
| 0.304379029 | 0.292542953 | 0.265080958 | 0.245508442 |
| 0.19875308  | 0.250210668 | 0.18662963  | 0.06763077  |
| 0.188754453 | 0.233467885 | 0.110081166 | 0.167036591 |
| 0.344404342 | 0.361654839 | 0.143319953 | 0.060911236 |
| 0.258334214 | 0.287587985 | 0.38767211  | 0.319124387 |
| 0.364436683 | 0.421114465 | 0.335102727 | 0.306412799 |
| 0.122026658 | 0.296155589 | 0.292618318 | 0.271515481 |
| 0.362135757 | 0.064900977 | 0.317502936 | 0.246108199 |
| 0.157795898 | 0.247643639 | 0.110506293 | 0.154580589 |
| 0.234023638 | 0.21926424  | 0.304463139 | 0.109736089 |
| 0.313064041 | 0.232555997 | 0.109476993 | 0.251598252 |
| 0.301667473 | 0.22097813  | 0.207842965 | 0.192158563 |
| 0.249278987 | 0.090487303 | 0.299975375 | 0.400237622 |
| 0.138229408 | 0.143459947 | 0.15045475  | 0.288545955 |
| 0.297077887 | 0.164764108 | 0.043344068 | 0.266915531 |
| 0.37515544  | 0.243217027 | 0.329604822 | 0.396345757 |
| 0.109327092 | 0.257674399 | 0.239530151 | 0.295915811 |
| 0.235258139 | 0.179864218 | 0.277680458 | 0.107131642 |
| 0.303467327 | 0.368686257 | 0.295690692 | 0.258602045 |
| 0.19113056  | 0.092530104 | 0.056202933 | 0.303370607 |
| 0.282561631 | 0.138463733 | 0.127585021 | 0.31519396  |
| 0.010791923 | 0.178922419 | 0.386354056 | 0.247115933 |
| 0.393723691 | 0.377060366 | 0.362231635 | 0.191721526 |
| 0.009372108 | 0.276692266 | 0.270097624 | 0.239625473 |
| 0.288559709 | 0.262079917 | 0.13911516  | 0.196588957 |
| 0.322284738 | 0.068834346 | 0.282007301 | 0.152918853 |
| 0.185507762 | 0.215635127 | 0.258208865 | 0.212976835 |
| 0.30799675  | 0.081265348 | 0.216664882 | 0.227902735 |
| 0.210631744 | 0.287063734 | 0.35192549  | 0.099160429 |
| 0.195267592 | 0.369616393 | 0.293207025 | 0.05814706  |
| 0.241335299 | 0.339764303 | 0.340901802 | 0.016064253 |
| 0.301490704 | 0.037888145 | 0.313669876 | 0.296557088 |
| 0.298668056 | 0.316627434 | 0.319654499 | 0.291594798 |
| 0.235560362 | 0.276343353 | 0.26387636  | 0.269649816 |
| 0.270961776 | 0.222759334 | 0.254609696 | 0.214203243 |
| 0.282776799 | 0.174302583 | 0.104536528 | 0.098809396 |
| 0.122104997 | 0.304275386 | 0.255237817 | 0.067804347 |
| 0.276495882 | 0.221411796 | 0.365110568 | 0.308394069 |
| 0.37073827  | 0.087572971 | 0.273424019 | 0.282199594 |
| 0.114569186 | 0.160736578 | 0.083375321 | 0.200948698 |
| 0.247701977 | 0.29476596  | 0.170485578 | 0.170566769 |
| 0.239515245 | 0.347295985 | 0.242973592 | 0.350449408 |
| 0.255587772 | 0.225607153 | 0.106466406 | 0.215919991 |
| 0.20801455  | 0.146735481 | 0.312927672 | 0.009624616 |
| 0.276319403 | 0.150527252 | 0.33501284  | 0.322480873 |
| 0.208992338 | 0.343756783 | 0.113971191 | 0.149211254 |
| 0.086649537 | 0.140618172 | 0.172688969 | 0.264338038 |
| 0.17259073  | 0.220133533 | 0.309300214 | 0.130264784 |
| 0.303559415 | 0.263982084 | 0.2862406   | 0.237538564 |
| 0.254959724 | 0.14982093  | 0.34038675  | 0.108442061 |
| 0.197051739 | 0.286916729 | 0.14149833  | 0.316668375 |
| 0.322243927 | 0.360268719 | 0.089745938 | 0.369584572 |
| 0.299339346 | 0.135677344 | 0.402734397 | 0.19702594  |
| 0.185857065 | 0.230739656 | 0.192772864 | 0.170146996 |

|             |             |             |             |
|-------------|-------------|-------------|-------------|
| 0.278696159 | 0.212134597 | 0.007537234 | 0.118978112 |
| 0.339985903 | 0.195887659 | 0.244438238 | 0.300688166 |
| 0.302917911 | 0.369742699 | 0.14478903  | 0.221972253 |
| 0.291850448 | 0.328722279 | 0.274062985 | 0.294179282 |
| 0.301800086 | 0.184818283 | 0.171987607 | 0.025503523 |
| 0.240649866 | 0.203270594 | 0.177810701 | 0.129405495 |
| 0.064153564 | 0.210271079 | 0.224435505 | 0.070299114 |
| 0.391340104 | 0.153497956 | 0.18012374  | 0.25642073  |
| 0.18146381  | 0.334490597 | 0.279936176 | 0.313745759 |
| 0.076033466 | 0.244204918 | 0.225539691 | 0.21155932  |
| 0.293463302 | 0.288206048 | 0.341719945 | 0.257026512 |
| 0.102618046 | 0.297604977 | 0.017359079 | 0.333504804 |
| 0.302169488 | 0.261104098 | 0.224085566 | 0.114817037 |
| 0.313808749 | 0.306785931 | 0.302036941 | 0.184709614 |
| 0.048799452 | 0.272919562 | 0.239885316 | 0.2823622   |
| 0.148496502 | 0.227171746 | 0.137519053 | 0.2811253   |
| 0.302208948 | 0.282574996 | 0.275772582 | 0.192039889 |
| 0.310235978 | 0.254307002 | 0.116382159 | 0.253299285 |
| 0.198495037 | 0.082972578 | 0.141271193 | 0.391660139 |
| 0.2890606   | 0.272612612 | 0.369197519 | 0.300302572 |
| 0.25729525  | 0.276055041 | 0.183774829 | 0.374410754 |
| 0.252106092 | 0.268162821 | 0.324980597 | 0.335677215 |
| 0.344392815 | 0.291237011 | 0.26103333  | 0.33266733  |
| 0.28374521  | 0.138987437 | 0.278095926 | 0.279900352 |
| 0.253736352 | 0.290437501 | 0.137024383 | 0.32013511  |
| 0.11351766  | 0.239895652 | 0.199199679 | 0.172591869 |
| 0.297873206 | 0.282294099 | 0.319326067 | 0.359634214 |
| 0.218445642 | 0.081695799 | 0.38731701  | 0.048066518 |
| 0.159987644 | 0.274990358 | 0.2481461   | 0.273361909 |
| 0.181730472 | 0.236587817 | 0.176974175 | 0.007184698 |
| 0.350271622 | 0.082537936 | 0.255876505 | 0.315214653 |
| 0.232636207 | 0.100865078 | 0.321242838 | 0.401521214 |
| 0.220232315 | 0.167058093 | 0.177995776 | 0.32768013  |
| 0.208179909 | 0.166934276 | 0.225645418 | 0.20117763  |
| 0.231088046 | 0.152165328 | 0.189832705 | 0.203639823 |
| 0.263607377 | 0.213667638 |             |             |
| CHAF1A      | 0.185260509 | 0.511512849 | 0.168765684 |
| 0.253603765 | 0.342000868 | 0.50713074  | 0.145937874 |
| 0.239029833 | 0.466039283 | 0.39858188  | 0.446935975 |
| 0.061651372 | 0.077079834 | 0.515849024 | 0.129263458 |
| 0.437061661 | 0.0850016   | 0.214374527 | 0.117675963 |
| 0.338387624 | 0.316920773 | 0.374765687 | 0.51753707  |
| 0.32062263  | 0.323437811 | 0.492585659 | 0.421971933 |
| 0.53084809  | 0.29963818  | 0.503417371 | 0.286574466 |
| 0.473653021 | 0.355532813 | 0.41886942  | 0.067177472 |
| 0.494082222 | 0.012704019 | 0.469808583 | 0.337606964 |
| 0.164712067 | 0.443430633 | 0.466585302 | 0.340348677 |
| 0.486582853 | 0.11897848  | 0.283514279 | 0.459604801 |
| 0.461213797 | 0.379263899 | 0.183745494 | 0.52129945  |
| 0.444990651 | 0.47839499  | 0.508896128 | 0.006500104 |
| 0.311443519 | 0.078297595 | 0.223202439 | 0.520440303 |
| 0.32471538  | 0.213136768 | 0.323377074 | 0.367085063 |
| 0.452913371 | 0.438525117 | 0.355837378 | 0.459644602 |
| 0.526090288 | 0.173018732 | 0.494620933 | 0.254313476 |

|             |             |             |             |
|-------------|-------------|-------------|-------------|
| 0.495969054 | 0.111184479 | 0.283455897 | 0.209410824 |
| 0.445619209 | 0.292559055 | 0.397337874 | 0.326545609 |
| 0.516386089 | 0.520020801 | 0.359706081 | 0.516688913 |
| 0.100354932 | 0.361571195 | 0.3113801   | 0.385340704 |
| 0.44864897  | 0.17947671  | 0.500501075 | 0.513276544 |
| 0.135510526 | 0.491249457 | 0.490619527 | 0.261976244 |
| 0.523224377 | 0.294639611 | 0.502180596 | 0.176501573 |
| 0.407141935 | 0.381908823 | 0.48683174  | 0.41607303  |
| 0.353021423 | 0.195511879 | 0.516125555 | 0.334178449 |
| 0.365442076 | 0.20857313  | 0.262757791 | 0.507513161 |
| 0.507104789 | 0.532237231 | 0.512639058 | 0.454780836 |
| 0.420479962 | 0.527252687 | 0.51094514  | 0.496436536 |
| 0.203328654 | 0.523381988 | 0.329467715 | 0.097467131 |
| 0.19547277  | 0.15645259  | 0.263721199 | 0.4006486   |
| 0.524175824 | 0.454162165 | 0.339364496 | 0.31026475  |
| 0.489583345 | 0.503372761 | 0.521505848 | 0.50299583  |
| 0.114101044 | 0.25525035  | 0.433319565 | 0.409038329 |
| 0.46459462  | 0.225121802 | 0.270276651 | 0.526437905 |
| 0.480769624 | 0.494484741 | 0.324757409 | 0.522928699 |
| 0.310277878 | 0.510073871 | 0.534703177 | 0.28573459  |
| 0.523798363 | 0.515956826 | 0.51221984  | 0.437061942 |
| 0.504408077 | 0.489890775 | 0.08934576  | 0.478486451 |
| 0.496818576 | 0.017150416 | 0.519276325 | 0.520938803 |
| 0.524370786 | 0.515153782 | 0.507203329 | 0.523635783 |
| 0.523722944 | 0.182576114 | 0.03349039  | 0.34945603  |
| 1           | 0.496979764 | 0.195568814 | 0.470393283 |
| 0.39967871  | 0.52556996  | 0.493110864 | 0.370522342 |
| 0.495409748 | 0.520579574 | 0.526819888 | 0.498667256 |
| 0.434069443 | 0.426233212 | 0.402413987 | 0.502259254 |
| 0.112564986 | 0.252594514 | 0.157944736 | 0.403850805 |
| 0.473984773 | 0.267337814 | 0.51938472  | 0.40133395  |
| 0.297384496 | 0.478908707 | 0.349056326 | 0.416141351 |
| 0.162890394 | 0.519560091 | 0.304744478 | 0.325857817 |
| 0.100962187 | 0.266249566 | 0.291354535 | 0.250209907 |
| 0.318545462 | 0.332500109 | 0.506604986 | 0.516424258 |
| 0.404682099 | 0.338704381 | 0.521744542 | 0.498493665 |
| 0.459397852 | 0.421767831 | 0.347978545 | 0.031391613 |
| 0.334476298 | 0.345428147 | 0.181953502 | 0.452672687 |
| 0.294086513 | 0.331076325 | 0.456521492 | 0.439644717 |
| 0.455035337 | 0.282975496 | 0.418408644 | 0.468841196 |
| 0.299352764 | 0.364750564 | 0.50372726  | 0.50180084  |
| 0.017920715 | 0.458855187 | 0.521634665 | 0.172621071 |
| 0.437685469 | 0.141668737 | 0.269750997 | 0.515615064 |
| 0.310459862 | 0.240091634 | 0.520426687 | 0.432668413 |
| 0.421869173 | 0.339720257 | 0.512214599 | 0.05129881  |
| 0.382453816 | 0.079990392 | 0.364124932 | 0.446042793 |
| 0.383487787 | 0.377633784 | 0.337935192 | 0.322930718 |
| 0.282250566 | 0.520060372 | 0.491652964 | 0.527935948 |
| 0.420886531 | 0.512770646 | 0.514976823 | 0.509123994 |
| 0.474754027 | 0.40372086  | 0.128597585 | 0.52336891  |
| 0.516183443 | 0.367637999 | 0.198442471 | 0.501386695 |
| 0.440600121 | 0.451506031 | 0.145378978 | 0.514123479 |
| 0.497355932 | 0.507006512 | 0.220714872 | 0.424070718 |
| 0.485668535 | 0.377958532 | 0.488023426 | 0.504556123 |

|             |             |             |             |
|-------------|-------------|-------------|-------------|
| 0.401755639 | 0.398186551 | 0.380461806 | 0.444385856 |
| 0.314302472 | 0.233100527 | 0.420050167 | 0.170045918 |
| 0.010994889 | 0.199785529 | 0.176694907 | 0.228576238 |
| 0.170230959 | 0.485929281 | 0.464946258 | 0.524467304 |
| 0.218823276 | 0.494930821 | 0.357433621 | 0.362957285 |
| 0.505094544 | 0.387674179 | 0.407048359 | 0.434361888 |
| 0.368570017 | 0.046375514 | 0.194486645 | 0.527169755 |
| 0.135593074 | 0.250577997 | 0.439465688 | 0.006469567 |
| 0.131582321 | 0.511897133 | 0.219595388 | 0.309753855 |
| 0.493221028 | 0.323848773 | 0.363007347 | 0.431315898 |
| 0.424993305 | 0.20142847  | 0.007205932 | 0.513398584 |
| 0.498975189 | 0.488145618 | 0.50041827  | 0.485152669 |
| 0.48853706  | 0.479962453 | 0.476289989 | 0.512369241 |
| 0.214495987 | 0.221743049 | 0.228506004 | 0.366349323 |
| 0.013289506 | 0.456590243 | 0.356412552 | 0.264948569 |
| 0.477320887 | 0.407930688 | 0.106931853 | 0.387261577 |
| 0.07673855  | 0.206452135 | 0.429118698 | 0.29801664  |
| 0.394523743 | 0.057938743 | 0.33714794  | 0.367000297 |
| 0.505690805 | 0.468443244 | 0.387266864 | 0.521549694 |
| 0.421254315 | 0.282996307 | 0.381955193 | 0.457768986 |
| 0.164351792 | 0.157048661 | 0.474532693 | 0.065485976 |
| 0.272191286 | 0.48281344  | 0.431600773 | 0.184031209 |
| 0.39548653  | 0.025499498 | 0.489100045 | 0.519194526 |
| 0.513469305 | 0.519191247 | 0.52704753  | 0.286404795 |
| 0.526654171 | 0.09607769  | 0.527488551 | 0.520294137 |
| 0.46069944  | 0.003903954 | 0.013022073 | 0.523032136 |
| 0.454213465 | 0.17020946  | 0.283079546 | 0.483630981 |
| 0.197019911 | 0.314680618 | 0.149170405 | 0.199138547 |
| 0.513252488 | 0.282771682 | 0.183350064 | 0.509506209 |
| 0.341397748 | 0.321149516 | 0.505247489 | 0.208919031 |
| 0.45884791  | 0.128528223 | 0.204788618 | 0.014330955 |
| 0.418603165 | 0.251250707 | 0.506725    | 0.524643497 |
| 0.505632082 | 0.444752178 | 0.412907263 | 0.419018553 |
| 0.484422484 | 0.24281855  | 0.413726932 | 0.260188352 |
| 0.529297393 | 0.455212137 | 0.428444272 | 0.44216366  |
| 0.508880266 | 0.51428824  | 0.095602737 | 0.485146506 |
| 0.042573249 | 0.002488654 | 0.527432833 | 0.373049584 |
| 0.073529713 | 0.415103375 | 0.38081158  | 0.323943904 |
| 0.297272841 | 0.096055766 | 0.270464899 | 0.251395482 |
| 0.390403251 | 0.43149978  | 0.296032496 | 0.364372475 |
| 0.305899182 | 0.159309853 | 0.278657479 | 0.244473428 |
| 0.302186881 | 0.445701234 | 0.329304913 | 0.071014179 |
| 0.504303289 | 0.463650986 | 0.14569522  | 0.291276506 |
| 0.515478564 | 0.527764125 | 0.101616121 | 0.02934877  |
| 0.397051385 | 0.376238155 | 0.514405813 | 0.529767137 |
| 0.530407833 | 0.505661539 | 0.454339781 | 0.17384585  |
| 0.160264262 | 0.389926116 | 0.314645428 | 0.132701059 |
| 0.525005416 | 0.1865811   | 0.516458756 | 0.306216579 |
| 0.233379064 | 0.337590065 | 0.081703292 | 0.181068902 |
| 0.411592322 | 0.292743838 | 0.245702032 | 0.309933598 |
| 0.385503131 | 0.260296509 | 0.127030646 | 0.31302271  |
| 0.465435784 | 0.18525961  | 0.282646603 | 0.430585327 |
| 0.481883376 | 0.305774841 | 0.485776528 | 0.479939779 |
| 0.264263431 | 0.236638735 | 0.460696198 | 0.456356749 |

|             |             |             |             |
|-------------|-------------|-------------|-------------|
| 0.525186767 | 0.465126695 | 0.067999991 | 0.521613537 |
| 0.509619905 | 0.507567633 | 0.519798586 | 0.446734684 |
| 0.198880764 | 0.427131792 | 0.331293264 | 0.399309715 |
| 0.296158091 | 0.509671664 | 0.327241626 | 0.159032152 |
| 0.393361683 | 0.490112531 | 0.513802599 | 0.256407536 |
| 0.491064719 | 0.280987556 | 0.172980853 | 0.507630065 |
| 0.191924535 | 0.199020007 | 0.474749142 | 0.488619313 |
| 0.003965843 | 0.129022262 | 0.495173738 | 0.33670483  |
| 0.502060361 | 0.514664083 | 0.496027484 | 0.371417747 |
| 0.001641974 | 0.452904856 | 0.459436396 | 0.475272877 |
| 0.527395231 | 0.474484555 | 0.227803213 | 0.143176745 |
| 0.385641778 | 0.211940015 | 0.2151308   | 0.459994604 |
| 0.188387348 | 0.521401054 | 0.302082728 | 0.327752722 |
| 0.263162441 | 0.222157967 | 0.249711697 | 0.361805868 |
| 0.151305908 | 0.347649967 | 0.443043124 | 0.399314802 |
| 0.216528006 | 0.482817232 | 0.511311383 | 0.087273732 |
| 0.378220312 | 0.478222445 | 0.487255935 | 0.007208057 |
| 0.48967901  | 0.026489769 | 0.258999676 | 0.288372921 |
| 0.271223267 | 0.279922707 | 0.314603373 | 0.349402117 |
| 0.467005094 | 0.331300041 | 0.377778723 | 0.337209927 |
| 0.23401935  | 0.340645187 | 0.448389226 | 0.480806597 |
| 0.33576903  | 0.243117928 | 0.220853478 | 0.219420401 |
| 0.114670053 | 0.51946997  | 0.367636727 | 0.196182688 |
| 0.318374201 | 0.460003002 | 0.431848105 | 0.522413306 |
| 0.471278598 | 0.253154657 | 0.406072171 | 0.537949563 |
| 0.282166829 | 0.410362108 | 0.170459652 | 0.503168131 |
| 0.347121483 | 0.245439185 | 0.498980347 | 0.481422068 |
| 0.503086918 | 0.461842697 | 0.366132458 | 0.489475771 |
| 0.442225589 | 0.413411747 | 0.440905626 | 0.145701272 |
| 0.315180575 | 0.262887388 | 0.290319588 | 0.010229789 |
| 0.451881127 | 0.431506108 | 0.529055642 | 0.515972787 |
| 0.294471316 | 0.458479915 | 0.455091733 | 0.198536415 |
| 0.395337559 | 0.319598586 | 0.264510566 | 0.511459649 |
| 0.215696823 | 0.297367358 | 0.3511156   | 0.493630876 |
| 0.492993122 | 0.486034244 | 0.283388751 | 0.363110041 |
| 0.334791134 | 0.356361042 | 0.48545226  | 0.266791926 |
| 0.496426574 | 0.209285449 | 0.482730178 | 0.367461166 |
| 0.283839174 | 0.521499371 | 0.157443753 | 0.526482157 |
| 0.383637256 | 0.263936049 | 0.487332444 | 0.420576678 |
| 0.418853871 | 0.171222189 | 0.182264672 | 0.488168097 |
| 0.317790771 | 0.353596125 | 0.022025684 | 0.07581942  |
| 0.409121388 | 0.374181787 | 0.508957852 | 0.442688813 |
| 0.267171893 | 0.405245762 | 0.154868495 | 0.427344235 |
| 0.510121271 | 0.51975315  | 0.353633889 | 0.354973931 |
| 0.45312667  | 0.19369808  | 0.530768545 | 0.022291432 |
| 0.481792998 | 0.465289209 | 0.449188776 | 0.12371799  |
| 0.060837046 | 0.214876497 | 0.498027727 | 0.181335894 |
| 0.50101891  | 0.213024105 | 0.460605831 | 0.509098841 |
| 0.306649947 | 0.523317383 | 0.175965628 | 0.478425032 |
| 0.127746416 | 0.369060485 | 0.406561852 | 0.438232534 |
| 0.280377738 | 0.309901631 | 0.453996372 | 0.24389284  |
| 0.086417129 | 0.319173359 | 0.005806107 | 0.459263502 |
| 0.502084951 | 0.363924569 | 0.329361946 | 0.373374856 |
| 0.361621891 | 0.462638145 | 0.284660697 | 0.470858622 |

|             |             |             |             |
|-------------|-------------|-------------|-------------|
| 0.031853057 | 0.405530745 | 0.300960658 | 0.520148179 |
| 0.278811418 | 0.448223841 | 0.118167984 | 0.337122075 |
| 0.501790854 | 0.33813091  | 0.363301618 | 0.370828559 |
| 0.5231989   | 0.487517214 | 0.320281677 | 0.256668967 |
| 0.473450435 | 0.169804258 | 0.485523094 | 0.513338385 |
| 0.250539507 | 0.225619092 | 0.48940383  | 0.29790639  |
| 0.321052922 | 0.487159087 | 0.47433902  | 0.50709714  |
| 0.111247256 | 0.355075327 | 0.482471046 | 0.512513501 |
| 0.381204893 | 0.176689952 | 0.256133055 | 0.27508812  |
| 0.51682958  | 0.191448204 | 0.277038931 | 0.481221473 |
| 0.225550983 | 0.394661245 | 0.462318088 | 0.223025141 |
| 0.080093641 | 0.257184074 | 0.456419744 | 0.265801259 |
| 0.385595992 | 0.423786444 | 0.271482733 | 0.456587412 |
| 0.200626987 | 0.060453507 | 0.4801504   | 0.017663184 |
| 0.49326254  | 0.46093131  | 0.348266227 | 0.395287431 |
| 0.326233592 | 0.466845757 | 0.492314511 | 0.006226356 |
| 0.47652824  | 0.060564418 | 0.353232669 | 0.273027246 |
| 0.31218928  | 0.139761678 | 0.506963202 | 0.513571102 |
| 0.440879398 | 0.377425852 | 0.378413293 | 0.509798247 |
| 0.148486247 | 0.351341964 | 0.363282233 | 0.529667669 |
| 0.222426351 | 0.472600041 | 0.464915453 | 0.413255698 |
| 0.497552648 | 0.388867322 |             |             |
| CHAF1B      | 0.169617668 | 0.387832286 | 0.137709492 |
| 0.307527279 | 0.325853803 | 0.404913525 | 0.134826858 |
| 0.21972091  | 0.312902058 | 0.23310897  | 0.408973627 |
| 0.072843491 | 0.076639272 | 0.434857807 | 0.121984474 |
| 0.362112956 | 0.10553702  | 0.207559531 | 0.082924711 |
| 0.264146342 | 0.306807403 | 0.322315342 | 0.368911338 |
| 0.291506679 | 0.252186824 | 0.353768581 | 0.306747988 |
| 0.464887234 | 0.225073997 | 0.403063288 | 0.197596233 |
| 0.434351325 | 0.327596275 | 0.320659601 | 0.070033778 |
| 0.384298545 | 0.009685911 | 0.450125308 | 0.338519133 |
| 0.190791829 | 0.374368422 | 0.296638493 | 0.359345731 |
| 0.331588748 | 0.116231841 | 0.166187584 | 0.34126231  |
| 0.326654719 | 0.308019679 | 0.133516577 | 0.396893454 |
| 0.317842817 | 0.384291125 | 0.335609866 | 0.00648883  |
| 0.266665768 | 0.064113452 | 0.177302224 | 0.487747255 |
| 0.311336497 | 0.231692404 | 0.209992269 | 0.256553814 |
| 0.31832433  | 0.33409021  | 0.305160509 | 0.307030198 |
| 0.484724639 | 0.156691254 | 0.363401682 | 0.252129519 |
| 0.367965684 | 0.079746579 | 0.259130693 | 0.138566845 |
| 0.337739011 | 0.302696455 | 0.35483678  | 0.28060215  |
| 0.394763238 | 0.505413302 | 0.306230536 | 0.481092062 |
| 0.080506362 | 0.305044326 | 0.293432828 | 0.343202354 |
| 0.3304236   | 0.137245815 | 0.424083492 | 0.511734517 |
| 0.096699577 | 0.317404256 | 0.358133718 | 0.189566798 |
| 0.400561643 | 0.214501272 | 0.34139347  | 0.186212506 |
| 0.346570611 | 0.330637775 | 0.449425441 | 0.372859557 |
| 0.300548654 | 0.147789462 | 0.47544176  | 0.29386656  |
| 0.370683113 | 0.183009743 | 0.261423908 | 0.390909518 |
| 0.407384086 | 0.467124657 | 0.357355294 | 0.350641424 |
| 0.348690538 | 0.484328956 | 0.425683281 | 0.380867278 |
| 0.110023692 | 0.495384914 | 0.315695872 | 0.120681426 |
| 0.147643343 | 0.171630117 | 0.201941085 | 0.334409384 |



|             |             |             |             |
|-------------|-------------|-------------|-------------|
| 0.433044659 | 0.365474524 | 0.315290329 | 0.318129946 |
| 0.409938123 | 0.460404211 | 0.486242879 | 0.38391684  |
| 0.116970455 | 0.195914965 | 0.365075901 | 0.32088388  |
| 0.364075059 | 0.188525202 | 0.259365972 | 0.50174738  |
| 0.410748658 | 0.39031836  | 0.260815026 | 0.501041923 |
| 0.232890083 | 0.510784995 | 0.416685017 | 0.303208137 |
| 0.513480542 | 0.494770691 | 0.497051901 | 0.367785456 |
| 0.477697238 | 0.423384031 | 0.047787041 | 0.356151722 |
| 0.481670497 | 0.02466735  | 0.417975915 | 0.450020441 |
| 0.478820921 | 0.402353328 | 0.487485013 | 0.472798581 |
| 0.476712198 | 0.154221184 | 0.017467026 | 0.324822936 |
| 0.496979764 | 1           | 0.190518836 | 0.356386551 |
| 0.331318548 | 0.4016303   | 0.362331185 | 0.32171396  |
| 0.504531206 | 0.424687574 | 0.439407086 | 0.368257976 |
| 0.286037922 | 0.354005666 | 0.306347648 | 0.469746615 |
| 0.132049842 | 0.22745378  | 0.123633009 | 0.316403882 |
| 0.32829689  | 0.281936382 | 0.393189473 | 0.306010268 |
| 0.296004688 | 0.335510561 | 0.270602614 | 0.355337838 |
| 0.11268455  | 0.390109839 | 0.276543901 | 0.26255525  |
| 0.13222061  | 0.209558884 | 0.305519638 | 0.282763209 |
| 0.313173641 | 0.287465473 | 0.374403127 | 0.455054669 |
| 0.303398903 | 0.277644442 | 0.394075818 | 0.47084897  |
| 0.437538299 | 0.363719224 | 0.28235182  | 0.064637527 |
| 0.303371482 | 0.218174696 | 0.155435879 | 0.339128302 |
| 0.230818193 | 0.292225875 | 0.364159706 | 0.381001875 |
| 0.368174427 | 0.193895928 | 0.331545493 | 0.450049232 |
| 0.216531    | 0.359051995 | 0.419763905 | 0.349621838 |
| 0.022410929 | 0.403511752 | 0.407955523 | 0.17875757  |
| 0.32293663  | 0.14887421  | 0.252363322 | 0.431328589 |
| 0.239516943 | 0.213579593 | 0.446393939 | 0.364453789 |
| 0.318385877 | 0.25453928  | 0.490119239 | 0.035439514 |
| 0.28911076  | 0.139683697 | 0.350542018 | 0.272829457 |
| 0.346274156 | 0.326221073 | 0.301863662 | 0.326211848 |
| 0.223978936 | 0.490129694 | 0.382532791 | 0.481374614 |
| 0.32725931  | 0.498380439 | 0.41007581  | 0.429141577 |
| 0.387660659 | 0.28230625  | 0.116354712 | 0.416488976 |
| 0.421657725 | 0.267351693 | 0.142998886 | 0.359980544 |
| 0.298753482 | 0.362477971 | 0.171997267 | 0.480287155 |
| 0.501085348 | 0.447569607 | 0.239516055 | 0.361968535 |
| 0.415806513 | 0.354793642 | 0.377262787 | 0.494931194 |
| 0.249710682 | 0.324225327 | 0.341995361 | 0.380478592 |
| 0.292823917 | 0.221670533 | 0.320936471 | 0.141835758 |
| 0.012242953 | 0.15493166  | 0.15532585  | 0.26459518  |
| 0.190512348 | 0.335165599 | 0.374861643 | 0.48879286  |
| 0.224958832 | 0.414366285 | 0.268606114 | 0.356881615 |
| 0.41726735  | 0.297404304 | 0.33442267  | 0.355342417 |
| 0.304680794 | 0.080751069 | 0.245637336 | 0.515524517 |
| 0.090939114 | 0.247711531 | 0.31638771  | 0.01282652  |
| 0.118947674 | 0.341213991 | 0.161011164 | 0.258711532 |
| 0.435088527 | 0.262305488 | 0.303721333 | 0.271516335 |
| 0.37859675  | 0.194269214 | 0.01863741  | 0.443418536 |
| 0.439515374 | 0.411290208 | 0.437266869 | 0.426218407 |
| 0.385127215 | 0.347089236 | 0.380844654 | 0.387762861 |
| 0.215180154 | 0.1725216   | 0.225966021 | 0.348015382 |

|             |             |             |             |
|-------------|-------------|-------------|-------------|
| 0.009240551 | 0.393226186 | 0.298871839 | 0.248264584 |
| 0.367602597 | 0.320828549 | 0.113843347 | 0.309861161 |
| 0.098668142 | 0.189073626 | 0.306036313 | 0.263712165 |
| 0.332292807 | 0.06026908  | 0.308873654 | 0.300665466 |
| 0.440690604 | 0.365270443 | 0.306142459 | 0.507660096 |
| 0.39755213  | 0.189407697 | 0.374144902 | 0.383063365 |
| 0.168090916 | 0.099882692 | 0.325488922 | 0.050131333 |
| 0.205448235 | 0.421825095 | 0.321426266 | 0.186571397 |
| 0.37046139  | 0.033382764 | 0.387493127 | 0.506572346 |
| 0.44837742  | 0.4832313   | 0.488078274 | 0.278712964 |
| 0.493976338 | 0.068585141 | 0.492966634 | 0.381230164 |
| 0.309988145 | 0.007002903 | 0.017503404 | 0.447697652 |
| 0.383733117 | 0.11298042  | 0.270616894 | 0.392444432 |
| 0.240048566 | 0.234564706 | 0.142866914 | 0.229545924 |
| 0.400043353 | 0.292688966 | 0.186250836 | 0.4498424   |
| 0.330310973 | 0.297902149 | 0.338727327 | 0.15700337  |
| 0.371777114 | 0.153389684 | 0.150588164 | 0.026994893 |
| 0.349769448 | 0.181092874 | 0.46780388  | 0.479340669 |
| 0.493564048 | 0.383182893 | 0.265117855 | 0.316632882 |
| 0.374496163 | 0.163398667 | 0.306739954 | 0.184577856 |
| 0.4651011   | 0.385573246 | 0.386710563 | 0.372118575 |
| 0.485752877 | 0.471863971 | 0.0998596   | 0.394430879 |
| 0.066100656 | 0.004283788 | 0.401388258 | 0.298772132 |
| 0.042242059 | 0.333943163 | 0.336823683 | 0.22592581  |
| 0.238733827 | 0.106047916 | 0.237270408 | 0.235056497 |
| 0.361858746 | 0.36406318  | 0.289152501 | 0.268985111 |
| 0.289435412 | 0.175076597 | 0.285494544 | 0.223830053 |
| 0.19991934  | 0.336109967 | 0.258977345 | 0.071106697 |
| 0.372107119 | 0.375673373 | 0.15032227  | 0.254734709 |
| 0.425564695 | 0.459940782 | 0.110904618 | 0.059371721 |
| 0.33082568  | 0.302134244 | 0.462909308 | 0.467036109 |
| 0.510141589 | 0.504299799 | 0.419490351 | 0.192573112 |
| 0.162433854 | 0.347089478 | 0.29228263  | 0.177462086 |
| 0.480620684 | 0.12853148  | 0.462678143 | 0.266065214 |
| 0.204338303 | 0.339961391 | 0.11830982  | 0.17313467  |
| 0.335392119 | 0.269878995 | 0.276970323 | 0.246376943 |
| 0.350106115 | 0.250748959 | 0.122123533 | 0.300947981 |
| 0.374683818 | 0.187134227 | 0.263262492 | 0.319250978 |
| 0.361621532 | 0.159454042 | 0.381085539 | 0.458840478 |
| 0.225357025 | 0.188165685 | 0.373320051 | 0.342656811 |
| 0.390974177 | 0.307539836 | 0.092616042 | 0.412208623 |
| 0.454958576 | 0.393643782 | 0.483493583 | 0.369569752 |
| 0.162629929 | 0.377918193 | 0.247525817 | 0.3404665   |
| 0.258693271 | 0.401756553 | 0.280464731 | 0.14396834  |
| 0.307234176 | 0.467524351 | 0.398244042 | 0.288477511 |
| 0.356389137 | 0.188650354 | 0.116494129 | 0.387091833 |
| 0.207187283 | 0.200506372 | 0.30090992  | 0.357323828 |
| 0.010220724 | 0.130113946 | 0.439894322 | 0.326050281 |
| 0.489332929 | 0.455539486 | 0.456691915 | 0.282852159 |
| 0.002017665 | 0.354161239 | 0.410611839 | 0.412976205 |
| 0.403803603 | 0.372973356 | 0.162784682 | 0.183654002 |
| 0.344521257 | 0.154822314 | 0.234138317 | 0.357227229 |
| 0.156991616 | 0.376852575 | 0.277399203 | 0.251976186 |
| 0.2749089   | 0.138349993 | 0.237332765 | 0.352689491 |

|             |             |             |             |
|-------------|-------------|-------------|-------------|
| 0.121348896 | 0.322503212 | 0.381887195 | 0.231368127 |
| 0.203176053 | 0.388119545 | 0.386602828 | 0.091802653 |
| 0.305767695 | 0.359594153 | 0.402099118 | 0.010182184 |
| 0.400139021 | 0.038875961 | 0.273766026 | 0.325086083 |
| 0.292941664 | 0.263124813 | 0.304473317 | 0.346749959 |
| 0.350467942 | 0.312262521 | 0.388435429 | 0.33427941  |
| 0.280108415 | 0.298389442 | 0.368285092 | 0.365653542 |
| 0.350074264 | 0.251335044 | 0.161228424 | 0.159279044 |
| 0.151042008 | 0.41658072  | 0.307751073 | 0.147657679 |
| 0.296344509 | 0.341995133 | 0.379333338 | 0.464202993 |
| 0.410913181 | 0.170493221 | 0.318173267 | 0.420673245 |
| 0.167182804 | 0.312934032 | 0.134582906 | 0.390504583 |
| 0.320440774 | 0.261062341 | 0.350849126 | 0.356755537 |
| 0.346217877 | 0.431333442 | 0.307251714 | 0.429112142 |
| 0.394395247 | 0.286915895 | 0.281692433 | 0.20123853  |
| 0.310631056 | 0.20698997  | 0.291288863 | 0.018173829 |
| 0.378152495 | 0.372975881 | 0.430651744 | 0.481666793 |
| 0.234602822 | 0.391896574 | 0.30936236  | 0.206255112 |
| 0.2525764   | 0.233196327 | 0.235213466 | 0.376397687 |
| 0.186593595 | 0.294773285 | 0.340855391 | 0.362012347 |
| 0.387057865 | 0.350076405 | 0.246851407 | 0.282961842 |
| 0.281585243 | 0.28450011  | 0.45225559  | 0.213446323 |
| 0.360518038 | 0.251430042 | 0.30420492  | 0.356045744 |
| 0.289312419 | 0.473498998 | 0.140574926 | 0.481690066 |
| 0.328388951 | 0.200667832 | 0.493170344 | 0.318765507 |
| 0.343846791 | 0.214669954 | 0.169125596 | 0.328604172 |
| 0.27490663  | 0.287561805 | 0.011418916 | 0.074372004 |
| 0.373212887 | 0.242158832 | 0.346240643 | 0.338126626 |
| 0.262870621 | 0.344823237 | 0.130235325 | 0.32110116  |
| 0.457196152 | 0.48389466  | 0.354943735 | 0.30936598  |
| 0.358925349 | 0.215833927 | 0.388442595 | 0.01290118  |
| 0.369659473 | 0.342878323 | 0.304964882 | 0.127630822 |
| 0.069462913 | 0.197273886 | 0.378026771 | 0.11966261  |
| 0.437881503 | 0.186678707 | 0.299810228 | 0.399141043 |
| 0.232232244 | 0.493295282 | 0.207892454 | 0.411753261 |
| 0.083966652 | 0.310176688 | 0.311330657 | 0.298748875 |
| 0.320391936 | 0.288670853 | 0.40270242  | 0.249397612 |
| 0.109245495 | 0.324851564 | 0.007358465 | 0.44147484  |
| 0.460198877 | 0.299234392 | 0.261741112 | 0.216183698 |
| 0.342997976 | 0.347475358 | 0.236490169 | 0.339714691 |
| 0.057563749 | 0.358880141 | 0.282847849 | 0.407694819 |
| 0.240527162 | 0.31548369  | 0.168985479 | 0.27294502  |
| 0.462882121 | 0.287691573 | 0.285532382 | 0.300405673 |
| 0.464023119 | 0.346247077 | 0.230605744 | 0.248890229 |
| 0.311362806 | 0.135121242 | 0.327554102 | 0.4945062   |
| 0.277357905 | 0.242307112 | 0.398686185 | 0.318030181 |
| 0.266632696 | 0.371466507 | 0.326632792 | 0.47683956  |
| 0.149636078 | 0.333656103 | 0.379818774 | 0.427404799 |
| 0.346218964 | 0.184424172 | 0.245613248 | 0.278987734 |
| 0.452092352 | 0.225796842 | 0.241454658 | 0.395191524 |
| 0.221182026 | 0.341078265 | 0.290166673 | 0.239308736 |
| 0.105694323 | 0.223429081 | 0.381092278 | 0.234622602 |
| 0.348717621 | 0.373186496 | 0.271475243 | 0.413747452 |
| 0.262801725 | 0.10739116  | 0.461192468 | 0.025125919 |

|             |             |             |             |
|-------------|-------------|-------------|-------------|
| 0.384243453 | 0.407500743 | 0.311691867 | 0.339295418 |
| 0.2741058   | 0.351487788 | 0.354723297 | 0.008130514 |
| 0.377611706 | 0.082971425 | 0.279102154 | 0.303132857 |
| 0.241708299 | 0.128309881 | 0.454815886 | 0.478537929 |
| 0.345669564 | 0.270841952 | 0.28914852  | 0.435629159 |
| 0.157192085 | 0.248671594 | 0.262628213 | 0.378369167 |
| 0.211267464 | 0.317471022 | 0.331537289 | 0.342280621 |
| 0.388199428 | 0.311786999 |             |             |
| CHCHD2      | 0.087680561 | 0.15266562  | 0.046076437 |
| 0.037407985 | 0.175154391 | 0.055341676 | 0.103964588 |
| 0.11458761  | 0.171704384 | 0.022087255 | 0.124411096 |
| 0.047336679 | 0.045134435 | 0.204303129 | 0.128866099 |
| 0.128097019 | 0.098469693 | 0.183206198 | 0.053576193 |
| 0.062295236 | 0.178005049 | 0.040734814 | 0.075226526 |
| 0.180896956 | 0.196702429 | 0.106321079 | 0.09556272  |
| 0.17276196  | 0.013477268 | 0.114848486 | 0.006726078 |
| 0.248413884 | 0.162585874 | 0.057651113 | 0.029399122 |
| 0.109322807 | 0.049087774 | 0.242897285 | 0.110805021 |
| 0.033465857 | 0.2602327   | 0.031035928 | 0.118562296 |
| 0.045485043 | 0.043819875 | 0.007433444 | 0.132172504 |
| 0.125950106 | 0.125391028 | 0.080050154 | 0.12097845  |
| 0.061021148 | 0.171026331 | 0.080695606 | 0.004776401 |
| 0.056337687 | 0.011646247 | 0.031683782 | 0.198961607 |
| 0.246666911 | 0.223462313 | 0.021880705 | 0.174629799 |
| 0.134113482 | 0.200835011 | 0.321684805 | 0.036180742 |
| 0.196742338 | 0.050828631 | 0.125552618 | 0.043943255 |
| 0.080067973 | 0.077249693 | 0.260539824 | 0.136887899 |
| 0.062166942 | 0.252390151 | 0.161309657 | 0.07817687  |
| 0.123725617 | 0.271657329 | 0.253933834 | 0.190462558 |
| 0.081337457 | 0.140211626 | 0.096488227 | 0.294180522 |
| 0.209891512 | 0.121047405 | 0.150961428 | 0.235809272 |
| 0.121888527 | 0.061824834 | 0.145635669 | 0.169275638 |
| 0.157865009 | 0.057549292 | 0.043117933 | 0.051588839 |
| 0.17714312  | 0.132930027 | 0.245618971 | 0.207576141 |
| 0.165834144 | 0.101814685 | 0.19784411  | 0.131960359 |
| 0.091914821 | 0.095618668 | 0.079139299 | 0.16078517  |
| 0.112053912 | 0.178182189 | 0.145807086 | 0.223924771 |
| 0.10114912  | 0.192477293 | 0.130390784 | 0.223998901 |
| 0.007990963 | 0.204574571 | 0.142538154 | 0.105474566 |
| 0.07254305  | 0.192327132 | 0.10202327  | 0.332973514 |
| 0.172444514 | 0.222365318 | 0.122771134 | 0.194567331 |
| 0.21249895  | 0.177268912 | 0.196534458 | 0.186887953 |
| 0.088926977 | 0.056957561 | 0.088865389 | 0.108233455 |
| 0.187421268 | 0.257072011 | 0.098180012 | 0.221016755 |
| 0.217560874 | 0.183171478 | 0.089254192 | 0.265021337 |
| 0.192596799 | 0.250464402 | 0.127379205 | 0.1639963   |
| 0.224276965 | 0.203818158 | 0.238311007 | 0.145874654 |
| 0.224396886 | 0.076172816 | 0.048872513 | 0.214736727 |
| 0.273782676 | 0.008032461 | 0.170518659 | 0.18502752  |
| 0.17664201  | 0.149967951 | 0.249356122 | 0.203168831 |
| 0.18267972  | 0.168600635 | 0.008395627 | 0.259432645 |
| 0.195568814 | 0.190518836 | 1           | 0.068624934 |
| 0.167506624 | 0.075922855 | 0.176767961 | 0.022528053 |
| 0.301324844 | 0.180439312 | 0.172747328 | 0.170432889 |

|             |             |             |             |
|-------------|-------------|-------------|-------------|
| 0.1047477   | 0.263869992 | 0.08287343  | 0.186326333 |
| 0.08806497  | 0.081999873 | 0.08828539  | 0.301132459 |
| 0.017032902 | 0.270121468 | 0.062914997 | 0.175619519 |
| 0.280859261 | 0.096196184 | 0.049678431 | 0.175803859 |
| 0.11052851  | 0.070779538 | 0.153601028 | 0.123312308 |
| 0.083580574 | 0.246931395 | 0.065083294 | 0.087481883 |
| 0.222186559 | 0.211651262 | 0.121303483 | 0.205941565 |
| 0.109553416 | 0.144223358 | 0.129777575 | 0.264313241 |
| 0.310994968 | 0.095375001 | 0.311955933 | 0.015435002 |
| 0.040027527 | 0.031196212 | 0.038541435 | 0.090712394 |
| 0.232087923 | 0.075428685 | 0.130776358 | 0.183666614 |
| 0.08198786  | 0.148854702 | 0.068353021 | 0.276568126 |
| 0.153922651 | 0.088729907 | 0.200787767 | 0.080061755 |
| 0.014515764 | 0.102992276 | 0.159560435 | 0.118228736 |
| 0.192143739 | 0.038097007 | 0.027119833 | 0.17935312  |
| 0.043578795 | 0.122254726 | 0.193148345 | 0.204885173 |
| 0.040762983 | 0.195788316 | 0.24191593  | 0.016012415 |
| 0.141587336 | 0.054681372 | 0.268290463 | 0.042070614 |
| 0.183081566 | 0.322381799 | 0.157293993 | 0.104339852 |
| 0.100827105 | 0.213521868 | 0.221370785 | 0.197520784 |
| 0.038629913 | 0.239462005 | 0.167875548 | 0.207245106 |
| 0.183109818 | 0.073261759 | 0.027248181 | 0.143477486 |
| 0.172622386 | 0.029980597 | 0.11116826  | 0.141384469 |
| 0.055539302 | 0.151713762 | 0.130461079 | 0.214708971 |
| 0.276871698 | 0.157289496 | 0.172758089 | 0.251196213 |
| 0.193402984 | 0.139705763 | 0.220647296 | 0.27010415  |
| 0.020243935 | 0.105687402 | 0.066591302 | 0.262195669 |
| 0.182964712 | 0.101071171 | 0.303629168 | 0.039149366 |
| 0.00087104  | 0.139260459 | 0.10643331  | 0.213416884 |
| 0.076186663 | 0.086388301 | 0.164962056 | 0.208041547 |
| 0.197844643 | 0.236334519 | 0.292546541 | 0.058343767 |
| 0.177189536 | 0.118528484 | 0.106757015 | 0.165419975 |
| 0.29952406  | 0.026892873 | 0.06844786  | 0.257557243 |
| 0.085578602 | 0.055330755 | 0.15061471  | 0.004291976 |
| 0.067559204 | 0.110154529 | 0.156553427 | 0.248671444 |
| 0.246029294 | 0.204288659 | 0.146568581 | 0.025552832 |
| 0.243350008 | 0.17778176  | 0.013555357 | 0.197510696 |
| 0.228956925 | 0.235124474 | 0.219668517 | 0.225250721 |
| 0.215637933 | 0.189069032 | 0.190661028 | 0.073604063 |
| 0.0955292   | 0.083309874 | 0.043877443 | 0.139237074 |
| 0.005436227 | 0.236450978 | 0.209576513 | 0.228057299 |
| 0.172609781 | 0.254964034 | 0.072190517 | 0.183943866 |
| 0.015921296 | 0.020201041 | 0.06746771  | 0.231362551 |
| 0.288307678 | 0.036875411 | 0.010936644 | 0.031839522 |
| 0.165829843 | 0.205564676 | 0.04790676  | 0.21335575  |
| 0.147899365 | 0.093890763 | 0.116796975 | 0.21116263  |
| 0.110665624 | 0.01487425  | 0.077469681 | 0.000809951 |
| 0.039156395 | 0.257892527 | 0.070983077 | 0.038790449 |
| 0.169893105 | 0.016832947 | 0.170608248 | 0.230910059 |
| 0.157536557 | 0.211093572 | 0.200371353 | 0.069683206 |
| 0.192074336 | 0.015746296 | 0.201852929 | 0.143307202 |
| 0.030512458 | 0.000924096 | 0.034384644 | 0.174967397 |
| 0.093515262 | 0.089157404 | 0.215287474 | 0.020019516 |
| 0.091627795 | 0.073834691 | 0.158394052 | 0.090140172 |

|             |             |             |             |
|-------------|-------------|-------------|-------------|
| 0.108277285 | 0.219330592 | 0.101888074 | 0.182369483 |
| 0.164836148 | 0.283925857 | 0.054291727 | 0.169846175 |
| 0.131412555 | 0.070974509 | 0.186403345 | 0.008046656 |
| 0.240560018 | 0.13483012  | 0.211754604 | 0.194919802 |
| 0.251866906 | 0.17441289  | 0.019967165 | 0.041319064 |
| 0.233426707 | 0.076708626 | 0.029218401 | 0.096409153 |
| 0.15724565  | 0.12746086  | 0.240689519 | 0.190511419 |
| 0.239243517 | 0.206343818 | 0.10360572  | 0.177647511 |
| 0.014628526 | 0.01769464  | 0.047919938 | 0.314559413 |
| 0.089773211 | 0.08744768  | 0.243156922 | 0.124268392 |
| 0.166836901 | 0.036293922 | 0.067766871 | 0.077796062 |
| 0.20474515  | 0.13040655  | 0.143415017 | 0.293925697 |
| 0.141948943 | 0.086475143 | 0.180281207 | 0.201224724 |
| 0.084701628 | 0.180835519 | 0.180684904 | 0.068540102 |
| 0.059795809 | 0.0812974   | 0.123492025 | 0.224208661 |
| 0.179114767 | 0.179586113 | 0.089908059 | 0.030784728 |
| 0.242061724 | 0.151428046 | 0.216662381 | 0.169612442 |
| 0.221909684 | 0.258653965 | 0.280723236 | 0.149586555 |
| 0.106687624 | 0.197034975 | 0.158848193 | 0.144341212 |
| 0.207094302 | 0.094124459 | 0.196147328 | 0.097219703 |
| 0.237097731 | 0.097056979 | 0.077046192 | 0.21207339  |
| 0.10955997  | 0.283317984 | 0.236178696 | 0.089969566 |
| 0.114112    | 0.050152636 | 0.127056866 | 0.225277672 |
| 0.200968061 | 0.029582086 | 0.229870005 | 0.116829196 |
| 0.189185024 | 0.023487974 | 0.136334319 | 0.277346885 |
| 0.179826003 | 0.160542451 | 0.021835164 | 0.232319666 |
| 0.13930803  | 0.066598443 | 0.020717522 | 0.136387186 |
| 0.237477464 | 0.100808085 | 0.193032094 | 0.299050309 |
| 0.185124368 | 0.088500549 | 0.088310778 | 0.148020006 |
| 0.282379273 | 0.065712649 | 0.271023266 | 0.168429172 |
| 0.351730027 | 0.284503408 | 0.15708456  | 0.178559042 |
| 0.097215552 | 0.112095725 | 0.079040621 | 0.195228615 |
| 0.051352595 | 0.055333071 | 0.036732116 | 0.187836506 |
| 0.008862161 | 0.043045227 | 0.245912628 | 0.122064908 |
| 0.27246336  | 0.198482439 | 0.231215658 | 0.120399856 |
| 0.003296096 | 0.131758824 | 0.13412941  | 0.054528956 |
| 0.148479289 | 0.209406615 | 0.133690855 | 0.10179192  |
| 0.309828816 | 0.091815449 | 0.10312038  | 0.028746053 |
| 0.024210285 | 0.110482322 | 0.331784163 | 0.228609142 |
| 0.221218872 | 0.134919973 | 0.048534464 | 0.141379845 |
| 0.082858587 | 0.302365218 | 0.247854517 | 0.023180107 |
| 0.018646171 | 0.247973128 | 0.141619803 | 0.055002627 |
| 0.123188198 | 0.225640579 | 0.257012093 | 0.00413671  |
| 0.136719092 | 0.043295359 | 0.232362175 | 0.162487819 |
| 0.197179227 | 0.218237295 | 0.29098682  | 0.09060833  |
| 0.156712768 | 0.182834751 | 0.108730045 | 0.250497335 |
| 0.131207175 | 0.211267757 | 0.148914106 | 0.087613486 |
| 0.083906282 | 0.111143071 | 0.165544411 | 0.144303506 |
| 0.074287087 | 0.183048257 | 0.268768388 | 0.101326768 |
| 0.315314472 | 0.090729846 | 0.306853047 | 0.164555661 |
| 0.289116194 | 0.104853386 | 0.143654191 | 0.132891505 |
| 0.0182791   | 0.033236376 | 0.066976292 | 0.095547684 |
| 0.230725786 | 0.064957991 | 0.078987436 | 0.079127403 |
| 0.122342529 | 0.260867783 | 0.262654054 | 0.251618039 |

|             |             |             |             |
|-------------|-------------|-------------|-------------|
| 0.09771153  | 0.116403858 | 0.017432773 | 0.094672466 |
| 0.110130438 | 0.216292901 | 0.16311493  | 0.008125827 |
| 0.202810251 | 0.032861355 | 0.154551626 | 0.180423196 |
| 0.057169671 | 0.289618765 | 0.01282931  | 0.05832145  |
| 0.009695953 | 0.121829001 | 0.237323303 | 0.138386993 |
| 0.030005228 | 0.148938564 | 0.176211315 | 0.029179733 |
| 0.154870053 | 0.14144561  | 0.128783134 | 0.185397193 |
| 0.267558508 | 0.150431285 | 0.244487553 | 0.093144102 |
| 0.075789304 | 0.077762567 | 0.077305936 | 0.126958657 |
| 0.19799854  | 0.201487708 | 0.141134225 | 0.196792194 |
| 0.101510155 | 0.203098448 | 0.294663055 | 0.176162369 |
| 0.068527491 | 0.134307162 | 0.039353383 | 0.053802178 |
| 0.115629331 | 0.054875139 | 0.000926011 | 0.02575197  |
| 0.254194179 | 0.089727604 | 0.118028322 | 0.244417053 |
| 0.128747288 | 0.318689078 | 0.043222676 | 0.135057154 |
| 0.16375758  | 0.215590299 | 0.047303572 | 0.319882506 |
| 0.230702658 | 0.142126156 | 0.085182381 | 0.029299424 |
| 0.095782898 | 0.079540279 | 0.025984359 | 0.137430604 |
| 0.064496388 | 0.035005619 | 0.092919135 | 0.132056411 |
| 0.219737186 | 0.021480773 | 0.119220614 | 0.135590989 |
| 0.271731978 | 0.213781768 | 0.171525406 | 0.167064585 |
| 0.062702956 | 0.28098041  | 0.100931752 | 0.09762403  |
| 0.05848493  | 0.09020766  | 0.201510335 | 0.074432602 |
| 0.085530144 | 0.078100484 | 0.007132283 | 0.250179077 |
| 0.183195803 | 0.088568488 | 0.285445497 | 0.022331709 |
| 0.299580264 | 0.263369162 | 0.094179008 | 0.070223453 |
| 0.036088826 | 0.117411969 | 0.301849907 | 0.160994793 |
| 0.011153192 | 0.120099755 | 0.082892489 | 0.147710495 |
| 0.214666166 | 0.049674567 | 0.342492447 | 0.01784977  |
| 0.173132125 | 0.18834598  | 0.120801796 | 0.118598774 |
| 0.112515907 | 0.151684021 | 0.037526228 | 0.240025321 |
| 0.213892928 | 0.085768813 | 0.187605977 | 0.11580538  |
| 0.096226216 | 0.217333114 | 0.086737337 | 0.242951031 |
| 0.14358912  | 0.275190224 | 0.202677104 | 0.196342061 |
| 0.338180507 | 0.116699766 | 0.059715964 | 0.137547319 |
| 0.152420793 | 0.052365569 | 0.074974298 | 0.183942052 |
| 0.052656325 | 0.286021946 | 0.083682693 | 0.189585191 |
| 0.072386415 | 0.177696059 | 0.052550538 | 0.234588494 |
| 0.216517061 | 0.118822294 | 0.10339552  | 0.283998279 |
| 0.079637821 | 0.03233226  | 0.288198769 | 0.006570355 |
| 0.086813709 | 0.143238694 | 0.265914168 | 0.122035285 |
| 0.185351199 | 0.161383814 | 0.067650244 | 0.006331511 |
| 0.218870864 | 0.034475242 | 0.150869342 | 0.07524098  |
| 0.047944099 | 0.078483629 | 0.209662972 | 0.227984631 |
| 0.217002609 | 0.046408004 | 0.022584021 | 0.209300203 |
| 0.04108936  | 0.036745889 | 0.058744109 | 0.091366058 |
| 0.066070539 | 0.035394086 | 0.056317358 | 0.044211486 |
| 0.169575559 | 0.164182332 |             |             |
| CHEK1       | 0.031570464 | 0.389786457 | 0.023325336 |
| 0.087121698 | 0.22076719  | 0.229335302 | 0.025239219 |
| 0.061538304 | 0.288537511 | 0.229426835 | 0.224467348 |
| 0.00624923  | 0.09756674  | 0.437542778 | 0.021981835 |
| 0.319173719 | 0.013468843 | 0.052555182 | 0.048239929 |
| 0.128829865 | 0.207757265 | 0.253179072 | 0.213641418 |

|             |             |             |             |
|-------------|-------------|-------------|-------------|
| 0.203171215 | 0.131613351 | 0.22324524  | 0.279001242 |
| 0.48662285  | 0.257065834 | 0.357972889 | 0.175688675 |
| 0.369402288 | 0.260475314 | 0.293174364 | 0.00489019  |
| 0.248973025 | 0.012612786 | 0.380795256 | 0.182760413 |
| 0.14226471  | 0.283363443 | 0.220653721 | 0.149441311 |
| 0.259561143 | 0.01487502  | 0.185800331 | 0.368253325 |
| 0.214548292 | 0.157121831 | 0.02682052  | 0.353349335 |
| 0.24812434  | 0.238776037 | 0.347815845 | 0.002109288 |
| 0.262803173 | 0.139351817 | 0.245580243 | 0.459720808 |
| 0.120823685 | 0.059480901 | 0.273677776 | 0.131210073 |
| 0.301812593 | 0.313071642 | 0.159935188 | 0.280226226 |
| 0.473537809 | 0.18312278  | 0.401980264 | 0.101056086 |
| 0.242459004 | 0.011060977 | 0.094690014 | 0.037899303 |
| 0.271893857 | 0.10650566  | 0.21689571  | 0.249079883 |
| 0.406905539 | 0.457699221 | 0.140542435 | 0.452881922 |
| 0.103290136 | 0.272806783 | 0.199500486 | 0.235874793 |
| 0.308542674 | 0.039207897 | 0.362315193 | 0.487085979 |
| 0.018263014 | 0.282705768 | 0.353525075 | 0.066935003 |
| 0.38490158  | 0.220959371 | 0.268251352 | 0.164343915 |
| 0.32177272  | 0.263570174 | 0.419921178 | 0.213898497 |
| 0.204670616 | 0.032027787 | 0.418854654 | 0.264837073 |
| 0.201573117 | 0.035816304 | 0.182949779 | 0.47838066  |
| 0.332892404 | 0.47800222  | 0.412561361 | 0.324137667 |
| 0.297768336 | 0.476020706 | 0.334979749 | 0.369834914 |
| 0.146576919 | 0.49280405  | 0.095959727 | 0.016261957 |
| 0.030799112 | 0.036339764 | 0.171041611 | 0.228535599 |
| 0.462072024 | 0.227299215 | 0.108451674 | 0.15074344  |
| 0.469672029 | 0.420376539 | 0.497552369 | 0.389705593 |
| 0.014681538 | 0.220450088 | 0.290735721 | 0.140424685 |
| 0.31217351  | 0.049406296 | 0.223351352 | 0.45096078  |
| 0.332173903 | 0.433800605 | 0.079559328 | 0.426083068 |
| 0.109462833 | 0.475185587 | 0.437811184 | 0.092817056 |
| 0.468526242 | 0.435580027 | 0.491467934 | 0.373798883 |
| 0.412836045 | 0.203350806 | 0.052768286 | 0.342097569 |
| 0.446423376 | 0.016343928 | 0.483018107 | 0.509991417 |
| 0.470218989 | 0.484033521 | 0.507011465 | 0.494966328 |
| 0.4704929   | 0.029440691 | 0.040887664 | 0.218093647 |
| 0.470393283 | 0.356386551 | 0.068624934 | 1           |
| 0.286392771 | 0.228748807 | 0.391001542 | 0.267531632 |
| 0.46273755  | 0.432172584 | 0.485724522 | 0.351933567 |
| 0.184130677 | 0.250292386 | 0.302921282 | 0.402540726 |
| 0.016363395 | 0.055863246 | 0.022465606 | 0.22819088  |
| 0.225642284 | 0.091818877 | 0.236847345 | 0.25304974  |
| 0.111067576 | 0.187717621 | 0.274550084 | 0.343852233 |
| 0.02871348  | 0.315805901 | 0.079421329 | 0.09438305  |
| 0.017641787 | 0.088606595 | 0.126508986 | 0.081690084 |
| 0.16185602  | 0.168266197 | 0.39260885  | 0.476923905 |
| 0.242537561 | 0.117791662 | 0.35992476  | 0.436488531 |
| 0.384333363 | 0.280965317 | 0.152072557 | 0.005691566 |
| 0.241175112 | 0.268567501 | 0.206005546 | 0.297780529 |
| 0.116133468 | 0.176511515 | 0.308724891 | 0.367187193 |
| 0.161015147 | 0.067573041 | 0.28622066  | 0.354227494 |
| 0.093148831 | 0.210105569 | 0.444819511 | 0.290427311 |
| 0.000280062 | 0.213135746 | 0.43341745  | 0.112294957 |



|             |             |             |             |
|-------------|-------------|-------------|-------------|
| 0.232983793 | 0.13983028  | 0.224847646 | 0.467694606 |
| 0.263322073 | 0.184794321 | 0.483599166 | 0.353869683 |
| 0.236212996 | 0.159269573 | 0.506863992 | 0.075892523 |
| 0.239885286 | 0.036060644 | 0.212315654 | 0.220556215 |
| 0.151089201 | 0.22147595  | 0.232839421 | 0.197905704 |
| 0.070966227 | 0.485011689 | 0.329550206 | 0.497434514 |
| 0.301601558 | 0.506976661 | 0.466047458 | 0.416704629 |
| 0.256924543 | 0.283125988 | 0.168456474 | 0.431276708 |
| 0.459534255 | 0.251042669 | 0.037192286 | 0.444254802 |
| 0.272204011 | 0.372778906 | 0.077798525 | 0.482910454 |
| 0.427538004 | 0.424295968 | 0.078467712 | 0.340694    |
| 0.340367715 | 0.127755005 | 0.367861288 | 0.496391432 |
| 0.257057353 | 0.275467272 | 0.265450489 | 0.376508876 |
| 0.09941354  | 0.172332792 | 0.245301295 | 0.187666059 |
| 0.017092662 | 0.034774706 | 0.027886171 | 0.092894934 |
| 0.154637047 | 0.339393983 | 0.326785897 | 0.498696223 |
| 0.05717279  | 0.358243519 | 0.157417676 | 0.228642238 |
| 0.393638127 | 0.252446214 | 0.274651145 | 0.294467609 |
| 0.161599378 | 0.007557211 | 0.066219485 | 0.461864419 |
| 0.01561766  | 0.213306813 | 0.180179587 | 0.001297889 |
| 0.019421502 | 0.388177533 | 0.056615365 | 0.132549861 |
| 0.466681551 | 0.137661663 | 0.133790349 | 0.249915861 |
| 0.264371907 | 0.039518914 | 0.001142424 | 0.471839239 |
| 0.447411357 | 0.417438289 | 0.447000765 | 0.396014422 |
| 0.426095164 | 0.340790643 | 0.400259961 | 0.197371156 |
| 0.050617353 | 0.039736709 | 0.218631566 | 0.200816841 |
| 0.003488328 | 0.318901524 | 0.190428008 | 0.079469545 |
| 0.398534306 | 0.217978611 | 0.014035897 | 0.261257881 |
| 0.010076149 | 0.23370225  | 0.193241053 | 0.123362609 |
| 0.297060988 | 0.003719952 | 0.199230325 | 0.28344616  |
| 0.375922839 | 0.283463617 | 0.286092039 | 0.493083096 |
| 0.205985832 | 0.080257189 | 0.215394225 | 0.338784357 |
| 0.031613556 | 0.112548362 | 0.221054323 | 0.048194907 |
| 0.123607475 | 0.391496006 | 0.25928269  | 0.033811227 |
| 0.173763984 | 0.001072243 | 0.313042556 | 0.493171507 |
| 0.420184755 | 0.517087645 | 0.473089565 | 0.231898962 |
| 0.477785305 | 0.155006282 | 0.508927312 | 0.370999159 |
| 0.297042503 | 0.000654469 | 0.001964544 | 0.4927012   |
| 0.301541864 | 0.029164494 | 0.082835356 | 0.233180597 |
| 0.059322089 | 0.077881553 | 0.024651227 | 0.149628039 |
| 0.304015418 | 0.157191677 | 0.139272341 | 0.42840322  |
| 0.148057967 | 0.125818123 | 0.250162757 | 0.042991583 |
| 0.287737153 | 0.022325811 | 0.041463733 | 0.00548524  |
| 0.305905027 | 0.070345028 | 0.395340393 | 0.479686505 |
| 0.454416732 | 0.34012978  | 0.28023022  | 0.220476191 |
| 0.408203965 | 0.056255032 | 0.264636522 | 0.055857777 |
| 0.45732714  | 0.336732103 | 0.257075061 | 0.248650129 |
| 0.484713986 | 0.433438529 | 0.011534664 | 0.387167225 |
| 0.005129798 | 0.000864396 | 0.234560589 | 0.174149083 |
| 0.05012035  | 0.287196712 | 0.186633357 | 0.137759845 |
| 0.127266351 | 0.012800906 | 0.246565792 | 0.228259391 |
| 0.205995804 | 0.250825441 | 0.215681422 | 0.163744013 |
| 0.178942394 | 0.119389787 | 0.104132283 | 0.077862441 |
| 0.171951671 | 0.25320927  | 0.138502984 | 0.006562651 |

|             |             |             |             |
|-------------|-------------|-------------|-------------|
| 0.286458632 | 0.296532111 | 0.02290724  | 0.084910018 |
| 0.424608648 | 0.495130278 | 0.019914603 | 0.005014754 |
| 0.194189827 | 0.212951996 | 0.49670019  | 0.471628552 |
| 0.472575786 | 0.489871178 | 0.322077443 | 0.08025753  |
| 0.027863275 | 0.214344949 | 0.220371071 | 0.057859288 |
| 0.485063594 | 0.031221002 | 0.432928205 | 0.252427296 |
| 0.055582872 | 0.125857497 | 0.013138215 | 0.035407049 |
| 0.304626195 | 0.095197802 | 0.103829596 | 0.087608565 |
| 0.223333213 | 0.212491502 | 0.017981133 | 0.106099639 |
| 0.291993163 | 0.206632391 | 0.083614845 | 0.162079547 |
| 0.280480739 | 0.165112789 | 0.413321867 | 0.401731721 |
| 0.067803115 | 0.05302286  | 0.179221807 | 0.316666263 |
| 0.443753142 | 0.288283044 | 0.012732003 | 0.427306229 |
| 0.461747276 | 0.379178846 | 0.450925629 | 0.359846692 |
| 0.038810658 | 0.276182093 | 0.254221337 | 0.24931864  |
| 0.096730094 | 0.222721785 | 0.132829782 | 0.02455356  |
| 0.223843756 | 0.410347027 | 0.39292769  | 0.090924083 |
| 0.283959319 | 0.065818607 | 0.025828563 | 0.413260362 |
| 0.185453858 | 0.047588983 | 0.238696373 | 0.423513886 |
| 0.000797047 | 0.149501946 | 0.472345414 | 0.131621954 |
| 0.463820386 | 0.48095495  | 0.393032504 | 0.128602086 |
| 0.003039239 | 0.378005671 | 0.284749859 | 0.283150749 |
| 0.412783274 | 0.263634109 | 0.074080278 | 0.036216838 |
| 0.215692868 | 0.04297872  | 0.08660475  | 0.208346746 |
| 0.197553716 | 0.304343713 | 0.121177122 | 0.11035876  |
| 0.115948835 | 0.049817602 | 0.199360011 | 0.127715668 |
| 0.133013052 | 0.163251792 | 0.301230452 | 0.196937716 |
| 0.236509033 | 0.416421139 | 0.383764591 | 0.008483243 |
| 0.254758288 | 0.381805189 | 0.382394501 | 0.001965197 |
| 0.401086874 | 0.001682892 | 0.119130824 | 0.134027007 |
| 0.112847338 | 0.131503482 | 0.172408948 | 0.20774889  |
| 0.25441874  | 0.12660984  | 0.1685976   | 0.143650887 |
| 0.092962646 | 0.110932396 | 0.278638227 | 0.221723337 |
| 0.198583248 | 0.061593792 | 0.057642133 | 0.062078079 |
| 0.022993994 | 0.431078499 | 0.174013583 | 0.036749965 |
| 0.129866008 | 0.225280353 | 0.291147994 | 0.461381286 |
| 0.366505878 | 0.070688408 | 0.209947183 | 0.42604505  |
| 0.227894291 | 0.192172531 | 0.027192247 | 0.229082806 |
| 0.122488505 | 0.179725133 | 0.238764224 | 0.213674036 |
| 0.360827685 | 0.336425882 | 0.166110092 | 0.383946162 |
| 0.234114445 | 0.232886141 | 0.240563453 | 0.046672136 |
| 0.10001609  | 0.072294979 | 0.200065024 | 1.96E-05    |
| 0.250482556 | 0.148122859 | 0.479921443 | 0.442226488 |
| 0.254927794 | 0.316643047 | 0.234257326 | 0.04800154  |
| 0.212612379 | 0.132667727 | 0.077245665 | 0.397590844 |
| 0.235784214 | 0.090011604 | 0.206823527 | 0.185205537 |
| 0.404362441 | 0.380925806 | 0.175266987 | 0.136320341 |
| 0.127798041 | 0.111187807 | 0.414296376 | 0.055145293 |
| 0.337682363 | 0.148491995 | 0.250682142 | 0.211187074 |
| 0.140736204 | 0.499193951 | 0.022240318 | 0.51796099  |
| 0.252168012 | 0.075218105 | 0.42873457  | 0.154684952 |
| 0.154685034 | 0.061065501 | 0.208217068 | 0.239147264 |
| 0.135469201 | 0.268848772 | 0.02338964  | 0.070421998 |
| 0.261409189 | 0.202352103 | 0.387605544 | 0.295631028 |

|             |             |             |             |
|-------------|-------------|-------------|-------------|
| 0.182071884 | 0.28662355  | 0.160204311 | 0.171626633 |
| 0.433447174 | 0.429314462 | 0.187514252 | 0.175414936 |
| 0.277183377 | 0.047096277 | 0.275683923 | 0.012306688 |
| 0.360623221 | 0.356633554 | 0.28622787  | 0.019839335 |
| 0.005235351 | 0.240936478 | 0.332289218 | 0.029263773 |
| 0.486692909 | 0.234487119 | 0.259106622 | 0.365138451 |
| 0.102843285 | 0.432077356 | 0.066622246 | 0.357663913 |
| 0.020988791 | 0.156907261 | 0.263144105 | 0.258067672 |
| 0.173660718 | 0.248326523 | 0.330877534 | 0.209311627 |
| 0.011544952 | 0.175394561 | 0.001069423 | 0.336556166 |
| 0.412916266 | 0.274811353 | 0.13497707  | 0.229754088 |
| 0.194362285 | 0.315662937 | 0.182854265 | 0.280278329 |
| 0.003512077 | 0.303961964 | 0.098026533 | 0.364978521 |
| 0.274052833 | 0.254921597 | 0.02385451  | 0.236079975 |
| 0.376403125 | 0.234515016 | 0.179970766 | 0.300545605 |
| 0.449948933 | 0.323191083 | 0.100621166 | 0.133476423 |
| 0.311116994 | 0.027540094 | 0.246950987 | 0.496472317 |
| 0.097929552 | 0.191542726 | 0.45297609  | 0.133901214 |
| 0.253480148 | 0.320518189 | 0.31934461  | 0.479264941 |
| 0.041508412 | 0.157588704 | 0.387887526 | 0.437569179 |
| 0.228621085 | 0.145414473 | 0.225092538 | 0.171977852 |
| 0.413303974 | 0.050054049 | 0.209755634 | 0.281980276 |
| 0.219552782 | 0.209147187 | 0.232895758 | 0.130700136 |
| 0.016474278 | 0.084768399 | 0.221991362 | 0.069702335 |
| 0.194169094 | 0.250738689 | 0.178795536 | 0.327554462 |
| 0.079102438 | 0.012324929 | 0.393996751 | 0.02993923  |
| 0.183705749 | 0.312594469 | 0.125585512 | 0.247795842 |
| 0.12330326  | 0.240109164 | 0.21193649  | 6.77E-05    |
| 0.381244048 | 0.032990372 | 0.186233503 | 0.175287485 |
| 0.248666686 | 0.021988162 | 0.397317584 | 0.505411126 |
| 0.198607461 | 0.221122023 | 0.293058738 | 0.416181067 |
| 0.156467924 | 0.281291692 | 0.274829391 | 0.327984501 |
| 0.205009342 | 0.285807148 | 0.293546412 | 0.292840122 |
| 0.299909846 | 0.137570322 |             |             |
| CHEK2       | 0.050306382 | 0.32803911  | 0.029481253 |
| 0.107059567 | 0.295756791 | 0.224104126 | 0.055896557 |
| 0.106512813 | 0.265558469 | 0.175725144 | 0.259442884 |
| 0.018332423 | 0.17794395  | 0.396386416 | 0.059456082 |
| 0.316601933 | 0.043903157 | 0.097640693 | 0.07905371  |
| 0.171696494 | 0.303841367 | 0.293306146 | 0.195839841 |
| 0.306559794 | 0.140652957 | 0.195020138 | 0.289296721 |
| 0.410596182 | 0.207824488 | 0.316548558 | 0.105412342 |
| 0.358412792 | 0.316444006 | 0.287968301 | 0.01168365  |
| 0.269920874 | 0.04443265  | 0.353500457 | 0.257843901 |
| 0.197745712 | 0.291117128 | 0.162204989 | 0.211935287 |
| 0.20909761  | 0.026059935 | 0.116356793 | 0.338865354 |
| 0.197389717 | 0.224803111 | 0.037508934 | 0.305511356 |
| 0.260130821 | 0.230694469 | 0.251868846 | 0.00280818  |
| 0.297335098 | 0.152489748 | 0.274007209 | 0.396731717 |
| 0.157469665 | 0.124935118 | 0.229105981 | 0.187921612 |
| 0.29121978  | 0.333361261 | 0.219339946 | 0.23882043  |
| 0.414072223 | 0.272094233 | 0.342940041 | 0.126124553 |
| 0.255955949 | 0.023296301 | 0.129705597 | 0.050175896 |
| 0.299849777 | 0.183762477 | 0.2851493   | 0.310577327 |

|             |             |             |             |
|-------------|-------------|-------------|-------------|
| 0.31471353  | 0.427153761 | 0.178988609 | 0.380437098 |
| 0.223303052 | 0.320364173 | 0.292961906 | 0.295067271 |
| 0.322781599 | 0.081772555 | 0.334453064 | 0.438967322 |
| 0.040178246 | 0.203298043 | 0.321474463 | 0.08110044  |
| 0.332048889 | 0.28749483  | 0.205668945 | 0.254127738 |
| 0.345622716 | 0.314830401 | 0.387736863 | 0.234989058 |
| 0.297876533 | 0.043117888 | 0.357259455 | 0.321731283 |
| 0.258580672 | 0.050348284 | 0.277542827 | 0.420352074 |
| 0.29566449  | 0.41054925  | 0.349033477 | 0.33600331  |
| 0.313223395 | 0.414924715 | 0.296384722 | 0.353312247 |
| 0.09586036  | 0.426043584 | 0.127562916 | 0.050979197 |
| 0.041696577 | 0.098121335 | 0.28204529  | 0.277418542 |
| 0.40940163  | 0.241499725 | 0.141430495 | 0.23681611  |
| 0.451428525 | 0.349866899 | 0.424670631 | 0.361990587 |
| 0.033105119 | 0.29944192  | 0.297026796 | 0.182996788 |
| 0.320269357 | 0.091112583 | 0.307226551 | 0.396536207 |
| 0.318321035 | 0.411847278 | 0.098513245 | 0.392490394 |
| 0.177599045 | 0.442075634 | 0.345309198 | 0.14160813  |
| 0.413641374 | 0.375941403 | 0.455139811 | 0.367049819 |
| 0.372795099 | 0.199336876 | 0.099609071 | 0.336570061 |
| 0.438503152 | 0.029676313 | 0.420199783 | 0.445825286 |
| 0.392117771 | 0.415125387 | 0.475818924 | 0.440241029 |
| 0.3955081   | 0.052268086 | 0.049342753 | 0.284252803 |
| 0.39967871  | 0.331318548 | 0.167506624 | 0.286392771 |
| 1           | 0.223830201 | 0.368616661 | 0.241675222 |
| 0.45387068  | 0.382525792 | 0.414408687 | 0.323877166 |
| 0.190428648 | 0.260851166 | 0.301199491 | 0.340563359 |
| 0.042184893 | 0.072785413 | 0.028867391 | 0.277650871 |
| 0.171074275 | 0.164447304 | 0.216839546 | 0.299462237 |
| 0.167136412 | 0.199548935 | 0.288277579 | 0.360856511 |
| 0.03567559  | 0.256643718 | 0.11443817  | 0.115654605 |
| 0.048120885 | 0.112876744 | 0.168416996 | 0.139298463 |
| 0.257153666 | 0.167835239 | 0.336340611 | 0.42744487  |
| 0.301885745 | 0.122513332 | 0.31424669  | 0.420823526 |
| 0.408868594 | 0.303120033 | 0.200426166 | 0.01461574  |
| 0.260780981 | 0.249171282 | 0.267694479 | 0.288283106 |
| 0.131394202 | 0.241961627 | 0.296823311 | 0.380286267 |
| 0.156944606 | 0.102168341 | 0.311391382 | 0.346520497 |
| 0.102038905 | 0.274476165 | 0.413275162 | 0.243498192 |
| 0.002554916 | 0.227044505 | 0.384464701 | 0.234155776 |
| 0.245908584 | 0.22741188  | 0.2492882   | 0.416194611 |
| 0.301163724 | 0.313709533 | 0.431881165 | 0.382273018 |
| 0.242984744 | 0.157352016 | 0.468873064 | 0.096243091 |
| 0.300897224 | 0.072930409 | 0.271319146 | 0.175873035 |
| 0.186343984 | 0.280770049 | 0.31920403  | 0.275881905 |
| 0.070693509 | 0.427875082 | 0.320371026 | 0.438907965 |
| 0.283908691 | 0.464606102 | 0.417124681 | 0.39161485  |
| 0.268743896 | 0.2862196   | 0.234162437 | 0.368842411 |
| 0.406822573 | 0.231010872 | 0.044238859 | 0.384155577 |
| 0.248340223 | 0.357967148 | 0.165201255 | 0.441689953 |
| 0.405830814 | 0.342374338 | 0.162928895 | 0.383414004 |
| 0.326366649 | 0.157773932 | 0.361248374 | 0.472629588 |
| 0.205613342 | 0.318474544 | 0.303861775 | 0.406929688 |
| 0.12113069  | 0.302181476 | 0.270734588 | 0.266342352 |

|             |             |             |             |
|-------------|-------------|-------------|-------------|
| 0.014073061 | 0.05690094  | 0.043126393 | 0.184673269 |
| 0.263748786 | 0.272764148 | 0.324693513 | 0.435510696 |
| 0.108492362 | 0.346613493 | 0.199581471 | 0.267979444 |
| 0.339804056 | 0.3188774   | 0.304575003 | 0.309456993 |
| 0.200609748 | 0.02019958  | 0.116831472 | 0.421966409 |
| 0.021713521 | 0.28861814  | 0.223609685 | 0.004165332 |
| 0.03740386  | 0.299937532 | 0.067948619 | 0.152509282 |
| 0.459712333 | 0.144901285 | 0.138678946 | 0.195448671 |
| 0.302121575 | 0.074120733 | 0.006075094 | 0.42024409  |
| 0.408378908 | 0.390855674 | 0.40080918  | 0.359578594 |
| 0.398771855 | 0.337524134 | 0.388957256 | 0.181754398 |
| 0.087467163 | 0.055362047 | 0.288149372 | 0.264437821 |
| 0.006556339 | 0.340490961 | 0.283980584 | 0.110873768 |
| 0.382339382 | 0.25416545  | 0.033094528 | 0.311440948 |
| 0.015279296 | 0.236838117 | 0.231512329 | 0.214535612 |
| 0.363695462 | 0.010825286 | 0.152386028 | 0.280094293 |
| 0.316369899 | 0.275809947 | 0.288127661 | 0.430682503 |
| 0.253082985 | 0.076881029 | 0.269015647 | 0.35898283  |
| 0.066075943 | 0.088053516 | 0.237269443 | 0.022288825 |
| 0.138164554 | 0.373350744 | 0.279072381 | 0.045730917 |
| 0.204153392 | 0.003817375 | 0.281735089 | 0.443157192 |
| 0.341603564 | 0.463284665 | 0.417023455 | 0.289904793 |
| 0.411603476 | 0.178812048 | 0.443478527 | 0.317775487 |
| 0.232034821 | 0.000822672 | 0.011016589 | 0.429277909 |
| 0.297197231 | 0.032839552 | 0.121915725 | 0.192663181 |
| 0.116861407 | 0.095152258 | 0.060126356 | 0.258281603 |
| 0.266467246 | 0.264310676 | 0.268069392 | 0.360250132 |
| 0.213890542 | 0.212965139 | 0.227833491 | 0.059089844 |
| 0.28476144  | 0.051190533 | 0.059950878 | 0.014935904 |
| 0.355435381 | 0.073922222 | 0.342515036 | 0.415079336 |
| 0.424749417 | 0.345860981 | 0.199790605 | 0.244135446 |
| 0.404240346 | 0.054211686 | 0.245006834 | 0.060451222 |
| 0.372096573 | 0.317450007 | 0.280712431 | 0.243307542 |
| 0.45118544  | 0.383870448 | 0.03271226  | 0.36750186  |
| 0.011222785 | 0.006762205 | 0.192403562 | 0.22285438  |
| 0.116489887 | 0.317638172 | 0.215323006 | 0.204199934 |
| 0.228277262 | 0.024281897 | 0.318166383 | 0.303362874 |
| 0.241646954 | 0.293754723 | 0.30703594  | 0.202707345 |
| 0.277859367 | 0.213130244 | 0.189048104 | 0.154406649 |
| 0.235016395 | 0.239496519 | 0.143699261 | 0.021361652 |
| 0.252215042 | 0.28773299  | 0.047774584 | 0.112093696 |
| 0.385941487 | 0.431954778 | 0.054797269 | 0.017581265 |
| 0.212901303 | 0.28568897  | 0.456587971 | 0.391799989 |
| 0.414928646 | 0.460856442 | 0.32157216  | 0.183438377 |
| 0.057329868 | 0.275056925 | 0.306602508 | 0.154765896 |
| 0.429448884 | 0.037642681 | 0.378164384 | 0.315574949 |
| 0.087546639 | 0.170487261 | 0.03928393  | 0.074971499 |
| 0.307974986 | 0.141923816 | 0.197370117 | 0.08245378  |
| 0.284848075 | 0.274845532 | 0.043971884 | 0.165280927 |
| 0.287821439 | 0.247609863 | 0.125394354 | 0.200359574 |
| 0.266800354 | 0.142269464 | 0.369589172 | 0.400711963 |
| 0.088663658 | 0.085806617 | 0.147903197 | 0.335695094 |
| 0.373021958 | 0.24133564  | 0.021846886 | 0.338081003 |
| 0.435515648 | 0.318235173 | 0.387290646 | 0.394731825 |

|             |             |             |             |
|-------------|-------------|-------------|-------------|
| 0.058232356 | 0.297685375 | 0.316982635 | 0.297736187 |
| 0.159737672 | 0.217101585 | 0.220034133 | 0.048605412 |
| 0.269362714 | 0.395425584 | 0.333359021 | 0.160876419 |
| 0.259210755 | 0.071415517 | 0.031914895 | 0.380423483 |
| 0.27608298  | 0.07281775  | 0.189029654 | 0.399575668 |
| 0.003430326 | 0.239156805 | 0.451901257 | 0.199453625 |
| 0.439116679 | 0.433316393 | 0.370826283 | 0.181086346 |
| 0.00589361  | 0.349941184 | 0.280658999 | 0.269215267 |
| 0.340134126 | 0.264740689 | 0.134684415 | 0.08837616  |
| 0.265610128 | 0.04585771  | 0.163780622 | 0.200813285 |
| 0.235869153 | 0.262369932 | 0.178262221 | 0.167306248 |
| 0.213257115 | 0.058550386 | 0.278526474 | 0.174831607 |
| 0.240805949 | 0.212401264 | 0.327581674 | 0.157002538 |
| 0.229796279 | 0.414083593 | 0.329511181 | 0.020613978 |
| 0.312796421 | 0.382306134 | 0.383090069 | 0.004181944 |
| 0.362517657 | 0.008783167 | 0.222023595 | 0.213847045 |
| 0.203832551 | 0.235193576 | 0.258819325 | 0.272532417 |
| 0.246485292 | 0.191204959 | 0.21417068  | 0.193837979 |
| 0.173934607 | 0.166089087 | 0.285675159 | 0.227408168 |
| 0.259235687 | 0.101639697 | 0.068414943 | 0.068177127 |
| 0.05362475  | 0.381347488 | 0.200674171 | 0.042265353 |
| 0.201197006 | 0.242710806 | 0.323328366 | 0.3770421   |
| 0.385650328 | 0.069162739 | 0.285080745 | 0.345564258 |
| 0.17649174  | 0.185438868 | 0.043431758 | 0.227051998 |
| 0.182512763 | 0.272212869 | 0.227347795 | 0.17400533  |
| 0.306374597 | 0.336075044 | 0.192264431 | 0.378766865 |
| 0.261558771 | 0.266091686 | 0.15782113  | 0.10627981  |
| 0.132098391 | 0.096752458 | 0.29988332  | 0.001739722 |
| 0.275540289 | 0.13898547  | 0.410236391 | 0.372497562 |
| 0.30200338  | 0.33751495  | 0.166014876 | 0.075090458 |
| 0.132996691 | 0.119066187 | 0.106982626 | 0.341926929 |
| 0.264997711 | 0.146937106 | 0.281324479 | 0.15896064  |
| 0.368400949 | 0.340154083 | 0.291590087 | 0.200084074 |
| 0.202886063 | 0.11977101  | 0.378861004 | 0.073398748 |
| 0.265740002 | 0.242716423 | 0.195468715 | 0.276042146 |
| 0.237646455 | 0.437595399 | 0.042436924 | 0.449413221 |
| 0.305840988 | 0.094760572 | 0.419976912 | 0.202062009 |
| 0.182802534 | 0.144263466 | 0.270400905 | 0.223596818 |
| 0.221916689 | 0.308599024 | 0.014547704 | 0.104374283 |
| 0.307151673 | 0.246448921 | 0.310719357 | 0.325615513 |
| 0.292537922 | 0.346046492 | 0.239724845 | 0.199305543 |
| 0.352493009 | 0.373917265 | 0.220049395 | 0.22435873  |
| 0.297364107 | 0.09524926  | 0.220097171 | 0.02287222  |
| 0.308895621 | 0.292984914 | 0.256893449 | 0.05510448  |
| 0.018511088 | 0.276189842 | 0.273137198 | 0.041025892 |
| 0.45710789  | 0.24454365  | 0.234222484 | 0.324121163 |
| 0.135579185 | 0.373114489 | 0.160909386 | 0.346206971 |
| 0.040207311 | 0.201802875 | 0.302826174 | 0.279485229 |
| 0.240740946 | 0.320125042 | 0.338842727 | 0.290211811 |
| 0.034232277 | 0.259317694 | 0.003248566 | 0.322802952 |
| 0.345084097 | 0.312300728 | 0.168281316 | 0.19122185  |
| 0.255803074 | 0.330906878 | 0.296187447 | 0.263586832 |
| 0.014191333 | 0.307693239 | 0.164241349 | 0.321612203 |
| 0.198407491 | 0.259956311 | 0.058005675 | 0.319329795 |

|             |             |             |             |
|-------------|-------------|-------------|-------------|
| 0.328978981 | 0.27860491  | 0.228419773 | 0.236190917 |
| 0.37560899  | 0.30295599  | 0.09765789  | 0.235830866 |
| 0.26797648  | 0.04187839  | 0.205735014 | 0.45223338  |
| 0.185801476 | 0.279009475 | 0.429280405 | 0.198965268 |
| 0.326411157 | 0.303241754 | 0.262038618 | 0.438245715 |
| 0.121578129 | 0.201814212 | 0.383508753 | 0.385491854 |
| 0.291315501 | 0.274792507 | 0.302532591 | 0.277283932 |
| 0.335465555 | 0.079736173 | 0.291939335 | 0.270196341 |
| 0.282688568 | 0.266313396 | 0.186192435 | 0.252562168 |
| 0.049902156 | 0.164146394 | 0.242292984 | 0.104996578 |
| 0.248822009 | 0.295806052 | 0.284479017 | 0.340068085 |
| 0.140563641 | 0.029777531 | 0.390908718 | 0.045311642 |
| 0.177283851 | 0.308879668 | 0.193817618 | 0.306025933 |
| 0.134729581 | 0.242259666 | 0.188468254 | 0.001437536 |
| 0.389150834 | 0.063616356 | 0.2840369   | 0.260524863 |
| 0.29815867  | 0.043692064 | 0.359814569 | 0.468306532 |
| 0.220011724 | 0.246758894 | 0.262460089 | 0.381592243 |
| 0.230850031 | 0.271201952 | 0.316959371 | 0.255668196 |
| 0.28995606  | 0.216766348 | 0.270386013 | 0.278903509 |
| 0.293832228 | 0.194344418 |             |             |
| CHIT1       | 0.068616353 | 0.434233114 | 0.057991618 |
| 0.10489514  | 0.179336426 | 0.235317537 | 0.043568518 |
| 0.083589351 | 0.306134463 | 0.146485043 | 0.235790061 |
| 0.021046402 | 0.043101139 | 0.456956017 | 0.041471313 |
| 0.24779434  | 0.028560829 | 0.073093684 | 0.043137328 |
| 0.115317323 | 0.154105432 | 0.191742893 | 0.241467831 |
| 0.134494452 | 0.224697096 | 0.244362473 | 0.20633285  |
| 0.507615064 | 0.15822888  | 0.344658219 | 0.106654979 |
| 0.42202718  | 0.201271289 | 0.190434357 | 0.019454287 |
| 0.252140565 | 0.00327089  | 0.446183004 | 0.137564658 |
| 0.076283663 | 0.365922879 | 0.179453094 | 0.153007761 |
| 0.18029007  | 0.039536292 | 0.126039581 | 0.28205177  |
| 0.214272068 | 0.149855775 | 0.062298339 | 0.346489163 |
| 0.170603688 | 0.318406583 | 0.341535036 | 0.002066284 |
| 0.154128607 | 0.042737652 | 0.106387425 | 0.528983605 |
| 0.184316344 | 0.087580845 | 0.124651866 | 0.134012148 |
| 0.242081358 | 0.268292638 | 0.195592539 | 0.166825116 |
| 0.519970425 | 0.083067992 | 0.341899792 | 0.110509097 |
| 0.197904141 | 0.027581859 | 0.153135574 | 0.073942581 |
| 0.181107983 | 0.133173307 | 0.208878945 | 0.140102643 |
| 0.436110694 | 0.527439879 | 0.176737639 | 0.51475614  |
| 0.037478752 | 0.19113883  | 0.130831698 | 0.240383395 |
| 0.275871688 | 0.050108536 | 0.362865174 | 0.527975887 |
| 0.037200251 | 0.247594005 | 0.309621112 | 0.122124886 |
| 0.443211553 | 0.122415756 | 0.231359145 | 0.098037229 |
| 0.255861309 | 0.189873362 | 0.480946528 | 0.260404223 |
| 0.158413454 | 0.073985396 | 0.515445759 | 0.180161856 |
| 0.1792651   | 0.074777218 | 0.103090405 | 0.425795357 |
| 0.300311524 | 0.507730265 | 0.393066827 | 0.307069828 |
| 0.207759024 | 0.517104642 | 0.339611483 | 0.418006702 |
| 0.081579416 | 0.537687315 | 0.137425042 | 0.039198895 |
| 0.059917643 | 0.061793304 | 0.095831632 | 0.281666923 |
| 0.47089063  | 0.266655768 | 0.130221399 | 0.124200563 |
| 0.428022876 | 0.508819499 | 0.528301339 | 0.381778667 |

|             |             |             |             |
|-------------|-------------|-------------|-------------|
| 0.037115853 | 0.104476501 | 0.2104225   | 0.177164682 |
| 0.292257636 | 0.086137131 | 0.125497795 | 0.532034386 |
| 0.402120458 | 0.39729292  | 0.111868608 | 0.520843063 |
| 0.107521266 | 0.528315508 | 0.46481019  | 0.114039717 |
| 0.534642638 | 0.526053907 | 0.511239832 | 0.311947364 |
| 0.505765007 | 0.215565245 | 0.031837901 | 0.344546598 |
| 0.498632861 | 0.010482239 | 0.459699367 | 0.488151337 |
| 0.516129404 | 0.432236576 | 0.508833545 | 0.51427867  |
| 0.522414169 | 0.064134205 | 0.011085628 | 0.196492357 |
| 0.52556996  | 0.4016303   | 0.075922855 | 0.228748807 |
| 0.223830201 | 1           | 0.374784893 | 0.181910037 |
| 0.517215973 | 0.446230376 | 0.488323801 | 0.337673786 |
| 0.172783248 | 0.342742193 | 0.20705042  | 0.506907799 |
| 0.036969086 | 0.094237854 | 0.062990888 | 0.247197014 |
| 0.195480708 | 0.12090216  | 0.207770059 | 0.196955153 |
| 0.153333026 | 0.192647267 | 0.16280575  | 0.282074874 |
| 0.075958954 | 0.292730867 | 0.109485291 | 0.114800442 |
| 0.035131559 | 0.166736348 | 0.124402471 | 0.116640356 |
| 0.143349078 | 0.273020765 | 0.35251872  | 0.478996326 |
| 0.156088914 | 0.187931724 | 0.350743571 | 0.478927773 |
| 0.425169609 | 0.219416525 | 0.208427144 | 0.014249471 |
| 0.134376911 | 0.132328122 | 0.084242813 | 0.23982382  |
| 0.210474127 | 0.13033063  | 0.244458284 | 0.328092217 |
| 0.20090776  | 0.096330451 | 0.174926827 | 0.459324773 |
| 0.15501502  | 0.17713722  | 0.432307538 | 0.241629681 |
| 0.004655822 | 0.195390778 | 0.423824765 | 0.066879291 |
| 0.239215545 | 0.081367964 | 0.151918812 | 0.444573142 |
| 0.134033531 | 0.104347241 | 0.491954988 | 0.314207613 |
| 0.191871487 | 0.253314626 | 0.516978021 | 0.020749394 |
| 0.169193543 | 0.036314953 | 0.225735299 | 0.164960607 |
| 0.186990615 | 0.232596514 | 0.182785777 | 0.14323858  |
| 0.139491417 | 0.530249488 | 0.382858034 | 0.521709629 |
| 0.172075432 | 0.519153279 | 0.437799812 | 0.44750591  |
| 0.284049309 | 0.159452291 | 0.069635445 | 0.411857998 |
| 0.433903069 | 0.12261447  | 0.08875135  | 0.387126167 |
| 0.161555371 | 0.295471384 | 0.05049524  | 0.493030638 |
| 0.513706646 | 0.49226956  | 0.096653651 | 0.305566098 |
| 0.378912662 | 0.172546124 | 0.378126071 | 0.523467873 |
| 0.139375347 | 0.175309348 | 0.160517629 | 0.358377216 |
| 0.151116243 | 0.098216621 | 0.3088251   | 0.084054603 |
| 0.009088658 | 0.062968236 | 0.061105236 | 0.099634612 |
| 0.081755376 | 0.287456989 | 0.284656042 | 0.521650406 |
| 0.084560817 | 0.437803866 | 0.190724367 | 0.156507182 |
| 0.425895953 | 0.161503255 | 0.223240346 | 0.265073395 |
| 0.215892193 | 0.017773948 | 0.094123774 | 0.530982551 |
| 0.046058572 | 0.125539833 | 0.171664481 | 0.004946652 |
| 0.040460921 | 0.386649447 | 0.116126504 | 0.225067678 |
| 0.464503939 | 0.228957328 | 0.177025383 | 0.148999411 |
| 0.282644979 | 0.072854623 | 0.004287096 | 0.47216032  |
| 0.473599684 | 0.438951105 | 0.473777585 | 0.462906705 |
| 0.403139205 | 0.338385126 | 0.344148565 | 0.25129389  |
| 0.071827624 | 0.066665273 | 0.096183622 | 0.14528944  |
| 0.005848636 | 0.34242623  | 0.157348058 | 0.136649486 |
| 0.344795284 | 0.220221674 | 0.03938399  | 0.215866927 |



|             |             |             |             |
|-------------|-------------|-------------|-------------|
| 0.028919881 | 0.103937205 | 0.168414296 | 0.113451985 |
| 0.270322535 | 0.017112542 | 0.155358339 | 0.156572075 |
| 0.475627162 | 0.365453756 | 0.164596315 | 0.539576257 |
| 0.214522859 | 0.136698013 | 0.157966009 | 0.343394093 |
| 0.055639649 | 0.04704978  | 0.186727425 | 0.025545003 |
| 0.13235417  | 0.453025992 | 0.18045062  | 0.055107778 |
| 0.200647502 | 0.008061695 | 0.392440995 | 0.543487142 |
| 0.494243    | 0.510878249 | 0.521310051 | 0.144492384 |
| 0.522380517 | 0.047376978 | 0.53703845  | 0.403060663 |
| 0.182159231 | 0.001414761 | 0.007224195 | 0.476205168 |
| 0.230500879 | 0.079534298 | 0.130189605 | 0.230396853 |
| 0.084246693 | 0.114068177 | 0.052715023 | 0.0904191   |
| 0.319323019 | 0.133268938 | 0.08806462  | 0.488681941 |
| 0.131129283 | 0.149770218 | 0.200009556 | 0.092454516 |
| 0.266558183 | 0.046430983 | 0.083599196 | 0.009063345 |
| 0.27804735  | 0.137214983 | 0.497383001 | 0.523536314 |
| 0.503181281 | 0.296265987 | 0.166948174 | 0.209858064 |
| 0.403108291 | 0.123683058 | 0.185623546 | 0.116002156 |
| 0.508848128 | 0.271430432 | 0.30404982  | 0.320638425 |
| 0.501144277 | 0.48793688  | 0.031211857 | 0.34971433  |
| 0.020055798 | 0.001717708 | 0.227352616 | 0.209443852 |
| 0.021855626 | 0.171006536 | 0.238712038 | 0.106935494 |
| 0.115221694 | 0.038444575 | 0.119034525 | 0.10646458  |
| 0.203052568 | 0.188485735 | 0.142313097 | 0.203504857 |
| 0.122388178 | 0.060647382 | 0.11677998  | 0.091355695 |
| 0.103303824 | 0.31610801  | 0.229547683 | 0.01944446  |
| 0.23531482  | 0.238057465 | 0.050813023 | 0.145912494 |
| 0.439975666 | 0.494370723 | 0.031003619 | 0.013099732 |
| 0.258457666 | 0.148319429 | 0.497302925 | 0.516975166 |
| 0.546672853 | 0.519238047 | 0.414023118 | 0.067380387 |
| 0.059122412 | 0.195065679 | 0.154390288 | 0.053403859 |
| 0.526192479 | 0.069116862 | 0.508855494 | 0.143593514 |
| 0.09800271  | 0.126333967 | 0.034750192 | 0.05945885  |
| 0.243385015 | 0.147334571 | 0.103506253 | 0.143242322 |
| 0.164242593 | 0.120246284 | 0.037366842 | 0.141201815 |
| 0.307555513 | 0.07844181  | 0.124684005 | 0.170658318 |
| 0.330309455 | 0.101189705 | 0.337532028 | 0.457789787 |
| 0.128957851 | 0.074484394 | 0.184103098 | 0.310385322 |
| 0.415916716 | 0.22797346  | 0.037175282 | 0.463201355 |
| 0.492035263 | 0.340236843 | 0.526160374 | 0.362216418 |
| 0.079727108 | 0.217965203 | 0.133212964 | 0.188460189 |
| 0.127889987 | 0.229344574 | 0.129664454 | 0.055997547 |
| 0.287628224 | 0.491652111 | 0.404778543 | 0.111703842 |
| 0.267694285 | 0.116420178 | 0.060275207 | 0.435918002 |
| 0.081722405 | 0.080212838 | 0.189571592 | 0.384505939 |
| 0.001461093 | 0.068279503 | 0.459546043 | 0.159991396 |
| 0.513214702 | 0.46500186  | 0.460380383 | 0.145259568 |
| 0.000410115 | 0.287380281 | 0.27485542  | 0.202847363 |
| 0.438743207 | 0.342599971 | 0.086866272 | 0.056366138 |
| 0.271244717 | 0.10243324  | 0.086424844 | 0.20860826  |
| 0.075101498 | 0.307936739 | 0.170375003 | 0.128689055 |
| 0.104093957 | 0.092459235 | 0.128173423 | 0.148734668 |
| 0.055911983 | 0.220479863 | 0.329486435 | 0.152918089 |
| 0.102174374 | 0.406811173 | 0.362469048 | 0.029428601 |

|             |             |             |             |
|-------------|-------------|-------------|-------------|
| 0.188630071 | 0.36761043  | 0.421947043 | 0.00223132  |
| 0.353223216 | 0.009418254 | 0.114326673 | 0.129803367 |
| 0.117673141 | 0.11366151  | 0.168108989 | 0.145655147 |
| 0.243880817 | 0.125295308 | 0.16926398  | 0.186675245 |
| 0.10428073  | 0.125773099 | 0.239962011 | 0.177150958 |
| 0.164788956 | 0.093833383 | 0.127189319 | 0.140775095 |
| 0.052943755 | 0.469331708 | 0.266716226 | 0.09376782  |
| 0.166506667 | 0.168432881 | 0.352510223 | 0.510864228 |
| 0.414172253 | 0.149141198 | 0.162005505 | 0.459852966 |
| 0.11096643  | 0.180393808 | 0.05332873  | 0.23003502  |
| 0.158040962 | 0.126025711 | 0.22189296  | 0.239472837 |
| 0.329480659 | 0.422211736 | 0.25859423  | 0.439798066 |
| 0.182809528 | 0.157632951 | 0.170155632 | 0.064660989 |
| 0.119267311 | 0.122165328 | 0.139153424 | 0.003444928 |
| 0.274097208 | 0.180129129 | 0.463516867 | 0.513348151 |
| 0.139018348 | 0.390160911 | 0.196237631 | 0.072097333 |
| 0.149907268 | 0.217911024 | 0.133204527 | 0.365268176 |
| 0.110843024 | 0.126027875 | 0.168409591 | 0.218010621 |
| 0.354831103 | 0.327113039 | 0.115093091 | 0.137982938 |
| 0.136012971 | 0.168687748 | 0.472015728 | 0.089849164 |
| 0.270322105 | 0.097739695 | 0.247842986 | 0.158167004 |
| 0.114571247 | 0.507409621 | 0.053650686 | 0.521263504 |
| 0.158673691 | 0.14186791  | 0.504647983 | 0.183289885 |
| 0.161047507 | 0.083336088 | 0.08932059  | 0.194722971 |
| 0.117529521 | 0.167005522 | 0.00764405  | 0.033861856 |
| 0.282037832 | 0.133775559 | 0.361539559 | 0.282799005 |
| 0.113672457 | 0.285029556 | 0.083683268 | 0.154013363 |
| 0.504927091 | 0.520920441 | 0.154087613 | 0.217921347 |
| 0.300625998 | 0.08060797  | 0.328779172 | 0.006715215 |
| 0.278673459 | 0.271230921 | 0.188133143 | 0.044540738 |
| 0.019325122 | 0.096378878 | 0.266398422 | 0.062212823 |
| 0.454428376 | 0.10551084  | 0.237177623 | 0.362610183 |
| 0.158817372 | 0.523389918 | 0.075176655 | 0.350530007 |
| 0.028891446 | 0.193877901 | 0.184612843 | 0.181911998 |
| 0.134695972 | 0.134672146 | 0.318784594 | 0.119970035 |
| 0.030705873 | 0.146484623 | 0.000871023 | 0.437399421 |
| 0.487183975 | 0.150554644 | 0.213073974 | 0.143590419 |
| 0.226221107 | 0.357710576 | 0.125279456 | 0.221470688 |
| 0.01345589  | 0.234003417 | 0.143517884 | 0.440620162 |
| 0.124385888 | 0.204143857 | 0.048525751 | 0.143025088 |
| 0.491109343 | 0.146843245 | 0.238996868 | 0.143915464 |
| 0.508015305 | 0.366062377 | 0.177840486 | 0.113206353 |
| 0.269037116 | 0.067317154 | 0.205359676 | 0.526451829 |
| 0.111727898 | 0.105999145 | 0.41352728  | 0.119648764 |
| 0.143980589 | 0.392675921 | 0.251798783 | 0.514695209 |
| 0.048319141 | 0.203654386 | 0.370808137 | 0.449660899 |
| 0.269277784 | 0.077362927 | 0.123822049 | 0.118777648 |
| 0.490950621 | 0.089444027 | 0.111680539 | 0.31946574  |
| 0.104871159 | 0.241580456 | 0.228203413 | 0.098284204 |
| 0.038909852 | 0.095800548 | 0.225714766 | 0.116684606 |
| 0.194699928 | 0.190915006 | 0.109654255 | 0.393872473 |
| 0.101937297 | 0.029018377 | 0.454187501 | 0.009944533 |
| 0.251862133 | 0.302704425 | 0.173736911 | 0.164074719 |
| 0.211038388 | 0.234195334 | 0.206144597 | 0.002885734 |

|             |             |             |             |
|-------------|-------------|-------------|-------------|
| 0.367434472 | 0.022204037 | 0.14858684  | 0.128899544 |
| 0.142573477 | 0.043517316 | 0.483025293 | 0.507566446 |
| 0.246710498 | 0.156022934 | 0.178573044 | 0.476749745 |
| 0.072872781 | 0.15447416  | 0.154455842 | 0.323343001 |
| 0.10920968  | 0.185676311 | 0.193578748 | 0.189099168 |
| 0.337513226 | 0.15725365  |             |             |
| CIRBP       | 0.083009034 | 0.429285372 | 0.063549969 |
| 0.130495032 | 0.320184144 | 0.383477257 | 0.070433244 |
| 0.140012177 | 0.336028344 | 0.337491279 | 0.342485651 |
| 0.019818582 | 0.148477678 | 0.440242871 | 0.070229227 |
| 0.376919483 | 0.040824468 | 0.118025614 | 0.108886028 |
| 0.253926909 | 0.291621339 | 0.361063181 | 0.355346923 |
| 0.314394591 | 0.178742863 | 0.329935013 | 0.409655952 |
| 0.497075213 | 0.308150443 | 0.4067107   | 0.209111449 |
| 0.394963404 | 0.332709383 | 0.402148057 | 0.019385637 |
| 0.407536401 | 0.030922989 | 0.422602281 | 0.259541424 |
| 0.186780101 | 0.32859843  | 0.338879473 | 0.238947469 |
| 0.355878336 | 0.04010107  | 0.254094495 | 0.397232229 |
| 0.335265803 | 0.322639785 | 0.07609096  | 0.398177202 |
| 0.381442358 | 0.319953629 | 0.360753    | 0.002294903 |
| 0.341700356 | 0.145700219 | 0.288072431 | 0.501070194 |
| 0.199548313 | 0.138570074 | 0.329806727 | 0.29603203  |
| 0.397823944 | 0.378824716 | 0.27263283  | 0.36412065  |
| 0.486321624 | 0.2347021   | 0.411415008 | 0.173418903 |
| 0.368855058 | 0.044015163 | 0.160418279 | 0.102079439 |
| 0.407081236 | 0.213314684 | 0.355786423 | 0.349197256 |
| 0.417486952 | 0.510706275 | 0.247375111 | 0.491493235 |
| 0.16154763  | 0.357961429 | 0.313956292 | 0.297461465 |
| 0.35831727  | 0.110003935 | 0.364831634 | 0.506705844 |
| 0.06823357  | 0.370426358 | 0.368951105 | 0.133060589 |
| 0.423848961 | 0.365208754 | 0.372762257 | 0.223476116 |
| 0.372236895 | 0.34005274  | 0.481921704 | 0.270662152 |
| 0.362186201 | 0.080761072 | 0.477592268 | 0.343032104 |
| 0.29419246  | 0.088812033 | 0.245817021 | 0.453175025 |
| 0.379270957 | 0.484936982 | 0.410072858 | 0.33867206  |
| 0.364204872 | 0.490129326 | 0.359358903 | 0.418940022 |
| 0.221462644 | 0.521504649 | 0.188837777 | 0.051416192 |
| 0.082171128 | 0.10839355  | 0.300011514 | 0.287790068 |
| 0.466159137 | 0.33193638  | 0.192916619 | 0.239124063 |
| 0.453257791 | 0.47180469  | 0.520347318 | 0.379885959 |
| 0.0445149   | 0.328430389 | 0.363378082 | 0.315238936 |
| 0.359982113 | 0.132960019 | 0.292465857 | 0.495539864 |
| 0.351898905 | 0.410966529 | 0.177983643 | 0.492240667 |
| 0.232963143 | 0.500295939 | 0.441636505 | 0.166740897 |
| 0.505117719 | 0.481914333 | 0.500204135 | 0.388756523 |
| 0.466354746 | 0.314830069 | 0.102096991 | 0.361154852 |
| 0.477359893 | 0.01887006  | 0.478350082 | 0.499604335 |
| 0.489323519 | 0.441471749 | 0.517747176 | 0.509802653 |
| 0.498176059 | 0.084429099 | 0.049833071 | 0.288291975 |
| 0.493110864 | 0.362331185 | 0.176767961 | 0.391001542 |
| 0.368616661 | 0.374784893 | 1           | 0.286551814 |
| 0.503250102 | 0.444317093 | 0.492866167 | 0.362609352 |
| 0.318709464 | 0.301505098 | 0.391739394 | 0.457066142 |
| 0.05248577  | 0.118598027 | 0.058667061 | 0.310218847 |

|             |             |             |             |
|-------------|-------------|-------------|-------------|
| 0.347622878 | 0.182553053 | 0.348752914 | 0.37273329  |
| 0.196984256 | 0.356872402 | 0.379940631 | 0.372607435 |
| 0.061569531 | 0.404086232 | 0.177702227 | 0.172330509 |
| 0.04530338  | 0.138800741 | 0.173165977 | 0.167362249 |
| 0.262559076 | 0.232380271 | 0.413939944 | 0.488857058 |
| 0.379615978 | 0.17508763  | 0.389142295 | 0.466510527 |
| 0.406866    | 0.374798063 | 0.233047291 | 0.010439885 |
| 0.253299429 | 0.362251128 | 0.250824462 | 0.419609801 |
| 0.18083069  | 0.238378791 | 0.365395633 | 0.373612041 |
| 0.259103732 | 0.176782687 | 0.367169938 | 0.415902612 |
| 0.153069665 | 0.308798133 | 0.419524395 | 0.387780528 |
| 0.003907712 | 0.299033436 | 0.413809205 | 0.183173528 |
| 0.312560057 | 0.171917137 | 0.291611581 | 0.445490876 |
| 0.333056568 | 0.280336821 | 0.499083228 | 0.383673313 |
| 0.348633959 | 0.225049952 | 0.522318529 | 0.073820109 |
| 0.384519091 | 0.056645415 | 0.272611317 | 0.352844309 |
| 0.244614044 | 0.285806228 | 0.343086961 | 0.294872463 |
| 0.130752419 | 0.509590617 | 0.376700311 | 0.503347513 |
| 0.359474324 | 0.521199714 | 0.43937454  | 0.419456428 |
| 0.351905423 | 0.388782196 | 0.195992775 | 0.391829373 |
| 0.439743824 | 0.298759046 | 0.082871239 | 0.421763832 |
| 0.367567492 | 0.385351693 | 0.150039299 | 0.475893797 |
| 0.484352528 | 0.461564212 | 0.160924581 | 0.354288657 |
| 0.335831415 | 0.226297117 | 0.403511654 | 0.527509222 |
| 0.332524414 | 0.352291138 | 0.32768251  | 0.37909344  |
| 0.173396429 | 0.252931203 | 0.313853649 | 0.262999845 |
| 0.016543076 | 0.096284471 | 0.071176898 | 0.174728647 |
| 0.208280277 | 0.412583396 | 0.380813869 | 0.50636089  |
| 0.125545914 | 0.410986225 | 0.251930557 | 0.266632785 |
| 0.397549835 | 0.377527949 | 0.396998159 | 0.392018236 |
| 0.248177992 | 0.019252298 | 0.118695635 | 0.505360051 |
| 0.048894953 | 0.274476406 | 0.336324308 | 0.003484279 |
| 0.050980408 | 0.397450091 | 0.096861439 | 0.187302719 |
| 0.480246463 | 0.188958759 | 0.196601666 | 0.325400126 |
| 0.333603332 | 0.104411938 | 0.00410857  | 0.487942587 |
| 0.496315735 | 0.468885257 | 0.492930992 | 0.466505064 |
| 0.444772315 | 0.399597376 | 0.379365834 | 0.340570589 |
| 0.112138784 | 0.102745065 | 0.228658065 | 0.277320387 |
| 0.0065139   | 0.35653779  | 0.345500557 | 0.143653275 |
| 0.404099396 | 0.303551096 | 0.04352091  | 0.38442843  |
| 0.020195957 | 0.236638768 | 0.318428713 | 0.24945277  |
| 0.350860377 | 0.017196271 | 0.215533485 | 0.320213894 |
| 0.414444182 | 0.319761861 | 0.383392995 | 0.521796181 |
| 0.312320448 | 0.131515887 | 0.299377441 | 0.382336787 |
| 0.079782584 | 0.128822119 | 0.371284302 | 0.04109639  |
| 0.260383578 | 0.4631911   | 0.402854385 | 0.070584938 |
| 0.256047624 | 0.00511845  | 0.338174363 | 0.521341903 |
| 0.460280773 | 0.510273713 | 0.489006928 | 0.295105675 |
| 0.490087721 | 0.181345411 | 0.524645783 | 0.379347524 |
| 0.362321549 | 0.000700466 | 0.008695886 | 0.4782888   |
| 0.365916862 | 0.065694954 | 0.162066951 | 0.336466093 |
| 0.113765876 | 0.163631493 | 0.084109097 | 0.212287556 |
| 0.405102573 | 0.261145162 | 0.229673376 | 0.45969187  |
| 0.24057728  | 0.251809104 | 0.384803613 | 0.097612493 |

|             |             |             |             |
|-------------|-------------|-------------|-------------|
| 0.407285686 | 0.057908346 | 0.100811282 | 0.008666394 |
| 0.367150287 | 0.112926129 | 0.459675953 | 0.504553576 |
| 0.478709631 | 0.372701332 | 0.344953341 | 0.362783929 |
| 0.446838217 | 0.104886008 | 0.389232544 | 0.121962461 |
| 0.472372227 | 0.35697084  | 0.289839544 | 0.267707172 |
| 0.484313803 | 0.448516344 | 0.040130819 | 0.366780816 |
| 0.014516245 | 0.004508219 | 0.334531094 | 0.271100555 |
| 0.131550741 | 0.363285354 | 0.236735283 | 0.283945335 |
| 0.284354568 | 0.033508479 | 0.30526131  | 0.273774573 |
| 0.286242871 | 0.345459259 | 0.291493196 | 0.258970253 |
| 0.29125823  | 0.156927467 | 0.224152247 | 0.179537795 |
| 0.304329038 | 0.287884619 | 0.179205142 | 0.02664364  |
| 0.400431221 | 0.38871312  | 0.064215352 | 0.165257525 |
| 0.411829817 | 0.477430484 | 0.050163414 | 0.010947087 |
| 0.242973667 | 0.333089644 | 0.493185679 | 0.493539467 |
| 0.512763055 | 0.506071332 | 0.380375159 | 0.143037977 |
| 0.078225532 | 0.321290597 | 0.316407616 | 0.122876214 |
| 0.505213192 | 0.073920786 | 0.483496307 | 0.338362609 |
| 0.127157317 | 0.212040054 | 0.038527017 | 0.097657978 |
| 0.395618834 | 0.185854504 | 0.190624155 | 0.144026381 |
| 0.303450114 | 0.289745961 | 0.058324773 | 0.199277183 |
| 0.312526495 | 0.207099494 | 0.164044235 | 0.342637923 |
| 0.339427593 | 0.288276361 | 0.394225737 | 0.43128758  |
| 0.135759238 | 0.126557998 | 0.250845269 | 0.384912854 |
| 0.420368833 | 0.401104313 | 0.029246036 | 0.448386604 |
| 0.491667776 | 0.405738248 | 0.490384388 | 0.372644739 |
| 0.09424102  | 0.358575899 | 0.364705973 | 0.333365402 |
| 0.200437102 | 0.379485686 | 0.267030924 | 0.071246642 |
| 0.295553844 | 0.479769059 | 0.393384609 | 0.171469509 |
| 0.419025907 | 0.139687258 | 0.065457499 | 0.453746625 |
| 0.2061162   | 0.090967824 | 0.364437665 | 0.429234019 |
| 0.002439165 | 0.200734442 | 0.495360026 | 0.255645758 |
| 0.51615928  | 0.466285914 | 0.417713112 | 0.303514591 |
| 0.003446622 | 0.395694726 | 0.345374471 | 0.356978015 |
| 0.410968386 | 0.329853578 | 0.221117754 | 0.081135557 |
| 0.266678378 | 0.0863871   | 0.141602201 | 0.343469494 |
| 0.217365464 | 0.38005462  | 0.20054767  | 0.230584343 |
| 0.217419403 | 0.106147893 | 0.296337761 | 0.244605864 |
| 0.225150697 | 0.227820287 | 0.312044132 | 0.333665074 |
| 0.196420686 | 0.430737386 | 0.354627377 | 0.030964787 |
| 0.391581253 | 0.400470105 | 0.438100249 | 0.001729077 |
| 0.389066268 | 0.008350857 | 0.21287788  | 0.21647673  |
| 0.216178155 | 0.230219923 | 0.269475908 | 0.29961646  |
| 0.341644577 | 0.228636473 | 0.261760875 | 0.233224898 |
| 0.17251813  | 0.241298246 | 0.384530666 | 0.350072013 |
| 0.274560175 | 0.132563966 | 0.100615643 | 0.106612305 |
| 0.058011    | 0.469414518 | 0.224878551 | 0.080300993 |
| 0.240745947 | 0.365369609 | 0.328807951 | 0.487407147 |
| 0.411226366 | 0.113067029 | 0.354112426 | 0.422732342 |
| 0.284777491 | 0.299971795 | 0.072909106 | 0.376536808 |
| 0.238939869 | 0.231154704 | 0.402274173 | 0.284482664 |
| 0.383495063 | 0.382964682 | 0.22046307  | 0.435901141 |
| 0.351765858 | 0.365366395 | 0.311877107 | 0.089220842 |
| 0.168570345 | 0.140837325 | 0.282515291 | 0.001765655 |

|             |             |             |             |
|-------------|-------------|-------------|-------------|
| 0.338026754 | 0.248841023 | 0.450360327 | 0.474707861 |
| 0.345469407 | 0.375577085 | 0.312557463 | 0.088054872 |
| 0.283408577 | 0.171983411 | 0.142935912 | 0.404602984 |
| 0.26840093  | 0.202017654 | 0.30090684  | 0.328888732 |
| 0.398684998 | 0.401461768 | 0.306154526 | 0.266853837 |
| 0.26485399  | 0.202029558 | 0.475028004 | 0.1348598   |
| 0.40225177  | 0.203758374 | 0.359121383 | 0.281765857 |
| 0.231318037 | 0.515245191 | 0.070214169 | 0.519717033 |
| 0.324527488 | 0.137399273 | 0.482049867 | 0.334821168 |
| 0.314784058 | 0.149161406 | 0.242443924 | 0.394291577 |
| 0.252378661 | 0.38180928  | 0.020876759 | 0.073670786 |
| 0.305734496 | 0.360123893 | 0.375644514 | 0.363039783 |
| 0.279596644 | 0.320078764 | 0.258691022 | 0.290232214 |
| 0.473322913 | 0.490426393 | 0.226065439 | 0.237386787 |
| 0.323606009 | 0.111773356 | 0.369362826 | 0.030185989 |
| 0.389344005 | 0.406575626 | 0.386520227 | 0.066666157 |
| 0.023108223 | 0.247643545 | 0.376912966 | 0.08210477  |
| 0.475208985 | 0.257899446 | 0.366808008 | 0.407398411 |
| 0.189764849 | 0.485293358 | 0.143008471 | 0.368139945 |
| 0.063523483 | 0.263685869 | 0.406013315 | 0.400252954 |
| 0.217851466 | 0.309245111 | 0.338599194 | 0.264343135 |
| 0.036078704 | 0.274049297 | 0.001366721 | 0.387649067 |
| 0.458371476 | 0.351486089 | 0.196901917 | 0.352570445 |
| 0.272571279 | 0.382370746 | 0.273478163 | 0.420934804 |
| 0.012099694 | 0.35177598  | 0.214261061 | 0.389327263 |
| 0.228157372 | 0.362702423 | 0.063605984 | 0.346048099 |
| 0.447094026 | 0.274045838 | 0.248929744 | 0.291391252 |
| 0.484240096 | 0.384367591 | 0.163916896 | 0.273150465 |
| 0.387128273 | 0.072863823 | 0.391671496 | 0.52333946  |
| 0.187229132 | 0.239867455 | 0.419109806 | 0.194502127 |
| 0.350209922 | 0.380808482 | 0.403745636 | 0.522013089 |
| 0.086428537 | 0.237767546 | 0.400005318 | 0.448366082 |
| 0.285167548 | 0.216265425 | 0.27249092  | 0.240286006 |
| 0.443446255 | 0.100322537 | 0.297863018 | 0.320384045 |
| 0.242628791 | 0.313530247 | 0.345521267 | 0.219140708 |
| 0.043637206 | 0.202033213 | 0.374151355 | 0.151534537 |
| 0.284960725 | 0.351282087 | 0.262100842 | 0.367137447 |
| 0.139173772 | 0.023869653 | 0.438667314 | 0.024906151 |
| 0.32754949  | 0.367766594 | 0.257935839 | 0.363993081 |
| 0.171229828 | 0.346536582 | 0.308719885 | 0.001081537 |
| 0.386463747 | 0.065602699 | 0.357785198 | 0.226510161 |
| 0.3154553   | 0.057561213 | 0.450462318 | 0.506803874 |
| 0.321508841 | 0.387887295 | 0.355736062 | 0.460880658 |
| 0.192680453 | 0.380565314 | 0.379446747 | 0.38031053  |
| 0.275179683 | 0.36965029  | 0.409618183 | 0.376409957 |
| 0.361700278 | 0.29778327  |             |             |
| CISD1       | 0.02392507  | 0.276204314 | 0.017890536 |
| 0.019777299 | 0.194039377 | 0.153364047 | 0.009859911 |
| 0.027128244 | 0.179887646 | 0.070286523 | 0.242897203 |
| 0.003566553 | 0.013716458 | 0.372082601 | 0.008532652 |
| 0.27097094  | 0.006460353 | 0.038186738 | 0.003826029 |
| 0.007107818 | 0.18477878  | 0.116015383 | 0.181788913 |
| 0.13823724  | 0.112585424 | 0.155400719 | 0.196368596 |
| 0.379818306 | 0.066023729 | 0.323395265 | 0.011959415 |

|             |             |             |             |
|-------------|-------------|-------------|-------------|
| 0.304275596 | 0.245985806 | 0.205866235 | 0.001590097 |
| 0.209668129 | 0.000387362 | 0.28730432  | 0.108718148 |
| 0.012646174 | 0.239983672 | 0.120059798 | 0.116403531 |
| 0.151561958 | 0.010534269 | 0.027977268 | 0.261880067 |
| 0.129448946 | 0.057477908 | 0.020535899 | 0.272537468 |
| 0.092102095 | 0.233407681 | 0.249026017 | 0.00211555  |
| 0.183175507 | 0.030079023 | 0.108250514 | 0.360582569 |
| 0.124687773 | 0.047499827 | 0.04631134  | 0.062442439 |
| 0.206440382 | 0.222459187 | 0.119543653 | 0.114801953 |
| 0.397834485 | 0.059548768 | 0.294876725 | 0.010458127 |
| 0.148139805 | 0.003971424 | 0.083321209 | 0.021279361 |
| 0.112880765 | 0.097097174 | 0.203824517 | 0.120235741 |
| 0.300529532 | 0.351163526 | 0.10314975  | 0.337478924 |
| 0.007336465 | 0.222709535 | 0.081045045 | 0.189552306 |
| 0.212647359 | 0.010570796 | 0.358327744 | 0.391740149 |
| 0.006769428 | 0.193154025 | 0.267407899 | 0.052059358 |
| 0.300399678 | 0.056066275 | 0.205104949 | 0.091125678 |
| 0.255456636 | 0.2297783   | 0.297560503 | 0.224086584 |
| 0.134148046 | 0.025243144 | 0.316655824 | 0.228466157 |
| 0.165496067 | 0.030166537 | 0.060479316 | 0.376885731 |
| 0.282939155 | 0.396674167 | 0.304044682 | 0.247175625 |
| 0.265166472 | 0.390373532 | 0.302680494 | 0.280763219 |
| 0.008916262 | 0.38382478  | 0.086125079 | 0.008740714 |
| 0.019209937 | 0.018257068 | 0.038814753 | 0.177743875 |
| 0.376209089 | 0.193575032 | 0.092314942 | 0.115479263 |
| 0.370778063 | 0.319080768 | 0.375783577 | 0.329689312 |
| 0.010003827 | 0.058758087 | 0.250207934 | 0.063259755 |
| 0.26367267  | 0.035312457 | 0.159534303 | 0.351046624 |
| 0.310406502 | 0.36198354  | 0.043827269 | 0.323679553 |
| 0.052078569 | 0.394705407 | 0.344590023 | 0.090095059 |
| 0.366794603 | 0.34483075  | 0.404287617 | 0.338488723 |
| 0.335714898 | 0.183076112 | 0.003100778 | 0.256727108 |
| 0.383477854 | 0.002236234 | 0.37253078  | 0.401066872 |
| 0.365453373 | 0.405235314 | 0.399557182 | 0.397949441 |
| 0.368620389 | 0.023007582 | 0.001582651 | 0.195463191 |
| 0.370522342 | 0.32171396  | 0.022528053 | 0.267531632 |
| 0.241675222 | 0.181910037 | 0.286551814 | 1           |
| 0.374894179 | 0.344338348 | 0.378536291 | 0.282169408 |
| 0.105485252 | 0.221381507 | 0.234674624 | 0.314583358 |
| 0.005385032 | 0.04744456  | 0.02084459  | 0.161800067 |
| 0.075508301 | 0.086960641 | 0.162669686 | 0.17147484  |
| 0.111400805 | 0.11019038  | 0.15362604  | 0.314047056 |
| 0.021375988 | 0.285989641 | 0.053963946 | 0.073152393 |
| 0.009862388 | 0.071304077 | 0.049180928 | 0.036082438 |
| 0.148645692 | 0.126028102 | 0.326670308 | 0.36296006  |
| 0.118054406 | 0.10361891  | 0.309599845 | 0.363082768 |
| 0.339013189 | 0.258665868 | 0.120874082 | 0.001386592 |
| 0.067650872 | 0.080793196 | 0.075670264 | 0.231761619 |
| 0.084330499 | 0.069010762 | 0.263201941 | 0.342282902 |
| 0.166221163 | 0.033314482 | 0.152235956 | 0.29912533  |
| 0.068131831 | 0.151493334 | 0.398399497 | 0.211909795 |
| 4.54E-05    | 0.191262658 | 0.372847034 | 0.015860034 |
| 0.172386483 | 0.023351045 | 0.097708954 | 0.373196139 |
| 0.076494192 | 0.08359809  | 0.381274941 | 0.296397305 |

|              |             |             |             |
|--------------|-------------|-------------|-------------|
| 0.032031486  | 0.113408121 | 0.399072015 | 0.00719594  |
| 0.145497456  | 0.006712172 | 0.203601942 | 0.112732014 |
| 0.13986436   | 0.18194093  | 0.210164118 | 0.11797981  |
| 0.071679395  | 0.38652216  | 0.262161369 | 0.411421291 |
| 0.138701605  | 0.396851732 | 0.395809749 | 0.374827078 |
| 0.217227854  | 0.159861488 | 0.048209954 | 0.386390843 |
| 0.363566843  | 0.017621355 | 0.026925055 | 0.33684303  |
| 0.134997364  | 0.311487613 | 0.005553163 | 0.404317741 |
| 0.343431776  | 0.316382194 | 0.051055317 | 0.288571192 |
| 0.332268684  | 0.131715109 | 0.273381419 | 0.38885195  |
| 0.059923402  | 0.214794648 | 0.150853294 | 0.312523349 |
| 0.09130763   | 0.063645723 | 0.180526128 | 0.057038566 |
| 0.004057108  | 0.024292279 | 0.026856866 | 0.075038521 |
| 0.077494852  | 0.248573922 | 0.253090725 | 0.402997045 |
| 0.0520154    | 0.300242077 | 0.103822535 | 0.144239622 |
| 0.322700722  | 0.157669365 | 0.236065589 | 0.249731097 |
| 0.124010192  | 0.00091727  | 0.015024427 | 0.360790891 |
| 0.0111108739 | 0.114223884 | 0.116624413 | 0.000259121 |
| 0.010756133  | 0.274458345 | 0.041136102 | 0.107800067 |
| 0.383155483  | 0.110810709 | 0.12075769  | 0.086212679 |
| 0.246502459  | 0.031867404 | 0.000269202 | 0.344144506 |
| 0.311680428  | 0.283415622 | 0.313142506 | 0.274230964 |
| 0.292694016  | 0.237032778 | 0.310897683 | 0.174605246 |
| 0.0220339    | 0.019609335 | 0.080142702 | 0.154414093 |
| 0.000614769  | 0.278657814 | 0.128464851 | 0.075823706 |
| 0.325383602  | 0.163304774 | 0.009497829 | 0.19933237  |
| 0.003210817  | 0.114986052 | 0.070434378 | 0.063733197 |
| 0.228373742  | 0.001659514 | 0.029786939 | 0.080469411 |
| 0.319043396  | 0.251696713 | 0.140053149 | 0.385550058 |
| 0.222647026  | 0.055611543 | 0.161149543 | 0.305405137 |
| 0.017693687  | 0.006603435 | 0.105405026 | 0.004610784 |
| 0.012222171  | 0.277195989 | 0.119675875 | 0.00735974  |
| 0.171435723  | 0.000652528 | 0.274685718 | 0.399504761 |
| 0.321616383  | 0.417541533 | 0.399653941 | 0.186733029 |
| 0.390648763  | 0.023838613 | 0.404965175 | 0.291770064 |
| 0.160543752  | 0.000246799 | 0.000383701 | 0.39760885  |
| 0.281576533  | 0.020516908 | 0.076160609 | 0.077288341 |
| 0.026841404  | 0.047225443 | 0.013355464 | 0.069031705 |
| 0.261661636  | 0.14133232  | 0.05374409  | 0.333246542 |
| 0.099982826  | 0.104288654 | 0.138132605 | 0.032342188 |
| 0.245772503  | 0.009669315 | 0.026933098 | 0.001415354 |
| 0.243498792  | 0.055854423 | 0.297342652 | 0.376686653 |
| 0.381958272  | 0.29671077  | 0.124043513 | 0.042537777 |
| 0.28776827   | 0.045669208 | 0.065718199 | 0.045740752 |
| 0.366455921  | 0.31652922  | 0.264327144 | 0.237466599 |
| 0.410023936  | 0.368767171 | 0.007202579 | 0.320787239 |
| 0.001139604  | 6.37E-05    | 0.200278845 | 0.134931725 |
| 0.001274638  | 0.202640671 | 0.16367311  | 0.038340211 |
| 0.040992997  | 0.003948955 | 0.126854169 | 0.123447533 |
| 0.180719207  | 0.204668201 | 0.195931849 | 0.104816955 |
| 0.083832565  | 0.012667039 | 0.05570265  | 0.036415325 |
| 0.010105284  | 0.196964977 | 0.123701854 | 0.002549693 |
| 0.218863586  | 0.276666323 | 0.019306162 | 0.074477951 |
| 0.380902466  | 0.422880002 | 0.002864062 | 0.001357754 |



|             |             |             |             |
|-------------|-------------|-------------|-------------|
| 0.17482011  | 0.124337749 | 0.421091561 | 0.370020378 |
| 0.374831985 | 0.396930755 | 0.267780274 | 0.031087349 |
| 0.017172958 | 0.167180971 | 0.183393342 | 0.013849165 |
| 0.397847374 | 0.024572947 | 0.336756083 | 0.186839399 |
| 0.043571908 | 0.062404491 | 0.005054561 | 0.02502584  |
| 0.275776602 | 0.090360588 | 0.083967328 | 0.079192785 |
| 0.157545592 | 0.068537853 | 0.009473176 | 0.100256806 |
| 0.258149954 | 0.03947423  | 0.07777464  | 0.073798025 |
| 0.201040187 | 0.01531042  | 0.338205488 | 0.334408488 |
| 0.06289652  | 0.032677725 | 0.089019668 | 0.226344105 |
| 0.352055537 | 0.192797914 | 0.003191784 | 0.316801212 |
| 0.370638946 | 0.344594799 | 0.359932121 | 0.304878268 |
| 0.028923298 | 0.284027792 | 0.119119379 | 0.207664276 |
| 0.079118038 | 0.156370395 | 0.089875842 | 0.021221638 |
| 0.163271496 | 0.306489923 | 0.302479328 | 0.0788586   |
| 0.220331911 | 0.048391976 | 0.019138573 | 0.307655746 |
| 0.066459249 | 0.019410731 | 0.134175712 | 0.309234211 |
| 6.42E-05    | 0.062475754 | 0.342846132 | 0.080962204 |
| 0.344904965 | 0.386751423 | 0.338137614 | 0.04293023  |
| 0.000122775 | 0.28389086  | 0.306686661 | 0.201468911 |
| 0.343588382 | 0.223593393 | 0.00584991  | 0.017361991 |
| 0.186400335 | 0.039223128 | 0.035332634 | 0.025992127 |
| 0.012541516 | 0.260180424 | 0.102950529 | 0.069832164 |
| 0.070415435 | 0.029243408 | 0.057260606 | 0.092326671 |
| 0.010355279 | 0.156207    | 0.279683846 | 0.0589422   |
| 0.070512815 | 0.321265122 | 0.312458503 | 0.004941294 |
| 0.19405898  | 0.2697258   | 0.288433082 | 0.000623316 |
| 0.378007028 | 0.000867015 | 0.098497052 | 0.119418778 |
| 0.073549591 | 0.085409275 | 0.152509953 | 0.103983687 |
| 0.189520343 | 0.080403503 | 0.141144073 | 0.145348504 |
| 0.056306741 | 0.071056654 | 0.221995451 | 0.122782658 |
| 0.153916399 | 0.040774472 | 0.043081865 | 0.046133262 |
| 0.008132378 | 0.331917282 | 0.158273025 | 0.029771564 |
| 0.114199026 | 0.106474963 | 0.257357154 | 0.351452585 |
| 0.305395392 | 0.05156507  | 0.118261708 | 0.359877739 |
| 0.014906539 | 0.019071853 | 0.014572693 | 0.163108711 |
| 0.120513862 | 0.084785396 | 0.163033591 | 0.190711194 |
| 0.253928088 | 0.280962481 | 0.154271105 | 0.29425665  |
| 0.154181361 | 0.126145061 | 0.113370136 | 0.021860862 |
| 0.084722117 | 0.05257282  | 0.17198896  | 5.48E-05    |
| 0.234534682 | 0.046839452 | 0.411626422 | 0.345702473 |
| 0.131432339 | 0.25721442  | 0.042289488 | 0.031371839 |
| 0.045839432 | 0.105002653 | 0.072768944 | 0.295359619 |
| 0.127065334 | 0.052120982 | 0.182018627 | 0.083856842 |
| 0.316287827 | 0.257748268 | 0.06092927  | 0.083914834 |
| 0.081502484 | 0.085249884 | 0.292152312 | 0.033053505 |
| 0.265855457 | 0.07503318  | 0.16045393  | 0.182949614 |
| 0.096198736 | 0.379203974 | 0.018305743 | 0.410621918 |
| 0.174715219 | 0.05621322  | 0.344027876 | 0.103680385 |
| 0.043750862 | 0.016361391 | 0.102407182 | 0.107724585 |
| 0.042245202 | 0.143666882 | 0.001673902 | 0.011385086 |
| 0.252471053 | 0.065402219 | 0.275212243 | 0.207828372 |
| 0.091321505 | 0.226417694 | 0.025120618 | 0.111664421 |
| 0.326866918 | 0.32228505  | 0.085049576 | 0.139364795 |

|             |             |             |             |
|-------------|-------------|-------------|-------------|
| 0.243941962 | 0.034505211 | 0.247409844 | 0.000577254 |
| 0.311077368 | 0.288509367 | 0.100147123 | 0.010915972 |
| 0.001129906 | 0.118040403 | 0.268364622 | 0.016725516 |
| 0.386177782 | 0.04772652  | 0.155940907 | 0.304135972 |
| 0.070714893 | 0.3325036   | 0.032174536 | 0.356328319 |
| 0.001697317 | 0.117627193 | 0.169034554 | 0.151288482 |
| 0.09961069  | 0.164480102 | 0.305821092 | 0.145087186 |
| 0.007543313 | 0.052937305 | 0.0001238   | 0.280984046 |
| 0.302707407 | 0.178463216 | 0.104120625 | 0.059888797 |
| 0.173391458 | 0.217156804 | 0.039829873 | 0.195024139 |
| 0.000642315 | 0.301422556 | 0.088739832 | 0.326579705 |
| 0.078225826 | 0.170694026 | 0.006634998 | 0.15037905  |
| 0.284872671 | 0.066867883 | 0.134194818 | 0.078204347 |
| 0.345864874 | 0.219792496 | 0.073574066 | 0.029712383 |
| 0.196138306 | 0.022322054 | 0.124263261 | 0.383713362 |
| 0.081068344 | 0.131211676 | 0.3966723   | 0.091967403 |
| 0.158748663 | 0.250471454 | 0.211672536 | 0.355894858 |
| 0.019695875 | 0.159781174 | 0.305949278 | 0.338605066 |
| 0.209879692 | 0.064296726 | 0.137418783 | 0.117898401 |
| 0.330928152 | 0.014217101 | 0.058643637 | 0.253457373 |
| 0.123268104 | 0.17805802  | 0.139580856 | 0.082562965 |
| 0.002894959 | 0.031297865 | 0.121243758 | 0.056655443 |
| 0.193658324 | 0.193667064 | 0.070883987 | 0.284819521 |
| 0.033622217 | 0.003145177 | 0.318787427 | 0.004556709 |
| 0.170903578 | 0.30775547  | 0.115181567 | 0.170743795 |
| 0.114886769 | 0.182531321 | 0.166605108 | 0.000318101 |
| 0.294501974 | 0.001886769 | 0.083009951 | 0.101932961 |
| 0.031631364 | 0.012357362 | 0.313658938 | 0.418687613 |
| 0.154074031 | 0.023812422 | 0.083019547 | 0.32337982  |
| 0.014856804 | 0.121772469 | 0.11887248  | 0.24554446  |
| 0.110811311 | 0.168412116 | 0.182908252 | 0.187031292 |
| 0.243415817 | 0.078991771 |             |             |
| CKAP2L      | 0.211767807 | 0.484067207 | 0.162315429 |
| 0.276190456 | 0.408089086 | 0.498680457 | 0.192283733 |
| 0.305026809 | 0.455201381 | 0.34509224  | 0.48658507  |
| 0.085576054 | 0.116080999 | 0.520736707 | 0.186075847 |
| 0.469213529 | 0.135472967 | 0.275400269 | 0.145783689 |
| 0.363412805 | 0.393576525 | 0.412818643 | 0.493051467 |
| 0.397782835 | 0.328361526 | 0.472244829 | 0.435332083 |
| 0.511278144 | 0.287272719 | 0.506389608 | 0.223523592 |
| 0.483871614 | 0.417857938 | 0.423361022 | 0.076600395 |
| 0.513672315 | 0.025131682 | 0.464038678 | 0.404570204 |
| 0.198620745 | 0.463389392 | 0.396459596 | 0.40561638  |
| 0.436868165 | 0.131824411 | 0.230894746 | 0.471120002 |
| 0.451833243 | 0.436309598 | 0.184545743 | 0.50947987  |
| 0.453665204 | 0.493789145 | 0.454905879 | 0.009398148 |
| 0.344050107 | 0.091573074 | 0.248463119 | 0.502263544 |
| 0.384042737 | 0.299298945 | 0.308220965 | 0.414590102 |
| 0.469889935 | 0.476331523 | 0.42871131  | 0.426299589 |
| 0.516451249 | 0.225514071 | 0.486612496 | 0.278446149 |
| 0.500569073 | 0.124357404 | 0.33192717  | 0.213746747 |
| 0.463049567 | 0.382636993 | 0.461278567 | 0.369115222 |
| 0.47220017  | 0.516341648 | 0.412849083 | 0.485385372 |
| 0.156093667 | 0.41093235  | 0.379369767 | 0.452757481 |

|             |             |             |             |
|-------------|-------------|-------------|-------------|
| 0.478337794 | 0.229386792 | 0.516039707 | 0.508015098 |
| 0.16342098  | 0.442889233 | 0.494683788 | 0.275983101 |
| 0.505040657 | 0.335474001 | 0.446040543 | 0.233325081 |
| 0.451312392 | 0.429873687 | 0.47870063  | 0.461284318 |
| 0.425376961 | 0.198843171 | 0.483884517 | 0.386269513 |
| 0.424479423 | 0.217318068 | 0.334938862 | 0.506953917 |
| 0.507880539 | 0.520324602 | 0.494887522 | 0.486069594 |
| 0.447807634 | 0.516214854 | 0.510987896 | 0.505115215 |
| 0.167428871 | 0.507738045 | 0.364596627 | 0.156528087 |
| 0.200606937 | 0.242612081 | 0.33699584  | 0.456057376 |
| 0.520325705 | 0.494506254 | 0.383745855 | 0.391239818 |
| 0.508996519 | 0.471814082 | 0.502343621 | 0.514059425 |
| 0.146258629 | 0.300268129 | 0.449095283 | 0.453033665 |
| 0.500891447 | 0.279442376 | 0.328415914 | 0.50502169  |
| 0.493983879 | 0.511964907 | 0.338351754 | 0.510882701 |
| 0.377628454 | 0.516207205 | 0.498127252 | 0.346736088 |
| 0.506851394 | 0.490479204 | 0.520106179 | 0.468088785 |
| 0.496656328 | 0.481269922 | 0.119229332 | 0.492398332 |
| 0.517997297 | 0.025728973 | 0.512874256 | 0.516053902 |
| 0.498806078 | 0.511429157 | 0.516944794 | 0.520313537 |
| 0.500576429 | 0.211859524 | 0.038588653 | 0.429596706 |
| 0.495409748 | 0.504531206 | 0.301324844 | 0.46273755  |
| 0.45387068  | 0.517215973 | 0.503250102 | 0.374894179 |
| 1           | 0.516074612 | 0.514055096 | 0.506366439 |
| 0.422987055 | 0.448705961 | 0.415412012 | 0.469456758 |
| 0.157711694 | 0.271709164 | 0.158304244 | 0.458190527 |
| 0.409167146 | 0.353721709 | 0.505184714 | 0.450825506 |
| 0.376176042 | 0.482298121 | 0.368088551 | 0.461760323 |
| 0.158500428 | 0.49963708  | 0.341168358 | 0.342754884 |
| 0.150275624 | 0.289493979 | 0.34824566  | 0.321186929 |
| 0.41161909  | 0.322759724 | 0.503662455 | 0.514394358 |
| 0.445379206 | 0.341350805 | 0.519690666 | 0.51565521  |
| 0.499039248 | 0.447225504 | 0.404718627 | 0.043188006 |
| 0.368546208 | 0.336100072 | 0.220888095 | 0.460190391 |
| 0.299104996 | 0.397254087 | 0.483506634 | 0.481192574 |
| 0.442556505 | 0.313665926 | 0.448960412 | 0.478793871 |
| 0.301154629 | 0.426131188 | 0.52012708  | 0.479822548 |
| 0.02203209  | 0.475315275 | 0.523643675 | 0.257586508 |
| 0.4657243   | 0.192360622 | 0.298678654 | 0.514082514 |
| 0.349528808 | 0.322346702 | 0.518114674 | 0.478961915 |
| 0.440863231 | 0.328029612 | 0.517200326 | 0.067205499 |
| 0.425708264 | 0.121478939 | 0.43864249  | 0.392757352 |
| 0.428318612 | 0.449509903 | 0.403855796 | 0.390011183 |
| 0.274770624 | 0.510156537 | 0.50783354  | 0.522656575 |
| 0.424812427 | 0.514811213 | 0.51973718  | 0.522713772 |
| 0.505241213 | 0.41337664  | 0.163826416 | 0.517646033 |
| 0.51325765  | 0.364196054 | 0.195367033 | 0.496832217 |
| 0.422885218 | 0.47930566  | 0.221028679 | 0.51830147  |
| 0.499026308 | 0.468773568 | 0.320127142 | 0.479507937 |
| 0.505811518 | 0.414160522 | 0.505817882 | 0.51564204  |
| 0.361928503 | 0.438119814 | 0.417726346 | 0.490155998 |
| 0.350382499 | 0.3164683   | 0.451036718 | 0.212291729 |
| 0.011609587 | 0.226801269 | 0.192478003 | 0.326742073 |
| 0.235717998 | 0.466272134 | 0.492940823 | 0.516840387 |

|             |             |             |             |
|-------------|-------------|-------------|-------------|
| 0.289765697 | 0.508442322 | 0.405214925 | 0.407720068 |
| 0.490432876 | 0.439003231 | 0.438921419 | 0.477928502 |
| 0.418592184 | 0.064409123 | 0.25741298  | 0.518011145 |
| 0.133278097 | 0.306946793 | 0.477082441 | 0.010200283 |
| 0.156703507 | 0.471166978 | 0.22064357  | 0.325232135 |
| 0.51760102  | 0.325130873 | 0.37571225  | 0.381044848 |
| 0.484586063 | 0.24936239  | 0.01388463  | 0.505109659 |
| 0.492772502 | 0.486613918 | 0.490366368 | 0.472033042 |
| 0.492375138 | 0.49494803  | 0.498587357 | 0.483365335 |
| 0.269478786 | 0.23306302  | 0.277674615 | 0.429324826 |
| 0.016489106 | 0.499156199 | 0.432244728 | 0.311811321 |
| 0.50021678  | 0.460444156 | 0.141871355 | 0.445024508 |
| 0.080122625 | 0.225976377 | 0.462477325 | 0.391987538 |
| 0.461848604 | 0.07107212  | 0.302494361 | 0.385328517 |
| 0.479834133 | 0.478886539 | 0.397869094 | 0.50853805  |
| 0.473732371 | 0.260611328 | 0.431554251 | 0.502131574 |
| 0.215926076 | 0.147787598 | 0.481417297 | 0.045000682 |
| 0.289318944 | 0.48430717  | 0.455246298 | 0.190365666 |
| 0.440558024 | 0.031477102 | 0.481034141 | 0.515107208 |
| 0.477791965 | 0.519246627 | 0.520615439 | 0.334370267 |
| 0.512088906 | 0.111548234 | 0.517063645 | 0.500858236 |
| 0.417846888 | 0.00405959  | 0.026285311 | 0.517496605 |
| 0.470547338 | 0.158048122 | 0.336888615 | 0.447145704 |
| 0.268587392 | 0.317745545 | 0.206551097 | 0.271974248 |
| 0.509881589 | 0.375960658 | 0.268139192 | 0.48510182  |
| 0.408222034 | 0.410339632 | 0.481627289 | 0.225619164 |
| 0.487701741 | 0.17340908  | 0.224704203 | 0.022963358 |
| 0.477202622 | 0.242946285 | 0.477745095 | 0.509376429 |
| 0.51337059  | 0.480997941 | 0.363265288 | 0.444680423 |
| 0.501975663 | 0.220653845 | 0.408460892 | 0.25255744  |
| 0.49837926  | 0.480166575 | 0.475515805 | 0.453733127 |
| 0.51834631  | 0.507725927 | 0.133508353 | 0.503727229 |
| 0.051103677 | 0.006759464 | 0.476281974 | 0.436827859 |
| 0.107345026 | 0.445182117 | 0.421160037 | 0.374606371 |
| 0.382683941 | 0.114678495 | 0.317049869 | 0.304610828 |
| 0.448099095 | 0.476222661 | 0.365592772 | 0.4067002   |
| 0.382007523 | 0.226486862 | 0.370478723 | 0.338956466 |
| 0.352658099 | 0.439352591 | 0.330852552 | 0.098345183 |
| 0.475475723 | 0.472979202 | 0.184944125 | 0.332869126 |
| 0.522743137 | 0.52409591  | 0.148800511 | 0.048810093 |
| 0.429504447 | 0.443471399 | 0.524270429 | 0.504683327 |
| 0.511781527 | 0.514246902 | 0.467603227 | 0.272479027 |
| 0.206216212 | 0.451780884 | 0.38088106  | 0.220103495 |
| 0.519393239 | 0.18255998  | 0.500051095 | 0.351449131 |
| 0.280577911 | 0.38363353  | 0.129216589 | 0.2376628   |
| 0.442188121 | 0.363804094 | 0.342059943 | 0.295031278 |
| 0.444713709 | 0.310776643 | 0.169535102 | 0.381407805 |
| 0.488903329 | 0.216046895 | 0.340219435 | 0.463845922 |
| 0.482746482 | 0.27318684  | 0.495274995 | 0.500286833 |
| 0.293729141 | 0.26983219  | 0.414502864 | 0.492079562 |
| 0.511242353 | 0.438226757 | 0.082660907 | 0.483139762 |
| 0.520911433 | 0.503239257 | 0.500108224 | 0.496343697 |
| 0.225502564 | 0.457341366 | 0.373189948 | 0.448220013 |
| 0.37012663  | 0.500512315 | 0.415459864 | 0.194103799 |

|             |             |             |             |
|-------------|-------------|-------------|-------------|
| 0.439170728 | 0.489963805 | 0.494803964 | 0.339990939 |
| 0.488566062 | 0.27527172  | 0.16530565  | 0.509074159 |
| 0.247913145 | 0.234393254 | 0.420328645 | 0.501656347 |
| 0.006659368 | 0.175207005 | 0.507237012 | 0.418574084 |
| 0.502548512 | 0.517265525 | 0.503362969 | 0.423643779 |
| 0.003072983 | 0.467862085 | 0.492788012 | 0.477479391 |
| 0.504676751 | 0.495194282 | 0.290107742 | 0.212586568 |
| 0.443396203 | 0.202336219 | 0.295567632 | 0.444010343 |
| 0.209206343 | 0.513503676 | 0.375005016 | 0.379749534 |
| 0.357782856 | 0.218513326 | 0.302271625 | 0.416977509 |
| 0.207168479 | 0.413591929 | 0.487331574 | 0.351466341 |
| 0.2375703   | 0.505575123 | 0.500627927 | 0.108922748 |
| 0.424331488 | 0.497449647 | 0.507975549 | 0.009606625 |
| 0.504128095 | 0.043893939 | 0.360039169 | 0.37096515  |
| 0.365389306 | 0.379257266 | 0.406956302 | 0.407787605 |
| 0.483218919 | 0.402411169 | 0.433046682 | 0.411607649 |
| 0.321427264 | 0.40533067  | 0.481434554 | 0.476347252 |
| 0.398147232 | 0.293523511 | 0.221390411 | 0.209790037 |
| 0.166986705 | 0.510595565 | 0.400698246 | 0.190721677 |
| 0.408058443 | 0.475131357 | 0.475920437 | 0.490447194 |
| 0.507359838 | 0.231740839 | 0.467409408 | 0.509415221 |
| 0.264945575 | 0.410938267 | 0.191041289 | 0.493801447 |
| 0.423279981 | 0.319194966 | 0.481273638 | 0.449185034 |
| 0.487093887 | 0.475217105 | 0.401775259 | 0.502741792 |
| 0.475369276 | 0.436004972 | 0.363298016 | 0.219372552 |
| 0.351715291 | 0.291342488 | 0.365666594 | 0.013224996 |
| 0.501148167 | 0.41226115  | 0.521322847 | 0.489700519 |
| 0.332359609 | 0.491679861 | 0.387254609 | 0.234234053 |
| 0.314647358 | 0.29216278  | 0.310049235 | 0.502025436 |
| 0.244175645 | 0.370020343 | 0.418866767 | 0.450383128 |
| 0.502511966 | 0.482772365 | 0.363264998 | 0.431967569 |
| 0.40830291  | 0.364984507 | 0.474078908 | 0.278266881 |
| 0.47420056  | 0.280056009 | 0.44109293  | 0.429196853 |
| 0.376740141 | 0.512001497 | 0.186007969 | 0.517666522 |
| 0.43185151  | 0.280759068 | 0.499373952 | 0.464867168 |
| 0.445282576 | 0.263983011 | 0.220058621 | 0.468204796 |
| 0.399270974 | 0.384261368 | 0.02005121  | 0.103898069 |
| 0.471638653 | 0.39977772  | 0.477858141 | 0.485299773 |
| 0.344190754 | 0.469227264 | 0.198598124 | 0.457226109 |
| 0.474271503 | 0.493887019 | 0.39611629  | 0.412943056 |
| 0.492962961 | 0.264074382 | 0.498844288 | 0.032542678 |
| 0.483321534 | 0.45702463  | 0.432879034 | 0.182769443 |
| 0.088652937 | 0.24544099  | 0.486244782 | 0.186768047 |
| 0.515455919 | 0.233850028 | 0.449286486 | 0.510473117 |
| 0.346031816 | 0.496733006 | 0.278824469 | 0.507397282 |
| 0.146172051 | 0.428267504 | 0.433735246 | 0.451639036 |
| 0.34402351  | 0.363603549 | 0.492578284 | 0.300768321 |
| 0.128289684 | 0.392251757 | 0.00828804  | 0.461137197 |
| 0.465590575 | 0.396258603 | 0.364448756 | 0.341997083 |
| 0.43803712  | 0.486500902 | 0.371036436 | 0.46008134  |
| 0.052010897 | 0.442600072 | 0.385135169 | 0.511140948 |
| 0.262511597 | 0.45984973  | 0.171987115 | 0.396608726 |
| 0.472721174 | 0.387716063 | 0.41564488  | 0.34852238  |
| 0.496911466 | 0.483439213 | 0.302157307 | 0.342708955 |

|             |             |             |             |
|-------------|-------------|-------------|-------------|
| 0.458741494 | 0.188620653 | 0.444839408 | 0.512394065 |
| 0.347559118 | 0.286279813 | 0.509889922 | 0.36862208  |
| 0.374087814 | 0.490367574 | 0.454715271 | 0.504171005 |
| 0.196436062 | 0.424648531 | 0.508714794 | 0.505071218 |
| 0.45501286  | 0.254857632 | 0.312505033 | 0.359718078 |
| 0.481639972 | 0.232042905 | 0.340421693 | 0.49751562  |
| 0.271892586 | 0.468747353 | 0.422965137 | 0.320197235 |
| 0.127926227 | 0.352489964 | 0.480233613 | 0.314903411 |
| 0.454893984 | 0.461371372 | 0.347415213 | 0.485442675 |
| 0.275039768 | 0.085568004 | 0.499522699 | 0.025664393 |
| 0.476462275 | 0.492027179 | 0.427961301 | 0.445554798 |
| 0.338938191 | 0.492104209 | 0.457463209 | 0.008958218 |
| 0.506503522 | 0.080418665 | 0.426692867 | 0.346188193 |
| 0.357473582 | 0.1723281   | 0.499225911 | 0.522795379 |
| 0.478558262 | 0.397496705 | 0.379133446 | 0.50501695  |
| 0.19241519  | 0.353137428 | 0.396053026 | 0.494299267 |
| 0.275578583 | 0.421979113 | 0.455530218 | 0.414379432 |
| 0.509382193 | 0.450527641 |             |             |
| CKAP5       | 0.121490446 | 0.432265088 | 0.100770801 |
| 0.217109659 | 0.358260679 | 0.464859321 | 0.091530193 |
| 0.178173033 | 0.373657735 | 0.33889571  | 0.421419852 |
| 0.032989351 | 0.117351506 | 0.453153093 | 0.084262971 |
| 0.415507732 | 0.057918018 | 0.153245233 | 0.101786076 |
| 0.290089962 | 0.317583116 | 0.385498162 | 0.420032688 |
| 0.327387766 | 0.224434098 | 0.395986778 | 0.410169084 |
| 0.510021212 | 0.313955419 | 0.472294439 | 0.268776997 |
| 0.420873206 | 0.361573418 | 0.419189066 | 0.036415483 |
| 0.449175015 | 0.016608869 | 0.448146694 | 0.312947299 |
| 0.221439971 | 0.352890381 | 0.390448792 | 0.310583988 |
| 0.410335003 | 0.067157655 | 0.258599965 | 0.419445355 |
| 0.385905616 | 0.349833496 | 0.104535758 | 0.467451675 |
| 0.399855642 | 0.397835313 | 0.415385053 | 0.003426968 |
| 0.344815773 | 0.112943501 | 0.255516166 | 0.522968689 |
| 0.262773787 | 0.1748405   | 0.31192579  | 0.300491193 |
| 0.400458204 | 0.397486938 | 0.310718807 | 0.390383393 |
| 0.507230958 | 0.206468162 | 0.455112019 | 0.233677344 |
| 0.412116068 | 0.058696038 | 0.212617171 | 0.1277372   |
| 0.421632929 | 0.262782092 | 0.393374947 | 0.355549045 |
| 0.433630177 | 0.525946318 | 0.298682741 | 0.514096858 |
| 0.109301735 | 0.369341354 | 0.338741744 | 0.344017432 |
| 0.381907462 | 0.119648783 | 0.448447275 | 0.529935076 |
| 0.07942902  | 0.408127103 | 0.409410328 | 0.166968832 |
| 0.442699338 | 0.318296907 | 0.428880453 | 0.221960539 |
| 0.40756949  | 0.367324363 | 0.482513589 | 0.342204683 |
| 0.364012569 | 0.113303673 | 0.501767559 | 0.353770655 |
| 0.361841284 | 0.135628509 | 0.265156793 | 0.458088288 |
| 0.450594181 | 0.501229988 | 0.424578791 | 0.378451578 |
| 0.401875491 | 0.512058732 | 0.452077122 | 0.416089727 |
| 0.202380204 | 0.535461967 | 0.265149223 | 0.069531846 |
| 0.117576703 | 0.129697095 | 0.259407588 | 0.338348552 |
| 0.473567491 | 0.390758255 | 0.263574609 | 0.28672278  |
| 0.443679603 | 0.493495746 | 0.529623523 | 0.424031381 |
| 0.068455253 | 0.283369104 | 0.417251942 | 0.356815496 |
| 0.397163988 | 0.160836051 | 0.301485219 | 0.519865263 |

|             |             |             |             |
|-------------|-------------|-------------|-------------|
| 0.399071493 | 0.445482722 | 0.240534233 | 0.51575774  |
| 0.239763388 | 0.524228395 | 0.459812826 | 0.231573779 |
| 0.533766353 | 0.513592311 | 0.518623653 | 0.431552633 |
| 0.494803815 | 0.422539552 | 0.063694058 | 0.395986262 |
| 0.49233831  | 0.02202559  | 0.470717309 | 0.498507066 |
| 0.512007408 | 0.46367553  | 0.521153719 | 0.517006754 |
| 0.514843433 | 0.116209266 | 0.030621652 | 0.32240897  |
| 0.520579574 | 0.424687574 | 0.180439312 | 0.432172584 |
| 0.382525792 | 0.446230376 | 0.444317093 | 0.344338348 |
| 0.516074612 | 1           | 0.492437888 | 0.411990024 |
| 0.345726229 | 0.333856831 | 0.399544005 | 0.488967044 |
| 0.082204256 | 0.173744851 | 0.089147115 | 0.340661482 |
| 0.421171608 | 0.230654242 | 0.427765675 | 0.371906873 |
| 0.247925861 | 0.394546388 | 0.373688869 | 0.409190786 |
| 0.087483735 | 0.463658922 | 0.240987713 | 0.226041955 |
| 0.071105039 | 0.180027572 | 0.234516786 | 0.22239976  |
| 0.297735003 | 0.259913585 | 0.456904716 | 0.497295047 |
| 0.375344121 | 0.241259614 | 0.449287432 | 0.48525352  |
| 0.422869277 | 0.424044347 | 0.269203141 | 0.025314238 |
| 0.295873091 | 0.327000496 | 0.221037643 | 0.438247192 |
| 0.202474364 | 0.266243903 | 0.406668123 | 0.425178008 |
| 0.35033411  | 0.194326586 | 0.385856837 | 0.443577195 |
| 0.196102336 | 0.364256431 | 0.441279422 | 0.429390774 |
| 0.009034906 | 0.385218534 | 0.461372925 | 0.180390306 |
| 0.345472697 | 0.162763695 | 0.314023613 | 0.457326864 |
| 0.313379294 | 0.251943606 | 0.497539873 | 0.421332101 |
| 0.374197372 | 0.242167925 | 0.526044203 | 0.051645093 |
| 0.374722728 | 0.095922591 | 0.327901802 | 0.376771824 |
| 0.311487636 | 0.325070847 | 0.351468249 | 0.348070725 |
| 0.189765407 | 0.521304782 | 0.426331444 | 0.515133856 |
| 0.393073587 | 0.530527659 | 0.458370977 | 0.439996585 |
| 0.416300378 | 0.377905505 | 0.162683581 | 0.458052855 |
| 0.454914852 | 0.326292756 | 0.11531359  | 0.443899621 |
| 0.383492964 | 0.423608352 | 0.17939173  | 0.494862529 |
| 0.511003504 | 0.483405851 | 0.189673041 | 0.395546851 |
| 0.417928554 | 0.308835128 | 0.438940939 | 0.527632206 |
| 0.340195281 | 0.368008065 | 0.370221599 | 0.414320701 |
| 0.239653462 | 0.238084296 | 0.340529064 | 0.215023683 |
| 0.019352989 | 0.124297403 | 0.10726549  | 0.21313011  |
| 0.213650897 | 0.438666126 | 0.430515747 | 0.520811188 |
| 0.163796193 | 0.429043309 | 0.278581099 | 0.329412211 |
| 0.42294381  | 0.366716118 | 0.41906068  | 0.42217672  |
| 0.298976734 | 0.039378674 | 0.165578967 | 0.529549642 |
| 0.069459373 | 0.287138315 | 0.359073095 | 0.00515594  |
| 0.073162737 | 0.422399403 | 0.132596043 | 0.216782557 |
| 0.471229946 | 0.227181772 | 0.264129272 | 0.350422235 |
| 0.394400478 | 0.143301594 | 0.007926605 | 0.487959397 |
| 0.488909729 | 0.457157453 | 0.486518006 | 0.467179729 |
| 0.429687512 | 0.42680737  | 0.431857974 | 0.427403098 |
| 0.158988325 | 0.143834265 | 0.241168068 | 0.33167983  |
| 0.006335986 | 0.424570949 | 0.352690568 | 0.194128087 |
| 0.438459372 | 0.337816413 | 0.065903941 | 0.382307544 |
| 0.044883493 | 0.244424261 | 0.33602748  | 0.267525551 |
| 0.373724636 | 0.030640802 | 0.308950127 | 0.346636501 |

|             |             |             |             |
|-------------|-------------|-------------|-------------|
| 0.45039616  | 0.3707167   | 0.405998212 | 0.542477189 |
| 0.387273833 | 0.173305822 | 0.37149027  | 0.431278995 |
| 0.111688852 | 0.13060587  | 0.389781978 | 0.05889488  |
| 0.271059351 | 0.458945513 | 0.414372371 | 0.124525012 |
| 0.329996574 | 0.012220379 | 0.390196543 | 0.535863406 |
| 0.484794299 | 0.51772516  | 0.512530368 | 0.321482343 |
| 0.517173666 | 0.128322543 | 0.534602886 | 0.422403366 |
| 0.394503641 | 0.002097559 | 0.009036288 | 0.488339926 |
| 0.427225783 | 0.093136234 | 0.215768943 | 0.437691229 |
| 0.159884134 | 0.20796323  | 0.106367021 | 0.236542026 |
| 0.473326445 | 0.289764084 | 0.213730977 | 0.477354518 |
| 0.295778669 | 0.283522524 | 0.419606009 | 0.12832367  |
| 0.450002882 | 0.088758989 | 0.12745136  | 0.013367367 |
| 0.395008287 | 0.156939807 | 0.486425632 | 0.516588647 |
| 0.503135967 | 0.432417017 | 0.365231212 | 0.377670383 |
| 0.427021154 | 0.143174748 | 0.41980462  | 0.161898049 |
| 0.497488106 | 0.416375282 | 0.366624846 | 0.351096838 |
| 0.499055553 | 0.479350507 | 0.057284286 | 0.429600923 |
| 0.031080465 | 0.00305169  | 0.434168212 | 0.303626161 |
| 0.077295679 | 0.383704724 | 0.304130515 | 0.274196614 |
| 0.272967862 | 0.057643057 | 0.296131686 | 0.277994546 |
| 0.348215395 | 0.390287417 | 0.313729973 | 0.28674905  |
| 0.316431073 | 0.168009901 | 0.265517429 | 0.199487312 |
| 0.268140271 | 0.341298857 | 0.226964951 | 0.038737866 |
| 0.457911955 | 0.441296642 | 0.095381424 | 0.217140861 |
| 0.45531408  | 0.490423146 | 0.064796062 | 0.0219364   |
| 0.309537834 | 0.341903548 | 0.495917831 | 0.509534345 |
| 0.535062594 | 0.520320476 | 0.407612165 | 0.155006458 |
| 0.109460573 | 0.364281333 | 0.335218798 | 0.145762352 |
| 0.514961389 | 0.101525427 | 0.499752662 | 0.338184745 |
| 0.164840172 | 0.289861393 | 0.061675839 | 0.127416526 |
| 0.415931926 | 0.229656833 | 0.232142546 | 0.207182497 |
| 0.347694306 | 0.312119714 | 0.080602095 | 0.251540594 |
| 0.379683371 | 0.220812759 | 0.214180704 | 0.376490321 |
| 0.407072429 | 0.258708411 | 0.444212954 | 0.450651108 |
| 0.182133169 | 0.157224936 | 0.355116481 | 0.411327795 |
| 0.459267702 | 0.413773996 | 0.05152053  | 0.459561925 |
| 0.491694682 | 0.463748388 | 0.513738869 | 0.389066878 |
| 0.126621297 | 0.414947179 | 0.333142785 | 0.367759585 |
| 0.232279348 | 0.45980319  | 0.285718265 | 0.099503449 |
| 0.319740561 | 0.487129299 | 0.423676365 | 0.224433294 |
| 0.453244882 | 0.175992455 | 0.090861109 | 0.441710004 |
| 0.219738589 | 0.132808034 | 0.395722483 | 0.435880088 |
| 0.005609358 | 0.177220135 | 0.485105962 | 0.306047136 |
| 0.521743519 | 0.481287374 | 0.449702788 | 0.32765258  |
| 0.002919534 | 0.43078701  | 0.420967462 | 0.446212328 |
| 0.428643169 | 0.395682339 | 0.203935683 | 0.113779533 |
| 0.327653173 | 0.124973942 | 0.170826011 | 0.416168163 |
| 0.197131167 | 0.43187722  | 0.242744283 | 0.253205366 |
| 0.254001944 | 0.129194763 | 0.301687858 | 0.325140751 |
| 0.17551505  | 0.285634459 | 0.376292808 | 0.337725139 |
| 0.216527101 | 0.416200187 | 0.423248656 | 0.050881325 |
| 0.391239027 | 0.410573197 | 0.435777961 | 0.003285052 |
| 0.449853901 | 0.015068574 | 0.241764611 | 0.278094292 |



|             |             |             |             |
|-------------|-------------|-------------|-------------|
| 0.259710403 | 0.244653666 | 0.299558928 | 0.361072175 |
| 0.386368204 | 0.282911259 | 0.351041171 | 0.292062382 |
| 0.224638539 | 0.294600352 | 0.432499123 | 0.416095167 |
| 0.337623444 | 0.186829338 | 0.137019315 | 0.131049926 |
| 0.087737713 | 0.467421403 | 0.281597995 | 0.117828644 |
| 0.275025631 | 0.407145555 | 0.366326399 | 0.505813238 |
| 0.421397534 | 0.15473867  | 0.360485413 | 0.450659926 |
| 0.253237956 | 0.355642415 | 0.09969533  | 0.454467931 |
| 0.292537906 | 0.251173465 | 0.449444567 | 0.361009233 |
| 0.418333117 | 0.412908072 | 0.281492418 | 0.448489262 |
| 0.432606503 | 0.360430889 | 0.365870617 | 0.12534865  |
| 0.240701631 | 0.178692332 | 0.307307239 | 0.005604241 |
| 0.391392429 | 0.358983154 | 0.463697835 | 0.505529245 |
| 0.321828872 | 0.392259145 | 0.369552981 | 0.132214104 |
| 0.341283756 | 0.206449273 | 0.189165915 | 0.458287952 |
| 0.253333115 | 0.258821142 | 0.352281544 | 0.413612431 |
| 0.454423141 | 0.435513461 | 0.294669109 | 0.287868874 |
| 0.29244199  | 0.267396204 | 0.483727497 | 0.186094018 |
| 0.447961428 | 0.243521173 | 0.39067978  | 0.336894293 |
| 0.267379329 | 0.522044839 | 0.100409965 | 0.526560793 |
| 0.350358781 | 0.177207272 | 0.499658247 | 0.365362061 |
| 0.389479333 | 0.180618999 | 0.226403243 | 0.419013325 |
| 0.269622086 | 0.378974337 | 0.01843072  | 0.071263503 |
| 0.363635566 | 0.329756067 | 0.414775968 | 0.389616614 |
| 0.294118079 | 0.36038248  | 0.207709072 | 0.333969374 |
| 0.494626216 | 0.512246417 | 0.298673647 | 0.289546003 |
| 0.370747443 | 0.151081418 | 0.446789228 | 0.020869549 |
| 0.43218034  | 0.434563156 | 0.392242224 | 0.084778838 |
| 0.036400829 | 0.248375801 | 0.437630514 | 0.103757026 |
| 0.472163135 | 0.256303645 | 0.382167954 | 0.474182503 |
| 0.222687121 | 0.514031697 | 0.166431988 | 0.441194531 |
| 0.071404358 | 0.311223598 | 0.408698063 | 0.388685446 |
| 0.277937014 | 0.32805793  | 0.412576839 | 0.281818654 |
| 0.057046295 | 0.317832734 | 0.002693518 | 0.422948868 |
| 0.485211236 | 0.364479949 | 0.242560348 | 0.328508414 |
| 0.326647739 | 0.397608488 | 0.250466149 | 0.447124746 |
| 0.02392146  | 0.400044152 | 0.257266879 | 0.437208648 |
| 0.276911618 | 0.377492923 | 0.104356626 | 0.334810671 |
| 0.476740796 | 0.292448982 | 0.284510808 | 0.349308002 |
| 0.504880961 | 0.413800942 | 0.220688265 | 0.288778146 |
| 0.400865589 | 0.10022725  | 0.430098819 | 0.529208223 |
| 0.227598738 | 0.264019065 | 0.447076183 | 0.254416839 |
| 0.335144391 | 0.403985303 | 0.428302632 | 0.519712067 |
| 0.101097304 | 0.298600068 | 0.44415245  | 0.456607963 |
| 0.337025592 | 0.206585422 | 0.278267151 | 0.262080914 |
| 0.476631932 | 0.152455076 | 0.295322743 | 0.403062769 |
| 0.251546183 | 0.351109585 | 0.377409554 | 0.232967349 |
| 0.057181454 | 0.216586821 | 0.433081919 | 0.195979639 |
| 0.334202518 | 0.405265693 | 0.286885697 | 0.396117085 |
| 0.194194722 | 0.047756584 | 0.462964384 | 0.024225045 |
| 0.416313801 | 0.441246438 | 0.299717608 | 0.39713507  |
| 0.23585039  | 0.387065567 | 0.378738137 | 0.001943531 |
| 0.423146478 | 0.09151723  | 0.342697737 | 0.272786874 |
| 0.298969781 | 0.081396932 | 0.475208793 | 0.510555383 |

|             |             |             |             |
|-------------|-------------|-------------|-------------|
| 0.375342966 | 0.378715509 | 0.37276569  | 0.465113173 |
| 0.19069794  | 0.361600209 | 0.347821799 | 0.449433361 |
| 0.267469816 | 0.410846227 | 0.432698915 | 0.424756376 |
| 0.425869487 | 0.334636097 |             |             |
| CKS1B       | 0.115381977 | 0.466763328 | 0.096007967 |
| 0.184453409 | 0.355183654 | 0.49325775  | 0.086575122 |
| 0.174934492 | 0.419163075 | 0.413906893 | 0.428442276 |
| 0.027228282 | 0.12213315  | 0.476645974 | 0.079137145 |
| 0.446380274 | 0.047111125 | 0.145437749 | 0.115372523 |
| 0.29574419  | 0.320798926 | 0.416177193 | 0.473913107 |
| 0.333312999 | 0.229721994 | 0.43000981  | 0.464871331 |
| 0.518107466 | 0.367458136 | 0.506261854 | 0.286745948 |
| 0.414196457 | 0.372570899 | 0.469058567 | 0.028465895 |
| 0.493342056 | 0.018024834 | 0.447705793 | 0.306047802 |
| 0.192883556 | 0.368841325 | 0.451302554 | 0.293688569 |
| 0.466039743 | 0.05958666  | 0.325609465 | 0.470673075 |
| 0.415770007 | 0.357258205 | 0.108193718 | 0.502205227 |
| 0.449637817 | 0.420312254 | 0.478299084 | 0.004171733 |
| 0.373538257 | 0.130284155 | 0.292978798 | 0.527707534 |
| 0.253539605 | 0.160109103 | 0.37645965  | 0.33237045  |
| 0.461977784 | 0.436226431 | 0.312008567 | 0.455906371 |
| 0.511810069 | 0.225244266 | 0.503285927 | 0.214158298 |
| 0.459333176 | 0.057189697 | 0.203837843 | 0.133175195 |
| 0.463331153 | 0.247406424 | 0.407581688 | 0.369999849 |
| 0.463279296 | 0.530327493 | 0.296620754 | 0.52485488  |
| 0.127136549 | 0.394560357 | 0.331933779 | 0.346603196 |
| 0.42420078  | 0.122161532 | 0.470325083 | 0.530038406 |
| 0.080788127 | 0.480339736 | 0.461954878 | 0.177430998 |
| 0.483181681 | 0.358892118 | 0.495526086 | 0.221942451 |
| 0.424352961 | 0.391072102 | 0.495966578 | 0.349997111 |
| 0.381602277 | 0.11418917  | 0.512789619 | 0.373207387 |
| 0.355772534 | 0.125611136 | 0.264604219 | 0.505871636 |
| 0.481075178 | 0.507455475 | 0.483104694 | 0.414473317 |
| 0.435465455 | 0.512696113 | 0.469668907 | 0.458837832 |
| 0.260046847 | 0.545142396 | 0.248712313 | 0.059190481 |
| 0.118403856 | 0.115354813 | 0.286574023 | 0.346237867 |
| 0.503795626 | 0.411136778 | 0.259963341 | 0.273493112 |
| 0.477235333 | 0.507231584 | 0.544159533 | 0.467142194 |
| 0.059893506 | 0.315107409 | 0.441635019 | 0.374335992 |
| 0.439513682 | 0.1576245   | 0.308175061 | 0.527397278 |
| 0.414315289 | 0.482484953 | 0.240269633 | 0.518214599 |
| 0.261994918 | 0.51871688  | 0.495281138 | 0.214237952 |
| 0.5337394   | 0.516828191 | 0.51295149  | 0.459166932 |
| 0.492360183 | 0.427140682 | 0.092820132 | 0.43321008  |
| 0.485651976 | 0.01954743  | 0.506527805 | 0.508444145 |
| 0.520352786 | 0.507133484 | 0.52328029  | 0.521165508 |
| 0.527637977 | 0.110031291 | 0.043389278 | 0.328377393 |
| 0.526819888 | 0.439407086 | 0.172747328 | 0.485724522 |
| 0.414408687 | 0.488323801 | 0.492866167 | 0.378536291 |
| 0.514055096 | 0.492437888 | 1           | 0.4609786   |
| 0.391533578 | 0.35005391  | 0.448358947 | 0.495496517 |
| 0.064540482 | 0.169457684 | 0.086529192 | 0.36110332  |
| 0.464017855 | 0.213837843 | 0.472072233 | 0.413247312 |
| 0.237186999 | 0.442725386 | 0.419058981 | 0.433610885 |

|             |             |             |             |
|-------------|-------------|-------------|-------------|
| 0.089318237 | 0.520347114 | 0.225302146 | 0.23404506  |
| 0.055868239 | 0.182297918 | 0.231894997 | 0.201803006 |
| 0.297945582 | 0.257701672 | 0.514156973 | 0.497739569 |
| 0.416822435 | 0.241719616 | 0.497540786 | 0.477010774 |
| 0.411155788 | 0.444501977 | 0.281118295 | 0.014620347 |
| 0.320120178 | 0.400890143 | 0.243337372 | 0.489906875 |
| 0.206071417 | 0.291373712 | 0.448504953 | 0.44510145  |
| 0.367634196 | 0.212780885 | 0.429918484 | 0.437852829 |
| 0.207359487 | 0.363411602 | 0.474986978 | 0.492844582 |
| 0.005785957 | 0.394711564 | 0.499698577 | 0.176273378 |
| 0.385413529 | 0.17211901  | 0.327662147 | 0.483785044 |
| 0.366817394 | 0.27106669  | 0.504573603 | 0.442942527 |
| 0.430269527 | 0.250669457 | 0.531061382 | 0.071910998 |
| 0.413326936 | 0.065814859 | 0.324349236 | 0.446054333 |
| 0.309896546 | 0.335987591 | 0.369783591 | 0.332816825 |
| 0.190419408 | 0.533077566 | 0.45215524  | 0.521520096 |
| 0.443777352 | 0.533360121 | 0.499880383 | 0.470111671 |
| 0.433730452 | 0.443341468 | 0.181525199 | 0.491359783 |
| 0.48829915  | 0.373306121 | 0.11705626  | 0.504867224 |
| 0.446433521 | 0.462685119 | 0.146691787 | 0.492447433 |
| 0.50453514  | 0.49834151  | 0.181198047 | 0.413751336 |
| 0.432321245 | 0.301707518 | 0.466363033 | 0.533365384 |
| 0.412347782 | 0.409243258 | 0.386784188 | 0.427705503 |
| 0.228370656 | 0.247732901 | 0.359183698 | 0.23888833  |
| 0.018577748 | 0.126952829 | 0.101124154 | 0.194232651 |
| 0.201815711 | 0.506649591 | 0.45802443  | 0.52878589  |
| 0.154219072 | 0.44938407  | 0.296734721 | 0.336325691 |
| 0.440420394 | 0.415873065 | 0.449667323 | 0.453530034 |
| 0.30182128  | 0.02454624  | 0.148173768 | 0.531580094 |
| 0.07105352  | 0.29233618  | 0.404689058 | 0.003820297 |
| 0.0700645   | 0.484692729 | 0.134326403 | 0.219674293 |
| 0.479640407 | 0.229673797 | 0.268476379 | 0.418763066 |
| 0.401649935 | 0.131496641 | 0.004132979 | 0.496209093 |
| 0.501808283 | 0.469547085 | 0.502217323 | 0.48004324  |
| 0.460596521 | 0.472847294 | 0.460728571 | 0.458331086 |
| 0.144709055 | 0.140970326 | 0.24760853  | 0.334420889 |
| 0.007916567 | 0.433605407 | 0.368888211 | 0.185334721 |
| 0.483932242 | 0.36241722  | 0.058054265 | 0.416544677 |
| 0.034229681 | 0.261581592 | 0.389774865 | 0.271214745 |
| 0.392210683 | 0.024153899 | 0.310718232 | 0.389308292 |
| 0.452977039 | 0.397233118 | 0.439480827 | 0.545575095 |
| 0.389934612 | 0.1873427   | 0.359695549 | 0.455755078 |
| 0.100565891 | 0.159339039 | 0.450317123 | 0.060315639 |
| 0.298179183 | 0.469417505 | 0.465562686 | 0.104047877 |
| 0.327334737 | 0.008427215 | 0.414207637 | 0.542396854 |
| 0.495417988 | 0.522299895 | 0.512870139 | 0.327652779 |
| 0.518426144 | 0.156789593 | 0.54369051  | 0.465013909 |
| 0.468511278 | 0.001373218 | 0.008026141 | 0.502228661 |
| 0.454130241 | 0.095923152 | 0.205301194 | 0.464327455 |
| 0.138239852 | 0.222713181 | 0.097714724 | 0.214835066 |
| 0.507609558 | 0.281417535 | 0.215387866 | 0.493227877 |
| 0.287556129 | 0.281445588 | 0.49278984  | 0.130208038 |
| 0.480465885 | 0.073999312 | 0.128957592 | 0.00977931  |
| 0.417036149 | 0.161460568 | 0.495074688 | 0.526303375 |

|             |             |             |             |
|-------------|-------------|-------------|-------------|
| 0.49784079  | 0.446093266 | 0.444941998 | 0.437848961 |
| 0.469888827 | 0.15387055  | 0.46661134  | 0.171230377 |
| 0.507925581 | 0.444483786 | 0.370914984 | 0.359280504 |
| 0.499819735 | 0.477231682 | 0.049857596 | 0.457832022 |
| 0.021233331 | 0.002493247 | 0.467855405 | 0.320721945 |
| 0.093140446 | 0.425560748 | 0.302785748 | 0.303008357 |
| 0.287029837 | 0.049902187 | 0.315358005 | 0.288030199 |
| 0.346401512 | 0.416129849 | 0.317122135 | 0.30580339  |
| 0.310078214 | 0.158293237 | 0.247391103 | 0.199901575 |
| 0.316977568 | 0.361871384 | 0.233664879 | 0.03282671  |
| 0.506267389 | 0.481720222 | 0.084381281 | 0.211949575 |
| 0.481826031 | 0.500117439 | 0.05659446  | 0.013749263 |
| 0.317920233 | 0.375838847 | 0.500840867 | 0.521617147 |
| 0.542223362 | 0.519869864 | 0.399222878 | 0.146945658 |
| 0.099310319 | 0.369512566 | 0.341501504 | 0.116765327 |
| 0.524414757 | 0.106733146 | 0.506510287 | 0.3578988   |
| 0.158494163 | 0.267182192 | 0.04757374  | 0.116926457 |
| 0.453637055 | 0.225957693 | 0.211007656 | 0.209574978 |
| 0.362645976 | 0.310471553 | 0.071625903 | 0.243643467 |
| 0.405170666 | 0.216982415 | 0.207295132 | 0.403585196 |
| 0.429316633 | 0.32746506  | 0.48642371  | 0.444374021 |
| 0.179862874 | 0.158201008 | 0.371715385 | 0.450150545 |
| 0.505455013 | 0.486708521 | 0.042673838 | 0.478420282 |
| 0.495650298 | 0.512674061 | 0.519681967 | 0.414534902 |
| 0.122671571 | 0.439506821 | 0.379952986 | 0.392483064 |
| 0.234602635 | 0.488215065 | 0.293732734 | 0.092570411 |
| 0.334393595 | 0.493768284 | 0.459329956 | 0.205246339 |
| 0.506687212 | 0.191602266 | 0.09562991  | 0.490125972 |
| 0.211632028 | 0.128098961 | 0.469799077 | 0.488443519 |
| 0.002282248 | 0.180350273 | 0.489232897 | 0.304832715 |
| 0.524677401 | 0.483359111 | 0.440080856 | 0.34310387  |
| 0.002639624 | 0.469265648 | 0.436192797 | 0.464385743 |
| 0.477600312 | 0.42022517  | 0.220122933 | 0.095107439 |
| 0.326302071 | 0.128152743 | 0.163942361 | 0.444714012 |
| 0.215783464 | 0.491016494 | 0.238524693 | 0.266622407 |
| 0.23519196  | 0.141784787 | 0.305114876 | 0.305965726 |
| 0.188663868 | 0.282319696 | 0.390837516 | 0.413667612 |
| 0.242011079 | 0.454623455 | 0.463627549 | 0.042642152 |
| 0.425174091 | 0.447696164 | 0.458863181 | 0.002740655 |
| 0.485885874 | 0.010633759 | 0.233548914 | 0.255652998 |
| 0.239654124 | 0.25132393  | 0.296740612 | 0.345570688 |
| 0.425280657 | 0.272837409 | 0.333589392 | 0.282611767 |
| 0.197243091 | 0.28664808  | 0.454063222 | 0.437213519 |
| 0.329911255 | 0.169999801 | 0.13814209  | 0.134961451 |
| 0.07369885  | 0.494054449 | 0.286080323 | 0.115991777 |
| 0.274335839 | 0.445111278 | 0.373076768 | 0.51912207  |
| 0.436381445 | 0.163064568 | 0.397736277 | 0.49271315  |
| 0.332526801 | 0.396681327 | 0.102072744 | 0.474393464 |
| 0.293189909 | 0.255130309 | 0.499674703 | 0.395946021 |
| 0.482099793 | 0.402266612 | 0.287212303 | 0.444131097 |
| 0.433275276 | 0.415120602 | 0.430963125 | 0.104926602 |
| 0.228206742 | 0.179582285 | 0.30365346  | 0.002914735 |
| 0.415334967 | 0.354631321 | 0.506112278 | 0.509094712 |
| 0.362131585 | 0.408774324 | 0.431909822 | 0.123272389 |

|             |             |             |             |
|-------------|-------------|-------------|-------------|
| 0.389790497 | 0.220007979 | 0.185302168 | 0.503432385 |
| 0.281085104 | 0.241439565 | 0.34596091  | 0.448581121 |
| 0.488760176 | 0.484405028 | 0.303336636 | 0.315357727 |
| 0.294670366 | 0.267242416 | 0.491551779 | 0.182146045 |
| 0.503783143 | 0.217507535 | 0.457792349 | 0.340016504 |
| 0.259257397 | 0.527629443 | 0.092426502 | 0.53632365  |
| 0.38062557  | 0.179681534 | 0.495899482 | 0.39195245  |
| 0.3855153   | 0.154274396 | 0.23848292  | 0.483104648 |
| 0.280169749 | 0.414198759 | 0.028774238 | 0.083972006 |
| 0.370751089 | 0.387830592 | 0.474999056 | 0.423434742 |
| 0.287098194 | 0.37384022  | 0.22741789  | 0.368584492 |
| 0.509557515 | 0.521334715 | 0.303083809 | 0.288816293 |
| 0.403191807 | 0.136710617 | 0.492992579 | 0.026329089 |
| 0.484853363 | 0.494046415 | 0.47295395  | 0.076929916 |
| 0.02847183  | 0.262108373 | 0.482178056 | 0.108173641 |
| 0.4826206   | 0.276946279 | 0.442398483 | 0.506706458 |
| 0.232174709 | 0.520850798 | 0.148897967 | 0.461877216 |
| 0.075864469 | 0.313244172 | 0.447861492 | 0.45559425  |
| 0.261871458 | 0.337779504 | 0.42150135  | 0.279956566 |
| 0.045109334 | 0.311055899 | 0.001994897 | 0.415236842 |
| 0.494927292 | 0.394218273 | 0.248799529 | 0.415660833 |
| 0.32086711  | 0.425421838 | 0.289497005 | 0.502612202 |
| 0.014979525 | 0.420670699 | 0.249517054 | 0.468720712 |
| 0.30146999  | 0.433115018 | 0.076802237 | 0.365756208 |
| 0.483617175 | 0.334109307 | 0.299642994 | 0.378715901 |
| 0.512886312 | 0.451944117 | 0.226550208 | 0.275245723 |
| 0.468501825 | 0.098320273 | 0.494760913 | 0.537699458 |
| 0.212248226 | 0.253584791 | 0.478869144 | 0.241435596 |
| 0.369716547 | 0.435919683 | 0.487817423 | 0.532667433 |
| 0.087312532 | 0.294747549 | 0.477933907 | 0.468570822 |
| 0.339545379 | 0.201964831 | 0.293686223 | 0.264614401 |
| 0.482736181 | 0.134820737 | 0.310394556 | 0.420013956 |
| 0.259892292 | 0.363608761 | 0.435348285 | 0.223087488 |
| 0.049905567 | 0.21988167  | 0.461189207 | 0.188576332 |
| 0.344580087 | 0.415316973 | 0.275970177 | 0.395746342 |
| 0.168909003 | 0.032044733 | 0.450887566 | 0.023844511 |
| 0.437606934 | 0.453601464 | 0.302687728 | 0.413311233 |
| 0.234480316 | 0.42619372  | 0.421551543 | 0.001726521 |
| 0.455356598 | 0.063956621 | 0.369559263 | 0.261746149 |
| 0.35004848  | 0.077501769 | 0.471459828 | 0.513968454 |
| 0.394177136 | 0.424881772 | 0.432399494 | 0.475401934 |
| 0.184586869 | 0.420788093 | 0.412200525 | 0.498862608 |
| 0.274999045 | 0.480430692 | 0.497029653 | 0.452113357 |
| 0.454508974 | 0.350669562 |             |             |
| CKS2        | 0.107284934 | 0.406330238 | 0.079282267 |
| 0.146730013 | 0.265786716 | 0.310058658 | 0.104748802 |
| 0.181625939 | 0.327981061 | 0.268817999 | 0.305959431 |
| 0.037673805 | 0.081076457 | 0.44727726  | 0.096230999 |
| 0.334411335 | 0.064442221 | 0.155659859 | 0.104881345 |
| 0.225504744 | 0.26624252  | 0.275701142 | 0.334108888 |
| 0.268865748 | 0.213309281 | 0.313919804 | 0.321584783 |
| 0.470744844 | 0.209634398 | 0.338496665 | 0.158814191 |
| 0.422742394 | 0.286339704 | 0.303816462 | 0.030712734 |
| 0.341217018 | 0.020525639 | 0.452168969 | 0.264087427 |

|             |             |             |             |
|-------------|-------------|-------------|-------------|
| 0.118672181 | 0.35588567  | 0.283778012 | 0.233219931 |
| 0.330163835 | 0.062719821 | 0.174070412 | 0.350483137 |
| 0.305270027 | 0.264841237 | 0.098736703 | 0.34026369  |
| 0.337209221 | 0.308084924 | 0.326297341 | 0.009242813 |
| 0.245005616 | 0.074481242 | 0.197233694 | 0.482128016 |
| 0.215762669 | 0.155051584 | 0.262053217 | 0.266424646 |
| 0.350907301 | 0.337263217 | 0.256363884 | 0.34212194  |
| 0.480485605 | 0.173545114 | 0.34641722  | 0.15661199  |
| 0.349434066 | 0.064493636 | 0.18490401  | 0.123203116 |
| 0.327451849 | 0.211177834 | 0.291623477 | 0.258362177 |
| 0.415312594 | 0.515141647 | 0.247160979 | 0.49234355  |
| 0.130989198 | 0.297002469 | 0.244439005 | 0.287032885 |
| 0.34162665  | 0.138810108 | 0.344330327 | 0.510870199 |
| 0.088939418 | 0.333015067 | 0.365152496 | 0.164855542 |
| 0.393311716 | 0.244335244 | 0.326789365 | 0.15171435  |
| 0.308658555 | 0.313196587 | 0.480607836 | 0.290238211 |
| 0.273226182 | 0.107433284 | 0.48020886  | 0.276449175 |
| 0.259949126 | 0.110423335 | 0.238037761 | 0.417043171 |
| 0.351872093 | 0.466248979 | 0.404228703 | 0.346099104 |
| 0.337191853 | 0.472985482 | 0.337758682 | 0.400999667 |
| 0.13497389  | 0.505774883 | 0.199713002 | 0.071110407 |
| 0.112269205 | 0.118978308 | 0.249105071 | 0.288302332 |
| 0.426797186 | 0.317349269 | 0.234302683 | 0.241761917 |
| 0.427687679 | 0.467990256 | 0.509732232 | 0.394613632 |
| 0.069496081 | 0.22662773  | 0.327767552 | 0.2608743   |
| 0.35513643  | 0.155772451 | 0.228295243 | 0.504711408 |
| 0.369245182 | 0.387697631 | 0.196107071 | 0.501629181 |
| 0.252049905 | 0.494316984 | 0.420367188 | 0.193346062 |
| 0.503947825 | 0.483218111 | 0.48666969  | 0.322280052 |
| 0.457698361 | 0.299809494 | 0.105059682 | 0.368959837 |
| 0.466368525 | 0.014804983 | 0.445781346 | 0.472038687 |
| 0.482720396 | 0.415714932 | 0.501719738 | 0.476246722 |
| 0.488802312 | 0.112217377 | 0.041050351 | 0.286519646 |
| 0.498667256 | 0.368257976 | 0.170432889 | 0.351933567 |
| 0.323877166 | 0.337673786 | 0.362609352 | 0.282169408 |
| 0.506366439 | 0.411990024 | 0.4609786   | 1           |
| 0.304554812 | 0.331537946 | 0.31196709  | 0.460369338 |
| 0.070374015 | 0.150001525 | 0.080942595 | 0.297781631 |
| 0.276314072 | 0.197319583 | 0.358201994 | 0.328302036 |
| 0.214455349 | 0.320083207 | 0.267973239 | 0.32150147  |
| 0.085567539 | 0.352671651 | 0.183867208 | 0.22065876  |
| 0.070440794 | 0.171595851 | 0.230815401 | 0.161271683 |
| 0.261209345 | 0.277435579 | 0.359990961 | 0.461103354 |
| 0.326747679 | 0.198225724 | 0.365518912 | 0.458753143 |
| 0.420910454 | 0.311182373 | 0.247356276 | 0.015083508 |
| 0.299680624 | 0.278657998 | 0.174239501 | 0.328309744 |
| 0.211583109 | 0.29799495  | 0.360326642 | 0.322719233 |
| 0.285166153 | 0.188638931 | 0.342848664 | 0.431189739 |
| 0.181740322 | 0.266601469 | 0.422821037 | 0.359769225 |
| 0.007158809 | 0.320191454 | 0.393758194 | 0.170979697 |
| 0.327745699 | 0.137365495 | 0.196936071 | 0.436436522 |
| 0.289006772 | 0.23263005  | 0.456490642 | 0.319201621 |
| 0.318599076 | 0.263115142 | 0.507210742 | 0.074100041 |
| 0.30570882  | 0.058780924 | 0.272834878 | 0.291590113 |

|             |             |             |             |
|-------------|-------------|-------------|-------------|
| 0.26077867  | 0.293523197 | 0.275185261 | 0.24477222  |
| 0.154366152 | 0.506606854 | 0.357768448 | 0.484721388 |
| 0.334435589 | 0.510292042 | 0.417818595 | 0.413355539 |
| 0.319683621 | 0.329175651 | 0.125247391 | 0.390421028 |
| 0.420407867 | 0.318667081 | 0.104832009 | 0.389037046 |
| 0.335622353 | 0.348804686 | 0.128422401 | 0.474885089 |
| 0.484060025 | 0.458702667 | 0.181066684 | 0.324317466 |
| 0.348524552 | 0.241100174 | 0.36745494  | 0.514066524 |
| 0.300682136 | 0.335310571 | 0.302794773 | 0.357900355 |
| 0.197817559 | 0.222618564 | 0.322714208 | 0.156840368 |
| 0.006677581 | 0.128148799 | 0.100912496 | 0.180476512 |
| 0.153381312 | 0.34095889  | 0.338843597 | 0.502111724 |
| 0.157944074 | 0.394446172 | 0.2595545   | 0.289560642 |
| 0.426330355 | 0.329118359 | 0.299401759 | 0.324151608 |
| 0.250657733 | 0.022794759 | 0.129899024 | 0.518018185 |
| 0.071275822 | 0.210266369 | 0.327819552 | 0.003165058 |
| 0.083794616 | 0.374510873 | 0.125315951 | 0.22430061  |
| 0.445960696 | 0.22362179  | 0.236658778 | 0.312231701 |
| 0.306198859 | 0.1259068   | 0.003569234 | 0.464474495 |
| 0.473936247 | 0.44995986  | 0.475857209 | 0.452436793 |
| 0.429821855 | 0.334752098 | 0.362183707 | 0.3063693   |
| 0.150566388 | 0.131509644 | 0.216074593 | 0.293699632 |
| 0.011511408 | 0.315961111 | 0.281201937 | 0.170756936 |
| 0.356310667 | 0.31349832  | 0.065173745 | 0.308081331 |
| 0.034440771 | 0.173043112 | 0.335445671 | 0.246750347 |
| 0.306956621 | 0.028256851 | 0.198317443 | 0.30844328  |
| 0.419665466 | 0.341196123 | 0.291567929 | 0.50629169  |
| 0.299765158 | 0.160402343 | 0.278412127 | 0.326317099 |
| 0.113034516 | 0.1483241   | 0.339606019 | 0.032965583 |
| 0.177618486 | 0.449847244 | 0.331383693 | 0.097996964 |
| 0.273219513 | 0.011204356 | 0.356463067 | 0.513150644 |
| 0.448519576 | 0.495375606 | 0.474774921 | 0.22619209  |
| 0.483397863 | 0.09545793  | 0.502835947 | 0.38332057  |
| 0.333734932 | 0.001872413 | 0.010360021 | 0.448643041 |
| 0.342769817 | 0.084057469 | 0.186833693 | 0.287495162 |
| 0.135299155 | 0.191633372 | 0.100958371 | 0.166999609 |
| 0.332789352 | 0.229556285 | 0.175464715 | 0.471890349 |
| 0.255571147 | 0.243601155 | 0.354692964 | 0.124576104 |
| 0.324351596 | 0.080192149 | 0.125767805 | 0.009413886 |
| 0.319274976 | 0.140844247 | 0.47237303  | 0.487667462 |
| 0.481750494 | 0.323408632 | 0.292562278 | 0.299909566 |
| 0.406200569 | 0.125503167 | 0.289257853 | 0.14392472  |
| 0.466038386 | 0.346292587 | 0.297405879 | 0.297786176 |
| 0.490995181 | 0.459371707 | 0.061781396 | 0.358180311 |
| 0.016914111 | 0.002375858 | 0.323718136 | 0.280169678 |
| 0.08123146  | 0.338491579 | 0.25516403  | 0.259254729 |
| 0.23700324  | 0.052370587 | 0.236230327 | 0.231195445 |
| 0.289233355 | 0.343223108 | 0.249976289 | 0.257726685 |
| 0.245009719 | 0.162072414 | 0.202048254 | 0.202632065 |
| 0.278235904 | 0.312905229 | 0.219270973 | 0.04538357  |
| 0.337572393 | 0.342003722 | 0.088350616 | 0.184858639 |
| 0.399600259 | 0.462368801 | 0.077966871 | 0.018113461 |
| 0.266719344 | 0.325283822 | 0.473808824 | 0.474777162 |
| 0.512423193 | 0.507215918 | 0.402385135 | 0.17153734  |

|             |             |             |             |
|-------------|-------------|-------------|-------------|
| 0.100670865 | 0.293541548 | 0.260558077 | 0.110634105 |
| 0.489793594 | 0.10608214  | 0.460114153 | 0.251540206 |
| 0.155099005 | 0.222824157 | 0.053674133 | 0.124106206 |
| 0.309926191 | 0.207124028 | 0.191605424 | 0.175572421 |
| 0.308469439 | 0.21310018  | 0.084874309 | 0.222262117 |
| 0.334765001 | 0.162853198 | 0.197590411 | 0.288856267 |
| 0.312869469 | 0.220760225 | 0.359424307 | 0.44679377  |
| 0.160890535 | 0.159818368 | 0.275338689 | 0.333484877 |
| 0.398179221 | 0.329802096 | 0.033132185 | 0.433136628 |
| 0.464022382 | 0.355796201 | 0.477135007 | 0.383758203 |
| 0.122027642 | 0.317095845 | 0.289978683 | 0.328004188 |
| 0.224507939 | 0.312083825 | 0.262192643 | 0.099557146 |
| 0.303567201 | 0.484429866 | 0.402057229 | 0.18246267  |
| 0.335153293 | 0.169069487 | 0.095094218 | 0.410497934 |
| 0.178519027 | 0.128797987 | 0.304794357 | 0.391571998 |
| 0.001870992 | 0.120330997 | 0.466477775 | 0.238053662 |
| 0.50224574  | 0.454656094 | 0.427806403 | 0.250786544 |
| 0.003019756 | 0.339496313 | 0.328495047 | 0.332017218 |
| 0.422731734 | 0.309036807 | 0.168008454 | 0.10377719  |
| 0.268186773 | 0.110429005 | 0.180933313 | 0.279893846 |
| 0.166469489 | 0.365320095 | 0.216810458 | 0.242726668 |
| 0.208589223 | 0.133893629 | 0.192460507 | 0.233055232 |
| 0.154984759 | 0.244626862 | 0.326211109 | 0.260882111 |
| 0.204833472 | 0.429583961 | 0.374698358 | 0.045883745 |
| 0.294527914 | 0.386249341 | 0.402829212 | 0.006324081 |
| 0.35426477  | 0.016146785 | 0.213771347 | 0.211971079 |
| 0.201868762 | 0.247629003 | 0.255596302 | 0.262613146 |
| 0.343355657 | 0.243922137 | 0.257487734 | 0.238275654 |
| 0.169338529 | 0.236236521 | 0.328780238 | 0.321518509 |
| 0.250207169 | 0.151234893 | 0.128187833 | 0.136965138 |
| 0.074604546 | 0.42948755  | 0.252368164 | 0.098575598 |
| 0.240727491 | 0.338287748 | 0.343016627 | 0.475050332 |
| 0.393387261 | 0.137368886 | 0.329224228 | 0.411614874 |
| 0.241824266 | 0.289711997 | 0.109750018 | 0.321885321 |
| 0.251776537 | 0.213180614 | 0.327404356 | 0.310950345 |
| 0.357076128 | 0.401552242 | 0.243264036 | 0.414875169 |
| 0.311297879 | 0.332427105 | 0.276026758 | 0.107754445 |
| 0.205828926 | 0.167180418 | 0.240401408 | 0.003763695 |
| 0.325668892 | 0.247965525 | 0.432525698 | 0.470745211 |
| 0.248092266 | 0.36493884  | 0.279148292 | 0.13156428  |
| 0.231104497 | 0.214077939 | 0.175088509 | 0.358190765 |
| 0.186045088 | 0.19375693  | 0.274590774 | 0.279841425 |
| 0.351006031 | 0.34409455  | 0.239721521 | 0.28829373  |
| 0.251542648 | 0.212066285 | 0.475059631 | 0.152923795 |
| 0.349254224 | 0.168594084 | 0.317728294 | 0.287606736 |
| 0.238993627 | 0.485331534 | 0.090972159 | 0.49917283  |
| 0.322094379 | 0.157345076 | 0.48594246  | 0.282650315 |
| 0.263762271 | 0.124100615 | 0.163313847 | 0.335906037 |
| 0.262073555 | 0.269332365 | 0.02294879  | 0.094563212 |
| 0.29817428  | 0.300449325 | 0.373321492 | 0.330742407 |
| 0.223055132 | 0.311379061 | 0.134984387 | 0.324801785 |
| 0.467890859 | 0.489786633 | 0.274900687 | 0.251091884 |
| 0.334314541 | 0.131311761 | 0.327202092 | 0.026791901 |
| 0.364036143 | 0.340704934 | 0.337179286 | 0.088692873 |



|             |             |             |             |
|-------------|-------------|-------------|-------------|
| 0.036709387 | 0.193978197 | 0.361788062 | 0.107099726 |
| 0.45608893  | 0.179444263 | 0.326279624 | 0.338624774 |
| 0.206372729 | 0.493693054 | 0.15146498  | 0.337492324 |
| 0.094326727 | 0.258971025 | 0.303243239 | 0.340564017 |
| 0.215914488 | 0.2636626   | 0.324896944 | 0.203055163 |
| 0.055860975 | 0.23965005  | 0.006495626 | 0.414796218 |
| 0.468605441 | 0.297774329 | 0.218514299 | 0.273308977 |
| 0.261612668 | 0.354287453 | 0.283048789 | 0.326367117 |
| 0.017197439 | 0.312726536 | 0.216660346 | 0.377521107 |
| 0.214131657 | 0.349750065 | 0.0717771   | 0.293399628 |
| 0.461337764 | 0.311336866 | 0.263351132 | 0.282335201 |
| 0.464468738 | 0.348738775 | 0.173292747 | 0.197528157 |
| 0.340445592 | 0.099594128 | 0.311319784 | 0.514764808 |
| 0.191264744 | 0.191674416 | 0.399346294 | 0.230236976 |
| 0.276410679 | 0.369165834 | 0.335540359 | 0.50733414  |
| 0.104628717 | 0.255777049 | 0.356877462 | 0.456678491 |
| 0.279266801 | 0.171105063 | 0.227950466 | 0.243868043 |
| 0.439859905 | 0.110703185 | 0.251801642 | 0.324429584 |
| 0.202848521 | 0.291315274 | 0.300177783 | 0.197230888 |
| 0.057979467 | 0.214501044 | 0.297769183 | 0.173459846 |
| 0.304445816 | 0.314055211 | 0.228019877 | 0.380770998 |
| 0.138772497 | 0.033156995 | 0.442744934 | 0.019870977 |
| 0.289535311 | 0.319340062 | 0.249829993 | 0.310407327 |
| 0.191599571 | 0.347984672 | 0.329618665 | 0.003633689 |
| 0.367558086 | 0.037056317 | 0.277338471 | 0.221790306 |
| 0.288219844 | 0.092984218 | 0.431540889 | 0.488217381 |
| 0.296350418 | 0.274436056 | 0.288922796 | 0.447173056 |
| 0.131786099 | 0.269124909 | 0.312167305 | 0.345991552 |
| 0.190245666 | 0.326382169 | 0.340340143 | 0.28872437  |
| 0.328322569 | 0.273208254 |             |             |
| CLDND1      | 0.057232693 | 0.383351559 | 0.049962771 |
| 0.059958741 | 0.137382278 | 0.152016211 | 0.077075656 |
| 0.098830866 | 0.349831892 | 0.214057375 | 0.134318402 |
| 0.019966862 | 0.039728427 | 0.354069686 | 0.06955106  |
| 0.201245593 | 0.035152347 | 0.090881401 | 0.088309898 |
| 0.194022531 | 0.129885585 | 0.121554879 | 0.172292725 |
| 0.152417013 | 0.196930062 | 0.235343311 | 0.197324025 |
| 0.402974991 | 0.09513064  | 0.221601825 | 0.117038119 |
| 0.359250121 | 0.148249297 | 0.160399935 | 0.022441187 |
| 0.179820498 | 0.039678724 | 0.418354287 | 0.131543074 |
| 0.061323433 | 0.297907477 | 0.190097053 | 0.103818724 |
| 0.223450993 | 0.036437031 | 0.105367177 | 0.280600475 |
| 0.253347705 | 0.181651034 | 0.069396341 | 0.273260183 |
| 0.228659393 | 0.20352376  | 0.306179596 | 0.001778769 |
| 0.115674393 | 0.042377084 | 0.107264239 | 0.415685322 |
| 0.128987059 | 0.078571996 | 0.190034492 | 0.191894481 |
| 0.258757893 | 0.279186091 | 0.192064427 | 0.228397275 |
| 0.390912468 | 0.088065159 | 0.300006548 | 0.073901536 |
| 0.200425017 | 0.06855718  | 0.142126604 | 0.129356011 |
| 0.193545299 | 0.103131378 | 0.13518282  | 0.152157824 |
| 0.382867214 | 0.453622546 | 0.187680159 | 0.451281518 |
| 0.108911732 | 0.170056204 | 0.138180865 | 0.21814327  |
| 0.310570928 | 0.137252425 | 0.236805278 | 0.433230158 |
| 0.086960445 | 0.24297458  | 0.30434004  | 0.140892562 |

|             |             |             |             |
|-------------|-------------|-------------|-------------|
| 0.337130025 | 0.178373933 | 0.18913734  | 0.062566827 |
| 0.217184407 | 0.166104583 | 0.458134708 | 0.178217548 |
| 0.151171709 | 0.084789582 | 0.439360678 | 0.146639215 |
| 0.103707608 | 0.073007525 | 0.128868952 | 0.34947554  |
| 0.229442965 | 0.375343027 | 0.367119608 | 0.308858057 |
| 0.172488617 | 0.390167734 | 0.238817809 | 0.354941516 |
| 0.103240382 | 0.437619473 | 0.105166161 | 0.033096535 |
| 0.07430387  | 0.066124591 | 0.194653159 | 0.251851499 |
| 0.346367141 | 0.210791796 | 0.110968371 | 0.123562041 |
| 0.356544988 | 0.423879092 | 0.452878642 | 0.317813117 |
| 0.042274051 | 0.165569547 | 0.169947246 | 0.14845163  |
| 0.25031799  | 0.114548852 | 0.111246023 | 0.446300324 |
| 0.281561781 | 0.312899281 | 0.121300716 | 0.45582432  |
| 0.179565497 | 0.403352325 | 0.359474893 | 0.091509242 |
| 0.438170663 | 0.420773421 | 0.395210913 | 0.216437081 |
| 0.384362977 | 0.14410524  | 0.10123092  | 0.336100573 |
| 0.368415742 | 0.005947572 | 0.378038392 | 0.398837055 |
| 0.422822168 | 0.331438603 | 0.425456239 | 0.39587948  |
| 0.421422718 | 0.082281708 | 0.055953016 | 0.170852449 |
| 0.434069443 | 0.286037922 | 0.1047477   | 0.184130677 |
| 0.190428648 | 0.172783248 | 0.318709464 | 0.105485252 |
| 0.422987055 | 0.345726229 | 0.391533578 | 0.304554812 |
| 1           | 0.2726605   | 0.18024313  | 0.409925976 |
| 0.041217628 | 0.07462311  | 0.061704073 | 0.266009026 |
| 0.164010967 | 0.101550656 | 0.178540558 | 0.221920935 |
| 0.120574166 | 0.199355478 | 0.139991127 | 0.210350541 |
| 0.100059929 | 0.19359397  | 0.118672451 | 0.137848067 |
| 0.035893893 | 0.170716426 | 0.081893155 | 0.069106598 |
| 0.118405078 | 0.288376726 | 0.26963739  | 0.399073183 |
| 0.208796003 | 0.157642987 | 0.26443356  | 0.369851311 |
| 0.330572582 | 0.153651912 | 0.204962137 | 0.005298679 |
| 0.135685669 | 0.210343588 | 0.099032883 | 0.192886057 |
| 0.227217341 | 0.143267487 | 0.217238585 | 0.223587208 |
| 0.137746206 | 0.14770439  | 0.181101278 | 0.360308359 |
| 0.173450678 | 0.109155357 | 0.320669217 | 0.234007881 |
| 0.005843456 | 0.156987674 | 0.304798781 | 0.110628336 |
| 0.258250667 | 0.048654819 | 0.078100193 | 0.366345506 |
| 0.143386762 | 0.13094436  | 0.381404879 | 0.238934263 |
| 0.139786215 | 0.279120186 | 0.428105933 | 0.045612373 |
| 0.203919993 | 0.020113378 | 0.169951982 | 0.214839458 |
| 0.151730805 | 0.222399894 | 0.136947835 | 0.117317273 |
| 0.104794007 | 0.43010239  | 0.297464985 | 0.39394297  |
| 0.17973322  | 0.435982657 | 0.324796037 | 0.314051951 |
| 0.218283208 | 0.210836786 | 0.062295346 | 0.300014842 |
| 0.353840986 | 0.194595536 | 0.102261171 | 0.335624405 |
| 0.238447262 | 0.246568716 | 0.079208311 | 0.383739606 |
| 0.413194899 | 0.422813144 | 0.078549314 | 0.255725655 |
| 0.252137513 | 0.111831525 | 0.321537    | 0.437142438 |
| 0.240060446 | 0.175717481 | 0.154119996 | 0.288696226 |
| 0.125542757 | 0.123983355 | 0.302874076 | 0.092401998 |
| 0.002407965 | 0.085869521 | 0.063346565 | 0.081919659 |
| 0.071672726 | 0.248619864 | 0.250278896 | 0.417609701 |
| 0.078601039 | 0.319314144 | 0.242413705 | 0.120916366 |
| 0.365118602 | 0.183807271 | 0.156132705 | 0.199498837 |

|             |             |             |             |
|-------------|-------------|-------------|-------------|
| 0.213964942 | 0.012162544 | 0.04991294  | 0.454786912 |
| 0.069353479 | 0.088373407 | 0.194998266 | 0.001201533 |
| 0.056110361 | 0.351197072 | 0.146238235 | 0.21580044  |
| 0.361113191 | 0.219449378 | 0.162271444 | 0.235380634 |
| 0.197756455 | 0.077554459 | 0.001205239 | 0.423761501 |
| 0.451713449 | 0.441409818 | 0.454103828 | 0.442461786 |
| 0.414776922 | 0.312601015 | 0.30308838  | 0.158644715 |
| 0.08566833  | 0.098711612 | 0.105400439 | 0.143351439 |
| 0.006768016 | 0.242546347 | 0.167880229 | 0.117225702 |
| 0.27962     | 0.239997452 | 0.032951277 | 0.19225556  |
| 0.014814134 | 0.074629135 | 0.197030567 | 0.149898235 |
| 0.247868713 | 0.020398082 | 0.086012011 | 0.155199013 |
| 0.347617343 | 0.277023494 | 0.158827497 | 0.435566956 |
| 0.1318945   | 0.164881027 | 0.138464556 | 0.233919528 |
| 0.068787561 | 0.111132264 | 0.218493863 | 0.017714192 |
| 0.082993014 | 0.424468315 | 0.192606151 | 0.063206911 |
| 0.145781158 | 0.006046306 | 0.28626471  | 0.427200878 |
| 0.400565919 | 0.410536265 | 0.380938063 | 0.096404154 |
| 0.400416068 | 0.065004766 | 0.423556361 | 0.329857865 |
| 0.197861696 | 0.000427987 | 0.004929465 | 0.369938589 |
| 0.171376126 | 0.094979432 | 0.112046511 | 0.12626379  |
| 0.061311507 | 0.120322848 | 0.0630172   | 0.08461364  |
| 0.206779108 | 0.106113448 | 0.087529857 | 0.4177865   |
| 0.139730976 | 0.136642881 | 0.209822727 | 0.115285839 |
| 0.185321997 | 0.041872902 | 0.12822266  | 0.003087634 |
| 0.235562123 | 0.151293934 | 0.436845482 | 0.415190768 |
| 0.390391503 | 0.223486743 | 0.177563205 | 0.135418586 |
| 0.373726979 | 0.113838597 | 0.158733064 | 0.109579289 |
| 0.397665761 | 0.207040809 | 0.206098369 | 0.231792428 |
| 0.395797566 | 0.375110996 | 0.039558463 | 0.290125038 |
| 0.00688636  | 0.001963905 | 0.166324561 | 0.212523128 |
| 0.13546884  | 0.179292376 | 0.20040388  | 0.232348735 |
| 0.17198204  | 0.022650458 | 0.132131337 | 0.119730428 |
| 0.170770833 | 0.173362023 | 0.117146147 | 0.258522916 |
| 0.148404149 | 0.093411754 | 0.106957933 | 0.114895637 |
| 0.205847892 | 0.295487449 | 0.196932444 | 0.036838336 |
| 0.194221557 | 0.165962247 | 0.050234719 | 0.130071569 |
| 0.305175865 | 0.365808723 | 0.057735181 | 0.005994154 |
| 0.215091662 | 0.181689774 | 0.374006355 | 0.407809615 |
| 0.441602052 | 0.421594112 | 0.342584176 | 0.083775422 |
| 0.054877296 | 0.178414361 | 0.135209371 | 0.064577954 |
| 0.401427143 | 0.093546544 | 0.397660263 | 0.133455074 |
| 0.116624444 | 0.124053814 | 0.021589466 | 0.083227545 |
| 0.168076742 | 0.121702125 | 0.093597851 | 0.124102266 |
| 0.147378508 | 0.100923709 | 0.061569396 | 0.118055351 |
| 0.263147813 | 0.090947884 | 0.118258012 | 0.189935609 |
| 0.298031687 | 0.234835236 | 0.27503032  | 0.36706696  |
| 0.11046296  | 0.12735542  | 0.1326443   | 0.293748052 |
| 0.338299936 | 0.225518645 | 0.010067421 | 0.393585985 |
| 0.384634274 | 0.231839171 | 0.406696397 | 0.306807894 |
| 0.105263853 | 0.139019527 | 0.190415322 | 0.177824908 |
| 0.138103957 | 0.155191122 | 0.157714673 | 0.068003909 |
| 0.288668488 | 0.443277445 | 0.359748467 | 0.080715443 |
| 0.20700997  | 0.13322491  | 0.087932177 | 0.35918306  |

|             |             |             |             |
|-------------|-------------|-------------|-------------|
| 0.089918484 | 0.05775117  | 0.192455401 | 0.343307853 |
| 0.001378331 | 0.060002404 | 0.418496321 | 0.099981407 |
| 0.452536469 | 0.37388892  | 0.344464387 | 0.171235258 |
| 0.003381137 | 0.25919923  | 0.169376312 | 0.155878698 |
| 0.350080744 | 0.25134909  | 0.127969399 | 0.050099895 |
| 0.219083731 | 0.093123505 | 0.086880499 | 0.141472884 |
| 0.11569605  | 0.240984595 | 0.159343457 | 0.183462274 |
| 0.117953323 | 0.159060092 | 0.095094693 | 0.117687142 |
| 0.148443957 | 0.172723452 | 0.247245551 | 0.190538566 |
| 0.075781069 | 0.376047768 | 0.319831875 | 0.028042725 |
| 0.157769503 | 0.356705554 | 0.351866308 | 0.003134333 |
| 0.243419347 | 0.007500794 | 0.09891048  | 0.09176839  |
| 0.103506208 | 0.12838703  | 0.145033569 | 0.129027313 |
| 0.249568775 | 0.141409636 | 0.108720128 | 0.128527792 |
| 0.075535453 | 0.143620902 | 0.19803995  | 0.212985391 |
| 0.097263899 | 0.077467412 | 0.145113001 | 0.157149728 |
| 0.026667656 | 0.368935067 | 0.209670476 | 0.091530271 |
| 0.140296691 | 0.219638936 | 0.275543741 | 0.423149316 |
| 0.317385909 | 0.153076332 | 0.192284204 | 0.332391138 |
| 0.15826212  | 0.13593018  | 0.067662375 | 0.193468336 |
| 0.118245657 | 0.081290707 | 0.197579048 | 0.195221143 |
| 0.326020652 | 0.336280391 | 0.195964103 | 0.365666701 |
| 0.156709015 | 0.242317014 | 0.174049406 | 0.04243826  |
| 0.1034546   | 0.151584924 | 0.116732374 | 0.002083962 |
| 0.198740521 | 0.119760043 | 0.33975919  | 0.412489252 |
| 0.133141036 | 0.303362076 | 0.142065437 | 0.063460138 |
| 0.154429037 | 0.221168804 | 0.123070205 | 0.311084803 |
| 0.085223807 | 0.100322118 | 0.136510111 | 0.146453763 |
| 0.291235586 | 0.327859276 | 0.158542608 | 0.162076927 |
| 0.173208946 | 0.159025171 | 0.458049195 | 0.100317624 |
| 0.227369746 | 0.074120153 | 0.254546826 | 0.131902987 |
| 0.121859762 | 0.422401201 | 0.060785748 | 0.419555559 |
| 0.165913431 | 0.154437863 | 0.409901361 | 0.168343538 |
| 0.157269398 | 0.057037283 | 0.082288943 | 0.210896228 |
| 0.156162788 | 0.13800699  | 0.013214819 | 0.03768601  |
| 0.199697524 | 0.248168851 | 0.354287022 | 0.292957727 |
| 0.12678546  | 0.262309363 | 0.075346225 | 0.188258264 |
| 0.425132725 | 0.446375446 | 0.106322254 | 0.218678829 |
| 0.25014313  | 0.060302069 | 0.210636035 | 0.032229973 |
| 0.225611821 | 0.219134035 | 0.192418013 | 0.051175254 |
| 0.025322051 | 0.095380704 | 0.239453884 | 0.116363196 |
| 0.374885961 | 0.07713315  | 0.291843426 | 0.25471669  |
| 0.192230403 | 0.443538087 | 0.070951851 | 0.222727578 |
| 0.123889809 | 0.197031728 | 0.186008153 | 0.226056744 |
| 0.080505833 | 0.130279804 | 0.230089645 | 0.087805706 |
| 0.029387899 | 0.117522966 | 0.009227974 | 0.354151666 |
| 0.44399183  | 0.17395614  | 0.212684148 | 0.200881555 |
| 0.174520902 | 0.33799893  | 0.134545009 | 0.189459973 |
| 0.007275705 | 0.162176801 | 0.117894294 | 0.29155431  |
| 0.0924973   | 0.248300901 | 0.032973503 | 0.181003425 |
| 0.427637296 | 0.136740859 | 0.249370929 | 0.156025034 |
| 0.408910423 | 0.341186067 | 0.177497213 | 0.115149617 |
| 0.303685056 | 0.08180056  | 0.17966105  | 0.442589264 |
| 0.087431191 | 0.085923367 | 0.30539776  | 0.106075007 |

|             |             |             |             |
|-------------|-------------|-------------|-------------|
| 0.144572791 | 0.322145506 | 0.256248371 | 0.455510448 |
| 0.045656483 | 0.151159835 | 0.296421377 | 0.396759026 |
| 0.206852734 | 0.096694117 | 0.09568765  | 0.112961617 |
| 0.380372456 | 0.043632929 | 0.150836272 | 0.247369674 |
| 0.094908612 | 0.19039068  | 0.266650396 | 0.097448185 |
| 0.022065653 | 0.125110108 | 0.130858196 | 0.119490868 |
| 0.156307328 | 0.168144666 | 0.134310425 | 0.304175996 |
| 0.047266556 | 0.011329455 | 0.370513757 | 0.009408162 |
| 0.150936616 | 0.186952096 | 0.130456124 | 0.160064003 |
| 0.162720619 | 0.228001585 | 0.19846209  | 0.001317912 |
| 0.310388938 | 0.030020073 | 0.176424648 | 0.091692328 |
| 0.140828785 | 0.056705892 | 0.36817264  | 0.393810129 |
| 0.209811658 | 0.163418499 | 0.13822569  | 0.388400091 |
| 0.064244871 | 0.164385271 | 0.182313967 | 0.268175038 |
| 0.09369623  | 0.200425832 | 0.191125819 | 0.144941453 |
| 0.26071824  | 0.152375311 |             |             |
| CLIC1       | 0.270788056 | 0.333278321 | 0.21356355  |
| 0.257392141 | 0.243406256 | 0.318888347 | 0.238866966 |
| 0.325675686 | 0.304375174 | 0.181560467 | 0.323265431 |
| 0.149978626 | 0.052386904 | 0.364910594 | 0.231009269 |
| 0.263351756 | 0.193878332 | 0.297080826 | 0.109001413 |
| 0.252089135 | 0.240073263 | 0.229311566 | 0.33528857  |
| 0.236827507 | 0.318097333 | 0.320189453 | 0.227790977 |
| 0.372654159 | 0.138912866 | 0.300581154 | 0.117505623 |
| 0.394925833 | 0.242035091 | 0.217005812 | 0.133798227 |
| 0.314336154 | 0.012081291 | 0.422728198 | 0.276811165 |
| 0.099435579 | 0.372736839 | 0.235024916 | 0.312177997 |
| 0.250395606 | 0.198600346 | 0.118939689 | 0.260692905 |
| 0.296701705 | 0.298682652 | 0.229096625 | 0.308293437 |
| 0.261775052 | 0.373615976 | 0.280003945 | 0.019564317 |
| 0.170076892 | 0.031230968 | 0.105789638 | 0.416720911 |
| 0.35388146  | 0.306102911 | 0.141645342 | 0.304175926 |
| 0.267213588 | 0.285309227 | 0.334033016 | 0.234161261 |
| 0.401962841 | 0.105361604 | 0.276948367 | 0.220741864 |
| 0.310320898 | 0.17239722  | 0.328240467 | 0.231567019 |
| 0.251483299 | 0.329437691 | 0.292766311 | 0.185397822 |
| 0.331500027 | 0.459511526 | 0.334437136 | 0.42282485  |
| 0.073844042 | 0.221086037 | 0.219616304 | 0.321304176 |
| 0.30144264  | 0.233068322 | 0.333291772 | 0.435370605 |
| 0.201315667 | 0.259771418 | 0.304246256 | 0.288274105 |
| 0.335439959 | 0.162403794 | 0.256917123 | 0.1219974   |
| 0.256780978 | 0.241825959 | 0.419168958 | 0.360902278 |
| 0.254463892 | 0.238861046 | 0.438751942 | 0.203945214 |
| 0.285441854 | 0.25851601  | 0.200470025 | 0.297121035 |
| 0.30876438  | 0.376218448 | 0.308215343 | 0.321500597 |
| 0.246638839 | 0.393841015 | 0.331747519 | 0.343320386 |
| 0.077962458 | 0.41774853  | 0.337832248 | 0.217800164 |
| 0.248810989 | 0.268974057 | 0.189562891 | 0.350889684 |
| 0.333992404 | 0.363605193 | 0.359238478 | 0.286761842 |
| 0.314773168 | 0.41564279  | 0.409961264 | 0.335568585 |
| 0.216290148 | 0.137115013 | 0.247535539 | 0.343755289 |
| 0.320507817 | 0.29250304  | 0.170809329 | 0.451927197 |
| 0.366315492 | 0.308673024 | 0.325358526 | 0.471710685 |
| 0.303581997 | 0.431276413 | 0.33196039  | 0.325464438 |

|             |             |             |             |
|-------------|-------------|-------------|-------------|
| 0.444250383 | 0.441225324 | 0.40341355  | 0.264438136 |
| 0.42679669  | 0.342358936 | 0.072307126 | 0.328907657 |
| 0.412081291 | 0.015849392 | 0.326346141 | 0.350218346 |
| 0.400826566 | 0.302361756 | 0.39900333  | 0.378873978 |
| 0.406222067 | 0.258976848 | 0.014201109 | 0.291833086 |
| 0.426233212 | 0.354005666 | 0.263869992 | 0.250292386 |
| 0.260851166 | 0.342742193 | 0.301505098 | 0.221381507 |
| 0.448705961 | 0.333856831 | 0.35005391  | 0.331537946 |
| 0.2726605   | 1           | 0.209529076 | 0.430496622 |
| 0.22043315  | 0.304920726 | 0.214753923 | 0.329888566 |
| 0.244335504 | 0.319857906 | 0.342779975 | 0.260509822 |
| 0.336065299 | 0.332402087 | 0.181001728 | 0.268370788 |
| 0.205514615 | 0.290027878 | 0.32052124  | 0.315392979 |
| 0.206723823 | 0.303715068 | 0.30955194  | 0.299538638 |
| 0.300668725 | 0.355439233 | 0.29409119  | 0.364231535 |
| 0.252046151 | 0.319821325 | 0.326740676 | 0.403090001 |
| 0.388197508 | 0.247128782 | 0.343993743 | 0.061907318 |
| 0.221467938 | 0.155978546 | 0.095234931 | 0.246898766 |
| 0.306629692 | 0.283211269 | 0.286715563 | 0.288270648 |
| 0.356244764 | 0.289163722 | 0.249296724 | 0.436468185 |
| 0.293534337 | 0.277373907 | 0.333577581 | 0.278557896 |
| 0.049257876 | 0.335514135 | 0.324261785 | 0.163417286 |
| 0.325173856 | 0.105054384 | 0.154385303 | 0.33207831  |
| 0.177594726 | 0.17776912  | 0.354519694 | 0.284372623 |
| 0.277284568 | 0.32044338  | 0.406421107 | 0.027290237 |
| 0.230714845 | 0.121099411 | 0.322667235 | 0.226432722 |
| 0.343879733 | 0.332733771 | 0.22769855  | 0.241365194 |
| 0.291837155 | 0.420047029 | 0.352801554 | 0.388568587 |
| 0.222193073 | 0.412831066 | 0.316250679 | 0.351207353 |
| 0.343894159 | 0.211848822 | 0.067401314 | 0.324745567 |
| 0.319734835 | 0.20216937  | 0.233025205 | 0.286938811 |
| 0.226403815 | 0.274571407 | 0.163816769 | 0.38607016  |
| 0.454606051 | 0.393639564 | 0.302684525 | 0.302363383 |
| 0.356440316 | 0.359316564 | 0.325450648 | 0.423433232 |
| 0.185380445 | 0.24189747  | 0.233285994 | 0.313505673 |
| 0.331766462 | 0.180891934 | 0.349898915 | 0.089865643 |
| 0.005146507 | 0.269351653 | 0.248401006 | 0.283811124 |
| 0.12593803  | 0.259206362 | 0.293402426 | 0.404712466 |
| 0.310837602 | 0.370733603 | 0.322056849 | 0.260713281 |
| 0.362950332 | 0.245673595 | 0.237414225 | 0.281713649 |
| 0.347488509 | 0.086791773 | 0.250668347 | 0.464025242 |
| 0.183763873 | 0.16403601  | 0.335512552 | 0.012851401 |
| 0.215302521 | 0.292007254 | 0.250380495 | 0.321061995 |
| 0.350844726 | 0.312191622 | 0.331692614 | 0.209724586 |
| 0.337453095 | 0.286977382 | 0.020223751 | 0.360410491 |
| 0.385170681 | 0.366354853 | 0.384846102 | 0.397358444 |
| 0.324505726 | 0.304271913 | 0.301938437 | 0.339002621 |
| 0.30267553  | 0.267226669 | 0.140356228 | 0.289343545 |
| 0.021368519 | 0.33507963  | 0.270134366 | 0.321197218 |
| 0.295834575 | 0.328408951 | 0.215385786 | 0.254524972 |
| 0.128717543 | 0.101577764 | 0.314812837 | 0.302694363 |
| 0.291405535 | 0.129955145 | 0.18273273  | 0.202026075 |
| 0.393939954 | 0.364517665 | 0.201315496 | 0.425361227 |
| 0.33044378  | 0.255708787 | 0.275227396 | 0.317450146 |

|             |             |             |             |
|-------------|-------------|-------------|-------------|
| 0.265527297 | 0.082280654 | 0.298459079 | 0.025194522 |
| 0.193877864 | 0.39684218  | 0.255408358 | 0.230681536 |
| 0.340369039 | 0.073347932 | 0.356776093 | 0.432094336 |
| 0.389196579 | 0.384561262 | 0.400646248 | 0.178168205 |
| 0.40683515  | 0.037565726 | 0.402912814 | 0.33448798  |
| 0.224174573 | 0.008366512 | 0.038881623 | 0.339577183 |
| 0.270115798 | 0.200207542 | 0.326720887 | 0.285705824 |
| 0.277657727 | 0.304651258 | 0.258813669 | 0.159004281 |
| 0.313456704 | 0.259456292 | 0.159786798 | 0.402447045 |
| 0.311854151 | 0.324121478 | 0.29049605  | 0.260376202 |
| 0.286138397 | 0.226875904 | 0.251751699 | 0.026334601 |
| 0.297787799 | 0.264164006 | 0.446403507 | 0.401824662 |
| 0.42400953  | 0.289589736 | 0.187984456 | 0.27756036  |
| 0.315020866 | 0.239562758 | 0.220078565 | 0.268776584 |
| 0.386964981 | 0.284722812 | 0.36194686  | 0.360398442 |
| 0.403321336 | 0.402789613 | 0.199873824 | 0.313518971 |
| 0.082942538 | 0.006343248 | 0.315033473 | 0.346534923 |
| 0.053649446 | 0.241772802 | 0.348564465 | 0.249479454 |
| 0.266001739 | 0.184859406 | 0.150816143 | 0.152531502 |
| 0.31796725  | 0.296041914 | 0.210735601 | 0.320517508 |
| 0.233381816 | 0.142672464 | 0.305756504 | 0.313214264 |
| 0.214181694 | 0.336214944 | 0.317147641 | 0.15762347  |
| 0.264999261 | 0.266029972 | 0.247342946 | 0.332755467 |
| 0.337759869 | 0.357674219 | 0.180954329 | 0.076307756 |
| 0.363260481 | 0.279743277 | 0.369819871 | 0.387225246 |
| 0.448913151 | 0.426640005 | 0.414676644 | 0.232124205 |
| 0.265135219 | 0.291397088 | 0.214955036 | 0.184163146 |
| 0.401476489 | 0.221182992 | 0.401937185 | 0.174300332 |
| 0.299132923 | 0.312672679 | 0.189234406 | 0.275492779 |
| 0.239233143 | 0.344798221 | 0.283234767 | 0.290216994 |
| 0.284273475 | 0.164091016 | 0.228184085 | 0.337376988 |
| 0.350975475 | 0.09579387  | 0.330464689 | 0.328394494 |
| 0.336033645 | 0.146301571 | 0.285732177 | 0.410002767 |
| 0.310973538 | 0.275957644 | 0.312451614 | 0.311252514 |
| 0.309055585 | 0.236728631 | 0.120467553 | 0.345217031 |
| 0.379798802 | 0.29126249  | 0.41668055  | 0.338350698 |
| 0.262479146 | 0.263841746 | 0.184802426 | 0.267665561 |
| 0.328551902 | 0.326410858 | 0.318333521 | 0.250264197 |
| 0.346168545 | 0.446393263 | 0.328569381 | 0.310833349 |
| 0.282960711 | 0.277229593 | 0.204141101 | 0.325362627 |
| 0.12583704  | 0.27290913  | 0.243198217 | 0.298315946 |
| 0.008377902 | 0.077823694 | 0.362202998 | 0.343451377 |
| 0.432745147 | 0.354526815 | 0.397443833 | 0.315271584 |
| 0.001184538 | 0.25674351  | 0.316937835 | 0.281212279 |
| 0.339746237 | 0.364940266 | 0.222919268 | 0.241297178 |
| 0.351841511 | 0.240234335 | 0.262911465 | 0.2889274   |
| 0.086414086 | 0.325421892 | 0.335827486 | 0.303205661 |
| 0.276187787 | 0.230107936 | 0.15498123  | 0.346900061 |
| 0.09717882  | 0.356177684 | 0.349471095 | 0.203545327 |
| 0.117909155 | 0.334959587 | 0.321849465 | 0.177170203 |
| 0.22941161  | 0.315703145 | 0.349035589 | 0.013601552 |
| 0.299844107 | 0.091299884 | 0.284154943 | 0.289382426 |
| 0.292131667 | 0.289467655 | 0.288556193 | 0.255332258 |
| 0.319609328 | 0.326801832 | 0.332124781 | 0.340459634 |

|             |             |             |             |
|-------------|-------------|-------------|-------------|
| 0.279453192 | 0.342955735 | 0.28670308  | 0.302602836 |
| 0.264719241 | 0.307213256 | 0.253419265 | 0.240261112 |
| 0.225566918 | 0.347554576 | 0.356468403 | 0.233117998 |
| 0.334332099 | 0.293223366 | 0.361285915 | 0.391951643 |
| 0.361609904 | 0.245486403 | 0.298412394 | 0.334546553 |
| 0.12766218  | 0.279870029 | 0.248966035 | 0.31105197  |
| 0.365853484 | 0.198366569 | 0.289061869 | 0.325307597 |
| 0.293902374 | 0.406200432 | 0.360482686 | 0.375448139 |
| 0.300195104 | 0.249207931 | 0.206844074 | 0.231709844 |
| 0.327164018 | 0.295968522 | 0.21689049  | 0.031477286 |
| 0.346253801 | 0.336182105 | 0.324645413 | 0.413051114 |
| 0.160201966 | 0.362454527 | 0.234219434 | 0.271412264 |
| 0.177422041 | 0.277505742 | 0.323185631 | 0.30128787  |
| 0.109123897 | 0.340282353 | 0.265325521 | 0.312380836 |
| 0.297790138 | 0.278084929 | 0.21115834  | 0.343476032 |
| 0.308749964 | 0.325373219 | 0.419270299 | 0.295705192 |
| 0.262644212 | 0.173838984 | 0.272581974 | 0.28157134  |
| 0.280771366 | 0.382089662 | 0.244918295 | 0.386531675 |
| 0.250114063 | 0.292535568 | 0.451065899 | 0.337972171 |
| 0.325415441 | 0.240921929 | 0.095654435 | 0.282378116 |
| 0.301030714 | 0.193102644 | 0.008597913 | 0.062073553 |
| 0.334675554 | 0.226162491 | 0.293914017 | 0.312929782 |
| 0.198254501 | 0.322795191 | 0.08837128  | 0.340731196 |
| 0.401831771 | 0.444980645 | 0.292971675 | 0.340928101 |
| 0.35255431  | 0.295564163 | 0.329374572 | 0.022069705 |
| 0.27152749  | 0.243061332 | 0.232196507 | 0.24214843  |
| 0.149164456 | 0.109064209 | 0.284073738 | 0.215762114 |
| 0.344293386 | 0.106402089 | 0.273149633 | 0.310053732 |
| 0.31832723  | 0.451432709 | 0.258562522 | 0.322273402 |
| 0.165863785 | 0.338704195 | 0.227579286 | 0.248534486 |
| 0.234374152 | 0.193263502 | 0.325397145 | 0.159553582 |
| 0.1944622   | 0.258540816 | 0.011874997 | 0.427283778 |
| 0.419189482 | 0.202158043 | 0.333452927 | 0.17790097  |
| 0.332663245 | 0.332472381 | 0.235741995 | 0.2491776   |
| 0.087439661 | 0.249391236 | 0.345140873 | 0.352676084 |
| 0.129618587 | 0.271407855 | 0.215772783 | 0.213769108 |
| 0.451047162 | 0.231879704 | 0.343761598 | 0.176983176 |
| 0.391571056 | 0.320804316 | 0.285369091 | 0.229085609 |
| 0.266846036 | 0.240187117 | 0.259847245 | 0.422563064 |
| 0.300589205 | 0.155074213 | 0.309464559 | 0.297086268 |
| 0.191555241 | 0.350953248 | 0.24909084  | 0.416722488 |
| 0.195855304 | 0.35925728  | 0.310927661 | 0.365807955 |
| 0.348103308 | 0.141339948 | 0.163931906 | 0.236424417 |
| 0.38844624  | 0.251409763 | 0.184379065 | 0.359613217 |
| 0.13326655  | 0.341555017 | 0.263236381 | 0.22036094  |
| 0.172434669 | 0.313782689 | 0.309998589 | 0.317208108 |
| 0.332450154 | 0.272740284 | 0.207666342 | 0.382379673 |
| 0.256195347 | 0.118310322 | 0.414974238 | 0.010507221 |
| 0.345311973 | 0.304904547 | 0.353546691 | 0.259426301 |
| 0.328417232 | 0.332501402 | 0.309960712 | 0.024686883 |
| 0.317511421 | 0.05065947  | 0.261667272 | 0.229872105 |
| 0.193614848 | 0.233179335 | 0.39772767  | 0.384961938 |
| 0.354302568 | 0.220109564 | 0.191689757 | 0.383267133 |
| 0.090645796 | 0.167281035 | 0.199132145 | 0.306163713 |



|             |             |             |             |
|-------------|-------------|-------------|-------------|
| 0.13411728  | 0.22963837  | 0.246980865 | 0.214671372 |
| 0.342624596 | 0.354260563 |             |             |
| CLOCK       | 0.023714504 | 0.350481559 | 0.016229266 |
| 0.066595259 | 0.245493105 | 0.218379807 | 0.020983867 |
| 0.052854848 | 0.269370082 | 0.234640228 | 0.213349768 |
| 0.004047121 | 0.180493935 | 0.386504801 | 0.019872531 |
| 0.318783168 | 0.011275239 | 0.044119199 | 0.061398008 |
| 0.134844942 | 0.227400954 | 0.283865899 | 0.184372745 |
| 0.239063191 | 0.101665001 | 0.194577128 | 0.315789155 |
| 0.436863791 | 0.287820026 | 0.343109301 | 0.162657045 |
| 0.315058739 | 0.278530594 | 0.325906505 | 0.003221702 |
| 0.250646932 | 0.032550335 | 0.323121288 | 0.179461675 |
| 0.195001467 | 0.23912328  | 0.203935658 | 0.138634625 |
| 0.239565412 | 0.009712604 | 0.18935808  | 0.371977235 |
| 0.203804714 | 0.178482467 | 0.019507164 | 0.331773883 |
| 0.264774708 | 0.204079128 | 0.305628472 | 0.000990865 |
| 0.322635876 | 0.235988549 | 0.332358802 | 0.404954544 |
| 0.102110841 | 0.056151838 | 0.314380907 | 0.139152352 |
| 0.308113492 | 0.325633572 | 0.160705772 | 0.264679149 |
| 0.413136601 | 0.261843454 | 0.398332932 | 0.094263478 |
| 0.224240296 | 0.008782901 | 0.078906494 | 0.031249235 |
| 0.291337858 | 0.104950682 | 0.234325194 | 0.311091686 |
| 0.34679979  | 0.404003275 | 0.13242977  | 0.390480569 |
| 0.16969169  | 0.307489757 | 0.245175489 | 0.229507538 |
| 0.301194516 | 0.03821946  | 0.321569669 | 0.42614026  |
| 0.016302873 | 0.257318682 | 0.32229614  | 0.052155573 |
| 0.346016689 | 0.312105755 | 0.242678221 | 0.229103246 |
| 0.347945987 | 0.272298245 | 0.37537704  | 0.179030947 |
| 0.251632499 | 0.023157918 | 0.356029109 | 0.304183219 |
| 0.198336227 | 0.027115406 | 0.204887544 | 0.459108762 |
| 0.300879055 | 0.424137099 | 0.372310691 | 0.298393776 |
| 0.295287128 | 0.420953768 | 0.294597062 | 0.343096198 |
| 0.176062732 | 0.437014226 | 0.080830047 | 0.01404676  |
| 0.022403964 | 0.037661622 | 0.228047773 | 0.213992387 |
| 0.429147708 | 0.208203438 | 0.087095264 | 0.150478008 |
| 0.452059533 | 0.359112674 | 0.441227146 | 0.348125699 |
| 0.010749678 | 0.316372673 | 0.291754474 | 0.14163467  |
| 0.289475855 | 0.044700275 | 0.27664161  | 0.384979863 |
| 0.279724362 | 0.412372617 | 0.066440767 | 0.36872925  |
| 0.110598451 | 0.421903588 | 0.382111945 | 0.077918184 |
| 0.406424085 | 0.369985566 | 0.444181353 | 0.386721013 |
| 0.358732188 | 0.172369798 | 0.067872035 | 0.312155008 |
| 0.404776338 | 0.023182238 | 0.453468246 | 0.474293641 |
| 0.407962315 | 0.4500663   | 0.469330536 | 0.457277652 |
| 0.410338102 | 0.023714608 | 0.061201029 | 0.21795736  |
| 0.402413987 | 0.306347648 | 0.08287343  | 0.302921282 |
| 0.301199491 | 0.20705042  | 0.391739394 | 0.234674624 |
| 0.415412012 | 0.399544005 | 0.448358947 | 0.31196709  |
| 0.18024313  | 0.209529076 | 1           | 0.337825311 |
| 0.013853275 | 0.040803768 | 0.015229746 | 0.222671326 |
| 0.211102853 | 0.087608543 | 0.199527907 | 0.274845111 |
| 0.099698957 | 0.18049621  | 0.335378854 | 0.35809624  |
| 0.019997349 | 0.287358535 | 0.071265997 | 0.07437152  |
| 0.014085663 | 0.070936314 | 0.096672447 | 0.075422098 |

|             |             |             |             |
|-------------|-------------|-------------|-------------|
| 0.165310273 | 0.131690807 | 0.375347975 | 0.443085336 |
| 0.269796425 | 0.090389623 | 0.323434907 | 0.395548356 |
| 0.3458139   | 0.29675851  | 0.136605639 | 0.00386344  |
| 0.216779561 | 0.316304186 | 0.301124618 | 0.316333581 |
| 0.093712262 | 0.156951056 | 0.290001669 | 0.368352147 |
| 0.124940459 | 0.062679111 | 0.288792553 | 0.303748767 |
| 0.072958392 | 0.21420484  | 0.40029774  | 0.267265699 |
| 0.000177229 | 0.179332085 | 0.393073809 | 0.149560441 |
| 0.211232073 | 0.173557313 | 0.273358814 | 0.424174569 |
| 0.307482505 | 0.241730373 | 0.45509136  | 0.370607277 |
| 0.223133224 | 0.127627674 | 0.463875    | 0.107034582 |
| 0.288048914 | 0.037723515 | 0.200523362 | 0.218577441 |
| 0.129626945 | 0.211415275 | 0.274456573 | 0.224004329 |
| 0.051343315 | 0.426267919 | 0.304046667 | 0.445852321 |
| 0.304176881 | 0.459358448 | 0.428998    | 0.369265625 |
| 0.238526863 | 0.313689258 | 0.258918446 | 0.378892919 |
| 0.420508472 | 0.240316404 | 0.0272007   | 0.428899055 |
| 0.275439941 | 0.371273105 | 0.107960647 | 0.429397823 |
| 0.377068395 | 0.360777676 | 0.076239003 | 0.341719094 |
| 0.291148444 | 0.105672486 | 0.359195177 | 0.456261112 |
| 0.256248067 | 0.281534913 | 0.271442357 | 0.372669752 |
| 0.080326138 | 0.213648091 | 0.224298    | 0.29963267  |
| 0.025666273 | 0.02735003  | 0.019887566 | 0.094760731 |
| 0.212610354 | 0.336782439 | 0.324707713 | 0.441719597 |
| 0.048184382 | 0.324402018 | 0.148550328 | 0.204293428 |
| 0.330417273 | 0.2846817   | 0.307273563 | 0.314176055 |
| 0.147935174 | 0.006700328 | 0.05698193  | 0.400468728 |
| 0.010776615 | 0.261787329 | 0.175388143 | 0.001244577 |
| 0.013736906 | 0.349724421 | 0.042323679 | 0.105525135 |
| 0.450599276 | 0.10791435  | 0.10343356  | 0.232633143 |
| 0.255328924 | 0.033469265 | 0.001342744 | 0.436962828 |
| 0.415814526 | 0.391913643 | 0.411405399 | 0.358676954 |
| 0.405638508 | 0.346210906 | 0.382773335 | 0.170455435 |
| 0.042146158 | 0.031754229 | 0.24849673  | 0.189456395 |
| 0.002761368 | 0.308917763 | 0.228056062 | 0.064260271 |
| 0.393365275 | 0.204869228 | 0.010266643 | 0.299271624 |
| 0.005494718 | 0.287854066 | 0.180447735 | 0.135290489 |
| 0.318143704 | 0.002522168 | 0.161400595 | 0.290441451 |
| 0.311878055 | 0.237532489 | 0.32713403  | 0.437479226 |
| 0.190706476 | 0.059608816 | 0.213715992 | 0.338736179 |
| 0.025960812 | 0.112432388 | 0.21624142  | 0.034638485 |
| 0.137226757 | 0.35962466  | 0.289714343 | 0.024141955 |
| 0.147102654 | 0.000254949 | 0.258448853 | 0.437009504 |
| 0.360430187 | 0.470208678 | 0.416712097 | 0.274382956 |
| 0.414680434 | 0.265888864 | 0.457912669 | 0.318545194 |
| 0.275208806 | 0.000133165 | 0.002224876 | 0.45531854  |
| 0.282717537 | 0.020557878 | 0.069155315 | 0.204160747 |
| 0.05097748  | 0.061365203 | 0.02249481  | 0.194389667 |
| 0.290033556 | 0.178719392 | 0.199744914 | 0.36492911  |
| 0.139767096 | 0.129556621 | 0.235526593 | 0.033565606 |
| 0.299409883 | 0.017654314 | 0.034045159 | 0.005108389 |
| 0.318339825 | 0.052054465 | 0.333328895 | 0.424487247 |
| 0.399048116 | 0.342431494 | 0.272304959 | 0.223731453 |
| 0.404941247 | 0.039849504 | 0.298989648 | 0.041704915 |

|             |             |             |             |
|-------------|-------------|-------------|-------------|
| 0.391394498 | 0.311136885 | 0.221892574 | 0.200828264 |
| 0.429833073 | 0.371569704 | 0.009077194 | 0.355489015 |
| 0.003505621 | 0.002288313 | 0.191441267 | 0.162992414 |
| 0.104196344 | 0.290227607 | 0.158134468 | 0.15952583  |
| 0.157193729 | 0.008313126 | 0.309342948 | 0.279580221 |
| 0.192116131 | 0.243542467 | 0.248555974 | 0.157137072 |
| 0.214741469 | 0.147156471 | 0.113483582 | 0.077923775 |
| 0.200028921 | 0.211216605 | 0.105039917 | 0.005074058 |
| 0.27692504  | 0.2949669   | 0.017698841 | 0.070423282 |
| 0.38053402  | 0.444842878 | 0.016967658 | 0.003473665 |
| 0.160019819 | 0.227124775 | 0.457697732 | 0.415229572 |
| 0.408716662 | 0.436930137 | 0.274735716 | 0.084329015 |
| 0.022522229 | 0.218678166 | 0.263518013 | 0.075974287 |
| 0.433122956 | 0.021625659 | 0.384280611 | 0.316012958 |
| 0.047027726 | 0.113461831 | 0.010802685 | 0.031152805 |
| 0.331638157 | 0.082811291 | 0.107973966 | 0.062677411 |
| 0.215500593 | 0.272618724 | 0.01484732  | 0.094076902 |
| 0.249733218 | 0.258911475 | 0.07022931  | 0.168751354 |
| 0.259508461 | 0.193299857 | 0.394388457 | 0.352608691 |
| 0.053196412 | 0.045445833 | 0.133044905 | 0.326470181 |
| 0.406928509 | 0.288596825 | 0.009027733 | 0.373482328 |
| 0.432633012 | 0.355975698 | 0.391392666 | 0.338183037 |
| 0.030833362 | 0.273456559 | 0.316648547 | 0.246891685 |
| 0.088886737 | 0.20839275  | 0.140339742 | 0.019377678 |
| 0.209978894 | 0.364506033 | 0.340543035 | 0.083859849 |
| 0.287294707 | 0.050149162 | 0.017751745 | 0.396772156 |
| 0.224619919 | 0.033985992 | 0.223641352 | 0.419855225 |
| 0.001294864 | 0.240620235 | 0.453806704 | 0.127067235 |
| 0.424505754 | 0.436343947 | 0.339014634 | 0.140063423 |
| 0.006209675 | 0.386372119 | 0.257262722 | 0.260384025 |
| 0.350879783 | 0.236339587 | 0.09280989  | 0.032535195 |
| 0.197086379 | 0.029906035 | 0.077251959 | 0.195567446 |
| 0.244705518 | 0.269668749 | 0.110346931 | 0.108271054 |
| 0.128565859 | 0.03930335  | 0.272856853 | 0.119156452 |
| 0.222480893 | 0.142893399 | 0.266444418 | 0.202574748 |
| 0.231068651 | 0.392577209 | 0.331283509 | 0.006104347 |
| 0.304772554 | 0.364472199 | 0.368286489 | 0.000892896 |
| 0.373056242 | 0.00106539  | 0.125538365 | 0.132582059 |
| 0.121473401 | 0.135937736 | 0.182014735 | 0.222406245 |
| 0.233355183 | 0.121172186 | 0.152990157 | 0.130184436 |
| 0.09444517  | 0.109471998 | 0.287116423 | 0.211338193 |
| 0.198662642 | 0.051226763 | 0.0437554   | 0.045781071 |
| 0.018097645 | 0.401751371 | 0.144745149 | 0.026643864 |
| 0.126819507 | 0.227783067 | 0.260697108 | 0.401071349 |
| 0.345438334 | 0.052314836 | 0.222227055 | 0.365402972 |
| 0.253493801 | 0.182202726 | 0.019482098 | 0.222353329 |
| 0.111841557 | 0.192313688 | 0.241113908 | 0.164933919 |
| 0.334459728 | 0.287181799 | 0.137754251 | 0.355424215 |
| 0.235155512 | 0.251407178 | 0.210608858 | 0.041844883 |
| 0.079037432 | 0.059332207 | 0.231692569 | 0.000694239 |
| 0.229652706 | 0.119421712 | 0.431150583 | 0.378305824 |
| 0.33126538  | 0.291831082 | 0.192159978 | 0.033946092 |
| 0.190540271 | 0.097535818 | 0.062214108 | 0.378704389 |
| 0.308763686 | 0.086027855 | 0.219738663 | 0.16064723  |

|             |             |             |             |
|-------------|-------------|-------------|-------------|
| 0.392309699 | 0.38067219  | 0.230458172 | 0.12845917  |
| 0.136096738 | 0.092816934 | 0.369537073 | 0.045088382 |
| 0.319067843 | 0.177910994 | 0.232303721 | 0.199988489 |
| 0.147940772 | 0.459060407 | 0.017657977 | 0.470117931 |
| 0.253810706 | 0.060881817 | 0.379451582 | 0.159327681 |
| 0.156012673 | 0.073392512 | 0.291796964 | 0.237170871 |
| 0.139131361 | 0.327310767 | 0.0241793   | 0.075586408 |
| 0.24200383  | 0.238223516 | 0.346007193 | 0.29687174  |
| 0.231185938 | 0.281247075 | 0.272096961 | 0.152337537 |
| 0.37062183  | 0.37041069  | 0.151716639 | 0.159183148 |
| 0.244642624 | 0.040526939 | 0.23789791  | 0.021184675 |
| 0.335182396 | 0.355314181 | 0.282873665 | 0.017464687 |
| 0.004224189 | 0.297757749 | 0.301475879 | 0.023288083 |
| 0.457043885 | 0.295763875 | 0.256424889 | 0.353397213 |
| 0.091177644 | 0.367462033 | 0.073563237 | 0.330454231 |
| 0.018858147 | 0.150993592 | 0.311468828 | 0.277747298 |
| 0.166178959 | 0.28259961  | 0.302443036 | 0.256451511 |
| 0.009001155 | 0.192387287 | 0.000490939 | 0.279611074 |
| 0.348744395 | 0.31061907  | 0.116130624 | 0.252126245 |
| 0.188357959 | 0.307812621 | 0.19698833  | 0.295603257 |
| 0.002725756 | 0.304906947 | 0.093654236 | 0.314294649 |
| 0.252777755 | 0.24856312  | 0.021687702 | 0.282328239 |
| 0.315064553 | 0.219746349 | 0.165082369 | 0.279260408 |
| 0.396126717 | 0.31043581  | 0.080177226 | 0.18141701  |
| 0.306973649 | 0.020467197 | 0.240999094 | 0.446933576 |
| 0.098106622 | 0.235597767 | 0.429159872 | 0.117304517 |
| 0.309395492 | 0.287907044 | 0.31955165  | 0.4369976   |
| 0.044524657 | 0.138307576 | 0.385303275 | 0.388020223 |
| 0.216920342 | 0.204230311 | 0.262459894 | 0.180566125 |
| 0.347387481 | 0.039804769 | 0.263944287 | 0.242456002 |
| 0.265136091 | 0.206187326 | 0.22141678  | 0.158729132 |
| 0.014036254 | 0.088841197 | 0.220486209 | 0.05943727  |
| 0.176311412 | 0.253816849 | 0.213825778 | 0.287685214 |
| 0.073184502 | 0.00887456  | 0.351996311 | 0.043619762 |
| 0.158712953 | 0.299869569 | 0.121289058 | 0.271500911 |
| 0.095680128 | 0.2191589   | 0.174558672 | 0.000545365 |
| 0.368541174 | 0.053909635 | 0.228964533 | 0.179263882 |
| 0.280945637 | 0.015848061 | 0.35107865  | 0.464077531 |
| 0.186713675 | 0.258886224 | 0.317185038 | 0.372984355 |
| 0.222078775 | 0.340339538 | 0.319233359 | 0.292857921 |
| 0.282640506 | 0.268173931 | 0.300370558 | 0.314513876 |
| 0.274524055 | 0.137090629 |             |             |

|             |             |             |             |
|-------------|-------------|-------------|-------------|
| CLSPN       | 0.219228801 | 0.502685923 | 0.216052487 |
| 0.244169948 | 0.287956701 | 0.49415256  | 0.158865082 |
| 0.245673304 | 0.456499817 | 0.369856041 | 0.408557149 |
| 0.075180579 | 0.059089283 | 0.483850324 | 0.142349198 |
| 0.370675639 | 0.091380896 | 0.218984372 | 0.109167177 |
| 0.323664678 | 0.260375588 | 0.329834773 | 0.515037701 |
| 0.267728068 | 0.354684348 | 0.480223656 | 0.365675128 |
| 0.505273585 | 0.265538259 | 0.460483997 | 0.262930877 |
| 0.455085674 | 0.296359737 | 0.364551866 | 0.090340197 |
| 0.458658027 | 0.008700016 | 0.461462301 | 0.285156354 |
| 0.130115273 | 0.44142685  | 0.454760991 | 0.310265158 |
| 0.438380346 | 0.146804059 | 0.27928     | 0.397288314 |

|             |             |             |             |
|-------------|-------------|-------------|-------------|
| 0.44068151  | 0.358416215 | 0.230007257 | 0.484227834 |
| 0.391560864 | 0.477421835 | 0.490684636 | 0.006944001 |
| 0.258034772 | 0.056636317 | 0.173266213 | 0.510137755 |
| 0.325393208 | 0.212848329 | 0.263307488 | 0.370100069 |
| 0.402634838 | 0.387486832 | 0.343123766 | 0.401605431 |
| 0.502687665 | 0.130244316 | 0.445333881 | 0.245921422 |
| 0.456398724 | 0.140251391 | 0.293134264 | 0.247645828 |
| 0.392526593 | 0.278840833 | 0.359606607 | 0.266255561 |
| 0.50432753  | 0.499936618 | 0.349894225 | 0.501226619 |
| 0.070852684 | 0.297522695 | 0.261774711 | 0.348437521 |
| 0.406024415 | 0.186806065 | 0.453321111 | 0.488386853 |
| 0.163077165 | 0.460887719 | 0.44050602  | 0.295514282 |
| 0.513490534 | 0.249312543 | 0.468985339 | 0.141745018 |
| 0.34807349  | 0.312816204 | 0.479899817 | 0.392208219 |
| 0.314886459 | 0.234348242 | 0.514262076 | 0.272773139 |
| 0.324916713 | 0.242698323 | 0.205300868 | 0.458619416 |
| 0.453015962 | 0.505938361 | 0.480464097 | 0.412131812 |
| 0.347434264 | 0.502664785 | 0.467181038 | 0.481231388 |
| 0.193289763 | 0.505013517 | 0.33635878  | 0.107942529 |
| 0.236316764 | 0.16309792  | 0.218830115 | 0.389102441 |
| 0.490444143 | 0.438290562 | 0.335079867 | 0.268869532 |
| 0.43871262  | 0.507105349 | 0.501013419 | 0.461874245 |
| 0.135241786 | 0.203215179 | 0.360034227 | 0.424204072 |
| 0.416947164 | 0.24268889  | 0.214484404 | 0.512464688 |
| 0.464461369 | 0.44297684  | 0.351801496 | 0.514054436 |
| 0.30063855  | 0.485271967 | 0.515682509 | 0.275539813 |
| 0.502127712 | 0.506497159 | 0.478427922 | 0.378327607 |
| 0.501277171 | 0.469526203 | 0.079084547 | 0.447842422 |
| 0.471093892 | 0.013111118 | 0.480390276 | 0.479690009 |
| 0.507113821 | 0.462913749 | 0.470612419 | 0.493055976 |
| 0.510205886 | 0.210489878 | 0.022849621 | 0.299851137 |
| 0.502259254 | 0.469746615 | 0.186326333 | 0.402540726 |
| 0.340563359 | 0.506907799 | 0.457066142 | 0.314583358 |
| 0.469456758 | 0.488967044 | 0.495496517 | 0.460369338 |
| 0.409925976 | 0.430496622 | 0.337825311 | 1           |
| 0.127940773 | 0.281098695 | 0.200739188 | 0.382904176 |
| 0.463348268 | 0.253023024 | 0.488644435 | 0.347512503 |
| 0.285675515 | 0.474760024 | 0.298195362 | 0.356453409 |
| 0.206709147 | 0.475185581 | 0.316990186 | 0.32878964  |
| 0.105317651 | 0.298270922 | 0.262415075 | 0.25070587  |
| 0.279964557 | 0.367237287 | 0.461046288 | 0.48242164  |
| 0.350463384 | 0.360538377 | 0.481280719 | 0.472192438 |
| 0.428942557 | 0.358136284 | 0.349435733 | 0.032280242 |
| 0.259902729 | 0.290579507 | 0.135870214 | 0.400373169 |
| 0.332699701 | 0.279740116 | 0.391051043 | 0.385503807 |
| 0.455352831 | 0.311422763 | 0.347443101 | 0.46960751  |
| 0.331128361 | 0.322572082 | 0.456236226 | 0.454219844 |
| 0.026409614 | 0.413588207 | 0.478870526 | 0.135315714 |
| 0.409077541 | 0.111962429 | 0.23089924  | 0.470065315 |
| 0.250654165 | 0.191766984 | 0.489226437 | 0.381948969 |
| 0.395300847 | 0.377026997 | 0.480379969 | 0.03403135  |
| 0.328675343 | 0.069208972 | 0.325834922 | 0.427572084 |
| 0.363463937 | 0.34478865  | 0.28452457  | 0.273402014 |
| 0.323675821 | 0.50042678  | 0.476640786 | 0.498121795 |

|             |             |             |             |
|-------------|-------------|-------------|-------------|
| 0.345965501 | 0.481265042 | 0.468327367 | 0.476923783 |
| 0.448383986 | 0.340271899 | 0.095168035 | 0.474927267 |
| 0.471033228 | 0.301357264 | 0.243652177 | 0.454049671 |
| 0.377803101 | 0.387588085 | 0.12133452  | 0.476738013 |
| 0.482015737 | 0.506242272 | 0.209708667 | 0.371545586 |
| 0.452997585 | 0.375643455 | 0.458123084 | 0.476665653 |
| 0.346761701 | 0.326902122 | 0.308113803 | 0.396577121 |
| 0.318491389 | 0.183857082 | 0.419776895 | 0.132913626 |
| 0.010002151 | 0.23320711  | 0.207475637 | 0.207699118 |
| 0.130850044 | 0.444172844 | 0.409223533 | 0.495563016 |
| 0.222577006 | 0.485638832 | 0.353708968 | 0.297494716 |
| 0.482295014 | 0.331336847 | 0.355310412 | 0.384671942 |
| 0.367122119 | 0.049569088 | 0.187302947 | 0.50587296  |
| 0.176907714 | 0.202396067 | 0.425634745 | 0.007217555 |
| 0.152121727 | 0.494047766 | 0.258127379 | 0.336876225 |
| 0.453783257 | 0.353318009 | 0.361474063 | 0.38058647  |
| 0.391295371 | 0.222339913 | 0.008381817 | 0.481672946 |
| 0.480761518 | 0.469425481 | 0.482979617 | 0.484061377 |
| 0.452917955 | 0.45238912  | 0.421333178 | 0.517039877 |
| 0.219631321 | 0.254409939 | 0.165722195 | 0.309567652 |
| 0.015411084 | 0.423847067 | 0.317838832 | 0.277310466 |
| 0.426225539 | 0.376542644 | 0.129616646 | 0.338551547 |
| 0.09228725  | 0.157984507 | 0.400766666 | 0.274099395 |
| 0.349085489 | 0.07860707  | 0.302021606 | 0.291317432 |
| 0.509162208 | 0.464056045 | 0.327179472 | 0.50204236  |
| 0.381000389 | 0.321947114 | 0.324386036 | 0.418789895 |
| 0.174725729 | 0.124157119 | 0.446848135 | 0.061893842 |
| 0.28748424  | 0.477467055 | 0.379639263 | 0.2014817   |
| 0.364767312 | 0.03627933  | 0.483106719 | 0.49842926  |
| 0.512883186 | 0.48024115  | 0.503694793 | 0.234008016 |
| 0.50449107  | 0.070686405 | 0.501099881 | 0.500072197 |
| 0.403651392 | 0.004637368 | 0.015177587 | 0.480832138 |
| 0.383118918 | 0.221470648 | 0.286007515 | 0.468512474 |
| 0.190311847 | 0.344261466 | 0.171845124 | 0.156071258 |
| 0.484712587 | 0.24490107  | 0.14915537  | 0.501189722 |
| 0.303962375 | 0.301266673 | 0.476080507 | 0.24490458  |
| 0.415224738 | 0.140657968 | 0.236498862 | 0.013806735 |
| 0.372716868 | 0.292459959 | 0.508366189 | 0.505969634 |
| 0.481927175 | 0.388656881 | 0.366928417 | 0.404699232 |
| 0.453161829 | 0.296435288 | 0.371329938 | 0.307252251 |
| 0.515015004 | 0.386620725 | 0.401565258 | 0.434038459 |
| 0.473320584 | 0.492635398 | 0.113327468 | 0.430405647 |
| 0.055140699 | 0.002442281 | 0.504921291 | 0.362330336 |
| 0.06165185  | 0.34278437  | 0.369039678 | 0.300533225 |
| 0.278663591 | 0.11886659  | 0.208989936 | 0.189969771 |
| 0.345261752 | 0.367910639 | 0.23944873  | 0.364659531 |
| 0.257217302 | 0.115927575 | 0.265772294 | 0.23884029  |
| 0.270346699 | 0.443957851 | 0.356456463 | 0.086395902 |
| 0.45360888  | 0.399367385 | 0.1678972   | 0.311016024 |
| 0.475541952 | 0.487799091 | 0.102127943 | 0.029998821 |
| 0.396180096 | 0.32388063  | 0.475331506 | 0.513298059 |
| 0.512002671 | 0.475922615 | 0.454378906 | 0.147874485 |
| 0.18333564  | 0.341341799 | 0.25768007  | 0.114276278 |
| 0.501632274 | 0.225090004 | 0.510885311 | 0.247536776 |

|             |             |             |             |
|-------------|-------------|-------------|-------------|
| 0.24937951  | 0.312798898 | 0.090460514 | 0.195521255 |
| 0.356276568 | 0.2965864   | 0.220080722 | 0.337029431 |
| 0.325273848 | 0.210928147 | 0.144984455 | 0.300456896 |
| 0.430861867 | 0.130543034 | 0.2821303   | 0.429028924 |
| 0.472853972 | 0.288374255 | 0.423483318 | 0.457372115 |
| 0.29141221  | 0.251222777 | 0.449036565 | 0.42382356  |
| 0.481354283 | 0.422545071 | 0.084725538 | 0.509877816 |
| 0.480747549 | 0.454463738 | 0.51193472  | 0.406798814 |
| 0.22681799  | 0.365796384 | 0.270560476 | 0.333032267 |
| 0.290209539 | 0.501148383 | 0.304695982 | 0.183596754 |
| 0.392075477 | 0.478515879 | 0.484989515 | 0.243953451 |
| 0.457902601 | 0.322717714 | 0.211664757 | 0.486014472 |
| 0.138516307 | 0.211020222 | 0.459272157 | 0.446055304 |
| 0.003655248 | 0.097776273 | 0.458812573 | 0.330004348 |
| 0.479305815 | 0.471847801 | 0.476923464 | 0.376964182 |
| 0.000767605 | 0.388164529 | 0.406234964 | 0.41049284  |
| 0.50398334  | 0.469401738 | 0.242560899 | 0.140579262 |
| 0.37083032  | 0.260135594 | 0.189605886 | 0.456355316 |
| 0.137212983 | 0.487564451 | 0.297626986 | 0.319411219 |
| 0.232636722 | 0.260559151 | 0.209576455 | 0.35392562  |
| 0.114268649 | 0.33718854  | 0.409156509 | 0.395913029 |
| 0.15840855  | 0.444608075 | 0.466582714 | 0.11248408  |
| 0.327713756 | 0.441212016 | 0.466465196 | 0.006124404 |
| 0.431223292 | 0.034006737 | 0.230460737 | 0.25611596  |
| 0.246486234 | 0.246469148 | 0.274986395 | 0.295368549 |
| 0.426651022 | 0.304734861 | 0.346036177 | 0.318327934 |
| 0.215793586 | 0.337545113 | 0.395195447 | 0.441581966 |
| 0.289342118 | 0.254630885 | 0.265525408 | 0.268357532 |
| 0.127425356 | 0.501741179 | 0.37990266  | 0.244120331 |
| 0.30238542  | 0.416216409 | 0.41193397  | 0.510724071 |
| 0.448085451 | 0.306025996 | 0.363012944 | 0.515977016 |
| 0.237308379 | 0.389606566 | 0.202868657 | 0.472052301 |
| 0.339499295 | 0.199326418 | 0.477471652 | 0.46686395  |
| 0.464868491 | 0.456033424 | 0.380507149 | 0.472267652 |
| 0.391807541 | 0.360856991 | 0.414312083 | 0.13756013  |
| 0.306033014 | 0.286584584 | 0.236731273 | 0.013990042 |
| 0.419315647 | 0.436878914 | 0.485430242 | 0.50771931  |
| 0.241451378 | 0.446503257 | 0.444415723 | 0.204611834 |
| 0.378287286 | 0.356011618 | 0.280141872 | 0.472259078 |
| 0.168862966 | 0.302428172 | 0.295772313 | 0.512385071 |
| 0.43923316  | 0.438408502 | 0.239679284 | 0.352575995 |
| 0.315499682 | 0.37639324  | 0.477142344 | 0.303654109 |
| 0.43980781  | 0.167294983 | 0.471662424 | 0.309303737 |
| 0.244008688 | 0.492024108 | 0.189834718 | 0.493392774 |
| 0.314119738 | 0.300032588 | 0.473115791 | 0.426135893 |
| 0.417661269 | 0.166808237 | 0.137112531 | 0.462020544 |
| 0.290283958 | 0.302355987 | 0.018150025 | 0.054990806 |
| 0.371329682 | 0.336728611 | 0.47578316  | 0.406020621 |
| 0.217699728 | 0.366669126 | 0.12859136  | 0.403467843 |
| 0.508956464 | 0.514029417 | 0.301985908 | 0.341910471 |
| 0.425321881 | 0.202968864 | 0.52577791  | 0.019878199 |
| 0.415149373 | 0.405101658 | 0.398866764 | 0.140358277 |
| 0.074463588 | 0.157829229 | 0.434127978 | 0.217465521 |
| 0.454860882 | 0.168571084 | 0.434458729 | 0.47194716  |

|             |             |             |             |
|-------------|-------------|-------------|-------------|
| 0.32542217  | 0.515497209 | 0.161485342 | 0.429717858 |
| 0.141061496 | 0.357909771 | 0.354060683 | 0.38944137  |
| 0.232560993 | 0.244672829 | 0.403674966 | 0.193882073 |
| 0.097899308 | 0.275055555 | 0.004470798 | 0.461167179 |
| 0.495823438 | 0.292347999 | 0.347076352 | 0.34658041  |
| 0.334234781 | 0.448575753 | 0.239142835 | 0.426582101 |
| 0.037321621 | 0.338655197 | 0.29959775  | 0.509302086 |
| 0.216306837 | 0.394284366 | 0.125376218 | 0.276218065 |
| 0.509443012 | 0.272927037 | 0.364046459 | 0.291756253 |
| 0.512260311 | 0.479235111 | 0.36124361  | 0.232080825 |
| 0.437185054 | 0.204566177 | 0.468609193 | 0.488779819 |
| 0.231885144 | 0.175358793 | 0.435170915 | 0.258673037 |
| 0.262762601 | 0.486087011 | 0.426487417 | 0.487553858 |
| 0.098475756 | 0.339158992 | 0.438940754 | 0.48429897  |
| 0.356793473 | 0.135322437 | 0.202065737 | 0.224575527 |
| 0.514636865 | 0.203347708 | 0.219407246 | 0.453620446 |
| 0.168218707 | 0.370462257 | 0.453037524 | 0.186649659 |
| 0.087971111 | 0.252811678 | 0.441295041 | 0.281100874 |
| 0.343480615 | 0.361826334 | 0.217911278 | 0.441209655 |
| 0.191197066 | 0.062176704 | 0.461837903 | 0.010324013 |
| 0.505271705 | 0.411723773 | 0.342843678 | 0.338035626 |
| 0.351905034 | 0.431122137 | 0.463132535 | 0.009154909 |
| 0.432331596 | 0.051957998 | 0.321923383 | 0.222431956 |
| 0.256095711 | 0.160196778 | 0.50165091  | 0.475835955 |
| 0.437188769 | 0.352473718 | 0.32173588  | 0.497637666 |
| 0.110026787 | 0.298994979 | 0.304214016 | 0.499084213 |
| 0.175857813 | 0.42241553  | 0.413055369 | 0.353534262 |
| 0.4767507   | 0.392248521 |             |             |
| CNIH        | 0.185279349 | 0.070241109 | 0.155683489 |
| 0.062247638 | 0.059445376 | 0.027061    | 0.148559156 |
| 0.120865428 | 0.07563049  | 0.004568    | 0.067982788 |
| 0.114630898 | 0.002856986 | 0.096513446 | 0.153841911 |
| 0.03505631  | 0.157369807 | 0.223862441 | 0.011046728 |
| 0.024827322 | 0.058713492 | 0.009471771 | 0.037124404 |
| 0.051435009 | 0.276752198 | 0.061955985 | 0.016742755 |
| 0.076589837 | 0.001403946 | 0.040868435 | 0.002246948 |
| 0.167714678 | 0.047182906 | 0.010456944 | 0.11309087  |
| 0.035505768 | 0.003102122 | 0.167481835 | 0.063978174 |
| 0.009186775 | 0.200081021 | 0.011621152 | 0.100488528 |
| 0.015628893 | 0.151536237 | 0.000972297 | 0.031311827 |
| 0.061451719 | 0.053327743 | 0.168653039 | 0.048275622 |
| 0.015703275 | 0.119957053 | 0.031334036 | 0.005868177 |
| 0.00886812  | 8.02E-05    | 0.002544477 | 0.106564115 |
| 0.267303916 | 0.224063887 | 0.001790958 | 0.067214987 |
| 0.029508226 | 0.056513587 | 0.183681031 | 0.008983737 |
| 0.100378768 | 0.004097512 | 0.03517649  | 0.037245098 |
| 0.031281623 | 0.138578049 | 0.318841283 | 0.172995433 |
| 0.014869082 | 0.194309626 | 0.058304772 | 0.015203795 |
| 0.062746836 | 0.150401593 | 0.185322587 | 0.108234983 |
| 0.00540098  | 0.029195163 | 0.030152465 | 0.155149787 |
| 0.070460932 | 0.095851437 | 0.076551368 | 0.128039503 |
| 0.13966594  | 0.018659804 | 0.050855458 | 0.207084357 |
| 0.078341629 | 0.006889846 | 0.013538908 | 0.010198682 |
| 0.050587092 | 0.035582726 | 0.124193779 | 0.163780003 |



|             |             |             |             |
|-------------|-------------|-------------|-------------|
| 0.04272261  | 0.208234214 | 0.124751796 | 0.02708632  |
| 0.051133653 | 0.233314495 | 0.023989809 | 0.049223619 |
| 0.048231296 | 0.082311657 | 0.052207515 | 0.09461771  |
| 0.025734078 | 0.097468736 | 0.075586542 | 0.096379513 |
| 0.000580118 | 0.097925613 | 0.202728297 | 0.155867901 |
| 0.141359381 | 0.181029281 | 0.017903849 | 0.20852377  |
| 0.07030178  | 0.119887401 | 0.14444088  | 0.118349821 |
| 0.073043178 | 0.104722794 | 0.090517296 | 0.08012294  |
| 0.214098305 | 0.006102481 | 0.026765525 | 0.056618398 |
| 0.068193294 | 0.25891635  | 0.020789738 | 0.134491479 |
| 0.164733168 | 0.063234754 | 0.116223499 | 0.168333477 |
| 0.091285106 | 0.13589066  | 0.059621419 | 0.206483505 |
| 0.1326828   | 0.131626248 | 0.115425715 | 0.040569874 |
| 0.139802515 | 0.069730534 | 0.004768848 | 0.096217823 |
| 0.13992478  | 0.003912221 | 0.058220469 | 0.067018546 |
| 0.09334647  | 0.050782528 | 0.104789343 | 0.084242295 |
| 0.091828659 | 0.282900005 | 1.44E-05    | 0.109911098 |
| 0.112564986 | 0.132049842 | 0.08806497  | 0.016363395 |
| 0.042184893 | 0.036969086 | 0.05248577  | 0.005385032 |
| 0.157711694 | 0.082204256 | 0.064540482 | 0.070374015 |
| 0.041217628 | 0.22043315  | 0.013853275 | 0.127940773 |
| 1           | 0.156215544 | 0.247327942 | 0.140782648 |
| 0.007496091 | 0.235654231 | 0.033057973 | 0.0410474   |
| 0.246526533 | 0.039745738 | 0.007104563 | 0.049559625 |
| 0.250024892 | 0.021924385 | 0.197304983 | 0.14615445  |
| 0.17056171  | 0.328843595 | 0.045240868 | 0.085572319 |
| 0.103243227 | 0.253745631 | 0.033864431 | 0.087687913 |
| 0.025264996 | 0.219162195 | 0.050891803 | 0.138107535 |
| 0.175367207 | 0.027493672 | 0.221286802 | 0.073531192 |
| 0.010346538 | 0.003344458 | 0.003336601 | 0.018657452 |
| 0.290269325 | 0.030887197 | 0.040885681 | 0.063892188 |
| 0.089003083 | 0.10415475  | 0.015597211 | 0.194033631 |
| 0.202725464 | 0.041997518 | 0.087411412 | 0.023444686 |
| 0.100538037 | 0.077067171 | 0.064332564 | 0.024555791 |
| 0.088978957 | 0.005784682 | 0.004554782 | 0.077155068 |
| 0.004275813 | 0.021670417 | 0.072919531 | 0.064170618 |
| 0.008763456 | 0.199591635 | 0.104050813 | 0.000299509 |
| 0.027519915 | 0.072682293 | 0.161895224 | 0.011932588 |
| 0.159848964 | 0.164985887 | 0.037315383 | 0.041488196 |
| 0.201823722 | 0.10319991  | 0.116866621 | 0.087283709 |
| 0.008385969 | 0.108734851 | 0.062230772 | 0.104176457 |
| 0.096495477 | 0.011306862 | 0.001432625 | 0.066524688 |
| 0.073072433 | 0.006043304 | 0.227667091 | 0.037267546 |
| 0.01206769  | 0.041480534 | 0.046016291 | 0.106125491 |
| 0.170359515 | 0.090332333 | 0.129330881 | 0.092035491 |
| 0.129691412 | 0.166500198 | 0.09314546  | 0.117732275 |
| 0.003709102 | 0.024542117 | 0.020230661 | 0.11117326  |
| 0.248553055 | 0.023551087 | 0.189834846 | 0.00277483  |
| 7.82E-05    | 0.198574807 | 0.245934573 | 0.155597045 |
| 0.018086706 | 0.019794512 | 0.055761978 | 0.096286888 |
| 0.235599803 | 0.13357953  | 0.166604206 | 0.030394012 |
| 0.107068299 | 0.02291524  | 0.023889698 | 0.045748893 |
| 0.218929533 | 0.09281583  | 0.068119688 | 0.153403181 |
| 0.192240024 | 0.012226352 | 0.059764093 | 0.007599128 |

|             |             |             |             |
|-------------|-------------|-------------|-------------|
| 0.143228104 | 0.040855327 | 0.281426361 | 0.328121488 |
| 0.089964725 | 0.289285995 | 0.180819825 | 0.006717631 |
| 0.125095312 | 0.282721327 | 0.045922892 | 0.081205792 |
| 0.09649758  | 0.097543934 | 0.092878773 | 0.112735909 |
| 0.078849579 | 0.058866978 | 0.070288758 | 0.051059228 |
| 0.139078343 | 0.143569015 | 0.009103138 | 0.070770474 |
| 0.00526223  | 0.119940259 | 0.059354565 | 0.314492068 |
| 0.049114455 | 0.118386569 | 0.17287221  | 0.04073341  |
| 0.072493924 | 0.002680221 | 0.024208912 | 0.102870707 |
| 0.095045165 | 0.156161608 | 0.006489447 | 0.004999179 |
| 0.11734225  | 0.149093472 | 0.009336693 | 0.109185755 |
| 0.089709916 | 0.147458591 | 0.063444399 | 0.078906067 |
| 0.178893168 | 0.002753212 | 0.023610517 | 0.000825304 |
| 0.009335853 | 0.122515785 | 0.015152767 | 0.086926164 |
| 0.14478984  | 0.098141308 | 0.137965541 | 0.113531425 |
| 0.091010731 | 0.088181897 | 0.102471426 | 0.016632055 |
| 0.104087836 | 3.90E-05    | 0.088559525 | 0.077673002 |
| 0.006846001 | 0.009346605 | 0.030765383 | 0.06968253  |
| 0.031358411 | 0.212924267 | 0.260987986 | 0.008572689 |
| 0.102818855 | 0.096192543 | 0.205649547 | 0.030424933 |
| 0.04294015  | 0.091071898 | 0.021393024 | 0.099764952 |
| 0.116586493 | 0.160555902 | 0.016425789 | 0.260472781 |
| 0.038641976 | 0.140606244 | 0.244454973 | 0.016039623 |
| 0.080985785 | 0.239535547 | 0.144041649 | 0.093018699 |
| 0.139879363 | 0.064405233 | 0.003797526 | 0.008114335 |
| 0.078417499 | 0.15605634  | 0.004462789 | 0.163433708 |
| 0.08395827  | 0.045793334 | 0.176767918 | 0.187331398 |
| 0.115199214 | 0.12315474  | 0.21469285  | 0.074854274 |
| 0.079508148 | 0.006850059 | 0.032516675 | 0.173087675 |
| 0.005917349 | 0.020587048 | 0.230531025 | 0.038012564 |
| 0.053827903 | 0.090926334 | 0.009948381 | 0.014208074 |
| 0.12447761  | 0.047259482 | 0.039305805 | 0.163496634 |
| 0.048878021 | 0.021098703 | 0.121509513 | 0.125114846 |
| 0.011577582 | 0.149245725 | 0.262669213 | 0.162519076 |
| 0.017710315 | 0.02230297  | 0.264576991 | 0.277505512 |
| 0.089410974 | 0.075510051 | 0.090570794 | 0.087530357 |
| 0.223111676 | 0.042004562 | 0.085429695 | 0.080859837 |
| 0.124608589 | 0.12947466  | 0.205240943 | 0.071953194 |
| 0.196677976 | 0.085982247 | 0.040390712 | 0.064136006 |
| 0.093697613 | 0.178504639 | 0.102927838 | 0.016272918 |
| 0.291754554 | 0.105788977 | 0.128078744 | 0.283949381 |
| 0.023257195 | 0.261649621 | 0.162773412 | 0.170250392 |
| 0.047107431 | 0.008974269 | 0.218028682 | 0.206084618 |
| 0.121942132 | 0.003836574 | 0.253750644 | 0.049635807 |
| 0.108827144 | 0.002936795 | 0.041707605 | 0.165918167 |
| 0.268967143 | 0.185396329 | 0.025673142 | 0.074557612 |
| 0.050850568 | 0.013735338 | 0.065126074 | 0.063507208 |
| 0.098281649 | 0.03069782  | 0.107095169 | 0.132885566 |
| 0.290362921 | 0.028701541 | 0.011754465 | 0.048485886 |
| 0.205154406 | 0.034144182 | 0.121675999 | 0.304877348 |
| 0.214866407 | 0.157734024 | 0.086247597 | 0.177884626 |
| 0.025840181 | 0.14394772  | 0.161615941 | 0.070191924 |
| 0.011175548 | 0.072864033 | 0.01057438  | 0.052870895 |
| 0.031247788 | 0.004942021 | 0.093270287 | 0.081558598 |

|             |             |             |             |
|-------------|-------------|-------------|-------------|
| 0.133156515 | 0.08874243  | 0.152298038 | 0.052351565 |
| 0.000309434 | 0.033352375 | 0.065538411 | 0.023930029 |
| 0.07331795  | 0.129752983 | 0.028637559 | 0.134175015 |
| 0.235403013 | 0.209652683 | 0.066365553 | 0.010838733 |
| 0.002290989 | 0.041426837 | 0.276093314 | 0.135620611 |
| 0.121802886 | 0.159183825 | 0.006863977 | 0.138707911 |
| 0.00680564  | 0.258884415 | 0.151356685 | 0.005736334 |
| 0.002470929 | 0.092394138 | 0.068141514 | 0.181460173 |
| 0.024061613 | 0.087860435 | 0.112604918 | 0.00933764  |
| 0.046908612 | 0.123745132 | 0.123450745 | 0.119583062 |
| 0.126456229 | 0.096938811 | 0.128083167 | 0.043114296 |
| 0.067736814 | 0.133627715 | 0.092365114 | 0.204087724 |
| 0.118779054 | 0.153821034 | 0.049578005 | 0.043562934 |
| 0.042487132 | 0.180953299 | 0.296074586 | 0.282268227 |
| 0.110674562 | 0.073655773 | 0.276430287 | 0.2475819   |
| 0.19140861  | 0.032352949 | 0.21285384  | 0.084086658 |
| 0.147880345 | 0.196780914 | 0.044111505 | 0.068938322 |
| 0.001384409 | 0.012514357 | 0.117137081 | 0.048206633 |
| 0.170132244 | 0.017522108 | 0.025871222 | 0.063534999 |
| 0.038515857 | 0.19849435  | 0.268524542 | 0.134953563 |
| 0.047093158 | 0.026347845 | 0.005945554 | 0.093722126 |
| 0.157353006 | 0.258610437 | 0.05140905  | 0.084684849 |
| 0.098624606 | 0.031010562 | 0.061916827 | 0.110642343 |
| 0.006788714 | 0.175681938 | 0.00373052  | 0.115154955 |
| 0.002904293 | 0.188779298 | 0.306102241 | 0.047507341 |
| 0.003078348 | 0.144595236 | 0.073618446 | 0.018891138 |
| 0.052856437 | 0.039984514 | 0.030511033 | 0.090118824 |
| 0.135199509 | 0.187799056 | 0.132125638 | 0.156056179 |
| 0.019704398 | 0.033723559 | 0.026753567 | 0.062345318 |
| 0.101159155 | 0.085165907 | 0.283921541 | 0.080581426 |
| 0.030037102 | 0.273663921 | 0.172342144 | 0.078600324 |
| 0.039930485 | 0.072607338 | 0.004245608 | 0.01574355  |
| 0.058961806 | 0.009017015 | 0.00015268  | 0.004081038 |
| 0.142457871 | 0.016984649 | 0.043132157 | 0.08509555  |
| 0.036416185 | 0.144992749 | 0.002690422 | 0.073343924 |
| 0.092339558 | 0.130554803 | 0.025966169 | 0.24416381  |
| 0.117426577 | 0.193960433 | 0.042779165 | 0.002743378 |
| 0.025742394 | 0.016422466 | 0.004772844 | 0.189768875 |
| 0.121586011 | 0.004587316 | 0.031698739 | 0.182683677 |
| 0.082519168 | 0.002001819 | 0.035210064 | 0.051015934 |
| 0.223634671 | 0.136724573 | 0.113621118 | 0.074720273 |
| 0.046893277 | 0.182670696 | 0.019104562 | 0.018651161 |
| 0.033255267 | 0.021115792 | 0.105996578 | 0.017982982 |
| 0.205156255 | 0.026794123 | 0.013025902 | 0.202746214 |
| 0.118778925 | 0.017428694 | 0.274176625 | 0.003411455 |
| 0.188048192 | 0.121448038 | 0.015424101 | 0.015684447 |
| 0.116535173 | 0.034288777 | 0.227126006 | 0.098787255 |
| 0.001916697 | 0.032962006 | 0.130316858 | 0.028017485 |
| 0.156646662 | 0.00967674  | 0.221763118 | 0.003556262 |
| 0.089892864 | 0.083527017 | 0.1770057   | 0.029789917 |
| 0.028732696 | 0.282615316 | 0.010959093 | 0.11006364  |
| 0.154911854 | 0.023080228 | 0.069554322 | 0.096162382 |
| 0.015405902 | 0.120695264 | 0.020401913 | 0.105980089 |
| 0.089681836 | 0.220676645 | 0.068029402 | 0.091755862 |

|             |             |             |             |
|-------------|-------------|-------------|-------------|
| 0.201266345 | 0.02465121  | 0.011590421 | 0.053144781 |
| 0.096491782 | 0.078684381 | 0.013202721 | 0.123820415 |
| 0.009600915 | 0.139417115 | 0.0300735   | 0.069105086 |
| 0.090715321 | 0.092216771 | 0.022275516 | 0.278988571 |
| 0.116312949 | 0.046365708 | 0.034429567 | 0.201055151 |
| 0.066509135 | 0.08927869  | 0.174782295 | 0.000575529 |
| 0.067398216 | 0.063497986 | 0.17110523  | 0.035977522 |
| 0.280664425 | 0.069879297 | 0.04077636  | 0.025714461 |
| 0.084240479 | 0.021183763 | 0.03700521  | 0.037429223 |
| 0.005254188 | 0.154165511 | 0.126637003 | 0.093462803 |
| 0.122835957 | 0.006859181 | 0.002711566 | 0.101477638 |
| 0.005271741 | 0.004346577 | 0.007550586 | 0.03927463  |
| 0.010593473 | 0.008902382 | 0.011607602 | 0.010566093 |
| 0.090439401 | 0.087321839 |             |             |
| CNIH4       | 0.18307934  | 0.175167684 | 0.169372482 |
| 0.141652802 | 0.070150957 | 0.068303181 | 0.141883411 |
| 0.151438246 | 0.142124217 | 0.024458652 | 0.114377393 |
| 0.165103593 | 0.005945561 | 0.206669369 | 0.134108606 |
| 0.074006474 | 0.145327883 | 0.169066598 | 0.023384838 |
| 0.057579397 | 0.068776733 | 0.039033492 | 0.107636096 |
| 0.054472295 | 0.337662066 | 0.124072143 | 0.044364695 |
| 0.191924793 | 0.018816093 | 0.105385031 | 0.018286866 |
| 0.271231999 | 0.070618302 | 0.03607288  | 0.135359947 |
| 0.083263503 | 0.000943219 | 0.28624854  | 0.072659168 |
| 0.016447436 | 0.288486864 | 0.047465981 | 0.106250515 |
| 0.052098687 | 0.175305293 | 0.017166324 | 0.076060174 |
| 0.098957478 | 0.063537615 | 0.186852116 | 0.115540506 |
| 0.039986364 | 0.208103927 | 0.112213875 | 0.024061383 |
| 0.023549135 | 0.001950391 | 0.010651233 | 0.238754849 |
| 0.25810936  | 0.158675265 | 0.015194283 | 0.076059307 |
| 0.069102729 | 0.093548294 | 0.16324789  | 0.034566571 |
| 0.230185546 | 0.013111775 | 0.093613668 | 0.07519299  |
| 0.069966217 | 0.106516106 | 0.275872079 | 0.159099652 |
| 0.037789661 | 0.158423964 | 0.08594908  | 0.024726564 |
| 0.180494381 | 0.27894088  | 0.170367196 | 0.247078858 |
| 0.007916918 | 0.050646471 | 0.038634528 | 0.160626121 |
| 0.115745934 | 0.090008795 | 0.157676483 | 0.2556805   |
| 0.100435553 | 0.070690574 | 0.115756815 | 0.230089934 |
| 0.183940028 | 0.017845257 | 0.061370376 | 0.020459433 |
| 0.080117833 | 0.062027489 | 0.242305007 | 0.220961658 |
| 0.053259321 | 0.21389294  | 0.275833018 | 0.046656483 |
| 0.076159283 | 0.209856475 | 0.041119207 | 0.12842291  |
| 0.108011666 | 0.20238705  | 0.141726758 | 0.152888869 |
| 0.059404431 | 0.219580895 | 0.150684559 | 0.187625396 |
| 0.008970389 | 0.228258969 | 0.195730285 | 0.166347283 |
| 0.150580093 | 0.131411269 | 0.02689406  | 0.223748435 |
| 0.166845564 | 0.168474784 | 0.162287485 | 0.103370212 |
| 0.149685306 | 0.250708891 | 0.218326559 | 0.167654354 |
| 0.174241712 | 0.01408443  | 0.059887638 | 0.089966061 |
| 0.126972156 | 0.185845591 | 0.029993432 | 0.281715015 |
| 0.266643663 | 0.137221802 | 0.135635809 | 0.305898833 |
| 0.083541193 | 0.256836592 | 0.173023418 | 0.187028128 |
| 0.268818963 | 0.279232416 | 0.224990727 | 0.088454221 |
| 0.271079857 | 0.127501507 | 0.010961113 | 0.168065762 |

|             |             |             |             |
|-------------|-------------|-------------|-------------|
| 0.246958562 | 0.004918637 | 0.151165991 | 0.16659012  |
| 0.224613983 | 0.13571441  | 0.208491797 | 0.19310792  |
| 0.22610437  | 0.211180689 | 0.000804584 | 0.118878433 |
| 0.252594514 | 0.22745378  | 0.081999873 | 0.055863246 |
| 0.072785413 | 0.094237854 | 0.118598027 | 0.04744456  |
| 0.271709164 | 0.173744851 | 0.169457684 | 0.150001525 |
| 0.07462311  | 0.304920726 | 0.040803768 | 0.281098695 |
| 0.156215544 | 1           | 0.244234038 | 0.160350447 |
| 0.044275236 | 0.178390943 | 0.085421849 | 0.064554482 |
| 0.210365775 | 0.081463955 | 0.022850971 | 0.091204895 |
| 0.258343311 | 0.081179203 | 0.163870586 | 0.171712912 |
| 0.154963547 | 0.32343925  | 0.141479057 | 0.14015277  |
| 0.105046889 | 0.353611188 | 0.102090273 | 0.18410228  |
| 0.041028698 | 0.268592931 | 0.128499874 | 0.239697945 |
| 0.256198286 | 0.059908463 | 0.225211569 | 0.072296253 |
| 0.048729976 | 0.016446541 | 0.009602206 | 0.054611779 |
| 0.329810467 | 0.079072369 | 0.087623181 | 0.115983786 |
| 0.171044921 | 0.107964648 | 0.040025416 | 0.313737558 |
| 0.238780375 | 0.067685322 | 0.181172219 | 0.073184351 |
| 0.07189347  | 0.125985311 | 0.154624287 | 0.03455082  |
| 0.137467417 | 0.020329862 | 0.025158468 | 0.169533954 |
| 0.023721637 | 0.028045427 | 0.172726213 | 0.106701377 |
| 0.054335541 | 0.292248001 | 0.214179275 | 0.002594722 |
| 0.044423537 | 0.063487475 | 0.169549159 | 0.043022388 |
| 0.179127206 | 0.174453355 | 0.056194838 | 0.051988081 |
| 0.263135974 | 0.235282098 | 0.195032568 | 0.206468312 |
| 0.03281752  | 0.221706387 | 0.152348758 | 0.206862532 |
| 0.146231454 | 0.032676182 | 0.006829678 | 0.1601445   |
| 0.160471589 | 0.031935467 | 0.241405486 | 0.109193021 |
| 0.036010186 | 0.090998586 | 0.041305146 | 0.216138849 |
| 0.291945523 | 0.230306077 | 0.126938807 | 0.131754958 |
| 0.221387091 | 0.19708551  | 0.156451997 | 0.229358383 |
| 0.024396247 | 0.052454975 | 0.04148373  | 0.159020214 |
| 0.238406512 | 0.032845242 | 0.234165254 | 0.008599174 |
| 0.000752347 | 0.179271345 | 0.22827496  | 0.114196135 |
| 0.021836905 | 0.069542848 | 0.100163211 | 0.220446653 |
| 0.189211596 | 0.231127841 | 0.169441711 | 0.066971873 |
| 0.226072669 | 0.043260495 | 0.053618622 | 0.083963811 |
| 0.215680474 | 0.078465355 | 0.140159028 | 0.289154865 |
| 0.187369543 | 0.027624799 | 0.093091751 | 0.015654077 |
| 0.160029551 | 0.130357155 | 0.285236937 | 0.357588218 |
| 0.176069174 | 0.341420132 | 0.22401189  | 0.031850764 |
| 0.16141365  | 0.204962684 | 0.023245932 | 0.179619598 |
| 0.198506171 | 0.18887593  | 0.199377696 | 0.225135344 |
| 0.155749321 | 0.116248342 | 0.128298798 | 0.123156357 |
| 0.158379755 | 0.132415446 | 0.022271449 | 0.087041418 |
| 0.010997438 | 0.169284398 | 0.065479012 | 0.275948932 |
| 0.109866681 | 0.143536896 | 0.186999357 | 0.064905973 |
| 0.161081406 | 0.01270902  | 0.068784857 | 0.080384299 |
| 0.11761124  | 0.13598334  | 0.048196005 | 0.031161222 |
| 0.263892304 | 0.254282401 | 0.02674234  | 0.237505679 |
| 0.129963653 | 0.212788346 | 0.076721948 | 0.135357772 |
| 0.159367838 | 0.0128961   | 0.054751803 | 0.006580666 |
| 0.042472767 | 0.225288019 | 0.038689602 | 0.151776877 |

|             |             |             |             |
|-------------|-------------|-------------|-------------|
| 0.174882111 | 0.120454464 | 0.253702001 | 0.244620352 |
| 0.227596235 | 0.197608417 | 0.228505546 | 0.030744433 |
| 0.233981378 | 0.002133748 | 0.211597021 | 0.181396675 |
| 0.033071404 | 0.018367435 | 0.035256402 | 0.166665151 |
| 0.072862443 | 0.237356762 | 0.227704255 | 0.066012296 |
| 0.148862396 | 0.130206731 | 0.148088573 | 0.032654404 |
| 0.105264886 | 0.084370269 | 0.029451917 | 0.238601196 |
| 0.108301523 | 0.138952113 | 0.053878497 | 0.237860055 |
| 0.080782627 | 0.166178472 | 0.205157972 | 0.018960437 |
| 0.113640036 | 0.284935768 | 0.295079938 | 0.219386732 |
| 0.259650676 | 0.107521534 | 0.025641062 | 0.053669665 |
| 0.148739696 | 0.236598991 | 0.031603127 | 0.211178698 |
| 0.219329528 | 0.098032376 | 0.235556945 | 0.276711411 |
| 0.230230965 | 0.250230695 | 0.159715167 | 0.143184029 |
| 0.10338393  | 0.003393253 | 0.099714857 | 0.181317489 |
| 0.004722332 | 0.047605568 | 0.249683969 | 0.046287307 |
| 0.055487327 | 0.192130765 | 0.019018296 | 0.02168055  |
| 0.137965412 | 0.07836529  | 0.051650609 | 0.170373592 |
| 0.045514349 | 0.030621727 | 0.099265609 | 0.113661799 |
| 0.032248693 | 0.237232437 | 0.343140429 | 0.130230252 |
| 0.060239077 | 0.064347517 | 0.189151595 | 0.256698821 |
| 0.185096441 | 0.184903306 | 0.114438512 | 0.092638336 |
| 0.274721637 | 0.056800056 | 0.190682982 | 0.208656035 |
| 0.26867836  | 0.245566159 | 0.308518843 | 0.080952851 |
| 0.174210784 | 0.097913849 | 0.051308397 | 0.062898206 |
| 0.218377072 | 0.205164819 | 0.229707182 | 0.030050983 |
| 0.222879628 | 0.111528066 | 0.168278373 | 0.181110556 |
| 0.058235638 | 0.229194948 | 0.1165055   | 0.237546879 |
| 0.067691375 | 0.025374816 | 0.149112215 | 0.186483535 |
| 0.194816591 | 0.012229094 | 0.218212368 | 0.070728917 |
| 0.17347027  | 0.018006251 | 0.102639003 | 0.26857436  |
| 0.260157958 | 0.152469552 | 0.106744548 | 0.12096915  |
| 0.136186714 | 0.050999749 | 0.138815384 | 0.18187296  |
| 0.199745786 | 0.096393606 | 0.244658782 | 0.192996119 |
| 0.230687369 | 0.068815612 | 0.022806302 | 0.075819269 |
| 0.172271059 | 0.080699702 | 0.106726942 | 0.22081424  |
| 0.233614527 | 0.277160505 | 0.186575113 | 0.144142048 |
| 0.072366665 | 0.186129244 | 0.187078451 | 0.157766386 |
| 0.02086855  | 0.189841656 | 0.046688503 | 0.121152726 |
| 0.006995198 | 0.009107613 | 0.177323334 | 0.117563604 |
| 0.243202901 | 0.185724674 | 0.264107051 | 0.074034184 |
| 8.68E-05    | 0.076626684 | 0.122589105 | 0.059113263 |
| 0.192124861 | 0.206463968 | 0.049219101 | 0.142539153 |
| 0.241174108 | 0.265945957 | 0.110759818 | 0.060591591 |
| 0.009633646 | 0.115327088 | 0.231257442 | 0.123723562 |
| 0.084921079 | 0.17916818  | 0.023121827 | 0.130244973 |
| 0.009936359 | 0.256431478 | 0.211894026 | 0.031074574 |
| 0.020013106 | 0.172137399 | 0.155565701 | 0.165401358 |
| 0.046430603 | 0.152863102 | 0.189557643 | 0.018819222 |
| 0.116597433 | 0.124821852 | 0.102344844 | 0.107569206 |
| 0.094684629 | 0.084593687 | 0.116152159 | 0.055694791 |
| 0.117538726 | 0.112792907 | 0.108945921 | 0.195805166 |
| 0.109726165 | 0.12818765  | 0.082439128 | 0.071538405 |
| 0.069799115 | 0.161034852 | 0.305199134 | 0.325709847 |

|             |             |             |             |
|-------------|-------------|-------------|-------------|
| 0.186708666 | 0.175625589 | 0.316852418 | 0.259708462 |
| 0.168460117 | 0.055573304 | 0.263615894 | 0.215871185 |
| 0.218714217 | 0.271321115 | 0.062695671 | 0.185452314 |
| 0.015135279 | 0.06209608  | 0.161150614 | 0.088525969 |
| 0.17616903  | 0.047559763 | 0.067523836 | 0.150272428 |
| 0.108427332 | 0.299758929 | 0.312341328 | 0.220480637 |
| 0.069666577 | 0.048802609 | 0.034953038 | 0.134987192 |
| 0.16481256  | 0.232955261 | 0.05704765  | 0.062410465 |
| 0.152090348 | 0.119774124 | 0.162939243 | 0.248696505 |
| 0.019257618 | 0.242475753 | 0.046347578 | 0.179243414 |
| 0.029597249 | 0.303678752 | 0.274796831 | 0.117237896 |
| 0.012759804 | 0.133599549 | 0.083089529 | 0.077208113 |
| 0.113969349 | 0.094832024 | 0.034758544 | 0.104088403 |
| 0.11151499  | 0.202257182 | 0.24650205  | 0.144388066 |
| 0.067734758 | 0.042138518 | 0.082039467 | 0.084580545 |
| 0.085008723 | 0.192819754 | 0.208713675 | 0.195447038 |
| 0.052684103 | 0.26346662  | 0.287968073 | 0.104222513 |
| 0.081195359 | 0.09698503  | 0.010706935 | 0.04713543  |
| 0.079861399 | 0.026018021 | 0.000888598 | 0.013745002 |
| 0.181100127 | 0.031573382 | 0.125773302 | 0.125472119 |
| 0.035475296 | 0.167052464 | 0.009220287 | 0.10679149  |
| 0.233942975 | 0.274462148 | 0.100253098 | 0.229270786 |
| 0.184237102 | 0.171811282 | 0.129680301 | 0.00354896  |
| 0.077932982 | 0.059492244 | 0.034056643 | 0.158952346 |
| 0.139159054 | 0.01300293  | 0.085105833 | 0.16409971  |
| 0.170073295 | 0.012952613 | 0.079850499 | 0.118501524 |
| 0.213560449 | 0.28694792  | 0.100000272 | 0.145453722 |
| 0.069270227 | 0.169678535 | 0.041025493 | 0.046735299 |
| 0.070402072 | 0.032962463 | 0.161514756 | 0.0272641   |
| 0.1677093   | 0.063073193 | 0.010868377 | 0.327130615 |
| 0.26123443  | 0.034996521 | 0.278411044 | 0.022591986 |
| 0.181861449 | 0.177503691 | 0.048095133 | 0.050443623 |
| 0.10437388  | 0.071711019 | 0.184692925 | 0.214653255 |
| 0.020620351 | 0.069053426 | 0.14655902  | 0.040537221 |
| 0.310922963 | 0.047861877 | 0.23108751  | 0.027095889 |
| 0.216898427 | 0.155742106 | 0.232911203 | 0.047209758 |
| 0.078629737 | 0.240761526 | 0.042898617 | 0.229673264 |
| 0.122436663 | 0.028036126 | 0.146460115 | 0.10977049  |
| 0.029381526 | 0.215072331 | 0.061499212 | 0.222764748 |
| 0.092485095 | 0.224656436 | 0.130309628 | 0.199221494 |
| 0.213560966 | 0.024010737 | 0.027575423 | 0.058766761 |
| 0.237864416 | 0.165671445 | 0.027599566 | 0.199538406 |
| 0.020033319 | 0.157404361 | 0.079165374 | 0.055493935 |
| 0.134952626 | 0.099902053 | 0.068617162 | 0.220809155 |
| 0.142092097 | 0.071845278 | 0.040194187 | 0.276182662 |
| 0.128383164 | 0.121516829 | 0.268723328 | 0.001444661 |
| 0.136884738 | 0.116786433 | 0.166376104 | 0.054447194 |
| 0.325040657 | 0.116061326 | 0.105058094 | 0.058032678 |
| 0.145958756 | 0.012144159 | 0.045109222 | 0.061237057 |
| 0.027494006 | 0.166839819 | 0.244505393 | 0.200951574 |
| 0.158950501 | 0.032497086 | 0.026234337 | 0.216995694 |
| 0.013114625 | 0.01898026  | 0.025095372 | 0.112216784 |
| 0.018335466 | 0.040236884 | 0.04087467  | 0.032498057 |
| 0.160200861 | 0.098342847 |             |             |

| COMMD10     | 0.280588656 | 0.113777748 | 0.288615024 |
|-------------|-------------|-------------|-------------|
| 0.133357206 | 0.028800643 | 0.050767749 | 0.227848956 |
| 0.188305624 | 0.104182648 | 0.022794177 | 0.052563743 |
| 0.271470422 | 0.002458988 | 0.107500376 | 0.215456345 |
| 0.027459678 | 0.214617375 | 0.201578307 | 0.026937594 |
| 0.072971816 | 0.030220628 | 0.020083533 | 0.070015883 |
| 0.029244991 | 0.314069987 | 0.084318107 | 0.019355521 |
| 0.105044677 | 0.008624859 | 0.04275138  | 0.014811962 |
| 0.17330963  | 0.025322877 | 0.01636119  | 0.295279318 |
| 0.042445443 | 0.001385027 | 0.204370985 | 0.05469461  |
| 0.008137071 | 0.199309073 | 0.038967017 | 0.085343412 |
| 0.035390939 | 0.307088433 | 0.012865955 | 0.032668533 |
| 0.070083264 | 0.066412193 | 0.273139244 | 0.056877347 |
| 0.032512363 | 0.121676345 | 0.066425203 | 0.019297107 |
| 0.010510106 | 0.000711493 | 0.004471496 | 0.14567034  |
| 0.174873524 | 0.163280561 | 0.008999234 | 0.085869158 |
| 0.033534897 | 0.046267721 | 0.109158747 | 0.027701865 |
| 0.127226162 | 0.0056456   | 0.041900735 | 0.077354256 |
| 0.053502645 | 0.240229876 | 0.225956246 | 0.208936391 |
| 0.026769793 | 0.112297486 | 0.039956083 | 0.013927275 |
| 0.115585736 | 0.179418992 | 0.124589127 | 0.164871569 |
| 0.005911699 | 0.018744529 | 0.025523707 | 0.089587141 |
| 0.065950072 | 0.15740795  | 0.067695548 | 0.149888245 |
| 0.214190896 | 0.038836647 | 0.060237131 | 0.240029876 |
| 0.108082329 | 0.012039103 | 0.033117654 | 0.008799908 |
| 0.031547114 | 0.024602783 | 0.168748107 | 0.124081381 |
| 0.030949478 | 0.263299148 | 0.198342784 | 0.016190862 |
| 0.045537609 | 0.267529492 | 0.026072157 | 0.057143006 |
| 0.049045567 | 0.105804357 | 0.079232109 | 0.085766419 |
| 0.022309803 | 0.120514124 | 0.071375772 | 0.112840928 |
| 0.006813682 | 0.133623571 | 0.172860327 | 0.220069084 |
| 0.262517721 | 0.165954771 | 0.023546384 | 0.146965943 |
| 0.081534448 | 0.096547424 | 0.162996854 | 0.069176246 |
| 0.068792989 | 0.1741127   | 0.12989291  | 0.085922218 |
| 0.285978453 | 0.008538836 | 0.023560403 | 0.095061933 |
| 0.061408062 | 0.197056664 | 0.013134904 | 0.188900834 |
| 0.156025008 | 0.060860336 | 0.190531012 | 0.215436225 |
| 0.104666717 | 0.143078214 | 0.097251098 | 0.155458033 |
| 0.168370693 | 0.186791844 | 0.116759657 | 0.031454803 |
| 0.172189252 | 0.08374278  | 0.015191791 | 0.101467125 |
| 0.132174825 | 0.002678754 | 0.073700644 | 0.081034115 |
| 0.136144819 | 0.058076463 | 0.109122393 | 0.099090547 |
| 0.136514622 | 0.255291126 | 0.00046201  | 0.055258328 |
| 0.157944736 | 0.123633009 | 0.08828539  | 0.022465606 |
| 0.028867391 | 0.062990888 | 0.058667061 | 0.02084459  |
| 0.158304244 | 0.089147115 | 0.086529192 | 0.080942595 |
| 0.061704073 | 0.214753923 | 0.015229746 | 0.200739188 |
| 0.247327942 | 0.244234038 | 1           | 0.105492537 |
| 0.037963001 | 0.127871573 | 0.06460313  | 0.031497472 |
| 0.135850889 | 0.072955429 | 0.01171557  | 0.033340097 |
| 0.339427197 | 0.033008602 | 0.179058457 | 0.17222719  |
| 0.21486812  | 0.321513369 | 0.106374499 | 0.137667226 |
| 0.060383791 | 0.355591094 | 0.043229355 | 0.097258918 |
| 0.030452343 | 0.234713464 | 0.061697718 | 0.130023457 |



|             |             |             |             |
|-------------|-------------|-------------|-------------|
| 0.13985346  | 0.022671417 | 0.17253216  | 0.084828118 |
| 0.025610356 | 0.011010751 | 0.004016423 | 0.022310191 |
| 0.344799908 | 0.061089136 | 0.036013371 | 0.044430336 |
| 0.126801647 | 0.163744662 | 0.02372003  | 0.210909396 |
| 0.250137688 | 0.040759603 | 0.082908798 | 0.036484795 |
| 0.200563585 | 0.077340476 | 0.070379922 | 0.02644514  |
| 0.089740371 | 0.008812261 | 0.010370981 | 0.084364057 |
| 0.011818617 | 0.017356462 | 0.086908567 | 0.043770392 |
| 0.036193018 | 0.299751766 | 0.115392976 | 0.000565749 |
| 0.023325116 | 0.046332899 | 0.085990128 | 0.034562082 |
| 0.119657401 | 0.099894995 | 0.021968758 | 0.030908663 |
| 0.251319082 | 0.137501792 | 0.112213506 | 0.107013253 |
| 0.017919932 | 0.121621029 | 0.067774717 | 0.103689718 |
| 0.080591551 | 0.017326987 | 0.002356716 | 0.072729472 |
| 0.078679295 | 0.022629617 | 0.296206938 | 0.049744052 |
| 0.024430171 | 0.034867395 | 0.035766859 | 0.112293537 |
| 0.184484911 | 0.15823459  | 0.119601852 | 0.058911328 |
| 0.111468529 | 0.145135301 | 0.084458762 | 0.127230024 |
| 0.019913601 | 0.02334616  | 0.022932522 | 0.073783264 |
| 0.185288874 | 0.021523039 | 0.171217944 | 0.003894606 |
| 0.00026301  | 0.249103581 | 0.281331333 | 0.093091398 |
| 0.010646508 | 0.030994273 | 0.044382915 | 0.119468527 |
| 0.194595686 | 0.135484049 | 0.136808992 | 0.03873954  |
| 0.139076899 | 0.024720812 | 0.020477818 | 0.033622323 |
| 0.160426596 | 0.113642999 | 0.129438155 | 0.186852543 |
| 0.263142534 | 0.012425693 | 0.075920671 | 0.015759138 |
| 0.26867372  | 0.077154755 | 0.336019287 | 0.334854815 |
| 0.083878975 | 0.32239855  | 0.174103296 | 0.028574978 |
| 0.076789583 | 0.238437224 | 0.031220748 | 0.101260422 |
| 0.124912528 | 0.121913393 | 0.126147183 | 0.160552353 |
| 0.09014634  | 0.064243474 | 0.059460744 | 0.081648654 |
| 0.206953017 | 0.23744842  | 0.010544376 | 0.052907115 |
| 0.022899667 | 0.08216914  | 0.03870619  | 0.228165284 |
| 0.046999908 | 0.088675722 | 0.289289045 | 0.027420708 |
| 0.237814189 | 0.004432487 | 0.066464441 | 0.078039563 |
| 0.056041018 | 0.290395829 | 0.028165697 | 0.015605027 |
| 0.173889906 | 0.16551639  | 0.014587017 | 0.139101105 |
| 0.062966588 | 0.243671013 | 0.043878978 | 0.058564858 |
| 0.232748264 | 0.010479872 | 0.051629688 | 0.005180249 |
| 0.033708799 | 0.152622353 | 0.025401807 | 0.237075782 |
| 0.102646997 | 0.246017432 | 0.164124644 | 0.139472802 |
| 0.150902748 | 0.09996842  | 0.122671917 | 0.013392031 |
| 0.132799497 | 0.000229751 | 0.114562036 | 0.110184777 |
| 0.02256198  | 0.025814804 | 0.04656022  | 0.079424966 |
| 0.028039328 | 0.325583837 | 0.182831802 | 0.044177677 |
| 0.160923887 | 0.200562776 | 0.232386703 | 0.018576205 |
| 0.047899084 | 0.044568404 | 0.017470214 | 0.155014591 |
| 0.088531971 | 0.094702146 | 0.0427246   | 0.27046054  |
| 0.031815489 | 0.239959584 | 0.24234783  | 0.02215098  |
| 0.052731588 | 0.315400237 | 0.220757107 | 0.127464423 |
| 0.145787585 | 0.043239328 | 0.016816776 | 0.03661823  |
| 0.081344258 | 0.278153187 | 0.018594414 | 0.236326522 |
| 0.130829278 | 0.037012939 | 0.125038454 | 0.179424247 |
| 0.12079254  | 0.144843152 | 0.269167451 | 0.065931801 |

|             |             |             |             |
|-------------|-------------|-------------|-------------|
| 0.168476285 | 0.003896786 | 0.064681691 | 0.124485319 |
| 0.008166922 | 0.022827873 | 0.172123322 | 0.057518399 |
| 0.060092002 | 0.292891962 | 0.009265159 | 0.010472667 |
| 0.071840392 | 0.040173746 | 0.021123656 | 0.140005673 |
| 0.033394741 | 0.021318768 | 0.095035742 | 0.127416046 |
| 0.031531978 | 0.179109592 | 0.308364449 | 0.256206818 |
| 0.029527181 | 0.024513404 | 0.274788739 | 0.217267427 |
| 0.087307975 | 0.088257995 | 0.173771441 | 0.111324758 |
| 0.191500271 | 0.039565637 | 0.090822621 | 0.12109065  |
| 0.169311816 | 0.137080309 | 0.212980977 | 0.072647805 |
| 0.266791012 | 0.050347587 | 0.021035445 | 0.057564587 |
| 0.118702877 | 0.247978678 | 0.142746742 | 0.011697792 |
| 0.211447508 | 0.115554052 | 0.209873718 | 0.223169469 |
| 0.020009134 | 0.166744301 | 0.085568855 | 0.220747345 |
| 0.043445866 | 0.012011366 | 0.251672935 | 0.141561693 |
| 0.110385584 | 0.005009799 | 0.176284654 | 0.075335349 |
| 0.115189941 | 0.021747271 | 0.041556787 | 0.159709049 |
| 0.241389631 | 0.196439896 | 0.100620591 | 0.064503817 |
| 0.065411178 | 0.025302031 | 0.17151131  | 0.112242676 |
| 0.104493577 | 0.037264293 | 0.150998057 | 0.099250743 |
| 0.250556338 | 0.026215735 | 0.013803255 | 0.034047804 |
| 0.139966512 | 0.05687053  | 0.08387919  | 0.266366962 |
| 0.173624081 | 0.191482883 | 0.11068084  | 0.126534208 |
| 0.033599408 | 0.207317912 | 0.246572812 | 0.086422301 |
| 0.009833741 | 0.224443468 | 0.035712232 | 0.058630712 |
| 0.010630354 | 0.003697891 | 0.095462677 | 0.096872407 |
| 0.150758483 | 0.092033195 | 0.156315269 | 0.085551662 |
| 0.00047252  | 0.030295112 | 0.048701448 | 0.032395557 |
| 0.108461697 | 0.128213869 | 0.066581341 | 0.168667676 |
| 0.153954005 | 0.298568901 | 0.107141546 | 0.049356141 |
| 0.005024817 | 0.058641393 | 0.167873033 | 0.114988189 |
| 0.07179207  | 0.229654957 | 0.011174196 | 0.117854303 |
| 0.007911149 | 0.165167816 | 0.114303863 | 0.03172621  |
| 0.006658908 | 0.092778931 | 0.082999083 | 0.302645156 |
| 0.019985731 | 0.086926301 | 0.107341441 | 0.022856803 |
| 0.044693271 | 0.217653458 | 0.072861922 | 0.073345245 |
| 0.081589715 | 0.071539814 | 0.057343272 | 0.036570279 |
| 0.0677888   | 0.106147548 | 0.080670938 | 0.113788215 |
| 0.096050929 | 0.12229697  | 0.035423076 | 0.058723773 |
| 0.03919415  | 0.206450068 | 0.357538589 | 0.39802466  |
| 0.212568869 | 0.09746728  | 0.242251443 | 0.313177264 |
| 0.105051625 | 0.04640355  | 0.157042781 | 0.134597956 |
| 0.119137444 | 0.322642563 | 0.04798312  | 0.10092084  |
| 0.009305942 | 0.049972197 | 0.26492722  | 0.054021627 |
| 0.124617124 | 0.023606889 | 0.041440112 | 0.099717051 |
| 0.05932229  | 0.201030509 | 0.234141574 | 0.133803565 |
| 0.042657931 | 0.03284474  | 0.029145712 | 0.130239218 |
| 0.166199981 | 0.233765965 | 0.024974076 | 0.141548346 |
| 0.076450358 | 0.118185852 | 0.074666386 | 0.160441639 |
| 0.009456583 | 0.14808954  | 0.037557141 | 0.225160627 |
| 0.026401023 | 0.309486185 | 0.232491438 | 0.057430274 |
| 0.004844134 | 0.146639728 | 0.037704495 | 0.073890422 |
| 0.050129666 | 0.047291029 | 0.026943118 | 0.102715261 |
| 0.088170313 | 0.181888253 | 0.173633699 | 0.230721355 |

|             |             |             |             |
|-------------|-------------|-------------|-------------|
| 0.028151066 | 0.023240715 | 0.054223823 | 0.046423709 |
| 0.06239806  | 0.10473871  | 0.279264607 | 0.101341958 |
| 0.028695027 | 0.281511777 | 0.180038612 | 0.083741359 |
| 0.08186089  | 0.08507691  | 0.00416722  | 0.042298595 |
| 0.084122463 | 0.01368337  | 0.000537265 | 0.006271534 |
| 0.089084642 | 0.031363385 | 0.072988984 | 0.069521251 |
| 0.022436626 | 0.090466133 | 0.004558949 | 0.092009688 |
| 0.157901948 | 0.192649004 | 0.064422902 | 0.161096707 |
| 0.105069956 | 0.201763878 | 0.069902828 | 0.004730639 |
| 0.030008255 | 0.022200814 | 0.022652226 | 0.23534409  |
| 0.247998034 | 0.00504901  | 0.037061653 | 0.220223489 |
| 0.080965805 | 0.0049762   | 0.05221309  | 0.052592865 |
| 0.198009168 | 0.19888817  | 0.092319608 | 0.059110708 |
| 0.156939414 | 0.119723424 | 0.020080213 | 0.028061221 |
| 0.039973008 | 0.01579797  | 0.072647047 | 0.012413485 |
| 0.251496192 | 0.04298262  | 0.01689251  | 0.231071447 |
| 0.191440633 | 0.015718475 | 0.244060996 | 0.018992908 |
| 0.100042448 | 0.114604093 | 0.033219996 | 0.02426472  |
| 0.149416372 | 0.023480935 | 0.134324289 | 0.120996624 |
| 0.007957602 | 0.039050636 | 0.178882448 | 0.020136615 |
| 0.240633688 | 0.026066679 | 0.177967281 | 0.013792995 |
| 0.132787537 | 0.102878541 | 0.246654811 | 0.036846737 |
| 0.044590585 | 0.274596509 | 0.034384731 | 0.132083176 |
| 0.100143263 | 0.013178712 | 0.061843284 | 0.090166548 |
| 0.014101299 | 0.139163903 | 0.029340525 | 0.134064518 |
| 0.083622309 | 0.13388446  | 0.060034964 | 0.115146973 |
| 0.118084176 | 0.0141248   | 0.012026932 | 0.038459399 |
| 0.154575618 | 0.180538412 | 0.016317932 | 0.111795976 |
| 0.008417979 | 0.086680551 | 0.056165003 | 0.03870374  |
| 0.176053579 | 0.112043774 | 0.04587295  | 0.200655937 |
| 0.073704742 | 0.035181725 | 0.027110039 | 0.168638668 |
| 0.097235147 | 0.141072934 | 0.161146986 | 0.000122419 |
| 0.091661199 | 0.045768887 | 0.11299841  | 0.028786397 |
| 0.278964019 | 0.068068241 | 0.074351612 | 0.103556987 |
| 0.073044117 | 0.010939276 | 0.038301489 | 0.035603769 |
| 0.014963678 | 0.268250971 | 0.153799011 | 0.099266241 |
| 0.102986686 | 0.023987901 | 0.01280114  | 0.133434817 |
| 0.00570362  | 0.010546094 | 0.014960835 | 0.060618312 |
| 0.008458608 | 0.024415199 | 0.022731219 | 0.016305693 |
| 0.092576554 | 0.099930737 |             |             |
| COPS5       | 0.139825863 | 0.331562184 | 0.094496927 |
| 0.141472431 | 0.254626925 | 0.227749873 | 0.180900529 |
| 0.235641241 | 0.302473057 | 0.178006817 | 0.248050243 |
| 0.073609468 | 0.090123357 | 0.362076665 | 0.191001355 |
| 0.260721363 | 0.136964107 | 0.224270201 | 0.131113888 |
| 0.261634302 | 0.259454656 | 0.208389359 | 0.233931235 |
| 0.283642912 | 0.237776774 | 0.256935462 | 0.244458564 |
| 0.372038755 | 0.118549054 | 0.24420361  | 0.093365698 |
| 0.384706159 | 0.251268599 | 0.209460533 | 0.061024138 |
| 0.267185299 | 0.0558822   | 0.41022716  | 0.259543335 |
| 0.116738634 | 0.347426944 | 0.178304168 | 0.239367908 |
| 0.215294736 | 0.090865682 | 0.092890315 | 0.265095556 |
| 0.269984769 | 0.308133903 | 0.123389997 | 0.256805479 |
| 0.265841957 | 0.255744652 | 0.23057355  | 0.005898636 |

|             |             |             |             |
|-------------|-------------|-------------|-------------|
| 0.179335458 | 0.054585773 | 0.142298905 | 0.397506076 |
| 0.247062188 | 0.23898077  | 0.170319104 | 0.312060865 |
| 0.280082664 | 0.299287158 | 0.315728458 | 0.225932495 |
| 0.386114348 | 0.156104238 | 0.263619893 | 0.157339675 |
| 0.273481317 | 0.121974287 | 0.23778313  | 0.172606472 |
| 0.265652848 | 0.2725252   | 0.263447786 | 0.227282495 |
| 0.31279143  | 0.456652898 | 0.296733039 | 0.402158999 |
| 0.179549232 | 0.250348034 | 0.259727429 | 0.306509419 |
| 0.306004837 | 0.243422772 | 0.264168389 | 0.430156748 |
| 0.165828525 | 0.215495356 | 0.275529045 | 0.193157313 |
| 0.322963138 | 0.233517566 | 0.198107228 | 0.141770647 |
| 0.266454799 | 0.257341278 | 0.431100031 | 0.263351306 |
| 0.28102023  | 0.13830988  | 0.402900547 | 0.232048825 |
| 0.22300882  | 0.142518314 | 0.24597546  | 0.325818533 |
| 0.257241015 | 0.365752175 | 0.315746832 | 0.321159346 |
| 0.244164837 | 0.382823656 | 0.252778718 | 0.358536266 |
| 0.077514347 | 0.412432025 | 0.221513248 | 0.142575061 |
| 0.134989768 | 0.228611264 | 0.301693582 | 0.335847457 |
| 0.343085629 | 0.292459997 | 0.23177071  | 0.277316114 |
| 0.363043092 | 0.380805733 | 0.410577624 | 0.322322983 |
| 0.120942003 | 0.219735887 | 0.235504746 | 0.275977136 |
| 0.289286796 | 0.244003287 | 0.201447347 | 0.425756026 |
| 0.327699218 | 0.323211326 | 0.212080057 | 0.45163166  |
| 0.315170412 | 0.425063525 | 0.314114679 | 0.225529868 |
| 0.425917709 | 0.403651204 | 0.41214442  | 0.245782412 |
| 0.395504871 | 0.226222558 | 0.125730729 | 0.338206371 |
| 0.415077327 | 0.016791738 | 0.350097531 | 0.373705285 |
| 0.383336918 | 0.315183828 | 0.42921952  | 0.388392896 |
| 0.387543418 | 0.173591059 | 0.039143899 | 0.293309042 |
| 0.403850805 | 0.316403882 | 0.301132459 | 0.22819088  |
| 0.277650871 | 0.247197014 | 0.310218847 | 0.161800067 |
| 0.458190527 | 0.340661482 | 0.36110332  | 0.297781631 |
| 0.266009026 | 0.329888566 | 0.222671326 | 0.382904176 |
| 0.140782648 | 0.160350447 | 0.105492537 | 1           |
| 0.174623256 | 0.266028832 | 0.243258282 | 0.299259233 |
| 0.268592906 | 0.270909353 | 0.191095416 | 0.25986353  |
| 0.113618502 | 0.227750077 | 0.235142257 | 0.221987263 |
| 0.13426244  | 0.228168919 | 0.200438489 | 0.205952968 |
| 0.280605148 | 0.294276219 | 0.253707086 | 0.384205512 |
| 0.295608126 | 0.200763351 | 0.26051636  | 0.406870505 |
| 0.401810477 | 0.231599541 | 0.289824108 | 0.028139196 |
| 0.205011753 | 0.19694247  | 0.1443087   | 0.240688771 |
| 0.261403706 | 0.260072695 | 0.269191563 | 0.26688005  |
| 0.213531266 | 0.245288079 | 0.255631054 | 0.402471021 |
| 0.196171821 | 0.230678971 | 0.342008213 | 0.246879217 |
| 0.020906249 | 0.251740924 | 0.311038803 | 0.238975435 |
| 0.293141215 | 0.123432031 | 0.137963612 | 0.352082131 |
| 0.204167822 | 0.253297023 | 0.371889906 | 0.28076858  |
| 0.217063442 | 0.275287183 | 0.428725147 | 0.050848409 |
| 0.281804802 | 0.083523262 | 0.282650072 | 0.197438461 |
| 0.268910902 | 0.312070038 | 0.248921805 | 0.239603278 |
| 0.15208329  | 0.414250871 | 0.328313329 | 0.388634781 |
| 0.21537682  | 0.431133653 | 0.327316696 | 0.34664069  |
| 0.289307296 | 0.238758851 | 0.104195069 | 0.296474262 |

|             |             |             |             |
|-------------|-------------|-------------|-------------|
| 0.341075938 | 0.205225412 | 0.133113857 | 0.298384347 |
| 0.236409235 | 0.262080641 | 0.21236086  | 0.391894939 |
| 0.438541604 | 0.363581761 | 0.250316222 | 0.311055316 |
| 0.298210328 | 0.230201006 | 0.338347247 | 0.448213145 |
| 0.197385091 | 0.257068342 | 0.234615123 | 0.342359175 |
| 0.225831711 | 0.253645848 | 0.351537776 | 0.144089872 |
| 0.004385535 | 0.174555403 | 0.135370776 | 0.249646237 |
| 0.167464108 | 0.233088349 | 0.280462245 | 0.403137143 |
| 0.222353636 | 0.356143509 | 0.306434821 | 0.220024746 |
| 0.344325515 | 0.2772431   | 0.234790826 | 0.268337402 |
| 0.292273609 | 0.048389157 | 0.158303083 | 0.450849324 |
| 0.101892644 | 0.174441647 | 0.30386768  | 0.006396432 |
| 0.127099373 | 0.278792337 | 0.168113106 | 0.270152294 |
| 0.389187567 | 0.253513487 | 0.224911829 | 0.199598213 |
| 0.284468204 | 0.19532933  | 0.011743641 | 0.388222155 |
| 0.415628631 | 0.406803083 | 0.410108815 | 0.405677057 |
| 0.378267483 | 0.306225646 | 0.313089388 | 0.223312186 |
| 0.206929658 | 0.167475973 | 0.178631154 | 0.270690688 |
| 0.013754567 | 0.303167239 | 0.305143068 | 0.219126508 |
| 0.2891101   | 0.314815445 | 0.111500163 | 0.282715126 |
| 0.043909438 | 0.110709096 | 0.285543388 | 0.319818817 |
| 0.310446141 | 0.06194682  | 0.115655149 | 0.198369981 |
| 0.338651279 | 0.309493275 | 0.208342009 | 0.417746715 |
| 0.257533449 | 0.158647792 | 0.251740798 | 0.285067939 |
| 0.1818826   | 0.088354782 | 0.278506944 | 0.016048567 |
| 0.150558271 | 0.415976199 | 0.256639091 | 0.126273751 |
| 0.259685631 | 0.024588576 | 0.303064521 | 0.426507195 |
| 0.356083909 | 0.401663439 | 0.385027973 | 0.178504087 |
| 0.388482468 | 0.075616737 | 0.404963125 | 0.305250185 |
| 0.197003734 | 0.001863817 | 0.029828967 | 0.355031415 |
| 0.240756179 | 0.104897398 | 0.237302338 | 0.176121536 |
| 0.1953043   | 0.193609633 | 0.187415441 | 0.197295731 |
| 0.245780632 | 0.261269377 | 0.21147763  | 0.37792529  |
| 0.278686027 | 0.311340275 | 0.241146606 | 0.171087078 |
| 0.258185372 | 0.138498116 | 0.186134163 | 0.015681411 |
| 0.298839494 | 0.164102727 | 0.405982066 | 0.395182847 |
| 0.416573334 | 0.266033491 | 0.163133693 | 0.218427563 |
| 0.372118162 | 0.125349936 | 0.197276966 | 0.155191517 |
| 0.359381427 | 0.253923745 | 0.28132244  | 0.276190848 |
| 0.411653542 | 0.378752522 | 0.125071373 | 0.30102913  |
| 0.029683714 | 0.010607981 | 0.207343197 | 0.312093897 |
| 0.166030877 | 0.253821631 | 0.26791667  | 0.320741198 |
| 0.32938718  | 0.073649146 | 0.202279409 | 0.197817694 |
| 0.283215462 | 0.27888441  | 0.23098322  | 0.302259125 |
| 0.279528034 | 0.197838142 | 0.279261181 | 0.292594262 |
| 0.288341667 | 0.295033441 | 0.232823813 | 0.105373804 |
| 0.227759745 | 0.228785691 | 0.14504825  | 0.231203294 |
| 0.323781671 | 0.360354519 | 0.159041892 | 0.038932638 |
| 0.277291608 | 0.302110555 | 0.385290489 | 0.372131794 |
| 0.426875484 | 0.437061441 | 0.389091898 | 0.255229779 |
| 0.159665426 | 0.295759061 | 0.244687382 | 0.217530127 |
| 0.396229201 | 0.129283509 | 0.38371786  | 0.2099191   |
| 0.226182291 | 0.245929167 | 0.104378446 | 0.211243184 |
| 0.232291274 | 0.265314655 | 0.262921273 | 0.163331898 |

|             |             |             |             |
|-------------|-------------|-------------|-------------|
| 0.266347343 | 0.182318286 | 0.162959053 | 0.267655201 |
| 0.289406309 | 0.13563137  | 0.246573779 | 0.29339445  |
| 0.298730032 | 0.174512228 | 0.265525641 | 0.410293634 |
| 0.198766793 | 0.223619012 | 0.178154227 | 0.311048969 |
| 0.304831709 | 0.225265323 | 0.040993897 | 0.330743043 |
| 0.397691216 | 0.23925662  | 0.390552661 | 0.367547431 |
| 0.182264609 | 0.225837595 | 0.250152476 | 0.274284821 |
| 0.292680005 | 0.232273458 | 0.329215529 | 0.162129187 |
| 0.358910933 | 0.449646918 | 0.323684646 | 0.234105581 |
| 0.24864966  | 0.179296032 | 0.118086061 | 0.349284992 |
| 0.175157856 | 0.146635761 | 0.196629028 | 0.329885329 |
| 0.006627007 | 0.12007496  | 0.411729993 | 0.256334307 |
| 0.451508018 | 0.371878674 | 0.375746247 | 0.297524534 |
| 0.004551368 | 0.256515009 | 0.251195106 | 0.224358674 |
| 0.321369259 | 0.288521226 | 0.258883304 | 0.177563311 |
| 0.309842273 | 0.121799419 | 0.232790507 | 0.202603335 |
| 0.142589809 | 0.259095511 | 0.281163242 | 0.304954501 |
| 0.288908953 | 0.167215652 | 0.179338289 | 0.253201104 |
| 0.211670968 | 0.274567821 | 0.312377175 | 0.176909767 |
| 0.114199287 | 0.383035974 | 0.291915189 | 0.086412804 |
| 0.248532702 | 0.357716741 | 0.379172557 | 0.00895624  |
| 0.255783537 | 0.043308955 | 0.270651089 | 0.237979665 |
| 0.270078848 | 0.300993682 | 0.295752596 | 0.245804329 |
| 0.284707511 | 0.29047109  | 0.23566732  | 0.267986791 |
| 0.22838065  | 0.293476094 | 0.272007011 | 0.27171036  |
| 0.213822014 | 0.200788705 | 0.172112288 | 0.172325424 |
| 0.118487874 | 0.35406662  | 0.284240229 | 0.122127222 |
| 0.302264797 | 0.281810033 | 0.355597894 | 0.373089552 |
| 0.378760416 | 0.154599405 | 0.315994776 | 0.309757123 |
| 0.138969958 | 0.19148426  | 0.140441379 | 0.256464192 |
| 0.276846295 | 0.193006545 | 0.245183909 | 0.221768695 |
| 0.269011887 | 0.381300494 | 0.271660179 | 0.389712202 |
| 0.25606363  | 0.287190188 | 0.153674908 | 0.164710123 |
| 0.214628033 | 0.222302211 | 0.240539844 | 0.010624627 |
| 0.290992356 | 0.18946     | 0.328944312 | 0.382424198 |
| 0.192117688 | 0.367324208 | 0.15536786  | 0.156006708 |
| 0.130490046 | 0.208766033 | 0.221580665 | 0.284096902 |
| 0.130043471 | 0.253899932 | 0.263477461 | 0.194397247 |
| 0.284102956 | 0.280818855 | 0.287048325 | 0.310718765 |
| 0.326180367 | 0.226931721 | 0.427509254 | 0.18254209  |
| 0.233479935 | 0.185828344 | 0.22878825  | 0.255224314 |
| 0.281253698 | 0.397765744 | 0.147360107 | 0.396414886 |
| 0.257995494 | 0.198962929 | 0.44718837  | 0.293620504 |
| 0.265216    | 0.211172746 | 0.135318769 | 0.24484321  |
| 0.313987206 | 0.208697602 | 0.009384429 | 0.067588048 |
| 0.283003686 | 0.289157048 | 0.282649583 | 0.315663405 |
| 0.250839321 | 0.336417799 | 0.134081755 | 0.285357399 |
| 0.371488532 | 0.417832083 | 0.207723328 | 0.298138078 |
| 0.298634179 | 0.195765034 | 0.227305977 | 0.041693939 |
| 0.244898206 | 0.226257664 | 0.21618097  | 0.172149626 |
| 0.089380825 | 0.142844062 | 0.248239767 | 0.157259382 |
| 0.381597576 | 0.116668366 | 0.266715048 | 0.257417981 |
| 0.262852014 | 0.415970769 | 0.245439895 | 0.262462661 |
| 0.160427448 | 0.304954757 | 0.253397087 | 0.273381608 |

|             |             |             |             |
|-------------|-------------|-------------|-------------|
| 0.192570727 | 0.223300053 | 0.279918435 | 0.176794436 |
| 0.114298761 | 0.241120688 | 0.011850737 | 0.386775063 |
| 0.38941487  | 0.234975228 | 0.276883429 | 0.18225946  |
| 0.290249498 | 0.3604598   | 0.271388818 | 0.232097281 |
| 0.044252962 | 0.234301342 | 0.286570081 | 0.30637562  |
| 0.109229004 | 0.28131349  | 0.13409661  | 0.274399652 |
| 0.403352826 | 0.219919116 | 0.322633282 | 0.164590427 |
| 0.372289257 | 0.320669563 | 0.178160478 | 0.258821885 |
| 0.258459734 | 0.148127334 | 0.205039827 | 0.434289855 |
| 0.255194994 | 0.179533288 | 0.325097351 | 0.244001734 |
| 0.229674727 | 0.337632587 | 0.241877772 | 0.436597131 |
| 0.187965829 | 0.277166954 | 0.315808344 | 0.371520314 |
| 0.308788001 | 0.213180758 | 0.184312931 | 0.252967342 |
| 0.346118057 | 0.133815212 | 0.242434783 | 0.275105578 |
| 0.162602976 | 0.308057443 | 0.231181976 | 0.254589638 |
| 0.104798496 | 0.308114026 | 0.228542696 | 0.239535378 |
| 0.29161366  | 0.266771922 | 0.25989329  | 0.369841101 |
| 0.167271166 | 0.055791861 | 0.414775172 | 0.015802993 |
| 0.224970151 | 0.251400613 | 0.294479704 | 0.267743487 |
| 0.21454759  | 0.294912248 | 0.230336961 | 0.00737904  |
| 0.333083705 | 0.066113489 | 0.310818102 | 0.21143797  |
| 0.208832917 | 0.141886001 | 0.375544174 | 0.405275363 |
| 0.294019939 | 0.232355539 | 0.172384712 | 0.382743268 |
| 0.129528924 | 0.188142059 | 0.238562955 | 0.237904103 |
| 0.171976871 | 0.194671754 | 0.230464056 | 0.195882823 |
| 0.281222473 | 0.301503209 |             |             |
| C0Q5        | 0.026475931 | 0.422280851 | 0.034226803 |
| 0.037134403 | 0.137687002 | 0.182914085 | 0.0090846   |
| 0.02140721  | 0.288854433 | 0.141408196 | 0.182120552 |
| 0.002325931 | 0.019366446 | 0.380419181 | 0.007260363 |
| 0.20191362  | 0.003417919 | 0.029119709 | 0.014677645 |
| 0.049547768 | 0.099021421 | 0.080817643 | 0.218936826 |
| 0.095752388 | 0.153825817 | 0.222653714 | 0.21170949  |
| 0.48539163  | 0.105914493 | 0.327871929 | 0.144777354 |
| 0.325939734 | 0.148749156 | 0.199640785 | 0.00435237  |
| 0.21060339  | 0.000948469 | 0.364129098 | 0.064748502 |
| 0.04531719  | 0.263552687 | 0.250113074 | 0.07422856  |
| 0.214012852 | 0.01053166  | 0.134578206 | 0.259240962 |
| 0.21501723  | 0.077800359 | 0.036937362 | 0.341827948 |
| 0.107329454 | 0.246444132 | 0.389422005 | 0.000229614 |
| 0.122974781 | 0.031826234 | 0.069360501 | 0.490078817 |
| 0.106341191 | 0.031654401 | 0.083670126 | 0.091115091 |
| 0.214991763 | 0.217759004 | 0.12871242  | 0.133249955 |
| 0.4516431   | 0.032359809 | 0.359332763 | 0.04849534  |
| 0.14609072  | 0.00955984  | 0.086265595 | 0.051424525 |
| 0.122958106 | 0.070804503 | 0.155971595 | 0.10423218  |
| 0.439679283 | 0.441992993 | 0.119558418 | 0.481605352 |
| 0.010091257 | 0.158079856 | 0.066901245 | 0.160540884 |
| 0.21860264  | 0.012916485 | 0.293490102 | 0.452829511 |
| 0.013257924 | 0.292035985 | 0.258551387 | 0.073434079 |
| 0.422232666 | 0.065602876 | 0.279214226 | 0.03896521  |
| 0.221081238 | 0.142632841 | 0.416206102 | 0.16432887  |
| 0.119297178 | 0.042134908 | 0.471180416 | 0.151242096 |
| 0.09576636  | 0.046420294 | 0.033337954 | 0.402818107 |

|             |             |             |             |
|-------------|-------------|-------------|-------------|
| 0.266645691 | 0.462817061 | 0.36697861  | 0.224687453 |
| 0.17775604  | 0.464978558 | 0.295448672 | 0.349537576 |
| 0.114127395 | 0.491460062 | 0.092210997 | 0.004845781 |
| 0.029583754 | 0.013794127 | 0.03548697  | 0.193327445 |
| 0.437393333 | 0.202019772 | 0.065573031 | 0.072353937 |
| 0.359405709 | 0.478038538 | 0.488563468 | 0.309137739 |
| 0.008829164 | 0.054168011 | 0.192372084 | 0.087610287 |
| 0.210770561 | 0.044891741 | 0.089286067 | 0.461610764 |
| 0.310831234 | 0.331863182 | 0.063419724 | 0.44158755  |
| 0.051918671 | 0.438465175 | 0.471463446 | 0.060417971 |
| 0.472673647 | 0.472167025 | 0.435124476 | 0.272121766 |
| 0.442201365 | 0.189904599 | 0.007033687 | 0.279267145 |
| 0.396612566 | 0.003059051 | 0.43428455  | 0.448762926 |
| 0.482232031 | 0.402564903 | 0.43323093  | 0.468897015 |
| 0.487972026 | 0.033106535 | 0.004340797 | 0.119501852 |
| 0.473984773 | 0.32829689  | 0.017032902 | 0.225642284 |
| 0.171074275 | 0.195480708 | 0.347622878 | 0.075508301 |
| 0.409167146 | 0.421171608 | 0.464017855 | 0.276314072 |
| 0.164010967 | 0.244335504 | 0.211102853 | 0.463348268 |
| 0.007496091 | 0.044275236 | 0.037963001 | 0.174623256 |
| 1           | 0.060545973 | 0.152621269 | 0.157670576 |
| 0.079990391 | 0.15189704  | 0.139698543 | 0.22843411  |
| 0.046385447 | 0.284256366 | 0.074928048 | 0.072240982 |
| 0.004959033 | 0.10084734  | 0.031436307 | 0.032284575 |
| 0.078904593 | 0.203479178 | 0.335974312 | 0.442249325 |
| 0.116240584 | 0.13143078  | 0.307928383 | 0.39506652  |
| 0.303754675 | 0.202687585 | 0.124659387 | 0.002296764 |
| 0.045090452 | 0.101766732 | 0.042293279 | 0.246396225 |
| 0.147276661 | 0.033996622 | 0.193827645 | 0.265153239 |
| 0.1568448   | 0.052056885 | 0.100120919 | 0.357978881 |
| 0.105912506 | 0.090391792 | 0.347859285 | 0.244334514 |
| 0.0008361   | 0.146059186 | 0.369357033 | 0.016956961 |
| 0.169656305 | 0.025269549 | 0.076838327 | 0.391717233 |
| 0.060488665 | 0.043360364 | 0.457963554 | 0.257504471 |
| 0.082205578 | 0.196533311 | 0.447995064 | 0.007225764 |
| 0.151574978 | 0.010198326 | 0.13745811  | 0.23123367  |
| 0.11768089  | 0.145953522 | 0.137038361 | 0.077810161 |
| 0.101075691 | 0.461232395 | 0.326580491 | 0.459123893 |
| 0.105512166 | 0.451152927 | 0.384991111 | 0.360188295 |
| 0.221850142 | 0.156652574 | 0.030210535 | 0.363813851 |
| 0.395174777 | 0.068995274 | 0.056460661 | 0.367897552 |
| 0.154342821 | 0.251476454 | 0.019575192 | 0.414088646 |
| 0.42603699  | 0.478139112 | 0.024674879 | 0.225358056 |
| 0.289443656 | 0.115533717 | 0.342659834 | 0.436786836 |
| 0.088328994 | 0.132342621 | 0.091978571 | 0.280013145 |
| 0.092799979 | 0.030824078 | 0.235825909 | 0.042332641 |
| 0.012170131 | 0.032850315 | 0.031505163 | 0.038053665 |
| 0.034408659 | 0.317604298 | 0.239357906 | 0.458992197 |
| 0.032510166 | 0.364188126 | 0.127541811 | 0.062597013 |
| 0.361366453 | 0.120456921 | 0.211873089 | 0.220145725 |
| 0.145117468 | 0.00391849  | 0.021084009 | 0.447827418 |
| 0.0268115   | 0.05575685  | 0.128470537 | 0.000675018 |
| 0.009060113 | 0.418637372 | 0.07518777  | 0.148255812 |
| 0.38571033  | 0.165885183 | 0.118163961 | 0.116532038 |



|             |             |             |             |
|-------------|-------------|-------------|-------------|
| 0.207393682 | 0.035497655 | 0.000545566 | 0.436242841 |
| 0.434080014 | 0.394734113 | 0.435556554 | 0.422170018 |
| 0.361182688 | 0.310753182 | 0.295432796 | 0.242618028 |
| 0.018049196 | 0.033678327 | 0.034908972 | 0.087377233 |
| 0.000732553 | 0.275167791 | 0.117255967 | 0.07273168  |
| 0.303105006 | 0.14941786  | 0.007088003 | 0.174847147 |
| 0.006554778 | 0.059149557 | 0.057748359 | 0.053291437 |
| 0.197046083 | 0.003047307 | 0.090614466 | 0.066444488 |
| 0.424904902 | 0.269027337 | 0.14125184  | 0.493876577 |
| 0.150424042 | 0.103287788 | 0.114775296 | 0.272101916 |
| 0.013077338 | 0.030791976 | 0.121057453 | 0.050139505 |
| 0.077862331 | 0.392848384 | 0.122502054 | 0.018232131 |
| 0.12812853  | 0.001079257 | 0.319859642 | 0.468767213 |
| 0.485721489 | 0.448252248 | 0.457273254 | 0.097755041 |
| 0.468304076 | 0.034439297 | 0.486108044 | 0.356870262 |
| 0.165986171 | 0.000287851 | 0.000203105 | 0.443153974 |
| 0.201330794 | 0.056594289 | 0.069897309 | 0.12682077  |
| 0.016559899 | 0.058908672 | 0.014837772 | 0.034848849 |
| 0.315223001 | 0.079248896 | 0.026870097 | 0.437572984 |
| 0.073664448 | 0.08454783  | 0.172409105 | 0.05218523  |
| 0.243185508 | 0.008499786 | 0.048203036 | 0.001711765 |
| 0.212255186 | 0.097951603 | 0.445190381 | 0.476560338 |
| 0.414298453 | 0.2541822   | 0.15726469  | 0.084053838 |
| 0.354795391 | 0.090142812 | 0.115291888 | 0.078849926 |
| 0.480908576 | 0.214919904 | 0.203956335 | 0.234170801 |
| 0.405112978 | 0.411904626 | 0.005936962 | 0.284265655 |
| 0.005399369 | 0.000167197 | 0.230394876 | 0.134044083 |
| 0.009555525 | 0.135682908 | 0.156016638 | 0.052241664 |
| 0.046280769 | 0.007564762 | 0.074678327 | 0.064802016 |
| 0.137701417 | 0.137874501 | 0.098525783 | 0.143744615 |
| 0.067643853 | 0.016698645 | 0.049648749 | 0.027490845 |
| 0.044695562 | 0.250807724 | 0.156125733 | 0.002732235 |
| 0.259210076 | 0.21773759  | 0.017610021 | 0.087812153 |
| 0.370707724 | 0.434394951 | 0.003940387 | 0.001082186 |
| 0.174402519 | 0.087978373 | 0.422100177 | 0.491550878 |
| 0.47933674  | 0.425740537 | 0.318004766 | 0.012234272 |
| 0.016437551 | 0.139130913 | 0.117683144 | 0.011603008 |
| 0.460080785 | 0.04025741  | 0.471261423 | 0.131650166 |
| 0.05123874  | 0.057934397 | 0.00466734  | 0.025953009 |
| 0.222337038 | 0.07677585  | 0.048134736 | 0.104798194 |
| 0.08780596  | 0.058163574 | 0.009822977 | 0.07463903  |
| 0.222840382 | 0.03721002  | 0.066225841 | 0.11025394  |
| 0.2979704   | 0.083621049 | 0.304854227 | 0.34476555  |
| 0.072810946 | 0.041113597 | 0.082245742 | 0.26324142  |
| 0.394530082 | 0.268058599 | 0.010369865 | 0.466930008 |
| 0.419569164 | 0.31661598  | 0.480325028 | 0.25733266  |
| 0.043029474 | 0.176227524 | 0.100637163 | 0.139358265 |
| 0.068389993 | 0.202259915 | 0.076244537 | 0.024419185 |
| 0.203044301 | 0.402053888 | 0.369557219 | 0.046521327 |
| 0.275236546 | 0.08158259  | 0.035532558 | 0.403347146 |
| 0.028557413 | 0.016601566 | 0.221576367 | 0.345225757 |
| 0.000723677 | 0.030941399 | 0.407024412 | 0.05772377  |
| 0.441228772 | 0.409568392 | 0.366468477 | 0.06771548  |
| 2.40E-06    | 0.271906015 | 0.206468454 | 0.15478263  |

|             |             |             |             |
|-------------|-------------|-------------|-------------|
| 0.391328463 | 0.263192829 | 0.032371498 | 0.009607742 |
| 0.179299975 | 0.067547083 | 0.016235511 | 0.110332479 |
| 0.035008257 | 0.259697654 | 0.092437316 | 0.081876701 |
| 0.048740878 | 0.06224613  | 0.057675734 | 0.092004697 |
| 0.022646434 | 0.127833443 | 0.224323794 | 0.131933581 |
| 0.040188668 | 0.323378367 | 0.311411899 | 0.00625372  |
| 0.169957396 | 0.304464254 | 0.361764454 | 2.11E-05    |
| 0.299807398 | 0.000675505 | 0.049712281 | 0.064537554 |
| 0.051010921 | 0.04511177  | 0.097865971 | 0.07931397  |
| 0.193598485 | 0.064673143 | 0.092834997 | 0.107261259 |
| 0.032869483 | 0.083357095 | 0.217228992 | 0.158801755 |
| 0.076035255 | 0.036417836 | 0.08608912  | 0.09941084  |
| 0.008988974 | 0.443398476 | 0.173667796 | 0.0637051   |
| 0.089650826 | 0.129653983 | 0.246239769 | 0.49613964  |
| 0.32612898  | 0.115648983 | 0.101627197 | 0.43751404  |
| 0.072491819 | 0.086771285 | 0.015269925 | 0.238366369 |
| 0.090642422 | 0.034488611 | 0.250297196 | 0.197889457 |
| 0.308494125 | 0.322512609 | 0.167260688 | 0.370623482 |
| 0.143935208 | 0.137463391 | 0.188033365 | 0.011282606 |
| 0.060794585 | 0.072635989 | 0.093028397 | 0.000342984 |
| 0.186642846 | 0.08239847  | 0.418099051 | 0.47594059  |
| 0.092822334 | 0.299453608 | 0.12105412  | 0.015691735 |
| 0.150503485 | 0.170434034 | 0.071159418 | 0.372705206 |
| 0.06654101  | 0.051661253 | 0.121121617 | 0.132867489 |
| 0.32963078  | 0.324737989 | 0.051880938 | 0.070682372 |
| 0.090254412 | 0.130173531 | 0.421493786 | 0.055095138 |
| 0.284639968 | 0.035012928 | 0.281283908 | 0.093564574 |
| 0.053691002 | 0.479457784 | 0.026686608 | 0.477349255 |
| 0.100992279 | 0.092079823 | 0.402364624 | 0.143655127 |
| 0.079370806 | 0.020323423 | 0.052935003 | 0.158763872 |
| 0.035608703 | 0.121114559 | 0.00633938  | 0.008080115 |
| 0.182383768 | 0.090409915 | 0.354149632 | 0.219582944 |
| 0.06097186  | 0.196119058 | 0.044662881 | 0.10584408  |
| 0.488264203 | 0.471805484 | 0.045204943 | 0.137325352 |
| 0.205629016 | 0.023120159 | 0.318368287 | 0.002431799 |
| 0.250350354 | 0.280150667 | 0.094733454 | 0.008329787 |
| 0.002371036 | 0.058426837 | 0.251694074 | 0.038513631 |
| 0.390402093 | 0.066042769 | 0.238764866 | 0.355570644 |
| 0.098868035 | 0.467697148 | 0.015616945 | 0.279394654 |
| 0.007900302 | 0.131382683 | 0.183368309 | 0.167643027 |
| 0.040820688 | 0.092236469 | 0.241037612 | 0.070563489 |
| 0.004394138 | 0.048215427 | 0.001585365 | 0.338403485 |
| 0.456781863 | 0.13345304  | 0.134011645 | 0.104302229 |
| 0.141665711 | 0.301363766 | 0.032424384 | 0.250585111 |
| 0.001432812 | 0.188855594 | 0.0803654   | 0.383006063 |
| 0.075322697 | 0.172184339 | 0.010490449 | 0.110873654 |
| 0.435417944 | 0.043944336 | 0.152602658 | 0.082789672 |
| 0.490713429 | 0.350970032 | 0.146889452 | 0.043499773 |
| 0.273911705 | 0.034337915 | 0.202167641 | 0.456105739 |
| 0.044183018 | 0.060979418 | 0.346063061 | 0.042390551 |
| 0.106336263 | 0.340105852 | 0.28658606  | 0.45232727  |
| 0.006187395 | 0.120119317 | 0.315689153 | 0.397278552 |
| 0.170749346 | 0.029692398 | 0.056030671 | 0.048790631 |
| 0.468017379 | 0.023469826 | 0.043883264 | 0.244216074 |

|             |             |             |             |
|-------------|-------------|-------------|-------------|
| 0.051986457 | 0.155600843 | 0.27055477  | 0.039852831 |
| 0.004636264 | 0.026876269 | 0.114159121 | 0.065820511 |
| 0.119195059 | 0.157091756 | 0.043928286 | 0.299249991 |
| 0.025771529 | 0.004493878 | 0.363717494 | 0.003184235 |
| 0.236057518 | 0.249724984 | 0.103192054 | 0.137603611 |
| 0.142614527 | 0.181531663 | 0.179606898 | 4.91E-05    |
| 0.292149614 | 0.018094843 | 0.084890505 | 0.040032157 |
| 0.054038482 | 0.009585939 | 0.428861548 | 0.430691177 |
| 0.191398843 | 0.091763235 | 0.09357349  | 0.409623007 |
| 0.030965596 | 0.129176499 | 0.090762276 | 0.340371678 |
| 0.064025467 | 0.220156561 | 0.190153065 | 0.169759711 |
| 0.281516916 | 0.091913431 |             |             |
| COR01B      | 0.179038386 | 0.188642054 | 0.104764614 |
| 0.213927134 | 0.184730767 | 0.112313045 | 0.219913017 |
| 0.244807739 | 0.170645852 | 0.042948468 | 0.175700825 |
| 0.165809169 | 0.047536847 | 0.258715868 | 0.231206771 |
| 0.152955428 | 0.251525075 | 0.260159277 | 0.060200719 |
| 0.144458572 | 0.19097899  | 0.106429648 | 0.100004653 |
| 0.177069118 | 0.2657749   | 0.1375403   | 0.088661953 |
| 0.228100883 | 0.040099845 | 0.1547706   | 0.030648546 |
| 0.324779003 | 0.176116748 | 0.077822086 | 0.116000633 |
| 0.125751159 | 0.023240199 | 0.309780489 | 0.2299058   |
| 0.096610941 | 0.32095387  | 0.053718652 | 0.257953366 |
| 0.073286525 | 0.145049235 | 0.022324951 | 0.142439549 |
| 0.134566275 | 0.182281419 | 0.111456875 | 0.160849896 |
| 0.101796894 | 0.218318077 | 0.110820803 | 0.0101928   |
| 0.080892593 | 0.017224739 | 0.050066989 | 0.25816558  |
| 0.318020224 | 0.312887016 | 0.045401244 | 0.144882674 |
| 0.122292045 | 0.185034413 | 0.285119719 | 0.071139927 |
| 0.266408057 | 0.078162642 | 0.145535015 | 0.149504237 |
| 0.123936683 | 0.110732652 | 0.317955294 | 0.123806613 |
| 0.105827856 | 0.295087243 | 0.170098482 | 0.109493689 |
| 0.1737668   | 0.322893835 | 0.261591526 | 0.250309272 |
| 0.079016573 | 0.133734703 | 0.166433797 | 0.310955035 |
| 0.198382087 | 0.182379423 | 0.223933715 | 0.306723268 |
| 0.132824673 | 0.078017255 | 0.170962815 | 0.179330712 |
| 0.203257495 | 0.078233368 | 0.065353166 | 0.100920903 |
| 0.185171154 | 0.14924144  | 0.272281567 | 0.287974176 |
| 0.1539936   | 0.138771339 | 0.255839724 | 0.129870578 |
| 0.193903902 | 0.159572332 | 0.186287733 | 0.194358132 |
| 0.164304978 | 0.239925585 | 0.173775461 | 0.243029588 |
| 0.12343139  | 0.261756777 | 0.204857201 | 0.237033251 |
| 0.015386697 | 0.259843476 | 0.229036163 | 0.266957153 |
| 0.123506424 | 0.298207924 | 0.132608725 | 0.336915183 |
| 0.224950373 | 0.225435555 | 0.227370095 | 0.262991739 |
| 0.250468338 | 0.232273643 | 0.248925871 | 0.227181885 |
| 0.195053116 | 0.079008157 | 0.121678417 | 0.164541155 |
| 0.205558136 | 0.22478134  | 0.125234664 | 0.28918717  |
| 0.306101528 | 0.223430207 | 0.164134503 | 0.321146615 |
| 0.188809851 | 0.324219614 | 0.182239117 | 0.280515512 |
| 0.29757631  | 0.27538812  | 0.305264685 | 0.173859425 |
| 0.287061432 | 0.150546261 | 0.040699768 | 0.233871702 |
| 0.33215125  | 0.025693862 | 0.207132097 | 0.230570931 |
| 0.241958096 | 0.198811189 | 0.29632904  | 0.25242382  |

|             |             |             |             |
|-------------|-------------|-------------|-------------|
| 0.239337582 | 0.184819489 | 0.007151197 | 0.26703044  |
| 0.267337814 | 0.281936382 | 0.270121468 | 0.091818877 |
| 0.164447304 | 0.12090216  | 0.182553053 | 0.086960641 |
| 0.353721709 | 0.230654242 | 0.213837843 | 0.197319583 |
| 0.101550656 | 0.319857906 | 0.087608543 | 0.253023024 |
| 0.235654231 | 0.178390943 | 0.127871573 | 0.266028832 |
| 0.060545973 | 1           | 0.117618456 | 0.146192837 |
| 0.323490814 | 0.115474342 | 0.069969428 | 0.189926945 |
| 0.138033683 | 0.103725971 | 0.221562928 | 0.176432638 |
| 0.264541465 | 0.278151005 | 0.227103427 | 0.281969975 |
| 0.246841888 | 0.259069802 | 0.144220019 | 0.25241106  |
| 0.12242852  | 0.225180269 | 0.168354929 | 0.318637582 |
| 0.373563347 | 0.123152931 | 0.299816913 | 0.109010127 |
| 0.134725288 | 0.04919231  | 0.060004269 | 0.096959921 |
| 0.259939129 | 0.197364308 | 0.155899471 | 0.221519628 |
| 0.142213105 | 0.145294859 | 0.116834782 | 0.334672148 |
| 0.190010656 | 0.183359964 | 0.2618706   | 0.097725663 |
| 0.060240617 | 0.17789934  | 0.213949058 | 0.204459619 |
| 0.196271149 | 0.087187228 | 0.075061392 | 0.24172415  |
| 0.079986385 | 0.145501477 | 0.232207273 | 0.217789386 |
| 0.0982689   | 0.213229156 | 0.288363855 | 0.017390168 |
| 0.114034433 | 0.183712001 | 0.321512768 | 0.054359222 |
| 0.250417867 | 0.312269709 | 0.148951801 | 0.184607933 |
| 0.15775387  | 0.269833435 | 0.250480252 | 0.258287267 |
| 0.08912575  | 0.293674118 | 0.220262614 | 0.272818451 |
| 0.215969689 | 0.078006462 | 0.047147247 | 0.213689509 |
| 0.231083898 | 0.078550057 | 0.144644576 | 0.161300421 |
| 0.076752689 | 0.172073996 | 0.208457959 | 0.290399782 |
| 0.338864841 | 0.213483663 | 0.307874779 | 0.265724505 |
| 0.285551365 | 0.220806968 | 0.237152099 | 0.309188819 |
| 0.052700688 | 0.12505587  | 0.138564128 | 0.298940835 |
| 0.266195939 | 0.172919891 | 0.294411581 | 0.055357396 |
| 0.002519021 | 0.160782348 | 0.161311273 | 0.315901629 |
| 0.133759414 | 0.097434643 | 0.187346613 | 0.267133188 |
| 0.282028878 | 0.27874401  | 0.245157162 | 0.178467095 |
| 0.244604674 | 0.119014976 | 0.112101994 | 0.164931479 |
| 0.295124499 | 0.141319073 | 0.27971356  | 0.324124423 |
| 0.096123179 | 0.114750063 | 0.144032463 | 0.025103846 |
| 0.171722894 | 0.137780917 | 0.196517721 | 0.313188689 |
| 0.274650055 | 0.274938892 | 0.222095532 | 0.057574628 |
| 0.272542362 | 0.236926875 | 0.054176096 | 0.239614582 |
| 0.248706085 | 0.244732319 | 0.241255684 | 0.24551708  |
| 0.227994093 | 0.17969383  | 0.224827421 | 0.111859495 |
| 0.256071871 | 0.145762781 | 0.118878865 | 0.211990362 |
| 0.012579423 | 0.276635824 | 0.170895943 | 0.298719303 |
| 0.184205293 | 0.236141325 | 0.195675354 | 0.151322997 |
| 0.107255186 | 0.053064039 | 0.135908616 | 0.240569172 |
| 0.260629738 | 0.1198229   | 0.0704816   | 0.094469528 |
| 0.238446014 | 0.269864979 | 0.081296021 | 0.276153878 |
| 0.206629683 | 0.132577262 | 0.197442212 | 0.23215941  |
| 0.248590872 | 0.029662223 | 0.107922757 | 0.006966325 |
| 0.065305708 | 0.265642639 | 0.101110392 | 0.167117752 |
| 0.254144383 | 0.079895945 | 0.255003924 | 0.289754899 |
| 0.214562689 | 0.269093139 | 0.270198405 | 0.112740913 |

|             |             |             |             |
|-------------|-------------|-------------|-------------|
| 0.267210854 | 0.018463174 | 0.257840855 | 0.201567914 |
| 0.061541887 | 0.009930862 | 0.066989738 | 0.231714184 |
| 0.132575063 | 0.112542411 | 0.280713455 | 0.087658451 |
| 0.310334078 | 0.140925357 | 0.226562105 | 0.182567986 |
| 0.140181586 | 0.234916485 | 0.158753098 | 0.235947192 |
| 0.253557744 | 0.265373925 | 0.083323057 | 0.184640442 |
| 0.140996403 | 0.250165019 | 0.179750788 | 0.048201573 |
| 0.233939042 | 0.176947866 | 0.268279884 | 0.250743075 |
| 0.320278422 | 0.207208877 | 0.045358206 | 0.097838842 |
| 0.23086786  | 0.11452423  | 0.070967548 | 0.129416045 |
| 0.223325839 | 0.175576134 | 0.3226478   | 0.291511315 |
| 0.305972199 | 0.283033508 | 0.203329124 | 0.232087014 |
| 0.094194551 | 0.019378744 | 0.096799157 | 0.270391403 |
| 0.043735101 | 0.11784155  | 0.324423174 | 0.138915576 |
| 0.191181187 | 0.14548084  | 0.097228323 | 0.1129626   |
| 0.257413967 | 0.161141625 | 0.160726501 | 0.24073727  |
| 0.196035552 | 0.180977503 | 0.279781856 | 0.269920259 |
| 0.100470373 | 0.244163509 | 0.264437654 | 0.166220551 |
| 0.085334008 | 0.108358882 | 0.219306895 | 0.264685491 |
| 0.25410961  | 0.243519457 | 0.232788728 | 0.152052262 |
| 0.301401912 | 0.161628414 | 0.266003995 | 0.225837081 |
| 0.286883365 | 0.323270155 | 0.333179573 | 0.287442307 |
| 0.22745141  | 0.217073028 | 0.152695314 | 0.294569594 |
| 0.261262153 | 0.116901417 | 0.245948077 | 0.100269285 |
| 0.25108364  | 0.251107809 | 0.252804775 | 0.245823513 |
| 0.117387836 | 0.297189823 | 0.308305638 | 0.159055451 |
| 0.189510406 | 0.107745354 | 0.211232682 | 0.273204304 |
| 0.254999066 | 0.081786876 | 0.272733331 | 0.14234793  |
| 0.215664498 | 0.035905091 | 0.173339941 | 0.348579724 |
| 0.231571206 | 0.185275157 | 0.109203823 | 0.204989502 |
| 0.184467708 | 0.073324528 | 0.1139333   | 0.182558373 |
| 0.273325277 | 0.139291923 | 0.255423706 | 0.318321491 |
| 0.206172268 | 0.129087804 | 0.091032139 | 0.165464556 |
| 0.259315639 | 0.11508596  | 0.232008278 | 0.197172447 |
| 0.322868242 | 0.315137875 | 0.218106046 | 0.308184669 |
| 0.104866171 | 0.125057024 | 0.102171526 | 0.208775595 |
| 0.130910795 | 0.208614091 | 0.057614747 | 0.192484209 |
| 0.027199851 | 0.068020301 | 0.268396839 | 0.24388166  |
| 0.30928894  | 0.262889347 | 0.315638396 | 0.163144686 |
| 0.003065558 | 0.151040564 | 0.196524156 | 0.124774515 |
| 0.202837255 | 0.246989266 | 0.125738763 | 0.311902817 |
| 0.362939515 | 0.1350799   | 0.285320207 | 0.093746983 |
| 0.059642055 | 0.138808848 | 0.345023477 | 0.195937991 |
| 0.280807497 | 0.125346533 | 0.101569853 | 0.241545269 |
| 0.088664524 | 0.357838661 | 0.31756005  | 0.044546571 |
| 0.066280715 | 0.259790831 | 0.199636116 | 0.158125545 |
| 0.110607917 | 0.242155331 | 0.270064726 | 0.023790758 |
| 0.184938186 | 0.135462984 | 0.284395785 | 0.278185841 |
| 0.296315354 | 0.25627563  | 0.275407797 | 0.190061133 |
| 0.172219277 | 0.259820813 | 0.232220163 | 0.313427726 |
| 0.306357552 | 0.228448691 | 0.158609174 | 0.129458588 |
| 0.192397982 | 0.256700742 | 0.198025309 | 0.185183826 |
| 0.249441698 | 0.213145597 | 0.332800237 | 0.145114519 |
| 0.300145662 | 0.12479886  | 0.370529555 | 0.221421583 |

|             |             |             |             |
|-------------|-------------|-------------|-------------|
| 0.319746152 | 0.145078281 | 0.161327298 | 0.198357736 |
| 0.03423441  | 0.097037803 | 0.144198961 | 0.125399134 |
| 0.251069399 | 0.173800785 | 0.089179837 | 0.133410741 |
| 0.142355176 | 0.341453952 | 0.321160584 | 0.29409781  |
| 0.160266898 | 0.105648446 | 0.045549523 | 0.316061918 |
| 0.238164486 | 0.229931513 | 0.182562522 | 0.05233414  |
| 0.232646295 | 0.135801729 | 0.216661297 | 0.25318492  |
| 0.075237835 | 0.329189189 | 0.053565459 | 0.223013163 |
| 0.038573024 | 0.184632118 | 0.281535962 | 0.164415979 |
| 0.055076031 | 0.269681583 | 0.200084644 | 0.086942146 |
| 0.189485423 | 0.153961436 | 0.165956745 | 0.195662074 |
| 0.2200625   | 0.198038726 | 0.27553729  | 0.154727493 |
| 0.099502974 | 0.194522341 | 0.086195943 | 0.206494448 |
| 0.262778791 | 0.248372735 | 0.177224675 | 0.24908654  |
| 0.149098366 | 0.222382618 | 0.350671501 | 0.155897191 |
| 0.156571716 | 0.295026138 | 0.064531766 | 0.084040478 |
| 0.230434473 | 0.08536401  | 0.001862247 | 0.056769476 |
| 0.311985209 | 0.091870259 | 0.148170192 | 0.221844245 |
| 0.176314412 | 0.317366002 | 0.051898014 | 0.159841606 |
| 0.219675285 | 0.269927512 | 0.195877102 | 0.343377472 |
| 0.25433034  | 0.291326625 | 0.123776888 | 0.014844127 |
| 0.127036331 | 0.09840037  | 0.068513908 | 0.243023365 |
| 0.169919856 | 0.069352222 | 0.127795762 | 0.121790679 |
| 0.262011238 | 0.050467046 | 0.110501065 | 0.170050665 |
| 0.243221612 | 0.27828336  | 0.318218157 | 0.22681845  |
| 0.1075355   | 0.269362086 | 0.098771112 | 0.091064801 |
| 0.21009566  | 0.131276809 | 0.271265197 | 0.122866136 |
| 0.234090475 | 0.219473371 | 0.02533719  | 0.3311585   |
| 0.243740336 | 0.107117403 | 0.304588726 | 0.042656208 |
| 0.3344574   | 0.258067745 | 0.163341633 | 0.080500512 |
| 0.151264946 | 0.150910641 | 0.28192792  | 0.230526004 |
| 0.050827664 | 0.118685899 | 0.270436341 | 0.128470686 |
| 0.272501449 | 0.132583771 | 0.311700669 | 0.07171259  |
| 0.22921354  | 0.195708484 | 0.163889968 | 0.192239854 |
| 0.111230837 | 0.174295702 | 0.066842701 | 0.287616784 |
| 0.311175847 | 0.138828642 | 0.24139752  | 0.271539726 |
| 0.106261458 | 0.239139506 | 0.095308967 | 0.27416837  |
| 0.307260971 | 0.319127795 | 0.219201317 | 0.240808378 |
| 0.357259426 | 0.157994152 | 0.113329671 | 0.218957279 |
| 0.221327809 | 0.228518479 | 0.130038995 | 0.248778747 |
| 0.101831248 | 0.27715817  | 0.08680919  | 0.239369101 |
| 0.223579154 | 0.245065212 | 0.126305282 | 0.25634698  |
| 0.243100406 | 0.158217076 | 0.19434479  | 0.351389893 |
| 0.277714835 | 0.175433255 | 0.345165045 | 0.019580443 |
| 0.127436268 | 0.198121658 | 0.255287715 | 0.143443572 |
| 0.272938883 | 0.170061752 | 0.104851103 | 0.029005019 |
| 0.249241521 | 0.079761071 | 0.153258683 | 0.216466498 |
| 0.091364651 | 0.188422819 | 0.270580896 | 0.280233194 |
| 0.213493363 | 0.080071839 | 0.065415872 | 0.251382071 |
| 0.087502203 | 0.056428913 | 0.082577417 | 0.128636782 |
| 0.096571338 | 0.060942281 | 0.078169188 | 0.085480636 |
| 0.213431202 | 0.188232032 |             |             |
| COR01C      | 0.057972549 | 0.411411549 | 0.04664148  |
| 0.088117361 | 0.168900204 | 0.16962443  | 0.042180241 |

|             |             |             |             |
|-------------|-------------|-------------|-------------|
| 0.08560015  | 0.305194585 | 0.123593483 | 0.21641234  |
| 0.017920686 | 0.031821892 | 0.461466878 | 0.036020375 |
| 0.243657546 | 0.026138892 | 0.071657595 | 0.038862604 |
| 0.092431171 | 0.150562973 | 0.136738224 | 0.238709436 |
| 0.130720847 | 0.222611248 | 0.242677609 | 0.198446762 |
| 0.487348636 | 0.116139406 | 0.31582452  | 0.087772614 |
| 0.424783585 | 0.193089384 | 0.16719641  | 0.015123384 |
| 0.222756761 | 0.003428468 | 0.451104886 | 0.116590374 |
| 0.055539731 | 0.36158809  | 0.165485214 | 0.115207394 |
| 0.190707754 | 0.033365351 | 0.097713785 | 0.284794888 |
| 0.215373838 | 0.110151246 | 0.060614288 | 0.324168292 |
| 0.147685147 | 0.302980077 | 0.342255833 | 0.009487337 |
| 0.116241765 | 0.030582389 | 0.083125641 | 0.504246144 |
| 0.176835371 | 0.070002197 | 0.115815791 | 0.114225026 |
| 0.243099684 | 0.262284221 | 0.184225612 | 0.157107955 |
| 0.503079941 | 0.068933886 | 0.335054617 | 0.081399655 |
| 0.172861565 | 0.025745479 | 0.152716223 | 0.078723094 |
| 0.144550553 | 0.12131519  | 0.18432774  | 0.109753257 |
| 0.437172673 | 0.516770009 | 0.172133133 | 0.50864501  |
| 0.033009065 | 0.18707046  | 0.102811906 | 0.233758123 |
| 0.281695077 | 0.047871215 | 0.354092541 | 0.522317937 |
| 0.033284724 | 0.257811524 | 0.323473701 | 0.128722348 |
| 0.411567528 | 0.093874272 | 0.232306135 | 0.06903845  |
| 0.244894425 | 0.192141865 | 0.469074341 | 0.257925824 |
| 0.132283255 | 0.073658637 | 0.49955491  | 0.173917498 |
| 0.13697999  | 0.071377787 | 0.095139313 | 0.416090777 |
| 0.294479002 | 0.490783611 | 0.399399656 | 0.317570648 |
| 0.219309528 | 0.494574286 | 0.331361423 | 0.397182942 |
| 0.068242159 | 0.520907171 | 0.129920164 | 0.030940075 |
| 0.059866545 | 0.048167198 | 0.08295854  | 0.269990989 |
| 0.43954344  | 0.269017503 | 0.12373425  | 0.121480972 |
| 0.412925519 | 0.491145639 | 0.518463959 | 0.391475706 |
| 0.033422052 | 0.082303143 | 0.214322862 | 0.127597122 |
| 0.296019122 | 0.089236331 | 0.104568709 | 0.519439648 |
| 0.396075583 | 0.380453593 | 0.099985544 | 0.508501283 |
| 0.096682858 | 0.50920071  | 0.449174967 | 0.112212283 |
| 0.521407327 | 0.509207057 | 0.498461569 | 0.291193406 |
| 0.482812094 | 0.204670541 | 0.028880282 | 0.346876375 |
| 0.475425758 | 0.006757808 | 0.447901328 | 0.475707433 |
| 0.503526637 | 0.42644215  | 0.49627764  | 0.488382112 |
| 0.510522332 | 0.0689135   | 0.010989808 | 0.197748748 |
| 0.51938472  | 0.393189473 | 0.062914997 | 0.236847345 |
| 0.216839546 | 0.207770059 | 0.348752914 | 0.162669686 |
| 0.505184714 | 0.427765675 | 0.472072233 | 0.358201994 |
| 0.178540558 | 0.342779975 | 0.199527907 | 0.488644435 |
| 0.033057973 | 0.085421849 | 0.06460313  | 0.243258282 |
| 0.152621269 | 0.117618456 | 1           | 0.198067375 |
| 0.147853123 | 0.168347292 | 0.126085341 | 0.273653713 |
| 0.079406889 | 0.278788757 | 0.10195223  | 0.132322957 |
| 0.031042772 | 0.16639226  | 0.12714114  | 0.080494639 |
| 0.14040045  | 0.280674474 | 0.345773374 | 0.465397868 |
| 0.131712397 | 0.18450193  | 0.348653612 | 0.469288731 |
| 0.415882484 | 0.206890413 | 0.202499035 | 0.008753068 |
| 0.14195594  | 0.114631665 | 0.069551332 | 0.22228369  |

|             |             |             |             |
|-------------|-------------|-------------|-------------|
| 0.207196258 | 0.129374225 | 0.261553382 | 0.307902003 |
| 0.21135558  | 0.081017984 | 0.155647942 | 0.446426268 |
| 0.157608243 | 0.135047162 | 0.433757614 | 0.255912196 |
| 0.003203377 | 0.207054209 | 0.409559032 | 0.058221333 |
| 0.247613792 | 0.056960606 | 0.10562701  | 0.437900881 |
| 0.127514137 | 0.084725675 | 0.463777353 | 0.29054974  |
| 0.171870447 | 0.261217615 | 0.50557482  | 0.027557723 |
| 0.160911883 | 0.035195357 | 0.217214531 | 0.16302142  |
| 0.179253582 | 0.239832376 | 0.165649276 | 0.116147458 |
| 0.141298141 | 0.518063274 | 0.367064551 | 0.501092341 |
| 0.157113445 | 0.51129844  | 0.426976129 | 0.431623524 |
| 0.262391529 | 0.162021767 | 0.049033597 | 0.412718569 |
| 0.425155348 | 0.142656707 | 0.08753291  | 0.380491194 |
| 0.156570055 | 0.302504823 | 0.050948621 | 0.482578791 |
| 0.496212985 | 0.482150669 | 0.078871244 | 0.297767536 |
| 0.373916332 | 0.168511292 | 0.358904271 | 0.508059236 |
| 0.132553005 | 0.181959096 | 0.139175799 | 0.343408746 |
| 0.150081727 | 0.079167736 | 0.307623932 | 0.059981485 |
| 0.004926846 | 0.068966547 | 0.065592143 | 0.079319186 |
| 0.063226224 | 0.279663176 | 0.278676492 | 0.518325229 |
| 0.079019437 | 0.410143361 | 0.194118333 | 0.141582942 |
| 0.441229661 | 0.149391081 | 0.19902995  | 0.24585386  |
| 0.212594678 | 0.011069629 | 0.065224601 | 0.526004113 |
| 0.050531323 | 0.099908681 | 0.171876522 | 0.001506679 |
| 0.037891379 | 0.384539767 | 0.120635782 | 0.223581098 |
| 0.438225411 | 0.231556459 | 0.1907657   | 0.142914384 |
| 0.271909302 | 0.06912978  | 0.001575492 | 0.45561971  |
| 0.459757833 | 0.427314203 | 0.46463431  | 0.444402081 |
| 0.402954824 | 0.311600446 | 0.347342381 | 0.232219934 |
| 0.072704961 | 0.063631846 | 0.087253964 | 0.147593303 |
| 0.004063035 | 0.319246465 | 0.144009936 | 0.13383156  |
| 0.341924454 | 0.232599919 | 0.033058256 | 0.198516182 |
| 0.024043321 | 0.085461021 | 0.14773307  | 0.100347241 |
| 0.25643618  | 0.013342205 | 0.122824238 | 0.144419323 |
| 0.45886395  | 0.354938999 | 0.137540669 | 0.522955021 |
| 0.207467194 | 0.141577669 | 0.147817937 | 0.31405886  |
| 0.049484415 | 0.067625646 | 0.152430346 | 0.023260257 |
| 0.09855399  | 0.437749445 | 0.152455083 | 0.053701506 |
| 0.19637529  | 0.006714077 | 0.380807077 | 0.526805818 |
| 0.476645462 | 0.500994889 | 0.501251165 | 0.110421774 |
| 0.508614354 | 0.034481885 | 0.516760704 | 0.393641871 |
| 0.164459925 | 0.001746573 | 0.003216182 | 0.459478472 |
| 0.238294205 | 0.079318945 | 0.126341214 | 0.176587366 |
| 0.062975243 | 0.091247699 | 0.043550764 | 0.069219976 |
| 0.288035993 | 0.121797465 | 0.067732379 | 0.49111091  |
| 0.122045574 | 0.138228963 | 0.17590255  | 0.093816164 |
| 0.24567964  | 0.036224288 | 0.086439761 | 0.003796221 |
| 0.262875954 | 0.146817258 | 0.491191612 | 0.502980476 |
| 0.497984549 | 0.287302425 | 0.149498707 | 0.153223564 |
| 0.380961169 | 0.117573923 | 0.147594356 | 0.108913952 |
| 0.496315704 | 0.280495694 | 0.30130401  | 0.31912517  |
| 0.497254171 | 0.483429212 | 0.02625924  | 0.353399387 |
| 0.010776328 | 0.000461336 | 0.228992604 | 0.215167443 |
| 0.016577691 | 0.173550972 | 0.236016187 | 0.093233029 |



|             |             |             |             |
|-------------|-------------|-------------|-------------|
| 0.086090204 | 0.031569081 | 0.096093126 | 0.095904941 |
| 0.20332779  | 0.196441462 | 0.135706538 | 0.20330443  |
| 0.099359284 | 0.057794617 | 0.088049335 | 0.083436904 |
| 0.104906595 | 0.313726927 | 0.230550215 | 0.017386855 |
| 0.223792266 | 0.237330666 | 0.042277024 | 0.144463544 |
| 0.421601819 | 0.480817419 | 0.027013596 | 0.008966704 |
| 0.27040608  | 0.13767763  | 0.483059832 | 0.497835938 |
| 0.531002219 | 0.509090548 | 0.411735808 | 0.064325746 |
| 0.047526723 | 0.18499384  | 0.148131848 | 0.040526027 |
| 0.506794875 | 0.076876992 | 0.479186331 | 0.132559753 |
| 0.101782655 | 0.105803902 | 0.02687061  | 0.060938931 |
| 0.222610993 | 0.144279585 | 0.09185201  | 0.151466485 |
| 0.139997931 | 0.101170831 | 0.035673461 | 0.136802187 |
| 0.327529137 | 0.068039471 | 0.130389724 | 0.133280368 |
| 0.311919325 | 0.088808787 | 0.342762563 | 0.44568165  |
| 0.122375808 | 0.078852568 | 0.167803369 | 0.298243523 |
| 0.407623351 | 0.223574916 | 0.024220274 | 0.453302204 |
| 0.465718203 | 0.325942317 | 0.502855363 | 0.36466263  |
| 0.083609361 | 0.207676928 | 0.112424469 | 0.200998704 |
| 0.131621156 | 0.181796171 | 0.128649355 | 0.058644021 |
| 0.277911036 | 0.476423828 | 0.413033107 | 0.087190196 |
| 0.245115265 | 0.122112942 | 0.065287401 | 0.406936431 |
| 0.071102473 | 0.069747496 | 0.170952223 | 0.372160269 |
| 0.000824492 | 0.047823771 | 0.447270528 | 0.120970483 |
| 0.494396317 | 0.461638699 | 0.444008039 | 0.111256895 |
| 0.001055227 | 0.285937597 | 0.265560968 | 0.176194578 |
| 0.446918838 | 0.316775175 | 0.064799502 | 0.043831129 |
| 0.256218609 | 0.10284368  | 0.07371484  | 0.154517814 |
| 0.05848536  | 0.30436127  | 0.165199677 | 0.129901953 |
| 0.086021981 | 0.100641421 | 0.087630778 | 0.12109836  |
| 0.045147145 | 0.216921685 | 0.321291877 | 0.126641508 |
| 0.102323254 | 0.404819452 | 0.37771344  | 0.022816822 |
| 0.171479249 | 0.356922062 | 0.394622866 | 0.002689851 |
| 0.3485512   | 0.007546366 | 0.096602777 | 0.105237233 |
| 0.088335913 | 0.098924109 | 0.162060341 | 0.123566943 |
| 0.256294913 | 0.110900191 | 0.139127396 | 0.172783269 |
| 0.078260346 | 0.121948882 | 0.234973098 | 0.167387916 |
| 0.129962422 | 0.073221252 | 0.129080162 | 0.14012067  |
| 0.040806759 | 0.437909776 | 0.255324953 | 0.08929642  |
| 0.155079023 | 0.1535245   | 0.341352953 | 0.496448142 |
| 0.392556515 | 0.144146782 | 0.139529089 | 0.444248201 |
| 0.113893996 | 0.153748693 | 0.055832794 | 0.21815492  |
| 0.156865606 | 0.099587721 | 0.208682405 | 0.251951795 |
| 0.332847604 | 0.407577951 | 0.249860727 | 0.410367267 |
| 0.162703537 | 0.163846417 | 0.151091116 | 0.049561645 |
| 0.108405169 | 0.125963164 | 0.129804491 | 0.001988972 |
| 0.259777282 | 0.152662275 | 0.451669602 | 0.495356455 |
| 0.108914301 | 0.362704673 | 0.163535419 | 0.067386002 |
| 0.129010037 | 0.228384109 | 0.137657147 | 0.360977725 |
| 0.085599886 | 0.094367522 | 0.169331389 | 0.165223668 |
| 0.349165107 | 0.318026962 | 0.08910745  | 0.126665614 |
| 0.134262551 | 0.162314966 | 0.467442674 | 0.075831894 |
| 0.269421862 | 0.076951058 | 0.244247427 | 0.149987209 |
| 0.102683203 | 0.491430449 | 0.052995534 | 0.510734563 |

|             |             |             |             |
|-------------|-------------|-------------|-------------|
| 0.149369055 | 0.138595329 | 0.488132933 | 0.16158053  |
| 0.132919414 | 0.055239955 | 0.067946465 | 0.16121341  |
| 0.101964622 | 0.12275568  | 0.010313375 | 0.040622674 |
| 0.266927974 | 0.113468602 | 0.369078562 | 0.279393953 |
| 0.089827413 | 0.281315531 | 0.054390947 | 0.170781068 |
| 0.491970861 | 0.504630643 | 0.144051825 | 0.220295776 |
| 0.304529279 | 0.062794866 | 0.303848514 | 0.009031778 |
| 0.287567908 | 0.26427008  | 0.159804594 | 0.037414432 |
| 0.015736329 | 0.083629605 | 0.283115539 | 0.067433114 |
| 0.450335827 | 0.088768364 | 0.235348832 | 0.337219464 |
| 0.159914861 | 0.515278075 | 0.062116524 | 0.33751028  |
| 0.031601064 | 0.187370594 | 0.165102177 | 0.178078901 |
| 0.109221954 | 0.115251202 | 0.318081186 | 0.093493707 |
| 0.025639336 | 0.108450242 | 0.002105312 | 0.429589334 |
| 0.484299652 | 0.149572216 | 0.204255548 | 0.124065052 |
| 0.211382575 | 0.332468534 | 0.108688234 | 0.207830886 |
| 0.00843164  | 0.230031843 | 0.137747585 | 0.410371049 |
| 0.119155501 | 0.214272023 | 0.036607329 | 0.142408179 |
| 0.481142348 | 0.142004188 | 0.236430301 | 0.142218778 |
| 0.487530853 | 0.33814484  | 0.168444454 | 0.083696305 |
| 0.268848563 | 0.070671735 | 0.16369431  | 0.516214206 |
| 0.086193646 | 0.08601898  | 0.399434349 | 0.107991542 |
| 0.122351609 | 0.379708995 | 0.249901694 | 0.501364747 |
| 0.040460439 | 0.205997838 | 0.348762115 | 0.459612164 |
| 0.259436377 | 0.061678547 | 0.102174242 | 0.100452854 |
| 0.475292688 | 0.061511334 | 0.103289719 | 0.325075215 |
| 0.087979554 | 0.223073866 | 0.225882651 | 0.078822427 |
| 0.023781504 | 0.088065909 | 0.161915406 | 0.115302315 |
| 0.203742067 | 0.186080622 | 0.090925527 | 0.387651775 |
| 0.075939544 | 0.018802895 | 0.448199179 | 0.007523045 |
| 0.223711968 | 0.27901436  | 0.158580654 | 0.158443854 |
| 0.204165789 | 0.244622175 | 0.224378934 | 0.001793916 |
| 0.34725912  | 0.015484013 | 0.10975213  | 0.103102894 |
| 0.127547604 | 0.042619183 | 0.450669812 | 0.492280426 |
| 0.234435456 | 0.126022244 | 0.14641155  | 0.448496127 |
| 0.053864002 | 0.121917796 | 0.129019852 | 0.321072777 |
| 0.080809365 | 0.183629284 | 0.177876471 | 0.146416504 |
| 0.308620282 | 0.126261581 |             |             |
| CPOX        | 0.046842412 | 0.345695211 | 0.028100533 |
| 0.074015224 | 0.250105577 | 0.187343571 | 0.064652056 |
| 0.109744114 | 0.305272536 | 0.196590602 | 0.203466198 |
| 0.01590395  | 0.148430349 | 0.385121064 | 0.06752464  |
| 0.290938874 | 0.041355499 | 0.096250185 | 0.100917392 |
| 0.195749044 | 0.253678283 | 0.226904687 | 0.181013819 |
| 0.281486342 | 0.145597074 | 0.206645604 | 0.283169492 |
| 0.405657295 | 0.161695364 | 0.2820368   | 0.099207266 |
| 0.35463577  | 0.263243459 | 0.249422648 | 0.011545084 |
| 0.241528389 | 0.079420602 | 0.369000545 | 0.214192364 |
| 0.149094186 | 0.289760092 | 0.165364655 | 0.160860367 |
| 0.213400524 | 0.023173745 | 0.109827499 | 0.346708053 |
| 0.224205192 | 0.231349394 | 0.040556041 | 0.296277282 |
| 0.272298092 | 0.214640424 | 0.265448297 | 0.002703643 |
| 0.237268765 | 0.126340024 | 0.234913336 | 0.396609114 |
| 0.144122962 | 0.110634758 | 0.244602542 | 0.213736059 |

|             |                      |             |             |
|-------------|----------------------|-------------|-------------|
| 0.311550225 | 0.349563483          | 0.230319548 | 0.243616188 |
| 0.399620683 | 0.233126545          | 0.344337548 | 0.097105962 |
| 0.237243593 | 0.034209293          | 0.131809642 | 0.069482723 |
| 0.278145551 | 0.158185546          | 0.235234352 | 0.279743802 |
| 0.327859109 | 0.438413 0.191776459 | 0.396005633 |             |
| 0.254503287 | 0.28776358           | 0.261497726 | 0.285638765 |
| 0.349030057 | 0.110849099          | 0.293375631 | 0.434124506 |
| 0.057019724 | 0.220724979          | 0.330011118 | 0.095481974 |
| 0.330228522 | 0.304791209          | 0.194676086 | 0.184501609 |
| 0.32555587  | 0.274227282          | 0.416926476 | 0.208874397 |
| 0.272462689 | 0.047602397          | 0.371986165 | 0.275007895 |
| 0.187073956 | 0.04912713           | 0.246862029 | 0.410828675 |
| 0.270983946 | 0.3950428            | 0.364370082 | 0.346111482 |
| 0.27074323  | 0.400568563          | 0.268459381 | 0.365756104 |
| 0.106171619 | 0.428151466          | 0.110946783 | 0.044366356 |
| 0.046510419 | 0.095736696          | 0.320477103 | 0.282879931 |
| 0.389151866 | 0.240144117          | 0.124060516 | 0.202003118 |
| 0.437034463 | 0.362666713          | 0.43440062  | 0.354163921 |
| 0.032913675 | 0.310071568          | 0.254359483 | 0.177200767 |
| 0.311815985 | 0.104686117          | 0.248639782 | 0.403732154 |
| 0.294907021 | 0.38860225           | 0.100736869 | 0.408430786 |
| 0.20294417  | 0.427367308          | 0.341213524 | 0.116030926 |
| 0.414713803 | 0.377971133          | 0.437511645 | 0.325148758 |
| 0.368940392 | 0.163308673          | 0.134156022 | 0.348251978 |
| 0.417785335 | 0.020398228          | 0.417919383 | 0.439681684 |
| 0.394206364 | 0.3916841            | 0.470804174 | 0.429378324 |
| 0.398656021 | 0.059476166          | 0.074635929 | 0.263583902 |
| 0.40133395  | 0.306010268          | 0.175619519 | 0.25304974  |
| 0.299462237 | 0.196955153          | 0.37273329  | 0.17147484  |
| 0.450825506 | 0.371906873          | 0.413247312 | 0.328302036 |
| 0.221920935 | 0.260509822          | 0.274845111 | 0.347512503 |
| 0.0410474   | 0.064554482          | 0.031497472 | 0.299259233 |
| 0.157670576 | 0.146192837          | 0.198067375 | 1           |
| 0.151508358 | 0.205948162          | 0.250119816 | 0.32539284  |
| 0.045363492 | 0.227797316          | 0.11223328  | 0.117606503 |
| 0.041513269 | 0.125707501          | 0.123471389 | 0.104436862 |
| 0.214868475 | 0.190664344          | 0.324099864 | 0.426574841 |
| 0.301205192 | 0.120860604          | 0.299477361 | 0.408867331 |
| 0.388004347 | 0.250168804          | 0.211542397 | 0.007403174 |
| 0.216128898 | 0.271729711          | 0.239415104 | 0.264388646 |
| 0.152068184 | 0.214449862          | 0.284404271 | 0.33344278  |
| 0.135686361 | 0.122228813          | 0.278409545 | 0.346067741 |
| 0.11626864  | 0.202550916          | 0.384478192 | 0.243158394 |
| 0.002501461 | 0.1915809            | 0.357081973 | 0.235621459 |
| 0.264451216 | 0.150636866          | 0.174483402 | 0.402551254 |
| 0.274840766 | 0.289839132          | 0.422828601 | 0.352836481 |
| 0.208367216 | 0.184930775          | 0.464528234 | 0.106952389 |
| 0.308095962 | 0.048920269          | 0.242398858 | 0.193379538 |
| 0.165238637 | 0.282607803          | 0.270477221 | 0.224052111 |
| 0.07026822  | 0.427764722          | 0.319304781 | 0.423214538 |
| 0.25767013  | 0.462159844          | 0.389648088 | 0.361680562 |
| 0.254265888 | 0.292105131          | 0.186129088 | 0.339119896 |
| 0.391928945 | 0.238472343          | 0.052930823 | 0.386777498 |
| 0.263411522 | 0.340372076          | 0.166289542 | 0.420827353 |

|             |             |             |             |
|-------------|-------------|-------------|-------------|
| 0.406671687 | 0.356462993 | 0.13689342  | 0.361528244 |
| 0.291125097 | 0.130689673 | 0.363395314 | 0.473421044 |
| 0.233540473 | 0.283032104 | 0.254794873 | 0.38416504  |
| 0.115875053 | 0.26977524  | 0.293444007 | 0.238052124 |
| 0.008356919 | 0.064708914 | 0.043034732 | 0.151022157 |
| 0.204559091 | 0.278803893 | 0.317935136 | 0.430532875 |
| 0.096445322 | 0.338388962 | 0.232724563 | 0.202365971 |
| 0.340658816 | 0.302710917 | 0.260462629 | 0.291215617 |
| 0.213715388 | 0.014726869 | 0.080140686 | 0.429718143 |
| 0.029043743 | 0.216735555 | 0.230734648 | 0.002156033 |
| 0.038956956 | 0.318591826 | 0.081450418 | 0.16278363  |
| 0.44282137  | 0.155198532 | 0.137258965 | 0.213189354 |
| 0.274597115 | 0.072753881 | 0.003129882 | 0.430348521 |
| 0.436779493 | 0.425285023 | 0.430690109 | 0.391647545 |
| 0.427601226 | 0.35384066  | 0.376076302 | 0.162018676 |
| 0.087146916 | 0.064496406 | 0.23137723  | 0.225118058 |
| 0.006431955 | 0.31406804  | 0.276207112 | 0.108587621 |
| 0.367359226 | 0.271503265 | 0.029556821 | 0.300798527 |
| 0.010137625 | 0.175300944 | 0.23255894  | 0.22298291  |
| 0.359944096 | 0.011211386 | 0.105509507 | 0.24431906  |
| 0.310125064 | 0.269291593 | 0.254894473 | 0.429311631 |
| 0.201175186 | 0.090613159 | 0.219953674 | 0.327077439 |
| 0.065118324 | 0.108529613 | 0.244155297 | 0.01677146  |
| 0.122815658 | 0.402720946 | 0.273815209 | 0.042903911 |
| 0.171604467 | 0.003102854 | 0.269108429 | 0.437391095 |
| 0.348683916 | 0.45079672  | 0.399354594 | 0.215124673 |
| 0.399745844 | 0.16639156  | 0.437682065 | 0.315917158 |
| 0.22069072  | 0.000385251 | 0.008886248 | 0.412188899 |
| 0.248585698 | 0.041431936 | 0.11288855  | 0.150610044 |
| 0.088661608 | 0.093760975 | 0.064317085 | 0.207447404 |
| 0.244455057 | 0.216786803 | 0.232861563 | 0.372924142 |
| 0.191156761 | 0.19953095  | 0.228199055 | 0.071647056 |
| 0.260946949 | 0.043590093 | 0.078439203 | 0.007288647 |
| 0.340648666 | 0.085803494 | 0.361629532 | 0.412042122 |
| 0.412117012 | 0.314710099 | 0.19550251  | 0.205490793 |
| 0.421828714 | 0.059741497 | 0.223064536 | 0.065863033 |
| 0.369249324 | 0.282680288 | 0.249888252 | 0.225399501 |
| 0.434549533 | 0.372510012 | 0.033366107 | 0.348532401 |
| 0.006174541 | 0.006979401 | 0.166556518 | 0.23865516  |
| 0.199563296 | 0.280334396 | 0.20623209  | 0.256637267 |
| 0.250939505 | 0.018275668 | 0.27525475  | 0.260306602 |
| 0.222361163 | 0.258473436 | 0.247634779 | 0.24107132  |
| 0.262259382 | 0.194889705 | 0.170495012 | 0.16026318  |
| 0.286079617 | 0.247732504 | 0.145717326 | 0.025195993 |
| 0.229017931 | 0.245003437 | 0.044249259 | 0.115808683 |
| 0.353182896 | 0.408655401 | 0.056214561 | 0.010065059 |
| 0.211022669 | 0.280575068 | 0.435708808 | 0.391446278 |
| 0.41686973  | 0.450943442 | 0.324763859 | 0.164958198 |
| 0.053107257 | 0.251991144 | 0.265621976 | 0.140408699 |
| 0.42032545  | 0.045908207 | 0.380201313 | 0.269820362 |
| 0.096674333 | 0.149005989 | 0.030233263 | 0.079967615 |
| 0.266780128 | 0.137072738 | 0.16640137  | 0.082686709 |
| 0.236450945 | 0.225885141 | 0.050156846 | 0.146984941 |
| 0.281541513 | 0.202089463 | 0.12091961  | 0.212981528 |

|             |             |             |             |
|-------------|-------------|-------------|-------------|
| 0.280474965 | 0.196219862 | 0.349686093 | 0.390174111 |
| 0.089148014 | 0.099002445 | 0.122900471 | 0.354179473 |
| 0.365134312 | 0.24491491  | 0.012300616 | 0.350622215 |
| 0.429228966 | 0.288913414 | 0.384968356 | 0.384842076 |
| 0.06995187  | 0.232176638 | 0.319858317 | 0.269660622 |
| 0.161636914 | 0.186428472 | 0.222226673 | 0.052331153 |
| 0.292455707 | 0.416178727 | 0.338313424 | 0.127122209 |
| 0.24666352  | 0.083082104 | 0.039212393 | 0.387963104 |
| 0.219417313 | 0.058405474 | 0.188887925 | 0.40779809  |
| 0.002617436 | 0.189878507 | 0.463521793 | 0.160397446 |
| 0.453092877 | 0.417542153 | 0.353944065 | 0.198099814 |
| 0.008822277 | 0.341221691 | 0.234396234 | 0.218719234 |
| 0.337551565 | 0.260615043 | 0.165826276 | 0.072214098 |
| 0.254588573 | 0.049922414 | 0.134456387 | 0.169859321 |
| 0.211049289 | 0.257033774 | 0.180294548 | 0.187915706 |
| 0.197060872 | 0.082342669 | 0.221872841 | 0.150836621 |
| 0.290282265 | 0.201227626 | 0.300108694 | 0.174956367 |
| 0.163852656 | 0.424109446 | 0.324827835 | 0.019491148 |
| 0.280069256 | 0.394832342 | 0.388902752 | 0.002612717 |
| 0.322233822 | 0.007206889 | 0.185661203 | 0.163749374 |
| 0.175506221 | 0.216949212 | 0.235042693 | 0.225558712 |
| 0.259500368 | 0.180387001 | 0.163593013 | 0.170308914 |
| 0.135449562 | 0.168816672 | 0.268329755 | 0.22501316  |
| 0.185348237 | 0.085731037 | 0.081794607 | 0.081278915 |
| 0.038572123 | 0.382883373 | 0.196981101 | 0.047608508 |
| 0.189433714 | 0.255375727 | 0.309772783 | 0.383820288 |
| 0.374028429 | 0.080003639 | 0.279247578 | 0.329003433 |
| 0.196847799 | 0.166600931 | 0.047996982 | 0.215457932 |
| 0.161341927 | 0.194105283 | 0.2224304   | 0.167610134 |
| 0.326697887 | 0.329390869 | 0.188282139 | 0.380976346 |
| 0.227363502 | 0.293039937 | 0.154169956 | 0.076714353 |
| 0.110716037 | 0.112288059 | 0.244610779 | 0.001078938 |
| 0.253831164 | 0.117200961 | 0.384078767 | 0.373030906 |
| 0.267779521 | 0.332173156 | 0.144003066 | 0.061954006 |
| 0.130294073 | 0.131105313 | 0.110000657 | 0.342566129 |
| 0.205561461 | 0.130330196 | 0.239344317 | 0.142359025 |
| 0.355437453 | 0.358819398 | 0.291092969 | 0.203730934 |
| 0.216897298 | 0.125467752 | 0.408656766 | 0.075607385 |
| 0.258153464 | 0.18056654  | 0.219188225 | 0.219396016 |
| 0.213145421 | 0.438190328 | 0.044879093 | 0.444051646 |
| 0.267032127 | 0.108049097 | 0.418873307 | 0.203219552 |
| 0.17962826  | 0.116874431 | 0.214311202 | 0.227593332 |
| 0.222132921 | 0.258101732 | 0.017473371 | 0.091564306 |
| 0.272910063 | 0.294010824 | 0.329311805 | 0.347754467 |
| 0.261806015 | 0.34235664  | 0.208228457 | 0.204809537 |
| 0.364872137 | 0.389657271 | 0.160849951 | 0.232386113 |
| 0.289607722 | 0.079114725 | 0.207355298 | 0.041818718 |
| 0.287478618 | 0.279138555 | 0.243181065 | 0.055875154 |
| 0.019569805 | 0.219190047 | 0.266475873 | 0.058237163 |
| 0.444679809 | 0.183372096 | 0.273390717 | 0.303996056 |
| 0.160909657 | 0.385787608 | 0.141061707 | 0.299788074 |
| 0.06621819  | 0.21429427  | 0.287039713 | 0.290527649 |
| 0.162377204 | 0.263513753 | 0.302079802 | 0.215917375 |
| 0.030329945 | 0.211236172 | 0.00422955  | 0.321760533 |

|             |             |             |             |
|-------------|-------------|-------------|-------------|
| 0.364410346 | 0.285665711 | 0.182922866 | 0.215670197 |
| 0.237927219 | 0.353276603 | 0.263271439 | 0.247651556 |
| 0.009674182 | 0.258324205 | 0.155459578 | 0.299381899 |
| 0.147075448 | 0.273315675 | 0.045808867 | 0.311796517 |
| 0.347134523 | 0.233142392 | 0.250568309 | 0.204310854 |
| 0.380071778 | 0.326320473 | 0.109175069 | 0.22344734  |
| 0.301868066 | 0.049704734 | 0.196375989 | 0.455992332 |
| 0.151962406 | 0.212113765 | 0.393553858 | 0.160242847 |
| 0.287917594 | 0.312282194 | 0.277045138 | 0.454632319 |
| 0.101044074 | 0.186574585 | 0.372444355 | 0.394615162 |
| 0.27398789  | 0.244417326 | 0.228743393 | 0.225641169 |
| 0.334374925 | 0.055081099 | 0.286615753 | 0.259379793 |
| 0.220735405 | 0.256745562 | 0.218301912 | 0.215733522 |
| 0.035314577 | 0.175846627 | 0.192780377 | 0.107622943 |
| 0.217103625 | 0.255644516 | 0.257374217 | 0.326812778 |
| 0.092809404 | 0.016386191 | 0.3886019   | 0.031403577 |
| 0.155183493 | 0.262965655 | 0.177947765 | 0.269057223 |
| 0.131124059 | 0.250345338 | 0.182752227 | 0.000781233 |
| 0.380002429 | 0.060195273 | 0.284781959 | 0.190587337 |
| 0.265436838 | 0.044716179 | 0.356682434 | 0.450409632 |
| 0.227093781 | 0.241841293 | 0.223143701 | 0.38514741  |
| 0.175262353 | 0.255575887 | 0.303700681 | 0.257705362 |
| 0.233039609 | 0.212181523 | 0.253920919 | 0.227326687 |
| 0.28318902  | 0.192194516 |             |             |
| CRCP        | 0.207397402 | 0.21294705  | 0.127348663 |
| 0.23240027  | 0.186125463 | 0.140355763 | 0.240926814 |
| 0.270415238 | 0.18761058  | 0.057473468 | 0.201756175 |
| 0.186812632 | 0.046308585 | 0.280922029 | 0.253681396 |
| 0.157314055 | 0.265114153 | 0.286193697 | 0.069253343 |
| 0.156583682 | 0.20423616  | 0.126539155 | 0.13027781  |
| 0.187619189 | 0.282201928 | 0.150537862 | 0.103337586 |
| 0.253898265 | 0.051775232 | 0.166845942 | 0.038553171 |
| 0.344510938 | 0.17343293  | 0.095537053 | 0.129202795 |
| 0.153261623 | 0.019647316 | 0.334353797 | 0.246943496 |
| 0.090517015 | 0.339234911 | 0.072158608 | 0.283165911 |
| 0.093742761 | 0.170115563 | 0.031439927 | 0.150909229 |
| 0.141881131 | 0.201779853 | 0.137659734 | 0.174680489 |
| 0.122588665 | 0.234659025 | 0.129742717 | 0.012485292 |
| 0.093066583 | 0.01796157  | 0.057414232 | 0.286693717 |
| 0.313580874 | 0.335656462 | 0.056386572 | 0.170437213 |
| 0.132108033 | 0.190781212 | 0.276718208 | 0.090369883 |
| 0.294140948 | 0.083634852 | 0.157794282 | 0.164621128 |
| 0.155966906 | 0.12708201  | 0.31302683  | 0.13016434  |
| 0.125864893 | 0.314967287 | 0.19219329  | 0.117635656 |
| 0.199217366 | 0.350756902 | 0.255006199 | 0.280239733 |
| 0.079971611 | 0.137852983 | 0.170972702 | 0.302460779 |
| 0.207923621 | 0.200394591 | 0.236639353 | 0.332977527 |
| 0.151896044 | 0.090609561 | 0.186625088 | 0.190389329 |
| 0.225359836 | 0.087156734 | 0.0868178   | 0.104282652 |
| 0.18278242  | 0.161932933 | 0.3001876   | 0.295597031 |
| 0.169502371 | 0.15518616  | 0.28893629  | 0.133111136 |
| 0.215966004 | 0.185221096 | 0.19115549  | 0.211415133 |
| 0.175202962 | 0.265118876 | 0.19497225  | 0.254087683 |
| 0.137652845 | 0.286656782 | 0.216088442 | 0.257571933 |

|             |             |             |             |
|-------------|-------------|-------------|-------------|
| 0.020475393 | 0.288615629 | 0.255695194 | 0.285897394 |
| 0.148059274 | 0.312511842 | 0.141574485 | 0.336637078 |
| 0.244886209 | 0.232008637 | 0.261508094 | 0.277898957 |
| 0.264346109 | 0.264318126 | 0.277686764 | 0.245917542 |
| 0.217303392 | 0.085041626 | 0.137209327 | 0.192996155 |
| 0.218076122 | 0.239113423 | 0.133089848 | 0.321428661 |
| 0.323538728 | 0.237845143 | 0.192288184 | 0.351090457 |
| 0.215488025 | 0.347103872 | 0.20717282  | 0.308063394 |
| 0.325323364 | 0.30651048  | 0.324906288 | 0.178850769 |
| 0.314095584 | 0.180748144 | 0.050543768 | 0.250542742 |
| 0.3517696   | 0.02328359  | 0.227177878 | 0.251921583 |
| 0.270122299 | 0.216460952 | 0.317751629 | 0.275618998 |
| 0.268771025 | 0.203819489 | 0.007947974 | 0.256831976 |
| 0.297384496 | 0.296004688 | 0.280859261 | 0.111067576 |
| 0.167136412 | 0.153333026 | 0.196984256 | 0.111400805 |
| 0.376176042 | 0.247925861 | 0.237186999 | 0.214455349 |
| 0.120574166 | 0.336065299 | 0.099698957 | 0.285675515 |
| 0.246526533 | 0.210365775 | 0.135850889 | 0.268592906 |
| 0.079990391 | 0.323490814 | 0.147853123 | 0.151508358 |
| 1           | 0.143146766 | 0.083320042 | 0.192230255 |
| 0.149492004 | 0.118056947 | 0.244608332 | 0.206509309 |
| 0.27827284  | 0.287554641 | 0.262714949 | 0.305297833 |
| 0.268408252 | 0.282934815 | 0.15978823  | 0.271306028 |
| 0.142206893 | 0.236482338 | 0.185324911 | 0.335393956 |
| 0.385583303 | 0.137892319 | 0.305014999 | 0.109529853 |
| 0.15488742  | 0.061378776 | 0.063802229 | 0.109963723 |
| 0.275577052 | 0.228491533 | 0.163982716 | 0.225594888 |
| 0.177388625 | 0.17487369  | 0.13895532  | 0.359513741 |
| 0.203198017 | 0.205339402 | 0.278564083 | 0.112197639 |
| 0.063197654 | 0.207382618 | 0.231863903 | 0.199933386 |
| 0.208720403 | 0.094077181 | 0.086252346 | 0.260276405 |
| 0.0944563   | 0.155131553 | 0.25397505  | 0.219239584 |
| 0.123051819 | 0.236484435 | 0.312054865 | 0.020136556 |
| 0.129677438 | 0.166805105 | 0.31091435  | 0.071788665 |
| 0.260065381 | 0.306956669 | 0.158880793 | 0.194765703 |
| 0.170348547 | 0.299790372 | 0.262455385 | 0.284100914 |
| 0.108411432 | 0.316752101 | 0.238338572 | 0.291952161 |
| 0.225707262 | 0.094881431 | 0.050070656 | 0.231423775 |
| 0.247548422 | 0.092480685 | 0.154551123 | 0.178592597 |
| 0.095648792 | 0.178968991 | 0.190443393 | 0.311881471 |
| 0.362769195 | 0.243903551 | 0.330787337 | 0.265446714 |
| 0.298233949 | 0.25265899  | 0.247543224 | 0.333006823 |
| 0.067558101 | 0.146930437 | 0.155329113 | 0.298457652 |
| 0.263135599 | 0.181825835 | 0.303715614 | 0.058746995 |
| 0.002520166 | 0.187587181 | 0.187474891 | 0.327858166 |
| 0.130487176 | 0.110107084 | 0.192751845 | 0.293431807 |
| 0.312092419 | 0.2976344   | 0.248279898 | 0.2029509   |
| 0.269097929 | 0.140209423 | 0.123882136 | 0.169008143 |
| 0.294620058 | 0.13597604  | 0.301857372 | 0.352757891 |
| 0.10509355  | 0.122971235 | 0.174547216 | 0.026270545 |
| 0.198490419 | 0.15905923  | 0.207329299 | 0.325286693 |
| 0.290818398 | 0.28854805  | 0.229776727 | 0.075193058 |
| 0.270565582 | 0.262335587 | 0.048540015 | 0.261611927 |
| 0.272217104 | 0.266148066 | 0.266008937 | 0.272290065 |

|             |             |             |             |
|-------------|-------------|-------------|-------------|
| 0.244947189 | 0.19294869  | 0.232674322 | 0.138027629 |
| 0.27728972  | 0.167367686 | 0.125746235 | 0.233709497 |
| 0.016561403 | 0.278492787 | 0.188028671 | 0.296182841 |
| 0.195801671 | 0.240436923 | 0.221293018 | 0.15204634  |
| 0.123879601 | 0.058993966 | 0.17122988  | 0.256758852 |
| 0.255824168 | 0.133053572 | 0.090797358 | 0.112808693 |
| 0.267918924 | 0.290086135 | 0.094738386 | 0.303247423 |
| 0.231287118 | 0.147541495 | 0.2134686   | 0.238630188 |
| 0.273770502 | 0.034848219 | 0.137234035 | 0.008336759 |
| 0.079530368 | 0.289566866 | 0.120944149 | 0.183962941 |
| 0.260486912 | 0.087897453 | 0.277238231 | 0.318269482 |
| 0.243914717 | 0.291407399 | 0.295701065 | 0.123757129 |
| 0.293702728 | 0.02027971  | 0.284859175 | 0.223650457 |
| 0.081809288 | 0.009828144 | 0.073113908 | 0.251247056 |
| 0.146904109 | 0.124075889 | 0.285508504 | 0.113028128 |
| 0.33490023  | 0.175155346 | 0.247457483 | 0.177695628 |
| 0.152292746 | 0.246613225 | 0.159852347 | 0.266323824 |
| 0.273254541 | 0.283731359 | 0.109117734 | 0.19270176  |
| 0.146016906 | 0.270045469 | 0.183849448 | 0.051062068 |
| 0.233007325 | 0.190675534 | 0.300160385 | 0.278782315 |
| 0.342489488 | 0.208206051 | 0.06087451  | 0.125109028 |
| 0.245825154 | 0.13130719  | 0.087619989 | 0.143236133 |
| 0.252611701 | 0.18291798  | 0.327801457 | 0.30690072  |
| 0.329133416 | 0.308217694 | 0.225492579 | 0.24199646  |
| 0.102877902 | 0.017612201 | 0.124796831 | 0.272493896 |
| 0.044405948 | 0.139442644 | 0.325777127 | 0.155983536 |
| 0.20728259  | 0.173994092 | 0.10551685  | 0.11826458  |
| 0.249694996 | 0.186135016 | 0.172094118 | 0.244608865 |
| 0.201174004 | 0.176000657 | 0.2916761   | 0.292258745 |
| 0.114495538 | 0.263350324 | 0.282755092 | 0.181475621 |
| 0.108477102 | 0.12835546  | 0.245778599 | 0.26388508  |
| 0.270828198 | 0.266062039 | 0.248627834 | 0.152002845 |
| 0.30981821  | 0.184461039 | 0.287610181 | 0.254481422 |
| 0.31828467  | 0.346824787 | 0.354011523 | 0.295673999 |
| 0.253052581 | 0.216875238 | 0.162980692 | 0.276169623 |
| 0.288680892 | 0.127404442 | 0.273838709 | 0.110111182 |
| 0.247801137 | 0.26915361  | 0.263408377 | 0.267034081 |
| 0.123120807 | 0.293224731 | 0.317808808 | 0.16963522  |
| 0.216773086 | 0.111474675 | 0.230886806 | 0.298963845 |
| 0.268034336 | 0.081227703 | 0.281867544 | 0.165516424 |
| 0.228761253 | 0.045952002 | 0.183842888 | 0.368109592 |
| 0.239055375 | 0.210279541 | 0.13967571  | 0.213116068 |
| 0.203209649 | 0.086731751 | 0.127441893 | 0.208990677 |
| 0.294428652 | 0.153730249 | 0.284816205 | 0.325456405 |
| 0.206974147 | 0.152850485 | 0.103902175 | 0.179008086 |
| 0.275583907 | 0.142174231 | 0.255412822 | 0.222078608 |
| 0.328701936 | 0.342960928 | 0.237788149 | 0.330568103 |
| 0.117394769 | 0.137482101 | 0.115627016 | 0.228910379 |
| 0.130183902 | 0.246322659 | 0.078086244 | 0.207120703 |
| 0.019731151 | 0.067432203 | 0.28448742  | 0.272515228 |
| 0.332946384 | 0.279976689 | 0.337331763 | 0.185251982 |
| 0.002124372 | 0.156806219 | 0.204026591 | 0.148436561 |
| 0.228866471 | 0.26118961  | 0.139913283 | 0.328256856 |
| 0.358821627 | 0.149289768 | 0.312780075 | 0.117638845 |



|             |             |             |             |
|-------------|-------------|-------------|-------------|
| 0.06479037  | 0.157834152 | 0.335476    | 0.216061814 |
| 0.288611472 | 0.136132068 | 0.107567946 | 0.263395817 |
| 0.086752846 | 0.352137215 | 0.326219382 | 0.060091727 |
| 0.078306406 | 0.277710582 | 0.218024613 | 0.176752414 |
| 0.126464706 | 0.255104761 | 0.283869672 | 0.028374842 |
| 0.197323753 | 0.144464957 | 0.303037955 | 0.294361492 |
| 0.307329587 | 0.279245522 | 0.261155245 | 0.199066723 |
| 0.18219809  | 0.28184827  | 0.25646446  | 0.303273153 |
| 0.316764854 | 0.24963266  | 0.16109512  | 0.153348345 |
| 0.212531541 | 0.284952293 | 0.209319962 | 0.201829394 |
| 0.267877444 | 0.236315606 | 0.344534685 | 0.154968437 |
| 0.292861728 | 0.146443364 | 0.375197157 | 0.250771324 |
| 0.329551953 | 0.162783766 | 0.185346983 | 0.223235791 |
| 0.044397464 | 0.121503381 | 0.171092262 | 0.145435048 |
| 0.283305272 | 0.188382991 | 0.112836023 | 0.150561828 |
| 0.159737392 | 0.361713986 | 0.331485722 | 0.309745902 |
| 0.178666301 | 0.125814478 | 0.062210317 | 0.32966848  |
| 0.27043798  | 0.233581022 | 0.191490553 | 0.052652008 |
| 0.242852585 | 0.163007018 | 0.237879865 | 0.28236199  |
| 0.08630354  | 0.338388409 | 0.073440369 | 0.256677642 |
| 0.051432383 | 0.206532375 | 0.282790885 | 0.178225139 |
| 0.062306418 | 0.291220666 | 0.211043683 | 0.113160087 |
| 0.198368501 | 0.165635444 | 0.174228895 | 0.22870613  |
| 0.238455699 | 0.20497052  | 0.301547417 | 0.181409947 |
| 0.111016797 | 0.191983405 | 0.100408057 | 0.231597023 |
| 0.274106687 | 0.271396625 | 0.201039358 | 0.27411666  |
| 0.171804607 | 0.231501979 | 0.373534701 | 0.183084776 |
| 0.176057644 | 0.295978487 | 0.068192828 | 0.106756049 |
| 0.249628324 | 0.099758024 | 0.002607594 | 0.060150733 |
| 0.311640933 | 0.109532108 | 0.168608416 | 0.227011111 |
| 0.178306825 | 0.314237442 | 0.055218402 | 0.189988221 |
| 0.250692364 | 0.301543285 | 0.230259661 | 0.336879541 |
| 0.268753461 | 0.318354423 | 0.142094782 | 0.015660713 |
| 0.138875544 | 0.108775451 | 0.090869786 | 0.266346181 |
| 0.182841602 | 0.074570483 | 0.138639966 | 0.128001281 |
| 0.277004527 | 0.056977944 | 0.122655207 | 0.181734452 |
| 0.246734565 | 0.309907351 | 0.322029082 | 0.23683077  |
| 0.120308566 | 0.265802656 | 0.115247415 | 0.112479143 |
| 0.228982814 | 0.140784149 | 0.273080202 | 0.12922167  |
| 0.250731032 | 0.234785869 | 0.024342176 | 0.356446225 |
| 0.274648714 | 0.121059315 | 0.312787067 | 0.056650882 |
| 0.320685117 | 0.268082743 | 0.19055398  | 0.099860513 |
| 0.149600682 | 0.15358863  | 0.292712865 | 0.25357988  |
| 0.061965868 | 0.133560767 | 0.270430513 | 0.142480504 |
| 0.305576791 | 0.160354862 | 0.316525527 | 0.085461159 |
| 0.256478855 | 0.212348753 | 0.177519632 | 0.193456228 |
| 0.124480964 | 0.178909789 | 0.087418355 | 0.313496022 |
| 0.330865708 | 0.141187533 | 0.253994479 | 0.29558026  |
| 0.119298473 | 0.258476965 | 0.105256288 | 0.301016082 |
| 0.307948615 | 0.314073578 | 0.228569858 | 0.26362089  |
| 0.350571816 | 0.155435311 | 0.125334508 | 0.236442956 |
| 0.250687488 | 0.255305444 | 0.136348846 | 0.260314751 |
| 0.10915024  | 0.274099186 | 0.099407627 | 0.245724051 |
| 0.246241801 | 0.26660269  | 0.154035396 | 0.257530409 |

|             |             |             |             |
|-------------|-------------|-------------|-------------|
| 0.251171862 | 0.176743206 | 0.196356709 | 0.362998582 |
| 0.291452654 | 0.185703505 | 0.360019354 | 0.019159218 |
| 0.152407505 | 0.202705489 | 0.273432857 | 0.160728218 |
| 0.2845091   | 0.178512996 | 0.133048967 | 0.038406954 |
| 0.259016019 | 0.063789404 | 0.171813893 | 0.229798848 |
| 0.109055952 | 0.216659563 | 0.293945778 | 0.301892271 |
| 0.220436829 | 0.095370435 | 0.081894499 | 0.278624444 |
| 0.087349914 | 0.06920625  | 0.100564851 | 0.144449315 |
| 0.10167617  | 0.079573532 | 0.098440216 | 0.102101175 |
| 0.228253293 | 0.215466823 |             |             |
| CROT        | 0.064890424 | 0.418048159 | 0.053043196 |
| 0.059581684 | 0.15118669  | 0.169581986 | 0.054667107 |
| 0.092914527 | 0.332844038 | 0.14524858  | 0.175540251 |
| 0.019544111 | 0.042060759 | 0.406707499 | 0.054395244 |
| 0.205969649 | 0.031016402 | 0.075820101 | 0.069123124 |
| 0.124787512 | 0.12945185  | 0.130888558 | 0.215291502 |
| 0.129317325 | 0.228400397 | 0.234640894 | 0.199691108 |
| 0.451671349 | 0.104486447 | 0.274868273 | 0.078150516 |
| 0.390644205 | 0.164846266 | 0.151664539 | 0.019803776 |
| 0.220292525 | 0.010893982 | 0.434931696 | 0.103286076 |
| 0.048757253 | 0.345828359 | 0.159190737 | 0.103452854 |
| 0.167547962 | 0.035728362 | 0.10215526  | 0.265501893 |
| 0.227967707 | 0.150031348 | 0.073770847 | 0.299199968 |
| 0.165656369 | 0.278306969 | 0.320734256 | 0.003204781 |
| 0.111515774 | 0.034195366 | 0.084257737 | 0.483183756 |
| 0.166820277 | 0.080809082 | 0.120323384 | 0.158786746 |
| 0.247716474 | 0.269741985 | 0.211923252 | 0.152030757 |
| 0.455821883 | 0.071719729 | 0.313423809 | 0.07500209  |
| 0.161297786 | 0.04490971  | 0.158267251 | 0.111933414 |
| 0.153451659 | 0.1221217   | 0.173188518 | 0.115889231 |
| 0.408329556 | 0.50541972  | 0.191508653 | 0.489716038 |
| 0.052008669 | 0.171134173 | 0.111432375 | 0.227197682 |
| 0.287095744 | 0.078725871 | 0.283063638 | 0.480097528 |
| 0.061224508 | 0.241990239 | 0.289965069 | 0.15121427  |
| 0.402487996 | 0.131066304 | 0.199243403 | 0.066832608 |
| 0.225628608 | 0.161216228 | 0.488268059 | 0.216165519 |
| 0.149154966 | 0.086409216 | 0.496717581 | 0.153565683 |
| 0.115797975 | 0.075224701 | 0.089223083 | 0.376831384 |
| 0.24347648  | 0.441391297 | 0.379654226 | 0.299659702 |
| 0.171277093 | 0.45302366  | 0.269736324 | 0.411166731 |
| 0.088826535 | 0.494573352 | 0.119236114 | 0.03865099  |
| 0.068932976 | 0.069246615 | 0.118705596 | 0.284052838 |
| 0.403578029 | 0.263712937 | 0.109153938 | 0.106917072 |
| 0.378784246 | 0.483879904 | 0.493231763 | 0.345708707 |
| 0.03939265  | 0.107282765 | 0.167149226 | 0.169804779 |
| 0.266597784 | 0.116001375 | 0.093101564 | 0.498902715 |
| 0.342299261 | 0.341906522 | 0.112341844 | 0.509373849 |
| 0.131607826 | 0.468279556 | 0.408419215 | 0.093287932 |
| 0.491041282 | 0.485062393 | 0.450293786 | 0.251568738 |
| 0.463449175 | 0.160653822 | 0.052137339 | 0.340177066 |
| 0.443595567 | 0.004741172 | 0.417441028 | 0.43629361  |
| 0.468930824 | 0.364398169 | 0.463128973 | 0.457486205 |
| 0.48101111  | 0.08312439  | 0.01916972  | 0.178393466 |
| 0.478908707 | 0.335510561 | 0.096196184 | 0.187717621 |

|             |             |             |             |
|-------------|-------------|-------------|-------------|
| 0.199548935 | 0.192647267 | 0.356872402 | 0.11019038  |
| 0.482298121 | 0.394546388 | 0.442725386 | 0.320083207 |
| 0.199355478 | 0.332402087 | 0.18049621  | 0.474760024 |
| 0.039745738 | 0.081463955 | 0.072955429 | 0.270909353 |
| 0.15189704  | 0.115474342 | 0.168347292 | 0.205948162 |
| 0.143146766 | 1           | 0.130358092 | 0.238850341 |
| 0.101258507 | 0.232653209 | 0.110750753 | 0.11871236  |
| 0.031538312 | 0.192491945 | 0.085905904 | 0.083494852 |
| 0.125150128 | 0.307059387 | 0.31102836  | 0.435596233 |
| 0.15070037  | 0.175514702 | 0.303083541 | 0.435345212 |
| 0.380307613 | 0.170860946 | 0.226784313 | 0.005187668 |
| 0.097896154 | 0.133548425 | 0.072609758 | 0.214189552 |
| 0.248278804 | 0.108306515 | 0.214082263 | 0.262924017 |
| 0.163986024 | 0.12114435  | 0.143588324 | 0.436311316 |
| 0.174272141 | 0.118405998 | 0.365559325 | 0.226962906 |
| 0.004782522 | 0.155397268 | 0.353934854 | 0.066897561 |
| 0.247058893 | 0.051697766 | 0.093419014 | 0.383884729 |
| 0.118123592 | 0.098997617 | 0.440103832 | 0.272550524 |
| 0.153741541 | 0.297765985 | 0.472762763 | 0.023233114 |
| 0.17752001  | 0.023439425 | 0.192076288 | 0.173612647 |
| 0.164118289 | 0.235064078 | 0.156837278 | 0.107824369 |
| 0.134195572 | 0.485363704 | 0.363927953 | 0.455323157 |
| 0.131571755 | 0.476626534 | 0.369217755 | 0.380038299 |
| 0.251233178 | 0.157445974 | 0.051163339 | 0.335126124 |
| 0.375771421 | 0.116559314 | 0.108167099 | 0.356657381 |
| 0.151334252 | 0.257520095 | 0.058400408 | 0.424919472 |
| 0.481916141 | 0.466695891 | 0.085394189 | 0.274874057 |
| 0.305580024 | 0.139324534 | 0.358642734 | 0.488989641 |
| 0.136775937 | 0.151417115 | 0.119807966 | 0.316664199 |
| 0.139730605 | 0.087710833 | 0.337752923 | 0.075403741 |
| 0.003870142 | 0.081303233 | 0.066982132 | 0.082475701 |
| 0.060488381 | 0.267228739 | 0.252594701 | 0.469743782 |
| 0.077966721 | 0.399461328 | 0.232345866 | 0.100742179 |
| 0.389864909 | 0.147224326 | 0.186149467 | 0.235042729 |
| 0.235394807 | 0.010396005 | 0.058354802 | 0.501687906 |
| 0.068749709 | 0.08705713  | 0.184549999 | 0.001958862 |
| 0.044116044 | 0.372847651 | 0.143108683 | 0.240492299 |
| 0.417692532 | 0.240655725 | 0.164986235 | 0.141996849 |
| 0.246585847 | 0.079111676 | 0.001724313 | 0.441404658 |
| 0.475562953 | 0.451911317 | 0.477406434 | 0.476329217 |
| 0.405280146 | 0.338210899 | 0.306637907 | 0.2114184   |
| 0.073274683 | 0.079052567 | 0.067346262 | 0.113932014 |
| 0.005919482 | 0.295810799 | 0.163723586 | 0.135299948 |
| 0.312042112 | 0.232757661 | 0.037950077 | 0.210147378 |
| 0.015983516 | 0.066118853 | 0.159668215 | 0.124507367 |
| 0.263075827 | 0.019015989 | 0.079076892 | 0.116155536 |
| 0.424402684 | 0.336526673 | 0.132233597 | 0.491500519 |
| 0.165300561 | 0.154906364 | 0.115951914 | 0.293377499 |
| 0.057422414 | 0.057888724 | 0.175099887 | 0.01397879  |
| 0.120912892 | 0.467619985 | 0.166869953 | 0.048085228 |
| 0.16263186  | 0.006676619 | 0.338607562 | 0.492822515 |
| 0.459137426 | 0.453896576 | 0.452500847 | 0.095418388 |
| 0.458150764 | 0.04572801  | 0.482211678 | 0.361133169 |
| 0.147349101 | 0.000588014 | 0.006521783 | 0.410269992 |

|             |             |             |             |
|-------------|-------------|-------------|-------------|
| 0.179622221 | 0.104046335 | 0.124984371 | 0.144123617 |
| 0.060798728 | 0.10789995  | 0.065635008 | 0.066900934 |
| 0.264181691 | 0.115739714 | 0.081018361 | 0.464625829 |
| 0.110527929 | 0.154299119 | 0.17513487  | 0.117598202 |
| 0.231397136 | 0.039160771 | 0.118231667 | 0.003344651 |
| 0.260617161 | 0.160150684 | 0.491905238 | 0.475227883 |
| 0.453622199 | 0.248495584 | 0.139077652 | 0.162403055 |
| 0.399040675 | 0.133449434 | 0.152150982 | 0.127407059 |
| 0.452805179 | 0.214940975 | 0.253719229 | 0.271642348 |
| 0.442759788 | 0.431570323 | 0.03582274  | 0.301040101 |
| 0.009676276 | 0.001929925 | 0.176989149 | 0.234220807 |
| 0.054313216 | 0.143314311 | 0.217105441 | 0.140962104 |
| 0.134541787 | 0.029387888 | 0.094901574 | 0.085242193 |
| 0.176680231 | 0.161587268 | 0.115034973 | 0.251585609 |
| 0.109384633 | 0.054821635 | 0.107497435 | 0.103931313 |
| 0.138114632 | 0.304502217 | 0.224716314 | 0.026410867 |
| 0.196029532 | 0.188880118 | 0.049250664 | 0.156578848 |
| 0.358858428 | 0.419920653 | 0.034178349 | 0.006618573 |
| 0.249525671 | 0.144183807 | 0.434831364 | 0.46603454  |
| 0.505319567 | 0.468414833 | 0.403359939 | 0.067087555 |
| 0.058726986 | 0.176100442 | 0.135151563 | 0.051213677 |
| 0.471120264 | 0.089718327 | 0.470200498 | 0.121977698 |
| 0.118500226 | 0.098805677 | 0.027480418 | 0.073855437 |
| 0.201348581 | 0.150569416 | 0.088053201 | 0.135064979 |
| 0.121209696 | 0.094678635 | 0.04828926  | 0.131111936 |
| 0.27891816  | 0.055627219 | 0.127564541 | 0.182480212 |
| 0.323748992 | 0.138704268 | 0.286896066 | 0.41357108  |
| 0.130964901 | 0.095343077 | 0.126432474 | 0.318475903 |
| 0.364213683 | 0.22154007  | 0.018851591 | 0.433172489 |
| 0.448740264 | 0.272414251 | 0.478614908 | 0.339506118 |
| 0.102082098 | 0.157889517 | 0.129980973 | 0.167074557 |
| 0.145302945 | 0.171596951 | 0.148893542 | 0.069000358 |
| 0.316635884 | 0.492473166 | 0.371122246 | 0.084508755 |
| 0.242410522 | 0.140965467 | 0.079693944 | 0.415307664 |
| 0.058923912 | 0.06118566  | 0.166519218 | 0.36934298  |
| 0.000966605 | 0.053205459 | 0.440559178 | 0.126337882 |
| 0.497119869 | 0.404919793 | 0.399474936 | 0.165000491 |
| 0.001052472 | 0.254915861 | 0.204722688 | 0.136447989 |
| 0.393656642 | 0.31844208  | 0.125320565 | 0.045811875 |
| 0.252185219 | 0.110962235 | 0.07017211  | 0.155061844 |
| 0.060895275 | 0.271677973 | 0.177619085 | 0.157761787 |
| 0.097477741 | 0.136759259 | 0.094769719 | 0.121577126 |
| 0.075171603 | 0.208020289 | 0.280918844 | 0.159131494 |
| 0.059735789 | 0.394011398 | 0.319769481 | 0.029589328 |
| 0.172559387 | 0.357077763 | 0.408635249 | 0.001064181 |
| 0.282758323 | 0.008788419 | 0.095668052 | 0.091599931 |
| 0.098932163 | 0.107855803 | 0.159290804 | 0.109723264 |
| 0.243257273 | 0.113762524 | 0.11605402  | 0.160265861 |
| 0.077277167 | 0.135621839 | 0.213782758 | 0.158266633 |
| 0.1048862   | 0.076604326 | 0.15841151  | 0.170560649 |
| 0.039105495 | 0.435120778 | 0.255879879 | 0.106356884 |
| 0.168134303 | 0.16175528  | 0.321357637 | 0.471107534 |
| 0.381703212 | 0.168324295 | 0.157023228 | 0.388432356 |
| 0.116859527 | 0.139236183 | 0.064177255 | 0.205087154 |

|             |             |             |             |
|-------------|-------------|-------------|-------------|
| 0.149254742 | 0.083550712 | 0.20887789  | 0.206437162 |
| 0.320934456 | 0.386552879 | 0.249500702 | 0.414918274 |
| 0.141552692 | 0.177320095 | 0.137517259 | 0.044281092 |
| 0.090180281 | 0.149321144 | 0.113745888 | 0.001993835 |
| 0.236943728 | 0.131886034 | 0.386136202 | 0.464452859 |
| 0.116165231 | 0.368000336 | 0.142185699 | 0.056955096 |
| 0.120761767 | 0.228492983 | 0.140694878 | 0.337896898 |
| 0.078085283 | 0.112040683 | 0.141621317 | 0.168542208 |
| 0.312192003 | 0.317116399 | 0.11479975  | 0.146064446 |
| 0.160550073 | 0.169237279 | 0.481656027 | 0.092024688 |
| 0.233977064 | 0.065411747 | 0.255389396 | 0.113712468 |
| 0.101041444 | 0.464710621 | 0.065427714 | 0.467653521 |
| 0.123770156 | 0.16867373  | 0.475365379 | 0.197103197 |
| 0.153856247 | 0.071942488 | 0.065480117 | 0.185739967 |
| 0.119024086 | 0.129050952 | 0.006505475 | 0.027667224 |
| 0.236033679 | 0.159220557 | 0.346889778 | 0.296754359 |
| 0.096963364 | 0.27424729  | 0.078296505 | 0.156928835 |
| 0.476366647 | 0.503468093 | 0.09698902  | 0.226056066 |
| 0.281925603 | 0.068775009 | 0.276813417 | 0.018516074 |
| 0.231262436 | 0.231203609 | 0.159506218 | 0.053017368 |
| 0.023187536 | 0.068203927 | 0.230653909 | 0.097417077 |
| 0.408632377 | 0.073066558 | 0.26286829  | 0.309662193 |
| 0.199782416 | 0.500254851 | 0.071286202 | 0.273084244 |
| 0.054297771 | 0.205598888 | 0.172390713 | 0.190356165 |
| 0.078370874 | 0.102351563 | 0.259511085 | 0.08097966  |
| 0.029310628 | 0.107439604 | 0.001325179 | 0.408389197 |
| 0.472689172 | 0.131861663 | 0.232974083 | 0.151703481 |
| 0.204830465 | 0.369244266 | 0.114982778 | 0.200395825 |
| 0.008669178 | 0.177738879 | 0.15206907  | 0.370351228 |
| 0.072662773 | 0.211855696 | 0.038899671 | 0.14428258  |
| 0.485826003 | 0.109266192 | 0.270800886 | 0.100960224 |
| 0.466932305 | 0.372422803 | 0.192798201 | 0.113209894 |
| 0.283779839 | 0.087083724 | 0.175064048 | 0.490704174 |
| 0.090213578 | 0.072944031 | 0.341917201 | 0.087361634 |
| 0.119976637 | 0.389860455 | 0.244391425 | 0.498797976 |
| 0.043989128 | 0.187439292 | 0.339832077 | 0.425154394 |
| 0.251908224 | 0.070065201 | 0.086413113 | 0.091422807 |
| 0.440634441 | 0.054224886 | 0.108594152 | 0.280920451 |
| 0.072224214 | 0.232708095 | 0.250122823 | 0.084876479 |
| 0.02863959  | 0.116782974 | 0.161810201 | 0.128204824 |
| 0.174490805 | 0.158195414 | 0.093757142 | 0.359130085 |
| 0.062973318 | 0.013307414 | 0.425380068 | 0.006044311 |
| 0.208377403 | 0.230262372 | 0.171484594 | 0.141009042 |
| 0.19771023  | 0.235010682 | 0.188276838 | 0.001828703 |
| 0.330966307 | 0.019276198 | 0.152003546 | 0.082661095 |
| 0.118791079 | 0.047205061 | 0.440470126 | 0.449382672 |
| 0.248580105 | 0.153890879 | 0.126176833 | 0.44527799  |
| 0.051777936 | 0.13432741  | 0.139027459 | 0.286960365 |
| 0.081668242 | 0.156310929 | 0.164104457 | 0.130859146 |
| 0.298738412 | 0.160073666 |             |             |
| CRYZL1      | 0.012835524 | 0.31457647  | 0.009953614 |
| 0.037017183 | 0.245623212 | 0.157663622 | 0.008790128 |
| 0.027628347 | 0.230535649 | 0.138071871 | 0.207301736 |
| 0.001530659 | 0.184059595 | 0.346984753 | 0.008742232 |

|             |             |             |             |
|-------------|-------------|-------------|-------------|
| 0.292198448 | 0.004926892 | 0.024074726 | 0.03634193  |
| 0.070306143 | 0.196632905 | 0.21578166  | 0.165180731 |
| 0.193437844 | 0.081887665 | 0.162854353 | 0.311505918 |
| 0.399181416 | 0.244850776 | 0.351632801 | 0.099197918 |
| 0.263015789 | 0.277161926 | 0.291596673 | 0.00137799  |
| 0.238210568 | 0.018641493 | 0.264977001 | 0.095661815 |
| 0.150975222 | 0.202992231 | 0.152622492 | 0.082929492 |
| 0.168650992 | 0.004404031 | 0.15159121  | 0.332613001 |
| 0.172150957 | 0.106372713 | 0.013397111 | 0.310047697 |
| 0.150599475 | 0.193658668 | 0.275185273 | 0.000567643 |
| 0.264603412 | 0.21742013  | 0.251072911 | 0.369595667 |
| 0.088190703 | 0.03474756  | 0.188454661 | 0.096395464 |
| 0.279251368 | 0.289684534 | 0.143823085 | 0.142324593 |
| 0.371256158 | 0.194191808 | 0.38178367  | 0.058587762 |
| 0.14404601  | 0.003579607 | 0.062197017 | 0.023085195 |
| 0.1808232   | 0.085452374 | 0.237650379 | 0.208128394 |
| 0.301505261 | 0.354144863 | 0.109236076 | 0.339905661 |
| 0.098236924 | 0.302730665 | 0.160464266 | 0.196216305 |
| 0.252864468 | 0.016251437 | 0.295686933 | 0.372071045 |
| 0.007386239 | 0.233486539 | 0.267089548 | 0.039713122 |
| 0.327229489 | 0.220106642 | 0.217333625 | 0.195081177 |
| 0.339140207 | 0.238970766 | 0.325329177 | 0.150480607 |
| 0.222812709 | 0.016557003 | 0.312558836 | 0.3163054   |
| 0.134317836 | 0.018701834 | 0.110469958 | 0.432469533 |
| 0.266320042 | 0.393457769 | 0.327533674 | 0.242676408 |
| 0.269491577 | 0.382450371 | 0.261969787 | 0.313936561 |
| 0.148988498 | 0.394094689 | 0.062239546 | 0.007282003 |
| 0.011615522 | 0.021578129 | 0.131899985 | 0.18790617  |
| 0.408884284 | 0.194785827 | 0.050361739 | 0.103963587 |
| 0.4082813   | 0.319259048 | 0.391165883 | 0.303292397 |
| 0.004795739 | 0.211443171 | 0.25710006  | 0.094616664 |
| 0.249474215 | 0.034334562 | 0.22130886  | 0.333362538 |
| 0.24623929  | 0.375968465 | 0.03656481  | 0.319650115 |
| 0.060802451 | 0.377712991 | 0.350194456 | 0.052488456 |
| 0.35684288  | 0.327187998 | 0.401474683 | 0.394827098 |
| 0.328120382 | 0.137885107 | 0.033702372 | 0.263720409 |
| 0.372764214 | 0.01805214  | 0.424720753 | 0.434590586 |
| 0.359453179 | 0.418053244 | 0.420163354 | 0.427879451 |
| 0.370499869 | 0.016828815 | 0.028717466 | 0.187682556 |
| 0.349056326 | 0.270602614 | 0.049678431 | 0.274550084 |
| 0.288277579 | 0.16280575  | 0.379940631 | 0.15362604  |
| 0.368088551 | 0.373688869 | 0.419058981 | 0.267973239 |
| 0.139991127 | 0.181001728 | 0.335378854 | 0.298195362 |
| 0.007104563 | 0.022850971 | 0.01171557  | 0.191095416 |
| 0.139698543 | 0.069969428 | 0.126085341 | 0.250119816 |
| 0.083320042 | 0.130358092 | 1           | 0.355914967 |
| 0.014311117 | 0.282069829 | 0.049446725 | 0.047741232 |
| 0.00609097  | 0.056347111 | 0.050353933 | 0.048257406 |
| 0.130512765 | 0.104185035 | 0.369050057 | 0.40390469  |
| 0.176663854 | 0.071405591 | 0.297442789 | 0.362241961 |
| 0.302252101 | 0.294496521 | 0.112922924 | 0.001771075 |
| 0.105590307 | 0.195882102 | 0.223707402 | 0.329637738 |
| 0.075548761 | 0.074156237 | 0.250317994 | 0.36659187  |
| 0.098950078 | 0.037055153 | 0.162557234 | 0.269526559 |

|             |             |             |             |
|-------------|-------------|-------------|-------------|
| 0.055644231 | 0.147736023 | 0.358221773 | 0.236857261 |
| 0.000464035 | 0.130710836 | 0.363917093 | 0.082002262 |
| 0.167974441 | 0.142775456 | 0.240260711 | 0.370092298 |
| 0.212186248 | 0.154115156 | 0.434551852 | 0.3705565   |
| 0.157339529 | 0.103148233 | 0.418927396 | 0.066530085 |
| 0.256088301 | 0.02669049  | 0.173793505 | 0.170719682 |
| 0.102830153 | 0.178023412 | 0.285115067 | 0.148509079 |
| 0.04297272  | 0.379306806 | 0.288057179 | 0.408545331 |
| 0.174138803 | 0.409223076 | 0.399849087 | 0.338005442 |
| 0.217391299 | 0.238668661 | 0.210763869 | 0.337546604 |
| 0.373974471 | 0.131705211 | 0.020336415 | 0.402061868 |
| 0.171777013 | 0.346847389 | 0.07228624  | 0.378069864 |
| 0.336657744 | 0.316510722 | 0.044122819 | 0.311569727 |
| 0.258700144 | 0.086621872 | 0.340206956 | 0.411314537 |
| 0.133866975 | 0.217423339 | 0.152558916 | 0.342894283 |
| 0.063007499 | 0.124367515 | 0.197116289 | 0.247938466 |
| 0.039356944 | 0.017390341 | 0.013157003 | 0.060619486 |
| 0.156737863 | 0.334727171 | 0.291425404 | 0.394335243 |
| 0.029250199 | 0.307344584 | 0.119929217 | 0.107683814 |
| 0.275201795 | 0.216712985 | 0.341333758 | 0.321275902 |
| 0.124780563 | 0.003375215 | 0.032828453 | 0.345688192 |
| 0.007548518 | 0.199913962 | 0.134470802 | 0.000669853 |
| 0.005543447 | 0.320258018 | 0.030991016 | 0.083995422 |
| 0.427049236 | 0.086191652 | 0.077338076 | 0.118263599 |
| 0.249551525 | 0.022949906 | 0.001150675 | 0.386889117 |
| 0.37064485  | 0.344552009 | 0.364425879 | 0.317535336 |
| 0.351617296 | 0.333328032 | 0.340037388 | 0.161133691 |
| 0.020545989 | 0.015571346 | 0.138510239 | 0.120819569 |
| 0.00126917  | 0.301532529 | 0.202453059 | 0.050390303 |
| 0.381808457 | 0.166733345 | 0.005143754 | 0.308443366 |
| 0.002420131 | 0.22348352  | 0.094365835 | 0.081260263 |
| 0.298806991 | 0.001021858 | 0.096716733 | 0.161898401 |
| 0.279995568 | 0.205170101 | 0.228797028 | 0.39420451  |
| 0.174335916 | 0.043902629 | 0.149938551 | 0.344423093 |
| 0.011563966 | 0.05471727  | 0.123768118 | 0.022428883 |
| 0.136399613 | 0.322966035 | 0.187745232 | 0.010896823 |
| 0.118560114 | 0.000251713 | 0.223472893 | 0.3942713   |
| 0.325071126 | 0.422634308 | 0.382739253 | 0.217220678 |
| 0.370400902 | 0.230216526 | 0.417824656 | 0.27576621  |
| 0.160841088 | 1.11E-05    | 0.001272468 | 0.41945808  |
| 0.25735888  | 0.015845513 | 0.053808721 | 0.141708637 |
| 0.025419806 | 0.03230433  | 0.012407858 | 0.127022442 |
| 0.300242369 | 0.156740356 | 0.148966376 | 0.317121122 |
| 0.084617316 | 0.110334225 | 0.158085459 | 0.024942349 |
| 0.320407784 | 0.008367808 | 0.024589943 | 0.003340617 |
| 0.306175504 | 0.039987425 | 0.289431894 | 0.384489353 |
| 0.356256825 | 0.331448338 | 0.171024924 | 0.168047262 |
| 0.377228236 | 0.031580286 | 0.222242009 | 0.033270288 |
| 0.349168636 | 0.271100274 | 0.194809684 | 0.167573801 |
| 0.376296226 | 0.32463508  | 0.003937068 | 0.305540138 |
| 0.002418837 | 0.001638861 | 0.15005365  | 0.139984002 |
| 0.061722172 | 0.209087565 | 0.12682576  | 0.083850956 |
| 0.094020293 | 0.004273714 | 0.198719553 | 0.175800508 |
| 0.159495981 | 0.185861981 | 0.2192193   | 0.130232235 |

|             |             |             |             |
|-------------|-------------|-------------|-------------|
| 0.127249781 | 0.074391174 | 0.071704629 | 0.042403569 |
| 0.120179155 | 0.169561421 | 0.083161941 | 0.001872111 |
| 0.245973583 | 0.280573638 | 0.009628922 | 0.05888139  |
| 0.348069526 | 0.406285233 | 0.005894402 | 0.00142721  |
| 0.133669184 | 0.144292217 | 0.425367833 | 0.378040919 |
| 0.361901297 | 0.383253701 | 0.238745101 | 0.042803231 |
| 0.011770599 | 0.190729927 | 0.247824832 | 0.044675951 |
| 0.397763722 | 0.01473698  | 0.356490016 | 0.297786935 |
| 0.035357718 | 0.05755281  | 0.005965594 | 0.019379673 |
| 0.362997568 | 0.069661124 | 0.075442302 | 0.047903962 |
| 0.125640212 | 0.21003832  | 0.006529857 | 0.071329902 |
| 0.203605669 | 0.151556886 | 0.053960113 | 0.106433581 |
| 0.231643033 | 0.114568936 | 0.361508048 | 0.30279843  |
| 0.042193131 | 0.027267616 | 0.070243642 | 0.312495474 |
| 0.36825897  | 0.278423621 | 0.007435052 | 0.335376721 |
| 0.404162963 | 0.346844548 | 0.355842899 | 0.297991607 |
| 0.022376605 | 0.251848853 | 0.213836117 | 0.208096188 |
| 0.070562645 | 0.166562486 | 0.104975362 | 0.013002739 |
| 0.18226759  | 0.318043559 | 0.287942186 | 0.053416467 |
| 0.29883732  | 0.039056073 | 0.011736573 | 0.382343812 |
| 0.130631661 | 0.016136039 | 0.168875545 | 0.395679785 |
| 0.000834661 | 0.205827735 | 0.411259605 | 0.086648512 |
| 0.377609853 | 0.388877645 | 0.295550911 | 0.089064941 |
| 0.003191263 | 0.359075575 | 0.238608094 | 0.167725572 |
| 0.306696003 | 0.217587282 | 0.066431087 | 0.015876981 |
| 0.171466595 | 0.023522624 | 0.034365819 | 0.1388996   |
| 0.127480644 | 0.239998523 | 0.090536345 | 0.080819382 |
| 0.078924625 | 0.027826172 | 0.224665985 | 0.081759934 |
| 0.134468374 | 0.120792798 | 0.227524151 | 0.134833309 |
| 0.139636075 | 0.343450406 | 0.272312217 | 0.002977325 |
| 0.312698303 | 0.315542559 | 0.348934665 | 0.000512422 |
| 0.352102128 | 0.000327339 | 0.086707506 | 0.090716607 |
| 0.074907645 | 0.078127231 | 0.164955586 | 0.137978484 |
| 0.191103232 | 0.069884015 | 0.097500343 | 0.114277602 |
| 0.057591877 | 0.079119817 | 0.279642807 | 0.138158701 |
| 0.131686416 | 0.027403551 | 0.03441827  | 0.035657935 |
| 0.011238371 | 0.385481541 | 0.122506411 | 0.021137828 |
| 0.111732221 | 0.138992034 | 0.226705712 | 0.358008304 |
| 0.326061811 | 0.041694566 | 0.147768901 | 0.332886285 |
| 0.157396889 | 0.119170487 | 0.009449059 | 0.199625733 |
| 0.092916825 | 0.125403247 | 0.225686803 | 0.12995237  |
| 0.290716505 | 0.247441418 | 0.119609498 | 0.322785776 |
| 0.168104791 | 0.183759078 | 0.123872768 | 0.022617299 |
| 0.04385102  | 0.044496613 | 0.201839162 | 0.001045095 |
| 0.206926945 | 0.071369472 | 0.395726539 | 0.333201728 |
| 0.246965928 | 0.268654382 | 0.121316638 | 0.015085173 |
| 0.118455929 | 0.074538822 | 0.04880704  | 0.361108331 |
| 0.248312861 | 0.052224782 | 0.194819247 | 0.105581066 |
| 0.365668929 | 0.344257341 | 0.143976671 | 0.079435958 |
| 0.108815136 | 0.07636556  | 0.319615775 | 0.026719125 |
| 0.295273372 | 0.118505505 | 0.211014059 | 0.133150266 |
| 0.091818204 | 0.420492516 | 0.012337147 | 0.428730483 |
| 0.161111758 | 0.048659246 | 0.336816941 | 0.14278394  |
| 0.103163479 | 0.054159934 | 0.223825563 | 0.145203438 |



|             |             |             |             |
|-------------|-------------|-------------|-------------|
| 0.074281201 | 0.247316186 | 0.016243915 | 0.044934578 |
| 0.21479226  | 0.135878418 | 0.293579337 | 0.26372809  |
| 0.146651272 | 0.245003416 | 0.261930006 | 0.098852561 |
| 0.32858824  | 0.326855259 | 0.077568017 | 0.128519232 |
| 0.208805098 | 0.022560728 | 0.233207336 | 0.013026598 |
| 0.301550598 | 0.348956597 | 0.17234613  | 0.008887136 |
| 0.001701073 | 0.200371933 | 0.25618399  | 0.016089226 |
| 0.416046396 | 0.253879256 | 0.224146651 | 0.357428653 |
| 0.07329225  | 0.32057432  | 0.043926997 | 0.31677951  |
| 0.00708646  | 0.12878538  | 0.288399112 | 0.224589385 |
| 0.10043985  | 0.198195155 | 0.268580537 | 0.187464485 |
| 0.004013291 | 0.118129454 | 0.000983544 | 0.237280103 |
| 0.297321158 | 0.236851186 | 0.093969955 | 0.166431925 |
| 0.169035767 | 0.281558153 | 0.113681673 | 0.28668559  |
| 0.001345891 | 0.294835627 | 0.085599495 | 0.294903638 |
| 0.152802393 | 0.201247839 | 0.012966923 | 0.229536327 |
| 0.273518865 | 0.114807576 | 0.138249648 | 0.145478905 |
| 0.360692817 | 0.288615487 | 0.065098236 | 0.134793401 |
| 0.273209534 | 0.015017313 | 0.166676965 | 0.39907067  |
| 0.063665877 | 0.162059121 | 0.398199857 | 0.056744817 |
| 0.245318114 | 0.268201567 | 0.299385614 | 0.390939351 |
| 0.023462944 | 0.119767517 | 0.36836114  | 0.338556608 |
| 0.197414216 | 0.132021989 | 0.183630523 | 0.099937079 |
| 0.309783192 | 0.024219052 | 0.161597681 | 0.206554822 |
| 0.16805641  | 0.192406257 | 0.198571078 | 0.09934744  |
| 0.007841646 | 0.05149997  | 0.165242656 | 0.04694623  |
| 0.149192791 | 0.209156668 | 0.121695569 | 0.255421663 |
| 0.051187303 | 0.004424127 | 0.313093821 | 0.026283894 |
| 0.157660752 | 0.297669995 | 0.11337293  | 0.219746307 |
| 0.07911101  | 0.185643512 | 0.129166638 | 0.001010549 |
| 0.329735274 | 0.040437947 | 0.15060524  | 0.105474539 |
| 0.185523292 | 0.006788812 | 0.322744531 | 0.425446216 |
| 0.1751887   | 0.200933321 | 0.223865398 | 0.337359028 |
| 0.157902651 | 0.243923225 | 0.204907698 | 0.264280728 |
| 0.215531979 | 0.192166899 | 0.232577831 | 0.230251084 |
| 0.251687455 | 0.094070301 |             |             |
| CSRP1       | 0.060950172 | 0.335811812 | 0.036455094 |
| 0.144457034 | 0.361184578 | 0.295126616 | 0.056560906 |
| 0.122121754 | 0.258526784 | 0.200969301 | 0.331767349 |
| 0.018872706 | 0.222378692 | 0.412211763 | 0.057116509 |
| 0.365079187 | 0.044957096 | 0.105864113 | 0.09023761  |
| 0.185424157 | 0.347030385 | 0.364756685 | 0.24429381  |
| 0.343531247 | 0.141543489 | 0.225602668 | 0.341228624 |
| 0.429826632 | 0.271158859 | 0.342096299 | 0.141079485 |
| 0.362740263 | 0.373101104 | 0.35282025  | 0.012971801 |
| 0.327474822 | 0.036424908 | 0.356725628 | 0.29594144  |
| 0.263694716 | 0.293073266 | 0.205309701 | 0.258446037 |
| 0.255169231 | 0.029908114 | 0.148101803 | 0.333939452 |
| 0.230021206 | 0.257545815 | 0.041071992 | 0.322086237 |
| 0.303326845 | 0.248887088 | 0.264003989 | 0.003553525 |
| 0.371463205 | 0.185780903 | 0.318522983 | 0.41729504  |
| 0.177396008 | 0.140573434 | 0.269110511 | 0.195982274 |
| 0.309095258 | 0.320617847 | 0.228317433 | 0.271362633 |
| 0.433439033 | 0.318433826 | 0.358499966 | 0.163671292 |

|             |             |             |             |
|-------------|-------------|-------------|-------------|
| 0.285426657 | 0.022714214 | 0.130794186 | 0.052437211 |
| 0.335433437 | 0.217149296 | 0.348220043 | 0.367405777 |
| 0.328590115 | 0.434697788 | 0.200374586 | 0.394731274 |
| 0.194868916 | 0.375676193 | 0.34809997  | 0.2859875   |
| 0.301843989 | 0.076632875 | 0.358878603 | 0.45361043  |
| 0.037672298 | 0.243844074 | 0.311937375 | 0.08191366  |
| 0.35088321  | 0.318071167 | 0.258219334 | 0.320631001 |
| 0.36617308  | 0.362587275 | 0.384895156 | 0.24583532  |
| 0.344067032 | 0.047097669 | 0.369195576 | 0.380705572 |
| 0.331257445 | 0.060388435 | 0.314709325 | 0.433868007 |
| 0.325266089 | 0.432816866 | 0.348656277 | 0.320666187 |
| 0.370814335 | 0.436864297 | 0.321467366 | 0.35701034  |
| 0.126396909 | 0.442301914 | 0.159414096 | 0.054490993 |
| 0.049680911 | 0.10621946  | 0.278700516 | 0.272838206 |
| 0.429958448 | 0.265238024 | 0.175102947 | 0.268914046 |
| 0.455197615 | 0.364273857 | 0.436518254 | 0.366970264 |
| 0.036614485 | 0.32374924  | 0.365114674 | 0.221937256 |
| 0.309575054 | 0.096497555 | 0.366995935 | 0.406890686 |
| 0.338132368 | 0.417881054 | 0.122944232 | 0.401653716 |
| 0.17734919  | 0.461455089 | 0.366796199 | 0.169488545 |
| 0.43109034  | 0.39283136  | 0.474954491 | 0.387288119 |
| 0.392648683 | 0.261908374 | 0.069708925 | 0.328657262 |
| 0.454256195 | 0.037042328 | 0.433667759 | 0.461922677 |
| 0.410419373 | 0.435859917 | 0.48580101  | 0.461832242 |
| 0.412761036 | 0.057706785 | 0.042060056 | 0.309266475 |
| 0.416141351 | 0.355337838 | 0.175803859 | 0.343852233 |
| 0.360856511 | 0.282074874 | 0.372607435 | 0.314047056 |
| 0.461760323 | 0.409190786 | 0.433610885 | 0.32150147  |
| 0.210350541 | 0.268370788 | 0.35809624  | 0.356453409 |
| 0.049559625 | 0.091204895 | 0.033340097 | 0.25986353  |
| 0.22843411  | 0.189926945 | 0.273653713 | 0.32539284  |
| 0.192230255 | 0.238850341 | 0.355914967 | 1           |
| 0.032898501 | 0.320609029 | 0.138005767 | 0.132050413 |
| 0.053258472 | 0.108913104 | 0.205885218 | 0.17045262  |
| 0.295362125 | 0.165907953 | 0.350669502 | 0.445488048 |
| 0.32338217  | 0.124934009 | 0.324264043 | 0.44116541  |
| 0.413819654 | 0.37888743  | 0.185740954 | 0.018269824 |
| 0.310676729 | 0.271570148 | 0.31685216  | 0.348412783 |
| 0.128398087 | 0.256807192 | 0.339637207 | 0.397064034 |
| 0.200583102 | 0.104754968 | 0.355594826 | 0.358762534 |
| 0.096346666 | 0.342437302 | 0.430782655 | 0.289333468 |
| 0.002594746 | 0.276936404 | 0.402281011 | 0.24291984  |
| 0.240131371 | 0.254826624 | 0.340420144 | 0.42835718  |
| 0.34964223  | 0.327132591 | 0.449540732 | 0.388513146 |
| 0.286960129 | 0.153554773 | 0.477614918 | 0.099665165 |
| 0.334875607 | 0.110163607 | 0.281527229 | 0.212163596 |
| 0.217642553 | 0.270362807 | 0.372042683 | 0.354308179 |
| 0.085026931 | 0.438629141 | 0.338659117 | 0.456248283 |
| 0.345012648 | 0.475230779 | 0.431999477 | 0.407916489 |
| 0.287709999 | 0.324712884 | 0.266696388 | 0.392982016 |
| 0.422166635 | 0.271543932 | 0.044252321 | 0.387175841 |
| 0.283777639 | 0.366958534 | 0.212218457 | 0.455897308 |
| 0.423161776 | 0.356334321 | 0.180219594 | 0.38141924  |
| 0.348741599 | 0.198251612 | 0.374827905 | 0.478290083 |

|             |             |             |             |
|-------------|-------------|-------------|-------------|
| 0.23132098  | 0.355221207 | 0.362869668 | 0.418020267 |
| 0.145352442 | 0.308432729 | 0.269492554 | 0.303275267 |
| 0.02415702  | 0.061597923 | 0.050188449 | 0.212330358 |
| 0.317192249 | 0.301781634 | 0.338076258 | 0.45402891  |
| 0.120809485 | 0.365926652 | 0.181843569 | 0.320812652 |
| 0.352289358 | 0.347990269 | 0.373638241 | 0.360045192 |
| 0.198559741 | 0.025101808 | 0.140351939 | 0.433148251 |
| 0.023103692 | 0.359804704 | 0.245167403 | 0.004706157 |
| 0.038556244 | 0.309957626 | 0.064061861 | 0.151234468 |
| 0.469767453 | 0.148484742 | 0.155798811 | 0.225114323 |
| 0.31486789  | 0.083132185 | 0.007633314 | 0.427390249 |
| 0.409364849 | 0.386501833 | 0.403105467 | 0.361231675 |
| 0.392655371 | 0.331740907 | 0.39102052  | 0.236297456 |
| 0.104437976 | 0.065166138 | 0.326405224 | 0.307334365 |
| 0.004636599 | 0.360387083 | 0.322570564 | 0.118796527 |
| 0.385801608 | 0.252406399 | 0.037124439 | 0.352741676 |
| 0.020159333 | 0.310930317 | 0.24584084  | 0.235340461 |
| 0.352433081 | 0.011779493 | 0.208439918 | 0.345080646 |
| 0.338316988 | 0.283693573 | 0.361801941 | 0.450223296 |
| 0.314478768 | 0.073134608 | 0.33054414  | 0.372616457 |
| 0.072987139 | 0.111700595 | 0.261253346 | 0.0288632   |
| 0.181589727 | 0.372939572 | 0.34287436  | 0.05863414  |
| 0.243190282 | 0.004390633 | 0.298101564 | 0.458214468 |
| 0.360714849 | 0.478000965 | 0.440603144 | 0.37170439  |
| 0.432372656 | 0.197606683 | 0.461259517 | 0.324294279 |
| 0.274747811 | 0.001031535 | 0.009429447 | 0.452423793 |
| 0.364707305 | 0.031318007 | 0.140740196 | 0.268507789 |
| 0.132555864 | 0.105857423 | 0.065278069 | 0.313316977 |
| 0.3168908   | 0.312111381 | 0.305394785 | 0.372930668 |
| 0.244828824 | 0.235577093 | 0.266203334 | 0.058812026 |
| 0.356543195 | 0.056784527 | 0.05960433  | 0.015268806 |
| 0.34614361  | 0.074733593 | 0.354119495 | 0.429212249 |
| 0.442836695 | 0.36712855  | 0.246388988 | 0.287883968 |
| 0.398940316 | 0.053776653 | 0.326828617 | 0.068548185 |
| 0.392894885 | 0.353613361 | 0.294077335 | 0.256367604 |
| 0.462920255 | 0.405755518 | 0.033541947 | 0.375895591 |
| 0.014659142 | 0.005359507 | 0.249931123 | 0.216081967 |
| 0.092935176 | 0.355404265 | 0.215617026 | 0.205423251 |
| 0.232403575 | 0.030012452 | 0.359190123 | 0.357176526 |
| 0.285699619 | 0.342778863 | 0.36570968  | 0.187494953 |
| 0.31973103  | 0.242685718 | 0.223777183 | 0.164790809 |
| 0.23061916  | 0.242833418 | 0.145546086 | 0.020246577 |
| 0.31241633  | 0.365643026 | 0.053618422 | 0.124697295 |
| 0.411460147 | 0.453445161 | 0.050725057 | 0.019769629 |
| 0.216295858 | 0.319000483 | 0.473875461 | 0.411596488 |
| 0.429427241 | 0.469486397 | 0.330969744 | 0.187956795 |
| 0.064449121 | 0.312882524 | 0.368512329 | 0.176174428 |
| 0.445957475 | 0.040446457 | 0.395371693 | 0.376126869 |
| 0.0969126   | 0.207043673 | 0.046814768 | 0.080131513 |
| 0.376565182 | 0.160110603 | 0.22744215  | 0.097565842 |
| 0.326882967 | 0.367246446 | 0.046175007 | 0.18721933  |
| 0.292289969 | 0.30443647  | 0.144313999 | 0.238002759 |
| 0.279189384 | 0.153324824 | 0.380536128 | 0.405145949 |
| 0.098117098 | 0.088900566 | 0.198225165 | 0.331991751 |

|             |             |             |             |
|-------------|-------------|-------------|-------------|
| 0.38857262  | 0.280852049 | 0.029621252 | 0.354137524 |
| 0.450873454 | 0.343458039 | 0.406212135 | 0.390580809 |
| 0.062543908 | 0.373191474 | 0.341437134 | 0.340692604 |
| 0.170836286 | 0.282943513 | 0.239169071 | 0.052490364 |
| 0.260338373 | 0.39485712  | 0.348187736 | 0.189289602 |
| 0.314604227 | 0.078348497 | 0.033856539 | 0.388096666 |
| 0.317329    | 0.085160892 | 0.22564379  | 0.396354715 |
| 0.005397058 | 0.288071178 | 0.454955874 | 0.244638495 |
| 0.445423808 | 0.450251706 | 0.387385957 | 0.211085325 |
| 0.008814629 | 0.357292356 | 0.341766547 | 0.349414386 |
| 0.356239574 | 0.277216442 | 0.13891522  | 0.097403923 |
| 0.265477839 | 0.048374073 | 0.170477815 | 0.254478937 |
| 0.240549632 | 0.287092878 | 0.174844446 | 0.171899151 |
| 0.246083514 | 0.053204534 | 0.352079978 | 0.223412373 |
| 0.240229331 | 0.21199113  | 0.327056606 | 0.186881656 |
| 0.284306346 | 0.406109711 | 0.336533615 | 0.023179023 |
| 0.369549962 | 0.369285483 | 0.39351209  | 0.003714484 |
| 0.381815546 | 0.00922777  | 0.249665813 | 0.263842744 |
| 0.241059415 | 0.246745689 | 0.293191734 | 0.341922729 |
| 0.271307638 | 0.222165622 | 0.28058262  | 0.228971845 |
| 0.209604558 | 0.200001275 | 0.351280652 | 0.270608043 |
| 0.336816943 | 0.118327543 | 0.067172294 | 0.066688441 |
| 0.064694748 | 0.396768418 | 0.203359572 | 0.043943432 |
| 0.224414619 | 0.289030247 | 0.332949377 | 0.394256831 |
| 0.398443454 | 0.068921868 | 0.305643806 | 0.367833283 |
| 0.212672851 | 0.242772177 | 0.048280115 | 0.286896308 |
| 0.218375065 | 0.319755719 | 0.281579477 | 0.208329391 |
| 0.302251103 | 0.3422114   | 0.195811248 | 0.388400896 |
| 0.342783833 | 0.28504177  | 0.20168596  | 0.12100819  |
| 0.159564188 | 0.094857098 | 0.352080039 | 0.001969826 |
| 0.295993908 | 0.196628597 | 0.431238977 | 0.390974243 |
| 0.357992032 | 0.347745006 | 0.206872889 | 0.085859078 |
| 0.174426743 | 0.12128598  | 0.113442412 | 0.356498354 |
| 0.326213734 | 0.1798957   | 0.343490294 | 0.214369896 |
| 0.384565402 | 0.341309055 | 0.312155935 | 0.213309907 |
| 0.222607587 | 0.139285361 | 0.381937074 | 0.087462139 |
| 0.319456173 | 0.308734083 | 0.219605917 | 0.321086807 |
| 0.271547426 | 0.454589172 | 0.047973901 | 0.467207643 |
| 0.342757213 | 0.089832544 | 0.427608594 | 0.235331424 |
| 0.23948404  | 0.178411101 | 0.322599076 | 0.266735508 |
| 0.2289992   | 0.369237779 | 0.015895639 | 0.117638261 |
| 0.308194075 | 0.253489634 | 0.311734336 | 0.311953869 |
| 0.338520593 | 0.33439816  | 0.284667494 | 0.228090091 |
| 0.368029515 | 0.386103756 | 0.268900008 | 0.218625505 |
| 0.287277619 | 0.110185834 | 0.257293748 | 0.025384054 |
| 0.343654629 | 0.33903496  | 0.294190879 | 0.057717329 |
| 0.020208583 | 0.332221669 | 0.320255634 | 0.04180507  |
| 0.466133261 | 0.31481454  | 0.241385291 | 0.353004275 |
| 0.127172328 | 0.388768937 | 0.179836192 | 0.370649759 |
| 0.03544554  | 0.215163454 | 0.350825918 | 0.300838568 |
| 0.301575335 | 0.374768912 | 0.354616198 | 0.358024229 |
| 0.037898574 | 0.311970081 | 0.003294191 | 0.332106627 |
| 0.355433861 | 0.362975084 | 0.16164817  | 0.216770673 |
| 0.263860234 | 0.329273951 | 0.290105995 | 0.321644265 |

|             |             |             |             |
|-------------|-------------|-------------|-------------|
| 0.016391099 | 0.378409079 | 0.190623859 | 0.344450832 |
| 0.266423538 | 0.28470632  | 0.075387506 | 0.348151804 |
| 0.339869097 | 0.310272842 | 0.21458698  | 0.300148812 |
| 0.396609293 | 0.308340814 | 0.100997436 | 0.289163502 |
| 0.264639048 | 0.044993568 | 0.258935785 | 0.460169814 |
| 0.213967094 | 0.347641117 | 0.445343611 | 0.231221828 |
| 0.369640658 | 0.316824789 | 0.29594412  | 0.442413012 |
| 0.129514798 | 0.223357654 | 0.393462594 | 0.395745732 |
| 0.292672891 | 0.304114982 | 0.358382046 | 0.303129285 |
| 0.35663461  | 0.10040502  | 0.344541957 | 0.287636413 |
| 0.341814876 | 0.276950257 | 0.207769864 | 0.285144569 |
| 0.049894931 | 0.176862969 | 0.313721195 | 0.117166504 |
| 0.285915135 | 0.348145952 | 0.323913614 | 0.353271789 |
| 0.181516443 | 0.037945013 | 0.406195878 | 0.059198981 |
| 0.230458774 | 0.352664963 | 0.223258443 | 0.367598972 |
| 0.139580317 | 0.274122092 | 0.226646748 | 0.000998508 |
| 0.384743223 | 0.090611564 | 0.303591235 | 0.311550983 |
| 0.327507004 | 0.045307516 | 0.378860581 | 0.482006266 |
| 0.239980497 | 0.288912941 | 0.332393513 | 0.386351473 |
| 0.290665971 | 0.321430599 | 0.338449732 | 0.273289802 |
| 0.351800133 | 0.267340556 | 0.325457958 | 0.360850693 |
| 0.297599631 | 0.225889512 |             |             |
| CST7        | 0.294431974 | 0.123671727 | 0.308185087 |
| 0.109073491 | 0.031763278 | 0.055725868 | 0.291964705 |
| 0.220313349 | 0.122041252 | 0.036830179 | 0.053102922 |
| 0.277316093 | 0.002848959 | 0.10630387  | 0.274510977 |
| 0.033008138 | 0.227564339 | 0.236987512 | 0.045856977 |
| 0.106673289 | 0.034108073 | 0.021708049 | 0.087742517 |
| 0.036415708 | 0.301721202 | 0.111429661 | 0.026853497 |
| 0.107377668 | 0.009571278 | 0.041361882 | 0.018623282 |
| 0.172650391 | 0.028408912 | 0.020126601 | 0.295216837 |
| 0.05236979  | 0.004293257 | 0.215246716 | 0.059573744 |
| 0.006956672 | 0.19480884  | 0.054314536 | 0.081763812 |
| 0.051523965 | 0.31679344  | 0.01659645  | 0.038325735 |
| 0.098950744 | 0.087206988 | 0.334176531 | 0.057422772 |
| 0.047853564 | 0.114372783 | 0.073828305 | 0.020331913 |
| 0.011883683 | 0.000644642 | 0.005851388 | 0.147838614 |
| 0.171909026 | 0.173262282 | 0.014258769 | 0.126873703 |
| 0.047219147 | 0.05455677  | 0.123923196 | 0.042072486 |
| 0.126259375 | 0.007202524 | 0.043818659 | 0.069653766 |
| 0.072090415 | 0.343129838 | 0.22661826  | 0.305813919 |
| 0.035428343 | 0.116906705 | 0.042836742 | 0.017354517 |
| 0.125497043 | 0.18596107  | 0.152558394 | 0.175387693 |
| 0.011465727 | 0.023700881 | 0.029518641 | 0.088756088 |
| 0.075863802 | 0.245370622 | 0.059932018 | 0.151485627 |
| 0.311638395 | 0.055168597 | 0.066791095 | 0.29068833  |
| 0.108722975 | 0.018182283 | 0.044361917 | 0.00846667  |
| 0.033328689 | 0.030629632 | 0.185497685 | 0.118325079 |
| 0.037576725 | 0.334470139 | 0.209620138 | 0.019281718 |
| 0.041668636 | 0.30047067  | 0.031736859 | 0.058572016 |
| 0.053270863 | 0.104198105 | 0.088043877 | 0.092990474 |
| 0.027429147 | 0.118917201 | 0.06615486  | 0.119073823 |
| 0.009877601 | 0.138327215 | 0.18024299  | 0.218839398 |
| 0.319047719 | 0.180723076 | 0.039138124 | 0.143254044 |

|             |             |             |             |
|-------------|-------------|-------------|-------------|
| 0.079409285 | 0.103801369 | 0.176191876 | 0.075999518 |
| 0.069696929 | 0.184002869 | 0.137809538 | 0.087310133 |
| 0.31436457  | 0.013124497 | 0.028159613 | 0.114598737 |
| 0.06724971  | 0.2578097   | 0.014586843 | 0.196335008 |
| 0.141693742 | 0.060573902 | 0.229593913 | 0.224754813 |
| 0.155071408 | 0.139492794 | 0.099479015 | 0.158337062 |
| 0.17104728  | 0.189867142 | 0.113779674 | 0.029623378 |
| 0.169487544 | 0.087295196 | 0.034282197 | 0.109708902 |
| 0.126207855 | 0.00167414  | 0.076190626 | 0.083345987 |
| 0.141012683 | 0.057395281 | 0.111377848 | 0.099095252 |
| 0.141188838 | 0.316993647 | 0.002646383 | 0.062036828 |
| 0.162890394 | 0.11268455  | 0.11052851  | 0.02871348  |
| 0.03567559  | 0.075958954 | 0.061569531 | 0.021375988 |
| 0.158500428 | 0.087483735 | 0.089318237 | 0.085567539 |
| 0.100059929 | 0.205514615 | 0.019997349 | 0.206709147 |
| 0.250024892 | 0.258343311 | 0.339427197 | 0.113618502 |
| 0.046385447 | 0.138033683 | 0.079406889 | 0.045363492 |
| 0.149492004 | 0.101258507 | 0.014311117 | 0.032898501 |
| 1           | 0.040375369 | 0.206567379 | 0.22178162  |
| 0.215361002 | 0.317043101 | 0.101501823 | 0.121676819 |
| 0.06537071  | 0.376180671 | 0.04373676  | 0.098970212 |
| 0.043764044 | 0.23137816  | 0.061816765 | 0.125290994 |
| 0.132518185 | 0.02561929  | 0.17850962  | 0.05459782  |
| 0.030597021 | 0.018029838 | 0.005374142 | 0.028834816 |
| 0.357591153 | 0.076868371 | 0.045148242 | 0.039391993 |
| 0.142085125 | 0.239490601 | 0.031278905 | 0.206709689 |
| 0.270553701 | 0.038617096 | 0.079101987 | 0.051706939 |
| 0.179958302 | 0.086974307 | 0.067726245 | 0.034998426 |
| 0.112431992 | 0.008400396 | 0.009776048 | 0.085109242 |
| 0.015665072 | 0.023118333 | 0.087442312 | 0.041040721 |
| 0.042451883 | 0.327848641 | 0.117742868 | 0.001917676 |
| 0.033843423 | 0.032260466 | 0.082939204 | 0.052308814 |
| 0.139451545 | 0.101984126 | 0.025440055 | 0.031969771 |
| 0.266264095 | 0.142158898 | 0.108807159 | 0.106644429 |
| 0.023418618 | 0.124438849 | 0.065803908 | 0.097322312 |
| 0.086858273 | 0.025882642 | 0.002897484 | 0.069026457 |
| 0.078686462 | 0.032337904 | 0.333215208 | 0.053439635 |
| 0.038601859 | 0.036116142 | 0.039949028 | 0.109965007 |
| 0.183182388 | 0.169509981 | 0.122603055 | 0.05672025  |
| 0.097979896 | 0.147493341 | 0.084596201 | 0.130686323 |
| 0.034029174 | 0.030550577 | 0.027077021 | 0.069475441 |
| 0.205585158 | 0.027459026 | 0.177439689 | 0.005190479 |
| 0.001305481 | 0.313148043 | 0.321276722 | 0.092892164 |
| 0.010747628 | 0.038212395 | 0.048929572 | 0.121524223 |
| 0.211661071 | 0.129417258 | 0.164459085 | 0.040037586 |
| 0.143452497 | 0.033803335 | 0.023993315 | 0.038314475 |
| 0.165638776 | 0.084509635 | 0.108169391 | 0.192536538 |
| 0.355567771 | 0.012557406 | 0.10498444  | 0.010609653 |
| 0.324747723 | 0.085717269 | 0.344887818 | 0.326605443 |
| 0.082882649 | 0.316411129 | 0.198013774 | 0.04669782  |
| 0.070287535 | 0.268663354 | 0.016419807 | 0.107982752 |
| 0.137410296 | 0.136591621 | 0.139815389 | 0.177373007 |
| 0.101207816 | 0.06952402  | 0.059677975 | 0.094392434 |
| 0.232916186 | 0.301634116 | 0.012272882 | 0.06055395  |

|             |             |             |             |
|-------------|-------------|-------------|-------------|
| 0.029096307 | 0.073038541 | 0.050076678 | 0.237059927 |
| 0.047050475 | 0.108181441 | 0.292346899 | 0.035630589 |
| 0.196052255 | 0.004665828 | 0.096555714 | 0.10129669  |
| 0.056032328 | 0.297652555 | 0.026522407 | 0.019740166 |
| 0.170936659 | 0.161028456 | 0.017801565 | 0.141288872 |
| 0.0642658   | 0.277278192 | 0.04644512  | 0.053169675 |
| 0.268048289 | 0.017342986 | 0.076911836 | 0.004569765 |
| 0.035880486 | 0.165954201 | 0.034156745 | 0.25252757  |
| 0.112891382 | 0.214210109 | 0.155388857 | 0.140927588 |
| 0.156922422 | 0.100863353 | 0.119425305 | 0.013512277 |
| 0.131734531 | 0.000485571 | 0.116853786 | 0.113465252 |
| 0.032220743 | 0.015639526 | 0.047096841 | 0.078725353 |
| 0.032532834 | 0.33668849  | 0.207814482 | 0.044063211 |
| 0.155423232 | 0.254277705 | 0.266397244 | 0.018825076 |
| 0.050943869 | 0.046222384 | 0.019788251 | 0.164983072 |
| 0.102214738 | 0.112461498 | 0.060219366 | 0.322699928 |
| 0.03716725  | 0.236961351 | 0.313233608 | 0.013934735 |
| 0.052919532 | 0.319385132 | 0.233407458 | 0.130500901 |
| 0.142302131 | 0.041148624 | 0.02374834  | 0.043273016 |
| 0.087639963 | 0.298122728 | 0.022784906 | 0.29599757  |
| 0.134024592 | 0.039954513 | 0.107879075 | 0.162556921 |
| 0.119950504 | 0.142385344 | 0.302940391 | 0.064960349 |
| 0.115540335 | 0.003401495 | 0.076037882 | 0.140276052 |
| 0.021655637 | 0.029748722 | 0.158498417 | 0.098333496 |
| 0.086383931 | 0.261455338 | 0.011851967 | 0.012693003 |
| 0.081604338 | 0.04907114  | 0.023170098 | 0.162871114 |
| 0.040949468 | 0.026625251 | 0.100074779 | 0.157576784 |
| 0.053232414 | 0.186212527 | 0.294614912 | 0.307509637 |
| 0.038274222 | 0.028852439 | 0.292364919 | 0.236432501 |
| 0.080819351 | 0.086480666 | 0.219224042 | 0.081084661 |
| 0.180370562 | 0.053640883 | 0.08925875  | 0.124775905 |
| 0.173703848 | 0.137378471 | 0.210170491 | 0.083936028 |
| 0.277523767 | 0.061462187 | 0.024568767 | 0.059566895 |
| 0.119450674 | 0.336491518 | 0.145167872 | 0.014127309 |
| 0.265229772 | 0.124263319 | 0.180546235 | 0.267393935 |
| 0.023673244 | 0.189967959 | 0.088454872 | 0.249035647 |
| 0.050311441 | 0.012750431 | 0.306224695 | 0.160518004 |
| 0.109347724 | 0.005841861 | 0.207703666 | 0.102408573 |
| 0.119507321 | 0.041214987 | 0.041127977 | 0.156613119 |
| 0.269650088 | 0.269648835 | 0.110829061 | 0.06878343  |
| 0.067360241 | 0.036756446 | 0.11483571  | 0.120727512 |
| 0.104742215 | 0.038143531 | 0.152797824 | 0.097584389 |
| 0.312945729 | 0.028209495 | 0.020713339 | 0.043123471 |
| 0.176904087 | 0.062959104 | 0.109242773 | 0.318525147 |
| 0.180012177 | 0.2033262   | 0.115484449 | 0.122353302 |
| 0.043497444 | 0.281929356 | 0.340114346 | 0.090179852 |
| 0.011034604 | 0.235966514 | 0.050861337 | 0.062799701 |
| 0.005757832 | 0.004071394 | 0.10051768  | 0.09450112  |
| 0.157708645 | 0.090909052 | 0.14921202  | 0.115446549 |
| 0.000193579 | 0.032814614 | 0.050219013 | 0.035357135 |
| 0.112091454 | 0.122868953 | 0.097560624 | 0.166503033 |
| 0.139792978 | 0.316952755 | 0.120855384 | 0.054896847 |
| 0.007486498 | 0.070185735 | 0.173616017 | 0.16709795  |
| 0.082346556 | 0.30263917  | 0.011987021 | 0.120344126 |

|             |             |             |             |
|-------------|-------------|-------------|-------------|
| 0.014500052 | 0.151440386 | 0.105134754 | 0.047966587 |
| 0.007202666 | 0.099462262 | 0.086584864 | 0.305854827 |
| 0.0246923   | 0.093809249 | 0.108476189 | 0.029259868 |
| 0.041353775 | 0.193836327 | 0.077521794 | 0.069448086 |
| 0.0855025   | 0.087643546 | 0.066360954 | 0.037817046 |
| 0.08763075  | 0.127083154 | 0.075482591 | 0.118177618 |
| 0.088498108 | 0.147673088 | 0.042990033 | 0.079745354 |
| 0.035903475 | 0.20945025  | 0.359928668 | 0.404492924 |
| 0.177207041 | 0.099943577 | 0.223888102 | 0.324275294 |
| 0.122619594 | 0.065353801 | 0.145648587 | 0.141458165 |
| 0.112950029 | 0.330513613 | 0.065135942 | 0.099051209 |
| 0.01496536  | 0.055598846 | 0.324104129 | 0.066782689 |
| 0.135322076 | 0.023044538 | 0.054673697 | 0.125578422 |
| 0.067806595 | 0.194174422 | 0.213444317 | 0.134110381 |
| 0.046697952 | 0.053014783 | 0.040323767 | 0.115382504 |
| 0.178517184 | 0.274438355 | 0.027119643 | 0.104847933 |
| 0.082453081 | 0.119788136 | 0.072886774 | 0.163589762 |
| 0.0121056   | 0.140660136 | 0.046110082 | 0.240461986 |
| 0.034635205 | 0.322817844 | 0.24975877  | 0.059110467 |
| 0.005573812 | 0.151637204 | 0.041445841 | 0.085622047 |
| 0.049551041 | 0.052799791 | 0.036667905 | 0.136211766 |
| 0.119474424 | 0.213160405 | 0.189388649 | 0.271663191 |
| 0.036503253 | 0.021300583 | 0.07587293  | 0.05053479  |
| 0.070964997 | 0.107787793 | 0.319268869 | 0.103661118 |
| 0.03617321  | 0.284994749 | 0.179116638 | 0.106802477 |
| 0.095995738 | 0.076308231 | 0.004902397 | 0.059517378 |
| 0.108176111 | 0.016254139 | 0.000950399 | 0.007681481 |
| 0.079806664 | 0.054179859 | 0.083235009 | 0.076429261 |
| 0.026381541 | 0.089281149 | 0.005627049 | 0.124616754 |
| 0.167760785 | 0.202807347 | 0.064576136 | 0.158392555 |
| 0.104660095 | 0.19871085  | 0.07644472  | 0.010926895 |
| 0.035648072 | 0.027483321 | 0.032403485 | 0.264796243 |
| 0.271569604 | 0.005953861 | 0.046483959 | 0.324760457 |
| 0.081242054 | 0.005257488 | 0.074742379 | 0.049346189 |
| 0.229956588 | 0.20738946  | 0.095077401 | 0.051293801 |
| 0.261267777 | 0.140156975 | 0.026795909 | 0.042977803 |
| 0.035286329 | 0.018157607 | 0.064265903 | 0.012395083 |
| 0.251425184 | 0.044584571 | 0.026520165 | 0.22796495  |
| 0.205962713 | 0.020810368 | 0.246228806 | 0.030244385 |
| 0.095922219 | 0.121036067 | 0.043733442 | 0.031661309 |
| 0.114885968 | 0.026473825 | 0.151493295 | 0.112546368 |
| 0.008463144 | 0.060476293 | 0.151195054 | 0.028458675 |
| 0.253022789 | 0.032557698 | 0.185682949 | 0.017302807 |
| 0.136884454 | 0.110966138 | 0.251812288 | 0.041547733 |
| 0.058673754 | 0.33888522  | 0.044662733 | 0.136745875 |
| 0.101604249 | 0.013233624 | 0.05844218  | 0.096158993 |
| 0.017774937 | 0.141165061 | 0.039875458 | 0.143311502 |
| 0.085489588 | 0.133826759 | 0.059790177 | 0.121012119 |
| 0.105620747 | 0.017136289 | 0.01299306  | 0.042880213 |
| 0.156996266 | 0.149747922 | 0.022051519 | 0.106373864 |
| 0.009465439 | 0.091878383 | 0.081290412 | 0.042533148 |
| 0.15314871  | 0.142283276 | 0.047340842 | 0.241403903 |
| 0.085328363 | 0.041334674 | 0.032747964 | 0.156564631 |
| 0.075213634 | 0.099453516 | 0.157113015 | 4.67E-05    |



|             |             |             |             |
|-------------|-------------|-------------|-------------|
| 0.102594831 | 0.043393498 | 0.128042755 | 0.034037518 |
| 0.250436561 | 0.090606286 | 0.102445014 | 0.09767245  |
| 0.073581199 | 0.009000444 | 0.052425327 | 0.034110784 |
| 0.019909578 | 0.316605903 | 0.151440926 | 0.09855619  |
| 0.117785523 | 0.031600687 | 0.015446346 | 0.138488931 |
| 0.006075573 | 0.014434176 | 0.021688518 | 0.066356092 |
| 0.009441179 | 0.03416145  | 0.030414073 | 0.018464734 |
| 0.090272398 | 0.122142006 |             |             |
| CTNNA1      | 0.049147748 | 0.436847153 | 0.04062403  |
| 0.111367567 | 0.212087092 | 0.309150635 | 0.030091465 |
| 0.073734422 | 0.303409435 | 0.240506898 | 0.269491957 |
| 0.009336551 | 0.081274025 | 0.466532355 | 0.026555107 |
| 0.290862462 | 0.015764017 | 0.061113902 | 0.045880881 |
| 0.140891109 | 0.194218867 | 0.290475641 | 0.277837987 |
| 0.187314074 | 0.164522975 | 0.242352302 | 0.278641754 |
| 0.52924449  | 0.299774939 | 0.383343733 | 0.189388108 |
| 0.39678734  | 0.23408624  | 0.313714077 | 0.008600035 |
| 0.297567121 | 0.005405701 | 0.414443762 | 0.177647913 |
| 0.130710966 | 0.321451919 | 0.265284021 | 0.174303375 |
| 0.271061445 | 0.023231503 | 0.235340838 | 0.33375934  |
| 0.216362981 | 0.175084242 | 0.042922468 | 0.374796173 |
| 0.246098328 | 0.287213106 | 0.375609116 | 0.002109101 |
| 0.264089648 | 0.109417514 | 0.212775628 | 0.521864119 |
| 0.140294409 | 0.072987924 | 0.234675769 | 0.152982605 |
| 0.278954351 | 0.288433646 | 0.165896952 | 0.269379801 |
| 0.522809954 | 0.149046324 | 0.395593114 | 0.120878939 |
| 0.26880483  | 0.015530177 | 0.107710091 | 0.046649063 |
| 0.278511024 | 0.126116009 | 0.249740245 | 0.22784379  |
| 0.449510788 | 0.505401247 | 0.145987117 | 0.50605805  |
| 0.064092703 | 0.241188659 | 0.188959058 | 0.226183494 |
| 0.289072086 | 0.040836468 | 0.38016962  | 0.524015115 |
| 0.024107061 | 0.288726607 | 0.337465372 | 0.082076368 |
| 0.443163806 | 0.202258284 | 0.312166683 | 0.160241998 |
| 0.292982518 | 0.241278162 | 0.461762576 | 0.231168503 |
| 0.217655769 | 0.04492647  | 0.486954055 | 0.236961616 |
| 0.234564607 | 0.052274274 | 0.151171893 | 0.480599813 |
| 0.330459078 | 0.52660145  | 0.424039477 | 0.311212231 |
| 0.277224826 | 0.52363459  | 0.352420118 | 0.406790087 |
| 0.163920496 | 0.542988613 | 0.125309755 | 0.022430662 |
| 0.045650014 | 0.044901552 | 0.140270346 | 0.245935917 |
| 0.499400073 | 0.247646833 | 0.132450886 | 0.148721959 |
| 0.463819412 | 0.489122219 | 0.539717407 | 0.394680006 |
| 0.021096949 | 0.182493061 | 0.280246195 | 0.193088746 |
| 0.305258869 | 0.059861875 | 0.203266614 | 0.509113635 |
| 0.372581345 | 0.431360479 | 0.107542763 | 0.482537913 |
| 0.115388519 | 0.519064208 | 0.488063092 | 0.111329233 |
| 0.521104178 | 0.502036716 | 0.52128726  | 0.362105123 |
| 0.479344526 | 0.257247191 | 0.044936313 | 0.344009674 |
| 0.487695149 | 0.016402603 | 0.502470308 | 0.527097243 |
| 0.519002262 | 0.486911777 | 0.525277429 | 0.533919652 |
| 0.526065353 | 0.039366057 | 0.022995909 | 0.19447288  |
| 0.519560091 | 0.390109839 | 0.070779538 | 0.315805901 |
| 0.256643718 | 0.292730867 | 0.404086232 | 0.285989641 |
| 0.49963708  | 0.463658922 | 0.520347114 | 0.352671651 |

|             |             |             |             |
|-------------|-------------|-------------|-------------|
| 0.19359397  | 0.290027878 | 0.287358535 | 0.475185581 |
| 0.021924385 | 0.081179203 | 0.033008602 | 0.227750077 |
| 0.284256366 | 0.103725971 | 0.278788757 | 0.227797316 |
| 0.118056947 | 0.232653209 | 0.282069829 | 0.320609029 |
| 0.040375369 | 1           | 0.101276575 | 0.110250533 |
| 0.0209193   | 0.110558716 | 0.138357447 | 0.111138877 |
| 0.168334836 | 0.206948751 | 0.403115469 | 0.500285656 |
| 0.229946059 | 0.142728303 | 0.375175874 | 0.471002937 |
| 0.403941729 | 0.287623657 | 0.165975918 | 0.008056118 |
| 0.207491604 | 0.243126282 | 0.16376844  | 0.304237902 |
| 0.14712048  | 0.167375361 | 0.280868926 | 0.362755303 |
| 0.208643393 | 0.08752284  | 0.267959082 | 0.410602571 |
| 0.112660895 | 0.237630588 | 0.452972377 | 0.288541314 |
| 0.00115493  | 0.232448014 | 0.454978413 | 0.089752028 |
| 0.230173367 | 0.133932475 | 0.253965087 | 0.474397811 |
| 0.237577925 | 0.157232962 | 0.520108245 | 0.345141409 |
| 0.28191497  | 0.195397149 | 0.532608358 | 0.04955927  |
| 0.229148053 | 0.035970895 | 0.208100922 | 0.248313058 |
| 0.162759383 | 0.2133142   | 0.230967621 | 0.199583116 |
| 0.096340742 | 0.53224592  | 0.368074125 | 0.540051094 |
| 0.287997103 | 0.532571735 | 0.480491837 | 0.450483506 |
| 0.275370512 | 0.264766246 | 0.140865597 | 0.44342595  |
| 0.466748497 | 0.213818462 | 0.051580698 | 0.44258719  |
| 0.257076607 | 0.345098677 | 0.062394273 | 0.505869531 |
| 0.481132838 | 0.484859767 | 0.089868665 | 0.319638726 |
| 0.368909536 | 0.165508943 | 0.385336771 | 0.527377995 |
| 0.240637554 | 0.25564482  | 0.247025287 | 0.369520394 |
| 0.112777526 | 0.143542198 | 0.269748861 | 0.161582248 |
| 0.023358154 | 0.048353294 | 0.039909323 | 0.100899394 |
| 0.131520936 | 0.343561784 | 0.312432046 | 0.534704521 |
| 0.070054779 | 0.413133819 | 0.160902238 | 0.222139537 |
| 0.419235241 | 0.244434612 | 0.288057572 | 0.291058742 |
| 0.175102743 | 0.010597588 | 0.08750086  | 0.508548465 |
| 0.022752479 | 0.204853844 | 0.208102802 | 0.00270006  |
| 0.025874982 | 0.419629043 | 0.071962354 | 0.161556487 |
| 0.484423156 | 0.168935123 | 0.144847405 | 0.240758766 |
| 0.276537774 | 0.053429152 | 0.002085832 | 0.492112805 |
| 0.477088308 | 0.439339626 | 0.477580368 | 0.443158542 |
| 0.423204738 | 0.354957365 | 0.379280493 | 0.267901753 |
| 0.059848359 | 0.053524094 | 0.166468535 | 0.194233207 |
| 0.003794113 | 0.340021212 | 0.196412968 | 0.092915801 |
| 0.388662613 | 0.208938783 | 0.021917395 | 0.242524886 |
| 0.016736543 | 0.208640413 | 0.2115274   | 0.126930286 |
| 0.278856517 | 0.006600891 | 0.239670447 | 0.258587099 |
| 0.447475974 | 0.326928038 | 0.280480247 | 0.542075141 |
| 0.23791961  | 0.099948385 | 0.216093487 | 0.357505481 |
| 0.038485692 | 0.082404216 | 0.249330823 | 0.05323727  |
| 0.180069425 | 0.433698085 | 0.268963034 | 0.043131124 |
| 0.183046533 | 0.002431145 | 0.3615211   | 0.542232282 |
| 0.486055503 | 0.537018325 | 0.52625592  | 0.232410249 |
| 0.526761937 | 0.118002211 | 0.553293609 | 0.40607785  |
| 0.302696338 | 0.000966974 | 0.00313288  | 0.513015774 |
| 0.290865439 | 0.043593276 | 0.096170757 | 0.318935399 |
| 0.070225252 | 0.105904589 | 0.034492425 | 0.130456236 |

|             |             |             |             |
|-------------|-------------|-------------|-------------|
| 0.340818354 | 0.161771477 | 0.125526447 | 0.479320521 |
| 0.15126969  | 0.139046804 | 0.288896189 | 0.054804231 |
| 0.297947694 | 0.030266644 | 0.04986206  | 0.007053428 |
| 0.293041695 | 0.090786376 | 0.460012372 | 0.529791596 |
| 0.493930497 | 0.326533048 | 0.295239877 | 0.291450287 |
| 0.420347564 | 0.081027195 | 0.293128401 | 0.076176546 |
| 0.51455356  | 0.309736133 | 0.276967773 | 0.282276721 |
| 0.507379172 | 0.475557301 | 0.016153971 | 0.375971366 |
| 0.011039529 | 0.000981219 | 0.289165324 | 0.179921852 |
| 0.032675062 | 0.268898968 | 0.199863497 | 0.133369584 |
| 0.133066666 | 0.021395247 | 0.206842477 | 0.183754595 |
| 0.194149908 | 0.245723232 | 0.20051619  | 0.171815582 |
| 0.167557175 | 0.082729664 | 0.121095371 | 0.086757944 |
| 0.154337574 | 0.281656866 | 0.171395146 | 0.008720653 |
| 0.315609251 | 0.314004564 | 0.032841181 | 0.102367353 |
| 0.45376884  | 0.523440736 | 0.019851247 | 0.006610646 |
| 0.217679356 | 0.203860745 | 0.522468767 | 0.527361028 |
| 0.531470597 | 0.518694314 | 0.366141297 | 0.06960736  |
| 0.039946321 | 0.205021233 | 0.205614967 | 0.052069543 |
| 0.534464699 | 0.040182072 | 0.498875973 | 0.232281873 |
| 0.063081072 | 0.138554723 | 0.019589601 | 0.043501147 |
| 0.295278727 | 0.107105788 | 0.108585153 | 0.107851505 |
| 0.219954979 | 0.198519299 | 0.022817866 | 0.121364174 |
| 0.295973296 | 0.149583778 | 0.09445814  | 0.19992746  |
| 0.311426072 | 0.160892481 | 0.392083454 | 0.433792279 |
| 0.084732064 | 0.06196586  | 0.226897554 | 0.320401125 |
| 0.455675605 | 0.291729714 | 0.026937421 | 0.47758631  |
| 0.498168646 | 0.390255834 | 0.516259696 | 0.357578156 |
| 0.046853307 | 0.297534841 | 0.222703801 | 0.230673188 |
| 0.106311764 | 0.299335753 | 0.139446273 | 0.03329076  |
| 0.243509304 | 0.457953151 | 0.412949404 | 0.109216307 |
| 0.304003049 | 0.082254197 | 0.034739277 | 0.450598518 |
| 0.138762358 | 0.064503709 | 0.28575211  | 0.42270248  |
| 0.000573768 | 0.126986572 | 0.480376473 | 0.17294557  |
| 0.500998477 | 0.493272044 | 0.43574904  | 0.160582674 |
| 0.000967869 | 0.343773252 | 0.289318234 | 0.304840442 |
| 0.448389173 | 0.307996952 | 0.09259666  | 0.04224457  |
| 0.232250388 | 0.061936856 | 0.084429767 | 0.28132471  |
| 0.144214474 | 0.322971603 | 0.12951121  | 0.118372539 |
| 0.114971745 | 0.060220819 | 0.206362429 | 0.160509458 |
| 0.091756235 | 0.177628118 | 0.311882493 | 0.231819128 |
| 0.198580193 | 0.416676168 | 0.382529146 | 0.014500821 |
| 0.261932866 | 0.379726211 | 0.415827641 | 0.001477051 |
| 0.398008966 | 0.002974894 | 0.125272332 | 0.148126337 |
| 0.123837619 | 0.128848035 | 0.159207156 | 0.204021014 |
| 0.246981441 | 0.133407232 | 0.199418173 | 0.154299944 |
| 0.105688555 | 0.130631798 | 0.265709236 | 0.236285514 |
| 0.218186451 | 0.08136443  | 0.077758682 | 0.086217187 |
| 0.035634592 | 0.480575731 | 0.207330976 | 0.053408274 |
| 0.136262073 | 0.236779655 | 0.314278958 | 0.515833642 |
| 0.398569274 | 0.099007065 | 0.214436996 | 0.475660289 |
| 0.20739789  | 0.236558259 | 0.03871395  | 0.265804833 |
| 0.150711611 | 0.17721526  | 0.284379861 | 0.231821822 |
| 0.362768204 | 0.381460077 | 0.201468469 | 0.421934361 |

|             |             |                      |             |
|-------------|-------------|----------------------|-------------|
| 0.253926613 | 0.220687198 | 0.274646713          | 0.055058797 |
| 0.118515429 | 0.083214433 | 0.187016656          | 0.000727187 |
| 0.264844174 | 0.20145553  | 0.503585754          | 0.501920364 |
| 0.241136975 | 0.355912511 | 0.300880156          | 0.059365109 |
| 0.246799033 | 0.165512694 | 0.09035694           | 0.406386376 |
| 0.216147774 | 0.117762983 | 0.202146283          | 0.269752643 |
| 0.39558796  | 0.36808816  | 0.160624332          | 0.154216286 |
| 0.135054999 | 0.131381576 | 0.452749744          | 0.077293611 |
| 0.325149508 | 0.137613162 | 0.267207047          | 0.210277758 |
| 0.136361119 | 0.530337455 | 0.033195285          | 0.549465769 |
| 0.23456441  | 0.094140143 | 0.47508415           | 0.199438282 |
| 0.19305845  | 0.076644283 | 0.17322988           | 0.272314787 |
| 0.136815413 | 0.277858168 | 0.022785215          | 0.058916496 |
| 0.267608081 | 0.193920427 | 0.392778711          | 0.288049069 |
| 0.164286442 | 0.276503058 | 0.152691277          | 0.187440689 |
| 0.496752667 | 0.493496466 | 0.195814964          | 0.180642555 |
| 0.286472316 | 0.063807704 | 0.332834991          | 0.008682036 |
| 0.33552384  | 0.339501399 | 0.304251356          | 0.026943503 |
| 0.007648539 | 0.18966805  | 0.308616238          | 0.035852685 |
| 0.488214222 | 0.214177547 | 0.255338225          | 0.392603126 |
| 0.11679211  | 0.495283974 | 0.069317799          | 0.371295989 |
| 0.021737671 | 0.163562054 | 0.268348806          | 0.25929983  |
| 0.177345731 | 0.217698049 | 0.327565558          | 0.194833112 |
| 0.015839324 | 0.186970085 | 1.13E-05 0.387862747 |             |
| 0.467027465 | 0.244474188 | 0.157964733          | 0.244010607 |
| 0.200109094 | 0.340543253 | 0.170424157          | 0.310088313 |
| 0.005834823 | 0.278218507 | 0.117055871          | 0.428386603 |
| 0.244135223 | 0.236984543 | 0.03261674           | 0.209312516 |
| 0.44534305  | 0.219311967 | 0.194934612          | 0.260001462 |
| 0.508488761 | 0.357938193 | 0.129690445          | 0.140803094 |
| 0.303089956 | 0.036219638 | 0.302614713          | 0.531842492 |
| 0.11173136  | 0.169255384 | 0.450919513          | 0.135061187 |
| 0.236521796 | 0.368336678 | 0.303911816          | 0.516432166 |
| 0.040159215 | 0.168336268 | 0.393748502          | 0.458605311 |
| 0.238914686 | 0.115843038 | 0.206779676          | 0.1579672   |
| 0.480160486 | 0.076179773 | 0.174856886          | 0.301901074 |
| 0.18184528  | 0.219171476 | 0.243764309          | 0.122307846 |
| 0.023543322 | 0.093672116 | 0.298783547          | 0.080537239 |
| 0.19045824  | 0.250106813 | 0.153995716          | 0.35989105  |
| 0.104029075 | 0.017278266 | 0.429486556          | 0.019682075 |
| 0.252895295 | 0.324798312 | 0.152665793          | 0.243501017 |
| 0.1549734   | 0.234803975 | 0.238601358          | 0.000566127 |
| 0.381717677 | 0.029976082 | 0.195831853          | 0.170287101 |
| 0.230126838 | 0.028836087 | 0.460830497          | 0.529691702 |
| 0.224081656 | 0.246590029 | 0.312701568          | 0.467476859 |
| 0.125045434 | 0.276201007 | 0.259440411          | 0.349323459 |
| 0.185996382 | 0.302911412 | 0.311329755          | 0.310055904 |
| 0.331150708 | 0.172882925 |                      |             |
| CTSC        | 0.165534335 | 0.227903456          | 0.140996441 |
| 0.183034598 | 0.124958183 | 0.106005023          | 0.17143679  |
| 0.174762402 | 0.202730251 | 0.049633311          | 0.139240113 |
| 0.124743316 | 0.018325498 | 0.247922723          | 0.16542189  |
| 0.115400619 | 0.164847365 | 0.189742155          | 0.045741718 |
| 0.137001531 | 0.110919557 | 0.068035368          | 0.109215199 |

|             |             |             |             |
|-------------|-------------|-------------|-------------|
| 0.103006145 | 0.317218329 | 0.163787601 | 0.07768543  |
| 0.251587725 | 0.031512668 | 0.144535122 | 0.043005087 |
| 0.323239743 | 0.112234115 | 0.06053401  | 0.140608432 |
| 0.11259751  | 0.009519943 | 0.345205617 | 0.13858787  |
| 0.059843267 | 0.318278276 | 0.067739739 | 0.168472505 |
| 0.077225039 | 0.148565008 | 0.026706495 | 0.123942044 |
| 0.159869517 | 0.149429374 | 0.138554384 | 0.170290234 |
| 0.08448856  | 0.214607898 | 0.141162894 | 0.003516412 |
| 0.048947922 | 0.008166138 | 0.027787483 | 0.296328615 |
| 0.2699273   | 0.197736765 | 0.036032038 | 0.126152189 |
| 0.107869827 | 0.155317995 | 0.242931121 | 0.065426261 |
| 0.277508469 | 0.032727999 | 0.146127628 | 0.134537382 |
| 0.103291281 | 0.128116994 | 0.301905301 | 0.175684022 |
| 0.083154882 | 0.1982522   | 0.119036599 | 0.070243755 |
| 0.217272518 | 0.345316977 | 0.247275058 | 0.301682308 |
| 0.030115439 | 0.091183402 | 0.105026983 | 0.242011306 |
| 0.176810643 | 0.151394974 | 0.193689656 | 0.319844909 |
| 0.13331835  | 0.093425279 | 0.157253313 | 0.205878002 |
| 0.235043606 | 0.054509445 | 0.077137565 | 0.044894347 |
| 0.142572634 | 0.099844521 | 0.308569682 | 0.233479827 |
| 0.098208054 | 0.180258787 | 0.318904593 | 0.084251021 |
| 0.115788762 | 0.196343502 | 0.095466682 | 0.185369145 |
| 0.150782612 | 0.25079861  | 0.18433019  | 0.207965081 |
| 0.089773241 | 0.277713246 | 0.197259732 | 0.241749135 |
| 0.018771525 | 0.287616617 | 0.219640891 | 0.164119189 |
| 0.13862225  | 0.187357752 | 0.079190963 | 0.299280578 |
| 0.227783678 | 0.202291093 | 0.17426396  | 0.159388889 |
| 0.220466093 | 0.290944392 | 0.278157131 | 0.208055382 |
| 0.164799735 | 0.048273707 | 0.096511601 | 0.142316393 |
| 0.162343083 | 0.21527336  | 0.064108672 | 0.33150137  |
| 0.298390043 | 0.195873861 | 0.173855109 | 0.367472771 |
| 0.137976507 | 0.323285591 | 0.215112772 | 0.1998189   |
| 0.33263462  | 0.32564084  | 0.295545758 | 0.135344409 |
| 0.32066122  | 0.145654311 | 0.02160209  | 0.227924352 |
| 0.309233074 | 0.011371359 | 0.208509016 | 0.229589191 |
| 0.278723105 | 0.187270491 | 0.285363913 | 0.258355402 |
| 0.273311527 | 0.205025724 | 0.003539836 | 0.17433136  |
| 0.304744478 | 0.276543901 | 0.153601028 | 0.079421329 |
| 0.11443817  | 0.109485291 | 0.177702227 | 0.053963946 |
| 0.341168358 | 0.240987713 | 0.225302146 | 0.183867208 |
| 0.118672451 | 0.32052124  | 0.071265997 | 0.316990186 |
| 0.197304983 | 0.163870586 | 0.179058457 | 0.235142257 |
| 0.074928048 | 0.221562928 | 0.10195223  | 0.11223328  |
| 0.244608332 | 0.110750753 | 0.049446725 | 0.138005767 |
| 0.206567379 | 0.101276575 | 1           | 0.169083081 |
| 0.184184226 | 0.312278958 | 0.128814968 | 0.191388344 |
| 0.133758142 | 0.341684121 | 0.136500328 | 0.259275857 |
| 0.088350292 | 0.268731014 | 0.159204658 | 0.306479914 |
| 0.319096613 | 0.096349123 | 0.264602485 | 0.092903005 |
| 0.071430606 | 0.040637024 | 0.028925056 | 0.088014142 |
| 0.334646247 | 0.105671809 | 0.120296704 | 0.16867611  |
| 0.148368702 | 0.139715363 | 0.073477493 | 0.350935436 |
| 0.238439029 | 0.108302723 | 0.228240483 | 0.100570843 |
| 0.083323354 | 0.146992894 | 0.201155413 | 0.093518423 |

|             |             |             |             |
|-------------|-------------|-------------|-------------|
| 0.176484811 | 0.034348376 | 0.045073502 | 0.235019484 |
| 0.043838164 | 0.067537153 | 0.236690989 | 0.169610093 |
| 0.069084151 | 0.288209928 | 0.285053802 | 0.004948027 |
| 0.089433207 | 0.104635123 | 0.228540701 | 0.064741268 |
| 0.221253362 | 0.235918683 | 0.094284013 | 0.110948427 |
| 0.208716383 | 0.286952476 | 0.253487935 | 0.261454531 |
| 0.062830296 | 0.294457977 | 0.202182723 | 0.250639143 |
| 0.199550601 | 0.057711887 | 0.019574614 | 0.20320264  |
| 0.227850063 | 0.059015871 | 0.206950524 | 0.155131795 |
| 0.066845416 | 0.134891636 | 0.124887728 | 0.279801892 |
| 0.359022982 | 0.27132128  | 0.165064469 | 0.200511693 |
| 0.255560853 | 0.197033254 | 0.235953143 | 0.301726017 |
| 0.051511778 | 0.079096589 | 0.08351415  | 0.243676856 |
| 0.261790929 | 0.080578556 | 0.299936705 | 0.027888099 |
| 0.001822939 | 0.15160951  | 0.176685274 | 0.171430344 |
| 0.059695026 | 0.101447706 | 0.159709306 | 0.274869339 |
| 0.189466672 | 0.283271766 | 0.233081042 | 0.101264173 |
| 0.262219619 | 0.074524223 | 0.089195111 | 0.128521328 |
| 0.280287904 | 0.135086907 | 0.167110556 | 0.351866172 |
| 0.144756956 | 0.055567146 | 0.117692779 | 0.014264351 |
| 0.147515654 | 0.168173348 | 0.267515248 | 0.35993582  |
| 0.245853886 | 0.345484985 | 0.2304631   | 0.059170412 |
| 0.212856463 | 0.209491248 | 0.045004779 | 0.255165384 |
| 0.274887909 | 0.267519645 | 0.269511909 | 0.292767421 |
| 0.23138526  | 0.180046994 | 0.195193339 | 0.134177146 |
| 0.1983727   | 0.165409973 | 0.055156523 | 0.12686957  |
| 0.009538507 | 0.239021859 | 0.117039098 | 0.279532278 |
| 0.156261421 | 0.196211382 | 0.154383802 | 0.111537171 |
| 0.1156949   | 0.028325936 | 0.099469007 | 0.148443303 |
| 0.193933995 | 0.131002388 | 0.065286064 | 0.057331349 |
| 0.284392854 | 0.270538414 | 0.061666271 | 0.303674157 |
| 0.153349768 | 0.199367632 | 0.130897896 | 0.187091859 |
| 0.193166231 | 0.022502269 | 0.093585962 | 0.00964978  |
| 0.05963617  | 0.293924278 | 0.076707531 | 0.194740976 |
| 0.209806738 | 0.084452115 | 0.279330016 | 0.301831379 |
| 0.270114008 | 0.262979103 | 0.279903294 | 0.060301585 |
| 0.287742851 | 0.009266521 | 0.272086846 | 0.221291196 |
| 0.055809771 | 0.00795063  | 0.032572775 | 0.231612737 |
| 0.104025371 | 0.190704263 | 0.251073368 | 0.085844615 |
| 0.197695387 | 0.14671901  | 0.17769396  | 0.090770913 |
| 0.14231692  | 0.126398187 | 0.068795052 | 0.273575392 |
| 0.169999351 | 0.195602321 | 0.079155994 | 0.222394759 |
| 0.120592949 | 0.196212364 | 0.217132409 | 0.027744345 |
| 0.178684523 | 0.250259467 | 0.334338275 | 0.274480716 |
| 0.317107488 | 0.168028863 | 0.0439603   | 0.071142399 |
| 0.22506741  | 0.181198124 | 0.061847085 | 0.181282708 |
| 0.260586671 | 0.134046952 | 0.264637265 | 0.293557872 |
| 0.288147903 | 0.295963554 | 0.159146371 | 0.200546373 |
| 0.105665844 | 0.007605411 | 0.106408393 | 0.226440911 |
| 0.02937947  | 0.074951109 | 0.300428344 | 0.113521981 |
| 0.131165293 | 0.12817196  | 0.051539574 | 0.055848862 |
| 0.20083847  | 0.110377399 | 0.085648347 | 0.240047155 |
| 0.119961963 | 0.086354798 | 0.185977569 | 0.164659371 |
| 0.069249857 | 0.279436144 | 0.311814531 | 0.142466887 |

|             |             |             |             |
|-------------|-------------|-------------|-------------|
| 0.090239341 | 0.088137682 | 0.185103975 | 0.266676277 |
| 0.237246951 | 0.236555921 | 0.157209466 | 0.090930212 |
| 0.287877061 | 0.097261507 | 0.246443054 | 0.25834342  |
| 0.320660136 | 0.31419663  | 0.348994526 | 0.132942607 |
| 0.184618017 | 0.165655086 | 0.094620602 | 0.157350247 |
| 0.26872242  | 0.159375213 | 0.28375034  | 0.060392606 |
| 0.244778344 | 0.202229273 | 0.164038207 | 0.197155248 |
| 0.090029005 | 0.242021925 | 0.175370529 | 0.206597962 |
| 0.111159334 | 0.061308883 | 0.17663864  | 0.217339653 |
| 0.226841356 | 0.041504977 | 0.236256609 | 0.130694195 |
| 0.246404802 | 0.043170821 | 0.149224393 | 0.329205042 |
| 0.24464632  | 0.177291757 | 0.113744326 | 0.185524651 |
| 0.187053553 | 0.079004418 | 0.090092503 | 0.224317402 |
| 0.266055682 | 0.127256989 | 0.293348056 | 0.253616336 |
| 0.232160363 | 0.090015764 | 0.057456843 | 0.11592385  |
| 0.206583281 | 0.109570976 | 0.154503916 | 0.197483484 |
| 0.31072948  | 0.341803879 | 0.239505709 | 0.189644664 |
| 0.105680401 | 0.169194255 | 0.148442406 | 0.21744261  |
| 0.059132812 | 0.152187942 | 0.064503746 | 0.178854966 |
| 0.026102459 | 0.029433221 | 0.262346777 | 0.151679883 |
| 0.325686027 | 0.253771472 | 0.317350039 | 0.141800898 |
| 0.001066122 | 0.129140207 | 0.150360334 | 0.094452259 |
| 0.219462007 | 0.243923167 | 0.102410415 | 0.196084913 |
| 0.314057738 | 0.19534486  | 0.15525558  | 0.09205843  |
| 0.033822338 | 0.135861764 | 0.280827821 | 0.181810209 |
| 0.168629576 | 0.178717516 | 0.058596084 | 0.191820034 |
| 0.047296756 | 0.289899936 | 0.258880349 | 0.053722409 |
| 0.029084176 | 0.235295381 | 0.197655794 | 0.152144079 |
| 0.080159625 | 0.228718202 | 0.26861739  | 0.012498225 |
| 0.152626171 | 0.098026476 | 0.147952934 | 0.161501345 |
| 0.177794696 | 0.135143078 | 0.17669627  | 0.122013428 |
| 0.158798336 | 0.18394712  | 0.158172601 | 0.236436925 |
| 0.185370491 | 0.184831269 | 0.133495285 | 0.123177071 |
| 0.108027968 | 0.210719589 | 0.277595669 | 0.283504116 |
| 0.159703392 | 0.232191353 | 0.330265855 | 0.22023157  |
| 0.216562764 | 0.106023102 | 0.330321413 | 0.265700519 |
| 0.291101105 | 0.237996796 | 0.108957319 | 0.221856516 |
| 0.02642801  | 0.083064442 | 0.133617234 | 0.139616965 |
| 0.181082779 | 0.073821443 | 0.099127707 | 0.150609641 |
| 0.148407328 | 0.349677169 | 0.311798821 | 0.304384139 |
| 0.120762572 | 0.085314855 | 0.054097017 | 0.172674243 |
| 0.1927194   | 0.251616088 | 0.099927738 | 0.063139403 |
| 0.184951297 | 0.145266465 | 0.210565249 | 0.300901017 |
| 0.044298128 | 0.314637428 | 0.057962275 | 0.170069511 |
| 0.051385769 | 0.270911251 | 0.264818009 | 0.170647731 |
| 0.028686008 | 0.202555666 | 0.13565447  | 0.100184652 |
| 0.173141727 | 0.15573297  | 0.097606265 | 0.134104488 |
| 0.184056511 | 0.243378445 | 0.31869092  | 0.176864409 |
| 0.098773965 | 0.097863168 | 0.110745471 | 0.119191935 |
| 0.144833544 | 0.264780339 | 0.183969577 | 0.256280928 |
| 0.086854593 | 0.270367139 | 0.35367864  | 0.140539153 |
| 0.153607449 | 0.171750119 | 0.031241319 | 0.08212815  |
| 0.150079349 | 0.057795004 | 0.001369746 | 0.017272847 |
| 0.230788847 | 0.076875427 | 0.16611449  | 0.19304603  |

|             |             |             |             |
|-------------|-------------|-------------|-------------|
| 0.097231761 | 0.245934892 | 0.027786993 | 0.125907953 |
| 0.275904573 | 0.327159651 | 0.114728366 | 0.301113385 |
| 0.21294441  | 0.194415726 | 0.143552948 | 0.00821791  |
| 0.106891938 | 0.089449617 | 0.056399552 | 0.169273393 |
| 0.142519744 | 0.034779386 | 0.119820281 | 0.169413776 |
| 0.23848859  | 0.028161416 | 0.124872967 | 0.168921859 |
| 0.251015681 | 0.33326441  | 0.162150663 | 0.183883166 |
| 0.11124918  | 0.244998663 | 0.079603723 | 0.076614635 |
| 0.109175627 | 0.070997071 | 0.217251553 | 0.060145974 |
| 0.169760351 | 0.125549177 | 0.013902533 | 0.361671282 |
| 0.30962776  | 0.068221421 | 0.314365829 | 0.043253966 |
| 0.251881083 | 0.265067533 | 0.073969551 | 0.079951515 |
| 0.116735112 | 0.105640723 | 0.221559558 | 0.245086825 |
| 0.033856279 | 0.10719787  | 0.207931487 | 0.079005103 |
| 0.345878131 | 0.065198322 | 0.284941383 | 0.053528277 |
| 0.27164097  | 0.227366937 | 0.246009872 | 0.121722662 |
| 0.119839166 | 0.203369765 | 0.070659033 | 0.295964368 |
| 0.173380171 | 0.067107218 | 0.205329833 | 0.162825955 |
| 0.059090212 | 0.26195939  | 0.100766438 | 0.291441549 |
| 0.13325888  | 0.250333618 | 0.193918156 | 0.250982664 |
| 0.272004507 | 0.070128579 | 0.052277113 | 0.106292205 |
| 0.273540197 | 0.176345284 | 0.070019877 | 0.236559573 |
| 0.047200765 | 0.211051706 | 0.116400624 | 0.114772711 |
| 0.128958656 | 0.154451056 | 0.098282939 | 0.250742991 |
| 0.171821372 | 0.120282526 | 0.108610513 | 0.334653166 |
| 0.156153755 | 0.1272414   | 0.340999813 | 0.005169405 |
| 0.150640474 | 0.161316458 | 0.200115006 | 0.09481847  |
| 0.31039565  | 0.1527275   | 0.116221562 | 0.018472896 |
| 0.216307313 | 0.070046562 | 0.103398363 | 0.107681048 |
| 0.047583374 | 0.155725792 | 0.304428058 | 0.264490978 |
| 0.208297383 | 0.068355979 | 0.046968169 | 0.270485191 |
| 0.041358139 | 0.043820423 | 0.052297059 | 0.148886876 |
| 0.049000541 | 0.060017899 | 0.065464644 | 0.066042447 |
| 0.215048329 | 0.149707147 |             |             |
| CXCL10      | 0.155858273 | 0.237834169 | 0.124963074 |
| 0.136745418 | 0.09765611  | 0.092132652 | 0.194828534 |
| 0.189768558 | 0.21760089  | 0.062459341 | 0.118045512 |
| 0.133476107 | 0.011610352 | 0.2690462   | 0.172094736 |
| 0.119846889 | 0.151417257 | 0.19966658  | 0.049727815 |
| 0.11881948  | 0.100682513 | 0.062307532 | 0.122163009 |
| 0.090613429 | 0.311127884 | 0.17302557  | 0.078738917 |
| 0.256694254 | 0.032030562 | 0.13252985  | 0.037821384 |
| 0.338713741 | 0.1014897   | 0.061230039 | 0.103541664 |
| 0.106803939 | 0.007587418 | 0.372258593 | 0.131532222 |
| 0.029597137 | 0.319672845 | 0.077349928 | 0.13452952  |
| 0.099526088 | 0.144674303 | 0.028933577 | 0.139303084 |
| 0.15682205  | 0.115011754 | 0.145210498 | 0.160027955 |
| 0.098044972 | 0.201241993 | 0.164195523 | 0.016025711 |
| 0.04587558  | 0.006605777 | 0.029731498 | 0.294642857 |
| 0.225145426 | 0.162774533 | 0.049016633 | 0.122407846 |
| 0.124518029 | 0.157857053 | 0.19333817  | 0.092190046 |
| 0.289885103 | 0.034365742 | 0.147370466 | 0.087878689 |
| 0.123689873 | 0.141403148 | 0.266274635 | 0.18179135  |
| 0.084378041 | 0.146315788 | 0.095555032 | 0.059926512 |



|             |             |             |             |
|-------------|-------------|-------------|-------------|
| 0.248281023 | 0.355666919 | 0.208323981 | 0.32341349  |
| 0.035273227 | 0.087603201 | 0.076482433 | 0.212586827 |
| 0.195998929 | 0.173862776 | 0.191941493 | 0.332204053 |
| 0.143011568 | 0.115108385 | 0.194674682 | 0.230555571 |
| 0.2239429   | 0.047612887 | 0.090157473 | 0.032453778 |
| 0.124895953 | 0.107742363 | 0.327461473 | 0.232481848 |
| 0.077923823 | 0.189050582 | 0.336887078 | 0.077426355 |
| 0.09639412  | 0.164203646 | 0.099363186 | 0.192739974 |
| 0.155243298 | 0.257543444 | 0.216666379 | 0.238721038 |
| 0.101853656 | 0.277635044 | 0.189750634 | 0.243119059 |
| 0.019351778 | 0.297977148 | 0.16770099  | 0.140423216 |
| 0.160367121 | 0.141777071 | 0.080402975 | 0.260796013 |
| 0.218470878 | 0.190423204 | 0.187538661 | 0.141664481 |
| 0.224471002 | 0.308478643 | 0.298966169 | 0.236294424 |
| 0.164006943 | 0.044199371 | 0.10092199  | 0.114124231 |
| 0.188405538 | 0.196802523 | 0.057515153 | 0.352587775 |
| 0.287746812 | 0.199095101 | 0.167528649 | 0.375640203 |
| 0.157553791 | 0.318089873 | 0.22609748  | 0.179693835 |
| 0.338026636 | 0.333275352 | 0.291819264 | 0.12564024  |
| 0.309920191 | 0.130811661 | 0.042631558 | 0.246405539 |
| 0.296425122 | 0.005689055 | 0.218101786 | 0.239783043 |
| 0.294297948 | 0.197647244 | 0.29025224  | 0.254230667 |
| 0.290299484 | 0.193468263 | 0.008546367 | 0.166255627 |
| 0.325857817 | 0.26255525  | 0.123312308 | 0.09438305  |
| 0.115654605 | 0.114800442 | 0.172330509 | 0.073152393 |
| 0.342754884 | 0.226041955 | 0.23404506  | 0.22065876  |
| 0.137848067 | 0.315392979 | 0.07437152  | 0.32878964  |
| 0.14615445  | 0.171712912 | 0.17222719  | 0.221987263 |
| 0.072240982 | 0.176432638 | 0.132322957 | 0.117606503 |
| 0.206509309 | 0.11871236  | 0.047741232 | 0.132050413 |
| 0.22178162  | 0.110250533 | 0.169083081 | 1           |
| 0.160856743 | 0.300375146 | 0.166342523 | 0.127817239 |
| 0.124937418 | 0.374071456 | 0.147070284 | 0.254827469 |
| 0.094982077 | 0.254529026 | 0.174782874 | 0.29379578  |
| 0.31160293  | 0.088015524 | 0.254362669 | 0.043100498 |
| 0.118162343 | 0.052185877 | 0.028745979 | 0.085810961 |
| 0.326153733 | 0.159828262 | 0.146560662 | 0.153453492 |
| 0.163190244 | 0.152550231 | 0.095212342 | 0.34406567  |
| 0.25538215  | 0.091189583 | 0.243014471 | 0.12401959  |
| 0.044518368 | 0.157912879 | 0.205878727 | 0.084603458 |
| 0.211323735 | 0.031647836 | 0.036351368 | 0.246207522 |
| 0.060467776 | 0.067852659 | 0.231079635 | 0.147439513 |
| 0.083668522 | 0.32243928  | 0.291977188 | 0.015727599 |
| 0.083521273 | 0.056040927 | 0.198776921 | 0.076292443 |
| 0.202538831 | 0.231087748 | 0.081285833 | 0.085482776 |
| 0.200239047 | 0.307599193 | 0.228847742 | 0.269033364 |
| 0.085149299 | 0.302754497 | 0.211171843 | 0.250332021 |
| 0.176160498 | 0.074773028 | 0.018527903 | 0.216147457 |
| 0.230048697 | 0.097714565 | 0.209021091 | 0.172598056 |
| 0.092216841 | 0.147005313 | 0.075056169 | 0.288173928 |
| 0.346071992 | 0.295575349 | 0.145322672 | 0.18775135  |
| 0.248900302 | 0.168184402 | 0.209445975 | 0.307668467 |
| 0.07793021  | 0.097881964 | 0.093926323 | 0.215842616 |
| 0.229767285 | 0.079671626 | 0.280702542 | 0.022720882 |

|             |             |             |             |
|-------------|-------------|-------------|-------------|
| 0.00045195  | 0.171970368 | 0.175650991 | 0.134949796 |
| 0.041812014 | 0.109668854 | 0.15623467  | 0.294281745 |
| 0.184377414 | 0.257934755 | 0.233461342 | 0.123132025 |
| 0.30105372  | 0.086590779 | 0.07589573  | 0.117346865 |
| 0.246926547 | 0.057622371 | 0.126742232 | 0.367740027 |
| 0.160688783 | 0.048893308 | 0.132090725 | 0.008201719 |
| 0.181797299 | 0.189793359 | 0.275492901 | 0.345169008 |
| 0.236754739 | 0.332156071 | 0.250326004 | 0.091931824 |
| 0.179949944 | 0.17427414  | 0.009110352 | 0.262373312 |
| 0.28243025  | 0.276284527 | 0.284889112 | 0.299817477 |
| 0.246990835 | 0.168392242 | 0.197934983 | 0.124693282 |
| 0.198990546 | 0.169208655 | 0.064191544 | 0.141556663 |
| 0.012428205 | 0.195538517 | 0.094477849 | 0.247481386 |
| 0.162574884 | 0.212042771 | 0.144723654 | 0.100185051 |
| 0.100713021 | 0.028808971 | 0.138322503 | 0.139996849 |
| 0.171143058 | 0.103510852 | 0.065580867 | 0.082973091 |
| 0.29279915  | 0.279343151 | 0.059461786 | 0.305990927 |
| 0.137386637 | 0.234653004 | 0.116045191 | 0.163638112 |
| 0.190751045 | 0.052052381 | 0.115692794 | 0.008971976 |
| 0.044551762 | 0.296527127 | 0.08352787  | 0.170892129 |
| 0.197136909 | 0.066163069 | 0.281356828 | 0.311402804 |
| 0.280544665 | 0.27419004  | 0.28031209  | 0.052684319 |
| 0.295454459 | 0.008680571 | 0.280429423 | 0.240321793 |
| 0.080416631 | 0.007790124 | 0.023531534 | 0.232098734 |
| 0.112446589 | 0.191682081 | 0.220353233 | 0.082200225 |
| 0.157727873 | 0.165669729 | 0.148737131 | 0.061078558 |
| 0.125310671 | 0.098181599 | 0.053255677 | 0.309697679 |
| 0.163224597 | 0.158251648 | 0.101111942 | 0.225275878 |
| 0.104383269 | 0.159943002 | 0.219143259 | 0.011320869 |
| 0.159107184 | 0.265868998 | 0.355932034 | 0.28413487  |
| 0.319066137 | 0.14855536  | 0.059961231 | 0.07530115  |
| 0.217546379 | 0.196682305 | 0.058311929 | 0.183224703 |
| 0.279171929 | 0.150945427 | 0.247919963 | 0.2882716   |
| 0.305672968 | 0.308476649 | 0.155714042 | 0.212770069 |
| 0.0448917   | 0.002611347 | 0.117429592 | 0.222958889 |
| 0.024316174 | 0.095194918 | 0.276768432 | 0.120503637 |
| 0.108385348 | 0.119639318 | 0.051725058 | 0.058575283 |
| 0.18260843  | 0.121243288 | 0.076185312 | 0.232493292 |
| 0.095682008 | 0.083548112 | 0.12691718  | 0.165264284 |
| 0.086185726 | 0.293285343 | 0.321656856 | 0.142876529 |
| 0.093201081 | 0.095089257 | 0.166062846 | 0.230383305 |
| 0.231065876 | 0.24722091  | 0.176781765 | 0.061117035 |
| 0.287717076 | 0.117796402 | 0.254149296 | 0.270040397 |
| 0.334648961 | 0.323747628 | 0.34397899  | 0.136742628 |
| 0.158624091 | 0.142132807 | 0.080148558 | 0.09345103  |
| 0.279199958 | 0.196319372 | 0.278522314 | 0.053777679 |
| 0.227298407 | 0.169331915 | 0.118941376 | 0.182404677 |
| 0.084088561 | 0.21346385  | 0.136251613 | 0.220822377 |
| 0.126114926 | 0.047851279 | 0.176551537 | 0.193668891 |
| 0.257273765 | 0.038855996 | 0.224631684 | 0.114298779 |
| 0.220324029 | 0.053515109 | 0.162983265 | 0.332569135 |
| 0.22176956  | 0.19021655  | 0.142350675 | 0.174723538 |
| 0.198609926 | 0.088699681 | 0.054225253 | 0.245665583 |
| 0.260313541 | 0.135208492 | 0.296534175 | 0.258374087 |

|             |             |             |             |
|-------------|-------------|-------------|-------------|
| 0.224932888 | 0.090791097 | 0.064418779 | 0.130673545 |
| 0.19907506  | 0.097144567 | 0.144200812 | 0.187594126 |
| 0.280510627 | 0.350769988 | 0.261273019 | 0.149673559 |
| 0.100075121 | 0.191086296 | 0.182911633 | 0.211202345 |
| 0.055441687 | 0.178265673 | 0.077998646 | 0.186201939 |
| 0.004789415 | 0.020100028 | 0.259848253 | 0.122091411 |
| 0.3226106   | 0.258875121 | 0.311406594 | 0.1159985   |
| 0.001240605 | 0.132552807 | 0.147619816 | 0.102768963 |
| 0.254384869 | 0.224351195 | 0.07736699  | 0.157929296 |
| 0.26120893  | 0.203892607 | 0.17068803  | 0.079072185 |
| 0.039078854 | 0.161298967 | 0.244763257 | 0.182185784 |
| 0.133355677 | 0.215185466 | 0.039757306 | 0.142625947 |
| 0.039158962 | 0.257133163 | 0.254302898 | 0.061736839 |
| 0.050397859 | 0.254729831 | 0.233483765 | 0.124216275 |
| 0.06965693  | 0.233557864 | 0.241516521 | 0.031806802 |
| 0.162042749 | 0.079310004 | 0.128519903 | 0.125760408 |
| 0.130091259 | 0.142814381 | 0.147894975 | 0.098752819 |
| 0.185642857 | 0.170644256 | 0.131636753 | 0.191253867 |
| 0.124236688 | 0.153969855 | 0.120734636 | 0.125661168 |
| 0.094366675 | 0.166557478 | 0.267919062 | 0.283974323 |
| 0.118472963 | 0.225862138 | 0.30146284  | 0.198107625 |
| 0.181235191 | 0.120108314 | 0.296227994 | 0.282432775 |
| 0.256889141 | 0.242881368 | 0.117432688 | 0.231476411 |
| 0.047029623 | 0.092266623 | 0.169796276 | 0.119598571 |
| 0.16092163  | 0.074791194 | 0.091821606 | 0.190387131 |
| 0.17955322  | 0.338551435 | 0.285498614 | 0.274128165 |
| 0.107741117 | 0.104317305 | 0.07096401  | 0.133041068 |
| 0.193365688 | 0.247911191 | 0.081418863 | 0.030703356 |
| 0.181321515 | 0.129937074 | 0.222264303 | 0.308849781 |
| 0.044682751 | 0.273470057 | 0.07430478  | 0.195605939 |
| 0.056866826 | 0.313488604 | 0.253151475 | 0.170324295 |
| 0.029027477 | 0.14412793  | 0.114735258 | 0.097231398 |
| 0.170371775 | 0.16010827  | 0.079713104 | 0.157153371 |
| 0.155378673 | 0.209005571 | 0.332356578 | 0.156010267 |
| 0.110189627 | 0.067513445 | 0.126063655 | 0.127018387 |
| 0.134857857 | 0.264964571 | 0.156882124 | 0.268668277 |
| 0.109803854 | 0.249499186 | 0.347369451 | 0.115138877 |
| 0.113748666 | 0.089857746 | 0.027438701 | 0.094162977 |
| 0.150924552 | 0.052084667 | 0.003979021 | 0.037445862 |
| 0.210893272 | 0.088794744 | 0.202583543 | 0.191294005 |
| 0.074244712 | 0.229887714 | 0.01795461  | 0.167394675 |
| 0.29692439  | 0.338584827 | 0.148592764 | 0.274704022 |
| 0.233976121 | 0.160859762 | 0.143461003 | 0.011661494 |
| 0.129824082 | 0.099013087 | 0.078709883 | 0.156438628 |
| 0.123974967 | 0.037260481 | 0.142899682 | 0.18599495  |
| 0.244685318 | 0.026969266 | 0.139815661 | 0.150700537 |
| 0.244294591 | 0.351680027 | 0.124927975 | 0.176571776 |
| 0.148715872 | 0.206297087 | 0.069158056 | 0.088823872 |
| 0.099798273 | 0.07032289  | 0.206368435 | 0.050092692 |
| 0.147214568 | 0.101195194 | 0.029917539 | 0.364885277 |
| 0.336422506 | 0.075374725 | 0.293276162 | 0.055291477 |
| 0.202098617 | 0.234817673 | 0.101467302 | 0.077044445 |
| 0.058977436 | 0.106548889 | 0.173908867 | 0.235485364 |
| 0.046872279 | 0.135406169 | 0.11505057  | 0.081556348 |

|             |             |             |             |
|-------------|-------------|-------------|-------------|
| 0.363408316 | 0.110895689 | 0.275175055 | 0.074157382 |
| 0.274660432 | 0.207965119 | 0.22743721  | 0.071423811 |
| 0.139870789 | 0.204672282 | 0.075029301 | 0.308613899 |
| 0.139317046 | 0.054351973 | 0.205290708 | 0.170516103 |
| 0.062045505 | 0.250212904 | 0.107740739 | 0.304647073 |
| 0.116700159 | 0.224387128 | 0.181714267 | 0.278796224 |
| 0.233907037 | 0.055711825 | 0.055924893 | 0.110849331 |
| 0.284969226 | 0.122843951 | 0.072529366 | 0.238860094 |
| 0.050695869 | 0.180335743 | 0.125812886 | 0.09346602  |
| 0.096256223 | 0.148726898 | 0.084837219 | 0.216950077 |
| 0.176923989 | 0.109809555 | 0.08893575  | 0.308128367 |
| 0.103028668 | 0.077879534 | 0.323691147 | 0.005396775 |
| 0.12732015  | 0.139666626 | 0.16040704  | 0.090040597 |
| 0.280420844 | 0.171026435 | 0.155030405 | 0.031565533 |
| 0.211175195 | 0.01725843  | 0.08737193  | 0.097101592 |
| 0.064612437 | 0.184973225 | 0.284568229 | 0.270036793 |
| 0.179857039 | 0.0607455   | 0.056022455 | 0.2766597   |
| 0.030836772 | 0.045815769 | 0.066442635 | 0.160262691 |
| 0.039236228 | 0.078890688 | 0.075922801 | 0.062510323 |
| 0.196792996 | 0.129210977 |             |             |
| CYB5R4      | 0.175250175 | 0.056758927 | 0.129526968 |
| 0.093145012 | 0.064567632 | 0.022427794 | 0.169194582 |
| 0.120508448 | 0.060881292 | 0.003232905 | 0.071999673 |
| 0.182016658 | 0.003102886 | 0.093352092 | 0.169078772 |
| 0.04070293  | 0.208286492 | 0.253828552 | 0.01305134  |
| 0.029923479 | 0.07513177  | 0.009849502 | 0.030474914 |
| 0.056479593 | 0.253271797 | 0.054799774 | 0.014720226 |
| 0.066593422 | 0.001521831 | 0.037501937 | 0.002040924 |
| 0.169488406 | 0.055847817 | 0.009746935 | 0.126926336 |
| 0.034070829 | 0.004108224 | 0.15839087  | 0.086934046 |
| 0.010953571 | 0.19312179  | 0.007788757 | 0.122921319 |
| 0.014385969 | 0.16095623  | 0.000223093 | 0.032322666 |
| 0.05065964  | 0.047550564 | 0.152105932 | 0.042652096 |
| 0.01454974  | 0.107903662 | 0.024286174 | 0.008479592 |
| 0.009176695 | 0.000153751 | 0.002898487 | 0.089316365 |
| 0.279109812 | 0.251626618 | 0.002180539 | 0.052277646 |
| 0.027846984 | 0.056581359 | 0.171084309 | 0.008735756 |
| 0.093930256 | 0.006153232 | 0.030143516 | 0.044224942 |
| 0.034024389 | 0.123143366 | 0.326968584 | 0.137633839 |
| 0.014405351 | 0.206281449 | 0.057918613 | 0.015920822 |
| 0.051953804 | 0.134874445 | 0.179801042 | 0.091271079 |
| 0.009864157 | 0.032152857 | 0.030140325 | 0.16918109  |
| 0.070609836 | 0.098165609 | 0.082978293 | 0.120130071 |
| 0.121064853 | 0.014613572 | 0.0544988   | 0.191017561 |
| 0.063646857 | 0.005347683 | 0.010959945 | 0.011429973 |
| 0.051749208 | 0.046303423 | 0.105817425 | 0.190558854 |
| 0.038608043 | 0.200216125 | 0.102207098 | 0.030463406 |
| 0.058332062 | 0.216345043 | 0.034608288 | 0.045677874 |
| 0.052594132 | 0.074127083 | 0.04672819  | 0.103941678 |
| 0.03110392  | 0.08899306  | 0.079100351 | 0.08244076  |
| 0.000729781 | 0.084701361 | 0.198702074 | 0.188326757 |
| 0.119101631 | 0.180792295 | 0.017577167 | 0.199396061 |
| 0.063861624 | 0.104472325 | 0.155196241 | 0.148073321 |
| 0.075554255 | 0.084397857 | 0.079031919 | 0.082952614 |

|             |             |             |             |
|-------------|-------------|-------------|-------------|
| 0.226935132 | 0.005832416 | 0.032336082 | 0.043148732 |
| 0.076637207 | 0.24183868  | 0.025884956 | 0.119626197 |
| 0.162048831 | 0.066108395 | 0.099388365 | 0.145830342 |
| 0.09012878  | 0.129140162 | 0.04971806  | 0.245654678 |
| 0.118505641 | 0.112322285 | 0.110219619 | 0.042547947 |
| 0.118383107 | 0.069234454 | 0.006840599 | 0.094333102 |
| 0.134076214 | 0.006966622 | 0.052128585 | 0.06223109  |
| 0.081885162 | 0.049774049 | 0.100184299 | 0.074803193 |
| 0.077915202 | 0.262854074 | 0.000251403 | 0.134772609 |
| 0.100962187 | 0.13222061  | 0.083580574 | 0.017641787 |
| 0.048120885 | 0.035131559 | 0.04530338  | 0.009862388 |
| 0.150275624 | 0.071105039 | 0.055868239 | 0.070440794 |
| 0.035893893 | 0.206723823 | 0.014085663 | 0.105317651 |
| 0.17056171  | 0.154963547 | 0.21486812  | 0.13426244  |
| 0.004959033 | 0.264541465 | 0.031042772 | 0.041513269 |
| 0.27827284  | 0.031538312 | 0.00609097  | 0.053258472 |
| 0.215361002 | 0.0209193   | 0.184184226 | 0.160856743 |
| 1           | 0.301750415 | 0.084319159 | 0.105939611 |
| 0.121867922 | 0.218638053 | 0.030449565 | 0.078037128 |
| 0.025660991 | 0.215487005 | 0.049416631 | 0.127643007 |
| 0.185503446 | 0.030123979 | 0.223721574 | 0.117016873 |
| 0.024074709 | 0.00294297  | 0.003743293 | 0.016577895 |
| 0.245291515 | 0.051442918 | 0.048677104 | 0.068880572 |
| 0.088317656 | 0.090171235 | 0.019229488 | 0.174265778 |
| 0.189534321 | 0.047311265 | 0.092530972 | 0.021458135 |
| 0.110329336 | 0.09312147  | 0.063389904 | 0.044162605 |
| 0.095252564 | 0.01162407  | 0.005338741 | 0.078728822 |
| 0.00592642  | 0.026609501 | 0.063299929 | 0.06416221  |
| 0.010302185 | 0.161903059 | 0.09645626  | 0.001026758 |
| 0.025604032 | 0.07711827  | 0.19238193  | 0.007863218 |
| 0.186518635 | 0.178800919 | 0.041911995 | 0.043017288 |
| 0.174385295 | 0.093636839 | 0.098314863 | 0.081169758 |
| 0.010365592 | 0.101243185 | 0.062254431 | 0.10356707  |
| 0.09336363  | 0.011053404 | 0.002616155 | 0.069394545 |
| 0.071534293 | 0.008726312 | 0.19698281  | 0.034311263 |
| 0.012278479 | 0.044822762 | 0.050679098 | 0.108097089 |
| 0.151859504 | 0.07299273  | 0.154634935 | 0.100289709 |
| 0.138382645 | 0.171611277 | 0.079650847 | 0.109248659 |
| 0.003456043 | 0.032905955 | 0.027889894 | 0.115703309 |
| 0.26166021  | 0.033204834 | 0.162477602 | 0.002747963 |
| 0.00023321  | 0.181724647 | 0.244507773 | 0.186883843 |
| 0.021520426 | 0.015931281 | 0.057640749 | 0.088882103 |
| 0.272735051 | 0.115286587 | 0.155139863 | 0.048296292 |
| 0.104695052 | 0.024428489 | 0.022136493 | 0.044396129 |
| 0.202229207 | 0.12012509  | 0.125135567 | 0.140120539 |
| 0.160199339 | 0.013975476 | 0.05377202  | 0.016857967 |
| 0.171780509 | 0.031446396 | 0.253802287 | 0.306742354 |
| 0.085999842 | 0.257559853 | 0.199055802 | 0.006440195 |
| 0.12399481  | 0.28410218  | 0.049692773 | 0.073984608 |
| 0.080518265 | 0.082383133 | 0.077361471 | 0.089939131 |
| 0.071420556 | 0.048669698 | 0.072596638 | 0.041046985 |
| 0.142603364 | 0.121805643 | 0.016237729 | 0.093456766 |
| 0.009997493 | 0.11299429  | 0.054836633 | 0.335101975 |
| 0.04706418  | 0.121842208 | 0.182187092 | 0.039285814 |

|             |                      |             |             |
|-------------|----------------------|-------------|-------------|
| 0.112712654 | 0.003222362          | 0.025898677 | 0.100919496 |
| 0.097474259 | 0.144154755          | 0.010861559 | 0.009407395 |
| 0.100241486 | 0.146821246          | 0.008082678 | 0.095327205 |
| 0.102244341 | 0.134186392          | 0.076900696 | 0.076323106 |
| 0.205267895 | 0.003847591          | 0.021951726 | 0.000927348 |
| 0.006448275 | 0.100033029          | 0.013113044 | 0.107482556 |
| 0.177143061 | 0.135246042          | 0.134276423 | 0.103029393 |
| 0.072444414 | 0.084886706          | 0.093507464 | 0.019388082 |
| 0.095205233 | 1.95E-05 0.079307175 | 0.073446432 |             |
| 0.006886429 | 0.019167308          | 0.059779403 | 0.065740985 |
| 0.037644753 | 0.16249285           | 0.288516207 | 0.009690983 |
| 0.149987478 | 0.100001718          | 0.186951122 | 0.037196834 |
| 0.035570935 | 0.103792878          | 0.02367329  | 0.086298579 |
| 0.142200973 | 0.172424696          | 0.01393678  | 0.240233314 |
| 0.033133087 | 0.180129499          | 0.219813744 | 0.034425384 |
| 0.082331965 | 0.204932851          | 0.117866024 | 0.081577074 |
| 0.131655792 | 0.065176352          | 0.003181059 | 0.009828385 |
| 0.068145308 | 0.132048829          | 0.004236897 | 0.145585782 |
| 0.072770916 | 0.057707823          | 0.194036809 | 0.19559396  |
| 0.116746705 | 0.117247827          | 0.236695236 | 0.08337882  |
| 0.097070269 | 0.0111110771         | 0.030398596 | 0.165194371 |
| 0.004645253 | 0.027146063          | 0.25110496  | 0.033024916 |
| 0.049186871 | 0.135952053          | 0.012752047 | 0.018629077 |
| 0.14820106  | 0.057461524          | 0.049585237 | 0.143861463 |
| 0.053532199 | 0.044301915          | 0.11974655  | 0.128257428 |
| 0.011705626 | 0.145298936          | 0.256970932 | 0.177678122 |
| 0.016442416 | 0.023763578          | 0.278475818 | 0.263187635 |
| 0.09054997  | 0.073717972          | 0.171837946 | 0.17585825  |
| 0.222157352 | 0.04483032           | 0.082325116 | 0.068554088 |
| 0.109597341 | 0.126660842          | 0.185760007 | 0.101443277 |
| 0.198801616 | 0.098180105          | 0.045543053 | 0.095025706 |
| 0.084547935 | 0.169447068          | 0.084044053 | 0.017581067 |
| 0.289476215 | 0.119899008          | 0.193561405 | 0.288204338 |
| 0.022902011 | 0.271349359          | 0.190887843 | 0.165668302 |
| 0.064761862 | 0.009595351          | 0.220918399 | 0.236454387 |
| 0.133445583 | 0.007750366          | 0.279163548 | 0.036290801 |
| 0.089780287 | 0.002279568          | 0.04454331  | 0.169805907 |
| 0.268284707 | 0.19422207           | 0.027465004 | 0.063817996 |
| 0.047427728 | 0.011083305          | 0.088314368 | 0.051278637 |
| 0.08940128  | 0.030973148          | 0.090482387 | 0.140549955 |
| 0.278430787 | 0.034671885          | 0.01222257  | 0.061430563 |
| 0.217259138 | 0.02723437           | 0.121301144 | 0.308144222 |
| 0.192038658 | 0.138100748          | 0.081162006 | 0.208680491 |
| 0.020198235 | 0.122263363          | 0.155665672 | 0.057282793 |
| 0.018192356 | 0.125540073          | 0.00761445  | 0.047834828 |
| 0.024745257 | 0.005281639          | 0.084826662 | 0.081459805 |
| 0.117551772 | 0.087360872          | 0.150559653 | 0.038101247 |
| 0.000516006 | 0.034404109          | 0.07797275  | 0.027649515 |
| 0.067650571 | 0.117924117          | 0.022750548 | 0.182362645 |
| 0.243178873 | 0.183204146          | 0.119232605 | 0.010593901 |
| 0.005241725 | 0.04100149           | 0.294494948 | 0.137312709 |
| 0.134989143 | 0.133634942          | 0.008499432 | 0.128287912 |
| 0.008979849 | 0.278691091          | 0.172262817 | 0.003295815 |
| 0.006784493 | 0.091183421          | 0.072953352 | 0.174610597 |

|             |             |              |             |
|-------------|-------------|--------------|-------------|
| 0.021967634 | 0.085994561 | 0.096071839  | 0.039678203 |
| 0.051222607 | 0.191759752 | 0.151906411  | 0.144097804 |
| 0.141644809 | 0.119734906 | 0.146411957  | 0.046617277 |
| 0.07050716  | 0.146799203 | 0.099679318  | 0.232026769 |
| 0.133841414 | 0.130669978 | 0.046679258  | 0.040540828 |
| 0.05205848  | 0.192310666 | 0.243081329  | 0.230103991 |
| 0.163013777 | 0.059821937 | 0.271579164  | 0.203631745 |
| 0.206129279 | 0.029104721 | 0.216890895  | 0.070038251 |
| 0.135275826 | 0.157062428 | 0.047421158  | 0.061793856 |
| 0.00169435  | 0.014831524 | 0.112567961  | 0.040483067 |
| 0.172826425 | 0.030148814 | 0.018122222  | 0.068293731 |
| 0.035872722 | 0.193409569 | 0.259694757  | 0.12050491  |
| 0.044353377 | 0.025941864 | 0.004551657  | 0.160522372 |
| 0.189591663 | 0.243854271 | 0.063916716  | 0.122187855 |
| 0.10765085  | 0.034244004 | 0.0611110864 | 0.095915896 |
| 0.006729086 | 0.162709291 | 0.004138892  | 0.150444985 |
| 0.002419039 | 0.168295015 | 0.316656666  | 0.039376936 |
| 0.003559156 | 0.132326134 | 0.084284551  | 0.013422885 |
| 0.050939464 | 0.035819557 | 0.03107673   | 0.089010768 |
| 0.128275549 | 0.168775386 | 0.110548562  | 0.128616191 |
| 0.018559863 | 0.041186688 | 0.019582734  | 0.088043571 |
| 0.122703781 | 0.073886641 | 0.257491982  | 0.072821131 |
| 0.043267749 | 0.237352835 | 0.15963055   | 0.060726136 |
| 0.028439613 | 0.092234136 | 0.005144247  | 0.012215699 |
| 0.067410408 | 0.008580875 | 0.000130515  | 0.010216247 |
| 0.166714989 | 0.013964566 | 0.039073034  | 0.080025644 |
| 0.040877501 | 0.154078814 | 0.002550163  | 0.073955119 |
| 0.074563899 | 0.107580728 | 0.055403373  | 0.252365115 |
| 0.126431654 | 0.216551191 | 0.034382374  | 0.00210556  |
| 0.029513038 | 0.016083283 | 0.004709432  | 0.198206305 |
| 0.170325809 | 0.006381097 | 0.034285552  | 0.154786686 |
| 0.080972822 | 0.002529348 | 0.028439235  | 0.042917802 |
| 0.200767025 | 0.115562639 | 0.12767624   | 0.080326238 |
| 0.06143588  | 0.173628582 | 0.017169646  | 0.01731722  |
| 0.048484878 | 0.027467911 | 0.118841048  | 0.02183432  |
| 0.23199701  | 0.044548336 | 0.044593606  | 0.190890756 |
| 0.098574214 | 0.021437604 | 0.261538874  | 0.002257329 |
| 0.203471016 | 0.10266624  | 0.028477536  | 0.012364937 |
| 0.161204456 | 0.041798951 | 0.216725065  | 0.089405281 |
| 0.003835118 | 0.035036207 | 0.15890861   | 0.031249762 |
| 0.127285141 | 0.020925977 | 0.211005012  | 0.00647557  |
| 0.073576826 | 0.064431717 | 0.141827473  | 0.031095082 |
| 0.024169957 | 0.264990958 | 0.007489576  | 0.099742256 |
| 0.184874441 | 0.028989485 | 0.074687365  | 0.134193148 |
| 0.017425276 | 0.096330555 | 0.01682339   | 0.09212563  |
| 0.134790438 | 0.236754404 | 0.063567539  | 0.084472234 |
| 0.210794045 | 0.031107878 | 0.01597926   | 0.078451437 |
| 0.08037917  | 0.120559137 | 0.014699736  | 0.125679794 |
| 0.014666773 | 0.141221017 | 0.020619927  | 0.084129942 |
| 0.165168262 | 0.083407104 | 0.019269801  | 0.271870102 |
| 0.139960499 | 0.054440488 | 0.042027259  | 0.193543462 |
| 0.100720748 | 0.154717751 | 0.16174585   | 0.002536169 |
| 0.053432538 | 0.067195321 | 0.168468864  | 0.035711587 |
| 0.267951159 | 0.069858666 | 0.042674823  | 0.063835108 |

|             |             |             |             |
|-------------|-------------|-------------|-------------|
| 0.088009476 | 0.01632071  | 0.032814127 | 0.054712068 |
| 0.008330532 | 0.175281138 | 0.107849727 | 0.090281901 |
| 0.10324019  | 0.005586261 | 0.003716973 | 0.090401549 |
| 0.009067965 | 0.003646758 | 0.008156923 | 0.033866715 |
| 0.011867736 | 0.007818852 | 0.009837067 | 0.010469388 |
| 0.086750142 | 0.071120667 |             |             |
| CYBA        | 0.347533272 | 0.203658737 | 0.295918819 |
| 0.194372237 | 0.109394757 | 0.139736914 | 0.361637626 |
| 0.341176548 | 0.189464539 | 0.077407112 | 0.149903016 |
| 0.287113193 | 0.016917774 | 0.20804102  | 0.358764582 |
| 0.105075662 | 0.308982503 | 0.348294694 | 0.083340406 |
| 0.186282913 | 0.114352383 | 0.080836309 | 0.170703716 |
| 0.116757085 | 0.336982337 | 0.193026165 | 0.085428266 |
| 0.203976524 | 0.037610339 | 0.119506783 | 0.042745666 |
| 0.280357012 | 0.100440655 | 0.071381339 | 0.267176068 |
| 0.140069667 | 0.011567298 | 0.316156356 | 0.15824623  |
| 0.033586734 | 0.296368433 | 0.104638847 | 0.198117502 |
| 0.109071355 | 0.31341585  | 0.040673509 | 0.107904243 |
| 0.180377317 | 0.196800605 | 0.326034177 | 0.138707035 |
| 0.119599931 | 0.222748025 | 0.132513516 | 0.022417085 |
| 0.051366871 | 0.005967619 | 0.028381794 | 0.253313041 |
| 0.301627245 | 0.314870007 | 0.046175147 | 0.231111122 |
| 0.121089746 | 0.141031099 | 0.253365851 | 0.096796081 |
| 0.232474092 | 0.034582881 | 0.113186005 | 0.148049076 |
| 0.158216292 | 0.317839234 | 0.337624734 | 0.316646032 |
| 0.104069905 | 0.258601853 | 0.135541771 | 0.067505475 |
| 0.197238335 | 0.308057652 | 0.272614893 | 0.272530825 |
| 0.039916187 | 0.085172991 | 0.101505215 | 0.206466487 |
| 0.167125198 | 0.318682987 | 0.15131045  | 0.267868886 |
| 0.330747866 | 0.114816834 | 0.149345814 | 0.336763382 |
| 0.195080339 | 0.06380983  | 0.101609809 | 0.041473228 |
| 0.108001133 | 0.100396048 | 0.289944508 | 0.237345544 |
| 0.121266438 | 0.337672275 | 0.303754044 | 0.074705985 |
| 0.131821365 | 0.333190723 | 0.102087289 | 0.138236014 |
| 0.135831755 | 0.204052289 | 0.162685613 | 0.184407132 |
| 0.091387531 | 0.223619422 | 0.157167797 | 0.215754713 |
| 0.025912028 | 0.245735913 | 0.291600863 | 0.318866945 |
| 0.329893535 | 0.318166022 | 0.109213122 | 0.254481571 |
| 0.171573164 | 0.220106804 | 0.292537024 | 0.190674943 |
| 0.162463468 | 0.274499405 | 0.241132222 | 0.174374515 |
| 0.351598801 | 0.050693798 | 0.0921292   | 0.231058333 |
| 0.163598339 | 0.356142491 | 0.061987511 | 0.303796851 |
| 0.245301993 | 0.143434119 | 0.308274935 | 0.339353121 |
| 0.268100343 | 0.261570289 | 0.179347972 | 0.284058154 |
| 0.283912299 | 0.293138511 | 0.229505781 | 0.100255536 |
| 0.279811204 | 0.18059488  | 0.063104975 | 0.195849145 |
| 0.249641313 | 0.00761882  | 0.164340078 | 0.178652789 |
| 0.238715784 | 0.13681234  | 0.226166851 | 0.203530422 |
| 0.240950743 | 0.36566792  | 0.006163774 | 0.168567866 |
| 0.266249566 | 0.209558884 | 0.246931395 | 0.088606595 |
| 0.112876744 | 0.166736348 | 0.138800741 | 0.071304077 |
| 0.289493979 | 0.180027572 | 0.182297918 | 0.171595851 |
| 0.170716426 | 0.303715068 | 0.070936314 | 0.298270922 |
| 0.328843595 | 0.32343925  | 0.321513369 | 0.228168919 |



|             |             |             |             |
|-------------|-------------|-------------|-------------|
| 0.10084734  | 0.278151005 | 0.16639226  | 0.125707501 |
| 0.287554641 | 0.192491945 | 0.056347111 | 0.108913104 |
| 0.317043101 | 0.110558716 | 0.312278958 | 0.300375146 |
| 0.301750415 | 1           | 0.20755845  | 0.249306181 |
| 0.181545413 | 0.395442454 | 0.118681236 | 0.200394139 |
| 0.119783193 | 0.301972382 | 0.148086655 | 0.244534566 |
| 0.257289958 | 0.089367809 | 0.299482084 | 0.081072768 |
| 0.091649555 | 0.054778611 | 0.027261336 | 0.091108994 |
| 0.377039518 | 0.174519574 | 0.124909827 | 0.121425697 |
| 0.228656464 | 0.314441945 | 0.098479794 | 0.322664144 |
| 0.318197357 | 0.125407215 | 0.17551307  | 0.120797869 |
| 0.139348623 | 0.185264219 | 0.151871138 | 0.106750436 |
| 0.210888598 | 0.037395428 | 0.044383331 | 0.177151545 |
| 0.059687489 | 0.084056272 | 0.185509109 | 0.124515552 |
| 0.116156783 | 0.347235122 | 0.232219492 | 0.008952871 |
| 0.102519334 | 0.087173828 | 0.202892213 | 0.103479976 |
| 0.257021315 | 0.225195622 | 0.093244071 | 0.109886989 |
| 0.303740807 | 0.25158865  | 0.205456914 | 0.212133089 |
| 0.077091452 | 0.239183623 | 0.152093785 | 0.199204059 |
| 0.193354807 | 0.079295701 | 0.017890275 | 0.149987095 |
| 0.167178832 | 0.082148158 | 0.327925709 | 0.123337403 |
| 0.094668746 | 0.110882369 | 0.11652476  | 0.218565135 |
| 0.307741112 | 0.253011195 | 0.264368919 | 0.149813329 |
| 0.193966555 | 0.264631204 | 0.17645278  | 0.252273519 |
| 0.07621852  | 0.097559713 | 0.091095794 | 0.16596817  |
| 0.311837002 | 0.094074075 | 0.275540613 | 0.02660808  |
| 0.000659368 | 0.359246649 | 0.345009589 | 0.224221852 |
| 0.049631918 | 0.101827845 | 0.13430551  | 0.229796654 |
| 0.337782711 | 0.237163568 | 0.273622545 | 0.11844079  |
| 0.232313739 | 0.105336755 | 0.085916073 | 0.120127148 |
| 0.286690995 | 0.12228419  | 0.217247155 | 0.311773792 |
| 0.307434232 | 0.055993476 | 0.209799509 | 0.017369721 |
| 0.343755198 | 0.149971844 | 0.331729943 | 0.373193523 |
| 0.188178495 | 0.350295467 | 0.284843241 | 0.092728268 |
| 0.182615998 | 0.361113033 | 0.029114041 | 0.205189654 |
| 0.239715692 | 0.235270018 | 0.239573196 | 0.273835607 |
| 0.19201044  | 0.152628005 | 0.140526015 | 0.178404467 |
| 0.342823799 | 0.336698384 | 0.051190526 | 0.159493644 |
| 0.031030854 | 0.174044337 | 0.144814899 | 0.342386064 |
| 0.126091375 | 0.219991714 | 0.339318838 | 0.113071082 |
| 0.192054336 | 0.024911668 | 0.191434075 | 0.230217342 |
| 0.154075957 | 0.273510464 | 0.067145289 | 0.069673626 |
| 0.259882265 | 0.250830102 | 0.065598505 | 0.252426894 |
| 0.170348856 | 0.286646026 | 0.135192754 | 0.147524548 |
| 0.357365952 | 0.03743886  | 0.160539929 | 0.008779211 |
| 0.09195413  | 0.271522492 | 0.10346881  | 0.286867092 |
| 0.22915852  | 0.174964926 | 0.241905491 | 0.257322218 |
| 0.243677372 | 0.207248952 | 0.227594308 | 0.058741037 |
| 0.237338453 | 0.008307194 | 0.224151874 | 0.191965248 |
| 0.082063246 | 0.0139468   | 0.069562521 | 0.171696868 |
| 0.102491154 | 0.299070227 | 0.32629267  | 0.111293198 |
| 0.278752453 | 0.307818192 | 0.359346859 | 0.074735607 |
| 0.134134498 | 0.146057413 | 0.07831345  | 0.25779015  |
| 0.22157227  | 0.247126949 | 0.132153199 | 0.353439259 |

|             |             |             |             |
|-------------|-------------|-------------|-------------|
| 0.116097957 | 0.318910308 | 0.347196691 | 0.026851608 |
| 0.148451176 | 0.314226404 | 0.325748947 | 0.234390305 |
| 0.261862718 | 0.124692984 | 0.063854364 | 0.118312845 |
| 0.18126562  | 0.288790062 | 0.074973219 | 0.313397595 |
| 0.226149947 | 0.118026948 | 0.223879833 | 0.248072857 |
| 0.234743707 | 0.248643252 | 0.347309136 | 0.149170832 |
| 0.128773671 | 0.009106975 | 0.147400475 | 0.265572969 |
| 0.047816982 | 0.094795677 | 0.274063802 | 0.187824801 |
| 0.197752407 | 0.276471279 | 0.050609967 | 0.05394729  |
| 0.193349624 | 0.138169554 | 0.087465407 | 0.268697099 |
| 0.125831034 | 0.084347272 | 0.234710448 | 0.300677362 |
| 0.125646658 | 0.255541812 | 0.328509324 | 0.317705265 |
| 0.102108345 | 0.094886851 | 0.356664641 | 0.339200118 |
| 0.17485269  | 0.18405512  | 0.291484371 | 0.117543922 |
| 0.282091869 | 0.147103878 | 0.194700255 | 0.2211676   |
| 0.285801009 | 0.258685206 | 0.320262971 | 0.200604369 |
| 0.358097752 | 0.161528178 | 0.090343508 | 0.159959117 |
| 0.227630392 | 0.317224678 | 0.247237796 | 0.058816423 |
| 0.35942273  | 0.23996165  | 0.268921415 | 0.365965697 |
| 0.084850717 | 0.324546655 | 0.217265174 | 0.288114153 |
| 0.143238683 | 0.055409075 | 0.3649246   | 0.291742958 |
| 0.20950343  | 0.028823783 | 0.327622348 | 0.20615597  |
| 0.205275189 | 0.075472632 | 0.115170448 | 0.277554749 |
| 0.348550138 | 0.338637183 | 0.175822148 | 0.162090936 |
| 0.143940078 | 0.093729949 | 0.14786233  | 0.200024756 |
| 0.214805975 | 0.111036799 | 0.256097623 | 0.205498954 |
| 0.361034923 | 0.097012939 | 0.071135977 | 0.124783534 |
| 0.306762379 | 0.150203119 | 0.239365635 | 0.370354799 |
| 0.284452169 | 0.319773323 | 0.197628417 | 0.258000465 |
| 0.117081778 | 0.309081994 | 0.306385042 | 0.181343618 |
| 0.04800744  | 0.308150229 | 0.105700443 | 0.142673385 |
| 0.011080034 | 0.023475682 | 0.206072638 | 0.22725714  |
| 0.277758438 | 0.190629537 | 0.26095341  | 0.228330476 |
| 0.000436309 | 0.100694103 | 0.141888091 | 0.106946618 |
| 0.195466502 | 0.225425258 | 0.191797815 | 0.284317129 |
| 0.256340884 | 0.310271487 | 0.237594447 | 0.127278738 |
| 0.02967444  | 0.15508686  | 0.307434461 | 0.273980864 |
| 0.20527069  | 0.304126203 | 0.052912044 | 0.245988802 |
| 0.049469422 | 0.284045032 | 0.208955367 | 0.093956246 |
| 0.032245253 | 0.198966097 | 0.161424684 | 0.3149142   |
| 0.087881421 | 0.184194446 | 0.214138743 | 0.02669269  |
| 0.120167214 | 0.204729596 | 0.202386743 | 0.184952022 |
| 0.21486753  | 0.211361196 | 0.180469978 | 0.120771787 |
| 0.18092966  | 0.256489159 | 0.188677262 | 0.251745603 |
| 0.213757973 | 0.277712327 | 0.126298535 | 0.164695563 |
| 0.119656164 | 0.320155059 | 0.332347073 | 0.353918328 |
| 0.274623978 | 0.193574011 | 0.311185415 | 0.318783945 |
| 0.262135539 | 0.150508869 | 0.262607823 | 0.233677801 |
| 0.228367493 | 0.293298347 | 0.163362437 | 0.181975149 |
| 0.043788264 | 0.12982554  | 0.345300642 | 0.152502961 |
| 0.275224214 | 0.087220052 | 0.129517117 | 0.19783912  |
| 0.140554538 | 0.305361556 | 0.305171588 | 0.24341399  |
| 0.135269234 | 0.125480046 | 0.082008791 | 0.231224439 |
| 0.285092288 | 0.345781817 | 0.098498161 | 0.086061994 |

|             |             |             |             |
|-------------|-------------|-------------|-------------|
| 0.19442249  | 0.202533502 | 0.160136494 | 0.261256724 |
| 0.050761568 | 0.255366317 | 0.09420042  | 0.313163018 |
| 0.070037999 | 0.312011645 | 0.350876235 | 0.132899673 |
| 0.028315148 | 0.290294439 | 0.130030737 | 0.158590089 |
| 0.127083182 | 0.124499091 | 0.114230325 | 0.260050002 |
| 0.242502726 | 0.296825135 | 0.292500541 | 0.329154896 |
| 0.099786562 | 0.082220349 | 0.140089824 | 0.143918873 |
| 0.185642858 | 0.210820931 | 0.359959457 | 0.207434399 |
| 0.110489    | 0.341252082 | 0.30696417  | 0.219452768 |
| 0.20005695  | 0.197464977 | 0.026228574 | 0.131197952 |
| 0.229727605 | 0.063507699 | 0.002662128 | 0.026473847 |
| 0.195717726 | 0.122942179 | 0.147029829 | 0.175494275 |
| 0.094458803 | 0.196290915 | 0.02786297  | 0.228523619 |
| 0.255491552 | 0.304746507 | 0.154742992 | 0.279584307 |
| 0.213853746 | 0.325858185 | 0.156945075 | 0.020756294 |
| 0.10376122  | 0.08546183  | 0.087317614 | 0.35792474  |
| 0.294654602 | 0.029886549 | 0.118290254 | 0.321067024 |
| 0.181063427 | 0.026538588 | 0.14665403  | 0.131590911 |
| 0.325366577 | 0.309604699 | 0.228474173 | 0.142883094 |
| 0.268169843 | 0.264409993 | 0.088002499 | 0.110888545 |
| 0.114138009 | 0.071200522 | 0.163083226 | 0.055527146 |
| 0.31775503  | 0.136892796 | 0.025051287 | 0.332298667 |
| 0.291962059 | 0.074139654 | 0.324664572 | 0.071986907 |
| 0.223869865 | 0.218624798 | 0.127923856 | 0.093250211 |
| 0.151948047 | 0.093023079 | 0.295411605 | 0.203190499 |
| 0.034089761 | 0.13621002  | 0.253137573 | 0.093600012 |
| 0.342047237 | 0.099634805 | 0.288778039 | 0.056400548 |
| 0.232583127 | 0.192088784 | 0.288278875 | 0.131430805 |
| 0.127699887 | 0.357428291 | 0.106184846 | 0.252100382 |
| 0.237983578 | 0.057982996 | 0.144910596 | 0.212061458 |
| 0.069579988 | 0.234451648 | 0.101922963 | 0.255494854 |
| 0.197114459 | 0.268746584 | 0.14380559  | 0.217234219 |
| 0.231185198 | 0.068138589 | 0.056251048 | 0.130721524 |
| 0.243479461 | 0.245106211 | 0.079367699 | 0.210064019 |
| 0.043595845 | 0.216666862 | 0.14318699  | 0.135350258 |
| 0.23315868  | 0.283446301 | 0.134056461 | 0.348586981 |
| 0.202188269 | 0.121897207 | 0.106632739 | 0.273529727 |
| 0.185452864 | 0.149641066 | 0.279815893 | 0.002779636 |
| 0.192625712 | 0.130279194 | 0.266629647 | 0.110372929 |
| 0.314593496 | 0.189135941 | 0.173078406 | 0.067767505 |
| 0.162881593 | 0.030139522 | 0.144683765 | 0.113416376 |
| 0.070963032 | 0.35678475  | 0.256244873 | 0.208391338 |
| 0.232233557 | 0.092460169 | 0.058162874 | 0.239967153 |
| 0.030920139 | 0.052442041 | 0.073219658 | 0.141746455 |
| 0.044504581 | 0.085377125 | 0.089839726 | 0.068305065 |
| 0.188216674 | 0.247622205 |             |             |
| CYP20A1     | 0.106393494 | 0.184375359 | 0.070057021 |
| 0.051892215 | 0.158222694 | 0.087272284 | 0.07216242  |
| 0.09613136  | 0.143471772 | 0.024653545 | 0.202414328 |
| 0.051147671 | 0.007236197 | 0.29746615  | 0.06769399  |
| 0.168554295 | 0.067925302 | 0.163559126 | 0.009186871 |
| 0.01604362  | 0.179098626 | 0.052662901 | 0.126011832 |
| 0.121282929 | 0.233484742 | 0.129151684 | 0.086597893 |
| 0.246015955 | 0.014089742 | 0.176613909 | 0.007139398 |

|             |             |             |             |
|-------------|-------------|-------------|-------------|
| 0.331498595 | 0.18103905  | 0.075116657 | 0.023442039 |
| 0.129491445 | 0.000997596 | 0.302519585 | 0.14182852  |
| 0.013139031 | 0.305596724 | 0.050846573 | 0.171905437 |
| 0.077522934 | 0.074738274 | 0.006110536 | 0.149366869 |
| 0.105926482 | 0.061937609 | 0.083916925 | 0.161649905 |
| 0.055095919 | 0.2388039   | 0.1303912   | 0.017063644 |
| 0.066605637 | 0.003945971 | 0.029188199 | 0.266016341 |
| 0.275052334 | 0.171104336 | 0.014377462 | 0.072441376 |
| 0.120920336 | 0.163039009 | 0.187537929 | 0.055267548 |
| 0.300004785 | 0.027503243 | 0.152069099 | 0.030218305 |
| 0.109280152 | 0.037450068 | 0.241420595 | 0.069080298 |
| 0.060995143 | 0.205366033 | 0.158527561 | 0.06029316  |
| 0.196976877 | 0.314463243 | 0.177862637 | 0.259138389 |
| 0.010262224 | 0.129818677 | 0.062384203 | 0.250765246 |
| 0.178991572 | 0.046774428 | 0.276135969 | 0.32555274  |
| 0.044312731 | 0.092944259 | 0.19549764  | 0.144403481 |
| 0.204059016 | 0.022525541 | 0.086727586 | 0.045844675 |
| 0.166584927 | 0.167773677 | 0.251693302 | 0.321161037 |
| 0.094871042 | 0.104061825 | 0.259541357 | 0.128788142 |
| 0.152833598 | 0.115396136 | 0.070184319 | 0.21228823  |
| 0.191656216 | 0.270898924 | 0.193809013 | 0.242501084 |
| 0.157194739 | 0.283919661 | 0.235586725 | 0.22169625  |
| 0.003303178 | 0.274231466 | 0.181729724 | 0.078213429 |
| 0.078154786 | 0.093030717 | 0.033773292 | 0.254803958 |
| 0.238118437 | 0.213003813 | 0.196486793 | 0.192602106 |
| 0.257082566 | 0.24174723  | 0.26388074  | 0.268242562 |
| 0.091091698 | 0.024225656 | 0.149007747 | 0.067484354 |
| 0.229145669 | 0.135113616 | 0.095342281 | 0.299559364 |
| 0.334865001 | 0.24221759  | 0.092204403 | 0.306290165 |
| 0.095424363 | 0.334722643 | 0.208882305 | 0.229811346 |
| 0.304688108 | 0.286458729 | 0.319293049 | 0.190655005 |
| 0.288088487 | 0.167263184 | 0.006968996 | 0.230540119 |
| 0.336636271 | 0.003992598 | 0.223419972 | 0.250700582 |
| 0.26282169  | 0.236260076 | 0.301447464 | 0.264728439 |
| 0.261488776 | 0.122960956 | 0.001196796 | 0.247949855 |
| 0.291354535 | 0.305519638 | 0.065083294 | 0.126508986 |
| 0.168416996 | 0.124402471 | 0.173165977 | 0.049180928 |
| 0.34824566  | 0.234516786 | 0.231894997 | 0.230815401 |
| 0.081893155 | 0.30955194  | 0.096672447 | 0.262415075 |
| 0.045240868 | 0.141479057 | 0.106374499 | 0.200438489 |
| 0.031436307 | 0.227103427 | 0.12714114  | 0.123471389 |
| 0.262714949 | 0.085905904 | 0.050353933 | 0.205885218 |
| 0.101501823 | 0.138357447 | 0.128814968 | 0.166342523 |
| 0.084319159 | 0.20755845  | 1           | 0.081890892 |
| 0.211835603 | 0.222754043 | 0.172035664 | 0.251682646 |
| 0.080203347 | 0.206743871 | 0.204435659 | 0.320245489 |
| 0.371290017 | 0.139638208 | 0.230938934 | 0.020526505 |
| 0.066135645 | 0.025693913 | 0.025194206 | 0.101944219 |
| 0.188910953 | 0.103346701 | 0.193311654 | 0.236682598 |
| 0.195957777 | 0.071105144 | 0.096240446 | 0.326478084 |
| 0.151077567 | 0.130774885 | 0.312275402 | 0.116826375 |
| 0.005790311 | 0.216917103 | 0.248617315 | 0.025092493 |
| 0.188704397 | 0.026758687 | 0.033670762 | 0.264360024 |
| 0.03493268  | 0.069040789 | 0.239101246 | 0.200646294 |

|             |             |             |             |
|-------------|-------------|-------------|-------------|
| 0.029136943 | 0.180734569 | 0.297652348 | 0.006982402 |
| 0.085139691 | 0.036299296 | 0.290377849 | 0.048068492 |
| 0.232038421 | 0.26751977  | 0.137778809 | 0.101089313 |
| 0.161655417 | 0.291686571 | 0.230649402 | 0.284967294 |
| 0.069738709 | 0.302369689 | 0.256225927 | 0.306861469 |
| 0.1973132   | 0.072482966 | 0.014358471 | 0.268979449 |
| 0.247714247 | 0.022833371 | 0.102586369 | 0.180241676 |
| 0.068037962 | 0.196562782 | 0.020918698 | 0.319887973 |
| 0.325126187 | 0.227626981 | 0.145149809 | 0.252547179 |
| 0.33244287  | 0.223133566 | 0.208121597 | 0.307760398 |
| 0.024446658 | 0.146830377 | 0.106171525 | 0.271661149 |
| 0.222919527 | 0.066932591 | 0.232427314 | 0.016426673 |
| 0.000553526 | 0.107719828 | 0.137277612 | 0.181571335 |
| 0.055397677 | 0.108298653 | 0.178904012 | 0.297555946 |
| 0.200100348 | 0.26567112  | 0.169370429 | 0.152724251 |
| 0.28602814  | 0.098677531 | 0.110461552 | 0.158811174 |
| 0.215378447 | 0.015190518 | 0.054285566 | 0.327394903 |
| 0.067037416 | 0.063196557 | 0.115255116 | 0.003965082 |
| 0.080496898 | 0.151667302 | 0.143737725 | 0.251184257 |
| 0.27434821  | 0.228811068 | 0.231316124 | 0.040988237 |
| 0.254560824 | 0.143943538 | 0.004772328 | 0.236956586 |
| 0.228637086 | 0.216541683 | 0.228229935 | 0.218757017 |
| 0.212246119 | 0.15209312  | 0.229595428 | 0.128579713 |
| 0.091978719 | 0.06957049  | 0.058293325 | 0.197222879 |
| 0.002754465 | 0.249104112 | 0.110561506 | 0.238325941 |
| 0.202244337 | 0.205767691 | 0.081281614 | 0.127383592 |
| 0.030662745 | 0.034366739 | 0.067782387 | 0.113517505 |
| 0.208324272 | 0.032828387 | 0.028184491 | 0.046548578 |
| 0.26737636  | 0.282176227 | 0.054804539 | 0.286602524 |
| 0.235199684 | 0.112743012 | 0.161626781 | 0.225307402 |
| 0.102181478 | 0.010587839 | 0.072739896 | 0.002996832 |
| 0.013258118 | 0.233827435 | 0.064051635 | 0.031600256 |
| 0.263295743 | 0.018394625 | 0.280484844 | 0.308534957 |
| 0.228570464 | 0.294309644 | 0.296819149 | 0.095401635 |
| 0.29422709  | 0.003347067 | 0.277255213 | 0.221076589 |
| 0.063354868 | 0.004856547 | 0.008463667 | 0.253501919 |
| 0.176891513 | 0.080206706 | 0.219284211 | 0.039314617 |
| 0.092981381 | 0.094926033 | 0.083616446 | 0.065715558 |
| 0.150023249 | 0.175593808 | 0.048186225 | 0.261023379 |
| 0.174259131 | 0.188834143 | 0.073826327 | 0.126470587 |
| 0.138569651 | 0.069112502 | 0.108160301 | 0.008063473 |
| 0.202521033 | 0.150298521 | 0.267560226 | 0.268198549 |
| 0.338653234 | 0.208306122 | 0.038122007 | 0.024905893 |
| 0.200854465 | 0.103747254 | 0.022782981 | 0.109278438 |
| 0.254414535 | 0.231403913 | 0.347731795 | 0.317087942 |
| 0.340315586 | 0.317867807 | 0.082515498 | 0.257082846 |
| 0.015519315 | 0.001257295 | 0.131901848 | 0.216013808 |
| 0.00192385  | 0.128296467 | 0.288599862 | 0.042828642 |
| 0.054364851 | 0.03966761  | 0.060438746 | 0.075446194 |
| 0.239629453 | 0.17887012  | 0.151630828 | 0.158134374 |
| 0.08471106  | 0.031632355 | 0.109125174 | 0.107711914 |
| 0.015609701 | 0.232086186 | 0.25364472  | 0.045562726 |
| 0.100672199 | 0.14461237  | 0.12645133  | 0.20204754  |
| 0.286256921 | 0.283845537 | 0.033286182 | 0.02972504  |

|             |             |             |             |
|-------------|-------------|-------------|-------------|
| 0.292325011 | 0.120384952 | 0.296009939 | 0.24697466  |
| 0.301705053 | 0.336468765 | 0.320313321 | 0.094225164 |
| 0.098504737 | 0.172242753 | 0.132714629 | 0.042298582 |
| 0.285296533 | 0.100212859 | 0.246783434 | 0.085922571 |
| 0.16659632  | 0.119382432 | 0.044767659 | 0.135838268 |
| 0.128957874 | 0.2375945   | 0.187157377 | 0.167436898 |
| 0.166624317 | 0.034475575 | 0.083419105 | 0.231994314 |
| 0.290755986 | 0.019468588 | 0.223779997 | 0.066604495 |
| 0.177317132 | 0.005796942 | 0.205504289 | 0.346949638 |
| 0.187763312 | 0.113003503 | 0.085572347 | 0.170219148 |
| 0.208064768 | 0.078690056 | 0.026769366 | 0.200086675 |
| 0.273059907 | 0.180195977 | 0.26959045  | 0.31325826  |
| 0.135058016 | 0.171224335 | 0.057657121 | 0.182414904 |
| 0.193973099 | 0.097704841 | 0.150724325 | 0.136519374 |
| 0.234678894 | 0.289191467 | 0.236767354 | 0.192973552 |
| 0.105413347 | 0.105561331 | 0.08310749  | 0.19841562  |
| 0.051906211 | 0.07046539  | 0.055216094 | 0.190475811 |
| 0.001645914 | 0.023528464 | 0.249621581 | 0.121108855 |
| 0.28690936  | 0.283381991 | 0.328775336 | 0.04977919  |
| 0.000345364 | 0.157737593 | 0.251957583 | 0.127020318 |
| 0.250475054 | 0.227024698 | 0.011533521 | 0.090158134 |
| 0.290370267 | 0.124044438 | 0.103010289 | 0.021330067 |
| 0.01214001  | 0.173918503 | 0.249763239 | 0.127396899 |
| 0.136385636 | 0.082635335 | 0.023642036 | 0.146569216 |
| 0.008035671 | 0.307773478 | 0.32776069  | 0.022378424 |
| 0.037053809 | 0.259782407 | 0.242035399 | 0.055749265 |
| 0.097726289 | 0.218036848 | 0.232982528 | 0.010685247 |
| 0.238767651 | 0.025049888 | 0.187552876 | 0.193890525 |
| 0.141762932 | 0.160002148 | 0.215415088 | 0.098699272 |
| 0.177149344 | 0.155363425 | 0.181992486 | 0.267844317 |
| 0.122657077 | 0.130707421 | 0.151659171 | 0.095864203 |
| 0.148122918 | 0.128904605 | 0.141264359 | 0.138357619 |
| 0.048681476 | 0.213171266 | 0.29134113  | 0.107586519 |
| 0.221593426 | 0.081205388 | 0.33491213  | 0.240017008 |
| 0.286611892 | 0.11488622  | 0.110119427 | 0.237642887 |
| 0.010922958 | 0.026901462 | 0.073611877 | 0.112529972 |
| 0.225036237 | 0.082625944 | 0.083124313 | 0.184473957 |
| 0.155368923 | 0.325030014 | 0.285449795 | 0.256586082 |
| 0.122437865 | 0.085175037 | 0.041521207 | 0.085712378 |
| 0.197514044 | 0.158583916 | 0.152502673 | 0.007112276 |
| 0.239207162 | 0.050345426 | 0.260021492 | 0.267294504 |
| 0.046842471 | 0.280053473 | 0.018271426 | 0.120919798 |
| 0.015690132 | 0.182982552 | 0.231387877 | 0.17083137  |
| 0.036224597 | 0.114335911 | 0.18280382  | 0.052031612 |
| 0.197669355 | 0.145594648 | 0.053357918 | 0.134198513 |
| 0.132802625 | 0.151547076 | 0.252829789 | 0.086278783 |
| 0.122824722 | 0.079463878 | 0.087867863 | 0.207163002 |
| 0.162777125 | 0.254100979 | 0.111451441 | 0.272479911 |
| 0.146338954 | 0.155025894 | 0.336516947 | 0.103486861 |
| 0.043565151 | 0.039451683 | 0.034306843 | 0.059138967 |
| 0.074333956 | 0.054365467 | 0.000693127 | 0.023365565 |
| 0.305948855 | 0.040983208 | 0.169412504 | 0.181831892 |
| 0.078138477 | 0.265349126 | 0.007253687 | 0.144783947 |
| 0.234606032 | 0.267123769 | 0.110112831 | 0.260792731 |

|             |             |             |             |
|-------------|-------------|-------------|-------------|
| 0.273540344 | 0.141472057 | 0.148932032 | 0.001483009 |
| 0.172939878 | 0.120775951 | 0.041025507 | 0.08699399  |
| 0.02207147  | 0.046111544 | 0.164092142 | 0.070310271 |
| 0.275814419 | 0.014353507 | 0.096111521 | 0.176917724 |
| 0.160754907 | 0.285039412 | 0.101429387 | 0.272345755 |
| 0.011442409 | 0.185858278 | 0.077356805 | 0.081136987 |
| 0.120636613 | 0.105156394 | 0.294247256 | 0.086135864 |
| 0.083389231 | 0.057011689 | 0.006106144 | 0.328678256 |
| 0.248375957 | 0.096797229 | 0.220875743 | 0.019657977 |
| 0.261469571 | 0.195880274 | 0.044151781 | 0.081726876 |
| 0.019306921 | 0.186752145 | 0.20147873  | 0.256838017 |
| 0.027455758 | 0.121260028 | 0.03583476  | 0.10084755  |
| 0.267429992 | 0.060368221 | 0.231368991 | 0.035673685 |
| 0.239186184 | 0.160412584 | 0.125186305 | 0.029645224 |
| 0.108648499 | 0.124155073 | 0.05287395  | 0.294861408 |
| 0.184447351 | 0.092305221 | 0.272359861 | 0.186269928 |
| 0.08286969  | 0.222752728 | 0.096990888 | 0.269130861 |
| 0.088262622 | 0.300043985 | 0.209234116 | 0.263300668 |
| 0.30566539  | 0.059629634 | 0.082043208 | 0.155140252 |
| 0.245064853 | 0.045405198 | 0.042156094 | 0.267829774 |
| 0.071849573 | 0.223342324 | 0.077738938 | 0.120759996 |
| 0.039283499 | 0.079182391 | 0.073977105 | 0.176062906 |
| 0.26738998  | 0.150002844 | 0.071288593 | 0.336712591 |
| 0.070088225 | 0.037683074 | 0.324764787 | 0.005340916 |
| 0.134887422 | 0.21862824  | 0.196804784 | 0.118892839 |
| 0.245962664 | 0.172379121 | 0.139493522 | 0.01322079  |
| 0.233766102 | 0.004133544 | 0.066300707 | 0.117280391 |
| 0.025173461 | 0.086645002 | 0.259772111 | 0.303276419 |
| 0.167731356 | 0.013781828 | 0.028130143 | 0.250019452 |
| 0.017996659 | 0.034917931 | 0.052708282 | 0.147419793 |
| 0.05145193  | 0.067203393 | 0.074838097 | 0.072931873 |
| 0.200783758 | 0.103526628 |             |             |
| CYP51       | 0.136238745 | 0.176840488 | 0.111128157 |
| 0.118615705 | 0.166406195 | 0.106687923 | 0.078509005 |
| 0.085400369 | 0.134848423 | 0.020160762 | 0.211032662 |
| 0.065328234 | 0.014999465 | 0.238013337 | 0.085621574 |
| 0.131171514 | 0.083863269 | 0.167711526 | 0.011234321 |
| 0.039047808 | 0.158135675 | 0.055578946 | 0.104966522 |
| 0.121466058 | 0.259952181 | 0.120465962 | 0.072992627 |
| 0.220971413 | 0.021095865 | 0.171650564 | 0.012343208 |
| 0.290175455 | 0.160457569 | 0.06990588  | 0.055841074 |
| 0.129705841 | 0.002034322 | 0.266260316 | 0.132063346 |
| 0.039865309 | 0.298450038 | 0.044934181 | 0.214973566 |
| 0.053163278 | 0.091873477 | 0.011201101 | 0.110998217 |
| 0.104466868 | 0.088570078 | 0.108485514 | 0.157671939 |
| 0.041768292 | 0.237288773 | 0.103332369 | 0.001685324 |
| 0.061965039 | 0.005779779 | 0.023136387 | 0.254792925 |
| 0.332941087 | 0.240453472 | 0.011221964 | 0.088848371 |
| 0.092874982 | 0.139004439 | 0.240156239 | 0.033191645 |
| 0.260392206 | 0.020943107 | 0.129093279 | 0.078360667 |
| 0.089913414 | 0.048253844 | 0.288253113 | 0.087489998 |
| 0.059024252 | 0.282574394 | 0.184546472 | 0.062081071 |
| 0.160671603 | 0.292020381 | 0.210563718 | 0.229863005 |
| 0.01255812  | 0.105413838 | 0.078109859 | 0.260514201 |

|             |             |             |             |
|-------------|-------------|-------------|-------------|
| 0.144401905 | 0.049742081 | 0.229269937 | 0.281629899 |
| 0.058978188 | 0.067515864 | 0.133371789 | 0.14479683  |
| 0.209811657 | 0.025697235 | 0.065162332 | 0.052882834 |
| 0.157934565 | 0.117614871 | 0.235904178 | 0.283851163 |
| 0.121331086 | 0.127917984 | 0.244050251 | 0.111022939 |
| 0.16740595  | 0.163988409 | 0.051751506 | 0.176407339 |
| 0.156514295 | 0.239933738 | 0.147779219 | 0.184969689 |
| 0.101608559 | 0.2587737   | 0.205073634 | 0.21315997  |
| 0.005866794 | 0.245830652 | 0.245701185 | 0.117517699 |
| 0.074131631 | 0.152496713 | 0.031544558 | 0.297424835 |
| 0.228829196 | 0.202172511 | 0.156784983 | 0.200444164 |
| 0.220556547 | 0.224766559 | 0.227746735 | 0.195470838 |
| 0.112669366 | 0.02439614  | 0.104909031 | 0.102467993 |
| 0.169726378 | 0.170410081 | 0.089168014 | 0.271120146 |
| 0.308831386 | 0.203478138 | 0.10129085  | 0.292622227 |
| 0.089544391 | 0.310709006 | 0.183190261 | 0.261027774 |
| 0.281219854 | 0.270052466 | 0.287632023 | 0.17097145  |
| 0.288852061 | 0.168509531 | 0.005997278 | 0.189704515 |
| 0.323481945 | 0.013699493 | 0.191209835 | 0.210345441 |
| 0.229171506 | 0.185956307 | 0.264231685 | 0.2437289   |
| 0.229591354 | 0.150512628 | 0.000378848 | 0.214218168 |
| 0.250209907 | 0.282763209 | 0.087481883 | 0.081690084 |
| 0.139298463 | 0.116640356 | 0.167362249 | 0.036082438 |
| 0.321186929 | 0.22239976  | 0.201803006 | 0.161271683 |
| 0.069106598 | 0.299538638 | 0.075422098 | 0.25070587  |
| 0.085572319 | 0.14015277  | 0.137667226 | 0.205952968 |
| 0.032284575 | 0.281969975 | 0.080494639 | 0.104436862 |
| 0.305297833 | 0.083494852 | 0.048257406 | 0.17045262  |
| 0.121676819 | 0.111138877 | 0.191388344 | 0.127817239 |
| 0.105939611 | 0.249306181 | 0.081890892 | 1           |
| 0.200873596 | 0.223208759 | 0.13697293  | 0.230262961 |
| 0.068718175 | 0.23071804  | 0.158934795 | 0.299226565 |
| 0.342094045 | 0.121691216 | 0.254128764 | 0.091831694 |
| 0.034098879 | 0.018740757 | 0.019643406 | 0.092246156 |
| 0.23046324  | 0.053093283 | 0.12300892  | 0.221879861 |
| 0.147730119 | 0.085631279 | 0.057521359 | 0.32071385  |
| 0.165078308 | 0.143236456 | 0.240572418 | 0.080469431 |
| 0.036388889 | 0.157514573 | 0.210819912 | 0.045641939 |
| 0.145702413 | 0.039614886 | 0.040020263 | 0.218097353 |
| 0.02174602  | 0.06064733  | 0.226126022 | 0.204790539 |
| 0.039047216 | 0.178054983 | 0.262337487 | 0.00202101  |
| 0.081277707 | 0.080364289 | 0.297715287 | 0.041192668 |
| 0.23263519  | 0.242126996 | 0.137280281 | 0.109327319 |
| 0.174721398 | 0.252269796 | 0.240751903 | 0.251719085 |
| 0.04048582  | 0.264487196 | 0.212991182 | 0.272361918 |
| 0.211041936 | 0.048050994 | 0.01539657  | 0.20492501  |
| 0.211693817 | 0.017696591 | 0.136991071 | 0.141942482 |
| 0.042724255 | 0.143466343 | 0.050053042 | 0.272649982 |
| 0.319741216 | 0.202798514 | 0.170765857 | 0.224375797 |
| 0.291994582 | 0.251857324 | 0.216421001 | 0.278609164 |
| 0.014998872 | 0.090155332 | 0.07311619  | 0.265964237 |
| 0.256884513 | 0.060371505 | 0.245274196 | 0.018740475 |
| 0.002491709 | 0.114927787 | 0.148773134 | 0.234922772 |
| 0.063872115 | 0.090047921 | 0.156014374 | 0.245829701 |



|             |             |             |             |
|-------------|-------------|-------------|-------------|
| 0.219991565 | 0.282580773 | 0.175503493 | 0.090991958 |
| 0.213760032 | 0.075924764 | 0.11554794  | 0.152091296 |
| 0.243087658 | 0.096596446 | 0.159122421 | 0.292956895 |
| 0.077233855 | 0.059209835 | 0.104849407 | 0.032118329 |
| 0.077797626 | 0.126422144 | 0.169652016 | 0.289562091 |
| 0.256162137 | 0.254433604 | 0.192985931 | 0.023185461 |
| 0.271641782 | 0.217039977 | 0.071525846 | 0.2126019   |
| 0.214257295 | 0.203449055 | 0.206100949 | 0.21650378  |
| 0.181045383 | 0.160185231 | 0.189726802 | 0.135426208 |
| 0.088450857 | 0.07671765  | 0.034976086 | 0.14093012  |
| 0.006526473 | 0.280742046 | 0.128468328 | 0.290324812 |
| 0.164252281 | 0.169629026 | 0.10789162  | 0.12817564  |
| 0.06871433  | 0.025026127 | 0.046041175 | 0.121460617 |
| 0.213143921 | 0.062633372 | 0.039707906 | 0.026464304 |
| 0.247413056 | 0.260180981 | 0.047932708 | 0.262950025 |
| 0.22706674  | 0.115542449 | 0.154973073 | 0.237728499 |
| 0.111997472 | 0.004567349 | 0.061489781 | 0.004790317 |
| 0.038278641 | 0.232025218 | 0.051304516 | 0.058729642 |
| 0.24718455  | 0.043778595 | 0.261476024 | 0.275582367 |
| 0.21272658  | 0.246595708 | 0.270623988 | 0.089211143 |
| 0.261166076 | 0.005362193 | 0.246142195 | 0.191286026 |
| 0.036816487 | 0.0094248   | 0.035840961 | 0.22039193  |
| 0.119781029 | 0.111291081 | 0.264668366 | 0.048036236 |
| 0.127492135 | 0.100257461 | 0.129959947 | 0.082453789 |
| 0.159523853 | 0.206057773 | 0.055772002 | 0.214051798 |
| 0.170063175 | 0.233478453 | 0.056923689 | 0.154170177 |
| 0.143451333 | 0.114900474 | 0.133447663 | 0.051790883 |
| 0.205677164 | 0.154101429 | 0.248698805 | 0.242626515 |
| 0.300983395 | 0.190849385 | 0.024472058 | 0.045319759 |
| 0.199641048 | 0.124399869 | 0.02605392  | 0.134269073 |
| 0.219305574 | 0.152805088 | 0.320665501 | 0.293712924 |
| 0.278197401 | 0.267391236 | 0.110384487 | 0.199789715 |
| 0.111349035 | 0.011223143 | 0.099219835 | 0.211039067 |
| 0.005729241 | 0.082333508 | 0.299869969 | 0.044346121 |
| 0.078332059 | 0.07614673  | 0.048880372 | 0.053482339 |
| 0.220303289 | 0.121531418 | 0.13055934  | 0.173976531 |
| 0.10081803  | 0.037613377 | 0.180339122 | 0.115848474 |
| 0.020404404 | 0.214688939 | 0.259722276 | 0.061616673 |
| 0.083268212 | 0.103153726 | 0.177590885 | 0.253813672 |
| 0.255214128 | 0.234777232 | 0.06079422  | 0.091068264 |
| 0.273733302 | 0.082972205 | 0.251399358 | 0.220736464 |
| 0.273075155 | 0.295215349 | 0.306789582 | 0.080067912 |
| 0.146206523 | 0.182310723 | 0.123183268 | 0.09227638  |
| 0.252863166 | 0.092349944 | 0.2469348   | 0.079611187 |
| 0.199311814 | 0.140921681 | 0.124962617 | 0.179334801 |
| 0.118290499 | 0.278973328 | 0.241584243 | 0.158639913 |
| 0.120037483 | 0.035566714 | 0.100860691 | 0.24953582  |
| 0.209731793 | 0.021063936 | 0.228398224 | 0.083991583 |
| 0.194309973 | 0.00840107  | 0.151939563 | 0.321772855 |
| 0.236062321 | 0.121676237 | 0.053716153 | 0.169652178 |
| 0.168891215 | 0.064387308 | 0.128735684 | 0.173199004 |
| 0.257418487 | 0.141295798 | 0.254870348 | 0.266724853 |
| 0.167146431 | 0.133976556 | 0.045644439 | 0.124619005 |
| 0.20227226  | 0.11908053  | 0.156499162 | 0.168672008 |

|             |             |             |             |
|-------------|-------------|-------------|-------------|
| 0.267393296 | 0.2794276   | 0.190271602 | 0.266256754 |
| 0.105550505 | 0.106777848 | 0.080820351 | 0.198252963 |
| 0.038573224 | 0.081824763 | 0.048068235 | 0.16605625  |
| 0.016420541 | 0.028570883 | 0.230305661 | 0.162520278 |
| 0.275642111 | 0.240691577 | 0.308427698 | 0.072673934 |
| 0.000144563 | 0.12510174  | 0.206094121 | 0.093839884 |
| 0.186545509 | 0.245237375 | 0.03755535  | 0.131860328 |
| 0.347133045 | 0.141702143 | 0.086241604 | 0.046042046 |
| 0.014870127 | 0.127104298 | 0.301796538 | 0.135594813 |
| 0.166409009 | 0.085482622 | 0.040260879 | 0.20470749  |
| 0.01554887  | 0.335087631 | 0.298917251 | 0.020972852 |
| 0.021221    | 0.211833751 | 0.168332416 | 0.100209626 |
| 0.10020321  | 0.200560359 | 0.250741797 | 0.005853107 |
| 0.17947128  | 0.06243663  | 0.210544019 | 0.234843156 |
| 0.203336398 | 0.141951773 | 0.228655523 | 0.104225494 |
| 0.129143265 | 0.156579548 | 0.191099093 | 0.3255434   |
| 0.192698348 | 0.159084757 | 0.139105529 | 0.087281615 |
| 0.138416751 | 0.19689479  | 0.180355211 | 0.175917505 |
| 0.14193253  | 0.210446128 | 0.329799149 | 0.1568991   |
| 0.268965494 | 0.067143478 | 0.343836824 | 0.212208717 |
| 0.306309984 | 0.146756167 | 0.098001442 | 0.20509569  |
| 0.008251311 | 0.036895237 | 0.061082776 | 0.120535856 |
| 0.234173    | 0.065828022 | 0.08529616  | 0.1235929   |
| 0.117077104 | 0.33216616  | 0.325769446 | 0.277161081 |
| 0.117307548 | 0.062815473 | 0.028862077 | 0.143056665 |
| 0.182567338 | 0.18425538  | 0.151194837 | 0.040103807 |
| 0.223206403 | 0.05969829  | 0.211901151 | 0.248021695 |
| 0.040703458 | 0.321613601 | 0.024166298 | 0.099117343 |
| 0.015152542 | 0.167063899 | 0.252636283 | 0.150380898 |
| 0.029181552 | 0.18291695  | 0.171539686 | 0.058456414 |
| 0.168667314 | 0.126164308 | 0.06559894  | 0.113806118 |
| 0.158109719 | 0.191494803 | 0.235760971 | 0.116169302 |
| 0.089457546 | 0.094336379 | 0.07586136  | 0.158427876 |
| 0.156197027 | 0.230629801 | 0.164428501 | 0.231418654 |
| 0.093252363 | 0.202695653 | 0.328205436 | 0.14309269  |
| 0.060062864 | 0.139316127 | 0.030752567 | 0.050585386 |
| 0.079266807 | 0.057488878 | 0.000394454 | 0.012492179 |
| 0.303232208 | 0.036731925 | 0.123647678 | 0.170237019 |
| 0.092283291 | 0.258782245 | 0.019413583 | 0.096932747 |
| 0.210857096 | 0.2544117   | 0.069822804 | 0.276871301 |
| 0.220563551 | 0.208117954 | 0.142361911 | 0.001337565 |
| 0.111001634 | 0.090744075 | 0.026560794 | 0.119395594 |
| 0.056691965 | 0.03044409  | 0.10399205  | 0.082660074 |
| 0.232514786 | 0.020340401 | 0.083719629 | 0.176741115 |
| 0.187360144 | 0.260082189 | 0.13537141  | 0.236207305 |
| 0.018582788 | 0.220108405 | 0.081763326 | 0.064684268 |
| 0.102227997 | 0.082527688 | 0.254680269 | 0.084076795 |
| 0.117838854 | 0.081109219 | 0.003204125 | 0.31599233  |
| 0.222359387 | 0.070870744 | 0.265901187 | 0.01587771  |
| 0.315478529 | 0.225835521 | 0.044690623 | 0.077784638 |
| 0.099679618 | 0.14132012  | 0.263679363 | 0.255289073 |
| 0.018351179 | 0.081440959 | 0.132870727 | 0.081478649 |
| 0.256976981 | 0.036165636 | 0.249920718 | 0.020342383 |
| 0.223795286 | 0.178043563 | 0.157740541 | 0.063711476 |

|             |             |             |             |
|-------------|-------------|-------------|-------------|
| 0.086982977 | 0.152876539 | 0.050976678 | 0.260850212 |
| 0.241732367 | 0.087503813 | 0.227854017 | 0.144649058 |
| 0.070386188 | 0.225266314 | 0.080156993 | 0.243310595 |
| 0.100019593 | 0.299572503 | 0.199354602 | 0.20740662  |
| 0.331719219 | 0.062506141 | 0.059349798 | 0.12408384  |
| 0.22376896  | 0.152303282 | 0.031617276 | 0.222976918 |
| 0.047949349 | 0.256899583 | 0.071526422 | 0.135807109 |
| 0.133909636 | 0.08440725  | 0.092816967 | 0.227401983 |
| 0.205454186 | 0.136464629 | 0.073778544 | 0.336658806 |
| 0.159804793 | 0.119383485 | 0.316159624 | 0.005849516 |
| 0.163644452 | 0.217148472 | 0.255221612 | 0.105259817 |
| 0.292912686 | 0.133137811 | 0.086407883 | 0.017073165 |
| 0.220870153 | 0.034501951 | 0.085548131 | 0.105912734 |
| 0.025631039 | 0.08336229  | 0.276020178 | 0.262224198 |
| 0.198668281 | 0.028917793 | 0.024538613 | 0.241354974 |
| 0.029107029 | 0.030650102 | 0.03780223  | 0.121537846 |
| 0.054295933 | 0.044774815 | 0.057047664 | 0.066954009 |
| 0.21652982  | 0.130852662 |             |             |
| D14ERTD449E | 0.092134101 | 0.235749777 | 0.045884496 |
| 0.137163281 | 0.254562423 | 0.137813894 | 0.104970053 |
| 0.159495423 | 0.19790246  | 0.063867321 | 0.225998801 |
| 0.061798836 | 0.106288446 | 0.332370642 | 0.118057255 |
| 0.240069836 | 0.116638441 | 0.152986312 | 0.060473682 |
| 0.117453602 | 0.260471862 | 0.175384794 | 0.131542644 |
| 0.218515804 | 0.191337562 | 0.153214593 | 0.156523431 |
| 0.301976033 | 0.084483965 | 0.23453556  | 0.0399036   |
| 0.342526222 | 0.270471448 | 0.132760991 | 0.03418548  |
| 0.18107549  | 0.02628457  | 0.319401204 | 0.225358588 |
| 0.127806036 | 0.31542208  | 0.070176389 | 0.225861922 |
| 0.095368902 | 0.057926261 | 0.039288386 | 0.224604195 |
| 0.14866203  | 0.170842333 | 0.054707825 | 0.218781943 |
| 0.134660398 | 0.240206437 | 0.15663955  | 0.008570523 |
| 0.151723137 | 0.051816518 | 0.112741034 | 0.3133383   |
| 0.254485418 | 0.206843685 | 0.084733365 | 0.13798936  |
| 0.192552092 | 0.257715138 | 0.269720822 | 0.103939683 |
| 0.335037259 | 0.155608102 | 0.223142413 | 0.128830338 |
| 0.151393627 | 0.041543695 | 0.219106952 | 0.069155084 |
| 0.15056106  | 0.24449749  | 0.235400262 | 0.165765099 |
| 0.220342416 | 0.368320187 | 0.220787955 | 0.293880952 |
| 0.129061692 | 0.22496041  | 0.20230778  | 0.328832438 |
| 0.255768764 | 0.103203053 | 0.295378677 | 0.366137434 |
| 0.062178873 | 0.118983875 | 0.238755233 | 0.120731205 |
| 0.253891716 | 0.129149757 | 0.103897454 | 0.177862857 |
| 0.272605333 | 0.229264483 | 0.313101592 | 0.290496203 |
| 0.200393971 | 0.072227709 | 0.286922146 | 0.225468241 |
| 0.227947515 | 0.079271112 | 0.213245667 | 0.292568903 |
| 0.226697133 | 0.317153943 | 0.241066061 | 0.295634875 |
| 0.206301886 | 0.329405145 | 0.252859286 | 0.292677071 |
| 0.027744748 | 0.327868038 | 0.158877161 | 0.13786502  |
| 0.061860145 | 0.187114086 | 0.168948007 | 0.3244175   |
| 0.307945609 | 0.250975593 | 0.168955258 | 0.236775344 |
| 0.349868738 | 0.271470159 | 0.317339822 | 0.299329444 |
| 0.082041034 | 0.135330114 | 0.191527178 | 0.154567015 |
| 0.278448349 | 0.146550385 | 0.194079439 | 0.328828817 |

|             |             |             |             |
|-------------|-------------|-------------|-------------|
| 0.326938191 | 0.31895167  | 0.104004856 | 0.344664745 |
| 0.162313979 | 0.386526061 | 0.243673875 | 0.191071515 |
| 0.342749528 | 0.311607489 | 0.381969786 | 0.279914916 |
| 0.324922888 | 0.151244774 | 0.057357752 | 0.280082543 |
| 0.399867813 | 0.032473944 | 0.296981708 | 0.324555672 |
| 0.299093752 | 0.29757176  | 0.382936393 | 0.337780705 |
| 0.301010055 | 0.098337343 | 0.015759735 | 0.319259842 |
| 0.318545462 | 0.313173641 | 0.222186559 | 0.16185602  |
| 0.257153666 | 0.143349078 | 0.262559076 | 0.148645692 |
| 0.41161909  | 0.297735003 | 0.297945582 | 0.261209345 |
| 0.118405078 | 0.300668725 | 0.165310273 | 0.279964557 |
| 0.103243227 | 0.105046889 | 0.060383791 | 0.280605148 |
| 0.078904593 | 0.246841888 | 0.14040045  | 0.214868475 |
| 0.268408252 | 0.125150128 | 0.130512765 | 0.295362125 |
| 0.06537071  | 0.168334836 | 0.133758142 | 0.124937418 |
| 0.121867922 | 0.181545413 | 0.211835603 | 0.200873596 |
| 1           | 0.193768658 | 0.229265429 | 0.328755427 |
| 0.164308548 | 0.162025175 | 0.240758601 | 0.37900346  |
| 0.418848596 | 0.199156097 | 0.263084472 | 0.044810443 |
| 0.182317515 | 0.088940074 | 0.126734199 | 0.166929262 |
| 0.175721598 | 0.216378922 | 0.231442644 | 0.324300743 |
| 0.141120321 | 0.101347528 | 0.177872013 | 0.346347328 |
| 0.131306276 | 0.227666606 | 0.352274307 | 0.148371303 |
| 0.012013807 | 0.186382462 | 0.299771408 | 0.215157041 |
| 0.224490702 | 0.161702763 | 0.143310384 | 0.320566351 |
| 0.152644317 | 0.213831673 | 0.320956312 | 0.315986886 |
| 0.150853002 | 0.169857128 | 0.373284833 | 0.045504753 |
| 0.173526813 | 0.131485098 | 0.33869331  | 0.072955734 |
| 0.223397639 | 0.328820649 | 0.240588391 | 0.218456146 |
| 0.104842081 | 0.339491366 | 0.289150053 | 0.342710471 |
| 0.141087307 | 0.371177731 | 0.316230658 | 0.345365924 |
| 0.251232204 | 0.12806891  | 0.112334766 | 0.290564041 |
| 0.308269204 | 0.110521603 | 0.074876339 | 0.253472143 |
| 0.110596393 | 0.268715034 | 0.180155386 | 0.366073005 |
| 0.371428325 | 0.254465751 | 0.24834246  | 0.351181531 |
| 0.326697222 | 0.186876288 | 0.294806918 | 0.389739604 |
| 0.078641394 | 0.192974605 | 0.187013433 | 0.373073017 |
| 0.188560083 | 0.223244638 | 0.283642963 | 0.119837458 |
| 0.006133371 | 0.086318435 | 0.079166494 | 0.255593675 |
| 0.198431044 | 0.162499922 | 0.257749043 | 0.344609161 |
| 0.179714494 | 0.320832399 | 0.223365351 | 0.213348495 |
| 0.285199393 | 0.179927149 | 0.194326802 | 0.249890319 |
| 0.253519435 | 0.053394762 | 0.187783825 | 0.364188976 |
| 0.042248303 | 0.194399067 | 0.15667903  | 0.011107598 |
| 0.075136376 | 0.192570121 | 0.107827341 | 0.217135477 |
| 0.374061005 | 0.190866845 | 0.176244995 | 0.080033501 |
| 0.321919379 | 0.125511385 | 0.022471364 | 0.309625511 |
| 0.308143008 | 0.297883222 | 0.299953684 | 0.281920164 |
| 0.295306493 | 0.245264846 | 0.306363479 | 0.132887656 |
| 0.143749989 | 0.073277012 | 0.181599161 | 0.22269564  |
| 0.008882467 | 0.33030232  | 0.20926986  | 0.199796813 |
| 0.283632958 | 0.259873944 | 0.088380815 | 0.236688497 |
| 0.040063441 | 0.115187078 | 0.160444223 | 0.219167966 |
| 0.3369901   | 0.036056173 | 0.089184859 | 0.153054911 |

|             |             |             |             |
|-------------|-------------|-------------|-------------|
| 0.26913572  | 0.279935592 | 0.134519293 | 0.339687065 |
| 0.243915439 | 0.087240093 | 0.208946149 | 0.319867011 |
| 0.126247679 | 0.042125518 | 0.133972409 | 0.008265898 |
| 0.085313464 | 0.307265002 | 0.147660262 | 0.07220859  |
| 0.24172103  | 0.019803123 | 0.268132403 | 0.361647636 |
| 0.257259897 | 0.359123803 | 0.340692002 | 0.18644392  |
| 0.330040484 | 0.054826599 | 0.338474515 | 0.247696133 |
| 0.098638642 | 0.003111996 | 0.035132899 | 0.319124773 |
| 0.207466208 | 0.054149114 | 0.197489464 | 0.115909454 |
| 0.199722808 | 0.094505035 | 0.120088775 | 0.217415228 |
| 0.200731458 | 0.258240612 | 0.221777907 | 0.283659734 |
| 0.211867266 | 0.25290905  | 0.114622047 | 0.104720802 |
| 0.216471264 | 0.114576107 | 0.101067692 | 0.031025719 |
| 0.31384945  | 0.106478229 | 0.287272687 | 0.319519161 |
| 0.377124516 | 0.289535028 | 0.076909451 | 0.147923813 |
| 0.306381614 | 0.070638602 | 0.11569811  | 0.08280265  |
| 0.280885079 | 0.259063912 | 0.334747677 | 0.274348269 |
| 0.384646234 | 0.332818829 | 0.085470682 | 0.303472189 |
| 0.033527875 | 0.01312415  | 0.116567904 | 0.267596244 |
| 0.052549305 | 0.176070323 | 0.277332046 | 0.133197827 |
| 0.185307527 | 0.063849689 | 0.167049874 | 0.180869958 |
| 0.269847437 | 0.212632902 | 0.230481345 | 0.218645899 |
| 0.212140074 | 0.193571899 | 0.223583253 | 0.209876311 |
| 0.133233392 | 0.229913363 | 0.191540045 | 0.059144788 |
| 0.133535859 | 0.182921212 | 0.101730977 | 0.18307896  |
| 0.328323028 | 0.334752103 | 0.110857878 | 0.063637429 |
| 0.266483398 | 0.202815812 | 0.36521986  | 0.2916643   |
| 0.339764403 | 0.393859056 | 0.331603106 | 0.253839499 |
| 0.115073606 | 0.253659564 | 0.228739932 | 0.222122671 |
| 0.340356037 | 0.062255475 | 0.298800153 | 0.171407898 |
| 0.157072129 | 0.179127884 | 0.120409383 | 0.129536897 |
| 0.210097786 | 0.237985544 | 0.252377084 | 0.107778775 |
| 0.225874184 | 0.171766919 | 0.093495798 | 0.226616343 |
| 0.286121283 | 0.132380725 | 0.19797867  | 0.140082525 |
| 0.230575191 | 0.049473609 | 0.266502238 | 0.385932691 |
| 0.152857585 | 0.105399114 | 0.106322411 | 0.271075389 |
| 0.2639043   | 0.124328825 | 0.056538569 | 0.236477842 |
| 0.355495733 | 0.22403197  | 0.30850758  | 0.386150341 |
| 0.111864039 | 0.202995044 | 0.150353843 | 0.230400146 |
| 0.216124644 | 0.13661022  | 0.214683075 | 0.10081999  |
| 0.304063651 | 0.347878727 | 0.260594289 | 0.229674543 |
| 0.165757202 | 0.088604195 | 0.050529009 | 0.283203791 |
| 0.187881379 | 0.125539007 | 0.081672606 | 0.284263316 |
| 0.009470859 | 0.135876215 | 0.349209678 | 0.230834004 |
| 0.364707312 | 0.342961661 | 0.350410222 | 0.145614746 |
| 0.004185424 | 0.2382599   | 0.265557293 | 0.164111706 |
| 0.2633097   | 0.265894333 | 0.114385859 | 0.175160913 |
| 0.33443767  | 0.075776448 | 0.222508918 | 0.116921646 |
| 0.098603169 | 0.19866512  | 0.277864509 | 0.169855716 |
| 0.237436128 | 0.075914869 | 0.165959811 | 0.186867852 |
| 0.126332601 | 0.310573168 | 0.351457113 | 0.0629397   |
| 0.133587704 | 0.339080507 | 0.256739945 | 0.05839795  |
| 0.187728405 | 0.304148503 | 0.325075416 | 0.010820388 |
| 0.282392803 | 0.043614155 | 0.265389979 | 0.247627205 |

|             |             |              |             |
|-------------|-------------|--------------|-------------|
| 0.245602609 | 0.251362974 | 0.309519439  | 0.211318157 |
| 0.207679499 | 0.20706509  | 0.217676398  | 0.284535303 |
| 0.23904731  | 0.174463332 | 0.224856495  | 0.136992499 |
| 0.234279147 | 0.151598423 | 0.109884621  | 0.102360687 |
| 0.139047364 | 0.284138122 | 0.273103946  | 0.074053316 |
| 0.282878604 | 0.142378992 | 0.36965062   | 0.277516282 |
| 0.371179676 | 0.088026727 | 0.191424438  | 0.260239832 |
| 0.067183404 | 0.121872937 | 0.074122707  | 0.153282822 |
| 0.227893089 | 0.243649644 | 0.125415834  | 0.148766883 |
| 0.203606968 | 0.341309212 | 0.266202635  | 0.332384503 |
| 0.183151056 | 0.140867531 | 0.064664971  | 0.203899656 |
| 0.161027864 | 0.14939536  | 0.242330685  | 0.010286093 |
| 0.281465602 | 0.116898528 | 0.306771913  | 0.295569276 |
| 0.145821414 | 0.34511034  | 0.076815123  | 0.125217893 |
| 0.052334274 | 0.132704711 | 0.191422638  | 0.235447683 |
| 0.123879905 | 0.1942938   | 0.252332964  | 0.096648778 |
| 0.272902072 | 0.223497851 | 0.200693017  | 0.1867581   |
| 0.203647038 | 0.146748152 | 0.307909446  | 0.087499158 |
| 0.164063737 | 0.22503244  | 0.120367537  | 0.232260528 |
| 0.248857827 | 0.326296919 | 0.082813483  | 0.336912345 |
| 0.199237124 | 0.143178246 | 0.389372041  | 0.159640901 |
| 0.139393109 | 0.224710333 | 0.133328668  | 0.110999702 |
| 0.206310533 | 0.149826462 | 0.0044446634 | 0.087732497 |
| 0.349453492 | 0.119406225 | 0.206261913  | 0.276073004 |
| 0.215697693 | 0.360412518 | 0.112232153  | 0.157054375 |
| 0.263860823 | 0.304331256 | 0.208805221  | 0.293696416 |
| 0.298080171 | 0.1763668   | 0.165673735  | 0.017692164 |
| 0.210353222 | 0.176191225 | 0.112747496  | 0.125927657 |
| 0.061156432 | 0.136282223 | 0.189693109  | 0.063509638 |
| 0.358187166 | 0.113530529 | 0.149904781  | 0.241873647 |
| 0.18497643  | 0.309534182 | 0.256593462  | 0.311798377 |
| 0.048777689 | 0.244912742 | 0.156248479  | 0.138684849 |
| 0.238745934 | 0.196889185 | 0.330693797  | 0.197411312 |
| 0.099850979 | 0.227256375 | 0.009051941  | 0.325463055 |
| 0.270847384 | 0.163450299 | 0.232627675  | 0.070023023 |
| 0.330571507 | 0.288648323 | 0.23185384   | 0.133226553 |
| 0.0562346   | 0.244523513 | 0.240668412  | 0.277415353 |
| 0.093826178 | 0.169150362 | 0.135825432  | 0.190422721 |
| 0.283114185 | 0.198903807 | 0.280786493  | 0.110546467 |
| 0.283728921 | 0.232230191 | 0.112135091  | 0.203943128 |
| 0.164568651 | 0.089139935 | 0.095489289  | 0.362213392 |
| 0.2540155   | 0.203612213 | 0.344431086  | 0.229034111 |
| 0.179579445 | 0.267382538 | 0.152376528  | 0.342910191 |
| 0.233116816 | 0.293051827 | 0.303751804  | 0.303567529 |
| 0.366131625 | 0.211273656 | 0.195805567  | 0.24999101  |
| 0.261363691 | 0.138357248 | 0.185819869  | 0.270165466 |
| 0.173362424 | 0.307065657 | 0.113776751  | 0.257532557 |
| 0.125724531 | 0.204717718 | 0.165233532  | 0.173350778 |
| 0.275168368 | 0.2050396   | 0.219198511  | 0.36044128  |
| 0.221279237 | 0.082388547 | 0.375035836  | 0.029296711 |
| 0.143497658 | 0.273500718 | 0.245342705  | 0.192584084 |
| 0.19486703  | 0.210167931 | 0.125795781  | 0.008563033 |
| 0.324997728 | 0.058384298 | 0.187081678  | 0.247857851 |
| 0.17049022  | 0.08873657  | 0.307149295  | 0.374655125 |

|             |             |             |             |
|-------------|-------------|-------------|-------------|
| 0.22498162  | 0.117624876 | 0.122478085 | 0.306837065 |
| 0.147506222 | 0.106864976 | 0.147483713 | 0.175956076 |
| 0.169601358 | 0.09245288  | 0.124811943 | 0.137825073 |
| 0.251935435 | 0.17500898  |             |             |
| D14ERTD668E | 0.339597059 | 0.299496602 | 0.333518605 |
| 0.204462825 | 0.142997711 | 0.231071872 | 0.323439188 |
| 0.332588631 | 0.311154616 | 0.169497448 | 0.208281331 |
| 0.211716351 | 0.020367441 | 0.279555288 | 0.296583996 |
| 0.170359683 | 0.215607257 | 0.32519638  | 0.103970493 |
| 0.256621099 | 0.141397398 | 0.12809932  | 0.294037126 |
| 0.148142103 | 0.396051302 | 0.317163419 | 0.155178146 |
| 0.273162579 | 0.078391179 | 0.20398472  | 0.097285967 |
| 0.32313031  | 0.139712419 | 0.134529791 | 0.225937568 |
| 0.226699727 | 0.010333181 | 0.360377453 | 0.185915283 |
| 0.045227469 | 0.346850475 | 0.219282881 | 0.213191763 |
| 0.220193734 | 0.295037557 | 0.094910823 | 0.190151017 |
| 0.292122233 | 0.247477283 | 0.375711834 | 0.240323114 |
| 0.20724042  | 0.314451539 | 0.260032532 | 0.020941563 |
| 0.088746397 | 0.012242087 | 0.053826727 | 0.315108666 |
| 0.315003551 | 0.265198725 | 0.099981152 | 0.302757546 |
| 0.208611062 | 0.216693738 | 0.286422995 | 0.19580088  |
| 0.289574384 | 0.050257276 | 0.205753824 | 0.166120516 |
| 0.258546151 | 0.326875098 | 0.352054371 | 0.390036168 |
| 0.177613058 | 0.246469998 | 0.180036504 | 0.107390183 |
| 0.299223522 | 0.357895086 | 0.319658152 | 0.346010993 |
| 0.046025756 | 0.13229022  | 0.13038693  | 0.248401772 |
| 0.255812193 | 0.325517895 | 0.234363381 | 0.32041417  |
| 0.333799349 | 0.231865398 | 0.251924992 | 0.405890901 |
| 0.289547481 | 0.105335166 | 0.210498211 | 0.052537227 |
| 0.163987424 | 0.152115768 | 0.348010302 | 0.292610849 |
| 0.16044188  | 0.386899154 | 0.376933369 | 0.114520146 |
| 0.163920972 | 0.360867189 | 0.1235966   | 0.219499702 |
| 0.226765211 | 0.272995456 | 0.269616685 | 0.272059708 |
| 0.153858609 | 0.282365567 | 0.249341384 | 0.297587336 |
| 0.063139453 | 0.309947595 | 0.320688675 | 0.219727856 |
| 0.380298668 | 0.24383795  | 0.14175094  | 0.308770638 |
| 0.247763524 | 0.298558297 | 0.328106332 | 0.202030659 |
| 0.226870237 | 0.349238415 | 0.30968689  | 0.269028819 |
| 0.297284037 | 0.083017162 | 0.156933128 | 0.296580386 |
| 0.245577793 | 0.356923848 | 0.088030386 | 0.367904545 |
| 0.310093213 | 0.223503996 | 0.379620184 | 0.393053237 |
| 0.311809218 | 0.302410012 | 0.275693871 | 0.279535618 |
| 0.342485325 | 0.356879485 | 0.270893178 | 0.162653377 |
| 0.327344367 | 0.270338168 | 0.081547721 | 0.291739195 |
| 0.281248797 | 0.006168643 | 0.24320424  | 0.24637154  |
| 0.306188036 | 0.219176071 | 0.270858223 | 0.262172966 |
| 0.309011025 | 0.368406744 | 0.013043927 | 0.199012501 |
| 0.332500109 | 0.287465473 | 0.211651262 | 0.168266197 |
| 0.167835239 | 0.273020765 | 0.232380271 | 0.126028102 |
| 0.322759724 | 0.259913585 | 0.257701672 | 0.277435579 |
| 0.288376726 | 0.355439233 | 0.131690807 | 0.367237287 |
| 0.253745631 | 0.353611188 | 0.355591094 | 0.294276219 |
| 0.203479178 | 0.259069802 | 0.280674474 | 0.190664344 |
| 0.282934815 | 0.307059387 | 0.104185035 | 0.165907953 |

|             |             |             |             |
|-------------|-------------|-------------|-------------|
| 0.376180671 | 0.206948751 | 0.341684121 | 0.374071456 |
| 0.218638053 | 0.395442454 | 0.222754043 | 0.223208759 |
| 0.193768658 | 1           | 0.213152262 | 0.262877338 |
| 0.186292901 | 0.37846388  | 0.250643566 | 0.283979891 |
| 0.282949965 | 0.148141969 | 0.343584946 | 0.050659041 |
| 0.140720951 | 0.115548256 | 0.045877357 | 0.166026553 |
| 0.406424188 | 0.215307799 | 0.202785011 | 0.181830485 |
| 0.334251151 | 0.380163487 | 0.163920784 | 0.346198235 |
| 0.405729226 | 0.158938562 | 0.246476711 | 0.228390259 |
| 0.093543076 | 0.264223838 | 0.241067615 | 0.104403813 |
| 0.305041387 | 0.044892918 | 0.073395259 | 0.252058078 |
| 0.102997285 | 0.103087473 | 0.252310624 | 0.18497714  |
| 0.190607929 | 0.406197661 | 0.280881099 | 0.016013058 |
| 0.161795302 | 0.064591641 | 0.230121394 | 0.213506286 |
| 0.304626877 | 0.267875744 | 0.130138856 | 0.137547891 |
| 0.38003182  | 0.311545157 | 0.292582273 | 0.270592403 |
| 0.145116428 | 0.28995661  | 0.231963534 | 0.269271966 |
| 0.273346511 | 0.149878213 | 0.028760861 | 0.243409049 |
| 0.246379283 | 0.156024932 | 0.39096377  | 0.218092228 |
| 0.185799362 | 0.182955405 | 0.103352625 | 0.270142682 |
| 0.345363184 | 0.331826271 | 0.222697547 | 0.207823855 |
| 0.273604495 | 0.306793886 | 0.258132313 | 0.297214891 |
| 0.165728485 | 0.15714871  | 0.142772546 | 0.221242845 |
| 0.343039088 | 0.107993465 | 0.341338271 | 0.043131829 |
| 0.001474238 | 0.381097707 | 0.35731158  | 0.193432075 |
| 0.056761764 | 0.196527072 | 0.210729702 | 0.286375875 |
| 0.3003482   | 0.301188243 | 0.339698541 | 0.160824301 |
| 0.31446281  | 0.163585055 | 0.142400831 | 0.183513178 |
| 0.339922234 | 0.081247125 | 0.182517346 | 0.365219157 |
| 0.357605811 | 0.078555425 | 0.298242731 | 0.010706344 |
| 0.323196039 | 0.266909733 | 0.397729905 | 0.394312905 |
| 0.241173638 | 0.39648127  | 0.361298135 | 0.198075881 |
| 0.234353875 | 0.335283343 | 0.012624173 | 0.271422082 |
| 0.297018655 | 0.296112142 | 0.300663577 | 0.334245256 |
| 0.267870096 | 0.247054277 | 0.222151502 | 0.294956234 |
| 0.3233116   | 0.386747042 | 0.072827036 | 0.199493078 |
| 0.029520725 | 0.239385328 | 0.185358161 | 0.347298521 |
| 0.207585462 | 0.289087933 | 0.271807647 | 0.166353957 |
| 0.173243889 | 0.046177204 | 0.283305999 | 0.242600632 |
| 0.204109023 | 0.217704895 | 0.122303751 | 0.124479379 |
| 0.329570054 | 0.338724415 | 0.121264737 | 0.312894546 |
| 0.219724679 | 0.403741655 | 0.177248376 | 0.213971513 |
| 0.311819786 | 0.076118626 | 0.267203646 | 0.020559938 |
| 0.138270602 | 0.318932282 | 0.176604237 | 0.307217506 |
| 0.276047238 | 0.123120108 | 0.329922918 | 0.311919602 |
| 0.316445781 | 0.260448    | 0.283304853 | 0.087603803 |
| 0.294354787 | 0.017178333 | 0.283555883 | 0.300810978 |
| 0.174213177 | 0.010962675 | 0.036671835 | 0.243074308 |
| 0.171846657 | 0.372630493 | 0.33160499  | 0.199635491 |
| 0.230282545 | 0.390872634 | 0.302427648 | 0.080050193 |
| 0.226323337 | 0.153060385 | 0.081794854 | 0.326814861 |
| 0.247992973 | 0.257534696 | 0.246296061 | 0.392910321 |
| 0.186506465 | 0.251954051 | 0.388465805 | 0.015323131 |
| 0.205693096 | 0.402360845 | 0.39481393  | 0.295363958 |



|             |             |             |             |
|-------------|-------------|-------------|-------------|
| 0.300508236 | 0.188606097 | 0.14318348  | 0.19036868  |
| 0.254618997 | 0.390233277 | 0.141452935 | 0.398472459 |
| 0.298662252 | 0.188735114 | 0.279894534 | 0.332613221 |
| 0.277506066 | 0.30439552  | 0.273100378 | 0.234390378 |
| 0.091457554 | 0.003643488 | 0.268311014 | 0.317025076 |
| 0.055104433 | 0.15817217  | 0.325039144 | 0.252284708 |
| 0.221924318 | 0.233790835 | 0.081052665 | 0.079896519 |
| 0.237373037 | 0.201068062 | 0.113887481 | 0.341749903 |
| 0.151290022 | 0.085402994 | 0.223499372 | 0.280366665 |
| 0.18170388  | 0.356252139 | 0.391597845 | 0.249339544 |
| 0.196941814 | 0.167965769 | 0.307365365 | 0.365695061 |
| 0.252133088 | 0.253207007 | 0.229615703 | 0.065678589 |
| 0.351005134 | 0.200669055 | 0.251542906 | 0.289511351 |
| 0.348577268 | 0.301043147 | 0.347423231 | 0.16674122  |
| 0.309808284 | 0.208124952 | 0.122539649 | 0.119662814 |
| 0.282738721 | 0.388172738 | 0.305902922 | 0.094594304 |
| 0.363640636 | 0.266885768 | 0.176175992 | 0.328675494 |
| 0.143195293 | 0.324077015 | 0.195543207 | 0.381638155 |
| 0.188305798 | 0.081489953 | 0.313518627 | 0.300432689 |
| 0.299034454 | 0.046221031 | 0.336024373 | 0.292460314 |
| 0.311811471 | 0.157483207 | 0.198356345 | 0.305835701 |
| 0.374585681 | 0.372194278 | 0.291812714 | 0.244104194 |
| 0.241639625 | 0.187737267 | 0.112074138 | 0.29240636  |
| 0.26832496  | 0.199364261 | 0.318494929 | 0.259175643 |
| 0.37798989  | 0.155560242 | 0.119757476 | 0.18240004  |
| 0.319702192 | 0.245465989 | 0.262733727 | 0.346310259 |
| 0.334893103 | 0.364200344 | 0.29518543  | 0.231085828 |
| 0.208647384 | 0.409096128 | 0.37991562  | 0.264083108 |
| 0.061659116 | 0.295751499 | 0.217246834 | 0.228682174 |
| 0.005552469 | 0.032044161 | 0.258472063 | 0.236281163 |
| 0.325309778 | 0.254620598 | 0.307553949 | 0.290010667 |
| 0.000492572 | 0.174760026 | 0.207278446 | 0.181309574 |
| 0.294868803 | 0.317455309 | 0.213281997 | 0.213566794 |
| 0.29721228  | 0.381957394 | 0.214341849 | 0.216152747 |
| 0.052488327 | 0.26660975  | 0.313873846 | 0.327594086 |
| 0.198700562 | 0.398944143 | 0.076553522 | 0.273960468 |
| 0.063814274 | 0.307655816 | 0.274049406 | 0.193792786 |
| 0.057194565 | 0.266796902 | 0.272011778 | 0.257781172 |
| 0.139015081 | 0.264886692 | 0.277257624 | 0.020053012 |
| 0.200406897 | 0.11968035  | 0.189062843 | 0.183168475 |
| 0.202335452 | 0.213683902 | 0.194991658 | 0.154474556 |
| 0.279944325 | 0.276570471 | 0.219656915 | 0.262595093 |
| 0.185522331 | 0.309502181 | 0.194912296 | 0.264800997 |
| 0.146158533 | 0.302448694 | 0.396211093 | 0.39609253  |
| 0.196036414 | 0.272797075 | 0.361518481 | 0.376059072 |
| 0.268048661 | 0.243277986 | 0.301197497 | 0.30654408  |
| 0.275756556 | 0.397431833 | 0.225416166 | 0.278766416 |
| 0.097094695 | 0.207620425 | 0.363468073 | 0.250532907 |
| 0.292809987 | 0.100852619 | 0.232181954 | 0.326857587 |
| 0.25514936  | 0.334613027 | 0.359585687 | 0.296314768 |
| 0.198256585 | 0.209558595 | 0.183966533 | 0.170079226 |
| 0.311753496 | 0.390603002 | 0.120260288 | 0.04984449  |
| 0.261118463 | 0.293903645 | 0.24203178  | 0.32688873  |
| 0.087722337 | 0.303338726 | 0.198653026 | 0.301349747 |

|             |             |             |             |
|-------------|-------------|-------------|-------------|
| 0.158688787 | 0.400054697 | 0.362768682 | 0.234310182 |
| 0.051165163 | 0.284215246 | 0.163632858 | 0.277414218 |
| 0.213227496 | 0.220779427 | 0.139623511 | 0.311018158 |
| 0.276747856 | 0.373796688 | 0.350644809 | 0.380828557 |
| 0.192556459 | 0.086472339 | 0.265531795 | 0.181037006 |
| 0.190663514 | 0.268579894 | 0.341989125 | 0.265326407 |
| 0.164126278 | 0.396726053 | 0.338281638 | 0.292564631 |
| 0.272997864 | 0.151481824 | 0.043160141 | 0.24089157  |
| 0.252207434 | 0.10980228  | 0.006544047 | 0.034215008 |
| 0.241098434 | 0.201723159 | 0.267406229 | 0.25496192  |
| 0.113677336 | 0.24858371  | 0.041422406 | 0.320182454 |
| 0.333139811 | 0.372505385 | 0.195244637 | 0.319756774 |
| 0.294150458 | 0.270225768 | 0.276521435 | 0.023548213 |
| 0.18795349  | 0.16495516  | 0.175150474 | 0.279142021 |
| 0.212229646 | 0.051958947 | 0.214165765 | 0.383757119 |
| 0.241068625 | 0.049257276 | 0.259287973 | 0.221958572 |
| 0.380333868 | 0.377508131 | 0.177715314 | 0.21510584  |
| 0.300378441 | 0.30931869  | 0.15004184  | 0.196085785 |
| 0.128172761 | 0.105095413 | 0.228316858 | 0.075810594 |
| 0.227630586 | 0.158761103 | 0.019612191 | 0.357085258 |
| 0.368003301 | 0.125069997 | 0.378853865 | 0.152803199 |
| 0.248200225 | 0.294531491 | 0.155162258 | 0.176571614 |
| 0.085805282 | 0.146945638 | 0.293006115 | 0.294831697 |
| 0.070682771 | 0.231102033 | 0.182741884 | 0.138629507 |
| 0.408445671 | 0.148457307 | 0.345495097 | 0.114719412 |
| 0.298921608 | 0.294337843 | 0.396919549 | 0.140815412 |
| 0.235718646 | 0.371848273 | 0.208411933 | 0.306007847 |
| 0.211171935 | 0.074019898 | 0.214633453 | 0.220205427 |
| 0.109018185 | 0.321639966 | 0.196031506 | 0.312728559 |
| 0.136008773 | 0.291895421 | 0.22606183  | 0.291720753 |
| 0.265092674 | 0.07379313  | 0.080976837 | 0.144191205 |
| 0.316441092 | 0.213851389 | 0.110913245 | 0.301608157 |
| 0.06514991  | 0.258145751 | 0.268243117 | 0.130334369 |
| 0.154006224 | 0.2753532   | 0.203544669 | 0.357784868 |
| 0.24399846  | 0.181469896 | 0.12606589  | 0.310925758 |
| 0.153951613 | 0.099463612 | 0.307128762 | 0.003721899 |
| 0.298793981 | 0.195049041 | 0.285062072 | 0.16243642  |
| 0.375165717 | 0.283037735 | 0.304354094 | 0.044465332 |
| 0.241039303 | 0.028439607 | 0.188744865 | 0.125657348 |
| 0.114602846 | 0.325648764 | 0.311567204 | 0.257807031 |
| 0.310151442 | 0.156335473 | 0.113703386 | 0.304518927 |
| 0.040426143 | 0.105019366 | 0.129873791 | 0.259556601 |
| 0.064352114 | 0.181658158 | 0.172750758 | 0.12685397  |
| 0.283835526 | 0.299952087 |             |             |
| D17H6S56E-5 | 0.064601151 | 0.430630431 | 0.049034098 |
| 0.121459853 | 0.285284583 | 0.363698955 | 0.047084369 |
| 0.111281079 | 0.321245344 | 0.313277894 | 0.326649786 |
| 0.01268649  | 0.134059708 | 0.461730593 | 0.043676832 |
| 0.35662033  | 0.025685223 | 0.088709889 | 0.086013778 |
| 0.194612796 | 0.26121111  | 0.353722966 | 0.340978752 |
| 0.268165485 | 0.16438181  | 0.293264654 | 0.37827487  |
| 0.515226389 | 0.336035456 | 0.389581517 | 0.208121134 |
| 0.394994136 | 0.308023183 | 0.391710374 | 0.011453334 |
| 0.374957481 | 0.016608569 | 0.416656022 | 0.230384191 |

|             |             |             |             |
|-------------|-------------|-------------|-------------|
| 0.165850129 | 0.321198473 | 0.323697162 | 0.211365873 |
| 0.342017839 | 0.029336008 | 0.269707296 | 0.36812947  |
| 0.284496782 | 0.249760413 | 0.056720507 | 0.367713015 |
| 0.341361328 | 0.293409683 | 0.364152085 | 0.003567191 |
| 0.336394327 | 0.147257807 | 0.283370703 | 0.510214326 |
| 0.166545782 | 0.103208847 | 0.322199464 | 0.228339941 |
| 0.359027257 | 0.33154024  | 0.214205764 | 0.351304935 |
| 0.505860709 | 0.221672572 | 0.400230977 | 0.147023768 |
| 0.337142315 | 0.025914556 | 0.125209575 | 0.070447613 |
| 0.364626186 | 0.171479129 | 0.322213973 | 0.310078131 |
| 0.435225321 | 0.508575943 | 0.195317282 | 0.498812383 |
| 0.120064639 | 0.329419208 | 0.266334223 | 0.249727707 |
| 0.312451378 | 0.07052938  | 0.360017441 | 0.517558535 |
| 0.041104052 | 0.356176291 | 0.343624759 | 0.103121619 |
| 0.431601617 | 0.305665774 | 0.374040054 | 0.211760659 |
| 0.336790889 | 0.318797596 | 0.471382351 | 0.245967201 |
| 0.305982047 | 0.059457304 | 0.478841311 | 0.319795513 |
| 0.280622754 | 0.067036271 | 0.216967494 | 0.477699791 |
| 0.359971162 | 0.508826689 | 0.426213367 | 0.324255195 |
| 0.358044762 | 0.506602721 | 0.341368386 | 0.414103404 |
| 0.224416011 | 0.534672633 | 0.15769087  | 0.033948508 |
| 0.06404199  | 0.071738376 | 0.231795854 | 0.261093724 |
| 0.483930211 | 0.292766756 | 0.173099605 | 0.200684445 |
| 0.464857961 | 0.477962862 | 0.533716594 | 0.397796817 |
| 0.030138922 | 0.276361791 | 0.353766434 | 0.257553568 |
| 0.331822036 | 0.092765899 | 0.270799545 | 0.499899583 |
| 0.360288317 | 0.427271352 | 0.146954005 | 0.484761972 |
| 0.178461768 | 0.509591082 | 0.465539642 | 0.140963246 |
| 0.51153797  | 0.488113999 | 0.513641362 | 0.370278498 |
| 0.469643692 | 0.299842582 | 0.076215662 | 0.357829727 |
| 0.483653276 | 0.017735918 | 0.4994625   | 0.521740602 |
| 0.504266496 | 0.474190114 | 0.527488624 | 0.525874326 |
| 0.514433659 | 0.058633236 | 0.040006558 | 0.251184109 |
| 0.506604986 | 0.374403127 | 0.121303483 | 0.39260885  |
| 0.336340611 | 0.35251872  | 0.413939944 | 0.326670308 |
| 0.503662455 | 0.456904716 | 0.514156973 | 0.359990961 |
| 0.26963739  | 0.29409119  | 0.375347975 | 0.461046288 |
| 0.033864431 | 0.102090273 | 0.043229355 | 0.253707086 |
| 0.335974312 | 0.144220019 | 0.345773374 | 0.324099864 |
| 0.15978823  | 0.31102836  | 0.369050057 | 0.350669502 |
| 0.04373676  | 0.403115469 | 0.136500328 | 0.147070284 |
| 0.030449565 | 0.118681236 | 0.172035664 | 0.13697293  |
| 0.229265429 | 0.213152262 | 1           | 0.498588927 |
| 0.327390485 | 0.147228338 | 0.37143249  | 0.472894618 |
| 0.406809019 | 0.361671396 | 0.18590307  | 0.007456957 |
| 0.265134579 | 0.337509672 | 0.237811431 | 0.3955193   |
| 0.156299234 | 0.224353872 | 0.351845787 | 0.357888809 |
| 0.249217063 | 0.129007236 | 0.351641764 | 0.411142452 |
| 0.121636392 | 0.290942242 | 0.44456839  | 0.373679472 |
| 0.001675967 | 0.284123236 | 0.438400883 | 0.141525921 |
| 0.272496314 | 0.172453414 | 0.30068467  | 0.463861105 |
| 0.33599782  | 0.236526393 | 0.514021766 | 0.351486074 |
| 0.348080904 | 0.205937981 | 0.533233463 | 0.079686376 |
| 0.329414457 | 0.048655482 | 0.236726876 | 0.326623084 |

|             |             |             |             |
|-------------|-------------|-------------|-------------|
| 0.209284875 | 0.241800329 | 0.310406226 | 0.267435458 |
| 0.111163274 | 0.52401803  | 0.37374858  | 0.524576444 |
| 0.365001119 | 0.531688807 | 0.466761797 | 0.436221799 |
| 0.310754759 | 0.365788717 | 0.188065737 | 0.423377078 |
| 0.456721353 | 0.302809452 | 0.060264003 | 0.444474273 |
| 0.344668671 | 0.368429084 | 0.11301612  | 0.493550928 |
| 0.481405295 | 0.471391002 | 0.128284533 | 0.333519868 |
| 0.352323108 | 0.2023945   | 0.397882878 | 0.532133425 |
| 0.31888254  | 0.336688368 | 0.314893466 | 0.378275463 |
| 0.142106228 | 0.209948055 | 0.29114316  | 0.235299346 |
| 0.021382792 | 0.071123558 | 0.0537912   | 0.139838176 |
| 0.184651846 | 0.394408603 | 0.347292832 | 0.526927869 |
| 0.097475547 | 0.410732433 | 0.196634902 | 0.267814869 |
| 0.413001398 | 0.343102676 | 0.3713302   | 0.358582836 |
| 0.19830013  | 0.012096106 | 0.100778408 | 0.507497762 |
| 0.033258846 | 0.265516911 | 0.290847071 | 0.002148738 |
| 0.036218939 | 0.415356821 | 0.077060457 | 0.16710778  |
| 0.488809913 | 0.172107851 | 0.171446237 | 0.314684834 |
| 0.298996531 | 0.075049226 | 0.002238826 | 0.493063239 |
| 0.489655338 | 0.456719603 | 0.489640401 | 0.453387669 |
| 0.440993322 | 0.370657045 | 0.385131182 | 0.318998262 |
| 0.087021352 | 0.076849555 | 0.220508248 | 0.255780297 |
| 0.004917858 | 0.341545899 | 0.28616799  | 0.112793749 |
| 0.397674877 | 0.258480147 | 0.030466109 | 0.336313022 |
| 0.016555259 | 0.254449613 | 0.285841576 | 0.194758997 |
| 0.302364507 | 0.009579018 | 0.237635969 | 0.328192858 |
| 0.427255417 | 0.320935084 | 0.370728275 | 0.5329746   |
| 0.293984561 | 0.106082523 | 0.273212827 | 0.357302877 |
| 0.056677321 | 0.129225717 | 0.328912642 | 0.045725279 |
| 0.241181309 | 0.449343046 | 0.373997846 | 0.05509685  |
| 0.227855723 | 0.002948031 | 0.34592875  | 0.534589857 |
| 0.471115018 | 0.529819622 | 0.508603655 | 0.291035278 |
| 0.507992496 | 0.172102076 | 0.542500109 | 0.390974098 |
| 0.371438835 | 0.000676837 | 0.004792142 | 0.501051575 |
| 0.362354143 | 0.0470303   | 0.128054126 | 0.346571959 |
| 0.088620837 | 0.134923644 | 0.055136311 | 0.180747478 |
| 0.379761024 | 0.223302458 | 0.191757453 | 0.473158606 |
| 0.201943793 | 0.198453489 | 0.367430999 | 0.070399718 |
| 0.378343919 | 0.04033343  | 0.069271274 | 0.006769501 |
| 0.320996145 | 0.095074731 | 0.457151523 | 0.517713184 |
| 0.489381803 | 0.346169309 | 0.361710291 | 0.352577377 |
| 0.437717074 | 0.084339827 | 0.383203873 | 0.096533594 |
| 0.493663401 | 0.349382478 | 0.272777787 | 0.270991791 |
| 0.501324369 | 0.464071268 | 0.024838955 | 0.372921349 |
| 0.01048573  | 0.001735791 | 0.332926208 | 0.221647519 |
| 0.075009947 | 0.347565148 | 0.201814178 | 0.21318061  |
| 0.206512773 | 0.026269012 | 0.28083784  | 0.257508482 |
| 0.250856134 | 0.323819506 | 0.26945415  | 0.20129104  |
| 0.239706751 | 0.13075647  | 0.17304673  | 0.135546481 |
| 0.251870702 | 0.280482765 | 0.169002662 | 0.014593639 |
| 0.387214244 | 0.388895293 | 0.045443882 | 0.129842826 |
| 0.433447615 | 0.505816408 | 0.030722271 | 0.007172014 |
| 0.222980347 | 0.297149592 | 0.515621581 | 0.511854399 |
| 0.52145971  | 0.514580755 | 0.372323225 | 0.110306058 |

|             |             |             |             |
|-------------|-------------|-------------|-------------|
| 0.055684839 | 0.274957305 | 0.285030633 | 0.083099406 |
| 0.523107432 | 0.055393853 | 0.489029947 | 0.313949164 |
| 0.092336717 | 0.176813244 | 0.026611384 | 0.066381075 |
| 0.378566455 | 0.147318066 | 0.151271418 | 0.124214619 |
| 0.28171717  | 0.277114035 | 0.037093221 | 0.161919305 |
| 0.299037409 | 0.197244806 | 0.131071757 | 0.280522336 |
| 0.318048383 | 0.243350273 | 0.388604513 | 0.430982489 |
| 0.106214245 | 0.091531048 | 0.2546696   | 0.344921957 |
| 0.443746889 | 0.378564396 | 0.025902334 | 0.465390297 |
| 0.499290579 | 0.400424323 | 0.501309277 | 0.372084796 |
| 0.066283174 | 0.359762949 | 0.323676593 | 0.309959597 |
| 0.155534748 | 0.354998951 | 0.20999751  | 0.049028771 |
| 0.265967754 | 0.467439074 | 0.406236314 | 0.141022723 |
| 0.389030987 | 0.111191359 | 0.047896398 | 0.455664565 |
| 0.189341138 | 0.078645494 | 0.349614426 | 0.435534173 |
| 0.00093962  | 0.181266414 | 0.493969849 | 0.222609635 |
| 0.50909934  | 0.484774851 | 0.423919458 | 0.233736503 |
| 0.002875839 | 0.370681052 | 0.334806397 | 0.361688446 |
| 0.436614409 | 0.306199417 | 0.151576417 | 0.05838259  |
| 0.239742047 | 0.068687836 | 0.115083835 | 0.327346177 |
| 0.190046863 | 0.363420742 | 0.156485461 | 0.175008812 |
| 0.169500805 | 0.076690629 | 0.272606512 | 0.207676168 |
| 0.163218087 | 0.190755857 | 0.30857045  | 0.309308361 |
| 0.232307864 | 0.432630848 | 0.374845732 | 0.019785756 |
| 0.355347693 | 0.391565551 | 0.428290737 | 0.001513819 |
| 0.383254701 | 0.004548008 | 0.175142856 | 0.189238603 |
| 0.170482995 | 0.188418333 | 0.224434312 | 0.269178412 |
| 0.306845146 | 0.185570271 | 0.243440462 | 0.196364127 |
| 0.139573303 | 0.190606714 | 0.35083145  | 0.307530186 |
| 0.265632282 | 0.104418484 | 0.08344641  | 0.089769456 |
| 0.045050483 | 0.477599902 | 0.210349608 | 0.059659557 |
| 0.191591359 | 0.32764601  | 0.319784609 | 0.502060636 |
| 0.405891539 | 0.099065919 | 0.303842265 | 0.448826523 |
| 0.291454554 | 0.295874297 | 0.056572846 | 0.336988742 |
| 0.204376095 | 0.221927474 | 0.370016434 | 0.271238262 |
| 0.366966316 | 0.37692178  | 0.20437591  | 0.425740684 |
| 0.328514112 | 0.316755312 | 0.321849536 | 0.070105181 |
| 0.146956993 | 0.104631534 | 0.251345822 | 0.000656349 |
| 0.305711136 | 0.237138802 | 0.482370006 | 0.484435092 |
| 0.328405111 | 0.361788648 | 0.325170597 | 0.074393212 |
| 0.284730304 | 0.163264069 | 0.112786101 | 0.408800785 |
| 0.27586179  | 0.158173927 | 0.270869974 | 0.311092954 |
| 0.395365334 | 0.379189594 | 0.241169602 | 0.223626984 |
| 0.202555894 | 0.163847391 | 0.464368839 | 0.104556948 |
| 0.392174176 | 0.18163263  | 0.326413622 | 0.263459971 |
| 0.194902439 | 0.527339681 | 0.048282912 | 0.54149631  |
| 0.306380376 | 0.103009969 | 0.477230316 | 0.274329043 |
| 0.265912793 | 0.110114386 | 0.233197801 | 0.358507541 |
| 0.200209584 | 0.360180721 | 0.027867581 | 0.081425893 |
| 0.272560961 | 0.294604431 | 0.391466396 | 0.312092676 |
| 0.234683847 | 0.294618572 | 0.226956179 | 0.259927044 |
| 0.483941585 | 0.489521091 | 0.232422366 | 0.195333693 |
| 0.293932596 | 0.085589775 | 0.353454043 | 0.022046494 |
| 0.385477826 | 0.399414056 | 0.385152878 | 0.043344745 |

|             |             |             |             |
|-------------|-------------|-------------|-------------|
| 0.012659473 | 0.248953125 | 0.367549669 | 0.055105796 |
| 0.49041763  | 0.273487367 | 0.318752688 | 0.384092542 |
| 0.143149764 | 0.488684168 | 0.106240613 | 0.356288506 |
| 0.039011841 | 0.210417641 | 0.361537405 | 0.356919502 |
| 0.211059015 | 0.290521817 | 0.321509154 | 0.251588777 |
| 0.023048258 | 0.239027292 | 0.000668596 | 0.383277581 |
| 0.46015514  | 0.327243615 | 0.168490206 | 0.333752027 |
| 0.228201999 | 0.358515598 | 0.244837075 | 0.397024559 |
| 0.007082771 | 0.345330769 | 0.167799974 | 0.404493167 |
| 0.268204213 | 0.325712297 | 0.04455446  | 0.302394135 |
| 0.441805761 | 0.280901213 | 0.215232843 | 0.310703883 |
| 0.495952971 | 0.369167414 | 0.130898381 | 0.213517785 |
| 0.348496245 | 0.051105919 | 0.373685199 | 0.53157465  |
| 0.151010016 | 0.224703848 | 0.44225049  | 0.173314212 |
| 0.323219842 | 0.375624824 | 0.374596035 | 0.523507268 |
| 0.062215306 | 0.204030269 | 0.400430134 | 0.462170017 |
| 0.251526428 | 0.177505578 | 0.270052332 | 0.214222129 |
| 0.458375304 | 0.085324081 | 0.264279404 | 0.298681666 |
| 0.237552831 | 0.263575563 | 0.305025604 | 0.179480414 |
| 0.030499033 | 0.15171598  | 0.356634471 | 0.113534933 |
| 0.256471223 | 0.320749185 | 0.219535689 | 0.362934697 |
| 0.124113798 | 0.017882329 | 0.435129908 | 0.025451609 |
| 0.30121261  | 0.349219551 | 0.210347834 | 0.334044136 |
| 0.152066547 | 0.308979092 | 0.294910675 | 0.000586931 |
| 0.384983285 | 0.044982608 | 0.285708121 | 0.211419414 |
| 0.30947113  | 0.041648721 | 0.450002804 | 0.524952798 |
| 0.272467767 | 0.347052374 | 0.374242944 | 0.462909207 |
| 0.1737475   | 0.366032975 | 0.355068337 | 0.359806384 |
| 0.253391795 | 0.371588202 | 0.402146843 | 0.373916485 |
| 0.325747303 | 0.244550719 |             |             |
| D2ERTD750E  | 0.130293732 | 0.459707069 | 0.105879916 |
| 0.216882005 | 0.387565472 | 0.482920503 | 0.1077605   |
| 0.199395438 | 0.421131874 | 0.384569376 | 0.442189065 |
| 0.036827399 | 0.125747856 | 0.47716234  | 0.099747087 |
| 0.458913708 | 0.065538889 | 0.173125677 | 0.118304191 |
| 0.329208737 | 0.352638496 | 0.409154178 | 0.453384648 |
| 0.366685693 | 0.245491657 | 0.436443819 | 0.457130928 |
| 0.503637061 | 0.329372142 | 0.503151704 | 0.281962242 |
| 0.420206198 | 0.395235665 | 0.453929361 | 0.038744052 |
| 0.486767945 | 0.023075225 | 0.450418692 | 0.345739293 |
| 0.227188988 | 0.383776956 | 0.424988202 | 0.328829288 |
| 0.457004275 | 0.072100117 | 0.275451929 | 0.472161212 |
| 0.430822708 | 0.388521682 | 0.116331258 | 0.504937388 |
| 0.453645938 | 0.424087251 | 0.456601769 | 0.003904842 |
| 0.369315205 | 0.124047693 | 0.284983482 | 0.514750036 |
| 0.282575483 | 0.191859511 | 0.358322281 | 0.344400416 |
| 0.457406154 | 0.449356285 | 0.344932348 | 0.444769154 |
| 0.500184729 | 0.230775955 | 0.498380201 | 0.2425954   |
| 0.461628542 | 0.069451134 | 0.233472455 | 0.147956496 |
| 0.468876439 | 0.283889131 | 0.421254892 | 0.392471562 |
| 0.452424225 | 0.52552686  | 0.330786028 | 0.511869424 |
| 0.142040842 | 0.410764081 | 0.369175314 | 0.381896406 |
| 0.43599777  | 0.146219231 | 0.480300725 | 0.526003457 |
| 0.095381082 | 0.455102272 | 0.463601623 | 0.190072559 |

|             |             |             |             |
|-------------|-------------|-------------|-------------|
| 0.477650028 | 0.362659475 | 0.46637744  | 0.234036641 |
| 0.445663121 | 0.409660847 | 0.487382757 | 0.372001786 |
| 0.399249553 | 0.127661072 | 0.498262695 | 0.388948006 |
| 0.37728714  | 0.145650955 | 0.29855161  | 0.502267535 |
| 0.491697712 | 0.492942775 | 0.47315638  | 0.428864523 |
| 0.445037355 | 0.503319219 | 0.483825399 | 0.459194296 |
| 0.216895826 | 0.530642749 | 0.279769114 | 0.076786564 |
| 0.129446049 | 0.144363711 | 0.310766179 | 0.373234463 |
| 0.502671061 | 0.424847565 | 0.283822517 | 0.316694525 |
| 0.485341492 | 0.489335713 | 0.528577468 | 0.469258436 |
| 0.076078069 | 0.327491995 | 0.456148841 | 0.382658157 |
| 0.446295335 | 0.18379864  | 0.329477777 | 0.517532505 |
| 0.429037943 | 0.48838555  | 0.257836477 | 0.513999279 |
| 0.28393067  | 0.517225418 | 0.48452626  | 0.248428134 |
| 0.527879853 | 0.506699662 | 0.511788742 | 0.465940502 |
| 0.485351637 | 0.441166443 | 0.089796313 | 0.441944351 |
| 0.485179676 | 0.024059776 | 0.50008674  | 0.500123899 |
| 0.507270256 | 0.5047601   | 0.519798428 | 0.509727106 |
| 0.510082233 | 0.130869335 | 0.043203033 | 0.361159708 |
| 0.516424258 | 0.455054669 | 0.205941565 | 0.476923905 |
| 0.42744487  | 0.478996326 | 0.488857058 | 0.36296006  |
| 0.514394358 | 0.497295047 | 0.497739569 | 0.461103354 |
| 0.399073183 | 0.364231535 | 0.443085336 | 0.48242164  |
| 0.087687913 | 0.18410228  | 0.097258918 | 0.384205512 |
| 0.442249325 | 0.25241106  | 0.465397868 | 0.426574841 |
| 0.271306028 | 0.435596233 | 0.40390469  | 0.445488048 |
| 0.098970212 | 0.500285656 | 0.259275857 | 0.254827469 |
| 0.078037128 | 0.200394139 | 0.251682646 | 0.230262961 |
| 0.328755427 | 0.262877338 | 0.498588927 | 1           |
| 0.42922081  | 0.261348409 | 0.493282885 | 0.478037917 |
| 0.429505591 | 0.455158938 | 0.303517822 | 0.023935703 |
| 0.333087123 | 0.379734688 | 0.248399046 | 0.477796724 |
| 0.220214703 | 0.30936758  | 0.455185368 | 0.458720257 |
| 0.373692687 | 0.225409219 | 0.43517627  | 0.438105624 |
| 0.221760378 | 0.383608224 | 0.481855323 | 0.47857028  |
| 0.009366116 | 0.418325016 | 0.499988056 | 0.213460173 |
| 0.396556745 | 0.175094748 | 0.320110213 | 0.490980518 |
| 0.354116025 | 0.292091009 | 0.499389822 | 0.459196909 |
| 0.410927566 | 0.256205227 | 0.524471348 | 0.067171763 |
| 0.425779906 | 0.091957919 | 0.35964935  | 0.419617296 |
| 0.340775852 | 0.364971032 | 0.386348863 | 0.366815813 |
| 0.201851721 | 0.51926279  | 0.460685347 | 0.509064807 |
| 0.438724927 | 0.528520698 | 0.499050934 | 0.476181288 |
| 0.451544616 | 0.432245539 | 0.182668126 | 0.495227088 |
| 0.496101678 | 0.3734102   | 0.129038114 | 0.492764142 |
| 0.439905763 | 0.467958186 | 0.190738524 | 0.490606222 |
| 0.504488333 | 0.480163367 | 0.210021556 | 0.436779449 |
| 0.447997499 | 0.326839948 | 0.477639463 | 0.527447794 |
| 0.394655419 | 0.417125332 | 0.407194387 | 0.451936998 |
| 0.259738662 | 0.276248279 | 0.376510075 | 0.240466647 |
| 0.016843544 | 0.141304279 | 0.117157668 | 0.231687341 |
| 0.230848772 | 0.48344841  | 0.474424416 | 0.517134539 |
| 0.18111965  | 0.455424001 | 0.319760414 | 0.359472159 |
| 0.443620851 | 0.417837455 | 0.451374784 | 0.460780748 |

|             |             |             |             |
|-------------|-------------|-------------|-------------|
| 0.329974098 | 0.038976812 | 0.173148165 | 0.527759423 |
| 0.079479784 | 0.307282395 | 0.407321148 | 0.005064747 |
| 0.084294206 | 0.465736925 | 0.149152673 | 0.238733337 |
| 0.484527865 | 0.247623664 | 0.291766539 | 0.401493214 |
| 0.424659825 | 0.157080097 | 0.007137694 | 0.48836419  |
| 0.492432862 | 0.463117495 | 0.49036771  | 0.469769964 |
| 0.465970637 | 0.473337603 | 0.476729776 | 0.450434937 |
| 0.175063221 | 0.160378919 | 0.273386464 | 0.366690268 |
| 0.008571852 | 0.45472248  | 0.392363485 | 0.212657234 |
| 0.483302615 | 0.384720934 | 0.071604604 | 0.426710744 |
| 0.04420801  | 0.259953163 | 0.388569299 | 0.305275926 |
| 0.416746207 | 0.03317892  | 0.310325087 | 0.388602917 |
| 0.440351003 | 0.404424023 | 0.438047346 | 0.535925808 |
| 0.411451428 | 0.196022231 | 0.399317764 | 0.465632735 |
| 0.125459854 | 0.155608098 | 0.443354984 | 0.058439519 |
| 0.27445737  | 0.461792374 | 0.457257073 | 0.130305146 |
| 0.358707153 | 0.012473651 | 0.421483881 | 0.531242232 |
| 0.477608835 | 0.514579188 | 0.502797685 | 0.339265789 |
| 0.509562188 | 0.146626106 | 0.529270454 | 0.464547488 |
| 0.44145043  | 0.002008203 | 0.010523576 | 0.503360367 |
| 0.465794686 | 0.10367778  | 0.236761915 | 0.44776053  |
| 0.172420244 | 0.232357951 | 0.118366358 | 0.255235464 |
| 0.502750926 | 0.314162108 | 0.238825443 | 0.476691385 |
| 0.329005324 | 0.315066226 | 0.471230209 | 0.145984376 |
| 0.482219844 | 0.096195041 | 0.147075537 | 0.013752811 |
| 0.437238428 | 0.173333273 | 0.484012411 | 0.511898924 |
| 0.496305949 | 0.465924299 | 0.404915496 | 0.408799579 |
| 0.473992569 | 0.15769081  | 0.446158848 | 0.179042395 |
| 0.490603303 | 0.456792067 | 0.394316304 | 0.377810619 |
| 0.496601775 | 0.472544245 | 0.064978692 | 0.471879183 |
| 0.028403642 | 0.003735566 | 0.460937499 | 0.342902782 |
| 0.104190039 | 0.433152373 | 0.333201977 | 0.325431137 |
| 0.31625648  | 0.059286097 | 0.332739617 | 0.310837519 |
| 0.382751563 | 0.435672492 | 0.342523197 | 0.327244609 |
| 0.352136002 | 0.194022893 | 0.28579964  | 0.228711979 |
| 0.322712001 | 0.375297845 | 0.247891095 | 0.045474802 |
| 0.495271715 | 0.477919443 | 0.103759473 | 0.236276774 |
| 0.490347201 | 0.498948062 | 0.077777127 | 0.022290101 |
| 0.338500065 | 0.390186519 | 0.492450673 | 0.503284877 |
| 0.53061349  | 0.518582252 | 0.403450386 | 0.180544169 |
| 0.119431756 | 0.404794157 | 0.367423721 | 0.160145689 |
| 0.509872093 | 0.116337712 | 0.492268559 | 0.370466615 |
| 0.185857693 | 0.312730034 | 0.064560556 | 0.144326576 |
| 0.450182884 | 0.253698159 | 0.253534184 | 0.22457516  |
| 0.387821147 | 0.328246509 | 0.09187513  | 0.278072477 |
| 0.420865105 | 0.24290281  | 0.237719271 | 0.413379527 |
| 0.442574517 | 0.306221418 | 0.489538533 | 0.449585905 |
| 0.200179834 | 0.182415481 | 0.372688177 | 0.45795633  |
| 0.502687366 | 0.463242179 | 0.048595616 | 0.464322462 |
| 0.487550507 | 0.501217615 | 0.505669963 | 0.432339395 |
| 0.143351509 | 0.443271645 | 0.384917597 | 0.413362442 |
| 0.263939831 | 0.481421909 | 0.323770208 | 0.112139771 |
| 0.356647633 | 0.489527927 | 0.46465354  | 0.240327588 |
| 0.493167813 | 0.199726138 | 0.104565079 | 0.48453258  |



|             |             |             |             |
|-------------|-------------|-------------|-------------|
| 0.244373604 | 0.143906773 | 0.436381568 | 0.485205884 |
| 0.005135136 | 0.192117588 | 0.487216018 | 0.323761954 |
| 0.521748355 | 0.491614158 | 0.446293037 | 0.360533801 |
| 0.003487008 | 0.476280744 | 0.451236946 | 0.474589364 |
| 0.469351666 | 0.42921571  | 0.231982762 | 0.124333887 |
| 0.357639462 | 0.136148532 | 0.194916653 | 0.435454785 |
| 0.229385691 | 0.477754807 | 0.270812032 | 0.294563309 |
| 0.279981844 | 0.151775887 | 0.316801035 | 0.340576668 |
| 0.21428983  | 0.31243542  | 0.413061686 | 0.376112455 |
| 0.238757588 | 0.460381142 | 0.468638047 | 0.054719897 |
| 0.428813242 | 0.459774236 | 0.466922469 | 0.003992335 |
| 0.487345544 | 0.016124191 | 0.26714351  | 0.29428368  |
| 0.281925943 | 0.281814566 | 0.333430901 | 0.386671463 |
| 0.43497144  | 0.314597385 | 0.365458078 | 0.316236982 |
| 0.237867352 | 0.320352255 | 0.470788554 | 0.460220832 |
| 0.35297807  | 0.199293108 | 0.15139763  | 0.145076201 |
| 0.090692188 | 0.486452583 | 0.30627937  | 0.127970068 |
| 0.306186007 | 0.45543826  | 0.398118707 | 0.501125559 |
| 0.451926015 | 0.170093694 | 0.411235508 | 0.486130201 |
| 0.295231322 | 0.386338586 | 0.112498217 | 0.489907636 |
| 0.317070417 | 0.273066564 | 0.48680535  | 0.396705888 |
| 0.470994125 | 0.408902339 | 0.305530683 | 0.456442165 |
| 0.459226042 | 0.42063944  | 0.397740213 | 0.134015812 |
| 0.259708826 | 0.20223981  | 0.336611927 | 0.005404465 |
| 0.428962135 | 0.366315669 | 0.503061318 | 0.498742296 |
| 0.356741336 | 0.425561049 | 0.396363299 | 0.14448991  |
| 0.364959732 | 0.227411564 | 0.209301575 | 0.50025825  |
| 0.273898098 | 0.274982043 | 0.382593431 | 0.430111918 |
| 0.497320195 | 0.485282482 | 0.336992346 | 0.32909988  |
| 0.330511641 | 0.290792583 | 0.486328373 | 0.20189371  |
| 0.491629484 | 0.256325606 | 0.437650538 | 0.370141816 |
| 0.298601093 | 0.517447489 | 0.109819534 | 0.522725352 |
| 0.397088756 | 0.197592693 | 0.496747474 | 0.399447721 |
| 0.40796666  | 0.186704045 | 0.246914917 | 0.465626477 |
| 0.312497202 | 0.408501606 | 0.023210111 | 0.084450567 |
| 0.396633831 | 0.38907632  | 0.464222774 | 0.438524064 |
| 0.325623595 | 0.402498978 | 0.22419757  | 0.379633147 |
| 0.490474154 | 0.509163159 | 0.322137643 | 0.322069918 |
| 0.413880892 | 0.162038324 | 0.474893316 | 0.02693291  |
| 0.479317011 | 0.478521178 | 0.438900172 | 0.095485465 |
| 0.040406052 | 0.273373591 | 0.483687263 | 0.121788722 |
| 0.489217107 | 0.271305529 | 0.436835151 | 0.506060148 |
| 0.253319628 | 0.509989664 | 0.18516476  | 0.472376564 |
| 0.0910019   | 0.345861738 | 0.452147575 | 0.44683677  |
| 0.292372461 | 0.361868014 | 0.44644876  | 0.301354077 |
| 0.062300707 | 0.344321584 | 0.003739255 | 0.418518725 |
| 0.484066485 | 0.409387002 | 0.270756576 | 0.374995555 |
| 0.356494842 | 0.43934228  | 0.295545355 | 0.486409077 |
| 0.023942884 | 0.433590098 | 0.280925934 | 0.467555529 |
| 0.295141489 | 0.436385116 | 0.104725573 | 0.384258767 |
| 0.47358816  | 0.335369178 | 0.321380269 | 0.383992349 |
| 0.497729953 | 0.454781202 | 0.239728798 | 0.310603884 |
| 0.455603172 | 0.113251905 | 0.464416304 | 0.529064098 |
| 0.247566351 | 0.282641173 | 0.487176411 | 0.279562705 |

|             |             |             |             |
|-------------|-------------|-------------|-------------|
| 0.376282511 | 0.438235724 | 0.477093654 | 0.521223022 |
| 0.114667891 | 0.324356779 | 0.485341321 | 0.468573871 |
| 0.368069257 | 0.234120121 | 0.302599119 | 0.294367968 |
| 0.467739258 | 0.155082045 | 0.334205313 | 0.436997085 |
| 0.276939522 | 0.387975144 | 0.422961904 | 0.258437658 |
| 0.062754104 | 0.247238849 | 0.449588206 | 0.21775196  |
| 0.370394899 | 0.44342708  | 0.320652058 | 0.415098499 |
| 0.195909317 | 0.046633806 | 0.457633836 | 0.026294338 |
| 0.435358127 | 0.468361641 | 0.327895744 | 0.432636008 |
| 0.253534873 | 0.437551285 | 0.420615704 | 0.002182037 |
| 0.469535642 | 0.090986834 | 0.387384238 | 0.295680951 |
| 0.346244112 | 0.093247087 | 0.465941421 | 0.506171573 |
| 0.410509242 | 0.410200991 | 0.407951613 | 0.463458002 |
| 0.204234298 | 0.399626546 | 0.400489057 | 0.49054071  |
| 0.289761476 | 0.455451865 | 0.475638328 | 0.449665101 |
| 0.463273954 | 0.365949407 |             |             |
| D5ERTD579E  | 0.029243089 | 0.349972356 | 0.01933582  |
| 0.050395305 | 0.234709389 | 0.129450812 | 0.038948148 |
| 0.06653264  | 0.309719531 | 0.144699286 | 0.183679594 |
| 0.009487756 | 0.09567868  | 0.380806764 | 0.040938211 |
| 0.289184381 | 0.025158762 | 0.063547683 | 0.065614042 |
| 0.128038643 | 0.218290062 | 0.155287616 | 0.16118845  |
| 0.222750908 | 0.141809113 | 0.206990552 | 0.269938045 |
| 0.41253731  | 0.114739259 | 0.286897384 | 0.076663992 |
| 0.351149068 | 0.260819494 | 0.201378184 | 0.007637931 |
| 0.218316391 | 0.052767824 | 0.367987231 | 0.144181387 |
| 0.104196098 | 0.28109871  | 0.131849956 | 0.107376159 |
| 0.178143039 | 0.015194027 | 0.082213779 | 0.350345957 |
| 0.229604697 | 0.158762484 | 0.032898602 | 0.300738059 |
| 0.188223769 | 0.209288202 | 0.273500058 | 0.001062277 |
| 0.165237391 | 0.090034401 | 0.165836183 | 0.40067686  |
| 0.135833505 | 0.069873391 | 0.17212201  | 0.153169687 |
| 0.314706418 | 0.348658537 | 0.222957656 | 0.175365027 |
| 0.400594105 | 0.152810242 | 0.353375584 | 0.074126306 |
| 0.175616571 | 0.021718334 | 0.12513818  | 0.0669661   |
| 0.201267034 | 0.124588555 | 0.204814035 | 0.194912446 |
| 0.332765657 | 0.436651164 | 0.186399267 | 0.399008984 |
| 0.168004814 | 0.28012306  | 0.17863829  | 0.280529132 |
| 0.347778966 | 0.070609361 | 0.290191423 | 0.435709671 |
| 0.036166702 | 0.226639596 | 0.329720228 | 0.090110824 |
| 0.334559104 | 0.211830763 | 0.181111184 | 0.122040567 |
| 0.325913717 | 0.257313498 | 0.418111241 | 0.200698731 |
| 0.206708608 | 0.044102744 | 0.375283169 | 0.267620782 |
| 0.125046283 | 0.041412194 | 0.162380723 | 0.414507849 |
| 0.276563379 | 0.397626677 | 0.367962687 | 0.33901836  |
| 0.259070858 | 0.40458406  | 0.26846908  | 0.361403409 |
| 0.080541526 | 0.431814685 | 0.092912482 | 0.026024622 |
| 0.02937886  | 0.058100272 | 0.216211304 | 0.274071723 |
| 0.395161434 | 0.232810439 | 0.079745382 | 0.155827347 |
| 0.437614154 | 0.36623264  | 0.438494043 | 0.353964196 |
| 0.019689527 | 0.214572112 | 0.242706595 | 0.116705782 |
| 0.303866624 | 0.09196776  | 0.176272145 | 0.405005833 |
| 0.290890041 | 0.390853267 | 0.066705264 | 0.408135136 |
| 0.132332999 | 0.42524881  | 0.34806773  | 0.087465329 |

|             |             |             |             |
|-------------|-------------|-------------|-------------|
| 0.416624956 | 0.380475489 | 0.436974987 | 0.326472279 |
| 0.368867261 | 0.137728562 | 0.082769017 | 0.351906248 |
| 0.413561578 | 0.011833859 | 0.422183167 | 0.442763799 |
| 0.398853726 | 0.396326572 | 0.470756456 | 0.432713464 |
| 0.402446416 | 0.051312937 | 0.047526465 | 0.254269353 |
| 0.404682099 | 0.303398903 | 0.109553416 | 0.242537561 |
| 0.301885745 | 0.156088914 | 0.379615978 | 0.118054406 |
| 0.445379206 | 0.375344121 | 0.416822435 | 0.326747679 |
| 0.208796003 | 0.252046151 | 0.269796425 | 0.350463384 |
| 0.025264996 | 0.041028698 | 0.030452343 | 0.295608126 |
| 0.116240584 | 0.12242852  | 0.131712397 | 0.301205192 |
| 0.142206893 | 0.15070037  | 0.176663854 | 0.32338217  |
| 0.043764044 | 0.229946059 | 0.088350292 | 0.094982077 |
| 0.025660991 | 0.119783193 | 0.080203347 | 0.068718175 |
| 0.164308548 | 0.186292901 | 0.327390485 | 0.42922081  |
| 1           | 0.120010133 | 0.300909847 | 0.405641421 |
| 0.379104546 | 0.239448819 | 0.20418669  | 0.005107446 |
| 0.142354216 | 0.194125302 | 0.161401949 | 0.266596481 |
| 0.14809623  | 0.136133031 | 0.280052214 | 0.332353312 |
| 0.117716024 | 0.082524655 | 0.191321223 | 0.340017335 |
| 0.114054702 | 0.138068878 | 0.381340366 | 0.245433235 |
| 0.001751653 | 0.164499295 | 0.359148423 | 0.141794874 |
| 0.258010529 | 0.10777827  | 0.121210093 | 0.405496801 |
| 0.184517129 | 0.191798845 | 0.427492047 | 0.351726663 |
| 0.138929749 | 0.182211545 | 0.466993194 | 0.059257546 |
| 0.273742745 | 0.029979627 | 0.233081735 | 0.160711601 |
| 0.161724284 | 0.270617844 | 0.24921966  | 0.148826165 |
| 0.068561921 | 0.428231351 | 0.316586211 | 0.424268575 |
| 0.17511298  | 0.463461812 | 0.392414639 | 0.359860965 |
| 0.253878612 | 0.229006784 | 0.126538843 | 0.341322303 |
| 0.397272909 | 0.166086649 | 0.051201777 | 0.391608797 |
| 0.194096694 | 0.336819147 | 0.104983623 | 0.422524851 |
| 0.403674426 | 0.361104314 | 0.085350925 | 0.357794623 |
| 0.286302389 | 0.111552731 | 0.368093683 | 0.471707085 |
| 0.16297509  | 0.239452099 | 0.173237367 | 0.379403043 |
| 0.1114509   | 0.180698405 | 0.287874519 | 0.163928529 |
| 0.005371676 | 0.046380841 | 0.035030714 | 0.094589905 |
| 0.135394605 | 0.285662526 | 0.313349913 | 0.430185652 |
| 0.065497628 | 0.334022672 | 0.226778398 | 0.136583328 |
| 0.340370475 | 0.225827456 | 0.252545944 | 0.286753266 |
| 0.206855052 | 0.009468677 | 0.050966039 | 0.428613517 |
| 0.027174999 | 0.144856064 | 0.183701736 | 0.001312267 |
| 0.024080243 | 0.3258461   | 0.079884776 | 0.158056511 |
| 0.442378861 | 0.151904271 | 0.13416752  | 0.152334026 |
| 0.267340889 | 0.056105143 | 0.002122259 | 0.436711947 |
| 0.440719069 | 0.428372879 | 0.433491744 | 0.394321543 |
| 0.430454058 | 0.359431406 | 0.380254158 | 0.152188931 |
| 0.053377897 | 0.041691326 | 0.158925618 | 0.162235529 |
| 0.004209746 | 0.310087903 | 0.226416256 | 0.102802068 |
| 0.372140513 | 0.261931835 | 0.017764589 | 0.30105108  |
| 0.006722799 | 0.122638997 | 0.151547256 | 0.139785635 |
| 0.353315178 | 0.007140796 | 0.075228446 | 0.163661575 |
| 0.310956976 | 0.262174772 | 0.183568779 | 0.433349375 |
| 0.179656284 | 0.090366935 | 0.166462634 | 0.321938083 |

|             |             |             |             |
|-------------|-------------|-------------|-------------|
| 0.040835546 | 0.075175296 | 0.164190518 | 0.01529326  |
| 0.086462124 | 0.402007696 | 0.186173203 | 0.028982266 |
| 0.16840553  | 0.00188733  | 0.26897463  | 0.43815052  |
| 0.354693425 | 0.453583492 | 0.3991561   | 0.145561092 |
| 0.402162403 | 0.121025705 | 0.440639343 | 0.318193413 |
| 0.156749228 | 0.000234382 | 0.00539901  | 0.41742664  |
| 0.243767445 | 0.041031989 | 0.105453649 | 0.104413369 |
| 0.056779479 | 0.063867925 | 0.039329411 | 0.13502519  |
| 0.249289144 | 0.168806619 | 0.147934446 | 0.372035732 |
| 0.136287167 | 0.176738594 | 0.158014697 | 0.067713015 |
| 0.26001026  | 0.027940057 | 0.074680144 | 0.005408123 |
| 0.340732504 | 0.083538328 | 0.362589094 | 0.417554407 |
| 0.40934269  | 0.315332544 | 0.13844927  | 0.13672441  |
| 0.424198436 | 0.059637388 | 0.155880313 | 0.065762095 |
| 0.372929631 | 0.281501315 | 0.241304585 | 0.221381676 |
| 0.432335428 | 0.371923749 | 0.020230391 | 0.346651866 |
| 0.004460113 | 0.004329015 | 0.144082183 | 0.229691903 |
| 0.135629205 | 0.225206237 | 0.202445027 | 0.171469234 |
| 0.166579749 | 0.011703639 | 0.189676001 | 0.175810216 |
| 0.219760734 | 0.219168973 | 0.201938356 | 0.234023263 |
| 0.172083974 | 0.128570915 | 0.111281277 | 0.09760974  |
| 0.191315425 | 0.246294624 | 0.14219471  | 0.015637718 |
| 0.215851724 | 0.225600223 | 0.027767913 | 0.110308733 |
| 0.351023997 | 0.409695598 | 0.036042219 | 0.006208827 |
| 0.202658812 | 0.184360228 | 0.434205607 | 0.395775478 |
| 0.418320996 | 0.450233809 | 0.320405088 | 0.102962138 |
| 0.03358521  | 0.245342185 | 0.230196828 | 0.086446171 |
| 0.420178788 | 0.043740621 | 0.383752219 | 0.226112923 |
| 0.089706015 | 0.100932984 | 0.017243843 | 0.058879308 |
| 0.269639315 | 0.128875248 | 0.116516176 | 0.081513441 |
| 0.158669579 | 0.151376605 | 0.030674738 | 0.129228403 |
| 0.27370098  | 0.140144751 | 0.109932002 | 0.141027635 |
| 0.280469349 | 0.14224454  | 0.353513219 | 0.384411441 |
| 0.086144714 | 0.078659231 | 0.084122084 | 0.350702222 |
| 0.368286709 | 0.251245597 | 0.007705588 | 0.355668908 |
| 0.427673292 | 0.291687647 | 0.388189796 | 0.374564763 |
| 0.065994448 | 0.201939613 | 0.22127522  | 0.251717955 |
| 0.145113975 | 0.135444039 | 0.174334314 | 0.0428517   |
| 0.28548971  | 0.413786723 | 0.338744503 | 0.080748666 |
| 0.250987205 | 0.082038791 | 0.037594321 | 0.391259532 |
| 0.148223768 | 0.035896361 | 0.147470212 | 0.411795088 |
| 0.001856249 | 0.128068478 | 0.466619979 | 0.102751856 |
| 0.4542763   | 0.419321201 | 0.351556054 | 0.129515628 |
| 0.004805586 | 0.346817629 | 0.231922558 | 0.149149042 |
| 0.337595667 | 0.252989378 | 0.107862317 | 0.045405874 |
| 0.247968067 | 0.048366837 | 0.087278017 | 0.117899923 |
| 0.157974119 | 0.255862159 | 0.170255233 | 0.170833764 |
| 0.125976541 | 0.079676034 | 0.149147377 | 0.100052273 |
| 0.192783447 | 0.190047056 | 0.293808701 | 0.126956127 |
| 0.109552914 | 0.420742442 | 0.325587243 | 0.01199009  |
| 0.249298832 | 0.398105933 | 0.387924468 | 0.001730143 |
| 0.323142776 | 0.004197654 | 0.124189861 | 0.107753062 |
| 0.111730838 | 0.138324598 | 0.222179865 | 0.154796069 |
| 0.256221087 | 0.119883899 | 0.10815387  | 0.163074439 |

|             |             |             |             |
|-------------|-------------|-------------|-------------|
| 0.087438979 | 0.122600501 | 0.271198776 | 0.173776193 |
| 0.123843744 | 0.057029002 | 0.07907311  | 0.079904802 |
| 0.022917191 | 0.387803351 | 0.190639314 | 0.046865109 |
| 0.178367028 | 0.170266673 | 0.300926304 | 0.390471537 |
| 0.367139131 | 0.080092055 | 0.196778721 | 0.334823343 |
| 0.134828202 | 0.113144366 | 0.029147335 | 0.20394988  |
| 0.130173572 | 0.12505256  | 0.200783091 | 0.169148262 |
| 0.328590886 | 0.325546991 | 0.180028183 | 0.380829622 |
| 0.157158111 | 0.24392282  | 0.111031935 | 0.047107896 |
| 0.075594869 | 0.10780723  | 0.200635002 | 0.00072983  |
| 0.246541236 | 0.079864553 | 0.386752494 | 0.377416939 |
| 0.182585009 | 0.327206392 | 0.103078012 | 0.03942912  |
| 0.097780615 | 0.130096598 | 0.102726455 | 0.350944881 |
| 0.143152217 | 0.083740276 | 0.210977668 | 0.097265702 |
| 0.35923862  | 0.36579424  | 0.193414888 | 0.132425966 |
| 0.187820614 | 0.126488707 | 0.411050569 | 0.051403707 |
| 0.266800556 | 0.118241792 | 0.22845038  | 0.162647197 |
| 0.134732196 | 0.444948607 | 0.035241444 | 0.446578314 |
| 0.19185767  | 0.105849076 | 0.416298942 | 0.167576692 |
| 0.122085282 | 0.072445456 | 0.150093177 | 0.161141961 |
| 0.149341128 | 0.185081676 | 0.010168509 | 0.049003983 |
| 0.264363112 | 0.204076359 | 0.335923712 | 0.341088959 |
| 0.171985757 | 0.333577204 | 0.144484647 | 0.150733593 |
| 0.369844356 | 0.392662807 | 0.106513003 | 0.222510917 |
| 0.284156311 | 0.048988213 | 0.208240377 | 0.023043061 |
| 0.292435979 | 0.286671406 | 0.169158157 | 0.033512892 |
| 0.011632304 | 0.155408075 | 0.270422649 | 0.055813328 |
| 0.446234605 | 0.132000695 | 0.280030188 | 0.308176303 |
| 0.153204807 | 0.386138888 | 0.085478583 | 0.296872213 |
| 0.04303106  | 0.207379671 | 0.250738921 | 0.250827222 |
| 0.109659283 | 0.182928644 | 0.298186824 | 0.146744349 |
| 0.017965587 | 0.137432007 | 0.002750178 | 0.318217478 |
| 0.368669642 | 0.230522444 | 0.175722993 | 0.15368369  |
| 0.227024753 | 0.352710443 | 0.173829195 | 0.228591654 |
| 0.005706518 | 0.255876262 | 0.137879151 | 0.299880503 |
| 0.105289865 | 0.268800412 | 0.028312747 | 0.257190615 |
| 0.348145236 | 0.148368749 | 0.240812916 | 0.144494075 |
| 0.384679389 | 0.330936383 | 0.109435167 | 0.143992557 |
| 0.30916276  | 0.046370966 | 0.140342884 | 0.456952003 |
| 0.095077889 | 0.141733049 | 0.395383107 | 0.103359139 |
| 0.205002124 | 0.30987072  | 0.288710935 | 0.456039679 |
| 0.058560854 | 0.177508415 | 0.372113083 | 0.395455436 |
| 0.26269269  | 0.157803595 | 0.155140063 | 0.148530749 |
| 0.338267553 | 0.036038833 | 0.184451767 | 0.251514663 |
| 0.148647811 | 0.247549708 | 0.226649305 | 0.137056157 |
| 0.022899042 | 0.109585679 | 0.131505917 | 0.102989595 |
| 0.209214205 | 0.228250498 | 0.168640135 | 0.323074203 |
| 0.057989328 | 0.010721504 | 0.383055236 | 0.019218945 |
| 0.148314135 | 0.262221171 | 0.160370657 | 0.210820606 |
| 0.128187532 | 0.250243951 | 0.164849679 | 0.000523033 |
| 0.379088398 | 0.040420086 | 0.193383629 | 0.124767264 |
| 0.174962813 | 0.027657604 | 0.357999499 | 0.451568676 |
| 0.220861327 | 0.172744574 | 0.150879379 | 0.386521866 |
| 0.125490764 | 0.18279422  | 0.209423945 | 0.263846769 |

|             |             |             |             |
|-------------|-------------|-------------|-------------|
| 0.159671915 | 0.164890544 | 0.189188524 | 0.161704835 |
| 0.286372068 | 0.127321134 |             |             |
| D5WSU178E   | 0.251433719 | 0.252002339 | 0.243175288 |
| 0.254949839 | 0.121160376 | 0.170448631 | 0.221689543 |
| 0.22313161  | 0.207884172 | 0.089222464 | 0.177325553 |
| 0.185552339 | 0.01470304  | 0.263560201 | 0.201837439 |
| 0.128931055 | 0.189515146 | 0.246076396 | 0.049856013 |
| 0.16746928  | 0.121790147 | 0.101712797 | 0.18177282  |
| 0.114626115 | 0.334652962 | 0.201672829 | 0.097970608 |
| 0.273230106 | 0.055728372 | 0.149613094 | 0.069798233 |
| 0.331502945 | 0.115709839 | 0.094869787 | 0.193188935 |
| 0.154462577 | 0.003841775 | 0.365254362 | 0.172633399 |
| 0.050844528 | 0.323126593 | 0.12569997  | 0.216955632 |
| 0.135146275 | 0.240570033 | 0.053091453 | 0.123934669 |
| 0.176689579 | 0.168633455 | 0.231288369 | 0.173407045 |
| 0.12314302  | 0.221225299 | 0.170670182 | 0.008013221 |
| 0.068475464 | 0.00892066  | 0.038398439 | 0.320042611 |
| 0.258810402 | 0.228147988 | 0.057048376 | 0.166805245 |
| 0.124431796 | 0.140206467 | 0.201891467 | 0.116687589 |
| 0.302990927 | 0.037124077 | 0.147118677 | 0.167594614 |
| 0.17530897  | 0.182831565 | 0.267919778 | 0.207308965 |
| 0.122972634 | 0.215738339 | 0.141207713 | 0.082995797 |
| 0.257494414 | 0.359984836 | 0.226806929 | 0.336323105 |
| 0.026490436 | 0.097540935 | 0.109041622 | 0.196000077 |
| 0.168099745 | 0.182054922 | 0.198501989 | 0.337318623 |
| 0.177761329 | 0.130678569 | 0.169590227 | 0.235668338 |
| 0.251090912 | 0.062588207 | 0.130437936 | 0.048505598 |
| 0.12343123  | 0.118246365 | 0.327979985 | 0.234583716 |
| 0.114121424 | 0.247994645 | 0.361024417 | 0.089090284 |
| 0.15704937  | 0.274671777 | 0.105565741 | 0.192086059 |
| 0.169189136 | 0.273092171 | 0.207180131 | 0.204190292 |
| 0.115908903 | 0.296607302 | 0.199933009 | 0.246545376 |
| 0.029927303 | 0.312556786 | 0.278386757 | 0.195703526 |
| 0.228845848 | 0.193557306 | 0.082887077 | 0.25436397  |
| 0.236226371 | 0.198113739 | 0.256343925 | 0.186031073 |
| 0.216898325 | 0.333338882 | 0.30608163  | 0.21955144  |
| 0.230458511 | 0.053414493 | 0.123728083 | 0.19052835  |
| 0.165941659 | 0.228178367 | 0.075729418 | 0.36717172  |
| 0.303843137 | 0.196951586 | 0.251709337 | 0.388485122 |
| 0.177471943 | 0.330397179 | 0.246622455 | 0.263953326 |
| 0.354810618 | 0.360712946 | 0.298511392 | 0.126851729 |
| 0.338607925 | 0.225444881 | 0.028699952 | 0.228761493 |
| 0.306196191 | 0.010085239 | 0.220261297 | 0.241358875 |
| 0.310007016 | 0.198363987 | 0.28740289  | 0.267907911 |
| 0.305796492 | 0.244290085 | 0.004805896 | 0.159976658 |
| 0.338704381 | 0.277644442 | 0.144223358 | 0.117791662 |
| 0.122513332 | 0.187931724 | 0.17508763  | 0.10361891  |
| 0.341350805 | 0.241259614 | 0.241719616 | 0.198225724 |
| 0.157642987 | 0.319821325 | 0.090389623 | 0.360538377 |
| 0.219162195 | 0.268592931 | 0.234713464 | 0.200763351 |
| 0.13143078  | 0.225180269 | 0.18450193  | 0.120860604 |
| 0.236482338 | 0.175514702 | 0.071405591 | 0.124934009 |
| 0.23137816  | 0.142728303 | 0.268731014 | 0.254529026 |
| 0.215487005 | 0.301972382 | 0.206743871 | 0.23071804  |

|             |             |             |             |
|-------------|-------------|-------------|-------------|
| 0.162025175 | 0.37846388  | 0.147228338 | 0.261348409 |
| 0.120010133 | 1           | 0.174615338 | 0.299694021 |
| 0.302433851 | 0.118243801 | 0.235518288 | 0.107691882 |
| 0.116003957 | 0.063913046 | 0.033007947 | 0.110456001 |
| 0.33942089  | 0.161262177 | 0.142270892 | 0.154839674 |
| 0.243898849 | 0.204069544 | 0.115641342 | 0.359535595 |
| 0.253941952 | 0.145818463 | 0.235224055 | 0.139401971 |
| 0.096057516 | 0.217808561 | 0.21326178  | 0.083638147 |
| 0.187529199 | 0.044334015 | 0.063267549 | 0.244223195 |
| 0.065272975 | 0.074996093 | 0.244675619 | 0.148661683 |
| 0.121201416 | 0.321935582 | 0.293352284 | 0.007116372 |
| 0.103077556 | 0.086068878 | 0.197247879 | 0.113259437 |
| 0.249688597 | 0.19580367  | 0.101691482 | 0.123167134 |
| 0.261705813 | 0.314882065 | 0.241555566 | 0.281241292 |
| 0.102304184 | 0.303349169 | 0.213235599 | 0.259881212 |
| 0.200098448 | 0.089359258 | 0.023259569 | 0.218332219 |
| 0.233423351 | 0.093379219 | 0.239413534 | 0.166924632 |
| 0.110026675 | 0.130656369 | 0.085008759 | 0.290852115 |
| 0.361694196 | 0.315745446 | 0.192360607 | 0.173980125 |
| 0.257503344 | 0.262845681 | 0.216111649 | 0.306692848 |
| 0.090888246 | 0.114568356 | 0.118043172 | 0.210262706 |
| 0.279127316 | 0.088043974 | 0.271978565 | 0.030108043 |
| 0.001800217 | 0.229310739 | 0.258403249 | 0.185241566 |
| 0.056213884 | 0.11942827  | 0.151086051 | 0.296212879 |
| 0.247767691 | 0.279627433 | 0.203843086 | 0.15482566  |
| 0.291583751 | 0.105751934 | 0.104916478 | 0.129172228 |
| 0.235283819 | 0.132710618 | 0.213775775 | 0.371884676 |
| 0.196468186 | 0.068466691 | 0.1759225   | 0.018390298 |
| 0.230575158 | 0.195156165 | 0.279144328 | 0.355993827 |
| 0.238941126 | 0.351607189 | 0.266323502 | 0.110066597 |
| 0.181853286 | 0.262932765 | 0.03490862  | 0.264149335 |
| 0.283126877 | 0.270713423 | 0.28288608  | 0.308854248 |
| 0.231075316 | 0.172136598 | 0.186127608 | 0.201778049 |
| 0.245647606 | 0.238770872 | 0.068678038 | 0.170533445 |
| 0.019500499 | 0.208020536 | 0.126992935 | 0.273334471 |
| 0.155330504 | 0.187179391 | 0.22064584  | 0.11250944  |
| 0.199857156 | 0.039562834 | 0.165089536 | 0.161928578 |
| 0.156030066 | 0.176354028 | 0.123758209 | 0.091425006 |
| 0.32455973  | 0.286709667 | 0.086234627 | 0.322589479 |
| 0.189752333 | 0.237788853 | 0.165331014 | 0.171142007 |
| 0.245384461 | 0.036030753 | 0.155798305 | 0.019947974 |
| 0.081964985 | 0.299625022 | 0.109374312 | 0.274548296 |
| 0.239905721 | 0.122619941 | 0.302740864 | 0.322602033 |
| 0.308021613 | 0.275085366 | 0.299241518 | 0.078215107 |
| 0.312855576 | 0.010618412 | 0.292631103 | 0.248919651 |
| 0.108019123 | 0.015537778 | 0.038263205 | 0.239947785 |
| 0.13566962  | 0.218545492 | 0.270140378 | 0.156666186 |
| 0.245610921 | 0.255765019 | 0.21087667  | 0.083529534 |
| 0.159140236 | 0.134758738 | 0.064544055 | 0.313304592 |
| 0.210870921 | 0.198258205 | 0.143252102 | 0.23973345  |
| 0.132334235 | 0.247414193 | 0.22636544  | 0.03397188  |
| 0.152032095 | 0.272936419 | 0.374451506 | 0.300545127 |
| 0.325079207 | 0.147661202 | 0.084131961 | 0.122168479 |
| 0.215683674 | 0.233140497 | 0.092337335 | 0.246348655 |

|             |             |             |             |
|-------------|-------------|-------------|-------------|
| 0.298605799 | 0.147826161 | 0.247218064 | 0.302090988 |
| 0.300384579 | 0.316788277 | 0.209085592 | 0.198365343 |
| 0.135032876 | 0.004641858 | 0.192342714 | 0.202337583 |
| 0.020055129 | 0.117257591 | 0.272855603 | 0.133670467 |
| 0.139018639 | 0.208288757 | 0.064621304 | 0.06539101  |
| 0.198634469 | 0.152650829 | 0.09906472  | 0.206138159 |
| 0.123392206 | 0.078899051 | 0.191237938 | 0.188682474 |
| 0.089181469 | 0.293445959 | 0.33824296  | 0.182486372 |
| 0.135318137 | 0.122877377 | 0.251576582 | 0.263952411 |
| 0.242939413 | 0.253919295 | 0.191076131 | 0.10684311  |
| 0.278913214 | 0.12897371  | 0.255502791 | 0.28865794  |
| 0.351555724 | 0.323268243 | 0.350914828 | 0.139687979 |
| 0.24571592  | 0.166226497 | 0.098366652 | 0.123571249 |
| 0.29060756  | 0.224035903 | 0.306059596 | 0.073273439 |
| 0.249996026 | 0.250971201 | 0.189396082 | 0.240085243 |
| 0.103944362 | 0.245076069 | 0.185852833 | 0.270424105 |
| 0.158300185 | 0.066234821 | 0.220670536 | 0.248748901 |
| 0.230240682 | 0.045297712 | 0.255267094 | 0.172554958 |
| 0.233135614 | 0.067081689 | 0.152607509 | 0.330285935 |
| 0.272632093 | 0.238875932 | 0.227513754 | 0.16619995  |
| 0.201536885 | 0.109942022 | 0.138632213 | 0.259351793 |
| 0.267153405 | 0.141374968 | 0.323216232 | 0.234039962 |
| 0.24720973  | 0.128574047 | 0.07557245  | 0.13683937  |
| 0.220258458 | 0.176377272 | 0.176287571 | 0.243976706 |
| 0.269580537 | 0.354066755 | 0.257527841 | 0.227802492 |
| 0.132437816 | 0.23127694  | 0.21749115  | 0.22198698  |
| 0.063394166 | 0.255232919 | 0.124074621 | 0.179542951 |
| 0.01217574  | 0.027558252 | 0.254532423 | 0.195790084 |
| 0.327302214 | 0.259071806 | 0.325678917 | 0.169328387 |
| 0.000294494 | 0.12288678  | 0.172946031 | 0.151231329 |
| 0.254088121 | 0.238637461 | 0.107493275 | 0.220484783 |
| 0.264600091 | 0.242138549 | 0.198371571 | 0.152578298 |
| 0.043763929 | 0.169613553 | 0.23625368  | 0.203102958 |
| 0.169241404 | 0.20275119  | 0.064572828 | 0.234256379 |
| 0.038113206 | 0.247989053 | 0.246773237 | 0.096062874 |
| 0.051297378 | 0.234392425 | 0.21747532  | 0.211939129 |
| 0.096740104 | 0.221669219 | 0.250770989 | 0.025092404 |
| 0.159415692 | 0.119432366 | 0.165977913 | 0.186961381 |
| 0.185897572 | 0.16098808  | 0.157925012 | 0.139987695 |
| 0.176732392 | 0.220541554 | 0.209716625 | 0.229886278 |
| 0.197881709 | 0.214089959 | 0.139900732 | 0.180808413 |
| 0.143142887 | 0.277748812 | 0.286241357 | 0.313656812 |
| 0.208095726 | 0.244078622 | 0.314562694 | 0.244819965 |
| 0.205112865 | 0.150101299 | 0.296469942 | 0.301060972 |
| 0.266120509 | 0.278863794 | 0.148091181 | 0.253418604 |
| 0.047366386 | 0.135249269 | 0.21955778  | 0.175466357 |
| 0.221880541 | 0.097059963 | 0.142792298 | 0.220780168 |
| 0.165498526 | 0.352812271 | 0.298453349 | 0.290900274 |
| 0.157763193 | 0.119418702 | 0.109882118 | 0.197739719 |
| 0.281526415 | 0.250284297 | 0.108268683 | 0.072493565 |
| 0.193747851 | 0.234235894 | 0.22901002  | 0.334047937 |
| 0.06013921  | 0.287277993 | 0.127800537 | 0.267695171 |
| 0.097289269 | 0.327010887 | 0.262696656 | 0.174505942 |
| 0.040159965 | 0.237158505 | 0.141458486 | 0.180810687 |



|               |             |             |             |
|---------------|-------------|-------------|-------------|
| 0.168318896   | 0.153923999 | 0.099243725 | 0.189298675 |
| 0.185495043   | 0.26304591  | 0.332247894 | 0.256588739 |
| 0.127841275   | 0.096336121 | 0.144968815 | 0.166491984 |
| 0.160701153   | 0.275162659 | 0.241228629 | 0.273992242 |
| 0.127320132   | 0.261362077 | 0.356056399 | 0.18032048  |
| 0.185973943   | 0.15253687  | 0.036566007 | 0.137234476 |
| 0.180596656   | 0.080986426 | 0.002845055 | 0.023524606 |
| 0.204676979   | 0.104412334 | 0.192043715 | 0.17207486  |
| 0.097292367   | 0.206343205 | 0.027829792 | 0.195513909 |
| 0.318598947   | 0.360174197 | 0.189233193 | 0.249718318 |
| 0.21455015    | 0.243307486 | 0.18045263  | 0.007013103 |
| 0.131562066   | 0.110500163 | 0.104735575 | 0.206011557 |
| 0.170878211   | 0.044846919 | 0.146823166 | 0.203795453 |
| 0.238183858   | 0.038843143 | 0.141417341 | 0.166003307 |
| 0.22838214    | 0.369157985 | 0.158368428 | 0.181237544 |
| 0.14637905    | 0.216173772 | 0.101724351 | 0.114365277 |
| 0.143966779   | 0.089721118 | 0.200937271 | 0.071263047 |
| 0.208405777   | 0.144848336 | 0.017013683 | 0.380932096 |
| 0.351647028   | 0.09295165  | 0.289039338 | 0.075313867 |
| 0.204111735   | 0.239564479 | 0.10414102  | 0.114309107 |
| 0.124355626   | 0.120224159 | 0.219464895 | 0.266036882 |
| 0.061905072   | 0.137922152 | 0.209823489 | 0.094504939 |
| 0.388202195   | 0.109520405 | 0.250779492 | 0.090156232 |
| 0.298113131   | 0.221438845 | 0.259368827 | 0.105982323 |
| 0.131832907   | 0.237719363 | 0.124842828 | 0.311246573 |
| 0.196246027   | 0.072837036 | 0.203781744 | 0.214808642 |
| 0.078569038   | 0.263587345 | 0.119479926 | 0.305818922 |
| 0.131020121   | 0.233050768 | 0.182346196 | 0.268776508 |
| 0.22359619    | 0.063627996 | 0.070133965 | 0.130371063 |
| 0.314856111   | 0.246553614 | 0.07702307  | 0.23464802  |
| 0.05904952    | 0.188902162 | 0.143204089 | 0.11427492  |
| 0.168089707   | 0.171598145 | 0.152278036 | 0.260160994 |
| 0.191207612   | 0.149007935 | 0.111038906 | 0.31541429  |
| 0.183778204   | 0.15792551  | 0.327563983 | 0.004013283 |
| 0.210414496   | 0.161127615 | 0.212877698 | 0.121899267 |
| 0.31295054    | 0.180091083 | 0.193935078 | 0.042755177 |
| 0.20547121    | 0.036479357 | 0.121379477 | 0.133628209 |
| 0.073990303   | 0.235000814 | 0.315533603 | 0.272353481 |
| 0.204538623   | 0.093102491 | 0.079239121 | 0.290020449 |
| 0.039887005   | 0.066601818 | 0.080721914 | 0.166146486 |
| 0.054286894   | 0.111321672 | 0.10957727  | 0.100064681 |
| 0.213664875   | 0.194525481 |             |             |
| D930014E17RIK | 0.08812573  | 0.42978805  | 0.067855988 |
| 0.150420669   | 0.267525911 | 0.344285872 | 0.066831158 |
| 0.137066613   | 0.319620389 | 0.265316927 | 0.323158287 |
| 0.024511329   | 0.089465248 | 0.468182619 | 0.061579975 |
| 0.333391115   | 0.041645475 | 0.114727505 | 0.077731619 |
| 0.198862265   | 0.255323723 | 0.310696289 | 0.333896764 |
| 0.251572866   | 0.199345159 | 0.292905697 | 0.323448692 |
| 0.509444116   | 0.263348204 | 0.36477454  | 0.184051949 |
| 0.424297693   | 0.288716336 | 0.333508771 | 0.021624187 |
| 0.352292775   | 0.011531699 | 0.445330566 | 0.247683437 |
| 0.144130591   | 0.354308356 | 0.296384765 | 0.234237863 |
| 0.320025583   | 0.047573601 | 0.207006164 | 0.337186165 |

|             |             |             |             |
|-------------|-------------|-------------|-------------|
| 0.278633726 | 0.246292117 | 0.07599454  | 0.351186321 |
| 0.319160997 | 0.304714892 | 0.348919174 | 0.004950079 |
| 0.27777223  | 0.094200945 | 0.217172915 | 0.515242476 |
| 0.194460035 | 0.127965896 | 0.257723005 | 0.22558628  |
| 0.328669229 | 0.313320364 | 0.224147354 | 0.324216874 |
| 0.514056604 | 0.172047654 | 0.369803628 | 0.164519799 |
| 0.335240932 | 0.037873302 | 0.151495343 | 0.086821184 |
| 0.328860801 | 0.191535429 | 0.304883342 | 0.267601685 |
| 0.436669781 | 0.52544029  | 0.210861556 | 0.510499769 |
| 0.098893282 | 0.294886078 | 0.241509528 | 0.260056256 |
| 0.308316258 | 0.086706072 | 0.366177275 | 0.532533383 |
| 0.055483515 | 0.326712301 | 0.343488296 | 0.12695746  |
| 0.427689772 | 0.24147476  | 0.341324939 | 0.175049204 |
| 0.309118321 | 0.299977467 | 0.482089672 | 0.272104697 |
| 0.274652827 | 0.080870067 | 0.495976568 | 0.281347713 |
| 0.282633977 | 0.090730032 | 0.20661471  | 0.453885815 |
| 0.357722057 | 0.506900552 | 0.416929365 | 0.334269929 |
| 0.333677928 | 0.511498793 | 0.34417967  | 0.416361168 |
| 0.149257927 | 0.535552879 | 0.184826927 | 0.050979008 |
| 0.083610581 | 0.090682886 | 0.204381484 | 0.279149867 |
| 0.472752839 | 0.296907265 | 0.204182651 | 0.216881667 |
| 0.45360206  | 0.489914967 | 0.534408503 | 0.403580095 |
| 0.047969061 | 0.219065967 | 0.331973845 | 0.255024807 |
| 0.330573381 | 0.113154752 | 0.238897494 | 0.520866921 |
| 0.38862505  | 0.416161151 | 0.165848475 | 0.507781786 |
| 0.193413814 | 0.523409278 | 0.460823057 | 0.171657028 |
| 0.526995221 | 0.507591749 | 0.518495024 | 0.339204323 |
| 0.485062057 | 0.313707257 | 0.071495136 | 0.363200101 |
| 0.494181848 | 0.018034132 | 0.480467213 | 0.507413035 |
| 0.512512553 | 0.456085316 | 0.525873161 | 0.517137985 |
| 0.518954543 | 0.079312047 | 0.030089782 | 0.258269362 |
| 0.521744542 | 0.394075818 | 0.129777575 | 0.35992476  |
| 0.31424669  | 0.350743571 | 0.389142295 | 0.309599845 |
| 0.519690666 | 0.449287432 | 0.497540786 | 0.365518912 |
| 0.26443356  | 0.326740676 | 0.323434907 | 0.481280719 |
| 0.050891803 | 0.128499874 | 0.061697718 | 0.26051636  |
| 0.307928383 | 0.168354929 | 0.348653612 | 0.299477361 |
| 0.185324911 | 0.303083541 | 0.297442789 | 0.324264043 |
| 0.061816765 | 0.375175874 | 0.159204658 | 0.174782874 |
| 0.049416631 | 0.148086655 | 0.204435659 | 0.158934795 |
| 0.240758601 | 0.250643566 | 0.37143249  | 0.493282885 |
| 0.300909847 | 0.174615338 | 1           | 0.481134714 |
| 0.42890158  | 0.331067567 | 0.206851694 | 0.015080619 |
| 0.265712023 | 0.270217271 | 0.181807574 | 0.342018711 |
| 0.186315363 | 0.245589093 | 0.33864694  | 0.345249879 |
| 0.276037617 | 0.145849416 | 0.330064575 | 0.439016485 |
| 0.147235751 | 0.288350982 | 0.449521651 | 0.343842778 |
| 0.004514451 | 0.306129628 | 0.431018317 | 0.139238739 |
| 0.283885136 | 0.145433822 | 0.246294671 | 0.464558382 |
| 0.279325863 | 0.210569716 | 0.498550715 | 0.334743768 |
| 0.336865361 | 0.236123366 | 0.533178268 | 0.058991276 |
| 0.289110109 | 0.059335364 | 0.254575724 | 0.288305014 |
| 0.234838944 | 0.253473911 | 0.281012047 | 0.249406081 |
| 0.136786023 | 0.531076675 | 0.376533507 | 0.523562053 |

|             |             |             |             |
|-------------|-------------|-------------|-------------|
| 0.328914722 | 0.534784049 | 0.455598811 | 0.445754887 |
| 0.31297975  | 0.314433479 | 0.14186517  | 0.425138901 |
| 0.452277929 | 0.275678045 | 0.08001763  | 0.417040576 |
| 0.310796904 | 0.341779005 | 0.105290687 | 0.504054014 |
| 0.500692698 | 0.480673233 | 0.152049158 | 0.331234805 |
| 0.372978479 | 0.231853421 | 0.387964792 | 0.534538252 |
| 0.275066494 | 0.315674783 | 0.29920486  | 0.377157412 |
| 0.171812985 | 0.196664818 | 0.308456413 | 0.172421831 |
| 0.012872407 | 0.092396497 | 0.075296092 | 0.159592613 |
| 0.16052369  | 0.347896912 | 0.32941018  | 0.529543768 |
| 0.124925698 | 0.420745506 | 0.209363292 | 0.27970812  |
| 0.433037302 | 0.31071421  | 0.324260028 | 0.330253549 |
| 0.214670918 | 0.020725526 | 0.127337919 | 0.528610876 |
| 0.04755918  | 0.234182932 | 0.29066847  | 0.003434488 |
| 0.055701718 | 0.397680009 | 0.10165259  | 0.202610643 |
| 0.47699667  | 0.205472542 | 0.202626961 | 0.285068893 |
| 0.30049881  | 0.0982793   | 0.00393781  | 0.486968    |
| 0.485600878 | 0.45358485  | 0.48557084  | 0.458928488 |
| 0.433516996 | 0.352851864 | 0.378624012 | 0.319841147 |
| 0.113819975 | 0.09943818  | 0.205967746 | 0.264230397 |
| 0.00986287  | 0.342810712 | 0.263880071 | 0.140982655 |
| 0.37724914  | 0.266572706 | 0.047911087 | 0.302209514 |
| 0.029788323 | 0.203201911 | 0.293139517 | 0.202898263 |
| 0.294840638 | 0.018465868 | 0.234821341 | 0.300525539 |
| 0.447262435 | 0.347375728 | 0.311136703 | 0.53814419  |
| 0.301523266 | 0.128574574 | 0.277100501 | 0.347660534 |
| 0.080781221 | 0.113665    | 0.314848096 | 0.043346803 |
| 0.194356611 | 0.453237789 | 0.3240533   | 0.077326192 |
| 0.254762501 | 0.007430789 | 0.372775473 | 0.541498545 |
| 0.477729655 | 0.527956793 | 0.513461517 | 0.254359791 |
| 0.518717348 | 0.108809454 | 0.538737357 | 0.405261241 |
| 0.335255678 | 0.001716187 | 0.007430147 | 0.48921501  |
| 0.348392541 | 0.063554453 | 0.155859761 | 0.336564554 |
| 0.119581534 | 0.163213429 | 0.073072802 | 0.168310125 |
| 0.357736753 | 0.221194623 | 0.169482302 | 0.485027214 |
| 0.226132    | 0.210899468 | 0.348913167 | 0.091890009 |
| 0.341238643 | 0.061162911 | 0.088709305 | 0.011693915 |
| 0.308132952 | 0.120167921 | 0.479444692 | 0.520391507 |
| 0.502910589 | 0.327832808 | 0.305803443 | 0.32688103  |
| 0.421689922 | 0.105500181 | 0.318120971 | 0.119578591 |
| 0.499670218 | 0.340023022 | 0.297445693 | 0.303579732 |
| 0.512144344 | 0.481989741 | 0.040237166 | 0.372862655 |
| 0.017955739 | 0.002060315 | 0.337679757 | 0.23593481  |
| 0.054933894 | 0.324963544 | 0.232197807 | 0.203206061 |
| 0.201198246 | 0.04286418  | 0.240099672 | 0.225157891 |
| 0.266013316 | 0.323700247 | 0.250081175 | 0.211205572 |
| 0.227112423 | 0.130762291 | 0.183508279 | 0.153912349 |
| 0.224645515 | 0.306059953 | 0.204498316 | 0.025978834 |
| 0.35228599  | 0.359429354 | 0.066344661 | 0.153612586 |
| 0.439955623 | 0.503071776 | 0.047196108 | 0.014893496 |
| 0.251889639 | 0.282950901 | 0.509499213 | 0.5105731   |
| 0.536545369 | 0.528303964 | 0.399676855 | 0.127718742 |
| 0.07883556  | 0.275533434 | 0.257503798 | 0.092256918 |
| 0.524510143 | 0.074598735 | 0.492704802 | 0.264717154 |

|             |             |             |             |
|-------------|-------------|-------------|-------------|
| 0.116117027 | 0.203508194 | 0.042258249 | 0.088853357 |
| 0.332548271 | 0.17278837  | 0.169771874 | 0.152077448 |
| 0.29051777  | 0.228509074 | 0.054027159 | 0.19122903  |
| 0.321447476 | 0.1663406   | 0.158999071 | 0.270412511 |
| 0.322334632 | 0.198339925 | 0.373709393 | 0.45572227  |
| 0.133696554 | 0.114600247 | 0.27632947  | 0.331421024 |
| 0.433801591 | 0.331852956 | 0.037537016 | 0.460135516 |
| 0.494321633 | 0.372810262 | 0.509804633 | 0.384400496 |
| 0.087157986 | 0.337327174 | 0.273238709 | 0.300553755 |
| 0.177864452 | 0.341407596 | 0.21773515  | 0.069604728 |
| 0.286003758 | 0.485690839 | 0.416462871 | 0.167474176 |
| 0.351944926 | 0.133827841 | 0.065698079 | 0.44049294  |
| 0.171389844 | 0.106639182 | 0.314332757 | 0.412612217 |
| 0.001951029 | 0.137022074 | 0.484800414 | 0.235036623 |
| 0.517410753 | 0.484626248 | 0.448459396 | 0.227444764 |
| 0.001542849 | 0.337198861 | 0.338435321 | 0.347824029 |
| 0.44233521  | 0.322550156 | 0.140915299 | 0.082037664 |
| 0.265475818 | 0.089040628 | 0.143129308 | 0.319588304 |
| 0.156723691 | 0.355439523 | 0.180427986 | 0.190316452 |
| 0.178934385 | 0.093990176 | 0.219476837 | 0.226152823 |
| 0.130639838 | 0.216142784 | 0.333739354 | 0.262538755 |
| 0.208384344 | 0.43243137  | 0.385068051 | 0.033329252 |
| 0.306853229 | 0.391004316 | 0.42179354  | 0.003255972 |
| 0.372732783 | 0.009931204 | 0.189528736 | 0.206746258 |
| 0.185705602 | 0.203588008 | 0.230737052 | 0.26466816  |
| 0.307597147 | 0.208908188 | 0.263415003 | 0.220732432 |
| 0.160869138 | 0.203551097 | 0.328768375 | 0.306559013 |
| 0.266300053 | 0.132496052 | 0.10736473  | 0.116340114 |
| 0.06482145  | 0.465227045 | 0.243390405 | 0.07925672  |
| 0.209060904 | 0.307429113 | 0.344958414 | 0.505136175 |
| 0.413383036 | 0.122439495 | 0.294823364 | 0.452903663 |
| 0.226580805 | 0.303296639 | 0.076834475 | 0.327705459 |
| 0.225720566 | 0.21740027  | 0.33547119  | 0.291321997 |
| 0.355015818 | 0.408053591 | 0.235610978 | 0.433972949 |
| 0.315472585 | 0.292271451 | 0.289480196 | 0.094494521 |
| 0.180929526 | 0.127525756 | 0.239101237 | 0.00273957  |
| 0.310813788 | 0.256750597 | 0.474610003 | 0.499799198 |
| 0.265968002 | 0.376659677 | 0.310913635 | 0.103902976 |
| 0.254762619 | 0.194451761 | 0.139769466 | 0.38819504  |
| 0.214224431 | 0.179830393 | 0.264980688 | 0.30426259  |
| 0.382577322 | 0.356326991 | 0.221262304 | 0.236843873 |
| 0.208064302 | 0.186994296 | 0.475842385 | 0.129293859 |
| 0.356975731 | 0.173958933 | 0.305305244 | 0.274867076 |
| 0.206674493 | 0.518992054 | 0.066895693 | 0.534551263 |
| 0.299081939 | 0.126466398 | 0.498272592 | 0.267909878 |
| 0.255533025 | 0.117741767 | 0.181423136 | 0.332391065 |
| 0.215449717 | 0.297882183 | 0.021036203 | 0.076061414 |
| 0.285064257 | 0.259160937 | 0.38365303  | 0.305882865 |
| 0.214880811 | 0.305439249 | 0.158182641 | 0.27299528  |
| 0.491908392 | 0.505272205 | 0.259514183 | 0.219915106 |
| 0.311360874 | 0.110345591 | 0.343416112 | 0.015731258 |
| 0.3626716   | 0.355069751 | 0.335703731 | 0.060852662 |
| 0.022303891 | 0.204888905 | 0.351526732 | 0.071292132 |
| 0.48229762  | 0.215310781 | 0.29903756  | 0.364524425 |

|             |             |             |             |
|-------------|-------------|-------------|-------------|
| 0.162246923 | 0.508216767 | 0.124630193 | 0.356251959 |
| 0.053228789 | 0.224850939 | 0.312294348 | 0.31893799  |
| 0.224386751 | 0.264507961 | 0.332384102 | 0.223461464 |
| 0.038816423 | 0.244054588 | 0.002116918 | 0.416050792 |
| 0.478984951 | 0.291963548 | 0.197298597 | 0.268934305 |
| 0.243288184 | 0.359521807 | 0.241032097 | 0.343338687 |
| 0.013840402 | 0.322714267 | 0.18640243  | 0.41658026  |
| 0.23847566  | 0.310718978 | 0.06231009  | 0.270247634 |
| 0.466998694 | 0.279250807 | 0.238544293 | 0.285229964 |
| 0.498374064 | 0.364616814 | 0.153411466 | 0.195187603 |
| 0.318732387 | 0.070318086 | 0.333956531 | 0.537104823 |
| 0.172359033 | 0.201454674 | 0.435096744 | 0.200863843 |
| 0.279304192 | 0.381207789 | 0.333195434 | 0.522853391 |
| 0.079009904 | 0.227330758 | 0.384138864 | 0.468440591 |
| 0.269882173 | 0.157516441 | 0.234870837 | 0.218786048 |
| 0.471067972 | 0.110088289 | 0.229063928 | 0.317443865 |
| 0.207309401 | 0.271265338 | 0.283434686 | 0.177569    |
| 0.048048275 | 0.164934219 | 0.333075665 | 0.138466869 |
| 0.271834791 | 0.311181208 | 0.211147527 | 0.388473738 |
| 0.143555509 | 0.031889784 | 0.452675056 | 0.021051758 |
| 0.306051462 | 0.338020591 | 0.225745186 | 0.305838059 |
| 0.184185867 | 0.316227081 | 0.30464933  | 0.00212246  |
| 0.385599654 | 0.040314044 | 0.261469875 | 0.223248392 |
| 0.291836823 | 0.062202975 | 0.461336961 | 0.519992543 |
| 0.276836818 | 0.279423508 | 0.321153542 | 0.468805455 |
| 0.139255144 | 0.290102058 | 0.304206251 | 0.346963235 |
| 0.207555233 | 0.334359865 | 0.349140245 | 0.325274536 |
| 0.332623787 | 0.247881783 |             |             |
| DBF4        | 0.1817256   | 0.438551594 | 0.138223922 |
| 0.268848311 | 0.396164936 | 0.480194418 | 0.152724555 |
| 0.265407056 | 0.404142527 | 0.312512711 | 0.468634611 |
| 0.06625697  | 0.122481927 | 0.479797399 | 0.145837109 |
| 0.439824615 | 0.111225461 | 0.232659707 | 0.12691106  |
| 0.321947464 | 0.369378138 | 0.401760673 | 0.453905741 |
| 0.372867918 | 0.283917098 | 0.425587227 | 0.410280694 |
| 0.474087847 | 0.286494041 | 0.48593334  | 0.221360846 |
| 0.436176759 | 0.399754161 | 0.4088285   | 0.062235758 |
| 0.478263007 | 0.020810557 | 0.449916579 | 0.374379658 |
| 0.21483454  | 0.413701096 | 0.369449624 | 0.379646713 |
| 0.402930341 | 0.108240254 | 0.22196108  | 0.434925813 |
| 0.40978925  | 0.397986845 | 0.148326779 | 0.477923682 |
| 0.415149591 | 0.457347326 | 0.417012995 | 0.008115501 |
| 0.342073995 | 0.096431828 | 0.242785623 | 0.496607363 |
| 0.346483838 | 0.262032057 | 0.287790665 | 0.359702132 |
| 0.423788644 | 0.433394133 | 0.386096195 | 0.389002887 |
| 0.486227631 | 0.219242653 | 0.459251054 | 0.273169405 |
| 0.446016624 | 0.094560416 | 0.289824258 | 0.171975391 |
| 0.431835151 | 0.350959771 | 0.441646449 | 0.359235364 |
| 0.429638889 | 0.519314995 | 0.3690569   | 0.489588131 |
| 0.132030149 | 0.391101998 | 0.370563501 | 0.412016045 |
| 0.42611833  | 0.180012088 | 0.48764034  | 0.514270037 |
| 0.125347856 | 0.406036236 | 0.44429104  | 0.226999712 |
| 0.46818888  | 0.316447393 | 0.417197011 | 0.238881169 |
| 0.431475217 | 0.400490679 | 0.47206355  | 0.418043794 |

|             |             |             |             |
|-------------|-------------|-------------|-------------|
| 0.403054904 | 0.159542156 | 0.484395903 | 0.373700658 |
| 0.414416107 | 0.185971909 | 0.313067201 | 0.473916993 |
| 0.474501667 | 0.483436908 | 0.44852824  | 0.432485289 |
| 0.424414549 | 0.485590645 | 0.482876376 | 0.457638936 |
| 0.165113271 | 0.50793083  | 0.335137044 | 0.130665719 |
| 0.168108796 | 0.210097378 | 0.298177776 | 0.410455267 |
| 0.487417366 | 0.456779611 | 0.347774206 | 0.359630317 |
| 0.470912074 | 0.470695805 | 0.500717644 | 0.470043779 |
| 0.118835469 | 0.282649393 | 0.430663106 | 0.415135495 |
| 0.450358057 | 0.233772667 | 0.321018367 | 0.506433731 |
| 0.456076355 | 0.475432258 | 0.303184606 | 0.51113268  |
| 0.31607982  | 0.511942026 | 0.461633675 | 0.31305755  |
| 0.51535046  | 0.496299324 | 0.500154726 | 0.450625569 |
| 0.482677054 | 0.459502026 | 0.083816898 | 0.442203103 |
| 0.487767316 | 0.026346985 | 0.476550983 | 0.479039043 |
| 0.482886508 | 0.480994308 | 0.500944387 | 0.48598315  |
| 0.487729519 | 0.175319129 | 0.030241256 | 0.392611576 |
| 0.498493665 | 0.47084897  | 0.264313241 | 0.436488531 |
| 0.420823526 | 0.478927773 | 0.466510527 | 0.363082768 |
| 0.51565521  | 0.48525352  | 0.477010774 | 0.458753143 |
| 0.369851311 | 0.403090001 | 0.395548356 | 0.472192438 |
| 0.138107535 | 0.239697945 | 0.130023457 | 0.406870505 |
| 0.39506652  | 0.318637582 | 0.469288731 | 0.408867331 |
| 0.335393956 | 0.435345212 | 0.362241961 | 0.44116541  |
| 0.125290994 | 0.471002937 | 0.306479914 | 0.29379578  |
| 0.127643007 | 0.244534566 | 0.320245489 | 0.299226565 |
| 0.37900346  | 0.283979891 | 0.472894618 | 0.478037917 |
| 0.405641421 | 0.299694021 | 0.481134714 | 1           |
| 0.455441485 | 0.435506809 | 0.349162731 | 0.041204882 |
| 0.340867663 | 0.307492199 | 0.21826688  | 0.437823447 |
| 0.253670342 | 0.343155033 | 0.44484057  | 0.459483257 |
| 0.406149823 | 0.255566683 | 0.414211587 | 0.454030063 |
| 0.251904279 | 0.414275325 | 0.484047191 | 0.440638649 |
| 0.01766445  | 0.440583139 | 0.489947254 | 0.230046683 |
| 0.404561012 | 0.189735779 | 0.309974981 | 0.475297149 |
| 0.331332743 | 0.294189674 | 0.482558063 | 0.454031654 |
| 0.411311512 | 0.278449966 | 0.505525395 | 0.056502394 |
| 0.393544116 | 0.13227295  | 0.402658242 | 0.361002111 |
| 0.383405099 | 0.403406743 | 0.385326315 | 0.386520126 |
| 0.241809168 | 0.501799946 | 0.47336573  | 0.488777303 |
| 0.399843609 | 0.509530955 | 0.485812512 | 0.484853484 |
| 0.464448669 | 0.381402176 | 0.161504369 | 0.485951876 |
| 0.478330551 | 0.341795976 | 0.158215614 | 0.458881063 |
| 0.383254487 | 0.451013047 | 0.225930871 | 0.47831517  |
| 0.507434762 | 0.455054805 | 0.284424133 | 0.44598068  |
| 0.472587    | 0.383546993 | 0.472911403 | 0.513920299 |
| 0.324914783 | 0.401424961 | 0.395650966 | 0.459900897 |
| 0.311642558 | 0.285373167 | 0.404106847 | 0.209645708 |
| 0.014570606 | 0.185807384 | 0.160883008 | 0.299279559 |
| 0.238276181 | 0.435845548 | 0.459273076 | 0.498265679 |
| 0.249292573 | 0.47040251  | 0.348311651 | 0.382072406 |
| 0.444887238 | 0.401682419 | 0.426862892 | 0.452736681 |
| 0.372338822 | 0.060983595 | 0.234222646 | 0.521660617 |
| 0.103443714 | 0.307665515 | 0.421952093 | 0.008544176 |

|             |             |             |             |
|-------------|-------------|-------------|-------------|
| 0.122360683 | 0.430927713 | 0.18090643  | 0.280177657 |
| 0.480880994 | 0.283481744 | 0.330192556 | 0.342129468 |
| 0.457768772 | 0.212976376 | 0.014198932 | 0.462414166 |
| 0.466157835 | 0.43896907  | 0.46361126  | 0.450721199 |
| 0.445890741 | 0.453199196 | 0.464218401 | 0.455683726 |
| 0.236460734 | 0.198122601 | 0.264014772 | 0.396160579 |
| 0.011218138 | 0.473503707 | 0.401190251 | 0.270317673 |
| 0.468264191 | 0.40610222  | 0.116868542 | 0.415433345 |
| 0.07045382  | 0.233439666 | 0.394707097 | 0.349033921 |
| 0.426194952 | 0.056599995 | 0.296951191 | 0.362084559 |
| 0.439134398 | 0.430674473 | 0.394383933 | 0.515600989 |
| 0.449283296 | 0.215059737 | 0.413961936 | 0.47435511  |
| 0.180149751 | 0.136065598 | 0.421729703 | 0.047280419 |
| 0.289199902 | 0.450484775 | 0.430391106 | 0.170510949 |
| 0.400729927 | 0.025355794 | 0.43943326  | 0.517684505 |
| 0.455334713 | 0.491627101 | 0.49005376  | 0.335916046 |
| 0.492613728 | 0.110835671 | 0.504861178 | 0.454917788 |
| 0.384313375 | 0.003736946 | 0.019820081 | 0.484751124 |
| 0.449971308 | 0.127081213 | 0.294570103 | 0.440074525 |
| 0.236510543 | 0.266299225 | 0.173883711 | 0.269659547 |
| 0.488207131 | 0.356858342 | 0.257245808 | 0.460448944 |
| 0.369309745 | 0.367399092 | 0.435850899 | 0.182815209 |
| 0.470436979 | 0.147581878 | 0.180990002 | 0.020981227 |
| 0.443742408 | 0.204783153 | 0.476716359 | 0.490152777 |
| 0.495908947 | 0.462523595 | 0.340513285 | 0.410720037 |
| 0.458912051 | 0.181610462 | 0.403424724 | 0.210189927 |
| 0.467185322 | 0.450539225 | 0.439413925 | 0.412807679 |
| 0.488595582 | 0.467927074 | 0.10543397  | 0.466831967 |
| 0.04814498  | 0.005526172 | 0.448365282 | 0.384569619 |
| 0.086249511 | 0.410060463 | 0.37712036  | 0.320553752 |
| 0.335285901 | 0.097276561 | 0.30302799  | 0.296581395 |
| 0.413840833 | 0.441403565 | 0.352446835 | 0.351518676 |
| 0.360419181 | 0.211855091 | 0.3462126   | 0.292048707 |
| 0.309613216 | 0.389322635 | 0.28623543  | 0.074878195 |
| 0.448976642 | 0.454430473 | 0.15464988  | 0.292750399 |
| 0.490286627 | 0.487966098 | 0.115291683 | 0.042948465 |
| 0.384980009 | 0.401319642 | 0.486856367 | 0.476876563 |
| 0.51758595  | 0.50955398  | 0.422674076 | 0.237186241 |
| 0.174835883 | 0.416259539 | 0.367631005 | 0.206820436 |
| 0.492662255 | 0.144083657 | 0.475739862 | 0.343920191 |
| 0.236898803 | 0.3546523   | 0.113647749 | 0.198770775 |
| 0.426724209 | 0.318894616 | 0.314707719 | 0.25726236  |
| 0.406080966 | 0.322775465 | 0.137230265 | 0.336368761 |
| 0.442030524 | 0.217267201 | 0.296330914 | 0.424045448 |
| 0.442576515 | 0.240963458 | 0.465919625 | 0.457192989 |
| 0.250227058 | 0.22105955  | 0.387192666 | 0.451775932 |
| 0.474997126 | 0.404497439 | 0.077984746 | 0.441639213 |
| 0.481304847 | 0.477110965 | 0.490121862 | 0.452333883 |
| 0.185158825 | 0.44067483  | 0.344343097 | 0.413068325 |
| 0.317898337 | 0.480440495 | 0.367943378 | 0.158414457 |
| 0.388947297 | 0.486902755 | 0.453240465 | 0.309970817 |
| 0.458932669 | 0.228396219 | 0.128619519 | 0.468897523 |
| 0.241625414 | 0.19846616  | 0.384614638 | 0.461897742 |
| 0.007742877 | 0.180218854 | 0.466700599 | 0.391966689 |

|             |             |             |             |
|-------------|-------------|-------------|-------------|
| 0.508115458 | 0.481661168 | 0.461265313 | 0.382669391 |
| 0.003409128 | 0.442220836 | 0.466282171 | 0.462675661 |
| 0.461468268 | 0.452028598 | 0.254388034 | 0.184289233 |
| 0.402515906 | 0.168104947 | 0.251152344 | 0.425361046 |
| 0.191088106 | 0.465850721 | 0.327977204 | 0.321449992 |
| 0.329281441 | 0.172477864 | 0.306556407 | 0.395654711 |
| 0.187623977 | 0.371165611 | 0.442658416 | 0.321951544 |
| 0.229911927 | 0.456763765 | 0.456393129 | 0.088962809 |
| 0.40754423  | 0.449379812 | 0.469585733 | 0.006746198 |
| 0.477261013 | 0.034970445 | 0.326290644 | 0.351795519 |
| 0.338094256 | 0.331227302 | 0.373455407 | 0.401660705 |
| 0.433380253 | 0.361620632 | 0.418805324 | 0.375543384 |
| 0.303098031 | 0.371337968 | 0.459565207 | 0.437740433 |
| 0.390734417 | 0.260915402 | 0.184522109 | 0.173128242 |
| 0.150044075 | 0.472262768 | 0.354918791 | 0.159376436 |
| 0.363350765 | 0.437436527 | 0.435362718 | 0.473107369 |
| 0.470834687 | 0.193556905 | 0.419927782 | 0.473218192 |
| 0.243834926 | 0.389494409 | 0.15583965  | 0.468981599 |
| 0.384877076 | 0.30245525  | 0.453097456 | 0.401561999 |
| 0.438844273 | 0.428790343 | 0.357344719 | 0.461764149 |
| 0.466001866 | 0.386377648 | 0.339981986 | 0.19631188  |
| 0.31461902  | 0.243304568 | 0.350380435 | 0.011190758 |
| 0.455586323 | 0.39984669  | 0.487075904 | 0.480660477 |
| 0.32182257  | 0.451624775 | 0.361282998 | 0.199000461 |
| 0.302487209 | 0.24923867  | 0.266371905 | 0.472115404 |
| 0.245555878 | 0.340869925 | 0.402520088 | 0.426732092 |
| 0.474804719 | 0.445534347 | 0.333535502 | 0.373779905 |
| 0.36308624  | 0.324130233 | 0.471439547 | 0.243306627 |
| 0.445262927 | 0.282297787 | 0.397599624 | 0.396215705 |
| 0.346081844 | 0.488478939 | 0.155397397 | 0.494972528 |
| 0.393345972 | 0.236529078 | 0.502197387 | 0.423026141 |
| 0.430593085 | 0.25347125  | 0.221912261 | 0.430595294 |
| 0.350397638 | 0.375886488 | 0.017578482 | 0.091947256 |
| 0.432884971 | 0.350661112 | 0.431177952 | 0.43845817  |
| 0.330692408 | 0.425731581 | 0.201967881 | 0.404229386 |
| 0.466406152 | 0.496083095 | 0.366262086 | 0.366360981 |
| 0.440286529 | 0.231782644 | 0.466230984 | 0.026797859 |
| 0.449977696 | 0.431117486 | 0.39329145  | 0.149930048 |
| 0.070955559 | 0.245435141 | 0.453328588 | 0.146540599 |
| 0.479112233 | 0.243178267 | 0.399216956 | 0.489557733 |
| 0.29340373  | 0.499620228 | 0.252847996 | 0.482408231 |
| 0.109046848 | 0.382842506 | 0.410608484 | 0.405241571 |
| 0.332933882 | 0.352435025 | 0.463685568 | 0.301840608 |
| 0.106313234 | 0.368666522 | 0.006090214 | 0.434134316 |
| 0.465188048 | 0.374090736 | 0.312982562 | 0.311054051 |
| 0.402837127 | 0.442351184 | 0.319457131 | 0.438953226 |
| 0.046266608 | 0.424928335 | 0.347310442 | 0.474870832 |
| 0.262710968 | 0.407507022 | 0.163583327 | 0.364599996 |
| 0.470196927 | 0.344397749 | 0.360953396 | 0.336535611 |
| 0.473285074 | 0.441070543 | 0.261824222 | 0.335622234 |
| 0.412479244 | 0.152146415 | 0.421062781 | 0.511038583 |
| 0.314694934 | 0.288218413 | 0.479267979 | 0.333420845 |
| 0.354870135 | 0.449084819 | 0.422552258 | 0.500618353 |
| 0.171100401 | 0.387002906 | 0.475749346 | 0.46121685  |



|             |             |             |             |
|-------------|-------------|-------------|-------------|
| 0.41704925  | 0.242294406 | 0.304206322 | 0.327201937 |
| 0.450230184 | 0.21347393  | 0.323893434 | 0.458618602 |
| 0.265495973 | 0.426606977 | 0.380452072 | 0.297846256 |
| 0.106015184 | 0.308063279 | 0.465027259 | 0.270888362 |
| 0.413937738 | 0.436307095 | 0.328426087 | 0.446433247 |
| 0.267377196 | 0.078719745 | 0.466201883 | 0.024879095 |
| 0.448839034 | 0.474125341 | 0.386735351 | 0.429712531 |
| 0.299465685 | 0.44248798  | 0.409825638 | 0.005597373 |
| 0.464088142 | 0.092059056 | 0.387548679 | 0.32910684  |
| 0.326680977 | 0.137390098 | 0.45969482  | 0.489935221 |
| 0.436040408 | 0.382553412 | 0.365686708 | 0.457137964 |
| 0.197923048 | 0.339154834 | 0.360230926 | 0.460431293 |
| 0.275844772 | 0.394426671 | 0.430605911 | 0.410016243 |
| 0.467271222 | 0.411276541 |             |             |
| DBI         | 0.20468392  | 0.375278228 | 0.141944676 |
| 0.294837788 | 0.390158902 | 0.40669805  | 0.200390924 |
| 0.300958121 | 0.35433028  | 0.245011625 | 0.445148156 |
| 0.104098729 | 0.112265527 | 0.434401939 | 0.198345592 |
| 0.416122913 | 0.165326265 | 0.286395693 | 0.124964559 |
| 0.30854073  | 0.393266423 | 0.363778727 | 0.387442537 |
| 0.379375766 | 0.283899749 | 0.378113583 | 0.351700649 |
| 0.427927004 | 0.226036502 | 0.42180177  | 0.164037511 |
| 0.424548831 | 0.396343972 | 0.345691121 | 0.080411294 |
| 0.42876651  | 0.02482261  | 0.434663176 | 0.412988071 |
| 0.198916729 | 0.400006033 | 0.285945934 | 0.418231947 |
| 0.337914879 | 0.135880458 | 0.156696518 | 0.391192216 |
| 0.359192562 | 0.382425969 | 0.158219598 | 0.414182941 |
| 0.368752487 | 0.419616467 | 0.341308172 | 0.010501246 |
| 0.301977707 | 0.078299528 | 0.214477215 | 0.449741855 |
| 0.376575737 | 0.32654875  | 0.238175557 | 0.339221391 |
| 0.381621829 | 0.406592749 | 0.394037545 | 0.332563861 |
| 0.452789467 | 0.21775546  | 0.38993149  | 0.266240563 |
| 0.421002126 | 0.110889458 | 0.321673899 | 0.17302936  |
| 0.384555774 | 0.394116754 | 0.420541123 | 0.329327852 |
| 0.363852258 | 0.490041983 | 0.377634663 | 0.443770638 |
| 0.155617414 | 0.369796089 | 0.35789568  | 0.428161047 |
| 0.403629461 | 0.215315264 | 0.454106923 | 0.484947129 |
| 0.145765182 | 0.330575388 | 0.412063169 | 0.236752913 |
| 0.399708553 | 0.273540076 | 0.338022977 | 0.234186046 |
| 0.401611826 | 0.400039099 | 0.439539305 | 0.435802253 |
| 0.379567784 | 0.175733663 | 0.439845497 | 0.353808518 |
| 0.416435842 | 0.202386903 | 0.3456892   | 0.414476115 |
| 0.434822711 | 0.431896856 | 0.391510157 | 0.423185031 |
| 0.398244662 | 0.44747079  | 0.441796647 | 0.409608429 |
| 0.108404211 | 0.462848453 | 0.348602881 | 0.188145314 |
| 0.173727536 | 0.266203025 | 0.301606953 | 0.410294589 |
| 0.426182007 | 0.426178853 | 0.370407756 | 0.406670528 |
| 0.433284846 | 0.42220088  | 0.455803217 | 0.434188066 |
| 0.157735724 | 0.257494928 | 0.398147816 | 0.379263037 |
| 0.438983617 | 0.263426277 | 0.31851576  | 0.471630849 |
| 0.430254137 | 0.437000823 | 0.292218536 | 0.479730428 |
| 0.338353535 | 0.48664987  | 0.39000313  | 0.365021278 |
| 0.478264786 | 0.455370888 | 0.473123194 | 0.409607031 |
| 0.44576507  | 0.41875443  | 0.101739151 | 0.412757683 |

|             |             |             |             |
|-------------|-------------|-------------|-------------|
| 0.470557755 | 0.031372455 | 0.413248159 | 0.425994816 |
| 0.438625882 | 0.423862146 | 0.474653923 | 0.444610618 |
| 0.440292656 | 0.200325042 | 0.030805507 | 0.423608471 |
| 0.459397852 | 0.437538299 | 0.310994968 | 0.384333363 |
| 0.408868594 | 0.425169609 | 0.406866    | 0.339013189 |
| 0.499039248 | 0.422869277 | 0.411155788 | 0.420910454 |
| 0.330572582 | 0.388197508 | 0.3458139   | 0.428942557 |
| 0.175367207 | 0.256198286 | 0.13985346  | 0.401810477 |
| 0.303754675 | 0.373563347 | 0.415882484 | 0.388004347 |
| 0.385583303 | 0.380307613 | 0.302252101 | 0.413819654 |
| 0.132518185 | 0.403941729 | 0.319096613 | 0.31160293  |
| 0.185503446 | 0.257289958 | 0.371290017 | 0.342094045 |
| 0.418848596 | 0.282949965 | 0.406809019 | 0.429505591 |
| 0.379104546 | 0.302433851 | 0.42890158  | 0.455441485 |
| 1           | 0.395636809 | 0.369107544 | 0.06323985  |
| 0.36379164  | 0.255369315 | 0.201249143 | 0.373437507 |
| 0.249130556 | 0.398824511 | 0.424988309 | 0.431579186 |
| 0.380080883 | 0.262735808 | 0.396917687 | 0.438606949 |
| 0.253807563 | 0.41260035  | 0.448790635 | 0.379205528 |
| 0.025523263 | 0.436993721 | 0.43852808  | 0.279571119 |
| 0.399540978 | 0.20101331  | 0.267876169 | 0.430894021 |
| 0.302879757 | 0.315410748 | 0.42149302  | 0.422629442 |
| 0.363496623 | 0.258624778 | 0.474233552 | 0.063326591 |
| 0.359378899 | 0.154553032 | 0.43522645  | 0.281253826 |
| 0.409600049 | 0.422496067 | 0.375366885 | 0.381755307 |
| 0.235464786 | 0.465817477 | 0.421152928 | 0.452784021 |
| 0.363542053 | 0.478298582 | 0.43548942  | 0.446830751 |
| 0.439892855 | 0.333805135 | 0.155435327 | 0.438273461 |
| 0.428155829 | 0.301509429 | 0.164971448 | 0.398515061 |
| 0.335993155 | 0.415282004 | 0.235761365 | 0.457134046 |
| 0.480578151 | 0.405739618 | 0.351714812 | 0.436206429 |
| 0.450441067 | 0.391515984 | 0.419574157 | 0.486647828 |
| 0.272345334 | 0.397064103 | 0.392439373 | 0.439866738 |
| 0.338393268 | 0.325855424 | 0.38108329  | 0.187593913 |
| 0.009831811 | 0.204955462 | 0.184758485 | 0.365163038 |
| 0.249154235 | 0.360232377 | 0.427183279 | 0.461699426 |
| 0.30977845  | 0.422734669 | 0.352281382 | 0.412363694 |
| 0.404210758 | 0.380740989 | 0.374350526 | 0.414647343 |
| 0.376599987 | 0.084106567 | 0.300034134 | 0.492966074 |
| 0.110509423 | 0.298342257 | 0.395521466 | 0.015552765 |
| 0.16208241  | 0.356559518 | 0.188982805 | 0.286331802 |
| 0.437333342 | 0.278509408 | 0.342845484 | 0.288858731 |
| 0.443206995 | 0.251375252 | 0.021535592 | 0.42217419  |
| 0.426650227 | 0.405906527 | 0.423087101 | 0.411021842 |
| 0.399558787 | 0.397815198 | 0.430039866 | 0.384475335 |
| 0.278225942 | 0.203401425 | 0.287385034 | 0.426333614 |
| 0.016053788 | 0.441859784 | 0.388792014 | 0.308071977 |
| 0.419742849 | 0.410248664 | 0.155796547 | 0.387122137 |
| 0.092549706 | 0.20654635  | 0.395446787 | 0.37671038  |
| 0.418311446 | 0.076421955 | 0.268723796 | 0.347427333 |
| 0.398518844 | 0.407688921 | 0.329592791 | 0.472090364 |
| 0.449621444 | 0.20818708  | 0.420423378 | 0.439246163 |
| 0.233168828 | 0.117965314 | 0.387427692 | 0.034066513 |
| 0.222138059 | 0.416932688 | 0.373460808 | 0.18964857  |

|             |             |             |             |
|-------------|-------------|-------------|-------------|
| 0.4280942   | 0.038384157 | 0.403957787 | 0.481750663 |
| 0.403647848 | 0.459856468 | 0.45341435  | 0.318990648 |
| 0.455012391 | 0.091050745 | 0.462324564 | 0.405243492 |
| 0.325553398 | 0.005440139 | 0.035239116 | 0.426401341 |
| 0.417767866 | 0.125482314 | 0.336927573 | 0.36314238  |
| 0.313726063 | 0.274040721 | 0.209620166 | 0.294065871 |
| 0.415040253 | 0.386549394 | 0.275098327 | 0.420857759 |
| 0.410036379 | 0.4025239   | 0.371411108 | 0.199439024 |
| 0.410698553 | 0.200124894 | 0.197014706 | 0.033638765 |
| 0.425861422 | 0.201744442 | 0.435950998 | 0.447779461 |
| 0.472449664 | 0.427340399 | 0.270186408 | 0.365114184 |
| 0.409526104 | 0.175147798 | 0.321173983 | 0.208547207 |
| 0.421069836 | 0.433210875 | 0.444863149 | 0.404110693 |
| 0.471417266 | 0.441695536 | 0.148990958 | 0.440207851 |
| 0.062252358 | 0.009312801 | 0.384272122 | 0.392105018 |
| 0.086372841 | 0.397084363 | 0.395329902 | 0.313548462 |
| 0.345671477 | 0.126629068 | 0.29557506  | 0.295752664 |
| 0.432107433 | 0.435902522 | 0.362547887 | 0.345991036 |
| 0.370128965 | 0.255527653 | 0.373508779 | 0.339780973 |
| 0.285079283 | 0.368589223 | 0.288401128 | 0.108819011 |
| 0.380455573 | 0.404404468 | 0.197107609 | 0.309784917 |
| 0.447363106 | 0.434833225 | 0.177043091 | 0.075022929 |
| 0.385491683 | 0.401868011 | 0.446476557 | 0.428254749 |
| 0.478641245 | 0.489691481 | 0.412868912 | 0.314557384 |
| 0.215520811 | 0.423482884 | 0.363086118 | 0.263033087 |
| 0.454992558 | 0.154737363 | 0.429188067 | 0.317046184 |
| 0.270118532 | 0.383440466 | 0.163217601 | 0.243644716 |
| 0.37861975  | 0.357388162 | 0.375243588 | 0.25570559  |
| 0.434103302 | 0.288877641 | 0.177550274 | 0.38532718  |
| 0.431843873 | 0.216945139 | 0.337826046 | 0.375312119 |
| 0.3934033   | 0.184171283 | 0.419710283 | 0.455516187 |
| 0.274485738 | 0.249775208 | 0.351467027 | 0.408191158 |
| 0.415212    | 0.332473068 | 0.094876413 | 0.373613983 |
| 0.442249919 | 0.417347141 | 0.445089296 | 0.443423977 |
| 0.209673749 | 0.415125238 | 0.31775698  | 0.415237997 |
| 0.358224074 | 0.405079359 | 0.392828429 | 0.194038603 |
| 0.381183335 | 0.462514404 | 0.403589396 | 0.370634014 |
| 0.386109683 | 0.221751101 | 0.138603541 | 0.405648109 |
| 0.265775398 | 0.24906351  | 0.307522055 | 0.408298509 |
| 0.009761451 | 0.171770247 | 0.433119003 | 0.406480232 |
| 0.476694344 | 0.434190522 | 0.435591071 | 0.352539295 |
| 0.003593579 | 0.395539096 | 0.453417401 | 0.422207146 |
| 0.405787672 | 0.418667521 | 0.236288909 | 0.258023113 |
| 0.415081626 | 0.169912294 | 0.340190777 | 0.353674147 |
| 0.196347194 | 0.418240419 | 0.367987042 | 0.339784065 |
| 0.375178711 | 0.173221925 | 0.278693318 | 0.396695335 |
| 0.190388321 | 0.401266743 | 0.44855102  | 0.243380798 |
| 0.236106183 | 0.425209763 | 0.419010974 | 0.116750332 |
| 0.363779983 | 0.41712908  | 0.420118294 | 0.015583537 |
| 0.4361383   | 0.059032672 | 0.387392596 | 0.398795506 |
| 0.387108013 | 0.390755506 | 0.408706146 | 0.394923636 |
| 0.410156646 | 0.398913951 | 0.428172546 | 0.414009813 |
| 0.357129718 | 0.371322091 | 0.416696379 | 0.396093711 |
| 0.401623298 | 0.302482609 | 0.185747332 | 0.17080842  |

|             |             |             |             |
|-------------|-------------|-------------|-------------|
| 0.197825196 | 0.404839003 | 0.362035413 | 0.161365928 |
| 0.402464047 | 0.391534122 | 0.43168861  | 0.422970864 |
| 0.43746357  | 0.182328122 | 0.412056013 | 0.409069271 |
| 0.197078605 | 0.33700485  | 0.175666966 | 0.402505283 |
| 0.408021453 | 0.340821728 | 0.37036409  | 0.372455131 |
| 0.384859069 | 0.420578607 | 0.362033788 | 0.418815623 |
| 0.423996968 | 0.357670226 | 0.264968381 | 0.273956528 |
| 0.355220684 | 0.262213402 | 0.368735927 | 0.018354308 |
| 0.452413068 | 0.351723532 | 0.43179497  | 0.438224194 |
| 0.285268436 | 0.424510261 | 0.291186659 | 0.253368049 |
| 0.223936062 | 0.235137711 | 0.298969822 | 0.401177108 |
| 0.218289824 | 0.363874773 | 0.408659038 | 0.346257508 |
| 0.421360826 | 0.387474585 | 0.34051906  | 0.387963507 |
| 0.37558318  | 0.31540032  | 0.436645496 | 0.241845467 |
| 0.379954156 | 0.307270321 | 0.325693239 | 0.431950191 |
| 0.392491551 | 0.443828827 | 0.179686519 | 0.453161606 |
| 0.407001954 | 0.243113227 | 0.48373447  | 0.384141133 |
| 0.370295223 | 0.294937015 | 0.207289108 | 0.358125399 |
| 0.382213237 | 0.326406806 | 0.014109604 | 0.113958818 |
| 0.449750207 | 0.31443685  | 0.373693018 | 0.413229729 |
| 0.340583976 | 0.431637536 | 0.170901918 | 0.394086118 |
| 0.415664623 | 0.452067847 | 0.408910099 | 0.387638492 |
| 0.435077477 | 0.29004085  | 0.391857456 | 0.026743647 |
| 0.408359609 | 0.370006603 | 0.341626171 | 0.199183153 |
| 0.102935066 | 0.232554591 | 0.40569784  | 0.154376543 |
| 0.433809335 | 0.205783956 | 0.344704125 | 0.418429301 |
| 0.301841097 | 0.458216625 | 0.318461893 | 0.451759682 |
| 0.127531927 | 0.389690251 | 0.35943084  | 0.36100285  |
| 0.375465832 | 0.348337391 | 0.452036332 | 0.299165    |
| 0.155484766 | 0.397250037 | 0.012219424 | 0.424619095 |
| 0.42278379  | 0.353219403 | 0.324666742 | 0.241945971 |
| 0.426386122 | 0.401137451 | 0.363702681 | 0.360437211 |
| 0.072124522 | 0.4057628   | 0.375361899 | 0.421061257 |
| 0.233421018 | 0.380264874 | 0.204046111 | 0.357375763 |
| 0.431373135 | 0.376484462 | 0.36861215  | 0.302323556 |
| 0.422574411 | 0.380596597 | 0.243409292 | 0.324433376 |
| 0.353256312 | 0.173432887 | 0.331329383 | 0.476663726 |
| 0.380295046 | 0.294998183 | 0.441527751 | 0.399147084 |
| 0.335409466 | 0.396108317 | 0.353175384 | 0.463270353 |
| 0.250572675 | 0.413767185 | 0.429686717 | 0.41030296  |
| 0.431968258 | 0.269264835 | 0.307544978 | 0.382253122 |
| 0.403865946 | 0.253339999 | 0.317963325 | 0.43477509  |
| 0.273294849 | 0.432155099 | 0.310748517 | 0.345235469 |
| 0.16119681  | 0.338769095 | 0.406215946 | 0.301084661 |
| 0.439531282 | 0.421596268 | 0.352117015 | 0.426058133 |
| 0.314800154 | 0.119271718 | 0.45046056  | 0.033650932 |
| 0.385488821 | 0.440596842 | 0.404132606 | 0.399255312 |
| 0.30399798  | 0.417325459 | 0.372904553 | 0.013307452 |
| 0.436887604 | 0.083779993 | 0.372109464 | 0.375644124 |
| 0.316718993 | 0.178556966 | 0.422422076 | 0.461774791 |
| 0.405481012 | 0.308499876 | 0.312233324 | 0.419090775 |
| 0.19825665  | 0.277836238 | 0.331717112 | 0.388025247 |
| 0.26240192  | 0.321504073 | 0.359768817 | 0.350454766 |
| 0.428057671 | 0.389167639 |             |             |

| DCK         | 0.036799183 | 0.341300004 | 0.024960737 |
|-------------|-------------|-------------|-------------|
| 0.122833361 | 0.283039304 | 0.243975678 | 0.029164336 |
| 0.069261868 | 0.248571684 | 0.163664574 | 0.261785135 |
| 0.00955296  | 0.157730317 | 0.409203615 | 0.027224488 |
| 0.326280433 | 0.022287022 | 0.061663204 | 0.049172152 |
| 0.138908679 | 0.255121204 | 0.296543487 | 0.18550254  |
| 0.249159281 | 0.127398353 | 0.198830468 | 0.265325352 |
| 0.445318379 | 0.247941946 | 0.367746413 | 0.148880243 |
| 0.353086604 | 0.309421496 | 0.297352818 | 0.007938313 |
| 0.252331136 | 0.017772462 | 0.345898189 | 0.224589988 |
| 0.245993409 | 0.274406543 | 0.173504505 | 0.19630953  |
| 0.210891857 | 0.018408085 | 0.135102236 | 0.339488237 |
| 0.197372717 | 0.182942679 | 0.025096447 | 0.343077422 |
| 0.228183569 | 0.240997819 | 0.277978668 | 0.001105589 |
| 0.309874055 | 0.16820303  | 0.266788779 | 0.424226024 |
| 0.143912247 | 0.084001151 | 0.213337386 | 0.126519702 |
| 0.264603109 | 0.307323038 | 0.184815609 | 0.217901852 |
| 0.44027542  | 0.230986636 | 0.376906696 | 0.131638957 |
| 0.217027693 | 0.010963813 | 0.108578333 | 0.03388762  |
| 0.268112533 | 0.143709592 | 0.261672136 | 0.297883034 |
| 0.339432321 | 0.423440785 | 0.156940166 | 0.398319063 |
| 0.118312733 | 0.301420387 | 0.268909984 | 0.266452544 |
| 0.283717741 | 0.039379562 | 0.373693124 | 0.454866296 |
| 0.018113192 | 0.218658601 | 0.307358456 | 0.060242628 |
| 0.361367356 | 0.237821505 | 0.215573942 | 0.253640757 |
| 0.363778689 | 0.280128082 | 0.371556097 | 0.226614412 |
| 0.251075032 | 0.030523101 | 0.367746352 | 0.309981245 |
| 0.260562872 | 0.040873897 | 0.228052388 | 0.450214332 |
| 0.324871024 | 0.445991886 | 0.349846783 | 0.301609882 |
| 0.298412016 | 0.449834119 | 0.341956782 | 0.343507861 |
| 0.108512563 | 0.447380841 | 0.116135577 | 0.027215538 |
| 0.02901853  | 0.056449659 | 0.183032938 | 0.24647533  |
| 0.449971353 | 0.231974709 | 0.118020832 | 0.192042158 |
| 0.460536149 | 0.366264478 | 0.441395708 | 0.360394774 |
| 0.019391475 | 0.245749233 | 0.300625044 | 0.153529682 |
| 0.293645296 | 0.05479802  | 0.290649676 | 0.404522476 |
| 0.334566674 | 0.425904875 | 0.083301654 | 0.390281598 |
| 0.105397033 | 0.462010917 | 0.386922972 | 0.117932516 |
| 0.434626065 | 0.395768647 | 0.480532595 | 0.408378641 |
| 0.391794518 | 0.215845757 | 0.034295766 | 0.315593515 |
| 0.447744744 | 0.031595439 | 0.446038832 | 0.474370098 |
| 0.421006466 | 0.457896487 | 0.485254953 | 0.472381567 |
| 0.419316061 | 0.032546551 | 0.026177358 | 0.250976412 |
| 0.421767831 | 0.363719224 | 0.095375001 | 0.280965317 |
| 0.303120033 | 0.219416525 | 0.374798063 | 0.258665868 |
| 0.447225504 | 0.424044347 | 0.444501977 | 0.311182373 |
| 0.153651912 | 0.247128782 | 0.29675851  | 0.358136284 |
| 0.027493672 | 0.059908463 | 0.022671417 | 0.231599541 |
| 0.202687585 | 0.123152931 | 0.206890413 | 0.250168804 |
| 0.137892319 | 0.170860946 | 0.294496521 | 0.37888743  |
| 0.02561929  | 0.287623657 | 0.096349123 | 0.088015524 |
| 0.030123979 | 0.089367809 | 0.139638208 | 0.121691216 |
| 0.199156097 | 0.148141969 | 0.361671396 | 0.455158938 |
| 0.239448819 | 0.118243801 | 0.331067567 | 0.435506809 |

|             |             |             |             |
|-------------|-------------|-------------|-------------|
| 0.395636809 | 1           | 0.156301878 | 0.015676417 |
| 0.234009187 | 0.214832663 | 0.248515776 | 0.293200527 |
| 0.110027175 | 0.169206137 | 0.292795675 | 0.40985641  |
| 0.151783455 | 0.061598118 | 0.267548817 | 0.341732289 |
| 0.0845716   | 0.268016127 | 0.433186501 | 0.242360169 |
| 0.001569032 | 0.215540208 | 0.415997392 | 0.158154382 |
| 0.20809982  | 0.200168938 | 0.297228    | 0.443098686 |
| 0.25729675  | 0.223546266 | 0.461227282 | 0.393713282 |
| 0.213607441 | 0.13500555  | 0.477837123 | 0.059437779 |
| 0.247691323 | 0.082506137 | 0.253385239 | 0.170096339 |
| 0.165617168 | 0.237971576 | 0.281798812 | 0.272816839 |
| 0.069881902 | 0.43804873  | 0.332003084 | 0.465877191 |
| 0.280088926 | 0.477235376 | 0.447677069 | 0.410190326 |
| 0.268166339 | 0.247360033 | 0.21862868  | 0.413395683 |
| 0.440640267 | 0.213745143 | 0.0347071   | 0.395465102 |
| 0.221554588 | 0.372051539 | 0.142296936 | 0.464938833 |
| 0.414157763 | 0.362951716 | 0.107507013 | 0.370416521 |
| 0.352234512 | 0.145669502 | 0.375032023 | 0.469895215 |
| 0.185115058 | 0.268444449 | 0.290543696 | 0.416047648 |
| 0.113288692 | 0.214840215 | 0.243726106 | 0.239797302 |
| 0.029760015 | 0.033969038 | 0.030279941 | 0.138366561 |
| 0.245865209 | 0.294485829 | 0.333912636 | 0.456885527 |
| 0.071088762 | 0.35936406  | 0.152465362 | 0.251645402 |
| 0.350690259 | 0.252386969 | 0.307985331 | 0.320203288 |
| 0.172994252 | 0.020346654 | 0.102778526 | 0.425922578 |
| 0.013597686 | 0.285392492 | 0.166559274 | 0.003869685 |
| 0.020951478 | 0.319701336 | 0.053289624 | 0.132712113 |
| 0.467862701 | 0.134970977 | 0.130609393 | 0.180996297 |
| 0.30513117  | 0.05048869  | 0.006265199 | 0.434965751 |
| 0.403180026 | 0.376018041 | 0.3961809   | 0.351588662 |
| 0.385830626 | 0.328062244 | 0.397656943 | 0.189284806 |
| 0.062471573 | 0.040391901 | 0.261765708 | 0.2239522   |
| 0.002329985 | 0.360685773 | 0.225703258 | 0.092435134 |
| 0.387837166 | 0.210567226 | 0.019434763 | 0.285607629 |
| 0.015232321 | 0.27846897  | 0.162971795 | 0.144821802 |
| 0.33203585  | 0.006193791 | 0.206682182 | 0.273084525 |
| 0.342588783 | 0.271182796 | 0.305047469 | 0.458154463 |
| 0.239877009 | 0.066817973 | 0.263877372 | 0.371966754 |
| 0.040898163 | 0.079447616 | 0.187218891 | 0.037317836 |
| 0.13788516  | 0.356485278 | 0.255638497 | 0.042028317 |
| 0.192465244 | 0.002453176 | 0.299443193 | 0.457835064 |
| 0.370176328 | 0.487014408 | 0.449924579 | 0.305201683 |
| 0.444110269 | 0.167582746 | 0.469740178 | 0.332396809 |
| 0.226817186 | 0.000961898 | 0.004193828 | 0.47312109  |
| 0.305618271 | 0.025701812 | 0.097745975 | 0.236242832 |
| 0.08778466  | 0.072146684 | 0.033307462 | 0.241274374 |
| 0.309448203 | 0.219474612 | 0.207984509 | 0.369527115 |
| 0.174699228 | 0.153747229 | 0.204454809 | 0.041914639 |
| 0.310524085 | 0.035141977 | 0.040405363 | 0.014092393 |
| 0.336119478 | 0.064228345 | 0.347478768 | 0.435973168 |
| 0.438767182 | 0.380165816 | 0.208005438 | 0.218119144 |
| 0.39127933  | 0.0479244   | 0.268010102 | 0.051099418 |
| 0.40549589  | 0.337828749 | 0.28139784  | 0.251309809 |
| 0.460162259 | 0.407103936 | 0.016384079 | 0.381690097 |

|             |             |             |             |
|-------------|-------------|-------------|-------------|
| 0.012703893 | 0.002867999 | 0.209280758 | 0.176900853 |
| 0.05122227  | 0.276123229 | 0.201397285 | 0.131538962 |
| 0.148284227 | 0.017956767 | 0.286565855 | 0.278244454 |
| 0.2351657   | 0.254673067 | 0.276605006 | 0.159415569 |
| 0.234819277 | 0.16771489  | 0.150833717 | 0.091208263 |
| 0.146613003 | 0.235786573 | 0.133065132 | 0.009369896 |
| 0.262882336 | 0.295425854 | 0.030900786 | 0.095273592 |
| 0.426591943 | 0.467937982 | 0.026567493 | 0.013561318 |
| 0.19644536  | 0.213967774 | 0.477437217 | 0.42256677  |
| 0.428978218 | 0.46612478  | 0.31118149  | 0.107126098 |
| 0.037343764 | 0.246838906 | 0.277663623 | 0.114338806 |
| 0.44884534  | 0.026086353 | 0.399842253 | 0.302612428 |
| 0.062505665 | 0.157264589 | 0.026539311 | 0.044625323 |
| 0.329129019 | 0.109703228 | 0.151667174 | 0.082536775 |
| 0.23943225  | 0.292290859 | 0.022999872 | 0.123669203 |
| 0.277696529 | 0.264803839 | 0.095199117 | 0.166293145 |
| 0.275847606 | 0.113134892 | 0.397565377 | 0.392576744 |
| 0.072699485 | 0.053616823 | 0.162010594 | 0.316022238 |
| 0.405864461 | 0.23740323  | 0.023045623 | 0.364667839 |
| 0.447992116 | 0.362856875 | 0.412319495 | 0.366418924 |
| 0.041286345 | 0.302587886 | 0.255230774 | 0.257448182 |
| 0.105764227 | 0.230200485 | 0.14926571  | 0.028788214 |
| 0.229278733 | 0.376219698 | 0.356571291 | 0.128177183 |
| 0.270409432 | 0.055365816 | 0.021433483 | 0.387564252 |
| 0.252159756 | 0.053046927 | 0.183271837 | 0.393787259 |
| 0.005164188 | 0.230589532 | 0.452989263 | 0.16707518  |
| 0.436984501 | 0.463730572 | 0.385436981 | 0.140197699 |
| 0.004634253 | 0.374439175 | 0.308010804 | 0.294038852 |
| 0.358493603 | 0.265776864 | 0.082358493 | 0.060348184 |
| 0.246565869 | 0.039519855 | 0.106117312 | 0.214385851 |
| 0.206788858 | 0.264828249 | 0.141393593 | 0.109652222 |
| 0.162872351 | 0.039694455 | 0.287480803 | 0.164199384 |
| 0.162599166 | 0.187208627 | 0.314679404 | 0.14647482  |
| 0.237613043 | 0.388655645 | 0.343125165 | 0.012850589 |
| 0.284905472 | 0.361831362 | 0.385283384 | 0.00216156  |
| 0.398704424 | 0.004264411 | 0.161461186 | 0.192164536 |
| 0.163880402 | 0.15174577  | 0.216427836 | 0.271515421 |
| 0.232259118 | 0.148671518 | 0.214749924 | 0.178194119 |
| 0.147572844 | 0.131210046 | 0.300755189 | 0.211366651 |
| 0.261934587 | 0.080896971 | 0.055546462 | 0.056709996 |
| 0.038799117 | 0.40224768  | 0.182794495 | 0.036726625 |
| 0.155872194 | 0.214381046 | 0.313866034 | 0.404870513 |
| 0.386381773 | 0.062074652 | 0.213668283 | 0.387504082 |
| 0.154238748 | 0.188174636 | 0.025590522 | 0.232656023 |
| 0.141653764 | 0.233695791 | 0.223058255 | 0.181155607 |
| 0.303116158 | 0.332136359 | 0.174885555 | 0.384979506 |
| 0.271655719 | 0.204163036 | 0.176120356 | 0.079664773 |
| 0.113929195 | 0.072324343 | 0.26490137  | 0.001476154 |
| 0.259081909 | 0.157241659 | 0.451797347 | 0.401191313 |
| 0.280541214 | 0.333599791 | 0.179268653 | 0.055181242 |
| 0.162757744 | 0.113152703 | 0.084863232 | 0.371381725 |
| 0.277355726 | 0.119744138 | 0.258634382 | 0.173919691 |
| 0.400861069 | 0.350352509 | 0.219791491 | 0.130878594 |
| 0.145006692 | 0.115382996 | 0.371452174 | 0.058742418 |

|             |             |             |             |
|-------------|-------------|-------------|-------------|
| 0.295904946 | 0.241096122 | 0.19802629  | 0.240243698 |
| 0.181799938 | 0.465688001 | 0.027162419 | 0.476911209 |
| 0.257080184 | 0.075030264 | 0.414197923 | 0.163149424 |
| 0.17871294  | 0.116455943 | 0.271540458 | 0.204439019 |
| 0.150556487 | 0.306882231 | 0.012919594 | 0.076230064 |
| 0.294364741 | 0.175559631 | 0.316586813 | 0.29085117  |
| 0.252524965 | 0.309396482 | 0.221885494 | 0.15263203  |
| 0.374222698 | 0.382789256 | 0.202785281 | 0.192558563 |
| 0.26469051  | 0.067028118 | 0.252792939 | 0.010067234 |
| 0.326911514 | 0.324056021 | 0.230090027 | 0.027731296 |
| 0.009224398 | 0.284381297 | 0.298184428 | 0.025555865 |
| 0.470855181 | 0.277411671 | 0.21625875  | 0.373461854 |
| 0.101293651 | 0.385893425 | 0.105709335 | 0.381748707 |
| 0.017945596 | 0.174048005 | 0.278659268 | 0.22241726  |
| 0.236182229 | 0.298386109 | 0.358309694 | 0.289459923 |
| 0.01992786  | 0.23809837  | 0.001553463 | 0.319440149 |
| 0.356975999 | 0.28884048  | 0.137892733 | 0.166915817 |
| 0.237652343 | 0.315504407 | 0.182543753 | 0.26265433  |
| 0.01033193  | 0.33412508  | 0.121654934 | 0.354430351 |
| 0.253598063 | 0.217621087 | 0.049370526 | 0.252174823 |
| 0.332075588 | 0.217546257 | 0.181513108 | 0.268351077 |
| 0.407376808 | 0.306045095 | 0.09539757  | 0.203050952 |
| 0.256476089 | 0.028204702 | 0.211466777 | 0.45715164  |
| 0.138939917 | 0.276839438 | 0.460173721 | 0.161474184 |
| 0.28238036  | 0.305842168 | 0.276257677 | 0.434556337 |
| 0.070516312 | 0.181961207 | 0.39365137  | 0.392860503 |
| 0.265320454 | 0.214454347 | 0.278537086 | 0.212325872 |
| 0.368120962 | 0.074215656 | 0.242913204 | 0.281123253 |
| 0.274399432 | 0.234905745 | 0.187161427 | 0.190251768 |
| 0.02924996  | 0.097698306 | 0.2496402   | 0.079140796 |
| 0.209972393 | 0.278710537 | 0.240042579 | 0.340499097 |
| 0.13206046  | 0.028801088 | 0.394275366 | 0.051091878 |
| 0.186259379 | 0.353180114 | 0.148188001 | 0.282818099 |
| 0.128895909 | 0.220536405 | 0.174530215 | 0.000279821 |
| 0.382272793 | 0.085463328 | 0.210949458 | 0.23763098  |
| 0.235493136 | 0.023896804 | 0.382598968 | 0.485728775 |
| 0.205814968 | 0.223117266 | 0.279876572 | 0.383261173 |
| 0.236258292 | 0.265582934 | 0.253532403 | 0.28940597  |
| 0.282589273 | 0.223603277 | 0.259732995 | 0.317215201 |
| 0.301518201 | 0.150007085 |             |             |
| DCPS        | 0.222436189 | 0.274074383 | 0.153595674 |
| 0.169003614 | 0.185333978 | 0.181304752 | 0.269809671 |
| 0.298640647 | 0.250974743 | 0.112363854 | 0.209023586 |
| 0.164529333 | 0.047029777 | 0.306143368 | 0.286758988 |
| 0.182086586 | 0.232453605 | 0.298760678 | 0.10755122  |
| 0.212421216 | 0.200299932 | 0.146797844 | 0.198894141 |
| 0.204512835 | 0.294021222 | 0.213781933 | 0.153039841 |
| 0.297732503 | 0.072017689 | 0.178813866 | 0.056473018 |
| 0.359279641 | 0.181206855 | 0.131499128 | 0.124741423 |
| 0.206268119 | 0.028551012 | 0.381007094 | 0.227816011 |
| 0.067147689 | 0.35168728  | 0.126999142 | 0.243214933 |
| 0.14820464  | 0.170539165 | 0.059158396 | 0.179342646 |
| 0.210644159 | 0.255785934 | 0.19199288  | 0.193092187 |
| 0.183892462 | 0.242437955 | 0.176657985 | 0.012931323 |



|             |             |             |             |
|-------------|-------------|-------------|-------------|
| 0.108247084 | 0.021669854 | 0.07404624  | 0.337582742 |
| 0.288440016 | 0.309419613 | 0.09229062  | 0.27601565  |
| 0.195736217 | 0.219051267 | 0.297597828 | 0.148582497 |
| 0.328017042 | 0.090103238 | 0.184125633 | 0.155177765 |
| 0.22040709  | 0.185398953 | 0.288907845 | 0.212969345 |
| 0.177643282 | 0.294950835 | 0.21137881  | 0.135883514 |
| 0.257286777 | 0.405124908 | 0.287700358 | 0.345503513 |
| 0.107518684 | 0.163066571 | 0.176524718 | 0.271875307 |
| 0.242702752 | 0.28429906  | 0.219003511 | 0.368758209 |
| 0.230829794 | 0.152917451 | 0.217425049 | 0.247772091 |
| 0.267510726 | 0.131739628 | 0.139526243 | 0.091975844 |
| 0.183463968 | 0.182125359 | 0.37681303  | 0.268352872 |
| 0.204945097 | 0.206369679 | 0.36253566  | 0.149151565 |
| 0.194123341 | 0.206531086 | 0.181929718 | 0.238976245 |
| 0.195636051 | 0.299384857 | 0.247156136 | 0.273535349 |
| 0.165089332 | 0.318240665 | 0.204199287 | 0.306033321 |
| 0.041249447 | 0.342389948 | 0.253986714 | 0.248329929 |
| 0.197124177 | 0.303991151 | 0.202585512 | 0.3279245   |
| 0.269396686 | 0.261605582 | 0.268995284 | 0.257677562 |
| 0.279047279 | 0.335445465 | 0.337622944 | 0.268335982 |
| 0.215892909 | 0.117756974 | 0.158843283 | 0.259556344 |
| 0.237923738 | 0.299929442 | 0.130698293 | 0.381521709 |
| 0.311755931 | 0.248094435 | 0.240388843 | 0.413540647 |
| 0.31102251  | 0.367322562 | 0.251826556 | 0.273043326 |
| 0.370266045 | 0.3611412   | 0.341375576 | 0.171327211 |
| 0.354902841 | 0.20090031  | 0.110636158 | 0.285595647 |
| 0.362209624 | 0.013657131 | 0.266155277 | 0.286983027 |
| 0.320925437 | 0.234330614 | 0.34790256  | 0.309935245 |
| 0.325806359 | 0.246581384 | 0.017753495 | 0.252484852 |
| 0.347978545 | 0.28235182  | 0.311955933 | 0.152072557 |
| 0.200426166 | 0.208427144 | 0.233047291 | 0.120874082 |
| 0.404718627 | 0.269203141 | 0.281118295 | 0.247356276 |
| 0.204962137 | 0.343993743 | 0.136605639 | 0.349435733 |
| 0.221286802 | 0.225211569 | 0.17253216  | 0.289824108 |
| 0.124659387 | 0.299816913 | 0.202499035 | 0.211542397 |
| 0.305014999 | 0.226784313 | 0.112922924 | 0.185740954 |
| 0.17850962  | 0.165975918 | 0.264602485 | 0.254362669 |
| 0.223721574 | 0.299482084 | 0.230938934 | 0.254128764 |
| 0.263084472 | 0.343584946 | 0.18590307  | 0.303517822 |
| 0.20418669  | 0.235518288 | 0.206851694 | 0.349162731 |
| 0.369107544 | 0.156301878 | 1           | 0.053237109 |
| 0.157228184 | 0.108980682 | 0.073708172 | 0.156838146 |
| 0.319488192 | 0.249960554 | 0.200233602 | 0.204760733 |
| 0.215991907 | 0.278481986 | 0.177994699 | 0.389425533 |
| 0.237811448 | 0.194004787 | 0.280545249 | 0.174977043 |
| 0.0524737   | 0.224453803 | 0.245437482 | 0.18933253  |
| 0.260436462 | 0.08723683  | 0.087751628 | 0.278384329 |
| 0.12776046  | 0.177066084 | 0.29087114  | 0.210011636 |
| 0.174648774 | 0.310763056 | 0.350231059 | 0.029334894 |
| 0.183085237 | 0.091443626 | 0.266427488 | 0.134283633 |
| 0.275541242 | 0.28793539  | 0.175212762 | 0.17820587  |
| 0.198817635 | 0.351789976 | 0.282873558 | 0.317942171 |
| 0.1406303   | 0.353595713 | 0.254148714 | 0.297156489 |
| 0.246225784 | 0.147507246 | 0.054473398 | 0.235767762 |

|             |             |             |             |
|-------------|-------------|-------------|-------------|
| 0.264398576 | 0.133099474 | 0.193558952 | 0.216812654 |
| 0.152774534 | 0.184975747 | 0.163821476 | 0.326709454 |
| 0.396098281 | 0.312846987 | 0.304606849 | 0.247969137 |
| 0.271374645 | 0.254306855 | 0.269092459 | 0.37445555  |
| 0.120795827 | 0.181244804 | 0.163596192 | 0.275799871 |
| 0.267036518 | 0.188904806 | 0.336584421 | 0.073128822 |
| 0.0018648   | 0.248917562 | 0.210786188 | 0.27557864  |
| 0.108245393 | 0.157421682 | 0.205375969 | 0.333248068 |
| 0.302964208 | 0.318760386 | 0.295421446 | 0.185731181 |
| 0.30307902  | 0.193866919 | 0.15440201  | 0.195855219 |
| 0.293741047 | 0.079711889 | 0.21945801  | 0.401986317 |
| 0.161562236 | 0.116461098 | 0.265114719 | 0.014051836 |
| 0.218995591 | 0.215114562 | 0.233440492 | 0.333110527 |
| 0.30954032  | 0.302124801 | 0.24935309  | 0.131954285 |
| 0.245661536 | 0.273461277 | 0.021568415 | 0.307392287 |
| 0.339029161 | 0.332983054 | 0.335461641 | 0.350405005 |
| 0.295483998 | 0.234999822 | 0.238214387 | 0.192670519 |
| 0.273527339 | 0.219479745 | 0.115958438 | 0.231685318 |
| 0.025437842 | 0.256285754 | 0.23094382  | 0.282873919 |
| 0.21479081  | 0.278678828 | 0.211074099 | 0.198452337 |
| 0.09165587  | 0.060071389 | 0.256143527 | 0.299286636 |
| 0.247211097 | 0.130787734 | 0.090151772 | 0.133519214 |
| 0.310612117 | 0.30506045  | 0.123142887 | 0.348850361 |
| 0.229779776 | 0.19307361  | 0.199957253 | 0.230407201 |
| 0.270704687 | 0.056448873 | 0.220863396 | 0.010178317 |
| 0.119199258 | 0.36039541  | 0.172293513 | 0.173562021 |
| 0.260528965 | 0.068485699 | 0.289845554 | 0.362499536 |
| 0.305067447 | 0.321054101 | 0.323987195 | 0.117857188 |
| 0.328098718 | 0.030356121 | 0.329359536 | 0.261098571 |
| 0.130973241 | 0.005425955 | 0.062095365 | 0.273655934 |
| 0.170028458 | 0.157895157 | 0.290600677 | 0.140163404 |
| 0.266448487 | 0.240475623 | 0.273861162 | 0.140116025 |
| 0.185773671 | 0.227440322 | 0.155755707 | 0.329687916 |
| 0.269707937 | 0.306630121 | 0.181766753 | 0.238164448 |
| 0.183408798 | 0.229459913 | 0.2436308   | 0.02860105  |
| 0.230240142 | 0.218061007 | 0.374568003 | 0.329328981 |
| 0.362925213 | 0.193930752 | 0.102834914 | 0.179633622 |
| 0.290178749 | 0.173073461 | 0.123808592 | 0.206701136 |
| 0.30213768  | 0.189453401 | 0.278459852 | 0.284530059 |
| 0.348625475 | 0.332437506 | 0.22643757  | 0.239063375 |
| 0.064612165 | 0.013551349 | 0.168807373 | 0.305043307 |
| 0.094311013 | 0.175075225 | 0.286829643 | 0.251308102 |
| 0.279287306 | 0.152493948 | 0.117883719 | 0.120284003 |
| 0.251758731 | 0.216783269 | 0.165564059 | 0.287017534 |
| 0.205850938 | 0.149714046 | 0.280381288 | 0.332044724 |
| 0.202996159 | 0.28820727  | 0.288344323 | 0.192931057 |
| 0.155122699 | 0.158881057 | 0.239526672 | 0.280013912 |
| 0.267716979 | 0.287966312 | 0.242398044 | 0.08266788  |
| 0.297533574 | 0.236589101 | 0.310308326 | 0.306809338 |
| 0.373655318 | 0.373832953 | 0.379638395 | 0.274431156 |
| 0.25364145  | 0.237317997 | 0.168218405 | 0.21288486  |
| 0.330876541 | 0.188775655 | 0.328149777 | 0.12547469  |
| 0.28811641  | 0.249280776 | 0.19258288  | 0.289903487 |
| 0.154613295 | 0.315631679 | 0.273048614 | 0.200172907 |

|             |             |             |             |
|-------------|-------------|-------------|-------------|
| 0.225004497 | 0.109451817 | 0.251549148 | 0.302405039 |
| 0.266654811 | 0.071218481 | 0.29717718  | 0.244430945 |
| 0.257192147 | 0.105311712 | 0.193126067 | 0.377492229 |
| 0.265290952 | 0.273200795 | 0.167069375 | 0.244365588 |
| 0.231408687 | 0.14729721  | 0.085941521 | 0.269198058 |
| 0.32659614  | 0.172527418 | 0.336323664 | 0.321128452 |
| 0.250740723 | 0.165715721 | 0.149213297 | 0.206083603 |
| 0.322910228 | 0.187941614 | 0.308888017 | 0.249494376 |
| 0.353534936 | 0.408520151 | 0.268966096 | 0.27921763  |
| 0.176103563 | 0.219387483 | 0.175424294 | 0.277503943 |
| 0.109118785 | 0.230455063 | 0.140598698 | 0.246340908 |
| 0.007652741 | 0.064150133 | 0.323296447 | 0.272150659 |
| 0.384633816 | 0.29580206  | 0.343954796 | 0.264244487 |
| 0.001592909 | 0.170464151 | 0.207216196 | 0.163462265 |
| 0.27050673  | 0.27339912  | 0.233464349 | 0.259221236 |
| 0.315310054 | 0.179106041 | 0.2799112   | 0.160080519 |
| 0.077016081 | 0.20866183  | 0.315241743 | 0.297698737 |
| 0.270504663 | 0.206595187 | 0.1090253   | 0.256120606 |
| 0.114940891 | 0.298040053 | 0.295685619 | 0.121434273 |
| 0.075013245 | 0.313867089 | 0.238788897 | 0.170420451 |
| 0.16303453  | 0.288369699 | 0.314467928 | 0.020788118 |
| 0.194532274 | 0.109643136 | 0.277796598 | 0.239015273 |
| 0.271926617 | 0.297375512 | 0.262719055 | 0.186650103 |
| 0.233983382 | 0.290219109 | 0.227045037 | 0.285993966 |
| 0.250876428 | 0.289513267 | 0.196181615 | 0.207801002 |
| 0.183683096 | 0.266574091 | 0.238114716 | 0.242381524 |
| 0.206988806 | 0.284919694 | 0.327278455 | 0.179637803 |
| 0.313400229 | 0.208140525 | 0.344324988 | 0.310634874 |
| 0.331177089 | 0.205194807 | 0.250452332 | 0.255476851 |
| 0.081777219 | 0.162548932 | 0.218872523 | 0.193640882 |
| 0.301493713 | 0.162233925 | 0.176203713 | 0.203815763 |
| 0.205754677 | 0.371995378 | 0.314971737 | 0.335437795 |
| 0.192671639 | 0.199395772 | 0.105755926 | 0.23460383  |
| 0.255805395 | 0.271532699 | 0.178725499 | 0.031375547 |
| 0.259698879 | 0.18180907  | 0.257238582 | 0.332075365 |
| 0.112039893 | 0.3404335   | 0.11912913  | 0.235878074 |
| 0.086706313 | 0.248574018 | 0.286488327 | 0.209067477 |
| 0.070890809 | 0.286837697 | 0.204265571 | 0.166458447 |
| 0.208979654 | 0.199418704 | 0.204191868 | 0.310129898 |
| 0.294602619 | 0.246263974 | 0.372435099 | 0.230196997 |
| 0.156949626 | 0.142664546 | 0.171823813 | 0.219946852 |
| 0.25898838  | 0.314607897 | 0.228321898 | 0.315233577 |
| 0.19464397  | 0.253836349 | 0.406329455 | 0.261384254 |
| 0.22075594  | 0.234935845 | 0.070521302 | 0.178713466 |
| 0.297493774 | 0.127599201 | 0.005598803 | 0.055920344 |
| 0.262161983 | 0.19506356  | 0.219131622 | 0.253520656 |
| 0.173536977 | 0.296784734 | 0.070306311 | 0.263285336 |
| 0.31930395  | 0.372488632 | 0.203679442 | 0.309429191 |
| 0.278796109 | 0.283141909 | 0.186313349 | 0.030812088 |
| 0.172224925 | 0.14760619  | 0.147414997 | 0.274537964 |
| 0.171195455 | 0.076460925 | 0.176501934 | 0.206826194 |
| 0.297391604 | 0.062969568 | 0.195529449 | 0.193452229 |
| 0.29090649  | 0.374249641 | 0.279824736 | 0.215199948 |
| 0.198976482 | 0.292752085 | 0.159840843 | 0.185100395 |

|             |             |             |             |
|-------------|-------------|-------------|-------------|
| 0.176025435 | 0.144523548 | 0.23719371  | 0.116458143 |
| 0.210993521 | 0.209382329 | 0.018788522 | 0.382194748 |
| 0.345845519 | 0.146402959 | 0.322520433 | 0.113771591 |
| 0.278288249 | 0.30642766  | 0.236372867 | 0.150872213 |
| 0.092248429 | 0.165226401 | 0.313643829 | 0.271819817 |
| 0.066449256 | 0.204975366 | 0.194993181 | 0.18103186  |
| 0.380951436 | 0.181551185 | 0.337579535 | 0.100866918 |
| 0.310095479 | 0.26343721  | 0.207480342 | 0.199431967 |
| 0.182700259 | 0.224815849 | 0.145155599 | 0.362743981 |
| 0.287655326 | 0.118862932 | 0.251608585 | 0.255402396 |
| 0.146672351 | 0.300393733 | 0.158306499 | 0.363335712 |
| 0.240650847 | 0.293569479 | 0.24214014  | 0.308609929 |
| 0.303582582 | 0.144403004 | 0.123551958 | 0.21975445  |
| 0.301526966 | 0.199302606 | 0.154942229 | 0.251350194 |
| 0.10131968  | 0.282993486 | 0.170566609 | 0.221807079 |
| 0.1975537   | 0.327013425 | 0.187492689 | 0.294182932 |
| 0.269945832 | 0.194629354 | 0.185794097 | 0.351847956 |
| 0.205853175 | 0.105232252 | 0.372591749 | 0.009739451 |
| 0.202442746 | 0.194639527 | 0.305619325 | 0.187230757 |
| 0.267008292 | 0.245615388 | 0.193908113 | 0.031222505 |
| 0.268841148 | 0.040487791 | 0.234177761 | 0.184315426 |
| 0.145825352 | 0.237282836 | 0.330993251 | 0.327097924 |
| 0.265559749 | 0.150894224 | 0.110469278 | 0.330858933 |
| 0.074704475 | 0.105767553 | 0.151324009 | 0.180145127 |
| 0.102348205 | 0.128330318 | 0.149724155 | 0.122857105 |
| 0.242667115 | 0.284642812 |             |             |
| DDB1        | 0.078561717 | 0.013743496 | 0.095610829 |
| 0.087294174 | 0.029757643 | 0.014986073 | 0.037628693 |
| 0.02457025  | 0.009925019 | 4.18E-05    | 0.049224404 |
| 0.081089299 | 0.000275036 | 0.026686333 | 0.036597451 |
| 0.015102418 | 0.072769551 | 0.070926673 | 5.86E-05    |
| 0.002558329 | 0.031130523 | 0.00583807  | 0.008168935 |
| 0.017896168 | 0.091554451 | 0.016502981 | 0.002693859 |
| 0.021087804 | 0.000431922 | 0.018258832 | 0.000509342 |
| 0.055306261 | 0.024546489 | 0.003541056 | 0.110605513 |
| 0.011022205 | 8.24E-05    | 0.044405471 | 0.046164078 |
| 0.003865059 | 0.062342436 | 0.001710553 | 0.107207955 |
| 0.003778163 | 0.098636872 | 0.000507806 | 0.007260744 |
| 0.011966083 | 0.013351469 | 0.046188303 | 0.01683234  |
| 0.002427182 | 0.040652514 | 0.005089694 | 3.79E-05    |
| 0.004348582 | 0.000529754 | 0.000755418 | 0.027882297 |
| 0.131716526 | 0.101915212 | 3.59E-05    | 0.006861137 |
| 0.004247159 | 0.011625598 | 0.047579541 | 0.001610579 |
| 0.031412881 | 0.001191183 | 0.00764592  | 0.006905551 |
| 0.011090277 | 0.02139275  | 0.118288214 | 0.022611538 |
| 0.004691521 | 0.097649475 | 0.026703665 | 0.006423238 |
| 0.013419992 | 0.035538171 | 0.052409485 | 0.024434263 |
| 0.00024672  | 0.009585855 | 0.013921201 | 0.058617785 |
| 0.013039787 | 0.01193516  | 0.042269891 | 0.037918189 |
| 0.016856721 | 0.002147075 | 0.012185961 | 0.036303353 |
| 0.021057767 | 0.000664661 | 0.00290755  | 0.007891673 |
| 0.018553062 | 0.015822445 | 0.022402105 | 0.083861407 |
| 0.011778879 | 0.065418858 | 0.027133478 | 0.011141115 |
| 0.05010211  | 0.127927877 | 0.010600603 | 0.01285138  |

|             |             |             |             |
|-------------|-------------|-------------|-------------|
| 0.025137854 | 0.025171685 | 0.009247621 | 0.023938301 |
| 0.010823796 | 0.032276632 | 0.04383955  | 0.018168668 |
| 0.000988387 | 0.023911505 | 0.139909257 | 0.081989468 |
| 0.027347408 | 0.060772413 | 0.002011011 | 0.059624096 |
| 0.024229517 | 0.025940577 | 0.05701955  | 0.068862017 |
| 0.023676432 | 0.022222939 | 0.020480009 | 0.021359865 |
| 0.094513227 | 0.001024427 | 0.014597221 | 0.012661345 |
| 0.018941207 | 0.049912599 | 0.012601364 | 0.034574223 |
| 0.07117475  | 0.022585656 | 0.029788639 | 0.038716361 |
| 0.01150401  | 0.045556593 | 0.016351947 | 0.152117767 |
| 0.038591771 | 0.036399012 | 0.0388416   | 0.018137389 |
| 0.039452438 | 0.062823506 | 5.36E-05    | 0.02162122  |
| 0.045891816 | 0.007854271 | 0.013687208 | 0.017706235 |
| 0.025396005 | 0.016937855 | 0.029009864 | 0.023297785 |
| 0.021461038 | 0.070125069 | 0.000513222 | 0.043511179 |
| 0.031391613 | 0.064637527 | 0.015435002 | 0.005691566 |
| 0.01461574  | 0.014249471 | 0.010439885 | 0.001386592 |
| 0.043188006 | 0.025314238 | 0.014620347 | 0.015083508 |
| 0.005298679 | 0.061907318 | 0.00386344  | 0.032280242 |
| 0.073531192 | 0.072296253 | 0.084828118 | 0.028139196 |
| 0.002296764 | 0.109010127 | 0.008753068 | 0.007403174 |
| 0.109529853 | 0.005187668 | 0.001771075 | 0.018269824 |
| 0.05459782  | 0.008056118 | 0.092903005 | 0.043100498 |
| 0.117016873 | 0.081072768 | 0.020526505 | 0.091831694 |
| 0.044810443 | 0.050659041 | 0.007456957 | 0.023935703 |
| 0.005107446 | 0.107691882 | 0.015080619 | 0.041204882 |
| 0.06323985  | 0.015676417 | 0.053237109 | 1           |
| 0.004975548 | 0.000123735 | 0.000919511 | 0.004326336 |
| 0.060914322 | 0.011906606 | 0.013102785 | 0.031747461 |
| 0.043446771 | 0.012364414 | 0.005167815 | 0.051877579 |
| 0.05055013  | 0.036176625 | 0.031944008 | 0.004092688 |
| 0.066533994 | 0.049960412 | 0.024276677 | 0.005596436 |
| 0.017941683 | 0.000993409 | 0.003992598 | 0.02828194  |
| 0.000645907 | 0.005915004 | 0.018944369 | 0.02470601  |
| 0.000928736 | 0.028774979 | 0.02751238  | 0.00035785  |
| 0.004703292 | 0.013322843 | 0.08612476  | 0.000697768 |
| 0.0842074   | 0.043141678 | 0.015969944 | 0.023424012 |
| 0.079827562 | 0.025729441 | 0.029776251 | 0.026790783 |
| 0.003088287 | 0.029719855 | 0.022282468 | 0.040279787 |
| 0.03846687  | 0.001432694 | 0.000837188 | 0.029555708 |
| 0.026856523 | 0.000311737 | 0.062157813 | 0.007340122 |
| 0.002061222 | 0.012499434 | 0.003174159 | 0.04015839  |
| 0.046895431 | 0.019416751 | 0.057604757 | 0.032842784 |
| 0.069131895 | 0.116281065 | 0.023334698 | 0.028992824 |
| 0.000352164 | 0.009339108 | 0.012429869 | 0.043349925 |
| 0.130737054 | 0.009824741 | 0.034929387 | 0.000619322 |
| 0.000108646 | 0.035993152 | 0.092096318 | 0.091109032 |
| 0.013689199 | 0.00289171  | 0.018212218 | 0.02530622  |
| 0.098125083 | 0.038287408 | 0.025894437 | 0.029700876 |
| 0.030293527 | 0.004495294 | 0.009036941 | 0.013093072 |
| 0.051391009 | 0.092783251 | 0.056814402 | 0.039592519 |
| 0.03207346  | 0.008140015 | 0.008480872 | 0.007608109 |
| 0.050792269 | 0.005928106 | 0.06980727  | 0.098234155 |
| 0.025704767 | 0.089585398 | 0.076369591 | 0.00088446  |

|             |             |             |             |
|-------------|-------------|-------------|-------------|
| 0.051294634 | 0.123951553 | 0.099726779 | 0.020251726 |
| 0.016989477 | 0.016233405 | 0.015385982 | 0.018328323 |
| 0.01469641  | 0.010418909 | 0.023967036 | 0.021251536 |
| 0.043732063 | 0.030728933 | 0.007596503 | 0.036310857 |
| 0.000844772 | 0.050746175 | 0.012733069 | 0.138220795 |
| 0.011993493 | 0.023450055 | 0.087897957 | 0.009253705 |
| 0.106377742 | 0.002229771 | 0.004010282 | 0.018640801 |
| 0.02641838  | 0.101765779 | 0.004062864 | 0.002293886 |
| 0.035688951 | 0.047374844 | 0.002792648 | 0.029842149 |
| 0.060251762 | 0.036369376 | 0.050165676 | 0.029734062 |
| 0.065481201 | 0.000181737 | 0.003616551 | 0.000728851 |
| 0.000189826 | 0.019877661 | 0.002055039 | 0.049129643 |
| 0.095544656 | 0.120460505 | 0.058170647 | 0.030413841 |
| 0.021222192 | 0.026526444 | 0.033819183 | 0.013039982 |
| 0.034447009 | 0.001489666 | 0.023583404 | 0.024702197 |
| 0.001437439 | 0.012299106 | 0.005872152 | 0.023273466 |
| 0.01734547  | 0.046926754 | 0.121854901 | 0.007941384 |
| 0.106317701 | 0.032604159 | 0.053439264 | 0.024198161 |
| 0.015869731 | 0.045255378 | 0.007050572 | 0.020335002 |
| 0.058479171 | 0.052927832 | 0.002382093 | 0.056554251 |
| 0.011595597 | 0.126103666 | 0.042379894 | 0.027593321 |
| 0.025910872 | 0.053050061 | 0.029508747 | 0.024445719 |
| 0.04314469  | 0.027479645 | 0.000182596 | 0.001405445 |
| 0.01507022  | 0.045349842 | 0.000754756 | 0.046405697 |
| 0.02331111  | 0.023463035 | 0.086504213 | 0.094857767 |
| 0.037046244 | 0.039818953 | 0.081426014 | 0.029743908 |
| 0.074635728 | 0.00305946  | 0.019102592 | 0.031263077 |
| 6.30E-05    | 0.008744006 | 0.106426766 | 0.00322682  |
| 0.008943773 | 0.035021654 | 0.004922301 | 0.00654553  |
| 0.061917359 | 0.018509314 | 0.021902787 | 0.022923262 |
| 0.019528747 | 0.003883337 | 0.055510859 | 0.023572971 |
| 0.000161213 | 0.046478506 | 0.09526304  | 0.057986418 |
| 0.006245865 | 0.00897461  | 0.132870363 | 0.090680259 |
| 0.041162594 | 0.025965426 | 0.021360875 | 0.12494778  |
| 0.071702771 | 0.006939052 | 0.025198009 | 0.020089046 |
| 0.032079304 | 0.040109536 | 0.053124445 | 0.024503959 |
| 0.088422414 | 0.039526709 | 0.01620531  | 0.038051288 |
| 0.024749922 | 0.034573806 | 0.025116277 | 0.006837438 |
| 0.075244009 | 0.082305366 | 0.105712218 | 0.084829521 |
| 0.008366221 | 0.087352628 | 0.092491026 | 0.081394095 |
| 0.026530926 | 0.003663429 | 0.057248298 | 0.095944471 |
| 0.038147228 | 0.00271368  | 0.085181848 | 0.006857862 |
| 0.026583427 | 0.000539719 | 0.014531544 | 0.057136728 |
| 0.106304321 | 0.042581925 | 0.023459371 | 0.012163496 |
| 0.014739882 | 0.001681951 | 0.033961825 | 0.012638797 |
| 0.02506288  | 0.011610301 | 0.028831024 | 0.037774525 |
| 0.072415032 | 0.019626999 | 0.001974245 | 0.018121136 |
| 0.048690275 | 0.016646555 | 0.023090238 | 0.092179497 |
| 0.043150576 | 0.032093158 | 0.025403249 | 0.139659995 |
| 0.005081859 | 0.024846701 | 0.032636495 | 0.013304741 |
| 0.0094091   | 0.043743435 | 0.001323413 | 0.01001857  |
| 0.018330826 | 0.002884122 | 0.021495894 | 0.042829172 |
| 0.030495197 | 0.031510192 | 0.059885097 | 0.006752685 |
| 0.000231371 | 0.010329531 | 0.044454153 | 0.018898787 |

|             |             |             |             |
|-------------|-------------|-------------|-------------|
| 0.018070981 | 0.037715109 | 0.000881086 | 0.103270244 |
| 0.100496207 | 0.06510217  | 0.037746327 | 0.002305328 |
| 0.000269348 | 0.009798827 | 0.091538104 | 0.025476211 |
| 0.045979712 | 0.017244293 | 0.003850352 | 0.081716763 |
| 0.000485426 | 0.10328909  | 0.070429157 | 0.000278389 |
| 0.001801837 | 0.019723829 | 0.022941852 | 0.120491513 |
| 0.006254828 | 0.022294895 | 0.025982051 | 0.004353682 |
| 0.020637228 | 0.082374908 | 0.056969854 | 0.099934417 |
| 0.068280378 | 0.028439662 | 0.048338465 | 0.028018905 |
| 0.01440752  | 0.049121994 | 0.077787347 | 0.116947593 |
| 0.108225745 | 0.035045954 | 0.015170149 | 0.014580052 |
| 0.039538694 | 0.139370324 | 0.067013149 | 0.066567134 |
| 0.082136389 | 0.015692947 | 0.09797787  | 0.087661321 |
| 0.063035328 | 0.005387264 | 0.080178298 | 0.019762776 |
| 0.045593419 | 0.051241973 | 0.009575545 | 0.024627311 |
| 0.00069286  | 0.000525182 | 0.02181263  | 0.018129413 |
| 0.055333412 | 0.014449896 | 0.00413639  | 0.026686995 |
| 0.006497412 | 0.072353205 | 0.092789953 | 0.040155995 |
| 0.021906741 | 0.003344893 | 0.001115342 | 0.112440536 |
| 0.11404823  | 0.060662328 | 0.030804731 | 0.100779352 |
| 0.038131233 | 0.019285429 | 0.022940651 | 0.033077129 |
| 0.001654386 | 0.056111467 | 0.000958688 | 0.078650036 |
| 0.000750952 | 0.051250527 | 0.096853108 | 0.010600005 |
| 0.001646947 | 0.072035722 | 0.037212998 | 0.006782768 |
| 0.017119144 | 0.008079314 | 0.007988135 | 0.013709706 |
| 0.027233996 | 0.071291591 | 0.024212373 | 0.049396947 |
| 0.005261493 | 0.033376024 | 0.002728831 | 0.046391914 |
| 0.040031349 | 0.021537648 | 0.092400312 | 0.020820259 |
| 0.014371667 | 0.06734606  | 0.048331074 | 0.013952928 |
| 0.010282974 | 0.038216167 | 0.002675334 | 0.001910913 |
| 0.016865091 | 0.003575828 | 0.000204599 | 0.000229098 |
| 0.072931118 | 0.001076732 | 0.007933476 | 0.015696053 |
| 0.016946553 | 0.044209978 | 0.000261984 | 0.011888248 |
| 0.01978079  | 0.028318466 | 0.023360018 | 0.073094963 |
| 0.032981887 | 0.115328882 | 0.013134161 | 0.000662487 |
| 0.009274335 | 0.004471728 | 0.000688744 | 0.054681359 |
| 0.033951217 | 0.003200225 | 0.010420179 | 0.023401785 |
| 0.024392463 | 0.000680025 | 0.003619088 | 0.01671064  |
| 0.037139662 | 0.031565083 | 0.048580976 | 0.039361484 |
| 0.002510718 | 0.04818826  | 0.004800599 | 0.002355814 |
| 0.045832989 | 0.012328168 | 0.055999819 | 0.014988141 |
| 0.13152543  | 0.019884064 | 0.002231008 | 0.065094265 |
| 0.026459015 | 0.006944462 | 0.070139793 | 0.000824593 |
| 0.085343331 | 0.025392458 | 0.002763469 | 0.003147271 |
| 0.114911298 | 0.019860297 | 0.067948197 | 0.040090093 |
| 0.001839488 | 0.00571086  | 0.104738236 | 0.006492613 |
| 0.033027162 | 0.003427866 | 0.042880348 | 0.00256148  |
| 0.022036148 | 0.014777536 | 0.050729179 | 0.008457466 |
| 0.003119084 | 0.070294002 | 0.00168035  | 0.026800779 |
| 0.089468426 | 0.018592318 | 0.029407207 | 0.067678155 |
| 0.004878064 | 0.023384487 | 0.003286046 | 0.020960344 |
| 0.044945434 | 0.085574017 | 0.018673275 | 0.020139349 |
| 0.071689466 | 0.010312445 | 0.007468459 | 0.031010274 |
| 0.027911691 | 0.10235065  | 0.002705278 | 0.044932247 |

|             |             |             |             |
|-------------|-------------|-------------|-------------|
| 0.007256334 | 0.04480239  | 0.002711609 | 0.02970817  |
| 0.023899404 | 0.01243375  | 0.011991864 | 0.090640489 |
| 0.04412025  | 0.027364496 | 0.017205104 | 0.071420436 |
| 0.080846453 | 0.118287048 | 0.051662832 | 0.000197652 |
| 0.032059533 | 0.041414734 | 0.057122003 | 0.011942022 |
| 0.129717746 | 0.015066939 | 0.012790346 | 0.005277413 |
| 0.028771096 | 0.008488271 | 0.007021    | 0.040239675 |
| 0.00054758  | 0.050888908 | 0.038972854 | 0.028151901 |
| 0.029520983 | 0.000357608 | 0.000946249 | 0.024664705 |
| 0.001189181 | 0.000489867 | 0.001292609 | 0.010293135 |
| 0.005952648 | 0.001712454 | 0.001963508 | 0.006457725 |
| 0.035536664 | 0.017451385 |             |             |
| DDOST       | 0.026452401 | 0.235577924 | 0.016102387 |
| 0.030495331 | 0.222040939 | 0.090193172 | 0.027600958 |
| 0.043197586 | 0.189754601 | 0.058021966 | 0.191653812 |
| 0.008151113 | 0.018979636 | 0.349541039 | 0.021883424 |
| 0.287753122 | 0.016715559 | 0.07557891  | 0.014791291 |
| 0.024530994 | 0.243028081 | 0.071707778 | 0.130484841 |
| 0.182387128 | 0.120316081 | 0.158245381 | 0.182576827 |
| 0.317572985 | 0.028109503 | 0.234640508 | 0.019557755 |
| 0.329105583 | 0.26280398  | 0.147311696 | 0.003193076 |
| 0.168879858 | 0.005677339 | 0.312287597 | 0.161297285 |
| 0.02845404  | 0.243163023 | 0.084784494 | 0.124316955 |
| 0.159792964 | 0.015159193 | 0.013450442 | 0.295485103 |
| 0.149542717 | 0.067896556 | 0.024041971 | 0.230068534 |
| 0.106447977 | 0.181582924 | 0.200583555 | 0.004135907 |
| 0.130882505 | 0.018376802 | 0.089138346 | 0.297143692 |
| 0.14267122  | 0.07280045  | 0.048323966 | 0.068611912 |
| 0.218296703 | 0.262157131 | 0.150021705 | 0.120377775 |
| 0.345070816 | 0.06703265  | 0.264352014 | 0.022163189 |
| 0.150092177 | 0.010603737 | 0.122388711 | 0.034188044 |
| 0.107580915 | 0.120562335 | 0.164869231 | 0.134087533 |
| 0.260594073 | 0.335651892 | 0.145520345 | 0.303415882 |
| 0.033700983 | 0.247925128 | 0.096800654 | 0.25381357  |
| 0.265723407 | 0.029333907 | 0.317723993 | 0.371844881 |
| 0.015135349 | 0.165630171 | 0.307212824 | 0.070554577 |
| 0.233230802 | 0.05699515  | 0.14825151  | 0.067563273 |
| 0.275706095 | 0.299345565 | 0.286951412 | 0.247116087 |
| 0.123462743 | 0.037030793 | 0.27044364  | 0.242454662 |
| 0.131973052 | 0.038990088 | 0.123402678 | 0.33436931  |
| 0.270488859 | 0.327402493 | 0.288128098 | 0.321023749 |
| 0.288412236 | 0.333918513 | 0.283284381 | 0.251898934 |
| 0.011008609 | 0.329949455 | 0.09471765  | 0.01638197  |
| 0.024487028 | 0.031279988 | 0.067120447 | 0.207483029 |
| 0.30773463  | 0.187833693 | 0.107538148 | 0.183857771 |
| 0.378647066 | 0.262515312 | 0.336404687 | 0.340271846 |
| 0.019956276 | 0.072413057 | 0.279354882 | 0.048255294 |
| 0.302089136 | 0.062510248 | 0.178586752 | 0.31895183  |
| 0.285377595 | 0.34693716  | 0.04885126  | 0.305195609 |
| 0.084698367 | 0.363688611 | 0.269908634 | 0.124079464 |
| 0.334881422 | 0.292628052 | 0.378030483 | 0.297696639 |
| 0.278043078 | 0.14677716  | 0.014932296 | 0.287910891 |
| 0.348647719 | 0.005519144 | 0.327338292 | 0.361882128 |
| 0.319056163 | 0.359364497 | 0.387915377 | 0.335820698 |



|             |             |             |             |
|-------------|-------------|-------------|-------------|
| 0.309169874 | 0.04223237  | 0.009659618 | 0.281375972 |
| 0.334476298 | 0.303371482 | 0.040027527 | 0.241175112 |
| 0.260780981 | 0.134376911 | 0.253299429 | 0.067650872 |
| 0.368546208 | 0.295873091 | 0.320120178 | 0.299680624 |
| 0.135685669 | 0.221467938 | 0.216779561 | 0.259902729 |
| 0.010346538 | 0.048729976 | 0.025610356 | 0.205011753 |
| 0.045090452 | 0.134725288 | 0.14195594  | 0.216128898 |
| 0.15488742  | 0.097896154 | 0.105590307 | 0.310676729 |
| 0.030597021 | 0.207491604 | 0.071430606 | 0.118162343 |
| 0.024074709 | 0.091649555 | 0.066135645 | 0.034098879 |
| 0.182317515 | 0.140720951 | 0.265134579 | 0.333087123 |
| 0.142354216 | 0.116003957 | 0.265712023 | 0.340867663 |
| 0.36379164  | 0.234009187 | 0.157228184 | 0.004975548 |
| 1           | 0.080092819 | 0.079840833 | 0.189531263 |
| 0.098003208 | 0.121325834 | 0.318846024 | 0.313763014 |
| 0.139788489 | 0.043809395 | 0.174983889 | 0.273263645 |
| 0.086836095 | 0.119828647 | 0.38929815  | 0.210488227 |
| 0.000420253 | 0.225025776 | 0.323149288 | 0.045656112 |
| 0.229254476 | 0.039789899 | 0.048893506 | 0.370430393 |
| 0.076706531 | 0.119428282 | 0.313658015 | 0.277139244 |
| 0.03715913  | 0.121716951 | 0.370651364 | 0.035256992 |
| 0.170309281 | 0.020513731 | 0.259883162 | 0.090231663 |
| 0.1820428   | 0.260068198 | 0.209875998 | 0.126339748 |
| 0.06460668  | 0.342886863 | 0.233363508 | 0.350202027 |
| 0.165093184 | 0.377431787 | 0.353310157 | 0.330040154 |
| 0.19921485  | 0.176199828 | 0.041420721 | 0.356082452 |
| 0.348400145 | 0.065253209 | 0.035898975 | 0.301516743 |
| 0.167525861 | 0.336669935 | 0.028794738 | 0.389579373 |
| 0.318063898 | 0.26565219  | 0.070902962 | 0.327414663 |
| 0.315792799 | 0.125870356 | 0.257460003 | 0.36821685  |
| 0.071603918 | 0.277332981 | 0.198622665 | 0.340579222 |
| 0.125056868 | 0.110248903 | 0.198892452 | 0.047379021 |
| 0.001241283 | 0.036713733 | 0.040730634 | 0.110822581 |
| 0.089489294 | 0.195363054 | 0.279378569 | 0.367827548 |
| 0.081618479 | 0.249167168 | 0.149350214 | 0.19087823  |
| 0.330002072 | 0.170591438 | 0.180991722 | 0.229999738 |
| 0.158314429 | 0.004300242 | 0.028637365 | 0.349738186 |
| 0.017957693 | 0.095752706 | 0.120646306 | 0.001261149 |
| 0.024199013 | 0.225243941 | 0.060180101 | 0.131227703 |
| 0.349561517 | 0.127278137 | 0.165093583 | 0.101941237 |
| 0.237463019 | 0.048999385 | 0.000575567 | 0.331326851 |
| 0.295121732 | 0.282941094 | 0.297386194 | 0.250696934 |
| 0.313567167 | 0.210673221 | 0.339263482 | 0.118654974 |
| 0.040141519 | 0.02963032  | 0.132038386 | 0.235403324 |
| 0.001029186 | 0.253884137 | 0.143782529 | 0.107894242 |
| 0.298859632 | 0.227128152 | 0.013973547 | 0.198783593 |
| 0.006828327 | 0.088183647 | 0.082641718 | 0.101367548 |
| 0.270807949 | 0.004002208 | 0.040441159 | 0.111918463 |
| 0.253741736 | 0.240208786 | 0.117801592 | 0.337125752 |
| 0.212876848 | 0.069943425 | 0.20142706  | 0.256889115 |
| 0.036887266 | 0.041387701 | 0.107167543 | 0.005578078 |
| 0.012605991 | 0.259066798 | 0.119160666 | 0.014219407 |
| 0.218929868 | 0.001390238 | 0.250689555 | 0.351062206 |
| 0.257471006 | 0.389334059 | 0.334306623 | 0.150089218 |

|             |             |             |             |
|-------------|-------------|-------------|-------------|
| 0.339039188 | 0.018554935 | 0.348060296 | 0.265025761 |
| 0.13717669  | 0.000760799 | 0.001337419 | 0.355137215 |
| 0.286902457 | 0.023646229 | 0.115912381 | 0.039863061 |
| 0.039815463 | 0.052801665 | 0.021509872 | 0.096945985 |
| 0.182121555 | 0.166925285 | 0.065221316 | 0.300277108 |
| 0.163902306 | 0.144764361 | 0.114281469 | 0.048281491 |
| 0.191702199 | 0.01871392  | 0.047509465 | 0.002759853 |
| 0.25830534  | 0.06856835  | 0.265547451 | 0.319230853 |
| 0.358159848 | 0.292380228 | 0.088901847 | 0.031346    |
| 0.275503038 | 0.042599205 | 0.041133725 | 0.046613192 |
| 0.303051457 | 0.35716366  | 0.277188502 | 0.241403612 |
| 0.403023435 | 0.341988004 | 0.016970818 | 0.36594908  |
| 0.001909898 | 0.00041983  | 0.151775191 | 0.173976914 |
| 0.007810547 | 0.246660161 | 0.211864495 | 0.064188512 |
| 0.057300888 | 0.007353057 | 0.149854287 | 0.17592484  |
| 0.253583293 | 0.247668932 | 0.226280458 | 0.142309872 |
| 0.126550096 | 0.068275052 | 0.069688732 | 0.062336015 |
| 0.030153523 | 0.219547683 | 0.137594714 | 0.008964793 |
| 0.180564795 | 0.243906566 | 0.03101535  | 0.094137293 |
| 0.336443044 | 0.369272578 | 0.017063574 | 0.007247319 |
| 0.200236026 | 0.173584597 | 0.375480248 | 0.302703782 |
| 0.327538281 | 0.387929297 | 0.263749467 | 0.070113321 |
| 0.024944945 | 0.218712259 | 0.222490403 | 0.031300011 |
| 0.336511227 | 0.038899059 | 0.268512814 | 0.184424033 |
| 0.077547364 | 0.094766951 | 0.008813933 | 0.05066229  |
| 0.215231322 | 0.118691987 | 0.130541323 | 0.092408677 |
| 0.209367539 | 0.063709774 | 0.023631057 | 0.145227284 |
| 0.307380771 | 0.068033163 | 0.125465307 | 0.06847887  |
| 0.192652733 | 0.017445636 | 0.343131239 | 0.348034905 |
| 0.076242802 | 0.064562023 | 0.0748861   | 0.225754148 |
| 0.310727407 | 0.158684897 | 0.00381466  | 0.262717582 |
| 0.329423187 | 0.277431176 | 0.292577744 | 0.348697951 |
| 0.052442125 | 0.243081464 | 0.143801435 | 0.299356356 |
| 0.126626572 | 0.097256459 | 0.13173217  | 0.040458421 |
| 0.189860743 | 0.294984774 | 0.307335742 | 0.098013302 |
| 0.156571447 | 0.055627796 | 0.032358518 | 0.252843205 |
| 0.111219275 | 0.024842219 | 0.090692621 | 0.291737915 |
| 0.000735709 | 0.054632756 | 0.34311244  | 0.065453818 |
| 0.330226276 | 0.376651292 | 0.320202876 | 0.043690597 |
| 0.004838039 | 0.304919473 | 0.280715033 | 0.189068115 |
| 0.306422011 | 0.198137027 | 0.01015413  | 0.034662949 |
| 0.2172872   | 0.040520685 | 0.073277078 | 0.025283047 |
| 0.057640988 | 0.23159991  | 0.151737075 | 0.116179081 |
| 0.120798688 | 0.046522836 | 0.040617686 | 0.091270022 |
| 0.031231259 | 0.196498443 | 0.308924018 | 0.038352655 |
| 0.096845563 | 0.342935683 | 0.33876003  | 0.008256112 |
| 0.164662348 | 0.297529833 | 0.264535063 | 0.006677606 |
| 0.340970078 | 0.002430094 | 0.139654689 | 0.141649122 |
| 0.104148115 | 0.142445954 | 0.214947498 | 0.125040523 |
| 0.247474716 | 0.127208753 | 0.131012826 | 0.176557679 |
| 0.068876779 | 0.089397873 | 0.222970913 | 0.136895899 |
| 0.138275921 | 0.050004226 | 0.053285089 | 0.052627277 |
| 0.010931439 | 0.261814684 | 0.169174761 | 0.03311563  |
| 0.153962429 | 0.133921842 | 0.281796069 | 0.293858299 |

|             |             |             |             |
|-------------|-------------|-------------|-------------|
| 0.282297891 | 0.051326213 | 0.146696857 | 0.283322401 |
| 0.040129605 | 0.034727248 | 0.021160544 | 0.149194322 |
| 0.129511903 | 0.093290221 | 0.118304907 | 0.194957639 |
| 0.259299086 | 0.278026806 | 0.158272684 | 0.274283302 |
| 0.155616918 | 0.173009179 | 0.079565173 | 0.034279365 |
| 0.11691814  | 0.081022361 | 0.213369518 | 0.000598766 |
| 0.233610762 | 0.033471978 | 0.355472447 | 0.296200529 |
| 0.106443227 | 0.249462559 | 0.029396174 | 0.048754905 |
| 0.029488739 | 0.116035088 | 0.103867083 | 0.255822174 |
| 0.089102048 | 0.055042776 | 0.236356104 | 0.048576452 |
| 0.305477407 | 0.260863079 | 0.084953783 | 0.106438235 |
| 0.126811507 | 0.0953836   | 0.287701794 | 0.035694216 |
| 0.227715067 | 0.095165857 | 0.134723932 | 0.238579173 |
| 0.158613052 | 0.334764345 | 0.027683985 | 0.361420665 |
| 0.253604154 | 0.069084879 | 0.329169409 | 0.087372945 |
| 0.038295607 | 0.018798432 | 0.092760346 | 0.092097843 |
| 0.070450905 | 0.102273079 | 0.004179184 | 0.06364097  |
| 0.285948315 | 0.083573101 | 0.270708862 | 0.243436265 |
| 0.12603978  | 0.289454468 | 0.019342212 | 0.152255825 |
| 0.270686734 | 0.280388632 | 0.098365373 | 0.202636696 |
| 0.269228078 | 0.045866809 | 0.161224425 | 0.004223895 |
| 0.307414201 | 0.239413215 | 0.083494405 | 0.020741176 |
| 0.004391995 | 0.132230005 | 0.290707987 | 0.031408702 |
| 0.381142947 | 0.037809258 | 0.16212836  | 0.235238828 |
| 0.099467673 | 0.296846597 | 0.053943178 | 0.313141985 |
| 0.008709229 | 0.150995282 | 0.151404513 | 0.158037992 |
| 0.109073141 | 0.199082088 | 0.333416337 | 0.134927178 |
| 0.017085362 | 0.0640381   | 0.013747156 | 0.274060416 |
| 0.275267069 | 0.229609987 | 0.130956223 | 0.04458677  |
| 0.214171268 | 0.217439721 | 0.062384815 | 0.147350444 |
| 0.002898319 | 0.299348146 | 0.109669651 | 0.249422604 |
| 0.069997346 | 0.226497567 | 0.011183224 | 0.204677528 |
| 0.25009972  | 0.098298233 | 0.173178476 | 0.096170706 |
| 0.282700053 | 0.193713325 | 0.07454327  | 0.031434556 |
| 0.199401208 | 0.036818455 | 0.078595139 | 0.354887321 |
| 0.108755513 | 0.150461164 | 0.378277117 | 0.152333359 |
| 0.165349389 | 0.215785437 | 0.19168013  | 0.330038211 |
| 0.045987295 | 0.195261987 | 0.28753241  | 0.33391588  |
| 0.243896057 | 0.105353131 | 0.137878361 | 0.184661545 |
| 0.265100762 | 0.016173944 | 0.091955904 | 0.264639108 |
| 0.163811095 | 0.193549433 | 0.123237987 | 0.124638424 |
| 0.009313505 | 0.047905382 | 0.06709797  | 0.083331138 |
| 0.252493834 | 0.228430954 | 0.114258671 | 0.286315032 |
| 0.028703815 | 0.010283203 | 0.318840284 | 0.027661059 |
| 0.108314132 | 0.25909251  | 0.122323898 | 0.178649586 |
| 0.11997313  | 0.209939437 | 0.187867032 | 0.001266293 |
| 0.310582979 | 0.006968273 | 0.086018991 | 0.125763596 |
| 0.052395658 | 0.02457675  | 0.261645054 | 0.383290266 |
| 0.143083932 | 0.025779761 | 0.061149731 | 0.281259421 |
| 0.046512171 | 0.087674923 | 0.117238772 | 0.215585967 |
| 0.104029001 | 0.14217206  | 0.139048866 | 0.13937627  |
| 0.214859273 | 0.073170943 |             |             |
| DDX17       | 0.008792446 | 0.335661825 | 0.007656188 |
| 0.01498106  | 0.16695187  | 0.104732968 | 0.007992093 |

|             |             |             |             |
|-------------|-------------|-------------|-------------|
| 0.01822514  | 0.286660198 | 0.183146507 | 0.126678467 |
| 0.000780154 | 0.072641918 | 0.313611916 | 0.007421386 |
| 0.258692406 | 0.002704223 | 0.02182502  | 0.037762385 |
| 0.066729532 | 0.145826821 | 0.100267672 | 0.14664969  |
| 0.159835831 | 0.07560844  | 0.178737669 | 0.31933864  |
| 0.381107437 | 0.133431053 | 0.262645544 | 0.094035146 |
| 0.249660842 | 0.196750717 | 0.237466574 | 0.000754977 |
| 0.19398755  | 0.032664519 | 0.277960341 | 0.0713368   |
| 0.055951334 | 0.182579134 | 0.186345141 | 0.050078649 |
| 0.221327153 | 0.002670093 | 0.132943356 | 0.3652934   |
| 0.206644113 | 0.083599794 | 0.013838945 | 0.282309416 |
| 0.151438767 | 0.143581098 | 0.324345553 | 0.000326442 |
| 0.172061995 | 0.12473247  | 0.16326153  | 0.344633815 |
| 0.061678424 | 0.023105496 | 0.213449811 | 0.110281592 |
| 0.33082655  | 0.309242289 | 0.124321655 | 0.182548158 |
| 0.336785275 | 0.110627039 | 0.377067018 | 0.026349726 |
| 0.152609861 | 0.005661048 | 0.052881564 | 0.033971664 |
| 0.159418033 | 0.0541251   | 0.147417658 | 0.171033039 |
| 0.333494662 | 0.345673198 | 0.10372125  | 0.35404965  |
| 0.106699979 | 0.257906908 | 0.092934808 | 0.169262834 |
| 0.297354586 | 0.021305854 | 0.224549074 | 0.352932248 |
| 0.011013581 | 0.295736363 | 0.305962885 | 0.045405902 |
| 0.295232053 | 0.178992642 | 0.238528744 | 0.069879357 |
| 0.276044065 | 0.21523686  | 0.354145071 | 0.116373571 |
| 0.161999937 | 0.018697163 | 0.318966644 | 0.238105905 |
| 0.069198194 | 0.015946204 | 0.075961808 | 0.409254547 |
| 0.237207605 | 0.349549914 | 0.3693951   | 0.265475329 |
| 0.239235553 | 0.343240693 | 0.212238718 | 0.305298365 |
| 0.150934434 | 0.382365816 | 0.043321759 | 0.003182776 |
| 0.011353529 | 0.011221733 | 0.131976569 | 0.162728383 |
| 0.351408085 | 0.159431831 | 0.037738943 | 0.079078345 |
| 0.381014267 | 0.324798078 | 0.401243626 | 0.292119336 |
| 0.00342691  | 0.175521251 | 0.223695034 | 0.058903558 |
| 0.244021342 | 0.035939526 | 0.147003311 | 0.331768874 |
| 0.196416643 | 0.339478901 | 0.031269542 | 0.317573558 |
| 0.076750806 | 0.331076646 | 0.340113422 | 0.035696642 |
| 0.33977552  | 0.311159823 | 0.352145192 | 0.292424545 |
| 0.288442029 | 0.09699556  | 0.064548138 | 0.282589624 |
| 0.309696421 | 0.005061149 | 0.408419009 | 0.416728105 |
| 0.356727032 | 0.378766003 | 0.396545167 | 0.384287417 |
| 0.361901659 | 0.017217057 | 0.066354864 | 0.155632594 |
| 0.345428147 | 0.218174696 | 0.031196212 | 0.268567501 |
| 0.249171282 | 0.132328122 | 0.362251128 | 0.080793196 |
| 0.336100072 | 0.327000496 | 0.400890143 | 0.278657998 |
| 0.210343588 | 0.155978546 | 0.316304186 | 0.290579507 |
| 0.003344458 | 0.016446541 | 0.011010751 | 0.19694247  |
| 0.101766732 | 0.04919231  | 0.114631665 | 0.271729711 |
| 0.061378776 | 0.133548425 | 0.195882102 | 0.271570148 |
| 0.018029838 | 0.243126282 | 0.040637024 | 0.052185877 |
| 0.00294297  | 0.054778611 | 0.025693913 | 0.018740757 |
| 0.088940074 | 0.115548256 | 0.337509672 | 0.379734688 |
| 0.194125302 | 0.063913046 | 0.270217271 | 0.307492199 |
| 0.255369315 | 0.214832663 | 0.108980682 | 0.000123735 |
| 0.080092819 | 1           | 0.140755482 | 0.295669398 |

|             |             |             |             |
|-------------|-------------|-------------|-------------|
| 0.079540583 | 0.059927643 | 0.246150613 | 0.262798925 |
| 0.079082485 | 0.046970796 | 0.154768619 | 0.236828293 |
| 0.06294548  | 0.073531285 | 0.308063888 | 0.27553381  |
| 0.000914255 | 0.110404938 | 0.312727511 | 0.059541082 |
| 0.197898646 | 0.052527242 | 0.087119355 | 0.353970948 |
| 0.147804689 | 0.116363639 | 0.391029034 | 0.285330839 |
| 0.092388182 | 0.120588943 | 0.39543448  | 0.075005526 |
| 0.271842007 | 0.005639441 | 0.129193937 | 0.235391768 |
| 0.087984172 | 0.162468871 | 0.200866393 | 0.080907409 |
| 0.035001942 | 0.368487769 | 0.241129264 | 0.369216948 |
| 0.147893512 | 0.391111656 | 0.348442329 | 0.277931972 |
| 0.180908951 | 0.288773923 | 0.108873406 | 0.293727453 |
| 0.350367646 | 0.129459295 | 0.022832164 | 0.415794959 |
| 0.246662376 | 0.31056445  | 0.03381956  | 0.341296752 |
| 0.302017163 | 0.335200223 | 0.022564968 | 0.262899711 |
| 0.197396935 | 0.057566046 | 0.301584679 | 0.389145119 |
| 0.181074063 | 0.215691795 | 0.123823714 | 0.278690557 |
| 0.051284162 | 0.086304082 | 0.190354837 | 0.143693482 |
| 0.0082741   | 0.017986509 | 0.011761314 | 0.035842203 |
| 0.065283834 | 0.352324989 | 0.270308274 | 0.374365302 |
| 0.021717353 | 0.249858336 | 0.140512942 | 0.06442454  |
| 0.279401705 | 0.209404523 | 0.244902768 | 0.249972817 |
| 0.11501125  | 0.00093601  | 0.012595452 | 0.338333764 |
| 0.010487899 | 0.084198545 | 0.139815542 | 0.000192179 |
| 0.004840529 | 0.365508047 | 0.03627312  | 0.079908139 |
| 0.368585356 | 0.082632793 | 0.074965356 | 0.163033513 |
| 0.172908079 | 0.018272175 | 0.000278552 | 0.399045185 |
| 0.399206658 | 0.384197889 | 0.399608133 | 0.345702571 |
| 0.397192954 | 0.332072955 | 0.31888702  | 0.125187915 |
| 0.012946427 | 0.016273986 | 0.089746587 | 0.100864774 |
| 0.001366553 | 0.216817583 | 0.169021087 | 0.041124117 |
| 0.339900183 | 0.180139701 | 0.002530329 | 0.263706825 |
| 0.000706417 | 0.107085237 | 0.087759497 | 0.073728891 |
| 0.258584831 | 0.000501424 | 0.051470434 | 0.121581969 |
| 0.250638543 | 0.181233212 | 0.175507115 | 0.371595962 |
| 0.112853497 | 0.056047769 | 0.108056214 | 0.24869559  |
| 0.008001258 | 0.079128047 | 0.149819383 | 0.017439458 |
| 0.05864529  | 0.336070313 | 0.165707233 | 0.006994263 |
| 0.093875515 | 0.001072633 | 0.192762186 | 0.365441616 |
| 0.322501771 | 0.395762201 | 0.332132647 | 0.118764351 |
| 0.33907089  | 0.168332977 | 0.393289795 | 0.274052484 |
| 0.203957974 | 0.000527664 | 0.000473001 | 0.37920775  |
| 0.21356751  | 0.018608565 | 0.043999658 | 0.068967821 |
| 0.012074211 | 0.033261242 | 0.008464545 | 0.057424964 |
| 0.226003196 | 0.093858335 | 0.071028522 | 0.329509813 |
| 0.072348439 | 0.089102766 | 0.177590171 | 0.028319391 |
| 0.235720876 | 0.004202725 | 0.031891175 | 0.000761839 |
| 0.254271516 | 0.043198816 | 0.297345173 | 0.367271597 |
| 0.313810391 | 0.251824615 | 0.188600816 | 0.091141558 |
| 0.377931856 | 0.033438749 | 0.139378118 | 0.034178297 |
| 0.338821733 | 0.234659095 | 0.143096831 | 0.137360363 |
| 0.345448989 | 0.294302772 | 0.002871983 | 0.283408271 |
| 0.000231297 | 0.000679291 | 0.132367162 | 0.135068947 |
| 0.109765418 | 0.208700095 | 0.108685564 | 0.104414367 |

|             |             |             |             |
|-------------|-------------|-------------|-------------|
| 0.078833976 | 0.001710115 | 0.163984615 | 0.135318961 |
| 0.13184407  | 0.166495971 | 0.146291345 | 0.151787986 |
| 0.103027369 | 0.052340478 | 0.04136066  | 0.031116779 |
| 0.133357825 | 0.175632961 | 0.077203609 | 0.001694486 |
| 0.242408689 | 0.225390447 | 0.007013289 | 0.048541476 |
| 0.281535784 | 0.360894025 | 0.005632452 | 0.000267055 |
| 0.115105336 | 0.144214915 | 0.372386482 | 0.365310874 |
| 0.347962351 | 0.356288248 | 0.215171967 | 0.026914119 |
| 0.006980799 | 0.165460057 | 0.180226786 | 0.020220642 |
| 0.363657698 | 0.019921455 | 0.329927597 | 0.222424452 |
| 0.034943796 | 0.039144779 | 0.001740308 | 0.017747822 |
| 0.267792067 | 0.054423283 | 0.047874388 | 0.045256054 |
| 0.105207452 | 0.094044346 | 0.005971123 | 0.057831615 |
| 0.193929368 | 0.097976141 | 0.046950789 | 0.100051976 |
| 0.221963877 | 0.182852039 | 0.332250205 | 0.27336623  |
| 0.036367314 | 0.034777382 | 0.04579266  | 0.299873047 |
| 0.360299026 | 0.335646061 | 0.001333072 | 0.356080032 |
| 0.359740216 | 0.289821067 | 0.33088262  | 0.265453522 |
| 0.024575368 | 0.170967396 | 0.236298141 | 0.197924675 |
| 0.067887599 | 0.114827411 | 0.097946102 | 0.012457757 |
| 0.17596957  | 0.322263697 | 0.296503922 | 0.031059481 |
| 0.267683436 | 0.046338642 | 0.017232795 | 0.361239135 |
| 0.075740433 | 0.00919936  | 0.204959181 | 0.397502043 |
| 0.000291428 | 0.088954005 | 0.406636735 | 0.037030029 |
| 0.3711659   | 0.355426548 | 0.254491349 | 0.062976446 |
| 0.003584842 | 0.345349023 | 0.16856879  | 0.127094397 |
| 0.30501162  | 0.179134208 | 0.04963895  | 0.007598608 |
| 0.135548414 | 0.022700941 | 0.023282237 | 0.07532672  |
| 0.125416742 | 0.238927894 | 0.076978484 | 0.101365937 |
| 0.058493657 | 0.045198066 | 0.095063599 | 0.051342496 |
| 0.139213738 | 0.093394002 | 0.188199154 | 0.144501354 |
| 0.080847215 | 0.352887607 | 0.285950827 | 0.001516427 |
| 0.24060003  | 0.332264907 | 0.309569167 | 7.23E-05    |
| 0.28471281  | 0.000520434 | 0.056867484 | 0.050353462 |
| 0.047663116 | 0.068874229 | 0.125327766 | 0.07780524  |
| 0.213622451 | 0.06066684  | 0.055157771 | 0.078189739 |
| 0.023751692 | 0.063868811 | 0.228828336 | 0.150799403 |
| 0.060536007 | 0.017316198 | 0.036342834 | 0.039196986 |
| 0.003423311 | 0.35625874  | 0.100938906 | 0.020190232 |
| 0.087468327 | 0.152748431 | 0.183924918 | 0.36372353  |
| 0.261592898 | 0.04531571  | 0.148474403 | 0.301229805 |
| 0.188290575 | 0.069239755 | 0.007473278 | 0.177664521 |
| 0.063909529 | 0.055524023 | 0.214371947 | 0.135304659 |
| 0.34642574  | 0.218210515 | 0.09508846  | 0.290509988 |
| 0.118300343 | 0.254554393 | 0.151401709 | 0.008674339 |
| 0.034258579 | 0.049235685 | 0.135208012 | 0.002980106 |
| 0.1678857   | 0.037535117 | 0.351436777 | 0.321412623 |
| 0.179336193 | 0.219686987 | 0.092906088 | 0.00939572  |
| 0.113977388 | 0.083375225 | 0.042226338 | 0.346765719 |
| 0.126997212 | 0.029341797 | 0.138297109 | 0.062616286 |
| 0.329207093 | 0.383026261 | 0.105575243 | 0.0794934   |
| 0.109783425 | 0.070475067 | 0.34537774  | 0.023468426 |
| 0.30912299  | 0.046052192 | 0.270860322 | 0.102097417 |
| 0.069715841 | 0.403603919 | 0.010331923 | 0.408009146 |

|             |             |             |             |
|-------------|-------------|-------------|-------------|
| 0.154680031 | 0.049508669 | 0.305072947 | 0.118663587 |
| 0.059515278 | 0.017775496 | 0.118777664 | 0.161911887 |
| 0.057121796 | 0.16468536  | 0.020864411 | 0.028813288 |
| 0.16147817  | 0.189375465 | 0.358434073 | 0.275295284 |
| 0.10457984  | 0.219078402 | 0.125758514 | 0.107973645 |
| 0.340456509 | 0.32942001  | 0.0435263   | 0.118969102 |
| 0.194938211 | 0.011962369 | 0.193860281 | 0.021365964 |
| 0.294319834 | 0.340403195 | 0.15688469  | 0.00523475  |
| 0.000889894 | 0.121419503 | 0.271535905 | 0.025723845 |
| 0.383309691 | 0.116302422 | 0.304905085 | 0.281586821 |
| 0.080579824 | 0.319725315 | 0.019867805 | 0.226725561 |
| 0.014163427 | 0.11822059  | 0.263368688 | 0.280716156 |
| 0.041242317 | 0.149142241 | 0.20746425  | 0.100073688 |
| 0.001836353 | 0.059694033 | 0.000171681 | 0.217204593 |
| 0.320888854 | 0.23216613  | 0.091437701 | 0.188978268 |
| 0.123355475 | 0.273259852 | 0.085600961 | 0.270437825 |
| 5.50E-05    | 0.217939596 | 0.061220098 | 0.236046945 |
| 0.09850748  | 0.269552862 | 0.004018402 | 0.234828109 |
| 0.277811928 | 0.085523083 | 0.138752625 | 0.126010056 |
| 0.348499669 | 0.293425623 | 0.067174548 | 0.064031535 |
| 0.358116294 | 0.016036846 | 0.163181246 | 0.387962721 |
| 0.038578154 | 0.090905485 | 0.331124    | 0.039220921 |
| 0.198481299 | 0.24288937  | 0.350959201 | 0.398573984 |
| 0.010725903 | 0.087463972 | 0.321132501 | 0.345298843 |
| 0.147263232 | 0.079658035 | 0.092651261 | 0.076284358 |
| 0.296109263 | 0.008695674 | 0.117839097 | 0.178004013 |
| 0.100530906 | 0.150921064 | 0.27140819  | 0.064440314 |
| 0.002956807 | 0.035116617 | 0.074354439 | 0.042022814 |
| 0.122694676 | 0.17499864  | 0.077981998 | 0.208454551 |
| 0.014810049 | 0.000692292 | 0.273576456 | 0.013893884 |
| 0.11299552  | 0.200208191 | 0.081745345 | 0.168400078 |
| 0.064376437 | 0.196209542 | 0.151447437 | 0.000976772 |
| 0.3048247   | 0.014529482 | 0.135467041 | 0.048936764 |
| 0.129477017 | 0.005279717 | 0.283273887 | 0.381126036 |
| 0.149425284 | 0.134352376 | 0.139681897 | 0.324504671 |
| 0.0727346   | 0.21429782  | 0.189862951 | 0.267786797 |
| 0.116017966 | 0.235705664 | 0.232698703 | 0.167962112 |
| 0.217930616 | 0.074170771 |             |             |
| DDX19A      | 0.005205118 | 0.161779624 | 0.002887124 |
| 0.014041449 | 0.253965603 | 0.077812472 | 0.005154805 |
| 0.013153272 | 0.136239628 | 0.069998053 | 0.13661626  |
| 0.000597478 | 0.205782149 | 0.206592401 | 0.005408113 |
| 0.257490239 | 0.003255635 | 0.017831622 | 0.030479007 |
| 0.038056519 | 0.222401587 | 0.11527767  | 0.075585692 |
| 0.222678153 | 0.036100698 | 0.088595575 | 0.265362401 |
| 0.219014993 | 0.110532518 | 0.21840947  | 0.034127879 |
| 0.153393502 | 0.278952416 | 0.223514754 | 0.000174631 |
| 0.15208509  | 0.054082606 | 0.145664798 | 0.091439003 |
| 0.120670264 | 0.110336074 | 0.071715737 | 0.062017231 |
| 0.10750515  | 0.001394464 | 0.04571436  | 0.275127406 |
| 0.109672378 | 0.073226888 | 0.004751985 | 0.186781507 |
| 0.106903403 | 0.096104083 | 0.138792322 | 0.000464387 |
| 0.255612143 | 0.214122309 | 0.235469812 | 0.187797046 |
| 0.052884536 | 0.027841615 | 0.127169047 | 0.066264181 |

|             |             |             |             |
|-------------|-------------|-------------|-------------|
| 0.222342554 | 0.251606874 | 0.111387727 | 0.094252742 |
| 0.20162602  | 0.201946225 | 0.262300509 | 0.023340556 |
| 0.093877143 | 0.001867479 | 0.038035042 | 0.011490587 |
| 0.126431491 | 0.068051501 | 0.185258897 | 0.228743399 |
| 0.14922678  | 0.195219989 | 0.079941281 | 0.172231781 |
| 0.148870938 | 0.323814514 | 0.143362647 | 0.165992653 |
| 0.201356772 | 0.011176593 | 0.191153638 | 0.211721189 |
| 0.004580066 | 0.131175864 | 0.19175802  | 0.0193015   |
| 0.164376733 | 0.163263667 | 0.113700706 | 0.164728865 |
| 0.314704647 | 0.247365094 | 0.178067356 | 0.095504005 |
| 0.206621335 | 0.007055594 | 0.147025737 | 0.340235577 |
| 0.101097217 | 0.007998912 | 0.103479742 | 0.292066949 |
| 0.178705745 | 0.214245482 | 0.196096782 | 0.184751562 |
| 0.248214907 | 0.208908103 | 0.162357578 | 0.182786679 |
| 0.056126842 | 0.211901436 | 0.033357573 | 0.00375238  |
| 0.004704087 | 0.015192029 | 0.119043399 | 0.126055653 |
| 0.239337299 | 0.120671312 | 0.030127963 | 0.104408548 |
| 0.296873428 | 0.149361661 | 0.214044954 | 0.198613576 |
| 0.002470549 | 0.188590718 | 0.227286873 | 0.042275813 |
| 0.187743678 | 0.023330933 | 0.267749268 | 0.169018578 |
| 0.134654163 | 0.268179353 | 0.017185078 | 0.164839195 |
| 0.052438208 | 0.217417638 | 0.175990484 | 0.036025176 |
| 0.188309165 | 0.158178136 | 0.244510223 | 0.321665556 |
| 0.162800006 | 0.069732142 | 0.03175689  | 0.174975104 |
| 0.223118321 | 0.019696458 | 0.262784765 | 0.273833767 |
| 0.187651952 | 0.2765651   | 0.270454565 | 0.251200189 |
| 0.189780691 | 0.009290529 | 0.045317979 | 0.190019638 |
| 0.181953502 | 0.155435879 | 0.038541435 | 0.206005546 |
| 0.267694479 | 0.084242813 | 0.250824462 | 0.075670264 |
| 0.220888095 | 0.221037643 | 0.243337372 | 0.174239501 |
| 0.099032883 | 0.095234931 | 0.301124618 | 0.135870214 |
| 0.003336601 | 0.009602206 | 0.004016423 | 0.1443087   |
| 0.042293279 | 0.060004269 | 0.069551332 | 0.239415104 |
| 0.063802229 | 0.072609758 | 0.223707402 | 0.31685216  |
| 0.005374142 | 0.16376844  | 0.028925056 | 0.028745979 |
| 0.003743293 | 0.027261336 | 0.025194206 | 0.019643406 |
| 0.126734199 | 0.045877357 | 0.237811431 | 0.248399046 |
| 0.161401949 | 0.033007947 | 0.181807574 | 0.21826688  |
| 0.201249143 | 0.248515776 | 0.073708172 | 0.000919511 |
| 0.079840833 | 0.140755482 | 1           | 0.245167565 |
| 0.033513016 | 0.049991462 | 0.209924753 | 0.291098076 |
| 0.045595194 | 0.021320138 | 0.142571327 | 0.13902253  |
| 0.026154354 | 0.106755693 | 0.23931698  | 0.154508694 |
| 0.001514761 | 0.087000665 | 0.223770893 | 0.098634454 |
| 0.12097828  | 0.111489312 | 0.137257527 | 0.240225686 |
| 0.155312516 | 0.184890123 | 0.257946115 | 0.304307045 |
| 0.064297856 | 0.04536918  | 0.256776343 | 0.106446242 |
| 0.25475475  | 0.023096109 | 0.14835729  | 0.09402205  |
| 0.070237717 | 0.150818703 | 0.291991356 | 0.141184279 |
| 0.015890445 | 0.207519215 | 0.164072794 | 0.233147656 |
| 0.131949329 | 0.24892954  | 0.255719606 | 0.200090953 |
| 0.139126853 | 0.219209556 | 0.210572468 | 0.210806802 |
| 0.240711773 | 0.081352502 | 0.007733442 | 0.270712849 |
| 0.143324811 | 0.292825928 | 0.077146172 | 0.2323159   |



|             |             |             |             |
|-------------|-------------|-------------|-------------|
| 0.182818264 | 0.149892378 | 0.032691408 | 0.27094343  |
| 0.155035791 | 0.045744109 | 0.220950433 | 0.252350769 |
| 0.07069424  | 0.214085247 | 0.14729567  | 0.273748969 |
| 0.036726926 | 0.124194656 | 0.117881644 | 0.22467833  |
| 0.02175813  | 0.008556792 | 0.005949185 | 0.061404721 |
| 0.175325928 | 0.214636385 | 0.236774477 | 0.226494903 |
| 0.020666608 | 0.166066554 | 0.08610075  | 0.080198553 |
| 0.154147286 | 0.207419272 | 0.280367266 | 0.264535008 |
| 0.081750468 | 0.002010123 | 0.014924183 | 0.188516332 |
| 0.00282421  | 0.162577825 | 0.088897313 | 0.000351553 |
| 0.00262685  | 0.167563468 | 0.013639614 | 0.040316187 |
| 0.28889784  | 0.039205175 | 0.044165996 | 0.069411012 |
| 0.181995356 | 0.01335955  | 0.000825381 | 0.236325109 |
| 0.217386959 | 0.209622059 | 0.210997103 | 0.168224185 |
| 0.239359009 | 0.22119361  | 0.259334574 | 0.06841379  |
| 0.010093005 | 0.007543475 | 0.139658567 | 0.117514156 |
| 0.001148946 | 0.206072208 | 0.197891255 | 0.029477089 |
| 0.280191757 | 0.134167066 | 0.001837092 | 0.285511822 |
| 0.000428655 | 0.17095233  | 0.046724691 | 0.082921007 |
| 0.273440829 | 8.74E-05    | 0.035525596 | 0.113024663 |
| 0.126921135 | 0.107048505 | 0.18551718  | 0.213822333 |
| 0.123205891 | 0.018308267 | 0.137233959 | 0.24545347  |
| 0.006907093 | 0.04334911  | 0.082502623 | 0.006131107 |
| 0.042062125 | 0.179906974 | 0.146653587 | 0.003995964 |
| 0.082061223 | 0.001123269 | 0.110512736 | 0.218129637 |
| 0.152066306 | 0.262557563 | 0.207827319 | 0.226143214 |
| 0.198201948 | 0.224865483 | 0.234959837 | 0.147181933 |
| 0.107406267 | 0.000326897 | 0.000865905 | 0.260592147 |
| 0.210782012 | 0.005002658 | 0.034658821 | 0.042745412 |
| 0.013812028 | 0.014765871 | 0.006950849 | 0.137801328 |
| 0.169055095 | 0.166309876 | 0.14406679  | 0.161238629 |
| 0.075311968 | 0.094318622 | 0.09239346  | 0.012130569 |
| 0.231024532 | 0.003640147 | 0.013466729 | 0.002021617 |
| 0.256302621 | 0.016405651 | 0.13612148  | 0.204768611 |
| 0.204814568 | 0.270845716 | 0.094914726 | 0.065999106 |
| 0.25400504  | 0.010268518 | 0.109409319 | 0.012536836 |
| 0.174149011 | 0.224629703 | 0.12646583  | 0.089004555 |
| 0.233536537 | 0.178170166 | 0.002294751 | 0.22453246  |
| 0.000280235 | 0.002950793 | 0.070598467 | 0.100588751 |
| 0.082495157 | 0.195139824 | 0.080574203 | 0.06895372  |
| 0.075748697 | 0.00110466  | 0.246674336 | 0.236907724 |
| 0.135742224 | 0.164170373 | 0.256794131 | 0.090201438 |
| 0.149277078 | 0.097570988 | 0.056537904 | 0.032411054 |
| 0.081162355 | 0.091056175 | 0.037017142 | 0.000936753 |
| 0.154953592 | 0.215287763 | 0.005263716 | 0.03142773  |
| 0.213345721 | 0.244777466 | 0.004635642 | 0.000975205 |
| 0.075590801 | 0.146313365 | 0.267618146 | 0.194820683 |
| 0.186591826 | 0.231967502 | 0.126661671 | 0.041122882 |
| 0.005350383 | 0.176794729 | 0.287331956 | 0.047639042 |
| 0.220318353 | 0.006444705 | 0.177670968 | 0.330485823 |
| 0.02300094  | 0.038184083 | 0.002849635 | 0.013933306 |
| 0.300318977 | 0.045491621 | 0.079098751 | 0.020249469 |
| 0.118462247 | 0.162557869 | 0.004359083 | 0.052393677 |
| 0.136383557 | 0.163854091 | 0.037619203 | 0.066383183 |

|             |             |             |             |
|-------------|-------------|-------------|-------------|
| 0.131473018 | 0.057216408 | 0.271662127 | 0.181919994 |
| 0.020662837 | 0.018454518 | 0.021527367 | 0.230744933 |
| 0.229773905 | 0.182932878 | 0.001361858 | 0.167073545 |
| 0.246875077 | 0.226225435 | 0.176404665 | 0.225098458 |
| 0.012363623 | 0.199765831 | 0.241351336 | 0.205123638 |
| 0.055152932 | 0.079361442 | 0.09579983  | 0.007528849 |
| 0.117234835 | 0.173964419 | 0.166588931 | 0.04150761  |
| 0.187893784 | 0.016726076 | 0.005001764 | 0.224308597 |
| 0.142636033 | 0.005968572 | 0.083705192 | 0.27570229  |
| 0.001138255 | 0.204941221 | 0.275425671 | 0.04344226  |
| 0.221038974 | 0.248072908 | 0.164887405 | 0.045028284 |
| 0.012297815 | 0.301357257 | 0.171386294 | 0.12094709  |
| 0.164518386 | 0.117740463 | 0.031742922 | 0.01001128  |
| 0.11638748  | 0.00805424  | 0.024964657 | 0.04474902  |
| 0.122145818 | 0.142379823 | 0.06655532  | 0.06453216  |
| 0.090101493 | 0.013618828 | 0.162557163 | 0.051539483 |
| 0.168213954 | 0.082169795 | 0.156003017 | 0.052012528 |
| 0.114167762 | 0.241695581 | 0.174724427 | 0.000911901 |
| 0.282208568 | 0.220358159 | 0.214888662 | 0.000164935 |
| 0.249756068 | 6.26E-05    | 0.090696755 | 0.083307969 |
| 0.07351964  | 0.085087358 | 0.172901923 | 0.115441212 |
| 0.138535099 | 0.061453814 | 0.068376887 | 0.082923498 |
| 0.042079038 | 0.056348432 | 0.225955537 | 0.095201464 |
| 0.101385405 | 0.014647005 | 0.013739728 | 0.013022748 |
| 0.004100203 | 0.211112223 | 0.063968726 | 0.007292946 |
| 0.09109334  | 0.106811254 | 0.147339423 | 0.179802941 |
| 0.20743562  | 0.014278015 | 0.127702615 | 0.168943604 |
| 0.095191718 | 0.047197711 | 0.003390396 | 0.120014577 |
| 0.061652305 | 0.095464486 | 0.12900124  | 0.066199749 |
| 0.185558303 | 0.133251746 | 0.06074799  | 0.190293075 |
| 0.130424026 | 0.168591802 | 0.057915382 | 0.014143157 |
| 0.027728541 | 0.025199372 | 0.237727828 | 0.001874364 |
| 0.142141855 | 0.021249203 | 0.239286882 | 0.164738481 |
| 0.2454368   | 0.158292182 | 0.033852707 | 0.0063149   |
| 0.035895745 | 0.030353391 | 0.028317019 | 0.225268397 |
| 0.218137721 | 0.029808856 | 0.200636352 | 0.030416112 |
| 0.263542716 | 0.24855497  | 0.142222582 | 0.058113751 |
| 0.096686342 | 0.038076002 | 0.175222928 | 0.01179012  |
| 0.199923343 | 0.108499422 | 0.111929783 | 0.126365168 |
| 0.105340456 | 0.246098419 | 0.005820024 | 0.252628553 |
| 0.164612568 | 0.022828132 | 0.189175802 | 0.082977905 |
| 0.040423535 | 0.034966001 | 0.241063974 | 0.085520101 |
| 0.045973893 | 0.201346843 | 0.0090145   | 0.052814588 |
| 0.162530978 | 0.116478559 | 0.174605735 | 0.207378543 |
| 0.184279893 | 0.204277991 | 0.212466359 | 0.068008353 |
| 0.156050881 | 0.159428068 | 0.042282643 | 0.094715828 |
| 0.138756174 | 0.01283882  | 0.105572779 | 0.019027235 |
| 0.226116799 | 0.256233498 | 0.079609975 | 0.004904811 |
| 0.00080647  | 0.216214927 | 0.18766503  | 0.008251727 |
| 0.283812667 | 0.174038216 | 0.150588328 | 0.219379227 |
| 0.043792162 | 0.15673997  | 0.036261921 | 0.21775642  |
| 0.004228537 | 0.095465805 | 0.252153562 | 0.180277775 |
| 0.065718948 | 0.229918385 | 0.200186514 | 0.21436779  |
| 0.002166578 | 0.078144978 | 0.00032791  | 0.119929189 |

|             |             |             |             |
|-------------|-------------|-------------|-------------|
| 0.144225979 | 0.25962974  | 0.052546023 | 0.073757899 |
| 0.135538446 | 0.177230468 | 0.085443137 | 0.188862299 |
| 0.000650301 | 0.269306868 | 0.061407351 | 0.144639848 |
| 0.093287139 | 0.167899396 | 0.006513627 | 0.268373812 |
| 0.124915898 | 0.080827434 | 0.090916766 | 0.092439919 |
| 0.18188772  | 0.1633787   | 0.026325471 | 0.097571958 |
| 0.185027052 | 0.007042189 | 0.083930721 | 0.232168828 |
| 0.058709469 | 0.212473136 | 0.286661155 | 0.049254774 |
| 0.265862577 | 0.139931929 | 0.207153266 | 0.225716928 |
| 0.024038506 | 0.083663498 | 0.261874877 | 0.200385389 |
| 0.14837105  | 0.178972408 | 0.173993142 | 0.119797865 |
| 0.143786216 | 0.007641489 | 0.151883075 | 0.127174357 |
| 0.199196939 | 0.144477531 | 0.110467563 | 0.131390444 |
| 0.003684827 | 0.03237633  | 0.067764317 | 0.028826945 |
| 0.125043597 | 0.182247445 | 0.127262636 | 0.150698157 |
| 0.025219947 | 0.002123402 | 0.1853444   | 0.04536568  |
| 0.066664972 | 0.211876452 | 0.077411944 | 0.200941196 |
| 0.035371971 | 0.129779937 | 0.073494643 | 0.002026198 |
| 0.239538827 | 0.036407152 | 0.137871156 | 0.084510776 |
| 0.134881745 | 0.003161515 | 0.162063233 | 0.266564716 |
| 0.104722152 | 0.090968501 | 0.120720607 | 0.181359577 |
| 0.159246125 | 0.188768661 | 0.173634638 | 0.144810502 |
| 0.2386926   | 0.119331172 | 0.163205605 | 0.179162157 |
| 0.146272095 | 0.057900101 |             |             |
| DDX26B      | 0.033367981 | 0.398377354 | 0.024730946 |
| 0.076834734 | 0.237654579 | 0.260990231 | 0.025600349 |
| 0.063849926 | 0.299908997 | 0.246141769 | 0.235256132 |
| 0.005545222 | 0.156551276 | 0.420460024 | 0.024681474 |
| 0.30370753  | 0.013725773 | 0.051937415 | 0.065055303 |
| 0.147669038 | 0.211809603 | 0.290868058 | 0.221576828 |
| 0.226142709 | 0.127881157 | 0.218607998 | 0.314030482 |
| 0.483127349 | 0.290263569 | 0.366118563 | 0.168666718 |
| 0.349627106 | 0.260724409 | 0.328184787 | 0.00523276  |
| 0.278868715 | 0.022914073 | 0.364383553 | 0.1728479   |
| 0.172674851 | 0.274800202 | 0.232206054 | 0.149246225 |
| 0.247793663 | 0.013876418 | 0.214922848 | 0.360218199 |
| 0.221144903 | 0.195552401 | 0.028848209 | 0.358219286 |
| 0.264661682 | 0.241835423 | 0.338062946 | 0.000985511 |
| 0.305086209 | 0.181874207 | 0.283443718 | 0.464479035 |
| 0.119532773 | 0.065940663 | 0.279377921 | 0.16315345  |
| 0.306332607 | 0.322160127 | 0.177471903 | 0.26165748  |
| 0.460881407 | 0.219627363 | 0.411027011 | 0.104844381 |
| 0.238374317 | 0.012942997 | 0.093831484 | 0.041627168 |
| 0.297731944 | 0.118274324 | 0.250649909 | 0.285508905 |
| 0.390648763 | 0.457041172 | 0.14774078  | 0.445391018 |
| 0.128713979 | 0.279767388 | 0.235098314 | 0.234907647 |
| 0.305679164 | 0.044171662 | 0.338707319 | 0.471036721 |
| 0.022607134 | 0.273574148 | 0.324267696 | 0.066448541 |
| 0.400162404 | 0.295282602 | 0.266052427 | 0.207078919 |
| 0.335667753 | 0.254410806 | 0.426488674 | 0.194861228 |
| 0.260257736 | 0.031098205 | 0.419113067 | 0.277932784 |
| 0.209343719 | 0.036782093 | 0.181590554 | 0.476002227 |
| 0.306795405 | 0.47138521  | 0.400071104 | 0.304646311 |
| 0.278963738 | 0.469010662 | 0.312848992 | 0.384981923 |

|             |             |             |             |
|-------------|-------------|-------------|-------------|
| 0.200209752 | 0.490858161 | 0.099043964 | 0.018378265 |
| 0.031921825 | 0.046129985 | 0.208833056 | 0.240181952 |
| 0.468576865 | 0.235820364 | 0.10204611  | 0.149347369 |
| 0.462789349 | 0.420913654 | 0.49028328  | 0.366778215 |
| 0.014676829 | 0.277315826 | 0.277669453 | 0.179686157 |
| 0.294357795 | 0.056136809 | 0.247115543 | 0.441407518 |
| 0.315510564 | 0.423694828 | 0.087327915 | 0.42740748  |
| 0.120797518 | 0.467556388 | 0.428883223 | 0.088468926 |
| 0.460811583 | 0.430301814 | 0.482378569 | 0.381505004 |
| 0.418956397 | 0.199898288 | 0.061346771 | 0.33465645  |
| 0.448849691 | 0.01688668  | 0.485094405 | 0.50354291  |
| 0.457439825 | 0.465181273 | 0.50209902  | 0.50123316  |
| 0.465428032 | 0.031729354 | 0.041748556 | 0.208684648 |
| 0.452672687 | 0.339128302 | 0.090712394 | 0.297780529 |
| 0.288283106 | 0.23982382  | 0.419609801 | 0.231761619 |
| 0.460190391 | 0.438247192 | 0.489906875 | 0.328309744 |
| 0.192886057 | 0.246898766 | 0.316333581 | 0.400373169 |
| 0.018657452 | 0.054611779 | 0.022310191 | 0.240688771 |
| 0.246396225 | 0.096959921 | 0.22228369  | 0.264388646 |
| 0.109963723 | 0.214189552 | 0.329637738 | 0.348412783 |
| 0.028834816 | 0.304237902 | 0.088014142 | 0.085810961 |
| 0.016577895 | 0.091108994 | 0.101944219 | 0.092246156 |
| 0.166929262 | 0.166026553 | 0.3955193   | 0.477796724 |
| 0.266596481 | 0.110456001 | 0.342018711 | 0.437823447 |
| 0.373437507 | 0.293200527 | 0.156838146 | 0.004326336 |
| 0.189531263 | 0.295669398 | 0.245167565 | 1           |
| 0.122321977 | 0.148546748 | 0.280051583 | 0.370142963 |
| 0.148892433 | 0.079695956 | 0.271836073 | 0.356333721 |
| 0.090313271 | 0.223185847 | 0.417238356 | 0.275936999 |
| 0.000527339 | 0.189292427 | 0.418992549 | 0.126006812 |
| 0.220701957 | 0.15887858  | 0.270890099 | 0.443100858 |
| 0.281708228 | 0.214602447 | 0.497477836 | 0.373094232 |
| 0.243076851 | 0.161403651 | 0.502599235 | 0.073459829 |
| 0.280571061 | 0.036901855 | 0.20333387  | 0.243067496 |
| 0.140466016 | 0.218810535 | 0.26458004  | 0.220908057 |
| 0.068194789 | 0.475660139 | 0.347407819 | 0.489378133 |
| 0.282621911 | 0.498713643 | 0.451921848 | 0.403859211 |
| 0.261635982 | 0.299202244 | 0.205759338 | 0.397564102 |
| 0.441979015 | 0.225536224 | 0.03788736  | 0.443065069 |
| 0.265905867 | 0.360855711 | 0.101462356 | 0.460088031 |
| 0.432147521 | 0.417711669 | 0.084102928 | 0.339195703 |
| 0.31728335  | 0.125951121 | 0.392032806 | 0.498641043 |
| 0.246652881 | 0.262566952 | 0.251939626 | 0.380923265 |
| 0.093292301 | 0.187650929 | 0.260755193 | 0.257838681 |
| 0.02514144  | 0.037357969 | 0.027334606 | 0.100022507 |
| 0.182424096 | 0.35176466  | 0.324014185 | 0.483825865 |
| 0.057266145 | 0.374366867 | 0.16588537  | 0.191486071 |
| 0.362882274 | 0.277148889 | 0.312390336 | 0.316956637 |
| 0.170616141 | 0.007897621 | 0.065699013 | 0.452257553 |
| 0.016177091 | 0.238556852 | 0.198174595 | 0.001715033 |
| 0.017713239 | 0.38884913  | 0.056137205 | 0.131985938 |
| 0.480000107 | 0.135801712 | 0.116044669 | 0.231397396 |
| 0.273184923 | 0.043627829 | 0.001758399 | 0.472127401 |
| 0.461307136 | 0.432240251 | 0.457265983 | 0.413455576 |

|             |             |             |             |
|-------------|-------------|-------------|-------------|
| 0.427327933 | 0.374945054 | 0.385042212 | 0.210521377 |
| 0.049897586 | 0.042061788 | 0.19633514  | 0.184560035 |
| 0.002361769 | 0.33467956  | 0.23451776  | 0.077173294 |
| 0.402102077 | 0.212308195 | 0.014638116 | 0.29407976  |
| 0.007493897 | 0.242464536 | 0.190951358 | 0.141937508 |
| 0.317703736 | 0.004219203 | 0.169528365 | 0.256853227 |
| 0.368896984 | 0.275315908 | 0.319890965 | 0.490543995 |
| 0.206936865 | 0.075574167 | 0.210140403 | 0.359231077 |
| 0.031353412 | 0.096665264 | 0.234461869 | 0.03614932  |
| 0.1882731   | 0.411894609 | 0.297617903 | 0.030269844 |
| 0.155312766 | 0.000911844 | 0.297726758 | 0.48824753  |
| 0.42054903  | 0.502550095 | 0.466587719 | 0.256259208 |
| 0.462657075 | 0.210932643 | 0.506138194 | 0.352738184 |
| 0.273395957 | 0.000226531 | 0.002879687 | 0.485180522 |
| 0.273063431 | 0.030850895 | 0.079904907 | 0.237770761 |
| 0.056146559 | 0.077755525 | 0.031285925 | 0.16980496  |
| 0.32183596  | 0.178930539 | 0.180554678 | 0.415500603 |
| 0.142571359 | 0.142745188 | 0.255829872 | 0.044248825 |
| 0.314744764 | 0.02240211  | 0.044192293 | 0.005089689 |
| 0.322752243 | 0.068976548 | 0.394702854 | 0.476275051 |
| 0.444532154 | 0.342663964 | 0.274844164 | 0.25632784  |
| 0.435377665 | 0.055487671 | 0.312794806 | 0.056386928 |
| 0.443515856 | 0.298486905 | 0.242546735 | 0.229238526 |
| 0.462024702 | 0.414191153 | 0.012444077 | 0.361202909 |
| 0.005768111 | 0.002161609 | 0.218473197 | 0.180777944 |
| 0.08913461  | 0.272024104 | 0.175285945 | 0.165928118 |
| 0.166948931 | 0.012084967 | 0.264658166 | 0.234994122 |
| 0.192149893 | 0.236945983 | 0.228583546 | 0.178659892 |
| 0.20379302  | 0.115534674 | 0.128246277 | 0.087896239 |
| 0.198975432 | 0.242343406 | 0.130713449 | 0.007039211 |
| 0.29349816  | 0.29522311  | 0.024003004 | 0.088351159 |
| 0.407861389 | 0.476490321 | 0.018063474 | 0.003943888 |
| 0.185537325 | 0.223620443 | 0.49043949  | 0.468576345 |
| 0.46610315  | 0.475038767 | 0.321447609 | 0.079151475 |
| 0.030493079 | 0.214689507 | 0.24544583  | 0.0718845   |
| 0.48201097  | 0.028986984 | 0.445465507 | 0.289041985 |
| 0.056855261 | 0.121602134 | 0.014232599 | 0.038789106 |
| 0.326146515 | 0.096748243 | 0.111174893 | 0.077539567 |
| 0.205932109 | 0.253896702 | 0.019671828 | 0.104659098 |
| 0.263161495 | 0.198456941 | 0.079840549 | 0.202154783 |
| 0.296778911 | 0.200785411 | 0.389848384 | 0.388357455 |
| 0.066939103 | 0.054516821 | 0.153844203 | 0.346702388 |
| 0.428001524 | 0.295609768 | 0.013943712 | 0.423632962 |
| 0.474279915 | 0.367302556 | 0.45142229  | 0.351672204 |
| 0.039809705 | 0.274811442 | 0.289195831 | 0.235474986 |
| 0.100989143 | 0.250520774 | 0.151441214 | 0.025879543 |
| 0.240695156 | 0.418021839 | 0.370341039 | 0.093882349 |
| 0.308762386 | 0.06464413  | 0.024155066 | 0.440715162 |
| 0.179003928 | 0.04127574  | 0.252141565 | 0.437915962 |
| 0.001164591 | 0.202093397 | 0.482759754 | 0.150959577 |
| 0.473054388 | 0.461716083 | 0.378539294 | 0.170947311 |
| 0.003562063 | 0.373127288 | 0.261883957 | 0.263908606 |
| 0.387882416 | 0.274238813 | 0.117240252 | 0.036519263 |
| 0.218744256 | 0.042078306 | 0.075876206 | 0.233873997 |

|             |             |             |             |
|-------------|-------------|-------------|-------------|
| 0.195527233 | 0.28883471  | 0.124106036 | 0.119807076 |
| 0.13023445  | 0.051107041 | 0.262610524 | 0.141145152 |
| 0.179353196 | 0.16028972  | 0.281995212 | 0.23249815  |
| 0.185005176 | 0.412078669 | 0.343647682 | 0.009416593 |
| 0.305078054 | 0.382529512 | 0.412808764 | 0.000525462 |
| 0.37794765  | 0.00187069  | 0.128469874 | 0.137828047 |
| 0.127856074 | 0.135003769 | 0.177992796 | 0.216710499 |
| 0.241841973 | 0.127179952 | 0.167232906 | 0.141928333 |
| 0.101007198 | 0.129463718 | 0.288392652 | 0.223462827 |
| 0.200454334 | 0.063576615 | 0.060780518 | 0.064138565 |
| 0.024305031 | 0.453289479 | 0.174127528 | 0.038170017 |
| 0.137725663 | 0.240526938 | 0.288699401 | 0.455276981 |
| 0.383184445 | 0.072471738 | 0.229743827 | 0.408709127 |
| 0.234507582 | 0.198293374 | 0.027125666 | 0.246910868 |
| 0.13087863  | 0.178119635 | 0.274451836 | 0.182140803 |
| 0.350953287 | 0.330154579 | 0.167814029 | 0.3999309   |
| 0.246448425 | 0.247309548 | 0.227982101 | 0.045439806 |
| 0.088892234 | 0.073106907 | 0.214015828 | 0.000102165 |
| 0.246175908 | 0.147351028 | 0.458741295 | 0.43322085  |
| 0.303473152 | 0.333998925 | 0.220090124 | 0.039808947 |
| 0.210599634 | 0.123331113 | 0.075408711 | 0.404643126 |
| 0.268758251 | 0.10518763  | 0.213021031 | 0.205210501 |
| 0.398904826 | 0.389188954 | 0.21680885  | 0.145306499 |
| 0.148529228 | 0.112757247 | 0.420554703 | 0.060327881 |
| 0.320846131 | 0.160719983 | 0.257249955 | 0.192471143 |
| 0.144504343 | 0.502188346 | 0.02554777  | 0.510006969 |
| 0.234662213 | 0.079085293 | 0.430149161 | 0.195064546 |
| 0.191178729 | 0.085345054 | 0.242929289 | 0.263581637 |
| 0.144046223 | 0.324504714 | 0.019845952 | 0.061373956 |
| 0.252748693 | 0.240535748 | 0.366448694 | 0.309881863 |
| 0.211156805 | 0.287897386 | 0.254752135 | 0.166368287 |
| 0.429716603 | 0.432429817 | 0.149915492 | 0.174826887 |
| 0.262994148 | 0.051015687 | 0.279731204 | 0.019279561 |
| 0.325675959 | 0.349191321 | 0.292089152 | 0.023613512 |
| 0.00613851  | 0.240836742 | 0.296640725 | 0.031174556 |
| 0.477297604 | 0.263397182 | 0.271136584 | 0.383952487 |
| 0.110488095 | 0.42771219  | 0.076081823 | 0.344198919 |
| 0.022351328 | 0.166697006 | 0.311446318 | 0.281462501 |
| 0.158755085 | 0.252469889 | 0.308896803 | 0.229947588 |
| 0.011776815 | 0.190982773 | 1.68E-05    | 0.326978235 |
| 0.403411508 | 0.279599685 | 0.139955666 | 0.266222129 |
| 0.19956822  | 0.345397952 | 0.185870222 | 0.315812034 |
| 0.003757342 | 0.286378741 | 0.111386371 | 0.36353617  |
| 0.213600898 | 0.241834922 | 0.027660942 | 0.259246431 |
| 0.377711534 | 0.198735687 | 0.189133498 | 0.242832521 |
| 0.452520413 | 0.353903505 | 0.104413534 | 0.187985211 |
| 0.319234908 | 0.028143038 | 0.276140458 | 0.491408534 |
| 0.105712353 | 0.205678037 | 0.437293203 | 0.116018095 |
| 0.285564259 | 0.339232992 | 0.325019422 | 0.485857988 |
| 0.043540017 | 0.153279801 | 0.405074215 | 0.421831945 |
| 0.235054969 | 0.172678311 | 0.236149677 | 0.166873359 |
| 0.404345286 | 0.050876882 | 0.232685184 | 0.264783622 |
| 0.218210618 | 0.222376737 | 0.245939667 | 0.149767819 |
| 0.017475725 | 0.101409106 | 0.261248445 | 0.071453513 |

|             |             |             |             |
|-------------|-------------|-------------|-------------|
| 0.178728397 | 0.251339726 | 0.190916331 | 0.324610292 |
| 0.084295992 | 0.010314735 | 0.394979866 | 0.030034975 |
| 0.19935189  | 0.31065968  | 0.142347595 | 0.270219016 |
| 0.119879185 | 0.228467677 | 0.19067531  | 0.000101896 |
| 0.380390995 | 0.05050283  | 0.239495077 | 0.164471212 |
| 0.248827113 | 0.020359916 | 0.408610045 | 0.499292799 |
| 0.215906845 | 0.293514985 | 0.301579698 | 0.424019512 |
| 0.183154403 | 0.3284006   | 0.300496073 | 0.317516795 |
| 0.249877914 | 0.274284751 | 0.311323527 | 0.312247833 |
| 0.306745928 | 0.166830488 |             |             |
| DDX28       | 0.33935219  | 0.234651476 | 0.323077248 |
| 0.187695876 | 0.120510506 | 0.181288434 | 0.336528607 |
| 0.323809284 | 0.250385488 | 0.118576619 | 0.169121132 |
| 0.232889046 | 0.018751881 | 0.219758249 | 0.324698605 |
| 0.127584924 | 0.248623283 | 0.326254349 | 0.095441802 |
| 0.22915185  | 0.118428566 | 0.09824508  | 0.223209777 |
| 0.127739234 | 0.357481613 | 0.252375328 | 0.114607001 |
| 0.230260403 | 0.052987802 | 0.153373696 | 0.067008822 |
| 0.284483131 | 0.111597512 | 0.096464923 | 0.251431288 |
| 0.176011705 | 0.012110895 | 0.334055421 | 0.158753893 |
| 0.038202043 | 0.294776761 | 0.155748477 | 0.19423388  |
| 0.153800905 | 0.29733123  | 0.064348308 | 0.139716647 |
| 0.237036857 | 0.228650469 | 0.357424921 | 0.183130385 |
| 0.154852498 | 0.261211206 | 0.188067487 | 0.01588386  |
| 0.064789927 | 0.008374754 | 0.037248416 | 0.282327296 |
| 0.300099949 | 0.281181951 | 0.066209481 | 0.277717605 |
| 0.157028059 | 0.172608036 | 0.273444313 | 0.13454235  |
| 0.25226521  | 0.038916305 | 0.15215817  | 0.156098285 |
| 0.197757854 | 0.339384776 | 0.342943051 | 0.372599546 |
| 0.135727793 | 0.246721711 | 0.151821192 | 0.083754351 |
| 0.230473996 | 0.329277931 | 0.299508635 | 0.307029906 |
| 0.041257577 | 0.101570609 | 0.114986236 | 0.221278809 |
| 0.204849719 | 0.330337761 | 0.179674355 | 0.287042297 |
| 0.348425676 | 0.163706223 | 0.187370165 | 0.373143159 |
| 0.227516589 | 0.084894671 | 0.145336758 | 0.044086003 |
| 0.129875545 | 0.115421135 | 0.319197191 | 0.249320888 |
| 0.140340112 | 0.367364497 | 0.340817588 | 0.088146739 |
| 0.137217699 | 0.352150119 | 0.104830215 | 0.162964543 |
| 0.16867105  | 0.22510177  | 0.20041541  | 0.21705707  |
| 0.110615871 | 0.244835861 | 0.191667345 | 0.239220373 |
| 0.043465698 | 0.274099578 | 0.304093093 | 0.256057626 |
| 0.357928763 | 0.279238409 | 0.126076499 | 0.281178132 |
| 0.190111497 | 0.254042875 | 0.293325766 | 0.186785634 |
| 0.17473094  | 0.311739721 | 0.271058622 | 0.206162804 |
| 0.316860138 | 0.065530918 | 0.113436192 | 0.272933257 |
| 0.191020416 | 0.364284939 | 0.069168869 | 0.331983217 |
| 0.254677392 | 0.17104502  | 0.349529988 | 0.365472929 |
| 0.288716321 | 0.275048573 | 0.207531166 | 0.268138049 |
| 0.309330435 | 0.322768629 | 0.242981217 | 0.122946741 |
| 0.301705249 | 0.215572733 | 0.069405453 | 0.233701926 |
| 0.256293896 | 0.0061475   | 0.184683286 | 0.198608247 |
| 0.267922604 | 0.16123515  | 0.241874181 | 0.224303485 |
| 0.270674391 | 0.373417853 | 0.008625623 | 0.172767392 |
| 0.294086513 | 0.230818193 | 0.232087923 | 0.116133468 |

|             |             |             |             |
|-------------|-------------|-------------|-------------|
| 0.131394202 | 0.210474127 | 0.18083069  | 0.084330499 |
| 0.299104996 | 0.202474364 | 0.206071417 | 0.211583109 |
| 0.227217341 | 0.306629692 | 0.093712262 | 0.332699701 |
| 0.290269325 | 0.329810467 | 0.344799908 | 0.261403706 |
| 0.147276661 | 0.259939129 | 0.207196258 | 0.152068184 |
| 0.275577052 | 0.248278804 | 0.075548761 | 0.128398087 |
| 0.357591153 | 0.14712048  | 0.334646247 | 0.326153733 |
| 0.245291515 | 0.377039518 | 0.188910953 | 0.23046324  |
| 0.175721598 | 0.406424188 | 0.156299234 | 0.220214703 |
| 0.14809623  | 0.33942089  | 0.186315363 | 0.253670342 |
| 0.249130556 | 0.110027175 | 0.319488192 | 0.060914322 |
| 0.098003208 | 0.079540583 | 0.033513016 | 0.122321977 |
| 1           | 0.171999408 | 0.149453374 | 0.142490412 |
| 0.266199455 | 0.35870573  | 0.118584444 | 0.330308625 |
| 0.364700194 | 0.132384323 | 0.188700371 | 0.163768263 |
| 0.120619533 | 0.207600631 | 0.182847596 | 0.100259347 |
| 0.247131936 | 0.037434139 | 0.054790125 | 0.191489863 |
| 0.07240578  | 0.088681563 | 0.206352969 | 0.148430813 |
| 0.1408967   | 0.365576346 | 0.250260137 | 0.009569572 |
| 0.12947219  | 0.069273432 | 0.204992022 | 0.154151316 |
| 0.271714933 | 0.238055248 | 0.105384559 | 0.118716477 |
| 0.342276602 | 0.275516899 | 0.242006345 | 0.231761868 |
| 0.098817981 | 0.258078059 | 0.174133753 | 0.211741515 |
| 0.228659938 | 0.105982059 | 0.02119627  | 0.181042265 |
| 0.187502726 | 0.104851995 | 0.370523278 | 0.159766317 |
| 0.130059425 | 0.135896341 | 0.112689429 | 0.230605055 |
| 0.323355617 | 0.291280558 | 0.229470425 | 0.170413587 |
| 0.219850374 | 0.275055473 | 0.210628813 | 0.268884288 |
| 0.111925391 | 0.114836932 | 0.105279981 | 0.181973239 |
| 0.321578155 | 0.095019676 | 0.300289936 | 0.033697926 |
| 0.001080527 | 0.37194635  | 0.349719355 | 0.198238846 |
| 0.050235079 | 0.141634908 | 0.164657966 | 0.250697193 |
| 0.305970313 | 0.24864502  | 0.310437688 | 0.122253571 |
| 0.249029365 | 0.126050369 | 0.108999032 | 0.144724998 |
| 0.315854505 | 0.101225715 | 0.184089657 | 0.333402451 |
| 0.345436655 | 0.061240648 | 0.249978751 | 0.012991144 |
| 0.322408562 | 0.196987838 | 0.373637314 | 0.364154401 |
| 0.198651387 | 0.358391034 | 0.311413914 | 0.133869978 |
| 0.20075249  | 0.350387768 | 0.020756395 | 0.228993989 |
| 0.268190463 | 0.261603077 | 0.269344907 | 0.307224798 |
| 0.211866036 | 0.197916912 | 0.172033303 | 0.231783941 |
| 0.320690383 | 0.368470098 | 0.053812295 | 0.165237322 |
| 0.027623874 | 0.201673415 | 0.164806391 | 0.339752411 |
| 0.15751023  | 0.247359779 | 0.295236946 | 0.135518494 |
| 0.17203027  | 0.031254995 | 0.223394896 | 0.23328095  |
| 0.174505549 | 0.249359278 | 0.085121589 | 0.084038968 |
| 0.285017077 | 0.279179687 | 0.087828739 | 0.278597966 |
| 0.182261535 | 0.349265349 | 0.14636139  | 0.173846162 |
| 0.324531239 | 0.048334219 | 0.207340049 | 0.013376905 |
| 0.120678262 | 0.297284841 | 0.133672008 | 0.296675335 |
| 0.238665969 | 0.143224645 | 0.266855678 | 0.278758293 |
| 0.279446351 | 0.224695055 | 0.246680926 | 0.067059325 |
| 0.259420887 | 0.011961739 | 0.248533464 | 0.230192572 |
| 0.115086707 | 0.010362983 | 0.049553363 | 0.189745799 |



|             |             |             |             |
|-------------|-------------|-------------|-------------|
| 0.12398618  | 0.351547028 | 0.323034362 | 0.145820778 |
| 0.239287694 | 0.346213433 | 0.335997005 | 0.073831636 |
| 0.174278715 | 0.142799674 | 0.076771193 | 0.287552977 |
| 0.222944627 | 0.250075593 | 0.178500438 | 0.381187374 |
| 0.146231692 | 0.276820415 | 0.380390619 | 0.018341535 |
| 0.171292352 | 0.364440914 | 0.361084212 | 0.260571502 |
| 0.273968765 | 0.148724557 | 0.093539066 | 0.146065428 |
| 0.204034009 | 0.346254189 | 0.103451    | 0.363106774 |
| 0.255724891 | 0.139223836 | 0.239211882 | 0.279773444 |
| 0.245426745 | 0.264034747 | 0.3033681   | 0.180112683 |
| 0.109671061 | 0.006364859 | 0.19437995  | 0.287900655 |
| 0.060044817 | 0.114723084 | 0.291967521 | 0.227420884 |
| 0.217829516 | 0.239907078 | 0.060506799 | 0.060469789 |
| 0.204681335 | 0.156012734 | 0.092945722 | 0.31176424  |
| 0.136409624 | 0.078223026 | 0.230671827 | 0.284343284 |
| 0.153302554 | 0.294622224 | 0.347241763 | 0.281910527 |
| 0.140784    | 0.11931976  | 0.326893029 | 0.355070598 |
| 0.194853352 | 0.199878846 | 0.250179733 | 0.080315657 |
| 0.309092568 | 0.163635581 | 0.207875913 | 0.250646765 |
| 0.312878652 | 0.271570279 | 0.325004272 | 0.17052824  |
| 0.328375442 | 0.17870395  | 0.100531009 | 0.138851372 |
| 0.248544397 | 0.356576446 | 0.27599335  | 0.07201639  |
| 0.363524434 | 0.246258954 | 0.208941585 | 0.347673136 |
| 0.106817989 | 0.318756426 | 0.198158272 | 0.330000884 |
| 0.150912543 | 0.065113443 | 0.339555065 | 0.285945323 |
| 0.239514876 | 0.033701976 | 0.322691002 | 0.257096016 |
| 0.260137003 | 0.117254522 | 0.144972012 | 0.279303933 |
| 0.361264272 | 0.35866591  | 0.216635291 | 0.200161542 |
| 0.178504508 | 0.133436543 | 0.121822587 | 0.233728283 |
| 0.230364388 | 0.14376291  | 0.284768158 | 0.213373405 |
| 0.376699618 | 0.114613428 | 0.090395978 | 0.141086302 |
| 0.307982548 | 0.19398551  | 0.249304027 | 0.358400657 |
| 0.30429651  | 0.341084433 | 0.225517711 | 0.232696383 |
| 0.157383047 | 0.365424664 | 0.348802677 | 0.207601168 |
| 0.049676891 | 0.28118726  | 0.154787051 | 0.175360461 |
| 0.008526774 | 0.02662121  | 0.223500435 | 0.224698614 |
| 0.299198677 | 0.204675588 | 0.267406971 | 0.272098776 |
| 0.000459154 | 0.129283774 | 0.160109921 | 0.131297721 |
| 0.221506428 | 0.26666135  | 0.225049131 | 0.234739053 |
| 0.272220515 | 0.352198056 | 0.206803266 | 0.167035599 |
| 0.037829049 | 0.198068999 | 0.306318497 | 0.303909347 |
| 0.198517075 | 0.364273657 | 0.063596195 | 0.257574416 |
| 0.058092617 | 0.286820671 | 0.228691216 | 0.142070453 |
| 0.035888031 | 0.210561615 | 0.20257183  | 0.286078543 |
| 0.109219894 | 0.212021756 | 0.22911414  | 0.018835632 |
| 0.147505333 | 0.151304732 | 0.184997673 | 0.172881593 |
| 0.203348983 | 0.20049334  | 0.180075393 | 0.130371929 |
| 0.21924817  | 0.259008241 | 0.191586869 | 0.247144256 |
| 0.191807998 | 0.298181553 | 0.153595918 | 0.210070726 |
| 0.121678601 | 0.306856484 | 0.376218737 | 0.368306796 |
| 0.221388202 | 0.218048253 | 0.329887102 | 0.360509886 |
| 0.259888058 | 0.190744207 | 0.262950513 | 0.267236472 |
| 0.231992611 | 0.358523615 | 0.187925222 | 0.209662902 |
| 0.062288863 | 0.155751851 | 0.348314194 | 0.198195859 |

|             |             |             |             |
|-------------|-------------|-------------|-------------|
| 0.273947963 | 0.083387778 | 0.178335123 | 0.246929267 |
| 0.187565614 | 0.306837224 | 0.328532472 | 0.257407471 |
| 0.159268621 | 0.160806853 | 0.122744424 | 0.184007266 |
| 0.283588484 | 0.374647872 | 0.102286367 | 0.065299679 |
| 0.217636597 | 0.241319614 | 0.179905908 | 0.291006743 |
| 0.064478404 | 0.261728017 | 0.134208959 | 0.286654413 |
| 0.107840385 | 0.33954365  | 0.351557693 | 0.176704555 |
| 0.035785936 | 0.288652588 | 0.138606378 | 0.214804154 |
| 0.160946476 | 0.166391446 | 0.126361704 | 0.277888907 |
| 0.264512249 | 0.341261048 | 0.322237566 | 0.363573572 |
| 0.135949821 | 0.079251927 | 0.198637931 | 0.147786241 |
| 0.177679607 | 0.23541453  | 0.358499105 | 0.229923609 |
| 0.123504122 | 0.37914175  | 0.317743531 | 0.263337218 |
| 0.246078935 | 0.175779037 | 0.031920917 | 0.179593697 |
| 0.234994878 | 0.082508517 | 0.00381439  | 0.023615332 |
| 0.206837545 | 0.162863674 | 0.195770002 | 0.211760266 |
| 0.101346725 | 0.215364243 | 0.035490624 | 0.261424104 |
| 0.293176914 | 0.339160674 | 0.15185432  | 0.296086606 |
| 0.242015308 | 0.287185672 | 0.209332147 | 0.023510367 |
| 0.132085312 | 0.11526155  | 0.119778458 | 0.313591068 |
| 0.252124427 | 0.036160479 | 0.152714679 | 0.369184267 |
| 0.193177715 | 0.033779681 | 0.199673454 | 0.170681857 |
| 0.361053769 | 0.34186481  | 0.19389589  | 0.167067271 |
| 0.291194185 | 0.288781852 | 0.115779227 | 0.147283611 |
| 0.107814014 | 0.080603942 | 0.183717012 | 0.060168576 |
| 0.260281566 | 0.138179547 | 0.019244131 | 0.340627867 |
| 0.329549243 | 0.091666573 | 0.355058008 | 0.107739476 |
| 0.22930837  | 0.250593918 | 0.127876875 | 0.129657345 |
| 0.114062298 | 0.109107459 | 0.293094662 | 0.232534228 |
| 0.043753956 | 0.173499049 | 0.216007644 | 0.110193268 |
| 0.377644059 | 0.10521412  | 0.31716705  | 0.073744717 |
| 0.263917121 | 0.239903948 | 0.353553485 | 0.140824302 |
| 0.175491801 | 0.371072386 | 0.15182096  | 0.273423603 |
| 0.213545956 | 0.060801975 | 0.163532833 | 0.198292604 |
| 0.082930998 | 0.264862437 | 0.14243431  | 0.281247822 |
| 0.152455801 | 0.269775009 | 0.178760456 | 0.236592534 |
| 0.240537092 | 0.068069784 | 0.061601577 | 0.125360413 |
| 0.2754144   | 0.220805834 | 0.089871245 | 0.244855625 |
| 0.048054567 | 0.232554297 | 0.204902606 | 0.126599604 |
| 0.177253833 | 0.278443152 | 0.163672741 | 0.355950058 |
| 0.208598034 | 0.142866308 | 0.111882879 | 0.267950055 |
| 0.158363341 | 0.112818154 | 0.285921519 | 0.002383799 |
| 0.243461685 | 0.153397352 | 0.273605121 | 0.129908087 |
| 0.344114012 | 0.225427492 | 0.223079923 | 0.046721808 |
| 0.192199074 | 0.033603752 | 0.169164463 | 0.106960404 |
| 0.081078284 | 0.330316813 | 0.278203627 | 0.222977991 |
| 0.273115053 | 0.126220968 | 0.07698105  | 0.26213158  |
| 0.033948205 | 0.074015994 | 0.093494858 | 0.191454834 |
| 0.051407563 | 0.122137432 | 0.122972632 | 0.090709237 |
| 0.231050054 | 0.279172259 |             |             |
| DDX39       | 0.057984932 | 0.238921923 | 0.034135863 |
| 0.046604808 | 0.187253466 | 0.08102983  | 0.066956264 |
| 0.077779257 | 0.210922617 | 0.046432684 | 0.175924438 |
| 0.02990067  | 0.019902735 | 0.340696138 | 0.063972005 |

|             |             |             |             |
|-------------|-------------|-------------|-------------|
| 0.235651588 | 0.04425129  | 0.138177037 | 0.026648139 |
| 0.044061383 | 0.224617532 | 0.059053013 | 0.130725058 |
| 0.174407692 | 0.187972813 | 0.161770272 | 0.144047519 |
| 0.294216094 | 0.026701119 | 0.193922239 | 0.01568618  |
| 0.358976137 | 0.222153823 | 0.107119619 | 0.012257125 |
| 0.160104912 | 0.008890719 | 0.345643688 | 0.156580478 |
| 0.025411171 | 0.306561371 | 0.067622689 | 0.137846381 |
| 0.117855083 | 0.035905582 | 0.014607419 | 0.243467346 |
| 0.149652813 | 0.081813342 | 0.059063109 | 0.199651096 |
| 0.092729922 | 0.205345412 | 0.173671989 | 0.009640027 |
| 0.088416087 | 0.012194613 | 0.056031751 | 0.297110859 |
| 0.208209843 | 0.136181014 | 0.042102231 | 0.105735228 |
| 0.209638245 | 0.255503314 | 0.208869729 | 0.092011038 |
| 0.335016386 | 0.053546427 | 0.212155713 | 0.033862287 |
| 0.154924547 | 0.034598809 | 0.19827539  | 0.076528407 |
| 0.09331004  | 0.172744884 | 0.164496693 | 0.096156532 |
| 0.243121367 | 0.366486865 | 0.191846328 | 0.306713042 |
| 0.056207832 | 0.196149656 | 0.081877962 | 0.289785661 |
| 0.280533801 | 0.065196987 | 0.277826987 | 0.369563523 |
| 0.048616502 | 0.138421218 | 0.292665963 | 0.13631807  |
| 0.228638427 | 0.047889665 | 0.113185625 | 0.049928962 |
| 0.226435763 | 0.242441808 | 0.32300111  | 0.286992623 |
| 0.126700308 | 0.082927876 | 0.292868444 | 0.184783943 |
| 0.120275082 | 0.0731543   | 0.09951542  | 0.285835534 |
| 0.228835278 | 0.305931529 | 0.271856618 | 0.340722421 |
| 0.216363508 | 0.315469609 | 0.241136853 | 0.277212533 |
| 0.010211453 | 0.323903281 | 0.125910974 | 0.047073557 |
| 0.051113972 | 0.075098378 | 0.073775043 | 0.273875668 |
| 0.278849777 | 0.214740889 | 0.13878185  | 0.201443951 |
| 0.344312878 | 0.275907452 | 0.328351531 | 0.327709112 |
| 0.054283341 | 0.056182505 | 0.194590024 | 0.066474991 |
| 0.314671145 | 0.132837237 | 0.132736478 | 0.340548826 |
| 0.303118405 | 0.309955529 | 0.070963843 | 0.342954281 |
| 0.141203095 | 0.365168518 | 0.243057427 | 0.167679942 |
| 0.338810163 | 0.307080129 | 0.360172967 | 0.234923425 |
| 0.297288599 | 0.131783263 | 0.051921322 | 0.301494453 |
| 0.362505748 | 0.007249855 | 0.292572872 | 0.322348766 |
| 0.305761255 | 0.295065157 | 0.375928472 | 0.313815641 |
| 0.304088638 | 0.095757257 | 0.012234314 | 0.299144898 |
| 0.331076325 | 0.292225875 | 0.075428685 | 0.176511515 |
| 0.241961627 | 0.13033063  | 0.238378791 | 0.069010762 |
| 0.397254087 | 0.266243903 | 0.291373712 | 0.29799495  |
| 0.143267487 | 0.283211269 | 0.156951056 | 0.279740116 |
| 0.030887197 | 0.079072369 | 0.061089136 | 0.260072695 |
| 0.033996622 | 0.197364308 | 0.129374225 | 0.214449862 |
| 0.228491533 | 0.108306515 | 0.074156237 | 0.256807192 |
| 0.076868371 | 0.167375361 | 0.105671809 | 0.159828262 |
| 0.051442918 | 0.174519574 | 0.103346701 | 0.053093283 |
| 0.216378922 | 0.215307799 | 0.224353872 | 0.30936758  |
| 0.136133031 | 0.161262177 | 0.245589093 | 0.343155033 |
| 0.398824511 | 0.169206137 | 0.249960554 | 0.011906606 |
| 0.121325834 | 0.059927643 | 0.049991462 | 0.148546748 |
| 0.171999408 | 1           | 0.274493075 | 0.271517047 |
| 0.147768322 | 0.090568108 | 0.142603587 | 0.324030595 |

|             |             |             |             |
|-------------|-------------|-------------|-------------|
| 0.147711937 | 0.111186272 | 0.354553257 | 0.176197712 |
| 0.00382712  | 0.203423597 | 0.286150542 | 0.080156779 |
| 0.274534964 | 0.048736464 | 0.034408881 | 0.330777617 |
| 0.068921232 | 0.122046356 | 0.293042437 | 0.25181326  |
| 0.057696867 | 0.188889827 | 0.364910164 | 0.047955374 |
| 0.154209557 | 0.029240989 | 0.294695534 | 0.075590689 |
| 0.218354393 | 0.315601801 | 0.185651977 | 0.103629981 |
| 0.099484922 | 0.348133808 | 0.243095297 | 0.333691272 |
| 0.113309917 | 0.367433438 | 0.310245803 | 0.323352126 |
| 0.215487308 | 0.138236719 | 0.03395447  | 0.297501941 |
| 0.303072116 | 0.068007592 | 0.08040494  | 0.263691072 |
| 0.128730621 | 0.274555493 | 0.043017394 | 0.368066144 |
| 0.345143016 | 0.267624974 | 0.119782603 | 0.314429088 |
| 0.306669819 | 0.15493449  | 0.250468542 | 0.379243721 |
| 0.052374959 | 0.231087036 | 0.142698453 | 0.321477669 |
| 0.17499081  | 0.112472374 | 0.256889713 | 0.033670387 |
| 0.000606323 | 0.086400608 | 0.083194055 | 0.155130221 |
| 0.068186909 | 0.161190173 | 0.246949235 | 0.35101223  |
| 0.149000253 | 0.272415016 | 0.222499817 | 0.152337011 |
| 0.32319638  | 0.165788146 | 0.142888585 | 0.207182044 |
| 0.22123439  | 0.012567953 | 0.061652834 | 0.371812656 |
| 0.051437814 | 0.071050482 | 0.156181462 | 0.003868956 |
| 0.058877855 | 0.206123803 | 0.120417429 | 0.212160586 |
| 0.337580242 | 0.188400465 | 0.204244636 | 0.074959835 |
| 0.250822539 | 0.104092056 | 0.002577134 | 0.313998532 |
| 0.306224543 | 0.300593661 | 0.306778688 | 0.280471533 |
| 0.30918199  | 0.217433511 | 0.300385596 | 0.113698076 |
| 0.068343182 | 0.055392359 | 0.09035507  | 0.219168656 |
| 0.005731334 | 0.253754549 | 0.157047852 | 0.182996235 |
| 0.267458528 | 0.276862013 | 0.040859637 | 0.192504865 |
| 0.017467999 | 0.044661226 | 0.10808662  | 0.146261267 |
| 0.283741841 | 0.015430721 | 0.03806169  | 0.088311292 |
| 0.263380803 | 0.280067155 | 0.077238168 | 0.328826856 |
| 0.20707111  | 0.112888962 | 0.168313712 | 0.252128704 |
| 0.076127689 | 0.034547499 | 0.121333438 | 0.003384131 |
| 0.019408234 | 0.296012253 | 0.097295459 | 0.03044743  |
| 0.239376561 | 0.007973522 | 0.265986305 | 0.354437747 |
| 0.255885909 | 0.358545276 | 0.322087204 | 0.103842162 |
| 0.32502694  | 0.015730146 | 0.33173939  | 0.262904671 |
| 0.100148942 | 0.001552706 | 0.010133181 | 0.306788099 |
| 0.210610626 | 0.057769008 | 0.181305438 | 0.038721574 |
| 0.067926999 | 0.085424781 | 0.059970414 | 0.078780615 |
| 0.159416449 | 0.180944937 | 0.066989781 | 0.308346829 |
| 0.184351596 | 0.202465646 | 0.111208076 | 0.110792566 |
| 0.163532115 | 0.041796137 | 0.108142695 | 0.007054933 |
| 0.261328408 | 0.118422566 | 0.295573849 | 0.314218251 |
| 0.361709027 | 0.241141932 | 0.060764935 | 0.052360946 |
| 0.282201547 | 0.079704726 | 0.036969369 | 0.086927679 |
| 0.288258959 | 0.284107484 | 0.304784636 | 0.271236572 |
| 0.393799836 | 0.335607359 | 0.054094524 | 0.319815361 |
| 0.007036889 | 0.002364226 | 0.121972049 | 0.250203869 |
| 0.017884887 | 0.199042416 | 0.265931845 | 0.085112295 |
| 0.086576156 | 0.025274993 | 0.106178119 | 0.119701911 |
| 0.255038295 | 0.221512092 | 0.185268749 | 0.21066623  |

|             |             |             |             |
|-------------|-------------|-------------|-------------|
| 0.120957758 | 0.08150556  | 0.098098802 | 0.116213176 |
| 0.056056518 | 0.252014136 | 0.203229047 | 0.03241189  |
| 0.134432293 | 0.178140205 | 0.075747553 | 0.156824062 |
| 0.305421863 | 0.33082951  | 0.058482068 | 0.021427837 |
| 0.259201338 | 0.181019966 | 0.352418457 | 0.290069746 |
| 0.340191795 | 0.392902058 | 0.314212846 | 0.103498857 |
| 0.059827277 | 0.222177497 | 0.18052573  | 0.05437589  |
| 0.332632248 | 0.084030712 | 0.277293997 | 0.131074705 |
| 0.149722074 | 0.104601576 | 0.034248198 | 0.11323088  |
| 0.169350626 | 0.200801074 | 0.172007286 | 0.12267323  |
| 0.200980422 | 0.044371408 | 0.063480507 | 0.207009885 |
| 0.321598626 | 0.050075617 | 0.19475299  | 0.082333221 |
| 0.205065288 | 0.024040672 | 0.275158811 | 0.383202942 |
| 0.141234361 | 0.119875287 | 0.061800595 | 0.239319923 |
| 0.267586083 | 0.130857586 | 0.012806352 | 0.248015808 |
| 0.327995071 | 0.21932859  | 0.295868869 | 0.376596393 |
| 0.115155238 | 0.18656471  | 0.119912852 | 0.259725802 |
| 0.207994198 | 0.090524655 | 0.185536412 | 0.099951278 |
| 0.267085796 | 0.345497952 | 0.283790362 | 0.143675494 |
| 0.141373842 | 0.099810471 | 0.072181345 | 0.255503663 |
| 0.074315436 | 0.060709055 | 0.079542317 | 0.275240785 |
| 0.001202018 | 0.036400965 | 0.333350593 | 0.090295361 |
| 0.350203339 | 0.3376577   | 0.33646575  | 0.061524421 |
| 0.002078895 | 0.233990776 | 0.247245951 | 0.133657636 |
| 0.289982241 | 0.231924125 | 0.029660322 | 0.06505622  |
| 0.27887614  | 0.080853896 | 0.107949099 | 0.035591974 |
| 0.052401866 | 0.225865781 | 0.242563556 | 0.177382864 |
| 0.148781486 | 0.098628241 | 0.037836763 | 0.11056685  |
| 0.041596899 | 0.271352538 | 0.34303598  | 0.035036868 |
| 0.083640554 | 0.355764497 | 0.303738354 | 0.027131701 |
| 0.139807739 | 0.306589151 | 0.27738965  | 0.016192648 |
| 0.276784497 | 0.015732715 | 0.188266046 | 0.157325732 |
| 0.135376069 | 0.198840839 | 0.25122073  | 0.102511462 |
| 0.246026538 | 0.160202295 | 0.129305501 | 0.230048963 |
| 0.092014752 | 0.124325484 | 0.190892113 | 0.125366722 |
| 0.117573145 | 0.084427677 | 0.109168143 | 0.107361667 |
| 0.03732176  | 0.25776723  | 0.246668043 | 0.069984263 |
| 0.228513156 | 0.123501738 | 0.326804956 | 0.283765704 |
| 0.307316894 | 0.093025544 | 0.162706962 | 0.257379136 |
| 0.041271173 | 0.048940454 | 0.049282592 | 0.129973313 |
| 0.184718072 | 0.088698782 | 0.107137735 | 0.189892307 |
| 0.24210917  | 0.32710084  | 0.234398338 | 0.292155968 |
| 0.125803528 | 0.16733712  | 0.054773781 | 0.065449168 |
| 0.145279909 | 0.151291833 | 0.186072159 | 0.003404122 |
| 0.264514901 | 0.040334994 | 0.306846458 | 0.295612534 |
| 0.078660992 | 0.288481474 | 0.034869618 | 0.075901819 |
| 0.02242481  | 0.161211266 | 0.184225188 | 0.219222388 |
| 0.053554866 | 0.085093573 | 0.205525093 | 0.045654042 |
| 0.25340242  | 0.225045391 | 0.09230423  | 0.162427984 |
| 0.172096921 | 0.133054427 | 0.315002764 | 0.062352763 |
| 0.171342569 | 0.075764217 | 0.130987692 | 0.22299     |
| 0.181590896 | 0.31201065  | 0.070881026 | 0.334896356 |
| 0.218323178 | 0.133771588 | 0.366992501 | 0.117074597 |
| 0.040522279 | 0.045349466 | 0.055721649 | 0.083988056 |

|             |             |             |             |
|-------------|-------------|-------------|-------------|
| 0.097613093 | 0.07627046  | 0.004330194 | 0.085149915 |
| 0.314849319 | 0.089820505 | 0.24636216  | 0.263611523 |
| 0.111684779 | 0.330248239 | 0.02178535  | 0.178655108 |
| 0.272935521 | 0.303512095 | 0.111925492 | 0.273383644 |
| 0.315440123 | 0.091139132 | 0.150899095 | 0.008764014 |
| 0.242018245 | 0.179328027 | 0.069967513 | 0.061082205 |
| 0.022755154 | 0.073128729 | 0.221579072 | 0.076186645 |
| 0.347423443 | 0.031861048 | 0.166621005 | 0.198050164 |
| 0.176118416 | 0.316051057 | 0.090774189 | 0.276634868 |
| 0.031844578 | 0.206889247 | 0.125749951 | 0.151396056 |
| 0.093302614 | 0.143536493 | 0.304320687 | 0.097144346 |
| 0.046720058 | 0.075970789 | 0.014843059 | 0.32186082  |
| 0.289393491 | 0.164156486 | 0.21818813  | 0.038697738 |
| 0.261555814 | 0.247938379 | 0.120198144 | 0.115219763 |
| 0.01324061  | 0.227973035 | 0.176308496 | 0.250425355 |
| 0.047967986 | 0.214884259 | 0.031327344 | 0.183322248 |
| 0.287656874 | 0.134701028 | 0.264870535 | 0.061328084 |
| 0.274424745 | 0.207150512 | 0.109670242 | 0.044183888 |
| 0.187042467 | 0.092815443 | 0.065597967 | 0.359941218 |
| 0.159934669 | 0.105928023 | 0.326998348 | 0.165305884 |
| 0.136258626 | 0.239458669 | 0.154801312 | 0.343179706 |
| 0.080039112 | 0.253035669 | 0.26543754  | 0.325014134 |
| 0.301688396 | 0.094715481 | 0.103120744 | 0.188834517 |
| 0.261286304 | 0.03955636  | 0.071926109 | 0.267506486 |
| 0.104830243 | 0.245265164 | 0.120672795 | 0.143643378 |
| 0.038978578 | 0.087734585 | 0.064291078 | 0.152058559 |
| 0.276848248 | 0.187965422 | 0.100988924 | 0.322301102 |
| 0.054616213 | 0.025261181 | 0.34267205  | 0.018699494 |
| 0.112751972 | 0.219701489 | 0.1828414   | 0.148991966 |
| 0.178483022 | 0.224559897 | 0.168965927 | 0.008596882 |
| 0.30962773  | 0.007437695 | 0.103958027 | 0.113320522 |
| 0.07680666  | 0.060386567 | 0.274728808 | 0.361959775 |
| 0.181407591 | 0.035146753 | 0.050866569 | 0.302688752 |
| 0.040841329 | 0.06102885  | 0.105635836 | 0.183037531 |
| 0.073384581 | 0.1004462   | 0.108329355 | 0.089370159 |
| 0.227053895 | 0.103174613 |             |             |
| DEPDC1A     | 0.056458108 | 0.363952471 | 0.035870824 |
| 0.119965786 | 0.260140126 | 0.22911697  | 0.062806915 |
| 0.116561572 | 0.291719979 | 0.196317776 | 0.256811884 |
| 0.020463395 | 0.103685573 | 0.438240537 | 0.057337541 |
| 0.309988957 | 0.041483093 | 0.104857751 | 0.077823688 |
| 0.169739313 | 0.269232591 | 0.252394372 | 0.225366447 |
| 0.260914325 | 0.161878801 | 0.222768116 | 0.27818161  |
| 0.449197241 | 0.189496179 | 0.315128142 | 0.125773315 |
| 0.399877958 | 0.281491292 | 0.270732101 | 0.013199181 |
| 0.269317391 | 0.026115837 | 0.405785011 | 0.252850283 |
| 0.146397192 | 0.317385615 | 0.193448149 | 0.20239391  |
| 0.257976931 | 0.031481249 | 0.122723255 | 0.3489892   |
| 0.217802081 | 0.202070879 | 0.045358686 | 0.321600886 |
| 0.274967144 | 0.247342263 | 0.296414209 | 0.005767666 |
| 0.249314614 | 0.099191797 | 0.221176684 | 0.437169535 |
| 0.159383786 | 0.113562223 | 0.242700451 | 0.174164213 |
| 0.289683559 | 0.324468331 | 0.200344146 | 0.27492829  |
| 0.458180089 | 0.211850166 | 0.356640152 | 0.117487324 |

|             |             |             |             |
|-------------|-------------|-------------|-------------|
| 0.274885586 | 0.027484658 | 0.136897772 | 0.059347992 |
| 0.279677185 | 0.165561709 | 0.249730108 | 0.263741651 |
| 0.372124638 | 0.468876298 | 0.179154585 | 0.437617996 |
| 0.156857316 | 0.290446891 | 0.240086093 | 0.280678902 |
| 0.331289706 | 0.084734667 | 0.356187582 | 0.485782728 |
| 0.041807541 | 0.239745792 | 0.357204291 | 0.094696266 |
| 0.357626583 | 0.227143575 | 0.243517379 | 0.177499548 |
| 0.318816634 | 0.311019479 | 0.425356192 | 0.251813753 |
| 0.239004185 | 0.053402037 | 0.408806779 | 0.281574632 |
| 0.235948742 | 0.05946628  | 0.26483417  | 0.438872533 |
| 0.314221867 | 0.448483743 | 0.389384416 | 0.360249954 |
| 0.320653847 | 0.452572795 | 0.326204049 | 0.369685327 |
| 0.099773039 | 0.469488527 | 0.136359983 | 0.04489052  |
| 0.053798796 | 0.080185294 | 0.231368571 | 0.272630458 |
| 0.426682749 | 0.247473058 | 0.164014257 | 0.222427712 |
| 0.461686344 | 0.400700219 | 0.474144094 | 0.398304155 |
| 0.037055783 | 0.235524792 | 0.311764191 | 0.171083708 |
| 0.335529273 | 0.092273568 | 0.255264805 | 0.449295932 |
| 0.349085636 | 0.41941634  | 0.116185206 | 0.43823316  |
| 0.175149143 | 0.476298918 | 0.390275084 | 0.14930297  |
| 0.462474691 | 0.424841287 | 0.485090208 | 0.346558269 |
| 0.407617806 | 0.225012552 | 0.088364484 | 0.361017914 |
| 0.455878136 | 0.020655318 | 0.446954943 | 0.477576821 |
| 0.444486278 | 0.442880969 | 0.503803148 | 0.46599847  |
| 0.4445288   | 0.059088565 | 0.045229708 | 0.265827675 |
| 0.456521492 | 0.364159706 | 0.130776358 | 0.308724891 |
| 0.296823311 | 0.244458284 | 0.365395633 | 0.263201941 |
| 0.483506634 | 0.406668123 | 0.448504953 | 0.360326642 |
| 0.217238585 | 0.286715563 | 0.290001669 | 0.391051043 |
| 0.040885681 | 0.087623181 | 0.036013371 | 0.269191563 |
| 0.193827645 | 0.155899471 | 0.261553382 | 0.284404271 |
| 0.163982716 | 0.214082263 | 0.250317994 | 0.339637207 |
| 0.045148242 | 0.280868926 | 0.120296704 | 0.146560662 |
| 0.048677104 | 0.124909827 | 0.193311654 | 0.12300892  |
| 0.231442644 | 0.202785011 | 0.351845787 | 0.455185368 |
| 0.280052214 | 0.142270892 | 0.33864694  | 0.44484057  |
| 0.424988309 | 0.292795675 | 0.200233602 | 0.013102785 |
| 0.318846024 | 0.246150613 | 0.209924753 | 0.280051583 |
| 0.149453374 | 0.274493075 | 1           | 0.360384989 |
| 0.192822599 | 0.106253836 | 0.316691589 | 0.378681808 |
| 0.120317949 | 0.242277305 | 0.44390924  | 0.282967917 |
| 0.002640938 | 0.261517262 | 0.406476016 | 0.192936566 |
| 0.269205851 | 0.159095329 | 0.200524809 | 0.452901265 |
| 0.287108425 | 0.245845403 | 0.448793664 | 0.347142529 |
| 0.240365046 | 0.188089847 | 0.49751322  | 0.103236986 |
| 0.271449856 | 0.061925669 | 0.25875976  | 0.201277675 |
| 0.19940756  | 0.278406694 | 0.268363003 | 0.24395003  |
| 0.086083131 | 0.473321677 | 0.332610501 | 0.473175287 |
| 0.323916715 | 0.49960563  | 0.43941068  | 0.412658067 |
| 0.265893824 | 0.292095963 | 0.162132286 | 0.409849441 |
| 0.436072167 | 0.290460654 | 0.053663674 | 0.402825261 |
| 0.284905121 | 0.366777316 | 0.131965938 | 0.479005358 |
| 0.440917311 | 0.397869603 | 0.142392052 | 0.36419153  |
| 0.354431723 | 0.170622647 | 0.363479333 | 0.498441565 |

|             |             |             |             |
|-------------|-------------|-------------|-------------|
| 0.249843483 | 0.324877627 | 0.310436396 | 0.396544114 |
| 0.135316915 | 0.245194099 | 0.282121793 | 0.18057262  |
| 0.008615213 | 0.065506715 | 0.052875586 | 0.159004984 |
| 0.188638429 | 0.285370329 | 0.32975049  | 0.483683524 |
| 0.109257662 | 0.362052867 | 0.201622381 | 0.293273998 |
| 0.400162219 | 0.293880267 | 0.269309923 | 0.288038518 |
| 0.203880431 | 0.017829635 | 0.110706376 | 0.472950522 |
| 0.028564227 | 0.230092535 | 0.228773609 | 0.00331279  |
| 0.046226743 | 0.341817564 | 0.082361494 | 0.172446252 |
| 0.45952486  | 0.170347563 | 0.1671372   | 0.247634157 |
| 0.287312247 | 0.075428591 | 0.003109686 | 0.454097573 |
| 0.437668827 | 0.416746632 | 0.437005179 | 0.393005118 |
| 0.424096396 | 0.327007272 | 0.398123092 | 0.204591772 |
| 0.099656855 | 0.06805046  | 0.27060493  | 0.277659079 |
| 0.005722336 | 0.32879285  | 0.241767289 | 0.117238003 |
| 0.378418245 | 0.262913589 | 0.034262666 | 0.270378184 |
| 0.020211817 | 0.206133863 | 0.253352422 | 0.19574109  |
| 0.327450618 | 0.011841838 | 0.182094473 | 0.322234637 |
| 0.363898884 | 0.306857716 | 0.271192089 | 0.473404664 |
| 0.255547573 | 0.099040933 | 0.266192926 | 0.33618329  |
| 0.071465102 | 0.132641129 | 0.253565867 | 0.02615351  |
| 0.118789973 | 0.397953932 | 0.28117155  | 0.059197087 |
| 0.220825461 | 0.004693352 | 0.322056872 | 0.482648995 |
| 0.390660653 | 0.498003939 | 0.454172961 | 0.243586106 |
| 0.457431193 | 0.117276419 | 0.482075395 | 0.35789042  |
| 0.274044626 | 0.001217065 | 0.006758716 | 0.459825356 |
| 0.314283747 | 0.041080285 | 0.129842635 | 0.214680646 |
| 0.10865343  | 0.111175605 | 0.055118187 | 0.199131871 |
| 0.267402704 | 0.21846724  | 0.189695458 | 0.419410459 |
| 0.218093515 | 0.191633965 | 0.257746578 | 0.067411425 |
| 0.269416352 | 0.051670953 | 0.067057243 | 0.009466801 |
| 0.320647095 | 0.093905534 | 0.395938754 | 0.453651982 |
| 0.461660666 | 0.335239053 | 0.234645894 | 0.226748687 |
| 0.401848657 | 0.067883315 | 0.239280408 | 0.072259341 |
| 0.426378492 | 0.338452613 | 0.294796669 | 0.276720096 |
| 0.49063061  | 0.43352085  | 0.033338364 | 0.395275062 |
| 0.009781083 | 0.002541636 | 0.234887659 | 0.220460378 |
| 0.073039651 | 0.323510735 | 0.230512958 | 0.195104883 |
| 0.184165897 | 0.027767451 | 0.266207886 | 0.269101572 |
| 0.248273363 | 0.303009377 | 0.264172863 | 0.205132155 |
| 0.240816718 | 0.1947568   | 0.15970536  | 0.145002838 |
| 0.212515728 | 0.278968331 | 0.171302909 | 0.022472704 |
| 0.276003451 | 0.304499675 | 0.050336441 | 0.118026862 |
| 0.411967944 | 0.467702807 | 0.05629512  | 0.015925735 |
| 0.235873675 | 0.284114368 | 0.481133516 | 0.437900065 |
| 0.463088629 | 0.496102562 | 0.352975577 | 0.159666869 |
| 0.057202895 | 0.260381316 | 0.267641673 | 0.112783313 |
| 0.465518044 | 0.050264329 | 0.411180947 | 0.263937863 |
| 0.094530603 | 0.180869053 | 0.035673669 | 0.075302241 |
| 0.281131732 | 0.140484037 | 0.171153959 | 0.10542981  |
| 0.290019093 | 0.228866861 | 0.046883348 | 0.16698419  |
| 0.32705431  | 0.222985336 | 0.13729434  | 0.195523968 |
| 0.285824423 | 0.150554902 | 0.389275152 | 0.431431239 |
| 0.095155865 | 0.096342389 | 0.196501551 | 0.324506387 |



|             |             |             |             |
|-------------|-------------|-------------|-------------|
| 0.40536787  | 0.255750671 | 0.019990696 | 0.389547329 |
| 0.45343712  | 0.33670741  | 0.428952946 | 0.400146461 |
| 0.06591806  | 0.298241931 | 0.280359814 | 0.310479709 |
| 0.159426558 | 0.223883899 | 0.201932753 | 0.053773237 |
| 0.268510734 | 0.428545517 | 0.387051426 | 0.147879816 |
| 0.25726383  | 0.086252079 | 0.043757592 | 0.38845315  |
| 0.233470009 | 0.086139672 | 0.212560429 | 0.400994995 |
| 0.002208838 | 0.154545058 | 0.466600537 | 0.178007323 |
| 0.467720345 | 0.467194269 | 0.406451066 | 0.16841441  |
| 0.006366234 | 0.352722819 | 0.28714031  | 0.301304601 |
| 0.395944193 | 0.278341903 | 0.104285461 | 0.082216337 |
| 0.261375707 | 0.057815277 | 0.164178304 | 0.198511707 |
| 0.212366746 | 0.293641167 | 0.172840299 | 0.169788454 |
| 0.187934662 | 0.072041747 | 0.204562325 | 0.173053366 |
| 0.173574698 | 0.214019372 | 0.338620874 | 0.170230535 |
| 0.257409819 | 0.432980764 | 0.382224163 | 0.021740994 |
| 0.266277809 | 0.390850113 | 0.385787643 | 0.006912561 |
| 0.376992605 | 0.008429814 | 0.192388297 | 0.195523067 |
| 0.176311845 | 0.215336621 | 0.229841354 | 0.25274185  |
| 0.277033017 | 0.19359771  | 0.21510058  | 0.187931453 |
| 0.147362793 | 0.163977178 | 0.281626503 | 0.248008154 |
| 0.24018259  | 0.101589113 | 0.081151848 | 0.083530832 |
| 0.048069154 | 0.400094799 | 0.214991466 | 0.050702263 |
| 0.18469029  | 0.270917647 | 0.334649193 | 0.428504335 |
| 0.384357542 | 0.085859696 | 0.268513474 | 0.388284487 |
| 0.207198937 | 0.21061665  | 0.054346905 | 0.243122643 |
| 0.181215408 | 0.232982799 | 0.237114089 | 0.218563035 |
| 0.343202565 | 0.365920709 | 0.204997845 | 0.391110119 |
| 0.269406877 | 0.275180157 | 0.200857308 | 0.0947868   |
| 0.153003926 | 0.10540496  | 0.252647991 | 0.001855523 |
| 0.275302726 | 0.166188274 | 0.445531927 | 0.423210684 |
| 0.249140805 | 0.342133385 | 0.195866686 | 0.091064411 |
| 0.163519086 | 0.154992302 | 0.116246255 | 0.358716629 |
| 0.211577585 | 0.134540511 | 0.265026871 | 0.181373483 |
| 0.378364938 | 0.353064745 | 0.230559214 | 0.202468693 |
| 0.190972953 | 0.132496779 | 0.420838302 | 0.082348598 |
| 0.286389112 | 0.196128798 | 0.218988353 | 0.277895205 |
| 0.220630005 | 0.469544978 | 0.045669134 | 0.488775449 |
| 0.317887491 | 0.10273819  | 0.447938778 | 0.189085505 |
| 0.183899314 | 0.104348679 | 0.202228134 | 0.23956859  |
| 0.207455547 | 0.255326496 | 0.023181933 | 0.126919909 |
| 0.300823453 | 0.235195046 | 0.358537658 | 0.319705669 |
| 0.235861854 | 0.333732254 | 0.144729863 | 0.233800875 |
| 0.406728621 | 0.421881637 | 0.257266912 | 0.230132552 |
| 0.31216015  | 0.090227446 | 0.243835651 | 0.022803013 |
| 0.331886839 | 0.299407634 | 0.280559351 | 0.050926332 |
| 0.018731624 | 0.240187827 | 0.311469519 | 0.049889302 |
| 0.475229186 | 0.198153942 | 0.248198433 | 0.328540204 |
| 0.141142075 | 0.428851307 | 0.128439088 | 0.35284023  |
| 0.049362685 | 0.196619489 | 0.268536038 | 0.275970234 |
| 0.226496704 | 0.283096386 | 0.348586758 | 0.229800655 |
| 0.034086065 | 0.234375772 | 0.007144603 | 0.363418845 |
| 0.403196601 | 0.302965513 | 0.177840592 | 0.201050109 |
| 0.239049695 | 0.329325969 | 0.265794938 | 0.262403784 |

|             |             |             |             |
|-------------|-------------|-------------|-------------|
| 0.011493256 | 0.304304211 | 0.152408309 | 0.349430505 |
| 0.234990388 | 0.285454512 | 0.050725288 | 0.286136633 |
| 0.379985798 | 0.317875469 | 0.230655743 | 0.29050496  |
| 0.419600102 | 0.313947849 | 0.116017394 | 0.17598695  |
| 0.287329532 | 0.048664855 | 0.219465218 | 0.488243735 |
| 0.162859928 | 0.226789766 | 0.439280847 | 0.211266991 |
| 0.277719009 | 0.325050656 | 0.272162605 | 0.472544812 |
| 0.099299841 | 0.203635556 | 0.375913484 | 0.434166359 |
| 0.278353468 | 0.203620338 | 0.25791718  | 0.253700264 |
| 0.387152636 | 0.077768212 | 0.264813847 | 0.303621859 |
| 0.253292664 | 0.243252952 | 0.206870909 | 0.202217247 |
| 0.039422142 | 0.148588882 | 0.227625092 | 0.108745543 |
| 0.254865907 | 0.290621061 | 0.242333248 | 0.359712464 |
| 0.120183857 | 0.027856055 | 0.417982757 | 0.044401936 |
| 0.192208813 | 0.300860588 | 0.178820178 | 0.283442911 |
| 0.152301537 | 0.259644228 | 0.241030905 | 0.001829224 |
| 0.388596341 | 0.043418213 | 0.228333336 | 0.235207443 |
| 0.269623307 | 0.05136626  | 0.38836143  | 0.492858738 |
| 0.217530096 | 0.214850613 | 0.269805518 | 0.410671028 |
| 0.172800788 | 0.24384776  | 0.290270651 | 0.294104843 |
| 0.218306938 | 0.257426637 | 0.278293781 | 0.270535765 |
| 0.301060801 | 0.181728724 |             |             |

DEPDC1B 0.079520144

0.352403735

0.051320518

|             |             |             |             |
|-------------|-------------|-------------|-------------|
| 0.195992598 | 0.385812351 | 0.354293352 | 0.066987434 |
| 0.137636496 | 0.262526293 | 0.209664664 | 0.388645997 |
| 0.026696959 | 0.196283896 | 0.426446076 | 0.067217013 |
| 0.391365732 | 0.056022481 | 0.124477308 | 0.076188385 |
| 0.209718322 | 0.367522269 | 0.406290996 | 0.283623184 |
| 0.354875836 | 0.160395361 | 0.260098896 | 0.347985531 |
| 0.449621875 | 0.297382258 | 0.38891106  | 0.16322962  |
| 0.382776729 | 0.397052614 | 0.379151125 | 0.020246828 |
| 0.366179562 | 0.023809221 | 0.375818579 | 0.330322819 |
| 0.291829328 | 0.316033838 | 0.23076607  | 0.313591118 |
| 0.27508839  | 0.04173483  | 0.164947443 | 0.348289171 |
| 0.253881168 | 0.282069478 | 0.053525363 | 0.34679295  |
| 0.307932744 | 0.289734842 | 0.271326742 | 0.002983988 |
| 0.385871158 | 0.168348227 | 0.307690137 | 0.44307108  |
| 0.215650861 | 0.169159589 | 0.251254342 | 0.213357964 |
| 0.320906535 | 0.333684614 | 0.255346014 | 0.281700574 |
| 0.456900671 | 0.291679054 | 0.354135678 | 0.204194698 |
| 0.32270236  | 0.027169767 | 0.157350461 | 0.061706282 |
| 0.364253434 | 0.255298893 | 0.390744115 | 0.376565368 |
| 0.34420746  | 0.456270566 | 0.225816133 | 0.416121128 |
| 0.163716687 | 0.381452822 | 0.367525541 | 0.309522645 |
| 0.300409294 | 0.081082641 | 0.377208594 | 0.474376112 |
| 0.043074144 | 0.263863537 | 0.315958261 | 0.096574003 |
| 0.373927706 | 0.30577368  | 0.288343661 | 0.333075183 |
| 0.387757524 | 0.376221488 | 0.400193809 | 0.288421458 |
| 0.364943536 | 0.060589536 | 0.394767299 | 0.391053878 |
| 0.38888523  | 0.079774911 | 0.314944402 | 0.435996762 |
| 0.367051379 | 0.455563627 | 0.351256687 | 0.318974645 |
| 0.388294843 | 0.46079305  | 0.355662537 | 0.367761822 |
| 0.12217075  | 0.462954168 | 0.200008338 | 0.070619451 |
| 0.060856621 | 0.125766501 | 0.26248002  | 0.286851572 |

|             |             |             |             |
|-------------|-------------|-------------|-------------|
| 0.450186886 | 0.296890787 | 0.206159148 | 0.301470937 |
| 0.45861567  | 0.388862348 | 0.453763058 | 0.370804184 |
| 0.047959647 | 0.305742161 | 0.388599725 | 0.260056352 |
| 0.336685915 | 0.111054732 | 0.37813556  | 0.432748121 |
| 0.365244612 | 0.422694403 | 0.146844447 | 0.425435407 |
| 0.186578865 | 0.486300614 | 0.387712325 | 0.209183184 |
| 0.457058205 | 0.422107253 | 0.494706179 | 0.407910984 |
| 0.422101096 | 0.319487189 | 0.061658323 | 0.331097114 |
| 0.476887674 | 0.044606976 | 0.440891895 | 0.470134655 |
| 0.432067943 | 0.441965957 | 0.497452079 | 0.478613291 |
| 0.434158543 | 0.070175013 | 0.030697091 | 0.331320051 |
| 0.439644717 | 0.381001875 | 0.183666614 | 0.367187193 |
| 0.380286267 | 0.328092217 | 0.373612041 | 0.342282902 |
| 0.481192574 | 0.425178008 | 0.44510145  | 0.322719233 |
| 0.223587208 | 0.288270648 | 0.368352147 | 0.385503807 |
| 0.063892188 | 0.115983786 | 0.044430336 | 0.26688005  |
| 0.265153239 | 0.221519628 | 0.307902003 | 0.33344278  |
| 0.225594888 | 0.262924017 | 0.36659187  | 0.397064034 |
| 0.039391993 | 0.362755303 | 0.16867611  | 0.153453492 |
| 0.068880572 | 0.121425697 | 0.236682598 | 0.221879861 |
| 0.324300743 | 0.181830485 | 0.357888809 | 0.458720257 |
| 0.332353312 | 0.154839674 | 0.345249879 | 0.459483257 |
| 0.431579186 | 0.40985641  | 0.204760733 | 0.031747461 |
| 0.313763014 | 0.262798925 | 0.291098076 | 0.370142963 |
| 0.142490412 | 0.271517047 | 0.360384989 | 1           |
| 0.242163439 | 0.118699189 | 0.363737582 | 0.384140797 |
| 0.114156297 | 0.395810281 | 0.440782872 | 0.311109009 |
| 0.004978368 | 0.31882746  | 0.417882521 | 0.242431822 |
| 0.261157573 | 0.270582066 | 0.373028899 | 0.440989072 |
| 0.333585753 | 0.319541714 | 0.46481388  | 0.39178391  |
| 0.320862161 | 0.165535911 | 0.492224528 | 0.074844512 |
| 0.33819549  | 0.129894443 | 0.319470348 | 0.226489693 |
| 0.254760847 | 0.284998943 | 0.391231894 | 0.381483016 |
| 0.108421931 | 0.459238074 | 0.354280404 | 0.477638003 |
| 0.3579222   | 0.490362845 | 0.444662733 | 0.429430616 |
| 0.330971045 | 0.320398602 | 0.257433718 | 0.407304557 |
| 0.434457462 | 0.266883063 | 0.056966316 | 0.383558495 |
| 0.287547298 | 0.380216689 | 0.209035463 | 0.475590893 |
| 0.448169363 | 0.378588418 | 0.208684309 | 0.376987369 |
| 0.373591922 | 0.246306305 | 0.383020205 | 0.492847289 |
| 0.233519545 | 0.366820255 | 0.380128208 | 0.422656421 |
| 0.178150556 | 0.310937358 | 0.278486728 | 0.287187599 |
| 0.028148977 | 0.073868819 | 0.064135764 | 0.245514382 |
| 0.325143384 | 0.324155468 | 0.366443514 | 0.470394621 |
| 0.145520941 | 0.390340563 | 0.19918498  | 0.357039724 |
| 0.366188216 | 0.353939819 | 0.402572918 | 0.385581696 |
| 0.218009481 | 0.040752197 | 0.187821583 | 0.455599162 |
| 0.028908666 | 0.37718039  | 0.268729313 | 0.008293851 |
| 0.048700958 | 0.317407505 | 0.072960636 | 0.168885739 |
| 0.478056446 | 0.166153959 | 0.184806347 | 0.230836048 |
| 0.353770855 | 0.105315911 | 0.014533841 | 0.438218702 |
| 0.418875028 | 0.392682759 | 0.411479883 | 0.376235617 |
| 0.391096859 | 0.334274003 | 0.391591441 | 0.284962027 |
| 0.122180985 | 0.078034742 | 0.32681832  | 0.33420353  |

|             |             |             |             |
|-------------|-------------|-------------|-------------|
| 0.005227947 | 0.377862113 | 0.336558387 | 0.146391361 |
| 0.380988233 | 0.271409071 | 0.050043998 | 0.367023654 |
| 0.032145135 | 0.313964403 | 0.263174891 | 0.247718219 |
| 0.348901126 | 0.017489454 | 0.262079251 | 0.34744837  |
| 0.367620798 | 0.304460592 | 0.374451924 | 0.473094895 |
| 0.365573954 | 0.089048106 | 0.370607623 | 0.384018941 |
| 0.088024069 | 0.093305712 | 0.28496713  | 0.03682697  |
| 0.208778291 | 0.386071206 | 0.346505077 | 0.076333287 |
| 0.286346459 | 0.00761174  | 0.325596164 | 0.480394228 |
| 0.3851517   | 0.490785299 | 0.46682464  | 0.395917159 |
| 0.458349904 | 0.173067789 | 0.480528423 | 0.343892543 |
| 0.290950373 | 0.001909507 | 0.01315375  | 0.465886959 |
| 0.394402557 | 0.039259748 | 0.171220213 | 0.330873072 |
| 0.168867787 | 0.129593167 | 0.079178038 | 0.329470584 |
| 0.36480495  | 0.340012698 | 0.302342787 | 0.390566072 |
| 0.275878464 | 0.263091657 | 0.29445445  | 0.072023928 |
| 0.391255013 | 0.07835776  | 0.070287415 | 0.02466104  |
| 0.364045088 | 0.083865659 | 0.377780605 | 0.45123913  |
| 0.464506497 | 0.392435878 | 0.257872171 | 0.330715191 |
| 0.401981858 | 0.069773155 | 0.340818713 | 0.086619967 |
| 0.416987581 | 0.383513726 | 0.314288681 | 0.282191271 |
| 0.478717085 | 0.427250169 | 0.043294113 | 0.380346525 |
| 0.028083305 | 0.006592148 | 0.295552015 | 0.237518978 |
| 0.07339571  | 0.37253615  | 0.237381086 | 0.205733379 |
| 0.245693904 | 0.041963274 | 0.356317281 | 0.3487208   |
| 0.318436267 | 0.364552625 | 0.379810433 | 0.197756578 |
| 0.337117771 | 0.229316079 | 0.258805376 | 0.180297867 |
| 0.220578783 | 0.259675914 | 0.164890846 | 0.026136404 |
| 0.345561825 | 0.393295225 | 0.07078001  | 0.150791716 |
| 0.433467697 | 0.470056228 | 0.061020174 | 0.03156519  |
| 0.232899903 | 0.319956556 | 0.486640582 | 0.433611729 |
| 0.454773345 | 0.488833841 | 0.35170907  | 0.196848313 |
| 0.083431205 | 0.344267354 | 0.377241551 | 0.195134492 |
| 0.466627751 | 0.049313327 | 0.421454508 | 0.381793819 |
| 0.114339869 | 0.247899481 | 0.065995148 | 0.096065306 |
| 0.401781284 | 0.189154789 | 0.259747433 | 0.12246722  |
| 0.35625676  | 0.367919618 | 0.055635876 | 0.219679105 |
| 0.299489058 | 0.294620154 | 0.16867277  | 0.262210657 |
| 0.293001366 | 0.145806642 | 0.377969695 | 0.428071817 |
| 0.123006786 | 0.102660848 | 0.239266373 | 0.327855616 |
| 0.396367518 | 0.298262509 | 0.050478361 | 0.3708119   |
| 0.465092467 | 0.3810371   | 0.433382915 | 0.393003279 |
| 0.076136112 | 0.414087657 | 0.331146856 | 0.356621411 |
| 0.191186869 | 0.340662641 | 0.253306492 | 0.065378246 |
| 0.269610193 | 0.41371124  | 0.360870041 | 0.232943723 |
| 0.347473427 | 0.094040978 | 0.04173202  | 0.399197924 |
| 0.317045243 | 0.108559686 | 0.252921397 | 0.392650241 |
| 0.007462224 | 0.280641422 | 0.459736625 | 0.293912811 |
| 0.461592338 | 0.464795552 | 0.415002673 | 0.233252907 |
| 0.004839417 | 0.373156466 | 0.389629071 | 0.395014391 |
| 0.370077372 | 0.296386556 | 0.150940071 | 0.123965374 |
| 0.284838804 | 0.062873686 | 0.192419776 | 0.307953242 |
| 0.235802213 | 0.319970938 | 0.203113674 | 0.188306916 |
| 0.266670117 | 0.061516753 | 0.370984561 | 0.269303549 |

|             |             |             |             |
|-------------|-------------|-------------|-------------|
| 0.209496845 | 0.239857051 | 0.344979686 | 0.198568479 |
| 0.287221063 | 0.404945774 | 0.343267949 | 0.033487011 |
| 0.385639094 | 0.373800037 | 0.406105266 | 0.004678695 |
| 0.390959155 | 0.013996387 | 0.277936581 | 0.309115228 |
| 0.275695551 | 0.262053826 | 0.316247317 | 0.376025681 |
| 0.290576352 | 0.247548565 | 0.333627027 | 0.271543435 |
| 0.253706282 | 0.223913225 | 0.377425416 | 0.300205288 |
| 0.384058874 | 0.153809522 | 0.076781813 | 0.077600464 |
| 0.091206567 | 0.413255229 | 0.224838168 | 0.057967676 |
| 0.254122871 | 0.306646917 | 0.352059581 | 0.41543479  |
| 0.4167327   | 0.081047621 | 0.321584925 | 0.392329741 |
| 0.191501823 | 0.273416676 | 0.057687506 | 0.327549889 |
| 0.252597633 | 0.345581288 | 0.313733637 | 0.242774516 |
| 0.300973451 | 0.371086876 | 0.217271714 | 0.408526221 |
| 0.380304684 | 0.285819272 | 0.223765697 | 0.1571401   |
| 0.195428373 | 0.112433382 | 0.372370256 | 0.004279377 |
| 0.337024795 | 0.239408213 | 0.447386134 | 0.4187663   |
| 0.353015323 | 0.369505833 | 0.244675211 | 0.108494967 |
| 0.197891181 | 0.135863184 | 0.136657357 | 0.360108198 |
| 0.324980783 | 0.218300437 | 0.369934775 | 0.261609437 |
| 0.385112542 | 0.335064111 | 0.318189524 | 0.231188737 |
| 0.240178344 | 0.169706552 | 0.396146727 | 0.108943476 |
| 0.343806253 | 0.336601609 | 0.242118165 | 0.357479839 |
| 0.291381946 | 0.469311579 | 0.061490188 | 0.481619378 |
| 0.359073585 | 0.10409181  | 0.451624603 | 0.26855835  |
| 0.273791868 | 0.214105598 | 0.316026468 | 0.286394983 |
| 0.250871307 | 0.39022313  | 0.016313164 | 0.108798799 |
| 0.33711922  | 0.249815043 | 0.313398201 | 0.311635307 |
| 0.350757643 | 0.336701025 | 0.272465155 | 0.246058222 |
| 0.390850986 | 0.410780823 | 0.306604233 | 0.228428936 |
| 0.298157987 | 0.140858701 | 0.303500588 | 0.016600421 |
| 0.369428593 | 0.361178494 | 0.308318614 | 0.070324089 |
| 0.026238199 | 0.32504467  | 0.342938945 | 0.048924082 |
| 0.47187559  | 0.316465109 | 0.256661213 | 0.368991794 |
| 0.145352555 | 0.413595253 | 0.202088224 | 0.390485058 |
| 0.037018162 | 0.242417538 | 0.368415924 | 0.310121695 |
| 0.348591062 | 0.38471037  | 0.367113021 | 0.377917693 |
| 0.050755748 | 0.35101946  | 0.002875628 | 0.359753842 |
| 0.377746564 | 0.366827221 | 0.175753987 | 0.218419844 |
| 0.302247953 | 0.339525131 | 0.291653948 | 0.348290677 |
| 0.02757372  | 0.407703185 | 0.219987066 | 0.375127357 |
| 0.280230058 | 0.293348287 | 0.101972774 | 0.344689387 |
| 0.365815888 | 0.318285621 | 0.221734309 | 0.309825998 |
| 0.419426036 | 0.319302689 | 0.116873962 | 0.304931107 |
| 0.279177063 | 0.0563969   | 0.289679289 | 0.477076591 |
| 0.250630264 | 0.361722678 | 0.453207991 | 0.264384537 |
| 0.374634566 | 0.33245915  | 0.313837625 | 0.455765891 |
| 0.144780556 | 0.257940952 | 0.395011674 | 0.404228474 |
| 0.304160891 | 0.297005514 | 0.368818554 | 0.32295296  |
| 0.384454671 | 0.143798404 | 0.324218202 | 0.302940588 |
| 0.340472864 | 0.3114107   | 0.22640655  | 0.299552922 |
| 0.070911087 | 0.187665729 | 0.373370435 | 0.141241655 |
| 0.313358296 | 0.382269768 | 0.334126595 | 0.376030476 |
| 0.23573462  | 0.058761602 | 0.426677954 | 0.052382709 |

|             |             |             |             |
|-------------|-------------|-------------|-------------|
| 0.283330086 | 0.40292857  | 0.25899718  | 0.386663519 |
| 0.160972256 | 0.297225501 | 0.25383982  | 0.001801733 |
| 0.39244946  | 0.10544704  | 0.319382441 | 0.347769398 |
| 0.323384108 | 0.056714852 | 0.408146738 | 0.495809013 |
| 0.276440403 | 0.306714131 | 0.354226632 | 0.4076351   |
| 0.286574464 | 0.322312659 | 0.338306244 | 0.306632218 |
| 0.356025018 | 0.286322052 | 0.343469147 | 0.394242416 |
| 0.321075102 | 0.256242835 |             |             |
| DERA        | 0.134522169 | 0.340213598 | 0.120313364 |
| 0.180649029 | 0.130895363 | 0.192545511 | 0.090327846 |
| 0.139616486 | 0.248858402 | 0.099743262 | 0.196597488 |
| 0.068810783 | 0.019345582 | 0.384572249 | 0.077989654 |
| 0.176366159 | 0.072633023 | 0.126424214 | 0.037535741 |
| 0.107367986 | 0.118707979 | 0.131631726 | 0.201474827 |
| 0.105722345 | 0.29003574  | 0.212479932 | 0.124047485 |
| 0.398188329 | 0.092015675 | 0.246667397 | 0.08247019  |
| 0.399549896 | 0.144678693 | 0.125080503 | 0.063112945 |
| 0.173998476 | 0.001431911 | 0.422448554 | 0.143522639 |
| 0.053949466 | 0.364041453 | 0.143118308 | 0.170155662 |
| 0.149480473 | 0.105959084 | 0.078098676 | 0.192884982 |
| 0.17591234  | 0.1242997   | 0.110774951 | 0.257286011 |
| 0.131183489 | 0.294963791 | 0.260950869 | 0.013857673 |
| 0.095818183 | 0.015395133 | 0.056295334 | 0.436975428 |
| 0.220401376 | 0.124310156 | 0.076988705 | 0.11990297  |
| 0.163835567 | 0.191067118 | 0.178992746 | 0.134656003 |
| 0.431441036 | 0.048542394 | 0.236697846 | 0.126268423 |
| 0.171739841 | 0.062790813 | 0.204111679 | 0.10763126  |
| 0.131753764 | 0.145326151 | 0.150718799 | 0.091962757 |
| 0.361954381 | 0.456295941 | 0.177945144 | 0.441949761 |
| 0.020880658 | 0.124241588 | 0.100183464 | 0.214281805 |
| 0.214869563 | 0.075093445 | 0.304678005 | 0.453411718 |
| 0.066861565 | 0.179850063 | 0.24584466  | 0.167522727 |
| 0.350444814 | 0.067687031 | 0.166845032 | 0.061599829 |
| 0.177787664 | 0.138382006 | 0.40387004  | 0.269418607 |
| 0.112335609 | 0.125502806 | 0.454256685 | 0.11579781  |
| 0.167555305 | 0.132004066 | 0.093183377 | 0.30677582  |
| 0.238397437 | 0.406837942 | 0.3045206   | 0.259305789 |
| 0.15264592  | 0.421264928 | 0.290364917 | 0.329097942 |
| 0.04314775  | 0.436360173 | 0.178237085 | 0.082789083 |
| 0.12336107  | 0.09159904  | 0.066823826 | 0.263372995 |
| 0.354956906 | 0.238644533 | 0.195788042 | 0.135542974 |
| 0.318072232 | 0.436367386 | 0.427106731 | 0.318846486 |
| 0.094582838 | 0.057530219 | 0.154673739 | 0.156320593 |
| 0.234474454 | 0.116856809 | 0.0878665   | 0.468529088 |
| 0.387984575 | 0.29565801  | 0.162290934 | 0.468113051 |
| 0.114868373 | 0.446286094 | 0.368929032 | 0.168758587 |
| 0.463060029 | 0.465534834 | 0.419434232 | 0.212983875 |
| 0.44121476  | 0.21992665  | 0.020533747 | 0.289336882 |
| 0.415756855 | 0.008551037 | 0.339806473 | 0.367263326 |
| 0.429287919 | 0.322297813 | 0.403360026 | 0.39499234  |
| 0.431233277 | 0.112964988 | 0.004348608 | 0.169830158 |
| 0.455035337 | 0.368174427 | 0.08198786  | 0.161015147 |
| 0.156944606 | 0.20090776  | 0.259103732 | 0.166221163 |
| 0.442556505 | 0.35033411  | 0.367634196 | 0.285166153 |

|             |             |             |             |
|-------------|-------------|-------------|-------------|
| 0.137746206 | 0.356244764 | 0.124940459 | 0.455352831 |
| 0.089003083 | 0.171044921 | 0.126801647 | 0.213531266 |
| 0.1568448   | 0.142213105 | 0.21135558  | 0.135686361 |
| 0.177388625 | 0.163986024 | 0.098950078 | 0.200583102 |
| 0.142085125 | 0.208643393 | 0.148368702 | 0.163190244 |
| 0.088317656 | 0.228656464 | 0.195957777 | 0.147730119 |
| 0.141120321 | 0.334251151 | 0.249217063 | 0.373692687 |
| 0.117716024 | 0.243898849 | 0.276037617 | 0.406149823 |
| 0.380080883 | 0.151783455 | 0.215991907 | 0.043446771 |
| 0.139788489 | 0.079082485 | 0.045595194 | 0.148892433 |
| 0.266199455 | 0.147768322 | 0.192822599 | 0.242163439 |
| 1           | 0.113007866 | 0.137371606 | 0.432231019 |
| 0.202288625 | 0.157667872 | 0.354845654 | 0.180627308 |
| 0.021613655 | 0.203954638 | 0.328390328 | 0.05850376  |
| 0.210236116 | 0.055277014 | 0.096070414 | 0.353956821 |
| 0.093754211 | 0.07220447  | 0.36644823  | 0.221305838 |
| 0.161639976 | 0.293464169 | 0.413385237 | 0.012468946 |
| 0.1047631   | 0.06527651  | 0.212799853 | 0.124296709 |
| 0.198694045 | 0.21684919  | 0.118509953 | 0.124090207 |
| 0.207256371 | 0.437909086 | 0.318496605 | 0.413430112 |
| 0.133837743 | 0.421775082 | 0.334238606 | 0.372739213 |
| 0.236424355 | 0.109566974 | 0.032983691 | 0.339162171 |
| 0.340629618 | 0.115564625 | 0.14576771  | 0.269669468 |
| 0.12280376  | 0.214691937 | 0.055804381 | 0.409759072 |
| 0.453732932 | 0.419930899 | 0.125786164 | 0.237835159 |
| 0.351594262 | 0.203530914 | 0.291361849 | 0.419979535 |
| 0.102828259 | 0.131632736 | 0.133080756 | 0.283245367 |
| 0.198927676 | 0.074928414 | 0.290745366 | 0.039115696 |
| 0.00414319  | 0.115372149 | 0.123923582 | 0.121564747 |
| 0.058030875 | 0.188429733 | 0.211902381 | 0.427569715 |
| 0.137320295 | 0.369809652 | 0.184324878 | 0.164835756 |
| 0.389567468 | 0.118868008 | 0.137927396 | 0.180239522 |
| 0.220809607 | 0.044713974 | 0.133967674 | 0.471259809 |
| 0.093026963 | 0.089503154 | 0.156398325 | 0.006721502 |
| 0.097319064 | 0.292619838 | 0.186770621 | 0.291356329 |
| 0.34781699  | 0.297882726 | 0.22666681  | 0.121750062 |
| 0.242520651 | 0.122421513 | 0.009919762 | 0.365097692 |
| 0.372007923 | 0.345134289 | 0.374930674 | 0.381074316 |
| 0.310269705 | 0.23734595  | 0.268177854 | 0.215578139 |
| 0.136708987 | 0.121555868 | 0.077361489 | 0.154578634 |
| 0.008407099 | 0.279573989 | 0.114640732 | 0.191644282 |
| 0.24869003  | 0.199227176 | 0.097634137 | 0.138012403 |
| 0.099365095 | 0.064416316 | 0.1552494   | 0.11539297  |
| 0.200208305 | 0.056076289 | 0.15872505  | 0.122254376 |
| 0.431064381 | 0.347291489 | 0.112953905 | 0.444929102 |
| 0.19553245  | 0.186833233 | 0.153279252 | 0.254444875 |
| 0.111665475 | 0.044920692 | 0.150476002 | 0.026881271 |
| 0.099319677 | 0.372188117 | 0.129736605 | 0.13252347  |
| 0.211286493 | 0.040343765 | 0.376871225 | 0.448463825 |
| 0.41741533  | 0.403285993 | 0.429654711 | 0.102766162 |
| 0.439200186 | 0.016516563 | 0.423576236 | 0.340122883 |
| 0.140962894 | 0.008606134 | 0.012035946 | 0.363829935 |
| 0.178531708 | 0.139261455 | 0.170609    | 0.205994559 |
| 0.132738711 | 0.154975112 | 0.093027165 | 0.072539188 |

|             |             |             |             |
|-------------|-------------|-------------|-------------|
| 0.231162847 | 0.117087706 | 0.061534735 | 0.423538487 |
| 0.150387553 | 0.139213449 | 0.163891221 | 0.144137351 |
| 0.180813109 | 0.10261366  | 0.12536278  | 0.01425066  |
| 0.205696115 | 0.210889863 | 0.455531162 | 0.422286215 |
| 0.437956874 | 0.224129267 | 0.118471458 | 0.154124733 |
| 0.293576227 | 0.178308708 | 0.125272017 | 0.159130753 |
| 0.424927569 | 0.21705503  | 0.30403283  | 0.344964291 |
| 0.420699779 | 0.431095106 | 0.077287845 | 0.284085018 |
| 0.055402668 | 0.001298457 | 0.214647004 | 0.202197757 |
| 0.009464623 | 0.134942829 | 0.265235046 | 0.090628596 |
| 0.092651842 | 0.107971289 | 0.076308691 | 0.077559418 |
| 0.191487012 | 0.160596051 | 0.107322318 | 0.190595101 |
| 0.101289822 | 0.058893954 | 0.124778479 | 0.115826794 |
| 0.081723907 | 0.316228765 | 0.301097262 | 0.056520425 |
| 0.163303875 | 0.168534987 | 0.110646853 | 0.190733237 |
| 0.359507826 | 0.388825869 | 0.066452993 | 0.040805527 |
| 0.292965034 | 0.128906542 | 0.386584892 | 0.415204731 |
| 0.4677723   | 0.436080443 | 0.404064848 | 0.086895862 |
| 0.114483548 | 0.157271045 | 0.105225987 | 0.061587874 |
| 0.421271002 | 0.123442373 | 0.415723012 | 0.089618197 |
| 0.141613979 | 0.162638448 | 0.083151696 | 0.105774718 |
| 0.152385319 | 0.177067585 | 0.121039581 | 0.208741482 |
| 0.154573356 | 0.084849482 | 0.085915957 | 0.163796166 |
| 0.296223439 | 0.052903313 | 0.166458217 | 0.144634311 |
| 0.277949082 | 0.064453228 | 0.249876784 | 0.409448671 |
| 0.18075011  | 0.113438941 | 0.231851398 | 0.226658285 |
| 0.313384725 | 0.145350247 | 0.084674785 | 0.370647595 |
| 0.380428133 | 0.242764307 | 0.440744371 | 0.307577435 |
| 0.13168404  | 0.162336583 | 0.085341791 | 0.150898615 |
| 0.14460312  | 0.193936252 | 0.125589717 | 0.105426323 |
| 0.269673552 | 0.426769307 | 0.350254166 | 0.14793503  |
| 0.177335252 | 0.155329741 | 0.109829369 | 0.319552069 |
| 0.063909754 | 0.153843507 | 0.143782849 | 0.26986982  |
| 0.003386452 | 0.034704071 | 0.350755903 | 0.167440046 |
| 0.420889525 | 0.375338799 | 0.415909689 | 0.126319321 |
| 0.000183362 | 0.197178098 | 0.231035562 | 0.183856851 |
| 0.372965805 | 0.297048667 | 0.070279123 | 0.102496793 |
| 0.269857915 | 0.171471563 | 0.120022732 | 0.176464409 |
| 0.043445921 | 0.241576563 | 0.192267389 | 0.127495761 |
| 0.111397096 | 0.13062763  | 0.077360668 | 0.175532359 |
| 0.029586869 | 0.243870456 | 0.304595575 | 0.108571978 |
| 0.085861112 | 0.320857465 | 0.310835689 | 0.07938019  |
| 0.113968    | 0.285378287 | 0.328676845 | 0.009791174 |
| 0.267366005 | 0.037591459 | 0.1220594   | 0.147246885 |
| 0.124131065 | 0.11909663  | 0.144565759 | 0.134641044 |
| 0.20595185  | 0.148167614 | 0.193189865 | 0.194891428 |
| 0.12914328  | 0.146004823 | 0.176353152 | 0.161438796 |
| 0.15609064  | 0.150486195 | 0.197992601 | 0.219125695 |
| 0.110666104 | 0.353657768 | 0.301868992 | 0.157340519 |
| 0.16068185  | 0.147269211 | 0.337405767 | 0.419515313 |
| 0.345677118 | 0.210919026 | 0.135068789 | 0.378320802 |
| 0.070286622 | 0.168173293 | 0.116073519 | 0.17946317  |
| 0.17369574  | 0.10699918  | 0.157619246 | 0.242214681 |
| 0.2449414   | 0.405784371 | 0.293471236 | 0.362584083 |



|             |             |             |             |
|-------------|-------------|-------------|-------------|
| 0.167926867 | 0.115672482 | 0.139272581 | 0.108302814 |
| 0.184129083 | 0.166795727 | 0.106016508 | 0.017604982 |
| 0.232842831 | 0.223199756 | 0.359800286 | 0.44270215  |
| 0.081456301 | 0.339647026 | 0.167239484 | 0.150491465 |
| 0.120523168 | 0.289709251 | 0.18999907  | 0.269295395 |
| 0.062331486 | 0.151317333 | 0.139001731 | 0.195924642 |
| 0.261275407 | 0.226745385 | 0.08281135  | 0.148493091 |
| 0.122967033 | 0.198415012 | 0.405875698 | 0.142336265 |
| 0.187205916 | 0.087841603 | 0.182428965 | 0.157470835 |
| 0.123787347 | 0.395053511 | 0.104574156 | 0.407632968 |
| 0.135437667 | 0.191333836 | 0.443309293 | 0.150243182 |
| 0.157571554 | 0.091829953 | 0.049765258 | 0.149676    |
| 0.123245789 | 0.103735152 | 0.005611487 | 0.032863073 |
| 0.251647764 | 0.093885464 | 0.279967889 | 0.216805769 |
| 0.086740369 | 0.242982995 | 0.036076817 | 0.170219273 |
| 0.427780212 | 0.453919901 | 0.195849289 | 0.232319381 |
| 0.271654878 | 0.131581994 | 0.260578788 | 0.004865782 |
| 0.20434721  | 0.175447345 | 0.134769136 | 0.087311243 |
| 0.055038054 | 0.062653669 | 0.208305552 | 0.099269826 |
| 0.351010001 | 0.064743231 | 0.170617834 | 0.263126322 |
| 0.179241988 | 0.467863184 | 0.09534729  | 0.283241732 |
| 0.054548562 | 0.187697816 | 0.113724154 | 0.121903897 |
| 0.143568362 | 0.102522579 | 0.277597228 | 0.086794545 |
| 0.080661251 | 0.128538267 | 0.005211284 | 0.433496664 |
| 0.437457356 | 0.107190567 | 0.242348604 | 0.092195136 |
| 0.210732235 | 0.282980698 | 0.104010974 | 0.139249369 |
| 0.040222156 | 0.170738827 | 0.154572443 | 0.374638883 |
| 0.102106416 | 0.151117425 | 0.096385648 | 0.097395847 |
| 0.459313959 | 0.135097526 | 0.237916278 | 0.121840838 |
| 0.414731483 | 0.280773009 | 0.21556291  | 0.087464971 |
| 0.185767064 | 0.122681818 | 0.152028679 | 0.428528191 |
| 0.131452831 | 0.081656745 | 0.314944101 | 0.158597016 |
| 0.09520725  | 0.336794637 | 0.166979902 | 0.4120024   |
| 0.070036196 | 0.224728454 | 0.266795817 | 0.376880601 |
| 0.252363032 | 0.055090954 | 0.09072486  | 0.114247977 |
| 0.42715276  | 0.147559457 | 0.08200593  | 0.302798829 |
| 0.074232076 | 0.203250905 | 0.168996719 | 0.089876699 |
| 0.072712036 | 0.112294487 | 0.180307606 | 0.156520136 |
| 0.188537583 | 0.148664735 | 0.092186928 | 0.376994719 |
| 0.138888507 | 0.073881417 | 0.407500273 | 0.005424229 |
| 0.219879154 | 0.234067847 | 0.166216304 | 0.133401749 |
| 0.275803263 | 0.198999759 | 0.192804059 | 0.015591814 |
| 0.279376334 | 0.019468182 | 0.105747678 | 0.126402514 |
| 0.101728532 | 0.104381834 | 0.407892825 | 0.398489763 |
| 0.216923443 | 0.105533759 | 0.119153534 | 0.386062776 |
| 0.044617148 | 0.089807914 | 0.100217689 | 0.252617527 |
| 0.066510434 | 0.142565807 | 0.140762952 | 0.132614358 |
| 0.275805    | 0.154583806 |             |             |
| DKKH        | 0.117369557 | 0.240636382 | 0.093664596 |
| 0.046722461 | 0.075564417 | 0.067919173 | 0.152810748 |
| 0.143918602 | 0.240309373 | 0.057833083 | 0.08487124  |
| 0.084287808 | 0.014258258 | 0.224118798 | 0.167246391 |
| 0.090113839 | 0.105925323 | 0.142731814 | 0.067225039 |
| 0.10689096  | 0.075289821 | 0.04497111  | 0.113969989 |

|             |             |             |             |
|-------------|-------------|-------------|-------------|
| 0.079601065 | 0.289571121 | 0.155670088 | 0.078060348 |
| 0.228159409 | 0.022737763 | 0.107874786 | 0.021099672 |
| 0.282297349 | 0.076843304 | 0.048476466 | 0.072572351 |
| 0.103662722 | 0.019021913 | 0.329720448 | 0.068645194 |
| 0.01435002  | 0.292445285 | 0.064936808 | 0.073783902 |
| 0.072247624 | 0.091516934 | 0.027100978 | 0.119791012 |
| 0.155271465 | 0.116776449 | 0.155311188 | 0.137274706 |
| 0.079316092 | 0.181283969 | 0.150768196 | 0.007569133 |
| 0.031042545 | 0.005629643 | 0.021851146 | 0.274377659 |
| 0.185787277 | 0.127068169 | 0.03709122  | 0.161662409 |
| 0.130396982 | 0.158049558 | 0.21594707  | 0.062323378 |
| 0.248273126 | 0.026280628 | 0.129800026 | 0.051128108 |
| 0.095012597 | 0.147406056 | 0.231240964 | 0.23064972  |
| 0.065983609 | 0.130164137 | 0.089327081 | 0.042253008 |
| 0.221207695 | 0.338119825 | 0.203311267 | 0.298303435 |
| 0.045156769 | 0.073202763 | 0.055391089 | 0.186038599 |
| 0.196106134 | 0.187745329 | 0.133330696 | 0.2847844   |
| 0.178607553 | 0.106499186 | 0.164152071 | 0.253157524 |
| 0.214048471 | 0.055155813 | 0.074306634 | 0.022758951 |
| 0.103298326 | 0.076973288 | 0.341679581 | 0.171375988 |
| 0.083756775 | 0.18595103  | 0.329227738 | 0.061270581 |
| 0.053680171 | 0.137302448 | 0.054313387 | 0.165706982 |
| 0.111793178 | 0.220791022 | 0.200942488 | 0.210367919 |
| 0.068308831 | 0.23762036  | 0.129360554 | 0.258311842 |
| 0.02083976  | 0.274602709 | 0.123966646 | 0.110965253 |
| 0.126111332 | 0.141388127 | 0.092773079 | 0.262876632 |
| 0.190023482 | 0.184901085 | 0.108056266 | 0.093961981 |
| 0.190738409 | 0.301009528 | 0.275199916 | 0.194596282 |
| 0.116732744 | 0.044069261 | 0.063365111 | 0.128236762 |
| 0.163971675 | 0.230375013 | 0.035846718 | 0.325765952 |
| 0.225261638 | 0.165502125 | 0.124941945 | 0.364078877 |
| 0.17131568  | 0.272845228 | 0.19699798  | 0.110522837 |
| 0.298445198 | 0.30544466  | 0.243694097 | 0.097887985 |
| 0.290073271 | 0.082900619 | 0.087410858 | 0.230551466 |
| 0.26383818  | 0.002501772 | 0.195027187 | 0.207630003 |
| 0.258812207 | 0.154540982 | 0.257001534 | 0.22907572  |
| 0.266369632 | 0.192973674 | 0.011305484 | 0.133627169 |
| 0.282975496 | 0.193895928 | 0.148854702 | 0.067573041 |
| 0.102168341 | 0.096330451 | 0.176782687 | 0.033314482 |
| 0.313665926 | 0.194326586 | 0.212780885 | 0.188638931 |
| 0.14770439  | 0.289163722 | 0.062679111 | 0.311422763 |
| 0.10415475  | 0.107964648 | 0.163744662 | 0.245288079 |
| 0.052056885 | 0.145294859 | 0.081017984 | 0.122228813 |
| 0.17487369  | 0.12114435  | 0.037055153 | 0.104754968 |
| 0.239490601 | 0.08752284  | 0.139715363 | 0.152550231 |
| 0.090171235 | 0.314441945 | 0.071105144 | 0.085631279 |
| 0.101347528 | 0.380163487 | 0.129007236 | 0.225409219 |
| 0.082524655 | 0.204069544 | 0.145849416 | 0.255566683 |
| 0.262735808 | 0.061598118 | 0.278481986 | 0.012364414 |
| 0.043809395 | 0.046970796 | 0.021320138 | 0.079695956 |
| 0.35870573  | 0.090568108 | 0.106253836 | 0.118699189 |
| 0.113007866 | 1           | 0.060744015 | 0.326563583 |
| 0.255492061 | 0.055197234 | 0.185492104 | 0.104093335 |
| 0.030982642 | 0.093073206 | 0.165051396 | 0.06621083  |

|             |             |             |             |
|-------------|-------------|-------------|-------------|
| 0.205352155 | 0.020419565 | 0.022631584 | 0.194316171 |
| 0.042319454 | 0.06111676  | 0.215061874 | 0.131004562 |
| 0.067425344 | 0.359053781 | 0.26362034  | 0.012264148 |
| 0.092502604 | 0.020476348 | 0.152122307 | 0.076572502 |
| 0.153748414 | 0.211053965 | 0.072842414 | 0.051113171 |
| 0.16978829  | 0.281422955 | 0.218561381 | 0.234286689 |
| 0.04525637  | 0.267156449 | 0.169257468 | 0.206431543 |
| 0.162193607 | 0.06379776  | 0.014191339 | 0.152921086 |
| 0.182839035 | 0.048351527 | 0.219907093 | 0.15863798  |
| 0.066600852 | 0.112619636 | 0.056472466 | 0.230281799 |
| 0.3198618   | 0.278812484 | 0.113218914 | 0.158948328 |
| 0.176126266 | 0.119260307 | 0.201265856 | 0.289492354 |
| 0.055934079 | 0.071657462 | 0.047270396 | 0.177773528 |
| 0.171338012 | 0.061439953 | 0.302394263 | 0.023130223 |
| 6.69E-06    | 0.172529749 | 0.144099166 | 0.090779294 |
| 0.026204789 | 0.105829273 | 0.128674686 | 0.253061502 |
| 0.137149269 | 0.248523572 | 0.276344571 | 0.048822222 |
| 0.240975404 | 0.07715685  | 0.068251858 | 0.109248945 |
| 0.254510471 | 0.02367203  | 0.065056183 | 0.332067044 |
| 0.18501173  | 0.029801815 | 0.147695231 | 0.004002426 |
| 0.126558983 | 0.18443426  | 0.275318425 | 0.32769562  |
| 0.218472388 | 0.299967472 | 0.177399186 | 0.061556159 |
| 0.152724367 | 0.159012547 | 0.004682046 | 0.240725353 |
| 0.291561331 | 0.292089985 | 0.291672961 | 0.326120648 |
| 0.241056735 | 0.190815779 | 0.157961039 | 0.107746459 |
| 0.124149042 | 0.13527286  | 0.027887501 | 0.07741868  |
| 0.016890972 | 0.168096147 | 0.110581304 | 0.208892471 |
| 0.144683762 | 0.207625911 | 0.108397352 | 0.109253005 |
| 0.037452172 | 0.013852607 | 0.12551927  | 0.132954427 |
| 0.17031307  | 0.079593687 | 0.024714709 | 0.040358029 |
| 0.259470463 | 0.248442374 | 0.039052355 | 0.274025816 |
| 0.093928772 | 0.223816861 | 0.062119323 | 0.149645021 |
| 0.132137706 | 0.025410003 | 0.108573779 | 0.002908724 |
| 0.055494038 | 0.3249109   | 0.067545868 | 0.080179894 |
| 0.131173585 | 0.035775564 | 0.225667247 | 0.282530337 |
| 0.263438298 | 0.231414118 | 0.239646284 | 0.029884218 |
| 0.248714321 | 0.009878324 | 0.251898662 | 0.206820766 |
| 0.051533462 | 0.001720077 | 0.032136639 | 0.189856924 |
| 0.069844365 | 0.219381405 | 0.177895434 | 0.047473737 |
| 0.092613283 | 0.13550676  | 0.153692976 | 0.035388668 |
| 0.111573497 | 0.082666106 | 0.049718204 | 0.285009571 |
| 0.100786349 | 0.163997545 | 0.082327802 | 0.249725045 |
| 0.095963166 | 0.095797967 | 0.259134672 | 0.005678509 |
| 0.152497964 | 0.252474029 | 0.347315763 | 0.261306478 |
| 0.271273785 | 0.112739132 | 0.041515429 | 0.073400258 |
| 0.231069058 | 0.20474186  | 0.045012784 | 0.195175133 |
| 0.242774911 | 0.096314275 | 0.182880582 | 0.211665416 |
| 0.252346131 | 0.252547465 | 0.12626352  | 0.156392639 |
| 0.022643104 | 0.007156092 | 0.078255819 | 0.246653672 |
| 0.077765489 | 0.064004123 | 0.215204421 | 0.143893445 |
| 0.140283858 | 0.072539569 | 0.033992225 | 0.032401983 |
| 0.128814259 | 0.087512811 | 0.054762135 | 0.287635712 |
| 0.06968811  | 0.04358509  | 0.105110047 | 0.157130801 |
| 0.10729829  | 0.254239401 | 0.274946845 | 0.118951446 |

|             |             |             |             |
|-------------|-------------|-------------|-------------|
| 0.073676568 | 0.066621075 | 0.119470391 | 0.21655966  |
| 0.176594925 | 0.200109681 | 0.120118099 | 0.022556793 |
| 0.239808996 | 0.093732763 | 0.218499666 | 0.246105722 |
| 0.308767198 | 0.280183163 | 0.320280901 | 0.09960122  |
| 0.12566613  | 0.118289388 | 0.064552203 | 0.069503868 |
| 0.254043375 | 0.195708056 | 0.272332052 | 0.043426012 |
| 0.223827071 | 0.087552035 | 0.072531667 | 0.171807511 |
| 0.072870885 | 0.207347656 | 0.096813477 | 0.160679327 |
| 0.071762424 | 0.029528176 | 0.14430804  | 0.159389184 |
| 0.195672356 | 0.015878738 | 0.184925698 | 0.124222742 |
| 0.21787663  | 0.069616531 | 0.121130719 | 0.286463116 |
| 0.210754182 | 0.185851295 | 0.064733936 | 0.193524435 |
| 0.165726192 | 0.089077172 | 0.030351453 | 0.228984518 |
| 0.245442275 | 0.10370675  | 0.274952656 | 0.228090175 |
| 0.226940584 | 0.059381137 | 0.056136385 | 0.09273336  |
| 0.20751656  | 0.074465012 | 0.161567531 | 0.180623645 |
| 0.318854528 | 0.362492321 | 0.209672915 | 0.094217151 |
| 0.103712869 | 0.211050239 | 0.183135723 | 0.222800435 |
| 0.025130844 | 0.101215379 | 0.071487198 | 0.184986305 |
| 0.001744889 | 0.016427771 | 0.246342966 | 0.099190813 |
| 0.316257282 | 0.204694859 | 0.2568061   | 0.142820945 |
| 0.000483437 | 0.104837807 | 0.097898167 | 0.0479734   |
| 0.212925611 | 0.220202827 | 0.158621182 | 0.094123376 |
| 0.23071639  | 0.194664043 | 0.101293076 | 0.062441388 |
| 0.022867687 | 0.143177247 | 0.237051323 | 0.209855033 |
| 0.097945703 | 0.266567387 | 0.031066985 | 0.094303964 |
| 0.050658943 | 0.218570196 | 0.201043762 | 0.067353603 |
| 0.016480935 | 0.243354148 | 0.173876905 | 0.094648657 |
| 0.071041377 | 0.224783785 | 0.246823506 | 0.007970039 |
| 0.116915497 | 0.051889561 | 0.097430035 | 0.069594905 |
| 0.093496385 | 0.11626302  | 0.13347403  | 0.053295152 |
| 0.160912839 | 0.115888341 | 0.067963807 | 0.152651728 |
| 0.076713557 | 0.143593842 | 0.101673597 | 0.094404681 |
| 0.048382884 | 0.108553507 | 0.286893711 | 0.304195717 |
| 0.076310116 | 0.227111201 | 0.278417933 | 0.199450093 |
| 0.186171072 | 0.089298438 | 0.25098881  | 0.259329003 |
| 0.242558486 | 0.255102291 | 0.10293592  | 0.190079911 |
| 0.036685724 | 0.062866661 | 0.136779335 | 0.10085635  |
| 0.149101597 | 0.041918274 | 0.095597056 | 0.135631159 |
| 0.167752328 | 0.297645378 | 0.266597406 | 0.263893688 |
| 0.061780681 | 0.108695926 | 0.046064388 | 0.071570306 |
| 0.097250117 | 0.25958312  | 0.060751818 | 0.013156405 |
| 0.160962885 | 0.070698291 | 0.174334931 | 0.273527177 |
| 0.036495944 | 0.262751625 | 0.04958608  | 0.099330996 |
| 0.037263877 | 0.274307864 | 0.226659021 | 0.152106618 |
| 0.018540382 | 0.117553892 | 0.079390705 | 0.075618889 |
| 0.137601437 | 0.151391827 | 0.079668427 | 0.151051711 |
| 0.176423774 | 0.189969234 | 0.335474982 | 0.128953307 |
| 0.08851165  | 0.033584082 | 0.138159926 | 0.070142368 |
| 0.08732655  | 0.239897419 | 0.158536007 | 0.235460374 |
| 0.064529422 | 0.277912769 | 0.325065504 | 0.154455034 |
| 0.096499949 | 0.080085022 | 0.017637017 | 0.083339968 |
| 0.125438064 | 0.040398007 | 0.002373996 | 0.01576081  |
| 0.166442015 | 0.103347452 | 0.182521387 | 0.201840477 |

|             |             |             |             |
|-------------|-------------|-------------|-------------|
| 0.053239965 | 0.211879197 | 0.02460492  | 0.132913392 |
| 0.281553971 | 0.332157751 | 0.056675021 | 0.249430713 |
| 0.211732288 | 0.114947475 | 0.130413428 | 0.027493596 |
| 0.0935548   | 0.081271108 | 0.060710617 | 0.146481744 |
| 0.097905297 | 0.018180944 | 0.09951808  | 0.230884422 |
| 0.20622004  | 0.015599509 | 0.161332186 | 0.129889146 |
| 0.291657977 | 0.328557281 | 0.100417468 | 0.127779421 |
| 0.157000781 | 0.214403904 | 0.071487712 | 0.098628851 |
| 0.041918098 | 0.039065445 | 0.142493268 | 0.028335633 |
| 0.096738287 | 0.063295416 | 0.009110684 | 0.322207845 |
| 0.314723846 | 0.052750689 | 0.312292502 | 0.058653576 |
| 0.17377428  | 0.260096282 | 0.090281437 | 0.073045235 |
| 0.032106347 | 0.070185478 | 0.18346314  | 0.202588094 |
| 0.015747757 | 0.127080175 | 0.067519497 | 0.078145194 |
| 0.359789383 | 0.058704519 | 0.311962676 | 0.028660299 |
| 0.254595726 | 0.232500115 | 0.230153637 | 0.076147123 |
| 0.149518402 | 0.21312586  | 0.063475263 | 0.285742238 |
| 0.099469085 | 0.028183258 | 0.157608637 | 0.080280785 |
| 0.047367316 | 0.257463986 | 0.102642817 | 0.301810385 |
| 0.082338903 | 0.181755021 | 0.169281564 | 0.243874131 |
| 0.211249514 | 0.043070426 | 0.031715853 | 0.065857818 |
| 0.252238345 | 0.067478387 | 0.052802548 | 0.18134737  |
| 0.024595821 | 0.186111018 | 0.144237393 | 0.071268729 |
| 0.07542679  | 0.162536917 | 0.066978586 | 0.212345869 |
| 0.135464051 | 0.076628062 | 0.057091774 | 0.261703796 |
| 0.055441945 | 0.029075802 | 0.285662558 | 0.001587127 |
| 0.116386839 | 0.100591756 | 0.173187684 | 0.066516919 |
| 0.236117036 | 0.158184253 | 0.112132443 | 0.017305772 |
| 0.18937137  | 0.010714489 | 0.10381801  | 0.046013992 |
| 0.051343739 | 0.131148459 | 0.267420049 | 0.233084604 |
| 0.196574984 | 0.064842443 | 0.035223642 | 0.274346613 |
| 0.01780974  | 0.03859003  | 0.057425054 | 0.132683921 |
| 0.027633216 | 0.054934035 | 0.058672162 | 0.036443924 |
| 0.181429653 | 0.133993732 |             |             |
| DHFR        | 0.023215808 | 0.339541599 | 0.016233292 |
| 0.051920762 | 0.244217238 | 0.12890502  | 0.024926869 |
| 0.050115461 | 0.269243867 | 0.115604212 | 0.209700886 |
| 0.007280648 | 0.07580208  | 0.407942331 | 0.024411482 |
| 0.32589612  | 0.016624115 | 0.056976632 | 0.042654596 |
| 0.08305268  | 0.24055677  | 0.146695063 | 0.175081393 |
| 0.211066395 | 0.131469201 | 0.200947575 | 0.268981966 |
| 0.425355745 | 0.117789175 | 0.314030421 | 0.067967099 |
| 0.361979194 | 0.287918377 | 0.213766291 | 0.004013944 |
| 0.229914888 | 0.019164088 | 0.363412527 | 0.134947708 |
| 0.08595276  | 0.281209971 | 0.13321811  | 0.112434741 |
| 0.190340548 | 0.011484754 | 0.071637426 | 0.364764291 |
| 0.200191312 | 0.106418576 | 0.025572302 | 0.309628978 |
| 0.154786349 | 0.220607495 | 0.283362008 | 0.002459513 |
| 0.176016519 | 0.079948626 | 0.150408051 | 0.401850869 |
| 0.135838971 | 0.063651467 | 0.160160232 | 0.110967565 |
| 0.305595056 | 0.334622091 | 0.185120834 | 0.156419378 |
| 0.427699021 | 0.141467813 | 0.359969668 | 0.062553587 |
| 0.185252613 | 0.010179674 | 0.112284652 | 0.042199427 |
| 0.161331528 | 0.120160001 | 0.212653278 | 0.174457494 |

|             |             |             |             |
|-------------|-------------|-------------|-------------|
| 0.344388704 | 0.427549611 | 0.159863946 | 0.39688395  |
| 0.107683251 | 0.296885137 | 0.13660894  | 0.271779042 |
| 0.32724872  | 0.038457741 | 0.339862449 | 0.451326796 |
| 0.017674351 | 0.23474431  | 0.349807336 | 0.075799748 |
| 0.329751463 | 0.145801124 | 0.204933289 | 0.113570418 |
| 0.331367296 | 0.294676512 | 0.392228494 | 0.229015035 |
| 0.183851454 | 0.035460667 | 0.365955617 | 0.283561977 |
| 0.135242969 | 0.034909845 | 0.148561016 | 0.436016815 |
| 0.309640087 | 0.420681888 | 0.376920392 | 0.348065686 |
| 0.300545756 | 0.425606882 | 0.304971978 | 0.352432354 |
| 0.060655314 | 0.438527023 | 0.090457577 | 0.018339505 |
| 0.022483994 | 0.036530411 | 0.140037544 | 0.247451063 |
| 0.41009561  | 0.230369746 | 0.085555308 | 0.160079248 |
| 0.460763083 | 0.361398849 | 0.443492627 | 0.379531986 |
| 0.013824602 | 0.154096648 | 0.28445854  | 0.085413443 |
| 0.331110385 | 0.06611457  | 0.193326558 | 0.406952749 |
| 0.315155076 | 0.422236767 | 0.050523368 | 0.393615117 |
| 0.100730921 | 0.443939429 | 0.365686788 | 0.093995399 |
| 0.421840332 | 0.382485475 | 0.460100413 | 0.361801939 |
| 0.367551844 | 0.15681191  | 0.054633944 | 0.344174711 |
| 0.428234549 | 0.011597916 | 0.434319111 | 0.465009949 |
| 0.41249407  | 0.439223275 | 0.482473849 | 0.446475903 |
| 0.41048093  | 0.037853902 | 0.038824993 | 0.268870369 |
| 0.418408644 | 0.331545493 | 0.068353021 | 0.28622066  |
| 0.311391382 | 0.174926827 | 0.367169938 | 0.152235956 |
| 0.448960412 | 0.385856837 | 0.429918484 | 0.342848664 |
| 0.181101278 | 0.249296724 | 0.288792553 | 0.347443101 |
| 0.015597211 | 0.040025416 | 0.02372003  | 0.255631054 |
| 0.100120919 | 0.116834782 | 0.155647942 | 0.278409545 |
| 0.13895532  | 0.143588324 | 0.162557234 | 0.355594826 |
| 0.031278905 | 0.267959082 | 0.073477493 | 0.095212342 |
| 0.019229488 | 0.098479794 | 0.096240446 | 0.057521359 |
| 0.177872013 | 0.163920784 | 0.351641764 | 0.43517627  |
| 0.191321223 | 0.115641342 | 0.330064575 | 0.414211587 |
| 0.396917687 | 0.267548817 | 0.177994699 | 0.005167815 |
| 0.174983889 | 0.154768619 | 0.142571327 | 0.271836073 |
| 0.118584444 | 0.142603587 | 0.316691589 | 0.363737582 |
| 0.137371606 | 0.060744015 | 1           | 0.335901052 |
| 0.09519592  | 0.134620427 | 0.43089547  | 0.258575956 |
| 0.00051215  | 0.197255321 | 0.398033429 | 0.104836367 |
| 0.253300479 | 0.100562685 | 0.123096971 | 0.435748315 |
| 0.171789487 | 0.152965153 | 0.433157697 | 0.358123095 |
| 0.134852076 | 0.15357672  | 0.473899638 | 0.06734044  |
| 0.243821673 | 0.030562995 | 0.247873121 | 0.149416623 |
| 0.168251578 | 0.264013234 | 0.257384948 | 0.133631115 |
| 0.065801421 | 0.440217938 | 0.307572434 | 0.448974202 |
| 0.176536493 | 0.473629547 | 0.429335471 | 0.395016406 |
| 0.25279624  | 0.234408406 | 0.11565704  | 0.392621571 |
| 0.423828026 | 0.14537426  | 0.039055109 | 0.408416157 |
| 0.202364793 | 0.371532126 | 0.06659476  | 0.452898246 |
| 0.398729573 | 0.361578646 | 0.0701999   | 0.370134421 |
| 0.326400404 | 0.120579901 | 0.346582452 | 0.472914374 |
| 0.140341729 | 0.275553256 | 0.179076019 | 0.388604995 |
| 0.109766546 | 0.147291793 | 0.251656041 | 0.126258337 |

|             |             |             |             |
|-------------|-------------|-------------|-------------|
| 0.005415417 | 0.035878139 | 0.030830042 | 0.093415505 |
| 0.117746411 | 0.29157085  | 0.326593683 | 0.454823845 |
| 0.063750107 | 0.329239969 | 0.183334756 | 0.156961877 |
| 0.3656028   | 0.218654342 | 0.2589949   | 0.297075777 |
| 0.181504041 | 0.006202718 | 0.050383785 | 0.428827421 |
| 0.018065812 | 0.142943161 | 0.160649387 | 0.001528927 |
| 0.017738066 | 0.325010199 | 0.060920816 | 0.139004978 |
| 0.451676196 | 0.135996213 | 0.140416662 | 0.136111404 |
| 0.271389108 | 0.044165546 | 0.001060345 | 0.433265186 |
| 0.413970341 | 0.395031219 | 0.411905945 | 0.360635539 |
| 0.412511809 | 0.322515105 | 0.395903337 | 0.16067814  |
| 0.041346442 | 0.028177355 | 0.163168049 | 0.188173033 |
| 0.003804236 | 0.310734763 | 0.195750875 | 0.094603265 |
| 0.385591605 | 0.249280255 | 0.012989985 | 0.280659782 |
| 0.007182463 | 0.133481751 | 0.134171663 | 0.113191781 |
| 0.332831708 | 0.003712111 | 0.090524213 | 0.183873266 |
| 0.323579169 | 0.274206151 | 0.158452757 | 0.43951104  |
| 0.207094072 | 0.076075741 | 0.186427128 | 0.332319421 |
| 0.029676532 | 0.077296427 | 0.150682416 | 0.015592042 |
| 0.060985723 | 0.366723504 | 0.158763493 | 0.022885353 |
| 0.190406147 | 0.001204148 | 0.283399494 | 0.450120509 |
| 0.354346817 | 0.480980678 | 0.422538437 | 0.165875408 |
| 0.424848041 | 0.094615254 | 0.456315889 | 0.331630673 |
| 0.170914831 | 0.000503726 | 0.00298476  | 0.443935786 |
| 0.292106347 | 0.028621282 | 0.099837357 | 0.107707461 |
| 0.052149199 | 0.055995677 | 0.02287304  | 0.117022852 |
| 0.26051133  | 0.171895693 | 0.11636557  | 0.381031057 |
| 0.141496657 | 0.157108227 | 0.160631246 | 0.050248447 |
| 0.268673703 | 0.019763415 | 0.051410043 | 0.004566863 |
| 0.327341904 | 0.069918031 | 0.350506474 | 0.427396704 |
| 0.427194143 | 0.335631687 | 0.134233994 | 0.123034812 |
| 0.393729084 | 0.051285449 | 0.136824939 | 0.054401497 |
| 0.392242136 | 0.340527591 | 0.268032109 | 0.240176292 |
| 0.465546508 | 0.398617069 | 0.012711945 | 0.385304217 |
| 0.003133952 | 0.001530477 | 0.172869351 | 0.202866394 |
| 0.051157522 | 0.257800927 | 0.202195923 | 0.103440957 |
| 0.09987681  | 0.010304601 | 0.176552779 | 0.16968879  |
| 0.23242442  | 0.248845028 | 0.22749729  | 0.184394925 |
| 0.138157153 | 0.113345771 | 0.078031282 | 0.069204517 |
| 0.123383886 | 0.243359216 | 0.137223595 | 0.008076916 |
| 0.235664343 | 0.274322953 | 0.023016506 | 0.095006379 |
| 0.39207921  | 0.450628378 | 0.024786295 | 0.006191431 |
| 0.20090031  | 0.185287991 | 0.465737071 | 0.407333364 |
| 0.42472254  | 0.468021825 | 0.312957155 | 0.085486709 |
| 0.023385317 | 0.238617818 | 0.240975147 | 0.058093215 |
| 0.438722045 | 0.035627459 | 0.376698879 | 0.234240713 |
| 0.071659827 | 0.085818802 | 0.013262372 | 0.044265697 |
| 0.291323134 | 0.117872131 | 0.114633963 | 0.083253624 |
| 0.187129182 | 0.136043063 | 0.018210237 | 0.130830458 |
| 0.300428112 | 0.147230207 | 0.103954171 | 0.106770219 |
| 0.258834936 | 0.091442527 | 0.391366959 | 0.396830634 |
| 0.075971497 | 0.059872085 | 0.093838366 | 0.317081301 |
| 0.3988155   | 0.247961665 | 0.007392338 | 0.360648771 |
| 0.432439326 | 0.337051454 | 0.393879304 | 0.386173732 |

|             |             |             |             |
|-------------|-------------|-------------|-------------|
| 0.048400917 | 0.250611092 | 0.197370506 | 0.277508347 |
| 0.126145293 | 0.141956481 | 0.151412112 | 0.032705344 |
| 0.242225886 | 0.390769608 | 0.356129352 | 0.083725307 |
| 0.247876193 | 0.066412846 | 0.029226556 | 0.374636883 |
| 0.146016688 | 0.037299389 | 0.151250714 | 0.407049424 |
| 0.000920304 | 0.10627331  | 0.451859394 | 0.089245096 |
| 0.437560497 | 0.446547294 | 0.370030095 | 0.084174952 |
| 0.004879738 | 0.366150501 | 0.282343273 | 0.182249554 |
| 0.368054388 | 0.252626916 | 0.052564236 | 0.034981175 |
| 0.234219091 | 0.041541152 | 0.084458322 | 0.101684023 |
| 0.145182452 | 0.28158817  | 0.150949535 | 0.134389992 |
| 0.112736077 | 0.05573566  | 0.124409354 | 0.096531277 |
| 0.118251711 | 0.188937586 | 0.31816408  | 0.0948661   |
| 0.152000023 | 0.421649119 | 0.362210225 | 0.00744115  |
| 0.243597166 | 0.382749108 | 0.363284858 | 0.003039154 |
| 0.381821957 | 0.00261863  | 0.126600134 | 0.12005897  |
| 0.100890515 | 0.132597494 | 0.21932099  | 0.13648265  |
| 0.264971339 | 0.118118565 | 0.119899795 | 0.167497269 |
| 0.072485167 | 0.102698896 | 0.273994328 | 0.171537158 |
| 0.132523659 | 0.043973852 | 0.059634699 | 0.060856139 |
| 0.019664768 | 0.379655347 | 0.181531884 | 0.036115259 |
| 0.164453811 | 0.155284393 | 0.303391727 | 0.396494322 |
| 0.357960506 | 0.063835948 | 0.179192727 | 0.362758578 |
| 0.136663611 | 0.102154058 | 0.021058142 | 0.198877298 |
| 0.131331741 | 0.141947793 | 0.186763517 | 0.195598807 |
| 0.333702492 | 0.322442928 | 0.17164802  | 0.362077827 |
| 0.167342033 | 0.224643106 | 0.108183643 | 0.042482247 |
| 0.085026693 | 0.085428911 | 0.218571654 | 0.000342494 |
| 0.262324275 | 0.077591092 | 0.430540446 | 0.384134602 |
| 0.161197278 | 0.311714402 | 0.107346834 | 0.038290163 |
| 0.087599494 | 0.122280196 | 0.09230038  | 0.351927914 |
| 0.141212147 | 0.064439371 | 0.228070951 | 0.089061275 |
| 0.380577423 | 0.357310346 | 0.134082727 | 0.121040924 |
| 0.150317634 | 0.107831075 | 0.384039195 | 0.039987249 |
| 0.298923116 | 0.111593366 | 0.21158462  | 0.200434582 |
| 0.13635959  | 0.44769454  | 0.025307501 | 0.466532107 |
| 0.225156418 | 0.081341051 | 0.410597456 | 0.138191802 |
| 0.086603476 | 0.050561335 | 0.136959254 | 0.142050122 |
| 0.105012318 | 0.155799573 | 0.00852199  | 0.062379979 |
| 0.288132997 | 0.135680016 | 0.349749272 | 0.314483251 |
| 0.140938454 | 0.323029769 | 0.104100774 | 0.152587251 |
| 0.369483241 | 0.379471759 | 0.129910744 | 0.204096914 |
| 0.294183117 | 0.039091245 | 0.225510376 | 0.014347637 |
| 0.341384527 | 0.318807814 | 0.161410936 | 0.021111395 |
| 0.00687255  | 0.156655345 | 0.310361008 | 0.03536386  |
| 0.466947795 | 0.129571907 | 0.244165645 | 0.320454103 |
| 0.119705182 | 0.383245111 | 0.065183817 | 0.343357405 |
| 0.019877568 | 0.176357532 | 0.232505716 | 0.235864205 |
| 0.1254473   | 0.203767858 | 0.337926764 | 0.147542244 |
| 0.012941607 | 0.124442566 | 0.002598959 | 0.318477135 |
| 0.360843423 | 0.25064983  | 0.149182783 | 0.118398604 |
| 0.223216754 | 0.30888177  | 0.157333041 | 0.229741225 |
| 0.003935186 | 0.307076775 | 0.120069099 | 0.318911611 |
| 0.140709156 | 0.268012982 | 0.020554312 | 0.247989555 |



|             |             |             |             |
|-------------|-------------|-------------|-------------|
| 0.3326061   | 0.176845166 | 0.205919043 | 0.166990437 |
| 0.386339493 | 0.292630064 | 0.092699419 | 0.096176321 |
| 0.290330514 | 0.034184828 | 0.132564964 | 0.460380515 |
| 0.097152297 | 0.145220855 | 0.435829226 | 0.106370251 |
| 0.210784236 | 0.294446742 | 0.283513702 | 0.444829608 |
| 0.050310508 | 0.181864954 | 0.381120603 | 0.405153155 |
| 0.258962296 | 0.126196972 | 0.156869805 | 0.149321181 |
| 0.348972169 | 0.032930839 | 0.161175593 | 0.275384806 |
| 0.158906527 | 0.235794996 | 0.198667234 | 0.119329038 |
| 0.017087805 | 0.073424993 | 0.119446034 | 0.083914494 |
| 0.22788077  | 0.243162145 | 0.139325768 | 0.322329589 |
| 0.057025722 | 0.011632889 | 0.379342836 | 0.028765305 |
| 0.150780688 | 0.296301135 | 0.144071334 | 0.210036973 |
| 0.122168535 | 0.249342418 | 0.191404281 | 0.000577147 |
| 0.384017925 | 0.020699947 | 0.138427548 | 0.132805062 |
| 0.17295056  | 0.019891943 | 0.352403113 | 0.47563419  |
| 0.194547451 | 0.120551339 | 0.153922429 | 0.379646337 |
| 0.118241882 | 0.155854407 | 0.177854514 | 0.276635675 |
| 0.138698241 | 0.188122028 | 0.201462918 | 0.17666687  |
| 0.277949887 | 0.102363398 |             |             |
| DHRS1       | 0.26300757  | 0.430833317 | 0.217122717 |
| 0.276514041 | 0.313282704 | 0.441727277 | 0.217566046 |
| 0.322851299 | 0.403601185 | 0.274193392 | 0.4160983   |
| 0.118197393 | 0.073904719 | 0.452323863 | 0.20997288  |
| 0.357601289 | 0.160090468 | 0.289249284 | 0.127813797 |
| 0.31416071  | 0.297615434 | 0.321753511 | 0.450665493 |
| 0.299986096 | 0.355414371 | 0.422134138 | 0.327986878 |
| 0.443090825 | 0.216940907 | 0.418074463 | 0.180211281 |
| 0.438421669 | 0.31572623  | 0.319902182 | 0.114140566 |
| 0.428920936 | 0.01433476  | 0.442996009 | 0.32612794  |
| 0.137542993 | 0.438945159 | 0.343189815 | 0.360137592 |
| 0.354005444 | 0.178398724 | 0.191463867 | 0.361486057 |
| 0.392349576 | 0.375547874 | 0.2346085   | 0.427123166 |
| 0.357721373 | 0.467555764 | 0.394638058 | 0.013675589 |
| 0.247154263 | 0.05183275  | 0.160804116 | 0.464002941 |
| 0.383839786 | 0.303711005 | 0.214464199 | 0.378059474 |
| 0.368302614 | 0.378314638 | 0.390054016 | 0.331097745 |
| 0.455300751 | 0.146045673 | 0.390740963 | 0.261442173 |
| 0.416413347 | 0.161071793 | 0.344511235 | 0.247445924 |
| 0.3553588   | 0.358047999 | 0.380375905 | 0.260730948 |
| 0.421380192 | 0.494962756 | 0.384677146 | 0.467246372 |
| 0.093032031 | 0.300355954 | 0.285381987 | 0.384993263 |
| 0.392063111 | 0.233466864 | 0.436048683 | 0.473793782 |
| 0.195309732 | 0.37017952  | 0.404417046 | 0.308151584 |
| 0.451745418 | 0.236846684 | 0.372072743 | 0.164444811 |
| 0.346305433 | 0.318997887 | 0.456609111 | 0.422563926 |
| 0.336250807 | 0.242731462 | 0.480051014 | 0.278665052 |
| 0.356132211 | 0.262059194 | 0.242425302 | 0.411874678 |
| 0.415400635 | 0.452879396 | 0.419491831 | 0.406713764 |
| 0.334634606 | 0.452592254 | 0.435955161 | 0.447467473 |
| 0.130231946 | 0.466991732 | 0.371934728 | 0.186025296 |
| 0.251103538 | 0.256425226 | 0.243200658 | 0.417972829 |
| 0.441442471 | 0.449499864 | 0.386564932 | 0.326083053 |
| 0.412965819 | 0.460475493 | 0.459627283 | 0.437025374 |

|             |             |             |             |
|-------------|-------------|-------------|-------------|
| 0.188021591 | 0.198776928 | 0.338479571 | 0.432754959 |
| 0.412888884 | 0.29838365  | 0.230393065 | 0.490741181 |
| 0.454787849 | 0.416179549 | 0.363969287 | 0.503570913 |
| 0.344051594 | 0.467550653 | 0.437404389 | 0.340715499 |
| 0.484721886 | 0.481195377 | 0.447985828 | 0.363832728 |
| 0.463061124 | 0.438518321 | 0.08876557  | 0.42442026  |
| 0.455588357 | 0.018097811 | 0.427850816 | 0.430856937 |
| 0.447228469 | 0.416679817 | 0.44138084  | 0.446468633 |
| 0.454201929 | 0.251255953 | 0.020646724 | 0.347237141 |
| 0.468841196 | 0.450049232 | 0.276568126 | 0.354227494 |
| 0.346520497 | 0.459324773 | 0.415902612 | 0.29912533  |
| 0.478793871 | 0.443577195 | 0.437852829 | 0.431189739 |
| 0.360308359 | 0.436468185 | 0.303748767 | 0.46960751  |
| 0.194033631 | 0.313737558 | 0.210909396 | 0.402471021 |
| 0.357978881 | 0.334672148 | 0.446426268 | 0.346067741 |
| 0.359513741 | 0.436311316 | 0.269526559 | 0.358762534 |
| 0.206709689 | 0.410602571 | 0.350935436 | 0.34406567  |
| 0.174265778 | 0.322664144 | 0.326478084 | 0.32071385  |
| 0.346347328 | 0.346198235 | 0.411142452 | 0.438105624 |
| 0.340017335 | 0.359535595 | 0.439016485 | 0.454030063 |
| 0.438606949 | 0.341732289 | 0.389425533 | 0.051877579 |
| 0.273263645 | 0.236828293 | 0.13902253  | 0.356333721 |
| 0.330308625 | 0.324030595 | 0.378681808 | 0.384140797 |
| 0.432231019 | 0.326563583 | 0.335901052 | 1           |
| 0.325927588 | 0.351252123 | 0.436555344 | 0.38934961  |
| 0.037534533 | 0.411173062 | 0.43863968  | 0.18588443  |
| 0.403816287 | 0.135130403 | 0.224372049 | 0.42889917  |
| 0.247750867 | 0.226634296 | 0.440509233 | 0.380563204 |
| 0.37349842  | 0.349319219 | 0.450426345 | 0.037630298 |
| 0.318421519 | 0.115487706 | 0.376359153 | 0.330314397 |
| 0.39519111  | 0.389809901 | 0.302568472 | 0.306381149 |
| 0.31943689  | 0.464907836 | 0.455726205 | 0.451042128 |
| 0.312488808 | 0.455720857 | 0.429568653 | 0.453961747 |
| 0.441740503 | 0.302964269 | 0.099631891 | 0.434409704 |
| 0.427446436 | 0.271682249 | 0.242080095 | 0.401098261 |
| 0.320430761 | 0.371842439 | 0.17924936  | 0.444004559 |
| 0.484281002 | 0.439773472 | 0.306453443 | 0.386419309 |
| 0.447588044 | 0.407855329 | 0.432511002 | 0.464650238 |
| 0.271276274 | 0.32323424  | 0.308564115 | 0.403201493 |
| 0.356576523 | 0.223168563 | 0.424368998 | 0.135032896 |
| 0.00858308  | 0.268425782 | 0.238591427 | 0.295798299 |
| 0.161266073 | 0.374998744 | 0.393153439 | 0.449265141 |
| 0.304085938 | 0.463317857 | 0.376336541 | 0.319422205 |
| 0.438674592 | 0.331646317 | 0.33642807  | 0.380549836 |
| 0.400441897 | 0.075662561 | 0.254176956 | 0.498175304 |
| 0.180084579 | 0.220936921 | 0.423481123 | 0.011340694 |
| 0.193249768 | 0.40839349  | 0.261295726 | 0.349486365 |
| 0.433108269 | 0.35024062  | 0.37125452  | 0.299088525 |
| 0.418616041 | 0.281811809 | 0.017146439 | 0.429990775 |
| 0.430806963 | 0.42437232  | 0.430040844 | 0.437398612 |
| 0.412994542 | 0.415403796 | 0.401521921 | 0.451787006 |
| 0.291178123 | 0.273230079 | 0.182178233 | 0.345833736 |
| 0.019412926 | 0.429620629 | 0.34671401  | 0.330829162 |
| 0.402142946 | 0.397578534 | 0.187021094 | 0.343295026 |

|             |             |             |             |
|-------------|-------------|-------------|-------------|
| 0.111983216 | 0.150189597 | 0.397657685 | 0.341707163 |
| 0.371351761 | 0.107208029 | 0.254890056 | 0.276953771 |
| 0.45125674  | 0.449715153 | 0.29376487  | 0.472564553 |
| 0.407151563 | 0.289806172 | 0.344127588 | 0.418696556 |
| 0.244034942 | 0.107898667 | 0.404286133 | 0.037755595 |
| 0.270624252 | 0.437942272 | 0.355805809 | 0.224796106 |
| 0.395368418 | 0.054062612 | 0.449662427 | 0.476273566 |
| 0.438417142 | 0.439479661 | 0.458608389 | 0.244242413 |
| 0.452662933 | 0.062935275 | 0.453216224 | 0.442798933 |
| 0.32548116  | 0.006105738 | 0.031648279 | 0.432955313 |
| 0.36381503  | 0.208934139 | 0.342075127 | 0.399486135 |
| 0.270705826 | 0.34066277  | 0.243492715 | 0.195109012 |
| 0.434994588 | 0.30601311  | 0.195578391 | 0.442266341 |
| 0.352586609 | 0.366851415 | 0.40552088  | 0.266160975 |
| 0.394944913 | 0.203284853 | 0.258199372 | 0.023567368 |
| 0.385085681 | 0.28491702  | 0.48041253  | 0.449797255 |
| 0.455891989 | 0.38471474  | 0.282637549 | 0.382418015 |
| 0.421267082 | 0.267244528 | 0.323420031 | 0.295472132 |
| 0.445803095 | 0.376065567 | 0.430813478 | 0.431624314 |
| 0.446682212 | 0.454764524 | 0.170244586 | 0.411460609 |
| 0.073920601 | 0.005857859 | 0.425334241 | 0.402524721 |
| 0.071259173 | 0.328443638 | 0.397967354 | 0.3108719   |
| 0.32202328  | 0.160850537 | 0.211465648 | 0.204299726 |
| 0.378435981 | 0.377067239 | 0.269693813 | 0.380063791 |
| 0.291389336 | 0.159084057 | 0.340091007 | 0.325279156 |
| 0.276211559 | 0.414985626 | 0.354770787 | 0.129407447 |
| 0.381422856 | 0.369050363 | 0.22668635  | 0.35447287  |
| 0.446395063 | 0.44382599  | 0.157612506 | 0.058495645 |
| 0.417723522 | 0.350742277 | 0.443197972 | 0.446727965 |
| 0.49175392  | 0.462777943 | 0.443897563 | 0.232098213 |
| 0.247293968 | 0.363970997 | 0.281070124 | 0.186461665 |
| 0.454713662 | 0.22511942  | 0.453052588 | 0.246470578 |
| 0.302244721 | 0.350338368 | 0.158336008 | 0.263003243 |
| 0.337773509 | 0.365733231 | 0.301919333 | 0.321891675 |
| 0.351859468 | 0.22449559  | 0.204127023 | 0.363199817 |
| 0.430874061 | 0.133349632 | 0.343363201 | 0.421232618 |
| 0.43727373  | 0.21696582  | 0.390484911 | 0.446217976 |
| 0.325980995 | 0.284591347 | 0.393506475 | 0.411926502 |
| 0.425041229 | 0.346254635 | 0.111840587 | 0.429480611 |
| 0.448980461 | 0.40694539  | 0.462234644 | 0.421608654 |
| 0.26111786  | 0.357441267 | 0.260851329 | 0.343271687 |
| 0.354063209 | 0.447438675 | 0.365609772 | 0.23394854  |
| 0.412287524 | 0.476674091 | 0.432739603 | 0.325466772 |
| 0.402884238 | 0.308877752 | 0.207208101 | 0.438523192 |
| 0.161029687 | 0.263977371 | 0.356331493 | 0.408709986 |
| 0.007035678 | 0.111001346 | 0.42606191  | 0.3955105   |
| 0.471818405 | 0.435042699 | 0.454471415 | 0.393039634 |
| 0.00137331  | 0.357175915 | 0.408313101 | 0.38109163  |
| 0.445793    | 0.45888189  | 0.273751237 | 0.221601166 |
| 0.409401492 | 0.253586254 | 0.265096319 | 0.399730688 |
| 0.126166039 | 0.438791691 | 0.362131204 | 0.347906862 |
| 0.305600978 | 0.249976739 | 0.219095511 | 0.398841699 |
| 0.130395745 | 0.394362559 | 0.426471049 | 0.301567527 |
| 0.159463906 | 0.425769617 | 0.423362213 | 0.152685002 |

|             |             |             |             |
|-------------|-------------|-------------|-------------|
| 0.32088969  | 0.415700601 | 0.443894703 | 0.009928579 |
| 0.405730234 | 0.065987216 | 0.31127975  | 0.324055361 |
| 0.322046447 | 0.320399042 | 0.335907423 | 0.320865081 |
| 0.408738526 | 0.362826194 | 0.389571703 | 0.380181485 |
| 0.296063294 | 0.38904246  | 0.385077236 | 0.400724823 |
| 0.326530344 | 0.314042107 | 0.267553167 | 0.257557958 |
| 0.200767935 | 0.446313313 | 0.404920375 | 0.242445736 |
| 0.372659185 | 0.38968214  | 0.433750485 | 0.441718892 |
| 0.447785622 | 0.276422909 | 0.378287979 | 0.448881778 |
| 0.190688668 | 0.366321469 | 0.238074669 | 0.421618057 |
| 0.407314976 | 0.241391862 | 0.410019696 | 0.412674369 |
| 0.403748959 | 0.443448606 | 0.408355983 | 0.447081044 |
| 0.391358589 | 0.336267047 | 0.305020014 | 0.218359064 |
| 0.34880081  | 0.313655193 | 0.272414505 | 0.022254139 |
| 0.433844898 | 0.411420215 | 0.436488744 | 0.456203682 |
| 0.232917199 | 0.447495148 | 0.338130972 | 0.25849539  |
| 0.266437572 | 0.319677974 | 0.332802504 | 0.417074502 |
| 0.162536451 | 0.370716381 | 0.329026765 | 0.428732338 |
| 0.405359909 | 0.387332765 | 0.270843515 | 0.39733738  |
| 0.360215568 | 0.375200618 | 0.454997264 | 0.318054063 |
| 0.374940303 | 0.209659329 | 0.383204928 | 0.342405933 |
| 0.313141936 | 0.439471722 | 0.233386293 | 0.442321966 |
| 0.323023156 | 0.315011907 | 0.477790151 | 0.429547437 |
| 0.414208158 | 0.252656722 | 0.139928681 | 0.394254258 |
| 0.342421125 | 0.282265996 | 0.013585799 | 0.071151778 |
| 0.405067347 | 0.310514773 | 0.403606776 | 0.403773629 |
| 0.251519555 | 0.395260728 | 0.133673485 | 0.409560793 |
| 0.449174479 | 0.486011391 | 0.337910545 | 0.385134766 |
| 0.434192408 | 0.286507762 | 0.452040794 | 0.025810757 |
| 0.375433532 | 0.350896956 | 0.33694841  | 0.216752631 |
| 0.120118855 | 0.156452568 | 0.387444149 | 0.222471821 |
| 0.426260911 | 0.159293228 | 0.375537798 | 0.428202697 |
| 0.353112294 | 0.489660283 | 0.257042425 | 0.422726847 |
| 0.160675457 | 0.395191542 | 0.326384852 | 0.348848573 |
| 0.27721355  | 0.257013531 | 0.411028796 | 0.213348308 |
| 0.160990382 | 0.315628237 | 0.008108717 | 0.439368473 |
| 0.458390476 | 0.280730781 | 0.372673637 | 0.269035938 |
| 0.386823363 | 0.430061463 | 0.2847439   | 0.36363189  |
| 0.068729524 | 0.33619084  | 0.375276919 | 0.464355186 |
| 0.186337761 | 0.363012031 | 0.196789884 | 0.285871303 |
| 0.48240919  | 0.291538283 | 0.396086944 | 0.249957548 |
| 0.445708279 | 0.430114828 | 0.332001401 | 0.282159891 |
| 0.373708574 | 0.233418577 | 0.378280502 | 0.466037515 |
| 0.318718994 | 0.201270522 | 0.414241093 | 0.321364052 |
| 0.265601104 | 0.453483632 | 0.358778203 | 0.461819404 |
| 0.180487579 | 0.400029569 | 0.418136005 | 0.440087241 |
| 0.407288364 | 0.174305349 | 0.219883891 | 0.277128592 |
| 0.443361077 | 0.255672641 | 0.240830747 | 0.44680909  |
| 0.180462605 | 0.411264109 | 0.368580835 | 0.252319698 |
| 0.149322539 | 0.335850609 | 0.421683756 | 0.332019207 |
| 0.389589385 | 0.358588347 | 0.255295576 | 0.445924552 |
| 0.267401564 | 0.101142083 | 0.450198994 | 0.013788145 |
| 0.454678831 | 0.404467386 | 0.403727265 | 0.344834855 |
| 0.363976058 | 0.420427775 | 0.402539587 | 0.016272829 |

|             |             |             |             |
|-------------|-------------|-------------|-------------|
| 0.4175483   | 0.0623465   | 0.342092257 | 0.270217149 |
| 0.260865759 | 0.210364985 | 0.456066463 | 0.443163354 |
| 0.441532282 | 0.318417865 | 0.282173536 | 0.450847182 |
| 0.124155533 | 0.254494201 | 0.284453782 | 0.42319251  |
| 0.187912337 | 0.334706736 | 0.356524458 | 0.313187612 |
| 0.448333954 | 0.425725873 |             |             |
| DHX33       | 0.243304711 | 0.235234361 | 0.230661699 |
| 0.147264192 | 0.088528395 | 0.127681737 | 0.256974831 |
| 0.236304911 | 0.21427121  | 0.08979799  | 0.124680546 |
| 0.181863269 | 0.011620414 | 0.225666856 | 0.239391896 |
| 0.099873612 | 0.188404887 | 0.246542778 | 0.063628094 |
| 0.168454658 | 0.092266188 | 0.072874558 | 0.16277254  |
| 0.095147439 | 0.324871127 | 0.187591033 | 0.085123141 |
| 0.232384196 | 0.039496182 | 0.113346991 | 0.050797021 |
| 0.293243382 | 0.085462366 | 0.073144202 | 0.185306382 |
| 0.128377572 | 0.008206508 | 0.341783025 | 0.129510566 |
| 0.028195973 | 0.295383877 | 0.115019018 | 0.148421733 |
| 0.121205685 | 0.225436027 | 0.046299428 | 0.10890458  |
| 0.174209734 | 0.15912212  | 0.261901163 | 0.13896318  |
| 0.11856891  | 0.186759732 | 0.155394852 | 0.011409775 |
| 0.048692323 | 0.006361211 | 0.029769806 | 0.280039631 |
| 0.218508255 | 0.202573157 | 0.05232194  | 0.193307302 |
| 0.120614694 | 0.12986175  | 0.191963859 | 0.109336929 |
| 0.25623392  | 0.029388552 | 0.122376924 | 0.115193995 |
| 0.156538327 | 0.241233365 | 0.250683686 | 0.267151389 |
| 0.103829045 | 0.174753945 | 0.108467152 | 0.063200081 |
| 0.235078848 | 0.330982629 | 0.213995    | 0.309691996 |
| 0.034161005 | 0.077661002 | 0.082515835 | 0.164969003 |
| 0.162653803 | 0.244968343 | 0.145899056 | 0.292116315 |
| 0.247737027 | 0.124728167 | 0.155403059 | 0.27465772  |
| 0.216423547 | 0.059895248 | 0.110485961 | 0.031789518 |
| 0.096582903 | 0.092070547 | 0.319829536 | 0.191236369 |
| 0.097095046 | 0.274912827 | 0.339570278 | 0.067550518 |
| 0.102230607 | 0.258403165 | 0.082424318 | 0.158749636 |
| 0.133054566 | 0.227951277 | 0.191604878 | 0.189105464 |
| 0.089542289 | 0.246926353 | 0.148195426 | 0.229318303 |
| 0.028853476 | 0.274930974 | 0.22084485  | 0.185222533 |
| 0.254733268 | 0.191715295 | 0.093150344 | 0.23147464  |
| 0.191138063 | 0.178918911 | 0.219810282 | 0.144043625 |
| 0.1785971   | 0.310601023 | 0.275208975 | 0.190963612 |
| 0.233576692 | 0.049059043 | 0.090763003 | 0.178097915 |
| 0.149326505 | 0.259668351 | 0.053819705 | 0.336173358 |
| 0.246443049 | 0.157495324 | 0.244769415 | 0.3636968   |
| 0.215761361 | 0.277196946 | 0.210034248 | 0.204821553 |
| 0.311139882 | 0.322897072 | 0.245639012 | 0.093070886 |
| 0.296998449 | 0.161494419 | 0.05874823  | 0.21141673  |
| 0.255982077 | 0.005648794 | 0.188247588 | 0.202940665 |
| 0.271823092 | 0.156733546 | 0.245889286 | 0.224322102 |
| 0.272880942 | 0.269748511 | 0.008264166 | 0.132890155 |
| 0.299352764 | 0.216531    | 0.153922651 | 0.093148831 |
| 0.102038905 | 0.15501502  | 0.153069665 | 0.068131831 |
| 0.301154629 | 0.196102336 | 0.207359487 | 0.181740322 |
| 0.173450678 | 0.293534337 | 0.072958392 | 0.331128361 |
| 0.202725464 | 0.238780375 | 0.250137688 | 0.196171821 |

|             |             |             |             |
|-------------|-------------|-------------|-------------|
| 0.105912506 | 0.190010656 | 0.157608243 | 0.11626864  |
| 0.203198017 | 0.174272141 | 0.055644231 | 0.096346666 |
| 0.270553701 | 0.112660895 | 0.238439029 | 0.25538215  |
| 0.189534321 | 0.318197357 | 0.151077567 | 0.165078308 |
| 0.131306276 | 0.405729226 | 0.121636392 | 0.221760378 |
| 0.114054702 | 0.253941952 | 0.147235751 | 0.251904279 |
| 0.253807563 | 0.0845716   | 0.237811448 | 0.05055013  |
| 0.086836095 | 0.06294548  | 0.026154354 | 0.090313271 |
| 0.364700194 | 0.147711937 | 0.120317949 | 0.114156297 |
| 0.202288625 | 0.255492061 | 0.09519592  | 0.325927588 |
| 1           | 0.099134488 | 0.188272865 | 0.126612821 |
| 0.089011714 | 0.166002508 | 0.167980768 | 0.079154193 |
| 0.193469582 | 0.030133899 | 0.039143645 | 0.200212424 |
| 0.057880848 | 0.067995879 | 0.206201562 | 0.115554694 |
| 0.107346028 | 0.362122467 | 0.254365795 | 0.009735688 |
| 0.095696248 | 0.047014658 | 0.156220786 | 0.112946723 |
| 0.207122661 | 0.177927085 | 0.079121399 | 0.084076216 |
| 0.247005025 | 0.280244997 | 0.208278643 | 0.235725342 |
| 0.082008421 | 0.262378425 | 0.170331384 | 0.209118088 |
| 0.166806044 | 0.083215894 | 0.01724506  | 0.168140332 |
| 0.187965856 | 0.090571719 | 0.270179201 | 0.145192941 |
| 0.104322111 | 0.105330852 | 0.071785022 | 0.239302265 |
| 0.319571021 | 0.292688798 | 0.168997203 | 0.140122618 |
| 0.195979299 | 0.205034318 | 0.184636562 | 0.271347022 |
| 0.090986091 | 0.094805291 | 0.085243126 | 0.165801222 |
| 0.240447751 | 0.075781301 | 0.267517303 | 0.024667217 |
| 0.000560897 | 0.270018065 | 0.256462528 | 0.144579433 |
| 0.037475118 | 0.105652535 | 0.124205786 | 0.255117219 |
| 0.227097133 | 0.24113408  | 0.225967693 | 0.104722548 |
| 0.258757741 | 0.098415799 | 0.079830345 | 0.10581904  |
| 0.223864466 | 0.078955133 | 0.145758615 | 0.337165954 |
| 0.247039211 | 0.046606561 | 0.18571576  | 0.010259088 |
| 0.252265338 | 0.18120655  | 0.308994618 | 0.352615814 |
| 0.198945764 | 0.340247078 | 0.243509431 | 0.108716111 |
| 0.145700514 | 0.2540164   | 0.01591904  | 0.233093865 |
| 0.267412561 | 0.261075877 | 0.26905073  | 0.30290076  |
| 0.216137165 | 0.158841596 | 0.151868068 | 0.165963607 |
| 0.237654365 | 0.267590257 | 0.048550429 | 0.131238978 |
| 0.027630664 | 0.16155425  | 0.115136241 | 0.252362297 |
| 0.130106086 | 0.18626393  | 0.214120323 | 0.099176367 |
| 0.133621381 | 0.025061707 | 0.174938168 | 0.166090972 |
| 0.134194327 | 0.178411642 | 0.068583376 | 0.071328139 |
| 0.284093598 | 0.255180611 | 0.065716916 | 0.279545274 |
| 0.137212972 | 0.267859346 | 0.113731446 | 0.134694678 |
| 0.245368597 | 0.041883482 | 0.156503031 | 0.010775667 |
| 0.071732071 | 0.291788836 | 0.096481012 | 0.219875822 |
| 0.186098917 | 0.10609331  | 0.256465051 | 0.281171717 |
| 0.277827408 | 0.230490988 | 0.248050666 | 0.050623246 |
| 0.263737968 | 0.009185681 | 0.250811409 | 0.220224391 |
| 0.093742636 | 0.009137057 | 0.03776544  | 0.193295485 |
| 0.099772569 | 0.25414828  | 0.241056357 | 0.107382068 |
| 0.184192554 | 0.266829747 | 0.22943691  | 0.054844821 |
| 0.125397912 | 0.102605717 | 0.054599323 | 0.291494858 |
| 0.173975964 | 0.178596166 | 0.138928337 | 0.279371679 |

|             |             |             |             |
|-------------|-------------|-------------|-------------|
| 0.103666615 | 0.21417382  | 0.275746632 | 0.019764634 |
| 0.127280043 | 0.293046608 | 0.358814012 | 0.262816697 |
| 0.274998747 | 0.110293823 | 0.073502922 | 0.107631968 |
| 0.196635831 | 0.255413897 | 0.072865333 | 0.26813767  |
| 0.259190591 | 0.111704581 | 0.192227901 | 0.246446237 |
| 0.252778178 | 0.267989899 | 0.223700877 | 0.157687228 |
| 0.082070954 | 0.004280487 | 0.148583706 | 0.208957705 |
| 0.038995838 | 0.094812046 | 0.231738116 | 0.164081743 |
| 0.151868551 | 0.177977899 | 0.04854828  | 0.049007742 |
| 0.157753026 | 0.124303339 | 0.07109795  | 0.226178401 |
| 0.100265848 | 0.06378665  | 0.158433356 | 0.203404459 |
| 0.113085536 | 0.271209625 | 0.321802073 | 0.211412239 |
| 0.106806649 | 0.092435904 | 0.240059026 | 0.252625914 |
| 0.187487568 | 0.205635769 | 0.203412884 | 0.067068697 |
| 0.251208148 | 0.12374196  | 0.211527568 | 0.252048897 |
| 0.31480999  | 0.278079991 | 0.319803472 | 0.131164433 |
| 0.239307008 | 0.136198638 | 0.074713262 | 0.096544512 |
| 0.250946345 | 0.265859529 | 0.272327931 | 0.054599867 |
| 0.265013999 | 0.18965249  | 0.151925589 | 0.253675769 |
| 0.079723323 | 0.230953486 | 0.144749069 | 0.250727999 |
| 0.122640283 | 0.045538655 | 0.245089744 | 0.215238252 |
| 0.200700985 | 0.027921442 | 0.241605957 | 0.171328192 |
| 0.208686006 | 0.085001963 | 0.121595694 | 0.286376057 |
| 0.267379717 | 0.272887382 | 0.167626326 | 0.15499688  |
| 0.16684079  | 0.101821263 | 0.089997849 | 0.235352331 |
| 0.229597377 | 0.110040116 | 0.2834103   | 0.203969743 |
| 0.27578823  | 0.089393811 | 0.07060954  | 0.113513318 |
| 0.227203703 | 0.136975917 | 0.176432909 | 0.263162527 |
| 0.268522357 | 0.339703339 | 0.224270269 | 0.172973717 |
| 0.114295468 | 0.271257735 | 0.262148654 | 0.199556607 |
| 0.041146014 | 0.217321847 | 0.115549705 | 0.159944297 |
| 0.005496421 | 0.019267261 | 0.225448921 | 0.155670568 |
| 0.298533132 | 0.211001759 | 0.272189735 | 0.176564727 |
| 0.000297437 | 0.099531117 | 0.124631237 | 0.103297805 |
| 0.222736856 | 0.210769672 | 0.137332387 | 0.183132825 |
| 0.224189103 | 0.255209525 | 0.168465463 | 0.120005823 |
| 0.033072366 | 0.152494156 | 0.224981726 | 0.227690394 |
| 0.140994536 | 0.267587366 | 0.043803819 | 0.180163232 |
| 0.042273635 | 0.212718137 | 0.201537625 | 0.10068939  |
| 0.033490521 | 0.214270085 | 0.185597496 | 0.205939845 |
| 0.079130761 | 0.201248023 | 0.220532335 | 0.02153297  |
| 0.119473635 | 0.11076257  | 0.136457203 | 0.128732402 |
| 0.145090918 | 0.15287532  | 0.132553527 | 0.098458307 |
| 0.168325979 | 0.192624146 | 0.141413062 | 0.183753793 |
| 0.1406883   | 0.202563372 | 0.113433559 | 0.157857256 |
| 0.091789305 | 0.22892844  | 0.313607121 | 0.347312671 |
| 0.159283113 | 0.214604958 | 0.286260973 | 0.257514155 |
| 0.18729968  | 0.14258883  | 0.24754773  | 0.269257233 |
| 0.225071925 | 0.300612473 | 0.143225368 | 0.20862189  |
| 0.04928092  | 0.12093679  | 0.253995842 | 0.144537059 |
| 0.19512181  | 0.065906546 | 0.127035851 | 0.195839586 |
| 0.156210955 | 0.31114089  | 0.27251211  | 0.253343593 |
| 0.116091871 | 0.125037813 | 0.094394504 | 0.144438287 |
| 0.222224447 | 0.273841193 | 0.07781075  | 0.051869627 |

|             |             |             |             |
|-------------|-------------|-------------|-------------|
| 0.163067747 | 0.169527483 | 0.182026015 | 0.293769155 |
| 0.048591939 | 0.248354571 | 0.10469955  | 0.229269015 |
| 0.081171429 | 0.332939883 | 0.259694986 | 0.147551814 |
| 0.027970794 | 0.19636685  | 0.103984927 | 0.148363442 |
| 0.135042523 | 0.136010214 | 0.092266504 | 0.204061055 |
| 0.186435005 | 0.249915912 | 0.321003109 | 0.261824413 |
| 0.104342879 | 0.058926494 | 0.147780271 | 0.119630925 |
| 0.134139349 | 0.236433055 | 0.25284411  | 0.233871273 |
| 0.103440564 | 0.281182511 | 0.317879183 | 0.177443866 |
| 0.159145794 | 0.112117379 | 0.024939996 | 0.13180114  |
| 0.184177417 | 0.061048144 | 0.004112593 | 0.022874539 |
| 0.159535424 | 0.120462001 | 0.178786351 | 0.161632967 |
| 0.074570989 | 0.18079797  | 0.022628657 | 0.200808032 |
| 0.293661652 | 0.337232342 | 0.128962163 | 0.230244537 |
| 0.194652937 | 0.207825462 | 0.151026331 | 0.014612327 |
| 0.106852958 | 0.089829006 | 0.094111219 | 0.22071176  |
| 0.17493853  | 0.030213139 | 0.120889753 | 0.267361253 |
| 0.19830453  | 0.026220715 | 0.150305607 | 0.128757649 |
| 0.258008942 | 0.341484122 | 0.138446787 | 0.132646887 |
| 0.228805179 | 0.207409504 | 0.085450411 | 0.113057583 |
| 0.087086621 | 0.064449287 | 0.149377392 | 0.0463695   |
| 0.19203958  | 0.106154443 | 0.019900043 | 0.341969665 |
| 0.332578903 | 0.07350204  | 0.293906199 | 0.079988068 |
| 0.167705273 | 0.224388317 | 0.104394317 | 0.09467035  |
| 0.083879676 | 0.085884866 | 0.202710706 | 0.217510395 |
| 0.037720256 | 0.137761407 | 0.146774321 | 0.085039606 |
| 0.373832511 | 0.092368354 | 0.25991148  | 0.063122616 |
| 0.262766681 | 0.209145749 | 0.260536245 | 0.089638815 |
| 0.132943198 | 0.269830064 | 0.109064786 | 0.277604946 |
| 0.155813215 | 0.046658252 | 0.157847927 | 0.159077008 |
| 0.064774616 | 0.241726842 | 0.107427682 | 0.281907473 |
| 0.113539646 | 0.197410433 | 0.149885041 | 0.243265787 |
| 0.187798901 | 0.050658346 | 0.048825956 | 0.101065128 |
| 0.275983565 | 0.167579362 | 0.066294976 | 0.192609086 |
| 0.039724235 | 0.167840843 | 0.149073158 | 0.092080038 |
| 0.14582862  | 0.191622399 | 0.114046517 | 0.259459726 |
| 0.160524279 | 0.11148395  | 0.08478286  | 0.26731492  |
| 0.114355314 | 0.089615149 | 0.283507609 | 0.00246175  |
| 0.171837662 | 0.114650374 | 0.193032317 | 0.096411107 |
| 0.279251461 | 0.173957651 | 0.176240395 | 0.042789388 |
| 0.174137683 | 0.020373131 | 0.118196166 | 0.087316749 |
| 0.068417934 | 0.254756171 | 0.273659255 | 0.226552804 |
| 0.192497631 | 0.084720314 | 0.061597458 | 0.2637374   |
| 0.025034296 | 0.055311987 | 0.075064805 | 0.144837869 |
| 0.038416677 | 0.096084848 | 0.092367114 | 0.06856305  |
| 0.180857405 | 0.189025948 |             |             |
| DHX58       | 0.04831375  | 0.277852846 | 0.034227533 |
| 0.121012739 | 0.280637356 | 0.165046221 | 0.033016236 |
| 0.065716502 | 0.196530798 | 0.057201944 | 0.290788299 |
| 0.020706497 | 0.090006316 | 0.370092623 | 0.035834156 |
| 0.275610152 | 0.038544308 | 0.079134383 | 0.023326101 |
| 0.071333438 | 0.255415671 | 0.179260503 | 0.164112804 |
| 0.205219239 | 0.160991281 | 0.165552887 | 0.189533074 |
| 0.371705915 | 0.118004935 | 0.329827042 | 0.050438376 |



|             |             |             |             |
|-------------|-------------|-------------|-------------|
| 0.342689332 | 0.305237417 | 0.189284793 | 0.01494918  |
| 0.223503115 | 0.006373521 | 0.315629172 | 0.15473878  |
| 0.141533393 | 0.297833542 | 0.093907306 | 0.186883305 |
| 0.117152825 | 0.026664202 | 0.053182878 | 0.249759096 |
| 0.151931801 | 0.107225202 | 0.036780042 | 0.280935249 |
| 0.097467986 | 0.267874425 | 0.20077487  | 0.002128401 |
| 0.183167146 | 0.063380123 | 0.111869557 | 0.373058994 |
| 0.215512332 | 0.11993959  | 0.07000344  | 0.096186499 |
| 0.199879562 | 0.25033282  | 0.214752535 | 0.084323379 |
| 0.395080622 | 0.116311776 | 0.280835947 | 0.119608484 |
| 0.147534315 | 0.011832025 | 0.157480957 | 0.039696488 |
| 0.129149455 | 0.201625986 | 0.281129645 | 0.154892303 |
| 0.266005035 | 0.386641548 | 0.17273302  | 0.334007126 |
| 0.054639617 | 0.248630159 | 0.150870861 | 0.288741497 |
| 0.233788535 | 0.03114898  | 0.361686446 | 0.406062136 |
| 0.019181137 | 0.148642627 | 0.244628123 | 0.078164632 |
| 0.315959615 | 0.099787769 | 0.148024711 | 0.171256106 |
| 0.310918799 | 0.239960713 | 0.321974445 | 0.276242874 |
| 0.20416537  | 0.046212735 | 0.322824525 | 0.267247587 |
| 0.221640376 | 0.060674634 | 0.126627152 | 0.358680884 |
| 0.279920132 | 0.391806942 | 0.271925367 | 0.268459692 |
| 0.24133015  | 0.398174154 | 0.312033315 | 0.310004005 |
| 0.033304342 | 0.382957213 | 0.150584409 | 0.052327463 |
| 0.030010156 | 0.07541045  | 0.087252183 | 0.27928656  |
| 0.391632294 | 0.243767413 | 0.115736495 | 0.198133696 |
| 0.392857983 | 0.31544908  | 0.365768752 | 0.316500472 |
| 0.029638755 | 0.100038387 | 0.236734832 | 0.109361211 |
| 0.271845362 | 0.082174564 | 0.206599106 | 0.362276125 |
| 0.355088644 | 0.368092317 | 0.064271362 | 0.358780404 |
| 0.081046459 | 0.433084112 | 0.31561635  | 0.158115676 |
| 0.387244203 | 0.358272157 | 0.437081783 | 0.361278973 |
| 0.372431481 | 0.202004824 | 0.016893609 | 0.27394514  |
| 0.44067237  | 0.028840201 | 0.360487972 | 0.387122371 |
| 0.354301001 | 0.373273638 | 0.422658362 | 0.407791162 |
| 0.357445126 | 0.054281024 | 0.006348501 | 0.274344178 |
| 0.364750564 | 0.359051995 | 0.088729907 | 0.210105569 |
| 0.274476165 | 0.17713722  | 0.308798133 | 0.151493334 |
| 0.426131188 | 0.364256431 | 0.363411602 | 0.266601469 |
| 0.109155357 | 0.277373907 | 0.21420484  | 0.322572082 |
| 0.041997518 | 0.067685322 | 0.040759603 | 0.230678971 |
| 0.090391792 | 0.183359964 | 0.135047162 | 0.202550916 |
| 0.205339402 | 0.118405998 | 0.147736023 | 0.342437302 |
| 0.038617096 | 0.237630588 | 0.108302723 | 0.091189583 |
| 0.047311265 | 0.125407215 | 0.130774885 | 0.143236456 |
| 0.227666606 | 0.158938562 | 0.290942242 | 0.383608224 |
| 0.138068878 | 0.145818463 | 0.288350982 | 0.414275325 |
| 0.41260035  | 0.268016127 | 0.194004787 | 0.036176625 |
| 0.119828647 | 0.073531285 | 0.106755693 | 0.223185847 |
| 0.132384323 | 0.111186272 | 0.242277305 | 0.395810281 |
| 0.157667872 | 0.055197234 | 0.134620427 | 0.351252123 |
| 0.099134488 | 1           | 0.397326253 | 0.173444446 |
| 0.005043633 | 0.200307232 | 0.369435053 | 0.099532143 |
| 0.189281214 | 0.148588557 | 0.182483814 | 0.371928166 |
| 0.118676424 | 0.12873077  | 0.394019649 | 0.367564886 |

|             |             |             |             |
|-------------|-------------|-------------|-------------|
| 0.135854031 | 0.138420224 | 0.418472344 | 0.020064738 |
| 0.176927618 | 0.099440241 | 0.307814624 | 0.090717467 |
| 0.196160867 | 0.260776292 | 0.273430849 | 0.17204827  |
| 0.095424059 | 0.384224125 | 0.318159181 | 0.410620967 |
| 0.118320133 | 0.414728372 | 0.389218011 | 0.400300073 |
| 0.270202167 | 0.135526141 | 0.107277568 | 0.357778399 |
| 0.367782603 | 0.080622758 | 0.050213698 | 0.303874079 |
| 0.106464064 | 0.304852062 | 0.093073743 | 0.41801393  |
| 0.395706118 | 0.300616649 | 0.121372301 | 0.353039443 |
| 0.369437869 | 0.191423065 | 0.330012708 | 0.421140664 |
| 0.06127392  | 0.20004638  | 0.150889295 | 0.394959611 |
| 0.154669288 | 0.129840867 | 0.247565704 | 0.110038949 |
| 0.015617665 | 0.046634044 | 0.05032393  | 0.166079958 |
| 0.158790884 | 0.212453041 | 0.279794124 | 0.394781479 |
| 0.106229543 | 0.358905782 | 0.158630078 | 0.160735778 |
| 0.305178448 | 0.167384207 | 0.26734177  | 0.29001567  |
| 0.19848644  | 0.03635955  | 0.130698505 | 0.385838406 |
| 0.021466205 | 0.182726032 | 0.137665845 | 0.009618351 |
| 0.025956706 | 0.238151949 | 0.071160861 | 0.169165663 |
| 0.423193988 | 0.159247487 | 0.148629057 | 0.06319329  |
| 0.340759053 | 0.082476766 | 0.022289922 | 0.352608525 |
| 0.332219439 | 0.308729245 | 0.322777216 | 0.29849838  |
| 0.305972475 | 0.273401821 | 0.337977394 | 0.182044714 |
| 0.060890343 | 0.034730447 | 0.132404294 | 0.186626293 |
| 0.003501643 | 0.373677305 | 0.194711315 | 0.145170159 |
| 0.330313799 | 0.205463105 | 0.035204481 | 0.252817588 |
| 0.026383645 | 0.131950213 | 0.091889095 | 0.11847522  |
| 0.31944794  | 0.012964758 | 0.112939931 | 0.121267934 |
| 0.320372727 | 0.282155719 | 0.137065571 | 0.397859196 |
| 0.278196314 | 0.070171238 | 0.216746537 | 0.375886824 |
| 0.047801635 | 0.023766557 | 0.104114988 | 0.014944162 |
| 0.095353241 | 0.314618653 | 0.116810842 | 0.038694171 |
| 0.230123134 | 0.007786007 | 0.298751528 | 0.411305976 |
| 0.313391149 | 0.416832108 | 0.409665487 | 0.211808605 |
| 0.393977736 | 0.05785087  | 0.402294262 | 0.287732839 |
| 0.099765117 | 0.002538243 | 0.01236942  | 0.394064607 |
| 0.257501549 | 0.036883874 | 0.145735698 | 0.141609772 |
| 0.108428796 | 0.061646255 | 0.045258213 | 0.157114626 |
| 0.281766482 | 0.2458242   | 0.142114516 | 0.314787831 |
| 0.159346086 | 0.195309487 | 0.11609053  | 0.062092945 |
| 0.280510313 | 0.053451788 | 0.05559109  | 0.029377601 |
| 0.32427739  | 0.078320945 | 0.310083742 | 0.378825606 |
| 0.413782192 | 0.342555856 | 0.076279102 | 0.140585036 |
| 0.330127708 | 0.06040894  | 0.118646792 | 0.066271816 |
| 0.343515166 | 0.294499886 | 0.332725416 | 0.279785701 |
| 0.419610969 | 0.373126207 | 0.027736884 | 0.331650397 |
| 0.033971871 | 0.005661316 | 0.162974135 | 0.201137353 |
| 0.017882281 | 0.187805353 | 0.241150029 | 0.063643197 |
| 0.094452439 | 0.03225271  | 0.141226354 | 0.143781524 |
| 0.249789572 | 0.213076836 | 0.249389305 | 0.160224833 |
| 0.144692579 | 0.095149092 | 0.13192406  | 0.084426215 |
| 0.069030455 | 0.222806756 | 0.164029634 | 0.016172144 |
| 0.185473891 | 0.241786367 | 0.052717872 | 0.137291715 |
| 0.398507884 | 0.406648794 | 0.033764915 | 0.034600054 |

|             |             |             |             |
|-------------|-------------|-------------|-------------|
| 0.230844553 | 0.140879618 | 0.426314764 | 0.356137875 |
| 0.383959102 | 0.427343209 | 0.321120232 | 0.102671301 |
| 0.051803351 | 0.241771538 | 0.243292422 | 0.108255784 |
| 0.399537718 | 0.035921438 | 0.356330512 | 0.217592517 |
| 0.093793731 | 0.114335483 | 0.05590639  | 0.069997233 |
| 0.284089688 | 0.170806373 | 0.185231553 | 0.098238801 |
| 0.179482951 | 0.156117772 | 0.029649087 | 0.173409042 |
| 0.268812104 | 0.111538483 | 0.135291828 | 0.102568421 |
| 0.24493071  | 0.035012093 | 0.32019143  | 0.390807443 |
| 0.113264138 | 0.061133745 | 0.094929964 | 0.274845686 |
| 0.324151658 | 0.160029878 | 0.05479874  | 0.289164569 |
| 0.402477331 | 0.301252778 | 0.367595314 | 0.364316781 |
| 0.063843719 | 0.271827963 | 0.126782726 | 0.223553734 |
| 0.141561916 | 0.178229884 | 0.152362123 | 0.053922483 |
| 0.248048488 | 0.348449431 | 0.292927029 | 0.165357909 |
| 0.220184011 | 0.064829895 | 0.028749665 | 0.332018921 |
| 0.135112499 | 0.061936252 | 0.104342508 | 0.320250685 |
| 0.007510672 | 0.127125052 | 0.380013528 | 0.161550455 |
| 0.387663278 | 0.399485829 | 0.380992098 | 0.087514766 |
| 0.001108303 | 0.2831562   | 0.321546266 | 0.182857695 |
| 0.303523888 | 0.277670609 | 0.057813933 | 0.080998926 |
| 0.298734253 | 0.057534051 | 0.101337166 | 0.127552078 |
| 0.076681021 | 0.225076988 | 0.19845274  | 0.114449149 |
| 0.14698697  | 0.04374954  | 0.163183007 | 0.160663871 |
| 0.065963635 | 0.252565497 | 0.345027705 | 0.057455675 |
| 0.119562498 | 0.337459145 | 0.281342539 | 0.024212341 |
| 0.232990518 | 0.310497197 | 0.353001786 | 0.003055152 |
| 0.354228326 | 0.014152678 | 0.184737278 | 0.208708881 |
| 0.161067029 | 0.139640937 | 0.256832768 | 0.167610996 |
| 0.194618687 | 0.133875977 | 0.19576211  | 0.252669856 |
| 0.15183794  | 0.128023133 | 0.260250321 | 0.136602799 |
| 0.203365725 | 0.090086837 | 0.075762205 | 0.074397985 |
| 0.077924173 | 0.3452294   | 0.23477387  | 0.055726745 |
| 0.214293713 | 0.115959953 | 0.347809838 | 0.334667528 |
| 0.392110435 | 0.07365147  | 0.148373586 | 0.33518124  |
| 0.051227983 | 0.106218713 | 0.02748316  | 0.191640881 |
| 0.188689609 | 0.184074557 | 0.163980957 | 0.163135969 |
| 0.226000984 | 0.345991264 | 0.230529904 | 0.358780122 |
| 0.189858532 | 0.128300864 | 0.068775715 | 0.112201548 |
| 0.119075413 | 0.09617675  | 0.25297643  | 0.005489081 |
| 0.280902065 | 0.105101821 | 0.385064318 | 0.350197472 |
| 0.131664264 | 0.351144132 | 0.087399599 | 0.060408376 |
| 0.060531719 | 0.1171761   | 0.129737446 | 0.292750975 |
| 0.133333511 | 0.116006387 | 0.25726774  | 0.100711142 |
| 0.328567692 | 0.25659176  | 0.122542953 | 0.112632892 |
| 0.148267364 | 0.131256354 | 0.318059492 | 0.05832806  |
| 0.213868138 | 0.176312001 | 0.142374281 | 0.216389024 |
| 0.162124426 | 0.387594239 | 0.049460415 | 0.399957113 |
| 0.175513933 | 0.101644145 | 0.40430331  | 0.157181025 |
| 0.106671814 | 0.138340508 | 0.129336145 | 0.100976061 |
| 0.104499045 | 0.15509347  | 0.003365707 | 0.04438953  |
| 0.342288108 | 0.07357622  | 0.234350314 | 0.255359549 |
| 0.15466496  | 0.319472019 | 0.113564361 | 0.11946052  |
| 0.312733476 | 0.337798051 | 0.147535069 | 0.224848667 |

|             |             |             |             |
|-------------|-------------|-------------|-------------|
| 0.273907485 | 0.089194239 | 0.228139034 | 0.003644333 |
| 0.25612205  | 0.236650579 | 0.097934219 | 0.043327332 |
| 0.017887185 | 0.126818452 | 0.22130634  | 0.032358481 |
| 0.405368279 | 0.138204707 | 0.154299301 | 0.323058983 |
| 0.122730045 | 0.342098842 | 0.118532362 | 0.383205676 |
| 0.012551712 | 0.1942726   | 0.19401717  | 0.145985021 |
| 0.197766525 | 0.191403616 | 0.362299199 | 0.192314952 |
| 0.036919842 | 0.16533326  | 0.001279383 | 0.326489312 |
| 0.301565762 | 0.180687624 | 0.172773169 | 0.060544961 |
| 0.294842324 | 0.288885931 | 0.122366871 | 0.185989382 |
| 0.030603626 | 0.301543754 | 0.180822926 | 0.347221309 |
| 0.104978146 | 0.158965364 | 0.077951557 | 0.180098111 |
| 0.30329915  | 0.124502197 | 0.208784906 | 0.101491492 |
| 0.344242522 | 0.257442629 | 0.101768206 | 0.13604435  |
| 0.179365631 | 0.049578485 | 0.109278705 | 0.40070134  |
| 0.170043841 | 0.184660237 | 0.409748158 | 0.12963762  |
| 0.18295426  | 0.287376972 | 0.189394573 | 0.372129688 |
| 0.092335283 | 0.244932335 | 0.346611786 | 0.329673237 |
| 0.324274865 | 0.128258666 | 0.166719515 | 0.161816329 |
| 0.320307464 | 0.105066768 | 0.116655044 | 0.275812026 |
| 0.142410197 | 0.276372704 | 0.129448832 | 0.157908594 |
| 0.064180899 | 0.084091357 | 0.171790355 | 0.117838302 |
| 0.238713788 | 0.233391795 | 0.136766006 | 0.363166481 |
| 0.172273031 | 0.058694737 | 0.385360914 | 0.023240211 |
| 0.195661705 | 0.354223371 | 0.204991675 | 0.20688679  |
| 0.173536252 | 0.198030539 | 0.135580604 | 0.002616988 |
| 0.346419349 | 0.051229159 | 0.131361773 | 0.180597017 |
| 0.125197565 | 0.030944328 | 0.358648747 | 0.43113746  |
| 0.216684766 | 0.108749809 | 0.127917192 | 0.344218342 |
| 0.130000439 | 0.105883419 | 0.113879521 | 0.22371245  |
| 0.15393928  | 0.116228001 | 0.147180323 | 0.173246006 |
| 0.286853536 | 0.125598599 |             |             |
| DLGAP5      | 0.125573648 | 0.400342832 | 0.089613047 |
| 0.233514872 | 0.378746201 | 0.421997646 | 0.107177151 |
| 0.200930712 | 0.339788767 | 0.288856178 | 0.43449     |
| 0.044357965 | 0.122520294 | 0.462414408 | 0.099695782 |
| 0.440038101 | 0.076666837 | 0.179090225 | 0.10354413  |
| 0.259718528 | 0.369386274 | 0.395582285 | 0.397962554 |
| 0.353370484 | 0.21579146  | 0.36563275  | 0.394397619 |
| 0.487480648 | 0.294376049 | 0.453280398 | 0.2062692   |
| 0.430973421 | 0.398648466 | 0.402942888 | 0.034706598 |
| 0.438447186 | 0.017724217 | 0.44279755  | 0.364085987 |
| 0.209303993 | 0.359849224 | 0.327733161 | 0.346385769 |
| 0.383110215 | 0.072682693 | 0.204511592 | 0.423424085 |
| 0.346152008 | 0.326400659 | 0.097947498 | 0.432949704 |
| 0.390553343 | 0.387695129 | 0.37404603  | 0.007611762 |
| 0.352666113 | 0.111354309 | 0.267581829 | 0.493293623 |
| 0.28018216  | 0.203707039 | 0.301722742 | 0.279531843 |
| 0.400230946 | 0.402576278 | 0.310018675 | 0.38267741  |
| 0.501218843 | 0.240133954 | 0.427138529 | 0.230938068 |
| 0.420503425 | 0.054711094 | 0.221988752 | 0.111175282 |
| 0.408232108 | 0.288903603 | 0.404773505 | 0.355920869 |
| 0.407029149 | 0.513599974 | 0.295283789 | 0.485183118 |
| 0.140065646 | 0.392544246 | 0.341530965 | 0.366009942 |

|             |             |             |             |
|-------------|-------------|-------------|-------------|
| 0.388222801 | 0.127418217 | 0.461510036 | 0.524862816 |
| 0.076666453 | 0.373411485 | 0.423861443 | 0.165137622 |
| 0.406338165 | 0.294660659 | 0.393013157 | 0.246488407 |
| 0.412061512 | 0.412902811 | 0.461105828 | 0.37673971  |
| 0.360061933 | 0.109198836 | 0.468424247 | 0.37828692  |
| 0.396796766 | 0.128744891 | 0.319633693 | 0.444226873 |
| 0.455288261 | 0.489230362 | 0.408638575 | 0.400216158 |
| 0.438273629 | 0.498178687 | 0.448762337 | 0.401146999 |
| 0.146960609 | 0.513732106 | 0.264432928 | 0.090143316 |
| 0.112379678 | 0.14753092  | 0.273655957 | 0.337903611 |
| 0.459090608 | 0.38613841  | 0.291856214 | 0.331124922 |
| 0.456237392 | 0.458889824 | 0.509604623 | 0.436024469 |
| 0.078592768 | 0.279859218 | 0.440694521 | 0.322320476 |
| 0.428914777 | 0.163606456 | 0.334640067 | 0.501761006 |
| 0.398979367 | 0.4499376   | 0.222527869 | 0.493927077 |
| 0.257125899 | 0.521917349 | 0.432324352 | 0.264574491 |
| 0.514226326 | 0.486943651 | 0.518331224 | 0.440044734 |
| 0.470656722 | 0.409941136 | 0.082292403 | 0.394112917 |
| 0.496828457 | 0.02861106  | 0.460163931 | 0.492317235 |
| 0.490080959 | 0.457476518 | 0.521882018 | 0.501696092 |
| 0.491506163 | 0.11653259  | 0.036262989 | 0.373025036 |
| 0.50372726  | 0.419763905 | 0.200787767 | 0.444819511 |
| 0.413275162 | 0.432307538 | 0.419524395 | 0.398399497 |
| 0.52012708  | 0.441279422 | 0.474986978 | 0.422821037 |
| 0.320669217 | 0.333577581 | 0.40029774  | 0.456236226 |
| 0.087411412 | 0.181172219 | 0.082908798 | 0.342008213 |
| 0.347859285 | 0.2618706   | 0.433757614 | 0.384478192 |
| 0.278564083 | 0.365559325 | 0.358221773 | 0.430782655 |
| 0.079101987 | 0.452972377 | 0.228240483 | 0.243014471 |
| 0.092530972 | 0.17551307  | 0.312275402 | 0.240572418 |
| 0.352274307 | 0.246476711 | 0.44456839  | 0.481855323 |
| 0.381340366 | 0.235224055 | 0.449521651 | 0.484047191 |
| 0.448790635 | 0.433186501 | 0.280545249 | 0.031944008 |
| 0.38929815  | 0.308063888 | 0.23931698  | 0.417238356 |
| 0.188700371 | 0.354553257 | 0.44390924  | 0.440782872 |
| 0.354845654 | 0.185492104 | 0.43089547  | 0.436555344 |
| 0.188272865 | 0.397326253 | 1           | 0.416503968 |
| 0.008208735 | 0.418643643 | 0.456415325 | 0.22112298  |
| 0.364310485 | 0.206817925 | 0.315812215 | 0.462428288 |
| 0.35061414  | 0.295925355 | 0.479481371 | 0.424677183 |
| 0.389172856 | 0.226003293 | 0.522295653 | 0.076963153 |
| 0.368128807 | 0.11116546  | 0.367973631 | 0.318148465 |
| 0.334551186 | 0.355580887 | 0.378252696 | 0.364443098 |
| 0.17789194  | 0.511854895 | 0.400744196 | 0.508767804 |
| 0.423574412 | 0.525522409 | 0.456604932 | 0.447316178 |
| 0.407985121 | 0.381483995 | 0.185838882 | 0.460179213 |
| 0.449631996 | 0.346738034 | 0.104461951 | 0.43237879  |
| 0.3794408   | 0.443655543 | 0.178696827 | 0.50376405  |
| 0.496568708 | 0.448910119 | 0.237183923 | 0.418693061 |
| 0.430465296 | 0.321845781 | 0.410837293 | 0.525487278 |
| 0.32163998  | 0.421102114 | 0.41560469  | 0.422055788 |
| 0.249403827 | 0.291020922 | 0.324189854 | 0.21674426  |
| 0.014244143 | 0.126411615 | 0.111012926 | 0.256877386 |
| 0.243233183 | 0.406860649 | 0.433080528 | 0.516303299 |

|             |             |             |             |
|-------------|-------------|-------------|-------------|
| 0.196190382 | 0.414679904 | 0.277807336 | 0.409832681 |
| 0.427263073 | 0.39252999  | 0.408549809 | 0.425336817 |
| 0.294864157 | 0.040963362 | 0.204212643 | 0.518851947 |
| 0.061998243 | 0.320921709 | 0.358964874 | 0.007105436 |
| 0.086684645 | 0.381948951 | 0.123583313 | 0.21329808  |
| 0.475303012 | 0.213603765 | 0.279090148 | 0.33535584  |
| 0.405612849 | 0.148931039 | 0.008495606 | 0.471882851 |
| 0.463503953 | 0.435158589 | 0.462043219 | 0.433386242 |
| 0.421770878 | 0.395725443 | 0.437180167 | 0.387111578 |
| 0.178014446 | 0.134381823 | 0.306935703 | 0.389662964 |
| 0.009487384 | 0.416722413 | 0.353550913 | 0.207480045 |
| 0.441332296 | 0.358316466 | 0.077365594 | 0.387445874 |
| 0.052063041 | 0.266132065 | 0.367521917 | 0.29050561  |
| 0.387598107 | 0.030973798 | 0.30667541  | 0.40442753  |
| 0.428404286 | 0.36924197  | 0.386436723 | 0.520380295 |
| 0.418246181 | 0.159241924 | 0.399965988 | 0.432004345 |
| 0.131720113 | 0.144788229 | 0.383330839 | 0.04657061  |
| 0.223233449 | 0.434120988 | 0.404983078 | 0.122400129 |
| 0.364913948 | 0.013978444 | 0.37968359  | 0.526486963 |
| 0.447456786 | 0.518753707 | 0.501978108 | 0.349676549 |
| 0.50443463  | 0.124211555 | 0.51974414  | 0.406307572 |
| 0.391093247 | 0.003043589 | 0.013480979 | 0.480516261 |
| 0.458069213 | 0.078335915 | 0.233572235 | 0.405488557 |
| 0.198850061 | 0.208612718 | 0.111698361 | 0.266292639 |
| 0.43765111  | 0.328308114 | 0.246270672 | 0.461162856 |
| 0.334541588 | 0.306363431 | 0.401490644 | 0.124028016 |
| 0.431482716 | 0.104774625 | 0.120995694 | 0.018701117 |
| 0.405984323 | 0.144068395 | 0.455519784 | 0.498080904 |
| 0.503472109 | 0.436629786 | 0.340540241 | 0.378059378 |
| 0.409842494 | 0.127727539 | 0.377286661 | 0.149243856 |
| 0.474961036 | 0.45690401  | 0.39193486  | 0.356375675 |
| 0.513783354 | 0.47824569  | 0.068176574 | 0.444602147 |
| 0.030222646 | 0.003890088 | 0.413473811 | 0.316388691 |
| 0.067945312 | 0.428458102 | 0.319151843 | 0.263209423 |
| 0.270819428 | 0.067637663 | 0.325757762 | 0.320502477 |
| 0.381459151 | 0.437532643 | 0.359616247 | 0.275649126 |
| 0.330925063 | 0.221263057 | 0.273795209 | 0.229014633 |
| 0.269991824 | 0.328531494 | 0.223091901 | 0.045058259 |
| 0.429080474 | 0.456988744 | 0.105559934 | 0.216546786 |
| 0.452689537 | 0.493728849 | 0.088075795 | 0.033325885 |
| 0.317607942 | 0.38189696  | 0.502688892 | 0.483992562 |
| 0.516677286 | 0.526275997 | 0.403644388 | 0.214857395 |
| 0.120202451 | 0.383715014 | 0.363057055 | 0.167105168 |
| 0.506053517 | 0.098607832 | 0.467680449 | 0.350681736 |
| 0.171145364 | 0.3052255   | 0.07838392  | 0.138636755 |
| 0.418369132 | 0.25080851  | 0.271846437 | 0.201963339 |
| 0.413120207 | 0.317196689 | 0.088933133 | 0.284262138 |
| 0.404009931 | 0.251666125 | 0.236712578 | 0.336116232 |
| 0.367837752 | 0.206901717 | 0.45507225  | 0.464672066 |
| 0.185731018 | 0.162900435 | 0.358087481 | 0.395171298 |
| 0.442619588 | 0.379894604 | 0.055814166 | 0.42811624  |
| 0.48490631  | 0.462830871 | 0.486994378 | 0.411945842 |
| 0.125622407 | 0.448480833 | 0.344448552 | 0.414460607 |
| 0.255766221 | 0.415843899 | 0.307642551 | 0.106320479 |

|             |             |             |             |
|-------------|-------------|-------------|-------------|
| 0.310705661 | 0.472133419 | 0.408560238 | 0.261349311 |
| 0.4158248   | 0.164890147 | 0.086355902 | 0.417175253 |
| 0.269710894 | 0.164525339 | 0.348607597 | 0.423844767 |
| 0.00470138  | 0.189513172 | 0.476321451 | 0.327899463 |
| 0.505104409 | 0.483841298 | 0.4534624   | 0.290464695 |
| 0.003885782 | 0.431461849 | 0.455230229 | 0.46299115  |
| 0.425637488 | 0.381335055 | 0.17448203  | 0.144655851 |
| 0.336948156 | 0.114989003 | 0.237136941 | 0.368437622 |
| 0.222463474 | 0.434867631 | 0.262449702 | 0.258833498 |
| 0.281847811 | 0.117345142 | 0.296172024 | 0.31965939  |
| 0.180482664 | 0.309321585 | 0.404034493 | 0.276242936 |
| 0.294576848 | 0.429721951 | 0.429888044 | 0.05357867  |
| 0.387370565 | 0.404204978 | 0.417366768 | 0.00819786  |
| 0.467557371 | 0.02050847  | 0.29291767  | 0.32000241  |
| 0.288374346 | 0.303017447 | 0.338881461 | 0.379375975 |
| 0.397519901 | 0.31084141  | 0.379553573 | 0.322754732 |
| 0.255846896 | 0.285135796 | 0.427474355 | 0.392291171 |
| 0.386572559 | 0.199161216 | 0.122165819 | 0.115534519 |
| 0.10848733  | 0.44000451  | 0.282921369 | 0.103466361 |
| 0.302726709 | 0.39239913  | 0.373715623 | 0.475701692 |
| 0.420030681 | 0.13286037  | 0.383217189 | 0.432673508 |
| 0.256845455 | 0.356334816 | 0.106643547 | 0.410157813 |
| 0.319005934 | 0.324327413 | 0.39396587  | 0.366449477 |
| 0.40610903  | 0.41350644  | 0.283013279 | 0.431261758 |
| 0.42738497  | 0.363873737 | 0.322398061 | 0.165463619 |
| 0.27125696  | 0.176386676 | 0.349574492 | 0.006079759 |
| 0.414557836 | 0.334717896 | 0.465228636 | 0.478763339 |
| 0.330432763 | 0.385281826 | 0.342502354 | 0.164859925 |
| 0.275968399 | 0.192425066 | 0.201882847 | 0.42716876  |
| 0.271629556 | 0.261314998 | 0.384967632 | 0.358141975 |
| 0.445993967 | 0.410850833 | 0.304599598 | 0.313980685 |
| 0.293164481 | 0.247280054 | 0.45769672  | 0.169662155 |
| 0.433120664 | 0.279027358 | 0.346203822 | 0.402047893 |
| 0.316238256 | 0.500739937 | 0.09874375  | 0.516233856 |
| 0.413460608 | 0.165888071 | 0.495810889 | 0.333736323 |
| 0.332196922 | 0.191424107 | 0.244597193 | 0.384926025 |
| 0.30159641  | 0.3693257   | 0.020330831 | 0.114982876 |
| 0.397965888 | 0.311405281 | 0.396800787 | 0.387456915 |
| 0.315172927 | 0.381262907 | 0.193141026 | 0.356857986 |
| 0.459960621 | 0.480225758 | 0.384188296 | 0.301694933 |
| 0.396444486 | 0.175513622 | 0.40893294  | 0.021569186 |
| 0.455304771 | 0.428308617 | 0.393895269 | 0.099612571 |
| 0.042216234 | 0.281962818 | 0.445931197 | 0.093700774 |
| 0.480465797 | 0.263832901 | 0.350600313 | 0.441951832 |
| 0.217087531 | 0.486987998 | 0.206259557 | 0.458265516 |
| 0.072143214 | 0.309296845 | 0.386821135 | 0.382917815 |
| 0.346085607 | 0.369381973 | 0.436657888 | 0.316383183 |
| 0.071597127 | 0.351851846 | 0.006066674 | 0.418746793 |
| 0.453447667 | 0.389328936 | 0.239221725 | 0.286187749 |
| 0.348661864 | 0.368254963 | 0.328425411 | 0.407805909 |
| 0.029074287 | 0.435715732 | 0.269717986 | 0.415331648 |
| 0.311904848 | 0.389920975 | 0.111664168 | 0.361308437 |
| 0.443920905 | 0.389368784 | 0.288155951 | 0.376072926 |
| 0.471584178 | 0.367905724 | 0.190366329 | 0.274353093 |

|             |             |             |             |
|-------------|-------------|-------------|-------------|
| 0.375474615 | 0.099345784 | 0.375895365 | 0.52109053  |
| 0.270512674 | 0.301450242 | 0.457543266 | 0.319231899 |
| 0.362547645 | 0.372223023 | 0.394464231 | 0.50328101  |
| 0.146854736 | 0.327704911 | 0.434282025 | 0.454274081 |
| 0.359169597 | 0.242597257 | 0.33066945  | 0.333154528 |
| 0.446247488 | 0.169255329 | 0.323915177 | 0.408049841 |
| 0.303390612 | 0.367658235 | 0.323020426 | 0.277497575 |
| 0.079574722 | 0.236536894 | 0.413174158 | 0.200148228 |
| 0.385303474 | 0.423045813 | 0.31804056  | 0.402348203 |
| 0.228654784 | 0.063545492 | 0.460010733 | 0.036594006 |
| 0.372909935 | 0.4485941   | 0.312828605 | 0.408096551 |
| 0.230336179 | 0.39985784  | 0.381468075 | 0.004023051 |
| 0.427621397 | 0.067346504 | 0.335607852 | 0.341049534 |
| 0.351027115 | 0.096823745 | 0.44795247  | 0.514867357 |
| 0.354127666 | 0.328163024 | 0.384055493 | 0.449785291 |
| 0.214895599 | 0.33751371  | 0.368685246 | 0.417434304 |
| 0.285455557 | 0.386299697 | 0.413988162 | 0.410752653 |
| 0.408179844 | 0.321267769 |             |             |
| DNA2        | 0.045206369 | 0.428909033 | 0.036984971 |
| 0.080101648 | 0.185972505 | 0.233143141 | 0.040800987 |
| 0.082298607 | 0.340241817 | 0.267540756 | 0.207934288 |
| 0.009646131 | 0.066241348 | 0.44138469  | 0.034828684 |
| 0.270549318 | 0.018177795 | 0.068402975 | 0.066926912 |
| 0.157996972 | 0.174842291 | 0.209926401 | 0.244502673 |
| 0.183590942 | 0.164826029 | 0.250379094 | 0.273718813 |
| 0.496902116 | 0.205155513 | 0.318179762 | 0.172950097 |
| 0.389334555 | 0.202845739 | 0.262476959 | 0.00940621  |
| 0.253090605 | 0.015488784 | 0.426264922 | 0.162917306 |
| 0.096163721 | 0.308456077 | 0.256966578 | 0.135041733 |
| 0.289042367 | 0.022741303 | 0.195357068 | 0.345333636 |
| 0.2438061   | 0.176121772 | 0.046643625 | 0.344658336 |
| 0.266261416 | 0.247899434 | 0.377023104 | 0.002923641 |
| 0.20480515  | 0.083898079 | 0.184308951 | 0.489670278 |
| 0.125826132 | 0.067162635 | 0.267367638 | 0.17115769  |
| 0.297771521 | 0.30393096  | 0.170742761 | 0.295820851 |
| 0.482175841 | 0.139816759 | 0.386620712 | 0.092606791 |
| 0.256222498 | 0.025837783 | 0.111482774 | 0.066021289 |
| 0.262855318 | 0.109252515 | 0.197832304 | 0.210140744 |
| 0.446575765 | 0.497733019 | 0.157050522 | 0.502151819 |
| 0.093173311 | 0.227030791 | 0.174402727 | 0.224412221 |
| 0.319834948 | 0.06555427  | 0.325711267 | 0.503691089 |
| 0.037137677 | 0.302193811 | 0.353760676 | 0.096096825 |
| 0.406365319 | 0.213250241 | 0.287322561 | 0.110542448 |
| 0.276564917 | 0.23107048  | 0.474858103 | 0.206309115 |
| 0.19226445  | 0.051293209 | 0.477453181 | 0.212346778 |
| 0.166860573 | 0.052319608 | 0.161606759 | 0.455172055 |
| 0.299829738 | 0.480029954 | 0.433043067 | 0.32987451  |
| 0.259426275 | 0.479934178 | 0.311754837 | 0.39425377  |
| 0.173506959 | 0.51888015  | 0.109245896 | 0.021064067 |
| 0.053079327 | 0.045243661 | 0.179274016 | 0.244772836 |
| 0.447631979 | 0.236887467 | 0.123774798 | 0.140322063 |
| 0.442002171 | 0.474081304 | 0.528682999 | 0.387474884 |
| 0.023210669 | 0.197800721 | 0.257544564 | 0.167192424 |
| 0.300795118 | 0.072970656 | 0.171992662 | 0.494864162 |



|             |             |             |             |
|-------------|-------------|-------------|-------------|
| 0.333743503 | 0.400281746 | 0.112156561 | 0.479392872 |
| 0.141959878 | 0.480261861 | 0.452913959 | 0.097500125 |
| 0.499652637 | 0.475987342 | 0.484231157 | 0.310763695 |
| 0.443633478 | 0.206368506 | 0.07176478  | 0.360538729 |
| 0.444172225 | 0.009051829 | 0.478775211 | 0.501241086 |
| 0.496578766 | 0.449341703 | 0.506756069 | 0.49332371  |
| 0.50174252  | 0.048313311 | 0.042668279 | 0.190931613 |
| 0.50180084  | 0.349621838 | 0.080061755 | 0.290427311 |
| 0.243498192 | 0.241629681 | 0.387780528 | 0.211909795 |
| 0.479822548 | 0.429390774 | 0.492844582 | 0.359769225 |
| 0.234007881 | 0.278557896 | 0.267265699 | 0.454219844 |
| 0.023444686 | 0.073184351 | 0.036484795 | 0.246879217 |
| 0.244334514 | 0.097725663 | 0.255912196 | 0.243158394 |
| 0.112197639 | 0.226962906 | 0.236857261 | 0.289333468 |
| 0.051706939 | 0.288541314 | 0.100570843 | 0.12401959  |
| 0.021458135 | 0.120797869 | 0.116826375 | 0.080469431 |
| 0.148371303 | 0.228390259 | 0.373679472 | 0.47857028  |
| 0.245433235 | 0.139401971 | 0.343842778 | 0.440638649 |
| 0.379205528 | 0.242360169 | 0.174977043 | 0.004092688 |
| 0.210488227 | 0.27553381  | 0.154508694 | 0.275936999 |
| 0.163768263 | 0.176197712 | 0.282967917 | 0.311109009 |
| 0.180627308 | 0.104093335 | 0.258575956 | 0.38934961  |
| 0.126612821 | 0.173444446 | 0.416503968 | 1           |
| 0.001418129 | 0.210126925 | 0.407415617 | 0.104502561 |
| 0.253500314 | 0.090201577 | 0.161522651 | 0.452444355 |
| 0.236358091 | 0.159078168 | 0.479924757 | 0.307439063 |
| 0.226313918 | 0.221701107 | 0.511434175 | 0.070294864 |
| 0.241724506 | 0.025820425 | 0.189563983 | 0.266718704 |
| 0.152874385 | 0.223027204 | 0.197260961 | 0.169562757 |
| 0.09124204  | 0.509483645 | 0.343832385 | 0.495610652 |
| 0.283447907 | 0.514418548 | 0.436415726 | 0.399821189 |
| 0.25140581  | 0.284546756 | 0.108657905 | 0.402671617 |
| 0.44112517  | 0.271872893 | 0.060076631 | 0.43137828  |
| 0.294361957 | 0.333429257 | 0.07586419  | 0.471646533 |
| 0.458688511 | 0.475789126 | 0.079800841 | 0.304820547 |
| 0.322165768 | 0.136347885 | 0.372557261 | 0.508983418 |
| 0.295024398 | 0.251256815 | 0.227584925 | 0.345567671 |
| 0.109491444 | 0.146415921 | 0.283562312 | 0.140033348 |
| 0.00841005  | 0.057590325 | 0.043222785 | 0.087231658 |
| 0.10651072  | 0.333763117 | 0.305763188 | 0.510367611 |
| 0.067694545 | 0.374136428 | 0.19024062  | 0.190984894 |
| 0.417610374 | 0.24411871  | 0.238027437 | 0.262007251 |
| 0.185206897 | 0.007546334 | 0.060239795 | 0.500829255 |
| 0.031682624 | 0.154342294 | 0.215710934 | 0.001029606 |
| 0.031573509 | 0.423249955 | 0.087595223 | 0.169431049 |
| 0.448161835 | 0.17734797  | 0.149549526 | 0.288867506 |
| 0.243916823 | 0.054654958 | 0.000689942 | 0.488163688 |
| 0.488003654 | 0.460467248 | 0.492136227 | 0.45519094  |
| 0.447943751 | 0.350626719 | 0.372078181 | 0.220206417 |
| 0.066283292 | 0.064250795 | 0.160982615 | 0.188594788 |
| 0.003554919 | 0.299163027 | 0.192717623 | 0.092536868 |
| 0.367648588 | 0.232093891 | 0.020801111 | 0.232022399 |
| 0.011870925 | 0.156610891 | 0.222900227 | 0.139300456 |
| 0.275092785 | 0.007732665 | 0.165282176 | 0.251283776 |

|             |             |             |             |
|-------------|-------------|-------------|-------------|
| 0.409251013 | 0.304662571 | 0.254735521 | 0.51475361  |
| 0.193113952 | 0.116998281 | 0.189864405 | 0.306549579 |
| 0.043290784 | 0.136712426 | 0.255937117 | 0.036237473 |
| 0.139068411 | 0.442766023 | 0.268226311 | 0.045780046 |
| 0.163296601 | 0.002244227 | 0.330890617 | 0.510865588 |
| 0.464021392 | 0.507516876 | 0.477045349 | 0.171890173 |
| 0.487638165 | 0.108342042 | 0.519492442 | 0.385076706 |
| 0.299963803 | 0.000475733 | 0.00231576  | 0.475811816 |
| 0.258666945 | 0.052513096 | 0.093989303 | 0.222117802 |
| 0.057028906 | 0.105229045 | 0.037819715 | 0.111037045 |
| 0.285040576 | 0.136839904 | 0.111360809 | 0.475250248 |
| 0.148175859 | 0.135501952 | 0.281794977 | 0.066626038 |
| 0.256968313 | 0.028267264 | 0.066690471 | 0.002943885 |
| 0.276857974 | 0.105001544 | 0.459451527 | 0.49829606  |
| 0.464229174 | 0.295743757 | 0.287569809 | 0.216663014 |
| 0.419657299 | 0.083988887 | 0.255063982 | 0.079678214 |
| 0.483447491 | 0.28805296  | 0.245977131 | 0.258381583 |
| 0.480476227 | 0.446788435 | 0.018965731 | 0.362895148 |
| 0.005449932 | 0.000555777 | 0.245801874 | 0.19387549  |
| 0.067330798 | 0.259578942 | 0.194996117 | 0.180393151 |
| 0.14635737  | 0.017202063 | 0.191770377 | 0.179203788 |
| 0.188112484 | 0.234118644 | 0.172374911 | 0.202288543 |
| 0.167966005 | 0.098265372 | 0.108885764 | 0.096863473 |
| 0.202031088 | 0.289375828 | 0.171704973 | 0.012864235 |
| 0.287935421 | 0.269566236 | 0.032883307 | 0.104207246 |
| 0.398304838 | 0.476171488 | 0.027235007 | 0.004017159 |
| 0.215370553 | 0.220731826 | 0.480382183 | 0.496518809 |
| 0.50712967  | 0.494422104 | 0.358094088 | 0.077329045 |
| 0.038132383 | 0.196477287 | 0.188566681 | 0.051599089 |
| 0.495159063 | 0.052635564 | 0.465613568 | 0.20432356  |
| 0.073892395 | 0.129672274 | 0.015338933 | 0.050752285 |
| 0.249357256 | 0.105399847 | 0.097497118 | 0.108100251 |
| 0.20098302  | 0.168334886 | 0.030530968 | 0.115014952 |
| 0.29662589  | 0.142455089 | 0.098563469 | 0.197816792 |
| 0.310689835 | 0.221024295 | 0.372058003 | 0.412551504 |
| 0.084396746 | 0.079319545 | 0.191262738 | 0.324687052 |
| 0.429731588 | 0.292271964 | 0.012463354 | 0.467090611 |
| 0.465429643 | 0.339767507 | 0.480511523 | 0.349398753 |
| 0.05883188  | 0.236657644 | 0.24011092  | 0.234053726 |
| 0.116449026 | 0.231132086 | 0.149823226 | 0.039356057 |
| 0.256466248 | 0.460088984 | 0.412472937 | 0.088822333 |
| 0.273014762 | 0.095254461 | 0.046321928 | 0.427651037 |
| 0.130593853 | 0.056091746 | 0.270343648 | 0.4160048   |
| 0.000430386 | 0.097923673 | 0.478622785 | 0.131349022 |
| 0.494446008 | 0.465962391 | 0.401163435 | 0.163765393 |
| 0.002988636 | 0.338309227 | 0.240043854 | 0.25671083  |
| 0.432176387 | 0.279264158 | 0.103401435 | 0.038783119 |
| 0.219164392 | 0.065566461 | 0.084306044 | 0.208683018 |
| 0.155973636 | 0.307649212 | 0.132849595 | 0.143045829 |
| 0.115977945 | 0.085901328 | 0.15312687  | 0.135846737 |
| 0.124938168 | 0.16824557  | 0.28639734  | 0.243390807 |
| 0.165908913 | 0.423385026 | 0.382508123 | 0.01436141  |
| 0.229843751 | 0.387563198 | 0.398446439 | 0.001968236 |
| 0.349164749 | 0.002908059 | 0.11206735  | 0.118164387 |

|             |             |             |             |
|-------------|-------------|-------------|-------------|
| 0.108637177 | 0.132976595 | 0.152516693 | 0.179418043 |
| 0.267886273 | 0.135838964 | 0.153712865 | 0.135357373 |
| 0.083829804 | 0.134968348 | 0.252357934 | 0.241268278 |
| 0.159520737 | 0.070987131 | 0.09045816  | 0.09908349  |
| 0.024846549 | 0.4481286   | 0.197806075 | 0.057266302 |
| 0.130803189 | 0.261441496 | 0.295905865 | 0.497028282 |
| 0.36703686  | 0.108434937 | 0.219835259 | 0.427959484 |
| 0.245503497 | 0.201428084 | 0.046331974 | 0.245759065 |
| 0.134831806 | 0.132870917 | 0.267202934 | 0.225620621 |
| 0.380028461 | 0.360985278 | 0.18912643  | 0.401127273 |
| 0.225931923 | 0.260566106 | 0.264718248 | 0.042647033 |
| 0.108514607 | 0.098768332 | 0.161125511 | 0.000348584 |
| 0.24008427  | 0.161071578 | 0.45549815  | 0.475181579 |
| 0.210166038 | 0.330827883 | 0.236551066 | 0.056585243 |
| 0.23121866  | 0.180943997 | 0.095177586 | 0.392419031 |
| 0.165477075 | 0.099688621 | 0.184253953 | 0.211017702 |
| 0.372195276 | 0.379813029 | 0.166515293 | 0.165043379 |
| 0.152208488 | 0.134586063 | 0.471014973 | 0.079022768 |
| 0.31105529  | 0.108873244 | 0.284537291 | 0.184072048 |
| 0.134867422 | 0.508729307 | 0.036724221 | 0.521191562 |
| 0.229605273 | 0.1045768   | 0.453726621 | 0.18544421  |
| 0.183806186 | 0.058298229 | 0.141498231 | 0.268098797 |
| 0.148571998 | 0.225361548 | 0.029330494 | 0.063518263 |
| 0.238014527 | 0.242109284 | 0.411188631 | 0.304785498 |
| 0.154727352 | 0.277837052 | 0.119364934 | 0.207130374 |
| 0.483825102 | 0.484768198 | 0.163648772 | 0.191563692 |
| 0.280965067 | 0.054487621 | 0.282751764 | 0.020913789 |
| 0.318251453 | 0.314281056 | 0.294499213 | 0.029862952 |
| 0.009594155 | 0.168285813 | 0.311162407 | 0.053860545 |
| 0.465991921 | 0.161890733 | 0.291609762 | 0.34376284  |
| 0.136396493 | 0.485894843 | 0.064596472 | 0.313861565 |
| 0.044378682 | 0.172395419 | 0.250312495 | 0.275966626 |
| 0.130735054 | 0.19549698  | 0.294497421 | 0.14834105  |
| 0.015888323 | 0.153809173 | 0.001975529 | 0.373584901 |
| 0.471956333 | 0.242440297 | 0.167509029 | 0.268448749 |
| 0.183673443 | 0.342690246 | 0.171488182 | 0.281782639 |
| 0.003861562 | 0.241288018 | 0.111471442 | 0.368934647 |
| 0.197888382 | 0.268318273 | 0.025816843 | 0.22143062  |
| 0.443215128 | 0.212596079 | 0.210882025 | 0.257259088 |
| 0.481539094 | 0.358234332 | 0.136473908 | 0.127079617 |
| 0.33534739  | 0.044515902 | 0.266323866 | 0.514910488 |
| 0.094466237 | 0.137524605 | 0.406601568 | 0.125200213 |
| 0.214880453 | 0.355895229 | 0.31513433  | 0.513518524 |
| 0.038801956 | 0.15784032  | 0.366276766 | 0.460070865 |
| 0.222762281 | 0.114140352 | 0.168994847 | 0.14744055  |
| 0.448531989 | 0.050592485 | 0.19117932  | 0.285913139 |
| 0.159135443 | 0.202897785 | 0.273447079 | 0.113902935 |
| 0.016890565 | 0.106363527 | 0.213356569 | 0.086077475 |
| 0.181814483 | 0.228912978 | 0.15311794  | 0.337857904 |
| 0.066495403 | 0.009799917 | 0.412829668 | 0.017873487 |
| 0.201972778 | 0.265156334 | 0.137780171 | 0.227864074 |
| 0.146251076 | 0.2439262   | 0.24298404  | 0.000442443 |
| 0.363178656 | 0.027715145 | 0.191566237 | 0.133141243 |
| 0.20864553  | 0.034517412 | 0.423483353 | 0.493564415 |

|             |             |             |             |
|-------------|-------------|-------------|-------------|
| 0.216994052 | 0.235258235 | 0.254208241 | 0.445205528 |
| 0.104596568 | 0.254785792 | 0.257645578 | 0.337478758 |
| 0.150644276 | 0.297129992 | 0.291506493 | 0.248107868 |
| 0.302862606 | 0.163481007 |             |             |
| DNAJB6      | 0.109528282 | 0.010108635 | 0.14961983  |
| 0.021141117 | 0.004640235 | 0.003654474 | 0.069771374 |
| 0.031982052 | 0.011280038 | 5.40E-05    | 0.008924797 |
| 0.107227143 | 0.000457896 | 0.010647609 | 0.070327495 |
| 0.00195082  | 0.094772613 | 0.080621242 | 0.000408454 |
| 0.002397488 | 0.004654038 | 0.000440451 | 0.004493853 |
| 0.003889719 | 0.114078082 | 0.011149439 | 0.000201168 |
| 0.008977757 | 0.000920812 | 0.003119843 | 5.92E-05    |
| 0.03095152  | 0.002996727 | 9.20E-05    | 0.200433077 |
| 0.002803615 | 1.14E-05    | 0.033494116 | 0.01057144  |
| 0.00068466  | 0.043430556 | 0.001107649 | 0.025456049 |
| 0.001282288 | 0.140767905 | 0.000621607 | 0.001481315 |
| 0.009562341 | 0.008131025 | 0.11931924  | 0.004985457 |
| 0.000929306 | 0.020768552 | 0.00325672  | 0.000161085 |
| 0.000394794 | 0.006391977 | 0.002418311 | 0.015949914 |
| 0.081143941 | 0.073016742 | 0.000701275 | 0.010763979 |
| 0.001533229 | 0.004118535 | 0.033668117 | 0.000423035 |
| 0.013209929 | 0.000648474 | 0.001955014 | 0.005232559 |
| 0.003825001 | 0.098020266 | 0.115232389 | 0.086208428 |
| 0.000990623 | 0.04424436  | 0.0050525   | 0.000555185 |
| 0.009175382 | 0.023752641 | 0.041354327 | 0.017903963 |
| 6.98E-05    | 0.000988753 | 0.002763573 | 0.023227111 |
| 0.006999204 | 0.031059753 | 0.00841653  | 0.018380925 |
| 0.075126996 | 0.001201248 | 0.004630534 | 0.080222301 |
| 0.011228105 | 9.55E-05    | 0.000609828 | 0.0002782   |
| 0.003183696 | 0.00194575  | 0.019799752 | 0.032224526 |
| 0.002907157 | 0.137074822 | 0.024180844 | 0.000918011 |
| 0.006830516 | 0.17135965  | 0.001952894 | 0.003195999 |
| 0.005184104 | 0.00947774  | 0.004956561 | 0.010946353 |
| 0.001024393 | 0.012940032 | 0.010337615 | 0.011480727 |
| 0.000772615 | 0.012745545 | 0.083475499 | 0.087602979 |
| 0.070748462 | 0.065051035 | 0.00106948  | 0.039323971 |
| 0.007323815 | 0.015042264 | 0.036939997 | 0.020945026 |
| 0.006087217 | 0.018759682 | 0.011588143 | 0.008236966 |
| 0.15030526  | 0.00022842  | 0.001471682 | 0.009895655 |
| 0.00610413  | 0.092227635 | 0.000816406 | 0.024067249 |
| 0.030694616 | 0.005181038 | 0.04079232  | 0.031543249 |
| 0.015987348 | 0.019062016 | 0.007435592 | 0.072382178 |
| 0.021873628 | 0.02461711  | 0.013740338 | 0.002128669 |
| 0.024228362 | 0.016325373 | 2.12E-05    | 0.012400873 |
| 0.018242691 | 0.003145277 | 0.004677366 | 0.005717963 |
| 0.013673913 | 0.003504778 | 0.011192062 | 0.008640419 |
| 0.012645413 | 0.147786055 | 0.001728188 | 0.011878696 |
| 0.017920715 | 0.022410929 | 0.014515764 | 0.000280062 |
| 0.002554916 | 0.004655822 | 0.003907712 | 4.54E-05    |
| 0.02203209  | 0.009034906 | 0.005785957 | 0.007158809 |
| 0.005843456 | 0.049257876 | 0.000177229 | 0.026409614 |
| 0.100538037 | 0.07189347  | 0.200563585 | 0.020906249 |
| 0.0008361   | 0.060240617 | 0.003203377 | 0.002501461 |
| 0.063197654 | 0.004782522 | 0.000464035 | 0.002594746 |

|             |             |             |             |             |
|-------------|-------------|-------------|-------------|-------------|
| 0.179958302 | 0.00115493  | 0.083323354 | 0.044518368 |             |
| 0.110329336 | 0.139348623 | 0.005790311 | 0.036388889 |             |
| 0.012013807 | 0.093543076 | 0.001675967 | 0.009366116 |             |
| 0.001751653 | 0.096057516 | 0.004514451 | 0.01766445  |             |
| 0.025523263 | 0.001569032 | 0.0524737   | 0.066533994 |             |
| 0.000420253 | 0.000914255 | 0.001514761 | 0.000527339 |             |
| 0.120619533 | 0.00382712  | 0.002640938 | 0.004978368 |             |
| 0.021613655 | 0.030982642 | 0.00051215  | 0.037534533 |             |
| 0.089011714 | 0.005043633 | 0.008208735 | 0.001418129 |             |
| 1           | 0.013164886 | 0.005919293 | 0.001688063 |             |
| 0.012656135 | 0.000107954 | 9.49E-05    | 0.008381471 |             |
| 0.000364464 | 0.000956814 | 0.006854253 | 0.004745672 |             |
| 0.000193919 | 0.066280336 | 0.011644977 | 0.003201428 |             |
| 0.001272062 | 0.00775766  | 0.02623636  | 0.000810894 |             |
| 0.039591604 | 0.022348626 | 0.001992856 | 0.003653426 |             |
| 0.102632041 | 0.013590363 | 0.015728903 | 0.009765498 |             |
| 5.01E-05    | 0.012835372 | 0.005213866 | 0.012626917 |             |
| 0.014695139 | 0.000153217 | 0.0016082   | 0.006761385 |             |
| 0.007671588 | 8.46E-05    | 0.154746641 | 0.002020781 |             |
| 0.000410705 | 0.002023559 | 0.002184431 | 0.013475537 |             |
| 0.028586432 | 0.01568037  | 0.03035132  | 0.008185067 |             |
| 0.020230399 | 0.052300672 | 0.010364293 | 0.013638789 |             |
| 0.000120973 | 0.001089643 | 0.001167066 | 0.011567629 |             |
| 0.094170672 | 0.001829561 | 0.035186853 | 0.00113464  |             |
| 0.000367848 | 0.089745212 | 0.151523072 | 0.034166117 |             |
| 0.001105825 | 0.000622605 | 0.004389258 | 0.010920803 |             |
| 0.081794165 | 0.020176623 | 0.032629319 | 0.003592641 |             |
| 0.016543035 | 0.000962176 | 0.000965128 | 0.00250452  |             |
| 0.046949414 | 0.091967201 | 0.017551328 | 0.025484356 |             |
| 0.140487205 | 0.000360824 | 0.007599826 | 0.004393217 |             |
| 0.090046373 | 0.004104436 | 0.162385786 | 0.13157812  |             |
| 0.008013925 | 0.117047025 | 0.057047626 | 0.000304271 |             |
| 0.015723153 | 0.155680808 | 0.076948945 | 0.009422816 |             |
| 0.01209336  | 0.012403324 | 0.011499067 | 0.01816859  |             |
| 0.008087557 | 0.005493332 | 0.006240181 | 0.009801391 |             |
| 0.048185625 | 0.068299497 | 0.000307216 | 0.008387442 |             |
| 0.001235147 | 0.015402475 | 0.004589452 | 0.130705507 |             |
| 0.002864195 | 0.015345886 | 0.12286312  | 0.00212677  |             |
| 0.04889392  | 0.002204019 | 0.002635971 | 0.012937393 |             |
| 0.00831376  | 0.225877331 | 0.000621353 | 0.000112636 |             |
| 0.022977029 | 0.029605041 | 8.29E-06    | 0.015071144 |             |
| 0.012899501 | 0.076823991 | 0.008638087 | 0.006967092 |             |
| 0.083440653 | 7.05E-05    | 0.002219418 | 7.46E-05    | 0.000306637 |
| 0.01790444  | 0.000433123 | 0.042145328 | 0.032418591 |             |
| 0.172152891 | 0.030714003 | 0.014815147 | 0.015454542 |             |
| 0.009013498 | 0.013256371 | 0.000547279 | 0.014848153 |             |
| 0.005739535 | 0.010075079 | 0.012409947 | 0.000274983 |             |
| 0.007433826 | 0.009553498 | 0.006591651 | 0.001938838 |             |
| 0.167892081 | 0.095003592 | 0.001111818 | 0.044731639 |             |
| 0.041981902 | 0.101463709 | 0.002971601 | 0.003963727 |             |
| 0.009951318 | 0.001133254 | 0.015117201 | 0.022297709 |             |
| 0.029076587 | 0.001224898 | 0.135085389 | 0.00216007  |             |
| 0.114565337 | 0.116707708 | 0.011054186 | 0.007300723 |             |
| 0.1171279   | 0.029444608 | 0.012259777 | 0.019417074 |             |

|                      |                      |             |             |
|----------------------|----------------------|-------------|-------------|
| 0.00511405           | 0.000984331          | 0.000317388 | 0.007448163 |
| 0.100086864          | 2.54E-05 0.09168797  | 0.012208952 |             |
| 0.003265882          | 0.031006123          | 0.047175669 | 0.013691131 |
| 0.018352767          | 0.151285025          | 0.00730429  | 0.080409204 |
| 0.003323961          | 0.005373821          | 0.028359162 | 0.000196323 |
| 0.000945795          | 0.06198415           | 0.004732456 | 0.007238855 |
| 0.032730642          | 0.000137925          | 0.000196053 | 0.01952276  |
| 0.003740389          | 0.002293999          | 0.031819306 | 0.004998914 |
| 0.000909922          | 0.027926377          | 0.024010483 | 0.000229603 |
| 0.036319275          | 0.108426099          | 0.142696989 | 0.001041677 |
| 0.000688669          | 0.179429147          | 0.104081993 | 0.010414798 |
| 0.007354348          | 0.026529556          | 0.045459084 | 0.053869227 |
| 0.002519496          | 0.007671572          | 0.01042534  | 0.019682167 |
| 0.017078735          | 0.040825866          | 0.01228428  | 0.119660205 |
| 0.011332891          | 0.002117525          | 0.015543848 | 0.010836508 |
| 0.098707741          | 0.015662369          | 0.000170919 | 0.112278201 |
| 0.033530404          | 0.074631697          | 0.128861043 | 0.000673877 |
| 0.073313692          | 0.033645522          | 0.082611158 | 0.004636542 |
| 0.000202856          | 0.12110451           | 0.054219106 | 0.017345174 |
| 0.000319643          | 0.076375891          | 0.006520111 | 0.018223336 |
| 6.94E-05 0.002522604 | 0.027341777          | 0.126585875 |             |
| 0.073897758          | 0.006492246          | 0.006282469 | 0.00424415  |
| 0.000323946          | 0.033247554          | 0.008409645 | 0.010267009 |
| 0.001605892          | 0.016742198          | 0.014560047 | 0.150771427 |
| 0.00169525           | 4.44E-05 0.003653229 | 0.047346557 |             |
| 0.0048856            | 0.016241065          | 0.174180377 | 0.041942217 |
| 0.026683207          | 0.012306403          | 0.055489924 | 0.001455973 |
| 0.060746268          | 0.101451405          | 0.006818797 | 0.000538431 |
| 0.02712143           | 0.000682775          | 0.003538809 | 0.022015996 |
| 0.000590355          | 0.009427754          | 0.015296859 | 0.018633076 |
| 0.009645193          | 0.026753401          | 0.007949425 | 0.000389855 |
| 0.001618414          | 0.006912007          | 0.002036058 | 0.008877665 |
| 0.022135575          | 0.002503437          | 0.069241887 | 0.054031814 |
| 0.134069786          | 0.016505275          | 0.000754241 | 0.000133405 |
| 0.003757658          | 0.073229379          | 0.030073597 | 0.019290168 |
| 0.070459504          | 0.000253895          | 0.037917477 | 5.95E-05    |
| 0.061043334          | 0.024692299          | 0.000210046 | 0.001106166 |
| 0.009054634          | 0.00814398           | 0.20213579  | 0.000797233 |
| 0.010175843          | 0.013572977          | 0.003826608 | 0.002981839 |
| 0.122067504          | 0.019411179          | 0.02386631  | 0.024422632 |
| 0.012821648          | 0.015116497          | 0.004955421 | 0.007427087 |
| 0.025563279          | 0.017487898          | 0.048423488 | 0.035906869 |
| 0.030967433          | 0.003492819          | 0.006195424 | 0.004714586 |
| 0.099123993          | 0.169399849          | 0.175990301 | 0.045234144 |
| 0.008007384          | 0.083407307          | 0.187289215 | 0.035695403 |
| 0.002789406          | 0.038863589          | 0.012274518 | 0.01983496  |
| 0.119312522          | 0.004228607          | 0.00933768  | 0.000574412 |
| 0.000461314          | 0.054841966          | 0.006696197 | 0.032093184 |
| 0.001275474          | 0.002056059          | 0.01384153  | 0.003281655 |
| 0.044526712          | 0.079920208          | 0.021363649 | 0.004558044 |
| 0.001679578          | 2.56E-05 0.043788608 | 0.056205924 |             |
| 0.102443392          | 0.003895134          | 0.11901714  | 0.012849604 |
| 0.00762835           | 0.005638589          | 0.019673826 | 0.000668163 |
| 0.030636946          | 0.000211532          | 0.056628752 | 0.000142733 |

|             |             |             |             |
|-------------|-------------|-------------|-------------|
| 0.081606821 | 0.113621361 | 0.003717949 | 0.002078915 |
| 0.043612337 | 0.006903504 | 0.003430649 | 0.003871148 |
| 0.00284301  | 0.002323261 | 0.013148428 | 0.022022667 |
| 0.07484571  | 0.021644355 | 0.080979043 | 0.00073976  |
| 0.004025075 | 0.002970212 | 0.007511375 | 0.013582634 |
| 0.009356507 | 0.191218191 | 0.008053681 | 0.002101683 |
| 0.127879361 | 0.02842472  | 0.012061663 | 0.006729905 |
| 0.015296156 | 0.001249843 | 0.001169476 | 0.011084074 |
| 8.18E-05    | 0.000483469 | 8.14E-05    | 0.02105357  |
| 0.004341659 | 0.008242086 | 0.002920718 | 0.018109941 |
| 0.000406163 | 0.009795681 | 0.015532166 | 0.023891473 |
| 0.003844302 | 0.053538085 | 0.016466636 | 0.085591327 |
| 0.005470546 | 0.000178172 | 0.001128337 | 0.0001163   |
| 9.44E-05    | 0.0931204   | 0.068630148 | 0.001349392 |
| 0.00212186  | 0.095225891 | 0.007292796 | 0.000589183 |
| 0.003579709 | 0.004145487 | 0.063536777 | 0.025168179 |
| 0.024151023 | 0.007051164 | 0.012482912 | 0.037069768 |
| 0.000774591 | 0.000838353 | 0.004987057 | 0.000961315 |
| 0.01252966  | 0.00082958  | 0.15406243  | 0.003637779 |
| 0.004342081 | 0.046457059 | 0.023520667 | 0.000453403 |
| 0.087043695 | 0.000499153 | 0.03332262  | 0.017702402 |
| 0.000736615 | 0.000491256 | 0.077698847 | 0.001773979 |
| 0.051436    | 0.016359255 | 0.001971902 | 0.0025207   |
| 0.063432357 | 0.001162762 | 0.034960767 | 0.000335111 |
| 0.046585138 | 0.000443196 | 0.013055562 | 0.011897157 |
| 0.082629485 | 0.00284635  | 0.002032795 | 0.171672524 |
| 0.000625114 | 0.013613533 | 0.034037245 | 0.001318948 |
| 0.005851551 | 0.019543808 | 0.000216461 | 0.018265775 |
| 0.000938691 | 0.01302314  | 0.021289679 | 0.045020224 |
| 0.005211682 | 0.010935808 | 0.032004643 | 0.001449614 |
| 0.000207873 | 0.006086774 | 0.017455326 | 0.037401852 |
| 0.000345099 | 0.018901371 | 0.000205269 | 0.019435204 |
| 0.003655912 | 0.007304654 | 0.022770822 | 0.014709103 |
| 0.00243011  | 0.108725532 | 0.015484744 | 0.004839801 |
| 0.003229492 | 0.037538442 | 0.019552837 | 0.040088015 |
| 0.027602337 | 0.000486162 | 0.015448073 | 0.006557301 |
| 0.034437563 | 0.002295139 | 0.122230343 | 0.008210732 |
| 0.006396796 | 0.014511707 | 0.008901113 | 0.007648509 |
| 0.003051229 | 0.004841062 | 6.71E-05    | 0.087132716 |
| 0.022315498 | 0.009333514 | 0.021093245 | 0.000149382 |
| 0.000457489 | 0.01489     | 8.39E-06    | 0.000892518 |
| 0.004235849 | 5.69E-05    | 6.10E-05    | 0.000114514 |
| 0.015516024 | 0.014387057 |             | 0.000122823 |
| DNMT1       | 0.090328619 | 0.337550936 | 0.068589194 |
| 0.199341996 | 0.203876373 | 0.183726347 | 0.084858555 |
| 0.125699296 | 0.255588304 | 0.108749347 | 0.230499567 |
| 0.051009272 | 0.037144768 | 0.413887316 | 0.073349488 |
| 0.252786993 | 0.072164905 | 0.130503042 | 0.040882318 |
| 0.134087622 | 0.196088921 | 0.160120932 | 0.182975937 |
| 0.166523323 | 0.237789091 | 0.221066667 | 0.166061756 |
| 0.419686822 | 0.103577378 | 0.284757086 | 0.09537537  |
| 0.4298662   | 0.223399425 | 0.157866926 | 0.040160436 |
| 0.19823595  | 0.00581769  | 0.431340507 | 0.220433415 |
| 0.106206617 | 0.358820146 | 0.13441001  | 0.215224843 |

|             |             |             |             |
|-------------|-------------|-------------|-------------|
| 0.173097726 | 0.07101088  | 0.06761346  | 0.262953157 |
| 0.198530616 | 0.150201415 | 0.067087954 | 0.293877322 |
| 0.164715403 | 0.273356919 | 0.259053781 | 0.006166204 |
| 0.137845238 | 0.03265175  | 0.096195195 | 0.431484453 |
| 0.22618412  | 0.135529355 | 0.111478412 | 0.118634928 |
| 0.208255778 | 0.253071531 | 0.20830367  | 0.168424721 |
| 0.4501815   | 0.091153984 | 0.286047845 | 0.143275429 |
| 0.197310436 | 0.042037199 | 0.205788136 | 0.079361127 |
| 0.175735228 | 0.169836936 | 0.186807884 | 0.152688906 |
| 0.355280365 | 0.463006221 | 0.205764612 | 0.432059466 |
| 0.053604041 | 0.194337422 | 0.159651666 | 0.288270883 |
| 0.269650419 | 0.079539457 | 0.358409146 | 0.483421957 |
| 0.049410874 | 0.189206668 | 0.299389811 | 0.130394259 |
| 0.345949257 | 0.101397237 | 0.174814894 | 0.100709844 |
| 0.25825764  | 0.22111154  | 0.402761616 | 0.301281403 |
| 0.147215988 | 0.089788063 | 0.418182679 | 0.187073867 |
| 0.208628554 | 0.099780827 | 0.178691899 | 0.364446993 |
| 0.299171682 | 0.426803467 | 0.332338922 | 0.322634223 |
| 0.226273176 | 0.446274696 | 0.340627186 | 0.338207161 |
| 0.042446985 | 0.44618634  | 0.174289761 | 0.074181476 |
| 0.075749372 | 0.094778893 | 0.112141411 | 0.292477593 |
| 0.393895008 | 0.2486572   | 0.184412945 | 0.203847315 |
| 0.399717316 | 0.401384382 | 0.441433388 | 0.363143663 |
| 0.071514763 | 0.102434427 | 0.231325213 | 0.139789026 |
| 0.289419155 | 0.111054372 | 0.152201843 | 0.458235274 |
| 0.399535992 | 0.367677466 | 0.129189564 | 0.452964156 |
| 0.126486971 | 0.479501483 | 0.371157993 | 0.189180588 |
| 0.471605359 | 0.443976952 | 0.471552955 | 0.28622358  |
| 0.424346745 | 0.223622468 | 0.02788647  | 0.331564625 |
| 0.451749863 | 0.016002308 | 0.382695084 | 0.418261388 |
| 0.436327151 | 0.385408511 | 0.460049831 | 0.428019596 |
| 0.427095269 | 0.091761642 | 0.011781479 | 0.251272365 |
| 0.458855187 | 0.403511752 | 0.102992276 | 0.213135746 |
| 0.227044505 | 0.195390778 | 0.299033436 | 0.191262658 |
| 0.475315275 | 0.385218534 | 0.394711564 | 0.320191454 |
| 0.156987674 | 0.335514135 | 0.179332085 | 0.413588207 |
| 0.077067171 | 0.125985311 | 0.077340476 | 0.251740924 |
| 0.146059186 | 0.17789934  | 0.207054209 | 0.1915809   |
| 0.207382618 | 0.155397268 | 0.130710836 | 0.276936404 |
| 0.086974307 | 0.232448014 | 0.146992894 | 0.157912879 |
| 0.09312147  | 0.185264219 | 0.216917103 | 0.157514573 |
| 0.186382462 | 0.264223838 | 0.284123236 | 0.418325016 |
| 0.164499295 | 0.217808561 | 0.306129628 | 0.440583139 |
| 0.436993721 | 0.215540208 | 0.224453803 | 0.049960412 |
| 0.225025776 | 0.110404938 | 0.087000665 | 0.189292427 |
| 0.207600631 | 0.203423597 | 0.261517262 | 0.31882746  |
| 0.203954638 | 0.093073206 | 0.197255321 | 0.411173062 |
| 0.166002508 | 0.200307232 | 0.418643643 | 0.210126925 |
| 0.013164886 | 1           | 0.377789559 | 0.115050519 |
| 0.242509691 | 0.092768246 | 0.124191014 | 0.420791126 |
| 0.134513865 | 0.127013071 | 0.399332471 | 0.293930364 |
| 0.159621973 | 0.22537664  | 0.457360122 | 0.025451324 |
| 0.152078789 | 0.09297446  | 0.285807461 | 0.123251079 |
| 0.235502387 | 0.274885971 | 0.179443451 | 0.181006175 |



|             |             |             |             |
|-------------|-------------|-------------|-------------|
| 0.1456448   | 0.449357948 | 0.330079643 | 0.444110226 |
| 0.189009232 | 0.46821932  | 0.393913501 | 0.412358399 |
| 0.26727847  | 0.150194097 | 0.06628015  | 0.396044292 |
| 0.406616676 | 0.164511429 | 0.09819247  | 0.316972898 |
| 0.162628994 | 0.290115162 | 0.096428138 | 0.467318009 |
| 0.45707346  | 0.394729224 | 0.144186272 | 0.322948628 |
| 0.393136505 | 0.202339343 | 0.331228322 | 0.459092964 |
| 0.132516213 | 0.197888744 | 0.213693407 | 0.369898915 |
| 0.207573058 | 0.143975749 | 0.292444435 | 0.07097348  |
| 0.004211397 | 0.081937877 | 0.090373867 | 0.163100686 |
| 0.114580323 | 0.212959545 | 0.27941896  | 0.455613899 |
| 0.138248561 | 0.366545273 | 0.200515545 | 0.246291211 |
| 0.406655532 | 0.160762052 | 0.183891048 | 0.230021765 |
| 0.234161474 | 0.052759343 | 0.157645037 | 0.479158401 |
| 0.053119587 | 0.140780898 | 0.156342773 | 0.009035141 |
| 0.077085823 | 0.292744084 | 0.139059115 | 0.250661035 |
| 0.405399368 | 0.249599839 | 0.231837821 | 0.147705492 |
| 0.287743669 | 0.108186636 | 0.010533924 | 0.408785782 |
| 0.391600404 | 0.36875648  | 0.389898046 | 0.369523532 |
| 0.360636132 | 0.26671857  | 0.351695096 | 0.196059783 |
| 0.131054631 | 0.089931002 | 0.164135651 | 0.225598879 |
| 0.00628681  | 0.327355236 | 0.150122498 | 0.187616859 |
| 0.306148539 | 0.240922665 | 0.066862801 | 0.189359549 |
| 0.069732019 | 0.109240174 | 0.165252191 | 0.144287939 |
| 0.273913706 | 0.034573086 | 0.174030521 | 0.188139158 |
| 0.393487909 | 0.339676185 | 0.156193325 | 0.46089656  |
| 0.240100007 | 0.141720003 | 0.227893565 | 0.30154792  |
| 0.10605572  | 0.067918726 | 0.161539043 | 0.030807753 |
| 0.078372581 | 0.369076676 | 0.158816865 | 0.118407354 |
| 0.263307538 | 0.021933479 | 0.368191453 | 0.464286495 |
| 0.391004571 | 0.459204481 | 0.447612839 | 0.154968656 |
| 0.458160807 | 0.034366688 | 0.448616484 | 0.354625703 |
| 0.165752333 | 0.007150287 | 0.010464255 | 0.419072492 |
| 0.250754525 | 0.079145724 | 0.183422924 | 0.185862521 |
| 0.15911851  | 0.124885261 | 0.07449935  | 0.141246687 |
| 0.247914888 | 0.168118586 | 0.103752192 | 0.407811571 |
| 0.210005054 | 0.177688246 | 0.16382951  | 0.107213577 |
| 0.217947318 | 0.098740419 | 0.100714587 | 0.019621091 |
| 0.27459914  | 0.149031938 | 0.414180504 | 0.434201032 |
| 0.466638386 | 0.299102126 | 0.130910483 | 0.144883286 |
| 0.336487082 | 0.111531677 | 0.138428145 | 0.110141707 |
| 0.419990335 | 0.301542084 | 0.34260812  | 0.34911137  |
| 0.472871202 | 0.44722888  | 0.061460757 | 0.36714503  |
| 0.03778297  | 0.002409695 | 0.208410833 | 0.220170372 |
| 0.019049327 | 0.201361692 | 0.297966664 | 0.114405649 |
| 0.118531107 | 0.064438735 | 0.141551475 | 0.149069703 |
| 0.266313893 | 0.217381919 | 0.173481088 | 0.200491676 |
| 0.164056086 | 0.133081541 | 0.151206087 | 0.125416413 |
| 0.102739443 | 0.316878394 | 0.251830302 | 0.045676204 |
| 0.19688801  | 0.217873644 | 0.088247961 | 0.17416776  |
| 0.409752293 | 0.435657372 | 0.085082598 | 0.049029556 |
| 0.289456833 | 0.171979809 | 0.435774016 | 0.415647982 |
| 0.462855113 | 0.483318621 | 0.391187586 | 0.136776548 |
| 0.092579393 | 0.227960127 | 0.171998651 | 0.110783481 |

|             |             |             |             |
|-------------|-------------|-------------|-------------|
| 0.437658431 | 0.083231275 | 0.402088399 | 0.145268055 |
| 0.135970584 | 0.210855048 | 0.073296222 | 0.101152876 |
| 0.202683546 | 0.180961279 | 0.170975544 | 0.174403487 |
| 0.221419099 | 0.132507878 | 0.072919072 | 0.194849093 |
| 0.335475825 | 0.129287595 | 0.177019871 | 0.14225508  |
| 0.286403052 | 0.069663566 | 0.32544071  | 0.447688185 |
| 0.152971593 | 0.108987953 | 0.21113754  | 0.262300842 |
| 0.359054928 | 0.169991978 | 0.050475661 | 0.362175811 |
| 0.413098427 | 0.286691454 | 0.42952403  | 0.373188042 |
| 0.109981915 | 0.215526389 | 0.134271453 | 0.22976083  |
| 0.163719707 | 0.183650529 | 0.153594032 | 0.086343618 |
| 0.279526741 | 0.421911073 | 0.381024939 | 0.173575399 |
| 0.194687745 | 0.112974327 | 0.072829979 | 0.335662454 |
| 0.147439322 | 0.12901785  | 0.137919364 | 0.320437398 |
| 0.006770978 | 0.069943491 | 0.408464223 | 0.1670472   |
| 0.445376258 | 0.440790852 | 0.437081901 | 0.124431493 |
| 0.00193665  | 0.275486125 | 0.290643813 | 0.23308757  |
| 0.377985914 | 0.292978147 | 0.065397152 | 0.123126622 |
| 0.307895662 | 0.105758601 | 0.173954508 | 0.159565972 |
| 0.109806252 | 0.255716645 | 0.216768974 | 0.149763588 |
| 0.163199928 | 0.094618708 | 0.115136475 | 0.184472422 |
| 0.067927861 | 0.269872935 | 0.362755232 | 0.097523793 |
| 0.149786664 | 0.373296349 | 0.362513052 | 0.051767832 |
| 0.156643229 | 0.346024138 | 0.356341485 | 0.014345787 |
| 0.335863885 | 0.026262738 | 0.165870932 | 0.197246745 |
| 0.169533519 | 0.163727316 | 0.210623706 | 0.203859581 |
| 0.248004379 | 0.186661153 | 0.22271009  | 0.235435485 |
| 0.167024187 | 0.151097464 | 0.23085957  | 0.192628129 |
| 0.207003135 | 0.145762334 | 0.136140827 | 0.141827665 |
| 0.089845196 | 0.360260123 | 0.281491484 | 0.100432811 |
| 0.19439001  | 0.175206013 | 0.374654444 | 0.413411273 |
| 0.378008049 | 0.136494613 | 0.173262385 | 0.385452748 |
| 0.088175533 | 0.152796952 | 0.074362324 | 0.205925942 |
| 0.174033937 | 0.169867463 | 0.160412825 | 0.244063822 |
| 0.277422083 | 0.410930662 | 0.266895674 | 0.388454277 |
| 0.209224559 | 0.154111572 | 0.13673481  | 0.136325685 |
| 0.197579403 | 0.150691901 | 0.175879671 | 0.012916569 |
| 0.268236523 | 0.18828758  | 0.409990999 | 0.435183206 |
| 0.119895426 | 0.360669945 | 0.152930306 | 0.142284404 |
| 0.117780822 | 0.221125437 | 0.1741974   | 0.307372975 |
| 0.101559336 | 0.152375118 | 0.213952096 | 0.158588347 |
| 0.328959768 | 0.280441724 | 0.13285926  | 0.151605296 |
| 0.156788429 | 0.182184092 | 0.406449051 | 0.106177209 |
| 0.230053577 | 0.157547046 | 0.179041983 | 0.229750209 |
| 0.179554107 | 0.42997852  | 0.07420018  | 0.443569673 |
| 0.208431812 | 0.152294173 | 0.45885883  | 0.141948409 |
| 0.153931822 | 0.109867589 | 0.096839802 | 0.156468758 |
| 0.162532808 | 0.142779595 | 0.005920489 | 0.05839985  |
| 0.318902718 | 0.118792056 | 0.306697229 | 0.266666502 |
| 0.15047464  | 0.315721844 | 0.05681452  | 0.178957508 |
| 0.401474995 | 0.426439412 | 0.248484449 | 0.269574321 |
| 0.30351098  | 0.125942349 | 0.240748195 | 0.005954085 |
| 0.268763672 | 0.22456209  | 0.156721056 | 0.072920292 |
| 0.042395592 | 0.125620891 | 0.266891551 | 0.071735608 |

|             |             |             |             |
|-------------|-------------|-------------|-------------|
| 0.423102411 | 0.100760582 | 0.189716051 | 0.29609555  |
| 0.16689108  | 0.44183225  | 0.12604955  | 0.341877726 |
| 0.049566376 | 0.211354599 | 0.152749488 | 0.15238127  |
| 0.216223376 | 0.178342051 | 0.359471174 | 0.146955369 |
| 0.0712243   | 0.188881934 | 0.011200997 | 0.416128713 |
| 0.413119666 | 0.17498694  | 0.225440538 | 0.096478357 |
| 0.267293132 | 0.307251822 | 0.149362791 | 0.166678237 |
| 0.036832693 | 0.247428102 | 0.165024846 | 0.368298593 |
| 0.156374655 | 0.198719766 | 0.098159023 | 0.154853982 |
| 0.406674906 | 0.195548013 | 0.245706154 | 0.192494019 |
| 0.408081129 | 0.285622876 | 0.167114246 | 0.117357193 |
| 0.213645166 | 0.088552306 | 0.146788734 | 0.456604572 |
| 0.165304363 | 0.14890797  | 0.394922899 | 0.221300845 |
| 0.147512683 | 0.322970877 | 0.204558276 | 0.430549786 |
| 0.105060714 | 0.250806402 | 0.325362104 | 0.402636218 |
| 0.299429427 | 0.114030833 | 0.150096451 | 0.187200633 |
| 0.401817697 | 0.130998816 | 0.140293788 | 0.328072431 |
| 0.14483855  | 0.241105231 | 0.168330333 | 0.144826611 |
| 0.068369891 | 0.117884954 | 0.175242927 | 0.151697314 |
| 0.243315211 | 0.221875039 | 0.167051888 | 0.399180117 |
| 0.154558821 | 0.079671685 | 0.433436348 | 0.02124251  |
| 0.193781361 | 0.292781882 | 0.176630037 | 0.184811941 |
| 0.235645247 | 0.232895077 | 0.208426815 | 0.007680336 |
| 0.348626402 | 0.040031446 | 0.135404945 | 0.20186962  |
| 0.138319579 | 0.081324856 | 0.402113274 | 0.452114478 |
| 0.217286665 | 0.11873683  | 0.147876267 | 0.389731541 |
| 0.098248576 | 0.119942547 | 0.140735963 | 0.26855096  |
| 0.11564101  | 0.161814179 | 0.163734187 | 0.175981046 |
| 0.298315428 | 0.146149114 |             |             |
| DSCC1       | 0.103102425 | 0.425958251 | 0.080685303 |
| 0.205071836 | 0.346747722 | 0.433091636 | 0.078320642 |
| 0.155533717 | 0.330082441 | 0.306361167 | 0.412355893 |
| 0.029739473 | 0.115289893 | 0.467761987 | 0.072774264 |
| 0.417201608 | 0.051135172 | 0.138510895 | 0.083204011 |
| 0.247563425 | 0.325957495 | 0.394344052 | 0.395479745 |
| 0.31786415  | 0.197808872 | 0.358608035 | 0.389911994 |
| 0.514738877 | 0.322106318 | 0.452129751 | 0.228951715 |
| 0.426544297 | 0.366928044 | 0.411079281 | 0.026565949 |
| 0.430513346 | 0.012958332 | 0.444162988 | 0.312167167 |
| 0.203266459 | 0.35436155  | 0.344454478 | 0.306315532 |
| 0.377780988 | 0.05639256  | 0.238796886 | 0.405561204 |
| 0.334722443 | 0.303432585 | 0.085783861 | 0.432085738 |
| 0.365583997 | 0.367142528 | 0.37932428  | 0.003783964 |
| 0.349160298 | 0.117494437 | 0.265657798 | 0.518932629 |
| 0.241202752 | 0.161285485 | 0.298977839 | 0.262966786 |
| 0.385488644 | 0.375468735 | 0.276222402 | 0.373932264 |
| 0.518545877 | 0.216355569 | 0.422420156 | 0.213253072 |
| 0.405615381 | 0.042780571 | 0.18682735  | 0.097540909 |
| 0.408921089 | 0.245697135 | 0.384298452 | 0.342959796 |
| 0.431545909 | 0.524287643 | 0.260738223 | 0.506265419 |
| 0.114765757 | 0.365479917 | 0.317713931 | 0.325439427 |
| 0.360469947 | 0.098864798 | 0.436444906 | 0.535788441 |
| 0.060625441 | 0.376032014 | 0.39625413  | 0.14201733  |
| 0.43376857  | 0.29253634  | 0.40477238  | 0.231741168 |

|             |             |             |             |
|-------------|-------------|-------------|-------------|
| 0.388905505 | 0.375044754 | 0.476039483 | 0.332941048 |
| 0.343111046 | 0.093517346 | 0.49095154  | 0.354808889 |
| 0.367232302 | 0.110212039 | 0.269185945 | 0.459017694 |
| 0.436547831 | 0.51231124  | 0.409389898 | 0.364134898 |
| 0.407575759 | 0.519333384 | 0.427723051 | 0.413268566 |
| 0.168782762 | 0.537697579 | 0.234806382 | 0.063957907 |
| 0.094096705 | 0.112858463 | 0.243810499 | 0.307108667 |
| 0.48471221  | 0.356590505 | 0.243755328 | 0.281468337 |
| 0.465609114 | 0.484280341 | 0.53219639  | 0.405883788 |
| 0.05750301  | 0.270473905 | 0.413885809 | 0.313938923 |
| 0.393407413 | 0.133792291 | 0.308509178 | 0.518248453 |
| 0.396731776 | 0.432023169 | 0.198592941 | 0.505603385 |
| 0.217129835 | 0.532831281 | 0.462363374 | 0.219741879 |
| 0.531678058 | 0.507938991 | 0.530558056 | 0.423975837 |
| 0.489290192 | 0.395342257 | 0.06847013  | 0.369151787 |
| 0.504030029 | 0.024773333 | 0.482071317 | 0.512000621 |
| 0.51233931  | 0.46554827  | 0.533065995 | 0.524303501 |
| 0.515149628 | 0.093198305 | 0.032714888 | 0.321070961 |
| 0.521634665 | 0.407955523 | 0.159560435 | 0.43341745  |
| 0.384464701 | 0.423824765 | 0.413809205 | 0.372847034 |
| 0.523643675 | 0.461372925 | 0.499698577 | 0.393758194 |
| 0.304798781 | 0.324261785 | 0.393073809 | 0.478870526 |
| 0.064332564 | 0.154624287 | 0.070379922 | 0.311038803 |
| 0.369357033 | 0.213949058 | 0.409559032 | 0.357081973 |
| 0.231863903 | 0.353934854 | 0.363917093 | 0.402281011 |
| 0.067726245 | 0.454978413 | 0.201155413 | 0.205878727 |
| 0.063389904 | 0.151871138 | 0.248617315 | 0.210819912 |
| 0.299771408 | 0.241067615 | 0.438400883 | 0.499988056 |
| 0.359148423 | 0.21326178  | 0.431018317 | 0.489947254 |
| 0.43852808  | 0.415997392 | 0.245437482 | 0.024276677 |
| 0.323149288 | 0.312727511 | 0.223770893 | 0.418992549 |
| 0.182847596 | 0.286150542 | 0.406476016 | 0.417882521 |
| 0.328390328 | 0.165051396 | 0.398033429 | 0.43863968  |
| 0.167980768 | 0.369435053 | 0.456415325 | 0.407415617 |
| 0.005919293 | 0.377789559 | 1           | 0.177457493 |
| 0.327584227 | 0.191609169 | 0.320858355 | 0.473793938 |
| 0.321809344 | 0.260535858 | 0.505274568 | 0.406095233 |
| 0.378074817 | 0.223263194 | 0.536705786 | 0.060457812 |
| 0.351692222 | 0.083851958 | 0.319892376 | 0.329687448 |
| 0.293521357 | 0.307632224 | 0.352931899 | 0.331361918 |
| 0.160671406 | 0.529750678 | 0.385064589 | 0.529901612 |
| 0.396621987 | 0.53917173  | 0.4661631   | 0.45613186  |
| 0.389254103 | 0.367204851 | 0.179856971 | 0.440302049 |
| 0.465299748 | 0.3102681   | 0.092274038 | 0.424574357 |
| 0.364702262 | 0.415679474 | 0.14241238  | 0.512264372 |
| 0.505237924 | 0.475474384 | 0.18656577  | 0.383169534 |
| 0.400402599 | 0.288248132 | 0.39827003  | 0.537298254 |
| 0.320794185 | 0.383998133 | 0.378026682 | 0.394678238 |
| 0.214061514 | 0.251047102 | 0.306756977 | 0.215211041 |
| 0.018666399 | 0.103387903 | 0.089717181 | 0.207675448 |
| 0.218562388 | 0.41199221  | 0.409961864 | 0.531265958 |
| 0.15377897  | 0.426075831 | 0.246696663 | 0.355137084 |
| 0.428991311 | 0.364048514 | 0.406308397 | 0.404112146 |
| 0.261603096 | 0.032083196 | 0.168527661 | 0.527845059 |

|             |             |             |             |
|-------------|-------------|-------------|-------------|
| 0.051761891 | 0.298243269 | 0.332690797 | 0.005835049 |
| 0.064168611 | 0.39011259  | 0.107013141 | 0.201807599 |
| 0.48733056  | 0.206165956 | 0.242146616 | 0.328344186 |
| 0.372584431 | 0.121555106 | 0.007017545 | 0.490826659 |
| 0.482560438 | 0.45020679  | 0.480431726 | 0.452704873 |
| 0.431510347 | 0.389978037 | 0.413348853 | 0.38993429  |
| 0.135431142 | 0.111934896 | 0.263853645 | 0.335866284 |
| 0.006740865 | 0.394404766 | 0.325885055 | 0.17302363  |
| 0.423117247 | 0.317304355 | 0.057309483 | 0.367777696 |
| 0.040730543 | 0.258746442 | 0.330504696 | 0.243531991 |
| 0.355407872 | 0.022471085 | 0.312248324 | 0.361615549 |
| 0.447100422 | 0.347044501 | 0.384121481 | 0.542210769 |
| 0.382455623 | 0.146309681 | 0.361775706 | 0.41356599  |
| 0.096623658 | 0.119416431 | 0.372248308 | 0.056536803 |
| 0.239412362 | 0.448839488 | 0.386909793 | 0.099875946 |
| 0.320546841 | 0.009443459 | 0.376849416 | 0.54383373  |
| 0.47560925  | 0.533337495 | 0.522219253 | 0.331609055 |
| 0.524279657 | 0.131677843 | 0.543223183 | 0.402280478 |
| 0.389513164 | 0.002256948 | 0.009601756 | 0.500859827 |
| 0.428423275 | 0.070614868 | 0.195425983 | 0.417776478 |
| 0.156460919 | 0.186807639 | 0.086785474 | 0.233542759 |
| 0.440701444 | 0.28569303  | 0.212778721 | 0.47661822  |
| 0.282858041 | 0.26470967  | 0.39627141  | 0.104467264 |
| 0.42617762  | 0.079233644 | 0.101253325 | 0.014919702 |
| 0.379039519 | 0.127010438 | 0.472140149 | 0.522421007 |
| 0.510995129 | 0.411366999 | 0.351073068 | 0.379259043 |
| 0.426005936 | 0.11986171  | 0.382698535 | 0.136115281 |
| 0.500194179 | 0.420896215 | 0.350927057 | 0.326378077 |
| 0.518127377 | 0.485555208 | 0.048256858 | 0.416096287 |
| 0.026240452 | 0.003033586 | 0.410128157 | 0.277082251 |
| 0.06196846  | 0.399359654 | 0.280916337 | 0.238079015 |
| 0.24455737  | 0.050410256 | 0.306424686 | 0.285119599 |
| 0.333560184 | 0.391249836 | 0.321547455 | 0.24845939  |
| 0.296588346 | 0.167831647 | 0.237098728 | 0.18224229  |
| 0.248461923 | 0.30844362  | 0.203466239 | 0.030729975 |
| 0.434207533 | 0.437511152 | 0.081460482 | 0.186945015 |
| 0.453632664 | 0.510336281 | 0.060972031 | 0.022529694 |
| 0.282636267 | 0.333666209 | 0.515789962 | 0.511386368 |
| 0.535596522 | 0.533718203 | 0.401310142 | 0.158813159 |
| 0.094033203 | 0.348853377 | 0.328882308 | 0.13061264  |
| 0.525898789 | 0.083152788 | 0.494469146 | 0.33665164  |
| 0.138937217 | 0.264239889 | 0.055904072 | 0.107322681 |
| 0.410871532 | 0.210657402 | 0.222883946 | 0.181839626 |
| 0.36147277  | 0.296377305 | 0.064970735 | 0.238046765 |
| 0.361663229 | 0.229548879 | 0.192488387 | 0.323993886 |
| 0.356328247 | 0.214216925 | 0.433509259 | 0.46263345  |
| 0.159586507 | 0.133520668 | 0.339271908 | 0.375912896 |
| 0.436923001 | 0.388164937 | 0.049220909 | 0.456297164 |
| 0.499536478 | 0.454032542 | 0.512395416 | 0.386513935 |
| 0.102829074 | 0.426186445 | 0.326415613 | 0.36898175  |
| 0.212064454 | 0.426022162 | 0.26303275  | 0.082264866 |
| 0.285873773 | 0.481356054 | 0.417184223 | 0.217284002 |
| 0.421509371 | 0.148765695 | 0.07297133  | 0.440648329 |
| 0.23575415  | 0.130467594 | 0.368856099 | 0.412996157 |

|             |             |             |             |
|-------------|-------------|-------------|-------------|
| 0.003315688 | 0.181119865 | 0.489079407 | 0.29531451  |
| 0.517982998 | 0.495962087 | 0.457162984 | 0.275220673 |
| 0.002435214 | 0.414851654 | 0.421747179 | 0.442432161 |
| 0.438173748 | 0.360345198 | 0.166966467 | 0.106567322 |
| 0.30063543  | 0.102804762 | 0.179648498 | 0.382338848 |
| 0.215683701 | 0.41717985  | 0.221060902 | 0.225670649 |
| 0.233689662 | 0.103114646 | 0.294722635 | 0.287746495 |
| 0.160760037 | 0.265600168 | 0.365160574 | 0.293944799 |
| 0.257436615 | 0.429520765 | 0.40369148  | 0.040646524 |
| 0.378806183 | 0.39632674  | 0.43109549  | 0.004664736 |
| 0.44609949  | 0.012798231 | 0.240976522 | 0.272684284 |
| 0.243179391 | 0.246144429 | 0.290470635 | 0.342737756 |
| 0.362368732 | 0.259851483 | 0.337627317 | 0.278552407 |
| 0.213204433 | 0.24924643  | 0.403873454 | 0.376454817 |
| 0.3469013   | 0.168428586 | 0.107998624 | 0.111247439 |
| 0.084097821 | 0.46688651  | 0.252711282 | 0.092438915 |
| 0.258750146 | 0.36826184  | 0.356486061 | 0.502739647 |
| 0.423418699 | 0.12526086  | 0.348438922 | 0.457041348 |
| 0.248727587 | 0.328250196 | 0.083767479 | 0.404667433 |
| 0.273735359 | 0.282273334 | 0.401361444 | 0.344717493 |
| 0.39416596  | 0.413554206 | 0.253288167 | 0.44319414  |
| 0.399974347 | 0.339528753 | 0.337866503 | 0.126172523 |
| 0.227137916 | 0.15127554  | 0.31205927  | 0.00419436  |
| 0.382778546 | 0.316907797 | 0.484409799 | 0.501480631 |
| 0.322447764 | 0.387153955 | 0.364877327 | 0.127391743 |
| 0.29927116  | 0.190196583 | 0.166781972 | 0.422522511 |
| 0.268837331 | 0.228413259 | 0.342703424 | 0.372822358 |
| 0.429083548 | 0.402508347 | 0.276252447 | 0.271911759 |
| 0.257786756 | 0.226397183 | 0.470649979 | 0.149857273 |
| 0.431436087 | 0.244124227 | 0.350511145 | 0.351990278 |
| 0.260000966 | 0.524154534 | 0.079591153 | 0.537059035 |
| 0.366321515 | 0.146445423 | 0.50166225  | 0.322999644 |
| 0.32178568  | 0.161284194 | 0.236715771 | 0.383360799 |
| 0.256507425 | 0.374902183 | 0.019569192 | 0.084114276 |
| 0.357185449 | 0.298887658 | 0.387738623 | 0.362177355 |
| 0.283781598 | 0.341980903 | 0.199903198 | 0.313003522 |
| 0.486847494 | 0.501136776 | 0.320741614 | 0.260864601 |
| 0.359283598 | 0.140091658 | 0.414447638 | 0.01615218  |
| 0.434832178 | 0.426517223 | 0.393065922 | 0.073041609 |
| 0.028392255 | 0.263919444 | 0.42217382  | 0.079335036 |
| 0.490481414 | 0.261499682 | 0.343219165 | 0.439008578 |
| 0.190277052 | 0.50436155  | 0.158112868 | 0.432525419 |
| 0.053829156 | 0.274414936 | 0.386148633 | 0.374930232 |
| 0.298250315 | 0.337589521 | 0.400902298 | 0.293726464 |
| 0.049458043 | 0.310774906 | 0.002710091 | 0.420235707 |
| 0.473060681 | 0.363635094 | 0.211365527 | 0.300184134 |
| 0.30689482  | 0.364836435 | 0.275844092 | 0.420574595 |
| 0.021184626 | 0.407088071 | 0.229844965 | 0.423952226 |
| 0.298695674 | 0.362131043 | 0.086479991 | 0.330374524 |
| 0.460598053 | 0.327877732 | 0.2544033   | 0.354044357 |
| 0.49854095  | 0.363842954 | 0.179257631 | 0.248838617 |
| 0.369937574 | 0.081261835 | 0.395129399 | 0.536326006 |
| 0.222237665 | 0.271424512 | 0.44770928  | 0.259487013 |
| 0.342406465 | 0.38191109  | 0.397521464 | 0.520990933 |

|             |             |             |             |
|-------------|-------------|-------------|-------------|
| 0.103222666 | 0.280062228 | 0.419336001 | 0.461032422 |
| 0.316578791 | 0.208236546 | 0.302783324 | 0.27911953  |
| 0.471991969 | 0.146742873 | 0.28515291  | 0.374621251 |
| 0.271119015 | 0.332523295 | 0.327309376 | 0.231349856 |
| 0.058680603 | 0.19204818  | 0.417965495 | 0.168786439 |
| 0.330721956 | 0.396498323 | 0.278104599 | 0.39605766  |
| 0.194870436 | 0.046706067 | 0.461031367 | 0.027065961 |
| 0.374803688 | 0.429901123 | 0.276647683 | 0.380265702 |
| 0.20701771  | 0.365930217 | 0.359575707 | 0.002205949 |
| 0.404912003 | 0.063425672 | 0.318719529 | 0.290607295 |
| 0.315431928 | 0.071887764 | 0.469144517 | 0.528955198 |
| 0.334769455 | 0.343818464 | 0.380527048 | 0.468492774 |
| 0.197848828 | 0.348899285 | 0.355393022 | 0.412655385 |
| 0.270969864 | 0.390709562 | 0.41697017  | 0.415308371 |
| 0.395392426 | 0.297327031 |             |             |
| DSCR3       | 0.030132409 | 0.135087508 | 0.013862099 |
| 0.015937424 | 0.256939457 | 0.049459881 | 0.053787526 |
| 0.057492428 | 0.145068016 | 0.029206756 | 0.130448977 |
| 0.01306502  | 0.036617192 | 0.195479728 | 0.058099593 |
| 0.210059357 | 0.039944123 | 0.103128344 | 0.016631694 |
| 0.036735333 | 0.269903954 | 0.055269777 | 0.056148508 |
| 0.265912975 | 0.096048738 | 0.099642999 | 0.141076555 |
| 0.170153422 | 0.012225882 | 0.135132333 | 0.005559664 |
| 0.211449517 | 0.249200064 | 0.094200187 | 0.006762211 |
| 0.113750655 | 0.041489829 | 0.194960572 | 0.158138878 |
| 0.040102904 | 0.183132864 | 0.032270772 | 0.118415912 |
| 0.066627171 | 0.015218258 | 0.003792372 | 0.199754856 |
| 0.120678437 | 0.108915897 | 0.025548672 | 0.141718753 |
| 0.079150167 | 0.111590134 | 0.082203285 | 0.00083643  |
| 0.105352176 | 0.023015727 | 0.080235908 | 0.165438662 |
| 0.151928323 | 0.13355092  | 0.02820249  | 0.105346005 |
| 0.168946239 | 0.24447899  | 0.232629102 | 0.055093115 |
| 0.181482297 | 0.08332116  | 0.159677498 | 0.014575654 |
| 0.094293944 | 0.025189464 | 0.148348028 | 0.055193764 |
| 0.088094049 | 0.182267965 | 0.166168619 | 0.15590275  |
| 0.115259273 | 0.219439483 | 0.188038084 | 0.161237857 |
| 0.080500125 | 0.238340705 | 0.151356988 | 0.288797571 |
| 0.231302272 | 0.06783654  | 0.175181674 | 0.214737666 |
| 0.041634723 | 0.070663105 | 0.181343045 | 0.071914501 |
| 0.133081805 | 0.091054293 | 0.052944205 | 0.094835693 |
| 0.265111405 | 0.227692221 | 0.194046002 | 0.172833011 |
| 0.18406211  | 0.041478619 | 0.145782664 | 0.237485584 |
| 0.102472842 | 0.041460781 | 0.13103222  | 0.201831622 |
| 0.150283578 | 0.171475208 | 0.153159741 | 0.241799323 |
| 0.177725174 | 0.180864243 | 0.15355555  | 0.181316195 |
| 0.00411748  | 0.182896476 | 0.08926814  | 0.039697486 |
| 0.023445059 | 0.092703531 | 0.133892333 | 0.242228095 |
| 0.182154115 | 0.153032689 | 0.076497167 | 0.221133526 |
| 0.263566686 | 0.135061807 | 0.183721329 | 0.191102448 |
| 0.033451985 | 0.118009343 | 0.160426177 | 0.056535919 |
| 0.209554835 | 0.120952302 | 0.199619419 | 0.178032085 |
| 0.173030987 | 0.225928217 | 0.042682629 | 0.194285516 |
| 0.130003635 | 0.226483885 | 0.123533151 | 0.123577846 |
| 0.191584207 | 0.158250772 | 0.235727375 | 0.214131929 |

|             |             |             |             |
|-------------|-------------|-------------|-------------|
| 0.167290658 | 0.071100853 | 0.027108756 | 0.199135988 |
| 0.239245404 | 0.013129128 | 0.189297915 | 0.208619611 |
| 0.161751851 | 0.190897835 | 0.257141847 | 0.200197814 |
| 0.158459826 | 0.067214354 | 0.013417735 | 0.301263248 |
| 0.172621071 | 0.17875757  | 0.118228736 | 0.112294957 |
| 0.234155776 | 0.066879291 | 0.183173528 | 0.015860034 |
| 0.257586508 | 0.180390306 | 0.176273378 | 0.170979697 |
| 0.110628336 | 0.163417286 | 0.149560441 | 0.135315714 |
| 0.024555791 | 0.03455082  | 0.02644514  | 0.238975435 |
| 0.016956961 | 0.204459619 | 0.058221333 | 0.235621459 |
| 0.199933386 | 0.066897561 | 0.082002262 | 0.24291984  |
| 0.034998426 | 0.089752028 | 0.093518423 | 0.084603458 |
| 0.044162605 | 0.106750436 | 0.025092493 | 0.045641939 |
| 0.215157041 | 0.104403813 | 0.141525921 | 0.213460173 |
| 0.141794874 | 0.083638147 | 0.139238739 | 0.230046683 |
| 0.279571119 | 0.158154382 | 0.18933253  | 0.005596436 |
| 0.045656112 | 0.059541082 | 0.098634454 | 0.126006812 |
| 0.100259347 | 0.080156779 | 0.192936566 | 0.242431822 |
| 0.05850376  | 0.06621083  | 0.104836367 | 0.18588443  |
| 0.079154193 | 0.099532143 | 0.22112298  | 0.104502561 |
| 0.001688063 | 0.115050519 | 0.177457493 | 1           |
| 0.179762538 | 0.031043591 | 0.034820444 | 0.215613757 |
| 0.055612689 | 0.193717935 | 0.194743018 | 0.261410431 |
| 0.017175376 | 0.091867185 | 0.237157738 | 0.030683358 |
| 0.204900117 | 0.024548953 | 0.274378764 | 0.044193259 |
| 0.154278042 | 0.281655356 | 0.236675068 | 0.146595141 |
| 0.041093702 | 0.192228238 | 0.170271348 | 0.196527806 |
| 0.081665033 | 0.236291823 | 0.198117025 | 0.195185979 |
| 0.167143045 | 0.121448852 | 0.055285269 | 0.171588245 |
| 0.204717352 | 0.02554507  | 0.040113796 | 0.17466775  |
| 0.093341251 | 0.224232532 | 0.070259504 | 0.226920882 |
| 0.212956679 | 0.128999864 | 0.113363187 | 0.299613804 |
| 0.183879016 | 0.093785279 | 0.206751314 | 0.250829101 |
| 0.036313097 | 0.182803296 | 0.128800689 | 0.306346207 |
| 0.119953668 | 0.169797096 | 0.19272285  | 0.080862397 |
| 0.001211415 | 0.050035056 | 0.04019104  | 0.183725654 |
| 0.155127337 | 0.106975792 | 0.227008147 | 0.199736074 |
| 0.106891545 | 0.177797321 | 0.193166553 | 0.098112631 |
| 0.161998884 | 0.16122937  | 0.15499106  | 0.202045729 |
| 0.185966763 | 0.00991907  | 0.026391129 | 0.212356189 |
| 0.024319179 | 0.099041676 | 0.112759897 | 0.001764319 |
| 0.029780486 | 0.107561063 | 0.064286286 | 0.123495491 |
| 0.25444078  | 0.103301872 | 0.107077506 | 0.040539044 |
| 0.225238798 | 0.083317303 | 0.003691021 | 0.207190221 |
| 0.203506138 | 0.209105431 | 0.194172595 | 0.171685216 |
| 0.227583742 | 0.18461269  | 0.243090511 | 0.053222818 |
| 0.053302307 | 0.034889736 | 0.112080619 | 0.18395249  |
| 0.001205708 | 0.227600809 | 0.225214078 | 0.126579478 |
| 0.201846571 | 0.22599172  | 0.022877193 | 0.229477076 |
| 0.003321821 | 0.055910385 | 0.061741131 | 0.188537083 |
| 0.326802043 | 0.009729411 | 0.009307929 | 0.051011946 |
| 0.121954208 | 0.149254066 | 0.082326097 | 0.191902704 |
| 0.154216978 | 0.048867472 | 0.173496733 | 0.220032665 |
| 0.05664547  | 0.011004192 | 0.079732104 | 0.000731442 |



|             |             |             |             |
|-------------|-------------|-------------|-------------|
| 0.008000887 | 0.194049178 | 0.087712278 | 0.010603002 |
| 0.161433508 | 0.00241979  | 0.134082736 | 0.203897765 |
| 0.125739742 | 0.224909038 | 0.184591351 | 0.130556629 |
| 0.179277511 | 0.023085421 | 0.194485905 | 0.139349621 |
| 0.049722247 | 0.000223261 | 0.006361044 | 0.200281927 |
| 0.152005781 | 0.025055099 | 0.137490938 | 0.013871484 |
| 0.053729826 | 0.038381622 | 0.054252089 | 0.174002774 |
| 0.106964093 | 0.242379311 | 0.14177808  | 0.150878081 |
| 0.171051134 | 0.218171299 | 0.061124424 | 0.067484789 |
| 0.15097145  | 0.032597746 | 0.077428908 | 0.004280964 |
| 0.269870546 | 0.05470501  | 0.147231642 | 0.174307153 |
| 0.218519743 | 0.23108891  | 0.031322526 | 0.017075838 |
| 0.232327773 | 0.02826585  | 0.0253331   | 0.03754677  |
| 0.142515323 | 0.197516224 | 0.202737596 | 0.146262062 |
| 0.237521263 | 0.180763579 | 0.038113961 | 0.226039987 |
| 0.002730114 | 0.008236292 | 0.049362881 | 0.204249073 |
| 0.048500616 | 0.155605207 | 0.186162786 | 0.115348662 |
| 0.141196049 | 0.005203903 | 0.160497309 | 0.17817553  |
| 0.225777172 | 0.168591226 | 0.238316506 | 0.190758479 |
| 0.220059169 | 0.077431813 | 0.134893615 | 0.120282837 |
| 0.037127048 | 0.140588807 | 0.095735009 | 0.025438332 |
| 0.084745638 | 0.123523234 | 0.049632    | 0.109801643 |
| 0.19482032  | 0.195880502 | 0.028674604 | 0.010192282 |
| 0.157687131 | 0.166386891 | 0.224644391 | 0.154267866 |
| 0.182209802 | 0.24547616  | 0.183591199 | 0.12345082  |
| 0.040980639 | 0.259979045 | 0.260390821 | 0.111765169 |
| 0.189396707 | 0.035141221 | 0.15629675  | 0.192420438 |
| 0.121877904 | 0.096323123 | 0.0188846   | 0.10199768  |
| 0.161287838 | 0.155155341 | 0.220526787 | 0.050674753 |
| 0.153626835 | 0.070768691 | 0.051846555 | 0.160724971 |
| 0.189738231 | 0.056531432 | 0.145477501 | 0.077770269 |
| 0.152267244 | 0.013494799 | 0.196902291 | 0.242608546 |
| 0.082891989 | 0.09053444  | 0.020248925 | 0.223264945 |
| 0.166270798 | 0.0892887   | 0.003852116 | 0.124405979 |
| 0.222064692 | 0.133414666 | 0.157226596 | 0.290505463 |
| 0.081063461 | 0.137587525 | 0.160733867 | 0.226859845 |
| 0.17887914  | 0.054734837 | 0.197285859 | 0.067837967 |
| 0.224736199 | 0.210871516 | 0.161131287 | 0.134417696 |
| 0.106055791 | 0.046249829 | 0.029972865 | 0.176161781 |
| 0.126474483 | 0.017519965 | 0.039028691 | 0.208521777 |
| 0.003757339 | 0.101159911 | 0.255958211 | 0.074620317 |
| 0.232524036 | 0.224682609 | 0.198930505 | 0.07023267  |
| 0.005657277 | 0.209889034 | 0.165300292 | 0.089257314 |
| 0.138481493 | 0.150065251 | 0.026441254 | 0.065637176 |
| 0.240182072 | 0.031352973 | 0.076187649 | 0.011904638 |
| 0.038933355 | 0.114539107 | 0.218512051 | 0.169193134 |
| 0.221307771 | 0.055636644 | 0.060051558 | 0.101893318 |
| 0.078369476 | 0.211103503 | 0.236163806 | 0.020231033 |
| 0.027076647 | 0.250292885 | 0.16754847  | 0.016614821 |
| 0.169459432 | 0.239415662 | 0.218139959 | 0.002971926 |
| 0.179807717 | 0.00666643  | 0.211969541 | 0.169082244 |
| 0.182258688 | 0.198868987 | 0.310541133 | 0.128964321 |
| 0.160060038 | 0.15564435  | 0.100212788 | 0.197140131 |
| 0.114140978 | 0.128242904 | 0.18411555  | 0.10003327  |

|             |             |             |             |
|-------------|-------------|-------------|-------------|
| 0.102061876 | 0.062332956 | 0.058954774 | 0.050480621 |
| 0.014071552 | 0.160651623 | 0.152565066 | 0.033564085 |
| 0.228237658 | 0.109315841 | 0.245633643 | 0.145212598 |
| 0.244845391 | 0.039786926 | 0.150573369 | 0.128344342 |
| 0.013694058 | 0.014105607 | 0.021975837 | 0.102660775 |
| 0.137867753 | 0.080133547 | 0.076462305 | 0.074139094 |
| 0.143992396 | 0.198668641 | 0.143595582 | 0.215698615 |
| 0.121491358 | 0.15499155  | 0.022373714 | 0.056946753 |
| 0.084868015 | 0.105892304 | 0.262707127 | 0.00130657  |
| 0.187952355 | 0.013898528 | 0.180337437 | 0.15398245  |
| 0.106094588 | 0.217599416 | 0.006469635 | 0.03545024  |
| 0.00873961  | 0.063608847 | 0.121274818 | 0.152094932 |
| 0.072079112 | 0.082942899 | 0.248605432 | 0.019842352 |
| 0.198752871 | 0.182194231 | 0.184329132 | 0.116397775 |
| 0.215189785 | 0.088388529 | 0.191802506 | 0.038190229 |
| 0.107593279 | 0.13412707  | 0.071512099 | 0.179522045 |
| 0.226446768 | 0.199856692 | 0.047259751 | 0.202102437 |
| 0.174465658 | 0.084393383 | 0.230153793 | 0.104374315 |
| 0.040263003 | 0.049142813 | 0.105778376 | 0.050351211 |
| 0.104804974 | 0.089376853 | 0.001658047 | 0.038854243 |
| 0.252356504 | 0.102842533 | 0.130923152 | 0.246671023 |
| 0.225091719 | 0.316637861 | 0.031572763 | 0.106014491 |
| 0.132676191 | 0.160709912 | 0.041078532 | 0.239664111 |
| 0.194576482 | 0.071904181 | 0.070317895 | 0.010603154 |
| 0.149376663 | 0.125726356 | 0.037957316 | 0.050275638 |
| 0.009725459 | 0.103069118 | 0.136195176 | 0.050576527 |
| 0.248419045 | 0.021956379 | 0.12463664  | 0.144690181 |
| 0.137765301 | 0.162170821 | 0.130422421 | 0.192120233 |
| 0.015382508 | 0.208474555 | 0.155802165 | 0.126648836 |
| 0.077609711 | 0.180459841 | 0.233009325 | 0.145255527 |
| 0.036246895 | 0.080749207 | 0.006280004 | 0.174899259 |
| 0.145048762 | 0.185070303 | 0.155680872 | 0.027135124 |
| 0.268334439 | 0.213766295 | 0.054960929 | 0.090303954 |
| 0.007695048 | 0.201623045 | 0.173178791 | 0.132401497 |
| 0.017328997 | 0.158188654 | 0.020256279 | 0.244048265 |
| 0.141933711 | 0.048270098 | 0.210404943 | 0.033066322 |
| 0.149385603 | 0.153465139 | 0.057495551 | 0.080633179 |
| 0.129359644 | 0.053694547 | 0.035454555 | 0.220815635 |
| 0.172945419 | 0.177333484 | 0.238472149 | 0.128067148 |
| 0.170281771 | 0.147725027 | 0.116923599 | 0.213639888 |
| 0.107995095 | 0.191171085 | 0.21942135  | 0.185680444 |
| 0.268711802 | 0.218585023 | 0.115953117 | 0.195920963 |
| 0.124647106 | 0.013857581 | 0.114879716 | 0.165637594 |
| 0.136035278 | 0.230188011 | 0.077136419 | 0.231794859 |
| 0.015791204 | 0.095513992 | 0.042855167 | 0.122789833 |
| 0.205862337 | 0.185939283 | 0.18584873  | 0.216669861 |
| 0.035275322 | 0.010051936 | 0.234404271 | 0.017704987 |
| 0.058615666 | 0.179057784 | 0.16539113  | 0.162051975 |
| 0.095568797 | 0.150455017 | 0.07299833  | 0.000781201 |
| 0.251731994 | 0.029825204 | 0.14982614  | 0.119349377 |
| 0.035382844 | 0.032131118 | 0.163961139 | 0.234093127 |
| 0.151768897 | 0.020564117 | 0.030810705 | 0.177012835 |
| 0.044256108 | 0.064111056 | 0.100275885 | 0.09891578  |
| 0.137777064 | 0.05290062  | 0.076344257 | 0.080260623 |

|             |             |             |             |
|-------------|-------------|-------------|-------------|
| 0.157644858 | 0.090168024 |             |             |
| DSN1        | 0.11228992  | 0.35808645  | 0.079467074 |
| 0.115694823 | 0.199370467 | 0.202434498 | 0.145246974 |
| 0.188201364 | 0.313907405 | 0.186529317 | 0.213311601 |
| 0.059630065 | 0.054786445 | 0.388369581 | 0.141634353 |
| 0.242288336 | 0.093997115 | 0.178578607 | 0.105421188 |
| 0.208564108 | 0.214459117 | 0.17990749  | 0.230423289 |
| 0.219508339 | 0.233973498 | 0.242695555 | 0.2240649   |
| 0.396520109 | 0.115252322 | 0.233517635 | 0.092400629 |
| 0.401960692 | 0.210608225 | 0.194223297 | 0.043810992 |
| 0.245033812 | 0.031457369 | 0.433842499 | 0.223578269 |
| 0.077701979 | 0.350074912 | 0.184865273 | 0.193826549 |
| 0.230656868 | 0.076105801 | 0.095826145 | 0.269928945 |
| 0.242958966 | 0.232675668 | 0.109590391 | 0.263477846 |
| 0.258463667 | 0.243070474 | 0.265928424 | 0.008292501 |
| 0.155030229 | 0.042551754 | 0.128837032 | 0.415429633 |
| 0.196117933 | 0.170882568 | 0.179231685 | 0.243338435 |
| 0.267742058 | 0.282040911 | 0.234356525 | 0.240409372 |
| 0.414558981 | 0.128657725 | 0.276294233 | 0.118111403 |
| 0.272783607 | 0.095296293 | 0.192146082 | 0.142914288 |
| 0.234977924 | 0.196000885 | 0.211768146 | 0.184723593 |
| 0.354166184 | 0.473119621 | 0.230640233 | 0.435458654 |
| 0.140381738 | 0.217088796 | 0.185770447 | 0.267652601 |
| 0.31410837  | 0.190592486 | 0.276878362 | 0.45384643  |
| 0.126442605 | 0.227622975 | 0.314143591 | 0.17340685  |
| 0.331419387 | 0.183885147 | 0.20945088  | 0.102125858 |
| 0.228943374 | 0.239579465 | 0.450780895 | 0.245731592 |
| 0.210007868 | 0.124098186 | 0.431284583 | 0.195990587 |
| 0.183919692 | 0.116615108 | 0.204253832 | 0.346267194 |
| 0.24976736  | 0.389596348 | 0.352515381 | 0.341677181 |
| 0.235052649 | 0.403165841 | 0.260783933 | 0.366378199 |
| 0.074703003 | 0.437033743 | 0.173693271 | 0.096220116 |
| 0.116730351 | 0.144853651 | 0.233007025 | 0.299565142 |
| 0.354653641 | 0.246567396 | 0.202216831 | 0.21771727  |
| 0.376940432 | 0.41162221  | 0.443826298 | 0.350607598 |
| 0.093375788 | 0.175586998 | 0.225763226 | 0.210654398 |
| 0.295640081 | 0.180989331 | 0.166005702 | 0.456855275 |
| 0.332516164 | 0.335423586 | 0.173574381 | 0.466728057 |
| 0.26301179  | 0.437128043 | 0.344713075 | 0.182217037 |
| 0.446748676 | 0.42704264  | 0.423065554 | 0.237699303 |
| 0.403145663 | 0.207320425 | 0.142647634 | 0.350327962 |
| 0.415981593 | 0.011862661 | 0.373029601 | 0.398837837 |
| 0.416205754 | 0.339469427 | 0.444896983 | 0.403191821 |
| 0.419025543 | 0.134357301 | 0.043842152 | 0.246193761 |
| 0.437685469 | 0.32293663  | 0.192143739 | 0.232983793 |
| 0.245908584 | 0.239215545 | 0.312560057 | 0.172386483 |
| 0.4657243   | 0.345472697 | 0.385413529 | 0.327745699 |
| 0.258250667 | 0.325173856 | 0.211232073 | 0.409077541 |
| 0.088978957 | 0.137467417 | 0.089740371 | 0.293141215 |
| 0.169656305 | 0.196271149 | 0.247613792 | 0.264451216 |
| 0.208720403 | 0.247058893 | 0.167974441 | 0.240131371 |
| 0.112431992 | 0.230173367 | 0.176484811 | 0.211323735 |
| 0.095252564 | 0.210888598 | 0.188704397 | 0.145702413 |
| 0.224490702 | 0.305041387 | 0.272496314 | 0.396556745 |

|             |             |             |             |
|-------------|-------------|-------------|-------------|
| 0.258010529 | 0.187529199 | 0.283885136 | 0.404561012 |
| 0.399540978 | 0.20809982  | 0.260436462 | 0.017941683 |
| 0.229254476 | 0.197898646 | 0.12097828  | 0.220701957 |
| 0.247131936 | 0.274534964 | 0.269205851 | 0.261157573 |
| 0.210236116 | 0.205352155 | 0.253300479 | 0.403816287 |
| 0.193469582 | 0.189281214 | 0.364310485 | 0.253500314 |
| 0.012656135 | 0.242509691 | 0.327584227 | 0.179762538 |
| 1           | 0.094243062 | 0.113506844 | 0.378662791 |
| 0.199601105 | 0.201968606 | 0.383640926 | 0.263669811 |
| 0.212449019 | 0.285467075 | 0.445636795 | 0.068508581 |
| 0.238342978 | 0.049032336 | 0.234829096 | 0.199218852 |
| 0.231870603 | 0.281997799 | 0.204204792 | 0.179824768 |
| 0.135496791 | 0.445550942 | 0.314800811 | 0.412989426 |
| 0.231333935 | 0.449868111 | 0.348308584 | 0.358210935 |
| 0.247665532 | 0.23727733  | 0.086520446 | 0.323209313 |
| 0.358482034 | 0.222390902 | 0.116883823 | 0.326146361 |
| 0.250359567 | 0.266557294 | 0.118043743 | 0.415632257 |
| 0.440770061 | 0.400068131 | 0.184075615 | 0.296732715 |
| 0.30575478  | 0.193934242 | 0.323231726 | 0.461615357 |
| 0.219594199 | 0.255684967 | 0.223135411 | 0.32517733  |
| 0.187129948 | 0.204377989 | 0.326655396 | 0.10896071  |
| 0.002461642 | 0.144483673 | 0.11269331  | 0.176872438 |
| 0.114408509 | 0.228476655 | 0.261026114 | 0.433251441 |
| 0.172282557 | 0.34938772  | 0.263659363 | 0.219627383 |
| 0.383097566 | 0.252783625 | 0.199081132 | 0.234660849 |
| 0.250198403 | 0.028331895 | 0.126310623 | 0.473765611 |
| 0.089188159 | 0.141578164 | 0.269731159 | 0.004992175 |
| 0.113400588 | 0.312115728 | 0.16318599  | 0.256954332 |
| 0.3893676   | 0.244778458 | 0.211897882 | 0.227144989 |
| 0.24572242  | 0.142893352 | 0.004446011 | 0.410404397 |
| 0.429772791 | 0.418245627 | 0.430760008 | 0.419597925 |
| 0.395205228 | 0.299890187 | 0.318890781 | 0.20697342  |
| 0.16284226  | 0.139117827 | 0.167822953 | 0.241900431 |
| 0.016111746 | 0.278053424 | 0.231541298 | 0.175498414 |
| 0.296711809 | 0.277726382 | 0.083571313 | 0.234095412 |
| 0.037966942 | 0.100706265 | 0.295893432 | 0.240607172 |
| 0.281553017 | 0.043594524 | 0.12092828  | 0.222114382 |
| 0.363031228 | 0.322368423 | 0.183197394 | 0.438002197 |
| 0.222490074 | 0.166489452 | 0.212067292 | 0.270805045 |
| 0.141937069 | 0.111121761 | 0.275934971 | 0.015642014 |
| 0.108736352 | 0.419224638 | 0.234809796 | 0.099997489 |
| 0.231489109 | 0.017907342 | 0.320385192 | 0.448671697 |
| 0.38373255  | 0.426450091 | 0.403420334 | 0.148058411 |
| 0.414431518 | 0.060945754 | 0.429901565 | 0.337097515 |
| 0.222134675 | 0.001845249 | 0.01851746  | 0.374337163 |
| 0.233000426 | 0.100651599 | 0.189984214 | 0.171570549 |
| 0.147306677 | 0.18380188  | 0.124888145 | 0.135672731 |
| 0.221014893 | 0.191724593 | 0.147436352 | 0.418072212 |
| 0.234036279 | 0.231158093 | 0.251763887 | 0.144035147 |
| 0.219292478 | 0.100450708 | 0.151849345 | 0.010430345 |
| 0.267043933 | 0.165503588 | 0.431915247 | 0.42022956  |
| 0.426568023 | 0.244632087 | 0.181906083 | 0.206850819 |
| 0.367945165 | 0.125858201 | 0.177122354 | 0.141128452 |
| 0.394831818 | 0.249331165 | 0.273537345 | 0.28260647  |

|             |             |             |             |
|-------------|-------------|-------------|-------------|
| 0.436409015 | 0.403380606 | 0.092698381 | 0.318414207 |
| 0.018351872 | 0.004695204 | 0.212943408 | 0.260710476 |
| 0.103407104 | 0.251218044 | 0.255223812 | 0.258223518 |
| 0.234586264 | 0.060670681 | 0.173755731 | 0.170136673 |
| 0.24148095  | 0.261063421 | 0.188326199 | 0.269243047 |
| 0.207832233 | 0.155154573 | 0.185374495 | 0.218329967 |
| 0.236117637 | 0.311199368 | 0.237936872 | 0.076822677 |
| 0.22432729  | 0.225605468 | 0.10858089  | 0.179292433 |
| 0.338496057 | 0.387571463 | 0.125225419 | 0.026096905 |
| 0.26810191  | 0.27078676  | 0.404932079 | 0.402145947 |
| 0.45382802  | 0.456599278 | 0.383996138 | 0.190696546 |
| 0.117964219 | 0.243486001 | 0.197112887 | 0.124193874 |
| 0.421411399 | 0.122356389 | 0.397586547 | 0.173921007 |
| 0.176023362 | 0.19857703  | 0.068242776 | 0.153566762 |
| 0.206672159 | 0.20458966  | 0.185908248 | 0.155973558 |
| 0.252123584 | 0.136635771 | 0.118187421 | 0.216781132 |
| 0.311069928 | 0.115250117 | 0.202118801 | 0.232230637 |
| 0.289557232 | 0.170577752 | 0.28784128  | 0.421205907 |
| 0.164142516 | 0.186467504 | 0.189277148 | 0.297959753 |
| 0.332763581 | 0.22508481  | 0.030000681 | 0.366470197 |
| 0.405862878 | 0.245297808 | 0.411281836 | 0.366192849 |
| 0.145289227 | 0.213108335 | 0.22224332  | 0.258585002 |
| 0.232926185 | 0.20554049  | 0.2511628   | 0.125863874 |
| 0.324005582 | 0.459905267 | 0.354935205 | 0.173816352 |
| 0.228159359 | 0.164137836 | 0.113751503 | 0.354686368 |
| 0.13928201  | 0.134839733 | 0.203237797 | 0.340791656 |
| 0.002504267 | 0.082635223 | 0.416730269 | 0.192328421 |
| 0.459412161 | 0.389965106 | 0.387831057 | 0.220250344 |
| 0.003012959 | 0.253756208 | 0.235082858 | 0.218233768 |
| 0.361354914 | 0.285516419 | 0.163268611 | 0.127407937 |
| 0.277444343 | 0.111359387 | 0.201944647 | 0.179611109 |
| 0.136150731 | 0.266333544 | 0.221069306 | 0.250855347 |
| 0.202818508 | 0.154143707 | 0.127840932 | 0.189369005 |
| 0.150281813 | 0.241112551 | 0.315117513 | 0.17431497  |
| 0.134508593 | 0.400098502 | 0.332326426 | 0.062569341 |
| 0.205536094 | 0.363636792 | 0.362272881 | 0.0124059   |
| 0.274703085 | 0.028420474 | 0.204396757 | 0.180800591 |
| 0.191465544 | 0.246108604 | 0.227962928 | 0.193679776 |
| 0.278415964 | 0.232142751 | 0.192643098 | 0.212456353 |
| 0.156236483 | 0.213524946 | 0.23615295  | 0.247759328 |
| 0.178688775 | 0.15025641  | 0.160564932 | 0.168975317 |
| 0.079666989 | 0.364004723 | 0.268165361 | 0.104848321 |
| 0.230084994 | 0.26059999  | 0.335244337 | 0.406584274 |
| 0.35723603  | 0.157342288 | 0.272529653 | 0.338417111 |
| 0.163133841 | 0.195325716 | 0.122838246 | 0.227367788 |
| 0.21961977  | 0.167297138 | 0.221652839 | 0.23645423  |
| 0.307628814 | 0.383556643 | 0.254513354 | 0.378597798 |
| 0.215848045 | 0.274990639 | 0.171461473 | 0.119222358 |
| 0.189051447 | 0.181195276 | 0.189130186 | 0.006748306 |
| 0.2591593   | 0.168730547 | 0.357012825 | 0.4103989   |
| 0.167538987 | 0.343970097 | 0.171402778 | 0.140772948 |
| 0.136965524 | 0.228542264 | 0.180855092 | 0.293353311 |
| 0.113921149 | 0.177517569 | 0.21215364  | 0.183818567 |
| 0.293396816 | 0.295050374 | 0.212832679 | 0.265882895 |

|             |             |             |             |
|-------------|-------------|-------------|-------------|
| 0.242718858 | 0.189307215 | 0.443490395 | 0.146109369 |
| 0.233326752 | 0.130418341 | 0.229141843 | 0.232893851 |
| 0.218386129 | 0.414210742 | 0.108469538 | 0.423787593 |
| 0.257278495 | 0.179243916 | 0.449217601 | 0.228424181 |
| 0.194623422 | 0.119860246 | 0.107571263 | 0.237878588 |
| 0.251697176 | 0.174919041 | 0.014257865 | 0.086587792 |
| 0.267526408 | 0.255902367 | 0.326713859 | 0.303060594 |
| 0.181774193 | 0.314682863 | 0.088597431 | 0.274078371 |
| 0.406013373 | 0.440383098 | 0.21351935  | 0.269176958 |
| 0.308176622 | 0.141962381 | 0.219604058 | 0.031934792 |
| 0.252177442 | 0.225708743 | 0.235286265 | 0.119161248 |
| 0.060301502 | 0.127018273 | 0.254272439 | 0.133258867 |
| 0.394173997 | 0.100769585 | 0.25635084  | 0.256170051 |
| 0.219066119 | 0.443713118 | 0.161540821 | 0.267674733 |
| 0.14203234  | 0.237901537 | 0.215760382 | 0.26071084  |
| 0.165798437 | 0.189239253 | 0.278430518 | 0.139160343 |
| 0.080278187 | 0.200300248 | 0.013271228 | 0.394712659 |
| 0.423599104 | 0.219123558 | 0.255976911 | 0.186072489 |
| 0.232417726 | 0.337697265 | 0.260256518 | 0.212767002 |
| 0.024856697 | 0.21730441  | 0.205714385 | 0.319388441 |
| 0.122726855 | 0.283280563 | 0.077838964 | 0.236769053 |
| 0.425856371 | 0.256972748 | 0.296827202 | 0.182675242 |
| 0.395501264 | 0.31643764  | 0.175845153 | 0.162465461 |
| 0.262381283 | 0.120331647 | 0.197993816 | 0.455993799 |
| 0.187630361 | 0.137019972 | 0.338245429 | 0.211810228 |
| 0.200723132 | 0.332354684 | 0.232760901 | 0.455818348 |
| 0.129961144 | 0.223511021 | 0.310379978 | 0.403049231 |
| 0.275492047 | 0.150192029 | 0.160031876 | 0.21633404  |
| 0.375254417 | 0.101772681 | 0.200053912 | 0.283196594 |
| 0.147605459 | 0.246005624 | 0.223247815 | 0.182606975 |
| 0.075390615 | 0.221136085 | 0.194974691 | 0.183389885 |
| 0.254952513 | 0.233141464 | 0.194471392 | 0.356571053 |
| 0.115737393 | 0.039793908 | 0.406552915 | 0.018530283 |
| 0.200365356 | 0.220372965 | 0.222126701 | 0.221510871 |
| 0.204490293 | 0.276611926 | 0.249962457 | 0.00863533  |
| 0.337558426 | 0.029282292 | 0.234305869 | 0.17849574  |
| 0.21501015  | 0.119474482 | 0.379306032 | 0.421206192 |
| 0.238624998 | 0.182563699 | 0.180518508 | 0.402039551 |
| 0.093885897 | 0.173010667 | 0.232409176 | 0.25122946  |
| 0.132023836 | 0.211605778 | 0.22146432  | 0.179117805 |
| 0.280195873 | 0.225444011 |             |             |
| DTL         | 0.013614282 | 0.108332681 | 0.007419205 |
| 0.011341603 | 0.213883662 | 0.086299918 | 0.008704213 |
| 0.01852825  | 0.08075307  | 0.025774857 | 0.17544663  |
| 0.003379258 | 0.039074359 | 0.172698962 | 0.010237338 |
| 0.201211898 | 0.009503169 | 0.029987345 | 0.001383101 |
| 0.004868166 | 0.216787162 | 0.133977012 | 0.068417381 |
| 0.17552145  | 0.046267688 | 0.063064226 | 0.138676997 |
| 0.162003663 | 0.047047041 | 0.189922912 | 0.002898066 |
| 0.139953899 | 0.263540647 | 0.160800182 | 0.001555875 |
| 0.131070584 | 0.000939506 | 0.118726396 | 0.099757957 |
| 0.014986252 | 0.115060473 | 0.03475643  | 0.099382274 |
| 0.051852888 | 0.005697819 | 0.010901882 | 0.160434857 |
| 0.060470432 | 0.050756047 | 0.009330422 | 0.131702    |

|             |             |             |             |
|-------------|-------------|-------------|-------------|
| 0.049664926 | 0.11036342  | 0.080119395 | 0.000111603 |
| 0.200148932 | 0.057067165 | 0.134271893 | 0.148333809 |
| 0.085056255 | 0.054154402 | 0.022691832 | 0.052828454 |
| 0.132379642 | 0.160018698 | 0.107961875 | 0.049356717 |
| 0.169306532 | 0.097318483 | 0.153140439 | 0.00344285  |
| 0.078822133 | 0.002767013 | 0.054118274 | 0.010432822 |
| 0.091170012 | 0.103549685 | 0.204401492 | 0.139772455 |
| 0.099369739 | 0.158578083 | 0.073515222 | 0.124638337 |
| 0.021405858 | 0.216070848 | 0.116615381 | 0.157351142 |
| 0.137315587 | 0.010048131 | 0.18981018  | 0.171395805 |
| 0.005857162 | 0.06557413  | 0.131242518 | 0.023472467 |
| 0.13480571  | 0.070396936 | 0.067318004 | 0.180337301 |
| 0.219136708 | 0.190794367 | 0.131163809 | 0.126066264 |
| 0.169317422 | 0.011043958 | 0.115564372 | 0.257146054 |
| 0.152840159 | 0.014064528 | 0.074985841 | 0.199503599 |
| 0.145253703 | 0.176151264 | 0.130364917 | 0.143820324 |
| 0.188192214 | 0.171520671 | 0.141037634 | 0.137462727 |
| 0.002340155 | 0.162346943 | 0.051270716 | 0.014983017 |
| 0.006799842 | 0.029670096 | 0.057400634 | 0.125267648 |
| 0.193625638 | 0.109639833 | 0.044843051 | 0.12135997  |
| 0.223171378 | 0.114139303 | 0.155109942 | 0.163748114 |
| 0.007728995 | 0.085582029 | 0.160717229 | 0.043845039 |
| 0.159176439 | 0.029176813 | 0.212863576 | 0.138028698 |
| 0.141457689 | 0.218316394 | 0.019146834 | 0.134287556 |
| 0.045497622 | 0.188799747 | 0.128454593 | 0.064932101 |
| 0.151701384 | 0.131946918 | 0.201805081 | 0.262175869 |
| 0.142714756 | 0.079760788 | 0.001977318 | 0.135302187 |
| 0.207452629 | 0.00365303  | 0.185406286 | 0.1952423   |
| 0.140155746 | 0.203314048 | 0.206109027 | 0.191872571 |
| 0.144509799 | 0.014482576 | 0.000784326 | 0.18947535  |
| 0.141668737 | 0.14887421  | 0.038097007 | 0.13983028  |
| 0.22741188  | 0.081367964 | 0.171917137 | 0.023351045 |
| 0.192360622 | 0.162763695 | 0.17211901  | 0.137365495 |
| 0.048654819 | 0.105054384 | 0.173557313 | 0.111962429 |
| 0.005784682 | 0.020329862 | 0.008812261 | 0.123432031 |
| 0.025269549 | 0.087187228 | 0.056960606 | 0.150636866 |
| 0.094077181 | 0.051697766 | 0.142775456 | 0.254826624 |
| 0.008400396 | 0.133932475 | 0.034348376 | 0.031647836 |
| 0.01162407  | 0.037395428 | 0.026758687 | 0.039614886 |
| 0.161702763 | 0.044892918 | 0.172453414 | 0.175094748 |
| 0.10777827  | 0.044334015 | 0.145433822 | 0.189735779 |
| 0.20101331  | 0.200168938 | 0.08723683  | 0.000993409 |
| 0.039789899 | 0.052527242 | 0.111489312 | 0.15887858  |
| 0.037434139 | 0.048736464 | 0.159095329 | 0.270582066 |
| 0.055277014 | 0.020419565 | 0.100562685 | 0.135130403 |
| 0.030133899 | 0.148588557 | 0.206817925 | 0.090201577 |
| 0.000107954 | 0.092768246 | 0.191609169 | 0.031043591 |
| 0.094243062 | 1           | 0.110586282 | 0.180137735 |
| 0.066694288 | 0.14481411  | 0.194621626 | 0.254399044 |
| 0.018224738 | 0.041258948 | 0.200639029 | 0.002768506 |
| 0.138211357 | 0.004123476 | 0.174119202 | 0.039518146 |
| 0.086213988 | 0.142329988 | 0.258938757 | 0.128210258 |
| 0.023794355 | 0.166467129 | 0.139567725 | 0.192118692 |
| 0.077793482 | 0.191708235 | 0.211571284 | 0.191806871 |

|             |             |             |             |
|-------------|-------------|-------------|-------------|
| 0.134548736 | 0.102561654 | 0.106901771 | 0.174443765 |
| 0.178463149 | 0.008126104 | 0.011010168 | 0.175986525 |
| 0.06259728  | 0.205105405 | 0.008650844 | 0.197648443 |
| 0.157656958 | 0.107866895 | 0.069145466 | 0.234785782 |
| 0.167529619 | 0.074278088 | 0.161467293 | 0.201126861 |
| 0.023593437 | 0.168482526 | 0.114768415 | 0.227926244 |
| 0.050130606 | 0.111728338 | 0.100606339 | 0.113411985 |
| 0.002575384 | 0.013972151 | 0.01287884  | 0.103390382 |
| 0.17020927  | 0.121750872 | 0.162118203 | 0.173730394 |
| 0.045495143 | 0.152499445 | 0.07252652  | 0.10299288  |
| 0.12143597  | 0.148835371 | 0.220524184 | 0.193440921 |
| 0.076982539 | 0.000838219 | 0.016329124 | 0.153080241 |
| 0.004343769 | 0.149191552 | 0.080336558 | 0.000295818 |
| 0.006693458 | 0.09979809  | 0.017909862 | 0.050769279 |
| 0.23831128  | 0.043837934 | 0.051158158 | 0.029167264 |
| 0.194229603 | 0.027220047 | 0.000917251 | 0.162047981 |
| 0.145934691 | 0.1373564   | 0.138997702 | 0.116574667 |
| 0.150126317 | 0.152074761 | 0.191540386 | 0.068736812 |
| 0.013394743 | 0.008528323 | 0.096755013 | 0.121100409 |
| 0.00042213  | 0.196803713 | 0.145376864 | 0.050110483 |
| 0.212516787 | 0.106911475 | 0.008558748 | 0.208364682 |
| 0.001388841 | 0.121481443 | 0.036932771 | 0.067911507 |
| 0.218768061 | 0.001839104 | 0.004466379 | 0.046307043 |
| 0.114025013 | 0.113243287 | 0.1108778   | 0.164584514 |
| 0.161628044 | 0.018895639 | 0.128693992 | 0.235865459 |
| 0.014060772 | 0.000894342 | 0.053195705 | 0.000743367 |
| 0.00445654  | 0.132676023 | 0.077553059 | 0.00288448  |
| 0.103562722 | 0.000617038 | 0.112056537 | 0.180909233 |
| 0.113974107 | 0.202243338 | 0.179505441 | 0.223909059 |
| 0.162494821 | 0.046035482 | 0.181651793 | 0.120315977 |
| 0.058552045 | 5.38E-05    | 0.00216624  | 0.193422998 |
| 0.173230298 | 0.007218226 | 0.052590877 | 0.031916637 |
| 0.02697762  | 0.02235258  | 0.015820184 | 0.127586413 |
| 0.141254803 | 0.196385739 | 0.11778963  | 0.120552448 |
| 0.078549657 | 0.113149737 | 0.058201181 | 0.017061994 |
| 0.183216954 | 0.011485838 | 0.015420418 | 0.007179794 |
| 0.224713728 | 0.018516358 | 0.107017625 | 0.161810079 |
| 0.180725913 | 0.215472067 | 0.043295498 | 0.033771383 |
| 0.176536814 | 0.014383027 | 0.040316571 | 0.019384583 |
| 0.134271055 | 0.191741968 | 0.15609211  | 0.103279191 |
| 0.199673716 | 0.15116209  | 0.007873746 | 0.176733279 |
| 0.000882756 | 0.000823627 | 0.06121055  | 0.098539361 |
| 0.001979691 | 0.154832568 | 0.09532148  | 0.034496611 |
| 0.057069622 | 0.001992209 | 0.161311814 | 0.153649884 |
| 0.133840691 | 0.143056769 | 0.244567471 | 0.069381026 |
| 0.109436969 | 0.019829383 | 0.073587519 | 0.03951452  |
| 0.00980051  | 0.077388621 | 0.048674018 | 0.003262194 |
| 0.100418201 | 0.154292543 | 0.015917951 | 0.047406804 |
| 0.189158897 | 0.199646899 | 0.003780995 | 0.002879959 |
| 0.090281144 | 0.101261115 | 0.218148718 | 0.145736004 |
| 0.15227373  | 0.194383408 | 0.123248862 | 0.050053182 |
| 0.015794301 | 0.154542489 | 0.214870087 | 0.035793611 |
| 0.17939508  | 0.008847275 | 0.143423818 | 0.226182063 |
| 0.02993381  | 0.042411456 | 0.008403099 | 0.023582146 |



|             |             |             |             |
|-------------|-------------|-------------|-------------|
| 0.235446611 | 0.07374152  | 0.110458042 | 0.025475809 |
| 0.120219699 | 0.087775386 | 0.008412674 | 0.075690066 |
| 0.121971936 | 0.049607045 | 0.050364707 | 0.047952638 |
| 0.092102402 | 0.006822202 | 0.194948887 | 0.17247586  |
| 0.036687254 | 0.022075732 | 0.022812647 | 0.156276374 |
| 0.156329951 | 0.094743234 | 0.001595916 | 0.112884777 |
| 0.195758507 | 0.180543161 | 0.145574678 | 0.201988927 |
| 0.017725878 | 0.208552756 | 0.127752869 | 0.158422205 |
| 0.065212231 | 0.081893013 | 0.088127505 | 0.015345949 |
| 0.105953468 | 0.141958376 | 0.116428904 | 0.083276158 |
| 0.125999228 | 0.020636933 | 0.006788072 | 0.162509214 |
| 0.1080959   | 0.009996443 | 0.048031695 | 0.186540997 |
| 0.000213634 | 0.15299224  | 0.19208558  | 0.082068916 |
| 0.167106263 | 0.192904064 | 0.156225147 | 0.031221724 |
| 0.000182474 | 0.187430598 | 0.188037909 | 0.105949981 |
| 0.126986935 | 0.11164733  | 0.007624687 | 0.023136649 |
| 0.135465544 | 0.013330492 | 0.035225303 | 0.014907801 |
| 0.007520585 | 0.112919856 | 0.086932033 | 0.054830359 |
| 0.087237583 | 0.012079606 | 0.099510182 | 0.065668851 |
| 0.021990749 | 0.111862307 | 0.171959461 | 0.022318797 |
| 0.050881224 | 0.181027303 | 0.129129979 | 0.005000828 |
| 0.201970233 | 0.161301079 | 0.169098365 | 0.000154841 |
| 0.214053553 | 0.001750303 | 0.12797448  | 0.124433776 |
| 0.089813894 | 0.099131302 | 0.174733767 | 0.100473161 |
| 0.091725462 | 0.059765378 | 0.098438029 | 0.122992199 |
| 0.075025409 | 0.051247301 | 0.15267956  | 0.05825885  |
| 0.145542084 | 0.033592425 | 0.01792706  | 0.01697813  |
| 0.011711724 | 0.159809191 | 0.083852585 | 0.012049561 |
| 0.116025046 | 0.057655045 | 0.154388522 | 0.130040247 |
| 0.191784385 | 0.017010787 | 0.116877297 | 0.140512178 |
| 0.004171227 | 0.004075136 | 0.006790368 | 0.079691364 |
| 0.090388195 | 0.113982061 | 0.081146474 | 0.062218006 |
| 0.112688765 | 0.136874227 | 0.084772687 | 0.160565278 |
| 0.101795471 | 0.083609563 | 0.028661605 | 0.031039639 |
| 0.044141836 | 0.030347646 | 0.226510984 | 0.000139387 |
| 0.160828751 | 0.015000697 | 0.194021342 | 0.130260547 |
| 0.148504273 | 0.1547147   | 0.012374222 | 0.016548871 |
| 0.011957559 | 0.030482746 | 0.044498344 | 0.148366875 |
| 0.165752542 | 0.046200446 | 0.178468939 | 0.027844481 |
| 0.179651033 | 0.13893494  | 0.089533372 | 0.063513974 |
| 0.075600898 | 0.040692328 | 0.123056938 | 0.015985982 |
| 0.122581404 | 0.122817347 | 0.060766045 | 0.149750845 |
| 0.112305159 | 0.17581769  | 0.013325705 | 0.185887509 |
| 0.138538626 | 0.030280194 | 0.173004762 | 0.078148227 |
| 0.026426453 | 0.033076487 | 0.173241353 | 0.048208644 |
| 0.049435041 | 0.163953639 | 0.000315577 | 0.005022781 |
| 0.190772915 | 0.051732581 | 0.103989865 | 0.148090799 |
| 0.145067002 | 0.178514895 | 0.05460823  | 0.054551955 |
| 0.114323537 | 0.124774055 | 0.046686884 | 0.094517703 |
| 0.14859233  | 0.035855629 | 0.095284452 | 0.000208474 |
| 0.167581069 | 0.16253046  | 0.046817467 | 0.014132807 |
| 0.001457384 | 0.144223226 | 0.118858481 | 0.008209556 |
| 0.219117606 | 0.047463038 | 0.078282487 | 0.167207277 |
| 0.045312349 | 0.12280074  | 0.058338152 | 0.218365788 |

|             |             |             |             |
|-------------|-------------|-------------|-------------|
| 0.001279127 | 0.086454032 | 0.156461272 | 0.103568089 |
| 0.094959357 | 0.19542439  | 0.19176193  | 0.210110702 |
| 0.008896196 | 0.053926211 | 4.39E-05    | 0.12071839  |
| 0.104980505 | 0.152845154 | 0.059946934 | 0.027340268 |
| 0.152478213 | 0.133017265 | 0.050854213 | 0.117053829 |
| 0.001417424 | 0.2348474   | 0.083185247 | 0.143311937 |
| 0.034574169 | 0.095586305 | 0.00939355  | 0.162940127 |
| 0.102035596 | 0.043862021 | 0.090908175 | 0.03288577  |
| 0.134828088 | 0.10830932  | 0.024632615 | 0.048088204 |
| 0.095050216 | 0.013193158 | 0.051585918 | 0.180772771 |
| 0.097822146 | 0.200282273 | 0.24355094  | 0.071429421 |
| 0.191020401 | 0.11355902  | 0.107313165 | 0.165929403 |
| 0.040956395 | 0.115001802 | 0.195497123 | 0.145425755 |
| 0.169912809 | 0.140624238 | 0.19042514  | 0.148139885 |
| 0.115482301 | 0.013307059 | 0.064772501 | 0.113726977 |
| 0.151185594 | 0.159685651 | 0.052952658 | 0.13839619  |
| 0.005486239 | 0.033694768 | 0.090546315 | 0.039955549 |
| 0.147963911 | 0.154875427 | 0.098276151 | 0.153468635 |
| 0.044512805 | 0.002854459 | 0.164012856 | 0.002579912 |
| 0.074316591 | 0.218115295 | 0.108762614 | 0.157179071 |
| 0.052279867 | 0.10495079  | 0.052811748 | 0.000175025 |
| 0.192279595 | 0.002727893 | 0.102969228 | 0.119072343 |
| 0.025025073 | 0.008438544 | 0.140233661 | 0.221500733 |
| 0.099062834 | 0.021127453 | 0.054194741 | 0.150559852 |
| 0.025186605 | 0.096893719 | 0.106717097 | 0.091498063 |
| 0.187213154 | 0.058073398 | 0.103205738 | 0.133276807 |
| 0.141353472 | 0.06787191  |             |             |
| DTX4        | 0.014191871 | 0.225249504 | 0.010903039 |
| 0.030741314 | 0.258006209 | 0.173462135 | 0.004981848 |
| 0.016070237 | 0.143093957 | 0.060742006 | 0.248518524 |
| 0.001166865 | 0.106284184 | 0.285939762 | 0.005011004 |
| 0.258720524 | 0.003384417 | 0.021619416 | 0.010016015 |
| 0.023293536 | 0.202397075 | 0.163702658 | 0.13859992  |
| 0.172152451 | 0.068637276 | 0.116963322 | 0.229454198 |
| 0.315917862 | 0.138702689 | 0.34426693  | 0.039915712 |
| 0.211992579 | 0.288181989 | 0.268446462 | 0.0009677   |
| 0.213732105 | 0.003442843 | 0.195765254 | 0.093118281 |
| 0.105441346 | 0.169551756 | 0.102010558 | 0.107892123 |
| 0.110130355 | 0.004218906 | 0.058408119 | 0.23901029  |
| 0.111451551 | 0.069434711 | 0.010606967 | 0.257135963 |
| 0.082889582 | 0.188529043 | 0.186975655 | 0.000279769 |
| 0.289783345 | 0.109580464 | 0.180100168 | 0.294686411 |
| 0.095059497 | 0.039748518 | 0.055389526 | 0.06040287  |
| 0.183367474 | 0.207975874 | 0.118445621 | 0.079908287 |
| 0.308355096 | 0.096109876 | 0.290625622 | 0.039694672 |
| 0.109378987 | 0.001862164 | 0.056561006 | 0.012987869 |
| 0.12774488  | 0.098360965 | 0.265732862 | 0.186303678 |
| 0.214806873 | 0.270468075 | 0.086265058 | 0.249303523 |
| 0.028134192 | 0.266326542 | 0.127929683 | 0.171354655 |
| 0.168699873 | 0.006264826 | 0.295806419 | 0.296253975 |
| 0.003963504 | 0.148189414 | 0.187113442 | 0.027645793 |
| 0.267355916 | 0.100374477 | 0.161816562 | 0.190805629 |
| 0.30378605  | 0.210809119 | 0.226864392 | 0.151923826 |
| 0.206932998 | 0.012619379 | 0.231881094 | 0.305651792 |

|             |             |             |             |
|-------------|-------------|-------------|-------------|
| 0.189489213 | 0.018043194 | 0.060701837 | 0.344935432 |
| 0.232295006 | 0.329807125 | 0.226401285 | 0.176206485 |
| 0.237181377 | 0.319445776 | 0.247552568 | 0.237840871 |
| 0.042278352 | 0.305483233 | 0.068185992 | 0.006245438 |
| 0.00923698  | 0.018765788 | 0.049291087 | 0.157671552 |
| 0.352035331 | 0.167004122 | 0.051591323 | 0.106433699 |
| 0.333379057 | 0.237786183 | 0.290610262 | 0.239208989 |
| 0.004756155 | 0.102246588 | 0.233183484 | 0.073530311 |
| 0.19808734  | 0.025031048 | 0.241093109 | 0.254521656 |
| 0.230843389 | 0.31893776  | 0.030054381 | 0.240852605 |
| 0.037018661 | 0.320896051 | 0.276034132 | 0.062287289 |
| 0.282141609 | 0.258587818 | 0.340620901 | 0.390167213 |
| 0.273138361 | 0.14988331  | 0.00531826  | 0.189428053 |
| 0.32822333  | 0.019709799 | 0.330539084 | 0.343388625 |
| 0.277054806 | 0.35214069  | 0.334309097 | 0.352524089 |
| 0.284946638 | 0.01327469  | 0.004737864 | 0.174403047 |
| 0.269750997 | 0.252363322 | 0.027119833 | 0.224847646 |
| 0.2492882   | 0.151918812 | 0.291611581 | 0.097708954 |
| 0.298678654 | 0.314023613 | 0.327662147 | 0.196936071 |
| 0.078100193 | 0.154385303 | 0.273358814 | 0.23089924  |
| 0.004554782 | 0.025158468 | 0.010370981 | 0.137963612 |
| 0.076838327 | 0.075061392 | 0.10562701  | 0.174483402 |
| 0.086252346 | 0.093419014 | 0.240260711 | 0.340420144 |
| 0.009776048 | 0.253965087 | 0.045073502 | 0.036351368 |
| 0.005338741 | 0.044383331 | 0.033670762 | 0.040020263 |
| 0.143310384 | 0.073395259 | 0.30068467  | 0.320110213 |
| 0.121210093 | 0.063267549 | 0.246294671 | 0.309974981 |
| 0.267876169 | 0.297228    | 0.087751628 | 0.003992598 |
| 0.048893506 | 0.087119355 | 0.137257527 | 0.270890099 |
| 0.054790125 | 0.034408881 | 0.200524809 | 0.373028899 |
| 0.096070414 | 0.022631584 | 0.123096971 | 0.224372049 |
| 0.039143645 | 0.182483814 | 0.315812215 | 0.161522651 |
| 9.49E-05    | 0.124191014 | 0.320858355 | 0.034820444 |
| 0.113506844 | 0.110586282 | 1           | 0.299703699 |
| 0.086458344 | 0.114183709 | 0.355239177 | 0.346612069 |
| 0.074949507 | 0.067801809 | 0.330907184 | 0.018963882 |
| 0.180526286 | 0.031091099 | 0.178371966 | 0.099206025 |
| 0.095721155 | 0.146678321 | 0.28872258  | 0.159605835 |
| 0.040909794 | 0.294783023 | 0.243545886 | 0.339570725 |
| 0.118693297 | 0.321530461 | 0.345321205 | 0.306999414 |
| 0.193654796 | 0.155797257 | 0.116034697 | 0.299107075 |
| 0.306194333 | 0.041213407 | 0.01502111  | 0.298094806 |
| 0.103240145 | 0.292718186 | 0.037421934 | 0.318336748 |
| 0.275081049 | 0.230481998 | 0.0437977   | 0.275891938 |
| 0.256746026 | 0.099720088 | 0.274234036 | 0.32300148  |
| 0.043396459 | 0.177393499 | 0.136016669 | 0.3101      |
| 0.061093152 | 0.077130768 | 0.146573326 | 0.136806039 |
| 0.051253551 | 0.013024679 | 0.012422397 | 0.076700184 |
| 0.155663013 | 0.242988992 | 0.240379453 | 0.313064819 |
| 0.031694039 | 0.269775621 | 0.078290038 | 0.097983009 |
| 0.210977064 | 0.165182252 | 0.335770173 | 0.29311857  |
| 0.099158294 | 0.004121047 | 0.028369874 | 0.266028234 |
| 0.004741028 | 0.185230414 | 0.093549175 | 0.001102842 |
| 0.003802974 | 0.217720147 | 0.021887188 | 0.06796428  |

|             |             |              |             |
|-------------|-------------|--------------|-------------|
| 0.3623616   | 0.069349897 | 0.065024795  | 0.054362554 |
| 0.25348933  | 0.022596854 | 0.003730313  | 0.286756137 |
| 0.259383098 | 0.234513606 | 0.252023273  | 0.219285316 |
| 0.240441027 | 0.243772475 | 0.275497718  | 0.153052088 |
| 0.012909612 | 0.011310051 | 0.083213617  | 0.116332929 |
| 0.000404539 | 0.296210613 | 0.168811445  | 0.048720343 |
| 0.313328711 | 0.119391043 | 0.0049483    | 0.256257342 |
| 0.002880644 | 0.184569656 | 0.042628191  | 0.064274141 |
| 0.251004161 | 0.000912374 | 0.068331447  | 0.070275949 |
| 0.234333553 | 0.175051196 | 0.191798164  | 0.312267959 |
| 0.201249462 | 0.028950812 | 0.159458865  | 0.338790817 |
| 0.008990941 | 0.012827337 | 0.081669423  | 0.012015245 |
| 0.071572922 | 0.228957175 | 0.132163946  | 0.005914941 |
| 0.12006221  | 0.000194001 | 0.196063215  | 0.31718268  |
| 0.247661899 | 0.341289764 | 0.328256006  | 0.282548596 |
| 0.305371624 | 0.09130709  | 0.33341465   | 0.214196    |
| 0.109887391 | 0.000192566 | 0.001144683  | 0.349657475 |
| 0.242069297 | 0.011072879 | 0.052125876  | 0.089168394 |
| 0.019112015 | 0.025333376 | 0.010689264  | 0.119258468 |
| 0.286081857 | 0.18423382  | 0.102365749  | 0.233152011 |
| 0.07843067  | 0.100096585 | 0.108561652  | 0.01777775  |
| 0.305352448 | 0.006495396 | 0.01571834   | 0.005342228 |
| 0.26540831  | 0.029340631 | 0.212368735  | 0.30263291  |
| 0.299819799 | 0.316560532 | 0.101305044  | 0.088167351 |
| 0.277681445 | 0.024322592 | 0.099913271  | 0.025617283 |
| 0.275106317 | 0.249612493 | 0.200332714  | 0.157815919 |
| 0.311507774 | 0.270331571 | 0.003627915  | 0.256848546 |
| 0.004380961 | 0.001215573 | 0.136188711  | 0.105438751 |
| 0.010118965 | 0.170826953 | 0.114816619  | 0.036298782 |
| 0.052980407 | 0.003770736 | 0.174610733  | 0.163089546 |
| 0.149006657 | 0.16243617  | 0.243112653  | 0.084080633 |
| 0.113968105 | 0.034543472 | 0.072261495  | 0.029780688 |
| 0.031324128 | 0.128881854 | 0.070457168  | 0.001115806 |
| 0.19868056  | 0.265704072 | 0.0111109823 | 0.053006424 |
| 0.323869836 | 0.346586231 | 0.002586812  | 0.002869514 |
| 0.116225659 | 0.107671904 | 0.360828454  | 0.29548317  |
| 0.283028628 | 0.31088164  | 0.194674914  | 0.024772553 |
| 0.011529391 | 0.167609672 | 0.246183751  | 0.027588811 |
| 0.323990531 | 0.009763461 | 0.283791028  | 0.287980894 |
| 0.028203761 | 0.051161478 | 0.006175097  | 0.016840487 |
| 0.353605709 | 0.066808077 | 0.089012464  | 0.041557192 |
| 0.122500632 | 0.122599832 | 0.005097717  | 0.069916171 |
| 0.166280587 | 0.078323507 | 0.048579888  | 0.078763076 |
| 0.177886983 | 0.022957652 | 0.300913513  | 0.253668839 |
| 0.038487696 | 0.018236818 | 0.046645162  | 0.232594374 |
| 0.290866115 | 0.18273076  | 0.011535929  | 0.243557551 |
| 0.332261947 | 0.316615438 | 0.285780543  | 0.249234586 |
| 0.016706418 | 0.282693224 | 0.147973254  | 0.172536009 |
| 0.055823292 | 0.174476068 | 0.081815959  | 0.011340872 |
| 0.136607744 | 0.234173061 | 0.217978316  | 0.071333141 |
| 0.242701829 | 0.025906794 | 0.007448384  | 0.294382858 |
| 0.085774159 | 0.009929985 | 0.113414719  | 0.293822983 |
| 0.001710823 | 0.164385948 | 0.309456783  | 0.090153098 |
| 0.285252064 | 0.322205433 | 0.258368728  | 0.050940913 |

|             |             |             |             |
|-------------|-------------|-------------|-------------|
| 0.001022532 | 0.286973071 | 0.259501589 | 0.174881666 |
| 0.237362729 | 0.190666622 | 0.021728181 | 0.012753903 |
| 0.159774812 | 0.019732414 | 0.018664843 | 0.073552535 |
| 0.047296392 | 0.186873699 | 0.080284367 | 0.051375232 |
| 0.078261804 | 0.014870303 | 0.138716727 | 0.092087512 |
| 0.039477722 | 0.117551973 | 0.211283166 | 0.056982511 |
| 0.084648847 | 0.25415561  | 0.208317977 | 0.003050737 |
| 0.283240673 | 0.229786369 | 0.280900039 | 0.000348134 |
| 0.331169384 | 0.000601681 | 0.098828215 | 0.122976996 |
| 0.085617511 | 0.068986139 | 0.160398309 | 0.129871049 |
| 0.134531239 | 0.062634497 | 0.129390431 | 0.126324039 |
| 0.065161824 | 0.067242957 | 0.243541366 | 0.100811709 |
| 0.169737563 | 0.030715644 | 0.025492074 | 0.025876121 |
| 0.011844988 | 0.304893238 | 0.111091255 | 0.017786656 |
| 0.104903799 | 0.095386281 | 0.206969475 | 0.269029367 |
| 0.289305225 | 0.030530665 | 0.109334606 | 0.280483863 |
| 0.04154315  | 0.055648026 | 0.005708082 | 0.164824612 |
| 0.097348701 | 0.092295597 | 0.17205813  | 0.103094387 |
| 0.193488475 | 0.209885754 | 0.111003704 | 0.262543596 |
| 0.168789604 | 0.107259205 | 0.080432895 | 0.019245621 |
| 0.046986371 | 0.032187778 | 0.223304333 | 1.24E-05    |
| 0.192950424 | 0.040341878 | 0.340261299 | 0.262372381 |
| 0.206087846 | 0.235231024 | 0.052181648 | 0.011477148 |
| 0.04186005  | 0.054480912 | 0.043648557 | 0.277688745 |
| 0.215159954 | 0.054206549 | 0.2028102   | 0.079387697 |
| 0.303389828 | 0.240565438 | 0.092086231 | 0.058362501 |
| 0.079735096 | 0.062182913 | 0.223265118 | 0.02251109  |
| 0.226285883 | 0.120280884 | 0.129142438 | 0.143123059 |
| 0.091673564 | 0.32698254  | 0.011556277 | 0.338813381 |
| 0.137975682 | 0.036525886 | 0.273890827 | 0.116705006 |
| 0.052633373 | 0.04173813  | 0.19482027  | 0.098098491 |
| 0.037442374 | 0.228122548 | 0.004177893 | 0.022730986 |
| 0.21722572  | 0.066258967 | 0.194868575 | 0.189583436 |
| 0.142240743 | 0.204252451 | 0.131728845 | 0.069188792 |
| 0.242354987 | 0.243395473 | 0.047533926 | 0.105594345 |
| 0.170033093 | 0.027154225 | 0.21057175  | 0.002310284 |
| 0.245869389 | 0.280390641 | 0.077948145 | 0.007202325 |
| 0.001077252 | 0.16671046  | 0.196359266 | 0.008826366 |
| 0.338144495 | 0.147658699 | 0.1301055   | 0.325241974 |
| 0.050450887 | 0.242276329 | 0.037632404 | 0.329011068 |
| 0.001362911 | 0.102558867 | 0.231595967 | 0.141134126 |
| 0.094619803 | 0.19944582  | 0.263592333 | 0.23598696  |
| 0.004295616 | 0.066705159 | 0.002078717 | 0.195677362 |
| 0.212829021 | 0.193417034 | 0.073048503 | 0.059503151 |
| 0.169579495 | 0.209959759 | 0.046249673 | 0.226824822 |
| 0.002464798 | 0.30595053  | 0.083648162 | 0.272602311 |
| 0.086413475 | 0.124503881 | 0.012321655 | 0.172332027 |
| 0.202556635 | 0.051992093 | 0.101814198 | 0.061473195 |
| 0.279994612 | 0.207313852 | 0.049025808 | 0.068564376 |
| 0.165251162 | 0.011638459 | 0.128839787 | 0.30732994  |
| 0.079230282 | 0.207421215 | 0.360743098 | 0.057574375 |
| 0.22103027  | 0.211478287 | 0.200711248 | 0.287299299 |
| 0.018051633 | 0.121799465 | 0.309124002 | 0.25105104  |
| 0.19091086  | 0.109129152 | 0.17596201  | 0.104712683 |

|             |             |             |             |
|-------------|-------------|-------------|-------------|
| 0.24660656  | 0.022670526 | 0.075326899 | 0.18195749  |
| 0.158141026 | 0.176540279 | 0.115301674 | 0.109567002 |
| 0.00747459  | 0.028381183 | 0.152411678 | 0.040075772 |
| 0.139460471 | 0.191522792 | 0.088824313 | 0.227779178 |
| 0.05193698  | 0.007641603 | 0.261600766 | 0.017858273 |
| 0.160478957 | 0.326002543 | 0.111176045 | 0.20114532  |
| 0.074874885 | 0.133908884 | 0.093511    | 0.000452558 |
| 0.269534715 | 0.028216596 | 0.11524032  | 0.101704379 |
| 0.078764981 | 0.004662206 | 0.269623099 | 0.3544738   |
| 0.144510186 | 0.076365784 | 0.108442221 | 0.261729285 |
| 0.097846074 | 0.167326106 | 0.128300604 | 0.20045991  |
| 0.21550715  | 0.132076373 | 0.178159508 | 0.239970921 |
| 0.215073485 | 0.080570388 |             |             |
| DUT         | 0.115090261 | 0.420972798 | 0.091841073 |
| 0.223977336 | 0.373607197 | 0.436722796 | 0.101034809 |
| 0.179390618 | 0.377535334 | 0.346016425 | 0.423147068 |
| 0.037175631 | 0.108402361 | 0.454905944 | 0.090925432 |
| 0.453787588 | 0.063172779 | 0.16568102  | 0.101477371 |
| 0.300752241 | 0.35559996  | 0.387236414 | 0.410619787 |
| 0.353226376 | 0.222101372 | 0.403849092 | 0.422027899 |
| 0.500813968 | 0.303961008 | 0.469298263 | 0.260859236 |
| 0.428232568 | 0.389696727 | 0.425939407 | 0.034703438 |
| 0.451151136 | 0.019563108 | 0.451511804 | 0.357726006 |
| 0.217871651 | 0.355033433 | 0.377806167 | 0.329719687 |
| 0.435951173 | 0.068404062 | 0.235227078 | 0.45320652  |
| 0.389573502 | 0.345052868 | 0.101413814 | 0.469328548 |
| 0.422188622 | 0.384638085 | 0.416505337 | 0.003652953 |
| 0.35147082  | 0.115177601 | 0.276883021 | 0.504286647 |
| 0.264666466 | 0.18062055  | 0.340034404 | 0.295117008 |
| 0.428496262 | 0.423116495 | 0.309885709 | 0.428749558 |
| 0.502973178 | 0.226758591 | 0.460734491 | 0.224930821 |
| 0.449247971 | 0.058358985 | 0.216907262 | 0.124165149 |
| 0.44278723  | 0.26551027  | 0.390230284 | 0.375606561 |
| 0.427923996 | 0.518648128 | 0.302874865 | 0.503574287 |
| 0.141935934 | 0.397997141 | 0.347591906 | 0.366410162 |
| 0.411987166 | 0.131226058 | 0.465358553 | 0.528999022 |
| 0.07905394  | 0.41581068  | 0.448791926 | 0.168375529 |
| 0.43049698  | 0.320654089 | 0.43359633  | 0.223494953 |
| 0.424850709 | 0.416792985 | 0.476034454 | 0.363804379 |
| 0.359369083 | 0.115270326 | 0.484825788 | 0.378719029 |
| 0.368810039 | 0.132364261 | 0.312480753 | 0.471021611 |
| 0.479202825 | 0.492255311 | 0.440524346 | 0.414713469 |
| 0.445941036 | 0.503649811 | 0.466415968 | 0.414787946 |
| 0.174248352 | 0.524757628 | 0.261160855 | 0.071639373 |
| 0.110808597 | 0.126591002 | 0.288195368 | 0.340895305 |
| 0.466137294 | 0.382242985 | 0.270834276 | 0.319586582 |
| 0.463151227 | 0.47550372  | 0.524598383 | 0.44698702  |
| 0.070407815 | 0.304918448 | 0.457324606 | 0.324404498 |
| 0.433507046 | 0.160750966 | 0.3284139   | 0.512842633 |
| 0.402793451 | 0.468112142 | 0.226280904 | 0.502862069 |
| 0.25792103  | 0.519089902 | 0.447958926 | 0.247501767 |
| 0.524232232 | 0.497955703 | 0.516398144 | 0.446048257 |
| 0.473407825 | 0.42033682  | 0.086710226 | 0.415644179 |
| 0.4856726   | 0.025554174 | 0.468222765 | 0.499716398 |

|             |             |             |             |
|-------------|-------------|-------------|-------------|
| 0.50457289  | 0.480255208 | 0.52446756  | 0.506370596 |
| 0.502653706 | 0.115004164 | 0.044003931 | 0.358489455 |
| 0.515615064 | 0.431328589 | 0.17935312  | 0.467694606 |
| 0.416194611 | 0.444573142 | 0.445490876 | 0.373196139 |
| 0.514082514 | 0.457326864 | 0.483785044 | 0.436436522 |
| 0.366345506 | 0.33207831  | 0.424174569 | 0.470065315 |
| 0.077155068 | 0.169533954 | 0.084364057 | 0.352082131 |
| 0.391717233 | 0.24172415  | 0.437900881 | 0.402551254 |
| 0.260276405 | 0.383884729 | 0.370092298 | 0.42835718  |
| 0.085109242 | 0.474397811 | 0.235019484 | 0.246207522 |
| 0.078728822 | 0.177151545 | 0.264360024 | 0.218097353 |
| 0.320566351 | 0.252058078 | 0.463861105 | 0.490980518 |
| 0.405496801 | 0.244223195 | 0.464558382 | 0.475297149 |
| 0.430894021 | 0.443098686 | 0.278384329 | 0.02828194  |
| 0.370430393 | 0.353970948 | 0.240225686 | 0.443100858 |
| 0.191489863 | 0.330777617 | 0.452901265 | 0.440989072 |
| 0.353956821 | 0.194316171 | 0.435748315 | 0.42889917  |
| 0.200212424 | 0.371928166 | 0.462428288 | 0.452444355 |
| 0.008381471 | 0.420791126 | 0.473793938 | 0.215613757 |
| 0.378662791 | 0.180137735 | 0.299703699 | 1           |
| 0.341544478 | 0.286452852 | 0.485759772 | 0.432203581 |
| 0.374863533 | 0.232149804 | 0.525555059 | 0.072648738 |
| 0.394075269 | 0.088324207 | 0.35386976  | 0.368318188 |
| 0.334395747 | 0.347108347 | 0.370855654 | 0.352546754 |
| 0.179659825 | 0.517966836 | 0.413098674 | 0.511564436 |
| 0.444106613 | 0.530895459 | 0.474514426 | 0.449145484 |
| 0.421940939 | 0.410302278 | 0.181755619 | 0.477772599 |
| 0.471111471 | 0.369543179 | 0.112360328 | 0.460538535 |
| 0.426556157 | 0.453336727 | 0.166950028 | 0.503150103 |
| 0.495830138 | 0.469900526 | 0.200645482 | 0.419985866 |
| 0.430489451 | 0.309192426 | 0.433028293 | 0.526088002 |
| 0.380582553 | 0.426722366 | 0.421817337 | 0.429605969 |
| 0.247692069 | 0.284353502 | 0.334458154 | 0.220607809 |
| 0.014079429 | 0.122239572 | 0.107425814 | 0.226585129 |
| 0.227949664 | 0.441283637 | 0.454584168 | 0.518936989 |
| 0.173938552 | 0.410223595 | 0.288292725 | 0.390810655 |
| 0.430217016 | 0.39782198  | 0.41869314  | 0.428519074 |
| 0.297629827 | 0.039938662 | 0.18026629  | 0.524821034 |
| 0.066518196 | 0.298981343 | 0.366838636 | 0.006204531 |
| 0.081840895 | 0.42145578  | 0.132114808 | 0.215592335 |
| 0.469145415 | 0.222707127 | 0.283505905 | 0.389632037 |
| 0.395246942 | 0.14260945  | 0.006959587 | 0.488847043 |
| 0.480760201 | 0.452555541 | 0.479250703 | 0.452027512 |
| 0.436665134 | 0.42541785  | 0.457746255 | 0.404653738 |
| 0.162959804 | 0.138088763 | 0.3035014   | 0.378280813 |
| 0.008436698 | 0.419959706 | 0.355893568 | 0.200078046 |
| 0.452846609 | 0.363570924 | 0.065313006 | 0.394060175 |
| 0.047449215 | 0.261289577 | 0.372723112 | 0.277337904 |
| 0.390986224 | 0.029204242 | 0.327195894 | 0.406601736 |
| 0.432443385 | 0.375920894 | 0.408113196 | 0.530719432 |
| 0.401798099 | 0.177815521 | 0.40264859  | 0.431827934 |
| 0.119742626 | 0.153256826 | 0.4136451   | 0.05761848  |
| 0.216475266 | 0.444431769 | 0.418188358 | 0.125408778 |
| 0.35947825  | 0.012021708 | 0.393716839 | 0.528660854 |

|             |             |             |             |
|-------------|-------------|-------------|-------------|
| 0.464896893 | 0.521763757 | 0.502388307 | 0.333645292 |
| 0.510910296 | 0.134417999 | 0.527485853 | 0.434932585 |
| 0.430873202 | 0.002503111 | 0.010197487 | 0.487226986 |
| 0.465932079 | 0.086220516 | 0.226465453 | 0.414034354 |
| 0.177478333 | 0.216077552 | 0.099342309 | 0.256400932 |
| 0.456311461 | 0.301570463 | 0.222830514 | 0.471057253 |
| 0.329342199 | 0.294306727 | 0.433103031 | 0.127878185 |
| 0.439868622 | 0.094845902 | 0.127577726 | 0.016220653 |
| 0.410322931 | 0.152201583 | 0.469128797 | 0.507522374 |
| 0.497687619 | 0.444032411 | 0.379630074 | 0.370005523 |
| 0.431555217 | 0.138726649 | 0.39519322  | 0.157961653 |
| 0.487825121 | 0.46158326  | 0.37955775  | 0.360504769 |
| 0.507933109 | 0.476196486 | 0.060062207 | 0.461138379 |
| 0.027473268 | 0.003298587 | 0.439325973 | 0.311074467 |
| 0.083912849 | 0.441934369 | 0.320081218 | 0.290578939 |
| 0.278850463 | 0.056430196 | 0.335978384 | 0.317161713 |
| 0.378690853 | 0.433142476 | 0.34291425  | 0.289883534 |
| 0.338110327 | 0.208116393 | 0.257692456 | 0.206410451 |
| 0.282501364 | 0.351793181 | 0.229248701 | 0.041776672 |
| 0.471070843 | 0.463004759 | 0.096237677 | 0.211922583 |
| 0.46612054  | 0.492801794 | 0.082195328 | 0.026558964 |
| 0.314624644 | 0.373417828 | 0.496323469 | 0.496909009 |
| 0.524718492 | 0.525141133 | 0.395949732 | 0.183264689 |
| 0.107826871 | 0.393946697 | 0.356961019 | 0.152797249 |
| 0.507403325 | 0.104288414 | 0.478055288 | 0.357237323 |
| 0.168115269 | 0.309733873 | 0.061691681 | 0.130627068 |
| 0.42363866  | 0.233830802 | 0.247866486 | 0.211336985 |
| 0.400810184 | 0.304997379 | 0.082354314 | 0.270740996 |
| 0.406679736 | 0.263490067 | 0.225867872 | 0.352552078 |
| 0.397195127 | 0.256262787 | 0.473454237 | 0.457230181 |
| 0.183232014 | 0.168644916 | 0.367012409 | 0.412200024 |
| 0.473128839 | 0.424227175 | 0.045273723 | 0.44785663  |
| 0.4829708   | 0.478565554 | 0.496424467 | 0.410573914 |
| 0.12773939  | 0.441478387 | 0.36689133  | 0.417956852 |
| 0.245839193 | 0.430648291 | 0.296489587 | 0.101256657 |
| 0.318089093 | 0.478333952 | 0.43707923  | 0.235302691 |
| 0.443683418 | 0.174411659 | 0.094103627 | 0.435451089 |
| 0.266114088 | 0.145830341 | 0.393292143 | 0.447754246 |
| 0.00476247  | 0.181298247 | 0.484767801 | 0.293942283 |
| 0.513334976 | 0.48709903  | 0.448220997 | 0.301586215 |
| 0.003460796 | 0.457819332 | 0.447078638 | 0.474378447 |
| 0.438645646 | 0.388265555 | 0.179269438 | 0.126683138 |
| 0.334661707 | 0.119576571 | 0.212037552 | 0.387313941 |
| 0.255708761 | 0.451876885 | 0.252711046 | 0.271998651 |
| 0.267659527 | 0.13075878  | 0.292953999 | 0.311057744 |
| 0.19828551  | 0.295149513 | 0.401694919 | 0.317112918 |
| 0.273495547 | 0.432252618 | 0.455048333 | 0.048807235 |
| 0.393520438 | 0.431679219 | 0.420475499 | 0.006879085 |
| 0.473484382 | 0.015560565 | 0.261879242 | 0.293223853 |
| 0.269118934 | 0.277550821 | 0.321660629 | 0.375612737 |
| 0.415346704 | 0.302871316 | 0.354686034 | 0.304806375 |
| 0.23070835  | 0.280430018 | 0.439915892 | 0.433054277 |
| 0.352254105 | 0.189463649 | 0.129290177 | 0.124307581 |
| 0.085198922 | 0.448224772 | 0.280978049 | 0.109792323 |



|             |             |             |             |
|-------------|-------------|-------------|-------------|
| 0.285439272 | 0.421701054 | 0.373114943 | 0.493602895 |
| 0.412568825 | 0.146864516 | 0.387724353 | 0.452504867 |
| 0.273338937 | 0.350088192 | 0.098601263 | 0.446290187 |
| 0.291445225 | 0.28602719  | 0.429041293 | 0.386788402 |
| 0.441762161 | 0.409663278 | 0.277759365 | 0.436041486 |
| 0.431658499 | 0.39764865  | 0.370143086 | 0.140075584 |
| 0.262242806 | 0.181847639 | 0.336349321 | 0.005780176 |
| 0.410449711 | 0.334152315 | 0.478159408 | 0.493679496 |
| 0.333671066 | 0.386814867 | 0.37141229  | 0.150063942 |
| 0.328045067 | 0.207219819 | 0.193187377 | 0.458000248 |
| 0.267276096 | 0.244834575 | 0.376038836 | 0.3775334   |
| 0.468520492 | 0.450902691 | 0.314128217 | 0.300936363 |
| 0.299544426 | 0.262249201 | 0.473910954 | 0.17424396  |
| 0.468223486 | 0.259393289 | 0.389365291 | 0.387751148 |
| 0.294213186 | 0.512960752 | 0.094759956 | 0.523265412 |
| 0.414053995 | 0.172140477 | 0.491830057 | 0.341454655 |
| 0.34591335  | 0.164950864 | 0.245016993 | 0.416059275 |
| 0.297123934 | 0.38094517  | 0.023123946 | 0.096891975 |
| 0.387434303 | 0.349368809 | 0.435392623 | 0.404970237 |
| 0.315342981 | 0.382571718 | 0.190349589 | 0.356663842 |
| 0.479027385 | 0.494755009 | 0.350962659 | 0.301739581 |
| 0.394426739 | 0.152884784 | 0.430240434 | 0.020894095 |
| 0.473835612 | 0.4568145   | 0.422181852 | 0.084375192 |
| 0.036436255 | 0.284900058 | 0.473944792 | 0.103495759 |
| 0.479103948 | 0.257498026 | 0.394512545 | 0.462182337 |
| 0.222204636 | 0.49918251  | 0.173424774 | 0.455106235 |
| 0.080561075 | 0.314307204 | 0.417038415 | 0.416801626 |
| 0.312135723 | 0.367051767 | 0.436199677 | 0.299777606 |
| 0.060036603 | 0.342330899 | 0.005444002 | 0.416473322 |
| 0.474892783 | 0.410222993 | 0.243868296 | 0.326937321 |
| 0.337931279 | 0.392159637 | 0.30009184  | 0.442060877 |
| 0.023946116 | 0.43401924  | 0.250849559 | 0.430492558 |
| 0.319370584 | 0.421499727 | 0.095686054 | 0.372767608 |
| 0.457333547 | 0.363538395 | 0.28971608  | 0.407790524 |
| 0.48671131  | 0.401677346 | 0.209923494 | 0.265630699 |
| 0.417340579 | 0.09929914  | 0.408543066 | 0.526426737 |
| 0.240937139 | 0.285937551 | 0.468953269 | 0.296827801 |
| 0.363084388 | 0.389066099 | 0.439943399 | 0.513339001 |
| 0.116704825 | 0.306718289 | 0.450179869 | 0.458640362 |
| 0.34455121  | 0.232418012 | 0.309790286 | 0.310495543 |
| 0.460322074 | 0.151994806 | 0.321700099 | 0.414028983 |
| 0.294490204 | 0.358018821 | 0.372064251 | 0.25305925  |
| 0.063414345 | 0.214400603 | 0.404565801 | 0.197741062 |
| 0.365564911 | 0.439974424 | 0.320744829 | 0.388978574 |
| 0.191305246 | 0.052884662 | 0.453516868 | 0.034408118 |
| 0.38767753  | 0.449734786 | 0.295991561 | 0.409695723 |
| 0.232483009 | 0.410986128 | 0.409867355 | 0.002833309 |
| 0.445789708 | 0.077315277 | 0.34562609  | 0.313448583 |
| 0.336804285 | 0.0884518   | 0.454402956 | 0.511906628 |
| 0.363469012 | 0.349591453 | 0.392820342 | 0.457427975 |
| 0.206842694 | 0.366742564 | 0.385444056 | 0.453267176 |
| 0.279350482 | 0.430387762 | 0.440686207 | 0.432362535 |
| 0.430032173 | 0.314528079 |             |             |

DYNLT1 0.013309074

0.264135024

0.007778325

|             |             |             |             |
|-------------|-------------|-------------|-------------|
| 0.01464993  | 0.232702082 | 0.108877463 | 0.011231296 |
| 0.027776468 | 0.217825933 | 0.094621974 | 0.176203739 |
| 0.00141366  | 0.090532113 | 0.33647884  | 0.011129134 |
| 0.287406823 | 0.005270719 | 0.035018039 | 0.02913245  |
| 0.029834268 | 0.216554765 | 0.106376519 | 0.145198351 |
| 0.205574132 | 0.077419459 | 0.144306894 | 0.286579001 |
| 0.338219778 | 0.080973009 | 0.278761694 | 0.027366197 |
| 0.258567676 | 0.275710595 | 0.231968684 | 0.00064924  |
| 0.20336411  | 0.019572343 | 0.255269019 | 0.101556195 |
| 0.050246623 | 0.196917328 | 0.113586154 | 0.075424098 |
| 0.155649894 | 0.003971204 | 0.046805629 | 0.334796291 |
| 0.155699843 | 0.080002233 | 0.013771074 | 0.25036189  |
| 0.13103693  | 0.170044138 | 0.233439235 | 0.002407627 |
| 0.220392886 | 0.080660775 | 0.177930765 | 0.309449655 |
| 0.08826562  | 0.041352998 | 0.093547635 | 0.097963248 |
| 0.290125865 | 0.301021469 | 0.144772951 | 0.132314674 |
| 0.329966758 | 0.116007969 | 0.334779606 | 0.021125153 |
| 0.141099076 | 0.004926468 | 0.067262468 | 0.025424609 |
| 0.142358767 | 0.086679379 | 0.20690551  | 0.18247598  |
| 0.261615097 | 0.327381703 | 0.110995264 | 0.29838001  |
| 0.076646198 | 0.307132465 | 0.116317878 | 0.205768922 |
| 0.277761358 | 0.019493061 | 0.269122006 | 0.341616267 |
| 0.010778703 | 0.211183294 | 0.290375049 | 0.047403841 |
| 0.261443038 | 0.13185642  | 0.178776622 | 0.115239603 |
| 0.317600862 | 0.266492632 | 0.300564786 | 0.158336664 |
| 0.197915971 | 0.017532419 | 0.268766155 | 0.310265095 |
| 0.114561486 | 0.016911026 | 0.087516498 | 0.390510905 |
| 0.241000206 | 0.340056469 | 0.31523652  | 0.275154708 |
| 0.285144859 | 0.326659486 | 0.228306194 | 0.285840484 |
| 0.053938041 | 0.343899801 | 0.054120587 | 0.006660126 |
| 0.014118559 | 0.02209752  | 0.103071337 | 0.184820659 |
| 0.338979627 | 0.191395784 | 0.059073495 | 0.116321801 |
| 0.385978649 | 0.270527285 | 0.349478933 | 0.315648489 |
| 0.00616733  | 0.140610259 | 0.249831466 | 0.063028812 |
| 0.280158689 | 0.043414651 | 0.215335333 | 0.29832872  |
| 0.224699455 | 0.349621546 | 0.035092405 | 0.28850014  |
| 0.084443903 | 0.337649586 | 0.287524841 | 0.056343023 |
| 0.3124897   | 0.278936751 | 0.361332037 | 0.349173445 |
| 0.277189773 | 0.108759521 | 0.036130824 | 0.271299779 |
| 0.3387118   | 0.007190181 | 0.379690409 | 0.391542051 |
| 0.310795281 | 0.377763104 | 0.392134614 | 0.368162879 |
| 0.322885465 | 0.02098906  | 0.022572294 | 0.222634457 |
| 0.310459862 | 0.239516943 | 0.043578795 | 0.263322073 |
| 0.301163724 | 0.134033531 | 0.333056568 | 0.076494192 |
| 0.349528808 | 0.313379294 | 0.366817394 | 0.289006772 |
| 0.143386762 | 0.177594726 | 0.307482505 | 0.250654165 |
| 0.004275813 | 0.023721637 | 0.011818617 | 0.204167822 |
| 0.060488665 | 0.079986385 | 0.127514137 | 0.274840766 |
| 0.0944563   | 0.118123592 | 0.212186248 | 0.34964223  |
| 0.015665072 | 0.237577925 | 0.043838164 | 0.060467776 |
| 0.00592642  | 0.059687489 | 0.03493268  | 0.02174602  |
| 0.152644317 | 0.102997285 | 0.33599782  | 0.354116025 |
| 0.184517129 | 0.065272975 | 0.279325863 | 0.331332743 |
| 0.302879757 | 0.25729675  | 0.12776046  | 0.000645907 |

|             |             |             |             |
|-------------|-------------|-------------|-------------|
| 0.076706531 | 0.147804689 | 0.155312516 | 0.281708228 |
| 0.07240578  | 0.068921232 | 0.287108425 | 0.333585753 |
| 0.093754211 | 0.042319454 | 0.171789487 | 0.247750867 |
| 0.057880848 | 0.118676424 | 0.35061414  | 0.236358091 |
| 0.000364464 | 0.134513865 | 0.321809344 | 0.055612689 |
| 0.199601105 | 0.066694288 | 0.086458344 | 0.341544478 |
| 1           | 0.162601352 | 0.369454246 | 0.331092056 |
| 0.076307381 | 0.104018527 | 0.386311745 | 0.079262846 |
| 0.253141236 | 0.013924288 | 0.184766344 | 0.140498372 |
| 0.105892225 | 0.212381354 | 0.273716862 | 0.127499002 |
| 0.038375058 | 0.34589689  | 0.249650491 | 0.359763112 |
| 0.159228357 | 0.376742291 | 0.363821547 | 0.306255032 |
| 0.191346548 | 0.253714977 | 0.091562572 | 0.310015637 |
| 0.332713524 | 0.087419374 | 0.019609932 | 0.375475006 |
| 0.181663943 | 0.359831745 | 0.04210477  | 0.349580154 |
| 0.300350081 | 0.268687371 | 0.048134537 | 0.317828546 |
| 0.240038219 | 0.078867236 | 0.296057837 | 0.3842377   |
| 0.084552492 | 0.255650871 | 0.153963789 | 0.32495831  |
| 0.062743885 | 0.109956249 | 0.194512318 | 0.129199472 |
| 0.007295895 | 0.02349642  | 0.015421534 | 0.07025371  |
| 0.11562613  | 0.291196338 | 0.281231099 | 0.363450088 |
| 0.039093397 | 0.262856749 | 0.137981836 | 0.102442689 |
| 0.270670103 | 0.242468053 | 0.277571621 | 0.299251296 |
| 0.128459768 | 0.001114322 | 0.01534539  | 0.320471092 |
| 0.009198564 | 0.136294147 | 0.147586275 | 0.000245549 |
| 0.00724298  | 0.277169402 | 0.032766958 | 0.083070831 |
| 0.389829612 | 0.080524534 | 0.085021924 | 0.102716864 |
| 0.235672882 | 0.024764665 | 0.000172205 | 0.346433787 |
| 0.334675356 | 0.318879899 | 0.333662388 | 0.280202549 |
| 0.341351798 | 0.291317139 | 0.331447217 | 0.120239119 |
| 0.018522322 | 0.016996163 | 0.101239856 | 0.148331794 |
| 0.001910895 | 0.260525851 | 0.201971139 | 0.054659164 |
| 0.369045463 | 0.201234019 | 0.005023784 | 0.29817181  |
| 0.001111762 | 0.129198342 | 0.082113221 | 0.103020158 |
| 0.304641931 | 0.000821501 | 0.032986916 | 0.094474761 |
| 0.235346842 | 0.194693935 | 0.183533542 | 0.340990936 |
| 0.166322336 | 0.043433737 | 0.14323182  | 0.303004393 |
| 0.013670264 | 0.051285261 | 0.125563861 | 0.005264181 |
| 0.047442477 | 0.294512933 | 0.176301506 | 0.005184583 |
| 0.121990207 | 6.07E-05    | 0.198230485 | 0.354385138 |
| 0.267753373 | 0.387449349 | 0.330267827 | 0.189506094 |
| 0.321136114 | 0.092443398 | 0.36593963  | 0.246044498 |
| 0.155040277 | 2.29E-05    | 0.000914092 | 0.365520069 |
| 0.253508579 | 0.014560924 | 0.058312214 | 0.04624853  |
| 0.014988266 | 0.033017833 | 0.014314483 | 0.092206002 |
| 0.228606418 | 0.163234649 | 0.104874013 | 0.293268558 |
| 0.095901767 | 0.120243063 | 0.150474524 | 0.028828856 |
| 0.266219668 | 0.005590437 | 0.029415847 | 0.001135625 |
| 0.296772112 | 0.040925746 | 0.255349783 | 0.332642169 |
| 0.328642611 | 0.303235605 | 0.132334587 | 0.070196216 |
| 0.342748398 | 0.0276631   | 0.08502326  | 0.031001793 |
| 0.298363516 | 0.286302595 | 0.195462498 | 0.157707692 |
| 0.362790161 | 0.297392898 | 0.005578118 | 0.305396348 |
| 0.000565763 | 0.000733318 | 0.122368916 | 0.164423551 |

|             |             |             |             |
|-------------|-------------|-------------|-------------|
| 0.036765031 | 0.229166349 | 0.129495817 | 0.08254289  |
| 0.079707653 | 0.002496609 | 0.190464607 | 0.194488075 |
| 0.170189935 | 0.20864355  | 0.229689227 | 0.141617633 |
| 0.127856778 | 0.054675364 | 0.062838802 | 0.052740255 |
| 0.076100756 | 0.161381055 | 0.081266336 | 0.002403212 |
| 0.201353459 | 0.263521866 | 0.011657963 | 0.059895211 |
| 0.305264328 | 0.364371646 | 0.005709406 | 0.000956677 |
| 0.140528673 | 0.190377317 | 0.393153309 | 0.321292833 |
| 0.319902008 | 0.359891236 | 0.22679004  | 0.043818361 |
| 0.011683216 | 0.190152252 | 0.255427342 | 0.023929704 |
| 0.353871318 | 0.018758342 | 0.29478698  | 0.271465553 |
| 0.043122717 | 0.048164581 | 0.003613944 | 0.025718464 |
| 0.314850921 | 0.080115927 | 0.084397016 | 0.045145524 |
| 0.147064184 | 0.09922279  | 0.009657305 | 0.080841505 |
| 0.227045286 | 0.074126352 | 0.066614724 | 0.091806203 |
| 0.19545269  | 0.050496756 | 0.351467632 | 0.292008548 |
| 0.043330401 | 0.035403508 | 0.041282002 | 0.300773618 |
| 0.326568886 | 0.242596381 | 0.002245584 | 0.285406805 |
| 0.362375333 | 0.305493908 | 0.298823885 | 0.320999252 |
| 0.026908673 | 0.233699986 | 0.228476378 | 0.248903884 |
| 0.091726873 | 0.117030669 | 0.128252106 | 0.017457924 |
| 0.183639333 | 0.296517674 | 0.267282019 | 0.055553144 |
| 0.242377845 | 0.04215244  | 0.014480291 | 0.327667312 |
| 0.088095772 | 0.010152909 | 0.133211797 | 0.370859484 |
| 7.68E-05    | 0.119970363 | 0.380340426 | 0.062944354 |
| 0.342019612 | 0.355269642 | 0.267489184 | 0.060907459 |
| 0.004684641 | 0.34108806  | 0.226419483 | 0.152143593 |
| 0.289715322 | 0.191577476 | 0.02939654  | 0.012316623 |
| 0.166497507 | 0.02242198  | 0.029036376 | 0.044982798 |
| 0.062632295 | 0.237884216 | 0.103155242 | 0.096991961 |
| 0.090758804 | 0.033721696 | 0.082006627 | 0.069782066 |
| 0.076328959 | 0.12995381  | 0.232979302 | 0.07997865  |
| 0.087931747 | 0.355021105 | 0.275334833 | 0.002484988 |
| 0.276641835 | 0.304558554 | 0.304504782 | 0.000391666 |
| 0.331773265 | 0.000445609 | 0.105819546 | 0.090873297 |
| 0.07581998  | 0.112603286 | 0.187277439 | 0.112061141 |
| 0.214474061 | 0.08031473  | 0.088451747 | 0.115542542 |
| 0.044295383 | 0.080730986 | 0.261169473 | 0.123663487 |
| 0.110075031 | 0.024735869 | 0.033451691 | 0.033205076 |
| 0.005879439 | 0.321595572 | 0.119424324 | 0.018228345 |
| 0.124550004 | 0.14670746  | 0.220249254 | 0.304407905 |
| 0.293665231 | 0.035467913 | 0.165563566 | 0.277858302 |
| 0.096381692 | 0.056251609 | 0.011337246 | 0.157045434 |
| 0.102767459 | 0.075146283 | 0.179409301 | 0.129387024 |
| 0.287588387 | 0.227734519 | 0.116489842 | 0.277518211 |
| 0.151818905 | 0.209639872 | 0.093192098 | 0.013251886 |
| 0.047671818 | 0.050285767 | 0.205634648 | 0.000725827 |
| 0.208823139 | 0.026684969 | 0.351700779 | 0.280791673 |
| 0.209761161 | 0.238223374 | 0.043842135 | 0.013807742 |
| 0.038247629 | 0.071175075 | 0.057892423 | 0.312384361 |
| 0.165927163 | 0.041853524 | 0.201383561 | 0.05469694  |
| 0.330120433 | 0.313050887 | 0.12005181  | 0.105626705 |
| 0.119782491 | 0.067434256 | 0.293745698 | 0.024540557 |
| 0.261646211 | 0.079595246 | 0.183675307 | 0.14985671  |

|             |             |             |             |
|-------------|-------------|-------------|-------------|
| 0.115697768 | 0.364840363 | 0.013803286 | 0.384292148 |
| 0.196193712 | 0.04859097  | 0.310064859 | 0.121458735 |
| 0.047063318 | 0.023059279 | 0.157500676 | 0.127899808 |
| 0.061253802 | 0.182787795 | 0.012420513 | 0.053070869 |
| 0.21863866  | 0.137072778 | 0.281036764 | 0.27208426  |
| 0.141639121 | 0.263198619 | 0.097944412 | 0.127196923 |
| 0.278638775 | 0.282992376 | 0.047866095 | 0.14169835  |
| 0.232853441 | 0.022875945 | 0.180787616 | 0.017191084 |
| 0.306104064 | 0.31106422  | 0.112368741 | 0.010912541 |
| 0.001374106 | 0.158945979 | 0.258989978 | 0.019857838 |
| 0.392248377 | 0.104959919 | 0.216315016 | 0.285986238 |
| 0.081683958 | 0.282589046 | 0.040323871 | 0.290225674 |
| 0.006490247 | 0.131846941 | 0.242385237 | 0.227376524 |
| 0.063546418 | 0.202226474 | 0.261203106 | 0.166659468 |
| 0.004396753 | 0.05471144  | 0.00041508  | 0.219005868 |
| 0.260478117 | 0.243496227 | 0.096659252 | 0.100202613 |
| 0.168547311 | 0.248067706 | 0.08579725  | 0.228187872 |
| 0.000613558 | 0.288925388 | 0.091540101 | 0.241279429 |
| 0.069405449 | 0.230688627 | 0.005815931 | 0.259472972 |
| 0.238623775 | 0.086896431 | 0.153594402 | 0.072493466 |
| 0.299548498 | 0.239737803 | 0.053324405 | 0.057281021 |
| 0.264805248 | 0.018366886 | 0.124713492 | 0.366683948 |
| 0.071381725 | 0.157815184 | 0.370208381 | 0.065914264 |
| 0.247890473 | 0.235465882 | 0.263122738 | 0.359227371 |
| 0.023088136 | 0.132383216 | 0.330167215 | 0.328657978 |
| 0.205598456 | 0.125641657 | 0.15829564  | 0.129678319 |
| 0.255603118 | 0.009381947 | 0.115953356 | 0.201630596 |
| 0.155394    | 0.191587888 | 0.169946422 | 0.118871414 |
| 0.005064104 | 0.051236722 | 0.092046828 | 0.051337817 |
| 0.181501378 | 0.197293013 | 0.100705026 | 0.240604169 |
| 0.022197883 | 0.002076472 | 0.290282608 | 0.019589342 |
| 0.113185544 | 0.250683376 | 0.113931657 | 0.216565701 |
| 0.071918074 | 0.201486416 | 0.133076207 | 0.000144769 |
| 0.311538125 | 0.010979573 | 0.140842026 | 0.080493065 |
| 0.109544731 | 0.008890528 | 0.263792615 | 0.39119481  |
| 0.158293962 | 0.078033445 | 0.096031967 | 0.298488066 |
| 0.070254471 | 0.178921417 | 0.191268496 | 0.227026705 |
| 0.169287712 | 0.169522597 | 0.207896822 | 0.175355766 |
| 0.214933389 | 0.088982849 |             |             |
| DYNLT3      | 0.020732874 | 0.201360509 | 0.010259932 |
| 0.033222888 | 0.279574742 | 0.082017477 | 0.030815233 |
| 0.051688406 | 0.187578077 | 0.05910764  | 0.167726502 |
| 0.009134955 | 0.165631564 | 0.266436403 | 0.037242266 |
| 0.275628315 | 0.027662767 | 0.065117377 | 0.052531324 |
| 0.079937327 | 0.284952191 | 0.130544969 | 0.095165049 |
| 0.275184622 | 0.088423546 | 0.123475858 | 0.22806325  |
| 0.255583724 | 0.075788829 | 0.216204611 | 0.026289794 |
| 0.24341067  | 0.308369428 | 0.170947211 | 0.004291458 |
| 0.17497832  | 0.083826825 | 0.229630927 | 0.138706695 |
| 0.112990958 | 0.200592626 | 0.060831235 | 0.107595818 |
| 0.09927545  | 0.00889571  | 0.031703866 | 0.282483633 |
| 0.141214606 | 0.110957788 | 0.01930646  | 0.201874255 |
| 0.11098775  | 0.146380042 | 0.14152165  | 0.001692777 |
| 0.181527557 | 0.110080118 | 0.158680799 | 0.240138137 |

|             |             |             |             |
|-------------|-------------|-------------|-------------|
| 0.126082574 | 0.089842483 | 0.104287767 | 0.122589636 |
| 0.251883102 | 0.306454611 | 0.212886575 | 0.089528125 |
| 0.259242069 | 0.201714427 | 0.247383929 | 0.045058908 |
| 0.129756453 | 0.012319212 | 0.107151845 | 0.038272032 |
| 0.133879606 | 0.148588354 | 0.220908459 | 0.197173257 |
| 0.177435948 | 0.283543116 | 0.158153979 | 0.226021516 |
| 0.231741973 | 0.310456667 | 0.166161706 | 0.277022271 |
| 0.280557429 | 0.049459199 | 0.22955924  | 0.28495682  |
| 0.024727667 | 0.123420811 | 0.241590617 | 0.06002602  |
| 0.201623506 | 0.174448122 | 0.098789242 | 0.167323198 |
| 0.323982754 | 0.276590812 | 0.259583718 | 0.176199107 |
| 0.235885683 | 0.027094233 | 0.207201378 | 0.314715005 |
| 0.1255576   | 0.026368816 | 0.170485813 | 0.302431102 |
| 0.203720452 | 0.256292043 | 0.233329199 | 0.277861661 |
| 0.243712254 | 0.259699063 | 0.191838306 | 0.250573085 |
| 0.032642736 | 0.267012662 | 0.072592694 | 0.031043462 |
| 0.016713576 | 0.063196154 | 0.197319829 | 0.235978632 |
| 0.271384721 | 0.184321994 | 0.066038063 | 0.184033974 |
| 0.351685087 | 0.19996413  | 0.267357053 | 0.258825648 |
| 0.015820183 | 0.196788837 | 0.212915374 | 0.0727227   |
| 0.265250244 | 0.081679898 | 0.243596737 | 0.241632612 |
| 0.205364587 | 0.314082969 | 0.03710834  | 0.249063357 |
| 0.119417535 | 0.294883916 | 0.197241499 | 0.089085666 |
| 0.256045208 | 0.220051292 | 0.311826592 | 0.308146323 |
| 0.228134511 | 0.089653858 | 0.086454273 | 0.252819724 |
| 0.31024611  | 0.023471454 | 0.288108959 | 0.306163875 |
| 0.234315431 | 0.286519736 | 0.341621224 | 0.29340018  |
| 0.237347765 | 0.039561386 | 0.046540058 | 0.296492691 |
| 0.240091634 | 0.213579593 | 0.122254726 | 0.184794321 |
| 0.313709533 | 0.104347241 | 0.280336821 | 0.08359809  |
| 0.322346702 | 0.251943606 | 0.27106669  | 0.23263005  |
| 0.13094436  | 0.17776912  | 0.241730373 | 0.191766984 |
| 0.021670417 | 0.028045427 | 0.017356462 | 0.253297023 |
| 0.043360364 | 0.145501477 | 0.084725675 | 0.289839132 |
| 0.155131553 | 0.098997617 | 0.154115156 | 0.327132591 |
| 0.023118333 | 0.157232962 | 0.067537153 | 0.067852659 |
| 0.026609501 | 0.084056272 | 0.069040789 | 0.06064733  |
| 0.213831673 | 0.103087473 | 0.236526393 | 0.292091009 |
| 0.191798845 | 0.074996093 | 0.210569716 | 0.294189674 |
| 0.315410748 | 0.223546266 | 0.177066084 | 0.005915004 |
| 0.119428282 | 0.116363639 | 0.184890123 | 0.214602447 |
| 0.088681563 | 0.122046356 | 0.245845403 | 0.319541714 |
| 0.07220447  | 0.06111676  | 0.152965153 | 0.226634296 |
| 0.067995879 | 0.12873077  | 0.295925355 | 0.159078168 |
| 0.000956814 | 0.127013071 | 0.260535858 | 0.193717935 |
| 0.201968606 | 0.14481411  | 0.114183709 | 0.286452852 |
| 0.162601352 | 1           | 0.293281457 | 0.340594304 |
| 0.090513174 | 0.098327475 | 0.32656105  | 0.090712964 |
| 0.264985023 | 0.042875801 | 0.253561791 | 0.081318469 |
| 0.1390733   | 0.26954588  | 0.306909852 | 0.152029461 |
| 0.038146058 | 0.273779847 | 0.222166131 | 0.285888459 |
| 0.116319788 | 0.318801686 | 0.290698155 | 0.266873942 |
| 0.202309077 | 0.19199108  | 0.17194266  | 0.239247013 |
| 0.278468238 | 0.092690293 | 0.028326515 | 0.280164639 |

|             |             |             |             |
|-------------|-------------|-------------|-------------|
| 0.134953969 | 0.301953523 | 0.128511566 | 0.299108663 |
| 0.266985968 | 0.192919239 | 0.095122635 | 0.350955636 |
| 0.219365786 | 0.089413194 | 0.269805682 | 0.337179658 |
| 0.07734952  | 0.242789311 | 0.153610908 | 0.347075632 |
| 0.089115988 | 0.210061625 | 0.208124012 | 0.189413804 |
| 0.00733946  | 0.0352353   | 0.025044543 | 0.137037536 |
| 0.186100062 | 0.190612626 | 0.270985273 | 0.282215585 |
| 0.074662433 | 0.23239474  | 0.182905613 | 0.115001576 |
| 0.211238224 | 0.230417248 | 0.244533841 | 0.276480631 |
| 0.169217633 | 0.009624745 | 0.05185613  | 0.27181659  |
| 0.014590032 | 0.163824543 | 0.143845209 | 0.002267365 |
| 0.016663813 | 0.179303859 | 0.045690444 | 0.10460062  |
| 0.352527623 | 0.090694064 | 0.09292767  | 0.065820327 |
| 0.254441208 | 0.051190212 | 0.003803899 | 0.28686142  |
| 0.282085495 | 0.28009554  | 0.272182249 | 0.235307354 |
| 0.300346867 | 0.266077253 | 0.307666456 | 0.085289924 |
| 0.040482941 | 0.022737966 | 0.17251814  | 0.176456175 |
| 0.003526192 | 0.267713002 | 0.252251499 | 0.089681955 |
| 0.304729164 | 0.231271103 | 0.015274427 | 0.314031094 |
| 0.004269515 | 0.122031492 | 0.100628127 | 0.156782932 |
| 0.366334659 | 0.004721599 | 0.038738557 | 0.125960539 |
| 0.175350428 | 0.180099273 | 0.134414145 | 0.270211078 |
| 0.174370426 | 0.044086375 | 0.170033236 | 0.294903696 |
| 0.032962003 | 0.039451599 | 0.112290724 | 0.004624481 |
| 0.050065367 | 0.259217777 | 0.133321218 | 0.014745227 |
| 0.150035197 | 0.001369578 | 0.167073181 | 0.287417846 |
| 0.191340864 | 0.31668993  | 0.26235953  | 0.184410275 |
| 0.252243967 | 0.131582798 | 0.285749659 | 0.194846696 |
| 0.089946274 | 0.000135721 | 0.009597752 | 0.288025205 |
| 0.209377103 | 0.018929651 | 0.096840969 | 0.049152128 |
| 0.057041622 | 0.038076541 | 0.034107516 | 0.174434438 |
| 0.173316219 | 0.239333682 | 0.207076704 | 0.215657468 |
| 0.139092848 | 0.195984503 | 0.099267717 | 0.045895845 |
| 0.22756282  | 0.023990205 | 0.050932292 | 0.006989404 |
| 0.332796285 | 0.044293972 | 0.20025914  | 0.259425005 |
| 0.283563027 | 0.287907465 | 0.063730916 | 0.094236816 |
| 0.317737398 | 0.028009927 | 0.094007416 | 0.035563204 |
| 0.214069043 | 0.251988771 | 0.211483597 | 0.154141494 |
| 0.312831848 | 0.240072421 | 0.017811203 | 0.278147395 |
| 0.003328985 | 0.012331757 | 0.078072894 | 0.204796813 |
| 0.134289445 | 0.214431059 | 0.164115795 | 0.116991383 |
| 0.142511264 | 0.008633828 | 0.210066159 | 0.207459866 |
| 0.211516108 | 0.206739621 | 0.275742232 | 0.181901143 |
| 0.18998453  | 0.160888351 | 0.109429104 | 0.092741954 |
| 0.137604779 | 0.152869179 | 0.087878519 | 0.012346305 |
| 0.1399985   | 0.190620801 | 0.027085394 | 0.087072924 |
| 0.258688647 | 0.285165537 | 0.035469591 | 0.009817789 |
| 0.152759814 | 0.194509944 | 0.321305343 | 0.234511935 |
| 0.255276467 | 0.318667454 | 0.215268195 | 0.132828561 |
| 0.025753895 | 0.251472574 | 0.293975648 | 0.123178775 |
| 0.277684582 | 0.024910643 | 0.230293491 | 0.270050901 |
| 0.077502534 | 0.070209468 | 0.021596436 | 0.058596466 |
| 0.262451727 | 0.127916741 | 0.163043039 | 0.04497601  |
| 0.168922514 | 0.156027694 | 0.025085205 | 0.129990412 |

|             |             |             |             |
|-------------|-------------|-------------|-------------|
| 0.21036725  | 0.151646125 | 0.102471448 | 0.096151513 |
| 0.181054642 | 0.060990358 | 0.279388783 | 0.284529475 |
| 0.065233427 | 0.06016542  | 0.035994509 | 0.288426611 |
| 0.247461886 | 0.161592402 | 0.006757173 | 0.195212651 |
| 0.308890477 | 0.217187719 | 0.230845495 | 0.334258301 |
| 0.048872216 | 0.198389871 | 0.224650446 | 0.253896174 |
| 0.144843432 | 0.088854759 | 0.187887566 | 0.037384941 |
| 0.226376209 | 0.269465717 | 0.208654963 | 0.101167489 |
| 0.180836097 | 0.045379225 | 0.019934508 | 0.267111714 |
| 0.181378198 | 0.028236666 | 0.078063193 | 0.312863302 |
| 0.002972683 | 0.181799097 | 0.339692637 | 0.089334708 |
| 0.304342892 | 0.298149992 | 0.242352116 | 0.083904189 |
| 0.01035977  | 0.290167984 | 0.210095076 | 0.117210742 |
| 0.205176819 | 0.182172415 | 0.080699353 | 0.049809834 |
| 0.220979927 | 0.025612741 | 0.093199726 | 0.059657559 |
| 0.141307346 | 0.174739514 | 0.170122677 | 0.144653449 |
| 0.163801769 | 0.043689652 | 0.163056652 | 0.089423902 |
| 0.215799154 | 0.181704841 | 0.256194747 | 0.049915562 |
| 0.111361837 | 0.326206452 | 0.218422663 | 0.0087223   |
| 0.259867019 | 0.301485929 | 0.284643226 | 0.002488804 |
| 0.265292519 | 0.005280872 | 0.180813532 | 0.140578934 |
| 0.139451188 | 0.177592764 | 0.282364855 | 0.129857716 |
| 0.19109092  | 0.121882877 | 0.10057355  | 0.17129529  |
| 0.092272115 | 0.109271075 | 0.236494565 | 0.117243791 |
| 0.120598361 | 0.044101293 | 0.044534736 | 0.040459724 |
| 0.02533028  | 0.249220018 | 0.143607629 | 0.024681342 |
| 0.20064745  | 0.124280638 | 0.249728527 | 0.220123727 |
| 0.294010926 | 0.037076255 | 0.187469236 | 0.198665889 |
| 0.077579099 | 0.060178983 | 0.017340937 | 0.1321643   |
| 0.132228696 | 0.15783547  | 0.125832398 | 0.098056492 |
| 0.214237595 | 0.224174283 | 0.1373429   | 0.267456904 |
| 0.137433393 | 0.199611955 | 0.043563803 | 0.058943273 |
| 0.064309748 | 0.078769289 | 0.27754431  | 0.000520465 |
| 0.223714612 | 0.035906994 | 0.268045922 | 0.216442866 |
| 0.177766334 | 0.249861733 | 0.040318038 | 0.029365134 |
| 0.031645747 | 0.063918734 | 0.087760974 | 0.233717381 |
| 0.148066133 | 0.06904684  | 0.245535827 | 0.039748079 |
| 0.275480977 | 0.259794615 | 0.192106081 | 0.124987465 |
| 0.18294588  | 0.078561095 | 0.249564934 | 0.030966179 |
| 0.181179639 | 0.149120229 | 0.121627108 | 0.184900992 |
| 0.180230586 | 0.28888449  | 0.028030513 | 0.29568992  |
| 0.204024504 | 0.069056046 | 0.288388097 | 0.133186232 |
| 0.067080223 | 0.091802401 | 0.172546152 | 0.088849681 |
| 0.120584489 | 0.158077029 | 0.005875371 | 0.078423833 |
| 0.264370189 | 0.138188868 | 0.200171032 | 0.291100554 |
| 0.210107762 | 0.32319768  | 0.170477289 | 0.115504723 |
| 0.19988151  | 0.224068697 | 0.086183818 | 0.198241136 |
| 0.235129977 | 0.047880133 | 0.120497982 | 0.025249511 |
| 0.2291453   | 0.217740224 | 0.095532025 | 0.032466037 |
| 0.010833908 | 0.157940188 | 0.190777892 | 0.032641964 |
| 0.339353366 | 0.12189162  | 0.179033111 | 0.220950396 |
| 0.116995134 | 0.22075537  | 0.111551864 | 0.255435352 |
| 0.022571877 | 0.182849855 | 0.229923771 | 0.198705519 |
| 0.113784369 | 0.222767026 | 0.264345963 | 0.187407684 |



|             |             |             |             |
|-------------|-------------|-------------|-------------|
| 0.018648238 | 0.134610869 | 0.003102736 | 0.204211795 |
| 0.199215804 | 0.236381092 | 0.132918602 | 0.073155275 |
| 0.239904057 | 0.25736774  | 0.185683104 | 0.162125039 |
| 0.0076751   | 0.265003083 | 0.145735659 | 0.190977795 |
| 0.069145658 | 0.206838163 | 0.029197436 | 0.292571886 |
| 0.190347545 | 0.138704469 | 0.200179071 | 0.085626259 |
| 0.222182896 | 0.20949887  | 0.055268294 | 0.151146889 |
| 0.201230636 | 0.033194111 | 0.073243382 | 0.305220199 |
| 0.134146842 | 0.195587261 | 0.324362229 | 0.09943599  |
| 0.24533662  | 0.199033636 | 0.19137568  | 0.298742981 |
| 0.096875225 | 0.173185575 | 0.304459365 | 0.25505094  |
| 0.263770808 | 0.214725863 | 0.173978222 | 0.188620652 |
| 0.184748123 | 0.028766667 | 0.187896889 | 0.184804276 |
| 0.170715957 | 0.248000162 | 0.120421832 | 0.200804346 |
| 0.027956872 | 0.099074678 | 0.08433863  | 0.087524703 |
| 0.214022389 | 0.213411906 | 0.177661386 | 0.241081064 |
| 0.065915219 | 0.012699776 | 0.274517608 | 0.039372274 |
| 0.087438275 | 0.234527536 | 0.162269934 | 0.209497719 |
| 0.084657354 | 0.189981444 | 0.097116071 | 0.000642715 |
| 0.313680825 | 0.045043423 | 0.184245502 | 0.138641462 |
| 0.160697584 | 0.020185011 | 0.222672721 | 0.329703103 |
| 0.170511032 | 0.106709431 | 0.105261256 | 0.249948725 |
| 0.160206671 | 0.125822259 | 0.163746343 | 0.151548272 |
| 0.186437368 | 0.095021924 | 0.138657361 | 0.131649198 |
| 0.203790506 | 0.105254196 |             |             |
| E2F1        | 0.120378866 | 0.462134266 | 0.097859329 |
| 0.198970456 | 0.381043003 | 0.508948642 | 0.090071017 |
| 0.181086214 | 0.413737136 | 0.393925084 | 0.450674369 |
| 0.029943513 | 0.140751885 | 0.476848939 | 0.085646424 |
| 0.458322104 | 0.053792327 | 0.152702938 | 0.112699457 |
| 0.305764643 | 0.343954663 | 0.443044993 | 0.468511981 |
| 0.357627089 | 0.231689351 | 0.426215606 | 0.469014338 |
| 0.515652082 | 0.375961825 | 0.519708971 | 0.278333112 |
| 0.414759343 | 0.396209887 | 0.48079088  | 0.031084669 |
| 0.504541719 | 0.019948549 | 0.442741069 | 0.324746028 |
| 0.221464855 | 0.374320113 | 0.433753348 | 0.318202773 |
| 0.446512843 | 0.0620807   | 0.313559517 | 0.469951049 |
| 0.413277481 | 0.377431958 | 0.107929335 | 0.507932122 |
| 0.445263074 | 0.428444422 | 0.462037634 | 0.003497446 |
| 0.395338845 | 0.141341077 | 0.306611342 | 0.525749276 |
| 0.26818956  | 0.177081596 | 0.361206946 | 0.342901415 |
| 0.461696064 | 0.443441193 | 0.330690837 | 0.43880635  |
| 0.510337242 | 0.240848173 | 0.503345954 | 0.233143068 |
| 0.462884983 | 0.057049259 | 0.21277423  | 0.131503296 |
| 0.478061605 | 0.270708243 | 0.436421899 | 0.392239954 |
| 0.451245259 | 0.529149825 | 0.307899656 | 0.515830361 |
| 0.137714488 | 0.410983174 | 0.361064568 | 0.364480096 |
| 0.426083361 | 0.124728051 | 0.480098433 | 0.528646365 |
| 0.082574036 | 0.460675561 | 0.456266054 | 0.175934791 |
| 0.485083388 | 0.37553746  | 0.479674482 | 0.251622157 |
| 0.442684546 | 0.402303253 | 0.491295081 | 0.360601429 |
| 0.411728437 | 0.113951052 | 0.50492407  | 0.394017624 |
| 0.384630925 | 0.129435052 | 0.27778718  | 0.508351095 |
| 0.487596406 | 0.506892631 | 0.474481476 | 0.415710965 |

|             |             |             |             |
|-------------|-------------|-------------|-------------|
| 0.442489851 | 0.512976548 | 0.476096448 | 0.46190124  |
| 0.243214345 | 0.541457671 | 0.261859403 | 0.068194658 |
| 0.116777478 | 0.13176478  | 0.300796316 | 0.360824945 |
| 0.510656983 | 0.420535306 | 0.266075845 | 0.294569676 |
| 0.484471896 | 0.498696476 | 0.537410296 | 0.465742402 |
| 0.063827146 | 0.331906936 | 0.448236583 | 0.393520479 |
| 0.44368564  | 0.164923292 | 0.332898631 | 0.522063913 |
| 0.421549442 | 0.490512167 | 0.242116059 | 0.515029122 |
| 0.268251662 | 0.52254777  | 0.490134713 | 0.228576364 |
| 0.531251835 | 0.512984642 | 0.517356303 | 0.476098565 |
| 0.494048378 | 0.436941886 | 0.091579157 | 0.433361131 |
| 0.493768298 | 0.023652511 | 0.506470166 | 0.507042078 |
| 0.513803848 | 0.509073769 | 0.525961502 | 0.523341578 |
| 0.521325199 | 0.113239879 | 0.04047959  | 0.346040192 |
| 0.520426687 | 0.446393939 | 0.193148345 | 0.483599166 |
| 0.431881165 | 0.491954988 | 0.499083228 | 0.381274941 |
| 0.518114674 | 0.497539873 | 0.504573603 | 0.456490642 |
| 0.381404879 | 0.354519694 | 0.45509136  | 0.489226437 |
| 0.072919531 | 0.172726213 | 0.086908567 | 0.371889906 |
| 0.457963554 | 0.232207273 | 0.463777353 | 0.422828601 |
| 0.25397505  | 0.440103832 | 0.434551852 | 0.449540732 |
| 0.087442312 | 0.520108245 | 0.236690989 | 0.231079635 |
| 0.063299929 | 0.185509109 | 0.239101246 | 0.226126022 |
| 0.320956312 | 0.252310624 | 0.514021766 | 0.499389822 |
| 0.427492047 | 0.244675619 | 0.498550715 | 0.482558063 |
| 0.42149302  | 0.461227282 | 0.29087114  | 0.018944369 |
| 0.313658015 | 0.391029034 | 0.257946115 | 0.497477836 |
| 0.206352969 | 0.293042437 | 0.448793664 | 0.46481388  |
| 0.36644823  | 0.215061874 | 0.433157697 | 0.440509233 |
| 0.206201562 | 0.394019649 | 0.479481371 | 0.479924757 |
| 0.006854253 | 0.399332471 | 0.505274568 | 0.194743018 |
| 0.383640926 | 0.194621626 | 0.355239177 | 0.485759772 |
| 0.369454246 | 0.293281457 | 1           | 0.464635609 |
| 0.439698188 | 0.24504803  | 0.533124028 | 0.067845308 |
| 0.426040528 | 0.07854518  | 0.344413733 | 0.427313412 |
| 0.320851572 | 0.347919131 | 0.39584549  | 0.359845034 |
| 0.190833338 | 0.52958504  | 0.460093226 | 0.522443832 |
| 0.436547295 | 0.534076829 | 0.505027196 | 0.47821745  |
| 0.449686938 | 0.437180843 | 0.200140013 | 0.492609215 |
| 0.491818776 | 0.354985187 | 0.116308457 | 0.502369884 |
| 0.43003212  | 0.467918368 | 0.166425045 | 0.49471367  |
| 0.507148412 | 0.487463622 | 0.200735984 | 0.42998938  |
| 0.441455717 | 0.315477066 | 0.476225814 | 0.536112749 |
| 0.386997617 | 0.414350214 | 0.396316513 | 0.443878027 |
| 0.236954067 | 0.269583129 | 0.364956962 | 0.261933051 |
| 0.021920966 | 0.128343541 | 0.102657783 | 0.2174192   |
| 0.230603419 | 0.501035829 | 0.467408809 | 0.525124379 |
| 0.165453417 | 0.458451448 | 0.302304818 | 0.346194895 |
| 0.433564796 | 0.427402513 | 0.472301823 | 0.470323681 |
| 0.31168772  | 0.030630058 | 0.165743671 | 0.528435575 |
| 0.068866672 | 0.320111417 | 0.409526143 | 0.004829273 |
| 0.071260532 | 0.472448485 | 0.133276042 | 0.22242175  |
| 0.489879662 | 0.230262233 | 0.268475368 | 0.390939278 |
| 0.422668531 | 0.141011645 | 0.006515377 | 0.49388155  |

|             |             |             |             |
|-------------|-------------|-------------|-------------|
| 0.498634975 | 0.466613382 | 0.496422336 | 0.475379719 |
| 0.459186933 | 0.481592543 | 0.468883422 | 0.460797414 |
| 0.151190896 | 0.140963683 | 0.260662051 | 0.346318074 |
| 0.008377423 | 0.453708507 | 0.392703069 | 0.194335343 |
| 0.491726166 | 0.368032905 | 0.063326181 | 0.437128113 |
| 0.036593909 | 0.275065486 | 0.387385225 | 0.288156739 |
| 0.411769419 | 0.026447172 | 0.316495645 | 0.382553611 |
| 0.448682257 | 0.399417318 | 0.450664258 | 0.543958836 |
| 0.409553202 | 0.181234089 | 0.380093038 | 0.476433674 |
| 0.106819496 | 0.139306646 | 0.448035327 | 0.058986636 |
| 0.314072492 | 0.46827637  | 0.466416555 | 0.10701797  |
| 0.339448115 | 0.009444597 | 0.415462703 | 0.541916048 |
| 0.487592959 | 0.522496512 | 0.514411396 | 0.353864996 |
| 0.517043269 | 0.166871537 | 0.542041352 | 0.462396845 |
| 0.449278741 | 0.00150675  | 0.01043035  | 0.505115643 |
| 0.461227375 | 0.09400389  | 0.215816655 | 0.472656745 |
| 0.155506817 | 0.222301817 | 0.107076866 | 0.243353302 |
| 0.520151451 | 0.310095807 | 0.242780695 | 0.482605855 |
| 0.302024023 | 0.302075174 | 0.483351906 | 0.131367922 |
| 0.498656703 | 0.082638845 | 0.129755255 | 0.0134423   |
| 0.437402559 | 0.158080505 | 0.48657857  | 0.523980287 |
| 0.500276506 | 0.462717351 | 0.422612426 | 0.454144505 |
| 0.477058026 | 0.150434398 | 0.471215334 | 0.170126063 |
| 0.500590499 | 0.449888225 | 0.38388836  | 0.364457082 |
| 0.500836059 | 0.474897178 | 0.054444987 | 0.462065466 |
| 0.026143877 | 0.00376627  | 0.460910843 | 0.330483727 |
| 0.099762386 | 0.431258184 | 0.312643201 | 0.307450643 |
| 0.309567254 | 0.053431087 | 0.334812707 | 0.303700155 |
| 0.360529234 | 0.424659081 | 0.340920939 | 0.311033628 |
| 0.334488571 | 0.169489094 | 0.274015202 | 0.213524482 |
| 0.320572088 | 0.359701718 | 0.233773621 | 0.035624593 |
| 0.503835483 | 0.485959489 | 0.091102433 | 0.220053262 |
| 0.489955708 | 0.502263465 | 0.06173396  | 0.017645878 |
| 0.323412629 | 0.382272779 | 0.504038742 | 0.516260888 |
| 0.538561749 | 0.522351548 | 0.401102611 | 0.162592721 |
| 0.107671361 | 0.389520229 | 0.363669736 | 0.139715059 |
| 0.523921202 | 0.102843586 | 0.505922361 | 0.380198584 |
| 0.164602938 | 0.282016201 | 0.056188994 | 0.125300882 |
| 0.471767335 | 0.239636356 | 0.235013489 | 0.206903063 |
| 0.376107839 | 0.333376284 | 0.076200789 | 0.2577994   |
| 0.40524827  | 0.229178512 | 0.215253323 | 0.413587813 |
| 0.433752461 | 0.307585414 | 0.489137609 | 0.449040472 |
| 0.186439336 | 0.160315353 | 0.36258497  | 0.460125159 |
| 0.504259636 | 0.477789493 | 0.049885369 | 0.467624224 |
| 0.499914067 | 0.515274511 | 0.517212518 | 0.424437841 |
| 0.125364456 | 0.455002186 | 0.389676681 | 0.399532214 |
| 0.245575491 | 0.502735982 | 0.309632184 | 0.096762913 |
| 0.344354781 | 0.492974092 | 0.453546647 | 0.227324242 |
| 0.514965262 | 0.188083003 | 0.091422045 | 0.494915004 |
| 0.23076541  | 0.132692364 | 0.456308536 | 0.492212529 |
| 0.003381984 | 0.205896066 | 0.492307447 | 0.331420812 |
| 0.52595468  | 0.487005647 | 0.443974529 | 0.358310713 |
| 0.002473421 | 0.474413363 | 0.451312471 | 0.470906214 |
| 0.469369553 | 0.428535111 | 0.238479858 | 0.108368893 |

|             |             |             |             |
|-------------|-------------|-------------|-------------|
| 0.34305393  | 0.126474957 | 0.175673014 | 0.46213095  |
| 0.222883212 | 0.485390152 | 0.252722117 | 0.273265517 |
| 0.257419895 | 0.13659524  | 0.338370094 | 0.326844404 |
| 0.203521302 | 0.296312928 | 0.403336492 | 0.397181782 |
| 0.241686771 | 0.456984408 | 0.457276699 | 0.046658086 |
| 0.447735637 | 0.453346363 | 0.468425072 | 0.002725843 |
| 0.492993084 | 0.012781556 | 0.256966467 | 0.281175188 |
| 0.265222241 | 0.26813822  | 0.319713216 | 0.37015511  |
| 0.420139642 | 0.286863332 | 0.355292231 | 0.302544421 |
| 0.223960785 | 0.301203294 | 0.468288242 | 0.440103854 |
| 0.355218056 | 0.184448638 | 0.137788734 | 0.133173275 |
| 0.085217058 | 0.496779561 | 0.29434168  | 0.116487267 |
| 0.293991155 | 0.442107303 | 0.385160413 | 0.510844763 |
| 0.450721871 | 0.159942479 | 0.409441084 | 0.490947002 |
| 0.305252846 | 0.396162025 | 0.1012493   | 0.481713049 |
| 0.309254512 | 0.277869713 | 0.502242968 | 0.385792895 |
| 0.471609452 | 0.407149852 | 0.29587857  | 0.452707669 |
| 0.448879321 | 0.410765201 | 0.406081055 | 0.121694668 |
| 0.236200248 | 0.182992451 | 0.330439267 | 0.003722685 |
| 0.429749444 | 0.357697892 | 0.507883933 | 0.50439547  |
| 0.379217225 | 0.421129909 | 0.420002002 | 0.127714844 |
| 0.371285325 | 0.212779323 | 0.191857965 | 0.504481888 |
| 0.298574858 | 0.263149241 | 0.367174234 | 0.448650812 |
| 0.495144959 | 0.483458003 | 0.330007932 | 0.322699251 |
| 0.309668149 | 0.272723001 | 0.486269443 | 0.186994693 |
| 0.498392728 | 0.245600889 | 0.444249824 | 0.356891028 |
| 0.278357175 | 0.527059086 | 0.097256614 | 0.534130586 |
| 0.387303715 | 0.18319869  | 0.500182681 | 0.408635215 |
| 0.401039632 | 0.182544464 | 0.260166192 | 0.47523571  |
| 0.295590407 | 0.438407262 | 0.025562017 | 0.082568341 |
| 0.388868451 | 0.386617717 | 0.461715439 | 0.431688556 |
| 0.315009405 | 0.389423294 | 0.25591071  | 0.363285381 |
| 0.499459521 | 0.515335195 | 0.309294668 | 0.299492387 |
| 0.409050085 | 0.151116438 | 0.492313044 | 0.024864355 |
| 0.483034582 | 0.493492325 | 0.460654817 | 0.084954839 |
| 0.031733899 | 0.276016557 | 0.474103602 | 0.105872094 |
| 0.487961658 | 0.294998257 | 0.434737615 | 0.516775033 |
| 0.23665556  | 0.513518049 | 0.170806088 | 0.476282344 |
| 0.073336206 | 0.327501554 | 0.465451817 | 0.454866178 |
| 0.285370311 | 0.357946285 | 0.435231556 | 0.308743434 |
| 0.051201272 | 0.336637413 | 0.001734039 | 0.415666368 |
| 0.484718369 | 0.402920204 | 0.255247771 | 0.397935374 |
| 0.342298964 | 0.434840487 | 0.301459172 | 0.506582806 |
| 0.019496434 | 0.435810246 | 0.268354271 | 0.474359135 |
| 0.295812542 | 0.425219234 | 0.090628182 | 0.379764019 |
| 0.476177876 | 0.332001682 | 0.307707956 | 0.36659902  |
| 0.508051447 | 0.455371355 | 0.225003506 | 0.30804174  |
| 0.458041948 | 0.099884703 | 0.48930065  | 0.537017168 |
| 0.235758837 | 0.27963124  | 0.488540616 | 0.254844426 |
| 0.38912709  | 0.438713848 | 0.482594955 | 0.530149742 |
| 0.101714172 | 0.30915754  | 0.489196741 | 0.463692431 |
| 0.3579406   | 0.226335653 | 0.314453959 | 0.2838753   |
| 0.476068078 | 0.150335693 | 0.322129669 | 0.423266352 |
| 0.275066194 | 0.384210334 | 0.423049269 | 0.24897094  |

|             |             |             |             |
|-------------|-------------|-------------|-------------|
| 0.059812938 | 0.234551517 | 0.485509137 | 0.198407115 |
| 0.356812892 | 0.432269888 | 0.299786684 | 0.405420838 |
| 0.194114562 | 0.039202126 | 0.456193531 | 0.024936461 |
| 0.447432813 | 0.473780924 | 0.323437534 | 0.432346958 |
| 0.239730064 | 0.427350316 | 0.405786044 | 0.001916203 |
| 0.466448912 | 0.077602097 | 0.395839541 | 0.285528468 |
| 0.360098626 | 0.080152139 | 0.474433169 | 0.517281597 |
| 0.40800323  | 0.440017706 | 0.434139687 | 0.475381396 |
| 0.20494198  | 0.425978254 | 0.41895286  | 0.490602056 |
| 0.302294894 | 0.460891099 | 0.494697359 | 0.466128259 |
| 0.465345026 | 0.367794891 |             |             |
| E2F3        | 0.075784091 | 0.357861356 | 0.048869639 |
| 0.163902888 | 0.383061544 | 0.337335683 | 0.068959067 |
| 0.137376587 | 0.276101832 | 0.223409943 | 0.360568372 |
| 0.024146963 | 0.2149939   | 0.414913896 | 0.071852659 |
| 0.38436864  | 0.055050775 | 0.122348783 | 0.087620108 |
| 0.233928544 | 0.362757476 | 0.390416386 | 0.273103985 |
| 0.370952529 | 0.158736707 | 0.260456923 | 0.362060704 |
| 0.445285785 | 0.282904439 | 0.375249833 | 0.159634163 |
| 0.375285832 | 0.389910914 | 0.375783401 | 0.019499369 |
| 0.362244691 | 0.037129343 | 0.374487975 | 0.314900201 |
| 0.287510272 | 0.312478236 | 0.231341578 | 0.288753911 |
| 0.27135408  | 0.038108707 | 0.164989823 | 0.352553502 |
| 0.264689397 | 0.304389124 | 0.05376556  | 0.342937043 |
| 0.320116872 | 0.277323203 | 0.270991811 | 0.002097016 |
| 0.378779576 | 0.180178878 | 0.315350574 | 0.440004403 |
| 0.206594889 | 0.166940796 | 0.264384675 | 0.239378188 |
| 0.335591696 | 0.347121455 | 0.269306489 | 0.285028703 |
| 0.445380093 | 0.29795508  | 0.357690403 | 0.188263973 |
| 0.317450114 | 0.031266102 | 0.155743201 | 0.069274927 |
| 0.375311837 | 0.2517838   | 0.383679721 | 0.390961478 |
| 0.341598268 | 0.457200399 | 0.234429268 | 0.415353695 |
| 0.198176279 | 0.387710623 | 0.383109263 | 0.311607807 |
| 0.311627992 | 0.09357905  | 0.355356727 | 0.467519067 |
| 0.050708372 | 0.265096947 | 0.312460098 | 0.099450589 |
| 0.373181809 | 0.348936049 | 0.280060635 | 0.325317728 |
| 0.390048398 | 0.367044655 | 0.410231685 | 0.269147487 |
| 0.386643757 | 0.060960029 | 0.394954251 | 0.391514563 |
| 0.354669854 | 0.077214211 | 0.310842249 | 0.434662623 |
| 0.352324552 | 0.445107055 | 0.354036324 | 0.321066938 |
| 0.374468425 | 0.452028132 | 0.335187054 | 0.376122716 |
| 0.130554069 | 0.460770383 | 0.18989436  | 0.068364001 |
| 0.060524891 | 0.132583484 | 0.30497632  | 0.294191887 |
| 0.443896348 | 0.29668478  | 0.190456101 | 0.293928785 |
| 0.457280343 | 0.388254342 | 0.453110343 | 0.361997144 |
| 0.046625003 | 0.345464794 | 0.370468978 | 0.271036849 |
| 0.330122559 | 0.119939155 | 0.372807061 | 0.429266316 |
| 0.349472991 | 0.418211889 | 0.145186902 | 0.427568953 |
| 0.204171445 | 0.477688717 | 0.380920071 | 0.192440425 |
| 0.452227394 | 0.417393941 | 0.486481799 | 0.396572682 |
| 0.417704369 | 0.292640983 | 0.076498539 | 0.334945456 |
| 0.469506187 | 0.041090299 | 0.440412931 | 0.46717172  |
| 0.426946583 | 0.431040035 | 0.495872125 | 0.475111601 |
| 0.430014328 | 0.072888399 | 0.041076882 | 0.327599363 |

|             |             |             |             |
|-------------|-------------|-------------|-------------|
| 0.432668413 | 0.364453789 | 0.204885173 | 0.353869683 |
| 0.382273018 | 0.314207613 | 0.383673313 | 0.296397305 |
| 0.478961915 | 0.421332101 | 0.442942527 | 0.319201621 |
| 0.238934263 | 0.284372623 | 0.370607277 | 0.381948969 |
| 0.064170618 | 0.106701377 | 0.043770392 | 0.28076858  |
| 0.257504471 | 0.217789386 | 0.29054974  | 0.352836481 |
| 0.219239584 | 0.272550524 | 0.3705565   | 0.388513146 |
| 0.041040721 | 0.345141409 | 0.169610093 | 0.147439513 |
| 0.06416221  | 0.124515552 | 0.200646294 | 0.204790539 |
| 0.315986886 | 0.18497714  | 0.351486074 | 0.459196909 |
| 0.351726663 | 0.148661683 | 0.334743768 | 0.454031654 |
| 0.422629442 | 0.393713282 | 0.210011636 | 0.02470601  |
| 0.277139244 | 0.285330839 | 0.304307045 | 0.373094232 |
| 0.148430813 | 0.25181326  | 0.347142529 | 0.39178391  |
| 0.221305838 | 0.131004562 | 0.358123095 | 0.380563204 |
| 0.115554694 | 0.367564886 | 0.424677183 | 0.307439063 |
| 0.004745672 | 0.293930364 | 0.406095233 | 0.261410431 |
| 0.263669811 | 0.254399044 | 0.346612069 | 0.432203581 |
| 0.331092056 | 0.340594304 | 0.464635609 | 1           |
| 0.311117937 | 0.171244682 | 0.491021562 | 0.0771287   |
| 0.36500024  | 0.113931381 | 0.308902195 | 0.236989528 |
| 0.244514773 | 0.286807731 | 0.39425894  | 0.369916907 |
| 0.102837671 | 0.45452727  | 0.356377008 | 0.469162852 |
| 0.336953565 | 0.48871694  | 0.432739324 | 0.416260677 |
| 0.328864979 | 0.332632192 | 0.264059894 | 0.387787319 |
| 0.428150195 | 0.257586713 | 0.058507414 | 0.386694232 |
| 0.293664729 | 0.370993161 | 0.224739084 | 0.463043131 |
| 0.445924516 | 0.377672692 | 0.202577893 | 0.378904761 |
| 0.351843262 | 0.227673237 | 0.390026975 | 0.494503811 |
| 0.242223419 | 0.356771048 | 0.362160159 | 0.421573139 |
| 0.17061249  | 0.322447309 | 0.289488077 | 0.314465217 |
| 0.026657081 | 0.076265451 | 0.061590482 | 0.238304397 |
| 0.327193957 | 0.327179615 | 0.364813079 | 0.462362037 |
| 0.139712999 | 0.38773413  | 0.213642713 | 0.313894955 |
| 0.355658123 | 0.364814324 | 0.403518724 | 0.385318651 |
| 0.224475281 | 0.036525809 | 0.161916666 | 0.452487557 |
| 0.031095426 | 0.362312417 | 0.278949452 | 0.006244383 |
| 0.04679118  | 0.320601499 | 0.075272324 | 0.169612109 |
| 0.478680721 | 0.165888946 | 0.174804229 | 0.232227026 |
| 0.345465136 | 0.105598249 | 0.012697748 | 0.441697752 |
| 0.431678006 | 0.408060205 | 0.422634421 | 0.38872585  |
| 0.403840619 | 0.35151912  | 0.39030493  | 0.272515078 |
| 0.118694215 | 0.080646154 | 0.308878159 | 0.314866293 |
| 0.005684881 | 0.373601476 | 0.359341755 | 0.14224363  |
| 0.381709659 | 0.277819866 | 0.04726266  | 0.384819683 |
| 0.024821545 | 0.292567365 | 0.264566779 | 0.264789614 |
| 0.360621127 | 0.017266156 | 0.218568476 | 0.318235596 |
| 0.357189388 | 0.297160142 | 0.373521475 | 0.469356728 |
| 0.338642492 | 0.089496086 | 0.351519457 | 0.381085819 |
| 0.086028626 | 0.090750271 | 0.293859007 | 0.033027551 |
| 0.210848306 | 0.399349204 | 0.352742592 | 0.070721999 |
| 0.266920842 | 0.006491384 | 0.311752271 | 0.474870827 |
| 0.382467431 | 0.484470212 | 0.455773508 | 0.374064063 |
| 0.448236606 | 0.196548115 | 0.475930591 | 0.338556218 |

|             |             |             |             |
|-------------|-------------|-------------|-------------|
| 0.282310162 | 0.001249778 | 0.013343193 | 0.457448354 |
| 0.371774124 | 0.041148907 | 0.165968424 | 0.296560001 |
| 0.156034393 | 0.127115325 | 0.084559846 | 0.330403198 |
| 0.355446326 | 0.336061516 | 0.318829864 | 0.386710116 |
| 0.268404966 | 0.270882561 | 0.294254085 | 0.075176829 |
| 0.390315646 | 0.072481503 | 0.076447703 | 0.020996223 |
| 0.372023976 | 0.084403195 | 0.378820819 | 0.447860317 |
| 0.455719852 | 0.383376009 | 0.253293295 | 0.322657914 |
| 0.418352996 | 0.068997407 | 0.340855626 | 0.086800566 |
| 0.408223151 | 0.359901016 | 0.297269967 | 0.266515199 |
| 0.467559433 | 0.414485999 | 0.043286163 | 0.369706246 |
| 0.022118303 | 0.008264343 | 0.273628763 | 0.246133133 |
| 0.114741467 | 0.362897947 | 0.229076983 | 0.238838422 |
| 0.28169543  | 0.035758481 | 0.365772831 | 0.345847195 |
| 0.307709555 | 0.352476304 | 0.371244053 | 0.214104422 |
| 0.352747897 | 0.229599631 | 0.264334078 | 0.188794536 |
| 0.257553041 | 0.256584457 | 0.159517456 | 0.027459265 |
| 0.336759864 | 0.372292474 | 0.067947233 | 0.150904573 |
| 0.416555819 | 0.457033342 | 0.060572646 | 0.025244455 |
| 0.227524724 | 0.325578458 | 0.477666259 | 0.428576954 |
| 0.450638983 | 0.482654331 | 0.349617177 | 0.197469458 |
| 0.081544282 | 0.348585955 | 0.378347407 | 0.207240859 |
| 0.460281046 | 0.050201411 | 0.421114387 | 0.387590059 |
| 0.118091121 | 0.236101476 | 0.059764531 | 0.099851537 |
| 0.397350233 | 0.188020892 | 0.256132988 | 0.11516296  |
| 0.334622308 | 0.36354438  | 0.058111716 | 0.213566889 |
| 0.288853126 | 0.287882347 | 0.164569449 | 0.283222669 |
| 0.299373214 | 0.173545799 | 0.368812026 | 0.420365204 |
| 0.120799027 | 0.107777151 | 0.210774773 | 0.344167586 |
| 0.39211988  | 0.307750732 | 0.039451486 | 0.36952378  |
| 0.464578346 | 0.362676601 | 0.429052922 | 0.392010588 |
| 0.079127076 | 0.382026615 | 0.356890535 | 0.346215055 |
| 0.196363547 | 0.327812132 | 0.268102756 | 0.066262085 |
| 0.283535906 | 0.421109738 | 0.354847495 | 0.218688955 |
| 0.352589898 | 0.096989874 | 0.04274632  | 0.408155966 |
| 0.311719869 | 0.095563161 | 0.255966571 | 0.403347832 |
| 0.007714025 | 0.292493197 | 0.469252573 | 0.280970019 |
| 0.468547691 | 0.456056289 | 0.402418813 | 0.256728097 |
| 0.005600356 | 0.37201798  | 0.359744143 | 0.360177142 |
| 0.359382923 | 0.29480881  | 0.184128373 | 0.11547854  |
| 0.283829017 | 0.061258554 | 0.178229656 | 0.302020289 |
| 0.24205872  | 0.309238982 | 0.205270384 | 0.202976032 |
| 0.272970261 | 0.06760537  | 0.377867518 | 0.260409075 |
| 0.259754897 | 0.233970755 | 0.332865171 | 0.212459806 |
| 0.241010902 | 0.410503419 | 0.332484555 | 0.032335962 |
| 0.398536306 | 0.384072021 | 0.415438464 | 0.003046954 |
| 0.370783043 | 0.01258718  | 0.271552906 | 0.287432812 |
| 0.274700453 | 0.264503486 | 0.320164798 | 0.363051511 |
| 0.288675042 | 0.24703138  | 0.303560274 | 0.260107574 |
| 0.242070323 | 0.23281028  | 0.375170882 | 0.3046016   |
| 0.344541024 | 0.145611742 | 0.080047139 | 0.080164937 |
| 0.081233044 | 0.416661769 | 0.220661958 | 0.058328251 |
| 0.258416167 | 0.312023372 | 0.346511659 | 0.412557549 |
| 0.418149957 | 0.082453087 | 0.335147951 | 0.379513467 |

|             |             |             |             |
|-------------|-------------|-------------|-------------|
| 0.195479071 | 0.254141774 | 0.057289751 | 0.326487785 |
| 0.244738016 | 0.31763081  | 0.319156193 | 0.227177121 |
| 0.304505365 | 0.364504516 | 0.213201985 | 0.414201074 |
| 0.364775984 | 0.305989175 | 0.216223394 | 0.140525173 |
| 0.1775781   | 0.117361941 | 0.368630182 | 0.003429094 |
| 0.327060274 | 0.218765815 | 0.432674277 | 0.412778072 |
| 0.365457529 | 0.37101219  | 0.23040285  | 0.095767139 |
| 0.194128368 | 0.133513689 | 0.134085292 | 0.363315305 |
| 0.318859717 | 0.218286409 | 0.360594362 | 0.249948974 |
| 0.383605493 | 0.346465573 | 0.351002467 | 0.238228636 |
| 0.259223172 | 0.169317694 | 0.405139958 | 0.110004469 |
| 0.338818424 | 0.319638334 | 0.249663478 | 0.331844518 |
| 0.290195825 | 0.469882408 | 0.062611218 | 0.476860631 |
| 0.342865988 | 0.108261913 | 0.450643426 | 0.284346903 |
| 0.280469476 | 0.21508239  | 0.319745354 | 0.295030838 |
| 0.261245365 | 0.394956878 | 0.01433716  | 0.095943031 |
| 0.323056147 | 0.284405549 | 0.314605117 | 0.326299202 |
| 0.366622568 | 0.34242518  | 0.305252495 | 0.243322828 |
| 0.38935223  | 0.412401809 | 0.260102446 | 0.231515783 |
| 0.292198593 | 0.132743511 | 0.291632872 | 0.022393997 |
| 0.353926706 | 0.356360202 | 0.304206935 | 0.072421222 |
| 0.026792614 | 0.31490663  | 0.330197677 | 0.054836968 |
| 0.46971071  | 0.303975313 | 0.27372143  | 0.362055915 |
| 0.155490825 | 0.411398783 | 0.204889445 | 0.366704336 |
| 0.044229054 | 0.251909768 | 0.387601141 | 0.329546507 |
| 0.302330513 | 0.379197465 | 0.351090353 | 0.36372715  |
| 0.048107668 | 0.336878602 | 0.002396142 | 0.353143772 |
| 0.378150087 | 0.367991292 | 0.180966044 | 0.236007064 |
| 0.299001406 | 0.356562783 | 0.291308783 | 0.354000634 |
| 0.024561536 | 0.385188154 | 0.224336084 | 0.361649798 |
| 0.240460046 | 0.30182772  | 0.096409923 | 0.364144295 |
| 0.366750909 | 0.286307879 | 0.23255886  | 0.283312925 |
| 0.417521357 | 0.333395927 | 0.118718332 | 0.331371192 |
| 0.291705475 | 0.058202884 | 0.29101323  | 0.477425902 |
| 0.24195434  | 0.348193407 | 0.440271872 | 0.241551116 |
| 0.382509831 | 0.336675685 | 0.323776521 | 0.462011916 |
| 0.140991195 | 0.247985874 | 0.400287711 | 0.401219425 |
| 0.302160532 | 0.315479127 | 0.348409107 | 0.308636852 |
| 0.376887382 | 0.123434342 | 0.339438538 | 0.290493102 |
| 0.321302045 | 0.316516133 | 0.239678159 | 0.302528443 |
| 0.063875398 | 0.202446899 | 0.353851323 | 0.143725322 |
| 0.300721915 | 0.37489582  | 0.347762391 | 0.368514887 |
| 0.206386676 | 0.046063279 | 0.424182337 | 0.043735765 |
| 0.27120447  | 0.381464555 | 0.261723103 | 0.38503068  |
| 0.155235438 | 0.300479262 | 0.242661254 | 0.00125622  |
| 0.395232889 | 0.116634267 | 0.353827951 | 0.31996662  |
| 0.326564877 | 0.054749463 | 0.40590328  | 0.489258224 |
| 0.283940147 | 0.329405265 | 0.33398918  | 0.408325743 |
| 0.278902255 | 0.337905265 | 0.352531261 | 0.298760642 |
| 0.358499629 | 0.281273528 | 0.345965434 | 0.377311959 |
| 0.31768751  | 0.268759677 |             |             |
| E2F7        | 0.03597097  | 0.357656429 | 0.027559659 |
| 0.013202118 | 0.178280176 | 0.16213526  | 0.017191668 |
| 0.040460851 | 0.253959895 | 0.088331776 | 0.216733822 |



|             |             |             |             |
|-------------|-------------|-------------|-------------|
| 0.004280631 | 0.013824578 | 0.408587372 | 0.017713924 |
| 0.240401346 | 0.009105917 | 0.050188424 | 0.005968117 |
| 0.013162018 | 0.162887523 | 0.103295919 | 0.229454446 |
| 0.142255974 | 0.155267041 | 0.186497647 | 0.216733208 |
| 0.427223526 | 0.062416072 | 0.325160935 | 0.012213294 |
| 0.338977782 | 0.217667294 | 0.198868094 | 0.002945988 |
| 0.232431663 | 0.00098166  | 0.343317014 | 0.088440715 |
| 0.013500203 | 0.299523095 | 0.145804175 | 0.096869377 |
| 0.147743209 | 0.012235128 | 0.037437142 | 0.271187524 |
| 0.167711778 | 0.079413844 | 0.039065467 | 0.289708388 |
| 0.104402064 | 0.273096356 | 0.291417539 | 0.001721923 |
| 0.156825933 | 0.024184881 | 0.092507236 | 0.431838134 |
| 0.143371441 | 0.061118417 | 0.044433737 | 0.11647797  |
| 0.251970885 | 0.250469304 | 0.166906185 | 0.115047788 |
| 0.436063947 | 0.047833177 | 0.316432659 | 0.013807597 |
| 0.159403994 | 0.010709934 | 0.106477012 | 0.047556847 |
| 0.128902369 | 0.113769284 | 0.223865326 | 0.114830984 |
| 0.353811829 | 0.436726711 | 0.130729088 | 0.410650213 |
| 0.009880741 | 0.206521032 | 0.080477572 | 0.207674964 |
| 0.253528963 | 0.021532532 | 0.315887791 | 0.435626981 |
| 0.019977541 | 0.232591414 | 0.284954274 | 0.090078313 |
| 0.365425952 | 0.075383651 | 0.213706486 | 0.073925217 |
| 0.247388009 | 0.187470339 | 0.397916733 | 0.215219014 |
| 0.168204549 | 0.042194799 | 0.406315699 | 0.20626717  |
| 0.137884385 | 0.040244468 | 0.046565052 | 0.396760578 |
| 0.264477066 | 0.442121139 | 0.355841979 | 0.272895493 |
| 0.218528212 | 0.428436829 | 0.271346158 | 0.368810052 |
| 0.016760165 | 0.449489969 | 0.093823048 | 0.014256894 |
| 0.033347644 | 0.033961475 | 0.054838935 | 0.235509432 |
| 0.411094881 | 0.247768365 | 0.089159311 | 0.106483133 |
| 0.383868569 | 0.406657252 | 0.443320369 | 0.343225548 |
| 0.015437633 | 0.066736546 | 0.194672055 | 0.10209113  |
| 0.283551063 | 0.06631251  | 0.133065011 | 0.426163245 |
| 0.32643045  | 0.354808858 | 0.05906034  | 0.4116882   |
| 0.087764806 | 0.438085274 | 0.38881406  | 0.082782803 |
| 0.426439637 | 0.418290064 | 0.437155454 | 0.311062101 |
| 0.414273253 | 0.164697371 | 0.010061447 | 0.292146625 |
| 0.433006364 | 0.002193391 | 0.419622563 | 0.430478895 |
| 0.416741812 | 0.393037014 | 0.439956325 | 0.44472807  |
| 0.440580312 | 0.041202818 | 0.002675668 | 0.188811532 |
| 0.421869173 | 0.318385877 | 0.040762983 | 0.236212996 |
| 0.242984744 | 0.191871487 | 0.348633959 | 0.032031486 |
| 0.440863231 | 0.374197372 | 0.430269527 | 0.318599076 |
| 0.139786215 | 0.277284568 | 0.223133224 | 0.395300847 |
| 0.008763456 | 0.054335541 | 0.036193018 | 0.217063442 |
| 0.082205578 | 0.0982689   | 0.171870447 | 0.208367216 |
| 0.123051819 | 0.153741541 | 0.157339529 | 0.286960129 |
| 0.042451883 | 0.28191497  | 0.069084151 | 0.083668522 |
| 0.010302185 | 0.116156783 | 0.029136943 | 0.039047216 |
| 0.150853002 | 0.190607929 | 0.348080904 | 0.410927566 |
| 0.138929749 | 0.121201416 | 0.336865361 | 0.411311512 |
| 0.363496623 | 0.213607441 | 0.174648774 | 0.000928736 |
| 0.03715913  | 0.092388182 | 0.064297856 | 0.243076851 |
| 0.1408967   | 0.057696867 | 0.240365046 | 0.320862161 |

|             |             |             |             |
|-------------|-------------|-------------|-------------|
| 0.161639976 | 0.067425344 | 0.134852076 | 0.37349842  |
| 0.107346028 | 0.135854031 | 0.389172856 | 0.226313918 |
| 0.000193919 | 0.159621973 | 0.378074817 | 0.017175376 |
| 0.212449019 | 0.018224738 | 0.074949507 | 0.374863533 |
| 0.076307381 | 0.090513174 | 0.439698188 | 0.311117937 |
| 1           | 0.187241747 | 0.455522518 | 0.009382731 |
| 0.173773896 | 0.005855067 | 0.19707525  | 0.148991549 |
| 0.133899097 | 0.211457744 | 0.207910259 | 0.09688101  |
| 0.092158227 | 0.452417997 | 0.328395446 | 0.453429733 |
| 0.11019465  | 0.447181504 | 0.404419144 | 0.395992848 |
| 0.238103986 | 0.172824046 | 0.039110941 | 0.351459645 |
| 0.366760534 | 0.021916203 | 0.050856619 | 0.375152696 |
| 0.133458184 | 0.295456358 | 0.008429455 | 0.415943576 |
| 0.414005279 | 0.392093347 | 0.061607734 | 0.285735356 |
| 0.314888277 | 0.136637377 | 0.326231896 | 0.459746829 |
| 0.061396983 | 0.183672444 | 0.109253317 | 0.315119362 |
| 0.100864959 | 0.061498249 | 0.256654383 | 0.060720687 |
| 0.002704531 | 0.048858621 | 0.036007796 | 0.077323416 |
| 0.063726471 | 0.287813272 | 0.250775035 | 0.447954598 |
| 0.062210681 | 0.373427473 | 0.160971667 | 0.087409206 |
| 0.342804975 | 0.179964136 | 0.242100206 | 0.269186494 |
| 0.167668204 | 0.00116204  | 0.01246925  | 0.428590045 |
| 0.025674398 | 0.101482161 | 0.172757083 | 0.000216755 |
| 0.014760379 | 0.340952975 | 0.069343734 | 0.152814055 |
| 0.423367816 | 0.149275561 | 0.124478773 | 0.083012994 |
| 0.27002238  | 0.047941576 | 0.00040788  | 0.392205391 |
| 0.402208211 | 0.371121201 | 0.40139994  | 0.377690914 |
| 0.351733202 | 0.313891608 | 0.315321563 | 0.206473597 |
| 0.027291339 | 0.032983749 | 0.048559893 | 0.123638718 |
| 0.003263778 | 0.304099247 | 0.160056447 | 0.093936925 |
| 0.357323703 | 0.200494778 | 0.014740306 | 0.237799934 |
| 0.001899016 | 0.074022914 | 0.088715302 | 0.094545301 |
| 0.262634349 | 0.003570284 | 0.017443155 | 0.056867798 |
| 0.37644561  | 0.292972876 | 0.131699083 | 0.446331357 |
| 0.197667963 | 0.085650189 | 0.127695569 | 0.336802966 |
| 0.021936926 | 0.008788871 | 0.136705292 | 0.004794284 |
| 0.031652347 | 0.385346023 | 0.131319505 | 0.00673939  |
| 0.152299926 | 0.000865465 | 0.300141141 | 0.463191803 |
| 0.395041642 | 0.445264318 | 0.44121725  | 0.138310068 |
| 0.432807329 | 0.022499158 | 0.4581178   | 0.335230939 |
| 0.142398956 | 0.000348708 | 0.000906805 | 0.407667348 |
| 0.222400688 | 0.044961776 | 0.089003581 | 0.070282055 |
| 0.023909483 | 0.063055347 | 0.029436846 | 0.053124857 |
| 0.294212722 | 0.140603099 | 0.060798388 | 0.403309275 |
| 0.097245407 | 0.130145735 | 0.179082956 | 0.059816217 |
| 0.270259387 | 0.011856545 | 0.053502186 | 0.001269056 |
| 0.278583681 | 0.085405468 | 0.390335653 | 0.444318154 |
| 0.424327434 | 0.273140514 | 0.119966102 | 0.061080882 |
| 0.366178344 | 0.076196374 | 0.064308894 | 0.07344596  |
| 0.41470055  | 0.24993091  | 0.253741879 | 0.238653169 |
| 0.42979986  | 0.393423232 | 0.012797403 | 0.300322486 |
| 0.001455699 | 0.000267367 | 0.182027381 | 0.196629143 |
| 0.00466994  | 0.172790702 | 0.175958342 | 0.062349129 |
| 0.070496364 | 0.003430744 | 0.103091941 | 0.096576399 |

|             |             |             |             |
|-------------|-------------|-------------|-------------|
| 0.165575552 | 0.181979532 | 0.154641656 | 0.168299636 |
| 0.086511613 | 0.008660747 | 0.072560463 | 0.061290603 |
| 0.024974786 | 0.224696059 | 0.154616421 | 0.005521397 |
| 0.201718669 | 0.240914935 | 0.027142132 | 0.104818051 |
| 0.37374851  | 0.432376412 | 0.003512501 | 0.00104988  |
| 0.208318512 | 0.139714843 | 0.453098738 | 0.431623835 |
| 0.44871155  | 0.442405376 | 0.331098518 | 0.034323211 |
| 0.027321803 | 0.169143262 | 0.16299553  | 0.016215897 |
| 0.46116869  | 0.041366865 | 0.423619572 | 0.16688618  |
| 0.06810759  | 0.057831328 | 0.006601385 | 0.042428052 |
| 0.271084245 | 0.123095973 | 0.086400761 | 0.090183512 |
| 0.128212504 | 0.057820321 | 0.017486806 | 0.108623703 |
| 0.260500312 | 0.021183781 | 0.091670941 | 0.114341333 |
| 0.250670129 | 0.025953411 | 0.323999211 | 0.377053794 |
| 0.087420211 | 0.050077187 | 0.066430221 | 0.29928476  |
| 0.364971767 | 0.231069435 | 0.004942027 | 0.381697286 |
| 0.43149723  | 0.319833814 | 0.431961901 | 0.338336263 |
| 0.050061522 | 0.218985786 | 0.130797101 | 0.183141004 |
| 0.111285898 | 0.186883394 | 0.123669634 | 0.035837058 |
| 0.239134431 | 0.405971912 | 0.32211933  | 0.07989019  |
| 0.270281812 | 0.085807223 | 0.032538868 | 0.399243833 |
| 0.040030928 | 0.016257542 | 0.172982257 | 0.374042417 |
| 0.000172434 | 0.055745062 | 0.405954103 | 0.100501528 |
| 0.428352722 | 0.400138046 | 0.366372333 | 0.07633452  |
| 8.41E-05    | 0.272106257 | 0.252031258 | 0.149369321 |
| 0.373371625 | 0.282567273 | 0.017324043 | 0.017463401 |
| 0.217224899 | 0.061025173 | 0.027865756 | 0.032354013 |
| 0.01085816  | 0.279897012 | 0.13694113  | 0.104473926 |
| 0.075132839 | 0.061526298 | 0.049433726 | 0.102021032 |
| 0.013536566 | 0.179138621 | 0.282897811 | 0.091913135 |
| 0.030823733 | 0.368886797 | 0.30130717  | 0.008946617 |
| 0.221166634 | 0.321821614 | 0.363262839 | 6.74E-05    |
| 0.338877264 | 0.001403634 | 0.101865146 | 0.098891844 |
| 0.078916803 | 0.099037879 | 0.163331956 | 0.093700532 |
| 0.208842093 | 0.085234345 | 0.116333451 | 0.152901969 |
| 0.054625674 | 0.100404883 | 0.231123058 | 0.131313066 |
| 0.112067584 | 0.046759145 | 0.077778279 | 0.08307067  |
| 0.010305024 | 0.412516685 | 0.199150089 | 0.05148219  |
| 0.148175732 | 0.126273723 | 0.280755153 | 0.416187022 |
| 0.365765304 | 0.088265202 | 0.144975886 | 0.384543536 |
| 0.023547589 | 0.029788158 | 0.025279698 | 0.185846902 |
| 0.146755827 | 0.062244975 | 0.205717023 | 0.183803079 |
| 0.298494502 | 0.332775538 | 0.202302833 | 0.355398292 |
| 0.145287062 | 0.154401518 | 0.108424535 | 0.019502634 |
| 0.070258683 | 0.08470551  | 0.146554979 | 8.34E-05    |
| 0.247570363 | 0.041567625 | 0.408280284 | 0.403959411 |
| 0.131264175 | 0.320606477 | 0.049322294 | 0.024074004 |
| 0.04761636  | 0.136681527 | 0.097598945 | 0.337306525 |
| 0.096069622 | 0.069625206 | 0.159763499 | 0.104723965 |
| 0.326887621 | 0.289290119 | 0.077571205 | 0.126270179 |
| 0.115601535 | 0.111993689 | 0.382424194 | 0.051546857 |
| 0.250841924 | 0.054083016 | 0.221841904 | 0.135053646 |
| 0.094692206 | 0.434339936 | 0.033410529 | 0.456762097 |
| 0.141226571 | 0.09731463  | 0.421754604 | 0.170597907 |

|             |             |             |             |
|-------------|-------------|-------------|-------------|
| 0.060030024 | 0.020720707 | 0.074860841 | 0.145103708 |
| 0.058937408 | 0.140950841 | 0.003276341 | 0.009314884 |
| 0.247558424 | 0.098345636 | 0.311430762 | 0.260812418 |
| 0.086989189 | 0.260688486 | 0.030185341 | 0.140307228 |
| 0.404779399 | 0.414866155 | 0.043456827 | 0.169919145 |
| 0.278431505 | 0.04340747  | 0.282495012 | 0.001923178 |
| 0.278218102 | 0.277364465 | 0.100935428 | 0.021548356 |
| 0.002105219 | 0.075092472 | 0.233707247 | 0.037790536 |
| 0.415348661 | 0.04176023  | 0.214663665 | 0.326294835 |
| 0.123445803 | 0.413175731 | 0.042792642 | 0.325256373 |
| 0.004277376 | 0.155165307 | 0.188673149 | 0.19033046  |
| 0.061403884 | 0.127800008 | 0.279511136 | 0.115048569 |
| 0.010183114 | 0.047528766 | 0.000132557 | 0.334059606 |
| 0.377745478 | 0.148614946 | 0.155211689 | 0.088154444 |
| 0.192859553 | 0.299124732 | 0.04513064  | 0.223910893 |
| 0.001087768 | 0.234551801 | 0.127354616 | 0.367867117 |
| 0.035500966 | 0.188218276 | 0.007597128 | 0.157380126 |
| 0.379652365 | 0.048729144 | 0.202809305 | 0.045050281 |
| 0.41385422  | 0.301678339 | 0.107123335 | 0.040798801 |
| 0.250770589 | 0.042631382 | 0.164335237 | 0.458106566 |
| 0.085279696 | 0.094223172 | 0.376014878 | 0.065878423 |
| 0.165093951 | 0.33138086  | 0.240180932 | 0.442984004 |
| 0.021374749 | 0.17316089  | 0.340623926 | 0.388741533 |
| 0.240881423 | 0.058623098 | 0.099249551 | 0.092738368 |
| 0.386926876 | 0.013527525 | 0.057313867 | 0.252719058 |
| 0.077144556 | 0.226661337 | 0.193921504 | 0.081881317 |
| 0.005094119 | 0.057710248 | 0.138031892 | 0.083709753 |
| 0.181777632 | 0.171228514 | 0.060719001 | 0.323785099 |
| 0.029329646 | 0.002188146 | 0.374416028 | 0.001612966 |
| 0.204914667 | 0.274167431 | 0.157592315 | 0.167733061 |
| 0.142218359 | 0.222237759 | 0.162513427 | 0.000184444 |
| 0.327846083 | 0.002430372 | 0.121994557 | 0.068208817 |
| 0.040750015 | 0.018018251 | 0.387680676 | 0.449883077 |
| 0.217084307 | 0.037352291 | 0.07670317  | 0.402239947 |
| 0.012481411 | 0.124556925 | 0.134045366 | 0.271741287 |
| 0.094417496 | 0.167532479 | 0.190866517 | 0.149205075 |
| 0.278506916 | 0.124857764 |             |             |
| EBP         | 0.281198284 | 0.286669956 | 0.275985554 |
| 0.147652356 | 0.127108684 | 0.214595497 | 0.267954375 |
| 0.290337214 | 0.302980533 | 0.175019968 | 0.183350314 |
| 0.154762901 | 0.021193898 | 0.261014349 | 0.249816429 |
| 0.15598592  | 0.166456654 | 0.26947743  | 0.106631721 |
| 0.230894806 | 0.123770356 | 0.120128082 | 0.282365945 |
| 0.135541998 | 0.345546669 | 0.294608566 | 0.153787438 |
| 0.274209678 | 0.076901339 | 0.189723071 | 0.090544345 |
| 0.303045796 | 0.125507284 | 0.13012437  | 0.171399381 |
| 0.21350778  | 0.011759929 | 0.362550457 | 0.154359424 |
| 0.037470311 | 0.31274909  | 0.21649091  | 0.171356429 |
| 0.210034516 | 0.228380955 | 0.101037785 | 0.182294091 |
| 0.277562938 | 0.231235247 | 0.32580735  | 0.223718678 |
| 0.201994984 | 0.287841964 | 0.25334343  | 0.021369668 |
| 0.084159958 | 0.012780954 | 0.053378094 | 0.325334412 |
| 0.263730062 | 0.216451498 | 0.102662071 | 0.301754483 |
| 0.206072916 | 0.207042908 | 0.260911145 | 0.191322292 |

|             |             |             |             |
|-------------|-------------|-------------|-------------|
| 0.291999185 | 0.048968845 | 0.198304526 | 0.141024063 |
| 0.241239933 | 0.286210821 | 0.29590546  | 0.357307624 |
| 0.170463179 | 0.207037895 | 0.16554241  | 0.100275634 |
| 0.284191748 | 0.367880754 | 0.282893104 | 0.357630455 |
| 0.047951479 | 0.124094784 | 0.118320005 | 0.219646407 |
| 0.244386279 | 0.29442515  | 0.208943343 | 0.325078108 |
| 0.303480266 | 0.230203516 | 0.2384356   | 0.363901396 |
| 0.274126712 | 0.108802303 | 0.203410564 | 0.047660693 |
| 0.151424064 | 0.137481906 | 0.363972264 | 0.250911524 |
| 0.153473543 | 0.328425888 | 0.390110144 | 0.106555811 |
| 0.139152175 | 0.295272414 | 0.106832626 | 0.208701053 |
| 0.205283411 | 0.265959463 | 0.259534403 | 0.251609273 |
| 0.142032425 | 0.28211177  | 0.220919883 | 0.283998383 |
| 0.071923614 | 0.321224689 | 0.263601558 | 0.170918392 |
| 0.333529396 | 0.206506453 | 0.142429144 | 0.279302093 |
| 0.232002365 | 0.277815142 | 0.27724228  | 0.167942341 |
| 0.211138396 | 0.363566172 | 0.322325291 | 0.251775001 |
| 0.233382289 | 0.083781823 | 0.142083753 | 0.28195849  |
| 0.22866558  | 0.316074484 | 0.079124705 | 0.376408535 |
| 0.275897065 | 0.20715577  | 0.336691819 | 0.402484862 |
| 0.296872579 | 0.304814034 | 0.260863427 | 0.220881482 |
| 0.348136945 | 0.364476788 | 0.273692788 | 0.150369994 |
| 0.33432287  | 0.233716731 | 0.089221651 | 0.273705036 |
| 0.280127482 | 0.004654089 | 0.232317748 | 0.239746544 |
| 0.314597122 | 0.205171114 | 0.277806091 | 0.263213424 |
| 0.321153708 | 0.314220244 | 0.0140563   | 0.175465461 |
| 0.339720257 | 0.25453928  | 0.195788316 | 0.159269573 |
| 0.157352016 | 0.253314626 | 0.225049952 | 0.113408121 |
| 0.328029612 | 0.242167925 | 0.250669457 | 0.263115142 |
| 0.279120186 | 0.32044338  | 0.127627674 | 0.377026997 |
| 0.199591635 | 0.292248001 | 0.299751766 | 0.275287183 |
| 0.196533311 | 0.213229156 | 0.261217615 | 0.184930775 |
| 0.236484435 | 0.297765985 | 0.103148233 | 0.153554773 |
| 0.327848641 | 0.195397149 | 0.288209928 | 0.32243928  |
| 0.161903059 | 0.347235122 | 0.180734569 | 0.178054983 |
| 0.169857128 | 0.406197661 | 0.205937981 | 0.256205227 |
| 0.182211545 | 0.321935582 | 0.236123366 | 0.278449966 |
| 0.258624778 | 0.13500555  | 0.310763056 | 0.028774979 |
| 0.121716951 | 0.120588943 | 0.04536918  | 0.161403651 |
| 0.365576346 | 0.188889827 | 0.188089847 | 0.165535911 |
| 0.293464169 | 0.359053781 | 0.15357672  | 0.349319219 |
| 0.362122467 | 0.138420224 | 0.226003293 | 0.221701107 |
| 0.066280336 | 0.22537664  | 0.223263194 | 0.091867185 |
| 0.285467075 | 0.041258948 | 0.067801809 | 0.232149804 |
| 0.104018527 | 0.098327475 | 0.24504803  | 0.171244682 |
| 0.187241747 | 1           | 0.289850254 | 0.017109285 |
| 0.159072951 | 0.045521669 | 0.196186936 | 0.217622799 |
| 0.257093522 | 0.241537787 | 0.120445797 | 0.119759658 |
| 0.326806012 | 0.322090567 | 0.27354862  | 0.271934217 |
| 0.136690703 | 0.297115834 | 0.216019793 | 0.245962121 |
| 0.248248576 | 0.150080117 | 0.02781894  | 0.221473727 |
| 0.226994511 | 0.152041026 | 0.338672533 | 0.211683791 |
| 0.181321414 | 0.171665912 | 0.091909913 | 0.262188578 |
| 0.350150792 | 0.344821537 | 0.188141454 | 0.189668332 |

|             |             |             |             |
|-------------|-------------|-------------|-------------|
| 0.240688237 | 0.257103051 | 0.243732152 | 0.306982315 |
| 0.165178138 | 0.145883765 | 0.12503865  | 0.199989103 |
| 0.281846862 | 0.097596293 | 0.318179357 | 0.0437616   |
| 0.001310635 | 0.337093146 | 0.292477087 | 0.156612511 |
| 0.049518314 | 0.195318353 | 0.194572562 | 0.294737359 |
| 0.245267762 | 0.280709944 | 0.317695894 | 0.133245317 |
| 0.289445388 | 0.161221007 | 0.135320462 | 0.173432752 |
| 0.305313122 | 0.051173405 | 0.133997688 | 0.371961482 |
| 0.31420431  | 0.071018179 | 0.292616982 | 0.005913017 |
| 0.259400025 | 0.261399531 | 0.346824743 | 0.343852956 |
| 0.227093101 | 0.346122543 | 0.307045438 | 0.194142374 |
| 0.211302655 | 0.276198512 | 0.007562642 | 0.269366874 |
| 0.31297184  | 0.302775896 | 0.317317376 | 0.352161152 |
| 0.256205582 | 0.240929272 | 0.205275661 | 0.273150514 |
| 0.266232975 | 0.33855283  | 0.06307461  | 0.17032754  |
| 0.026557241 | 0.216948673 | 0.177080315 | 0.287139945 |
| 0.199044299 | 0.268486832 | 0.21382545  | 0.161265326 |
| 0.116625327 | 0.042750254 | 0.272500546 | 0.224150125 |
| 0.190046954 | 0.167737546 | 0.100564661 | 0.115055683 |
| 0.322206021 | 0.306268656 | 0.117501014 | 0.321471695 |
| 0.189231749 | 0.360707108 | 0.148737193 | 0.198495146 |
| 0.251324976 | 0.078548867 | 0.260277955 | 0.017629115 |
| 0.145292206 | 0.336342591 | 0.174577248 | 0.236098634 |
| 0.22941983  | 0.084366669 | 0.297149277 | 0.321158882 |
| 0.328686047 | 0.263866335 | 0.283062922 | 0.078320859 |
| 0.298821836 | 0.019052863 | 0.293236066 | 0.279204855 |
| 0.169706379 | 0.006154492 | 0.028407097 | 0.226604838 |
| 0.155327374 | 0.330316711 | 0.272790335 | 0.182369652 |
| 0.172276828 | 0.344086077 | 0.259939443 | 0.066320518 |
| 0.213219407 | 0.133348685 | 0.076647343 | 0.339372195 |
| 0.20722688  | 0.227288942 | 0.244206594 | 0.344773194 |
| 0.176652344 | 0.189908039 | 0.345052122 | 0.009744243 |
| 0.19156795  | 0.35523379  | 0.407259123 | 0.305719963 |
| 0.303203854 | 0.171630675 | 0.144125632 | 0.187882976 |
| 0.245211061 | 0.345909934 | 0.140854031 | 0.35375801  |
| 0.303594202 | 0.169379563 | 0.242184647 | 0.287827151 |
| 0.27871784  | 0.296988847 | 0.21626187  | 0.212112796 |
| 0.061194374 | 0.00300241  | 0.241719744 | 0.295165944 |
| 0.065072655 | 0.146691579 | 0.277552984 | 0.249198075 |
| 0.214654948 | 0.17707409  | 0.075012396 | 0.073117695 |
| 0.203673971 | 0.183318688 | 0.100913769 | 0.322133369 |
| 0.134844217 | 0.07240353  | 0.193515432 | 0.253604493 |
| 0.194172551 | 0.319588206 | 0.338674835 | 0.198415746 |
| 0.185670157 | 0.156067131 | 0.243749668 | 0.314275034 |
| 0.228228799 | 0.236866687 | 0.178195332 | 0.039058826 |
| 0.309598313 | 0.192648122 | 0.243890699 | 0.299069258 |
| 0.358045835 | 0.305031623 | 0.337651239 | 0.142251998 |
| 0.251540225 | 0.184334944 | 0.111526219 | 0.095191321 |
| 0.291653878 | 0.33906258  | 0.318118112 | 0.089046598 |
| 0.310936475 | 0.214492647 | 0.127669027 | 0.275330188 |
| 0.136116105 | 0.280084731 | 0.159314197 | 0.321414228 |
| 0.164551348 | 0.075766088 | 0.258562912 | 0.250407013 |
| 0.269434443 | 0.039474723 | 0.282505455 | 0.282410802 |
| 0.290266699 | 0.17315511  | 0.185572418 | 0.297192711 |

|             |             |             |             |
|-------------|-------------|-------------|-------------|
| 0.318680464 | 0.324574326 | 0.248945636 | 0.237071787 |
| 0.226873414 | 0.188401717 | 0.080310331 | 0.285916059 |
| 0.264546917 | 0.187247688 | 0.328021542 | 0.238031631 |
| 0.323918187 | 0.139426506 | 0.119670138 | 0.165537967 |
| 0.283270983 | 0.228791683 | 0.243138698 | 0.287359    |
| 0.310611508 | 0.376725308 | 0.271889855 | 0.184120226 |
| 0.204227177 | 0.376295078 | 0.330371966 | 0.25595136  |
| 0.051673409 | 0.230095706 | 0.217274313 | 0.221842605 |
| 0.00321055  | 0.030378545 | 0.258173909 | 0.209128299 |
| 0.336010042 | 0.236203438 | 0.286499166 | 0.280164067 |
| 0.000508832 | 0.164830511 | 0.181707875 | 0.15977013  |
| 0.277583299 | 0.291727198 | 0.22480878  | 0.160821331 |
| 0.259280437 | 0.330568071 | 0.170231228 | 0.202230289 |
| 0.047377011 | 0.25478516  | 0.270868988 | 0.301315357 |
| 0.168855875 | 0.369124558 | 0.070900677 | 0.231808964 |
| 0.064729629 | 0.263056064 | 0.241361784 | 0.205939031 |
| 0.050593815 | 0.252800567 | 0.249509021 | 0.199215774 |
| 0.134871393 | 0.248906152 | 0.262037655 | 0.012270271 |
| 0.18385109  | 0.084523842 | 0.160959524 | 0.146946868 |
| 0.167570815 | 0.190638092 | 0.171286159 | 0.133434048 |
| 0.261210628 | 0.235839154 | 0.18140425  | 0.219672388 |
| 0.147186592 | 0.278914613 | 0.182466365 | 0.243019714 |
| 0.123562513 | 0.242264303 | 0.348800559 | 0.350547915 |
| 0.147173972 | 0.262459957 | 0.316655477 | 0.322971479 |
| 0.235791915 | 0.23281614  | 0.266366886 | 0.318705289 |
| 0.254519871 | 0.355997194 | 0.215646999 | 0.259538437 |
| 0.105640801 | 0.201603188 | 0.316071089 | 0.231908516 |
| 0.258618484 | 0.085279328 | 0.22962548  | 0.292732732 |
| 0.247230318 | 0.315903906 | 0.316287256 | 0.276910716 |
| 0.177865233 | 0.206511012 | 0.178972029 | 0.124134702 |
| 0.248317268 | 0.342395456 | 0.104492972 | 0.029835708 |
| 0.236855766 | 0.25308913  | 0.224583039 | 0.333394657 |
| 0.08670554  | 0.276906031 | 0.188636894 | 0.231601856 |
| 0.154533176 | 0.355053618 | 0.308430487 | 0.224649713 |
| 0.049115141 | 0.240975701 | 0.142305385 | 0.260089478 |
| 0.19907647  | 0.212557338 | 0.132005642 | 0.295427858 |
| 0.25377523  | 0.329047369 | 0.364727544 | 0.334651165 |
| 0.183892486 | 0.069869483 | 0.266965132 | 0.152178109 |
| 0.163299388 | 0.277632275 | 0.286700629 | 0.274950635 |
| 0.147766803 | 0.352563948 | 0.343189826 | 0.28349748  |
| 0.255157714 | 0.125104619 | 0.040500892 | 0.239348326 |
| 0.230148366 | 0.10597396  | 0.007965084 | 0.030587301 |
| 0.209700883 | 0.20827012  | 0.257472715 | 0.242367379 |
| 0.101279862 | 0.225764036 | 0.043242779 | 0.300484403 |
| 0.346979942 | 0.386083434 | 0.158297449 | 0.279710133 |
| 0.271278993 | 0.215241877 | 0.261235673 | 0.02815978  |
| 0.176472695 | 0.158874432 | 0.173458376 | 0.231752973 |
| 0.163487696 | 0.047763631 | 0.199066753 | 0.347758931 |
| 0.225310202 | 0.0474717   | 0.258563253 | 0.208646765 |
| 0.347885672 | 0.38771858  | 0.149385103 | 0.193596953 |
| 0.274760855 | 0.279340924 | 0.145960069 | 0.196569931 |
| 0.101611634 | 0.094328235 | 0.200282189 | 0.066818678 |
| 0.169330367 | 0.133470388 | 0.013673617 | 0.354369816 |
| 0.378985824 | 0.116403301 | 0.337361253 | 0.164769019 |

|             |             |             |             |
|-------------|-------------|-------------|-------------|
| 0.21428297  | 0.278993738 | 0.149424815 | 0.173177792 |
| 0.055363154 | 0.132099698 | 0.258287964 | 0.271015371 |
| 0.062414461 | 0.223055195 | 0.13395244  | 0.132914234 |
| 0.420441645 | 0.134987884 | 0.31785147  | 0.102242151 |
| 0.310019803 | 0.283512671 | 0.352649768 | 0.131799044 |
| 0.235282678 | 0.317801777 | 0.207843947 | 0.316739165 |
| 0.172954852 | 0.063703606 | 0.197176573 | 0.174191929 |
| 0.1049609   | 0.304211166 | 0.19304157  | 0.327398098 |
| 0.106880771 | 0.25142849  | 0.212210149 | 0.279737    |
| 0.234793739 | 0.066191517 | 0.073608448 | 0.123130882 |
| 0.319685264 | 0.161932876 | 0.105132451 | 0.26878396  |
| 0.057525383 | 0.23514529  | 0.26834508  | 0.113394043 |
| 0.116832386 | 0.260230998 | 0.190982301 | 0.30737292  |
| 0.215235941 | 0.160425991 | 0.108941521 | 0.279485761 |
| 0.117458337 | 0.061961776 | 0.302835437 | 0.002702038 |
| 0.274817717 | 0.173801343 | 0.256639133 | 0.152240789 |
| 0.31991348  | 0.266725743 | 0.276831915 | 0.028972849 |
| 0.223070192 | 0.022548399 | 0.184945257 | 0.101157817 |
| 0.11340584  | 0.266473503 | 0.306965273 | 0.258563266 |
| 0.290771357 | 0.160866971 | 0.11053356  | 0.300915648 |
| 0.036177584 | 0.106108305 | 0.130321    | 0.246957028 |
| 0.060020404 | 0.177023673 | 0.170379583 | 0.117165854 |
| 0.261667127 | 0.286174077 |             |             |
| ECT2        | 0.1546557   | 0.491520924 | 0.122105402 |
| 0.235270066 | 0.410417844 | 0.509869766 | 0.132818221 |
| 0.236330766 | 0.455020162 | 0.396002427 | 0.47865175  |
| 0.049059717 | 0.130690231 | 0.519028617 | 0.126101519 |
| 0.492312045 | 0.084463671 | 0.207476485 | 0.133538715 |
| 0.347488238 | 0.387070959 | 0.438853051 | 0.494503557 |
| 0.397471588 | 0.27840864  | 0.468660696 | 0.47901295  |
| 0.524301201 | 0.339123665 | 0.531366306 | 0.265325422 |
| 0.461263356 | 0.427357479 | 0.473568839 | 0.046915348 |
| 0.524359351 | 0.02533354  | 0.453272918 | 0.381053258 |
| 0.217485478 | 0.427289351 | 0.434866603 | 0.364332725 |
| 0.474153072 | 0.088413296 | 0.279129233 | 0.502616376 |
| 0.454409662 | 0.4155453   | 0.139600266 | 0.53065468  |
| 0.479372344 | 0.466187752 | 0.482030189 | 0.005872472 |
| 0.385331048 | 0.121565942 | 0.296396471 | 0.507984871 |
| 0.321016473 | 0.226899302 | 0.365980886 | 0.387946287 |
| 0.496630703 | 0.486127307 | 0.383636645 | 0.471273427 |
| 0.516767298 | 0.248222912 | 0.521719147 | 0.256882488 |
| 0.509042509 | 0.084681319 | 0.267414562 | 0.170592603 |
| 0.499295702 | 0.320856679 | 0.457026836 | 0.403556047 |
| 0.482903368 | 0.526693169 | 0.365141765 | 0.506158007 |
| 0.163555467 | 0.436574177 | 0.386126245 | 0.421800739 |
| 0.479191539 | 0.175832159 | 0.517459993 | 0.523456578 |
| 0.116965948 | 0.479012946 | 0.506592676 | 0.223104136 |
| 0.509912534 | 0.375846167 | 0.487571832 | 0.247426582 |
| 0.470084548 | 0.444735984 | 0.488819995 | 0.418558833 |
| 0.429534333 | 0.150713742 | 0.496832106 | 0.41311229  |
| 0.410343263 | 0.166160873 | 0.326689758 | 0.533970357 |
| 0.525127873 | 0.528670665 | 0.511299729 | 0.47508367  |
| 0.477873362 | 0.519807742 | 0.513686584 | 0.499114943 |
| 0.21173525  | 0.525040612 | 0.309199718 | 0.098774759 |



|             |             |             |             |
|-------------|-------------|-------------|-------------|
| 0.152204505 | 0.173865864 | 0.34264103  | 0.41444821  |
| 0.535348445 | 0.466617971 | 0.3245645   | 0.352715749 |
| 0.521758991 | 0.485793372 | 0.522951161 | 0.514108475 |
| 0.094282745 | 0.340039523 | 0.479678878 | 0.418857275 |
| 0.496377804 | 0.216142211 | 0.348553817 | 0.51774714  |
| 0.468901922 | 0.526206208 | 0.287814268 | 0.515205348 |
| 0.331771831 | 0.514139577 | 0.51454106  | 0.283788946 |
| 0.523215246 | 0.503881417 | 0.51985029  | 0.493333909 |
| 0.485047014 | 0.470185716 | 0.114824801 | 0.485681473 |
| 0.506587258 | 0.024680104 | 0.533657449 | 0.533898766 |
| 0.50302557  | 0.536825733 | 0.520685476 | 0.530658853 |
| 0.504895087 | 0.154642421 | 0.046367714 | 0.403572282 |
| 0.512214599 | 0.490119239 | 0.24191593  | 0.506863992 |
| 0.468873064 | 0.516978021 | 0.522318529 | 0.399072015 |
| 0.517200326 | 0.526044203 | 0.531061382 | 0.507210742 |
| 0.428105933 | 0.406421107 | 0.463875    | 0.480379969 |
| 0.104050813 | 0.214179275 | 0.115392976 | 0.428725147 |
| 0.447995064 | 0.288363855 | 0.50557482  | 0.464528234 |
| 0.312054865 | 0.472762763 | 0.418927396 | 0.477614918 |
| 0.117742868 | 0.532608358 | 0.285053802 | 0.291977188 |
| 0.09645626  | 0.232219492 | 0.297652348 | 0.262337487 |
| 0.373284833 | 0.280881099 | 0.533233463 | 0.524471348 |
| 0.466993194 | 0.293352284 | 0.533178268 | 0.505525395 |
| 0.474233552 | 0.477837123 | 0.350231059 | 0.02751238  |
| 0.370651364 | 0.39543448  | 0.256776343 | 0.502599235 |
| 0.250260137 | 0.364910164 | 0.49751322  | 0.492224528 |
| 0.413385237 | 0.26362034  | 0.473899638 | 0.450426345 |
| 0.254365795 | 0.418472344 | 0.522295653 | 0.511434175 |
| 0.011644977 | 0.457360122 | 0.536705786 | 0.237157738 |
| 0.445636795 | 0.200639029 | 0.330907184 | 0.525555059 |
| 0.386311745 | 0.32656105  | 0.533124028 | 0.491021562 |
| 0.455522518 | 0.289850254 | 1           | 0.076764496 |
| 0.45213106  | 0.095552807 | 0.40052673  | 0.433240174 |
| 0.381555626 | 0.41031981  | 0.416891174 | 0.386779857 |
| 0.228148192 | 0.51855299  | 0.495307686 | 0.529975271 |
| 0.464468289 | 0.524188503 | 0.536418796 | 0.517776505 |
| 0.492324444 | 0.458731181 | 0.192055793 | 0.529785275 |
| 0.527693654 | 0.397935136 | 0.150227807 | 0.527266039 |
| 0.463541978 | 0.501615301 | 0.196759147 | 0.519232805 |
| 0.503501695 | 0.474344339 | 0.252409322 | 0.475628377 |
| 0.487666546 | 0.363982498 | 0.508631468 | 0.526970748 |
| 0.410640889 | 0.459033971 | 0.435165278 | 0.485367519 |
| 0.291302917 | 0.311765138 | 0.415963301 | 0.248787001 |
| 0.01512498  | 0.170295485 | 0.139453493 | 0.266946225 |
| 0.243224527 | 0.509068362 | 0.505428747 | 0.52066027  |
| 0.218251273 | 0.493308247 | 0.362503916 | 0.399353985 |
| 0.482677616 | 0.460930836 | 0.473471414 | 0.491952072 |
| 0.368068225 | 0.042218633 | 0.201808843 | 0.528038397 |
| 0.095520541 | 0.325985808 | 0.45930086  | 0.006089594 |
| 0.105980128 | 0.494795633 | 0.173300172 | 0.271484483 |
| 0.523304784 | 0.276962985 | 0.328391288 | 0.422200956 |
| 0.463512704 | 0.185040776 | 0.00837678  | 0.515881088 |
| 0.49632917  | 0.487792017 | 0.49407955  | 0.46748263  |
| 0.50137664  | 0.508293081 | 0.511301973 | 0.480156133 |

|             |             |             |             |
|-------------|-------------|-------------|-------------|
| 0.202963182 | 0.182220729 | 0.295303807 | 0.407729082 |
| 0.012261283 | 0.487925932 | 0.426134429 | 0.246586669 |
| 0.521455749 | 0.431993851 | 0.090728741 | 0.461087735 |
| 0.052186892 | 0.264976072 | 0.44671072  | 0.344968834 |
| 0.454399555 | 0.041376639 | 0.323478082 | 0.414448974 |
| 0.469058259 | 0.448367053 | 0.4490984   | 0.528573198 |
| 0.452227757 | 0.223262912 | 0.42464448  | 0.502960853 |
| 0.151762996 | 0.161561156 | 0.488541532 | 0.055008751 |
| 0.294929108 | 0.475153973 | 0.483662395 | 0.144141385 |
| 0.399123039 | 0.016126352 | 0.459917307 | 0.529495403 |
| 0.479991189 | 0.528411034 | 0.521598547 | 0.357062106 |
| 0.513581874 | 0.14829972  | 0.525094527 | 0.502283314 |
| 0.468181881 | 0.002412455 | 0.015317554 | 0.534598272 |
| 0.496388327 | 0.120906425 | 0.27143966  | 0.466891487 |
| 0.203450045 | 0.270068724 | 0.144015387 | 0.267399858 |
| 0.529245891 | 0.347897199 | 0.261870068 | 0.481664794 |
| 0.365132129 | 0.358120808 | 0.508683483 | 0.172687375 |
| 0.508821094 | 0.117013377 | 0.17265346  | 0.016993203 |
| 0.476243599 | 0.197821534 | 0.483993851 | 0.514091376 |
| 0.502980575 | 0.493156046 | 0.41985073  | 0.455844995 |
| 0.510447228 | 0.182375696 | 0.455526988 | 0.207746121 |
| 0.504020185 | 0.494045405 | 0.437785141 | 0.417223535 |
| 0.514675636 | 0.499167505 | 0.0832011   | 0.508595189 |
| 0.033057553 | 0.004571763 | 0.488565158 | 0.390773581 |
| 0.113131942 | 0.472490233 | 0.372378166 | 0.359722288 |
| 0.35347631  | 0.074510661 | 0.351321213 | 0.328579198 |
| 0.419142963 | 0.477680834 | 0.37066508  | 0.366859328 |
| 0.373926247 | 0.211890311 | 0.31695274  | 0.271671804 |
| 0.361532101 | 0.412065767 | 0.281856897 | 0.058824933 |
| 0.517252367 | 0.504639982 | 0.126689153 | 0.270245794 |
| 0.525295169 | 0.535556045 | 0.098720914 | 0.028078676 |
| 0.381007676 | 0.43613818  | 0.531831448 | 0.513164459 |
| 0.529018386 | 0.518467214 | 0.435465122 | 0.218841495 |
| 0.144715229 | 0.439126325 | 0.390749911 | 0.175848309 |
| 0.522756267 | 0.139120501 | 0.499573964 | 0.387160612 |
| 0.216248771 | 0.338047728 | 0.07994635  | 0.172277036 |
| 0.476816633 | 0.296152217 | 0.286524871 | 0.251567415 |
| 0.432321864 | 0.334896476 | 0.11312304  | 0.319223063 |
| 0.465893808 | 0.243769851 | 0.274423848 | 0.444572635 |
| 0.471435884 | 0.312805049 | 0.521783678 | 0.479142526 |
| 0.23377252  | 0.213955381 | 0.401924026 | 0.494814336 |
| 0.533697493 | 0.486628366 | 0.057788993 | 0.495326618 |
| 0.522646721 | 0.533141978 | 0.500950949 | 0.478202983 |
| 0.168967526 | 0.476960101 | 0.411846531 | 0.452644913 |
| 0.30857534  | 0.507927047 | 0.36896943  | 0.136018093 |
| 0.397810992 | 0.494122971 | 0.496851612 | 0.2767336   |
| 0.521319523 | 0.231863628 | 0.124959788 | 0.519973911 |
| 0.259740284 | 0.175104331 | 0.459962983 | 0.521651272 |
| 0.00446497  | 0.197834157 | 0.514898861 | 0.367355961 |
| 0.518893559 | 0.525778477 | 0.485822913 | 0.39144342  |
| 0.003117562 | 0.501107548 | 0.49070977  | 0.499437225 |
| 0.508639763 | 0.468433856 | 0.260806499 | 0.150322318 |
| 0.39755163  | 0.158787156 | 0.236547878 | 0.460666922 |
| 0.240957257 | 0.523286625 | 0.311681046 | 0.335946817 |

|             |             |             |             |
|-------------|-------------|-------------|-------------|
| 0.310358396 | 0.177532414 | 0.327130234 | 0.369488862 |
| 0.223623212 | 0.354673653 | 0.459519767 | 0.391409288 |
| 0.262020253 | 0.504644468 | 0.506739121 | 0.067719479 |
| 0.454517161 | 0.499184085 | 0.502422683 | 0.005765539 |
| 0.52333429  | 0.022163201 | 0.308638629 | 0.326546675 |
| 0.312312551 | 0.331016939 | 0.372019808 | 0.405231138 |
| 0.475786142 | 0.350039471 | 0.39740351  | 0.356422758 |
| 0.266973268 | 0.352974491 | 0.497469752 | 0.484024449 |
| 0.384227779 | 0.230848912 | 0.174199719 | 0.167040337 |
| 0.112032395 | 0.520838324 | 0.346560102 | 0.146902586 |
| 0.350282233 | 0.484239181 | 0.438591222 | 0.497486479 |
| 0.490777798 | 0.193102801 | 0.459977604 | 0.520020115 |
| 0.308905151 | 0.414987538 | 0.13848786  | 0.506525653 |
| 0.363218345 | 0.307994693 | 0.510691047 | 0.43729949  |
| 0.507783922 | 0.446048569 | 0.346518873 | 0.491803307 |
| 0.479271088 | 0.455782491 | 0.408232039 | 0.160905586 |
| 0.294529237 | 0.234608052 | 0.363398417 | 0.006532013 |
| 0.479218488 | 0.387088868 | 0.538491666 | 0.49236368  |
| 0.374573183 | 0.464140019 | 0.420790538 | 0.174891186 |
| 0.361210066 | 0.255347611 | 0.244924812 | 0.527736759 |
| 0.2855621   | 0.306386839 | 0.409555094 | 0.452017345 |
| 0.524368014 | 0.511319699 | 0.363369942 | 0.385233659 |
| 0.366773248 | 0.320719801 | 0.484654846 | 0.227936539 |
| 0.51701644  | 0.270086859 | 0.465764549 | 0.411917819 |
| 0.335165435 | 0.523935894 | 0.131337528 | 0.529933468 |
| 0.439037474 | 0.22787267  | 0.500016084 | 0.439022332 |
| 0.426921056 | 0.209628743 | 0.255468253 | 0.493720884 |
| 0.358006755 | 0.428967058 | 0.025515832 | 0.09990213  |
| 0.441118486 | 0.421207359 | 0.498123291 | 0.479177949 |
| 0.344725121 | 0.445010132 | 0.230658525 | 0.427671586 |
| 0.484813378 | 0.507054469 | 0.367882651 | 0.361065684 |
| 0.467610025 | 0.194267315 | 0.507836502 | 0.030069838 |
| 0.51654486  | 0.504484669 | 0.476605498 | 0.120879719 |
| 0.050861397 | 0.283704584 | 0.513656957 | 0.143246597 |
| 0.525912599 | 0.278587884 | 0.468948758 | 0.530882297 |
| 0.290586544 | 0.507882986 | 0.216988471 | 0.509735578 |
| 0.109788846 | 0.383670408 | 0.47314567  | 0.484396764 |
| 0.324094238 | 0.385855663 | 0.482533801 | 0.318502045 |
| 0.078283152 | 0.372326328 | 0.004760252 | 0.431018489 |
| 0.480459119 | 0.430748074 | 0.308603496 | 0.39321527  |
| 0.394234715 | 0.473977982 | 0.355160291 | 0.506049204 |
| 0.029422921 | 0.463783211 | 0.320650934 | 0.504952149 |
| 0.30307841  | 0.475897468 | 0.118384781 | 0.415964462 |
| 0.475000455 | 0.386389764 | 0.365766245 | 0.392978903 |
| 0.502098873 | 0.484697807 | 0.263204051 | 0.325704985 |
| 0.487253485 | 0.136460468 | 0.483194605 | 0.526791772 |
| 0.285805424 | 0.297020671 | 0.523019851 | 0.318789429 |
| 0.404524519 | 0.475447969 | 0.498971391 | 0.519445578 |
| 0.141060271 | 0.367703275 | 0.518808694 | 0.506881695 |
| 0.411316461 | 0.253439881 | 0.331480768 | 0.336865432 |
| 0.481021107 | 0.17979479  | 0.353596271 | 0.474808953 |
| 0.293589217 | 0.432815286 | 0.445765422 | 0.290245121 |
| 0.083563072 | 0.290541394 | 0.48454919  | 0.251599322 |
| 0.420058806 | 0.4725993   | 0.341715426 | 0.455419552 |

|             |             |             |             |
|-------------|-------------|-------------|-------------|
| 0.223914689 | 0.055273942 | 0.479185561 | 0.027234599 |
| 0.466144917 | 0.498902601 | 0.37302849  | 0.46238839  |
| 0.286065664 | 0.482900277 | 0.456734235 | 0.003955382 |
| 0.508292912 | 0.078753411 | 0.424657887 | 0.326827866 |
| 0.384427247 | 0.117803401 | 0.490189742 | 0.528742065 |
| 0.4506983   | 0.433056005 | 0.42694599  | 0.501478472 |
| 0.209529024 | 0.412325703 | 0.437879717 | 0.516089051 |
| 0.302153042 | 0.471736806 | 0.502845961 | 0.461038613 |
| 0.50313427  | 0.409544857 |             |             |
| EFCAB2      | 0.001230648 | 0.04763496  | 0.000346304 |
| 0.000520735 | 0.063062134 | 0.011581316 | 0.004471075 |
| 0.007828176 | 0.050784276 | 0.03197681  | 0.026426449 |
| 0.000182324 | 0.027136055 | 0.070057454 | 0.00442255  |
| 0.087978782 | 0.001295503 | 0.009282192 | 0.001581112 |
| 0.002361599 | 0.074996142 | 0.023977783 | 0.023844548 |
| 0.072595407 | 0.009420947 | 0.027594137 | 0.098619747 |
| 0.057534525 | 0.016469972 | 0.045507765 | 0.001206138 |
| 0.048897152 | 0.080263675 | 0.059356864 | 0.001659711 |
| 0.042515403 | 0.003721201 | 0.046812215 | 0.027656443 |
| 0.002653293 | 0.034499643 | 0.020821032 | 0.011356297 |
| 0.042881474 | 9.87E-05    | 0.006713292 | 0.112165015 |
| 0.033900433 | 0.017379627 | 0.001644749 | 0.044813429 |
| 0.046842649 | 0.022237218 | 0.046510577 | 0.001264103 |
| 0.068972449 | 0.044986249 | 0.092544244 | 0.045885199 |
| 0.012536294 | 0.008824191 | 0.051269866 | 0.024637276 |
| 0.102749637 | 0.097886813 | 0.03006051  | 0.041859004 |
| 0.056946381 | 0.087884738 | 0.079651194 | 9.35E-05    |
| 0.038407822 | 0.00096535  | 0.0107971   | 0.004994078 |
| 0.034528341 | 0.01536368  | 0.041975216 | 0.061647458 |
| 0.046223845 | 0.059039561 | 0.021972039 | 0.04975348  |
| 0.041521447 | 0.115604348 | 0.030505882 | 0.049259772 |
| 0.088764935 | 0.008437796 | 0.04913129  | 0.060351246 |
| 0.002970952 | 0.055000227 | 0.091207774 | 0.010270968 |
| 0.036014017 | 0.059570401 | 0.038663175 | 0.04040519  |
| 0.089227975 | 0.102543751 | 0.058858814 | 0.033136817 |
| 0.05272815  | 0.002851065 | 0.040129133 | 0.108344255 |
| 0.018026736 | 0.001067488 | 0.042643638 | 0.09190575  |
| 0.048050004 | 0.056874926 | 0.076147795 | 0.087171632 |
| 0.093112376 | 0.051278724 | 0.037722895 | 0.058564521 |
| 0.003894411 | 0.058685676 | 0.004898668 | 0.001395046 |
| 0.002104111 | 0.004901983 | 0.059170942 | 0.035913075 |
| 0.056868394 | 0.03597818  | 0.010740422 | 0.029480804 |
| 0.095231889 | 0.04054046  | 0.065158345 | 0.075368061 |
| 0.000975821 | 0.076106662 | 0.069757424 | 0.008546833 |
| 0.095356362 | 0.009775602 | 0.08231111  | 0.049345309 |
| 0.032151427 | 0.080461133 | 0.004353972 | 0.046490228 |
| 0.033037496 | 0.056745869 | 0.04497156  | 0.009375643 |
| 0.049115461 | 0.039433713 | 0.065025695 | 0.084682811 |
| 0.038022676 | 0.010878631 | 0.020180415 | 0.064168439 |
| 0.059450356 | 0.000302773 | 0.080446706 | 0.082986937 |
| 0.050725092 | 0.082434229 | 0.083355767 | 0.06573362  |
| 0.053441714 | 0.003378933 | 0.012974235 | 0.072730793 |
| 0.05129881  | 0.035439514 | 0.016012415 | 0.075892523 |
| 0.096243091 | 0.020749394 | 0.073820109 | 0.00719594  |

|             |             |             |             |
|-------------|-------------|-------------|-------------|
| 0.067205499 | 0.051645093 | 0.071910998 | 0.074100041 |
| 0.045612373 | 0.027290237 | 0.107034582 | 0.03403135  |
| 0.000299509 | 0.002594722 | 0.000565749 | 0.050848409 |
| 0.007225764 | 0.017390168 | 0.027557723 | 0.106952389 |
| 0.020136556 | 0.023233114 | 0.066530085 | 0.099665165 |
| 0.001917676 | 0.04955927  | 0.004948027 | 0.015727599 |
| 0.001026758 | 0.008952871 | 0.006982402 | 0.00202101  |
| 0.045504753 | 0.016013058 | 0.079686376 | 0.067171763 |
| 0.059257546 | 0.007116372 | 0.058991276 | 0.056502394 |
| 0.063326591 | 0.059437779 | 0.029334894 | 0.00035785  |
| 0.035256992 | 0.075005526 | 0.106446242 | 0.073459829 |
| 0.009569572 | 0.047955374 | 0.103236986 | 0.074844512 |
| 0.012468946 | 0.012264148 | 0.06734044  | 0.037630298 |
| 0.009735688 | 0.020064738 | 0.076963153 | 0.070294864 |
| 0.003201428 | 0.025451324 | 0.060457812 | 0.030683358 |
| 0.068508581 | 0.002768506 | 0.018963882 | 0.072648738 |
| 0.079262846 | 0.090712964 | 0.067845308 | 0.0771287   |
| 0.009382731 | 0.017109285 | 0.076764496 | 1           |
| 0.095906591 | 0.000306435 | 0.043364673 | 0.034723194 |
| 0.019466233 | 0.062739759 | 0.086853466 | 0.032174308 |
| 0.002994996 | 0.065063382 | 0.037648005 | 0.065483608 |
| 0.069422923 | 0.073697884 | 0.075893665 | 0.053305556 |
| 0.032757083 | 0.115442656 | 0.053735031 | 0.059338829 |
| 0.06512516  | 0.011083634 | 0.002196913 | 0.099698481 |
| 0.075816212 | 0.116704821 | 0.004362885 | 0.066210818 |
| 0.046664185 | 0.04223427  | 0.01275599  | 0.082810523 |
| 0.038865404 | 0.008482478 | 0.053643107 | 0.078878384 |
| 0.041486979 | 0.107939789 | 0.054017994 | 0.072959225 |
| 0.00875677  | 0.057449889 | 0.035675236 | 0.071169985 |
| 0.000120948 | 0.004857392 | 0.001675462 | 0.0170138   |
| 0.044244939 | 0.077066698 | 0.079724965 | 0.070349318 |
| 0.008804234 | 0.038634047 | 0.036912412 | 0.03447665  |
| 0.053063017 | 0.097376119 | 0.065226809 | 0.08349549  |
| 0.024532353 | 0.000378506 | 0.001215216 | 0.056326488 |
| 0.001306453 | 0.047344242 | 0.039046303 | 1.02E-05    |
| 0.00254945  | 0.056925708 | 0.004432528 | 0.01112164  |
| 0.082256208 | 0.009472434 | 0.015727451 | 0.039309723 |
| 0.043662204 | 0.003230099 | 0.000235372 | 0.071243234 |
| 0.068237664 | 0.07002153  | 0.06998517  | 0.051325388 |
| 0.086819387 | 0.064623021 | 0.080464245 | 0.011147235 |
| 0.004375835 | 0.002433426 | 0.056494673 | 0.049210983 |
| 0.000203682 | 0.042570474 | 0.063695154 | 0.008407356 |
| 0.092920835 | 0.066037586 | 0.000559839 | 0.094078925 |
| 0.00065451  | 0.053712219 | 0.044166642 | 0.039918855 |
| 0.088553931 | 0.001623502 | 0.000720718 | 0.05233525  |
| 0.030041672 | 0.032812928 | 0.049706419 | 0.055483709 |
| 0.03031631  | 0.007018498 | 0.031073847 | 0.060719845 |
| 0.003134172 | 0.002780519 | 0.046450545 | 0.000124894 |
| 0.000778487 | 0.056394789 | 0.064078    | 0.000160517 |
| 0.02344919  | 0.003506843 | 0.026888143 | 0.062250185 |
| 0.037688308 | 0.077462237 | 0.052683595 | 0.054985456 |
| 0.051086181 | 0.04766604  | 0.06597289  | 0.043141213 |
| 0.052197779 | 9.14E-05    | 0.069582361 | 0.062661839 |
| 0.000942308 | 3.30E-05    | 0.004631419 | 0.002551255 |
|             | 0.010298377 |             |             |

|                      |             |                      |             |
|----------------------|-------------|----------------------|-------------|
| 0.0052313            | 0.002295862 | 0.032648516          | 0.032276137 |
| 0.044653971          | 0.05205244  | 0.054359432          | 0.024187224 |
| 0.027980196          | 0.042873906 | 0.005338643          | 0.055193646 |
| 0.000471412          | 0.005980944 | 0.000204261          | 0.072342663 |
| 0.005211613          | 0.038246093 | 0.055340099          | 0.056139645 |
| 0.066744982          | 0.046499133 | 0.010269803          | 0.079119584 |
| 0.002810538          | 0.01973383  | 0.003201687          | 0.047430746 |
| 0.084052738          | 0.035111982 | 0.022791875          | 0.07474832  |
| 0.049333854          | 0.001139756 | 0.076679792          | 0.000817466 |
| 7.54E-05 0.015393107 | 0.042235653 | 0.007689435          |             |
| 0.083696637          | 0.022080242 | 0.036894639          | 0.027321247 |
| 7.39E-05 0.089001591 | 0.101394033 | 0.038852423          |             |
| 0.060547663          | 0.079908039 | 0.036581648          | 0.045118604 |
| 0.014035663          | 0.010689619 | 0.019840664          | 0.013665477 |
| 0.02932294           | 0.010986153 | 0.000355802          | 0.042690015 |
| 0.073982447          | 0.00135593  | 0.007613267          | 0.053323864 |
| 0.069611674          | 0.001375674 | 0.00029855           | 0.023888439 |
| 0.089440872          | 0.082212528 | 0.053355494          | 0.052017731 |
| 0.069993438          | 0.03461135  | 0.02179065           | 0.001274032 |
| 0.050563683          | 0.094684897 | 0.007684975          | 0.064571728 |
| 0.004051451          | 0.043010277 | 0.097827575          | 0.009092008 |
| 0.007663802          | 0.000193749 | 0.0052566            | 0.084367938 |
| 0.015025947          | 0.020503263 | 0.005119121          | 0.052178149 |
| 0.034738112          | 0.002250525 | 0.01642125           | 0.057426977 |
| 0.031597542          | 0.015303372 | 0.017280807          | 0.031911276 |
| 0.015988658          | 0.091770288 | 0.056716944          | 0.005612166 |
| 0.008655627          | 0.005442042 | 0.078354946          | 0.069716437 |
| 0.069895224          | 0.000135476 | 0.049746537          | 0.070485971 |
| 0.067942989          | 0.043289395 | 0.08417738           | 0.004838976 |
| 0.058731274          | 0.111266565 | 0.095300336          | 0.026083821 |
| 0.012160219          | 0.039806765 | 0.003171494          | 0.03650185  |
| 0.055077785          | 0.052274641 | 0.009474903          | 0.052148842 |
| 0.006312445          | 0.003027893 | 0.063297225          | 0.044708002 |
| 0.002748617          | 0.029484469 | 0.094710973          | 0.000330689 |
| 0.059069427          | 0.083612453 | 0.00921451           | 0.063394565 |
| 0.06962721           | 0.042734548 | 0.012964766          | 0.001829078 |
| 0.100197534          | 0.046877706 | 0.032986293          | 0.056752187 |
| 0.030331684          | 0.003467531 | 0.00277549           | 0.027939423 |
| 0.002120009          | 0.013340077 | 0.001820018          | 0.005645715 |
| 0.062226231          | 0.022847699 | 0.029443336          | 0.027915945 |
| 0.008279929          | 0.021058677 | 0.007802302          | 0.035573038 |
| 0.024616092          | 0.050580324 | 0.019971157          | 0.040667075 |
| 0.095520619          | 0.065836477 | 0.000519194          | 0.081444136 |
| 0.074097497          | 0.054669535 | 7.66E-05 0.076897347 |             |
| 0.000741195          | 0.033821191 | 0.017903004          | 0.017334563 |
| 0.050009727          | 0.058963752 | 0.024214254          | 0.066280489 |
| 0.020209017          | 0.011578426 | 0.020048611          | 0.006885064 |
| 0.015042621          | 0.063828011 | 0.026090823          | 0.021779981 |
| 0.002373355          | 0.00355444  | 0.003243181          | 0.000270876 |
| 0.054156049          | 0.017216465 | 0.000920592          | 0.030225559 |
| 0.048345247          | 0.038488531 | 0.049030575          | 0.05085598  |
| 0.00320685           | 0.05003441  | 0.040824477          | 0.019510839 |
| 0.002089295          | 0.002728943 | 0.023742783          | 0.020178252 |
| 0.030923718          | 0.032599379 | 0.024363692          | 0.082721779 |

|             |             |             |             |
|-------------|-------------|-------------|-------------|
| 0.035552378 | 0.016336206 | 0.044262631 | 0.030217162 |
| 0.090980829 | 0.021250404 | 0.003033328 | 0.007872379 |
| 0.009413275 | 0.067308071 | 0.003980696 | 0.04982662  |
| 0.001681306 | 0.06849777  | 0.040982052 | 0.095418248 |
| 0.036583078 | 0.004238715 | 0.003612213 | 0.006339546 |
| 0.009667766 | 0.010910867 | 0.061176703 | 0.07271794  |
| 0.004722592 | 0.056534556 | 0.005106408 | 0.073508079 |
| 0.08363604  | 0.051036535 | 0.036047419 | 0.034104115 |
| 0.007497515 | 0.054921592 | 0.002084568 | 0.065405142 |
| 0.022409133 | 0.040519324 | 0.046094109 | 0.041707778 |
| 0.065965465 | 0.001263495 | 0.075316913 | 0.085510584 |
| 0.006141891 | 0.051607751 | 0.019858025 | 0.005871307 |
| 0.00263837  | 0.073244879 | 0.028788836 | 0.018415633 |
| 0.046756681 | 0.002766686 | 0.034568022 | 0.04973471  |
| 0.060286906 | 0.07096175  | 0.078623116 | 0.052083927 |
| 0.071656372 | 0.024507899 | 0.040846095 | 0.043070383 |
| 0.042890297 | 0.014699205 | 0.032031943 | 0.058611082 |
| 0.003494445 | 0.023364619 | 0.031843769 | 0.090994128 |
| 0.088819023 | 0.045179907 | 0.002479748 | 8.44E-05    |
| 0.07825642  | 0.07150461  | 0.004319392 | 0.085823078 |
| 0.021935109 | 0.06344694  | 0.046402497 | 0.017290154 |
| 0.043825782 | 0.012298885 | 0.056834174 | 0.0016711   |
| 0.028109218 | 0.069824047 | 0.082758118 | 0.015077099 |
| 0.068511352 | 0.053603667 | 0.052045563 | 0.000560728 |
| 0.015416612 | 9.10E-05    | 0.032273658 | 0.041526194 |
| 0.10056262  | 0.017622279 | 0.040673589 | 0.035003209 |
| 0.046490097 | 0.038913637 | 0.050809602 | 0.000422484 |
| 0.086066065 | 0.016717932 | 0.031088592 | 0.020361266 |
| 0.089662741 | 5.09E-05    | 0.122437295 | 0.033910906 |
| 0.060222901 | 0.03576444  | 0.028198471 | 0.045123609 |
| 0.041605687 | 0.005178219 | 0.013972618 | 0.081739254 |
| 0.002825817 | 0.021380158 | 0.07039137  | 0.017632435 |
| 0.055386147 | 0.080837313 | 0.020287627 | 0.102628848 |
| 0.036412751 | 0.07181389  | 0.072263459 | 0.012547362 |
| 0.024790635 | 0.073098715 | 0.068442132 | 0.043001021 |
| 0.069552424 | 0.066403332 | 0.054736589 | 0.034565674 |
| 0.000272892 | 0.074623152 | 0.038101595 | 0.083983303 |
| 0.041169249 | 0.039251821 | 0.048417765 | 0.000180526 |
| 0.017388424 | 0.011587638 | 0.00852044  | 0.049605011 |
| 0.046233976 | 0.039183852 | 0.036859292 | 0.002014696 |
| 0.000248382 | 0.04858241  | 0.002651525 | 0.009561752 |
| 0.042719216 | 0.020031487 | 0.056661176 | 0.007228444 |
| 0.049667547 | 0.032426185 | 4.86E-05    | 0.074003676 |
| 0.043184269 | 0.023389198 | 0.029023999 | 7.33E-05    |
| 0.035111845 | 0.077699816 | 0.026738315 | 0.002594419 |
| 0.035924756 | 0.054187178 | 0.008362801 | 0.009141019 |
| 0.09445893  | 0.042260305 | 0.06559657  | 0.065063602 |
| 0.057412935 | 0.038328815 | 0.03394316  | 0.048986859 |
| EIF4EBP2    | 0.03116792  | 0.340804441 | 0.01947745  |
| 0.056144751 | 0.250736201 | 0.17050752  | 0.040665003 |
| 0.074991325 | 0.299082429 | 0.192588428 | 0.181747981 |
| 0.008224941 | 0.170948219 | 0.364534108 | 0.043351859 |
| 0.294538011 | 0.024746433 | 0.06483344  | 0.090144045 |
| 0.170239564 | 0.222003757 | 0.216091539 | 0.153264369 |

|             |             |             |             |
|-------------|-------------|-------------|-------------|
| 0.255596121 | 0.122291656 | 0.198694934 | 0.291155397 |
| 0.402336587 | 0.166722963 | 0.291387955 | 0.102654875 |
| 0.323458059 | 0.268574182 | 0.244954466 | 0.006850452 |
| 0.221783302 | 0.086755057 | 0.339438149 | 0.175001031 |
| 0.162586193 | 0.258662456 | 0.155092787 | 0.130204012 |
| 0.192027989 | 0.013939971 | 0.114235642 | 0.355970294 |
| 0.225430417 | 0.212425686 | 0.026921627 | 0.303723009 |
| 0.249599892 | 0.198971555 | 0.267049615 | 0.001051622 |
| 0.240213489 | 0.158876486 | 0.248773656 | 0.386752393 |
| 0.123033539 | 0.080136558 | 0.248531606 | 0.181446094 |
| 0.315486232 | 0.353749673 | 0.217905728 | 0.217275852 |
| 0.38292038  | 0.234735492 | 0.362723776 | 0.085834153 |
| 0.199325147 | 0.022128891 | 0.109907612 | 0.057201729 |
| 0.259599179 | 0.12544223  | 0.213021633 | 0.281585428 |
| 0.317720762 | 0.414548444 | 0.177513351 | 0.379673585 |
| 0.242477326 | 0.300794908 | 0.252917987 | 0.269538699 |
| 0.33719487  | 0.078635052 | 0.282147469 | 0.413462044 |
| 0.038389203 | 0.224576884 | 0.313506052 | 0.075416208 |
| 0.327650827 | 0.321076472 | 0.180590476 | 0.188297512 |
| 0.344531039 | 0.258627481 | 0.397344147 | 0.182121277 |
| 0.258887614 | 0.035266633 | 0.352683018 | 0.287432225 |
| 0.161026356 | 0.034907201 | 0.212852775 | 0.417878438 |
| 0.265522917 | 0.385212093 | 0.354000467 | 0.320689314 |
| 0.257508474 | 0.39027604  | 0.261250107 | 0.354804859 |
| 0.121702555 | 0.416823818 | 0.08623399  | 0.027269132 |
| 0.031066703 | 0.069536473 | 0.298294212 | 0.262291873 |
| 0.391167586 | 0.225565847 | 0.089853008 | 0.164098903 |
| 0.435267079 | 0.347233253 | 0.421923397 | 0.333708709 |
| 0.019726683 | 0.324649132 | 0.243599469 | 0.154235268 |
| 0.290030229 | 0.080766555 | 0.239132857 | 0.379608177 |
| 0.271617071 | 0.386917339 | 0.077547094 | 0.383876789 |
| 0.156251441 | 0.409484358 | 0.337603375 | 0.084844892 |
| 0.396478643 | 0.358595673 | 0.424879271 | 0.341162236 |
| 0.35249312  | 0.137290598 | 0.103903059 | 0.33047186  |
| 0.399725811 | 0.019595424 | 0.419025158 | 0.438929038 |
| 0.381671453 | 0.393971269 | 0.460351723 | 0.428104744 |
| 0.38502354  | 0.042302617 | 0.075068672 | 0.246440332 |
| 0.382453816 | 0.28911076  | 0.141587336 | 0.239885286 |
| 0.300897224 | 0.169193543 | 0.384519091 | 0.145497456 |
| 0.425708264 | 0.374722728 | 0.413326936 | 0.30570882  |
| 0.203919993 | 0.230714845 | 0.288048914 | 0.328675343 |
| 0.027519915 | 0.044423537 | 0.023325116 | 0.281804802 |
| 0.151574978 | 0.114034433 | 0.160911883 | 0.308095962 |
| 0.129677438 | 0.17752001  | 0.256088301 | 0.334875607 |
| 0.033843423 | 0.229148053 | 0.089433207 | 0.083521273 |
| 0.025604032 | 0.102519334 | 0.085139691 | 0.081277707 |
| 0.173526813 | 0.161795302 | 0.329414457 | 0.425779906 |
| 0.273742745 | 0.103077556 | 0.289110109 | 0.393544116 |
| 0.359378899 | 0.247691323 | 0.183085237 | 0.004703292 |
| 0.170309281 | 0.271842007 | 0.25475475  | 0.280571061 |
| 0.12947219  | 0.154209557 | 0.271449856 | 0.33819549  |
| 0.1047631   | 0.092502604 | 0.243821673 | 0.318421519 |
| 0.095696248 | 0.176927618 | 0.368128807 | 0.241724506 |
| 0.001272062 | 0.152078789 | 0.351692222 | 0.204900117 |



|             |             |             |             |
|-------------|-------------|-------------|-------------|
| 0.238342978 | 0.138211357 | 0.180526286 | 0.394075269 |
| 0.253141236 | 0.264985023 | 0.426040528 | 0.36500024  |
| 0.173773896 | 0.159072951 | 0.45213106  | 0.095906591 |
| 1           | 0.040550167 | 0.222373837 | 0.183927296 |
| 0.145785854 | 0.256829667 | 0.266312699 | 0.209074877 |
| 0.058153437 | 0.408708797 | 0.311830345 | 0.412166113 |
| 0.230893755 | 0.44803134  | 0.383808472 | 0.344740396 |
| 0.246755657 | 0.274281023 | 0.200588883 | 0.329108141 |
| 0.389331655 | 0.2020576   | 0.041498442 | 0.392502025 |
| 0.240168371 | 0.342512625 | 0.157625108 | 0.403507701 |
| 0.386095955 | 0.342635738 | 0.099007739 | 0.356636761 |
| 0.270550629 | 0.100412662 | 0.369114898 | 0.457430974 |
| 0.21590502  | 0.243504907 | 0.224610294 | 0.382463591 |
| 0.098116423 | 0.237486525 | 0.272265139 | 0.264497581 |
| 0.011689801 | 0.042641167 | 0.02801713  | 0.1167391   |
| 0.202341797 | 0.295111485 | 0.32204763  | 0.415150015 |
| 0.065631615 | 0.326436856 | 0.209602275 | 0.160689168 |
| 0.315705747 | 0.271189063 | 0.273247054 | 0.303708961 |
| 0.194393666 | 0.010775879 | 0.056965392 | 0.404010996 |
| 0.021068562 | 0.208163851 | 0.188828899 | 0.001440023 |
| 0.022820396 | 0.319599403 | 0.06443286  | 0.136701962 |
| 0.44103175  | 0.133144688 | 0.114676295 | 0.190688537 |
| 0.264632531 | 0.051121273 | 0.002568627 | 0.427157214 |
| 0.430339285 | 0.41807572  | 0.422260275 | 0.380108255 |
| 0.4227932   | 0.363620484 | 0.373051113 | 0.145643038 |
| 0.059975467 | 0.045851728 | 0.208540623 | 0.180794861 |
| 0.003396378 | 0.312346684 | 0.254398073 | 0.088013309 |
| 0.369957024 | 0.24785996  | 0.017603277 | 0.317904478 |
| 0.005934088 | 0.182263358 | 0.182138276 | 0.181678918 |
| 0.361328914 | 0.006492028 | 0.092758543 | 0.21629346  |
| 0.291683364 | 0.242389919 | 0.255371094 | 0.418159512 |
| 0.17237295  | 0.074462632 | 0.191717863 | 0.328870107 |
| 0.04272075  | 0.095494934 | 0.209138889 | 0.016517923 |
| 0.118505446 | 0.388708867 | 0.258658042 | 0.030502148 |
| 0.151804636 | 0.00137561  | 0.247675626 | 0.420186857 |
| 0.338524163 | 0.440587009 | 0.386286689 | 0.209138245 |
| 0.384618494 | 0.203946674 | 0.429039573 | 0.298910393 |
| 0.197916086 | 2.39E-05    | 0.005828379 | 0.413434501 |
| 0.237866569 | 0.032336147 | 0.092641062 | 0.134556573 |
| 0.062514295 | 0.067720889 | 0.044167587 | 0.199551691 |
| 0.253446531 | 0.188144532 | 0.220381772 | 0.351478718 |
| 0.151142285 | 0.168512487 | 0.197372305 | 0.055913062 |
| 0.276701037 | 0.027899711 | 0.062605401 | 0.005045063 |
| 0.341045679 | 0.06971946  | 0.338575387 | 0.400463376 |
| 0.390588752 | 0.324015935 | 0.184966764 | 0.17818906  |
| 0.425796198 | 0.048293237 | 0.227410858 | 0.053716084 |
| 0.356422876 | 0.273508118 | 0.225361159 | 0.200648679 |
| 0.412162046 | 0.35206252  | 0.019850353 | 0.336906746 |
| 0.00409333  | 0.006931858 | 0.140592649 | 0.212614484 |
| 0.21906445  | 0.244566966 | 0.181455487 | 0.224514122 |
| 0.222724428 | 0.01082108  | 0.270390037 | 0.247285705 |
| 0.207621563 | 0.218212578 | 0.225744274 | 0.221592064 |
| 0.241787865 | 0.172241235 | 0.144073371 | 0.117524362 |
| 0.249935082 | 0.225392346 | 0.121141598 | 0.014485716 |

|             |             |             |             |
|-------------|-------------|-------------|-------------|
| 0.217202561 | 0.232158913 | 0.028417276 | 0.09735229  |
| 0.343732044 | 0.399480809 | 0.034889505 | 0.005522974 |
| 0.18230282  | 0.237035119 | 0.425985738 | 0.383278224 |
| 0.396577452 | 0.429116277 | 0.29667025  | 0.120493358 |
| 0.034887425 | 0.245804187 | 0.251561088 | 0.121856734 |
| 0.406635899 | 0.033959446 | 0.371128909 | 0.269472008 |
| 0.078079094 | 0.119976394 | 0.018647025 | 0.054937243 |
| 0.28788806  | 0.11431262  | 0.132915254 | 0.068104444 |
| 0.193896403 | 0.230404884 | 0.032035673 | 0.114441672 |
| 0.253100088 | 0.206547122 | 0.096483908 | 0.188908262 |
| 0.278269071 | 0.199696133 | 0.350257902 | 0.361117555 |
| 0.072087508 | 0.07013331  | 0.097456387 | 0.357968979 |
| 0.365245221 | 0.257204106 | 0.008054274 | 0.344418646 |
| 0.423224475 | 0.293061973 | 0.37152425  | 0.359930572 |
| 0.054566666 | 0.205304795 | 0.308612351 | 0.245397837 |
| 0.129207968 | 0.167095877 | 0.180995584 | 0.034344744 |
| 0.270240709 | 0.391268976 | 0.323830345 | 0.095667853 |
| 0.261258764 | 0.067479374 | 0.028761734 | 0.391277881 |
| 0.205629817 | 0.037286373 | 0.17345801  | 0.413343814 |
| 0.002782179 | 0.209055011 | 0.462084828 | 0.128894904 |
| 0.439156717 | 0.408391565 | 0.331783918 | 0.175290463 |
| 0.009668192 | 0.357456401 | 0.223787197 | 0.19179144  |
| 0.319565763 | 0.245680076 | 0.148583608 | 0.048906874 |
| 0.232733036 | 0.039131452 | 0.093173169 | 0.152805722 |
| 0.21025963  | 0.244812418 | 0.154652503 | 0.155944606 |
| 0.165583837 | 0.066061617 | 0.234343175 | 0.124594311 |
| 0.305809247 | 0.174068574 | 0.27279129  | 0.170125487 |
| 0.139450316 | 0.407567039 | 0.306255523 | 0.011719389 |
| 0.27161341  | 0.38578879  | 0.387431319 | 0.001049044 |
| 0.318650887 | 0.003585985 | 0.147143267 | 0.133548067 |
| 0.146304142 | 0.167066503 | 0.223197785 | 0.204370607 |
| 0.243892291 | 0.143750586 | 0.134404184 | 0.15106709  |
| 0.109225477 | 0.138672672 | 0.279091369 | 0.199747712 |
| 0.160201489 | 0.062199261 | 0.066300685 | 0.065770433 |
| 0.024507843 | 0.384181389 | 0.170888002 | 0.038318596 |
| 0.169462484 | 0.22421724  | 0.286235131 | 0.374108485 |
| 0.362501653 | 0.067236198 | 0.237166117 | 0.319790977 |
| 0.191640484 | 0.141858516 | 0.029552726 | 0.206022346 |
| 0.123548788 | 0.162592374 | 0.208099318 | 0.148711494 |
| 0.320175511 | 0.300899301 | 0.162109106 | 0.372293523 |
| 0.205064455 | 0.261245133 | 0.142068342 | 0.052474534 |
| 0.080662349 | 0.092031067 | 0.221828198 | 0.000313339 |
| 0.235854304 | 0.097530873 | 0.377662163 | 0.358169135 |
| 0.272551603 | 0.316651896 | 0.124538794 | 0.039176237 |
| 0.126389078 | 0.11060837  | 0.087871618 | 0.351061736 |
| 0.214995711 | 0.104590945 | 0.217826208 | 0.125133841 |
| 0.362832029 | 0.373473976 | 0.275300423 | 0.154316999 |
| 0.18510354  | 0.113005512 | 0.391196002 | 0.056690711 |
| 0.268489348 | 0.168522193 | 0.223104435 | 0.178533937 |
| 0.172407725 | 0.43690707  | 0.030186983 | 0.436989167 |
| 0.224252311 | 0.089823487 | 0.393314621 | 0.176683597 |
| 0.163169614 | 0.100711573 | 0.228446488 | 0.206728932 |
| 0.175170778 | 0.260364241 | 0.014302077 | 0.066824799 |
| 0.251930563 | 0.273549837 | 0.322608402 | 0.34091067  |

|             |             |             |             |
|-------------|-------------|-------------|-------------|
| 0.248817394 | 0.32416597  | 0.243489618 | 0.157945074 |
| 0.35161999  | 0.371413623 | 0.1191368   | 0.206791139 |
| 0.259453174 | 0.054593931 | 0.203946079 | 0.040021008 |
| 0.283416311 | 0.294326569 | 0.217424223 | 0.035803614 |
| 0.011866546 | 0.220750847 | 0.26374791  | 0.045931623 |
| 0.438054629 | 0.191858893 | 0.277233267 | 0.316458008 |
| 0.138235585 | 0.364175921 | 0.107895707 | 0.292678564 |
| 0.043762652 | 0.199959841 | 0.282827002 | 0.264735449 |
| 0.133618038 | 0.244363552 | 0.288726376 | 0.208696244 |
| 0.018081858 | 0.18420302  | 0.002100285 | 0.292056286 |
| 0.345248857 | 0.269702164 | 0.157843114 | 0.211359694 |
| 0.221816723 | 0.350165184 | 0.206027387 | 0.240140348 |
| 0.005852532 | 0.262745952 | 0.130839505 | 0.286524064 |
| 0.135960684 | 0.261753429 | 0.033662511 | 0.288277311 |
| 0.323511771 | 0.179249893 | 0.221601886 | 0.186161498 |
| 0.373023944 | 0.330122914 | 0.097647671 | 0.218885566 |
| 0.308797549 | 0.036871842 | 0.185026758 | 0.439481937 |
| 0.117512418 | 0.20392434  | 0.39072615  | 0.119748738 |
| 0.273431579 | 0.30025874  | 0.295252241 | 0.441276191 |
| 0.070660705 | 0.162658916 | 0.379134641 | 0.37676677  |
| 0.251870177 | 0.232619201 | 0.210356356 | 0.18296361  |
| 0.320760564 | 0.039594391 | 0.271501338 | 0.240755199 |
| 0.210585789 | 0.241728508 | 0.225970098 | 0.186447396 |
| 0.021398021 | 0.134556277 | 0.17362056  | 0.08990023  |
| 0.191558895 | 0.226576235 | 0.236082011 | 0.302835863 |
| 0.071077159 | 0.01034933  | 0.367689007 | 0.030097434 |
| 0.14313968  | 0.265343712 | 0.152615918 | 0.247295628 |
| 0.111180737 | 0.232879844 | 0.150932409 | 1.76E-05    |
| 0.373415973 | 0.071446432 | 0.264485108 | 0.159029376 |
| 0.23399536  | 0.026529961 | 0.345597696 | 0.439739171 |
| 0.21667112  | 0.238350768 | 0.212095789 | 0.369990067 |
| 0.188708684 | 0.26507965  | 0.281699507 | 0.258207909 |
| 0.240967382 | 0.195087366 | 0.237212282 | 0.224287027 |
| 0.274689402 | 0.159765932 |             |             |
| EIF4ENIF1   | 0.058638896 | 0.044610713 | 0.037182237 |
| 0.050590191 | 0.149822614 | 0.038538605 | 0.035564839 |
| 0.056293627 | 0.036272    | 0.003539932 | 0.122794251 |
| 0.026467658 | 0.010122593 | 0.092155012 | 0.03434313  |
| 0.071083271 | 0.055486511 | 0.086470586 | 0.000643615 |
| 0.004575011 | 0.12532002  | 0.02700928  | 0.028660496 |
| 0.093870924 | 0.089737161 | 0.03698741  | 0.031539825 |
| 0.071092667 | 0.005106963 | 0.076627767 | 0.001310369 |
| 0.115512996 | 0.120735457 | 0.028715431 | 0.026603383 |
| 0.044780827 | 0.000665282 | 0.090837915 | 0.098112206 |
| 0.019065723 | 0.110946686 | 0.010132126 | 0.13209292  |
| 0.017879519 | 0.03689393  | 0.000807664 | 0.047333701 |
| 0.04189843  | 0.042478822 | 0.025535431 | 0.0610974   |
| 0.018427903 | 0.095433004 | 0.023966618 | 0.000491762 |
| 0.043960287 | 0.005302172 | 0.016343099 | 0.079888337 |
| 0.173602033 | 0.127575946 | 0.003972533 | 0.024563208 |
| 0.029821127 | 0.060193839 | 0.120054077 | 0.0107109   |
| 0.088788864 | 0.022398123 | 0.053968487 | 0.005853916 |
| 0.02557932  | 0.015374021 | 0.139701282 | 0.02592109  |
| 0.024030877 | 0.172453498 | 0.10437967  | 0.052538693 |

|             |             |             |             |
|-------------|-------------|-------------|-------------|
| 0.042101438 | 0.09568547  | 0.109132597 | 0.067411253 |
| 0.003894157 | 0.075886672 | 0.073623329 | 0.148119631 |
| 0.053197387 | 0.020480867 | 0.118528897 | 0.104177479 |
| 0.018086053 | 0.016576858 | 0.04618625  | 0.044396716 |
| 0.063362055 | 0.014175775 | 0.016710287 | 0.061346247 |
| 0.110022286 | 0.077836991 | 0.064386679 | 0.136534942 |
| 0.068861437 | 0.035708297 | 0.064406976 | 0.089768631 |
| 0.121680599 | 0.07123247  | 0.054827776 | 0.068534882 |
| 0.072841535 | 0.083011437 | 0.041888529 | 0.074087362 |
| 0.065485542 | 0.092708091 | 0.108084217 | 0.066599469 |
| 0.000276    | 0.076219178 | 0.142074731 | 0.057044616 |
| 0.03249201  | 0.087410017 | 0.019092604 | 0.133133886 |
| 0.084279413 | 0.10002733  | 0.096322378 | 0.146537518 |
| 0.093057919 | 0.057667971 | 0.067620667 | 0.076144812 |
| 0.055729667 | 0.017056388 | 0.072726809 | 0.035265365 |
| 0.067071795 | 0.074732803 | 0.087014684 | 0.080110763 |
| 0.141772718 | 0.084092686 | 0.048594758 | 0.091874074 |
| 0.033400289 | 0.121752403 | 0.053731677 | 0.154807053 |
| 0.096452273 | 0.082805454 | 0.122084507 | 0.100319746 |
| 0.098433774 | 0.090743471 | 3.76E-05    | 0.067233231 |
| 0.131569033 | 0.001766773 | 0.066297266 | 0.076218195 |
| 0.07154847  | 0.078008288 | 0.101935129 | 0.088041478 |
| 0.068481247 | 0.068981893 | 2.27E-05    | 0.139619509 |
| 0.079990392 | 0.139683697 | 0.054681372 | 0.036060644 |
| 0.072930409 | 0.036314953 | 0.056645415 | 0.006712172 |
| 0.121478939 | 0.095922591 | 0.065814859 | 0.058780924 |
| 0.020113378 | 0.121099411 | 0.037723515 | 0.069208972 |
| 0.072682293 | 0.063487475 | 0.046332899 | 0.083523262 |
| 0.010198326 | 0.183712001 | 0.035195357 | 0.048920269 |
| 0.166805105 | 0.023439425 | 0.02669049  | 0.110163607 |
| 0.032260466 | 0.035970895 | 0.104635123 | 0.056040927 |
| 0.07711827  | 0.087173828 | 0.036299296 | 0.080364289 |
| 0.131485098 | 0.064591641 | 0.048655482 | 0.091957919 |
| 0.029979627 | 0.086068878 | 0.059335364 | 0.13227295  |
| 0.154553032 | 0.082506137 | 0.091443626 | 0.013322843 |
| 0.020513731 | 0.005639441 | 0.023096109 | 0.036901855 |
| 0.069273432 | 0.029240989 | 0.061925669 | 0.129894443 |
| 0.06527651  | 0.020476348 | 0.030562995 | 0.115487706 |
| 0.047014658 | 0.099440241 | 0.11116546  | 0.025820425 |
| 0.00775766  | 0.09297446  | 0.083851958 | 0.024548953 |
| 0.049032336 | 0.004123476 | 0.031091099 | 0.088324207 |
| 0.013924288 | 0.042875801 | 0.07854518  | 0.113931381 |
| 0.005855067 | 0.045521669 | 0.095552807 | 0.000306435 |
| 0.040550167 | 1           | 0.182211204 | 0.00904178  |
| 0.110147118 | 0.130500106 | 0.092228055 | 0.11665116  |
| 0.06924477  | 0.076951677 | 0.103771797 | 0.085918963 |
| 0.021853493 | 0.09942441  | 0.085992805 | 0.112700623 |
| 0.08727971  | 0.020116992 | 0.012349611 | 0.093643984 |
| 0.090375678 | 0.003907253 | 0.036889582 | 0.045224801 |
| 0.014994248 | 0.079833374 | 0.028983546 | 0.109656488 |
| 0.120020154 | 0.052132771 | 0.094270455 | 0.127150107 |
| 0.148376566 | 0.136385801 | 0.096830757 | 0.09825853  |
| 0.003994343 | 0.047803924 | 0.055999562 | 0.15539279  |
| 0.13690692  | 0.043559001 | 0.100737879 | 0.016289429 |

|             |             |             |             |
|-------------|-------------|-------------|-------------|
| 0.000557062 | 0.041814755 | 0.062389168 | 0.169587641 |
| 0.090872346 | 0.026246456 | 0.080532401 | 0.087147757 |
| 0.105925045 | 0.108165697 | 0.064520392 | 0.067090265 |
| 0.077757441 | 0.03388074  | 0.064643789 | 0.081399093 |
| 0.115376347 | 0.012322067 | 0.033512803 | 0.099992181 |
| 0.021619373 | 0.065418121 | 0.031141453 | 0.000771826 |
| 0.028317713 | 0.030494664 | 0.05289372  | 0.105482526 |
| 0.103188006 | 0.098660578 | 0.088645085 | 0.006265817 |
| 0.163379034 | 0.09682046  | 0.007133938 | 0.070432216 |
| 0.064128533 | 0.060940199 | 0.060003888 | 0.057339006 |
| 0.062868981 | 0.0501308   | 0.097961144 | 0.046806506 |
| 0.073880773 | 0.041206817 | 0.039108549 | 0.104404702 |
| 7.80E-05    | 0.158730908 | 0.07287173  | 0.131552255 |
| 0.072505835 | 0.074945969 | 0.047755596 | 0.063638021 |
| 0.017915224 | 0.030424828 | 0.0129424   | 0.076818688 |
| 0.116408135 | 0.031947626 | 0.002456936 | 0.015700305 |
| 0.076746625 | 0.091238154 | 0.035373579 | 0.090570635 |
| 0.14104327  | 0.026643114 | 0.133800896 | 0.115449221 |
| 0.059537263 | 0.000632682 | 0.014160341 | 0.000409466 |
| 0.001471687 | 0.06732149  | 0.025720195 | 0.034959323 |
| 0.133547309 | 0.024909553 | 0.094501544 | 0.091268367 |
| 0.058531142 | 0.094665747 | 0.097933493 | 0.085376002 |
| 0.092640175 | 0.002497583 | 0.08030439  | 0.058524404 |
| 0.009839913 | 0.004575991 | 0.000850903 | 0.088719219 |
| 0.077511528 | 0.026833799 | 0.126818688 | 0.017084512 |
| 0.073321874 | 0.024879259 | 0.061211962 | 0.107437701 |
| 0.065393476 | 0.161806353 | 0.055797735 | 0.060610197 |
| 0.116055581 | 0.118062457 | 0.013313003 | 0.047734181 |
| 0.075628742 | 0.054093914 | 0.044468057 | 0.002219061 |
| 0.107440299 | 0.053998871 | 0.070141872 | 0.074220988 |
| 0.122211582 | 0.13074914  | 0.006134594 | 0.005865696 |
| 0.067866042 | 0.024532721 | 0.011236412 | 0.030816302 |
| 0.065047259 | 0.088775599 | 0.173037525 | 0.130094599 |
| 0.109085014 | 0.102921031 | 0.046991431 | 0.09960375  |
| 0.00880566  | 0.000679727 | 0.038847238 | 0.09058473  |
| 0.000370776 | 0.04111864  | 0.144245409 | 0.017548875 |
| 0.032654277 | 0.013201263 | 0.040733833 | 0.065955616 |
| 0.145036441 | 0.071386963 | 0.117546741 | 0.06339686  |
| 0.086656581 | 0.019118805 | 0.12071679  | 0.060614231 |
| 0.002728951 | 0.074238003 | 0.087725563 | 0.028030183 |
| 0.028975315 | 0.059111498 | 0.079247676 | 0.113861723 |
| 0.116520397 | 0.089693605 | 0.013413667 | 0.028910783 |
| 0.12330347  | 0.047683711 | 0.098425735 | 0.064776303 |
| 0.084145313 | 0.111963305 | 0.117131997 | 0.064424344 |
| 0.066332422 | 0.107972391 | 0.112200988 | 0.092683409 |
| 0.082376653 | 0.025056894 | 0.072780335 | 0.066084365 |
| 0.094850801 | 0.103668572 | 0.056794816 | 0.091391428 |
| 0.063188385 | 0.12493775  | 0.185390326 | 0.062807963 |
| 0.070713264 | 0.052173606 | 0.054102661 | 0.127149598 |
| 0.097483748 | 0.023153228 | 0.121270978 | 0.032351038 |
| 0.075451277 | 0.000933021 | 0.074847627 | 0.123494058 |
| 0.082446165 | 0.04641463  | 0.025999474 | 0.068776275 |
| 0.061707578 | 0.016158639 | 0.007169298 | 0.044507221 |
| 0.09341541  | 0.05644216  | 0.077421096 | 0.127950088 |

|             |             |             |             |
|-------------|-------------|-------------|-------------|
| 0.065552412 | 0.081067223 | 0.024102309 | 0.08047314  |
| 0.093890369 | 0.044823873 | 0.080132657 | 0.072104729 |
| 0.105492776 | 0.083580356 | 0.073777878 | 0.160181672 |
| 0.033981646 | 0.026104901 | 0.019883272 | 0.060254772 |
| 0.053521398 | 0.023814228 | 0.008358794 | 0.057554415 |
| 0.028886283 | 0.040133464 | 0.089622572 | 0.081615373 |
| 0.094602215 | 0.105515604 | 0.121342106 | 0.030385161 |
| 0.000391901 | 0.067325126 | 0.119302784 | 0.061853469 |
| 0.05877256  | 0.092275874 | 0.004935931 | 0.078231261 |
| 0.173232202 | 0.038202383 | 0.047404292 | 0.006045372 |
| 0.001442167 | 0.035869344 | 0.14344517  | 0.051114752 |
| 0.136935872 | 0.019741308 | 0.029698972 | 0.151635914 |
| 0.007670572 | 0.172898406 | 0.138805142 | 0.003559544 |
| 0.012958553 | 0.076597314 | 0.065768199 | 0.045052088 |
| 0.056850817 | 0.072981004 | 0.097151855 | 0.000458059 |
| 0.090297511 | 0.028827299 | 0.133063731 | 0.187715959 |
| 0.145295004 | 0.079005925 | 0.15667239  | 0.115291617 |
| 0.053946079 | 0.102986864 | 0.157264882 | 0.179437925 |
| 0.150321754 | 0.107858807 | 0.090553798 | 0.041268044 |
| 0.116434401 | 0.09542314  | 0.059249904 | 0.047167895 |
| 0.044215998 | 0.063073487 | 0.128557546 | 0.048712236 |
| 0.131721368 | 0.034677338 | 0.168539101 | 0.059672668 |
| 0.139742901 | 0.032381741 | 0.039520729 | 0.06682903  |
| 0.000616933 | 0.002488176 | 0.024694046 | 0.062489781 |
| 0.121931818 | 0.053570398 | 0.027626858 | 0.039960685 |
| 0.031568696 | 0.123198133 | 0.128291198 | 0.105576982 |
| 0.104534086 | 0.023186319 | 0.006664944 | 0.084978758 |
| 0.101567366 | 0.068114065 | 0.135573592 | 0.009295962 |
| 0.09005768  | 0.036920363 | 0.080836869 | 0.07698051  |
| 0.026274893 | 0.1349015   | 0.002909963 | 0.048090554 |
| 0.003970456 | 0.046446905 | 0.111132152 | 0.060679745 |
| 0.025266245 | 0.112177778 | 0.158384643 | 0.017324477 |
| 0.086603737 | 0.046089332 | 0.045232452 | 0.042538825 |
| 0.086163759 | 0.07748008  | 0.072867361 | 0.05138742  |
| 0.032101112 | 0.127657269 | 0.015022278 | 0.102992649 |
| 0.125388642 | 0.08213508  | 0.069515314 | 0.080863066 |
| 0.053399175 | 0.0664331   | 0.11902007  | 0.047056262 |
| 0.04478554  | 0.074729751 | 0.034474314 | 0.014036934 |
| 0.038962443 | 0.030253773 | 0.000196421 | 0.001725429 |
| 0.157895528 | 0.010719661 | 0.032792576 | 0.070261936 |
| 0.089418544 | 0.13565432  | 0.008256983 | 0.042238178 |
| 0.054821333 | 0.071189754 | 0.038069429 | 0.144822419 |
| 0.082327982 | 0.101063828 | 0.040351062 | 0.000129916 |
| 0.046908352 | 0.033613467 | 0.006386965 | 0.051608778 |
| 0.01799793  | 0.037333237 | 0.048517434 | 0.023446944 |
| 0.100875974 | 0.012851375 | 0.020397353 | 0.082443676 |
| 0.065311168 | 0.078327579 | 0.107210547 | 0.129724372 |
| 0.004077878 | 0.107753916 | 0.037234212 | 0.017928812 |
| 0.093021892 | 0.077043748 | 0.159903359 | 0.094263005 |
| 0.075049133 | 0.050363562 | 0.000806416 | 0.109294978 |
| 0.061800673 | 0.048563247 | 0.092884572 | 0.002927435 |
| 0.187322008 | 0.082343829 | 0.012322373 | 0.027753092 |
| 0.019259287 | 0.097422977 | 0.144248985 | 0.089673432 |
| 0.010650941 | 0.027913916 | 0.095263368 | 0.050908716 |

|             |             |             |             |
|-------------|-------------|-------------|-------------|
| 0.070361785 | 0.014550121 | 0.094372414 | 0.013529124 |
| 0.068231314 | 0.054718205 | 0.05043252  | 0.052446919 |
| 0.021767459 | 0.051244947 | 0.012908589 | 0.087606973 |
| 0.147092514 | 0.115967247 | 0.109466452 | 0.1037914   |
| 0.046154283 | 0.080224397 | 0.026287038 | 0.074123111 |
| 0.082530599 | 0.169580019 | 0.088958052 | 0.073843587 |
| 0.18140091  | 0.071015072 | 0.053960002 | 0.088177757 |
| 0.065591972 | 0.034868536 | 0.036156446 | 0.111053195 |
| 0.054905666 | 0.119014602 | 0.015816711 | 0.115163499 |
| 0.008762538 | 0.046536689 | 0.037041992 | 0.101802411 |
| 0.117873217 | 0.090580077 | 0.073076024 | 0.159004797 |
| 0.088945998 | 0.02803175  | 0.138958184 | 0.001382721 |
| 0.059137595 | 0.128868614 | 0.112913426 | 0.079840665 |
| 0.114889655 | 0.053477547 | 0.029390607 | 0.000449352 |
| 0.091168407 | 0.012801481 | 0.035464048 | 0.090590974 |
| 0.005194996 | 0.032839086 | 0.093294027 | 0.100571755 |
| 0.079195458 | 0.00552373  | 0.009558604 | 0.067490304 |
| 0.010698421 | 0.012117206 | 0.013999344 | 0.041090201 |
| 0.056197303 | 0.013311215 | 0.020110596 | 0.040133232 |
| 0.074670073 | 0.052764613 |             |             |
| EIF4H       | 0.1449957   | 0.270253773 | 0.08630752  |
| 0.248693598 | 0.297985997 | 0.216431623 | 0.163802611 |
| 0.22245622  | 0.221209401 | 0.106072301 | 0.293517994 |
| 0.100156    | 0.097460875 | 0.353744652 | 0.169247175 |
| 0.265453882 | 0.169584327 | 0.231698506 | 0.075702854 |
| 0.200301621 | 0.317277141 | 0.230230065 | 0.186523842 |
| 0.292194263 | 0.223628908 | 0.19632164  | 0.194121579 |
| 0.338168661 | 0.115573673 | 0.246012912 | 0.077979328 |
| 0.381169384 | 0.291587912 | 0.191801609 | 0.068081765 |
| 0.240523257 | 0.026492914 | 0.365457325 | 0.340417968 |
| 0.183799369 | 0.341788556 | 0.12298607  | 0.344088236 |
| 0.1645315   | 0.104789999 | 0.061909798 | 0.232071008 |
| 0.191746038 | 0.255358901 | 0.091964619 | 0.245463888 |
| 0.203564671 | 0.252105548 | 0.182414005 | 0.006809102 |
| 0.195793507 | 0.056138058 | 0.1396696   | 0.353210278 |
| 0.280600925 | 0.291846235 | 0.122348844 | 0.194136656 |
| 0.208395358 | 0.25749598  | 0.277082267 | 0.166602712 |
| 0.370785889 | 0.170633564 | 0.238758677 | 0.202198493 |
| 0.237008251 | 0.072327663 | 0.241453441 | 0.096058017 |
| 0.224582159 | 0.328995425 | 0.286542433 | 0.231371085 |
| 0.258636026 | 0.405020554 | 0.260312982 | 0.339562083 |
| 0.137967793 | 0.251281588 | 0.279533177 | 0.333294731 |
| 0.262342829 | 0.155697508 | 0.313942963 | 0.406780661 |
| 0.096211852 | 0.149754178 | 0.253682044 | 0.138630849 |
| 0.28510734  | 0.167833897 | 0.155003882 | 0.199969788 |
| 0.269446753 | 0.277715902 | 0.347390603 | 0.30394038  |
| 0.26051318  | 0.109093443 | 0.331814666 | 0.249321994 |
| 0.314889251 | 0.139002981 | 0.294278677 | 0.3099471   |
| 0.255676486 | 0.348615878 | 0.264049567 | 0.30737378  |
| 0.253220272 | 0.367617818 | 0.284732996 | 0.309387223 |
| 0.041525551 | 0.365207339 | 0.252144298 | 0.18734415  |
| 0.101284023 | 0.246149802 | 0.21503269  | 0.333228634 |
| 0.335211943 | 0.25402517  | 0.257452885 | 0.346661526 |
| 0.366196367 | 0.313519417 | 0.355702769 | 0.314111423 |

|             |             |             |             |
|-------------|-------------|-------------|-------------|
| 0.132503328 | 0.175117251 | 0.253212232 | 0.221111405 |
| 0.277594502 | 0.189315029 | 0.251204484 | 0.374307478 |
| 0.357736813 | 0.332628415 | 0.173019467 | 0.388161551 |
| 0.222821562 | 0.421892815 | 0.279912414 | 0.302221353 |
| 0.389349638 | 0.357663959 | 0.413415532 | 0.2754602   |
| 0.362016321 | 0.2489836   | 0.06097921  | 0.299836637 |
| 0.421264906 | 0.040203816 | 0.319392249 | 0.350666881 |
| 0.342589455 | 0.318041256 | 0.409919225 | 0.365892285 |
| 0.338752837 | 0.141850715 | 0.018789338 | 0.327418128 |
| 0.364124932 | 0.350542018 | 0.268290463 | 0.212315654 |
| 0.271319146 | 0.225735299 | 0.272611317 | 0.203601942 |
| 0.43864249  | 0.327901802 | 0.324349236 | 0.272834878 |
| 0.169951982 | 0.322667235 | 0.200523362 | 0.325834922 |
| 0.161895224 | 0.169549159 | 0.085990128 | 0.282650072 |
| 0.13745811  | 0.321512768 | 0.217214531 | 0.242398858 |
| 0.31091435  | 0.192076288 | 0.173793505 | 0.281527229 |
| 0.082939204 | 0.208100922 | 0.228540701 | 0.198776921 |
| 0.19238193  | 0.202892213 | 0.290377849 | 0.297715287 |
| 0.33869331  | 0.230121394 | 0.236726876 | 0.35964935  |
| 0.233081735 | 0.197247879 | 0.254575724 | 0.402658242 |
| 0.43522645  | 0.253385239 | 0.266427488 | 0.08612476  |
| 0.259883162 | 0.129193937 | 0.14835729  | 0.20333387  |
| 0.204992022 | 0.294695534 | 0.25875976  | 0.319470348 |
| 0.212799853 | 0.152122307 | 0.247873121 | 0.376359153 |
| 0.156220786 | 0.307814624 | 0.367973631 | 0.189563983 |
| 0.02623636  | 0.285807461 | 0.319892376 | 0.274378764 |
| 0.234829096 | 0.174119202 | 0.178371966 | 0.35386976  |
| 0.184766344 | 0.253561791 | 0.344413733 | 0.308902195 |
| 0.19707525  | 0.196186936 | 0.40052673  | 0.043364673 |
| 0.222373837 | 0.182211204 | 1           | 0.12168311  |
| 0.292664489 | 0.320517136 | 0.271100894 | 0.30002509  |
| 0.134870063 | 0.373500774 | 0.306936431 | 0.373083476 |
| 0.211398743 | 0.404080717 | 0.335164052 | 0.365949598 |
| 0.269635854 | 0.182002712 | 0.124097768 | 0.319335999 |
| 0.340836346 | 0.167348951 | 0.095594734 | 0.26537473  |
| 0.174925796 | 0.267320193 | 0.23257684  | 0.400851438 |
| 0.408756437 | 0.298178853 | 0.315861326 | 0.34458118  |
| 0.352543284 | 0.271497344 | 0.312769224 | 0.414095745 |
| 0.129367597 | 0.258917076 | 0.276548908 | 0.38190804  |
| 0.246794689 | 0.282121553 | 0.299288801 | 0.136127989 |
| 0.006917135 | 0.13149526  | 0.128548778 | 0.345584765 |
| 0.237589093 | 0.176216628 | 0.268095227 | 0.37674498  |
| 0.259339244 | 0.341530921 | 0.22914135  | 0.314731238 |
| 0.322532487 | 0.236513739 | 0.229447863 | 0.25700916  |
| 0.266449842 | 0.104327753 | 0.291401625 | 0.407343561 |
| 0.061416201 | 0.234227534 | 0.221452433 | 0.021048357 |
| 0.12558466  | 0.218658408 | 0.134282861 | 0.25142163  |
| 0.383523017 | 0.229676597 | 0.221393517 | 0.135237972 |
| 0.315397188 | 0.198489219 | 0.036048866 | 0.344792874 |
| 0.338661594 | 0.326010042 | 0.330776718 | 0.316170835 |
| 0.318746599 | 0.254840504 | 0.321624103 | 0.193187557 |
| 0.222713093 | 0.126419896 | 0.245995277 | 0.324151366 |
| 0.012075655 | 0.338318528 | 0.268239327 | 0.231817683 |
| 0.281272977 | 0.262084553 | 0.132440729 | 0.248396806 |



|             |             |             |             |
|-------------|-------------|-------------|-------------|
| 0.081384468 | 0.144870582 | 0.224919293 | 0.286604731 |
| 0.321631049 | 0.065682563 | 0.158665525 | 0.219279687 |
| 0.309266214 | 0.305970955 | 0.192737867 | 0.380561852 |
| 0.315213654 | 0.113231309 | 0.321821512 | 0.312650126 |
| 0.198851068 | 0.060711484 | 0.202473515 | 0.017241284 |
| 0.109195991 | 0.332652955 | 0.206852982 | 0.144343041 |
| 0.312444779 | 0.037677692 | 0.306779922 | 0.394450647 |
| 0.299344479 | 0.38909353  | 0.374644013 | 0.238244323 |
| 0.371488443 | 0.059768624 | 0.372125352 | 0.282673297 |
| 0.157320345 | 0.006135154 | 0.04227693  | 0.349551152 |
| 0.262410804 | 0.07049689  | 0.260284098 | 0.187158681 |
| 0.306666875 | 0.160461898 | 0.168208483 | 0.287805224 |
| 0.223356933 | 0.328675543 | 0.2465297   | 0.320430932 |
| 0.327469995 | 0.311833689 | 0.178217407 | 0.125322719 |
| 0.240722386 | 0.190842229 | 0.124406309 | 0.050258207 |
| 0.303133523 | 0.131236787 | 0.331668848 | 0.355115186 |
| 0.408729025 | 0.293466684 | 0.12170393  | 0.195629648 |
| 0.319553585 | 0.090488596 | 0.166143737 | 0.113873528 |
| 0.322383638 | 0.276105719 | 0.34757608  | 0.311589009 |
| 0.412604437 | 0.370651358 | 0.13223652  | 0.325070679 |
| 0.066257011 | 0.01469487  | 0.193990113 | 0.258552709 |
| 0.060971633 | 0.253187132 | 0.308082446 | 0.192216603 |
| 0.24756926  | 0.103480098 | 0.21999884  | 0.233467863 |
| 0.320311733 | 0.290377237 | 0.28963706  | 0.227088427 |
| 0.299031315 | 0.258128079 | 0.312039449 | 0.267720993 |
| 0.16475382  | 0.271146067 | 0.227430202 | 0.097685446 |
| 0.196357014 | 0.235212265 | 0.164068636 | 0.21262835  |
| 0.355884749 | 0.362268984 | 0.176608429 | 0.105023054 |
| 0.286085245 | 0.264580114 | 0.382882673 | 0.32900737  |
| 0.381063098 | 0.426490568 | 0.360711824 | 0.309728954 |
| 0.176953212 | 0.308758379 | 0.275540592 | 0.300345612 |
| 0.368832549 | 0.087326442 | 0.334211528 | 0.221724826 |
| 0.19838309  | 0.306093493 | 0.175289508 | 0.198801587 |
| 0.229216734 | 0.267827718 | 0.350210018 | 0.149937098 |
| 0.320034161 | 0.21499833  | 0.146055788 | 0.303118357 |
| 0.3038523   | 0.186542636 | 0.255505584 | 0.208106897 |
| 0.260635817 | 0.077723177 | 0.277769741 | 0.416738677 |
| 0.187679687 | 0.172388718 | 0.188419849 | 0.269537697 |
| 0.290268955 | 0.159712367 | 0.089150692 | 0.272821279 |
| 0.374944205 | 0.234867974 | 0.348117089 | 0.384136123 |
| 0.144568466 | 0.268029041 | 0.199971871 | 0.283844971 |
| 0.264186083 | 0.214580859 | 0.285120647 | 0.148005173 |
| 0.313583448 | 0.379986721 | 0.300644943 | 0.331567311 |
| 0.199015556 | 0.116384465 | 0.07707899  | 0.299450472 |
| 0.249613208 | 0.194652948 | 0.134607489 | 0.290923833 |
| 0.017500201 | 0.149793626 | 0.371937798 | 0.301366039 |
| 0.398266525 | 0.374929959 | 0.387611387 | 0.209217157 |
| 0.004428398 | 0.246440286 | 0.2987174   | 0.258456328 |
| 0.292407848 | 0.283171699 | 0.142371773 | 0.26718984  |
| 0.351549769 | 0.093840587 | 0.317486534 | 0.184163911 |
| 0.148191405 | 0.216648555 | 0.282503773 | 0.225765167 |
| 0.331112534 | 0.090319633 | 0.207916493 | 0.289938532 |
| 0.156195247 | 0.318359435 | 0.366118608 | 0.099912278 |
| 0.171008799 | 0.34943053  | 0.287749655 | 0.09901824  |

|             |             |             |             |
|-------------|-------------|-------------|-------------|
| 0.22822831  | 0.324279046 | 0.34262174  | 0.019681548 |
| 0.289678188 | 0.066483173 | 0.343500463 | 0.353454444 |
| 0.346186276 | 0.32077171  | 0.332347203 | 0.308298095 |
| 0.235620699 | 0.311231002 | 0.324188269 | 0.326912223 |
| 0.340647682 | 0.256217214 | 0.258316095 | 0.228223236 |
| 0.316025957 | 0.246381798 | 0.133735802 | 0.129139152 |
| 0.192620457 | 0.307647761 | 0.29670444  | 0.094994072 |
| 0.312001907 | 0.219652612 | 0.390273233 | 0.319121856 |
| 0.382259474 | 0.11374958  | 0.264196933 | 0.295924158 |
| 0.090412452 | 0.179603317 | 0.111446813 | 0.223811751 |
| 0.293043405 | 0.29554675  | 0.181773759 | 0.196777403 |
| 0.222754141 | 0.379888977 | 0.283669797 | 0.363670487 |
| 0.276088368 | 0.202260743 | 0.113630877 | 0.295621991 |
| 0.270702542 | 0.171485527 | 0.307624742 | 0.023553418 |
| 0.290014507 | 0.199001094 | 0.333967344 | 0.343353503 |
| 0.181225662 | 0.365565918 | 0.129661199 | 0.206478439 |
| 0.095774517 | 0.16890184  | 0.213961527 | 0.254480711 |
| 0.148695569 | 0.283965672 | 0.316990756 | 0.161995555 |
| 0.288691847 | 0.241990081 | 0.264255238 | 0.24706714  |
| 0.26702194  | 0.19274224  | 0.346298286 | 0.149496617 |
| 0.197013138 | 0.298730321 | 0.146471141 | 0.33559018  |
| 0.336471134 | 0.359649038 | 0.130750218 | 0.367406692 |
| 0.283850235 | 0.163804841 | 0.420742138 | 0.220000572 |
| 0.216187654 | 0.292109871 | 0.161335426 | 0.172731068 |
| 0.288864191 | 0.20079261  | 0.005796948 | 0.096964445 |
| 0.350970178 | 0.170160202 | 0.232469727 | 0.277581188 |
| 0.288201389 | 0.357434316 | 0.119854178 | 0.229998017 |
| 0.306620776 | 0.347477488 | 0.309103698 | 0.310653198 |
| 0.299215686 | 0.255689736 | 0.190073639 | 0.016272789 |
| 0.230749335 | 0.19735935  | 0.167834491 | 0.172820087 |
| 0.09720275  | 0.176298711 | 0.224334239 | 0.088084995 |
| 0.376398973 | 0.137016821 | 0.170404222 | 0.257278701 |
| 0.194667677 | 0.355293752 | 0.317659185 | 0.317498717 |
| 0.082577759 | 0.26606776  | 0.213596391 | 0.193192322 |
| 0.3316419   | 0.265682371 | 0.345035629 | 0.246445541 |
| 0.15539048  | 0.329481455 | 0.01668385  | 0.366766033 |
| 0.319220651 | 0.234805988 | 0.253398186 | 0.104257838 |
| 0.330983699 | 0.30761083  | 0.26746055  | 0.184779189 |
| 0.092137766 | 0.272081455 | 0.28462022  | 0.307955963 |
| 0.142360064 | 0.212040343 | 0.211851266 | 0.246035234 |
| 0.328132564 | 0.258614635 | 0.284799406 | 0.180644443 |
| 0.323897223 | 0.25726036  | 0.143362463 | 0.26035467  |
| 0.177049464 | 0.115506146 | 0.151274744 | 0.392954706 |
| 0.345090487 | 0.259156514 | 0.357557541 | 0.343566743 |
| 0.228316988 | 0.289114102 | 0.178316652 | 0.372358323 |
| 0.284105723 | 0.303804687 | 0.310536799 | 0.332219486 |
| 0.35799965  | 0.255115064 | 0.237356559 | 0.329887215 |
| 0.305698676 | 0.222041071 | 0.235575556 | 0.294894135 |
| 0.222660853 | 0.299740692 | 0.140708951 | 0.319416725 |
| 0.174109065 | 0.251715639 | 0.23244603  | 0.219214134 |
| 0.316676204 | 0.289790587 | 0.306234884 | 0.386446984 |
| 0.302285194 | 0.14425514  | 0.404611372 | 0.040396271 |
| 0.201579012 | 0.283840829 | 0.289839189 | 0.265969338 |
| 0.227997728 | 0.243188381 | 0.19223586  | 0.014117706 |

|             |             |             |             |
|-------------|-------------|-------------|-------------|
| 0.338694828 | 0.095638763 | 0.246386469 | 0.339823681 |
| 0.203279205 | 0.138798183 | 0.345388488 | 0.39708575  |
| 0.240088528 | 0.16137646  | 0.171461902 | 0.33706965  |
| 0.179730822 | 0.148687507 | 0.193886555 | 0.201824709 |
| 0.206520445 | 0.151710131 | 0.183829451 | 0.206732173 |
| 0.275806558 | 0.240331506 |             |             |
| EIF5        | 0.028187946 | 0.421031029 | 0.028342729 |
| 0.037403315 | 0.120930517 | 0.163176114 | 0.020834712 |
| 0.043884671 | 0.334010035 | 0.274233557 | 0.134148271 |
| 0.00395101  | 0.04137508  | 0.358163006 | 0.017719243 |
| 0.195876525 | 0.006840033 | 0.033822743 | 0.051483924 |
| 0.111534562 | 0.094604772 | 0.125195131 | 0.198082275 |
| 0.101576704 | 0.141641208 | 0.223680196 | 0.237848117 |
| 0.450440126 | 0.163933543 | 0.268394158 | 0.193921038 |
| 0.30987607  | 0.135272697 | 0.184350345 | 0.006249218 |
| 0.192825928 | 0.010619589 | 0.364779141 | 0.076577325 |
| 0.053848779 | 0.247399214 | 0.250619513 | 0.066025745 |
| 0.227663695 | 0.013389869 | 0.243138404 | 0.289482535 |
| 0.235860626 | 0.122206744 | 0.037233223 | 0.306534783 |
| 0.195405697 | 0.203790029 | 0.395672797 | 0.000840358 |
| 0.127832005 | 0.066458773 | 0.122168158 | 0.449394759 |
| 0.08784292  | 0.03228211  | 0.224428309 | 0.12684011  |
| 0.263577417 | 0.249859764 | 0.132746872 | 0.223016605 |
| 0.410127138 | 0.073919742 | 0.357952176 | 0.057726289 |
| 0.159702764 | 0.019658793 | 0.081056572 | 0.068529721 |
| 0.177294861 | 0.059963859 | 0.129658398 | 0.130424738 |
| 0.433530051 | 0.433346057 | 0.123248449 | 0.469526673 |
| 0.049213501 | 0.164684629 | 0.098714963 | 0.157353085 |
| 0.261264155 | 0.040487997 | 0.240174281 | 0.426277132 |
| 0.027597936 | 0.322018784 | 0.285626889 | 0.085035892 |
| 0.380654121 | 0.168384697 | 0.265919536 | 0.056945242 |
| 0.210549685 | 0.144992988 | 0.439256426 | 0.140026386 |
| 0.121403703 | 0.044282199 | 0.453965128 | 0.146517438 |
| 0.084929834 | 0.038116127 | 0.071182902 | 0.392317371 |
| 0.235560104 | 0.415978759 | 0.394346048 | 0.249600403 |
| 0.173924542 | 0.41643855  | 0.241442255 | 0.354850704 |
| 0.255052716 | 0.46813538  | 0.069300358 | 0.008628819 |
| 0.03748557  | 0.022626056 | 0.113213716 | 0.189429196 |
| 0.387683859 | 0.192418183 | 0.065178024 | 0.065606236 |
| 0.351801885 | 0.457280351 | 0.481399517 | 0.307076133 |
| 0.012182    | 0.1382685   | 0.174706898 | 0.120362942 |
| 0.220912898 | 0.054156839 | 0.088420705 | 0.441986369 |
| 0.260495776 | 0.315656884 | 0.07559565  | 0.431377489 |
| 0.087679812 | 0.396865969 | 0.428308861 | 0.046882636 |
| 0.439430468 | 0.433152997 | 0.396373815 | 0.238035183 |
| 0.395195163 | 0.133912342 | 0.047679521 | 0.298325293 |
| 0.357820137 | 0.003226049 | 0.424766792 | 0.43409405  |
| 0.452960813 | 0.372394034 | 0.420487225 | 0.432894231 |
| 0.461823814 | 0.036359005 | 0.034321345 | 0.120319897 |
| 0.446042793 | 0.272829457 | 0.042070614 | 0.220556215 |
| 0.175873035 | 0.164960607 | 0.352844309 | 0.112732014 |
| 0.392757352 | 0.376771824 | 0.446054333 | 0.291590113 |
| 0.214839458 | 0.226432722 | 0.218577441 | 0.427572084 |
| 0.011932588 | 0.043022388 | 0.034562082 | 0.197438461 |

|             |             |             |             |
|-------------|-------------|-------------|-------------|
| 0.23123367  | 0.054359222 | 0.16302142  | 0.193379538 |
| 0.071788665 | 0.173612647 | 0.170719682 | 0.212163596 |
| 0.052308814 | 0.248313058 | 0.064741268 | 0.076292443 |
| 0.007863218 | 0.103479976 | 0.048068492 | 0.041192668 |
| 0.072955734 | 0.213506286 | 0.326623084 | 0.419617296 |
| 0.160711601 | 0.113259437 | 0.288305014 | 0.361002111 |
| 0.281253826 | 0.170096339 | 0.134283633 | 0.000697768 |
| 0.090231663 | 0.235391768 | 0.09402205  | 0.243067496 |
| 0.154151316 | 0.075590689 | 0.201277675 | 0.226489693 |
| 0.124296709 | 0.076572502 | 0.149416623 | 0.330314397 |
| 0.112946723 | 0.090717467 | 0.318148465 | 0.266718704 |
| 0.000810894 | 0.123251079 | 0.329687448 | 0.044193259 |
| 0.199218852 | 0.039518146 | 0.099206025 | 0.368318188 |
| 0.140498372 | 0.081318469 | 0.427313412 | 0.236989528 |
| 0.148991549 | 0.217622799 | 0.433240174 | 0.034723194 |
| 0.183927296 | 0.00904178  | 0.12168311  | 1           |
| 0.105002012 | 0.154736793 | 0.130170532 | 0.087268407 |
| 0.081277063 | 0.443987029 | 0.299199485 | 0.421521177 |
| 0.164698358 | 0.435846324 | 0.351209828 | 0.315973813 |
| 0.198968958 | 0.202592313 | 0.061212568 | 0.317311888 |
| 0.366135854 | 0.166227075 | 0.058770891 | 0.385942989 |
| 0.213260311 | 0.250771373 | 0.036320267 | 0.378201779 |
| 0.394425656 | 0.462375407 | 0.035509484 | 0.22040053  |
| 0.236509457 | 0.085446049 | 0.325935365 | 0.429565975 |
| 0.238192485 | 0.143791166 | 0.117145972 | 0.258117051 |
| 0.078934922 | 0.067244029 | 0.245928842 | 0.095200014 |
| 0.007502014 | 0.037921775 | 0.029091002 | 0.037945315 |
| 0.049175156 | 0.332687959 | 0.235668139 | 0.436388674 |
| 0.032163439 | 0.32208551  | 0.158010981 | 0.082052364 |
| 0.349822091 | 0.14871492  | 0.18777798  | 0.208667746 |
| 0.148329165 | 0.002925645 | 0.025657537 | 0.432599207 |
| 0.033313793 | 0.080042505 | 0.147224668 | 0.000374263 |
| 0.016745285 | 0.434131546 | 0.081354653 | 0.143306423 |
| 0.366771953 | 0.155451559 | 0.110236137 | 0.229567059 |
| 0.177702803 | 0.032760883 | 0.000582283 | 0.435844037 |
| 0.457625948 | 0.429982065 | 0.463334037 | 0.442550674 |
| 0.399308133 | 0.327818865 | 0.289291645 | 0.188950901 |
| 0.033692482 | 0.046401909 | 0.067710337 | 0.086620091 |
| 0.002336878 | 0.231824567 | 0.126620099 | 0.065672341 |
| 0.301829191 | 0.172846074 | 0.010731995 | 0.187775707 |
| 0.005295962 | 0.08930391  | 0.134861678 | 0.076705523 |
| 0.20560145  | 0.004891502 | 0.094381791 | 0.133205612 |
| 0.370418676 | 0.247299112 | 0.177898138 | 0.459154846 |
| 0.116922713 | 0.111931976 | 0.095996968 | 0.238180887 |
| 0.021361951 | 0.101121969 | 0.176961268 | 0.041635894 |
| 0.120378444 | 0.412925423 | 0.18681967  | 0.026311936 |
| 0.107141443 | 0.000928001 | 0.27333555  | 0.440432134 |
| 0.450389937 | 0.425335211 | 0.405264456 | 0.090443788 |
| 0.421381861 | 0.093052284 | 0.457328627 | 0.336780351 |
| 0.223517745 | 0.000166905 | 0.000401343 | 0.404354444 |
| 0.177916476 | 0.058909128 | 0.063024269 | 0.155199051 |
| 0.024047345 | 0.070627821 | 0.022586744 | 0.049818849 |
| 0.256818564 | 0.069424882 | 0.056207234 | 0.433509721 |
| 0.074524473 | 0.08572682  | 0.210640378 | 0.059353268 |

|             |             |             |             |
|-------------|-------------|-------------|-------------|
| 0.215778192 | 0.012698259 | 0.06126063  | 0.000961318 |
| 0.210908492 | 0.099253746 | 0.435107664 | 0.447814538 |
| 0.379712193 | 0.222786426 | 0.248994372 | 0.144998865 |
| 0.374044229 | 0.085240776 | 0.207739498 | 0.076829484 |
| 0.441205462 | 0.197026914 | 0.16994435  | 0.194808628 |
| 0.381940269 | 0.373039388 | 0.009505947 | 0.27018635  |
| 0.002930637 | 0.000738097 | 0.181100667 | 0.149764431 |
| 0.068257148 | 0.143138832 | 0.139917302 | 0.128596491 |
| 0.094815402 | 0.009013276 | 0.106145178 | 0.089111394 |
| 0.125572709 | 0.136513908 | 0.089559252 | 0.17667532  |
| 0.089263104 | 0.039250742 | 0.059588435 | 0.049564532 |
| 0.149184071 | 0.24381698  | 0.141955898 | 0.006731928 |
| 0.237261646 | 0.193732357 | 0.017496918 | 0.081838689 |
| 0.313972202 | 0.393888711 | 0.010409092 | 0.000235498 |
| 0.162136999 | 0.122919631 | 0.393103727 | 0.458177334 |
| 0.452035372 | 0.40379434  | 0.29996     | 0.028545273 |
| 0.021503789 | 0.135619559 | 0.113392637 | 0.020989204 |
| 0.429374218 | 0.048496027 | 0.433935217 | 0.127144014 |
| 0.055978878 | 0.068124612 | 0.005697484 | 0.02835655  |
| 0.202042705 | 0.073241022 | 0.043768928 | 0.090171824 |
| 0.096695132 | 0.096518992 | 0.016423192 | 0.068800812 |
| 0.218047376 | 0.068520322 | 0.064641482 | 0.150815071 |
| 0.284581103 | 0.276630613 | 0.29308504  | 0.322963139 |
| 0.066636801 | 0.051430009 | 0.117596539 | 0.283921174 |
| 0.37658963  | 0.302720384 | 0.00670135  | 0.456250532 |
| 0.397687006 | 0.279258122 | 0.438528048 | 0.258151842 |
| 0.048435962 | 0.141263634 | 0.157735398 | 0.145834397 |
| 0.076823912 | 0.164493144 | 0.088676529 | 0.026095705 |
| 0.215791653 | 0.409788313 | 0.356653299 | 0.040777119 |
| 0.26373461  | 0.091827291 | 0.043685999 | 0.398765061 |
| 0.053727624 | 0.026273796 | 0.241944935 | 0.367307894 |
| 0.000174899 | 0.05519353  | 0.414894013 | 0.071800528 |
| 0.43845227  | 0.378949105 | 0.322318702 | 0.122289915 |
| 0.001133377 | 0.275033237 | 0.164499266 | 0.1422789   |
| 0.37538988  | 0.236798766 | 0.083983642 | 0.01501427  |
| 0.160762979 | 0.062007767 | 0.032188608 | 0.15930438  |
| 0.084796822 | 0.258047606 | 0.092551586 | 0.105420451 |
| 0.056082573 | 0.08803246  | 0.09137494  | 0.079041682 |
| 0.084571511 | 0.116046445 | 0.201725224 | 0.271130473 |
| 0.067921323 | 0.346247462 | 0.307094667 | 0.008565825 |
| 0.168751736 | 0.323514586 | 0.348768301 | 0.000127841 |
| 0.264176955 | 0.000730176 | 0.050266585 | 0.053507695 |
| 0.053683761 | 0.061593558 | 0.097323391 | 0.094465428 |
| 0.215136148 | 0.071617406 | 0.078822627 | 0.089025375 |
| 0.038296878 | 0.084252003 | 0.202509715 | 0.166230988 |
| 0.076459281 | 0.03786892  | 0.088734334 | 0.101127794 |
| 0.010670943 | 0.420111292 | 0.155185496 | 0.057500986 |
| 0.089319625 | 0.172587912 | 0.22127694  | 0.471289875 |
| 0.296647616 | 0.112476156 | 0.13244692  | 0.380167487 |
| 0.216869233 | 0.139034764 | 0.029203158 | 0.208151643 |
| 0.080274803 | 0.056071232 | 0.240615439 | 0.183083468 |
| 0.345937959 | 0.291943832 | 0.148428165 | 0.347392105 |
| 0.132124147 | 0.190404285 | 0.243023898 | 0.015101907 |
| 0.054122264 | 0.081942697 | 0.08399775  | 0.000601061 |

|             |             |             |             |
|-------------|-------------|-------------|-------------|
| 0.171846155 | 0.10807084  | 0.375004272 | 0.433992116 |
| 0.139555428 | 0.271600531 | 0.193785065 | 0.025367083 |
| 0.24815908  | 0.16793473  | 0.068932482 | 0.362382681 |
| 0.100471149 | 0.058552849 | 0.107076272 | 0.167932609 |
| 0.311611301 | 0.351945285 | 0.09780407  | 0.095952575 |
| 0.104797644 | 0.11741047  | 0.438719566 | 0.05739181  |
| 0.283070099 | 0.046464349 | 0.31697255  | 0.083852199 |
| 0.061535916 | 0.457574765 | 0.025524831 | 0.455102874 |
| 0.114000458 | 0.095470517 | 0.380462137 | 0.142918182 |
| 0.133175629 | 0.028942735 | 0.079952067 | 0.222519883 |
| 0.080014465 | 0.150538024 | 0.018616683 | 0.020611731 |
| 0.159611474 | 0.192409633 | 0.386417539 | 0.24953309  |
| 0.079604351 | 0.199936512 | 0.092023805 | 0.124243762 |
| 0.46836412  | 0.456466423 | 0.068834903 | 0.139600708 |
| 0.208077922 | 0.026130196 | 0.264399941 | 0.018585385 |
| 0.247076111 | 0.279048388 | 0.210313524 | 0.015126245 |
| 0.004688904 | 0.087947212 | 0.252157591 | 0.054617186 |
| 0.378711006 | 0.104674408 | 0.300033257 | 0.303946971 |
| 0.117156161 | 0.447412362 | 0.027401041 | 0.228072142 |
| 0.03259803  | 0.134806174 | 0.190580185 | 0.214667715 |
| 0.053814792 | 0.099996237 | 0.205847349 | 0.073712311 |
| 0.006496039 | 0.077643087 | 0.000417735 | 0.310947063 |
| 0.449438778 | 0.143114586 | 0.138099549 | 0.273436327 |
| 0.12599603  | 0.309318863 | 0.081343795 | 0.245807054 |
| 0.000958305 | 0.163487991 | 0.075825369 | 0.315774324 |
| 0.109824524 | 0.220435365 | 0.01171251  | 0.136713197 |
| 0.420962312 | 0.093075136 | 0.170080066 | 0.150871773 |
| 0.455316731 | 0.355199672 | 0.137787067 | 0.079670884 |
| 0.336040974 | 0.03817656  | 0.23703304  | 0.447000759 |
| 0.042890355 | 0.063403958 | 0.311500272 | 0.051641918 |
| 0.125212473 | 0.324792748 | 0.316560159 | 0.46105792  |
| 0.012314398 | 0.106085117 | 0.304935922 | 0.399817612 |
| 0.156601994 | 0.052875751 | 0.079516842 | 0.061540086 |
| 0.419002164 | 0.02485364  | 0.105775757 | 0.218984619 |
| 0.073064934 | 0.15057733  | 0.317282755 | 0.050527099 |
| 0.006537232 | 0.059880999 | 0.139441679 | 0.065091038 |
| 0.11486606  | 0.141953319 | 0.075057959 | 0.265015948 |
| 0.028299293 | 0.002746067 | 0.337495325 | 0.005876685 |
| 0.175336768 | 0.194613736 | 0.095524507 | 0.132947548 |
| 0.118732985 | 0.199119978 | 0.18335883  | 0.000210977 |
| 0.28697595  | 0.018920843 | 0.127399811 | 0.05588826  |
| 0.12393507  | 0.017675062 | 0.380790214 | 0.404883283 |
| 0.184319124 | 0.190525153 | 0.166694136 | 0.395509736 |
| 0.051919405 | 0.207180566 | 0.16788217  | 0.318762903 |
| 0.083361886 | 0.239412455 | 0.215281638 | 0.162514882 |
| 0.253051704 | 0.108805486 |             |             |
| EL0F1       | 0.156568688 | 0.282549677 | 0.115763993 |
| 0.223409887 | 0.183110436 | 0.169517904 | 0.171266767 |
| 0.194693216 | 0.233968578 | 0.089668952 | 0.209204977 |
| 0.119477139 | 0.03569619  | 0.338484206 | 0.165772173 |
| 0.192977547 | 0.161548701 | 0.217289162 | 0.060958221 |
| 0.167027274 | 0.194713136 | 0.141228492 | 0.160175979 |
| 0.178792883 | 0.283785441 | 0.194226673 | 0.130796639 |
| 0.334767331 | 0.071407524 | 0.211943516 | 0.066594479 |

|             |             |             |             |
|-------------|-------------|-------------|-------------|
| 0.394361428 | 0.181134768 | 0.125883033 | 0.093664938 |
| 0.178277663 | 0.011656057 | 0.400267935 | 0.240087752 |
| 0.090191225 | 0.358972535 | 0.109583664 | 0.258471967 |
| 0.139985606 | 0.134873824 | 0.048705115 | 0.197856431 |
| 0.178219253 | 0.194123135 | 0.119425512 | 0.230515879 |
| 0.15179037  | 0.251639026 | 0.191944396 | 0.005411123 |
| 0.109186188 | 0.021811315 | 0.071883578 | 0.363862114 |
| 0.271461517 | 0.235756078 | 0.082559668 | 0.15964078  |
| 0.16655667  | 0.221516331 | 0.248155243 | 0.132539762 |
| 0.369741439 | 0.081149707 | 0.21188104  | 0.163027582 |
| 0.192288238 | 0.099116817 | 0.273257053 | 0.122044114 |
| 0.156501405 | 0.244598328 | 0.184103843 | 0.135043539 |
| 0.27933209  | 0.416302388 | 0.243984824 | 0.365154394 |
| 0.066768916 | 0.153327103 | 0.167462532 | 0.29634464  |
| 0.242187949 | 0.156367838 | 0.282935945 | 0.40989222  |
| 0.112029426 | 0.134442044 | 0.238922208 | 0.175627069 |
| 0.288380337 | 0.097250312 | 0.128757208 | 0.092788743 |
| 0.20863349  | 0.182171938 | 0.366682701 | 0.296626999 |
| 0.160039524 | 0.139485841 | 0.368656395 | 0.144772682 |
| 0.205657388 | 0.166763026 | 0.183423403 | 0.275885641 |
| 0.226872689 | 0.338441647 | 0.260530588 | 0.289627049 |
| 0.167411182 | 0.364078157 | 0.269795351 | 0.302139662 |
| 0.030631986 | 0.369750432 | 0.234210896 | 0.166411755 |
| 0.123374514 | 0.193151573 | 0.132835283 | 0.321504657 |
| 0.312060793 | 0.234851464 | 0.230248738 | 0.24836451  |
| 0.324118793 | 0.344257023 | 0.3621482   | 0.297720653 |
| 0.149745816 | 0.095992612 | 0.173632043 | 0.17705011  |
| 0.247023841 | 0.182877863 | 0.136247017 | 0.401450984 |
| 0.360909102 | 0.29493381  | 0.178655356 | 0.418983189 |
| 0.183472282 | 0.413092683 | 0.28559014  | 0.260693274 |
| 0.405470782 | 0.385119157 | 0.391762376 | 0.214912185 |
| 0.375012528 | 0.212240147 | 0.041232765 | 0.297269157 |
| 0.397859904 | 0.018103601 | 0.295717925 | 0.327054817 |
| 0.356313679 | 0.285404176 | 0.386302372 | 0.347095174 |
| 0.348759294 | 0.159857706 | 0.011112751 | 0.245536713 |
| 0.383487787 | 0.346274156 | 0.183081566 | 0.151089201 |
| 0.186343984 | 0.186990615 | 0.244614044 | 0.13986436  |
| 0.428318612 | 0.311487636 | 0.309896546 | 0.26077867  |
| 0.151730805 | 0.343879733 | 0.129626945 | 0.363463937 |
| 0.159848964 | 0.179127206 | 0.119657401 | 0.268910902 |
| 0.11768089  | 0.250417867 | 0.179253582 | 0.165238637 |
| 0.260065381 | 0.164118289 | 0.102830153 | 0.217642553 |
| 0.139451545 | 0.162759383 | 0.221253362 | 0.202538831 |
| 0.186518635 | 0.257021315 | 0.232038421 | 0.23263519  |
| 0.223397639 | 0.304626877 | 0.209284875 | 0.340775852 |
| 0.161724284 | 0.249688597 | 0.234838944 | 0.383405099 |
| 0.409600049 | 0.165617168 | 0.275541242 | 0.0842074   |
| 0.1820428   | 0.087984172 | 0.070237717 | 0.140466016 |
| 0.271714933 | 0.218354393 | 0.19940756  | 0.254760847 |
| 0.198694045 | 0.153748414 | 0.168251578 | 0.39519111  |
| 0.207122661 | 0.196160867 | 0.334551186 | 0.152874385 |
| 0.039591604 | 0.235502387 | 0.293521357 | 0.154278042 |
| 0.231870603 | 0.086213988 | 0.095721155 | 0.334395747 |
| 0.105892225 | 0.1390733   | 0.320851572 | 0.244514773 |

|             |             |             |             |
|-------------|-------------|-------------|-------------|
| 0.133899097 | 0.257093522 | 0.381555626 | 0.019466233 |
| 0.145785854 | 0.110147118 | 0.292664489 | 0.105002012 |
| 1           | 0.28835351  | 0.159375684 | 0.184115593 |
| 0.171413454 | 0.37635749  | 0.294899219 | 0.358710194 |
| 0.144963295 | 0.38998304  | 0.301440905 | 0.343382375 |
| 0.250160544 | 0.123602238 | 0.053824921 | 0.299570016 |
| 0.319707788 | 0.119515839 | 0.147158106 | 0.238162827 |
| 0.135681866 | 0.21760022  | 0.132719058 | 0.384314902 |
| 0.418350284 | 0.328304505 | 0.226741286 | 0.28592422  |
| 0.336644093 | 0.235088829 | 0.288680456 | 0.395985632 |
| 0.10461938  | 0.172836581 | 0.182651145 | 0.326233833 |
| 0.248616807 | 0.163386534 | 0.308599435 | 0.061605062 |
| 0.002613069 | 0.144144916 | 0.155386152 | 0.238635308 |
| 0.113653223 | 0.153528628 | 0.230415478 | 0.369874128 |
| 0.230053393 | 0.332912767 | 0.238244719 | 0.222248286 |
| 0.339841149 | 0.152222274 | 0.143723825 | 0.188536604 |
| 0.276468373 | 0.098671287 | 0.228291516 | 0.425553125 |
| 0.09173293  | 0.119358912 | 0.176901583 | 0.017761764 |
| 0.150952892 | 0.224293389 | 0.199837911 | 0.314708271 |
| 0.341212858 | 0.297121552 | 0.244079452 | 0.117140121 |
| 0.265940044 | 0.199294418 | 0.025843785 | 0.338151407 |
| 0.340212062 | 0.328040013 | 0.335922707 | 0.336798656 |
| 0.306191604 | 0.232151727 | 0.281771302 | 0.170046057 |
| 0.208809145 | 0.14606608  | 0.1394262   | 0.232378359 |
| 0.014228076 | 0.294373247 | 0.17436639  | 0.254229167 |
| 0.236649771 | 0.243931095 | 0.142830589 | 0.163521796 |
| 0.108502348 | 0.072981754 | 0.181122856 | 0.200608438 |
| 0.259377421 | 0.088886508 | 0.130926767 | 0.144373101 |
| 0.336708877 | 0.322150721 | 0.120785026 | 0.383538844 |
| 0.227181887 | 0.169218284 | 0.224609793 | 0.257986103 |
| 0.202098027 | 0.046490635 | 0.165141989 | 0.015248908 |
| 0.075265367 | 0.341229665 | 0.142129002 | 0.175449909 |
| 0.261752419 | 0.054833286 | 0.330227653 | 0.391713931 |
| 0.324198944 | 0.367670776 | 0.367238101 | 0.130390914 |
| 0.373802599 | 0.025209837 | 0.364489859 | 0.290671575 |
| 0.124242016 | 0.0072382   | 0.036181991 | 0.325902276 |
| 0.182366542 | 0.121265722 | 0.241780315 | 0.148029398 |
| 0.25836973  | 0.177446642 | 0.159037701 | 0.155539321 |
| 0.191196139 | 0.200993826 | 0.121480263 | 0.342634197 |
| 0.254957181 | 0.234484834 | 0.143545154 | 0.168173596 |
| 0.170290804 | 0.19228834  | 0.161269002 | 0.036943775 |
| 0.245585338 | 0.192592344 | 0.373425314 | 0.357299451 |
| 0.402148973 | 0.239493988 | 0.09408784  | 0.135307004 |
| 0.293119406 | 0.142998495 | 0.112780609 | 0.146922664 |
| 0.337041311 | 0.225720161 | 0.329354573 | 0.336483326 |
| 0.396390174 | 0.378275399 | 0.145458474 | 0.294993554 |
| 0.073484647 | 0.007708413 | 0.172571465 | 0.247732842 |
| 0.035108624 | 0.171813068 | 0.324980735 | 0.152171839 |
| 0.173575784 | 0.123789771 | 0.121358346 | 0.125887724 |
| 0.256526064 | 0.205739534 | 0.168084461 | 0.237523007 |
| 0.187613343 | 0.157118638 | 0.222754869 | 0.20315313  |
| 0.110124579 | 0.310473878 | 0.291324111 | 0.118010844 |
| 0.153425931 | 0.161087626 | 0.175492315 | 0.229807627 |
| 0.330073893 | 0.340045625 | 0.180257461 | 0.09444126  |



|             |             |             |             |
|-------------|-------------|-------------|-------------|
| 0.305072938 | 0.17930149  | 0.350514751 | 0.335527132 |
| 0.397311941 | 0.41450384  | 0.384134785 | 0.205078167 |
| 0.177225949 | 0.218810694 | 0.161697998 | 0.186132473 |
| 0.359581146 | 0.122746988 | 0.343364526 | 0.123966771 |
| 0.202535522 | 0.261640606 | 0.153953278 | 0.193803416 |
| 0.148231317 | 0.238499228 | 0.243337473 | 0.188114896 |
| 0.225117358 | 0.111783397 | 0.157856977 | 0.257273788 |
| 0.299996721 | 0.099154095 | 0.233891406 | 0.167595028 |
| 0.269780602 | 0.065679214 | 0.237272614 | 0.413347204 |
| 0.21254792  | 0.18387043  | 0.184759206 | 0.235804112 |
| 0.272547144 | 0.122249935 | 0.081361461 | 0.287820736 |
| 0.3512663   | 0.205113585 | 0.36168951  | 0.341899341 |
| 0.174506707 | 0.17727438  | 0.121342006 | 0.195469916 |
| 0.222315206 | 0.168715324 | 0.211972474 | 0.164633039 |
| 0.317514465 | 0.397986063 | 0.309563243 | 0.252568556 |
| 0.149721141 | 0.141410632 | 0.111193703 | 0.281680141 |
| 0.134515227 | 0.20015323  | 0.114761792 | 0.257383753 |
| 0.012151487 | 0.062504457 | 0.34518655  | 0.213214537 |
| 0.397487368 | 0.3508469   | 0.392365998 | 0.165684889 |
| 0.001946436 | 0.203273813 | 0.232307101 | 0.187454093 |
| 0.29979527  | 0.28116878  | 0.103540229 | 0.226583573 |
| 0.339926171 | 0.146248939 | 0.25478845  | 0.143066384 |
| 0.089918068 | 0.203539002 | 0.28166673  | 0.199270931 |
| 0.229901987 | 0.136747149 | 0.108184139 | 0.23148413  |
| 0.080795733 | 0.3123422   | 0.342623568 | 0.085009374 |
| 0.098224132 | 0.325560101 | 0.285566716 | 0.118668085 |
| 0.138297479 | 0.304493103 | 0.322596306 | 0.026845641 |
| 0.246922841 | 0.075140333 | 0.22967078  | 0.244079007 |
| 0.24153382  | 0.221425505 | 0.225820522 | 0.197512759 |
| 0.21549164  | 0.250914246 | 0.239543155 | 0.267205185 |
| 0.239959717 | 0.209660477 | 0.185464505 | 0.190309038 |
| 0.201786163 | 0.231284998 | 0.196975738 | 0.201441493 |
| 0.164671425 | 0.298166831 | 0.328261261 | 0.148931817 |
| 0.239790851 | 0.168727635 | 0.380536416 | 0.336091183 |
| 0.350697521 | 0.177837088 | 0.188618026 | 0.298979667 |
| 0.062754373 | 0.136549438 | 0.128745036 | 0.179338884 |
| 0.228749832 | 0.168175914 | 0.143195687 | 0.200189368 |
| 0.2164195   | 0.398467179 | 0.308328686 | 0.358039564 |
| 0.192697278 | 0.150737187 | 0.100763267 | 0.222817945 |
| 0.256866827 | 0.211342101 | 0.180585929 | 0.033726099 |
| 0.253126927 | 0.185782636 | 0.311024653 | 0.366247963 |
| 0.099416936 | 0.354734944 | 0.111796875 | 0.215499147 |
| 0.084453763 | 0.243171255 | 0.237804219 | 0.233432617 |
| 0.074252477 | 0.228961845 | 0.205018867 | 0.144588435 |
| 0.250552155 | 0.220646688 | 0.157633208 | 0.195751883 |
| 0.208615756 | 0.213400837 | 0.368393751 | 0.163592774 |
| 0.160118426 | 0.166081844 | 0.14238897  | 0.235916445 |
| 0.225459888 | 0.348058877 | 0.148899737 | 0.352262091 |
| 0.193026119 | 0.213323461 | 0.422988139 | 0.173457394 |
| 0.17325129  | 0.188775058 | 0.07675981  | 0.139270817 |
| 0.214165787 | 0.119159031 | 0.003513257 | 0.049848952 |
| 0.308866814 | 0.126683447 | 0.236946566 | 0.248622093 |
| 0.164945497 | 0.312451924 | 0.052527126 | 0.193576095 |
| 0.334535571 | 0.378240561 | 0.240513251 | 0.313706456 |

|             |             |             |             |
|-------------|-------------|-------------|-------------|
| 0.285095075 | 0.219954984 | 0.187993805 | 0.00972352  |
| 0.187589674 | 0.153292933 | 0.126275614 | 0.163693392 |
| 0.1137163   | 0.091151639 | 0.191135183 | 0.117761047 |
| 0.338685525 | 0.067034574 | 0.161722496 | 0.228102161 |
| 0.2225713   | 0.388134366 | 0.207226178 | 0.27182385  |
| 0.100208537 | 0.248750911 | 0.139127137 | 0.141186331 |
| 0.215322447 | 0.154480897 | 0.302916586 | 0.127990045 |
| 0.158090536 | 0.212784552 | 0.020166117 | 0.403461812 |
| 0.358758314 | 0.148833356 | 0.290621585 | 0.079960501 |
| 0.290440764 | 0.29800834  | 0.167398753 | 0.132928163 |
| 0.086940077 | 0.18245343  | 0.223486026 | 0.308673311 |
| 0.093387213 | 0.165920205 | 0.180108502 | 0.151752735 |
| 0.375934589 | 0.172703489 | 0.292221829 | 0.128955992 |
| 0.33577384  | 0.258890419 | 0.199083048 | 0.150847989 |
| 0.169796921 | 0.146505023 | 0.120657799 | 0.385363701 |
| 0.245010071 | 0.135893812 | 0.309842943 | 0.268762034 |
| 0.129375034 | 0.295464337 | 0.149245762 | 0.371128884 |
| 0.186183294 | 0.278155142 | 0.269725011 | 0.330816678 |
| 0.318433824 | 0.130975975 | 0.12793395  | 0.211142468 |
| 0.331842249 | 0.200028101 | 0.134517825 | 0.294348224 |
| 0.11955234  | 0.254388882 | 0.139529333 | 0.1880363   |
| 0.149704094 | 0.185920746 | 0.16411016  | 0.214899067 |
| 0.236196247 | 0.201577944 | 0.186597083 | 0.38314566  |
| 0.206092782 | 0.136065751 | 0.39962873  | 0.017335031 |
| 0.176061845 | 0.23322588  | 0.223052336 | 0.170907052 |
| 0.279853224 | 0.204021841 | 0.178109599 | 0.023390878 |
| 0.301545617 | 0.051660382 | 0.161423133 | 0.213012663 |
| 0.117926615 | 0.157489053 | 0.355087957 | 0.369189401 |
| 0.222596707 | 0.107288677 | 0.108607918 | 0.341469004 |
| 0.088115199 | 0.09402189  | 0.121342984 | 0.201288871 |
| 0.10291866  | 0.120870181 | 0.131599765 | 0.135738076 |
| 0.268451159 | 0.188218846 |             |             |
| EN01        | 0.15176597  | 0.291676497 | 0.088352727 |
| 0.178647443 | 0.278603141 | 0.209143131 | 0.201265677 |
| 0.267355609 | 0.261331714 | 0.135913796 | 0.264390484 |
| 0.096299136 | 0.096765198 | 0.359992493 | 0.208272373 |
| 0.265039097 | 0.174427462 | 0.257067484 | 0.119114364 |
| 0.225837405 | 0.296940348 | 0.208955239 | 0.210728416 |
| 0.296710832 | 0.23262782  | 0.225859198 | 0.220547405 |
| 0.344398952 | 0.10833996  | 0.232457357 | 0.076500763 |
| 0.385501675 | 0.27359038  | 0.1931016   | 0.06442023  |
| 0.251167249 | 0.047502758 | 0.390384029 | 0.305256622 |
| 0.134001957 | 0.347506018 | 0.143808844 | 0.282657779 |
| 0.190537289 | 0.101571894 | 0.070179094 | 0.249568581 |
| 0.232435188 | 0.284776917 | 0.111949297 | 0.238816691 |
| 0.243804297 | 0.249395188 | 0.200299523 | 0.011776445 |
| 0.18182438  | 0.052161252 | 0.13902616  | 0.3648564   |
| 0.273465516 | 0.283711653 | 0.151537018 | 0.259743279 |
| 0.250377141 | 0.282052533 | 0.309834638 | 0.198597982 |
| 0.371608128 | 0.174603256 | 0.246104345 | 0.171212219 |
| 0.255505264 | 0.10764271  | 0.252345522 | 0.141109142 |
| 0.2387773   | 0.311931862 | 0.273280433 | 0.225659953 |
| 0.27909277  | 0.429605642 | 0.291963306 | 0.36429253  |
| 0.17753468  | 0.256740856 | 0.267308406 | 0.321523828 |

|             |             |             |             |
|-------------|-------------|-------------|-------------|
| 0.291843293 | 0.227610386 | 0.281226517 | 0.41469375  |
| 0.145485979 | 0.182525309 | 0.270515088 | 0.179900412 |
| 0.291828951 | 0.199344919 | 0.172200241 | 0.164375451 |
| 0.268627415 | 0.277839293 | 0.386941601 | 0.290758206 |
| 0.270845128 | 0.129737146 | 0.359179147 | 0.243130894 |
| 0.258869678 | 0.142724829 | 0.292320921 | 0.311654763 |
| 0.253479986 | 0.34828162  | 0.288957024 | 0.325770889 |
| 0.25518229  | 0.364983417 | 0.257611905 | 0.332426153 |
| 0.05636974  | 0.380747137 | 0.236411087 | 0.181961881 |
| 0.131722482 | 0.261103446 | 0.2765573   | 0.341142935 |
| 0.326321826 | 0.286607716 | 0.264937368 | 0.323874576 |
| 0.360987249 | 0.338131496 | 0.376786277 | 0.324299483 |
| 0.14130616  | 0.198093355 | 0.246724026 | 0.24818812  |
| 0.292178577 | 0.23957017  | 0.225963812 | 0.394262958 |
| 0.339171045 | 0.322065353 | 0.20284142  | 0.417193079 |
| 0.298266205 | 0.41750534  | 0.285824362 | 0.271520366 |
| 0.400328037 | 0.371266852 | 0.406968386 | 0.248855118 |
| 0.370230689 | 0.228909034 | 0.1081934   | 0.324056921 |
| 0.413923965 | 0.024037181 | 0.328675383 | 0.356146869 |
| 0.354468168 | 0.310205723 | 0.416676076 | 0.368043582 |
| 0.355694962 | 0.174431003 | 0.031628582 | 0.330107734 |
| 0.377633784 | 0.326221073 | 0.322381799 | 0.22147595  |
| 0.280770049 | 0.232596514 | 0.285806228 | 0.18194093  |
| 0.449509903 | 0.325070847 | 0.335987591 | 0.293523197 |
| 0.222399894 | 0.332733771 | 0.211415275 | 0.34478865  |
| 0.164985887 | 0.174453355 | 0.099894995 | 0.312070038 |
| 0.145953522 | 0.312269709 | 0.239832376 | 0.282607803 |
| 0.306956669 | 0.235064078 | 0.178023412 | 0.270362807 |
| 0.101984126 | 0.2133142   | 0.235918683 | 0.231087748 |
| 0.178800919 | 0.225195622 | 0.26751977  | 0.242126996 |
| 0.328820649 | 0.267875744 | 0.241800329 | 0.364971032 |
| 0.270617844 | 0.19580367  | 0.253473911 | 0.403406743 |
| 0.422496067 | 0.237971576 | 0.28793539  | 0.043141678 |
| 0.260068198 | 0.162468871 | 0.150818703 | 0.218810535 |
| 0.238055248 | 0.315601801 | 0.278406694 | 0.284998943 |
| 0.21684919  | 0.211053965 | 0.264013234 | 0.389809901 |
| 0.177927085 | 0.260776292 | 0.355580887 | 0.223027204 |
| 0.022348626 | 0.274885971 | 0.307632224 | 0.281655356 |
| 0.281997799 | 0.142329988 | 0.146678321 | 0.347108347 |
| 0.212381354 | 0.26954588  | 0.347919131 | 0.286807731 |
| 0.211457744 | 0.241537787 | 0.41031981  | 0.062739759 |
| 0.256829667 | 0.130500106 | 0.320517136 | 0.154736793 |
| 0.28835351  | 1           | 0.261349035 | 0.270987628 |
| 0.146256283 | 0.389008333 | 0.314989338 | 0.372028815 |
| 0.223390054 | 0.413351774 | 0.32454348  | 0.350219975 |
| 0.277165712 | 0.218697512 | 0.111084969 | 0.302181866 |
| 0.332778234 | 0.208223597 | 0.118293055 | 0.278777279 |
| 0.21250752  | 0.265866348 | 0.24862156  | 0.390517828 |
| 0.420488395 | 0.32174742  | 0.307633758 | 0.329794801 |
| 0.320485762 | 0.251850897 | 0.320879214 | 0.429177874 |
| 0.165852272 | 0.271275381 | 0.261081184 | 0.359478107 |
| 0.244951278 | 0.282863985 | 0.334367144 | 0.136997407 |
| 0.004159361 | 0.171978697 | 0.142864197 | 0.311161072 |
| 0.198817546 | 0.202546776 | 0.276006011 | 0.387512121 |

|             |             |             |             |
|-------------|-------------|-------------|-------------|
| 0.263753395 | 0.343031538 | 0.281928984 | 0.274033935 |
| 0.336602916 | 0.268545406 | 0.225379808 | 0.266889162 |
| 0.286431251 | 0.064350801 | 0.212556188 | 0.427834946 |
| 0.087798672 | 0.201773953 | 0.274850948 | 0.010429298 |
| 0.143426786 | 0.24247049  | 0.156567046 | 0.267006273 |
| 0.381482299 | 0.244687834 | 0.235486935 | 0.171482062 |
| 0.297669351 | 0.20751344  | 0.0160644   | 0.35991358  |
| 0.372692929 | 0.364197856 | 0.367563628 | 0.355390696 |
| 0.349389368 | 0.273466353 | 0.316077189 | 0.201328825 |
| 0.245827376 | 0.159730927 | 0.219577086 | 0.316436545 |
| 0.013083055 | 0.313068438 | 0.296040343 | 0.237745167 |
| 0.284786408 | 0.312006696 | 0.133462057 | 0.269851337 |
| 0.058788683 | 0.124242122 | 0.276651229 | 0.337868224 |
| 0.320214841 | 0.067747486 | 0.121591542 | 0.22614267  |
| 0.315636136 | 0.308396498 | 0.197772515 | 0.390480439 |
| 0.286988535 | 0.135335725 | 0.285254735 | 0.291530194 |
| 0.213921786 | 0.09683981  | 0.245150336 | 0.013967781 |
| 0.125623593 | 0.372510213 | 0.242423825 | 0.13985562  |
| 0.292269788 | 0.031967841 | 0.299645693 | 0.404878046 |
| 0.317067963 | 0.390207732 | 0.370489093 | 0.201674891 |
| 0.370728606 | 0.064838616 | 0.380249069 | 0.28692736  |
| 0.177908967 | 0.003339342 | 0.036283605 | 0.343457311 |
| 0.253863375 | 0.086766948 | 0.262627293 | 0.169583104 |
| 0.250290204 | 0.180596709 | 0.196889906 | 0.238652985 |
| 0.226800521 | 0.303986646 | 0.241653599 | 0.347826048 |
| 0.318955252 | 0.328811639 | 0.210403591 | 0.159085772 |
| 0.246426061 | 0.170022491 | 0.16801739  | 0.02161761  |
| 0.295116022 | 0.153560829 | 0.364489732 | 0.36613611  |
| 0.410678446 | 0.272122692 | 0.141267926 | 0.202310508 |
| 0.3413963   | 0.10579103  | 0.178354219 | 0.135406515 |
| 0.331683071 | 0.272405786 | 0.315942535 | 0.291721332 |
| 0.411912954 | 0.372357565 | 0.145245767 | 0.313795708 |
| 0.036329568 | 0.011673983 | 0.195300864 | 0.307973194 |
| 0.112323955 | 0.261058994 | 0.291584874 | 0.271578329 |
| 0.299743078 | 0.092456391 | 0.210580512 | 0.225743268 |
| 0.313749458 | 0.299230627 | 0.264892347 | 0.273616875 |
| 0.296673273 | 0.256105752 | 0.303865481 | 0.323003558 |
| 0.243738579 | 0.283487042 | 0.232935498 | 0.116105473 |
| 0.205809796 | 0.234809782 | 0.16521552  | 0.233993979 |
| 0.330471877 | 0.354094275 | 0.193228285 | 0.064593355 |
| 0.291048974 | 0.315256709 | 0.38047821  | 0.341032991 |
| 0.397257512 | 0.429324359 | 0.379227708 | 0.32680789  |
| 0.179536178 | 0.306409257 | 0.267858532 | 0.269834337 |
| 0.376176672 | 0.11752252  | 0.347774707 | 0.213960539 |
| 0.233623763 | 0.278770377 | 0.144846197 | 0.22752676  |
| 0.227533345 | 0.286846133 | 0.319835025 | 0.160141379 |
| 0.307103709 | 0.201171566 | 0.177997209 | 0.301263409 |
| 0.308328032 | 0.160662181 | 0.27510313  | 0.252960753 |
| 0.27498273  | 0.120725001 | 0.270454526 | 0.414178545 |
| 0.200650546 | 0.216197347 | 0.182664032 | 0.292507636 |
| 0.290559717 | 0.188603935 | 0.054261034 | 0.293713281 |
| 0.381928862 | 0.231705497 | 0.358713721 | 0.386881269 |
| 0.17820409  | 0.244143922 | 0.231476143 | 0.297009747 |
| 0.307342484 | 0.2124464   | 0.336669395 | 0.172201683 |

|             |             |             |             |
|-------------|-------------|-------------|-------------|
| 0.346114996 | 0.414540792 | 0.310289898 | 0.28657326  |
| 0.217583782 | 0.153917331 | 0.104589108 | 0.316658166 |
| 0.213834807 | 0.181919357 | 0.158224928 | 0.308465199 |
| 0.009791795 | 0.130648228 | 0.389061314 | 0.283868525 |
| 0.421422062 | 0.367761416 | 0.376714048 | 0.260757622 |
| 0.007306759 | 0.247942551 | 0.274184842 | 0.238729745 |
| 0.306549136 | 0.283965685 | 0.204179095 | 0.232666257 |
| 0.331359098 | 0.11100379  | 0.301685538 | 0.177123264 |
| 0.144262272 | 0.243067531 | 0.300555222 | 0.284321449 |
| 0.33155835  | 0.136511673 | 0.182170525 | 0.27132503  |
| 0.193137882 | 0.301256509 | 0.339980383 | 0.131809257 |
| 0.150582701 | 0.372564451 | 0.291580266 | 0.096757844 |
| 0.237131203 | 0.339867284 | 0.356240929 | 0.016751681 |
| 0.268419407 | 0.060667451 | 0.327680761 | 0.295709827 |
| 0.317512244 | 0.34688109  | 0.332410307 | 0.278158062 |
| 0.277383446 | 0.323517325 | 0.277177307 | 0.305207121 |
| 0.281175777 | 0.294310447 | 0.269851428 | 0.249790629 |
| 0.260836852 | 0.22311959  | 0.157056522 | 0.151959591 |
| 0.155866696 | 0.320992309 | 0.294738335 | 0.108888286 |
| 0.327106821 | 0.263703903 | 0.376055151 | 0.336642818 |
| 0.377225197 | 0.131783331 | 0.303761465 | 0.291693076 |
| 0.128715415 | 0.192528909 | 0.14607979  | 0.234873292 |
| 0.306236876 | 0.247178505 | 0.207299228 | 0.212971661 |
| 0.246599456 | 0.377200817 | 0.282381862 | 0.368169797 |
| 0.269397786 | 0.257013116 | 0.129143993 | 0.229873278 |
| 0.250777727 | 0.210686795 | 0.276608219 | 0.014647731 |
| 0.29771612  | 0.191052744 | 0.323048167 | 0.352234491 |
| 0.187060962 | 0.363803885 | 0.134759554 | 0.194058748 |
| 0.105534141 | 0.190245095 | 0.236683242 | 0.262990187 |
| 0.13545455  | 0.273832281 | 0.299052925 | 0.170112711 |
| 0.281738655 | 0.257218347 | 0.283557302 | 0.30963076  |
| 0.317071157 | 0.211427679 | 0.385644223 | 0.169737539 |
| 0.21331081  | 0.236741524 | 0.184266873 | 0.302057653 |
| 0.334002198 | 0.370217755 | 0.14950144  | 0.375733474 |
| 0.286479295 | 0.18476012  | 0.432325062 | 0.257974965 |
| 0.241637637 | 0.249933745 | 0.143396424 | 0.208973829 |
| 0.325428909 | 0.195560578 | 0.008708763 | 0.102051296 |
| 0.314209307 | 0.235243479 | 0.256603647 | 0.302546667 |
| 0.272150648 | 0.356610808 | 0.120736026 | 0.286918199 |
| 0.329899963 | 0.375385094 | 0.267825623 | 0.318018149 |
| 0.308529484 | 0.237084635 | 0.202226758 | 0.037731064 |
| 0.242304296 | 0.209711111 | 0.194740835 | 0.196314928 |
| 0.106921059 | 0.159347871 | 0.242769287 | 0.131827428 |
| 0.37660934  | 0.122782521 | 0.218914019 | 0.24735016  |
| 0.242368984 | 0.38066871  | 0.308793827 | 0.283278259 |
| 0.138788066 | 0.299189893 | 0.227243342 | 0.236252814 |
| 0.255300722 | 0.246043971 | 0.30992664  | 0.205297211 |
| 0.148082825 | 0.28298005  | 0.019661968 | 0.375622951 |
| 0.347486539 | 0.240168738 | 0.273902656 | 0.140344587 |
| 0.317741747 | 0.330547807 | 0.303257979 | 0.202146067 |
| 0.061265757 | 0.254349484 | 0.30578736  | 0.295632802 |
| 0.124866657 | 0.259586472 | 0.170217852 | 0.272846889 |
| 0.3603444   | 0.27000501  | 0.319473829 | 0.176943711 |
| 0.337451263 | 0.280868151 | 0.157368341 | 0.264128558 |

|             |             |             |             |
|-------------|-------------|-------------|-------------|
| 0.217961406 | 0.143635738 | 0.171303437 | 0.409921877 |
| 0.312646469 | 0.216697284 | 0.335181233 | 0.310435535 |
| 0.233525855 | 0.311704541 | 0.2071618   | 0.401483243 |
| 0.265959981 | 0.309502584 | 0.309014968 | 0.354577846 |
| 0.341668775 | 0.244271178 | 0.21383657  | 0.308138871 |
| 0.314894332 | 0.163889756 | 0.262530686 | 0.288145026 |
| 0.197055286 | 0.314708699 | 0.181282601 | 0.305367681 |
| 0.136172338 | 0.322814752 | 0.220219201 | 0.244452604 |
| 0.326270375 | 0.276360297 | 0.288907877 | 0.379163678 |
| 0.221419594 | 0.086621732 | 0.410640946 | 0.028168138 |
| 0.203606702 | 0.261151748 | 0.304747981 | 0.273074059 |
| 0.220096902 | 0.282367058 | 0.218404148 | 0.01139176  |
| 0.332295512 | 0.070860439 | 0.280700405 | 0.271706921 |
| 0.219534431 | 0.160732526 | 0.349263747 | 0.396318835 |
| 0.270730088 | 0.191098756 | 0.17163081  | 0.352635803 |
| 0.153548546 | 0.163240172 | 0.221765497 | 0.214094976 |
| 0.185745349 | 0.172177205 | 0.205416306 | 0.191689275 |
| 0.268075066 | 0.279936141 |             |             |
| ENPP5       | 0.040278242 | 0.279076876 | 0.021751791 |
| 0.096674365 | 0.301122274 | 0.199292931 | 0.041290351 |
| 0.084622896 | 0.218800267 | 0.127303385 | 0.239168676 |
| 0.014325757 | 0.244282929 | 0.350667973 | 0.045687506 |
| 0.309163624 | 0.037062058 | 0.0759193   | 0.063583644 |
| 0.141757323 | 0.290686718 | 0.298767213 | 0.150415006 |
| 0.292366461 | 0.115435957 | 0.162663644 | 0.252100253 |
| 0.360550449 | 0.208548999 | 0.31213458  | 0.083442524 |
| 0.307478508 | 0.329057083 | 0.265791907 | 0.009026782 |
| 0.233223007 | 0.044745925 | 0.293005071 | 0.229997775 |
| 0.246066294 | 0.252469278 | 0.120777389 | 0.19759725  |
| 0.153475469 | 0.019183413 | 0.095752829 | 0.309782443 |
| 0.167968531 | 0.199695681 | 0.025353605 | 0.281147742 |
| 0.208472374 | 0.212044256 | 0.207417419 | 0.001657045 |
| 0.31132834  | 0.192687674 | 0.283441241 | 0.345741169 |
| 0.150846472 | 0.114430149 | 0.185633208 | 0.147752193 |
| 0.258446897 | 0.309649844 | 0.212094603 | 0.172985954 |
| 0.363048168 | 0.297002182 | 0.317215486 | 0.116076257 |
| 0.194144867 | 0.014841395 | 0.115906078 | 0.035981938 |
| 0.253833633 | 0.17386933  | 0.279150602 | 0.308677416 |
| 0.258828572 | 0.367694449 | 0.164129436 | 0.318204973 |
| 0.211184376 | 0.315310742 | 0.299419716 | 0.283318048 |
| 0.280276279 | 0.056899837 | 0.317001648 | 0.380815718 |
| 0.02703318  | 0.167836882 | 0.271542725 | 0.062682446 |
| 0.296067506 | 0.278355025 | 0.156563631 | 0.316182719 |
| 0.358263158 | 0.279401294 | 0.325044914 | 0.215238303 |
| 0.295567604 | 0.030512594 | 0.29648277  | 0.327646643 |
| 0.258907313 | 0.037721817 | 0.257732943 | 0.386878037 |
| 0.269543923 | 0.36585918  | 0.293405725 | 0.29027784  |
| 0.273086517 | 0.368580739 | 0.274572588 | 0.313754336 |
| 0.080634628 | 0.369103619 | 0.107506728 | 0.047336407 |
| 0.028667307 | 0.092930388 | 0.247184233 | 0.257982544 |
| 0.378423935 | 0.224064542 | 0.112226551 | 0.213682328 |
| 0.418828974 | 0.291862117 | 0.362505418 | 0.315572168 |
| 0.0259851   | 0.293098344 | 0.257108894 | 0.161941917 |
| 0.285764248 | 0.070416172 | 0.322749293 | 0.333256538 |

|             |             |             |             |
|-------------|-------------|-------------|-------------|
| 0.286076171 | 0.38299534  | 0.074695024 | 0.331990786 |
| 0.133797868 | 0.397103293 | 0.297911458 | 0.121624967 |
| 0.356625411 | 0.319293167 | 0.413497362 | 0.381652374 |
| 0.327638523 | 0.165096658 | 0.067821667 | 0.286441831 |
| 0.403793919 | 0.04397631  | 0.378757079 | 0.401145813 |
| 0.334744572 | 0.381073084 | 0.427257764 | 0.400071663 |
| 0.338422392 | 0.038168568 | 0.038103574 | 0.282588697 |
| 0.337935192 | 0.301863662 | 0.157293993 | 0.232839421 |
| 0.31920403  | 0.182785777 | 0.343086961 | 0.210164118 |
| 0.403855796 | 0.351468249 | 0.369783591 | 0.275185261 |
| 0.136947835 | 0.22769855  | 0.274456573 | 0.28452457  |
| 0.037315383 | 0.056194838 | 0.021968758 | 0.248921805 |
| 0.137038361 | 0.148951801 | 0.165649276 | 0.270477221 |
| 0.158880793 | 0.156837278 | 0.285115067 | 0.372042683 |
| 0.025440055 | 0.230967621 | 0.094284013 | 0.081285833 |
| 0.041911995 | 0.093244071 | 0.137778809 | 0.137280281 |
| 0.240588391 | 0.130138856 | 0.310406226 | 0.386348863 |
| 0.24921966  | 0.101691482 | 0.281012047 | 0.385326315 |
| 0.375366885 | 0.281798812 | 0.175212762 | 0.015969944 |
| 0.209875998 | 0.200866393 | 0.291991356 | 0.26458004  |
| 0.105384559 | 0.185651977 | 0.268363003 | 0.391231894 |
| 0.118509953 | 0.072842414 | 0.257384948 | 0.302568472 |
| 0.079121399 | 0.273430849 | 0.378252696 | 0.197260961 |
| 0.001992856 | 0.179443451 | 0.352931899 | 0.236675068 |
| 0.204204792 | 0.258938757 | 0.28872258  | 0.370855654 |
| 0.273716862 | 0.306909852 | 0.39584549  | 0.39425894  |
| 0.207910259 | 0.120445797 | 0.416891174 | 0.086853466 |
| 0.266312699 | 0.092228055 | 0.271100894 | 0.130170532 |
| 0.159375684 | 0.261349035 | 1           | 0.284502749 |
| 0.058161045 | 0.368223887 | 0.297177573 | 0.391937659 |
| 0.235745808 | 0.410749601 | 0.383540584 | 0.358528229 |
| 0.250563921 | 0.234408098 | 0.279138553 | 0.332453849 |
| 0.366799971 | 0.171859177 | 0.033601954 | 0.345027973 |
| 0.186201643 | 0.344077325 | 0.185150031 | 0.394152313 |
| 0.358678792 | 0.2827629   | 0.152501166 | 0.376380464 |
| 0.302198549 | 0.133064387 | 0.338483239 | 0.421045336 |
| 0.146722871 | 0.265298076 | 0.2698686   | 0.401562139 |
| 0.108320837 | 0.287395884 | 0.237687916 | 0.306248028 |
| 0.025395352 | 0.040241779 | 0.031056432 | 0.182490605 |
| 0.313252942 | 0.247756587 | 0.309604235 | 0.380693859 |
| 0.090256284 | 0.319693398 | 0.169012713 | 0.230082793 |
| 0.282927679 | 0.275482713 | 0.300796011 | 0.319859281 |
| 0.180084922 | 0.022763547 | 0.115405186 | 0.359985259 |
| 0.014561524 | 0.321131107 | 0.17310297  | 0.005398387 |
| 0.025909037 | 0.251018681 | 0.05115511  | 0.126400759 |
| 0.43366935  | 0.118533423 | 0.113715554 | 0.134586415 |
| 0.30670214  | 0.060503498 | 0.010001001 | 0.367633222 |
| 0.352008653 | 0.335336533 | 0.34181887  | 0.303226733 |
| 0.345674795 | 0.311671601 | 0.359174983 | 0.146051272 |
| 0.070461589 | 0.039596025 | 0.274980314 | 0.224647842 |
| 0.004157641 | 0.341938236 | 0.26668756  | 0.09928292  |
| 0.360977829 | 0.22152099  | 0.027398325 | 0.316933957 |
| 0.012417443 | 0.261306016 | 0.168918347 | 0.190038781 |
| 0.365619346 | 0.008419218 | 0.128188428 | 0.239385693 |

|             |             |             |             |
|-------------|-------------|-------------|-------------|
| 0.269892752 | 0.239635216 | 0.269151114 | 0.376619475 |
| 0.227567254 | 0.055856302 | 0.246319021 | 0.365884406 |
| 0.052107553 | 0.0609324   | 0.178685626 | 0.01687215  |
| 0.135196118 | 0.321309422 | 0.24349197  | 0.0342762   |
| 0.179825867 | 0.003068373 | 0.243381528 | 0.388568412 |
| 0.288067777 | 0.414026973 | 0.373222245 | 0.316010061 |
| 0.360009499 | 0.203357316 | 0.391586928 | 0.270367161 |
| 0.171375869 | 0.0006785   | 0.011172519 | 0.391535077 |
| 0.261021199 | 0.023750123 | 0.104925335 | 0.16914242  |
| 0.106712016 | 0.06695784  | 0.050989376 | 0.294177387 |
| 0.259813739 | 0.270930925 | 0.306178382 | 0.298951298 |
| 0.18142118  | 0.188138813 | 0.172253368 | 0.046076465 |
| 0.293365694 | 0.044347788 | 0.04623189  | 0.017596944 |
| 0.354820683 | 0.056201634 | 0.282590894 | 0.360588921 |
| 0.37775125  | 0.351011994 | 0.153330764 | 0.220961298 |
| 0.369342636 | 0.040258317 | 0.228831238 | 0.046413979 |
| 0.316822842 | 0.297777504 | 0.264687047 | 0.212696612 |
| 0.399428188 | 0.334064315 | 0.025697776 | 0.334675739 |
| 0.012225068 | 0.009752841 | 0.146398397 | 0.19846019  |
| 0.102837202 | 0.262849267 | 0.191989005 | 0.158258683 |
| 0.204212618 | 0.019660617 | 0.31408678  | 0.303147138 |
| 0.230673054 | 0.245155846 | 0.310069765 | 0.173486001 |
| 0.272259765 | 0.208288426 | 0.186689845 | 0.131064168 |
| 0.184155958 | 0.197218969 | 0.11653268  | 0.015407028 |
| 0.203261019 | 0.252851955 | 0.038571192 | 0.100033406 |
| 0.359573233 | 0.390221966 | 0.040790285 | 0.018692427 |
| 0.185258819 | 0.238650262 | 0.418216936 | 0.338555303 |
| 0.354900182 | 0.407125498 | 0.277730748 | 0.165866632 |
| 0.047903731 | 0.258679208 | 0.306930232 | 0.174714182 |
| 0.380162746 | 0.025707133 | 0.330978789 | 0.320152116 |
| 0.073354559 | 0.145864128 | 0.040627338 | 0.05968137  |
| 0.319111241 | 0.130027722 | 0.19306755  | 0.065358248 |
| 0.242734602 | 0.308137196 | 0.033088894 | 0.136793118 |
| 0.248257398 | 0.258108605 | 0.103957431 | 0.169507944 |
| 0.23765209  | 0.102249632 | 0.34405859  | 0.354769462 |
| 0.07557663  | 0.060344962 | 0.109752691 | 0.316777777 |
| 0.33282216  | 0.199664627 | 0.023971914 | 0.284066059 |
| 0.399384078 | 0.301049761 | 0.335302579 | 0.365671198 |
| 0.046796319 | 0.273764129 | 0.282224665 | 0.253454161 |
| 0.128492419 | 0.189757063 | 0.186328845 | 0.036218686 |
| 0.240428843 | 0.336918543 | 0.283378747 | 0.152120807 |
| 0.240004219 | 0.052349361 | 0.020610537 | 0.346178435 |
| 0.285362498 | 0.056845938 | 0.141149977 | 0.36603242  |
| 0.006152626 | 0.302977165 | 0.408881562 | 0.192890268 |
| 0.385517597 | 0.391362164 | 0.329258004 | 0.156961817 |
| 0.007211489 | 0.335454036 | 0.275256139 | 0.232171128 |
| 0.286367083 | 0.243625425 | 0.121158208 | 0.081649193 |
| 0.25242303  | 0.035041267 | 0.134474962 | 0.17617732  |
| 0.207528671 | 0.225005611 | 0.166314325 | 0.125495692 |
| 0.204019822 | 0.040765056 | 0.327490517 | 0.159874947 |
| 0.239821288 | 0.200488035 | 0.30116932  | 0.117899173 |
| 0.212253607 | 0.365437482 | 0.2784003   | 0.017097909 |
| 0.302922909 | 0.338740087 | 0.356335686 | 0.002382026 |
| 0.345471321 | 0.007915914 | 0.212889782 | 0.212225925 |



|             |             |             |             |
|-------------|-------------|-------------|-------------|
| 0.202807578 | 0.203734982 | 0.263326453 | 0.266053956 |
| 0.209897509 | 0.161552916 | 0.201004018 | 0.193245909 |
| 0.178352496 | 0.141989755 | 0.279870992 | 0.177354395 |
| 0.262649924 | 0.086346517 | 0.053394461 | 0.051464484 |
| 0.054160479 | 0.343335115 | 0.177082239 | 0.033473813 |
| 0.192954242 | 0.193772242 | 0.300771276 | 0.318840204 |
| 0.367323506 | 0.052069998 | 0.236542409 | 0.301059877 |
| 0.135822352 | 0.156178921 | 0.029741265 | 0.188896028 |
| 0.158190141 | 0.281614644 | 0.186307776 | 0.138015664 |
| 0.25785246  | 0.293913468 | 0.171841247 | 0.344984845 |
| 0.2398004   | 0.205421129 | 0.114407831 | 0.105793267 |
| 0.104483153 | 0.078120449 | 0.304685809 | 0.001603101 |
| 0.257935308 | 0.114214527 | 0.370859597 | 0.317227342 |
| 0.307466114 | 0.315602368 | 0.124709407 | 0.056702757 |
| 0.099348761 | 0.089342928 | 0.092764185 | 0.310848897 |
| 0.29112523  | 0.137381927 | 0.268811679 | 0.129855603 |
| 0.348777262 | 0.306589647 | 0.283561676 | 0.154470845 |
| 0.170442933 | 0.101788623 | 0.317731929 | 0.055018179 |
| 0.237828841 | 0.277456133 | 0.159717296 | 0.242020801 |
| 0.222376981 | 0.388868409 | 0.032639106 | 0.398211786 |
| 0.256338409 | 0.077000149 | 0.370940406 | 0.173523981 |
| 0.160954526 | 0.168454939 | 0.304591966 | 0.174368394 |
| 0.184301913 | 0.307533584 | 0.010506143 | 0.10090846  |
| 0.299785664 | 0.191983676 | 0.254679298 | 0.2983712   |
| 0.304972847 | 0.328583864 | 0.296857357 | 0.146460584 |
| 0.293269254 | 0.314137325 | 0.180907252 | 0.203181488 |
| 0.259851314 | 0.086552351 | 0.197071798 | 0.019185134 |
| 0.278115101 | 0.275380756 | 0.197570563 | 0.046268609 |
| 0.0154617   | 0.283203911 | 0.238535812 | 0.028437776 |
| 0.41920989  | 0.26721491  | 0.195289101 | 0.315443406 |
| 0.113793818 | 0.312730723 | 0.164798709 | 0.340272604 |
| 0.02399297  | 0.187254054 | 0.278100415 | 0.220292856 |
| 0.238242598 | 0.310960038 | 0.326627833 | 0.321935064 |
| 0.030101303 | 0.258991093 | 0.001910893 | 0.274541429 |
| 0.28182586  | 0.279856581 | 0.144126021 | 0.146186601 |
| 0.2599602   | 0.302661036 | 0.248505522 | 0.225639155 |
| 0.016002183 | 0.312840431 | 0.14841403  | 0.290332016 |
| 0.174093304 | 0.204234294 | 0.062286732 | 0.28697582  |
| 0.270555023 | 0.224045101 | 0.199800099 | 0.189996767 |
| 0.32489957  | 0.269630265 | 0.078391807 | 0.262532596 |
| 0.226334798 | 0.032743699 | 0.166797537 | 0.395357452 |
| 0.179946614 | 0.310582785 | 0.408829069 | 0.169754734 |
| 0.316829971 | 0.268080131 | 0.232615601 | 0.379123062 |
| 0.123917222 | 0.19259585  | 0.368769713 | 0.3295779   |
| 0.286892284 | 0.299383538 | 0.311255532 | 0.254954033 |
| 0.283611492 | 0.076028036 | 0.282343104 | 0.241977558 |
| 0.29219972  | 0.263931621 | 0.152055203 | 0.260858608 |
| 0.047713118 | 0.139682255 | 0.229886037 | 0.088979335 |
| 0.219702747 | 0.259722428 | 0.281410499 | 0.309177622 |
| 0.153777263 | 0.031275425 | 0.352519208 | 0.056456057 |
| 0.148410273 | 0.317614616 | 0.173690249 | 0.280776114 |
| 0.115731748 | 0.209161873 | 0.133278019 | 0.000729479 |
| 0.363027144 | 0.091104959 | 0.262005433 | 0.261441234 |
| 0.268690266 | 0.030811422 | 0.320496303 | 0.425097233 |

|             |             |             |             |
|-------------|-------------|-------------|-------------|
| 0.204360542 | 0.222988857 | 0.244677446 | 0.331555143 |
| 0.27043359  | 0.249002237 | 0.272400392 | 0.221149054 |
| 0.328613537 | 0.164543151 | 0.224134339 | 0.263856339 |
| 0.267582597 | 0.166975911 |             |             |
| ERH         | 0.035816939 | 0.246366402 | 0.023493446 |
| 0.097092454 | 0.32208852  | 0.133711288 | 0.032956833 |
| 0.063629027 | 0.194101038 | 0.055204387 | 0.252000966 |
| 0.0142136   | 0.125124291 | 0.332307441 | 0.034266395 |
| 0.282654308 | 0.034726024 | 0.075337577 | 0.036327314 |
| 0.085868016 | 0.276039592 | 0.153984384 | 0.129404836 |
| 0.247805284 | 0.132907978 | 0.158626149 | 0.203009962 |
| 0.334217277 | 0.09169983  | 0.291910069 | 0.050858262 |
| 0.310917069 | 0.317214382 | 0.179373559 | 0.01129726  |
| 0.197476928 | 0.021518755 | 0.290110339 | 0.160571535 |
| 0.186098686 | 0.257783455 | 0.08295444  | 0.162709639 |
| 0.118234207 | 0.018689584 | 0.040123686 | 0.261407853 |
| 0.164378449 | 0.120456628 | 0.027101141 | 0.268235529 |
| 0.106017873 | 0.219858326 | 0.178124977 | 0.00126357  |
| 0.183236251 | 0.076702082 | 0.122666195 | 0.329011598 |
| 0.187156487 | 0.110122417 | 0.082798263 | 0.096222432 |
| 0.199582724 | 0.270522594 | 0.228478734 | 0.082951134 |
| 0.344199934 | 0.15064343  | 0.284012503 | 0.092185414 |
| 0.129732086 | 0.012622284 | 0.149630226 | 0.040803479 |
| 0.126103998 | 0.192045501 | 0.255042753 | 0.188779125 |
| 0.233841528 | 0.349657157 | 0.190067804 | 0.298876059 |
| 0.085004181 | 0.283811355 | 0.191976402 | 0.301767303 |
| 0.24324352  | 0.037277707 | 0.324751349 | 0.369028649 |
| 0.019506466 | 0.136194818 | 0.233161653 | 0.066910529 |
| 0.277134981 | 0.124524102 | 0.128474823 | 0.179371483 |
| 0.350962552 | 0.261442775 | 0.292940591 | 0.235270885 |
| 0.216720473 | 0.037902276 | 0.278180893 | 0.299820648 |
| 0.185198738 | 0.051592039 | 0.168065084 | 0.344473904 |
| 0.256760485 | 0.342310528 | 0.249011811 | 0.265027928 |
| 0.24968547  | 0.35258768  | 0.291729387 | 0.280637186 |
| 0.03548381  | 0.342523769 | 0.133704828 | 0.040429547 |
| 0.026033876 | 0.072702181 | 0.118265944 | 0.274633416 |
| 0.352558906 | 0.229700454 | 0.102117513 | 0.212046279 |
| 0.383180012 | 0.269899348 | 0.329483444 | 0.291564847 |
| 0.024463113 | 0.134778103 | 0.250725907 | 0.095322741 |
| 0.25173056  | 0.084928006 | 0.235442688 | 0.315071716 |
| 0.307512552 | 0.351554129 | 0.063118109 | 0.321922947 |
| 0.083798668 | 0.390683733 | 0.273643014 | 0.140308401 |
| 0.34816047  | 0.308658378 | 0.404965974 | 0.355973665 |
| 0.323196094 | 0.169643107 | 0.016791147 | 0.266107912 |
| 0.395188121 | 0.029201869 | 0.334874977 | 0.363567146 |
| 0.314029909 | 0.351668123 | 0.401982187 | 0.373059098 |
| 0.311466544 | 0.052649345 | 0.010814845 | 0.289400765 |
| 0.322930718 | 0.326211848 | 0.104339852 | 0.197905704 |
| 0.275881905 | 0.14323858  | 0.294872463 | 0.11797981  |
| 0.390011183 | 0.348070725 | 0.332816825 | 0.24477222  |
| 0.117317273 | 0.241365194 | 0.224004329 | 0.273402014 |
| 0.041488196 | 0.051988081 | 0.030908663 | 0.239603278 |
| 0.077810161 | 0.184607933 | 0.116147458 | 0.224052111 |
| 0.194765703 | 0.107824369 | 0.148509079 | 0.354308179 |

|             |             |             |             |
|-------------|-------------|-------------|-------------|
| 0.031969771 | 0.199583116 | 0.110948427 | 0.085482776 |
| 0.043017288 | 0.109886989 | 0.101089313 | 0.109327319 |
| 0.218456146 | 0.137547891 | 0.267435458 | 0.366815813 |
| 0.148826165 | 0.123167134 | 0.249406081 | 0.386520126 |
| 0.381755307 | 0.272816839 | 0.17820587  | 0.023424012 |
| 0.126339748 | 0.080907409 | 0.141184279 | 0.220908057 |
| 0.118716477 | 0.103629981 | 0.24395003  | 0.381483016 |
| 0.124090207 | 0.051113171 | 0.133631115 | 0.306381149 |
| 0.084076216 | 0.17204827  | 0.364443098 | 0.169562757 |
| 0.003653426 | 0.181006175 | 0.331361918 | 0.146595141 |
| 0.179824768 | 0.128210258 | 0.159605835 | 0.352546754 |
| 0.127499002 | 0.152029461 | 0.359845034 | 0.369916907 |
| 0.09688101  | 0.119759658 | 0.386779857 | 0.032174308 |
| 0.209074877 | 0.11665116  | 0.30002509  | 0.087268407 |
| 0.184115593 | 0.270987628 | 0.284502749 | 1           |
| 0.074130338 | 0.337833208 | 0.297580838 | 0.362837689 |
| 0.124859838 | 0.386593354 | 0.352723591 | 0.34755985  |
| 0.252177981 | 0.147528725 | 0.119514053 | 0.327929638 |
| 0.352834874 | 0.095861984 | 0.041167553 | 0.284879152 |
| 0.116602091 | 0.315691373 | 0.178852697 | 0.380516356 |
| 0.360149917 | 0.260168018 | 0.104738306 | 0.367209931 |
| 0.32498446  | 0.154801715 | 0.332545176 | 0.388485677 |
| 0.066993737 | 0.204317833 | 0.164520441 | 0.411918536 |
| 0.142516437 | 0.153170205 | 0.243557412 | 0.133070649 |
| 0.017140775 | 0.040025621 | 0.041962788 | 0.163761786 |
| 0.198667106 | 0.200211043 | 0.300843595 | 0.357438499 |
| 0.091261796 | 0.31762532  | 0.164647212 | 0.147865463 |
| 0.275639196 | 0.171322377 | 0.264177896 | 0.291867967 |
| 0.204224299 | 0.032176588 | 0.092595744 | 0.349441996 |
| 0.01878905  | 0.181861067 | 0.126456132 | 0.004650247 |
| 0.021210928 | 0.213929051 | 0.063040074 | 0.148771781 |
| 0.399358437 | 0.143957609 | 0.13338746  | 0.06500793  |
| 0.325237184 | 0.07434833  | 0.017612036 | 0.336204315 |
| 0.314785539 | 0.298519329 | 0.304638938 | 0.274118577 |
| 0.30704342  | 0.264567443 | 0.344199707 | 0.143921732 |
| 0.063295905 | 0.034394014 | 0.160449963 | 0.198701671 |
| 0.001254597 | 0.363001895 | 0.225127058 | 0.128480837 |
| 0.314896263 | 0.213796683 | 0.02480755  | 0.265536066 |
| 0.016128399 | 0.139902279 | 0.081367017 | 0.136817502 |
| 0.346010624 | 0.010036292 | 0.090559235 | 0.128711263 |
| 0.265201837 | 0.238571366 | 0.151732711 | 0.359637785 |
| 0.247068136 | 0.058464368 | 0.234475759 | 0.347395136 |
| 0.045371614 | 0.034492723 | 0.096391297 | 0.010887291 |
| 0.074463354 | 0.291743067 | 0.129002782 | 0.039951681 |
| 0.208002099 | 0.004787707 | 0.251817946 | 0.363918487 |
| 0.270269267 | 0.384872989 | 0.359669203 | 0.215614775 |
| 0.346292765 | 0.071724723 | 0.360940283 | 0.246723136 |
| 0.090957452 | 0.001137659 | 0.007534544 | 0.37134476  |
| 0.252711672 | 0.028981233 | 0.135524076 | 0.103630699 |
| 0.088785906 | 0.047292931 | 0.040863692 | 0.209603618 |
| 0.245342131 | 0.258139864 | 0.170329984 | 0.275509672 |
| 0.16537805  | 0.199740641 | 0.100548794 | 0.055181767 |
| 0.27321787  | 0.042488707 | 0.055066716 | 0.013913053 |
| 0.32727665  | 0.069325487 | 0.270003295 | 0.330644076 |

|             |             |             |             |
|-------------|-------------|-------------|-------------|
| 0.376083046 | 0.363017691 | 0.069636421 | 0.098805966 |
| 0.323906626 | 0.04328485  | 0.123057196 | 0.050459209 |
| 0.296870917 | 0.290595133 | 0.298505684 | 0.241689301 |
| 0.382404187 | 0.332889502 | 0.023182593 | 0.329612679 |
| 0.017085107 | 0.005520399 | 0.133501595 | 0.19621824  |
| 0.036474078 | 0.188314105 | 0.224735427 | 0.081584825 |
| 0.107953756 | 0.019920628 | 0.169606225 | 0.184822634 |
| 0.260508563 | 0.212121764 | 0.278158774 | 0.169437571 |
| 0.19221388  | 0.149091415 | 0.139791107 | 0.085992574 |
| 0.078958682 | 0.206705577 | 0.135090459 | 0.014748646 |
| 0.176870275 | 0.229984821 | 0.042999943 | 0.125850741 |
| 0.359105447 | 0.364440951 | 0.034191293 | 0.022836992 |
| 0.208423268 | 0.156322085 | 0.387044703 | 0.312014084 |
| 0.334670876 | 0.388734899 | 0.288979459 | 0.111952519 |
| 0.040010185 | 0.266100308 | 0.294075894 | 0.152082552 |
| 0.348852623 | 0.030460583 | 0.30938775  | 0.251119038 |
| 0.094728277 | 0.118870519 | 0.041910665 | 0.069210949 |
| 0.273367062 | 0.151608162 | 0.195872446 | 0.080480428 |
| 0.172273832 | 0.200053182 | 0.030345277 | 0.159165753 |
| 0.25272306  | 0.16437772  | 0.132033125 | 0.104865209 |
| 0.24587317  | 0.040079318 | 0.312811263 | 0.3512812   |
| 0.092116674 | 0.062056591 | 0.075356339 | 0.281580148 |
| 0.301800146 | 0.151455759 | 0.024035214 | 0.254940778 |
| 0.370695826 | 0.269668011 | 0.316836223 | 0.35190468  |
| 0.062084649 | 0.247283036 | 0.151163441 | 0.244180322 |
| 0.14043501  | 0.142619982 | 0.165017935 | 0.048912135 |
| 0.244665372 | 0.314200867 | 0.277607764 | 0.143484245 |
| 0.200854927 | 0.052688991 | 0.024660204 | 0.302108275 |
| 0.183723813 | 0.044774463 | 0.087129642 | 0.306614405 |
| 0.014320363 | 0.157699666 | 0.374766567 | 0.125936354 |
| 0.361935185 | 0.379203605 | 0.336767618 | 0.093013264 |
| 0.006903598 | 0.304490277 | 0.28297676  | 0.177145589 |
| 0.265213098 | 0.24203389  | 0.061266148 | 0.073209444 |
| 0.284756297 | 0.043868082 | 0.09357374  | 0.096859468 |
| 0.100097845 | 0.194029372 | 0.192046491 | 0.122819382 |
| 0.182839784 | 0.04136756  | 0.188062623 | 0.155212203 |
| 0.115028915 | 0.232941247 | 0.308811714 | 0.05167924  |
| 0.114954126 | 0.325646487 | 0.263662234 | 0.01753472  |
| 0.239609585 | 0.303932148 | 0.341622129 | 0.002601776 |
| 0.323559414 | 0.009506234 | 0.183294531 | 0.203185426 |
| 0.172596357 | 0.141768013 | 0.280129422 | 0.189047493 |
| 0.196460968 | 0.145944853 | 0.173976015 | 0.227431763 |
| 0.144393696 | 0.143289    | 0.278234193 | 0.144663983 |
| 0.179454125 | 0.073650035 | 0.067212489 | 0.061978203 |
| 0.048938975 | 0.307951896 | 0.202146808 | 0.044608826 |
| 0.207140139 | 0.132830864 | 0.332038658 | 0.293622633 |
| 0.370113106 | 0.059259497 | 0.148830381 | 0.28408019  |
| 0.055131344 | 0.086691788 | 0.022333026 | 0.19267067  |
| 0.165768497 | 0.163092024 | 0.156667116 | 0.134568534 |
| 0.211557108 | 0.303592656 | 0.193999831 | 0.33938077  |
| 0.208691538 | 0.14377586  | 0.060355827 | 0.091676479 |
| 0.105250029 | 0.092016723 | 0.284461708 | 0.003369184 |
| 0.250880232 | 0.088777007 | 0.345378503 | 0.305304277 |
| 0.141140044 | 0.32496293  | 0.06012396  | 0.047817685 |

|             |             |             |             |
|-------------|-------------|-------------|-------------|
| 0.053415192 | 0.099374559 | 0.116644534 | 0.283022644 |
| 0.137355386 | 0.104962899 | 0.29663071  | 0.076362161 |
| 0.326920693 | 0.265780796 | 0.15503287  | 0.103624249 |
| 0.176806317 | 0.122788119 | 0.298346425 | 0.051109942 |
| 0.204693007 | 0.212414152 | 0.128352473 | 0.209126022 |
| 0.186314698 | 0.362342757 | 0.043320177 | 0.365798227 |
| 0.180585602 | 0.089047792 | 0.361374788 | 0.143871796 |
| 0.11996118  | 0.142346443 | 0.155622873 | 0.091386569 |
| 0.106229607 | 0.152623939 | 0.003576737 | 0.052377215 |
| 0.315019279 | 0.08544308  | 0.216240201 | 0.269731072 |
| 0.205131368 | 0.329792275 | 0.129480486 | 0.115421726 |
| 0.270294963 | 0.296093848 | 0.123431749 | 0.23410317  |
| 0.241820151 | 0.071025534 | 0.183020469 | 0.009854569 |
| 0.238673999 | 0.223906771 | 0.087095083 | 0.037364791 |
| 0.016991066 | 0.153928208 | 0.223203038 | 0.03291764  |
| 0.388314808 | 0.135972501 | 0.154667208 | 0.304677053 |
| 0.120133269 | 0.300954381 | 0.122020142 | 0.345317203 |
| 0.015162616 | 0.20776699  | 0.209415929 | 0.145599705 |
| 0.172277073 | 0.21834699  | 0.350280753 | 0.203553099 |
| 0.030889265 | 0.168753145 | 0.003030791 | 0.284704088 |
| 0.267154039 | 0.213392235 | 0.158986236 | 0.058118654 |
| 0.293887248 | 0.286485651 | 0.109776353 | 0.178336196 |
| 0.021382765 | 0.304849472 | 0.175342306 | 0.284928743 |
| 0.101115178 | 0.166561064 | 0.073275105 | 0.21751899  |
| 0.261512621 | 0.114457422 | 0.200223365 | 0.112899097 |
| 0.304947607 | 0.247039356 | 0.091264753 | 0.174889015 |
| 0.177095848 | 0.042855092 | 0.09151571  | 0.362926847 |
| 0.159481158 | 0.221906034 | 0.387636433 | 0.127468579 |
| 0.193496139 | 0.262756214 | 0.191425062 | 0.342367516 |
| 0.095221431 | 0.227300291 | 0.339783445 | 0.30518768  |
| 0.312396136 | 0.17928692  | 0.170977891 | 0.169507169 |
| 0.272585266 | 0.066797501 | 0.164494657 | 0.26223633  |
| 0.169554515 | 0.258786463 | 0.126898013 | 0.186759922 |
| 0.036013239 | 0.088692402 | 0.129406268 | 0.112448723 |
| 0.229610298 | 0.247388696 | 0.185602245 | 0.334075849 |
| 0.129621353 | 0.038464802 | 0.364733812 | 0.037563439 |
| 0.153799752 | 0.328280484 | 0.184852092 | 0.228681641 |
| 0.142854512 | 0.185648356 | 0.122065498 | 0.000792415 |
| 0.331946591 | 0.108385195 | 0.139839887 | 0.174028391 |
| 0.11318704  | 0.025116265 | 0.3143178   | 0.395828018 |
| 0.206132258 | 0.10909483  | 0.114891222 | 0.300002879 |
| 0.175344749 | 0.109317962 | 0.113141302 | 0.204741523 |
| 0.179896986 | 0.108075318 | 0.141374365 | 0.171998145 |
| 0.256404305 | 0.116541926 |             |             |
| ERMP1       | 0.261337616 | 0.20888203  | 0.266096598 |
| 0.191896621 | 0.069696826 | 0.127966343 | 0.181018003 |
| 0.198191052 | 0.167761096 | 0.057960456 | 0.121798146 |
| 0.182430544 | 0.008077869 | 0.211989189 | 0.164263076 |
| 0.073589157 | 0.15820242  | 0.193778739 | 0.037344326 |
| 0.104236906 | 0.066866009 | 0.064087441 | 0.145984965 |
| 0.063116963 | 0.333663584 | 0.143032186 | 0.058429833 |
| 0.217980675 | 0.03690449  | 0.112039059 | 0.045186474 |
| 0.270066885 | 0.065745369 | 0.05711234  | 0.201860717 |
| 0.10405635  | 0.001141229 | 0.305002392 | 0.098690839 |

|             |             |             |             |
|-------------|-------------|-------------|-------------|
| 0.025901933 | 0.280322425 | 0.094359303 | 0.141407323 |
| 0.08736632  | 0.248856174 | 0.041567086 | 0.081538152 |
| 0.120769766 | 0.110129231 | 0.23679263  | 0.129892162 |
| 0.077292552 | 0.203133714 | 0.140766952 | 0.018528795 |
| 0.039458461 | 0.0037893   | 0.019167111 | 0.269828968 |
| 0.207204129 | 0.172853761 | 0.031500734 | 0.121436938 |
| 0.076219027 | 0.095279774 | 0.145392681 | 0.071254911 |
| 0.246764812 | 0.018505571 | 0.106812353 | 0.125664092 |
| 0.11152873  | 0.172860513 | 0.23156502  | 0.187377018 |
| 0.0709796   | 0.152917208 | 0.093693337 | 0.042944434 |
| 0.216486707 | 0.299432332 | 0.159292823 | 0.285543145 |
| 0.010136805 | 0.053991088 | 0.059836933 | 0.138715055 |
| 0.118573399 | 0.13297359  | 0.150794866 | 0.272194176 |
| 0.160734637 | 0.092136677 | 0.12214967  | 0.222089114 |
| 0.210175455 | 0.03423603  | 0.091724631 | 0.027438066 |
| 0.077799625 | 0.06423814  | 0.27286326  | 0.185193861 |
| 0.070771747 | 0.232737188 | 0.319768298 | 0.04863721  |
| 0.104563251 | 0.255831149 | 0.052829763 | 0.140452022 |
| 0.112125841 | 0.220667259 | 0.160919831 | 0.147467346 |
| 0.06616402  | 0.238896626 | 0.151909967 | 0.202701728 |
| 0.022384383 | 0.255890215 | 0.22047909  | 0.172635523 |
| 0.244887408 | 0.154892416 | 0.04275163  | 0.203806384 |
| 0.181984525 | 0.159398447 | 0.215216442 | 0.109154614 |
| 0.153079034 | 0.294636866 | 0.247959112 | 0.169653973 |
| 0.221454319 | 0.025685882 | 0.070261442 | 0.15404637  |
| 0.119516151 | 0.185916148 | 0.03924032  | 0.312594001 |
| 0.258273512 | 0.139593704 | 0.226688808 | 0.335342564 |
| 0.125210812 | 0.265337733 | 0.203473895 | 0.192971713 |
| 0.29455114  | 0.313590599 | 0.232080153 | 0.087047705 |
| 0.29454951  | 0.167923289 | 0.016217484 | 0.174299402 |
| 0.245336911 | 0.005186813 | 0.16771583  | 0.18237011  |
| 0.255946391 | 0.145257517 | 0.218639835 | 0.211037269 |
| 0.257484372 | 0.222097914 | 0.001406604 | 0.095351193 |
| 0.282250566 | 0.223978936 | 0.100827105 | 0.070966227 |
| 0.070693509 | 0.139491417 | 0.130752419 | 0.071679395 |
| 0.274770624 | 0.189765407 | 0.190419408 | 0.154366152 |
| 0.104794007 | 0.291837155 | 0.051343315 | 0.323675821 |
| 0.201823722 | 0.263135974 | 0.251319082 | 0.15208329  |
| 0.101075691 | 0.15775387  | 0.141298141 | 0.07026822  |
| 0.170348547 | 0.134195572 | 0.04297272  | 0.085026931 |
| 0.266264095 | 0.096340742 | 0.208716383 | 0.200239047 |
| 0.174385295 | 0.303740807 | 0.161655417 | 0.174721398 |
| 0.104842081 | 0.38003182  | 0.111163274 | 0.201851721 |
| 0.068561921 | 0.261705813 | 0.136786023 | 0.241809168 |
| 0.235464786 | 0.069881902 | 0.198817635 | 0.079827562 |
| 0.06460668  | 0.035001942 | 0.015890445 | 0.068194789 |
| 0.342276602 | 0.099484922 | 0.086083131 | 0.108421931 |
| 0.207256371 | 0.16978829  | 0.065801421 | 0.31943689  |
| 0.247005025 | 0.095424059 | 0.17789194  | 0.09124204  |
| 0.102632041 | 0.1456448   | 0.160671406 | 0.041093702 |
| 0.135496791 | 0.023794355 | 0.040909794 | 0.179659825 |
| 0.038375058 | 0.038146058 | 0.190833338 | 0.102837671 |
| 0.092158227 | 0.326806012 | 0.228148192 | 0.002994996 |
| 0.058153437 | 0.06924477  | 0.134870063 | 0.081277063 |

|             |             |             |             |
|-------------|-------------|-------------|-------------|
| 0.171413454 | 0.146256283 | 0.058161045 | 0.074130338 |
| 1           | 0.257309965 | 0.202035908 | 0.222187644 |
| 0.058114775 | 0.236218063 | 0.158119644 | 0.205394294 |
| 0.143937294 | 0.051421317 | 0.01046275  | 0.165110444 |
| 0.171641183 | 0.056886455 | 0.247408191 | 0.121964436 |
| 0.063917679 | 0.089334519 | 0.054267267 | 0.222714848 |
| 0.306016183 | 0.274381719 | 0.14237525  | 0.119970402 |
| 0.205852127 | 0.209624635 | 0.166634466 | 0.240778034 |
| 0.052496697 | 0.06255915  | 0.063439013 | 0.149124469 |
| 0.216806497 | 0.042092361 | 0.234822794 | 0.014770623 |
| 0.001432654 | 0.221562679 | 0.250699009 | 0.122930225 |
| 0.027949386 | 0.082536749 | 0.10033236  | 0.237532606 |
| 0.197756926 | 0.239489995 | 0.162706607 | 0.088787323 |
| 0.240880736 | 0.062300263 | 0.063954549 | 0.082416942 |
| 0.198669485 | 0.096443246 | 0.153816172 | 0.310305497 |
| 0.208181779 | 0.039380003 | 0.128043361 | 0.012945041 |
| 0.208912169 | 0.160218335 | 0.290601415 | 0.344441709 |
| 0.179281881 | 0.345442743 | 0.206808605 | 0.068283018 |
| 0.141738111 | 0.221333789 | 0.024383879 | 0.201320173 |
| 0.226167754 | 0.213816031 | 0.228096284 | 0.261863591 |
| 0.172168381 | 0.130137736 | 0.12937587  | 0.164072369 |
| 0.210815683 | 0.228002034 | 0.03039498  | 0.100486291 |
| 0.016563773 | 0.160294342 | 0.078561449 | 0.225748785 |
| 0.112922209 | 0.13172989  | 0.227501793 | 0.067537075 |
| 0.213468363 | 0.020960363 | 0.114734054 | 0.109255657 |
| 0.106953676 | 0.189774958 | 0.083511203 | 0.050674335 |
| 0.2936018   | 0.249828216 | 0.050925344 | 0.263675766 |
| 0.128340973 | 0.238178277 | 0.095437115 | 0.128880229 |
| 0.205368025 | 0.023175261 | 0.10349691  | 0.014518844 |
| 0.077001704 | 0.251106736 | 0.070288356 | 0.240299242 |
| 0.160802962 | 0.148727399 | 0.262433341 | 0.263333506 |
| 0.269490659 | 0.210081345 | 0.243795613 | 0.044936279 |
| 0.25504699  | 0.00437463  | 0.23333898  | 0.20141269  |
| 0.067815239 | 0.019232678 | 0.029545762 | 0.180665372 |
| 0.081004515 | 0.263174794 | 0.204364705 | 0.125943753 |
| 0.175029184 | 0.219526499 | 0.194875574 | 0.041609008 |
| 0.115975605 | 0.083141322 | 0.036723375 | 0.269702122 |
| 0.131325887 | 0.131414022 | 0.101205007 | 0.227499155 |
| 0.087332287 | 0.201963212 | 0.200160007 | 0.020123502 |
| 0.105910645 | 0.298749431 | 0.337859551 | 0.245359157 |
| 0.264464575 | 0.103620528 | 0.055331186 | 0.092566409 |
| 0.161448908 | 0.260275996 | 0.063527216 | 0.235476747 |
| 0.250871372 | 0.091078413 | 0.20022057  | 0.260387994 |
| 0.233101491 | 0.262635561 | 0.193218411 | 0.139627151 |
| 0.140240159 | 0.002617096 | 0.145766242 | 0.161393927 |
| 0.008908032 | 0.063438421 | 0.220868477 | 0.082050322 |
| 0.086441928 | 0.24659013  | 0.030521195 | 0.031910767 |
| 0.12358991  | 0.092321986 | 0.054477209 | 0.169530561 |
| 0.066665442 | 0.037118168 | 0.132406991 | 0.142428944 |
| 0.05611429  | 0.248874347 | 0.332804431 | 0.164302489 |
| 0.085568613 | 0.077590496 | 0.230973932 | 0.223224327 |
| 0.187068274 | 0.195659175 | 0.128962374 | 0.082776689 |
| 0.247047182 | 0.080302598 | 0.19697264  | 0.239341054 |
| 0.296970964 | 0.253161255 | 0.309605525 | 0.085550141 |

|             |             |             |             |
|-------------|-------------|-------------|-------------|
| 0.230160325 | 0.096629243 | 0.054585435 | 0.070691379 |
| 0.236300072 | 0.218045438 | 0.261196087 | 0.038768714 |
| 0.204473325 | 0.164146421 | 0.172889684 | 0.196567874 |
| 0.063595955 | 0.192173578 | 0.117917311 | 0.24088318  |
| 0.091848964 | 0.039347049 | 0.194878021 | 0.176260786 |
| 0.182725878 | 0.018408007 | 0.197528095 | 0.129652815 |
| 0.191743622 | 0.044841494 | 0.106137549 | 0.262875905 |
| 0.237309106 | 0.185945207 | 0.187204161 | 0.126051729 |
| 0.151634609 | 0.070388848 | 0.164839332 | 0.21770693  |
| 0.210830896 | 0.102467731 | 0.275276038 | 0.176201035 |
| 0.21622603  | 0.078853731 | 0.039428817 | 0.077724003 |
| 0.160906861 | 0.134753942 | 0.118740157 | 0.221053123 |
| 0.226540996 | 0.299211093 | 0.205098489 | 0.161678901 |
| 0.090547256 | 0.214627301 | 0.210711756 | 0.177381615 |
| 0.02677977  | 0.227744443 | 0.089047639 | 0.131390005 |
| 0.009220865 | 0.013278311 | 0.190685431 | 0.154051699 |
| 0.263954268 | 0.194113866 | 0.266868461 | 0.129012426 |
| 0.000220319 | 0.080780648 | 0.112593179 | 0.094349522 |
| 0.211201654 | 0.207046964 | 0.08438979  | 0.158814574 |
| 0.21093762  | 0.268980427 | 0.123476441 | 0.120276364 |
| 0.01583962  | 0.124034607 | 0.185673948 | 0.137564636 |
| 0.103859095 | 0.197753699 | 0.036502617 | 0.178241305 |
| 0.016096001 | 0.20667358  | 0.187951573 | 0.074018101 |
| 0.026547334 | 0.176026008 | 0.163989357 | 0.220711138 |
| 0.058192635 | 0.160263669 | 0.199137722 | 0.014647628 |
| 0.114852693 | 0.127087418 | 0.106716876 | 0.121071391 |
| 0.118994765 | 0.101163396 | 0.096638871 | 0.082730566 |
| 0.11862434  | 0.147378242 | 0.150874569 | 0.160581072 |
| 0.133005918 | 0.16518504  | 0.088582686 | 0.116441345 |
| 0.09271513  | 0.22111648  | 0.314721122 | 0.35198672  |
| 0.197038244 | 0.199653301 | 0.288976357 | 0.270600065 |
| 0.141968505 | 0.097722038 | 0.239036768 | 0.25293682  |
| 0.213496506 | 0.307815332 | 0.091427283 | 0.208740687 |
| 0.029958184 | 0.114268059 | 0.230537602 | 0.119878302 |
| 0.176154328 | 0.055258584 | 0.102489607 | 0.166238871 |
| 0.124020769 | 0.297861576 | 0.279988582 | 0.232598168 |
| 0.103988622 | 0.069893029 | 0.079527973 | 0.138226853 |
| 0.210036016 | 0.217166885 | 0.058453483 | 0.075529036 |
| 0.135641991 | 0.210953165 | 0.173450618 | 0.283110872 |
| 0.033742249 | 0.236115968 | 0.09847978  | 0.222480824 |
| 0.072051192 | 0.333882362 | 0.227319398 | 0.132932334 |
| 0.021239378 | 0.187694274 | 0.082729836 | 0.156627387 |
| 0.120845665 | 0.108586157 | 0.053358752 | 0.141901583 |
| 0.121438425 | 0.213904104 | 0.278631544 | 0.241294176 |
| 0.080384962 | 0.051746959 | 0.10619811  | 0.095780042 |
| 0.098725468 | 0.215822999 | 0.23450933  | 0.214842265 |
| 0.069153873 | 0.26306038  | 0.294988011 | 0.138621045 |
| 0.145861447 | 0.110826743 | 0.017101172 | 0.097354941 |
| 0.113667932 | 0.046843144 | 0.001828254 | 0.013533729 |
| 0.1503234   | 0.062217529 | 0.147917991 | 0.124528671 |
| 0.050442827 | 0.148143734 | 0.015803612 | 0.144014085 |
| 0.277294498 | 0.314805285 | 0.125071246 | 0.198932607 |
| 0.169337558 | 0.202075597 | 0.148123617 | 0.00521022  |
| 0.08079593  | 0.067383069 | 0.066144341 | 0.186237476 |



|             |             |             |             |
|-------------|-------------|-------------|-------------|
| 0.165652794 | 0.020666388 | 0.091831001 | 0.186453187 |
| 0.175252094 | 0.022356286 | 0.097093395 | 0.128868114 |
| 0.20261021  | 0.323841638 | 0.109908118 | 0.13593885  |
| 0.118036358 | 0.156288866 | 0.058614725 | 0.068390635 |
| 0.08558146  | 0.046044111 | 0.145287913 | 0.038340172 |
| 0.188709581 | 0.0854759   | 0.009537359 | 0.333621344 |
| 0.306389012 | 0.047907498 | 0.261841955 | 0.051055886 |
| 0.148038228 | 0.189479464 | 0.061395049 | 0.073153796 |
| 0.106342562 | 0.069885495 | 0.169145526 | 0.227799303 |
| 0.034852327 | 0.083002165 | 0.17582152  | 0.049954012 |
| 0.356108875 | 0.063805874 | 0.21286488  | 0.048490724 |
| 0.251623166 | 0.181886387 | 0.264224835 | 0.070257092 |
| 0.094060291 | 0.226602538 | 0.092674786 | 0.248666756 |
| 0.133383473 | 0.037627359 | 0.145790891 | 0.133686627 |
| 0.042640222 | 0.231687988 | 0.074834623 | 0.246201482 |
| 0.086031029 | 0.17841202  | 0.133269957 | 0.216672851 |
| 0.176246936 | 0.030145554 | 0.037496302 | 0.071076435 |
| 0.27531723  | 0.20702098  | 0.041376755 | 0.191774788 |
| 0.028130192 | 0.135477105 | 0.1039597   | 0.065698291 |
| 0.13964868  | 0.133328747 | 0.115985048 | 0.208608189 |
| 0.126250451 | 0.084282593 | 0.05605205  | 0.263596815 |
| 0.139121324 | 0.132433686 | 0.268659353 | 0.001331582 |
| 0.174884774 | 0.110005828 | 0.159430832 | 0.073642337 |
| 0.3061825   | 0.122812326 | 0.138373844 | 0.052959999 |
| 0.146250441 | 0.02019648  | 0.074555701 | 0.074898349 |
| 0.044359009 | 0.215333974 | 0.26807417  | 0.208260084 |
| 0.158388092 | 0.062771062 | 0.048897606 | 0.238416298 |
| 0.018194989 | 0.03851034  | 0.044832959 | 0.132338644 |
| 0.028059309 | 0.072549758 | 0.070119618 | 0.059378413 |
| 0.167332514 | 0.15297376  |             |             |
| ESC02       | 0.171931677 | 0.508389403 | 0.14617807  |
| 0.231305911 | 0.360067049 | 0.514177758 | 0.138072611 |
| 0.237353735 | 0.464397295 | 0.401016557 | 0.459190205 |
| 0.05501176  | 0.096420858 | 0.521191804 | 0.12771666  |
| 0.456814037 | 0.081890146 | 0.207833263 | 0.125562149 |
| 0.333687005 | 0.338763907 | 0.407100093 | 0.520581995 |
| 0.344445198 | 0.303490539 | 0.48198926  | 0.446303569 |
| 0.530678443 | 0.324677805 | 0.516240107 | 0.264568925 |
| 0.467745489 | 0.379414248 | 0.443725374 | 0.054689939 |
| 0.51451292  | 0.016308215 | 0.460858125 | 0.344238531 |
| 0.1708486   | 0.439220951 | 0.454856079 | 0.342846911 |
| 0.476253999 | 0.102497115 | 0.292348561 | 0.476354349 |
| 0.452159342 | 0.389137412 | 0.166355528 | 0.523668111 |
| 0.456685789 | 0.479378886 | 0.502397832 | 0.006991549 |
| 0.340490656 | 0.093407485 | 0.251745553 | 0.516451366 |
| 0.320369847 | 0.216774742 | 0.339036975 | 0.383358261 |
| 0.47654826  | 0.457575135 | 0.364563648 | 0.462022672 |
| 0.525884919 | 0.201280542 | 0.50463681  | 0.243832963 |
| 0.50731027  | 0.097687585 | 0.271649275 | 0.191177551 |
| 0.466181933 | 0.300343084 | 0.42411085  | 0.347584839 |
| 0.505565866 | 0.529648042 | 0.35505983  | 0.518081661 |
| 0.123978772 | 0.386861304 | 0.329656321 | 0.394059547 |
| 0.462642165 | 0.175757039 | 0.50583891  | 0.521208756 |
| 0.127778176 | 0.491442512 | 0.500016393 | 0.247735576 |

|             |             |             |             |
|-------------|-------------|-------------|-------------|
| 0.522103625 | 0.325995448 | 0.501046852 | 0.201897709 |
| 0.425663914 | 0.402240208 | 0.495756327 | 0.416584818 |
| 0.384457034 | 0.174977853 | 0.516224141 | 0.360652699 |
| 0.380543707 | 0.184301529 | 0.277743983 | 0.520218594 |
| 0.510224144 | 0.53473387  | 0.51754141  | 0.464239433 |
| 0.439035476 | 0.525666026 | 0.50589341  | 0.504541154 |
| 0.211303697 | 0.52752376  | 0.312461372 | 0.097875447 |
| 0.176115758 | 0.162446565 | 0.29249617  | 0.405492033 |
| 0.530897056 | 0.461631716 | 0.329870871 | 0.317037035 |
| 0.502829317 | 0.504484943 | 0.526067345 | 0.510555526 |
| 0.103123165 | 0.284267071 | 0.442498998 | 0.422113865 |
| 0.483392012 | 0.219483826 | 0.294784626 | 0.529990247 |
| 0.474720022 | 0.508052259 | 0.305873932 | 0.525897297 |
| 0.323332083 | 0.510450502 | 0.529626119 | 0.277617709 |
| 0.527706104 | 0.517160191 | 0.515115168 | 0.45806104  |
| 0.49982999  | 0.475040603 | 0.110642597 | 0.482481911 |
| 0.503597977 | 0.019203287 | 0.528822265 | 0.52841112  |
| 0.517418033 | 0.524265471 | 0.51407567  | 0.529330944 |
| 0.520545875 | 0.166902579 | 0.039049835 | 0.366596482 |
| 0.520060372 | 0.490129694 | 0.213521868 | 0.485011689 |
| 0.427875082 | 0.530249488 | 0.509590617 | 0.38652216  |
| 0.510156537 | 0.521304782 | 0.533077566 | 0.506606854 |
| 0.43010239  | 0.420047029 | 0.426267919 | 0.50042678  |
| 0.10319991  | 0.235282098 | 0.137501792 | 0.414250871 |
| 0.461232395 | 0.269833435 | 0.518063274 | 0.427764722 |
| 0.299790372 | 0.485363704 | 0.379306806 | 0.438629141 |
| 0.142158898 | 0.53224592  | 0.286952476 | 0.307599193 |
| 0.093636839 | 0.25158865  | 0.291686571 | 0.252269796 |
| 0.339491366 | 0.311545157 | 0.52401803  | 0.51926279  |
| 0.428231351 | 0.314882065 | 0.531076675 | 0.501799946 |
| 0.465817477 | 0.43804873  | 0.351789976 | 0.025729441 |
| 0.342886863 | 0.368487769 | 0.207519215 | 0.475660139 |
| 0.275516899 | 0.348133808 | 0.473321677 | 0.459238074 |
| 0.437909086 | 0.281422955 | 0.440217938 | 0.464907836 |
| 0.280244997 | 0.384224125 | 0.511854895 | 0.509483645 |
| 0.013590363 | 0.449357948 | 0.529750678 | 0.192228238 |
| 0.445550942 | 0.166467129 | 0.294783023 | 0.517966836 |
| 0.34589689  | 0.273779847 | 0.52958504  | 0.45452727  |
| 0.452417997 | 0.322090567 | 0.51855299  | 0.065063382 |
| 0.408708797 | 0.076951677 | 0.373500774 | 0.443987029 |
| 0.37635749  | 0.389008333 | 0.368223887 | 0.337833208 |
| 0.257309965 | 1           | 0.494471386 | 0.532973496 |
| 0.436885286 | 0.515900879 | 0.526079647 | 0.51511834  |
| 0.481939188 | 0.428117091 | 0.152918278 | 0.523786642 |
| 0.517806682 | 0.372448313 | 0.176346913 | 0.517705445 |
| 0.44770579  | 0.471036049 | 0.15174661  | 0.516017852 |
| 0.504449782 | 0.495809563 | 0.234680697 | 0.441502013 |
| 0.48415999  | 0.368108086 | 0.494914967 | 0.517247576 |
| 0.40475519  | 0.422649339 | 0.39352875  | 0.455940792 |
| 0.296599978 | 0.260668669 | 0.419045888 | 0.199802868 |
| 0.012631216 | 0.188637319 | 0.157049343 | 0.23920744  |
| 0.190362414 | 0.502233976 | 0.477924506 | 0.525978623 |
| 0.217129065 | 0.498520607 | 0.360219735 | 0.370455149 |
| 0.495987055 | 0.422394566 | 0.433664252 | 0.459391761 |

|             |             |             |             |
|-------------|-------------|-------------|-------------|
| 0.365251454 | 0.039088361 | 0.194547109 | 0.532731894 |
| 0.117336466 | 0.276628121 | 0.458638794 | 0.006173381 |
| 0.119164656 | 0.511009551 | 0.196929339 | 0.29156948  |
| 0.508625528 | 0.300140254 | 0.342162435 | 0.425181918 |
| 0.439199101 | 0.190925657 | 0.006915554 | 0.515302389 |
| 0.501386525 | 0.491175566 | 0.501910563 | 0.482377458 |
| 0.494585518 | 0.496673349 | 0.486013593 | 0.502536679 |
| 0.202797945 | 0.199963245 | 0.244997033 | 0.375112452 |
| 0.013973783 | 0.466598675 | 0.383842289 | 0.253271388 |
| 0.49826319  | 0.418413043 | 0.099618783 | 0.419023491 |
| 0.060851737 | 0.224999622 | 0.451221267 | 0.315794556 |
| 0.416945346 | 0.048147286 | 0.324458319 | 0.383683234 |
| 0.494555318 | 0.464494403 | 0.405870108 | 0.528485018 |
| 0.431416206 | 0.256706089 | 0.384768384 | 0.479259425 |
| 0.154551689 | 0.153650499 | 0.492644837 | 0.056484066 |
| 0.293636212 | 0.485406887 | 0.455518369 | 0.153538983 |
| 0.389687019 | 0.019767327 | 0.477488172 | 0.529039195 |
| 0.503306919 | 0.524090177 | 0.52791395  | 0.310373169 |
| 0.522687205 | 0.116181424 | 0.53041433  | 0.515731872 |
| 0.467767874 | 0.00281615  | 0.014956535 | 0.527314644 |
| 0.464299423 | 0.147959628 | 0.27275917  | 0.479979716 |
| 0.193322664 | 0.298944213 | 0.146919234 | 0.214027636 |
| 0.52249986  | 0.304638306 | 0.212026908 | 0.503403164 |
| 0.340340482 | 0.334102349 | 0.519103125 | 0.193127063 |
| 0.480757685 | 0.118931287 | 0.189242254 | 0.014582231 |
| 0.440818133 | 0.226054414 | 0.504419715 | 0.524568007 |
| 0.505621307 | 0.457511003 | 0.421985642 | 0.458422453 |
| 0.498858695 | 0.219128042 | 0.432435509 | 0.239690808 |
| 0.522436045 | 0.466850029 | 0.43002442  | 0.428647031 |
| 0.512967943 | 0.508667267 | 0.088923602 | 0.490916038 |
| 0.035719842 | 0.003332681 | 0.508585521 | 0.383120407 |
| 0.088349732 | 0.436924218 | 0.371163508 | 0.337756131 |
| 0.321423073 | 0.08550262  | 0.296001388 | 0.272689045 |
| 0.392058547 | 0.446069738 | 0.319543809 | 0.366399804 |
| 0.322443911 | 0.168143273 | 0.288633201 | 0.257855234 |
| 0.331737986 | 0.429589839 | 0.308187238 | 0.063480399 |
| 0.508085331 | 0.479813966 | 0.13495694  | 0.279717832 |
| 0.518673291 | 0.533233291 | 0.096237916 | 0.02620021  |
| 0.389430017 | 0.402563406 | 0.525426257 | 0.527535379 |
| 0.537356967 | 0.510019208 | 0.447941662 | 0.188359245 |
| 0.151970171 | 0.402468715 | 0.33788075  | 0.13960433  |
| 0.529891845 | 0.165474522 | 0.514737484 | 0.332860329 |
| 0.222176129 | 0.321548152 | 0.078682829 | 0.173350154 |
| 0.439990203 | 0.29423661  | 0.254487172 | 0.27950044  |
| 0.401214412 | 0.280926143 | 0.117836185 | 0.310635802 |
| 0.464677207 | 0.194284098 | 0.274551688 | 0.44055019  |
| 0.475428919 | 0.311322019 | 0.498651864 | 0.481076865 |
| 0.250439516 | 0.223085472 | 0.430109685 | 0.47585144  |
| 0.529465937 | 0.479611583 | 0.063699836 | 0.515632266 |
| 0.519372654 | 0.52177459  | 0.515283181 | 0.460665786 |
| 0.182806186 | 0.447181422 | 0.362887466 | 0.415959732 |
| 0.300751999 | 0.514108493 | 0.343879299 | 0.146613472 |
| 0.396183692 | 0.499977317 | 0.5042279   | 0.260457097 |
| 0.510603556 | 0.262636817 | 0.151029559 | 0.519687117 |

|             |             |             |             |
|-------------|-------------|-------------|-------------|
| 0.206569461 | 0.189364728 | 0.478950334 | 0.506964629 |
| 0.003028967 | 0.151592933 | 0.503687487 | 0.354957778 |
| 0.514220828 | 0.517203931 | 0.491946303 | 0.383486164 |
| 0.001852954 | 0.467873601 | 0.469973762 | 0.477661586 |
| 0.524544199 | 0.476768584 | 0.249498512 | 0.140747346 |
| 0.386641823 | 0.189119291 | 0.220072464 | 0.466376544 |
| 0.201621162 | 0.53254173  | 0.303746811 | 0.329415993 |
| 0.272747926 | 0.203806786 | 0.277245701 | 0.357041729 |
| 0.172788589 | 0.348131551 | 0.449085174 | 0.40622443  |
| 0.233600056 | 0.495775641 | 0.507654489 | 0.076779222 |
| 0.409976495 | 0.48728306  | 0.495832377 | 0.006143082 |
| 0.503581722 | 0.023745278 | 0.277317988 | 0.295873193 |
| 0.280580591 | 0.301535154 | 0.33314372  | 0.356763033 |
| 0.470274613 | 0.329570313 | 0.377382502 | 0.340980664 |
| 0.239285906 | 0.34012327  | 0.462815672 | 0.471997596 |
| 0.350284274 | 0.232472702 | 0.199070659 | 0.195899459 |
| 0.113052007 | 0.526390045 | 0.359156734 | 0.17242897  |
| 0.331435285 | 0.467489687 | 0.431923135 | 0.515580264 |
| 0.480531502 | 0.22741692  | 0.431361768 | 0.533185217 |
| 0.30075947  | 0.419312809 | 0.158453037 | 0.496362468 |
| 0.356176963 | 0.270268642 | 0.508419962 | 0.462829676 |
| 0.511089669 | 0.456129745 | 0.359880857 | 0.490559635 |
| 0.4468061   | 0.431607581 | 0.428336495 | 0.147548779 |
| 0.297329216 | 0.248400661 | 0.311571707 | 0.007343536 |
| 0.468363277 | 0.404494129 | 0.534869873 | 0.505805548 |
| 0.328104901 | 0.461586291 | 0.450005676 | 0.184344354 |
| 0.375591349 | 0.290602219 | 0.254530469 | 0.51793194  |
| 0.242946828 | 0.297236749 | 0.363956213 | 0.4836614   |
| 0.501945128 | 0.495240078 | 0.31021891  | 0.381534035 |
| 0.342856315 | 0.33542389  | 0.490259753 | 0.246238793 |
| 0.504771293 | 0.221329982 | 0.483036417 | 0.379506459 |
| 0.297820182 | 0.523628354 | 0.143915921 | 0.530949896 |
| 0.403739636 | 0.247688436 | 0.498186102 | 0.436994065 |
| 0.415612574 | 0.183249933 | 0.205643357 | 0.496237919 |
| 0.332182986 | 0.38455408  | 0.025981761 | 0.088514844 |
| 0.420778486 | 0.397219664 | 0.508033629 | 0.459127908 |
| 0.288063466 | 0.418975298 | 0.185318954 | 0.430522938 |
| 0.501786423 | 0.522089532 | 0.355257923 | 0.35223823  |
| 0.464799413 | 0.192930501 | 0.530146712 | 0.026357327 |
| 0.49725021  | 0.484003551 | 0.473496567 | 0.123007115 |
| 0.054115919 | 0.233550535 | 0.499698246 | 0.16340824  |
| 0.511193051 | 0.235625661 | 0.468472644 | 0.517793555 |
| 0.300981903 | 0.523523131 | 0.188837848 | 0.490648267 |
| 0.1172786   | 0.37125099  | 0.432388064 | 0.463951062 |
| 0.289543377 | 0.330817712 | 0.459126907 | 0.26653166  |
| 0.079847975 | 0.334610616 | 0.004549701 | 0.448705052 |
| 0.498124868 | 0.383294885 | 0.321062092 | 0.39330753  |
| 0.370179126 | 0.468453616 | 0.324510246 | 0.487912424 |
| 0.028510607 | 0.425051664 | 0.308151633 | 0.518259005 |
| 0.280742035 | 0.46099087  | 0.11042302  | 0.365874997 |
| 0.498072498 | 0.365189928 | 0.366866835 | 0.365937253 |
| 0.51746193  | 0.489038856 | 0.29249457  | 0.277919555 |
| 0.484715061 | 0.154319231 | 0.492314468 | 0.522436006 |
| 0.262355629 | 0.243858953 | 0.502045878 | 0.29722906  |

|             |             |             |             |
|-------------|-------------|-------------|-------------|
| 0.354695906 | 0.48673742  | 0.484524466 | 0.517704099 |
| 0.120731617 | 0.35744868  | 0.497994871 | 0.512456456 |
| 0.392180712 | 0.199489143 | 0.284654198 | 0.296217993 |
| 0.504804455 | 0.183869425 | 0.300297181 | 0.475610272 |
| 0.245452716 | 0.412480537 | 0.458617059 | 0.244945477 |
| 0.082773168 | 0.273638675 | 0.478815651 | 0.255956932 |
| 0.397516393 | 0.433381721 | 0.286541057 | 0.454305599 |
| 0.206918385 | 0.05312418  | 0.478990314 | 0.020091175 |
| 0.486114455 | 0.473008681 | 0.361540543 | 0.415871632 |
| 0.306497539 | 0.474802723 | 0.476057249 | 0.005582769 |
| 0.489893623 | 0.057589744 | 0.385738191 | 0.286715346 |
| 0.349439941 | 0.12936195  | 0.502473239 | 0.522515667 |
| 0.448465621 | 0.405906585 | 0.405267277 | 0.513378372 |
| 0.163545992 | 0.378332761 | 0.401665818 | 0.524275755 |
| 0.248741056 | 0.473182629 | 0.485669579 | 0.42741814  |
| 0.502139845 | 0.403476255 |             |             |
| ESD         | 0.153171226 | 0.406158863 | 0.120119231 |
| 0.20204305  | 0.304903762 | 0.393140245 | 0.123046053 |
| 0.216243972 | 0.331114822 | 0.254065023 | 0.36456174  |
| 0.051872285 | 0.100691342 | 0.430579676 | 0.119634165 |
| 0.331299009 | 0.087951643 | 0.183573403 | 0.106488337 |
| 0.265745735 | 0.274368058 | 0.313755552 | 0.369246746 |
| 0.286559376 | 0.238523125 | 0.341930365 | 0.325095742 |
| 0.468202966 | 0.228497119 | 0.384875717 | 0.178310306 |
| 0.415550715 | 0.301716139 | 0.321010205 | 0.053741505 |
| 0.382855041 | 0.017149465 | 0.44383751  | 0.274514147 |
| 0.166703208 | 0.367395971 | 0.304315632 | 0.287609504 |
| 0.31342877  | 0.08803444  | 0.188008105 | 0.335497202 |
| 0.334060911 | 0.329971994 | 0.127583356 | 0.380447536 |
| 0.326419047 | 0.371727315 | 0.336475604 | 0.005926412 |
| 0.264306809 | 0.075311721 | 0.183502278 | 0.497623668 |
| 0.277047851 | 0.209719986 | 0.220719496 | 0.306666334 |
| 0.3328363   | 0.339257015 | 0.317069003 | 0.29845004  |
| 0.476590883 | 0.163094599 | 0.364707765 | 0.219589687 |
| 0.34231918  | 0.083546723 | 0.234186041 | 0.151062326 |
| 0.339372789 | 0.280891451 | 0.351892699 | 0.27777388  |
| 0.398965723 | 0.517076264 | 0.300033612 | 0.489128975 |
| 0.09676413  | 0.297574099 | 0.291404454 | 0.320423904 |
| 0.333485809 | 0.149017892 | 0.374413816 | 0.503825059 |
| 0.110879512 | 0.325891018 | 0.340240815 | 0.190194108 |
| 0.41553361  | 0.259340236 | 0.331176162 | 0.183824937 |
| 0.334305937 | 0.294772037 | 0.474533697 | 0.320374693 |
| 0.328339683 | 0.133438229 | 0.48934623  | 0.283783278 |
| 0.317273146 | 0.154686723 | 0.227230698 | 0.394875729 |
| 0.362779014 | 0.466036411 | 0.367501394 | 0.333057924 |
| 0.314515537 | 0.478346554 | 0.373330086 | 0.40566344  |
| 0.145880616 | 0.504411483 | 0.270500774 | 0.106587702 |
| 0.144050178 | 0.177028107 | 0.235547884 | 0.332931727 |
| 0.433697397 | 0.372579349 | 0.27106451  | 0.269995165 |
| 0.40468209  | 0.475513993 | 0.495613043 | 0.364924489 |
| 0.097489737 | 0.221818108 | 0.320496748 | 0.359972187 |
| 0.344576071 | 0.197284745 | 0.23969113  | 0.503589321 |
| 0.38600402  | 0.368200715 | 0.255020251 | 0.51370604  |
| 0.255981174 | 0.502818071 | 0.418072523 | 0.23942769  |

|             |             |             |             |
|-------------|-------------|-------------|-------------|
| 0.511384549 | 0.497003919 | 0.488472046 | 0.348219982 |
| 0.485904794 | 0.360792079 | 0.064858634 | 0.348444904 |
| 0.47984646  | 0.019059808 | 0.429045355 | 0.452913249 |
| 0.477822748 | 0.392266099 | 0.488135525 | 0.479865434 |
| 0.485758095 | 0.148226542 | 0.021998218 | 0.295740237 |
| 0.491652964 | 0.382532791 | 0.221370785 | 0.329550206 |
| 0.320371026 | 0.382858034 | 0.376700311 | 0.262161369 |
| 0.50783354  | 0.426331444 | 0.45215524  | 0.357768448 |
| 0.297464985 | 0.352801554 | 0.304046667 | 0.476640786 |
| 0.116866621 | 0.195032568 | 0.112213506 | 0.328313329 |
| 0.326580491 | 0.250480252 | 0.367064551 | 0.319304781 |
| 0.262455385 | 0.363927953 | 0.288057179 | 0.338659117 |
| 0.108807159 | 0.368074125 | 0.253487935 | 0.228847742 |
| 0.098314863 | 0.205456914 | 0.230649402 | 0.240751903 |
| 0.289150053 | 0.292582273 | 0.37374858  | 0.460685347 |
| 0.316586211 | 0.241555566 | 0.376533507 | 0.47336573  |
| 0.421152928 | 0.332003084 | 0.282873558 | 0.029776251 |
| 0.233363508 | 0.241129264 | 0.164072794 | 0.347407819 |
| 0.242006345 | 0.243095297 | 0.332610501 | 0.354280404 |
| 0.318496605 | 0.218561381 | 0.307572434 | 0.455726205 |
| 0.208278643 | 0.318159181 | 0.400744196 | 0.343832385 |
| 0.015728903 | 0.330079643 | 0.385064589 | 0.170271348 |
| 0.314800811 | 0.139567725 | 0.243545886 | 0.413098674 |
| 0.249650491 | 0.222166131 | 0.460093226 | 0.356377008 |
| 0.328395446 | 0.27354862  | 0.495307686 | 0.037648005 |
| 0.311830345 | 0.103771797 | 0.306936431 | 0.299199485 |
| 0.294899219 | 0.314989338 | 0.297177573 | 0.297580838 |
| 0.202035908 | 0.494471386 | 1           | 0.478602575 |
| 0.294460319 | 0.499004624 | 0.400170319 | 0.414909465 |
| 0.368376146 | 0.29482442  | 0.120176605 | 0.374231411 |
| 0.40712458  | 0.254573573 | 0.13636645  | 0.361571818 |
| 0.292907575 | 0.344231696 | 0.186621475 | 0.460269371 |
| 0.507507409 | 0.457140347 | 0.223039689 | 0.343821436 |
| 0.366584773 | 0.303557146 | 0.386134397 | 0.506091994 |
| 0.250154849 | 0.293996114 | 0.288477873 | 0.363035643 |
| 0.247007593 | 0.209462891 | 0.3456723   | 0.165897657 |
| 0.012855976 | 0.158144891 | 0.132690649 | 0.231618911 |
| 0.179010323 | 0.349205421 | 0.354940064 | 0.487878896 |
| 0.196190545 | 0.428051072 | 0.285432341 | 0.268238998 |
| 0.401423968 | 0.309496763 | 0.338247617 | 0.357495083 |
| 0.305398981 | 0.04876286  | 0.176803164 | 0.516437749 |
| 0.091634269 | 0.232563401 | 0.342942938 | 0.006523133 |
| 0.096972187 | 0.356103751 | 0.15293911  | 0.252223679 |
| 0.444516398 | 0.253345752 | 0.256013845 | 0.262417755 |
| 0.363187426 | 0.176443024 | 0.012173197 | 0.450137558 |
| 0.467634817 | 0.440184045 | 0.464546128 | 0.458588711 |
| 0.402118282 | 0.369991216 | 0.358358421 | 0.37608164  |
| 0.18874599  | 0.169441905 | 0.180516722 | 0.289787677 |
| 0.008634136 | 0.37871554  | 0.323780939 | 0.216784386 |
| 0.367304997 | 0.317678674 | 0.096710803 | 0.330100971 |
| 0.053473885 | 0.17194957  | 0.303945822 | 0.281741078 |
| 0.335678549 | 0.049288243 | 0.215406579 | 0.259671236 |
| 0.437698442 | 0.349091852 | 0.309330746 | 0.511572026 |
| 0.344355528 | 0.178326633 | 0.309040259 | 0.377246546 |

|             |             |             |             |
|-------------|-------------|-------------|-------------|
| 0.142654692 | 0.101075826 | 0.334493209 | 0.037738683 |
| 0.266874462 | 0.45780628  | 0.343265264 | 0.135902254 |
| 0.302871183 | 0.021198248 | 0.367768764 | 0.511155907 |
| 0.459268257 | 0.4775224   | 0.482760953 | 0.253136307 |
| 0.484228908 | 0.087262541 | 0.497846427 | 0.369862274 |
| 0.29143567  | 0.002731931 | 0.016102278 | 0.440668702 |
| 0.334925747 | 0.113615675 | 0.233116164 | 0.35242245  |
| 0.17789184  | 0.21601488  | 0.151917538 | 0.20137658  |
| 0.395784765 | 0.27682968  | 0.20174362  | 0.457592968 |
| 0.279228866 | 0.293954132 | 0.346826916 | 0.154959385 |
| 0.378691733 | 0.116724404 | 0.154872809 | 0.014880016 |
| 0.34982447  | 0.17315386  | 0.483288053 | 0.48610435  |
| 0.487137906 | 0.358509793 | 0.266063267 | 0.33384617  |
| 0.40319682  | 0.155027515 | 0.327872606 | 0.178388751 |
| 0.462351165 | 0.333266129 | 0.340495558 | 0.323391196 |
| 0.471362248 | 0.457632157 | 0.086615654 | 0.35663865  |
| 0.040342942 | 0.004936637 | 0.350822751 | 0.311942625 |
| 0.076141271 | 0.301503094 | 0.294827738 | 0.263574137 |
| 0.279853947 | 0.078162794 | 0.223401982 | 0.215891421 |
| 0.314168286 | 0.329601359 | 0.262134409 | 0.292306419 |
| 0.279382774 | 0.148968702 | 0.285459849 | 0.237600055 |
| 0.254478241 | 0.313247274 | 0.236744678 | 0.062102045 |
| 0.350242631 | 0.346654758 | 0.126419999 | 0.243458878 |
| 0.401914574 | 0.448005932 | 0.086096028 | 0.031057254 |
| 0.307815903 | 0.308015215 | 0.461713665 | 0.474057605 |
| 0.514729937 | 0.496192045 | 0.423716788 | 0.175991405 |
| 0.145862849 | 0.319940066 | 0.2798126   | 0.163738442 |
| 0.486190326 | 0.120636325 | 0.480301464 | 0.262988822 |
| 0.195235958 | 0.27229048  | 0.091920198 | 0.164095382 |
| 0.333618667 | 0.257644238 | 0.243122568 | 0.206886781 |
| 0.29531839  | 0.252863405 | 0.114127882 | 0.260780405 |
| 0.339594772 | 0.152601473 | 0.233756962 | 0.364788488 |
| 0.363443268 | 0.206526223 | 0.356863043 | 0.444924708 |
| 0.204889328 | 0.179617203 | 0.29590086  | 0.367042605 |
| 0.377698231 | 0.323706669 | 0.064901126 | 0.424868499 |
| 0.468646884 | 0.369805266 | 0.490760892 | 0.36725049  |
| 0.155249362 | 0.330260956 | 0.265163126 | 0.305531279 |
| 0.253881613 | 0.397146057 | 0.296227913 | 0.131453872 |
| 0.326835625 | 0.489326898 | 0.38529219  | 0.240131244 |
| 0.372506515 | 0.193532727 | 0.108040801 | 0.417728735 |
| 0.168691288 | 0.150372115 | 0.313587019 | 0.370320428 |
| 0.006917656 | 0.139490907 | 0.456689445 | 0.319863229 |
| 0.506959472 | 0.441564178 | 0.437328819 | 0.334634068 |
| 0.002514979 | 0.340582194 | 0.351086499 | 0.346203206 |
| 0.399009035 | 0.369226482 | 0.238388881 | 0.14026541  |
| 0.320653573 | 0.142941174 | 0.179265912 | 0.351964091 |
| 0.134429381 | 0.363537749 | 0.262702193 | 0.259027339 |
| 0.257255642 | 0.148370482 | 0.24391415  | 0.322312637 |
| 0.147476728 | 0.2937819   | 0.339987938 | 0.274582834 |
| 0.152760717 | 0.397986571 | 0.349768053 | 0.076184366 |
| 0.325049304 | 0.366790371 | 0.428279053 | 0.003465535 |
| 0.364747976 | 0.028569286 | 0.249719122 | 0.266608938 |
| 0.266304411 | 0.25124823  | 0.288380413 | 0.307621061 |
| 0.337011864 | 0.280123465 | 0.322696127 | 0.293344445 |

|             |             |             |             |
|-------------|-------------|-------------|-------------|
| 0.236294057 | 0.310711479 | 0.360657937 | 0.344421805 |
| 0.292970998 | 0.208593322 | 0.160342652 | 0.162039244 |
| 0.122354436 | 0.441548742 | 0.287849497 | 0.138926253 |
| 0.290628076 | 0.347508438 | 0.365245968 | 0.471749352 |
| 0.421509004 | 0.167167263 | 0.330392882 | 0.409992464 |
| 0.190714407 | 0.310808761 | 0.1308616   | 0.37990388  |
| 0.309076057 | 0.219046313 | 0.373500621 | 0.309181481 |
| 0.346088646 | 0.418611408 | 0.291979009 | 0.43987256  |
| 0.365649469 | 0.301562822 | 0.269717692 | 0.146464098 |
| 0.237257922 | 0.201876651 | 0.262258581 | 0.009134388 |
| 0.353985517 | 0.325323621 | 0.415305504 | 0.478420572 |
| 0.250574876 | 0.401314123 | 0.288487659 | 0.148282589 |
| 0.247510504 | 0.221681631 | 0.215343244 | 0.37882149  |
| 0.185122627 | 0.28475163  | 0.305293638 | 0.359967666 |
| 0.372049664 | 0.353507136 | 0.263138394 | 0.300492674 |
| 0.296201615 | 0.267382984 | 0.474526527 | 0.207900598 |
| 0.345307121 | 0.209991628 | 0.326518739 | 0.286224424 |
| 0.262667332 | 0.483234709 | 0.133940295 | 0.485219611 |
| 0.284445154 | 0.201357656 | 0.499560026 | 0.362932439 |
| 0.370454691 | 0.214192086 | 0.165192275 | 0.35331843  |
| 0.275291088 | 0.296785459 | 0.012639071 | 0.061519861 |
| 0.332098945 | 0.285144586 | 0.339950704 | 0.350557687 |
| 0.253827899 | 0.332289591 | 0.17053946  | 0.317105958 |
| 0.468981643 | 0.501149234 | 0.255916558 | 0.291478811 |
| 0.342970493 | 0.186278779 | 0.380017654 | 0.023804392 |
| 0.33834922  | 0.333366331 | 0.3030499   | 0.126087156 |
| 0.059891818 | 0.175721469 | 0.343419278 | 0.127665461 |
| 0.437244726 | 0.185480321 | 0.323939532 | 0.394364922 |
| 0.247131883 | 0.501796335 | 0.200720888 | 0.371414906 |
| 0.091769506 | 0.310692828 | 0.32695809  | 0.3200117   |
| 0.23732269  | 0.259788161 | 0.354148295 | 0.225241789 |
| 0.085154439 | 0.279500565 | 0.003579119 | 0.43131742  |
| 0.466510897 | 0.278184402 | 0.258098453 | 0.257131254 |
| 0.317379403 | 0.377990123 | 0.235349739 | 0.354661918 |
| 0.037740183 | 0.3158978   | 0.287048548 | 0.399846905 |
| 0.183898671 | 0.312892846 | 0.136967544 | 0.277466358 |
| 0.478365989 | 0.239677847 | 0.295894915 | 0.239376296 |
| 0.474807275 | 0.368828002 | 0.222929334 | 0.284750178 |
| 0.33085558  | 0.129566549 | 0.349882182 | 0.504266467 |
| 0.243878375 | 0.2123971   | 0.381947595 | 0.240053676 |
| 0.271349545 | 0.396318169 | 0.336317491 | 0.498378583 |
| 0.128693887 | 0.304758257 | 0.378962064 | 0.432244012 |
| 0.330757864 | 0.181442959 | 0.221918325 | 0.235487988 |
| 0.450354011 | 0.16814235  | 0.246594708 | 0.358972544 |
| 0.18792845  | 0.342682416 | 0.315479517 | 0.226632985 |
| 0.08281587  | 0.257284593 | 0.381666463 | 0.222081395 |
| 0.31309261  | 0.330086394 | 0.245651571 | 0.404216688 |
| 0.208561708 | 0.057476436 | 0.462828532 | 0.015334921 |
| 0.372470912 | 0.36715408  | 0.316820124 | 0.333218735 |
| 0.244615299 | 0.348000452 | 0.315231081 | 0.003905124 |
| 0.363093744 | 0.081273175 | 0.318811097 | 0.235950732 |
| 0.243196892 | 0.109499421 | 0.463564327 | 0.47700178  |
| 0.361225878 | 0.326451999 | 0.279421966 | 0.448552877 |
| 0.146365807 | 0.269344226 | 0.275285876 | 0.367278908 |



|             |             |             |             |
|-------------|-------------|-------------|-------------|
| 0.210587045 | 0.30788345  | 0.33999054  | 0.316375429 |
| 0.373697935 | 0.350053944 |             |             |
| ESPL1       | 0.144819874 | 0.481657849 | 0.119116667 |
| 0.23596735  | 0.382755086 | 0.523882333 | 0.109931803 |
| 0.206340058 | 0.427697348 | 0.38387397  | 0.476205687 |
| 0.042666083 | 0.115147473 | 0.505991373 | 0.10208212  |
| 0.472698799 | 0.067997649 | 0.180180886 | 0.110555795 |
| 0.314855845 | 0.356552194 | 0.440599108 | 0.497612569 |
| 0.356962202 | 0.264754972 | 0.453243987 | 0.45524029  |
| 0.516663882 | 0.358904014 | 0.531479668 | 0.273262255 |
| 0.442810436 | 0.403247003 | 0.469435222 | 0.041404027 |
| 0.517490116 | 0.01514609  | 0.456093844 | 0.352443627 |
| 0.205005199 | 0.409522506 | 0.437701306 | 0.351721421 |
| 0.462071022 | 0.081831707 | 0.295081818 | 0.476694989 |
| 0.424409747 | 0.376656384 | 0.130272897 | 0.522803464 |
| 0.445835111 | 0.460680585 | 0.478977801 | 0.005072299 |
| 0.377729877 | 0.115097683 | 0.28146698  | 0.525546472 |
| 0.3017062   | 0.201291925 | 0.343927812 | 0.346808746 |
| 0.465496467 | 0.449993909 | 0.344783932 | 0.449728415 |
| 0.515474802 | 0.223805834 | 0.505557914 | 0.247098153 |
| 0.492580931 | 0.069303093 | 0.242754321 | 0.148321178 |
| 0.475245746 | 0.29398244  | 0.441972879 | 0.3752323   |
| 0.477610035 | 0.533828944 | 0.329538098 | 0.520109222 |
| 0.125240682 | 0.406866641 | 0.351104695 | 0.386287676 |
| 0.441877989 | 0.139556836 | 0.512760988 | 0.534723436 |
| 0.094829241 | 0.47056518  | 0.482231273 | 0.203066861 |
| 0.50479251  | 0.338058283 | 0.494559575 | 0.236105715 |
| 0.44257393  | 0.417121064 | 0.492276278 | 0.403191917 |
| 0.398029791 | 0.138507833 | 0.511900421 | 0.387285511 |
| 0.407437294 | 0.154913907 | 0.289111998 | 0.520372251 |
| 0.514701071 | 0.523322459 | 0.495436657 | 0.443864764 |
| 0.456343202 | 0.514350823 | 0.508326775 | 0.481055893 |
| 0.210485003 | 0.540801401 | 0.294824058 | 0.084258494 |
| 0.139190153 | 0.145638903 | 0.286019582 | 0.383441723 |
| 0.528510894 | 0.44237979  | 0.305891534 | 0.319207339 |
| 0.502208611 | 0.503198935 | 0.536822276 | 0.494747975 |
| 0.082139258 | 0.300804744 | 0.462586014 | 0.402277873 |
| 0.471857247 | 0.18415867  | 0.326175545 | 0.531532067 |
| 0.458706633 | 0.510244307 | 0.268812382 | 0.522789289 |
| 0.285085539 | 0.527139229 | 0.513531501 | 0.265644326 |
| 0.537220702 | 0.520970676 | 0.517873035 | 0.481195362 |
| 0.498108225 | 0.475106784 | 0.092573139 | 0.457917183 |
| 0.49591055  | 0.023806573 | 0.521230399 | 0.521282335 |
| 0.517054884 | 0.527639353 | 0.522754381 | 0.520361823 |
| 0.522458441 | 0.133830347 | 0.037048397 | 0.367600171 |
| 0.527935948 | 0.481374614 | 0.197520784 | 0.497434514 |
| 0.438907965 | 0.521709629 | 0.503347513 | 0.411421291 |
| 0.522656575 | 0.515133856 | 0.521520096 | 0.484721388 |
| 0.39394297  | 0.388568587 | 0.445852321 | 0.498121795 |
| 0.087283709 | 0.206468312 | 0.107013253 | 0.388634781 |
| 0.459123893 | 0.258287267 | 0.501092341 | 0.423214538 |
| 0.284100914 | 0.455323157 | 0.408545331 | 0.456248283 |
| 0.106644429 | 0.540051094 | 0.261454531 | 0.269033364 |
| 0.081169758 | 0.212133089 | 0.284967294 | 0.251719085 |

|             |             |             |             |
|-------------|-------------|-------------|-------------|
| 0.342710471 | 0.270592403 | 0.524576444 | 0.509064807 |
| 0.424268575 | 0.281241292 | 0.523562053 | 0.488777303 |
| 0.452784021 | 0.465877191 | 0.317942171 | 0.026790783 |
| 0.350202027 | 0.369216948 | 0.233147656 | 0.489378133 |
| 0.231761868 | 0.333691272 | 0.473175287 | 0.477638003 |
| 0.413430112 | 0.234286689 | 0.448974202 | 0.451042128 |
| 0.235725342 | 0.410620967 | 0.508767804 | 0.495610652 |
| 0.009765498 | 0.444110226 | 0.529901612 | 0.196527806 |
| 0.412989426 | 0.192118692 | 0.339570725 | 0.511564436 |
| 0.359763112 | 0.285888459 | 0.522443832 | 0.469162852 |
| 0.453429733 | 0.271934217 | 0.529975271 | 0.065483608 |
| 0.412166113 | 0.085918963 | 0.373083476 | 0.421521177 |
| 0.358710194 | 0.372028815 | 0.391937659 | 0.362837689 |
| 0.222187644 | 0.532973496 | 0.478602575 | 1           |
| 0.449654948 | 0.533061754 | 0.527186135 | 0.508592624 |
| 0.473523434 | 0.429498377 | 0.180120281 | 0.523587347 |
| 0.514338291 | 0.363821237 | 0.138679119 | 0.512383382 |
| 0.436708342 | 0.479901456 | 0.156669214 | 0.506430708 |
| 0.512216044 | 0.491941321 | 0.224395714 | 0.44547232  |
| 0.479512629 | 0.354715512 | 0.485719174 | 0.533761715 |
| 0.389573311 | 0.431869306 | 0.414879609 | 0.459987334 |
| 0.272118038 | 0.271956677 | 0.385709654 | 0.227145294 |
| 0.01800949  | 0.150557547 | 0.127276451 | 0.239224022 |
| 0.21963921  | 0.499369929 | 0.481216981 | 0.526910843 |
| 0.19507098  | 0.481223045 | 0.321755894 | 0.386683539 |
| 0.469298741 | 0.425230436 | 0.460797311 | 0.471386223 |
| 0.335055406 | 0.03856425  | 0.196593288 | 0.536817097 |
| 0.084679284 | 0.311942619 | 0.426201368 | 0.006632582 |
| 0.0927365   | 0.486866313 | 0.157133829 | 0.252973518 |
| 0.505399496 | 0.261126683 | 0.309786751 | 0.403487371 |
| 0.441419463 | 0.164556647 | 0.007783086 | 0.498845644 |
| 0.490752865 | 0.463452987 | 0.490060231 | 0.4719343   |
| 0.474076638 | 0.483757362 | 0.486281626 | 0.488497001 |
| 0.177162865 | 0.162477447 | 0.268840106 | 0.378245142 |
| 0.010689307 | 0.469769554 | 0.38565755  | 0.225801118 |
| 0.500469935 | 0.392110234 | 0.081058169 | 0.428161201 |
| 0.052879495 | 0.261872937 | 0.417527324 | 0.298535819 |
| 0.417694584 | 0.035459771 | 0.349726123 | 0.399042874 |
| 0.467346353 | 0.436856937 | 0.431753461 | 0.543707537 |
| 0.441584484 | 0.210503245 | 0.402745103 | 0.487936399 |
| 0.130058967 | 0.141351105 | 0.466229388 | 0.061473523 |
| 0.295455444 | 0.463782743 | 0.45800877  | 0.132175496 |
| 0.380960422 | 0.014606353 | 0.453491714 | 0.544003445 |
| 0.489565084 | 0.520764468 | 0.516804017 | 0.349357387 |
| 0.521831729 | 0.135169859 | 0.539544178 | 0.493999269 |
| 0.463957938 | 0.00259785  | 0.012862511 | 0.524719239 |
| 0.482608675 | 0.111990417 | 0.248347481 | 0.496936298 |
| 0.186296964 | 0.257279555 | 0.12198035  | 0.240521973 |
| 0.529591459 | 0.318671232 | 0.229708438 | 0.489735165 |
| 0.332473052 | 0.320846797 | 0.49828391  | 0.153915855 |
| 0.496960383 | 0.103782027 | 0.149393691 | 0.016584086 |
| 0.444656622 | 0.184128107 | 0.49561818  | 0.523816449 |
| 0.506282159 | 0.472708281 | 0.421688173 | 0.462952494 |
| 0.485115574 | 0.177468917 | 0.450027387 | 0.197624193 |

|             |             |             |             |
|-------------|-------------|-------------|-------------|
| 0.505086715 | 0.478175826 | 0.421453129 | 0.406763119 |
| 0.507208873 | 0.489160425 | 0.069645121 | 0.489572968 |
| 0.033961671 | 0.003501748 | 0.500182284 | 0.352205277 |
| 0.079660484 | 0.448373015 | 0.348789672 | 0.306169703 |
| 0.30497512  | 0.07091932  | 0.32431911  | 0.297933967 |
| 0.389190859 | 0.449019703 | 0.345143575 | 0.327382407 |
| 0.333895841 | 0.175019212 | 0.28464283  | 0.231941001 |
| 0.308750645 | 0.395100023 | 0.269893581 | 0.046601198 |
| 0.514559818 | 0.499303297 | 0.112710289 | 0.247990765 |
| 0.518989249 | 0.528338993 | 0.078742342 | 0.025619677 |
| 0.359516594 | 0.393100151 | 0.519699335 | 0.515249433 |
| 0.544566721 | 0.527186435 | 0.416922767 | 0.180279056 |
| 0.12919848  | 0.405665844 | 0.360212517 | 0.143872888 |
| 0.52375079  | 0.126083461 | 0.503797238 | 0.363677442 |
| 0.188708077 | 0.314041276 | 0.07120111  | 0.145754768 |
| 0.465639285 | 0.268351986 | 0.255294671 | 0.243969413 |
| 0.407445499 | 0.313859827 | 0.092734451 | 0.291783019 |
| 0.44321823  | 0.224015321 | 0.246735454 | 0.416600903 |
| 0.451621985 | 0.28374739  | 0.505410715 | 0.461277389 |
| 0.216774192 | 0.184603057 | 0.41458104  | 0.463142521 |
| 0.524264214 | 0.473144984 | 0.062218727 | 0.490019224 |
| 0.507676574 | 0.532666375 | 0.519904915 | 0.449289209 |
| 0.147373624 | 0.474868237 | 0.372396901 | 0.420000115 |
| 0.270919878 | 0.518356076 | 0.323340107 | 0.117589567 |
| 0.364094906 | 0.497147966 | 0.48337957  | 0.256872675 |
| 0.512351182 | 0.214741365 | 0.11308726  | 0.504930376 |
| 0.233082287 | 0.167853201 | 0.462541708 | 0.49946153  |
| 0.003492539 | 0.180761925 | 0.491074015 | 0.353742139 |
| 0.523396941 | 0.511593795 | 0.474141416 | 0.357847389 |
| 0.002025064 | 0.478609863 | 0.484126671 | 0.49960247  |
| 0.501478906 | 0.455493255 | 0.22520561  | 0.130748712 |
| 0.370757136 | 0.151904192 | 0.208554254 | 0.473299442 |
| 0.21944326  | 0.514404384 | 0.279434138 | 0.293074113 |
| 0.270491372 | 0.156729698 | 0.314918024 | 0.351163599 |
| 0.178569619 | 0.328965249 | 0.439170012 | 0.38263761  |
| 0.259365469 | 0.477840713 | 0.491507835 | 0.060469896 |
| 0.43115272  | 0.471366571 | 0.481349388 | 0.00501696  |
| 0.515815901 | 0.018391635 | 0.27716344  | 0.306960994 |
| 0.282354335 | 0.289891364 | 0.334738743 | 0.378204058 |
| 0.446295109 | 0.313807168 | 0.388258296 | 0.333657845 |
| 0.244579362 | 0.316545015 | 0.471516188 | 0.458400813 |
| 0.377284896 | 0.214389647 | 0.159791495 | 0.155677846 |
| 0.10516378  | 0.510925939 | 0.328073095 | 0.138087814 |
| 0.316221978 | 0.45126285  | 0.415783789 | 0.511559288 |
| 0.470201425 | 0.184677026 | 0.419771163 | 0.520248346 |
| 0.293227673 | 0.41085975  | 0.123713019 | 0.492549395 |
| 0.338398903 | 0.295395536 | 0.499321746 | 0.432727966 |
| 0.489680724 | 0.430497525 | 0.329245544 | 0.473231185 |
| 0.460878899 | 0.413538538 | 0.417927218 | 0.146149708 |
| 0.278741393 | 0.208685356 | 0.335696639 | 0.00596803  |
| 0.460134499 | 0.393546941 | 0.533494659 | 0.510497515 |
| 0.355364519 | 0.444208828 | 0.445929447 | 0.162628602 |
| 0.371074424 | 0.245895715 | 0.222058494 | 0.512734259 |
| 0.278546149 | 0.284515365 | 0.380307925 | 0.471332783 |

|             |             |             |             |
|-------------|-------------|-------------|-------------|
| 0.506845164 | 0.487982714 | 0.317595912 | 0.347109071 |
| 0.320597613 | 0.300832085 | 0.486807616 | 0.21043582  |
| 0.50891762  | 0.249527977 | 0.45175264  | 0.391218393 |
| 0.297616468 | 0.519268151 | 0.115855841 | 0.529831688 |
| 0.411453243 | 0.207286553 | 0.506154315 | 0.414263381 |
| 0.403012078 | 0.188099041 | 0.239109712 | 0.478378846 |
| 0.313181472 | 0.41698451  | 0.024827742 | 0.090945761 |
| 0.419893752 | 0.374048756 | 0.483531858 | 0.443023074 |
| 0.308725609 | 0.409222699 | 0.213327613 | 0.394647349 |
| 0.502916193 | 0.519963655 | 0.360185827 | 0.326993626 |
| 0.442430676 | 0.177305242 | 0.517765715 | 0.021725114 |
| 0.503979949 | 0.496575369 | 0.469821165 | 0.101192634 |
| 0.041381035 | 0.26579103  | 0.497618367 | 0.122874524 |
| 0.507022648 | 0.271663252 | 0.438785955 | 0.524768071 |
| 0.258952382 | 0.521779055 | 0.184492402 | 0.502288578 |
| 0.084714937 | 0.346746925 | 0.448196883 | 0.452959826 |
| 0.314581008 | 0.359082553 | 0.46476694  | 0.302824851 |
| 0.066638042 | 0.351991778 | 0.003196363 | 0.432089418 |
| 0.492686181 | 0.402388656 | 0.283028685 | 0.37774318  |
| 0.365580655 | 0.446436765 | 0.318171303 | 0.497520311 |
| 0.026401038 | 0.450620861 | 0.288540078 | 0.505214764 |
| 0.310740836 | 0.440720373 | 0.105777964 | 0.374278895 |
| 0.486653659 | 0.366912274 | 0.331325571 | 0.385418508 |
| 0.50639193  | 0.464529573 | 0.25131239  | 0.289499607 |
| 0.462097252 | 0.120606206 | 0.487179364 | 0.536298701 |
| 0.260170226 | 0.276591256 | 0.50920345  | 0.294383571 |
| 0.377557181 | 0.45953676  | 0.479824342 | 0.5264536   |
| 0.116995526 | 0.34144593  | 0.499234031 | 0.489421806 |
| 0.38222433  | 0.217673872 | 0.315187013 | 0.305659931 |
| 0.482827245 | 0.179183341 | 0.312980956 | 0.459284668 |
| 0.275251135 | 0.402872098 | 0.426071737 | 0.254777726 |
| 0.075180251 | 0.246209931 | 0.495430495 | 0.224150156 |
| 0.389012539 | 0.448806529 | 0.302775139 | 0.435654222 |
| 0.218464658 | 0.053277937 | 0.460546952 | 0.025104861 |
| 0.473202347 | 0.493190502 | 0.344500488 | 0.43112726  |
| 0.274297123 | 0.451828356 | 0.447416332 | 0.003732379 |
| 0.485320261 | 0.067216499 | 0.383694964 | 0.309785865 |
| 0.360210171 | 0.102111248 | 0.481762709 | 0.514858085 |
| 0.425175596 | 0.411131413 | 0.430929024 | 0.489298601 |
| 0.19113908  | 0.398769372 | 0.410012459 | 0.5099979   |
| 0.282174055 | 0.469724785 | 0.492243178 | 0.462179257 |
| 0.489310705 | 0.379524507 |             |             |
| EX01        | 0.017110808 | 0.344123503 | 0.013288649 |
| 0.045108353 | 0.22856145  | 0.135470224 | 0.014835824 |
| 0.033489821 | 0.266394345 | 0.112708502 | 0.204769443 |
| 0.003388278 | 0.05924021  | 0.409250435 | 0.012200659 |
| 0.319215728 | 0.007688509 | 0.040523833 | 0.031389231 |
| 0.068466517 | 0.208330291 | 0.130897422 | 0.175410819 |
| 0.183501385 | 0.111319602 | 0.204436558 | 0.271451733 |
| 0.435422084 | 0.126812414 | 0.322164526 | 0.085949992 |
| 0.341575983 | 0.26215146  | 0.232309185 | 0.002266004 |
| 0.222892038 | 0.011349115 | 0.348661918 | 0.122681271 |
| 0.085007332 | 0.252657681 | 0.15371255  | 0.097242092 |
| 0.221276011 | 0.007009988 | 0.081745678 | 0.370801456 |

|             |             |             |             |
|-------------|-------------|-------------|-------------|
| 0.20314623  | 0.084831059 | 0.019515109 | 0.322752868 |
| 0.138567546 | 0.207721579 | 0.308567853 | 0.00154136  |
| 0.183461212 | 0.08247735  | 0.144256691 | 0.403637989 |
| 0.110092934 | 0.043487429 | 0.156250531 | 0.09025936  |
| 0.288707559 | 0.311059554 | 0.150196052 | 0.159997201 |
| 0.426788149 | 0.120007321 | 0.380184089 | 0.048138406 |
| 0.17730105  | 0.00614572  | 0.088166361 | 0.033152101 |
| 0.150219816 | 0.092152366 | 0.1929757   | 0.173604119 |
| 0.360957251 | 0.413511548 | 0.134455546 | 0.403352858 |
| 0.073507032 | 0.282392458 | 0.113565562 | 0.231385822 |
| 0.303158399 | 0.0225014   | 0.341475806 | 0.442752879 |
| 0.010514797 | 0.258189377 | 0.349088933 | 0.058615883 |
| 0.335024469 | 0.122585261 | 0.232223499 | 0.095446635 |
| 0.32645664  | 0.283285783 | 0.37493382  | 0.20254729  |
| 0.160812396 | 0.027590958 | 0.362725621 | 0.276407269 |
| 0.12291108  | 0.028401962 | 0.123756632 | 0.450212809 |
| 0.312654646 | 0.429276134 | 0.37877025  | 0.322592285 |
| 0.305441624 | 0.425273983 | 0.317065613 | 0.329879533 |
| 0.071908044 | 0.438827549 | 0.078566965 | 0.008695414 |
| 0.017809007 | 0.019239958 | 0.102462136 | 0.212152438 |
| 0.417615845 | 0.205040712 | 0.073776814 | 0.133278335 |
| 0.452666657 | 0.363613061 | 0.448399128 | 0.373690533 |
| 0.007970177 | 0.131204272 | 0.30213079  | 0.065828522 |
| 0.30888191  | 0.04595443  | 0.189294379 | 0.399591179 |
| 0.297926727 | 0.410102512 | 0.046687611 | 0.377518279 |
| 0.076438183 | 0.431864923 | 0.384761594 | 0.077458623 |
| 0.418995278 | 0.378470833 | 0.451618046 | 0.36583291  |
| 0.359223048 | 0.161706262 | 0.034104982 | 0.322760845 |
| 0.405997541 | 0.012682201 | 0.446738992 | 0.474449771 |
| 0.418986396 | 0.45632206  | 0.474345322 | 0.448360436 |
| 0.416229161 | 0.026452222 | 0.027998269 | 0.227555223 |
| 0.420886531 | 0.32725931  | 0.038629913 | 0.301601558 |
| 0.283908691 | 0.172075432 | 0.359474324 | 0.138701605 |
| 0.424812427 | 0.393073587 | 0.443777352 | 0.334435589 |
| 0.17973322  | 0.222193073 | 0.304176881 | 0.345965501 |
| 0.008385969 | 0.03281752  | 0.017919932 | 0.21537682  |
| 0.105512166 | 0.08912575  | 0.157113445 | 0.25767013  |
| 0.108411432 | 0.131571755 | 0.174138803 | 0.345012648 |
| 0.023418618 | 0.287997103 | 0.062830296 | 0.085149299 |
| 0.010365592 | 0.077091452 | 0.069738709 | 0.04048582  |
| 0.141087307 | 0.145116428 | 0.365001119 | 0.438724927 |
| 0.17511298  | 0.102304184 | 0.328914722 | 0.399843609 |
| 0.363542053 | 0.280088926 | 0.1406303   | 0.003088287 |
| 0.165093184 | 0.147893512 | 0.131949329 | 0.282621911 |
| 0.098817981 | 0.113309917 | 0.323916715 | 0.3579222   |
| 0.133837743 | 0.04525637  | 0.176536493 | 0.312488808 |
| 0.082008421 | 0.118320133 | 0.423574412 | 0.283447907 |
| 5.01E-05    | 0.189009232 | 0.396621987 | 0.081665033 |
| 0.231333935 | 0.077793482 | 0.118693297 | 0.444106613 |
| 0.159228357 | 0.116319788 | 0.436547295 | 0.336953565 |
| 0.11019465  | 0.136690703 | 0.464468289 | 0.069422923 |
| 0.230893755 | 0.021853493 | 0.211398743 | 0.164698358 |
| 0.144963295 | 0.223390054 | 0.235745808 | 0.124859838 |
| 0.058114775 | 0.436885286 | 0.294460319 | 0.449654948 |

| 1           | 0.465062494 | 0.435389367 | 0.375376013 |
|-------------|-------------|-------------|-------------|
| 0.230650221 | 0.240704852 | 0.105966558 | 0.406995419 |
| 0.428367176 | 0.161288443 | 0.030659168 | 0.416675129 |
| 0.219537936 | 0.384617895 | 0.053733215 | 0.449944197 |
| 0.383506776 | 0.368797201 | 0.042979494 | 0.335014378 |
| 0.316319193 | 0.107239661 | 0.340528627 | 0.455602151 |
| 0.147488085 | 0.268890193 | 0.179531074 | 0.369175585 |
| 0.09250805  | 0.10982312  | 0.222125255 | 0.110002257 |
| 0.008697317 | 0.025657656 | 0.022557405 | 0.068552945 |
| 0.094685806 | 0.313381404 | 0.329366321 | 0.457689412 |
| 0.043612993 | 0.317765683 | 0.148551725 | 0.139516009 |
| 0.366270669 | 0.204510608 | 0.25970084  | 0.290195252 |
| 0.149699096 | 0.004478581 | 0.036687669 | 0.418773005 |
| 0.012790313 | 0.121533893 | 0.144912184 | 0.000908522 |
| 0.010612115 | 0.345862061 | 0.048812762 | 0.115932034 |
| 0.434139902 | 0.119471977 | 0.126789125 | 0.139788834 |
| 0.249350755 | 0.031666001 | 0.000594347 | 0.438103742 |
| 0.404293983 | 0.381348145 | 0.405401578 | 0.349780557 |
| 0.402340304 | 0.309115295 | 0.387760576 | 0.163170078 |
| 0.028465273 | 0.023085863 | 0.151492982 | 0.174164663 |
| 0.001298239 | 0.296562968 | 0.171825371 | 0.073254588 |
| 0.375484239 | 0.21665142  | 0.006763504 | 0.255217024 |
| 0.004913955 | 0.142024482 | 0.104868407 | 0.088676416 |
| 0.295651572 | 0.001769116 | 0.105550437 | 0.194051147 |
| 0.324073119 | 0.253415133 | 0.175450045 | 0.441050143 |
| 0.194381853 | 0.069947175 | 0.180353534 | 0.314675816 |
| 0.017755067 | 0.083965595 | 0.141364626 | 0.019055394 |
| 0.054750258 | 0.348783849 | 0.161719221 | 0.017316738 |
| 0.169262824 | 0.000470725 | 0.280716166 | 0.443168017 |
| 0.363100438 | 0.477709897 | 0.423373976 | 0.167494586 |
| 0.426705638 | 0.089604479 | 0.459195972 | 0.332165453 |
| 0.192006848 | 0.00023447  | 0.001032706 | 0.459294068 |
| 0.300713395 | 0.022445017 | 0.079469482 | 0.11095532  |
| 0.031397275 | 0.046823072 | 0.01285026  | 0.094671741 |
| 0.267247578 | 0.141981276 | 0.085832536 | 0.384393413 |
| 0.120081753 | 0.120468857 | 0.172070153 | 0.037734718 |
| 0.26551626  | 0.012101586 | 0.037221078 | 0.002720969 |
| 0.291428686 | 0.060764596 | 0.343622559 | 0.423556898 |
| 0.412643421 | 0.334425195 | 0.151798642 | 0.105350117 |
| 0.376623301 | 0.044346583 | 0.136988945 | 0.045420205 |
| 0.404830812 | 0.347670823 | 0.242880276 | 0.226577471 |
| 0.452178223 | 0.394905084 | 0.006248994 | 0.384430341 |
| 0.002222493 | 0.00062175  | 0.184891136 | 0.163731306 |
| 0.031734129 | 0.253364591 | 0.176620465 | 0.078521512 |
| 0.069072911 | 0.006055606 | 0.169201048 | 0.171042028 |
| 0.210458256 | 0.230211447 | 0.206459463 | 0.153812977 |
| 0.128161676 | 0.091607573 | 0.061752636 | 0.044030187 |
| 0.089711649 | 0.233788988 | 0.121130866 | 0.003549883 |
| 0.259138285 | 0.292778867 | 0.015231776 | 0.075386277 |
| 0.393548279 | 0.456035085 | 0.012896519 | 0.003085004 |
| 0.177769747 | 0.16629089  | 0.460828465 | 0.418549927 |
| 0.417496161 | 0.45062821  | 0.285809352 | 0.050533535 |
| 0.013667344 | 0.217116663 | 0.229339608 | 0.036994307 |
| 0.435481885 | 0.027105155 | 0.376236342 | 0.233479176 |

|             |             |             |             |
|-------------|-------------|-------------|-------------|
| 0.052873432 | 0.072548957 | 0.007189707 | 0.02888048  |
| 0.292112329 | 0.087444211 | 0.086451984 | 0.076083448 |
| 0.170267591 | 0.126394651 | 0.010534558 | 0.09950461  |
| 0.286126451 | 0.143234781 | 0.083090474 | 0.094935055 |
| 0.255363022 | 0.082663744 | 0.409288741 | 0.373098894 |
| 0.058655958 | 0.04523625  | 0.088651813 | 0.300473705 |
| 0.409003351 | 0.2634329   | 0.005296325 | 0.379218668 |
| 0.424741524 | 0.360523573 | 0.391749628 | 0.348921693 |
| 0.035620337 | 0.258794287 | 0.190270174 | 0.274069432 |
| 0.094381976 | 0.145345388 | 0.114874862 | 0.02169483  |
| 0.204158846 | 0.365885696 | 0.368106614 | 0.064125439 |
| 0.252218267 | 0.054585242 | 0.022705715 | 0.368638194 |
| 0.122782305 | 0.024870015 | 0.1614045   | 0.394352991 |
| 0.000648692 | 0.091527904 | 0.442252857 | 0.064341909 |
| 0.419894436 | 0.45122132  | 0.358393343 | 0.064478717 |
| 0.004327402 | 0.382326629 | 0.273961407 | 0.20519588  |
| 0.376258667 | 0.235662587 | 0.035882265 | 0.021604422 |
| 0.201636913 | 0.034861872 | 0.054247442 | 0.091132724 |
| 0.133423736 | 0.285823211 | 0.116399857 | 0.107813928 |
| 0.090036272 | 0.043884711 | 0.110747508 | 0.086378741 |
| 0.088222643 | 0.153856669 | 0.286360422 | 0.090554973 |
| 0.166932906 | 0.39731596  | 0.370872273 | 0.003984524 |
| 0.230858225 | 0.359163691 | 0.348239081 | 0.001897914 |
| 0.384101405 | 0.000925172 | 0.096804811 | 0.102261001 |
| 0.080023317 | 0.099165589 | 0.177906782 | 0.122201193 |
| 0.257801636 | 0.095688208 | 0.108840493 | 0.137277538 |
| 0.050555862 | 0.085262663 | 0.275053155 | 0.167723988 |
| 0.116278938 | 0.033823809 | 0.047764714 | 0.050472232 |
| 0.010944157 | 0.380594064 | 0.155212595 | 0.02937462  |
| 0.125411449 | 0.168084979 | 0.273014492 | 0.406355044 |
| 0.334596433 | 0.057100892 | 0.155701741 | 0.374571465 |
| 0.136896536 | 0.107302463 | 0.013247921 | 0.208775739 |
| 0.105269365 | 0.105336962 | 0.199485754 | 0.194244523 |
| 0.346146384 | 0.302923579 | 0.146607104 | 0.345506328 |
| 0.176672928 | 0.213710874 | 0.133359143 | 0.027060971 |
| 0.073243786 | 0.064524954 | 0.1921401   | 9.75E-05    |
| 0.236376759 | 0.06960008  | 0.444359235 | 0.389223146 |
| 0.155558352 | 0.287073423 | 0.102056366 | 0.026077514 |
| 0.099502316 | 0.114756411 | 0.071944674 | 0.361610872 |
| 0.135490548 | 0.04728822  | 0.213697809 | 0.083364459 |
| 0.384991213 | 0.364772025 | 0.103078614 | 0.095191626 |
| 0.122621893 | 0.098398909 | 0.372543144 | 0.03338764  |
| 0.313286482 | 0.092101726 | 0.221159708 | 0.180811101 |
| 0.113330661 | 0.452159363 | 0.017218628 | 0.473866822 |
| 0.221532973 | 0.063252532 | 0.38433898  | 0.121052201 |
| 0.07706232  | 0.033303996 | 0.125403662 | 0.138691774 |
| 0.076603386 | 0.155879489 | 0.022849608 | 0.068567576 |
| 0.254527101 | 0.123037403 | 0.360585084 | 0.284541938 |
| 0.127935744 | 0.283381541 | 0.084728244 | 0.141232512 |
| 0.377237276 | 0.374666713 | 0.111007704 | 0.170592626 |
| 0.260465079 | 0.026002873 | 0.233943236 | 0.010521446 |
| 0.355934868 | 0.339614599 | 0.151571173 | 0.010249558 |
| 0.002893756 | 0.152253449 | 0.332271417 | 0.025978105 |
| 0.457658535 | 0.12798     | 0.241939471 | 0.331847827 |

|               |             |             |             |
|---------------|-------------|-------------|-------------|
| 0.092932122   | 0.381037584 | 0.038390481 | 0.340777018 |
| 0.012576403   | 0.149557692 | 0.231089861 | 0.2220682   |
| 0.10079698    | 0.193847096 | 0.321734814 | 0.139895341 |
| 0.006349508   | 0.10512525  | 0.001869329 | 0.298478265 |
| 0.36266492    | 0.258833058 | 0.122058694 | 0.114613897 |
| 0.189829722   | 0.286766009 | 0.109549877 | 0.240898767 |
| 0.001854836   | 0.314172519 | 0.090715355 | 0.317558103 |
| 0.167501703   | 0.260843937 | 0.012530308 | 0.227882475 |
| 0.324339595   | 0.157541491 | 0.166876643 | 0.186651746 |
| 0.395217097   | 0.287819538 | 0.084381318 | 0.075050686 |
| 0.294686059   | 0.023747109 | 0.13940526  | 0.449504135 |
| 0.072427598   | 0.139921339 | 0.436464505 | 0.085782762 |
| 0.202187198   | 0.280754611 | 0.295755592 | 0.433604084 |
| 0.027270542   | 0.150231713 | 0.360969876 | 0.407406635 |
| 0.219365553   | 0.094876699 | 0.135794488 | 0.127502376 |
| 0.357466426   | 0.024360893 | 0.134912444 | 0.267115406 |
| 0.148617788   | 0.19439978  | 0.205940225 | 0.095992375 |
| 0.008416465   | 0.045866102 | 0.104919436 | 0.063686551 |
| 0.194749553   | 0.235821141 | 0.109355746 | 0.299269281 |
| 0.040593547   | 0.006854586 | 0.361529522 | 0.034218972 |
| 0.151760218   | 0.295582381 | 0.114578439 | 0.204048261 |
| 0.106107995   | 0.223919648 | 0.19499288  | 3.50E-05    |
| 0.364273744   | 0.022155171 | 0.114272972 | 0.103729507 |
| 0.13652275    | 0.011627668 | 0.347081306 | 0.466412827 |
| 0.176791082   | 0.106631042 | 0.170973181 | 0.371502597 |
| 0.103708246   | 0.153928895 | 0.158180218 | 0.304373374 |
| 0.129568737   | 0.216199427 | 0.209159852 | 0.198740335 |
| 0.269937921   | 0.084640942 |             |             |
| F630043A04RIK | 0.15976046  | 0.496593186 | 0.128076333 |
| 0.246195914   | 0.409654953 | 0.508952705 | 0.138797705 |
| 0.241428424   | 0.459256258 | 0.396899821 | 0.478812322 |
| 0.052252235   | 0.122429057 | 0.52234827  | 0.129424322 |
| 0.492740476   | 0.087598249 | 0.214117087 | 0.133436247 |
| 0.358806405   | 0.386407618 | 0.42845021  | 0.496126373 |
| 0.395480637   | 0.286930552 | 0.477060437 | 0.474761596 |
| 0.528316423   | 0.330008367 | 0.530820918 | 0.272953698 |
| 0.46943332    | 0.424940905 | 0.467100017 | 0.050753675 |
| 0.523318251   | 0.024631412 | 0.456376412 | 0.387104389 |
| 0.217450499   | 0.433302072 | 0.439675112 | 0.369007671 |
| 0.483330663   | 0.094062393 | 0.273130623 | 0.503827883 |
| 0.462378541   | 0.416236201 | 0.145399424 | 0.53511179  |
| 0.481972116   | 0.468917353 | 0.487094292 | 0.005906036 |
| 0.376746179   | 0.114961954 | 0.2871265   | 0.507383625 |
| 0.327159026   | 0.23018647  | 0.364273917 | 0.38536515  |
| 0.494554087   | 0.486170686 | 0.385528272 | 0.476431547 |
| 0.521699075   | 0.239907057 | 0.522924592 | 0.257862849 |
| 0.509951459   | 0.090057181 | 0.275573031 | 0.178050845 |
| 0.496238439   | 0.323310266 | 0.450990635 | 0.400708784 |
| 0.490537182   | 0.525253035 | 0.373037061 | 0.507148636 |
| 0.157335585   | 0.433349551 | 0.384224744 | 0.425559656 |
| 0.481335299   | 0.18185388  | 0.521801291 | 0.523263415 |
| 0.121285825   | 0.482573099 | 0.510030177 | 0.23039517  |
| 0.513615186   | 0.367252856 | 0.491576669 | 0.238611239 |
| 0.469514403   | 0.445838432 | 0.487567581 | 0.424396685 |



|             |             |             |             |
|-------------|-------------|-------------|-------------|
| 0.421881423 | 0.158308531 | 0.497489439 | 0.408498963 |
| 0.409220081 | 0.174595533 | 0.330832033 | 0.534960524 |
| 0.530598611 | 0.532149376 | 0.515623757 | 0.479874303 |
| 0.478075705 | 0.525205584 | 0.521758262 | 0.501378664 |
| 0.207276893 | 0.52294422  | 0.318383566 | 0.100699053 |
| 0.158684795 | 0.174670588 | 0.338068316 | 0.417874202 |
| 0.537416545 | 0.469458844 | 0.332201675 | 0.357587958 |
| 0.523706449 | 0.485630154 | 0.521305846 | 0.517146789 |
| 0.099523923 | 0.332994566 | 0.483116914 | 0.417038556 |
| 0.49710654  | 0.221555573 | 0.34416242  | 0.518201884 |
| 0.475419123 | 0.52780719  | 0.296238991 | 0.515852297 |
| 0.332998563 | 0.513429594 | 0.519645166 | 0.29180973  |
| 0.523841752 | 0.504427582 | 0.524568826 | 0.490903696 |
| 0.489964753 | 0.478679953 | 0.110433226 | 0.490372003 |
| 0.50954668  | 0.02392363  | 0.535576493 | 0.53676704  |
| 0.509674531 | 0.539099273 | 0.523913119 | 0.533192769 |
| 0.509661087 | 0.161506467 | 0.046411399 | 0.404827707 |
| 0.512770646 | 0.498380439 | 0.239462005 | 0.506976661 |
| 0.464606102 | 0.519153279 | 0.521199714 | 0.396851732 |
| 0.514811213 | 0.530527659 | 0.533360121 | 0.510292042 |
| 0.435982657 | 0.412831066 | 0.459358448 | 0.481265042 |
| 0.108734851 | 0.221706387 | 0.121621029 | 0.431133653 |
| 0.451152927 | 0.293674118 | 0.51129844  | 0.462159844 |
| 0.316752101 | 0.476626534 | 0.409223076 | 0.475230779 |
| 0.124438849 | 0.532571735 | 0.294457977 | 0.302754497 |
| 0.101243185 | 0.239183623 | 0.302369689 | 0.264487196 |
| 0.371177731 | 0.28995661  | 0.531688807 | 0.528520698 |
| 0.463461812 | 0.303349169 | 0.534784049 | 0.509530955 |
| 0.478298582 | 0.477235376 | 0.353595713 | 0.029719855 |
| 0.377431787 | 0.391111656 | 0.24892954  | 0.498713643 |
| 0.258078059 | 0.367433438 | 0.49960563  | 0.490362845 |
| 0.421775082 | 0.267156449 | 0.473629547 | 0.455720857 |
| 0.262378425 | 0.414728372 | 0.525522409 | 0.514418548 |
| 0.012835372 | 0.46821932  | 0.53917173  | 0.236291823 |
| 0.449868111 | 0.191708235 | 0.321530461 | 0.530895459 |
| 0.376742291 | 0.318801686 | 0.534076829 | 0.48871694  |
| 0.447181504 | 0.297115834 | 0.524188503 | 0.073697884 |
| 0.44803134  | 0.09942441  | 0.404080717 | 0.435846324 |
| 0.38998304  | 0.413351774 | 0.410749601 | 0.386593354 |
| 0.236218063 | 0.515900879 | 0.499004624 | 0.533061754 |
| 0.465062494 | 1           | 0.538246529 | 0.521341319 |
| 0.494840682 | 0.45609934  | 0.183162191 | 0.535652657 |
| 0.533372133 | 0.403434366 | 0.157729405 | 0.526842679 |
| 0.468350613 | 0.501375743 | 0.197583428 | 0.524378673 |
| 0.502921235 | 0.477583263 | 0.251352612 | 0.476161409 |
| 0.493941813 | 0.370742439 | 0.510528118 | 0.522916272 |
| 0.416414996 | 0.458096846 | 0.440734306 | 0.488095187 |
| 0.301814989 | 0.307622536 | 0.42129031  | 0.237911144 |
| 0.014365399 | 0.175596479 | 0.146995532 | 0.269166816 |
| 0.238424002 | 0.506592816 | 0.507710634 | 0.525083476 |
| 0.222816192 | 0.495506147 | 0.366993029 | 0.404383922 |
| 0.491098797 | 0.452792419 | 0.46695411  | 0.487845728 |
| 0.374497079 | 0.045541158 | 0.2063443   | 0.52841125  |
| 0.101523028 | 0.318804105 | 0.45609817  | 0.006559741 |

|             |             |             |             |
|-------------|-------------|-------------|-------------|
| 0.112055096 | 0.498369827 | 0.181610816 | 0.280138502 |
| 0.523269471 | 0.287005898 | 0.339906229 | 0.430545093 |
| 0.463629598 | 0.191032031 | 0.008400597 | 0.52059121  |
| 0.500224412 | 0.491838598 | 0.49838362  | 0.471238887 |
| 0.505474772 | 0.506677024 | 0.514549488 | 0.48549927  |
| 0.210972849 | 0.190847016 | 0.29480177  | 0.413372689 |
| 0.012103173 | 0.489188059 | 0.420934514 | 0.254287149 |
| 0.518935153 | 0.435043012 | 0.09397839  | 0.454093735 |
| 0.056924049 | 0.259325767 | 0.444960877 | 0.344923061 |
| 0.452598183 | 0.044469129 | 0.329569595 | 0.415283703 |
| 0.475603903 | 0.455174329 | 0.44466192  | 0.527287715 |
| 0.45522753  | 0.23273862  | 0.431382969 | 0.499939681 |
| 0.157856816 | 0.166271112 | 0.487861387 | 0.05771285  |
| 0.285671945 | 0.47831824  | 0.480091262 | 0.155364725 |
| 0.407910072 | 0.017868341 | 0.467070198 | 0.526441962 |
| 0.486222527 | 0.532650138 | 0.525872281 | 0.351291512 |
| 0.519639461 | 0.139794663 | 0.528712204 | 0.508990084 |
| 0.47003031  | 0.002858998 | 0.014700766 | 0.538396947 |
| 0.499256221 | 0.12728976  | 0.27951936  | 0.467140878 |
| 0.209008005 | 0.277366162 | 0.146749545 | 0.266937562 |
| 0.528541468 | 0.345178336 | 0.253824043 | 0.487773209 |
| 0.373770831 | 0.359761232 | 0.506755843 | 0.179113603 |
| 0.505404375 | 0.122026336 | 0.179940636 | 0.01712526  |
| 0.474366412 | 0.2065667   | 0.485811498 | 0.518187234 |
| 0.508403522 | 0.494404686 | 0.419134504 | 0.444145189 |
| 0.510605921 | 0.189360638 | 0.448889147 | 0.214556385 |
| 0.510101093 | 0.497367165 | 0.443102595 | 0.426081778 |
| 0.519190742 | 0.505857694 | 0.087013582 | 0.514624971 |
| 0.03464706  | 0.004278648 | 0.498583186 | 0.392516337 |
| 0.109101575 | 0.47184804  | 0.380679812 | 0.361899387 |
| 0.349347893 | 0.077772356 | 0.34723975  | 0.3260884   |
| 0.425962993 | 0.478560464 | 0.367779103 | 0.371603123 |
| 0.374752437 | 0.213763492 | 0.317506339 | 0.271552432 |
| 0.355325973 | 0.42252024  | 0.291022356 | 0.062530975 |
| 0.520610282 | 0.504620065 | 0.131815187 | 0.277750499 |
| 0.529834312 | 0.539083365 | 0.103436626 | 0.030240442 |
| 0.388308806 | 0.43340443  | 0.533362224 | 0.517476942 |
| 0.528116071 | 0.516579519 | 0.441820179 | 0.218532311 |
| 0.149407115 | 0.442235754 | 0.387947496 | 0.177914446 |
| 0.525563183 | 0.146665541 | 0.503181992 | 0.381097063 |
| 0.223740851 | 0.34980369  | 0.082607977 | 0.177995316 |
| 0.470421363 | 0.299458716 | 0.289587221 | 0.263506881 |
| 0.432905243 | 0.330027114 | 0.11840666  | 0.325666111 |
| 0.472547151 | 0.246561786 | 0.282080715 | 0.447228251 |
| 0.477789234 | 0.313146006 | 0.523332083 | 0.484320534 |
| 0.239995468 | 0.222198123 | 0.414904918 | 0.492840695 |
| 0.538094843 | 0.485249214 | 0.0586489   | 0.500845156 |
| 0.523865838 | 0.532716535 | 0.503781411 | 0.480210529 |
| 0.176364898 | 0.475409843 | 0.405554382 | 0.455121662 |
| 0.312624914 | 0.508100466 | 0.369073719 | 0.141958692 |
| 0.401338086 | 0.492607259 | 0.506472973 | 0.280054491 |
| 0.517267614 | 0.23836985  | 0.132649233 | 0.519377121 |
| 0.260627892 | 0.180898584 | 0.460165525 | 0.52058561  |
| 0.004967564 | 0.189474065 | 0.517592581 | 0.363506279 |

|             |             |             |             |
|-------------|-------------|-------------|-------------|
| 0.516892068 | 0.531083466 | 0.491566802 | 0.392191962 |
| 0.003289923 | 0.50218191  | 0.493047188 | 0.504934329 |
| 0.513928421 | 0.472316961 | 0.254308893 | 0.154635575 |
| 0.402405706 | 0.16543524  | 0.240861814 | 0.460486067 |
| 0.242341155 | 0.523429398 | 0.316409834 | 0.341154617 |
| 0.313553098 | 0.185044131 | 0.318778551 | 0.37604595  |
| 0.219866258 | 0.360477921 | 0.463720769 | 0.38854926  |
| 0.260071071 | 0.506401922 | 0.514881772 | 0.07162697  |
| 0.446401689 | 0.502510847 | 0.504335835 | 0.006332513 |
| 0.524745132 | 0.023452789 | 0.307268763 | 0.329804862 |
| 0.31499918  | 0.329393003 | 0.372276667 | 0.408195361 |
| 0.482525728 | 0.356826505 | 0.402659021 | 0.360782938 |
| 0.269170543 | 0.358064792 | 0.496847454 | 0.492869976 |
| 0.382825715 | 0.236945134 | 0.181970503 | 0.174480532 |
| 0.11391956  | 0.521679285 | 0.352590331 | 0.15397952  |
| 0.351425369 | 0.488770059 | 0.444129304 | 0.503296501 |
| 0.492403111 | 0.200486478 | 0.457578509 | 0.525214845 |
| 0.304741508 | 0.410277009 | 0.143828882 | 0.512974684 |
| 0.364204395 | 0.304659639 | 0.508332153 | 0.44810476  |
| 0.511299727 | 0.452494192 | 0.351965434 | 0.49649371  |
| 0.483126472 | 0.45733653  | 0.414230994 | 0.16423909  |
| 0.304943068 | 0.242647051 | 0.361931011 | 0.007411155 |
| 0.478801109 | 0.397762957 | 0.541984181 | 0.494778552 |
| 0.364552175 | 0.468004693 | 0.424738789 | 0.182913991 |
| 0.367546308 | 0.26578576  | 0.251452926 | 0.530231036 |
| 0.276510674 | 0.310165226 | 0.412089066 | 0.456588266 |
| 0.527416819 | 0.514270421 | 0.35850516  | 0.383989529 |
| 0.37041873  | 0.329324412 | 0.48500462  | 0.234931283 |
| 0.519277403 | 0.270191086 | 0.46699423  | 0.415085543 |
| 0.337614083 | 0.527746314 | 0.136691208 | 0.533285337 |
| 0.44000537  | 0.234674236 | 0.498463355 | 0.436475921 |
| 0.430925519 | 0.208006308 | 0.248214521 | 0.495347109 |
| 0.358281137 | 0.419570906 | 0.023772828 | 0.099577321 |
| 0.443796638 | 0.418433524 | 0.503559545 | 0.480836071 |
| 0.342885265 | 0.446739494 | 0.217868084 | 0.432370704 |
| 0.485026083 | 0.506902356 | 0.373851097 | 0.368393408 |
| 0.46922063  | 0.19775404  | 0.510688187 | 0.029396365 |
| 0.517408738 | 0.502849745 | 0.473807867 | 0.123292309 |
| 0.054034692 | 0.279823658 | 0.520145738 | 0.150385896 |
| 0.528729014 | 0.2697802   | 0.470993798 | 0.531870424 |
| 0.296479671 | 0.509131638 | 0.216124835 | 0.510549259 |
| 0.116490643 | 0.387599346 | 0.467758731 | 0.480861552 |
| 0.325492854 | 0.384524849 | 0.487818559 | 0.313114944 |
| 0.082338657 | 0.374172813 | 0.005625451 | 0.438371212 |
| 0.4829544   | 0.430695064 | 0.314690406 | 0.387543263 |
| 0.397597781 | 0.476856706 | 0.34576424  | 0.50349786  |
| 0.031119512 | 0.462812174 | 0.322581315 | 0.509053134 |
| 0.306029238 | 0.47926445  | 0.123257685 | 0.412156444 |
| 0.476712609 | 0.384367103 | 0.369641446 | 0.40223324  |
| 0.507576306 | 0.487786845 | 0.27366521  | 0.320800848 |
| 0.488425751 | 0.142713895 | 0.481894619 | 0.523751693 |
| 0.286931582 | 0.294259009 | 0.524335648 | 0.326407933 |
| 0.396202614 | 0.479793133 | 0.500004415 | 0.516156514 |
| 0.141793342 | 0.372109106 | 0.519769685 | 0.512073295 |

|               |             |             |             |
|---------------|-------------|-------------|-------------|
| 0.413405766   | 0.249598203 | 0.324549644 | 0.336016351 |
| 0.488126345   | 0.182616512 | 0.352032565 | 0.482869856 |
| 0.290893485   | 0.43211369  | 0.449685784 | 0.287072704 |
| 0.083497353   | 0.288404121 | 0.477841688 | 0.257640638 |
| 0.422647242   | 0.477463925 | 0.344055341 | 0.460854449 |
| 0.224830709   | 0.058610593 | 0.484756619 | 0.028332529 |
| 0.46947163    | 0.499696482 | 0.372033427 | 0.459075809 |
| 0.294409078   | 0.486730739 | 0.469536705 | 0.004255098 |
| 0.509913224   | 0.080990112 | 0.417143737 | 0.32819373  |
| 0.373701135   | 0.122618377 | 0.495338404 | 0.531248733 |
| 0.451575359   | 0.424487308 | 0.419058476 | 0.504416564 |
| 0.20474627    | 0.404935239 | 0.42859381  | 0.52113426  |
| 0.29365947    | 0.475875462 | 0.49968727  | 0.459309291 |
| 0.505871847   | 0.407484213 |             |             |
| F730047E07RIK | 0.100373142 | 0.422883296 | 0.076417916 |
| 0.205165024   | 0.371728693 | 0.446865255 | 0.07906118  |
| 0.1603695     | 0.347355192 | 0.328624641 | 0.430153397 |
| 0.028175934   | 0.132409467 | 0.466969686 | 0.073198806 |
| 0.447181374   | 0.050694956 | 0.141069192 | 0.090594405 |
| 0.261312648   | 0.351517961 | 0.420286151 | 0.409638375 |
| 0.345007934   | 0.195131599 | 0.371744848 | 0.422992783 |
| 0.511360834   | 0.348997587 | 0.476017263 | 0.240386753 |
| 0.422021059   | 0.395618989 | 0.444489311 | 0.024503605 |
| 0.454819022   | 0.01668037  | 0.437612219 | 0.334065107 |
| 0.222836058   | 0.346761369 | 0.361535098 | 0.315660165 |
| 0.402976531   | 0.053648456 | 0.255234137 | 0.438250281 |
| 0.352265871   | 0.319602168 | 0.084167973 | 0.453540458 |
| 0.396830423   | 0.376605919 | 0.397861097 | 0.004098908 |
| 0.382630836   | 0.137026542 | 0.301074568 | 0.511667063 |
| 0.244639513   | 0.163618307 | 0.330442686 | 0.277262518 |
| 0.417003789   | 0.403158657 | 0.287294495 | 0.404353807 |
| 0.513755243   | 0.245887138 | 0.450889606 | 0.214304899 |
| 0.428200092   | 0.041390063 | 0.188291858 | 0.097949723 |
| 0.440323389   | 0.251748379 | 0.406444129 | 0.375090936 |
| 0.427302349   | 0.518869266 | 0.269153536 | 0.500174163 |
| 0.137077952   | 0.397998558 | 0.342210032 | 0.342102876 |
| 0.385774316   | 0.102743272 | 0.456743797 | 0.531251441 |
| 0.060873506   | 0.399973769 | 0.423750948 | 0.143481469 |
| 0.428141928   | 0.325635142 | 0.426908786 | 0.254560174 |
| 0.418557204   | 0.407310007 | 0.472078663 | 0.343814905 |
| 0.369241369   | 0.091682305 | 0.481999081 | 0.388780334 |
| 0.383308919   | 0.107074848 | 0.29672793  | 0.464184418 |
| 0.461769514   | 0.509129098 | 0.421919385 | 0.387110299 |
| 0.442529023   | 0.514205356 | 0.446120345 | 0.410771537 |
| 0.187299368   | 0.532844968 | 0.235489517 | 0.062832753 |
| 0.092363895   | 0.11400197  | 0.272849251 | 0.318132981 |
| 0.483519739   | 0.370978534 | 0.248657868 | 0.296693103 |
| 0.469714173   | 0.475941392 | 0.529357661 | 0.42940499  |
| 0.055265108   | 0.304397638 | 0.445504237 | 0.32139901  |
| 0.419505003   | 0.135747122 | 0.340134071 | 0.510771798 |
| 0.388084328   | 0.456851336 | 0.200665417 | 0.497089002 |
| 0.231615822   | 0.526847611 | 0.45795588  | 0.223127631 |
| 0.524326614   | 0.498434827 | 0.527450366 | 0.453630191 |
| 0.480164902   | 0.404765433 | 0.081664315 | 0.38939967  |

|             |             |                      |             |
|-------------|-------------|----------------------|-------------|
| 0.499839458 | 0.02661101  | 0.48554957           | 0.513816363 |
| 0.506667084 | 0.471554933 | 0.533215452          | 0.522271168 |
| 0.510616322 | 0.09182506  | 0.03833225           | 0.342320135 |
| 0.514976823 | 0.41007581  | 0.167875548          | 0.466047458 |
| 0.417124681 | 0.437799812 | 0.43937454           | 0.395809749 |
| 0.51973718  | 0.458370977 | 0.499880383          | 0.417818595 |
| 0.324796037 | 0.316250679 | 0.428998 0.468327367 |             |
| 0.062230772 | 0.152348758 | 0.067774717          | 0.327316696 |
| 0.384991111 | 0.220262614 | 0.426976129          | 0.389648088 |
| 0.238338572 | 0.369217755 | 0.399849087          | 0.431999477 |
| 0.065803908 | 0.480491837 | 0.202182723          | 0.211171843 |
| 0.062254431 | 0.152093785 | 0.256225927          | 0.212991182 |
| 0.316230658 | 0.231963534 | 0.466761797          | 0.499050934 |
| 0.392414639 | 0.213235599 | 0.455598811          | 0.485812512 |
| 0.43548942  | 0.447677069 | 0.254148714          | 0.022282468 |
| 0.353310157 | 0.348442329 | 0.255719606          | 0.451921848 |
| 0.174133753 | 0.310245803 | 0.43941068           | 0.444662733 |
| 0.334238606 | 0.169257468 | 0.429335471          | 0.429568653 |
| 0.170331384 | 0.389218011 | 0.456604932          | 0.436415726 |
| 0.005213866 | 0.393913501 | 0.4661631            | 0.198117025 |
| 0.348308584 | 0.211571284 | 0.345321205          | 0.474514426 |
| 0.363821547 | 0.290698155 | 0.505027196          | 0.432739324 |
| 0.404419144 | 0.216019793 | 0.536418796          | 0.075893665 |
| 0.383808472 | 0.085992805 | 0.335164052          | 0.351209828 |
| 0.301440905 | 0.32454348  | 0.383540584          | 0.352723591 |
| 0.158119644 | 0.526079647 | 0.400170319          | 0.527186135 |
| 0.435389367 | 0.538246529 | 1                    | 0.452127602 |
| 0.404621444 | 0.404740611 | 0.205937585          | 0.46232019  |
| 0.465216759 | 0.351220514 | 0.09010386           | 0.453689    |
| 0.396536561 | 0.448631364 | 0.154843769          | 0.51070745  |
| 0.497298362 | 0.468281241 | 0.193305505          | 0.407397181 |
| 0.414874915 | 0.291945819 | 0.417650869          | 0.536351002 |
| 0.350476968 | 0.419860962 | 0.410404498          | 0.414314057 |
| 0.215660741 | 0.2795091   | 0.309884748          | 0.245889194 |
| 0.019991785 | 0.103510108 | 0.087046902          | 0.216054126 |
| 0.240876994 | 0.441094591 | 0.435911716          | 0.528548443 |
| 0.154971797 | 0.419596032 | 0.257861007          | 0.37925902  |
| 0.425225603 | 0.401272251 | 0.437159418          | 0.432819603 |
| 0.268902226 | 0.030488418 | 0.172241015          | 0.521708359 |
| 0.049975521 | 0.327182832 | 0.353359277          | 0.005814891 |
| 0.063331762 | 0.405018554 | 0.106096175          | 0.192847754 |
| 0.48892144  | 0.19619827  | 0.247270915          | 0.355611608 |
| 0.391414481 | 0.120543942 | 0.006609533          | 0.491371728 |
| 0.481738485 | 0.450261626 | 0.479626564          | 0.448404354 |
| 0.435088613 | 0.414255643 | 0.439946369          | 0.398895259 |
| 0.137107977 | 0.111647548 | 0.295892902          | 0.357872938 |
| 0.007170799 | 0.412392196 | 0.350563974          | 0.173831616 |
| 0.453247297 | 0.335515067 | 0.054810057          | 0.399056174 |
| 0.036841084 | 0.288349554 | 0.352696721          | 0.258854276 |
| 0.380158922 | 0.020565831 | 0.321811692          | 0.399070589 |
| 0.436685269 | 0.354888543 | 0.419871698          | 0.537154458 |
| 0.400445718 | 0.147403786 | 0.382876285          | 0.436406168 |
| 0.096223705 | 0.136425624 | 0.394151875          | 0.058143745 |
| 0.25360806  | 0.445515144 | 0.41947328           | 0.095994915 |

|             |             |             |             |
|-------------|-------------|-------------|-------------|
| 0.331057676 | 0.008287925 | 0.37010802  | 0.539215707 |
| 0.467853777 | 0.533561165 | 0.516515782 | 0.359221538 |
| 0.518475346 | 0.155034713 | 0.540249154 | 0.412015024 |
| 0.419271553 | 0.002136467 | 0.009284879 | 0.501083454 |
| 0.458900011 | 0.068379103 | 0.197320552 | 0.428212369 |
| 0.156396099 | 0.189086711 | 0.085897469 | 0.252796422 |
| 0.460850454 | 0.304365094 | 0.236445198 | 0.471432306 |
| 0.297015872 | 0.276380586 | 0.423097633 | 0.10384633  |
| 0.451815904 | 0.077705985 | 0.101336213 | 0.015244763 |
| 0.405251678 | 0.126121285 | 0.462956479 | 0.517777338 |
| 0.50553555  | 0.437306734 | 0.379873522 | 0.404713484 |
| 0.42901479  | 0.117894628 | 0.409688053 | 0.135152639 |
| 0.493842212 | 0.449560481 | 0.362752275 | 0.333379811 |
| 0.51606488  | 0.47888101  | 0.046791919 | 0.440497719 |
| 0.024020758 | 0.003226607 | 0.422400827 | 0.290360036 |
| 0.073041081 | 0.434044594 | 0.288138775 | 0.257846298 |
| 0.261793657 | 0.047719985 | 0.339908449 | 0.319302434 |
| 0.350718767 | 0.417376705 | 0.34868849  | 0.259624607 |
| 0.319746561 | 0.185730512 | 0.246111191 | 0.190372494 |
| 0.275492063 | 0.315989028 | 0.201296632 | 0.029587921 |
| 0.460411245 | 0.468351058 | 0.079357172 | 0.188072242 |
| 0.452958043 | 0.509151539 | 0.061168731 | 0.021601731 |
| 0.289896066 | 0.363053075 | 0.516333686 | 0.50643857  |
| 0.528441184 | 0.530932744 | 0.392454505 | 0.169690092 |
| 0.092736828 | 0.370721551 | 0.358033367 | 0.136975993 |
| 0.522663986 | 0.081719108 | 0.487702885 | 0.370704651 |
| 0.13995261  | 0.271343687 | 0.054013247 | 0.107478803 |
| 0.443535787 | 0.214314366 | 0.231859492 | 0.181236011 |
| 0.384354249 | 0.324772949 | 0.063875956 | 0.243215056 |
| 0.378735727 | 0.255362149 | 0.196476776 | 0.337956405 |
| 0.368732561 | 0.234135259 | 0.464649893 | 0.457694227 |
| 0.158857371 | 0.136223938 | 0.342648311 | 0.400862441 |
| 0.456743357 | 0.418239986 | 0.04677122  | 0.452420841 |
| 0.498191153 | 0.481574514 | 0.504439089 | 0.394279837 |
| 0.102246351 | 0.454846057 | 0.364921338 | 0.400939116 |
| 0.220872417 | 0.438859927 | 0.277526226 | 0.080872507 |
| 0.292585575 | 0.475738272 | 0.415236542 | 0.221885124 |
| 0.448076626 | 0.149713651 | 0.07160658  | 0.440867005 |
| 0.260491266 | 0.12822816  | 0.388277561 | 0.440001374 |
| 0.00327048  | 0.205195386 | 0.491931985 | 0.302830402 |
| 0.514743135 | 0.495933217 | 0.449308572 | 0.287201316 |
| 0.002941228 | 0.447192332 | 0.443365381 | 0.467407719 |
| 0.43470724  | 0.372131685 | 0.176647652 | 0.10826765  |
| 0.310789179 | 0.099803072 | 0.187920824 | 0.397315661 |
| 0.242715775 | 0.439714201 | 0.227692916 | 0.23710595  |
| 0.245723828 | 0.104007162 | 0.319340911 | 0.294284523 |
| 0.184373968 | 0.272978732 | 0.381514159 | 0.313337918 |
| 0.288851842 | 0.433026358 | 0.425784522 | 0.038160358 |
| 0.411356163 | 0.408009821 | 0.429243053 | 0.004557997 |
| 0.47338628  | 0.011889109 | 0.253942542 | 0.283615079 |
| 0.252398409 | 0.262760085 | 0.308516658 | 0.366351472 |
| 0.385455333 | 0.268313755 | 0.346983568 | 0.287121339 |
| 0.219304127 | 0.257021204 | 0.432096775 | 0.393673001 |
| 0.363873622 | 0.168155208 | 0.106313882 | 0.103773057 |

|             |             |             |             |
|-------------|-------------|-------------|-------------|
| 0.081275739 | 0.464626979 | 0.256569465 | 0.089213175 |
| 0.268803231 | 0.396294695 | 0.350066898 | 0.497215988 |
| 0.42014254  | 0.123024493 | 0.376681129 | 0.451601533 |
| 0.277204427 | 0.350445829 | 0.083172816 | 0.423015132 |
| 0.281366316 | 0.303454372 | 0.423876215 | 0.356120629 |
| 0.421139935 | 0.405915657 | 0.257326642 | 0.43845692  |
| 0.422616294 | 0.370955531 | 0.356090287 | 0.12903004  |
| 0.2291225   | 0.152355456 | 0.33656112  | 0.003583098 |
| 0.400260636 | 0.316644708 | 0.484345263 | 0.493489262 |
| 0.357457587 | 0.381436794 | 0.379701222 | 0.12685621  |
| 0.314432114 | 0.18089335  | 0.168213297 | 0.447716546 |
| 0.300695842 | 0.229594838 | 0.365400176 | 0.378098719 |
| 0.456142105 | 0.430001129 | 0.303149344 | 0.286894338 |
| 0.270977635 | 0.229053428 | 0.466703797 | 0.149540199 |
| 0.458882158 | 0.261108917 | 0.369990183 | 0.372167582 |
| 0.276746603 | 0.522866226 | 0.077451738 | 0.536543237 |
| 0.399245005 | 0.146612849 | 0.495469667 | 0.336343081 |
| 0.332880803 | 0.16519129  | 0.266221322 | 0.407381437 |
| 0.275102599 | 0.409506597 | 0.024626621 | 0.101134156 |
| 0.373980673 | 0.327583204 | 0.40997783  | 0.385222922 |
| 0.308119343 | 0.361920425 | 0.225517393 | 0.330709187 |
| 0.479611658 | 0.492694128 | 0.336574265 | 0.270013082 |
| 0.377606587 | 0.140151102 | 0.427871057 | 0.018795082 |
| 0.468045451 | 0.45978899  | 0.427218832 | 0.072215509 |
| 0.026328845 | 0.296492482 | 0.450417565 | 0.078945299 |
| 0.493555649 | 0.295007065 | 0.367856433 | 0.461418383 |
| 0.194416182 | 0.495666701 | 0.164447005 | 0.454544164 |
| 0.056878302 | 0.284579353 | 0.418686526 | 0.406878774 |
| 0.314132739 | 0.37004993  | 0.420744019 | 0.320705888 |
| 0.047527122 | 0.33353414  | 0.002737753 | 0.409425424 |
| 0.465419739 | 0.398842233 | 0.214924701 | 0.328480513 |
| 0.319732233 | 0.370402807 | 0.306236032 | 0.449257332 |
| 0.019364405 | 0.43729173  | 0.235821615 | 0.420340204 |
| 0.324362635 | 0.391529303 | 0.083622222 | 0.364195415 |
| 0.449977548 | 0.360584925 | 0.264319258 | 0.384418772 |
| 0.492430693 | 0.38006408  | 0.178859642 | 0.266676787 |
| 0.397238766 | 0.079625087 | 0.415308336 | 0.534210239 |
| 0.229673739 | 0.296041496 | 0.460714708 | 0.269144785 |
| 0.37934611  | 0.376475868 | 0.426562037 | 0.519162757 |
| 0.107811278 | 0.28832671  | 0.443166159 | 0.461221052 |
| 0.330462665 | 0.231313386 | 0.334281291 | 0.302489715 |
| 0.462789033 | 0.143608221 | 0.315213528 | 0.387546062 |
| 0.301270033 | 0.347833511 | 0.345636564 | 0.249609801 |
| 0.058855337 | 0.201372062 | 0.434806611 | 0.170002997 |
| 0.349175049 | 0.423985525 | 0.30035636  | 0.389901687 |
| 0.198047576 | 0.044254593 | 0.455131298 | 0.034551254 |
| 0.382293397 | 0.451404442 | 0.285480002 | 0.41147314  |
| 0.206665509 | 0.388207853 | 0.375441484 | 0.002065859 |
| 0.428673794 | 0.067742638 | 0.343779668 | 0.308716078 |
| 0.350914651 | 0.070897152 | 0.460660617 | 0.528812223 |
| 0.347281529 | 0.373601995 | 0.416655565 | 0.465127149 |
| 0.217233653 | 0.383095881 | 0.395799332 | 0.433506085 |
| 0.300407457 | 0.417626985 | 0.447958476 | 0.44453668  |
| 0.413018439 | 0.307949677 |             |             |

| FAM110A     | 0.150376621 | 0.408551425 | 0.114724993 |
|-------------|-------------|-------------|-------------|
| 0.254325727 | 0.358948805 | 0.448243989 | 0.117696556 |
| 0.211671388 | 0.345682835 | 0.280583898 | 0.442494894 |
| 0.055659397 | 0.106895639 | 0.455855145 | 0.113031881 |
| 0.415108552 | 0.087457435 | 0.191564206 | 0.094561545 |
| 0.2678568   | 0.345163851 | 0.390336894 | 0.416975366 |
| 0.331062795 | 0.242426739 | 0.376034747 | 0.371124831 |
| 0.488608409 | 0.289719355 | 0.456270303 | 0.203068774 |
| 0.434398342 | 0.376201519 | 0.386945604 | 0.047571745 |
| 0.444589662 | 0.012984862 | 0.448974333 | 0.346948598 |
| 0.195031792 | 0.373341974 | 0.332970625 | 0.358367196 |
| 0.363872049 | 0.090587806 | 0.211161368 | 0.396706453 |
| 0.347270593 | 0.332338688 | 0.121230831 | 0.436861182 |
| 0.365063922 | 0.41143772  | 0.377159698 | 0.00663965  |
| 0.328838093 | 0.09255903  | 0.233790562 | 0.505046934 |
| 0.302943655 | 0.222382612 | 0.262283324 | 0.294899404 |
| 0.382851918 | 0.384357072 | 0.321653708 | 0.356328647 |
| 0.504664173 | 0.203508856 | 0.41451143  | 0.245785076 |
| 0.41894942  | 0.066488621 | 0.241513287 | 0.128483244 |
| 0.398994783 | 0.305016371 | 0.408782427 | 0.326358309 |
| 0.410158794 | 0.521472266 | 0.305763294 | 0.493413837 |
| 0.1124115   | 0.359239619 | 0.322626964 | 0.363846438 |
| 0.375418289 | 0.13392803  | 0.458570998 | 0.525735494 |
| 0.090456299 | 0.366029693 | 0.40558865  | 0.185487697 |
| 0.419830823 | 0.272830904 | 0.390653473 | 0.229146755 |
| 0.390314153 | 0.377496753 | 0.470118096 | 0.385380372 |
| 0.356791899 | 0.129933514 | 0.486882121 | 0.346996638 |
| 0.402211103 | 0.15222167  | 0.281609218 | 0.434460882 |
| 0.446555158 | 0.491241059 | 0.405967288 | 0.388623349 |
| 0.400742708 | 0.502289856 | 0.447349471 | 0.40695448  |
| 0.141832822 | 0.518727353 | 0.29025445  | 0.107218602 |
| 0.131381575 | 0.165994099 | 0.247870988 | 0.352309848 |
| 0.458773303 | 0.397754011 | 0.303367975 | 0.323370206 |
| 0.439132991 | 0.475295492 | 0.510548385 | 0.426805386 |
| 0.094536436 | 0.247534243 | 0.405018168 | 0.357126105 |
| 0.416076736 | 0.180883398 | 0.303575614 | 0.514165936 |
| 0.413406303 | 0.440936458 | 0.2446411   | 0.509039067 |
| 0.259021163 | 0.525229029 | 0.4365528   | 0.27999469  |
| 0.523001371 | 0.503740103 | 0.51526385  | 0.422663464 |
| 0.488407029 | 0.427872001 | 0.074427831 | 0.392509933 |
| 0.501186795 | 0.025566997 | 0.45051054  | 0.480408626 |
| 0.494418123 | 0.446379223 | 0.513146633 | 0.500298176 |
| 0.498351623 | 0.134115708 | 0.027080796 | 0.355135277 |
| 0.509123994 | 0.429141577 | 0.207245106 | 0.416704629 |
| 0.39161485  | 0.44750591  | 0.419456428 | 0.374827078 |
| 0.522713772 | 0.439996585 | 0.470111671 | 0.413355539 |
| 0.314051951 | 0.351207353 | 0.369265625 | 0.476923783 |
| 0.104176457 | 0.206862532 | 0.103689718 | 0.34664069  |
| 0.360188295 | 0.272818451 | 0.431623524 | 0.361680562 |
| 0.291952161 | 0.380038299 | 0.338005442 | 0.407916489 |
| 0.097322312 | 0.450483506 | 0.250639143 | 0.250332021 |
| 0.10356707  | 0.199204059 | 0.306861469 | 0.272361918 |
| 0.345365924 | 0.269271966 | 0.436221799 | 0.476181288 |
| 0.359860965 | 0.259881212 | 0.445754887 | 0.484853484 |



|             |             |             |             |
|-------------|-------------|-------------|-------------|
| 0.446830751 | 0.410190326 | 0.297156489 | 0.040279787 |
| 0.330040154 | 0.277931972 | 0.200090953 | 0.403859211 |
| 0.211741515 | 0.323352126 | 0.412658067 | 0.429430616 |
| 0.372739213 | 0.206431543 | 0.395016406 | 0.453961747 |
| 0.209118088 | 0.400300073 | 0.447316178 | 0.399821189 |
| 0.012626917 | 0.412358399 | 0.45613186  | 0.195185979 |
| 0.358210935 | 0.191806871 | 0.306999414 | 0.449145484 |
| 0.306255032 | 0.266873942 | 0.47821745  | 0.416260677 |
| 0.395992848 | 0.245962121 | 0.517776505 | 0.053305556 |
| 0.344740396 | 0.112700623 | 0.365949598 | 0.315973813 |
| 0.343382375 | 0.350219975 | 0.358528229 | 0.34755985  |
| 0.205394294 | 0.51511834  | 0.414909465 | 0.508592624 |
| 0.375376013 | 0.521341319 | 0.452127602 | 1           |
| 0.420782666 | 0.346007921 | 0.159138661 | 0.452848192 |
| 0.438989477 | 0.297290146 | 0.126711601 | 0.42093403  |
| 0.345635502 | 0.415051066 | 0.162022428 | 0.496823932 |
| 0.508329903 | 0.461512816 | 0.248230613 | 0.403924455 |
| 0.436698616 | 0.345943038 | 0.414658087 | 0.523653603 |
| 0.291683099 | 0.381861354 | 0.378516366 | 0.413689625 |
| 0.268451624 | 0.263098582 | 0.339710511 | 0.192488907 |
| 0.014765033 | 0.145860854 | 0.130446042 | 0.264539991 |
| 0.219426167 | 0.397478094 | 0.415981076 | 0.512083908 |
| 0.21341349  | 0.427632202 | 0.28698846  | 0.377466926 |
| 0.422987964 | 0.365340889 | 0.397017331 | 0.412437954 |
| 0.310394171 | 0.050898121 | 0.226047386 | 0.525538514 |
| 0.077299945 | 0.297724832 | 0.363883148 | 0.009851262 |
| 0.099882568 | 0.386385617 | 0.14357486  | 0.234207645 |
| 0.467758077 | 0.236345939 | 0.289288011 | 0.308625782 |
| 0.409936493 | 0.171956176 | 0.012558727 | 0.466054213 |
| 0.4651249   | 0.435328942 | 0.462808343 | 0.445319938 |
| 0.410099406 | 0.400485197 | 0.422627054 | 0.415813406 |
| 0.18792555  | 0.151091564 | 0.255505456 | 0.365895186 |
| 0.010957496 | 0.423940635 | 0.344982593 | 0.228935626 |
| 0.428337524 | 0.351619797 | 0.096082715 | 0.372761536 |
| 0.065495855 | 0.230619315 | 0.360266345 | 0.286994918 |
| 0.37664178  | 0.042208555 | 0.30825297  | 0.346580059 |
| 0.446395142 | 0.387095931 | 0.358618557 | 0.525524971 |
| 0.422028909 | 0.178988078 | 0.383766304 | 0.434887307 |
| 0.143978996 | 0.111758149 | 0.38331902  | 0.050134808 |
| 0.252004032 | 0.444095384 | 0.380477045 | 0.137470228 |
| 0.36955347  | 0.020275126 | 0.396288605 | 0.53055317  |
| 0.461859085 | 0.509546171 | 0.507257295 | 0.326067568 |
| 0.509132039 | 0.104034285 | 0.520150143 | 0.415372527 |
| 0.365844256 | 0.004116788 | 0.017459605 | 0.470622679 |
| 0.427284201 | 0.099036176 | 0.251553839 | 0.425726374 |
| 0.217405083 | 0.232390916 | 0.132636324 | 0.243578712 |
| 0.450002978 | 0.321890322 | 0.226539046 | 0.466631618 |
| 0.328977181 | 0.315413028 | 0.396844117 | 0.143997697 |
| 0.42965194  | 0.122955288 | 0.138512918 | 0.023098395 |
| 0.399085802 | 0.164341409 | 0.474215912 | 0.504300135 |
| 0.506463891 | 0.420924215 | 0.319492626 | 0.397111686 |
| 0.406400437 | 0.154039553 | 0.36209089  | 0.17558104  |
| 0.481659617 | 0.427201449 | 0.39993379  | 0.372631034 |
| 0.506191706 | 0.479766804 | 0.082690912 | 0.430226712 |

|             |             |             |             |
|-------------|-------------|-------------|-------------|
| 0.044205682 | 0.004700509 | 0.423763853 | 0.324577055 |
| 0.059598056 | 0.392080627 | 0.331376456 | 0.256030811 |
| 0.274783468 | 0.084658453 | 0.288100001 | 0.273820392 |
| 0.370891034 | 0.407870925 | 0.330646341 | 0.287004685 |
| 0.310690278 | 0.180164439 | 0.288185764 | 0.236381808 |
| 0.254131352 | 0.342432798 | 0.247119629 | 0.055285613 |
| 0.419881623 | 0.431259361 | 0.126109098 | 0.241123099 |
| 0.4546981   | 0.485616388 | 0.093783148 | 0.04097233  |
| 0.333600604 | 0.353122809 | 0.49438599  | 0.489763143 |
| 0.527466255 | 0.524003669 | 0.418268849 | 0.204066549 |
| 0.1433727   | 0.372849639 | 0.33285034  | 0.166276909 |
| 0.509026405 | 0.114937059 | 0.482673435 | 0.319707998 |
| 0.187746265 | 0.310763916 | 0.094961566 | 0.155244571 |
| 0.402161089 | 0.270768516 | 0.275579718 | 0.223732741 |
| 0.386993584 | 0.286440066 | 0.102579345 | 0.29669492  |
| 0.397098401 | 0.206310109 | 0.24819182  | 0.354462144 |
| 0.381823919 | 0.1967858   | 0.431735453 | 0.467575035 |
| 0.21144144  | 0.17527579  | 0.367988567 | 0.392655032 |
| 0.437511701 | 0.368688617 | 0.076582278 | 0.43271623  |
| 0.483361172 | 0.450928401 | 0.500937737 | 0.405675812 |
| 0.143638347 | 0.4297489   | 0.308727953 | 0.379481482 |
| 0.266053621 | 0.444518796 | 0.308519205 | 0.12378785  |
| 0.326244101 | 0.484618166 | 0.406868776 | 0.279535503 |
| 0.419443518 | 0.186668381 | 0.101671737 | 0.420317322 |
| 0.229729893 | 0.182252692 | 0.356282156 | 0.416959064 |
| 0.005291269 | 0.16734491  | 0.466915826 | 0.354593348 |
| 0.509421789 | 0.472988607 | 0.459479934 | 0.311939183 |
| 0.001966426 | 0.40425615  | 0.447337429 | 0.44186267  |
| 0.422382396 | 0.401302018 | 0.194613965 | 0.157692207 |
| 0.351167007 | 0.138522653 | 0.232416962 | 0.399705572 |
| 0.188895478 | 0.430722791 | 0.277329487 | 0.264639972 |
| 0.27703648  | 0.133251779 | 0.283163901 | 0.341955129 |
| 0.151954455 | 0.323956433 | 0.407130861 | 0.280913929 |
| 0.240720032 | 0.416935551 | 0.418667763 | 0.070570135 |
| 0.372523632 | 0.40221504  | 0.42235479  | 0.007280237 |
| 0.452763772 | 0.027615109 | 0.292274839 | 0.323599898 |
| 0.294242591 | 0.292942361 | 0.330095188 | 0.360897712 |
| 0.384186902 | 0.309216909 | 0.388147906 | 0.336607466 |
| 0.26885625  | 0.299257497 | 0.411190904 | 0.387653152 |
| 0.377901052 | 0.226050542 | 0.145154162 | 0.13790096  |
| 0.132884218 | 0.446210757 | 0.307094551 | 0.1273278   |
| 0.313760001 | 0.374935059 | 0.383788135 | 0.482935901 |
| 0.425039585 | 0.158125213 | 0.370914291 | 0.437181292 |
| 0.220223697 | 0.347911102 | 0.123087947 | 0.414430061 |
| 0.33521928  | 0.305752627 | 0.400311276 | 0.372559117 |
| 0.396802392 | 0.427923416 | 0.309001667 | 0.439502196 |
| 0.414486102 | 0.338343718 | 0.316957171 | 0.180385833 |
| 0.282536391 | 0.196410504 | 0.326640878 | 0.009089481 |
| 0.41947352  | 0.357703831 | 0.455912371 | 0.490504785 |
| 0.300786668 | 0.39707095  | 0.359678755 | 0.178418764 |
| 0.277128925 | 0.211355772 | 0.221038955 | 0.424177233 |
| 0.241540337 | 0.289415929 | 0.363124527 | 0.393330994 |
| 0.432652894 | 0.398310856 | 0.287212953 | 0.320195091 |
| 0.296404537 | 0.270313827 | 0.465577202 | 0.195189549 |

|             |             |             |             |
|-------------|-------------|-------------|-------------|
| 0.416255935 | 0.260512012 | 0.350118604 | 0.381585582 |
| 0.301417284 | 0.498215988 | 0.119948071 | 0.510277809 |
| 0.373866001 | 0.190897518 | 0.506274841 | 0.360008338 |
| 0.352085469 | 0.211589113 | 0.212842996 | 0.38545184  |
| 0.297201495 | 0.355041171 | 0.015196353 | 0.088899714 |
| 0.399752457 | 0.295467451 | 0.390632649 | 0.382440242 |
| 0.291250816 | 0.376125934 | 0.182299789 | 0.348579803 |
| 0.472702318 | 0.49646493  | 0.362110399 | 0.310143156 |
| 0.398005777 | 0.200106297 | 0.431497867 | 0.017294136 |
| 0.427912151 | 0.407121827 | 0.376302905 | 0.117281139 |
| 0.052219837 | 0.237235506 | 0.418290866 | 0.108655865 |
| 0.466047008 | 0.237100218 | 0.346042763 | 0.445346141 |
| 0.236113362 | 0.501477923 | 0.211167811 | 0.45347821  |
| 0.076139081 | 0.319217346 | 0.371562372 | 0.366320436 |
| 0.333493779 | 0.332226062 | 0.428673929 | 0.291841391 |
| 0.085823594 | 0.343625494 | 0.004468486 | 0.435590128 |
| 0.466321204 | 0.346819157 | 0.261004755 | 0.275640662 |
| 0.355401302 | 0.380564185 | 0.302787162 | 0.402404721 |
| 0.039380292 | 0.40653866  | 0.289047029 | 0.436170423 |
| 0.26855351  | 0.36439267  | 0.13219589  | 0.327059978 |
| 0.46648217  | 0.3411358   | 0.302674578 | 0.324690705 |
| 0.480839447 | 0.381840046 | 0.216909039 | 0.272846013 |
| 0.365206542 | 0.118749626 | 0.386276046 | 0.520828104 |
| 0.281567805 | 0.271262277 | 0.445327591 | 0.309294688 |
| 0.331776543 | 0.391572497 | 0.381215645 | 0.505222171 |
| 0.147873131 | 0.338076262 | 0.431475804 | 0.446419364 |
| 0.366646848 | 0.21435342  | 0.298266927 | 0.308849336 |
| 0.460825432 | 0.199457838 | 0.28176888  | 0.410581541 |
| 0.258529897 | 0.376965566 | 0.327657908 | 0.26352658  |
| 0.09774132  | 0.243976196 | 0.440579744 | 0.220881516 |
| 0.374649068 | 0.405120937 | 0.290389813 | 0.410134119 |
| 0.252956782 | 0.076418111 | 0.465111109 | 0.026385979 |
| 0.407935388 | 0.446054129 | 0.332722726 | 0.385249529 |
| 0.257957886 | 0.392939903 | 0.376908746 | 0.005983264 |
| 0.422817777 | 0.064671614 | 0.336310417 | 0.321340021 |
| 0.315141912 | 0.110853616 | 0.464737812 | 0.507857666 |
| 0.373554128 | 0.333889717 | 0.353486994 | 0.459436667 |
| 0.18413449  | 0.315180205 | 0.338652769 | 0.415732113 |
| 0.257437596 | 0.367206513 | 0.398266092 | 0.391876325 |
| 0.422256029 | 0.34387645  |             |             |

FAM120B 0.114513236

0.383440893

0.08715413

|             |             |             |             |
|-------------|-------------|-------------|-------------|
| 0.179301697 | 0.256726488 | 0.289038896 | 0.10133914  |
| 0.160076998 | 0.29996192  | 0.177707714 | 0.293752574 |
| 0.049273428 | 0.082269606 | 0.421316055 | 0.10370186  |
| 0.276509564 | 0.082056782 | 0.152863788 | 0.074626002 |
| 0.212545695 | 0.247231286 | 0.25701216  | 0.256869902 |
| 0.249339057 | 0.235247869 | 0.254022959 | 0.244093292 |
| 0.454548852 | 0.169076598 | 0.308848485 | 0.127464741 |
| 0.419853805 | 0.259474788 | 0.247093899 | 0.045406802 |
| 0.290086928 | 0.016095523 | 0.434395719 | 0.24994012  |
| 0.147321663 | 0.369803269 | 0.203421356 | 0.260747631 |
| 0.226137358 | 0.073264886 | 0.121981164 | 0.274539906 |
| 0.242088174 | 0.257784033 | 0.092788436 | 0.322020513 |
| 0.24199679  | 0.292195755 | 0.280119351 | 0.002778986 |

|             |             |             |             |
|-------------|-------------|-------------|-------------|
| 0.213389038 | 0.062246475 | 0.153521312 | 0.474870921 |
| 0.224620136 | 0.184251116 | 0.163846766 | 0.226926841 |
| 0.255110221 | 0.284192184 | 0.251313139 | 0.221908895 |
| 0.46761821  | 0.1431709   | 0.314973834 | 0.174673276 |
| 0.280218877 | 0.061061149 | 0.194862301 | 0.105393461 |
| 0.271391657 | 0.237501139 | 0.281162046 | 0.230942316 |
| 0.371729059 | 0.501309045 | 0.23612258  | 0.461728776 |
| 0.09774404  | 0.246412748 | 0.246181171 | 0.292053928 |
| 0.294698533 | 0.119246067 | 0.342168467 | 0.496654203 |
| 0.081932121 | 0.223506508 | 0.296835925 | 0.137220728 |
| 0.393154086 | 0.200130673 | 0.233978877 | 0.16252321  |
| 0.277671972 | 0.254269773 | 0.455211046 | 0.272029102 |
| 0.262606424 | 0.10194729  | 0.459199989 | 0.237425932 |
| 0.269533827 | 0.121026998 | 0.204859487 | 0.393824072 |
| 0.288606292 | 0.451873241 | 0.354071576 | 0.321125618 |
| 0.257773921 | 0.467914294 | 0.320518969 | 0.391648701 |
| 0.083804251 | 0.485793554 | 0.215656029 | 0.095945339 |
| 0.097329641 | 0.149983132 | 0.198095498 | 0.324867672 |
| 0.429407767 | 0.271554436 | 0.210710623 | 0.244862976 |
| 0.419508416 | 0.443407578 | 0.476012227 | 0.360040735 |
| 0.080891185 | 0.18545253  | 0.260129883 | 0.25847269  |
| 0.291376965 | 0.152152251 | 0.21178431  | 0.485540886 |
| 0.389309495 | 0.38495573  | 0.179234229 | 0.491797578 |
| 0.20084537  | 0.499334371 | 0.396579758 | 0.210228451 |
| 0.49510719  | 0.474570795 | 0.487811442 | 0.30193291  |
| 0.46498614  | 0.276968327 | 0.058091141 | 0.348797707 |
| 0.481265221 | 0.020391917 | 0.416257098 | 0.446403294 |
| 0.458004324 | 0.394421419 | 0.490746007 | 0.469483922 |
| 0.459970041 | 0.111771155 | 0.019716138 | 0.256331076 |
| 0.474754027 | 0.387660659 | 0.183109818 | 0.256924543 |
| 0.268743896 | 0.284049309 | 0.351905423 | 0.217227854 |
| 0.505241213 | 0.416300378 | 0.433730452 | 0.319683621 |
| 0.218283208 | 0.343894159 | 0.238526863 | 0.448383986 |
| 0.096495477 | 0.146231454 | 0.080591551 | 0.289307296 |
| 0.221850142 | 0.215969689 | 0.262391529 | 0.254265888 |
| 0.225707262 | 0.251233178 | 0.217391299 | 0.287709999 |
| 0.086858273 | 0.275370512 | 0.199550601 | 0.176160498 |
| 0.09336363  | 0.193354807 | 0.1973132   | 0.211041936 |
| 0.251232204 | 0.273346511 | 0.310754759 | 0.451544616 |
| 0.253878612 | 0.200098448 | 0.31297975  | 0.464448669 |
| 0.439892855 | 0.268166339 | 0.246225784 | 0.03846687  |
| 0.19921485  | 0.180908951 | 0.139126853 | 0.261635982 |
| 0.228659938 | 0.215487308 | 0.265893824 | 0.330971045 |
| 0.236424355 | 0.162193607 | 0.25279624  | 0.441740503 |
| 0.166806044 | 0.270202167 | 0.407985121 | 0.25140581  |
| 0.014695139 | 0.26727847  | 0.389254103 | 0.167143045 |
| 0.247665532 | 0.134548736 | 0.193654796 | 0.421940939 |
| 0.191346548 | 0.202309077 | 0.449686938 | 0.328864979 |
| 0.238103986 | 0.248248576 | 0.492324444 | 0.032757083 |
| 0.246755657 | 0.08727971  | 0.269635854 | 0.198968958 |
| 0.250160544 | 0.277165712 | 0.250563921 | 0.252177981 |
| 0.143937294 | 0.481939188 | 0.368376146 | 0.473523434 |
| 0.230650221 | 0.494840682 | 0.404621444 | 0.420782666 |
| 1           | 0.221781326 | 0.110781091 | 0.376735681 |

|             |             |             |             |
|-------------|-------------|-------------|-------------|
| 0.413460416 | 0.179567042 | 0.098739149 | 0.348312676 |
| 0.221232271 | 0.290164459 | 0.146479657 | 0.467324642 |
| 0.491912293 | 0.426968617 | 0.195539038 | 0.335489707 |
| 0.367211162 | 0.240273763 | 0.37782895  | 0.501838748 |
| 0.183511216 | 0.249075091 | 0.247985383 | 0.384241988 |
| 0.200225858 | 0.20318826  | 0.33194968  | 0.140154376 |
| 0.010613005 | 0.113292496 | 0.101443213 | 0.211026414 |
| 0.168526941 | 0.25038804  | 0.29440621  | 0.474299915 |
| 0.168822651 | 0.413437486 | 0.2307344   | 0.242386736 |
| 0.390742889 | 0.248789021 | 0.264644452 | 0.276581784 |
| 0.255659617 | 0.051227049 | 0.169704445 | 0.501648856 |
| 0.062574584 | 0.199206366 | 0.253792034 | 0.008010103 |
| 0.081211125 | 0.327970139 | 0.135541215 | 0.249553139 |
| 0.449590474 | 0.24522583  | 0.201026781 | 0.189667623 |
| 0.304500916 | 0.145451916 | 0.015744172 | 0.443688756 |
| 0.448894595 | 0.425166554 | 0.442776652 | 0.432615492 |
| 0.397420633 | 0.331978583 | 0.354806617 | 0.261471519 |
| 0.147653009 | 0.117161671 | 0.17566979  | 0.253550055 |
| 0.008762287 | 0.35639244  | 0.260801242 | 0.178104709 |
| 0.331652811 | 0.253005593 | 0.080949554 | 0.262498403 |
| 0.049240068 | 0.142095903 | 0.243320625 | 0.225043017 |
| 0.311201283 | 0.040605455 | 0.19164705  | 0.207836846 |
| 0.412437092 | 0.344756144 | 0.232446514 | 0.494376681 |
| 0.283668194 | 0.136950356 | 0.269062598 | 0.341199291 |
| 0.121754155 | 0.060786934 | 0.258786808 | 0.026330953 |
| 0.162015186 | 0.434753091 | 0.247355212 | 0.109763233 |
| 0.258185935 | 0.018716808 | 0.361044777 | 0.498783854 |
| 0.427544855 | 0.475561922 | 0.47281607  | 0.216861163 |
| 0.473099942 | 0.073023035 | 0.484951767 | 0.362392734 |
| 0.218961737 | 0.002348896 | 0.019666858 | 0.437985012 |
| 0.270502555 | 0.08406891  | 0.195124163 | 0.254264469 |
| 0.179178673 | 0.166053536 | 0.117357676 | 0.19390301  |
| 0.28947038  | 0.241200042 | 0.175970062 | 0.430402635 |
| 0.24154355  | 0.246979831 | 0.249333414 | 0.115913452 |
| 0.284363598 | 0.107754819 | 0.114613443 | 0.023352235 |
| 0.306916916 | 0.144276967 | 0.448728709 | 0.470041492 |
| 0.48075968  | 0.307303844 | 0.186585248 | 0.250726254 |
| 0.400123785 | 0.114479158 | 0.230700226 | 0.128900096 |
| 0.441143226 | 0.27429558  | 0.32050638  | 0.320560634 |
| 0.476489965 | 0.447383491 | 0.07563451  | 0.348816942 |
| 0.040565234 | 0.006041796 | 0.256820391 | 0.245141781 |
| 0.065222359 | 0.255368041 | 0.27342096  | 0.204345538 |
| 0.228907779 | 0.065935047 | 0.203229252 | 0.188794907 |
| 0.263649558 | 0.270483182 | 0.233246878 | 0.240675246 |
| 0.242856619 | 0.143059431 | 0.233495937 | 0.189704295 |
| 0.186249831 | 0.314239719 | 0.235439474 | 0.054378561 |
| 0.266451405 | 0.265238431 | 0.10771306  | 0.184853494 |
| 0.41001516  | 0.446475247 | 0.08750824  | 0.037832161 |
| 0.279114767 | 0.243686364 | 0.460432013 | 0.452200773 |
| 0.495863147 | 0.499171366 | 0.411367443 | 0.166791755 |
| 0.118393672 | 0.274935622 | 0.237131147 | 0.158782269 |
| 0.473087585 | 0.087127123 | 0.455785163 | 0.220687243 |
| 0.153197711 | 0.23286069  | 0.084005937 | 0.134472321 |
| 0.261581397 | 0.208898123 | 0.221482647 | 0.153254562 |

|             |             |             |             |
|-------------|-------------|-------------|-------------|
| 0.263185253 | 0.196664896 | 0.092956275 | 0.225362412 |
| 0.309028132 | 0.14417248  | 0.190065336 | 0.254594771 |
| 0.32780943  | 0.13349581  | 0.318666186 | 0.454441505 |
| 0.163399626 | 0.142559979 | 0.220572259 | 0.318533402 |
| 0.375111576 | 0.233495831 | 0.056674621 | 0.395116939 |
| 0.460064594 | 0.293743746 | 0.468554936 | 0.381861859 |
| 0.11914173  | 0.272684665 | 0.216313151 | 0.255319795 |
| 0.207625848 | 0.28438975  | 0.238532757 | 0.105104264 |
| 0.326218558 | 0.473974126 | 0.375242455 | 0.218097289 |
| 0.273992351 | 0.135008221 | 0.078183147 | 0.400697618 |
| 0.17103258  | 0.132877621 | 0.219674854 | 0.364933348 |
| 0.006559097 | 0.125083234 | 0.452033303 | 0.2538686   |
| 0.494136696 | 0.444020323 | 0.440924965 | 0.236988551 |
| 0.001566097 | 0.283813035 | 0.290477343 | 0.276956295 |
| 0.381926224 | 0.324137212 | 0.165013063 | 0.138417381 |
| 0.316455273 | 0.103341197 | 0.180088132 | 0.261015133 |
| 0.134243242 | 0.272113386 | 0.222186552 | 0.208505872 |
| 0.226615189 | 0.105160415 | 0.207519278 | 0.252643038 |
| 0.132830378 | 0.261488351 | 0.348161445 | 0.176832947 |
| 0.136438214 | 0.403279842 | 0.338435794 | 0.063155068 |
| 0.253811558 | 0.377050082 | 0.416923329 | 0.005724902 |
| 0.325709532 | 0.027339133 | 0.226643363 | 0.241867287 |
| 0.234775894 | 0.223381995 | 0.25024547  | 0.254102024 |
| 0.253982989 | 0.236755614 | 0.265931351 | 0.249048904 |
| 0.217173491 | 0.231121268 | 0.277973665 | 0.268068388 |
| 0.251727679 | 0.181492752 | 0.143434962 | 0.149202868 |
| 0.107728992 | 0.420258216 | 0.287719912 | 0.101397267 |
| 0.24186056  | 0.253287726 | 0.379849838 | 0.446081153 |
| 0.422678291 | 0.146359121 | 0.261906996 | 0.397349205 |
| 0.122690617 | 0.210918803 | 0.091848347 | 0.276946233 |
| 0.241968102 | 0.205819607 | 0.264292246 | 0.233636103 |
| 0.295828592 | 0.422378106 | 0.275608878 | 0.435933955 |
| 0.277823266 | 0.232449159 | 0.185126005 | 0.149858611 |
| 0.204790702 | 0.155858726 | 0.237763686 | 0.009835714 |
| 0.289574575 | 0.227896196 | 0.41654431  | 0.458811528 |
| 0.200105792 | 0.398116929 | 0.202877018 | 0.133391981 |
| 0.163579241 | 0.208010505 | 0.170213549 | 0.337535861 |
| 0.155069532 | 0.226283065 | 0.257969906 | 0.241517891 |
| 0.339292487 | 0.313189259 | 0.230170518 | 0.230777982 |
| 0.23637359  | 0.201781252 | 0.451354482 | 0.15020605  |
| 0.260881448 | 0.196946527 | 0.224673598 | 0.263633771 |
| 0.229587042 | 0.469462895 | 0.102006001 | 0.473600851 |
| 0.247620759 | 0.166302823 | 0.491485847 | 0.260459038 |
| 0.255130542 | 0.185534291 | 0.14953233  | 0.242192407 |
| 0.227132845 | 0.237562549 | 0.008354937 | 0.053210662 |
| 0.309768998 | 0.214269247 | 0.318791335 | 0.306966792 |
| 0.227829216 | 0.331489223 | 0.135381808 | 0.231437782 |
| 0.437495522 | 0.471363462 | 0.230915992 | 0.269491312 |
| 0.307846656 | 0.161884053 | 0.26962201  | 0.014714509 |
| 0.266096829 | 0.254150174 | 0.229711306 | 0.104532828 |
| 0.05110004  | 0.157068772 | 0.262808408 | 0.090154188 |
| 0.439511812 | 0.147031755 | 0.234692412 | 0.329227704 |
| 0.191570981 | 0.472262003 | 0.17856562  | 0.336126602 |
| 0.067059358 | 0.246851422 | 0.25841746  | 0.245669134 |

|             |             |             |             |
|-------------|-------------|-------------|-------------|
| 0.226506109 | 0.228199628 | 0.332254616 | 0.201801693 |
| 0.078244584 | 0.248834991 | 0.00391212  | 0.425353242 |
| 0.439640235 | 0.233561159 | 0.24557929  | 0.172659191 |
| 0.272468275 | 0.369157066 | 0.209559617 | 0.257398491 |
| 0.041011327 | 0.265514124 | 0.226070226 | 0.389467847 |
| 0.149918032 | 0.242852172 | 0.118850598 | 0.234649732 |
| 0.445250396 | 0.209818305 | 0.276685975 | 0.1930944   |
| 0.447784037 | 0.349072687 | 0.177780538 | 0.221769051 |
| 0.247221028 | 0.097168464 | 0.23560607  | 0.492849796 |
| 0.222466231 | 0.194216836 | 0.397348724 | 0.225222865 |
| 0.224440299 | 0.370951142 | 0.247432633 | 0.482335208 |
| 0.1278126   | 0.244506211 | 0.362477377 | 0.414466591 |
| 0.311032417 | 0.174424512 | 0.198991198 | 0.225851172 |
| 0.42519937  | 0.153087003 | 0.200965543 | 0.314306395 |
| 0.173382428 | 0.273740241 | 0.218361769 | 0.210218579 |
| 0.087116092 | 0.195537644 | 0.283181731 | 0.179021629 |
| 0.260802861 | 0.278720505 | 0.229371127 | 0.406173647 |
| 0.189567058 | 0.065743606 | 0.455091014 | 0.016881245 |
| 0.266754026 | 0.295929177 | 0.251316589 | 0.265071115 |
| 0.224641671 | 0.261961103 | 0.233915519 | 0.00520928  |
| 0.371712282 | 0.06607666  | 0.257899678 | 0.227897866 |
| 0.200641261 | 0.09100337  | 0.444394401 | 0.477744706 |
| 0.269651094 | 0.227362188 | 0.21013031  | 0.438206508 |
| 0.134247397 | 0.203973448 | 0.224089857 | 0.277291027 |
| 0.183686676 | 0.218581178 | 0.250745389 | 0.249607122 |
| 0.330277731 | 0.253308802 |             |             |
| FAM178A     | 0.019527141 | 0.360981434 | 0.012978221 |
| 0.039725716 | 0.208918288 | 0.147980645 | 0.022219956 |
| 0.049548571 | 0.301397111 | 0.219195253 | 0.16819054  |
| 0.003561155 | 0.119877026 | 0.381987925 | 0.020846699 |
| 0.295753339 | 0.010150333 | 0.03989888  | 0.070554394 |
| 0.116275955 | 0.188287634 | 0.181854874 | 0.171757697 |
| 0.190143716 | 0.105707937 | 0.200970639 | 0.310782065 |
| 0.42604302  | 0.18686217  | 0.29954581  | 0.115036459 |
| 0.317299938 | 0.24167942  | 0.233477093 | 0.002697271 |
| 0.222503588 | 0.044902823 | 0.338496872 | 0.129651431 |
| 0.103107363 | 0.239811521 | 0.171402007 | 0.090247049 |
| 0.216475893 | 0.008091779 | 0.14941811  | 0.383181026 |
| 0.219810075 | 0.142725122 | 0.020224755 | 0.310400102 |
| 0.234424045 | 0.19079027  | 0.32203777  | 0.001699125 |
| 0.212253804 | 0.150854556 | 0.2352256   | 0.397504487 |
| 0.094975689 | 0.04339917  | 0.287077386 | 0.129601802 |
| 0.335210799 | 0.339916227 | 0.161726657 | 0.238062229 |
| 0.401408003 | 0.193301844 | 0.392238247 | 0.059099849 |
| 0.181610707 | 0.011264414 | 0.080751961 | 0.042452455 |
| 0.224726154 | 0.082903473 | 0.184551333 | 0.221761695 |
| 0.360958411 | 0.411989949 | 0.137081767 | 0.401992734 |
| 0.166779229 | 0.286755831 | 0.169721169 | 0.221275491 |
| 0.330108363 | 0.045868279 | 0.286227919 | 0.422855652 |
| 0.020176817 | 0.281728261 | 0.343178781 | 0.064002407 |
| 0.333964746 | 0.258602336 | 0.230602223 | 0.133161031 |
| 0.316930198 | 0.256031199 | 0.399858199 | 0.167551706 |
| 0.184279366 | 0.027156618 | 0.366761275 | 0.268570762 |
| 0.123294167 | 0.024498784 | 0.16090647  | 0.445871632 |

|             |             |             |             |
|-------------|-------------|-------------|-------------|
| 0.278056342 | 0.407022082 | 0.396556284 | 0.318743962 |
| 0.274991368 | 0.403773184 | 0.264961343 | 0.351520185 |
| 0.162275262 | 0.435955003 | 0.064775056 | 0.011500425 |
| 0.022022951 | 0.031124678 | 0.215330335 | 0.213053128 |
| 0.400113823 | 0.207679754 | 0.06936183  | 0.112636861 |
| 0.43744682  | 0.36772336  | 0.44955462  | 0.353110755 |
| 0.009819368 | 0.257732177 | 0.258130669 | 0.109376582 |
| 0.296367399 | 0.053049234 | 0.184919664 | 0.391562363 |
| 0.261439028 | 0.391794102 | 0.056613199 | 0.379725451 |
| 0.111480339 | 0.405574872 | 0.373377014 | 0.058064969 |
| 0.403169459 | 0.367959716 | 0.424886007 | 0.337761582 |
| 0.348811289 | 0.127715895 | 0.091654668 | 0.329906668 |
| 0.385481264 | 0.010463698 | 0.448531166 | 0.465784205 |
| 0.407336162 | 0.426680129 | 0.462778199 | 0.439759456 |
| 0.412262285 | 0.027655952 | 0.078961947 | 0.209194446 |
| 0.40372086  | 0.28230625  | 0.073261759 | 0.283125988 |
| 0.2862196   | 0.159452291 | 0.388782196 | 0.159861488 |
| 0.41337664  | 0.377905505 | 0.443341468 | 0.329175651 |
| 0.210836786 | 0.211848822 | 0.313689258 | 0.340271899 |
| 0.011306862 | 0.032676182 | 0.017326987 | 0.238758851 |
| 0.156652574 | 0.078006462 | 0.162021767 | 0.292105131 |
| 0.094881431 | 0.157445974 | 0.238668661 | 0.324712884 |
| 0.025882642 | 0.264766246 | 0.057711887 | 0.074773028 |
| 0.011053404 | 0.079295701 | 0.072482966 | 0.048050994 |
| 0.12806891  | 0.149878213 | 0.365788717 | 0.432245539 |
| 0.229006784 | 0.089359258 | 0.314433479 | 0.381402176 |
| 0.333805135 | 0.247360033 | 0.147507246 | 0.001432694 |
| 0.176199828 | 0.288773923 | 0.219209556 | 0.299202244 |
| 0.105982059 | 0.138236719 | 0.292095963 | 0.320398602 |
| 0.109566974 | 0.06379776  | 0.234408406 | 0.302964269 |
| 0.083215894 | 0.135526141 | 0.381483995 | 0.284546756 |
| 0.000153217 | 0.150194097 | 0.367204851 | 0.121448852 |
| 0.23727733  | 0.102561654 | 0.155797257 | 0.410302278 |
| 0.253714977 | 0.19199108  | 0.437180843 | 0.332632192 |
| 0.172824046 | 0.150080117 | 0.458731181 | 0.115442656 |
| 0.274281023 | 0.020116992 | 0.182002712 | 0.202592313 |
| 0.123602238 | 0.218697512 | 0.234408098 | 0.147528725 |
| 0.051421317 | 0.428117091 | 0.29482442  | 0.429498377 |
| 0.240704852 | 0.45609934  | 0.404740611 | 0.346007921 |
| 0.221781326 | 1           | 0.164608254 | 0.354003481 |
| 0.402177299 | 0.225369146 | 0.032102312 | 0.435355135 |
| 0.25207913  | 0.358761673 | 0.079974207 | 0.412078399 |
| 0.37234406  | 0.372082739 | 0.058393185 | 0.323619105 |
| 0.264291324 | 0.086056793 | 0.347527869 | 0.456189658 |
| 0.24857974  | 0.247874127 | 0.200846804 | 0.345029779 |
| 0.077380553 | 0.166118439 | 0.238900077 | 0.208734395 |
| 0.009790739 | 0.028187304 | 0.019966529 | 0.066993597 |
| 0.129796485 | 0.341435324 | 0.311703206 | 0.439045657 |
| 0.039597078 | 0.308708761 | 0.172898109 | 0.144004685 |
| 0.339687721 | 0.235502687 | 0.26296984  | 0.289867638 |
| 0.15505513  | 0.003366614 | 0.035336177 | 0.407268662 |
| 0.015384461 | 0.164676772 | 0.162938112 | 0.000595069 |
| 0.013946316 | 0.369547238 | 0.050743394 | 0.11259383  |
| 0.431121287 | 0.113816212 | 0.106789632 | 0.223656668 |



|             |             |             |             |
|-------------|-------------|-------------|-------------|
| 0.229316007 | 0.029641124 | 0.000192586 | 0.441234062 |
| 0.436327806 | 0.418466583 | 0.436411714 | 0.381236075 |
| 0.431509368 | 0.350293922 | 0.370452202 | 0.151374285 |
| 0.036828991 | 0.030621614 | 0.175018309 | 0.145332219 |
| 0.003111433 | 0.274739265 | 0.194979441 | 0.064512501 |
| 0.382629121 | 0.224713452 | 0.008655517 | 0.287703349 |
| 0.003336537 | 0.176657329 | 0.167242945 | 0.118150483 |
| 0.308723441 | 0.002317322 | 0.094893147 | 0.228903867 |
| 0.304588065 | 0.236754407 | 0.236616557 | 0.430490704 |
| 0.157152253 | 0.070225295 | 0.146309178 | 0.302540901 |
| 0.023311325 | 0.135344358 | 0.1920775   | 0.020894162 |
| 0.100676197 | 0.38000615  | 0.24070083  | 0.018826278 |
| 0.134660789 | 0.00011872  | 0.24752625  | 0.431240913 |
| 0.362129218 | 0.459713019 | 0.396877034 | 0.168931625 |
| 0.401105619 | 0.194552624 | 0.449472167 | 0.317666136 |
| 0.233290252 | 1.85E-05    | 0.001597876 | 0.432559973 |
| 0.255046121 | 0.025427008 | 0.068099813 | 0.131601629 |
| 0.034630209 | 0.053830152 | 0.020858605 | 0.120851984 |
| 0.256830126 | 0.13046495  | 0.141425938 | 0.380894002 |
| 0.108515281 | 0.122880124 | 0.201544354 | 0.040917439 |
| 0.26729658  | 0.013213561 | 0.044291202 | 0.002094609 |
| 0.301626984 | 0.060459481 | 0.348832272 | 0.419730632 |
| 0.388891796 | 0.304904166 | 0.231035714 | 0.163951526 |
| 0.411818049 | 0.04427267  | 0.220690836 | 0.046210292 |
| 0.387187    | 0.289063844 | 0.203450553 | 0.189382849 |
| 0.421605425 | 0.363539004 | 0.008757231 | 0.343587781 |
| 0.00152373  | 0.001392147 | 0.156295189 | 0.178289569 |
| 0.129647766 | 0.23356824  | 0.153184418 | 0.163893153 |
| 0.137116143 | 0.006143771 | 0.222670323 | 0.203681925 |
| 0.179834791 | 0.208631814 | 0.1848106   | 0.182469746 |
| 0.159193302 | 0.116136518 | 0.081385781 | 0.071440334 |
| 0.208876986 | 0.219090263 | 0.108944089 | 0.005689643 |
| 0.246857857 | 0.259435768 | 0.014703828 | 0.072784384 |
| 0.34699117  | 0.423483218 | 0.01656689  | 0.001692383 |
| 0.162183861 | 0.199785746 | 0.440151566 | 0.410844557 |
| 0.409558842 | 0.430232474 | 0.278615997 | 0.071395816 |
| 0.018697425 | 0.204111419 | 0.217532021 | 0.051117782 |
| 0.424454092 | 0.028732949 | 0.377698854 | 0.235230968 |
| 0.053617281 | 0.081629323 | 0.007262471 | 0.029625683 |
| 0.291037135 | 0.083759873 | 0.076561772 | 0.064261173 |
| 0.161715191 | 0.179799982 | 0.015266634 | 0.087757743 |
| 0.2547809   | 0.172809068 | 0.073567047 | 0.14316494  |
| 0.258507051 | 0.213292393 | 0.377623584 | 0.346458795 |
| 0.054670801 | 0.048485821 | 0.098864627 | 0.334596685 |
| 0.397429158 | 0.304707415 | 0.004491645 | 0.383694106 |
| 0.421155723 | 0.326303217 | 0.384554156 | 0.337804899 |
| 0.037176887 | 0.210534207 | 0.267748734 | 0.243331458 |
| 0.097839043 | 0.145084204 | 0.129525159 | 0.021397125 |
| 0.222706767 | 0.380880294 | 0.345755531 | 0.057354737 |
| 0.27359521  | 0.060493556 | 0.024170355 | 0.394628615 |
| 0.150196906 | 0.026636924 | 0.189359772 | 0.427047847 |
| 0.000338164 | 0.146990859 | 0.457123022 | 0.087578678 |
| 0.431026771 | 0.41900127  | 0.323022976 | 0.119650905 |
| 0.007845122 | 0.372647059 | 0.221896679 | 0.180714522 |

|             |             |             |             |
|-------------|-------------|-------------|-------------|
| 0.356459473 | 0.228543153 | 0.085820186 | 0.023538846 |
| 0.186184918 | 0.033037787 | 0.062694616 | 0.134137303 |
| 0.1868223   | 0.273644811 | 0.112736408 | 0.123924914 |
| 0.097554464 | 0.055694659 | 0.165608998 | 0.083434288 |
| 0.205038342 | 0.138515013 | 0.251615284 | 0.187775733 |
| 0.158598604 | 0.409022732 | 0.33672928  | 0.005110807 |
| 0.255269471 | 0.374257755 | 0.361396246 | 0.000759035 |
| 0.340933721 | 0.000845473 | 0.092357608 | 0.08624     |
| 0.085239483 | 0.114886031 | 0.170965492 | 0.149723441 |
| 0.254427608 | 0.097047064 | 0.10022527  | 0.116656696 |
| 0.060358471 | 0.09026169  | 0.266778275 | 0.171439659 |
| 0.123847009 | 0.037176233 | 0.051197087 | 0.053415407 |
| 0.011892291 | 0.394186779 | 0.143278949 | 0.029069941 |
| 0.124756822 | 0.198788771 | 0.248852299 | 0.404656671 |
| 0.326785642 | 0.058446467 | 0.189856029 | 0.34752996  |
| 0.261260228 | 0.138490568 | 0.020593797 | 0.200363955 |
| 0.09720935  | 0.126317125 | 0.216408039 | 0.168251726 |
| 0.362593861 | 0.280733071 | 0.136227916 | 0.345605161 |
| 0.16665721  | 0.255306009 | 0.176234636 | 0.02693848  |
| 0.059275865 | 0.0691161   | 0.172717102 | 0.001033793 |
| 0.217110752 | 0.084405309 | 0.406746436 | 0.373505005 |
| 0.242555197 | 0.279939791 | 0.147510199 | 0.027304076 |
| 0.151827456 | 0.1084662   | 0.066236639 | 0.372811244 |
| 0.199218645 | 0.062159362 | 0.183773394 | 0.117864782 |
| 0.372973517 | 0.392488633 | 0.181434961 | 0.118842701 |
| 0.137790385 | 0.093030385 | 0.392887903 | 0.038113529 |
| 0.31352656  | 0.105272906 | 0.257200838 | 0.142915456 |
| 0.114209954 | 0.452114139 | 0.017426096 | 0.46318005  |
| 0.200851832 | 0.068403119 | 0.377133053 | 0.140176845 |
| 0.118244375 | 0.045896889 | 0.185979527 | 0.206015062 |
| 0.119958543 | 0.223048929 | 0.023312709 | 0.068168133 |
| 0.220510795 | 0.235669145 | 0.373798353 | 0.314065598 |
| 0.162330247 | 0.278411122 | 0.180732913 | 0.140827949 |
| 0.379822363 | 0.380172011 | 0.108549193 | 0.164545664 |
| 0.251034786 | 0.03006916  | 0.222104642 | 0.033285602 |
| 0.325974238 | 0.341038848 | 0.242842268 | 0.016501316 |
| 0.004069219 | 0.198995295 | 0.302693575 | 0.033564907 |
| 0.445798571 | 0.186668792 | 0.294445831 | 0.320159512 |
| 0.107012512 | 0.376662603 | 0.054603367 | 0.289580546 |
| 0.027979994 | 0.154101715 | 0.259864522 | 0.270466008 |
| 0.101419965 | 0.198139063 | 0.272934397 | 0.157308214 |
| 0.007300559 | 0.129666625 | 0.001294153 | 0.279406315 |
| 0.364375595 | 0.247567069 | 0.124774237 | 0.240464745 |
| 0.172178255 | 0.313090936 | 0.173022101 | 0.262919387 |
| 0.001399099 | 0.26368457  | 0.091590281 | 0.290302119 |
| 0.166991696 | 0.283230918 | 0.013624758 | 0.252169524 |
| 0.328355563 | 0.183028731 | 0.182016813 | 0.213264654 |
| 0.392648061 | 0.317486033 | 0.085282732 | 0.127029646 |
| 0.345779397 | 0.025254699 | 0.192028795 | 0.449529408 |
| 0.069418123 | 0.146199229 | 0.3952225   | 0.086655951 |
| 0.230499082 | 0.291126848 | 0.332635065 | 0.450540744 |
| 0.03409129  | 0.132192534 | 0.36884715  | 0.401527705 |
| 0.205612716 | 0.147131284 | 0.175505894 | 0.134059717 |
| 0.342244887 | 0.023957527 | 0.2182799   | 0.234566209 |

|             |             |             |             |
|-------------|-------------|-------------|-------------|
| 0.17830434  | 0.197638367 | 0.25085333  | 0.114077812 |
| 0.009709652 | 0.082696721 | 0.146222239 | 0.062523828 |
| 0.17269747  | 0.209776424 | 0.155630185 | 0.275779182 |
| 0.041831427 | 0.004181543 | 0.345169701 | 0.029143427 |
| 0.139108699 | 0.250978021 | 0.114795764 | 0.200545565 |
| 0.09324559  | 0.234168028 | 0.177638737 | 0.000328974 |
| 0.356668112 | 0.027506148 | 0.184817178 | 0.114724268 |
| 0.226365464 | 0.015679332 | 0.33780878  | 0.448927382 |
| 0.184463819 | 0.205860228 | 0.226225159 | 0.373996881 |
| 0.134525145 | 0.264444692 | 0.267309565 | 0.290992716 |
| 0.180423829 | 0.225559995 | 0.241308555 | 0.20879047  |
| 0.258850176 | 0.111863537 |             |             |
| FAM20B      | 0.003748696 | 0.116117197 | 0.001963049 |
| 0.007912417 | 0.220159314 | 0.070242093 | 0.003292013 |
| 0.008179491 | 0.089642615 | 0.048430673 | 0.124096306 |
| 0.000310067 | 0.140547386 | 0.153215904 | 0.003742063 |
| 0.220613102 | 0.001977744 | 0.012371911 | 0.009624124 |
| 0.018345526 | 0.201335266 | 0.11837617  | 0.057246143 |
| 0.186770348 | 0.024713138 | 0.061280874 | 0.210936455 |
| 0.162440748 | 0.083212509 | 0.188909471 | 0.017349008 |
| 0.110046063 | 0.255809034 | 0.211635544 | 0.000103154 |
| 0.130896916 | 0.021253525 | 0.099354535 | 0.077207905 |
| 0.082266137 | 0.081131378 | 0.048954765 | 0.057723644 |
| 0.071053614 | 0.000945113 | 0.027430108 | 0.210210788 |
| 0.070192031 | 0.054823942 | 0.003134237 | 0.143914498 |
| 0.072426628 | 0.073960668 | 0.095410601 | 0.000118555 |
| 0.261399403 | 0.164833751 | 0.242681551 | 0.136232938 |
| 0.041394807 | 0.022994177 | 0.059337839 | 0.047871333 |
| 0.169871881 | 0.188666619 | 0.082387443 | 0.065176659 |
| 0.151155791 | 0.143089731 | 0.194699521 | 0.013144587 |
| 0.077163979 | 0.000721122 | 0.026475323 | 0.006182992 |
| 0.109295382 | 0.057651491 | 0.175978232 | 0.20376662  |
| 0.102512154 | 0.139356849 | 0.054406808 | 0.118379498 |
| 0.08615453  | 0.274583163 | 0.124310683 | 0.129128181 |
| 0.145274682 | 0.006434937 | 0.156349551 | 0.152537075 |
| 0.002485084 | 0.08926974  | 0.140592309 | 0.01216477  |
| 0.123881821 | 0.133678782 | 0.085159541 | 0.191631503 |
| 0.257201031 | 0.20687727  | 0.124658028 | 0.076918081 |
| 0.186515055 | 0.004602793 | 0.101951423 | 0.308548815 |
| 0.10193455  | 0.005274793 | 0.073212676 | 0.226791818 |
| 0.143078932 | 0.163393252 | 0.140099665 | 0.135729108 |
| 0.204792183 | 0.156993376 | 0.124618269 | 0.135010195 |
| 0.024760049 | 0.153988396 | 0.024952274 | 0.002921698 |
| 0.002522269 | 0.011866872 | 0.082359346 | 0.093902932 |
| 0.190683569 | 0.086263767 | 0.020877843 | 0.086765432 |
| 0.235513698 | 0.104415785 | 0.153458973 | 0.14592427  |
| 0.001661847 | 0.162160902 | 0.183734627 | 0.034036502 |
| 0.149119783 | 0.0147644   | 0.262487385 | 0.120242444 |
| 0.100651403 | 0.217180684 | 0.010175523 | 0.114160711 |
| 0.035966976 | 0.163519815 | 0.12929362  | 0.029106279 |
| 0.13436976  | 0.112651137 | 0.18463076  | 0.285463057 |
| 0.118567416 | 0.054989815 | 0.018626914 | 0.123581181 |
| 0.173241126 | 0.025415344 | 0.200039521 | 0.207072917 |
| 0.133978047 | 0.216036392 | 0.202104094 | 0.190814694 |

|             |             |             |             |
|-------------|-------------|-------------|-------------|
| 0.136310346 | 0.005447346 | 0.020728341 | 0.155992605 |
| 0.128597585 | 0.116354712 | 0.027248181 | 0.168456474 |
| 0.234162437 | 0.069635445 | 0.195992775 | 0.048209954 |
| 0.163826416 | 0.162683581 | 0.181525199 | 0.125247391 |
| 0.062295346 | 0.067401314 | 0.258918446 | 0.095168035 |
| 0.001432625 | 0.006829678 | 0.002356716 | 0.104195069 |
| 0.030210535 | 0.047147247 | 0.049033597 | 0.186129088 |
| 0.050070656 | 0.051163339 | 0.210763869 | 0.266696388 |
| 0.002897484 | 0.140865597 | 0.019574614 | 0.018527903 |
| 0.002616155 | 0.017890275 | 0.014358471 | 0.01539657  |
| 0.112334766 | 0.028760861 | 0.188065737 | 0.182668126 |
| 0.126538843 | 0.023259569 | 0.14186517  | 0.161504369 |
| 0.155435327 | 0.21862868  | 0.054473398 | 0.000837188 |
| 0.041420721 | 0.108873406 | 0.210572468 | 0.205759338 |
| 0.02119627  | 0.03395447  | 0.162132286 | 0.257433718 |
| 0.032983691 | 0.014191339 | 0.11565704  | 0.099631891 |
| 0.01724506  | 0.107277568 | 0.185838882 | 0.108657905 |
| 0.0016082   | 0.06628015  | 0.179856971 | 0.055285269 |
| 0.086520446 | 0.106901771 | 0.116034697 | 0.181755619 |
| 0.091562572 | 0.17194266  | 0.200140013 | 0.264059894 |
| 0.039110941 | 0.02781894  | 0.192055793 | 0.053735031 |
| 0.200588883 | 0.012349611 | 0.124097768 | 0.061212568 |
| 0.053824921 | 0.111084969 | 0.279138553 | 0.119514053 |
| 0.01046275  | 0.152918278 | 0.120176605 | 0.180120281 |
| 0.105966558 | 0.183162191 | 0.205937585 | 0.159138661 |
| 0.110781091 | 0.164608254 | 1           | 0.161021656 |
| 0.181676577 | 0.032138292 | 0.004833798 | 0.210214071 |
| 0.097851729 | 0.231710661 | 0.032319341 | 0.177350529 |
| 0.130781237 | 0.103543323 | 0.029559754 | 0.218411623 |
| 0.121802111 | 0.036728709 | 0.162477642 | 0.189161874 |
| 0.043006464 | 0.181859215 | 0.123135757 | 0.216206316 |
| 0.02625066  | 0.117901524 | 0.078944656 | 0.209927681 |
| 0.022033491 | 0.005218162 | 0.003743982 | 0.054885368 |
| 0.184082728 | 0.165597439 | 0.182966774 | 0.164993285 |
| 0.016372437 | 0.125748069 | 0.057734365 | 0.073082892 |
| 0.105526139 | 0.17485012  | 0.262192555 | 0.222510805 |
| 0.054799354 | 0.001278653 | 0.011021254 | 0.132438385 |
| 0.001167402 | 0.168830648 | 0.066006087 | 0.00050335  |
| 0.001790394 | 0.116556377 | 0.008166864 | 0.026913286 |
| 0.230592802 | 0.02495377  | 0.030072229 | 0.04390721  |
| 0.149382869 | 0.009621336 | 0.000849782 | 0.17197888  |
| 0.153237587 | 0.14630731  | 0.146472784 | 0.115817457 |
| 0.168297957 | 0.171490383 | 0.197991755 | 0.052990955 |
| 0.005891709 | 0.004088348 | 0.116177722 | 0.09303799  |
| 0.000788115 | 0.166500373 | 0.16015285  | 0.021603458 |
| 0.224127965 | 0.093921268 | 0.001427443 | 0.246890992 |
| 0.000195086 | 0.181668915 | 0.035135522 | 0.059615818 |
| 0.221699065 | 0.000271404 | 0.023262853 | 0.063728678 |
| 0.091252656 | 0.079837402 | 0.154503607 | 0.154667366 |
| 0.107541712 | 0.011601107 | 0.11300315  | 0.214333042 |
| 0.004635257 | 0.011972177 | 0.062948059 | 0.003828044 |
| 0.0233412   | 0.126347603 | 0.106742235 | 0.001506475 |
| 0.06590422  | 0.001159583 | 0.081399042 | 0.16220452  |
| 0.106463737 | 0.197924185 | 0.158136522 | 0.236044807 |

|             |             |             |             |
|-------------|-------------|-------------|-------------|
| 0.146805813 | 0.161032593 | 0.175935434 | 0.11008726  |
| 0.081656928 | 0.000243343 | 0.001194343 | 0.198717139 |
| 0.173036225 | 0.002738348 | 0.025773813 | 0.026483808 |
| 0.010070078 | 0.010891698 | 0.004767533 | 0.13231699  |
| 0.140646424 | 0.153196064 | 0.131817538 | 0.111152682 |
| 0.057710787 | 0.075981415 | 0.070517323 | 0.007486386 |
| 0.197215744 | 0.002581671 | 0.00780314  | 0.002808489 |
| 0.214884277 | 0.00937209  | 0.091801187 | 0.152352559 |
| 0.150340504 | 0.216910222 | 0.072567497 | 0.046513909 |
| 0.193028146 | 0.006952609 | 0.058463033 | 0.008543076 |
| 0.125705706 | 0.182924278 | 0.099383269 | 0.065443758 |
| 0.175712174 | 0.127821092 | 0.001587972 | 0.171097648 |
| 0.000261336 | 0.004493954 | 0.052285788 | 0.071271734 |
| 0.035163822 | 0.168806126 | 0.059347882 | 0.044118239 |
| 0.060328281 | 0.000577015 | 0.234644216 | 0.206199574 |
| 0.10407761  | 0.130304542 | 0.238970851 | 0.059201628 |
| 0.121838471 | 0.048600291 | 0.046627393 | 0.023285359 |
| 0.036608711 | 0.061434805 | 0.025393953 | 0.000457071 |
| 0.121740194 | 0.179191956 | 0.00386056  | 0.021654245 |
| 0.169410552 | 0.190368082 | 0.002456567 | 0.000873531 |
| 0.053037735 | 0.106135025 | 0.208736647 | 0.142214664 |
| 0.134592153 | 0.173774238 | 0.087949354 | 0.029206486 |
| 0.004119561 | 0.144815842 | 0.247819721 | 0.026599331 |
| 0.167126292 | 0.003636618 | 0.130886597 | 0.310523114 |
| 0.014679104 | 0.028287989 | 0.001793809 | 0.009291918 |
| 0.278341205 | 0.034841243 | 0.067741408 | 0.013454167 |
| 0.103045568 | 0.106966201 | 0.002509069 | 0.041211546 |
| 0.096393306 | 0.099078315 | 0.025762318 | 0.047244021 |
| 0.089497891 | 0.022444767 | 0.215114163 | 0.13797586  |
| 0.015071574 | 0.011621012 | 0.01514801  | 0.172732534 |
| 0.172966444 | 0.140345798 | 0.001278966 | 0.117240879 |
| 0.188939307 | 0.190431364 | 0.129186997 | 0.172525694 |
| 0.007475247 | 0.188355456 | 0.199466476 | 0.160131567 |
| 0.039301997 | 0.068937048 | 0.069754856 | 0.004792309 |
| 0.081889085 | 0.123437733 | 0.113748736 | 0.037741279 |
| 0.154378779 | 0.010568708 | 0.002732237 | 0.17206414  |
| 0.120226942 | 0.003477438 | 0.064218721 | 0.21446317  |
| 0.000563558 | 0.231970943 | 0.203394366 | 0.041764782 |
| 0.158909315 | 0.186877312 | 0.123702633 | 0.031576703 |
| 0.003935443 | 0.23675836  | 0.149350452 | 0.100336044 |
| 0.116716996 | 0.089403815 | 0.016018667 | 0.007520379 |
| 0.089826092 | 0.005103457 | 0.017126671 | 0.027594626 |
| 0.080255261 | 0.109197901 | 0.050018008 | 0.044134353 |
| 0.06851604  | 0.00747895  | 0.116773442 | 0.039333698 |
| 0.084775835 | 0.063131305 | 0.125857859 | 0.035259176 |
| 0.078572178 | 0.178515418 | 0.124449449 | 0.000593335 |
| 0.255896906 | 0.166546679 | 0.160645053 | 6.86E-05    |
| 0.207613025 | 0.000173074 | 0.081444015 | 0.075125396 |
| 0.062669222 | 0.070697861 | 0.143622037 | 0.094534183 |
| 0.093528578 | 0.043483765 | 0.058222942 | 0.070099386 |
| 0.038591841 | 0.036352993 | 0.17311484  | 0.065358681 |
| 0.099601024 | 0.011950683 | 0.008080266 | 0.00778258  |
| 0.002947388 | 0.160092436 | 0.04648422  | 0.004540333 |
| 0.074413407 | 0.070116965 | 0.109870743 | 0.127260022 |

|             |             |             |             |
|-------------|-------------|-------------|-------------|
| 0.1604618   | 0.008969368 | 0.103135239 | 0.127812575 |
| 0.040046194 | 0.024480429 | 0.001947356 | 0.087035022 |
| 0.04819479  | 0.083716052 | 0.095535193 | 0.047319542 |
| 0.133945749 | 0.098850135 | 0.044929924 | 0.142017581 |
| 0.097849057 | 0.117462558 | 0.040619352 | 0.010208075 |
| 0.020903391 | 0.016200507 | 0.222324734 | 0.001461985 |
| 0.119594553 | 0.009780513 | 0.188575819 | 0.117732995 |
| 0.234848382 | 0.120540218 | 0.019568053 | 0.004925569 |
| 0.017626266 | 0.018825846 | 0.019403391 | 0.165700861 |
| 0.240251982 | 0.024089174 | 0.164176505 | 0.023765805 |
| 0.202751687 | 0.181695204 | 0.119817455 | 0.042585871 |
| 0.066822374 | 0.025126391 | 0.117840357 | 0.007392168 |
| 0.153756156 | 0.106121507 | 0.076435073 | 0.11372301  |
| 0.083945223 | 0.180127175 | 0.003653341 | 0.187790449 |
| 0.1406545   | 0.014890478 | 0.139929473 | 0.06544975  |
| 0.022581732 | 0.022100462 | 0.260897314 | 0.061119523 |
| 0.036065578 | 0.202225791 | 0.005657183 | 0.031700051 |
| 0.138469994 | 0.080623712 | 0.121135293 | 0.152799165 |
| 0.163700206 | 0.157883713 | 0.150635813 | 0.044156849 |
| 0.108432482 | 0.110848311 | 0.02510212  | 0.065855973 |
| 0.107693098 | 0.011128369 | 0.083229139 | 0.004905005 |
| 0.1839793   | 0.21513399  | 0.061971287 | 0.003567923 |
| 0.000238549 | 0.2120741   | 0.133795432 | 0.004261661 |
| 0.218223146 | 0.116436961 | 0.102677898 | 0.173867269 |
| 0.028655967 | 0.107616604 | 0.03127652  | 0.184470604 |
| 0.001284765 | 0.066750124 | 0.219723962 | 0.140847189 |
| 0.060197718 | 0.20967444  | 0.159721631 | 0.225863209 |
| 0.001666469 | 0.050314444 | 0.000324904 | 0.085477272 |
| 0.096884488 | 0.215724215 | 0.036374862 | 0.052129844 |
| 0.110434544 | 0.129742162 | 0.054496004 | 0.155247806 |
| 0.000483246 | 0.241246282 | 0.046432029 | 0.113921226 |
| 0.057437506 | 0.118031461 | 0.003522811 | 0.218613045 |
| 0.084376559 | 0.047751667 | 0.063987245 | 0.046932624 |
| 0.130010354 | 0.115881919 | 0.016364432 | 0.054266249 |
| 0.129787997 | 0.00431176  | 0.065468336 | 0.17111449  |
| 0.053213885 | 0.210688644 | 0.23545942  | 0.040751793 |
| 0.252778835 | 0.097524029 | 0.152292165 | 0.162737412 |
| 0.018578637 | 0.063571075 | 0.207393237 | 0.139450515 |
| 0.117288323 | 0.166800929 | 0.18152705  | 0.111757418 |
| 0.102265429 | 0.00544347  | 0.095760895 | 0.089970033 |
| 0.195916818 | 0.121005353 | 0.07084014  | 0.118318819 |
| 0.003109838 | 0.02208429  | 0.067069968 | 0.019741129 |
| 0.098204521 | 0.151684235 | 0.105421848 | 0.110030977 |
| 0.018547591 | 0.001684709 | 0.133198725 | 0.03066281  |
| 0.053199366 | 0.188286406 | 0.063868867 | 0.161599638 |
| 0.025182959 | 0.093862455 | 0.049571325 | 0.001543819 |
| 0.193836199 | 0.019920199 | 0.118635812 | 0.08558873  |
| 0.082547796 | 0.002134011 | 0.120524765 | 0.206311789 |
| 0.07784866  | 0.049493925 | 0.080849205 | 0.136850673 |
| 0.111926883 | 0.167483495 | 0.155021739 | 0.102581686 |
| 0.250642759 | 0.087005795 | 0.130697481 | 0.166832113 |
| 0.11706658  | 0.044498863 |             |             |
| FANCD2      | 0.104390639 | 0.416447507 | 0.082706144 |
| 0.229385678 | 0.338111136 | 0.412720272 | 0.080215233 |

|             |             |             |             |
|-------------|-------------|-------------|-------------|
| 0.157819003 | 0.317504704 | 0.290764197 | 0.405623851 |
| 0.032504646 | 0.096554003 | 0.467874828 | 0.069898544 |
| 0.409691856 | 0.053111342 | 0.141860548 | 0.081208544 |
| 0.23936645  | 0.319281064 | 0.365594129 | 0.380223742 |
| 0.30422678  | 0.200504772 | 0.352197737 | 0.368208252 |
| 0.509136305 | 0.295345568 | 0.437529882 | 0.240236992 |
| 0.432703796 | 0.356255168 | 0.389046184 | 0.029166191 |
| 0.40857466  | 0.01101714  | 0.448369486 | 0.323977525 |
| 0.20143626  | 0.352863062 | 0.337687162 | 0.310044423 |
| 0.386922772 | 0.06188632  | 0.216734466 | 0.396595412 |
| 0.329023654 | 0.285440553 | 0.085135174 | 0.42248949  |
| 0.362246461 | 0.358122793 | 0.372322818 | 0.004891267 |
| 0.328633253 | 0.103151489 | 0.247077    | 0.51158892  |
| 0.241195367 | 0.157490104 | 0.291882091 | 0.236601142 |
| 0.365506398 | 0.362124693 | 0.261878176 | 0.375833557 |
| 0.516867041 | 0.201732926 | 0.411819755 | 0.212624144 |
| 0.393668157 | 0.042639444 | 0.188692412 | 0.095361856 |
| 0.384026933 | 0.237512229 | 0.359206328 | 0.327607465 |
| 0.431966159 | 0.517677574 | 0.25706438  | 0.505017154 |
| 0.101280651 | 0.353562071 | 0.303116053 | 0.319272176 |
| 0.349410133 | 0.095782756 | 0.439048931 | 0.537345335 |
| 0.057299422 | 0.368214697 | 0.394677072 | 0.140543602 |
| 0.423088961 | 0.26034196  | 0.398822387 | 0.211782739 |
| 0.379031015 | 0.375091835 | 0.464842975 | 0.337379279 |
| 0.311354059 | 0.095325273 | 0.485253387 | 0.341675488 |
| 0.360511251 | 0.115804606 | 0.275669763 | 0.453102346 |
| 0.439346845 | 0.507274478 | 0.405168463 | 0.360569373 |
| 0.410419337 | 0.516867436 | 0.435631092 | 0.399236277 |
| 0.153407968 | 0.530740976 | 0.240099075 | 0.061987173 |
| 0.096349891 | 0.104658817 | 0.222314907 | 0.294833626 |
| 0.476048386 | 0.344599043 | 0.255672266 | 0.283729101 |
| 0.460003664 | 0.47780428  | 0.527064353 | 0.404623674 |
| 0.060300117 | 0.246212612 | 0.423161469 | 0.283509295 |
| 0.385374579 | 0.128904483 | 0.298408565 | 0.515606729 |
| 0.402268002 | 0.424565373 | 0.201228923 | 0.500647118 |
| 0.205516817 | 0.530285431 | 0.459411585 | 0.229335416 |
| 0.530702381 | 0.504861069 | 0.528363178 | 0.411926953 |
| 0.481925978 | 0.40397666  | 0.05661723  | 0.363033185 |
| 0.496684277 | 0.023701005 | 0.474185704 | 0.507343842 |
| 0.512227322 | 0.46549002  | 0.528104395 | 0.515959061 |
| 0.510441931 | 0.09437396  | 0.029112652 | 0.317603542 |
| 0.52336891  | 0.416488976 | 0.143477486 | 0.431276708 |
| 0.368842411 | 0.411857998 | 0.391829373 | 0.386390843 |
| 0.517646033 | 0.458052855 | 0.491359783 | 0.390421028 |
| 0.300014842 | 0.324745567 | 0.378892919 | 0.474927267 |
| 0.066524688 | 0.1601445   | 0.072729472 | 0.296474262 |
| 0.363813851 | 0.213689509 | 0.412718569 | 0.339119896 |
| 0.231423775 | 0.335126124 | 0.337546604 | 0.392982016 |
| 0.069026457 | 0.44342595  | 0.20320264  | 0.216147457 |
| 0.069394545 | 0.149987095 | 0.268979449 | 0.20492501  |
| 0.290564041 | 0.243409049 | 0.423377078 | 0.495227088 |
| 0.341322303 | 0.218332219 | 0.425138901 | 0.485951876 |
| 0.438273461 | 0.413395683 | 0.235767762 | 0.029555708 |
| 0.356082452 | 0.293727453 | 0.210806802 | 0.397564102 |

|             |             |             |             |
|-------------|-------------|-------------|-------------|
| 0.181042265 | 0.297501941 | 0.409849441 | 0.407304557 |
| 0.339162171 | 0.152921086 | 0.392621571 | 0.434409704 |
| 0.168140332 | 0.357778399 | 0.460179213 | 0.402671617 |
| 0.006761385 | 0.396044292 | 0.440302049 | 0.171588245 |
| 0.323209313 | 0.174443765 | 0.299107075 | 0.477772599 |
| 0.310015637 | 0.239247013 | 0.492609215 | 0.387787319 |
| 0.351459645 | 0.221473727 | 0.529785275 | 0.059338829 |
| 0.329108141 | 0.093643984 | 0.319335999 | 0.317311888 |
| 0.299570016 | 0.302181866 | 0.332453849 | 0.327929638 |
| 0.165110444 | 0.523786642 | 0.374231411 | 0.523587347 |
| 0.406995419 | 0.535652657 | 0.46232019  | 0.452848192 |
| 0.376735681 | 0.354003481 | 0.161021656 | 1           |
| 0.467184298 | 0.332631395 | 0.092408168 | 0.40988076  |
| 0.365698674 | 0.411514012 | 0.142352262 | 0.515668663 |
| 0.500924179 | 0.472244305 | 0.179624289 | 0.374645518 |
| 0.404003525 | 0.292652298 | 0.388569614 | 0.527193913 |
| 0.320588891 | 0.381798527 | 0.389198043 | 0.392726882 |
| 0.221935688 | 0.237513299 | 0.300002668 | 0.187682176 |
| 0.016163242 | 0.101669262 | 0.094669823 | 0.203930427 |
| 0.20628353  | 0.393007928 | 0.403181839 | 0.529595112 |
| 0.15432451  | 0.415713074 | 0.235459099 | 0.377844217 |
| 0.439420655 | 0.344365998 | 0.381203804 | 0.385714113 |
| 0.255116458 | 0.036423017 | 0.173899668 | 0.527445808 |
| 0.052597573 | 0.283770099 | 0.313427418 | 0.005855563 |
| 0.068578343 | 0.382934246 | 0.109099818 | 0.20451949  |
| 0.474738608 | 0.211402228 | 0.255286614 | 0.336938087 |
| 0.362301673 | 0.121320184 | 0.00668819  | 0.486108496 |
| 0.470467115 | 0.438368655 | 0.469997302 | 0.440124372 |
| 0.425041908 | 0.365935739 | 0.408820707 | 0.379553459 |
| 0.144398969 | 0.116166266 | 0.275575228 | 0.346396478 |
| 0.006465955 | 0.38264965  | 0.302184455 | 0.175922802 |
| 0.408019468 | 0.310050413 | 0.058113724 | 0.340825325 |
| 0.049977108 | 0.255778857 | 0.318759746 | 0.230520729 |
| 0.338061438 | 0.024010054 | 0.339721303 | 0.378343802 |
| 0.446420977 | 0.347276835 | 0.373223822 | 0.538260835 |
| 0.382405488 | 0.148888011 | 0.372227708 | 0.393496366 |
| 0.102123832 | 0.135171174 | 0.35015418  | 0.061322618 |
| 0.204456612 | 0.433513113 | 0.371232837 | 0.115104902 |
| 0.330664537 | 0.011268303 | 0.382165546 | 0.537042971 |
| 0.471121312 | 0.531757119 | 0.517958589 | 0.320603807 |
| 0.524172302 | 0.112077677 | 0.536159813 | 0.402952028 |
| 0.391112292 | 0.003142068 | 0.007850593 | 0.499693381 |
| 0.437607142 | 0.070469001 | 0.198711189 | 0.413372501 |
| 0.161797562 | 0.187285311 | 0.081556683 | 0.228776555 |
| 0.422030023 | 0.272887823 | 0.192688587 | 0.475406339 |
| 0.291264795 | 0.251948283 | 0.382032223 | 0.103819925 |
| 0.402190525 | 0.083417269 | 0.099994109 | 0.015646639 |
| 0.360656771 | 0.130701687 | 0.468560063 | 0.514360069 |
| 0.509922322 | 0.407478974 | 0.346145346 | 0.342617155 |
| 0.408338112 | 0.119256443 | 0.365442822 | 0.135076237 |
| 0.499467144 | 0.42932809  | 0.35367789  | 0.333208696 |
| 0.519353033 | 0.490789711 | 0.049054305 | 0.418072906 |
| 0.028601204 | 0.002110848 | 0.420385309 | 0.26521766  |
| 0.048274077 | 0.395552618 | 0.285412875 | 0.221715256 |



|             |             |             |             |
|-------------|-------------|-------------|-------------|
| 0.217432035 | 0.055643081 | 0.294310961 | 0.285060206 |
| 0.340900181 | 0.393762735 | 0.314833879 | 0.23613697  |
| 0.28702707  | 0.178752863 | 0.224875121 | 0.171782468 |
| 0.222585889 | 0.315200485 | 0.209790087 | 0.031870456 |
| 0.429422577 | 0.436311475 | 0.083839683 | 0.185466726 |
| 0.456334322 | 0.509651073 | 0.063840617 | 0.026221519 |
| 0.283460626 | 0.324266755 | 0.509435369 | 0.505393446 |
| 0.530844563 | 0.531532834 | 0.399485887 | 0.155731359 |
| 0.094160108 | 0.342384623 | 0.319905843 | 0.125715593 |
| 0.517573479 | 0.085721964 | 0.482847495 | 0.319985699 |
| 0.139305674 | 0.278657093 | 0.0573119   | 0.106797365 |
| 0.38916328  | 0.20456614  | 0.2196537   | 0.192126151 |
| 0.365004374 | 0.287252607 | 0.066070687 | 0.239348515 |
| 0.368637588 | 0.239391659 | 0.1977801   | 0.300144982 |
| 0.347047608 | 0.197663221 | 0.431658007 | 0.461629701 |
| 0.159360242 | 0.135250926 | 0.364162238 | 0.355352235 |
| 0.436603022 | 0.369402999 | 0.049629663 | 0.451558097 |
| 0.488113887 | 0.446561249 | 0.505201946 | 0.383799782 |
| 0.103837917 | 0.423429887 | 0.306492891 | 0.373629842 |
| 0.20680303  | 0.403614956 | 0.248670572 | 0.083798397 |
| 0.27636515  | 0.470620186 | 0.426598786 | 0.21634756  |
| 0.396119738 | 0.146082848 | 0.076071658 | 0.422142846 |
| 0.239148793 | 0.138251752 | 0.348128111 | 0.397648847 |
| 0.004167572 | 0.161498175 | 0.479583132 | 0.275420228 |
| 0.508874608 | 0.498099394 | 0.459511808 | 0.250073421 |
| 0.00274145  | 0.408658252 | 0.425399573 | 0.456529689 |
| 0.440843428 | 0.348746657 | 0.137098091 | 0.11169504  |
| 0.296219387 | 0.104414592 | 0.187406689 | 0.36402011  |
| 0.210730045 | 0.408924663 | 0.216292893 | 0.217477506 |
| 0.229798512 | 0.101277063 | 0.268187584 | 0.287432367 |
| 0.144348239 | 0.264440953 | 0.364288344 | 0.27134121  |
| 0.277975788 | 0.423062183 | 0.41180702  | 0.04194043  |
| 0.349255413 | 0.387471544 | 0.416248711 | 0.00657742  |
| 0.443155326 | 0.013677585 | 0.232799397 | 0.275842963 |
| 0.236844375 | 0.237161991 | 0.281136347 | 0.346347877 |
| 0.363778279 | 0.263496396 | 0.345973815 | 0.276709076 |
| 0.21195402  | 0.242620115 | 0.395979331 | 0.376333676 |
| 0.347309674 | 0.171015864 | 0.107994274 | 0.112769913 |
| 0.082906591 | 0.451502595 | 0.250342578 | 0.093532538 |
| 0.246306813 | 0.364551991 | 0.357807947 | 0.499223447 |
| 0.413140999 | 0.12420901  | 0.330992431 | 0.457313083 |
| 0.238531046 | 0.330920555 | 0.085465922 | 0.399068048 |
| 0.266360569 | 0.273980425 | 0.380819653 | 0.356291974 |
| 0.385666018 | 0.413520202 | 0.249089493 | 0.434570819 |
| 0.40269864  | 0.327720513 | 0.341666578 | 0.130315587 |
| 0.244063324 | 0.149539744 | 0.303482072 | 0.005404094 |
| 0.37044801  | 0.331114148 | 0.484549929 | 0.501166645 |
| 0.297229087 | 0.378058408 | 0.355247108 | 0.140530644 |
| 0.302332029 | 0.197797172 | 0.16855874  | 0.410916127 |
| 0.251615585 | 0.218991971 | 0.342946182 | 0.356802316 |
| 0.423318625 | 0.391271055 | 0.254748444 | 0.257128909 |
| 0.245438632 | 0.22779771  | 0.464510408 | 0.151050872 |
| 0.425155346 | 0.243290514 | 0.33497496  | 0.359274125 |
| 0.259704444 | 0.517534685 | 0.079710911 | 0.532308093 |

|             |             |             |             |
|-------------|-------------|-------------|-------------|
| 0.371244103 | 0.143440391 | 0.494497692 | 0.293114094 |
| 0.308939057 | 0.148060558 | 0.222443925 | 0.365144912 |
| 0.24661764  | 0.345687456 | 0.019754041 | 0.091718489 |
| 0.352679118 | 0.27477481  | 0.383099842 | 0.345315737 |
| 0.271223311 | 0.332595559 | 0.164690545 | 0.313225343 |
| 0.482500687 | 0.494195879 | 0.351072616 | 0.25991586  |
| 0.351790212 | 0.138395436 | 0.400835312 | 0.01405531  |
| 0.434730824 | 0.414940618 | 0.377972202 | 0.069669099 |
| 0.029406238 | 0.264233989 | 0.432597193 | 0.078478465 |
| 0.485873567 | 0.250387441 | 0.328216884 | 0.425086672 |
| 0.181658698 | 0.502368615 | 0.150184741 | 0.428811165 |
| 0.055794224 | 0.266516899 | 0.359982681 | 0.350012196 |
| 0.309691029 | 0.334688845 | 0.403965066 | 0.282446358 |
| 0.052195085 | 0.310132525 | 0.004484317 | 0.421260946 |
| 0.473336548 | 0.361593601 | 0.205993762 | 0.275176822 |
| 0.300390269 | 0.349984365 | 0.258438094 | 0.395680622 |
| 0.022059921 | 0.406758432 | 0.219003088 | 0.419548677 |
| 0.327351263 | 0.357170531 | 0.089587167 | 0.314815564 |
| 0.456125466 | 0.33781047  | 0.243875495 | 0.388211822 |
| 0.493314858 | 0.351019071 | 0.180228687 | 0.227320013 |
| 0.354209987 | 0.081371709 | 0.370816243 | 0.528631117 |
| 0.216353381 | 0.267406709 | 0.447850522 | 0.275263632 |
| 0.32012574  | 0.372129093 | 0.383091132 | 0.509363751 |
| 0.100799151 | 0.279917493 | 0.401981724 | 0.462843623 |
| 0.308610056 | 0.195778732 | 0.292464758 | 0.278694975 |
| 0.471307661 | 0.149085212 | 0.277550699 | 0.380067491 |
| 0.273311889 | 0.313975711 | 0.314043341 | 0.220623673 |
| 0.056721841 | 0.1775492   | 0.387108453 | 0.166835037 |
| 0.332869265 | 0.396797768 | 0.275116211 | 0.397505599 |
| 0.193059158 | 0.05467733  | 0.458780684 | 0.033188432 |
| 0.362563197 | 0.423462432 | 0.260349706 | 0.370780442 |
| 0.209600377 | 0.360106941 | 0.372062633 | 0.002735215 |
| 0.392555503 | 0.06404659  | 0.284158644 | 0.297295912 |
| 0.300632341 | 0.074960802 | 0.460386796 | 0.522612983 |
| 0.316953978 | 0.30422936  | 0.368989367 | 0.457115136 |
| 0.18890104  | 0.323474363 | 0.330393761 | 0.410178271 |
| 0.252480274 | 0.390209246 | 0.398588822 | 0.407567117 |
| 0.383682286 | 0.273841954 |             |             |

|             |             |             |             |
|-------------|-------------|-------------|-------------|
| FANCI       | 0.107599671 | 0.423472188 | 0.087104412 |
| 0.219157765 | 0.371783594 | 0.435819814 | 0.090949237 |
| 0.167698843 | 0.366927136 | 0.344015452 | 0.417145924 |
| 0.03239049  | 0.113678895 | 0.453810496 | 0.082113764 |
| 0.444934452 | 0.056976943 | 0.153499677 | 0.096371502 |
| 0.2964438   | 0.347126463 | 0.385106418 | 0.401458908 |
| 0.348422039 | 0.211702984 | 0.39392524  | 0.419741982 |
| 0.505654623 | 0.308868962 | 0.46694471  | 0.269795869 |
| 0.424915425 | 0.384966436 | 0.425929752 | 0.031952211 |
| 0.443871185 | 0.019246818 | 0.447896856 | 0.344287017 |
| 0.228569193 | 0.34720757  | 0.376317928 | 0.319453405 |
| 0.426809673 | 0.062502998 | 0.240046253 | 0.443257576 |
| 0.382655197 | 0.339383978 | 0.094048811 | 0.464908785 |
| 0.411687895 | 0.374748322 | 0.409089342 | 0.002955658 |
| 0.354120703 | 0.120872588 | 0.27787867  | 0.508396225 |
| 0.253643289 | 0.170084197 | 0.337221642 | 0.286509984 |

|             |             |             |             |
|-------------|-------------|-------------|-------------|
| 0.417667463 | 0.412122139 | 0.3015157   | 0.419731062 |
| 0.504377693 | 0.224773421 | 0.456890662 | 0.224076838 |
| 0.432263815 | 0.053273848 | 0.206054022 | 0.116887932 |
| 0.440726702 | 0.256726272 | 0.386525126 | 0.378084186 |
| 0.429738718 | 0.517706698 | 0.293569419 | 0.504630495 |
| 0.13481516  | 0.393484974 | 0.349978972 | 0.355475587 |
| 0.397770153 | 0.120884018 | 0.454974856 | 0.529841563 |
| 0.072565867 | 0.407952952 | 0.430822475 | 0.157207655 |
| 0.424440091 | 0.32384029  | 0.428820002 | 0.226581168 |
| 0.421610613 | 0.405415108 | 0.475063101 | 0.347323338 |
| 0.358849063 | 0.106411803 | 0.485364173 | 0.376624583 |
| 0.364332406 | 0.125070937 | 0.303418541 | 0.463325152 |
| 0.469203624 | 0.496090045 | 0.429044662 | 0.39722947  |
| 0.436396404 | 0.507894528 | 0.457390112 | 0.404613442 |
| 0.18153104  | 0.527918396 | 0.253487316 | 0.065169202 |
| 0.1035866   | 0.119571711 | 0.281399483 | 0.330544025 |
| 0.470934879 | 0.374142824 | 0.256855022 | 0.308788031 |
| 0.459446624 | 0.47674317  | 0.526295784 | 0.431430065 |
| 0.06391352  | 0.305892012 | 0.449964334 | 0.320727759 |
| 0.415307695 | 0.151565416 | 0.326462845 | 0.511840748 |
| 0.391345991 | 0.458461632 | 0.21826032  | 0.502208962 |
| 0.242320868 | 0.520875187 | 0.452823742 | 0.234955762 |
| 0.526226853 | 0.49959878  | 0.520112076 | 0.442012093 |
| 0.476389435 | 0.413990219 | 0.075614141 | 0.402478405 |
| 0.48752646  | 0.024515181 | 0.472751618 | 0.503619487 |
| 0.506915422 | 0.47208636  | 0.52622924  | 0.511648391 |
| 0.504975099 | 0.107231354 | 0.041698969 | 0.344879898 |
| 0.516183443 | 0.421657725 | 0.172622386 | 0.459534255 |
| 0.406822573 | 0.433903069 | 0.439743824 | 0.363566843 |
| 0.51325765  | 0.454914852 | 0.48829915  | 0.420407867 |
| 0.353840986 | 0.319734835 | 0.420508472 | 0.471033228 |
| 0.073072433 | 0.160471589 | 0.078679295 | 0.341075938 |
| 0.395174777 | 0.231083898 | 0.425155348 | 0.391928945 |
| 0.247548422 | 0.375771421 | 0.373974471 | 0.422166635 |
| 0.078686462 | 0.466748497 | 0.227850063 | 0.230048697 |
| 0.071534293 | 0.167178832 | 0.247714247 | 0.211693817 |
| 0.308269204 | 0.246379283 | 0.456721353 | 0.496101678 |
| 0.397272909 | 0.233423351 | 0.452277929 | 0.478330551 |
| 0.428155829 | 0.440640267 | 0.264398576 | 0.026856523 |
| 0.348400145 | 0.350367646 | 0.240711773 | 0.441979015 |
| 0.187502726 | 0.303072116 | 0.436072167 | 0.434457462 |
| 0.340629618 | 0.182839035 | 0.423828026 | 0.427446436 |
| 0.187965856 | 0.367782603 | 0.449631996 | 0.44112517  |
| 0.007671588 | 0.406616676 | 0.465299748 | 0.204717352 |
| 0.358482034 | 0.178463149 | 0.306194333 | 0.47111471  |
| 0.332713524 | 0.278468238 | 0.491818776 | 0.428150195 |
| 0.366760534 | 0.226994511 | 0.527693654 | 0.06512516  |
| 0.389331655 | 0.090375678 | 0.340836346 | 0.366135854 |
| 0.319707788 | 0.332778234 | 0.366799971 | 0.352834874 |
| 0.171641183 | 0.517806682 | 0.40712458  | 0.514338291 |
| 0.428367176 | 0.533372133 | 0.465216759 | 0.438989477 |
| 0.413460416 | 0.402177299 | 0.181676577 | 0.467184298 |
| 1           | 0.357082239 | 0.105060448 | 0.451234526 |
| 0.414395427 | 0.442663139 | 0.17011675  | 0.503688658 |

|             |             |             |             |
|-------------|-------------|-------------|-------------|
| 0.497072641 | 0.471710527 | 0.188371705 | 0.410381453 |
| 0.418771108 | 0.298763643 | 0.427978415 | 0.5270051   |
| 0.370655668 | 0.41074924  | 0.412650631 | 0.421687393 |
| 0.23645203  | 0.273914058 | 0.325088519 | 0.225135513 |
| 0.016081942 | 0.113320477 | 0.099856472 | 0.21746481  |
| 0.230791167 | 0.436465179 | 0.445043447 | 0.520089231 |
| 0.161837336 | 0.41072192  | 0.275857298 | 0.37255199  |
| 0.42704293  | 0.385907397 | 0.420374804 | 0.422237357 |
| 0.287930063 | 0.038576478 | 0.16958864  | 0.523605449 |
| 0.061130032 | 0.299736009 | 0.351839178 | 0.005661823 |
| 0.072753207 | 0.413691116 | 0.123659963 | 0.205122086 |
| 0.47300774  | 0.213469259 | 0.268043226 | 0.378199687 |
| 0.387788986 | 0.134215029 | 0.006892371 | 0.491598937 |
| 0.483284763 | 0.454009574 | 0.480972181 | 0.453182706 |
| 0.437761946 | 0.419085308 | 0.44887884  | 0.400894712 |
| 0.152429848 | 0.130230512 | 0.292422846 | 0.363398012 |
| 0.00700709  | 0.414806479 | 0.350863667 | 0.188718791 |
| 0.445031521 | 0.34746755  | 0.059348397 | 0.389135013 |
| 0.043777295 | 0.263650082 | 0.348994894 | 0.266326191 |
| 0.382616048 | 0.026478226 | 0.323499669 | 0.387698704 |
| 0.433553708 | 0.362233416 | 0.412503229 | 0.534598437 |
| 0.39240755  | 0.166708414 | 0.396546209 | 0.425565793 |
| 0.109237899 | 0.145897271 | 0.397790903 | 0.062848302 |
| 0.223784981 | 0.445384026 | 0.412609665 | 0.120164457 |
| 0.344358422 | 0.010711746 | 0.380970414 | 0.529937922 |
| 0.468498974 | 0.524631426 | 0.505906289 | 0.334367702 |
| 0.513794661 | 0.139524645 | 0.530906362 | 0.422483879 |
| 0.419970834 | 0.00241486  | 0.008759734 | 0.492671336 |
| 0.45697127  | 0.080976091 | 0.214072141 | 0.412236477 |
| 0.166375872 | 0.202207923 | 0.093365064 | 0.256886817 |
| 0.454892143 | 0.295883601 | 0.220303594 | 0.469474327 |
| 0.315723114 | 0.28420357  | 0.418718449 | 0.11855697  |
| 0.440209189 | 0.087083266 | 0.119008841 | 0.015141878 |
| 0.403604878 | 0.143532882 | 0.468802081 | 0.510645934 |
| 0.499385558 | 0.439887917 | 0.374488445 | 0.3609005   |
| 0.423763684 | 0.130415345 | 0.398543312 | 0.14867399  |
| 0.490116534 | 0.447614956 | 0.366483581 | 0.347124924 |
| 0.506939178 | 0.476096008 | 0.053874112 | 0.449047751 |
| 0.026496933 | 0.003071632 | 0.43224526  | 0.298004378 |
| 0.082762145 | 0.42798479  | 0.306375222 | 0.280582408 |
| 0.270981721 | 0.051239091 | 0.334161946 | 0.313163097 |
| 0.366042396 | 0.418035072 | 0.33800188  | 0.278789938 |
| 0.3336999   | 0.198445566 | 0.252761895 | 0.193790779 |
| 0.276065237 | 0.338489207 | 0.217320162 | 0.037106493 |
| 0.46747813  | 0.455443855 | 0.088755029 | 0.203019368 |
| 0.456389979 | 0.495549145 | 0.072717868 | 0.02415407  |
| 0.301683877 | 0.358383183 | 0.498692699 | 0.500190021 |
| 0.52547516  | 0.524950581 | 0.394627246 | 0.170835214 |
| 0.10046387  | 0.38415704  | 0.353364128 | 0.150429947 |
| 0.509297139 | 0.095632131 | 0.482078518 | 0.358647703 |
| 0.15778425  | 0.300077493 | 0.056742003 | 0.121794637 |
| 0.422122905 | 0.221819976 | 0.239322032 | 0.201072532 |
| 0.381726386 | 0.311558751 | 0.075513319 | 0.256894424 |
| 0.388640814 | 0.265454588 | 0.212096988 | 0.349334366 |

|             |             |             |             |
|-------------|-------------|-------------|-------------|
| 0.390439072 | 0.255076766 | 0.463188658 | 0.453889675 |
| 0.172313532 | 0.156755039 | 0.355701234 | 0.403963802 |
| 0.464420113 | 0.419687841 | 0.043255804 | 0.450703925 |
| 0.485606409 | 0.470023738 | 0.499937059 | 0.396409392 |
| 0.118990323 | 0.433460355 | 0.360975722 | 0.402540608 |
| 0.232181255 | 0.430264498 | 0.285488402 | 0.093105457 |
| 0.307445591 | 0.476594964 | 0.425697394 | 0.224758458 |
| 0.440933485 | 0.164072417 | 0.085881958 | 0.429079047 |
| 0.263928548 | 0.132912691 | 0.389434425 | 0.439473655 |
| 0.005085016 | 0.186324579 | 0.488459538 | 0.286312359 |
| 0.515042331 | 0.490603289 | 0.446967958 | 0.298128173 |
| 0.003542054 | 0.451650135 | 0.435364812 | 0.466561858 |
| 0.427376851 | 0.377448532 | 0.177479703 | 0.116623846 |
| 0.323519719 | 0.111920092 | 0.193756136 | 0.388748492 |
| 0.252718638 | 0.43495916  | 0.240113211 | 0.258257188 |
| 0.260106112 | 0.121526352 | 0.299931886 | 0.306591484 |
| 0.197400181 | 0.282395495 | 0.386109123 | 0.316761241 |
| 0.259359972 | 0.425544655 | 0.439426741 | 0.044712136 |
| 0.394207506 | 0.420490282 | 0.423856141 | 0.005350833 |
| 0.464326625 | 0.013614797 | 0.249618199 | 0.284717093 |
| 0.261037736 | 0.260754763 | 0.311496154 | 0.374435676 |
| 0.398931793 | 0.289809925 | 0.347682342 | 0.292912236 |
| 0.22398395  | 0.274528203 | 0.435282818 | 0.426168415 |
| 0.345725098 | 0.18047783  | 0.122510034 | 0.117241883 |
| 0.079886655 | 0.453537991 | 0.268624774 | 0.103826088 |
| 0.273393229 | 0.410898974 | 0.361302383 | 0.496581666 |
| 0.411673238 | 0.139293687 | 0.374666297 | 0.443830843 |
| 0.26578463  | 0.335075897 | 0.090278939 | 0.444279955 |
| 0.279420883 | 0.276914508 | 0.427100911 | 0.370369937 |
| 0.427883799 | 0.407106619 | 0.265948135 | 0.439674124 |
| 0.429321787 | 0.384480831 | 0.366985092 | 0.130527034 |
| 0.247484055 | 0.171776493 | 0.332014066 | 0.005250018 |
| 0.395645308 | 0.331018415 | 0.470165878 | 0.495869393 |
| 0.333712098 | 0.378395533 | 0.368647531 | 0.137041901 |
| 0.332485405 | 0.196596544 | 0.181078138 | 0.454225115 |
| 0.269845583 | 0.239141451 | 0.370383402 | 0.376434253 |
| 0.462457168 | 0.444046114 | 0.309202723 | 0.284956496 |
| 0.291046276 | 0.252986144 | 0.474349168 | 0.167040646 |
| 0.463012456 | 0.259808124 | 0.381142158 | 0.371725829 |
| 0.282313618 | 0.518584248 | 0.088715623 | 0.526631479 |
| 0.394487372 | 0.163455694 | 0.491694217 | 0.33634914  |
| 0.349290831 | 0.163343716 | 0.248950052 | 0.411134016 |
| 0.282206883 | 0.385275953 | 0.020036498 | 0.085941342 |
| 0.373938535 | 0.340703106 | 0.422883011 | 0.394897824 |
| 0.313763863 | 0.370081597 | 0.199617693 | 0.338042909 |
| 0.480989668 | 0.495611668 | 0.329313942 | 0.289342695 |
| 0.377131202 | 0.143545643 | 0.424364301 | 0.019669187 |
| 0.460952258 | 0.451247824 | 0.410855872 | 0.077402907 |
| 0.032843418 | 0.285096332 | 0.461898815 | 0.095982946 |
| 0.482718196 | 0.264000339 | 0.384246344 | 0.460703645 |
| 0.211454367 | 0.499326232 | 0.16524029  | 0.445804033 |
| 0.072310119 | 0.303616485 | 0.417048941 | 0.407170199 |
| 0.302545691 | 0.364218969 | 0.426147561 | 0.301231215 |
| 0.05440845  | 0.332072009 | 0.00433973  | 0.413606619 |

|             |             |             |             |
|-------------|-------------|-------------|-------------|
| 0.474987013 | 0.402863696 | 0.231576765 | 0.324070604 |
| 0.327629798 | 0.384925817 | 0.279032637 | 0.444081588 |
| 0.022376945 | 0.425748118 | 0.242297045 | 0.421771168 |
| 0.315013533 | 0.404636753 | 0.093438473 | 0.364269994 |
| 0.456593485 | 0.33552579  | 0.276684155 | 0.400080961 |
| 0.491136448 | 0.395424919 | 0.202732394 | 0.268391315 |
| 0.407278791 | 0.091862025 | 0.409672803 | 0.527495716 |
| 0.229671555 | 0.286573955 | 0.458876576 | 0.279984346 |
| 0.358261159 | 0.381885102 | 0.436765024 | 0.514553898 |
| 0.10773576  | 0.294219188 | 0.444790985 | 0.457703228 |
| 0.333449937 | 0.229877341 | 0.304955355 | 0.295239046 |
| 0.463170363 | 0.144262911 | 0.317424427 | 0.400904086 |
| 0.288552341 | 0.347528797 | 0.36655673  | 0.245499556 |
| 0.056781919 | 0.204241614 | 0.40370005  | 0.187367315 |
| 0.349515138 | 0.434251306 | 0.31656683  | 0.388775283 |
| 0.186716065 | 0.049147188 | 0.454787809 | 0.032302941 |
| 0.383847238 | 0.444774764 | 0.285618511 | 0.407106249 |
| 0.222353164 | 0.396501247 | 0.394177127 | 0.002087615 |
| 0.434070708 | 0.084115274 | 0.341295392 | 0.302373741 |
| 0.322553875 | 0.079184688 | 0.458493258 | 0.514840061 |
| 0.355246326 | 0.357604925 | 0.383861218 | 0.457536655 |
| 0.210413448 | 0.370370883 | 0.375150237 | 0.44449013  |
| 0.281644298 | 0.424292089 | 0.4383393   | 0.435274722 |
| 0.420142826 | 0.308273717 |             |             |
| FANCL       | 0.017471475 | 0.298463526 | 0.013103317 |
| 0.010285649 | 0.176791287 | 0.091052689 | 0.01828769  |
| 0.035133581 | 0.266895678 | 0.10699617  | 0.144377843 |
| 0.002341683 | 0.010482856 | 0.354100277 | 0.012908897 |
| 0.24586062  | 0.006740408 | 0.046318538 | 0.006395695 |
| 0.011121107 | 0.160466413 | 0.058839235 | 0.146715122 |
| 0.155315806 | 0.106411843 | 0.184970851 | 0.228022711 |
| 0.362730668 | 0.032510031 | 0.237848076 | 0.012924242 |
| 0.307251767 | 0.199322019 | 0.167101577 | 0.001852095 |
| 0.162463284 | 0.004636211 | 0.326709962 | 0.102305408 |
| 0.010146484 | 0.220218229 | 0.14073508  | 0.066254502 |
| 0.218487469 | 0.007447851 | 0.021965711 | 0.325894174 |
| 0.209082879 | 0.071787967 | 0.022506874 | 0.257024149 |
| 0.13402357  | 0.16577217  | 0.281092108 | 0.00077053  |
| 0.123830101 | 0.023403129 | 0.094566103 | 0.340120934 |
| 0.092571179 | 0.036520459 | 0.070456413 | 0.090670296 |
| 0.262816687 | 0.273106613 | 0.13601327  | 0.16869605  |
| 0.351267336 | 0.053941399 | 0.332365838 | 0.006540736 |
| 0.13994801  | 0.01097517  | 0.086015062 | 0.04864374  |
| 0.124699156 | 0.072059458 | 0.135871934 | 0.133958447 |
| 0.32769574  | 0.366514142 | 0.128978692 | 0.364894138 |
| 0.016455099 | 0.226465568 | 0.08916298  | 0.198812688 |
| 0.288796919 | 0.029105209 | 0.26015266  | 0.385300117 |
| 0.017082874 | 0.249217232 | 0.319910599 | 0.069006474 |
| 0.275423612 | 0.082952667 | 0.196773411 | 0.046241566 |
| 0.265477414 | 0.228545054 | 0.343140454 | 0.16151728  |
| 0.122273745 | 0.031197793 | 0.32355583  | 0.21823016  |
| 0.080315046 | 0.028837683 | 0.082273856 | 0.374911115 |
| 0.253408653 | 0.353634721 | 0.351044887 | 0.295927026 |
| 0.262415125 | 0.349252378 | 0.25068725  | 0.279872024 |

|             |             |             |             |
|-------------|-------------|-------------|-------------|
| 0.012941386 | 0.374626632 | 0.067053849 | 0.006002002 |
| 0.024827783 | 0.017771539 | 0.079469797 | 0.186415614 |
| 0.3300568   | 0.186860102 | 0.072640774 | 0.112294391 |
| 0.36597174  | 0.319342279 | 0.393356903 | 0.333740246 |
| 0.009867613 | 0.090293083 | 0.248395713 | 0.050305335 |
| 0.260153319 | 0.055491913 | 0.135257038 | 0.35035117  |
| 0.245065315 | 0.321982116 | 0.051797853 | 0.339852466 |
| 0.086411375 | 0.354985736 | 0.322684288 | 0.064648634 |
| 0.363226237 | 0.326860229 | 0.375090526 | 0.270080707 |
| 0.302793435 | 0.123504144 | 0.006453327 | 0.301231653 |
| 0.329208921 | 0.000831965 | 0.381491279 | 0.396516886 |
| 0.361016032 | 0.371670123 | 0.400382185 | 0.365323911 |
| 0.362733464 | 0.034805743 | 0.005231248 | 0.190875168 |
| 0.367637999 | 0.267351693 | 0.029980597 | 0.251042669 |
| 0.231010872 | 0.12261447  | 0.298759046 | 0.017621355 |
| 0.364196054 | 0.326292756 | 0.373306121 | 0.318667081 |
| 0.194595536 | 0.20216937  | 0.240316404 | 0.301357264 |
| 0.006043304 | 0.031935467 | 0.022629617 | 0.205225412 |
| 0.068995274 | 0.078550057 | 0.142656707 | 0.238472343 |
| 0.092480685 | 0.116559314 | 0.131705211 | 0.271543932 |
| 0.032337904 | 0.213818462 | 0.059015871 | 0.097714565 |
| 0.008726312 | 0.082148158 | 0.022833371 | 0.017696591 |
| 0.110521603 | 0.156024932 | 0.302809452 | 0.3734102   |
| 0.166086649 | 0.093379219 | 0.275678045 | 0.341795976 |
| 0.301509429 | 0.213745143 | 0.133099474 | 0.000311737 |
| 0.065253209 | 0.129459295 | 0.081352502 | 0.225536224 |
| 0.104851995 | 0.068007592 | 0.290460654 | 0.266883063 |
| 0.115564625 | 0.048351527 | 0.14537426  | 0.271682249 |
| 0.090571719 | 0.080622758 | 0.346738034 | 0.271872893 |
| 8.46E-05    | 0.164511429 | 0.3102681   | 0.02554507  |
| 0.222390902 | 0.008126104 | 0.041213407 | 0.369543179 |
| 0.087419374 | 0.092690293 | 0.354985187 | 0.257586713 |
| 0.021916203 | 0.152041026 | 0.397935136 | 0.011083634 |
| 0.2020576   | 0.003907253 | 0.167348951 | 0.166227075 |
| 0.119515839 | 0.208223597 | 0.171859177 | 0.095861984 |
| 0.056886455 | 0.372448313 | 0.254573573 | 0.363821237 |
| 0.161288443 | 0.403434366 | 0.351220514 | 0.297290146 |
| 0.179567042 | 0.225369146 | 0.032138292 | 0.332631395 |
| 0.357082239 | 1           | 0.035605005 | 0.353752989 |
| 0.21559804  | 0.327750626 | 0.01261662  | 0.373156924 |
| 0.330982473 | 0.329534295 | 0.035483393 | 0.274945728 |
| 0.250637736 | 0.087217414 | 0.295831998 | 0.388298614 |
| 0.114388986 | 0.222624691 | 0.143714643 | 0.300028005 |
| 0.084731035 | 0.072457843 | 0.220180241 | 0.053826657 |
| 0.000846357 | 0.034764425 | 0.026875672 | 0.054447778 |
| 0.061195138 | 0.267053386 | 0.26837424  | 0.391954402 |
| 0.040691433 | 0.259272878 | 0.157777603 | 0.101096181 |
| 0.336891013 | 0.179538346 | 0.188976272 | 0.22236801  |
| 0.143457434 | 0.000581001 | 0.006412777 | 0.374367037 |
| 0.020398441 | 0.073023762 | 0.140407568 | 3.27E-05    |
| 0.013067187 | 0.317696798 | 0.061248485 | 0.116518959 |
| 0.347984223 | 0.121053993 | 0.127109484 | 0.153239296 |
| 0.204521273 | 0.031993764 | 2.47E-05    | 0.380072643 |
| 0.36701253  | 0.352210214 | 0.372081861 | 0.320147456 |

|             |             |             |             |
|-------------|-------------|-------------|-------------|
| 0.374566491 | 0.263975774 | 0.339722508 | 0.129461571 |
| 0.028028506 | 0.032192255 | 0.084131109 | 0.153114594 |
| 0.000269666 | 0.234434278 | 0.143337643 | 0.069217608 |
| 0.323399356 | 0.211063169 | 0.006109299 | 0.206276441 |
| 0.001055184 | 0.076192922 | 0.073784928 | 0.088580823 |
| 0.24653829  | 0.002012979 | 0.010350087 | 0.084870078 |
| 0.272658647 | 0.213827032 | 0.15433978  | 0.378143858 |
| 0.14765038  | 0.081429391 | 0.143649725 | 0.234780256 |
| 0.019309357 | 0.050250599 | 0.117077146 | 0.003610897 |
| 0.009107988 | 0.318541001 | 0.143874069 | 0.00819063  |
| 0.135568963 | 0.000386514 | 0.234172423 | 0.37273353  |
| 0.317317451 | 0.402224701 | 0.343465466 | 0.10803891  |
| 0.356823595 | 0.02453858  | 0.381396599 | 0.285015905 |
| 0.168643715 | 7.84E-05    | 0.000317724 | 0.375761245 |
| 0.2489112   | 0.029489712 | 0.071575396 | 0.03835486  |
| 0.01424877  | 0.043965118 | 0.015103399 | 0.059030119 |
| 0.201118414 | 0.106601235 | 0.048773474 | 0.347876895 |
| 0.107804994 | 0.102817925 | 0.151978497 | 0.045407506 |
| 0.202711205 | 0.007961206 | 0.049222311 | 0.000160734 |
| 0.242967285 | 0.073570829 | 0.318424641 | 0.356304168 |
| 0.353364775 | 0.271065626 | 0.132788054 | 0.02218275  |
| 0.324333132 | 0.044708219 | 0.056075476 | 0.046211145 |
| 0.342898707 | 0.279889398 | 0.195837936 | 0.189408555 |
| 0.379244673 | 0.335822161 | 0.007751706 | 0.323409685 |
| 0.000238013 | 0.000201601 | 0.151076195 | 0.164669983 |
| 0.007025341 | 0.205603206 | 0.156042123 | 0.08903885  |
| 0.059616957 | 0.001399689 | 0.124346879 | 0.146421724 |
| 0.181718299 | 0.196107662 | 0.152320209 | 0.162816065 |
| 0.107008009 | 0.020123454 | 0.051929024 | 0.047149891 |
| 0.022767955 | 0.21480375  | 0.1160224   | 0.004740038 |
| 0.207601798 | 0.22535493  | 0.015984027 | 0.075469989 |
| 0.303238657 | 0.366549089 | 0.004438972 | 0.000453599 |
| 0.170121748 | 0.161484725 | 0.374377384 | 0.351696184 |
| 0.358804179 | 0.381560759 | 0.259577922 | 0.034646746 |
| 0.014376634 | 0.176393291 | 0.180123335 | 0.016625828 |
| 0.358951022 | 0.036665953 | 0.315517669 | 0.175149625 |
| 0.060370613 | 0.063890751 | 0.002673333 | 0.034239746 |
| 0.213440998 | 0.079958838 | 0.069463953 | 0.077265329 |
| 0.127408582 | 0.064222645 | 0.015218735 | 0.084832306 |
| 0.262064337 | 0.04539821  | 0.084086211 | 0.085421483 |
| 0.222936191 | 0.038957239 | 0.34799468  | 0.312142848 |
| 0.054854644 | 0.056980105 | 0.056356996 | 0.268761291 |
| 0.338621978 | 0.235606845 | 0.000533596 | 0.334547401 |
| 0.346482704 | 0.272015674 | 0.328964215 | 0.304520192 |
| 0.045220139 | 0.180615116 | 0.170438559 | 0.247147978 |
| 0.097278737 | 0.103924851 | 0.11000917  | 0.027123641 |
| 0.193589889 | 0.3280136   | 0.33780015  | 0.047834359 |
| 0.198990067 | 0.064706961 | 0.031761047 | 0.307504361 |
| 0.066254017 | 0.009178556 | 0.136328742 | 0.338259165 |
| 0.00016134  | 0.04650006  | 0.390176999 | 0.043152333 |
| 0.368853628 | 0.382583846 | 0.29174097  | 0.054668094 |
| 0.001787979 | 0.325188794 | 0.199677486 | 0.157229724 |
| 0.329338363 | 0.18942737  | 0.009735661 | 0.013345036 |
| 0.170749144 | 0.037065857 | 0.027699253 | 0.014914466 |



|             |             |             |             |
|-------------|-------------|-------------|-------------|
| 0.015950878 | 0.233620606 | 0.107711391 | 0.115913554 |
| 0.078732652 | 0.062954994 | 0.035247917 | 0.072119693 |
| 0.025879893 | 0.134102402 | 0.230434257 | 0.079137035 |
| 0.042128355 | 0.350897759 | 0.333545413 | 0.004046783 |
| 0.178478471 | 0.315415539 | 0.295651907 | 0.000334276 |
| 0.298416845 | 0.000554101 | 0.074294059 | 0.073787323 |
| 0.05976832  | 0.086965478 | 0.145939898 | 0.105580365 |
| 0.24959351  | 0.086137722 | 0.081134237 | 0.107714304 |
| 0.03561261  | 0.087298547 | 0.237380763 | 0.151740614 |
| 0.077094795 | 0.028987767 | 0.057341449 | 0.058920798 |
| 0.003036354 | 0.314869707 | 0.135553193 | 0.032105597 |
| 0.104753204 | 0.177994069 | 0.228154712 | 0.353840248 |
| 0.27641591  | 0.060097446 | 0.143158435 | 0.305441671 |
| 0.023332754 | 0.015700699 | 0.017881809 | 0.179493626 |
| 0.09076406  | 0.041255408 | 0.172805824 | 0.175285499 |
| 0.319055849 | 0.259570757 | 0.129321529 | 0.289675486 |
| 0.153478406 | 0.215696719 | 0.121152143 | 0.011587669 |
| 0.063608662 | 0.07307026  | 0.139633714 | 5.51E-06    |
| 0.179845204 | 0.028807872 | 0.354826176 | 0.333118178 |
| 0.113102895 | 0.238854453 | 0.0281966   | 0.02015114  |
| 0.054015506 | 0.121340913 | 0.074234427 | 0.325341625 |
| 0.081617404 | 0.037406826 | 0.176197203 | 0.055488838 |
| 0.325508998 | 0.323322153 | 0.082088798 | 0.09698167  |
| 0.12253505  | 0.095319744 | 0.353402246 | 0.036928034 |
| 0.261104103 | 0.053788598 | 0.211531391 | 0.132155995 |
| 0.101138456 | 0.388762676 | 0.020858359 | 0.401015811 |
| 0.177949058 | 0.069099368 | 0.332173041 | 0.10224886  |
| 0.052324989 | 0.009593714 | 0.080051326 | 0.128638627 |
| 0.061684514 | 0.11126638  | 0.005275544 | 0.010691895 |
| 0.193716538 | 0.128609736 | 0.333716628 | 0.259936535 |
| 0.098840258 | 0.246866272 | 0.018631899 | 0.154925743 |
| 0.334247205 | 0.334057719 | 0.043471479 | 0.163633012 |
| 0.229484615 | 0.021611911 | 0.178605345 | 0.002830237 |
| 0.298007158 | 0.270974473 | 0.096391811 | 0.010952639 |
| 0.001319344 | 0.11089271  | 0.301231867 | 0.03989636  |
| 0.391129207 | 0.034600724 | 0.242968317 | 0.262550057 |
| 0.100807734 | 0.342411203 | 0.028027207 | 0.255084665 |
| 0.0099299   | 0.138430012 | 0.180427602 | 0.199532356 |
| 0.048586976 | 0.155651192 | 0.258992101 | 0.095053193 |
| 0.005987107 | 0.04037617  | 0.001528979 | 0.260435101 |
| 0.336809745 | 0.21013124  | 0.115994225 | 0.089036144 |
| 0.152149368 | 0.252510124 | 0.035661943 | 0.197439004 |
| 0.000223829 | 0.231655555 | 0.082659934 | 0.247019663 |
| 0.05213203  | 0.252954701 | 0.004230071 | 0.197351771 |
| 0.29795072  | 0.053794466 | 0.164565291 | 0.08994721  |
| 0.338655148 | 0.25485165  | 0.083583881 | 0.032066826 |
| 0.282882503 | 0.030743403 | 0.115899876 | 0.389928387 |
| 0.052850331 | 0.099691723 | 0.342879324 | 0.070254199 |
| 0.156196915 | 0.251756801 | 0.271539507 | 0.382330769 |
| 0.015423687 | 0.132850749 | 0.289352729 | 0.378599558 |
| 0.185062184 | 0.071256203 | 0.092381433 | 0.098487414 |
| 0.304590087 | 0.005148468 | 0.086335089 | 0.227408434 |
| 0.102204228 | 0.156133116 | 0.208405413 | 0.074452758 |
| 0.001036807 | 0.043123484 | 0.062456893 | 0.064623946 |

|             |             |             |             |
|-------------|-------------|-------------|-------------|
| 0.173008098 | 0.193595539 | 0.081426961 | 0.262343849 |
| 0.011956361 | 0.000688937 | 0.318225938 | 0.003462657 |
| 0.11468785  | 0.210816865 | 0.094228766 | 0.184596795 |
| 0.095343668 | 0.218177198 | 0.185868984 | 1.53E-06    |
| 0.292273764 | 0.003529809 | 0.092638715 | 0.058929577 |
| 0.024818253 | 0.014033924 | 0.286294745 | 0.384320747 |
| 0.15458662  | 0.030095523 | 0.06328199  | 0.310481451 |
| 0.010972405 | 0.120575096 | 0.129917543 | 0.268041931 |
| 0.086812652 | 0.193693608 | 0.179461257 | 0.138732015 |
| 0.215785909 | 0.076910109 |             |             |
| FAR1        | 0.26971172  | 0.152921542 | 0.281170303 |
| 0.124159804 | 0.041489894 | 0.069969942 | 0.257231289 |
| 0.200352524 | 0.143071114 | 0.042906561 | 0.066245236 |
| 0.237261755 | 0.004032267 | 0.134360399 | 0.243053315 |
| 0.042639516 | 0.199205838 | 0.221810373 | 0.038979005 |
| 0.112827542 | 0.043046432 | 0.030106205 | 0.097342144 |
| 0.04421107  | 0.322221978 | 0.119832806 | 0.034641234 |
| 0.138641779 | 0.014580238 | 0.056265112 | 0.024495536 |
| 0.205519685 | 0.037094017 | 0.028201848 | 0.259429675 |
| 0.064730631 | 0.003686788 | 0.249601488 | 0.070310915 |
| 0.011653454 | 0.226190436 | 0.062605682 | 0.097316357 |
| 0.05933794  | 0.276658996 | 0.021429879 | 0.049815415 |
| 0.105971333 | 0.097806973 | 0.294359599 | 0.077756893 |
| 0.054857173 | 0.132550639 | 0.092656881 | 0.010975337 |
| 0.017416375 | 0.000849895 | 0.008833176 | 0.183727486 |
| 0.1768272   | 0.174584034 | 0.018367805 | 0.127425938 |
| 0.055027829 | 0.066568769 | 0.130212542 | 0.048232178 |
| 0.159921031 | 0.009717773 | 0.060713658 | 0.082313357 |
| 0.083168912 | 0.278149367 | 0.227028832 | 0.264357662 |
| 0.045660253 | 0.128056914 | 0.05457031  | 0.024473493 |
| 0.152759011 | 0.2239155   | 0.155503091 | 0.210227087 |
| 0.012242657 | 0.030871756 | 0.038158525 | 0.107489678 |
| 0.092791111 | 0.212388808 | 0.081416395 | 0.187270571 |
| 0.259969294 | 0.062841938 | 0.084090976 | 0.260453987 |
| 0.138095645 | 0.023517438 | 0.053617455 | 0.012411765 |
| 0.043778806 | 0.038841952 | 0.219345894 | 0.131658998 |
| 0.046945974 | 0.297554816 | 0.246055559 | 0.02606201  |
| 0.054275242 | 0.278118437 | 0.038474959 | 0.080264388 |
| 0.065219778 | 0.135363921 | 0.109946412 | 0.113556163 |
| 0.035137118 | 0.152604084 | 0.086992296 | 0.147052905 |
| 0.012537559 | 0.172828768 | 0.187067978 | 0.203063187 |
| 0.276137521 | 0.175094657 | 0.042779931 | 0.171012463 |
| 0.107544406 | 0.111860508 | 0.171475211 | 0.08756096  |
| 0.094683845 | 0.218789862 | 0.171166503 | 0.10929576  |
| 0.276293006 | 0.017372058 | 0.037174594 | 0.126094331 |
| 0.080890099 | 0.235782637 | 0.020711138 | 0.234390307 |
| 0.173433162 | 0.082656959 | 0.215203199 | 0.263556869 |
| 0.147382512 | 0.176586122 | 0.127591083 | 0.165430341 |
| 0.209327778 | 0.227891879 | 0.147609641 | 0.042962584 |
| 0.206841093 | 0.101711743 | 0.031612104 | 0.132278976 |
| 0.160907172 | 0.002862062 | 0.101403157 | 0.110564462 |
| 0.174711364 | 0.079388809 | 0.143392107 | 0.130040306 |
| 0.174426886 | 0.280482238 | 0.00262241  | 0.071438043 |
| 0.198442471 | 0.142998886 | 0.11116826  | 0.037192286 |

|             |             |             |             |
|-------------|-------------|-------------|-------------|
| 0.044238859 | 0.08875135  | 0.082871239 | 0.026925055 |
| 0.195367033 | 0.11531359  | 0.11705626  | 0.104832009 |
| 0.102261171 | 0.233025205 | 0.0272007   | 0.243652177 |
| 0.227667091 | 0.241405486 | 0.296206938 | 0.133113857 |
| 0.056460661 | 0.144644576 | 0.08753291  | 0.052930823 |
| 0.154551123 | 0.108167099 | 0.020336415 | 0.044252321 |
| 0.333215208 | 0.051580698 | 0.206950524 | 0.209021091 |
| 0.19698281  | 0.327925709 | 0.102586369 | 0.136991071 |
| 0.074876339 | 0.39096377  | 0.060264003 | 0.129038114 |
| 0.051201777 | 0.239413534 | 0.08001763  | 0.158215614 |
| 0.164971448 | 0.0347071   | 0.193558952 | 0.062157813 |
| 0.035898975 | 0.022832164 | 0.007733442 | 0.03788736  |
| 0.370523278 | 0.08040494  | 0.053663674 | 0.056966316 |
| 0.14576771  | 0.219907093 | 0.039055109 | 0.242080095 |
| 0.270179201 | 0.050213698 | 0.104461951 | 0.060076631 |
| 0.154746641 | 0.09819247  | 0.092274038 | 0.040113796 |
| 0.116883823 | 0.011010168 | 0.01502111  | 0.112360328 |
| 0.019609932 | 0.028326515 | 0.116308457 | 0.058507414 |
| 0.050856619 | 0.338672533 | 0.150227807 | 0.002196913 |
| 0.041498442 | 0.036889582 | 0.095594734 | 0.058770891 |
| 0.147158106 | 0.118293055 | 0.033601954 | 0.041167553 |
| 0.247408191 | 0.176346913 | 0.13636645  | 0.138679119 |
| 0.030659168 | 0.157729405 | 0.09010386  | 0.126711601 |
| 0.098739149 | 0.032102312 | 0.004833798 | 0.092408168 |
| 0.105060448 | 0.035605005 | 1           | 0.072408373 |
| 0.045112322 | 0.048588802 | 0.042787787 | 0.141965357 |
| 0.221694802 | 0.202458496 | 0.126075143 | 0.075572208 |
| 0.125958975 | 0.157036184 | 0.109867693 | 0.164830647 |
| 0.039141004 | 0.038209447 | 0.03550543  | 0.093440902 |
| 0.206566499 | 0.033871746 | 0.201891591 | 0.007768121 |
| 0.000290086 | 0.275144484 | 0.284680671 | 0.102649312 |
| 0.015210636 | 0.047336004 | 0.06174668  | 0.15389445  |
| 0.203879455 | 0.161424763 | 0.169344205 | 0.049805269 |
| 0.17117506  | 0.040549951 | 0.032960805 | 0.048617655 |
| 0.181595111 | 0.096359001 | 0.123947769 | 0.230520794 |
| 0.292163454 | 0.017977314 | 0.108792117 | 0.015902456 |
| 0.279034324 | 0.107535506 | 0.342546879 | 0.346830886 |
| 0.110428082 | 0.335786565 | 0.193585168 | 0.05127349  |
| 0.086975683 | 0.252225568 | 0.021617925 | 0.13784185  |
| 0.168505517 | 0.165872674 | 0.170232678 | 0.209759724 |
| 0.126082626 | 0.090110208 | 0.080211316 | 0.10659216  |
| 0.214799166 | 0.264955211 | 0.016829168 | 0.070088064 |
| 0.023411737 | 0.09763272  | 0.058565269 | 0.229052936 |
| 0.064171146 | 0.112594469 | 0.260234317 | 0.044202052 |
| 0.186182583 | 0.007552954 | 0.099749303 | 0.105444521 |
| 0.074111105 | 0.255274178 | 0.035110695 | 0.026147079 |
| 0.204825544 | 0.189181348 | 0.024553525 | 0.177130931 |
| 0.076954911 | 0.268511736 | 0.05886841  | 0.073616587 |
| 0.240360254 | 0.017607415 | 0.085646966 | 0.006232762 |
| 0.04234888  | 0.197746342 | 0.042027278 | 0.233134128 |
| 0.125032398 | 0.180844825 | 0.186679455 | 0.176451052 |
| 0.19010282  | 0.131428652 | 0.153285211 | 0.019592155 |
| 0.166635814 | 0.001751147 | 0.150002244 | 0.140647461 |
| 0.039149843 | 0.016143505 | 0.043015664 | 0.106155888 |

|             |             |             |             |
|-------------|-------------|-------------|-------------|
| 0.04181482  | 0.319162143 | 0.207558776 | 0.056706679 |
| 0.161678932 | 0.236528351 | 0.23993198  | 0.025844707 |
| 0.06410416  | 0.056280715 | 0.024753897 | 0.196299806 |
| 0.112610507 | 0.120608682 | 0.068787335 | 0.28429863  |
| 0.048148261 | 0.22694588  | 0.274409366 | 0.015220266 |
| 0.068691122 | 0.318103289 | 0.268991455 | 0.164531002 |
| 0.177152663 | 0.055545103 | 0.029752467 | 0.052666004 |
| 0.11307424  | 0.281127328 | 0.030019631 | 0.267212272 |
| 0.166671099 | 0.049818784 | 0.13335561  | 0.191745781 |
| 0.152190928 | 0.175482387 | 0.262904012 | 0.086751014 |
| 0.121033237 | 0.004228451 | 0.086963912 | 0.144787361 |
| 0.020017707 | 0.038054332 | 0.184941762 | 0.097669143 |
| 0.092423573 | 0.227007348 | 0.016731962 | 0.01723663  |
| 0.092775615 | 0.05811537  | 0.030308828 | 0.175229618 |
| 0.050401537 | 0.030202171 | 0.110962542 | 0.153797981 |
| 0.054164242 | 0.212168349 | 0.314376414 | 0.255221779 |
| 0.048627871 | 0.038149385 | 0.265602895 | 0.226742252 |
| 0.108598071 | 0.114919137 | 0.19834662  | 0.082970687 |
| 0.20297918  | 0.059610436 | 0.118127432 | 0.157340974 |
| 0.211270546 | 0.172920372 | 0.24264331  | 0.086393174 |
| 0.257054995 | 0.072751383 | 0.032009349 | 0.068136611 |
| 0.152367006 | 0.285294216 | 0.180059019 | 0.019951625 |
| 0.245302929 | 0.137463125 | 0.176917335 | 0.245286045 |
| 0.032170737 | 0.18852823  | 0.099418753 | 0.236699226 |
| 0.060906433 | 0.017606828 | 0.264756496 | 0.16555117  |
| 0.130380113 | 0.009123263 | 0.200731287 | 0.109792186 |
| 0.145716285 | 0.04306725  | 0.057765015 | 0.192532842 |
| 0.253825713 | 0.242403385 | 0.117938278 | 0.087757614 |
| 0.090010116 | 0.044974852 | 0.12301696  | 0.149336835 |
| 0.135689562 | 0.051089181 | 0.18863536  | 0.122057195 |
| 0.278693222 | 0.037889137 | 0.026005525 | 0.05159496  |
| 0.172746765 | 0.078086886 | 0.113523175 | 0.281261218 |
| 0.205088275 | 0.239316284 | 0.142004504 | 0.133442196 |
| 0.054104249 | 0.251776075 | 0.285890487 | 0.116872848 |
| 0.015439667 | 0.219800854 | 0.059830079 | 0.083820611 |
| 0.007203198 | 0.006376505 | 0.12948395  | 0.106599161 |
| 0.193672577 | 0.119932768 | 0.184753046 | 0.122446485 |
| 0.000102475 | 0.044838765 | 0.062283621 | 0.046424299 |
| 0.138073758 | 0.150210569 | 0.098620754 | 0.164938822 |
| 0.167819974 | 0.283640798 | 0.122988291 | 0.065746375 |
| 0.011276771 | 0.079619147 | 0.177964429 | 0.162624788 |
| 0.091345526 | 0.263494065 | 0.01745413  | 0.131650802 |
| 0.016902587 | 0.17073548  | 0.131604256 | 0.053400208 |
| 0.010009943 | 0.123969073 | 0.10828502  | 0.272708584 |
| 0.032795653 | 0.119083168 | 0.137975811 | 0.023740429 |
| 0.058695411 | 0.165626097 | 0.086895877 | 0.082254671 |
| 0.098751003 | 0.093163069 | 0.076038654 | 0.048756418 |
| 0.094671881 | 0.133575567 | 0.088734283 | 0.129947224 |
| 0.100709206 | 0.149371122 | 0.053232763 | 0.089940913 |
| 0.046708098 | 0.209265518 | 0.358382986 | 0.401144679 |
| 0.176971433 | 0.128717346 | 0.250779121 | 0.297207814 |
| 0.130522934 | 0.073393982 | 0.176549258 | 0.174263773 |
| 0.143170927 | 0.335916586 | 0.072454042 | 0.12741115  |
| 0.018310509 | 0.061795783 | 0.272775398 | 0.080058035 |

|             |             |             |             |
|-------------|-------------|-------------|-------------|
| 0.140250919 | 0.030600996 | 0.064770133 | 0.130144054 |
| 0.08596771  | 0.230530853 | 0.239163315 | 0.167022091 |
| 0.058094272 | 0.058818187 | 0.047119348 | 0.123596667 |
| 0.180639029 | 0.252374075 | 0.035701472 | 0.097213198 |
| 0.093654647 | 0.126936146 | 0.098657526 | 0.199919402 |
| 0.016906428 | 0.173880434 | 0.055644887 | 0.221360432 |
| 0.041674874 | 0.332973078 | 0.234502104 | 0.078992398 |
| 0.008576669 | 0.161676974 | 0.051737867 | 0.098785267 |
| 0.068761145 | 0.070537847 | 0.044134586 | 0.134780696 |
| 0.124083783 | 0.208846775 | 0.222671796 | 0.249936059 |
| 0.045725515 | 0.029458721 | 0.082750909 | 0.061664571 |
| 0.078651986 | 0.13906096  | 0.283260351 | 0.134372599 |
| 0.044656447 | 0.290358613 | 0.21738338  | 0.115936901 |
| 0.10530171  | 0.087436482 | 0.007576556 | 0.068404582 |
| 0.113376991 | 0.023080647 | 0.001048684 | 0.008143352 |
| 0.101865044 | 0.058634429 | 0.103593931 | 0.09512313  |
| 0.03412142  | 0.112193417 | 0.008249382 | 0.125451701 |
| 0.201247656 | 0.239818305 | 0.071251377 | 0.180886561 |
| 0.125332358 | 0.198126121 | 0.088102235 | 0.008924554 |
| 0.044719867 | 0.036039671 | 0.039735931 | 0.236416816 |
| 0.23066451  | 0.008986645 | 0.055322533 | 0.274672377 |
| 0.107964826 | 0.008077788 | 0.080503312 | 0.069189965 |
| 0.225523736 | 0.244535034 | 0.100744992 | 0.071505885 |
| 0.208253016 | 0.144067273 | 0.035394783 | 0.050614459 |
| 0.04591337  | 0.024562943 | 0.086682762 | 0.018014862 |
| 0.227768767 | 0.057059274 | 0.018826165 | 0.264218722 |
| 0.240104235 | 0.027776735 | 0.266994752 | 0.035482738 |
| 0.111177731 | 0.149001324 | 0.048243032 | 0.041426614 |
| 0.117310345 | 0.03530068  | 0.155115794 | 0.143418958 |
| 0.012462409 | 0.066774801 | 0.156106357 | 0.03491518  |
| 0.289062949 | 0.038296512 | 0.206305994 | 0.023237221 |
| 0.170067853 | 0.136685458 | 0.265601    | 0.049877656 |
| 0.068225916 | 0.295547835 | 0.054916532 | 0.170998588 |
| 0.112267341 | 0.018801243 | 0.081106912 | 0.105122234 |
| 0.024070581 | 0.169017706 | 0.048492203 | 0.176781745 |
| 0.08933628  | 0.139953965 | 0.081611421 | 0.148369215 |
| 0.129884279 | 0.021912066 | 0.017896305 | 0.050984325 |
| 0.190696941 | 0.16298299  | 0.027238527 | 0.129673815 |
| 0.013765427 | 0.102741907 | 0.086462233 | 0.050542334 |
| 0.146880296 | 0.138164244 | 0.060420088 | 0.230717934 |
| 0.092768802 | 0.052498093 | 0.040499841 | 0.18882762  |
| 0.088327653 | 0.106292092 | 0.191970747 | 0.000499264 |
| 0.115063568 | 0.056078718 | 0.135501704 | 0.042403288 |
| 0.274031252 | 0.097071383 | 0.107857299 | 0.070288898 |
| 0.098008991 | 0.013033111 | 0.061011947 | 0.043860863 |
| 0.024380269 | 0.272811029 | 0.188189018 | 0.129058882 |
| 0.12547654  | 0.039418416 | 0.022030324 | 0.171147822 |
| 0.009346342 | 0.019905336 | 0.027581851 | 0.081731665 |
| 0.013883244 | 0.042130623 | 0.038313604 | 0.02676857  |
| 0.114575958 | 0.12707439  |             |             |
| FBXL12      | 0.070192498 | 0.4329213   | 0.054064116 |
| 0.123598654 | 0.31470328  | 0.382834206 | 0.058493491 |
| 0.125134253 | 0.342662727 | 0.38307226  | 0.34330872  |
| 0.014688539 | 0.137973453 | 0.450276079 | 0.054373081 |

|             |                      |                      |             |
|-------------|----------------------|----------------------|-------------|
| 0.405296232 | 0.029660871          | 0.103301011          | 0.103958626 |
| 0.241873239 | 0.295396444          | 0.372084966          | 0.372619927 |
| 0.309890906 | 0.163667691          | 0.339941771          | 0.437228999 |
| 0.506434342 | 0.348823222          | 0.422400036          | 0.238549989 |
| 0.392792944 | 0.341019912          | 0.432278315          | 0.013406677 |
| 0.415594747 | 0.025950572          | 0.42056299           | 0.262540517 |
| 0.174464873 | 0.317395052          | 0.372144328          | 0.227662069 |
| 0.404094346 | 0.033060793          | 0.293854643          | 0.431948382 |
| 0.338526562 | 0.293349497          | 0.066457565          | 0.413358304 |
| 0.408603478 | 0.316068393          | 0.394722528          | 0.003122467 |
| 0.360197821 | 0.162230431          | 0.320392947          | 0.499441453 |
| 0.182247286 | 0.115079394          | 0.392306865          | 0.273832951 |
| 0.427624135 | 0.391719162          | 0.246647287          | 0.422830643 |
| 0.493509238 | 0.246512739          | 0.437422092          | 0.155708679 |
| 0.393465995 | 0.034212281          | 0.142919079          | 0.088892316 |
| 0.422265089 | 0.187591251          | 0.345061125          | 0.356045305 |
| 0.435359334 | 0.505639408          | 0.227694499          | 0.497577123 |
| 0.164343966 | 0.376157712          | 0.29936253           | 0.287378406 |
| 0.373533583 | 0.094026391          | 0.38359581           | 0.511037416 |
| 0.053696163 | 0.414761967          | 0.404339223          | 0.123092384 |
| 0.41976692  | 0.365777425          | 0.421414256          | 0.217140236 |
| 0.379479405 | 0.366022477          | 0.478048939          | 0.271803747 |
| 0.342086631 | 0.071814965          | 0.475740769          | 0.356965594 |
| 0.289946298 | 0.076540247          | 0.252258456          | 0.471131956 |
| 0.406373388 | 0.493462475          | 0.430891346          | 0.355723001 |
| 0.404379277 | 0.494184981          | 0.376348299          | 0.412695873 |
| 0.248388147 | 0.527108 0.171735542 | 0.037177696          |             |
| 0.072689371 | 0.08084932           | 0.294861852          | 0.270025697 |
| 0.469585562 | 0.323679742          | 0.187621 0.228436742 |             |
| 0.462688933 | 0.473504567          | 0.531567064          | 0.393618374 |
| 0.034807674 | 0.337427139          | 0.398400647          | 0.282096365 |
| 0.38209067  | 0.111319876          | 0.299403834          | 0.496745912 |
| 0.345740794 | 0.421413341          | 0.162764792          | 0.482869113 |
| 0.220987858 | 0.497726669          | 0.455812366          | 0.15426803  |
| 0.504533348 | 0.479896309          | 0.50160569           | 0.405991167 |
| 0.45612185  | 0.320145984          | 0.112830332          | 0.363124282 |
| 0.468954806 | 0.0187499            | 0.492795132          | 0.515332845 |
| 0.499104253 | 0.46267363           | 0.522674808          | 0.51352792  |
| 0.506384041 | 0.06977647           | 0.063517428          | 0.28782832  |
| 0.501386695 | 0.359980544          | 0.141384469          | 0.444254802 |
| 0.384155577 | 0.387126167          | 0.421763832          | 0.33684303  |
| 0.496832217 | 0.443899621          | 0.504867224          | 0.389037046 |
| 0.335624405 | 0.286938811          | 0.428899055          | 0.454049671 |
| 0.037267546 | 0.109193021          | 0.049744052          | 0.298384347 |
| 0.367897552 | 0.161300421          | 0.380491194          | 0.386777498 |
| 0.178592597 | 0.356657381          | 0.402061868          | 0.387175841 |
| 0.053439635 | 0.44258719           | 0.155131795          | 0.172598056 |
| 0.034311263 | 0.123337403          | 0.180241676          | 0.141942482 |
| 0.253472143 | 0.218092228          | 0.444474273          | 0.492764142 |
| 0.391608797 | 0.166924632          | 0.417040576          | 0.458881063 |
| 0.398515061 | 0.395465102          | 0.216812654          | 0.007340122 |
| 0.301516743 | 0.415794959          | 0.270712849          | 0.443065069 |
| 0.159766317 | 0.263691072          | 0.402825261          | 0.383558495 |
| 0.269669468 | 0.15863798           | 0.408416157          | 0.401098261 |

|             |             |             |             |
|-------------|-------------|-------------|-------------|
| 0.145192941 | 0.303874079 | 0.43237879  | 0.43137828  |
| 0.002020781 | 0.316972898 | 0.424574357 | 0.17466775  |
| 0.326146361 | 0.175986525 | 0.298094806 | 0.460538535 |
| 0.375475006 | 0.280164639 | 0.502369884 | 0.386694232 |
| 0.375152696 | 0.211683791 | 0.527266039 | 0.099698481 |
| 0.392502025 | 0.045224801 | 0.26537473  | 0.385942989 |
| 0.238162827 | 0.278777279 | 0.345027973 | 0.284879152 |
| 0.121964436 | 0.517705445 | 0.361571818 | 0.512383382 |
| 0.416675129 | 0.526842679 | 0.453689    | 0.42093403  |
| 0.348312676 | 0.435355135 | 0.210214071 | 0.40988076  |
| 0.451234526 | 0.353752989 | 0.072408373 | 1           |
| 0.420638671 | 0.415268028 | 0.122617754 | 0.484921817 |
| 0.471648668 | 0.469610325 | 0.14039214  | 0.359749288 |
| 0.33934129  | 0.216650461 | 0.390795439 | 0.527426589 |
| 0.397617914 | 0.391350687 | 0.35745294  | 0.370761918 |
| 0.160480129 | 0.251545299 | 0.291562736 | 0.266448224 |
| 0.017394156 | 0.083380609 | 0.061363822 | 0.152848691 |
| 0.199341343 | 0.448569744 | 0.396856725 | 0.517849991 |
| 0.10912215  | 0.395495335 | 0.2374212   | 0.294541269 |
| 0.410569562 | 0.39874986  | 0.405623516 | 0.398100493 |
| 0.228068409 | 0.013001638 | 0.105355246 | 0.504014578 |
| 0.041329432 | 0.279561935 | 0.337496581 | 0.002276396 |
| 0.04406862  | 0.416253796 | 0.086509298 | 0.168115837 |
| 0.478249696 | 0.172046324 | 0.197261263 | 0.386268861 |
| 0.324960506 | 0.085627013 | 0.001961393 | 0.495309898 |
| 0.495460378 | 0.466375901 | 0.495562056 | 0.458921556 |
| 0.452312478 | 0.402138069 | 0.397743941 | 0.343407272 |
| 0.09813307  | 0.090693187 | 0.255853852 | 0.288622479 |
| 0.0070505   | 0.347988634 | 0.327741395 | 0.127972475 |
| 0.425364524 | 0.305314167 | 0.033283022 | 0.384624256 |
| 0.016903646 | 0.267220536 | 0.341094323 | 0.228226385 |
| 0.344736114 | 0.011295091 | 0.245118549 | 0.374169851 |
| 0.413444607 | 0.31394356  | 0.408082747 | 0.524068545 |
| 0.313527708 | 0.128405909 | 0.30278861  | 0.381482809 |
| 0.066243636 | 0.159829783 | 0.39197276  | 0.048753422 |
| 0.233217506 | 0.451991222 | 0.422238547 | 0.061879582 |
| 0.255192959 | 0.003172602 | 0.335485144 | 0.524452058 |
| 0.463538376 | 0.522515479 | 0.492315418 | 0.30435109  |
| 0.496849379 | 0.201236565 | 0.532846728 | 0.389708567 |
| 0.432684504 | 0.000648337 | 0.00554461  | 0.489813479 |
| 0.403046882 | 0.056429262 | 0.145826609 | 0.355174785 |
| 0.098195285 | 0.158051844 | 0.062681717 | 0.199607025 |
| 0.41127064  | 0.242636489 | 0.212958608 | 0.47015703  |
| 0.233873108 | 0.227096084 | 0.424714987 | 0.084977868 |
| 0.411131044 | 0.045136794 | 0.086271755 | 0.007110937 |
| 0.364580325 | 0.104426262 | 0.455084227 | 0.509847967 |
| 0.476604514 | 0.381439585 | 0.414837493 | 0.375776774 |
| 0.440911355 | 0.098222461 | 0.412860069 | 0.112431968 |
| 0.484264526 | 0.391392552 | 0.287812825 | 0.267294472 |
| 0.493101715 | 0.452973122 | 0.029474912 | 0.388494714 |
| 0.009656517 | 0.002368309 | 0.364238775 | 0.257027398 |
| 0.11564546  | 0.404155331 | 0.227997609 | 0.27328542  |
| 0.252108651 | 0.026959701 | 0.326702553 | 0.293111301 |
| 0.284901072 | 0.369378385 | 0.296760578 | 0.242333605 |

|             |             |             |             |
|-------------|-------------|-------------|-------------|
| 0.278210878 | 0.157129218 | 0.189487218 | 0.156819251 |
| 0.313742949 | 0.282973209 | 0.167624076 | 0.018699511 |
| 0.436347833 | 0.426564248 | 0.050999834 | 0.145929125 |
| 0.417467586 | 0.49253366  | 0.040095041 | 0.007382281 |
| 0.236505615 | 0.345365921 | 0.502049304 | 0.502560925 |
| 0.51433301  | 0.508908445 | 0.364818748 | 0.129157077 |
| 0.062159148 | 0.318279423 | 0.318169573 | 0.095073017 |
| 0.511412149 | 0.06805464  | 0.478387676 | 0.350713885 |
| 0.109428518 | 0.200172624 | 0.027280611 | 0.078746243 |
| 0.413929754 | 0.165473664 | 0.168243251 | 0.141247759 |
| 0.320778974 | 0.28953086  | 0.044582099 | 0.184788593 |
| 0.327845353 | 0.228057834 | 0.150140002 | 0.320907404 |
| 0.333003029 | 0.317191456 | 0.428264261 | 0.425956541 |
| 0.121217578 | 0.113855315 | 0.274143004 | 0.384455122 |
| 0.439575225 | 0.443215103 | 0.022928712 | 0.462233181 |
| 0.48894565  | 0.440127028 | 0.490154812 | 0.369303042 |
| 0.079859796 | 0.385115079 | 0.38999591  | 0.357856337 |
| 0.18260977  | 0.376825767 | 0.245415665 | 0.057989727 |
| 0.26931874  | 0.469088188 | 0.405757882 | 0.151965398 |
| 0.435028032 | 0.132364034 | 0.060008273 | 0.450066816 |
| 0.217194057 | 0.085948128 | 0.402735935 | 0.437152941 |
| 0.001036241 | 0.195215309 | 0.495462383 | 0.231190589 |
| 0.508789093 | 0.476719525 | 0.413370393 | 0.268125024 |
| 0.003562853 | 0.424651529 | 0.362752151 | 0.391004593 |
| 0.429047868 | 0.322956175 | 0.177962062 | 0.06524067  |
| 0.250726813 | 0.078333365 | 0.135037292 | 0.348602279 |
| 0.24175763  | 0.411478372 | 0.180230273 | 0.216640939 |
| 0.193140168 | 0.097761735 | 0.286421635 | 0.222028121 |
| 0.21796419  | 0.213174803 | 0.315815189 | 0.36167736  |
| 0.249072062 | 0.437010487 | 0.386417634 | 0.022284151 |
| 0.395630323 | 0.400331218 | 0.420681626 | 0.002037584 |
| 0.418365073 | 0.00486602  | 0.194307083 | 0.201411802 |
| 0.189616094 | 0.220513172 | 0.255316726 | 0.293931296 |
| 0.359965462 | 0.21491853  | 0.254245127 | 0.21639677  |
| 0.148923883 | 0.213866426 | 0.391698848 | 0.361757304 |
| 0.274071765 | 0.11455133  | 0.086875752 | 0.092488683 |
| 0.044732091 | 0.467455183 | 0.205960968 | 0.069013521 |
| 0.217932932 | 0.381286334 | 0.311664636 | 0.497090588 |
| 0.393315348 | 0.103795767 | 0.357267447 | 0.435206275 |
| 0.347364182 | 0.31918986  | 0.064829755 | 0.379644285 |
| 0.221239935 | 0.237333881 | 0.413743459 | 0.309463447 |
| 0.41769191  | 0.37044636  | 0.206158548 | 0.420594773 |
| 0.354581517 | 0.392382464 | 0.367504035 | 0.074698143 |
| 0.163667913 | 0.125574508 | 0.280103175 | 0.00067261  |
| 0.340711218 | 0.24722141  | 0.468626728 | 0.477624116 |
| 0.367897214 | 0.352307075 | 0.357304506 | 0.083165595 |
| 0.323637805 | 0.165891322 | 0.12832539  | 0.424544777 |
| 0.295314194 | 0.171432289 | 0.299854497 | 0.330206812 |
| 0.419650577 | 0.425067896 | 0.289168783 | 0.259186512 |
| 0.240733461 | 0.187500127 | 0.46958402  | 0.118686329 |
| 0.447054108 | 0.191877619 | 0.384169047 | 0.29513235  |
| 0.221382641 | 0.520773358 | 0.055142545 | 0.532934775 |
| 0.356661919 | 0.121152219 | 0.470127221 | 0.307425776 |
| 0.286580866 | 0.112927998 | 0.256443472 | 0.415300696 |



|             |             |             |             |
|-------------|-------------|-------------|-------------|
| 0.239308111 | 0.392817717 | 0.032350453 | 0.091084898 |
| 0.302857838 | 0.371982797 | 0.403544125 | 0.364946497 |
| 0.268391256 | 0.314934653 | 0.243771745 | 0.301990103 |
| 0.480046311 | 0.486280959 | 0.249996965 | 0.222776787 |
| 0.331812927 | 0.09193723  | 0.383593634 | 0.028939114 |
| 0.437867199 | 0.452610373 | 0.443580502 | 0.049453081 |
| 0.014996816 | 0.277810128 | 0.421642692 | 0.070931931 |
| 0.484419639 | 0.282776945 | 0.386923216 | 0.416357473 |
| 0.17092372  | 0.484016093 | 0.11761928  | 0.381907582 |
| 0.05626544  | 0.243868813 | 0.416052636 | 0.430361704 |
| 0.220300141 | 0.326729402 | 0.347517209 | 0.267550579 |
| 0.025852173 | 0.264931402 | 0.001462355 | 0.376812783 |
| 0.462076561 | 0.383207209 | 0.180040429 | 0.398286524 |
| 0.255091853 | 0.36110964  | 0.288695874 | 0.445538301 |
| 0.007268156 | 0.378711154 | 0.18583935  | 0.385965019 |
| 0.288232203 | 0.397254788 | 0.045311416 | 0.360964341 |
| 0.4390564   | 0.321288783 | 0.232813886 | 0.357011968 |
| 0.487631752 | 0.371120841 | 0.152157243 | 0.233912516 |
| 0.417293099 | 0.061010755 | 0.415538168 | 0.527894422 |
| 0.165340141 | 0.24095428  | 0.430201628 | 0.194534003 |
| 0.367590364 | 0.366357282 | 0.438437129 | 0.523402924 |
| 0.070139811 | 0.224033291 | 0.406807454 | 0.460630972 |
| 0.269860814 | 0.206551663 | 0.289544553 | 0.243644612 |
| 0.448308398 | 0.086355632 | 0.308011192 | 0.328266332 |
| 0.264441387 | 0.297115015 | 0.364177259 | 0.200860632 |
| 0.033084772 | 0.174573124 | 0.366585426 | 0.131596299 |
| 0.287994221 | 0.364006017 | 0.257111556 | 0.351560414 |
| 0.120706706 | 0.017647041 | 0.425600625 | 0.02846972  |
| 0.321295938 | 0.375571372 | 0.232687273 | 0.369473971 |
| 0.159236106 | 0.361373465 | 0.342980013 | 0.000696565 |
| 0.387599485 | 0.048748826 | 0.335420165 | 0.230403516 |
| 0.358922358 | 0.04915634  | 0.438425287 | 0.513660093 |
| 0.306068871 | 0.380748981 | 0.408585461 | 0.458576706 |
| 0.18845357  | 0.418068539 | 0.419627934 | 0.407420323 |
| 0.275368939 | 0.43029341  | 0.452821912 | 0.404071263 |
| 0.362936677 | 0.271076573 |             |             |
| FBX032      | 0.021491768 | 0.386386331 | 0.016758586 |
| 0.042846608 | 0.177809909 | 0.132584027 | 0.026051767 |
| 0.047493595 | 0.326665625 | 0.216470538 | 0.155927862 |
| 0.004719107 | 0.055225603 | 0.387931501 | 0.021977967 |
| 0.275623297 | 0.010369031 | 0.041856659 | 0.059561065 |
| 0.1200181   | 0.161101809 | 0.134469287 | 0.174439359 |
| 0.159923708 | 0.12743985  | 0.227400519 | 0.274413882 |
| 0.443300829 | 0.134580172 | 0.279727332 | 0.132393339 |
| 0.344183134 | 0.20340681  | 0.200255846 | 0.004263431 |
| 0.206058337 | 0.028610629 | 0.381401143 | 0.117902376 |
| 0.073648937 | 0.257299475 | 0.183228157 | 0.082836591 |
| 0.246754119 | 0.010936842 | 0.12663279  | 0.370512822 |
| 0.2431482   | 0.126656626 | 0.027190749 | 0.316595575 |
| 0.214663961 | 0.192641005 | 0.351256843 | 0.001117505 |
| 0.149251888 | 0.083332185 | 0.160020606 | 0.419676503 |
| 0.099076883 | 0.039594272 | 0.250496741 | 0.11529961  |
| 0.315529026 | 0.322514148 | 0.155707285 | 0.236769225 |
| 0.418913748 | 0.122015298 | 0.380876326 | 0.055199614 |

|             |             |             |             |
|-------------|-------------|-------------|-------------|
| 0.177187835 | 0.016336034 | 0.09192788  | 0.057627233 |
| 0.191950689 | 0.077312006 | 0.152705407 | 0.17259395  |
| 0.402285758 | 0.435681201 | 0.14622718  | 0.442860466 |
| 0.11084927  | 0.242845027 | 0.13180141  | 0.215816656 |
| 0.331035687 | 0.052015781 | 0.285116007 | 0.447886384 |
| 0.024011072 | 0.297643591 | 0.356204667 | 0.078243847 |
| 0.34513634  | 0.186783547 | 0.242149836 | 0.079414868 |
| 0.282871202 | 0.235579844 | 0.42818998  | 0.174183391 |
| 0.143685766 | 0.038412077 | 0.405780226 | 0.218166643 |
| 0.100060924 | 0.033141792 | 0.135488167 | 0.433525004 |
| 0.28347696  | 0.415372068 | 0.412238214 | 0.328489248 |
| 0.253769    | 0.420114178 | 0.278264254 | 0.352542252 |
| 0.12842656  | 0.457086659 | 0.072374549 | 0.010655937 |
| 0.026584954 | 0.026266962 | 0.167093945 | 0.214146127 |
| 0.397123799 | 0.200623055 | 0.070025681 | 0.108272152 |
| 0.427858869 | 0.403478463 | 0.476353319 | 0.358410539 |
| 0.011987081 | 0.187703346 | 0.249985851 | 0.095014304 |
| 0.288612945 | 0.059166574 | 0.13474413  | 0.427814223 |
| 0.275911946 | 0.381866348 | 0.061496562 | 0.413687413 |
| 0.103430275 | 0.419147581 | 0.396899423 | 0.063027207 |
| 0.434870587 | 0.401399882 | 0.431739009 | 0.298110987 |
| 0.367111585 | 0.137338623 | 0.072559417 | 0.344462674 |
| 0.383539957 | 0.00671314  | 0.443841632 | 0.467922436 |
| 0.440471283 | 0.421636274 | 0.467911696 | 0.440817005 |
| 0.436125779 | 0.035387873 | 0.067715866 | 0.192235244 |
| 0.440600121 | 0.298753482 | 0.055539302 | 0.272204011 |
| 0.248340223 | 0.161555371 | 0.367567492 | 0.134997364 |
| 0.422885218 | 0.383492964 | 0.446433521 | 0.335622353 |
| 0.238447262 | 0.226403815 | 0.275439941 | 0.377803101 |
| 0.01206769  | 0.036010186 | 0.024430171 | 0.236409235 |
| 0.154342821 | 0.076752689 | 0.156570055 | 0.263411522 |
| 0.095648792 | 0.151334252 | 0.171777013 | 0.283777639 |
| 0.038601859 | 0.257076607 | 0.066845416 | 0.092216841 |
| 0.012278479 | 0.094668746 | 0.068037962 | 0.042724255 |
| 0.110596393 | 0.185799362 | 0.344668671 | 0.439905763 |
| 0.194096694 | 0.110026675 | 0.310796904 | 0.383254487 |
| 0.335993155 | 0.221554588 | 0.152774534 | 0.002061222 |
| 0.167525861 | 0.246662376 | 0.143324811 | 0.265905867 |
| 0.130059425 | 0.128730621 | 0.284905121 | 0.287547298 |
| 0.12280376  | 0.066600852 | 0.202364793 | 0.320430761 |
| 0.104322111 | 0.106464064 | 0.3794408   | 0.294361957 |
| 0.000410705 | 0.162628994 | 0.364702262 | 0.093341251 |
| 0.250359567 | 0.06259728  | 0.103240145 | 0.426556157 |
| 0.181663943 | 0.134953969 | 0.43003212  | 0.293664729 |
| 0.133458184 | 0.181321414 | 0.463541978 | 0.075816212 |
| 0.240168371 | 0.014994248 | 0.174925796 | 0.213260311 |
| 0.135681866 | 0.21250752  | 0.186201643 | 0.116602091 |
| 0.063917679 | 0.44770579  | 0.292907575 | 0.436708342 |
| 0.219537936 | 0.468350613 | 0.396536561 | 0.345635502 |
| 0.221232271 | 0.25207913  | 0.097851729 | 0.365698674 |
| 0.414395427 | 0.21559804  | 0.045112322 | 0.420638671 |
| 1           | 0.333004443 | 0.057600335 | 0.426159729 |
| 0.391669633 | 0.413884122 | 0.047557286 | 0.299689969 |
| 0.272368594 | 0.09119057  | 0.340198617 | 0.459308696 |

|             |             |             |             |
|-------------|-------------|-------------|-------------|
| 0.259002015 | 0.229688268 | 0.177885216 | 0.328758541 |
| 0.090476623 | 0.125218314 | 0.247860279 | 0.124328504 |
| 0.004754667 | 0.033596775 | 0.026910498 | 0.055275589 |
| 0.084414163 | 0.324306147 | 0.304266949 | 0.455260663 |
| 0.039913165 | 0.309367323 | 0.182336281 | 0.13370576  |
| 0.375848329 | 0.190200238 | 0.216740338 | 0.251382169 |
| 0.163540785 | 0.004199498 | 0.033187781 | 0.439232948 |
| 0.02369101  | 0.109967858 | 0.156149499 | 0.000659192 |
| 0.018245114 | 0.390588691 | 0.069872605 | 0.135230537 |
| 0.410504639 | 0.14083811  | 0.129253377 | 0.242906181 |
| 0.209620897 | 0.034345013 | 0.000140233 | 0.460810742 |
| 0.45368281  | 0.436440519 | 0.457553969 | 0.408226356 |
| 0.444470538 | 0.332733519 | 0.364524883 | 0.158305189 |
| 0.039144644 | 0.037139674 | 0.143519997 | 0.13801241  |
| 0.002551461 | 0.259106448 | 0.16302531  | 0.074026957 |
| 0.349297583 | 0.227278076 | 0.00955304  | 0.237498055 |
| 0.005182521 | 0.123183681 | 0.155879273 | 0.098483873 |
| 0.275190563 | 0.003536461 | 0.101171925 | 0.20451654  |
| 0.332623858 | 0.253549681 | 0.188149146 | 0.452452159 |
| 0.148601333 | 0.096915876 | 0.139959814 | 0.27017854  |
| 0.026221335 | 0.136297774 | 0.181253371 | 0.024633917 |
| 0.068672639 | 0.393944649 | 0.197663501 | 0.025873184 |
| 0.144696376 | 0.000729414 | 0.272605835 | 0.445251646 |
| 0.395500755 | 0.466940179 | 0.408331964 | 0.120818817 |
| 0.424102611 | 0.112824596 | 0.46196285  | 0.342544428 |
| 0.227482024 | 0.000138759 | 0.001103308 | 0.437610318 |
| 0.245220222 | 0.037080445 | 0.077183776 | 0.122092314 |
| 0.034168045 | 0.061327586 | 0.020053483 | 0.089020853 |
| 0.242943329 | 0.105206776 | 0.087309683 | 0.415111023 |
| 0.10628125  | 0.114655254 | 0.188131372 | 0.052995971 |
| 0.232431147 | 0.014959586 | 0.058042916 | 0.001782226 |
| 0.267807868 | 0.080863554 | 0.389210367 | 0.437181669 |
| 0.401801114 | 0.282002237 | 0.21505521  | 0.124521099 |
| 0.398941033 | 0.060132515 | 0.175033251 | 0.059410357 |
| 0.418439317 | 0.284194115 | 0.206293373 | 0.211483495 |
| 0.433317424 | 0.388262205 | 0.010243087 | 0.350332411 |
| 0.001963565 | 0.000474442 | 0.174815072 | 0.174604709 |
| 0.092616607 | 0.220137482 | 0.169108069 | 0.152432176 |
| 0.110998889 | 0.007359248 | 0.167951313 | 0.153806723 |
| 0.181988182 | 0.199332473 | 0.150113592 | 0.192501526 |
| 0.130958382 | 0.096516412 | 0.067340459 | 0.061359966 |
| 0.163574037 | 0.256340627 | 0.133579043 | 0.00766571  |
| 0.25229232  | 0.239247509 | 0.016748383 | 0.081297683 |
| 0.350941992 | 0.428002359 | 0.020374148 | 0.00208234  |
| 0.175660719 | 0.165748819 | 0.431547615 | 0.433272411 |
| 0.437315159 | 0.444177017 | 0.298265427 | 0.057000684 |
| 0.019550344 | 0.195508364 | 0.17861116  | 0.039317717 |
| 0.431598184 | 0.042226022 | 0.39401178  | 0.185122163 |
| 0.063126901 | 0.085410987 | 0.007051642 | 0.033852087 |
| 0.240889883 | 0.085219801 | 0.067566286 | 0.084364671 |
| 0.145191362 | 0.123091314 | 0.017817102 | 0.092639169 |
| 0.271067616 | 0.142424747 | 0.082105304 | 0.127753268 |
| 0.276834656 | 0.202792005 | 0.36526421  | 0.36250393  |
| 0.0645451   | 0.061203772 | 0.111283808 | 0.310187    |

|             |             |             |             |
|-------------|-------------|-------------|-------------|
| 0.405996246 | 0.295686054 | 0.004263797 | 0.415409123 |
| 0.415388006 | 0.31218578  | 0.407470771 | 0.325939158 |
| 0.048236009 | 0.189139962 | 0.208941593 | 0.232734849 |
| 0.099726919 | 0.130596768 | 0.118929076 | 0.027147155 |
| 0.227948133 | 0.403523402 | 0.381882743 | 0.051541408 |
| 0.250252198 | 0.07533907  | 0.037822714 | 0.383544716 |
| 0.117664102 | 0.029669579 | 0.188507867 | 0.404021494 |
| 0.000438032 | 0.083178084 | 0.45526469  | 0.070813682 |
| 0.446819657 | 0.428872733 | 0.343138405 | 0.104483727 |
| 0.005434727 | 0.353703364 | 0.21339593  | 0.169803694 |
| 0.380974709 | 0.232524175 | 0.065624807 | 0.023205472 |
| 0.189250786 | 0.045143474 | 0.060363296 | 0.117978008 |
| 0.168693922 | 0.278547402 | 0.115853011 | 0.134083771 |
| 0.083074911 | 0.07690963  | 0.109346638 | 0.077683404 |
| 0.146182156 | 0.141705455 | 0.254787309 | 0.171030465 |
| 0.12989323  | 0.406906452 | 0.366984117 | 0.006492604 |
| 0.20235198  | 0.378738991 | 0.354176139 | 0.001620296 |
| 0.324219577 | 0.001125214 | 0.074262935 | 0.073945693 |
| 0.07228915  | 0.09545725  | 0.150460842 | 0.12539944  |
| 0.268443524 | 0.094242433 | 0.090305005 | 0.114893986 |
| 0.050930184 | 0.088253707 | 0.244804845 | 0.183001656 |
| 0.099932303 | 0.038470805 | 0.067839632 | 0.073316851 |
| 0.010828697 | 0.392376415 | 0.157016594 | 0.040279823 |
| 0.116834245 | 0.188358367 | 0.256045303 | 0.437562139 |
| 0.316565953 | 0.079651331 | 0.160538691 | 0.367543192 |
| 0.215657172 | 0.121071959 | 0.023595827 | 0.207874189 |
| 0.092225902 | 0.09292856  | 0.208988415 | 0.198494021 |
| 0.377144321 | 0.302364236 | 0.146194719 | 0.354679019 |
| 0.147120355 | 0.251542323 | 0.186618692 | 0.024329154 |
| 0.065302546 | 0.08419731  | 0.142380748 | 0.000189182 |
| 0.209909862 | 0.087625291 | 0.411038762 | 0.409478674 |
| 0.167316478 | 0.281175777 | 0.143626711 | 0.031857887 |
| 0.161927683 | 0.14504127  | 0.075445266 | 0.366883316 |
| 0.130169472 | 0.056363086 | 0.165566916 | 0.114893622 |
| 0.361418108 | 0.39302448  | 0.137573565 | 0.105167095 |
| 0.135230897 | 0.110276876 | 0.425853244 | 0.042642129 |
| 0.312924849 | 0.078984454 | 0.27251549  | 0.136305867 |
| 0.096152164 | 0.462881907 | 0.02170516  | 0.471956244 |
| 0.180412456 | 0.082574359 | 0.390776857 | 0.129366412 |
| 0.107530465 | 0.033253146 | 0.122077029 | 0.187907068 |
| 0.105532625 | 0.161537281 | 0.019603376 | 0.049860552 |
| 0.212921993 | 0.207242515 | 0.40513189  | 0.302447158 |
| 0.123488687 | 0.26684285  | 0.095665752 | 0.146452979 |
| 0.41800843  | 0.414913077 | 0.105426676 | 0.174878829 |
| 0.250694912 | 0.028517273 | 0.227714543 | 0.023095299 |
| 0.31750588  | 0.318146552 | 0.215260573 | 0.015970169 |
| 0.005233978 | 0.148116846 | 0.317885486 | 0.048125787 |
| 0.43766404  | 0.118989432 | 0.305125283 | 0.304413413 |
| 0.119034598 | 0.415232431 | 0.041603057 | 0.274754014 |
| 0.039475771 | 0.157607265 | 0.223709872 | 0.252574775 |
| 0.085544458 | 0.155182765 | 0.26947485  | 0.109271265 |
| 0.008251393 | 0.107814862 | 0.003617475 | 0.309559878 |
| 0.413514997 | 0.226062071 | 0.140572355 | 0.207246145 |
| 0.164518022 | 0.313959741 | 0.12967652  | 0.240622959 |

|             |             |             |             |
|-------------|-------------|-------------|-------------|
| 0.001661471 | 0.237354684 | 0.086477043 | 0.299909103 |
| 0.155726306 | 0.292288417 | 0.013064662 | 0.215604919 |
| 0.369081165 | 0.159153706 | 0.187926418 | 0.218638695 |
| 0.418270497 | 0.326021773 | 0.109773786 | 0.08867709  |
| 0.351137567 | 0.033457351 | 0.171378576 | 0.462133476 |
| 0.058582771 | 0.105432048 | 0.380901633 | 0.084764989 |
| 0.167700958 | 0.298595009 | 0.328755009 | 0.464727477 |
| 0.026445276 | 0.131665411 | 0.346440843 | 0.421448844 |
| 0.194491296 | 0.101213837 | 0.124378942 | 0.110021038 |
| 0.377265699 | 0.024106655 | 0.166239013 | 0.250471208 |
| 0.13580436  | 0.181168812 | 0.271926091 | 0.083951401 |
| 0.00846418  | 0.067769745 | 0.117645044 | 0.070755836 |
| 0.166250934 | 0.201854148 | 0.127599382 | 0.284710477 |
| 0.033772864 | 0.004938711 | 0.356994385 | 0.021964083 |
| 0.143867571 | 0.234037353 | 0.106603705 | 0.17119788  |
| 0.110308587 | 0.235549485 | 0.209232707 | 1.44E-05    |
| 0.348498329 | 0.022027478 | 0.141188272 | 0.094575406 |
| 0.162675125 | 0.018756502 | 0.355023679 | 0.445880898 |
| 0.181716646 | 0.153506412 | 0.178870659 | 0.387589094 |
| 0.092716275 | 0.203139261 | 0.206497978 | 0.310279791 |
| 0.119475842 | 0.230178991 | 0.20752753  | 0.174764547 |
| 0.263380657 | 0.095695983 |             |             |
| FBX05       | 0.057996962 | 0.368653373 | 0.036911662 |
| 0.13244502  | 0.332013001 | 0.295259928 | 0.057172106 |
| 0.120319012 | 0.288676102 | 0.243019192 | 0.316264525 |
| 0.016395948 | 0.16892862  | 0.435966352 | 0.053549582 |
| 0.372966603 | 0.037559399 | 0.103179781 | 0.091431624 |
| 0.197289826 | 0.322023843 | 0.335931358 | 0.268542153 |
| 0.3217026   | 0.146989596 | 0.254322462 | 0.358053956 |
| 0.45921171  | 0.26898487  | 0.346921597 | 0.163689931 |
| 0.382362923 | 0.349276454 | 0.357716507 | 0.011624461 |
| 0.334309296 | 0.033753925 | 0.387505061 | 0.284312664 |
| 0.217752139 | 0.303092683 | 0.241266288 | 0.233769689 |
| 0.303275917 | 0.028405831 | 0.169552666 | 0.36312175  |
| 0.257731345 | 0.25118935  | 0.044254541 | 0.3362812   |
| 0.332315753 | 0.25015773  | 0.30157162  | 0.004280967 |
| 0.343825923 | 0.16216097  | 0.3053063   | 0.444382972 |
| 0.168126329 | 0.122142444 | 0.308373715 | 0.204365376 |
| 0.338563088 | 0.335065906 | 0.220210113 | 0.319245411 |
| 0.458823918 | 0.284826439 | 0.378529059 | 0.146396832 |
| 0.312276446 | 0.024525524 | 0.128524224 | 0.059679858 |
| 0.348038443 | 0.192207347 | 0.320704556 | 0.350696805 |
| 0.37022123  | 0.463459941 | 0.200602101 | 0.43428502  |
| 0.186795076 | 0.366679166 | 0.315287078 | 0.274772806 |
| 0.322227513 | 0.081441589 | 0.359937396 | 0.481233441 |
| 0.039586052 | 0.288305678 | 0.34368014  | 0.089687754 |
| 0.370396729 | 0.312904554 | 0.29755517  | 0.256493742 |
| 0.359792561 | 0.365942915 | 0.418982167 | 0.246714288 |
| 0.315557668 | 0.051265674 | 0.404242508 | 0.361749087 |
| 0.294425748 | 0.060661869 | 0.304211371 | 0.455628626 |
| 0.344073886 | 0.45732932  | 0.38637078  | 0.341445017 |
| 0.383517459 | 0.459203159 | 0.329479561 | 0.374527004 |
| 0.146828145 | 0.47405099  | 0.153322033 | 0.04363669  |
| 0.05359803  | 0.087716521 | 0.279820052 | 0.26786884  |

|             |             |             |             |
|-------------|-------------|-------------|-------------|
| 0.444410602 | 0.269607834 | 0.174813496 | 0.250890807 |
| 0.469351403 | 0.399778895 | 0.475065677 | 0.389616184 |
| 0.033788711 | 0.316530336 | 0.377849961 | 0.215271751 |
| 0.329812613 | 0.095832619 | 0.332816771 | 0.440889664 |
| 0.343092614 | 0.426887717 | 0.128665596 | 0.430728689 |
| 0.186726621 | 0.478284034 | 0.399040953 | 0.158772742 |
| 0.460603125 | 0.422366546 | 0.491105505 | 0.373979993 |
| 0.411553329 | 0.267871091 | 0.085419223 | 0.350036726 |
| 0.460432734 | 0.028648304 | 0.461031912 | 0.489145256 |
| 0.445237384 | 0.456251865 | 0.507867362 | 0.481397551 |
| 0.447279418 | 0.058216402 | 0.051985684 | 0.297775314 |
| 0.451506031 | 0.362477971 | 0.151713762 | 0.372778906 |
| 0.357967148 | 0.295471384 | 0.385351693 | 0.311487613 |
| 0.47930566  | 0.423608352 | 0.462685119 | 0.348804686 |
| 0.246568716 | 0.274571407 | 0.371273105 | 0.387588085 |
| 0.041480534 | 0.090998586 | 0.034867395 | 0.262080641 |
| 0.251476454 | 0.172073996 | 0.302504823 | 0.340372076 |
| 0.178968991 | 0.257520095 | 0.346847389 | 0.366958534 |
| 0.036116142 | 0.345098677 | 0.134891636 | 0.147005313 |
| 0.044822762 | 0.110882369 | 0.196562782 | 0.143466343 |
| 0.268715034 | 0.182955405 | 0.368429084 | 0.467958186 |
| 0.336819147 | 0.130656369 | 0.341779005 | 0.451013047 |
| 0.415282004 | 0.372051539 | 0.184975747 | 0.012499434 |
| 0.336669935 | 0.31056445  | 0.292825928 | 0.360855711 |
| 0.135896341 | 0.274555493 | 0.366777316 | 0.380216689 |
| 0.214691937 | 0.112619636 | 0.371532126 | 0.371842439 |
| 0.105330852 | 0.304852062 | 0.443655543 | 0.333429257 |
| 0.002023559 | 0.290115162 | 0.415679474 | 0.224232532 |
| 0.266557294 | 0.205105405 | 0.292718186 | 0.453336727 |
| 0.359831745 | 0.301953523 | 0.467918368 | 0.370993161 |
| 0.295456358 | 0.171665912 | 0.501615301 | 0.116704821 |
| 0.342512625 | 0.079833374 | 0.267320193 | 0.250771373 |
| 0.21760022  | 0.265866348 | 0.344077325 | 0.315691373 |
| 0.089334519 | 0.471036049 | 0.344231696 | 0.479901456 |
| 0.384617895 | 0.501375743 | 0.448631364 | 0.415051066 |
| 0.290164459 | 0.358761673 | 0.231710661 | 0.411514012 |
| 0.442663139 | 0.327750626 | 0.048588802 | 0.415268028 |
| 0.333004443 | 1           | 0.177146452 | 0.476603869 |
| 0.440712705 | 0.395756503 | 0.155136322 | 0.369778245 |
| 0.350212611 | 0.192923022 | 0.380982245 | 0.500789483 |
| 0.2903139   | 0.373548369 | 0.366036136 | 0.407808522 |
| 0.144725274 | 0.28650551  | 0.276787161 | 0.267309972 |
| 0.017492589 | 0.064622929 | 0.050683471 | 0.180130244 |
| 0.258387067 | 0.333239995 | 0.351999296 | 0.48502849  |
| 0.110883562 | 0.371705786 | 0.192579229 | 0.321323572 |
| 0.385023697 | 0.356023744 | 0.35917228  | 0.355407686 |
| 0.196015276 | 0.018810658 | 0.119049209 | 0.464098336 |
| 0.026193246 | 0.312116134 | 0.262921709 | 0.003258374 |
| 0.039620274 | 0.349079474 | 0.069155651 | 0.155753944 |
| 0.474743314 | 0.155752079 | 0.167896177 | 0.281188318 |
| 0.300283424 | 0.077728064 | 0.003849147 | 0.458781876 |
| 0.441786806 | 0.417900193 | 0.438931959 | 0.393191544 |
| 0.424019798 | 0.34298461  | 0.402273154 | 0.250484538 |
| 0.101219153 | 0.069722787 | 0.316614881 | 0.307491921 |

|             |             |             |             |
|-------------|-------------|-------------|-------------|
| 0.004703307 | 0.34556475  | 0.305661323 | 0.1155428   |
| 0.393366926 | 0.267203506 | 0.03221764  | 0.343876829 |
| 0.017882556 | 0.287504432 | 0.273042028 | 0.225914377 |
| 0.338079255 | 0.010250907 | 0.216073228 | 0.37720953  |
| 0.362364664 | 0.295326951 | 0.363391444 | 0.4789243   |
| 0.301873093 | 0.085450343 | 0.31738699  | 0.356993229 |
| 0.068257297 | 0.148025298 | 0.292427293 | 0.033045222 |
| 0.171118847 | 0.39915631  | 0.358693989 | 0.05851535  |
| 0.242416857 | 0.003557795 | 0.313939857 | 0.484536312 |
| 0.394255029 | 0.502767893 | 0.460917547 | 0.328028967 |
| 0.459326349 | 0.181790568 | 0.489849916 | 0.352209316 |
| 0.322591552 | 0.000910218 | 0.006397201 | 0.473606066 |
| 0.376145663 | 0.034535207 | 0.136824481 | 0.274851417 |
| 0.112132804 | 0.114476388 | 0.057556495 | 0.260898223 |
| 0.323560077 | 0.270488856 | 0.254067794 | 0.411990346 |
| 0.239770509 | 0.219419756 | 0.306100142 | 0.062649442 |
| 0.351103918 | 0.049514015 | 0.064019491 | 0.009900373 |
| 0.332686574 | 0.08168726  | 0.388364736 | 0.458287183 |
| 0.460185703 | 0.35548916  | 0.291624027 | 0.286076444 |
| 0.414827384 | 0.060925679 | 0.330038016 | 0.074756735 |
| 0.427705705 | 0.368872524 | 0.285505491 | 0.262304395 |
| 0.484519445 | 0.428964031 | 0.029814629 | 0.39081499  |
| 0.010274825 | 0.003282093 | 0.276087823 | 0.22024265  |
| 0.094871444 | 0.375317036 | 0.21433796  | 0.223224028 |
| 0.222539891 | 0.025765686 | 0.34087337  | 0.339505381 |
| 0.282465194 | 0.350162492 | 0.330423749 | 0.195342541 |
| 0.299378726 | 0.222768357 | 0.195005548 | 0.156488115 |
| 0.251682549 | 0.262382143 | 0.153242127 | 0.018679107 |
| 0.340497315 | 0.378620901 | 0.048612467 | 0.123077545 |
| 0.419321508 | 0.474873694 | 0.047925159 | 0.013867177 |
| 0.220296838 | 0.328878596 | 0.490375241 | 0.444642024 |
| 0.460507144 | 0.491593823 | 0.343033497 | 0.166631183 |
| 0.057670834 | 0.307289514 | 0.341815661 | 0.137639801 |
| 0.471172417 | 0.046499142 | 0.419961563 | 0.352320052 |
| 0.09684756  | 0.201784631 | 0.035690716 | 0.075467174 |
| 0.367406185 | 0.15207186  | 0.196339251 | 0.107387265 |
| 0.325566857 | 0.324253571 | 0.043682876 | 0.178774826 |
| 0.308104782 | 0.286891907 | 0.142909167 | 0.243369163 |
| 0.291903574 | 0.189218885 | 0.397878043 | 0.419599926 |
| 0.097886277 | 0.094684305 | 0.218514072 | 0.338191899 |
| 0.414267341 | 0.318003435 | 0.022294236 | 0.393762832 |
| 0.465781549 | 0.362698143 | 0.433327743 | 0.392671923 |
| 0.064797713 | 0.366518849 | 0.351732636 | 0.355075948 |
| 0.169085272 | 0.286897203 | 0.230653291 | 0.05124318  |
| 0.261681322 | 0.421016949 | 0.380557569 | 0.164604944 |
| 0.329451891 | 0.088690176 | 0.03969588  | 0.40594682  |
| 0.285383754 | 0.081989045 | 0.261857015 | 0.415294647 |
| 0.003065791 | 0.233034118 | 0.476502939 | 0.216294771 |
| 0.469838986 | 0.471734785 | 0.40078669  | 0.210041042 |
| 0.008767174 | 0.372737887 | 0.338205015 | 0.363259953 |
| 0.390252001 | 0.280756102 | 0.133467306 | 0.081919303 |
| 0.254231572 | 0.052710427 | 0.159309347 | 0.254833742 |
| 0.25128704  | 0.31784031  | 0.168524516 | 0.182050487 |
| 0.219981779 | 0.063274676 | 0.297026219 | 0.207691721 |

|             |             |             |             |
|-------------|-------------|-------------|-------------|
| 0.229060073 | 0.201067395 | 0.324993691 | 0.218629023 |
| 0.293724438 | 0.427378581 | 0.368126597 | 0.020192173 |
| 0.354021552 | 0.388441315 | 0.40054332  | 0.003939094 |
| 0.38662683  | 0.006842035 | 0.219226951 | 0.229617471 |
| 0.209486978 | 0.233726379 | 0.27002364  | 0.318001655 |
| 0.300600145 | 0.214880984 | 0.256847095 | 0.212753303 |
| 0.17348724  | 0.193017716 | 0.353446542 | 0.292981868 |
| 0.297687813 | 0.108151216 | 0.070938735 | 0.072418928 |
| 0.050283503 | 0.417045483 | 0.201838902 | 0.04650789  |
| 0.209509939 | 0.321726769 | 0.327694319 | 0.431382515 |
| 0.394485112 | 0.076526465 | 0.31265903  | 0.393359575 |
| 0.260152765 | 0.259300473 | 0.051119035 | 0.303468578 |
| 0.206043485 | 0.278121552 | 0.302739792 | 0.237200828 |
| 0.339774937 | 0.354179417 | 0.193614754 | 0.397926437 |
| 0.339068271 | 0.319748804 | 0.243940067 | 0.098256617 |
| 0.158332928 | 0.099465075 | 0.314994903 | 0.001320696 |
| 0.297898067 | 0.199194169 | 0.45330809  | 0.422604792 |
| 0.340831097 | 0.346267087 | 0.236276995 | 0.08412646  |
| 0.207816768 | 0.137205192 | 0.113099451 | 0.376538162 |
| 0.297174791 | 0.159602922 | 0.323322367 | 0.228401201 |
| 0.395234623 | 0.365857463 | 0.291475731 | 0.220543927 |
| 0.220449465 | 0.145953346 | 0.415645611 | 0.089388078 |
| 0.350290937 | 0.254970717 | 0.256433144 | 0.311384807 |
| 0.251351023 | 0.481744779 | 0.045652349 | 0.49723652  |
| 0.357470469 | 0.091937843 | 0.44371716  | 0.234740366 |
| 0.237109874 | 0.134257771 | 0.283894621 | 0.295831868 |
| 0.228936251 | 0.348506482 | 0.026239542 | 0.127350787 |
| 0.294069875 | 0.28259031  | 0.353291305 | 0.320645677 |
| 0.303052887 | 0.328354019 | 0.233210905 | 0.254131901 |
| 0.406403362 | 0.419460611 | 0.268099303 | 0.215591224 |
| 0.295819109 | 0.095189157 | 0.276776608 | 0.028555215 |
| 0.373707859 | 0.364572801 | 0.333890067 | 0.049952569 |
| 0.016751631 | 0.313918022 | 0.355829056 | 0.047841951 |
| 0.483290834 | 0.285826616 | 0.276864832 | 0.355355595 |
| 0.133368196 | 0.42333007  | 0.146962357 | 0.363082603 |
| 0.04288307  | 0.214092962 | 0.351583546 | 0.331521704 |
| 0.264200961 | 0.352893948 | 0.348557579 | 0.308067269 |
| 0.03126486  | 0.284787816 | 0.003874917 | 0.349307515 |
| 0.394840194 | 0.37240728  | 0.163698591 | 0.256395017 |
| 0.248673587 | 0.337815208 | 0.287616743 | 0.340892042 |
| 0.011050997 | 0.373012165 | 0.175250611 | 0.355581747 |
| 0.286125168 | 0.323408971 | 0.057115541 | 0.349207788 |
| 0.371763155 | 0.334842619 | 0.216955867 | 0.340162396 |
| 0.427524202 | 0.325853926 | 0.108495703 | 0.24511878  |
| 0.303809356 | 0.046610761 | 0.283865927 | 0.489217619 |
| 0.184201499 | 0.298939397 | 0.449980237 | 0.221018033 |
| 0.356888286 | 0.330440369 | 0.329489413 | 0.474185547 |
| 0.103592451 | 0.214304789 | 0.394560783 | 0.429486409 |
| 0.274913401 | 0.260853254 | 0.325118114 | 0.28243281  |
| 0.387814938 | 0.085358216 | 0.335168595 | 0.296433286 |
| 0.318214874 | 0.266195298 | 0.242340538 | 0.244699686 |
| 0.037980546 | 0.166989826 | 0.297838635 | 0.115082784 |
| 0.282722666 | 0.348271663 | 0.296100406 | 0.354750201 |
| 0.143020879 | 0.027087577 | 0.41712903  | 0.053255059 |



|             |             |             |             |
|-------------|-------------|-------------|-------------|
| 0.237073437 | 0.343056777 | 0.20877718  | 0.357107246 |
| 0.140215503 | 0.295552472 | 0.264197417 | 0.000797517 |
| 0.392255478 | 0.06982582  | 0.289441259 | 0.274770344 |
| 0.328214588 | 0.045398928 | 0.395807974 | 0.499742828 |
| 0.244423233 | 0.292191359 | 0.351118211 | 0.411072286 |
| 0.24241951  | 0.330577327 | 0.356257445 | 0.305765596 |
| 0.305556405 | 0.31333345  | 0.350718655 | 0.358128051 |
| 0.304066724 | 0.219774048 |             |             |
| FCF1        | 0.037989406 | 0.105663616 | 0.019498054 |
| 0.017428025 | 0.259840726 | 0.049605507 | 0.049150437 |
| 0.071243897 | 0.12129766  | 0.018092185 | 0.127423572 |
| 0.011340298 | 0.029135345 | 0.163445311 | 0.0513241   |
| 0.146941286 | 0.044595863 | 0.101244963 | 0.007914075 |
| 0.012194217 | 0.207635882 | 0.042469272 | 0.047465803 |
| 0.227454875 | 0.098950138 | 0.082942275 | 0.109074209 |
| 0.143294615 | 0.00882031  | 0.121242559 | 0.002453706 |
| 0.177754762 | 0.204139222 | 0.071292807 | 0.01110432  |
| 0.084173809 | 0.017800124 | 0.166726327 | 0.124093649 |
| 0.02281288  | 0.158931088 | 0.027474356 | 0.104453463 |
| 0.049204284 | 0.017521594 | 0.002926197 | 0.13828341  |
| 0.119491481 | 0.110796558 | 0.025779438 | 0.121948283 |
| 0.061200339 | 0.11507134  | 0.062918822 | 0.000451889 |
| 0.088063422 | 0.017941652 | 0.05180443  | 0.150362969 |
| 0.158615793 | 0.129245783 | 0.018892501 | 0.094124292 |
| 0.107550071 | 0.182808035 | 0.246913448 | 0.035698487 |
| 0.148316417 | 0.064032776 | 0.142074772 | 0.009396422 |
| 0.054545458 | 0.029519353 | 0.162293516 | 0.062767756 |
| 0.065268848 | 0.190687283 | 0.15373388  | 0.13543901  |
| 0.090660229 | 0.190005742 | 0.204616858 | 0.138232028 |
| 0.02729882  | 0.190147469 | 0.166186834 | 0.258460871 |
| 0.164513192 | 0.059814565 | 0.148171696 | 0.184424553 |
| 0.043323062 | 0.05150414  | 0.115363035 | 0.068384309 |
| 0.122961701 | 0.072271927 | 0.038075595 | 0.090245949 |
| 0.243932475 | 0.157895384 | 0.157086444 | 0.138546303 |
| 0.169771115 | 0.038678316 | 0.126807645 | 0.199090639 |
| 0.097429984 | 0.053956395 | 0.108889813 | 0.159180878 |
| 0.113297822 | 0.145847211 | 0.108497587 | 0.166373741 |
| 0.133467426 | 0.155953846 | 0.139898628 | 0.148978874 |
| 0.002239581 | 0.15480989  | 0.112792432 | 0.038880153 |
| 0.035683729 | 0.107983688 | 0.098819342 | 0.238914735 |
| 0.155623858 | 0.171120573 | 0.086667706 | 0.198136582 |
| 0.197693186 | 0.11572699  | 0.147659023 | 0.148662516 |
| 0.037523362 | 0.08466476  | 0.132972585 | 0.063859825 |
| 0.134992628 | 0.136071771 | 0.160810583 | 0.146869958 |
| 0.166827292 | 0.168376304 | 0.068721695 | 0.17657947  |
| 0.10139235  | 0.19866042  | 0.103090531 | 0.119402809 |
| 0.170958533 | 0.141384955 | 0.20863971  | 0.181653817 |
| 0.161981534 | 0.077157873 | 0.003007238 | 0.159110126 |
| 0.211473603 | 0.003418875 | 0.151978787 | 0.166087186 |
| 0.134910354 | 0.153596818 | 0.211402072 | 0.173744671 |
| 0.134210639 | 0.086775302 | 0.001706106 | 0.23954691  |
| 0.145378978 | 0.171997267 | 0.130461079 | 0.077798525 |
| 0.165201255 | 0.05049524  | 0.150039299 | 0.005553163 |
| 0.221028679 | 0.17939173  | 0.146691787 | 0.128422401 |

|             |             |             |             |
|-------------|-------------|-------------|-------------|
| 0.079208311 | 0.163816769 | 0.107960647 | 0.12133452  |
| 0.046016291 | 0.041305146 | 0.035766859 | 0.21236086  |
| 0.019575192 | 0.208457959 | 0.050948621 | 0.166289542 |
| 0.190443393 | 0.058400408 | 0.07228624  | 0.212218457 |
| 0.039949028 | 0.062394273 | 0.124887728 | 0.075056169 |
| 0.050679098 | 0.11652476  | 0.020918698 | 0.050053042 |
| 0.180155386 | 0.103352625 | 0.11301612  | 0.190738524 |
| 0.104983623 | 0.085008759 | 0.105290687 | 0.225930871 |
| 0.235761365 | 0.142296936 | 0.163821476 | 0.003174159 |
| 0.028794738 | 0.03381956  | 0.077146172 | 0.101462356 |
| 0.112689429 | 0.043017394 | 0.131965938 | 0.209035463 |
| 0.055804381 | 0.056472466 | 0.06659476  | 0.17924936  |
| 0.071785022 | 0.093073743 | 0.178696827 | 0.07586419  |
| 0.002184431 | 0.096428138 | 0.14241238  | 0.070259504 |
| 0.118043743 | 0.008650844 | 0.037421934 | 0.166950028 |
| 0.04210477  | 0.128511566 | 0.166425045 | 0.224739084 |
| 0.008429455 | 0.091909913 | 0.196759147 | 0.004362885 |
| 0.157625108 | 0.028983546 | 0.23257684  | 0.036320267 |
| 0.132719058 | 0.24862156  | 0.185150031 | 0.178852697 |
| 0.054267267 | 0.15174661  | 0.186621475 | 0.156669214 |
| 0.053733215 | 0.197583428 | 0.154843769 | 0.162022428 |
| 0.146479657 | 0.079974207 | 0.032319341 | 0.142352262 |
| 0.17011675  | 0.01261662  | 0.042787787 | 0.122617754 |
| 0.057600335 | 0.177146452 | 1           | 0.18233895  |
| 0.206279585 | 0.106919536 | 0.100178927 | 0.251461825 |
| 0.16693623  | 0.101326075 | 0.216810762 | 0.205084076 |
| 0.019881083 | 0.107997059 | 0.092306064 | 0.281668477 |
| 0.127948926 | 0.107122494 | 0.21010018  | 0.060125801 |
| 0.0012498   | 0.056838006 | 0.049636161 | 0.174302443 |
| 0.153775762 | 0.081379949 | 0.184354872 | 0.166530517 |
| 0.099326106 | 0.178486264 | 0.173435292 | 0.065110573 |
| 0.133377799 | 0.10797744  | 0.138366423 | 0.174155672 |
| 0.208787033 | 0.006562926 | 0.015072505 | 0.185245605 |
| 0.02985698  | 0.090455885 | 0.089265646 | 0.000296805 |
| 0.024885402 | 0.084594477 | 0.07181024  | 0.132204532 |
| 0.21156531  | 0.122274003 | 0.097457993 | 0.024299441 |
| 0.234749394 | 0.096222354 | 0.004610252 | 0.165411044 |
| 0.169553525 | 0.171109171 | 0.159880494 | 0.147578177 |
| 0.17771236  | 0.149832505 | 0.203821483 | 0.05638959  |
| 0.073803318 | 0.053406415 | 0.073897293 | 0.149235922 |
| 0.000142255 | 0.24408572  | 0.209549753 | 0.128753598 |
| 0.16584258  | 0.182353712 | 0.02556101  | 0.181350128 |
| 0.002805155 | 0.050666682 | 0.034015903 | 0.182902968 |
| 0.276789159 | 0.015215159 | 0.002527693 | 0.031640209 |
| 0.112134409 | 0.123813129 | 0.091416894 | 0.171372565 |
| 0.141291575 | 0.041711719 | 0.169278508 | 0.195255014 |
| 0.060841628 | 0.006040419 | 0.045901869 | 0.000421337 |
| 0.007178128 | 0.171176744 | 0.08136305  | 0.020047223 |
| 0.133424615 | 0.004238857 | 0.121021977 | 0.171034442 |
| 0.113115857 | 0.181121336 | 0.160644362 | 0.119618543 |
| 0.152742649 | 0.014662764 | 0.159638863 | 0.102395845 |
| 0.027891174 | 0.000226018 | 0.001409678 | 0.171075044 |
| 0.123988744 | 0.032232013 | 0.134534397 | 0.014244797 |
| 0.045632289 | 0.029594021 | 0.07189724  | 0.173626305 |

|             |             |             |             |
|-------------|-------------|-------------|-------------|
| 0.106810775 | 0.231310734 | 0.125562131 | 0.122813335 |
| 0.149909881 | 0.202184161 | 0.039014438 | 0.070478505 |
| 0.150720574 | 0.034143834 | 0.083214263 | 0.001225916 |
| 0.227618374 | 0.070111732 | 0.134977675 | 0.14343268  |
| 0.200268605 | 0.234250602 | 0.020105982 | 0.00944831  |
| 0.188518138 | 0.026091766 | 0.030504232 | 0.037013466 |
| 0.117726169 | 0.144191904 | 0.189723575 | 0.136738107 |
| 0.189131928 | 0.160926926 | 0.038775771 | 0.177224466 |
| 0.001944516 | 0.001904332 | 0.042525311 | 0.192497422 |
| 0.012423414 | 0.092532439 | 0.176247482 | 0.091884438 |
| 0.11667452  | 0.004091923 | 0.1080714   | 0.14924997  |
| 0.207626362 | 0.130045908 | 0.199292028 | 0.179758947 |
| 0.206205749 | 0.047237725 | 0.16953145  | 0.116476037 |
| 0.015932975 | 0.121291701 | 0.092699417 | 0.027470279 |
| 0.065365293 | 0.100219555 | 0.056494872 | 0.133379564 |
| 0.165476259 | 0.155417976 | 0.017541504 | 0.005137931 |
| 0.16045925  | 0.132894084 | 0.182301047 | 0.128898006 |
| 0.154093446 | 0.199571921 | 0.18715777  | 0.10134878  |
| 0.047453677 | 0.211584817 | 0.238300444 | 0.135198538 |
| 0.153656788 | 0.033938628 | 0.14134393  | 0.161862111 |
| 0.135208386 | 0.106077425 | 0.022225042 | 0.115560347 |
| 0.130880865 | 0.155019115 | 0.218319757 | 0.052027861 |
| 0.102202948 | 0.102209508 | 0.064197682 | 0.14230845  |
| 0.154892281 | 0.047357413 | 0.148440766 | 0.085795516 |
| 0.162269868 | 0.009150714 | 0.153611323 | 0.196673267 |
| 0.083401009 | 0.084834991 | 0.017772433 | 0.198229922 |
| 0.127187703 | 0.059643567 | 0.001699906 | 0.101030942 |
| 0.190331984 | 0.101232638 | 0.13844627  | 0.236450829 |
| 0.09244083  | 0.105026182 | 0.105817232 | 0.166504979 |
| 0.163180215 | 0.05728867  | 0.187758183 | 0.076924799 |
| 0.226123852 | 0.179146564 | 0.136796769 | 0.127018659 |
| 0.087209721 | 0.045487314 | 0.027852597 | 0.148941296 |
| 0.10033294  | 0.012865941 | 0.025390026 | 0.157433826 |
| 0.008999659 | 0.09094059  | 0.217337451 | 0.076951536 |
| 0.203209881 | 0.191127562 | 0.174667449 | 0.083548346 |
| 0.008703006 | 0.16945762  | 0.131116743 | 0.080215341 |
| 0.109495477 | 0.139041062 | 0.022145682 | 0.061720729 |
| 0.236829278 | 0.036057064 | 0.049629069 | 0.007161771 |
| 0.007182254 | 0.075545029 | 0.206331673 | 0.138768487 |
| 0.237047439 | 0.051415305 | 0.061678149 | 0.142994424 |
| 0.048476682 | 0.202216057 | 0.182896663 | 0.016643426 |
| 0.01458588  | 0.186600009 | 0.121213713 | 0.021332691 |
| 0.145342917 | 0.178738028 | 0.213303822 | 0.000392876 |
| 0.140284326 | 0.00871179  | 0.177690711 | 0.168505842 |
| 0.184262938 | 0.145209161 | 0.270947384 | 0.157820607 |
| 0.12393141  | 0.156938709 | 0.115958766 | 0.18296918  |
| 0.128554778 | 0.189264277 | 0.191177    | 0.090634561 |
| 0.099576528 | 0.06872485  | 0.077791446 | 0.061255264 |
| 0.015184045 | 0.141318833 | 0.153989264 | 0.045041272 |
| 0.203850531 | 0.102968642 | 0.241038295 | 0.121816913 |
| 0.242278316 | 0.044557805 | 0.108374504 | 0.106805853 |
| 0.003573608 | 0.005792256 | 0.026163297 | 0.115392761 |
| 0.145260016 | 0.051969636 | 0.078821385 | 0.051150875 |
| 0.092658028 | 0.176815205 | 0.147215106 | 0.201905412 |

|             |             |             |             |
|-------------|-------------|-------------|-------------|
| 0.161829546 | 0.099427919 | 0.016318848 | 0.048559813 |
| 0.079659742 | 0.108963426 | 0.220817896 | 0.000998741 |
| 0.140913188 | 0.02274781  | 0.140291464 | 0.133596356 |
| 0.078392202 | 0.21837819  | 0.00394969  | 0.029404987 |
| 0.008906512 | 0.062194811 | 0.127932108 | 0.143263024 |
| 0.054485939 | 0.106247385 | 0.252187532 | 0.02097169  |
| 0.174907237 | 0.139744874 | 0.146697118 | 0.09514988  |
| 0.221067392 | 0.107230563 | 0.171713324 | 0.05752835  |
| 0.078620867 | 0.151315597 | 0.054072627 | 0.12422728  |
| 0.20404267  | 0.176478403 | 0.066687521 | 0.166083071 |
| 0.102872771 | 0.095959833 | 0.205920725 | 0.109368134 |
| 0.085408464 | 0.071270145 | 0.084007939 | 0.040415155 |
| 0.084285446 | 0.073696872 | 0.000301199 | 0.005961315 |
| 0.20095277  | 0.068853496 | 0.088844141 | 0.198903434 |
| 0.206636272 | 0.268529937 | 0.028617545 | 0.090884567 |
| 0.11234014  | 0.143757739 | 0.026779179 | 0.237866854 |
| 0.14376232  | 0.072219094 | 0.061235783 | 0.004036919 |
| 0.096971046 | 0.085262769 | 0.019780683 | 0.054540569 |
| 0.012348301 | 0.082113758 | 0.104167151 | 0.054363722 |
| 0.204706998 | 0.02226052  | 0.086976459 | 0.151038457 |
| 0.138891095 | 0.146017306 | 0.13630872  | 0.169380689 |
| 0.011947467 | 0.218377343 | 0.12133857  | 0.075539861 |
| 0.065853091 | 0.148149498 | 0.211405979 | 0.13277483  |
| 0.040977279 | 0.062529494 | 0.002310977 | 0.160861221 |
| 0.12494246  | 0.13094724  | 0.150608013 | 0.017591844 |
| 0.255911024 | 0.202270163 | 0.02755231  | 0.07733764  |
| 0.00455315  | 0.157671085 | 0.202909859 | 0.118428402 |
| 0.012916105 | 0.097060086 | 0.039646941 | 0.171423575 |
| 0.132318887 | 0.022290072 | 0.19293297  | 0.024526226 |
| 0.134044515 | 0.144857298 | 0.069047914 | 0.114961464 |
| 0.08689785  | 0.060455778 | 0.031327122 | 0.180864309 |
| 0.152660463 | 0.175008078 | 0.19071613  | 0.101800891 |
| 0.11859263  | 0.157512994 | 0.0891499   | 0.175014901 |
| 0.087533276 | 0.19910744  | 0.188254043 | 0.156146718 |
| 0.261802676 | 0.179380752 | 0.086024329 | 0.131578925 |
| 0.11011871  | 0.013035364 | 0.10742371  | 0.157243514 |
| 0.09768057  | 0.200651553 | 0.063256397 | 0.204917049 |
| 0.004489579 | 0.108114856 | 0.042419962 | 0.13730203  |
| 0.170789011 | 0.154748692 | 0.162502979 | 0.225929976 |
| 0.040343284 | 0.004728944 | 0.235831848 | 0.003211855 |
| 0.065925104 | 0.166461365 | 0.165941972 | 0.173581355 |
| 0.105605989 | 0.116866232 | 0.049187082 | 5.98E-05    |
| 0.186053847 | 0.036004201 | 0.118224755 | 0.088679004 |
| 0.012492937 | 0.030608404 | 0.156413783 | 0.191183193 |
| 0.159093725 | 0.019473352 | 0.020132366 | 0.138631678 |
| 0.019642217 | 0.046218975 | 0.053426094 | 0.086721337 |
| 0.121369805 | 0.035941785 | 0.059115156 | 0.07297586  |
| 0.131209168 | 0.106004376 |             |             |
| FEN1        | 0.153741908 | 0.450519034 | 0.121728343 |
| 0.271533213 | 0.398751611 | 0.484118304 | 0.130336587 |
| 0.224836517 | 0.406654943 | 0.342734343 | 0.474024638 |
| 0.055660673 | 0.109643258 | 0.491273546 | 0.119541168 |
| 0.474438236 | 0.088882353 | 0.207461563 | 0.110956905 |
| 0.320980752 | 0.382426831 | 0.416484331 | 0.457995908 |

|             |             |             |             |
|-------------|-------------|-------------|-------------|
| 0.374197958 | 0.267509781 | 0.437649893 | 0.430188076 |
| 0.491968397 | 0.311793359 | 0.50537613  | 0.253602692 |
| 0.443309425 | 0.415639729 | 0.438673993 | 0.050751709 |
| 0.490572288 | 0.017562119 | 0.456222243 | 0.39437335  |
| 0.220004141 | 0.406626338 | 0.392973175 | 0.382410372 |
| 0.444800893 | 0.095374456 | 0.238343178 | 0.467112025 |
| 0.41415061  | 0.377880012 | 0.131836921 | 0.49988677  |
| 0.435922247 | 0.442951271 | 0.4409699   | 0.005558727 |
| 0.361787492 | 0.105158558 | 0.269311297 | 0.504064376 |
| 0.320634884 | 0.227957652 | 0.322807155 | 0.330964521 |
| 0.446178473 | 0.446284908 | 0.354190004 | 0.434114454 |
| 0.502170642 | 0.227024457 | 0.480828111 | 0.2619187   |
| 0.482176086 | 0.076417081 | 0.263901182 | 0.150232144 |
| 0.459618874 | 0.317617004 | 0.432890979 | 0.378615372 |
| 0.448866971 | 0.522168402 | 0.345573611 | 0.501200692 |
| 0.137416404 | 0.410565264 | 0.365525191 | 0.407383824 |
| 0.439133214 | 0.156216868 | 0.51018999  | 0.527932271 |
| 0.101358025 | 0.432640385 | 0.476396192 | 0.206193052 |
| 0.472807011 | 0.318084547 | 0.452676709 | 0.237013381 |
| 0.445304257 | 0.43485011  | 0.475656202 | 0.420036213 |
| 0.387870847 | 0.145905799 | 0.489379011 | 0.391906512 |
| 0.417829737 | 0.168235994 | 0.32793633  | 0.498309021 |
| 0.512353951 | 0.498250644 | 0.470832437 | 0.449389544 |
| 0.463424395 | 0.500796146 | 0.507538231 | 0.456504348 |
| 0.168167422 | 0.520572643 | 0.314156066 | 0.102346914 |
| 0.142628691 | 0.165224349 | 0.294268061 | 0.38864776  |
| 0.50427266  | 0.433217567 | 0.326883055 | 0.359245048 |
| 0.494017558 | 0.477701938 | 0.517344787 | 0.487563548 |
| 0.097827315 | 0.295806244 | 0.473012954 | 0.37493377  |
| 0.470982113 | 0.1981711   | 0.33936252  | 0.516507479 |
| 0.456619246 | 0.500634438 | 0.271801018 | 0.510006827 |
| 0.294133757 | 0.52081783  | 0.481440439 | 0.300221143 |
| 0.525129048 | 0.503035199 | 0.512710384 | 0.472284966 |
| 0.48107046  | 0.472821684 | 0.088856099 | 0.452705887 |
| 0.490476353 | 0.02738159  | 0.49550866  | 0.500037993 |
| 0.499936691 | 0.510027901 | 0.516059843 | 0.498957922 |
| 0.500323752 | 0.147581891 | 0.036934505 | 0.395473388 |
| 0.514123479 | 0.480287155 | 0.214708971 | 0.482910454 |
| 0.441689953 | 0.493030638 | 0.475893797 | 0.404317741 |
| 0.51830147  | 0.494862529 | 0.492447433 | 0.474885089 |
| 0.383739606 | 0.38607016  | 0.429397823 | 0.476738013 |
| 0.106125491 | 0.216138849 | 0.112293537 | 0.391894939 |
| 0.414088646 | 0.290399782 | 0.482578791 | 0.420827353 |
| 0.311881471 | 0.424919472 | 0.378069864 | 0.455897308 |
| 0.109965007 | 0.505869531 | 0.279801892 | 0.288173928 |
| 0.108097089 | 0.218565135 | 0.319887973 | 0.272649982 |
| 0.366073005 | 0.270142682 | 0.493550928 | 0.490606222 |
| 0.422524851 | 0.290852115 | 0.504054014 | 0.47831517  |
| 0.457134046 | 0.464938833 | 0.326709454 | 0.04015839  |
| 0.389579373 | 0.341296752 | 0.2323159   | 0.460088031 |
| 0.230605055 | 0.368066144 | 0.479005358 | 0.475590893 |
| 0.409759072 | 0.230281799 | 0.452898246 | 0.444004559 |
| 0.239302265 | 0.41801393  | 0.50376405  | 0.471646533 |
| 0.013475537 | 0.467318009 | 0.512264372 | 0.226920882 |

|             |             |             |             |
|-------------|-------------|-------------|-------------|
| 0.415632257 | 0.197648443 | 0.318336748 | 0.503150103 |
| 0.349580154 | 0.299108663 | 0.49471367  | 0.463043131 |
| 0.415943576 | 0.262188578 | 0.519232805 | 0.066210818 |
| 0.403507701 | 0.109656488 | 0.400851438 | 0.378201779 |
| 0.384314902 | 0.390517828 | 0.394152313 | 0.380516356 |
| 0.222714848 | 0.516017852 | 0.460269371 | 0.506430708 |
| 0.449944197 | 0.524378673 | 0.51070745  | 0.496823932 |
| 0.467324642 | 0.412078399 | 0.177350529 | 0.515668663 |
| 0.503688658 | 0.373156924 | 0.141965357 | 0.484921817 |
| 0.426159729 | 0.476603869 | 0.18233895  | 1           |
| 0.503604546 | 0.46780545  | 0.250656252 | 0.454375311 |
| 0.482638013 | 0.368771576 | 0.469975439 | 0.522788151 |
| 0.369637833 | 0.443690888 | 0.438519841 | 0.466027613 |
| 0.296564769 | 0.299059089 | 0.380314521 | 0.21569994  |
| 0.014088323 | 0.157091382 | 0.140918171 | 0.272972586 |
| 0.237839243 | 0.458860745 | 0.479633657 | 0.513760988 |
| 0.221333527 | 0.460550593 | 0.326883965 | 0.426168489 |
| 0.460998491 | 0.418057061 | 0.439812159 | 0.458382898 |
| 0.343984693 | 0.054037092 | 0.228500069 | 0.528282414 |
| 0.087284183 | 0.31615848  | 0.409770419 | 0.009028069 |
| 0.109320451 | 0.448824503 | 0.164016518 | 0.260005274 |
| 0.489494582 | 0.265494068 | 0.33026985  | 0.387969817 |
| 0.444471629 | 0.18324493  | 0.010950628 | 0.480352468 |
| 0.472816089 | 0.444430568 | 0.471244949 | 0.450856335 |
| 0.459727234 | 0.45643549  | 0.486621628 | 0.455555394 |
| 0.204252403 | 0.171490978 | 0.305237389 | 0.414057516 |
| 0.011640693 | 0.465639253 | 0.384083599 | 0.247571285 |
| 0.483771149 | 0.401348442 | 0.093867404 | 0.417495235 |
| 0.067267062 | 0.259370893 | 0.409123717 | 0.314712937 |
| 0.422765726 | 0.043815235 | 0.348661425 | 0.412424438 |
| 0.443023279 | 0.428948016 | 0.414754309 | 0.527346638 |
| 0.454074156 | 0.210423474 | 0.434698372 | 0.474179883 |
| 0.155869323 | 0.147810987 | 0.440924862 | 0.057998543 |
| 0.249019488 | 0.445379655 | 0.436110432 | 0.156797075 |
| 0.410675103 | 0.019821937 | 0.445118861 | 0.5283323   |
| 0.464516194 | 0.512335681 | 0.502033109 | 0.351596832 |
| 0.508947628 | 0.121596457 | 0.520969104 | 0.476033646 |
| 0.437196124 | 0.003843835 | 0.0155849   | 0.506726307 |
| 0.490756693 | 0.110975306 | 0.27462534  | 0.458323023 |
| 0.224038441 | 0.260630523 | 0.13358529  | 0.270167967 |
| 0.496100595 | 0.339897149 | 0.240474821 | 0.47109465  |
| 0.371603623 | 0.340863421 | 0.460259505 | 0.160819874 |
| 0.471722721 | 0.128886585 | 0.157688871 | 0.02249879  |
| 0.445148215 | 0.186592894 | 0.476503077 | 0.504218155 |
| 0.501219758 | 0.474656419 | 0.380465902 | 0.414184788 |
| 0.463654262 | 0.171806421 | 0.409177531 | 0.19562779  |
| 0.48453795  | 0.489943363 | 0.435197147 | 0.414247351 |
| 0.505527751 | 0.478799186 | 0.084834937 | 0.494079364 |
| 0.041681932 | 0.004274736 | 0.480073578 | 0.357834168 |
| 0.077695563 | 0.457141933 | 0.370462989 | 0.307258121 |
| 0.307613999 | 0.082456719 | 0.334224788 | 0.319218847 |
| 0.420264657 | 0.465557276 | 0.364660881 | 0.327467136 |
| 0.35701292  | 0.2170919   | 0.304367229 | 0.249546694 |
| 0.295367094 | 0.394591046 | 0.275174296 | 0.059428962 |

|             |             |             |             |
|-------------|-------------|-------------|-------------|
| 0.488920426 | 0.487118314 | 0.130611823 | 0.260244262 |
| 0.509418572 | 0.510333453 | 0.105391943 | 0.039424082 |
| 0.367746195 | 0.401284554 | 0.501838258 | 0.491833213 |
| 0.527072573 | 0.523677395 | 0.410658435 | 0.216793357 |
| 0.1458829   | 0.425616122 | 0.37422931  | 0.177408202 |
| 0.505282903 | 0.131210477 | 0.479525585 | 0.362904687 |
| 0.207340052 | 0.353655845 | 0.089686728 | 0.167142387 |
| 0.445413859 | 0.285853874 | 0.291373518 | 0.252943007 |
| 0.435557521 | 0.315806084 | 0.109935092 | 0.321582852 |
| 0.452144388 | 0.250898734 | 0.272976855 | 0.392447624 |
| 0.436114881 | 0.248987163 | 0.498588429 | 0.463739886 |
| 0.228615508 | 0.202966641 | 0.413482126 | 0.445188534 |
| 0.503065106 | 0.434197573 | 0.066965407 | 0.457009175 |
| 0.486714147 | 0.50916435  | 0.498214795 | 0.45405271  |
| 0.16085714  | 0.473467213 | 0.366659665 | 0.441546338 |
| 0.291260684 | 0.4790196   | 0.337838595 | 0.13340565  |
| 0.36355899  | 0.484275574 | 0.472970212 | 0.287977676 |
| 0.471237015 | 0.211140916 | 0.118408791 | 0.472346227 |
| 0.267577889 | 0.188422567 | 0.411165364 | 0.476070173 |
| 0.005890794 | 0.181272565 | 0.476211719 | 0.35414958  |
| 0.5117489   | 0.502169592 | 0.467923852 | 0.340337463 |
| 0.002796828 | 0.472455551 | 0.491969115 | 0.503252858 |
| 0.479293923 | 0.440546738 | 0.205839145 | 0.165061012 |
| 0.386063936 | 0.15208981  | 0.253210083 | 0.430707077 |
| 0.23823526  | 0.490172271 | 0.301153639 | 0.30682277  |
| 0.30368508  | 0.156726999 | 0.304796988 | 0.365366221 |
| 0.18795747  | 0.349257178 | 0.451720035 | 0.32834333  |
| 0.277791596 | 0.468210123 | 0.488838342 | 0.07106178  |
| 0.41249203  | 0.463940828 | 0.461961873 | 0.008846872 |
| 0.507637592 | 0.025649755 | 0.306350322 | 0.34107731  |
| 0.31284619  | 0.317750739 | 0.359996265 | 0.404796574 |
| 0.448236351 | 0.345917275 | 0.410596172 | 0.359345653 |
| 0.278189992 | 0.326602153 | 0.467506327 | 0.457498703 |
| 0.396301262 | 0.238751431 | 0.161847253 | 0.15527865  |
| 0.121755008 | 0.477253527 | 0.334374433 | 0.140601115 |
| 0.334821752 | 0.443955419 | 0.424451192 | 0.488568855 |
| 0.460335827 | 0.179302749 | 0.422082254 | 0.49419435  |
| 0.265081188 | 0.390457874 | 0.130413877 | 0.477669517 |
| 0.349508825 | 0.317024499 | 0.456821174 | 0.429724852 |
| 0.466492251 | 0.426940186 | 0.332725706 | 0.459667193 |
| 0.46592005  | 0.407824907 | 0.378420056 | 0.181078032 |
| 0.313159757 | 0.220104284 | 0.359473694 | 0.009451652 |
| 0.459608784 | 0.387643437 | 0.514729346 | 0.493818628 |
| 0.337288245 | 0.437271348 | 0.399489368 | 0.192019406 |
| 0.332629914 | 0.243825444 | 0.23943236  | 0.486726458 |
| 0.267221281 | 0.298157644 | 0.405894345 | 0.423902645 |
| 0.496237075 | 0.468828369 | 0.32840578  | 0.348516078 |
| 0.335077854 | 0.307125754 | 0.473093804 | 0.215571338 |
| 0.484122541 | 0.280813301 | 0.412045198 | 0.42510407  |
| 0.331838212 | 0.502736897 | 0.126776118 | 0.513374563 |
| 0.435377227 | 0.211506538 | 0.500247741 | 0.388509211 |
| 0.387932449 | 0.205656321 | 0.240853468 | 0.442096768 |
| 0.336695915 | 0.393984529 | 0.021130363 | 0.102648626 |
| 0.436605111 | 0.356378976 | 0.460227326 | 0.436923248 |

|             |             |             |             |
|-------------|-------------|-------------|-------------|
| 0.329883902 | 0.422210226 | 0.191826589 | 0.398760654 |
| 0.477695494 | 0.498774286 | 0.399758532 | 0.347237441 |
| 0.443491403 | 0.200098081 | 0.475907158 | 0.020661256 |
| 0.495688698 | 0.4704541   | 0.43533875  | 0.116342303 |
| 0.053128304 | 0.278299836 | 0.494266637 | 0.127360557 |
| 0.496156531 | 0.259434528 | 0.413290137 | 0.497790617 |
| 0.263109097 | 0.503900758 | 0.213477006 | 0.49901352  |
| 0.096144817 | 0.357917648 | 0.427909773 | 0.429580574 |
| 0.352537008 | 0.379313365 | 0.478553136 | 0.314835714 |
| 0.085762261 | 0.377769493 | 0.00651319  | 0.430872676 |
| 0.475239248 | 0.412382863 | 0.289527922 | 0.327638551 |
| 0.386272769 | 0.431224212 | 0.331078966 | 0.458560034 |
| 0.036642287 | 0.457551521 | 0.302551128 | 0.481656157 |
| 0.317149992 | 0.437579844 | 0.129755356 | 0.381589376 |
| 0.467335189 | 0.388155365 | 0.335840694 | 0.40057787  |
| 0.483439069 | 0.437253321 | 0.24739128  | 0.292538889 |
| 0.433635809 | 0.129553369 | 0.433563072 | 0.522574525 |
| 0.290045782 | 0.29852592  | 0.503960138 | 0.341632075 |
| 0.373943535 | 0.435753912 | 0.450441218 | 0.508590182 |
| 0.147448776 | 0.362385075 | 0.483868131 | 0.473650919 |
| 0.396209447 | 0.240750455 | 0.325296524 | 0.341905435 |
| 0.461811135 | 0.198581813 | 0.326347457 | 0.461926164 |
| 0.29656439  | 0.407077496 | 0.390403305 | 0.282211543 |
| 0.092314634 | 0.256776373 | 0.456579735 | 0.241703055 |
| 0.413592466 | 0.465720978 | 0.33528575  | 0.436799973 |
| 0.242129271 | 0.074615952 | 0.46031533  | 0.032764213 |
| 0.441613799 | 0.490196687 | 0.350663747 | 0.435044973 |
| 0.281844686 | 0.45022208  | 0.44273458  | 0.005426152 |
| 0.480994279 | 0.078391903 | 0.372571354 | 0.347964329 |
| 0.351625907 | 0.118705727 | 0.459411031 | 0.505622249 |
| 0.411542916 | 0.368417415 | 0.402193229 | 0.464806678 |
| 0.206507553 | 0.364408141 | 0.391810596 | 0.483449196 |
| 0.284776137 | 0.437386789 | 0.456139311 | 0.44476816  |
| 0.475561596 | 0.366493368 |             |             |
| FHL2        | 0.232528176 | 0.487238097 | 0.193463904 |
| 0.286775479 | 0.371392628 | 0.504155536 | 0.194022571 |
| 0.303852743 | 0.453716754 | 0.336736191 | 0.46790728  |
| 0.091093894 | 0.09476976  | 0.507250897 | 0.183702382 |
| 0.426361152 | 0.134492337 | 0.272126344 | 0.136949885 |
| 0.358054354 | 0.344439856 | 0.379849201 | 0.496106469 |
| 0.352350645 | 0.349984258 | 0.474806269 | 0.402064838 |
| 0.507296181 | 0.269068728 | 0.490199362 | 0.233419675 |
| 0.478041042 | 0.372391977 | 0.393996035 | 0.093158267 |
| 0.492586856 | 0.018256803 | 0.466163315 | 0.366959629 |
| 0.182172184 | 0.463550065 | 0.407078534 | 0.386900375 |
| 0.426600677 | 0.149765592 | 0.233795354 | 0.434557954 |
| 0.451799415 | 0.424237522 | 0.208278026 | 0.50065394  |
| 0.426014765 | 0.499317273 | 0.457130469 | 0.008830418 |
| 0.307885083 | 0.074440271 | 0.210217883 | 0.506961679 |
| 0.384718608 | 0.289851691 | 0.276792812 | 0.404306711 |
| 0.432955132 | 0.440985611 | 0.416120476 | 0.40027404  |
| 0.511115206 | 0.183466848 | 0.467959866 | 0.285529594 |
| 0.472990519 | 0.139875678 | 0.339016271 | 0.23552115  |
| 0.429108612 | 0.367615047 | 0.431479612 | 0.330029389 |



|             |             |             |             |
|-------------|-------------|-------------|-------------|
| 0.477359365 | 0.512721605 | 0.409608874 | 0.489813345 |
| 0.114281297 | 0.365066041 | 0.345395625 | 0.425007601 |
| 0.44707125  | 0.224194252 | 0.496340007 | 0.502604059 |
| 0.173744405 | 0.435823449 | 0.464423204 | 0.291558368 |
| 0.510429477 | 0.299417754 | 0.440777015 | 0.200423748 |
| 0.415884837 | 0.379899829 | 0.478347468 | 0.445821236 |
| 0.391100743 | 0.220639613 | 0.494230078 | 0.340935103 |
| 0.398195207 | 0.244453724 | 0.286811548 | 0.484547413 |
| 0.484452442 | 0.514288962 | 0.48051644  | 0.455381748 |
| 0.402398492 | 0.512575513 | 0.500522869 | 0.497699731 |
| 0.168988979 | 0.505930575 | 0.37966519  | 0.155374959 |
| 0.225817058 | 0.236419735 | 0.288736521 | 0.446596745 |
| 0.509684349 | 0.486859506 | 0.38507326  | 0.357785613 |
| 0.480530508 | 0.483116704 | 0.49884033  | 0.492241961 |
| 0.157716692 | 0.25730053  | 0.412134746 | 0.460193736 |
| 0.463416513 | 0.284677811 | 0.283936339 | 0.507313773 |
| 0.493355961 | 0.483548861 | 0.364311808 | 0.515924075 |
| 0.354127059 | 0.509476257 | 0.500484206 | 0.341461009 |
| 0.507502604 | 0.497789482 | 0.50820814  | 0.434343842 |
| 0.504058899 | 0.488773616 | 0.092171461 | 0.475229527 |
| 0.506630278 | 0.021540635 | 0.497047429 | 0.499680177 |
| 0.500490166 | 0.489356524 | 0.500430751 | 0.511199229 |
| 0.502199488 | 0.228988911 | 0.027999735 | 0.386182428 |
| 0.497355932 | 0.501085348 | 0.276871698 | 0.427538004 |
| 0.405830814 | 0.513706646 | 0.484352528 | 0.343431776 |
| 0.499026308 | 0.511003504 | 0.50453514  | 0.484060025 |
| 0.413194899 | 0.454606051 | 0.377068395 | 0.482015737 |
| 0.170359515 | 0.291945523 | 0.184484911 | 0.438541604 |
| 0.42603699  | 0.338864841 | 0.496212985 | 0.406671687 |
| 0.362769195 | 0.481916141 | 0.336657744 | 0.423161776 |
| 0.183182388 | 0.481132838 | 0.359022982 | 0.346071992 |
| 0.151859504 | 0.307741112 | 0.325126187 | 0.319741216 |
| 0.371428325 | 0.345363184 | 0.481405295 | 0.504488333 |
| 0.403674426 | 0.361694196 | 0.500692698 | 0.507434762 |
| 0.480578151 | 0.414157763 | 0.396098281 | 0.046895431 |
| 0.318063898 | 0.302017163 | 0.182818264 | 0.432147521 |
| 0.323355617 | 0.345143016 | 0.440917311 | 0.448169363 |
| 0.453732932 | 0.3198618   | 0.398729573 | 0.484281002 |
| 0.319571021 | 0.395706118 | 0.496568708 | 0.458688511 |
| 0.028586432 | 0.45707346  | 0.505237924 | 0.212956679 |
| 0.440770061 | 0.157656958 | 0.275081049 | 0.495830138 |
| 0.300350081 | 0.266985968 | 0.507148412 | 0.445924516 |
| 0.414005279 | 0.350150792 | 0.503501695 | 0.046664185 |
| 0.386095955 | 0.120020154 | 0.408756437 | 0.394425656 |
| 0.418350284 | 0.420488395 | 0.358678792 | 0.360149917 |
| 0.306016183 | 0.504449782 | 0.507507409 | 0.512216044 |
| 0.383506776 | 0.502921235 | 0.497298362 | 0.508329903 |
| 0.491912293 | 0.37234406  | 0.130781237 | 0.500924179 |
| 0.497072641 | 0.330982473 | 0.221694802 | 0.471648668 |
| 0.391669633 | 0.440712705 | 0.206279585 | 0.503604546 |
| 1           | 0.478891174 | 0.296023048 | 0.443108859 |
| 0.494801687 | 0.419903347 | 0.496325928 | 0.502072265 |
| 0.337584731 | 0.383695838 | 0.372228265 | 0.463441692 |
| 0.35946269  | 0.260956853 | 0.452825248 | 0.177223436 |

|             |             |             |             |
|-------------|-------------|-------------|-------------|
| 0.01148172  | 0.241791418 | 0.21280562  | 0.301200498 |
| 0.198838269 | 0.448045635 | 0.462461444 | 0.508090782 |
| 0.283899188 | 0.50975414  | 0.395330166 | 0.363814622 |
| 0.48676245  | 0.389358183 | 0.407511077 | 0.445549605 |
| 0.418536985 | 0.071577048 | 0.248125153 | 0.516080687 |
| 0.155942715 | 0.267357955 | 0.457943244 | 0.010042101 |
| 0.164951742 | 0.47062631  | 0.244639286 | 0.344148484 |
| 0.4956707   | 0.349809449 | 0.381138328 | 0.36291883  |
| 0.463721231 | 0.261530941 | 0.01513325  | 0.494714071 |
| 0.487584188 | 0.479586654 | 0.485871968 | 0.476828208 |
| 0.475003482 | 0.478820104 | 0.46915646  | 0.500997778 |
| 0.27519934  | 0.258206097 | 0.227523886 | 0.388097469 |
| 0.015372736 | 0.484995084 | 0.39783887  | 0.319230338 |
| 0.468889375 | 0.432803337 | 0.152649177 | 0.404278834 |
| 0.094336158 | 0.195742262 | 0.427609489 | 0.362178837 |
| 0.425063024 | 0.084937527 | 0.300087647 | 0.338659882 |
| 0.492937527 | 0.479479882 | 0.369653151 | 0.507716838 |
| 0.449691208 | 0.284674951 | 0.401336445 | 0.477096549 |
| 0.220406353 | 0.133341751 | 0.456608985 | 0.048142398 |
| 0.297980089 | 0.483996178 | 0.425392214 | 0.215451979 |
| 0.424347636 | 0.039158862 | 0.488069514 | 0.509478596 |
| 0.489490021 | 0.503536768 | 0.516345378 | 0.297528    |
| 0.509939668 | 0.089335952 | 0.509909628 | 0.496932358 |
| 0.392736981 | 0.004733738 | 0.024151013 | 0.503575406 |
| 0.433807719 | 0.18745722  | 0.338645872 | 0.457396484 |
| 0.259055501 | 0.332432434 | 0.215241596 | 0.23608188  |
| 0.504544597 | 0.338776221 | 0.226526588 | 0.48809628  |
| 0.382549107 | 0.386368999 | 0.465799571 | 0.244668497 |
| 0.465114376 | 0.180399483 | 0.241503547 | 0.021457574 |
| 0.441965042 | 0.271288536 | 0.490041176 | 0.506460414 |
| 0.506810082 | 0.453192154 | 0.346820552 | 0.421552362 |
| 0.483868729 | 0.250363309 | 0.395620972 | 0.279390159 |
| 0.501831238 | 0.440637733 | 0.461751987 | 0.457999967 |
| 0.502059168 | 0.505645235 | 0.140273131 | 0.47578042  |
| 0.062447063 | 0.005573784 | 0.483137405 | 0.420379069 |
| 0.087983174 | 0.393592626 | 0.417505254 | 0.349582844 |
| 0.353507694 | 0.129224489 | 0.268293398 | 0.25694946  |
| 0.421499154 | 0.433604564 | 0.319259087 | 0.401741438 |
| 0.344731775 | 0.188051146 | 0.358376438 | 0.318058165 |
| 0.314356042 | 0.446501308 | 0.350684161 | 0.105201602 |
| 0.459843834 | 0.440884143 | 0.197388057 | 0.346816499 |
| 0.508808266 | 0.508897845 | 0.14138927  | 0.048803151 |
| 0.43145366  | 0.396367886 | 0.505482816 | 0.505557615 |
| 0.511878449 | 0.501493847 | 0.473032011 | 0.233076042 |
| 0.217798736 | 0.417422663 | 0.337795445 | 0.19921534  |
| 0.511785101 | 0.20310038  | 0.505726556 | 0.309320184 |
| 0.288810423 | 0.379461342 | 0.133019091 | 0.242702012 |
| 0.406648115 | 0.358555204 | 0.315808963 | 0.31943382  |
| 0.397607396 | 0.280714557 | 0.177911519 | 0.368545211 |
| 0.470962892 | 0.180454882 | 0.338561403 | 0.465275406 |
| 0.489727257 | 0.266937185 | 0.463136843 | 0.48928792  |
| 0.3091437   | 0.275673428 | 0.428026512 | 0.470325937 |
| 0.495592897 | 0.418368325 | 0.093456158 | 0.487651676 |
| 0.508585552 | 0.479387983 | 0.505303304 | 0.467292875 |

|             |             |             |             |
|-------------|-------------|-------------|-------------|
| 0.241787131 | 0.420382835 | 0.324042522 | 0.400926903 |
| 0.35495029  | 0.507877057 | 0.387162444 | 0.206965464 |
| 0.435825254 | 0.488122578 | 0.491181422 | 0.325571608 |
| 0.473362606 | 0.297110575 | 0.186419277 | 0.500137937 |
| 0.203307181 | 0.237428865 | 0.417811712 | 0.475954306 |
| 0.007759773 | 0.14480211  | 0.490295412 | 0.405414375 |
| 0.496704339 | 0.50113174  | 0.500212086 | 0.424988088 |
| 0.002205156 | 0.433656984 | 0.463393507 | 0.452755993 |
| 0.499908788 | 0.496454365 | 0.285792173 | 0.205484023 |
| 0.434587679 | 0.231332382 | 0.263163857 | 0.451608254 |
| 0.170050771 | 0.494799549 | 0.365030226 | 0.365608363 |
| 0.330455218 | 0.23743401  | 0.272132007 | 0.42259933  |
| 0.168882611 | 0.404067007 | 0.464511573 | 0.355109623 |
| 0.195650344 | 0.480682216 | 0.48308787  | 0.124407216 |
| 0.386885105 | 0.474897343 | 0.500587248 | 0.008128765 |
| 0.473517969 | 0.047871812 | 0.324208641 | 0.346856678 |
| 0.342752397 | 0.334525307 | 0.368485069 | 0.379009441 |
| 0.460613171 | 0.384917175 | 0.421772717 | 0.396014402 |
| 0.305883843 | 0.407361733 | 0.454696074 | 0.466764269 |
| 0.367456782 | 0.302338582 | 0.249788525 | 0.239828114 |
| 0.171391776 | 0.507518283 | 0.409645363 | 0.222066069 |
| 0.385379616 | 0.454905013 | 0.467533587 | 0.495002184 |
| 0.496672494 | 0.264463188 | 0.426718717 | 0.509394875 |
| 0.237846452 | 0.407078704 | 0.206129214 | 0.494679268 |
| 0.412034324 | 0.271560805 | 0.479683613 | 0.449539839 |
| 0.467569638 | 0.476651003 | 0.410860461 | 0.49994959  |
| 0.45861225  | 0.397746652 | 0.366080814 | 0.205907622 |
| 0.352540289 | 0.303627208 | 0.320580741 | 0.016935251 |
| 0.474395253 | 0.441961739 | 0.504572267 | 0.49694466  |
| 0.291091611 | 0.488633283 | 0.388742093 | 0.23666599  |
| 0.326965075 | 0.319030621 | 0.317724398 | 0.489706022 |
| 0.208764398 | 0.374646446 | 0.382388734 | 0.475984303 |
| 0.479193106 | 0.461617589 | 0.320222962 | 0.407141791 |
| 0.390056394 | 0.38692563  | 0.476948184 | 0.307016684 |
| 0.451072827 | 0.248010822 | 0.441352289 | 0.385245914 |
| 0.339285107 | 0.504757962 | 0.206097256 | 0.506634614 |
| 0.378248698 | 0.302085503 | 0.495770203 | 0.463835054 |
| 0.462692856 | 0.255240937 | 0.183842658 | 0.458666188 |
| 0.366145812 | 0.349341852 | 0.016832549 | 0.079385851 |
| 0.442932406 | 0.367623071 | 0.465904287 | 0.457887289 |
| 0.3028728   | 0.438469904 | 0.171748382 | 0.438746004 |
| 0.484077321 | 0.502055688 | 0.362627298 | 0.403810895 |
| 0.468518987 | 0.263795024 | 0.507187113 | 0.027815468 |
| 0.445559839 | 0.426013168 | 0.399849549 | 0.185014299 |
| 0.097042635 | 0.20540262  | 0.459686092 | 0.206176642 |
| 0.492266553 | 0.205055224 | 0.435326965 | 0.501260018 |
| 0.352358307 | 0.504877671 | 0.253893363 | 0.482634154 |
| 0.150081215 | 0.420582651 | 0.40065543  | 0.41426272  |
| 0.308940409 | 0.315629488 | 0.466676592 | 0.260948093 |
| 0.133736161 | 0.358304146 | 0.007292632 | 0.468698578 |
| 0.475041248 | 0.349953683 | 0.373111951 | 0.32657445  |
| 0.417042629 | 0.481240919 | 0.307631014 | 0.441435358 |
| 0.056425445 | 0.400901548 | 0.377964654 | 0.514629002 |
| 0.23638063  | 0.423822721 | 0.183088994 | 0.344979691 |

|             |             |             |             |
|-------------|-------------|-------------|-------------|
| 0.488056911 | 0.328150862 | 0.408764278 | 0.31730908  |
| 0.502847111 | 0.486605352 | 0.335048444 | 0.323367538 |
| 0.439295488 | 0.207132857 | 0.445459395 | 0.503230527 |
| 0.322920859 | 0.247265926 | 0.481682343 | 0.338708878 |
| 0.324374965 | 0.496796359 | 0.434592868 | 0.497046191 |
| 0.170850652 | 0.412511594 | 0.485115363 | 0.496084391 |
| 0.434748013 | 0.210367576 | 0.264851837 | 0.308279705 |
| 0.49320328  | 0.241559401 | 0.294353612 | 0.491181718 |
| 0.227066211 | 0.444116909 | 0.426733028 | 0.278452904 |
| 0.123522369 | 0.333113889 | 0.472967206 | 0.323030372 |
| 0.420290337 | 0.425844938 | 0.304726584 | 0.482606084 |
| 0.265557864 | 0.089492024 | 0.495978815 | 0.018793125 |
| 0.497140021 | 0.468808468 | 0.415702864 | 0.409376596 |
| 0.360350965 | 0.468146282 | 0.450912661 | 0.009446876 |
| 0.478916287 | 0.08335687  | 0.391219745 | 0.304370307 |
| 0.304512202 | 0.17967986  | 0.50634608  | 0.505227351 |
| 0.476954553 | 0.380703808 | 0.346396146 | 0.501432224 |
| 0.161919912 | 0.322467684 | 0.344441751 | 0.492223533 |
| 0.237198493 | 0.406869912 | 0.42909849  | 0.389571402 |
| 0.501906463 | 0.447276609 |             |             |
| FIGNL1      | 0.169814236 | 0.50191391  | 0.16942172  |
| 0.201547859 | 0.280138124 | 0.475993006 | 0.12509145  |
| 0.204432079 | 0.456266791 | 0.416613018 | 0.384422606 |
| 0.049549374 | 0.061141979 | 0.474215559 | 0.10892835  |
| 0.377718508 | 0.062570865 | 0.178475454 | 0.107508446 |
| 0.316785673 | 0.252400231 | 0.326483005 | 0.503644699 |
| 0.26342885  | 0.309546965 | 0.473038902 | 0.389296485 |
| 0.503619507 | 0.285815582 | 0.458761363 | 0.294707045 |
| 0.434020025 | 0.292751075 | 0.382959831 | 0.061490296 |
| 0.454340017 | 0.009933647 | 0.449216497 | 0.267728195 |
| 0.128653349 | 0.408990152 | 0.483116187 | 0.273993135 |
| 0.469711645 | 0.107531126 | 0.313795681 | 0.416880315 |
| 0.442085262 | 0.340322759 | 0.187585682 | 0.486521033 |
| 0.411580305 | 0.442328892 | 0.508762491 | 0.005212352 |
| 0.268337259 | 0.067725903 | 0.193114068 | 0.499902391 |
| 0.277523163 | 0.169529767 | 0.307849275 | 0.351634972 |
| 0.420966932 | 0.392929758 | 0.311533412 | 0.438589358 |
| 0.492283586 | 0.137967884 | 0.461643488 | 0.213771778 |
| 0.455175059 | 0.11169128  | 0.247483752 | 0.215731248 |
| 0.405448978 | 0.237609727 | 0.341927634 | 0.277856525 |
| 0.508203208 | 0.505474379 | 0.318290152 | 0.516045954 |
| 0.077880295 | 0.306565643 | 0.256429013 | 0.326140882 |
| 0.408697078 | 0.162633314 | 0.440437592 | 0.491874243 |
| 0.133202369 | 0.490189852 | 0.449074686 | 0.256701114 |
| 0.503551532 | 0.270132569 | 0.495741937 | 0.138385284 |
| 0.350427941 | 0.318322216 | 0.484362986 | 0.357384241 |
| 0.307131923 | 0.193289036 | 0.521782424 | 0.279296694 |
| 0.299585559 | 0.194939891 | 0.202981378 | 0.468021516 |
| 0.453615448 | 0.499425869 | 0.490611056 | 0.407113838 |
| 0.359074801 | 0.49362581  | 0.456048037 | 0.470800852 |
| 0.23184444  | 0.50732771  | 0.286906115 | 0.074003771 |
| 0.19380571  | 0.123955809 | 0.227122194 | 0.35692918  |
| 0.486719092 | 0.412498541 | 0.290189045 | 0.244190998 |
| 0.439993928 | 0.50993414  | 0.508436428 | 0.456695308 |

|             |             |             |             |
|-------------|-------------|-------------|-------------|
| 0.098080122 | 0.223394441 | 0.3709977   | 0.387659024 |
| 0.412177671 | 0.203070581 | 0.216941269 | 0.519701596 |
| 0.434445779 | 0.44334151  | 0.306888679 | 0.515736808 |
| 0.279724473 | 0.470893746 | 0.516758375 | 0.230679837 |
| 0.510345038 | 0.511569901 | 0.468039302 | 0.380829559 |
| 0.479863382 | 0.440654011 | 0.086025435 | 0.441033664 |
| 0.45228469  | 0.011620002 | 0.486525444 | 0.48384754  |
| 0.501784392 | 0.469773396 | 0.465306039 | 0.488704339 |
| 0.503967946 | 0.168670756 | 0.031553376 | 0.283751702 |
| 0.507006512 | 0.447569607 | 0.157289496 | 0.424295968 |
| 0.342374338 | 0.49226956  | 0.461564212 | 0.316382194 |
| 0.468773568 | 0.483405851 | 0.49834151  | 0.458702667 |
| 0.422813144 | 0.393639564 | 0.360777676 | 0.506242272 |
| 0.090332333 | 0.230306077 | 0.15823459  | 0.363581761 |
| 0.478139112 | 0.213483663 | 0.482150669 | 0.356462993 |
| 0.243903551 | 0.466695891 | 0.316510722 | 0.356334321 |
| 0.169509981 | 0.484859767 | 0.27132128  | 0.295575349 |
| 0.07299273  | 0.253011195 | 0.227626981 | 0.202798514 |
| 0.254465751 | 0.331826271 | 0.471391002 | 0.480163367 |
| 0.361104314 | 0.315745446 | 0.480673233 | 0.455054805 |
| 0.405739618 | 0.362951716 | 0.312846987 | 0.019416751 |
| 0.26565219  | 0.335200223 | 0.149892378 | 0.417711669 |
| 0.291280558 | 0.267624974 | 0.397869603 | 0.378588418 |
| 0.419930899 | 0.278812484 | 0.361578646 | 0.439773472 |
| 0.292688798 | 0.300616649 | 0.448910119 | 0.475789126 |
| 0.01568037  | 0.394729224 | 0.475474384 | 0.128999864 |
| 0.400068131 | 0.107866895 | 0.230481998 | 0.469900526 |
| 0.268687371 | 0.192919239 | 0.487463622 | 0.377672692 |
| 0.392093347 | 0.344821537 | 0.474344339 | 0.04223427  |
| 0.342635738 | 0.052132771 | 0.298178853 | 0.462375407 |
| 0.328304505 | 0.32174742  | 0.2827629   | 0.260168018 |
| 0.274381719 | 0.495809563 | 0.457140347 | 0.491941321 |
| 0.368797201 | 0.477583263 | 0.468281241 | 0.461512816 |
| 0.426968617 | 0.372082739 | 0.103543323 | 0.472244305 |
| 0.471710527 | 0.329534295 | 0.202458496 | 0.469610325 |
| 0.413884122 | 0.395756503 | 0.106919536 | 0.46780545  |
| 0.478891174 | 1           | 0.170909848 | 0.362974351 |
| 0.428363255 | 0.327895989 | 0.449365837 | 0.475828948 |
| 0.39604014  | 0.337988818 | 0.314946693 | 0.385306544 |
| 0.273333877 | 0.181265585 | 0.392290609 | 0.14501362  |
| 0.010288999 | 0.191392857 | 0.16357145  | 0.173341634 |
| 0.127235275 | 0.467990254 | 0.410882017 | 0.490050215 |
| 0.177900843 | 0.461188625 | 0.329496066 | 0.286792275 |
| 0.47241705  | 0.340278149 | 0.361068157 | 0.383185121 |
| 0.331719899 | 0.032292622 | 0.148480267 | 0.511576734 |
| 0.143682463 | 0.201026407 | 0.410548018 | 0.004731446 |
| 0.117322719 | 0.507900585 | 0.218145468 | 0.292610223 |
| 0.447393133 | 0.310687015 | 0.325626122 | 0.424225253 |
| 0.366237665 | 0.175233667 | 0.004207152 | 0.483057278 |
| 0.478823894 | 0.467669956 | 0.482209039 | 0.475112361 |
| 0.458003801 | 0.453460985 | 0.422496376 | 0.49496888  |
| 0.177685723 | 0.21399989  | 0.171823926 | 0.295137505 |
| 0.012353774 | 0.402232675 | 0.308680941 | 0.229948577 |
| 0.430824399 | 0.361227313 | 0.090887354 | 0.340821154 |

|             |             |             |             |
|-------------|-------------|-------------|-------------|
| 0.062968937 | 0.16989233  | 0.39433473  | 0.250571245 |
| 0.340027142 | 0.052169024 | 0.29684417  | 0.309150854 |
| 0.488101552 | 0.435312525 | 0.346610926 | 0.506461228 |
| 0.354646614 | 0.289457358 | 0.310827225 | 0.405115101 |
| 0.134471075 | 0.14569949  | 0.452500505 | 0.068518325 |
| 0.271334225 | 0.465590501 | 0.394270502 | 0.160366087 |
| 0.332276158 | 0.021460343 | 0.455363949 | 0.498284362 |
| 0.50430399  | 0.478214206 | 0.491639512 | 0.233034128 |
| 0.494506303 | 0.086809964 | 0.496830394 | 0.493382274 |
| 0.440746231 | 0.00296397  | 0.009270897 | 0.481710213 |
| 0.389443278 | 0.183044101 | 0.240809022 | 0.453982788 |
| 0.148256315 | 0.303458454 | 0.130172035 | 0.147940888 |
| 0.47818551  | 0.223456254 | 0.142376558 | 0.493215053 |
| 0.278142932 | 0.268937759 | 0.491147122 | 0.203446446 |
| 0.413847047 | 0.101009188 | 0.199887111 | 0.009102774 |
| 0.364381202 | 0.251884011 | 0.512315606 | 0.499141724 |
| 0.465141615 | 0.384160314 | 0.410611565 | 0.394789101 |
| 0.452592975 | 0.255254738 | 0.389146669 | 0.263521224 |
| 0.509143909 | 0.388473565 | 0.367815514 | 0.397678616 |
| 0.463112554 | 0.47721435  | 0.080112042 | 0.42834197  |
| 0.034013969 | 0.001522395 | 0.49991747  | 0.333304278 |
| 0.070102481 | 0.355971645 | 0.33118467  | 0.301451299 |
| 0.262458054 | 0.08199695  | 0.222155215 | 0.19859184  |
| 0.323825776 | 0.364443743 | 0.235074232 | 0.34136932  |
| 0.249392137 | 0.111607098 | 0.228225578 | 0.203652773 |
| 0.283105326 | 0.420160666 | 0.312648479 | 0.060546108 |
| 0.472855883 | 0.409613986 | 0.124269627 | 0.26320171  |
| 0.464062226 | 0.484926102 | 0.077018953 | 0.017579548 |
| 0.357431754 | 0.322162365 | 0.470212615 | 0.50904999  |
| 0.520899894 | 0.469141625 | 0.423858879 | 0.125187271 |
| 0.13788894  | 0.328968899 | 0.256650947 | 0.092558797 |
| 0.493470344 | 0.189993268 | 0.498005907 | 0.257901953 |
| 0.207537328 | 0.277943154 | 0.059128418 | 0.154345765 |
| 0.363982729 | 0.250606819 | 0.187677755 | 0.296342581 |
| 0.313879443 | 0.213077597 | 0.109153829 | 0.259880419 |
| 0.413104111 | 0.141799646 | 0.239992172 | 0.412358523 |
| 0.456239429 | 0.33463642  | 0.43320583  | 0.435711587 |
| 0.241796136 | 0.21673859  | 0.426904651 | 0.420191942 |
| 0.48915693  | 0.45532431  | 0.056984116 | 0.512518053 |
| 0.471809843 | 0.461828679 | 0.499163504 | 0.391653881 |
| 0.185816769 | 0.363489059 | 0.292452051 | 0.334727584 |
| 0.254581656 | 0.48218838  | 0.279379934 | 0.142263607 |
| 0.361486183 | 0.4812633   | 0.482227374 | 0.200932887 |
| 0.466876139 | 0.285396008 | 0.178676743 | 0.48335372  |
| 0.141037529 | 0.167349176 | 0.486293811 | 0.45400075  |
| 0.002188196 | 0.101319565 | 0.457923647 | 0.285702033 |
| 0.486262623 | 0.46860562  | 0.453466498 | 0.352228166 |
| 0.001006725 | 0.403463844 | 0.391269445 | 0.410825079 |
| 0.500059536 | 0.440717105 | 0.221793516 | 0.104090463 |
| 0.334139669 | 0.215514932 | 0.160358945 | 0.443008427 |
| 0.155487201 | 0.487582183 | 0.257363458 | 0.296558653 |
| 0.206212485 | 0.232144597 | 0.209190047 | 0.3104719   |
| 0.1258786   | 0.296242721 | 0.383853563 | 0.428553989 |
| 0.168352144 | 0.441269861 | 0.468044338 | 0.077637138 |

|             |             |             |             |
|-------------|-------------|-------------|-------------|
| 0.334498125 | 0.438960131 | 0.453068102 | 0.004458139 |
| 0.432458172 | 0.0192805   | 0.200677951 | 0.223162739 |
| 0.213664875 | 0.223187167 | 0.253734991 | 0.282988665 |
| 0.42529276  | 0.273153509 | 0.309605471 | 0.278379468 |
| 0.177762763 | 0.30023388  | 0.394388633 | 0.4425329   |
| 0.267349071 | 0.204066173 | 0.223086297 | 0.226881324 |
| 0.088097938 | 0.497012519 | 0.334080226 | 0.19911269  |
| 0.266793431 | 0.423361485 | 0.379916162 | 0.507298105 |
| 0.425718577 | 0.265029519 | 0.357936563 | 0.510082165 |
| 0.27914157  | 0.377616366 | 0.163277716 | 0.468428759 |
| 0.295781943 | 0.188282409 | 0.484778422 | 0.453617911 |
| 0.480724176 | 0.425901453 | 0.333716264 | 0.454811771 |
| 0.380962698 | 0.381911366 | 0.451809662 | 0.103037364 |
| 0.262286284 | 0.246526629 | 0.229106756 | 0.007504938 |
| 0.396141196 | 0.397978601 | 0.485836201 | 0.496506343 |
| 0.257706436 | 0.418004692 | 0.461526849 | 0.162809765 |
| 0.414977684 | 0.32179959  | 0.233592915 | 0.480919581 |
| 0.181947148 | 0.253632946 | 0.283989941 | 0.493361084 |
| 0.445100419 | 0.455353913 | 0.237097485 | 0.325267479 |
| 0.292173966 | 0.334142433 | 0.482213535 | 0.25540523  |
| 0.463298189 | 0.154340289 | 0.489184301 | 0.293745817 |
| 0.221845225 | 0.490820158 | 0.145475374 | 0.492890351 |
| 0.317810326 | 0.255720834 | 0.465818389 | 0.39855813  |
| 0.389752125 | 0.131211708 | 0.147022343 | 0.478960962 |
| 0.267650124 | 0.313650552 | 0.022320175 | 0.056764402 |
| 0.345297997 | 0.358697515 | 0.491240065 | 0.401756618 |
| 0.212841818 | 0.348741748 | 0.135927013 | 0.388181309 |
| 0.507380669 | 0.521247832 | 0.279147615 | 0.308516717 |
| 0.404693875 | 0.155992726 | 0.515221181 | 0.021456296 |
| 0.430795027 | 0.429258625 | 0.428549614 | 0.10255859  |
| 0.049407823 | 0.171262778 | 0.450196048 | 0.186321242 |
| 0.454249573 | 0.181000951 | 0.452006055 | 0.469785603 |
| 0.289092654 | 0.521986035 | 0.129694947 | 0.416304379 |
| 0.125059023 | 0.325959268 | 0.368941459 | 0.412515316 |
| 0.210970324 | 0.249804118 | 0.387889439 | 0.191961767 |
| 0.065966296 | 0.25724032  | 0.003621114 | 0.430613621 |
| 0.507217988 | 0.309644676 | 0.30527173  | 0.3898722   |
| 0.30239591  | 0.43386545  | 0.233356608 | 0.447693043 |
| 0.021574288 | 0.340477688 | 0.256196152 | 0.487951157 |
| 0.235591426 | 0.412109266 | 0.087657613 | 0.286846798 |
| 0.509093258 | 0.275560715 | 0.33154123  | 0.320651776 |
| 0.505642908 | 0.472237984 | 0.322735212 | 0.21455863  |
| 0.460722806 | 0.163515823 | 0.486853769 | 0.490360001 |
| 0.19449183  | 0.17226209  | 0.43263361  | 0.228911789 |
| 0.273073555 | 0.465880353 | 0.454664884 | 0.491722466 |
| 0.074989393 | 0.29856089  | 0.437013685 | 0.480983894 |
| 0.324349992 | 0.132834274 | 0.203436223 | 0.210840903 |
| 0.502679486 | 0.155055993 | 0.227769159 | 0.431132503 |
| 0.174478973 | 0.342702853 | 0.471907795 | 0.169167146 |
| 0.059083445 | 0.219363259 | 0.418162499 | 0.23521188  |
| 0.319872163 | 0.360175854 | 0.212689691 | 0.410550216 |
| 0.151353077 | 0.039551015 | 0.439328556 | 0.011445874 |
| 0.473053809 | 0.39894566  | 0.301553332 | 0.33687021  |
| 0.30246053  | 0.424987791 | 0.466059727 | 0.004996447 |

|             |             |             |             |
|-------------|-------------|-------------|-------------|
| 0.42669127  | 0.04698817  | 0.315323807 | 0.205703998 |
| 0.268326652 | 0.122239995 | 0.482048371 | 0.47016344  |
| 0.407948991 | 0.363726081 | 0.342164175 | 0.48562976  |
| 0.111996255 | 0.330557083 | 0.327071007 | 0.506985289 |
| 0.179589861 | 0.460437495 | 0.437935911 | 0.366961888 |
| 0.45887499  | 0.356755746 |             |             |
| FIS1        | 0.127710176 | 0.153118004 | 0.074095325 |
| 0.099785052 | 0.170397769 | 0.070923605 | 0.121785478 |
| 0.145715673 | 0.139876633 | 0.017722746 | 0.17081709  |
| 0.108247636 | 0.033448585 | 0.233150239 | 0.141310305 |
| 0.136013452 | 0.15960128  | 0.207700149 | 0.034949287 |
| 0.058936569 | 0.187454894 | 0.063003453 | 0.090445869 |
| 0.151166377 | 0.239115448 | 0.106660716 | 0.076794855 |
| 0.18836987  | 0.02123237  | 0.135652283 | 0.009842009 |
| 0.282943054 | 0.172760086 | 0.059085236 | 0.059329131 |
| 0.117338138 | 0.012323319 | 0.258504237 | 0.136775576 |
| 0.040020913 | 0.297857359 | 0.032363478 | 0.175705844 |
| 0.04681944  | 0.081275069 | 0.010309305 | 0.120621815 |
| 0.100971403 | 0.093377626 | 0.101658959 | 0.127725449 |
| 0.048596333 | 0.212236841 | 0.085683299 | 0.010997711 |
| 0.057003135 | 0.009503578 | 0.027064683 | 0.216285545 |
| 0.319006    | 0.266667456 | 0.019908924 | 0.116037592 |
| 0.111210849 | 0.166858446 | 0.275491155 | 0.034745479 |
| 0.229781901 | 0.048667648 | 0.118069448 | 0.075858972 |
| 0.089088816 | 0.063021221 | 0.296772538 | 0.103152045 |
| 0.056021919 | 0.29049745  | 0.176497288 | 0.063312303 |
| 0.136118143 | 0.282052199 | 0.227889185 | 0.202971828 |
| 0.051237834 | 0.123953131 | 0.081664305 | 0.288828363 |
| 0.177921865 | 0.094064313 | 0.200038123 | 0.260752091 |
| 0.086601224 | 0.061298819 | 0.150208084 | 0.172466007 |
| 0.170726289 | 0.039259805 | 0.050479252 | 0.064504902 |
| 0.161564412 | 0.137014853 | 0.233575096 | 0.283035946 |
| 0.133519791 | 0.124689223 | 0.212308718 | 0.122968708 |
| 0.135552418 | 0.130549375 | 0.093635471 | 0.165343501 |
| 0.136968046 | 0.206090865 | 0.146582091 | 0.220737782 |
| 0.11098948  | 0.220438784 | 0.167669325 | 0.214266713 |
| 0.006518554 | 0.219036207 | 0.192963481 | 0.188036199 |
| 0.081753373 | 0.193292533 | 0.071294589 | 0.319012133 |
| 0.191884799 | 0.217399784 | 0.167251609 | 0.216641416 |
| 0.219139752 | 0.192171385 | 0.207531798 | 0.207879118 |
| 0.12318451  | 0.038805982 | 0.100479232 | 0.095650324 |
| 0.200100498 | 0.219514677 | 0.095997651 | 0.244555889 |
| 0.275409771 | 0.197567056 | 0.095815593 | 0.274312496 |
| 0.143289435 | 0.283040854 | 0.146587965 | 0.239466869 |
| 0.24723445  | 0.230063344 | 0.263280501 | 0.1587951   |
| 0.24876274  | 0.114916945 | 0.032800497 | 0.205484084 |
| 0.305036814 | 0.016759466 | 0.17667683  | 0.195393673 |
| 0.197391858 | 0.168287054 | 0.257620997 | 0.216675624 |
| 0.201237813 | 0.171854265 | 0.003583904 | 0.267887214 |
| 0.220714872 | 0.239516055 | 0.172758089 | 0.078467712 |
| 0.162928895 | 0.096653651 | 0.160924581 | 0.051055317 |
| 0.320127142 | 0.189673041 | 0.181198047 | 0.181066684 |
| 0.078549314 | 0.302684525 | 0.076239003 | 0.209708667 |
| 0.129330881 | 0.126938807 | 0.119601852 | 0.250316222 |



|             |             |             |             |
|-------------|-------------|-------------|-------------|
| 0.024674879 | 0.307874779 | 0.078871244 | 0.13689342  |
| 0.330787337 | 0.085394189 | 0.044122819 | 0.180219594 |
| 0.122603055 | 0.089868665 | 0.165064469 | 0.145322672 |
| 0.154634935 | 0.264368919 | 0.145149809 | 0.170765857 |
| 0.24834246  | 0.222697547 | 0.128284533 | 0.210021556 |
| 0.085350925 | 0.192360607 | 0.152049158 | 0.284424133 |
| 0.351714812 | 0.107507013 | 0.304606849 | 0.057604757 |
| 0.070902962 | 0.022564968 | 0.032691408 | 0.084102928 |
| 0.229470425 | 0.119782603 | 0.142392052 | 0.208684309 |
| 0.125786164 | 0.113218914 | 0.0701999   | 0.306453443 |
| 0.168997203 | 0.121372301 | 0.237183923 | 0.079800841 |
| 0.03035132  | 0.144186272 | 0.18656577  | 0.113363187 |
| 0.184075615 | 0.069145466 | 0.0437977   | 0.200645482 |
| 0.048134537 | 0.095122635 | 0.200735984 | 0.202577893 |
| 0.061607734 | 0.188141454 | 0.252409322 | 0.01275599  |
| 0.099007739 | 0.094270455 | 0.315861326 | 0.035509484 |
| 0.226741286 | 0.307633758 | 0.152501166 | 0.104738306 |
| 0.14237525  | 0.234680697 | 0.223039689 | 0.224395714 |
| 0.042979494 | 0.251352612 | 0.193305505 | 0.248230613 |
| 0.195539038 | 0.058393185 | 0.029559754 | 0.179624289 |
| 0.188371705 | 0.035483393 | 0.126075143 | 0.14039214  |
| 0.047557286 | 0.155136322 | 0.100178927 | 0.250656252 |
| 0.296023048 | 0.170909848 | 1           | 0.250333016 |
| 0.257645707 | 0.207735104 | 0.203462779 | 0.276226105 |
| 0.021241326 | 0.112035866 | 0.076284848 | 0.267041802 |
| 0.234145438 | 0.101613379 | 0.268125184 | 0.031833213 |
| 0.001347867 | 0.143814983 | 0.145285682 | 0.25714636  |
| 0.075817313 | 0.081958409 | 0.159242908 | 0.22944408  |
| 0.254471543 | 0.255613188 | 0.229175883 | 0.094833091 |
| 0.205301305 | 0.101640694 | 0.103923752 | 0.157541311 |
| 0.2699129   | 0.067932223 | 0.172938622 | 0.277065159 |
| 0.086146823 | 0.068166266 | 0.133513337 | 0.016464044 |
| 0.097719208 | 0.11034738  | 0.168956984 | 0.281538311 |
| 0.251799634 | 0.231013797 | 0.190743619 | 0.023712566 |
| 0.269223176 | 0.213275263 | 0.033430442 | 0.196943201 |
| 0.209229507 | 0.206265639 | 0.202375447 | 0.206309034 |
| 0.191049592 | 0.15990622  | 0.191809971 | 0.095097031 |
| 0.135044887 | 0.083492306 | 0.061503231 | 0.162490953 |
| 0.012912854 | 0.254248892 | 0.157604488 | 0.288606285 |
| 0.171836583 | 0.224404909 | 0.129077944 | 0.150866064 |
| 0.055807722 | 0.027829719 | 0.079622993 | 0.179368573 |
| 0.251377388 | 0.066691788 | 0.030288504 | 0.047279686 |
| 0.202544662 | 0.249615934 | 0.043206777 | 0.230501217 |
| 0.202698805 | 0.107328585 | 0.139023436 | 0.226952559 |
| 0.139257617 | 0.013029864 | 0.068839499 | 0.002072697 |
| 0.041350762 | 0.233374251 | 0.057356699 | 0.067505039 |
| 0.230913291 | 0.047752515 | 0.221381516 | 0.254179828 |
| 0.173530768 | 0.2306394   | 0.233425487 | 0.081494098 |
| 0.223729749 | 0.010518778 | 0.219828004 | 0.168931673 |
| 0.034857143 | 0.005962873 | 0.067163452 | 0.192511537 |
| 0.115292899 | 0.097071842 | 0.264858519 | 0.042250605 |
| 0.1799679   | 0.09725584  | 0.155597041 | 0.093483163 |
| 0.122063515 | 0.230169616 | 0.104481046 | 0.199298287 |
| 0.184133383 | 0.272620555 | 0.056609915 | 0.173958851 |

|             |             |             |             |
|-------------|-------------|-------------|-------------|
| 0.129041753 | 0.144855274 | 0.161011026 | 0.044073539 |
| 0.225791068 | 0.150344381 | 0.223418938 | 0.213372805 |
| 0.281633477 | 0.181379717 | 0.02147221  | 0.064026403 |
| 0.203650158 | 0.101488929 | 0.033887279 | 0.120499887 |
| 0.183058878 | 0.156569521 | 0.310965896 | 0.257453933 |
| 0.271672896 | 0.242590273 | 0.131374193 | 0.197245384 |
| 0.055209376 | 0.017322912 | 0.070221134 | 0.276873637 |
| 0.023212253 | 0.094637391 | 0.291706613 | 0.067733711 |
| 0.108359412 | 0.096418287 | 0.057908619 | 0.068604885 |
| 0.229957883 | 0.144095856 | 0.14989938  | 0.219996294 |
| 0.115436521 | 0.092492102 | 0.179405691 | 0.17627385  |
| 0.058869684 | 0.199627272 | 0.236422629 | 0.09531058  |
| 0.06589966  | 0.096088167 | 0.17373232  | 0.252494073 |
| 0.220529727 | 0.210698984 | 0.129288988 | 0.099311545 |
| 0.283472994 | 0.125567474 | 0.239491813 | 0.187777025 |
| 0.245175565 | 0.284075859 | 0.301491679 | 0.187848367 |
| 0.143839037 | 0.193907374 | 0.142543626 | 0.15958164  |
| 0.230320088 | 0.105130046 | 0.209847481 | 0.084251573 |
| 0.235104202 | 0.120127705 | 0.170393028 | 0.215379107 |
| 0.111712613 | 0.317734506 | 0.263955994 | 0.128957894 |
| 0.138790207 | 0.055267194 | 0.129658992 | 0.269066382 |
| 0.232396048 | 0.033974742 | 0.262287018 | 0.087715256 |
| 0.174094163 | 0.015109184 | 0.149874822 | 0.315762146 |
| 0.228368397 | 0.15058029  | 0.048005451 | 0.190753508 |
| 0.151639665 | 0.059886398 | 0.084519759 | 0.146374369 |
| 0.245574586 | 0.12261576  | 0.215727759 | 0.308429561 |
| 0.187529886 | 0.11926106  | 0.061803423 | 0.151586007 |
| 0.265637019 | 0.081406715 | 0.218074721 | 0.193170498 |
| 0.305346765 | 0.279878709 | 0.172742631 | 0.249722356 |
| 0.092193137 | 0.116261673 | 0.088545899 | 0.185403263 |
| 0.06440273  | 0.128981484 | 0.037881496 | 0.172542128 |
| 0.009585236 | 0.040154524 | 0.230306259 | 0.161760602 |
| 0.266843302 | 0.220168452 | 0.277742752 | 0.085110195 |
| 0.001026489 | 0.125466933 | 0.185819256 | 0.075648919 |
| 0.173434946 | 0.230638175 | 0.078166064 | 0.186217583 |
| 0.343814694 | 0.12376944  | 0.171312544 | 0.046685243 |
| 0.025494699 | 0.12780533  | 0.346258234 | 0.179129064 |
| 0.198680706 | 0.107568229 | 0.054910534 | 0.169252249 |
| 0.04295326  | 0.356775526 | 0.30336297  | 0.020261676 |
| 0.039508689 | 0.238491491 | 0.165029573 | 0.093628555 |
| 0.104947056 | 0.209693763 | 0.239553732 | 0.013850446 |
| 0.16690276  | 0.096778329 | 0.257494975 | 0.217239589 |
| 0.210875894 | 0.212561712 | 0.282322277 | 0.096528419 |
| 0.14946643  | 0.182583914 | 0.15816773  | 0.317197354 |
| 0.177671306 | 0.178153349 | 0.13894945  | 0.081008812 |
| 0.121845298 | 0.161866624 | 0.17264387  | 0.159402347 |
| 0.18005721  | 0.18537498  | 0.32071263  | 0.126286121 |
| 0.320395391 | 0.074592374 | 0.343112795 | 0.179857562 |
| 0.298214924 | 0.12050234  | 0.127722089 | 0.164475657 |
| 0.017283176 | 0.054802832 | 0.086607225 | 0.095740628 |
| 0.265624804 | 0.114631707 | 0.07199344  | 0.110255574 |
| 0.119706089 | 0.305439639 | 0.318515956 | 0.253924012 |
| 0.104227552 | 0.08412352  | 0.021004388 | 0.200423269 |
| 0.166500953 | 0.207729884 | 0.167770149 | 0.027574537 |

|             |             |             |             |
|-------------|-------------|-------------|-------------|
| 0.234780457 | 0.061807201 | 0.184643652 | 0.205999396 |
| 0.046663509 | 0.303202732 | 0.024171614 | 0.125351695 |
| 0.014278581 | 0.147679621 | 0.279857587 | 0.135167464 |
| 0.031490575 | 0.167564502 | 0.182580176 | 0.039953699 |
| 0.158854805 | 0.123802461 | 0.088112574 | 0.167173761 |
| 0.19925733  | 0.165365667 | 0.229296331 | 0.103899987 |
| 0.08020476  | 0.10298613  | 0.069954862 | 0.168259958 |
| 0.202146851 | 0.206446262 | 0.163574151 | 0.211824891 |
| 0.114749819 | 0.205626644 | 0.31608615  | 0.146131533 |
| 0.071681294 | 0.186088563 | 0.034556028 | 0.048150015 |
| 0.131710797 | 0.051377273 | 0.001258963 | 0.041670707 |
| 0.308083871 | 0.051572407 | 0.119579785 | 0.202003108 |
| 0.10670693  | 0.302494689 | 0.032349501 | 0.130362639 |
| 0.178231938 | 0.226328503 | 0.111488139 | 0.313323728 |
| 0.256205873 | 0.201913807 | 0.106274015 | 0.009915012 |
| 0.112063914 | 0.083808484 | 0.034244502 | 0.161030142 |
| 0.100354623 | 0.034605266 | 0.102915323 | 0.103639414 |
| 0.229161741 | 0.027725606 | 0.091591964 | 0.144083994 |
| 0.230512328 | 0.231509635 | 0.209459238 | 0.212135977 |
| 0.051105638 | 0.248827003 | 0.080650222 | 0.076944345 |
| 0.120585354 | 0.09224148  | 0.242303278 | 0.082303784 |
| 0.143199192 | 0.117548522 | 0.011812752 | 0.291377323 |
| 0.194541216 | 0.080086242 | 0.28767357  | 0.020228188 |
| 0.326338144 | 0.225957261 | 0.121305016 | 0.065204757 |
| 0.094422485 | 0.139571705 | 0.2995874   | 0.203764162 |
| 0.023012655 | 0.102757467 | 0.148943597 | 0.112203597 |
| 0.228190646 | 0.083468835 | 0.307365688 | 0.028534927 |
| 0.187489839 | 0.163223959 | 0.128064467 | 0.105854557 |
| 0.092514596 | 0.16839886  | 0.038334543 | 0.250908645 |
| 0.261574569 | 0.090423065 | 0.216048572 | 0.159367428 |
| 0.0852244   | 0.211171899 | 0.075206523 | 0.237865272 |
| 0.2120486   | 0.325468171 | 0.19486309  | 0.206738139 |
| 0.36235011  | 0.089327962 | 0.069483577 | 0.158760214 |
| 0.17920702  | 0.141153664 | 0.066404813 | 0.216761654 |
| 0.055823456 | 0.288445234 | 0.066438074 | 0.177020587 |
| 0.182992227 | 0.157789215 | 0.073503452 | 0.243977725 |
| 0.249032826 | 0.128825454 | 0.094009548 | 0.321011198 |
| 0.18094647  | 0.102404228 | 0.30486123  | 0.009866574 |
| 0.112342537 | 0.180456241 | 0.27992303  | 0.112905731 |
| 0.24809911  | 0.158361379 | 0.082266796 | 0.027533564 |
| 0.224181635 | 0.02709203  | 0.105492294 | 0.123866499 |
| 0.059811356 | 0.112372102 | 0.230336081 | 0.24873284  |
| 0.202802848 | 0.040969667 | 0.033931185 | 0.222016236 |
| 0.046077718 | 0.029372548 | 0.049172313 | 0.101421454 |
| 0.057837176 | 0.038582555 | 0.054560236 | 0.050496394 |
| 0.189836025 | 0.146451251 |             |             |
| FKBP2       | 0.097858771 | 0.33764422  | 0.059869962 |
| 0.182747183 | 0.37981338  | 0.301143658 | 0.106613862 |
| 0.182539219 | 0.274786898 | 0.205583727 | 0.350574555 |
| 0.041714774 | 0.173800399 | 0.407772987 | 0.109432379 |
| 0.381519666 | 0.088740841 | 0.170552451 | 0.110455949 |
| 0.247282165 | 0.381473358 | 0.339902046 | 0.264974438 |
| 0.383061442 | 0.179256128 | 0.267516607 | 0.336575277 |
| 0.418543657 | 0.214602658 | 0.344762464 | 0.136067996 |

|             |             |             |             |
|-------------|-------------|-------------|-------------|
| 0.390417301 | 0.386076056 | 0.326700898 | 0.030062697 |
| 0.343579344 | 0.046000478 | 0.389709543 | 0.35339865  |
| 0.240223647 | 0.32766589  | 0.210604439 | 0.313460671 |
| 0.269725593 | 0.056543375 | 0.126154966 | 0.35077639  |
| 0.273273958 | 0.315765428 | 0.069645979 | 0.326464799 |
| 0.325234131 | 0.282571731 | 0.251121611 | 0.004306642 |
| 0.323370585 | 0.129833981 | 0.266601447 | 0.418640746 |
| 0.241219886 | 0.21230614  | 0.249384799 | 0.255684997 |
| 0.33522718  | 0.358739935 | 0.300159619 | 0.286823916 |
| 0.42994163  | 0.280366569 | 0.331028878 | 0.193902961 |
| 0.325420928 | 0.050037027 | 0.195825137 | 0.090477574 |
| 0.352062595 | 0.287897432 | 0.363082064 | 0.361707192 |
| 0.326974343 | 0.455203751 | 0.27239369  | 0.404861906 |
| 0.220057629 | 0.379319709 | 0.374174286 | 0.345431379 |
| 0.333418832 | 0.137451165 | 0.353025301 | 0.462560914 |
| 0.074961165 | 0.254384105 | 0.328776804 | 0.126829517 |
| 0.346166672 | 0.311547276 | 0.258861038 | 0.27897485  |
| 0.380614825 | 0.382260174 | 0.40774373  | 0.302403481 |
| 0.363990374 | 0.081619335 | 0.385807473 | 0.372293507 |
| 0.34476955  | 0.099500239 | 0.352967432 | 0.403699442 |
| 0.350578045 | 0.418985349 | 0.342620286 | 0.339567852 |
| 0.375628785 | 0.43120379  | 0.336858324 | 0.364630907 |
| 0.100529519 | 0.441432369 | 0.217061864 | 0.099548518 |
| 0.080471885 | 0.172684035 | 0.327235461 | 0.311292693 |
| 0.409360924 | 0.311581721 | 0.231659034 | 0.338959261 |
| 0.440993985 | 0.373875533 | 0.436548665 | 0.365570437 |
| 0.071753147 | 0.318676729 | 0.368841877 | 0.265259994 |
| 0.350307607 | 0.158993415 | 0.351559329 | 0.424505413 |
| 0.354143789 | 0.401597491 | 0.169662672 | 0.429217621 |
| 0.250026669 | 0.467826971 | 0.353359693 | 0.235551203 |
| 0.443017165 | 0.406290543 | 0.471691405 | 0.372970318 |
| 0.403327549 | 0.291370556 | 0.092177489 | 0.345044353 |
| 0.45902374  | 0.037087437 | 0.411033633 | 0.441964604 |
| 0.411280058 | 0.403655893 | 0.483485865 | 0.446486731 |
| 0.410841188 | 0.10286047  | 0.045711496 | 0.367775363 |
| 0.424070718 | 0.361968535 | 0.251196213 | 0.340694    |
| 0.383414004 | 0.305566098 | 0.354288657 | 0.288571192 |
| 0.479507937 | 0.395546851 | 0.413751336 | 0.324317466 |
| 0.255725655 | 0.302363383 | 0.341719094 | 0.371545586 |
| 0.092035491 | 0.131754958 | 0.058911328 | 0.311055316 |
| 0.225358056 | 0.265724505 | 0.297767536 | 0.361528244 |
| 0.265446714 | 0.274874057 | 0.311569727 | 0.38141924  |
| 0.05672025  | 0.319638726 | 0.200511693 | 0.18775135  |
| 0.100289709 | 0.149813329 | 0.252547179 | 0.224375797 |
| 0.351181531 | 0.207823855 | 0.333519868 | 0.436779449 |
| 0.357794623 | 0.173980125 | 0.331234805 | 0.44598068  |
| 0.436206429 | 0.370416521 | 0.247969137 | 0.032842784 |
| 0.327414663 | 0.262899711 | 0.27094343  | 0.339195703 |
| 0.170413587 | 0.314429088 | 0.36419153  | 0.376987369 |
| 0.237835159 | 0.158948328 | 0.370134421 | 0.386419309 |
| 0.140122618 | 0.353039443 | 0.418693061 | 0.304820547 |
| 0.008185067 | 0.322948628 | 0.383169534 | 0.299613804 |
| 0.296732715 | 0.234785782 | 0.275891938 | 0.419985866 |
| 0.317828546 | 0.350955636 | 0.42998938  | 0.378904761 |

|             |             |             |             |
|-------------|-------------|-------------|-------------|
| 0.285735356 | 0.189668332 | 0.475628377 | 0.082810523 |
| 0.356636761 | 0.127150107 | 0.34458118  | 0.22040053  |
| 0.28592422  | 0.329794801 | 0.376380464 | 0.367209931 |
| 0.119970402 | 0.441502013 | 0.343821436 | 0.44547232  |
| 0.335014378 | 0.476161409 | 0.407397181 | 0.403924455 |
| 0.335489707 | 0.323619105 | 0.218411623 | 0.374645518 |
| 0.410381453 | 0.274945728 | 0.075572208 | 0.359749288 |
| 0.299689969 | 0.369778245 | 0.251461825 | 0.454375311 |
| 0.443108859 | 0.362974351 | 0.250333016 | 1           |
| 0.352915547 | 0.25074981  | 0.371614364 | 0.483070948 |
| 0.241513155 | 0.373042745 | 0.374435467 | 0.415815804 |
| 0.20755682  | 0.348914386 | 0.304749147 | 0.257141248 |
| 0.0138267   | 0.103173162 | 0.086729155 | 0.282293699 |
| 0.307525408 | 0.301349517 | 0.367657149 | 0.448764783 |
| 0.186933705 | 0.372697914 | 0.250978605 | 0.348933503 |
| 0.363328597 | 0.363880832 | 0.358176642 | 0.368527718 |
| 0.259543343 | 0.046094305 | 0.188769509 | 0.453845071 |
| 0.045142502 | 0.324298248 | 0.296263522 | 0.007416074 |
| 0.074101536 | 0.297523283 | 0.095367555 | 0.196883426 |
| 0.45610872  | 0.188553402 | 0.212375916 | 0.239013415 |
| 0.352519344 | 0.138976905 | 0.013040378 | 0.42537176  |
| 0.418432446 | 0.400481161 | 0.41123774  | 0.379671879 |
| 0.398631471 | 0.327050905 | 0.382091445 | 0.258747431 |
| 0.163543359 | 0.105992568 | 0.327681956 | 0.359043375 |
| 0.008423018 | 0.357355506 | 0.362006308 | 0.180599249 |
| 0.3590746   | 0.317225469 | 0.069516624 | 0.370158057 |
| 0.036124246 | 0.246559284 | 0.295142324 | 0.307428959 |
| 0.372523294 | 0.028396107 | 0.201724979 | 0.328968634 |
| 0.345920316 | 0.306096161 | 0.332256505 | 0.450547783 |
| 0.348913462 | 0.107810771 | 0.368058673 | 0.363285758 |
| 0.128478723 | 0.10853576  | 0.29934322  | 0.026568358 |
| 0.168402858 | 0.392347427 | 0.339749942 | 0.097591168 |
| 0.305220931 | 0.011642677 | 0.313964919 | 0.460069252 |
| 0.362936353 | 0.467250172 | 0.434266144 | 0.335688418 |
| 0.431039967 | 0.148258435 | 0.452386254 | 0.329228563 |
| 0.273288152 | 0.001819946 | 0.019157059 | 0.430494392 |
| 0.372044824 | 0.052726672 | 0.208528422 | 0.259630076 |
| 0.201466172 | 0.152621173 | 0.114825247 | 0.332247291 |
| 0.324340949 | 0.352170016 | 0.31264191  | 0.380988011 |
| 0.317270652 | 0.311672621 | 0.283630797 | 0.100471034 |
| 0.357734638 | 0.10306371  | 0.104301979 | 0.023444231 |
| 0.374787625 | 0.101941445 | 0.376451685 | 0.427010109 |
| 0.451244033 | 0.377444275 | 0.229751406 | 0.284451247 |
| 0.398142859 | 0.08105073  | 0.295117785 | 0.104230018 |
| 0.38920511  | 0.372845424 | 0.318864956 | 0.282322014 |
| 0.465535214 | 0.412187627 | 0.069248217 | 0.369688878 |
| 0.025472742 | 0.00881063  | 0.267701748 | 0.283544884 |
| 0.121485231 | 0.372180496 | 0.266735082 | 0.269912302 |
| 0.302456642 | 0.052105316 | 0.34764843  | 0.344614653 |
| 0.346360271 | 0.379540924 | 0.373784168 | 0.245585309 |
| 0.367673257 | 0.286550292 | 0.29057793  | 0.239034315 |
| 0.271660613 | 0.272243976 | 0.181797479 | 0.048397209 |
| 0.315292933 | 0.354439378 | 0.096496249 | 0.183610958 |
| 0.398773597 | 0.434985561 | 0.102082724 | 0.037965137 |

|             |             |             |             |
|-------------|-------------|-------------|-------------|
| 0.25116676  | 0.358374867 | 0.456268966 | 0.404423035 |
| 0.439687216 | 0.478474084 | 0.363674871 | 0.263217819 |
| 0.110462974 | 0.369967706 | 0.375779549 | 0.245150579 |
| 0.438996072 | 0.070577919 | 0.397255327 | 0.353150474 |
| 0.157875803 | 0.275199885 | 0.083101531 | 0.14009457  |
| 0.358503513 | 0.230044717 | 0.300846746 | 0.137172912 |
| 0.370322281 | 0.327586164 | 0.090579566 | 0.262576498 |
| 0.314423557 | 0.28320414  | 0.21234848  | 0.283451956 |
| 0.293570035 | 0.165482718 | 0.359912235 | 0.429581743 |
| 0.150903599 | 0.1477147   | 0.223028985 | 0.3372381   |
| 0.369103323 | 0.284147313 | 0.041085809 | 0.348386242 |
| 0.443812825 | 0.343029079 | 0.40922401  | 0.405443238 |
| 0.109478022 | 0.365525077 | 0.345931229 | 0.374073218 |
| 0.245923215 | 0.294592743 | 0.312875862 | 0.096641838 |
| 0.303985331 | 0.423515609 | 0.35229851  | 0.256615415 |
| 0.319010702 | 0.117925274 | 0.061143297 | 0.377871935 |
| 0.32525541  | 0.129796533 | 0.232207651 | 0.379379016 |
| 0.008452919 | 0.242892072 | 0.453443483 | 0.29069226  |
| 0.460586236 | 0.440960054 | 0.403605765 | 0.261730704 |
| 0.008038055 | 0.362539458 | 0.36440882  | 0.351994669 |
| 0.352333857 | 0.291301667 | 0.182749825 | 0.159531361 |
| 0.30430027  | 0.076575998 | 0.245783026 | 0.262877686 |
| 0.241626883 | 0.312551096 | 0.249677106 | 0.245952848 |
| 0.319522002 | 0.0892375   | 0.31817871  | 0.278225551 |
| 0.264357331 | 0.274016978 | 0.348605691 | 0.189451827 |
| 0.245841928 | 0.413240155 | 0.336964407 | 0.047777717 |
| 0.360503389 | 0.381312644 | 0.397916007 | 0.00774634  |
| 0.363570152 | 0.022364826 | 0.314996851 | 0.316985387 |
| 0.310655427 | 0.320814878 | 0.355860711 | 0.366074078 |
| 0.315631298 | 0.299437248 | 0.320364064 | 0.296017076 |
| 0.27333417  | 0.265294259 | 0.367239363 | 0.314718944 |
| 0.345411688 | 0.178266971 | 0.097372785 | 0.096114545 |
| 0.103063228 | 0.385401702 | 0.243861575 | 0.073095856 |
| 0.299295657 | 0.321373504 | 0.365295215 | 0.392956193 |
| 0.408570784 | 0.093061313 | 0.35720768  | 0.356511051 |
| 0.188260877 | 0.246727298 | 0.081778729 | 0.314072462 |
| 0.279848718 | 0.326816649 | 0.292539728 | 0.246417724 |
| 0.300373402 | 0.373963586 | 0.233024567 | 0.40417725  |
| 0.359316616 | 0.322285732 | 0.199458294 | 0.178688354 |
| 0.221987804 | 0.151056883 | 0.374482031 | 0.005914574 |
| 0.344528448 | 0.224136078 | 0.407599609 | 0.398352694 |
| 0.319527154 | 0.37035072  | 0.205752606 | 0.135821374 |
| 0.170031038 | 0.150966329 | 0.17258469  | 0.335057034 |
| 0.264936189 | 0.244572728 | 0.377418287 | 0.226246794 |
| 0.360698128 | 0.328584671 | 0.354814858 | 0.278552389 |
| 0.297935663 | 0.192728253 | 0.404340945 | 0.131482471 |
| 0.323254035 | 0.321183721 | 0.241384897 | 0.367101808 |
| 0.338643076 | 0.444842129 | 0.086415044 | 0.453259215 |
| 0.371760471 | 0.133179869 | 0.451245172 | 0.28119621  |
| 0.275008801 | 0.230822832 | 0.27565592  | 0.28209699  |
| 0.305712502 | 0.337230087 | 0.012628345 | 0.113167741 |
| 0.348477777 | 0.291044113 | 0.306500924 | 0.341613032 |
| 0.368920175 | 0.359198383 | 0.231369064 | 0.281526972 |
| 0.373205306 | 0.403238718 | 0.307277807 | 0.273716175 |

|             |             |             |             |
|-------------|-------------|-------------|-------------|
| 0.320779407 | 0.168758558 | 0.273202122 | 0.02829405  |
| 0.351328633 | 0.330495179 | 0.289579659 | 0.105810964 |
| 0.04592127  | 0.291670037 | 0.337774165 | 0.07686763  |
| 0.453223406 | 0.244201524 | 0.275457958 | 0.337063796 |
| 0.189056664 | 0.405857018 | 0.251196386 | 0.362615918 |
| 0.071316188 | 0.285963114 | 0.352539722 | 0.324229064 |
| 0.322073234 | 0.375739385 | 0.362860944 | 0.332745404 |
| 0.075229105 | 0.34633091  | 0.00810906  | 0.365951317 |
| 0.373395075 | 0.365373769 | 0.207409485 | 0.211056458 |
| 0.328849642 | 0.349255295 | 0.331368155 | 0.315348954 |
| 0.034088569 | 0.377262352 | 0.260858671 | 0.341245421 |
| 0.227853435 | 0.323408125 | 0.121194436 | 0.371727164 |
| 0.36556204  | 0.32628374  | 0.260099256 | 0.287165589 |
| 0.394544698 | 0.315456393 | 0.134066891 | 0.318682957 |
| 0.288704616 | 0.08182773  | 0.256350458 | 0.464654427 |
| 0.283754799 | 0.334554764 | 0.421037177 | 0.30103313  |
| 0.357201175 | 0.327975376 | 0.305799231 | 0.449559715 |
| 0.192080474 | 0.289075029 | 0.377406846 | 0.397982056 |
| 0.326220322 | 0.326189457 | 0.333069869 | 0.351959021 |
| 0.359916338 | 0.140498151 | 0.351502622 | 0.311882795 |
| 0.316061094 | 0.337289575 | 0.233575289 | 0.332800236 |
| 0.086547209 | 0.24809841  | 0.311326571 | 0.181630957 |
| 0.345757434 | 0.379869087 | 0.372686    | 0.378932813 |
| 0.219906772 | 0.062253331 | 0.427336717 | 0.045821654 |
| 0.255977534 | 0.366796848 | 0.289246948 | 0.378940754 |
| 0.17399493  | 0.32405054  | 0.261504814 | 0.003284837 |
| 0.386282243 | 0.102423881 | 0.346408838 | 0.345228987 |
| 0.3182058   | 0.084734129 | 0.387710384 | 0.470944639 |
| 0.292842277 | 0.281678626 | 0.29060011  | 0.393797048 |
| 0.259999404 | 0.289389624 | 0.334303861 | 0.290093622 |
| 0.316166126 | 0.264723303 | 0.318672734 | 0.33166372  |
| 0.31773918  | 0.282111813 |             |             |
| FKBP5       | 0.165114564 | 0.371606969 | 0.12438128  |
| 0.307423993 | 0.322722659 | 0.379825287 | 0.132111445 |
| 0.218500183 | 0.279159181 | 0.201818047 | 0.405478032 |
| 0.076753868 | 0.08045394  | 0.438440068 | 0.122178747 |
| 0.351968828 | 0.111602095 | 0.207374362 | 0.076470715 |
| 0.231321038 | 0.313845596 | 0.322978558 | 0.344250468 |
| 0.287403821 | 0.244079735 | 0.319210062 | 0.285841139 |
| 0.455079688 | 0.217268199 | 0.381993224 | 0.165812739 |
| 0.434472317 | 0.329499742 | 0.3039254   | 0.064104124 |
| 0.364638689 | 0.008871324 | 0.440331077 | 0.340930133 |
| 0.18407577  | 0.376902961 | 0.258172057 | 0.366055745 |
| 0.296259471 | 0.112137862 | 0.147016149 | 0.320325937 |
| 0.289053165 | 0.284231778 | 0.120626899 | 0.364136688 |
| 0.291205752 | 0.366473081 | 0.299939932 | 0.008708557 |
| 0.263961754 | 0.063395376 | 0.174637819 | 0.475320558 |
| 0.308067709 | 0.23927439  | 0.191696648 | 0.234839203 |
| 0.297490291 | 0.314878175 | 0.291137722 | 0.279388701 |
| 0.481745414 | 0.162965621 | 0.334150219 | 0.248045454 |
| 0.348623954 | 0.06937735  | 0.249036959 | 0.118053275 |
| 0.316385437 | 0.307486162 | 0.35379763  | 0.268145015 |
| 0.378388952 | 0.497459786 | 0.286157786 | 0.463684102 |
| 0.083010058 | 0.298155358 | 0.284303372 | 0.334418434 |

|             |             |             |             |
|-------------|-------------|-------------|-------------|
| 0.309515092 | 0.126777877 | 0.410621146 | 0.506463486 |
| 0.086463192 | 0.284625084 | 0.337603619 | 0.173735724 |
| 0.389421169 | 0.197606384 | 0.309591769 | 0.197893039 |
| 0.332354679 | 0.32776267  | 0.435345547 | 0.370535357 |
| 0.291596298 | 0.133438338 | 0.457180301 | 0.290919411 |
| 0.382363981 | 0.167336258 | 0.265340764 | 0.389117365 |
| 0.385948513 | 0.463555947 | 0.3490546   | 0.334311412 |
| 0.341759861 | 0.47849598  | 0.402636988 | 0.375444035 |
| 0.092766382 | 0.484819746 | 0.302279469 | 0.131102431 |
| 0.134866014 | 0.177240172 | 0.192230314 | 0.318693676 |
| 0.430046499 | 0.347861811 | 0.313371892 | 0.322044346 |
| 0.414139451 | 0.442668711 | 0.474199283 | 0.372355795 |
| 0.11598807  | 0.184082481 | 0.352561537 | 0.300152401 |
| 0.354393902 | 0.177602245 | 0.262992607 | 0.489688733 |
| 0.417184342 | 0.382336837 | 0.238063964 | 0.487615906 |
| 0.222184343 | 0.510507324 | 0.404509745 | 0.306905779 |
| 0.502379439 | 0.481149968 | 0.497661226 | 0.357186082 |
| 0.46904985  | 0.401619816 | 0.047558699 | 0.338337132 |
| 0.487113033 | 0.02826974  | 0.413076082 | 0.446199037 |
| 0.465989417 | 0.404066379 | 0.486460889 | 0.468026996 |
| 0.464914652 | 0.143100303 | 0.01606044  | 0.328626303 |
| 0.485668535 | 0.415806513 | 0.193402984 | 0.340367715 |
| 0.326366649 | 0.378912662 | 0.335831415 | 0.332268684 |
| 0.505811518 | 0.417928554 | 0.432321245 | 0.348524552 |
| 0.252137513 | 0.356440316 | 0.291148444 | 0.452997585 |
| 0.129691412 | 0.221387091 | 0.111468529 | 0.298210328 |
| 0.289443656 | 0.285551365 | 0.373916332 | 0.291125097 |
| 0.298233949 | 0.305580024 | 0.258700144 | 0.348741599 |
| 0.097979896 | 0.368909536 | 0.255560853 | 0.248900302 |
| 0.138382645 | 0.193966555 | 0.33244287  | 0.291994582 |
| 0.326697222 | 0.273604495 | 0.352323108 | 0.447997499 |
| 0.286302389 | 0.257503344 | 0.372978479 | 0.472587    |
| 0.450441067 | 0.352234512 | 0.271374645 | 0.069131895 |
| 0.315792799 | 0.197396935 | 0.155035791 | 0.31728335  |
| 0.219850374 | 0.306669819 | 0.354431723 | 0.373591922 |
| 0.351594262 | 0.176126266 | 0.326400404 | 0.447588044 |
| 0.195979299 | 0.369437869 | 0.430465296 | 0.322165768 |
| 0.020230399 | 0.393136505 | 0.400402599 | 0.183879016 |
| 0.30575478  | 0.167529619 | 0.256746026 | 0.430489451 |
| 0.240038219 | 0.219365786 | 0.441455717 | 0.351843262 |
| 0.314888277 | 0.240688237 | 0.487666546 | 0.038865404 |
| 0.270550629 | 0.148376566 | 0.352543284 | 0.236509457 |
| 0.336644093 | 0.320485762 | 0.302198549 | 0.32498446  |
| 0.205852127 | 0.48415999  | 0.366584773 | 0.479512629 |
| 0.316319193 | 0.493941813 | 0.414874915 | 0.436698616 |
| 0.367211162 | 0.264291324 | 0.121802111 | 0.404003525 |
| 0.418771108 | 0.250637736 | 0.125958975 | 0.33934129  |
| 0.272368594 | 0.350212611 | 0.16693623  | 0.482638013 |
| 0.494801687 | 0.428363255 | 0.257645707 | 0.352915547 |
| 1           | 0.348977612 | 0.362187175 | 0.49327076  |
| 0.221459914 | 0.32228743  | 0.337466231 | 0.381065891 |
| 0.280535314 | 0.229643969 | 0.315125231 | 0.139802959 |
| 0.011956907 | 0.145507534 | 0.146643167 | 0.279240606 |
| 0.199604106 | 0.307564036 | 0.355420694 | 0.485218882 |



|             |             |             |             |
|-------------|-------------|-------------|-------------|
| 0.232071407 | 0.413098251 | 0.249570766 | 0.37186092  |
| 0.412836259 | 0.290388981 | 0.321509188 | 0.343144804 |
| 0.285943569 | 0.079768208 | 0.264027587 | 0.506741802 |
| 0.078112403 | 0.257886414 | 0.298934198 | 0.014780561 |
| 0.116663972 | 0.321481166 | 0.142812852 | 0.254307891 |
| 0.439647203 | 0.253249561 | 0.288207861 | 0.241335944 |
| 0.37122423  | 0.187771253 | 0.021099807 | 0.432970778 |
| 0.425252453 | 0.397523613 | 0.422652113 | 0.408100862 |
| 0.376217517 | 0.318468858 | 0.361096864 | 0.35690053  |
| 0.211488891 | 0.153981817 | 0.235639793 | 0.352220858 |
| 0.009589852 | 0.376878518 | 0.28769553  | 0.241527425 |
| 0.350943261 | 0.307682472 | 0.117250106 | 0.299010462 |
| 0.09924259  | 0.192451167 | 0.296126184 | 0.26000508  |
| 0.322046642 | 0.056645082 | 0.297798054 | 0.300342031 |
| 0.430971005 | 0.359634557 | 0.287778358 | 0.497118033 |
| 0.398653364 | 0.165776666 | 0.368264285 | 0.371509305 |
| 0.167693883 | 0.092234474 | 0.302328728 | 0.043650125 |
| 0.193561151 | 0.409264058 | 0.302298911 | 0.17044604  |
| 0.366304497 | 0.033150258 | 0.386362625 | 0.502423272 |
| 0.430557547 | 0.481855806 | 0.48554521  | 0.285680757 |
| 0.487558255 | 0.066086784 | 0.486367785 | 0.371042859 |
| 0.286938456 | 0.007439245 | 0.021071696 | 0.444629246 |
| 0.374378514 | 0.095984145 | 0.264730718 | 0.373149228 |
| 0.252781897 | 0.217804736 | 0.140579804 | 0.23548848  |
| 0.373966292 | 0.303046851 | 0.195719272 | 0.438191898 |
| 0.326631337 | 0.295309419 | 0.31225851  | 0.142724487 |
| 0.354061137 | 0.156674718 | 0.134331884 | 0.031216477 |
| 0.338410477 | 0.160466989 | 0.449454983 | 0.470755169 |
| 0.49405295  | 0.368522509 | 0.241380603 | 0.311316014 |
| 0.368683048 | 0.143820397 | 0.28414616  | 0.165452459 |
| 0.453438901 | 0.379185821 | 0.381629251 | 0.354902885 |
| 0.490430054 | 0.469675781 | 0.10064879  | 0.376712041 |
| 0.067593871 | 0.005071359 | 0.371242957 | 0.287530526 |
| 0.036026576 | 0.328760744 | 0.324486519 | 0.203407088 |
| 0.226658804 | 0.109377036 | 0.235069682 | 0.23761965  |
| 0.355393179 | 0.360961483 | 0.296700007 | 0.246206135 |
| 0.281368408 | 0.182786812 | 0.28365736  | 0.227357381 |
| 0.18681355  | 0.319890741 | 0.252622744 | 0.069177289 |
| 0.34165918  | 0.364016958 | 0.149168838 | 0.241488508 |
| 0.431266244 | 0.461681876 | 0.114464737 | 0.06754797  |
| 0.316618044 | 0.298556832 | 0.467469927 | 0.455571928 |
| 0.500028912 | 0.505090275 | 0.416997027 | 0.210452723 |
| 0.161776598 | 0.336280982 | 0.291147922 | 0.182994549 |
| 0.477583235 | 0.114495418 | 0.45039119  | 0.260820426 |
| 0.193526063 | 0.327405914 | 0.12902946  | 0.168275995 |
| 0.325605225 | 0.26898939  | 0.286858533 | 0.225594874 |
| 0.357951318 | 0.248573013 | 0.11820214  | 0.300697348 |
| 0.360596417 | 0.185772576 | 0.258126135 | 0.288997573 |
| 0.326724232 | 0.132083189 | 0.363622388 | 0.464145794 |
| 0.214815157 | 0.174068007 | 0.352865209 | 0.319707852 |
| 0.378300266 | 0.278274984 | 0.101836724 | 0.396126234 |
| 0.454217383 | 0.375569357 | 0.472041639 | 0.382363141 |
| 0.149598051 | 0.378127459 | 0.235656241 | 0.336045478 |
| 0.253813021 | 0.375502516 | 0.274973159 | 0.13791048  |

|             |             |             |             |
|-------------|-------------|-------------|-------------|
| 0.300819726 | 0.457785774 | 0.388665976 | 0.300804803 |
| 0.329161408 | 0.168795859 | 0.10185246  | 0.380005721 |
| 0.214917525 | 0.209130683 | 0.268911037 | 0.345869273 |
| 0.00926234  | 0.134375888 | 0.434281226 | 0.336180021 |
| 0.479829871 | 0.455283782 | 0.45900771  | 0.257222832 |
| 0.002004185 | 0.334147243 | 0.408357029 | 0.400594055 |
| 0.399764913 | 0.350465747 | 0.148581882 | 0.19410806  |
| 0.333121439 | 0.13925851  | 0.251778923 | 0.329669105 |
| 0.151659553 | 0.356538596 | 0.272575761 | 0.234870637 |
| 0.275380246 | 0.118844807 | 0.235095227 | 0.340168477 |
| 0.113727341 | 0.318679997 | 0.37425686  | 0.200567861 |
| 0.221518744 | 0.390119698 | 0.362028107 | 0.089389316 |
| 0.295070071 | 0.356485987 | 0.396941039 | 0.012542476 |
| 0.388066796 | 0.042401247 | 0.289311299 | 0.337403452 |
| 0.297574343 | 0.274448635 | 0.308156235 | 0.341460021 |
| 0.328851295 | 0.306226459 | 0.39215607  | 0.33661425  |
| 0.29145983  | 0.281002581 | 0.35002079  | 0.331869069 |
| 0.36702016  | 0.248838707 | 0.141916406 | 0.147735341 |
| 0.166441555 | 0.407695388 | 0.295890581 | 0.130022168 |
| 0.297113161 | 0.314251351 | 0.388485931 | 0.448547181 |
| 0.41530283  | 0.147703645 | 0.307662998 | 0.414456735 |
| 0.156589808 | 0.300902299 | 0.128852661 | 0.354209499 |
| 0.323122719 | 0.286687901 | 0.31700044  | 0.332944296 |
| 0.317697662 | 0.43128245  | 0.294403802 | 0.422229602 |
| 0.377513601 | 0.264767508 | 0.248976315 | 0.220795287 |
| 0.307613151 | 0.190520198 | 0.297764689 | 0.017754167 |
| 0.371851645 | 0.347952073 | 0.432309507 | 0.467394042 |
| 0.229778423 | 0.393410047 | 0.284240278 | 0.211634359 |
| 0.216904801 | 0.220351836 | 0.228225454 | 0.345508739 |
| 0.189243678 | 0.289671278 | 0.339813063 | 0.329085886 |
| 0.363234607 | 0.319276664 | 0.238852525 | 0.278075997 |
| 0.265574021 | 0.258309567 | 0.435528024 | 0.193054654 |
| 0.3343213   | 0.263110295 | 0.269828229 | 0.366067162 |
| 0.296542089 | 0.463852747 | 0.131954529 | 0.476420002 |
| 0.330282029 | 0.1819548   | 0.491390277 | 0.296302586 |
| 0.310689418 | 0.224225062 | 0.170972136 | 0.297477711 |
| 0.271673043 | 0.277536268 | 0.011212193 | 0.084996103 |
| 0.372264462 | 0.21809215  | 0.316529904 | 0.317166921 |
| 0.260676992 | 0.335132643 | 0.127801986 | 0.307400151 |
| 0.438897519 | 0.466981948 | 0.376167732 | 0.29610776  |
| 0.349210981 | 0.224787624 | 0.358219446 | 0.011909166 |
| 0.355559777 | 0.322471366 | 0.286716923 | 0.131256266 |
| 0.069193689 | 0.199543147 | 0.354918174 | 0.102682893 |
| 0.440537049 | 0.187332588 | 0.267155537 | 0.371977522 |
| 0.214308325 | 0.47749052  | 0.223407124 | 0.403522599 |
| 0.072340009 | 0.292934778 | 0.290265221 | 0.277308295 |
| 0.345199634 | 0.289910193 | 0.393574276 | 0.258966852 |
| 0.113734938 | 0.327375971 | 0.007990222 | 0.437744979 |
| 0.439879116 | 0.288725422 | 0.244574643 | 0.191482482 |
| 0.339344053 | 0.33901967  | 0.252622863 | 0.312196651 |
| 0.062154221 | 0.357211639 | 0.279868872 | 0.406674064 |
| 0.239661839 | 0.294026919 | 0.17156427  | 0.265427283 |
| 0.444206078 | 0.305292677 | 0.27011756  | 0.285810928 |
| 0.448866579 | 0.322110419 | 0.200204741 | 0.240372644 |

|             |             |             |             |
|-------------|-------------|-------------|-------------|
| 0.281137094 | 0.124635598 | 0.296084976 | 0.48912022  |
| 0.291761858 | 0.251506702 | 0.408544232 | 0.331107416 |
| 0.265333199 | 0.362801307 | 0.295392207 | 0.467394696 |
| 0.169384748 | 0.333403786 | 0.358374911 | 0.42177423  |
| 0.342316837 | 0.19058302  | 0.259265994 | 0.295381721 |
| 0.437230404 | 0.236572291 | 0.23740799  | 0.375390371 |
| 0.230324441 | 0.335142544 | 0.251906162 | 0.251555937 |
| 0.120093058 | 0.223026723 | 0.371892057 | 0.223646471 |
| 0.352101515 | 0.359681669 | 0.268642278 | 0.418853561 |
| 0.286508277 | 0.117266657 | 0.460585984 | 0.026877354 |
| 0.355004334 | 0.397597077 | 0.3088791   | 0.329781489 |
| 0.257171067 | 0.332572764 | 0.326979153 | 0.009866999 |
| 0.361755282 | 0.071751071 | 0.265787859 | 0.322816611 |
| 0.246304944 | 0.128089925 | 0.44493921  | 0.481078182 |
| 0.323063348 | 0.248100812 | 0.282343926 | 0.428447452 |
| 0.164070345 | 0.230736086 | 0.254419939 | 0.344755531 |
| 0.214364872 | 0.288199616 | 0.309095546 | 0.325765182 |
| 0.362627167 | 0.296845552 |             |             |
| FLNA        | 0.177176811 | 0.272991945 | 0.138852119 |
| 0.258774148 | 0.157899559 | 0.174753002 | 0.136439257 |
| 0.180880505 | 0.206553544 | 0.066117527 | 0.211850981 |
| 0.121476164 | 0.02764108  | 0.335072767 | 0.131353618 |
| 0.165841559 | 0.146015925 | 0.182357463 | 0.036320672 |
| 0.119685611 | 0.146662397 | 0.131027286 | 0.158708113 |
| 0.127978751 | 0.303658007 | 0.180578797 | 0.104135913 |
| 0.329286905 | 0.071668431 | 0.22065806  | 0.058975991 |
| 0.377286829 | 0.16160981  | 0.105759638 | 0.108435844 |
| 0.158252953 | 0.003038956 | 0.377002171 | 0.183455642 |
| 0.080768981 | 0.362572322 | 0.097564718 | 0.236674136 |
| 0.107428098 | 0.145366182 | 0.049307709 | 0.163110012 |
| 0.15463013  | 0.146503226 | 0.120049711 | 0.221925233 |
| 0.10851742  | 0.283709859 | 0.185730025 | 0.00948332  |
| 0.091975508 | 0.015149076 | 0.050305839 | 0.369144257 |
| 0.292680876 | 0.21189188  | 0.053869623 | 0.123611079 |
| 0.136483188 | 0.179217373 | 0.226716811 | 0.096424002 |
| 0.368844692 | 0.052918219 | 0.194687369 | 0.173515482 |
| 0.148915514 | 0.078660903 | 0.270596462 | 0.111504785 |
| 0.120232849 | 0.222520284 | 0.171702611 | 0.097036718 |
| 0.273340046 | 0.404924106 | 0.215866509 | 0.358678343 |
| 0.028077629 | 0.123950736 | 0.127376261 | 0.258427574 |
| 0.196157567 | 0.100169953 | 0.287007237 | 0.397472266 |
| 0.086710841 | 0.125450829 | 0.203622534 | 0.173611224 |
| 0.297624743 | 0.065324527 | 0.116691017 | 0.08286599  |
| 0.181666849 | 0.137887811 | 0.343766734 | 0.298015759 |
| 0.130100254 | 0.140774056 | 0.371053136 | 0.120820954 |
| 0.206150511 | 0.165785791 | 0.117418796 | 0.257447619 |
| 0.213260507 | 0.344245676 | 0.238174087 | 0.243085729 |
| 0.137528311 | 0.36400498  | 0.269292419 | 0.290411117 |
| 0.026588624 | 0.363779356 | 0.231923744 | 0.171249549 |
| 0.127860626 | 0.177321361 | 0.076081611 | 0.305059435 |
| 0.310918972 | 0.240478444 | 0.222879409 | 0.19096876  |
| 0.29026157  | 0.3492946   | 0.348717998 | 0.277084017 |
| 0.148621842 | 0.058065389 | 0.141108675 | 0.170537174 |
| 0.217149429 | 0.160104865 | 0.102339943 | 0.396364113 |

|             |             |             |             |
|-------------|-------------|-------------|-------------|
| 0.379633007 | 0.267597474 | 0.17182912  | 0.411564751 |
| 0.129851677 | 0.409595605 | 0.290183758 | 0.240677249 |
| 0.401781494 | 0.394063059 | 0.382971378 | 0.203862038 |
| 0.392236942 | 0.214262491 | 0.017973829 | 0.259576302 |
| 0.397427306 | 0.019457714 | 0.282433193 | 0.308550742 |
| 0.351198854 | 0.271085866 | 0.360448408 | 0.341111499 |
| 0.350477397 | 0.149787928 | 0.003080235 | 0.207056313 |
| 0.377958532 | 0.354793642 | 0.139705763 | 0.127755005 |
| 0.157773932 | 0.172546124 | 0.226297117 | 0.131715109 |
| 0.414160522 | 0.308835128 | 0.301707518 | 0.241100174 |
| 0.111831525 | 0.359316564 | 0.105672486 | 0.375643455 |
| 0.166500198 | 0.19708551  | 0.145135301 | 0.230201006 |
| 0.115533717 | 0.220806968 | 0.168511292 | 0.130689673 |
| 0.25265899  | 0.139324534 | 0.086621872 | 0.198251612 |
| 0.147493341 | 0.165508943 | 0.197033254 | 0.168184402 |
| 0.171611277 | 0.264631204 | 0.223133566 | 0.251857324 |
| 0.186876288 | 0.306793886 | 0.2023945   | 0.326839948 |
| 0.111552731 | 0.262845681 | 0.231853421 | 0.383546993 |
| 0.391515984 | 0.145669502 | 0.254306855 | 0.116281065 |
| 0.125870356 | 0.057566046 | 0.045744109 | 0.125951121 |
| 0.275055473 | 0.15493449  | 0.170622647 | 0.246306305 |
| 0.203530914 | 0.119260307 | 0.120579901 | 0.407855329 |
| 0.205034318 | 0.191423065 | 0.321845781 | 0.136347885 |
| 0.052300672 | 0.202339343 | 0.288248132 | 0.093785279 |
| 0.193934242 | 0.074278088 | 0.099720088 | 0.309192426 |
| 0.078867236 | 0.089413194 | 0.315477066 | 0.227673237 |
| 0.136637377 | 0.257103051 | 0.363982498 | 0.008482478 |
| 0.100412662 | 0.136385801 | 0.271497344 | 0.085446049 |
| 0.235088829 | 0.251850897 | 0.133064387 | 0.154801715 |
| 0.209624635 | 0.368108086 | 0.303557146 | 0.354715512 |
| 0.107239661 | 0.370742439 | 0.291945819 | 0.345943038 |
| 0.240273763 | 0.086056793 | 0.036728709 | 0.292652298 |
| 0.298763643 | 0.087217414 | 0.157036184 | 0.216650461 |
| 0.09119057  | 0.192923022 | 0.101326075 | 0.368771576 |
| 0.419903347 | 0.327895989 | 0.207735104 | 0.25074981  |
| 0.348977612 | 1           | 0.275543524 | 0.376334456 |
| 0.069113506 | 0.120572004 | 0.131826682 | 0.298289898 |
| 0.252413006 | 0.101161309 | 0.295316925 | 0.042494493 |
| 0.004652943 | 0.136512866 | 0.153541464 | 0.209251613 |
| 0.087804381 | 0.143829945 | 0.200325948 | 0.361013194 |
| 0.208004856 | 0.35059902  | 0.200437313 | 0.176485183 |
| 0.32561718  | 0.110675807 | 0.133074918 | 0.176273606 |
| 0.256009517 | 0.127011823 | 0.242182303 | 0.414013031 |
| 0.095962148 | 0.105294066 | 0.146113266 | 0.021951813 |
| 0.131737128 | 0.216414799 | 0.200987908 | 0.322276478 |
| 0.323326723 | 0.308810546 | 0.237019785 | 0.080350964 |
| 0.274338633 | 0.187170984 | 0.051044528 | 0.309878874 |
| 0.314852568 | 0.295475139 | 0.310776976 | 0.319641063 |
| 0.265911324 | 0.212147021 | 0.250501303 | 0.184947947 |
| 0.189328967 | 0.135998177 | 0.087392604 | 0.176219942 |
| 0.011271182 | 0.300592625 | 0.131883264 | 0.260373576 |
| 0.220851222 | 0.204657276 | 0.159457403 | 0.141048489 |
| 0.142542572 | 0.060788631 | 0.134026233 | 0.153070034 |
| 0.222454633 | 0.098930987 | 0.134319469 | 0.101808156 |

|             |             |             |             |
|-------------|-------------|-------------|-------------|
| 0.360756342 | 0.327742434 | 0.099056925 | 0.38005785  |
| 0.221681943 | 0.166400263 | 0.181251378 | 0.260076859 |
| 0.171737186 | 0.028569668 | 0.123688883 | 0.019239579 |
| 0.095134255 | 0.325321758 | 0.110553286 | 0.170961301 |
| 0.248780323 | 0.075062628 | 0.345675522 | 0.387849649 |
| 0.332490863 | 0.349286515 | 0.374840275 | 0.113984485 |
| 0.375966844 | 0.014965784 | 0.356874764 | 0.284582809 |
| 0.095746262 | 0.014946258 | 0.036202508 | 0.313061375 |
| 0.16175428  | 0.138022845 | 0.235255654 | 0.171699339 |
| 0.233844833 | 0.156781932 | 0.154765356 | 0.114803956 |
| 0.205948292 | 0.168899784 | 0.092590102 | 0.338066351 |
| 0.195260809 | 0.193742095 | 0.122067992 | 0.166989274 |
| 0.171989442 | 0.192580021 | 0.147025379 | 0.047039813 |
| 0.220823166 | 0.204383221 | 0.376921479 | 0.35395846  |
| 0.40064868  | 0.225070428 | 0.076791307 | 0.136064942 |
| 0.265190657 | 0.161552254 | 0.101011468 | 0.158693529 |
| 0.34065516  | 0.200166914 | 0.33707779  | 0.349908969 |
| 0.377478025 | 0.3773489   | 0.134573866 | 0.263425183 |
| 0.128284492 | 0.006964191 | 0.166845929 | 0.227021176 |
| 0.012540759 | 0.12160101  | 0.311628813 | 0.093313147 |
| 0.121489177 | 0.152471778 | 0.079346582 | 0.084914844 |
| 0.226454136 | 0.15738242  | 0.127987959 | 0.202482425 |
| 0.133145132 | 0.08753846  | 0.200476633 | 0.167459055 |
| 0.075676442 | 0.289927398 | 0.308121758 | 0.101120169 |
| 0.128558401 | 0.144083845 | 0.175621459 | 0.242254417 |
| 0.331145173 | 0.333269673 | 0.121808854 | 0.113344168 |
| 0.313986647 | 0.128528124 | 0.341078638 | 0.336292238 |
| 0.396452845 | 0.395910685 | 0.388360452 | 0.147257352 |
| 0.183729931 | 0.184430413 | 0.121259337 | 0.142835591 |
| 0.358799028 | 0.120753879 | 0.352539129 | 0.092147584 |
| 0.191299911 | 0.219066365 | 0.186060276 | 0.165886815 |
| 0.141481541 | 0.242093136 | 0.202711996 | 0.205211975 |
| 0.168039879 | 0.095820152 | 0.13573753  | 0.222339381 |
| 0.279263529 | 0.059731059 | 0.218382775 | 0.143078692 |
| 0.257563757 | 0.042961808 | 0.216570315 | 0.397422692 |
| 0.225457131 | 0.139013348 | 0.185438941 | 0.214288566 |
| 0.256819244 | 0.107692051 | 0.163084759 | 0.28443936  |
| 0.341695234 | 0.201551667 | 0.370444529 | 0.312960707 |
| 0.168677975 | 0.155413119 | 0.078059876 | 0.150634417 |
| 0.188574487 | 0.17711646  | 0.15837971  | 0.151179458 |
| 0.29488133  | 0.38139613  | 0.292267734 | 0.240760053 |
| 0.147911323 | 0.14539583  | 0.106186067 | 0.275038369 |
| 0.083948921 | 0.197213767 | 0.099663432 | 0.232805593 |
| 0.015784499 | 0.04670366  | 0.315179238 | 0.227337862 |
| 0.377022183 | 0.334507781 | 0.393407042 | 0.139269479 |
| 0.000291316 | 0.174194174 | 0.232536948 | 0.165973811 |
| 0.296022564 | 0.291244795 | 0.087576486 | 0.202408749 |
| 0.332024358 | 0.170797201 | 0.181309076 | 0.155193039 |
| 0.044081654 | 0.19299819  | 0.264381344 | 0.146972383 |
| 0.172503104 | 0.120736742 | 0.092014959 | 0.230813692 |
| 0.038317858 | 0.311369813 | 0.325954473 | 0.07297071  |
| 0.073122605 | 0.287518275 | 0.258465465 | 0.136088573 |
| 0.112554675 | 0.264210992 | 0.312173666 | 0.013670534 |
| 0.238025913 | 0.088807701 | 0.187867126 | 0.221393051 |

|             |             |             |             |
|-------------|-------------|-------------|-------------|
| 0.201023856 | 0.16219425  | 0.19634656  | 0.167026335 |
| 0.182293594 | 0.192944033 | 0.240285036 | 0.269131515 |
| 0.228932724 | 0.182464203 | 0.17145324  | 0.145988856 |
| 0.192477537 | 0.230530685 | 0.211250897 | 0.218674764 |
| 0.219775683 | 0.298694279 | 0.34171149  | 0.173353126 |
| 0.223612005 | 0.129706873 | 0.371690859 | 0.33376062  |
| 0.352587232 | 0.194869888 | 0.13884791  | 0.308823637 |
| 0.043772077 | 0.140635897 | 0.129807315 | 0.164764613 |
| 0.217755056 | 0.139494415 | 0.127930561 | 0.195198154 |
| 0.189954911 | 0.401178723 | 0.333555081 | 0.347143442 |
| 0.173732715 | 0.098155839 | 0.088046268 | 0.220731321 |
| 0.228472309 | 0.197790284 | 0.137028255 | 0.049250978 |
| 0.24220093  | 0.209408311 | 0.30429381  | 0.369485095 |
| 0.075415004 | 0.356344665 | 0.112533558 | 0.198880582 |
| 0.078948742 | 0.24934828  | 0.24305021  | 0.224881035 |
| 0.059002591 | 0.225803608 | 0.168376296 | 0.157292341 |
| 0.233514164 | 0.18906282  | 0.105498136 | 0.159626156 |
| 0.154931457 | 0.217150697 | 0.346561442 | 0.16384268  |
| 0.144634091 | 0.13844959  | 0.132702481 | 0.182122811 |
| 0.173726471 | 0.335664766 | 0.148867822 | 0.34131936  |
| 0.133489247 | 0.218579251 | 0.41852829  | 0.157749209 |
| 0.168292263 | 0.194437509 | 0.054033933 | 0.115763149 |
| 0.160774383 | 0.098765522 | 0.002735638 | 0.032890032 |
| 0.293320137 | 0.080422582 | 0.210755309 | 0.211489251 |
| 0.117294937 | 0.273591809 | 0.042119006 | 0.156108045 |
| 0.3364148   | 0.378908118 | 0.205400297 | 0.282557499 |
| 0.266343148 | 0.22380596  | 0.208519588 | 0.004759089 |
| 0.166893177 | 0.138627731 | 0.096307136 | 0.154054338 |
| 0.105896423 | 0.062263657 | 0.167247075 | 0.104319379 |
| 0.316074285 | 0.060672954 | 0.134471836 | 0.234615562 |
| 0.204597133 | 0.390150704 | 0.18224507  | 0.277058422 |
| 0.062362001 | 0.224854401 | 0.105398792 | 0.099697011 |
| 0.19269178  | 0.112204266 | 0.290476408 | 0.107278829 |
| 0.157739362 | 0.172641587 | 0.008370208 | 0.408682227 |
| 0.352132416 | 0.100289866 | 0.279177383 | 0.061684407 |
| 0.277739573 | 0.276889134 | 0.114104074 | 0.113629201 |
| 0.122978002 | 0.166582929 | 0.218978586 | 0.334347144 |
| 0.077654495 | 0.12473596  | 0.210801293 | 0.099126235 |
| 0.383516008 | 0.121481385 | 0.267646831 | 0.093547669 |
| 0.339628381 | 0.246438195 | 0.205485198 | 0.129571326 |
| 0.142486797 | 0.153424195 | 0.113590929 | 0.371359265 |
| 0.215519488 | 0.106971676 | 0.291968861 | 0.211330753 |
| 0.095821372 | 0.30223449  | 0.129839863 | 0.351107023 |
| 0.149959965 | 0.282399186 | 0.250301231 | 0.314712637 |
| 0.310411064 | 0.083293457 | 0.099866546 | 0.150805376 |
| 0.344901207 | 0.250224529 | 0.088484989 | 0.289726794 |
| 0.08146236  | 0.243595808 | 0.124701717 | 0.141076876 |
| 0.168594974 | 0.154219473 | 0.178363312 | 0.211175508 |
| 0.213879636 | 0.155661907 | 0.124411369 | 0.389977897 |
| 0.251698893 | 0.164297592 | 0.396828803 | 0.007591632 |
| 0.201159384 | 0.239364183 | 0.218142066 | 0.137510457 |
| 0.310588285 | 0.182722615 | 0.147837279 | 0.024405352 |
| 0.270664724 | 0.047619588 | 0.119986013 | 0.173571142 |
| 0.089201891 | 0.144474685 | 0.36764089  | 0.354386429 |

|             |             |             |             |
|-------------|-------------|-------------|-------------|
| 0.226017721 | 0.095091943 | 0.094352419 | 0.333370749 |
| 0.060441248 | 0.071349202 | 0.084321067 | 0.198040926 |
| 0.078657705 | 0.098409002 | 0.10871949  | 0.117126215 |
| 0.263463746 | 0.175815486 |             |             |
| FOSB        | 0.117048639 | 0.40979671  | 0.090111363 |
| 0.182210697 | 0.344483971 | 0.392629421 | 0.103305532 |
| 0.186006249 | 0.34466069  | 0.292657982 | 0.36897455  |
| 0.035517547 | 0.133117017 | 0.431983538 | 0.10148959  |
| 0.371667227 | 0.070165312 | 0.161392624 | 0.114204852 |
| 0.284042284 | 0.307808962 | 0.34286367  | 0.35549741  |
| 0.331121028 | 0.206916969 | 0.348188393 | 0.376970156 |
| 0.478683175 | 0.256273063 | 0.405711824 | 0.206643965 |
| 0.407623474 | 0.339319323 | 0.367799091 | 0.037811384 |
| 0.398349555 | 0.029937103 | 0.434283449 | 0.29571539  |
| 0.213051148 | 0.347128531 | 0.320937233 | 0.284404592 |
| 0.345126397 | 0.063948449 | 0.206334897 | 0.37935298  |
| 0.35618625  | 0.356014973 | 0.09944441  | 0.404129375 |
| 0.368683043 | 0.349462173 | 0.348439957 | 0.003139626 |
| 0.312701513 | 0.110667286 | 0.240164564 | 0.494048439 |
| 0.250117005 | 0.186992921 | 0.277499889 | 0.31254087  |
| 0.371532179 | 0.377236709 | 0.318675196 | 0.33720056  |
| 0.475569081 | 0.211367148 | 0.401545492 | 0.217844811 |
| 0.364071344 | 0.066533004 | 0.210426816 | 0.131932561 |
| 0.388945503 | 0.266466625 | 0.368128707 | 0.341662195 |
| 0.398895124 | 0.511475434 | 0.297567486 | 0.484514837 |
| 0.141056935 | 0.349162826 | 0.341905169 | 0.335338807 |
| 0.36148301  | 0.14198691  | 0.383436446 | 0.504910859 |
| 0.093501836 | 0.34646567  | 0.364195655 | 0.16202029  |
| 0.413970032 | 0.326901001 | 0.348608738 | 0.218815174 |
| 0.380961881 | 0.338290283 | 0.472999442 | 0.306625449 |
| 0.365238925 | 0.108063515 | 0.474210563 | 0.335520506 |
| 0.32132139  | 0.127424717 | 0.267195033 | 0.422807439 |
| 0.386636891 | 0.469395    | 0.380560044 | 0.349443534 |
| 0.35732693  | 0.480775967 | 0.384243525 | 0.405908189 |
| 0.175786014 | 0.507031169 | 0.244948567 | 0.081612889 |
| 0.11272215  | 0.154962005 | 0.291693727 | 0.329104978 |
| 0.448231784 | 0.363394165 | 0.241641922 | 0.284674276 |
| 0.432533259 | 0.462981241 | 0.501634705 | 0.375914627 |
| 0.072427868 | 0.294460953 | 0.365167698 | 0.342422217 |
| 0.360941586 | 0.176652132 | 0.289728583 | 0.492932803 |
| 0.370713128 | 0.394519468 | 0.226826975 | 0.499693083 |
| 0.257125977 | 0.501761293 | 0.42193191  | 0.218865981 |
| 0.506442419 | 0.483062222 | 0.496711925 | 0.384979724 |
| 0.47169538  | 0.351909153 | 0.077848259 | 0.362381649 |
| 0.478479311 | 0.022339393 | 0.448949521 | 0.473783628 |
| 0.477980528 | 0.416369625 | 0.505539747 | 0.492307298 |
| 0.483160461 | 0.122539671 | 0.033909783 | 0.316019073 |
| 0.488023426 | 0.377262787 | 0.220647296 | 0.367861288 |
| 0.361248374 | 0.378126071 | 0.403511654 | 0.273381419 |
| 0.505817882 | 0.438940939 | 0.466363033 | 0.36745494  |
| 0.321537    | 0.325450648 | 0.359195177 | 0.458123084 |
| 0.09314546  | 0.156451997 | 0.084458762 | 0.338347247 |
| 0.342659834 | 0.237152099 | 0.358904271 | 0.363395314 |
| 0.247543224 | 0.358642734 | 0.340206956 | 0.374827905 |

|             |             |             |             |
|-------------|-------------|-------------|-------------|
| 0.084596201 | 0.385336771 | 0.235953143 | 0.209445975 |
| 0.079650847 | 0.17645278  | 0.208121597 | 0.216421001 |
| 0.294806918 | 0.258132313 | 0.397882878 | 0.477639463 |
| 0.368093683 | 0.216111649 | 0.387964792 | 0.472911403 |
| 0.419574157 | 0.375032023 | 0.269092459 | 0.023334698 |
| 0.257460003 | 0.301584679 | 0.220950433 | 0.392032806 |
| 0.210628813 | 0.250468542 | 0.363479333 | 0.383020205 |
| 0.291361849 | 0.201265856 | 0.346582452 | 0.432511002 |
| 0.184636562 | 0.330012708 | 0.410837293 | 0.372557261 |
| 0.010364293 | 0.331228322 | 0.39827003  | 0.206751314 |
| 0.323231726 | 0.161467293 | 0.274234036 | 0.433028293 |
| 0.296057837 | 0.269805682 | 0.476225814 | 0.390026975 |
| 0.326231896 | 0.243732152 | 0.508631468 | 0.053643107 |
| 0.369114898 | 0.096830757 | 0.312769224 | 0.325935365 |
| 0.288680456 | 0.320879214 | 0.338483239 | 0.332545176 |
| 0.166634466 | 0.494914967 | 0.386134397 | 0.485719174 |
| 0.340528627 | 0.510528118 | 0.417650869 | 0.414658087 |
| 0.37782895  | 0.347527869 | 0.162477642 | 0.388569614 |
| 0.427978415 | 0.295831998 | 0.109867693 | 0.390795439 |
| 0.340198617 | 0.380982245 | 0.216810762 | 0.469975439 |
| 0.496325928 | 0.449365837 | 0.203462779 | 0.371614364 |
| 0.362187175 | 0.275543524 | 1           | 0.515181726 |
| 0.295100478 | 0.336291331 | 0.32958559  | 0.384971902 |
| 0.224312119 | 0.254465982 | 0.334353956 | 0.223020537 |
| 0.015089784 | 0.127963922 | 0.103621536 | 0.223469036 |
| 0.221913519 | 0.382583705 | 0.390854744 | 0.49288467  |
| 0.16912354  | 0.417991588 | 0.284020134 | 0.285982391 |
| 0.397354248 | 0.354938888 | 0.382078402 | 0.390223797 |
| 0.294921482 | 0.040707675 | 0.155518301 | 0.509337424 |
| 0.069159912 | 0.270381158 | 0.34629823  | 0.004944124 |
| 0.075100898 | 0.366553189 | 0.128298917 | 0.221047158 |
| 0.463109272 | 0.223059878 | 0.237136637 | 0.298281842 |
| 0.368375589 | 0.149555715 | 0.009968315 | 0.469869314 |
| 0.479592704 | 0.453821379 | 0.474605696 | 0.457543773 |
| 0.425843432 | 0.396025787 | 0.390045409 | 0.358373159 |
| 0.163183271 | 0.142094389 | 0.229908197 | 0.309136449 |
| 0.006726279 | 0.38936795  | 0.360436748 | 0.190191941 |
| 0.396672179 | 0.3284991   | 0.069473326 | 0.37343676  |
| 0.036927856 | 0.214903035 | 0.311816779 | 0.288700958 |
| 0.366937399 | 0.033814091 | 0.226059943 | 0.301846587 |
| 0.416864797 | 0.328919221 | 0.367100562 | 0.514343461 |
| 0.345037754 | 0.156377966 | 0.338316307 | 0.39367287  |
| 0.120054675 | 0.120382791 | 0.35451959  | 0.040232255 |
| 0.257474571 | 0.45660587  | 0.38447798  | 0.114391795 |
| 0.297882834 | 0.012344705 | 0.351305371 | 0.51104825  |
| 0.450973707 | 0.49263404  | 0.481598769 | 0.292176078 |
| 0.483472262 | 0.131718007 | 0.505756067 | 0.369060544 |
| 0.325037305 | 0.001476217 | 0.012612842 | 0.460912289 |
| 0.36938559  | 0.088081442 | 0.211699849 | 0.344414935 |
| 0.159037208 | 0.189830157 | 0.123016678 | 0.243529463 |
| 0.409122218 | 0.293908347 | 0.236254955 | 0.448870254 |
| 0.285984611 | 0.294423917 | 0.363791733 | 0.129547587 |
| 0.406210301 | 0.094347642 | 0.133689005 | 0.0133198   |
| 0.378590296 | 0.145215252 | 0.463027414 | 0.488128806 |



|             |             |             |             |
|-------------|-------------|-------------|-------------|
| 0.483049363 | 0.391888269 | 0.298545921 | 0.332503089 |
| 0.426014369 | 0.126206559 | 0.368196343 | 0.148895192 |
| 0.459125673 | 0.362981024 | 0.330414966 | 0.306394639 |
| 0.477529579 | 0.451384028 | 0.065699766 | 0.379639065 |
| 0.028581201 | 0.005387807 | 0.346214537 | 0.30512492  |
| 0.115050082 | 0.346060055 | 0.283763451 | 0.295814329 |
| 0.305269721 | 0.054190159 | 0.284244658 | 0.271377256 |
| 0.327818615 | 0.357113878 | 0.301416817 | 0.290875732 |
| 0.324619956 | 0.185458576 | 0.282092952 | 0.222595583 |
| 0.287710502 | 0.303459239 | 0.206249111 | 0.047125912 |
| 0.385914319 | 0.377417188 | 0.099326297 | 0.213617614 |
| 0.408756073 | 0.459113774 | 0.077551328 | 0.022951427 |
| 0.28589283  | 0.337672007 | 0.474194598 | 0.475888823 |
| 0.506795814 | 0.501640965 | 0.402021439 | 0.179328858 |
| 0.114925565 | 0.350416943 | 0.326956891 | 0.176732308 |
| 0.487865066 | 0.09672401  | 0.474847109 | 0.32208064  |
| 0.172457235 | 0.272097088 | 0.068052735 | 0.14160817  |
| 0.374495293 | 0.232928724 | 0.242946046 | 0.178601204 |
| 0.319337525 | 0.300898937 | 0.092787044 | 0.246376121 |
| 0.33934849  | 0.207146441 | 0.213132693 | 0.363369396 |
| 0.369112235 | 0.245275198 | 0.390020932 | 0.440106117 |
| 0.17563833  | 0.164190193 | 0.276158802 | 0.391164261 |
| 0.396406413 | 0.362429468 | 0.04431268  | 0.426715209 |
| 0.478126725 | 0.393819231 | 0.482765356 | 0.375027963 |
| 0.131741267 | 0.356935218 | 0.329590316 | 0.34241751  |
| 0.242527533 | 0.391317763 | 0.302528325 | 0.106014331 |
| 0.318191184 | 0.480569796 | 0.390726824 | 0.22220186  |
| 0.400684917 | 0.166120573 | 0.086451376 | 0.429902994 |
| 0.217299323 | 0.120576077 | 0.330756846 | 0.39630152  |
| 0.007046402 | 0.185756709 | 0.480217862 | 0.294446303 |
| 0.511890856 | 0.458047663 | 0.429582034 | 0.333561589 |
| 0.00415576  | 0.387499145 | 0.3634086   | 0.371470078 |
| 0.396867796 | 0.356142185 | 0.238421755 | 0.124269638 |
| 0.313971005 | 0.112920268 | 0.175454186 | 0.347634886 |
| 0.189518258 | 0.372976245 | 0.248219158 | 0.263689203 |
| 0.271428742 | 0.129067065 | 0.291211483 | 0.305677233 |
| 0.21062616  | 0.275337402 | 0.341265105 | 0.29580246  |
| 0.180216426 | 0.414510337 | 0.363737602 | 0.053559666 |
| 0.37184483  | 0.387808626 | 0.436262614 | 0.003027117 |
| 0.387511975 | 0.018374945 | 0.251905209 | 0.266677394 |
| 0.268579847 | 0.258538785 | 0.304889743 | 0.342054051 |
| 0.352491588 | 0.281394397 | 0.312368175 | 0.28116622  |
| 0.229022312 | 0.299929086 | 0.39865295  | 0.372231198 |
| 0.302953184 | 0.182496931 | 0.131964441 | 0.131471862 |
| 0.089971585 | 0.448692963 | 0.262783833 | 0.11012276  |
| 0.282884657 | 0.378398043 | 0.356329542 | 0.471640941 |
| 0.421946153 | 0.140002151 | 0.356261366 | 0.409801744 |
| 0.225495955 | 0.309253261 | 0.099472257 | 0.401049232 |
| 0.284666519 | 0.23490659  | 0.398205842 | 0.299817336 |
| 0.368295757 | 0.4027321   | 0.262700649 | 0.442419775 |
| 0.390201676 | 0.346182452 | 0.287331296 | 0.129783723 |
| 0.217655036 | 0.180104866 | 0.300096129 | 0.005731242 |
| 0.358001119 | 0.294478111 | 0.429543241 | 0.471864835 |
| 0.304507335 | 0.392801818 | 0.284869227 | 0.122742327 |

|             |             |             |             |
|-------------|-------------|-------------|-------------|
| 0.267459423 | 0.193372708 | 0.187484007 | 0.403602178 |
| 0.231677352 | 0.258583155 | 0.335892998 | 0.337510039 |
| 0.402315504 | 0.391606477 | 0.316127349 | 0.29008838  |
| 0.308650513 | 0.249669153 | 0.473642062 | 0.178885221 |
| 0.380682447 | 0.241467103 | 0.343257529 | 0.305892779 |
| 0.274355481 | 0.498848694 | 0.105655834 | 0.498554549 |
| 0.321825669 | 0.174744183 | 0.489933436 | 0.356433449 |
| 0.370649227 | 0.202879245 | 0.219450181 | 0.371663585 |
| 0.285689135 | 0.349747494 | 0.016179255 | 0.069003021 |
| 0.336580462 | 0.333928779 | 0.358217189 | 0.373437431 |
| 0.303176242 | 0.349211155 | 0.219680053 | 0.312978756 |
| 0.461071196 | 0.488692523 | 0.253084871 | 0.285302283 |
| 0.34167594  | 0.155972266 | 0.371839465 | 0.028417103 |
| 0.371994802 | 0.374136213 | 0.336128731 | 0.099931218 |
| 0.04375437  | 0.230838275 | 0.374809558 | 0.108689035 |
| 0.458330661 | 0.231060284 | 0.353181713 | 0.414191477 |
| 0.227616296 | 0.486727904 | 0.191648728 | 0.384809682 |
| 0.084240834 | 0.311495233 | 0.383903255 | 0.363953343 |
| 0.249276478 | 0.310025516 | 0.368011029 | 0.267084549 |
| 0.064040152 | 0.302061881 | 0.003326081 | 0.408403151 |
| 0.456835261 | 0.337340253 | 0.237434037 | 0.294556758 |
| 0.318338861 | 0.385494471 | 0.256739653 | 0.393361577 |
| 0.026723469 | 0.353372548 | 0.26700897  | 0.388222318 |
| 0.21419088  | 0.348878886 | 0.11199821  | 0.333395473 |
| 0.454519252 | 0.260665996 | 0.284139187 | 0.283102345 |
| 0.473324068 | 0.377489989 | 0.19869976  | 0.313603336 |
| 0.363292675 | 0.10285528  | 0.36431932  | 0.510234603 |
| 0.233762707 | 0.255710943 | 0.404696019 | 0.239191921 |
| 0.323528818 | 0.385204695 | 0.379059536 | 0.505569927 |
| 0.120639998 | 0.287364159 | 0.403126948 | 0.437616587 |
| 0.326788276 | 0.227944057 | 0.261792897 | 0.260128067 |
| 0.438852998 | 0.139372466 | 0.298982391 | 0.354442728 |
| 0.235740652 | 0.343229941 | 0.33625134  | 0.251178738 |
| 0.064396677 | 0.244989192 | 0.376971805 | 0.200686545 |
| 0.317130695 | 0.36854054  | 0.292507962 | 0.39252678  |
| 0.184592905 | 0.044997272 | 0.456328308 | 0.022790504 |
| 0.353433909 | 0.386318303 | 0.301011543 | 0.377354972 |
| 0.214147621 | 0.357455391 | 0.315894077 | 0.002015802 |
| 0.386346861 | 0.10387452  | 0.35601131  | 0.2536747   |
| 0.277972412 | 0.085546637 | 0.454085146 | 0.490326271 |
| 0.355997739 | 0.364271503 | 0.316393377 | 0.447884428 |
| 0.195058101 | 0.32604486  | 0.328097032 | 0.382306045 |
| 0.264492274 | 0.338241626 | 0.376753229 | 0.362238527 |
| 0.380931168 | 0.33398955  |             |             |
| FOXM1       | 0.17086697  | 0.497743191 | 0.132278152 |
| 0.236561734 | 0.413033777 | 0.510654848 | 0.151877245 |
| 0.259431767 | 0.46555415  | 0.389511223 | 0.481454028 |
| 0.057995883 | 0.132231242 | 0.525098919 | 0.147037027 |
| 0.490415959 | 0.098315947 | 0.228461742 | 0.144898326 |
| 0.360216591 | 0.393131298 | 0.437546023 | 0.5010544   |
| 0.405200811 | 0.294763056 | 0.475429512 | 0.476804382 |
| 0.526013867 | 0.327385608 | 0.52765915  | 0.247832529 |
| 0.471808498 | 0.428600862 | 0.464935735 | 0.053477521 |
| 0.531531173 | 0.028216161 | 0.454820435 | 0.386841182 |

|             |             |             |             |
|-------------|-------------|-------------|-------------|
| 0.208539074 | 0.442981824 | 0.427543572 | 0.374017615 |
| 0.465805107 | 0.098482688 | 0.268757957 | 0.501794238 |
| 0.460601349 | 0.432829365 | 0.154255911 | 0.529081799 |
| 0.481657496 | 0.47894847  | 0.479949301 | 0.006794521 |
| 0.378021036 | 0.11543558  | 0.28823126  | 0.508426427 |
| 0.340342684 | 0.25065242  | 0.356107376 | 0.412344988 |
| 0.501898709 | 0.494531759 | 0.405735298 | 0.462552742 |
| 0.521758278 | 0.248980634 | 0.517781136 | 0.25835087  |
| 0.514143067 | 0.098195635 | 0.287501023 | 0.187773933 |
| 0.496516938 | 0.342336636 | 0.46568299  | 0.398981821 |
| 0.485061927 | 0.524873331 | 0.384760648 | 0.499806672 |
| 0.172716896 | 0.435980559 | 0.388889736 | 0.436097012 |
| 0.490087765 | 0.198841205 | 0.51761805  | 0.516540728 |
| 0.135354752 | 0.475606843 | 0.510588342 | 0.243292123 |
| 0.515164669 | 0.37889642  | 0.479052952 | 0.247112674 |
| 0.469942472 | 0.444801005 | 0.488482859 | 0.43226917  |
| 0.440911094 | 0.165756277 | 0.493691998 | 0.410513911 |
| 0.413434891 | 0.179094512 | 0.332116524 | 0.532594844 |
| 0.521035234 | 0.531362886 | 0.514903481 | 0.486690311 |
| 0.471047287 | 0.523369578 | 0.512086915 | 0.511686817 |
| 0.20362047  | 0.517221453 | 0.322854736 | 0.11583372  |
| 0.166997097 | 0.198237114 | 0.356961675 | 0.434129815 |
| 0.536390471 | 0.482414926 | 0.340233771 | 0.364686606 |
| 0.524936666 | 0.48119212  | 0.514744051 | 0.519947933 |
| 0.108295039 | 0.340380211 | 0.470147138 | 0.441941654 |
| 0.5066073   | 0.240071349 | 0.346325272 | 0.51394507  |
| 0.477665887 | 0.528126363 | 0.304054423 | 0.514927557 |
| 0.358517538 | 0.515711658 | 0.514205283 | 0.299146743 |
| 0.517072669 | 0.498897602 | 0.524646369 | 0.490387673 |
| 0.494004203 | 0.469200049 | 0.128946368 | 0.495510959 |
| 0.516085673 | 0.024842427 | 0.534931488 | 0.535183203 |
| 0.506780318 | 0.533381885 | 0.526363674 | 0.534114073 |
| 0.509637008 | 0.172435044 | 0.047985146 | 0.416473342 |
| 0.504556123 | 0.494931194 | 0.27010415  | 0.496391432 |
| 0.472629588 | 0.523467873 | 0.527509222 | 0.38885195  |
| 0.51564204  | 0.527632206 | 0.533365384 | 0.514066524 |
| 0.437142438 | 0.423433232 | 0.456261112 | 0.476665653 |
| 0.117732275 | 0.229358383 | 0.127230024 | 0.448213145 |
| 0.436786836 | 0.309188819 | 0.508059236 | 0.473421044 |
| 0.333006823 | 0.488989641 | 0.411314537 | 0.478290083 |
| 0.130686323 | 0.527377995 | 0.301726017 | 0.307668467 |
| 0.109248659 | 0.252273519 | 0.307760398 | 0.278609164 |
| 0.389739604 | 0.297214891 | 0.532133425 | 0.527447794 |
| 0.471707085 | 0.306692848 | 0.534538252 | 0.513920299 |
| 0.486647828 | 0.469895215 | 0.37445555  | 0.028992824 |
| 0.36821685  | 0.389145119 | 0.252350769 | 0.498641043 |
| 0.268884288 | 0.379243721 | 0.498441565 | 0.492847289 |
| 0.419979535 | 0.289492354 | 0.472914374 | 0.464650238 |
| 0.271347022 | 0.421140664 | 0.525487278 | 0.508983418 |
| 0.013638789 | 0.459092964 | 0.537298254 | 0.250829101 |
| 0.461615357 | 0.201126861 | 0.32300148  | 0.526088002 |
| 0.3842377   | 0.337179658 | 0.536112749 | 0.494503811 |
| 0.459746829 | 0.306982315 | 0.526970748 | 0.078878384 |
| 0.457430974 | 0.09825853  | 0.414095745 | 0.429565975 |

|             |             |             |             |
|-------------|-------------|-------------|-------------|
| 0.395985632 | 0.429177874 | 0.421045336 | 0.388485677 |
| 0.240778034 | 0.517247576 | 0.506091994 | 0.533761715 |
| 0.455602151 | 0.522916272 | 0.536351002 | 0.523653603 |
| 0.501838748 | 0.456189658 | 0.189161874 | 0.527193913 |
| 0.5270051   | 0.388298614 | 0.164830647 | 0.527426589 |
| 0.459308696 | 0.500789483 | 0.205084076 | 0.522788151 |
| 0.502072265 | 0.475828948 | 0.276226105 | 0.483070948 |
| 0.49327076  | 0.376334456 | 0.515181726 | 1           |
| 0.403695188 | 0.459110399 | 0.430784665 | 0.491723809 |
| 0.307121484 | 0.321796281 | 0.434766054 | 0.247023032 |
| 0.013922215 | 0.189938404 | 0.15358151  | 0.286342273 |
| 0.243287483 | 0.505577308 | 0.50796132  | 0.525324759 |
| 0.240224161 | 0.504609864 | 0.385824429 | 0.397533411 |
| 0.488477164 | 0.466870319 | 0.470167393 | 0.496939767 |
| 0.389413226 | 0.045578458 | 0.215009894 | 0.524826662 |
| 0.107869592 | 0.322893538 | 0.47816692  | 0.007116111 |
| 0.120397676 | 0.495635735 | 0.188436648 | 0.289548058 |
| 0.529878804 | 0.292323377 | 0.341094765 | 0.414918104 |
| 0.474168952 | 0.204349327 | 0.009273693 | 0.519891459 |
| 0.504881645 | 0.497782442 | 0.502554588 | 0.477806043 |
| 0.50811273  | 0.516748033 | 0.511974221 | 0.483784742 |
| 0.221185376 | 0.197932624 | 0.289481078 | 0.414247258 |
| 0.014000317 | 0.495616209 | 0.440788273 | 0.265960991 |
| 0.523028769 | 0.449843142 | 0.104616081 | 0.468997976 |
| 0.056072624 | 0.252742188 | 0.465292938 | 0.369750866 |
| 0.466680402 | 0.048559863 | 0.30798978  | 0.408354787 |
| 0.476176133 | 0.462712149 | 0.436732269 | 0.520178168 |
| 0.458497902 | 0.236436233 | 0.423638614 | 0.510263548 |
| 0.169969415 | 0.158894668 | 0.501247259 | 0.048930595 |
| 0.301992148 | 0.488356965 | 0.486610389 | 0.151699366 |
| 0.409888424 | 0.019069294 | 0.468094419 | 0.523203325 |
| 0.484746064 | 0.531255388 | 0.526149013 | 0.351843245 |
| 0.51722149  | 0.142956061 | 0.529257029 | 0.50683816  |
| 0.457002399 | 0.002517317 | 0.019145654 | 0.534012491 |
| 0.487677628 | 0.132943877 | 0.291019126 | 0.4582576   |
| 0.219705631 | 0.287351617 | 0.165509141 | 0.269876253 |
| 0.528449147 | 0.361245472 | 0.272896431 | 0.489249096 |
| 0.378287574 | 0.381375808 | 0.510674759 | 0.191018535 |
| 0.51027899  | 0.130699882 | 0.191821853 | 0.017707725 |
| 0.485357708 | 0.21210036  | 0.482893644 | 0.519121238 |
| 0.510822475 | 0.492173898 | 0.407614975 | 0.465926835 |
| 0.519371487 | 0.195386608 | 0.447674064 | 0.223328992 |
| 0.507025543 | 0.490860801 | 0.449836823 | 0.427520544 |
| 0.5208953   | 0.505299968 | 0.097703694 | 0.510554019 |
| 0.035568752 | 0.005719268 | 0.482220785 | 0.414305745 |
| 0.124019983 | 0.469535897 | 0.38736349  | 0.380410354 |
| 0.378794712 | 0.083474964 | 0.346604962 | 0.324192301 |
| 0.428354308 | 0.480614125 | 0.372681288 | 0.390083883 |
| 0.382455497 | 0.217397162 | 0.337485789 | 0.300216014 |
| 0.37610713  | 0.423664526 | 0.297072773 | 0.069980178 |
| 0.507869332 | 0.49800283  | 0.14244846  | 0.290865099 |
| 0.527076918 | 0.536767867 | 0.113374062 | 0.031684833 |
| 0.397859489 | 0.449624557 | 0.536090537 | 0.516718731 |
| 0.523824844 | 0.516044218 | 0.450170505 | 0.238853091 |

|             |             |             |             |
|-------------|-------------|-------------|-------------|
| 0.162501776 | 0.44808808  | 0.393272256 | 0.190657443 |
| 0.528705601 | 0.153353145 | 0.506709063 | 0.382164426 |
| 0.237806277 | 0.347132617 | 0.092134828 | 0.193174914 |
| 0.473649093 | 0.320130437 | 0.304569324 | 0.262215394 |
| 0.438458897 | 0.329875225 | 0.130173976 | 0.339073902 |
| 0.476003817 | 0.233994018 | 0.294992243 | 0.464645542 |
| 0.481515402 | 0.314175535 | 0.517836299 | 0.490752025 |
| 0.252572345 | 0.233799505 | 0.399576299 | 0.506575132 |
| 0.532235285 | 0.481898841 | 0.062353524 | 0.498282374 |
| 0.53040988  | 0.528487612 | 0.504892749 | 0.490958247 |
| 0.187204777 | 0.47214578  | 0.412838854 | 0.455616995 |
| 0.333369714 | 0.51008383  | 0.393811641 | 0.153450339 |
| 0.419366203 | 0.496062896 | 0.499697658 | 0.294732662 |
| 0.521425581 | 0.24882967  | 0.138069655 | 0.527290251 |
| 0.255943287 | 0.190596043 | 0.456402612 | 0.5266708   |
| 0.004644881 | 0.195966249 | 0.521075324 | 0.38791229  |
| 0.515947567 | 0.527048454 | 0.494356855 | 0.416007118 |
| 0.003269348 | 0.49668876  | 0.491028103 | 0.489181815 |
| 0.512527671 | 0.483895541 | 0.287071414 | 0.166452254 |
| 0.414600579 | 0.171900446 | 0.25459714  | 0.458800186 |
| 0.235053621 | 0.528458744 | 0.335087317 | 0.35852298  |
| 0.328470225 | 0.194829323 | 0.325723814 | 0.382963229 |
| 0.23107074  | 0.37491497  | 0.470960958 | 0.390320154 |
| 0.252289925 | 0.514657085 | 0.507849922 | 0.078287105 |
| 0.455957426 | 0.507754299 | 0.513420586 | 0.006374396 |
| 0.520479389 | 0.027174937 | 0.328742501 | 0.338008458 |
| 0.331329719 | 0.353838522 | 0.388866064 | 0.403937677 |
| 0.48565966  | 0.367827662 | 0.403814074 | 0.37417936  |
| 0.281621095 | 0.374035764 | 0.497540925 | 0.485030709 |
| 0.386387155 | 0.246928733 | 0.189839593 | 0.181169347 |
| 0.125969493 | 0.526558212 | 0.365577753 | 0.159814341 |
| 0.375019672 | 0.490018592 | 0.453379065 | 0.501111005 |
| 0.502661496 | 0.206348094 | 0.47492291  | 0.519942481 |
| 0.305582901 | 0.416856771 | 0.155278897 | 0.505480037 |
| 0.385612375 | 0.31423159  | 0.51027244  | 0.44111696  |
| 0.511432886 | 0.458741778 | 0.366329978 | 0.502083663 |
| 0.477700204 | 0.463623153 | 0.39571328  | 0.175249649 |
| 0.306718196 | 0.254947718 | 0.367589987 | 0.007535066 |
| 0.492751143 | 0.389523014 | 0.537285672 | 0.492627741 |
| 0.371638091 | 0.47909511  | 0.412009741 | 0.188557398 |
| 0.345579445 | 0.26733826  | 0.265585687 | 0.526244618 |
| 0.277043567 | 0.328104294 | 0.413633952 | 0.455706731 |
| 0.522532788 | 0.511732367 | 0.375401177 | 0.411283651 |
| 0.388890126 | 0.334782883 | 0.483141775 | 0.243131362 |
| 0.508757084 | 0.271348142 | 0.468303757 | 0.416800421 |
| 0.351306075 | 0.526671527 | 0.147579612 | 0.532545783 |
| 0.44156619  | 0.246744958 | 0.499755621 | 0.460890531 |
| 0.436914736 | 0.228879741 | 0.248116873 | 0.497003851 |
| 0.378563593 | 0.422899274 | 0.024580667 | 0.103962159 |
| 0.453804202 | 0.432923063 | 0.499492188 | 0.493130744 |
| 0.350336686 | 0.45961173  | 0.231225372 | 0.443891864 |
| 0.481473016 | 0.504083266 | 0.370486303 | 0.380819237 |
| 0.482659598 | 0.214781145 | 0.510420628 | 0.034273914 |
| 0.510408378 | 0.496403161 | 0.47389878  | 0.141168158 |

|             |             |             |             |
|-------------|-------------|-------------|-------------|
| 0.061083099 | 0.272240391 | 0.507476318 | 0.159801419 |
| 0.529008513 | 0.265293801 | 0.475880013 | 0.529744206 |
| 0.315069614 | 0.504537035 | 0.238907544 | 0.510813521 |
| 0.124613506 | 0.403790708 | 0.471837852 | 0.489341533 |
| 0.324760228 | 0.381138671 | 0.486028054 | 0.314360885 |
| 0.091001182 | 0.381073592 | 0.005465728 | 0.443864792 |
| 0.475675933 | 0.425587386 | 0.330692796 | 0.390967607 |
| 0.411341629 | 0.488330406 | 0.373613585 | 0.500420729 |
| 0.03401799  | 0.458970712 | 0.345617315 | 0.51063056  |
| 0.284313413 | 0.482060913 | 0.130427657 | 0.42139126  |
| 0.475060393 | 0.392433305 | 0.389926792 | 0.374157788 |
| 0.506358597 | 0.494433759 | 0.276835514 | 0.34009026  |
| 0.491108601 | 0.153017443 | 0.479410692 | 0.520714253 |
| 0.306818329 | 0.293887495 | 0.523065213 | 0.330500813 |
| 0.404840436 | 0.487988674 | 0.493889485 | 0.515224136 |
| 0.159368989 | 0.386589749 | 0.524504142 | 0.512606689 |
| 0.42972891  | 0.260557329 | 0.329055765 | 0.347148961 |
| 0.485218386 | 0.190856739 | 0.358154841 | 0.483686456 |
| 0.288460903 | 0.452901327 | 0.448900408 | 0.304997646 |
| 0.095926952 | 0.319756397 | 0.489653869 | 0.272522747 |
| 0.433762415 | 0.470438703 | 0.347143323 | 0.467520183 |
| 0.235500691 | 0.059819262 | 0.490373565 | 0.026900404 |
| 0.471835531 | 0.497989972 | 0.39713454  | 0.461543329 |
| 0.301367959 | 0.493785311 | 0.459181295 | 0.005089305 |
| 0.515627159 | 0.077623066 | 0.442180984 | 0.330833362 |
| 0.386498184 | 0.133360733 | 0.498661429 | 0.533349486 |
| 0.46803329  | 0.434755338 | 0.417830329 | 0.511058193 |
| 0.205704226 | 0.403660104 | 0.438945598 | 0.513594374 |
| 0.299121475 | 0.460579719 | 0.496531859 | 0.447643567 |
| 0.51104131  | 0.433181907 |             |             |
| FRMD4B      | 0.012986423 | 0.368507857 | 0.013202445 |
| 0.015885033 | 0.135731263 | 0.101867313 | 0.011939187 |
| 0.019428147 | 0.31588279  | 0.180673554 | 0.122261419 |
| 0.001400387 | 0.02129323  | 0.339163933 | 0.009146474 |
| 0.238116224 | 0.002900105 | 0.02926744  | 0.025516848 |
| 0.058860622 | 0.121492225 | 0.058828948 | 0.16090677  |
| 0.125663757 | 0.105713953 | 0.216515542 | 0.259963626 |
| 0.408000951 | 0.073820604 | 0.243617579 | 0.088561416 |
| 0.293879    | 0.159062201 | 0.187198362 | 0.001505593 |
| 0.177446131 | 0.012181578 | 0.340395152 | 0.071258988 |
| 0.028590202 | 0.214817518 | 0.202823829 | 0.051678253 |
| 0.261109253 | 0.005141634 | 0.086926541 | 0.345968191 |
| 0.23234587  | 0.073791293 | 0.02304442  | 0.289885384 |
| 0.142153525 | 0.157885578 | 0.364250131 | 0.0003909   |
| 0.114522752 | 0.043799694 | 0.099605972 | 0.380503804 |
| 0.072299901 | 0.024879466 | 0.143791151 | 0.10157704  |
| 0.299065673 | 0.282825223 | 0.120837361 | 0.194624258 |
| 0.371129765 | 0.050597104 | 0.358772404 | 0.020481095 |
| 0.159854782 | 0.011190533 | 0.068898636 | 0.053257454 |
| 0.135771567 | 0.053486115 | 0.118334886 | 0.126107119 |
| 0.394858639 | 0.386467318 | 0.116604653 | 0.414445587 |
| 0.047907839 | 0.203137965 | 0.070529894 | 0.167786367 |
| 0.298930794 | 0.02659871  | 0.236819989 | 0.395309338 |
| 0.016327683 | 0.316656241 | 0.328167777 | 0.066064812 |

|             |             |             |             |
|-------------|-------------|-------------|-------------|
| 0.315404014 | 0.097640858 | 0.256710992 | 0.032968328 |
| 0.235255181 | 0.195093076 | 0.394604021 | 0.134115432 |
| 0.114259659 | 0.032630751 | 0.376570506 | 0.178902454 |
| 0.0616731   | 0.025757635 | 0.054216888 | 0.39756957  |
| 0.247362134 | 0.373013674 | 0.395839735 | 0.285990784 |
| 0.220204708 | 0.372983218 | 0.236857388 | 0.31287061  |
| 0.088947903 | 0.417882191 | 0.054398815 | 0.003057086 |
| 0.019141782 | 0.010877373 | 0.07719951  | 0.171594872 |
| 0.353334414 | 0.163714065 | 0.048339084 | 0.078165874 |
| 0.374092143 | 0.378066226 | 0.44307154  | 0.311771216 |
| 0.006030754 | 0.099975947 | 0.216321192 | 0.055561033 |
| 0.246028893 | 0.045275993 | 0.103741974 | 0.387369678 |
| 0.226200985 | 0.332127515 | 0.042454867 | 0.369184671 |
| 0.078081856 | 0.360522354 | 0.376579591 | 0.044304803 |
| 0.389698827 | 0.363014282 | 0.373490761 | 0.249777171 |
| 0.322478412 | 0.113673207 | 0.039410879 | 0.304968674 |
| 0.321811216 | 0.002447201 | 0.409306066 | 0.426113864 |
| 0.406222036 | 0.380803564 | 0.411505617 | 0.392651003 |
| 0.402435626 | 0.027039637 | 0.043478315 | 0.144933086 |
| 0.401755639 | 0.249710682 | 0.020243935 | 0.257057353 |
| 0.205613342 | 0.139375347 | 0.332524414 | 0.059923402 |
| 0.361928503 | 0.340195281 | 0.412347782 | 0.300682136 |
| 0.240060446 | 0.185380445 | 0.256248067 | 0.346761701 |
| 0.003709102 | 0.024396247 | 0.019913601 | 0.197385091 |
| 0.088328994 | 0.052700688 | 0.132553005 | 0.233540473 |
| 0.067558101 | 0.136775937 | 0.133866975 | 0.23132098  |
| 0.034029174 | 0.240637554 | 0.051511778 | 0.07793021  |
| 0.003456043 | 0.07621852  | 0.024446658 | 0.014998872 |
| 0.078641394 | 0.165728485 | 0.31888254  | 0.394655419 |
| 0.16297509  | 0.090888246 | 0.275066494 | 0.324914783 |
| 0.272345334 | 0.185115058 | 0.120795827 | 0.000352164 |
| 0.071603918 | 0.181074063 | 0.07069424  | 0.246652881 |
| 0.111925391 | 0.052374959 | 0.249843483 | 0.233519545 |
| 0.102828259 | 0.055934079 | 0.140341729 | 0.271276274 |
| 0.090986091 | 0.06127392  | 0.32163998  | 0.295024398 |
| 0.000120973 | 0.132516213 | 0.320794185 | 0.036313097 |
| 0.219594199 | 0.023593437 | 0.043396459 | 0.380582553 |
| 0.084552492 | 0.07734952  | 0.386997617 | 0.242223419 |
| 0.061396983 | 0.165178138 | 0.410640889 | 0.041486979 |
| 0.21590502  | 0.003994343 | 0.129367597 | 0.238192485 |
| 0.10461938  | 0.165852272 | 0.146722871 | 0.066993737 |
| 0.052496697 | 0.40475519  | 0.250154849 | 0.389573311 |
| 0.147488085 | 0.416414996 | 0.350476968 | 0.291683099 |
| 0.183511216 | 0.24857974  | 0.043006464 | 0.320588891 |
| 0.370655668 | 0.114388986 | 0.039141004 | 0.397617914 |
| 0.259002015 | 0.2903139   | 0.019881083 | 0.369637833 |
| 0.337584731 | 0.39604014  | 0.021241326 | 0.241513155 |
| 0.221459914 | 0.069113506 | 0.295100478 | 0.403695188 |
| 1           | 0.197968213 | 0.117989686 | 0.26714311  |
| 0.068751571 | 0.056850621 | 0.208996901 | 0.056221283 |
| 0.003031391 | 0.026749941 | 0.020467127 | 0.033380464 |
| 0.038810866 | 0.324221242 | 0.264962088 | 0.408668634 |
| 0.02677068  | 0.262189587 | 0.154730453 | 0.069541984 |
| 0.337163576 | 0.164111141 | 0.185463136 | 0.208241381 |

|             |             |             |             |
|-------------|-------------|-------------|-------------|
| 0.129692934 | 0.001224335 | 0.011166119 | 0.389943708 |
| 0.021145985 | 0.050857484 | 0.136627157 | 0.000190669 |
| 0.009128048 | 0.394607001 | 0.060220707 | 0.110688343 |
| 0.351726562 | 0.118814939 | 0.105986005 | 0.194562906 |
| 0.163053758 | 0.024585999 | 0.000255124 | 0.423996825 |
| 0.421559297 | 0.405532049 | 0.428657711 | 0.380886933 |
| 0.412289947 | 0.302680306 | 0.317115303 | 0.140667675 |
| 0.015089061 | 0.025632906 | 0.058781844 | 0.107121908 |
| 0.001015813 | 0.208317839 | 0.130453376 | 0.054572823 |
| 0.305927705 | 0.190926288 | 0.003604526 | 0.198947985 |
| 0.001674296 | 0.061482528 | 0.077714085 | 0.066836917 |
| 0.222209006 | 0.001192633 | 0.049335999 | 0.093463288 |
| 0.297602536 | 0.213701463 | 0.138173072 | 0.407856789 |
| 0.114177758 | 0.091562869 | 0.107862567 | 0.220570258 |
| 0.011670105 | 0.074382033 | 0.150849269 | 0.017883853 |
| 0.032057284 | 0.358792851 | 0.139972953 | 0.010202817 |
| 0.110383738 | 5.98E-06    | 0.2331195   | 0.395191327 |
| 0.371976892 | 0.414619572 | 0.360113468 | 0.083971729 |
| 0.379193174 | 0.061635125 | 0.418270946 | 0.312783332 |
| 0.213276957 | 7.54E-05    | 8.58E-05    | 0.392271367 |
| 0.033406302 | 0.056819772 | 0.056846137 | 0.208896646 |
| 0.046324841 | 0.010183295 | 0.03946643  | 0.011053455 |
| 0.073510309 | 0.032715133 | 0.386056409 | 0.212742354 |
| 0.084211487 | 0.179734926 | 0.043746347 | 0.079194943 |
| 0.004850634 | 0.048845905 | 0.000465997 | 0.199049717 |
| 0.070251966 | 0.358556753 | 0.397147492 | 0.218018092 |
| 0.231275016 | 0.184117631 | 0.056918537 | 0.345659913 |
| 0.054451427 | 0.0861834   | 0.051364852 | 0.359796646 |
| 0.240056882 | 0.159065636 | 0.172344758 | 0.38876511  |
| 0.337825075 | 0.004670342 | 0.302323001 | 0.374294785 |
| 0.000359427 | 0.162508193 | 0.139362895 | 0.000543327 |
| 0.193601732 | 0.131985786 | 0.099125009 | 0.047551354 |
| 0.002370688 | 0.116282317 | 0.101609558 | 0.061833969 |
| 0.161650404 | 0.112347205 | 0.165952791 | 0.139575846 |
| 0.034838256 | 0.036737232 | 0.031419254 | 0.086142051 |
| 0.226030289 | 0.111304965 | 0.002851038 | 0.082918332 |
| 0.209152801 | 0.01060216  | 0.062374101 | 0.245156981 |
| 0.378802294 | 0.007067467 | 0.000237042 | 0.2980878   |
| 0.128316172 | 0.375773814 | 0.401811621 | 0.141946065 |
| 0.385168701 | 0.251340923 | 0.018932595 | 0.393588836 |
| 0.156865034 | 0.138578275 | 0.012301867 | 0.009381913 |
| 0.037599331 | 0.357803376 | 0.154602082 | 0.385058816 |
| 0.047560637 | 0.001876284 | 0.023614673 | 0.047888678 |
| 0.061707973 | 0.044852947 | 0.072224041 | 0.206727035 |
| 0.049861463 | 0.009490761 | 0.066763889 | 0.103694089 |
| 0.062192172 | 0.060390819 | 0.095318885 | 0.226685141 |
| 0.128879257 | 0.325370592 | 0.305236057 | 0.245750179 |
| 0.050440497 | 0.054909747 | 0.27132224  | 0.049524    |
| 0.310060782 | 0.001375514 | 0.403625795 | 0.374774641 |
| 0.280321315 | 0.369439024 | 0.265667762 | 0.361952192 |
| 0.15529262  | 0.176171082 | 0.194051517 | 0.038432406 |
| 0.113917241 | 0.090013571 | 0.01970897  | 0.075000989 |
| 0.358616979 | 0.350987359 | 0.03260605  | 0.187080481 |
| 0.067473014 | 0.034568733 | 0.348821264 | 0.233442013 |
|             |             |             | 0.046507994 |



|             |             |             |             |
|-------------|-------------|-------------|-------------|
| 0.010939382 | 0.206679306 | 0.368522438 | 0.000139626 |
| 0.03580884  | 0.406958821 | 0.034106475 | 0.396169415 |
| 0.378823286 | 0.289635764 | 0.057380128 | 0.002275379 |
| 0.320275629 | 0.169290692 | 0.136340514 | 0.350485748 |
| 0.193183729 | 0.029413429 | 0.007075498 | 0.145463462 |
| 0.038733706 | 0.02069664  | 0.055366511 | 0.083450833 |
| 0.253354981 | 0.085681579 | 0.113437176 | 0.053693913 |
| 0.073103266 | 0.045109828 | 0.055196095 | 0.066145983 |
| 0.105440904 | 0.202219031 | 0.124233579 | 0.057990142 |
| 0.357203533 | 0.333211027 | 0.002689414 | 0.172068825 |
| 0.337377596 | 0.30694951  | 0.000624046 | 0.277028838 |
| 4.18E-06    | 0.04998158  | 0.048660034 | 0.043711408 |
| 0.062684424 | 0.109804785 | 0.069214451 | 0.237644764 |
| 0.06692698  | 0.057718652 | 0.082395694 | 0.02211858  |
| 0.067326148 | 0.204909147 | 0.166916969 | 0.053658457 |
| 0.021581444 | 0.057982196 | 0.064693119 | 0.003295584 |
| 0.357697876 | 0.123326512 | 0.033952454 | 0.085092441 |
| 0.161668872 | 0.202660872 | 0.411733191 | 0.261267712 |
| 0.072980427 | 0.130592981 | 0.335591539 | 0.125073661 |
| 0.052911995 | 0.012018822 | 0.186234177 | 0.06686333  |
| 0.03421507  | 0.201200487 | 0.18069665  | 0.367742599 |
| 0.254600423 | 0.11500809  | 0.306283852 | 0.116347862 |
| 0.241626751 | 0.176455243 | 0.007433997 | 0.046997355 |
| 0.069093333 | 0.105241533 | 0.000691074 | 0.169430179 |
| 0.037247237 | 0.368410722 | 0.374239711 | 0.114732957 |
| 0.230836111 | 0.07964344  | 0.012626578 | 0.101971032 |
| 0.133352186 | 0.056578121 | 0.341792772 | 0.0751512   |
| 0.030449031 | 0.126018505 | 0.068144738 | 0.318623803 |
| 0.373936948 | 0.075055758 | 0.080665697 | 0.10836746  |
| 0.091676016 | 0.391653592 | 0.031945935 | 0.305011368 |
| 0.031948845 | 0.283389777 | 0.10333223  | 0.065552875 |
| 0.421659557 | 0.015811104 | 0.428850815 | 0.149001782 |
| 0.06789434  | 0.334341844 | 0.108920166 | 0.047183607 |
| 0.010566249 | 0.068711686 | 0.15396086  | 0.046126233 |
| 0.1117244   | 0.016451154 | 0.02075735  | 0.163236299 |
| 0.163130572 | 0.400121161 | 0.264617658 | 0.077745841 |
| 0.213251185 | 0.041813275 | 0.126209991 | 0.396778021 |
| 0.381167341 | 0.040707397 | 0.136802293 | 0.207087884 |
| 0.014106419 | 0.209473853 | 0.012108383 | 0.290467173 |
| 0.306018333 | 0.120312063 | 0.006572749 | 0.001461072 |
| 0.08630083  | 0.296876726 | 0.043914395 | 0.384113436 |
| 0.054423177 | 0.306541873 | 0.267493991 | 0.098859533 |
| 0.379405638 | 0.014911123 | 0.223355857 | 0.019796942 |
| 0.124870142 | 0.202945811 | 0.245936078 | 0.030484407 |
| 0.117315423 | 0.215629912 | 0.0672838   | 0.002713642 |
| 0.040851669 | 0.001761698 | 0.265213675 | 0.390185904 |
| 0.199535936 | 0.113522819 | 0.135770535 | 0.122304229 |
| 0.274417729 | 0.052043236 | 0.235013686 | 0.000281439 |
| 0.195297587 | 0.061930464 | 0.25912779  | 0.079926625 |
| 0.278289909 | 0.003775327 | 0.184747171 | 0.338531934 |
| 0.067163338 | 0.152348749 | 0.114167237 | 0.387509265 |
| 0.299192596 | 0.097314101 | 0.033398885 | 0.354728111 |
| 0.026720293 | 0.151478416 | 0.413848864 | 0.036724909 |
| 0.065017839 | 0.323127183 | 0.04614679  | 0.139405146 |

|             |             |             |             |
|-------------|-------------|-------------|-------------|
| 0.26240469  | 0.33287642  | 0.423423267 | 0.007609594 |
| 0.096296647 | 0.298037264 | 0.38211878  | 0.146089683 |
| 0.051092522 | 0.06600936  | 0.067206173 | 0.34986551  |
| 0.008461745 | 0.071231357 | 0.208541351 | 0.076013105 |
| 0.140078052 | 0.287641901 | 0.048418943 | 0.002378772 |
| 0.029202267 | 0.062205314 | 0.05334773  | 0.125887019 |
| 0.167347281 | 0.063530698 | 0.231052503 | 0.011194334 |
| 0.001096749 | 0.301785187 | 0.007878358 | 0.123833596 |
| 0.189163044 | 0.079130887 | 0.139222511 | 0.088066212 |
| 0.204119249 | 0.199972969 | 0.000238099 | 0.297695786 |
| 0.008328922 | 0.098411969 | 0.039799536 | 0.072045058 |
| 0.008752471 | 0.312961819 | 0.38972615  | 0.152726556 |
| 0.077612371 | 0.089375828 | 0.348223664 | 0.035147632 |
| 0.154626533 | 0.142834689 | 0.296476981 | 0.069419092 |
| 0.248907577 | 0.205307165 | 0.141999475 | 0.226458563 |
| 0.069992687 |             |             |             |

|       |             |             |             |
|-------|-------------|-------------|-------------|
| FYC01 | 0.032662574 | 0.319706581 | 0.019080045 |
|-------|-------------|-------------|-------------|

|             |             |             |             |
|-------------|-------------|-------------|-------------|
| 0.081600768 | 0.25196997  | 0.162416988 | 0.040819273 |
| 0.075758498 | 0.259247534 | 0.151097343 | 0.210826651 |
| 0.012512026 | 0.112885918 | 0.397189415 | 0.03946326  |
| 0.328327573 | 0.028260008 | 0.07256863  | 0.060486329 |
| 0.126900171 | 0.254087412 | 0.215511182 | 0.162841471 |
| 0.231280745 | 0.127359605 | 0.195262319 | 0.256067541 |
| 0.403763439 | 0.160434828 | 0.301030622 | 0.09012252  |
| 0.356616943 | 0.295994334 | 0.226322385 | 0.006662273 |
| 0.222821354 | 0.031865272 | 0.352719547 | 0.212231159 |
| 0.135815769 | 0.275121547 | 0.133047191 | 0.15868774  |
| 0.189731222 | 0.017814048 | 0.09072658  | 0.358616683 |
| 0.19348882  | 0.156372339 | 0.025567164 | 0.29785452  |
| 0.217082484 | 0.210784569 | 0.260339507 | 0.003502017 |
| 0.226537844 | 0.113851082 | 0.221931381 | 0.38017678  |
| 0.138475287 | 0.083379169 | 0.211683205 | 0.128866841 |
| 0.296915994 | 0.331454663 | 0.187779367 | 0.216167319 |
| 0.410082073 | 0.218543537 | 0.342667522 | 0.087168233 |
| 0.215118729 | 0.015223278 | 0.11541344  | 0.041650808 |
| 0.234927166 | 0.125388027 | 0.212655824 | 0.240757054 |
| 0.321391879 | 0.412708618 | 0.161816832 | 0.375815092 |
| 0.179930286 | 0.297860126 | 0.210541944 | 0.279469863 |
| 0.327494192 | 0.059777913 | 0.335392707 | 0.434597375 |
| 0.025522295 | 0.215322598 | 0.346451101 | 0.073925409 |
| 0.312430372 | 0.208990986 | 0.187751975 | 0.175807262 |
| 0.334459283 | 0.305893109 | 0.375156479 | 0.232053407 |
| 0.204220588 | 0.035813597 | 0.344771103 | 0.291515034 |
| 0.190799826 | 0.035201181 | 0.244152114 | 0.421322512 |
| 0.304022003 | 0.402678696 | 0.359517796 | 0.351126344 |
| 0.303473039 | 0.405926854 | 0.299478753 | 0.334343986 |
| 0.075288217 | 0.416497995 | 0.0914375   | 0.030724374 |
| 0.029073023 | 0.057828333 | 0.215216898 | 0.248946842 |
| 0.395119345 | 0.2207059   | 0.109220536 | 0.185255185 |
| 0.455178289 | 0.338644737 | 0.42229126  | 0.372831214 |
| 0.02180476  | 0.229924403 | 0.285382653 | 0.119152534 |
| 0.333652356 | 0.067920159 | 0.242075975 | 0.388795804 |
| 0.305480868 | 0.414337852 | 0.070046429 | 0.375911695 |
| 0.133085473 | 0.429068202 | 0.342618702 | 0.106963093 |

|             |             |             |             |
|-------------|-------------|-------------|-------------|
| 0.403769885 | 0.362110299 | 0.445667055 | 0.358561116 |
| 0.349385414 | 0.155365796 | 0.089092612 | 0.338587171 |
| 0.417123952 | 0.0215386   | 0.417514646 | 0.44693225  |
| 0.389818164 | 0.424022212 | 0.470209279 | 0.426242105 |
| 0.388019645 | 0.03847096  | 0.051400889 | 0.281966497 |
| 0.398186551 | 0.324225327 | 0.105687402 | 0.275467272 |
| 0.318474544 | 0.175309348 | 0.352291138 | 0.214794648 |
| 0.438119814 | 0.368008065 | 0.409243258 | 0.335310571 |
| 0.175717481 | 0.24189747  | 0.281534913 | 0.326902122 |
| 0.024542117 | 0.052454975 | 0.02334616  | 0.257068342 |
| 0.132342621 | 0.12505587  | 0.181959096 | 0.283032104 |
| 0.146930437 | 0.151417115 | 0.217423339 | 0.355221207 |
| 0.030550577 | 0.25564482  | 0.079096589 | 0.097881964 |
| 0.032905955 | 0.097559713 | 0.146830377 | 0.090155332 |
| 0.192974605 | 0.15714871  | 0.336688368 | 0.417125332 |
| 0.239452099 | 0.114568356 | 0.315674783 | 0.401424961 |
| 0.397064103 | 0.268444449 | 0.181244804 | 0.009339108 |
| 0.277332981 | 0.215691795 | 0.214085247 | 0.262566952 |
| 0.114836932 | 0.231087036 | 0.324877627 | 0.366820255 |
| 0.131632736 | 0.071657462 | 0.275553256 | 0.32323424  |
| 0.094805291 | 0.20004638  | 0.421102114 | 0.251256815 |
| 0.001089643 | 0.197888744 | 0.383998133 | 0.182803296 |
| 0.255684967 | 0.168482526 | 0.177393499 | 0.426722366 |
| 0.255650871 | 0.242789311 | 0.414350214 | 0.356771048 |
| 0.183672444 | 0.145883765 | 0.459033971 | 0.107939789 |
| 0.243504907 | 0.047803924 | 0.258917076 | 0.143791166 |
| 0.172836581 | 0.271275381 | 0.265298076 | 0.204317833 |
| 0.06255915  | 0.422649339 | 0.293996114 | 0.431869306 |
| 0.268890193 | 0.458096846 | 0.419860962 | 0.381861354 |
| 0.249075091 | 0.247874127 | 0.181859215 | 0.381798527 |
| 0.41074924  | 0.222624691 | 0.038209447 | 0.391350687 |
| 0.229688268 | 0.373548369 | 0.107997059 | 0.443690888 |
| 0.383695838 | 0.337988818 | 0.112035866 | 0.373042745 |
| 0.32228743  | 0.120572004 | 0.336291331 | 0.459110399 |
| 0.197968213 | 1           | 0.271853759 | 0.391082539 |
| 0.112074966 | 0.244798889 | 0.244870817 | 0.18956305  |
| 0.00808516  | 0.038891183 | 0.031216552 | 0.129307936 |
| 0.189225159 | 0.273633153 | 0.32789465  | 0.435759096 |
| 0.07749732  | 0.316508578 | 0.183976733 | 0.250138471 |
| 0.352096835 | 0.2547709   | 0.254053778 | 0.292909656 |
| 0.179420309 | 0.011766616 | 0.085005625 | 0.413596456 |
| 0.017509141 | 0.214719635 | 0.168208198 | 0.003109532 |
| 0.028668563 | 0.302304923 | 0.060552386 | 0.137182022 |
| 0.441062936 | 0.132077999 | 0.141672626 | 0.189501222 |
| 0.273418472 | 0.048292122 | 0.002300102 | 0.418762821 |
| 0.394929038 | 0.378964131 | 0.391901756 | 0.341636407 |
| 0.399438351 | 0.312226394 | 0.393259708 | 0.149112828 |
| 0.063486222 | 0.038713403 | 0.270187877 | 0.22908343  |
| 0.004702732 | 0.308533585 | 0.201474845 | 0.098386268 |
| 0.375562314 | 0.252334198 | 0.020355192 | 0.281387309 |
| 0.011501221 | 0.198192982 | 0.197076012 | 0.153483283 |
| 0.339606216 | 0.006078074 | 0.135220064 | 0.281279594 |
| 0.304577539 | 0.266313564 | 0.22617927  | 0.418878381 |
| 0.212748851 | 0.074989009 | 0.217780122 | 0.328705263 |

|             |             |             |             |
|-------------|-------------|-------------|-------------|
| 0.047077296 | 0.101631458 | 0.195687732 | 0.019760813 |
| 0.083115712 | 0.350676426 | 0.224687447 | 0.034394819 |
| 0.19654964  | 0.002164663 | 0.275251746 | 0.431867363 |
| 0.331041608 | 0.463907816 | 0.40519678  | 0.221705234 |
| 0.40571208  | 0.134903747 | 0.435982683 | 0.318991071 |
| 0.215008783 | 0.0007399   | 0.005790763 | 0.428728986 |
| 0.290456107 | 0.027065269 | 0.104886783 | 0.14779365  |
| 0.083256653 | 0.072689105 | 0.034774989 | 0.190438227 |
| 0.245921529 | 0.188795871 | 0.184618019 | 0.360874902 |
| 0.172239045 | 0.164424371 | 0.187715739 | 0.050576609 |
| 0.258851208 | 0.033921779 | 0.051511888 | 0.00876712  |
| 0.3301996   | 0.067331895 | 0.329971724 | 0.405337395 |
| 0.413216185 | 0.334441966 | 0.179982069 | 0.176194283 |
| 0.383051365 | 0.048824036 | 0.184621324 | 0.052862976 |
| 0.370425116 | 0.346390848 | 0.270132944 | 0.237778103 |
| 0.4543024   | 0.382003285 | 0.020756482 | 0.385860133 |
| 0.005557287 | 0.00327851  | 0.161151135 | 0.203058002 |
| 0.077639631 | 0.283852486 | 0.206450347 | 0.155208919 |
| 0.153420722 | 0.015884456 | 0.262462443 | 0.257988469 |
| 0.241030252 | 0.249138566 | 0.241949104 | 0.183568217 |
| 0.208560386 | 0.189143015 | 0.122005244 | 0.10739359  |
| 0.176506845 | 0.238976848 | 0.135478472 | 0.013523656 |
| 0.225159679 | 0.265423848 | 0.030878478 | 0.095790357 |
| 0.381421138 | 0.433885954 | 0.043582548 | 0.012023774 |
| 0.200683953 | 0.235672247 | 0.451059806 | 0.384869906 |
| 0.403928553 | 0.455570054 | 0.301654918 | 0.140985249 |
| 0.036073889 | 0.250413949 | 0.251070443 | 0.099029066 |
| 0.419383909 | 0.03487056  | 0.35647577  | 0.244961509 |
| 0.073939617 | 0.132843547 | 0.022960307 | 0.049779664 |
| 0.285387161 | 0.120935237 | 0.140013932 | 0.081185559 |
| 0.247782798 | 0.201979891 | 0.02876365  | 0.134996974 |
| 0.299224922 | 0.230931125 | 0.108687119 | 0.138766041 |
| 0.24847188  | 0.116672492 | 0.386791281 | 0.392859696 |
| 0.076722804 | 0.064432709 | 0.129917839 | 0.311030191 |
| 0.379102156 | 0.23161473  | 0.011821158 | 0.337833551 |
| 0.41755711  | 0.326075709 | 0.371864154 | 0.386873888 |
| 0.050040761 | 0.254492165 | 0.25763628  | 0.292878233 |
| 0.131587502 | 0.156730121 | 0.159491875 | 0.034424206 |
| 0.239056935 | 0.376046423 | 0.34315902  | 0.11217908  |
| 0.233684478 | 0.063668565 | 0.028966328 | 0.356544192 |
| 0.239281248 | 0.057920846 | 0.15438535  | 0.392076007 |
| 0.00171856  | 0.166073353 | 0.439615449 | 0.131954028 |
| 0.420541081 | 0.435776529 | 0.36085853  | 0.119417247 |
| 0.007353871 | 0.362625156 | 0.283003108 | 0.232588577 |
| 0.349484898 | 0.243046803 | 0.076762525 | 0.061241264 |
| 0.239391751 | 0.040140234 | 0.140803043 | 0.139338982 |
| 0.236702482 | 0.272390043 | 0.158016342 | 0.139211308 |
| 0.153829287 | 0.054125184 | 0.189329178 | 0.119621233 |
| 0.181335047 | 0.193630006 | 0.322634246 | 0.121491237 |
| 0.246634235 | 0.414229303 | 0.354565668 | 0.011956582 |
| 0.239378014 | 0.378082669 | 0.352418717 | 0.006417066 |
| 0.373130082 | 0.004859172 | 0.162253229 | 0.156804907 |
| 0.142147486 | 0.183305857 | 0.231105503 | 0.207973511 |
| 0.262022219 | 0.14652782  | 0.159341114 | 0.174611174 |

|             |             |             |             |
|-------------|-------------|-------------|-------------|
| 0.116084911 | 0.113046887 | 0.270294226 | 0.184363095 |
| 0.199799972 | 0.068677314 | 0.057672405 | 0.058484889 |
| 0.031557304 | 0.359382546 | 0.180596785 | 0.03489128  |
| 0.17094831  | 0.200776579 | 0.302885983 | 0.372404203 |
| 0.351450911 | 0.060973803 | 0.222030089 | 0.342955261 |
| 0.173695073 | 0.14532236  | 0.030775131 | 0.190112862 |
| 0.131940538 | 0.222614203 | 0.175698769 | 0.188812127 |
| 0.323317013 | 0.318869888 | 0.170600961 | 0.351848922 |
| 0.202444772 | 0.226801513 | 0.141200258 | 0.074109856 |
| 0.106715417 | 0.08585064  | 0.2313491   | 0.000848159 |
| 0.26571318  | 0.104703015 | 0.41654582  | 0.364297352 |
| 0.231739586 | 0.306432074 | 0.139942274 | 0.061462354 |
| 0.112502496 | 0.11714633  | 0.095209359 | 0.33374736  |
| 0.208724758 | 0.094181408 | 0.238056652 | 0.117973353 |
| 0.367271964 | 0.343679529 | 0.209380802 | 0.150819606 |
| 0.154860313 | 0.106925761 | 0.366503296 | 0.048853894 |
| 0.279989911 | 0.180510682 | 0.195052551 | 0.236823419 |
| 0.182827804 | 0.427001056 | 0.026282079 | 0.446492932 |
| 0.279637172 | 0.079906877 | 0.39834023  | 0.134948227 |
| 0.122616249 | 0.081993679 | 0.210304212 | 0.178000941 |
| 0.167374333 | 0.227559083 | 0.016663147 | 0.117913549 |
| 0.297093402 | 0.195364302 | 0.330450768 | 0.312875115 |
| 0.216132415 | 0.330795726 | 0.149076044 | 0.167316076 |
| 0.345844878 | 0.358583758 | 0.205757859 | 0.209059035 |
| 0.29500115  | 0.062394359 | 0.209637285 | 0.018790794 |
| 0.337097036 | 0.305117059 | 0.22823579  | 0.033436539 |
| 0.011050865 | 0.241394234 | 0.30182572  | 0.034924689 |
| 0.455505722 | 0.184880738 | 0.233800045 | 0.30502569  |
| 0.118752336 | 0.362794269 | 0.104736536 | 0.340504601 |
| 0.031118281 | 0.178797564 | 0.229425153 | 0.229695214 |
| 0.19777596  | 0.262874164 | 0.339006731 | 0.218796135 |
| 0.02162576  | 0.19854934  | 0.005638278 | 0.309135192 |
| 0.34042389  | 0.272198865 | 0.149401007 | 0.156868663 |
| 0.231296297 | 0.300566845 | 0.251104738 | 0.215518336 |
| 0.007361785 | 0.313777084 | 0.122285441 | 0.304709457 |
| 0.204148219 | 0.265570049 | 0.033261958 | 0.259537456 |
| 0.313463736 | 0.282587727 | 0.206178725 | 0.24334548  |
| 0.363216829 | 0.278271508 | 0.087515619 | 0.145405929 |
| 0.276261657 | 0.034774909 | 0.158536586 | 0.442418838 |
| 0.130328242 | 0.216189781 | 0.431584966 | 0.170170857 |
| 0.257635656 | 0.278805224 | 0.266521019 | 0.426370694 |
| 0.08678853  | 0.185373771 | 0.36768545  | 0.389503112 |
| 0.264330116 | 0.206084823 | 0.248080524 | 0.232814574 |
| 0.327516816 | 0.052482393 | 0.240434158 | 0.269129045 |
| 0.252788153 | 0.237183003 | 0.182826725 | 0.183964789 |
| 0.030289587 | 0.109519531 | 0.168852276 | 0.086313989 |
| 0.235741419 | 0.250350511 | 0.220760342 | 0.317825381 |
| 0.091237469 | 0.020147328 | 0.370299285 | 0.053621775 |
| 0.141884312 | 0.295076145 | 0.146639651 | 0.235086106 |
| 0.120723737 | 0.24224031  | 0.18294301  | 0.001273815 |
| 0.382583674 | 0.036092662 | 0.195236141 | 0.211405414 |
| 0.2442159   | 0.03175303  | 0.336115837 | 0.46202468  |
| 0.191465244 | 0.16998645  | 0.224193086 | 0.366858389 |
| 0.185159415 | 0.213871731 | 0.263096776 | 0.261532316 |

|             |             |             |             |
|-------------|-------------|-------------|-------------|
| 0.214718875 | 0.194017268 | 0.21948784  | 0.223926795 |
| 0.275582161 | 0.128569489 |             |             |
| G6PDX       | 0.023790387 | 0.295263249 | 0.016637757 |
| 0.079722056 | 0.28129661  | 0.126972084 | 0.026174615 |
| 0.048980701 | 0.226029004 | 0.086882288 | 0.228759579 |
| 0.009610078 | 0.077896356 | 0.377446363 | 0.023783841 |
| 0.330136549 | 0.020973797 | 0.061351281 | 0.033623593 |
| 0.090917847 | 0.270682967 | 0.147760597 | 0.148217092 |
| 0.228092008 | 0.123873261 | 0.185195208 | 0.237382278 |
| 0.38746081  | 0.106598213 | 0.308082592 | 0.071355417 |
| 0.349436154 | 0.313120309 | 0.202884164 | 0.005846894 |
| 0.216052819 | 0.018049731 | 0.334656774 | 0.166674368 |
| 0.132992439 | 0.262669921 | 0.110693491 | 0.13945726  |
| 0.174182854 | 0.013907862 | 0.052951206 | 0.337027836 |
| 0.184155242 | 0.105773288 | 0.022674273 | 0.300665944 |
| 0.138481741 | 0.20694407  | 0.237319942 | 0.001448525 |
| 0.181376335 | 0.079412716 | 0.146580826 | 0.363743925 |
| 0.148436693 | 0.07365041  | 0.129578665 | 0.088525892 |
| 0.255954729 | 0.307163693 | 0.182698691 | 0.133467106 |
| 0.396622712 | 0.147126996 | 0.331811311 | 0.069674288 |
| 0.166497052 | 0.008768646 | 0.120357197 | 0.0349876   |
| 0.151526369 | 0.136578381 | 0.216964263 | 0.189712973 |
| 0.300050262 | 0.38516825  | 0.165016381 | 0.353314216 |
| 0.097935494 | 0.301092001 | 0.160386536 | 0.285594548 |
| 0.291411541 | 0.03372052  | 0.351707109 | 0.421243124 |
| 0.014034044 | 0.190774619 | 0.312713965 | 0.063960679 |
| 0.300258178 | 0.12879671  | 0.176870435 | 0.135039674 |
| 0.350028295 | 0.312873964 | 0.337207179 | 0.237876753 |
| 0.18114193  | 0.033665614 | 0.319584319 | 0.302183192 |
| 0.156551868 | 0.039050317 | 0.186825917 | 0.404902306 |
| 0.312260782 | 0.389111977 | 0.324856632 | 0.323854955 |
| 0.305582146 | 0.399802233 | 0.322273519 | 0.306328887 |
| 0.043363697 | 0.393417096 | 0.10515615  | 0.022079156 |
| 0.019675647 | 0.039989979 | 0.126362294 | 0.241513726 |
| 0.389240883 | 0.212683028 | 0.089968662 | 0.193005108 |
| 0.442858243 | 0.313333679 | 0.393877548 | 0.348868961 |
| 0.016024858 | 0.147345322 | 0.305056645 | 0.076898184 |
| 0.304568599 | 0.061893765 | 0.225271785 | 0.365140688 |
| 0.311401676 | 0.405688373 | 0.050026117 | 0.352326157 |
| 0.083547672 | 0.42241536  | 0.32886649  | 0.116409559 |
| 0.391396842 | 0.346085527 | 0.442539594 | 0.371229643 |
| 0.337029744 | 0.170356749 | 0.03075829  | 0.312356265 |
| 0.408846805 | 0.018772775 | 0.395386447 | 0.428891171 |
| 0.373965753 | 0.417763262 | 0.451296812 | 0.41274809  |
| 0.364662124 | 0.03714198  | 0.025559665 | 0.286268388 |
| 0.380461806 | 0.341995361 | 0.066591302 | 0.265450489 |
| 0.303861775 | 0.160517629 | 0.32768251  | 0.150853294 |
| 0.417726346 | 0.370221599 | 0.386784188 | 0.302794773 |
| 0.154119996 | 0.233285994 | 0.271442357 | 0.308113803 |
| 0.020230661 | 0.04148373  | 0.022932522 | 0.234615123 |
| 0.091978571 | 0.138564128 | 0.139175799 | 0.254794873 |
| 0.155329113 | 0.119807966 | 0.152558916 | 0.362869668 |
| 0.027077021 | 0.247025287 | 0.08351415  | 0.093926323 |
| 0.027889894 | 0.091095794 | 0.106171525 | 0.07311619  |

|             |             |             |             |
|-------------|-------------|-------------|-------------|
| 0.187013433 | 0.142772546 | 0.314893466 | 0.407194387 |
| 0.173237367 | 0.118043172 | 0.29920486  | 0.395650966 |
| 0.392439373 | 0.290543696 | 0.163596192 | 0.012429869 |
| 0.198622665 | 0.123823714 | 0.14729567  | 0.251939626 |
| 0.105279981 | 0.142698453 | 0.310436396 | 0.380128208 |
| 0.133080756 | 0.047270396 | 0.179076019 | 0.308564115 |
| 0.085243126 | 0.150889295 | 0.41560469  | 0.227584925 |
| 0.001167066 | 0.213693407 | 0.378026682 | 0.128800689 |
| 0.223135411 | 0.114768415 | 0.136016669 | 0.421817337 |
| 0.153963789 | 0.153610908 | 0.396316513 | 0.362160159 |
| 0.109253317 | 0.12503865  | 0.435165278 | 0.054017994 |
| 0.224610294 | 0.055999562 | 0.276548908 | 0.117145972 |
| 0.182651145 | 0.261081184 | 0.2698686   | 0.164520441 |
| 0.063439013 | 0.39352875  | 0.288477873 | 0.414879609 |
| 0.179531074 | 0.440734306 | 0.410404498 | 0.378516366 |
| 0.247985383 | 0.200846804 | 0.123135757 | 0.389198043 |
| 0.412650631 | 0.143714643 | 0.03550543  | 0.35745294  |
| 0.177885216 | 0.366036136 | 0.092306064 | 0.438519841 |
| 0.372228265 | 0.314946693 | 0.076284848 | 0.374435467 |
| 0.337466231 | 0.131826682 | 0.32958559  | 0.430784665 |
| 0.117989686 | 0.271853759 | 1           | 0.406879815 |
| 0.124554376 | 0.163381551 | 0.228913654 | 0.124702977 |
| 0.007887992 | 0.030782819 | 0.032350451 | 0.116904578 |
| 0.152461956 | 0.247177487 | 0.327698584 | 0.415013606 |
| 0.068971055 | 0.306927564 | 0.160365869 | 0.187358749 |
| 0.337506483 | 0.195098283 | 0.257419891 | 0.289083254 |
| 0.175524088 | 0.014844516 | 0.07438074  | 0.392738874 |
| 0.014889661 | 0.16180806  | 0.132648297 | 0.004153285 |
| 0.018890595 | 0.272116218 | 0.056357482 | 0.133793249 |
| 0.424725219 | 0.13182413  | 0.144947698 | 0.116011252 |
| 0.28262453  | 0.049425158 | 0.003053401 | 0.398250994 |
| 0.360970695 | 0.343335549 | 0.356182789 | 0.308343675 |
| 0.367183859 | 0.28377411  | 0.390669762 | 0.150014911 |
| 0.047136349 | 0.026887858 | 0.202104338 | 0.214746783 |
| 0.001885087 | 0.322549382 | 0.19145323  | 0.103589825 |
| 0.352811736 | 0.227059187 | 0.014484141 | 0.262651838 |
| 0.011943702 | 0.152008251 | 0.107530222 | 0.109652024 |
| 0.330431956 | 0.004904359 | 0.112281223 | 0.193219741 |
| 0.293985149 | 0.257087647 | 0.159060081 | 0.404369908 |
| 0.231797175 | 0.066926867 | 0.229706588 | 0.327697256 |
| 0.033936586 | 0.064985701 | 0.122557159 | 0.017832945 |
| 0.051832321 | 0.314948002 | 0.14368451  | 0.031064567 |
| 0.214550423 | 0.002184469 | 0.272624595 | 0.4083403   |
| 0.313104409 | 0.450702537 | 0.396411877 | 0.19207176  |
| 0.397285711 | 0.082160421 | 0.415490089 | 0.304299641 |
| 0.144523446 | 0.001030375 | 0.003367045 | 0.425964219 |
| 0.30495436  | 0.024065176 | 0.112253253 | 0.108224599 |
| 0.069225746 | 0.050923806 | 0.022622418 | 0.16300762  |
| 0.247884955 | 0.198900794 | 0.128839171 | 0.331606536 |
| 0.16496815  | 0.163952515 | 0.130974192 | 0.044885066 |
| 0.260686566 | 0.027835762 | 0.045444226 | 0.009574904 |
| 0.323205333 | 0.063205963 | 0.305971756 | 0.382873371 |
| 0.404850823 | 0.356592119 | 0.109714222 | 0.104831103 |
| 0.352116477 | 0.043742583 | 0.124429539 | 0.04781805  |

|             |             |             |             |
|-------------|-------------|-------------|-------------|
| 0.353993633 | 0.35491007  | 0.282941021 | 0.246195101 |
| 0.439165871 | 0.375016206 | 0.014401    | 0.391015184 |
| 0.006655078 | 0.00224162  | 0.167265013 | 0.180856357 |
| 0.035534165 | 0.253105872 | 0.214862293 | 0.088236641 |
| 0.091833944 | 0.012644164 | 0.190510525 | 0.195318534 |
| 0.261365787 | 0.244677794 | 0.260558704 | 0.161167824 |
| 0.162953935 | 0.149709216 | 0.091655947 | 0.064871979 |
| 0.089985026 | 0.233709591 | 0.132983906 | 0.009239508 |
| 0.224747128 | 0.271300596 | 0.026984646 | 0.097247341 |
| 0.391530312 | 0.425118204 | 0.030314682 | 0.014236555 |
| 0.19685273  | 0.168923551 | 0.434167953 | 0.363854901 |
| 0.381290148 | 0.438902726 | 0.288874587 | 0.094221196 |
| 0.026210911 | 0.261852438 | 0.270064521 | 0.087208142 |
| 0.396238078 | 0.029935009 | 0.3363974   | 0.249663908 |
| 0.072741978 | 0.110513904 | 0.020139879 | 0.046981944 |
| 0.284105724 | 0.117217657 | 0.143168286 | 0.08511738  |
| 0.195888724 | 0.159127218 | 0.019376239 | 0.141243323 |
| 0.28865993  | 0.20112981  | 0.111493972 | 0.094512257 |
| 0.244150724 | 0.061004303 | 0.380617916 | 0.380228867 |
| 0.075152293 | 0.057613402 | 0.096546723 | 0.283973063 |
| 0.369432884 | 0.203941278 | 0.011322755 | 0.313395997 |
| 0.397200357 | 0.321129914 | 0.35478148  | 0.370543966 |
| 0.04763336  | 0.268687188 | 0.180069378 | 0.29179141  |
| 0.122111722 | 0.136139732 | 0.141674393 | 0.033764754 |
| 0.220462535 | 0.342761926 | 0.338939091 | 0.103455016 |
| 0.217890566 | 0.053005327 | 0.025105706 | 0.327285953 |
| 0.195177108 | 0.041079377 | 0.118581114 | 0.357436914 |
| 0.003542153 | 0.12438262  | 0.417126804 | 0.091849811 |
| 0.396366338 | 0.434647146 | 0.357743186 | 0.075648096 |
| 0.007238357 | 0.361361619 | 0.301061765 | 0.202091959 |
| 0.326218435 | 0.236728514 | 0.041138714 | 0.050649165 |
| 0.247479527 | 0.037431944 | 0.099517761 | 0.097615313 |
| 0.174641461 | 0.243488433 | 0.157004689 | 0.122776084 |
| 0.135805795 | 0.042636476 | 0.144463482 | 0.113013393 |
| 0.116480635 | 0.199991662 | 0.323474008 | 0.067813814 |
| 0.175409642 | 0.377997486 | 0.344365274 | 0.009411513 |
| 0.231737967 | 0.352908406 | 0.338471638 | 0.005021433 |
| 0.377670545 | 0.004072077 | 0.142785639 | 0.155413701 |
| 0.123947017 | 0.131083932 | 0.239832481 | 0.168226806 |
| 0.245141484 | 0.127580568 | 0.142799941 | 0.18975666  |
| 0.096968045 | 0.103819527 | 0.275459719 | 0.165973271 |
| 0.157770825 | 0.053222759 | 0.054120961 | 0.053573319 |
| 0.025533262 | 0.335646389 | 0.17797076  | 0.034429296 |
| 0.167800079 | 0.148145951 | 0.308995365 | 0.350874434 |
| 0.346693044 | 0.055207541 | 0.164190312 | 0.335131919 |
| 0.09389788  | 0.093012807 | 0.017993013 | 0.19884491  |
| 0.129722365 | 0.164289243 | 0.163074081 | 0.182105594 |
| 0.287510016 | 0.312322506 | 0.167073333 | 0.345329888 |
| 0.186807064 | 0.192186913 | 0.09155321  | 0.063442356 |
| 0.100293842 | 0.079857949 | 0.257445472 | 0.001365503 |
| 0.253460999 | 0.082165646 | 0.410456621 | 0.352284435 |
| 0.151165708 | 0.303849185 | 0.090455146 | 0.046196582 |
| 0.077285479 | 0.110129391 | 0.093450852 | 0.322188355 |
| 0.146363077 | 0.071098655 | 0.267467508 | 0.081330798 |



|             |                     |                      |             |
|-------------|---------------------|----------------------|-------------|
| 0.370695919 | 0.325181258         | 0.139852233          | 0.100699334 |
| 0.148985073 | 0.10832697          | 0.337542 0.038779809 |             |
| 0.269576267 | 0.158902689         | 0.165719461          | 0.22747741  |
| 0.158271064 | 0.410478174         | 0.026187589          | 0.425836335 |
| 0.235472201 | 0.073783201         | 0.380260497          | 0.121304431 |
| 0.088641155 | 0.068229308         | 0.155521266          | 0.115459631 |
| 0.10477277  | 0.154948901         | 0.007018343          | 0.075890536 |
| 0.307127414 | 0.10684346          | 0.297655309          | 0.287784214 |
| 0.169130946 | 0.322268 0.09767665 | 0.132585314          |             |
| 0.321812607 | 0.332710612         | 0.152820425          | 0.210717418 |
| 0.267707075 | 0.046853354         | 0.203061157          | 0.00838657  |
| 0.321886935 | 0.290634746         | 0.134117176          | 0.021556005 |
| 0.008553985 | 0.181780808         | 0.299032207          | 0.028669203 |
| 0.442826588 | 0.134698026         | 0.198576457          | 0.310937517 |
| 0.104622416 | 0.341699803         | 0.076501157          | 0.353503273 |
| 0.016534345 | 0.174383276         | 0.220978459          | 0.192092563 |
| 0.162677543 | 0.232258152         | 0.362498073          | 0.175925091 |
| 0.017802573 | 0.158210784         | 0.006469421          | 0.298145102 |
| 0.318215093 | 0.262589218         | 0.139422452          | 0.083659861 |
| 0.246703332 | 0.282999808         | 0.136004413          | 0.204780569 |
| 0.007930796 | 0.331361933         | 0.122435813          | 0.302303126 |
| 0.160098526 | 0.232985267         | 0.032861607          | 0.241005374 |
| 0.289800718 | 0.173029813         | 0.185227699          | 0.186352006 |
| 0.347405482 | 0.259379015         | 0.087084969          | 0.10893237  |
| 0.236903508 | 0.031916591         | 0.108526964          | 0.41397214  |
| 0.115410415 | 0.18549739          | 0.433896763          | 0.130977893 |
| 0.206391445 | 0.263681654         | 0.245427501          | 0.390681298 |
| 0.065049134 | 0.190990983         | 0.361622589          | 0.364048262 |
| 0.268413217 | 0.152786784         | 0.175655414          | 0.172701827 |
| 0.315613666 | 0.043969839         | 0.16816757           | 0.274559117 |
| 0.192569188 | 0.229236314         | 0.158880359          | 0.140981597 |
| 0.021995056 | 0.064005312         | 0.116429936          | 0.085131281 |
| 0.23357461  | 0.272340124         | 0.172516428          | 0.319615564 |
| 0.079520614 | 0.02344578          | 0.36503497           | 0.060144388 |
| 0.144469399 | 0.319277068         | 0.141223644          | 0.217212475 |
| 0.124338051 | 0.220716924         | 0.176312766          | 0.000814551 |
| 0.369654848 | 0.043252402         | 0.125426422          | 0.169756738 |
| 0.142043525 | 0.019887478         | 0.328063173          | 0.445791403 |
| 0.179976262 | 0.103688513         | 0.145577817          | 0.338731658 |
| 0.150280307 | 0.135457051         | 0.151771721          | 0.25146914  |
| 0.158350331 | 0.161328039         | 0.17331456           | 0.187368379 |
| 0.268899458 | 0.091250753         |                      |             |
| GAPDH       | 0.118491556         | 0.355372371          | 0.077971662 |
| 0.23262629  | 0.418865866         | 0.364834511          | 0.119696978 |
| 0.203853893 | 0.298774527         | 0.234047941          | 0.405602966 |
| 0.048543166 | 0.17050043          | 0.417019194          | 0.118886354 |
| 0.416682647 | 0.098052927         | 0.190939044          | 0.111432397 |
| 0.28799435  | 0.402538311         | 0.374941095          | 0.311755187 |
| 0.40487816  | 0.191485628         | 0.316212741          | 0.368821058 |
| 0.437092233 | 0.244125644         | 0.400929405          | 0.173164635 |
| 0.401843951 | 0.414023989         | 0.366467011          | 0.039939937 |
| 0.392314403 | 0.039440416         | 0.404638618          | 0.388545647 |
| 0.284864657 | 0.338045105         | 0.2555349            | 0.36044191  |
| 0.313934822 | 0.069698379         | 0.150610443          | 0.385374605 |

|             |             |             |             |
|-------------|-------------|-------------|-------------|
| 0.320390535 | 0.359608359 | 0.084856086 | 0.384502831 |
| 0.359076409 | 0.333311338 | 0.294202483 | 0.003832221 |
| 0.350961348 | 0.130265302 | 0.27424198  | 0.441848832 |
| 0.280682028 | 0.238017312 | 0.265127428 | 0.280233985 |
| 0.36121735  | 0.389632597 | 0.336124334 | 0.31537065  |
| 0.447135647 | 0.276607903 | 0.37932052  | 0.233519004 |
| 0.363041348 | 0.058530891 | 0.228288589 | 0.107421395 |
| 0.389301835 | 0.324815515 | 0.405362391 | 0.393860839 |
| 0.345141169 | 0.471242551 | 0.311793611 | 0.4268441   |
| 0.194465253 | 0.403496424 | 0.410809541 | 0.382359791 |
| 0.362722443 | 0.146659257 | 0.406884805 | 0.478675408 |
| 0.083771301 | 0.294434071 | 0.363242887 | 0.146643295 |
| 0.366915316 | 0.328593787 | 0.304788845 | 0.293461449 |
| 0.422229287 | 0.406939158 | 0.420260598 | 0.343551244 |
| 0.395628633 | 0.099093365 | 0.408782718 | 0.397298799 |
| 0.391188136 | 0.12506807  | 0.3692595   | 0.409006382 |
| 0.401350254 | 0.436856449 | 0.346969925 | 0.364707922 |
| 0.405184202 | 0.450781539 | 0.396845006 | 0.372925046 |
| 0.118762404 | 0.459760434 | 0.263829675 | 0.111117378 |
| 0.097628439 | 0.190785914 | 0.326536317 | 0.338396268 |
| 0.425400083 | 0.356168736 | 0.266869608 | 0.371726515 |
| 0.441290744 | 0.396687362 | 0.453009371 | 0.373831043 |
| 0.084855995 | 0.327376274 | 0.410287498 | 0.312077699 |
| 0.38204207  | 0.179336179 | 0.374281149 | 0.444617512 |
| 0.369911283 | 0.406318082 | 0.206815261 | 0.449249245 |
| 0.262651203 | 0.484986274 | 0.373850969 | 0.273844111 |
| 0.465460602 | 0.430442444 | 0.486307128 | 0.417304548 |
| 0.426748821 | 0.354824719 | 0.080268535 | 0.352352287 |
| 0.471190379 | 0.040392965 | 0.420521163 | 0.451631002 |
| 0.431928867 | 0.410513278 | 0.491998709 | 0.462135901 |
| 0.430551041 | 0.121276319 | 0.039121464 | 0.391706927 |
| 0.444385856 | 0.380478592 | 0.262195669 | 0.376508876 |
| 0.406929688 | 0.358377216 | 0.37909344  | 0.312523349 |
| 0.490155998 | 0.414320701 | 0.427705503 | 0.357900355 |
| 0.288696226 | 0.313505673 | 0.372669752 | 0.396577121 |
| 0.11117326  | 0.159020214 | 0.073783264 | 0.342359175 |
| 0.280013145 | 0.298940835 | 0.343408746 | 0.38416504  |
| 0.298457652 | 0.316664199 | 0.342894283 | 0.418020267 |
| 0.069475441 | 0.369520394 | 0.243676856 | 0.215842616 |
| 0.115703309 | 0.16596817  | 0.271661149 | 0.265964237 |
| 0.373073017 | 0.221242845 | 0.378275463 | 0.451936998 |
| 0.379403043 | 0.210262706 | 0.377157412 | 0.459900897 |
| 0.439866738 | 0.416047648 | 0.275799871 | 0.043349925 |
| 0.340579222 | 0.278690557 | 0.273748969 | 0.380923265 |
| 0.181973239 | 0.321477669 | 0.396544114 | 0.422656421 |
| 0.283245367 | 0.177773528 | 0.388604995 | 0.403201493 |
| 0.165801222 | 0.394959611 | 0.422055788 | 0.345567671 |
| 0.011567629 | 0.369898915 | 0.394678238 | 0.306346207 |
| 0.32517733  | 0.227926244 | 0.3101      | 0.429605969 |
| 0.32495831  | 0.347075632 | 0.443878027 | 0.421573139 |
| 0.315119362 | 0.199989103 | 0.485367519 | 0.072959225 |
| 0.382463591 | 0.15539279  | 0.38190804  | 0.258117051 |
| 0.326233833 | 0.359478107 | 0.401562139 | 0.411918536 |
| 0.149124469 | 0.455940792 | 0.363035643 | 0.459987334 |

|             |             |             |             |
|-------------|-------------|-------------|-------------|
| 0.369175585 | 0.488095187 | 0.414314057 | 0.413689625 |
| 0.384241988 | 0.345029779 | 0.216206316 | 0.392726882 |
| 0.421687393 | 0.300028005 | 0.093440902 | 0.370761918 |
| 0.328758541 | 0.407808522 | 0.281668477 | 0.466027613 |
| 0.463441692 | 0.385306544 | 0.267041802 | 0.415815804 |
| 0.381065891 | 0.298289898 | 0.384971902 | 0.491723809 |
| 0.26714311  | 0.391082539 | 0.406879815 | 1           |
| 0.247160449 | 0.348805847 | 0.312363255 | 0.260981481 |
| 0.017052375 | 0.119005463 | 0.104694766 | 0.309457423 |
| 0.32147142  | 0.34346637  | 0.413374167 | 0.462945416 |
| 0.207985288 | 0.390561634 | 0.276970298 | 0.378398933 |
| 0.375373223 | 0.37933386  | 0.399940831 | 0.410671783 |
| 0.297342112 | 0.063431323 | 0.22331374  | 0.471860661 |
| 0.055118538 | 0.346242672 | 0.324788058 | 0.009941392 |
| 0.085123879 | 0.310566028 | 0.112955258 | 0.208766915 |
| 0.459505181 | 0.203819759 | 0.247930384 | 0.267420392 |
| 0.400103788 | 0.164082094 | 0.01786812  | 0.437937429 |
| 0.430107004 | 0.409097785 | 0.422902782 | 0.395690367 |
| 0.400893438 | 0.366543575 | 0.407152777 | 0.31629792  |
| 0.190095433 | 0.128709849 | 0.334722997 | 0.389639486 |
| 0.007565934 | 0.405982528 | 0.391316579 | 0.210951867 |
| 0.397809605 | 0.344600153 | 0.081402151 | 0.397082029 |
| 0.048215234 | 0.264806242 | 0.313415704 | 0.329163277 |
| 0.404958356 | 0.036282604 | 0.247875969 | 0.354621903 |
| 0.369670054 | 0.317190065 | 0.372593928 | 0.471610166 |
| 0.397998615 | 0.130814805 | 0.41810552  | 0.410953553 |
| 0.146262314 | 0.115609063 | 0.331489586 | 0.034404716 |
| 0.20237367  | 0.404314964 | 0.375980515 | 0.125142173 |
| 0.349183091 | 0.015599812 | 0.332432251 | 0.475672812 |
| 0.387304528 | 0.477372959 | 0.453582951 | 0.365500352 |
| 0.4515513   | 0.143605473 | 0.468700876 | 0.342605771 |
| 0.304210394 | 0.002551643 | 0.01943444  | 0.444727494 |
| 0.41264432  | 0.066644217 | 0.24249001  | 0.320751361 |
| 0.228271291 | 0.177901251 | 0.130756801 | 0.358663044 |
| 0.384072654 | 0.379877733 | 0.317715947 | 0.397641534 |
| 0.354378864 | 0.340723506 | 0.322854487 | 0.118359211 |
| 0.408022501 | 0.123578745 | 0.121489871 | 0.026563777 |
| 0.410015477 | 0.123731211 | 0.398990925 | 0.444276285 |
| 0.466230269 | 0.426854224 | 0.260687475 | 0.31783512  |
| 0.401190534 | 0.100755664 | 0.339287988 | 0.126137369 |
| 0.410835249 | 0.411399632 | 0.365177938 | 0.312835513 |
| 0.473108832 | 0.429360206 | 0.07935543  | 0.403123787 |
| 0.036608995 | 0.009091696 | 0.322832416 | 0.310867109 |
| 0.11154807  | 0.394150247 | 0.308445914 | 0.286879357 |
| 0.322134915 | 0.063287914 | 0.358582843 | 0.357566835 |
| 0.387789672 | 0.407575751 | 0.394214206 | 0.275076834 |
| 0.402262431 | 0.289058286 | 0.331319219 | 0.254954853 |
| 0.272169566 | 0.286486546 | 0.194270726 | 0.055441145 |
| 0.366212507 | 0.398968109 | 0.114597556 | 0.216381267 |
| 0.413033274 | 0.446646596 | 0.109990357 | 0.046270043 |
| 0.289714641 | 0.373960266 | 0.464015099 | 0.424912759 |
| 0.459545083 | 0.489163846 | 0.377642382 | 0.262966027 |
| 0.129784462 | 0.40876928  | 0.403219043 | 0.270356462 |
| 0.453802754 | 0.083491211 | 0.419480924 | 0.377276234 |

|             |             |             |             |
|-------------|-------------|-------------|-------------|
| 0.182178885 | 0.326788904 | 0.099536372 | 0.15960012  |
| 0.395911601 | 0.25794161  | 0.331363643 | 0.168905956 |
| 0.395861018 | 0.360357799 | 0.10376818  | 0.293870066 |
| 0.354181664 | 0.299488836 | 0.242262731 | 0.328001241 |
| 0.337689028 | 0.181721022 | 0.403444983 | 0.439383764 |
| 0.177396482 | 0.166986524 | 0.270809128 | 0.377349327 |
| 0.378669835 | 0.320357977 | 0.054679448 | 0.367746696 |
| 0.45495758  | 0.392127804 | 0.431612346 | 0.398488124 |
| 0.129006277 | 0.407726521 | 0.356483546 | 0.401863388 |
| 0.268474431 | 0.357830613 | 0.333804858 | 0.112776384 |
| 0.307168898 | 0.436327454 | 0.367902027 | 0.291648483 |
| 0.36683591  | 0.137973932 | 0.073270586 | 0.38845072  |
| 0.333173673 | 0.148086993 | 0.271386445 | 0.379708122 |
| 0.012551136 | 0.249055068 | 0.459953633 | 0.328951596 |
| 0.474729931 | 0.452854774 | 0.420374324 | 0.303490209 |
| 0.007516692 | 0.40371877  | 0.4119252   | 0.408320127 |
| 0.364182035 | 0.340843063 | 0.202396151 | 0.182083958 |
| 0.341254331 | 0.095159706 | 0.256257146 | 0.316064511 |
| 0.24744442  | 0.353675503 | 0.280133984 | 0.268894544 |
| 0.350642536 | 0.103660127 | 0.348115423 | 0.334016354 |
| 0.258983342 | 0.310980508 | 0.375399718 | 0.219935651 |
| 0.251070053 | 0.408510577 | 0.362130769 | 0.05961473  |
| 0.39185525  | 0.381082788 | 0.410261542 | 0.007506336 |
| 0.409323778 | 0.026734396 | 0.335792658 | 0.358588701 |
| 0.348873813 | 0.329219013 | 0.381848671 | 0.416527472 |
| 0.35285365  | 0.334054804 | 0.373741264 | 0.336440843 |
| 0.31156862  | 0.306538557 | 0.415241544 | 0.364346261 |
| 0.385720552 | 0.211749118 | 0.111591153 | 0.106193947 |
| 0.120959485 | 0.401093858 | 0.263041066 | 0.092708452 |
| 0.328115875 | 0.366583814 | 0.373910763 | 0.414228995 |
| 0.418884728 | 0.110049635 | 0.378125184 | 0.375601277 |
| 0.198395184 | 0.288828941 | 0.09387953  | 0.377423804 |
| 0.313739929 | 0.337128952 | 0.344214264 | 0.287037764 |
| 0.339761276 | 0.390261347 | 0.261490245 | 0.4199782   |
| 0.420474381 | 0.343254221 | 0.238250756 | 0.203287095 |
| 0.259281045 | 0.174565863 | 0.398825444 | 0.008716154 |
| 0.383533504 | 0.280325619 | 0.419048059 | 0.422872897 |
| 0.335107316 | 0.384332275 | 0.244871371 | 0.15560975  |
| 0.210641798 | 0.164106927 | 0.19933997  | 0.374764084 |
| 0.275903559 | 0.287009247 | 0.417069117 | 0.283445914 |
| 0.405958654 | 0.372257117 | 0.374213075 | 0.29608141  |
| 0.329155447 | 0.233655294 | 0.420234683 | 0.160914855 |
| 0.365559711 | 0.354610602 | 0.280212403 | 0.396607239 |
| 0.362520257 | 0.461068408 | 0.104253412 | 0.466953116 |
| 0.392367739 | 0.157794606 | 0.465489026 | 0.323954761 |
| 0.33655404  | 0.265774447 | 0.28332617  | 0.322653275 |
| 0.326165211 | 0.368492525 | 0.013730938 | 0.109931875 |
| 0.389352684 | 0.307259181 | 0.323757595 | 0.376106255 |
| 0.39508298  | 0.385595238 | 0.238631718 | 0.310363136 |
| 0.395835393 | 0.425529974 | 0.333893008 | 0.31005099  |
| 0.353036909 | 0.194837091 | 0.328396433 | 0.026541781 |
| 0.387167627 | 0.368747291 | 0.316880461 | 0.11736438  |
| 0.054234745 | 0.301658074 | 0.380482065 | 0.090105892 |
| 0.456722214 | 0.26203927  | 0.30908247  | 0.396027357 |

|             |             |             |             |
|-------------|-------------|-------------|-------------|
| 0.214771342 | 0.429169275 | 0.267816447 | 0.413972564 |
| 0.077598734 | 0.324042843 | 0.388917803 | 0.347073879 |
| 0.354772449 | 0.395754057 | 0.412159058 | 0.355099254 |
| 0.088293308 | 0.390978134 | 0.007702457 | 0.383532813 |
| 0.395664193 | 0.391059302 | 0.231449483 | 0.233772164 |
| 0.371436469 | 0.358872711 | 0.31819972  | 0.361326275 |
| 0.043585808 | 0.414412992 | 0.294014155 | 0.361811043 |
| 0.25314578  | 0.34837933  | 0.151356211 | 0.384926976 |
| 0.38891661  | 0.331429193 | 0.282195206 | 0.321347886 |
| 0.417792151 | 0.332006319 | 0.167476009 | 0.357489983 |
| 0.322961307 | 0.09688931  | 0.303253287 | 0.476593196 |
| 0.312680479 | 0.357617249 | 0.423085346 | 0.329457299 |
| 0.373082347 | 0.343861666 | 0.345744068 | 0.461028239 |
| 0.198659698 | 0.32602939  | 0.404814072 | 0.407548867 |
| 0.365402111 | 0.329560031 | 0.343350158 | 0.363038156 |
| 0.384822596 | 0.172943664 | 0.365329916 | 0.362311427 |
| 0.328444646 | 0.372893919 | 0.272545571 | 0.348226395 |
| 0.095217305 | 0.262959824 | 0.366054532 | 0.210260909 |
| 0.373015967 | 0.424150421 | 0.396312992 | 0.392352626 |
| 0.256753622 | 0.078606563 | 0.44282117  | 0.049271525 |
| 0.31496879  | 0.42189527  | 0.323740446 | 0.415286519 |
| 0.208653572 | 0.356700954 | 0.302071923 | 0.003439171 |
| 0.399500261 | 0.135215956 | 0.369812413 | 0.369983177 |
| 0.318138974 | 0.095715806 | 0.411834317 | 0.478901796 |
| 0.338417698 | 0.317996608 | 0.324793378 | 0.407912672 |
| 0.272270458 | 0.313866195 | 0.344296272 | 0.343724332 |
| 0.333988399 | 0.304360578 | 0.354445677 | 0.380659849 |
| 0.369323911 | 0.318506474 |             |             |
| GARS        | 0.230233615 | 0.22464388  | 0.185411192 |
| 0.267840906 | 0.136986563 | 0.136485508 | 0.237345    |
| 0.240772284 | 0.190880712 | 0.061422203 | 0.170932843 |
| 0.196734566 | 0.019529418 | 0.263745506 | 0.223302657 |
| 0.125250771 | 0.231382648 | 0.26712564  | 0.050376492 |
| 0.156728431 | 0.142493872 | 0.092876732 | 0.134984667 |
| 0.129970676 | 0.326772636 | 0.162697508 | 0.084794904 |
| 0.254978857 | 0.043389157 | 0.149367842 | 0.050600077 |
| 0.341943295 | 0.124587533 | 0.079745693 | 0.177558031 |
| 0.133013684 | 0.007328312 | 0.35446259  | 0.20069224  |
| 0.06751322  | 0.333024161 | 0.08568449  | 0.240771358 |
| 0.103508127 | 0.215068138 | 0.033271253 | 0.128656968 |
| 0.147408509 | 0.169111452 | 0.177139432 | 0.169405786 |
| 0.108675852 | 0.223162885 | 0.143190497 | 0.009328948 |
| 0.065779177 | 0.009548357 | 0.037054654 | 0.295849889 |
| 0.285130791 | 0.269888385 | 0.047839035 | 0.143788237 |
| 0.109359866 | 0.153778143 | 0.226045902 | 0.090577393 |
| 0.291292674 | 0.043820973 | 0.144718956 | 0.168069746 |
| 0.14490758  | 0.156401613 | 0.308586435 | 0.162550636 |
| 0.106890905 | 0.249536229 | 0.142421283 | 0.086986392 |
| 0.222966886 | 0.348292704 | 0.234516317 | 0.303560723 |
| 0.036066174 | 0.099907423 | 0.123744833 | 0.246493512 |
| 0.177619459 | 0.186315953 | 0.213852616 | 0.331238265 |
| 0.159922056 | 0.095521382 | 0.170401173 | 0.211950891 |
| 0.230189236 | 0.059764009 | 0.093936429 | 0.058770967 |
| 0.141424631 | 0.122804352 | 0.304394174 | 0.264881933 |

|             |             |             |             |
|-------------|-------------|-------------|-------------|
| 0.117486078 | 0.200431305 | 0.31833098  | 0.093344562 |
| 0.168279743 | 0.238514003 | 0.13412198  | 0.190578986 |
| 0.164077183 | 0.260197984 | 0.191253968 | 0.222373465 |
| 0.110900163 | 0.286122426 | 0.211424304 | 0.240443108 |
| 0.020165567 | 0.291056211 | 0.271312487 | 0.234504573 |
| 0.186050314 | 0.2369975   | 0.091176919 | 0.293003722 |
| 0.231233919 | 0.203082781 | 0.254192634 | 0.221574794 |
| 0.229729333 | 0.290810459 | 0.282645136 | 0.224053367 |
| 0.235126011 | 0.054976241 | 0.118862171 | 0.168223423 |
| 0.179665713 | 0.227809248 | 0.087554281 | 0.339334124 |
| 0.318005187 | 0.206295487 | 0.21643095  | 0.366410604 |
| 0.174886838 | 0.334216109 | 0.219888075 | 0.288499772 |
| 0.337813855 | 0.329746297 | 0.306096565 | 0.141922118 |
| 0.321103204 | 0.195400682 | 0.027964454 | 0.232194491 |
| 0.319512964 | 0.014927207 | 0.212626362 | 0.236274918 |
| 0.285257806 | 0.19841348  | 0.292198681 | 0.261259384 |
| 0.278569412 | 0.228814617 | 0.004777934 | 0.188652715 |
| 0.314302472 | 0.292823917 | 0.182964712 | 0.09941354  |
| 0.12113069  | 0.151116243 | 0.173396429 | 0.09130763  |
| 0.350382499 | 0.239653462 | 0.228370656 | 0.197817559 |
| 0.125542757 | 0.331766462 | 0.080326138 | 0.318491389 |
| 0.248553055 | 0.238406512 | 0.185288874 | 0.225831711 |
| 0.092799979 | 0.266195939 | 0.150081727 | 0.115875053 |
| 0.263135599 | 0.139730605 | 0.063007499 | 0.145352442 |
| 0.205585158 | 0.112777526 | 0.261790929 | 0.229767285 |
| 0.26166021  | 0.311837002 | 0.222919527 | 0.256884513 |
| 0.188560083 | 0.343039088 | 0.142106228 | 0.259738662 |
| 0.1114509   | 0.279127316 | 0.171812985 | 0.311642558 |
| 0.338393268 | 0.113288692 | 0.267036518 | 0.130737054 |
| 0.125056868 | 0.051284162 | 0.036726926 | 0.093292301 |
| 0.321578155 | 0.17499081  | 0.135316915 | 0.178150556 |
| 0.198927676 | 0.171338012 | 0.109766546 | 0.356576523 |
| 0.240447751 | 0.154669288 | 0.249403827 | 0.109491444 |
| 0.094170672 | 0.207573058 | 0.214061514 | 0.119953668 |
| 0.187129948 | 0.050130606 | 0.061093152 | 0.247692069 |
| 0.062743885 | 0.089115988 | 0.236954067 | 0.17061249  |
| 0.100864959 | 0.281846862 | 0.291302917 | 0.00875677  |
| 0.098116423 | 0.13690692  | 0.246794689 | 0.078934922 |
| 0.248616807 | 0.244951278 | 0.108320837 | 0.142516437 |
| 0.216806497 | 0.296599978 | 0.247007593 | 0.272118038 |
| 0.09250805  | 0.301814989 | 0.215660741 | 0.268451624 |
| 0.200225858 | 0.077380553 | 0.02625066  | 0.221935688 |
| 0.23645203  | 0.084731035 | 0.206566499 | 0.160480129 |
| 0.090476623 | 0.144725274 | 0.127948926 | 0.296564769 |
| 0.35946269  | 0.273333877 | 0.234145438 | 0.20755682  |
| 0.280535314 | 0.252413006 | 0.224312119 | 0.307121484 |
| 0.068751571 | 0.112074966 | 0.124554376 | 0.247160449 |
| 1           | 0.110185834 | 0.285989623 | 0.032299698 |
| 0.001663899 | 0.202823881 | 0.229319629 | 0.237673494 |
| 0.075768505 | 0.101372832 | 0.162843608 | 0.286612345 |
| 0.272933672 | 0.280746279 | 0.222176011 | 0.167746853 |
| 0.28081245  | 0.099887929 | 0.096566673 | 0.129707324 |
| 0.270245822 | 0.161192183 | 0.25480341  | 0.359198703 |
| 0.147373985 | 0.078274808 | 0.149380251 | 0.024705372 |

|             |             |             |             |
|-------------|-------------|-------------|-------------|
| 0.22081072  | 0.167817364 | 0.264369655 | 0.363134489 |
| 0.249771073 | 0.344372644 | 0.254004947 | 0.081489179 |
| 0.217193822 | 0.26462376  | 0.044430079 | 0.255139969 |
| 0.267130823 | 0.258351429 | 0.26398213  | 0.280987989 |
| 0.22901599  | 0.169259033 | 0.202863925 | 0.153547281 |
| 0.272729269 | 0.207005253 | 0.084573143 | 0.189266474 |
| 0.015380979 | 0.236695799 | 0.13280454  | 0.293439043 |
| 0.162002669 | 0.201219589 | 0.22406142  | 0.109427004 |
| 0.185430131 | 0.040646837 | 0.14259042  | 0.186994962 |
| 0.190413972 | 0.168892206 | 0.101012706 | 0.090266617 |
| 0.293180067 | 0.287959585 | 0.077801397 | 0.306560889 |
| 0.1936704   | 0.2025092   | 0.182766799 | 0.190352    |
| 0.267812651 | 0.034066674 | 0.124532396 | 0.013768021 |
| 0.064621593 | 0.282904121 | 0.097865372 | 0.258534888 |
| 0.245754585 | 0.121553123 | 0.294420827 | 0.310123533 |
| 0.269408665 | 0.274665518 | 0.289996549 | 0.08442419  |
| 0.299128012 | 0.010481489 | 0.278346101 | 0.23272815  |
| 0.081072468 | 0.017392203 | 0.0459669   | 0.23838909  |
| 0.127791205 | 0.182947276 | 0.279524763 | 0.120452118 |
| 0.290747426 | 0.202446569 | 0.222891699 | 0.115120221 |
| 0.14166826  | 0.165305403 | 0.085988103 | 0.282516219 |
| 0.239489934 | 0.219830062 | 0.106924663 | 0.219871593 |
| 0.119321258 | 0.270998926 | 0.207080298 | 0.039289433 |
| 0.178442313 | 0.249634524 | 0.333693795 | 0.280209662 |
| 0.329153881 | 0.170988924 | 0.06100385  | 0.098392927 |
| 0.216734077 | 0.186116855 | 0.07605937  | 0.181895353 |
| 0.269256406 | 0.153764917 | 0.289585322 | 0.317845423 |
| 0.307176374 | 0.311314587 | 0.223004038 | 0.217110011 |
| 0.131850657 | 0.008244526 | 0.146033461 | 0.225534269 |
| 0.022646312 | 0.110960206 | 0.316193319 | 0.127303055 |
| 0.147609322 | 0.196595127 | 0.069928359 | 0.077487876 |
| 0.213971179 | 0.151891649 | 0.115068124 | 0.222403819 |
| 0.146338785 | 0.116768165 | 0.224223637 | 0.21748364  |
| 0.081595363 | 0.286970903 | 0.330097503 | 0.191864577 |
| 0.107281622 | 0.110715658 | 0.254563169 | 0.26512726  |
| 0.253216002 | 0.251390802 | 0.227485698 | 0.143431186 |
| 0.303093321 | 0.133118535 | 0.259028223 | 0.262484394 |
| 0.327663715 | 0.328207137 | 0.353237319 | 0.191877971 |
| 0.251604343 | 0.175944067 | 0.111908869 | 0.186948588 |
| 0.278148226 | 0.17078072  | 0.28029777  | 0.075900782 |
| 0.250490587 | 0.272981071 | 0.233186673 | 0.25640741  |
| 0.095172398 | 0.253859072 | 0.237109561 | 0.22510105  |
| 0.169276521 | 0.075122366 | 0.233220495 | 0.267166589 |
| 0.250179842 | 0.057226043 | 0.267934123 | 0.150128236 |
| 0.23093556  | 0.046916033 | 0.160817514 | 0.346665697 |
| 0.252338842 | 0.223693804 | 0.177392334 | 0.175921539 |
| 0.195382828 | 0.083016245 | 0.135331512 | 0.225965755 |
| 0.268200369 | 0.137795875 | 0.296356191 | 0.26828056  |
| 0.229017637 | 0.122768958 | 0.072587559 | 0.141603967 |
| 0.232642626 | 0.141545862 | 0.191959425 | 0.237917301 |
| 0.295078961 | 0.339377902 | 0.249251432 | 0.267358901 |
| 0.105866818 | 0.170561929 | 0.162156921 | 0.211493303 |
| 0.083977199 | 0.249286728 | 0.084408481 | 0.179559286 |
| 0.022158138 | 0.034815865 | 0.259194279 | 0.206165292 |

|             |             |             |             |
|-------------|-------------|-------------|-------------|
| 0.322031544 | 0.265232073 | 0.332315101 | 0.157756883 |
| 0.000989076 | 0.132533367 | 0.171825094 | 0.138939452 |
| 0.234505672 | 0.246356209 | 0.100690221 | 0.27522517  |
| 0.316211826 | 0.201730198 | 0.243598294 | 0.117058623 |
| 0.047205291 | 0.147318399 | 0.285943332 | 0.195716593 |
| 0.21418648  | 0.170794713 | 0.06901378  | 0.243704411 |
| 0.04876871  | 0.306481793 | 0.283788774 | 0.063698184 |
| 0.054097204 | 0.242462744 | 0.21663516  | 0.205237094 |
| 0.0920473   | 0.229766114 | 0.256838533 | 0.029053093 |
| 0.169873959 | 0.141765267 | 0.206817968 | 0.227362478 |
| 0.232126501 | 0.191686665 | 0.187315234 | 0.161064206 |
| 0.167781582 | 0.246535882 | 0.225240029 | 0.252117927 |
| 0.245637143 | 0.221317955 | 0.133745396 | 0.1573587   |
| 0.160003977 | 0.282627267 | 0.266766463 | 0.274352472 |
| 0.234565686 | 0.227503444 | 0.339364693 | 0.213714022 |
| 0.227358224 | 0.13410785  | 0.338933978 | 0.268464258 |
| 0.288223534 | 0.23011998  | 0.142619256 | 0.232672354 |
| 0.037770477 | 0.113671822 | 0.191223914 | 0.150244527 |
| 0.231442366 | 0.118531856 | 0.109497082 | 0.172394979 |
| 0.154079457 | 0.360313666 | 0.322021931 | 0.295530086 |
| 0.1575338   | 0.106008896 | 0.074131148 | 0.25650928  |
| 0.283940113 | 0.248796723 | 0.130375379 | 0.081201898 |
| 0.198586932 | 0.19601999  | 0.225238774 | 0.305566807 |
| 0.057774676 | 0.309658952 | 0.085491963 | 0.26983466  |
| 0.065318067 | 0.280744639 | 0.277251325 | 0.168882119 |
| 0.039731983 | 0.255301289 | 0.162125258 | 0.1306859   |
| 0.177835454 | 0.152347024 | 0.114623275 | 0.181467203 |
| 0.196520453 | 0.231592149 | 0.311403224 | 0.216163081 |
| 0.104209188 | 0.130419346 | 0.106625465 | 0.183176983 |
| 0.199263664 | 0.26455571  | 0.223970496 | 0.263827858 |
| 0.13203169  | 0.259675652 | 0.359113313 | 0.157274472 |
| 0.168971288 | 0.200995065 | 0.04055158  | 0.105564914 |
| 0.196160236 | 0.073511555 | 0.001959048 | 0.032080479 |
| 0.251933376 | 0.088994692 | 0.17319949  | 0.188096896 |
| 0.119296348 | 0.251020763 | 0.029192497 | 0.176726903 |
| 0.277121004 | 0.324193168 | 0.19841307  | 0.303064843 |
| 0.230928857 | 0.273439693 | 0.147738197 | 0.008228653 |
| 0.120821881 | 0.094980868 | 0.080611445 | 0.229252097 |
| 0.190643008 | 0.049339661 | 0.131196729 | 0.16146531  |
| 0.247832818 | 0.038420646 | 0.11774527  | 0.166947076 |
| 0.240074999 | 0.336028294 | 0.215429714 | 0.20116555  |
| 0.134312585 | 0.231439079 | 0.091252257 | 0.094311827 |
| 0.172997426 | 0.099606584 | 0.237049023 | 0.083646541 |
| 0.242594706 | 0.174046252 | 0.024317491 | 0.373072449 |
| 0.310423245 | 0.093349731 | 0.310242957 | 0.053168875 |
| 0.257495336 | 0.246400808 | 0.11320438  | 0.091473874 |
| 0.151823306 | 0.119515462 | 0.238293498 | 0.254829396 |
| 0.056472968 | 0.11910139  | 0.257097853 | 0.098654764 |
| 0.343318683 | 0.113640098 | 0.28037908  | 0.083134764 |
| 0.270557244 | 0.209288518 | 0.233049823 | 0.12897498  |
| 0.11741544  | 0.206527114 | 0.090260527 | 0.30203879  |
| 0.242248223 | 0.091455783 | 0.219303928 | 0.251496257 |
| 0.079928841 | 0.253999865 | 0.098545812 | 0.291016566 |
| 0.195676848 | 0.26625003  | 0.19467044  | 0.259816676 |



|             |             |             |             |
|-------------|-------------|-------------|-------------|
| 0.279888881 | 0.087786525 | 0.077628935 | 0.15910112  |
| 0.27869827  | 0.250688155 | 0.090181537 | 0.251896767 |
| 0.070286727 | 0.212881855 | 0.106906177 | 0.151918847 |
| 0.191092858 | 0.192548653 | 0.130150284 | 0.255450141 |
| 0.201757111 | 0.150486484 | 0.138680924 | 0.341597523 |
| 0.223301007 | 0.193693471 | 0.343048153 | 0.008917374 |
| 0.163782016 | 0.170968825 | 0.218632463 | 0.122699693 |
| 0.320431667 | 0.160214967 | 0.151879745 | 0.040355759 |
| 0.2229853   | 0.054600524 | 0.120358049 | 0.165378836 |
| 0.071929481 | 0.228215662 | 0.301009415 | 0.275293456 |
| 0.196440364 | 0.076901593 | 0.067357601 | 0.27260974  |
| 0.052132192 | 0.055274217 | 0.071691295 | 0.152017868 |
| 0.061924088 | 0.08346036  | 0.087342053 | 0.088638205 |
| 0.21439532  | 0.17959262  |             |             |
| GBP5        | 0.024606351 | 0.186547212 | 0.012694795 |
| 0.038528467 | 0.279460809 | 0.074599658 | 0.034286125 |
| 0.045603928 | 0.17519767  | 0.047062866 | 0.169229101 |
| 0.012293701 | 0.095950613 | 0.255858129 | 0.038886635 |
| 0.271020977 | 0.032272927 | 0.082287806 | 0.034609578 |
| 0.069687916 | 0.297015285 | 0.093046262 | 0.08571583  |
| 0.271383013 | 0.098211588 | 0.123495997 | 0.194221964 |
| 0.24013472  | 0.047161145 | 0.199187002 | 0.020515193 |
| 0.254099162 | 0.304550724 | 0.14723906  | 0.005871596 |
| 0.161348405 | 0.059344265 | 0.234565436 | 0.163291892 |
| 0.093754393 | 0.20668446  | 0.052286408 | 0.128411186 |
| 0.094233108 | 0.011990786 | 0.018865907 | 0.264537575 |
| 0.137663917 | 0.107326777 | 0.022789466 | 0.192134096 |
| 0.096781497 | 0.140932985 | 0.126343567 | 0.001102405 |
| 0.154479343 | 0.063725371 | 0.118604665 | 0.226456675 |
| 0.145055813 | 0.10853916  | 0.068848754 | 0.111765131 |
| 0.226194192 | 0.288167411 | 0.218017962 | 0.08264055  |
| 0.25090198  | 0.140497805 | 0.222162122 | 0.042232219 |
| 0.13181308  | 0.015286208 | 0.128549095 | 0.041457331 |
| 0.126929177 | 0.166355899 | 0.206824103 | 0.184230754 |
| 0.165973443 | 0.274704269 | 0.172090357 | 0.215157313 |
| 0.174010414 | 0.287520927 | 0.152964057 | 0.2988803   |
| 0.271391188 | 0.04729597  | 0.231496246 | 0.280163056 |
| 0.027703035 | 0.107000252 | 0.235844252 | 0.064842035 |
| 0.186723167 | 0.11488457  | 0.087187811 | 0.119387764 |
| 0.310829274 | 0.283271499 | 0.246432616 | 0.195985459 |
| 0.210954818 | 0.03378884  | 0.196999464 | 0.294211911 |
| 0.130060317 | 0.034357924 | 0.155192476 | 0.277953966 |
| 0.206819371 | 0.242168059 | 0.215858259 | 0.282956205 |
| 0.237551202 | 0.250539521 | 0.197682986 | 0.230952994 |
| 0.017617549 | 0.251286183 | 0.086994006 | 0.033490377 |
| 0.018253456 | 0.066712129 | 0.147560572 | 0.245295935 |
| 0.256251296 | 0.175145408 | 0.074312455 | 0.21706399  |
| 0.342198175 | 0.187073897 | 0.251693466 | 0.251648804 |
| 0.021858111 | 0.137103935 | 0.21493116  | 0.064609797 |
| 0.263406549 | 0.091791846 | 0.235927128 | 0.235549177 |
| 0.211621991 | 0.304732275 | 0.039615946 | 0.242514474 |
| 0.119170659 | 0.290223166 | 0.183132472 | 0.114393619 |
| 0.250527801 | 0.212634064 | 0.305360717 | 0.288149632 |
| 0.218792435 | 0.095368782 | 0.06175224  | 0.25059151  |

|             |             |             |             |
|-------------|-------------|-------------|-------------|
| 0.303585359 | 0.020518766 | 0.26454397  | 0.285871563 |
| 0.2237405   | 0.270156577 | 0.329413065 | 0.273699423 |
| 0.221931117 | 0.048105334 | 0.030347481 | 0.316655155 |
| 0.233100527 | 0.221670533 | 0.101071171 | 0.172332792 |
| 0.302181476 | 0.098216621 | 0.252931203 | 0.063645723 |
| 0.3164683   | 0.238084296 | 0.247732901 | 0.222618564 |
| 0.123983355 | 0.180891934 | 0.213648091 | 0.183857082 |
| 0.023551087 | 0.032845242 | 0.021523039 | 0.253645848 |
| 0.030824078 | 0.172919891 | 0.079167736 | 0.26977524  |
| 0.181825835 | 0.087710833 | 0.124367515 | 0.308432729 |
| 0.027459026 | 0.143542198 | 0.080578556 | 0.079671626 |
| 0.033204834 | 0.094074075 | 0.066932591 | 0.060371505 |
| 0.223244638 | 0.107993465 | 0.209948055 | 0.276248279 |
| 0.180698405 | 0.088043974 | 0.196664818 | 0.285373167 |
| 0.325855424 | 0.214840215 | 0.188904806 | 0.009824741 |
| 0.110248903 | 0.086304082 | 0.124194656 | 0.187650929 |
| 0.095019676 | 0.112472374 | 0.245194099 | 0.310937358 |
| 0.074928414 | 0.061439953 | 0.147291793 | 0.223168563 |
| 0.075781301 | 0.129840867 | 0.291020922 | 0.146415921 |
| 0.001829561 | 0.143975749 | 0.251047102 | 0.169797096 |
| 0.204377989 | 0.111728338 | 0.077130768 | 0.284353502 |
| 0.109956249 | 0.210061625 | 0.269583129 | 0.322447309 |
| 0.061498249 | 0.097596293 | 0.311765138 | 0.057449889 |
| 0.237486525 | 0.043559001 | 0.282121553 | 0.067244029 |
| 0.163386534 | 0.282863985 | 0.287395884 | 0.153170205 |
| 0.042092361 | 0.260668669 | 0.209462891 | 0.271956677 |
| 0.10982312  | 0.307622536 | 0.2795091   | 0.263098582 |
| 0.20318826  | 0.166118439 | 0.117901524 | 0.237513299 |
| 0.273914058 | 0.072457843 | 0.033871746 | 0.251545299 |
| 0.125218314 | 0.28650551  | 0.107122494 | 0.299059089 |
| 0.260956853 | 0.181265585 | 0.101613379 | 0.348914386 |
| 0.229643969 | 0.101161309 | 0.254465982 | 0.321796281 |
| 0.056850621 | 0.244798889 | 0.163381551 | 0.348805847 |
| 0.110185834 | 1           | 0.204412028 | 0.121821417 |
| 0.00377588  | 0.038903184 | 0.032457135 | 0.160878355 |
| 0.160245337 | 0.161814757 | 0.265533114 | 0.268703833 |
| 0.092079552 | 0.220204143 | 0.186693912 | 0.125529083 |
| 0.210679516 | 0.207789132 | 0.21487916  | 0.250848976 |
| 0.178642053 | 0.013957002 | 0.059370976 | 0.267129545 |
| 0.01694872  | 0.124684163 | 0.131925098 | 0.003964695 |
| 0.021360076 | 0.15903827  | 0.054404154 | 0.118241897 |
| 0.332036681 | 0.10112876  | 0.109919596 | 0.05921659  |
| 0.252534968 | 0.064443166 | 0.005237653 | 0.274374155 |
| 0.261925761 | 0.261714461 | 0.251755244 | 0.218687221 |
| 0.283356587 | 0.238985961 | 0.305544485 | 0.080116433 |
| 0.040312377 | 0.025533454 | 0.154450182 | 0.200860147 |
| 0.002721816 | 0.263650268 | 0.232696948 | 0.110704175 |
| 0.278141886 | 0.234191006 | 0.016537649 | 0.281280013 |
| 0.006458527 | 0.086644781 | 0.078515652 | 0.156529693 |
| 0.356260771 | 0.006125741 | 0.035336044 | 0.103546979 |
| 0.168677044 | 0.18272114  | 0.116704897 | 0.257928051 |
| 0.186054171 | 0.049594964 | 0.191720788 | 0.276564927 |
| 0.040245445 | 0.028510633 | 0.104317912 | 0.00444563  |
| 0.029994033 | 0.240539686 | 0.113216029 | 0.017472942 |

|             |             |             |             |
|-------------|-------------|-------------|-------------|
| 0.179071557 | 0.002346032 | 0.171835095 | 0.274049392 |
| 0.178749147 | 0.304462155 | 0.251646171 | 0.171059553 |
| 0.24510453  | 0.07630877  | 0.269060684 | 0.191116548 |
| 0.081434032 | 0.000415418 | 0.010515355 | 0.275080204 |
| 0.209565923 | 0.021474693 | 0.12063593  | 0.036526714 |
| 0.063641169 | 0.04295693  | 0.038593757 | 0.160485874 |
| 0.156800962 | 0.246458349 | 0.1530051   | 0.20332751  |
| 0.166216603 | 0.21208868  | 0.086525106 | 0.052874343 |
| 0.201407766 | 0.029716046 | 0.058649598 | 0.009326652 |
| 0.321701873 | 0.049095755 | 0.191454536 | 0.245478364 |
| 0.278986371 | 0.279833378 | 0.052486073 | 0.063590325 |
| 0.293051029 | 0.030978296 | 0.059450836 | 0.039243218 |
| 0.203052247 | 0.260179333 | 0.228503673 | 0.169640849 |
| 0.309628679 | 0.236833637 | 0.024865695 | 0.286288859 |
| 0.005186961 | 0.012405804 | 0.077178146 | 0.205101935 |
| 0.08771896  | 0.21694771  | 0.190718003 | 0.105052237 |
| 0.128653744 | 0.010101929 | 0.199145309 | 0.202095864 |
| 0.238711868 | 0.209325713 | 0.274195001 | 0.181195614 |
| 0.196865779 | 0.150432471 | 0.118461924 | 0.094705335 |
| 0.092234768 | 0.163013385 | 0.100105688 | 0.015277093 |
| 0.131333381 | 0.176000948 | 0.036761158 | 0.099019588 |
| 0.256428164 | 0.272839951 | 0.04579695  | 0.016309047 |
| 0.163785272 | 0.183907983 | 0.304070376 | 0.218667985 |
| 0.244865829 | 0.315410517 | 0.215737639 | 0.125584334 |
| 0.032387758 | 0.267361122 | 0.283647686 | 0.119960296 |
| 0.261042014 | 0.029291974 | 0.214511383 | 0.244439313 |
| 0.092207032 | 0.089498456 | 0.02521541  | 0.072926735 |
| 0.230646796 | 0.143262485 | 0.190913121 | 0.053724188 |
| 0.185472313 | 0.110384453 | 0.032697627 | 0.155169613 |
| 0.218190593 | 0.131455308 | 0.122558581 | 0.085228649 |
| 0.17562587  | 0.037628433 | 0.268196035 | 0.292631023 |
| 0.077155746 | 0.072632708 | 0.031501106 | 0.259902867 |
| 0.231916572 | 0.137727856 | 0.008079994 | 0.17928067  |
| 0.289058766 | 0.200754324 | 0.218376527 | 0.333210899 |
| 0.060007907 | 0.195498971 | 0.197963381 | 0.26551304  |
| 0.160745374 | 0.081117128 | 0.190182658 | 0.047842509 |
| 0.226664358 | 0.259379523 | 0.2066603   | 0.123188501 |
| 0.154230961 | 0.04678335  | 0.024347411 | 0.239228614 |
| 0.161645609 | 0.030068806 | 0.066544473 | 0.28317985  |
| 0.004179099 | 0.124862666 | 0.321271516 | 0.081942241 |
| 0.291293196 | 0.293623477 | 0.247181721 | 0.068067947 |
| 0.007952026 | 0.274715949 | 0.217845925 | 0.120486358 |
| 0.194295897 | 0.177109359 | 0.054806174 | 0.058415556 |
| 0.241735378 | 0.029253844 | 0.100761351 | 0.042564656 |
| 0.133768164 | 0.163315706 | 0.193957317 | 0.155541784 |
| 0.183589911 | 0.046491509 | 0.114502487 | 0.097993265 |
| 0.156128842 | 0.203631829 | 0.275491155 | 0.032792451 |
| 0.094727488 | 0.311389458 | 0.220665714 | 0.010944148 |
| 0.224182896 | 0.296994863 | 0.267273476 | 0.005872977 |
| 0.256653747 | 0.007538597 | 0.200467927 | 0.163814727 |
| 0.158566442 | 0.191116306 | 0.297511718 | 0.137796751 |
| 0.19136549  | 0.138441957 | 0.110753143 | 0.197544529 |
| 0.100707046 | 0.111741311 | 0.222995885 | 0.118438376 |
| 0.126696194 | 0.056828751 | 0.049986012 | 0.045229816 |

|             |             |             |             |
|-------------|-------------|-------------|-------------|
| 0.026801484 | 0.224870124 | 0.157130191 | 0.029153225 |
| 0.216320991 | 0.11766388  | 0.263214008 | 0.206260764 |
| 0.284246878 | 0.040331075 | 0.181108622 | 0.189500542 |
| 0.047790728 | 0.042552142 | 0.016719986 | 0.128147707 |
| 0.137484969 | 0.135222395 | 0.107315076 | 0.103966534 |
| 0.198624377 | 0.233706986 | 0.147380482 | 0.26073453  |
| 0.135937281 | 0.184195341 | 0.038183704 | 0.067329592 |
| 0.083149127 | 0.090794012 | 0.285242766 | 0.0015094   |
| 0.227537837 | 0.029500805 | 0.257557208 | 0.209897396 |
| 0.144199844 | 0.25025122  | 0.029672682 | 0.033687909 |
| 0.02259441  | 0.069630057 | 0.102973197 | 0.212089228 |
| 0.108941218 | 0.075702576 | 0.257782496 | 0.031099823 |
| 0.260322194 | 0.238714968 | 0.171600191 | 0.121780051 |
| 0.190327997 | 0.087684086 | 0.238431246 | 0.034238265 |
| 0.164907631 | 0.132760404 | 0.105536948 | 0.210761466 |
| 0.197387834 | 0.270871583 | 0.034655709 | 0.276987468 |
| 0.217936074 | 0.076569021 | 0.284626149 | 0.12016986  |
| 0.051172954 | 0.081788686 | 0.139645704 | 0.076483873 |
| 0.106556114 | 0.135710646 | 0.003683195 | 0.064475723 |
| 0.286577332 | 0.119598645 | 0.187142466 | 0.277218977 |
| 0.210959965 | 0.333688052 | 0.099620167 | 0.114492398 |
| 0.186841338 | 0.212515511 | 0.084787871 | 0.220491122 |
| 0.23777394  | 0.060539927 | 0.10892026  | 0.013672941 |
| 0.22095741  | 0.193813324 | 0.068754907 | 0.035542418 |
| 0.012968031 | 0.138891468 | 0.186265357 | 0.036777528 |
| 0.325968892 | 0.07985956  | 0.15946222  | 0.200949914 |
| 0.122540639 | 0.211924449 | 0.1011599   | 0.253448397 |
| 0.021933499 | 0.190954334 | 0.202528001 | 0.176390498 |
| 0.10979303  | 0.222601156 | 0.279276117 | 0.179554781 |
| 0.023068378 | 0.121159267 | 0.00612734  | 0.210040841 |
| 0.192093604 | 0.230148729 | 0.145006665 | 0.045269327 |
| 0.26150824  | 0.245137513 | 0.149353507 | 0.139176445 |
| 0.010850973 | 0.261856795 | 0.15440503  | 0.184992464 |
| 0.056693442 | 0.198115822 | 0.032535521 | 0.274601629 |
| 0.182898953 | 0.119416714 | 0.2055585   | 0.073117964 |
| 0.206959015 | 0.191586728 | 0.059524436 | 0.111440104 |
| 0.178210165 | 0.040389416 | 0.060454521 | 0.290116408 |
| 0.155563142 | 0.19626455  | 0.317192933 | 0.125700284 |
| 0.220818597 | 0.185237071 | 0.168994873 | 0.279800588 |
| 0.098444833 | 0.190500285 | 0.28498074  | 0.242235935 |
| 0.276829    | 0.202355308 | 0.156093821 | 0.212576217 |
| 0.176200791 | 0.031693386 | 0.139856299 | 0.189297396 |
| 0.168571513 | 0.248440406 | 0.104402352 | 0.211503422 |
| 0.032153383 | 0.07837145  | 0.065429337 | 0.102744821 |
| 0.23012157  | 0.226055203 | 0.168061102 | 0.24814963  |
| 0.064182496 | 0.01903152  | 0.273089349 | 0.040200716 |
| 0.082784254 | 0.23273603  | 0.166132049 | 0.198574307 |
| 0.097403994 | 0.184371759 | 0.099616646 | 0.001524783 |
| 0.310738135 | 0.041547633 | 0.166277586 | 0.129743889 |
| 0.108938132 | 0.023352524 | 0.214687828 | 0.315974119 |
| 0.162587655 | 0.069911911 | 0.072411459 | 0.23795073  |
| 0.129769143 | 0.099989978 | 0.142331621 | 0.141287427 |
| 0.167231627 | 0.083826901 | 0.11696337  | 0.120509528 |
| 0.202204981 | 0.097099835 |             |             |

| GBP6        | 0.209161601 | 0.344252625 | 0.159775634 |
|-------------|-------------|-------------|-------------|
| 0.184536183 | 0.251344227 | 0.290304172 | 0.219589286 |
| 0.298762873 | 0.323949439 | 0.204915892 | 0.286800273 |
| 0.101327675 | 0.072142936 | 0.359453769 | 0.220816905 |
| 0.262826571 | 0.162057135 | 0.266783261 | 0.138623428 |
| 0.285537207 | 0.240456911 | 0.218016624 | 0.30668403  |
| 0.261968249 | 0.276351383 | 0.315551969 | 0.253329516 |
| 0.376100617 | 0.133755273 | 0.285899247 | 0.119137288 |
| 0.38555287  | 0.242614546 | 0.223107397 | 0.098996839 |
| 0.306877324 | 0.032572455 | 0.421512218 | 0.25838364  |
| 0.109671585 | 0.357161686 | 0.235590296 | 0.26330804  |
| 0.25474538  | 0.140040807 | 0.120921588 | 0.276383061 |
| 0.320760437 | 0.334598816 | 0.189993131 | 0.304087009 |
| 0.28821321  | 0.33260078  | 0.275311408 | 0.01172789  |
| 0.17662805  | 0.042276987 | 0.122889151 | 0.4161648   |
| 0.304919793 | 0.271281317 | 0.167900495 | 0.349080162 |
| 0.291371929 | 0.308992931 | 0.350122237 | 0.246887137 |
| 0.39272105  | 0.125703586 | 0.287705192 | 0.192862808 |
| 0.300312664 | 0.169165461 | 0.295968925 | 0.238350897 |
| 0.271328745 | 0.302981816 | 0.284388404 | 0.210995499 |
| 0.331909262 | 0.464530378 | 0.341718944 | 0.424865141 |
| 0.115152896 | 0.238257221 | 0.245743283 | 0.322663938 |
| 0.322703144 | 0.266450065 | 0.299627849 | 0.432989897 |
| 0.212637829 | 0.26460052  | 0.30304639  | 0.264591189 |
| 0.337638604 | 0.214127793 | 0.246820692 | 0.126315672 |
| 0.271399166 | 0.245659254 | 0.437397895 | 0.310100623 |
| 0.282234693 | 0.20157204  | 0.436019037 | 0.218160056 |
| 0.245218149 | 0.210535525 | 0.215913664 | 0.305262939 |
| 0.291056187 | 0.37124189  | 0.308265363 | 0.322333931 |
| 0.24524635  | 0.388859555 | 0.302127339 | 0.35701551  |
| 0.098455083 | 0.42116837  | 0.287488957 | 0.172569385 |
| 0.211201567 | 0.259070253 | 0.256173414 | 0.349228915 |
| 0.336967414 | 0.355267436 | 0.29851602  | 0.275716226 |
| 0.327807038 | 0.412660183 | 0.416765121 | 0.321404714 |
| 0.168430604 | 0.183011637 | 0.243781794 | 0.346116126 |
| 0.311982545 | 0.296340262 | 0.180660716 | 0.446143275 |
| 0.338305465 | 0.302491594 | 0.299136709 | 0.473891608 |
| 0.336174454 | 0.425011735 | 0.328883485 | 0.266992014 |
| 0.441053098 | 0.431777199 | 0.403406809 | 0.261228002 |
| 0.419486149 | 0.29124022  | 0.101354505 | 0.332202294 |
| 0.408116723 | 0.013482147 | 0.338859389 | 0.359874255 |
| 0.398170255 | 0.297659817 | 0.41006444  | 0.384835914 |
| 0.405127324 | 0.236325341 | 0.024575437 | 0.289173875 |
| 0.420050167 | 0.320936471 | 0.303629168 | 0.245301295 |
| 0.270734588 | 0.3088251   | 0.313853649 | 0.180526128 |
| 0.451036718 | 0.340529064 | 0.359183698 | 0.322714208 |
| 0.302874076 | 0.349898915 | 0.224298    | 0.419776895 |
| 0.189834846 | 0.234165254 | 0.171217944 | 0.351537776 |
| 0.235825909 | 0.294411581 | 0.307623932 | 0.293444007 |
| 0.303715614 | 0.337752923 | 0.197116289 | 0.269492554 |
| 0.177439689 | 0.269748861 | 0.299936705 | 0.280702542 |
| 0.162477602 | 0.275540613 | 0.232427314 | 0.245274196 |
| 0.283642963 | 0.341338271 | 0.29114316  | 0.376510075 |
| 0.287874519 | 0.271978565 | 0.308456413 | 0.404106847 |

|             |             |             |             |
|-------------|-------------|-------------|-------------|
| 0.38108329  | 0.243726106 | 0.336584421 | 0.034929387 |
| 0.198892452 | 0.190354837 | 0.117881644 | 0.260755193 |
| 0.300289936 | 0.256889713 | 0.282121793 | 0.278486728 |
| 0.290745366 | 0.302394263 | 0.251656041 | 0.424368998 |
| 0.267517303 | 0.247565704 | 0.324189854 | 0.283562312 |
| 0.035186853 | 0.292444435 | 0.306756977 | 0.19272285  |
| 0.326655396 | 0.100606339 | 0.146573326 | 0.334458154 |
| 0.194512318 | 0.208124012 | 0.364956962 | 0.289488077 |
| 0.256654383 | 0.318179357 | 0.415963301 | 0.035675236 |
| 0.272265139 | 0.100737879 | 0.299288801 | 0.245928842 |
| 0.308599435 | 0.334367144 | 0.237687916 | 0.243557412 |
| 0.234822794 | 0.419045888 | 0.3456723   | 0.385709654 |
| 0.222125255 | 0.42129031  | 0.309884748 | 0.339710511 |
| 0.33194968  | 0.238900077 | 0.078944656 | 0.300002668 |
| 0.325088519 | 0.220180241 | 0.201891591 | 0.291562736 |
| 0.247860279 | 0.276787161 | 0.21010018  | 0.380314521 |
| 0.452825248 | 0.392290609 | 0.268125184 | 0.304749147 |
| 0.315125231 | 0.295316925 | 0.334353956 | 0.434766054 |
| 0.208996901 | 0.244870817 | 0.228913654 | 0.312363255 |
| 0.285989623 | 0.204412028 | 1           | 0.11697701  |
| 0.004883958 | 0.242944427 | 0.198292179 | 0.257944134 |
| 0.138309872 | 0.269099125 | 0.299213935 | 0.404040684 |
| 0.26290072  | 0.367843274 | 0.346344588 | 0.221249208 |
| 0.353278397 | 0.268376006 | 0.246356746 | 0.288432604 |
| 0.348998397 | 0.061514154 | 0.182863195 | 0.462932489 |
| 0.162040862 | 0.164518059 | 0.346515739 | 0.007223225 |
| 0.170797161 | 0.29230835  | 0.224838389 | 0.301067509 |
| 0.363244075 | 0.291759965 | 0.286369614 | 0.224264988 |
| 0.322348559 | 0.251177644 | 0.013568216 | 0.377304944 |
| 0.411694297 | 0.397419931 | 0.409458701 | 0.419385546 |
| 0.354274576 | 0.324198628 | 0.30457449  | 0.303537776 |
| 0.266921489 | 0.245287067 | 0.144460929 | 0.27268777  |
| 0.016039917 | 0.324475246 | 0.305435299 | 0.276438714 |
| 0.299835908 | 0.339731707 | 0.158056791 | 0.280833927 |
| 0.071416502 | 0.103513119 | 0.311513137 | 0.331571729 |
| 0.310718883 | 0.097787434 | 0.140784931 | 0.197439117 |
| 0.373004395 | 0.329117432 | 0.219040211 | 0.427592719 |
| 0.291468278 | 0.229000291 | 0.260576214 | 0.309171605 |
| 0.226536653 | 0.098230917 | 0.308809679 | 0.021237666 |
| 0.204748894 | 0.420946961 | 0.278778338 | 0.184183286 |
| 0.295629182 | 0.043099872 | 0.322597431 | 0.430516851 |
| 0.386279755 | 0.388694068 | 0.391904592 | 0.173385755 |
| 0.398278267 | 0.055797608 | 0.405697346 | 0.313793226 |
| 0.221176927 | 0.00351641  | 0.029454127 | 0.344281182 |
| 0.255821792 | 0.173734394 | 0.286696376 | 0.237085333 |
| 0.217608447 | 0.260504211 | 0.241419098 | 0.169172157 |
| 0.300568641 | 0.256914115 | 0.182713568 | 0.399050608 |
| 0.295371244 | 0.327959218 | 0.287963683 | 0.237279834 |
| 0.290001529 | 0.174759847 | 0.24760473  | 0.015490948 |
| 0.309710009 | 0.232437529 | 0.443769651 | 0.402601904 |
| 0.418326522 | 0.288141287 | 0.190711151 | 0.256441879 |
| 0.346046797 | 0.19817062  | 0.230405426 | 0.229992922 |
| 0.378612586 | 0.267484799 | 0.319236004 | 0.310891913 |
| 0.398513923 | 0.389440049 | 0.163249815 | 0.303220836 |

|             |             |             |             |
|-------------|-------------|-------------|-------------|
| 0.048272934 | 0.007475757 | 0.272625095 | 0.35451     |
| 0.118672662 | 0.243817265 | 0.315097733 | 0.320168445 |
| 0.322264808 | 0.116811281 | 0.16988304  | 0.169609612 |
| 0.302801993 | 0.286795139 | 0.212867837 | 0.349120816 |
| 0.26116576  | 0.159946465 | 0.306070136 | 0.319610054 |
| 0.277522059 | 0.314875773 | 0.26958076  | 0.136245744 |
| 0.262448939 | 0.25375622  | 0.196348446 | 0.301468745 |
| 0.316704408 | 0.352328312 | 0.164663938 | 0.045379779 |
| 0.328164358 | 0.301577642 | 0.371085632 | 0.386397879 |
| 0.444190289 | 0.42640472  | 0.407170733 | 0.233774733 |
| 0.215647479 | 0.297677386 | 0.230463957 | 0.199182147 |
| 0.399406113 | 0.19126235  | 0.403354816 | 0.193266466 |
| 0.282854043 | 0.281945458 | 0.134791832 | 0.258008608 |
| 0.243380864 | 0.314275524 | 0.267240861 | 0.236941116 |
| 0.263648466 | 0.18035843  | 0.208619462 | 0.302234445 |
| 0.324707865 | 0.107913194 | 0.297603347 | 0.356012673 |
| 0.338772008 | 0.194545134 | 0.281573804 | 0.40142064  |
| 0.264681488 | 0.271082883 | 0.244732397 | 0.333890404 |
| 0.300928715 | 0.25364466  | 0.06652932  | 0.349027608 |
| 0.388571309 | 0.275174736 | 0.4113765   | 0.334120699 |
| 0.24313462  | 0.240812159 | 0.223478399 | 0.270979453 |
| 0.326903531 | 0.299710703 | 0.343904476 | 0.217139719 |
| 0.354847846 | 0.457788302 | 0.328689058 | 0.261329496 |
| 0.289865705 | 0.25433005  | 0.17682277  | 0.34407955  |
| 0.135648333 | 0.191430376 | 0.243776946 | 0.310282449 |
| 0.008009978 | 0.09530328  | 0.388025901 | 0.301668965 |
| 0.449282221 | 0.357234499 | 0.380510242 | 0.356444172 |
| 0.002843162 | 0.268536327 | 0.280229669 | 0.253338059 |
| 0.331180916 | 0.341731569 | 0.292147683 | 0.197753001 |
| 0.331509235 | 0.193569297 | 0.228334609 | 0.262949829 |
| 0.105110183 | 0.306808043 | 0.320256928 | 0.330423073 |
| 0.288305011 | 0.230610407 | 0.169041468 | 0.314928679 |
| 0.154724311 | 0.322112284 | 0.318992377 | 0.224337168 |
| 0.102960498 | 0.353183211 | 0.304379978 | 0.130954971 |
| 0.250522948 | 0.32564469  | 0.370537647 | 0.007388537 |
| 0.281459336 | 0.060988538 | 0.269007823 | 0.252826516 |
| 0.280777256 | 0.29084612  | 0.292515114 | 0.254565572 |
| 0.322784005 | 0.316961353 | 0.27883578  | 0.30253529  |
| 0.245225764 | 0.353976107 | 0.296795812 | 0.310598292 |
| 0.227952287 | 0.252282553 | 0.228088281 | 0.220370595 |
| 0.155489391 | 0.35869094  | 0.317357255 | 0.194543154 |
| 0.326157815 | 0.31686338  | 0.346012976 | 0.392469374 |
| 0.368148824 | 0.214449414 | 0.319442101 | 0.322281003 |
| 0.147571985 | 0.250702336 | 0.207070595 | 0.312008444 |
| 0.329986786 | 0.176463258 | 0.299772447 | 0.28295961  |
| 0.299245715 | 0.391128858 | 0.31878321  | 0.386542303 |
| 0.29352763  | 0.288064123 | 0.198549862 | 0.178343398 |
| 0.263137786 | 0.28356016  | 0.220403101 | 0.017494488 |
| 0.323261983 | 0.274716922 | 0.319551981 | 0.405407204 |
| 0.179895487 | 0.365777676 | 0.204529204 | 0.198879478 |
| 0.17533289  | 0.25224652  | 0.283859744 | 0.306589647 |
| 0.116853355 | 0.310506515 | 0.264443771 | 0.277197313 |
| 0.298315646 | 0.296326848 | 0.256406767 | 0.347131485 |
| 0.345861313 | 0.301793851 | 0.439251397 | 0.265107548 |

|             |             |             |             |
|-------------|-------------|-------------|-------------|
| 0.262598913 | 0.170096177 | 0.283749156 | 0.252489594 |
| 0.277611011 | 0.39465907  | 0.211023551 | 0.392026947 |
| 0.245662331 | 0.27232963  | 0.450511214 | 0.354023331 |
| 0.343193938 | 0.230243708 | 0.11029688  | 0.29523862  |
| 0.316779078 | 0.207511962 | 0.009707344 | 0.058244449 |
| 0.307776362 | 0.285861745 | 0.29376856  | 0.336306263 |
| 0.222565794 | 0.328116214 | 0.117297968 | 0.334656133 |
| 0.400307506 | 0.446273486 | 0.225871617 | 0.334393549 |
| 0.333537464 | 0.239612806 | 0.299704183 | 0.039165976 |
| 0.263068416 | 0.245733252 | 0.235535456 | 0.213330161 |
| 0.120792842 | 0.119517405 | 0.277816521 | 0.217096363 |
| 0.355777843 | 0.113586313 | 0.302849224 | 0.304336431 |
| 0.323604017 | 0.446899549 | 0.248944628 | 0.294601062 |
| 0.191513587 | 0.347099573 | 0.255274556 | 0.278511031 |
| 0.193102599 | 0.201475548 | 0.302220035 | 0.160503382 |
| 0.148073622 | 0.244894448 | 0.010237246 | 0.40820067  |
| 0.419342089 | 0.219243191 | 0.316491368 | 0.206476613 |
| 0.317581859 | 0.348735765 | 0.240781731 | 0.262432114 |
| 0.056972755 | 0.238341023 | 0.334330943 | 0.323281512 |
| 0.114313783 | 0.292489596 | 0.173456545 | 0.246999768 |
| 0.445404157 | 0.209898737 | 0.347170222 | 0.170561436 |
| 0.392716934 | 0.33348253  | 0.261401539 | 0.268115297 |
| 0.290641008 | 0.210183169 | 0.259950774 | 0.430271932 |
| 0.268643697 | 0.158734446 | 0.297076719 | 0.252785698 |
| 0.210377008 | 0.355680277 | 0.269211711 | 0.4335615   |
| 0.178349335 | 0.324038551 | 0.315984473 | 0.371824347 |
| 0.332745522 | 0.168056919 | 0.163584922 | 0.227556664 |
| 0.376148534 | 0.174517152 | 0.21854436  | 0.32879517  |
| 0.13745846  | 0.336928758 | 0.285636961 | 0.230759565 |
| 0.120601785 | 0.339660129 | 0.281178456 | 0.296447094 |
| 0.310716136 | 0.272079305 | 0.228445937 | 0.372775991 |
| 0.194384476 | 0.070683187 | 0.416212563 | 0.011437859 |
| 0.307261315 | 0.281891369 | 0.337873283 | 0.274092269 |
| 0.276768047 | 0.332946112 | 0.284884115 | 0.010788082 |
| 0.316588673 | 0.067400697 | 0.305706115 | 0.199888873 |
| 0.197381959 | 0.188047412 | 0.394573344 | 0.388845215 |
| 0.354606409 | 0.25851211  | 0.186362426 | 0.387176774 |
| 0.104169709 | 0.189909047 | 0.222283549 | 0.296689764 |
| 0.150038548 | 0.229563789 | 0.255479067 | 0.211765092 |
| 0.328562749 | 0.361134161 |             |             |
| GCH1        | 0.005080225 | 0.163380258 | 0.00300528  |
| 0.010348221 | 0.246536503 | 0.086179275 | 0.004374635 |
| 0.011282176 | 0.134750634 | 0.071466261 | 0.135327774 |
| 0.000364393 | 0.217004139 | 0.19108617  | 0.005204018 |
| 0.241188529 | 0.002476385 | 0.015128648 | 0.022304878 |
| 0.035408171 | 0.208005566 | 0.121047808 | 0.075394376 |
| 0.219949037 | 0.034236666 | 0.083774561 | 0.272182309 |
| 0.213924381 | 0.112896851 | 0.225563323 | 0.028663206 |
| 0.139137884 | 0.271960454 | 0.241301103 | 0.000156879 |
| 0.161046003 | 0.047860299 | 0.132790874 | 0.07893001  |
| 0.11343985  | 0.104821186 | 0.071128828 | 0.058336894 |
| 0.091671174 | 0.00117414  | 0.04795537  | 0.257793682 |
| 0.104830641 | 0.079554156 | 0.004890798 | 0.185766203 |
| 0.098468938 | 0.095158198 | 0.132365903 | 5.88E-05    |



|             |             |             |             |
|-------------|-------------|-------------|-------------|
| 0.275946138 | 0.220849494 | 0.251856662 | 0.185970408 |
| 0.050053338 | 0.027215188 | 0.100869379 | 0.07682877  |
| 0.222102893 | 0.243580722 | 0.115254882 | 0.083156194 |
| 0.192053256 | 0.176508006 | 0.256156392 | 0.020366761 |
| 0.089926301 | 0.00185635  | 0.034792831 | 0.011759638 |
| 0.135977337 | 0.067899854 | 0.201976239 | 0.234844465 |
| 0.140046673 | 0.188701094 | 0.075990508 | 0.163949121 |
| 0.132597101 | 0.312784734 | 0.147669282 | 0.15667037  |
| 0.190489507 | 0.010423747 | 0.174427411 | 0.197832875 |
| 0.004995561 | 0.123723184 | 0.170004731 | 0.018096089 |
| 0.169805017 | 0.183835666 | 0.108364028 | 0.183726393 |
| 0.306535956 | 0.218446324 | 0.176470345 | 0.084006077 |
| 0.236703822 | 0.006651041 | 0.144194422 | 0.337686313 |
| 0.101078339 | 0.007439554 | 0.076191346 | 0.283966324 |
| 0.164175167 | 0.208799325 | 0.186225794 | 0.165306724 |
| 0.219799185 | 0.202193004 | 0.14507204  | 0.186150614 |
| 0.056447645 | 0.206640572 | 0.031364486 | 0.003318895 |
| 0.004203875 | 0.016475872 | 0.114269197 | 0.1262521   |
| 0.241377847 | 0.117838577 | 0.024646307 | 0.093288068 |
| 0.284405165 | 0.147035938 | 0.205939841 | 0.178286373 |
| 0.00216372  | 0.203895997 | 0.196683429 | 0.051232994 |
| 0.172327657 | 0.02319319  | 0.265387386 | 0.16180839  |
| 0.123811605 | 0.257347553 | 0.015882177 | 0.159503358 |
| 0.051544501 | 0.207942244 | 0.171184732 | 0.031003717 |
| 0.179652004 | 0.153671431 | 0.232881867 | 0.320061669 |
| 0.162162664 | 0.064252836 | 0.030744144 | 0.162599753 |
| 0.218957438 | 0.019179798 | 0.258566116 | 0.262967709 |
| 0.178149187 | 0.259548019 | 0.25817539  | 0.248323176 |
| 0.184196325 | 0.008595992 | 0.034410512 | 0.171254388 |
| 0.170045918 | 0.141835758 | 0.039149366 | 0.187666059 |
| 0.266342352 | 0.084054603 | 0.262999845 | 0.057038566 |
| 0.212291729 | 0.215023683 | 0.23888833  | 0.156840368 |
| 0.092401998 | 0.089865643 | 0.29963267  | 0.132913626 |
| 0.00277483  | 0.008599174 | 0.003894606 | 0.144089872 |
| 0.042332641 | 0.055357396 | 0.059981485 | 0.238052124 |
| 0.058746995 | 0.075403741 | 0.247938466 | 0.303275267 |
| 0.005190479 | 0.161582248 | 0.027888099 | 0.022720882 |
| 0.002747963 | 0.02660808  | 0.016426673 | 0.018740475 |
| 0.119837458 | 0.043131829 | 0.235299346 | 0.240466647 |
| 0.163928529 | 0.030108043 | 0.172421831 | 0.209645708 |
| 0.187593913 | 0.239797302 | 0.073128822 | 0.000619322 |
| 0.047379021 | 0.143693482 | 0.22467833  | 0.257838681 |
| 0.033697926 | 0.033670387 | 0.18057262  | 0.287187599 |
| 0.039115696 | 0.023130223 | 0.126258337 | 0.135032896 |
| 0.024667217 | 0.110038949 | 0.21674426  | 0.140033348 |
| 0.00113464  | 0.07097348  | 0.215211041 | 0.080862397 |
| 0.10896071  | 0.113411985 | 0.136806039 | 0.220607809 |
| 0.129199472 | 0.189413804 | 0.261933051 | 0.314465217 |
| 0.060720687 | 0.0437616   | 0.248787001 | 0.071169985 |
| 0.264497581 | 0.016289429 | 0.136127989 | 0.095200014 |
| 0.061605062 | 0.136997407 | 0.306248028 | 0.133070649 |
| 0.014770623 | 0.199802868 | 0.165897657 | 0.227145294 |
| 0.110002257 | 0.237911144 | 0.245889194 | 0.192488907 |
| 0.140154376 | 0.208734395 | 0.209927681 | 0.187682176 |

|             |             |             |             |
|-------------|-------------|-------------|-------------|
| 0.225135513 | 0.053826657 | 0.007768121 | 0.266448224 |
| 0.124328504 | 0.267309972 | 0.060125801 | 0.21569994  |
| 0.177223436 | 0.14501362  | 0.031833213 | 0.257141248 |
| 0.139802959 | 0.042494493 | 0.223020537 | 0.247023032 |
| 0.056221283 | 0.18956305  | 0.124702977 | 0.260981481 |
| 0.032299698 | 0.121821417 | 0.11697701  | 1           |
| 0.027360722 | 0.008175757 | 0.005168078 | 0.058540832 |
| 0.18037893  | 0.219010762 | 0.220690809 | 0.212253531 |
| 0.018462917 | 0.169179035 | 0.084869945 | 0.062130932 |
| 0.134158021 | 0.210102709 | 0.306870006 | 0.269045249 |
| 0.078540183 | 0.001771246 | 0.012526117 | 0.17729817  |
| 0.002740724 | 0.166981568 | 0.091190132 | 0.000343073 |
| 0.00208716  | 0.164626602 | 0.012804711 | 0.038193445 |
| 0.289725165 | 0.036352098 | 0.035809229 | 0.057337499 |
| 0.180675481 | 0.013254374 | 0.001063938 | 0.228351504 |
| 0.21727475  | 0.209033111 | 0.207935255 | 0.170590454 |
| 0.229418052 | 0.239895866 | 0.240733608 | 0.070574802 |
| 0.007811401 | 0.00678538  | 0.10142702  | 0.095461168 |
| 0.000700458 | 0.207849272 | 0.211224844 | 0.02702332  |
| 0.277598364 | 0.121486825 | 0.001757151 | 0.308035981 |
| 7.62E-05    | 0.166059382 | 0.042581535 | 0.080573392 |
| 0.275721387 | 9.87E-05    | 0.026365062 | 0.077492271 |
| 0.122332453 | 0.101150214 | 0.187320471 | 0.207102464 |
| 0.115297582 | 0.016826512 | 0.120179602 | 0.257241941 |
| 0.005691485 | 0.022321956 | 0.082548627 | 0.005402605 |
| 0.052433673 | 0.183703482 | 0.141857364 | 0.002691262 |
| 0.07022412  | 0.001293876 | 0.101983493 | 0.211596114 |
| 0.149493812 | 0.248665798 | 0.201739053 | 0.229512315 |
| 0.188758311 | 0.237405157 | 0.229192102 | 0.139890261 |
| 0.094482377 | 0.00041904  | 0.001165758 | 0.24855694  |
| 0.183382167 | 0.00529374  | 0.031160853 | 0.038196852 |
| 0.010926862 | 0.013956527 | 0.007722562 | 0.132869699 |
| 0.179505229 | 0.166871621 | 0.144184904 | 0.15078396  |
| 0.06446473  | 0.095457683 | 0.090800124 | 0.011769803 |
| 0.246107007 | 0.002975248 | 0.013179047 | 0.002014385 |
| 0.26444687  | 0.014786663 | 0.131704789 | 0.201772113 |
| 0.193279847 | 0.25624     | 0.088598101 | 0.069668721 |
| 0.264340899 | 0.010331599 | 0.100419417 | 0.012641012 |
| 0.165787015 | 0.19046558  | 0.113401034 | 0.078475211 |
| 0.215237742 | 0.162675914 | 0.002126704 | 0.198389719 |
| 0.000315307 | 0.004813315 | 0.062552538 | 0.098087119 |
| 0.09099022  | 0.175816149 | 0.071586224 | 0.070493861 |
| 0.087979173 | 0.000785479 | 0.243001652 | 0.211517296 |
| 0.117294241 | 0.142197469 | 0.243443539 | 0.091148062 |
| 0.145279142 | 0.065044895 | 0.060177013 | 0.031106674 |
| 0.075584808 | 0.08164287  | 0.033543984 | 0.000843114 |
| 0.148887948 | 0.19685012  | 0.004939672 | 0.030615728 |
| 0.200279537 | 0.231426408 | 0.003280425 | 0.000636567 |
| 0.068284442 | 0.13103316  | 0.258034247 | 0.190168835 |
| 0.180398096 | 0.219233797 | 0.120328831 | 0.031235342 |
| 0.005381238 | 0.169425323 | 0.274853082 | 0.041473831 |
| 0.215963289 | 0.00556415  | 0.181149969 | 0.341128922 |
| 0.021137878 | 0.032593715 | 0.00244344  | 0.013173096 |
| 0.317665181 | 0.044057194 | 0.074462443 | 0.017356056 |

|             |             |             |             |
|-------------|-------------|-------------|-------------|
| 0.100692916 | 0.141770826 | 0.003882203 | 0.047001234 |
| 0.114329121 | 0.119682011 | 0.032044115 | 0.074441227 |
| 0.129868368 | 0.053865154 | 0.248816382 | 0.170698738 |
| 0.019906925 | 0.016545166 | 0.016601382 | 0.239294217 |
| 0.217021518 | 0.188662585 | 0.001508162 | 0.161921921 |
| 0.245738745 | 0.216770981 | 0.174846939 | 0.209821442 |
| 0.011562171 | 0.18826833  | 0.246079224 | 0.174539632 |
| 0.051665712 | 0.088065614 | 0.094083025 | 0.006895614 |
| 0.119127463 | 0.172376697 | 0.148123878 | 0.03977811  |
| 0.205185532 | 0.016206481 | 0.004330065 | 0.236847786 |
| 0.108709659 | 0.004224789 | 0.088446049 | 0.2804595   |
| 0.001168716 | 0.232688643 | 0.271126098 | 0.047742283 |
| 0.217918398 | 0.230893807 | 0.153804597 | 0.05248013  |
| 0.006234266 | 0.282866906 | 0.15539447  | 0.103335026 |
| 0.149015611 | 0.118738764 | 0.040308742 | 0.007814341 |
| 0.112909465 | 0.00769533  | 0.017370999 | 0.046444337 |
| 0.099322592 | 0.132044007 | 0.063953418 | 0.06267743  |
| 0.083083038 | 0.013071489 | 0.166873052 | 0.050654367 |
| 0.155078455 | 0.076252341 | 0.142867227 | 0.057699924 |
| 0.075676012 | 0.229182181 | 0.148700955 | 0.000956045 |
| 0.311682729 | 0.216500602 | 0.222616653 | 0.001615866 |
| 0.231215682 | 0.000103457 | 0.086642854 | 0.076536586 |
| 0.071966494 | 0.078313584 | 0.165233673 | 0.10604477  |
| 0.119395811 | 0.052825867 | 0.061779555 | 0.07891148  |
| 0.041406214 | 0.054785407 | 0.217080725 | 0.086905087 |
| 0.09429221  | 0.0142413   | 0.013741604 | 0.013042027 |
| 0.00381927  | 0.219483173 | 0.061130745 | 0.007443986 |
| 0.091513027 | 0.096580792 | 0.137327093 | 0.173890997 |
| 0.209803514 | 0.014477368 | 0.129254561 | 0.161788009 |
| 0.071218089 | 0.038007309 | 0.002928449 | 0.117893445 |
| 0.059011753 | 0.080039015 | 0.137519975 | 0.054973498 |
| 0.174854844 | 0.127572881 | 0.059312777 | 0.192538061 |
| 0.118511052 | 0.159272398 | 0.052202491 | 0.011334724 |
| 0.022029316 | 0.024010013 | 0.229010361 | 0.001984799 |
| 0.137696699 | 0.016672612 | 0.225796233 | 0.158215813 |
| 0.264777657 | 0.160915856 | 0.030447681 | 0.004686396 |
| 0.030517339 | 0.026790315 | 0.025492265 | 0.223336246 |
| 0.233974749 | 0.031690087 | 0.180345736 | 0.032608966 |
| 0.250755436 | 0.242791774 | 0.152114441 | 0.056257554 |
| 0.095942387 | 0.036396014 | 0.170051555 | 0.011665834 |
| 0.18784463  | 0.10129268  | 0.113318052 | 0.107073905 |
| 0.093101872 | 0.240864412 | 0.005921747 | 0.242632447 |
| 0.139699156 | 0.023308795 | 0.18532132  | 0.098708973 |
| 0.037357448 | 0.035594985 | 0.255047022 | 0.087840289 |
| 0.044570513 | 0.230618629 | 0.006332542 | 0.034276328 |
| 0.152549073 | 0.122736212 | 0.159874388 | 0.205973485 |
| 0.184162014 | 0.194540931 | 0.246288725 | 0.057095505 |
| 0.151746893 | 0.156744826 | 0.02723527  | 0.086269625 |
| 0.129018755 | 0.012666019 | 0.10849238  | 0.013082782 |
| 0.202868568 | 0.251908234 | 0.074396354 | 0.004988121 |
| 0.00064587  | 0.198973716 | 0.157057783 | 0.008048654 |
| 0.271205885 | 0.161043153 | 0.151978719 | 0.223880785 |
| 0.044187337 | 0.149849076 | 0.035512426 | 0.204745571 |
| 0.003247394 | 0.093345691 | 0.276871318 | 0.186528053 |

|             |             |             |             |
|-------------|-------------|-------------|-------------|
| 0.050989815 | 0.214889178 | 0.178913111 | 0.217517272 |
| 0.001897964 | 0.066788688 | 0.000670935 | 0.112646347 |
| 0.136720004 | 0.236270576 | 0.051710507 | 0.078297975 |
| 0.1314075   | 0.186896389 | 0.073219172 | 0.203615912 |
| 0.000611632 | 0.246188372 | 0.062798792 | 0.144382759 |
| 0.061654043 | 0.150226632 | 0.005678266 | 0.260923769 |
| 0.121879607 | 0.054740675 | 0.090407709 | 0.058573531 |
| 0.179014426 | 0.172674391 | 0.025913025 | 0.097954965 |
| 0.183056069 | 0.006816002 | 0.091749636 | 0.225416913 |
| 0.056870876 | 0.201603673 | 0.270463445 | 0.038086977 |
| 0.277434407 | 0.141899512 | 0.207012534 | 0.222637697 |
| 0.018719363 | 0.075617529 | 0.264384157 | 0.183959658 |
| 0.143414416 | 0.176670186 | 0.169318059 | 0.10602317  |
| 0.138638974 | 0.006886967 | 0.118954678 | 0.110640008 |
| 0.175368278 | 0.15048359  | 0.112349875 | 0.127177931 |
| 0.003570872 | 0.032398749 | 0.07898021  | 0.0276691   |
| 0.108458505 | 0.169532074 | 0.117309651 | 0.142151447 |
| 0.022751851 | 0.001495135 | 0.176532822 | 0.028535773 |
| 0.071349865 | 0.207818695 | 0.082298931 | 0.194829974 |
| 0.03333662  | 0.120391276 | 0.059762981 | 0.002877599 |
| 0.235664073 | 0.036808694 | 0.162043565 | 0.074859379 |
| 0.116026057 | 0.002587093 | 0.164392522 | 0.257545555 |
| 0.110838778 | 0.100119335 | 0.105830214 | 0.18312562  |
| 0.138609495 | 0.20693578  | 0.180656756 | 0.134456308 |
| 0.256148263 | 0.107826398 | 0.165342085 | 0.180301356 |
| 0.149637325 | 0.065153128 |             |             |
| GDA         | 0.000318491 | 0.010664617 | 0.000444369 |
| 0.001507279 | 0.021000894 | 0.023516964 | 0.000888045 |
| 0.000285994 | 0.004922614 | 0.005003973 | 0.021786544 |
| 0.000816728 | 0.0107396   | 0.012302162 | 0.001415471 |
| 0.017504821 | 0.000549338 | 3.67E-05    | 1.82E-05    |
| 0.011569126 | 0.027456153 | 0.007689991 | 0.011964327 |
| 0.001760885 | 0.004825064 | 0.018405812 | 0.017176311 |
| 0.036196531 | 0.03387626  | 0.008125212 | 0.006597663 |
| 0.021756265 | 0.037611021 | 0.000286871 | 0.014357363 |
| 5.69E-05    | 0.005653357 | 0.003911885 | 0.01756235  |
| 0.005616716 | 0.010040817 | 0.005978214 | 0.006430167 |
| 0.000243532 | 0.010774942 | 0.012303313 | 0.004549359 |
| 0.003326866 | 0.000195064 | 0.019055361 | 0.003562694 |
| 0.009907594 | 0.01075617  | 3.07E-05    | 0.049346956 |
| 0.037851805 | 0.031897078 | 0.014873923 | 0.003360842 |
| 0.001069549 | 0.004218521 | 0.002230178 | 0.008478496 |
| 0.009016192 | 0.004893548 | 0.004237756 | 0.014062832 |
| 0.011550049 | 0.020398946 | 0.000166813 | 0.004016798 |
| 0.003062884 | 0.001253637 | 0.000601179 | 0.008860673 |
| 0.004524639 | 0.022550891 | 0.020480567 | 0.009763748 |
| 0.010115014 | 0.00283341  | 0.010385648 | 0.000504096 |
| 0.020531931 | 0.014394668 | 0.006009065 | 0.005591711 |
| 0.001363601 | 0.018546159 | 0.011829111 | 0.002184055 |
| 0.008740629 | 0.006192041 | 7.21E-06    | 0.017194514 |
| 0.011071301 | 0.015514269 | 0.0389625   | 0.022910507 |
| 0.010653586 | 0.007955074 | 0.00471845  | 0.019212436 |
| 0.000380624 | 0.009435038 | 0.029078549 | 0.017485801 |
| 0.000376474 | 0.002777322 | 0.022541346 | 0.012817284 |

|             |             |             |             |
|-------------|-------------|-------------|-------------|
| 0.018327251 | 0.009604506 | 0.004875548 | 0.015848144 |
| 0.016235514 | 0.014673485 | 0.01018042  | 0.003802355 |
| 0.014549799 | 0.003088215 | 0.000195779 | 0.000105687 |
| 0.000423297 | 0.002221434 | 0.005706076 | 0.023039383 |
| 0.007006972 | 0.001453991 | 0.003925398 | 0.016558988 |
| 0.010544071 | 0.012875645 | 0.008651212 | 0.000464601 |
| 0.011222061 | 0.015785759 | 0.004756584 | 0.006621611 |
| 3.68E-05    | 0.025638754 | 0.009601185 | 0.009596731 |
| 0.017523789 | 0.00111236  | 0.00859488  | 0.000483074 |
| 0.014398074 | 0.016820626 | 0.002000255 | 0.01198947  |
| 0.011457564 | 0.016322537 | 0.034905544 | 0.013195428 |
| 0.01074219  | 9.17E-05    | 0.005795369 | 0.015317817 |
| 0.000678838 | 0.019281785 | 0.018847373 | 0.012631979 |
| 0.022432556 | 0.015043625 | 0.01989448  | 0.013502476 |
| 0.00047196  | 5.99E-07    | 0.006264819 | 0.010994889 |
| 0.012242953 | 0.00087104  | 0.017092662 | 0.014073061 |
| 0.009088658 | 0.016543076 | 0.004057108 | 0.011609587 |
| 0.019352989 | 0.018577748 | 0.006677581 | 0.002407965 |
| 0.005146507 | 0.025666273 | 0.010002151 | 7.82E-05    |
| 0.000752347 | 0.00026301  | 0.004385535 | 0.012170131 |
| 0.002519021 | 0.004926846 | 0.008356919 | 0.002520166 |
| 0.003870142 | 0.039356944 | 0.02415702  | 0.001305481 |
| 0.023358154 | 0.001822939 | 0.00045195  | 0.00023321  |
| 0.000659368 | 0.000553526 | 0.002491709 | 0.006133371 |
| 0.001474238 | 0.021382792 | 0.016843544 | 0.005371676 |
| 0.001800217 | 0.012872407 | 0.014570606 | 0.009831811 |
| 0.029760015 | 0.0018648   | 0.000108646 | 0.001241283 |
| 0.0082741   | 0.02175813  | 0.02514144  | 0.001080527 |
| 0.000606323 | 0.008615213 | 0.028148977 | 0.00414319  |
| 6.69E-06    | 0.005415417 | 0.00858308  | 0.000560897 |
| 0.015617665 | 0.014244143 | 0.00841005  | 0.000367848 |
| 0.004211397 | 0.018666399 | 0.001211415 | 0.002461642 |
| 0.002575384 | 0.051253551 | 0.014079429 | 0.007295895 |
| 0.00733946  | 0.021920966 | 0.026657081 | 0.002704531 |
| 0.001310635 | 0.01512498  | 0.000120948 | 0.011689801 |
| 0.000557062 | 0.006917135 | 0.007502014 | 0.002613069 |
| 0.004159361 | 0.025395352 | 0.017140775 | 0.001432654 |
| 0.012631216 | 0.012855976 | 0.01800949  | 0.008697317 |
| 0.014365399 | 0.019991785 | 0.014765033 | 0.010613005 |
| 0.009790739 | 0.022033491 | 0.016163242 | 0.016081942 |
| 0.000846357 | 0.000290086 | 0.017394156 | 0.004754667 |
| 0.017492589 | 0.0012498   | 0.014088323 | 0.01148172  |
| 0.010288999 | 0.001347867 | 0.0138267   | 0.011956907 |
| 0.004652943 | 0.015089784 | 0.013922215 | 0.003031391 |
| 0.00808516  | 0.007887992 | 0.017052375 | 0.001663899 |
| 0.00377588  | 0.004883958 | 0.027360722 | 1           |
| 0.000319391 | 0.00025476  | 0.003502611 | 0.023538594 |
| 0.019586968 | 0.013725378 | 0.013782228 | 0.000409092 |
| 0.014477261 | 0.001602365 | 0.004506428 | 0.006734339 |
| 0.009099589 | 0.041173431 | 0.020640132 | 0.002776782 |
| 0.000458661 | 0.000707414 | 0.009647907 | 0.00195614  |
| 0.025252496 | 0.003441002 | 1.89E-06    | 0.000964308 |
| 0.011953349 | 0.000399975 | 0.001464377 | 0.020080533 |
| 0.001789432 | 0.001298139 | 0.002553772 | 0.015430966 |

|             |             |             |             |
|-------------|-------------|-------------|-------------|
| 0.000473784 | 0.000254065 | 0.012962469 | 0.010962807 |
| 0.009123591 | 0.010228476 | 0.008678237 | 0.009411766 |
| 0.01437424  | 0.013167195 | 0.011497542 | 0.000248963 |
| 7.91E-05    | 0.005845649 | 0.004170509 | 1.34E-05    |
| 0.012078609 | 0.001056772 | 0.018262279 | 0.003023845 |
| 0.000231096 | 0.017928199 | 9.03E-06    | 0.04875469  |
| 0.000971216 | 0.00222276  | 0.013113404 | 0.00099002  |
| 0.002868698 | 0.003807752 | 0.01106539  | 0.006223887 |
| 0.02743094  | 0.014947178 | 0.012446852 | 0.000251912 |
| 0.009965368 | 0.025297222 | 0.000262188 | 2.24E-05    |
| 0.002923237 | 0.000568924 | 0.001411207 | 0.009135001 |
| 0.008887466 | 8.08E-05    | 0.003552119 | 0.000628074 |
| 0.007780617 | 0.014266341 | 0.012376018 | 0.016186616 |
| 0.017720059 | 0.04520882  | 0.014770961 | 0.017186407 |
| 0.016915028 | 0.00958152  | 0.008132619 | 6.64E-07    |
| 0.000147633 | 0.020490786 | 0.015974508 | 0.000545652 |
| 0.001154759 | 0.016780957 | 0.000528921 | 0.00047218  |
| 4.71E-05    | 0.015297253 | 0.025980781 | 0.012595976 |
| 0.010370165 | 0.008795571 | 0.002136657 | 0.003562779 |
| 0.006521006 | 0.000437117 | 0.030929009 | 3.48E-05    |
| 0.000905442 | 0.000189623 | 0.014835211 | 0.000206588 |
| 0.007831142 | 0.014219128 | 0.012843623 | 0.023592498 |
| 0.012685751 | 0.006086342 | 0.014189009 | 0.000407818 |
| 0.015401585 | 0.000514587 | 0.013586409 | 0.012726685 |
| 0.007898565 | 0.005502485 | 0.012359031 | 0.010749575 |
| 0.001177412 | 0.010847049 | 0.000144476 | 3.65E-05    |
| 0.009684313 | 0.002649577 | 7.48E-05    | 0.008625878 |
| 0.003095057 | 0.00107308  | 0.002442893 | 4.32E-05    |
| 0.018148297 | 0.014209499 | 0.005100609 | 0.00621622  |
| 0.020122001 | 0.002092894 | 0.009008871 | 0.000487419 |
| 0.004653622 | 0.000559802 | 0.000508957 | 0.00357035  |
| 0.001628576 | 0.002690487 | 0.017062305 | 0.021981013 |
| 4.30E-05    | 0.001532478 | 0.018496955 | 0.018875866 |
| 0.002111541 | 1.71E-05    | 0.00351938  | 0.00373336  |
| 0.018512051 | 0.015240295 | 0.011863154 | 0.01221209  |
| 0.006516066 | 0.000357689 | 0.000122066 | 0.008879596 |
| 0.020358949 | 0.002331271 | 0.015827771 | 0.001379832 |
| 0.01513285  | 0.034864084 | 0.000190944 | 0.002162706 |
| 0.000166473 | 0.000197697 | 0.038331319 | 0.001587276 |
| 0.004032197 | 0.000992696 | 0.004114872 | 0.023069906 |
| 0.000864574 | 0.001495242 | 0.004643827 | 0.007668931 |
| 0.000880323 | 0.005267614 | 0.008415167 | 0.001075367 |
| 0.017507003 | 0.008812408 | 0.00075356  | 0.000519113 |
| 0.00242405  | 0.012240102 | 0.016791234 | 0.014517457 |
| 0.000289077 | 0.012264495 | 0.016777144 | 0.025314623 |
| 0.014368162 | 0.009003304 | 0.000467711 | 0.026887214 |
| 0.010974568 | 0.006801353 | 0.000928695 | 0.019077836 |
| 0.002246161 | 0.000621186 | 0.004187086 | 0.008173952 |
| 0.008729219 | 0.003180606 | 0.02248598  | 0.00025364  |
| 0.001779931 | 0.01680994  | 0.007991105 | 7.18E-05    |
| 0.009880829 | 0.015265158 | 0.000416368 | 0.037366698 |
| 0.014469233 | 0.005787889 | 0.011512976 | 0.016089368 |
| 0.010368141 | 0.002686262 | 5.01E-06    | 0.019084081 |
| 0.015270433 | 0.01694949  | 0.009658678 | 0.008451579 |

|                      |                      |                      |             |
|----------------------|----------------------|----------------------|-------------|
| 0.000621325          | 0.000235002          | 0.006178325          | 0.000151124 |
| 1.71E-05 0.016944928 | 0.000544311          | 0.007899781          |             |
| 0.00196366           | 0.000712423          | 0.003631546          | 0.001251711 |
| 0.036817833          | 0.006620418          | 0.001500922          | 0.003649009 |
| 0.007266901          | 0.005200799          | 0.006992558          | 0.009311282 |
| 0.007317918          | 0.000252051          | 0.028108644          | 0.008678055 |
| 0.015063324          | 0.001661939          | 0.020772203          | 0.000833419 |
| 0.003929025          | 0.007696152          | 0.004480178          | 0.001630789 |
| 0.007181073          | 0.010424323          | 0.003502068          | 0.001610855 |
| 0.00840422           | 0.004636256          | 0.004541634          | 0.002909299 |
| 0.015368279          | 0.004315689          | 0.014139182          | 0.001230545 |
| 0.000155115          | 7.15E-05 0.000407502 | 0.018180408          |             |
| 0.003234343          | 0.000212414          | 0.0033848            | 0.004620199 |
| 0.007939765          | 0.012780568          | 0.015882569          | 0.000593792 |
| 0.004264761          | 0.016479898          | 0.000645946          | 0.000663051 |
| 0.000370792          | 0.011671842          | 0.003356532          | 0.006664045 |
| 0.015494877          | 0.002873563          | 0.007875248          | 0.007810564 |
| 0.003676508          | 0.013568586          | 0.014403042          | 0.003688244 |
| 0.009994698          | 0.000828601          | 0.001138242          | 0.000194511 |
| 0.017038036          | 0.000124582          | 0.00854786           | 0.002659429 |
| 0.020200338          | 0.012089176          | 0.027951929          | 0.010602801 |
| 0.004291492          | 4.14E-05 0.010089644 | 0.001003991          |             |
| 0.000750414          | 0.01852877           | 0.047971172          | 0.002764588 |
| 0.013026801          | 0.00813299           | 0.018482925          | 0.0132309   |
| 0.006260513          | 0.001293332          | 0.002729132          | 0.002085275 |
| 0.007856484          | 0.000837524          | 0.016612001          | 0.014783194 |
| 0.006337677          | 0.005874013          | 0.004025611          | 0.017119143 |
| 0.000141743          | 0.017394911          | 0.005245709          | 0.000619692 |
| 0.010592967          | 0.00691893           | 0.005144283          | 0.004067176 |
| 0.039528072          | 0.004817005          | 0.000933333          | 0.034314911 |
| 4.97E-05 0.000102666 | 0.008723871          | 0.002757736          |             |
| 0.007387226          | 0.008168227          | 0.014829647          | 0.00728394  |
| 0.018897916          | 0.001488309          | 0.011023249          | 0.009952574 |
| 0.001567255          | 0.002810425          | 0.005005592          | 0.000816045 |
| 0.017523693          | 1.99E-06 0.01406512  | 0.025387204          |             |
| 0.005228066          | 0.000485451          | 0.000706909          | 0.025412072 |
| 0.009431747          | 0.001894918          | 0.016731154          | 0.024981737 |
| 0.005404391          | 0.028281037          | 0.000836106          | 0.009468073 |
| 0.001583413          | 0.021185143          | 0.001178201          | 0.003644253 |
| 0.023738921          | 0.006932293          | 0.006212847          | 0.016889963 |
| 0.012332049          | 0.032321683          | 0.000358246          | 0.004355632 |
| 0.003004149          | 0.006616221          | 0.008109267          | 0.013438748 |
| 0.001567457          | 0.005407654          | 0.00740457           | 0.009704842 |
| 0.000921033          | 0.024071561          | 7.63E-05 0.025636323 |             |
| 0.003126161          | 0.016055974          | 0.013490031          | 0.003736767 |
| 0.000704561          | 0.009936556          | 0.007498404          | 0.001258787 |
| 0.002370381          | 0.005643984          | 0.014995159          | 0.010809458 |
| 0.001537155          | 0.008371976          | 0.007214453          | 0.000735922 |
| 0.012824241          | 0.013175035          | 0.003363031          | 0.026461593 |
| 0.021037405          | 0.001523569          | 0.019305172          | 0.009845815 |
| 0.01421103           | 0.011908671          | 0.000307799          | 0.00385275  |
| 0.017672384          | 0.009540279          | 0.007476285          | 0.010065027 |
| 0.019635877          | 0.004276446          | 0.012580181          | 0.000932236 |
| 0.005155014          | 0.007044405          | 0.015692744          | 0.007716654 |

|             |             |             |             |
|-------------|-------------|-------------|-------------|
| 0.006254176 | 0.006721688 | 9.04E-06    | 0.000693781 |
| 0.018968439 | 0.000766133 | 0.004175209 | 0.011840509 |
| 0.006826498 | 0.008996878 | 0.004257555 | 0.000117822 |
| 0.010980451 | 0.000183436 | 0.014698136 | 0.028654096 |
| 0.004858638 | 0.014446888 | 0.002383356 | 0.004052584 |
| 0.002617784 | 0.000450362 | 0.012092314 | 0.006632738 |
| 0.007784342 | 0.006894142 | 0.002176292 | 0.000732479 |
| 0.01394037  | 0.017629868 | 0.008253913 | 0.005659924 |
| 0.015950041 | 0.011576345 | 0.003240081 | 0.025187561 |
| 0.009546662 | 0.011059279 | 0.033252599 | 0.011406445 |
| 0.018352483 | 0.041551217 | 0.012355489 | 0.004641372 |
| GIMAP4      | 0.203850818 | 0.149695413 | 0.160681287 |
| 0.080459086 | 0.048394322 | 0.047883768 | 0.229175341 |
| 0.208542479 | 0.15095105  | 0.02670924  | 0.064932628 |
| 0.194706936 | 0.00662264  | 0.157319113 | 0.230981923 |
| 0.04928787  | 0.2012574   | 0.202422041 | 0.044402521 |
| 0.078653838 | 0.050562837 | 0.026375231 | 0.079944979 |
| 0.047655868 | 0.321430808 | 0.107840813 | 0.034503036 |
| 0.142460745 | 0.010606919 | 0.062752721 | 0.011687434 |
| 0.226821164 | 0.046891196 | 0.021624652 | 0.160701276 |
| 0.058899249 | 0.006672458 | 0.258511018 | 0.063421274 |
| 0.008912077 | 0.254868655 | 0.036575247 | 0.079406993 |
| 0.039302715 | 0.185536393 | 0.012977456 | 0.060422855 |
| 0.099045604 | 0.081204948 | 0.205553639 | 0.079631966 |
| 0.045063333 | 0.153823049 | 0.087460389 | 0.033791965 |
| 0.015468334 | 0.001182758 | 0.008161167 | 0.186681389 |
| 0.212325055 | 0.169631464 | 0.014911454 | 0.112467084 |
| 0.064823172 | 0.086644219 | 0.172444277 | 0.034627675 |
| 0.169812065 | 0.012625863 | 0.068043882 | 0.057947418 |
| 0.060533654 | 0.202938086 | 0.269789519 | 0.234989628 |
| 0.035570409 | 0.133010474 | 0.059206926 | 0.021112537 |
| 0.144646745 | 0.243303207 | 0.17494838  | 0.207439742 |
| 0.019210022 | 0.037211063 | 0.036102664 | 0.143726251 |
| 0.11700946  | 0.191469144 | 0.094956525 | 0.201366405 |
| 0.211283342 | 0.057421489 | 0.098990702 | 0.278144657 |
| 0.139599417 | 0.022207522 | 0.039881416 | 0.013971625 |
| 0.057545747 | 0.043760286 | 0.231066026 | 0.163329404 |
| 0.046929919 | 0.238217546 | 0.238618849 | 0.031643383 |
| 0.048862523 | 0.192244491 | 0.041482287 | 0.091760387 |
| 0.06998519  | 0.144837896 | 0.11913892  | 0.142109325 |
| 0.038357341 | 0.159262774 | 0.092575498 | 0.167183752 |
| 0.008537414 | 0.180066302 | 0.146901779 | 0.204893557 |
| 0.201471298 | 0.186504945 | 0.049002878 | 0.216975639 |
| 0.115724948 | 0.14769806  | 0.151489705 | 0.083363308 |
| 0.112020872 | 0.211185951 | 0.177231392 | 0.132310836 |
| 0.222715988 | 0.016864534 | 0.035717017 | 0.103040251 |
| 0.106808031 | 0.246951329 | 0.020568554 | 0.236785655 |
| 0.193324325 | 0.097031232 | 0.158099524 | 0.273219371 |
| 0.144779825 | 0.194600545 | 0.124246973 | 0.140310658 |
| 0.21440194  | 0.225395287 | 0.166151721 | 0.054204264 |
| 0.215834735 | 0.071533988 | 0.040260163 | 0.153635721 |
| 0.188902657 | 0.002748801 | 0.113151293 | 0.122611855 |
| 0.173948653 | 0.089641326 | 0.164238704 | 0.142328155 |
| 0.178604657 | 0.255460567 | 0.002466194 | 0.101356598 |



|             |             |             |             |
|-------------|-------------|-------------|-------------|
| 0.199785529 | 0.15493166  | 0.139260459 | 0.034774706 |
| 0.05690094  | 0.062968236 | 0.096284471 | 0.024292279 |
| 0.226801269 | 0.124297403 | 0.126952829 | 0.128148799 |
| 0.085869521 | 0.269351653 | 0.02735003  | 0.23320711  |
| 0.198574807 | 0.179271345 | 0.249103581 | 0.174555403 |
| 0.032850315 | 0.160782348 | 0.068966547 | 0.064708914 |
| 0.187587181 | 0.081303233 | 0.017390341 | 0.061597923 |
| 0.313148043 | 0.048353294 | 0.15160951  | 0.171970368 |
| 0.181724647 | 0.359246649 | 0.107719828 | 0.114927787 |
| 0.086318435 | 0.381097707 | 0.071123558 | 0.141304279 |
| 0.046380841 | 0.229310739 | 0.092396497 | 0.185807384 |
| 0.204955462 | 0.033969038 | 0.248917562 | 0.035993152 |
| 0.036713733 | 0.017986509 | 0.008556792 | 0.037357969 |
| 0.37194635  | 0.086400608 | 0.065506715 | 0.073868819 |
| 0.115372149 | 0.172529749 | 0.035878139 | 0.268425782 |
| 0.270018065 | 0.046634044 | 0.126411615 | 0.057590325 |
| 0.089745212 | 0.081937877 | 0.103387903 | 0.050035056 |
| 0.144483673 | 0.013972151 | 0.013024679 | 0.122239572 |
| 0.02349642  | 0.0352353   | 0.128343541 | 0.076265451 |
| 0.048858621 | 0.337093146 | 0.170295485 | 0.004857392 |
| 0.042641167 | 0.041814755 | 0.13149526  | 0.037921775 |
| 0.144144916 | 0.171978697 | 0.040241779 | 0.040025621 |
| 0.221562679 | 0.188637319 | 0.158144891 | 0.150557547 |
| 0.025657656 | 0.175596479 | 0.103510108 | 0.145860854 |
| 0.113292496 | 0.028187304 | 0.005218162 | 0.101669262 |
| 0.113320477 | 0.034764425 | 0.275144484 | 0.083380609 |
| 0.033596775 | 0.064622929 | 0.056838006 | 0.157091382 |
| 0.241791418 | 0.191392857 | 0.143814983 | 0.103173162 |
| 0.145507534 | 0.136512866 | 0.127963922 | 0.189938404 |
| 0.026749941 | 0.038891183 | 0.030782819 | 0.119005463 |
| 0.202823881 | 0.038903184 | 0.242944427 | 0.008175757 |
| 0.000319391 | 1           | 0.22212286  | 0.10927372  |
| 0.017324638 | 0.051507467 | 0.075256495 | 0.168729519 |
| 0.190981855 | 0.183361218 | 0.215492241 | 0.044555482 |
| 0.180708364 | 0.041624282 | 0.033887486 | 0.061838134 |
| 0.224838229 | 0.055985682 | 0.102362676 | 0.24505111  |
| 0.246375584 | 0.019184411 | 0.101057748 | 0.008447739 |
| 0.218229559 | 0.106877917 | 0.332450225 | 0.361566399 |
| 0.134111653 | 0.329652131 | 0.194843206 | 0.033881092 |
| 0.120333134 | 0.21028064  | 0.012803891 | 0.145867772 |
| 0.181111089 | 0.180572811 | 0.182054542 | 0.215616045 |
| 0.142859269 | 0.104660449 | 0.097334168 | 0.081463068 |
| 0.200128088 | 0.190157794 | 0.017280398 | 0.067416703 |
| 0.019009608 | 0.121767686 | 0.064296678 | 0.258984979 |
| 0.083164838 | 0.153638919 | 0.218264403 | 0.05658587  |
| 0.105452084 | 0.006804027 | 0.08939449  | 0.119013538 |
| 0.10606275  | 0.175607392 | 0.019187585 | 0.023877615 |
| 0.20063592  | 0.208006315 | 0.020254414 | 0.184691879 |
| 0.08007928  | 0.236830529 | 0.048642647 | 0.096013509 |
| 0.210303952 | 0.019192028 | 0.065336612 | 0.002468183 |
| 0.040354055 | 0.21737555  | 0.038301201 | 0.146852115 |
| 0.125533959 | 0.118750975 | 0.189862454 | 0.192022747 |
| 0.181602746 | 0.146602547 | 0.164303542 | 0.018550098 |
| 0.172194565 | 0.00205612  | 0.160058536 | 0.141683213 |

|             |             |             |             |
|-------------|-------------|-------------|-------------|
| 0.02735879  | 0.009276262 | 0.046375991 | 0.115294933 |
| 0.042620807 | 0.280970411 | 0.209485501 | 0.03652967  |
| 0.137314349 | 0.155603216 | 0.222199073 | 0.026162766 |
| 0.067084816 | 0.065091406 | 0.034164598 | 0.200840458 |
| 0.098810719 | 0.137513338 | 0.050738141 | 0.295473566 |
| 0.05417236  | 0.180708913 | 0.282981839 | 0.010857714 |
| 0.094772668 | 0.30569719  | 0.264437461 | 0.170974157 |
| 0.200039433 | 0.070771358 | 0.020684469 | 0.04645211  |
| 0.132847355 | 0.238891051 | 0.023827803 | 0.220247115 |
| 0.164104052 | 0.061312826 | 0.169041551 | 0.204256418 |
| 0.174639122 | 0.18768951  | 0.226487696 | 0.102428403 |
| 0.063653607 | 0.005263531 | 0.057515248 | 0.204968164 |
| 0.024898824 | 0.033604533 | 0.213088755 | 0.08953478  |
| 0.093263642 | 0.169697588 | 0.01580664  | 0.01874627  |
| 0.107177574 | 0.058515011 | 0.033971137 | 0.217665173 |
| 0.048932105 | 0.036139105 | 0.108719019 | 0.176174465 |
| 0.064144476 | 0.211281571 | 0.311693068 | 0.213227864 |
| 0.037527798 | 0.037371505 | 0.211225649 | 0.251420594 |
| 0.120763055 | 0.127046244 | 0.180832106 | 0.06784811  |
| 0.243458805 | 0.067305578 | 0.138821629 | 0.159083947 |
| 0.218066704 | 0.194486935 | 0.271837584 | 0.113362882 |
| 0.211132001 | 0.080103872 | 0.037383431 | 0.075302697 |
| 0.16660235  | 0.246496534 | 0.183957931 | 0.01962629  |
| 0.262392003 | 0.102153784 | 0.164191247 | 0.218596127 |
| 0.036454149 | 0.227512504 | 0.10162545  | 0.19866005  |
| 0.056737829 | 0.018654731 | 0.232415181 | 0.167080423 |
| 0.160136088 | 0.007899055 | 0.216912869 | 0.089046534 |
| 0.151892836 | 0.029737145 | 0.069838817 | 0.219756989 |
| 0.254246617 | 0.197075792 | 0.070243214 | 0.114608591 |
| 0.096248859 | 0.040423888 | 0.082703793 | 0.144910777 |
| 0.15672898  | 0.058086759 | 0.190428412 | 0.165637022 |
| 0.281858143 | 0.036287928 | 0.025398423 | 0.059658665 |
| 0.199826732 | 0.053759596 | 0.124393542 | 0.256461735 |
| 0.254769517 | 0.260393404 | 0.145773414 | 0.12402702  |
| 0.053008863 | 0.222141412 | 0.228544601 | 0.131173973 |
| 0.015803593 | 0.175840269 | 0.037464076 | 0.101113447 |
| 0.004416541 | 0.007257089 | 0.149874235 | 0.107450198 |
| 0.212677162 | 0.133665551 | 0.199951179 | 0.10653424  |
| 0.000181896 | 0.054165436 | 0.071081978 | 0.035068645 |
| 0.146025001 | 0.170794158 | 0.104486109 | 0.154774496 |
| 0.208423704 | 0.259934856 | 0.122867322 | 0.044197475 |
| 0.008393708 | 0.08829916  | 0.238904803 | 0.163711083 |
| 0.094750553 | 0.26373875  | 0.01626619  | 0.107770182 |
| 0.019731983 | 0.224607612 | 0.163140835 | 0.035503928 |
| 0.010689993 | 0.152765579 | 0.117063918 | 0.195456539 |
| 0.034631587 | 0.137683665 | 0.160992947 | 0.01877952  |
| 0.071417413 | 0.147661505 | 0.097419116 | 0.078319242 |
| 0.095736405 | 0.107946619 | 0.104356825 | 0.044423407 |
| 0.108983441 | 0.120074934 | 0.076517606 | 0.153590929 |
| 0.095565494 | 0.136675897 | 0.06107084  | 0.061942789 |
| 0.044689197 | 0.160130048 | 0.347442307 | 0.365215785 |
| 0.162434553 | 0.138444197 | 0.285353914 | 0.264745515 |
| 0.166425072 | 0.061399926 | 0.215221138 | 0.170686358 |
| 0.176588707 | 0.287198353 | 0.070010937 | 0.126808949 |

|             |             |             |             |
|-------------|-------------|-------------|-------------|
| 0.017439006 | 0.054152269 | 0.227029221 | 0.064390406 |
| 0.154126499 | 0.034228085 | 0.052287286 | 0.112024048 |
| 0.093689042 | 0.24994047  | 0.279479823 | 0.182879175 |
| 0.049716558 | 0.053861208 | 0.027433869 | 0.120323943 |
| 0.1352018   | 0.279150914 | 0.039209847 | 0.052133322 |
| 0.118574168 | 0.082305585 | 0.107647861 | 0.194203804 |
| 0.016398501 | 0.204000733 | 0.032502716 | 0.175689608 |
| 0.022482749 | 0.29362695  | 0.279690289 | 0.087685861 |
| 0.008146272 | 0.138366953 | 0.058441097 | 0.059853341 |
| 0.080283709 | 0.077850377 | 0.046336783 | 0.138916031 |
| 0.133017999 | 0.191902842 | 0.233114069 | 0.171623318 |
| 0.04462716  | 0.029451242 | 0.076511062 | 0.055848597 |
| 0.086850529 | 0.148934275 | 0.229593761 | 0.146801512 |
| 0.041793652 | 0.304096156 | 0.244331296 | 0.10559705  |
| 0.083933615 | 0.093129964 | 0.007423833 | 0.049859497 |
| 0.11397513  | 0.019518129 | 0.001283503 | 0.014826725 |
| 0.134628411 | 0.051371943 | 0.105905164 | 0.124057762 |
| 0.034786522 | 0.154655625 | 0.009139986 | 0.113651077 |
| 0.192827447 | 0.238799832 | 0.064959548 | 0.230543184 |
| 0.162916176 | 0.181203319 | 0.085815521 | 0.015607487 |
| 0.051249973 | 0.038286437 | 0.030575605 | 0.231574244 |
| 0.195159289 | 0.008614021 | 0.058351906 | 0.247244476 |
| 0.128343062 | 0.007716809 | 0.084669129 | 0.077311808 |
| 0.270573093 | 0.24394943  | 0.123903744 | 0.08895863  |
| 0.169397636 | 0.17753921  | 0.031244686 | 0.0451214   |
| 0.042923167 | 0.023909894 | 0.107985353 | 0.018149663 |
| 0.200740293 | 0.051941812 | 0.01821609  | 0.27638128  |
| 0.228704492 | 0.024648171 | 0.303903084 | 0.02647877  |
| 0.151173968 | 0.170792319 | 0.063049822 | 0.034641983 |
| 0.087233085 | 0.041283503 | 0.184554569 | 0.148708589 |
| 0.009440853 | 0.068236289 | 0.131037766 | 0.038170532 |
| 0.281015864 | 0.042789716 | 0.265484332 | 0.01692012  |
| 0.169032477 | 0.14367112  | 0.232009367 | 0.05492039  |
| 0.075173012 | 0.288042202 | 0.036854981 | 0.18906922  |
| 0.11524029  | 0.019433346 | 0.097426441 | 0.096812357 |
| 0.024547228 | 0.187811545 | 0.048766046 | 0.193974331 |
| 0.114756926 | 0.189005196 | 0.099189492 | 0.165307694 |
| 0.183552373 | 0.026852184 | 0.019724625 | 0.055776457 |
| 0.180891586 | 0.117238034 | 0.031836745 | 0.149311627 |
| 0.013898569 | 0.142480725 | 0.078769122 | 0.061103819 |
| 0.137641624 | 0.165316875 | 0.049135772 | 0.240064164 |
| 0.116349716 | 0.047803623 | 0.039916839 | 0.223139067 |
| 0.085676262 | 0.074549705 | 0.221873505 | 0.000693769 |
| 0.091189272 | 0.067082577 | 0.155804788 | 0.041084928 |
| 0.27706798  | 0.109709432 | 0.082089747 | 0.055334144 |
| 0.117075442 | 0.008619016 | 0.060198414 | 0.042600383 |
| 0.028189638 | 0.229894816 | 0.192538429 | 0.149007381 |
| 0.149670218 | 0.034977566 | 0.017991583 | 0.181773467 |
| 0.00952587  | 0.015778271 | 0.026338408 | 0.081779503 |
| 0.01409908  | 0.028264699 | 0.030375628 | 0.019523578 |
| 0.123991484 | 0.118301336 |             |             |
| GIN54       | 0.249541003 | 0.120020992 | 0.222198825 |
| 0.146980115 | 0.042869445 | 0.04800505  | 0.241726521 |
| 0.200407484 | 0.112589645 | 0.019854862 | 0.064581443 |

|             |             |             |             |
|-------------|-------------|-------------|-------------|
| 0.273661192 | 0.003662164 | 0.132154585 | 0.227908417 |
| 0.041237646 | 0.240785647 | 0.221332103 | 0.030308859 |
| 0.072538761 | 0.044380937 | 0.023352611 | 0.065029908 |
| 0.039179845 | 0.330601369 | 0.094674531 | 0.023367727 |
| 0.119919549 | 0.008668105 | 0.053780407 | 0.012986744 |
| 0.209751094 | 0.040070428 | 0.017874501 | 0.238936577 |
| 0.046856209 | 0.002353661 | 0.233356624 | 0.0736842   |
| 0.010974643 | 0.2323471   | 0.031826704 | 0.104228935 |
| 0.034900064 | 0.271002109 | 0.009625589 | 0.04482078  |
| 0.079713244 | 0.070660821 | 0.217238039 | 0.06822954  |
| 0.035082165 | 0.140551927 | 0.069513143 | 0.022521201 |
| 0.013063266 | 0.000225454 | 0.005915908 | 0.160002025 |
| 0.222742712 | 0.186949225 | 0.010424659 | 0.079822727 |
| 0.042949812 | 0.063395048 | 0.141904932 | 0.028496985 |
| 0.148845379 | 0.008842208 | 0.052129922 | 0.078470951 |
| 0.055404527 | 0.208178485 | 0.279016783 | 0.201504367 |
| 0.029220659 | 0.132842885 | 0.048328974 | 0.018170926 |
| 0.12250953  | 0.204321611 | 0.160291224 | 0.177362367 |
| 0.00959617  | 0.028142653 | 0.033580413 | 0.128657792 |
| 0.086039378 | 0.16414457  | 0.091947903 | 0.177241609 |
| 0.186532787 | 0.042008049 | 0.077408977 | 0.251529803 |
| 0.117772266 | 0.013705955 | 0.032025804 | 0.012448942 |
| 0.046891142 | 0.037227367 | 0.184232997 | 0.167180825 |
| 0.036234272 | 0.252576443 | 0.205425242 | 0.024496608 |
| 0.056928431 | 0.232759578 | 0.041133268 | 0.072004339 |
| 0.064595271 | 0.123283742 | 0.091431798 | 0.115046445 |
| 0.031746596 | 0.140852827 | 0.093583697 | 0.128997285 |
| 0.00534516  | 0.150664027 | 0.174574793 | 0.239416248 |
| 0.221513751 | 0.182330432 | 0.030173517 | 0.186447423 |
| 0.097869639 | 0.120016595 | 0.175941713 | 0.092361591 |
| 0.092072442 | 0.17944017  | 0.145911743 | 0.109914209 |
| 0.279055161 | 0.010976274 | 0.032794442 | 0.08787343  |
| 0.084024236 | 0.212935609 | 0.018937238 | 0.206685667 |
| 0.190244116 | 0.081835395 | 0.17381203  | 0.236124091 |
| 0.10987581  | 0.173277901 | 0.106053936 | 0.178997551 |
| 0.19063647  | 0.200734362 | 0.145557844 | 0.045266811 |
| 0.189492446 | 0.085256924 | 0.016134015 | 0.125645686 |
| 0.163789934 | 0.003575235 | 0.088638188 | 0.099542806 |
| 0.15147055  | 0.075117247 | 0.136082798 | 0.117909209 |
| 0.149363068 | 0.254329021 | 0.001058955 | 0.088321261 |
| 0.176694907 | 0.15532585  | 0.10643331  | 0.027886171 |
| 0.043126393 | 0.061105236 | 0.071176898 | 0.026856866 |
| 0.192478003 | 0.10726549  | 0.101124154 | 0.100912496 |
| 0.063346565 | 0.248401006 | 0.019887566 | 0.207475637 |
| 0.245934573 | 0.22827496  | 0.281331333 | 0.135370776 |
| 0.031505163 | 0.161311273 | 0.065592143 | 0.043034732 |
| 0.187474891 | 0.066982132 | 0.013157003 | 0.050188449 |
| 0.321276722 | 0.039909323 | 0.176685274 | 0.175650991 |
| 0.244507773 | 0.345009589 | 0.137277612 | 0.148773134 |
| 0.079166494 | 0.35731158  | 0.0537912   | 0.117157668 |
| 0.035030714 | 0.258403249 | 0.075296092 | 0.160883008 |
| 0.184758485 | 0.030279941 | 0.210786188 | 0.092096318 |
| 0.040730634 | 0.011761314 | 0.005949185 | 0.027334606 |
| 0.349719355 | 0.083194055 | 0.052875586 | 0.064135764 |

|             |             |             |             |
|-------------|-------------|-------------|-------------|
| 0.123923582 | 0.144099166 | 0.030830042 | 0.238591427 |
| 0.256462528 | 0.05032393  | 0.111012926 | 0.043222785 |
| 0.151523072 | 0.090373867 | 0.089717181 | 0.04019104  |
| 0.11269331  | 0.01287884  | 0.012422397 | 0.107425814 |
| 0.015421534 | 0.025044543 | 0.102657783 | 0.061590482 |
| 0.036007796 | 0.292477087 | 0.139453493 | 0.001675462 |
| 0.02801713  | 0.062389168 | 0.128548778 | 0.029091002 |
| 0.155386152 | 0.142864197 | 0.031056432 | 0.041962788 |
| 0.250699009 | 0.157049343 | 0.132690649 | 0.127276451 |
| 0.022557405 | 0.146995532 | 0.087046902 | 0.130446042 |
| 0.101443213 | 0.019966529 | 0.003743982 | 0.094669823 |
| 0.099856472 | 0.026875672 | 0.284680671 | 0.061363822 |
| 0.026910498 | 0.050683471 | 0.049636161 | 0.140918171 |
| 0.21280562  | 0.16357145  | 0.145285682 | 0.086729155 |
| 0.146643167 | 0.153541464 | 0.103621536 | 0.15358151  |
| 0.020467127 | 0.031216552 | 0.032350451 | 0.104694766 |
| 0.229319629 | 0.032457135 | 0.198292179 | 0.005168078 |
| 0.00025476  | 0.22212286  | 1           | 0.120517124 |
| 0.016425927 | 0.036259887 | 0.062335214 | 0.142070048 |
| 0.217287992 | 0.156124693 | 0.165680948 | 0.056265153 |
| 0.163683685 | 0.029556106 | 0.025875023 | 0.04677257  |
| 0.198344614 | 0.110639218 | 0.149306777 | 0.213494927 |
| 0.242906655 | 0.017248685 | 0.074278241 | 0.017402473 |
| 0.26575361  | 0.081458484 | 0.338014548 | 0.363819103 |
| 0.107793726 | 0.342465446 | 0.211432356 | 0.028472689 |
| 0.105319132 | 0.23366564  | 0.026974637 | 0.119579605 |
| 0.140214159 | 0.138080722 | 0.140819383 | 0.16982511  |
| 0.109077634 | 0.074866969 | 0.081506323 | 0.077121822 |
| 0.224631897 | 0.205972901 | 0.01795339  | 0.073016877 |
| 0.018830207 | 0.108605507 | 0.04600799  | 0.278394863 |
| 0.062099688 | 0.119361177 | 0.275535093 | 0.038490899 |
| 0.218467739 | 0.006310806 | 0.069405771 | 0.093657875 |
| 0.081083031 | 0.246270803 | 0.031037084 | 0.021922993 |
| 0.184691035 | 0.192866858 | 0.016831754 | 0.158393413 |
| 0.081079122 | 0.235328553 | 0.058462422 | 0.078201821 |
| 0.250074083 | 0.013301438 | 0.050742799 | 0.00438132  |
| 0.027501363 | 0.167439397 | 0.028746276 | 0.229984877 |
| 0.14009528  | 0.211223912 | 0.187414917 | 0.161869411 |
| 0.156524517 | 0.123792839 | 0.144190919 | 0.018349315 |
| 0.153390785 | 0.000547593 | 0.133394852 | 0.124054448 |
| 0.023196853 | 0.023447575 | 0.051662753 | 0.098863853 |
| 0.039310806 | 0.286351945 | 0.225283802 | 0.040971473 |
| 0.18869325  | 0.174788656 | 0.22342643  | 0.02872587  |
| 0.056261777 | 0.059997959 | 0.024954247 | 0.168505163 |
| 0.110958152 | 0.119620162 | 0.039119217 | 0.281263855 |
| 0.041881425 | 0.247787182 | 0.256014564 | 0.020873477 |
| 0.073923428 | 0.3125131   | 0.228825564 | 0.143509756 |
| 0.177177396 | 0.062438101 | 0.016332789 | 0.034628197 |
| 0.098158825 | 0.251257417 | 0.019116133 | 0.225380455 |
| 0.143434768 | 0.056708554 | 0.170415741 | 0.218227905 |
| 0.152523223 | 0.171968177 | 0.269072102 | 0.09228992  |
| 0.131579069 | 0.004612695 | 0.061071755 | 0.157624418 |
| 0.008655276 | 0.029762276 | 0.221621438 | 0.061191714 |
| 0.066481969 | 0.263865812 | 0.01341117  | 0.016258317 |

|             |             |             |             |
|-------------|-------------|-------------|-------------|
| 0.107867277 | 0.0514573   | 0.030700424 | 0.164433093 |
| 0.04515845  | 0.037483893 | 0.11058628  | 0.146877463 |
| 0.033487286 | 0.20376346  | 0.331741637 | 0.251692961 |
| 0.031870381 | 0.031275192 | 0.266593255 | 0.252900116 |
| 0.112132322 | 0.109704451 | 0.211715284 | 0.130825985 |
| 0.23362217  | 0.050183878 | 0.114335001 | 0.133475528 |
| 0.187768132 | 0.16807436  | 0.245233821 | 0.103468756 |
| 0.252345916 | 0.071952058 | 0.030317414 | 0.080227866 |
| 0.137800415 | 0.249630266 | 0.153662002 | 0.015537422 |
| 0.251067652 | 0.135399141 | 0.22474574  | 0.228968233 |
| 0.027640249 | 0.213134741 | 0.112090593 | 0.233734142 |
| 0.059077899 | 0.01631322  | 0.255292007 | 0.172162168 |
| 0.145682586 | 0.008921229 | 0.217964594 | 0.071131211 |
| 0.131131389 | 0.018133091 | 0.057247449 | 0.198074968 |
| 0.267456105 | 0.193183863 | 0.098427578 | 0.080274439 |
| 0.07986977  | 0.027650028 | 0.138912485 | 0.119047716 |
| 0.126603175 | 0.048561785 | 0.164617565 | 0.135853729 |
| 0.277967152 | 0.033621658 | 0.017209721 | 0.049968607 |
| 0.169634145 | 0.052593628 | 0.098507622 | 0.264642083 |
| 0.206018591 | 0.213017545 | 0.130513702 | 0.150328331 |
| 0.038060466 | 0.200861973 | 0.236390099 | 0.098020816 |
| 0.017439942 | 0.240651611 | 0.030038327 | 0.073018135 |
| 0.011626514 | 0.005553787 | 0.117636739 | 0.107069251 |
| 0.174316547 | 0.117073929 | 0.188664565 | 0.081472262 |
| 4.02E-05    | 0.042862553 | 0.070698569 | 0.039593354 |
| 0.124765413 | 0.14874706  | 0.058076821 | 0.199611302 |
| 0.200112437 | 0.28572854  | 0.145045915 | 0.042213996 |
| 0.008110007 | 0.070170732 | 0.220606804 | 0.129490551 |
| 0.095437741 | 0.223914266 | 0.014194182 | 0.126147225 |
| 0.011437612 | 0.219786366 | 0.15473459  | 0.02471377  |
| 0.011363987 | 0.117968558 | 0.105023763 | 0.264333644 |
| 0.023890064 | 0.109128161 | 0.128495964 | 0.036895802 |
| 0.062403373 | 0.216567617 | 0.096341751 | 0.095952211 |
| 0.104286875 | 0.093739174 | 0.088694139 | 0.048287145 |
| 0.08830265  | 0.128264066 | 0.096872453 | 0.158532723 |
| 0.117893512 | 0.12912494  | 0.04902051  | 0.06099089  |
| 0.052628021 | 0.208513524 | 0.34822154  | 0.372147675 |
| 0.219090283 | 0.108598689 | 0.281742151 | 0.29428442  |
| 0.144023349 | 0.049972076 | 0.204672626 | 0.144691593 |
| 0.148840184 | 0.294630694 | 0.055366556 | 0.113733816 |
| 0.010389509 | 0.04708815  | 0.239454481 | 0.057363596 |
| 0.138353582 | 0.035728944 | 0.038272833 | 0.114359289 |
| 0.069609684 | 0.234584989 | 0.270846227 | 0.157785429 |
| 0.050856077 | 0.036551378 | 0.025369608 | 0.160316469 |
| 0.184923909 | 0.262079452 | 0.036100608 | 0.122300172 |
| 0.103132188 | 0.111151655 | 0.093459828 | 0.174220074 |
| 0.011738564 | 0.180012889 | 0.031320375 | 0.24499747  |
| 0.021447947 | 0.307901701 | 0.279862933 | 0.068521652 |
| 0.006554661 | 0.153756259 | 0.054613332 | 0.060702001 |
| 0.066237816 | 0.058708253 | 0.034474556 | 0.109623244 |
| 0.104177649 | 0.196894006 | 0.189957725 | 0.19327478  |
| 0.035747371 | 0.035304268 | 0.054799283 | 0.06461995  |
| 0.085349721 | 0.122465104 | 0.24868243  | 0.120420302 |
| 0.039706288 | 0.288629016 | 0.211227415 | 0.078142662 |

|             |             |             |             |
|-------------|-------------|-------------|-------------|
| 0.078854155 | 0.101042298 | 0.006203124 | 0.038934943 |
| 0.098260816 | 0.015790407 | 0.000468552 | 0.010565608 |
| 0.128512784 | 0.032329914 | 0.083316103 | 0.09112344  |
| 0.031827985 | 0.127526981 | 0.005351273 | 0.097972236 |
| 0.163901226 | 0.203183787 | 0.088984323 | 0.212584987 |
| 0.135795637 | 0.217178515 | 0.074267659 | 0.005111496 |
| 0.041635092 | 0.028972849 | 0.023380847 | 0.243234156 |
| 0.253984841 | 0.00790162  | 0.050418485 | 0.217818426 |
| 0.105201558 | 0.006329524 | 0.05761338  | 0.06459329  |
| 0.224316985 | 0.212811796 | 0.118653646 | 0.082298533 |
| 0.144697511 | 0.152403745 | 0.022324683 | 0.029554571 |
| 0.057792206 | 0.022955625 | 0.105281986 | 0.017917396 |
| 0.265531148 | 0.056679769 | 0.029307276 | 0.262184078 |
| 0.199630438 | 0.021233078 | 0.277664948 | 0.016636355 |
| 0.142395051 | 0.133895162 | 0.044658067 | 0.025178824 |
| 0.149529799 | 0.037025083 | 0.161672219 | 0.136735729 |
| 0.011207671 | 0.049234489 | 0.190893115 | 0.02668874  |
| 0.246151643 | 0.037984152 | 0.214234823 | 0.018675558 |
| 0.143590627 | 0.11108176  | 0.238820281 | 0.043731636 |
| 0.05129952  | 0.289477812 | 0.029763949 | 0.154419454 |
| 0.125861304 | 0.02027511  | 0.084858996 | 0.123425858 |
| 0.018390758 | 0.153779324 | 0.035058915 | 0.153232686 |
| 0.118124039 | 0.183434449 | 0.078899174 | 0.135592048 |
| 0.163498411 | 0.022432958 | 0.017895309 | 0.056797594 |
| 0.163162764 | 0.179949803 | 0.023755401 | 0.143793524 |
| 0.013795801 | 0.116974019 | 0.056522298 | 0.055506915 |
| 0.178582143 | 0.12475377  | 0.045593113 | 0.233636806 |
| 0.106027383 | 0.045259793 | 0.039847696 | 0.20800608  |
| 0.115931599 | 0.154629804 | 0.196490376 | 0.000923629 |
| 0.087390918 | 0.064357594 | 0.133573791 | 0.035750071 |
| 0.305326485 | 0.085755255 | 0.077637838 | 0.09965331  |
| 0.096517289 | 0.012909138 | 0.042416146 | 0.052613355 |
| 0.018820742 | 0.267140094 | 0.170077957 | 0.12459451  |
| 0.119922979 | 0.023014886 | 0.01449505  | 0.148870042 |
| 0.009646815 | 0.011477238 | 0.017596985 | 0.068600164 |
| 0.011921313 | 0.024084663 | 0.023748533 | 0.018975105 |
| 0.109487193 | 0.098467544 |             |             |
| GLIPR2      | 0.114029209 | 0.158425101 | 0.060923189 |
| 0.162363784 | 0.217439939 | 0.082552801 | 0.135547729 |
| 0.163252511 | 0.139411919 | 0.026141143 | 0.193839768 |
| 0.108706565 | 0.058562646 | 0.239881622 | 0.151344554 |
| 0.166217175 | 0.177809286 | 0.185607655 | 0.039928455 |
| 0.096190361 | 0.226023698 | 0.09728935  | 0.087039978 |
| 0.183850004 | 0.214260745 | 0.11448646  | 0.090842799 |
| 0.203124625 | 0.034771432 | 0.158246534 | 0.019073188 |
| 0.290866096 | 0.211833221 | 0.072772623 | 0.066608503 |
| 0.127619873 | 0.021299042 | 0.260297318 | 0.188918285 |
| 0.097845834 | 0.287181562 | 0.035544387 | 0.213308464 |
| 0.054746365 | 0.087142853 | 0.014794643 | 0.140577949 |
| 0.111585091 | 0.131727104 | 0.076991716 | 0.150025601 |
| 0.070371865 | 0.204407309 | 0.090387004 | 0.006861479 |
| 0.07670414  | 0.02053768  | 0.049231    | 0.224343587 |
| 0.310483169 | 0.250227285 | 0.03295239  | 0.10309787  |
| 0.118106876 | 0.183417178 | 0.277480225 | 0.046901081 |

|             |             |             |             |
|-------------|-------------|-------------|-------------|
| 0.241103776 | 0.083045696 | 0.137655132 | 0.113099924 |
| 0.094081033 | 0.055624082 | 0.282651595 | 0.084379342 |
| 0.081246771 | 0.296996764 | 0.19391088  | 0.096181693 |
| 0.14170718  | 0.282529531 | 0.237865977 | 0.207585298 |
| 0.077052115 | 0.154533444 | 0.145496446 | 0.316878844 |
| 0.185679497 | 0.107950289 | 0.22699668  | 0.27402267  |
| 0.072622254 | 0.064794426 | 0.157604393 | 0.137903704 |
| 0.179423602 | 0.065262528 | 0.056567732 | 0.113280326 |
| 0.202910893 | 0.168309128 | 0.230007703 | 0.285720844 |
| 0.150534389 | 0.102105833 | 0.209160833 | 0.158090278 |
| 0.174529587 | 0.118924148 | 0.163124986 | 0.187159804 |
| 0.161333007 | 0.219474647 | 0.152498176 | 0.229348735 |
| 0.135371786 | 0.237476108 | 0.196942892 | 0.21384928  |
| 0.010056577 | 0.228046069 | 0.201072476 | 0.202978823 |
| 0.066474611 | 0.227893728 | 0.106012111 | 0.320308424 |
| 0.213628742 | 0.213622432 | 0.15607203  | 0.250810137 |
| 0.248091161 | 0.190342586 | 0.215670072 | 0.212837946 |
| 0.121709572 | 0.069960035 | 0.129768711 | 0.117718733 |
| 0.205065494 | 0.189771298 | 0.129857613 | 0.245451932 |
| 0.284194296 | 0.22367488  | 0.098140349 | 0.27121999  |
| 0.12677163  | 0.299632198 | 0.157264528 | 0.247187958 |
| 0.258424397 | 0.233091502 | 0.287460754 | 0.193256539 |
| 0.251978637 | 0.131285965 | 0.029276574 | 0.211264704 |
| 0.318636139 | 0.02992336  | 0.192858746 | 0.214979949 |
| 0.207571806 | 0.192688684 | 0.277507256 | 0.234141144 |
| 0.206190512 | 0.143753969 | 0.005759303 | 0.293992703 |
| 0.228576238 | 0.26459518  | 0.213416884 | 0.092894934 |
| 0.184673269 | 0.099634612 | 0.174728647 | 0.075038521 |
| 0.326742073 | 0.21313011  | 0.194232651 | 0.180476512 |
| 0.081919659 | 0.283811124 | 0.094760731 | 0.207699118 |
| 0.155597045 | 0.114196135 | 0.093091398 | 0.249646237 |
| 0.038053665 | 0.315901629 | 0.079319186 | 0.151022157 |
| 0.327858166 | 0.082475701 | 0.060619486 | 0.212330358 |
| 0.092892164 | 0.100899394 | 0.171430344 | 0.134949796 |
| 0.186883843 | 0.224221852 | 0.181571335 | 0.234922772 |
| 0.255593675 | 0.193432075 | 0.139838176 | 0.231687341 |
| 0.094589905 | 0.185241566 | 0.159592613 | 0.299279559 |
| 0.365163038 | 0.138366561 | 0.27557864  | 0.091109032 |
| 0.110822581 | 0.035842203 | 0.061404721 | 0.100022507 |
| 0.198238846 | 0.155130221 | 0.159004984 | 0.245514382 |
| 0.121564747 | 0.090779294 | 0.093415505 | 0.295798299 |
| 0.144579433 | 0.166079958 | 0.256877386 | 0.087231658 |
| 0.034166117 | 0.163100686 | 0.207675448 | 0.183725654 |
| 0.176872438 | 0.103390382 | 0.076700184 | 0.226585129 |
| 0.07025371  | 0.137037536 | 0.2174192   | 0.238304397 |
| 0.077323416 | 0.156612511 | 0.266946225 | 0.0170138   |
| 0.1167391   | 0.169587641 | 0.345584765 | 0.037945315 |
| 0.238635308 | 0.311161072 | 0.182490605 | 0.163761786 |
| 0.122930225 | 0.23920744  | 0.231618911 | 0.239224022 |
| 0.068552945 | 0.269166816 | 0.216054126 | 0.264539991 |
| 0.211026414 | 0.066993597 | 0.054885368 | 0.203930427 |
| 0.21746481  | 0.054447778 | 0.102649312 | 0.152848691 |
| 0.055275589 | 0.180130244 | 0.174302443 | 0.272972586 |
| 0.301200498 | 0.173341634 | 0.25714636  | 0.282293699 |



|             |             |             |             |
|-------------|-------------|-------------|-------------|
| 0.279240606 | 0.209251613 | 0.223469036 | 0.286342273 |
| 0.033380464 | 0.129307936 | 0.116904578 | 0.309457423 |
| 0.237673494 | 0.160878355 | 0.257944134 | 0.058540832 |
| 0.003502611 | 0.10927372  | 0.120517124 | 1           |
| 0.142790304 | 0.090471869 | 0.188550069 | 0.240611236 |
| 0.225206334 | 0.258147783 | 0.213241387 | 0.151486715 |
| 0.210189682 | 0.107153468 | 0.127938677 | 0.178414283 |
| 0.264724079 | 0.109177726 | 0.242118109 | 0.280911686 |
| 0.062434647 | 0.11779335  | 0.118846403 | 0.025122738 |
| 0.102392671 | 0.114714993 | 0.141237704 | 0.254357123 |
| 0.27203483  | 0.215148401 | 0.187275428 | 0.035162997 |
| 0.289229262 | 0.191588549 | 0.056224641 | 0.214391835 |
| 0.215732783 | 0.211870143 | 0.206922914 | 0.204050861 |
| 0.204239581 | 0.169149934 | 0.222866978 | 0.098869237 |
| 0.16546419  | 0.079002265 | 0.113922781 | 0.188257926 |
| 0.008710434 | 0.28438862  | 0.173068535 | 0.269226858 |
| 0.187125991 | 0.221225751 | 0.130924181 | 0.168161995 |
| 0.068378181 | 0.054952873 | 0.094107409 | 0.182370147 |
| 0.278514977 | 0.069114949 | 0.05396884  | 0.076864938 |
| 0.201914957 | 0.242600991 | 0.066229488 | 0.243847057 |
| 0.226695862 | 0.091753625 | 0.181444979 | 0.248528564 |
| 0.161197574 | 0.018087375 | 0.072369994 | 0.004674997 |
| 0.050995975 | 0.228605652 | 0.075744866 | 0.095004345 |
| 0.252199744 | 0.048180138 | 0.223818466 | 0.261208344 |
| 0.177279533 | 0.251487523 | 0.247861128 | 0.112181465 |
| 0.238669535 | 0.020384285 | 0.233102934 | 0.176558384 |
| 0.041425094 | 0.008000153 | 0.060475467 | 0.218218561 |
| 0.1412565   | 0.073588736 | 0.259085598 | 0.063661006 |
| 0.245379577 | 0.085028813 | 0.152094538 | 0.17925923  |
| 0.13729108  | 0.259220529 | 0.160464903 | 0.196979015 |
| 0.207560878 | 0.276304762 | 0.056107148 | 0.139142032 |
| 0.150182723 | 0.176224016 | 0.132946775 | 0.052011346 |
| 0.250880298 | 0.125307169 | 0.216900765 | 0.22211809  |
| 0.294485293 | 0.2207847   | 0.030148761 | 0.079575511 |
| 0.217002734 | 0.080199208 | 0.053619741 | 0.096735765 |
| 0.19110282  | 0.185094656 | 0.32341119  | 0.263093452 |
| 0.286875415 | 0.252260974 | 0.130613278 | 0.228151944 |
| 0.073361176 | 0.021876618 | 0.078613582 | 0.253096257 |
| 0.032474159 | 0.112051429 | 0.29953938  | 0.091351897 |
| 0.145041738 | 0.095955579 | 0.092079943 | 0.107244096 |
| 0.262589146 | 0.158612887 | 0.187654151 | 0.206331835 |
| 0.1646517   | 0.159999584 | 0.225652114 | 0.19896445  |
| 0.071642957 | 0.202854073 | 0.213662994 | 0.098790058 |
| 0.07989409  | 0.114610701 | 0.146116181 | 0.232060987 |
| 0.247312561 | 0.230329445 | 0.155538703 | 0.131372164 |
| 0.270125253 | 0.126784802 | 0.256387747 | 0.196040193 |
| 0.248405306 | 0.29908142  | 0.291618911 | 0.245163598 |
| 0.154210355 | 0.230172443 | 0.181448282 | 0.261055585 |
| 0.238217893 | 0.080077645 | 0.214030315 | 0.11403159  |
| 0.211099562 | 0.178940072 | 0.198398153 | 0.189177917 |
| 0.134009668 | 0.286258428 | 0.289834574 | 0.122595152 |
| 0.155145322 | 0.103694127 | 0.128181197 | 0.267769322 |
| 0.235204218 | 0.080486152 | 0.247199793 | 0.096069592 |
| 0.186282164 | 0.020719814 | 0.174179075 | 0.324121018 |

|             |             |             |             |
|-------------|-------------|-------------|-------------|
| 0.198111018 | 0.133830133 | 0.06884016  | 0.198098506 |
| 0.17060499  | 0.066707691 | 0.0983931   | 0.151691825 |
| 0.257356296 | 0.139567676 | 0.221578553 | 0.318027609 |
| 0.159906361 | 0.144052463 | 0.07575803  | 0.176750229 |
| 0.243905857 | 0.088919245 | 0.210370173 | 0.158371731 |
| 0.290308937 | 0.272119395 | 0.188332983 | 0.256179694 |
| 0.101524895 | 0.091004874 | 0.067737696 | 0.191931529 |
| 0.130921083 | 0.144892016 | 0.040054891 | 0.185225478 |
| 0.02493557  | 0.078726783 | 0.250205743 | 0.204421233 |
| 0.275201078 | 0.248054655 | 0.288815944 | 0.11147462  |
| 0.002868376 | 0.154606367 | 0.212384794 | 0.096544586 |
| 0.17607237  | 0.228484223 | 0.088081787 | 0.242770159 |
| 0.355105551 | 0.097368639 | 0.226982267 | 0.068361718 |
| 0.054384019 | 0.127032758 | 0.331916625 | 0.171405379 |
| 0.226539753 | 0.083508787 | 0.102289032 | 0.18506214  |
| 0.078531868 | 0.351201827 | 0.317741091 | 0.026799009 |
| 0.066506344 | 0.244626652 | 0.179529227 | 0.099579916 |
| 0.124280483 | 0.226708733 | 0.252882132 | 0.016210047 |
| 0.19219852  | 0.094643798 | 0.263561414 | 0.249382116 |
| 0.246059674 | 0.209286841 | 0.309000093 | 0.1602383   |
| 0.155533138 | 0.193538438 | 0.187934917 | 0.329080665 |
| 0.262680155 | 0.177927776 | 0.163698634 | 0.095475145 |
| 0.176395055 | 0.183487099 | 0.142946138 | 0.128609342 |
| 0.203533072 | 0.192456132 | 0.297975224 | 0.104261171 |
| 0.312356054 | 0.084500776 | 0.35524498  | 0.186551123 |
| 0.311807935 | 0.099473137 | 0.129257852 | 0.176178173 |
| 0.023524347 | 0.067968891 | 0.082818241 | 0.11406876  |
| 0.243616005 | 0.176650412 | 0.077809305 | 0.111582348 |
| 0.125432651 | 0.307077938 | 0.291250623 | 0.269743904 |
| 0.128995609 | 0.090848969 | 0.027433736 | 0.27314531  |
| 0.170948825 | 0.184130696 | 0.212897215 | 0.033612358 |
| 0.238506333 | 0.088357488 | 0.2062829   | 0.214767515 |
| 0.069541443 | 0.311710855 | 0.034834416 | 0.150330067 |
| 0.022926586 | 0.131489849 | 0.246032368 | 0.152236358 |
| 0.057575798 | 0.202938141 | 0.227487972 | 0.055612697 |
| 0.186688211 | 0.142649602 | 0.141233058 | 0.141733404 |
| 0.207635341 | 0.161660402 | 0.230127322 | 0.090804861 |
| 0.094237361 | 0.191901455 | 0.06953283  | 0.196102672 |
| 0.222175583 | 0.224158109 | 0.13337066  | 0.227241738 |
| 0.132776149 | 0.174769849 | 0.318117717 | 0.137917053 |
| 0.106334583 | 0.267600002 | 0.069357409 | 0.05489631  |
| 0.172917836 | 0.076471282 | 0.001257669 | 0.059067774 |
| 0.331784204 | 0.062531292 | 0.12563865  | 0.21362027  |
| 0.160255875 | 0.321946618 | 0.05604184  | 0.119302441 |
| 0.179908774 | 0.223856646 | 0.159471592 | 0.31786275  |
| 0.245168372 | 0.222195142 | 0.110155214 | 0.009819028 |
| 0.12818628  | 0.099171245 | 0.048957146 | 0.168234252 |
| 0.105125595 | 0.069781656 | 0.119898208 | 0.081600016 |
| 0.254066794 | 0.051833114 | 0.093575875 | 0.16625598  |
| 0.201942128 | 0.230736943 | 0.274151368 | 0.239487703 |
| 0.053885039 | 0.250435148 | 0.099855415 | 0.081916505 |
| 0.196434644 | 0.123573647 | 0.280396787 | 0.126083063 |
| 0.161555295 | 0.192746481 | 0.016141171 | 0.285692319 |
| 0.195699772 | 0.105835261 | 0.259979223 | 0.027615521 |

|             |             |             |             |
|-------------|-------------|-------------|-------------|
| 0.351821054 | 0.234870854 | 0.145426529 | 0.077377091 |
| 0.121224051 | 0.173655184 | 0.282195742 | 0.211891352 |
| 0.042896915 | 0.109135261 | 0.209524017 | 0.133728832 |
| 0.218697852 | 0.112796448 | 0.280340648 | 0.053944661 |
| 0.195969451 | 0.169421609 | 0.119915135 | 0.166801418 |
| 0.096948589 | 0.132885891 | 0.044152805 | 0.25914451  |
| 0.267228938 | 0.140660776 | 0.246726832 | 0.213940174 |
| 0.102715787 | 0.20937779  | 0.087408209 | 0.242220065 |
| 0.27637232  | 0.318619323 | 0.219467018 | 0.211907287 |
| 0.369128192 | 0.156548371 | 0.11593055  | 0.19723598  |
| 0.184768852 | 0.183122535 | 0.112518392 | 0.22888546  |
| 0.102359764 | 0.289383218 | 0.068524805 | 0.220701815 |
| 0.192325602 | 0.178748313 | 0.103080396 | 0.22336671  |
| 0.254018099 | 0.165358646 | 0.169958546 | 0.328170753 |
| 0.25761408  | 0.143535258 | 0.316208365 | 0.025845171 |
| 0.115541447 | 0.215568917 | 0.26223669  | 0.134766532 |
| 0.23109705  | 0.15773     | 0.08710912  | 0.020001712 |
| 0.24751765  | 0.074213426 | 0.12319644  | 0.202545471 |
| 0.080641394 | 0.115068811 | 0.239240526 | 0.26772363  |
| 0.198716235 | 0.060962231 | 0.053689593 | 0.223592838 |
| 0.093897642 | 0.045496828 | 0.068379504 | 0.110876554 |
| 0.099289406 | 0.044471104 | 0.061963155 | 0.070426502 |
| 0.201482528 | 0.135534698 |             |             |
| GLTP        | 0.015306402 | 0.132672495 | 0.008119645 |
| 0.046905477 | 0.324906772 | 0.082845084 | 0.014638902 |
| 0.029199119 | 0.109327437 | 0.031497009 | 0.187973266 |
| 0.005585654 | 0.192655861 | 0.199234655 | 0.016702633 |
| 0.250162137 | 0.018074069 | 0.042813243 | 0.021043235 |
| 0.056103654 | 0.292720583 | 0.132028356 | 0.06652367  |
| 0.264852653 | 0.058345052 | 0.08529919  | 0.178513563 |
| 0.193191622 | 0.076512808 | 0.211065209 | 0.025969243 |
| 0.175732227 | 0.328804264 | 0.165291039 | 0.003600238 |
| 0.140962224 | 0.037462072 | 0.152288381 | 0.141107928 |
| 0.20469097  | 0.141256617 | 0.042092774 | 0.123564603 |
| 0.069129474 | 0.006154551 | 0.022260488 | 0.208869694 |
| 0.097745517 | 0.085731403 | 0.009950517 | 0.171976457 |
| 0.07213084  | 0.118719296 | 0.092017568 | 0.000352584 |
| 0.213157078 | 0.128746279 | 0.147851912 | 0.177005034 |
| 0.110190228 | 0.075170499 | 0.061807098 | 0.065927191 |
| 0.158081752 | 0.217939664 | 0.164220547 | 0.057560265 |
| 0.194468284 | 0.184507053 | 0.199748458 | 0.054215816 |
| 0.086378646 | 0.004765208 | 0.080434793 | 0.016710144 |
| 0.110893435 | 0.145026765 | 0.230741709 | 0.214515335 |
| 0.117362665 | 0.194524947 | 0.12049974  | 0.152750545 |
| 0.125973597 | 0.295592292 | 0.18603014  | 0.234151403 |
| 0.177586304 | 0.018560007 | 0.217975147 | 0.210715752 |
| 0.009040739 | 0.076716215 | 0.155654169 | 0.028870831 |
| 0.154310115 | 0.122105145 | 0.072152069 | 0.221780896 |
| 0.321649744 | 0.246818924 | 0.160639037 | 0.144980752 |
| 0.220662793 | 0.014763278 | 0.135420448 | 0.333706345 |
| 0.162885558 | 0.020786911 | 0.149430271 | 0.24123423  |
| 0.178887035 | 0.200376631 | 0.148775307 | 0.18211033  |
| 0.22575192  | 0.203659722 | 0.182436257 | 0.167911132 |
| 0.020648969 | 0.191325574 | 0.072627675 | 0.021459736 |

|             |             |             |             |
|-------------|-------------|-------------|-------------|
| 0.009044417 | 0.045236233 | 0.112792147 | 0.179101322 |
| 0.227111594 | 0.141509858 | 0.053520044 | 0.183923789 |
| 0.28096836  | 0.13193382  | 0.184067392 | 0.183855119 |
| 0.010783159 | 0.147227128 | 0.213534939 | 0.053610566 |
| 0.181410402 | 0.046376736 | 0.290275107 | 0.163187298 |
| 0.172152693 | 0.257093352 | 0.026985637 | 0.166572077 |
| 0.058813449 | 0.232076897 | 0.147502979 | 0.087035686 |
| 0.188117826 | 0.156538577 | 0.254039866 | 0.314506381 |
| 0.171399064 | 0.094539222 | 0.017685182 | 0.165735484 |
| 0.247944098 | 0.047261371 | 0.217926883 | 0.234720401 |
| 0.16819268  | 0.240333467 | 0.258716022 | 0.230608226 |
| 0.166771882 | 0.023147121 | 0.015039643 | 0.257395177 |
| 0.170230959 | 0.190512348 | 0.076186663 | 0.154637047 |
| 0.263748786 | 0.081755376 | 0.208280277 | 0.077494852 |
| 0.235717998 | 0.213650897 | 0.201815711 | 0.153381312 |
| 0.071672726 | 0.12593803  | 0.212610354 | 0.130850044 |
| 0.018086706 | 0.021836905 | 0.010646508 | 0.167464108 |
| 0.034408659 | 0.133759414 | 0.063226224 | 0.204559091 |
| 0.130487176 | 0.060488381 | 0.156737863 | 0.317192249 |
| 0.010747628 | 0.131520936 | 0.059695026 | 0.041812014 |
| 0.021520426 | 0.049631918 | 0.055397677 | 0.063872115 |
| 0.198431044 | 0.056761764 | 0.184651846 | 0.230848772 |
| 0.135394605 | 0.056213884 | 0.16052369  | 0.238276181 |
| 0.249154235 | 0.245865209 | 0.108245393 | 0.013689199 |
| 0.089489294 | 0.065283834 | 0.175325928 | 0.182424096 |
| 0.050235079 | 0.068186909 | 0.188638429 | 0.325143384 |
| 0.058030875 | 0.026204789 | 0.117746411 | 0.161266073 |
| 0.037475118 | 0.158790884 | 0.243233183 | 0.10651072  |
| 0.001105825 | 0.114580323 | 0.218562388 | 0.155127337 |
| 0.114408509 | 0.17020927  | 0.155663013 | 0.227949664 |
| 0.11562613  | 0.186100062 | 0.230603419 | 0.327193957 |
| 0.063726471 | 0.049518314 | 0.243224527 | 0.044244939 |
| 0.202341797 | 0.090872346 | 0.237589093 | 0.049175156 |
| 0.113653223 | 0.198817546 | 0.313252942 | 0.198667106 |
| 0.027949386 | 0.190362414 | 0.179010323 | 0.21963921  |
| 0.094685806 | 0.238424002 | 0.240876994 | 0.219426167 |
| 0.168526941 | 0.129796485 | 0.184082728 | 0.20628353  |
| 0.230791167 | 0.061195138 | 0.015210636 | 0.199341343 |
| 0.084414163 | 0.258387067 | 0.153775762 | 0.237839243 |
| 0.198838269 | 0.127235275 | 0.075817313 | 0.307525408 |
| 0.199604106 | 0.087804381 | 0.221913519 | 0.243287483 |
| 0.038810866 | 0.189225159 | 0.152461956 | 0.32147142  |
| 0.075768505 | 0.160245337 | 0.138309872 | 0.18037893  |
| 0.023538594 | 0.017324638 | 0.016425927 | 0.142790304 |
| 1           | 0.137853131 | 0.232323851 | 0.207289315 |
| 0.054792889 | 0.18453951  | 0.102602757 | 0.108773793 |
| 0.14573872  | 0.166094534 | 0.256442487 | 0.249222167 |
| 0.118512366 | 0.019146586 | 0.05534416  | 0.189174343 |
| 0.005948171 | 0.194908349 | 0.083706079 | 0.00283715  |
| 0.008020796 | 0.115734529 | 0.024601834 | 0.067873366 |
| 0.28310443  | 0.061481046 | 0.066763682 | 0.035784953 |
| 0.247428527 | 0.0389523   | 0.01718875  | 0.206063588 |
| 0.185717365 | 0.178781479 | 0.174882286 | 0.146587702 |
| 0.200040649 | 0.188098477 | 0.259025778 | 0.072790053 |

|             |             |             |             |
|-------------|-------------|-------------|-------------|
| 0.027618228 | 0.013798807 | 0.170395811 | 0.163156131 |
| 0.000846983 | 0.263618571 | 0.211456786 | 0.068210701 |
| 0.244572787 | 0.147216732 | 0.009748251 | 0.260311347 |
| 0.005056734 | 0.156426355 | 0.044209722 | 0.113357843 |
| 0.306079726 | 0.003182899 | 0.044891201 | 0.094910143 |
| 0.128002255 | 0.126799695 | 0.143533007 | 0.20230962  |
| 0.183989618 | 0.022835891 | 0.200090161 | 0.27532921  |
| 0.020480524 | 0.019547981 | 0.062310663 | 0.006272056 |
| 0.043403039 | 0.164920529 | 0.102304095 | 0.013563444 |
| 0.134436394 | 0.001310086 | 0.129032033 | 0.209447938 |
| 0.13358516  | 0.244111229 | 0.208123132 | 0.253422151 |
| 0.194350394 | 0.116650622 | 0.212295139 | 0.138231944 |
| 0.05970454  | 0.000419027 | 0.005543351 | 0.238718379 |
| 0.207219175 | 0.009276139 | 0.077001527 | 0.049811857 |
| 0.051440653 | 0.021543512 | 0.021669201 | 0.222640894 |
| 0.162738013 | 0.262848939 | 0.198190072 | 0.139209182 |
| 0.124105652 | 0.155256107 | 0.061491237 | 0.023237596 |
| 0.223283672 | 0.020044425 | 0.024121823 | 0.014066801 |
| 0.286227616 | 0.02496672  | 0.128790556 | 0.187165869 |
| 0.220073862 | 0.29701173  | 0.043818746 | 0.065818853 |
| 0.225853714 | 0.015060612 | 0.081734739 | 0.019685826 |
| 0.15441857  | 0.227762956 | 0.189300336 | 0.126407342 |
| 0.236212853 | 0.18182942  | 0.010669433 | 0.230602377 |
| 0.007381122 | 0.010681323 | 0.067036524 | 0.12810655  |
| 0.046906769 | 0.172612289 | 0.132350583 | 0.058329336 |
| 0.088449863 | 0.006587928 | 0.217392723 | 0.230136065 |
| 0.196139079 | 0.173800384 | 0.312960386 | 0.102799025 |
| 0.199565571 | 0.147527052 | 0.113666608 | 0.056996794 |
| 0.062968028 | 0.102670811 | 0.058274923 | 0.005866485 |
| 0.117418495 | 0.181692278 | 0.020504522 | 0.063740917 |
| 0.230111368 | 0.229098179 | 0.018563963 | 0.014512957 |
| 0.112384161 | 0.133127302 | 0.253213619 | 0.169117351 |
| 0.178564184 | 0.237953414 | 0.151550302 | 0.092816762 |
| 0.019091019 | 0.232157756 | 0.317809625 | 0.139987325 |
| 0.204126135 | 0.010756553 | 0.167215748 | 0.297824161 |
| 0.049127571 | 0.07571677  | 0.022051042 | 0.038466927 |
| 0.260335775 | 0.092430241 | 0.172676247 | 0.032600452 |
| 0.145704844 | 0.194462004 | 0.014507331 | 0.103176664 |
| 0.151276481 | 0.18463162  | 0.074169917 | 0.066695385 |
| 0.136689914 | 0.023519586 | 0.237934395 | 0.211266002 |
| 0.044020852 | 0.032251142 | 0.027870125 | 0.208072469 |
| 0.191739803 | 0.107661819 | 0.011370816 | 0.131362874 |
| 0.235383602 | 0.189935723 | 0.168186264 | 0.253344953 |
| 0.027739149 | 0.213755887 | 0.168196963 | 0.21084846  |
| 0.090914579 | 0.086763273 | 0.126719379 | 0.022369239 |
| 0.148498868 | 0.172715015 | 0.153226588 | 0.106415903 |
| 0.144254922 | 0.021817327 | 0.008351526 | 0.192341071 |
| 0.208856895 | 0.018340423 | 0.049522818 | 0.223750256 |
| 0.013861647 | 0.225212745 | 0.252902682 | 0.081285983 |
| 0.213829595 | 0.246109295 | 0.19133715  | 0.050343724 |
| 0.009072597 | 0.253096018 | 0.210792467 | 0.129137456 |
| 0.141100439 | 0.137571584 | 0.039579333 | 0.042852144 |
| 0.188089295 | 0.014940067 | 0.060366409 | 0.05268584  |
| 0.110579492 | 0.114854353 | 0.12480793  | 0.08145647  |

|             |             |             |             |
|-------------|-------------|-------------|-------------|
| 0.160732104 | 0.016315106 | 0.202076486 | 0.099030249 |
| 0.141490904 | 0.147636169 | 0.208177231 | 0.025155012 |
| 0.111298156 | 0.218996206 | 0.157328383 | 0.006331525 |
| 0.246664381 | 0.211425626 | 0.219606277 | 0.001241552 |
| 0.240280358 | 0.004046599 | 0.16611879  | 0.172037555 |
| 0.147691073 | 0.125924419 | 0.25821447  | 0.166462247 |
| 0.122589133 | 0.101463019 | 0.124274747 | 0.160589159 |
| 0.107185362 | 0.088355182 | 0.22244775  | 0.093232121 |
| 0.159855217 | 0.04210028  | 0.025017075 | 0.02184076  |
| 0.025975377 | 0.183741806 | 0.104122207 | 0.015746928 |
| 0.155771599 | 0.090223183 | 0.206976996 | 0.153055901 |
| 0.246145345 | 0.020680163 | 0.127170334 | 0.155915462 |
| 0.035663946 | 0.043951389 | 0.007264598 | 0.122269224 |
| 0.1064695   | 0.160215107 | 0.098541967 | 0.065811672 |
| 0.131436192 | 0.167733995 | 0.100717743 | 0.208385698 |
| 0.158778134 | 0.115675742 | 0.030826849 | 0.060862939 |
| 0.057505664 | 0.044895649 | 0.319747985 | 0.001108458 |
| 0.175598714 | 0.03362144  | 0.219984758 | 0.15745587  |
| 0.172087618 | 0.200381985 | 0.027081244 | 0.020066324 |
| 0.023378127 | 0.0371722   | 0.058982624 | 0.187230086 |
| 0.162756234 | 0.066970057 | 0.278036936 | 0.029819446 |
| 0.241154452 | 0.188826278 | 0.153974649 | 0.068722594 |
| 0.13162083  | 0.059315537 | 0.159966903 | 0.02201993  |
| 0.142240735 | 0.21155886  | 0.070368196 | 0.180160122 |
| 0.171753626 | 0.219955668 | 0.018408196 | 0.222137475 |
| 0.163915269 | 0.040145254 | 0.209730175 | 0.094008905 |
| 0.05938977  | 0.108877838 | 0.205601217 | 0.056947039 |
| 0.074978846 | 0.167507314 | 0.002497323 | 0.056408936 |
| 0.235151476 | 0.072014916 | 0.123467587 | 0.201597764 |
| 0.241704503 | 0.255141396 | 0.173870865 | 0.067368332 |
| 0.13321532  | 0.149066444 | 0.072928117 | 0.147649844 |
| 0.157198506 | 0.042494176 | 0.095356736 | 0.007319049 |
| 0.181153908 | 0.177742707 | 0.051942203 | 0.017706277 |
| 0.00642935  | 0.183625013 | 0.149786319 | 0.012883868 |
| 0.271659693 | 0.150071257 | 0.099915277 | 0.206859585 |
| 0.063962717 | 0.148930188 | 0.096677015 | 0.251731352 |
| 0.006263172 | 0.136762428 | 0.202705441 | 0.119574324 |
| 0.136033699 | 0.251330642 | 0.256709945 | 0.263113757 |
| 0.013851968 | 0.131361014 | 0.00172947  | 0.144830241 |
| 0.129718334 | 0.216916061 | 0.082642742 | 0.034876475 |
| 0.223906294 | 0.184753189 | 0.097100349 | 0.136607874 |
| 0.012264497 | 0.281122002 | 0.117344444 | 0.156923162 |
| 0.076363123 | 0.121129967 | 0.040025378 | 0.232618839 |
| 0.12200504  | 0.08381662  | 0.120785046 | 0.075745805 |
| 0.161889408 | 0.145012214 | 0.035581889 | 0.15205031  |
| 0.116630627 | 0.017540222 | 0.055534006 | 0.217159196 |
| 0.130738138 | 0.283728848 | 0.288660496 | 0.094899281 |
| 0.228612232 | 0.141366633 | 0.137034503 | 0.200497334 |
| 0.07914681  | 0.146663426 | 0.251896878 | 0.175780123 |
| 0.22496448  | 0.223946059 | 0.188359313 | 0.17413814  |
| 0.133927468 | 0.032961166 | 0.152881316 | 0.150288459 |
| 0.200574876 | 0.199351824 | 0.069479669 | 0.20713869  |
| 0.022583809 | 0.053627607 | 0.079127    | 0.060872602 |
| 0.172140173 | 0.21575549  | 0.174860886 | 0.197352378 |

|             |             |             |             |
|-------------|-------------|-------------|-------------|
| 0.090355502 | 0.019943795 | 0.215886114 | 0.047967931 |
| 0.078886164 | 0.25779658  | 0.129123933 | 0.210775373 |
| 0.065071782 | 0.125160015 | 0.062460691 | 0.00010874  |
| 0.246734147 | 0.110713837 | 0.136698033 | 0.152828845 |
| 0.106289317 | 0.009684819 | 0.171640595 | 0.257681134 |
| 0.128932409 | 0.078798154 | 0.08964     | 0.170592252 |
| 0.211806189 | 0.107028901 | 0.112545273 | 0.114340258 |
| 0.238969143 | 0.067591093 | 0.108736799 | 0.154140333 |
| 0.162285274 | 0.076908896 |             |             |
| GM114       | 0.043102468 | 0.434627882 | 0.035349297 |
| 0.077821915 | 0.220917701 | 0.297752216 | 0.031176233 |
| 0.075767157 | 0.329918453 | 0.337969268 | 0.244819248 |
| 0.006314162 | 0.114964554 | 0.430517938 | 0.028424862 |
| 0.291369759 | 0.013426542 | 0.058895457 | 0.074666091 |
| 0.168082554 | 0.19528465  | 0.285109138 | 0.285010545 |
| 0.212126754 | 0.143312018 | 0.250501658 | 0.347523284 |
| 0.504136735 | 0.316436457 | 0.345651561 | 0.221473125 |
| 0.358919924 | 0.238202077 | 0.349567436 | 0.006857681 |
| 0.310929714 | 0.017589849 | 0.391182867 | 0.166615953 |
| 0.132391544 | 0.28725325  | 0.320313292 | 0.146454768 |
| 0.31815331  | 0.01809314  | 0.304607335 | 0.347021409 |
| 0.253604072 | 0.209330751 | 0.042431228 | 0.356098812 |
| 0.309316106 | 0.248042672 | 0.384970183 | 0.001818678 |
| 0.285987045 | 0.152132453 | 0.263979676 | 0.492958381 |
| 0.116334323 | 0.066649516 | 0.335908033 | 0.196717812 |
| 0.321637448 | 0.304094789 | 0.165674393 | 0.329331806 |
| 0.476924037 | 0.185095198 | 0.407659144 | 0.108948709 |
| 0.282103654 | 0.019361458 | 0.093198266 | 0.058398739 |
| 0.320645012 | 0.118199079 | 0.249745504 | 0.267666693 |
| 0.437996399 | 0.48258147  | 0.150796364 | 0.488724253 |
| 0.108414578 | 0.274253986 | 0.212797907 | 0.209707216 |
| 0.303306855 | 0.054336982 | 0.321066868 | 0.487213099 |
| 0.031492123 | 0.338151868 | 0.33295023  | 0.079299324 |
| 0.420093102 | 0.296960477 | 0.346142532 | 0.162138197 |
| 0.288135741 | 0.253645165 | 0.462072894 | 0.187296739 |
| 0.251970306 | 0.044440254 | 0.466168378 | 0.261421097 |
| 0.200373704 | 0.047820774 | 0.161585263 | 0.470346221 |
| 0.295301696 | 0.485676268 | 0.426880739 | 0.301773227 |
| 0.291883391 | 0.480872655 | 0.303024079 | 0.400268389 |
| 0.278946961 | 0.518562358 | 0.112258913 | 0.018213327 |
| 0.046845081 | 0.045587213 | 0.206710502 | 0.232005864 |
| 0.464930051 | 0.2336406   | 0.119659931 | 0.142424306 |
| 0.442144481 | 0.469573114 | 0.52361671  | 0.370921726 |
| 0.018036595 | 0.263199243 | 0.289818831 | 0.208011792 |
| 0.286034373 | 0.067996912 | 0.214575713 | 0.47737492  |
| 0.318370592 | 0.402827023 | 0.111616266 | 0.460911667 |
| 0.142939543 | 0.472685008 | 0.461538096 | 0.093422968 |
| 0.48604366  | 0.465859748 | 0.47924303  | 0.334239667 |
| 0.442109982 | 0.230267855 | 0.076125386 | 0.339832413 |
| 0.44263324  | 0.012589351 | 0.492207221 | 0.508486181 |
| 0.490087498 | 0.457003666 | 0.501469395 | 0.506780787 |
| 0.501044059 | 0.041415997 | 0.048163315 | 0.18649302  |
| 0.485929281 | 0.335165599 | 0.086388301 | 0.339393983 |
| 0.272764148 | 0.287456989 | 0.412583396 | 0.248573922 |

|             |             |             |             |
|-------------|-------------|-------------|-------------|
| 0.466272134 | 0.438666126 | 0.506649591 | 0.34095889  |
| 0.248619864 | 0.259206362 | 0.336782439 | 0.444172844 |
| 0.019794512 | 0.069542848 | 0.030994273 | 0.233088349 |
| 0.317604298 | 0.097434643 | 0.279663176 | 0.278803893 |
| 0.110107084 | 0.267228739 | 0.334727171 | 0.301781634 |
| 0.038212395 | 0.343561784 | 0.101447706 | 0.109668854 |
| 0.015931281 | 0.101827845 | 0.108298653 | 0.090047921 |
| 0.162499922 | 0.196527072 | 0.394408603 | 0.48344841  |
| 0.285662526 | 0.11942827  | 0.347896912 | 0.435845548 |
| 0.360232377 | 0.294485829 | 0.157421682 | 0.00289171  |
| 0.195363054 | 0.352324989 | 0.214636385 | 0.35176466  |
| 0.141634908 | 0.161190173 | 0.285370329 | 0.324155468 |
| 0.188429733 | 0.105829273 | 0.29157085  | 0.374998744 |
| 0.105652535 | 0.212453041 | 0.406860649 | 0.333763117 |
| 0.000622605 | 0.212959545 | 0.41199221  | 0.106975792 |
| 0.228476655 | 0.121750872 | 0.242988992 | 0.441283637 |
| 0.291196338 | 0.190612626 | 0.501035829 | 0.327179615 |
| 0.287813272 | 0.195318353 | 0.509068362 | 0.077066698 |
| 0.295111485 | 0.026246456 | 0.176216628 | 0.332687959 |
| 0.153528628 | 0.202546776 | 0.247756587 | 0.200211043 |
| 0.082536749 | 0.502233976 | 0.349205421 | 0.499369929 |
| 0.313381404 | 0.506592816 | 0.441094591 | 0.397478094 |
| 0.25038804  | 0.341435324 | 0.165597439 | 0.393007928 |
| 0.436465179 | 0.267053386 | 0.047336004 | 0.448569744 |
| 0.324306147 | 0.333239995 | 0.081379949 | 0.458860745 |
| 0.448045635 | 0.467990254 | 0.081958409 | 0.301349517 |
| 0.307564036 | 0.143829945 | 0.382583705 | 0.505577308 |
| 0.324221242 | 0.273633153 | 0.247177487 | 0.34346637  |
| 0.101372832 | 0.161814757 | 0.269099125 | 0.219010762 |
| 0.019586968 | 0.051507467 | 0.036259887 | 0.090471869 |
| 0.137853131 | 1           | 0.302149759 | 0.502880897 |
| 0.06240254  | 0.380981223 | 0.170226616 | 0.189934226 |
| 0.387624703 | 0.29195337  | 0.314965856 | 0.296250953 |
| 0.169067788 | 0.00631704  | 0.061443047 | 0.478952824 |
| 0.025503301 | 0.205572313 | 0.241756207 | 0.001058302 |
| 0.023248006 | 0.434455768 | 0.067794451 | 0.144922899 |
| 0.460931884 | 0.151896355 | 0.127388875 | 0.307536139 |
| 0.245954155 | 0.050754305 | 0.000742939 | 0.485361344 |
| 0.487943706 | 0.456032384 | 0.489038448 | 0.4519558   |
| 0.439044189 | 0.372803921 | 0.36349934  | 0.261556733 |
| 0.057431086 | 0.058110625 | 0.168846338 | 0.186098632 |
| 0.003654395 | 0.307009445 | 0.234907062 | 0.078169347 |
| 0.382622428 | 0.209097513 | 0.017557128 | 0.284343007 |
| 0.008651216 | 0.216206751 | 0.235839232 | 0.148308046 |
| 0.278664865 | 0.005443449 | 0.185430626 | 0.27169194  |
| 0.402271152 | 0.287820558 | 0.330862961 | 0.51268893  |
| 0.214188024 | 0.09421728  | 0.204332392 | 0.326547852 |
| 0.035683622 | 0.127582367 | 0.290028773 | 0.045905325 |
| 0.208167431 | 0.440330816 | 0.330370499 | 0.036839388 |
| 0.164728909 | 0.001099612 | 0.31387959  | 0.507457229 |
| 0.464374313 | 0.504719631 | 0.478081844 | 0.225695728 |
| 0.481561561 | 0.18769366  | 0.523737815 | 0.374788028 |
| 0.347787851 | 0.000186807 | 0.002377143 | 0.481961762 |
| 0.290231069 | 0.041682896 | 0.089329468 | 0.282491434 |



|             |                     |                      |             |
|-------------|---------------------|----------------------|-------------|
| 0.053820729 | 0.103320797         | 0.036186346          | 0.131821672 |
| 0.319196595 | 0.160061491         | 0.146799288          | 0.459232689 |
| 0.146667786 | 0.145587216         | 0.332797234          | 0.0530513   |
| 0.315425476 | 0.023453704         | 0.053558411          | 0.003381605 |
| 0.285170253 | 0.084577184         | 0.44179278           | 0.50078421  |
| 0.450953606 | 0.302946054         | 0.362410931          | 0.291496551 |
| 0.432462641 | 0.071172453         | 0.353564347          | 0.07513345  |
| 0.479264395 | 0.275152806         | 0.228862242          | 0.234114461 |
| 0.463991856 | 0.430558 0.01447112 | 0.343823264          |             |
| 0.005468588 | 0.00109132          | 0.274206021          | 0.178915011 |
| 0.089198768 | 0.286314823         | 0.171095954          | 0.19217658  |
| 0.172294095 | 0.014645361         | 0.238037635          | 0.207429812 |
| 0.187037503 | 0.253394908         | 0.203418029          | 0.185270664 |
| 0.189252077 | 0.094120543         | 0.123682219          | 0.095760448 |
| 0.234680267 | 0.259340209         | 0.146004784          | 0.008511409 |
| 0.343542846 | 0.322172343         | 0.028175517          | 0.093641572 |
| 0.397602258 | 0.47818174          | 0.018342504          | 0.002438405 |
| 0.190984757 | 0.239423962         | 0.485679424          | 0.501322629 |
| 0.497967842 | 0.4802153           | 0.337213954          | 0.070445484 |
| 0.035351259 | 0.215150348         | 0.225326106          | 0.053874605 |
| 0.499382049 | 0.042216287         | 0.47449804           | 0.265890141 |
| 0.06616829  | 0.127633879         | 0.013205457          | 0.044608662 |
| 0.319034156 | 0.103187918         | 0.101181541          | 0.093457613 |
| 0.21066222  | 0.223226341         | 0.023612824          | 0.113226533 |
| 0.266524907 | 0.161680101         | 0.091666911          | 0.238619525 |
| 0.307155179 | 0.288833225         | 0.372229419          | 0.391009516 |
| 0.076230511 | 0.068800321         | 0.195401262          | 0.337386215 |
| 0.435519024 | 0.364476665         | 0.014569193          | 0.469181846 |
| 0.475375703 | 0.35644589          | 0.481680525          | 0.334357985 |
| 0.048182045 | 0.279410039         | 0.29551874           | 0.244680091 |
| 0.11341839  | 0.292217152         | 0.160349408          | 0.032727053 |
| 0.243247551 | 0.445916381         | 0.390123874          | 0.091684086 |
| 0.346994341 | 0.089163605         | 0.037011312          | 0.452040008 |
| 0.14117777  | 0.049274427         | 0.339566823          | 0.43341209  |
| 0.000180678 | 0.152047647         | 0.480873133          | 0.156446911 |
| 0.489367266 | 0.457338897         | 0.385476144          | 0.196773616 |
| 0.002509465 | 0.345417555         | 0.253139794          | 0.285329437 |
| 0.418629787 | 0.279813687         | 0.133183477          | 0.033677513 |
| 0.205255273 | 0.053086731         | 0.073084411          | 0.274627117 |
| 0.172114641 | 0.305324046         | 0.116598785          | 0.140898084 |
| 0.120737883 | 0.066375972         | 0.222882337          | 0.150419989 |
| 0.158055283 | 0.151081308         | 0.267544193          | 0.328992792 |
| 0.176077384 | 0.412332163         | 0.354706527          | 0.0116955   |
| 0.30468539  | 0.378232479         | 0.408572904          | 0.000471284 |
| 0.353789574 | 0.00166001          | 0.119361365          | 0.12708063  |
| 0.119043746 | 0.134687482         | 0.164838184          | 0.203891696 |
| 0.254284833 | 0.135443657         | 0.169967684          | 0.137926998 |
| 0.090814549 | 0.144552561         | 0.290699 0.263981035 |             |
| 0.186700269 | 0.069623812         | 0.073770102          | 0.080985099 |
| 0.02424585  | 0.470746548         | 0.179678472          | 0.047024727 |
| 0.138769813 | 0.283707561         | 0.278493433          | 0.496055768 |
| 0.370543558 | 0.092048632         | 0.247683025          | 0.430552716 |
| 0.310929507 | 0.24541604          | 0.038997569          | 0.288529518 |
| 0.144641598 | 0.153622316         | 0.336276991          | 0.217680078 |

|             |             |             |             |
|-------------|-------------|-------------|-------------|
| 0.373857139 | 0.339873446 | 0.173611635 | 0.401111744 |
| 0.258749894 | 0.288349264 | 0.318121373 | 0.039481252 |
| 0.100447986 | 0.079820282 | 0.188353525 | 0.000446152 |
| 0.234957674 | 0.179411622 | 0.458072012 | 0.46662556  |
| 0.2939935   | 0.327983457 | 0.294061045 | 0.046083436 |
| 0.294824762 | 0.149868969 | 0.079177365 | 0.408651054 |
| 0.240293838 | 0.111670279 | 0.203275445 | 0.262696933 |
| 0.381739877 | 0.389518628 | 0.202030412 | 0.171864883 |
| 0.160291076 | 0.128222019 | 0.45480567  | 0.079207712 |
| 0.349694175 | 0.126268389 | 0.310851983 | 0.190178115 |
| 0.137656143 | 0.515696029 | 0.032735812 | 0.524863379 |
| 0.240403094 | 0.089419862 | 0.441307068 | 0.226760353 |
| 0.217729141 | 0.071338048 | 0.199567513 | 0.330002638 |
| 0.152601117 | 0.313511939 | 0.032195441 | 0.05745095  |
| 0.22634502  | 0.285203875 | 0.400619347 | 0.299000806 |
| 0.183672806 | 0.263509879 | 0.211540289 | 0.207006702 |
| 0.4790034   | 0.475507177 | 0.156366281 | 0.16805187  |
| 0.261997738 | 0.053229738 | 0.298271076 | 0.023546391 |
| 0.324232483 | 0.35657497  | 0.353683289 | 0.026274448 |
| 0.006724016 | 0.208785077 | 0.311978759 | 0.044688988 |
| 0.465110592 | 0.239299599 | 0.298874884 | 0.370370444 |
| 0.118988848 | 0.469729416 | 0.06721413  | 0.316874799 |
| 0.032266383 | 0.163786875 | 0.324676846 | 0.329314577 |
| 0.14030494  | 0.228641046 | 0.28144206  | 0.191975555 |
| 0.011993792 | 0.176964806 | 0.000271189 | 0.347643664 |
| 0.451682603 | 0.279804673 | 0.148230308 | 0.359841441 |
| 0.175326781 | 0.346549525 | 0.186178575 | 0.363609111 |
| 0.002848876 | 0.271815838 | 0.119683147 | 0.374141051 |
| 0.224975813 | 0.287283507 | 0.024868173 | 0.257510615 |
| 0.425253394 | 0.211374022 | 0.192643325 | 0.268725912 |
| 0.486606477 | 0.371337592 | 0.121531325 | 0.169426372 |
| 0.342026264 | 0.03646994  | 0.35140226  | 0.510086641 |
| 0.09984619  | 0.167227562 | 0.409807417 | 0.115352822 |
| 0.273413712 | 0.356655102 | 0.351361351 | 0.510548039 |
| 0.034944371 | 0.144353228 | 0.381958815 | 0.445066268 |
| 0.213017023 | 0.136207593 | 0.205828103 | 0.151180693 |
| 0.443290495 | 0.053171024 | 0.220491009 | 0.266322233 |
| 0.18565516  | 0.202836187 | 0.295596631 | 0.127267864 |
| 0.016063998 | 0.111256703 | 0.282215804 | 0.082026639 |
| 0.1867847   | 0.25455631  | 0.168348683 | 0.321807293 |
| 0.074553568 | 0.00787179  | 0.3981644   | 0.018448434 |
| 0.243342071 | 0.2757792   | 0.154579108 | 0.270044332 |
| 0.128509533 | 0.253476326 | 0.245741811 | 4.93E-05    |
| 0.362219134 | 0.036383227 | 0.243355179 | 0.144567362 |
| 0.26415753  | 0.02636508  | 0.426436621 | 0.494434033 |
| 0.219551937 | 0.322168403 | 0.333946168 | 0.445168233 |
| 0.137554567 | 0.356995857 | 0.321877347 | 0.340526695 |
| 0.208249527 | 0.354128415 | 0.365580729 | 0.320455926 |
| 0.303980955 | 0.191565793 |             |             |
| GM129       | 0.068341901 | 0.381602297 | 0.046975985 |
| 0.142934474 | 0.313388118 | 0.285477106 | 0.071326487 |
| 0.127124985 | 0.305147495 | 0.226846224 | 0.29954289  |
| 0.022704505 | 0.130469366 | 0.430709457 | 0.068420829 |
| 0.343653234 | 0.048093358 | 0.117034087 | 0.086850564 |

|             |             |             |             |
|-------------|-------------|-------------|-------------|
| 0.22513072  | 0.299509343 | 0.295834135 | 0.253077124 |
| 0.307712548 | 0.171795444 | 0.262080809 | 0.321222333 |
| 0.464664196 | 0.214764473 | 0.32855638  | 0.160525375 |
| 0.399167026 | 0.316702068 | 0.313605023 | 0.018770814 |
| 0.313970882 | 0.033162555 | 0.411538807 | 0.27733982  |
| 0.207939524 | 0.325077196 | 0.229236226 | 0.240209948 |
| 0.284233764 | 0.037065095 | 0.143814295 | 0.33990579  |
| 0.265597063 | 0.267504706 | 0.05442962  | 0.342653707 |
| 0.307801075 | 0.256723452 | 0.298684976 | 0.002378532 |
| 0.287413693 | 0.119087968 | 0.243853544 | 0.459067994 |
| 0.18124481  | 0.13900654  | 0.261759624 | 0.214588497 |
| 0.312102114 | 0.327695919 | 0.236097948 | 0.287115149 |
| 0.46337649  | 0.22901343  | 0.366119226 | 0.152231521 |
| 0.303758576 | 0.035748788 | 0.147233592 | 0.07555227  |
| 0.326260997 | 0.205693437 | 0.299123328 | 0.32229819  |
| 0.376340914 | 0.482123296 | 0.220455807 | 0.450693622 |
| 0.165710919 | 0.32894883  | 0.307643524 | 0.291901912 |
| 0.325704825 | 0.099460801 | 0.354356389 | 0.492511246 |
| 0.052482741 | 0.264926526 | 0.334894243 | 0.101285469 |
| 0.381191796 | 0.284519066 | 0.271818117 | 0.215095952 |
| 0.336943735 | 0.330348559 | 0.439578791 | 0.245863217 |
| 0.299170103 | 0.064897109 | 0.425437081 | 0.318408881 |
| 0.273812885 | 0.076918842 | 0.279996252 | 0.44225336  |
| 0.325308565 | 0.456414339 | 0.379898779 | 0.344266277 |
| 0.336119785 | 0.466265728 | 0.333060323 | 0.384655232 |
| 0.118843604 | 0.483565421 | 0.170990927 | 0.054000593 |
| 0.062921224 | 0.104827537 | 0.267768082 | 0.294068236 |
| 0.444487726 | 0.264543971 | 0.178181222 | 0.255816513 |
| 0.464742946 | 0.416853355 | 0.482539799 | 0.379748492 |
| 0.044683105 | 0.286178112 | 0.339548235 | 0.225703206 |
| 0.314653691 | 0.114564795 | 0.292079259 | 0.459726345 |
| 0.357147491 | 0.421080786 | 0.142427821 | 0.456493698 |
| 0.193465295 | 0.490872699 | 0.40173905  | 0.172610616 |
| 0.479148327 | 0.442323143 | 0.497282151 | 0.352590677 |
| 0.43029556  | 0.266284647 | 0.077342059 | 0.357429932 |
| 0.468945352 | 0.027376105 | 0.451080881 | 0.482927697 |
| 0.455743685 | 0.440674075 | 0.512858607 | 0.483433735 |
| 0.453440933 | 0.073643441 | 0.045128088 | 0.286485203 |
| 0.464946258 | 0.374861643 | 0.164962056 | 0.326785897 |
| 0.324693513 | 0.284656042 | 0.380813869 | 0.253090725 |
| 0.492940823 | 0.430515747 | 0.45802443  | 0.338843597 |
| 0.250278896 | 0.293402426 | 0.324707713 | 0.409223533 |
| 0.055761978 | 0.100163211 | 0.044382915 | 0.280462245 |
| 0.239357906 | 0.187346613 | 0.278676492 | 0.317935136 |
| 0.192751845 | 0.252594701 | 0.291425404 | 0.338076258 |
| 0.048929572 | 0.312432046 | 0.159709306 | 0.15623467  |
| 0.057640749 | 0.13430551  | 0.178904012 | 0.156014374 |
| 0.257749043 | 0.210729702 | 0.347292832 | 0.474424416 |
| 0.313349913 | 0.151086051 | 0.32941018  | 0.459273076 |
| 0.427183279 | 0.333912636 | 0.205375969 | 0.018212218 |
| 0.279378569 | 0.270308274 | 0.236774477 | 0.324014185 |
| 0.164657966 | 0.246949235 | 0.32975049  | 0.366443514 |
| 0.211902381 | 0.128674686 | 0.326593683 | 0.393153439 |
| 0.124205786 | 0.279794124 | 0.433080528 | 0.305763188 |

|             |             |             |             |
|-------------|-------------|-------------|-------------|
| 0.004389258 | 0.27941896  | 0.409961864 | 0.227008147 |
| 0.261026114 | 0.162118203 | 0.240379453 | 0.454584168 |
| 0.281231099 | 0.270985273 | 0.467408809 | 0.364813079 |
| 0.250775035 | 0.194572562 | 0.505428747 | 0.079724965 |
| 0.32204763  | 0.080532401 | 0.268095227 | 0.235668139 |
| 0.230415478 | 0.276006011 | 0.309604235 | 0.300843595 |
| 0.10033236  | 0.477924506 | 0.354940064 | 0.481216981 |
| 0.329366321 | 0.507710634 | 0.435911716 | 0.415981076 |
| 0.29440621  | 0.311703206 | 0.182966774 | 0.403181839 |
| 0.445043447 | 0.26837424  | 0.06174668  | 0.396856725 |
| 0.304266949 | 0.351999296 | 0.184354872 | 0.479633657 |
| 0.462461444 | 0.410882017 | 0.159242908 | 0.367657149 |
| 0.355420694 | 0.200325948 | 0.390854744 | 0.50796132  |
| 0.264962088 | 0.32789465  | 0.327698584 | 0.413374167 |
| 0.162843608 | 0.265533114 | 0.299213935 | 0.220690809 |
| 0.013725378 | 0.075256495 | 0.062335214 | 0.188550069 |
| 0.232323851 | 0.302149759 | 1           | 0.485911913 |
| 0.123718108 | 0.385956423 | 0.209882148 | 0.287119073 |
| 0.390368753 | 0.313520571 | 0.322956543 | 0.326753925 |
| 0.221434488 | 0.02886273  | 0.12681453  | 0.482795677 |
| 0.035171143 | 0.261439973 | 0.254866816 | 0.004291345 |
| 0.049488047 | 0.346600307 | 0.088522403 | 0.184191331 |
| 0.471983997 | 0.184523304 | 0.177675334 | 0.255917044 |
| 0.299396567 | 0.0962866   | 0.006100957 | 0.467479102 |
| 0.456212133 | 0.434139469 | 0.451210414 | 0.415519459 |
| 0.430862228 | 0.348340793 | 0.398292386 | 0.245762957 |
| 0.11515779  | 0.083577273 | 0.271184669 | 0.2917927   |
| 0.004500218 | 0.354891651 | 0.298170379 | 0.132697543 |
| 0.372045727 | 0.266963299 | 0.041018829 | 0.316553595 |
| 0.024018505 | 0.223297926 | 0.259366219 | 0.231758303 |
| 0.341412217 | 0.01662482  | 0.205478848 | 0.311704333 |
| 0.376282606 | 0.308927576 | 0.314960139 | 0.490827602 |
| 0.287439738 | 0.10149879  | 0.309904005 | 0.35241046  |
| 0.083407861 | 0.112632558 | 0.285947464 | 0.029510791 |
| 0.150200721 | 0.418444741 | 0.318223027 | 0.075432305 |
| 0.247493394 | 0.006058651 | 0.328847351 | 0.492172307 |
| 0.408262667 | 0.500187671 | 0.467067567 | 0.281296793 |
| 0.468128103 | 0.137474851 | 0.493625149 | 0.358816445 |
| 0.282427276 | 0.000998545 | 0.00884136  | 0.470530552 |
| 0.335267935 | 0.046519092 | 0.15585505  | 0.254942442 |
| 0.129977056 | 0.125389258 | 0.071604285 | 0.254482266 |
| 0.306777239 | 0.259325645 | 0.226383356 | 0.42033169  |
| 0.246659318 | 0.230717338 | 0.282231917 | 0.077402923 |
| 0.324968082 | 0.063802545 | 0.080435928 | 0.011493209 |
| 0.330197856 | 0.099335274 | 0.410624897 | 0.465622001 |
| 0.469973455 | 0.347673828 | 0.248312351 | 0.251602456 |
| 0.422347507 | 0.072282312 | 0.289978981 | 0.086785914 |
| 0.435360421 | 0.334576933 | 0.295516642 | 0.28133038  |
| 0.486252421 | 0.437753011 | 0.040530794 | 0.387073035 |
| 0.014956091 | 0.004599227 | 0.263839663 | 0.22425408  |
| 0.102313336 | 0.333286765 | 0.237825807 | 0.234570252 |
| 0.237093173 | 0.031396482 | 0.29984017  | 0.289643479 |
| 0.281482403 | 0.320756407 | 0.296654025 | 0.21928765  |
| 0.302204111 | 0.20953896  | 0.210044216 | 0.165888279 |

|             |             |             |             |
|-------------|-------------|-------------|-------------|
| 0.230250222 | 0.286774238 | 0.176104422 | 0.027864036 |
| 0.317569412 | 0.331397236 | 0.062099258 | 0.139400488 |
| 0.420665634 | 0.46837105  | 0.062973537 | 0.018762342 |
| 0.237791861 | 0.297985811 | 0.482225753 | 0.451361868 |
| 0.47532481  | 0.500650036 | 0.365207979 | 0.166734259 |
| 0.06991686  | 0.309207116 | 0.311683737 | 0.160838343 |
| 0.472950752 | 0.056965026 | 0.434595131 | 0.308337093 |
| 0.115779755 | 0.221351676 | 0.045444711 | 0.093529364 |
| 0.322890121 | 0.165607776 | 0.208583324 | 0.119122879 |
| 0.304200648 | 0.27747274  | 0.057974808 | 0.193360446 |
| 0.311222095 | 0.251291554 | 0.157826501 | 0.250254241 |
| 0.316941817 | 0.179867421 | 0.375593736 | 0.43634811  |
| 0.113841785 | 0.112333583 | 0.212640983 | 0.340169921 |
| 0.409053962 | 0.289075309 | 0.02539602  | 0.399467185 |
| 0.469204165 | 0.330905856 | 0.44709967  | 0.392810471 |
| 0.081451    | 0.32391415  | 0.310916985 | 0.323664061 |
| 0.18129425  | 0.278369915 | 0.235832574 | 0.065425972 |
| 0.289111151 | 0.444128245 | 0.388654672 | 0.177351953 |
| 0.307514362 | 0.099249796 | 0.050139035 | 0.408946719 |
| 0.258094823 | 0.090763963 | 0.245068292 | 0.40488276  |
| 0.005019069 | 0.193838408 | 0.482045195 | 0.214201824 |
| 0.487914309 | 0.472259788 | 0.418180737 | 0.224127724 |
| 0.006833003 | 0.352124239 | 0.314543399 | 0.332642409 |
| 0.387498317 | 0.29523212  | 0.145724673 | 0.097872589 |
| 0.279258612 | 0.063616223 | 0.16423971  | 0.245595037 |
| 0.227741933 | 0.296234347 | 0.184846414 | 0.199094775 |
| 0.23444886  | 0.076414653 | 0.268553788 | 0.221026616 |
| 0.221437879 | 0.220372602 | 0.334615142 | 0.201677449 |
| 0.217141513 | 0.427073969 | 0.365271803 | 0.028870592 |
| 0.315983362 | 0.398871245 | 0.414628758 | 0.004601833 |
| 0.364440177 | 0.010389396 | 0.219702077 | 0.232817316 |
| 0.224468425 | 0.229340721 | 0.268294177 | 0.302811568 |
| 0.287579634 | 0.230583216 | 0.252753818 | 0.221711365 |
| 0.186728439 | 0.208718237 | 0.33068864  | 0.299545168 |
| 0.270773133 | 0.125990409 | 0.090958187 | 0.092959374 |
| 0.058195825 | 0.421286907 | 0.226803013 | 0.05921063  |
| 0.219827355 | 0.308323474 | 0.350321614 | 0.441362414 |
| 0.408440284 | 0.096082066 | 0.293627858 | 0.395113656 |
| 0.200979007 | 0.226980492 | 0.05787837  | 0.303285541 |
| 0.208506922 | 0.240284715 | 0.290059638 | 0.231732885 |
| 0.331789755 | 0.378805981 | 0.215085335 | 0.420612417 |
| 0.322321073 | 0.300340168 | 0.221780643 | 0.109803529 |
| 0.171803496 | 0.117889208 | 0.293873683 | 0.002995804 |
| 0.291372419 | 0.20147105  | 0.444066819 | 0.440149344 |
| 0.284726692 | 0.367497236 | 0.211607524 | 0.094075278 |
| 0.193174531 | 0.159331808 | 0.12781585  | 0.36940055  |
| 0.233184698 | 0.178069569 | 0.308540551 | 0.225128062 |
| 0.385280944 | 0.363766879 | 0.288847959 | 0.216627453 |
| 0.237943928 | 0.165178626 | 0.437543739 | 0.104515924 |
| 0.319432925 | 0.243712546 | 0.246684054 | 0.295963467 |
| 0.249740773 | 0.487071439 | 0.059035742 | 0.495354539 |
| 0.31999784  | 0.113289744 | 0.462354286 | 0.240355029 |
| 0.247248305 | 0.149236439 | 0.234552937 | 0.2734269   |
| 0.230933089 | 0.302409406 | 0.01802633  | 0.090346082 |

|             |             |             |             |
|-------------|-------------|-------------|-------------|
| 0.301687059 | 0.272026874 | 0.349635976 | 0.328588209 |
| 0.295820695 | 0.340520196 | 0.191803157 | 0.242970418 |
| 0.420530471 | 0.440934943 | 0.242158501 | 0.241602596 |
| 0.297212317 | 0.10901523  | 0.266345329 | 0.025233471 |
| 0.330443563 | 0.321957826 | 0.288704964 | 0.062087675 |
| 0.025657884 | 0.255678801 | 0.3256593   | 0.062024362 |
| 0.476129282 | 0.216195579 | 0.269637059 | 0.350106935 |
| 0.151962741 | 0.443478111 | 0.156444502 | 0.352743945 |
| 0.053867725 | 0.231960689 | 0.327298413 | 0.305545724 |
| 0.242706905 | 0.310471743 | 0.349041422 | 0.266420624 |
| 0.042355504 | 0.277468267 | 0.004500816 | 0.375579403 |
| 0.416653486 | 0.333654558 | 0.192013747 | 0.224621488 |
| 0.25678229  | 0.360851622 | 0.245265949 | 0.310996322 |
| 0.017261245 | 0.333162677 | 0.188746504 | 0.363508886 |
| 0.225863365 | 0.303190266 | 0.073077074 | 0.319281257 |
| 0.397601205 | 0.276844297 | 0.239330795 | 0.291830145 |
| 0.439596663 | 0.3442337   | 0.131843467 | 0.247239922 |
| 0.286111145 | 0.059232465 | 0.260155217 | 0.496431379 |
| 0.19457708  | 0.265942169 | 0.437226548 | 0.224402332 |
| 0.306283936 | 0.34482197  | 0.306358941 | 0.484789732 |
| 0.110918744 | 0.21914322  | 0.391972777 | 0.428615907 |
| 0.28807057  | 0.244447939 | 0.268855332 | 0.262588195 |
| 0.402438328 | 0.097120155 | 0.298639904 | 0.30729868  |
| 0.267490466 | 0.266850653 | 0.240637438 | 0.238527261 |
| 0.044312693 | 0.173642047 | 0.27547568  | 0.135512677 |
| 0.269691068 | 0.332344411 | 0.295842762 | 0.372915421 |
| 0.145084985 | 0.035161701 | 0.436127636 | 0.0387858   |
| 0.238886052 | 0.323855335 | 0.217385607 | 0.324241838 |
| 0.163449588 | 0.281470985 | 0.254115554 | 0.001241067 |
| 0.396746052 | 0.087278942 | 0.285025661 | 0.25697085  |
| 0.2667522   | 0.055406295 | 0.416036898 | 0.496580708 |
| 0.25300656  | 0.263577092 | 0.287502976 | 0.423400103 |
| 0.21117929  | 0.282903961 | 0.304532033 | 0.298613021 |
| 0.263180099 | 0.27928478  | 0.309953679 | 0.319040448 |
| 0.317072137 | 0.22446509  |             |             |
| GMNN        | 0.156114456 | 0.492442527 | 0.128055094 |
| 0.235072765 | 0.377697869 | 0.509177377 | 0.125708398 |
| 0.227772581 | 0.447282424 | 0.394720854 | 0.465882691 |
| 0.047718001 | 0.106654482 | 0.517453425 | 0.114331742 |
| 0.469556775 | 0.07555329  | 0.197239985 | 0.12412028  |
| 0.32241465  | 0.35276258  | 0.415560306 | 0.506166951 |
| 0.355338825 | 0.281281146 | 0.46837556  | 0.456454321 |
| 0.523652904 | 0.3341088   | 0.521852549 | 0.271694254 |
| 0.457799117 | 0.395114589 | 0.454826695 | 0.046204657 |
| 0.511725165 | 0.017076721 | 0.460634863 | 0.354417802 |
| 0.190256787 | 0.42307981  | 0.447790438 | 0.345593165 |
| 0.480724683 | 0.090212808 | 0.286580262 | 0.484920585 |
| 0.444192118 | 0.383155435 | 0.1431124   | 0.522982884 |
| 0.462501586 | 0.467627746 | 0.4928955   | 0.0071979   |
| 0.359143454 | 0.104254403 | 0.268145252 | 0.51735514  |
| 0.310808642 | 0.208391571 | 0.355284059 | 0.359712312 |
| 0.474179291 | 0.459456815 | 0.355343574 | 0.466253756 |
| 0.517982667 | 0.218255971 | 0.511159152 | 0.247124047 |
| 0.496143399 | 0.082736283 | 0.258627835 | 0.168098097 |

|             |             |             |             |
|-------------|-------------|-------------|-------------|
| 0.468674657 | 0.297449005 | 0.429631034 | 0.366735155 |
| 0.493091607 | 0.531240789 | 0.346118888 | 0.519061426 |
| 0.127417707 | 0.404372007 | 0.3447645   | 0.394368567 |
| 0.457108271 | 0.160230351 | 0.512580828 | 0.529566138 |
| 0.109697442 | 0.486860933 | 0.497880739 | 0.223853595 |
| 0.509787801 | 0.334020921 | 0.500054848 | 0.217354915 |
| 0.44057683  | 0.418668477 | 0.492193113 | 0.412031985 |
| 0.38838224  | 0.153367595 | 0.510759739 | 0.379428913 |
| 0.392170952 | 0.16762329  | 0.296245134 | 0.523497776 |
| 0.515708772 | 0.528876046 | 0.509306353 | 0.460111102 |
| 0.457834243 | 0.519357328 | 0.512116964 | 0.491238132 |
| 0.214046759 | 0.533134772 | 0.303607132 | 0.089540612 |
| 0.158154213 | 0.153210664 | 0.294832371 | 0.394703657 |
| 0.528338986 | 0.456046367 | 0.32425416  | 0.323769518 |
| 0.505917408 | 0.500559334 | 0.53144782  | 0.508893084 |
| 0.092233793 | 0.296440831 | 0.464487387 | 0.40342208  |
| 0.481520904 | 0.202448344 | 0.314587424 | 0.528860338 |
| 0.468323441 | 0.511362279 | 0.28940299  | 0.523210049 |
| 0.306041926 | 0.517898584 | 0.520971456 | 0.27363268  |
| 0.532340209 | 0.516358917 | 0.513299182 | 0.472790118 |
| 0.490927682 | 0.475324201 | 0.098551941 | 0.474049647 |
| 0.497776316 | 0.021022474 | 0.527112038 | 0.527884666 |
| 0.511628882 | 0.530705457 | 0.513753785 | 0.525311928 |
| 0.516394097 | 0.151002025 | 0.040083169 | 0.37420758  |
| 0.524467304 | 0.48879286  | 0.208041547 | 0.498696223 |
| 0.435510696 | 0.521650406 | 0.50636089  | 0.402997045 |
| 0.516840387 | 0.520811188 | 0.52878589  | 0.502111724 |
| 0.417609701 | 0.404712466 | 0.441719597 | 0.495563016 |
| 0.096286888 | 0.220446653 | 0.119468527 | 0.403137143 |
| 0.458992197 | 0.267133188 | 0.518325229 | 0.430532875 |
| 0.293431807 | 0.469743782 | 0.394335243 | 0.45402891  |
| 0.121524223 | 0.534704521 | 0.274869339 | 0.294281745 |
| 0.088882103 | 0.229796654 | 0.297555946 | 0.245829701 |
| 0.344609161 | 0.286375875 | 0.526927869 | 0.517134539 |
| 0.430185652 | 0.296212879 | 0.529543768 | 0.498265679 |
| 0.461699426 | 0.456885527 | 0.333248068 | 0.02530622  |
| 0.367827548 | 0.374365302 | 0.226494903 | 0.483825865 |
| 0.250697193 | 0.35101223  | 0.483683524 | 0.470394621 |
| 0.427569715 | 0.253061502 | 0.454823845 | 0.449265141 |
| 0.255117219 | 0.394781479 | 0.516303299 | 0.510367611 |
| 0.010920803 | 0.455613899 | 0.531265958 | 0.199736074 |
| 0.433251441 | 0.173730394 | 0.313064819 | 0.518936989 |
| 0.363450088 | 0.282215585 | 0.525124379 | 0.462362037 |
| 0.447954598 | 0.294737359 | 0.52066027  | 0.070349318 |
| 0.415150015 | 0.087147757 | 0.37674498  | 0.436388674 |
| 0.369874128 | 0.387512121 | 0.380693859 | 0.357438499 |
| 0.237532606 | 0.525978623 | 0.487878896 | 0.526910843 |
| 0.457689412 | 0.525083476 | 0.528548443 | 0.512083908 |
| 0.474299915 | 0.439045657 | 0.164993285 | 0.529595112 |
| 0.520089231 | 0.391954402 | 0.15389445  | 0.517849991 |
| 0.455260663 | 0.48502849  | 0.166530517 | 0.513760988 |
| 0.508090782 | 0.490050215 | 0.22944408  | 0.448764783 |
| 0.485218882 | 0.361013194 | 0.49288467  | 0.525324759 |
| 0.408668634 | 0.435759096 | 0.415013606 | 0.462945416 |

|             |             |             |             |
|-------------|-------------|-------------|-------------|
| 0.286612345 | 0.268703833 | 0.404040684 | 0.212253531 |
| 0.013782228 | 0.168729519 | 0.142070048 | 0.240611236 |
| 0.207289315 | 0.502880897 | 0.485911913 | 1           |
| 0.206839069 | 0.487605333 | 0.342751397 | 0.388416821 |
| 0.488379703 | 0.426818028 | 0.445943602 | 0.468558765 |
| 0.353080428 | 0.037868604 | 0.191105097 | 0.535616983 |
| 0.099000156 | 0.296489567 | 0.440220735 | 0.005666669 |
| 0.105505116 | 0.49993574  | 0.17520366  | 0.270854315 |
| 0.507638325 | 0.280238934 | 0.330840997 | 0.427627937 |
| 0.44221456  | 0.175743182 | 0.00636004  | 0.508913767 |
| 0.488771526 | 0.478043992 | 0.489069035 | 0.47132356  |
| 0.48861066  | 0.486913183 | 0.49273537  | 0.490964798 |
| 0.196904977 | 0.183181596 | 0.267144846 | 0.387727458 |
| 0.010994279 | 0.46899122  | 0.386134419 | 0.239177477 |
| 0.50325384  | 0.411593523 | 0.088427176 | 0.424001267 |
| 0.056447854 | 0.248635366 | 0.434284297 | 0.313200245 |
| 0.42048947  | 0.040525988 | 0.333255511 | 0.409831397 |
| 0.478686501 | 0.449463274 | 0.426530042 | 0.535837216 |
| 0.437977975 | 0.230500165 | 0.401716261 | 0.481584992 |
| 0.144542612 | 0.168931428 | 0.476189442 | 0.058639975 |
| 0.286577558 | 0.467916692 | 0.467391162 | 0.147030024 |
| 0.389321668 | 0.016622107 | 0.465268799 | 0.535479335 |
| 0.487527002 | 0.522504722 | 0.52121742  | 0.331506955 |
| 0.515068746 | 0.125068366 | 0.528939511 | 0.503769599 |
| 0.472812992 | 0.002745792 | 0.01218538  | 0.529222326 |
| 0.483685595 | 0.125974962 | 0.26174918  | 0.482572304 |
| 0.188111456 | 0.272101176 | 0.132900123 | 0.231527181 |
| 0.522897617 | 0.313805238 | 0.222787042 | 0.490301605 |
| 0.344135288 | 0.327969601 | 0.50754201  | 0.171002132 |
| 0.489206068 | 0.109813231 | 0.168347802 | 0.013395341 |
| 0.443746241 | 0.204721442 | 0.498352969 | 0.514636687 |
| 0.499884571 | 0.471972874 | 0.428054054 | 0.443261896 |
| 0.491289712 | 0.191585515 | 0.446132105 | 0.212354914 |
| 0.511237793 | 0.482513245 | 0.429167273 | 0.419245387 |
| 0.509610664 | 0.502211288 | 0.078216206 | 0.498063545 |
| 0.031901945 | 0.002968751 | 0.506778883 | 0.370369508 |
| 0.084271936 | 0.449664642 | 0.362701898 | 0.326127741 |
| 0.309939367 | 0.076583718 | 0.314257574 | 0.29668958  |
| 0.39928817  | 0.458410386 | 0.337820708 | 0.348030121 |
| 0.334292573 | 0.185158916 | 0.286769349 | 0.248357093 |
| 0.324993158 | 0.413613916 | 0.287142087 | 0.054474204 |
| 0.513824505 | 0.498390917 | 0.122067718 | 0.263509493 |
| 0.52087419  | 0.533017438 | 0.088839445 | 0.025227134 |
| 0.377032543 | 0.409513401 | 0.524579052 | 0.516714672 |
| 0.539169437 | 0.519566537 | 0.433316448 | 0.190649434 |
| 0.138352432 | 0.407089908 | 0.356829007 | 0.144907575 |
| 0.521155297 | 0.14451007  | 0.499770623 | 0.352160123 |
| 0.207229196 | 0.324236604 | 0.073939889 | 0.160422767 |
| 0.452990488 | 0.280981672 | 0.257875676 | 0.262220113 |
| 0.411638131 | 0.307127782 | 0.106442128 | 0.303256264 |
| 0.462534657 | 0.220056117 | 0.265029838 | 0.426773673 |
| 0.464626382 | 0.302338934 | 0.510261661 | 0.471999409 |
| 0.229932705 | 0.205141258 | 0.428886953 | 0.471170082 |
| 0.530175262 | 0.477748571 | 0.058277239 | 0.502853636 |



|             |             |             |             |
|-------------|-------------|-------------|-------------|
| 0.513892956 | 0.530078107 | 0.511586166 | 0.459950036 |
| 0.164836558 | 0.463488393 | 0.373087669 | 0.429828096 |
| 0.288169884 | 0.50807674  | 0.338112824 | 0.131702618 |
| 0.38003012  | 0.496264103 | 0.4997184   | 0.257160707 |
| 0.507219203 | 0.235161265 | 0.130369701 | 0.509546973 |
| 0.227332655 | 0.177615931 | 0.466026238 | 0.505075007 |
| 0.003505722 | 0.165896028 | 0.500335365 | 0.348808288 |
| 0.518599994 | 0.518899162 | 0.483751663 | 0.368376272 |
| 0.002743124 | 0.482086407 | 0.480098329 | 0.497461807 |
| 0.516609657 | 0.463877217 | 0.230330937 | 0.135637047 |
| 0.378857118 | 0.166683606 | 0.218221444 | 0.454416545 |
| 0.214280583 | 0.524687676 | 0.292285997 | 0.31283152  |
| 0.278242874 | 0.178660879 | 0.292008225 | 0.355081928 |
| 0.181300358 | 0.340348798 | 0.445532532 | 0.392636426 |
| 0.257435531 | 0.490279856 | 0.507410705 | 0.066271949 |
| 0.420641718 | 0.480713975 | 0.488117295 | 0.005930498 |
| 0.514984678 | 0.020516484 | 0.278973541 | 0.303637518 |
| 0.283668474 | 0.300011258 | 0.338406098 | 0.377305378 |
| 0.468758558 | 0.329974133 | 0.386997603 | 0.337720868 |
| 0.241396347 | 0.333740456 | 0.475101517 | 0.47202118  |
| 0.367215018 | 0.219981203 | 0.176940694 | 0.172059988 |
| 0.105975441 | 0.515873024 | 0.341728145 | 0.151469223 |
| 0.324022751 | 0.471013073 | 0.426556517 | 0.506355722 |
| 0.475099973 | 0.200902327 | 0.427403792 | 0.525861119 |
| 0.314382224 | 0.420458359 | 0.141429883 | 0.498757592 |
| 0.349057492 | 0.28378913  | 0.502106447 | 0.45105624  |
| 0.50422423  | 0.441532887 | 0.342121901 | 0.480510134 |
| 0.464866021 | 0.431053481 | 0.42796219  | 0.145280709 |
| 0.292239535 | 0.227904952 | 0.32780333  | 0.006295624 |
| 0.462286411 | 0.404055511 | 0.536255113 | 0.504859088 |
| 0.343742041 | 0.451876328 | 0.440384319 | 0.174872927 |
| 0.376898398 | 0.267285881 | 0.238994129 | 0.519232585 |
| 0.261296457 | 0.28918673  | 0.381818329 | 0.470556993 |
| 0.51117738  | 0.496666831 | 0.315292356 | 0.365534559 |
| 0.33617193  | 0.316938597 | 0.489050853 | 0.226122788 |
| 0.512638507 | 0.240519835 | 0.467223998 | 0.390904176 |
| 0.305704137 | 0.518639044 | 0.128098059 | 0.526857735 |
| 0.417052519 | 0.224005525 | 0.500983548 | 0.418145063 |
| 0.412900186 | 0.182627703 | 0.223818781 | 0.490487772 |
| 0.325355054 | 0.396570871 | 0.025829874 | 0.095474664 |
| 0.421586627 | 0.389045361 | 0.500613709 | 0.454263044 |
| 0.302760893 | 0.418297364 | 0.194930056 | 0.423567342 |
| 0.500224797 | 0.518478776 | 0.366739215 | 0.344056041 |
| 0.454996332 | 0.182787876 | 0.518116489 | 0.026666917 |
| 0.50777714  | 0.493741416 | 0.472462697 | 0.111047331 |
| 0.047947334 | 0.257488441 | 0.511670521 | 0.142153796 |
| 0.51352912  | 0.256547645 | 0.455137507 | 0.522602544 |
| 0.279478507 | 0.521826987 | 0.189217253 | 0.499458858 |
| 0.103159511 | 0.360970392 | 0.439313733 | 0.459596264 |
| 0.305971196 | 0.352307279 | 0.468838749 | 0.286691103 |
| 0.073137371 | 0.344305481 | 0.004762912 | 0.432413373 |
| 0.494618841 | 0.403199546 | 0.299958565 | 0.386613626 |
| 0.369917918 | 0.456227232 | 0.32217796  | 0.49301988  |
| 0.026001809 | 0.44418988  | 0.299053745 | 0.507655533 |

|             |             |             |             |
|-------------|-------------|-------------|-------------|
| 0.3083118   | 0.459951012 | 0.108482208 | 0.377026365 |
| 0.489383228 | 0.377576343 | 0.349201482 | 0.395504102 |
| 0.505584841 | 0.47442746  | 0.268895853 | 0.285669434 |
| 0.477213453 | 0.1355837   | 0.487506925 | 0.529348549 |
| 0.260849791 | 0.265893542 | 0.509640543 | 0.303898383 |
| 0.368852297 | 0.472372207 | 0.486631184 | 0.521449426 |
| 0.121379574 | 0.353880228 | 0.500966323 | 0.506130371 |
| 0.389724603 | 0.21283376  | 0.302871659 | 0.305445466 |
| 0.490092537 | 0.17517766  | 0.321596778 | 0.474271125 |
| 0.268912853 | 0.406373488 | 0.443032243 | 0.253474916 |
| 0.073471328 | 0.264104258 | 0.475526439 | 0.239659364 |
| 0.400692384 | 0.44634439  | 0.301704581 | 0.447079572 |
| 0.208762523 | 0.052232961 | 0.471994493 | 0.024525071 |
| 0.471075113 | 0.483764034 | 0.349914545 | 0.431398052 |
| 0.287939728 | 0.469176173 | 0.470364459 | 0.004018005 |
| 0.488597136 | 0.064836929 | 0.379249451 | 0.301602664 |
| 0.357960575 | 0.115538068 | 0.489174494 | 0.520377681 |
| 0.433383039 | 0.404688825 | 0.421177564 | 0.497353006 |
| 0.183166184 | 0.389541712 | 0.406013232 | 0.522363866 |
| 0.267073198 | 0.480128948 | 0.491947484 | 0.446947058 |
| 0.490513365 | 0.387865341 |             |             |
| GNB1        | 0.203986543 | 0.147758948 | 0.12616813  |
| 0.15812339  | 0.111433908 | 0.065305779 | 0.237441679 |
| 0.22795282  | 0.138147361 | 0.02271485  | 0.12889698  |
| 0.237008786 | 0.01618483  | 0.204201515 | 0.25168309  |
| 0.096076771 | 0.27635569  | 0.248367737 | 0.042241914 |
| 0.084899903 | 0.123915118 | 0.053641823 | 0.083643358 |
| 0.098368461 | 0.308305389 | 0.111769983 | 0.051178525 |
| 0.169319426 | 0.01745126  | 0.100833075 | 0.013159075 |
| 0.282471671 | 0.109725079 | 0.036890777 | 0.146404779 |
| 0.089035443 | 0.00846696  | 0.275516383 | 0.137514396 |
| 0.029676079 | 0.302423265 | 0.030940469 | 0.173439643 |
| 0.043501177 | 0.186934945 | 0.01144236  | 0.090204305 |
| 0.100133687 | 0.1085571   | 0.157628383 | 0.107945833 |
| 0.054483059 | 0.19547648  | 0.082341449 | 0.02039108  |
| 0.033559212 | 0.004161428 | 0.018158103 | 0.205367548 |
| 0.319668614 | 0.268738192 | 0.019707293 | 0.103862867 |
| 0.08346192  | 0.127120734 | 0.240325764 | 0.038251865 |
| 0.211045275 | 0.032258411 | 0.091466771 | 0.099674384 |
| 0.079234494 | 0.135920152 | 0.341160642 | 0.155069332 |
| 0.052728702 | 0.245621075 | 0.116396164 | 0.043948568 |
| 0.138341646 | 0.270915416 | 0.228549582 | 0.205941279 |
| 0.036745357 | 0.076604974 | 0.075309443 | 0.244280708 |
| 0.149592135 | 0.170024142 | 0.164367544 | 0.245638552 |
| 0.149026894 | 0.055130817 | 0.128870963 | 0.230553395 |
| 0.155835432 | 0.031713801 | 0.044231608 | 0.042461031 |
| 0.109976516 | 0.095079361 | 0.23014289  | 0.266397687 |
| 0.082731967 | 0.197192955 | 0.223347902 | 0.071443511 |
| 0.114720413 | 0.191096764 | 0.09642255  | 0.128977765 |
| 0.11335144  | 0.181278496 | 0.131030664 | 0.195046006 |
| 0.075771262 | 0.200416737 | 0.148290138 | 0.190198023 |
| 0.00667686  | 0.203256848 | 0.210943907 | 0.297805434 |
| 0.144698632 | 0.263607626 | 0.068263716 | 0.293367777 |
| 0.158808198 | 0.189416956 | 0.196643031 | 0.178341207 |

|             |             |             |             |
|-------------|-------------|-------------|-------------|
| 0.173656041 | 0.197977124 | 0.194172886 | 0.178877931 |
| 0.237252131 | 0.029669873 | 0.072582248 | 0.116424778 |
| 0.161826524 | 0.254606146 | 0.054255718 | 0.248039946 |
| 0.264891259 | 0.155509872 | 0.143834304 | 0.280985492 |
| 0.149567828 | 0.256797834 | 0.136585266 | 0.246058186 |
| 0.242468154 | 0.234137851 | 0.22978546  | 0.105839929 |
| 0.240412715 | 0.110286257 | 0.034085504 | 0.188801577 |
| 0.263686201 | 0.011644613 | 0.144603337 | 0.162567468 |
| 0.191081534 | 0.133771477 | 0.220868172 | 0.1841628   |
| 0.19074419  | 0.238823015 | 0.003007352 | 0.203091021 |
| 0.218823276 | 0.224958832 | 0.197844643 | 0.05717279  |
| 0.108492362 | 0.084560817 | 0.125545914 | 0.0520154   |
| 0.289765697 | 0.163796193 | 0.154219072 | 0.157944074 |
| 0.078601039 | 0.310837602 | 0.048184382 | 0.222577006 |
| 0.235599803 | 0.189211596 | 0.194595686 | 0.222353636 |
| 0.032510166 | 0.282028878 | 0.079019437 | 0.096445322 |
| 0.312092419 | 0.077966721 | 0.029250199 | 0.120809485 |
| 0.211661071 | 0.070054779 | 0.189466672 | 0.184377414 |
| 0.272735051 | 0.337782711 | 0.200100348 | 0.219991565 |
| 0.179714494 | 0.3003482   | 0.097475547 | 0.18111965  |
| 0.065497628 | 0.247767691 | 0.124925698 | 0.249292573 |
| 0.30977845  | 0.071088762 | 0.302964208 | 0.098125083 |
| 0.081618479 | 0.021717353 | 0.020666608 | 0.057266145 |
| 0.305970313 | 0.149000253 | 0.109257662 | 0.145520941 |
| 0.137320295 | 0.137149269 | 0.063750107 | 0.304085938 |
| 0.227097133 | 0.106229543 | 0.196190382 | 0.067694545 |
| 0.081794165 | 0.138248561 | 0.15377897  | 0.106891545 |
| 0.172282557 | 0.045495143 | 0.031694039 | 0.173938552 |
| 0.039093397 | 0.074662433 | 0.165453417 | 0.139712999 |
| 0.062210681 | 0.245267762 | 0.218251273 | 0.008804234 |
| 0.065631615 | 0.105925045 | 0.259339244 | 0.032163439 |
| 0.230053393 | 0.263753395 | 0.090256284 | 0.091261796 |
| 0.197756926 | 0.217129065 | 0.196190545 | 0.19507098  |
| 0.043612993 | 0.222816192 | 0.154971797 | 0.21341349  |
| 0.168822651 | 0.039597078 | 0.016372437 | 0.15432451  |
| 0.161837336 | 0.040691433 | 0.203879455 | 0.10912215  |
| 0.039913165 | 0.110883562 | 0.099326106 | 0.221333527 |
| 0.283899188 | 0.177900843 | 0.254471543 | 0.186933705 |
| 0.232071407 | 0.208004856 | 0.16912354  | 0.240224161 |
| 0.02677068  | 0.07749732  | 0.068971055 | 0.207985288 |
| 0.272933672 | 0.092079552 | 0.26290072  | 0.018462917 |
| 0.000409092 | 0.190981855 | 0.217287992 | 0.225206334 |
| 0.054792889 | 0.06240254  | 0.123718108 | 0.206839069 |
| 1           | 0.227278095 | 0.230054811 | 0.109612096 |
| 0.206591465 | 0.064673666 | 0.063354328 | 0.10686151  |
| 0.273653346 | 0.112523688 | 0.229295671 | 0.273482604 |
| 0.154568466 | 0.050997118 | 0.111693574 | 0.0241468   |
| 0.217464274 | 0.102380192 | 0.259627128 | 0.356885761 |
| 0.197873195 | 0.306559935 | 0.231802103 | 0.032271196 |
| 0.206726143 | 0.25617718  | 0.038823857 | 0.176020304 |
| 0.192247416 | 0.190577203 | 0.188551597 | 0.204212209 |
| 0.167629335 | 0.126548732 | 0.153239452 | 0.091298249 |
| 0.234074874 | 0.145344136 | 0.053492694 | 0.133271156 |
| 0.019388108 | 0.200523866 | 0.106368446 | 0.335972357 |

|             |             |             |             |
|-------------|-------------|-------------|-------------|
| 0.124980398 | 0.201114768 | 0.24902332  | 0.095963561 |
| 0.137174533 | 0.018916096 | 0.101972453 | 0.163430008 |
| 0.181622389 | 0.161637229 | 0.03967504  | 0.047862355 |
| 0.20843929  | 0.250341974 | 0.033669623 | 0.214503756 |
| 0.160459002 | 0.167296859 | 0.10911322  | 0.163444209 |
| 0.255308298 | 0.017221161 | 0.070028979 | 0.003273513 |
| 0.039500817 | 0.220139935 | 0.051844513 | 0.156490467 |
| 0.223851511 | 0.125749519 | 0.227639497 | 0.230933528 |
| 0.175664017 | 0.197845828 | 0.209441468 | 0.049803392 |
| 0.20924873  | 0.004995656 | 0.195101669 | 0.162004957 |
| 0.033142617 | 0.014360961 | 0.088171061 | 0.161313918 |
| 0.08427054  | 0.17057495  | 0.295913812 | 0.0509387   |
| 0.265875597 | 0.142132282 | 0.234662965 | 0.080541815 |
| 0.095016196 | 0.152636589 | 0.078886916 | 0.200077954 |
| 0.170729817 | 0.229466045 | 0.050383203 | 0.246728443 |
| 0.088398665 | 0.256867953 | 0.228299099 | 0.041000472 |
| 0.161976537 | 0.228569738 | 0.241160781 | 0.196454206 |
| 0.258392656 | 0.131709039 | 0.022982349 | 0.062005232 |
| 0.165797923 | 0.163846211 | 0.032481978 | 0.172920505 |
| 0.177784907 | 0.120106261 | 0.280922476 | 0.273615491 |
| 0.240692012 | 0.232405015 | 0.250479924 | 0.16629948  |
| 0.099575741 | 0.01501745  | 0.070434106 | 0.251310148 |
| 0.019705295 | 0.066381824 | 0.304959309 | 0.087130952 |
| 0.120133894 | 0.200889486 | 0.039256382 | 0.04717193  |
| 0.199659004 | 0.109183637 | 0.090271928 | 0.221134246 |
| 0.097077047 | 0.092887553 | 0.186223365 | 0.224508599 |
| 0.060209065 | 0.226719048 | 0.308752963 | 0.211366177 |
| 0.053327006 | 0.067544658 | 0.244354407 | 0.289950894 |
| 0.187024612 | 0.178136004 | 0.246779614 | 0.161764969 |
| 0.298187185 | 0.099271947 | 0.196228593 | 0.175161025 |
| 0.238369353 | 0.255945005 | 0.306944024 | 0.214415234 |
| 0.244538731 | 0.151155453 | 0.086966968 | 0.171278049 |
| 0.203523987 | 0.177322354 | 0.197175506 | 0.045694883 |
| 0.286972606 | 0.170651133 | 0.268878633 | 0.256677424 |
| 0.068646796 | 0.315309551 | 0.211455625 | 0.187405698 |
| 0.118264909 | 0.041967621 | 0.233355034 | 0.268512773 |
| 0.219919994 | 0.027522532 | 0.28963383  | 0.090548951 |
| 0.169799314 | 0.019280968 | 0.112975918 | 0.295319878 |
| 0.281737316 | 0.195225248 | 0.083485004 | 0.146790649 |
| 0.127989513 | 0.046137764 | 0.130663717 | 0.142335215 |
| 0.205810627 | 0.092272697 | 0.207327683 | 0.25271578  |
| 0.261917722 | 0.080672507 | 0.040781153 | 0.11355192  |
| 0.261971819 | 0.068416886 | 0.180677058 | 0.264684059 |
| 0.292754932 | 0.274023709 | 0.169339816 | 0.237848037 |
| 0.068068265 | 0.160307591 | 0.157869683 | 0.153411175 |
| 0.054436592 | 0.241313963 | 0.033751005 | 0.13314882  |
| 0.012589603 | 0.022564336 | 0.192950019 | 0.182812118 |
| 0.24581314  | 0.189353512 | 0.264993804 | 0.108433404 |
| 0.000685174 | 0.090383923 | 0.144172397 | 0.065552554 |
| 0.164623629 | 0.212662674 | 0.086916928 | 0.276579547 |
| 0.317644863 | 0.197454862 | 0.239250163 | 0.053754775 |
| 0.023115428 | 0.110081584 | 0.33998341  | 0.183575195 |
| 0.176170221 | 0.166522765 | 0.03953956  | 0.165652266 |
| 0.033553943 | 0.342118513 | 0.267704123 | 0.025741998 |

|             |             |             |             |
|-------------|-------------|-------------|-------------|
| 0.033304966 | 0.200634294 | 0.153892637 | 0.200430911 |
| 0.062103057 | 0.180711727 | 0.203402345 | 0.039643054 |
| 0.125779131 | 0.196319269 | 0.198117286 | 0.179773359 |
| 0.192914975 | 0.185327087 | 0.208830499 | 0.095416135 |
| 0.137448861 | 0.184208791 | 0.151867702 | 0.281064895 |
| 0.208343529 | 0.168128055 | 0.101079681 | 0.076648733 |
| 0.112471975 | 0.228435645 | 0.260559708 | 0.253780467 |
| 0.268396021 | 0.159041022 | 0.346168079 | 0.201364874 |
| 0.272080283 | 0.070535683 | 0.318103373 | 0.175496258 |
| 0.249219045 | 0.192792942 | 0.09969381  | 0.152227484 |
| 0.017941224 | 0.062727897 | 0.180964332 | 0.084006514 |
| 0.233504417 | 0.101446521 | 0.057805426 | 0.124238704 |
| 0.104512361 | 0.306767637 | 0.336761677 | 0.229804276 |
| 0.083983215 | 0.066254092 | 0.025377    | 0.262767836 |
| 0.201519031 | 0.267933225 | 0.104957045 | 0.07197086  |
| 0.193223744 | 0.098191861 | 0.15439715  | 0.207110155 |
| 0.031295867 | 0.273207049 | 0.032702887 | 0.239998019 |
| 0.019921381 | 0.223014164 | 0.328640298 | 0.10995178  |
| 0.020523713 | 0.205943216 | 0.130283923 | 0.057370489 |
| 0.122881812 | 0.099843921 | 0.081883179 | 0.158159835 |
| 0.178226273 | 0.19866862  | 0.230345319 | 0.146451681 |
| 0.063088468 | 0.092389125 | 0.065606508 | 0.131322092 |
| 0.166681085 | 0.181041347 | 0.223570952 | 0.183461204 |
| 0.084642934 | 0.267151116 | 0.296505803 | 0.120716399 |
| 0.093526953 | 0.196794536 | 0.021928493 | 0.049073477 |
| 0.161044572 | 0.036661749 | 0.000935023 | 0.033866068 |
| 0.253380165 | 0.050996462 | 0.111906239 | 0.164628498 |
| 0.080590625 | 0.247512267 | 0.017942333 | 0.125311352 |
| 0.182362001 | 0.231608935 | 0.145233085 | 0.313904725 |
| 0.225304614 | 0.276196558 | 0.096566638 | 0.009768629 |
| 0.084143034 | 0.059134445 | 0.037954295 | 0.271179021 |
| 0.21727319  | 0.025117061 | 0.086173858 | 0.164364844 |
| 0.18573028  | 0.018034222 | 0.08082824  | 0.111767138 |
| 0.260621623 | 0.240571258 | 0.233255298 | 0.162858986 |
| 0.11082731  | 0.233593712 | 0.051186227 | 0.056693811 |
| 0.126849624 | 0.059156711 | 0.199475755 | 0.053252295 |
| 0.26929271  | 0.122529093 | 0.029755831 | 0.309977406 |
| 0.210388984 | 0.051804516 | 0.325490057 | 0.022475549 |
| 0.272144273 | 0.200311123 | 0.114896597 | 0.046846876 |
| 0.160447953 | 0.09307079  | 0.26823271  | 0.187491722 |
| 0.022723926 | 0.086037499 | 0.224351744 | 0.071004842 |
| 0.251504159 | 0.087546657 | 0.30289443  | 0.032600205 |
| 0.179028216 | 0.148682625 | 0.182069823 | 0.09523313  |
| 0.078219136 | 0.248639962 | 0.036756463 | 0.225187543 |
| 0.229542159 | 0.059561343 | 0.165947803 | 0.197882492 |
| 0.048961893 | 0.199906673 | 0.059059069 | 0.216455853 |
| 0.244914035 | 0.299440369 | 0.150280982 | 0.189852013 |
| 0.302902222 | 0.071368321 | 0.054229418 | 0.134730267 |
| 0.18347314  | 0.210461745 | 0.059597908 | 0.207512518 |
| 0.043444914 | 0.228773172 | 0.06445006  | 0.139673927 |
| 0.251093304 | 0.195125655 | 0.075765737 | 0.280963364 |
| 0.206797685 | 0.097098317 | 0.093022562 | 0.301453832 |
| 0.205379352 | 0.171151265 | 0.283289649 | 0.005863064 |
| 0.106158637 | 0.132957675 | 0.235834777 | 0.075043947 |

|             |             |             |             |
|-------------|-------------|-------------|-------------|
| 0.30572034  | 0.137613033 | 0.089374413 | 0.072662355 |
| 0.180219429 | 0.022996062 | 0.085868691 | 0.124553343 |
| 0.049514332 | 0.232965485 | 0.219831485 | 0.207987685 |
| 0.179371674 | 0.039094257 | 0.030246478 | 0.205062934 |
| 0.033219314 | 0.02352762  | 0.040929722 | 0.092430215 |
| 0.037760288 | 0.032155906 | 0.039350859 | 0.037027402 |
| 0.166940627 | 0.136397437 |             |             |
| GNPDA1      | 0.185246555 | 0.407358235 | 0.148086411 |
| 0.23529581  | 0.323796398 | 0.449812496 | 0.140328299 |
| 0.24201217  | 0.363184476 | 0.271817491 | 0.412523789 |
| 0.06619335  | 0.098933536 | 0.431499985 | 0.138264123 |
| 0.35945458  | 0.102756044 | 0.207612391 | 0.108528836 |
| 0.28091478  | 0.294299022 | 0.35374963  | 0.419505568 |
| 0.300908643 | 0.272239672 | 0.37917376  | 0.343865584 |
| 0.46861385  | 0.255985463 | 0.428098022 | 0.190682728 |
| 0.417535743 | 0.324236327 | 0.349681091 | 0.066934941 |
| 0.426379115 | 0.014231475 | 0.444527578 | 0.30031055  |
| 0.170733318 | 0.377543121 | 0.33539969  | 0.329848611 |
| 0.337528926 | 0.109413488 | 0.211265988 | 0.358137949 |
| 0.358620928 | 0.356284449 | 0.154914144 | 0.420593224 |
| 0.347099495 | 0.42583726  | 0.372594818 | 0.0071009   |
| 0.284104777 | 0.074284419 | 0.191347446 | 0.50116636  |
| 0.317670041 | 0.240949221 | 0.226595721 | 0.33510045  |
| 0.357840543 | 0.364084653 | 0.346022932 | 0.316667519 |
| 0.480840376 | 0.167117729 | 0.393470973 | 0.247329849 |
| 0.387207465 | 0.09484624  | 0.264930517 | 0.169552662 |
| 0.364169947 | 0.314689639 | 0.39090816  | 0.287200467 |
| 0.399060298 | 0.519176466 | 0.325547726 | 0.490834111 |
| 0.094057173 | 0.313691158 | 0.301807242 | 0.349127344 |
| 0.360306868 | 0.159671879 | 0.420052279 | 0.504003355 |
| 0.125168889 | 0.355216201 | 0.374329926 | 0.219330305 |
| 0.428978008 | 0.263995241 | 0.366609129 | 0.197409635 |
| 0.356207174 | 0.315354331 | 0.474609458 | 0.366936599 |
| 0.352312492 | 0.159681291 | 0.495923696 | 0.299014521 |
| 0.359593124 | 0.183396022 | 0.231733756 | 0.40829789  |
| 0.401885835 | 0.468231728 | 0.391180392 | 0.364913453 |
| 0.337277423 | 0.479530363 | 0.415969947 | 0.415165498 |
| 0.149587634 | 0.505470333 | 0.308114959 | 0.12810603  |
| 0.168761476 | 0.200483161 | 0.236767025 | 0.368993611 |
| 0.433243334 | 0.409876694 | 0.310068675 | 0.292961028 |
| 0.401263809 | 0.482135484 | 0.495334938 | 0.4043191   |
| 0.116978707 | 0.222847119 | 0.343070217 | 0.406238352 |
| 0.382775282 | 0.219045436 | 0.253440087 | 0.509568334 |
| 0.408665982 | 0.405386291 | 0.287178678 | 0.517147071 |
| 0.279298576 | 0.504538747 | 0.420280815 | 0.27553894  |
| 0.513087574 | 0.50371569  | 0.485868965 | 0.379579138 |
| 0.492194742 | 0.410646706 | 0.0718831   | 0.382345298 |
| 0.481907205 | 0.021835735 | 0.423527748 | 0.448117114 |
| 0.479402481 | 0.411255675 | 0.484660821 | 0.478731473 |
| 0.488578255 | 0.169030973 | 0.019782368 | 0.320518801 |
| 0.494930821 | 0.414366285 | 0.236334519 | 0.358243519 |
| 0.346613493 | 0.437803866 | 0.410986225 | 0.300242077 |
| 0.508442322 | 0.429043309 | 0.44938407  | 0.394446172 |
| 0.319314144 | 0.370733603 | 0.324402018 | 0.485638832 |

|             |             |             |             |
|-------------|-------------|-------------|-------------|
| 0.13357953  | 0.231127841 | 0.135484049 | 0.356143509 |
| 0.364188126 | 0.27874401  | 0.410143361 | 0.338388962 |
| 0.2976344   | 0.399461328 | 0.307344584 | 0.365926652 |
| 0.129417258 | 0.413133819 | 0.283271766 | 0.257934755 |
| 0.115286587 | 0.237163568 | 0.26567112  | 0.282580773 |
| 0.320832399 | 0.301188243 | 0.410732433 | 0.455424001 |
| 0.334022672 | 0.279627433 | 0.420745506 | 0.47040251  |
| 0.422734669 | 0.35936406  | 0.318760386 | 0.038287408 |
| 0.249167168 | 0.249858336 | 0.166066554 | 0.374366867 |
| 0.24864502  | 0.272415016 | 0.362052867 | 0.390340563 |
| 0.369809652 | 0.248523572 | 0.329239969 | 0.463317857 |
| 0.24113408  | 0.358905782 | 0.414679904 | 0.374136428 |
| 0.020176623 | 0.366545273 | 0.426075831 | 0.177797321 |
| 0.34938772  | 0.152499445 | 0.269775621 | 0.410223595 |
| 0.262856749 | 0.23239474  | 0.458451448 | 0.38773413  |
| 0.373427473 | 0.280709944 | 0.493308247 | 0.038634047 |
| 0.326436856 | 0.108165697 | 0.341530921 | 0.32208551  |
| 0.332912767 | 0.343031538 | 0.319693398 | 0.31762532  |
| 0.239489995 | 0.498520607 | 0.428051072 | 0.481223045 |
| 0.317765683 | 0.495506147 | 0.419596032 | 0.427632202 |
| 0.413437486 | 0.308708761 | 0.125748069 | 0.415713074 |
| 0.41072192  | 0.259272878 | 0.161424763 | 0.395495335 |
| 0.309367323 | 0.371705786 | 0.178486264 | 0.460550593 |
| 0.50975414  | 0.461188625 | 0.255613188 | 0.372697914 |
| 0.413098251 | 0.35059902  | 0.417991588 | 0.504609864 |
| 0.262189587 | 0.316508578 | 0.306927564 | 0.390561634 |
| 0.280746279 | 0.220204143 | 0.367843274 | 0.169179035 |
| 0.014477261 | 0.183361218 | 0.156124693 | 0.258147783 |
| 0.18453951  | 0.380981223 | 0.385956423 | 0.487605333 |
| 0.227278095 | 1           | 0.310794674 | 0.298530836 |
| 0.402263854 | 0.333464568 | 0.366054796 | 0.390082083 |
| 0.335902596 | 0.058046328 | 0.213696884 | 0.518563927 |
| 0.108249616 | 0.250285943 | 0.382019175 | 0.008849147 |
| 0.116567369 | 0.38672538  | 0.177109668 | 0.265651932 |
| 0.440391919 | 0.26829191  | 0.290580284 | 0.277871996 |
| 0.401832437 | 0.204611833 | 0.015969147 | 0.44532908  |
| 0.462311953 | 0.433699711 | 0.459600624 | 0.458421649 |
| 0.392362015 | 0.405385485 | 0.388184672 | 0.426171137 |
| 0.211771243 | 0.19147108  | 0.188326279 | 0.314371851 |
| 0.011629541 | 0.418595163 | 0.346201011 | 0.250003305 |
| 0.399717261 | 0.346896046 | 0.120212932 | 0.353537506 |
| 0.069341159 | 0.181168983 | 0.346645338 | 0.301961778 |
| 0.361158424 | 0.061121343 | 0.256083429 | 0.279308285 |
| 0.447546682 | 0.391987381 | 0.324238884 | 0.511903105 |
| 0.387179169 | 0.207345529 | 0.334399979 | 0.419146186 |
| 0.165424211 | 0.096067071 | 0.374310433 | 0.039189814 |
| 0.293175237 | 0.456167619 | 0.363975076 | 0.153642427 |
| 0.342003664 | 0.027932487 | 0.399060346 | 0.514244536 |
| 0.463703606 | 0.473847185 | 0.486424556 | 0.274753262 |
| 0.487034453 | 0.085395829 | 0.498361748 | 0.405671225 |
| 0.31962013  | 0.003359714 | 0.021912854 | 0.436579641 |
| 0.363339434 | 0.135441184 | 0.265972734 | 0.411269107 |
| 0.211004433 | 0.255153005 | 0.174249934 | 0.209403202 |
| 0.441779856 | 0.300929808 | 0.211350482 | 0.461355461 |

|             |             |             |             |
|-------------|-------------|-------------|-------------|
| 0.30440925  | 0.321770766 | 0.390087492 | 0.181489555 |
| 0.411971481 | 0.140072645 | 0.175391481 | 0.020352586 |
| 0.378014399 | 0.20059692  | 0.48824256  | 0.488217431 |
| 0.487052638 | 0.387822342 | 0.289698376 | 0.391563591 |
| 0.405470118 | 0.187805713 | 0.354800328 | 0.212344188 |
| 0.467034482 | 0.365149655 | 0.384952714 | 0.3701595   |
| 0.471521507 | 0.460477857 | 0.104348192 | 0.389733167 |
| 0.054896692 | 0.005808418 | 0.396524306 | 0.343171465 |
| 0.070953883 | 0.32477039  | 0.332367042 | 0.273541122 |
| 0.299495831 | 0.101717663 | 0.231887342 | 0.220197645 |
| 0.342121312 | 0.358069357 | 0.279650442 | 0.31801882  |
| 0.291935574 | 0.148317472 | 0.312005591 | 0.263085544 |
| 0.259564875 | 0.349590359 | 0.270665894 | 0.073221698 |
| 0.384108271 | 0.378987882 | 0.152133452 | 0.275111619 |
| 0.428717673 | 0.448156248 | 0.098434462 | 0.03919782  |
| 0.347104158 | 0.328319818 | 0.460818689 | 0.47750784  |
| 0.519795927 | 0.496469018 | 0.426844756 | 0.189952839 |
| 0.173079015 | 0.346534141 | 0.29445162  | 0.170670794 |
| 0.48967648  | 0.142013671 | 0.48526872  | 0.275240069 |
| 0.219463773 | 0.299869371 | 0.112457282 | 0.185382418 |
| 0.362780264 | 0.293628971 | 0.267013359 | 0.239443032 |
| 0.328935958 | 0.258362476 | 0.130131004 | 0.294961457 |
| 0.378743671 | 0.150112874 | 0.264183201 | 0.393638353 |
| 0.40162573  | 0.210723478 | 0.387769016 | 0.448914622 |
| 0.241867562 | 0.200426808 | 0.340647205 | 0.398834239 |
| 0.411705565 | 0.349792693 | 0.089243779 | 0.425732757 |
| 0.467906218 | 0.410902783 | 0.495810672 | 0.388213243 |
| 0.177410665 | 0.36780453  | 0.274183402 | 0.327366948 |
| 0.282039144 | 0.450449751 | 0.318898881 | 0.153542813 |
| 0.35526993  | 0.492159928 | 0.394843917 | 0.277653813 |
| 0.412718964 | 0.223945435 | 0.127579222 | 0.424617094 |
| 0.170553761 | 0.185544008 | 0.349235817 | 0.400538581 |
| 0.006704043 | 0.142337924 | 0.447298574 | 0.369160933 |
| 0.504362148 | 0.436401022 | 0.443962018 | 0.362797516 |
| 0.001572113 | 0.362993557 | 0.395914232 | 0.382432499 |
| 0.408961741 | 0.417951497 | 0.257333687 | 0.165115199 |
| 0.359264476 | 0.173163874 | 0.204563866 | 0.405766943 |
| 0.134011722 | 0.411331856 | 0.294806643 | 0.281823782 |
| 0.274367582 | 0.168376988 | 0.260264597 | 0.359883868 |
| 0.140537002 | 0.331086144 | 0.384014043 | 0.298956525 |
| 0.166651586 | 0.395244076 | 0.387161943 | 0.094566171 |
| 0.34674527  | 0.38808484  | 0.422658932 | 0.004504975 |
| 0.402457769 | 0.036753707 | 0.279394905 | 0.29990562  |
| 0.293285416 | 0.276924691 | 0.312308299 | 0.325604799 |
| 0.366266101 | 0.306978193 | 0.364250339 | 0.332041484 |
| 0.267195378 | 0.335859996 | 0.38863422  | 0.373068871 |
| 0.329063731 | 0.244849721 | 0.185729297 | 0.177105576 |
| 0.15098996  | 0.441962976 | 0.331856696 | 0.165640168 |
| 0.323370512 | 0.370470138 | 0.385842326 | 0.474184305 |
| 0.422380748 | 0.198062813 | 0.354888883 | 0.424088456 |
| 0.195290664 | 0.359541743 | 0.154077885 | 0.413430923 |
| 0.351133977 | 0.243432836 | 0.412445486 | 0.351530616 |
| 0.379661008 | 0.426345804 | 0.336581419 | 0.437924139 |
| 0.393347934 | 0.317117057 | 0.297433952 | 0.174868081 |



|             |             |             |             |
|-------------|-------------|-------------|-------------|
| 0.273980114 | 0.227824258 | 0.279621454 | 0.012171015 |
| 0.40145598  | 0.368672178 | 0.423095111 | 0.483451946 |
| 0.264859555 | 0.409901716 | 0.328531342 | 0.177575216 |
| 0.26893768  | 0.237173226 | 0.24843749  | 0.410992061 |
| 0.195879068 | 0.321503663 | 0.324865797 | 0.412938123 |
| 0.402749199 | 0.380245077 | 0.276480295 | 0.334648397 |
| 0.314821278 | 0.303871797 | 0.471756016 | 0.240326701 |
| 0.375133428 | 0.222157571 | 0.360367985 | 0.319236956 |
| 0.282600079 | 0.478878115 | 0.157143655 | 0.483440442 |
| 0.309209529 | 0.231796638 | 0.5016009   | 0.403158289 |
| 0.39728203  | 0.239316435 | 0.169940089 | 0.381394673 |
| 0.297812804 | 0.318564657 | 0.015352593 | 0.066474859 |
| 0.372836049 | 0.297169057 | 0.373968992 | 0.377352076 |
| 0.263758761 | 0.363174997 | 0.174521341 | 0.347776286 |
| 0.473539296 | 0.505967515 | 0.294846035 | 0.320985615 |
| 0.384983782 | 0.220503533 | 0.433559602 | 0.022564254 |
| 0.370428457 | 0.362415981 | 0.334035024 | 0.147567986 |
| 0.070729155 | 0.179504922 | 0.371906403 | 0.144225028 |
| 0.428846836 | 0.195255202 | 0.350721787 | 0.433337846 |
| 0.274570571 | 0.50644743  | 0.221724309 | 0.415689077 |
| 0.098219813 | 0.342677766 | 0.348885503 | 0.34251864  |
| 0.268962644 | 0.270708365 | 0.389914529 | 0.240394624 |
| 0.102508985 | 0.31165373  | 0.003530481 | 0.439402433 |
| 0.470005007 | 0.291445953 | 0.294619699 | 0.275029058 |
| 0.351619709 | 0.399829221 | 0.260934191 | 0.38151072  |
| 0.047557749 | 0.345598598 | 0.319493635 | 0.435398123 |
| 0.198376441 | 0.335379366 | 0.155462399 | 0.28958023  |
| 0.486162476 | 0.269122505 | 0.328960011 | 0.251692859 |
| 0.476799827 | 0.404460712 | 0.255579286 | 0.298617731 |
| 0.356917343 | 0.151730805 | 0.384889941 | 0.503520162 |
| 0.278133997 | 0.222522522 | 0.407499636 | 0.269162148 |
| 0.287375207 | 0.413523417 | 0.359865912 | 0.496578282 |
| 0.144379468 | 0.341664165 | 0.411996585 | 0.428824807 |
| 0.367022008 | 0.184642598 | 0.238628126 | 0.258073689 |
| 0.457024555 | 0.210137495 | 0.248507431 | 0.401034657 |
| 0.197298013 | 0.37973552  | 0.34374063  | 0.243967596 |
| 0.10726191  | 0.280040571 | 0.438288418 | 0.252975031 |
| 0.345491522 | 0.354197795 | 0.254330604 | 0.406070155 |
| 0.24602593  | 0.073600394 | 0.460597326 | 0.015997361 |
| 0.429799748 | 0.408667467 | 0.357687169 | 0.353347243 |
| 0.285193157 | 0.379143578 | 0.349280361 | 0.006476728 |
| 0.400142614 | 0.076703018 | 0.342696317 | 0.262763341 |
| 0.268811241 | 0.131481277 | 0.467584373 | 0.474383269 |
| 0.403763944 | 0.342716698 | 0.310729472 | 0.454002988 |
| 0.146983937 | 0.283992089 | 0.296115453 | 0.406105441 |
| 0.220978157 | 0.333343292 | 0.367034536 | 0.343636334 |
| 0.420912222 | 0.386804663 |             |             |
| GOLT1B      | 0.161421132 | 0.293770969 | 0.114409796 |
| 0.115973933 | 0.177352134 | 0.163535326 | 0.231301975 |
| 0.254647865 | 0.287479218 | 0.139209615 | 0.177227338 |
| 0.101195059 | 0.051434668 | 0.307294815 | 0.240770734 |
| 0.182562546 | 0.167027566 | 0.247370814 | 0.127497418 |
| 0.238323782 | 0.185737414 | 0.132909107 | 0.188986306 |
| 0.208441387 | 0.265888886 | 0.22121418  | 0.172207974 |

|             |             |             |             |
|-------------|-------------|-------------|-------------|
| 0.310218104 | 0.070157489 | 0.170593605 | 0.064286393 |
| 0.353865294 | 0.171473343 | 0.135824152 | 0.085382323 |
| 0.19747581  | 0.05259381  | 0.391879886 | 0.199663224 |
| 0.065604975 | 0.333595823 | 0.139242634 | 0.186195884 |
| 0.167506809 | 0.115518731 | 0.063665603 | 0.196946628 |
| 0.235505789 | 0.262121206 | 0.156580992 | 0.202870505 |
| 0.208640697 | 0.216508573 | 0.196473366 | 0.008772439 |
| 0.107934056 | 0.027127402 | 0.083451497 | 0.345510723 |
| 0.229371795 | 0.23532487  | 0.118923335 | 0.295579067 |
| 0.217393679 | 0.236206381 | 0.284803693 | 0.173034059 |
| 0.32789197  | 0.096787623 | 0.205378987 | 0.125974192 |
| 0.216892545 | 0.179099751 | 0.245331727 | 0.220931009 |
| 0.189696243 | 0.237755389 | 0.188306316 | 0.14829704  |
| 0.276569796 | 0.415057705 | 0.278946906 | 0.363682791 |
| 0.138678806 | 0.171159539 | 0.180528808 | 0.263235227 |
| 0.272323775 | 0.302661968 | 0.20673292  | 0.375231805 |
| 0.22722646  | 0.170154556 | 0.235791006 | 0.226423179 |
| 0.274235377 | 0.163418964 | 0.146218513 | 0.082382295 |
| 0.187721446 | 0.181951574 | 0.402109125 | 0.223258305 |
| 0.204089155 | 0.175206405 | 0.374348326 | 0.152316832 |
| 0.153889309 | 0.164684344 | 0.182248321 | 0.255614236 |
| 0.189270205 | 0.302488607 | 0.270977327 | 0.288122846 |
| 0.167566733 | 0.32119196  | 0.198226615 | 0.318275166 |
| 0.053637502 | 0.355532356 | 0.204659939 | 0.163673219 |
| 0.169073784 | 0.240766696 | 0.248035171 | 0.319709771 |
| 0.274255181 | 0.247704222 | 0.217893603 | 0.225965725 |
| 0.291457983 | 0.347563613 | 0.35663528  | 0.273938086 |
| 0.156665127 | 0.14854031  | 0.160568815 | 0.238704581 |
| 0.231452115 | 0.279452177 | 0.127424191 | 0.388548603 |
| 0.289379149 | 0.255181675 | 0.217184418 | 0.423519648 |
| 0.321157025 | 0.3644471   | 0.26221542  | 0.207050142 |
| 0.377627131 | 0.364608237 | 0.344119198 | 0.171936086 |
| 0.352095721 | 0.173434515 | 0.133558412 | 0.303916105 |
| 0.353181278 | 0.010190634 | 0.283374143 | 0.303141576 |
| 0.333054202 | 0.244287059 | 0.360833719 | 0.3191403   |
| 0.337040634 | 0.215558959 | 0.032671564 | 0.233208875 |
| 0.357433621 | 0.268606114 | 0.292546541 | 0.157417676 |
| 0.199581471 | 0.190724367 | 0.251930557 | 0.103822535 |
| 0.405214925 | 0.278581099 | 0.296734721 | 0.2595545   |
| 0.242413705 | 0.322056849 | 0.148550328 | 0.353708968 |
| 0.166604206 | 0.169441711 | 0.136808992 | 0.306434821 |
| 0.127541811 | 0.245157162 | 0.194118333 | 0.232724563 |
| 0.248279898 | 0.232345866 | 0.119929217 | 0.181843569 |
| 0.164459085 | 0.160902238 | 0.233081042 | 0.233461342 |
| 0.155139863 | 0.273622545 | 0.169370429 | 0.175503493 |
| 0.223365351 | 0.339698541 | 0.196634902 | 0.319760414 |
| 0.226778398 | 0.203843086 | 0.209363292 | 0.348311651 |
| 0.352281382 | 0.152465362 | 0.295421446 | 0.025894437 |
| 0.149350214 | 0.140512942 | 0.08610075  | 0.16588537  |
| 0.310437688 | 0.222499817 | 0.201622381 | 0.19918498  |
| 0.184324878 | 0.276344571 | 0.183334756 | 0.376336541 |
| 0.225967693 | 0.158630078 | 0.277807336 | 0.19024062  |
| 0.032629319 | 0.200515545 | 0.246696663 | 0.193166553 |
| 0.263659363 | 0.07252652  | 0.078290038 | 0.288292725 |

|             |             |             |             |
|-------------|-------------|-------------|-------------|
| 0.137981836 | 0.182905613 | 0.302304818 | 0.213642713 |
| 0.160971667 | 0.317695894 | 0.362503916 | 0.036912412 |
| 0.209602275 | 0.064520392 | 0.22914135  | 0.158010981 |
| 0.238244719 | 0.281928984 | 0.169012713 | 0.164647212 |
| 0.162706607 | 0.360219735 | 0.285432341 | 0.321755894 |
| 0.148551725 | 0.366993029 | 0.257861007 | 0.28698846  |
| 0.2307344   | 0.172898109 | 0.057734365 | 0.235459099 |
| 0.275857298 | 0.157777603 | 0.169344205 | 0.2374212   |
| 0.182336281 | 0.192579229 | 0.173435292 | 0.326883965 |
| 0.395330166 | 0.329496066 | 0.229175883 | 0.250978605 |
| 0.249570766 | 0.200437313 | 0.284020134 | 0.385824429 |
| 0.154730453 | 0.183976733 | 0.160365869 | 0.276970298 |
| 0.222176011 | 0.186693912 | 0.346344588 | 0.084869945 |
| 0.001602365 | 0.215492241 | 0.165680948 | 0.213241387 |
| 0.102602757 | 0.170226616 | 0.209882148 | 0.342751397 |
| 0.230054811 | 0.310794674 | 1           | 0.15672326  |
| 0.309710151 | 0.203940313 | 0.154720827 | 0.192946965 |
| 0.288691209 | 0.04757312  | 0.135144452 | 0.410115497 |
| 0.146639483 | 0.106676234 | 0.266963335 | 0.005867744 |
| 0.16824117  | 0.238915182 | 0.220961976 | 0.306659976 |
| 0.315910661 | 0.284798772 | 0.220730971 | 0.160898483 |
| 0.222885054 | 0.217402208 | 0.009595238 | 0.330217113 |
| 0.370190558 | 0.367842092 | 0.367186393 | 0.378127073 |
| 0.33061514  | 0.257496551 | 0.25205612  | 0.177299894 |
| 0.227563683 | 0.202687864 | 0.114867249 | 0.211460478 |
| 0.017697097 | 0.246684081 | 0.236841342 | 0.227962878 |
| 0.226516585 | 0.281716321 | 0.1387395   | 0.205750865 |
| 0.051341343 | 0.060608532 | 0.252645377 | 0.293423982 |
| 0.257114799 | 0.089934125 | 0.074537501 | 0.136143015 |
| 0.30423919  | 0.287803096 | 0.134048025 | 0.359530399 |
| 0.192392182 | 0.187239636 | 0.181803937 | 0.223217589 |
| 0.21291219  | 0.078248046 | 0.232656545 | 0.010195997 |
| 0.111749231 | 0.384730473 | 0.1874983   | 0.142415388 |
| 0.218791382 | 0.037240783 | 0.27409793  | 0.367451916 |
| 0.316635803 | 0.331543349 | 0.3225436   | 0.107568375 |
| 0.330786077 | 0.041386914 | 0.339867812 | 0.266058424 |
| 0.142724746 | 0.002286696 | 0.034305934 | 0.283873564 |
| 0.165668425 | 0.146103296 | 0.238273133 | 0.121692715 |
| 0.182924682 | 0.205234264 | 0.220804924 | 0.129761423 |
| 0.177849229 | 0.195448419 | 0.148256031 | 0.343026223 |
| 0.240895882 | 0.275390288 | 0.190335252 | 0.212324617 |
| 0.181050246 | 0.155879447 | 0.234029577 | 0.011723158 |
| 0.233833445 | 0.206854722 | 0.386948364 | 0.338683123 |
| 0.360905462 | 0.193251661 | 0.115238259 | 0.158328923 |
| 0.315855285 | 0.148580831 | 0.131345222 | 0.17800915  |
| 0.309818305 | 0.181724173 | 0.246472752 | 0.256665266 |
| 0.349330343 | 0.330154938 | 0.164855656 | 0.244707168 |
| 0.030547988 | 0.009980136 | 0.158608559 | 0.293173669 |
| 0.159450093 | 0.179058912 | 0.261156035 | 0.307426255 |
| 0.295234534 | 0.088338151 | 0.127475022 | 0.127474662 |
| 0.230020912 | 0.209960419 | 0.154665379 | 0.312827496 |
| 0.210297192 | 0.152459296 | 0.239218021 | 0.29715503  |
| 0.253474139 | 0.289086089 | 0.257493052 | 0.15193198  |
| 0.161258621 | 0.155846553 | 0.171990084 | 0.238845568 |

|             |             |             |             |
|-------------|-------------|-------------|-------------|
| 0.260100644 | 0.290851056 | 0.198792423 | 0.040461647 |
| 0.275371078 | 0.244445542 | 0.313634888 | 0.317658145 |
| 0.379856003 | 0.37701461  | 0.370803695 | 0.235474448 |
| 0.183277196 | 0.23003158  | 0.167649227 | 0.185108689 |
| 0.335053586 | 0.17099955  | 0.335128679 | 0.13230205  |
| 0.256637    | 0.214906804 | 0.114314738 | 0.24599498  |
| 0.153495115 | 0.261200491 | 0.222787729 | 0.172217227 |
| 0.201680032 | 0.111925694 | 0.210413318 | 0.250927979 |
| 0.262068841 | 0.078916762 | 0.252293206 | 0.254088152 |
| 0.271173832 | 0.152532928 | 0.203890972 | 0.367102013 |
| 0.214648973 | 0.261779488 | 0.145418791 | 0.26576651  |
| 0.244972639 | 0.166674141 | 0.039660846 | 0.287923548 |
| 0.333405264 | 0.167931004 | 0.341130101 | 0.318871975 |
| 0.223830619 | 0.149663862 | 0.176507222 | 0.206371433 |
| 0.293725142 | 0.171625157 | 0.299925839 | 0.20297937  |
| 0.358701517 | 0.421562471 | 0.2832352   | 0.204414976 |
| 0.180996729 | 0.207143898 | 0.16063949  | 0.293619984 |
| 0.109473276 | 0.155436044 | 0.151483888 | 0.269150636 |
| 0.005525641 | 0.067004891 | 0.348125894 | 0.20953302  |
| 0.40205103  | 0.304516334 | 0.330689442 | 0.271755027 |
| 0.00340765  | 0.184257777 | 0.180613234 | 0.152997906 |
| 0.277839097 | 0.260849877 | 0.254649968 | 0.18018719  |
| 0.289061142 | 0.147969477 | 0.21774621  | 0.146178015 |
| 0.091148593 | 0.204312597 | 0.273728275 | 0.309021486 |
| 0.247006175 | 0.215042198 | 0.107055561 | 0.213629077 |
| 0.160171214 | 0.260034424 | 0.272496653 | 0.142060338 |
| 0.068618205 | 0.331980926 | 0.248951936 | 0.113819363 |
| 0.168734405 | 0.310458938 | 0.326427295 | 0.012796581 |
| 0.193023741 | 0.060899741 | 0.225757795 | 0.184599863 |
| 0.225634172 | 0.265486007 | 0.238976962 | 0.174113672 |
| 0.242076138 | 0.264780779 | 0.179499936 | 0.230257863 |
| 0.187297559 | 0.275076149 | 0.198685056 | 0.221452152 |
| 0.146325536 | 0.197484217 | 0.223398312 | 0.226505971 |
| 0.120413567 | 0.297094613 | 0.290314724 | 0.150575988 |
| 0.272135969 | 0.22984643  | 0.323158052 | 0.325783769 |
| 0.325079801 | 0.194122901 | 0.255326054 | 0.256581468 |
| 0.103800473 | 0.147947171 | 0.179559674 | 0.197652151 |
| 0.247980294 | 0.129735765 | 0.185756795 | 0.191909887 |
| 0.230171128 | 0.35451523  | 0.276494179 | 0.341568687 |
| 0.185120223 | 0.23587659  | 0.115045651 | 0.150263581 |
| 0.201688926 | 0.252617309 | 0.165214271 | 0.015069302 |
| 0.232742117 | 0.155402711 | 0.260659498 | 0.338562837 |
| 0.121211569 | 0.329511947 | 0.114384181 | 0.167711391 |
| 0.096151606 | 0.242374676 | 0.237719377 | 0.228006405 |
| 0.07306132  | 0.23111213  | 0.191839757 | 0.15331929  |
| 0.222023574 | 0.22872109  | 0.219661686 | 0.29383087  |
| 0.30281805  | 0.225228072 | 0.40007454  | 0.200034488 |
| 0.166652157 | 0.121984094 | 0.190761732 | 0.189368458 |
| 0.232374081 | 0.332578384 | 0.18177338  | 0.328808673 |
| 0.189179178 | 0.238360657 | 0.403472979 | 0.253521417 |
| 0.220126018 | 0.174489421 | 0.075656421 | 0.193844936 |
| 0.28598611  | 0.130715798 | 0.007012025 | 0.050211048 |
| 0.235887127 | 0.245032189 | 0.244989527 | 0.278076822 |
| 0.175330084 | 0.297384017 | 0.078277416 | 0.26327749  |

|             |             |             |             |
|-------------|-------------|-------------|-------------|
| 0.334465792 | 0.385652325 | 0.15770876  | 0.299824078 |
| 0.269979709 | 0.197243418 | 0.175556044 | 0.046072437 |
| 0.174341536 | 0.155500579 | 0.156750989 | 0.207167797 |
| 0.123858335 | 0.08224725  | 0.184695222 | 0.211135551 |
| 0.310330319 | 0.06436587  | 0.226018179 | 0.198398086 |
| 0.283145478 | 0.384426919 | 0.222735782 | 0.202131221 |
| 0.229809797 | 0.281356958 | 0.175006973 | 0.210992733 |
| 0.132849744 | 0.144651549 | 0.225816956 | 0.106930972 |
| 0.140657896 | 0.176685354 | 0.01849424  | 0.36857198  |
| 0.364645389 | 0.159623917 | 0.304937902 | 0.139872973 |
| 0.242504375 | 0.326311276 | 0.216579378 | 0.162294465 |
| 0.049224047 | 0.156628148 | 0.268790769 | 0.258738073 |
| 0.065016392 | 0.230855148 | 0.131344823 | 0.200435342 |
| 0.389615664 | 0.164852401 | 0.335887585 | 0.108842753 |
| 0.322530071 | 0.286188948 | 0.20323072  | 0.19645885  |
| 0.208968097 | 0.190531354 | 0.151566013 | 0.376280547 |
| 0.219805708 | 0.110747926 | 0.252173102 | 0.206508403 |
| 0.152638266 | 0.306925532 | 0.179738816 | 0.384858229 |
| 0.177573461 | 0.246412374 | 0.252989766 | 0.325216948 |
| 0.277963269 | 0.147178517 | 0.114461298 | 0.190781237 |
| 0.306068397 | 0.121125821 | 0.174797625 | 0.243281451 |
| 0.099409115 | 0.256707659 | 0.197429376 | 0.196410878 |
| 0.108868299 | 0.308164701 | 0.161105251 | 0.255716551 |
| 0.240330795 | 0.190678786 | 0.188425892 | 0.334306862 |
| 0.13062572  | 0.053393583 | 0.370868417 | 0.008366257 |
| 0.179842566 | 0.175705216 | 0.261118759 | 0.189123664 |
| 0.229774866 | 0.249072318 | 0.196727779 | 0.012231789 |
| 0.275774476 | 0.043197688 | 0.245267671 | 0.147076178 |
| 0.146553694 | 0.182198323 | 0.330476991 | 0.332976946 |
| 0.254656692 | 0.167405569 | 0.110772718 | 0.337094897 |
| 0.075639078 | 0.121692322 | 0.166949177 | 0.186795774 |
| 0.10316816  | 0.142080039 | 0.161441661 | 0.122830643 |
| 0.239210104 | 0.266600652 |             |             |
| G0T2        | 0.041015392 | 0.254365159 | 0.028534357 |
| 0.109842231 | 0.250556659 | 0.11934463  | 0.035874531 |
| 0.05692786  | 0.189773443 | 0.04979634  | 0.246319889 |
| 0.022362354 | 0.039510065 | 0.368282211 | 0.032010757 |
| 0.29235331  | 0.035987153 | 0.092389154 | 0.020439654 |
| 0.061232713 | 0.262796769 | 0.112244309 | 0.143624726 |
| 0.19247639  | 0.157019141 | 0.17088423  | 0.169103762 |
| 0.347239202 | 0.067537588 | 0.274336387 | 0.043846478 |
| 0.363404974 | 0.286493921 | 0.155732669 | 0.011869196 |
| 0.189005203 | 0.00550044  | 0.33521139  | 0.184573994 |
| 0.085435309 | 0.288109979 | 0.08469134  | 0.178318887 |
| 0.139832389 | 0.025670105 | 0.030437104 | 0.270269568 |
| 0.151528594 | 0.079989389 | 0.034526986 | 0.257579852 |
| 0.092259414 | 0.223859716 | 0.197157738 | 0.004652494 |
| 0.139423899 | 0.034125888 | 0.082168432 | 0.336142472 |
| 0.197896806 | 0.106581299 | 0.067784827 | 0.074597554 |
| 0.200321734 | 0.251900389 | 0.181863756 | 0.101414086 |
| 0.38103533  | 0.091086028 | 0.262075995 | 0.075986156 |
| 0.160654675 | 0.012808085 | 0.161329354 | 0.038626665 |
| 0.115724308 | 0.168902531 | 0.206868487 | 0.137424894 |
| 0.267331206 | 0.368544273 | 0.169805928 | 0.324910212 |

|             |             |             |             |
|-------------|-------------|-------------|-------------|
| 0.054110324 | 0.239717008 | 0.110973109 | 0.292400887 |
| 0.252684161 | 0.031757675 | 0.361147285 | 0.404297119 |
| 0.017714153 | 0.150298708 | 0.28673283  | 0.0799965   |
| 0.269863279 | 0.062901592 | 0.145601133 | 0.096779931 |
| 0.289076902 | 0.28365012  | 0.305471692 | 0.295499745 |
| 0.143456937 | 0.050717433 | 0.300761949 | 0.24535596  |
| 0.17952414  | 0.061054319 | 0.147018789 | 0.342666332 |
| 0.294907123 | 0.363256153 | 0.279201451 | 0.311577842 |
| 0.273170892 | 0.37450893  | 0.32172358  | 0.273068761 |
| 0.018752362 | 0.358943722 | 0.139805902 | 0.038051709 |
| 0.029461321 | 0.048037446 | 0.073089636 | 0.251133373 |
| 0.349445774 | 0.209393986 | 0.126427168 | 0.22004967  |
| 0.395115748 | 0.290373641 | 0.354877405 | 0.339354118 |
| 0.03058632  | 0.07421429  | 0.271390146 | 0.064265197 |
| 0.298756698 | 0.076689378 | 0.188508251 | 0.3525941   |
| 0.342628384 | 0.367335813 | 0.05971701  | 0.339618217 |
| 0.082349184 | 0.411869154 | 0.294781274 | 0.172156204 |
| 0.373515578 | 0.334143409 | 0.419268606 | 0.322792865 |
| 0.327296407 | 0.191118218 | 0.020097241 | 0.290352637 |
| 0.401364186 | 0.020164558 | 0.339016929 | 0.375378476 |
| 0.344986235 | 0.371351051 | 0.413031944 | 0.369185618 |
| 0.334940668 | 0.055263854 | 0.009254632 | 0.2991031   |
| 0.362957285 | 0.356881615 | 0.058343767 | 0.228642238 |
| 0.267979444 | 0.156507182 | 0.266632785 | 0.144239622 |
| 0.407720068 | 0.329412211 | 0.336325691 | 0.289560642 |
| 0.120916366 | 0.260713281 | 0.204293428 | 0.297494716 |
| 0.030394012 | 0.066971873 | 0.03873954  | 0.220024746 |
| 0.062597013 | 0.178467095 | 0.141582942 | 0.202365971 |
| 0.2029509   | 0.100742179 | 0.107683814 | 0.320812652 |
| 0.040037586 | 0.222139537 | 0.101264173 | 0.123132025 |
| 0.048296292 | 0.11844079  | 0.152724251 | 0.090991958 |
| 0.213348495 | 0.160824301 | 0.267814869 | 0.359472159 |
| 0.136583328 | 0.15482566  | 0.27970812  | 0.382072406 |
| 0.412363694 | 0.251645402 | 0.185731181 | 0.029700876 |
| 0.19087823  | 0.06442454  | 0.080198553 | 0.191486071 |
| 0.122253571 | 0.152337011 | 0.293273998 | 0.357039724 |
| 0.164835756 | 0.048822222 | 0.156961877 | 0.319422205 |
| 0.104722548 | 0.160735778 | 0.409832681 | 0.190984894 |
| 0.003592641 | 0.246291211 | 0.355137084 | 0.098112631 |
| 0.219627383 | 0.10299288  | 0.097983009 | 0.390810655 |
| 0.102442689 | 0.115001576 | 0.346194895 | 0.313894955 |
| 0.087409206 | 0.133245317 | 0.399353985 | 0.03447665  |
| 0.160689168 | 0.067090265 | 0.314731238 | 0.082052364 |
| 0.222248286 | 0.274033935 | 0.230082793 | 0.147865463 |
| 0.088787323 | 0.370455149 | 0.268238998 | 0.386683539 |
| 0.139516009 | 0.404383922 | 0.37925902  | 0.377466926 |
| 0.242386736 | 0.144004685 | 0.073082892 | 0.377844217 |
| 0.37255199  | 0.101096181 | 0.049805269 | 0.294541269 |
| 0.13370576  | 0.321323572 | 0.065110573 | 0.426168489 |
| 0.363814622 | 0.286792275 | 0.094833091 | 0.348933503 |
| 0.37186092  | 0.176485183 | 0.285982391 | 0.397533411 |
| 0.069541984 | 0.250138471 | 0.187358749 | 0.378398933 |
| 0.167746853 | 0.125529083 | 0.221249208 | 0.062130932 |
| 0.004506428 | 0.044555482 | 0.056265153 | 0.151486715 |

|             |             |             |             |
|-------------|-------------|-------------|-------------|
| 0.108773793 | 0.189934226 | 0.287119073 | 0.388416821 |
| 0.109612096 | 0.298530836 | 0.15672326  | 1           |
| 0.336618019 | 0.160234554 | 0.20368681  | 0.244784931 |
| 0.184995487 | 0.026446655 | 0.106557934 | 0.381262446 |
| 0.022131766 | 0.11999819  | 0.124304861 | 0.00848818  |
| 0.031201349 | 0.224672563 | 0.076410702 | 0.167947678 |
| 0.382029653 | 0.160182572 | 0.187739401 | 0.077280025 |
| 0.288158098 | 0.075765083 | 0.007359754 | 0.346800545 |
| 0.308640654 | 0.291409963 | 0.305142349 | 0.269716875 |
| 0.308859395 | 0.227599042 | 0.351222436 | 0.148079122 |
| 0.059102768 | 0.035102437 | 0.161431575 | 0.239881302 |
| 0.002793256 | 0.311922097 | 0.155263396 | 0.149358649 |
| 0.304682004 | 0.224648605 | 0.02691223  | 0.207010217 |
| 0.029465656 | 0.101284608 | 0.090433059 | 0.106978556 |
| 0.290989236 | 0.01017036  | 0.1119031   | 0.15047819  |
| 0.294554924 | 0.276308602 | 0.11660245  | 0.372666385 |
| 0.262903148 | 0.080835631 | 0.234920084 | 0.30454718  |
| 0.04858727  | 0.040250657 | 0.104995068 | 0.014256232 |
| 0.035395258 | 0.279638506 | 0.105959433 | 0.044006494 |
| 0.266506315 | 0.007015553 | 0.296747508 | 0.386783109 |
| 0.286350271 | 0.411998117 | 0.379302225 | 0.171396196 |
| 0.3791441   | 0.032748133 | 0.377882108 | 0.290056897 |
| 0.118411829 | 0.003262667 | 0.007201141 | 0.380793734 |
| 0.28786124  | 0.033005859 | 0.15623426  | 0.094709915 |
| 0.0967024   | 0.065787453 | 0.032547568 | 0.123077607 |
| 0.219037335 | 0.205231095 | 0.08988744  | 0.312450421 |
| 0.188926066 | 0.177439442 | 0.111964017 | 0.061869139 |
| 0.216592546 | 0.047510402 | 0.056653058 | 0.017658343 |
| 0.286596974 | 0.081747402 | 0.292062398 | 0.352278378 |
| 0.398598466 | 0.319341247 | 0.075571636 | 0.081637088 |
| 0.292563091 | 0.057821704 | 0.076028904 | 0.062528339 |
| 0.330944739 | 0.351843352 | 0.333978183 | 0.295165772 |
| 0.430340623 | 0.37413151  | 0.026672748 | 0.372756014 |
| 0.017416713 | 0.002475865 | 0.169298501 | 0.187855645 |
| 0.0107597   | 0.230200178 | 0.262209367 | 0.056466948 |
| 0.064876422 | 0.026905304 | 0.142978531 | 0.157893383 |
| 0.283466399 | 0.244366432 | 0.240411097 | 0.150008004 |
| 0.138912107 | 0.122971517 | 0.099029554 | 0.070049963 |
| 0.052716421 | 0.243484924 | 0.173956821 | 0.016288225 |
| 0.184496523 | 0.2407896   | 0.050893786 | 0.125969012 |
| 0.384318491 | 0.397763699 | 0.047067622 | 0.033695019 |
| 0.235073583 | 0.152445107 | 0.403235083 | 0.330810148 |
| 0.363309313 | 0.424393163 | 0.302565611 | 0.103825586 |
| 0.040842433 | 0.248324767 | 0.227168401 | 0.079317945 |
| 0.369514909 | 0.043853374 | 0.308748506 | 0.187032975 |
| 0.097105379 | 0.124647608 | 0.038688814 | 0.06927309  |
| 0.230691934 | 0.155934332 | 0.174224562 | 0.115805596 |
| 0.218890996 | 0.102833038 | 0.031596472 | 0.18568574  |
| 0.312267536 | 0.125847178 | 0.15127868  | 0.07631176  |
| 0.219176662 | 0.027185347 | 0.33879118  | 0.394403609 |
| 0.108620335 | 0.073256556 | 0.100527786 | 0.234355012 |
| 0.321069168 | 0.148902022 | 0.02634209  | 0.275114422 |
| 0.361575397 | 0.289594033 | 0.332755479 | 0.367490206 |
| 0.067793384 | 0.266155106 | 0.124466175 | 0.278511584 |

|             |             |             |             |
|-------------|-------------|-------------|-------------|
| 0.144919356 | 0.128284959 | 0.140557261 | 0.056379145 |
| 0.218902565 | 0.324642429 | 0.314968459 | 0.148488317 |
| 0.171895631 | 0.063946514 | 0.036701672 | 0.277521387 |
| 0.145109578 | 0.067982055 | 0.092298058 | 0.294276492 |
| 0.003656026 | 0.071347594 | 0.359390083 | 0.09621909  |
| 0.360404564 | 0.403802414 | 0.373932835 | 0.052630183 |
| 0.002902347 | 0.293306016 | 0.324409246 | 0.20192403  |
| 0.31322627  | 0.237641179 | 0.026299846 | 0.07472752  |
| 0.278519299 | 0.056166236 | 0.127478443 | 0.074190738 |
| 0.103849737 | 0.232350476 | 0.192691114 | 0.123015246 |
| 0.142960041 | 0.047338337 | 0.091055581 | 0.130439043 |
| 0.052595347 | 0.247103276 | 0.360385449 | 0.038547463 |
| 0.165496356 | 0.34309105  | 0.332202714 | 0.017760932 |
| 0.175483334 | 0.31218479  | 0.298852807 | 0.013938682 |
| 0.356701171 | 0.011372089 | 0.173539178 | 0.194351303 |
| 0.141427332 | 0.150739357 | 0.245454579 | 0.147358383 |
| 0.227487606 | 0.146533269 | 0.176346603 | 0.238227141 |
| 0.108419194 | 0.106633039 | 0.235413233 | 0.144097544 |
| 0.1742379   | 0.082163486 | 0.070246638 | 0.070065338 |
| 0.047535348 | 0.291636359 | 0.219513369 | 0.050085518 |
| 0.191958155 | 0.122649325 | 0.336208298 | 0.317199218 |
| 0.334067138 | 0.06878345  | 0.146346824 | 0.318252003 |
| 0.052716767 | 0.078933642 | 0.02526342  | 0.171273389 |
| 0.16194197  | 0.158353947 | 0.129150094 | 0.201738319 |
| 0.241579748 | 0.334889681 | 0.20685526  | 0.319450177 |
| 0.174496465 | 0.144515226 | 0.072898828 | 0.094647196 |
| 0.149909259 | 0.099496136 | 0.239798501 | 0.004981981 |
| 0.270649612 | 0.080957172 | 0.381582358 | 0.334096129 |
| 0.101471537 | 0.303108751 | 0.069634704 | 0.07488082  |
| 0.049288009 | 0.132554006 | 0.133253726 | 0.265747696 |
| 0.090986302 | 0.083764387 | 0.259325514 | 0.064682004 |
| 0.316707885 | 0.252706254 | 0.090886971 | 0.108295473 |
| 0.139066435 | 0.125583345 | 0.304160473 | 0.049861031 |
| 0.218988183 | 0.136406441 | 0.131490173 | 0.26366715  |
| 0.173204315 | 0.36047086  | 0.042913237 | 0.382706208 |
| 0.233927587 | 0.091748374 | 0.376168085 | 0.10792468  |
| 0.065902791 | 0.070704904 | 0.092844987 | 0.088802591 |
| 0.09406206  | 0.113526205 | 0.005496907 | 0.077435031 |
| 0.342382659 | 0.070032284 | 0.254537421 | 0.245375079 |
| 0.139514605 | 0.318185821 | 0.045829757 | 0.139242519 |
| 0.29394866  | 0.311823433 | 0.189217607 | 0.234678682 |
| 0.286330459 | 0.074479701 | 0.189736384 | 0.003084338 |
| 0.291410821 | 0.231197048 | 0.090470561 | 0.0317026   |
| 0.015560004 | 0.11935093  | 0.265824397 | 0.034387933 |
| 0.398672634 | 0.083396932 | 0.150320263 | 0.267073483 |
| 0.1140875   | 0.326295655 | 0.084047456 | 0.360306485 |
| 0.015357093 | 0.178801677 | 0.158560403 | 0.143813775 |
| 0.180716985 | 0.199568501 | 0.376477466 | 0.156673227 |
| 0.032580083 | 0.136155161 | 0.009942385 | 0.321611098 |
| 0.297033527 | 0.207317983 | 0.163674161 | 0.044692833 |
| 0.271088795 | 0.246184544 | 0.121916156 | 0.153010848 |
| 0.018870121 | 0.311967818 | 0.144667568 | 0.303625863 |
| 0.128189111 | 0.193473708 | 0.048222977 | 0.18612343  |
| 0.281582838 | 0.169905069 | 0.195238537 | 0.135626179 |



|             |             |             |             |
|-------------|-------------|-------------|-------------|
| 0.313191862 | 0.215249589 | 0.095117414 | 0.072252224 |
| 0.17988072  | 0.049990053 | 0.08409584  | 0.381929412 |
| 0.152051569 | 0.167618156 | 0.406917336 | 0.173402741 |
| 0.162267633 | 0.243526905 | 0.181340707 | 0.349362687 |
| 0.083375416 | 0.238430678 | 0.30886577  | 0.336726313 |
| 0.294255833 | 0.107262342 | 0.140768193 | 0.195383088 |
| 0.300112602 | 0.07149597  | 0.104898094 | 0.290008376 |
| 0.151387015 | 0.233955822 | 0.118315742 | 0.144220742 |
| 0.042815258 | 0.058813602 | 0.096173526 | 0.112930616 |
| 0.26791343  | 0.249387725 | 0.125641023 | 0.340881659 |
| 0.106743134 | 0.050090736 | 0.362325101 | 0.038323545 |
| 0.146801594 | 0.313809815 | 0.161219425 | 0.186792222 |
| 0.166885262 | 0.207946526 | 0.174540868 | 0.004452121 |
| 0.339321604 | 0.025638624 | 0.096322807 | 0.169547608 |
| 0.101347881 | 0.033285204 | 0.31206745  | 0.413280734 |
| 0.173851885 | 0.060074452 | 0.102323462 | 0.315020273 |
| 0.103371427 | 0.08147657  | 0.104549169 | 0.221293732 |
| 0.112966171 | 0.126062586 | 0.13336047  | 0.151794568 |
| 0.258788451 | 0.089621571 |             |             |
| GPD2        | 0.165536057 | 0.410253341 | 0.142009174 |
| 0.22666511  | 0.290852825 | 0.392948566 | 0.144769913 |
| 0.227313076 | 0.381169504 | 0.31101203  | 0.370545909 |
| 0.064255851 | 0.061806332 | 0.432373634 | 0.12549931  |
| 0.369759988 | 0.088505011 | 0.20619897  | 0.109437882 |
| 0.277748336 | 0.280506427 | 0.297986791 | 0.417726986 |
| 0.276333973 | 0.276566994 | 0.403966267 | 0.342379898 |
| 0.462499906 | 0.225369268 | 0.403041215 | 0.215118336 |
| 0.425129967 | 0.30423249  | 0.331322912 | 0.061502195 |
| 0.399382696 | 0.012608005 | 0.462887249 | 0.30682589  |
| 0.131015885 | 0.375018263 | 0.362199585 | 0.296581537 |
| 0.405499097 | 0.112189531 | 0.202107815 | 0.386561611 |
| 0.379354461 | 0.310837176 | 0.158809707 | 0.418592515 |
| 0.376939199 | 0.394423927 | 0.408469585 | 0.009570143 |
| 0.251041528 | 0.059898755 | 0.181863266 | 0.485328923 |
| 0.285738295 | 0.196240751 | 0.26953144  | 0.298963726 |
| 0.376609621 | 0.370901999 | 0.302496458 | 0.387325677 |
| 0.476184568 | 0.151498534 | 0.401635717 | 0.210427663 |
| 0.412849511 | 0.103019217 | 0.254592157 | 0.180964817 |
| 0.358061164 | 0.257100711 | 0.324518342 | 0.268290797 |
| 0.421847347 | 0.509486282 | 0.312233098 | 0.50069927  |
| 0.094486032 | 0.307368731 | 0.259075306 | 0.335574318 |
| 0.383006364 | 0.171011056 | 0.421277849 | 0.506165523 |
| 0.123183618 | 0.397825011 | 0.420884788 | 0.231686491 |
| 0.416657393 | 0.233023651 | 0.400938492 | 0.144641398 |
| 0.340392429 | 0.336690843 | 0.473160128 | 0.366775413 |
| 0.285003341 | 0.173212475 | 0.49656717  | 0.282262574 |
| 0.307723895 | 0.183395559 | 0.247479445 | 0.415552637 |
| 0.424083905 | 0.455775554 | 0.424057121 | 0.396406266 |
| 0.364191455 | 0.469848078 | 0.428018639 | 0.405240503 |
| 0.146689596 | 0.499234814 | 0.284200563 | 0.095532179 |
| 0.17536069  | 0.143560514 | 0.229338139 | 0.339206796 |
| 0.422857466 | 0.38209315  | 0.311477483 | 0.281718151 |
| 0.408250815 | 0.481304777 | 0.500443956 | 0.429516928 |
| 0.111064909 | 0.208686801 | 0.372379324 | 0.321566552 |

|             |             |             |             |
|-------------|-------------|-------------|-------------|
| 0.401478337 | 0.202935138 | 0.230673461 | 0.513406346 |
| 0.405312755 | 0.411466339 | 0.279609117 | 0.5110114   |
| 0.277787209 | 0.487788485 | 0.429655886 | 0.262323015 |
| 0.510311699 | 0.498081228 | 0.471917731 | 0.36064129  |
| 0.465508739 | 0.404551581 | 0.083052705 | 0.405969471 |
| 0.450914097 | 0.014516216 | 0.423490498 | 0.445642838 |
| 0.486394747 | 0.425453653 | 0.476245113 | 0.458893843 |
| 0.486831159 | 0.167653358 | 0.031433087 | 0.314678437 |
| 0.505094544 | 0.41726735  | 0.177189536 | 0.393638127 |
| 0.339804056 | 0.425895953 | 0.397549835 | 0.322700722 |
| 0.490432876 | 0.42294381  | 0.440420394 | 0.426330355 |
| 0.365118602 | 0.362950332 | 0.330417273 | 0.482295014 |
| 0.107068299 | 0.226072669 | 0.139076899 | 0.344325515 |
| 0.361366453 | 0.244604674 | 0.441229661 | 0.340658816 |
| 0.269097929 | 0.389864909 | 0.275201795 | 0.352289358 |
| 0.143452497 | 0.419235241 | 0.262219619 | 0.30105372  |
| 0.104695052 | 0.232313739 | 0.28602814  | 0.213760032 |
| 0.285199393 | 0.31446281  | 0.413001398 | 0.443620851 |
| 0.340370475 | 0.291583751 | 0.433037302 | 0.444887238 |
| 0.404210758 | 0.350690259 | 0.30307902  | 0.030293527 |
| 0.330002072 | 0.279401705 | 0.154147286 | 0.362882274 |
| 0.249029365 | 0.32319638  | 0.400162219 | 0.366188216 |
| 0.389567468 | 0.240975404 | 0.3656028   | 0.438674592 |
| 0.258757741 | 0.305178448 | 0.427263073 | 0.417610374 |
| 0.016543035 | 0.406655532 | 0.428991311 | 0.161998884 |
| 0.383097566 | 0.12143597  | 0.210977064 | 0.430217016 |
| 0.270670103 | 0.211238224 | 0.433564796 | 0.355658123 |
| 0.342804975 | 0.289445388 | 0.482677616 | 0.053063017 |
| 0.315705747 | 0.077757441 | 0.322532487 | 0.349822091 |
| 0.339841149 | 0.336602916 | 0.282927679 | 0.275639196 |
| 0.240880736 | 0.495987055 | 0.401423968 | 0.469298741 |
| 0.366270669 | 0.491098797 | 0.425225603 | 0.422987964 |
| 0.390742889 | 0.339687721 | 0.105526139 | 0.439420655 |
| 0.42704293  | 0.336891013 | 0.17117506  | 0.410569562 |
| 0.375848329 | 0.385023697 | 0.133377799 | 0.460998491 |
| 0.48676245  | 0.47241705  | 0.205301305 | 0.363328597 |
| 0.412836259 | 0.32561718  | 0.397354248 | 0.488477164 |
| 0.337163576 | 0.352096835 | 0.337506483 | 0.375373223 |
| 0.28081245  | 0.210679516 | 0.353278397 | 0.134158021 |
| 0.006734339 | 0.180708364 | 0.163683685 | 0.210189682 |
| 0.14573872  | 0.387624703 | 0.390368753 | 0.488379703 |
| 0.206591465 | 0.402263854 | 0.309710151 | 0.336618019 |
| 1           | 0.329303494 | 0.32450005  | 0.358441003 |
| 0.318110671 | 0.042022505 | 0.177310918 | 0.519790939 |
| 0.120939419 | 0.210474937 | 0.367635046 | 0.005833816 |
| 0.130395042 | 0.410591792 | 0.193380668 | 0.268279958 |
| 0.411605077 | 0.277842909 | 0.327866711 | 0.368188904 |
| 0.357900717 | 0.181207425 | 0.005767247 | 0.447728584 |
| 0.455917508 | 0.430244597 | 0.459354601 | 0.449479238 |
| 0.406045812 | 0.384052783 | 0.401664187 | 0.406087629 |
| 0.208032617 | 0.198595776 | 0.214171477 | 0.336772422 |
| 0.012574643 | 0.375962265 | 0.296432548 | 0.23924141  |
| 0.395832763 | 0.35911429  | 0.101867877 | 0.318687532 |
| 0.074722311 | 0.172390027 | 0.374880282 | 0.266076389 |

|             |             |             |             |
|-------------|-------------|-------------|-------------|
| 0.333999931 | 0.05472131  | 0.275826578 | 0.3335502   |
| 0.439684921 | 0.395131038 | 0.312902374 | 0.503109213 |
| 0.361489727 | 0.243015679 | 0.333286995 | 0.374144477 |
| 0.161935171 | 0.158384343 | 0.39065983  | 0.048436069 |
| 0.200082527 | 0.436706953 | 0.358857182 | 0.17269084  |
| 0.352469996 | 0.025849364 | 0.408074773 | 0.502020046 |
| 0.461977526 | 0.473202931 | 0.469415188 | 0.238516645 |
| 0.483649394 | 0.073619232 | 0.489252883 | 0.428574412 |
| 0.383241347 | 0.004281263 | 0.012125976 | 0.430675299 |
| 0.390872012 | 0.143730423 | 0.256388979 | 0.377329266 |
| 0.185316842 | 0.271967166 | 0.13522312  | 0.174088691 |
| 0.404958499 | 0.246832481 | 0.158802572 | 0.474632763 |
| 0.312209553 | 0.281425233 | 0.409463773 | 0.18512902  |
| 0.367525004 | 0.122864638 | 0.182797414 | 0.012486843 |
| 0.350118753 | 0.21925741  | 0.491582104 | 0.480489978 |
| 0.474406343 | 0.372682324 | 0.332243957 | 0.328486775 |
| 0.393391424 | 0.20238103  | 0.324446937 | 0.219590631 |
| 0.472253114 | 0.397410236 | 0.372859547 | 0.379833839 |
| 0.472784657 | 0.462702015 | 0.094298552 | 0.415373406 |
| 0.035581706 | 0.001993472 | 0.43317186  | 0.32527811  |
| 0.060250453 | 0.360832177 | 0.335279906 | 0.277774363 |
| 0.247323144 | 0.092573097 | 0.230190927 | 0.224824612 |
| 0.348272773 | 0.381653262 | 0.259139946 | 0.310836821 |
| 0.263051922 | 0.162278942 | 0.238589828 | 0.225495866 |
| 0.255939702 | 0.378936184 | 0.285435771 | 0.071704501 |
| 0.406736837 | 0.389168589 | 0.136373514 | 0.25507457  |
| 0.427503696 | 0.444153969 | 0.10731672  | 0.031255307 |
| 0.346186197 | 0.336646056 | 0.445815716 | 0.472650836 |
| 0.5150265   | 0.491484228 | 0.410646666 | 0.174779558 |
| 0.147184535 | 0.334532213 | 0.271218664 | 0.122561801 |
| 0.475369499 | 0.169370672 | 0.460917446 | 0.25319658  |
| 0.213591546 | 0.301869705 | 0.079844949 | 0.16949613  |
| 0.333584578 | 0.260929602 | 0.224121877 | 0.271858914 |
| 0.347324    | 0.217395254 | 0.123911422 | 0.284217571 |
| 0.410150256 | 0.166450964 | 0.262134378 | 0.345206577 |
| 0.3916954   | 0.238693498 | 0.409260073 | 0.439337168 |
| 0.231667442 | 0.218108371 | 0.39736194  | 0.374487885 |
| 0.431136817 | 0.370051537 | 0.056816304 | 0.434380082 |
| 0.440819929 | 0.416621537 | 0.482252354 | 0.385827051 |
| 0.180823632 | 0.360239014 | 0.278630236 | 0.357557963 |
| 0.269149325 | 0.395014039 | 0.289808132 | 0.149260475 |
| 0.332095828 | 0.479087565 | 0.43084556  | 0.230631979 |
| 0.38537926  | 0.240136826 | 0.157089789 | 0.406009224 |
| 0.176157004 | 0.190290762 | 0.367661881 | 0.399765816 |
| 0.003697364 | 0.104208028 | 0.434814671 | 0.282105401 |
| 0.489166918 | 0.436363092 | 0.432242394 | 0.298390498 |
| 0.002229855 | 0.378529274 | 0.392905108 | 0.402643186 |
| 0.439028572 | 0.39064301  | 0.176317406 | 0.14050663  |
| 0.331228311 | 0.182085011 | 0.216158747 | 0.350012684 |
| 0.164694049 | 0.434743486 | 0.269751831 | 0.28892106  |
| 0.238682123 | 0.194577034 | 0.195755705 | 0.305913447 |
| 0.130558056 | 0.308414934 | 0.383409558 | 0.303174724 |
| 0.206156088 | 0.4078569   | 0.438255129 | 0.080644087 |
| 0.304574201 | 0.398253246 | 0.39566368  | 0.01030404  |

|             |             |             |             |
|-------------|-------------|-------------|-------------|
| 0.41167935  | 0.028248214 | 0.23611704  | 0.257600176 |
| 0.240131992 | 0.260711175 | 0.279619788 | 0.301081295 |
| 0.407671183 | 0.301621397 | 0.328313529 | 0.297277034 |
| 0.208083303 | 0.293619184 | 0.373399759 | 0.399983183 |
| 0.291546318 | 0.215197188 | 0.189714483 | 0.186327242 |
| 0.10594615  | 0.414933353 | 0.315634276 | 0.166436384 |
| 0.280245303 | 0.389546778 | 0.369995352 | 0.479268127 |
| 0.388711092 | 0.209599572 | 0.348524395 | 0.436583401 |
| 0.241462933 | 0.342935001 | 0.160063309 | 0.404345689 |
| 0.305432231 | 0.220778828 | 0.38930286  | 0.414763917 |
| 0.418011194 | 0.410578216 | 0.313141403 | 0.408123289 |
| 0.371553262 | 0.354373851 | 0.350896507 | 0.140128676 |
| 0.291437782 | 0.232922213 | 0.252951684 | 0.010151086 |
| 0.383089975 | 0.359442222 | 0.435892178 | 0.484290741 |
| 0.2393198   | 0.378997799 | 0.355570046 | 0.19550764  |
| 0.302412531 | 0.274107109 | 0.240263863 | 0.413957201 |
| 0.175797618 | 0.252538962 | 0.307905311 | 0.380488153 |
| 0.408193258 | 0.397809487 | 0.238446451 | 0.320467545 |
| 0.29037232  | 0.300420556 | 0.473630178 | 0.226897366 |
| 0.406340166 | 0.184302012 | 0.383720202 | 0.331684648 |
| 0.262500663 | 0.469160897 | 0.141593447 | 0.479160978 |
| 0.346546201 | 0.225988469 | 0.479314368 | 0.333854327 |
| 0.334162958 | 0.145706477 | 0.150569937 | 0.392997459 |
| 0.284076146 | 0.278539508 | 0.018647162 | 0.082766111 |
| 0.354825777 | 0.309034722 | 0.42217363  | 0.37215257  |
| 0.228530468 | 0.350481634 | 0.115373706 | 0.382233868 |
| 0.479654051 | 0.500589902 | 0.337442623 | 0.31473105  |
| 0.391915755 | 0.177519682 | 0.419912596 | 0.021475481 |
| 0.409243612 | 0.379474272 | 0.370514295 | 0.118225486 |
| 0.061618913 | 0.186930466 | 0.427021031 | 0.161277804 |
| 0.422328003 | 0.172275012 | 0.375598319 | 0.407570877 |
| 0.265601294 | 0.508618022 | 0.164872457 | 0.401412888 |
| 0.125563851 | 0.316609643 | 0.323365596 | 0.36003671  |
| 0.255002949 | 0.270053523 | 0.390776816 | 0.205955627 |
| 0.087316798 | 0.276902404 | 0.009401513 | 0.433219921 |
| 0.487065107 | 0.313527621 | 0.283734223 | 0.290295808 |
| 0.313594181 | 0.375895046 | 0.263125862 | 0.369330249 |
| 0.030027815 | 0.346772746 | 0.262673077 | 0.421155165 |
| 0.2454667   | 0.388159175 | 0.108294333 | 0.291011639 |
| 0.485412115 | 0.322574518 | 0.314016863 | 0.330363229 |
| 0.468395999 | 0.388806991 | 0.265404249 | 0.208656495 |
| 0.387291541 | 0.153616966 | 0.373530267 | 0.495777247 |
| 0.226734852 | 0.196163493 | 0.409774066 | 0.28538022  |
| 0.269055765 | 0.396484556 | 0.381656195 | 0.488179518 |
| 0.113723417 | 0.316995831 | 0.395946462 | 0.440728207 |
| 0.33091984  | 0.157557599 | 0.223185256 | 0.255880318 |
| 0.457878697 | 0.165646308 | 0.246853946 | 0.413186201 |
| 0.20265863  | 0.334005659 | 0.366728925 | 0.201521192 |
| 0.075699937 | 0.231802621 | 0.35557308  | 0.23575928  |
| 0.349296347 | 0.360650898 | 0.240528394 | 0.386039243 |
| 0.176235756 | 0.060079609 | 0.437413807 | 0.019810378 |
| 0.387107406 | 0.380514664 | 0.296174396 | 0.333814928 |
| 0.279714731 | 0.401539689 | 0.4269376   | 0.007612267 |
| 0.397309602 | 0.046276161 | 0.285436789 | 0.248616971 |

|             |             |             |             |
|-------------|-------------|-------------|-------------|
| 0.271094926 | 0.137134738 | 0.438659059 | 0.461780589 |
| 0.359733068 | 0.287988432 | 0.308105989 | 0.438277796 |
| 0.127925503 | 0.275865934 | 0.302614193 | 0.431044822 |
| 0.183297352 | 0.385259177 | 0.374509053 | 0.330962555 |
| 0.404984684 | 0.31893378  |             |             |
| GPR89       | 0.030190765 | 0.331839307 | 0.017147447 |
| 0.05132911  | 0.243993047 | 0.147075967 | 0.036049252 |
| 0.072336529 | 0.281270823 | 0.143243724 | 0.197905405 |
| 0.009144542 | 0.142311611 | 0.387865386 | 0.039139464 |
| 0.300525239 | 0.024519315 | 0.060389409 | 0.072651518 |
| 0.115507123 | 0.232515102 | 0.198860004 | 0.166427411 |
| 0.227327123 | 0.127096425 | 0.188655038 | 0.277006148 |
| 0.402011433 | 0.153392332 | 0.299120931 | 0.070082564 |
| 0.336687064 | 0.280915766 | 0.217227187 | 0.005676772 |
| 0.229510888 | 0.046821278 | 0.341121899 | 0.15567263  |
| 0.115077702 | 0.273098322 | 0.122933489 | 0.118683272 |
| 0.165042231 | 0.013800828 | 0.095813786 | 0.349139825 |
| 0.200145122 | 0.158225327 | 0.027946308 | 0.292299719 |
| 0.199851529 | 0.21582372  | 0.261421986 | 0.002706935 |
| 0.209723964 | 0.123959075 | 0.210979112 | 0.386725743 |
| 0.133229335 | 0.073850597 | 0.189540793 | 0.146186795 |
| 0.315012754 | 0.344312732 | 0.209446765 | 0.179402662 |
| 0.397838624 | 0.206869709 | 0.349689368 | 0.071743631 |
| 0.177075514 | 0.01629804  | 0.111902913 | 0.050626964 |
| 0.211518596 | 0.125468682 | 0.22605727  | 0.214466592 |
| 0.315026254 | 0.420403217 | 0.165697208 | 0.376888903 |
| 0.192402888 | 0.29741881  | 0.191657965 | 0.269366605 |
| 0.334761845 | 0.060900034 | 0.302295463 | 0.421924977 |
| 0.030363448 | 0.219877494 | 0.328390561 | 0.080249815 |
| 0.324468155 | 0.234057614 | 0.181267535 | 0.168184215 |
| 0.332098993 | 0.269693136 | 0.393530581 | 0.206296352 |
| 0.219115463 | 0.035973344 | 0.353421783 | 0.290278113 |
| 0.152086246 | 0.033671256 | 0.178763768 | 0.420441006 |
| 0.274155148 | 0.397713129 | 0.360045221 | 0.333373744 |
| 0.273426589 | 0.395912354 | 0.266073335 | 0.356856913 |
| 0.090757383 | 0.419577503 | 0.084570321 | 0.028543656 |
| 0.028078779 | 0.061412028 | 0.226032756 | 0.260517112 |
| 0.394111629 | 0.23401651  | 0.087702184 | 0.15062434  |
| 0.438753737 | 0.348174506 | 0.423729505 | 0.359210624 |
| 0.018544137 | 0.236914168 | 0.246197549 | 0.126846892 |
| 0.318322775 | 0.078785244 | 0.20386805  | 0.386715211 |
| 0.288129429 | 0.395455039 | 0.064986362 | 0.384395121 |
| 0.136313482 | 0.41848413  | 0.338630403 | 0.084654554 |
| 0.397187405 | 0.362480905 | 0.431354562 | 0.34988072  |
| 0.357543286 | 0.135043882 | 0.104153904 | 0.335789385 |
| 0.415888563 | 0.016657439 | 0.422791585 | 0.441820326 |
| 0.382548971 | 0.403316928 | 0.465152336 | 0.430687607 |
| 0.392067219 | 0.041648899 | 0.048951975 | 0.26188569  |
| 0.387674179 | 0.297404304 | 0.118528484 | 0.252446214 |
| 0.3188774   | 0.161503255 | 0.377527949 | 0.157669365 |
| 0.439003231 | 0.366716118 | 0.415873065 | 0.329118359 |
| 0.183807271 | 0.245673595 | 0.2846817   | 0.331336847 |
| 0.02291524  | 0.043260495 | 0.024720812 | 0.2772431   |
| 0.120456921 | 0.119014976 | 0.149391081 | 0.302710917 |

|             |             |             |             |
|-------------|-------------|-------------|-------------|
| 0.140209423 | 0.147224326 | 0.216712985 | 0.347990269 |
| 0.033803335 | 0.244434612 | 0.074524223 | 0.086590779 |
| 0.024428489 | 0.105336755 | 0.098677531 | 0.075924764 |
| 0.179927149 | 0.163585055 | 0.343102676 | 0.417837455 |
| 0.225827456 | 0.105751934 | 0.31071421  | 0.401682419 |
| 0.380740989 | 0.252386969 | 0.193866919 | 0.004495294 |
| 0.170591438 | 0.209404523 | 0.207419272 | 0.277148889 |
| 0.126050369 | 0.165788146 | 0.293880267 | 0.353939819 |
| 0.118868008 | 0.07715685  | 0.218654342 | 0.331646317 |
| 0.098415799 | 0.167384207 | 0.39252999  | 0.24411871  |
| 0.000962176 | 0.160762052 | 0.364048514 | 0.16122937  |
| 0.252783625 | 0.148835371 | 0.165182252 | 0.39782198  |
| 0.242468053 | 0.230417248 | 0.427402513 | 0.364814324 |
| 0.179964136 | 0.161221007 | 0.460930836 | 0.097376119 |
| 0.271189063 | 0.03388074  | 0.236513739 | 0.14871492  |
| 0.152222274 | 0.268545406 | 0.275482713 | 0.171322377 |
| 0.062300263 | 0.422394566 | 0.309496763 | 0.425230436 |
| 0.204510608 | 0.452792419 | 0.401272251 | 0.365340889 |
| 0.248789021 | 0.235502687 | 0.17485012  | 0.344365998 |
| 0.385907397 | 0.179538346 | 0.040549951 | 0.39874986  |
| 0.190200238 | 0.356023744 | 0.10797744  | 0.418057061 |
| 0.389358183 | 0.340278149 | 0.101640694 | 0.363880832 |
| 0.290388981 | 0.110675807 | 0.354938888 | 0.466870319 |
| 0.164111141 | 0.2547709   | 0.195098283 | 0.37933386  |
| 0.099887929 | 0.207789132 | 0.268376006 | 0.210102709 |
| 0.009099589 | 0.041624282 | 0.029556106 | 0.107153468 |
| 0.166094534 | 0.29195337  | 0.313520571 | 0.426818028 |
| 0.064673666 | 0.333464568 | 0.203940313 | 0.160234554 |
| 0.329303494 | 1           | 0.272327056 | 0.308769782 |
| 0.188977942 | 0.00769601  | 0.059107944 | 0.410450274 |
| 0.020553627 | 0.190273349 | 0.185461697 | 0.001475425 |
| 0.022638263 | 0.314247352 | 0.063331747 | 0.138893764 |
| 0.450215613 | 0.131229324 | 0.122666899 | 0.151401314 |
| 0.278289689 | 0.048778573 | 0.001995779 | 0.417833419 |
| 0.417341651 | 0.402274547 | 0.411847041 | 0.368174716 |
| 0.409001828 | 0.351118464 | 0.373011841 | 0.149466855 |
| 0.053506895 | 0.037168679 | 0.185812965 | 0.165501798 |
| 0.006060063 | 0.313092463 | 0.232413026 | 0.093551612 |
| 0.386835444 | 0.25488547  | 0.018492759 | 0.317159499 |
| 0.006157541 | 0.162302274 | 0.17670832  | 0.152380744 |
| 0.357265561 | 0.005514053 | 0.085880854 | 0.199145669 |
| 0.302172417 | 0.259569107 | 0.207682036 | 0.418583289 |
| 0.191328332 | 0.074495516 | 0.163037366 | 0.342151866 |
| 0.039362118 | 0.078323064 | 0.178177988 | 0.012314961 |
| 0.105927522 | 0.382240419 | 0.214503583 | 0.023670089 |
| 0.163620304 | 0.00145975  | 0.260676767 | 0.432932189 |
| 0.336777707 | 0.449820078 | 0.39763672  | 0.186733586 |
| 0.392336696 | 0.156266201 | 0.435143281 | 0.307804096 |
| 0.17336026  | 0.00020283  | 0.006610372 | 0.413988895 |
| 0.252595938 | 0.031358097 | 0.096105432 | 0.123017878 |
| 0.0599575   | 0.063250293 | 0.038977338 | 0.154055842 |
| 0.255163149 | 0.184203472 | 0.191026447 | 0.361114692 |
| 0.130064408 | 0.171685088 | 0.175009157 | 0.056628503 |
| 0.275399853 | 0.026250376 | 0.058870908 | 0.005971667 |

|             |             |             |             |
|-------------|-------------|-------------|-------------|
| 0.345358087 | 0.07007336  | 0.339165668 | 0.406661614 |
| 0.403085123 | 0.32253994  | 0.157510089 | 0.181761037 |
| 0.413183165 | 0.050963954 | 0.185590847 | 0.056786771 |
| 0.362493049 | 0.29463774  | 0.246804729 | 0.214152081 |
| 0.432098701 | 0.364734216 | 0.018905045 | 0.344391147 |
| 0.004103105 | 0.004499533 | 0.140965099 | 0.22370064  |
| 0.12043218  | 0.233563681 | 0.18803653  | 0.163711858 |
| 0.170990313 | 0.012571368 | 0.220788185 | 0.2081632   |
| 0.212102014 | 0.226054665 | 0.223691187 | 0.209524522 |
| 0.182647721 | 0.138699695 | 0.117960626 | 0.108399784 |
| 0.203686323 | 0.225129058 | 0.129109396 | 0.012490475 |
| 0.212224363 | 0.246087474 | 0.026760729 | 0.099474135 |
| 0.356134795 | 0.414974742 | 0.031180944 | 0.006056294 |
| 0.195300054 | 0.213360973 | 0.445133921 | 0.386776647 |
| 0.404792673 | 0.442326439 | 0.306168402 | 0.117867968 |
| 0.033373979 | 0.238029086 | 0.248010035 | 0.087744645 |
| 0.421592699 | 0.035548431 | 0.372011176 | 0.245762427 |
| 0.077111939 | 0.096430784 | 0.019087859 | 0.050156939 |
| 0.298334197 | 0.125492976 | 0.116553874 | 0.070999705 |
| 0.182775877 | 0.187491123 | 0.027208323 | 0.122996391 |
| 0.274153763 | 0.153672076 | 0.102781763 | 0.146258941 |
| 0.258721132 | 0.133368317 | 0.362325208 | 0.377278954 |
| 0.077763868 | 0.064120198 | 0.090242932 | 0.350932518 |
| 0.366059111 | 0.247967337 | 0.009792967 | 0.341414424 |
| 0.430066308 | 0.310266138 | 0.375844761 | 0.382565141 |
| 0.053215322 | 0.226292514 | 0.2485695   | 0.259259415 |
| 0.137720019 | 0.142753581 | 0.170618016 | 0.036063746 |
| 0.266021401 | 0.394597706 | 0.321981002 | 0.090008533 |
| 0.259699205 | 0.07114952  | 0.029158956 | 0.388896982 |
| 0.167314405 | 0.040959732 | 0.143917877 | 0.413103977 |
| 0.001160457 | 0.170000884 | 0.452151935 | 0.12485814  |
| 0.434643855 | 0.411969411 | 0.34421665  | 0.133063298 |
| 0.004966707 | 0.347651711 | 0.248519943 | 0.169146567 |
| 0.336531818 | 0.252771852 | 0.111315909 | 0.046808922 |
| 0.237513978 | 0.041673026 | 0.096857759 | 0.133760177 |
| 0.15734993  | 0.26698713  | 0.160866363 | 0.149557561 |
| 0.132583268 | 0.062573566 | 0.187596527 | 0.104199818 |
| 0.19840336  | 0.186940094 | 0.297022844 | 0.132552743 |
| 0.152318751 | 0.420146483 | 0.318446345 | 0.010809957 |
| 0.269825725 | 0.379053959 | 0.377876369 | 0.001733608 |
| 0.342077537 | 0.004001697 | 0.138842093 | 0.120761913 |
| 0.1213595   | 0.159982266 | 0.229334144 | 0.167190351 |
| 0.24896362  | 0.119791523 | 0.12305943  | 0.162992163 |
| 0.096225799 | 0.113800315 | 0.274987752 | 0.15547576  |
| 0.153053389 | 0.056531807 | 0.064119528 | 0.064481594 |
| 0.027120131 | 0.383801857 | 0.181677433 | 0.037478229 |
| 0.178531817 | 0.179135683 | 0.294061027 | 0.373561682 |
| 0.367455686 | 0.065653351 | 0.209208653 | 0.330078612 |
| 0.162072409 | 0.140350529 | 0.03002685  | 0.189271449 |
| 0.137342266 | 0.165983955 | 0.198592387 | 0.162307935 |
| 0.322951788 | 0.312297355 | 0.174974366 | 0.36327716  |
| 0.168587842 | 0.233231589 | 0.116290278 | 0.05365006  |
| 0.074748303 | 0.090217782 | 0.21504732  | 0.000290233 |
| 0.258304525 | 0.084386142 | 0.392526398 | 0.358553828 |

|             |             |             |             |
|-------------|-------------|-------------|-------------|
| 0.231015755 | 0.317520513 | 0.114261691 | 0.041243669 |
| 0.096033398 | 0.112001904 | 0.095545469 | 0.343184143 |
| 0.19220654  | 0.087954788 | 0.216135173 | 0.106041211 |
| 0.358006391 | 0.35068333  | 0.210646359 | 0.148035611 |
| 0.169939864 | 0.108722781 | 0.38183385  | 0.04758899  |
| 0.266431173 | 0.137712473 | 0.214260443 | 0.171254328 |
| 0.150941711 | 0.431491361 | 0.02941058  | 0.443813806 |
| 0.207482425 | 0.089418641 | 0.403665542 | 0.165288793 |
| 0.123322213 | 0.083796868 | 0.189240386 | 0.169910132 |
| 0.154814928 | 0.220589155 | 0.016847515 | 0.081351747 |
| 0.272897661 | 0.206189732 | 0.321562968 | 0.331685595 |
| 0.191218755 | 0.329656012 | 0.191536954 | 0.150221305 |
| 0.350983074 | 0.370581383 | 0.129635554 | 0.20549152  |
| 0.290342255 | 0.053618124 | 0.21244986  | 0.026785912 |
| 0.305710381 | 0.300088418 | 0.198359488 | 0.034539286 |
| 0.00991575  | 0.187456484 | 0.267972093 | 0.041390893 |
| 0.444999793 | 0.176866067 | 0.259844869 | 0.312427306 |
| 0.134892293 | 0.366077506 | 0.098778872 | 0.315856097 |
| 0.03288603  | 0.192157868 | 0.25403341  | 0.247970136 |
| 0.132713564 | 0.209220314 | 0.300921716 | 0.183555966 |
| 0.017369801 | 0.159965893 | 0.001613998 | 0.302022031 |
| 0.340942315 | 0.235488411 | 0.159005924 | 0.168302437 |
| 0.225778508 | 0.330334742 | 0.226018114 | 0.229983208 |
| 0.005321141 | 0.279697613 | 0.135843498 | 0.300624728 |
| 0.127104075 | 0.259563539 | 0.027726361 | 0.26550997  |
| 0.324399974 | 0.197517932 | 0.226745242 | 0.155536649 |
| 0.369637248 | 0.309755539 | 0.090721684 | 0.163860074 |
| 0.295374395 | 0.038061026 | 0.152537724 | 0.447372451 |
| 0.109465692 | 0.17196324  | 0.407058633 | 0.113229792 |
| 0.238629394 | 0.299851009 | 0.276977803 | 0.442220201 |
| 0.070533081 | 0.178520937 | 0.374226275 | 0.387001579 |
| 0.266695217 | 0.185510512 | 0.201904811 | 0.175726299 |
| 0.323319415 | 0.040144869 | 0.214078899 | 0.24904395  |
| 0.185034941 | 0.251978158 | 0.204541897 | 0.162829233 |
| 0.026859576 | 0.121015588 | 0.16052238  | 0.090226567 |
| 0.216789206 | 0.222562014 | 0.179972208 | 0.314380372 |
| 0.072227343 | 0.010961125 | 0.370601209 | 0.028490331 |
| 0.147304795 | 0.275646303 | 0.163077877 | 0.217621656 |
| 0.116648086 | 0.244470801 | 0.156845432 | 0.000601092 |
| 0.376163675 | 0.034576151 | 0.212014866 | 0.149743746 |
| 0.237077008 | 0.027120819 | 0.343423953 | 0.454032895 |
| 0.215340954 | 0.19113944  | 0.196285647 | 0.378637135 |
| 0.147677473 | 0.212333916 | 0.250966781 | 0.255409217 |
| 0.200206257 | 0.163001859 | 0.201753088 | 0.185904957 |
| 0.279140973 | 0.137850944 |             |             |
| GPRASP1     | 0.034544904 | 0.349703052 | 0.02334452  |
| 0.091757442 | 0.275309046 | 0.260383894 | 0.025479518 |
| 0.064982769 | 0.257073792 | 0.18350572  | 0.2558009   |
| 0.006868737 | 0.219060973 | 0.395856657 | 0.026151197 |
| 0.313113811 | 0.018034459 | 0.053400256 | 0.053809746 |
| 0.14087757  | 0.244473497 | 0.331924515 | 0.194576861 |
| 0.254368271 | 0.119153083 | 0.193508838 | 0.292688925 |
| 0.442930622 | 0.296502431 | 0.372971411 | 0.140178068 |
| 0.327619146 | 0.301891114 | 0.326153982 | 0.006058047 |



|             |             |             |             |
|-------------|-------------|-------------|-------------|
| 0.26831596  | 0.023382798 | 0.32695184  | 0.191858461 |
| 0.244088176 | 0.263921692 | 0.183530697 | 0.174269989 |
| 0.199838456 | 0.01425186  | 0.170485945 | 0.336029201 |
| 0.195480899 | 0.197462688 | 0.024596907 | 0.340473397 |
| 0.232208723 | 0.239504507 | 0.280772126 | 0.00081146  |
| 0.343619986 | 0.219820586 | 0.306274324 | 0.425071208 |
| 0.131227596 | 0.078783739 | 0.228384687 | 0.14951292  |
| 0.278878129 | 0.311082139 | 0.189048808 | 0.212573308 |
| 0.427841359 | 0.257109707 | 0.382570644 | 0.122964985 |
| 0.214518513 | 0.010772873 | 0.097064075 | 0.03458143  |
| 0.287036953 | 0.140017945 | 0.283174799 | 0.313126816 |
| 0.333374522 | 0.419742483 | 0.14902692  | 0.391930125 |
| 0.138387847 | 0.303565467 | 0.278098457 | 0.250693053 |
| 0.282051462 | 0.039000025 | 0.34530907  | 0.436586079 |
| 0.019604692 | 0.224098636 | 0.291614255 | 0.058229348 |
| 0.370428532 | 0.296481394 | 0.22053141  | 0.28878346  |
| 0.360176789 | 0.258492463 | 0.377765425 | 0.201412081 |
| 0.290506902 | 0.027586173 | 0.367606494 | 0.313923147 |
| 0.252247285 | 0.035501887 | 0.198887474 | 0.451088655 |
| 0.300242108 | 0.441345208 | 0.348808138 | 0.284487811 |
| 0.277943893 | 0.439255415 | 0.309955805 | 0.357242169 |
| 0.143071089 | 0.446315143 | 0.104324121 | 0.025045842 |
| 0.027761964 | 0.058755619 | 0.207442366 | 0.245592084 |
| 0.451365684 | 0.234321935 | 0.102649831 | 0.170176227 |
| 0.450704044 | 0.368638824 | 0.438411009 | 0.341969964 |
| 0.016235771 | 0.288229565 | 0.275502204 | 0.180102297 |
| 0.282750242 | 0.054769848 | 0.294938369 | 0.395826183 |
| 0.311657999 | 0.415346411 | 0.079786346 | 0.38596297  |
| 0.111060269 | 0.448258457 | 0.384230089 | 0.098544246 |
| 0.422379993 | 0.38942672  | 0.465591505 | 0.408500282 |
| 0.391794018 | 0.197897384 | 0.04622212  | 0.304829775 |
| 0.441414198 | 0.0324983   | 0.450314311 | 0.469969413 |
| 0.410749103 | 0.444236258 | 0.476163542 | 0.474158497 |
| 0.417606563 | 0.030284123 | 0.031520292 | 0.231392674 |
| 0.407048359 | 0.33442267  | 0.106757015 | 0.274651145 |
| 0.304575003 | 0.223240346 | 0.396998159 | 0.236065589 |
| 0.438921419 | 0.41906068  | 0.449667323 | 0.299401759 |
| 0.156132705 | 0.237414225 | 0.307273563 | 0.355310412 |
| 0.023889698 | 0.053618622 | 0.020477818 | 0.234790826 |
| 0.211873089 | 0.112101994 | 0.19902995  | 0.260462629 |
| 0.123882136 | 0.186149467 | 0.341333758 | 0.373638241 |
| 0.023993315 | 0.288057572 | 0.089195111 | 0.07589573  |
| 0.022136493 | 0.085916073 | 0.110461552 | 0.11554794  |
| 0.194326802 | 0.142400831 | 0.3713302   | 0.451374784 |
| 0.252545944 | 0.104916478 | 0.324260028 | 0.426862892 |
| 0.374350526 | 0.307985331 | 0.15440201  | 0.009036941 |
| 0.180991722 | 0.244902768 | 0.280367266 | 0.312390336 |
| 0.108999032 | 0.142888585 | 0.269309923 | 0.402572918 |
| 0.137927396 | 0.068251858 | 0.2589949   | 0.33642807  |
| 0.079830345 | 0.26734177  | 0.408549809 | 0.238027437 |
| 0.000965128 | 0.183891048 | 0.406308397 | 0.15499106  |
| 0.199081132 | 0.220524184 | 0.335770173 | 0.41869314  |
| 0.277571621 | 0.244533841 | 0.472301823 | 0.403518724 |
| 0.242100206 | 0.135320462 | 0.473471414 | 0.065226809 |

|             |             |             |             |
|-------------|-------------|-------------|-------------|
| 0.273247054 | 0.064643789 | 0.229447863 | 0.18777798  |
| 0.143723825 | 0.225379808 | 0.300796011 | 0.264177896 |
| 0.063954549 | 0.433664252 | 0.338247617 | 0.460797311 |
| 0.25970084  | 0.46695411  | 0.437159418 | 0.397017331 |
| 0.264644452 | 0.26296984  | 0.262192555 | 0.381203804 |
| 0.420374804 | 0.188976272 | 0.032960805 | 0.405623516 |
| 0.216740338 | 0.35917228  | 0.138366423 | 0.439812159 |
| 0.407511077 | 0.361068157 | 0.103923752 | 0.358176642 |
| 0.321509188 | 0.133074918 | 0.382078402 | 0.470167393 |
| 0.185463136 | 0.254053778 | 0.257419891 | 0.399940831 |
| 0.096566673 | 0.21487916  | 0.246356746 | 0.306870006 |
| 0.041173431 | 0.033887486 | 0.025875023 | 0.127938677 |
| 0.256442487 | 0.314965856 | 0.322956543 | 0.445943602 |
| 0.063354328 | 0.366054796 | 0.154720827 | 0.20368681  |
| 0.32450005  | 0.272327056 | 1           | 0.33397324  |
| 0.168438554 | 0.014119453 | 0.084271402 | 0.412770357 |
| 0.013075408 | 0.302978776 | 0.18081579  | 0.002573107 |
| 0.016798609 | 0.329422383 | 0.048855228 | 0.12373264  |
| 0.474037858 | 0.124563393 | 0.109410453 | 0.171743585 |
| 0.300804653 | 0.046721604 | 0.005601471 | 0.430046335 |
| 0.413617006 | 0.385975336 | 0.404633432 | 0.363774212 |
| 0.386209784 | 0.355090054 | 0.379207549 | 0.194203838 |
| 0.052779453 | 0.037788904 | 0.224247882 | 0.192762085 |
| 0.002466843 | 0.358439953 | 0.250528033 | 0.081084955 |
| 0.395601382 | 0.203449014 | 0.01728506  | 0.313202933 |
| 0.009268377 | 0.285997504 | 0.165704632 | 0.151685304 |
| 0.339365646 | 0.00496906  | 0.169215656 | 0.241467133 |
| 0.335113427 | 0.259412684 | 0.322047847 | 0.451921048 |
| 0.224136285 | 0.061872985 | 0.23206403  | 0.385161111 |
| 0.033725332 | 0.066314808 | 0.200674342 | 0.031566576 |
| 0.189099955 | 0.371812057 | 0.275459222 | 0.030694353 |
| 0.162927178 | 0.001447982 | 0.280206873 | 0.453841496 |
| 0.370456565 | 0.473153519 | 0.442005579 | 0.314238336 |
| 0.429968175 | 0.229631215 | 0.467709424 | 0.320540211 |
| 0.222243038 | 0.000397409 | 0.004845278 | 0.460666102 |
| 0.27535202  | 0.025440295 | 0.084936532 | 0.238627169 |
| 0.071383438 | 0.067893715 | 0.035168813 | 0.232099066 |
| 0.322057783 | 0.221298424 | 0.238227853 | 0.363409967 |
| 0.1507322   | 0.154353412 | 0.217867134 | 0.040175837 |
| 0.331506635 | 0.027866431 | 0.039157644 | 0.010644418 |
| 0.343956196 | 0.059200791 | 0.345388377 | 0.435617093 |
| 0.423580807 | 0.36526374  | 0.218896075 | 0.260149937 |
| 0.411820317 | 0.046392939 | 0.302351297 | 0.049312026 |
| 0.396797828 | 0.30074106  | 0.254819957 | 0.224106919 |
| 0.438431944 | 0.385474846 | 0.014108755 | 0.350358424 |
| 0.00958312  | 0.004181872 | 0.194028708 | 0.178631702 |
| 0.080675899 | 0.262433425 | 0.177906622 | 0.145848222 |
| 0.174708228 | 0.013944246 | 0.294042479 | 0.267094702 |
| 0.205127531 | 0.236949008 | 0.270636481 | 0.165283959 |
| 0.23371591  | 0.137871236 | 0.154566922 | 0.094491475 |
| 0.178508743 | 0.216826393 | 0.120122826 | 0.00771517  |
| 0.261389342 | 0.289695111 | 0.026643587 | 0.089646164 |
| 0.404853371 | 0.453370218 | 0.019911856 | 0.007962621 |
| 0.181834761 | 0.215911186 | 0.472250328 | 0.422398448 |

|             |             |             |             |
|-------------|-------------|-------------|-------------|
| 0.423485779 | 0.450120995 | 0.302093555 | 0.09698395  |
| 0.034214029 | 0.233359759 | 0.279271616 | 0.108493973 |
| 0.448966291 | 0.023536279 | 0.408696598 | 0.32319367  |
| 0.057260907 | 0.1307574   | 0.022250009 | 0.041304671 |
| 0.350116629 | 0.104778159 | 0.139759822 | 0.070202258 |
| 0.214647057 | 0.308638418 | 0.020509473 | 0.110777877 |
| 0.250092327 | 0.230089428 | 0.082495922 | 0.189580618 |
| 0.276407895 | 0.140904821 | 0.379405901 | 0.374083223 |
| 0.066906995 | 0.048993135 | 0.137298304 | 0.337672761 |
| 0.396458111 | 0.255610566 | 0.02127181  | 0.366521518 |
| 0.454279465 | 0.356821068 | 0.412272102 | 0.353350945 |
| 0.037701011 | 0.291309369 | 0.281474789 | 0.232125726 |
| 0.100565401 | 0.247854303 | 0.15467833  | 0.025895176 |
| 0.234318524 | 0.380060116 | 0.332619096 | 0.115881655 |
| 0.296299699 | 0.054983227 | 0.018991665 | 0.412550124 |
| 0.22331866  | 0.043130089 | 0.203252932 | 0.412189717 |
| 0.003661505 | 0.276338945 | 0.456195904 | 0.178162622 |
| 0.438421881 | 0.442308127 | 0.364907922 | 0.164799485 |
| 0.003823229 | 0.365507653 | 0.280144864 | 0.264366581 |
| 0.345125428 | 0.267785801 | 0.1184836   | 0.047850325 |
| 0.232611371 | 0.036952991 | 0.083585724 | 0.235728277 |
| 0.189088345 | 0.260756623 | 0.132991244 | 0.109794866 |
| 0.153523738 | 0.039864484 | 0.33477886  | 0.156339579 |
| 0.192309363 | 0.171923983 | 0.289002052 | 0.177652449 |
| 0.197227886 | 0.385318447 | 0.311057038 | 0.011101304 |
| 0.324455138 | 0.360115273 | 0.399521049 | 0.000466046 |
| 0.378989386 | 0.003136429 | 0.155292081 | 0.171655495 |
| 0.156677593 | 0.147211043 | 0.208347703 | 0.25197497  |
| 0.216967317 | 0.134011926 | 0.192833769 | 0.162060847 |
| 0.135287781 | 0.132699832 | 0.297822071 | 0.202932268 |
| 0.24413192  | 0.071401618 | 0.053686428 | 0.054831893 |
| 0.035537106 | 0.420708442 | 0.172557967 | 0.034667318 |
| 0.154058527 | 0.214400634 | 0.295050399 | 0.402056718 |
| 0.390065508 | 0.060979845 | 0.223206478 | 0.376364419 |
| 0.172741262 | 0.190379707 | 0.024198877 | 0.232882735 |
| 0.140121655 | 0.223627031 | 0.246570457 | 0.159305357 |
| 0.302700171 | 0.31665287  | 0.168058876 | 0.38578157  |
| 0.259637199 | 0.212373853 | 0.175332645 | 0.064345004 |
| 0.091294287 | 0.068273349 | 0.25872347  | 0.000544565 |
| 0.252659283 | 0.14356319  | 0.435685301 | 0.39098585  |
| 0.327355746 | 0.333922079 | 0.185297951 | 0.041318427 |
| 0.164975723 | 0.103005799 | 0.076536756 | 0.377294318 |
| 0.313411406 | 0.121036944 | 0.24172127  | 0.186411644 |
| 0.391811015 | 0.355026416 | 0.243100675 | 0.13721109  |
| 0.14897132  | 0.107494209 | 0.371910548 | 0.056847585 |
| 0.291602014 | 0.22353828  | 0.2114611   | 0.209163506 |
| 0.167937658 | 0.465211094 | 0.025785984 | 0.472400284 |
| 0.231978229 | 0.073593862 | 0.408833827 | 0.190461186 |
| 0.190499183 | 0.124436684 | 0.297884896 | 0.222920409 |
| 0.149440415 | 0.350375073 | 0.014462536 | 0.065112644 |
| 0.27312744  | 0.203320907 | 0.310130114 | 0.298855193 |
| 0.257556353 | 0.299610965 | 0.316861597 | 0.146454773 |
| 0.37390291  | 0.38413817  | 0.157052873 | 0.177661614 |
| 0.254291475 | 0.061366217 | 0.2587848   | 0.014256801 |

|             |             |             |             |
|-------------|-------------|-------------|-------------|
| 0.307958561 | 0.329346926 | 0.242023981 | 0.027370696 |
| 0.007697964 | 0.275530211 | 0.270395691 | 0.025312575 |
| 0.461432334 | 0.308471074 | 0.229258829 | 0.381321292 |
| 0.103390091 | 0.37986611  | 0.104566642 | 0.362328986 |
| 0.016784982 | 0.17117789  | 0.311698576 | 0.245719512 |
| 0.199144014 | 0.286221388 | 0.325136087 | 0.296099018 |
| 0.01569712  | 0.223004453 | 6.92E-05    | 0.30450069  |
| 0.349261459 | 0.279661575 | 0.134484809 | 0.204216344 |
| 0.225201398 | 0.330706477 | 0.189144708 | 0.29088592  |
| 0.007842017 | 0.31260757  | 0.122463459 | 0.349487656 |
| 0.209411906 | 0.211033777 | 0.041950618 | 0.263678412 |
| 0.33108479  | 0.189929404 | 0.182931057 | 0.218253964 |
| 0.408051386 | 0.32336595  | 0.091149045 | 0.235535014 |
| 0.269873411 | 0.026326571 | 0.238991905 | 0.455323684 |
| 0.130960847 | 0.268448222 | 0.44085423  | 0.128798422 |
| 0.309515797 | 0.314445714 | 0.287700132 | 0.440948542 |
| 0.062495741 | 0.166405676 | 0.402292611 | 0.380865049 |
| 0.255767889 | 0.222282912 | 0.280564473 | 0.190983635 |
| 0.360950837 | 0.064859216 | 0.247318786 | 0.257175695 |
| 0.255210786 | 0.240991406 | 0.200222924 | 0.189699076 |
| 0.025835624 | 0.107267346 | 0.2794754   | 0.073871753 |
| 0.188510379 | 0.2601455   | 0.226734139 | 0.323375418 |
| 0.121590356 | 0.017972426 | 0.382967736 | 0.034926368 |
| 0.190917342 | 0.339543427 | 0.153876824 | 0.285763887 |
| 0.117368886 | 0.214223888 | 0.157549548 | 0.000181394 |
| 0.377519755 | 0.084248504 | 0.251196572 | 0.207580563 |
| 0.259035216 | 0.020246902 | 0.384552872 | 0.478228614 |
| 0.216377446 | 0.280932888 | 0.299383113 | 0.388562755 |
| 0.237903833 | 0.310278462 | 0.284393248 | 0.282480463 |
| 0.312010569 | 0.224355534 | 0.281214609 | 0.32215838  |
| 0.299339202 | 0.16923492  |             |             |
| GPMS2       | 0.059549985 | 0.364891797 | 0.036977924 |
| 0.114830841 | 0.302572312 | 0.279593088 | 0.052890402 |
| 0.112722241 | 0.281069926 | 0.19529448  | 0.288231215 |
| 0.016744163 | 0.191749537 | 0.420981916 | 0.055325793 |
| 0.308970985 | 0.039069109 | 0.094011189 | 0.08615008  |
| 0.173976513 | 0.281485613 | 0.322312284 | 0.233299066 |
| 0.289300316 | 0.152479438 | 0.211182116 | 0.310985682 |
| 0.448950515 | 0.249529594 | 0.345996489 | 0.126781738 |
| 0.368580884 | 0.308330944 | 0.317201668 | 0.012597778 |
| 0.305145413 | 0.033026821 | 0.370973875 | 0.237430059 |
| 0.213579462 | 0.306453234 | 0.200861003 | 0.216570552 |
| 0.229589709 | 0.027341562 | 0.150431197 | 0.331001991 |
| 0.217157794 | 0.247523487 | 0.042532283 | 0.33200016  |
| 0.277995314 | 0.262462263 | 0.281617783 | 0.002691635 |
| 0.320001362 | 0.159009179 | 0.271891525 | 0.443685375 |
| 0.16336429  | 0.127044125 | 0.239749258 | 0.197368455 |
| 0.282879485 | 0.323236742 | 0.220488702 | 0.237579581 |
| 0.448501047 | 0.260701344 | 0.366652868 | 0.143002961 |
| 0.25760873  | 0.023895173 | 0.130930885 | 0.055175221 |
| 0.299978916 | 0.193021537 | 0.312797729 | 0.313382247 |
| 0.348243493 | 0.459159263 | 0.183337972 | 0.419943485 |
| 0.164425787 | 0.317982213 | 0.293262629 | 0.279094718 |
| 0.305351037 | 0.073919692 | 0.349229665 | 0.466232203 |

|             |             |             |             |
|-------------|-------------|-------------|-------------|
| 0.040511813 | 0.231068069 | 0.311449877 | 0.084387619 |
| 0.375703667 | 0.299031438 | 0.239816371 | 0.265099249 |
| 0.34334437  | 0.29616176  | 0.414210424 | 0.234737187 |
| 0.31643343  | 0.047059372 | 0.399282872 | 0.317891734 |
| 0.277997586 | 0.05763826  | 0.241819952 | 0.4406503   |
| 0.296812594 | 0.449041722 | 0.361777475 | 0.318698384 |
| 0.304419404 | 0.452030705 | 0.315422066 | 0.383795117 |
| 0.130724639 | 0.465166093 | 0.143133446 | 0.050227992 |
| 0.049776671 | 0.101579652 | 0.249082251 | 0.284201935 |
| 0.444159428 | 0.261380948 | 0.152307574 | 0.219192588 |
| 0.455057472 | 0.394884442 | 0.458943573 | 0.367261105 |
| 0.034253866 | 0.287316429 | 0.300284341 | 0.227120733 |
| 0.307608637 | 0.09400135  | 0.300009509 | 0.430889915 |
| 0.342638547 | 0.413933211 | 0.117623713 | 0.428847042 |
| 0.168399683 | 0.475080945 | 0.386187204 | 0.143365772 |
| 0.450982119 | 0.41775069  | 0.48300649  | 0.377325987 |
| 0.418568874 | 0.231538466 | 0.072262553 | 0.333839468 |
| 0.467464271 | 0.029243456 | 0.448345039 | 0.473005876 |
| 0.430296932 | 0.434246425 | 0.496612522 | 0.480410261 |
| 0.437118724 | 0.056114941 | 0.036912744 | 0.258126149 |
| 0.434361888 | 0.355342417 | 0.165419975 | 0.294467609 |
| 0.309456993 | 0.265073395 | 0.392018236 | 0.249731097 |
| 0.477928502 | 0.42217672  | 0.453530034 | 0.324151608 |
| 0.199498837 | 0.281713649 | 0.314176055 | 0.384671942 |
| 0.045748893 | 0.083963811 | 0.033622323 | 0.268337402 |
| 0.220145725 | 0.164931479 | 0.24585386  | 0.291215617 |
| 0.169008143 | 0.235042729 | 0.321275902 | 0.360045192 |
| 0.038314475 | 0.291058742 | 0.128521328 | 0.117346865 |
| 0.044396129 | 0.120127148 | 0.158811174 | 0.152091296 |
| 0.249890319 | 0.183513178 | 0.358582836 | 0.460780748 |
| 0.286753266 | 0.129172228 | 0.330253549 | 0.452736681 |
| 0.414647343 | 0.320203288 | 0.195855219 | 0.013093072 |
| 0.229999738 | 0.249972817 | 0.264535008 | 0.316956637 |
| 0.144724998 | 0.207182044 | 0.288038518 | 0.385581696 |
| 0.180239522 | 0.109248945 | 0.297075777 | 0.380549836 |
| 0.10581904  | 0.29001567  | 0.425336817 | 0.262007251 |
| 0.00250452  | 0.230021765 | 0.404112146 | 0.202045729 |
| 0.234660849 | 0.193440921 | 0.29311857  | 0.428519074 |
| 0.299251296 | 0.276480631 | 0.470323681 | 0.385318651 |
| 0.269186494 | 0.173432752 | 0.491952072 | 0.08349549  |
| 0.303708961 | 0.081399093 | 0.25700916  | 0.208667746 |
| 0.188536604 | 0.266889162 | 0.319859281 | 0.291867967 |
| 0.082416942 | 0.459391761 | 0.357495083 | 0.471386223 |
| 0.290195252 | 0.487845728 | 0.432819603 | 0.412437954 |
| 0.276581784 | 0.289867638 | 0.222510805 | 0.385714113 |
| 0.422237357 | 0.22236801  | 0.048617655 | 0.398100493 |
| 0.251382169 | 0.355407686 | 0.174155672 | 0.458382898 |
| 0.445549605 | 0.383185121 | 0.157541311 | 0.368527718 |
| 0.343144804 | 0.176273606 | 0.390223797 | 0.496939767 |
| 0.208241381 | 0.292909656 | 0.289083254 | 0.410671783 |
| 0.129707324 | 0.250848976 | 0.288432604 | 0.269045249 |
| 0.020640132 | 0.061838134 | 0.04677257  | 0.178414283 |
| 0.249222167 | 0.296250953 | 0.326753925 | 0.468558765 |
| 0.10686151  | 0.390082083 | 0.192946965 | 0.244784931 |

|             |             |             |             |
|-------------|-------------|-------------|-------------|
| 0.358441003 | 0.308769782 | 0.33397324  | 1           |
| 0.208295619 | 0.020867595 | 0.118404169 | 0.453142013 |
| 0.024734284 | 0.297013269 | 0.234185316 | 0.004281833 |
| 0.03537488  | 0.332991583 | 0.071097204 | 0.162451399 |
| 0.480364529 | 0.159158243 | 0.137662418 | 0.200087795 |
| 0.313763225 | 0.078269828 | 0.006385461 | 0.444051771 |
| 0.437128692 | 0.412828898 | 0.4306335   | 0.395120387 |
| 0.406859885 | 0.355494731 | 0.381829    | 0.225457298 |
| 0.092961534 | 0.064328652 | 0.240750763 | 0.244994733 |
| 0.004772294 | 0.364541272 | 0.295072468 | 0.110809034 |
| 0.387131526 | 0.240424923 | 0.035301291 | 0.319672992 |
| 0.016192297 | 0.248078222 | 0.228390153 | 0.215803374 |
| 0.351451488 | 0.011710212 | 0.16825325  | 0.282163716 |
| 0.360373485 | 0.295871112 | 0.314299121 | 0.471300022 |
| 0.267199574 | 0.08103028  | 0.267544028 | 0.379114736 |
| 0.065304971 | 0.093905997 | 0.24951622  | 0.023022082 |
| 0.188425362 | 0.405130001 | 0.314210049 | 0.049690488 |
| 0.205889739 | 0.003938762 | 0.308327197 | 0.478361616 |
| 0.388133312 | 0.485561899 | 0.456351075 | 0.304480347 |
| 0.447361534 | 0.175017808 | 0.480823165 | 0.337139584 |
| 0.242582798 | 0.000644939 | 0.009325119 | 0.45903337  |
| 0.30011181  | 0.037993008 | 0.126122038 | 0.248010365 |
| 0.110270499 | 0.10141068  | 0.065773637 | 0.245666753 |
| 0.304438889 | 0.263772281 | 0.262339616 | 0.395814058 |
| 0.204862158 | 0.210956708 | 0.254742555 | 0.061440357 |
| 0.325154157 | 0.049911809 | 0.060798259 | 0.011188518 |
| 0.344143124 | 0.082952317 | 0.383403271 | 0.451189172 |
| 0.453179249 | 0.354255817 | 0.226509969 | 0.280487506 |
| 0.420856009 | 0.06161062  | 0.304116416 | 0.069210755 |
| 0.413081728 | 0.302666587 | 0.287329925 | 0.25703225  |
| 0.466616802 | 0.416019772 | 0.031875185 | 0.363832822 |
| 0.013056762 | 0.005819055 | 0.223515039 | 0.219227487 |
| 0.098119327 | 0.293421691 | 0.213769527 | 0.196673702 |
| 0.225943934 | 0.027040816 | 0.291561589 | 0.280546273 |
| 0.239516833 | 0.285687505 | 0.294327599 | 0.203865905 |
| 0.271492716 | 0.178654905 | 0.203226929 | 0.154194536 |
| 0.216647199 | 0.252117117 | 0.153712425 | 0.019256219 |
| 0.279776059 | 0.316453124 | 0.049821264 | 0.118381776 |
| 0.412571676 | 0.459381167 | 0.042561423 | 0.014492262 |
| 0.220209647 | 0.278139432 | 0.483189548 | 0.435778452 |
| 0.453612496 | 0.479770082 | 0.347048281 | 0.151525401 |
| 0.061259472 | 0.268610717 | 0.307006036 | 0.145901271 |
| 0.466826952 | 0.040187986 | 0.425592458 | 0.317124601 |
| 0.091677801 | 0.174208703 | 0.041791785 | 0.07520303  |
| 0.33367329  | 0.147207549 | 0.190547256 | 0.089736981 |
| 0.267883773 | 0.303354551 | 0.043691107 | 0.163137341 |
| 0.287927992 | 0.221324182 | 0.12897051  | 0.237630297 |
| 0.298886956 | 0.158266211 | 0.370912944 | 0.414101437 |
| 0.093228015 | 0.083048336 | 0.17117205  | 0.351120202 |
| 0.395829577 | 0.264298514 | 0.02762804  | 0.379018205 |
| 0.471520467 | 0.33980972  | 0.431554658 | 0.389133069 |
| 0.060793365 | 0.312174422 | 0.299835628 | 0.281038409 |
| 0.155883706 | 0.270860629 | 0.217815998 | 0.050215383 |
| 0.279427224 | 0.42344527  | 0.355280754 | 0.162416691 |

|             |             |             |             |
|-------------|-------------|-------------|-------------|
| 0.299942216 | 0.078625795 | 0.033973395 | 0.417398797 |
| 0.229062968 | 0.073585147 | 0.219834818 | 0.411110544 |
| 0.004330334 | 0.240209678 | 0.470304725 | 0.225411955 |
| 0.470359536 | 0.451143389 | 0.397152518 | 0.217389474 |
| 0.005825406 | 0.348148559 | 0.289332305 | 0.290187697 |
| 0.367751819 | 0.29754023  | 0.156877096 | 0.082083305 |
| 0.268488469 | 0.052403748 | 0.135033088 | 0.24322713  |
| 0.184424976 | 0.275554175 | 0.172612128 | 0.160351279 |
| 0.209229081 | 0.059799126 | 0.303531781 | 0.2011947   |
| 0.212810345 | 0.212026663 | 0.321302705 | 0.191884364 |
| 0.205394567 | 0.414973015 | 0.332259677 | 0.022761277 |
| 0.333352645 | 0.378145464 | 0.416860929 | 0.001922815 |
| 0.36999748  | 0.008371931 | 0.212467268 | 0.217088379 |
| 0.209960988 | 0.211665099 | 0.250770941 | 0.281073211 |
| 0.245935935 | 0.192462427 | 0.235731578 | 0.200407008 |
| 0.176428441 | 0.187394307 | 0.311188798 | 0.243147149 |
| 0.273789057 | 0.105374145 | 0.076935015 | 0.077348921 |
| 0.057773679 | 0.425431464 | 0.214010445 | 0.049113779 |
| 0.203700408 | 0.26413697  | 0.335989957 | 0.418771659 |
| 0.4133002   | 0.080129404 | 0.273127301 | 0.380649996 |
| 0.199053903 | 0.23296337  | 0.047190819 | 0.265869349 |
| 0.198682533 | 0.251345932 | 0.272034399 | 0.185064828 |
| 0.314827125 | 0.355575056 | 0.207410067 | 0.40795762  |
| 0.29574803  | 0.258871297 | 0.187140425 | 0.098925636 |
| 0.133679098 | 0.095928157 | 0.285401058 | 0.001599874 |
| 0.274175184 | 0.17766734  | 0.433765692 | 0.413181234 |
| 0.31690801  | 0.365487371 | 0.193208797 | 0.07072357  |
| 0.16490693  | 0.130976923 | 0.108309595 | 0.367380109 |
| 0.271474741 | 0.168929873 | 0.281655804 | 0.213111882 |
| 0.383906605 | 0.351378937 | 0.279879723 | 0.198861504 |
| 0.204966508 | 0.132324938 | 0.408998713 | 0.086190841 |
| 0.283789094 | 0.238211484 | 0.215728312 | 0.256052145 |
| 0.224462748 | 0.473053441 | 0.047565148 | 0.482973598 |
| 0.279339852 | 0.100369285 | 0.447312042 | 0.237021762 |
| 0.229471991 | 0.162406201 | 0.259304147 | 0.257005737 |
| 0.203402746 | 0.326876562 | 0.015826537 | 0.090253724 |
| 0.299284543 | 0.24309742  | 0.323453255 | 0.320437911 |
| 0.280743265 | 0.332114362 | 0.265722951 | 0.206427708 |
| 0.396041624 | 0.416611869 | 0.204663352 | 0.220525068 |
| 0.288502507 | 0.099942105 | 0.257918997 | 0.026632884 |
| 0.298973569 | 0.301738041 | 0.26755997  | 0.055967478 |
| 0.019303895 | 0.253970174 | 0.274900364 | 0.043756893 |
| 0.467738843 | 0.261964136 | 0.239110247 | 0.36417377  |
| 0.138697487 | 0.415790162 | 0.156035399 | 0.361400397 |
| 0.035711965 | 0.204456736 | 0.319808501 | 0.278224807 |
| 0.230506967 | 0.295828347 | 0.338331519 | 0.286802146 |
| 0.0338676   | 0.26804366  | 0.001547426 | 0.347177488 |
| 0.380412538 | 0.30120717  | 0.175463008 | 0.216156982 |
| 0.254874178 | 0.354362391 | 0.24724998  | 0.298715797 |
| 0.014041114 | 0.312555344 | 0.177644476 | 0.361401785 |
| 0.200343931 | 0.254086096 | 0.065734893 | 0.29878214  |
| 0.370133674 | 0.249035328 | 0.229449793 | 0.232366227 |
| 0.422870775 | 0.338484486 | 0.113530804 | 0.269757579 |
| 0.274834044 | 0.044853047 | 0.252939408 | 0.48002937  |

|             |             |             |             |
|-------------|-------------|-------------|-------------|
| 0.185017836 | 0.269765623 | 0.436923217 | 0.180977492 |
| 0.319038461 | 0.341850263 | 0.272625893 | 0.468165885 |
| 0.106211485 | 0.202543381 | 0.401389267 | 0.408599157 |
| 0.293008179 | 0.244322639 | 0.28310616  | 0.239038527 |
| 0.379132211 | 0.088709144 | 0.2874212   | 0.287702129 |
| 0.262436364 | 0.266694358 | 0.204969942 | 0.236884446 |
| 0.044278073 | 0.169193536 | 0.29587571  | 0.110129998 |
| 0.239869444 | 0.289386372 | 0.259313207 | 0.360394092 |
| 0.150616166 | 0.029096651 | 0.419257834 | 0.042395277 |
| 0.222659756 | 0.324034316 | 0.20886532  | 0.312875068 |
| 0.146929495 | 0.247119281 | 0.200980795 | 0.000804078 |
| 0.389264517 | 0.077468054 | 0.288716828 | 0.24079935  |
| 0.288784865 | 0.041547217 | 0.404813892 | 0.489867322 |
| 0.238099172 | 0.278878612 | 0.298552632 | 0.41215669  |
| 0.222912387 | 0.293025968 | 0.302609062 | 0.285246927 |
| 0.293386542 | 0.242932166 | 0.294292096 | 0.310583595 |
| 0.308937991 | 0.219633117 |             |             |
| GRAMD1B     | 0.204194916 | 0.289897663 | 0.147010383 |
| 0.182210284 | 0.204332937 | 0.197585159 | 0.238129289 |
| 0.28321975  | 0.262391003 | 0.121718735 | 0.2200819   |
| 0.129094472 | 0.053060478 | 0.318928601 | 0.244227378 |
| 0.191346429 | 0.199424869 | 0.275603413 | 0.111430633 |
| 0.227900122 | 0.203097876 | 0.150770315 | 0.203846478 |
| 0.213979414 | 0.289400868 | 0.226966688 | 0.166672208 |
| 0.320387597 | 0.078216563 | 0.19462634  | 0.072555375 |
| 0.369625843 | 0.188991255 | 0.14254203  | 0.114162624 |
| 0.213819022 | 0.030441769 | 0.395125082 | 0.230517643 |
| 0.089525046 | 0.351822415 | 0.142404835 | 0.244310732 |
| 0.16481006  | 0.150723667 | 0.064216615 | 0.189639029 |
| 0.231866781 | 0.273730686 | 0.170193935 | 0.214213901 |
| 0.198156659 | 0.248904769 | 0.191294774 | 0.00987042  |
| 0.118610206 | 0.025457851 | 0.078818454 | 0.360953283 |
| 0.282939738 | 0.28606903  | 0.103869509 | 0.266068374 |
| 0.197371576 | 0.227127049 | 0.302903651 | 0.157091551 |
| 0.345394292 | 0.094286491 | 0.205509811 | 0.172214712 |
| 0.21589899  | 0.170341404 | 0.284327922 | 0.205899595 |
| 0.185923159 | 0.291921149 | 0.21741313  | 0.15395498  |
| 0.275283069 | 0.420334167 | 0.301223028 | 0.367020476 |
| 0.095272397 | 0.17506621  | 0.198855232 | 0.277968239 |
| 0.245960498 | 0.261156302 | 0.233961974 | 0.389844964 |
| 0.205007782 | 0.163761617 | 0.220226807 | 0.228746291 |
| 0.287539217 | 0.144037969 | 0.152077912 | 0.098173285 |
| 0.202429518 | 0.188739702 | 0.387871297 | 0.262972886 |
| 0.213935627 | 0.188338867 | 0.379242469 | 0.160066162 |
| 0.200960964 | 0.204279849 | 0.191945825 | 0.257603604 |
| 0.207519094 | 0.318447801 | 0.257329004 | 0.27407418  |
| 0.17409747  | 0.340940258 | 0.225206964 | 0.316916007 |
| 0.050526549 | 0.36352931  | 0.264410383 | 0.205462663 |
| 0.190099393 | 0.278785043 | 0.202008384 | 0.334056887 |
| 0.290079133 | 0.273155117 | 0.267264063 | 0.261156248 |
| 0.294664873 | 0.352530813 | 0.356662281 | 0.275682412 |
| 0.190903986 | 0.127707821 | 0.175621657 | 0.266747311 |
| 0.232469687 | 0.284830589 | 0.140186223 | 0.396229712 |
| 0.326872442 | 0.261909338 | 0.252580852 | 0.431370329 |



|             |             |             |             |
|-------------|-------------|-------------|-------------|
| 0.284756629 | 0.388479775 | 0.272267196 | 0.266654421 |
| 0.394017424 | 0.380865816 | 0.365298552 | 0.185368525 |
| 0.375542085 | 0.219853622 | 0.076634826 | 0.294136594 |
| 0.37799635  | 0.013385682 | 0.284373135 | 0.307801439 |
| 0.342988508 | 0.254102438 | 0.367969282 | 0.333313845 |
| 0.344577943 | 0.235510982 | 0.016349397 | 0.251123678 |
| 0.368570017 | 0.304680794 | 0.29952406  | 0.161599378 |
| 0.200609748 | 0.215892193 | 0.248177992 | 0.124010192 |
| 0.418592184 | 0.298976734 | 0.30182128  | 0.250657733 |
| 0.213964942 | 0.347488509 | 0.147935174 | 0.367122119 |
| 0.218929533 | 0.215680474 | 0.160426596 | 0.292273609 |
| 0.145117468 | 0.295124499 | 0.212594678 | 0.213715388 |
| 0.294620058 | 0.235394807 | 0.124780563 | 0.198559741 |
| 0.165638776 | 0.175102743 | 0.280287904 | 0.246926547 |
| 0.202229207 | 0.286690995 | 0.215378447 | 0.243087658 |
| 0.253519435 | 0.339922234 | 0.19830013  | 0.329974098 |
| 0.206855052 | 0.235283819 | 0.214670918 | 0.372338822 |
| 0.376599987 | 0.172994252 | 0.293741047 | 0.051391009 |
| 0.158314429 | 0.11501125  | 0.081750468 | 0.170616141 |
| 0.315854505 | 0.22123439  | 0.203880431 | 0.218009481 |
| 0.220809607 | 0.254510471 | 0.181504041 | 0.400441897 |
| 0.223864466 | 0.19848644  | 0.294864157 | 0.185206897 |
| 0.046949414 | 0.234161474 | 0.261603096 | 0.185966763 |
| 0.250198403 | 0.076982539 | 0.099158294 | 0.297629827 |
| 0.128459768 | 0.169217633 | 0.31168772  | 0.224475281 |
| 0.167668204 | 0.305313122 | 0.368068225 | 0.024532353 |
| 0.194393666 | 0.115376347 | 0.266449842 | 0.148329165 |
| 0.276468373 | 0.286431251 | 0.180084922 | 0.204224299 |
| 0.198669485 | 0.365251454 | 0.305398981 | 0.335055406 |
| 0.149699096 | 0.374497079 | 0.268902226 | 0.310394171 |
| 0.255659617 | 0.15505513  | 0.054799354 | 0.255116458 |
| 0.287930063 | 0.143457434 | 0.181595111 | 0.228068409 |
| 0.163540785 | 0.196015276 | 0.208787033 | 0.343984693 |
| 0.418536985 | 0.331719899 | 0.2699129   | 0.259543343 |
| 0.285943569 | 0.256009517 | 0.294921482 | 0.389413226 |
| 0.129692934 | 0.179420309 | 0.175524088 | 0.297342112 |
| 0.270245822 | 0.178642053 | 0.348998397 | 0.078540183 |
| 0.002776782 | 0.224838229 | 0.198344614 | 0.264724079 |
| 0.118512366 | 0.169067788 | 0.221434488 | 0.353080428 |
| 0.273653346 | 0.335902596 | 0.288691209 | 0.184995487 |
| 0.318110671 | 0.188977942 | 0.168438554 | 0.208295619 |
| 1           | 0.081901958 | 0.194860592 | 0.420304168 |
| 0.148632174 | 0.124521276 | 0.251824623 | 0.010538789 |
| 0.184612999 | 0.230390489 | 0.224119163 | 0.328679383 |
| 0.325701928 | 0.310113651 | 0.248527559 | 0.141608341 |
| 0.25551242  | 0.256979513 | 0.019857743 | 0.328449755 |
| 0.357867265 | 0.349651115 | 0.353791641 | 0.366502848 |
| 0.312181212 | 0.246377685 | 0.255507943 | 0.207657202 |
| 0.274019511 | 0.221477966 | 0.118843378 | 0.236325503 |
| 0.014432359 | 0.277374693 | 0.240673341 | 0.269852706 |
| 0.225260834 | 0.275622097 | 0.178519401 | 0.203578584 |
| 0.086418345 | 0.069268637 | 0.232480127 | 0.296199047 |
| 0.256094355 | 0.117011816 | 0.100966238 | 0.140392343 |
| 0.327405886 | 0.307279856 | 0.142782357 | 0.373828776 |

|             |             |             |             |
|-------------|-------------|-------------|-------------|
| 0.235965337 | 0.183731714 | 0.220465352 | 0.24147227  |
| 0.2493375   | 0.065324804 | 0.21599445  | 0.012845443 |
| 0.129302443 | 0.373676207 | 0.189066936 | 0.193228832 |
| 0.262370619 | 0.058279226 | 0.300988091 | 0.379352863 |
| 0.326705395 | 0.341341825 | 0.344612628 | 0.129299725 |
| 0.349643412 | 0.032766881 | 0.349785169 | 0.270248136 |
| 0.137108741 | 0.004493543 | 0.039115712 | 0.298305179 |
| 0.18312703  | 0.150216735 | 0.28230998  | 0.155565279 |
| 0.245583815 | 0.217350324 | 0.249388948 | 0.157495432 |
| 0.203673912 | 0.230042419 | 0.155666683 | 0.343842151 |
| 0.274633697 | 0.300076888 | 0.182390317 | 0.219275385 |
| 0.201593012 | 0.203103271 | 0.229807653 | 0.019095237 |
| 0.236063989 | 0.217613335 | 0.391765619 | 0.347142382 |
| 0.383613364 | 0.215007707 | 0.11133784  | 0.166811617 |
| 0.304771257 | 0.1602687   | 0.144734333 | 0.191094048 |
| 0.321994886 | 0.198594982 | 0.28527587  | 0.293647393 |
| 0.363276386 | 0.353032607 | 0.191573799 | 0.255062796 |
| 0.058884238 | 0.009890391 | 0.184845456 | 0.295344202 |
| 0.092393426 | 0.175638824 | 0.290606421 | 0.253247158 |
| 0.271174059 | 0.130541871 | 0.125491184 | 0.131082795 |
| 0.263029062 | 0.221346397 | 0.173546907 | 0.287651147 |
| 0.22455482  | 0.161827805 | 0.287894843 | 0.305451795 |
| 0.193652923 | 0.299400625 | 0.282246935 | 0.163710801 |
| 0.172051904 | 0.173112235 | 0.214753768 | 0.276330466 |
| 0.287470264 | 0.306373334 | 0.204965157 | 0.067886592 |
| 0.298988085 | 0.235019397 | 0.326627907 | 0.327125097 |
| 0.391136342 | 0.389456683 | 0.392788877 | 0.247875163 |
| 0.226434438 | 0.246540186 | 0.183256191 | 0.22673     |
| 0.346339321 | 0.172550658 | 0.347581537 | 0.138217079 |
| 0.277837969 | 0.268926783 | 0.167468205 | 0.270949188 |
| 0.165399065 | 0.296615984 | 0.272180936 | 0.201360641 |
| 0.221068619 | 0.133329343 | 0.231235947 | 0.291844924 |
| 0.272412558 | 0.086966184 | 0.288766056 | 0.261776722 |
| 0.283485589 | 0.114441433 | 0.206781382 | 0.38490236  |
| 0.246856473 | 0.256845725 | 0.181243848 | 0.256033736 |
| 0.250455043 | 0.156260205 | 0.07133407  | 0.288070119 |
| 0.34448292  | 0.184067724 | 0.356454241 | 0.325143217 |
| 0.237245493 | 0.17407225  | 0.153339505 | 0.21095376  |
| 0.303745045 | 0.204232636 | 0.30337866  | 0.227252959 |
| 0.357302168 | 0.417707012 | 0.291124144 | 0.265178688 |
| 0.188378906 | 0.204147839 | 0.159912192 | 0.292438495 |
| 0.119241511 | 0.19890863  | 0.147562758 | 0.257673739 |
| 0.012636804 | 0.071405298 | 0.344427366 | 0.260346833 |
| 0.40481404  | 0.318673183 | 0.359268924 | 0.279701584 |
| 0.002976488 | 0.186545239 | 0.214865689 | 0.182094414 |
| 0.283862471 | 0.282529198 | 0.226544523 | 0.232626215 |
| 0.320398294 | 0.168786421 | 0.246751316 | 0.171055404 |
| 0.079783452 | 0.209269101 | 0.302110278 | 0.28655833  |
| 0.284089654 | 0.193067064 | 0.123931587 | 0.277049258 |
| 0.124656027 | 0.292942991 | 0.29532733  | 0.12993786  |
| 0.073917534 | 0.32047048  | 0.251321604 | 0.149257953 |
| 0.173774185 | 0.298166554 | 0.336437389 | 0.012900335 |
| 0.207407089 | 0.08675943  | 0.261792164 | 0.24375739  |
| 0.277960804 | 0.271302654 | 0.263245231 | 0.211553506 |

|             |             |             |             |
|-------------|-------------|-------------|-------------|
| 0.241190455 | 0.300699151 | 0.242564414 | 0.28077164  |
| 0.250618848 | 0.310883774 | 0.216895381 | 0.231363124 |
| 0.191843989 | 0.253334487 | 0.234209605 | 0.235080138 |
| 0.17592698  | 0.303202131 | 0.323109393 | 0.174375688 |
| 0.30013548  | 0.226287972 | 0.357869881 | 0.331676085 |
| 0.348617122 | 0.201169258 | 0.241407835 | 0.273399543 |
| 0.086881981 | 0.167031893 | 0.193997686 | 0.221233127 |
| 0.29189115  | 0.153029532 | 0.19374028  | 0.205909698 |
| 0.212373383 | 0.379111631 | 0.308578202 | 0.357091276 |
| 0.222764588 | 0.202890527 | 0.118120353 | 0.207317423 |
| 0.254551633 | 0.260393166 | 0.187441017 | 0.027458105 |
| 0.254566744 | 0.210609092 | 0.274874046 | 0.35387662  |
| 0.119407139 | 0.355773777 | 0.12312367  | 0.21043712  |
| 0.102390107 | 0.250318333 | 0.270633726 | 0.230611248 |
| 0.076604119 | 0.293443762 | 0.222914534 | 0.183451944 |
| 0.230175144 | 0.217708959 | 0.210910911 | 0.283767956 |
| 0.303967598 | 0.25473233  | 0.392053894 | 0.230996815 |
| 0.171353262 | 0.1599934   | 0.179356967 | 0.218743898 |
| 0.259806825 | 0.340181518 | 0.2137547   | 0.336323371 |
| 0.191238053 | 0.244579803 | 0.419390155 | 0.264408584 |
| 0.261672413 | 0.238578246 | 0.078325854 | 0.189956154 |
| 0.276412765 | 0.137215997 | 0.004562905 | 0.046498582 |
| 0.262594874 | 0.197018761 | 0.230310648 | 0.262142156 |
| 0.189337746 | 0.301887381 | 0.077577588 | 0.259045963 |
| 0.33843798  | 0.390800735 | 0.195889878 | 0.315360026 |
| 0.269711952 | 0.25492603  | 0.198173488 | 0.030981919 |
| 0.17795189  | 0.157744804 | 0.147633637 | 0.236127848 |
| 0.154625392 | 0.085503612 | 0.191736618 | 0.195159207 |
| 0.315975927 | 0.072187223 | 0.20143372  | 0.217251845 |
| 0.280605429 | 0.394416965 | 0.263524784 | 0.228663404 |
| 0.179362364 | 0.299874406 | 0.173228228 | 0.185212727 |
| 0.177893426 | 0.154530277 | 0.253664416 | 0.125964706 |
| 0.185187359 | 0.214771667 | 0.01586158  | 0.392233638 |
| 0.365426028 | 0.15867983  | 0.313515188 | 0.118502029 |
| 0.28275695  | 0.323976959 | 0.194589938 | 0.166788029 |
| 0.080958449 | 0.176066238 | 0.309149575 | 0.286199022 |
| 0.076017385 | 0.206841948 | 0.204188988 | 0.185787011 |
| 0.396489189 | 0.162840428 | 0.327918481 | 0.117072256 |
| 0.334125352 | 0.2834608   | 0.217877773 | 0.226275237 |
| 0.189637011 | 0.204571364 | 0.158817729 | 0.378801679 |
| 0.271990033 | 0.132567775 | 0.26724709  | 0.251621171 |
| 0.148930486 | 0.319785187 | 0.172880535 | 0.379283082 |
| 0.211842939 | 0.291615084 | 0.260979349 | 0.32465136  |
| 0.306509566 | 0.15068739  | 0.124353468 | 0.207271398 |
| 0.322436322 | 0.180889121 | 0.172565046 | 0.268703591 |
| 0.1087107   | 0.278542753 | 0.183726214 | 0.220172413 |
| 0.14155535  | 0.309658152 | 0.195007934 | 0.284436891 |
| 0.264361232 | 0.209713637 | 0.203380258 | 0.367755593 |
| 0.196751367 | 0.097110168 | 0.395104771 | 0.01079696  |
| 0.216599038 | 0.210209286 | 0.294111624 | 0.203748728 |
| 0.266307333 | 0.245355581 | 0.202017295 | 0.016160339 |
| 0.277715858 | 0.065883504 | 0.233145746 | 0.183256471 |
| 0.135113581 | 0.201339462 | 0.352731535 | 0.344631308 |
| 0.27207124  | 0.164513045 | 0.116541698 | 0.339640516 |

|             |             |             |             |
|-------------|-------------|-------------|-------------|
| 0.087814688 | 0.11646593  | 0.146078051 | 0.1963899   |
| 0.112403376 | 0.140880775 | 0.160950249 | 0.141318259 |
| 0.250960981 | 0.283711523 |             |             |
| GTDC1       | 0.094450098 | 0.025412105 | 0.113907711 |
| 0.07043551  | 0.043269733 | 0.01884548  | 0.055371781 |
| 0.03555389  | 0.02148655  | 0.001139499 | 0.053773353 |
| 0.07176997  | 0.000614561 | 0.038172539 | 0.051861196 |
| 0.020346411 | 0.078428617 | 0.092458376 | 0.000196645 |
| 0.006142794 | 0.038830152 | 0.006651828 | 0.011651772 |
| 0.029029612 | 0.122295168 | 0.027438618 | 0.005955996 |
| 0.032724906 | 0.000632461 | 0.024115151 | 0.001077846 |
| 0.075859413 | 0.030922102 | 0.00580313  | 0.143752271 |
| 0.016381504 | 4.94E-05    | 0.067268464 | 0.053877787 |
| 0.008221563 | 0.08557231  | 0.004141295 | 0.106153021 |
| 0.006919493 | 0.09772866  | 2.60E-05    | 0.012915516 |
| 0.024609648 | 0.025763911 | 0.066664464 | 0.026629165 |
| 0.004989002 | 0.052432678 | 0.009842535 | 0.000122552 |
| 0.005873394 | 5.87E-05    | 0.001528442 | 0.043668655 |
| 0.15988801  | 0.127106257 | 0.000384236 | 0.015524442 |
| 0.008481927 | 0.020773622 | 0.078841409 | 0.002985599 |
| 0.043681055 | 0.001852277 | 0.014317514 | 0.006192279 |
| 0.014474031 | 0.037524009 | 0.160588537 | 0.046495139 |
| 0.00785638  | 0.125713696 | 0.034970871 | 0.012185284 |
| 0.02251044  | 0.056615543 | 0.085401598 | 0.04042143  |
| 0.000728687 | 0.015121631 | 0.024663512 | 0.082398933 |
| 0.023208366 | 0.02254803  | 0.048341278 | 0.054806081 |
| 0.031879324 | 0.005059683 | 0.01851021  | 0.05683252  |
| 0.034333134 | 0.002554867 | 0.005082045 | 0.009663337 |
| 0.029940352 | 0.020088468 | 0.039893789 | 0.092022543 |
| 0.020779928 | 0.093702195 | 0.044261081 | 0.016774577 |
| 0.049071875 | 0.160661476 | 0.01495705  | 0.020969742 |
| 0.031168167 | 0.03640285  | 0.016236217 | 0.035788951 |
| 0.013912429 | 0.045950689 | 0.05328326  | 0.031365791 |
| 0.000335882 | 0.037826885 | 0.167899312 | 0.092753476 |
| 0.039737411 | 0.085051344 | 0.005239245 | 0.09256128  |
| 0.035686385 | 0.040232866 | 0.064272435 | 0.08544969  |
| 0.035267869 | 0.036766806 | 0.033620078 | 0.029950735 |
| 0.110006636 | 0.003217714 | 0.018676343 | 0.021823565 |
| 0.026005639 | 0.083351297 | 0.017320724 | 0.05245052  |
| 0.086677639 | 0.031070927 | 0.046694367 | 0.062030978 |
| 0.021354365 | 0.064309151 | 0.025282805 | 0.163586484 |
| 0.058064592 | 0.054377043 | 0.055416274 | 0.024661291 |
| 0.058942787 | 0.064439158 | 3.53E-05    | 0.033714347 |
| 0.064161333 | 0.016151845 | 0.023123989 | 0.028105639 |
| 0.038861441 | 0.024032364 | 0.044400586 | 0.036059339 |
| 0.034059854 | 0.10526553  | 0.000370861 | 0.056663146 |
| 0.046375514 | 0.080751069 | 0.026892873 | 0.007557211 |
| 0.02019958  | 0.017773948 | 0.019252298 | 0.00091727  |
| 0.064409123 | 0.039378674 | 0.02454624  | 0.022794759 |
| 0.012162544 | 0.086791773 | 0.006700328 | 0.049569088 |
| 0.09281583  | 0.078465355 | 0.113642999 | 0.048389157 |
| 0.00391849  | 0.141319073 | 0.011069629 | 0.014726869 |
| 0.13597604  | 0.010396005 | 0.003375215 | 0.025101808 |
| 0.084509635 | 0.010597588 | 0.135086907 | 0.057622371 |

|             |             |             |             |
|-------------|-------------|-------------|-------------|
| 0.12012509  | 0.12228419  | 0.015190518 | 0.096596446 |
| 0.053394762 | 0.081247125 | 0.012096106 | 0.038976812 |
| 0.009468677 | 0.132710618 | 0.020725526 | 0.060983595 |
| 0.084106567 | 0.020346654 | 0.079711889 | 0.092783251 |
| 0.004300242 | 0.00093601  | 0.002010123 | 0.007897621 |
| 0.101225715 | 0.012567953 | 0.017829635 | 0.040752197 |
| 0.044713974 | 0.02367203  | 0.006202718 | 0.075662561 |
| 0.078955133 | 0.03635955  | 0.040963362 | 0.007546334 |
| 0.091967201 | 0.052759343 | 0.032083196 | 0.00991907  |
| 0.028331895 | 0.000838219 | 0.004121047 | 0.039938662 |
| 0.001114322 | 0.009624745 | 0.030630058 | 0.036525809 |
| 0.00116204  | 0.051173405 | 0.042218633 | 0.000378506 |
| 0.010775879 | 0.012322067 | 0.104327753 | 0.002925645 |
| 0.098671287 | 0.064350801 | 0.022763547 | 0.032176588 |
| 0.096443246 | 0.039088361 | 0.04876286  | 0.03856425  |
| 0.004478581 | 0.045541158 | 0.030488418 | 0.050898121 |
| 0.051227049 | 0.003366614 | 0.001278653 | 0.036423017 |
| 0.038576478 | 0.000581001 | 0.096359001 | 0.013001638 |
| 0.004199498 | 0.018810658 | 0.006562926 | 0.054037092 |
| 0.071577048 | 0.032292622 | 0.067932223 | 0.046094305 |
| 0.079768208 | 0.127011823 | 0.040707675 | 0.045578458 |
| 0.001224335 | 0.011766616 | 0.014844516 | 0.063431323 |
| 0.161192183 | 0.013957002 | 0.061514154 | 0.001771246 |
| 0.000458661 | 0.055985682 | 0.110639218 | 0.109177726 |
| 0.019146586 | 0.00631704  | 0.02886273  | 0.037868604 |
| 0.112523688 | 0.058046328 | 0.04757312  | 0.026446655 |
| 0.042022505 | 0.00769601  | 0.014119453 | 0.020867595 |
| 0.081901958 | 1           | 0.052822829 | 0.06053424  |
| 0.053311364 | 0.009500407 | 0.015759809 | 0.006312015 |
| 0.059681524 | 0.012130552 | 0.108414101 | 0.141475823 |
| 0.039042689 | 0.129137258 | 0.092448924 | 0.00196176  |
| 0.070037206 | 0.169119147 | 0.119360449 | 0.03405836  |
| 0.032061443 | 0.031403711 | 0.029246599 | 0.035158279 |
| 0.027222537 | 0.020833858 | 0.035360054 | 0.027634715 |
| 0.057275154 | 0.050353345 | 0.008517255 | 0.042200899 |
| 0.00039599  | 0.072194185 | 0.024242174 | 0.174685552 |
| 0.018633665 | 0.0374763   | 0.09295061  | 0.016639045 |
| 0.062315982 | 0.002576991 | 0.005880315 | 0.033511432 |
| 0.043598837 | 0.126091999 | 0.002454722 | 0.002674969 |
| 0.04959642  | 0.063714413 | 0.005257873 | 0.046139232 |
| 0.066509588 | 0.058211259 | 0.05981973  | 0.041768253 |
| 0.079589451 | 0.000100769 | 0.006670357 | 0.000581771 |
| 0.000395147 | 0.037594573 | 0.004399401 | 0.051642967 |
| 0.10364361  | 0.109498377 | 0.073836043 | 0.045333131 |
| 0.03446173  | 0.038802546 | 0.047517166 | 0.014713564 |
| 0.048588143 | 0.000478553 | 0.036304744 | 0.035742567 |
| 0.00233171  | 0.005923051 | 0.006351458 | 0.034481484 |
| 0.02013338  | 0.076877606 | 0.155696891 | 0.007356721 |
| 0.094154153 | 0.041310846 | 0.078899149 | 0.034177186 |
| 0.022859886 | 0.059732546 | 0.011651732 | 0.032713753 |
| 0.074132374 | 0.077022384 | 0.004790537 | 0.089354025 |
| 0.018717242 | 0.144503453 | 0.073714524 | 0.018422238 |
| 0.039684828 | 0.080848648 | 0.048814415 | 0.037213263 |
| 0.060951142 | 0.039025531 | 0.001028858 | 0.001853627 |

|             |             |             |             |
|-------------|-------------|-------------|-------------|
| 0.02848655  | 0.063230792 | 0.001586507 | 0.06597473  |
| 0.034619717 | 0.026918565 | 0.100641851 | 0.109925486 |
| 0.050398434 | 0.054184515 | 0.097671085 | 0.039998959 |
| 0.065970542 | 0.004529091 | 0.02017315  | 0.051070971 |
| 0.000118945 | 0.010981954 | 0.134739152 | 0.00890781  |
| 0.01899819  | 0.024497673 | 0.007425651 | 0.009777436 |
| 0.079665947 | 0.022528601 | 0.027015124 | 0.045722816 |
| 0.035052269 | 0.005365674 | 0.083742476 | 0.037808187 |
| 0.000570109 | 0.066597105 | 0.122553669 | 0.073243822 |
| 0.009430525 | 0.011437664 | 0.157748363 | 0.130523078 |
| 0.052113253 | 0.03552448  | 0.024620801 | 0.088248924 |
| 0.096929414 | 0.011422252 | 0.036106475 | 0.031710802 |
| 0.048470895 | 0.057026183 | 0.077735341 | 0.029385412 |
| 0.107827098 | 0.057696003 | 0.024939953 | 0.056180495 |
| 0.036967197 | 0.049697614 | 0.040634212 | 0.011118613 |
| 0.114608496 | 0.100433265 | 0.11203058  | 0.121257379 |
| 0.012094558 | 0.114892818 | 0.115835449 | 0.096353623 |
| 0.027958888 | 0.006183281 | 0.079398716 | 0.111228778 |
| 0.049564083 | 0.003977811 | 0.113866029 | 0.015420904 |
| 0.047088101 | 0.000184234 | 0.02097847  | 0.078489377 |
| 0.133689465 | 0.066942104 | 0.018303591 | 0.024447713 |
| 0.022466749 | 0.004329574 | 0.027791354 | 0.022260734 |
| 0.039725484 | 0.015234335 | 0.043717478 | 0.054090827 |
| 0.113056881 | 0.020560306 | 0.004612927 | 0.024709517 |
| 0.071450839 | 0.02201798  | 0.037963622 | 0.126326997 |
| 0.073671131 | 0.053435327 | 0.038469697 | 0.152278291 |
| 0.009618197 | 0.039874627 | 0.048758204 | 0.024481714 |
| 0.011597397 | 0.034772611 | 0.003135399 | 0.018289088 |
| 0.022589889 | 0.004973348 | 0.037559914 | 0.050311459 |
| 0.050807137 | 0.045314397 | 0.078569422 | 0.015408097 |
| 0.000152276 | 0.01732481  | 0.0455842   | 0.020383347 |
| 0.025874385 | 0.056453388 | 0.002666821 | 0.114581421 |
| 0.136823105 | 0.085968782 | 0.036227316 | 0.003034397 |
| 0.000402474 | 0.01391908  | 0.129572235 | 0.045022566 |
| 0.069099859 | 0.03441501  | 0.006364739 | 0.10724122  |
| 0.001751494 | 0.13321967  | 0.083994359 | 0.000909459 |
| 0.001170534 | 0.03158566  | 0.030727655 | 0.146758346 |
| 0.011013198 | 0.036682821 | 0.045576728 | 0.001573408 |
| 0.024701943 | 0.075169022 | 0.070348771 | 0.109228977 |
| 0.091873235 | 0.037590447 | 0.067850022 | 0.038380766 |
| 0.022888663 | 0.065746848 | 0.079847916 | 0.139527151 |
| 0.122898015 | 0.059255501 | 0.024290559 | 0.023056972 |
| 0.037605311 | 0.158272827 | 0.108412948 | 0.105780271 |
| 0.079194566 | 0.027231054 | 0.129576187 | 0.126446519 |
| 0.08912276  | 0.011526784 | 0.109108935 | 0.031905473 |
| 0.069025514 | 0.080392252 | 0.016156471 | 0.033018541 |
| 0.000436133 | 0.000745567 | 0.029345927 | 0.030824025 |
| 0.070908949 | 0.013343642 | 0.008957831 | 0.029694267 |
| 0.012301924 | 0.099474725 | 0.124808725 | 0.064201699 |
| 0.031862894 | 0.007402298 | 0.002191707 | 0.109846299 |
| 0.114270833 | 0.093152531 | 0.039497894 | 0.096687181 |
| 0.047704655 | 0.02020145  | 0.030785355 | 0.049362135 |
| 0.003084815 | 0.08545893  | 0.001136393 | 0.069682449 |
| 0.001618778 | 0.071994415 | 0.130463223 | 0.018982345 |

|             |             |             |             |
|-------------|-------------|-------------|-------------|
| 0.002151616 | 0.09460267  | 0.051303324 | 0.00949212  |
| 0.026890728 | 0.016095904 | 0.015968461 | 0.021703912 |
| 0.050955621 | 0.104775788 | 0.043397046 | 0.07273918  |
| 0.008201671 | 0.040778509 | 0.006736381 | 0.046329921 |
| 0.055499805 | 0.035270242 | 0.131852693 | 0.03246005  |
| 0.017182836 | 0.104088288 | 0.071963862 | 0.026654682 |
| 0.019303514 | 0.05242414  | 0.004043786 | 0.00416379  |
| 0.027230057 | 0.005546424 | 0.000198946 | 0.000284684 |
| 0.087355439 | 0.003577524 | 0.013781627 | 0.029305952 |
| 0.029001796 | 0.066013818 | 0.0008053   | 0.01887115  |
| 0.032810901 | 0.046860775 | 0.017653874 | 0.108490286 |
| 0.043742902 | 0.131949536 | 0.018357723 | 0.000220441 |
| 0.011925317 | 0.007223827 | 0.001295783 | 0.071883308 |
| 0.038643956 | 0.004198752 | 0.014476596 | 0.045243364 |
| 0.036935542 | 0.000862746 | 0.009137472 | 0.026115269 |
| 0.066258932 | 0.050342938 | 0.063409304 | 0.045612822 |
| 0.005332046 | 0.07814942  | 0.009971738 | 0.005205115 |
| 0.03717124  | 0.016121379 | 0.067914371 | 0.017384065 |
| 0.13699256  | 0.025182382 | 0.001265717 | 0.089827135 |
| 0.043338008 | 0.011016008 | 0.108061294 | 0.00027007  |
| 0.116505019 | 0.047902834 | 0.003370535 | 0.006503596 |
| 0.124219546 | 0.023232253 | 0.099509345 | 0.051641028 |
| 0.001451068 | 0.010212618 | 0.118876218 | 0.011983658 |
| 0.053862225 | 0.003163656 | 0.071185535 | 0.002979319 |
| 0.036075506 | 0.030114677 | 0.07985617  | 0.017327256 |
| 0.007571731 | 0.10422977  | 0.003575722 | 0.042252057 |
| 0.104841833 | 0.023271513 | 0.038732625 | 0.066904449 |
| 0.00786196  | 0.040146123 | 0.007277115 | 0.036038234 |
| 0.04997904  | 0.107881738 | 0.029825268 | 0.032281902 |
| 0.098891372 | 0.017075292 | 0.007848118 | 0.034621134 |
| 0.041151508 | 0.091519319 | 0.005302059 | 0.059183151 |
| 0.008226251 | 0.064610528 | 0.007497655 | 0.04134125  |
| 0.021796746 | 0.02183149  | 0.014015703 | 0.129266775 |
| 0.052764847 | 0.036592451 | 0.026640188 | 0.098135503 |
| 0.077688066 | 0.069239707 | 0.078101472 | 0.00020395  |
| 0.040775386 | 0.048936312 | 0.080571615 | 0.018231705 |
| 0.161361506 | 0.023331346 | 0.01641204  | 0.002301875 |
| 0.04287292  | 0.024380516 | 0.013767025 | 0.038275932 |
| 0.000688262 | 0.059634364 | 0.059619674 | 0.040695925 |
| 0.049417694 | 0.001024744 | 0.001434955 | 0.039145749 |
| 0.001559914 | 0.001674708 | 0.002487853 | 0.017032811 |
| 0.009018513 | 0.003355594 | 0.003813683 | 0.008695317 |
| 0.050398824 | 0.0297675   |             |             |
| GTF2E2      | 0.135180789 | 0.127664241 | 0.105167203 |
| 0.063933863 | 0.14164989  | 0.079075065 | 0.08483795  |
| 0.079248143 | 0.092390352 | 0.012821344 | 0.18729254  |
| 0.079197149 | 0.003994989 | 0.191895562 | 0.086574083 |
| 0.113151089 | 0.093609457 | 0.173615363 | 0.003071812 |
| 0.01362906  | 0.151378235 | 0.043520263 | 0.076838796 |
| 0.100666672 | 0.228332286 | 0.091767374 | 0.050104277 |
| 0.164403152 | 0.009751956 | 0.131546531 | 0.003738476 |
| 0.25181814  | 0.14180373  | 0.050837184 | 0.054919272 |
| 0.102857231 | 0.00043665  | 0.217309049 | 0.143864484 |
| 0.014571936 | 0.254140026 | 0.029628597 | 0.227505196 |

|             |             |             |             |
|-------------|-------------|-------------|-------------|
| 0.040907083 | 0.10475548  | 0.003556513 | 0.087203185 |
| 0.073458676 | 0.06548729  | 0.103068449 | 0.119040644 |
| 0.031359074 | 0.189526204 | 0.072299768 | 0.001107931 |
| 0.047730136 | 0.002620402 | 0.017584927 | 0.187749934 |
| 0.32038409  | 0.24476695  | 0.005912653 | 0.056706931 |
| 0.067751422 | 0.106960688 | 0.187387582 | 0.025175198 |
| 0.207681078 | 0.016217787 | 0.091886048 | 0.027148614 |
| 0.076317722 | 0.041452121 | 0.271548282 | 0.065688833 |
| 0.043305873 | 0.262835087 | 0.148712776 | 0.047870405 |
| 0.119010506 | 0.224615164 | 0.174072642 | 0.171712188 |
| 0.004555256 | 0.084974117 | 0.059787128 | 0.230199507 |
| 0.112379058 | 0.042775169 | 0.203482865 | 0.224409832 |
| 0.04801357  | 0.046967488 | 0.111630201 | 0.126636357 |
| 0.150717904 | 0.015363913 | 0.047317028 | 0.043999091 |
| 0.125987185 | 0.110776615 | 0.173084612 | 0.281941514 |
| 0.087154016 | 0.125979392 | 0.179888334 | 0.091103551 |
| 0.158917977 | 0.157598505 | 0.053105835 | 0.133498408 |
| 0.136802364 | 0.184746547 | 0.110972782 | 0.160998344 |
| 0.089156382 | 0.202357605 | 0.180367633 | 0.156539012 |
| 0.001244351 | 0.182911505 | 0.230567977 | 0.132359296 |
| 0.06362754  | 0.139345933 | 0.022063688 | 0.242550239 |
| 0.174684439 | 0.152777926 | 0.152782425 | 0.201502208 |
| 0.17973152  | 0.163493336 | 0.17039853  | 0.161635999 |
| 0.124085154 | 0.016333918 | 0.093349209 | 0.070177448 |
| 0.149525533 | 0.143176724 | 0.081440011 | 0.211199743 |
| 0.265208498 | 0.165809818 | 0.08135723  | 0.222367635 |
| 0.071863414 | 0.250314943 | 0.13504481  | 0.285133374 |
| 0.218533996 | 0.205586523 | 0.230162129 | 0.139190571 |
| 0.217706039 | 0.150801964 | 0.002243302 | 0.149691285 |
| 0.261420241 | 0.007978172 | 0.14279124  | 0.16081364  |
| 0.17498041  | 0.146519944 | 0.207257576 | 0.182816712 |
| 0.171034573 | 0.134766419 | 7.40E-05    | 0.202703403 |
| 0.194486645 | 0.245637336 | 0.06844786  | 0.066219485 |
| 0.116831472 | 0.094123774 | 0.118695635 | 0.015024427 |
| 0.25741298  | 0.165578967 | 0.148173768 | 0.129899024 |
| 0.04991294  | 0.250668347 | 0.05698193  | 0.187302947 |
| 0.068119688 | 0.140159028 | 0.129438155 | 0.158303083 |
| 0.021084009 | 0.27971356  | 0.065224601 | 0.080140686 |
| 0.301857372 | 0.058354802 | 0.032828453 | 0.140351939 |
| 0.108169391 | 0.08750086  | 0.167110556 | 0.126742232 |
| 0.125135567 | 0.217247155 | 0.054285566 | 0.159122421 |
| 0.187783825 | 0.182517346 | 0.100778408 | 0.173148165 |
| 0.050966039 | 0.213775775 | 0.127337919 | 0.234222646 |
| 0.300034134 | 0.102778526 | 0.21945801  | 0.056814402 |
| 0.028637365 | 0.012595452 | 0.014924183 | 0.065699013 |
| 0.184089657 | 0.061652834 | 0.110706376 | 0.187821583 |
| 0.133967674 | 0.065056183 | 0.050383785 | 0.254176956 |
| 0.145758615 | 0.130698505 | 0.204212643 | 0.060239795 |
| 0.017551328 | 0.157645037 | 0.168527661 | 0.026391129 |
| 0.126310623 | 0.016329124 | 0.028369874 | 0.18026629  |
| 0.01534539  | 0.05185613  | 0.165743671 | 0.161916666 |
| 0.01246925  | 0.133997688 | 0.201808843 | 0.001215216 |
| 0.056965392 | 0.033512803 | 0.291401625 | 0.025657537 |
| 0.228291516 | 0.212556188 | 0.115405186 | 0.092595744 |



|             |             |             |             |
|-------------|-------------|-------------|-------------|
| 0.153816172 | 0.194547109 | 0.176803164 | 0.196593288 |
| 0.036687669 | 0.2063443   | 0.172241015 | 0.226047386 |
| 0.169704445 | 0.035336177 | 0.011021254 | 0.173899668 |
| 0.16958864  | 0.006412777 | 0.123947769 | 0.105355246 |
| 0.033187781 | 0.119049209 | 0.015072505 | 0.228500069 |
| 0.248125153 | 0.148480267 | 0.172938622 | 0.188769509 |
| 0.264027587 | 0.242182303 | 0.155518301 | 0.215009894 |
| 0.011166119 | 0.085005625 | 0.07438074  | 0.22331374  |
| 0.25480341  | 0.059370976 | 0.182863195 | 0.012526117 |
| 0.000707414 | 0.102362676 | 0.149306777 | 0.242118109 |
| 0.05534416  | 0.061443047 | 0.12681453  | 0.191105097 |
| 0.229295671 | 0.213696884 | 0.135144452 | 0.106557934 |
| 0.177310918 | 0.059107944 | 0.084271402 | 0.118404169 |
| 0.194860592 | 0.052822829 | 1           | 0.230651439 |
| 0.06719943  | 0.051124563 | 0.076428724 | 0.048060887 |
| 0.092939534 | 0.087165957 | 0.150052358 | 0.255390595 |
| 0.198098032 | 0.216223397 | 0.191747668 | 0.01785982  |
| 0.226978784 | 0.210476569 | 0.03161386  | 0.161406673 |
| 0.152644131 | 0.145345806 | 0.147152973 | 0.152005264 |
| 0.134258836 | 0.110220726 | 0.154262421 | 0.101316293 |
| 0.087695679 | 0.064369607 | 0.039712613 | 0.144077651 |
| 0.004477214 | 0.224606169 | 0.093751482 | 0.289721149 |
| 0.124036554 | 0.139736225 | 0.118429066 | 0.094266737 |
| 0.043004089 | 0.021265519 | 0.039218804 | 0.09910487  |
| 0.170617732 | 0.066695743 | 0.01783509  | 0.023745594 |
| 0.19142837  | 0.224913537 | 0.033303936 | 0.19863421  |
| 0.217745763 | 0.10250615  | 0.1509942   | 0.188104415 |
| 0.119043884 | 0.001673238 | 0.04637597  | 0.001835694 |
| 0.008620864 | 0.163568383 | 0.035940945 | 0.034803016 |
| 0.256861137 | 0.041937982 | 0.22317872  | 0.212036487 |
| 0.153712268 | 0.195754922 | 0.211702375 | 0.077987878 |
| 0.206176397 | 0.001900489 | 0.186698818 | 0.155824148 |
| 0.029067041 | 0.010249738 | 0.020208516 | 0.17176128  |
| 0.107341278 | 0.09150664  | 0.268028846 | 0.030860861 |
| 0.142432008 | 0.096092647 | 0.113775691 | 0.077282771 |
| 0.115276899 | 0.188019411 | 0.046649046 | 0.162384979 |
| 0.174617065 | 0.205646326 | 0.04137063  | 0.136806117 |
| 0.102734099 | 0.138150119 | 0.112544477 | 0.035070597 |
| 0.16421813  | 0.129990443 | 0.184373795 | 0.182613293 |
| 0.240901352 | 0.154746101 | 0.017642498 | 0.016760442 |
| 0.142730146 | 0.110101586 | 0.013415078 | 0.117279262 |
| 0.167028908 | 0.143380086 | 0.299589738 | 0.271924975 |
| 0.230834083 | 0.217206624 | 0.121287083 | 0.175790664 |
| 0.061474741 | 0.006467655 | 0.082706776 | 0.168054488 |
| 0.00098037  | 0.075503898 | 0.284477727 | 0.029782171 |
| 0.056714625 | 0.038887396 | 0.042204236 | 0.04864989  |
| 0.21172169  | 0.109047063 | 0.120450847 | 0.128878171 |
| 0.085622714 | 0.017315886 | 0.154619345 | 0.101684473 |
| 0.00511653  | 0.184063875 | 0.24221919  | 0.066614713 |
| 0.06302937  | 0.08637184  | 0.188541982 | 0.224540719 |
| 0.215548561 | 0.188793515 | 0.034706539 | 0.063870657 |
| 0.241472137 | 0.067526558 | 0.198899611 | 0.163366204 |
| 0.209132156 | 0.24036801  | 0.242685153 | 0.083020434 |
| 0.149871552 | 0.163732288 | 0.104871253 | 0.070402973 |

|             |             |             |             |
|-------------|-------------|-------------|-------------|
| 0.194154516 | 0.08595743  | 0.178638928 | 0.062110955 |
| 0.183085656 | 0.143170589 | 0.098536661 | 0.169584346 |
| 0.090202491 | 0.254933395 | 0.23973708  | 0.15558894  |
| 0.122396702 | 0.024832792 | 0.097667755 | 0.247323691 |
| 0.188674542 | 0.0137331   | 0.225797618 | 0.054783051 |
| 0.140369083 | 0.002738891 | 0.12543243  | 0.27652268  |
| 0.221814102 | 0.112515788 | 0.052353793 | 0.119653914 |
| 0.131122287 | 0.043745281 | 0.077387486 | 0.124780022 |
| 0.19530215  | 0.113456571 | 0.190065876 | 0.227829681 |
| 0.153109676 | 0.123021601 | 0.033544789 | 0.117658844 |
| 0.183270689 | 0.086880451 | 0.125299379 | 0.166381138 |
| 0.20419102  | 0.210741464 | 0.154091725 | 0.282429789 |
| 0.071394554 | 0.084607035 | 0.077456185 | 0.138283093 |
| 0.039739925 | 0.071844069 | 0.031924662 | 0.120779637 |
| 0.005874405 | 0.02155052  | 0.17230259  | 0.142303181 |
| 0.207237343 | 0.194988396 | 0.259872442 | 0.04740304  |
| 0.000220845 | 0.098456133 | 0.195149084 | 0.085801011 |
| 0.146011715 | 0.197656389 | 0.008424013 | 0.159417515 |
| 0.309999774 | 0.127812966 | 0.101332886 | 0.013969212 |
| 0.00675005  | 0.101533383 | 0.281819989 | 0.112053825 |
| 0.151408227 | 0.066604479 | 0.023802508 | 0.178911672 |
| 0.004977474 | 0.317146813 | 0.281037949 | 0.011970097 |
| 0.015113743 | 0.167129131 | 0.145788424 | 0.109807201 |
| 0.070813916 | 0.157789509 | 0.181909448 | 0.007025483 |
| 0.153375479 | 0.051712326 | 0.209816647 | 0.243458525 |
| 0.195397468 | 0.137043472 | 0.209244672 | 0.092497345 |
| 0.10886738  | 0.144550612 | 0.182810946 | 0.323203987 |
| 0.1928753   | 0.120086323 | 0.106306514 | 0.067235206 |
| 0.134629774 | 0.200699798 | 0.148652238 | 0.145563856 |
| 0.088685365 | 0.147966769 | 0.293252825 | 0.13623888  |
| 0.24304434  | 0.050159761 | 0.29787602  | 0.156106092 |
| 0.238478482 | 0.118347226 | 0.079326478 | 0.159157514 |
| 0.002548062 | 0.012694019 | 0.05840017  | 0.088806302 |
| 0.206382997 | 0.070496968 | 0.053888992 | 0.113832256 |
| 0.089869307 | 0.28379712  | 0.289076676 | 0.211849018 |
| 0.094729206 | 0.047187758 | 0.020744081 | 0.163725977 |
| 0.198529649 | 0.159238134 | 0.141305044 | 0.026965787 |
| 0.195542227 | 0.038248152 | 0.171305373 | 0.190644273 |
| 0.029398905 | 0.257663544 | 0.010255766 | 0.122139351 |
| 0.008965774 | 0.143624693 | 0.241938734 | 0.106346273 |
| 0.023005222 | 0.156251564 | 0.154924317 | 0.041226445 |
| 0.132001117 | 0.091798508 | 0.051480371 | 0.091922147 |
| 0.12271797  | 0.158238858 | 0.172012863 | 0.093399386 |
| 0.067097213 | 0.091097689 | 0.04943795  | 0.168742394 |
| 0.152280916 | 0.16991965  | 0.150687097 | 0.175873321 |
| 0.096274965 | 0.166516911 | 0.260289272 | 0.096560086 |
| 0.038239151 | 0.07836924  | 0.024475646 | 0.034256066 |
| 0.071936153 | 0.041070118 | 0.000158737 | 0.008959053 |
| 0.29105221  | 0.023167091 | 0.093367193 | 0.128270834 |
| 0.077993189 | 0.221576888 | 0.005529379 | 0.080540424 |
| 0.153456976 | 0.186345083 | 0.068047671 | 0.246356291 |
| 0.19088523  | 0.224780853 | 0.104172912 | 0.000189125 |
| 0.0951787   | 0.069438702 | 0.02074222  | 0.118102225 |
| 0.032369488 | 0.027052749 | 0.08705824  | 0.065724698 |

|             |             |             |             |
|-------------|-------------|-------------|-------------|
| 0.184009579 | 0.007665909 | 0.056562124 | 0.128324794 |
| 0.148232625 | 0.196375849 | 0.129275104 | 0.205069662 |
| 0.008056723 | 0.176593984 | 0.056894105 | 0.045755518 |
| 0.114837248 | 0.074989577 | 0.231937505 | 0.074750651 |
| 0.136961212 | 0.078366204 | 0.003018939 | 0.261360405 |
| 0.166011574 | 0.061553346 | 0.2278442   | 0.0095593   |
| 0.291078446 | 0.162101961 | 0.027064652 | 0.051815226 |
| 0.053512824 | 0.128190064 | 0.222364864 | 0.2040047   |
| 0.012501344 | 0.065595134 | 0.074022784 | 0.065341907 |
| 0.189997492 | 0.029035064 | 0.203738108 | 0.016868115 |
| 0.163022607 | 0.121142702 | 0.124741719 | 0.035597991 |
| 0.06023696  | 0.142633211 | 0.032547432 | 0.199099116 |
| 0.248754562 | 0.080454432 | 0.191792316 | 0.164744274 |
| 0.056644758 | 0.160558015 | 0.054713399 | 0.179003253 |
| 0.115451159 | 0.276101469 | 0.151557778 | 0.160539406 |
| 0.293142107 | 0.055594126 | 0.055757063 | 0.134422967 |
| 0.168504461 | 0.096152272 | 0.024995397 | 0.192789978 |
| 0.049325977 | 0.214523224 | 0.044691389 | 0.12795517  |
| 0.077224164 | 0.064100645 | 0.0698422   | 0.202192573 |
| 0.194738909 | 0.123398779 | 0.067227374 | 0.280394668 |
| 0.123118832 | 0.074482068 | 0.250947763 | 0.007443205 |
| 0.122638583 | 0.186640774 | 0.214089268 | 0.080764872 |
| 0.268921172 | 0.107514103 | 0.076793891 | 0.016030274 |
| 0.183780445 | 0.009294389 | 0.059489281 | 0.119090083 |
| 0.009346465 | 0.091470794 | 0.208618363 | 0.207012774 |
| 0.144926359 | 0.007229458 | 0.016859772 | 0.184209459 |
| 0.010536868 | 0.020122348 | 0.029184986 | 0.090533741 |
| 0.043228475 | 0.033341523 | 0.039424256 | 0.052119129 |
| 0.174334406 | 0.090971793 |             |             |
| GTSE1       | 0.223762196 | 0.518140547 | 0.191730098 |
| 0.275297033 | 0.367989179 | 0.505435808 | 0.194955012 |
| 0.297909465 | 0.486856718 | 0.379118921 | 0.464838738 |
| 0.086477745 | 0.086359086 | 0.532054877 | 0.179021164 |
| 0.4480759   | 0.123791753 | 0.269832791 | 0.140843879 |
| 0.372613222 | 0.347631238 | 0.378955646 | 0.520776989 |
| 0.354864383 | 0.359462871 | 0.506721611 | 0.4252997   |
| 0.534702737 | 0.277681187 | 0.502864585 | 0.254382141 |
| 0.50119983  | 0.37688476  | 0.410750219 | 0.087874945 |
| 0.506281741 | 0.018915927 | 0.494420188 | 0.373161778 |
| 0.170902463 | 0.478133793 | 0.44295125  | 0.375971217 |
| 0.473936087 | 0.147008334 | 0.252536291 | 0.467787814 |
| 0.481179315 | 0.422047583 | 0.214979237 | 0.523331717 |
| 0.458633167 | 0.503574102 | 0.497424829 | 0.00912487  |
| 0.311475014 | 0.07534794  | 0.221118458 | 0.530243412 |
| 0.374206188 | 0.27039912  | 0.311445973 | 0.414335683 |
| 0.467309253 | 0.464450263 | 0.410194808 | 0.450498374 |
| 0.536405363 | 0.186217913 | 0.494841282 | 0.272410464 |
| 0.508666284 | 0.14480141  | 0.335715304 | 0.248593532 |
| 0.452584151 | 0.346808835 | 0.423072523 | 0.337567317 |
| 0.515093671 | 0.518430624 | 0.411461241 | 0.518628933 |
| 0.123140892 | 0.37776334  | 0.339233376 | 0.429664846 |
| 0.478181191 | 0.23416999  | 0.51171564  | 0.528356414 |
| 0.177688212 | 0.479392514 | 0.505132538 | 0.30469455  |
| 0.530563821 | 0.309058684 | 0.479267451 | 0.188695924 |

|             |             |             |             |
|-------------|-------------|-------------|-------------|
| 0.425496171 | 0.400543336 | 0.507202864 | 0.453225393 |
| 0.383987079 | 0.229935782 | 0.505912112 | 0.348758966 |
| 0.386202837 | 0.243357727 | 0.295748915 | 0.511495466 |
| 0.511744796 | 0.538490159 | 0.519174135 | 0.485948538 |
| 0.427927942 | 0.535905971 | 0.519239087 | 0.518464853 |
| 0.183671318 | 0.532969538 | 0.37020882  | 0.138594041 |
| 0.230545197 | 0.212755672 | 0.302763006 | 0.448306833 |
| 0.529852405 | 0.49140685  | 0.384970125 | 0.35549806  |
| 0.504367594 | 0.511898269 | 0.530145274 | 0.52155328  |
| 0.151377641 | 0.269313117 | 0.436183776 | 0.447447212 |
| 0.490828015 | 0.282395414 | 0.285491107 | 0.517455146 |
| 0.505179998 | 0.506553921 | 0.36618624  | 0.516640735 |
| 0.368872253 | 0.52844758  | 0.530865022 | 0.332903443 |
| 0.525572779 | 0.518050774 | 0.528144225 | 0.444990664 |
| 0.521443379 | 0.49708235  | 0.10908214  | 0.50458298  |
| 0.52020195  | 0.019346612 | 0.524804925 | 0.527413279 |
| 0.530526527 | 0.516394134 | 0.52433015  | 0.53279577  |
| 0.53097688  | 0.228437348 | 0.035802576 | 0.391711181 |
| 0.527169755 | 0.515524517 | 0.257557243 | 0.461864419 |
| 0.421966409 | 0.530982551 | 0.505360051 | 0.360790891 |
| 0.518011145 | 0.529549642 | 0.531580094 | 0.518018185 |
| 0.454786912 | 0.464025242 | 0.400468728 | 0.50587296  |
| 0.153403181 | 0.289154865 | 0.186852543 | 0.450849324 |
| 0.447827418 | 0.324124423 | 0.526004113 | 0.429718143 |
| 0.352757891 | 0.501687906 | 0.345688192 | 0.433148251 |
| 0.192536538 | 0.508548465 | 0.351866172 | 0.367740027 |
| 0.140120539 | 0.311773792 | 0.327394903 | 0.292956895 |
| 0.364188976 | 0.365219157 | 0.507497762 | 0.527759423 |
| 0.428613517 | 0.371884676 | 0.528610876 | 0.521660617 |
| 0.492966074 | 0.425922578 | 0.401986317 | 0.039592519 |
| 0.349738186 | 0.338333764 | 0.188516332 | 0.452257553 |
| 0.333402451 | 0.371812656 | 0.472950522 | 0.455599162 |
| 0.471259809 | 0.332067044 | 0.428827421 | 0.498175304 |
| 0.337165954 | 0.385838406 | 0.518851947 | 0.500829255 |
| 0.025484356 | 0.479158401 | 0.527845059 | 0.212356189 |
| 0.473765611 | 0.153080241 | 0.266028234 | 0.524821034 |
| 0.320471092 | 0.27181659  | 0.528435575 | 0.452487557 |
| 0.428590045 | 0.371961482 | 0.528038397 | 0.056326488 |
| 0.404010996 | 0.099992181 | 0.407343561 | 0.432599207 |
| 0.425553125 | 0.427834946 | 0.359985259 | 0.349441996 |
| 0.310305497 | 0.532731894 | 0.516437749 | 0.536817097 |
| 0.418773005 | 0.52841125  | 0.521708359 | 0.525538514 |
| 0.501648856 | 0.407268662 | 0.132438385 | 0.527445808 |
| 0.523605449 | 0.374367037 | 0.230520794 | 0.504014578 |
| 0.439232948 | 0.464098336 | 0.185245605 | 0.528282414 |
| 0.516080687 | 0.511576734 | 0.277065159 | 0.453845071 |
| 0.506741802 | 0.414013031 | 0.509337424 | 0.524826662 |
| 0.389943708 | 0.413596456 | 0.392738874 | 0.471860661 |
| 0.359198703 | 0.267129545 | 0.462932489 | 0.17729817  |
| 0.009647907 | 0.24505111  | 0.213494927 | 0.280911686 |
| 0.189174343 | 0.478952824 | 0.482795677 | 0.535616983 |
| 0.273482604 | 0.518563927 | 0.410115497 | 0.381262446 |
| 0.519790939 | 0.410450274 | 0.412770357 | 0.453142013 |
| 0.420304168 | 0.06053424  | 0.230651439 | 1           |

|             |             |             |             |
|-------------|-------------|-------------|-------------|
| 0.164035672 | 0.262443761 | 0.477939415 | 0.00840492  |
| 0.168903569 | 0.507845013 | 0.255863049 | 0.35166335  |
| 0.511873112 | 0.359927692 | 0.39974061  | 0.418784363 |
| 0.45983339  | 0.251355762 | 0.010496391 | 0.524461936 |
| 0.515775098 | 0.508342433 | 0.516076159 | 0.503881574 |
| 0.506776794 | 0.498477781 | 0.493011143 | 0.513627215 |
| 0.26822641  | 0.262875365 | 0.24212301  | 0.401376835 |
| 0.016743251 | 0.48402614  | 0.395656761 | 0.315086783 |
| 0.490267496 | 0.45323412  | 0.141959632 | 0.412334584 |
| 0.089840226 | 0.200685956 | 0.462461825 | 0.357328525 |
| 0.431035829 | 0.079159427 | 0.313871519 | 0.369730852 |
| 0.515449865 | 0.496714482 | 0.383722404 | 0.532511191 |
| 0.448933565 | 0.309754479 | 0.405861865 | 0.479849115 |
| 0.214120157 | 0.159786602 | 0.4925048   | 0.053000613 |
| 0.281834622 | 0.507045573 | 0.444223966 | 0.214497046 |
| 0.432103981 | 0.035354477 | 0.507515431 | 0.533567092 |
| 0.51770721  | 0.530024123 | 0.537438663 | 0.293940043 |
| 0.535410834 | 0.094028212 | 0.53600938  | 0.528991189 |
| 0.440195893 | 0.004542042 | 0.020419711 | 0.528150224 |
| 0.457770833 | 0.195898146 | 0.334730609 | 0.463293815 |
| 0.243183581 | 0.349212275 | 0.199358959 | 0.224808479 |
| 0.514278351 | 0.323759518 | 0.214519988 | 0.520588598 |
| 0.387556254 | 0.377743981 | 0.50485987  | 0.251305495 |
| 0.4696194   | 0.168424576 | 0.249726243 | 0.018108638 |
| 0.449457859 | 0.283829949 | 0.495504605 | 0.533309409 |
| 0.526103212 | 0.461569829 | 0.386369757 | 0.427724304 |
| 0.505140119 | 0.265261355 | 0.4053267   | 0.290969087 |
| 0.532063826 | 0.466153554 | 0.464628324 | 0.470716049 |
| 0.526811474 | 0.529410641 | 0.13317748  | 0.501576471 |
| 0.051902005 | 0.004209538 | 0.513657141 | 0.427158549 |
| 0.093583324 | 0.425036153 | 0.42422619  | 0.371172479 |
| 0.350669157 | 0.120441371 | 0.280256713 | 0.266565425 |
| 0.428918728 | 0.455086735 | 0.319318521 | 0.415307395 |
| 0.342738575 | 0.190580294 | 0.333005161 | 0.308874424 |
| 0.337045214 | 0.472389708 | 0.363455526 | 0.102189744 |
| 0.491411558 | 0.461981184 | 0.187637507 | 0.341738981 |
| 0.526310956 | 0.534152581 | 0.141912823 | 0.041625397 |
| 0.439851238 | 0.41474551  | 0.527247357 | 0.53387973  |
| 0.526536335 | 0.525207444 | 0.487068459 | 0.226490492 |
| 0.205088478 | 0.425246823 | 0.338911838 | 0.176626472 |
| 0.536119066 | 0.218229448 | 0.527378333 | 0.315489547 |
| 0.287702795 | 0.378282137 | 0.114294615 | 0.235147196 |
| 0.416315328 | 0.349739266 | 0.297807573 | 0.335678342 |
| 0.413888497 | 0.272914394 | 0.172612647 | 0.365662827 |
| 0.495809175 | 0.189092117 | 0.337560634 | 0.467292152 |
| 0.505329233 | 0.302826221 | 0.491241365 | 0.508228844 |
| 0.308907144 | 0.287173742 | 0.454909414 | 0.484982883 |
| 0.526206932 | 0.455465375 | 0.079608236 | 0.521558609 |
| 0.527040976 | 0.503552484 | 0.529248891 | 0.482170633 |
| 0.245069546 | 0.432088542 | 0.346631851 | 0.424991458 |
| 0.356367286 | 0.510334642 | 0.385693078 | 0.20405807  |
| 0.441987967 | 0.505043625 | 0.524079593 | 0.306053087 |
| 0.49194215  | 0.315300528 | 0.202258234 | 0.520628744 |
| 0.208093367 | 0.235888636 | 0.455507367 | 0.501804987 |

|             |             |             |             |
|-------------|-------------|-------------|-------------|
| 0.005603794 | 0.138166972 | 0.513857403 | 0.381191971 |
| 0.519198128 | 0.526036959 | 0.517790224 | 0.418342206 |
| 0.002262073 | 0.459136491 | 0.474378087 | 0.472723382 |
| 0.533539405 | 0.504129371 | 0.273190167 | 0.189862759 |
| 0.432273774 | 0.239271602 | 0.264633194 | 0.454953694 |
| 0.190685305 | 0.529010122 | 0.359985066 | 0.381912175 |
| 0.316902654 | 0.258215103 | 0.260511142 | 0.404383225 |
| 0.175292184 | 0.399480059 | 0.476913485 | 0.386113238 |
| 0.214286253 | 0.507665032 | 0.520991439 | 0.115606894 |
| 0.392039646 | 0.501744475 | 0.512420836 | 0.009583452 |
| 0.494832993 | 0.041323393 | 0.310472315 | 0.329697246 |
| 0.322544755 | 0.335221141 | 0.362595757 | 0.375116648 |
| 0.493885498 | 0.384099408 | 0.408622144 | 0.385659464 |
| 0.280554111 | 0.396265174 | 0.466175125 | 0.49501682  |
| 0.357368038 | 0.289136586 | 0.256251859 | 0.249692384 |
| 0.149365304 | 0.528545876 | 0.411625931 | 0.225386852 |
| 0.375701466 | 0.483121266 | 0.47160796  | 0.526081825 |
| 0.502001646 | 0.278207963 | 0.444260868 | 0.537009968 |
| 0.272351846 | 0.418750989 | 0.20991436  | 0.510818308 |
| 0.4001133   | 0.26836855  | 0.499545802 | 0.488922646 |
| 0.509357328 | 0.491923922 | 0.410599904 | 0.514028221 |
| 0.4608343   | 0.43580522  | 0.40775242  | 0.187340396 |
| 0.355772044 | 0.311595457 | 0.317717174 | 0.014390793 |
| 0.484653981 | 0.440448426 | 0.531428398 | 0.524218526 |
| 0.299462822 | 0.493075821 | 0.422789017 | 0.238233843 |
| 0.359059425 | 0.342767489 | 0.316263569 | 0.515120785 |
| 0.213393396 | 0.349239617 | 0.381980874 | 0.48535459  |
| 0.501164098 | 0.492932397 | 0.320597094 | 0.417911824 |
| 0.391047887 | 0.393940837 | 0.504880596 | 0.306189106 |
| 0.485861965 | 0.233917809 | 0.480511672 | 0.395887821 |
| 0.33380981  | 0.530266883 | 0.198882637 | 0.534118855 |
| 0.405101815 | 0.30718747  | 0.513084621 | 0.460097264 |
| 0.451194243 | 0.217634135 | 0.185896034 | 0.489943045 |
| 0.372771593 | 0.355105534 | 0.020970312 | 0.087160176 |
| 0.4462737   | 0.399543624 | 0.509850973 | 0.477013484 |
| 0.297818325 | 0.447493857 | 0.162770765 | 0.46722034  |
| 0.515279166 | 0.510950606 | 0.377049641 | 0.407735733 |
| 0.488855505 | 0.244139024 | 0.526799049 | 0.029347257 |
| 0.481107864 | 0.456446038 | 0.440575644 | 0.171416532 |
| 0.088625051 | 0.215826462 | 0.498142861 | 0.2193597   |
| 0.515806298 | 0.207807999 | 0.474010031 | 0.51314225  |
| 0.359713329 | 0.511641385 | 0.230309695 | 0.492618185 |
| 0.166176275 | 0.421058132 | 0.415018124 | 0.449785413 |
| 0.303261837 | 0.324860237 | 0.477670508 | 0.256228027 |
| 0.121698357 | 0.351801812 | 0.008720656 | 0.48686201  |
| 0.501333556 | 0.372954258 | 0.378622679 | 0.362102452 |
| 0.40914658  | 0.49406689  | 0.323896396 | 0.463570092 |
| 0.045902866 | 0.414682457 | 0.360318209 | 0.530213087 |
| 0.258496534 | 0.466824762 | 0.155394641 | 0.362579239 |
| 0.491632409 | 0.358805948 | 0.416480491 | 0.354106043 |
| 0.529008129 | 0.50609098  | 0.347948532 | 0.297367606 |
| 0.479756002 | 0.20981041  | 0.469497667 | 0.529364351 |
| 0.303309086 | 0.241993253 | 0.501119833 | 0.341328175 |
| 0.335506155 | 0.511340968 | 0.469636721 | 0.524196741 |

|             |             |             |             |
|-------------|-------------|-------------|-------------|
| 0.155015927 | 0.406134104 | 0.499921183 | 0.527277095 |
| 0.429481422 | 0.205579845 | 0.268899734 | 0.312586288 |
| 0.520765131 | 0.221852457 | 0.303019827 | 0.507478119 |
| 0.234950031 | 0.440737254 | 0.464086499 | 0.26619314  |
| 0.109876137 | 0.321947189 | 0.46434236  | 0.319468346 |
| 0.428862392 | 0.441391248 | 0.304691643 | 0.490514708 |
| 0.236129912 | 0.077316957 | 0.509305345 | 0.019640856 |
| 0.500906898 | 0.472920984 | 0.402167667 | 0.416658619 |
| 0.363056641 | 0.496341033 | 0.496976567 | 0.00937002  |
| 0.498930355 | 0.070131976 | 0.391585937 | 0.300397907 |
| 0.32450325  | 0.180679429 | 0.522849031 | 0.527686566 |
| 0.47976697  | 0.386891073 | 0.366723864 | 0.52619678  |
| 0.158001602 | 0.342108115 | 0.372248288 | 0.525557656 |
| 0.233708892 | 0.449998776 | 0.457686134 | 0.401969947 |
| 0.517937811 | 0.437774499 |             |             |
| GVIN1       | 0.219843272 | 0.103362216 | 0.224087566 |
| 0.064652446 | 0.018539107 | 0.032044188 | 0.233413944 |
| 0.171092835 | 0.107822765 | 0.022716796 | 0.030476091 |
| 0.215935503 | 0.001760677 | 0.086685989 | 0.222113096 |
| 0.019646982 | 0.177345586 | 0.17781387  | 0.03891772  |
| 0.07459889  | 0.020185508 | 0.011431589 | 0.055900157 |
| 0.022693749 | 0.279785879 | 0.078371581 | 0.015626393 |
| 0.085695856 | 0.004543058 | 0.028039724 | 0.00989766  |
| 0.147227962 | 0.016099164 | 0.010471895 | 0.223348522 |
| 0.031106646 | 0.004161823 | 0.187895496 | 0.035731783 |
| 0.003283815 | 0.171052652 | 0.033355887 | 0.048503757 |
| 0.031374928 | 0.233719128 | 0.009232876 | 0.027778384 |
| 0.069506891 | 0.05850756  | 0.253600961 | 0.043710973 |
| 0.030326884 | 0.092359973 | 0.060062684 | 0.024450894 |
| 0.006010184 | 0.001601158 | 0.002790989 | 0.122171703 |
| 0.130966653 | 0.124799382 | 0.008199003 | 0.092525291 |
| 0.031800419 | 0.042366097 | 0.097706522 | 0.025399663 |
| 0.102109375 | 0.004129376 | 0.033476036 | 0.040524389 |
| 0.043805691 | 0.290210536 | 0.194885972 | 0.245395151 |
| 0.020150675 | 0.079085862 | 0.025357464 | 0.009479407 |
| 0.104630571 | 0.158736222 | 0.115151224 | 0.148765443 |
| 0.008303073 | 0.013607555 | 0.017534429 | 0.072378931 |
| 0.064942327 | 0.201929081 | 0.045266329 | 0.125221865 |
| 0.262769052 | 0.036022466 | 0.054335969 | 0.250031476 |
| 0.088527239 | 0.011277272 | 0.025898946 | 0.004495709 |
| 0.022875801 | 0.01757701  | 0.161194023 | 0.091240648 |
| 0.023381778 | 0.253239739 | 0.180541216 | 0.010678068 |
| 0.023218505 | 0.217241228 | 0.019839213 | 0.044759695 |
| 0.034767259 | 0.082686704 | 0.07232539  | 0.07920074  |
| 0.015183616 | 0.095281068 | 0.049496462 | 0.101289596 |
| 0.005994263 | 0.113782735 | 0.120476734 | 0.168458454 |
| 0.249793056 | 0.138288815 | 0.027760781 | 0.127199153 |
| 0.061131452 | 0.080844165 | 0.123602407 | 0.04820366  |
| 0.05414002  | 0.156885527 | 0.113779704 | 0.071110485 |
| 0.246060764 | 0.007818579 | 0.01522746  | 0.078613693 |
| 0.051663473 | 0.20089923  | 0.007806952 | 0.166738459 |
| 0.117632879 | 0.046321146 | 0.167954267 | 0.195375708 |
| 0.117288486 | 0.114002507 | 0.079282664 | 0.105907057 |
| 0.142916408 | 0.160317039 | 0.091327356 | 0.020441806 |

|             |             |             |             |
|-------------|-------------|-------------|-------------|
| 0.142541985 | 0.051693641 | 0.028785253 | 0.093210307 |
| 0.103123784 | 0.000784333 | 0.059786417 | 0.065425707 |
| 0.115983988 | 0.04306826  | 0.090112398 | 0.078705388 |
| 0.116646837 | 0.247375492 | 0.001978467 | 0.042722248 |
| 0.135593074 | 0.090939114 | 0.085578602 | 0.01561766  |
| 0.021713521 | 0.046058572 | 0.048894953 | 0.011108739 |
| 0.133278097 | 0.069459373 | 0.07105352  | 0.071275822 |
| 0.069353479 | 0.183763873 | 0.010776615 | 0.176907714 |
| 0.192240024 | 0.187369543 | 0.263142534 | 0.101892644 |
| 0.0268115   | 0.096123179 | 0.050531323 | 0.029043743 |
| 0.10509355  | 0.068749709 | 0.007548518 | 0.023103692 |
| 0.355567771 | 0.022752479 | 0.144756956 | 0.160688783 |
| 0.160199339 | 0.307434232 | 0.067037416 | 0.077233855 |
| 0.042248303 | 0.357605811 | 0.033258846 | 0.079479784 |
| 0.027174999 | 0.196468186 | 0.04755918  | 0.103443714 |
| 0.110509423 | 0.013597686 | 0.161562236 | 0.03207346  |
| 0.017957693 | 0.010487899 | 0.00282421  | 0.016177091 |
| 0.345436655 | 0.051437814 | 0.028564227 | 0.028908666 |
| 0.093026963 | 0.18501173  | 0.018065812 | 0.180084579 |
| 0.247039211 | 0.021466205 | 0.061998243 | 0.031682624 |
| 0.140487205 | 0.053119587 | 0.051761891 | 0.024319179 |
| 0.089188159 | 0.004343769 | 0.004741028 | 0.066518196 |
| 0.009198564 | 0.014590032 | 0.068866672 | 0.031095426 |
| 0.025674398 | 0.31420431  | 0.095520541 | 0.001306453 |
| 0.021068562 | 0.021619373 | 0.061416201 | 0.033313793 |
| 0.09173293  | 0.087798672 | 0.014561524 | 0.01878905  |
| 0.208181779 | 0.117336466 | 0.091634269 | 0.084679284 |
| 0.012790313 | 0.101523028 | 0.049975521 | 0.077299945 |
| 0.062574584 | 0.015384461 | 0.001167402 | 0.052597573 |
| 0.061130032 | 0.020398441 | 0.292163454 | 0.041329432 |
| 0.02369101  | 0.026193246 | 0.02985698  | 0.087284183 |
| 0.155942715 | 0.143682463 | 0.086146823 | 0.045142502 |
| 0.078112403 | 0.095962148 | 0.069159912 | 0.107869592 |
| 0.021145985 | 0.017509141 | 0.014889661 | 0.055118538 |
| 0.147373985 | 0.01694872  | 0.162040862 | 0.002740724 |
| 0.00195614  | 0.246375584 | 0.242906655 | 0.062434647 |
| 0.005948171 | 0.025503301 | 0.035171143 | 0.099000156 |
| 0.154568466 | 0.108249616 | 0.146639483 | 0.022131766 |
| 0.120939419 | 0.020553627 | 0.013075408 | 0.024734284 |
| 0.148632174 | 0.053311364 | 0.06719943  | 0.164035672 |
| 1           | 0.006673258 | 0.071995108 | 0.006763983 |
| 0.253213425 | 0.070346555 | 0.338394569 | 0.306849536 |
| 0.065665206 | 0.295932508 | 0.149579808 | 0.029359873 |
| 0.054178885 | 0.19873535  | 0.00921415  | 0.087696375 |
| 0.116547279 | 0.117233747 | 0.119119966 | 0.154588975 |
| 0.084918434 | 0.056996525 | 0.046580662 | 0.058760238 |
| 0.176890565 | 0.232655856 | 0.00637732  | 0.03772808  |
| 0.020339968 | 0.058210116 | 0.032838392 | 0.189264296 |
| 0.036303911 | 0.086665371 | 0.225199779 | 0.022160789 |
| 0.134241548 | 0.001930477 | 0.066011119 | 0.074447427 |
| 0.046274304 | 0.236014279 | 0.0129803   | 0.01075324  |
| 0.143837535 | 0.139093166 | 0.009481293 | 0.115877509 |
| 0.038405449 | 0.250105146 | 0.026551922 | 0.041226769 |
| 0.204309125 | 0.01235357  | 0.050212504 | 0.002133391 |



|             |             |             |             |
|-------------|-------------|-------------|-------------|
| 0.02371031  | 0.144831112 | 0.020967778 | 0.180354141 |
| 0.07145409  | 0.167287688 | 0.129748309 | 0.115735168 |
| 0.131485529 | 0.080061136 | 0.09592269  | 0.006913979 |
| 0.106574623 | 0.000449876 | 0.09407545  | 0.092589304 |
| 0.018240167 | 0.010300638 | 0.036295568 | 0.060740207 |
| 0.017733695 | 0.328719836 | 0.146782296 | 0.023991228 |
| 0.103263459 | 0.179432884 | 0.212048448 | 0.010725269 |
| 0.032912089 | 0.028974257 | 0.012825233 | 0.140753694 |
| 0.067022083 | 0.077337091 | 0.037292851 | 0.28029631  |
| 0.022278672 | 0.169046004 | 0.270086882 | 0.006353079 |
| 0.040963735 | 0.311851767 | 0.20466448  | 0.106313115 |
| 0.117839848 | 0.02965795  | 0.013345001 | 0.025664122 |
| 0.072328383 | 0.262531793 | 0.012850332 | 0.223133703 |
| 0.109559805 | 0.025512042 | 0.08974048  | 0.13797311  |
| 0.097252061 | 0.117672309 | 0.241187612 | 0.050841206 |
| 0.073246096 | 0.00262115  | 0.045299989 | 0.118881157 |
| 0.019796917 | 0.016590463 | 0.137898713 | 0.073837859 |
| 0.062354837 | 0.189976525 | 0.006242944 | 0.007037981 |
| 0.053304496 | 0.02943429  | 0.013162578 | 0.152079872 |
| 0.025845161 | 0.0175024   | 0.067684562 | 0.120942268 |
| 0.039291967 | 0.163975069 | 0.270875343 | 0.252598581 |
| 0.02134771  | 0.015787356 | 0.21932672  | 0.188661123 |
| 0.06234448  | 0.067157926 | 0.169867986 | 0.054365344 |
| 0.162484667 | 0.035973277 | 0.070380145 | 0.101560586 |
| 0.145604833 | 0.112547451 | 0.185409092 | 0.060786547 |
| 0.205992771 | 0.038123016 | 0.014424527 | 0.041204789 |
| 0.096771318 | 0.267555591 | 0.120467336 | 0.007545525 |
| 0.203710884 | 0.079653347 | 0.133314892 | 0.205642039 |
| 0.013026149 | 0.139482725 | 0.058885277 | 0.187697054 |
| 0.029780233 | 0.00722986  | 0.2472801   | 0.110119668 |
| 0.093323323 | 0.002787577 | 0.150922218 | 0.07163204  |
| 0.102769432 | 0.029053692 | 0.030541334 | 0.131258051 |
| 0.207001662 | 0.205357637 | 0.069229767 | 0.058112216 |
| 0.05220953  | 0.021680512 | 0.075254583 | 0.099893208 |
| 0.084934419 | 0.025606517 | 0.12653256  | 0.081933155 |
| 0.253183168 | 0.014975292 | 0.012367887 | 0.026158356 |
| 0.129811744 | 0.037080868 | 0.078357887 | 0.248009204 |
| 0.165198984 | 0.177437088 | 0.095728019 | 0.080542335 |
| 0.02576896  | 0.21546482  | 0.266132128 | 0.073481438 |
| 0.005862002 | 0.170655718 | 0.030804223 | 0.050088449 |
| 0.003655967 | 0.002044852 | 0.08219174  | 0.061927895 |
| 0.133233783 | 0.071550769 | 0.123146973 | 0.083832195 |
| 0.000118602 | 0.023087232 | 0.03024326  | 0.019021173 |
| 0.092308965 | 0.105146573 | 0.078408622 | 0.116463185 |
| 0.120541334 | 0.276609689 | 0.08281585  | 0.031822424 |
| 0.00374519  | 0.049161953 | 0.145647653 | 0.122596356 |
| 0.05649812  | 0.280932063 | 0.006439119 | 0.079007753 |
| 0.010315613 | 0.131345824 | 0.08614518  | 0.031093555 |
| 0.003374116 | 0.083054267 | 0.069895165 | 0.235115614 |
| 0.01421517  | 0.077578376 | 0.090676021 | 0.02213587  |
| 0.030251205 | 0.155217368 | 0.051654753 | 0.042791057 |
| 0.056389122 | 0.061136101 | 0.043909355 | 0.021909092 |
| 0.063701376 | 0.087761732 | 0.045610387 | 0.07979173  |
| 0.056009972 | 0.106849984 | 0.026223475 | 0.050567972 |

|             |             |             |             |
|-------------|-------------|-------------|-------------|
| 0.020014711 | 0.142137604 | 0.356620769 | 0.397050274 |
| 0.125862327 | 0.080999753 | 0.201874757 | 0.286146032 |
| 0.085537681 | 0.042995062 | 0.124672386 | 0.116900176 |
| 0.093979279 | 0.316594723 | 0.042304972 | 0.078041929 |
| 0.009336053 | 0.034581706 | 0.260217325 | 0.040641872 |
| 0.094179134 | 0.012945204 | 0.0334861   | 0.084705327 |
| 0.055337244 | 0.166026466 | 0.193421505 | 0.112075521 |
| 0.027798597 | 0.035052842 | 0.023767814 | 0.076531125 |
| 0.119314749 | 0.237101045 | 0.015623862 | 0.075969171 |
| 0.058590159 | 0.076885216 | 0.055495836 | 0.13583526  |
| 0.006580553 | 0.119632862 | 0.026110697 | 0.171684081 |
| 0.020005225 | 0.302743551 | 0.206168877 | 0.046369358 |
| 0.002569265 | 0.104324004 | 0.024980051 | 0.0536798   |
| 0.037775498 | 0.041885241 | 0.023927867 | 0.099180356 |
| 0.086067051 | 0.158003509 | 0.165235745 | 0.197315294 |
| 0.021785096 | 0.011906629 | 0.05328846  | 0.02940528  |
| 0.047837649 | 0.086742137 | 0.246824105 | 0.082807076 |
| 0.021000635 | 0.272214464 | 0.152027882 | 0.073326191 |
| 0.064944491 | 0.051737291 | 0.002284641 | 0.037526949 |
| 0.074721005 | 0.008468049 | 0.00057409  | 0.005413818 |
| 0.063378987 | 0.037405502 | 0.068341138 | 0.065937356 |
| 0.015924755 | 0.075924287 | 0.003269352 | 0.087968406 |
| 0.141732458 | 0.174351929 | 0.038210854 | 0.14473053  |
| 0.089220066 | 0.141887317 | 0.053389192 | 0.011681685 |
| 0.022021819 | 0.016214208 | 0.018686462 | 0.211785221 |
| 0.226455124 | 0.002776727 | 0.029609892 | 0.265410732 |
| 0.064112615 | 0.00238719  | 0.055399328 | 0.037420677 |
| 0.209360161 | 0.178556347 | 0.068205854 | 0.038371356 |
| 0.221835974 | 0.109326695 | 0.015243785 | 0.026722909 |
| 0.019141237 | 0.009795921 | 0.049965143 | 0.006401444 |
| 0.193514957 | 0.026207519 | 0.0237254   | 0.19851474  |
| 0.177834591 | 0.011500018 | 0.23178516  | 0.018960016 |
| 0.074500652 | 0.104565724 | 0.028596406 | 0.0179455   |
| 0.081478224 | 0.014613397 | 0.108617428 | 0.090304741 |
| 0.003690357 | 0.039189894 | 0.105876208 | 0.017559876 |
| 0.223090851 | 0.01956676  | 0.174089765 | 0.008931505 |
| 0.11295461  | 0.094510134 | 0.235137998 | 0.028177292 |
| 0.044712717 | 0.274010544 | 0.026506249 | 0.112932525 |
| 0.068139424 | 0.007071321 | 0.043809684 | 0.062142343 |
| 0.009944479 | 0.122552575 | 0.025663744 | 0.120418713 |
| 0.062847066 | 0.102426587 | 0.047203178 | 0.100967715 |
| 0.09115594  | 0.010659918 | 0.00688031  | 0.026148114 |
| 0.130610392 | 0.094624226 | 0.0141981   | 0.089698655 |
| 0.004809944 | 0.069386916 | 0.058882019 | 0.027754497 |
| 0.102358055 | 0.110271562 | 0.027269141 | 0.176859353 |
| 0.055529189 | 0.023524556 | 0.020118257 | 0.133022075 |
| 0.046531304 | 0.062776296 | 0.133574371 | 0.000269402 |
| 0.06409491  | 0.027954419 | 0.087910623 | 0.020060927 |
| 0.226458544 | 0.061913421 | 0.066734733 | 0.076132144 |
| 0.058418244 | 0.005226677 | 0.034674149 | 0.01897201  |
| 0.011643005 | 0.246763491 | 0.126001729 | 0.078213066 |
| 0.089777543 | 0.019632145 | 0.007883311 | 0.11516331  |
| 0.003104739 | 0.007737998 | 0.012481145 | 0.049605219 |
| 0.004950779 | 0.01965382  | 0.01739685  | 0.00922787  |

|             |             |             |             |
|-------------|-------------|-------------|-------------|
| 0.072607758 | 0.085670755 |             |             |
| GYG         | 0.017271346 | 0.200475266 | 0.01013052  |
| 0.046835238 | 0.30562505  | 0.122482376 | 0.011121586 |
| 0.027844424 | 0.146160384 | 0.049916016 | 0.230030748 |
| 0.004085529 | 0.160371202 | 0.279781216 | 0.012081548 |
| 0.281618524 | 0.011478624 | 0.038471489 | 0.01913635  |
| 0.044375381 | 0.272273626 | 0.152523385 | 0.11304387  |
| 0.231963663 | 0.07503171  | 0.114224851 | 0.221280207 |
| 0.280857258 | 0.119598427 | 0.289852965 | 0.035772579 |
| 0.228370047 | 0.334630727 | 0.217280513 | 0.002404505 |
| 0.191441804 | 0.016541898 | 0.20456826  | 0.130462536 |
| 0.161286616 | 0.183021761 | 0.074718825 | 0.124876469 |
| 0.101806922 | 0.006092214 | 0.043316493 | 0.255593412 |
| 0.118143851 | 0.082444345 | 0.012383978 | 0.230408666 |
| 0.090863164 | 0.169965133 | 0.153641154 | 0.001070611 |
| 0.25169911  | 0.129259124 | 0.167264855 | 0.260187818 |
| 0.116678209 | 0.06366093  | 0.079142544 | 0.071910732 |
| 0.199271609 | 0.241901005 | 0.154298437 | 0.080831066 |
| 0.28358246  | 0.165273889 | 0.267535673 | 0.057233987 |
| 0.114676632 | 0.003800555 | 0.078299012 | 0.017514394 |
| 0.129403911 | 0.131453041 | 0.263645033 | 0.205757015 |
| 0.187559926 | 0.26722547  | 0.113355507 | 0.228305575 |
| 0.083760044 | 0.305560352 | 0.153656299 | 0.227609142 |
| 0.20300601  | 0.013712133 | 0.284436906 | 0.290428286 |
| 0.007768815 | 0.127069809 | 0.206731759 | 0.035852296 |
| 0.225104487 | 0.117367054 | 0.124200744 | 0.201017244 |
| 0.335306706 | 0.259344272 | 0.22410823  | 0.175405981 |
| 0.22347778  | 0.016614353 | 0.207307763 | 0.340629563 |
| 0.18667341  | 0.021730432 | 0.115033831 | 0.324406167 |
| 0.232682138 | 0.293467381 | 0.21801184  | 0.215517608 |
| 0.261779369 | 0.290267973 | 0.236833575 | 0.232006281 |
| 0.035675592 | 0.277833729 | 0.076242812 | 0.015349417 |
| 0.011441248 | 0.034232992 | 0.08933175  | 0.189966517 |
| 0.313069508 | 0.177682797 | 0.063169454 | 0.158250829 |
| 0.345676817 | 0.206814071 | 0.268874284 | 0.248507975 |
| 0.009106    | 0.127647796 | 0.246379428 | 0.067254832 |
| 0.228605971 | 0.041170905 | 0.279730916 | 0.239539456 |
| 0.229904361 | 0.32004249  | 0.032088822 | 0.233590123 |
| 0.058845423 | 0.311494346 | 0.230934373 | 0.084291229 |
| 0.265373162 | 0.233226871 | 0.334417318 | 0.375105076 |
| 0.247047419 | 0.1297584   | 0.017972396 | 0.207997738 |
| 0.324307506 | 0.031950422 | 0.304840597 | 0.322344168 |
| 0.250357647 | 0.327714134 | 0.336101009 | 0.320967725 |
| 0.25387369  | 0.021297582 | 0.012777512 | 0.245601823 |
| 0.250577997 | 0.247711531 | 0.055330755 | 0.213306813 |
| 0.28861814  | 0.125539833 | 0.274476406 | 0.114223884 |
| 0.306946793 | 0.287138315 | 0.29233618  | 0.210266369 |
| 0.088373407 | 0.16403601  | 0.261787329 | 0.202396067 |
| 0.012226352 | 0.027624799 | 0.012425693 | 0.174441647 |
| 0.05575685  | 0.114750063 | 0.099908681 | 0.216735555 |
| 0.122971235 | 0.08705713  | 0.199913962 | 0.359804704 |
| 0.012557406 | 0.204853844 | 0.055567146 | 0.048893308 |
| 0.013975476 | 0.055993476 | 0.063196557 | 0.059209835 |
| 0.194399067 | 0.078555425 | 0.265516911 | 0.307282395 |

|             |             |             |             |
|-------------|-------------|-------------|-------------|
| 0.144856064 | 0.068466691 | 0.234182932 | 0.307665515 |
| 0.298342257 | 0.285392492 | 0.116461098 | 0.008140015 |
| 0.095752706 | 0.084198545 | 0.162577825 | 0.238556852 |
| 0.061240648 | 0.071050482 | 0.230092535 | 0.37718039  |
| 0.089503154 | 0.029801815 | 0.142943161 | 0.220936921 |
| 0.046606561 | 0.182726032 | 0.320921709 | 0.154342294 |
| 0.000360824 | 0.140780898 | 0.298243269 | 0.099041676 |
| 0.141578164 | 0.149191552 | 0.185230414 | 0.298981343 |
| 0.136294147 | 0.163824543 | 0.320111417 | 0.362312417 |
| 0.101482161 | 0.071018179 | 0.325985808 | 0.047344242 |
| 0.208163851 | 0.065418121 | 0.234227534 | 0.080042505 |
| 0.119358912 | 0.201773953 | 0.321131107 | 0.181861067 |
| 0.039380003 | 0.276628121 | 0.232563401 | 0.311942619 |
| 0.121533893 | 0.318804105 | 0.327182832 | 0.297724832 |
| 0.199206366 | 0.164676772 | 0.168830648 | 0.283770099 |
| 0.299736009 | 0.073023762 | 0.017977314 | 0.279561935 |
| 0.109967858 | 0.312116134 | 0.090455885 | 0.31615848  |
| 0.267357955 | 0.201026407 | 0.068166266 | 0.324298248 |
| 0.257886414 | 0.105294066 | 0.270381158 | 0.322893538 |
| 0.050857484 | 0.214719635 | 0.16180806  | 0.346242672 |
| 0.078274808 | 0.124684163 | 0.164518059 | 0.166981568 |
| 0.025252496 | 0.019184411 | 0.017248685 | 0.11779335  |
| 0.194908349 | 0.205572313 | 0.261439973 | 0.296489567 |
| 0.050997118 | 0.250285943 | 0.106676234 | 0.11999819  |
| 0.210474937 | 0.190273349 | 0.302978776 | 0.297013269 |
| 0.124521276 | 0.009500407 | 0.051124563 | 0.262443761 |
| 0.006673258 | 1           | 0.104625787 | 0.002208176 |
| 0.007450082 | 0.185418414 | 0.027812506 | 0.079815456 |
| 0.357183929 | 0.075754914 | 0.080017491 | 0.053335621 |
| 0.275671957 | 0.033800752 | 0.00612483  | 0.27722988  |
| 0.252827155 | 0.236544056 | 0.243943805 | 0.208031276 |
| 0.254145264 | 0.237245188 | 0.303102007 | 0.116445922 |
| 0.023847934 | 0.014921877 | 0.142938178 | 0.160753674 |
| 0.001809447 | 0.300562758 | 0.20269131  | 0.067441079 |
| 0.314451872 | 0.159724991 | 0.008395247 | 0.281420478 |
| 0.004867086 | 0.171215219 | 0.056666237 | 0.101091147 |
| 0.306721758 | 0.002067108 | 0.063992601 | 0.11371004  |
| 0.200916185 | 0.175216367 | 0.171923592 | 0.28780451  |
| 0.213259736 | 0.031429816 | 0.193605405 | 0.331406568 |
| 0.017014526 | 0.026017944 | 0.085322462 | 0.008948214 |
| 0.065047941 | 0.224507173 | 0.129792849 | 0.011567385 |
| 0.147349452 | 0.000815693 | 0.183663361 | 0.297401224 |
| 0.210071316 | 0.331585374 | 0.296998221 | 0.270346251 |
| 0.280670527 | 0.115881922 | 0.304043129 | 0.202164944 |
| 0.095887875 | 0.000493603 | 0.003138503 | 0.323409715 |
| 0.25154846  | 0.011967784 | 0.073477652 | 0.08087648  |
| 0.041573935 | 0.028227176 | 0.018140084 | 0.161741634 |
| 0.232753222 | 0.237644159 | 0.158618896 | 0.214898791 |
| 0.115962838 | 0.140309362 | 0.098089641 | 0.024805933 |
| 0.276500872 | 0.014354108 | 0.023742087 | 0.009316402 |
| 0.304907701 | 0.032656855 | 0.19514503  | 0.274490721 |
| 0.295449257 | 0.329422186 | 0.076398932 | 0.09823859  |
| 0.280761254 | 0.022924695 | 0.10755694  | 0.026361482 |
| 0.23924063  | 0.272893635 | 0.222807998 | 0.163677104 |

|             |             |             |             |
|-------------|-------------|-------------|-------------|
| 0.315636196 | 0.257962642 | 0.008174654 | 0.279272281 |
| 0.005522499 | 0.004077508 | 0.11023326  | 0.139763218 |
| 0.027874672 | 0.197604749 | 0.142573942 | 0.053168108 |
| 0.075690342 | 0.006843782 | 0.206740156 | 0.212978736 |
| 0.194033216 | 0.195824574 | 0.295145542 | 0.108782246 |
| 0.158237282 | 0.094498298 | 0.09467786  | 0.051358892 |
| 0.063454192 | 0.13546404  | 0.076378644 | 0.003591954 |
| 0.166528064 | 0.247270732 | 0.017917366 | 0.06616686  |
| 0.307244124 | 0.321565789 | 0.011242292 | 0.008356309 |
| 0.134492616 | 0.144375601 | 0.346036871 | 0.257276326 |
| 0.261988049 | 0.315930663 | 0.199768177 | 0.066808247 |
| 0.017608482 | 0.21511893  | 0.298388863 | 0.076133568 |
| 0.297121975 | 0.013212003 | 0.247448179 | 0.302595218 |
| 0.044792377 | 0.06852107  | 0.0152766   | 0.031152138 |
| 0.322540746 | 0.092724764 | 0.138183172 | 0.044047065 |
| 0.157773796 | 0.178606476 | 0.011085227 | 0.100687963 |
| 0.191609748 | 0.143869681 | 0.072241455 | 0.078971967 |
| 0.172687002 | 0.030987294 | 0.304571835 | 0.269332274 |
| 0.048277262 | 0.029711051 | 0.043381851 | 0.247256388 |
| 0.270471926 | 0.158711656 | 0.012678075 | 0.207906377 |
| 0.316185026 | 0.272591111 | 0.251293155 | 0.294198848 |
| 0.02589932  | 0.266492236 | 0.174196032 | 0.223076712 |
| 0.087526437 | 0.129914983 | 0.119934732 | 0.019797257 |
| 0.164063375 | 0.235252431 | 0.214205855 | 0.097143147 |
| 0.205451564 | 0.029399695 | 0.010036996 | 0.268056866 |
| 0.151437236 | 0.01965914  | 0.085953037 | 0.292165998 |
| 0.004345933 | 0.188276746 | 0.316899044 | 0.092757942 |
| 0.283959676 | 0.32001898  | 0.255271186 | 0.055645419 |
| 0.004331882 | 0.296949476 | 0.263757796 | 0.163523196 |
| 0.217905528 | 0.184940998 | 0.037346549 | 0.029661005 |
| 0.194079268 | 0.020303303 | 0.049602624 | 0.075162909 |
| 0.089968983 | 0.1746472   | 0.117389709 | 0.077257398 |
| 0.123721834 | 0.019671829 | 0.178758728 | 0.101199378 |
| 0.095481532 | 0.152709852 | 0.244927747 | 0.042257071 |
| 0.129652738 | 0.27646623  | 0.21610517  | 0.004990872 |
| 0.280374071 | 0.253571761 | 0.274252771 | 0.00070308  |
| 0.319837074 | 0.002343531 | 0.146985825 | 0.156876246 |
| 0.121735815 | 0.115129468 | 0.230330891 | 0.157788797 |
| 0.15603348  | 0.09275774  | 0.137578812 | 0.160704661 |
| 0.088055062 | 0.085976759 | 0.257051537 | 0.109384197 |
| 0.175794512 | 0.039645816 | 0.029500411 | 0.027875624 |
| 0.022336742 | 0.265522895 | 0.124579881 | 0.018825607 |
| 0.147197788 | 0.106526    | 0.233424206 | 0.235502667 |
| 0.296151084 | 0.029027006 | 0.135396742 | 0.239405321 |
| 0.057668858 | 0.068809673 | 0.008551671 | 0.153910296 |
| 0.11841605  | 0.155397745 | 0.141301375 | 0.101457779 |
| 0.190212083 | 0.216323399 | 0.122305495 | 0.25883852  |
| 0.1749613   | 0.132440987 | 0.057066462 | 0.045962517 |
| 0.06081639  | 0.045707063 | 0.287045183 | 0.000389095 |
| 0.209792373 | 0.046682991 | 0.310656322 | 0.234759555 |
| 0.197804944 | 0.241389232 | 0.051185395 | 0.019317387 |
| 0.039712716 | 0.054460064 | 0.061065544 | 0.25528287  |
| 0.186221402 | 0.064707119 | 0.257765613 | 0.05268232  |
| 0.302981844 | 0.239054174 | 0.129716559 | 0.079119112 |

|             |             |             |             |
|-------------|-------------|-------------|-------------|
| 0.115323195 | 0.067736952 | 0.221299655 | 0.025306404 |
| 0.201850018 | 0.158539868 | 0.11185755  | 0.184038402 |
| 0.143397421 | 0.303861023 | 0.016889456 | 0.315121166 |
| 0.177515677 | 0.044927594 | 0.276397784 | 0.114064276 |
| 0.062663688 | 0.075742759 | 0.196187983 | 0.087645272 |
| 0.063894719 | 0.195970083 | 0.005010636 | 0.054298943 |
| 0.257393256 | 0.079408955 | 0.186103671 | 0.222333015 |
| 0.190436608 | 0.26306659  | 0.167661495 | 0.08642329  |
| 0.209968151 | 0.221457035 | 0.082146303 | 0.145075861 |
| 0.196303582 | 0.03892231  | 0.158418482 | 0.006759426 |
| 0.245837456 | 0.247992274 | 0.07731473  | 0.014289555 |
| 0.003915946 | 0.180931139 | 0.199615356 | 0.013133049 |
| 0.344864859 | 0.183675314 | 0.133206559 | 0.279069045 |
| 0.067539109 | 0.222677949 | 0.069362931 | 0.320301695 |
| 0.004874541 | 0.132836814 | 0.225221299 | 0.150123323 |
| 0.13309215  | 0.239604797 | 0.294010443 | 0.257241889 |
| 0.009429207 | 0.120218068 | 0.000144096 | 0.195655003 |
| 0.196179281 | 0.224301236 | 0.091097554 | 0.053360293 |
| 0.216887466 | 0.218352024 | 0.099536869 | 0.188290867 |
| 0.00626779  | 0.319511651 | 0.11228568  | 0.233558796 |
| 0.101698881 | 0.14808163  | 0.0257504   | 0.224894176 |
| 0.184843222 | 0.099837673 | 0.13212589  | 0.090183208 |
| 0.243265563 | 0.193620896 | 0.047639019 | 0.119654837 |
| 0.162652481 | 0.01754574  | 0.094227195 | 0.299853308 |
| 0.114974331 | 0.248406819 | 0.359964128 | 0.087385518 |
| 0.245968974 | 0.19741952  | 0.185841497 | 0.278188017 |
| 0.052142124 | 0.154573999 | 0.309479787 | 0.248533885 |
| 0.235270535 | 0.16605865  | 0.193264384 | 0.156105329 |
| 0.209912706 | 0.032553116 | 0.132049329 | 0.19086333  |
| 0.191315615 | 0.211416833 | 0.103168895 | 0.166394915 |
| 0.017577376 | 0.047365003 | 0.113229597 | 0.057636134 |
| 0.183373005 | 0.2213038   | 0.131827679 | 0.241611605 |
| 0.08233001  | 0.015278388 | 0.269844086 | 0.039919796 |
| 0.121323382 | 0.307551658 | 0.133458709 | 0.223077215 |
| 0.079797422 | 0.156412183 | 0.094810718 | 0.000105275 |
| 0.292288406 | 0.052000899 | 0.13575959  | 0.133442666 |
| 0.132861283 | 0.008973462 | 0.241565872 | 0.343537001 |
| 0.151045036 | 0.095136064 | 0.125454834 | 0.243564915 |
| 0.16095011  | 0.138903558 | 0.137629432 | 0.174689791 |
| 0.225979692 | 0.110076994 | 0.153338321 | 0.193064269 |
| 0.205859703 | 0.086326279 |             |             |
| GZMB        | 0.079008881 | 0.371761966 | 0.054888179 |
| 0.067458358 | 0.163258001 | 0.159315212 | 0.08484307  |
| 0.13161816  | 0.324618887 | 0.131640961 | 0.174959911 |
| 0.031976657 | 0.054813347 | 0.396411197 | 0.089666254 |
| 0.211614179 | 0.057662928 | 0.109388767 | 0.079565123 |
| 0.13824937  | 0.153743007 | 0.1436611   | 0.193045996 |
| 0.154804866 | 0.228762562 | 0.219468807 | 0.189436759 |
| 0.410296175 | 0.09544455  | 0.250075626 | 0.061989313 |
| 0.38660011  | 0.181689201 | 0.146634467 | 0.026482472 |
| 0.201928995 | 0.021885647 | 0.419584511 | 0.133375359 |
| 0.054813474 | 0.35288119  | 0.133876551 | 0.123761243 |
| 0.146285118 | 0.044894865 | 0.08472857  | 0.261587451 |
| 0.216657182 | 0.170904507 | 0.077326914 | 0.269389588 |

|             |             |             |             |
|-------------|-------------|-------------|-------------|
| 0.172873158 | 0.265835307 | 0.272950458 | 0.006588941 |
| 0.118643406 | 0.036516895 | 0.095724984 | 0.43750515  |
| 0.185692636 | 0.115575052 | 0.117348134 | 0.199015948 |
| 0.254168262 | 0.282349982 | 0.244515691 | 0.155896869 |
| 0.420725438 | 0.093775139 | 0.286623398 | 0.083176151 |
| 0.180107764 | 0.059142792 | 0.1805747   | 0.121944045 |
| 0.169277514 | 0.14555704  | 0.181251677 | 0.12929886  |
| 0.355597056 | 0.487956838 | 0.207542767 | 0.443411613 |
| 0.0965126   | 0.182073143 | 0.137062922 | 0.257571753 |
| 0.309765227 | 0.117090203 | 0.272571088 | 0.453985789 |
| 0.086357113 | 0.209761884 | 0.297090177 | 0.162595149 |
| 0.359965791 | 0.147076959 | 0.165604296 | 0.083319145 |
| 0.231555382 | 0.175008314 | 0.466464038 | 0.230999389 |
| 0.1702101   | 0.092117783 | 0.448421857 | 0.166938687 |
| 0.130385712 | 0.078093708 | 0.119589333 | 0.356608907 |
| 0.233420113 | 0.406331032 | 0.355221971 | 0.320056948 |
| 0.18095827  | 0.411874097 | 0.249913043 | 0.389428222 |
| 0.067646628 | 0.454293807 | 0.123409991 | 0.066355523 |
| 0.080306365 | 0.109879866 | 0.167994241 | 0.311261488 |
| 0.372263904 | 0.265278761 | 0.133709814 | 0.134281448 |
| 0.373048888 | 0.431537398 | 0.454957787 | 0.34795265  |
| 0.056258394 | 0.129811858 | 0.164589141 | 0.177278205 |
| 0.28523396  | 0.146287095 | 0.113217357 | 0.463208312 |
| 0.332710498 | 0.334140074 | 0.124553884 | 0.479687399 |
| 0.18495047  | 0.444286291 | 0.357631287 | 0.111511829 |
| 0.453195232 | 0.441293907 | 0.428081067 | 0.245497354 |
| 0.428352786 | 0.145786544 | 0.091511398 | 0.345031246 |
| 0.432136237 | 0.008332946 | 0.3892358   | 0.407247893 |
| 0.421159908 | 0.341293766 | 0.450424675 | 0.422383838 |
| 0.436585422 | 0.099658713 | 0.02273813  | 0.214445544 |
| 0.439465688 | 0.31638771  | 0.15061471  | 0.180179587 |
| 0.223609685 | 0.171664481 | 0.336324308 | 0.116624413 |
| 0.477082441 | 0.359073095 | 0.404689058 | 0.327819552 |
| 0.194998266 | 0.335512552 | 0.175388143 | 0.425634745 |
| 0.059764093 | 0.093091751 | 0.075920671 | 0.30386768  |
| 0.128470537 | 0.144032463 | 0.171876522 | 0.230734648 |
| 0.174547216 | 0.184549999 | 0.134470802 | 0.245167403 |
| 0.10498444  | 0.208102802 | 0.117692779 | 0.132090725 |
| 0.05377202  | 0.209799509 | 0.115255116 | 0.104849407 |
| 0.15667903  | 0.298242731 | 0.290847071 | 0.407321148 |
| 0.183701736 | 0.1759225   | 0.29066847  | 0.421952093 |
| 0.395521466 | 0.166559274 | 0.265114719 | 0.008480872 |
| 0.120646306 | 0.139815542 | 0.088897313 | 0.198174595 |
| 0.249978751 | 0.156181462 | 0.228773609 | 0.268729313 |
| 0.156398325 | 0.147695231 | 0.160649387 | 0.423481123 |
| 0.18571576  | 0.137665845 | 0.358964874 | 0.215710934 |
| 0.007599826 | 0.156342773 | 0.332690797 | 0.112759897 |
| 0.269731159 | 0.080336558 | 0.093549175 | 0.366838636 |
| 0.147586275 | 0.143845209 | 0.409526143 | 0.278949452 |
| 0.172757083 | 0.292616982 | 0.45930086  | 0.039046303 |
| 0.188828899 | 0.031141453 | 0.221452433 | 0.147224668 |
| 0.176901583 | 0.274850948 | 0.17310297  | 0.126456132 |
| 0.128043361 | 0.458638794 | 0.342942938 | 0.426201368 |
| 0.144912184 | 0.45609817  | 0.353359277 | 0.363883148 |

|             |             |             |             |
|-------------|-------------|-------------|-------------|
| 0.253792034 | 0.162938112 | 0.066006087 | 0.313427418 |
| 0.351839178 | 0.140407568 | 0.108792117 | 0.337496581 |
| 0.156149499 | 0.262921709 | 0.089265646 | 0.409770419 |
| 0.457943244 | 0.410548018 | 0.133513337 | 0.296263522 |
| 0.298934198 | 0.146113266 | 0.34629823  | 0.47816692  |
| 0.136627157 | 0.168208198 | 0.132648297 | 0.324788058 |
| 0.149380251 | 0.131925098 | 0.346515739 | 0.091190132 |
| 0.003441002 | 0.101057748 | 0.074278241 | 0.118846403 |
| 0.083706079 | 0.241756207 | 0.254866816 | 0.440220735 |
| 0.111693574 | 0.382019175 | 0.266963335 | 0.124304861 |
| 0.367635046 | 0.185461697 | 0.18081579  | 0.234185316 |
| 0.251824623 | 0.015759809 | 0.076428724 | 0.477939415 |
| 0.071995108 | 0.104625787 | 1           | 0.002058809 |
| 0.062650427 | 0.328237751 | 0.151307354 | 0.249073504 |
| 0.40983452  | 0.236029878 | 0.173745406 | 0.137812214 |
| 0.264260321 | 0.098055582 | 0.003782458 | 0.413165414 |
| 0.4490126   | 0.432974211 | 0.447210817 | 0.443168215 |
| 0.396146526 | 0.331545649 | 0.311603065 | 0.178946413 |
| 0.101063588 | 0.092501    | 0.094032345 | 0.144886183 |
| 0.010927502 | 0.297648005 | 0.186028826 | 0.156847893 |
| 0.314512183 | 0.268246408 | 0.055810603 | 0.227573676 |
| 0.018724978 | 0.071409838 | 0.196650674 | 0.173749471 |
| 0.293138111 | 0.026523865 | 0.074578163 | 0.127885934 |
| 0.378245297 | 0.324074504 | 0.137402358 | 0.451908315 |
| 0.173544715 | 0.152627507 | 0.130750297 | 0.296477589 |
| 0.084330946 | 0.058470087 | 0.190219077 | 0.010111952 |
| 0.121078848 | 0.450967194 | 0.172638272 | 0.055045336 |
| 0.173371567 | 0.0096944   | 0.320343795 | 0.466112285 |
| 0.402336058 | 0.428325713 | 0.418714215 | 0.107322367 |
| 0.420047362 | 0.052019962 | 0.445169242 | 0.335562472 |
| 0.145529729 | 0.000700764 | 0.015054015 | 0.378872016 |
| 0.179861288 | 0.09976816  | 0.144780287 | 0.130642986 |
| 0.085982564 | 0.121096928 | 0.095734508 | 0.089376272 |
| 0.23471073  | 0.140162897 | 0.117384765 | 0.426099871 |
| 0.138384343 | 0.185665229 | 0.185602788 | 0.134158697 |
| 0.217937109 | 0.060678909 | 0.134565649 | 0.007123857 |
| 0.282881742 | 0.158115714 | 0.446584946 | 0.436204036 |
| 0.435025363 | 0.248391397 | 0.128946361 | 0.178452905 |
| 0.393499423 | 0.123842719 | 0.143915246 | 0.126535599 |
| 0.403644789 | 0.220955529 | 0.267129299 | 0.269444237 |
| 0.431962849 | 0.401999385 | 0.056331449 | 0.297303511 |
| 0.012561866 | 0.004209017 | 0.149154492 | 0.274634596 |
| 0.086210279 | 0.158613703 | 0.236168466 | 0.180858849 |
| 0.183543002 | 0.038284571 | 0.114934728 | 0.109404409 |
| 0.19447838  | 0.177566991 | 0.131990614 | 0.278275899 |
| 0.141185106 | 0.085326153 | 0.141873385 | 0.159870161 |
| 0.196042056 | 0.290999297 | 0.225346318 | 0.044090147 |
| 0.171641017 | 0.17578994  | 0.069516577 | 0.171814847 |
| 0.337320817 | 0.391668543 | 0.061288115 | 0.012320659 |
| 0.267895466 | 0.185893128 | 0.417124175 | 0.419202794 |
| 0.467495548 | 0.456335899 | 0.39672064  | 0.12094416  |
| 0.08037197  | 0.19771768  | 0.149992415 | 0.082567973 |
| 0.43998732  | 0.094474093 | 0.428345559 | 0.128480258 |
| 0.142692432 | 0.116645025 | 0.045506414 | 0.099820786 |



|             |             |             |             |
|-------------|-------------|-------------|-------------|
| 0.195973518 | 0.184848336 | 0.121916996 | 0.127757898 |
| 0.152113424 | 0.106068893 | 0.073472659 | 0.154261881 |
| 0.291779107 | 0.063603935 | 0.152797232 | 0.185829821 |
| 0.300361438 | 0.128084504 | 0.282551594 | 0.416085267 |
| 0.147459293 | 0.11614489  | 0.117029969 | 0.328274336 |
| 0.331979461 | 0.200601722 | 0.023323706 | 0.3799076   |
| 0.428982877 | 0.250884974 | 0.432468637 | 0.366147864 |
| 0.121068795 | 0.157178485 | 0.158638811 | 0.188911899 |
| 0.183836547 | 0.161773239 | 0.181830145 | 0.088010096 |
| 0.343393034 | 0.479296817 | 0.340263533 | 0.115915838 |
| 0.222996636 | 0.148319605 | 0.082222937 | 0.39100813  |
| 0.081024881 | 0.079251739 | 0.151355871 | 0.359835324 |
| 0.00115289  | 0.068009689 | 0.430001616 | 0.156667858 |
| 0.475319743 | 0.386520271 | 0.386805289 | 0.17851101  |
| 0.001338975 | 0.249157052 | 0.206150309 | 0.141213961 |
| 0.363285465 | 0.302268347 | 0.167228614 | 0.075560172 |
| 0.278735169 | 0.109231625 | 0.108398666 | 0.148822404 |
| 0.071245503 | 0.263203438 | 0.216432306 | 0.190595455 |
| 0.133398076 | 0.145113442 | 0.106607257 | 0.13698698  |
| 0.10478841  | 0.236177285 | 0.301429658 | 0.143399127 |
| 0.075579703 | 0.40321102  | 0.307410643 | 0.040328034 |
| 0.175698748 | 0.361426044 | 0.393528419 | 0.002687239 |
| 0.270849255 | 0.016840259 | 0.139052968 | 0.117775001 |
| 0.128246971 | 0.16292688  | 0.194848712 | 0.129323789 |
| 0.243446038 | 0.144184287 | 0.130359079 | 0.183067074 |
| 0.107954783 | 0.158188229 | 0.214916208 | 0.160481458 |
| 0.121765423 | 0.100454169 | 0.159271887 | 0.166908577 |
| 0.059610031 | 0.399153739 | 0.270366776 | 0.103376661 |
| 0.204110154 | 0.178964114 | 0.334579384 | 0.419081077 |
| 0.385624726 | 0.157968282 | 0.197649809 | 0.347370039 |
| 0.110120901 | 0.152876375 | 0.084204686 | 0.183852989 |
| 0.173776263 | 0.107832999 | 0.191246385 | 0.192100278 |
| 0.303906259 | 0.386221225 | 0.264657213 | 0.397808385 |
| 0.151857623 | 0.186724763 | 0.117495477 | 0.072167875 |
| 0.109521314 | 0.169386948 | 0.131765404 | 0.003206152 |
| 0.256385275 | 0.119621716 | 0.358657884 | 0.417511424 |
| 0.129409424 | 0.364567775 | 0.122417919 | 0.077696975 |
| 0.097481859 | 0.211912481 | 0.167580087 | 0.310696624 |
| 0.087462013 | 0.132211349 | 0.157508522 | 0.141746682 |
| 0.294764622 | 0.296410631 | 0.154756833 | 0.197452117 |
| 0.189021757 | 0.173052878 | 0.454377556 | 0.105710603 |
| 0.209577178 | 0.085311033 | 0.229891002 | 0.138806127 |
| 0.142816279 | 0.429984552 | 0.077914437 | 0.435991703 |
| 0.153630365 | 0.182463899 | 0.46567054  | 0.200168237 |
| 0.158759107 | 0.100259669 | 0.079268574 | 0.174008184 |
| 0.175515724 | 0.138804445 | 0.013588709 | 0.046504266 |
| 0.257576398 | 0.186727809 | 0.317182075 | 0.313277695 |
| 0.127014248 | 0.311091318 | 0.08796133  | 0.183443134 |
| 0.421294012 | 0.461201779 | 0.121431664 | 0.255728503 |
| 0.310331324 | 0.097153091 | 0.235822195 | 0.025914037 |
| 0.229222497 | 0.213801574 | 0.161667031 | 0.084264438 |
| 0.03529706  | 0.082431133 | 0.218401316 | 0.10804217  |
| 0.399008096 | 0.080660893 | 0.255605252 | 0.277497115 |
| 0.224640159 | 0.455384909 | 0.117781663 | 0.270197299 |

|             |             |             |             |
|-------------|-------------|-------------|-------------|
| 0.079601935 | 0.234075868 | 0.171094803 | 0.194228519 |
| 0.098900528 | 0.125022756 | 0.264193505 | 0.098957672 |
| 0.047084382 | 0.127825372 | 0.00301408  | 0.396888412 |
| 0.426711164 | 0.138806184 | 0.255511937 | 0.147282387 |
| 0.230602786 | 0.363849652 | 0.178317725 | 0.177804744 |
| 0.015433545 | 0.184108203 | 0.182337059 | 0.337124458 |
| 0.07181309  | 0.219483572 | 0.05367711  | 0.167032093 |
| 0.443451662 | 0.145575308 | 0.306432519 | 0.100608591 |
| 0.415129754 | 0.344382316 | 0.171511653 | 0.139733418 |
| 0.268151025 | 0.101751523 | 0.155081736 | 0.471068043 |
| 0.126501764 | 0.09247085  | 0.337386013 | 0.117896565 |
| 0.146162216 | 0.362632714 | 0.22338617  | 0.47589697  |
| 0.080860416 | 0.215431315 | 0.322882425 | 0.406449184 |
| 0.283197384 | 0.103451318 | 0.111504921 | 0.13291942  |
| 0.387309387 | 0.069880445 | 0.133350487 | 0.273611877 |
| 0.089014674 | 0.259562542 | 0.221994507 | 0.126197878 |
| 0.053782463 | 0.175265078 | 0.162555461 | 0.15489687  |
| 0.205777523 | 0.163766002 | 0.123990943 | 0.365361016 |
| 0.085217138 | 0.01959671  | 0.419256307 | 0.006620774 |
| 0.182565592 | 0.224002399 | 0.201584253 | 0.161824515 |
| 0.200700844 | 0.246378943 | 0.169707363 | 0.003605839 |
| 0.336261801 | 0.02305635  | 0.188639967 | 0.10830863  |
| 0.154356428 | 0.072692013 | 0.402189102 | 0.432205867 |
| 0.262317405 | 0.164517343 | 0.131748313 | 0.422421398 |
| 0.062955629 | 0.133159927 | 0.167594547 | 0.25424325  |
| 0.099784002 | 0.142241668 | 0.166307616 | 0.127322271 |
| 0.29464696  | 0.192648079 |             |             |
| GZMC        | 0.01770686  | 0.004345868 | 0.01788564  |
| 0.012331564 | 0.006875446 | 0.004605066 | 0.009421446 |
| 0.004805895 | 0.002245334 | 0.000274737 | 0.012531295 |
| 0.018539762 | 3.32E-05    | 0.00603562  | 0.009721732 |
| 0.003906374 | 0.010809115 | 0.016092969 | 1.89E-06    |
| 0.00061881  | 0.008303229 | 0.00180557  | 0.002323597 |
| 0.004035326 | 0.018048658 | 0.003657175 | 0.000973174 |
| 0.004862396 | 0.000269313 | 0.00468412  | 0.000107155 |
| 0.012171173 | 0.006283431 | 0.001299998 | 0.012090424 |
| 0.00565137  | 0.000447161 | 0.009015259 | 0.011841579 |
| 0.00052464  | 0.013591326 | 0.000764686 | 0.029243244 |
| 0.000840023 | 0.018037849 | 3.74E-05    | 0.002159529 |
| 0.002090096 | 0.003578186 | 0.013591577 | 0.004224258 |
| 0.000702091 | 0.009238992 | 0.001532037 | 2.79E-05    |
| 0.001479193 | 4.61E-06    | 0.000446589 | 0.006323444 |
| 0.030069767 | 0.028198421 | 6.02E-05    | 0.001817934 |
| 0.001405255 | 0.003120761 | 0.009734608 | 0.000352142 |
| 0.007858743 | 0.000580674 | 0.001891786 | 0.000438755 |
| 0.003177446 | 0.004208178 | 0.023162562 | 0.004016415 |
| 0.001444998 | 0.023687253 | 0.008252536 | 0.001711171 |
| 0.003368092 | 0.007993242 | 0.009744361 | 0.00530563  |
| 0.000124643 | 0.0024924   | 0.002457561 | 0.012767712 |
| 0.003141796 | 0.002846196 | 0.009211458 | 0.007875434 |
| 0.003893982 | 0.000720236 | 0.002904809 | 0.009224675 |
| 0.005339317 | 0.000324465 | 0.001060097 | 0.002302876 |
| 0.004401539 | 0.004736171 | 0.005554419 | 0.021708868 |
| 0.003690039 | 0.016012773 | 0.006325496 | 0.00298737  |

|             |             |             |             |
|-------------|-------------|-------------|-------------|
| 0.013745883 | 0.019007785 | 0.003135454 | 0.003190702 |
| 0.005447867 | 0.006066021 | 0.00252007  | 0.006175352 |
| 0.002262946 | 0.007664933 | 0.008599342 | 0.005204294 |
| 4.26E-05    | 0.005513353 | 0.023183897 | 0.020814684 |
| 0.004898277 | 0.013652878 | 0.000608052 | 0.013574288 |
| 0.006306513 | 0.005497006 | 0.009434093 | 0.015067516 |
| 0.006421589 | 0.005355533 | 0.004813673 | 0.004740407 |
| 0.018364962 | 0.000420979 | 0.003001296 | 0.004555854 |
| 0.005916885 | 0.009936008 | 0.004375116 | 0.008053094 |
| 0.013286929 | 0.005768423 | 0.004616504 | 0.008392566 |
| 0.003018202 | 0.010358837 | 0.00391529  | 0.033598035 |
| 0.008252055 | 0.007812668 | 0.008583318 | 0.005020691 |
| 0.00863491  | 0.010851247 | 1.54E-05    | 0.00483702  |
| 0.011576046 | 0.000104384 | 0.003638077 | 0.004332991 |
| 0.005666308 | 0.003818178 | 0.006684516 | 0.005638775 |
| 0.004999838 | 0.011560818 | 4.19E-06    | 0.010950401 |
| 0.006469567 | 0.01282652  | 0.004291976 | 0.001297889 |
| 0.004165332 | 0.004946652 | 0.003484279 | 0.000259121 |
| 0.010200283 | 0.00515594  | 0.003820297 | 0.003165058 |
| 0.001201533 | 0.012851401 | 0.001244577 | 0.007217555 |
| 0.007599128 | 0.015654077 | 0.015759138 | 0.006396432 |
| 0.000675018 | 0.025103846 | 0.001506679 | 0.002156033 |
| 0.026270545 | 0.001958862 | 0.000669853 | 0.004706157 |
| 0.010609653 | 0.00270006  | 0.014264351 | 0.008201719 |
| 0.016857967 | 0.017369721 | 0.003965082 | 0.032118329 |
| 0.011107598 | 0.010706344 | 0.002148738 | 0.005064747 |
| 0.001312267 | 0.018390298 | 0.003434488 | 0.008544176 |
| 0.015552765 | 0.003869685 | 0.014051836 | 0.007608109 |
| 0.001261149 | 0.000192179 | 0.000351553 | 0.001715033 |
| 0.012991144 | 0.003868956 | 0.00331279  | 0.008293851 |
| 0.006721502 | 0.004002426 | 0.001528927 | 0.011340694 |
| 0.010259088 | 0.009618351 | 0.007105436 | 0.001029606 |
| 0.004393217 | 0.009035141 | 0.005835049 | 0.001764319 |
| 0.004992175 | 0.000295818 | 0.001102842 | 0.006204531 |
| 0.000245549 | 0.002267365 | 0.004829273 | 0.006244383 |
| 0.000216755 | 0.005913017 | 0.006089594 | 1.02E-05    |
| 0.001440023 | 0.000771826 | 0.021048357 | 0.000374263 |
| 0.017761764 | 0.010429298 | 0.005398387 | 0.004650247 |
| 0.012945041 | 0.006173381 | 0.006523133 | 0.006632582 |
| 0.000908522 | 0.006559741 | 0.005814891 | 0.009851262 |
| 0.008010103 | 0.000595069 | 0.00050335  | 0.005855563 |
| 0.005661823 | 3.27E-05    | 0.015902456 | 0.002276396 |
| 0.000659192 | 0.003258374 | 0.000296805 | 0.009028069 |
| 0.010042101 | 0.004731446 | 0.016464044 | 0.007416074 |
| 0.014780561 | 0.021951813 | 0.004944124 | 0.007116111 |
| 0.000190669 | 0.003109532 | 0.004153285 | 0.009941392 |
| 0.024705372 | 0.003964695 | 0.007223225 | 0.000343073 |
| 1.89E-06    | 0.008447739 | 0.017402473 | 0.025122738 |
| 0.00283715  | 0.001058302 | 0.004291345 | 0.005666669 |
| 0.0241468   | 0.008849147 | 0.005867744 | 0.00848818  |
| 0.005833816 | 0.001475425 | 0.002573107 | 0.004281833 |
| 0.010538789 | 0.006312015 | 0.048060887 | 0.00840492  |
| 0.006763983 | 0.002208176 | 0.002058809 | 1           |
| 0.014227492 | 0.001734402 | 0.012389666 | 0.020040888 |

|             |             |             |             |
|-------------|-------------|-------------|-------------|
| 0.006858568 | 0.015181409 | 0.012968804 | 0.00030849  |
| 0.011346065 | 0.022941272 | 0.001601024 | 0.005023102 |
| 0.004157655 | 0.004059268 | 0.003848129 | 0.004615731 |
| 0.003427486 | 0.00305026  | 0.004752487 | 0.00548661  |
| 0.006387272 | 0.003957424 | 0.002040638 | 0.007805064 |
| 1.86E-05    | 0.010790922 | 0.003639847 | 0.029543266 |
| 0.00293083  | 0.005187201 | 0.018496632 | 0.002990411 |
| 0.019318995 | 0.00056079  | 0.001375209 | 0.004729089 |
| 0.007072688 | 0.014201228 | 0.00046438  | 0.000895571 |
| 0.0079469   | 0.013281131 | 0.000551755 | 0.006442549 |
| 0.016769246 | 0.007916277 | 0.009496579 | 0.008236008 |
| 0.011849248 | 2.59E-05    | 0.001542604 | 7.00E-05    |
| 0.004904009 | 0.000757917 | 0.003773949 | 0.023485808 |
| 0.015289767 | 0.012389255 | 0.007022391 | 0.004906558 |
| 0.006219359 | 0.007784769 | 0.003648622 | 0.007565591 |
| 4.96E-05    | 0.00581324  | 0.006216554 | 0.000450075 |
| 0.000514177 | 0.000832918 | 0.00538516  | 0.003190449 |
| 0.009956145 | 0.028331545 | 0.001458212 | 0.020510572 |
| 0.008953477 | 0.011182338 | 0.005454324 | 0.004215273 |
| 0.013429847 | 0.002429921 | 0.004695315 | 0.013452096 |
| 0.014956828 | 0.000661834 | 0.011443866 | 0.003098911 |
| 0.026499508 | 0.008581214 | 0.000641374 | 0.006645861 |
| 0.00870551  | 0.006518727 | 0.006018796 | 0.009085955 |
| 0.005342508 | 0.000196899 | 0.000835815 | 0.004185164 |
| 0.01294123  | 0.000165314 | 0.010359581 | 0.005379686 |
| 0.005296018 | 0.019078404 | 0.01791701  | 0.008452834 |
| 0.008096861 | 0.017880007 | 0.007141247 | 0.009113077 |
| 0.005721099 | 0.003327154 | 0.007289513 | 0.000100777 |
| 0.002649246 | 0.020634107 | 0.000886117 | 0.00291376  |
| 0.006718757 | 0.001652791 | 0.001678045 | 0.012870578 |
| 0.003626539 | 0.005881899 | 0.005386049 | 0.004427041 |
| 0.000819093 | 0.013556571 | 0.006496577 | 9.28E-05    |
| 0.009868314 | 0.020785032 | 0.009475845 | 0.001879246 |
| 0.002393102 | 0.025415683 | 0.018479901 | 0.00942152  |
| 0.006175655 | 0.005303549 | 0.021307826 | 0.013376312 |
| 0.00197613  | 0.006438147 | 0.004885544 | 0.007324228 |
| 0.009191113 | 0.010501791 | 0.005696588 | 0.021046894 |
| 0.009014577 | 0.004472379 | 0.006240569 | 0.006368316 |
| 0.00790223  | 0.006080168 | 0.001967439 | 0.014617705 |
| 0.013089404 | 0.020535768 | 0.015265818 | 0.002719124 |
| 0.019988788 | 0.02126079  | 0.015670598 | 0.006971196 |
| 0.000670751 | 0.009780635 | 0.021007454 | 0.007354287 |
| 0.000914988 | 0.017705684 | 0.001970921 | 0.005447643 |
| 3.32E-05    | 0.003317624 | 0.01424319  | 0.020867928 |
| 0.007844488 | 0.003554136 | 0.003203114 | 0.003538435 |
| 0.000736989 | 0.009421148 | 0.003360984 | 0.006575754 |
| 0.003336755 | 0.006717454 | 0.009277204 | 0.013387549 |
| 0.006049951 | 0.000736654 | 0.004651464 | 0.011877    |
| 0.005015635 | 0.0061267   | 0.017436204 | 0.009331735 |
| 0.007709628 | 0.005011224 | 0.034592922 | 0.001635054 |
| 0.004466876 | 0.007923767 | 0.003807734 | 0.002212863 |
| 0.012628249 | 0.000876721 | 0.003001438 | 0.00027264  |
| 0.000885189 | 0.005010382 | 0.012662981 | 0.00705113  |
| 0.006546777 | 0.012672963 | 0.002335645 | 1.41E-05    |

|             |             |             |             |          |
|-------------|-------------|-------------|-------------|----------|
| 0.00254849  | 0.010857099 | 0.003308762 | 0.003869085 |          |
| 0.01124342  | 0.000344586 | 0.024448059 | 0.021336301 |          |
| 0.013425488 | 0.011761778 | 0.000395498 | 0.001716336 |          |
| 0.002724917 | 0.022343677 | 0.00569346  | 0.010294881 |          |
| 0.004029765 | 0.001059371 | 0.014007701 | 0.000181993 |          |
| 0.024301546 | 0.017297898 | 9.35E-05    | 0.000611545 |          |
| 0.004999332 | 0.004569067 | 0.022212171 | 0.001968213 |          |
| 0.005706545 | 0.006685851 | 0.000722209 | 0.005305977 |          |
| 0.01253199  | 0.018098287 | 0.02473479  | 0.019389781 |          |
| 0.008631183 | 0.012681654 | 0.004719289 | 0.003760785 |          |
| 0.00874288  | 0.013932232 | 0.033167648 | 0.020480644 |          |
| 0.005708498 | 0.003093763 | 0.002298458 | 0.010301195 |          |
| 0.024463687 | 0.012507675 | 0.012601225 | 0.016454025 |          |
| 0.004195479 | 0.021994109 | 0.016098499 | 0.018592852 |          |
| 0.001182735 | 0.016617072 | 0.004608023 | 0.009971756 |          |
| 0.01071286  | 0.003000418 | 0.005299329 | 3.52E-06    | 6.48E-05 |
| 0.004991407 | 0.003245303 | 0.01327342  | 0.007044504 |          |
| 0.000937423 | 0.005316902 | 0.002165414 | 0.01651975  |          |
| 0.022490459 | 0.008953126 | 0.003368334 | 0.00109153  |          |
| 0.000411203 | 0.031466465 | 0.019140147 | 0.011534617 |          |
| 0.008313942 | 0.009931954 | 0.010496301 | 0.002128846 |          |
| 0.00558613  | 0.007252105 | 0.000676214 | 0.014857585 |          |
| 0.00061293  | 0.016733437 | 0.000272441 | 0.009561484 |          |
| 0.01988825  | 0.00224318  | 0.000611459 | 0.014442102 |          |
| 0.00752807  | 0.003036457 | 0.003710545 | 0.002235872 |          |
| 0.002381513 | 0.003847061 | 0.005971663 | 0.009855538 |          |
| 0.005266642 | 0.005948381 | 0.001396881 | 0.007003115 |          |
| 0.000829347 | 0.011543931 | 0.009127034 | 0.004724222 |          |
| 0.01649129  | 0.004807332 | 0.005066622 | 0.011950502 |          |
| 0.011206164 | 0.004626398 | 0.001395357 | 0.009749582 |          |
| 0.000797022 | 0.000796159 | 0.004214817 | 0.001277969 |          |
| 7.92E-06    | 0.000115949 | 0.022181178 | 0.000428307 |          |
| 0.002137192 | 0.004115611 | 0.003902472 | 0.010475972 |          |
| 0.000100219 | 0.002460914 | 0.004703738 | 0.006248642 |          |
| 0.005469135 | 0.014694645 | 0.008181548 | 0.035099602 |          |
| 0.003893959 | 3.89E-05    | 0.002378235 | 0.001499238 |          |
| 0.000524341 | 0.013905761 | 0.005926297 | 0.000807498 |          |
| 0.001978793 | 0.004623565 | 0.005621127 | 9.96E-05    |          |
| 0.001044179 | 0.003951638 | 0.008705716 | 0.006905283 |          |
| 0.010186532 | 0.009248936 | 0.000455471 | 0.008732381 |          |
| 0.001538987 | 0.000990019 | 0.0117791   | 0.00291778  |          |
| 0.011635798 | 0.003624428 | 0.023154893 | 0.012030584 |          |
| 0.000156999 | 0.013345633 | 0.00544886  | 0.00210859  |          |
| 0.016096579 | 7.07E-05    | 0.022268575 | 0.006307012 |          |
| 0.001459503 | 0.001183011 | 0.008616527 | 0.004860754 |          |
| 0.015396451 | 0.010439082 | 0.000314884 | 0.001633981 |          |
| 0.011376001 | 0.002008979 | 0.0071116   | 0.001478992 |          |
| 0.010765547 | 0.00045459  | 0.004978688 | 0.003755027 |          |
| 0.009593076 | 0.001820427 | 0.001145212 | 0.014963444 |          |
| 0.000859117 | 0.006054667 | 0.027138266 | 0.004058563 |          |
| 0.007040177 | 0.013705627 | 0.001829916 | 0.005412636 |          |
| 0.000971222 | 0.005165273 | 0.013407623 | 0.018149744 |          |
| 0.005380097 | 0.004131649 | 0.018598978 | 0.003022637 |          |
| 0.002512009 | 0.010109513 | 0.006095986 | 0.025121011 |          |

|             |             |             |             |
|-------------|-------------|-------------|-------------|
| 0.000740486 | 0.008242241 | 0.002659018 | 0.01256252  |
| 0.000744622 | 0.008811998 | 0.008316266 | 0.0029953   |
| 0.004473499 | 0.015332742 | 0.009847539 | 0.006109717 |
| 0.003486708 | 0.01366471  | 0.020071468 | 0.019057496 |
| 0.010218692 | 0.000170086 | 0.007189938 | 0.009688847 |
| 0.014781017 | 0.002231446 | 0.024767541 | 0.00310649  |
| 0.002874046 | 0.001503404 | 0.008091765 | 0.0001575   |
| 0.002434097 | 0.011149469 | 0.000150367 | 0.010229438 |
| 0.009565242 | 0.006909683 | 0.005726963 | 0.000136788 |
| 0.000406763 | 0.007159999 | 0.000368364 | 0.000352442 |
| 0.000686879 | 0.002239482 | 0.00175442  | 0.000570713 |
| 0.000562846 | 0.0016729   | 0.008780184 | 0.00375045  |
| H2-DMA      | 0.172604578 | 0.08706202  | 0.153309876 |
| 0.066168752 | 0.034807526 | 0.021352854 | 0.180235124 |
| 0.122741591 | 0.09062553  | 0.007729581 | 0.047967026 |
| 0.213667681 | 0.001462224 | 0.102110674 | 0.174226249 |
| 0.032929722 | 0.180010195 | 0.218344277 | 0.018320834 |
| 0.037542934 | 0.042765606 | 0.008821431 | 0.044803383 |
| 0.033772376 | 0.300387449 | 0.073588508 | 0.016035712 |
| 0.083272907 | 0.002391814 | 0.034227292 | 0.003426412 |
| 0.179988262 | 0.033547722 | 0.009829743 | 0.137787509 |
| 0.03450297  | 0.002675801 | 0.195834413 | 0.050793906 |
| 0.003795047 | 0.204971144 | 0.016346304 | 0.070673421 |
| 0.023031348 | 0.162981808 | 0.002484871 | 0.035139098 |
| 0.062130955 | 0.036931482 | 0.216201905 | 0.045977598 |
| 0.01690451  | 0.106927423 | 0.045817284 | 0.016547611 |
| 0.006347371 | 0.000395909 | 0.002328795 | 0.113256749 |
| 0.214876355 | 0.172869323 | 0.004159349 | 0.061556545 |
| 0.035363939 | 0.054439499 | 0.132720231 | 0.013977987 |
| 0.110430261 | 0.004573429 | 0.034392966 | 0.030153451 |
| 0.040284567 | 0.163712738 | 0.284233354 | 0.203270096 |
| 0.013781015 | 0.128397808 | 0.037388787 | 0.009619922 |
| 0.086565966 | 0.162125304 | 0.151164061 | 0.131022889 |
| 0.008549014 | 0.022552281 | 0.015104175 | 0.122176784 |
| 0.078219581 | 0.120414955 | 0.068982134 | 0.136241383 |
| 0.15589799  | 0.028236014 | 0.067007913 | 0.262217921 |
| 0.07988335  | 0.005605917 | 0.019544062 | 0.00534827  |
| 0.03578578  | 0.033699451 | 0.147432676 | 0.158508688 |
| 0.025510876 | 0.269113606 | 0.152910665 | 0.019198173 |
| 0.0315399   | 0.216501863 | 0.024499928 | 0.050515751 |
| 0.048564661 | 0.086736748 | 0.069287024 | 0.109133487 |
| 0.025097326 | 0.100948322 | 0.068316061 | 0.100731326 |
| 0.001194578 | 0.108818946 | 0.149213356 | 0.172397477 |
| 0.153878303 | 0.119432957 | 0.018179864 | 0.170667069 |
| 0.067397452 | 0.096449424 | 0.130922281 | 0.086785888 |
| 0.072254947 | 0.129877933 | 0.10730322  | 0.08956531  |
| 0.212178485 | 0.004995615 | 0.024468999 | 0.040918367 |
| 0.077553868 | 0.235132001 | 0.01334473  | 0.160047047 |
| 0.150995012 | 0.062642211 | 0.103757398 | 0.186052313 |
| 0.097153638 | 0.132687846 | 0.070484547 | 0.170502277 |
| 0.142861217 | 0.148013135 | 0.109301704 | 0.032008469 |
| 0.138911601 | 0.056906219 | 0.018840409 | 0.106962295 |
| 0.12825731  | 0.002028353 | 0.062443394 | 0.071365843 |
| 0.109193584 | 0.052222249 | 0.105161059 | 0.083070561 |

|             |             |             |             |
|-------------|-------------|-------------|-------------|
| 0.106944342 | 0.270979569 | 0.001398025 | 0.089448475 |
| 0.131582321 | 0.118947674 | 0.067559204 | 0.019421502 |
| 0.03740386  | 0.040460921 | 0.050980408 | 0.010756133 |
| 0.156703507 | 0.073162737 | 0.0700645   | 0.083794616 |
| 0.056110361 | 0.215302521 | 0.013736906 | 0.152121727 |
| 0.143228104 | 0.160029551 | 0.26867372  | 0.127099373 |
| 0.009060113 | 0.171722894 | 0.037891379 | 0.038956956 |
| 0.198490419 | 0.044116044 | 0.005543447 | 0.038556244 |
| 0.324747723 | 0.025874982 | 0.147515654 | 0.181797299 |
| 0.171780509 | 0.343755198 | 0.080496898 | 0.077797626 |
| 0.075136376 | 0.323196039 | 0.036218939 | 0.084294206 |
| 0.024080243 | 0.230575158 | 0.055701718 | 0.122360683 |
| 0.16208241  | 0.020951478 | 0.218995591 | 0.050792269 |
| 0.024199013 | 0.004840529 | 0.00262685  | 0.017713239 |
| 0.322408562 | 0.058877855 | 0.046226743 | 0.048700958 |
| 0.097319064 | 0.126558983 | 0.017738066 | 0.193249768 |
| 0.252265338 | 0.025956706 | 0.086684645 | 0.031573509 |
| 0.090046373 | 0.077085823 | 0.064168611 | 0.029780486 |
| 0.113400588 | 0.006693458 | 0.003802974 | 0.081840895 |
| 0.00724298  | 0.016663813 | 0.071260532 | 0.04679118  |
| 0.014760379 | 0.259400025 | 0.105980128 | 0.00254945  |
| 0.022820396 | 0.028317713 | 0.12558466  | 0.016745285 |
| 0.150952892 | 0.143426786 | 0.025909037 | 0.021210928 |
| 0.208912169 | 0.119164656 | 0.096972187 | 0.0927365   |
| 0.010612115 | 0.112055096 | 0.063331762 | 0.099882568 |
| 0.081211125 | 0.013946316 | 0.001790394 | 0.068578343 |
| 0.072753207 | 0.013067187 | 0.279034324 | 0.04406862  |
| 0.018245114 | 0.039620274 | 0.024885402 | 0.109320451 |
| 0.164951742 | 0.117322719 | 0.097719208 | 0.074101536 |
| 0.116663972 | 0.131737128 | 0.075100898 | 0.120397676 |
| 0.009128048 | 0.028668563 | 0.018890595 | 0.085123879 |
| 0.22081072  | 0.021360076 | 0.170797161 | 0.00208716  |
| 0.000964308 | 0.218229559 | 0.26575361  | 0.102392671 |
| 0.008020796 | 0.023248006 | 0.049488047 | 0.105505116 |
| 0.217464274 | 0.116567369 | 0.16824117  | 0.031201349 |
| 0.130395042 | 0.022638263 | 0.016798609 | 0.03537488  |
| 0.184612999 | 0.059681524 | 0.092939534 | 0.168903569 |
| 0.253213425 | 0.007450082 | 0.062650427 | 0.014227492 |
| 1           | 0.055088818 | 0.334698451 | 0.343928048 |
| 0.08172647  | 0.301812848 | 0.204143346 | 0.013308406 |
| 0.085829742 | 0.238536828 | 0.013593033 | 0.08965387  |
| 0.106647704 | 0.108704251 | 0.107209596 | 0.130415933 |
| 0.087161051 | 0.055827239 | 0.064192069 | 0.049130416 |
| 0.135126212 | 0.13682054  | 0.010649897 | 0.063039227 |
| 0.017034073 | 0.08213587  | 0.038833895 | 0.29150661  |
| 0.045914414 | 0.118770242 | 0.179674528 | 0.03120848  |
| 0.11824369  | 0.002154909 | 0.040710246 | 0.075115762 |
| 0.071876342 | 0.150586975 | 0.010612705 | 0.010861239 |
| 0.13307902  | 0.164460695 | 0.006668839 | 0.11442326  |
| 0.067977759 | 0.222958388 | 0.043288055 | 0.059078143 |
| 0.170585381 | 0.007081688 | 0.032655296 | 0.000967741 |
| 0.007964909 | 0.131285885 | 0.013471102 | 0.111533754 |
| 0.133784256 | 0.134848077 | 0.14700515  | 0.121319352 |
| 0.108415854 | 0.092322329 | 0.103791405 | 0.009949157 |

|             |             |             |             |
|-------------|-------------|-------------|-------------|
| 0.11151527  | 9.48E-05    | 0.096087287 | 0.095312911 |
| 0.011939244 | 0.014426759 | 0.050426557 | 0.069254879 |
| 0.029335583 | 0.260001294 | 0.237523427 | 0.01223779  |
| 0.119989233 | 0.132250973 | 0.158252995 | 0.014765352 |
| 0.0348632   | 0.054053458 | 0.013903345 | 0.127560996 |
| 0.097064534 | 0.122310066 | 0.023166614 | 0.300377745 |
| 0.027321749 | 0.162033282 | 0.276974017 | 0.015203627 |
| 0.061934822 | 0.28416261  | 0.174040291 | 0.103833849 |
| 0.136469464 | 0.045642153 | 0.006245247 | 0.014395283 |
| 0.075566689 | 0.225962354 | 0.005674087 | 0.21003088  |
| 0.101170899 | 0.046748396 | 0.150458154 | 0.185770222 |
| 0.121476753 | 0.130694698 | 0.213445649 | 0.075337343 |
| 0.0623574   | 0.004909366 | 0.038589516 | 0.156006223 |
| 0.006675899 | 0.023980171 | 0.210663522 | 0.037932278 |
| 0.03993216  | 0.156346685 | 0.007825926 | 0.01005679  |
| 0.100983705 | 0.044547719 | 0.026365573 | 0.161093412 |
| 0.029464433 | 0.025529531 | 0.067694401 | 0.103292539 |
| 0.018085431 | 0.176391205 | 0.307993582 | 0.189379736 |
| 0.020220344 | 0.021486097 | 0.238644044 | 0.242834929 |
| 0.082733654 | 0.079337296 | 0.18548766  | 0.098635913 |
| 0.214001366 | 0.038744555 | 0.085237826 | 0.093349205 |
| 0.141114756 | 0.133902369 | 0.201857804 | 0.07644831  |
| 0.16614543  | 0.066259304 | 0.025642828 | 0.049467317 |
| 0.101326624 | 0.267721827 | 0.10872674  | 0.010899476 |
| 0.274819851 | 0.077488035 | 0.147691395 | 0.243974725 |
| 0.018698557 | 0.222828177 | 0.103465971 | 0.205873862 |
| 0.045766287 | 0.005840718 | 0.201446957 | 0.181758563 |
| 0.131402741 | 0.004183923 | 0.236070184 | 0.038977646 |
| 0.098265343 | 0.007586226 | 0.042524861 | 0.169593145 |
| 0.26975657  | 0.210975803 | 0.039310901 | 0.063796147 |
| 0.056304533 | 0.018326702 | 0.070168227 | 0.082378011 |
| 0.094669115 | 0.032582447 | 0.117412979 | 0.122123656 |
| 0.30222978  | 0.025023895 | 0.011296662 | 0.047382564 |
| 0.189899722 | 0.026754175 | 0.096570273 | 0.30454345  |
| 0.189145308 | 0.174269325 | 0.099411951 | 0.124321545 |
| 0.024387675 | 0.188758524 | 0.257080171 | 0.06979637  |
| 0.009726737 | 0.162800279 | 0.016360816 | 0.054764678 |
| 0.004352144 | 0.00236141  | 0.090218585 | 0.053204505 |
| 0.135861986 | 0.087261314 | 0.150430684 | 0.038179075 |
| 4.48E-05    | 0.031322055 | 0.056698485 | 0.021338544 |
| 0.092307266 | 0.120110889 | 0.029554801 | 0.13872372  |
| 0.18496486  | 0.263408154 | 0.10925787  | 0.013712383 |
| 0.004698219 | 0.054719444 | 0.236096484 | 0.141992227 |
| 0.076747622 | 0.233653824 | 0.005175419 | 0.082277108 |
| 0.007075089 | 0.218337098 | 0.142273793 | 0.00833116  |
| 0.006329959 | 0.099886669 | 0.085026709 | 0.162434347 |
| 0.016882341 | 0.091650008 | 0.096472549 | 0.056562238 |
| 0.045637605 | 0.16048593  | 0.089303455 | 0.074680883 |
| 0.078303535 | 0.08570962  | 0.089905247 | 0.023620007 |
| 0.079373314 | 0.104943407 | 0.058051145 | 0.155592328 |
| 0.064871784 | 0.100989076 | 0.035982202 | 0.040913913 |
| 0.027128249 | 0.137823759 | 0.323249652 | 0.339340894 |
| 0.13290048  | 0.07481258  | 0.261357514 | 0.262251786 |
| 0.150711167 | 0.031283021 | 0.179129265 | 0.101903423 |



|             |             |             |             |
|-------------|-------------|-------------|-------------|
| 0.117084362 | 0.25361155  | 0.042796897 | 0.077585208 |
| 0.00448923  | 0.01868387  | 0.148313823 | 0.038118208 |
| 0.132448013 | 0.020558608 | 0.023441337 | 0.094841966 |
| 0.05484757  | 0.198630667 | 0.249995001 | 0.121336297 |
| 0.029064582 | 0.032747158 | 0.010044733 | 0.108745664 |
| 0.150902542 | 0.273279473 | 0.032408418 | 0.076926206 |
| 0.092388678 | 0.039077143 | 0.06628878  | 0.126390951 |
| 0.005401224 | 0.146617976 | 0.010515845 | 0.163625846 |
| 0.006176159 | 0.268093985 | 0.297244062 | 0.045435976 |
| 0.00240551  | 0.088296125 | 0.047235455 | 0.02002139  |
| 0.047162007 | 0.042893278 | 0.019376543 | 0.09195155  |
| 0.103645719 | 0.168477375 | 0.149178775 | 0.131109496 |
| 0.023512619 | 0.017367022 | 0.038125573 | 0.056467498 |
| 0.072568494 | 0.086565606 | 0.249930767 | 0.086581255 |
| 0.033877615 | 0.276686446 | 0.170399591 | 0.060655069 |
| 0.028795989 | 0.053035721 | 0.002561083 | 0.019014301 |
| 0.061234266 | 0.006635332 | 0.000286385 | 0.010646951 |
| 0.120221212 | 0.019472832 | 0.063127556 | 0.079382146 |
| 0.019848299 | 0.120488628 | 0.00177951  | 0.083952839 |
| 0.116749924 | 0.151592312 | 0.051460291 | 0.212205488 |
| 0.126482624 | 0.154439731 | 0.047301878 | 0.004019145 |
| 0.031760566 | 0.019270136 | 0.00978659  | 0.168943274 |
| 0.176447011 | 0.00347004  | 0.037734622 | 0.233278894 |
| 0.079835386 | 0.001971183 | 0.04614491  | 0.040702319 |
| 0.228545146 | 0.160271511 | 0.075744393 | 0.061870496 |
| 0.108281489 | 0.143969336 | 0.015241979 | 0.023664254 |
| 0.030275317 | 0.015278743 | 0.086460295 | 0.009777861 |
| 0.185715534 | 0.030882205 | 0.039499776 | 0.21707367  |
| 0.150031385 | 0.016192941 | 0.276356414 | 0.0061602   |
| 0.135085768 | 0.106826057 | 0.031652293 | 0.015050843 |
| 0.094521089 | 0.028826285 | 0.158200311 | 0.097555116 |
| 0.003997897 | 0.045359091 | 0.099140392 | 0.024095134 |
| 0.188078863 | 0.025411384 | 0.214703309 | 0.00757701  |
| 0.099490326 | 0.081067687 | 0.196288611 | 0.019202718 |
| 0.039399482 | 0.315436392 | 0.012306252 | 0.118066301 |
| 0.109277087 | 0.011994058 | 0.06418619  | 0.087598153 |
| 0.012645791 | 0.114115456 | 0.023481985 | 0.117424711 |
| 0.091890108 | 0.176252445 | 0.058508792 | 0.104499983 |
| 0.152800967 | 0.013812239 | 0.008952695 | 0.045776995 |
| 0.114095723 | 0.095484996 | 0.012004672 | 0.117733197 |
| 0.007614669 | 0.107790182 | 0.039610643 | 0.042432453 |
| 0.133612776 | 0.075321137 | 0.016215908 | 0.240551437 |
| 0.104733209 | 0.036751701 | 0.021440551 | 0.171403881 |
| 0.060392402 | 0.092277309 | 0.156458379 | 0.00099668  |
| 0.056786261 | 0.046188377 | 0.126708086 | 0.023994262 |
| 0.272132596 | 0.075357138 | 0.064147416 | 0.112222288 |
| 0.08035257  | 0.00373448  | 0.026505208 | 0.029433996 |
| 0.010111427 | 0.188605999 | 0.123499717 | 0.093574482 |
| 0.097801887 | 0.007725602 | 0.005234991 | 0.11499195  |
| 0.004365767 | 0.004352152 | 0.009397112 | 0.04607384  |
| 0.005702831 | 0.013447433 | 0.012682939 | 0.008340943 |
| 0.085312976 | 0.062507051 |             |             |
| H2-KE6      | 0.087891279 | 0.450230036 | 0.083391175 |
| 0.118695235 | 0.235974601 | 0.380902729 | 0.064362938 |

|             |             |             |             |
|-------------|-------------|-------------|-------------|
| 0.126211159 | 0.369180337 | 0.417702616 | 0.299390022 |
| 0.01757764  | 0.072373572 | 0.423840707 | 0.055850666 |
| 0.328704491 | 0.027042301 | 0.102533846 | 0.092344031 |
| 0.239204189 | 0.209178885 | 0.290541716 | 0.400843019 |
| 0.225865512 | 0.190897404 | 0.365840954 | 0.375312759 |
| 0.498119154 | 0.29804544  | 0.387526671 | 0.281847042 |
| 0.382380187 | 0.251523839 | 0.365316677 | 0.022124158 |
| 0.379557958 | 0.012736496 | 0.43274792  | 0.202249813 |
| 0.115905808 | 0.317071881 | 0.433609985 | 0.189669539 |
| 0.41819561  | 0.046011546 | 0.34236273  | 0.377375338 |
| 0.357211751 | 0.267380039 | 0.09854032  | 0.403832591 |
| 0.372105147 | 0.325395778 | 0.435936943 | 0.003303243 |
| 0.262599071 | 0.093377886 | 0.21559078  | 0.509792326 |
| 0.177585454 | 0.100506553 | 0.341340918 | 0.274963155 |
| 0.381941552 | 0.338921674 | 0.226693274 | 0.408967837 |
| 0.481030651 | 0.146606664 | 0.412281786 | 0.147858449 |
| 0.369817014 | 0.053203344 | 0.149930785 | 0.126224251 |
| 0.364984038 | 0.159368259 | 0.2811541   | 0.262462253 |
| 0.463143366 | 0.505966808 | 0.222322079 | 0.523151677 |
| 0.086354428 | 0.28176195  | 0.221049302 | 0.246123181 |
| 0.341201689 | 0.099730889 | 0.34866018  | 0.498329819 |
| 0.071416777 | 0.443372437 | 0.377625736 | 0.154726688 |
| 0.426197272 | 0.282023124 | 0.444240135 | 0.130848069 |
| 0.306113534 | 0.277963171 | 0.490890199 | 0.25235063  |
| 0.267464976 | 0.101218315 | 0.515378494 | 0.258630382 |
| 0.230580421 | 0.101129146 | 0.171785905 | 0.422055941 |
| 0.371587821 | 0.477769253 | 0.418769021 | 0.325246373 |
| 0.321752784 | 0.48096007  | 0.357056409 | 0.400869799 |
| 0.291117114 | 0.526428121 | 0.179088913 | 0.033793499 |
| 0.104898901 | 0.070439921 | 0.214823689 | 0.259109012 |
| 0.438382935 | 0.314904485 | 0.187659393 | 0.177334585 |
| 0.399949821 | 0.511609871 | 0.53242168  | 0.36995234  |
| 0.042777062 | 0.236864944 | 0.326412006 | 0.288580703 |
| 0.337109572 | 0.121573113 | 0.199780732 | 0.5147173   |
| 0.334106938 | 0.370226081 | 0.19552194  | 0.503458012 |
| 0.206750724 | 0.47481757  | 0.465691241 | 0.141778017 |
| 0.510603209 | 0.504231772 | 0.466651286 | 0.333304864 |
| 0.467591068 | 0.322955115 | 0.085879496 | 0.350749606 |
| 0.434862062 | 0.009560966 | 0.459197563 | 0.477213384 |
| 0.507884917 | 0.413070273 | 0.481800228 | 0.48627027  |
| 0.51704845  | 0.088553393 | 0.041803134 | 0.22232946  |
| 0.511897133 | 0.341213991 | 0.110154529 | 0.388177533 |
| 0.299937532 | 0.386649447 | 0.397450091 | 0.274458345 |
| 0.471166978 | 0.422399403 | 0.484692729 | 0.374510873 |
| 0.351197072 | 0.292007254 | 0.349724421 | 0.494047766 |
| 0.040855327 | 0.130357155 | 0.077154755 | 0.278792337 |
| 0.418637372 | 0.137780917 | 0.384539767 | 0.318591826 |
| 0.15905923  | 0.372847651 | 0.320258018 | 0.309957626 |
| 0.085717269 | 0.419629043 | 0.168173348 | 0.189793359 |
| 0.031446396 | 0.149971844 | 0.151667302 | 0.126422144 |
| 0.192570121 | 0.266909733 | 0.415356821 | 0.465736925 |
| 0.3258461   | 0.195156165 | 0.397680009 | 0.430927713 |
| 0.356559518 | 0.319701336 | 0.215114562 | 0.005928106 |
| 0.225243941 | 0.365508047 | 0.167563468 | 0.38884913  |

|             |             |             |             |
|-------------|-------------|-------------|-------------|
| 0.196987838 | 0.206123803 | 0.341817564 | 0.317407505 |
| 0.292619838 | 0.18443426  | 0.325010199 | 0.40839349  |
| 0.18120655  | 0.238151949 | 0.381948951 | 0.423249955 |
| 0.004104436 | 0.292744084 | 0.39011259  | 0.107561063 |
| 0.312115728 | 0.09979809  | 0.217720147 | 0.42145578  |
| 0.277169402 | 0.179303859 | 0.472448485 | 0.320601499 |
| 0.340952975 | 0.261399531 | 0.494795633 | 0.056925708 |
| 0.319599403 | 0.030494664 | 0.218658408 | 0.434131546 |
| 0.224293389 | 0.24247049  | 0.251018681 | 0.213929051 |
| 0.160218335 | 0.511009551 | 0.356103751 | 0.486866313 |
| 0.345862061 | 0.498369827 | 0.405018554 | 0.386385617 |
| 0.327970139 | 0.369547238 | 0.116556377 | 0.382934246 |
| 0.413691116 | 0.317696798 | 0.107535506 | 0.416253796 |
| 0.390588691 | 0.349079474 | 0.084594477 | 0.448824503 |
| 0.47062631  | 0.507900585 | 0.11034738  | 0.297523283 |
| 0.321481166 | 0.216414799 | 0.366553189 | 0.495635735 |
| 0.394607001 | 0.302304923 | 0.272116218 | 0.310566028 |
| 0.167817364 | 0.15903827  | 0.29230835  | 0.164626602 |
| 0.011953349 | 0.106877917 | 0.081458484 | 0.114714993 |
| 0.115734529 | 0.434455768 | 0.346600307 | 0.49993574  |
| 0.102380192 | 0.38672538  | 0.238915182 | 0.224672563 |
| 0.410591792 | 0.314247352 | 0.329422383 | 0.332991583 |
| 0.230390489 | 0.012130552 | 0.087165957 | 0.507845013 |
| 0.070346555 | 0.185418414 | 0.328237751 | 0.001734402 |
| 0.055088818 | 1           | 0.120632216 | 0.192250885 |
| 0.422274386 | 0.203650789 | 0.211551198 | 0.399360534 |
| 0.284157202 | 0.094602673 | 0.00113667  | 0.475408063 |
| 0.492167497 | 0.460836521 | 0.496759809 | 0.481397552 |
| 0.424832286 | 0.38518233  | 0.353332378 | 0.37644611  |
| 0.101030822 | 0.120818233 | 0.158463186 | 0.228459359 |
| 0.006732092 | 0.315349372 | 0.262734452 | 0.134814884 |
| 0.375565821 | 0.27942024  | 0.039605615 | 0.306089208 |
| 0.022752689 | 0.177901886 | 0.317215375 | 0.189361054 |
| 0.282135229 | 0.018150999 | 0.232438462 | 0.289109342 |
| 0.440508947 | 0.31565349  | 0.338411924 | 0.521087961 |
| 0.268668435 | 0.176530334 | 0.242862359 | 0.332303044 |
| 0.06866767  | 0.154007153 | 0.380342918 | 0.061939044 |
| 0.241325193 | 0.459191568 | 0.367946421 | 0.079092638 |
| 0.231533338 | 0.005569662 | 0.342568268 | 0.511755353 |
| 0.497717867 | 0.484232287 | 0.477050298 | 0.211195782 |
| 0.490261615 | 0.122727923 | 0.516223404 | 0.388604076 |
| 0.417728772 | 0.000806441 | 0.003774247 | 0.452602239 |
| 0.334917591 | 0.094881484 | 0.146030258 | 0.363954808 |
| 0.081774228 | 0.188344718 | 0.06860889  | 0.123407133 |
| 0.397805924 | 0.174836739 | 0.128972434 | 0.490857685 |
| 0.197535086 | 0.192528837 | 0.430587225 | 0.112441853 |
| 0.359466802 | 0.046349481 | 0.112802404 | 0.00418228  |
| 0.30307572  | 0.145784866 | 0.498297208 | 0.506527249 |
| 0.45674006  | 0.32232916  | 0.417019496 | 0.338956532 |
| 0.404522818 | 0.145862562 | 0.377172331 | 0.153519623 |
| 0.498135336 | 0.326090708 | 0.265371588 | 0.275814976 |
| 0.456125639 | 0.445424387 | 0.034192203 | 0.348852142 |
| 0.012234404 | 0.00069022  | 0.389199863 | 0.244574278 |
| 0.081630063 | 0.318591465 | 0.223959046 | 0.252049636 |

|             |             |             |             |
|-------------|-------------|-------------|-------------|
| 0.209961295 | 0.034274621 | 0.217197469 | 0.191130758 |
| 0.242198512 | 0.302234337 | 0.203444885 | 0.249645249 |
| 0.207165357 | 0.093304257 | 0.159395647 | 0.137591153 |
| 0.270463059 | 0.299696437 | 0.193744735 | 0.023838813 |
| 0.418564308 | 0.36370695  | 0.059032973 | 0.160863453 |
| 0.379365681 | 0.455248223 | 0.036397679 | 0.005198732 |
| 0.244609729 | 0.278009168 | 0.455921482 | 0.509443297 |
| 0.523683343 | 0.478589079 | 0.371979628 | 0.086007073 |
| 0.069351205 | 0.260714646 | 0.227580555 | 0.060568092 |
| 0.494714144 | 0.101171741 | 0.491194819 | 0.249004649 |
| 0.120606317 | 0.184650715 | 0.024745767 | 0.083420978 |
| 0.33378888  | 0.159817225 | 0.12710735  | 0.177606376 |
| 0.249950526 | 0.203188928 | 0.052203953 | 0.168346971 |
| 0.312921962 | 0.139809295 | 0.148905718 | 0.325023073 |
| 0.350541687 | 0.356058516 | 0.376902024 | 0.401646737 |
| 0.139941937 | 0.129158919 | 0.302155893 | 0.354718778 |
| 0.411555371 | 0.43364182  | 0.026131319 | 0.485900099 |
| 0.455934652 | 0.400240392 | 0.503148487 | 0.316088587 |
| 0.100747918 | 0.309862002 | 0.293609489 | 0.284448897 |
| 0.17094726  | 0.383007825 | 0.209728616 | 0.070932208 |
| 0.261993414 | 0.476455056 | 0.40273443  | 0.126808586 |
| 0.414331581 | 0.176198692 | 0.093061822 | 0.431374246 |
| 0.127364452 | 0.089566738 | 0.441378826 | 0.394529884 |
| 0.000487634 | 0.108254811 | 0.455893991 | 0.202961931 |
| 0.497430507 | 0.437321814 | 0.399918568 | 0.270333798 |
| 0.001529899 | 0.363224965 | 0.309405217 | 0.34151311  |
| 0.429086284 | 0.32831977  | 0.176073886 | 0.053755138 |
| 0.235122456 | 0.116153215 | 0.101612598 | 0.355517097 |
| 0.158738355 | 0.402968558 | 0.169040483 | 0.21192691  |
| 0.148376768 | 0.139174343 | 0.196699803 | 0.212131066 |
| 0.135067836 | 0.199299412 | 0.285953922 | 0.418171029 |
| 0.163157732 | 0.393408932 | 0.376232243 | 0.030846485 |
| 0.311539205 | 0.362844674 | 0.396715732 | 0.001530744 |
| 0.365360819 | 0.005460882 | 0.143712197 | 0.155853996 |
| 0.148511433 | 0.166350461 | 0.194659515 | 0.229338929 |
| 0.343194507 | 0.1890242   | 0.220070931 | 0.189615426 |
| 0.115537398 | 0.209950766 | 0.338639042 | 0.355668263 |
| 0.208250178 | 0.116363282 | 0.124037251 | 0.133043792 |
| 0.041888517 | 0.459141991 | 0.219558051 | 0.104001754 |
| 0.187404025 | 0.362575128 | 0.286222473 | 0.51692823  |
| 0.359608381 | 0.154004673 | 0.299618854 | 0.434710454 |
| 0.32202546  | 0.313288394 | 0.086667138 | 0.380464156 |
| 0.204124097 | 0.154133278 | 0.424536649 | 0.333657165 |
| 0.414016708 | 0.368902472 | 0.219893291 | 0.405090694 |
| 0.311159644 | 0.347480005 | 0.418785781 | 0.056155643 |
| 0.160884308 | 0.147728753 | 0.192379114 | 0.001251137 |
| 0.304889911 | 0.274489974 | 0.430628391 | 0.496956684 |
| 0.264787286 | 0.33453253  | 0.394940218 | 0.08571511  |
| 0.390226121 | 0.213358927 | 0.138842734 | 0.413741978 |
| 0.194467949 | 0.163197822 | 0.229787155 | 0.37966938  |
| 0.380062747 | 0.401262121 | 0.208967946 | 0.242384266 |
| 0.217468312 | 0.216756415 | 0.4866557   | 0.150520536 |
| 0.4186292   | 0.123405805 | 0.426061604 | 0.226628317 |
| 0.165463364 | 0.502295782 | 0.072170257 | 0.507862017 |

|             |             |             |             |
|-------------|-------------|-------------|-------------|
| 0.272260024 | 0.151851593 | 0.458918622 | 0.308031283 |
| 0.298594011 | 0.085401833 | 0.155684388 | 0.423434277 |
| 0.200687684 | 0.302970788 | 0.030498484 | 0.053937709 |
| 0.258862362 | 0.338487966 | 0.416137201 | 0.330905438 |
| 0.183556879 | 0.271753696 | 0.154664983 | 0.297817791 |
| 0.516084387 | 0.517955429 | 0.202201498 | 0.213128317 |
| 0.309531707 | 0.086557889 | 0.410183069 | 0.023884564 |
| 0.381716452 | 0.400770386 | 0.408363628 | 0.050827438 |
| 0.018205372 | 0.176716674 | 0.38900316  | 0.10359867  |
| 0.430594731 | 0.195552979 | 0.395366682 | 0.395339494 |
| 0.189834659 | 0.514748121 | 0.083981854 | 0.335316786 |
| 0.072779426 | 0.233429557 | 0.34539614  | 0.384154501 |
| 0.15722203  | 0.226195336 | 0.302781416 | 0.173795171 |
| 0.026489016 | 0.200271439 | 0.001050225 | 0.39061448  |
| 0.502420704 | 0.29026836  | 0.197672548 | 0.412755871 |
| 0.219047985 | 0.346718638 | 0.201579007 | 0.416865432 |
| 0.006571265 | 0.295352963 | 0.171907496 | 0.383514204 |
| 0.22745386  | 0.361190394 | 0.041657075 | 0.266804503 |
| 0.487692686 | 0.237837859 | 0.234035239 | 0.300833684 |
| 0.503306134 | 0.380228596 | 0.201329502 | 0.177748989 |
| 0.415061021 | 0.083556579 | 0.440310063 | 0.509683694 |
| 0.129057139 | 0.152817114 | 0.365402173 | 0.154586897 |
| 0.26285023  | 0.374698383 | 0.422092571 | 0.513999706 |
| 0.044051795 | 0.204933283 | 0.366606574 | 0.448889273 |
| 0.237739138 | 0.120213337 | 0.189091653 | 0.166708662 |
| 0.477958472 | 0.084947287 | 0.216182606 | 0.32192812  |
| 0.165724678 | 0.259521736 | 0.409827822 | 0.133142226 |
| 0.027117508 | 0.155232129 | 0.339265089 | 0.141372162 |
| 0.240997765 | 0.298272823 | 0.176803664 | 0.335132836 |
| 0.094712583 | 0.014490434 | 0.409271882 | 0.012334525 |
| 0.351225669 | 0.322987965 | 0.212743599 | 0.295757676 |
| 0.185246621 | 0.34039347  | 0.362032887 | 0.001058831 |
| 0.347996067 | 0.036683496 | 0.272092959 | 0.157221134 |
| 0.259821489 | 0.059001039 | 0.446081768 | 0.469448014 |
| 0.306954431 | 0.351154787 | 0.336998477 | 0.455673515 |
| 0.109987636 | 0.348677337 | 0.325925061 | 0.424313899 |
| 0.175996342 | 0.43403038  | 0.414391407 | 0.337641221 |
| 0.356024902 | 0.265279313 |             |             |
| H2-0A       | 0.307819329 | 0.166855782 | 0.305656668 |
| 0.158427928 | 0.063381297 | 0.091473431 | 0.327602639 |
| 0.267251955 | 0.161708892 | 0.060573646 | 0.092536408 |
| 0.266969132 | 0.006787925 | 0.154483093 | 0.30407418  |
| 0.06480905  | 0.25647996  | 0.289765322 | 0.061518474 |
| 0.156101904 | 0.066263549 | 0.043340258 | 0.125810109 |
| 0.069543682 | 0.323119119 | 0.160185352 | 0.052675097 |
| 0.156486973 | 0.020396915 | 0.075294918 | 0.034573228 |
| 0.229846435 | 0.057136721 | 0.041909028 | 0.285360565 |
| 0.089083503 | 0.007808377 | 0.275439713 | 0.1061237   |
| 0.018175289 | 0.243220433 | 0.083236914 | 0.131795881 |
| 0.086503179 | 0.315147442 | 0.027561833 | 0.071752375 |
| 0.148747985 | 0.137593747 | 0.332960142 | 0.097333022 |
| 0.083450803 | 0.160148174 | 0.104746686 | 0.015326204 |
| 0.026891782 | 0.002238408 | 0.014729893 | 0.201673849 |
| 0.226669054 | 0.224042011 | 0.029862936 | 0.173453833 |

|             |             |             |             |
|-------------|-------------|-------------|-------------|
| 0.081852285 | 0.094581427 | 0.180591596 | 0.073597141 |
| 0.17864433  | 0.016729409 | 0.076061458 | 0.109537371 |
| 0.115342986 | 0.338905156 | 0.28303708  | 0.328598837 |
| 0.067681059 | 0.170769703 | 0.076763881 | 0.038880467 |
| 0.167906254 | 0.248284497 | 0.214594216 | 0.230684959 |
| 0.022986652 | 0.049119498 | 0.059888867 | 0.142821064 |
| 0.121725254 | 0.291888734 | 0.100246228 | 0.211649304 |
| 0.321649408 | 0.08761217  | 0.109194948 | 0.317897653 |
| 0.151546884 | 0.037037836 | 0.073791923 | 0.01900209  |
| 0.065744424 | 0.061431684 | 0.241713512 | 0.171260766 |
| 0.068637974 | 0.346756489 | 0.262925612 | 0.041622749 |
| 0.075585423 | 0.329099372 | 0.063673449 | 0.096152275 |
| 0.093960978 | 0.152558595 | 0.127317065 | 0.135403571 |
| 0.056061769 | 0.171206637 | 0.111229774 | 0.163234596 |
| 0.017616232 | 0.193030597 | 0.238002196 | 0.240741408 |
| 0.326877249 | 0.223677193 | 0.070541589 | 0.191263572 |
| 0.123095435 | 0.153086496 | 0.228853992 | 0.128494042 |
| 0.113363167 | 0.234041254 | 0.192271694 | 0.129518836 |
| 0.322505949 | 0.029123104 | 0.058384921 | 0.157461301 |
| 0.110231019 | 0.305269094 | 0.032974605 | 0.254881613 |
| 0.191067235 | 0.09899731  | 0.27585096  | 0.286551031 |
| 0.207426446 | 0.198520497 | 0.141521192 | 0.217045449 |
| 0.23139857  | 0.245682525 | 0.169521617 | 0.059018429 |
| 0.223762081 | 0.135083632 | 0.045342293 | 0.155030308 |
| 0.181730394 | 0.003710766 | 0.11865305  | 0.129593973 |
| 0.193868125 | 0.095171427 | 0.166930185 | 0.148610174 |
| 0.192872842 | 0.346882406 | 0.005085492 | 0.107035729 |
| 0.219595388 | 0.161011164 | 0.156553427 | 0.056615365 |
| 0.067948619 | 0.116126504 | 0.096861439 | 0.041136102 |
| 0.22064357  | 0.132596043 | 0.134326403 | 0.125315951 |
| 0.146238235 | 0.250380495 | 0.042323679 | 0.258127379 |
| 0.281426361 | 0.285236937 | 0.336019287 | 0.168113106 |
| 0.07518777  | 0.196517721 | 0.120635782 | 0.081450418 |
| 0.207329299 | 0.143108683 | 0.030991016 | 0.064061861 |
| 0.344887818 | 0.071962354 | 0.267515248 | 0.275492901 |
| 0.253802287 | 0.331729943 | 0.143737725 | 0.169652016 |
| 0.107827341 | 0.397729905 | 0.077060457 | 0.149152673 |
| 0.079884776 | 0.279144328 | 0.10165259  | 0.18090643  |
| 0.188982805 | 0.053289624 | 0.233440492 | 0.06980727  |
| 0.060180101 | 0.03627312  | 0.013639614 | 0.056137205 |
| 0.373637314 | 0.120417429 | 0.082361494 | 0.072960636 |
| 0.186770621 | 0.275318425 | 0.060920816 | 0.261295726 |
| 0.308994618 | 0.071160861 | 0.123583313 | 0.087595223 |
| 0.162385786 | 0.139059115 | 0.107013141 | 0.064286286 |
| 0.16318599  | 0.017909862 | 0.021887188 | 0.132114808 |
| 0.032766958 | 0.045690444 | 0.133276042 | 0.075272324 |
| 0.069343734 | 0.346824743 | 0.173300172 | 0.004432528 |
| 0.06443286  | 0.05289372  | 0.134282861 | 0.081354653 |
| 0.199837911 | 0.156567046 | 0.05115511  | 0.063040074 |
| 0.290601415 | 0.196929339 | 0.15293911  | 0.157133829 |
| 0.048812762 | 0.181610816 | 0.106096175 | 0.14357486  |
| 0.135541215 | 0.050743394 | 0.008166864 | 0.109099818 |
| 0.123659963 | 0.061248485 | 0.342546879 | 0.086509298 |
| 0.069872605 | 0.069155651 | 0.07181024  | 0.164016518 |

|             |             |             |             |
|-------------|-------------|-------------|-------------|
| 0.244639286 | 0.218145468 | 0.168956984 | 0.095367555 |
| 0.142812852 | 0.200987908 | 0.128298917 | 0.188436648 |
| 0.060220707 | 0.060552386 | 0.056357482 | 0.112955258 |
| 0.264369655 | 0.054404154 | 0.224838389 | 0.012804711 |
| 0.000399975 | 0.332450225 | 0.338014548 | 0.141237704 |
| 0.024601834 | 0.067794451 | 0.088522403 | 0.17520366  |
| 0.259627128 | 0.177109668 | 0.220961976 | 0.076410702 |
| 0.193380668 | 0.063331747 | 0.048855228 | 0.071097204 |
| 0.224119163 | 0.108414101 | 0.150052358 | 0.255863049 |
| 0.338394569 | 0.027812506 | 0.151307354 | 0.012389666 |
| 0.334698451 | 0.120632216 | 1           | 0.355109309 |
| 0.129519967 | 0.343828721 | 0.25438508  | 0.077343908 |
| 0.115970695 | 0.311651565 | 0.021808864 | 0.159029024 |
| 0.190735695 | 0.18872396  | 0.192353539 | 0.229448267 |
| 0.148909426 | 0.105484008 | 0.098417128 | 0.135475768 |
| 0.286023471 | 0.332357009 | 0.029611091 | 0.106567382 |
| 0.028479053 | 0.113462449 | 0.087403111 | 0.28868771  |
| 0.080166221 | 0.161759806 | 0.293017446 | 0.066523179 |
| 0.196826126 | 0.012568077 | 0.138105524 | 0.152183874 |
| 0.096855195 | 0.280609989 | 0.047870381 | 0.042390085 |
| 0.21738757  | 0.203287191 | 0.038799321 | 0.198345109 |
| 0.10829267  | 0.305368251 | 0.088435331 | 0.090043282 |
| 0.31019882  | 0.03116824  | 0.116869712 | 0.008161473 |
| 0.053933033 | 0.218768037 | 0.063683129 | 0.295997178 |
| 0.170636493 | 0.186302539 | 0.201551687 | 0.197686414 |
| 0.205026578 | 0.152922162 | 0.171440709 | 0.030182413 |
| 0.185810309 | 0.003718637 | 0.169627367 | 0.155962547 |
| 0.058131958 | 0.01462897  | 0.047266279 | 0.124284674 |
| 0.064818059 | 0.329390643 | 0.266836516 | 0.073438143 |
| 0.205061171 | 0.288814352 | 0.291664445 | 0.040681738 |
| 0.087349628 | 0.082220302 | 0.038404862 | 0.215261259 |
| 0.161384611 | 0.16794089  | 0.095075884 | 0.344351299 |
| 0.069074126 | 0.276253874 | 0.3413514   | 0.019265147 |
| 0.093245302 | 0.32205947  | 0.286862258 | 0.182927322 |
| 0.200238391 | 0.07776867  | 0.043638055 | 0.068667296 |
| 0.131710699 | 0.304328456 | 0.04431493  | 0.313995481 |
| 0.183177804 | 0.075993412 | 0.156760471 | 0.207380093 |
| 0.175544022 | 0.196540699 | 0.311068774 | 0.10474262  |
| 0.120336103 | 0.004435474 | 0.115528033 | 0.194865466 |
| 0.033556109 | 0.059746804 | 0.218710875 | 0.146781296 |
| 0.132058475 | 0.252104348 | 0.027850336 | 0.02976292  |
| 0.135864345 | 0.089234577 | 0.0478942   | 0.217533855 |
| 0.078090173 | 0.053932154 | 0.153101976 | 0.209122063 |
| 0.084883377 | 0.230436659 | 0.318013709 | 0.309892764 |
| 0.070271728 | 0.057184742 | 0.315921366 | 0.286336285 |
| 0.124731872 | 0.132945369 | 0.262254984 | 0.094619394 |
| 0.225661367 | 0.092452396 | 0.13721816  | 0.174150182 |
| 0.231615867 | 0.197066413 | 0.26448369  | 0.128597498 |
| 0.303961487 | 0.107757913 | 0.050682819 | 0.099598043 |
| 0.170715523 | 0.339928982 | 0.195936385 | 0.032052431 |
| 0.314757602 | 0.190210548 | 0.202237791 | 0.313573199 |
| 0.048031176 | 0.244118558 | 0.139517292 | 0.286510474 |
| 0.090939961 | 0.028625051 | 0.332199344 | 0.220235564 |
| 0.157156974 | 0.016324392 | 0.266316095 | 0.147197757 |

|             |             |             |             |
|-------------|-------------|-------------|-------------|
| 0.161832443 | 0.062801037 | 0.07510396  | 0.21548795  |
| 0.309075894 | 0.319939992 | 0.151230059 | 0.108400001 |
| 0.10528107  | 0.064994124 | 0.114789037 | 0.164375585 |
| 0.154934596 | 0.070551158 | 0.205456893 | 0.144899166 |
| 0.346581733 | 0.056452201 | 0.04281519  | 0.081087517 |
| 0.23467069  | 0.100586514 | 0.162519046 | 0.343207558 |
| 0.228036921 | 0.26233186  | 0.162316021 | 0.174563696 |
| 0.075418051 | 0.307125649 | 0.340205484 | 0.131966657 |
| 0.026901498 | 0.25797688  | 0.079154237 | 0.099599987 |
| 0.009083913 | 0.010551935 | 0.152298583 | 0.137102294 |
| 0.218048063 | 0.140721442 | 0.204676069 | 0.161433958 |
| 0.000218168 | 0.064598549 | 0.089505968 | 0.069012364 |
| 0.155253204 | 0.164243316 | 0.127847012 | 0.217240815 |
| 0.188260106 | 0.320397022 | 0.1722991   | 0.085568334 |
| 0.019116499 | 0.110006806 | 0.232845716 | 0.226851325 |
| 0.134208553 | 0.321107355 | 0.026478141 | 0.175487156 |
| 0.029926597 | 0.208744768 | 0.150564673 | 0.07130453  |
| 0.017574245 | 0.146583644 | 0.127701425 | 0.298513138 |
| 0.049301996 | 0.139681472 | 0.157003201 | 0.030894011 |
| 0.07575613  | 0.1823423   | 0.122490273 | 0.11524531  |
| 0.13631666  | 0.13503932  | 0.111478801 | 0.074628605 |
| 0.136296264 | 0.188884146 | 0.122507146 | 0.174170604 |
| 0.137719223 | 0.205572365 | 0.07985664  | 0.128190973 |
| 0.067581825 | 0.262132682 | 0.351403339 | 0.387425067 |
| 0.197716244 | 0.143965754 | 0.263036143 | 0.33179634  |
| 0.177098806 | 0.108976529 | 0.199245412 | 0.191798275 |
| 0.163032481 | 0.321776552 | 0.108379863 | 0.141604696 |
| 0.028511852 | 0.086729208 | 0.325853752 | 0.111188616 |
| 0.186407129 | 0.044940512 | 0.089817127 | 0.17159853  |
| 0.104732269 | 0.250629444 | 0.2490053   | 0.187604671 |
| 0.08635716  | 0.09053536  | 0.064691724 | 0.158638954 |
| 0.238025569 | 0.319107827 | 0.054988549 | 0.097385687 |
| 0.129270935 | 0.162572653 | 0.11485497  | 0.21765019  |
| 0.026652923 | 0.192487435 | 0.070820203 | 0.277179275 |
| 0.056562865 | 0.334983025 | 0.297518127 | 0.093535192 |
| 0.014013928 | 0.204323765 | 0.079175766 | 0.119140511 |
| 0.084081409 | 0.087639124 | 0.068346084 | 0.185085813 |
| 0.177797192 | 0.26800322  | 0.247112306 | 0.309156215 |
| 0.067277371 | 0.044993448 | 0.111769853 | 0.091534273 |
| 0.11796226  | 0.15960475  | 0.336085825 | 0.154521384 |
| 0.070030308 | 0.320162567 | 0.240975716 | 0.151516627 |
| 0.14445687  | 0.114211836 | 0.012990424 | 0.094629065 |
| 0.16528476  | 0.035076643 | 0.001824487 | 0.014186072 |
| 0.128936976 | 0.089241524 | 0.119588558 | 0.122029972 |
| 0.053912118 | 0.133836131 | 0.012559632 | 0.176909419 |
| 0.217324923 | 0.258774201 | 0.105577235 | 0.216950605 |
| 0.153167212 | 0.241372593 | 0.113715121 | 0.013677758 |
| 0.067639239 | 0.053851128 | 0.057825886 | 0.286277005 |
| 0.26909685  | 0.015931792 | 0.083563069 | 0.339879416 |
| 0.128605736 | 0.013299949 | 0.114587416 | 0.08575192  |
| 0.278999671 | 0.264167162 | 0.139647734 | 0.089950482 |
| 0.290017239 | 0.199259464 | 0.053412968 | 0.075247251 |
| 0.06732452  | 0.040459772 | 0.108500538 | 0.028281661 |
| 0.269365154 | 0.081628621 | 0.030667074 | 0.283503373 |



|             |             |             |             |
|-------------|-------------|-------------|-------------|
| 0.259498783 | 0.045182254 | 0.28035818  | 0.050566913 |
| 0.149805277 | 0.168149489 | 0.073351507 | 0.059612806 |
| 0.124450918 | 0.054378719 | 0.20609967  | 0.155060184 |
| 0.020483634 | 0.100858784 | 0.190868737 | 0.056377611 |
| 0.305048967 | 0.059920831 | 0.22753341  | 0.038219955 |
| 0.187089315 | 0.15216907  | 0.285840687 | 0.073057796 |
| 0.09503037  | 0.351040397 | 0.07323278  | 0.193846959 |
| 0.150346505 | 0.030306506 | 0.097932502 | 0.150775991 |
| 0.038013493 | 0.185066348 | 0.07133385  | 0.19944103  |
| 0.121591352 | 0.190689465 | 0.096399563 | 0.171040552 |
| 0.154740293 | 0.036162119 | 0.028958377 | 0.078433992 |
| 0.204951644 | 0.186804209 | 0.045326977 | 0.156186398 |
| 0.023124513 | 0.141236712 | 0.118105175 | 0.076015244 |
| 0.172405596 | 0.191515779 | 0.079217549 | 0.295950221 |
| 0.135835008 | 0.079694139 | 0.065140898 | 0.212073247 |
| 0.111575638 | 0.120119467 | 0.216631802 | 0.001216803 |
| 0.144214443 | 0.080316475 | 0.180083789 | 0.066536665 |
| 0.27963459  | 0.139044445 | 0.14714945  | 0.072286411 |
| 0.115275287 | 0.020004805 | 0.088333974 | 0.065496781 |
| 0.038523974 | 0.332811151 | 0.20372109  | 0.150039705 |
| 0.168186236 | 0.05667588  | 0.032888449 | 0.188352997 |
| 0.015681428 | 0.030673545 | 0.043152575 | 0.10641782  |
| 0.022285986 | 0.061063856 | 0.056951832 | 0.040195249 |
| 0.137085238 | 0.170191481 |             |             |
| H2-0B       | 0.359838249 | 0.236547579 | 0.320251402 |
| 0.258462763 | 0.148364444 | 0.195475745 | 0.355936266 |
| 0.351824395 | 0.237731687 | 0.110266367 | 0.204356517 |
| 0.273197712 | 0.021384105 | 0.242586081 | 0.340126901 |
| 0.150121616 | 0.29607605  | 0.36581098  | 0.088163319 |
| 0.228713555 | 0.150981845 | 0.115660544 | 0.225094752 |
| 0.150534115 | 0.359496899 | 0.251937003 | 0.121538493 |
| 0.245186211 | 0.05945437  | 0.171731782 | 0.069929454 |
| 0.312663038 | 0.138575667 | 0.107558122 | 0.267440959 |
| 0.190493183 | 0.010451199 | 0.349709128 | 0.207329896 |
| 0.052942919 | 0.315350222 | 0.149324189 | 0.253280738 |
| 0.158415278 | 0.325766579 | 0.060486547 | 0.151986351 |
| 0.232574413 | 0.237592837 | 0.338126683 | 0.195277134 |
| 0.161460836 | 0.278692419 | 0.183884619 | 0.017327873 |
| 0.077578422 | 0.010063422 | 0.044015396 | 0.29456223  |
| 0.345673548 | 0.333280717 | 0.069315118 | 0.257811402 |
| 0.161939617 | 0.184451871 | 0.290730522 | 0.139659574 |
| 0.274015002 | 0.047694172 | 0.161122212 | 0.190822159 |
| 0.212248362 | 0.304932803 | 0.374247876 | 0.327838981 |
| 0.147369478 | 0.295488459 | 0.176969787 | 0.098566837 |
| 0.234175831 | 0.344796133 | 0.317917302 | 0.313762161 |
| 0.04497201  | 0.119475483 | 0.136383312 | 0.254284949 |
| 0.212736645 | 0.315696077 | 0.210592864 | 0.310623742 |
| 0.312832139 | 0.160635279 | 0.20041214  | 0.356391924 |
| 0.23046924  | 0.085855445 | 0.149195976 | 0.057625499 |
| 0.150347341 | 0.141003    | 0.321397444 | 0.293458458 |
| 0.15405317  | 0.355949864 | 0.341866305 | 0.106545525 |
| 0.178653621 | 0.366319515 | 0.134729586 | 0.1756375   |
| 0.19354352  | 0.244472064 | 0.203419885 | 0.234631736 |
| 0.133253419 | 0.266227163 | 0.220556215 | 0.241452649 |

|             |             |             |             |
|-------------|-------------|-------------|-------------|
| 0.038049216 | 0.287674346 | 0.348095975 | 0.304229985 |
| 0.342053883 | 0.313361339 | 0.129050103 | 0.300181806 |
| 0.209067957 | 0.269057013 | 0.338883065 | 0.236437226 |
| 0.196022835 | 0.312710098 | 0.282712549 | 0.223897552 |
| 0.346026056 | 0.070404103 | 0.137820999 | 0.269854024 |
| 0.21223219  | 0.364304903 | 0.08892857  | 0.344288637 |
| 0.281506108 | 0.190662607 | 0.350045873 | 0.375047513 |
| 0.286489061 | 0.302993309 | 0.2180363   | 0.333009791 |
| 0.327401983 | 0.334363263 | 0.270888391 | 0.144229501 |
| 0.316778577 | 0.249515203 | 0.059858588 | 0.243102801 |
| 0.285358823 | 0.010066128 | 0.199676258 | 0.217150046 |
| 0.281606945 | 0.178244957 | 0.265372042 | 0.2431514   |
| 0.281698398 | 0.373660964 | 0.007937375 | 0.209948302 |
| 0.309753855 | 0.258711532 | 0.248671444 | 0.132549861 |
| 0.152509282 | 0.225067678 | 0.187302719 | 0.107800067 |
| 0.325232135 | 0.216782557 | 0.219674293 | 0.22430061  |
| 0.21580044  | 0.321061995 | 0.105525135 | 0.336876225 |
| 0.328121488 | 0.357588218 | 0.334854815 | 0.270152294 |
| 0.148255812 | 0.313188689 | 0.223581098 | 0.16278363  |
| 0.325286693 | 0.240492299 | 0.083995422 | 0.151234468 |
| 0.326605443 | 0.161556487 | 0.35993582  | 0.345169008 |
| 0.306742354 | 0.373193523 | 0.251184257 | 0.289562091 |
| 0.217135477 | 0.394312905 | 0.16710778  | 0.238733337 |
| 0.158056511 | 0.355993827 | 0.202610643 | 0.280177657 |
| 0.286331802 | 0.132712113 | 0.333110527 | 0.098234155 |
| 0.131227703 | 0.079908139 | 0.040316187 | 0.131985938 |
| 0.364154401 | 0.212160586 | 0.172446252 | 0.168885739 |
| 0.291356329 | 0.32769562  | 0.139004978 | 0.349486365 |
| 0.352615814 | 0.169165663 | 0.21329808  | 0.169431049 |
| 0.13157812  | 0.250661035 | 0.201807599 | 0.123495491 |
| 0.256954332 | 0.050769279 | 0.06796428  | 0.215592335 |
| 0.083070831 | 0.10460062  | 0.22242175  | 0.169612109 |
| 0.152814055 | 0.343852956 | 0.271484483 | 0.01112164  |
| 0.136701962 | 0.105482526 | 0.25142163  | 0.143306423 |
| 0.314708271 | 0.267006273 | 0.126400759 | 0.148771781 |
| 0.344441709 | 0.29156948  | 0.252223679 | 0.252973518 |
| 0.115932034 | 0.280138502 | 0.192847754 | 0.234207645 |
| 0.249553139 | 0.11259383  | 0.026913286 | 0.20451949  |
| 0.205122086 | 0.116518959 | 0.346830886 | 0.168115837 |
| 0.135230537 | 0.155753944 | 0.132204532 | 0.260005274 |
| 0.344148484 | 0.292610223 | 0.281538311 | 0.196883426 |
| 0.254307891 | 0.322276478 | 0.221047158 | 0.289548058 |
| 0.110688343 | 0.137182022 | 0.133793249 | 0.208766915 |
| 0.363134489 | 0.118241897 | 0.301067509 | 0.038193445 |
| 0.001464377 | 0.361566399 | 0.363819103 | 0.254357123 |
| 0.067873366 | 0.144922899 | 0.184191331 | 0.270854315 |
| 0.356885761 | 0.265651932 | 0.306659976 | 0.167947678 |
| 0.268279958 | 0.138893764 | 0.12373264  | 0.162451399 |
| 0.328679383 | 0.141475823 | 0.255390595 | 0.35166335  |
| 0.306849536 | 0.079815456 | 0.249073504 | 0.020040888 |
| 0.343928048 | 0.192250885 | 0.355109309 | 1           |
| 0.221270115 | 0.356780712 | 0.340936571 | 0.133315678 |
| 0.231873376 | 0.378981726 | 0.032244565 | 0.243304047 |
| 0.273340698 | 0.265340758 | 0.273297066 | 0.303947688 |

|             |             |             |             |
|-------------|-------------|-------------|-------------|
| 0.222001307 | 0.199444634 | 0.192751253 | 0.239705365 |
| 0.363201061 | 0.356998943 | 0.075941259 | 0.208249002 |
| 0.029562113 | 0.227606451 | 0.178045032 | 0.376979562 |
| 0.172630692 | 0.262330207 | 0.329178378 | 0.148298774 |
| 0.217920484 | 0.040939367 | 0.229863314 | 0.252984434 |
| 0.194983368 | 0.261903298 | 0.109135405 | 0.104226311 |
| 0.297141823 | 0.294528957 | 0.099277808 | 0.295771096 |
| 0.224997576 | 0.324467685 | 0.188208534 | 0.195747202 |
| 0.365874904 | 0.050677511 | 0.205655504 | 0.015863254 |
| 0.113338581 | 0.298372232 | 0.141604525 | 0.334145262 |
| 0.290191843 | 0.167111682 | 0.2840497   | 0.298209885 |
| 0.283360096 | 0.248464134 | 0.269160383 | 0.086862596 |
| 0.280955665 | 0.013060356 | 0.266134883 | 0.239580559 |
| 0.122669475 | 0.015989194 | 0.059610141 | 0.211279457 |
| 0.151187938 | 0.312428104 | 0.366704529 | 0.164419111 |
| 0.313219456 | 0.347259049 | 0.346581331 | 0.1006962   |
| 0.187830286 | 0.178965685 | 0.093487927 | 0.294605205 |
| 0.272354104 | 0.282771917 | 0.178789432 | 0.364399111 |
| 0.161158079 | 0.334225695 | 0.356229258 | 0.031764623 |
| 0.192487357 | 0.344319889 | 0.36072783  | 0.275181845 |
| 0.300915046 | 0.173816868 | 0.096466487 | 0.15415214  |
| 0.20867118  | 0.318956668 | 0.109575355 | 0.343428815 |
| 0.268342195 | 0.168746608 | 0.280943901 | 0.310869211 |
| 0.274336315 | 0.288620146 | 0.330284045 | 0.205336645 |
| 0.142371235 | 0.007789272 | 0.211519853 | 0.299595678 |
| 0.045327773 | 0.136342146 | 0.329675973 | 0.213131143 |
| 0.218904022 | 0.281237829 | 0.074970262 | 0.077956057 |
| 0.247692541 | 0.186122422 | 0.119604059 | 0.301977852 |
| 0.161535274 | 0.105763674 | 0.268391844 | 0.307736724 |
| 0.143322003 | 0.301503336 | 0.35499614  | 0.296265368 |
| 0.152251617 | 0.140001943 | 0.362750838 | 0.373747062 |
| 0.219604059 | 0.224026754 | 0.290590682 | 0.124558997 |
| 0.332744503 | 0.18130636  | 0.232010666 | 0.262078176 |
| 0.327358163 | 0.298934579 | 0.344041094 | 0.213775361 |
| 0.36340439  | 0.209334026 | 0.122846805 | 0.17845716  |
| 0.266832474 | 0.331329561 | 0.284818801 | 0.086253543 |
| 0.377803617 | 0.302298347 | 0.266783403 | 0.371642122 |
| 0.122475731 | 0.353020131 | 0.251764207 | 0.341195762 |
| 0.190017532 | 0.079685086 | 0.35475189  | 0.334939034 |
| 0.265928707 | 0.047159932 | 0.361683058 | 0.247901523 |
| 0.261821573 | 0.097466877 | 0.164762752 | 0.310483108 |
| 0.378842668 | 0.359848479 | 0.244230874 | 0.205754158 |
| 0.191188876 | 0.134011554 | 0.157731321 | 0.23722928  |
| 0.249623907 | 0.161541977 | 0.297010461 | 0.238188731 |
| 0.373817568 | 0.142126171 | 0.098159737 | 0.16886832  |
| 0.332306675 | 0.206618132 | 0.267999466 | 0.372123016 |
| 0.308110057 | 0.349150561 | 0.236360415 | 0.29601555  |
| 0.162523886 | 0.336119362 | 0.320503794 | 0.210559978 |
| 0.070543309 | 0.332845352 | 0.148827081 | 0.183238458 |
| 0.013339261 | 0.033642033 | 0.240390463 | 0.262892292 |
| 0.314100647 | 0.230451034 | 0.297413291 | 0.259474981 |
| 0.000598464 | 0.145301166 | 0.197132726 | 0.160937955 |
| 0.230621828 | 0.279604721 | 0.192057839 | 0.302671378 |
| 0.306637054 | 0.334602128 | 0.267855913 | 0.176310988 |

|             |             |             |             |
|-------------|-------------|-------------|-------------|
| 0.047320731 | 0.208347219 | 0.34005505  | 0.305315726 |
| 0.238776372 | 0.317842657 | 0.075772945 | 0.299250997 |
| 0.060182482 | 0.328311329 | 0.264745873 | 0.125999234 |
| 0.051580434 | 0.226240794 | 0.220525052 | 0.308531097 |
| 0.121357581 | 0.222816705 | 0.242348897 | 0.028201497 |
| 0.171929256 | 0.183761014 | 0.231332131 | 0.229643157 |
| 0.2520483   | 0.236699964 | 0.216484906 | 0.16576653  |
| 0.232532816 | 0.300982245 | 0.245264003 | 0.299128181 |
| 0.251612334 | 0.314254023 | 0.172931857 | 0.221958959 |
| 0.162799859 | 0.359486761 | 0.350799191 | 0.337665139 |
| 0.280130609 | 0.22702867  | 0.350915307 | 0.342009864 |
| 0.294982615 | 0.19760426  | 0.292970022 | 0.275126168 |
| 0.254983892 | 0.325232999 | 0.203170726 | 0.221007921 |
| 0.062192445 | 0.169838985 | 0.343271119 | 0.210696819 |
| 0.311269657 | 0.115567942 | 0.177153492 | 0.261603102 |
| 0.19051302  | 0.334179524 | 0.349059951 | 0.275558594 |
| 0.187334797 | 0.163231878 | 0.122741801 | 0.255048699 |
| 0.342936741 | 0.370760582 | 0.13222125  | 0.085723021 |
| 0.245521422 | 0.268071215 | 0.198435462 | 0.304136724 |
| 0.073405229 | 0.279179567 | 0.139176553 | 0.345359208 |
| 0.106727672 | 0.322417973 | 0.377542178 | 0.184864371 |
| 0.044296521 | 0.327391237 | 0.173401642 | 0.214550878 |
| 0.17876166  | 0.17264592  | 0.14046751  | 0.287042451 |
| 0.276475689 | 0.347995562 | 0.325250068 | 0.361026926 |
| 0.147049727 | 0.111718342 | 0.186121609 | 0.19312948  |
| 0.220305054 | 0.251309212 | 0.363448946 | 0.248428611 |
| 0.152462242 | 0.366270826 | 0.340998736 | 0.258063452 |
| 0.249309934 | 0.216580085 | 0.040690932 | 0.177197294 |
| 0.261787361 | 0.093923468 | 0.003596867 | 0.032658363 |
| 0.247510468 | 0.152847988 | 0.197069378 | 0.220343993 |
| 0.124272914 | 0.241858076 | 0.037627909 | 0.272900419 |
| 0.295403881 | 0.342525205 | 0.207999604 | 0.323509511 |
| 0.263760117 | 0.343265776 | 0.214460743 | 0.017837527 |
| 0.151178274 | 0.127144414 | 0.125614294 | 0.339014271 |
| 0.27373581  | 0.047885265 | 0.170652737 | 0.326356389 |
| 0.216880219 | 0.042260489 | 0.190090956 | 0.18492577  |
| 0.349900683 | 0.349025442 | 0.240564789 | 0.197447741 |
| 0.261344242 | 0.305660349 | 0.124668911 | 0.149079051 |
| 0.156633184 | 0.103451561 | 0.220125391 | 0.080498343 |
| 0.309930064 | 0.178644694 | 0.025004633 | 0.361911253 |
| 0.330964988 | 0.108953558 | 0.359288285 | 0.098920074 |
| 0.270268314 | 0.252260114 | 0.1498641   | 0.135635991 |
| 0.152886431 | 0.135420882 | 0.32349727  | 0.24740462  |
| 0.058455825 | 0.180278797 | 0.274423547 | 0.124391033 |
| 0.375084814 | 0.13344538  | 0.322919461 | 0.092155581 |
| 0.273142425 | 0.234333792 | 0.333393598 | 0.155354198 |
| 0.171477117 | 0.361877049 | 0.150405284 | 0.291220443 |
| 0.268899422 | 0.083047911 | 0.18757402  | 0.261876667 |
| 0.097303494 | 0.264397108 | 0.145447675 | 0.291886758 |
| 0.201777948 | 0.313807446 | 0.194151993 | 0.252004443 |
| 0.275985322 | 0.086222077 | 0.080616719 | 0.164882299 |
| 0.284559924 | 0.282953702 | 0.104462004 | 0.270985291 |
| 0.065588149 | 0.258820656 | 0.188072805 | 0.159625516 |
| 0.231159437 | 0.289029092 | 0.181154094 | 0.37595017  |

|             |             |             |             |
|-------------|-------------|-------------|-------------|
| 0.249105571 | 0.172499909 | 0.140231117 | 0.300279822 |
| 0.219570461 | 0.170480741 | 0.312232134 | 0.004671464 |
| 0.252590047 | 0.183599042 | 0.301495633 | 0.150844385 |
| 0.36270533  | 0.238980167 | 0.233494026 | 0.060023279 |
| 0.211896134 | 0.041966186 | 0.174600077 | 0.152303374 |
| 0.094938388 | 0.353703657 | 0.292920145 | 0.247577314 |
| 0.278830569 | 0.123372326 | 0.088592386 | 0.273468957 |
| 0.045616061 | 0.078847577 | 0.101862088 | 0.198084119 |
| 0.064196336 | 0.127661153 | 0.130203477 | 0.106937682 |
| 0.246366166 | 0.282561502 |             |             |
| H2AFX       | 0.126646332 | 0.42085539  | 0.090863538 |
| 0.20963025  | 0.419370689 | 0.471455439 | 0.108818351 |
| 0.206279038 | 0.385896351 | 0.33703596  | 0.459195276 |
| 0.039397537 | 0.172830914 | 0.460444383 | 0.108684283 |
| 0.472329659 | 0.075627868 | 0.179724742 | 0.127632372 |
| 0.307260884 | 0.396000149 | 0.452778615 | 0.427635266 |
| 0.405362827 | 0.224712643 | 0.396695965 | 0.458958219 |
| 0.488029847 | 0.341063044 | 0.496897945 | 0.221804301 |
| 0.414731645 | 0.434593044 | 0.462264844 | 0.033850083 |
| 0.493352464 | 0.030326075 | 0.431285699 | 0.367685261 |
| 0.242137957 | 0.369246697 | 0.363292818 | 0.352089048 |
| 0.402792508 | 0.06711414  | 0.24558574  | 0.464948704 |
| 0.388504676 | 0.393093791 | 0.103510362 | 0.476832607 |
| 0.436150845 | 0.414321889 | 0.406512009 | 0.004480073 |
| 0.407920208 | 0.149603226 | 0.320877097 | 0.495892827 |
| 0.290033233 | 0.217290168 | 0.340598249 | 0.347657392 |
| 0.45575719  | 0.454803783 | 0.357532618 | 0.407317176 |
| 0.491759373 | 0.285247965 | 0.475567947 | 0.237349968 |
| 0.451917177 | 0.060691106 | 0.230702595 | 0.126943086 |
| 0.470638448 | 0.31312576  | 0.459239592 | 0.415352841 |
| 0.405214747 | 0.514051801 | 0.326684755 | 0.48227687  |
| 0.185638614 | 0.439878183 | 0.400690416 | 0.396339221 |
| 0.431729055 | 0.145720185 | 0.475778052 | 0.514477966 |
| 0.090389615 | 0.407720803 | 0.447324742 | 0.175454831 |
| 0.446728893 | 0.387886491 | 0.421101752 | 0.293435577 |
| 0.460809388 | 0.435152083 | 0.471017987 | 0.378059619 |
| 0.442138153 | 0.112199339 | 0.469485121 | 0.425656718 |
| 0.413056123 | 0.129596285 | 0.333622018 | 0.48700262  |
| 0.474697193 | 0.484698739 | 0.444333788 | 0.425193451 |
| 0.45688801  | 0.492622534 | 0.461872763 | 0.44267899  |
| 0.190725878 | 0.514809542 | 0.270853119 | 0.093458874 |
| 0.113933095 | 0.169688197 | 0.345131594 | 0.375877932 |
| 0.483782426 | 0.422760658 | 0.282918215 | 0.343023873 |
| 0.481178937 | 0.460501886 | 0.509421335 | 0.458112998 |
| 0.075935657 | 0.358767164 | 0.454765453 | 0.388382543 |
| 0.45469328  | 0.183699646 | 0.374676483 | 0.49621802  |
| 0.412898944 | 0.486922701 | 0.236909831 | 0.494373973 |
| 0.295257434 | 0.514291257 | 0.443799816 | 0.257896746 |
| 0.508281796 | 0.482642093 | 0.511250587 | 0.482518181 |
| 0.471492096 | 0.415615711 | 0.10731932  | 0.427677833 |
| 0.494805616 | 0.030456564 | 0.479158302 | 0.492421852 |
| 0.483614662 | 0.488660463 | 0.52153661  | 0.505917008 |
| 0.489667435 | 0.122218217 | 0.04624635  | 0.394129816 |
| 0.493221028 | 0.435088527 | 0.246029294 | 0.466681551 |

|             |             |             |             |
|-------------|-------------|-------------|-------------|
| 0.459712333 | 0.464503939 | 0.480246463 | 0.383155483 |
| 0.51760102  | 0.471229946 | 0.479640407 | 0.445960696 |
| 0.361113191 | 0.350844726 | 0.450599276 | 0.453783257 |
| 0.089964725 | 0.176069174 | 0.083878975 | 0.389187567 |
| 0.38571033  | 0.274650055 | 0.438225411 | 0.44282137  |
| 0.290818398 | 0.417692532 | 0.427049236 | 0.469767453 |
| 0.082882649 | 0.484423156 | 0.245853886 | 0.236754739 |
| 0.085999842 | 0.188178495 | 0.27434821  | 0.256162137 |
| 0.374061005 | 0.241173638 | 0.488809913 | 0.484527865 |
| 0.442378861 | 0.238941126 | 0.47699667  | 0.480880994 |
| 0.437333342 | 0.467862701 | 0.30954032  | 0.025704767 |
| 0.349561517 | 0.368585356 | 0.28889784  | 0.480000107 |
| 0.198651387 | 0.337580242 | 0.45952486  | 0.478056446 |
| 0.34781699  | 0.218472388 | 0.451676196 | 0.433108269 |
| 0.198945764 | 0.423193988 | 0.475303012 | 0.448161835 |
| 0.008013925 | 0.405399368 | 0.48733056  | 0.25444078  |
| 0.3893676   | 0.23831128  | 0.3623616   | 0.469145415 |
| 0.389829612 | 0.352527623 | 0.489879662 | 0.478680721 |
| 0.423367816 | 0.227093101 | 0.523304784 | 0.082256208 |
| 0.44103175  | 0.103188006 | 0.383523017 | 0.366771953 |
| 0.341212858 | 0.381482299 | 0.43366935  | 0.399358437 |
| 0.179281881 | 0.508625528 | 0.444516398 | 0.505399496 |
| 0.434139902 | 0.523269471 | 0.48892144  | 0.467758077 |
| 0.449590474 | 0.431121287 | 0.230592802 | 0.474738608 |
| 0.47300774  | 0.347984223 | 0.110428082 | 0.478249696 |
| 0.410504639 | 0.474743314 | 0.21156531  | 0.489494582 |
| 0.4956707   | 0.447393133 | 0.251799634 | 0.45610872  |
| 0.439647203 | 0.323326723 | 0.463109272 | 0.529878804 |
| 0.351726562 | 0.441062936 | 0.424725219 | 0.459505181 |
| 0.249771073 | 0.332036681 | 0.363244075 | 0.289725165 |
| 0.020080533 | 0.134111653 | 0.107793726 | 0.27203483  |
| 0.28310443  | 0.460931884 | 0.471983997 | 0.507638325 |
| 0.197873195 | 0.440391919 | 0.315910661 | 0.382029653 |
| 0.411605077 | 0.450215613 | 0.474037858 | 0.480364529 |
| 0.325701928 | 0.039042689 | 0.198098032 | 0.511873112 |
| 0.065665206 | 0.357183929 | 0.40983452  | 0.006858568 |
| 0.08172647  | 0.422274386 | 0.129519967 | 0.221270115 |
| 1           | 0.222123246 | 0.271476236 | 0.353215493 |
| 0.441789666 | 0.158229344 | 0.009848587 | 0.476783103 |
| 0.478549923 | 0.451429619 | 0.474378619 | 0.449301822 |
| 0.443194948 | 0.464019124 | 0.469699337 | 0.416730737 |
| 0.17378644  | 0.140083942 | 0.308126343 | 0.3870044   |
| 0.009708009 | 0.459276994 | 0.426809645 | 0.212104296 |
| 0.487251644 | 0.388364604 | 0.076033032 | 0.459817694 |
| 0.039961884 | 0.288246918 | 0.395568925 | 0.332547741 |
| 0.442280633 | 0.030612684 | 0.290927676 | 0.398048579 |
| 0.419234853 | 0.389214646 | 0.440025533 | 0.519151383 |
| 0.43080391  | 0.165523909 | 0.409203484 | 0.483178695 |
| 0.129595905 | 0.135270989 | 0.433074168 | 0.043958465 |
| 0.287724795 | 0.451697938 | 0.462951939 | 0.110870726 |
| 0.361312373 | 0.01156069  | 0.394291797 | 0.524106787 |
| 0.447956126 | 0.512306985 | 0.495987227 | 0.384827886 |
| 0.494434378 | 0.175480874 | 0.519956241 | 0.431903812 |
| 0.409393995 | 0.001715602 | 0.01669072  | 0.481365061 |

|             |             |             |             |
|-------------|-------------|-------------|-------------|
| 0.466575365 | 0.08449794  | 0.238289247 | 0.421632651 |
| 0.193510021 | 0.217355822 | 0.1273069   | 0.299333023 |
| 0.487434318 | 0.365655446 | 0.302185112 | 0.454020321 |
| 0.338863892 | 0.345099624 | 0.442039627 | 0.13337453  |
| 0.492508987 | 0.101904296 | 0.133670375 | 0.018578353 |
| 0.460245899 | 0.148703304 | 0.454445117 | 0.498362774 |
| 0.493900485 | 0.473107707 | 0.369365054 | 0.439375935 |
| 0.464117472 | 0.134237046 | 0.439054532 | 0.159421179 |
| 0.467026282 | 0.46246436  | 0.400403225 | 0.359863131 |
| 0.499369593 | 0.46150873  | 0.068998303 | 0.463747675 |
| 0.02889303  | 0.006472428 | 0.415494598 | 0.351847317 |
| 0.119681556 | 0.450084785 | 0.326867569 | 0.325319175 |
| 0.346771128 | 0.060696818 | 0.371626273 | 0.347358738 |
| 0.391337462 | 0.449932299 | 0.391000352 | 0.319050944 |
| 0.380026872 | 0.225700662 | 0.315731349 | 0.255290122 |
| 0.335479668 | 0.344869364 | 0.226981194 | 0.045672593 |
| 0.46615918  | 0.478731492 | 0.105889097 | 0.231347378 |
| 0.476394831 | 0.483119306 | 0.084942323 | 0.027379766 |
| 0.328888897 | 0.417808094 | 0.498924498 | 0.483643795 |
| 0.513024286 | 0.517795728 | 0.398304289 | 0.222910014 |
| 0.12430383  | 0.421145922 | 0.406732343 | 0.193475965 |
| 0.504876147 | 0.099637652 | 0.47591412  | 0.407193274 |
| 0.181636205 | 0.304092657 | 0.076474401 | 0.147702496 |
| 0.475160192 | 0.26781569  | 0.289435027 | 0.195822982 |
| 0.414816416 | 0.363661314 | 0.092369989 | 0.290682206 |
| 0.409712116 | 0.263726465 | 0.239838599 | 0.405498761 |
| 0.411492257 | 0.264792319 | 0.481630619 | 0.453504197 |
| 0.193751369 | 0.172946957 | 0.333634829 | 0.458472311 |
| 0.475899761 | 0.434954667 | 0.053200298 | 0.429065181 |
| 0.492338997 | 0.493429769 | 0.487204878 | 0.441558835 |
| 0.133094214 | 0.466632804 | 0.411565969 | 0.42972955  |
| 0.277386395 | 0.462941625 | 0.351173317 | 0.109203014 |
| 0.352373405 | 0.479957777 | 0.426663381 | 0.268805233 |
| 0.481464262 | 0.177122501 | 0.087448087 | 0.466970842 |
| 0.28412445  | 0.149727137 | 0.393750442 | 0.478323979 |
| 0.004981769 | 0.243396752 | 0.487639963 | 0.361737503 |
| 0.513415438 | 0.473481962 | 0.439177832 | 0.361236753 |
| 0.004092849 | 0.471764084 | 0.463159485 | 0.463567714 |
| 0.437657937 | 0.417524932 | 0.249459473 | 0.143078744 |
| 0.363036118 | 0.117620132 | 0.225866711 | 0.418348265 |
| 0.247431871 | 0.462085402 | 0.283311143 | 0.292904616 |
| 0.311095903 | 0.129964107 | 0.368218024 | 0.342459277 |
| 0.2460375   | 0.32331115  | 0.419034815 | 0.333774575 |
| 0.267063768 | 0.454757349 | 0.44062376  | 0.053657714 |
| 0.461095284 | 0.448334815 | 0.455758861 | 0.004520698 |
| 0.489023459 | 0.018944921 | 0.315126045 | 0.328131086 |
| 0.315814962 | 0.325493947 | 0.372379327 | 0.401488054 |
| 0.419386841 | 0.322743818 | 0.379719548 | 0.336778774 |
| 0.270716929 | 0.321084316 | 0.472176271 | 0.423514022 |
| 0.392356936 | 0.20404193  | 0.131670615 | 0.123059945 |
| 0.107158689 | 0.462836051 | 0.299105111 | 0.109034093 |
| 0.33545643  | 0.433118937 | 0.396902765 | 0.474331877 |
| 0.450037774 | 0.142830154 | 0.436620753 | 0.451775972 |
| 0.281398161 | 0.372141166 | 0.106351354 | 0.451085194 |

|             |             |             |             |
|-------------|-------------|-------------|-------------|
| 0.33860635  | 0.333200287 | 0.456764659 | 0.361534228 |
| 0.44332831  | 0.405118363 | 0.300446991 | 0.441657693 |
| 0.453791083 | 0.414620732 | 0.339460401 | 0.160836619 |
| 0.254868755 | 0.190183395 | 0.382866455 | 0.004926655 |
| 0.445263874 | 0.332855943 | 0.484062066 | 0.472699994 |
| 0.39619219  | 0.419266574 | 0.356634534 | 0.14639873  |
| 0.29752066  | 0.194106169 | 0.207671481 | 0.473674321 |
| 0.31638248  | 0.289266906 | 0.407718642 | 0.391656907 |
| 0.483215529 | 0.462021031 | 0.376013853 | 0.347698224 |
| 0.340235877 | 0.265009937 | 0.464921912 | 0.182220535 |
| 0.46720107  | 0.297810664 | 0.392817058 | 0.398942661 |
| 0.33403568  | 0.505507439 | 0.105212481 | 0.514338053 |
| 0.421897478 | 0.182139891 | 0.495295011 | 0.404512749 |
| 0.386945729 | 0.229590786 | 0.291484549 | 0.436412176 |
| 0.334965095 | 0.44277023  | 0.02138606  | 0.105707218 |
| 0.417516693 | 0.385936473 | 0.426177154 | 0.441314228 |
| 0.367144033 | 0.416792644 | 0.278772719 | 0.3690271   |
| 0.459563483 | 0.483267189 | 0.342311269 | 0.322363254 |
| 0.419713447 | 0.181220236 | 0.444632784 | 0.029921995 |
| 0.473976842 | 0.470063989 | 0.433480599 | 0.108302572 |
| 0.042395661 | 0.304862103 | 0.45825472  | 0.104416169 |
| 0.479187239 | 0.300959452 | 0.406234989 | 0.490609752 |
| 0.245102534 | 0.482943399 | 0.22676652  | 0.479442104 |
| 0.079977926 | 0.346984479 | 0.464216121 | 0.446153814 |
| 0.33078655  | 0.398806018 | 0.449487792 | 0.350185383 |
| 0.068570876 | 0.378352887 | 0.00345361  | 0.40741966  |
| 0.449485233 | 0.424379298 | 0.261684808 | 0.347745891 |
| 0.376774638 | 0.425072887 | 0.358397212 | 0.470882547 |
| 0.028022311 | 0.45591937  | 0.301446984 | 0.444841571 |
| 0.288118821 | 0.424417561 | 0.114437415 | 0.416703857 |
| 0.443834928 | 0.370459066 | 0.322035132 | 0.357033932 |
| 0.473820718 | 0.425110274 | 0.205912471 | 0.348950323 |
| 0.427898414 | 0.104313884 | 0.428549072 | 0.52182449  |
| 0.28746848  | 0.327610959 | 0.487119406 | 0.30032415  |
| 0.419503553 | 0.415166459 | 0.447588214 | 0.512245476 |
| 0.151412624 | 0.338885811 | 0.48572645  | 0.446245818 |
| 0.388580157 | 0.288436577 | 0.358248312 | 0.344198082 |
| 0.439621504 | 0.166046546 | 0.366122016 | 0.419810365 |
| 0.317674939 | 0.412843578 | 0.374119427 | 0.312635029 |
| 0.081998077 | 0.274515628 | 0.46842494  | 0.214869907 |
| 0.394278308 | 0.450564881 | 0.354599454 | 0.40488314  |
| 0.231729866 | 0.052984078 | 0.45644476  | 0.034877147 |
| 0.408277794 | 0.478319894 | 0.352797786 | 0.454130467 |
| 0.236663575 | 0.42867627  | 0.380099798 | 0.002924836 |
| 0.468883516 | 0.087991195 | 0.424658198 | 0.339313344 |
| 0.384357802 | 0.092886106 | 0.452517838 | 0.512436911 |
| 0.404949415 | 0.417477957 | 0.416078198 | 0.457097506 |
| 0.245307015 | 0.407082128 | 0.430009128 | 0.446154179 |
| 0.340246618 | 0.410125846 | 0.465564813 | 0.451115024 |
| 0.450771931 | 0.379041782 |             |             |
| H2AFZ       | 0.329505503 | 0.24794659  | 0.316308758 |
| 0.257582363 | 0.141714947 | 0.203948844 | 0.305222421 |
| 0.311974083 | 0.241788793 | 0.119416562 | 0.201119414 |
| 0.224951279 | 0.019125848 | 0.24717981  | 0.279600882 |



|             |             |             |             |
|-------------|-------------|-------------|-------------|
| 0.14919752  | 0.239206285 | 0.319814562 | 0.080843166 |
| 0.225102876 | 0.137743253 | 0.113885917 | 0.232746906 |
| 0.13916501  | 0.350636708 | 0.261524192 | 0.123927955 |
| 0.257743674 | 0.063301574 | 0.177379673 | 0.08388066  |
| 0.313154787 | 0.131548995 | 0.111450492 | 0.245548093 |
| 0.189443105 | 0.007733369 | 0.356305259 | 0.190708513 |
| 0.054567269 | 0.309633525 | 0.165486561 | 0.233003185 |
| 0.171892055 | 0.299137979 | 0.067458536 | 0.153567689 |
| 0.240009561 | 0.224593669 | 0.319829341 | 0.204292821 |
| 0.162920737 | 0.276574612 | 0.197948377 | 0.014794359 |
| 0.078030385 | 0.010204067 | 0.043895697 | 0.307950275 |
| 0.316907245 | 0.281124192 | 0.073468012 | 0.239591984 |
| 0.160112296 | 0.179421683 | 0.267069712 | 0.147243986 |
| 0.283184501 | 0.043982562 | 0.168438442 | 0.18639827  |
| 0.210288621 | 0.280244271 | 0.34515196  | 0.316561033 |
| 0.14785999  | 0.260484982 | 0.167312273 | 0.097955998 |
| 0.250964485 | 0.35035428  | 0.300388074 | 0.32981487  |
| 0.035331954 | 0.116416185 | 0.13059741  | 0.236177656 |
| 0.206701158 | 0.274691871 | 0.212835655 | 0.319326396 |
| 0.276088664 | 0.171865922 | 0.200364115 | 0.335332193 |
| 0.240594677 | 0.083920555 | 0.162424605 | 0.053108192 |
| 0.148891308 | 0.135982404 | 0.32764197  | 0.276700482 |
| 0.143933188 | 0.338176865 | 0.357424866 | 0.103511545 |
| 0.169302404 | 0.354664952 | 0.123005659 | 0.18074231  |
| 0.197564602 | 0.254604179 | 0.209169122 | 0.226428786 |
| 0.133433034 | 0.276866312 | 0.22760698  | 0.243001107 |
| 0.043439621 | 0.299730923 | 0.335131985 | 0.241403168 |
| 0.332201935 | 0.25616668  | 0.114979592 | 0.281917514 |
| 0.217155467 | 0.261340109 | 0.320200168 | 0.212899816 |
| 0.197910896 | 0.328903472 | 0.294916867 | 0.223387305 |
| 0.302251937 | 0.068003883 | 0.141057246 | 0.257710799 |
| 0.203595441 | 0.325057116 | 0.084296017 | 0.355517159 |
| 0.280822195 | 0.191353129 | 0.347677003 | 0.383822158 |
| 0.25258168  | 0.3086217   | 0.233159441 | 0.302874502 |
| 0.339720968 | 0.348692404 | 0.277028993 | 0.144750427 |
| 0.326577656 | 0.259438472 | 0.045721772 | 0.240849018 |
| 0.285483728 | 0.008431485 | 0.20747208  | 0.225522783 |
| 0.296233836 | 0.184398026 | 0.270052753 | 0.251927213 |
| 0.294966766 | 0.343846914 | 0.007081936 | 0.190086228 |
| 0.323848773 | 0.262305488 | 0.204288659 | 0.137661663 |
| 0.144901285 | 0.228957328 | 0.188958759 | 0.110810709 |
| 0.325130873 | 0.227181772 | 0.229673797 | 0.22362179  |
| 0.219449378 | 0.312191622 | 0.10791435  | 0.353318009 |
| 0.289285995 | 0.341420132 | 0.32239855  | 0.253513487 |
| 0.165885183 | 0.274938892 | 0.231556459 | 0.155198532 |
| 0.28854805  | 0.240655725 | 0.086191652 | 0.148484742 |
| 0.316411129 | 0.168935123 | 0.345484985 | 0.332156071 |
| 0.257559853 | 0.350295467 | 0.228811068 | 0.254433604 |
| 0.190866845 | 0.39648127  | 0.172107851 | 0.247623664 |
| 0.151904271 | 0.351607189 | 0.205472542 | 0.283481744 |
| 0.278509408 | 0.134970977 | 0.302124801 | 0.089585398 |
| 0.127278137 | 0.082632793 | 0.039205175 | 0.135801712 |
| 0.358391034 | 0.188400465 | 0.170347563 | 0.166153959 |
| 0.297882726 | 0.299967472 | 0.135996213 | 0.35024062  |

|             |             |             |             |
|-------------|-------------|-------------|-------------|
| 0.340247078 | 0.159247487 | 0.213603765 | 0.17734797  |
| 0.117047025 | 0.249599839 | 0.206165956 | 0.103301872 |
| 0.244778458 | 0.043837934 | 0.069349897 | 0.222707127 |
| 0.080524534 | 0.090694064 | 0.230262233 | 0.165888946 |
| 0.149275561 | 0.346122543 | 0.276962985 | 0.009472434 |
| 0.133144688 | 0.098660578 | 0.229676597 | 0.155451559 |
| 0.297121552 | 0.244687834 | 0.118533423 | 0.143957609 |
| 0.345442743 | 0.300140254 | 0.253345752 | 0.261126683 |
| 0.119471977 | 0.287005898 | 0.19619827  | 0.236345939 |
| 0.24522583  | 0.113816212 | 0.02495377  | 0.211402228 |
| 0.213469259 | 0.121053993 | 0.335786565 | 0.172046324 |
| 0.14083811  | 0.155752079 | 0.122274003 | 0.265494068 |
| 0.349809449 | 0.310687015 | 0.231013797 | 0.188553402 |
| 0.253249561 | 0.308810546 | 0.223059878 | 0.292323377 |
| 0.118814939 | 0.132077999 | 0.13182413  | 0.203819759 |
| 0.344372644 | 0.10112876  | 0.291759965 | 0.036352098 |
| 0.001789432 | 0.329652131 | 0.342465446 | 0.215148401 |
| 0.061481046 | 0.151896355 | 0.184523304 | 0.280238934 |
| 0.306559935 | 0.26829191  | 0.284798772 | 0.160182572 |
| 0.277842909 | 0.131229324 | 0.124563393 | 0.159158243 |
| 0.310113651 | 0.129137258 | 0.216223397 | 0.359927692 |
| 0.295932508 | 0.075754914 | 0.236029878 | 0.015181409 |
| 0.301812848 | 0.203650789 | 0.343828721 | 0.356780712 |
| 0.222123246 | 1           | 0.332753231 | 0.143632612 |
| 0.221209024 | 0.339070087 | 0.026277397 | 0.25204884  |
| 0.281017389 | 0.270850967 | 0.281950656 | 0.312953175 |
| 0.226409412 | 0.199163375 | 0.193083878 | 0.25203222  |
| 0.33006014  | 0.346097805 | 0.070843137 | 0.195364787 |
| 0.02176294  | 0.223639365 | 0.165382352 | 0.343815675 |
| 0.172204774 | 0.246219332 | 0.280772268 | 0.140935854 |
| 0.211745261 | 0.042382323 | 0.215278213 | 0.221973001 |
| 0.182772424 | 0.232851645 | 0.121891969 | 0.104508276 |
| 0.311393058 | 0.289949012 | 0.104341585 | 0.308039867 |
| 0.215582188 | 0.32607375  | 0.183576989 | 0.190753431 |
| 0.318649349 | 0.053257465 | 0.20282409  | 0.019797988 |
| 0.114366008 | 0.302511984 | 0.142923786 | 0.341431723 |
| 0.274747937 | 0.14762481  | 0.288030548 | 0.306052904 |
| 0.301106956 | 0.2556377   | 0.278753166 | 0.085125045 |
| 0.292712251 | 0.012826385 | 0.276305467 | 0.245491033 |
| 0.130787845 | 0.014581631 | 0.040218964 | 0.22071002  |
| 0.153756272 | 0.309439192 | 0.334290735 | 0.178501504 |
| 0.26752855  | 0.329634278 | 0.295549855 | 0.091607037 |
| 0.194750041 | 0.157916835 | 0.079357936 | 0.30742174  |
| 0.249863198 | 0.249822008 | 0.183961468 | 0.339608221 |
| 0.162952756 | 0.286905066 | 0.331611096 | 0.023323574 |
| 0.182726081 | 0.343789265 | 0.375622112 | 0.285682914 |
| 0.306315356 | 0.174353315 | 0.105014559 | 0.148209227 |
| 0.209720225 | 0.318780582 | 0.117213218 | 0.334218403 |
| 0.283938697 | 0.168576953 | 0.26868354  | 0.308444721 |
| 0.277852033 | 0.297826246 | 0.276251625 | 0.205897439 |
| 0.130391989 | 0.00468145  | 0.229264375 | 0.273984089 |
| 0.037101655 | 0.133446876 | 0.312926133 | 0.198166296 |
| 0.191805124 | 0.249984206 | 0.072370738 | 0.074499746 |
| 0.234187571 | 0.179315561 | 0.111327609 | 0.283901259 |

|             |             |             |             |
|-------------|-------------|-------------|-------------|
| 0.150414362 | 0.092678265 | 0.238122117 | 0.25991076  |
| 0.131865251 | 0.304006521 | 0.347707013 | 0.248836083 |
| 0.162707106 | 0.144010782 | 0.318786486 | 0.34888164  |
| 0.22319521  | 0.231879489 | 0.236940207 | 0.099015262 |
| 0.319765461 | 0.167854698 | 0.236298146 | 0.275869839 |
| 0.338466432 | 0.302312883 | 0.344103775 | 0.171759652 |
| 0.314757689 | 0.197618512 | 0.116624321 | 0.149219752 |
| 0.274458351 | 0.320400539 | 0.296384426 | 0.085030196 |
| 0.34273205  | 0.290059702 | 0.218041543 | 0.324442668 |
| 0.122758355 | 0.313061172 | 0.217368774 | 0.345739262 |
| 0.176704243 | 0.080226605 | 0.3090583   | 0.300734112 |
| 0.260694004 | 0.047578466 | 0.328451002 | 0.243378809 |
| 0.267681737 | 0.10318774  | 0.167667144 | 0.307505774 |
| 0.350464501 | 0.329771791 | 0.264670707 | 0.201172377 |
| 0.198699051 | 0.140652128 | 0.137825985 | 0.253000284 |
| 0.253301609 | 0.167119476 | 0.310118291 | 0.226667823 |
| 0.345370522 | 0.142018433 | 0.094852171 | 0.161931408 |
| 0.293048804 | 0.214684485 | 0.237456037 | 0.331943808 |
| 0.290624526 | 0.351353836 | 0.245663211 | 0.257072767 |
| 0.167441111 | 0.327889057 | 0.311520024 | 0.215542836 |
| 0.065640566 | 0.296830238 | 0.159551098 | 0.1835561   |
| 0.013286001 | 0.031249368 | 0.244264444 | 0.234322388 |
| 0.319109975 | 0.237815831 | 0.300948504 | 0.246200714 |
| 0.00058251  | 0.1483575   | 0.193981163 | 0.168635982 |
| 0.241448462 | 0.274328863 | 0.169959104 | 0.250766266 |
| 0.286460001 | 0.331158803 | 0.223076695 | 0.184650328 |
| 0.045928049 | 0.210933273 | 0.302518818 | 0.279078586 |
| 0.211353247 | 0.308133992 | 0.074426898 | 0.286801632 |
| 0.053477086 | 0.299824908 | 0.251534041 | 0.135174478 |
| 0.050902044 | 0.22456074  | 0.226066768 | 0.271491856 |
| 0.118794437 | 0.219879479 | 0.244291327 | 0.022144363 |
| 0.174065148 | 0.145263739 | 0.195573909 | 0.20638881  |
| 0.220995852 | 0.199713753 | 0.192094211 | 0.16086169  |
| 0.229579988 | 0.276500425 | 0.235510625 | 0.269677125 |
| 0.219597486 | 0.295795534 | 0.173266556 | 0.2293575   |
| 0.153482227 | 0.325447456 | 0.342907636 | 0.334643799 |
| 0.231898424 | 0.235412651 | 0.332511179 | 0.337098581 |
| 0.258301203 | 0.20025585  | 0.281478694 | 0.29113195  |
| 0.252147425 | 0.329836707 | 0.187818294 | 0.234009936 |
| 0.064516965 | 0.171337414 | 0.314884722 | 0.221071518 |
| 0.28086581  | 0.101218144 | 0.186613357 | 0.270649682 |
| 0.194961499 | 0.332576565 | 0.329387545 | 0.278817094 |
| 0.190979311 | 0.159602131 | 0.138402742 | 0.208640719 |
| 0.325061239 | 0.346306157 | 0.121314587 | 0.075097152 |
| 0.232739582 | 0.287519259 | 0.206841288 | 0.319641995 |
| 0.072291139 | 0.274466661 | 0.151283895 | 0.311190375 |
| 0.123492103 | 0.333299932 | 0.344367279 | 0.192601377 |
| 0.044318838 | 0.297270814 | 0.164950415 | 0.230604767 |
| 0.182757195 | 0.17779595  | 0.126666991 | 0.25707864  |
| 0.253440584 | 0.344201224 | 0.334401899 | 0.350443438 |
| 0.155371867 | 0.102546154 | 0.195789434 | 0.179879794 |
| 0.194524065 | 0.262046167 | 0.331171368 | 0.258209631 |
| 0.144117326 | 0.347103636 | 0.341318539 | 0.245995878 |
| 0.256080833 | 0.182586209 | 0.039895218 | 0.182687035 |

|             |             |             |             |
|-------------|-------------|-------------|-------------|
| 0.229004675 | 0.094357433 | 0.003760629 | 0.02754597  |
| 0.230335746 | 0.147990845 | 0.205363632 | 0.212663424 |
| 0.114818382 | 0.225617419 | 0.035598569 | 0.262351222 |
| 0.312960089 | 0.356274063 | 0.196968261 | 0.300772953 |
| 0.249983241 | 0.291778777 | 0.225944004 | 0.014882885 |
| 0.154034878 | 0.132197868 | 0.128939539 | 0.278770582 |
| 0.231733343 | 0.047936375 | 0.178086694 | 0.311255644 |
| 0.2204578   | 0.043643354 | 0.193289951 | 0.192174357 |
| 0.324526688 | 0.363791008 | 0.195673787 | 0.196643924 |
| 0.23475435  | 0.285880792 | 0.125447189 | 0.147413875 |
| 0.143759318 | 0.099452949 | 0.216043245 | 0.076362894 |
| 0.258408485 | 0.162461498 | 0.020466718 | 0.365352705 |
| 0.348746967 | 0.10845366  | 0.335767374 | 0.103844053 |
| 0.247146097 | 0.248688574 | 0.124879382 | 0.142539374 |
| 0.126763945 | 0.134648358 | 0.287624839 | 0.252884264 |
| 0.063852427 | 0.17835222  | 0.244217786 | 0.117159055 |
| 0.390032921 | 0.122905117 | 0.297309914 | 0.100265229 |
| 0.288412744 | 0.238873563 | 0.340701015 | 0.142673332 |
| 0.175659141 | 0.333373558 | 0.160720055 | 0.297606587 |
| 0.228120705 | 0.078472833 | 0.188121051 | 0.237129743 |
| 0.092455669 | 0.267331175 | 0.152907687 | 0.298595831 |
| 0.155446444 | 0.28779368  | 0.193681313 | 0.259661739 |
| 0.253315789 | 0.074856031 | 0.075601666 | 0.143610632 |
| 0.302414485 | 0.253228123 | 0.099098046 | 0.27158146  |
| 0.062651485 | 0.236359405 | 0.199460667 | 0.135860295 |
| 0.172752645 | 0.247270379 | 0.180609051 | 0.343336601 |
| 0.229128796 | 0.17043035  | 0.129665788 | 0.297070528 |
| 0.19045335  | 0.147996491 | 0.313826236 | 0.003951897 |
| 0.262104419 | 0.183868395 | 0.269987129 | 0.14798891  |
| 0.352465751 | 0.231986114 | 0.244305122 | 0.043773936 |
| 0.207204373 | 0.044779969 | 0.159598476 | 0.136749564 |
| 0.088159939 | 0.308913791 | 0.302355617 | 0.252234064 |
| 0.270281603 | 0.125377429 | 0.091629987 | 0.278581952 |
| 0.043140981 | 0.082073906 | 0.09829322  | 0.210172778 |
| 0.061290799 | 0.138512304 | 0.136057041 | 0.113436636 |
| 0.245542396 | 0.263739536 |             |             |
| HAT1        | 0.197924746 | 0.264093119 | 0.167074027 |
| 0.223591231 | 0.134320306 | 0.150561789 | 0.210844319 |
| 0.222913895 | 0.223608004 | 0.090090238 | 0.174577837 |
| 0.15369872  | 0.017568348 | 0.300228087 | 0.185228011 |
| 0.145519426 | 0.174696054 | 0.238431954 | 0.056930029 |
| 0.158443166 | 0.142973042 | 0.103074792 | 0.16861414  |
| 0.13072342  | 0.31398369  | 0.189550105 | 0.107635535 |
| 0.296018271 | 0.055791863 | 0.164919636 | 0.065702609 |
| 0.365794515 | 0.13185413  | 0.099910626 | 0.132085564 |
| 0.152990492 | 0.006553852 | 0.392546733 | 0.196045594 |
| 0.055404616 | 0.338610231 | 0.117653659 | 0.210606299 |
| 0.145384724 | 0.185113499 | 0.046990002 | 0.156583785 |
| 0.17272532  | 0.162035632 | 0.173718266 | 0.190399793 |
| 0.139596649 | 0.226638107 | 0.185038844 | 0.012735435 |
| 0.076606807 | 0.011594118 | 0.0478897   | 0.333515222 |
| 0.239381064 | 0.211392928 | 0.071373813 | 0.153397462 |
| 0.136389658 | 0.171611125 | 0.198987193 | 0.132749198 |
| 0.330399662 | 0.049795399 | 0.172559043 | 0.146044542 |

|             |             |             |             |
|-------------|-------------|-------------|-------------|
| 0.178879069 | 0.147944596 | 0.264072317 | 0.169817437 |
| 0.12860384  | 0.20456958  | 0.141359325 | 0.095281463 |
| 0.275343578 | 0.385089216 | 0.2170591   | 0.354668624 |
| 0.040721186 | 0.115117729 | 0.117458992 | 0.22945771  |
| 0.203389858 | 0.181733221 | 0.229911255 | 0.371083476 |
| 0.150049431 | 0.133411407 | 0.20990838  | 0.209516785 |
| 0.257773346 | 0.069224124 | 0.130134293 | 0.054262857 |
| 0.147167111 | 0.143393153 | 0.346903597 | 0.255717387 |
| 0.116130706 | 0.196845447 | 0.365983096 | 0.104771492 |
| 0.158205094 | 0.214103011 | 0.137326593 | 0.224850571 |
| 0.186204859 | 0.297839608 | 0.237482345 | 0.249262836 |
| 0.139187329 | 0.321074775 | 0.227456399 | 0.265625961 |
| 0.028933151 | 0.335211778 | 0.239890771 | 0.166885727 |
| 0.186486283 | 0.173167819 | 0.100080017 | 0.271625252 |
| 0.258769459 | 0.20406512  | 0.251131715 | 0.202057515 |
| 0.25723924  | 0.339006621 | 0.332923852 | 0.26067142  |
| 0.191587824 | 0.064350376 | 0.145019297 | 0.160688408 |
| 0.203036222 | 0.205375385 | 0.091261574 | 0.385379512 |
| 0.325477665 | 0.231785561 | 0.215462358 | 0.403083366 |
| 0.184344858 | 0.360615898 | 0.262682539 | 0.251167241 |
| 0.376708143 | 0.370334159 | 0.333859305 | 0.154057081 |
| 0.346941026 | 0.208461671 | 0.039274964 | 0.262170013 |
| 0.335511728 | 0.010205798 | 0.25082383  | 0.276312618 |
| 0.332533594 | 0.233837298 | 0.326507423 | 0.294534323 |
| 0.325978341 | 0.2071049   | 0.008828497 | 0.182018271 |
| 0.363007347 | 0.303721333 | 0.146568581 | 0.133790349 |
| 0.138678946 | 0.177025383 | 0.196601666 | 0.12075769  |
| 0.37571225  | 0.264129272 | 0.268476379 | 0.236658778 |
| 0.162271444 | 0.331692614 | 0.10343356  | 0.361474063 |
| 0.180819825 | 0.22401189  | 0.174103296 | 0.224911829 |
| 0.118163961 | 0.222095532 | 0.1907657   | 0.137258965 |
| 0.229776727 | 0.164986235 | 0.077338076 | 0.155798811 |
| 0.198013774 | 0.144847405 | 0.2304631   | 0.250326004 |
| 0.199055802 | 0.284843241 | 0.231316124 | 0.192985931 |
| 0.176244995 | 0.361298135 | 0.171446237 | 0.291766539 |
| 0.13416752  | 0.266323502 | 0.202626961 | 0.330192556 |
| 0.342845484 | 0.130609393 | 0.24935309  | 0.076369591 |
| 0.165093583 | 0.074965356 | 0.044165996 | 0.116044669 |
| 0.311413914 | 0.204244636 | 0.1671372   | 0.184806347 |
| 0.22666681  | 0.177399186 | 0.140416662 | 0.37125452  |
| 0.243509431 | 0.148629057 | 0.279090148 | 0.149549526 |
| 0.057047626 | 0.231837821 | 0.242146616 | 0.107077506 |
| 0.211897882 | 0.051158158 | 0.065024795 | 0.283505905 |
| 0.085021924 | 0.09292767  | 0.268475368 | 0.174804229 |
| 0.124478773 | 0.307045438 | 0.328391288 | 0.015727451 |
| 0.114676295 | 0.088645085 | 0.221393517 | 0.110236137 |
| 0.244079452 | 0.235486935 | 0.113715554 | 0.13338746  |
| 0.206808605 | 0.342162435 | 0.256013845 | 0.309786751 |
| 0.126789125 | 0.339906229 | 0.247270915 | 0.289288011 |
| 0.201026781 | 0.106789632 | 0.030072229 | 0.255286614 |
| 0.268043226 | 0.127109484 | 0.193585168 | 0.197261263 |
| 0.129253377 | 0.167896177 | 0.097457993 | 0.33026985  |
| 0.381138328 | 0.325626122 | 0.190743619 | 0.212375916 |
| 0.288207861 | 0.237019785 | 0.237136637 | 0.341094765 |

|             |             |             |             |
|-------------|-------------|-------------|-------------|
| 0.105986005 | 0.141672626 | 0.144947698 | 0.247930384 |
| 0.254004947 | 0.109919596 | 0.286369614 | 0.035809229 |
| 0.001298139 | 0.194843206 | 0.211432356 | 0.187275428 |
| 0.066763682 | 0.127388875 | 0.177675334 | 0.330840997 |
| 0.231802103 | 0.290580284 | 0.220730971 | 0.187739401 |
| 0.327866711 | 0.122666899 | 0.109410453 | 0.137662418 |
| 0.248527559 | 0.092448924 | 0.191747668 | 0.39974061  |
| 0.149579808 | 0.080017491 | 0.173745406 | 0.012968804 |
| 0.204143346 | 0.211551198 | 0.25438508  | 0.340936571 |
| 0.271476236 | 0.332753231 | 1           | 0.12609114  |
| 0.205139519 | 0.218903703 | 0.016887217 | 0.29471947  |
| 0.306786207 | 0.295478901 | 0.307680761 | 0.319774756 |
| 0.266717285 | 0.188241614 | 0.225416495 | 0.176379868 |
| 0.242050024 | 0.203684087 | 0.097832042 | 0.199581962 |
| 0.016213685 | 0.22815964  | 0.132856149 | 0.247554457 |
| 0.186703222 | 0.210682136 | 0.174219548 | 0.121385367 |
| 0.148180048 | 0.049806736 | 0.178098844 | 0.174031976 |
| 0.187580571 | 0.124527489 | 0.118478968 | 0.122443384 |
| 0.328926947 | 0.302380526 | 0.095897766 | 0.346430678 |
| 0.194002533 | 0.221357343 | 0.18166784  | 0.192540999 |
| 0.229031142 | 0.058884881 | 0.157348535 | 0.0173806   |
| 0.066400394 | 0.314582857 | 0.121115159 | 0.232017806 |
| 0.243200786 | 0.083273284 | 0.314989413 | 0.349641714 |
| 0.314659047 | 0.314141941 | 0.322878774 | 0.088522682 |
| 0.338256342 | 0.013857388 | 0.319981633 | 0.270713572 |
| 0.121096189 | 0.012212045 | 0.027915382 | 0.272469645 |
| 0.156589969 | 0.176650571 | 0.248704128 | 0.140980482 |
| 0.226016246 | 0.216015854 | 0.174060714 | 0.096589982 |
| 0.154010068 | 0.144138906 | 0.075702018 | 0.335542043 |
| 0.228254938 | 0.196176313 | 0.145275551 | 0.202662831 |
| 0.133215978 | 0.206206468 | 0.19206502  | 0.022989116 |
| 0.179841025 | 0.25067647  | 0.379913604 | 0.322058468 |
| 0.356607539 | 0.177652972 | 0.091686932 | 0.115340073 |
| 0.24021923  | 0.19136454  | 0.094223628 | 0.189989681 |
| 0.317090094 | 0.176096013 | 0.276796182 | 0.318044725 |
| 0.343085943 | 0.34686011  | 0.175764557 | 0.241430327 |
| 0.07662815  | 0.003523814 | 0.184099337 | 0.218356312 |
| 0.023790868 | 0.141218696 | 0.294154014 | 0.14208487  |
| 0.13803835  | 0.159757778 | 0.081013867 | 0.087975819 |
| 0.214432666 | 0.177488584 | 0.117433872 | 0.221049975 |
| 0.137357115 | 0.113139553 | 0.17807387  | 0.192659975 |
| 0.101795828 | 0.308232991 | 0.324691323 | 0.15404935  |
| 0.13863172  | 0.138133041 | 0.205109947 | 0.228570507 |
| 0.273974384 | 0.288733873 | 0.193495821 | 0.088243635 |
| 0.295670642 | 0.154188101 | 0.291991099 | 0.307247443 |
| 0.371383553 | 0.36170693  | 0.365003607 | 0.166030296 |
| 0.2004833   | 0.177399365 | 0.115430444 | 0.127702257 |
| 0.316960122 | 0.184239466 | 0.314331772 | 0.085606275 |
| 0.22673808  | 0.247414498 | 0.153513469 | 0.215460224 |
| 0.11185498  | 0.22595745  | 0.190665055 | 0.230597909 |
| 0.184732152 | 0.076774708 | 0.195034906 | 0.242626003 |
| 0.273777118 | 0.063512753 | 0.247732588 | 0.157206778 |
| 0.241557765 | 0.069043637 | 0.190531405 | 0.36408507  |
| 0.226504435 | 0.221670079 | 0.216367434 | 0.189497056 |

|             |             |             |             |
|-------------|-------------|-------------|-------------|
| 0.23208441  | 0.114059964 | 0.086392793 | 0.274831779 |
| 0.295085072 | 0.164044247 | 0.335182283 | 0.279339834 |
| 0.210464445 | 0.141872708 | 0.091749758 | 0.165703976 |
| 0.219031094 | 0.155690695 | 0.183646002 | 0.207149987 |
| 0.283486468 | 0.372049215 | 0.29019984  | 0.213632468 |
| 0.129291633 | 0.190373023 | 0.176537069 | 0.238815779 |
| 0.085633579 | 0.228675105 | 0.116677351 | 0.209044872 |
| 0.009102933 | 0.033155107 | 0.289565973 | 0.177392593 |
| 0.353985048 | 0.297928032 | 0.350466383 | 0.152291701 |
| 0.001168159 | 0.154900813 | 0.184161302 | 0.165043786 |
| 0.282848907 | 0.248293325 | 0.091741924 | 0.207324664 |
| 0.282808364 | 0.194734431 | 0.222031603 | 0.131539431 |
| 0.059014536 | 0.179970791 | 0.243155609 | 0.202013074 |
| 0.180353681 | 0.183302309 | 0.066562711 | 0.211246278 |
| 0.050156952 | 0.268725612 | 0.282968868 | 0.088709628 |
| 0.077146177 | 0.275146537 | 0.259732239 | 0.15321931  |
| 0.103615683 | 0.254510212 | 0.268845243 | 0.031623365 |
| 0.194250924 | 0.091585479 | 0.176077777 | 0.190335217 |
| 0.186062051 | 0.182166703 | 0.17229152  | 0.154928497 |
| 0.193486802 | 0.230057553 | 0.207032876 | 0.222775711 |
| 0.186362803 | 0.202097076 | 0.150296953 | 0.183096064 |
| 0.153041507 | 0.23230634  | 0.250059486 | 0.267191448 |
| 0.161340889 | 0.258436751 | 0.313452953 | 0.193247825 |
| 0.202100097 | 0.162651899 | 0.323414162 | 0.317852468 |
| 0.288193903 | 0.234125005 | 0.160892326 | 0.271603163 |
| 0.06164504  | 0.139062034 | 0.188715374 | 0.169178082 |
| 0.213608859 | 0.115142205 | 0.134363055 | 0.216789886 |
| 0.194943661 | 0.368055621 | 0.295729804 | 0.307291117 |
| 0.166124196 | 0.137899625 | 0.109241777 | 0.186028306 |
| 0.270105986 | 0.229334716 | 0.125180934 | 0.044514129 |
| 0.200754448 | 0.204293973 | 0.262021309 | 0.347985674 |
| 0.070057876 | 0.30155673  | 0.119237909 | 0.250877834 |
| 0.091616208 | 0.307196148 | 0.242712886 | 0.197624591 |
| 0.048615472 | 0.204524194 | 0.15991654  | 0.151537159 |
| 0.201037006 | 0.181294104 | 0.111014504 | 0.193044876 |
| 0.186801861 | 0.223657778 | 0.352539392 | 0.205103087 |
| 0.136492345 | 0.108448686 | 0.137939536 | 0.190309289 |
| 0.182416126 | 0.302785357 | 0.188698253 | 0.306909121 |
| 0.158322987 | 0.239046105 | 0.37996941  | 0.15895468  |
| 0.163776473 | 0.130699293 | 0.04572154  | 0.137207347 |
| 0.192863487 | 0.085547386 | 0.004209624 | 0.042402946 |
| 0.237198818 | 0.113539545 | 0.221478192 | 0.201008114 |
| 0.110769926 | 0.244864402 | 0.029092914 | 0.210963532 |
| 0.328393423 | 0.36834382  | 0.221330553 | 0.276999436 |
| 0.247267338 | 0.210785693 | 0.17012284  | 0.00963462  |
| 0.151656636 | 0.120850256 | 0.115273172 | 0.177275182 |
| 0.139032487 | 0.060768278 | 0.165685946 | 0.168903207 |
| 0.279041128 | 0.046705834 | 0.146429392 | 0.182682029 |
| 0.225965064 | 0.382050219 | 0.162318182 | 0.211694063 |
| 0.147533607 | 0.211110936 | 0.107058135 | 0.124275236 |
| 0.161609478 | 0.11054096  | 0.239970042 | 0.083268914 |
| 0.177177199 | 0.157063766 | 0.027108286 | 0.390956374 |
| 0.363011971 | 0.114441156 | 0.286955061 | 0.077610005 |
| 0.221718594 | 0.253431503 | 0.130285959 | 0.115109263 |

|             |             |             |             |
|-------------|-------------|-------------|-------------|
| 0.083055483 | 0.138264452 | 0.204067617 | 0.275240074 |
| 0.08009242  | 0.157899862 | 0.165618396 | 0.114448259 |
| 0.386370644 | 0.149388288 | 0.268200754 | 0.117041887 |
| 0.311907183 | 0.229445268 | 0.231651902 | 0.104569068 |
| 0.149763355 | 0.191684204 | 0.116850681 | 0.342941176 |
| 0.194037895 | 0.08786334  | 0.243042707 | 0.238668584 |
| 0.093461101 | 0.271860399 | 0.125079928 | 0.332940774 |
| 0.143731641 | 0.236321268 | 0.20962908  | 0.305406663 |
| 0.251619959 | 0.079495831 | 0.08662005  | 0.156824111 |
| 0.322259045 | 0.188392894 | 0.099470478 | 0.264214518 |
| 0.079517429 | 0.195073875 | 0.135104318 | 0.129442418 |
| 0.132406097 | 0.174030366 | 0.13717721  | 0.229199341 |
| 0.210230881 | 0.164195    | 0.130861318 | 0.338991039 |
| 0.160928352 | 0.125834295 | 0.354700837 | 0.008625667 |
| 0.17730367  | 0.173155821 | 0.196816722 | 0.135655265 |
| 0.293416236 | 0.190953901 | 0.201760581 | 0.034499313 |
| 0.239168526 | 0.03129281  | 0.122038225 | 0.154157525 |
| 0.094274879 | 0.207842982 | 0.322116786 | 0.308788571 |
| 0.191926124 | 0.089123319 | 0.089825093 | 0.306530327 |
| 0.050275327 | 0.072891719 | 0.095687171 | 0.184816816 |
| 0.063662154 | 0.12022368  | 0.116202813 | 0.106366395 |
| 0.225666283 | 0.174668164 |             |             |
| HBP1        | 0.017418173 | 0.380320271 | 0.018731222 |
| 0.026585054 | 0.129065019 | 0.105897271 | 0.016484274 |
| 0.028619596 | 0.318591336 | 0.16692912  | 0.128254746 |
| 0.003089149 | 0.020992283 | 0.356611232 | 0.012512544 |
| 0.226591743 | 0.005270269 | 0.035390119 | 0.034019124 |
| 0.073746867 | 0.115551426 | 0.073364395 | 0.172859494 |
| 0.114199342 | 0.128581183 | 0.223712413 | 0.234945301 |
| 0.422302051 | 0.086860088 | 0.245026574 | 0.114204321 |
| 0.321001551 | 0.151593316 | 0.171391159 | 0.003349655 |
| 0.177343712 | 0.011409904 | 0.371114021 | 0.073756987 |
| 0.033610949 | 0.236472833 | 0.203776906 | 0.056279409 |
| 0.259827903 | 0.008424182 | 0.105432685 | 0.326866891 |
| 0.233705662 | 0.072083671 | 0.031242203 | 0.290367569 |
| 0.137065373 | 0.175435994 | 0.372168769 | 0.000752318 |
| 0.102348971 | 0.040528108 | 0.085555667 | 0.403315133 |
| 0.083318997 | 0.028136105 | 0.168264525 | 0.099027487 |
| 0.27909315  | 0.269451907 | 0.123228429 | 0.18886862  |
| 0.394971883 | 0.056544625 | 0.348840373 | 0.032165311 |
| 0.161429476 | 0.014563709 | 0.081047901 | 0.062775013 |
| 0.126620645 | 0.057076177 | 0.116114985 | 0.110580398 |
| 0.416825915 | 0.40969934  | 0.123939327 | 0.441641772 |
| 0.047714108 | 0.185284144 | 0.065468354 | 0.171271795 |
| 0.291140534 | 0.033163693 | 0.249380447 | 0.421084422 |
| 0.019627124 | 0.312695771 | 0.329914941 | 0.080944116 |
| 0.329079535 | 0.099455193 | 0.255460729 | 0.03465164  |
| 0.222495171 | 0.187402925 | 0.412362106 | 0.150270393 |
| 0.103930714 | 0.042518439 | 0.408918944 | 0.162653818 |
| 0.064450136 | 0.034165046 | 0.069723606 | 0.390879372 |
| 0.254900464 | 0.389959108 | 0.401597088 | 0.290373928 |
| 0.21334686  | 0.394308363 | 0.251296138 | 0.321303408 |
| 0.105522528 | 0.43737742  | 0.064101355 | 0.005332274 |
| 0.025812461 | 0.012561631 | 0.085703947 | 0.179343365 |



|             |             |             |             |
|-------------|-------------|-------------|-------------|
| 0.360395168 | 0.17447255  | 0.058330642 | 0.080563974 |
| 0.370407703 | 0.407267117 | 0.461013215 | 0.327377318 |
| 0.008459204 | 0.096209734 | 0.213596447 | 0.057531943 |
| 0.248410527 | 0.051573459 | 0.093095334 | 0.418536887 |
| 0.251244363 | 0.331525605 | 0.050829384 | 0.399692341 |
| 0.079183419 | 0.381502472 | 0.39391703  | 0.051898256 |
| 0.416956935 | 0.394428926 | 0.388951923 | 0.241440025 |
| 0.348014049 | 0.127541528 | 0.041959743 | 0.317212593 |
| 0.338716254 | 0.002341806 | 0.409733795 | 0.429646302 |
| 0.431287878 | 0.382820991 | 0.420310944 | 0.403160872 |
| 0.426343106 | 0.034496729 | 0.038916179 | 0.145124244 |
| 0.431315898 | 0.271516335 | 0.025552832 | 0.249915861 |
| 0.195448671 | 0.148999411 | 0.325400126 | 0.086212679 |
| 0.381044848 | 0.350422235 | 0.418763066 | 0.312231701 |
| 0.235380634 | 0.209724586 | 0.232633143 | 0.38058647  |
| 0.006717631 | 0.031850764 | 0.028574978 | 0.199598213 |
| 0.116532038 | 0.057574628 | 0.142914384 | 0.213189354 |
| 0.075193058 | 0.141996849 | 0.118263599 | 0.225114323 |
| 0.04669782  | 0.240758766 | 0.059170412 | 0.091931824 |
| 0.006440195 | 0.092728268 | 0.040988237 | 0.023185461 |
| 0.080033501 | 0.198075881 | 0.314684834 | 0.401493214 |
| 0.152334026 | 0.110066597 | 0.285068893 | 0.342129468 |
| 0.288858731 | 0.180996297 | 0.131954285 | 0.00088446  |
| 0.101941237 | 0.163033513 | 0.069411012 | 0.231397396 |
| 0.133869978 | 0.074959835 | 0.247634157 | 0.230836048 |
| 0.121750062 | 0.061556159 | 0.136111404 | 0.299088525 |
| 0.108716111 | 0.06319329  | 0.33535584  | 0.288867506 |
| 0.000304271 | 0.147705492 | 0.328344186 | 0.040539044 |
| 0.227144989 | 0.029167264 | 0.054362554 | 0.389632037 |
| 0.102716864 | 0.065820327 | 0.390939278 | 0.232227026 |
| 0.083012994 | 0.194142374 | 0.422200956 | 0.039309723 |
| 0.190688537 | 0.006265817 | 0.135237972 | 0.229567059 |
| 0.117140121 | 0.171482062 | 0.134586415 | 0.06500793  |
| 0.068283018 | 0.425181918 | 0.262417755 | 0.403487371 |
| 0.139788834 | 0.430545093 | 0.355611608 | 0.308625782 |
| 0.189667623 | 0.223656668 | 0.04390721  | 0.336938087 |
| 0.378199687 | 0.153239296 | 0.05127349  | 0.386268861 |
| 0.242906181 | 0.281188318 | 0.024299441 | 0.387969817 |
| 0.36291883  | 0.424225253 | 0.023712566 | 0.239013415 |
| 0.241335944 | 0.080350964 | 0.298281842 | 0.414918104 |
| 0.194562906 | 0.189501222 | 0.116011252 | 0.267420392 |
| 0.081489179 | 0.05921659  | 0.224264988 | 0.057337499 |
| 0.002553772 | 0.033881092 | 0.028472689 | 0.035162997 |
| 0.035784953 | 0.307536139 | 0.255917044 | 0.427627937 |
| 0.032271196 | 0.277871996 | 0.160898483 | 0.077280025 |
| 0.368188904 | 0.151401314 | 0.171743585 | 0.200087795 |
| 0.141608341 | 0.00196176  | 0.01785982  | 0.418784363 |
| 0.029359873 | 0.053335621 | 0.137812214 | 0.00030849  |
| 0.013308406 | 0.399360534 | 0.077343908 | 0.133315678 |
| 0.353215493 | 0.143632612 | 0.12609114  | 1           |
| 0.168210775 | 0.029972104 | 0.000672231 | 0.431096046 |
| 0.428322904 | 0.409752807 | 0.43757947  | 0.396506483 |
| 0.409496506 | 0.292679727 | 0.315611572 | 0.15531257  |
| 0.023681223 | 0.032205799 | 0.073579959 | 0.110556768 |

|             |             |             |             |
|-------------|-------------|-------------|-------------|
| 0.001657165 | 0.213118003 | 0.119941136 | 0.065711351 |
| 0.300990566 | 0.193884574 | 0.006073164 | 0.181913992 |
| 0.004014157 | 0.066423319 | 0.098071389 | 0.064920906 |
| 0.211858415 | 0.002623229 | 0.072316179 | 0.123079129 |
| 0.330513948 | 0.237529137 | 0.127690314 | 0.429409794 |
| 0.121423737 | 0.112083735 | 0.11017729  | 0.218877271 |
| 0.015720047 | 0.108281932 | 0.145791892 | 0.026420252 |
| 0.043628203 | 0.370445601 | 0.132224369 | 0.018908963 |
| 0.123499834 | 0.000581715 | 0.261266893 | 0.415940849 |
| 0.399749054 | 0.427466696 | 0.37960462  | 0.078000187 |
| 0.402983323 | 0.057559366 | 0.433242588 | 0.33169521  |
| 0.206699617 | 0.000126307 | 0.000135768 | 0.400053873 |
| 0.211401388 | 0.046013102 | 0.066204785 | 0.082587013 |
| 0.017819565 | 0.056953352 | 0.012432491 | 0.038575341 |
| 0.216875732 | 0.071786771 | 0.036653817 | 0.414190583 |
| 0.08504422  | 0.086801232 | 0.175675642 | 0.054610811 |
| 0.191421711 | 0.008708555 | 0.059228451 | 0.000674788 |
| 0.211518519 | 0.090548977 | 0.39367378  | 0.417077468 |
| 0.368577208 | 0.229846911 | 0.171117422 | 0.075025381 |
| 0.351011553 | 0.071599763 | 0.109132061 | 0.065730036 |
| 0.414463527 | 0.243244343 | 0.175427693 | 0.197158092 |
| 0.393600069 | 0.366979409 | 0.006491836 | 0.308482455 |
| 0.00126251  | 0.001108922 | 0.180397717 | 0.147342747 |
| 0.043367583 | 0.185015894 | 0.148720495 | 0.09092877  |
| 0.056855452 | 0.005199972 | 0.099634486 | 0.090623367 |
| 0.147714885 | 0.164625026 | 0.105759834 | 0.171032095 |
| 0.077421433 | 0.044732251 | 0.037765238 | 0.032894451 |
| 0.096444744 | 0.252172277 | 0.136776752 | 0.004999459 |
| 0.242386846 | 0.206876884 | 0.014265839 | 0.073995487 |
| 0.311823507 | 0.391960541 | 0.011671883 | 0.000829954 |
| 0.160811998 | 0.124077199 | 0.385323375 | 0.421236644 |
| 0.421621046 | 0.404325985 | 0.279453838 | 0.026303476 |
| 0.012364013 | 0.15193518  | 0.127550488 | 0.015093657 |
| 0.401971544 | 0.050376398 | 0.377430702 | 0.135985236 |
| 0.056404982 | 0.05276037  | 0.003438626 | 0.028385046 |
| 0.193490151 | 0.070189135 | 0.046273955 | 0.091808445 |
| 0.106140134 | 0.061021243 | 0.012230954 | 0.075586785 |
| 0.245650925 | 0.073453062 | 0.070583219 | 0.094647908 |
| 0.25593717  | 0.151684635 | 0.322036005 | 0.325676923 |
| 0.061160241 | 0.058902955 | 0.083718185 | 0.262220964 |
| 0.378740478 | 0.288235336 | 0.00265857  | 0.421035685 |
| 0.370393625 | 0.28099383  | 0.394396316 | 0.27313691  |
| 0.047736779 | 0.155112132 | 0.150225028 | 0.190548983 |
| 0.082066084 | 0.118575622 | 0.091331902 | 0.02567409  |
| 0.197936606 | 0.380361193 | 0.371861658 | 0.036155086 |
| 0.22391956  | 0.082555301 | 0.04673505  | 0.348711979 |
| 0.055905543 | 0.019390848 | 0.200104852 | 0.35715072  |
| 7.06E-05    | 0.034374124 | 0.406342001 | 0.038589045 |
| 0.412064075 | 0.389057184 | 0.313896984 | 0.061297153 |
| 0.002331875 | 0.304295954 | 0.178475973 | 0.139190367 |
| 0.374439153 | 0.207676944 | 0.036026963 | 0.011600913 |
| 0.156744931 | 0.052335766 | 0.032062685 | 0.076961808 |
| 0.095793377 | 0.262224807 | 0.093849261 | 0.116716922 |
| 0.053312585 | 0.087622431 | 0.051688952 | 0.060840585 |

|             |             |             |             |
|-------------|-------------|-------------|-------------|
| 0.066104639 | 0.117331117 | 0.216406916 | 0.130611183 |
| 0.075654558 | 0.360647595 | 0.351022354 | 0.004490546 |
| 0.155429917 | 0.335729003 | 0.311684534 | 0.00130901  |
| 0.282070643 | 0.000496858 | 0.051132856 | 0.051592189 |
| 0.044514108 | 0.063009973 | 0.107660248 | 0.069301113 |
| 0.24689392  | 0.071920441 | 0.064192791 | 0.090541161 |
| 0.024747455 | 0.072444299 | 0.201960099 | 0.169117709 |
| 0.056458085 | 0.026164635 | 0.074495862 | 0.084329913 |
| 0.005817448 | 0.365374611 | 0.143000205 | 0.045700684 |
| 0.088735987 | 0.156038649 | 0.218864931 | 0.435997579 |
| 0.269752351 | 0.092642694 | 0.126821907 | 0.357588846 |
| 0.15158562  | 0.077354034 | 0.017793714 | 0.18957241  |
| 0.07466088  | 0.045326921 | 0.196647718 | 0.206862807 |
| 0.364527255 | 0.27918818  | 0.132803068 | 0.317984774 |
| 0.117781659 | 0.223195046 | 0.176251374 | 0.011669562 |
| 0.057018068 | 0.081366797 | 0.098209697 | 0.000290101 |
| 0.175042665 | 0.060460133 | 0.37859101  | 0.403014591 |
| 0.09697104  | 0.244740276 | 0.11306675  | 0.021117405 |
| 0.138090742 | 0.165269257 | 0.068195464 | 0.34061161  |
| 0.06781496  | 0.03382573  | 0.123496419 | 0.08172801  |
| 0.316512447 | 0.358872475 | 0.066271821 | 0.084708983 |
| 0.107047164 | 0.106386614 | 0.413237724 | 0.039892429 |
| 0.297845346 | 0.03559067  | 0.28229608  | 0.106301773 |
| 0.06505353  | 0.431996654 | 0.021118312 | 0.440075263 |
| 0.145903344 | 0.082469868 | 0.35740399  | 0.110018758 |
| 0.066369424 | 0.014409725 | 0.058643743 | 0.154387565 |
| 0.058124802 | 0.100110901 | 0.015161382 | 0.025677236 |
| 0.171110632 | 0.143696655 | 0.407307502 | 0.255750359 |
| 0.067778663 | 0.214103358 | 0.042653686 | 0.135535137 |
| 0.424965276 | 0.410337175 | 0.063614336 | 0.147751155 |
| 0.220159646 | 0.017054326 | 0.222963377 | 0.012078552 |
| 0.287646694 | 0.289414779 | 0.147476079 | 0.008832527 |
| 0.003018755 | 0.078185302 | 0.30051594  | 0.053765484 |
| 0.38706549  | 0.064925971 | 0.29427865  | 0.269814641 |
| 0.109309203 | 0.412355876 | 0.018266596 | 0.23166102  |
| 0.030574918 | 0.130044043 | 0.180707147 | 0.224623042 |
| 0.044543266 | 0.10926447  | 0.225364676 | 0.061307016 |
| 0.004497301 | 0.054887777 | 0.003094526 | 0.296128509 |
| 0.422795053 | 0.181845767 | 0.128533452 | 0.150287097 |
| 0.126926419 | 0.276322155 | 0.067748725 | 0.21972807  |
| 0.000617881 | 0.189832951 | 0.067286951 | 0.280786262 |
| 0.106613293 | 0.268384389 | 0.006410449 | 0.162991795 |
| 0.374599795 | 0.09181581  | 0.163551195 | 0.151951376 |
| 0.408697066 | 0.303388461 | 0.117774129 | 0.040580393 |
| 0.338825746 | 0.035122279 | 0.1496375   | 0.429011253 |
| 0.038849483 | 0.059147514 | 0.326647804 | 0.050948814 |
| 0.122590636 | 0.280126885 | 0.313499329 | 0.435719278 |
| 0.010833328 | 0.107951491 | 0.294297334 | 0.40121975  |
| 0.154663179 | 0.042873376 | 0.062885933 | 0.066309483 |
| 0.379860513 | 0.01417581  | 0.084329515 | 0.226429375 |
| 0.068668306 | 0.142372967 | 0.282324313 | 0.045118979 |
| 0.004178396 | 0.035920168 | 0.070321156 | 0.062016817 |
| 0.134947351 | 0.164880923 | 0.061593913 | 0.2528581   |
| 0.016960074 | 0.002423988 | 0.320990114 | 0.010362437 |

|             |             |             |             |
|-------------|-------------|-------------|-------------|
| 0.13684996  | 0.192308095 | 0.084102021 | 0.135143544 |
| 0.107456424 | 0.211708153 | 0.218782275 | 2.47E-05    |
| 0.295692045 | 0.008950654 | 0.087939881 | 0.046957279 |
| 0.088299063 | 0.012935204 | 0.33369457  | 0.400346086 |
| 0.157073907 | 0.094092347 | 0.109088673 | 0.364238428 |
| 0.041446822 | 0.132627036 | 0.124504293 | 0.306536584 |
| 0.059038282 | 0.240688378 | 0.192065612 | 0.134618005 |
| 0.235655359 | 0.072844121 |             |             |
| HCFC1       | 0.130190554 | 0.332636706 | 0.081897191 |
| 0.219266512 | 0.319915185 | 0.298897943 | 0.115838623 |
| 0.20352439  | 0.26009038  | 0.150075083 | 0.340925513 |
| 0.058728954 | 0.135600393 | 0.407458746 | 0.119999775 |
| 0.298073792 | 0.110386779 | 0.180510101 | 0.083371874 |
| 0.205111644 | 0.307251191 | 0.300122242 | 0.252787899 |
| 0.301348297 | 0.213376724 | 0.234473232 | 0.254954802 |
| 0.411743848 | 0.185013284 | 0.309118216 | 0.110997184 |
| 0.396055184 | 0.314988316 | 0.263152436 | 0.047089988 |
| 0.302215256 | 0.022172288 | 0.391193426 | 0.300254956 |
| 0.211240026 | 0.352785005 | 0.180295297 | 0.312568322 |
| 0.208749503 | 0.07658356  | 0.110373718 | 0.265141993 |
| 0.229857155 | 0.27680498  | 0.084755486 | 0.296025024 |
| 0.246012606 | 0.291073663 | 0.237727705 | 0.006862948 |
| 0.259293988 | 0.084199357 | 0.182611437 | 0.42928778  |
| 0.262024871 | 0.235988908 | 0.160466012 | 0.228290315 |
| 0.254210774 | 0.279098683 | 0.282822328 | 0.207996105 |
| 0.432757151 | 0.195122502 | 0.298403507 | 0.208840942 |
| 0.265569863 | 0.055680461 | 0.207137583 | 0.093175538 |
| 0.276234847 | 0.301092489 | 0.340096966 | 0.269517764 |
| 0.319406725 | 0.461836194 | 0.253223596 | 0.406263719 |
| 0.122394992 | 0.286246708 | 0.305983508 | 0.307425783 |
| 0.277394118 | 0.122007692 | 0.345033956 | 0.460588894 |
| 0.079878026 | 0.207006372 | 0.275235129 | 0.132821741 |
| 0.357541399 | 0.22137082  | 0.21731399  | 0.239816902 |
| 0.307646799 | 0.287025227 | 0.402661367 | 0.291585348 |
| 0.312841858 | 0.092206368 | 0.398784859 | 0.288315394 |
| 0.341231217 | 0.119227556 | 0.261240092 | 0.3744332   |
| 0.295288714 | 0.422448734 | 0.316897632 | 0.308065978 |
| 0.288460625 | 0.433355704 | 0.312574291 | 0.363571007 |
| 0.080344482 | 0.439551826 | 0.240326433 | 0.134057185 |
| 0.09909504  | 0.202906972 | 0.223641885 | 0.330056427 |
| 0.405566868 | 0.299603593 | 0.24732619  | 0.298948746 |
| 0.405817675 | 0.384935004 | 0.426535274 | 0.348660441 |
| 0.093822958 | 0.209600012 | 0.28635091  | 0.276729004 |
| 0.290050044 | 0.166480864 | 0.273271047 | 0.432205186 |
| 0.38204143  | 0.370769359 | 0.187717589 | 0.44286918  |
| 0.215210931 | 0.475226096 | 0.35205896  | 0.251540305 |
| 0.450375951 | 0.423133904 | 0.46914395  | 0.31907916  |
| 0.429695007 | 0.290634413 | 0.055018532 | 0.322975573 |
| 0.471803873 | 0.034921026 | 0.391108147 | 0.418170408 |
| 0.408769286 | 0.377654282 | 0.465002403 | 0.440868017 |
| 0.414175499 | 0.117999443 | 0.017270437 | 0.307618006 |
| 0.424993305 | 0.37859675  | 0.243350008 | 0.264371907 |
| 0.302121575 | 0.282644979 | 0.333603332 | 0.246502459 |
| 0.484586063 | 0.394400478 | 0.401649935 | 0.306198859 |

|             |             |             |             |
|-------------|-------------|-------------|-------------|
| 0.197756455 | 0.337453095 | 0.255328924 | 0.391295371 |
| 0.125095312 | 0.16141365  | 0.076789583 | 0.284468204 |
| 0.207393682 | 0.272542362 | 0.271909302 | 0.274597115 |
| 0.270565582 | 0.246585847 | 0.249551525 | 0.31486789  |
| 0.070287535 | 0.276537774 | 0.212856463 | 0.179949944 |
| 0.12399481  | 0.182615998 | 0.254560824 | 0.271641782 |
| 0.321919379 | 0.234353875 | 0.298996531 | 0.424659825 |
| 0.267340889 | 0.181853286 | 0.30049881  | 0.457768772 |
| 0.443206995 | 0.30513117  | 0.245661536 | 0.051294634 |
| 0.237463019 | 0.172908079 | 0.181995356 | 0.273184923 |
| 0.20075249  | 0.250822539 | 0.287312247 | 0.353770855 |
| 0.242520651 | 0.152724367 | 0.271389108 | 0.418616041 |
| 0.145700514 | 0.340759053 | 0.405612849 | 0.243916823 |
| 0.015723153 | 0.287743669 | 0.372584431 | 0.225238798 |
| 0.24572242  | 0.194229603 | 0.25348933  | 0.395246942 |
| 0.235672882 | 0.254441208 | 0.422668531 | 0.345465136 |
| 0.27002238  | 0.211302655 | 0.463512704 | 0.043662204 |
| 0.264632531 | 0.163379034 | 0.315397188 | 0.177702803 |
| 0.265940044 | 0.297669351 | 0.30670214  | 0.325237184 |
| 0.141738111 | 0.439199101 | 0.363187426 | 0.441419463 |
| 0.249350755 | 0.463629598 | 0.391414481 | 0.409936493 |
| 0.304500916 | 0.229316007 | 0.149382869 | 0.362301673 |
| 0.387788986 | 0.204521273 | 0.086975683 | 0.324960506 |
| 0.209620897 | 0.300283424 | 0.234749394 | 0.444471629 |
| 0.463721231 | 0.366237665 | 0.269223176 | 0.352519344 |
| 0.37122423  | 0.274338633 | 0.368375589 | 0.474168952 |
| 0.163053758 | 0.273418472 | 0.28262453  | 0.400103788 |
| 0.217193822 | 0.252534968 | 0.322348559 | 0.180675481 |
| 0.015430966 | 0.120333134 | 0.105319132 | 0.289229262 |
| 0.247428527 | 0.245954155 | 0.299396567 | 0.44221456  |
| 0.206726143 | 0.401832437 | 0.222885054 | 0.288158098 |
| 0.357900717 | 0.278289689 | 0.300804653 | 0.313763225 |
| 0.25551242  | 0.070037206 | 0.226978784 | 0.45983339  |
| 0.054178885 | 0.275671957 | 0.264260321 | 0.011346065 |
| 0.085829742 | 0.284157202 | 0.115970695 | 0.231873376 |
| 0.441789666 | 0.221209024 | 0.205139519 | 0.168210775 |
| 1           | 0.16387505  | 0.027909029 | 0.402263546 |
| 0.40309554  | 0.380910896 | 0.395434162 | 0.378714222 |
| 0.363472767 | 0.309875033 | 0.349672897 | 0.260096497 |
| 0.183881287 | 0.119957421 | 0.223085519 | 0.299127045 |
| 0.007947691 | 0.37523876  | 0.303838121 | 0.197204183 |
| 0.333726352 | 0.267674707 | 0.099011452 | 0.298006476 |
| 0.054194634 | 0.187998612 | 0.2402784   | 0.277779846 |
| 0.331470526 | 0.043979049 | 0.186816974 | 0.23739356  |
| 0.371296878 | 0.326733349 | 0.26411649  | 0.452738101 |
| 0.3360798   | 0.108666556 | 0.316237749 | 0.358911858 |
| 0.143923276 | 0.070503792 | 0.240200513 | 0.024064379 |
| 0.198222942 | 0.394104561 | 0.271376983 | 0.113917579 |
| 0.284807084 | 0.022208527 | 0.336856793 | 0.462841501 |
| 0.373334456 | 0.448764987 | 0.443643676 | 0.283014123 |
| 0.435237522 | 0.088186929 | 0.446052794 | 0.325588298 |
| 0.203809312 | 0.003621127 | 0.026015653 | 0.413846421 |
| 0.299650284 | 0.066069019 | 0.218155734 | 0.266466668 |
| 0.220541285 | 0.154654933 | 0.14443206  | 0.270189723 |

|             |             |             |             |
|-------------|-------------|-------------|-------------|
| 0.301996241 | 0.323664546 | 0.259392765 | 0.382590687 |
| 0.281172485 | 0.291236329 | 0.239057119 | 0.111236672 |
| 0.316954047 | 0.133311068 | 0.108820125 | 0.031917497 |
| 0.324044572 | 0.125201629 | 0.393251722 | 0.426089181 |
| 0.46087942  | 0.325978443 | 0.175687132 | 0.273805429 |
| 0.375867353 | 0.091488384 | 0.250473441 | 0.115438881 |
| 0.392184535 | 0.300000974 | 0.339085835 | 0.309529798 |
| 0.454928906 | 0.419130981 | 0.088747092 | 0.341836059 |
| 0.051616709 | 0.009373338 | 0.246430462 | 0.264124932 |
| 0.064753234 | 0.272634592 | 0.274202369 | 0.203379394 |
| 0.255088801 | 0.078468588 | 0.238451678 | 0.246087114 |
| 0.302405007 | 0.303910614 | 0.298933924 | 0.227554516 |
| 0.296263003 | 0.199092564 | 0.303555927 | 0.241538664 |
| 0.202934869 | 0.27769494  | 0.213794375 | 0.060270467 |
| 0.256086588 | 0.293285845 | 0.124330596 | 0.202633765 |
| 0.400171401 | 0.423699922 | 0.098999426 | 0.057210903 |
| 0.281005924 | 0.283056736 | 0.446186198 | 0.405185449 |
| 0.447724381 | 0.47189208  | 0.391267605 | 0.234071809 |
| 0.142512733 | 0.307247588 | 0.297996762 | 0.23496555  |
| 0.440346811 | 0.076112412 | 0.411965236 | 0.266446274 |
| 0.167233837 | 0.264155741 | 0.125874505 | 0.155870462 |
| 0.296739378 | 0.244142056 | 0.294121907 | 0.145444458 |
| 0.299791311 | 0.275346281 | 0.106692818 | 0.256551623 |
| 0.305358941 | 0.181658367 | 0.217635686 | 0.264300803 |
| 0.299647365 | 0.112293058 | 0.317613061 | 0.436275353 |
| 0.168315181 | 0.142325358 | 0.214832218 | 0.316052897 |
| 0.345568644 | 0.22076987  | 0.081424524 | 0.343786161 |
| 0.441091426 | 0.291782158 | 0.421951648 | 0.394152076 |
| 0.120659501 | 0.313475593 | 0.237094629 | 0.289631911 |
| 0.235709057 | 0.296056222 | 0.277789328 | 0.114551446 |
| 0.319719163 | 0.430302959 | 0.341170086 | 0.28106169  |
| 0.276061914 | 0.122878246 | 0.065363384 | 0.373258518 |
| 0.223972296 | 0.149194574 | 0.194091712 | 0.34798204  |
| 0.012926597 | 0.183568819 | 0.42912494  | 0.325743794 |
| 0.456931349 | 0.425009193 | 0.41913511  | 0.253572063 |
| 0.003619329 | 0.282087316 | 0.326627466 | 0.303192207 |
| 0.347457571 | 0.315946426 | 0.184764765 | 0.184694361 |
| 0.330668742 | 0.092006567 | 0.21862418  | 0.26425955  |
| 0.135024885 | 0.267469005 | 0.249573331 | 0.211009155 |
| 0.28958834  | 0.087231178 | 0.267343303 | 0.302228247 |
| 0.157021321 | 0.283355458 | 0.353393516 | 0.157354479 |
| 0.176294631 | 0.384212893 | 0.312083613 | 0.071938681 |
| 0.293988435 | 0.351259012 | 0.402693258 | 0.005785788 |
| 0.329186195 | 0.038495646 | 0.299674529 | 0.317928996 |
| 0.303836484 | 0.277732198 | 0.312060797 | 0.324295309 |
| 0.258669253 | 0.272377561 | 0.330839209 | 0.299221904 |
| 0.295657093 | 0.269038957 | 0.311551363 | 0.257689004 |
| 0.330161215 | 0.208821909 | 0.124590912 | 0.122645273 |
| 0.156688094 | 0.387319867 | 0.283609336 | 0.089690281 |
| 0.28975941  | 0.265300835 | 0.387246604 | 0.391979537 |
| 0.42759028  | 0.115589983 | 0.288524035 | 0.360435202 |
| 0.126219127 | 0.243040828 | 0.100426508 | 0.281442084 |
| 0.295741014 | 0.279411344 | 0.260126382 | 0.218756681 |
| 0.264295509 | 0.399707612 | 0.277845867 | 0.411442304 |

|             |             |             |             |
|-------------|-------------|-------------|-------------|
| 0.328710151 | 0.230337583 | 0.163178878 | 0.213066443 |
| 0.225261588 | 0.153960158 | 0.304157559 | 0.011913892 |
| 0.312530142 | 0.243603421 | 0.393587741 | 0.407181429 |
| 0.238092683 | 0.396553517 | 0.185017937 | 0.150520948 |
| 0.144729452 | 0.170079492 | 0.188763994 | 0.31910939  |
| 0.197517117 | 0.275206276 | 0.321663777 | 0.233657935 |
| 0.33549187  | 0.287239427 | 0.273150965 | 0.257478874 |
| 0.26227653  | 0.198421996 | 0.401783025 | 0.152420478 |
| 0.25443864  | 0.284412164 | 0.202119747 | 0.305631382 |
| 0.299395928 | 0.433398867 | 0.110776067 | 0.440305973 |
| 0.277379722 | 0.151134835 | 0.467030332 | 0.277390518 |
| 0.285343493 | 0.276331385 | 0.194414062 | 0.235014734 |
| 0.268185093 | 0.271249992 | 0.009696969 | 0.08436088  |
| 0.330928867 | 0.206590002 | 0.2763865   | 0.299730824 |
| 0.290555155 | 0.346511954 | 0.181207365 | 0.247824253 |
| 0.378635399 | 0.415820747 | 0.273860681 | 0.276862022 |
| 0.30539529  | 0.208432967 | 0.261437509 | 0.019071486 |
| 0.275660198 | 0.258255462 | 0.219571554 | 0.132654913 |
| 0.061495715 | 0.199345132 | 0.26546724  | 0.078787362 |
| 0.428652095 | 0.19777501  | 0.216610299 | 0.324593711 |
| 0.186426313 | 0.419623085 | 0.264458248 | 0.35137031  |
| 0.063100528 | 0.26776771  | 0.273559755 | 0.239045369 |
| 0.299792106 | 0.281745452 | 0.348799241 | 0.274579699 |
| 0.101495118 | 0.311641127 | 0.00505287  | 0.39217103  |
| 0.377574886 | 0.258358605 | 0.233524568 | 0.158582444 |
| 0.314138369 | 0.349258831 | 0.253619913 | 0.259984704 |
| 0.059351367 | 0.306643468 | 0.277240931 | 0.366640462 |
| 0.169298673 | 0.237014792 | 0.17166441  | 0.265841164 |
| 0.387590686 | 0.243936097 | 0.274788113 | 0.201963453 |
| 0.400414956 | 0.314852036 | 0.147308452 | 0.301923684 |
| 0.223869907 | 0.096895353 | 0.227177167 | 0.457432705 |
| 0.292408717 | 0.270103312 | 0.39839956  | 0.271400136 |
| 0.269891195 | 0.34831169  | 0.23714126  | 0.439550554 |
| 0.19748075  | 0.292296711 | 0.358145382 | 0.386448942 |
| 0.344088862 | 0.239784853 | 0.261577576 | 0.284726837 |
| 0.373467546 | 0.190485859 | 0.253466906 | 0.309110831 |
| 0.225306097 | 0.314973405 | 0.192543853 | 0.288987535 |
| 0.120771385 | 0.248538976 | 0.320705596 | 0.193550633 |
| 0.306125269 | 0.307572795 | 0.282597458 | 0.407704336 |
| 0.280057907 | 0.08996341  | 0.44510792  | 0.02880121  |
| 0.268061927 | 0.332988283 | 0.29762246  | 0.314812789 |
| 0.213812393 | 0.272869256 | 0.218087064 | 0.005460527 |
| 0.362464388 | 0.104802136 | 0.285751495 | 0.298727382 |
| 0.237577186 | 0.101005149 | 0.409809327 | 0.458038705 |
| 0.284955743 | 0.247727638 | 0.235365143 | 0.396785703 |
| 0.188849284 | 0.211703356 | 0.237949137 | 0.252331873 |
| 0.245012369 | 0.205842828 | 0.253956702 | 0.272110439 |
| 0.310436265 | 0.287235955 |             |             |
| HDGF        | 0.233981183 | 0.14184845  | 0.179733189 |
| 0.169006474 | 0.080205571 | 0.064065271 | 0.257610355 |
| 0.223282246 | 0.137039118 | 0.023376656 | 0.098255756 |
| 0.251045716 | 0.010661166 | 0.166797112 | 0.264834983 |
| 0.066722622 | 0.284129896 | 0.249334675 | 0.040602938 |
| 0.103339633 | 0.08122764  | 0.040704122 | 0.072357839 |

|             |             |             |             |
|-------------|-------------|-------------|-------------|
| 0.072505043 | 0.328903146 | 0.109529691 | 0.038405042 |
| 0.150148901 | 0.013459151 | 0.079586436 | 0.015549449 |
| 0.249986916 | 0.072665703 | 0.028730838 | 0.22384996  |
| 0.069634492 | 0.008288152 | 0.261398595 | 0.113113789 |
| 0.027308051 | 0.276317551 | 0.033385945 | 0.15378172  |
| 0.038658212 | 0.228163248 | 0.011598977 | 0.067201438 |
| 0.100815201 | 0.112494435 | 0.186019855 | 0.094365167 |
| 0.04838577  | 0.17067642  | 0.076417991 | 0.010158566 |
| 0.023971906 | 0.002499534 | 0.011972209 | 0.19170608  |
| 0.285214574 | 0.254992085 | 0.015132346 | 0.112541987 |
| 0.064168324 | 0.099337305 | 0.217373931 | 0.033743672 |
| 0.181448936 | 0.018914576 | 0.074800692 | 0.104636387 |
| 0.070678862 | 0.188480506 | 0.331442596 | 0.198750788 |
| 0.046268041 | 0.203017114 | 0.085159255 | 0.035456216 |
| 0.131250186 | 0.24824481  | 0.218216607 | 0.19827899  |
| 0.024051956 | 0.05134793  | 0.066395969 | 0.197615067 |
| 0.122744343 | 0.192772358 | 0.125545278 | 0.216066255 |
| 0.192811714 | 0.048364974 | 0.100343904 | 0.243399352 |
| 0.146762151 | 0.028109716 | 0.037444841 | 0.028533341 |
| 0.082014438 | 0.061371735 | 0.219161907 | 0.211614648 |
| 0.06839731  | 0.23011443  | 0.222414165 | 0.046929442 |
| 0.090105843 | 0.226336174 | 0.069973151 | 0.102630521 |
| 0.088753573 | 0.155323746 | 0.111603594 | 0.154292886 |
| 0.049598614 | 0.175460154 | 0.122212984 | 0.167898783 |
| 0.007016248 | 0.183299532 | 0.210821115 | 0.291725971 |
| 0.179628394 | 0.261937445 | 0.058180472 | 0.262633353 |
| 0.134481789 | 0.159679579 | 0.186445071 | 0.142193474 |
| 0.134986233 | 0.195315309 | 0.175282913 | 0.140477827 |
| 0.268915658 | 0.024182386 | 0.050009911 | 0.121766296 |
| 0.117624732 | 0.259972652 | 0.037797474 | 0.233677315 |
| 0.230203949 | 0.119199281 | 0.173380649 | 0.270957836 |
| 0.146061272 | 0.221735029 | 0.124369557 | 0.220250407 |
| 0.224971286 | 0.225411432 | 0.192802417 | 0.075135657 |
| 0.226060083 | 0.098896238 | 0.026119623 | 0.161252045 |
| 0.220512756 | 0.010336846 | 0.119989453 | 0.133850665 |
| 0.17553818  | 0.103628125 | 0.184200705 | 0.157132237 |
| 0.174390337 | 0.263142875 | 0.001877535 | 0.14320079  |
| 0.20142847  | 0.194269214 | 0.17778176  | 0.039518914 |
| 0.074120733 | 0.072854623 | 0.104411938 | 0.031867404 |
| 0.24936239  | 0.143301594 | 0.131496641 | 0.1259068   |
| 0.077554459 | 0.286977382 | 0.033469265 | 0.222339913 |
| 0.282721327 | 0.204962684 | 0.238437224 | 0.19532933  |
| 0.035497655 | 0.236926875 | 0.06912978  | 0.072753881 |
| 0.262335587 | 0.079111676 | 0.022949906 | 0.083132185 |
| 0.268663354 | 0.053429152 | 0.209491248 | 0.17427414  |
| 0.28410218  | 0.361113033 | 0.143943538 | 0.217039977 |
| 0.125511385 | 0.335283343 | 0.075049226 | 0.157080097 |
| 0.056105143 | 0.262932765 | 0.0982793   | 0.212976376 |
| 0.251375252 | 0.05048869  | 0.273461277 | 0.123951553 |
| 0.048999385 | 0.018272175 | 0.01335955  | 0.043627829 |
| 0.350387768 | 0.104092056 | 0.075428591 | 0.105315911 |
| 0.122421513 | 0.159012547 | 0.044165546 | 0.281811809 |
| 0.2540164   | 0.082476766 | 0.148931039 | 0.054654958 |
| 0.155680808 | 0.108186636 | 0.121555106 | 0.083317303 |



|             |             |             |             |
|-------------|-------------|-------------|-------------|
| 0.142893352 | 0.027220047 | 0.022596854 | 0.14260945  |
| 0.024764665 | 0.051190212 | 0.141011645 | 0.105598249 |
| 0.047941576 | 0.276198512 | 0.185040776 | 0.003230099 |
| 0.051121273 | 0.09682046  | 0.198489219 | 0.032760883 |
| 0.199294418 | 0.20751344  | 0.060503498 | 0.07434833  |
| 0.221333789 | 0.190925657 | 0.176443024 | 0.164556647 |
| 0.031666001 | 0.191032031 | 0.120543942 | 0.171956176 |
| 0.145451916 | 0.029641124 | 0.009621336 | 0.121320184 |
| 0.134215029 | 0.031993764 | 0.252225568 | 0.085627013 |
| 0.034345013 | 0.077728064 | 0.096222354 | 0.18324493  |
| 0.261530941 | 0.175233667 | 0.213275263 | 0.138976905 |
| 0.187771253 | 0.187170984 | 0.149555715 | 0.204349327 |
| 0.024585999 | 0.048292122 | 0.049425158 | 0.164082094 |
| 0.26462376  | 0.064443166 | 0.251177644 | 0.013254374 |
| 0.000473784 | 0.21028064  | 0.23366564  | 0.191588549 |
| 0.0389523   | 0.050754305 | 0.0962866   | 0.175743182 |
| 0.25617718  | 0.204611833 | 0.217402208 | 0.075765083 |
| 0.181207425 | 0.048778573 | 0.046721604 | 0.078269828 |
| 0.256979513 | 0.169119147 | 0.210476569 | 0.251355762 |
| 0.19873535  | 0.033800752 | 0.098055582 | 0.022941272 |
| 0.238536828 | 0.094602673 | 0.311651565 | 0.378981726 |
| 0.158229344 | 0.339070087 | 0.218903703 | 0.029972104 |
| 0.16387505  | 1           | 0.066399801 | 0.155525203 |
| 0.178191937 | 0.177056885 | 0.174398217 | 0.201659175 |
| 0.145988165 | 0.112045949 | 0.119664893 | 0.086997504 |
| 0.243593181 | 0.190331087 | 0.032878521 | 0.102402629 |
| 0.019465866 | 0.167297389 | 0.083970379 | 0.324934562 |
| 0.093274427 | 0.164452416 | 0.27003107  | 0.070619321 |
| 0.164083705 | 0.011732939 | 0.08513392  | 0.145585295 |
| 0.139375561 | 0.226253009 | 0.034992674 | 0.030431114 |
| 0.199147966 | 0.222921227 | 0.027764864 | 0.194402694 |
| 0.120050793 | 0.203420259 | 0.089604736 | 0.126057445 |
| 0.270385814 | 0.011875272 | 0.064653965 | 0.003717467 |
| 0.040497805 | 0.209174926 | 0.042709607 | 0.204280523 |
| 0.181897931 | 0.171481582 | 0.210798959 | 0.201699184 |
| 0.17223866  | 0.162870208 | 0.181340865 | 0.034364894 |
| 0.185343835 | 0.003166733 | 0.169104877 | 0.145835245 |
| 0.027228732 | 0.014780794 | 0.082173366 | 0.133476891 |
| 0.057531742 | 0.232848575 | 0.276243998 | 0.047634589 |
| 0.249389388 | 0.164140244 | 0.263668915 | 0.062689906 |
| 0.080240129 | 0.108028149 | 0.055829367 | 0.185038773 |
| 0.152041249 | 0.188764194 | 0.047377362 | 0.280193804 |
| 0.068627156 | 0.289550468 | 0.263272589 | 0.0447213   |
| 0.124375659 | 0.270802254 | 0.242620499 | 0.175253097 |
| 0.222335142 | 0.100134391 | 0.019651133 | 0.050671613 |
| 0.143538738 | 0.20338996  | 0.028739792 | 0.204487389 |
| 0.162881643 | 0.081393672 | 0.225253658 | 0.247523041 |
| 0.195967309 | 0.202633393 | 0.277604446 | 0.12720499  |
| 0.154835925 | 0.013896387 | 0.061826145 | 0.215090948 |
| 0.024383289 | 0.044528943 | 0.275977672 | 0.092191172 |
| 0.117836221 | 0.216277411 | 0.026951242 | 0.03109008  |
| 0.157210318 | 0.074633315 | 0.056902971 | 0.216458453 |
| 0.084986407 | 0.066642131 | 0.181635535 | 0.203236994 |
| 0.054162496 | 0.221695248 | 0.321696812 | 0.254585027 |

|             |             |             |             |
|-------------|-------------|-------------|-------------|
| 0.043397768 | 0.045854483 | 0.278319623 | 0.292684986 |
| 0.150964765 | 0.143716427 | 0.245353107 | 0.163074371 |
| 0.271952132 | 0.074964756 | 0.155794975 | 0.159004803 |
| 0.219249824 | 0.21642719  | 0.285978466 | 0.16143616  |
| 0.272440529 | 0.120557359 | 0.058622816 | 0.158071376 |
| 0.174018544 | 0.20408836  | 0.186249324 | 0.030305684 |
| 0.29077227  | 0.174605049 | 0.277939885 | 0.265314322 |
| 0.047770657 | 0.277542995 | 0.180480105 | 0.203662175 |
| 0.085950195 | 0.031796862 | 0.26824626  | 0.227109577 |
| 0.17686458  | 0.018081258 | 0.262522354 | 0.098013035 |
| 0.167204392 | 0.022479854 | 0.082859187 | 0.252823894 |
| 0.28997815  | 0.205320877 | 0.08096635  | 0.123876556 |
| 0.105076656 | 0.038459904 | 0.151601918 | 0.134131635 |
| 0.173294483 | 0.068098127 | 0.193312431 | 0.194924949 |
| 0.290727159 | 0.052874547 | 0.031541349 | 0.077171479 |
| 0.227110283 | 0.068216391 | 0.14602695  | 0.278399761 |
| 0.275985945 | 0.257317716 | 0.151770649 | 0.217373334 |
| 0.057033889 | 0.184375236 | 0.189625086 | 0.135114862 |
| 0.035532686 | 0.223595147 | 0.033890476 | 0.106667159 |
| 0.021446059 | 0.01528509  | 0.165178682 | 0.158532284 |
| 0.223350032 | 0.156346816 | 0.232992269 | 0.11806512  |
| 0.000362244 | 0.0672022   | 0.102233264 | 0.052728755 |
| 0.14085318  | 0.190378905 | 0.101402823 | 0.272234888 |
| 0.282370914 | 0.235813113 | 0.189052371 | 0.056693299 |
| 0.015520303 | 0.086783501 | 0.302208077 | 0.174414397 |
| 0.156384819 | 0.203204805 | 0.032098246 | 0.17181418  |
| 0.028768836 | 0.292550633 | 0.212025451 | 0.028364348 |
| 0.015840882 | 0.161860272 | 0.12533138  | 0.255663289 |
| 0.044760056 | 0.153338712 | 0.18162763  | 0.027499836 |
| 0.088937956 | 0.219398685 | 0.157110741 | 0.152036706 |
| 0.171624795 | 0.143755489 | 0.153524285 | 0.080468828 |
| 0.110995307 | 0.171936577 | 0.132755475 | 0.230968267 |
| 0.193270256 | 0.171843688 | 0.078213245 | 0.076553874 |
| 0.08273208  | 0.252423817 | 0.320189384 | 0.323475289 |
| 0.265215995 | 0.14267822  | 0.329584923 | 0.259022599 |
| 0.220663014 | 0.067132245 | 0.27466853  | 0.164872053 |
| 0.214160482 | 0.250193527 | 0.084641169 | 0.134302073 |
| 0.012367074 | 0.056134026 | 0.201524109 | 0.078705887 |
| 0.187886286 | 0.06256725  | 0.053595907 | 0.110201536 |
| 0.087419134 | 0.28454163  | 0.317868669 | 0.212387502 |
| 0.074656724 | 0.05250787  | 0.025277172 | 0.237551642 |
| 0.199794205 | 0.285231864 | 0.069469379 | 0.119715628 |
| 0.148897801 | 0.106472354 | 0.123178223 | 0.19762557  |
| 0.022293781 | 0.245582782 | 0.030849667 | 0.234588559 |
| 0.022032777 | 0.25752196  | 0.315944658 | 0.093920569 |
| 0.012982859 | 0.211576706 | 0.093843986 | 0.062412873 |
| 0.096848719 | 0.084270169 | 0.070319081 | 0.140418439 |
| 0.160926969 | 0.220948906 | 0.222996893 | 0.192390159 |
| 0.048517825 | 0.070769477 | 0.063492547 | 0.094932474 |
| 0.135817141 | 0.159417826 | 0.252117792 | 0.155310957 |
| 0.059298765 | 0.303340413 | 0.265783943 | 0.113312079 |
| 0.10772059  | 0.188473006 | 0.014328304 | 0.047106301 |
| 0.14793058  | 0.029019501 | 0.000723592 | 0.016398253 |
| 0.192118553 | 0.049582897 | 0.096741719 | 0.137094978 |

|             |             |             |             |
|-------------|-------------|-------------|-------------|
| 0.065838137 | 0.196185371 | 0.014198009 | 0.109605066 |
| 0.178184666 | 0.227839958 | 0.102421332 | 0.282600949 |
| 0.177768878 | 0.271352013 | 0.08689667  | 0.008789135 |
| 0.05811754  | 0.043036302 | 0.029842961 | 0.280694864 |
| 0.252164495 | 0.015492406 | 0.06478491  | 0.205230904 |
| 0.147861304 | 0.011866613 | 0.075661723 | 0.093469614 |
| 0.265726883 | 0.233640196 | 0.197114188 | 0.119932251 |
| 0.145494299 | 0.217682442 | 0.040576279 | 0.044113479 |
| 0.089814658 | 0.041533972 | 0.15120407  | 0.036254384 |
| 0.288756296 | 0.099570987 | 0.025295712 | 0.294761292 |
| 0.21167209  | 0.03565973  | 0.327137065 | 0.021576164 |
| 0.222184286 | 0.188719661 | 0.071642947 | 0.038276318 |
| 0.203636756 | 0.060894155 | 0.234454541 | 0.166841657 |
| 0.014120429 | 0.066967128 | 0.258581188 | 0.048605708 |
| 0.258133654 | 0.05035639  | 0.278428598 | 0.023318284 |
| 0.169131049 | 0.146573236 | 0.224017993 | 0.091103162 |
| 0.067643489 | 0.279452969 | 0.036191132 | 0.196447471 |
| 0.195626919 | 0.041311212 | 0.12480671  | 0.160911292 |
| 0.034441197 | 0.188327217 | 0.049664105 | 0.19357009  |
| 0.188519386 | 0.245825215 | 0.119169726 | 0.164070627 |
| 0.243510147 | 0.051092878 | 0.033126462 | 0.094791589 |
| 0.177553896 | 0.225272585 | 0.043158408 | 0.175825929 |
| 0.026062026 | 0.183328235 | 0.066501972 | 0.105590521 |
| 0.241986929 | 0.178369236 | 0.0666349   | 0.283979103 |
| 0.150047965 | 0.073365428 | 0.076028301 | 0.267339539 |
| 0.18251829  | 0.179072258 | 0.252970993 | 0.002622809 |
| 0.104280992 | 0.100689437 | 0.200220451 | 0.058672226 |
| 0.318986001 | 0.112196297 | 0.07674729  | 0.064384119 |
| 0.144040718 | 0.035961701 | 0.077858827 | 0.08929516  |
| 0.030865408 | 0.251754844 | 0.208693436 | 0.168839624 |
| 0.168493385 | 0.038215774 | 0.022093148 | 0.185752891 |
| 0.021486795 | 0.019180044 | 0.029553109 | 0.081943572 |
| 0.026526705 | 0.028103114 | 0.03328464  | 0.029987929 |
| 0.1503272   | 0.137905979 |             |             |
| HEXIM1      | 0.032801666 | 0.003590651 | 0.048013445 |
| 0.038902344 | 0.018868112 | 0.008123604 | 0.013220614 |
| 0.009056922 | 0.002902131 | 0.000666315 | 0.025299387 |
| 0.025861672 | 0.001059078 | 0.007333076 | 0.015762924 |
| 0.004742637 | 0.03307812  | 0.02436761  | 3.33E-06    |
| 0.001643711 | 0.014390783 | 0.003969652 | 0.002249668 |
| 0.010968816 | 0.02844523  | 0.00399906  | 0.001071943 |
| 0.005638962 | 0.000236411 | 0.007118422 | 0.000187128 |
| 0.014373268 | 0.012162033 | 0.001579581 | 0.083743162 |
| 0.004607388 | 1.90E-05    | 0.010383538 | 0.017012235 |
| 0.007432862 | 0.019992789 | 6.65E-05    | 0.053483207 |
| 0.000301315 | 0.032198393 | 0.000556073 | 0.001891676 |
| 0.003394118 | 0.008489565 | 0.017591143 | 0.005148141 |
| 0.000596931 | 0.015926369 | 0.000594616 | 0.000281421 |
| 0.002751631 | 0.000151688 | 0.000515849 | 0.008138799 |
| 0.058540042 | 0.054650599 | 0.000394566 | 0.004268701 |
| 0.001262638 | 0.004073531 | 0.027293794 | 2.30E-05    |
| 0.008272107 | 0.000932644 | 0.002265725 | 0.003043105 |
| 0.002923315 | 0.007596327 | 0.045048851 | 0.008158529 |
| 0.001985117 | 0.060821067 | 0.01903287  | 0.004173251 |

|             |             |             |             |
|-------------|-------------|-------------|-------------|
| 0.002368501 | 0.010550212 | 0.021108141 | 0.005672642 |
| 0.000246059 | 0.004291569 | 0.013091812 | 0.024071527 |
| 0.003910155 | 0.004085033 | 0.012651195 | 0.009759477 |
| 0.007085696 | 0.000275918 | 0.00248367  | 0.00976663  |
| 0.007308358 | 0.000780146 | 0.000213331 | 0.010636802 |
| 0.00891415  | 0.004547627 | 0.006344306 | 0.026138847 |
| 0.010972777 | 0.021436941 | 0.006934579 | 0.006164042 |
| 0.028986116 | 0.052345677 | 0.003937517 | 0.003780786 |
| 0.00629617  | 0.007265551 | 0.001937885 | 0.005944315 |
| 0.002965012 | 0.008909947 | 0.011371732 | 0.006035391 |
| 0.001206586 | 0.006475028 | 0.065479758 | 0.046358756 |
| 0.007637959 | 0.044846118 | 0.001385343 | 0.02780095  |
| 0.008258243 | 0.010377981 | 0.016526755 | 0.030370218 |
| 0.007241435 | 0.005571989 | 0.005077074 | 0.005317019 |
| 0.035782007 | 0.000965785 | 0.003622715 | 0.010044777 |
| 0.005213149 | 0.022013355 | 0.007924691 | 0.008756663 |
| 0.021589324 | 0.006805732 | 0.010836704 | 0.010857732 |
| 0.004519465 | 0.013799559 | 0.003789506 | 0.061414599 |
| 0.010241366 | 0.009725933 | 0.01165425  | 0.007713157 |
| 0.012946186 | 0.020170505 | 3.54E-05    | 0.005774611 |
| 0.016524239 | 0.006448632 | 0.004009956 | 0.00481686  |
| 0.005837067 | 0.004366812 | 0.008653186 | 0.00727631  |
| 0.005466959 | 0.02601089  | 0.00064888  | 0.016917947 |
| 0.007205932 | 0.01863741  | 0.013555357 | 0.001142424 |
| 0.006075094 | 0.004287096 | 0.00410857  | 0.000269202 |
| 0.01388463  | 0.007926605 | 0.004132979 | 0.003569234 |
| 0.001205239 | 0.020223751 | 0.001342744 | 0.008381817 |
| 0.045922892 | 0.023245932 | 0.031220748 | 0.011743641 |
| 0.000545566 | 0.054176096 | 0.001575492 | 0.003129882 |
| 0.048540015 | 0.001724313 | 0.001150675 | 0.007633314 |
| 0.016419807 | 0.002085832 | 0.045004779 | 0.009110352 |
| 0.049692773 | 0.029114041 | 0.004772328 | 0.071525846 |
| 0.022471364 | 0.012624173 | 0.002238826 | 0.007137694 |
| 0.002122259 | 0.03490862  | 0.00393781  | 0.014198932 |
| 0.021535592 | 0.006265199 | 0.021568415 | 0.099726779 |
| 0.000575567 | 0.000278552 | 0.000825381 | 0.001758399 |
| 0.020756395 | 0.002577134 | 0.003109686 | 0.014533841 |
| 0.009919762 | 0.004682046 | 0.001060345 | 0.017146439 |
| 0.01591904  | 0.022289922 | 0.008495606 | 0.000689942 |
| 0.076948945 | 0.010533924 | 0.007017545 | 0.003691021 |
| 0.004446011 | 0.000917251 | 0.003730313 | 0.006959587 |
| 0.000172205 | 0.003803899 | 0.006515377 | 0.012697748 |
| 0.00040788  | 0.007562642 | 0.00837678  | 0.000235372 |
| 0.002568627 | 0.007133938 | 0.036048866 | 0.000582283 |
| 0.025843785 | 0.0160644   | 0.010001001 | 0.017612036 |
| 0.024383879 | 0.006915554 | 0.012173197 | 0.007783086 |
| 0.000594347 | 0.008400597 | 0.006609533 | 0.012558727 |
| 0.015744172 | 0.000192586 | 0.000849782 | 0.00668819  |
| 0.006892371 | 2.47E-05    | 0.021617925 | 0.001961393 |
| 0.000140233 | 0.003849147 | 0.004610252 | 0.010950628 |
| 0.01513325  | 0.004207152 | 0.033430442 | 0.013040378 |
| 0.021099807 | 0.051044528 | 0.009968315 | 0.009273693 |
| 0.000255124 | 0.002300102 | 0.003053401 | 0.01786812  |
| 0.044430079 | 0.005237653 | 0.013568216 | 0.001063938 |

|             |             |             |             |
|-------------|-------------|-------------|-------------|
| 0.000254065 | 0.012803891 | 0.026974637 | 0.056224641 |
| 0.01718875  | 0.000742939 | 0.006100957 | 0.00636004  |
| 0.038823857 | 0.015969147 | 0.009595238 | 0.007359754 |
| 0.005767247 | 0.001995779 | 0.005601471 | 0.006385461 |
| 0.019857743 | 0.119360449 | 0.03161386  | 0.010496391 |
| 0.00921415  | 0.00612483  | 0.003782458 | 0.001601024 |
| 0.013593033 | 0.00113667  | 0.021808864 | 0.032244565 |
| 0.009848587 | 0.026277397 | 0.016887217 | 0.000672231 |
| 0.027909029 | 0.066399801 | 1           | 0.005475021 |
| 0.005103998 | 0.004906806 | 0.004274887 | 0.005525851 |
| 0.00404135  | 0.004774111 | 0.007221989 | 0.007242258 |
| 0.014255155 | 0.00975951  | 0.002503104 | 0.010434182 |
| 0.000290567 | 0.026888482 | 0.009843976 | 0.054023312 |
| 0.004319219 | 0.00727834  | 0.038028709 | 0.00565853  |
| 0.032016765 | 0.001326876 | 0.000951706 | 0.010441727 |
| 0.013801723 | 0.057089681 | 0.001026258 | 0.000334106 |
| 0.009352224 | 0.013754909 | 0.001420232 | 0.008279334 |
| 0.026778242 | 0.00922271  | 0.018996678 | 0.015936873 |
| 0.021538508 | 0.000842614 | 0.000968662 | 6.14E-05    |
| 0.000290022 | 0.006854642 | 0.000789741 | 0.015107239 |
| 0.028196885 | 0.053208688 | 0.016740252 | 0.008893712 |
| 0.005242759 | 0.00704964  | 0.010093228 | 0.008980465 |
| 0.008912846 | 0.000121774 | 0.006595755 | 0.005972321 |
| 0.000241644 | 0.000868303 | 0.004722557 | 0.006474675 |
| 0.004322443 | 0.017049339 | 0.047355041 | 0.002925775 |
| 0.046957439 | 0.009695832 | 0.031942822 | 0.023665395 |
| 0.006806623 | 0.034178437 | 0.008216018 | 0.004414177 |
| 0.018433021 | 0.029223075 | 0.000561273 | 0.019665662 |
| 0.006477957 | 0.073853734 | 0.014171269 | 0.014989687 |
| 0.013229957 | 0.013258484 | 0.007346477 | 0.00673403  |
| 0.012758093 | 0.011646694 | 0.001015401 | 0.000941206 |
| 0.006040437 | 0.01399802  | 0.00037374  | 0.015991336 |
| 0.005303284 | 0.00549148  | 0.030586837 | 0.026919905 |
| 0.009796722 | 0.009650004 | 0.033069024 | 0.00730328  |
| 0.093441875 | 0.009888029 | 0.00302639  | 0.012875751 |
| 7.56E-05    | 0.00213757  | 0.035486749 | 0.001587998 |
| 0.007328844 | 0.010824743 | 0.002355111 | 0.00319434  |
| 0.020430214 | 0.005048304 | 0.01190725  | 0.009114724 |
| 0.013801198 | 0.001727348 | 0.05010993  | 0.012394985 |
| 0.000107269 | 0.010567292 | 0.026970208 | 0.025210041 |
| 0.001365715 | 0.002307444 | 0.061166025 | 0.038984453 |
| 0.012202144 | 0.006870948 | 0.007400616 | 0.0605309   |
| 0.023810611 | 0.002474877 | 0.007723746 | 0.005166262 |
| 0.00854412  | 0.011364186 | 0.016660665 | 0.01170788  |
| 0.042174322 | 0.017773893 | 0.009817707 | 0.045220835 |
| 0.007237127 | 0.007191434 | 0.008241534 | 0.004445244 |
| 0.02791315  | 0.031727593 | 0.07108619  | 0.038101131 |
| 0.004122988 | 0.040256262 | 0.056398858 | 0.017830883 |
| 0.007426455 | 0.003917007 | 0.022776068 | 0.0335139   |
| 0.008633577 | 0.001229191 | 0.028096104 | 0.004076204 |
| 0.009160883 | 0.000767244 | 0.003856721 | 0.01769834  |
| 0.042199583 | 0.013281536 | 0.002684649 | 0.005910125 |
| 0.003411708 | 0.00026676  | 0.03434026  | 0.002742463 |
| 0.008845041 | 0.003183972 | 0.008206144 | 0.012969834 |

|             |             |             |             |
|-------------|-------------|-------------|-------------|
| 0.026830752 | 0.007131066 | 0.00100648  | 0.005056511 |
| 0.019139852 | 0.00864519  | 0.011294546 | 0.03527635  |
| 0.018561271 | 0.009986502 | 0.00504499  | 0.081886842 |
| 0.002183217 | 0.007217358 | 0.006840478 | 0.005227012 |
| 0.004810738 | 0.011361749 | 5.71E-05    | 0.003452263 |
| 0.008528757 | 0.005234679 | 0.007189191 | 0.032059309 |
| 0.009563658 | 0.008562778 | 0.018011755 | 0.005252301 |
| 0.000188147 | 0.003210052 | 0.014339459 | 0.004669769 |
| 0.003576414 | 0.014483822 | 0.001773164 | 0.054578495 |
| 0.046496028 | 0.020289072 | 0.010734031 | 0.001385291 |
| 6.18E-05    | 0.002237307 | 0.040994378 | 0.009230522 |
| 0.027968646 | 0.004337947 | 0.006039735 | 0.048637203 |
| 0.000590554 | 0.04179007  | 0.02344192  | 0.001038546 |
| 0.000310323 | 0.005790322 | 0.004058481 | 0.069785828 |
| 0.004242666 | 0.006943845 | 0.01154488  | 0.000205282 |
| 0.005626879 | 0.039142136 | 0.033082047 | 0.057073212 |
| 0.044602511 | 0.012154952 | 0.025588049 | 0.015590256 |
| 0.002995689 | 0.016567672 | 0.034861748 | 0.055918503 |
| 0.082693901 | 0.018778311 | 0.006436647 | 0.003466316 |
| 0.020554591 | 0.080109343 | 0.023226234 | 0.022012204 |
| 0.055973457 | 0.005662387 | 0.037329174 | 0.035498759 |
| 0.033029735 | 0.001745945 | 0.029996553 | 0.004599749 |
| 0.020990813 | 0.017427241 | 0.00425662  | 0.006018816 |
| 0.002447003 | 0.000197576 | 0.005957665 | 0.006373113 |
| 0.02655152  | 0.006804276 | 0.001795707 | 0.00392096  |
| 0.001287567 | 0.024890004 | 0.038527665 | 0.015438498 |
| 0.009726898 | 0.000883432 | 0.000680847 | 0.067324294 |
| 0.031878081 | 0.020518513 | 0.018067318 | 0.067194166 |
| 0.015330166 | 0.004851383 | 0.005908559 | 0.008233843 |
| 0.001085021 | 0.02527443  | 0.000101068 | 0.019985619 |
| 0.000202742 | 0.009931576 | 0.035391738 | 0.003278633 |
| 0.001173038 | 0.047524151 | 0.018313312 | 0.002236454 |
| 0.005179938 | 0.002306338 | 0.006380141 | 0.005467669 |
| 0.014066719 | 0.028119851 | 0.006582295 | 0.021907189 |
| 0.001008267 | 0.03080817  | 0.000439226 | 0.0142879   |
| 0.019565932 | 0.006253243 | 0.044276561 | 0.005594435 |
| 0.003553996 | 0.026727784 | 0.016263424 | 0.010612472 |
| 0.007441713 | 0.056378433 | 0.002431496 | 0.000311579 |
| 0.008578263 | 0.002530909 | 4.35E-05    | 2.57E-05    |
| 0.000478719 | 0.001201688 | 0.006160174 | 0.029406569 |
| 0.018042413 | 0.000967438 | 0.002753174 | 0.014422832 |
| 0.00774911  | 0.005045685 | 0.026243991 | 0.004556467 |
| 0.064612658 | 0.003987535 | 0.000241285 | 0.010504141 |
| 0.001117132 | 0.000267836 | 0.000241285 | 0.001915146 |
| 0.001561027 | 0.000267836 | 0.027636504 | 0.014068132 |
| 0.000511736 | 0.001701433 | 0.007041085 | 0.014187389 |
| 0.007816273 | 0.001008691 | 0.00664294  | 0.014187389 |
| 0.022247811 | 0.036657234 | 0.014308216 | 0.000703554 |
| 0.0056769   | 0.002814255 | 0.00072028  | 0.018920127 |
| 0.010400901 | 0.01789522  | 0.011710549 | 0.057839639 |
| 0.002227764 | 9.15E-05    | 0.019027194 | 0.005783547 |
| 0.011397815 | 0.026541587 | 0.001740263 | 0.043652417 |
| 0.006950865 | 0.001110531 | 0.0012344   | 0.138154892 |
| 0.001134975 | 0.04090976  | 0.013767381 | 0.000192006 |
|             | 0.087156116 | 0.002974053 | 0.008654636 |

|             |             |             |             |
|-------------|-------------|-------------|-------------|
| 0.00059073  | 0.016941302 | 0.000223227 | 0.005893623 |
| 0.005858159 | 0.014470308 | 0.014181412 | 0.000600309 |
| 0.026042642 | 0.000433055 | 0.007758802 | 0.052286978 |
| 0.014831729 | 0.009430403 | 0.019292356 | 0.002698265 |
| 0.008496751 | 0.000821326 | 0.006204442 | 0.025135246 |
| 0.035212169 | 0.007122433 | 0.004794128 | 0.034735454 |
| 0.009381146 | 0.004149847 | 0.012985355 | 0.006622586 |
| 0.080159021 | 0.001429586 | 0.011397941 | 0.002999753 |
| 0.023681282 | 0.000588946 | 0.022753859 | 0.017044249 |
| 0.007556767 | 0.008892052 | 0.040382155 | 0.014713524 |
| 0.009762814 | 0.009982896 | 0.026334636 | 0.064788042 |
| 0.05272184  | 0.017783503 | 1.63E-05    | 0.015230318 |
| 0.018467948 | 0.035741162 | 0.006421258 | 0.048140262 |
| 0.004090554 | 0.001378094 | 0.000484182 | 0.010026639 |
| 0.012364382 | 0.005686285 | 0.018164906 | 0.00017191  |
| 0.016596719 | 0.013625909 | 0.0086693   | 0.015838239 |
| 0.000382899 | 0.000321144 | 0.008064209 | 0.001222825 |
| 0.000275811 | 0.000462216 | 0.002132329 | 0.00612334  |
| 0.00016113  | 0.000573865 | 0.002560929 | 0.014865498 |
| 0.012052638 |             |             |             |
| HIST1H2AB   | 0.127013972 | 0.468060418 | 0.107167033 |
| 0.197226554 | 0.362654922 | 0.462714533 | 0.112338231 |
| 0.193343199 | 0.437032529 | 0.409485251 | 0.415335679 |
| 0.037231062 | 0.10967692  | 0.472180695 | 0.103239719 |
| 0.449675028 | 0.063168637 | 0.173093559 | 0.124773562 |
| 0.338808851 | 0.335726282 | 0.384738875 | 0.450247949 |
| 0.352933513 | 0.249176567 | 0.445888533 | 0.455316582 |
| 0.496557173 | 0.312174011 | 0.484183758 | 0.281329308 |
| 0.42074385  | 0.374865601 | 0.442177255 | 0.039257528 |
| 0.47969137  | 0.025877623 | 0.453107972 | 0.333612654 |
| 0.196134733 | 0.382094858 | 0.433662661 | 0.309084435 |
| 0.471648706 | 0.073363969 | 0.277749411 | 0.476627275 |
| 0.44112378  | 0.385281324 | 0.124355321 | 0.49932285  |
| 0.461643291 | 0.410621999 | 0.467490748 | 0.003260254 |
| 0.346792601 | 0.114831655 | 0.276607345 | 0.507673036 |
| 0.270768057 | 0.18258304  | 0.369537103 | 0.354893987 |
| 0.468503183 | 0.452851293 | 0.337975398 | 0.462215939 |
| 0.491823019 | 0.219343658 | 0.494735117 | 0.221220012 |
| 0.472416408 | 0.077662255 | 0.231360444 | 0.161255272 |
| 0.468574075 | 0.265693428 | 0.394872215 | 0.376800081 |
| 0.46150975  | 0.521909519 | 0.329800159 | 0.512665291 |
| 0.151314481 | 0.397287623 | 0.346595372 | 0.373786415 |
| 0.447255452 | 0.160211574 | 0.463148198 | 0.518946898 |
| 0.10468814  | 0.467479124 | 0.473682465 | 0.200068472 |
| 0.475292826 | 0.36166111  | 0.470185075 | 0.206901263 |
| 0.429690076 | 0.403708599 | 0.492498418 | 0.36213418  |
| 0.381339049 | 0.136560759 | 0.500673898 | 0.371016166 |
| 0.344628547 | 0.147229106 | 0.291829931 | 0.497695401 |
| 0.484117604 | 0.487196575 | 0.483400686 | 0.436489507 |
| 0.43428456  | 0.493091132 | 0.47011143  | 0.460219703 |
| 0.223316879 | 0.525535993 | 0.268107669 | 0.072392186 |
| 0.132535763 | 0.135561886 | 0.320539543 | 0.367594456 |
| 0.494911491 | 0.412177438 | 0.272763372 | 0.30371035  |
| 0.481712586 | 0.490497533 | 0.527272622 | 0.469081647 |

|             |             |             |             |
|-------------|-------------|-------------|-------------|
| 0.075772679 | 0.327748784 | 0.443858136 | 0.371344186 |
| 0.447728725 | 0.187351178 | 0.309039358 | 0.517380897 |
| 0.417852316 | 0.483238015 | 0.257097528 | 0.513278895 |
| 0.296025811 | 0.504407447 | 0.484738465 | 0.237152241 |
| 0.522130444 | 0.502613542 | 0.497497919 | 0.446173414 |
| 0.475320141 | 0.422488356 | 0.109062742 | 0.450583335 |
| 0.47024126  | 0.019750218 | 0.498298173 | 0.497794515 |
| 0.503804081 | 0.49715014  | 0.510970889 | 0.497866488 |
| 0.506001748 | 0.134132541 | 0.051730462 | 0.35037027  |
| 0.513398584 | 0.443418536 | 0.197510696 | 0.471839239 |
| 0.42024409  | 0.47216032  | 0.487942587 | 0.344144506 |
| 0.505109659 | 0.487959397 | 0.496209093 | 0.464474495 |
| 0.423761501 | 0.360410491 | 0.436962828 | 0.481672946 |
| 0.081205792 | 0.179619598 | 0.101260422 | 0.388222155 |
| 0.436242841 | 0.239614582 | 0.45561971  | 0.430348521 |
| 0.261611927 | 0.441404658 | 0.386889117 | 0.427390249 |
| 0.107982752 | 0.492112805 | 0.255165384 | 0.262373312 |
| 0.073984608 | 0.205189654 | 0.236956586 | 0.2126019   |
| 0.309625511 | 0.271422082 | 0.493063239 | 0.48836419  |
| 0.436711947 | 0.264149335 | 0.486968    | 0.462414166 |
| 0.42217419  | 0.434965751 | 0.307392287 | 0.020251726 |
| 0.331326851 | 0.399045185 | 0.236325109 | 0.472127401 |
| 0.228993989 | 0.313998532 | 0.454097573 | 0.438218702 |
| 0.365097692 | 0.240725353 | 0.433265186 | 0.429990775 |
| 0.233093865 | 0.352608525 | 0.471882851 | 0.488163688 |
| 0.009422816 | 0.408785782 | 0.490826659 | 0.207190221 |
| 0.410404397 | 0.162047981 | 0.286756137 | 0.488847043 |
| 0.346433787 | 0.28686142  | 0.49388155  | 0.441697752 |
| 0.392205391 | 0.269366874 | 0.515881088 | 0.071243234 |
| 0.427157214 | 0.070432216 | 0.344792874 | 0.435844037 |
| 0.338151407 | 0.35991358  | 0.367633222 | 0.336204315 |
| 0.201320173 | 0.515302389 | 0.450137558 | 0.498845644 |
| 0.438103742 | 0.52059121  | 0.491371728 | 0.466054213 |
| 0.443688756 | 0.441234062 | 0.17197888  | 0.486108496 |
| 0.491598937 | 0.380072643 | 0.13784185  | 0.495309898 |
| 0.460810742 | 0.458781876 | 0.165411044 | 0.480352468 |
| 0.494714071 | 0.483057278 | 0.196943201 | 0.42537176  |
| 0.432970778 | 0.309878874 | 0.469869314 | 0.519891459 |
| 0.423996825 | 0.418762821 | 0.398250994 | 0.437937429 |
| 0.255139969 | 0.274374155 | 0.377304944 | 0.228351504 |
| 0.012962469 | 0.145867772 | 0.119579605 | 0.214391835 |
| 0.206063588 | 0.485361344 | 0.467479102 | 0.508913767 |
| 0.176020304 | 0.44532908  | 0.330217113 | 0.346800545 |
| 0.447728584 | 0.417833419 | 0.430046335 | 0.444051771 |
| 0.328449755 | 0.03405836  | 0.161406673 | 0.524461936 |
| 0.087696375 | 0.27722988  | 0.413165414 | 0.005023102 |
| 0.08965387  | 0.475408063 | 0.159029024 | 0.243304047 |
| 0.476783103 | 0.25204884  | 0.29471947  | 0.431096046 |
| 0.402263546 | 0.155525203 | 0.005475021 | 1           |
| 0.493957717 | 0.467115103 | 0.493304361 | 0.47442198  |
| 0.474261396 | 0.475718418 | 0.470530021 | 0.439484905 |
| 0.168227021 | 0.163699135 | 0.265126577 | 0.356444145 |
| 0.009690833 | 0.433751507 | 0.381334886 | 0.210651262 |
| 0.474848543 | 0.389082222 | 0.069462084 | 0.417517667 |



|             |             |             |             |
|-------------|-------------|-------------|-------------|
| 0.041902239 | 0.238255431 | 0.403905011 | 0.296834198 |
| 0.407477302 | 0.033732121 | 0.297398685 | 0.386211008 |
| 0.434001658 | 0.403821947 | 0.420089038 | 0.527972365 |
| 0.388745845 | 0.212204046 | 0.378306968 | 0.446045696 |
| 0.125101383 | 0.165289112 | 0.460723468 | 0.056150378 |
| 0.255113342 | 0.462594424 | 0.452085432 | 0.12740895  |
| 0.350287868 | 0.012124203 | 0.418543917 | 0.5231273   |
| 0.475968329 | 0.505092693 | 0.490014689 | 0.310053585 |
| 0.500086815 | 0.144541832 | 0.521542885 | 0.468492361 |
| 0.454401641 | 0.001737101 | 0.01054246  | 0.497263104 |
| 0.450406776 | 0.112135194 | 0.233650079 | 0.41964317  |
| 0.162413045 | 0.244633669 | 0.115309859 | 0.230991426 |
| 0.484292373 | 0.290852603 | 0.219063383 | 0.477801368 |
| 0.321137886 | 0.308102774 | 0.478789947 | 0.1542347   |
| 0.460053002 | 0.09332536  | 0.157679711 | 0.01218254  |
| 0.426089392 | 0.18134831  | 0.486456498 | 0.50638779  |
| 0.48412082  | 0.445305825 | 0.413498951 | 0.397132229 |
| 0.475930175 | 0.168731781 | 0.426398094 | 0.189344407 |
| 0.486477521 | 0.447042847 | 0.379286683 | 0.371817566 |
| 0.487317482 | 0.463391898 | 0.065978143 | 0.46749675  |
| 0.0250391   | 0.00357499  | 0.454142055 | 0.342510952 |
| 0.119387662 | 0.434641279 | 0.329368916 | 0.345968546 |
| 0.318943399 | 0.057127758 | 0.323402176 | 0.295853728 |
| 0.371930227 | 0.426185289 | 0.321537589 | 0.337504373 |
| 0.337152666 | 0.186762242 | 0.266637173 | 0.222930974 |
| 0.332374819 | 0.384537356 | 0.253088234 | 0.048046274 |
| 0.495816301 | 0.460251726 | 0.102459143 | 0.233930075 |
| 0.477110656 | 0.492343602 | 0.08261358  | 0.019669096 |
| 0.334127441 | 0.38851811  | 0.485098985 | 0.498221643 |
| 0.526435447 | 0.510009951 | 0.397109465 | 0.172992263 |
| 0.116425005 | 0.396054838 | 0.347546314 | 0.143416414 |
| 0.500859519 | 0.1277644   | 0.485671528 | 0.352886004 |
| 0.188057806 | 0.300861862 | 0.057382335 | 0.144174049 |
| 0.431424868 | 0.247360193 | 0.235746137 | 0.229159674 |
| 0.379284906 | 0.294361708 | 0.093412007 | 0.272153999 |
| 0.418732626 | 0.231160972 | 0.23510124  | 0.410391518 |
| 0.442157964 | 0.335915371 | 0.481762259 | 0.441999542 |
| 0.202004078 | 0.193910157 | 0.366395508 | 0.454805567 |
| 0.500386678 | 0.474045276 | 0.041535614 | 0.47134023  |
| 0.47932651  | 0.490258457 | 0.499224932 | 0.425656995 |
| 0.149655012 | 0.422074522 | 0.390053152 | 0.410016502 |
| 0.265117974 | 0.459941382 | 0.320677918 | 0.114603948 |
| 0.357632209 | 0.490293527 | 0.467882599 | 0.223553219 |
| 0.48570362  | 0.211634106 | 0.117334284 | 0.483000661 |
| 0.23077267  | 0.141900546 | 0.44834304  | 0.485786308 |
| 0.003791559 | 0.172773469 | 0.480772333 | 0.298634314 |
| 0.517337551 | 0.485377548 | 0.44072721  | 0.356936763 |
| 0.003169227 | 0.470716456 | 0.431093803 | 0.453799638 |
| 0.471671312 | 0.421749454 | 0.231308279 | 0.118096664 |
| 0.34815465  | 0.142458901 | 0.194997446 | 0.415704856 |
| 0.244475055 | 0.48191163  | 0.267043091 | 0.308265158 |
| 0.265239297 | 0.169227525 | 0.28908018  | 0.317633336 |
| 0.219006756 | 0.302941791 | 0.405229471 | 0.390391149 |
| 0.229366037 | 0.464223697 | 0.473160533 | 0.054188267 |

|             |             |             |             |
|-------------|-------------|-------------|-------------|
| 0.411523158 | 0.465484301 | 0.461697526 | 0.004651854 |
| 0.473238759 | 0.015275265 | 0.252261608 | 0.270042693 |
| 0.263149517 | 0.277104942 | 0.31848968  | 0.356854646 |
| 0.44398933  | 0.305676064 | 0.334799258 | 0.301759459 |
| 0.215415988 | 0.308308986 | 0.453797546 | 0.461932488 |
| 0.321395749 | 0.192077614 | 0.158555624 | 0.1540617   |
| 0.080416231 | 0.484302133 | 0.303698589 | 0.133130738 |
| 0.29719805  | 0.458323427 | 0.388398991 | 0.49992606  |
| 0.439079225 | 0.18072906  | 0.415405474 | 0.482515697 |
| 0.307925277 | 0.369023536 | 0.115805699 | 0.478250006 |
| 0.30122447  | 0.253551222 | 0.482109018 | 0.40586054  |
| 0.485440007 | 0.403219176 | 0.300821601 | 0.453085426 |
| 0.430015142 | 0.440651249 | 0.408012283 | 0.122438963 |
| 0.253666932 | 0.210224584 | 0.315297541 | 0.005047397 |
| 0.421102357 | 0.344656804 | 0.49659185  | 0.494950594 |
| 0.342255893 | 0.417396202 | 0.396839841 | 0.143793272 |
| 0.368166267 | 0.239676935 | 0.208612808 | 0.495173939 |
| 0.256141257 | 0.256686104 | 0.359137062 | 0.417870772 |
| 0.486376241 | 0.491262118 | 0.329575195 | 0.33174882  |
| 0.330146725 | 0.292810769 | 0.48979797  | 0.201952338 |
| 0.491817602 | 0.22728606  | 0.454048203 | 0.357474079 |
| 0.283163728 | 0.509233143 | 0.110687549 | 0.513950263 |
| 0.39768458  | 0.204090279 | 0.488408572 | 0.393718118 |
| 0.387036483 | 0.164268374 | 0.230737744 | 0.472515261 |
| 0.312869041 | 0.39204737  | 0.024508641 | 0.084048658 |
| 0.383836197 | 0.413456317 | 0.478902828 | 0.441276519 |
| 0.306390085 | 0.395864678 | 0.206103412 | 0.384419525 |
| 0.491968988 | 0.50937464  | 0.310171733 | 0.319762386 |
| 0.414175428 | 0.153157957 | 0.467996727 | 0.028992377 |
| 0.477639394 | 0.475694568 | 0.454169121 | 0.093754661 |
| 0.040098003 | 0.259318311 | 0.484552424 | 0.135164959 |
| 0.483277207 | 0.245855202 | 0.457724323 | 0.488916091 |
| 0.26099219  | 0.509173032 | 0.167792213 | 0.451412954 |
| 0.106530483 | 0.342080997 | 0.446040131 | 0.463121138 |
| 0.267507476 | 0.34471806  | 0.428990679 | 0.273268327 |
| 0.059379863 | 0.325660941 | 0.004472929 | 0.414554926 |
| 0.488711002 | 0.405776764 | 0.275409242 | 0.393610775 |
| 0.340797126 | 0.439857142 | 0.300912393 | 0.480373779 |
| 0.02066876  | 0.414234626 | 0.267808344 | 0.458626776 |
| 0.282037012 | 0.456100881 | 0.090602416 | 0.383552158 |
| 0.476327005 | 0.337317252 | 0.325258268 | 0.381329862 |
| 0.492322533 | 0.458737466 | 0.248634125 | 0.282085806 |
| 0.474395332 | 0.118940812 | 0.46042584  | 0.52288423  |
| 0.231296692 | 0.255735786 | 0.475433327 | 0.268761712 |
| 0.364596472 | 0.435772102 | 0.484633755 | 0.519760788 |
| 0.10537641  | 0.310658616 | 0.476169626 | 0.471111034 |
| 0.353971264 | 0.220387026 | 0.284748513 | 0.285995109 |
| 0.463878435 | 0.142885002 | 0.322104081 | 0.428063683 |
| 0.262728715 | 0.376136439 | 0.441561545 | 0.24134377  |
| 0.060082214 | 0.239857877 | 0.422309634 | 0.217366642 |
| 0.361112843 | 0.431636819 | 0.30565723  | 0.405649575 |
| 0.170199056 | 0.040839587 | 0.444968363 | 0.02644097  |
| 0.421289572 | 0.443650881 | 0.315492261 | 0.413431005 |
| 0.252229957 | 0.440511396 | 0.433486323 | 0.002708316 |

|             |             |             |             |
|-------------|-------------|-------------|-------------|
| 0.466118395 | 0.075015918 | 0.384049311 | 0.273725361 |
| 0.336436996 | 0.096191417 | 0.456457927 | 0.494797836 |
| 0.402712492 | 0.401082349 | 0.393485003 | 0.464543715 |
| 0.187325752 | 0.396766165 | 0.407304615 | 0.490760081 |
| 0.267769762 | 0.462487821 | 0.471997258 | 0.429094519 |
| 0.460631716 | 0.355181076 |             |             |
| HIST1H2AF   | 0.148934945 | 0.488066324 | 0.127086051 |
| 0.179889955 | 0.342910452 | 0.457705819 | 0.135447062 |
| 0.222580384 | 0.469616511 | 0.423572795 | 0.397937424 |
| 0.044230452 | 0.10703159  | 0.476970363 | 0.128550848 |
| 0.426059155 | 0.074422754 | 0.193120134 | 0.145316281 |
| 0.359121707 | 0.316320123 | 0.364104984 | 0.468203007 |
| 0.345383868 | 0.278100525 | 0.461691975 | 0.450915594 |
| 0.495973201 | 0.291675551 | 0.469571012 | 0.261338086 |
| 0.431325671 | 0.352654258 | 0.420942299 | 0.048623101 |
| 0.478300876 | 0.031470052 | 0.449459291 | 0.311344701 |
| 0.167160934 | 0.403322647 | 0.44377527  | 0.292779701 |
| 0.463348774 | 0.085354846 | 0.283744798 | 0.467191596 |
| 0.46227314  | 0.406020091 | 0.153301029 | 0.493439967 |
| 0.466225623 | 0.426605407 | 0.479428627 | 0.004519353 |
| 0.320131658 | 0.102285434 | 0.253386377 | 0.496280825 |
| 0.284377756 | 0.197703437 | 0.359543148 | 0.407997011 |
| 0.478472677 | 0.458108171 | 0.364735521 | 0.457885163 |
| 0.480783183 | 0.203688938 | 0.489862456 | 0.216191071 |
| 0.470730545 | 0.105594073 | 0.253018943 | 0.204324838 |
| 0.459968214 | 0.275280356 | 0.389302249 | 0.352854793 |
| 0.475690202 | 0.516663213 | 0.353061816 | 0.505855011 |
| 0.156136024 | 0.378625447 | 0.332857977 | 0.377060614 |
| 0.461611189 | 0.199179474 | 0.445125799 | 0.500574232 |
| 0.14144466  | 0.478946931 | 0.47422566  | 0.238679886 |
| 0.489322761 | 0.369081523 | 0.465593084 | 0.188043614 |
| 0.41258087  | 0.377113333 | 0.496259886 | 0.36186265  |
| 0.386880054 | 0.163719943 | 0.502157075 | 0.347694904 |
| 0.321965002 | 0.16683124  | 0.26984683  | 0.491787326 |
| 0.464427834 | 0.490547462 | 0.495072377 | 0.443480761 |
| 0.405932393 | 0.484423384 | 0.452253368 | 0.483493685 |
| 0.235580603 | 0.511334992 | 0.277485764 | 0.085093912 |
| 0.163337433 | 0.159482226 | 0.339125938 | 0.39018843  |
| 0.492415468 | 0.434638715 | 0.284420452 | 0.293455898 |
| 0.474228496 | 0.489732    | 0.513445297 | 0.471192938 |
| 0.091529431 | 0.321908936 | 0.408279002 | 0.408770259 |
| 0.448011961 | 0.225099467 | 0.280454335 | 0.510789495 |
| 0.422990093 | 0.472987174 | 0.287658952 | 0.514499728 |
| 0.338594349 | 0.484131226 | 0.490642494 | 0.237287951 |
| 0.508676549 | 0.495908079 | 0.476571724 | 0.423380948 |
| 0.468955021 | 0.408996404 | 0.131791504 | 0.464181358 |
| 0.463325449 | 0.01631924  | 0.500312924 | 0.496887652 |
| 0.487855947 | 0.484010515 | 0.488100977 | 0.494929495 |
| 0.494347386 | 0.163526145 | 0.054398303 | 0.343775469 |
| 0.498975189 | 0.439515374 | 0.228956925 | 0.447411357 |
| 0.408378908 | 0.473599684 | 0.496315735 | 0.311680428 |
| 0.492772502 | 0.488909729 | 0.501808283 | 0.473936247 |
| 0.451713449 | 0.385170681 | 0.415814526 | 0.480761518 |
| 0.09649758  | 0.198506171 | 0.124912528 | 0.415628631 |

|             |             |             |             |
|-------------|-------------|-------------|-------------|
| 0.434080014 | 0.248706085 | 0.459757833 | 0.436779493 |
| 0.272217104 | 0.475562953 | 0.37064485  | 0.409364849 |
| 0.137410296 | 0.477088308 | 0.274887909 | 0.28243025  |
| 0.080518265 | 0.239715692 | 0.228637086 | 0.214257295 |
| 0.308143008 | 0.297018655 | 0.489655338 | 0.492432862 |
| 0.440719069 | 0.283126877 | 0.485600878 | 0.466157835 |
| 0.426650227 | 0.403180026 | 0.339029161 | 0.016989477 |
| 0.295121732 | 0.399206658 | 0.217386959 | 0.461307136 |
| 0.268190463 | 0.306224543 | 0.437668827 | 0.418875028 |
| 0.372007923 | 0.291561331 | 0.413970341 | 0.430806963 |
| 0.267412561 | 0.332219439 | 0.463503953 | 0.488003654 |
| 0.01209336  | 0.391600404 | 0.482560438 | 0.203506138 |
| 0.429772791 | 0.145934691 | 0.259383098 | 0.480760201 |
| 0.334675356 | 0.282085495 | 0.498634975 | 0.431678006 |
| 0.402208211 | 0.31297184  | 0.49632917  | 0.068237664 |
| 0.430339285 | 0.064128533 | 0.338661594 | 0.457625948 |
| 0.340212062 | 0.372692929 | 0.352008653 | 0.314785539 |
| 0.226167754 | 0.501386525 | 0.467634817 | 0.490752865 |
| 0.404293983 | 0.500224412 | 0.481738485 | 0.4651249   |
| 0.448894595 | 0.436327806 | 0.153237587 | 0.470467115 |
| 0.483284763 | 0.36701253  | 0.168505517 | 0.495460378 |
| 0.45368281  | 0.441786806 | 0.169553525 | 0.472816089 |
| 0.487584188 | 0.478823894 | 0.209229507 | 0.418432446 |
| 0.425252453 | 0.314852568 | 0.479592704 | 0.504881645 |
| 0.421559297 | 0.394929038 | 0.360970695 | 0.430107004 |
| 0.267130823 | 0.261925761 | 0.411694297 | 0.21727475  |
| 0.010962807 | 0.18111089  | 0.140214159 | 0.215732783 |
| 0.185717365 | 0.487943706 | 0.456212133 | 0.488771526 |
| 0.192247416 | 0.462311953 | 0.370190558 | 0.308640654 |
| 0.455917508 | 0.417341651 | 0.413617006 | 0.437128692 |
| 0.357867265 | 0.032061443 | 0.152644131 | 0.515775098 |
| 0.116547279 | 0.252827155 | 0.4490126   | 0.004157655 |
| 0.106647704 | 0.492167497 | 0.190735695 | 0.273340698 |
| 0.478549923 | 0.281017389 | 0.306786207 | 0.428322904 |
| 0.40309554  | 0.178191937 | 0.005103998 | 0.493957717 |
| 1           | 0.485610163 | 0.490322181 | 0.481077957 |
| 0.488127013 | 0.494394633 | 0.460919883 | 0.449654464 |
| 0.186850314 | 0.196618822 | 0.226986121 | 0.337301625 |
| 0.012411414 | 0.432801958 | 0.392844651 | 0.229498514 |
| 0.472036663 | 0.409460723 | 0.083901317 | 0.419376621 |
| 0.041915702 | 0.204816692 | 0.426322628 | 0.323011715 |
| 0.410868359 | 0.043414991 | 0.255419057 | 0.347596939 |
| 0.448609003 | 0.420795877 | 0.397548006 | 0.511341732 |
| 0.373431716 | 0.244492589 | 0.348517191 | 0.443234273 |
| 0.142109079 | 0.163795578 | 0.481274697 | 0.048540108 |
| 0.280398688 | 0.473730853 | 0.452522072 | 0.135968828 |
| 0.341404063 | 0.014805171 | 0.427478521 | 0.507555385 |
| 0.470899033 | 0.487957425 | 0.482567062 | 0.278697132 |
| 0.479949388 | 0.136109241 | 0.501256766 | 0.476313502 |
| 0.439106272 | 0.001544726 | 0.012991785 | 0.490413556 |
| 0.418063152 | 0.143368543 | 0.248110428 | 0.401769372 |
| 0.161883949 | 0.27208248  | 0.144904072 | 0.207630669 |
| 0.48071029  | 0.28413669  | 0.216256276 | 0.47264926  |
| 0.315907571 | 0.324643548 | 0.49324797  | 0.188574022 |

|             |             |             |             |
|-------------|-------------|-------------|-------------|
| 0.454271949 | 0.101358267 | 0.195382824 | 0.010287315 |
| 0.426710687 | 0.213724367 | 0.492416444 | 0.491297507 |
| 0.467067208 | 0.427303587 | 0.404737265 | 0.40705055  |
| 0.491631362 | 0.199659203 | 0.41991703  | 0.222298457 |
| 0.48114542  | 0.418093197 | 0.378069875 | 0.377242634 |
| 0.47084767  | 0.464037482 | 0.081666399 | 0.453184561 |
| 0.025194585 | 0.004226141 | 0.443193381 | 0.375777589 |
| 0.149370506 | 0.408165209 | 0.338235787 | 0.388007562 |
| 0.353540486 | 0.064775023 | 0.295061424 | 0.266870914 |
| 0.361757436 | 0.410776927 | 0.297444744 | 0.380528578 |
| 0.327677908 | 0.170558209 | 0.279478925 | 0.254787985 |
| 0.377177329 | 0.40177592  | 0.277165625 | 0.06242255  |
| 0.476706152 | 0.433747432 | 0.118906021 | 0.262090856 |
| 0.466812933 | 0.487018595 | 0.092722676 | 0.017858314 |
| 0.354802446 | 0.395589462 | 0.484429419 | 0.491073333 |
| 0.516741408 | 0.489542836 | 0.416927151 | 0.179976474 |
| 0.136007986 | 0.387662439 | 0.327771648 | 0.144346291 |
| 0.489764828 | 0.157851725 | 0.482428464 | 0.327992417 |
| 0.217692675 | 0.29277329  | 0.063039782 | 0.170111392 |
| 0.413214058 | 0.271681469 | 0.235407532 | 0.247001443 |
| 0.357005523 | 0.27289547  | 0.116209461 | 0.282125284 |
| 0.422778654 | 0.191206278 | 0.253312175 | 0.451066156 |
| 0.462147859 | 0.378554434 | 0.463680353 | 0.442356173 |
| 0.227606117 | 0.225444524 | 0.35501303  | 0.474299244 |
| 0.495270491 | 0.479241509 | 0.042918112 | 0.486749529 |
| 0.487920736 | 0.471348135 | 0.488834672 | 0.431572277 |
| 0.180039895 | 0.3890516   | 0.384443893 | 0.390542673 |
| 0.292879584 | 0.46199582  | 0.347549924 | 0.138752426 |
| 0.392394366 | 0.494459522 | 0.47186895  | 0.224543441 |
| 0.491342791 | 0.253244818 | 0.1455506   | 0.500296184 |
| 0.197943859 | 0.149932191 | 0.461973008 | 0.493447045 |
| 0.003200039 | 0.156776847 | 0.488491916 | 0.310753576 |
| 0.509708266 | 0.479864509 | 0.446451503 | 0.402357281 |
| 0.00292501  | 0.452061702 | 0.406652855 | 0.415784777 |
| 0.479871279 | 0.441106258 | 0.288506498 | 0.121573571 |
| 0.359886348 | 0.1700586   | 0.191875701 | 0.419928143 |
| 0.210193744 | 0.486340019 | 0.288728416 | 0.342897659 |
| 0.268773587 | 0.212815918 | 0.269661888 | 0.324446221 |
| 0.224642024 | 0.316844164 | 0.403376799 | 0.424603075 |
| 0.190150467 | 0.475087875 | 0.467369326 | 0.066859058 |
| 0.404732265 | 0.474787886 | 0.478644989 | 0.003865183 |
| 0.451968229 | 0.018750615 | 0.253474024 | 0.256442953 |
| 0.263572224 | 0.287120193 | 0.319042196 | 0.33281648  |
| 0.452108223 | 0.313724918 | 0.320062623 | 0.304256999 |
| 0.211678299 | 0.338371342 | 0.444017788 | 0.463074334 |
| 0.294878575 | 0.20320617  | 0.193096298 | 0.187694998 |
| 0.087994404 | 0.499349264 | 0.326999583 | 0.160911614 |
| 0.315331241 | 0.467055501 | 0.397754325 | 0.488198294 |
| 0.450978516 | 0.214820333 | 0.42826165  | 0.483509226 |
| 0.31185143  | 0.371973856 | 0.145010945 | 0.477030004 |
| 0.320112373 | 0.230304575 | 0.496663651 | 0.408910867 |
| 0.494434727 | 0.418460342 | 0.326047578 | 0.467635441 |
| 0.412893448 | 0.453686047 | 0.402414378 | 0.119421199 |
| 0.252858757 | 0.245254928 | 0.293129923 | 0.005268039 |

|             |             |             |             |
|-------------|-------------|-------------|-------------|
| 0.423736931 | 0.346483096 | 0.486612291 | 0.482288608 |
| 0.327618477 | 0.434035608 | 0.392190177 | 0.149668655 |
| 0.363240063 | 0.268399235 | 0.233579998 | 0.497956237 |
| 0.230008118 | 0.275642423 | 0.339589969 | 0.430772155 |
| 0.475730834 | 0.492850407 | 0.333043402 | 0.368561726 |
| 0.358041228 | 0.318167694 | 0.492424928 | 0.233762748 |
| 0.477386578 | 0.201541334 | 0.48159527  | 0.330743301 |
| 0.281289131 | 0.496487326 | 0.135973836 | 0.496186082 |
| 0.370885929 | 0.24125069  | 0.481458268 | 0.433460822 |
| 0.411449323 | 0.172507765 | 0.204197759 | 0.491807982 |
| 0.331028775 | 0.372217963 | 0.024306692 | 0.075693539 |
| 0.377459678 | 0.446425352 | 0.487891333 | 0.459155208 |
| 0.29125278  | 0.402495083 | 0.204340297 | 0.40840751  |
| 0.487417109 | 0.510246956 | 0.281743991 | 0.3390322   |
| 0.427220172 | 0.166017836 | 0.476190649 | 0.038525109 |
| 0.455302721 | 0.457607887 | 0.447352946 | 0.116329845 |
| 0.050710302 | 0.223595432 | 0.465658728 | 0.174081185 |
| 0.480804301 | 0.220955631 | 0.485848925 | 0.483397987 |
| 0.304692087 | 0.507138278 | 0.178850122 | 0.433666787 |
| 0.139581861 | 0.367287701 | 0.438491165 | 0.474995218 |
| 0.235351574 | 0.313691435 | 0.412804401 | 0.24454474  |
| 0.068561903 | 0.304532349 | 0.004553251 | 0.412745686 |
| 0.487775888 | 0.376449943 | 0.308943469 | 0.418415193 |
| 0.344379899 | 0.465620699 | 0.304231899 | 0.476341965 |
| 0.021856225 | 0.381691484 | 0.294063325 | 0.464558755 |
| 0.235996501 | 0.462203891 | 0.095944015 | 0.376089846 |
| 0.485124045 | 0.313367921 | 0.361361259 | 0.332731076 |
| 0.485643252 | 0.485287593 | 0.281139829 | 0.293384245 |
| 0.492480765 | 0.14799818  | 0.471643449 | 0.508922276 |
| 0.234064847 | 0.226219106 | 0.459613237 | 0.254525544 |
| 0.348196563 | 0.463067455 | 0.486053976 | 0.512352035 |
| 0.109344341 | 0.321688195 | 0.476056552 | 0.482596744 |
| 0.363856951 | 0.208282208 | 0.256587476 | 0.268046165 |
| 0.464434048 | 0.142314126 | 0.311932212 | 0.430830846 |
| 0.226668742 | 0.391451976 | 0.473347229 | 0.236463017 |
| 0.065278673 | 0.28007278  | 0.420289409 | 0.245319704 |
| 0.359742302 | 0.405964414 | 0.287999256 | 0.417414898 |
| 0.163615458 | 0.03643215  | 0.44805244  | 0.0179893   |
| 0.433589017 | 0.421278689 | 0.339232461 | 0.400077773 |
| 0.273590689 | 0.456261983 | 0.435115457 | 0.003247956 |
| 0.464551736 | 0.068196903 | 0.405867383 | 0.245016935 |
| 0.330019719 | 0.115557193 | 0.468236967 | 0.484721236 |
| 0.43249847  | 0.420705496 | 0.366983596 | 0.481947678 |
| 0.161731728 | 0.386066576 | 0.401477681 | 0.491804762 |
| 0.244155132 | 0.452030126 | 0.467621343 | 0.39317892  |
| 0.46743981  | 0.394789302 |             |             |
| HIST1H2AK   | 0.143932736 | 0.459297879 | 0.120864564 |
| 0.166335173 | 0.326994946 | 0.418038228 | 0.141113583 |
| 0.221037197 | 0.451699228 | 0.400839682 | 0.368426708 |
| 0.04540727  | 0.103243769 | 0.447904609 | 0.13538277  |
| 0.403504272 | 0.077787608 | 0.194497508 | 0.149054751 |
| 0.354604446 | 0.305273663 | 0.335768157 | 0.433211324 |
| 0.336863223 | 0.26709053  | 0.438426059 | 0.427901088 |
| 0.463530904 | 0.261484116 | 0.433440514 | 0.23693729  |

|             |             |             |             |
|-------------|-------------|-------------|-------------|
| 0.410087938 | 0.335010912 | 0.39026021  | 0.048714172 |
| 0.447921154 | 0.037694521 | 0.446606187 | 0.30047197  |
| 0.156030846 | 0.383926675 | 0.409737757 | 0.277016799 |
| 0.436626463 | 0.083806681 | 0.25428398  | 0.445756881 |
| 0.444898808 | 0.396520682 | 0.150056547 | 0.461053018 |
| 0.448744567 | 0.397633748 | 0.446990899 | 0.004419752 |
| 0.297175339 | 0.095906626 | 0.239661512 | 0.483839692 |
| 0.273055655 | 0.196473158 | 0.344052101 | 0.40228177  |
| 0.459954398 | 0.442894776 | 0.35739662  | 0.434997956 |
| 0.459198858 | 0.197954167 | 0.459859816 | 0.201402266 |
| 0.447410002 | 0.110753085 | 0.248468349 | 0.206526296 |
| 0.436387051 | 0.267128762 | 0.36529228  | 0.33721457  |
| 0.445291391 | 0.509887529 | 0.346683115 | 0.495964756 |
| 0.166912935 | 0.362213063 | 0.320606655 | 0.366257374 |
| 0.448380016 | 0.21185143  | 0.414012057 | 0.491422889 |
| 0.148416269 | 0.44857561  | 0.452939396 | 0.235645196 |
| 0.456257053 | 0.359595086 | 0.428919239 | 0.176273854 |
| 0.39246108  | 0.361820109 | 0.492573456 | 0.343441587 |
| 0.370994384 | 0.162056135 | 0.492218511 | 0.330654377 |
| 0.298007331 | 0.162144804 | 0.266688482 | 0.461332077 |
| 0.434629857 | 0.457040823 | 0.468007894 | 0.428633062 |
| 0.383361577 | 0.458470438 | 0.421208108 | 0.45825805  |
| 0.216001901 | 0.499891007 | 0.263974304 | 0.086675414 |
| 0.159690591 | 0.162268959 | 0.345484766 | 0.37748907  |
| 0.45909973  | 0.412831034 | 0.271673665 | 0.286585456 |
| 0.449015321 | 0.478424291 | 0.503220204 | 0.445681557 |
| 0.092650774 | 0.316883543 | 0.383869884 | 0.387973657 |
| 0.428399137 | 0.228468602 | 0.267241645 | 0.501578995 |
| 0.396595021 | 0.446011035 | 0.276522076 | 0.50803241  |
| 0.342324872 | 0.474150235 | 0.45563736  | 0.228844856 |
| 0.4984339   | 0.484402337 | 0.462524173 | 0.395691948 |
| 0.457724994 | 0.37631774  | 0.142027838 | 0.445308832 |
| 0.443684535 | 0.015423576 | 0.469156715 | 0.466403878 |
| 0.476164864 | 0.451897441 | 0.480799861 | 0.46400661  |
| 0.482007245 | 0.164869802 | 0.058522593 | 0.334595006 |
| 0.488145618 | 0.411290208 | 0.235124474 | 0.417438289 |
| 0.390855674 | 0.438951105 | 0.468885257 | 0.283415622 |
| 0.486613918 | 0.457157453 | 0.469547085 | 0.44995986  |
| 0.441409818 | 0.366354853 | 0.391913643 | 0.469425481 |
| 0.097543934 | 0.18887593  | 0.121913393 | 0.406803083 |
| 0.394734113 | 0.244732319 | 0.427314203 | 0.425285023 |
| 0.266148066 | 0.451911317 | 0.344552009 | 0.386501833 |
| 0.136591621 | 0.439339626 | 0.267519645 | 0.276284527 |
| 0.082383133 | 0.235270018 | 0.216541683 | 0.203449055 |
| 0.297883222 | 0.296112142 | 0.456719603 | 0.463117495 |
| 0.428372879 | 0.270713423 | 0.45358485  | 0.43896907  |
| 0.405906527 | 0.376018041 | 0.332983054 | 0.016233405 |
| 0.282941094 | 0.384197889 | 0.209622059 | 0.432240251 |
| 0.261603077 | 0.300593661 | 0.416746632 | 0.392682759 |
| 0.345134289 | 0.292089985 | 0.395031219 | 0.42437232  |
| 0.261075877 | 0.308729245 | 0.435158589 | 0.460467248 |
| 0.012403324 | 0.36875648  | 0.45020679  | 0.209105431 |
| 0.418245627 | 0.1373564   | 0.234513606 | 0.452555541 |
| 0.318879899 | 0.28009554  | 0.466613382 | 0.408060205 |

|             |             |             |             |
|-------------|-------------|-------------|-------------|
| 0.371121201 | 0.302775896 | 0.487792017 | 0.07002153  |
| 0.41807572  | 0.060940199 | 0.326010042 | 0.429982065 |
| 0.328040013 | 0.364197856 | 0.335336533 | 0.298519329 |
| 0.213816031 | 0.491175566 | 0.440184045 | 0.463452987 |
| 0.381348145 | 0.491838598 | 0.450261626 | 0.435328942 |
| 0.425166554 | 0.418466583 | 0.14630731  | 0.438368655 |
| 0.454009574 | 0.352210214 | 0.165872674 | 0.466375901 |
| 0.436440519 | 0.417900193 | 0.171109171 | 0.444430568 |
| 0.479586654 | 0.467669956 | 0.206265639 | 0.400481161 |
| 0.397523613 | 0.295475139 | 0.453821379 | 0.497782442 |
| 0.405532049 | 0.378964131 | 0.343335549 | 0.409097785 |
| 0.258351429 | 0.261714461 | 0.397419931 | 0.209033111 |
| 0.009123591 | 0.180572811 | 0.138080722 | 0.211870143 |
| 0.178781479 | 0.456032384 | 0.434139469 | 0.478043992 |
| 0.190577203 | 0.433699711 | 0.367842092 | 0.291409963 |
| 0.430244597 | 0.402274547 | 0.385975336 | 0.412828898 |
| 0.349651115 | 0.031403711 | 0.145345806 | 0.508342433 |
| 0.117233747 | 0.236544056 | 0.432974211 | 0.004059268 |
| 0.108704251 | 0.460836521 | 0.18872396  | 0.265340758 |
| 0.451429619 | 0.270850967 | 0.295478901 | 0.409752807 |
| 0.380910896 | 0.177056885 | 0.004906806 | 0.467115103 |
| 0.485610163 | 1           | 0.485369787 | 0.476558082 |
| 0.467111215 | 0.470307929 | 0.437573373 | 0.412816281 |
| 0.185990687 | 0.194246191 | 0.220237463 | 0.325448237 |
| 0.012646282 | 0.407218976 | 0.382193116 | 0.224724126 |
| 0.444875747 | 0.401032156 | 0.083547151 | 0.402492623 |
| 0.039642355 | 0.188346372 | 0.414269949 | 0.322585605 |
| 0.397357389 | 0.04424279  | 0.228902802 | 0.329693031 |
| 0.41771535  | 0.397649599 | 0.370680261 | 0.499750572 |
| 0.349594189 | 0.237817884 | 0.330661337 | 0.416009212 |
| 0.144359622 | 0.16160368  | 0.46254188  | 0.041940921 |
| 0.2557843   | 0.465764098 | 0.429823506 | 0.132428604 |
| 0.325910684 | 0.014818032 | 0.400243117 | 0.496668867 |
| 0.457046837 | 0.468381644 | 0.455874559 | 0.258896172 |
| 0.466567479 | 0.130931588 | 0.489362682 | 0.44700943  |
| 0.41008842  | 0.001406678 | 0.013752955 | 0.458664343 |
| 0.390868816 | 0.140406871 | 0.243216686 | 0.359245042 |
| 0.158845911 | 0.262793664 | 0.146857031 | 0.201674707 |
| 0.443451236 | 0.274219363 | 0.212398612 | 0.46333107  |
| 0.308465344 | 0.319696271 | 0.462722421 | 0.18835864  |
| 0.423701696 | 0.101249841 | 0.19828518  | 0.009712172 |
| 0.408497024 | 0.207833315 | 0.484162458 | 0.479633988 |
| 0.457989206 | 0.402150553 | 0.374128472 | 0.375494707 |
| 0.468494812 | 0.191267215 | 0.386987104 | 0.214575401 |
| 0.457034952 | 0.394003614 | 0.357553934 | 0.355658662 |
| 0.455121975 | 0.435315204 | 0.084601774 | 0.429300632 |
| 0.023289959 | 0.004742986 | 0.406068388 | 0.36823577  |
| 0.166212635 | 0.389632707 | 0.325915497 | 0.39463842  |
| 0.355434575 | 0.062443512 | 0.284293219 | 0.257768106 |
| 0.348434756 | 0.391950199 | 0.284437525 | 0.376961596 |
| 0.321156158 | 0.173712969 | 0.27247919  | 0.256909358 |
| 0.376793251 | 0.384150555 | 0.265634285 | 0.066534888 |
| 0.443239633 | 0.402632541 | 0.118534177 | 0.255284584 |
| 0.435288395 | 0.454704283 | 0.099604805 | 0.017871008 |



|             |             |             |             |
|-------------|-------------|-------------|-------------|
| 0.339735081 | 0.386644236 | 0.454290779 | 0.469994307 |
| 0.505895233 | 0.481866026 | 0.39617229  | 0.184607602 |
| 0.134711791 | 0.374898511 | 0.314834326 | 0.147661498 |
| 0.471862001 | 0.157392099 | 0.466746442 | 0.311384972 |
| 0.218734905 | 0.282374275 | 0.062629222 | 0.173342546 |
| 0.385564775 | 0.266132601 | 0.231677537 | 0.235292543 |
| 0.342449332 | 0.256066152 | 0.120701402 | 0.275973967 |
| 0.403179012 | 0.184277126 | 0.24992697  | 0.433020174 |
| 0.438971076 | 0.369963188 | 0.435620731 | 0.422655416 |
| 0.22164197  | 0.229069854 | 0.325535054 | 0.454180662 |
| 0.463631302 | 0.450782339 | 0.038640939 | 0.455101731 |
| 0.459271059 | 0.436533429 | 0.476104195 | 0.413339934 |
| 0.181525443 | 0.360591531 | 0.374927265 | 0.376528722 |
| 0.29239218  | 0.422721537 | 0.345553572 | 0.14050394  |
| 0.382026839 | 0.49071125  | 0.44492138  | 0.216969761 |
| 0.458147722 | 0.246782551 | 0.145817871 | 0.470775291 |
| 0.193153748 | 0.14494504  | 0.428531389 | 0.467803529 |
| 0.003242164 | 0.149896822 | 0.464039416 | 0.292881964 |
| 0.50390809  | 0.450895465 | 0.419980946 | 0.39170977  |
| 0.003328119 | 0.428002919 | 0.378973774 | 0.384086799 |
| 0.449090573 | 0.416074696 | 0.288374722 | 0.122390321 |
| 0.346336323 | 0.163805685 | 0.193047936 | 0.381957127 |
| 0.20787475  | 0.456581097 | 0.284995006 | 0.344974387 |
| 0.267364133 | 0.214553012 | 0.252675325 | 0.307173426 |
| 0.234028549 | 0.306436796 | 0.383893316 | 0.397076994 |
| 0.177181532 | 0.454320652 | 0.441665575 | 0.06678989  |
| 0.382713358 | 0.455128315 | 0.453506019 | 0.004219692 |
| 0.421195422 | 0.019525809 | 0.248960027 | 0.245034949 |
| 0.2578339   | 0.286553875 | 0.312216043 | 0.315471894 |
| 0.435581821 | 0.308640798 | 0.298456818 | 0.292543895 |
| 0.204460509 | 0.330318816 | 0.4198303   | 0.442111669 |
| 0.274227227 | 0.19658624  | 0.189376234 | 0.182995533 |
| 0.084702967 | 0.467372757 | 0.313590203 | 0.156020129 |
| 0.309495339 | 0.448960208 | 0.379598421 | 0.475965696 |
| 0.426523066 | 0.206830765 | 0.416637983 | 0.448263732 |
| 0.297278413 | 0.342613451 | 0.143906033 | 0.446692821 |
| 0.307317008 | 0.218746245 | 0.463132582 | 0.384182169 |
| 0.469557678 | 0.396592737 | 0.311696068 | 0.442790339 |
| 0.386433021 | 0.44519698  | 0.369021998 | 0.11739938  |
| 0.242945989 | 0.244582842 | 0.281880482 | 0.005276492 |
| 0.402585239 | 0.316918224 | 0.453329573 | 0.47039839  |
| 0.309955209 | 0.411971901 | 0.354330947 | 0.146405117 |
| 0.330052071 | 0.257334977 | 0.229572763 | 0.466483248 |
| 0.213789278 | 0.265352151 | 0.324979259 | 0.391934677 |
| 0.447066015 | 0.468669952 | 0.330535895 | 0.361866991 |
| 0.356957862 | 0.305974184 | 0.488691062 | 0.225835785 |
| 0.445788895 | 0.192609586 | 0.454431845 | 0.316010391 |
| 0.276867633 | 0.478944386 | 0.135557331 | 0.479696753 |
| 0.357396159 | 0.236946347 | 0.47502638  | 0.414242849 |
| 0.388490506 | 0.168226435 | 0.193629484 | 0.463229275 |
| 0.329151209 | 0.347374784 | 0.022776489 | 0.074924481 |
| 0.359929695 | 0.442565861 | 0.461609097 | 0.444582121 |
| 0.284205834 | 0.390070542 | 0.194057609 | 0.395575307 |
| 0.475639837 | 0.500808908 | 0.26493993  | 0.332508454 |

|             |             |             |             |
|-------------|-------------|-------------|-------------|
| 0.408836305 | 0.162641118 | 0.437678828 | 0.04222928  |
| 0.427223689 | 0.427030056 | 0.420773062 | 0.119421215 |
| 0.053273093 | 0.211879133 | 0.438684027 | 0.177904579 |
| 0.453661291 | 0.202318641 | 0.4683246   | 0.448521879 |
| 0.302717538 | 0.497423895 | 0.179395692 | 0.403764001 |
| 0.15094185  | 0.359466668 | 0.416656436 | 0.4578988   |
| 0.220935713 | 0.299299502 | 0.389317893 | 0.229842339 |
| 0.070162305 | 0.291354047 | 0.00554235  | 0.407306202 |
| 0.479405535 | 0.361296578 | 0.302462759 | 0.39590542  |
| 0.332164419 | 0.446034086 | 0.300712549 | 0.443571526 |
| 0.021824403 | 0.357842963 | 0.287530671 | 0.430858896 |
| 0.214737536 | 0.44929182  | 0.093764568 | 0.368258943 |
| 0.477056271 | 0.301577976 | 0.354774648 | 0.311168588 |
| 0.468332461 | 0.460456103 | 0.26997356  | 0.28495743  |
| 0.47129132  | 0.148451646 | 0.433723194 | 0.500303245 |
| 0.228802294 | 0.214964802 | 0.431181676 | 0.247503033 |
| 0.33285682  | 0.437014318 | 0.459157355 | 0.505527161 |
| 0.112628668 | 0.309641184 | 0.449892862 | 0.455795516 |
| 0.350089747 | 0.207899641 | 0.242680711 | 0.262314088 |
| 0.440260874 | 0.133197438 | 0.306374158 | 0.406903243 |
| 0.216709331 | 0.376867481 | 0.450340851 | 0.233932623 |
| 0.064942067 | 0.281688229 | 0.383939935 | 0.24293391  |
| 0.346831153 | 0.385586454 | 0.283450902 | 0.395438262 |
| 0.153060475 | 0.03510999  | 0.429568945 | 0.017971035 |
| 0.398315896 | 0.391282198 | 0.327650484 | 0.379909215 |
| 0.260947218 | 0.437854718 | 0.411497731 | 0.003402209 |
| 0.442059912 | 0.066083062 | 0.396622306 | 0.233327021 |
| 0.314783348 | 0.117175856 | 0.438615429 | 0.459940434 |
| 0.412693722 | 0.395846561 | 0.337645765 | 0.454292265 |
| 0.155363402 | 0.362230509 | 0.385825672 | 0.45825705  |
| 0.231886635 | 0.420055881 | 0.436274143 | 0.361775333 |
| 0.440344147 | 0.379024508 |             |             |
| HIST1H2AN   | 0.148451362 | 0.48986041  | 0.127653725 |
| 0.175132799 | 0.332129239 | 0.453383541 | 0.134228997 |
| 0.221375904 | 0.47093473  | 0.428964541 | 0.391230466 |
| 0.043528777 | 0.100956016 | 0.477543612 | 0.125825286 |
| 0.420376723 | 0.071526225 | 0.190549052 | 0.14660933  |
| 0.351213217 | 0.306811697 | 0.355951992 | 0.472543062 |
| 0.334035272 | 0.278885426 | 0.462674721 | 0.447201566 |
| 0.496071383 | 0.289616436 | 0.464736593 | 0.260889598 |
| 0.431101909 | 0.343351916 | 0.415581206 | 0.047585225 |
| 0.474644389 | 0.029535274 | 0.450483798 | 0.303087802 |
| 0.156173497 | 0.402298788 | 0.449426609 | 0.284160673 |
| 0.468870922 | 0.085231147 | 0.287837166 | 0.465293649 |
| 0.46095453  | 0.395222414 | 0.155246078 | 0.490303072 |
| 0.466067441 | 0.425709422 | 0.485558158 | 0.005181979 |
| 0.312518716 | 0.097978624 | 0.247432416 | 0.496074212 |
| 0.279581357 | 0.191257118 | 0.362745253 | 0.40239709  |
| 0.476974537 | 0.453448389 | 0.35597061  | 0.462153757 |
| 0.481413136 | 0.198001939 | 0.488204084 | 0.208523198 |
| 0.46919471  | 0.106241827 | 0.249666809 | 0.205750001 |
| 0.451548536 | 0.266321966 | 0.379544451 | 0.341640378 |
| 0.480689851 | 0.516133751 | 0.347254477 | 0.508164768 |
| 0.14943311  | 0.370870968 | 0.319127676 | 0.368833104 |

|             |             |             |             |
|-------------|-------------|-------------|-------------|
| 0.459370732 | 0.197487018 | 0.442146012 | 0.499983225 |
| 0.14094378  | 0.485790081 | 0.47586916  | 0.241283265 |
| 0.488662894 | 0.359278087 | 0.471166719 | 0.178858811 |
| 0.403965363 | 0.371758424 | 0.496885234 | 0.359211547 |
| 0.374447925 | 0.165252815 | 0.504774763 | 0.338782769 |
| 0.313392411 | 0.165981661 | 0.2629467   | 0.4900071   |
| 0.461116568 | 0.49047425  | 0.498291141 | 0.442559197 |
| 0.402054786 | 0.483858232 | 0.449653087 | 0.482766125 |
| 0.240729482 | 0.511537418 | 0.272535167 | 0.081777077 |
| 0.166140718 | 0.152513748 | 0.329487682 | 0.383972583 |
| 0.489488663 | 0.431887979 | 0.283898496 | 0.284041174 |
| 0.470476394 | 0.492518335 | 0.514528911 | 0.472029766 |
| 0.090517564 | 0.311782055 | 0.403997851 | 0.402449892 |
| 0.44683224  | 0.221863158 | 0.270783243 | 0.512237864 |
| 0.421325347 | 0.469318572 | 0.288158397 | 0.515049652 |
| 0.335514168 | 0.481742091 | 0.49272256  | 0.232240677 |
| 0.50848261  | 0.49684957  | 0.474254805 | 0.41668738  |
| 0.467990485 | 0.40604548  | 0.13276064  | 0.463791697 |
| 0.46034318  | 0.014887658 | 0.499699024 | 0.496183602 |
| 0.489075091 | 0.482719023 | 0.485489751 | 0.493403637 |
| 0.495844208 | 0.162688638 | 0.054881787 | 0.336222247 |
| 0.50041827  | 0.437266869 | 0.219668517 | 0.447000765 |
| 0.40080918  | 0.473777585 | 0.492930992 | 0.313142506 |
| 0.490366368 | 0.486518006 | 0.502217323 | 0.475857209 |
| 0.454103828 | 0.384846102 | 0.411405399 | 0.482979617 |
| 0.092878773 | 0.199377696 | 0.126147183 | 0.410108815 |
| 0.435556554 | 0.241255684 | 0.46463431  | 0.430690109 |
| 0.266008937 | 0.477406434 | 0.364425879 | 0.403105467 |
| 0.139815389 | 0.477580368 | 0.269511909 | 0.284889112 |
| 0.077361471 | 0.239573196 | 0.228229935 | 0.206100949 |
| 0.299953684 | 0.300663577 | 0.489640401 | 0.49036771  |
| 0.433491744 | 0.28288608  | 0.48557084  | 0.46361126  |
| 0.423087101 | 0.3961809   | 0.335461641 | 0.015385982 |
| 0.297386194 | 0.399608133 | 0.210997103 | 0.457265983 |
| 0.269344907 | 0.306778688 | 0.437005179 | 0.411479883 |
| 0.374930674 | 0.291672961 | 0.411905945 | 0.430040844 |
| 0.26905073  | 0.322777216 | 0.462043219 | 0.492136227 |
| 0.011499067 | 0.389898046 | 0.480431726 | 0.194172595 |
| 0.430760008 | 0.138997702 | 0.252023273 | 0.479250703 |
| 0.333662388 | 0.272182249 | 0.496422336 | 0.422634421 |
| 0.40139994  | 0.317317376 | 0.49407955  | 0.06998517  |
| 0.422260275 | 0.060003888 | 0.330776718 | 0.463334037 |
| 0.335922707 | 0.367563628 | 0.34181887  | 0.304638938 |
| 0.228096284 | 0.501910563 | 0.464546128 | 0.490060231 |
| 0.405401578 | 0.49838362  | 0.479626564 | 0.462808343 |
| 0.442776652 | 0.436411714 | 0.146472784 | 0.469997302 |
| 0.480972181 | 0.372081861 | 0.170232678 | 0.495562056 |
| 0.457553969 | 0.438931959 | 0.159880494 | 0.471244949 |
| 0.485871968 | 0.482209039 | 0.202375447 | 0.41123774  |
| 0.422652113 | 0.310776976 | 0.474605696 | 0.502554588 |
| 0.428657711 | 0.391901756 | 0.356182789 | 0.422902782 |
| 0.26398213  | 0.251755244 | 0.409458701 | 0.207935255 |
| 0.010228476 | 0.182054542 | 0.140819383 | 0.206922914 |
| 0.174882286 | 0.489038448 | 0.451210414 | 0.489069035 |

|             |             |             |             |
|-------------|-------------|-------------|-------------|
| 0.188551597 | 0.459600624 | 0.367186393 | 0.305142349 |
| 0.459354601 | 0.411847041 | 0.404633432 | 0.4306335   |
| 0.353791641 | 0.029246599 | 0.147152973 | 0.516076159 |
| 0.119119966 | 0.243943805 | 0.447210817 | 0.003848129 |
| 0.107209596 | 0.496759809 | 0.192353539 | 0.273297066 |
| 0.474378619 | 0.281950656 | 0.307680761 | 0.43757947  |
| 0.395434162 | 0.174398217 | 0.004274887 | 0.493304361 |
| 0.490322181 | 0.485369787 | 1           | 0.481660827 |
| 0.487395642 | 0.48966959  | 0.456296833 | 0.449884582 |
| 0.184841437 | 0.197450679 | 0.220533841 | 0.332307513 |
| 0.012335647 | 0.42499083  | 0.382075468 | 0.226431115 |
| 0.468472958 | 0.406830396 | 0.08261725  | 0.410122648 |
| 0.041516998 | 0.200013931 | 0.42956814  | 0.315255984 |
| 0.401789036 | 0.042570052 | 0.254306904 | 0.349263457 |
| 0.451126828 | 0.421529201 | 0.391415621 | 0.510626795 |
| 0.367322733 | 0.248699221 | 0.339611439 | 0.43583045  |
| 0.139856731 | 0.171612836 | 0.482535266 | 0.048113183 |
| 0.276936048 | 0.47363349  | 0.451359388 | 0.134896283 |
| 0.336937918 | 0.014526032 | 0.427956662 | 0.50687979  |
| 0.473766535 | 0.486967072 | 0.481913371 | 0.270262637 |
| 0.480114871 | 0.131360535 | 0.5006118   | 0.477458676 |
| 0.445387563 | 0.001513027 | 0.012007633 | 0.4886992   |
| 0.414389012 | 0.145792646 | 0.244065974 | 0.400758444 |
| 0.155536048 | 0.27396252  | 0.141220127 | 0.19598492  |
| 0.476295015 | 0.273481761 | 0.20576368  | 0.476309728 |
| 0.30914638  | 0.315652318 | 0.496938411 | 0.189258956 |
| 0.447335265 | 0.097763672 | 0.195708276 | 0.009079702 |
| 0.417601092 | 0.217004297 | 0.495464637 | 0.491082145 |
| 0.465447053 | 0.420178732 | 0.411883784 | 0.404507429 |
| 0.48762187  | 0.203424892 | 0.417852575 | 0.224563157 |
| 0.483802065 | 0.415590537 | 0.374253673 | 0.376432531 |
| 0.470178133 | 0.465008115 | 0.080087313 | 0.450826574 |
| 0.023598775 | 0.003546647 | 0.446575688 | 0.371972756 |
| 0.142540146 | 0.404369271 | 0.334330068 | 0.383094968 |
| 0.341406773 | 0.064553112 | 0.285954876 | 0.259452025 |
| 0.355192012 | 0.406677547 | 0.288363554 | 0.377634734 |
| 0.315423028 | 0.164259424 | 0.268109179 | 0.249466739 |
| 0.372994362 | 0.403459953 | 0.278893592 | 0.061153274 |
| 0.476283523 | 0.432091894 | 0.116767681 | 0.259402623 |
| 0.464009799 | 0.486315446 | 0.090035426 | 0.016390598 |
| 0.353685901 | 0.392754308 | 0.482873363 | 0.492763045 |
| 0.517475454 | 0.487455743 | 0.416749896 | 0.173342552 |
| 0.133199252 | 0.37785377  | 0.318439007 | 0.133606656 |
| 0.489925152 | 0.161633739 | 0.482526215 | 0.318409246 |
| 0.215312813 | 0.285500769 | 0.059982511 | 0.166377916 |
| 0.406431708 | 0.266844423 | 0.225575608 | 0.249628538 |
| 0.351878787 | 0.264330978 | 0.114463564 | 0.276664628 |
| 0.423477456 | 0.184473252 | 0.250610261 | 0.446382117 |
| 0.459803958 | 0.38373431  | 0.461379814 | 0.440433361 |
| 0.225986391 | 0.224546009 | 0.360443784 | 0.469301835 |
| 0.495181286 | 0.48066487  | 0.041429648 | 0.49068878  |
| 0.485738633 | 0.470442601 | 0.489096666 | 0.427737064 |
| 0.17942627  | 0.38426137  | 0.377710896 | 0.386615648 |
| 0.288528295 | 0.457625195 | 0.34042483  | 0.137590905 |

|             |             |             |             |
|-------------|-------------|-------------|-------------|
| 0.388083845 | 0.494052943 | 0.473955654 | 0.216698714 |
| 0.487937579 | 0.256511097 | 0.149339919 | 0.498185496 |
| 0.189209141 | 0.150079358 | 0.466715582 | 0.490863727 |
| 0.002682407 | 0.147680344 | 0.485459095 | 0.302952824 |
| 0.507646502 | 0.477757683 | 0.444939127 | 0.395681747 |
| 0.002929116 | 0.447856531 | 0.402070126 | 0.412985124 |
| 0.484059327 | 0.438982853 | 0.279408774 | 0.116189474 |
| 0.353012527 | 0.172887559 | 0.187559823 | 0.414897561 |
| 0.204139527 | 0.489676268 | 0.282868455 | 0.338807494 |
| 0.258721215 | 0.216749048 | 0.258018629 | 0.316668308 |
| 0.2145173   | 0.31189257  | 0.399081446 | 0.430289684 |
| 0.190373065 | 0.473919537 | 0.46969582  | 0.065589899 |
| 0.395370559 | 0.47115887  | 0.474408986 | 0.003942186 |
| 0.449500588 | 0.01794108  | 0.244859969 | 0.247511556 |
| 0.253048305 | 0.280457393 | 0.309422762 | 0.322156525 |
| 0.454000701 | 0.307342494 | 0.31326872  | 0.296854639 |
| 0.201529999 | 0.332068632 | 0.437453904 | 0.459686007 |
| 0.287418495 | 0.19774356  | 0.194643535 | 0.190097022 |
| 0.08449626  | 0.49835154  | 0.324987036 | 0.161969757 |
| 0.307385646 | 0.466490643 | 0.393283285 | 0.490187245 |
| 0.445496859 | 0.217938142 | 0.421981496 | 0.484640188 |
| 0.321617615 | 0.373468668 | 0.147526652 | 0.472082276 |
| 0.315503231 | 0.223510503 | 0.494904443 | 0.41438685  |
| 0.497909186 | 0.416732162 | 0.324085572 | 0.463730299 |
| 0.406199195 | 0.452950884 | 0.410943271 | 0.113528194 |
| 0.250380472 | 0.244354361 | 0.282415386 | 0.004876251 |
| 0.419209088 | 0.346897554 | 0.48593217  | 0.483107712 |
| 0.320720683 | 0.429226987 | 0.397403693 | 0.149146572 |
| 0.36792528  | 0.273515863 | 0.231925792 | 0.496282601 |
| 0.224001647 | 0.267392738 | 0.330484416 | 0.432897634 |
| 0.471827497 | 0.490994078 | 0.319791614 | 0.366857016 |
| 0.349867535 | 0.315896677 | 0.493152114 | 0.232414335 |
| 0.47807893  | 0.191107294 | 0.486229317 | 0.32444643  |
| 0.273089683 | 0.495471884 | 0.134602152 | 0.496208375 |
| 0.367400001 | 0.24059135  | 0.47904673  | 0.426969912 |
| 0.404626891 | 0.162075096 | 0.195826627 | 0.494130436 |
| 0.322657314 | 0.362712149 | 0.025368209 | 0.07675296  |
| 0.370985892 | 0.443591622 | 0.492707814 | 0.454480021 |
| 0.278455188 | 0.395476959 | 0.194181711 | 0.411498226 |
| 0.490520495 | 0.511822828 | 0.281090315 | 0.334311733 |
| 0.425796324 | 0.161249165 | 0.47815412  | 0.039128316 |
| 0.455200466 | 0.456540565 | 0.452421583 | 0.113435611 |
| 0.049376212 | 0.217218701 | 0.467537872 | 0.176104565 |
| 0.477915099 | 0.215242085 | 0.487176538 | 0.479249668 |
| 0.303078146 | 0.509452503 | 0.170014345 | 0.429107114 |
| 0.14093303  | 0.360565931 | 0.429308929 | 0.473137129 |
| 0.228217242 | 0.304594727 | 0.407375466 | 0.234567335 |
| 0.066236534 | 0.2949585   | 0.00468822  | 0.412583493 |
| 0.490899467 | 0.370551258 | 0.306913808 | 0.423836719 |
| 0.335660458 | 0.460617417 | 0.300570822 | 0.473089994 |
| 0.019992786 | 0.375947127 | 0.286807568 | 0.463635215 |
| 0.236832529 | 0.463751347 | 0.090414213 | 0.368275627 |
| 0.488021851 | 0.31575797  | 0.358244988 | 0.334652942 |
| 0.486959739 | 0.483046163 | 0.282966193 | 0.279467924 |

|             |             |             |             |
|-------------|-------------|-------------|-------------|
| 0.495010425 | 0.148402383 | 0.473310195 | 0.507786177 |
| 0.225585925 | 0.216527876 | 0.455457035 | 0.249526357 |
| 0.339793671 | 0.462863411 | 0.485628991 | 0.511913492 |
| 0.103764996 | 0.316825372 | 0.470995646 | 0.484557149 |
| 0.356988484 | 0.19748285  | 0.249695057 | 0.260534295 |
| 0.467115941 | 0.137678147 | 0.305642502 | 0.430285883 |
| 0.220587331 | 0.383249517 | 0.477085345 | 0.226223124 |
| 0.061783022 | 0.274176896 | 0.414245778 | 0.241287201 |
| 0.355395331 | 0.39750095  | 0.276294109 | 0.414085606 |
| 0.156363639 | 0.034077903 | 0.445553442 | 0.017737276 |
| 0.431568773 | 0.414088188 | 0.331508077 | 0.391639369 |
| 0.272760494 | 0.455212642 | 0.442291663 | 0.003295885 |
| 0.459142296 | 0.061405262 | 0.393543081 | 0.236566612 |
| 0.327095182 | 0.115436413 | 0.466819339 | 0.482833088 |
| 0.427042444 | 0.413636081 | 0.366111872 | 0.481890404 |
| 0.153677777 | 0.382245104 | 0.397706211 | 0.494209313 |
| 0.233926177 | 0.457699832 | 0.467435881 | 0.387109297 |
| 0.462977063 | 0.388140359 |             |             |
| HIST1H2A0   | 0.178293229 | 0.485901608 | 0.162229676 |
| 0.178533264 | 0.297589797 | 0.442865902 | 0.156287388 |
| 0.238146264 | 0.469453398 | 0.398879822 | 0.369646518 |
| 0.057206556 | 0.081117292 | 0.458897187 | 0.148356591 |
| 0.3748215   | 0.08493952  | 0.2079082   | 0.141520189 |
| 0.352124631 | 0.271901881 | 0.321179389 | 0.468312133 |
| 0.299217359 | 0.310582133 | 0.460329098 | 0.398816447 |
| 0.480044429 | 0.253868881 | 0.433933052 | 0.242069251 |
| 0.427497531 | 0.303574064 | 0.369843386 | 0.066834741 |
| 0.449550561 | 0.024311383 | 0.445194007 | 0.278283053 |
| 0.133106013 | 0.411130096 | 0.434677392 | 0.276095666 |
| 0.433296048 | 0.108887103 | 0.270115371 | 0.418685866 |
| 0.453250254 | 0.391333925 | 0.193378887 | 0.466266687 |
| 0.426512832 | 0.429976421 | 0.469278813 | 0.005357017 |
| 0.267825254 | 0.073944393 | 0.201107171 | 0.482858475 |
| 0.292766884 | 0.204747989 | 0.305586778 | 0.414457102 |
| 0.437856521 | 0.419274401 | 0.360025076 | 0.416489966 |
| 0.468804071 | 0.159448916 | 0.450303498 | 0.210898257 |
| 0.447334738 | 0.136833537 | 0.270834878 | 0.245418237 |
| 0.412182622 | 0.269560758 | 0.355366794 | 0.295432962 |
| 0.473091645 | 0.504343939 | 0.355000818 | 0.497206027 |
| 0.121049058 | 0.322817628 | 0.286296641 | 0.354611876 |
| 0.433775546 | 0.219169183 | 0.414797715 | 0.479314236 |
| 0.173718098 | 0.45817902  | 0.443915413 | 0.275778314 |
| 0.483440617 | 0.315561891 | 0.441053851 | 0.151455578 |
| 0.36321951  | 0.324970733 | 0.488967997 | 0.354411856 |
| 0.347431424 | 0.201351569 | 0.504226771 | 0.292354636 |
| 0.29132527  | 0.198608183 | 0.226082672 | 0.454687016 |
| 0.428438735 | 0.47389935  | 0.475565272 | 0.41993936  |
| 0.350384668 | 0.470255567 | 0.42591217  | 0.476106176 |
| 0.217669339 | 0.491769856 | 0.289379662 | 0.097265066 |
| 0.200733788 | 0.170240151 | 0.294557335 | 0.388031411 |
| 0.467521476 | 0.427040131 | 0.29224723  | 0.267871323 |
| 0.437706266 | 0.489058541 | 0.493003492 | 0.447459871 |
| 0.112993793 | 0.263767858 | 0.354449659 | 0.419756455 |
| 0.418179246 | 0.24975602  | 0.230081601 | 0.504251953 |

|             |             |             |             |
|-------------|-------------|-------------|-------------|
| 0.418502947 | 0.435869958 | 0.316382925 | 0.512411689 |
| 0.341916574 | 0.461370048 | 0.479554452 | 0.239235728 |
| 0.494719023 | 0.491373596 | 0.455536661 | 0.374752308 |
| 0.465003642 | 0.398644762 | 0.125506621 | 0.448729841 |
| 0.448158494 | 0.012720189 | 0.471810616 | 0.468199433 |
| 0.475436993 | 0.446305742 | 0.460771376 | 0.473999826 |
| 0.480129452 | 0.194220398 | 0.042246155 | 0.31021989  |
| 0.485152669 | 0.426218407 | 0.225250721 | 0.396014422 |
| 0.359578594 | 0.462906705 | 0.466505064 | 0.274230964 |
| 0.472033042 | 0.467179729 | 0.48004324  | 0.452436793 |
| 0.442461786 | 0.397358444 | 0.358676954 | 0.484061377 |
| 0.112735909 | 0.225135344 | 0.160552353 | 0.405677057 |
| 0.422170018 | 0.24551708  | 0.444402081 | 0.391647545 |
| 0.272290065 | 0.476329217 | 0.317535336 | 0.361231675 |
| 0.177373007 | 0.443158542 | 0.292767421 | 0.299817477 |
| 0.089939131 | 0.273835607 | 0.218757017 | 0.21650378  |
| 0.281920164 | 0.334245256 | 0.453387669 | 0.469769964 |
| 0.394321543 | 0.308854248 | 0.458928488 | 0.450721199 |
| 0.411021842 | 0.351588662 | 0.350405005 | 0.018328323 |
| 0.250696934 | 0.345702571 | 0.168224185 | 0.413455576 |
| 0.307224798 | 0.280471533 | 0.393005118 | 0.376235617 |
| 0.381074316 | 0.326120648 | 0.360635539 | 0.437398612 |
| 0.30290076  | 0.29849838  | 0.433386242 | 0.45519094  |
| 0.01816859  | 0.369523532 | 0.452704873 | 0.171685216 |
| 0.419597925 | 0.116574667 | 0.219285316 | 0.452027512 |
| 0.280202549 | 0.235307354 | 0.475379719 | 0.38872585  |
| 0.377690914 | 0.352161152 | 0.46748263  | 0.051325388 |
| 0.380108255 | 0.057339006 | 0.316170835 | 0.442550674 |
| 0.336798656 | 0.355390696 | 0.303226733 | 0.274118577 |
| 0.261863591 | 0.482377458 | 0.458588711 | 0.4719343   |
| 0.349780557 | 0.471238887 | 0.448404354 | 0.445319938 |
| 0.432615492 | 0.381236075 | 0.115817457 | 0.440124372 |
| 0.453182706 | 0.320147456 | 0.209759724 | 0.458921556 |
| 0.408226356 | 0.393191544 | 0.147578177 | 0.450856335 |
| 0.476828208 | 0.475112361 | 0.206309034 | 0.379671879 |
| 0.408100862 | 0.319641063 | 0.457543773 | 0.477806043 |
| 0.380886933 | 0.341636407 | 0.308343675 | 0.395690367 |
| 0.280987989 | 0.218687221 | 0.419385546 | 0.170590454 |
| 0.008678237 | 0.215616045 | 0.16982511  | 0.204050861 |
| 0.146587702 | 0.4519558   | 0.415519459 | 0.47132356  |
| 0.204212209 | 0.458421649 | 0.378127073 | 0.269716875 |
| 0.449479238 | 0.368174716 | 0.363774212 | 0.395120387 |
| 0.366502848 | 0.035158279 | 0.152005264 | 0.503881574 |
| 0.154588975 | 0.208031276 | 0.443168215 | 0.004615731 |
| 0.130415933 | 0.481397552 | 0.229448267 | 0.303947688 |
| 0.449301822 | 0.312953175 | 0.319774756 | 0.396506483 |
| 0.378714222 | 0.201659175 | 0.005525851 | 0.47442198  |
| 0.481077957 | 0.476558082 | 0.481660827 | 1           |
| 0.465585588 | 0.471347797 | 0.421692809 | 0.452682028 |
| 0.20166339  | 0.231323502 | 0.178236451 | 0.302463604 |
| 0.014883195 | 0.408381397 | 0.357600397 | 0.248603053 |
| 0.431141747 | 0.394735829 | 0.104127773 | 0.373459799 |
| 0.052793167 | 0.160804714 | 0.415645133 | 0.30905687  |
| 0.374411481 | 0.060342163 | 0.234811699 | 0.294726059 |

|             |             |             |             |
|-------------|-------------|-------------|-------------|
| 0.456904594 | 0.426330189 | 0.341408987 | 0.491001458 |
| 0.347136939 | 0.284714216 | 0.309283242 | 0.411189255 |
| 0.160105045 | 0.143102823 | 0.465252388 | 0.04432569  |
| 0.278464186 | 0.475004424 | 0.407430854 | 0.156092228 |
| 0.3296741   | 0.02190769  | 0.431213179 | 0.486605198 |
| 0.475236362 | 0.462837616 | 0.469024779 | 0.232054836 |
| 0.468757264 | 0.100858336 | 0.47828855  | 0.468036389 |
| 0.398840276 | 0.001914851 | 0.015302395 | 0.461138734 |
| 0.36736482  | 0.186803359 | 0.261006837 | 0.386782034 |
| 0.164640697 | 0.304806191 | 0.16874289  | 0.169347988 |
| 0.455362994 | 0.253279305 | 0.180257263 | 0.471423433 |
| 0.297679969 | 0.314379702 | 0.473468884 | 0.22615887  |
| 0.414028743 | 0.115658014 | 0.231602991 | 0.009881768 |
| 0.389015014 | 0.253824691 | 0.498481344 | 0.479225034 |
| 0.453699447 | 0.383930257 | 0.367584255 | 0.389125397 |
| 0.467881538 | 0.244904841 | 0.377993826 | 0.264772851 |
| 0.475985124 | 0.372023285 | 0.366194066 | 0.381437816 |
| 0.450885284 | 0.455634943 | 0.100985577 | 0.417974456 |
| 0.031931705 | 0.004031615 | 0.432267008 | 0.376047183 |
| 0.130749137 | 0.353627456 | 0.340604685 | 0.37393951  |
| 0.338169898 | 0.082158246 | 0.237683922 | 0.212969115 |
| 0.335886518 | 0.367767482 | 0.250219834 | 0.390922109 |
| 0.286477503 | 0.138050797 | 0.270896213 | 0.25882092  |
| 0.34580179  | 0.412714599 | 0.307332869 | 0.079878156 |
| 0.438243184 | 0.38506794  | 0.141338009 | 0.28549898  |
| 0.441351811 | 0.460847026 | 0.102430978 | 0.019494091 |
| 0.364260928 | 0.357130912 | 0.457821373 | 0.482848831 |
| 0.505059181 | 0.4635583   | 0.425354869 | 0.165338841 |
| 0.158757996 | 0.35271631  | 0.278310905 | 0.130196614 |
| 0.476125256 | 0.196530622 | 0.481439789 | 0.271572249 |
| 0.241496446 | 0.284451919 | 0.071790805 | 0.190883525 |
| 0.362546325 | 0.283316798 | 0.220234154 | 0.276290539 |
| 0.319085803 | 0.224630382 | 0.138518705 | 0.283393894 |
| 0.408835249 | 0.1442942   | 0.265185332 | 0.450706507 |
| 0.46104071  | 0.36151937  | 0.417968549 | 0.433598739 |
| 0.25673338  | 0.250486    | 0.356691379 | 0.448519109 |
| 0.465397281 | 0.442123758 | 0.051361706 | 0.482574438 |
| 0.46867592  | 0.431484627 | 0.477635061 | 0.40700746  |
| 0.211801062 | 0.34291364  | 0.325317565 | 0.344109636 |
| 0.299275418 | 0.450380898 | 0.335789928 | 0.165922441 |
| 0.399586178 | 0.489241306 | 0.459042491 | 0.220972064 |
| 0.460287962 | 0.294827994 | 0.1841469   | 0.483625947 |
| 0.152841902 | 0.166760017 | 0.447962346 | 0.459595174 |
| 0.003051979 | 0.119650512 | 0.463222395 | 0.305749203 |
| 0.490941957 | 0.452042521 | 0.439883216 | 0.408972513 |
| 0.001817247 | 0.40043936  | 0.371905118 | 0.372045034 |
| 0.469841667 | 0.442723811 | 0.300515656 | 0.126544403 |
| 0.355930514 | 0.210941629 | 0.184136059 | 0.409793927 |
| 0.164281427 | 0.467246531 | 0.29491786  | 0.348267734 |
| 0.249214155 | 0.255291775 | 0.225187375 | 0.32228038  |
| 0.179980904 | 0.317996455 | 0.386375076 | 0.417078755 |
| 0.150206397 | 0.451367237 | 0.443994973 | 0.08756671  |
| 0.353969107 | 0.450746795 | 0.464219542 | 0.004163505 |
| 0.409898226 | 0.025077265 | 0.235630259 | 0.236580438 |



|             |             |             |             |
|-------------|-------------|-------------|-------------|
| 0.248381172 | 0.267557213 | 0.290759513 | 0.291166138 |
| 0.431609175 | 0.304441822 | 0.301447995 | 0.297004997 |
| 0.200960509 | 0.342747151 | 0.401816013 | 0.440154748 |
| 0.261691385 | 0.218047407 | 0.23454132  | 0.231529623 |
| 0.098422911 | 0.486516931 | 0.345509    | 0.201365503 |
| 0.309236607 | 0.437201366 | 0.390718145 | 0.479904993 |
| 0.435964303 | 0.260813671 | 0.395103349 | 0.471141664 |
| 0.272568867 | 0.359236841 | 0.177108737 | 0.4547584   |
| 0.321026672 | 0.195011285 | 0.476366896 | 0.411011035 |
| 0.47025967  | 0.422375353 | 0.344957039 | 0.458654603 |
| 0.37532561  | 0.413699775 | 0.384264298 | 0.118440884 |
| 0.258668424 | 0.275249991 | 0.248461085 | 0.0076138   |
| 0.404450609 | 0.353838716 | 0.45712649  | 0.472799374 |
| 0.27281548  | 0.429404662 | 0.381596351 | 0.164068184 |
| 0.348233816 | 0.305931281 | 0.255964798 | 0.467289824 |
| 0.182583896 | 0.283442575 | 0.298050615 | 0.44091987  |
| 0.435270028 | 0.456410149 | 0.290948574 | 0.369143582 |
| 0.349202736 | 0.342582727 | 0.485370666 | 0.268537773 |
| 0.434258441 | 0.166996533 | 0.475782339 | 0.294396827 |
| 0.255120635 | 0.47707158  | 0.16632669  | 0.474814436 |
| 0.322759611 | 0.277960792 | 0.468267305 | 0.437195191 |
| 0.409192243 | 0.167730201 | 0.157333028 | 0.470965497 |
| 0.315448946 | 0.318897423 | 0.021102245 | 0.061180748 |
| 0.354978863 | 0.413206995 | 0.469606078 | 0.433158874 |
| 0.245768304 | 0.377942213 | 0.164775325 | 0.402789908 |
| 0.482819783 | 0.508878931 | 0.257408016 | 0.339890422 |
| 0.414593806 | 0.178619229 | 0.472451716 | 0.036466176 |
| 0.407482051 | 0.407977337 | 0.407734448 | 0.135604558 |
| 0.064904093 | 0.172367634 | 0.423919836 | 0.213745232 |
| 0.448149702 | 0.17602265  | 0.468840299 | 0.452506697 |
| 0.330751844 | 0.505306209 | 0.170893737 | 0.399686816 |
| 0.163643322 | 0.366956099 | 0.387120404 | 0.433096473 |
| 0.205029315 | 0.258369727 | 0.380574895 | 0.199024784 |
| 0.08166115  | 0.272739945 | 0.004708159 | 0.422020521 |
| 0.487895097 | 0.317301122 | 0.33354939  | 0.389963314 |
| 0.328681976 | 0.457946206 | 0.269907187 | 0.433923327 |
| 0.02602902  | 0.330869535 | 0.298869665 | 0.459623622 |
| 0.193665452 | 0.426438226 | 0.103307351 | 0.321830718 |
| 0.496071146 | 0.273179766 | 0.372051927 | 0.280009235 |
| 0.481546014 | 0.481560435 | 0.320551787 | 0.266218121 |
| 0.465922952 | 0.182277551 | 0.4523044   | 0.484968316 |
| 0.225117763 | 0.182250067 | 0.420777722 | 0.237083411 |
| 0.292615137 | 0.466493501 | 0.446153739 | 0.492033939 |
| 0.10384134  | 0.318154043 | 0.441801719 | 0.468413947 |
| 0.350723031 | 0.167565155 | 0.209509608 | 0.232695675 |
| 0.468236232 | 0.152514924 | 0.25991744  | 0.420008707 |
| 0.179076995 | 0.375646784 | 0.469454352 | 0.206843028 |
| 0.073189026 | 0.283514143 | 0.400957842 | 0.267159262 |
| 0.336125653 | 0.359717278 | 0.243565673 | 0.412910875 |
| 0.1573757   | 0.039562874 | 0.440557104 | 0.012285079 |
| 0.441341836 | 0.384026892 | 0.339285814 | 0.351515975 |
| 0.300570353 | 0.436261522 | 0.427003461 | 0.005216378 |
| 0.4337218   | 0.058014714 | 0.373752213 | 0.210422643 |
| 0.282143103 | 0.139058498 | 0.468043754 | 0.459415386 |

|             |             |             |             |
|-------------|-------------|-------------|-------------|
| 0.433093482 | 0.385964222 | 0.31869508  | 0.477625097 |
| 0.124483851 | 0.331615696 | 0.346254079 | 0.472986527 |
| 0.196554034 | 0.415115423 | 0.421830151 | 0.341706973 |
| 0.455138052 | 0.398690983 |             |             |
| HIST1H2BB   | 0.112569255 | 0.41689287  | 0.088803894 |
| 0.155946805 | 0.337319142 | 0.381160671 | 0.118172808 |
| 0.193210661 | 0.410594161 | 0.382972687 | 0.35445316  |
| 0.034812526 | 0.115038847 | 0.423950661 | 0.111659232 |
| 0.414083771 | 0.065637271 | 0.170980934 | 0.141237688 |
| 0.330162919 | 0.32152797  | 0.333899857 | 0.389182799 |
| 0.349523334 | 0.222328233 | 0.400698404 | 0.430493702 |
| 0.470934934 | 0.260788482 | 0.416907421 | 0.230456666 |
| 0.404559067 | 0.348934308 | 0.39180026  | 0.034339799 |
| 0.423988771 | 0.044307321 | 0.442938171 | 0.309654645 |
| 0.172300471 | 0.344308665 | 0.376016644 | 0.267264346 |
| 0.427690861 | 0.063705272 | 0.232817466 | 0.449652531 |
| 0.412944221 | 0.368293844 | 0.112172713 | 0.437695168 |
| 0.445991149 | 0.355219558 | 0.413070272 | 0.00398902  |
| 0.311704579 | 0.112706425 | 0.265388008 | 0.479680304 |
| 0.243154085 | 0.174638638 | 0.366406771 | 0.355178838 |
| 0.453086242 | 0.437564827 | 0.327020848 | 0.437517802 |
| 0.465031612 | 0.224078596 | 0.448167804 | 0.186206387 |
| 0.428414205 | 0.082671446 | 0.216001874 | 0.162234227 |
| 0.433264748 | 0.246881086 | 0.353480292 | 0.357725908 |
| 0.414270152 | 0.507030916 | 0.315833149 | 0.490738316 |
| 0.193262093 | 0.381077778 | 0.331253199 | 0.354555204 |
| 0.434767804 | 0.183437909 | 0.401718353 | 0.498826797 |
| 0.114629753 | 0.42415231  | 0.443099505 | 0.191856643 |
| 0.413444054 | 0.368676248 | 0.407619177 | 0.190315491 |
| 0.39943209  | 0.382224229 | 0.485646379 | 0.322060859 |
| 0.362956811 | 0.12581447  | 0.47635529  | 0.350640205 |
| 0.294114118 | 0.128871978 | 0.292611113 | 0.448207303 |
| 0.427302444 | 0.453979237 | 0.441876293 | 0.415333804 |
| 0.402919091 | 0.465116305 | 0.405768536 | 0.418991864 |
| 0.202302461 | 0.502173915 | 0.232353517 | 0.070975799 |
| 0.123186421 | 0.138754249 | 0.35794717  | 0.343908782 |
| 0.432802266 | 0.378462141 | 0.246138912 | 0.288051357 |
| 0.43879745  | 0.464564592 | 0.507673716 | 0.427177548 |
| 0.072516403 | 0.341669745 | 0.401477978 | 0.333478471 |
| 0.418221216 | 0.191712662 | 0.290518988 | 0.494549875 |
| 0.364656944 | 0.43614229  | 0.231910345 | 0.496397545 |
| 0.312897047 | 0.481366812 | 0.420080473 | 0.211090768 |
| 0.497371085 | 0.474411556 | 0.476958116 | 0.398647071 |
| 0.44854395  | 0.349428003 | 0.139321704 | 0.419982822 |
| 0.451173917 | 0.017692786 | 0.446742648 | 0.47112043  |
| 0.478065353 | 0.441358321 | 0.498404386 | 0.475065994 |
| 0.480842597 | 0.131783854 | 0.069844164 | 0.338598509 |
| 0.48853706  | 0.385127215 | 0.215637933 | 0.426095164 |
| 0.398771855 | 0.403139205 | 0.444772315 | 0.292694016 |
| 0.492375138 | 0.429687512 | 0.460596521 | 0.429821855 |
| 0.414776922 | 0.324505726 | 0.405638508 | 0.452917955 |
| 0.078849579 | 0.155749321 | 0.09014634  | 0.378267483 |
| 0.361182688 | 0.227994093 | 0.402954824 | 0.427601226 |
| 0.244947189 | 0.405280146 | 0.351617296 | 0.392655371 |

|             |             |             |             |
|-------------|-------------|-------------|-------------|
| 0.101207816 | 0.423204738 | 0.23138526  | 0.246990835 |
| 0.071420556 | 0.19201044  | 0.212246119 | 0.181045383 |
| 0.295306493 | 0.267870096 | 0.440993322 | 0.465970637 |
| 0.430454058 | 0.231075316 | 0.433516996 | 0.445890741 |
| 0.399558787 | 0.385830626 | 0.295483998 | 0.01469641  |
| 0.313567167 | 0.397192954 | 0.239359009 | 0.427327933 |
| 0.211866036 | 0.30918199  | 0.424096396 | 0.391096859 |
| 0.310269705 | 0.241056735 | 0.412511809 | 0.412994542 |
| 0.216137165 | 0.305972475 | 0.421770878 | 0.447943751 |
| 0.008087557 | 0.360636132 | 0.431510347 | 0.227583742 |
| 0.395205228 | 0.150126317 | 0.240441027 | 0.436665134 |
| 0.341351798 | 0.300346867 | 0.459186933 | 0.403840619 |
| 0.351733202 | 0.256205582 | 0.50137664  | 0.086819387 |
| 0.4227932   | 0.062868981 | 0.318746599 | 0.399308133 |
| 0.306191604 | 0.349389368 | 0.345674795 | 0.30704342  |
| 0.172168381 | 0.494585518 | 0.402118282 | 0.474076638 |
| 0.402340304 | 0.505474772 | 0.435088613 | 0.410099406 |
| 0.397420633 | 0.431509368 | 0.168297957 | 0.425041908 |
| 0.437761946 | 0.374566491 | 0.126082626 | 0.452312478 |
| 0.444470538 | 0.424019798 | 0.17771236  | 0.459727234 |
| 0.475003482 | 0.458003801 | 0.191049592 | 0.398631471 |
| 0.376217517 | 0.265911324 | 0.425843432 | 0.50811273  |
| 0.412289947 | 0.399438351 | 0.367183859 | 0.400893438 |
| 0.22901599  | 0.283356587 | 0.354274576 | 0.229418052 |
| 0.009411766 | 0.142859269 | 0.109077634 | 0.204239581 |
| 0.200040649 | 0.439044189 | 0.430862228 | 0.48861066  |
| 0.167629335 | 0.392362015 | 0.33061514  | 0.308859395 |
| 0.406045812 | 0.409001828 | 0.386209784 | 0.406859885 |
| 0.312181212 | 0.027222537 | 0.134258836 | 0.506776794 |
| 0.084918434 | 0.254145264 | 0.396146526 | 0.003427486 |
| 0.087161051 | 0.424832286 | 0.148909426 | 0.222001307 |
| 0.443194948 | 0.226409412 | 0.266717285 | 0.409496506 |
| 0.363472767 | 0.145988165 | 0.00404135  | 0.474261396 |
| 0.488127013 | 0.467111215 | 0.487395642 | 0.465585588 |
| 1           | 0.439975936 | 0.432939436 | 0.366697043 |
| 0.163708152 | 0.15634903  | 0.257945451 | 0.335013075 |
| 0.010378689 | 0.385837159 | 0.373644245 | 0.193683058 |
| 0.436266178 | 0.381996421 | 0.064062926 | 0.400962168 |
| 0.031298549 | 0.212456166 | 0.391889476 | 0.306766883 |
| 0.391478775 | 0.030890849 | 0.227497277 | 0.357979085 |
| 0.40258207  | 0.357850177 | 0.382118231 | 0.503046065 |
| 0.339517798 | 0.193163243 | 0.339542631 | 0.398900352 |
| 0.122961558 | 0.176691093 | 0.433943591 | 0.041353747 |
| 0.218989363 | 0.457793013 | 0.426267671 | 0.111773968 |
| 0.311506705 | 0.01002845  | 0.361554897 | 0.500697739 |
| 0.447046728 | 0.487264432 | 0.46141218  | 0.27529739  |
| 0.471902412 | 0.150574113 | 0.497727111 | 0.413348545 |
| 0.411481021 | 0.001203083 | 0.010660334 | 0.4472691   |
| 0.403861849 | 0.101664401 | 0.215404331 | 0.331845215 |
| 0.146375046 | 0.219233842 | 0.116347278 | 0.221864637 |
| 0.414891709 | 0.275387081 | 0.224800177 | 0.458924952 |
| 0.303170958 | 0.298912446 | 0.435057313 | 0.148540713 |
| 0.410523935 | 0.084333685 | 0.158392068 | 0.009385373 |
| 0.400877318 | 0.165325564 | 0.46608929  | 0.482050156 |

|             |             |             |             |
|-------------|-------------|-------------|-------------|
| 0.464494348 | 0.401914154 | 0.37093485  | 0.3455981   |
| 0.441082454 | 0.146137013 | 0.378547387 | 0.16816707  |
| 0.456727427 | 0.404054902 | 0.336600731 | 0.323334459 |
| 0.471144423 | 0.43997143  | 0.065970498 | 0.42368988  |
| 0.01712435  | 0.004164703 | 0.37884669  | 0.33553317  |
| 0.169125552 | 0.408925458 | 0.298887431 | 0.374060141 |
| 0.3318812   | 0.047488842 | 0.315795227 | 0.291721468 |
| 0.344347976 | 0.39975944  | 0.303970172 | 0.335596607 |
| 0.331071366 | 0.200411958 | 0.251317076 | 0.232196339 |
| 0.369504107 | 0.345175971 | 0.223646301 | 0.051025519 |
| 0.433116401 | 0.407893609 | 0.094628137 | 0.216037785 |
| 0.415502144 | 0.448051968 | 0.088624734 | 0.01608337  |
| 0.304314879 | 0.390077155 | 0.459739898 | 0.47074043  |
| 0.501922856 | 0.493884461 | 0.385599279 | 0.18703545  |
| 0.108059288 | 0.373679897 | 0.332417475 | 0.148973251 |
| 0.477528622 | 0.121956468 | 0.459069182 | 0.333007563 |
| 0.18531209  | 0.269521576 | 0.051622608 | 0.145482086 |
| 0.388577182 | 0.234307771 | 0.226052114 | 0.198470714 |
| 0.352049406 | 0.274236236 | 0.097204876 | 0.254555224 |
| 0.38427044  | 0.22211379  | 0.22363675  | 0.385594363 |
| 0.397394879 | 0.348771731 | 0.436577233 | 0.428457835 |
| 0.183251537 | 0.19589417  | 0.300507572 | 0.429797254 |
| 0.445564626 | 0.436954563 | 0.029554281 | 0.434678525 |
| 0.460144818 | 0.42744138  | 0.470420404 | 0.398116461 |
| 0.146406743 | 0.367270038 | 0.396204965 | 0.391478242 |
| 0.26467433  | 0.382835705 | 0.324898047 | 0.112131924 |
| 0.340819304 | 0.481676324 | 0.417828524 | 0.201644172 |
| 0.433275446 | 0.198260672 | 0.111740949 | 0.434844651 |
| 0.227538418 | 0.124517885 | 0.39529494  | 0.449937073 |
| 0.003219709 | 0.169162115 | 0.47664091  | 0.264447443 |
| 0.50616198  | 0.447514494 | 0.409655122 | 0.342485254 |
| 0.00501467  | 0.434989371 | 0.375332725 | 0.389198316 |
| 0.417176709 | 0.373634482 | 0.241132481 | 0.110989615 |
| 0.318649821 | 0.124571868 | 0.190854809 | 0.345718734 |
| 0.241322849 | 0.431079853 | 0.256721835 | 0.314244524 |
| 0.263176217 | 0.169991741 | 0.262457614 | 0.279152139 |
| 0.260643683 | 0.280030618 | 0.365932518 | 0.358913146 |
| 0.207486926 | 0.43388293  | 0.426828927 | 0.048694746 |
| 0.38491206  | 0.434061008 | 0.418308667 | 0.004482839 |
| 0.418470435 | 0.014334475 | 0.243628942 | 0.241667927 |
| 0.247859682 | 0.282664025 | 0.310693579 | 0.325115177 |
| 0.419256984 | 0.29458836  | 0.2872951   | 0.273161717 |
| 0.19541024  | 0.295892144 | 0.416076817 | 0.424607283 |
| 0.277792739 | 0.169538389 | 0.146324779 | 0.139491775 |
| 0.069682313 | 0.433729063 | 0.272455306 | 0.11713661  |
| 0.286411307 | 0.435769003 | 0.35162576  | 0.473722356 |
| 0.395902021 | 0.159076356 | 0.407068691 | 0.415173749 |
| 0.307809966 | 0.320224676 | 0.112517452 | 0.420547408 |
| 0.278246087 | 0.233091669 | 0.428644128 | 0.354619761 |
| 0.44839634  | 0.385363786 | 0.269472677 | 0.420992956 |
| 0.382103848 | 0.445165792 | 0.350682739 | 0.110361655 |
| 0.223682784 | 0.204397227 | 0.299020243 | 0.003685562 |
| 0.381440391 | 0.282348271 | 0.435041604 | 0.465662285 |
| 0.327454809 | 0.374523758 | 0.327293439 | 0.129033627 |

|             |             |             |             |
|-------------|-------------|-------------|-------------|
| 0.309565134 | 0.212444772 | 0.195956672 | 0.445281632 |
| 0.235793705 | 0.232532225 | 0.335276685 | 0.340793575 |
| 0.439557407 | 0.4559574   | 0.33805861  | 0.330092241 |
| 0.332903292 | 0.262008747 | 0.4824066   | 0.182333632 |
| 0.441479949 | 0.208921441 | 0.414680024 | 0.326323178 |
| 0.279968308 | 0.490000525 | 0.104185616 | 0.493647992 |
| 0.377299397 | 0.19124125  | 0.473128089 | 0.363316728 |
| 0.346821507 | 0.152513228 | 0.220495581 | 0.433119966 |
| 0.315472524 | 0.354082604 | 0.024193423 | 0.087734328 |
| 0.347509555 | 0.430936766 | 0.437177211 | 0.425515955 |
| 0.301413457 | 0.37733448  | 0.202482858 | 0.370799719 |
| 0.465808475 | 0.487210791 | 0.271499962 | 0.30570877  |
| 0.384360423 | 0.139420853 | 0.394484536 | 0.041524295 |
| 0.433060396 | 0.428893152 | 0.416174588 | 0.095842193 |
| 0.040460976 | 0.246422895 | 0.440635466 | 0.138359369 |
| 0.450373415 | 0.22212625  | 0.439617893 | 0.426027831 |
| 0.257247588 | 0.485799781 | 0.170985268 | 0.394094071 |
| 0.1267916   | 0.328071997 | 0.417328163 | 0.451135358 |
| 0.231896065 | 0.32696397  | 0.383471395 | 0.25037362  |
| 0.056848776 | 0.294247123 | 0.00627393  | 0.396239409 |
| 0.46812395  | 0.388070743 | 0.258574272 | 0.377609522 |
| 0.315396999 | 0.407068635 | 0.30916336  | 0.430211142 |
| 0.017378132 | 0.372462513 | 0.256029296 | 0.391513251 |
| 0.240413482 | 0.446817854 | 0.080142853 | 0.387796109 |
| 0.454813495 | 0.322479724 | 0.315304854 | 0.343101715 |
| 0.465106878 | 0.416141933 | 0.21967091  | 0.275427093 |
| 0.45007498  | 0.11455806  | 0.399918326 | 0.507923331 |
| 0.216758679 | 0.238660615 | 0.4243888   | 0.249201964 |
| 0.351555192 | 0.390321515 | 0.448758047 | 0.508903459 |
| 0.110558542 | 0.286424509 | 0.433500035 | 0.444758745 |
| 0.328779273 | 0.231215499 | 0.265391827 | 0.277206056 |
| 0.431974767 | 0.113892057 | 0.332572586 | 0.381674404 |
| 0.248406709 | 0.352697827 | 0.410317357 | 0.241479386 |
| 0.053945214 | 0.252889068 | 0.352306731 | 0.207331747 |
| 0.340490303 | 0.39377097  | 0.304597342 | 0.362869361 |
| 0.142952643 | 0.031301822 | 0.431940396 | 0.024844497 |
| 0.349266621 | 0.383912708 | 0.294388343 | 0.386696335 |
| 0.219895864 | 0.41778641  | 0.389328474 | 0.002222732 |
| 0.42716844  | 0.068421116 | 0.380465491 | 0.248430114 |
| 0.332770612 | 0.094448233 | 0.429622112 | 0.477336215 |
| 0.369854476 | 0.373855823 | 0.346192451 | 0.44343472  |
| 0.178104308 | 0.371027722 | 0.399932982 | 0.430532275 |
| 0.252726862 | 0.414134012 | 0.430917194 | 0.369343923 |
| 0.406744998 | 0.33386149  |             |             |
| HIST1H2BC   | 0.086542925 | 0.423565278 | 0.067338757 |
| 0.116954089 | 0.289445482 | 0.345037894 | 0.078649089 |
| 0.143792818 | 0.342529384 | 0.311388782 | 0.305247693 |
| 0.022532665 | 0.134748672 | 0.422519653 | 0.080938843 |
| 0.336879832 | 0.046291818 | 0.121297935 | 0.111957291 |
| 0.263142999 | 0.265115058 | 0.318949893 | 0.322838612 |
| 0.297830503 | 0.188123252 | 0.311721624 | 0.370427024 |
| 0.479051168 | 0.257850667 | 0.361974156 | 0.185428148 |
| 0.388794022 | 0.297833487 | 0.354074232 | 0.023638542 |
| 0.369694359 | 0.037874413 | 0.420998028 | 0.238427352 |

|             |             |             |             |
|-------------|-------------|-------------|-------------|
| 0.164426848 | 0.331069406 | 0.307746613 | 0.219140326 |
| 0.31944434  | 0.043396667 | 0.22340585  | 0.359459165 |
| 0.322492938 | 0.320747695 | 0.082843027 | 0.363779849 |
| 0.3540515   | 0.297404424 | 0.329066162 | 0.002060986 |
| 0.294834741 | 0.124015293 | 0.250161279 | 0.489364561 |
| 0.193736889 | 0.14138643  | 0.288942728 | 0.309290301 |
| 0.371560571 | 0.356525836 | 0.274268901 | 0.329337467 |
| 0.467179455 | 0.205921892 | 0.371784992 | 0.157203228 |
| 0.341787122 | 0.054198463 | 0.1619989   | 0.116264988 |
| 0.373921658 | 0.207611857 | 0.324483041 | 0.315123045 |
| 0.4041151   | 0.506550367 | 0.246841767 | 0.483647367 |
| 0.167094732 | 0.322324112 | 0.294123411 | 0.283387032 |
| 0.342204055 | 0.126270624 | 0.324780211 | 0.492533564 |
| 0.083155516 | 0.336059506 | 0.339589728 | 0.13971349  |
| 0.413732484 | 0.348206735 | 0.329423306 | 0.195815162 |
| 0.337912614 | 0.301700406 | 0.484666483 | 0.249944754 |
| 0.344416261 | 0.087713116 | 0.474685686 | 0.305508841 |
| 0.258052968 | 0.093386532 | 0.220903408 | 0.431424618 |
| 0.340380846 | 0.464042562 | 0.397439192 | 0.320749793 |
| 0.319976224 | 0.470973441 | 0.321577107 | 0.415882176 |
| 0.194035682 | 0.507606928 | 0.182586407 | 0.056382374 |
| 0.087130603 | 0.118904447 | 0.302853912 | 0.291499038 |
| 0.445755912 | 0.312561629 | 0.18283985  | 0.224279326 |
| 0.433742435 | 0.466143873 | 0.507196845 | 0.364464121 |
| 0.049551192 | 0.31084062  | 0.315202849 | 0.309023681 |
| 0.330743258 | 0.145410424 | 0.257613139 | 0.488722303 |
| 0.3411361   | 0.391097414 | 0.178341249 | 0.492019609 |
| 0.244299906 | 0.484843504 | 0.423120684 | 0.15898322  |
| 0.494056271 | 0.474317647 | 0.480883611 | 0.343532263 |
| 0.458990065 | 0.281839684 | 0.113334347 | 0.356995398 |
| 0.463668636 | 0.017280469 | 0.458366032 | 0.477877419 |
| 0.474435131 | 0.413685523 | 0.502241264 | 0.490747153 |
| 0.484438796 | 0.093042584 | 0.048988208 | 0.268091084 |
| 0.479962453 | 0.347089236 | 0.189069032 | 0.340790643 |
| 0.337524134 | 0.338385126 | 0.399597376 | 0.237032778 |
| 0.49494803  | 0.42680737  | 0.472847294 | 0.334752098 |
| 0.312601015 | 0.304271913 | 0.346210906 | 0.45238912  |
| 0.058866978 | 0.116248342 | 0.064243474 | 0.306225646 |
| 0.310753182 | 0.17969383  | 0.311600446 | 0.35384066  |
| 0.19294869  | 0.338210899 | 0.333328032 | 0.331740907 |
| 0.06952402  | 0.354957365 | 0.180046994 | 0.168392242 |
| 0.048669698 | 0.152628005 | 0.15209312  | 0.160185231 |
| 0.245264846 | 0.247054277 | 0.370657045 | 0.473337603 |
| 0.359431406 | 0.172136598 | 0.352851864 | 0.453199196 |
| 0.397815198 | 0.328062244 | 0.234999822 | 0.010418909 |
| 0.210673221 | 0.332072955 | 0.22119361  | 0.374945054 |
| 0.197916912 | 0.217433511 | 0.327007272 | 0.334274003 |
| 0.23734595  | 0.190815779 | 0.322515105 | 0.415403796 |
| 0.158841596 | 0.273401821 | 0.395725443 | 0.350626719 |
| 0.005493332 | 0.26671857  | 0.389978037 | 0.18461269  |
| 0.299890187 | 0.152074761 | 0.243772475 | 0.42541785  |
| 0.291317139 | 0.266077253 | 0.481592543 | 0.35151912  |
| 0.313891608 | 0.240929272 | 0.508293081 | 0.064623021 |
| 0.363620484 | 0.0501308   | 0.254840504 | 0.327818865 |

|             |             |             |             |
|-------------|-------------|-------------|-------------|
| 0.232151727 | 0.273466353 | 0.311671601 | 0.264567443 |
| 0.130137736 | 0.496673349 | 0.369991216 | 0.483757362 |
| 0.309115295 | 0.506677024 | 0.414255643 | 0.400485197 |
| 0.331978583 | 0.350293922 | 0.171490383 | 0.365935739 |
| 0.419085308 | 0.263975774 | 0.090110208 | 0.402138069 |
| 0.332733519 | 0.34298461  | 0.149832505 | 0.45643549  |
| 0.478820104 | 0.453460985 | 0.15990622  | 0.327050905 |
| 0.318468858 | 0.212147021 | 0.396025787 | 0.516748033 |
| 0.302680306 | 0.312226394 | 0.28377411  | 0.366543575 |
| 0.169259033 | 0.238985961 | 0.324198628 | 0.239895866 |
| 0.01437424  | 0.104660449 | 0.074866969 | 0.169149934 |
| 0.188098477 | 0.372803921 | 0.348340793 | 0.486913183 |
| 0.126548732 | 0.405385485 | 0.257496551 | 0.227599042 |
| 0.384052783 | 0.351118464 | 0.355090054 | 0.355494731 |
| 0.246377685 | 0.020833858 | 0.110220726 | 0.498477781 |
| 0.056996525 | 0.237245188 | 0.331545649 | 0.00305026  |
| 0.055827239 | 0.38518233  | 0.105484008 | 0.199444634 |
| 0.464019124 | 0.199163375 | 0.188241614 | 0.292679727 |
| 0.309875033 | 0.112045949 | 0.004774111 | 0.475718418 |
| 0.494394633 | 0.470307929 | 0.48966959  | 0.471347797 |
| 0.439975936 | 1           | 0.359975375 | 0.309559003 |
| 0.114492146 | 0.110871722 | 0.196975896 | 0.249359308 |
| 0.008133992 | 0.332615517 | 0.33502498  | 0.145350561 |
| 0.366792514 | 0.293889599 | 0.047796797 | 0.359909636 |
| 0.019697526 | 0.192764917 | 0.304747738 | 0.251571001 |
| 0.332302296 | 0.021122959 | 0.181233691 | 0.266409313 |
| 0.403767379 | 0.315632862 | 0.336210116 | 0.507575414 |
| 0.280207214 | 0.136047666 | 0.267440505 | 0.350771734 |
| 0.085152649 | 0.105649883 | 0.352042859 | 0.0329142   |
| 0.238893693 | 0.468239826 | 0.361588544 | 0.071676233 |
| 0.23533628  | 0.006207045 | 0.329354258 | 0.507069131 |
| 0.450382553 | 0.488821646 | 0.470285417 | 0.252627594 |
| 0.472277806 | 0.161416755 | 0.506354406 | 0.369271611 |
| 0.317598408 | 0.000590275 | 0.011110889 | 0.454033923 |
| 0.318288238 | 0.073437104 | 0.16100999  | 0.290751221 |
| 0.112067341 | 0.165125124 | 0.095304218 | 0.194397698 |
| 0.364722876 | 0.243061073 | 0.218049766 | 0.44983852  |
| 0.226190975 | 0.248783799 | 0.358024158 | 0.107703734 |
| 0.367029767 | 0.061767866 | 0.112741394 | 0.009533696 |
| 0.344085016 | 0.117491208 | 0.459189769 | 0.489459909 |
| 0.46416323  | 0.335225418 | 0.300376503 | 0.333782231 |
| 0.444063951 | 0.108977659 | 0.345020182 | 0.127723177 |
| 0.455578889 | 0.312525301 | 0.266805593 | 0.261870411 |
| 0.465563069 | 0.431958872 | 0.046287463 | 0.337705091 |
| 0.015365292 | 0.006116113 | 0.29513953  | 0.269306083 |
| 0.159602253 | 0.321428213 | 0.226840721 | 0.297213376 |
| 0.299209685 | 0.034783362 | 0.272490644 | 0.239414046 |
| 0.26409562  | 0.310440893 | 0.259633439 | 0.265809505 |
| 0.278220893 | 0.144177426 | 0.222953947 | 0.186372886 |
| 0.311355467 | 0.288641231 | 0.185711533 | 0.033048683 |
| 0.354818097 | 0.334759017 | 0.069673992 | 0.16803278  |
| 0.389767159 | 0.452448891 | 0.055382397 | 0.011092705 |
| 0.234145459 | 0.309732775 | 0.470571303 | 0.477503033 |
| 0.502550756 | 0.491765415 | 0.380884343 | 0.141565146 |

|             |             |             |             |
|-------------|-------------|-------------|-------------|
| 0.083799777 | 0.303966152 | 0.285150941 | 0.127010628 |
| 0.488099912 | 0.080266154 | 0.475473062 | 0.300428058 |
| 0.135017824 | 0.20001021  | 0.040958735 | 0.106974308 |
| 0.349996917 | 0.186732278 | 0.184406383 | 0.139844506 |
| 0.2708457   | 0.251614692 | 0.066728341 | 0.193637946 |
| 0.28872964  | 0.172770698 | 0.163568985 | 0.338197477 |
| 0.331426321 | 0.286739959 | 0.350399422 | 0.423339932 |
| 0.140122617 | 0.13627646  | 0.218751916 | 0.367621388 |
| 0.399844265 | 0.36649416  | 0.028281806 | 0.435030423 |
| 0.477609755 | 0.355848077 | 0.47871272  | 0.365249051 |
| 0.103471081 | 0.308756296 | 0.339947788 | 0.299710426 |
| 0.203824466 | 0.342792194 | 0.265676572 | 0.079003707 |
| 0.310529885 | 0.483544538 | 0.380083562 | 0.165486607 |
| 0.385575848 | 0.146990615 | 0.072096794 | 0.446155749 |
| 0.180666724 | 0.088317359 | 0.332296574 | 0.416169056 |
| 0.002696239 | 0.1792537   | 0.485852605 | 0.241495716 |
| 0.512057593 | 0.445253391 | 0.406605849 | 0.307502859 |
| 0.002726335 | 0.353788197 | 0.304558407 | 0.306694833 |
| 0.393118304 | 0.311592264 | 0.24735576  | 0.083780376 |
| 0.261279579 | 0.090699505 | 0.134709205 | 0.321309218 |
| 0.187827176 | 0.345853957 | 0.202142001 | 0.23898537  |
| 0.212432724 | 0.11769686  | 0.267689312 | 0.233883645 |
| 0.229823023 | 0.220639469 | 0.299270401 | 0.314533425 |
| 0.154392431 | 0.423533379 | 0.337779622 | 0.03576154  |
| 0.356288646 | 0.396467966 | 0.434181008 | 0.001511987 |
| 0.341124838 | 0.009981677 | 0.203735008 | 0.199320907 |
| 0.208585949 | 0.224026337 | 0.257045289 | 0.268207649 |
| 0.3157969   | 0.221374188 | 0.234606791 | 0.221461467 |
| 0.166925842 | 0.241624739 | 0.349172203 | 0.327673288 |
| 0.236713904 | 0.134037616 | 0.114003755 | 0.120728583 |
| 0.059116455 | 0.458362103 | 0.231433262 | 0.086673206 |
| 0.237587295 | 0.341776238 | 0.326566261 | 0.474148494 |
| 0.407133538 | 0.124492023 | 0.339336689 | 0.402832043 |
| 0.238292166 | 0.2716325   | 0.078535644 | 0.346602861 |
| 0.22957435  | 0.199259439 | 0.375340065 | 0.259163077 |
| 0.353825644 | 0.382375453 | 0.22326401  | 0.434167194 |
| 0.314266424 | 0.34735917  | 0.273624794 | 0.087508256 |
| 0.159138406 | 0.149274746 | 0.255469627 | 0.002271017 |
| 0.314833479 | 0.224014811 | 0.423844773 | 0.463697224 |
| 0.307175752 | 0.374354605 | 0.270822601 | 0.086421575 |
| 0.250233533 | 0.179331441 | 0.146123009 | 0.377542957 |
| 0.227372768 | 0.200107343 | 0.271625478 | 0.295598071 |
| 0.35996073  | 0.371038703 | 0.302887939 | 0.265432025 |
| 0.268254893 | 0.202888771 | 0.476835358 | 0.14199722  |
| 0.356090369 | 0.180245519 | 0.338601918 | 0.251009312 |
| 0.22067266  | 0.499187067 | 0.078213001 | 0.499635421 |
| 0.287813809 | 0.146489979 | 0.477518431 | 0.331518986 |
| 0.302986075 | 0.150796883 | 0.210804112 | 0.360720076 |
| 0.252920698 | 0.339480626 | 0.019753721 | 0.063045842 |
| 0.281894293 | 0.357290932 | 0.361830695 | 0.348161051 |
| 0.26361252  | 0.308621787 | 0.238645785 | 0.274423751 |
| 0.464582661 | 0.487967727 | 0.194969935 | 0.234015033 |
| 0.304615867 | 0.112953809 | 0.334913451 | 0.032919451 |
| 0.342252796 | 0.358606692 | 0.341291636 | 0.074868849 |



|                      |             |             |             |
|----------------------|-------------|-------------|-------------|
| 0.027283204          | 0.208612732 | 0.333530838 | 0.094500543 |
| 0.455138764          | 0.215532367 | 0.354898411 | 0.366872884 |
| 0.198988632          | 0.479741492 | 0.145333311 | 0.326711999 |
| 0.077643646          | 0.264855617 | 0.375925098 | 0.375359218 |
| 0.185887997          | 0.272553999 | 0.303980394 | 0.229436737 |
| 0.039905248          | 0.250619607 | 0.001464789 | 0.386730839 |
| 0.455481504          | 0.311678185 | 0.206780515 | 0.327704354 |
| 0.259820354          | 0.389025159 | 0.256095714 | 0.377422474 |
| 0.013812104          | 0.306487543 | 0.215358149 | 0.374662278 |
| 0.179058863          | 0.338513814 | 0.065818346 | 0.323008494 |
| 0.44942852           | 0.235135131 | 0.255879996 | 0.240303166 |
| 0.472338404          | 0.388311821 | 0.166665419 | 0.270972013 |
| 0.362670583          | 0.081149253 | 0.350676209 | 0.512073985 |
| 0.181233413          | 0.208863582 | 0.394791594 | 0.177862187 |
| 0.314748076          | 0.379287001 | 0.369462688 | 0.51519139  |
| 0.086642472          | 0.226163892 | 0.381264276 | 0.435630455 |
| 0.271269767          | 0.205022268 | 0.234181865 | 0.219651522 |
| 0.431512843          | 0.096239707 | 0.26989839  | 0.295056496 |
| 0.20410253           | 0.301497187 | 0.332778516 | 0.208877898 |
| 0.047292964          | 0.211193256 | 0.334545966 | 0.15845009  |
| 0.263748829          | 0.317092287 | 0.247914768 | 0.363098197 |
| 0.128335425          | 0.022820764 | 0.432855682 | 0.018446778 |
| 0.303755019          | 0.326826145 | 0.255210633 | 0.329738782 |
| 0.16895977           | 0.326661159 | 0.279007847 | 0.001394181 |
| 0.376514919          | 0.066997846 | 0.355675395 | 0.200628317 |
| 0.286518454          | 0.063193567 | 0.442995296 | 0.486169526 |
| 0.316260815          | 0.362747772 | 0.303302388 | 0.45516442  |
| 0.162072414          | 0.338986279 | 0.347547866 | 0.343917557 |
| 0.243345881          | 0.324135668 | 0.366733093 | 0.323269022 |
| 0.34105448           | 0.297738644 |             |             |
| HIST1H3G 0.087335971 | 0.387139019 | 0.062005158 |             |
| 0.183263812          | 0.363884405 | 0.341355979 | 0.088821168 |
| 0.158932037          | 0.308626435 | 0.276501559 | 0.359827148 |
| 0.029683994          | 0.135717475 | 0.43708916  | 0.083955836 |
| 0.407527811          | 0.061065297 | 0.147123386 | 0.096520524 |
| 0.264469324          | 0.352184218 | 0.34222784  | 0.314822183 |
| 0.356868504          | 0.1808957   | 0.319722406 | 0.377695816 |
| 0.470787496          | 0.253023322 | 0.389345945 | 0.198666563 |
| 0.409988865          | 0.374848237 | 0.37027762  | 0.025394796 |
| 0.373842937          | 0.033345331 | 0.423175676 | 0.336174098 |
| 0.234556368          | 0.332871425 | 0.283638032 | 0.289442568 |
| 0.348086541          | 0.049672423 | 0.176143695 | 0.397810059 |
| 0.323456007          | 0.311066225 | 0.071563409 | 0.382510167 |
| 0.367324061          | 0.303244773 | 0.319073539 | 0.003349724 |
| 0.331610314          | 0.128487993 | 0.277121393 | 0.466862095 |
| 0.222606249          | 0.165702263 | 0.305789914 | 0.259434409 |
| 0.376130457          | 0.37899505  | 0.281271786 | 0.36052707  |
| 0.471340166          | 0.249290261 | 0.388709031 | 0.1964113   |
| 0.370174589          | 0.045963634 | 0.182309421 | 0.096229442 |
| 0.397879636          | 0.244150163 | 0.352653561 | 0.370604269 |
| 0.386894106          | 0.490567291 | 0.265452341 | 0.461362451 |
| 0.180034918          | 0.382707583 | 0.352953848 | 0.335312603 |
| 0.361262606          | 0.12220785  | 0.385298683 | 0.502699555 |
| 0.066696909          | 0.326922701 | 0.375985707 | 0.129618146 |

|             |             |             |             |
|-------------|-------------|-------------|-------------|
| 0.386064306 | 0.320642159 | 0.334391064 | 0.237501283 |
| 0.394638122 | 0.391019735 | 0.447807256 | 0.301957972 |
| 0.344891683 | 0.083448565 | 0.437550893 | 0.371468153 |
| 0.328673361 | 0.098404131 | 0.326281424 | 0.441403536 |
| 0.400165543 | 0.463825846 | 0.387987587 | 0.35669582  |
| 0.406865426 | 0.474260887 | 0.380337081 | 0.386483247 |
| 0.14163598  | 0.491324461 | 0.212864596 | 0.066214499 |
| 0.082096206 | 0.124210496 | 0.307758294 | 0.295237667 |
| 0.447110163 | 0.32376198  | 0.223406788 | 0.308405126 |
| 0.462065831 | 0.427699526 | 0.491051563 | 0.386623301 |
| 0.057034214 | 0.319224489 | 0.409028621 | 0.267081946 |
| 0.372475632 | 0.141722203 | 0.333691846 | 0.471592975 |
| 0.365456442 | 0.419512482 | 0.177557778 | 0.467027933 |
| 0.235878297 | 0.49656953  | 0.41020255  | 0.212829338 |
| 0.489099301 | 0.454397333 | 0.502459849 | 0.396172785 |
| 0.438968067 | 0.330290092 | 0.086718678 | 0.363705572 |
| 0.472855215 | 0.027707311 | 0.454341084 | 0.484662874 |
| 0.465638405 | 0.442376845 | 0.514433542 | 0.485666595 |
| 0.464088171 | 0.093883616 | 0.048270532 | 0.341494887 |
| 0.476289989 | 0.380844654 | 0.190661028 | 0.400259961 |
| 0.388957256 | 0.344148565 | 0.379365834 | 0.310897683 |
| 0.498587357 | 0.431857974 | 0.460728571 | 0.362183707 |
| 0.30308838  | 0.301938437 | 0.382773335 | 0.421333178 |
| 0.070288758 | 0.128298798 | 0.059460744 | 0.313089388 |
| 0.295432796 | 0.224827421 | 0.347342381 | 0.376076302 |
| 0.232674322 | 0.306637907 | 0.340037388 | 0.39102052  |
| 0.059677975 | 0.379280493 | 0.195193339 | 0.197934983 |
| 0.072596638 | 0.140526015 | 0.229595428 | 0.189726802 |
| 0.306363479 | 0.222151502 | 0.385131182 | 0.476729776 |
| 0.380254158 | 0.186127608 | 0.378624012 | 0.464218401 |
| 0.430039866 | 0.397656943 | 0.238214387 | 0.023967036 |
| 0.339263482 | 0.31888702  | 0.259334574 | 0.385042212 |
| 0.172033303 | 0.300385596 | 0.398123092 | 0.391591441 |
| 0.268177854 | 0.157961039 | 0.395903337 | 0.401521921 |
| 0.151868068 | 0.337977394 | 0.437180167 | 0.372078181 |
| 0.006240181 | 0.351695096 | 0.413348853 | 0.243090511 |
| 0.318890781 | 0.191540386 | 0.275497718 | 0.457746255 |
| 0.331447217 | 0.307666456 | 0.468883422 | 0.39030493  |
| 0.315321563 | 0.205275661 | 0.511301973 | 0.080464245 |
| 0.373051113 | 0.097961144 | 0.321624103 | 0.289291645 |
| 0.281771302 | 0.316077189 | 0.359174983 | 0.344199707 |
| 0.12937587  | 0.486013593 | 0.358358421 | 0.486281626 |
| 0.387760576 | 0.514549488 | 0.439946369 | 0.422627054 |
| 0.354806617 | 0.370452202 | 0.197991755 | 0.408820707 |
| 0.44887884  | 0.339722508 | 0.080211316 | 0.397743941 |
| 0.364524883 | 0.402273154 | 0.203821483 | 0.486621628 |
| 0.46915646  | 0.422496376 | 0.191809971 | 0.382091445 |
| 0.361096864 | 0.250501303 | 0.390045409 | 0.511974221 |
| 0.317115303 | 0.393259708 | 0.390669762 | 0.407152777 |
| 0.202863925 | 0.305544485 | 0.30457449  | 0.240733608 |
| 0.013167195 | 0.097334168 | 0.081506323 | 0.222866978 |
| 0.259025778 | 0.36349934  | 0.398292386 | 0.49273537  |
| 0.153239452 | 0.388184672 | 0.25205612  | 0.351222436 |
| 0.401664187 | 0.373011841 | 0.379207549 | 0.381829    |

|             |             |             |             |
|-------------|-------------|-------------|-------------|
| 0.255507943 | 0.035360054 | 0.154262421 | 0.493011143 |
| 0.046580662 | 0.303102007 | 0.311603065 | 0.004752487 |
| 0.064192069 | 0.353332378 | 0.098417128 | 0.192751253 |
| 0.469699337 | 0.193083878 | 0.225416495 | 0.315611572 |
| 0.349672897 | 0.119664893 | 0.007221989 | 0.470530021 |
| 0.460919883 | 0.437573373 | 0.456296833 | 0.421692809 |
| 0.432939436 | 0.359975375 | 1           | 0.306575201 |
| 0.143033994 | 0.107132752 | 0.316405421 | 0.352550815 |
| 0.006590739 | 0.362942837 | 0.34184787  | 0.165454564 |
| 0.394516731 | 0.322502698 | 0.052481041 | 0.370564132 |
| 0.03244176  | 0.256699685 | 0.311843656 | 0.270789318 |
| 0.364850955 | 0.022041627 | 0.246548626 | 0.362965198 |
| 0.387464373 | 0.31597949  | 0.375690684 | 0.499205387 |
| 0.348899104 | 0.127251381 | 0.371959382 | 0.374863521 |
| 0.103556521 | 0.141232058 | 0.340013382 | 0.043877308 |
| 0.184593423 | 0.423396882 | 0.371150636 | 0.098317375 |
| 0.304918109 | 0.008442591 | 0.338203328 | 0.499786344 |
| 0.419197346 | 0.506314652 | 0.473279693 | 0.322186543 |
| 0.477970088 | 0.15021385  | 0.499055715 | 0.369043036 |
| 0.347371692 | 0.001867777 | 0.009718328 | 0.472337521 |
| 0.41037239  | 0.058666681 | 0.191401003 | 0.310911872 |
| 0.158878705 | 0.160511904 | 0.088545976 | 0.280657174 |
| 0.3712066   | 0.300757065 | 0.249226061 | 0.430578554 |
| 0.30191431  | 0.275194494 | 0.344013718 | 0.098254871 |
| 0.384236322 | 0.080878927 | 0.10184507  | 0.0149763   |
| 0.376808359 | 0.110728616 | 0.42393919  | 0.475276986 |
| 0.478190804 | 0.397103406 | 0.301484344 | 0.30078988  |
| 0.42001827  | 0.093622132 | 0.336262393 | 0.11244451  |
| 0.444995526 | 0.403618049 | 0.319621581 | 0.28902373  |
| 0.49257996  | 0.446452012 | 0.051219383 | 0.3939902   |
| 0.019892518 | 0.004327822 | 0.332073541 | 0.275112485 |
| 0.106493057 | 0.402665882 | 0.268081967 | 0.274457077 |
| 0.272436645 | 0.041139473 | 0.343304273 | 0.333988004 |
| 0.341583567 | 0.390570395 | 0.342957634 | 0.250244707 |
| 0.341603522 | 0.236357916 | 0.2462534   | 0.197938505 |
| 0.281967354 | 0.293282725 | 0.185374788 | 0.036313394 |
| 0.383730406 | 0.396457147 | 0.078560966 | 0.174100591 |
| 0.422346583 | 0.472838359 | 0.078487447 | 0.02441023  |
| 0.257524542 | 0.35330968  | 0.484651501 | 0.458556325 |
| 0.485979628 | 0.508267021 | 0.374988326 | 0.199949308 |
| 0.089531087 | 0.364660554 | 0.355743711 | 0.177308211 |
| 0.479142632 | 0.07479559  | 0.441840969 | 0.354454825 |
| 0.143192572 | 0.271947317 | 0.055186788 | 0.116585118 |
| 0.380506835 | 0.203793855 | 0.245448308 | 0.154782207 |
| 0.363978969 | 0.313887127 | 0.072887978 | 0.237690003 |
| 0.337529214 | 0.282963385 | 0.193941791 | 0.296994905 |
| 0.320814803 | 0.215363575 | 0.407387609 | 0.442186737 |
| 0.143771872 | 0.14181807  | 0.268925331 | 0.359479509 |
| 0.411638377 | 0.351112923 | 0.032903907 | 0.40728369  |
| 0.468719948 | 0.393751744 | 0.456822425 | 0.394150802 |
| 0.103204177 | 0.385718653 | 0.360590582 | 0.387595047 |
| 0.222562353 | 0.338395361 | 0.281724568 | 0.083137508 |
| 0.291270245 | 0.451904666 | 0.39609752  | 0.213489105 |
| 0.367914543 | 0.129765162 | 0.065892297 | 0.409732307 |

|             |             |             |             |
|-------------|-------------|-------------|-------------|
| 0.294776118 | 0.112828362 | 0.302089596 | 0.405181703 |
| 0.005813017 | 0.208833242 | 0.483300177 | 0.256993826 |
| 0.493539229 | 0.477402251 | 0.424251688 | 0.26217348  |
| 0.006134163 | 0.406528314 | 0.381032814 | 0.399978657 |
| 0.396447804 | 0.310329348 | 0.169114279 | 0.118651432 |
| 0.288904803 | 0.082491706 | 0.200656305 | 0.302072758 |
| 0.263387481 | 0.360036758 | 0.224560038 | 0.242792022 |
| 0.269747576 | 0.098362444 | 0.292814961 | 0.267275015 |
| 0.23578317  | 0.25486711  | 0.340934664 | 0.247601805 |
| 0.256787628 | 0.428061808 | 0.372671071 | 0.037326894 |
| 0.369806126 | 0.40140258  | 0.413212757 | 0.005861517 |
| 0.402103353 | 0.013511861 | 0.256573343 | 0.274439401 |
| 0.258709673 | 0.272327699 | 0.313827647 | 0.363347264 |
| 0.350289133 | 0.275908251 | 0.307188718 | 0.268864074 |
| 0.22119256  | 0.251083872 | 0.394248294 | 0.364131027 |
| 0.321641385 | 0.158461214 | 0.097109743 | 0.100023531 |
| 0.073186874 | 0.424198848 | 0.232259466 | 0.076970041 |
| 0.261999908 | 0.365777515 | 0.351117309 | 0.451591322 |
| 0.407702111 | 0.102498862 | 0.356135783 | 0.405020266 |
| 0.237372252 | 0.276710069 | 0.07610134  | 0.367846031 |
| 0.253600488 | 0.281369793 | 0.348782066 | 0.294346586 |
| 0.358935309 | 0.387347935 | 0.222284557 | 0.422281799 |
| 0.383602878 | 0.358028351 | 0.275519921 | 0.132681424 |
| 0.214871609 | 0.148742398 | 0.339512738 | 0.00415378  |
| 0.349288922 | 0.251591278 | 0.448288066 | 0.450883873 |
| 0.323578982 | 0.369282902 | 0.272853025 | 0.120680626 |
| 0.244287398 | 0.169190972 | 0.159373945 | 0.381049055 |
| 0.265676389 | 0.213526743 | 0.362421664 | 0.275794569 |
| 0.401101279 | 0.381986229 | 0.324919375 | 0.266514358 |
| 0.281566563 | 0.206420898 | 0.446662885 | 0.134433169 |
| 0.388382585 | 0.27565801  | 0.304413214 | 0.354219219 |
| 0.291847389 | 0.492454374 | 0.075424796 | 0.500437683 |
| 0.381007975 | 0.134450578 | 0.471454115 | 0.287760154 |
| 0.296277836 | 0.166459848 | 0.262560315 | 0.338404282 |
| 0.283670448 | 0.355190823 | 0.019002421 | 0.09804673  |
| 0.339932358 | 0.320553068 | 0.356681505 | 0.358536377 |
| 0.330672284 | 0.346795624 | 0.208397222 | 0.301744536 |
| 0.431739678 | 0.451930948 | 0.299148804 | 0.264533532 |
| 0.333031115 | 0.133275273 | 0.326174122 | 0.024622888 |
| 0.404281728 | 0.387614537 | 0.348387771 | 0.07660023  |
| 0.031436858 | 0.29672307  | 0.397231203 | 0.079563323 |
| 0.480247503 | 0.258740112 | 0.327283199 | 0.383000944 |
| 0.185882856 | 0.454934461 | 0.182425149 | 0.386349528 |
| 0.069914787 | 0.276913944 | 0.381032229 | 0.367367934 |
| 0.293420007 | 0.368401185 | 0.379721942 | 0.308101321 |
| 0.052865288 | 0.318351767 | 0.005778562 | 0.385747875 |
| 0.429718068 | 0.388546071 | 0.197959876 | 0.270301749 |
| 0.3054093   | 0.359785615 | 0.294156882 | 0.374443495 |
| 0.021403081 | 0.392989779 | 0.227281996 | 0.370694501 |
| 0.275445477 | 0.365639789 | 0.088770599 | 0.368878215 |
| 0.410576582 | 0.327254015 | 0.24786876  | 0.354398677 |
| 0.447520465 | 0.344642187 | 0.152855665 | 0.27303065  |
| 0.346554908 | 0.076727433 | 0.320915926 | 0.504371053 |
| 0.227685671 | 0.30221526  | 0.436779823 | 0.271887396 |

|             |             |             |             |
|-------------|-------------|-------------|-------------|
| 0.356824207 | 0.350210348 | 0.37147662  | 0.490468043 |
| 0.12764771  | 0.268295796 | 0.388521729 | 0.437820281 |
| 0.307174046 | 0.267381294 | 0.312400326 | 0.309328096 |
| 0.4135174   | 0.120221531 | 0.335412827 | 0.337083137 |
| 0.301983264 | 0.319500802 | 0.294209119 | 0.269053151 |
| 0.056422799 | 0.208394561 | 0.330414337 | 0.168006721 |
| 0.330448442 | 0.401635611 | 0.334814287 | 0.380367994 |
| 0.174925836 | 0.044451394 | 0.441347274 | 0.038231566 |
| 0.294338236 | 0.386672271 | 0.261019907 | 0.389121343 |
| 0.17796632  | 0.350980332 | 0.318273449 | 0.001756838 |
| 0.395049623 | 0.09060215  | 0.330394232 | 0.3024412   |
| 0.31711965  | 0.072110035 | 0.422523534 | 0.500646116 |
| 0.304751438 | 0.319230837 | 0.333595362 | 0.428822273 |
| 0.232364502 | 0.330908991 | 0.358948544 | 0.356870513 |
| 0.292970658 | 0.342891441 | 0.374777353 | 0.375903745 |
| 0.350357798 | 0.272442082 |             |             |
| HIST2H2AA1  | 0.091428814 | 0.422654618 | 0.089963781 |
| 0.140157483 | 0.151081368 | 0.272779767 | 0.049914299 |
| 0.096151819 | 0.294942682 | 0.158439293 | 0.220853529 |
| 0.026342803 | 0.03568604  | 0.425396328 | 0.044337914 |
| 0.205049185 | 0.032493909 | 0.081792716 | 0.037976773 |
| 0.129542129 | 0.125714028 | 0.187008173 | 0.249524075 |
| 0.123473843 | 0.242148617 | 0.240776638 | 0.174567405 |
| 0.486231968 | 0.165206927 | 0.320874819 | 0.138892136 |
| 0.40122479  | 0.164127462 | 0.191899206 | 0.03318533  |
| 0.227749634 | 0.001781007 | 0.434878571 | 0.133194906 |
| 0.082133786 | 0.353542429 | 0.21459884  | 0.159388901 |
| 0.19352034  | 0.056268725 | 0.153616818 | 0.239030328 |
| 0.21014232  | 0.156206116 | 0.081647397 | 0.326795553 |
| 0.168372631 | 0.314369181 | 0.335248942 | 0.002557695 |
| 0.145390792 | 0.034794573 | 0.090786889 | 0.521486525 |
| 0.179696032 | 0.091224737 | 0.115078418 | 0.145959415 |
| 0.20464306  | 0.224205586 | 0.180298345 | 0.173610243 |
| 0.493880694 | 0.065155705 | 0.312579307 | 0.138972353 |
| 0.200236942 | 0.038652039 | 0.154016257 | 0.086085533 |
| 0.187088801 | 0.132110152 | 0.191160453 | 0.133426929 |
| 0.43224581  | 0.507606058 | 0.167900641 | 0.50979162  |
| 0.023238964 | 0.151749167 | 0.130914872 | 0.210099613 |
| 0.237982538 | 0.053539065 | 0.330284666 | 0.502989154 |
| 0.046744857 | 0.236140824 | 0.267968844 | 0.128370677 |
| 0.440497011 | 0.114419484 | 0.227851078 | 0.087250746 |
| 0.218055968 | 0.149299795 | 0.462950945 | 0.235560764 |
| 0.156096694 | 0.083967002 | 0.520099501 | 0.14506196  |
| 0.186646721 | 0.095169598 | 0.092157706 | 0.383148791 |
| 0.271522039 | 0.486840398 | 0.36399584  | 0.264461243 |
| 0.172038849 | 0.496381941 | 0.318990753 | 0.389317611 |
| 0.098622991 | 0.517891704 | 0.158220621 | 0.04385754  |
| 0.08530828  | 0.066354978 | 0.084094031 | 0.264756163 |
| 0.443859231 | 0.255564954 | 0.149504    | 0.122852949 |
| 0.374917306 | 0.511804813 | 0.505580505 | 0.342940795 |
| 0.048076935 | 0.091106674 | 0.178781867 | 0.203215245 |
| 0.245845897 | 0.087105286 | 0.112621531 | 0.521175243 |
| 0.390307085 | 0.347332181 | 0.146061952 | 0.514357059 |
| 0.10740922  | 0.500014018 | 0.457369546 | 0.126404132 |

|             |             |             |             |
|-------------|-------------|-------------|-------------|
| 0.52408217  | 0.527619727 | 0.479545885 | 0.267753411 |
| 0.50543957  | 0.245455941 | 0.019739369 | 0.313632311 |
| 0.465482149 | 0.008824851 | 0.425367285 | 0.446785211 |
| 0.502085945 | 0.390529796 | 0.464695172 | 0.482194322 |
| 0.510821043 | 0.072514425 | 0.005952813 | 0.158618814 |
| 0.512369241 | 0.387762861 | 0.073604063 | 0.197371156 |
| 0.181754398 | 0.25129389  | 0.340570589 | 0.174605246 |
| 0.483365335 | 0.427403098 | 0.458331086 | 0.3063693   |
| 0.158644715 | 0.339002621 | 0.170455435 | 0.517039877 |
| 0.051059228 | 0.123156357 | 0.081648654 | 0.223312186 |
| 0.242618028 | 0.111859495 | 0.232219934 | 0.162018676 |
| 0.138027629 | 0.2114184   | 0.161133691 | 0.236297456 |
| 0.094392434 | 0.267901753 | 0.134177146 | 0.124693282 |
| 0.041046985 | 0.178404467 | 0.128579713 | 0.135426208 |
| 0.132887656 | 0.294956234 | 0.318998262 | 0.450434937 |
| 0.152188931 | 0.201778049 | 0.319841147 | 0.455683726 |
| 0.384475335 | 0.189284806 | 0.192670519 | 0.021251536 |
| 0.118654974 | 0.125187915 | 0.06841379  | 0.210521377 |
| 0.231783941 | 0.113698076 | 0.204591772 | 0.284962027 |
| 0.215578139 | 0.107746459 | 0.16067814  | 0.451787006 |
| 0.165963607 | 0.182044714 | 0.387111578 | 0.220206417 |
| 0.009801391 | 0.196059783 | 0.38993429  | 0.053222818 |
| 0.20697342  | 0.068736812 | 0.153052088 | 0.404653738 |
| 0.120239119 | 0.085289924 | 0.460797414 | 0.272515078 |
| 0.206473597 | 0.273150514 | 0.480156133 | 0.011147235 |
| 0.145643038 | 0.046806506 | 0.193187557 | 0.188950901 |
| 0.170046057 | 0.201328825 | 0.146051272 | 0.143921732 |
| 0.164072369 | 0.502536679 | 0.37608164  | 0.488497001 |
| 0.163170078 | 0.48549927  | 0.398895259 | 0.415813406 |
| 0.261471519 | 0.151374285 | 0.052990955 | 0.379553459 |
| 0.400894712 | 0.129461571 | 0.10659216  | 0.343407272 |
| 0.158305189 | 0.250484538 | 0.05638959  | 0.455555394 |
| 0.500997778 | 0.49496888  | 0.095097031 | 0.258747431 |
| 0.35690053  | 0.184947947 | 0.358373159 | 0.483784742 |
| 0.140667675 | 0.149112828 | 0.150014911 | 0.31629792  |
| 0.153547281 | 0.080116433 | 0.303537776 | 0.070574802 |
| 0.011497542 | 0.081463068 | 0.077121822 | 0.098869237 |
| 0.072790053 | 0.261556733 | 0.245762957 | 0.490964798 |
| 0.091298249 | 0.426171137 | 0.177299894 | 0.148079122 |
| 0.406087629 | 0.149466855 | 0.194203838 | 0.225457298 |
| 0.207657202 | 0.027634715 | 0.101316293 | 0.513627215 |
| 0.058760238 | 0.116445922 | 0.178946413 | 0.00548661  |
| 0.049130416 | 0.37644611  | 0.135475768 | 0.239705365 |
| 0.416730737 | 0.25203222  | 0.176379868 | 0.15531257  |
| 0.260096497 | 0.086997504 | 0.007242258 | 0.439484905 |
| 0.449654464 | 0.412816281 | 0.449884582 | 0.452682028 |
| 0.366697043 | 0.309559003 | 0.306575201 | 1           |
| 0.085533868 | 0.091337313 | 0.078707841 | 0.141430289 |
| 0.004701649 | 0.320993222 | 0.144754187 | 0.137444279 |
| 0.30471839  | 0.191257016 | 0.050778801 | 0.178369659 |
| 0.046315256 | 0.094636816 | 0.158305476 | 0.111972928 |
| 0.227799873 | 0.027522805 | 0.177052774 | 0.138119131 |
| 0.483483466 | 0.350256419 | 0.170799611 | 0.523274369 |
| 0.19698723  | 0.153924365 | 0.161849254 | 0.306813841 |

|             |             |             |             |
|-------------|-------------|-------------|-------------|
| 0.062685459 | 0.046549218 | 0.185981769 | 0.047833432 |
| 0.179654077 | 0.437680984 | 0.179207165 | 0.081755705 |
| 0.181732288 | 0.014872295 | 0.389916488 | 0.516446127 |
| 0.501183174 | 0.470442702 | 0.500409023 | 0.13557717  |
| 0.505524282 | 0.037335656 | 0.507430811 | 0.38648369  |
| 0.184366115 | 0.003323856 | 0.00575456  | 0.441670125 |
| 0.198777516 | 0.104639254 | 0.126171495 | 0.279648133 |
| 0.086260413 | 0.133756334 | 0.064757884 | 0.08152555  |
| 0.309058194 | 0.12385011  | 0.07494078  | 0.476280832 |
| 0.133002816 | 0.131143612 | 0.212855947 | 0.101229426 |
| 0.2427943   | 0.058306219 | 0.091023694 | 0.009567274 |
| 0.240973408 | 0.16068764  | 0.506938257 | 0.503980955 |
| 0.480725811 | 0.262548087 | 0.174540091 | 0.214845818 |
| 0.367215579 | 0.146318315 | 0.195208936 | 0.130849977 |
| 0.499339679 | 0.228306837 | 0.280733439 | 0.315599963 |
| 0.458410273 | 0.467298639 | 0.037782467 | 0.309240889 |
| 0.036154542 | 0.0012659   | 0.253610172 | 0.191581602 |
| 0.015956633 | 0.158636872 | 0.227888437 | 0.106635807 |
| 0.111703625 | 0.052468005 | 0.10178888  | 0.093127824 |
| 0.178024112 | 0.170128275 | 0.12199661  | 0.192262075 |
| 0.117789693 | 0.047667343 | 0.12767222  | 0.092869256 |
| 0.103767718 | 0.309434323 | 0.244407189 | 0.025247146 |
| 0.221389067 | 0.205049358 | 0.064554066 | 0.154196791 |
| 0.406514035 | 0.455191212 | 0.030480147 | 0.016875567 |
| 0.256908734 | 0.138332253 | 0.452557728 | 0.501952171 |
| 0.532185394 | 0.481956223 | 0.410240731 | 0.058442002 |
| 0.074512916 | 0.165819143 | 0.127535256 | 0.051771926 |
| 0.496335295 | 0.079384945 | 0.504164096 | 0.127981151 |
| 0.099445491 | 0.142848363 | 0.043423745 | 0.070020188 |
| 0.206260564 | 0.139448442 | 0.102698033 | 0.162267182 |
| 0.149807198 | 0.119522661 | 0.046785884 | 0.127901754 |
| 0.277470823 | 0.066811276 | 0.118279323 | 0.191767273 |
| 0.324513583 | 0.108455028 | 0.296352504 | 0.424994722 |
| 0.134387368 | 0.083898043 | 0.222688948 | 0.278423458 |
| 0.380306309 | 0.206423759 | 0.058961139 | 0.456372924 |
| 0.454048852 | 0.302862609 | 0.520661267 | 0.316258406 |
| 0.087985257 | 0.195512838 | 0.119327343 | 0.153411583 |
| 0.115128538 | 0.274165157 | 0.125011493 | 0.063130611 |
| 0.273519    | 0.472702264 | 0.387731103 | 0.118195623 |
| 0.246217321 | 0.129871472 | 0.07007467  | 0.409777588 |
| 0.068291703 | 0.088182914 | 0.214894384 | 0.342546633 |
| 0.002555893 | 0.057292425 | 0.422202964 | 0.174621474 |
| 0.486805915 | 0.432181063 | 0.438578131 | 0.163026945 |
| 0.000195933 | 0.247669877 | 0.239996244 | 0.21429692  |
| 0.417252166 | 0.327069456 | 0.099170477 | 0.059359408 |
| 0.254391058 | 0.123635371 | 0.075406248 | 0.250985256 |
| 0.060439706 | 0.273994391 | 0.15665585  | 0.116152551 |
| 0.101911206 | 0.102697567 | 0.12204739  | 0.176771925 |
| 0.042941875 | 0.204863932 | 0.292413583 | 0.177551063 |
| 0.084439069 | 0.357373775 | 0.3290984   | 0.043116    |
| 0.167227207 | 0.330206196 | 0.400229734 | 0.001624134 |
| 0.310074298 | 0.013284411 | 0.106186983 | 0.131774712 |
| 0.116704729 | 0.101356368 | 0.137023153 | 0.153443976 |
| 0.215360134 | 0.127482522 | 0.186558704 | 0.169280825 |

|             |             |             |             |
|-------------|-------------|-------------|-------------|
| 0.110609292 | 0.145578523 | 0.213618457 | 0.192656987 |
| 0.164353868 | 0.114406657 | 0.15276464  | 0.171016791 |
| 0.067619489 | 0.450118608 | 0.264951382 | 0.117909133 |
| 0.144421636 | 0.179892987 | 0.328615294 | 0.502957373 |
| 0.389324041 | 0.17990601  | 0.158243603 | 0.449395455 |
| 0.104085618 | 0.196569871 | 0.070448566 | 0.228646812 |
| 0.157015454 | 0.108240782 | 0.228194119 | 0.232948393 |
| 0.296409234 | 0.41208226  | 0.260062836 | 0.421258215 |
| 0.201219931 | 0.144551873 | 0.197834742 | 0.067165146 |
| 0.134256917 | 0.127750084 | 0.119377119 | 0.006799284 |
| 0.238843182 | 0.233495912 | 0.426897439 | 0.510558984 |
| 0.124170903 | 0.375266658 | 0.238555281 | 0.082380697 |
| 0.191739363 | 0.243622422 | 0.134108132 | 0.347472071 |
| 0.097289248 | 0.145209517 | 0.145992125 | 0.275478567 |
| 0.32065047  | 0.292313929 | 0.104256548 | 0.141802427 |
| 0.126489387 | 0.181421141 | 0.461768621 | 0.12221807  |
| 0.241131634 | 0.093784537 | 0.240899818 | 0.147283335 |
| 0.108978182 | 0.48241108  | 0.069898974 | 0.48748369  |
| 0.141639613 | 0.156446013 | 0.484666909 | 0.196027421 |
| 0.203893698 | 0.09081158  | 0.075923387 | 0.213461612 |
| 0.118577847 | 0.16455021  | 0.006797705 | 0.023821501 |
| 0.244348277 | 0.130137053 | 0.333532028 | 0.248857557 |
| 0.104909068 | 0.246764391 | 0.075460611 | 0.164370595 |
| 0.506627876 | 0.521701626 | 0.148121008 | 0.202501497 |
| 0.26702926  | 0.091530143 | 0.329082941 | 0.005006587 |
| 0.237934049 | 0.234110792 | 0.183300258 | 0.050938575 |
| 0.024755895 | 0.083540151 | 0.235046065 | 0.071600421 |
| 0.412462799 | 0.10225325  | 0.21645121  | 0.34518058  |
| 0.158360702 | 0.524025583 | 0.072970439 | 0.31447227  |
| 0.035010523 | 0.179955666 | 0.170960457 | 0.167314924 |
| 0.129411263 | 0.124038397 | 0.286177503 | 0.11074792  |
| 0.03741113  | 0.137707917 | 0.000490113 | 0.434950397 |
| 0.49187823  | 0.136578012 | 0.210095226 | 0.151246319 |
| 0.201454541 | 0.340247018 | 0.100766267 | 0.214552769 |
| 0.020155425 | 0.192644788 | 0.136082574 | 0.434762294 |
| 0.121366611 | 0.169725786 | 0.066286575 | 0.121162648 |
| 0.505326877 | 0.120923462 | 0.223323721 | 0.14158326  |
| 0.502864195 | 0.355917337 | 0.201305219 | 0.116941606 |
| 0.241193317 | 0.07791255  | 0.239322974 | 0.495783123 |
| 0.108873045 | 0.096819224 | 0.364223867 | 0.115738145 |
| 0.130303683 | 0.391307478 | 0.229154945 | 0.485436921 |
| 0.041442628 | 0.189335018 | 0.331466348 | 0.423632645 |
| 0.242143146 | 0.063035084 | 0.108965618 | 0.102733913 |
| 0.49754479  | 0.112711622 | 0.099019594 | 0.299253454 |
| 0.086792635 | 0.212956855 | 0.224049419 | 0.087103525 |
| 0.041209694 | 0.099706796 | 0.255146202 | 0.118616635 |
| 0.16584015  | 0.175446271 | 0.09925496  | 0.381960313 |
| 0.11726973  | 0.036674335 | 0.438622923 | 0.005296843 |
| 0.267208509 | 0.273553103 | 0.160049326 | 0.166878321 |
| 0.228045827 | 0.210779524 | 0.198839536 | 0.002985037 |
| 0.32211885  | 0.031197619 | 0.143829815 | 0.115906751 |
| 0.118955079 | 0.053519821 | 0.482091383 | 0.465367392 |
| 0.240214599 | 0.179150208 | 0.171227269 | 0.453038962 |
| 0.062067549 | 0.149554599 | 0.137513502 | 0.313390439 |



|                      |             |             |             |
|----------------------|-------------|-------------|-------------|
| 0.096876362          | 0.199059783 | 0.200938199 | 0.194731458 |
| 0.318987298          | 0.179345179 |             |             |
| HIST2H3B 0.158895185 | 0.142932396 | 0.118861468 |             |
| 0.081653062          | 0.098226168 | 0.047957195 | 0.147962293 |
| 0.140632837          | 0.142165029 | 0.015201123 | 0.106041502 |
| 0.107410508          | 0.007119312 | 0.192431108 | 0.138086216 |
| 0.081224099          | 0.139776032 | 0.23593718  | 0.026911143 |
| 0.048334368          | 0.099893453 | 0.02059266  | 0.076059463 |
| 0.086187027          | 0.308478771 | 0.11212962  | 0.046346125 |
| 0.160014756          | 0.007148734 | 0.087517071 | 0.008365665 |
| 0.272756773          | 0.088406998 | 0.030620838 | 0.08296191  |
| 0.072933421          | 0.006083103 | 0.27773477  | 0.096433372 |
| 0.017167258          | 0.284443067 | 0.032218693 | 0.117557462 |
| 0.046630458          | 0.115672553 | 0.005308048 | 0.083145868 |
| 0.110407283          | 0.072874871 | 0.15320103  | 0.101701215 |
| 0.039223739          | 0.178400431 | 0.082176069 | 0.016915642 |
| 0.023421662          | 0.001804523 | 0.009263254 | 0.197112499 |
| 0.288098629          | 0.213244715 | 0.010730126 | 0.092617115 |
| 0.074039862          | 0.116701404 | 0.225127253 | 0.028913058 |
| 0.195526817          | 0.013567666 | 0.088549242 | 0.049686954 |
| 0.064952649          | 0.120457153 | 0.336795589 | 0.183175914 |
| 0.033460809          | 0.206138312 | 0.090628218 | 0.033259317 |
| 0.139256485          | 0.260870672 | 0.232208269 | 0.207426195 |
| 0.01594129           | 0.066754158 | 0.046000805 | 0.220877278 |
| 0.140228868          | 0.109325679 | 0.146215617 | 0.236351318 |
| 0.128647108          | 0.055696966 | 0.120977519 | 0.238243811 |
| 0.146176688          | 0.01586914  | 0.042157976 | 0.017010348 |
| 0.100805901          | 0.080516829 | 0.222704073 | 0.232471136 |
| 0.067555667          | 0.200805977 | 0.220714602 | 0.060178944 |
| 0.071444417          | 0.20321937  | 0.047431731 | 0.118833099 |
| 0.102915503          | 0.167920215 | 0.124718454 | 0.18104559  |
| 0.067199938          | 0.187321999 | 0.141566939 | 0.175735334 |
| 0.003912599          | 0.19316841  | 0.20382442  | 0.126501396 |
| 0.145381677          | 0.151109108 | 0.034203428 | 0.27168287  |
| 0.14324874           | 0.18280518  | 0.183235896 | 0.156131263 |
| 0.154289688          | 0.194785675 | 0.186879388 | 0.167053285 |
| 0.169766599          | 0.015111669 | 0.067129227 | 0.069296257 |
| 0.139161942          | 0.262957015 | 0.042444049 | 0.239796266 |
| 0.250251602          | 0.13453474  | 0.134819357 | 0.277303412 |
| 0.128276205          | 0.239124505 | 0.131283053 | 0.22179287  |
| 0.236480431          | 0.228302343 | 0.214449523 | 0.089916456 |
| 0.230244194          | 0.104228865 | 0.014276327 | 0.178668161 |
| 0.237014983          | 0.004411779 | 0.134382171 | 0.15129041  |
| 0.18639998           | 0.122499214 | 0.205564507 | 0.170667469 |
| 0.184279934          | 0.263175026 | 0.001447389 | 0.174165002 |
| 0.214495987          | 0.215180154 | 0.0955292   | 0.050617353 |
| 0.087467163          | 0.071827624 | 0.112138784 | 0.0220339   |
| 0.269478786          | 0.158988325 | 0.144709055 | 0.150566388 |
| 0.08566833           | 0.30267553  | 0.042146158 | 0.219631321 |
| 0.139078343          | 0.158379755 | 0.206953017 | 0.206929658 |
| 0.018049196          | 0.256071871 | 0.072704961 | 0.087146916 |
| 0.27728972           | 0.073274683 | 0.020545989 | 0.104437976 |
| 0.232916186          | 0.059848359 | 0.1983727   | 0.198990546 |
| 0.142603364          | 0.342823799 | 0.091978719 | 0.088450857 |

|             |             |             |             |
|-------------|-------------|-------------|-------------|
| 0.143749989 | 0.3233116   | 0.087021352 | 0.175063221 |
| 0.053377897 | 0.245647606 | 0.113819975 | 0.236460734 |
| 0.278225942 | 0.062471573 | 0.273527339 | 0.043732063 |
| 0.040141519 | 0.012946427 | 0.010093005 | 0.049897586 |
| 0.320690383 | 0.068343182 | 0.099656855 | 0.122180985 |
| 0.136708987 | 0.124149042 | 0.041346442 | 0.291178123 |
| 0.237654365 | 0.060890343 | 0.178014446 | 0.066283292 |
| 0.048185625 | 0.131054631 | 0.135431142 | 0.053302307 |
| 0.16284226  | 0.013394743 | 0.012909612 | 0.162959804 |
| 0.018522322 | 0.040482941 | 0.151190896 | 0.118694215 |
| 0.027291339 | 0.266232975 | 0.202963182 | 0.004375835 |
| 0.059975467 | 0.073880773 | 0.222713093 | 0.033692482 |
| 0.208809145 | 0.245827376 | 0.070461589 | 0.063295905 |
| 0.210815683 | 0.202797945 | 0.18874599  | 0.177162865 |
| 0.028465273 | 0.210972849 | 0.137107977 | 0.18792555  |
| 0.147653009 | 0.036828991 | 0.005891709 | 0.144398969 |
| 0.152429848 | 0.028028506 | 0.214799166 | 0.09813307  |
| 0.039144644 | 0.101219153 | 0.073803318 | 0.204252403 |
| 0.27519934  | 0.177685723 | 0.135044887 | 0.163543359 |
| 0.211488891 | 0.189328967 | 0.163183271 | 0.221185376 |
| 0.015089061 | 0.063486222 | 0.047136349 | 0.190095433 |
| 0.272729269 | 0.040312377 | 0.266921489 | 0.007811401 |
| 0.000248963 | 0.200128088 | 0.224631897 | 0.16546419  |
| 0.027618228 | 0.057431086 | 0.11515779  | 0.196904977 |
| 0.234074874 | 0.211771243 | 0.227563683 | 0.059102768 |
| 0.208032617 | 0.053506895 | 0.052779453 | 0.092961534 |
| 0.274019511 | 0.057275154 | 0.087695679 | 0.26822641  |
| 0.176890565 | 0.023847934 | 0.101063588 | 0.006387272 |
| 0.135126212 | 0.101030822 | 0.286023471 | 0.363201061 |
| 0.17378644  | 0.33006014  | 0.242050024 | 0.023681223 |
| 0.183881287 | 0.243593181 | 0.014255155 | 0.168227021 |
| 0.186850314 | 0.185990687 | 0.184841437 | 0.20166339  |
| 0.163708152 | 0.114492146 | 0.143033994 | 0.085533868 |
| 1           | 0.15102155  | 0.023948759 | 0.120179522 |
| 0.006275551 | 0.181777496 | 0.094008413 | 0.317957677 |
| 0.110547846 | 0.193336022 | 0.126514487 | 0.07974475  |
| 0.069210219 | 0.008842384 | 0.048501289 | 0.139022377 |
| 0.158617456 | 0.088349514 | 0.018401169 | 0.023421368 |
| 0.202361203 | 0.23025803  | 0.025448022 | 0.207149768 |
| 0.134510213 | 0.182928447 | 0.100541998 | 0.13655329  |
| 0.17189037  | 0.015276424 | 0.051809664 | 0.002009043 |
| 0.018699403 | 0.212743234 | 0.038146139 | 0.10862558  |
| 0.199317758 | 0.065474948 | 0.217725696 | 0.214724361 |
| 0.174228884 | 0.183646871 | 0.193866086 | 0.034038867 |
| 0.198782464 | 0.002020653 | 0.181375624 | 0.15276207  |
| 0.025997497 | 0.006568791 | 0.023110763 | 0.150802813 |
| 0.076052779 | 0.190655604 | 0.278700757 | 0.024676125 |
| 0.113762189 | 0.112932516 | 0.164277283 | 0.042543127 |
| 0.085021332 | 0.121080076 | 0.033426219 | 0.198303157 |
| 0.160193741 | 0.194001921 | 0.044042939 | 0.259376713 |
| 0.077471161 | 0.122452229 | 0.250099895 | 0.010348451 |
| 0.137869256 | 0.267985433 | 0.24494949  | 0.182878461 |
| 0.244363726 | 0.122484332 | 0.015823146 | 0.023529517 |
| 0.151546346 | 0.163803801 | 0.017121739 | 0.169303153 |

|             |             |             |             |
|-------------|-------------|-------------|-------------|
| 0.171705043 | 0.105910206 | 0.252317695 | 0.26205493  |
| 0.221120446 | 0.224929831 | 0.163199936 | 0.153577992 |
| 0.043718283 | 0.003827984 | 0.069130394 | 0.238041259 |
| 0.011190204 | 0.054082621 | 0.291393332 | 0.061987022 |
| 0.070154996 | 0.095608124 | 0.025186245 | 0.033998519 |
| 0.187441923 | 0.096652298 | 0.072206295 | 0.224473944 |
| 0.074572058 | 0.051489822 | 0.12477347  | 0.146510812 |
| 0.032134394 | 0.230107678 | 0.308797725 | 0.116181446 |
| 0.049049647 | 0.060611534 | 0.209591191 | 0.285123542 |
| 0.169897767 | 0.16207397  | 0.120084054 | 0.065353243 |
| 0.293736535 | 0.084028569 | 0.176369288 | 0.167008521 |
| 0.227721632 | 0.237072094 | 0.30002218  | 0.098168094 |
| 0.15612735  | 0.134397633 | 0.076293843 | 0.084453411 |
| 0.186549462 | 0.192097705 | 0.186709965 | 0.038460616 |
| 0.30241241  | 0.125571829 | 0.119288148 | 0.259721951 |
| 0.056218587 | 0.279408671 | 0.179457377 | 0.201061057 |
| 0.08675694  | 0.022513656 | 0.186898277 | 0.237598496 |
| 0.21652056  | 0.013933843 | 0.29384825  | 0.073610254 |
| 0.173774868 | 0.011673415 | 0.103803364 | 0.269893004 |
| 0.262425735 | 0.207576795 | 0.046191932 | 0.137882349 |
| 0.12042981  | 0.042533303 | 0.048993085 | 0.140188684 |
| 0.187687006 | 0.080227822 | 0.196767437 | 0.228812835 |
| 0.281887186 | 0.064478225 | 0.031697085 | 0.103351656 |
| 0.246681554 | 0.058090346 | 0.164197403 | 0.270008304 |
| 0.283876163 | 0.261654424 | 0.174228844 | 0.176119951 |
| 0.060536827 | 0.168286368 | 0.172826499 | 0.139906247 |
| 0.024254018 | 0.105075798 | 0.0305686   | 0.119020158 |
| 0.011840066 | 0.009639793 | 0.183242459 | 0.089703479 |
| 0.235935253 | 0.179082233 | 0.247597229 | 0.067985515 |
| 0.001143684 | 0.08417493  | 0.120781913 | 0.054889411 |
| 0.159041854 | 0.195815034 | 0.043222387 | 0.129642051 |
| 0.290586742 | 0.205428186 | 0.103131847 | 0.025460875 |
| 0.009523855 | 0.097637479 | 0.311875796 | 0.181188341 |
| 0.149535701 | 0.189279502 | 0.01693375  | 0.149792177 |
| 0.01827016  | 0.310822089 | 0.232571288 | 0.015579879 |
| 0.013505071 | 0.183999793 | 0.150699188 | 0.11433217  |
| 0.051539156 | 0.165453584 | 0.190020963 | 0.014064385 |
| 0.108852631 | 0.090014459 | 0.151230685 | 0.140523563 |
| 0.1422914   | 0.135413662 | 0.178805426 | 0.065971494 |
| 0.137426864 | 0.173274405 | 0.117124081 | 0.237526856 |
| 0.112721011 | 0.181447334 | 0.09754333  | 0.079971266 |
| 0.06424972  | 0.155815624 | 0.288864883 | 0.279302455 |
| 0.105039142 | 0.146746993 | 0.325140486 | 0.216005622 |
| 0.228666432 | 0.068572337 | 0.297475938 | 0.171666288 |
| 0.228753739 | 0.207476702 | 0.079515959 | 0.14267922  |
| 0.010003035 | 0.036713814 | 0.121151239 | 0.087012472 |
| 0.206536996 | 0.035916175 | 0.056333676 | 0.120832848 |
| 0.099258759 | 0.288034942 | 0.312776609 | 0.216516403 |
| 0.081675935 | 0.064170613 | 0.020305396 | 0.1090649   |
| 0.184850251 | 0.275584411 | 0.084233005 | 0.038261444 |
| 0.157700564 | 0.058395962 | 0.139501309 | 0.202985153 |
| 0.019204849 | 0.250724868 | 0.015201522 | 0.11890073  |
| 0.011778611 | 0.246259253 | 0.325982504 | 0.106942315 |
| 0.009871699 | 0.136054808 | 0.119577409 | 0.033886724 |

|             |             |             |             |
|-------------|-------------|-------------|-------------|
| 0.116827424 | 0.096323442 | 0.048569255 | 0.130822232 |
| 0.177044156 | 0.211663419 | 0.23345234  | 0.149606503 |
| 0.05788525  | 0.044643851 | 0.064894134 | 0.105253005 |
| 0.141171164 | 0.173540478 | 0.228168109 | 0.172814622 |
| 0.068845278 | 0.273840153 | 0.276699206 | 0.105778994 |
| 0.057210707 | 0.081992078 | 0.011288889 | 0.038624378 |
| 0.079533587 | 0.022138369 | 0.000656111 | 0.016676466 |
| 0.209672724 | 0.037746372 | 0.109165678 | 0.152753699 |
| 0.057109787 | 0.224238795 | 0.007381823 | 0.130819883 |
| 0.180881165 | 0.228726771 | 0.065048396 | 0.312233569 |
| 0.195759494 | 0.167604494 | 0.087625227 | 0.007161153 |
| 0.07359895  | 0.051647377 | 0.017008765 | 0.153049287 |
| 0.113670215 | 0.014052006 | 0.085121799 | 0.191526964 |
| 0.170530431 | 0.008544819 | 0.080479142 | 0.104374594 |
| 0.262481596 | 0.241355822 | 0.113483991 | 0.140345196 |
| 0.078872996 | 0.231732012 | 0.044486312 | 0.048770794 |
| 0.051693004 | 0.045585573 | 0.180773766 | 0.033071461 |
| 0.14615755  | 0.054486736 | 0.019948293 | 0.298212977 |
| 0.216070922 | 0.046434852 | 0.316549166 | 0.011623008 |
| 0.239531776 | 0.190902091 | 0.041987434 | 0.042083328 |
| 0.068165454 | 0.078242287 | 0.244235636 | 0.169591087 |
| 0.011088847 | 0.082040381 | 0.115814734 | 0.061987295 |
| 0.25467336  | 0.036644075 | 0.288715341 | 0.018106099 |
| 0.175469803 | 0.146796516 | 0.202290021 | 0.050138802 |
| 0.075114307 | 0.255109523 | 0.028728354 | 0.211766482 |
| 0.166806537 | 0.040487662 | 0.145910083 | 0.130780292 |
| 0.037177618 | 0.196507192 | 0.056722111 | 0.204838904 |
| 0.103746387 | 0.274956403 | 0.133573761 | 0.188673243 |
| 0.268145539 | 0.039731794 | 0.025871315 | 0.084714149 |
| 0.180540801 | 0.083584871 | 0.032170302 | 0.206446404 |
| 0.024019225 | 0.190027505 | 0.067982306 | 0.092566934 |
| 0.08365701  | 0.110074809 | 0.036370519 | 0.279584953 |
| 0.181516108 | 0.086532442 | 0.054605315 | 0.289639408 |
| 0.079909765 | 0.074965831 | 0.275749971 | 0.002885142 |
| 0.097958725 | 0.112897732 | 0.196748674 | 0.069065958 |
| 0.298873821 | 0.130916522 | 0.091319268 | 0.022549602 |
| 0.157772063 | 0.018460247 | 0.057377264 | 0.055744887 |
| 0.02097162  | 0.141458324 | 0.208211365 | 0.187243726 |
| 0.168991756 | 0.019231943 | 0.013766662 | 0.186746751 |
| 0.014170172 | 0.014791419 | 0.023050439 | 0.093113153 |
| 0.021751302 | 0.031641611 | 0.034611898 | 0.02857873  |
| 0.147710909 | 0.108160124 |             |             |
| HIST2H3C1   | 0.137631016 | 0.16583968  | 0.142879775 |
| 0.072530445 | 0.052512529 | 0.044010317 | 0.146829537 |
| 0.141238366 | 0.163205729 | 0.024885405 | 0.066960547 |
| 0.108525994 | 0.004584396 | 0.165085124 | 0.134446164 |
| 0.05323055  | 0.121955249 | 0.158085938 | 0.034766531 |
| 0.07085902  | 0.048541159 | 0.020484448 | 0.080181167 |
| 0.048086169 | 0.317964812 | 0.120148166 | 0.038968792 |
| 0.160527665 | 0.009264339 | 0.071207212 | 0.015943824 |
| 0.236890264 | 0.047415168 | 0.025024905 | 0.12064944  |
| 0.060337954 | 0.004937595 | 0.277535239 | 0.051249897 |
| 0.011239565 | 0.251074427 | 0.044587693 | 0.063418983 |
| 0.050601858 | 0.129443209 | 0.011482969 | 0.067366158 |

|             |             |             |             |
|-------------|-------------|-------------|-------------|
| 0.117586918 | 0.067596711 | 0.181643425 | 0.093906369 |
| 0.040676213 | 0.153390038 | 0.101896245 | 0.012790421 |
| 0.014541509 | 0.001364961 | 0.007182148 | 0.206277064 |
| 0.196708541 | 0.123538095 | 0.014268246 | 0.093745801 |
| 0.065947535 | 0.091197459 | 0.166386923 | 0.032032631 |
| 0.182822801 | 0.00894775  | 0.080649467 | 0.053991211 |
| 0.056601025 | 0.144438455 | 0.257098301 | 0.236593376 |
| 0.029741566 | 0.118373688 | 0.056010114 | 0.020476262 |
| 0.165384315 | 0.255704006 | 0.182520188 | 0.23212289  |
| 0.011513709 | 0.040441042 | 0.032084867 | 0.141824791 |
| 0.118998431 | 0.131354328 | 0.104060623 | 0.219528122 |
| 0.140666916 | 0.066595583 | 0.10459956  | 0.253187393 |
| 0.155665269 | 0.018993129 | 0.047445507 | 0.010519096 |
| 0.065067514 | 0.04553069  | 0.242138228 | 0.154719049 |
| 0.044645326 | 0.22308955  | 0.25882704  | 0.033930656 |
| 0.037293584 | 0.201277604 | 0.032390139 | 0.103368441 |
| 0.08049271  | 0.158431306 | 0.128704881 | 0.141638568 |
| 0.042539466 | 0.177004077 | 0.109337563 | 0.17099851  |
| 0.008441616 | 0.197243602 | 0.155530696 | 0.109581244 |
| 0.15188758  | 0.112464871 | 0.03504633  | 0.207927016 |
| 0.129118486 | 0.144895202 | 0.125343559 | 0.081043875 |
| 0.12054518  | 0.231126875 | 0.195192539 | 0.13810158  |
| 0.142686296 | 0.014792504 | 0.043314985 | 0.073336008 |
| 0.101096727 | 0.221078909 | 0.020061822 | 0.253724383 |
| 0.203896041 | 0.104398555 | 0.128922801 | 0.290936745 |
| 0.105129125 | 0.20911023  | 0.142924707 | 0.132105249 |
| 0.236633935 | 0.246452263 | 0.180854246 | 0.060164558 |
| 0.231173754 | 0.084164319 | 0.01842607  | 0.159224542 |
| 0.194090697 | 0.002178209 | 0.125632427 | 0.13724275  |
| 0.196568595 | 0.101863823 | 0.176882708 | 0.157404585 |
| 0.196212198 | 0.240586505 | 0.002010598 | 0.09482118  |
| 0.221743049 | 0.1725216   | 0.083309874 | 0.039736709 |
| 0.055362047 | 0.066665273 | 0.102745065 | 0.019609335 |
| 0.23306302  | 0.143834265 | 0.140970326 | 0.131509644 |
| 0.098711612 | 0.267226669 | 0.031754229 | 0.254409939 |
| 0.143569015 | 0.132415446 | 0.23744842  | 0.167475973 |
| 0.033678327 | 0.145762781 | 0.063631846 | 0.064496406 |
| 0.167367686 | 0.079052567 | 0.015571346 | 0.065166138 |
| 0.301634116 | 0.053524094 | 0.165409973 | 0.169208655 |
| 0.121805643 | 0.336698384 | 0.06957049  | 0.07671765  |
| 0.073277012 | 0.386747042 | 0.076849555 | 0.160378919 |
| 0.041691326 | 0.238770872 | 0.09943818  | 0.198122601 |
| 0.203401425 | 0.040391901 | 0.219479745 | 0.030728933 |
| 0.02963032  | 0.016273986 | 0.007543475 | 0.042061788 |
| 0.368470098 | 0.055392359 | 0.06805046  | 0.078034742 |
| 0.121555868 | 0.13527286  | 0.028177355 | 0.273230079 |
| 0.267590257 | 0.034730447 | 0.134381823 | 0.064250795 |
| 0.068299497 | 0.089931002 | 0.111934896 | 0.034889736 |
| 0.139117827 | 0.008528323 | 0.011310051 | 0.138088763 |
| 0.016996163 | 0.022737966 | 0.140963683 | 0.080646154 |
| 0.032983749 | 0.33855283  | 0.182220729 | 0.002433426 |
| 0.045851728 | 0.041206817 | 0.126419896 | 0.046401909 |
| 0.14606608  | 0.159730927 | 0.039596025 | 0.034394014 |
| 0.228002034 | 0.199963245 | 0.169441905 | 0.162477447 |

|             |             |             |             |
|-------------|-------------|-------------|-------------|
| 0.023085863 | 0.190847016 | 0.111647548 | 0.151091564 |
| 0.117161671 | 0.030621614 | 0.004088348 | 0.116166266 |
| 0.130230512 | 0.032192255 | 0.264955211 | 0.090693187 |
| 0.037139674 | 0.069722787 | 0.053406415 | 0.171490978 |
| 0.258206097 | 0.21399989  | 0.083492306 | 0.105992568 |
| 0.153981817 | 0.135998177 | 0.142094389 | 0.197932624 |
| 0.025632906 | 0.038713403 | 0.026887858 | 0.128709849 |
| 0.207005253 | 0.025533454 | 0.245287067 | 0.00678538  |
| 7.91E-05    | 0.190157794 | 0.205972901 | 0.079002265 |
| 0.013798807 | 0.058110625 | 0.083577273 | 0.183181596 |
| 0.145344136 | 0.19147108  | 0.202687864 | 0.035102437 |
| 0.198595776 | 0.037168679 | 0.037788904 | 0.064328652 |
| 0.221477966 | 0.050353345 | 0.064369607 | 0.262875365 |
| 0.232655856 | 0.014921877 | 0.092501    | 0.003957424 |
| 0.13682054  | 0.120818233 | 0.332357009 | 0.356998943 |
| 0.140083942 | 0.346097805 | 0.203684087 | 0.032205799 |
| 0.119957421 | 0.190331087 | 0.00975951  | 0.163699135 |
| 0.196618822 | 0.194246191 | 0.197450679 | 0.231323502 |
| 0.15634903  | 0.110871722 | 0.107132752 | 0.091337313 |
| 0.15102155  | 1           | 0.014609299 | 0.063196717 |
| 0.010240382 | 0.129847313 | 0.06250684  | 0.239696996 |
| 0.086685025 | 0.145220624 | 0.128042786 | 0.055652909 |
| 0.07912363  | 0.006606407 | 0.059301014 | 0.086377029 |
| 0.104306659 | 0.121308642 | 0.019466135 | 0.020567096 |
| 0.218232661 | 0.207555945 | 0.019798296 | 0.205468276 |
| 0.078819049 | 0.245611539 | 0.054449299 | 0.096762511 |
| 0.146494837 | 0.017651455 | 0.051001833 | 0.003297607 |
| 0.027700678 | 0.225492453 | 0.031956107 | 0.138005813 |
| 0.126804957 | 0.078343257 | 0.204544038 | 0.204118844 |
| 0.204389873 | 0.16113346  | 0.17856083  | 0.016815363 |
| 0.190970399 | 0.001908037 | 0.1750641   | 0.15565187  |
| 0.025818938 | 0.005819316 | 0.017604335 | 0.131974384 |
| 0.049619093 | 0.278968232 | 0.196036397 | 0.033989644 |
| 0.091576156 | 0.122419759 | 0.13928063  | 0.022363972 |
| 0.075950939 | 0.058235724 | 0.022293769 | 0.216370204 |
| 0.094165731 | 0.121567657 | 0.047798908 | 0.274701207 |
| 0.05878353  | 0.119971393 | 0.269428161 | 0.006791417 |
| 0.094306415 | 0.317586115 | 0.285699866 | 0.185314541 |
| 0.212109458 | 0.081157025 | 0.019281655 | 0.030437743 |
| 0.139553695 | 0.231967386 | 0.023336987 | 0.214901662 |
| 0.183699306 | 0.066849338 | 0.166347556 | 0.213632555 |
| 0.184031806 | 0.205475247 | 0.135328472 | 0.11172507  |
| 0.049858505 | 0.002022397 | 0.069390757 | 0.183123443 |
| 0.017173054 | 0.034818278 | 0.215513663 | 0.068335395 |
| 0.063824518 | 0.108297567 | 0.013531628 | 0.015898231 |
| 0.113815054 | 0.060688322 | 0.034198602 | 0.210386193 |
| 0.041060081 | 0.031407988 | 0.079225235 | 0.105723737 |
| 0.042395202 | 0.227688145 | 0.308578821 | 0.134546602 |
| 0.045808295 | 0.042700371 | 0.156721348 | 0.239083633 |
| 0.133944004 | 0.140035043 | 0.108752014 | 0.040420737 |
| 0.237099233 | 0.052446222 | 0.146619121 | 0.176573847 |
| 0.234356944 | 0.20531797  | 0.277302572 | 0.065462679 |
| 0.137080519 | 0.084390553 | 0.039619797 | 0.055646347 |
| 0.176585132 | 0.23027209  | 0.199793263 | 0.022212486 |

|              |             |             |             |
|--------------|-------------|-------------|-------------|
| 0.245245787  | 0.090497022 | 0.097012524 | 0.193779137 |
| 0.039343359  | 0.19352048  | 0.088143463 | 0.211732808 |
| 0.046539327  | 0.017567622 | 0.153219794 | 0.152688031 |
| 0.165052496  | 0.00849637  | 0.203834551 | 0.073195889 |
| 0.172080077  | 0.028413673 | 0.07878764  | 0.223102925 |
| 0.234646782  | 0.189868062 | 0.063816469 | 0.117540553 |
| 0.110800924  | 0.046482417 | 0.048835748 | 0.163794141 |
| 0.165753978  | 0.065114289 | 0.207885584 | 0.161618117 |
| 0.2651287    | 0.038516432 | 0.022610153 | 0.061068321 |
| 0.171936185  | 0.054834425 | 0.108402863 | 0.225075037 |
| 0.247458839  | 0.266771712 | 0.168885944 | 0.093291153 |
| 0.058386649  | 0.215269491 | 0.218966165 | 0.138999377 |
| 0.013575778  | 0.105711506 | 0.03985374  | 0.10611367  |
| 0.007541702  | 0.006025187 | 0.163687125 | 0.067146137 |
| 0.22809838   | 0.150088444 | 0.212903727 | 0.078993647 |
| 0.00040048   | 0.063248082 | 0.074508178 | 0.036251901 |
| 0.158251136  | 0.173206334 | 0.064071188 | 0.101537719 |
| 0.20660909   | 0.250005361 | 0.075633289 | 0.039889284 |
| 0.007548505  | 0.090200738 | 0.213528864 | 0.155008744 |
| 0.078236039  | 0.255880213 | 0.014229188 | 0.102078411 |
| 0.016342173  | 0.207825478 | 0.159395283 | 0.030942256 |
| 0.008483505  | 0.155458071 | 0.131843959 | 0.127570206 |
| 0.035946504  | 0.144095467 | 0.170303299 | 0.008571974 |
| 0.077424259  | 0.080249241 | 0.072419295 | 0.067093461 |
| 0.073943371  | 0.071488421 | 0.095371506 | 0.040043976 |
| 0.113993546  | 0.108922681 | 0.066462591 | 0.14198622  |
| 0.069849857  | 0.135835407 | 0.068950355 | 0.0729149   |
| 0.034118642  | 0.115537256 | 0.34733847  | 0.369350678 |
| 0.090055584  | 0.150238185 | 0.273003188 | 0.270434659 |
| 0.142164597  | 0.058170969 | 0.219213037 | 0.192107269 |
| 0.181924696  | 0.295488357 | 0.058750861 | 0.143460527 |
| 0.013507935  | 0.048061905 | 0.144513699 | 0.081016027 |
| 0.132383643  | 0.021574595 | 0.060591209 | 0.121350033 |
| 0.101462713  | 0.256251509 | 0.261065232 | 0.199227447 |
| 0.053488632  | 0.056679469 | 0.027098233 | 0.073133945 |
| 0.124322186  | 0.263329408 | 0.039289143 | 0.040922566 |
| 0.109412183  | 0.080277968 | 0.119791256 | 0.218356617 |
| 0.01356927   | 0.208001739 | 0.027746152 | 0.116726798 |
| 0.024745804  | 0.312428541 | 0.253288606 | 0.101705607 |
| 0.007034594  | 0.101114082 | 0.062612106 | 0.051798664 |
| 0.093650094  | 0.090991665 | 0.035126067 | 0.098051014 |
| 0.129002267  | 0.211776238 | 0.252244667 | 0.158895795 |
| 0.052850682  | 0.0244034   | 0.085428826 | 0.053020553 |
| 0.0711152885 | 0.16781579  | 0.208243875 | 0.162152466 |
| 0.038728943  | 0.295219561 | 0.251410203 | 0.098724301 |
| 0.076076187  | 0.061665431 | 0.006681156 | 0.042905963 |
| 0.078279664  | 0.016671254 | 0.0009164   | 0.008934137 |
| 0.126983709  | 0.040324456 | 0.118319164 | 0.124405506 |
| 0.028846419  | 0.149276967 | 0.00708501  | 0.105973707 |
| 0.214669061  | 0.259259492 | 0.048858457 | 0.226745843 |
| 0.150223759  | 0.109656321 | 0.093879857 | 0.008396363 |
| 0.056137024  | 0.044182136 | 0.02405449  | 0.131550947 |
| 0.124466299  | 0.008081437 | 0.069629636 | 0.241819935 |
| 0.138973043  | 0.007211299 | 0.093335365 | 0.090029648 |

|             |             |             |             |
|-------------|-------------|-------------|-------------|
| 0.250555396 | 0.266133455 | 0.07622745  | 0.093780836 |
| 0.132971667 | 0.178961691 | 0.035848155 | 0.045779197 |
| 0.032024262 | 0.023150005 | 0.115454294 | 0.014767802 |
| 0.123753468 | 0.040602237 | 0.013745822 | 0.28575341  |
| 0.255686596 | 0.02888355  | 0.28773342  | 0.022075271 |
| 0.145510582 | 0.180441333 | 0.033223752 | 0.040230189 |
| 0.055471375 | 0.045110786 | 0.162209769 | 0.159222242 |
| 0.009795125 | 0.072379461 | 0.100388061 | 0.038356993 |
| 0.301364851 | 0.027710453 | 0.243192814 | 0.018165264 |
| 0.19172108  | 0.160329039 | 0.258741575 | 0.045437647 |
| 0.082149413 | 0.255932486 | 0.033899205 | 0.201600657 |
| 0.083003747 | 0.016593824 | 0.106774165 | 0.070877911 |
| 0.022029921 | 0.196832205 | 0.057820998 | 0.20508321  |
| 0.062094683 | 0.174865347 | 0.105796305 | 0.180801703 |
| 0.170796286 | 0.019675996 | 0.014157205 | 0.03742934  |
| 0.203821094 | 0.078635397 | 0.025568444 | 0.162503955 |
| 0.01158617  | 0.129181323 | 0.092252713 | 0.040377116 |
| 0.068903658 | 0.101222839 | 0.036955987 | 0.224919528 |
| 0.107537233 | 0.054416832 | 0.034370551 | 0.231780225 |
| 0.054952534 | 0.053643918 | 0.235425674 | 0.000734755 |
| 0.100645551 | 0.074189297 | 0.135420596 | 0.043391314 |
| 0.277768326 | 0.111703785 | 0.092153583 | 0.020586599 |
| 0.122267265 | 0.015217605 | 0.042900478 | 0.032337316 |
| 0.019610405 | 0.141317419 | 0.209906504 | 0.15846891  |
| 0.149093897 | 0.027358279 | 0.015747242 | 0.188657706 |
| 0.008272219 | 0.01450757  | 0.019479734 | 0.097256263 |
| 0.011774959 | 0.033690815 | 0.031837899 | 0.02073462  |
| 0.132146323 | 0.091293755 |             |             |
| HMBS        | 0.012632009 | 0.169612063 | 0.007143576 |
| 0.03736831  | 0.284971041 | 0.075136223 | 0.015586293 |
| 0.024625203 | 0.142391096 | 0.048394253 | 0.175191877 |
| 0.004386092 | 0.072400462 | 0.253325884 | 0.014449038 |
| 0.298239026 | 0.011969213 | 0.047848466 | 0.017584744 |
| 0.043910844 | 0.291174242 | 0.086916332 | 0.081101783 |
| 0.241533637 | 0.066981584 | 0.114067159 | 0.197024337 |
| 0.241608036 | 0.052970303 | 0.217148806 | 0.029464876 |
| 0.230722558 | 0.316051635 | 0.169805857 | 0.002063081 |
| 0.148281214 | 0.024702808 | 0.207996946 | 0.167619648 |
| 0.104840325 | 0.165248376 | 0.059637948 | 0.119551657 |
| 0.119550529 | 0.006531206 | 0.018665004 | 0.279825806 |
| 0.123109742 | 0.075617008 | 0.010489293 | 0.200358766 |
| 0.09647257  | 0.120918821 | 0.135352952 | 0.000840289 |
| 0.183608662 | 0.074314319 | 0.146119589 | 0.212154349 |
| 0.102563912 | 0.060168874 | 0.072896262 | 0.06112266  |
| 0.202533227 | 0.256338445 | 0.142414245 | 0.098323163 |
| 0.247303853 | 0.124819104 | 0.239715967 | 0.036706244 |
| 0.126054632 | 0.004692588 | 0.082055352 | 0.018092595 |
| 0.123386787 | 0.113420382 | 0.183223586 | 0.201951935 |
| 0.169551895 | 0.23911766  | 0.121091599 | 0.20343111  |
| 0.102029977 | 0.304068565 | 0.147378315 | 0.246453314 |
| 0.231415679 | 0.020082535 | 0.257897795 | 0.270090656 |
| 0.008355255 | 0.11660283  | 0.240020627 | 0.034802369 |
| 0.173217987 | 0.089431188 | 0.10573233  | 0.123687367 |
| 0.322418345 | 0.313080476 | 0.20328779  | 0.175430338 |



|             |             |             |             |
|-------------|-------------|-------------|-------------|
| 0.165679003 | 0.017656729 | 0.173998764 | 0.320349109 |
| 0.136446624 | 0.021464008 | 0.137606851 | 0.293098762 |
| 0.236879487 | 0.244362468 | 0.210306774 | 0.25392045  |
| 0.290109534 | 0.249365849 | 0.227120607 | 0.190291013 |
| 0.016049609 | 0.238768023 | 0.068544968 | 0.01112221  |
| 0.009464107 | 0.028290122 | 0.092169795 | 0.174519748 |
| 0.258811122 | 0.139828376 | 0.061702281 | 0.192342698 |
| 0.342408973 | 0.169767781 | 0.241958814 | 0.25181687  |
| 0.00962981  | 0.123110767 | 0.282302874 | 0.039568367 |
| 0.243404956 | 0.042291307 | 0.265298586 | 0.213842444 |
| 0.20030423  | 0.310726845 | 0.027138495 | 0.205576752 |
| 0.067152135 | 0.27485396  | 0.192205337 | 0.092045305 |
| 0.236277421 | 0.195677568 | 0.300179853 | 0.320129517 |
| 0.194400064 | 0.108395613 | 0.022322776 | 0.22125079  |
| 0.273911434 | 0.023404313 | 0.26722765  | 0.293691806 |
| 0.222754928 | 0.303966755 | 0.315505236 | 0.268230448 |
| 0.213829138 | 0.022491317 | 0.020682458 | 0.280160075 |
| 0.228506004 | 0.225966021 | 0.043877443 | 0.218631566 |
| 0.288149372 | 0.096183622 | 0.228658065 | 0.080142702 |
| 0.277674615 | 0.241168068 | 0.24760853  | 0.216074593 |
| 0.105400439 | 0.140356228 | 0.24849673  | 0.165722195 |
| 0.009103138 | 0.022271449 | 0.010544376 | 0.178631154 |
| 0.034908972 | 0.118878865 | 0.087253964 | 0.23137723  |
| 0.125746235 | 0.067346262 | 0.138510239 | 0.326405224 |
| 0.012272882 | 0.166468535 | 0.055156523 | 0.064191544 |
| 0.016237729 | 0.051190526 | 0.058293325 | 0.034976086 |
| 0.181599161 | 0.072827036 | 0.220508248 | 0.273386464 |
| 0.158925618 | 0.068678038 | 0.205967746 | 0.264014772 |
| 0.287385034 | 0.261765708 | 0.115958438 | 0.007596503 |
| 0.132038386 | 0.089746587 | 0.139658567 | 0.19633514  |
| 0.053812295 | 0.09035507  | 0.27060493  | 0.32681832  |
| 0.077361489 | 0.027887501 | 0.163168049 | 0.182178233 |
| 0.048550429 | 0.132404294 | 0.306935703 | 0.160982615 |
| 0.000307216 | 0.164135651 | 0.263853645 | 0.112080619 |
| 0.167822953 | 0.096755013 | 0.083213617 | 0.3035014   |
| 0.101239856 | 0.17251814  | 0.260662051 | 0.308878159 |
| 0.048559893 | 0.06307461  | 0.295303807 | 0.056494673 |
| 0.208540623 | 0.039108549 | 0.245995277 | 0.067710337 |
| 0.1394262   | 0.219577086 | 0.274980314 | 0.160449963 |
| 0.03039498  | 0.244997033 | 0.180516722 | 0.268840106 |
| 0.151492982 | 0.29480177  | 0.295892902 | 0.255505456 |
| 0.17566979  | 0.175018309 | 0.116177722 | 0.275575228 |
| 0.292422846 | 0.084131109 | 0.016829168 | 0.255853852 |
| 0.143519997 | 0.316614881 | 0.073897293 | 0.305237389 |
| 0.227523886 | 0.171823926 | 0.061503231 | 0.327681956 |
| 0.235639793 | 0.087392604 | 0.229908197 | 0.289481078 |
| 0.058781844 | 0.270187877 | 0.202104338 | 0.334722997 |
| 0.084573143 | 0.154450182 | 0.144460929 | 0.10142702  |
| 0.005845649 | 0.017280398 | 0.01795339  | 0.113922781 |
| 0.170395811 | 0.168846338 | 0.271184669 | 0.267144846 |
| 0.053492694 | 0.188326279 | 0.114867249 | 0.161431575 |
| 0.214171477 | 0.185812965 | 0.224247882 | 0.240750763 |
| 0.118843378 | 0.008517255 | 0.039712613 | 0.24212301  |
| 0.00637732  | 0.142938178 | 0.094032345 | 0.002040638 |

|             |             |             |             |
|-------------|-------------|-------------|-------------|
| 0.010649897 | 0.158463186 | 0.029611091 | 0.075941259 |
| 0.308126343 | 0.070843137 | 0.097832042 | 0.073579959 |
| 0.223085519 | 0.032878521 | 0.002503104 | 0.265126577 |
| 0.226986121 | 0.220237463 | 0.220533841 | 0.178236451 |
| 0.257945451 | 0.196975896 | 0.316405421 | 0.078707841 |
| 0.023948759 | 0.014609299 | 1           | 0.208254296 |
| 0.00113353  | 0.241472627 | 0.176008092 | 0.070239227 |
| 0.276055585 | 0.181783574 | 0.006726041 | 0.23918311  |
| 0.004613897 | 0.132372356 | 0.058103602 | 0.099578326 |
| 0.296078803 | 0.001885694 | 0.052976874 | 0.126056547 |
| 0.159399515 | 0.154482361 | 0.144731778 | 0.248453797 |
| 0.185479291 | 0.034410544 | 0.217248294 | 0.252653485 |
| 0.021935644 | 0.037136435 | 0.085275303 | 0.007791831 |
| 0.018507685 | 0.190126306 | 0.112157806 | 0.012537893 |
| 0.17013402  | 0.000717242 | 0.164816938 | 0.256738335 |
| 0.170346991 | 0.308156632 | 0.247487598 | 0.209197998 |
| 0.245628274 | 0.073432276 | 0.262480104 | 0.18901426  |
| 0.107144381 | 0.000408454 | 0.002363167 | 0.293494568 |
| 0.270459222 | 0.009682591 | 0.081713852 | 0.040238723 |
| 0.038216567 | 0.02903979  | 0.013879001 | 0.16660812  |
| 0.160410758 | 0.204724857 | 0.109031835 | 0.19144052  |
| 0.148105921 | 0.139429711 | 0.08599934  | 0.024920303 |
| 0.197896292 | 0.013781951 | 0.026013792 | 0.007957355 |
| 0.27803252  | 0.030752931 | 0.165193484 | 0.233603723 |
| 0.26199735  | 0.30251952  | 0.070133192 | 0.044359112 |
| 0.247869699 | 0.018870173 | 0.057895535 | 0.022862268 |
| 0.205472994 | 0.314474454 | 0.208046333 | 0.158090274 |
| 0.303889228 | 0.235115965 | 0.009169268 | 0.30686719  |
| 0.002613907 | 0.003084087 | 0.097193953 | 0.133620765 |
| 0.030047279 | 0.247272857 | 0.157236319 | 0.064343251 |
| 0.072108818 | 0.004658198 | 0.228161641 | 0.245536418 |
| 0.230548414 | 0.224551339 | 0.290028876 | 0.109819547 |
| 0.176019167 | 0.138344657 | 0.078218963 | 0.049564333 |
| 0.050757915 | 0.142304491 | 0.073642542 | 0.004824087 |
| 0.15817377  | 0.220946246 | 0.017541394 | 0.059137352 |
| 0.271947514 | 0.28796574  | 0.019756843 | 0.009566775 |
| 0.128076667 | 0.157107289 | 0.301345436 | 0.215078818 |
| 0.225576024 | 0.297569837 | 0.173785386 | 0.070972677 |
| 0.015087719 | 0.242629306 | 0.291366184 | 0.068538584 |
| 0.24857545  | 0.015122999 | 0.193189491 | 0.273422576 |
| 0.049341255 | 0.085088486 | 0.010012866 | 0.034596808 |
| 0.246572283 | 0.085422632 | 0.142094511 | 0.045796775 |
| 0.194846523 | 0.110828041 | 0.013125265 | 0.112609528 |
| 0.211770716 | 0.172054911 | 0.082944515 | 0.057240906 |
| 0.14969747  | 0.02498771  | 0.309719693 | 0.260057119 |
| 0.045543615 | 0.040529627 | 0.038761649 | 0.210973835 |
| 0.250026671 | 0.141663363 | 0.004180305 | 0.177554016 |
| 0.265249168 | 0.235504557 | 0.203670576 | 0.291214745 |
| 0.029036965 | 0.237441553 | 0.187384415 | 0.284100814 |
| 0.096378917 | 0.079016921 | 0.120496668 | 0.021562058 |
| 0.148793015 | 0.207952178 | 0.216210685 | 0.088950922 |
| 0.14680543  | 0.027309707 | 0.012336529 | 0.208993293 |
| 0.170838029 | 0.018031795 | 0.067301322 | 0.260555114 |
| 0.00309598  | 0.127152998 | 0.295990398 | 0.057013883 |

|             |             |             |             |
|-------------|-------------|-------------|-------------|
| 0.2532298   | 0.307785042 | 0.233163326 | 0.039139065 |
| 0.010268224 | 0.310469704 | 0.24469962  | 0.165906192 |
| 0.200432873 | 0.14334094  | 0.018275626 | 0.030555449 |
| 0.185474244 | 0.01683164  | 0.065985401 | 0.035354419 |
| 0.140411509 | 0.164247455 | 0.121632632 | 0.096337192 |
| 0.136514564 | 0.021834919 | 0.099774347 | 0.079418021 |
| 0.099369306 | 0.147983666 | 0.249887134 | 0.029097555 |
| 0.143024443 | 0.276902856 | 0.244200626 | 0.004167208 |
| 0.211017489 | 0.261591411 | 0.223249945 | 0.004931013 |
| 0.294702344 | 0.00198716  | 0.145027166 | 0.147106529 |
| 0.116800786 | 0.133284621 | 0.235194356 | 0.153132939 |
| 0.180720383 | 0.109515304 | 0.113134898 | 0.152974194 |
| 0.078016302 | 0.073496622 | 0.230778003 | 0.120295383 |
| 0.142460576 | 0.037492055 | 0.025385189 | 0.023999398 |
| 0.01146734  | 0.204725589 | 0.110183023 | 0.01543829  |
| 0.139197064 | 0.113370961 | 0.219903147 | 0.202131009 |
| 0.240529048 | 0.024167042 | 0.142418889 | 0.201955489 |
| 0.047993901 | 0.040693248 | 0.007745496 | 0.134002725 |
| 0.094604814 | 0.117230847 | 0.102585881 | 0.1134093   |
| 0.195834037 | 0.197816415 | 0.10100613  | 0.223506415 |
| 0.153546813 | 0.161303829 | 0.052856195 | 0.039717283 |
| 0.075692873 | 0.049489923 | 0.286815331 | 0.000565481 |
| 0.194346018 | 0.027520776 | 0.28186362  | 0.203454772 |
| 0.152274663 | 0.19959253  | 0.030805216 | 0.024442178 |
| 0.027287483 | 0.054454584 | 0.061868058 | 0.218214512 |
| 0.142076996 | 0.047310033 | 0.266931941 | 0.030383242 |
| 0.282184272 | 0.238172941 | 0.131462411 | 0.075776289 |
| 0.123756122 | 0.065058595 | 0.202202952 | 0.020968022 |
| 0.19571659  | 0.145776888 | 0.097597032 | 0.225961017 |
| 0.163399103 | 0.265822991 | 0.014547511 | 0.278565844 |
| 0.242315156 | 0.040614146 | 0.241843863 | 0.075293046 |
| 0.035089228 | 0.040483615 | 0.176237692 | 0.071057939 |
| 0.069758366 | 0.143397264 | 0.005881334 | 0.063377528 |
| 0.253706038 | 0.086502705 | 0.192961098 | 0.221688775 |
| 0.197685494 | 0.273878119 | 0.072200939 | 0.096438217 |
| 0.17645047  | 0.186391761 | 0.090005337 | 0.159430516 |
| 0.198527407 | 0.032901777 | 0.108840865 | 0.005365432 |
| 0.265822476 | 0.227832421 | 0.067407217 | 0.012679896 |
| 0.003650715 | 0.204532659 | 0.231699125 | 0.015017721 |
| 0.325915831 | 0.096797079 | 0.134331555 | 0.209986422 |
| 0.065279624 | 0.191524682 | 0.060116955 | 0.274521434 |
| 0.007386826 | 0.131925225 | 0.194620753 | 0.153533702 |
| 0.112232973 | 0.261654755 | 0.294013485 | 0.211633117 |
| 0.010247651 | 0.097508365 | 0.007358585 | 0.177521619 |
| 0.177321078 | 0.273744217 | 0.087484146 | 0.038687374 |
| 0.205974948 | 0.187874855 | 0.093868259 | 0.145343408 |
| 0.004222803 | 0.317009529 | 0.091355728 | 0.178154558 |
| 0.10405464  | 0.189022532 | 0.016185403 | 0.253988589 |
| 0.153892295 | 0.115905301 | 0.127401597 | 0.112280412 |
| 0.199576024 | 0.156962961 | 0.041170477 | 0.068545601 |
| 0.163246677 | 0.017398674 | 0.061669395 | 0.268493641 |
| 0.10706955  | 0.234814879 | 0.342498385 | 0.121574817 |
| 0.22214843  | 0.150934932 | 0.176650553 | 0.246970583 |
| 0.049309179 | 0.145879129 | 0.266243109 | 0.237333819 |

|             |             |             |             |
|-------------|-------------|-------------|-------------|
| 0.212368791 | 0.181344714 | 0.179897089 | 0.198573218 |
| 0.173112777 | 0.019500151 | 0.118523435 | 0.185183993 |
| 0.22610443  | 0.180676117 | 0.092239896 | 0.166346478 |
| 0.012739973 | 0.039406919 | 0.060563295 | 0.058802554 |
| 0.204220372 | 0.247787834 | 0.163021738 | 0.214746676 |
| 0.04364011  | 0.013287243 | 0.239902056 | 0.056881752 |
| 0.076270638 | 0.254941629 | 0.105188835 | 0.205257011 |
| 0.070307361 | 0.162849912 | 0.111483823 | 0.000345491 |
| 0.288205801 | 0.036158653 | 0.111454661 | 0.14351348  |
| 0.092099569 | 0.011280585 | 0.191188745 | 0.30868508  |
| 0.117836252 | 0.047891024 | 0.082293746 | 0.207306708 |
| 0.138320878 | 0.109741355 | 0.134630405 | 0.158549666 |
| 0.185954054 | 0.109174675 | 0.127459991 | 0.161487577 |
| 0.180389543 | 0.059972501 |             |             |
| HMGA1       | 0.063884681 | 0.265554039 | 0.03639808  |
| 0.142753885 | 0.253559333 | 0.12661584  | 0.084284777 |
| 0.11932948  | 0.222030653 | 0.075920569 | 0.222453135 |
| 0.043129762 | 0.066547863 | 0.364707111 | 0.080241531 |
| 0.274280661 | 0.079314417 | 0.125802984 | 0.048210395 |
| 0.120124286 | 0.258680753 | 0.145845688 | 0.140114172 |
| 0.212743184 | 0.185157167 | 0.18421745  | 0.172118346 |
| 0.343976271 | 0.078248625 | 0.250690509 | 0.056593411 |
| 0.378415364 | 0.272287715 | 0.138326788 | 0.025561633 |
| 0.182948786 | 0.020553358 | 0.361744086 | 0.225868247 |
| 0.123073711 | 0.313463698 | 0.081973321 | 0.196097417 |
| 0.133754516 | 0.046217132 | 0.040237442 | 0.268644611 |
| 0.176671372 | 0.142581253 | 0.047172319 | 0.253307268 |
| 0.142079263 | 0.227414791 | 0.19414459  | 0.006231271 |
| 0.137310738 | 0.04368921  | 0.108819244 | 0.343886096 |
| 0.221048191 | 0.141911063 | 0.102051613 | 0.107499936 |
| 0.212582319 | 0.274234059 | 0.233313504 | 0.129481284 |
| 0.37346717  | 0.135087397 | 0.260672687 | 0.108592376 |
| 0.159578639 | 0.033242076 | 0.201630948 | 0.065817004 |
| 0.155067449 | 0.194940623 | 0.203126373 | 0.16463211  |
| 0.267734266 | 0.394093762 | 0.21526158  | 0.338022868 |
| 0.106599095 | 0.237436849 | 0.18283789  | 0.325997753 |
| 0.281784846 | 0.085868849 | 0.327444528 | 0.410782878 |
| 0.043951067 | 0.14897715  | 0.284827399 | 0.109421544 |
| 0.274321432 | 0.113245968 | 0.132141945 | 0.130210945 |
| 0.293007623 | 0.266580258 | 0.338062214 | 0.289826983 |
| 0.159778601 | 0.068455127 | 0.318188915 | 0.235239117 |
| 0.189923889 | 0.075373798 | 0.23189825  | 0.333563231 |
| 0.269849672 | 0.353070768 | 0.283805447 | 0.330186099 |
| 0.246641801 | 0.368205063 | 0.297548486 | 0.295998593 |
| 0.029954248 | 0.365666817 | 0.152164883 | 0.079184139 |
| 0.050543269 | 0.109546407 | 0.149173122 | 0.300273724 |
| 0.338757871 | 0.235994378 | 0.149901372 | 0.232974739 |
| 0.390805848 | 0.302233601 | 0.361972801 | 0.334884077 |
| 0.059088504 | 0.127895163 | 0.240660978 | 0.111736965 |
| 0.298308884 | 0.120449488 | 0.180823368 | 0.365784783 |
| 0.341348415 | 0.355060796 | 0.093783858 | 0.369866461 |
| 0.129922875 | 0.415772562 | 0.28509886  | 0.179575275 |
| 0.384455375 | 0.344290659 | 0.419716024 | 0.296628814 |
| 0.341109775 | 0.171375069 | 0.042734102 | 0.313014507 |

|             |             |             |             |
|-------------|-------------|-------------|-------------|
| 0.408913202 | 0.022185852 | 0.335295135 | 0.36922204  |
| 0.345036642 | 0.347783032 | 0.421645447 | 0.368129838 |
| 0.338000363 | 0.085113232 | 0.018215725 | 0.313691638 |
| 0.366349323 | 0.348015382 | 0.139237074 | 0.200816841 |
| 0.264437821 | 0.14528944  | 0.277320387 | 0.154414093 |
| 0.429324826 | 0.33167983  | 0.334420889 | 0.293699632 |
| 0.143351439 | 0.289343545 | 0.189456395 | 0.309567652 |
| 0.070770474 | 0.087041418 | 0.052907115 | 0.270690688 |
| 0.087377233 | 0.211990362 | 0.147593303 | 0.225118058 |
| 0.233709497 | 0.113932014 | 0.120819569 | 0.307334365 |
| 0.06055395  | 0.194233207 | 0.12686957  | 0.141556663 |
| 0.093456766 | 0.159493644 | 0.197222879 | 0.14093012  |
| 0.22269564  | 0.199493078 | 0.255780297 | 0.366690268 |
| 0.162235529 | 0.170533445 | 0.264230397 | 0.396160579 |
| 0.426333614 | 0.2239522   | 0.231685318 | 0.036310857 |
| 0.235403324 | 0.100864774 | 0.117514156 | 0.184560035 |
| 0.165237322 | 0.219168656 | 0.277659079 | 0.33420353  |
| 0.154578634 | 0.07741868  | 0.188173033 | 0.345833736 |
| 0.131238978 | 0.186626293 | 0.389662964 | 0.188594788 |
| 0.008387442 | 0.225598879 | 0.335866284 | 0.18395249  |
| 0.241900431 | 0.121100409 | 0.116332929 | 0.378280813 |
| 0.148331794 | 0.176456175 | 0.346318074 | 0.314866293 |
| 0.123638718 | 0.17032754  | 0.407729082 | 0.049210983 |
| 0.180794861 | 0.104404702 | 0.324151366 | 0.086620091 |
| 0.232378359 | 0.316436545 | 0.224647842 | 0.198701671 |
| 0.100486291 | 0.375112452 | 0.289787677 | 0.378245142 |
| 0.174164663 | 0.413372689 | 0.357872938 | 0.365895186 |
| 0.253550055 | 0.145332219 | 0.09303799  | 0.346396478 |
| 0.363398012 | 0.153114594 | 0.070088064 | 0.288622479 |
| 0.13801241  | 0.307491921 | 0.149235922 | 0.414057516 |
| 0.388097469 | 0.295137505 | 0.162490953 | 0.359043375 |
| 0.352220858 | 0.176219942 | 0.309136449 | 0.414247258 |
| 0.107121908 | 0.22908343  | 0.214746783 | 0.389639486 |
| 0.189266474 | 0.200860147 | 0.27268777  | 0.095461168 |
| 0.004170509 | 0.067416703 | 0.073016877 | 0.188257926 |
| 0.163156131 | 0.186098632 | 0.2917927   | 0.387727458 |
| 0.133271156 | 0.314371851 | 0.211460478 | 0.239881302 |
| 0.336772422 | 0.165501798 | 0.192762085 | 0.244994733 |
| 0.236325503 | 0.042200899 | 0.144077651 | 0.401376835 |
| 0.03772808  | 0.160753674 | 0.144886183 | 0.007805064 |
| 0.063039227 | 0.228459359 | 0.106567382 | 0.208249002 |
| 0.3870044   | 0.195364787 | 0.199581962 | 0.110556768 |
| 0.299127045 | 0.102402629 | 0.010434182 | 0.356444145 |
| 0.337301625 | 0.325448237 | 0.332307513 | 0.302463604 |
| 0.335013075 | 0.249359308 | 0.352550815 | 0.141430289 |
| 0.120179522 | 0.063196717 | 0.208254296 | 1           |
| 0.004384395 | 0.322329896 | 0.184758463 | 0.179801785 |
| 0.301425182 | 0.264450526 | 0.054759635 | 0.221679658 |
| 0.038245093 | 0.116791896 | 0.148332259 | 0.166602933 |
| 0.32305907  | 0.024370936 | 0.11479442  | 0.187392009 |
| 0.294544773 | 0.28623743  | 0.141499128 | 0.379357083 |
| 0.24438174  | 0.098912244 | 0.22330847  | 0.302886951 |
| 0.099105034 | 0.065424986 | 0.133116513 | 0.01409466  |
| 0.058726305 | 0.317304876 | 0.145504327 | 0.079401565 |

|             |             |             |             |
|-------------|-------------|-------------|-------------|
| 0.25970727  | 0.013435253 | 0.293229187 | 0.391945863 |
| 0.292294646 | 0.405707932 | 0.372981289 | 0.165700552 |
| 0.37328204  | 0.047146346 | 0.376897523 | 0.284638768 |
| 0.122235809 | 0.003230225 | 0.01401236  | 0.367974162 |
| 0.250900894 | 0.049355575 | 0.184482482 | 0.114886823 |
| 0.153117862 | 0.084194446 | 0.071553244 | 0.192075284 |
| 0.208061716 | 0.216402637 | 0.153035035 | 0.322060776 |
| 0.205389406 | 0.215574274 | 0.118632622 | 0.091338037 |
| 0.214812998 | 0.086969158 | 0.091029925 | 0.017415826 |
| 0.304271978 | 0.107916117 | 0.316050837 | 0.354138575 |
| 0.407435957 | 0.31249736  | 0.092481692 | 0.113132445 |
| 0.319782476 | 0.069497214 | 0.110505641 | 0.076907336 |
| 0.325237451 | 0.313028299 | 0.333291995 | 0.295569338 |
| 0.426269078 | 0.371976345 | 0.057328844 | 0.361132018 |
| 0.021584334 | 0.004980304 | 0.147397757 | 0.236805748 |
| 0.03820765  | 0.207976107 | 0.285103071 | 0.123007495 |
| 0.136239559 | 0.043415755 | 0.169123803 | 0.188079148 |
| 0.290922417 | 0.232831572 | 0.227023881 | 0.206001785 |
| 0.196392598 | 0.200837505 | 0.160775427 | 0.144184507 |
| 0.112618589 | 0.263917249 | 0.196066666 | 0.04287268  |
| 0.168703126 | 0.209979915 | 0.073396272 | 0.161119315 |
| 0.362041776 | 0.377519655 | 0.098033218 | 0.047464369 |
| 0.264062469 | 0.186837261 | 0.394523979 | 0.32976772  |
| 0.373065009 | 0.430588573 | 0.335768494 | 0.192805251 |
| 0.076734266 | 0.264372728 | 0.230004824 | 0.163586605 |
| 0.368140033 | 0.06221231  | 0.319243226 | 0.178041394 |
| 0.138893431 | 0.183523701 | 0.071251343 | 0.103408437 |
| 0.212293109 | 0.192819794 | 0.198523326 | 0.123909048 |
| 0.223427155 | 0.154438583 | 0.070090058 | 0.208272265 |
| 0.317473439 | 0.16799906  | 0.184907798 | 0.115784084 |
| 0.24759724  | 0.053584408 | 0.315232029 | 0.407283291 |
| 0.132399722 | 0.103724617 | 0.127932492 | 0.265568918 |
| 0.309065078 | 0.147677766 | 0.031334066 | 0.277509979 |
| 0.370434207 | 0.256083289 | 0.337929442 | 0.387873835 |
| 0.101851402 | 0.222449259 | 0.149556728 | 0.271888087 |
| 0.188991767 | 0.124758927 | 0.182864909 | 0.083587906 |
| 0.276639    | 0.360597012 | 0.317038097 | 0.171997314 |
| 0.17136761  | 0.084111169 | 0.05259187  | 0.291729737 |
| 0.204654042 | 0.103175662 | 0.089495808 | 0.3045602   |
| 0.007337714 | 0.104204688 | 0.381000613 | 0.153307862 |
| 0.388358844 | 0.39621055  | 0.375364982 | 0.111015059 |
| 0.00701266  | 0.284348253 | 0.284159666 | 0.190176201 |
| 0.306012084 | 0.253353458 | 0.068039942 | 0.132188515 |
| 0.312148647 | 0.070986652 | 0.198244388 | 0.103563984 |
| 0.138944482 | 0.221987661 | 0.240339047 | 0.166171379 |
| 0.196698203 | 0.075497331 | 0.133414641 | 0.155135754 |
| 0.112451258 | 0.279562286 | 0.359045549 | 0.063673501 |
| 0.165556837 | 0.362727726 | 0.318674349 | 0.037886483 |
| 0.177564797 | 0.334750354 | 0.328111377 | 0.017260775 |
| 0.319444397 | 0.024782969 | 0.197296613 | 0.204782229 |
| 0.187947727 | 0.197023646 | 0.2759832   | 0.206216124 |
| 0.241903819 | 0.184262204 | 0.190409421 | 0.252458958 |
| 0.175894142 | 0.143347201 | 0.240221736 | 0.153752321 |
| 0.201340245 | 0.119608052 | 0.101273076 | 0.097099876 |

|             |             |             |             |
|-------------|-------------|-------------|-------------|
| 0.078539459 | 0.299574711 | 0.250840151 | 0.067144268 |
| 0.230928766 | 0.155079094 | 0.363624761 | 0.319922574 |
| 0.35862879  | 0.088603248 | 0.171179794 | 0.300261026 |
| 0.078625428 | 0.109106744 | 0.055791095 | 0.175731706 |
| 0.184097513 | 0.201255943 | 0.13466891  | 0.187941641 |
| 0.244459319 | 0.354287119 | 0.236961188 | 0.344031549 |
| 0.184885673 | 0.163526883 | 0.082634353 | 0.148226916 |
| 0.159104936 | 0.139863479 | 0.234970661 | 0.007685132 |
| 0.273412222 | 0.115220506 | 0.355458098 | 0.337032833 |
| 0.128176125 | 0.332680041 | 0.086793474 | 0.116314235 |
| 0.066833158 | 0.152918746 | 0.168667108 | 0.268483653 |
| 0.112881708 | 0.135624763 | 0.263236287 | 0.093220381 |
| 0.309332689 | 0.262327076 | 0.166933102 | 0.146474589 |
| 0.189518201 | 0.149564077 | 0.339410248 | 0.071511692 |
| 0.202817468 | 0.199111744 | 0.139554224 | 0.237367403 |
| 0.211887268 | 0.366800958 | 0.064577115 | 0.379794455 |
| 0.217153153 | 0.126329377 | 0.40076039  | 0.131902544 |
| 0.123786554 | 0.13214972  | 0.124489008 | 0.11225933  |
| 0.173462654 | 0.135989266 | 0.00674047  | 0.091907853 |
| 0.341278169 | 0.116328292 | 0.255146105 | 0.283100365 |
| 0.19178676  | 0.354774161 | 0.073929005 | 0.158003847 |
| 0.302043651 | 0.332546012 | 0.22548224  | 0.286051306 |
| 0.298826915 | 0.119213763 | 0.178983941 | 0.012516596 |
| 0.258689813 | 0.208818969 | 0.126348807 | 0.075479725 |
| 0.039845236 | 0.151034795 | 0.246757056 | 0.060213458 |
| 0.398099695 | 0.103721478 | 0.170755081 | 0.259584511 |
| 0.162987316 | 0.344250202 | 0.163136759 | 0.328864124 |
| 0.04570155  | 0.225556775 | 0.162935152 | 0.153509034 |
| 0.222424344 | 0.199939371 | 0.36161903  | 0.171849806 |
| 0.06768768  | 0.198904676 | 0.01839007  | 0.343632206 |
| 0.314341357 | 0.195535884 | 0.209720618 | 0.07314637  |
| 0.299499747 | 0.286579544 | 0.18571185  | 0.149481378 |
| 0.03280519  | 0.273701794 | 0.186286408 | 0.292547096 |
| 0.129932555 | 0.204496568 | 0.090392431 | 0.200649118 |
| 0.307348156 | 0.213394207 | 0.250357697 | 0.164168385 |
| 0.318348116 | 0.241908523 | 0.117377072 | 0.141082832 |
| 0.193374613 | 0.075814764 | 0.096022213 | 0.394134248 |
| 0.182954875 | 0.187205368 | 0.381007868 | 0.226409914 |
| 0.163574505 | 0.270830082 | 0.184465956 | 0.371829993 |
| 0.154901966 | 0.263929235 | 0.317240318 | 0.34497509  |
| 0.327168738 | 0.177235681 | 0.180998566 | 0.229533497 |
| 0.299384222 | 0.09897393  | 0.180312595 | 0.295080655 |
| 0.182884417 | 0.262860233 | 0.133950482 | 0.19816687  |
| 0.067398273 | 0.13476765  | 0.132537777 | 0.151404031 |
| 0.274077003 | 0.239946695 | 0.210331998 | 0.363292298 |
| 0.14968721  | 0.063651879 | 0.390039117 | 0.039623559 |
| 0.14275988  | 0.285161569 | 0.191182413 | 0.189979533 |
| 0.187552334 | 0.222250668 | 0.167392526 | 0.005727149 |
| 0.344798102 | 0.052841627 | 0.143925557 | 0.222357466 |
| 0.142428022 | 0.069390994 | 0.324174623 | 0.409342106 |
| 0.20500229  | 0.103830233 | 0.125466124 | 0.326699981 |
| 0.140607622 | 0.106608586 | 0.143509857 | 0.213571069 |
| 0.145289975 | 0.113960484 | 0.130704653 | 0.147264418 |
| 0.263077061 | 0.126813957 |             |             |

|             |             |             |             |
|-------------|-------------|-------------|-------------|
| HMGB3       | 0.015182567 | 0.010328298 | 0.013539733 |
| 0.00109619  | 0.002872131 | 0.00215311  | 0.011757273 |
| 0.007971449 | 0.009781846 | 0.001460155 | 0.004123288 |
| 0.013610664 | 0.000104107 | 0.010929517 | 0.01431347  |
| 0.004148377 | 0.011651676 | 0.015981361 | 6.98E-05    |
| 0.000673318 | 0.005083789 | 0.001453974 | 0.005434275 |
| 0.003989281 | 0.027699976 | 0.005674574 | 0.002705896 |
| 0.008930785 | 0.000539462 | 0.004044766 | 3.15E-05    |
| 0.017381776 | 0.004263996 | 0.001735536 | 0.006588704 |
| 0.004841835 | 1.95E-05    | 0.018204723 | 0.005250631 |
| 0.021354763 | 0.001951971 | 0.007734361 | 3.18E-05    |
| 0.017411638 | 0.000425521 | 0.004849709 | 0.002215461 |
| 0.003804007 | 0.022586812 | 0.004290582 | 0.005056303 |
| 0.010590758 | 0.005268043 | 1.67E-05    | 0.003211477 |
| 0.000150745 | 0.001297865 | 0.001469896 | 0.018188437 |
| 0.015575875 | 0.001297865 | 0.011471657 | 0.007243103 |
| 0.007810779 | 0.000686585 | 0.009522033 | 0.011775419 |
| 0.000787604 | 0.012415545 | 0.002568973 | 0.006495754 |
| 0.012443819 | 0.003848846 | 0.000159864 | 0.0020108   |
| 0.010506935 | 0.020522822 | 0.017154796 | 0.008966445 |
| 0.0170119   | 0.004536881 | 0.001166264 | 0.000920894 |
| 0.003799588 | 0.011423163 | 0.013158182 | 0.010463375 |
| 0.010544852 | 0.001238204 | 0.011037946 | 0.017000663 |
| 0.003998887 | 0.006516546 | 0.013819106 | 0.00838637  |
| 0.001011708 | 0.010059885 | 0.027204219 | 0.003510958 |
| 0.0040176   | 0.002517699 | 0.000862071 | 0.003559777 |
| 0.023525201 | 0.017351833 | 0.015668217 | 0.003322005 |
| 0.016616859 | 0.016221191 | 0.002718845 | 0.006043873 |
| 0.009326938 | 0.001277098 | 0.006443073 | 0.003827523 |
| 0.01045239  | 0.009540599 | 0.013035255 | 1.01E-05    |
| 0.011743976 | 0.005292167 | 0.01314827  | 0.00973306  |
| 0.011067165 | 0.010696704 | 0.013266054 | 0.007332207 |
| 0.008916163 | 0.002590763 | 0.014519837 | 0.008243708 |
| 0.014202802 | 0.009371567 | 0.006713845 | 0.015853666 |
| 0.000929524 | 0.012106535 | 0.011188282 | 0.011428174 |
| 0.019490962 | 0.002450048 | 0.004209126 | 0.013464456 |
| 0.00749917  | 0.001773063 | 0.017225707 | 0.015030174 |
| 0.013022539 | 0.005898871 | 0.018666073 | 0.013468188 |
| 0.015047874 | 0.007630415 | 0.012320498 | 0.013470565 |
| 0.004020337 | 0.010382662 | 0.003871401 | 0.013331813 |
| 3.84E-05    | 0.000718273 | 0.012013415 | 0.007707358 |
| 0.005865843 | 0.008316596 | 0.011553633 | 0.011262236 |
| 0.019305579 | 0.011262236 | 0.009106279 | 9.51E-05    |
| 0.009240551 | 0.00937008  | 0.013289506 | 0.005436227 |
| 0.005848636 | 0.005436227 | 0.003488328 | 0.0065139   |
| 0.006335986 | 0.0065139   | 0.000614769 | 0.007916567 |
| 0.021368519 | 0.007916567 | 0.011511408 | 0.002761368 |
| 0.010997438 | 0.002761368 | 0.015411084 | 0.022899667 |
| 0.012579423 | 0.022899667 | 0.013754567 | 0.004063035 |
| 0.005919482 | 0.004063035 | 0.006431955 | 0.00126917  |
| 0.003794113 | 0.00126917  | 0.004636599 | 0.009538507 |
| 0.031030854 | 0.009538507 | 0.012428205 | 0.002754465 |
| 0.029520725 | 0.002754465 | 0.006526473 | 0.004917858 |
| 0.019500499 | 0.004917858 | 0.008571852 | 0.00986287  |
|             | 0.00986287  | 0.011218138 | 0.016053788 |



|             |             |             |             |             |
|-------------|-------------|-------------|-------------|-------------|
| 0.002329985 | 0.025437842 | 0.000844772 | 0.001029186 |             |
| 0.001366553 | 0.001148946 | 0.002361769 | 0.027623874 |             |
| 0.005731334 | 0.005722336 | 0.005227947 | 0.008407099 |             |
| 0.016890972 | 0.003804236 | 0.019412926 | 0.027630664 |             |
| 0.003501643 | 0.009487384 | 0.003554919 | 0.001235147 |             |
| 0.00628681  | 0.006740865 | 0.001205708 | 0.016111746 |             |
| 0.00042213  | 0.000404539 | 0.008436698 | 0.001910895 |             |
| 0.003526192 | 0.008377423 | 0.005684881 | 0.003263778 |             |
| 0.026557241 | 0.012261283 | 0.000203682 | 0.003396378 |             |
| 7.80E-05    | 0.012075655 | 0.002336878 | 0.014228076 |             |
| 0.013083055 | 0.004157641 | 0.001254597 | 0.016563773 |             |
| 0.013973783 | 0.008634136 | 0.010689307 | 0.001298239 |             |
| 0.012103173 | 0.007170799 | 0.010957496 | 0.008762287 |             |
| 0.003111433 | 0.000788115 | 0.006465955 | 0.00700709  |             |
| 0.000269666 | 0.023411737 | 0.0070505   | 0.002551461 |             |
| 0.004703307 | 0.000142255 | 0.011640693 | 0.015372736 |             |
| 0.012353774 | 0.012912854 | 0.008423018 | 0.009589852 |             |
| 0.011271182 | 0.006726279 | 0.014000317 | 0.001015813 |             |
| 0.004702732 | 0.001885087 | 0.007565934 | 0.015380979 |             |
| 0.002721816 | 0.016039917 | 0.000700458 | 1.34E-05    |             |
| 0.019009608 | 0.018830207 | 0.008710434 | 0.000846983 |             |
| 0.003654395 | 0.004500218 | 0.010994279 | 0.019388108 |             |
| 0.011629541 | 0.017697097 | 0.002793256 | 0.012574643 |             |
| 0.006060063 | 0.002466843 | 0.004772294 | 0.014432359 |             |
| 0.00039599  | 0.004477214 | 0.016743251 | 0.020339968 |             |
| 0.001809447 | 0.010927502 | 1.86E-05    | 0.017034073 |             |
| 0.006732092 | 0.028479053 | 0.029562113 | 0.009708009 |             |
| 0.02176294  | 0.016213685 | 0.001657165 | 0.007947691 |             |
| 0.019465866 | 0.000290567 | 0.009690833 | 0.012411414 |             |
| 0.012646282 | 0.012335647 | 0.014883195 | 0.010378689 |             |
| 0.008133992 | 0.006590739 | 0.004701649 | 0.006275551 |             |
| 0.010240382 | 0.00113353  | 0.004384395 | 1           |             |
| 0.00680197  | 0.004661329 | 0.024522651 | 0.007137323 |             |
| 0.012498873 | 0.015191963 | 0.0054912   | 0.002034545 |             |
| 0.000471442 | 0.008621133 | 0.007409463 | 0.008171387 |             |
| 0.009141757 | 4.63E-05    | 0.000897879 | 0.013157368 |             |
| 0.018274822 | 0.000836603 | 0.011514473 | 0.005543664 |             |
| 0.021570719 | 0.002924309 | 0.00701371  | 0.013590907 |             |
| 4.28E-06    | 0.005811196 | 2.66E-06    | 8.92E-05    | 0.015010029 |
| 0.001632388 | 0.002012004 | 0.011381481 | 0.004486816 |             |
| 0.013939569 | 0.013564222 | 0.011048066 | 0.010496323 |             |
| 0.010425955 | 0.001323604 | 0.01133717  | 0.000190791 |             |
| 0.010673894 | 0.012540836 | 0.002541187 | 6.07E-05    |             |
| 0.00180047  | 0.006787669 | 0.003624111 | 0.023715075 |             |
| 0.017040236 | 0.000705616 | 0.011433159 | 0.026715925 |             |
| 0.014412746 | 0.001037396 | 0.003760229 | 0.004999779 |             |
| 0.002010475 | 0.013684049 | 0.007996961 | 0.011948551 |             |
| 0.005556783 | 0.027737917 | 0.002918726 | 0.010763233 |             |
| 0.024283417 | 0.015515084 | 0.008167993 | 0.020739978 |             |
| 0.017369265 | 0.012075357 | 0.012623181 | 0.0039904   |             |
| 0.001372897 | 0.002862115 | 0.009364523 | 0.025537221 |             |
| 0.000491165 | 0.030222248 | 0.010446304 | 0.004732512 |             |
| 0.012184108 | 0.014609868 | 0.012988551 | 0.01225972  |             |
| 0.018525372 | 0.006478816 | 0.001068771 | 0.000342696 |             |

|             |             |             |             |
|-------------|-------------|-------------|-------------|
| 0.003342208 | 0.017533658 | 0.000220163 | 0.003750802 |
| 0.017024742 | 0.004718217 | 0.005552437 | 0.004682778 |
| 0.001644769 | 0.001449335 | 0.007968942 | 0.006233759 |
| 0.003186208 | 0.016336836 | 0.002139093 | 0.00043176  |
| 0.005122364 | 0.008995614 | 0.001127554 | 0.014596348 |
| 0.026609082 | 0.014179551 | 0.0020829   | 0.003130833 |
| 0.019820745 | 0.01878106  | 0.00802974  | 0.009049895 |
| 0.004436149 | 0.002705984 | 0.016981876 | 0.005499478 |
| 0.009982831 | 0.010095393 | 0.015434294 | 0.014537954 |
| 0.018330553 | 0.00524997  | 0.019574809 | 0.006282947 |
| 0.002580491 | 0.001710111 | 0.012057455 | 0.022493342 |
| 0.011896483 | 0.001669675 | 0.019944678 | 0.004560862 |
| 0.004748303 | 0.019389515 | 0.003377233 | 0.020948558 |
| 0.007941743 | 0.014588811 | 0.005525039 | 0.000278668 |
| 0.012967736 | 0.017717984 | 0.012467881 | 9.24E-05    |
| 0.01676431  | 0.004096304 | 0.00737133  | 0.000737425 |
| 0.005308782 | 0.017180418 | 0.030103679 | 0.019478307 |
| 0.001897643 | 0.008379079 | 0.006996056 | 0.003603517 |
| 0.001204397 | 0.00876075  | 0.010672261 | 0.00415896  |
| 0.012531594 | 0.014497873 | 0.021889762 | 0.002830591 |
| 0.002700833 | 0.004789398 | 0.018310425 | 0.002638235 |
| 0.010322219 | 0.023296165 | 0.019588548 | 0.020020962 |
| 0.008731139 | 0.011938933 | 0.004344734 | 0.024299944 |
| 0.022068043 | 0.009317969 | 0.000637502 | 0.007349874 |
| 0.003119761 | 0.008185167 | 1.87E-06    | 0.000460558 |
| 0.010102002 | 0.006012812 | 0.014944095 | 0.008304332 |
| 0.014199155 | 0.003493932 | 0.002217338 | 0.003437419 |
| 0.006289973 | 0.001448255 | 0.009936144 | 0.012668955 |
| 0.001219411 | 0.009692544 | 0.017140448 | 0.021172923 |
| 0.008059907 | 0.001435431 | 5.71E-05    | 0.008573499 |
| 0.021089896 | 0.015200492 | 0.004870305 | 0.022576766 |
| 0.000309889 | 0.005482255 | 0.000473192 | 0.019154707 |
| 0.015952145 | 0.00191363  | 0.000550676 | 0.013582266 |
| 0.009053054 | 0.0132992   | 0.003064993 | 0.010986511 |
| 0.009249997 | 8.33E-05    | 0.005479614 | 0.005818802 |
| 0.008694444 | 0.005598995 | 0.005816815 | 0.010705254 |
| 0.008722224 | 0.001631224 | 0.007989084 | 0.00798697  |
| 0.004359395 | 0.014772818 | 0.006573355 | 0.006894783 |
| 0.003606038 | 0.003624857 | 0.002351148 | 0.015350751 |
| 0.025184715 | 0.029417048 | 0.006506322 | 0.009146729 |
| 0.024282223 | 0.022095644 | 0.015175869 | 0.002488472 |
| 0.014927019 | 0.011025563 | 0.011537147 | 0.021278106 |
| 0.007785943 | 0.008583078 | 0.000197249 | 0.000465796 |
| 0.011556441 | 0.002945638 | 0.011995549 | 0.002193585 |
| 0.002742129 | 0.009987482 | 0.007930418 | 0.019371816 |
| 0.023326378 | 0.012274511 | 0.001680782 | 0.005546208 |
| 0.00116121  | 0.007460324 | 0.011227342 | 0.023072391 |
| 0.003444316 | 0.00082624  | 0.010779236 | 0.001221879 |
| 0.007256716 | 0.01263309  | 0.002698691 | 0.013310264 |
| 0.001163657 | 0.012179068 | 0.000408603 | 0.020113667 |
| 0.023428657 | 0.005107847 | 0.001075288 | 0.007617716 |
| 0.00328705  | 0.001612263 | 0.005505899 | 0.005198604 |
| 0.002731443 | 0.012741004 | 0.008230222 | 0.013820359 |
| 0.015217296 | 0.013234131 | 0.003213058 | 0.00091783  |

|             |             |             |             |
|-------------|-------------|-------------|-------------|
| 0.005908333 | 0.00566626  | 0.005724606 | 0.00912652  |
| 0.019102999 | 0.009804567 | 0.00461003  | 0.029143018 |
| 0.018148686 | 0.007290142 | 0.001102259 | 0.001729044 |
| 0.000611058 | 0.0034205   | 0.006711279 | 0.001197581 |
| 5.83E-05    | 8.80E-05    | 0.011771201 | 0.003662189 |
| 0.00908695  | 0.001725013 | 0.012034443 | 0.000247255 |
| 0.008283538 | 0.012422991 | 0.016005826 | 0.002886925 |
| 0.016210071 | 0.017495757 | 0.013757615 | 0.005362417 |
| 6.09E-05    | 0.005141395 | 0.003669607 | 0.002029164 |
| 0.014704997 | 0.003972603 | 0.000626243 | 0.003907574 |
| 0.019770622 | 0.008980829 | 0.00058176  | 0.007537965 |
| 0.003778487 | 0.021412364 | 0.015511606 | 0.006041488 |
| 0.005931863 | 0.004427382 | 0.012627437 | 0.002352707 |
| 0.005197435 | 0.002134153 | 0.002044416 | 0.006950448 |
| 0.001473772 | 0.012618384 | 0.001803794 | 4.82E-05    |
| 0.019793217 | 0.01486196  | 0.002137595 | 0.026218795 |
| 0.001657489 | 0.011193031 | 0.011001792 | 0.004976969 |
| 0.001942729 | 0.001176027 | 0.003369412 | 0.01321418  |
| 0.010401488 | 0.000185236 | 0.007090469 | 0.002317096 |
| 0.004090071 | 0.018602828 | 0.002707284 | 0.023614495 |
| 0.000367437 | 0.010347302 | 0.009044782 | 0.015774619 |
| 0.000960792 | 0.006155067 | 0.025619427 | 0.002066146 |
| 0.01405211  | 0.010121829 | 0.001071442 | 0.007424884 |
| 0.006128974 | 0.003148365 | 0.010695694 | 0.003317827 |
| 0.013699882 | 0.005170511 | 0.013996024 | 0.006365643 |
| 0.011822104 | 0.013812811 | 0.001570081 | 0.00137494  |
| 0.005162904 | 0.01115576  | 0.005083584 | 0.001049856 |
| 0.008891447 | 0.000953874 | 0.013118285 | 0.004995583 |
| 0.00375852  | 0.022237109 | 0.006921005 | 0.002075253 |
| 0.019393964 | 0.010931035 | 0.003369829 | 0.001829731 |
| 0.014996586 | 0.0030392   | 0.001667626 | 0.013228175 |
| 2.24E-06    | 0.005666767 | 0.004190467 | 0.014398809 |
| 0.002495278 | 0.022844397 | 0.0124023   | 0.00585134  |
| 0.001993639 | 0.010054817 | 1.45E-05    | 0.004702288 |
| 0.003710654 | 0.008765102 | 0.015373275 | 0.011835861 |
| 0.010463516 | 0.00983423  | 0.000340291 | 0.001125981 |
| 0.014422806 | 3.82E-05    | 0.001246933 | 0.00419956  |
| 0.004476192 | 0.000861712 | 0.002083238 | 0.002382362 |
| 0.000855174 | 0.010745432 | 0.007501394 |             |
| HMG2        | 0.131607877 | 0.365754309 | 0.0919165   |
| 0.240112639 | 0.358925288 | 0.37001069  | 0.110159083 |
| 0.196918065 | 0.28079633  | 0.199274262 | 0.38901911  |
| 0.05118793  | 0.142693893 | 0.42261372  | 0.11152703  |
| 0.348238813 | 0.0961715   | 0.17705448  | 0.08815199  |
| 0.24691922  | 0.329933478 | 0.349269946 | 0.305760276 |
| 0.331101392 | 0.212439162 | 0.290000142 | 0.310588033 |
| 0.447514754 | 0.232230697 | 0.375496711 | 0.157642383 |
| 0.405532034 | 0.34982411  | 0.324107293 | 0.047502213 |
| 0.361048009 | 0.021458762 | 0.409630924 | 0.322985181 |
| 0.250040518 | 0.354710144 | 0.23898939  | 0.337597405 |
| 0.266150413 | 0.076196086 | 0.149658173 | 0.318148843 |
| 0.28460177  | 0.322481454 | 0.091641261 | 0.352145597 |
| 0.295379033 | 0.333407268 | 0.270247447 | 0.003943711 |
| 0.304175629 | 0.10067382  | 0.215060593 | 0.464115188 |

|             |             |             |             |
|-------------|-------------|-------------|-------------|
| 0.276792232 | 0.23029258  | 0.201365253 | 0.259103907 |
| 0.301753659 | 0.325372585 | 0.309968666 | 0.256905816 |
| 0.459708894 | 0.20977215  | 0.33492784  | 0.239254457 |
| 0.317275488 | 0.057418081 | 0.219575466 | 0.104948237 |
| 0.335105123 | 0.310903513 | 0.38133083  | 0.31956116  |
| 0.352649357 | 0.485056089 | 0.282721275 | 0.440626883 |
| 0.122154431 | 0.32775612  | 0.348135403 | 0.333495878 |
| 0.304751563 | 0.123174956 | 0.372760858 | 0.485801923 |
| 0.080560512 | 0.262012889 | 0.307129406 | 0.143189675 |
| 0.389348151 | 0.2657276   | 0.278258853 | 0.258301716 |
| 0.359165646 | 0.324045166 | 0.42846249  | 0.31842912  |
| 0.353858203 | 0.100666736 | 0.4317223   | 0.327491865 |
| 0.374010543 | 0.131549284 | 0.277350181 | 0.400561089 |
| 0.353785745 | 0.451884881 | 0.339635175 | 0.309774278 |
| 0.332215572 | 0.464160984 | 0.362675214 | 0.382085476 |
| 0.110058648 | 0.473073346 | 0.265962588 | 0.117492258 |
| 0.104476004 | 0.191157006 | 0.245123901 | 0.324714736 |
| 0.436055066 | 0.338554162 | 0.258254758 | 0.316345466 |
| 0.424598135 | 0.419424049 | 0.460080923 | 0.357474201 |
| 0.088488899 | 0.247457321 | 0.339048354 | 0.320781929 |
| 0.328628482 | 0.171052441 | 0.304414161 | 0.461079673 |
| 0.389745915 | 0.38809163  | 0.211047026 | 0.468377741 |
| 0.225245292 | 0.497922064 | 0.388031491 | 0.260721808 |
| 0.481318472 | 0.454805151 | 0.492415614 | 0.367495989 |
| 0.456433303 | 0.348193784 | 0.053694525 | 0.333914471 |
| 0.485895377 | 0.035622212 | 0.419399222 | 0.447563933 |
| 0.443259404 | 0.403012805 | 0.488564757 | 0.471940128 |
| 0.446817454 | 0.121390952 | 0.019849476 | 0.327270957 |
| 0.456590243 | 0.393226186 | 0.236450978 | 0.318901524 |
| 0.340490961 | 0.34242623  | 0.35653779  | 0.278657814 |
| 0.499156199 | 0.424570949 | 0.433605407 | 0.315961111 |
| 0.242546347 | 0.33507963  | 0.308917763 | 0.423847067 |
| 0.119940259 | 0.169284398 | 0.08216914  | 0.303167239 |
| 0.275167791 | 0.276635824 | 0.319246465 | 0.31406804  |
| 0.278492787 | 0.295810799 | 0.301532529 | 0.360387083 |
| 0.073038541 | 0.340021212 | 0.239021859 | 0.195538517 |
| 0.11299429  | 0.174044337 | 0.249104112 | 0.280742046 |
| 0.33030232  | 0.239385328 | 0.341545899 | 0.45472248  |
| 0.310087903 | 0.208020536 | 0.342810712 | 0.473503707 |
| 0.441859784 | 0.360685773 | 0.256285754 | 0.050746175 |
| 0.253884137 | 0.216817583 | 0.206072208 | 0.33467956  |
| 0.201673415 | 0.253754549 | 0.32879285  | 0.377862113 |
| 0.279573989 | 0.168096147 | 0.310734763 | 0.429620629 |
| 0.16155425  | 0.373677305 | 0.416722413 | 0.299163027 |
| 0.015402475 | 0.327355236 | 0.394404766 | 0.227600809 |
| 0.278053424 | 0.196803713 | 0.296210613 | 0.419959706 |
| 0.260525851 | 0.267713002 | 0.453708507 | 0.373601476 |
| 0.304099247 | 0.216948673 | 0.487925932 | 0.042570474 |
| 0.312346684 | 0.158730908 | 0.338318528 | 0.231824567 |
| 0.294373247 | 0.313068438 | 0.341938236 | 0.363001895 |
| 0.160294342 | 0.466598675 | 0.37871554  | 0.469769554 |
| 0.296562968 | 0.489188059 | 0.412392196 | 0.423940635 |
| 0.35639244  | 0.274739265 | 0.166500373 | 0.38264965  |
| 0.414806479 | 0.234434278 | 0.09763272  | 0.347988634 |

|             |             |             |             |
|-------------|-------------|-------------|-------------|
| 0.259106448 | 0.34556475  | 0.24408572  | 0.465639253 |
| 0.484995084 | 0.402232675 | 0.254248892 | 0.357355506 |
| 0.376878518 | 0.300592625 | 0.38936795  | 0.495616209 |
| 0.208317839 | 0.308533585 | 0.322549382 | 0.405982528 |
| 0.236695799 | 0.263650268 | 0.324475246 | 0.207849272 |
| 0.020136379 | 0.121767686 | 0.108605507 | 0.28438862  |
| 0.263618571 | 0.307009445 | 0.354891651 | 0.46899122  |
| 0.200523866 | 0.418595163 | 0.246684081 | 0.311922097 |
| 0.375962265 | 0.313092463 | 0.358439953 | 0.364541272 |
| 0.277374693 | 0.072194185 | 0.224606169 | 0.48402614  |
| 0.058210116 | 0.300562758 | 0.297648005 | 0.010790922 |
| 0.08213587  | 0.315349372 | 0.113462449 | 0.227606451 |
| 0.459276994 | 0.223639365 | 0.22815964  | 0.213118003 |
| 0.37523876  | 0.167297389 | 0.026888482 | 0.433751507 |
| 0.432801958 | 0.407218976 | 0.42499083  | 0.408381397 |
| 0.385837159 | 0.332615517 | 0.362942837 | 0.320993222 |
| 0.181777496 | 0.129847313 | 0.241472627 | 0.322329896 |
| 0.00680197  | 1           | 0.340357762 | 0.205992297 |
| 0.351557504 | 0.296023292 | 0.091010739 | 0.34095999  |
| 0.055695416 | 0.218322448 | 0.267755171 | 0.287255316 |
| 0.348574181 | 0.042435065 | 0.236124822 | 0.273360461 |
| 0.398394116 | 0.332409666 | 0.3217314   | 0.486173202 |
| 0.371539711 | 0.127588233 | 0.358483698 | 0.381943608 |
| 0.138724288 | 0.079899668 | 0.288911332 | 0.033905492 |
| 0.234002868 | 0.417128205 | 0.322651734 | 0.125835089 |
| 0.313954563 | 0.020013319 | 0.352274507 | 0.489648823 |
| 0.409895223 | 0.474630418 | 0.471608914 | 0.318879019 |
| 0.465680543 | 0.106159235 | 0.478396836 | 0.348285107 |
| 0.254630869 | 0.003197151 | 0.021270408 | 0.444435472 |
| 0.349598499 | 0.073423659 | 0.229946058 | 0.333314107 |
| 0.217284184 | 0.173095355 | 0.138429046 | 0.291654476 |
| 0.370776066 | 0.337375828 | 0.264380151 | 0.409686273 |
| 0.301861975 | 0.306948836 | 0.292317118 | 0.118777184 |
| 0.377586715 | 0.128163936 | 0.116983827 | 0.02919485  |
| 0.359407643 | 0.126119068 | 0.421985027 | 0.4580547   |
| 0.479062245 | 0.376698783 | 0.224661189 | 0.315266759 |
| 0.397490761 | 0.107476219 | 0.312472598 | 0.131411459 |
| 0.426728019 | 0.345809855 | 0.341871164 | 0.312768381 |
| 0.471748501 | 0.440823855 | 0.081120315 | 0.353664706 |
| 0.053114932 | 0.008503103 | 0.306822903 | 0.283768724 |
| 0.072934185 | 0.314149998 | 0.285181852 | 0.231833362 |
| 0.279183635 | 0.073719402 | 0.273084561 | 0.271238944 |
| 0.334041921 | 0.339855709 | 0.324356562 | 0.248329986 |
| 0.330678478 | 0.202075482 | 0.319084831 | 0.234805604 |
| 0.221917168 | 0.290928161 | 0.212632564 | 0.054914275 |
| 0.324075033 | 0.348112648 | 0.120998801 | 0.216807799 |
| 0.419832967 | 0.449211023 | 0.092038923 | 0.049671459 |
| 0.277351965 | 0.306204866 | 0.466631544 | 0.44077319  |
| 0.477618678 | 0.491678563 | 0.398709536 | 0.214875205 |
| 0.138177912 | 0.346771151 | 0.331783499 | 0.233779808 |
| 0.467329056 | 0.082567298 | 0.445097352 | 0.309050699 |
| 0.173357548 | 0.294555386 | 0.11222749  | 0.154015893 |
| 0.350089975 | 0.250248464 | 0.297149956 | 0.16740767  |
| 0.327337442 | 0.311695422 | 0.101732959 | 0.268318386 |

|             |             |             |             |
|-------------|-------------|-------------|-------------|
| 0.314089279 | 0.211348856 | 0.22500939  | 0.312235626 |
| 0.322413478 | 0.147428786 | 0.347386032 | 0.445492659 |
| 0.179708067 | 0.150617618 | 0.259612998 | 0.33865122  |
| 0.373209243 | 0.278530744 | 0.078689107 | 0.379391349 |
| 0.463878348 | 0.353312222 | 0.455026141 | 0.388032359 |
| 0.126599111 | 0.361216535 | 0.275310041 | 0.323349064 |
| 0.242270217 | 0.364884506 | 0.292192825 | 0.113416037 |
| 0.316476329 | 0.450225426 | 0.36568635  | 0.28306179  |
| 0.34060797  | 0.138341448 | 0.071967368 | 0.399862184 |
| 0.242692482 | 0.147050873 | 0.251528532 | 0.367285121 |
| 0.014080377 | 0.202507378 | 0.453044021 | 0.340009239 |
| 0.482621783 | 0.449054841 | 0.435269301 | 0.293064711 |
| 0.003552265 | 0.338590082 | 0.371853419 | 0.362071492 |
| 0.370136401 | 0.329468672 | 0.204075385 | 0.173762605 |
| 0.320951292 | 0.103336925 | 0.210398793 | 0.325753158 |
| 0.163577883 | 0.319393249 | 0.260222981 | 0.231545031 |
| 0.301897191 | 0.098426199 | 0.310072035 | 0.334094325 |
| 0.176161374 | 0.292654815 | 0.347659898 | 0.205056595 |
| 0.189528645 | 0.394602474 | 0.328389306 | 0.069143869 |
| 0.342896024 | 0.367111152 | 0.422757085 | 0.004838202 |
| 0.362387392 | 0.031514771 | 0.298560524 | 0.331109312 |
| 0.316739858 | 0.275939339 | 0.327721508 | 0.36422037  |
| 0.300377904 | 0.291723708 | 0.360800258 | 0.316215781 |
| 0.300321257 | 0.293449245 | 0.366135353 | 0.316945834 |
| 0.35648432  | 0.217168669 | 0.122998528 | 0.123839991 |
| 0.142477923 | 0.418241159 | 0.276194143 | 0.1018173   |
| 0.301183941 | 0.315822888 | 0.383910799 | 0.428755651 |
| 0.43561786  | 0.121620949 | 0.319725614 | 0.39113111  |
| 0.153378344 | 0.280652548 | 0.097690637 | 0.350374864 |
| 0.306620882 | 0.285119493 | 0.326425314 | 0.261242787 |
| 0.294913756 | 0.409247788 | 0.268246112 | 0.433112649 |
| 0.383898253 | 0.271416752 | 0.215430302 | 0.198749601 |
| 0.241462416 | 0.166582586 | 0.329621452 | 0.01149552  |
| 0.350719697 | 0.290853322 | 0.419801396 | 0.441775202 |
| 0.277038753 | 0.404176994 | 0.236533494 | 0.148227818 |
| 0.197399586 | 0.178211795 | 0.195187698 | 0.345054331 |
| 0.227880115 | 0.292657907 | 0.355030811 | 0.297211041 |
| 0.357350621 | 0.319975812 | 0.303065259 | 0.26889591  |
| 0.287972155 | 0.230517499 | 0.428692392 | 0.169706974 |
| 0.316317409 | 0.303579183 | 0.256263749 | 0.331597183 |
| 0.30605161  | 0.467057123 | 0.112485619 | 0.470955794 |
| 0.308021038 | 0.159654579 | 0.482453507 | 0.320580813 |
| 0.340403814 | 0.276107789 | 0.22229745  | 0.290805255 |
| 0.279935277 | 0.324275315 | 0.011002181 | 0.076629933 |
| 0.350660458 | 0.246621491 | 0.30123417  | 0.325962499 |
| 0.320947186 | 0.338405776 | 0.209212567 | 0.273182191 |
| 0.414808799 | 0.447948952 | 0.28699718  | 0.27996914  |
| 0.317664897 | 0.201702593 | 0.324800373 | 0.018470716 |
| 0.326996653 | 0.316852807 | 0.268146194 | 0.120895817 |
| 0.056484044 | 0.227765186 | 0.320354045 | 0.086651474 |
| 0.447555114 | 0.227559708 | 0.26689629  | 0.37192821  |
| 0.203340086 | 0.450209835 | 0.248166738 | 0.380267511 |
| 0.063691586 | 0.297205258 | 0.33265086  | 0.287214583 |
| 0.314411883 | 0.314571916 | 0.366967901 | 0.301490932 |

|             |             |             |             |
|-------------|-------------|-------------|-------------|
| 0.091737127 | 0.339593933 | 0.004033709 | 0.405025281 |
| 0.410722967 | 0.303627117 | 0.226997718 | 0.202380192 |
| 0.339762126 | 0.366273419 | 0.252152834 | 0.326155456 |
| 0.054269241 | 0.352110509 | 0.286907855 | 0.389259652 |
| 0.203772391 | 0.279624171 | 0.169154626 | 0.299761885 |
| 0.415769032 | 0.256368411 | 0.264015135 | 0.247413204 |
| 0.436936738 | 0.341682704 | 0.169204729 | 0.331108177 |
| 0.276639424 | 0.099864853 | 0.290717073 | 0.483051215 |
| 0.291355636 | 0.294234718 | 0.413131752 | 0.27959181  |
| 0.304730373 | 0.366225309 | 0.297862331 | 0.467122117 |
| 0.173390089 | 0.307591921 | 0.374776336 | 0.407008105 |
| 0.338110316 | 0.250879789 | 0.282080739 | 0.29152434  |
| 0.408098424 | 0.19581767  | 0.279685875 | 0.33329426  |
| 0.248947216 | 0.343746435 | 0.246465044 | 0.292515889 |
| 0.104572052 | 0.245102308 | 0.377879772 | 0.204668122 |
| 0.324470255 | 0.357538322 | 0.310053257 | 0.410398295 |
| 0.275802366 | 0.086250047 | 0.457731778 | 0.028979548 |
| 0.327940675 | 0.389156624 | 0.315304731 | 0.359005696 |
| 0.212893169 | 0.311203479 | 0.263670106 | 0.003860357 |
| 0.374452657 | 0.128795739 | 0.323421956 | 0.31161523  |
| 0.257100404 | 0.095207434 | 0.43892421  | 0.480060268 |
| 0.32784829  | 0.301119638 | 0.283935138 | 0.42195813  |
| 0.212522191 | 0.263741043 | 0.275656141 | 0.315606408 |
| 0.276208389 | 0.262380922 | 0.311414431 | 0.336991968 |
| 0.346259596 | 0.316488225 |             |             |

|             |             |             |             |
|-------------|-------------|-------------|-------------|
| HMMR        | 0.054341897 | 0.302886134 | 0.030259177 |
| 0.076377603 | 0.263792775 | 0.163796107 | 0.066392515 |
| 0.113674503 | 0.267040251 | 0.118328319 | 0.201850835 |
| 0.021121528 | 0.170859498 | 0.351132646 | 0.076915933 |
| 0.263336201 | 0.055007222 | 0.098199698 | 0.094386243 |
| 0.160001787 | 0.235857432 | 0.20324366  | 0.14567838  |
| 0.251290631 | 0.155144955 | 0.181700466 | 0.233153423 |
| 0.363055842 | 0.12413291  | 0.271275029 | 0.064701967 |
| 0.331440206 | 0.270121258 | 0.19139223  | 0.016201893 |
| 0.21222892  | 0.070193999 | 0.334321757 | 0.185296062 |
| 0.157891158 | 0.289168479 | 0.109888741 | 0.161334428 |
| 0.133946537 | 0.026872371 | 0.073315188 | 0.289219597 |
| 0.199982409 | 0.221669979 | 0.039090607 | 0.271972106 |
| 0.194522015 | 0.22594036  | 0.212130282 | 0.002110306 |
| 0.202170342 | 0.105722787 | 0.17943443  | 0.367390507 |
| 0.177326757 | 0.133337011 | 0.149898861 | 0.188777313 |
| 0.259977621 | 0.321414343 | 0.270967219 | 0.146366323 |
| 0.364080891 | 0.205669224 | 0.302912066 | 0.100499858 |
| 0.169791921 | 0.034822457 | 0.158786672 | 0.073550073 |
| 0.207643576 | 0.178220031 | 0.236901266 | 0.232862612 |
| 0.271646051 | 0.408478807 | 0.214492329 | 0.348681656 |
| 0.199675274 | 0.271185191 | 0.249929879 | 0.303936528 |
| 0.306894769 | 0.100635538 | 0.281068843 | 0.396436412 |
| 0.058516043 | 0.168742875 | 0.269106177 | 0.099574897 |
| 0.31003177  | 0.248131361 | 0.138367292 | 0.195838957 |
| 0.325052709 | 0.235818443 | 0.375867695 | 0.216658712 |
| 0.260672943 | 0.051067468 | 0.335552035 | 0.265258652 |
| 0.182462578 | 0.052882505 | 0.206162094 | 0.363805123 |
| 0.238761228 | 0.359417971 | 0.300382306 | 0.305391002 |

|             |             |             |             |
|-------------|-------------|-------------|-------------|
| 0.222669221 | 0.36818995  | 0.252446435 | 0.345885542 |
| 0.071998889 | 0.386435927 | 0.115687173 | 0.06416779  |
| 0.045794057 | 0.130086704 | 0.258241745 | 0.311717817 |
| 0.362497058 | 0.252882944 | 0.117138067 | 0.189861954 |
| 0.397949141 | 0.324121876 | 0.380556146 | 0.314251767 |
| 0.040326489 | 0.244901101 | 0.208045258 | 0.181067453 |
| 0.278481441 | 0.122063724 | 0.219759343 | 0.364327447 |
| 0.295257038 | 0.355778001 | 0.097394459 | 0.382820218 |
| 0.172939445 | 0.406832748 | 0.296736611 | 0.119199396 |
| 0.381073902 | 0.347537994 | 0.411458196 | 0.317620833 |
| 0.356756026 | 0.137152592 | 0.083300314 | 0.313368048 |
| 0.412221138 | 0.02343032  | 0.369044536 | 0.390326505 |
| 0.347704001 | 0.34574154  | 0.434305965 | 0.399318488 |
| 0.354482228 | 0.069445617 | 0.036961028 | 0.275377286 |
| 0.356412552 | 0.298871839 | 0.209576513 | 0.190428008 |
| 0.283980584 | 0.157348058 | 0.345500557 | 0.128464851 |
| 0.432244728 | 0.352690568 | 0.368888211 | 0.281201937 |
| 0.167880229 | 0.270134366 | 0.228056062 | 0.317838832 |
| 0.059354565 | 0.065479012 | 0.03870619  | 0.305143068 |
| 0.117255967 | 0.170895943 | 0.144009936 | 0.276207112 |
| 0.188028671 | 0.163723586 | 0.202453059 | 0.322570564 |
| 0.050076678 | 0.196412968 | 0.117039098 | 0.094477849 |
| 0.054836633 | 0.144814899 | 0.110561506 | 0.128468328 |
| 0.20926986  | 0.185358161 | 0.28616799  | 0.392363485 |
| 0.226416256 | 0.126992935 | 0.263880071 | 0.401190251 |
| 0.388792014 | 0.225703258 | 0.23094382  | 0.012733069 |
| 0.143782529 | 0.169021087 | 0.197891255 | 0.23451776  |
| 0.164806391 | 0.157047852 | 0.241767289 | 0.336558387 |
| 0.114640732 | 0.110581304 | 0.195750875 | 0.34671401  |
| 0.115136241 | 0.194711315 | 0.353550913 | 0.192717623 |
| 0.004589452 | 0.150122498 | 0.325885055 | 0.225214078 |
| 0.231541298 | 0.145376864 | 0.168811445 | 0.355893568 |
| 0.201971139 | 0.252251499 | 0.392703069 | 0.359341755 |
| 0.160056447 | 0.177080315 | 0.426134429 | 0.063695154 |
| 0.254398073 | 0.07287173  | 0.268239327 | 0.126620099 |
| 0.17436639  | 0.296040343 | 0.26668756  | 0.225127058 |
| 0.078561449 | 0.383842289 | 0.323780939 | 0.38565755  |
| 0.171825371 | 0.420934514 | 0.350563974 | 0.344982593 |
| 0.260801242 | 0.194979441 | 0.16015285  | 0.302184455 |
| 0.350863667 | 0.143337643 | 0.058565269 | 0.327741395 |
| 0.16302531  | 0.305661323 | 0.209549753 | 0.384083599 |
| 0.39783887  | 0.308680941 | 0.157604488 | 0.362006308 |
| 0.28769553  | 0.131883264 | 0.360436748 | 0.440788273 |
| 0.130453376 | 0.201474845 | 0.19145323  | 0.391316579 |
| 0.13280454  | 0.232696948 | 0.305435299 | 0.211224844 |
| 0.012078609 | 0.064296678 | 0.04600799  | 0.173068535 |
| 0.211456786 | 0.234907062 | 0.298170379 | 0.386134419 |
| 0.106368446 | 0.346201011 | 0.236841342 | 0.155263396 |
| 0.296432548 | 0.232413026 | 0.250528033 | 0.295072468 |
| 0.240673341 | 0.024242174 | 0.093751482 | 0.395656761 |
| 0.032838392 | 0.20269131  | 0.186028826 | 0.003639847 |
| 0.038833895 | 0.262734452 | 0.087403111 | 0.178045032 |
| 0.426809645 | 0.165382352 | 0.132856149 | 0.119941136 |
| 0.303838121 | 0.083970379 | 0.009843976 | 0.381334886 |



|             |             |             |             |
|-------------|-------------|-------------|-------------|
| 0.392844651 | 0.382193116 | 0.382075468 | 0.357600397 |
| 0.373644245 | 0.33502498  | 0.34184787  | 0.144754187 |
| 0.094008413 | 0.06250684  | 0.176008092 | 0.184758463 |
| 0.004661329 | 0.340357762 | 1           | 0.132628787 |
| 0.336260473 | 0.260898168 | 0.040045795 | 0.303646155 |
| 0.012809889 | 0.142619678 | 0.168645434 | 0.21871586  |
| 0.374714674 | 0.016587783 | 0.080144395 | 0.164359087 |
| 0.288345739 | 0.261853166 | 0.199823245 | 0.393215346 |
| 0.198099527 | 0.081564557 | 0.191634174 | 0.342827619 |
| 0.073851755 | 0.05722519  | 0.174392225 | 0.009811845 |
| 0.128598138 | 0.378175484 | 0.213741394 | 0.044975261 |
| 0.177351865 | 0.005337574 | 0.256419707 | 0.403173108 |
| 0.311280636 | 0.404926409 | 0.372759473 | 0.199138812 |
| 0.36264641  | 0.128388643 | 0.39585411  | 0.273857842 |
| 0.133246049 | 0.000363344 | 0.0158172   | 0.373494757 |
| 0.210507916 | 0.046026716 | 0.134076119 | 0.123418176 |
| 0.104164005 | 0.078439603 | 0.08460755  | 0.218218775 |
| 0.24064041  | 0.226771941 | 0.246478401 | 0.32525672  |
| 0.169801154 | 0.219883351 | 0.155406538 | 0.082503918 |
| 0.266294688 | 0.055560819 | 0.088545152 | 0.010376834 |
| 0.34668603  | 0.090180759 | 0.328781995 | 0.371009389 |
| 0.391948402 | 0.317537565 | 0.11923928  | 0.172888631 |
| 0.395342571 | 0.059842206 | 0.1838831   | 0.069650495 |
| 0.32466571  | 0.249942846 | 0.267055143 | 0.226837715 |
| 0.397949529 | 0.34444201  | 0.042925664 | 0.313005993 |
| 0.012160762 | 0.012227289 | 0.120065977 | 0.25463109  |
| 0.16579445  | 0.195162696 | 0.219609556 | 0.203666628 |
| 0.243519181 | 0.025080202 | 0.217452841 | 0.21095026  |
| 0.229741257 | 0.201102803 | 0.224176879 | 0.248236944 |
| 0.24589133  | 0.178304134 | 0.199678615 | 0.169150323 |
| 0.20821377  | 0.230565057 | 0.150391452 | 0.030781455 |
| 0.174693443 | 0.202655963 | 0.054930262 | 0.141333559 |
| 0.335303647 | 0.36833463  | 0.058481761 | 0.016512078 |
| 0.221061193 | 0.224025922 | 0.403293991 | 0.348886632 |
| 0.380247815 | 0.416731951 | 0.326341433 | 0.169832279 |
| 0.065511609 | 0.257105161 | 0.25296969  | 0.184548254 |
| 0.384684088 | 0.046271568 | 0.356031963 | 0.227189675 |
| 0.117720434 | 0.140152868 | 0.049017839 | 0.089977664 |
| 0.260354759 | 0.170162451 | 0.184813708 | 0.080741715 |
| 0.190021533 | 0.219448704 | 0.059047246 | 0.156472068 |
| 0.259457824 | 0.157754651 | 0.138177015 | 0.192951509 |
| 0.278702035 | 0.118698653 | 0.303072654 | 0.374577856 |
| 0.106710221 | 0.088486185 | 0.09036956  | 0.347974211 |
| 0.316638592 | 0.191152396 | 0.020000165 | 0.299253241 |
| 0.409733501 | 0.256863099 | 0.354408324 | 0.376966749 |
| 0.083647895 | 0.195399108 | 0.235275998 | 0.229311728 |
| 0.174505424 | 0.160157245 | 0.212478544 | 0.061711412 |
| 0.316212885 | 0.392145029 | 0.293190004 | 0.144608585 |
| 0.230097633 | 0.081419086 | 0.038522837 | 0.363882519 |
| 0.187146006 | 0.059728462 | 0.124347713 | 0.363974695 |
| 0.006942936 | 0.191773133 | 0.426768525 | 0.178189029 |
| 0.424970832 | 0.377861543 | 0.342411415 | 0.197536767 |
| 0.007206665 | 0.300130663 | 0.230608678 | 0.166630109 |
| 0.290571804 | 0.269836214 | 0.186461654 | 0.091436342 |

|             |             |             |             |
|-------------|-------------|-------------|-------------|
| 0.28818809  | 0.055677458 | 0.127320417 | 0.145112786 |
| 0.135135716 | 0.220483791 | 0.215439042 | 0.175765414 |
| 0.211291723 | 0.078376295 | 0.228177248 | 0.160447713 |
| 0.241906011 | 0.233267632 | 0.299965342 | 0.117807698 |
| 0.109235777 | 0.384630715 | 0.271183176 | 0.027487996 |
| 0.25037407  | 0.356784676 | 0.390046893 | 0.00176976  |
| 0.292553916 | 0.013100307 | 0.198261417 | 0.176751475 |
| 0.197550843 | 0.20254321  | 0.271245827 | 0.208484002 |
| 0.225260827 | 0.172698586 | 0.162922512 | 0.204735133 |
| 0.163682583 | 0.175641196 | 0.265954311 | 0.169356824 |
| 0.18122315  | 0.096203422 | 0.093692748 | 0.088786742 |
| 0.057782345 | 0.357844711 | 0.22140367  | 0.056853471 |
| 0.229367214 | 0.190982083 | 0.332368437 | 0.336020044 |
| 0.391665904 | 0.082569651 | 0.223348393 | 0.292011265 |
| 0.112841478 | 0.13449506  | 0.047347074 | 0.189739295 |
| 0.170579498 | 0.178850489 | 0.182273401 | 0.137764816 |
| 0.262328572 | 0.326451682 | 0.21371698  | 0.377838525 |
| 0.200090499 | 0.200135659 | 0.094397407 | 0.097386763 |
| 0.102656753 | 0.124355399 | 0.228587036 | 0.002449158 |
| 0.258363785 | 0.1054536   | 0.341011715 | 0.336253577 |
| 0.218354182 | 0.352157354 | 0.092775178 | 0.060671008 |
| 0.082479938 | 0.121378197 | 0.132018151 | 0.305594629 |
| 0.170132109 | 0.153386393 | 0.235547273 | 0.11678285  |
| 0.323402994 | 0.308642102 | 0.269266607 | 0.176769073 |
| 0.218305478 | 0.136667896 | 0.371174958 | 0.076455942 |
| 0.211608384 | 0.194583372 | 0.1771642   | 0.183050781 |
| 0.207054799 | 0.397512686 | 0.053924282 | 0.396690602 |
| 0.194397682 | 0.123556033 | 0.406507734 | 0.193708459 |
| 0.179497507 | 0.176450703 | 0.185915797 | 0.161345276 |
| 0.194954667 | 0.216669708 | 0.008022965 | 0.066447427 |
| 0.289689495 | 0.208629818 | 0.260938242 | 0.331611662 |
| 0.251410559 | 0.352437869 | 0.21384985  | 0.154637747 |
| 0.319660088 | 0.356252052 | 0.128655476 | 0.255336301 |
| 0.275138674 | 0.099200807 | 0.192714982 | 0.036295931 |
| 0.234252351 | 0.232189176 | 0.156355766 | 0.073794859 |
| 0.029387143 | 0.169332961 | 0.216791859 | 0.06136791  |
| 0.404568269 | 0.15349419  | 0.225034269 | 0.296341297 |
| 0.176899989 | 0.350830629 | 0.175765993 | 0.29738057  |
| 0.051596078 | 0.242953193 | 0.232570751 | 0.200541405 |
| 0.155144749 | 0.215350532 | 0.298986025 | 0.202757251 |
| 0.043213769 | 0.205110187 | 0.002818771 | 0.313674527 |
| 0.31885492  | 0.210348791 | 0.204178179 | 0.136329514 |
| 0.278157384 | 0.355051866 | 0.207606822 | 0.194608831 |
| 0.018940726 | 0.246541389 | 0.19416426  | 0.288888919 |
| 0.09444924  | 0.212741578 | 0.073959192 | 0.244115286 |
| 0.320443115 | 0.159389999 | 0.268639251 | 0.125166451 |
| 0.34381809  | 0.312671355 | 0.11350556  | 0.263723929 |
| 0.242031271 | 0.060723234 | 0.142630346 | 0.414010654 |
| 0.173336672 | 0.203829378 | 0.366873822 | 0.145938573 |
| 0.23134334  | 0.30963619  | 0.226618459 | 0.412138153 |
| 0.127194171 | 0.21793965  | 0.359110129 | 0.346105811 |
| 0.313602903 | 0.23924657  | 0.196735866 | 0.199772286 |
| 0.299664575 | 0.069344541 | 0.238647997 | 0.253362222 |
| 0.180926051 | 0.28716682  | 0.179442998 | 0.229425859 |

|             |             |             |             |
|-------------|-------------|-------------|-------------|
| 0.050218937 | 0.188379789 | 0.17973084  | 0.132474073 |
| 0.220497599 | 0.212965093 | 0.237213292 | 0.339076951 |
| 0.120850884 | 0.026509925 | 0.387079531 | 0.027210211 |
| 0.152849301 | 0.270476176 | 0.208678761 | 0.229248046 |
| 0.147567223 | 0.222722111 | 0.129255027 | 0.001256118 |
| 0.356979481 | 0.089434484 | 0.261148151 | 0.17904919  |
| 0.195365688 | 0.04667875  | 0.34556073  | 0.416044567 |
| 0.246562445 | 0.20233558  | 0.16120703  | 0.355583307 |
| 0.171207037 | 0.186557816 | 0.213296126 | 0.218733083 |
| 0.219079345 | 0.131853325 | 0.180311681 | 0.180147449 |
| 0.276768693 | 0.191236783 |             |             |
| HPRT1       | 0.287667302 | 0.188109775 | 0.217723684 |
| 0.249908688 | 0.122947913 | 0.11871378  | 0.310388977 |
| 0.294123424 | 0.168484929 | 0.049672901 | 0.157147453 |
| 0.282578831 | 0.018403112 | 0.224568068 | 0.308257824 |
| 0.104700062 | 0.320568436 | 0.324582736 | 0.058337514 |
| 0.152077737 | 0.134512004 | 0.081278982 | 0.123853038 |
| 0.123663272 | 0.333903269 | 0.144228689 | 0.070569485 |
| 0.207337653 | 0.032840728 | 0.116562996 | 0.034023374 |
| 0.306533118 | 0.112011818 | 0.06351225  | 0.230119992 |
| 0.120077673 | 0.009377294 | 0.31697544  | 0.191049604 |
| 0.049093493 | 0.316492754 | 0.068777773 | 0.240507548 |
| 0.082250153 | 0.272470643 | 0.026052583 | 0.101135823 |
| 0.132315225 | 0.169331742 | 0.222947658 | 0.132964743 |
| 0.094590433 | 0.20501677  | 0.1121568   | 0.015121003 |
| 0.052842809 | 0.006649185 | 0.028727056 | 0.249738744 |
| 0.294489648 | 0.330089813 | 0.036400193 | 0.160280355 |
| 0.094839239 | 0.132158157 | 0.226851129 | 0.073614972 |
| 0.244614769 | 0.039031438 | 0.111317563 | 0.156436376 |
| 0.132852761 | 0.20924766  | 0.324911386 | 0.195872206 |
| 0.091066586 | 0.277294396 | 0.136348649 | 0.070509065 |
| 0.181320255 | 0.308631516 | 0.239113261 | 0.257223556 |
| 0.039656309 | 0.086111592 | 0.111300769 | 0.229321436 |
| 0.157623557 | 0.237204563 | 0.174996795 | 0.282116395 |
| 0.217539857 | 0.07855415  | 0.142348485 | 0.235674802 |
| 0.192395407 | 0.052214955 | 0.074853578 | 0.05288105  |
| 0.11353568  | 0.107447091 | 0.271328946 | 0.250481854 |
| 0.113982731 | 0.242999713 | 0.278135093 | 0.079721155 |
| 0.157399285 | 0.271628282 | 0.124531455 | 0.150734666 |
| 0.129066287 | 0.214008167 | 0.15786546  | 0.198630485 |
| 0.092328034 | 0.236720533 | 0.168671803 | 0.212948016 |
| 0.015423209 | 0.244304633 | 0.283179745 | 0.331966782 |
| 0.225594143 | 0.310738972 | 0.093360429 | 0.285952721 |
| 0.187049673 | 0.188910336 | 0.275736426 | 0.222651004 |
| 0.188728715 | 0.250013779 | 0.23611872  | 0.191655425 |
| 0.311784112 | 0.046768674 | 0.095064712 | 0.178469094 |
| 0.158896173 | 0.281353729 | 0.07483419  | 0.295886208 |
| 0.28234311  | 0.168802194 | 0.236155531 | 0.328235668 |
| 0.205669828 | 0.2864344   | 0.175532689 | 0.313072077 |
| 0.288225589 | 0.284696907 | 0.256421725 | 0.111321803 |
| 0.280776194 | 0.171942083 | 0.038488457 | 0.205426338 |
| 0.280407595 | 0.01421847  | 0.171446431 | 0.190595183 |
| 0.236087026 | 0.154923438 | 0.246354953 | 0.21508164  |
| 0.233522639 | 0.282759182 | 0.004346036 | 0.18124037  |

|             |             |             |             |
|-------------|-------------|-------------|-------------|
| 0.264948569 | 0.248264584 | 0.228057299 | 0.079469545 |
| 0.110873768 | 0.136649486 | 0.143653275 | 0.075823706 |
| 0.311811321 | 0.194128087 | 0.185334721 | 0.170756936 |
| 0.117225702 | 0.321197218 | 0.064260271 | 0.277310466 |
| 0.314492068 | 0.275948932 | 0.228165284 | 0.219126508 |
| 0.07273168  | 0.298719303 | 0.13383156  | 0.108587621 |
| 0.296182841 | 0.135299948 | 0.050390303 | 0.118796527 |
| 0.237059927 | 0.092915801 | 0.279532278 | 0.247481386 |
| 0.335101975 | 0.342386064 | 0.238325941 | 0.290324812 |
| 0.199796813 | 0.347298521 | 0.112793749 | 0.212657234 |
| 0.102802068 | 0.273334471 | 0.140982655 | 0.270317673 |
| 0.308071977 | 0.092435134 | 0.282873919 | 0.138220795 |
| 0.107894242 | 0.041124117 | 0.029477089 | 0.077173294 |
| 0.339752411 | 0.182996235 | 0.117238003 | 0.146391361 |
| 0.191644282 | 0.208892471 | 0.094603265 | 0.330829162 |
| 0.252362297 | 0.145170159 | 0.207480045 | 0.092536868 |
| 0.130705507 | 0.187616859 | 0.17302363  | 0.126579478 |
| 0.175498414 | 0.050110483 | 0.048720343 | 0.200078046 |
| 0.054659164 | 0.089681955 | 0.194335343 | 0.14224363  |
| 0.093936925 | 0.287139945 | 0.246586669 | 0.008407356 |
| 0.088013309 | 0.131552255 | 0.231817683 | 0.065672341 |
| 0.254229167 | 0.237745167 | 0.09928292  | 0.128480837 |
| 0.225748785 | 0.253271388 | 0.216784386 | 0.225801118 |
| 0.073254588 | 0.254287149 | 0.173831616 | 0.228935626 |
| 0.178104709 | 0.064512501 | 0.021603458 | 0.175922802 |
| 0.188718791 | 0.069217608 | 0.229052936 | 0.127972475 |
| 0.074026957 | 0.1155428   | 0.128753598 | 0.247571285 |
| 0.319230338 | 0.229948577 | 0.288606285 | 0.180599249 |
| 0.241527425 | 0.260373576 | 0.190191941 | 0.265960991 |
| 0.054572823 | 0.098386268 | 0.103589825 | 0.210951867 |
| 0.293439043 | 0.110704175 | 0.276438714 | 0.02702332  |
| 0.001056772 | 0.258984979 | 0.278394863 | 0.269226858 |
| 0.068210701 | 0.078169347 | 0.132697543 | 0.239177477 |
| 0.335972357 | 0.250003305 | 0.227962878 | 0.149358649 |
| 0.23924141  | 0.093551612 | 0.081084955 | 0.110809034 |
| 0.269852706 | 0.174685552 | 0.289721149 | 0.315086783 |
| 0.189264296 | 0.067441079 | 0.156847893 | 0.029543266 |
| 0.29150661  | 0.134814884 | 0.28868771  | 0.376979562 |
| 0.212104296 | 0.343815675 | 0.247554457 | 0.065711351 |
| 0.197204183 | 0.324934562 | 0.054023312 | 0.210651262 |
| 0.229498514 | 0.224724126 | 0.226431115 | 0.248603053 |
| 0.193683058 | 0.145350561 | 0.165454564 | 0.137444279 |
| 0.317957677 | 0.239696996 | 0.070239227 | 0.179801785 |
| 0.024522651 | 0.205992297 | 0.132628787 | 1           |
| 0.133352371 | 0.192573884 | 0.309080867 | 0.102293349 |
| 0.205886573 | 0.029407921 | 0.148197058 | 0.20912918  |
| 0.171823794 | 0.230951257 | 0.075778886 | 0.072175287 |
| 0.25302277  | 0.267063633 | 0.060276287 | 0.256661081 |
| 0.184877528 | 0.206175942 | 0.160116158 | 0.164451322 |
| 0.335662392 | 0.027191796 | 0.118181889 | 0.008477242 |
| 0.063799189 | 0.254685022 | 0.085022917 | 0.265307737 |
| 0.24215482  | 0.169650438 | 0.259375665 | 0.265213522 |
| 0.22567712  | 0.22591655  | 0.242623614 | 0.070481119 |
| 0.248473919 | 0.007930787 | 0.230779725 | 0.195324603 |

|             |             |             |             |
|-------------|-------------|-------------|-------------|
| 0.064144078 | 0.018791197 | 0.08092252  | 0.189822717 |
| 0.104829697 | 0.205419392 | 0.314014976 | 0.097207291 |
| 0.336119363 | 0.231015923 | 0.300347285 | 0.104677741 |
| 0.112575887 | 0.170430067 | 0.089551517 | 0.242571071 |
| 0.239250022 | 0.243556573 | 0.094284188 | 0.252865784 |
| 0.103659606 | 0.341002675 | 0.240785136 | 0.050885652 |
| 0.157736072 | 0.262153027 | 0.296344593 | 0.234935601 |
| 0.284927813 | 0.137754876 | 0.047076239 | 0.095228707 |
| 0.186337237 | 0.198186457 | 0.060772066 | 0.212564129 |
| 0.221771412 | 0.122144798 | 0.26806526  | 0.290191043 |
| 0.261916431 | 0.265028546 | 0.311942669 | 0.177522457 |
| 0.156858875 | 0.01289451  | 0.120633392 | 0.231685385 |
| 0.028176158 | 0.094760337 | 0.302941716 | 0.135745626 |
| 0.165328007 | 0.260932736 | 0.057423974 | 0.064397546 |
| 0.205227056 | 0.138227294 | 0.104869645 | 0.226183468 |
| 0.137801367 | 0.111528002 | 0.247093271 | 0.269241019 |
| 0.086224812 | 0.260747165 | 0.333773903 | 0.272822922 |
| 0.085338611 | 0.089854711 | 0.328566881 | 0.287287693 |
| 0.207353408 | 0.204020974 | 0.297788635 | 0.183069996 |
| 0.297448981 | 0.132371916 | 0.215831984 | 0.216575669 |
| 0.282464472 | 0.28234402  | 0.330358556 | 0.228653131 |
| 0.324753833 | 0.167176601 | 0.100214905 | 0.205817396 |
| 0.234777527 | 0.208720168 | 0.239516191 | 0.06243899  |
| 0.29921124  | 0.263132329 | 0.312187859 | 0.321385324 |
| 0.080155665 | 0.298879806 | 0.258239637 | 0.224429995 |
| 0.159212664 | 0.061503856 | 0.308512027 | 0.293815889 |
| 0.223873038 | 0.04108081  | 0.304828471 | 0.150945055 |
| 0.200826221 | 0.041381261 | 0.125320283 | 0.311643673 |
| 0.28918074  | 0.265499946 | 0.152696392 | 0.15575247  |
| 0.153950863 | 0.06838129  | 0.171212643 | 0.18462787  |
| 0.228868722 | 0.106130727 | 0.251572993 | 0.244149831 |
| 0.27724384  | 0.103971845 | 0.063393952 | 0.127996492 |
| 0.271867364 | 0.124062141 | 0.213864613 | 0.30546067  |
| 0.294422154 | 0.309864921 | 0.204685411 | 0.3014951   |
| 0.091081162 | 0.19762115  | 0.198362722 | 0.179272178 |
| 0.070317242 | 0.305709448 | 0.070422724 | 0.149081475 |
| 0.01963077  | 0.029427313 | 0.218341389 | 0.230525799 |
| 0.281163924 | 0.215687987 | 0.291096979 | 0.168323554 |
| 0.000712469 | 0.101506843 | 0.149889917 | 0.111180612 |
| 0.195178189 | 0.2263655   | 0.123104707 | 0.339517924 |
| 0.306770329 | 0.220942435 | 0.280148067 | 0.102729112 |
| 0.03585582  | 0.123913179 | 0.303726217 | 0.218181035 |
| 0.227032785 | 0.190442847 | 0.059095646 | 0.248266918 |
| 0.046398309 | 0.310847894 | 0.259708685 | 0.055175109 |
| 0.042440085 | 0.212747408 | 0.176874988 | 0.276816029 |
| 0.08076426  | 0.19843933  | 0.225157078 | 0.038995376 |
| 0.134211467 | 0.217336956 | 0.232258727 | 0.232764136 |
| 0.247847184 | 0.217615516 | 0.194870731 | 0.14070472  |
| 0.148355795 | 0.256502157 | 0.216076236 | 0.269363364 |
| 0.267144258 | 0.238793584 | 0.116703539 | 0.136877577 |
| 0.148364956 | 0.325722173 | 0.292319325 | 0.298358331 |
| 0.310794911 | 0.190712447 | 0.344705989 | 0.232649186 |
| 0.256524046 | 0.120610286 | 0.316296792 | 0.222129036 |
| 0.259009796 | 0.2401548   | 0.14359537  | 0.187814385 |

|             |             |             |             |
|-------------|-------------|-------------|-------------|
| 0.03036179  | 0.104224053 | 0.249902983 | 0.127046861 |
| 0.260293914 | 0.115871099 | 0.094582883 | 0.156717193 |
| 0.126072213 | 0.332283974 | 0.330586801 | 0.259489355 |
| 0.135392469 | 0.097340964 | 0.057044891 | 0.308574973 |
| 0.295722882 | 0.270908839 | 0.120596269 | 0.1055483   |
| 0.184043307 | 0.176181426 | 0.179339855 | 0.256937915 |
| 0.048093464 | 0.285257389 | 0.068591438 | 0.31949001  |
| 0.048254128 | 0.273690363 | 0.304678967 | 0.133630288 |
| 0.030923059 | 0.284158841 | 0.148171665 | 0.114043725 |
| 0.139709643 | 0.120650042 | 0.112906509 | 0.208910168 |
| 0.211026526 | 0.235394975 | 0.274860457 | 0.245464247 |
| 0.082439686 | 0.118469736 | 0.090158066 | 0.172125808 |
| 0.209128212 | 0.216874736 | 0.28655936  | 0.216087431 |
| 0.118698137 | 0.283658365 | 0.323594999 | 0.165754936 |
| 0.161075517 | 0.236447473 | 0.031780748 | 0.092239377 |
| 0.216052893 | 0.060671108 | 0.001680018 | 0.033249585 |
| 0.232833112 | 0.085672878 | 0.139798016 | 0.16958772  |
| 0.110414154 | 0.233147716 | 0.025878765 | 0.180467843 |
| 0.233657786 | 0.283694954 | 0.190383078 | 0.300611453 |
| 0.218000652 | 0.34190684  | 0.120679878 | 0.010916757 |
| 0.094051448 | 0.073021429 | 0.067732807 | 0.321252114 |
| 0.267705731 | 0.036998449 | 0.103449436 | 0.199867635 |
| 0.204412079 | 0.02859972  | 0.100235165 | 0.131697066 |
| 0.259334369 | 0.292782234 | 0.259886483 | 0.16629344  |
| 0.173275986 | 0.229515191 | 0.077153204 | 0.084663519 |
| 0.160911152 | 0.084107336 | 0.199524487 | 0.071264905 |
| 0.326944268 | 0.167064888 | 0.031447281 | 0.344082905 |
| 0.267131858 | 0.076009411 | 0.326838267 | 0.045152547 |
| 0.247156622 | 0.222458971 | 0.126286819 | 0.074273755 |
| 0.199913203 | 0.100736294 | 0.275126857 | 0.216937994 |
| 0.038926987 | 0.10810283  | 0.299048903 | 0.09013676  |
| 0.30893368  | 0.1071707   | 0.291235473 | 0.058892362 |
| 0.224542557 | 0.181213029 | 0.227291615 | 0.130553374 |
| 0.096224984 | 0.263326504 | 0.074541569 | 0.258237483 |
| 0.276405655 | 0.078273948 | 0.177744195 | 0.256614892 |
| 0.069960759 | 0.227880261 | 0.077596527 | 0.251363325 |
| 0.247764642 | 0.266725994 | 0.161963083 | 0.219817935 |
| 0.273094574 | 0.085374294 | 0.068583231 | 0.161711433 |
| 0.232946375 | 0.288312928 | 0.080625405 | 0.220384698 |
| 0.057283843 | 0.207780393 | 0.090544924 | 0.16214561  |
| 0.277805052 | 0.23660082  | 0.120021022 | 0.298700581 |
| 0.206257969 | 0.129575206 | 0.128071485 | 0.313151187 |
| 0.249710156 | 0.219711946 | 0.305989352 | 0.006779732 |
| 0.151887697 | 0.138538742 | 0.246996031 | 0.108917584 |
| 0.323447329 | 0.154040041 | 0.133961028 | 0.073236744 |
| 0.190375598 | 0.042813546 | 0.123394728 | 0.157170331 |
| 0.065980241 | 0.303894832 | 0.260067192 | 0.23045777  |
| 0.187323126 | 0.068659168 | 0.052647787 | 0.238322583 |
| 0.042385852 | 0.043496165 | 0.0631364   | 0.118543649 |
| 0.05227862  | 0.064653524 | 0.071885454 | 0.067296981 |
| 0.187588961 | 0.197671915 |             |             |
| HSD17B11    | 0.073723325 | 0.399392957 | 0.050269779 |
| 0.136750386 | 0.336966403 | 0.350106894 | 0.064262882 |
| 0.1387352   | 0.31062243  | 0.287671363 | 0.346785431 |

|             |             |             |             |
|-------------|-------------|-------------|-------------|
| 0.018858783 | 0.170853547 | 0.447920223 | 0.063394468 |
| 0.386914891 | 0.042006897 | 0.114713074 | 0.100032904 |
| 0.219079557 | 0.320555897 | 0.37093294  | 0.32476362  |
| 0.330332813 | 0.164905403 | 0.292352279 | 0.393389748 |
| 0.483754019 | 0.307147592 | 0.392423044 | 0.181937964 |
| 0.394044683 | 0.358794393 | 0.394740144 | 0.01522694  |
| 0.381873519 | 0.030344972 | 0.407026982 | 0.280935773 |
| 0.205258705 | 0.322921101 | 0.29020063  | 0.246437064 |
| 0.328498294 | 0.035201917 | 0.217870925 | 0.387519936 |
| 0.29472285  | 0.287124079 | 0.060112058 | 0.367248941 |
| 0.361594497 | 0.297966656 | 0.32269351  | 0.004223182 |
| 0.361573896 | 0.161866006 | 0.310135595 | 0.478338423 |
| 0.192102782 | 0.136253958 | 0.31996801  | 0.256775748 |
| 0.379742832 | 0.365103987 | 0.253824953 | 0.351403113 |
| 0.480199727 | 0.269399334 | 0.388047141 | 0.170065882 |
| 0.349726155 | 0.032631194 | 0.147693767 | 0.078392934 |
| 0.391140235 | 0.212304679 | 0.358305351 | 0.356565454 |
| 0.39516066  | 0.493511974 | 0.226219132 | 0.465431395 |
| 0.178116349 | 0.375383258 | 0.323699539 | 0.294417698 |
| 0.341406484 | 0.094899294 | 0.36467007  | 0.501135112 |
| 0.053196611 | 0.334477667 | 0.358638178 | 0.113111434 |
| 0.401851613 | 0.344952565 | 0.342163492 | 0.257008121 |
| 0.375885443 | 0.362454539 | 0.453759236 | 0.270460143 |
| 0.35442775  | 0.064990339 | 0.444296502 | 0.367827562 |
| 0.314400254 | 0.074555645 | 0.27559509  | 0.461158605 |
| 0.374128466 | 0.480156083 | 0.403442991 | 0.336564286 |
| 0.391031702 | 0.481577105 | 0.349311249 | 0.402706958 |
| 0.183240907 | 0.504201945 | 0.176052391 | 0.05125033  |
| 0.069277163 | 0.10370974  | 0.29621982  | 0.280186288 |
| 0.462657969 | 0.314485024 | 0.194792334 | 0.25321922  |
| 0.465892964 | 0.439347998 | 0.502826707 | 0.393730015 |
| 0.040273139 | 0.326311935 | 0.380281218 | 0.27087961  |
| 0.35816623  | 0.116600527 | 0.323626422 | 0.473227913 |
| 0.356293991 | 0.425388867 | 0.155642654 | 0.465802483 |
| 0.217909479 | 0.496973196 | 0.425135696 | 0.169016098 |
| 0.487493613 | 0.457726383 | 0.503574868 | 0.394689093 |
| 0.446328608 | 0.301343205 | 0.095731193 | 0.359982889 |
| 0.479444996 | 0.024073998 | 0.476896798 | 0.50057772  |
| 0.471523085 | 0.456108634 | 0.519378867 | 0.503104256 |
| 0.479708923 | 0.071963735 | 0.048151147 | 0.305509916 |
| 0.477320887 | 0.367602597 | 0.172609781 | 0.398534306 |
| 0.382339382 | 0.344795284 | 0.404099396 | 0.325383602 |
| 0.50021678  | 0.438459372 | 0.483932242 | 0.356310667 |
| 0.27962     | 0.295834575 | 0.393365275 | 0.426225539 |
| 0.049114455 | 0.109866681 | 0.046999908 | 0.2891101   |
| 0.303105006 | 0.184205293 | 0.341924454 | 0.367359226 |
| 0.195801671 | 0.312042112 | 0.381808457 | 0.385801608 |
| 0.047050475 | 0.388662613 | 0.156261421 | 0.162574884 |
| 0.04706418  | 0.126091375 | 0.202244337 | 0.164252281 |
| 0.283632958 | 0.207585462 | 0.397674877 | 0.483302615 |
| 0.372140513 | 0.155330504 | 0.37724914  | 0.468264191 |
| 0.419742849 | 0.387837166 | 0.21479081  | 0.011993493 |
| 0.298859632 | 0.339900183 | 0.280191757 | 0.402102077 |
| 0.15751023  | 0.267458528 | 0.378418245 | 0.380988233 |

|             |             |             |             |
|-------------|-------------|-------------|-------------|
| 0.24869003  | 0.144683762 | 0.385591605 | 0.402142946 |
| 0.130106086 | 0.330313799 | 0.441332296 | 0.367648588 |
| 0.002864195 | 0.306148539 | 0.423117247 | 0.201846571 |
| 0.296711809 | 0.212516787 | 0.313328711 | 0.452846609 |
| 0.369045463 | 0.304729164 | 0.491726166 | 0.381709659 |
| 0.357323703 | 0.199044299 | 0.521455749 | 0.092920835 |
| 0.369957024 | 0.072505835 | 0.281272977 | 0.301829191 |
| 0.236649771 | 0.284786408 | 0.360977829 | 0.314896263 |
| 0.112922209 | 0.49826319  | 0.367304997 | 0.500469935 |
| 0.375484239 | 0.518935153 | 0.453247297 | 0.428337524 |
| 0.331652811 | 0.382629121 | 0.224127965 | 0.408019468 |
| 0.445031521 | 0.323399356 | 0.064171146 | 0.425364524 |
| 0.349297583 | 0.393366926 | 0.16584258  | 0.483771149 |
| 0.468889375 | 0.430824399 | 0.171836583 | 0.3590746   |
| 0.350943261 | 0.220851222 | 0.396672179 | 0.523028769 |
| 0.305927705 | 0.375562314 | 0.352811736 | 0.397809605 |
| 0.162002669 | 0.278141886 | 0.299835908 | 0.277598364 |
| 0.018262279 | 0.083164838 | 0.062099688 | 0.187125991 |
| 0.244572787 | 0.382622428 | 0.372045727 | 0.50325384  |
| 0.124980398 | 0.399717261 | 0.226516585 | 0.304682004 |
| 0.395832763 | 0.386835444 | 0.395601382 | 0.387131526 |
| 0.225260834 | 0.018633665 | 0.124036554 | 0.490267496 |
| 0.036303911 | 0.314451872 | 0.314512183 | 0.00293083  |
| 0.045914414 | 0.375565821 | 0.080166221 | 0.172630692 |
| 0.487251644 | 0.172204774 | 0.186703222 | 0.300990566 |
| 0.333726352 | 0.093274427 | 0.004319219 | 0.474848543 |
| 0.472036663 | 0.444875747 | 0.468472958 | 0.431141747 |
| 0.436266178 | 0.366792514 | 0.394516731 | 0.30471839  |
| 0.110547846 | 0.086685025 | 0.276055585 | 0.301425182 |
| 0.007137323 | 0.351557504 | 0.336260473 | 0.133352371 |
| 1           | 0.29418983  | 0.040348872 | 0.380226515 |
| 0.019481353 | 0.274596542 | 0.307235948 | 0.246602779 |
| 0.347054045 | 0.013512861 | 0.219482654 | 0.348034588 |
| 0.394572801 | 0.313589559 | 0.388707852 | 0.506531626 |
| 0.323407263 | 0.10709776  | 0.315846793 | 0.374322663 |
| 0.076130263 | 0.135077466 | 0.335707354 | 0.038930889 |
| 0.232533187 | 0.435540884 | 0.389033787 | 0.064268874 |
| 0.25679378  | 0.004425109 | 0.331294271 | 0.512112797 |
| 0.430779274 | 0.514587097 | 0.483564305 | 0.328209997 |
| 0.481826157 | 0.190258239 | 0.514360473 | 0.37094935  |
| 0.351883036 | 0.000948271 | 0.008213677 | 0.480883183 |
| 0.387819033 | 0.048259364 | 0.152345693 | 0.319627723 |
| 0.118541713 | 0.141978739 | 0.074185198 | 0.239754342 |
| 0.37746454  | 0.280319411 | 0.256056266 | 0.440651724 |
| 0.246052803 | 0.244575534 | 0.357140604 | 0.080135402 |
| 0.394741502 | 0.055505297 | 0.081181672 | 0.010820735 |
| 0.364647675 | 0.093946017 | 0.427317483 | 0.489094592 |
| 0.47861415  | 0.37691444  | 0.325744393 | 0.34991885  |
| 0.435567212 | 0.082123545 | 0.372483064 | 0.098913796 |
| 0.454957465 | 0.375016756 | 0.289304537 | 0.269502102 |
| 0.493158031 | 0.445352225 | 0.03595502  | 0.375880309 |
| 0.013042913 | 0.003681952 | 0.314963419 | 0.257032493 |
| 0.10719276  | 0.38233062  | 0.226099842 | 0.251598641 |
| 0.257940079 | 0.031810744 | 0.332191572 | 0.314626214 |



|             |             |             |             |
|-------------|-------------|-------------|-------------|
| 0.29234395  | 0.365068855 | 0.325217823 | 0.227489577 |
| 0.297223358 | 0.187396475 | 0.217732572 | 0.177465452 |
| 0.297223307 | 0.273627511 | 0.16778907  | 0.022802014 |
| 0.376215539 | 0.398413799 | 0.058414383 | 0.148242369 |
| 0.42247621  | 0.484865139 | 0.048595926 | 0.012893454 |
| 0.230994291 | 0.34502258  | 0.502363685 | 0.474441023 |
| 0.493618826 | 0.5072493   | 0.369038946 | 0.165468797 |
| 0.071479012 | 0.321231115 | 0.338724579 | 0.131130374 |
| 0.497631113 | 0.059566845 | 0.45799802  | 0.358447325 |
| 0.113322493 | 0.208669612 | 0.039716719 | 0.088878554 |
| 0.4004846   | 0.177875091 | 0.201511843 | 0.127146053 |
| 0.32621683  | 0.32058297  | 0.051866281 | 0.196420738 |
| 0.308527012 | 0.239679982 | 0.157764054 | 0.296224352 |
| 0.309192626 | 0.232151666 | 0.395660107 | 0.432044755 |
| 0.120318347 | 0.110998267 | 0.241420743 | 0.35937827  |
| 0.421938223 | 0.367353186 | 0.028823857 | 0.422988031 |
| 0.486510224 | 0.398132168 | 0.468620067 | 0.392562602 |
| 0.079367777 | 0.379785823 | 0.368522584 | 0.353299936 |
| 0.192236857 | 0.344886541 | 0.259139747 | 0.062385337 |
| 0.282912314 | 0.455956727 | 0.387596308 | 0.177500556 |
| 0.387087409 | 0.116571597 | 0.050971351 | 0.437159255 |
| 0.247887884 | 0.090706444 | 0.318378367 | 0.429976824 |
| 0.002472753 | 0.227941245 | 0.491089951 | 0.254603027 |
| 0.498306359 | 0.47492714  | 0.415577589 | 0.257008988 |
| 0.004529116 | 0.392420333 | 0.358593931 | 0.369938648 |
| 0.407350007 | 0.300995891 | 0.179675574 | 0.084588354 |
| 0.260687635 | 0.069559475 | 0.155868941 | 0.316427126 |
| 0.223756083 | 0.360836109 | 0.190784014 | 0.208615321 |
| 0.222670078 | 0.082575647 | 0.309127799 | 0.234558516 |
| 0.222424058 | 0.222257416 | 0.323833609 | 0.279049479 |
| 0.251734255 | 0.436199378 | 0.3639666   | 0.026007692 |
| 0.391336022 | 0.397663063 | 0.42433062  | 0.002481489 |
| 0.393942608 | 0.00810987  | 0.227772988 | 0.233037541 |
| 0.218030554 | 0.244988504 | 0.280935049 | 0.320288328 |
| 0.325946588 | 0.226849785 | 0.273982775 | 0.232892773 |
| 0.182799399 | 0.22336223  | 0.381420115 | 0.323523146 |
| 0.303807043 | 0.125903682 | 0.084806829 | 0.088113135 |
| 0.060299234 | 0.450448178 | 0.217802204 | 0.062409153 |
| 0.234886828 | 0.344875721 | 0.333774663 | 0.463391563 |
| 0.412441955 | 0.092830957 | 0.349540816 | 0.415559757 |
| 0.274420212 | 0.296860825 | 0.065309904 | 0.343614928 |
| 0.23709818  | 0.271091551 | 0.361035638 | 0.268036008 |
| 0.3544939   | 0.374556367 | 0.210988035 | 0.42103698  |
| 0.355604397 | 0.345837    | 0.280072091 | 0.099256243 |
| 0.168415153 | 0.12119104  | 0.310469367 | 0.001485948 |
| 0.331964668 | 0.232153942 | 0.459472685 | 0.452332565 |
| 0.360229828 | 0.366614133 | 0.287456151 | 0.089958323 |
| 0.246211467 | 0.153100606 | 0.132490428 | 0.39170834  |
| 0.300551872 | 0.187925487 | 0.321765226 | 0.282909429 |
| 0.393063638 | 0.371820019 | 0.30478667  | 0.259137438 |
| 0.245709366 | 0.175566791 | 0.447378768 | 0.114772451 |
| 0.386664326 | 0.235406851 | 0.311222939 | 0.307523024 |
| 0.250679788 | 0.50450277  | 0.058912526 | 0.516213869 |
| 0.349032262 | 0.114626311 | 0.471914221 | 0.29299217  |

|             |             |             |             |
|-------------|-------------|-------------|-------------|
| 0.280841434 | 0.148542787 | 0.274934445 | 0.353454385 |
| 0.252625987 | 0.385084066 | 0.023449018 | 0.098203105 |
| 0.308456261 | 0.322874684 | 0.365447436 | 0.342318524 |
| 0.296782955 | 0.324044027 | 0.263064029 | 0.283028408 |
| 0.44294816  | 0.459032493 | 0.260228268 | 0.224721701 |
| 0.317187974 | 0.109371281 | 0.332603839 | 0.027315427 |
| 0.39698765  | 0.39889353  | 0.370785125 | 0.061672327 |
| 0.019800896 | 0.289994439 | 0.374563297 | 0.06267185  |
| 0.488156245 | 0.298089379 | 0.324351028 | 0.383536348 |
| 0.163676435 | 0.45802505  | 0.155668335 | 0.372289498 |
| 0.051545925 | 0.244089639 | 0.388426333 | 0.375626663 |
| 0.254767939 | 0.345894446 | 0.344295746 | 0.303450407 |
| 0.034995934 | 0.284111683 | 0.001931229 | 0.373750976 |
| 0.428014042 | 0.366049442 | 0.179186864 | 0.309347841 |
| 0.269531451 | 0.361859613 | 0.303758321 | 0.391889911 |
| 0.01216855  | 0.376625921 | 0.204540071 | 0.380844076 |
| 0.263430972 | 0.347597602 | 0.063158998 | 0.356746207 |
| 0.412508681 | 0.3143522   | 0.233688832 | 0.314727875 |
| 0.460171682 | 0.355380706 | 0.131447438 | 0.267145045 |
| 0.349051427 | 0.060128427 | 0.347516438 | 0.515159408 |
| 0.194983631 | 0.279543764 | 0.442956656 | 0.214114143 |
| 0.371242501 | 0.361337649 | 0.373232701 | 0.504274448 |
| 0.099999913 | 0.238042042 | 0.40163289  | 0.445796898 |
| 0.281862925 | 0.243839524 | 0.316949563 | 0.272300451 |
| 0.419765297 | 0.098519027 | 0.319872349 | 0.307824669 |
| 0.283362992 | 0.303609881 | 0.293302671 | 0.241265185 |
| 0.04584966  | 0.196706504 | 0.356342738 | 0.136622362 |
| 0.300060046 | 0.359669689 | 0.282252528 | 0.369698509 |
| 0.154157485 | 0.026588378 | 0.434774119 | 0.032459139 |
| 0.291425674 | 0.37025018  | 0.246075434 | 0.379304363 |
| 0.153946756 | 0.335938644 | 0.29041166  | 0.000997636 |
| 0.394102838 | 0.062943618 | 0.335490591 | 0.262713346 |
| 0.352735857 | 0.053949694 | 0.42788453  | 0.51319885  |
| 0.2925679   | 0.357174612 | 0.366848042 | 0.441821495 |
| 0.219080286 | 0.368231179 | 0.385446921 | 0.348645519 |
| 0.302626323 | 0.347339174 | 0.397051897 | 0.378188559 |
| 0.33408367  | 0.272608918 |             |             |
| HSP90B1     | 0.120487352 | 0.326112823 | 0.076630253 |
| 0.127357127 | 0.227405243 | 0.192546301 | 0.166611847 |
| 0.218332577 | 0.298103858 | 0.158508171 | 0.221461641 |
| 0.067813702 | 0.074660912 | 0.374007044 | 0.169324972 |
| 0.244414034 | 0.122556438 | 0.205781791 | 0.116228886 |
| 0.217234838 | 0.241985203 | 0.182496229 | 0.209590344 |
| 0.252799096 | 0.232178243 | 0.229121678 | 0.218836609 |
| 0.371733598 | 0.104127331 | 0.227229256 | 0.081052461 |
| 0.393019012 | 0.229870608 | 0.18505591  | 0.048581682 |
| 0.234192176 | 0.045940547 | 0.415313455 | 0.2437493   |
| 0.097261229 | 0.349202872 | 0.156936267 | 0.21379871  |
| 0.203050049 | 0.078817923 | 0.078644009 | 0.261041289 |
| 0.236153166 | 0.253608575 | 0.103961254 | 0.252799274 |
| 0.245410204 | 0.24172844  | 0.233496882 | 0.009644476 |
| 0.159389098 | 0.046430897 | 0.129787659 | 0.391252457 |
| 0.21713507  | 0.207985279 | 0.165510116 | 0.255978189 |
| 0.255690981 | 0.287007522 | 0.266971916 | 0.214245283 |

|             |             |             |             |
|-------------|-------------|-------------|-------------|
| 0.390787911 | 0.148421056 | 0.265363811 | 0.132368823 |
| 0.253730031 | 0.102650148 | 0.215396487 | 0.144046867 |
| 0.231458324 | 0.235146479 | 0.228179679 | 0.199669814 |
| 0.316427271 | 0.455490649 | 0.255276207 | 0.401714207 |
| 0.165712622 | 0.230647591 | 0.220381453 | 0.29758514  |
| 0.313925385 | 0.214279532 | 0.274664104 | 0.435353558 |
| 0.138002141 | 0.197965844 | 0.295238514 | 0.170833926 |
| 0.311972582 | 0.195061601 | 0.18163733  | 0.122870983 |
| 0.244944869 | 0.247667307 | 0.425930253 | 0.254065286 |
| 0.233783625 | 0.120408294 | 0.396386664 | 0.211490704 |
| 0.200095259 | 0.120568568 | 0.236843615 | 0.332005213 |
| 0.237870249 | 0.367527819 | 0.323599014 | 0.338988052 |
| 0.2353317   | 0.382399353 | 0.255589525 | 0.353689277 |
| 0.064439739 | 0.411161731 | 0.189315899 | 0.123252933 |
| 0.120221333 | 0.190624775 | 0.264292437 | 0.326995507 |
| 0.33990638  | 0.257941051 | 0.217914006 | 0.253588431 |
| 0.371782268 | 0.375261832 | 0.412688641 | 0.337971588 |
| 0.107879597 | 0.190392439 | 0.224673681 | 0.221589962 |
| 0.290830768 | 0.20837949  | 0.1847326   | 0.425766277 |
| 0.332389196 | 0.330711667 | 0.181706473 | 0.445890387 |
| 0.281669051 | 0.426891233 | 0.314092891 | 0.205630378 |
| 0.424590599 | 0.399046516 | 0.415963813 | 0.242306771 |
| 0.387302005 | 0.201966836 | 0.125680411 | 0.343928816 |
| 0.414399961 | 0.015312533 | 0.352629352 | 0.379609751 |
| 0.384917997 | 0.325574726 | 0.435155496 | 0.387023289 |
| 0.387234758 | 0.150102119 | 0.040174834 | 0.274558624 |
| 0.407930688 | 0.320828549 | 0.254964034 | 0.217978611 |
| 0.25416545  | 0.220221674 | 0.303551096 | 0.163304774 |
| 0.460444156 | 0.337816413 | 0.36241722  | 0.31349832  |
| 0.239997452 | 0.328408951 | 0.204869228 | 0.376542644 |
| 0.118386569 | 0.143536896 | 0.088675722 | 0.314815445 |
| 0.14941786  | 0.236141325 | 0.232599919 | 0.271503265 |
| 0.240436923 | 0.232757661 | 0.166733345 | 0.252406399 |
| 0.108181441 | 0.208938783 | 0.196211382 | 0.212042771 |
| 0.121842208 | 0.219991714 | 0.205767691 | 0.169629026 |
| 0.259873944 | 0.289087933 | 0.258480147 | 0.384720934 |
| 0.261931835 | 0.187179391 | 0.266572706 | 0.40610222  |
| 0.410248664 | 0.210567226 | 0.278678828 | 0.023450055 |
| 0.227128152 | 0.180139701 | 0.134167066 | 0.212308195 |
| 0.247359779 | 0.276862013 | 0.262913589 | 0.271409071 |
| 0.199227176 | 0.207625911 | 0.249280255 | 0.397578534 |
| 0.18626393  | 0.205463105 | 0.358316466 | 0.232093891 |
| 0.015345886 | 0.240922665 | 0.317304355 | 0.22599172  |
| 0.277726382 | 0.106911475 | 0.119391043 | 0.363570924 |
| 0.201234019 | 0.231271103 | 0.368032905 | 0.277819866 |
| 0.200494778 | 0.268486832 | 0.431993851 | 0.066037586 |
| 0.24785996  | 0.074945969 | 0.262084553 | 0.172846074 |
| 0.243931095 | 0.312006696 | 0.22152099  | 0.213796683 |
| 0.13172989  | 0.418413043 | 0.317678674 | 0.392110234 |
| 0.21665142  | 0.435043012 | 0.335515067 | 0.351619797 |
| 0.253005593 | 0.224713452 | 0.093921268 | 0.310050413 |
| 0.34746755  | 0.211063169 | 0.112594469 | 0.305314167 |
| 0.227278076 | 0.267203506 | 0.182353712 | 0.401348442 |
| 0.432803337 | 0.361227313 | 0.224404909 | 0.317225469 |

|             |             |             |             |
|-------------|-------------|-------------|-------------|
| 0.307682472 | 0.204657276 | 0.3284991   | 0.449843142 |
| 0.190926288 | 0.252334198 | 0.227059187 | 0.344600153 |
| 0.201219589 | 0.234191006 | 0.339731707 | 0.121486825 |
| 0.003023845 | 0.153638919 | 0.119361177 | 0.221225751 |
| 0.147216732 | 0.209097513 | 0.266963299 | 0.411593523 |
| 0.201114768 | 0.346896046 | 0.281716321 | 0.224648605 |
| 0.35911429  | 0.25488547  | 0.203449014 | 0.240424923 |
| 0.275622097 | 0.0374763   | 0.139736225 | 0.45323412  |
| 0.086665371 | 0.159724991 | 0.268246408 | 0.005187201 |
| 0.118770242 | 0.27942024  | 0.161759806 | 0.262330207 |
| 0.388364604 | 0.246219332 | 0.210682136 | 0.193884574 |
| 0.267674707 | 0.164452416 | 0.00727834  | 0.389082222 |
| 0.409460723 | 0.401032156 | 0.406830396 | 0.394735829 |
| 0.381996421 | 0.293889599 | 0.322502698 | 0.191257016 |
| 0.193336022 | 0.145220624 | 0.181783574 | 0.264450526 |
| 0.012498873 | 0.296023292 | 0.260898168 | 0.192573884 |
| 0.29418983  | 1           | 0.097359319 | 0.246287941 |
| 0.040138016 | 0.10515461  | 0.27812284  | 0.286378995 |
| 0.308206599 | 0.05036219  | 0.110668204 | 0.209259532 |
| 0.335920775 | 0.311563198 | 0.185115684 | 0.415865661 |
| 0.235356184 | 0.149611645 | 0.23254637  | 0.280943485 |
| 0.165472644 | 0.102782508 | 0.255386149 | 0.013519268 |
| 0.113011386 | 0.404952605 | 0.233394543 | 0.11281159  |
| 0.241641023 | 0.020811032 | 0.305376718 | 0.427937866 |
| 0.350203426 | 0.409019242 | 0.385861698 | 0.162386677 |
| 0.391147351 | 0.063848654 | 0.406085179 | 0.309119695 |
| 0.191336096 | 0.001812291 | 0.023260075 | 0.359463984 |
| 0.230372066 | 0.093947189 | 0.211162811 | 0.156937966 |
| 0.174941486 | 0.169179755 | 0.15378081  | 0.174753027 |
| 0.212388702 | 0.230732007 | 0.185381505 | 0.383710659 |
| 0.258521476 | 0.267900282 | 0.222519045 | 0.147317106 |
| 0.22414399  | 0.119059622 | 0.158602315 | 0.011526358 |
| 0.285084923 | 0.160772482 | 0.400120475 | 0.393606382 |
| 0.419848752 | 0.258518741 | 0.154616319 | 0.190246587 |
| 0.36379316  | 0.110903824 | 0.172752942 | 0.130056112 |
| 0.36175174  | 0.247207985 | 0.289826015 | 0.282699215 |
| 0.42432475  | 0.386253202 | 0.109758524 | 0.316710086 |
| 0.021090963 | 0.006809106 | 0.19089583  | 0.284152693 |
| 0.126614483 | 0.245685878 | 0.271251038 | 0.276571708 |
| 0.269345859 | 0.065198151 | 0.187024643 | 0.190722119 |
| 0.261663223 | 0.268092624 | 0.213888613 | 0.2856081   |
| 0.246383225 | 0.196055193 | 0.229100197 | 0.265012265 |
| 0.255335476 | 0.298213685 | 0.2320308   | 0.091550927 |
| 0.206107924 | 0.217288885 | 0.125136002 | 0.196460138 |
| 0.331054698 | 0.369055617 | 0.149596695 | 0.034292642 |
| 0.280581739 | 0.289154716 | 0.392888354 | 0.371727097 |
| 0.426069083 | 0.444139533 | 0.384867029 | 0.245778823 |
| 0.13457684  | 0.264722872 | 0.223429493 | 0.182824017 |
| 0.398485519 | 0.116092458 | 0.373886318 | 0.187627467 |
| 0.198379306 | 0.221100474 | 0.08974289  | 0.182911433 |
| 0.207081106 | 0.232933261 | 0.233020004 | 0.147330065 |
| 0.262518167 | 0.16211605  | 0.14365608  | 0.242051746 |
| 0.31021489  | 0.131482578 | 0.225579803 | 0.239413807 |
| 0.288784192 | 0.149337927 | 0.279420213 | 0.416999056 |

|             |             |             |             |
|-------------|-------------|-------------|-------------|
| 0.171252943 | 0.197562047 | 0.171571436 | 0.304494729 |
| 0.312464154 | 0.201417912 | 0.032775681 | 0.330545858 |
| 0.396136793 | 0.231335928 | 0.384956741 | 0.379523203 |
| 0.157502253 | 0.212881652 | 0.226901279 | 0.266882042 |
| 0.262173616 | 0.196247057 | 0.289807014 | 0.141949938 |
| 0.345504663 | 0.443381372 | 0.333233193 | 0.206714008 |
| 0.215586684 | 0.154841515 | 0.10512192  | 0.340018954 |
| 0.167923688 | 0.141371251 | 0.173743839 | 0.330330438 |
| 0.004561832 | 0.101830642 | 0.410253069 | 0.21879998  |
| 0.445972913 | 0.380135234 | 0.380098214 | 0.239741957 |
| 0.005528853 | 0.252343123 | 0.236389507 | 0.214853699 |
| 0.333367034 | 0.282638565 | 0.192318045 | 0.158142795 |
| 0.303447087 | 0.105970372 | 0.228548197 | 0.16750284  |
| 0.13470177  | 0.242934006 | 0.252196655 | 0.267732863 |
| 0.255720757 | 0.147593512 | 0.148367608 | 0.214210288 |
| 0.18204676  | 0.267934023 | 0.323671004 | 0.150085082 |
| 0.129422206 | 0.393005121 | 0.311356544 | 0.071068976 |
| 0.214936457 | 0.358909725 | 0.365407624 | 0.012544969 |
| 0.268673242 | 0.037529535 | 0.246447455 | 0.214739238 |
| 0.23440435  | 0.284039183 | 0.267080338 | 0.221391237 |
| 0.268746509 | 0.266618778 | 0.213348111 | 0.237587926 |
| 0.195595262 | 0.249324985 | 0.244926441 | 0.24460859  |
| 0.198274669 | 0.169862329 | 0.161199321 | 0.161489188 |
| 0.099705193 | 0.344858125 | 0.279253236 | 0.102591752 |
| 0.264531933 | 0.25964097  | 0.35581731  | 0.371879106 |
| 0.37051035  | 0.144932968 | 0.280226093 | 0.312103914 |
| 0.143100875 | 0.178732676 | 0.128993745 | 0.222589841 |
| 0.247617065 | 0.186245456 | 0.210068391 | 0.210812768 |
| 0.279074549 | 0.379010357 | 0.265803269 | 0.377103473 |
| 0.231685547 | 0.265823175 | 0.142470939 | 0.148758375 |
| 0.201633652 | 0.192331246 | 0.219240572 | 0.008162028 |
| 0.265322861 | 0.166876723 | 0.33815806  | 0.380218223 |
| 0.172514756 | 0.354568348 | 0.140565635 | 0.150475492 |
| 0.115168915 | 0.209086722 | 0.197906545 | 0.282145333 |
| 0.118482478 | 0.209472268 | 0.242914039 | 0.165267149 |
| 0.289118517 | 0.282297305 | 0.247304228 | 0.283344152 |
| 0.280204989 | 0.192639374 | 0.422274571 | 0.150999144 |
| 0.215673246 | 0.16720837  | 0.201601904 | 0.248727379 |
| 0.262007031 | 0.396013276 | 0.122198214 | 0.401617029 |
| 0.256897652 | 0.185068096 | 0.4426343   | 0.237622522 |
| 0.215121162 | 0.16481282  | 0.121061462 | 0.214838822 |
| 0.279231874 | 0.17758255  | 0.011325158 | 0.084112398 |
| 0.285879374 | 0.2522941   | 0.2937963   | 0.314175596 |
| 0.220150558 | 0.341838271 | 0.103332245 | 0.274244533 |
| 0.368274169 | 0.410495782 | 0.216511636 | 0.298646562 |
| 0.309715323 | 0.169393009 | 0.198929954 | 0.040686094 |
| 0.235564005 | 0.208680524 | 0.205460812 | 0.147872949 |
| 0.077050898 | 0.137300649 | 0.238897373 | 0.133912666 |
| 0.38845998  | 0.106069609 | 0.235728398 | 0.251982191 |
| 0.234960918 | 0.413448022 | 0.217543756 | 0.27164032  |
| 0.143532485 | 0.263790992 | 0.217636695 | 0.246140378 |
| 0.186348315 | 0.207079676 | 0.29154066  | 0.160218171 |
| 0.101334532 | 0.218395411 | 0.01520215  | 0.38552453  |
| 0.387755441 | 0.222620549 | 0.268760128 | 0.16144504  |

|             |             |             |             |
|-------------|-------------|-------------|-------------|
| 0.263822676 | 0.342928931 | 0.267926256 | 0.201522903 |
| 0.03483873  | 0.223155191 | 0.244311556 | 0.302682159 |
| 0.1143572   | 0.266979811 | 0.107336159 | 0.253003698 |
| 0.395303517 | 0.244976826 | 0.31624946  | 0.170683979 |
| 0.367101388 | 0.304786146 | 0.167073478 | 0.206987234 |
| 0.240644743 | 0.127206534 | 0.176327609 | 0.436444885 |
| 0.227385591 | 0.165256064 | 0.335229599 | 0.240357257 |
| 0.209498408 | 0.326481257 | 0.216244527 | 0.434874094 |
| 0.177265709 | 0.25051772  | 0.313204234 | 0.381143171 |
| 0.307572832 | 0.191313885 | 0.175368121 | 0.244190226 |
| 0.343426252 | 0.113029297 | 0.231196179 | 0.285584266 |
| 0.161308025 | 0.267768996 | 0.200533414 | 0.230549834 |
| 0.086529422 | 0.271779836 | 0.192689221 | 0.206590028 |
| 0.275365981 | 0.242619701 | 0.234916917 | 0.367890021 |
| 0.143401175 | 0.049057866 | 0.412271334 | 0.018084889 |
| 0.189493472 | 0.225694315 | 0.250292528 | 0.240227311 |
| 0.208559915 | 0.270534011 | 0.222380992 | 0.007466596 |
| 0.336756895 | 0.046577118 | 0.256077073 | 0.202064432 |
| 0.208336912 | 0.132101584 | 0.364098081 | 0.410104297 |
| 0.24955803  | 0.187289268 | 0.164897027 | 0.378152182 |
| 0.116340719 | 0.165011523 | 0.222367004 | 0.229552665 |
| 0.151490615 | 0.183581219 | 0.208452887 | 0.175670831 |
| 0.273861459 | 0.247331717 |             |             |
| HTATIP2     | 0.220374179 | 0.067452411 | 0.187640718 |
| 0.077437733 | 0.037135347 | 0.025075847 | 0.150714433 |
| 0.117930979 | 0.064619715 | 0.004250391 | 0.058577376 |
| 0.222054904 | 0.002092873 | 0.089602532 | 0.159320354 |
| 0.02710764  | 0.190972681 | 0.215205084 | 0.012283765 |
| 0.025123529 | 0.04246631  | 0.009744807 | 0.041622489 |
| 0.032171667 | 0.294092396 | 0.054894923 | 0.012205916 |
| 0.069281955 | 0.002164268 | 0.034265707 | 0.002069832 |
| 0.154077446 | 0.034122117 | 0.008461162 | 0.159812686 |
| 0.033070032 | 0.001111629 | 0.155332601 | 0.047093497 |
| 0.004639992 | 0.195473317 | 0.011306118 | 0.086475045 |
| 0.013211381 | 0.186795553 | 0.001868438 | 0.024156952 |
| 0.044067207 | 0.035761703 | 0.216351713 | 0.038862158 |
| 0.011400287 | 0.120985597 | 0.031528069 | 0.017587809 |
| 0.006439565 | 0.000572897 | 0.001673429 | 0.099108056 |
| 0.254288415 | 0.215546628 | 0.001950846 | 0.055253874 |
| 0.024643975 | 0.042283544 | 0.138295421 | 0.007600772 |
| 0.096069872 | 0.003707785 | 0.026808081 | 0.039222455 |
| 0.030577587 | 0.139119825 | 0.290943113 | 0.161254226 |
| 0.010939411 | 0.164752222 | 0.048010021 | 0.008284654 |
| 0.062647581 | 0.138912581 | 0.139325777 | 0.102919774 |
| 0.004586888 | 0.019424009 | 0.016009986 | 0.116568386 |
| 0.056526824 | 0.081319413 | 0.06722848  | 0.115232298 |
| 0.136664192 | 0.018117148 | 0.045907232 | 0.232967274 |
| 0.071995467 | 0.004044547 | 0.01373268  | 0.007136784 |
| 0.032588744 | 0.02639143  | 0.116723844 | 0.163373119 |
| 0.029625489 | 0.244666145 | 0.125435322 | 0.017724755 |
| 0.04364302  | 0.232020629 | 0.017270914 | 0.040937389 |
| 0.040054824 | 0.076580355 | 0.049241609 | 0.082215693 |
| 0.019435569 | 0.088594672 | 0.061990578 | 0.08899093  |
| 0.000675915 | 0.091018709 | 0.174012683 | 0.215480638 |

|             |             |                      |             |
|-------------|-------------|----------------------|-------------|
| 0.156683164 | 0.160678949 | 0.011548246          | 0.171996617 |
| 0.060885135 | 0.101184354 | 0.140951725          | 0.086305293 |
| 0.059906699 | 0.106319944 | 0.084670121          | 0.073492397 |
| 0.241248914 | 0.003180901 | 0.018846332          | 0.051186694 |
| 0.063808777 | 0.227428754 | 0.013171716          | 0.13229539  |
| 0.152352549 | 0.053387406 | 0.103865976          | 0.158479259 |
| 0.07916332  | 0.121490016 | 0.057148446          | 0.191540576 |
| 0.12127934  | 0.127840312 | 0.098292569          | 0.030974371 |
| 0.130933215 | 0.06080217  | 0.008425457          | 0.082951505 |
| 0.125251757 | 0.004160571 | 0.050721773          | 0.058049388 |
| 0.0879899   | 0.04304613  | 0.089192605          | 0.073665838 |
| 0.088570828 | 0.267914051 | 4.10E-06 0.085323991 |             |
| 0.106931853 | 0.113843347 | 0.072190517          | 0.014035897 |
| 0.033094528 | 0.03938399  | 0.04352091           | 0.009497829 |
| 0.141871355 | 0.065903941 | 0.058054265          | 0.065173745 |
| 0.032951277 | 0.215385786 | 0.010266643          | 0.129616646 |
| 0.17287221  | 0.186999357 | 0.289289045          | 0.111500163 |
| 0.007088003 | 0.195675354 | 0.033058256          | 0.029556821 |
| 0.221293018 | 0.037950077 | 0.005143754          | 0.037124439 |
| 0.292346899 | 0.021917395 | 0.154383802          | 0.144723654 |
| 0.182187092 | 0.339318838 | 0.081281614          | 0.10789162  |
| 0.088380815 | 0.271807647 | 0.030466109          | 0.071604604 |
| 0.017764589 | 0.22064584  | 0.047911087          | 0.116868542 |
| 0.155796547 | 0.019434763 | 0.211074099          | 0.087897957 |
| 0.013973547 | 0.002530329 | 0.001837092          | 0.014638116 |
| 0.295236946 | 0.040859637 | 0.034262666          | 0.050043998 |
| 0.097634137 | 0.108397352 | 0.012989985          | 0.187021094 |
| 0.214120323 | 0.035204481 | 0.077365594          | 0.020801111 |
| 0.12286312  | 0.066862801 | 0.057309483          | 0.022877193 |
| 0.083571313 | 0.008558748 | 0.0049483            | 0.065313006 |
| 0.005023784 | 0.015274427 | 0.063326181          | 0.04726266  |
| 0.014740306 | 0.21382545  | 0.090728741          | 0.000559839 |
| 0.017603277 | 0.047755596 | 0.132440729          | 0.010731995 |
| 0.142830589 | 0.133462057 | 0.027398325          | 0.02480755  |
| 0.227501793 | 0.099618783 | 0.096710803          | 0.081058169 |
| 0.006763504 | 0.09397839  | 0.054810057          | 0.096082715 |
| 0.080949554 | 0.008655517 | 0.001427443          | 0.058113724 |
| 0.059348397 | 0.006109299 | 0.260234317          | 0.033283022 |
| 0.00955304  | 0.03221764  | 0.02556101           | 0.093867404 |
| 0.152649177 | 0.090887354 | 0.129077944          | 0.069516624 |
| 0.117250106 | 0.159457403 | 0.069473326          | 0.104616081 |
| 0.003604526 | 0.020355192 | 0.014484141          | 0.081402151 |
| 0.22406142  | 0.016537649 | 0.158056791          | 0.001757151 |
| 0.000231096 | 0.218264403 | 0.275535093          | 0.130924181 |
| 0.009748251 | 0.017557128 | 0.041018829          | 0.088427176 |
| 0.24902332  | 0.120212932 | 0.1387395            | 0.02691223  |
| 0.101867877 | 0.018492759 | 0.01728506           | 0.035301291 |
| 0.178519401 | 0.09295061  | 0.118429066          | 0.141959632 |
| 0.225199779 | 0.008395247 | 0.055810603          | 0.018496632 |
| 0.179674528 | 0.039605615 | 0.293017446          | 0.329178378 |
| 0.076033032 | 0.280772268 | 0.174219548          | 0.006073164 |
| 0.099011452 | 0.27003107  | 0.038028709          | 0.069462084 |
| 0.083901317 | 0.083547151 | 0.08261725           | 0.104127773 |
| 0.064062926 | 0.047796797 | 0.052481041          | 0.050778801 |

|             |             |             |             |
|-------------|-------------|-------------|-------------|
| 0.126514487 | 0.128042786 | 0.006726041 | 0.054759635 |
| 0.015191963 | 0.091010739 | 0.040045795 | 0.309080867 |
| 0.040348872 | 0.097359319 | 1           | 0.02985928  |
| 0.144562962 | 0.001749887 | 0.027939692 | 0.075275688 |
| 0.068830509 | 0.17660132  | 0.009553841 | 0.00622235  |
| 0.120860064 | 0.154726877 | 0.005675878 | 0.09774381  |
| 0.078082128 | 0.168092337 | 0.041667998 | 0.065394409 |
| 0.175142629 | 0.002572506 | 0.023549929 | 0.000666124 |
| 0.012267311 | 0.110466575 | 0.011172723 | 0.101238919 |
| 0.129652175 | 0.175024891 | 0.136502594 | 0.106382562 |
| 0.089319556 | 0.077047003 | 0.094769905 | 0.011720386 |
| 0.096208578 | 0.00050208  | 0.08141573  | 0.075963538 |
| 0.006938467 | 0.020032399 | 0.073474883 | 0.058403723 |
| 0.024199083 | 0.248107776 | 0.244499104 | 0.013426068 |
| 0.135583988 | 0.118538635 | 0.200144131 | 0.016182855 |
| 0.036280403 | 0.068194056 | 0.015967401 | 0.1007146   |
| 0.088624906 | 0.131782678 | 0.016877487 | 0.277605641 |
| 0.029064517 | 0.177855941 | 0.237301656 | 0.028555958 |
| 0.060715569 | 0.253752651 | 0.143294015 | 0.087925311 |
| 0.12474715  | 0.044379925 | 0.003843126 | 0.01544475  |
| 0.063565995 | 0.208521552 | 0.005010474 | 0.198336917 |
| 0.082661933 | 0.037756075 | 0.161000616 | 0.180747078 |
| 0.10470778  | 0.114618933 | 0.241302665 | 0.060599388 |
| 0.119891449 | 0.00915183  | 0.032535102 | 0.149578681 |
| 0.003433738 | 0.016849941 | 0.202019752 | 0.024956244 |
| 0.0382396   | 0.200425077 | 0.006048668 | 0.007984764 |
| 0.092919905 | 0.037899584 | 0.027426411 | 0.133347804 |
| 0.027779132 | 0.017042594 | 0.088380325 | 0.111313946 |
| 0.012048776 | 0.141168754 | 0.289430668 | 0.174384024 |
| 0.014928094 | 0.018581657 | 0.284675515 | 0.261055874 |
| 0.077948453 | 0.068629028 | 0.138472523 | 0.139282069 |
| 0.210222337 | 0.03246845  | 0.076513968 | 0.077544845 |
| 0.120370688 | 0.115918474 | 0.191095469 | 0.070934313 |
| 0.211842127 | 0.060556781 | 0.02526062  | 0.055879946 |
| 0.089243689 | 0.219093963 | 0.097263313 | 0.009910181 |
| 0.264095684 | 0.07521604  | 0.214747441 | 0.254802464 |
| 0.018302702 | 0.253213718 | 0.124244476 | 0.184668542 |
| 0.040502901 | 0.006189842 | 0.205732805 | 0.189106736 |
| 0.110698508 | 0.002491774 | 0.231875367 | 0.03821493  |
| 0.086330391 | 0.003444989 | 0.03351402  | 0.153489834 |
| 0.287773475 | 0.169698581 | 0.031182585 | 0.057308491 |
| 0.044335265 | 0.012193362 | 0.147046623 | 0.062628454 |
| 0.086659193 | 0.028145711 | 0.103023249 | 0.112896358 |
| 0.279848078 | 0.024863839 | 0.007653277 | 0.03614542  |
| 0.182423455 | 0.031228053 | 0.09532342  | 0.31369555  |
| 0.179950001 | 0.148746938 | 0.075232941 | 0.16376602  |
| 0.022072699 | 0.161934095 | 0.200543539 | 0.062060758 |
| 0.007068486 | 0.162111822 | 0.011458579 | 0.044436265 |
| 0.010875452 | 0.002595422 | 0.074379187 | 0.082165811 |
| 0.115808846 | 0.073313133 | 0.140587905 | 0.039015169 |
| 0.000283954 | 0.023685976 | 0.058029891 | 0.018841902 |
| 0.073609324 | 0.123362571 | 0.031284063 | 0.149343005 |
| 0.195773921 | 0.263540327 | 0.091666475 | 0.014773756 |
| 0.001940042 | 0.043764872 | 0.24484438  | 0.110179616 |



|             |             |             |             |
|-------------|-------------|-------------|-------------|
| 0.081125619 | 0.170213512 | 0.006157579 | 0.104242361 |
| 0.004078994 | 0.236606533 | 0.137999616 | 0.005684764 |
| 0.003674647 | 0.08078864  | 0.061526118 | 0.205432058 |
| 0.01704452  | 0.071936056 | 0.09113753  | 0.025446248 |
| 0.040763454 | 0.215758647 | 0.107228079 | 0.094740068 |
| 0.095426502 | 0.085368999 | 0.095817886 | 0.025057181 |
| 0.057425954 | 0.100519187 | 0.074844955 | 0.181694408 |
| 0.091210094 | 0.109084884 | 0.033488542 | 0.030698708 |
| 0.035494125 | 0.17000176  | 0.308671543 | 0.314823253 |
| 0.209741041 | 0.066908784 | 0.275318639 | 0.27366752  |
| 0.168710768 | 0.022712762 | 0.181519122 | 0.081110377 |
| 0.121685858 | 0.228510644 | 0.036427092 | 0.066680674 |
| 0.002051245 | 0.01833538  | 0.144692907 | 0.033753521 |
| 0.163508934 | 0.022062556 | 0.020809323 | 0.070257467 |
| 0.036360272 | 0.186825895 | 0.273863481 | 0.112256346 |
| 0.029959302 | 0.019636937 | 0.00626312  | 0.134431686 |
| 0.149378618 | 0.244778483 | 0.03451988  | 0.113574906 |
| 0.09405337  | 0.04180211  | 0.056100786 | 0.105471983 |
| 0.004845286 | 0.150489266 | 0.007312952 | 0.147738131 |
| 0.003795669 | 0.214247646 | 0.306496125 | 0.037328038 |
| 0.002167163 | 0.121526707 | 0.047734239 | 0.020484859 |
| 0.03971748  | 0.030585848 | 0.017918627 | 0.088461821 |
| 0.09336564  | 0.160895547 | 0.117810112 | 0.141244969 |
| 0.016862438 | 0.019690983 | 0.02615957  | 0.052931223 |
| 0.074276719 | 0.072273352 | 0.287992664 | 0.071981262 |
| 0.02485338  | 0.270037301 | 0.157426208 | 0.067866036 |
| 0.029798831 | 0.083663434 | 0.002291346 | 0.014282019 |
| 0.049589235 | 0.0065347   | 2.27E-06    | 0.006111609 |
| 0.125864355 | 0.011997386 | 0.041310071 | 0.065636425 |
| 0.020259321 | 0.112316197 | 0.002254228 | 0.066837087 |
| 0.092573261 | 0.126615272 | 0.043158878 | 0.197601745 |
| 0.115148073 | 0.208199738 | 0.045200988 | 0.002651703 |
| 0.02294605  | 0.014200847 | 0.005604074 | 0.206381651 |
| 0.195464125 | 0.002531938 | 0.025824615 | 0.181276735 |
| 0.067719457 | 0.001832977 | 0.02971057  | 0.039873459 |
| 0.205931478 | 0.133104861 | 0.092254024 | 0.06419838  |
| 0.060395295 | 0.139622301 | 0.012866108 | 0.015739945 |
| 0.032349127 | 0.013418962 | 0.083512016 | 0.011569692 |
| 0.215580523 | 0.030719508 | 0.017605439 | 0.198441759 |
| 0.115517873 | 0.011292801 | 0.264195102 | 0.00348477  |
| 0.149652557 | 0.096113726 | 0.025438767 | 0.012384661 |
| 0.160560615 | 0.026471111 | 0.19303371  | 0.097156718 |
| 0.002410963 | 0.027337644 | 0.148977695 | 0.018357271 |
| 0.158110495 | 0.016198781 | 0.200156138 | 0.003808217 |
| 0.083636455 | 0.06897141  | 0.175088374 | 0.0242268   |
| 0.025138333 | 0.310199004 | 0.010530426 | 0.099605483 |
| 0.140407443 | 0.013403122 | 0.057626783 | 0.083683968 |
| 0.011170624 | 0.107552876 | 0.015937407 | 0.0962806   |
| 0.10339984  | 0.197212351 | 0.053625768 | 0.082645163 |
| 0.169247131 | 0.013788656 | 0.009074854 | 0.0438136   |
| 0.096008679 | 0.139345859 | 0.008817715 | 0.10826137  |
| 0.006231238 | 0.119948485 | 0.026159136 | 0.049207895 |
| 0.186455043 | 0.075828904 | 0.021974503 | 0.247701522 |
| 0.101766138 | 0.031644546 | 0.019075878 | 0.172554334 |

|             |             |             |             |
|-------------|-------------|-------------|-------------|
| 0.097953429 | 0.140834124 | 0.147458366 | 0.000386551 |
| 0.065395817 | 0.050327039 | 0.156044922 | 0.02328106  |
| 0.288455913 | 0.060481159 | 0.041631833 | 0.101476328 |
| 0.069661362 | 0.006156101 | 0.026789902 | 0.030010997 |
| 0.007513221 | 0.181112013 | 0.115660792 | 0.082410401 |
| 0.102135335 | 0.006995071 | 0.003862604 | 0.098824391 |
| 0.004041892 | 0.003243495 | 0.006490455 | 0.035146046 |
| 0.006235791 | 0.008313138 | 0.009872451 | 0.007562741 |
| 0.080125906 | 0.074707147 |             |             |
| ICOS        | 0.047795902 | 0.335209406 | 0.02802665  |
| 0.08233323  | 0.286310892 | 0.225465468 | 0.051426006 |
| 0.102429871 | 0.277028799 | 0.185033792 | 0.239572892 |
| 0.014128978 | 0.223464884 | 0.381378924 | 0.05765788  |
| 0.296649753 | 0.038082448 | 0.086593358 | 0.093526121 |
| 0.176629405 | 0.275871251 | 0.293614634 | 0.190584634 |
| 0.301333754 | 0.134911573 | 0.190812595 | 0.302099806 |
| 0.406389278 | 0.216658526 | 0.313936808 | 0.101585293 |
| 0.336146557 | 0.295177946 | 0.29218622  | 0.010298873 |
| 0.269409953 | 0.062498337 | 0.339653119 | 0.218583044 |
| 0.199586161 | 0.279824223 | 0.16629899  | 0.182708141 |
| 0.196732479 | 0.021431208 | 0.129151928 | 0.333220861 |
| 0.203754639 | 0.244898197 | 0.03618808  | 0.303693567 |
| 0.263715711 | 0.22813993  | 0.25283084  | 0.001934509 |
| 0.303587791 | 0.180371573 | 0.285293733 | 0.397616947 |
| 0.147748578 | 0.117413242 | 0.235872719 | 0.209564722 |
| 0.296035861 | 0.337951669 | 0.230175815 | 0.222154469 |
| 0.399806355 | 0.280321371 | 0.349554147 | 0.116849808 |
| 0.232735505 | 0.024658259 | 0.122836205 | 0.053873904 |
| 0.295363209 | 0.176225678 | 0.286276867 | 0.316500699 |
| 0.309461558 | 0.424193567 | 0.180178354 | 0.377454442 |
| 0.238611238 | 0.313742142 | 0.298627271 | 0.281692257 |
| 0.318838831 | 0.083639959 | 0.307502578 | 0.42329567  |
| 0.044513003 | 0.206286656 | 0.301571832 | 0.080562749 |
| 0.339141908 | 0.3375895   | 0.198127614 | 0.26365637  |
| 0.345793183 | 0.281149632 | 0.393058307 | 0.20882307  |
| 0.323331018 | 0.040157621 | 0.357708529 | 0.31335643  |
| 0.233387515 | 0.046247814 | 0.243185025 | 0.416586219 |
| 0.271748083 | 0.401989322 | 0.342998988 | 0.315627006 |
| 0.28081332  | 0.404742903 | 0.273849356 | 0.36387808  |
| 0.120925433 | 0.423160045 | 0.116751977 | 0.047043694 |
| 0.040947844 | 0.102651383 | 0.304826341 | 0.279605167 |
| 0.406238148 | 0.245446816 | 0.12360472  | 0.207333956 |
| 0.43758396  | 0.351871227 | 0.420493447 | 0.342338966 |
| 0.029476684 | 0.33321272  | 0.265732902 | 0.204609167 |
| 0.299475074 | 0.093534923 | 0.295344898 | 0.387928555 |
| 0.298872377 | 0.394951643 | 0.097739875 | 0.391726524 |
| 0.180291508 | 0.429735867 | 0.340862598 | 0.119158474 |
| 0.40500633  | 0.370542057 | 0.441197675 | 0.361271234 |
| 0.372995787 | 0.178713368 | 0.103581221 | 0.325547502 |
| 0.42960832  | 0.028051992 | 0.420141493 | 0.439652222 |
| 0.384205037 | 0.398932053 | 0.466200709 | 0.440163504 |
| 0.392439058 | 0.051284748 | 0.054278601 | 0.262673162 |
| 0.387261577 | 0.309861161 | 0.183943866 | 0.261257881 |
| 0.311440948 | 0.215866927 | 0.38442843  | 0.19933237  |

|             |             |             |             |
|-------------|-------------|-------------|-------------|
| 0.445024508 | 0.382307544 | 0.416544677 | 0.308081331 |
| 0.19225556  | 0.254524972 | 0.299271624 | 0.338551547 |
| 0.04073341  | 0.064905973 | 0.027420708 | 0.282715126 |
| 0.174847147 | 0.151322997 | 0.198516182 | 0.300798527 |
| 0.15204634  | 0.210147378 | 0.308443366 | 0.352741676 |
| 0.035630589 | 0.242524886 | 0.111537171 | 0.100185051 |
| 0.039285814 | 0.113071082 | 0.127383592 | 0.12817564  |
| 0.236688497 | 0.166353957 | 0.336313022 | 0.426710744 |
| 0.30105108  | 0.11250944  | 0.302209514 | 0.415433345 |
| 0.387122137 | 0.285607629 | 0.198452337 | 0.009253705 |
| 0.198783593 | 0.263706825 | 0.285511822 | 0.29407976  |
| 0.135518494 | 0.192504865 | 0.270378184 | 0.367023654 |
| 0.138012403 | 0.109253005 | 0.280659782 | 0.343295026 |
| 0.099176367 | 0.252817588 | 0.387445874 | 0.232022399 |
| 0.00212677  | 0.189359549 | 0.367777696 | 0.229477076 |
| 0.234095412 | 0.208364682 | 0.256257342 | 0.394060175 |
| 0.29817181  | 0.314031094 | 0.437128113 | 0.384819683 |
| 0.237799934 | 0.161265326 | 0.461087735 | 0.094078925 |
| 0.317904478 | 0.063638021 | 0.248396806 | 0.187775707 |
| 0.163521796 | 0.269851337 | 0.316933957 | 0.265536066 |
| 0.067537075 | 0.419023491 | 0.330100971 | 0.428161201 |
| 0.255217024 | 0.454093735 | 0.399056174 | 0.372761536 |
| 0.262498403 | 0.287703349 | 0.246890992 | 0.340825325 |
| 0.389135013 | 0.206276441 | 0.044202052 | 0.384624256 |
| 0.237498055 | 0.343876829 | 0.181350128 | 0.417495235 |
| 0.404278834 | 0.340821154 | 0.150866064 | 0.370158057 |
| 0.299010462 | 0.141048489 | 0.37343676  | 0.468997976 |
| 0.198947985 | 0.281387309 | 0.262651838 | 0.397082029 |
| 0.109427004 | 0.281280013 | 0.280833927 | 0.308035981 |
| 0.017928199 | 0.05658587  | 0.038490899 | 0.168161995 |
| 0.260311347 | 0.284343007 | 0.316553595 | 0.424001267 |
| 0.095963561 | 0.353537506 | 0.205750865 | 0.207010217 |
| 0.318687532 | 0.317159499 | 0.313202933 | 0.319672992 |
| 0.203578584 | 0.016639045 | 0.094266737 | 0.412334584 |
| 0.022160789 | 0.281420478 | 0.227573676 | 0.002990411 |
| 0.03120848  | 0.306089208 | 0.066523179 | 0.148298774 |
| 0.459817694 | 0.140935854 | 0.121385367 | 0.181913992 |
| 0.298006476 | 0.070619321 | 0.00565853  | 0.417517667 |
| 0.419376621 | 0.402492623 | 0.410122648 | 0.373459799 |
| 0.400962168 | 0.359909636 | 0.370564132 | 0.178369659 |
| 0.07974475  | 0.055652909 | 0.23918311  | 0.221679658 |
| 0.0054912   | 0.34095999  | 0.303646155 | 0.102293349 |
| 0.380226515 | 0.246287941 | 0.02985928  | 1           |
| 0.010305655 | 0.227308238 | 0.215268642 | 0.221387591 |
| 0.370372286 | 0.009990926 | 0.119734451 | 0.243280084 |
| 0.309878137 | 0.264090086 | 0.293313469 | 0.426186005 |
| 0.225192669 | 0.07346006  | 0.235071914 | 0.363067696 |
| 0.058704602 | 0.082514492 | 0.234071175 | 0.018011914 |
| 0.169803348 | 0.388789722 | 0.292776345 | 0.03798122  |
| 0.173110929 | 0.002809605 | 0.266269292 | 0.435859746 |
| 0.342706574 | 0.448402978 | 0.406866666 | 0.278335813 |
| 0.397841028 | 0.215416954 | 0.438323899 | 0.304493839 |
| 0.212274942 | 0.000333306 | 0.010960797 | 0.418700937 |
| 0.261914241 | 0.034364601 | 0.109555691 | 0.182492916 |

|             |             |             |             |
|-------------|-------------|-------------|-------------|
| 0.095141635 | 0.087126289 | 0.064526221 | 0.246943132 |
| 0.273123212 | 0.255294585 | 0.287533669 | 0.354300056 |
| 0.186439608 | 0.208224245 | 0.225583772 | 0.059684101 |
| 0.295456201 | 0.043130176 | 0.062423963 | 0.010306328 |
| 0.357413041 | 0.072942427 | 0.343484106 | 0.410279756 |
| 0.41073001  | 0.337113628 | 0.196485922 | 0.251168348 |
| 0.42069404  | 0.052953903 | 0.267618969 | 0.059339269 |
| 0.36315247  | 0.280995457 | 0.256469757 | 0.220865927 |
| 0.427721398 | 0.367096356 | 0.029757545 | 0.33900569  |
| 0.008876307 | 0.00918407  | 0.171857193 | 0.225751902 |
| 0.170219969 | 0.280333232 | 0.196529707 | 0.223355374 |
| 0.256830169 | 0.019731434 | 0.305798616 | 0.283364588 |
| 0.218054408 | 0.262223276 | 0.28573447  | 0.215509291 |
| 0.2769156   | 0.188666394 | 0.195002597 | 0.155713799 |
| 0.259533817 | 0.226450976 | 0.133467975 | 0.019474732 |
| 0.240085064 | 0.26924975  | 0.042839649 | 0.110870822 |
| 0.365925257 | 0.414665481 | 0.043799662 | 0.011327885 |
| 0.200808559 | 0.275944969 | 0.445521452 | 0.389509999 |
| 0.408448553 | 0.443215101 | 0.316304469 | 0.161291873 |
| 0.053793582 | 0.258669137 | 0.300315503 | 0.155151416 |
| 0.423834336 | 0.035000809 | 0.384386136 | 0.318135372 |
| 0.084848066 | 0.147953009 | 0.034758626 | 0.072400217 |
| 0.309345869 | 0.135323591 | 0.181231025 | 0.073502259 |
| 0.241767435 | 0.28660969  | 0.042103442 | 0.14631265  |
| 0.262873333 | 0.21820462  | 0.113591035 | 0.224587172 |
| 0.276111789 | 0.171494822 | 0.350609868 | 0.381294247 |
| 0.084048165 | 0.080983784 | 0.123451912 | 0.357930886 |
| 0.362909157 | 0.247022637 | 0.018426962 | 0.339260261 |
| 0.439438971 | 0.306462256 | 0.385250575 | 0.379539219 |
| 0.057578907 | 0.266790941 | 0.327779625 | 0.26397813  |
| 0.151907499 | 0.21955303  | 0.221990916 | 0.045707361 |
| 0.280679314 | 0.398985767 | 0.318087425 | 0.142264148 |
| 0.270291344 | 0.070578551 | 0.029640322 | 0.398466788 |
| 0.237148935 | 0.057522275 | 0.191735987 | 0.408824772 |
| 0.00372076  | 0.263831156 | 0.456445866 | 0.197163406 |
| 0.443066926 | 0.414336365 | 0.353090094 | 0.21073346  |
| 0.006721091 | 0.343050638 | 0.251335036 | 0.234497981 |
| 0.325574434 | 0.268727854 | 0.181546429 | 0.073987774 |
| 0.256705304 | 0.044424003 | 0.127152346 | 0.203516795 |
| 0.203692519 | 0.251437194 | 0.172688148 | 0.165219342 |
| 0.205818444 | 0.061292666 | 0.302890376 | 0.168961252 |
| 0.282520053 | 0.199801752 | 0.29889732  | 0.177734965 |
| 0.175290624 | 0.407145102 | 0.301459993 | 0.019014721 |
| 0.330085112 | 0.377121144 | 0.399235697 | 0.001399838 |
| 0.337947481 | 0.007195772 | 0.204906164 | 0.188691609 |
| 0.196350748 | 0.215891203 | 0.24660486  | 0.253478012 |
| 0.235243865 | 0.176133695 | 0.189684629 | 0.178610292 |
| 0.159457516 | 0.172844982 | 0.283258206 | 0.216752149 |
| 0.229221464 | 0.090085299 | 0.070598182 | 0.069605695 |
| 0.047532269 | 0.39450868  | 0.193564196 | 0.042719693 |
| 0.195896961 | 0.242245379 | 0.310880857 | 0.374448704 |
| 0.390307637 | 0.070291048 | 0.280664236 | 0.332559213 |
| 0.186058287 | 0.185068836 | 0.04115112  | 0.226504395 |
| 0.174665173 | 0.233598678 | 0.240516504 | 0.152593838 |

|             |             |             |             |
|-------------|-------------|-------------|-------------|
| 0.302503362 | 0.322355933 | 0.187457359 | 0.38386024  |
| 0.250999446 | 0.266528538 | 0.150844263 | 0.085757705 |
| 0.10750519  | 0.095367343 | 0.279719597 | 0.001033058 |
| 0.260581878 | 0.129594153 | 0.390391031 | 0.365057084 |
| 0.322842605 | 0.341801795 | 0.153007782 | 0.056933343 |
| 0.132133389 | 0.11244671  | 0.101045071 | 0.346804521 |
| 0.269385995 | 0.148598599 | 0.259826149 | 0.161859835 |
| 0.362754835 | 0.347301254 | 0.311094919 | 0.195766084 |
| 0.208825697 | 0.118068563 | 0.383906499 | 0.073411455 |
| 0.257593187 | 0.222206622 | 0.205907378 | 0.228101527 |
| 0.218514548 | 0.43759791  | 0.042222967 | 0.442585964 |
| 0.262447717 | 0.096813746 | 0.414513849 | 0.224307431 |
| 0.199234362 | 0.155062623 | 0.273510279 | 0.232278756 |
| 0.212868246 | 0.321479746 | 0.014154369 | 0.085429715 |
| 0.282573619 | 0.270476285 | 0.302438957 | 0.333371629 |
| 0.292812672 | 0.336288714 | 0.305227125 | 0.185931238 |
| 0.352312816 | 0.376680379 | 0.163600683 | 0.216216694 |
| 0.278940421 | 0.086503312 | 0.220526391 | 0.033084022 |
| 0.283034749 | 0.288758836 | 0.244490812 | 0.054726631 |
| 0.017658611 | 0.253492458 | 0.25145048  | 0.043023139 |
| 0.444795928 | 0.247424996 | 0.247676446 | 0.331421104 |
| 0.142321313 | 0.370540601 | 0.157157149 | 0.324083503 |
| 0.041382617 | 0.20647491  | 0.319646529 | 0.283775484 |
| 0.19217487  | 0.292657528 | 0.309684162 | 0.275629665 |
| 0.029396766 | 0.240942488 | 0.001507514 | 0.310193299 |
| 0.340967508 | 0.2939213   | 0.168999008 | 0.21335318  |
| 0.247675278 | 0.350890878 | 0.267097332 | 0.272943956 |
| 0.011617152 | 0.27860781  | 0.166186623 | 0.313758739 |
| 0.158540503 | 0.247021823 | 0.05466712  | 0.317388927 |
| 0.330551739 | 0.222640417 | 0.233195695 | 0.193781356 |
| 0.377850886 | 0.324715018 | 0.099451695 | 0.276892375 |
| 0.278563497 | 0.041218877 | 0.216525442 | 0.447210219 |
| 0.170422851 | 0.259880435 | 0.408013281 | 0.157231923 |
| 0.3273703   | 0.31416421  | 0.269659204 | 0.441810191 |
| 0.106996408 | 0.189006501 | 0.388595743 | 0.376539072 |
| 0.284095402 | 0.274877385 | 0.275669055 | 0.235713801 |
| 0.329462934 | 0.067459166 | 0.295747264 | 0.253790159 |
| 0.251618749 | 0.269320887 | 0.200463214 | 0.24336737  |
| 0.041676142 | 0.17546155  | 0.246725332 | 0.100976043 |
| 0.219497766 | 0.267314058 | 0.268995999 | 0.328718048 |
| 0.122795859 | 0.020355442 | 0.385788024 | 0.035452711 |
| 0.17619516  | 0.294006868 | 0.195342245 | 0.298247602 |
| 0.126977588 | 0.234128104 | 0.165425907 | 0.000594789 |
| 0.380222426 | 0.077015061 | 0.313912216 | 0.217519111 |
| 0.289856953 | 0.037504928 | 0.362899997 | 0.455817675 |
| 0.231633997 | 0.281712629 | 0.258534934 | 0.381775867 |
| 0.2258823   | 0.291905574 | 0.317251493 | 0.252605284 |
| 0.299836713 | 0.207721128 | 0.270728637 | 0.26997946  |
| 0.289630982 | 0.209954387 |             |             |
| IDH3A       | 0.162128315 | 0.039984501 | 0.203186448 |
| 0.064889668 | 0.021576402 | 0.021595415 | 0.071356153 |
| 0.048093615 | 0.02933842  | 0.002029714 | 0.048466001 |
| 0.120770967 | 9.16E-05    | 0.054974123 | 0.061822627 |
| 0.017131764 | 0.077791705 | 0.114464008 | 0.000764831 |

|             |             |             |             |
|-------------|-------------|-------------|-------------|
| 0.00420232  | 0.022924362 | 0.005148271 | 0.026701253 |
| 0.013385584 | 0.214968197 | 0.038114869 | 0.00500633  |
| 0.046804223 | 0.000817495 | 0.025329139 | 0.001278482 |
| 0.104684484 | 0.019379519 | 0.005116712 | 0.115589494 |
| 0.017741219 | 0.001052593 | 0.10314855  | 0.036466871 |
| 0.002023485 | 0.118916745 | 0.008444739 | 0.082037597 |
| 0.010621698 | 0.188162478 | 0.00041883  | 0.012413966 |
| 0.024596292 | 0.015081219 | 0.148623685 | 0.028241066 |
| 0.0049191   | 0.078731657 | 0.021268942 | 0.002069982 |
| 0.003793696 | 0.001315605 | 0.000584681 | 0.065654325 |
| 0.167690786 | 0.108213785 | 0.000420602 | 0.014608738 |
| 0.0091303   | 0.017436098 | 0.056608931 | 0.004610652 |
| 0.067097032 | 0.000746507 | 0.015241783 | 0.014956148 |
| 0.0190607   | 0.064419376 | 0.181641685 | 0.074245335 |
| 0.005838085 | 0.087709233 | 0.023767793 | 0.004566908 |
| 0.045303277 | 0.079871366 | 0.07269015  | 0.068510447 |
| 6.02E-05    | 0.009146686 | 0.008324763 | 0.062235972 |
| 0.0236371   | 0.02582197  | 0.057109808 | 0.077400463 |
| 0.047360889 | 0.010323711 | 0.025446558 | 0.120660604 |
| 0.046851342 | 0.00076473  | 0.010833658 | 0.003447016 |
| 0.01800656  | 0.016143579 | 0.060195319 | 0.118698976 |
| 0.010059187 | 0.17466142  | 0.081885034 | 0.009048243 |
| 0.037668143 | 0.219962089 | 0.008221131 | 0.023824871 |
| 0.034195625 | 0.052461179 | 0.026659971 | 0.041824094 |
| 0.01292263  | 0.063916845 | 0.06148698  | 0.041811897 |
| 0.000308727 | 0.05721296  | 0.161328544 | 0.09195058  |
| 0.102455659 | 0.061237197 | 0.002006498 | 0.082983146 |
| 0.041206247 | 0.047182007 | 0.100832731 | 0.055841437 |
| 0.03526694  | 0.06972244  | 0.052247933 | 0.042950021 |
| 0.16059964  | 0.000701477 | 0.016482596 | 0.020940262 |
| 0.031619319 | 0.091901368 | 0.007733917 | 0.087722895 |
| 0.118522339 | 0.03320177  | 0.068946885 | 0.095939269 |
| 0.022373571 | 0.081370542 | 0.042964552 | 0.160416207 |
| 0.084525511 | 0.090411597 | 0.065470641 | 0.019740455 |
| 0.086039453 | 0.082113016 | 0.000119139 | 0.043618126 |
| 0.075012899 | 0.00222023  | 0.028967668 | 0.035359699 |
| 0.062895502 | 0.029876582 | 0.051936259 | 0.045353186 |
| 0.057283737 | 0.149350778 | 0.000785582 | 0.042432314 |
| 0.07673855  | 0.098668142 | 0.015921296 | 0.010076149 |
| 0.015279296 | 0.028919881 | 0.020195957 | 0.003210817 |
| 0.080122625 | 0.044883493 | 0.034229681 | 0.034440771 |
| 0.014814134 | 0.128717543 | 0.005494718 | 0.09228725  |
| 0.072493924 | 0.161081406 | 0.237814189 | 0.043909438 |
| 0.006554778 | 0.107255186 | 0.024043321 | 0.010137625 |
| 0.123879601 | 0.015983516 | 0.002420131 | 0.020159333 |
| 0.196052255 | 0.016736543 | 0.1156949   | 0.100713021 |
| 0.112712654 | 0.192054336 | 0.030662745 | 0.06871433  |
| 0.040063441 | 0.173243889 | 0.016555259 | 0.04420801  |
| 0.006722799 | 0.199857156 | 0.029788323 | 0.07045382  |
| 0.092549706 | 0.015232321 | 0.09165587  | 0.106377742 |
| 0.006828327 | 0.000706417 | 0.000428655 | 0.007493897 |
| 0.17203027  | 0.017467999 | 0.020211817 | 0.032145135 |
| 0.099365095 | 0.037452172 | 0.007182463 | 0.111983216 |
| 0.133621381 | 0.026383645 | 0.052063041 | 0.011870925 |

|             |             |             |                   |
|-------------|-------------|-------------|-------------------|
| 0.04889392  | 0.069732019 | 0.040730543 | 0.003321821       |
| 0.037966942 | 0.001388841 | 0.002880644 | 0.047449215       |
| 0.001111762 | 0.004269515 | 0.036593909 | 0.024821545       |
| 0.001899016 | 0.116625327 | 0.052186892 | 0.00065451        |
| 0.005934088 | 0.017915224 | 0.081384468 | 0.005295962       |
| 0.108502348 | 0.058788683 | 0.012417443 | 0.016128399       |
| 0.213468363 | 0.060851737 | 0.053473885 | 0.052879495       |
| 0.004913955 | 0.056924049 | 0.036841084 | 0.065495855       |
| 0.049240068 | 0.003336537 | 0.000195086 | 0.049977108       |
| 0.043777295 | 0.001055184 | 0.186182583 | 0.016903646       |
| 0.005182521 | 0.017882556 | 0.002805155 | 0.067267062       |
| 0.094336158 | 0.062968937 | 0.055807722 | 0.036124246       |
| 0.09924259  | 0.142542572 | 0.036927856 | 0.056072624       |
| 0.001674296 | 0.011501221 | 0.011943702 | 0.048215234       |
| 0.185430131 | 0.006458527 | 0.071416502 | 7.62E-05 9.03E-06 |
| 0.105452084 | 0.218467739 | 0.068378181 | 0.005056734       |
| 0.008651216 | 0.024018505 | 0.056447854 | 0.137174533       |
| 0.069341159 | 0.051341343 | 0.029465656 | 0.074722311       |
| 0.006157541 | 0.009268377 | 0.016192297 | 0.086418345       |
| 0.062315982 | 0.043004089 | 0.089840226 | 0.134241548       |
| 0.004867086 | 0.018724978 | 0.019318995 | 0.11824369        |
| 0.022752689 | 0.196826126 | 0.217920484 | 0.039961884       |
| 0.211745261 | 0.148180048 | 0.004014157 | 0.054194634       |
| 0.164083705 | 0.032016765 | 0.041902239 | 0.041915702       |
| 0.039642355 | 0.041516998 | 0.052793167 | 0.031298549       |
| 0.019697526 | 0.03244176  | 0.046315256 | 0.069210219       |
| 0.07912363  | 0.004613897 | 0.038245093 | 0.002034545       |
| 0.055695416 | 0.012809889 | 0.205886573 | 0.019481353       |
| 0.040138016 | 0.144562962 | 0.010305655 | 1                 |
| 0.001521052 | 0.00991928  | 0.02252321  | 0.02804362        |
| 0.140341026 | 0.012595442 | 0.003185277 | 0.094223694       |
| 0.101278091 | 0.003417706 | 0.064739081 | 0.06051852        |
| 0.127142973 | 0.040139075 | 0.034110318 | 0.103475707       |
| 0.000406268 | 0.009647613 | 0.00207856  | 0.001291812       |
| 0.051166272 | 0.004272833 | 0.065015438 | 0.113811466       |
| 0.132437423 | 0.115113206 | 0.065450223 | 0.063084301       |
| 0.049485589 | 0.066200688 | 0.008477534 | 0.071253582       |
| 0.002010514 | 0.051383815 | 0.054778564 | 0.004968957       |
| 0.024811931 | 0.008940379 | 0.041076311 | 0.020834414       |
| 0.179143517 | 0.165779029 | 0.0125705   | 0.081681825       |
| 0.082383902 | 0.083747336 | 0.010317725 | 0.025140844       |
| 0.03151957  | 0.003817957 | 0.063617536 | 0.060374237       |
| 0.056267419 | 0.008121301 | 0.15013231  | 0.014918955       |
| 0.117037279 | 0.114109799 | 0.01337961  | 0.027232879       |
| 0.185343157 | 0.091794776 | 0.056444911 | 0.081088483       |
| 0.029151267 | 0.002429585 | 0.002333175 | 0.027845066       |
| 0.174540509 | 0.001639789 | 0.140921434 | 0.061650317       |
| 0.030099385 | 0.114669404 | 0.160040802 | 0.067745616       |
| 0.084243922 | 0.134456349 | 0.043551731 | 0.096176565       |
| 0.001140339 | 0.044068523 | 0.05501847  | 0.000463009       |
| 0.010658468 | 0.147167956 | 0.006110986 | 0.009724006       |
| 0.068842416 | 0.00324692  | 0.004340124 | 0.065796108       |
| 0.022815974 | 0.015176388 | 0.048168735 | 0.013486228       |
| 0.002732282 | 0.042962028 | 0.034530907 | 0.000513733       |

|             |             |             |             |
|-------------|-------------|-------------|-------------|
| 0.104579788 | 0.231699578 | 0.089345447 | 0.012244197 |
| 0.01349443  | 0.19524406  | 0.155620565 | 0.061459749 |
| 0.04807548  | 0.026036942 | 0.073052909 | 0.131003158 |
| 0.010596043 | 0.045433268 | 0.051824328 | 0.078069719 |
| 0.072772149 | 0.114470331 | 0.020728633 | 0.13346263  |
| 0.035355694 | 0.012297212 | 0.016444904 | 0.054300476 |
| 0.143006907 | 0.06023173  | 0.005104067 | 0.135511161 |
| 0.077286498 | 0.081906684 | 0.124652358 | 0.009699848 |
| 0.124217082 | 0.067257053 | 0.202824602 | 0.027392788 |
| 0.00235074  | 0.101247634 | 0.116309799 | 0.071145576 |
| 0.001324178 | 0.135129224 | 0.013584512 | 0.051839689 |
| 0.000258455 | 0.022161089 | 0.097292388 | 0.190659726 |
| 0.086285975 | 0.05560502  | 0.021009221 | 0.029887735 |
| 0.005774922 | 0.078934382 | 0.041358512 | 0.046923998 |
| 0.020495771 | 0.069666868 | 0.054954063 | 0.156292366 |
| 0.020660591 | 0.002382087 | 0.021060971 | 0.074887622 |
| 0.025408634 | 0.031012107 | 0.178134596 | 0.075846964 |
| 0.077162178 | 0.056652898 | 0.110837745 | 0.010572201 |
| 0.09035526  | 0.137847712 | 0.029363004 | 0.004565696 |
| 0.076936593 | 0.006688759 | 0.019717163 | 0.011407765 |
| 0.000822054 | 0.038297146 | 0.042147221 | 0.063086006 |
| 0.051822893 | 0.10356546  | 0.012168023 | 0.000454745 |
| 0.014232281 | 0.049399616 | 0.022858528 | 0.050824414 |
| 0.070544522 | 0.001561942 | 0.084855445 | 0.116515845 |
| 0.21924664  | 0.040408362 | 0.003459138 | 0.000506095 |
| 0.025367129 | 0.118974585 | 0.043070474 | 0.037731596 |
| 0.078682957 | 0.001957307 | 0.077649398 | 0.000126702 |
| 0.135485479 | 0.090497615 | 0.002116454 | 0.001867278 |
| 0.037865034 | 0.046981412 | 0.165077692 | 0.006643501 |
| 0.036945306 | 0.044974813 | 0.019369731 | 0.029887484 |
| 0.086666767 | 0.047744261 | 0.071159287 | 0.051959353 |
| 0.030701796 | 0.041741542 | 0.019654248 | 0.030570398 |
| 0.05719643  | 0.070866417 | 0.117378478 | 0.064281031 |
| 0.048277884 | 0.018319516 | 0.02240693  | 0.03073835  |
| 0.136589065 | 0.201238143 | 0.223193403 | 0.067273313 |
| 0.036217431 | 0.174619906 | 0.227647831 | 0.071325915 |
| 0.010487253 | 0.112327666 | 0.055576798 | 0.064396885 |
| 0.178974521 | 0.01309373  | 0.054785106 | 0.000109464 |
| 0.003309448 | 0.078631284 | 0.02639292  | 0.078636619 |
| 0.009930831 | 0.010392453 | 0.071300406 | 0.018807211 |
| 0.126444633 | 0.166890455 | 0.065905044 | 0.022700674 |
| 0.006827859 | 0.006183281 | 0.071542788 | 0.150782159 |
| 0.129189868 | 0.019503981 | 0.08825626  | 0.051243473 |
| 0.035341016 | 0.041774748 | 0.079452176 | 0.001758376 |
| 0.085066446 | 0.003573043 | 0.125427513 | 0.002961472 |
| 0.18680445  | 0.176992987 | 0.021509593 | 0.001182617 |
| 0.071029519 | 0.030131968 | 0.019740586 | 0.025252085 |
| 0.015918444 | 0.005688387 | 0.028149453 | 0.034728056 |
| 0.120567513 | 0.06404994  | 0.097132217 | 0.011577877 |
| 0.015521803 | 0.012659534 | 0.042183024 | 0.03476832  |
| 0.044409359 | 0.176399512 | 0.044577236 | 0.015828614 |
| 0.152367153 | 0.091824826 | 0.024087325 | 0.013320403 |
| 0.020496873 | 0.001214063 | 0.006534379 | 0.018297112 |
| 0.003426087 | 6.55E-05    | 0.00072777  | 0.078876284 |



|             |             |             |             |
|-------------|-------------|-------------|-------------|
| 0.002816913 | 0.025020846 | 0.025554359 | 0.009546431 |
| 0.05268056  | 1.13E-05    | 0.030108518 | 0.06282444  |
| 0.078989709 | 0.029269048 | 0.104307609 | 0.057839937 |
| 0.129122719 | 0.034739138 | 0.000178442 | 0.015886687 |
| 0.00865763  | 0.002569895 | 0.088349013 | 0.050354949 |
| 0.001940161 | 0.019979176 | 0.084636727 | 0.039697356 |
| 0.000499263 | 0.011555954 | 0.026400153 | 0.08468772  |
| 0.088391042 | 0.034706473 | 0.048194391 | 0.007753911 |
| 0.064430168 | 0.005682625 | 0.005467022 | 0.031297658 |
| 0.008662035 | 0.064435191 | 0.007850704 | 0.149276715 |
| 0.014126758 | 0.005609692 | 0.138510722 | 0.079753445 |
| 0.006852795 | 0.137230847 | 0.000860812 | 0.083352053 |
| 0.043957332 | 0.00338681  | 0.006611354 | 0.063028842 |
| 0.019611328 | 0.082544896 | 0.075585398 | 0.002584506 |
| 0.012232638 | 0.060324553 | 0.006528325 | 0.102483567 |
| 0.005022703 | 0.080782108 | 0.003638418 | 0.056302808 |
| 0.033630678 | 0.141163491 | 0.004867941 | 0.010447505 |
| 0.17888372  | 0.006098019 | 0.056888851 | 0.073642354 |
| 0.00929974  | 0.039260644 | 0.067968929 | 0.004418783 |
| 0.056471091 | 0.00814225  | 0.050183148 | 0.03328497  |
| 0.112529688 | 0.027728091 | 0.04865415  | 0.084168912 |
| 0.004910669 | 0.005263626 | 0.024044518 | 0.075713571 |
| 0.074024193 | 0.002416751 | 0.079123796 | 0.004639658 |
| 0.051448255 | 0.012067887 | 0.019313589 | 0.036992866 |
| 0.019425502 | 0.014355858 | 0.135689875 | 0.055543952 |
| 0.024923597 | 0.010487247 | 0.110597536 | 0.047437454 |
| 0.112344306 | 0.089134213 | 0.000192787 | 0.0567966   |
| 0.041419323 | 0.067568209 | 0.01178274  | 0.239673045 |
| 0.028622108 | 0.037772454 | 0.040095297 | 0.038896035 |
| 0.002900882 | 0.007310178 | 0.024746118 | 0.000748844 |
| 0.106454787 | 0.078156106 | 0.049814938 | 0.046044903 |
| 0.000710789 | 0.001597057 | 0.056058079 | 0.000837939 |
| 0.001295634 | 0.002137619 | 0.026286908 | 0.003103064 |
| 0.006110661 | 0.004884686 | 0.007122694 | 0.051632129 |
| 0.026641872 |             |             |             |
| IDI1        | 0.005983317 | 0.169556108 | 0.004136007 |
| 0.025745363 | 0.238547436 | 0.106630667 | 0.003180097 |
| 0.010313466 | 0.116730142 | 0.062775433 | 0.174974169 |
| 0.000474772 | 0.134941954 | 0.227269901 | 0.002777124 |
| 0.255838211 | 0.002083897 | 0.014631102 | 0.012066977 |
| 0.027174574 | 0.199475885 | 0.133431829 | 0.093800882 |
| 0.170530722 | 0.040226184 | 0.092804972 | 0.226442926 |
| 0.245925245 | 0.161087817 | 0.265003223 | 0.059208406 |
| 0.164356829 | 0.270601409 | 0.244888276 | 0.000128201 |
| 0.159728765 | 0.009808204 | 0.15151544  | 0.090598075 |
| 0.141073064 | 0.116933905 | 0.085968308 | 0.075595372 |
| 0.117016448 | 0.001758146 | 0.063911391 | 0.247309316 |
| 0.097166567 | 0.054018635 | 0.004799396 | 0.207342123 |
| 0.084871002 | 0.116434728 | 0.156838655 | 0.000343547 |
| 0.271092746 | 0.193254802 | 0.213326556 | 0.211947783 |
| 0.057580753 | 0.023217996 | 0.102137198 | 0.042764433 |
| 0.178085888 | 0.19775025  | 0.085638054 | 0.091742507 |
| 0.232671851 | 0.14766533  | 0.263799571 | 0.033212807 |
| 0.094979002 | 0.000655378 | 0.035905489 | 0.007655083 |

|             |             |             |             |
|-------------|-------------|-------------|-------------|
| 0.118716288 | 0.063839063 | 0.192240586 | 0.198657102 |
| 0.170695356 | 0.201255012 | 0.065176664 | 0.188751238 |
| 0.058837151 | 0.277442028 | 0.121066749 | 0.145322827 |
| 0.159075061 | 0.004959267 | 0.236385848 | 0.231393728 |
| 0.001940115 | 0.137394575 | 0.181734643 | 0.016530214 |
| 0.187213671 | 0.104407879 | 0.143789822 | 0.16444788  |
| 0.289083867 | 0.228844238 | 0.170977817 | 0.110471894 |
| 0.165004691 | 0.006764261 | 0.162894261 | 0.311483516 |
| 0.133320763 | 0.009224747 | 0.082633024 | 0.302368165 |
| 0.207700075 | 0.250054877 | 0.195749087 | 0.162664523 |
| 0.25600248  | 0.241381918 | 0.202498871 | 0.17511978  |
| 0.05359815  | 0.231445856 | 0.040837924 | 0.002853844 |
| 0.004601022 | 0.009659756 | 0.06054795  | 0.112218748 |
| 0.271407717 | 0.118424324 | 0.034702246 | 0.096362066 |
| 0.294496178 | 0.167885786 | 0.228785482 | 0.205325818 |
| 0.002058355 | 0.121039686 | 0.251921735 | 0.039938028 |
| 0.17642086  | 0.015317242 | 0.250346202 | 0.186504465 |
| 0.162600748 | 0.276207277 | 0.017823717 | 0.172399228 |
| 0.03051501  | 0.241142905 | 0.211491055 | 0.041830206 |
| 0.210438746 | 0.182400903 | 0.268306799 | 0.344778879 |
| 0.185783504 | 0.103111904 | 0.0094775   | 0.161232584 |
| 0.240719932 | 0.024956845 | 0.275642189 | 0.288957025 |
| 0.213190611 | 0.309870075 | 0.274199435 | 0.272473129 |
| 0.213444523 | 0.007186076 | 0.01612127  | 0.163108616 |
| 0.206452135 | 0.189073626 | 0.020201041 | 0.23370225  |
| 0.236838117 | 0.103937205 | 0.236638768 | 0.114986052 |
| 0.225976377 | 0.244424261 | 0.261581592 | 0.173043112 |
| 0.074629135 | 0.101577764 | 0.287854066 | 0.157984507 |
| 0.002680221 | 0.01270902  | 0.004432487 | 0.110709096 |
| 0.059149557 | 0.053064039 | 0.085461021 | 0.175300944 |
| 0.058993966 | 0.066118853 | 0.22348352  | 0.310930317 |
| 0.004665828 | 0.208640413 | 0.028325936 | 0.028808971 |
| 0.003222362 | 0.024911668 | 0.034366739 | 0.025026127 |
| 0.115187078 | 0.046177204 | 0.254449613 | 0.259953163 |
| 0.122638997 | 0.039562834 | 0.203201911 | 0.233439666 |
| 0.20654635  | 0.27846897  | 0.060071389 | 0.002229771 |
| 0.088183647 | 0.107085237 | 0.17095233  | 0.242464536 |
| 0.031254995 | 0.044661226 | 0.206133863 | 0.313964403 |
| 0.064416316 | 0.013852607 | 0.133481751 | 0.150189597 |
| 0.025061707 | 0.131950213 | 0.266132065 | 0.156610891 |
| 0.002204019 | 0.109240174 | 0.258746442 | 0.055910385 |
| 0.100706265 | 0.121481443 | 0.184569656 | 0.261289577 |
| 0.129198342 | 0.122031492 | 0.275065486 | 0.292567365 |
| 0.074022914 | 0.042750254 | 0.264976072 | 0.053712219 |
| 0.182263358 | 0.030424828 | 0.144870582 | 0.08930391  |
| 0.072981754 | 0.124242122 | 0.261306016 | 0.139902279 |
| 0.020960363 | 0.224999622 | 0.17194957  | 0.261872937 |
| 0.142024482 | 0.259325767 | 0.288349554 | 0.230619315 |
| 0.142095903 | 0.176657329 | 0.181668915 | 0.255778857 |
| 0.263650082 | 0.076192922 | 0.007552954 | 0.267220536 |
| 0.123183681 | 0.287504432 | 0.050666682 | 0.259370893 |
| 0.195742262 | 0.16989233  | 0.027829719 | 0.246559284 |
| 0.192451167 | 0.060788631 | 0.214903035 | 0.252742188 |
| 0.061482528 | 0.198192982 | 0.152008251 | 0.264806242 |

|             |             |             |             |
|-------------|-------------|-------------|-------------|
| 0.040646837 | 0.086644781 | 0.103513119 | 0.166059382 |
| 0.04875469  | 0.006804027 | 0.006310806 | 0.054952873 |
| 0.156426355 | 0.216206751 | 0.223297926 | 0.248635366 |
| 0.018916096 | 0.181168983 | 0.060608532 | 0.101284608 |
| 0.172390027 | 0.162302274 | 0.285997504 | 0.248078222 |
| 0.069268637 | 0.002576991 | 0.021265519 | 0.200685956 |
| 0.001930477 | 0.171215219 | 0.071409838 | 0.00056079  |
| 0.002154909 | 0.177901886 | 0.012568077 | 0.040939367 |
| 0.288246918 | 0.042382323 | 0.049806736 | 0.066423319 |
| 0.187998612 | 0.011732939 | 0.001326876 | 0.238255431 |
| 0.204816692 | 0.188346372 | 0.200013931 | 0.160804714 |
| 0.212456166 | 0.192764917 | 0.256699685 | 0.094636816 |
| 0.008842384 | 0.006606407 | 0.132372356 | 0.116791896 |
| 0.000471442 | 0.218322448 | 0.142619678 | 0.029407921 |
| 0.274596542 | 0.10515461  | 0.001749887 | 0.227308238 |
| 0.001521052 | 1           | 0.036935209 | 0.053431389 |
| 0.220155268 | 0.000208397 | 0.077994765 | 0.120605549 |
| 0.15743304  | 0.119899811 | 0.192959926 | 0.23668321  |
| 0.149868644 | 0.018928643 | 0.1506588   | 0.253736545 |
| 0.00538794  | 0.031963315 | 0.069128667 | 0.01944966  |
| 0.04758874  | 0.167486479 | 0.123572002 | 0.005078121 |
| 0.094727637 | 0.000931512 | 0.137006301 | 0.238238597 |
| 0.176867953 | 0.28215816  | 0.242401188 | 0.255732747 |
| 0.231757501 | 0.163977117 | 0.257826455 | 0.167635068 |
| 0.122379838 | 6.33E-05    | 0.000279986 | 0.290457587 |
| 0.245465301 | 0.004866466 | 0.034136978 | 0.076439821 |
| 0.014909689 | 0.015533783 | 0.004495817 | 0.120849209 |
| 0.204279477 | 0.148542152 | 0.100927107 | 0.176599334 |
| 0.070781364 | 0.073877084 | 0.093896814 | 0.009665552 |
| 0.239374731 | 0.003743319 | 0.009201292 | 0.003428879 |
| 0.225486887 | 0.016864333 | 0.14859011  | 0.227712923 |
| 0.22601513  | 0.280065112 | 0.110902269 | 0.074412198 |
| 0.224953005 | 0.012234546 | 0.114147447 | 0.013385217 |
| 0.206716391 | 0.250033515 | 0.145185996 | 0.110229143 |
| 0.252119274 | 0.205511259 | 0.001441051 | 0.236718748 |
| 0.001299976 | 0.001050856 | 0.105722681 | 0.078440789 |
| 0.018039746 | 0.189998254 | 0.084763628 | 0.035155657 |
| 0.042353962 | 0.001757041 | 0.208883216 | 0.204236088 |
| 0.134139254 | 0.160875935 | 0.238499449 | 0.063015148 |
| 0.113588905 | 0.066488359 | 0.048007442 | 0.020789001 |
| 0.043518855 | 0.096598937 | 0.043039144 | 0.000253972 |
| 0.181521902 | 0.250702244 | 0.004989654 | 0.03045966  |
| 0.253706985 | 0.280477583 | 0.002806329 | 0.001644123 |
| 0.080057499 | 0.107609781 | 0.288594995 | 0.221907376 |
| 0.207047774 | 0.246003392 | 0.13348858  | 0.02718801  |
| 0.005094857 | 0.153603441 | 0.246583405 | 0.031781492 |
| 0.243618137 | 0.005602764 | 0.198047264 | 0.299071967 |
| 0.01771792  | 0.04203564  | 0.003074208 | 0.009823326 |
| 0.309198155 | 0.040874526 | 0.068776278 | 0.026651    |
| 0.119736372 | 0.156378043 | 0.00261239  | 0.050042689 |
| 0.141544017 | 0.162270928 | 0.033903765 | 0.053306882 |
| 0.129788805 | 0.033342882 | 0.290472556 | 0.192602431 |
| 0.021086752 | 0.013190514 | 0.035863832 | 0.189860731 |
| 0.250410302 | 0.174313273 | 0.003959493 | 0.187622548 |

|             |             |             |             |
|-------------|-------------|-------------|-------------|
| 0.253507343 | 0.271557612 | 0.202825666 | 0.208285211 |
| 0.009601926 | 0.247295123 | 0.169651604 | 0.187138603 |
| 0.040950357 | 0.10713547  | 0.065340407 | 0.005811667 |
| 0.095739085 | 0.169433621 | 0.183561967 | 0.044564028 |
| 0.190201687 | 0.015546949 | 0.00424805  | 0.220923771 |
| 0.128824614 | 0.007542349 | 0.093814335 | 0.253222937 |
| 0.001301347 | 0.16995899  | 0.25979329  | 0.049444467 |
| 0.21787824  | 0.272600544 | 0.189350111 | 0.032708999 |
| 0.004304874 | 0.291829093 | 0.211858073 | 0.163898753 |
| 0.189012004 | 0.125678705 | 0.016894774 | 0.008940627 |
| 0.113039834 | 0.00942373  | 0.021605733 | 0.059494354 |
| 0.105064881 | 0.153483979 | 0.055124036 | 0.042711769 |
| 0.067429365 | 0.009409164 | 0.155262527 | 0.057962865 |
| 0.07378467  | 0.080384563 | 0.165595654 | 0.046943008 |
| 0.158625309 | 0.21751809  | 0.191433511 | 0.000818131 |
| 0.249318976 | 0.198669362 | 0.206755525 | 3.34E-05    |
| 0.290979403 | 0.000426814 | 0.07623089  | 0.09123486  |
| 0.063670271 | 0.060728479 | 0.138563801 | 0.12148634  |
| 0.125070972 | 0.052163262 | 0.089816153 | 0.086596077 |
| 0.043259366 | 0.046183174 | 0.218626001 | 0.092282106 |
| 0.130627963 | 0.016668876 | 0.01298681  | 0.013074432 |
| 0.005649374 | 0.222955799 | 0.067833817 | 0.008067231 |
| 0.073810118 | 0.09131969  | 0.150421978 | 0.203533996 |
| 0.208617419 | 0.015799775 | 0.09797568  | 0.211444495 |
| 0.075008075 | 0.057603643 | 0.002857883 | 0.132823866 |
| 0.061102997 | 0.103541127 | 0.131802142 | 0.084389584 |
| 0.176936962 | 0.146627774 | 0.065435207 | 0.19190437  |
| 0.145105452 | 0.11658308  | 0.079538709 | 0.015622092 |
| 0.034007766 | 0.020465381 | 0.216198433 | 0.001230747 |
| 0.14442407  | 0.032605666 | 0.281143189 | 0.192245806 |
| 0.209010173 | 0.161497616 | 0.054112859 | 0.007584233 |
| 0.053527123 | 0.035063975 | 0.026370307 | 0.234989196 |
| 0.229143796 | 0.029772428 | 0.192912743 | 0.044726575 |
| 0.273505425 | 0.224856941 | 0.090989303 | 0.04339782  |
| 0.06554871  | 0.039956251 | 0.170150788 | 0.012097849 |
| 0.218556783 | 0.112453399 | 0.107321891 | 0.135792596 |
| 0.084329189 | 0.260878682 | 0.004922727 | 0.273410364 |
| 0.154890541 | 0.020358921 | 0.197870567 | 0.071425351 |
| 0.040429332 | 0.030412689 | 0.224529122 | 0.081638186 |
| 0.033458869 | 0.202364708 | 0.011003718 | 0.042430176 |
| 0.168897731 | 0.067592737 | 0.176779833 | 0.163743486 |
| 0.143411231 | 0.174381123 | 0.155444464 | 0.06028404  |
| 0.176895083 | 0.172640973 | 0.058061931 | 0.080928607 |
| 0.134154749 | 0.013328286 | 0.138383237 | 0.00441488  |
| 0.249059911 | 0.27425744  | 0.079385205 | 0.003063045 |
| 0.00020223  | 0.221831619 | 0.203415832 | 0.005120047 |
| 0.29054316  | 0.207462121 | 0.117853561 | 0.24972737  |
| 0.032602592 | 0.173878418 | 0.026674425 | 0.261083817 |
| 0.001574715 | 0.07596043  | 0.215345124 | 0.138853153 |
| 0.087547561 | 0.220118641 | 0.224516905 | 0.226418172 |
| 0.001776152 | 0.076382497 | 0.000617332 | 0.134391591 |
| 0.15844922  | 0.230200646 | 0.045920907 | 0.059434577 |
| 0.126993608 | 0.15575519  | 0.060376193 | 0.196478108 |
| 0.000799589 | 0.297073688 | 0.051647869 | 0.182628481 |

|             |             |             |             |
|-------------|-------------|-------------|-------------|
| 0.164613294 | 0.132779678 | 0.007343676 | 0.191275926 |
| 0.137375561 | 0.080771814 | 0.071501433 | 0.122476804 |
| 0.205834563 | 0.152069315 | 0.028506394 | 0.070730492 |
| 0.155025057 | 0.005713362 | 0.097824577 | 0.240585433 |
| 0.053665196 | 0.213594709 | 0.312833937 | 0.052064244 |
| 0.226253983 | 0.143939399 | 0.194055588 | 0.222810767 |
| 0.016623162 | 0.084763088 | 0.25369455  | 0.20776055  |
| 0.139099143 | 0.121800169 | 0.17681845  | 0.104999597 |
| 0.175166357 | 0.012929396 | 0.104509299 | 0.141402654 |
| 0.196168544 | 0.127351385 | 0.096879625 | 0.09911727  |
| 0.003865622 | 0.01964515  | 0.089981402 | 0.024619737 |
| 0.11952924  | 0.186599183 | 0.097270018 | 0.162807031 |
| 0.036714035 | 0.004412793 | 0.193645731 | 0.043394502 |
| 0.091427956 | 0.25558426  | 0.06892484  | 0.188860631 |
| 0.042649367 | 0.117444188 | 0.085324761 | 0.001920173 |
| 0.229427915 | 0.033903448 | 0.092987097 | 0.093449013 |
| 0.110316614 | 0.002540955 | 0.184259298 | 0.284249018 |
| 0.096535803 | 0.079450226 | 0.147225585 | 0.19022301  |
| 0.15059238  | 0.171428487 | 0.136666719 | 0.168923172 |
| 0.216635966 | 0.139168957 | 0.165673258 | 0.224501434 |
| 0.15637573  | 0.049402745 |             |             |
| IFIH1       | 0.05197839  | 0.356908578 | 0.03977697  |
| 0.032031536 | 0.154552939 | 0.111405391 | 0.047553054 |
| 0.062364948 | 0.307556743 | 0.084537908 | 0.165223984 |
| 0.017761109 | 0.022822201 | 0.392842701 | 0.049436547 |
| 0.22579743  | 0.027499255 | 0.09671092  | 0.04066126  |
| 0.062123756 | 0.162530806 | 0.069108868 | 0.18566975  |
| 0.148924565 | 0.214414887 | 0.212593383 | 0.186849606 |
| 0.394612474 | 0.047014764 | 0.235457252 | 0.028416132 |
| 0.387090139 | 0.183189899 | 0.135194307 | 0.010774069 |
| 0.198626731 | 0.0102931   | 0.412976961 | 0.102472534 |
| 0.022505918 | 0.343387776 | 0.117986146 | 0.096537035 |
| 0.152184092 | 0.025522034 | 0.039104238 | 0.274208396 |
| 0.200267616 | 0.096323192 | 0.071826297 | 0.25794167  |
| 0.114770227 | 0.245420038 | 0.268807639 | 0.005424129 |
| 0.092331081 | 0.017127533 | 0.059706814 | 0.409682752 |
| 0.172777704 | 0.094430339 | 0.06893947  | 0.152333048 |
| 0.265015283 | 0.287095817 | 0.213865266 | 0.115713432 |
| 0.415433732 | 0.05270566  | 0.275443506 | 0.035203013 |
| 0.180029886 | 0.038220155 | 0.167868275 | 0.106167787 |
| 0.111862373 | 0.131383842 | 0.165778043 | 0.094217571 |
| 0.349219516 | 0.466720857 | 0.188558624 | 0.424970297 |
| 0.056847643 | 0.18612621  | 0.071711948 | 0.253154701 |
| 0.31799975  | 0.063741056 | 0.275063995 | 0.444554099 |
| 0.057831331 | 0.210609997 | 0.32508744  | 0.159496681 |
| 0.325844942 | 0.067151661 | 0.167216594 | 0.038667623 |
| 0.22374409  | 0.197774704 | 0.448502382 | 0.242793839 |
| 0.140882713 | 0.089882004 | 0.424332324 | 0.16502789  |
| 0.094463325 | 0.06942449  | 0.066650009 | 0.352550457 |
| 0.239940332 | 0.390024985 | 0.360482833 | 0.346014129 |
| 0.193592427 | 0.396315166 | 0.247886701 | 0.375781067 |
| 0.029411002 | 0.435655949 | 0.10793719  | 0.030717103 |
| 0.056301724 | 0.05612824  | 0.082938266 | 0.285570823 |
| 0.352715752 | 0.24308926  | 0.108837556 | 0.132760933 |

|             |             |             |             |
|-------------|-------------|-------------|-------------|
| 0.379365761 | 0.408424073 | 0.442434543 | 0.35696016  |
| 0.036371345 | 0.064678551 | 0.173540231 | 0.094960112 |
| 0.317129593 | 0.129878364 | 0.102443848 | 0.450274514 |
| 0.321693389 | 0.3408262   | 0.079111166 | 0.454077238 |
| 0.151415037 | 0.428940394 | 0.342612652 | 0.108966231 |
| 0.432397845 | 0.417152878 | 0.414786921 | 0.241172275 |
| 0.395697418 | 0.136247545 | 0.085863403 | 0.348039309 |
| 0.414981194 | 0.003735746 | 0.37626213  | 0.401233527 |
| 0.408385967 | 0.342887597 | 0.4447085   | 0.404070643 |
| 0.418124119 | 0.088354131 | 0.019360368 | 0.226594751 |
| 0.429118698 | 0.306036313 | 0.06746771  | 0.193241053 |
| 0.231512329 | 0.168414296 | 0.318428713 | 0.070434378 |
| 0.462477325 | 0.33602748  | 0.389774865 | 0.335445671 |
| 0.197030567 | 0.314812837 | 0.180447735 | 0.400766666 |
| 0.024208912 | 0.068784857 | 0.066464441 | 0.285543388 |
| 0.057748359 | 0.135908616 | 0.14773307  | 0.23255894  |
| 0.17122988  | 0.159668215 | 0.094365835 | 0.24584084  |
| 0.096555714 | 0.2115274   | 0.099469007 | 0.138322503 |
| 0.025898677 | 0.191434075 | 0.067782387 | 0.046041175 |
| 0.160444223 | 0.283305999 | 0.285841576 | 0.388569299 |
| 0.151547256 | 0.165089536 | 0.293139517 | 0.394707097 |
| 0.395446787 | 0.162971795 | 0.256143527 | 0.004010282 |
| 0.082641718 | 0.087759497 | 0.046724691 | 0.190951358 |
| 0.223394896 | 0.10808662  | 0.253352422 | 0.263174891 |
| 0.1552494   | 0.12551927  | 0.134171663 | 0.397657685 |
| 0.174938168 | 0.091889095 | 0.367521917 | 0.222900227 |
| 0.002635971 | 0.165252191 | 0.330504696 | 0.061741131 |
| 0.295893432 | 0.036932771 | 0.042628191 | 0.372723112 |
| 0.082113221 | 0.100628127 | 0.387385225 | 0.264566779 |
| 0.088715302 | 0.272500546 | 0.44671072  | 0.044166642 |
| 0.182138276 | 0.0129424   | 0.224919293 | 0.134861678 |
| 0.181122856 | 0.276651229 | 0.168918347 | 0.081367017 |
| 0.114734054 | 0.451221267 | 0.303945822 | 0.417527324 |
| 0.104868407 | 0.444960877 | 0.352696721 | 0.360266345 |
| 0.243320625 | 0.167242945 | 0.035135522 | 0.318759746 |
| 0.348994894 | 0.073784928 | 0.099749303 | 0.341094323 |
| 0.155879273 | 0.273042028 | 0.034015903 | 0.409123717 |
| 0.427609489 | 0.39433473  | 0.079622993 | 0.295142324 |
| 0.296126184 | 0.134026233 | 0.311816779 | 0.465292938 |
| 0.077714085 | 0.197076012 | 0.107530222 | 0.313415704 |
| 0.14259042  | 0.078515652 | 0.311513137 | 0.042581535 |
| 0.000971216 | 0.08939449  | 0.069405771 | 0.094107409 |
| 0.044209722 | 0.235839232 | 0.259366219 | 0.434284297 |
| 0.101972453 | 0.346645338 | 0.252645377 | 0.090433059 |
| 0.374880282 | 0.17670832  | 0.165704632 | 0.228390153 |
| 0.232480127 | 0.005880315 | 0.039218804 | 0.462461825 |
| 0.066011119 | 0.056666237 | 0.196650674 | 0.001375209 |
| 0.040710246 | 0.317215375 | 0.138105524 | 0.229863314 |
| 0.395568925 | 0.215278213 | 0.178098844 | 0.098071389 |
| 0.2402784   | 0.08513392  | 0.000951706 | 0.403905011 |
| 0.426322628 | 0.414269949 | 0.42956814  | 0.415645133 |
| 0.391889476 | 0.304747738 | 0.311843656 | 0.158305476 |
| 0.048501289 | 0.059301014 | 0.058103602 | 0.148332259 |
| 0.008621133 | 0.267755171 | 0.168645434 | 0.148197058 |

|             |             |             |             |
|-------------|-------------|-------------|-------------|
| 0.307235948 | 0.27812284  | 0.027939692 | 0.215268642 |
| 0.00991928  | 0.036935209 | 1           | 0.131628912 |
| 0.281021883 | 0.011231424 | 0.042004322 | 0.082789419 |
| 0.357308414 | 0.319576377 | 0.08942313  | 0.429609783 |
| 0.170581676 | 0.147283099 | 0.123668377 | 0.276979951 |
| 0.050294286 | 0.037282854 | 0.167080256 | 0.004459948 |
| 0.041861894 | 0.418387382 | 0.119267505 | 0.025168181 |
| 0.18264263  | 0.004407343 | 0.307072366 | 0.450500131 |
| 0.376871964 | 0.424989846 | 0.401384404 | 0.084743298 |
| 0.406954767 | 0.02583341  | 0.431560367 | 0.332020156 |
| 0.129389552 | 0.000388588 | 0.007702959 | 0.36948445  |
| 0.188314972 | 0.086042807 | 0.140060532 | 0.06095961  |
| 0.045895959 | 0.097051321 | 0.053442996 | 0.048008751 |
| 0.212601218 | 0.132064855 | 0.054877671 | 0.419651502 |
| 0.130661321 | 0.173241779 | 0.16167415  | 0.124704246 |
| 0.197643044 | 0.027351463 | 0.124082851 | 0.002799476 |
| 0.265881129 | 0.144855436 | 0.420299117 | 0.420139165 |
| 0.418529326 | 0.237063318 | 0.091101133 | 0.089177073 |
| 0.37098382  | 0.117101599 | 0.0653634   | 0.115359148 |
| 0.392208975 | 0.243780438 | 0.265478981 | 0.2661402   |
| 0.437455244 | 0.395212255 | 0.035994214 | 0.311683871 |
| 0.004502674 | 0.001573433 | 0.148513329 | 0.26044747  |
| 0.036853307 | 0.17689564  | 0.23126207  | 0.107388457 |
| 0.098866682 | 0.019362002 | 0.090824134 | 0.08571762  |
| 0.196811438 | 0.190704844 | 0.135871052 | 0.256885295 |
| 0.098444566 | 0.048682812 | 0.08002448  | 0.097327741 |
| 0.089148627 | 0.292961708 | 0.217791689 | 0.02115627  |
| 0.172621997 | 0.184098938 | 0.053931595 | 0.14958119  |
| 0.33441396  | 0.390362025 | 0.03616041  | 0.006298042 |
| 0.252684669 | 0.168867569 | 0.41388533  | 0.403086759 |
| 0.450746547 | 0.453068667 | 0.370924795 | 0.067342712 |
| 0.045669598 | 0.194036893 | 0.148670862 | 0.035269943 |
| 0.428971361 | 0.096202936 | 0.395328071 | 0.124830013 |
| 0.132285675 | 0.073946576 | 0.019629512 | 0.088794228 |
| 0.190050625 | 0.172222713 | 0.108005094 | 0.124094426 |
| 0.149649947 | 0.046736802 | 0.047043799 | 0.157163892 |
| 0.308396743 | 0.03641423  | 0.151119815 | 0.119373581 |
| 0.273952202 | 0.061331918 | 0.28818309  | 0.414274387 |
| 0.137331839 | 0.11233176  | 0.062955914 | 0.302980399 |
| 0.335098541 | 0.198353346 | 0.009599051 | 0.365474213 |
| 0.410453294 | 0.254450864 | 0.407314629 | 0.370353611 |
| 0.110162832 | 0.165327179 | 0.132667364 | 0.209402327 |
| 0.182331324 | 0.125482325 | 0.175152969 | 0.081651701 |
| 0.311831106 | 0.457845836 | 0.340057038 | 0.093288787 |
| 0.208444832 | 0.134994665 | 0.084229526 | 0.362874203 |
| 0.045649553 | 0.046903089 | 0.139005758 | 0.351194619 |
| 0.000320286 | 0.030514471 | 0.410283733 | 0.081855428 |
| 0.451435793 | 0.379648578 | 0.377517977 | 0.087268128 |
| 0.000826868 | 0.250712958 | 0.21709425  | 0.120431564 |
| 0.367239708 | 0.28366021  | 0.059653614 | 0.037318699 |
| 0.257567578 | 0.100753387 | 0.070138783 | 0.06415172  |
| 0.0465157   | 0.281102816 | 0.205584778 | 0.186076829 |
| 0.104818339 | 0.139928985 | 0.045665338 | 0.098838907 |
| 0.051858442 | 0.22676663  | 0.312942545 | 0.073066822 |

|             |             |             |             |
|-------------|-------------|-------------|-------------|
| 0.054087638 | 0.412346066 | 0.3281164   | 0.01960712  |
| 0.162047075 | 0.359495344 | 0.355426422 | 0.004006554 |
| 0.281307435 | 0.007874045 | 0.127078906 | 0.099422902 |
| 0.095215875 | 0.147131213 | 0.19337583  | 0.077972026 |
| 0.26136966  | 0.125535383 | 0.097620534 | 0.175985659 |
| 0.057060641 | 0.126233689 | 0.20425368  | 0.148075993 |
| 0.082436799 | 0.063157068 | 0.138506223 | 0.147348073 |
| 0.025225925 | 0.368612736 | 0.254264494 | 0.088126068 |
| 0.194403362 | 0.14180822  | 0.319068225 | 0.402474652 |
| 0.351176724 | 0.139988256 | 0.166560957 | 0.336107225 |
| 0.068779187 | 0.072228396 | 0.04652183  | 0.164514224 |
| 0.162704378 | 0.064635395 | 0.168331202 | 0.207685871 |
| 0.317104257 | 0.368131065 | 0.243182867 | 0.363650106 |
| 0.119645267 | 0.200009691 | 0.086177286 | 0.036676519 |
| 0.099314361 | 0.158381078 | 0.133683653 | 0.00126947  |
| 0.263843575 | 0.053822899 | 0.359848281 | 0.398524164 |
| 0.089717379 | 0.329332483 | 0.063742201 | 0.044073112 |
| 0.045593574 | 0.206555304 | 0.158937956 | 0.288663581 |
| 0.051428715 | 0.076199429 | 0.154173408 | 0.07300664  |
| 0.286688613 | 0.292192864 | 0.089280668 | 0.169023375 |
| 0.171492333 | 0.15095734  | 0.431476771 | 0.072412275 |
| 0.216558259 | 0.042848254 | 0.219069363 | 0.15149065  |
| 0.121234706 | 0.408497794 | 0.065442441 | 0.426289068 |
| 0.166913745 | 0.160010854 | 0.439750554 | 0.165748845 |
| 0.061710559 | 0.038248842 | 0.0470638   | 0.126913999 |
| 0.082900746 | 0.089458762 | 0.006950388 | 0.042449281 |
| 0.265258035 | 0.129213785 | 0.332264678 | 0.303229382 |
| 0.08683487  | 0.309465156 | 0.035456845 | 0.180952784 |
| 0.401641952 | 0.431898925 | 0.076299844 | 0.246551914 |
| 0.320313402 | 0.06124113  | 0.22136461  | 0.015319298 |
| 0.250418162 | 0.220892312 | 0.096209539 | 0.045487754 |
| 0.016664028 | 0.053732849 | 0.233803002 | 0.099263515 |
| 0.391135871 | 0.038733352 | 0.249797475 | 0.252372513 |
| 0.204191938 | 0.433086861 | 0.055694665 | 0.270083835 |
| 0.040394615 | 0.212891389 | 0.159087756 | 0.201970934 |
| 0.056402718 | 0.107867558 | 0.267046283 | 0.07129662  |
| 0.024384937 | 0.067222783 | 0.002773053 | 0.379160419 |
| 0.409826892 | 0.148950953 | 0.239742656 | 0.073845151 |
| 0.218063954 | 0.324854909 | 0.116974223 | 0.164207185 |
| 0.00612706  | 0.19590309  | 0.15830427  | 0.317276337 |
| 0.043177742 | 0.244114919 | 0.020416445 | 0.175901636 |
| 0.414437925 | 0.111970767 | 0.289505164 | 0.060592792 |
| 0.388697333 | 0.308678133 | 0.154219468 | 0.053726889 |
| 0.270891334 | 0.09258407  | 0.110202316 | 0.456087476 |
| 0.106121027 | 0.068634275 | 0.338642026 | 0.09315898  |
| 0.131359363 | 0.3280754   | 0.218445733 | 0.459007406 |
| 0.044328419 | 0.2050387   | 0.311370839 | 0.399844199 |
| 0.267722955 | 0.063862231 | 0.073579855 | 0.116354407 |
| 0.367201928 | 0.031522518 | 0.071312942 | 0.273148482 |
| 0.067039772 | 0.241924748 | 0.207760395 | 0.095406152 |
| 0.025319592 | 0.083614612 | 0.08179138  | 0.139730587 |
| 0.215709755 | 0.163445906 | 0.071778503 | 0.33928712  |
| 0.03745926  | 0.010339154 | 0.389132246 | 0.00658475  |
| 0.158494368 | 0.214680562 | 0.177431276 | 0.14253492  |



|             |             |             |             |
|-------------|-------------|-------------|-------------|
| 0.183179809 | 0.246344571 | 0.188920734 | 0.003397161 |
| 0.336866351 | 0.006236094 | 0.126799198 | 0.064476935 |
| 0.098343427 | 0.042619693 | 0.367139473 | 0.424108838 |
| 0.226966692 | 0.066427    | 0.070730522 | 0.40773088  |
| 0.031720577 | 0.087236813 | 0.123311786 | 0.245688909 |
| 0.062712415 | 0.138827072 | 0.146572673 | 0.098883171 |
| 0.274484793 | 0.126435227 |             |             |
| IFIT2       | 0.079057292 | 0.236725114 | 0.042562073 |
| 0.06955211  | 0.206573279 | 0.083604386 | 0.121304056 |
| 0.158901893 | 0.234898806 | 0.054431614 | 0.159447659 |
| 0.051956087 | 0.070293945 | 0.296395563 | 0.135756347 |
| 0.189248253 | 0.108786519 | 0.156815564 | 0.077873554 |
| 0.121425921 | 0.204320819 | 0.092091059 | 0.11576514  |
| 0.202269258 | 0.210059439 | 0.157136518 | 0.145835044 |
| 0.27207799  | 0.041805621 | 0.179109644 | 0.026200927 |
| 0.325510959 | 0.20311774  | 0.096522065 | 0.034246397 |
| 0.152515536 | 0.055709291 | 0.328064407 | 0.142288852 |
| 0.070877587 | 0.310576163 | 0.062316588 | 0.128046246 |
| 0.089448113 | 0.047767636 | 0.025748563 | 0.206653716 |
| 0.174019511 | 0.158261813 | 0.07177109  | 0.191541537 |
| 0.113240032 | 0.211273561 | 0.148991258 | 0.007867143 |
| 0.083351558 | 0.028937564 | 0.066353402 | 0.2945199   |
| 0.236146153 | 0.177251919 | 0.066662419 | 0.168473666 |
| 0.193682764 | 0.260232723 | 0.3065669   | 0.077807352 |
| 0.294407275 | 0.098196256 | 0.203100083 | 0.075833171 |
| 0.117912207 | 0.066548809 | 0.242271533 | 0.126930444 |
| 0.105225644 | 0.224160331 | 0.184377853 | 0.111656136 |
| 0.21156689  | 0.367537936 | 0.256472569 | 0.291663062 |
| 0.128735464 | 0.188756869 | 0.143798154 | 0.316035626 |
| 0.272431872 | 0.147247014 | 0.222092673 | 0.338764489 |
| 0.097682786 | 0.116479681 | 0.223718078 | 0.164194351 |
| 0.23578939  | 0.114695159 | 0.08740892  | 0.089807508 |
| 0.235226316 | 0.181759042 | 0.334841622 | 0.239205351 |
| 0.17797329  | 0.096166006 | 0.289602789 | 0.176388576 |
| 0.11484854  | 0.089949785 | 0.148186247 | 0.255315415 |
| 0.178537332 | 0.275311759 | 0.23294449  | 0.291914541 |
| 0.157557346 | 0.289676948 | 0.199771857 | 0.296015343 |
| 0.024300729 | 0.307379175 | 0.145209117 | 0.113198497 |
| 0.069199504 | 0.177157083 | 0.173800869 | 0.344861698 |
| 0.26254454  | 0.252647816 | 0.129234003 | 0.199109088 |
| 0.30581932  | 0.269029243 | 0.302972724 | 0.26812062  |
| 0.079668236 | 0.11313187  | 0.143610279 | 0.132764636 |
| 0.249032842 | 0.212793316 | 0.124662115 | 0.319306459 |
| 0.281820692 | 0.266415937 | 0.099287845 | 0.35483948  |
| 0.180948522 | 0.347124535 | 0.216196357 | 0.159007011 |
| 0.324879949 | 0.2975127   | 0.337818395 | 0.212210362 |
| 0.307977953 | 0.111951001 | 0.076813272 | 0.282133791 |
| 0.356551336 | 0.014743642 | 0.268046728 | 0.288898725 |
| 0.277654171 | 0.243970399 | 0.352794643 | 0.302009072 |
| 0.282512348 | 0.141701139 | 0.020294386 | 0.281276909 |
| 0.29801664  | 0.263712165 | 0.231362551 | 0.123362609 |
| 0.214535612 | 0.113451985 | 0.24945277  | 0.063733197 |
| 0.391987538 | 0.267525551 | 0.271214745 | 0.246750347 |
| 0.149898235 | 0.302694363 | 0.135290489 | 0.274099395 |

|             |             |             |             |
|-------------|-------------|-------------|-------------|
| 0.102870707 | 0.080384299 | 0.078039563 | 0.319818817 |
| 0.053291437 | 0.240569172 | 0.100347241 | 0.22298291  |
| 0.256758852 | 0.124507367 | 0.081260263 | 0.235340461 |
| 0.10129669  | 0.126930286 | 0.148443303 | 0.139996849 |
| 0.100919496 | 0.230217342 | 0.113517505 | 0.121460617 |
| 0.219167966 | 0.242600632 | 0.194758997 | 0.305275926 |
| 0.139785635 | 0.161928578 | 0.202898263 | 0.349033921 |
| 0.37671038  | 0.144821802 | 0.299286636 | 0.018640801 |
| 0.101367548 | 0.073728891 | 0.082921007 | 0.141937508 |
| 0.23328095  | 0.146261267 | 0.19574109  | 0.247718219 |
| 0.11539297  | 0.132954427 | 0.113191781 | 0.341707163 |
| 0.166090972 | 0.11847522  | 0.29050561  | 0.139300456 |
| 0.012937393 | 0.144287939 | 0.243531991 | 0.188537083 |
| 0.240607172 | 0.067911507 | 0.064274141 | 0.277337904 |
| 0.103020158 | 0.156782932 | 0.288156739 | 0.264789614 |
| 0.094545301 | 0.224150125 | 0.344968834 | 0.039918855 |
| 0.181678918 | 0.076818688 | 0.286604731 | 0.076705523 |
| 0.200608438 | 0.337868224 | 0.190038781 | 0.136817502 |
| 0.109255657 | 0.315794556 | 0.281741078 | 0.298535819 |
| 0.088676416 | 0.344923061 | 0.258854276 | 0.286994918 |
| 0.225043017 | 0.118150483 | 0.059615818 | 0.230520729 |
| 0.266326191 | 0.088580823 | 0.105444521 | 0.228226385 |
| 0.098483873 | 0.225914377 | 0.182902968 | 0.314712937 |
| 0.362178837 | 0.250571245 | 0.179368573 | 0.307428959 |
| 0.26000508  | 0.153070034 | 0.288700958 | 0.369750866 |
| 0.066836917 | 0.153483283 | 0.109652024 | 0.329163277 |
| 0.186994962 | 0.156529693 | 0.331571729 | 0.080573392 |
| 0.00222276  | 0.119013538 | 0.093657875 | 0.182370147 |
| 0.113357843 | 0.148308046 | 0.231758303 | 0.313200245 |
| 0.163430008 | 0.301961778 | 0.293423982 | 0.106978556 |
| 0.266076389 | 0.152380744 | 0.151685304 | 0.215803374 |
| 0.296199047 | 0.033511432 | 0.09910487  | 0.357328525 |
| 0.074447427 | 0.101091147 | 0.173749471 | 0.004729089 |
| 0.075115762 | 0.189361054 | 0.152183874 | 0.252984434 |
| 0.332547741 | 0.221973001 | 0.174031976 | 0.064920906 |
| 0.277779846 | 0.145585295 | 0.010441727 | 0.296834198 |
| 0.323011715 | 0.322585605 | 0.315255984 | 0.30905687  |
| 0.306766883 | 0.251571001 | 0.270789318 | 0.111972928 |
| 0.139022377 | 0.086377029 | 0.099578326 | 0.166602933 |
| 0.007409463 | 0.287255316 | 0.21871586  | 0.20912918  |
| 0.246602779 | 0.286378995 | 0.075275688 | 0.221387591 |
| 0.02252321  | 0.053431389 | 0.131628912 | 1           |
| 0.325913173 | 0.038795424 | 0.036694015 | 0.090173232 |
| 0.246174528 | 0.261159679 | 0.086669172 | 0.316738429 |
| 0.178980352 | 0.113561887 | 0.148341213 | 0.265839157 |
| 0.11960149  | 0.043674905 | 0.110505838 | 0.003826198 |
| 0.066008983 | 0.335437489 | 0.114315636 | 0.063296783 |
| 0.196410126 | 0.016594123 | 0.237266711 | 0.332322196 |
| 0.247348328 | 0.316994279 | 0.296942239 | 0.093415091 |
| 0.292532096 | 0.037088261 | 0.306269527 | 0.224597021 |
| 0.064562708 | 0.00117928  | 0.025786821 | 0.27376668  |
| 0.150258845 | 0.083815384 | 0.201954582 | 0.060019182 |
| 0.126095361 | 0.0800043   | 0.129587005 | 0.133619839 |
| 0.163520163 | 0.211906447 | 0.157131047 | 0.278153196 |

|             |             |             |             |
|-------------|-------------|-------------|-------------|
| 0.176453556 | 0.258879066 | 0.093252876 | 0.151647567 |
| 0.180861216 | 0.089313047 | 0.163642892 | 0.009811769 |
| 0.28533541  | 0.142543378 | 0.299902821 | 0.293277426 |
| 0.34351872  | 0.237145356 | 0.052134976 | 0.090557514 |
| 0.311085732 | 0.085040674 | 0.078185226 | 0.09944567  |
| 0.254156302 | 0.193860466 | 0.278158301 | 0.238947887 |
| 0.338729643 | 0.298380945 | 0.087275217 | 0.257484702 |
| 0.016089995 | 0.012166543 | 0.088664417 | 0.310761694 |
| 0.110771048 | 0.133081083 | 0.264888469 | 0.164404726 |
| 0.192898653 | 0.043770854 | 0.10274992  | 0.113039592 |
| 0.236408761 | 0.173725646 | 0.169626732 | 0.297071504 |
| 0.165807383 | 0.144812853 | 0.177760532 | 0.207724724 |
| 0.152115409 | 0.236442315 | 0.201009965 | 0.072415201 |
| 0.108409637 | 0.135394813 | 0.094616782 | 0.207401921 |
| 0.264655414 | 0.279528287 | 0.110828161 | 0.032300375 |
| 0.268290346 | 0.173298389 | 0.314880019 | 0.267952043 |
| 0.322253964 | 0.359053195 | 0.336450243 | 0.201988867 |
| 0.100416163 | 0.231658619 | 0.189993118 | 0.183589361 |
| 0.306117164 | 0.091460465 | 0.2849704   | 0.133196921 |
| 0.208022544 | 0.128811093 | 0.085584477 | 0.168182093 |
| 0.159964015 | 0.249213823 | 0.209169946 | 0.109317195 |
| 0.140891307 | 0.105554753 | 0.109964263 | 0.21456108  |
| 0.264311446 | 0.073313939 | 0.216836531 | 0.134833155 |
| 0.245138719 | 0.060558532 | 0.218481802 | 0.3559953   |
| 0.165396626 | 0.149147913 | 0.060930046 | 0.286902603 |
| 0.22926557  | 0.118436011 | 0.025061615 | 0.227116322 |
| 0.328022999 | 0.170244086 | 0.286811851 | 0.360674189 |
| 0.161081487 | 0.13311295  | 0.121015388 | 0.197937711 |
| 0.254383059 | 0.09669978  | 0.248162811 | 0.13498661  |
| 0.359307139 | 0.366121435 | 0.245966821 | 0.157465575 |
| 0.148715433 | 0.118867391 | 0.077535471 | 0.275143681 |
| 0.105051073 | 0.082353607 | 0.069608966 | 0.270077892 |
| 0.007540163 | 0.078169954 | 0.342034587 | 0.149299117 |
| 0.366884092 | 0.298624426 | 0.311163605 | 0.155425211 |
| 0.006323896 | 0.205575147 | 0.186026392 | 0.093176583 |
| 0.236988415 | 0.255340265 | 0.158772985 | 0.128970615 |
| 0.322380958 | 0.091897162 | 0.15059646  | 0.07256958  |
| 0.060923434 | 0.17314992  | 0.302102521 | 0.226121832 |
| 0.200405958 | 0.133782587 | 0.09672293  | 0.144292896 |
| 0.139746181 | 0.298601675 | 0.2982362   | 0.056118103 |
| 0.05466843  | 0.331349195 | 0.226442593 | 0.0538932   |
| 0.160308251 | 0.301868563 | 0.324998265 | 0.005472489 |
| 0.211721825 | 0.037258413 | 0.205239058 | 0.159728033 |
| 0.178585051 | 0.201022779 | 0.287723035 | 0.134171967 |
| 0.21231947  | 0.182828451 | 0.124322043 | 0.244843101 |
| 0.152632831 | 0.197964133 | 0.200204878 | 0.12643851  |
| 0.11596407  | 0.109827736 | 0.156675836 | 0.143640528 |
| 0.085530542 | 0.267879136 | 0.276445023 | 0.095968513 |
| 0.286012762 | 0.127809363 | 0.347211963 | 0.262547416 |
| 0.349263986 | 0.115282834 | 0.166093053 | 0.21897668  |
| 0.056044406 | 0.082944256 | 0.080812896 | 0.143177534 |
| 0.216348078 | 0.117437698 | 0.121680338 | 0.127152831 |
| 0.200305586 | 0.324750844 | 0.268281894 | 0.32515952  |
| 0.132464096 | 0.160855098 | 0.044081456 | 0.123290838 |

|             |             |             |             |
|-------------|-------------|-------------|-------------|
| 0.118510499 | 0.201120648 | 0.18466215  | 0.007216133 |
| 0.23992807  | 0.074732426 | 0.249593273 | 0.276347353 |
| 0.093556385 | 0.336023359 | 0.044723739 | 0.08702395  |
| 0.03641903  | 0.154287936 | 0.216859451 | 0.217011721 |
| 0.062633091 | 0.150900603 | 0.207602498 | 0.065256462 |
| 0.236164862 | 0.21960796  | 0.173268474 | 0.181281986 |
| 0.255689938 | 0.164516436 | 0.333755341 | 0.089689398 |
| 0.135831407 | 0.123743125 | 0.128616625 | 0.155099526 |
| 0.19654428  | 0.303754835 | 0.109654435 | 0.303717479 |
| 0.140220899 | 0.189006504 | 0.3765234   | 0.179894803 |
| 0.124560202 | 0.160620424 | 0.07205373  | 0.088953473 |
| 0.181609542 | 0.08921332  | 0.003999655 | 0.05597427  |
| 0.28670776  | 0.126822967 | 0.199931999 | 0.296173088 |
| 0.153705678 | 0.353942405 | 0.076783781 | 0.163794541 |
| 0.258108778 | 0.308695053 | 0.101797903 | 0.323931316 |
| 0.276960191 | 0.129870868 | 0.138529546 | 0.038689053 |
| 0.163542519 | 0.141203969 | 0.076108113 | 0.126461825 |
| 0.066731169 | 0.071512696 | 0.160152644 | 0.118903417 |
| 0.317680362 | 0.056150745 | 0.175264047 | 0.204229448 |
| 0.254701724 | 0.309679035 | 0.201933224 | 0.232653681 |
| 0.090220422 | 0.281308422 | 0.142752994 | 0.142058811 |
| 0.109058227 | 0.12134317  | 0.263752125 | 0.10071798  |
| 0.086648883 | 0.141762107 | 0.009792708 | 0.316967571 |
| 0.277292197 | 0.13355276  | 0.278561639 | 0.062071592 |
| 0.304250943 | 0.316079644 | 0.159427387 | 0.116276241 |
| 0.035489538 | 0.172638988 | 0.260300161 | 0.233404244 |
| 0.040651156 | 0.176514684 | 0.09873924  | 0.18429869  |
| 0.297667484 | 0.114367017 | 0.337878355 | 0.062070481 |
| 0.268592716 | 0.252503473 | 0.138711928 | 0.176345996 |
| 0.177083361 | 0.127020419 | 0.067747805 | 0.343803875 |
| 0.183633111 | 0.109402439 | 0.275411819 | 0.143224915 |
| 0.127739686 | 0.276932413 | 0.146706861 | 0.342310618 |
| 0.172740727 | 0.272588516 | 0.273559314 | 0.292467897 |
| 0.343890597 | 0.150409963 | 0.099553886 | 0.153224164 |
| 0.241282408 | 0.07400281  | 0.147781999 | 0.243942111 |
| 0.090709191 | 0.293385255 | 0.133021864 | 0.182433365 |
| 0.075504957 | 0.216578661 | 0.094908555 | 0.208313525 |
| 0.238438615 | 0.163942053 | 0.158123009 | 0.338420832 |
| 0.111979387 | 0.039192071 | 0.363899818 | 0.013514539 |
| 0.12105256  | 0.19880803  | 0.243657566 | 0.155105757 |
| 0.194952919 | 0.21036857  | 0.114847372 | 0.004939604 |
| 0.293201571 | 0.051442659 | 0.163127534 | 0.126624251 |
| 0.109154754 | 0.087678628 | 0.290219227 | 0.327828629 |
| 0.240631243 | 0.096712143 | 0.069197406 | 0.294109428 |
| 0.077757439 | 0.072879073 | 0.104830145 | 0.159262136 |
| 0.097836561 | 0.073920544 | 0.095898115 | 0.076497476 |
| 0.226822956 | 0.157667266 |             |             |
| IGF2BP3     | 0.093315865 | 0.324678205 | 0.054542929 |
| 0.148246347 | 0.362464527 | 0.269252011 | 0.112729743 |
| 0.183280412 | 0.276778386 | 0.193084991 | 0.311035385 |
| 0.040120255 | 0.195207251 | 0.382208815 | 0.122071946 |
| 0.346488406 | 0.09227784  | 0.168842054 | 0.120580631 |
| 0.253086481 | 0.360667056 | 0.313770218 | 0.235860191 |
| 0.381379068 | 0.173115487 | 0.245013559 | 0.323408514 |

|             |             |             |             |
|-------------|-------------|-------------|-------------|
| 0.392533976 | 0.192205315 | 0.30835058  | 0.114214975 |
| 0.368054252 | 0.35992623  | 0.301567584 | 0.029341084 |
| 0.319188564 | 0.071617794 | 0.370502939 | 0.321362194 |
| 0.233144388 | 0.315421173 | 0.18740903  | 0.280685907 |
| 0.236544463 | 0.050949433 | 0.114723185 | 0.326236767 |
| 0.261512782 | 0.328292227 | 0.068023887 | 0.295376064 |
| 0.309447956 | 0.255502336 | 0.232974966 | 0.003561956 |
| 0.303194873 | 0.134126596 | 0.259668677 | 0.395704143 |
| 0.226129076 | 0.214928156 | 0.234331522 | 0.275558542 |
| 0.322614321 | 0.346947761 | 0.306573655 | 0.254981479 |
| 0.399771056 | 0.283789539 | 0.313599604 | 0.173857895 |
| 0.295665141 | 0.055835738 | 0.188798544 | 0.096517239 |
| 0.335432342 | 0.283531978 | 0.347514559 | 0.352945381 |
| 0.302817428 | 0.438548937 | 0.268918359 | 0.38165476  |
| 0.262044303 | 0.361034014 | 0.372542514 | 0.332011425 |
| 0.320993896 | 0.155458691 | 0.310908454 | 0.433951139 |
| 0.087541701 | 0.229258354 | 0.298597964 | 0.125163974 |
| 0.329522631 | 0.336589557 | 0.224337891 | 0.274676187 |
| 0.360524153 | 0.349371453 | 0.399438381 | 0.269010559 |
| 0.374402921 | 0.078874117 | 0.365885383 | 0.354259148 |
| 0.305893906 | 0.092207808 | 0.336370635 | 0.383181875 |
| 0.306823056 | 0.390780528 | 0.325295873 | 0.330335797 |
| 0.333832308 | 0.401942707 | 0.291734175 | 0.359062628 |
| 0.099470054 | 0.417065979 | 0.197783771 | 0.104741658 |
| 0.077939103 | 0.191432518 | 0.362538577 | 0.318707192 |
| 0.386440567 | 0.295185175 | 0.206130742 | 0.320497297 |
| 0.422609165 | 0.353192365 | 0.412793673 | 0.342691493 |
| 0.071160864 | 0.339332134 | 0.323012015 | 0.269955834 |
| 0.32327892  | 0.170140296 | 0.336655426 | 0.400558629 |
| 0.327332021 | 0.379616166 | 0.160712069 | 0.412772612 |
| 0.265699431 | 0.441267124 | 0.326210845 | 0.213334722 |
| 0.416928735 | 0.381300582 | 0.444658087 | 0.340667254 |
| 0.383329331 | 0.246861506 | 0.115896554 | 0.334617319 |
| 0.438832883 | 0.036240092 | 0.391319388 | 0.417292986 |
| 0.382897123 | 0.373673872 | 0.462323414 | 0.423499149 |
| 0.385752024 | 0.10516163  | 0.052061731 | 0.349723154 |
| 0.394523743 | 0.332292807 | 0.288307678 | 0.297060988 |
| 0.363695462 | 0.270322535 | 0.350860377 | 0.228373742 |
| 0.461848604 | 0.373724636 | 0.392210683 | 0.306956621 |
| 0.247868713 | 0.291405535 | 0.318143704 | 0.349085489 |
| 0.095045165 | 0.11761124  | 0.056041018 | 0.310446141 |
| 0.197046083 | 0.260629738 | 0.25643618  | 0.359944096 |
| 0.255824168 | 0.263075827 | 0.298806991 | 0.352433081 |
| 0.056032328 | 0.278856517 | 0.193933995 | 0.171143058 |
| 0.097474259 | 0.154075957 | 0.208324272 | 0.213143921 |
| 0.3369901   | 0.204109023 | 0.302364507 | 0.416746207 |
| 0.353315178 | 0.156030066 | 0.294840638 | 0.426194952 |
| 0.418311446 | 0.33203585  | 0.247211097 | 0.02641838  |
| 0.270807949 | 0.258584831 | 0.273440829 | 0.317703736 |
| 0.174505549 | 0.283741841 | 0.327450618 | 0.348901126 |
| 0.200208305 | 0.17031307  | 0.332831708 | 0.371351761 |
| 0.134194327 | 0.31944794  | 0.387598107 | 0.275092785 |
| 0.00831376  | 0.273913706 | 0.355407872 | 0.326802043 |
| 0.281553017 | 0.218768061 | 0.251004161 | 0.390986224 |

|             |             |             |             |
|-------------|-------------|-------------|-------------|
| 0.304641931 | 0.366334659 | 0.411769419 | 0.360621127 |
| 0.262634349 | 0.190046954 | 0.454399555 | 0.088553931 |
| 0.361328914 | 0.116408135 | 0.321631049 | 0.20560145  |
| 0.259377421 | 0.320214841 | 0.365619346 | 0.346010624 |
| 0.106953676 | 0.416945346 | 0.335678549 | 0.417694584 |
| 0.295651572 | 0.452598183 | 0.380158922 | 0.37664178  |
| 0.311201283 | 0.308723441 | 0.221699065 | 0.338061438 |
| 0.382616048 | 0.24653829  | 0.074111105 | 0.344736114 |
| 0.275190563 | 0.338079255 | 0.276789159 | 0.422765726 |
| 0.425063024 | 0.340027142 | 0.251377388 | 0.372523294 |
| 0.322046642 | 0.222454633 | 0.366937399 | 0.466680402 |
| 0.222209006 | 0.339606216 | 0.330431956 | 0.404958356 |
| 0.190413972 | 0.356260771 | 0.310718883 | 0.275721387 |
| 0.013113404 | 0.10606275  | 0.081083031 | 0.278514977 |
| 0.306079726 | 0.278664865 | 0.341412217 | 0.42048947  |
| 0.181622389 | 0.361158424 | 0.257114799 | 0.290989236 |
| 0.333999931 | 0.357265561 | 0.339365646 | 0.351451488 |
| 0.256094355 | 0.043598837 | 0.170617732 | 0.431035829 |
| 0.046274304 | 0.306721758 | 0.293138111 | 0.007072688 |
| 0.071876342 | 0.282135229 | 0.096855195 | 0.194983368 |
| 0.442280633 | 0.182772424 | 0.187580571 | 0.211858415 |
| 0.331470526 | 0.139375561 | 0.013801723 | 0.407477302 |
| 0.410868359 | 0.397357389 | 0.401789036 | 0.374411481 |
| 0.391478775 | 0.332302296 | 0.364850955 | 0.227799873 |
| 0.158617456 | 0.104306659 | 0.296078803 | 0.32305907  |
| 0.008171387 | 0.348574181 | 0.374714674 | 0.171823794 |
| 0.347054045 | 0.308206599 | 0.068830509 | 0.370372286 |
| 0.02804362  | 0.220155268 | 0.281021883 | 0.325913173 |
| 1           | 0.029004349 | 0.153047336 | 0.287019193 |
| 0.319625781 | 0.288755234 | 0.308592207 | 0.425024123 |
| 0.310409288 | 0.100286724 | 0.329080262 | 0.346748641 |
| 0.126626295 | 0.098373353 | 0.286878035 | 0.020105275 |
| 0.173430525 | 0.391009148 | 0.326597849 | 0.084605835 |
| 0.269889005 | 0.010656219 | 0.288859845 | 0.435215023 |
| 0.339913408 | 0.438685712 | 0.405290296 | 0.307354431 |
| 0.399963386 | 0.160296574 | 0.426537625 | 0.306126504 |
| 0.235180432 | 0.001220885 | 0.022503009 | 0.402361141 |
| 0.321105821 | 0.052109152 | 0.198359129 | 0.216335627 |
| 0.185669845 | 0.140466114 | 0.126530714 | 0.327072072 |
| 0.294429344 | 0.347308649 | 0.335620644 | 0.357603678 |
| 0.295564459 | 0.315048072 | 0.260563153 | 0.101993196 |
| 0.336376464 | 0.09982847  | 0.109614957 | 0.019597464 |
| 0.362730234 | 0.099997121 | 0.358531156 | 0.40263907  |
| 0.425211739 | 0.345325113 | 0.201381524 | 0.269194833 |
| 0.400065203 | 0.074806733 | 0.273766875 | 0.09818382  |
| 0.35942192  | 0.324422711 | 0.293056103 | 0.258312237 |
| 0.435720592 | 0.381108073 | 0.072577876 | 0.344794811 |
| 0.02219297  | 0.013660004 | 0.221131398 | 0.284363821 |
| 0.179093955 | 0.335544811 | 0.245086915 | 0.296598455 |
| 0.340732073 | 0.045846891 | 0.333521096 | 0.32750857  |
| 0.317398944 | 0.34105689  | 0.351090536 | 0.253707748 |
| 0.37208085  | 0.27912576  | 0.300005561 | 0.256879183 |
| 0.29732018  | 0.25725704  | 0.171784675 | 0.052521867 |
| 0.27741602  | 0.311093494 | 0.094652568 | 0.178480692 |

|             |             |             |             |
|-------------|-------------|-------------|-------------|
| 0.367519483 | 0.402500664 | 0.105561154 | 0.03363791  |
| 0.241757353 | 0.351191654 | 0.431015502 | 0.378920612 |
| 0.414607292 | 0.453172214 | 0.350374965 | 0.270748995 |
| 0.110326871 | 0.354251475 | 0.363544179 | 0.267182609 |
| 0.414521488 | 0.067974526 | 0.379413873 | 0.340613487 |
| 0.1604642   | 0.249821324 | 0.083040662 | 0.146547468 |
| 0.33451613  | 0.227067559 | 0.297029865 | 0.119030612 |
| 0.331888716 | 0.314900254 | 0.096463024 | 0.247605923 |
| 0.289366555 | 0.256423651 | 0.203615787 | 0.288188205 |
| 0.288781783 | 0.172907884 | 0.327681049 | 0.409585485 |
| 0.143752076 | 0.149524092 | 0.176088224 | 0.340216439 |
| 0.343368229 | 0.265081028 | 0.035942778 | 0.326656735 |
| 0.42869417  | 0.301531423 | 0.384836996 | 0.396371488 |
| 0.111607676 | 0.318516313 | 0.349362004 | 0.343796007 |
| 0.249349411 | 0.266046028 | 0.32369235  | 0.09829809  |
| 0.316974426 | 0.415241625 | 0.326259433 | 0.243494182 |
| 0.300018819 | 0.113963375 | 0.058984114 | 0.372370064 |
| 0.301617296 | 0.11302685  | 0.210404637 | 0.374145888 |
| 0.009245481 | 0.253629552 | 0.444194818 | 0.280949532 |
| 0.448418264 | 0.412327694 | 0.377372704 | 0.281455733 |
| 0.009115668 | 0.333524956 | 0.315818025 | 0.296744893 |
| 0.323642484 | 0.28378541  | 0.228641846 | 0.156581998 |
| 0.302475987 | 0.070889853 | 0.228832048 | 0.235286325 |
| 0.22898248  | 0.279203357 | 0.248982397 | 0.25410583  |
| 0.324610096 | 0.092434241 | 0.316070635 | 0.261022593 |
| 0.311330608 | 0.259591557 | 0.329883116 | 0.182276336 |
| 0.19872445  | 0.403558436 | 0.30737171  | 0.047774499 |
| 0.354746463 | 0.376253732 | 0.396193868 | 0.005482437 |
| 0.319167654 | 0.023096923 | 0.313021773 | 0.293342968 |
| 0.310255135 | 0.322923048 | 0.352227347 | 0.339789227 |
| 0.291830066 | 0.286935537 | 0.280511199 | 0.278562659 |
| 0.263738395 | 0.268275068 | 0.34422389  | 0.288007324 |
| 0.303871642 | 0.166955513 | 0.100043778 | 0.096956284 |
| 0.098764853 | 0.37246454  | 0.238546769 | 0.069764945 |
| 0.301402617 | 0.308186896 | 0.353640125 | 0.367561137 |
| 0.402051126 | 0.091718005 | 0.352852479 | 0.325077112 |
| 0.178644996 | 0.221260604 | 0.080610102 | 0.288064326 |
| 0.268761133 | 0.297301524 | 0.275037788 | 0.207841642 |
| 0.283001941 | 0.357011528 | 0.228929817 | 0.39474216  |
| 0.32689643  | 0.318004055 | 0.168447091 | 0.169879253 |
| 0.192131788 | 0.151351789 | 0.357349291 | 0.005241397 |
| 0.318850207 | 0.186974882 | 0.374685595 | 0.371248846 |
| 0.314674883 | 0.366157443 | 0.171524808 | 0.11746386  |
| 0.145039864 | 0.140878214 | 0.166860322 | 0.320199475 |
| 0.249014523 | 0.242162488 | 0.352746403 | 0.199662903 |
| 0.342256421 | 0.319360409 | 0.381706417 | 0.28023238  |
| 0.311191422 | 0.181162039 | 0.394438391 | 0.126553539 |
| 0.285319506 | 0.303967602 | 0.225582855 | 0.32371862  |
| 0.331234254 | 0.423205822 | 0.088218452 | 0.426853266 |
| 0.336450586 | 0.132610798 | 0.435469019 | 0.288490803 |
| 0.269932644 | 0.247213908 | 0.266958226 | 0.26417671  |
| 0.313312117 | 0.323475907 | 0.012555224 | 0.107213006 |
| 0.321186261 | 0.307649385 | 0.287733995 | 0.334994079 |
| 0.372522093 | 0.362535112 | 0.257442468 | 0.264132232 |

|             |             |             |             |
|-------------|-------------|-------------|-------------|
| 0.35021796  | 0.385037433 | 0.24664629  | 0.267974301 |
| 0.297206975 | 0.165846577 | 0.240835282 | 0.039110508 |
| 0.308008547 | 0.297049909 | 0.26204076  | 0.115121974 |
| 0.048804866 | 0.26569354  | 0.293619607 | 0.082079763 |
| 0.431879499 | 0.22519661  | 0.268088398 | 0.306859544 |
| 0.195106677 | 0.383570287 | 0.265399734 | 0.321075425 |
| 0.081859697 | 0.285621965 | 0.346323633 | 0.31672346  |
| 0.275440512 | 0.346707411 | 0.328320212 | 0.311706668 |
| 0.075377017 | 0.329985069 | 0.006599551 | 0.346192378 |
| 0.351767062 | 0.340146475 | 0.213694629 | 0.207590522 |
| 0.31724639  | 0.35700171  | 0.32961123  | 0.293990376 |
| 0.033442879 | 0.335115587 | 0.26556982  | 0.316330573 |
| 0.176596922 | 0.304889623 | 0.119288417 | 0.371069101 |
| 0.348902633 | 0.285973872 | 0.272931004 | 0.233349232 |
| 0.371419019 | 0.316459582 | 0.125358706 | 0.348549039 |
| 0.275352358 | 0.083083544 | 0.234095257 | 0.444292816 |
| 0.279147448 | 0.314098449 | 0.393902569 | 0.265867228 |
| 0.350627396 | 0.320953499 | 0.284521032 | 0.435954221 |
| 0.201482869 | 0.271158259 | 0.36889963  | 0.375918914 |
| 0.321973712 | 0.340815819 | 0.30798953  | 0.331409744 |
| 0.332350677 | 0.124832738 | 0.352472197 | 0.279016968 |
| 0.289300398 | 0.33157912  | 0.222236597 | 0.341253552 |
| 0.086149774 | 0.272236694 | 0.285767272 | 0.181529161 |
| 0.317764366 | 0.345103303 | 0.366006896 | 0.363231265 |
| 0.201419169 | 0.052237281 | 0.412046533 | 0.042008025 |
| 0.228641902 | 0.326866842 | 0.289276745 | 0.358255319 |
| 0.165443395 | 0.302055064 | 0.22346938  | 0.002773375 |
| 0.376897562 | 0.114273233 | 0.370545557 | 0.306976785 |
| 0.302473098 | 0.083368936 | 0.37038695  | 0.445655746 |
| 0.286696385 | 0.288589743 | 0.261520665 | 0.37938047  |
| 0.251740546 | 0.277694511 | 0.327779945 | 0.257571658 |
| 0.313369501 | 0.230548319 | 0.290809644 | 0.293455686 |
| 0.293414273 | 0.286993801 |             |             |
| IGF2R       | 0.178530202 | 0.035925186 | 0.192669364 |
| 0.055821813 | 0.014481815 | 0.010604119 | 0.123255837 |
| 0.07236169  | 0.038313381 | 0.001665029 | 0.023509158 |
| 0.181196333 | 0.000124736 | 0.039213064 | 0.12476576  |
| 0.00873909  | 0.146752312 | 0.155089569 | 0.006717627 |
| 0.017494634 | 0.015445303 | 0.002240733 | 0.017974543 |
| 0.012793045 | 0.230242458 | 0.033161263 | 0.003497151 |
| 0.032326968 | 2.92E-05    | 0.011907353 | 0.000981462 |
| 0.087629222 | 0.011096916 | 0.002003024 | 0.198921082 |
| 0.012005068 | 0.000761317 | 0.096536357 | 0.02360943  |
| 0.002116631 | 0.115166006 | 0.005361709 | 0.046619613 |
| 0.006004358 | 0.180079455 | 0.000104368 | 0.008325634 |
| 0.028330691 | 0.021468944 | 0.197913249 | 0.017214075 |
| 0.004676143 | 0.061047545 | 0.014682536 | 0.004451738 |
| 0.001286972 | 0.0033838   | 0.000187089 | 0.052011001 |
| 0.161160057 | 0.1371243   | 0.000259846 | 0.032359455 |
| 0.008666463 | 0.017477529 | 0.082554851 | 0.002852452 |
| 0.045575825 | 0.000577011 | 0.009760407 | 0.026821977 |
| 0.013509437 | 0.153193531 | 0.217132213 | 0.161437036 |
| 0.003972314 | 0.092470047 | 0.016914392 | 0.002781506 |
| 0.033461747 | 0.075509496 | 0.095383539 | 0.058446567 |



|             |             |             |             |
|-------------|-------------|-------------|-------------|
| 0.001381943 | 0.005820187 | 0.007115251 | 0.061607704 |
| 0.026470893 | 0.067694471 | 0.027072651 | 0.059308499 |
| 0.132664099 | 0.007302621 | 0.019335293 | 0.182306996 |
| 0.036488217 | 0.001189968 | 0.004767319 | 0.001710216 |
| 0.012079952 | 0.008730508 | 0.06589485  | 0.084542016 |
| 0.010893347 | 0.22706449  | 0.075198739 | 0.005045929 |
| 0.016681008 | 0.229326984 | 0.006692555 | 0.014702247 |
| 0.016805512 | 0.033967846 | 0.021480764 | 0.03910429  |
| 0.005609979 | 0.042916771 | 0.029500248 | 0.042748107 |
| 0.000474731 | 0.044885761 | 0.131689558 | 0.143344437 |
| 0.135862242 | 0.110906523 | 0.00462866  | 0.100128897 |
| 0.025835207 | 0.049255846 | 0.085151522 | 0.046190334 |
| 0.02385076  | 0.06118259  | 0.041950916 | 0.031531008 |
| 0.213820336 | 0.000904566 | 0.006357602 | 0.027572105 |
| 0.024904892 | 0.180214871 | 0.003840593 | 0.075065705 |
| 0.082600643 | 0.020427475 | 0.082387814 | 0.094701758 |
| 0.047244936 | 0.06034719  | 0.027108608 | 0.125194811 |
| 0.067100673 | 0.073772287 | 0.045686122 | 0.009537516 |
| 0.072113109 | 0.034593934 | 0.003377118 | 0.042411979 |
| 0.058685292 | 0.002371604 | 0.020011946 | 0.023550863 |
| 0.046083435 | 0.015402804 | 0.040281037 | 0.03217143  |
| 0.044493747 | 0.24516662  | 0.00085663  | 0.037115821 |
| 0.057938743 | 0.06026908  | 0.036875411 | 0.003719952 |
| 0.010825286 | 0.017112542 | 0.017196271 | 0.001659514 |
| 0.07107212  | 0.030640802 | 0.024153899 | 0.028256851 |
| 0.020398082 | 0.129955145 | 0.002522168 | 0.07860707  |
| 0.156161608 | 0.13598334  | 0.290395829 | 0.06194682  |
| 0.003047307 | 0.1198229   | 0.013342205 | 0.011211386 |
| 0.133053572 | 0.019015989 | 0.001021858 | 0.011779493 |
| 0.297652555 | 0.006600891 | 0.131002388 | 0.103510852 |
| 0.144154755 | 0.273510464 | 0.032828387 | 0.062633372 |
| 0.036056173 | 0.217704895 | 0.009579018 | 0.03317892  |
| 0.007140796 | 0.176354028 | 0.018465868 | 0.056599995 |
| 0.076421955 | 0.006193791 | 0.130787734 | 0.101765779 |
| 0.004002208 | 0.000501424 | 8.74E-05    | 0.004219203 |
| 0.249359278 | 0.015430721 | 0.011841838 | 0.017489454 |
| 0.056076289 | 0.079593687 | 0.003712111 | 0.107208029 |
| 0.178411642 | 0.012964758 | 0.030973798 | 0.007732665 |
| 0.225877331 | 0.034573086 | 0.022471085 | 0.009729411 |
| 0.043594524 | 0.001839104 | 0.000912374 | 0.029204242 |
| 0.000821501 | 0.004721599 | 0.026447172 | 0.017266156 |
| 0.003570284 | 0.167737546 | 0.041376639 | 0.001623502 |
| 0.006492028 | 0.031947626 | 0.065682563 | 0.004891502 |
| 0.088886508 | 0.067747486 | 0.008419218 | 0.010036292 |
| 0.189774958 | 0.048147286 | 0.049288243 | 0.035459771 |
| 0.001769116 | 0.044469129 | 0.020565831 | 0.042208555 |
| 0.040605455 | 0.002317322 | 0.000271404 | 0.024010054 |
| 0.026478226 | 0.002012979 | 0.255274178 | 0.011295091 |
| 0.003536461 | 0.010250907 | 0.015215159 | 0.043815235 |
| 0.084937527 | 0.052169024 | 0.066691788 | 0.028396107 |
| 0.056645082 | 0.098930987 | 0.033814091 | 0.048559863 |
| 0.001192633 | 0.006078074 | 0.004904359 | 0.036282604 |
| 0.168892206 | 0.006125741 | 0.097787434 | 9.87E-05    |
| 0.00099002  | 0.175607392 | 0.246270803 | 0.069114949 |

|             |             |             |             |
|-------------|-------------|-------------|-------------|
| 0.003182899 | 0.005443449 | 0.01662482  | 0.040525988 |
| 0.161637229 | 0.061121343 | 0.089934125 | 0.01017036  |
| 0.05472131  | 0.005514053 | 0.00496906  | 0.011710212 |
| 0.117011816 | 0.126091999 | 0.066695743 | 0.079159427 |
| 0.236014279 | 0.002067108 | 0.026523865 | 0.014201228 |
| 0.150586975 | 0.018150999 | 0.280609989 | 0.261903298 |
| 0.030612684 | 0.232851645 | 0.124527489 | 0.002623229 |
| 0.043979049 | 0.226253009 | 0.057089681 | 0.033732121 |
| 0.043414991 | 0.04424279  | 0.042570052 | 0.060342163 |
| 0.030890849 | 0.021122959 | 0.022041627 | 0.027522805 |
| 0.088349514 | 0.121308642 | 0.001885694 | 0.024370936 |
| 0.009141757 | 0.042435065 | 0.016587783 | 0.230951257 |
| 0.013512861 | 0.05036219  | 0.17660132  | 0.009990926 |
| 0.140341026 | 0.000208397 | 0.011231424 | 0.038795424 |
| 0.029004349 | 1           | 0.003957558 | 0.001425984 |
| 0.068898845 | 0.08594143  | 0.001504361 | 0.049787218 |
| 0.03332827  | 0.153178643 | 0.020054221 | 0.024465412 |
| 0.141634047 | 0.000987516 | 0.010093713 | 0.000325214 |
| 0.004165564 | 0.060376372 | 0.003447347 | 0.100525823 |
| 0.074146718 | 0.217531204 | 0.080708298 | 0.051142722 |
| 0.050300249 | 0.033502868 | 0.044312357 | 0.002993306 |
| 0.048067016 | 0.003237916 | 0.037096919 | 0.039527455 |
| 0.001910433 | 0.019799108 | 0.043677603 | 0.02453397  |
| 0.007900617 | 0.266751869 | 0.175768663 | 0.004709513 |
| 0.083310609 | 0.089653078 | 0.162796986 | 0.006799234 |
| 0.014249154 | 0.027699258 | 0.004656545 | 0.053594533 |
| 0.051924551 | 0.072200024 | 0.006308207 | 0.245965343 |
| 0.0095336   | 0.144800898 | 0.219074738 | 0.018346637 |
| 0.024713568 | 0.231177764 | 0.089387332 | 0.042852606 |
| 0.061941616 | 0.01726381  | 0.000796791 | 0.003828552 |
| 0.028437167 | 0.18947365  | 0.001196816 | 0.173378592 |
| 0.042031314 | 0.01308124  | 0.081409582 | 0.110979249 |
| 0.047766788 | 0.059107537 | 0.213313202 | 0.0259396   |
| 0.148293466 | 0.006823122 | 0.016291409 | 0.082861557 |
| 0.002585663 | 0.005115654 | 0.132605417 | 0.015414348 |
| 0.020792881 | 0.154059828 | 0.001533267 | 0.002230367 |
| 0.049743095 | 0.01434     | 0.008732263 | 0.088222929 |
| 0.013331129 | 0.008024475 | 0.052666249 | 0.062423825 |
| 0.00437819  | 0.094792699 | 0.222350309 | 0.171875884 |
| 0.00530346  | 0.00501319  | 0.24508099  | 0.196608493 |
| 0.033913028 | 0.028029205 | 0.106002099 | 0.123795649 |
| 0.12999417  | 0.011808707 | 0.030383475 | 0.03764386  |
| 0.064135323 | 0.056314418 | 0.114004777 | 0.032815226 |
| 0.174543621 | 0.029794822 | 0.008575746 | 0.03322542  |
| 0.040040578 | 0.198656011 | 0.050914411 | 0.002625085 |
| 0.211935055 | 0.054859298 | 0.156218846 | 0.210684567 |
| 0.004747005 | 0.158500729 | 0.068076215 | 0.155919425 |
| 0.015837572 | 0.001630388 | 0.185104593 | 0.11780509  |
| 0.055838374 | 0.000599677 | 0.160391794 | 0.021070622 |
| 0.052443853 | 0.001603938 | 0.01143008  | 0.08064974  |
| 0.225127028 | 0.143293944 | 0.017088789 | 0.024679261 |
| 0.017787373 | 0.003938054 | 0.107678305 | 0.031752848 |
| 0.0380963   | 0.008582605 | 0.054211904 | 0.050083192 |
| 0.253531146 | 0.007084725 | 0.002182706 | 0.013838702 |

|             |             |             |             |
|-------------|-------------|-------------|-------------|
| 0.113724545 | 0.013925196 | 0.049635163 | 0.275455756 |
| 0.111727438 | 0.084174076 | 0.040265893 | 0.09537223  |
| 0.00745537  | 0.134595718 | 0.19325032  | 0.026966067 |
| 0.002186657 | 0.09354538  | 0.004409792 | 0.016668968 |
| 0.025909302 | 0.000438856 | 0.034296769 | 0.037260243 |
| 0.061173647 | 0.032853064 | 0.075863538 | 0.023021371 |
| 0.000313709 | 0.008060839 | 0.021901934 | 0.006673082 |
| 0.034246491 | 0.065916422 | 0.017862544 | 0.101759405 |
| 0.118051606 | 0.238957791 | 0.0469967   | 0.00602966  |
| 0.000481948 | 0.01701702  | 0.15704998  | 0.075453201 |
| 0.045268516 | 0.157760771 | 0.001656869 | 0.066803936 |
| 0.001678584 | 0.139695733 | 0.06814734  | 0.002361837 |
| 0.000164147 | 0.035481354 | 0.029059435 | 0.213171076 |
| 0.004868278 | 0.034948544 | 0.044782978 | 0.018877697 |
| 0.013229087 | 0.212956521 | 0.049498997 | 0.047529598 |
| 0.052408511 | 0.038952538 | 0.043625683 | 0.011602072 |
| 0.02829577  | 0.062045248 | 0.037427164 | 0.102540557 |
| 0.054143222 | 0.071392795 | 0.013101333 | 0.017811512 |
| 0.012887157 | 0.132336874 | 0.295543153 | 0.308268024 |
| 0.129879426 | 0.030211279 | 0.183600054 | 0.28026021  |
| 0.090608986 | 0.010698158 | 0.101290323 | 0.042617424 |
| 0.059064302 | 0.219484199 | 0.015385304 | 0.031493096 |
| 0.000137867 | 0.006873881 | 0.111914166 | 0.018403039 |
| 0.084299841 | 0.005789929 | 0.008598406 | 0.04104352  |
| 0.015314507 | 0.111780195 | 0.177032264 | 0.061421979 |
| 0.013065733 | 0.008307095 | 0.002400342 | 0.077581779 |
| 0.103888024 | 0.200815053 | 0.012471832 | 0.206532964 |
| 0.040687368 | 0.025434417 | 0.021939404 | 0.059813458 |
| 0.000907898 | 0.083010416 | 0.002482353 | 0.098353597 |
| 0.001581748 | 0.182070553 | 0.222948479 | 0.015216635 |
| 4.83E-05    | 0.07977171  | 0.020110349 | 0.010748469 |
| 0.015425693 | 0.012712345 | 0.007739759 | 0.043208295 |
| 0.057568467 | 0.134228527 | 0.069383987 | 0.129118915 |
| 0.005354367 | 0.008206668 | 0.012967837 | 0.021596285 |
| 0.03569886  | 0.033695633 | 0.271396294 | 0.031170262 |
| 0.008649556 | 0.233233108 | 0.084908883 | 0.035574445 |
| 0.017268283 | 0.044588614 | 0.000201502 | 0.005933365 |
| 0.026321199 | 0.001603736 | 0.000466998 | 0.001242244 |
| 0.058272556 | 0.005431495 | 0.019039387 | 0.030403657 |
| 0.008346023 | 0.054659067 | 0.000306595 | 0.034507007 |
| 0.052104373 | 0.074535541 | 0.01603927  | 0.126945421 |
| 0.053814111 | 0.139682411 | 0.020030031 | 0.001146528 |
| 0.006819639 | 0.003679346 | 0.001280234 | 0.156849402 |
| 0.189568977 | 0.000262654 | 0.009763909 | 0.182313136 |
| 0.027776781 | 5.31E-05    | 0.014893272 | 0.015592915 |
| 0.151043907 | 0.078385345 | 0.048943308 | 0.023939968 |
| 0.05786297  | 0.088779945 | 0.004205989 | 0.005426321 |
| 0.011806524 | 0.004128776 | 0.037151171 | 0.003224911 |
| 0.190365497 | 0.01248677  | 0.019094658 | 0.12282838  |
| 0.071882229 | 0.003497398 | 0.191360148 | 0.000918011 |
| 0.079705131 | 0.053624719 | 0.006968974 | 0.00377951  |
| 0.165675683 | 0.007812347 | 0.114982552 | 0.048505338 |
| 0.000300824 | 0.011718694 | 0.124973049 | 0.006147211 |
| 0.101841142 | 0.003921617 | 0.124262911 | 0.000915626 |

|             |             |             |             |
|-------------|-------------|-------------|-------------|
| 0.043873454 | 0.038560416 | 0.161033268 | 0.010722195 |
| 0.010602618 | 0.282894242 | 0.003758033 | 0.047874246 |
| 0.07308026  | 0.004258764 | 0.021692022 | 0.044583816 |
| 0.002792118 | 0.058458289 | 0.00578381  | 0.047370808 |
| 0.050399011 | 0.109382541 | 0.021175608 | 0.040082404 |
| 0.085649903 | 0.004980097 | 0.0020677   | 0.017245018 |
| 0.054219516 | 0.092522028 | 0.002658234 | 0.056863311 |
| 0.001513212 | 0.056950701 | 0.014554838 | 0.020392995 |
| 0.115418105 | 0.041056094 | 0.007670397 | 0.193193503 |
| 0.046368834 | 0.013625039 | 0.008719727 | 0.097228003 |
| 0.046607022 | 0.124660376 | 0.080041828 | 0.000285239 |
| 0.03720129  | 0.019354177 | 0.08378292  | 0.008368059 |
| 0.223543426 | 0.029093547 | 0.022592548 | 0.075301375 |
| 0.030600233 | 0.008091871 | 0.011175393 | 0.01167518  |
| 0.001381205 | 0.145735044 | 0.064566016 | 0.034691659 |
| 0.056553216 | 0.002131189 | 0.000574774 | 0.049910068 |
| 0.001106958 | 0.000562096 | 0.001461118 | 0.016288782 |
| 0.001607746 | 0.002583614 | 0.002585474 | 0.002011787 |
| 0.041709768 | 0.039664066 |             |             |
| IL10        | 0.024453539 | 0.249200035 | 0.031543104 |
| 0.040784637 | 0.139731756 | 0.157197143 | 0.008281694 |
| 0.016414181 | 0.149690823 | 0.060216337 | 0.212689854 |
| 0.004352147 | 0.003767269 | 0.292066751 | 0.006228782 |
| 0.202298568 | 0.005139685 | 0.030336834 | 0.000496831 |
| 0.006683694 | 0.118235348 | 0.080773118 | 0.14550367  |
| 0.087177556 | 0.117670952 | 0.155807236 | 0.127926526 |
| 0.34012772  | 0.050554647 | 0.278527259 | 0.023624386 |
| 0.26523549  | 0.161126159 | 0.157550282 | 0.005162224 |
| 0.159194325 | 9.14E-05    | 0.258106161 | 0.089681945 |
| 0.010326757 | 0.206562183 | 0.12330896  | 0.115480772 |
| 0.144549926 | 0.015718866 | 0.026634334 | 0.186581175 |
| 0.11972177  | 0.046587282 | 0.024060698 | 0.263135371 |
| 0.061829219 | 0.195493991 | 0.223468506 | 3.83E-05    |
| 0.115155509 | 0.015301298 | 0.0597994   | 0.328610983 |
| 0.112837049 | 0.037575956 | 0.02915401  | 0.041668944 |
| 0.131515496 | 0.14961495  | 0.090373983 | 0.086417995 |
| 0.345618057 | 0.023764076 | 0.234949781 | 0.00470145  |
| 0.125327514 | 0.004400229 | 0.08045704  | 0.021847219 |
| 0.088948154 | 0.076793255 | 0.140823567 | 0.086694379 |
| 0.277187662 | 0.296689725 | 0.089236857 | 0.308252977 |
| 0.002128411 | 0.137059671 | 0.059618677 | 0.147371193 |
| 0.148118722 | 0.006957375 | 0.311189621 | 0.338881176 |
| 0.005126607 | 0.154149556 | 0.196146445 | 0.043081358 |
| 0.277459581 | 0.03061251  | 0.187341299 | 0.047671731 |
| 0.189887193 | 0.154782449 | 0.248020513 | 0.184435259 |
| 0.083229494 | 0.032131019 | 0.2927631   | 0.143090036 |
| 0.132752865 | 0.046275457 | 0.037884236 | 0.297427153 |
| 0.253000263 | 0.344081818 | 0.234389233 | 0.178506828 |
| 0.181686082 | 0.350050664 | 0.299584889 | 0.215795359 |
| 0.004331748 | 0.332804959 | 0.103602534 | 0.006958513 |
| 0.018168635 | 0.012438961 | 0.018480143 | 0.145172424 |
| 0.332451404 | 0.1374859   | 0.072845778 | 0.092940479 |
| 0.291331621 | 0.293426566 | 0.322400991 | 0.240927984 |
| 0.010991646 | 0.032581997 | 0.202748667 | 0.051032028 |

|             |             |             |             |
|-------------|-------------|-------------|-------------|
| 0.178172258 | 0.027681919 | 0.101769849 | 0.316134598 |
| 0.280775305 | 0.284570808 | 0.043637607 | 0.286027703 |
| 0.029440484 | 0.342033689 | 0.323080023 | 0.092729063 |
| 0.336928325 | 0.323748228 | 0.344232642 | 0.251635526 |
| 0.30587679  | 0.216570175 | 0.00023798  | 0.197597184 |
| 0.31305355  | 0.000969073 | 0.296766448 | 0.325703765 |
| 0.332809198 | 0.331098386 | 0.324470061 | 0.334737651 |
| 0.321049594 | 0.023003771 | 0.000166422 | 0.126312438 |
| 0.33714794  | 0.308873654 | 0.010936644 | 0.199230325 |
| 0.152386028 | 0.155358339 | 0.215533485 | 0.029786939 |
| 0.302494361 | 0.308950127 | 0.310718232 | 0.198317443 |
| 0.086012011 | 0.18273273  | 0.161400595 | 0.302021606 |
| 0.006489447 | 0.048196005 | 0.028165697 | 0.115655149 |
| 0.090614466 | 0.0704816   | 0.122824238 | 0.105509507 |
| 0.090797358 | 0.079076892 | 0.096716733 | 0.208439918 |
| 0.026522407 | 0.239670447 | 0.065286064 | 0.065580867 |
| 0.010861559 | 0.067145289 | 0.028184491 | 0.039707906 |
| 0.089184859 | 0.122303751 | 0.237635969 | 0.310325087 |
| 0.075228446 | 0.123758209 | 0.234821341 | 0.296951191 |
| 0.268723796 | 0.206682182 | 0.090151772 | 0.004062864 |
| 0.040441159 | 0.051470434 | 0.035525596 | 0.169528365 |
| 0.085121589 | 0.03806169  | 0.182094473 | 0.262079251 |
| 0.15872505  | 0.024714709 | 0.090524213 | 0.254890056 |
| 0.068583376 | 0.112939931 | 0.30667541  | 0.165282176 |
| 0.000621353 | 0.174030521 | 0.312248324 | 0.009307929 |
| 0.12092828  | 0.004466379 | 0.068331447 | 0.327195894 |
| 0.032986916 | 0.038738557 | 0.316495645 | 0.218568476 |
| 0.017443155 | 0.100564661 | 0.323478082 | 0.000720718 |
| 0.092758543 | 0.002456936 | 0.158665525 | 0.094381791 |
| 0.130926767 | 0.121591542 | 0.128188428 | 0.090559235 |
| 0.083511203 | 0.324458319 | 0.215406579 | 0.349726123 |
| 0.105550437 | 0.329569595 | 0.321811692 | 0.30825297  |
| 0.19164705  | 0.094893147 | 0.023262853 | 0.339721303 |
| 0.323499669 | 0.010350087 | 0.035110695 | 0.245118549 |
| 0.101171925 | 0.216073228 | 0.002527693 | 0.348661425 |
| 0.300087647 | 0.29684417  | 0.030288504 | 0.201724979 |
| 0.297798054 | 0.134319469 | 0.226059943 | 0.30798978  |
| 0.049335999 | 0.135220064 | 0.112281223 | 0.247875969 |
| 0.101012706 | 0.035336044 | 0.140784931 | 0.026365062 |
| 0.002868698 | 0.019187585 | 0.031037084 | 0.05396884  |
| 0.044891201 | 0.185430626 | 0.205478848 | 0.333255511 |
| 0.03967504  | 0.256083429 | 0.074537501 | 0.1119031   |
| 0.275826578 | 0.085880854 | 0.169215656 | 0.16825325  |
| 0.100966238 | 0.002454722 | 0.01783509  | 0.313871519 |
| 0.0129803   | 0.063992601 | 0.074578163 | 0.00046438  |
| 0.010612705 | 0.232438462 | 0.047870381 | 0.109135405 |
| 0.290927676 | 0.121891969 | 0.118478968 | 0.072316179 |
| 0.186816974 | 0.034992674 | 0.001026258 | 0.297398685 |
| 0.255419057 | 0.228902802 | 0.254306904 | 0.234811699 |
| 0.227497277 | 0.181233691 | 0.246548626 | 0.177052774 |
| 0.018401169 | 0.019466135 | 0.052976874 | 0.11479442  |
| 4.63E-05    | 0.236124822 | 0.080144395 | 0.075778886 |
| 0.219482654 | 0.110668204 | 0.009553841 | 0.119734451 |
| 0.012595442 | 0.077994765 | 0.042004322 | 0.036694015 |

|             |             |             |             |
|-------------|-------------|-------------|-------------|
| 0.153047336 | 0.003957558 | 1           | 0.053155105 |
| 0.303288595 | 0.212920115 | 0.103589348 | 0.343712339 |
| 0.185356924 | 0.065232509 | 0.150620421 | 0.228017337 |
| 0.015484742 | 0.001456722 | 0.077305347 | 0.006552565 |
| 0.003177743 | 0.223242441 | 0.072495709 | 0.014742708 |
| 0.16064956  | 0.00287547  | 0.267129141 | 0.335062625 |
| 0.304934398 | 0.341949296 | 0.353346551 | 0.124440062 |
| 0.35552178  | 0.010425332 | 0.344873312 | 0.263442379 |
| 0.126616537 | 0.000433716 | 0.000136818 | 0.346635197 |
| 0.217888587 | 0.027756978 | 0.076784075 | 0.094897083 |
| 0.027872385 | 0.045407717 | 0.009886307 | 0.050220772 |
| 0.232324381 | 0.088731845 | 0.02278249  | 0.28302304  |
| 0.083770472 | 0.073758903 | 0.102787591 | 0.03235021  |
| 0.181792777 | 0.014758286 | 0.025866482 | 0.001269711 |
| 0.166984618 | 0.060717751 | 0.270205177 | 0.326398132 |
| 0.3218431   | 0.234457062 | 0.097372157 | 0.02551367  |
| 0.220899434 | 0.057820555 | 0.046628791 | 0.050543344 |
| 0.339314958 | 0.242642226 | 0.220274821 | 0.237142751 |
| 0.331181247 | 0.322147863 | 0.007114428 | 0.264543587 |
| 0.004179599 | 1.42E-05    | 0.218365643 | 0.087205909 |
| 0.000175334 | 0.138458398 | 0.156248888 | 0.024384199 |
| 0.025839247 | 0.004541793 | 0.078940431 | 0.071280614 |
| 0.148285084 | 0.134258369 | 0.118917315 | 0.077730408 |
| 0.063654513 | 0.006685732 | 0.044674613 | 0.020189652 |
| 0.004200227 | 0.19537576  | 0.131583743 | 0.00297726  |
| 0.209911943 | 0.201286703 | 0.022492428 | 0.069699258 |
| 0.339080724 | 0.352738522 | 0.002905023 | 0.003859388 |
| 0.14822827  | 0.064651341 | 0.32765249  | 0.331011207 |
| 0.329533159 | 0.329830349 | 0.226293365 | 0.014736385 |
| 0.016698855 | 0.136941918 | 0.115339914 | 0.010857754 |
| 0.32829691  | 0.025788546 | 0.303525185 | 0.119069886 |
| 0.039148072 | 0.07474948  | 0.006683918 | 0.02212333  |
| 0.184154942 | 0.068930757 | 0.063957473 | 0.0996827   |
| 0.110374504 | 0.0409337   | 0.008681656 | 0.083770692 |
| 0.197745032 | 0.031333165 | 0.065484538 | 0.054850446 |
| 0.191564345 | 0.009886681 | 0.257547979 | 0.283458125 |
| 0.064491875 | 0.029406489 | 0.105980824 | 0.155928461 |
| 0.296817614 | 0.145327216 | 0.003683013 | 0.286120037 |
| 0.294277828 | 0.274824805 | 0.327281493 | 0.210718675 |
| 0.030368731 | 0.217524439 | 0.066069551 | 0.142139582 |
| 0.054593707 | 0.155376033 | 0.052710351 | 0.021278395 |
| 0.125876683 | 0.253330242 | 0.276484084 | 0.071350225 |
| 0.170096403 | 0.043508181 | 0.022488629 | 0.242201736 |
| 0.044356117 | 0.017431728 | 0.116948354 | 0.218576528 |
| 0.000236553 | 0.030098501 | 0.271164703 | 0.057932429 |
| 0.287019878 | 0.333937042 | 0.308281863 | 0.03200114  |
| 3.98E-05    | 0.2165983   | 0.249026003 | 0.201289963 |
| 0.283630856 | 0.187161498 | 0.003484641 | 0.018264411 |
| 0.163652948 | 0.049357783 | 0.023711544 | 0.025585688 |
| 0.005055946 | 0.193737383 | 0.082319266 | 0.053059539 |
| 0.051287229 | 0.027008732 | 0.039764756 | 0.093353624 |
| 0.004569678 | 0.125982514 | 0.22723886  | 0.043541923 |
| 0.041755725 | 0.228845135 | 0.264114302 | 0.008338278 |
| 0.118315178 | 0.214937445 | 0.234724425 | 0.000304941 |

|             |             |             |             |
|-------------|-------------|-------------|-------------|
| 0.286440677 | 0.001422477 | 0.062035441 | 0.102209261 |
| 0.058766856 | 0.046047569 | 0.098631962 | 0.086305301 |
| 0.137839643 | 0.063870749 | 0.127604949 | 0.123518381 |
| 0.051476366 | 0.054935959 | 0.16622359  | 0.117103282 |
| 0.113420554 | 0.049545371 | 0.04922677  | 0.056585813 |
| 0.009017674 | 0.276055749 | 0.145156417 | 0.042660375 |
| 0.079062502 | 0.082319612 | 0.218235586 | 0.32082106  |
| 0.246298316 | 0.067684753 | 0.07072414  | 0.337854749 |
| 0.005134355 | 0.006732136 | 0.010229737 | 0.164351639 |
| 0.082019242 | 0.045860239 | 0.13801055  | 0.180768954 |
| 0.1937653   | 0.260940101 | 0.13658871  | 0.26109919  |
| 0.135110288 | 0.079634635 | 0.121137132 | 0.022575887 |
| 0.091447547 | 0.049859303 | 0.113007517 | 0.001246247 |
| 0.177709136 | 0.053440636 | 0.353090057 | 0.333285047 |
| 0.068036372 | 0.219760388 | 0.041537013 | 0.030060806 |
| 0.062593986 | 0.120284883 | 0.063781191 | 0.239522218 |
| 0.070083159 | 0.046678683 | 0.135493385 | 0.09025384  |
| 0.250930855 | 0.205639316 | 0.038184466 | 0.046685129 |
| 0.059709012 | 0.097321279 | 0.250050661 | 0.035993202 |
| 0.214116196 | 0.058269498 | 0.130746387 | 0.14057434  |
| 0.06176178  | 0.325271088 | 0.020416296 | 0.340387953 |
| 0.116619716 | 0.056108417 | 0.28793899  | 0.077541599 |
| 0.041200535 | 0.013327815 | 0.059619492 | 0.076750681 |
| 0.027775432 | 0.097517312 | 0.000550944 | 0.001445445 |
| 0.198762183 | 0.038809018 | 0.223725015 | 0.14490601  |
| 0.062574596 | 0.16453328  | 0.010372171 | 0.071690857 |
| 0.302650271 | 0.291445942 | 0.060811691 | 0.115491821 |
| 0.169360426 | 0.031988488 | 0.230590659 | 2.14E-05    |
| 0.227719313 | 0.214464085 | 0.065946453 | 0.007504202 |
| 0.001401354 | 0.076218314 | 0.216740365 | 0.016867361 |
| 0.299115268 | 0.026388284 | 0.116791288 | 0.261558262 |
| 0.055479642 | 0.302578556 | 0.01850238  | 0.28860653  |
| 0.001192276 | 0.096021175 | 0.123956659 | 0.096190943 |
| 0.079146799 | 0.105671713 | 0.255024958 | 0.091541439 |
| 0.008870242 | 0.043599332 | 1.18E-05    | 0.260883505 |
| 0.287175973 | 0.125781377 | 0.093373336 | 0.037237545 |
| 0.140063571 | 0.179332839 | 0.015840304 | 0.153705079 |
| 0.001964213 | 0.223836627 | 0.064024712 | 0.30613268  |
| 0.078691889 | 0.115248421 | 0.010063818 | 0.086543442 |
| 0.265329307 | 0.034044022 | 0.097207186 | 0.078517    |
| 0.317665711 | 0.191186738 | 0.090896163 | 0.018752528 |
| 0.142058848 | 0.023390245 | 0.102373395 | 0.312807875 |
| 0.060412266 | 0.086795098 | 0.314230958 | 0.075087256 |
| 0.087726268 | 0.207343529 | 0.166905019 | 0.287136399 |
| 0.010363182 | 0.120370254 | 0.229768624 | 0.267787739 |
| 0.153421797 | 0.032950675 | 0.07598371  | 0.07304202  |
| 0.324143996 | 0.023989627 | 0.030093432 | 0.218998338 |
| 0.076871091 | 0.123744676 | 0.119374014 | 0.047711021 |
| 0.002066412 | 0.015602032 | 0.098938243 | 0.054396008 |
| 0.126114371 | 0.166405777 | 0.050756102 | 0.24532983  |
| 0.032626702 | 0.007976536 | 0.271086894 | 0.001059198 |
| 0.183314535 | 0.269184266 | 0.083231499 | 0.114072089 |
| 0.129689974 | 0.123351728 | 0.148265487 | 0.000107855 |
| 0.232884846 | 0.00172718  | 0.050994725 | 0.073799095 |

|             |             |             |             |
|-------------|-------------|-------------|-------------|
| 0.012779897 | 0.010847901 | 0.295436532 | 0.333842919 |
| 0.126095319 | 0.015289399 | 0.058565935 | 0.276153261 |
| 0.007670964 | 0.078238344 | 0.064016985 | 0.224876478 |
| 0.065447042 | 0.143390829 | 0.124934929 | 0.173232297 |
| 0.223820433 | 0.053908247 |             |             |
| IL12RB2     | 0.016422068 | 0.290548535 | 0.011170294 |
| 0.02540234  | 0.234638714 | 0.116178923 | 0.013998134 |
| 0.027561057 | 0.224569476 | 0.090000524 | 0.195866511 |
| 0.002508819 | 0.036464671 | 0.374220999 | 0.011610077 |
| 0.311399099 | 0.006294418 | 0.043888242 | 0.019196828 |
| 0.031767667 | 0.224545219 | 0.092069376 | 0.151496608 |
| 0.183953736 | 0.09862586  | 0.173125674 | 0.25091     |
| 0.377270936 | 0.062491519 | 0.289946581 | 0.036904604 |
| 0.314306217 | 0.269451033 | 0.210748922 | 0.001251051 |
| 0.206158509 | 0.007882964 | 0.310430557 | 0.131357991 |
| 0.047840705 | 0.228767803 | 0.124010309 | 0.101474428 |
| 0.195430425 | 0.006689811 | 0.034124006 | 0.350706438 |
| 0.173616243 | 0.078427276 | 0.016721241 | 0.281105169 |
| 0.13198829  | 0.186850916 | 0.257827492 | 0.001657229 |
| 0.181947976 | 0.045571634 | 0.135197333 | 0.345495645 |
| 0.108312721 | 0.047440946 | 0.083631997 | 0.076292864 |
| 0.263149904 | 0.295039465 | 0.139837512 | 0.141345104 |
| 0.381298792 | 0.082303437 | 0.339197879 | 0.027095627 |
| 0.16316203  | 0.005489454 | 0.085892963 | 0.026895369 |
| 0.134046042 | 0.094957566 | 0.187356649 | 0.171283125 |
| 0.305853897 | 0.36311173  | 0.125866496 | 0.34389617  |
| 0.046473274 | 0.285371678 | 0.105913086 | 0.229309015 |
| 0.279866129 | 0.019260861 | 0.32407297  | 0.395850531 |
| 0.009618    | 0.219361219 | 0.327673503 | 0.053646682 |
| 0.281831584 | 0.088589343 | 0.196564821 | 0.083915172 |
| 0.317211206 | 0.29926984  | 0.32212097  | 0.20395173  |
| 0.152349982 | 0.024594916 | 0.305311088 | 0.280218404 |
| 0.127169771 | 0.025796854 | 0.10208227  | 0.40466843  |
| 0.291325568 | 0.377493797 | 0.332526616 | 0.311225521 |
| 0.303677014 | 0.376005552 | 0.294838455 | 0.291588766 |
| 0.031884001 | 0.379708106 | 0.073491983 | 0.007309332 |
| 0.01599883  | 0.019817142 | 0.074926355 | 0.196067809 |
| 0.368310449 | 0.189597135 | 0.074181581 | 0.142919533 |
| 0.423953146 | 0.30513099  | 0.38829255  | 0.351253339 |
| 0.008644895 | 0.103052258 | 0.303371035 | 0.05724188  |
| 0.304362089 | 0.043656237 | 0.204809203 | 0.346587991 |
| 0.274510342 | 0.382731515 | 0.040571181 | 0.326989145 |
| 0.073856587 | 0.389601366 | 0.327173153 | 0.081385625 |
| 0.36521685  | 0.323262047 | 0.409893631 | 0.354522008 |
| 0.309348527 | 0.146185081 | 0.020719945 | 0.295548115 |
| 0.371011651 | 0.00781899  | 0.395214567 | 0.425050835 |
| 0.363240423 | 0.417671942 | 0.43026323  | 0.397026832 |
| 0.358077521 | 0.025218199 | 0.016471986 | 0.243093551 |
| 0.367000297 | 0.300665466 | 0.031839522 | 0.28344616  |
| 0.280094293 | 0.156572075 | 0.320213894 | 0.080469411 |
| 0.385328517 | 0.346636501 | 0.389308292 | 0.30844328  |
| 0.155199013 | 0.202026075 | 0.290441451 | 0.291317432 |
| 0.004999179 | 0.031161222 | 0.015605027 | 0.198369981 |
| 0.066444488 | 0.094469528 | 0.144419323 | 0.24431906  |



|             |             |             |             |
|-------------|-------------|-------------|-------------|
| 0.112808693 | 0.116155536 | 0.161898401 | 0.345080646 |
| 0.019740166 | 0.258587099 | 0.057331349 | 0.082973091 |
| 0.009407395 | 0.069673626 | 0.046548578 | 0.026464304 |
| 0.153054911 | 0.124479379 | 0.328192858 | 0.388602917 |
| 0.163661575 | 0.091425006 | 0.300525539 | 0.362084559 |
| 0.347427333 | 0.273084525 | 0.133519214 | 0.002293886 |
| 0.111918463 | 0.121581969 | 0.113024663 | 0.256853227 |
| 0.084038968 | 0.088311292 | 0.322234637 | 0.34744837  |
| 0.122254376 | 0.040358029 | 0.183873266 | 0.276953771 |
| 0.071328139 | 0.121267934 | 0.40442753  | 0.251283776 |
| 0.000112636 | 0.188139158 | 0.361615549 | 0.051011946 |
| 0.222114382 | 0.046307043 | 0.070275949 | 0.406601736 |
| 0.094474761 | 0.125960539 | 0.382553611 | 0.318235596 |
| 0.056867798 | 0.115055683 | 0.414448974 | 0.05233525  |
| 0.21629346  | 0.015700305 | 0.219279687 | 0.133205612 |
| 0.144373101 | 0.22614267  | 0.239385693 | 0.128711263 |
| 0.050674335 | 0.383683234 | 0.259671236 | 0.399042874 |
| 0.194051147 | 0.415283703 | 0.399070589 | 0.346580059 |
| 0.207836846 | 0.228903867 | 0.063728678 | 0.378343802 |
| 0.387698704 | 0.084870078 | 0.026147079 | 0.374169851 |
| 0.20451654  | 0.37720953  | 0.031640209 | 0.412424438 |
| 0.338659882 | 0.309150854 | 0.047279686 | 0.328968634 |
| 0.300342031 | 0.101808156 | 0.301846587 | 0.408354787 |
| 0.093463288 | 0.281279594 | 0.193219741 | 0.354621903 |
| 0.090266617 | 0.103546979 | 0.197439117 | 0.077492271 |
| 0.003807752 | 0.023877615 | 0.021922993 | 0.076864938 |
| 0.094910143 | 0.27169194  | 0.311704333 | 0.409831397 |
| 0.047862355 | 0.279308285 | 0.136143015 | 0.15047819  |
| 0.3335502   | 0.199145669 | 0.241467133 | 0.282163716 |
| 0.140392343 | 0.002674969 | 0.023745594 | 0.369730852 |
| 0.01075324  | 0.11371004  | 0.127885934 | 0.000895571 |
| 0.010861239 | 0.289109342 | 0.042390085 | 0.104226311 |
| 0.398048579 | 0.104508276 | 0.122443384 | 0.123079129 |
| 0.23739356  | 0.030431114 | 0.000334106 | 0.386211008 |
| 0.347596939 | 0.329693031 | 0.349263457 | 0.294726059 |
| 0.357979085 | 0.266409313 | 0.362965198 | 0.138119131 |
| 0.023421368 | 0.020567096 | 0.126056547 | 0.187392009 |
| 0.000897879 | 0.273360461 | 0.164359087 | 0.072175287 |
| 0.348034588 | 0.209259532 | 0.00622235  | 0.243280084 |
| 0.003185277 | 0.120605549 | 0.082789419 | 0.090173232 |
| 0.287019193 | 0.001425984 | 0.053155105 | 1           |
| 0.278387708 | 0.231011587 | 0.161869929 | 0.383749052 |
| 0.193011154 | 0.058355806 | 0.184897188 | 0.293537867 |
| 0.018867647 | 0.059402903 | 0.127664147 | 0.008389347 |
| 0.025002185 | 0.297759766 | 0.156478675 | 0.009370995 |
| 0.173983318 | 0.000328698 | 0.25089877  | 0.391217827 |
| 0.304066354 | 0.433302784 | 0.373649267 | 0.17691934  |
| 0.375480799 | 0.047574371 | 0.403433907 | 0.290692431 |
| 0.172485167 | 0.000200186 | 0.000661442 | 0.413367588 |
| 0.297519072 | 0.017884051 | 0.080138563 | 0.054004669 |
| 0.02283843  | 0.042365819 | 0.012823934 | 0.093856325 |
| 0.23473697  | 0.15306834  | 0.071391517 | 0.333555627 |
| 0.128052486 | 0.121311972 | 0.147262357 | 0.033723352 |
| 0.242531857 | 0.008894759 | 0.033483971 | 0.001774773 |

|             |             |             |             |
|-------------|-------------|-------------|-------------|
| 0.276570725 | 0.052551752 | 0.290916514 | 0.368347234 |
| 0.372175311 | 0.320799216 | 0.131012812 | 0.052664054 |
| 0.330891513 | 0.03639228  | 0.067971957 | 0.03812951  |
| 0.348443508 | 0.352734749 | 0.238964209 | 0.210824088 |
| 0.418588742 | 0.357621053 | 0.007145963 | 0.37145153  |
| 0.001227608 | 0.000446713 | 0.162411643 | 0.156152587 |
| 0.015543781 | 0.257013017 | 0.171242417 | 0.069101757 |
| 0.061920884 | 0.003828637 | 0.176894971 | 0.189885564 |
| 0.216839886 | 0.23630696  | 0.224423365 | 0.137507613 |
| 0.128396009 | 0.06555825  | 0.060940559 | 0.046292969 |
| 0.043863335 | 0.209717944 | 0.109125543 | 0.003201131 |
| 0.229222505 | 0.289754481 | 0.015714254 | 0.069623505 |
| 0.364120053 | 0.41449098  | 0.009264956 | 0.002683066 |
| 0.164607619 | 0.173417257 | 0.422997959 | 0.359672849 |
| 0.362836125 | 0.410378785 | 0.25537974  | 0.043202034 |
| 0.014106564 | 0.211319471 | 0.242282162 | 0.023267482 |
| 0.385548721 | 0.024485835 | 0.31844416  | 0.234786397 |
| 0.051680877 | 0.072981899 | 0.004820874 | 0.029621127 |
| 0.278883987 | 0.087163264 | 0.095193178 | 0.068657937 |
| 0.188162371 | 0.078916219 | 0.01116763  | 0.104425249 |
| 0.278206822 | 0.093240325 | 0.085558206 | 0.081308229 |
| 0.219922592 | 0.036630528 | 0.388785119 | 0.345244231 |
| 0.054683905 | 0.043212076 | 0.064918855 | 0.269837115 |
| 0.366400637 | 0.223684764 | 0.002992479 | 0.319762606 |
| 0.381947851 | 0.335929942 | 0.334951172 | 0.339081944 |
| 0.033084999 | 0.26086051  | 0.183437701 | 0.286071737 |
| 0.095600536 | 0.123947295 | 0.116699494 | 0.021714543 |
| 0.184500028 | 0.318733663 | 0.328717576 | 0.068587481 |
| 0.216984859 | 0.04584506  | 0.020199961 | 0.317978161 |
| 0.100439825 | 0.015562887 | 0.130378783 | 0.355396528 |
| 0.000503017 | 0.0781502   | 0.395242371 | 0.059802456 |
| 0.3696834   | 0.410179995 | 0.326270745 | 0.051910188 |
| 0.004461182 | 0.362933166 | 0.274635538 | 0.198559463 |
| 0.335362556 | 0.213150103 | 0.016383114 | 0.017929831 |
| 0.191358276 | 0.029570049 | 0.042945746 | 0.041231785 |
| 0.0833437   | 0.262593368 | 0.115978845 | 0.100855256 |
| 0.096829921 | 0.037014873 | 0.059413281 | 0.080774064 |
| 0.051092099 | 0.152927198 | 0.280564362 | 0.062468984 |
| 0.114324761 | 0.368322066 | 0.345688341 | 0.003600825 |
| 0.218469642 | 0.32567642  | 0.306259873 | 0.002073583 |
| 0.372304087 | 0.000745913 | 0.109387078 | 0.111258742 |
| 0.086287657 | 0.111488878 | 0.188071325 | 0.124814874 |
| 0.251454505 | 0.100241867 | 0.111234565 | 0.141131757 |
| 0.051093658 | 0.079713282 | 0.262031729 | 0.150054118 |
| 0.128122687 | 0.032941973 | 0.040194058 | 0.041412333 |
| 0.006800314 | 0.325747167 | 0.143869776 | 0.024477856 |
| 0.127843857 | 0.153081601 | 0.258534308 | 0.346035848 |
| 0.302037244 | 0.045461387 | 0.149070355 | 0.325124095 |
| 0.082381206 | 0.057461512 | 0.011565739 | 0.181712661 |
| 0.10579835  | 0.080412742 | 0.164147378 | 0.178508024 |
| 0.309158528 | 0.270826908 | 0.134560815 | 0.302066708 |
| 0.168291591 | 0.200817898 | 0.109657932 | 0.018748305 |
| 0.075938338 | 0.058910967 | 0.208102465 | 4.46E-06    |
| 0.226794411 | 0.034938679 | 0.402881178 | 0.333623976 |

|             |             |             |             |
|-------------|-------------|-------------|-------------|
| 0.154094672 | 0.259297342 | 0.047708181 | 0.022963267 |
| 0.044045856 | 0.097886128 | 0.070299084 | 0.314346389 |
| 0.126833408 | 0.046042071 | 0.222438801 | 0.062828135 |
| 0.356898736 | 0.325281823 | 0.09786871  | 0.092437277 |
| 0.11632062  | 0.085063136 | 0.320414915 | 0.028647817 |
| 0.282028295 | 0.08711607  | 0.181376573 | 0.197766223 |
| 0.122984581 | 0.394718807 | 0.016069208 | 0.419769914 |
| 0.242086912 | 0.054875153 | 0.342870365 | 0.103551098 |
| 0.04432846  | 0.019615792 | 0.124016976 | 0.122465165 |
| 0.059815462 | 0.144221478 | 0.010043249 | 0.055225401 |
| 0.257922533 | 0.10849197  | 0.318673516 | 0.260607808 |
| 0.131175985 | 0.277388938 | 0.045235257 | 0.137349814 |
| 0.316792131 | 0.316958175 | 0.071205266 | 0.165749454 |
| 0.248909638 | 0.027955379 | 0.198298524 | 0.007759068 |
| 0.341525277 | 0.31099575  | 0.107839133 | 0.010516568 |
| 0.001999507 | 0.157327268 | 0.315140566 | 0.022135797 |
| 0.420510598 | 0.071405699 | 0.204968219 | 0.294792979 |
| 0.083738893 | 0.32652196  | 0.036630235 | 0.32977359  |
| 0.006637563 | 0.138617149 | 0.208212499 | 0.199755582 |
| 0.086867021 | 0.203944385 | 0.318112386 | 0.151248887 |
| 0.006652616 | 0.063969282 | 0.002118927 | 0.264316234 |
| 0.305861005 | 0.265739575 | 0.111489777 | 0.073980511 |
| 0.190060444 | 0.249120071 | 0.07069067  | 0.20762544  |
| 0.001255119 | 0.320120076 | 0.088989529 | 0.278566311 |
| 0.099342615 | 0.247901016 | 0.007656094 | 0.230182476 |
| 0.272546673 | 0.107474153 | 0.155548743 | 0.10688399  |
| 0.335427955 | 0.242062974 | 0.070147389 | 0.040638404 |
| 0.256858156 | 0.021751851 | 0.116232698 | 0.396920318 |
| 0.080473101 | 0.155434516 | 0.414480962 | 0.098278482 |
| 0.205366137 | 0.241883755 | 0.254931712 | 0.378277535 |
| 0.024852165 | 0.152064031 | 0.334758483 | 0.365015327 |
| 0.217624939 | 0.104307149 | 0.143490798 | 0.147237249 |
| 0.302050828 | 0.013826023 | 0.101367475 | 0.251242544 |
| 0.176486058 | 0.187491823 | 0.165238604 | 0.108772427 |
| 0.005698729 | 0.039127628 | 0.084902518 | 0.060293983 |
| 0.203582039 | 0.22942638  | 0.105157666 | 0.274621701 |
| 0.024703524 | 0.005497499 | 0.325232564 | 0.035205937 |
| 0.127114714 | 0.281703024 | 0.109425456 | 0.197461602 |
| 0.095517401 | 0.209197703 | 0.180972974 | 0.000144505 |
| 0.340965439 | 0.010847147 | 0.104912835 | 0.101438387 |
| 0.079970609 | 0.011220633 | 0.297828838 | 0.423975257 |
| 0.15205875  | 0.04868178  | 0.092910231 | 0.32249444  |
| 0.070444835 | 0.137751525 | 0.151773845 | 0.266370736 |
| 0.136824705 | 0.189970716 | 0.182547343 | 0.186059571 |
| 0.235966724 | 0.074250757 |             |             |
| IL7R        | 0.20227757  | 0.44781528  | 0.193016061 |
| 0.249901168 | 0.274384081 | 0.471176063 | 0.136301522 |
| 0.225205589 | 0.394315378 | 0.314561373 | 0.399049951 |
| 0.069971996 | 0.056886659 | 0.447911048 | 0.121401674 |
| 0.346751619 | 0.084353656 | 0.19782889  | 0.093223838 |
| 0.274749639 | 0.248335008 | 0.321270372 | 0.476168489 |
| 0.24675061  | 0.315091225 | 0.425203657 | 0.330948401 |
| 0.464581225 | 0.258098472 | 0.436054921 | 0.235059115 |
| 0.415005262 | 0.28366495  | 0.341330502 | 0.079294181 |

|             |             |             |             |
|-------------|-------------|-------------|-------------|
| 0.427727708 | 0.005919242 | 0.450402264 | 0.272241313 |
| 0.127871705 | 0.401692552 | 0.403631746 | 0.304242276 |
| 0.390763417 | 0.134131959 | 0.251317432 | 0.359930407 |
| 0.382432505 | 0.316953794 | 0.196408818 | 0.443831938 |
| 0.348595068 | 0.448865129 | 0.4383283   | 0.007952555 |
| 0.249340681 | 0.053360264 | 0.162012843 | 0.501269559 |
| 0.306865287 | 0.200322487 | 0.231494313 | 0.314887921 |
| 0.357625243 | 0.347809941 | 0.307596376 | 0.355569373 |
| 0.476769716 | 0.123720698 | 0.405951198 | 0.23840257  |
| 0.412359448 | 0.110631558 | 0.264956937 | 0.198779924 |
| 0.354548672 | 0.265431267 | 0.345225333 | 0.245925964 |
| 0.452125017 | 0.508043126 | 0.311272604 | 0.506350324 |
| 0.058302976 | 0.277437378 | 0.243441795 | 0.319861573 |
| 0.359274813 | 0.149753368 | 0.433618076 | 0.496069286 |
| 0.129454751 | 0.409767055 | 0.397807185 | 0.252960395 |
| 0.467858809 | 0.217731281 | 0.428758747 | 0.142511524 |
| 0.324000134 | 0.293731288 | 0.471635092 | 0.372789905 |
| 0.290716673 | 0.198828169 | 0.517631054 | 0.257947376 |
| 0.326407637 | 0.215447646 | 0.19280072  | 0.421741933 |
| 0.423075829 | 0.467343828 | 0.431235674 | 0.371717541 |
| 0.328113006 | 0.472677695 | 0.441437324 | 0.433787109 |
| 0.166282096 | 0.502976524 | 0.31581015  | 0.102788465 |
| 0.205496549 | 0.149377327 | 0.185717208 | 0.351773457 |
| 0.453639526 | 0.404644053 | 0.319650947 | 0.253855782 |
| 0.403830641 | 0.503875495 | 0.496923514 | 0.425953233 |
| 0.121781581 | 0.177941574 | 0.340746003 | 0.385554311 |
| 0.384018128 | 0.20745376  | 0.206490263 | 0.520385258 |
| 0.435019444 | 0.41055522  | 0.314808208 | 0.518761096 |
| 0.25701724  | 0.484135469 | 0.470683509 | 0.264979915 |
| 0.51383825  | 0.516638764 | 0.460601118 | 0.359973536 |
| 0.487112368 | 0.450832033 | 0.060114456 | 0.401289417 |
| 0.448132213 | 0.013931973 | 0.439538852 | 0.43998457  |
| 0.489115476 | 0.43087284  | 0.455900117 | 0.457752206 |
| 0.495583378 | 0.180344056 | 0.016908822 | 0.281401622 |
| 0.505690805 | 0.440690604 | 0.165829843 | 0.375922839 |
| 0.316369899 | 0.475627162 | 0.414444182 | 0.319043396 |
| 0.479834133 | 0.45039616  | 0.452977039 | 0.419665466 |
| 0.347617343 | 0.393939954 | 0.311878055 | 0.509162208 |
| 0.11734225  | 0.263892304 | 0.173889906 | 0.338651279 |
| 0.424904902 | 0.238446014 | 0.45886395  | 0.310125064 |
| 0.267918924 | 0.424402684 | 0.279995568 | 0.338316988 |
| 0.170936659 | 0.447475974 | 0.284392854 | 0.29279915  |
| 0.100241486 | 0.259882265 | 0.26737636  | 0.247413056 |
| 0.26913572  | 0.329570054 | 0.427255417 | 0.440351003 |
| 0.310956976 | 0.32455973  | 0.447262435 | 0.439134398 |
| 0.398518844 | 0.342588783 | 0.310612117 | 0.035688951 |
| 0.253741736 | 0.250638543 | 0.126921135 | 0.368896984 |
| 0.285017077 | 0.263380803 | 0.363898884 | 0.367620798 |
| 0.431064381 | 0.259470463 | 0.323579169 | 0.45125674  |
| 0.284093598 | 0.320372727 | 0.428404286 | 0.409251013 |
| 0.022977029 | 0.393487909 | 0.447100422 | 0.121954208 |
| 0.363031228 | 0.114025013 | 0.234333553 | 0.432443385 |
| 0.235346842 | 0.175350428 | 0.448682257 | 0.357189388 |
| 0.37644561  | 0.322206021 | 0.469058259 | 0.030041672 |

|             |             |             |             |
|-------------|-------------|-------------|-------------|
| 0.291683364 | 0.076746625 | 0.309266214 | 0.370418676 |
| 0.336708877 | 0.315636136 | 0.269892752 | 0.265201837 |
| 0.2936018   | 0.494555318 | 0.437698442 | 0.467346353 |
| 0.324073119 | 0.475603903 | 0.436685269 | 0.446395142 |
| 0.412437092 | 0.304588065 | 0.091252656 | 0.446420977 |
| 0.433553708 | 0.272658647 | 0.204825544 | 0.413444607 |
| 0.332623858 | 0.362364664 | 0.112134409 | 0.443023279 |
| 0.492937527 | 0.488101552 | 0.202544662 | 0.345920316 |
| 0.430971005 | 0.360756342 | 0.416864797 | 0.476176133 |
| 0.297602536 | 0.304577539 | 0.293985149 | 0.369670054 |
| 0.293180067 | 0.168677044 | 0.373004395 | 0.122332453 |
| 0.01106539  | 0.20063592  | 0.184691035 | 0.201914957 |
| 0.128002255 | 0.402271152 | 0.376282606 | 0.478686501 |
| 0.20843929  | 0.447546682 | 0.30423919  | 0.294554924 |
| 0.439684921 | 0.302172417 | 0.335113427 | 0.360373485 |
| 0.327405886 | 0.04959642  | 0.19142837  | 0.515449865 |
| 0.143837535 | 0.200916185 | 0.378245297 | 0.0079469   |
| 0.13307902  | 0.440508947 | 0.21738757  | 0.297141823 |
| 0.419234853 | 0.311393058 | 0.328926947 | 0.330513948 |
| 0.371296878 | 0.199147966 | 0.009352224 | 0.434001658 |
| 0.448609003 | 0.41771535  | 0.451126828 | 0.456904594 |
| 0.40258207  | 0.403767379 | 0.387464373 | 0.483483466 |
| 0.202361203 | 0.218232661 | 0.159399515 | 0.294544773 |
| 0.013157368 | 0.398394116 | 0.288345739 | 0.25302277  |
| 0.394572801 | 0.335920775 | 0.120860064 | 0.309878137 |
| 0.094223694 | 0.15743304  | 0.357308414 | 0.246174528 |
| 0.319625781 | 0.068898845 | 0.303288595 | 0.278387708 |
| 1           | 0.42662339  | 0.305336227 | 0.506124319 |
| 0.371340702 | 0.271366023 | 0.311198691 | 0.394978972 |
| 0.158127144 | 0.108603913 | 0.393357763 | 0.060072122 |
| 0.273458837 | 0.440329009 | 0.347979563 | 0.183641688 |
| 0.345763055 | 0.034861807 | 0.446221022 | 0.502640021 |
| 0.484371087 | 0.454982009 | 0.475550551 | 0.232818301 |
| 0.486055319 | 0.062752047 | 0.488133141 | 0.454689392 |
| 0.366752801 | 0.00540521  | 0.014184045 | 0.444420861 |
| 0.365986165 | 0.1832315   | 0.262215032 | 0.461441728 |
| 0.185454415 | 0.303409615 | 0.152060396 | 0.151310611 |
| 0.454989005 | 0.236793307 | 0.141937315 | 0.477160081 |
| 0.283262209 | 0.275826569 | 0.427545996 | 0.206605059 |
| 0.390484069 | 0.13207033  | 0.194942152 | 0.01503482  |
| 0.343910868 | 0.251268959 | 0.510357423 | 0.485980975 |
| 0.468448449 | 0.367155015 | 0.332579658 | 0.385125797 |
| 0.405957747 | 0.254211507 | 0.346922983 | 0.265080581 |
| 0.482168605 | 0.367672724 | 0.382865709 | 0.404821002 |
| 0.45178565  | 0.457969722 | 0.100371477 | 0.399845182 |
| 0.057668901 | 0.00224653  | 0.475585707 | 0.323818909 |
| 0.042491573 | 0.318446979 | 0.339336797 | 0.247761499 |
| 0.239770873 | 0.117136799 | 0.19450657  | 0.180348122 |
| 0.324009655 | 0.3460169   | 0.231805953 | 0.312539541 |
| 0.235665569 | 0.108709547 | 0.249130026 | 0.21513226  |
| 0.227153097 | 0.396123024 | 0.319144556 | 0.072794927 |
| 0.417183938 | 0.382225332 | 0.153152645 | 0.280325235 |
| 0.447532709 | 0.453784476 | 0.0882386   | 0.032707526 |
| 0.363424471 | 0.295871705 | 0.441317053 | 0.482549337 |

|             |             |             |             |
|-------------|-------------|-------------|-------------|
| 0.523327612 | 0.47546613  | 0.415247996 | 0.138468226 |
| 0.168426591 | 0.314011237 | 0.244198585 | 0.107131727 |
| 0.477789435 | 0.187506822 | 0.482871012 | 0.232993759 |
| 0.217613538 | 0.292937467 | 0.091275774 | 0.171424679 |
| 0.337785837 | 0.272489802 | 0.210841266 | 0.303040011 |
| 0.309769306 | 0.20569409  | 0.124838506 | 0.278975682 |
| 0.398390314 | 0.124697686 | 0.257709537 | 0.380193131 |
| 0.422628241 | 0.230275618 | 0.394892305 | 0.426050594 |
| 0.260777482 | 0.211981229 | 0.43173855  | 0.381044125 |
| 0.442025616 | 0.375350574 | 0.092280365 | 0.458220219 |
| 0.441384529 | 0.429595465 | 0.500621691 | 0.376170745 |
| 0.192640688 | 0.357549466 | 0.240621824 | 0.310158065 |
| 0.258871165 | 0.474473932 | 0.273173385 | 0.159819401 |
| 0.346885954 | 0.480941534 | 0.440350301 | 0.237918048 |
| 0.418521571 | 0.273462481 | 0.174138835 | 0.43956668  |
| 0.133111422 | 0.203094733 | 0.407812651 | 0.403965186 |
| 0.003749155 | 0.09441032  | 0.414591993 | 0.322121363 |
| 0.483177111 | 0.435778507 | 0.440820307 | 0.330083559 |
| 0.000644797 | 0.35739521  | 0.394229584 | 0.397509153 |
| 0.46163     | 0.432172946 | 0.20275942  | 0.135237451 |
| 0.342313377 | 0.226150235 | 0.179969343 | 0.431234147 |
| 0.121231106 | 0.447981441 | 0.27000884  | 0.271883366 |
| 0.215929892 | 0.209221814 | 0.202475007 | 0.336911558 |
| 0.094335617 | 0.314664715 | 0.383111685 | 0.340561203 |
| 0.161763804 | 0.402387978 | 0.427525325 | 0.101665876 |
| 0.304779792 | 0.394953864 | 0.423451824 | 0.005966193 |
| 0.410408746 | 0.032972984 | 0.221076854 | 0.253785383 |
| 0.23455428  | 0.227805821 | 0.257626501 | 0.284113019 |
| 0.384215562 | 0.279952678 | 0.344657195 | 0.303342268 |
| 0.212452692 | 0.304802298 | 0.367328845 | 0.393645873 |
| 0.293225103 | 0.238772192 | 0.225108585 | 0.226344702 |
| 0.130373118 | 0.456141268 | 0.34674469  | 0.209752545 |
| 0.278963661 | 0.371523929 | 0.382095923 | 0.488954875 |
| 0.414050065 | 0.259353953 | 0.327593237 | 0.476808144 |
| 0.210258132 | 0.373372233 | 0.178017915 | 0.430840204 |
| 0.322115505 | 0.201294952 | 0.430315898 | 0.427236659 |
| 0.414970863 | 0.416196848 | 0.349172292 | 0.428502507 |
| 0.373687437 | 0.312996875 | 0.373861999 | 0.138936037 |
| 0.290312205 | 0.244846094 | 0.227548375 | 0.01388823  |
| 0.391784958 | 0.423983519 | 0.452482402 | 0.49705347  |
| 0.225890679 | 0.409741303 | 0.415991732 | 0.19447091  |
| 0.339124782 | 0.308834792 | 0.252945595 | 0.430528778 |
| 0.16443418  | 0.284567688 | 0.282757855 | 0.48066258  |
| 0.406799724 | 0.39205133  | 0.213320396 | 0.315786194 |
| 0.276372333 | 0.333233383 | 0.470099218 | 0.267145793 |
| 0.403756585 | 0.167399302 | 0.410942725 | 0.298793866 |
| 0.230900245 | 0.463494656 | 0.166138926 | 0.46987469  |
| 0.294843301 | 0.257425055 | 0.479444252 | 0.38188824  |
| 0.380286286 | 0.163861085 | 0.131414571 | 0.413005666 |
| 0.25959197  | 0.284782893 | 0.015686599 | 0.055023363 |
| 0.35210879  | 0.282304722 | 0.423925047 | 0.362422264 |
| 0.202773672 | 0.335361306 | 0.119638647 | 0.363107949 |
| 0.497210063 | 0.518115964 | 0.304349681 | 0.308120012 |
| 0.390813514 | 0.194727718 | 0.489496576 | 0.015039402 |

|             |             |             |             |
|-------------|-------------|-------------|-------------|
| 0.387646151 | 0.374934027 | 0.362754705 | 0.126255475 |
| 0.066185366 | 0.151919285 | 0.400827894 | 0.173347983 |
| 0.419253075 | 0.165904696 | 0.373709145 | 0.441208633 |
| 0.278810169 | 0.522122705 | 0.154880126 | 0.41282207  |
| 0.107467823 | 0.319370605 | 0.320659685 | 0.342049969 |
| 0.238594694 | 0.233803804 | 0.383845379 | 0.191943264 |
| 0.092086466 | 0.265735062 | 0.003791882 | 0.441011    |
| 0.496361568 | 0.269875814 | 0.304931315 | 0.297395125 |
| 0.31364954  | 0.3989766   | 0.221829263 | 0.389578146 |
| 0.038015179 | 0.326518986 | 0.276617224 | 0.47497511  |
| 0.216308192 | 0.347364391 | 0.124960716 | 0.249245095 |
| 0.510428026 | 0.262949733 | 0.321256733 | 0.276422065 |
| 0.482995504 | 0.424353291 | 0.311839814 | 0.215124647 |
| 0.38196058  | 0.173839907 | 0.427090001 | 0.487427042 |
| 0.224254504 | 0.173270619 | 0.409050746 | 0.250756579 |
| 0.245388147 | 0.439499737 | 0.379380236 | 0.482012735 |
| 0.096202357 | 0.32079801  | 0.40475335  | 0.439636386 |
| 0.334371912 | 0.12601902  | 0.198932111 | 0.215452584 |
| 0.479684099 | 0.205394319 | 0.201627203 | 0.422713514 |
| 0.16431475  | 0.342755774 | 0.388212511 | 0.177620616 |
| 0.087174893 | 0.225548747 | 0.428961454 | 0.248616386 |
| 0.324729988 | 0.338689494 | 0.2019453   | 0.408312485 |
| 0.201089622 | 0.067873419 | 0.431898005 | 0.011001338 |
| 0.473247527 | 0.396800933 | 0.317957043 | 0.316958326 |
| 0.320315331 | 0.389384088 | 0.419455705 | 0.009219361 |
| 0.396021271 | 0.047741118 | 0.285785443 | 0.223024306 |
| 0.240542148 | 0.141529587 | 0.459571641 | 0.447357499 |
| 0.394439573 | 0.316016305 | 0.308088571 | 0.449701772 |
| 0.107104885 | 0.271508732 | 0.274765389 | 0.454777788 |
| 0.169117558 | 0.383033677 | 0.378770024 | 0.338319819 |
| 0.436363329 | 0.355838902 |             |             |
| IMPA1       | 0.209963871 | 0.372457707 | 0.17072842  |
| 0.233262111 | 0.245982231 | 0.341420646 | 0.176881998 |
| 0.252381541 | 0.305289183 | 0.207224091 | 0.33200545  |
| 0.10597081  | 0.052522927 | 0.400923341 | 0.16788094  |
| 0.288043235 | 0.132136221 | 0.234854509 | 0.094684717 |
| 0.242333073 | 0.24319042  | 0.254502247 | 0.351222929 |
| 0.234641415 | 0.281205095 | 0.327609589 | 0.251534824 |
| 0.420330881 | 0.169737218 | 0.326878576 | 0.136204206 |
| 0.416271388 | 0.253719067 | 0.24884401  | 0.091360998 |
| 0.338865084 | 0.009168197 | 0.444415439 | 0.271714481 |
| 0.103243661 | 0.378544701 | 0.260399272 | 0.298618114 |
| 0.278365812 | 0.149902516 | 0.141467734 | 0.285440806 |
| 0.295941811 | 0.280849845 | 0.185542489 | 0.331568828 |
| 0.276861989 | 0.364553639 | 0.305175574 | 0.011598554 |
| 0.193609319 | 0.038489796 | 0.125817904 | 0.457662234 |
| 0.308021041 | 0.24647604  | 0.165104364 | 0.278224551 |
| 0.287257241 | 0.294952122 | 0.296323228 | 0.261609546 |
| 0.44742926  | 0.114937515 | 0.300503795 | 0.198355129 |
| 0.333619927 | 0.123244051 | 0.273610291 | 0.184323239 |
| 0.275001877 | 0.285046485 | 0.296826416 | 0.201586789 |
| 0.374415755 | 0.490761581 | 0.297140948 | 0.462766557 |
| 0.072983492 | 0.236845932 | 0.21761682  | 0.304459986 |
| 0.30667946  | 0.179763231 | 0.350898664 | 0.474887055 |

|             |             |             |             |
|-------------|-------------|-------------|-------------|
| 0.146991964 | 0.286047602 | 0.323228162 | 0.241808961 |
| 0.371925911 | 0.173776795 | 0.291853262 | 0.128931869 |
| 0.269523781 | 0.261036296 | 0.44985026  | 0.346568043 |
| 0.254589226 | 0.194409564 | 0.473776352 | 0.219787143 |
| 0.289730335 | 0.207140617 | 0.200377326 | 0.336993963 |
| 0.333282087 | 0.422652419 | 0.335674249 | 0.326007644 |
| 0.270278149 | 0.439044639 | 0.348504961 | 0.371635063 |
| 0.090363243 | 0.463170837 | 0.295233472 | 0.155405058 |
| 0.192411671 | 0.198089461 | 0.183169328 | 0.322653005 |
| 0.379071108 | 0.345423131 | 0.312055543 | 0.26628511  |
| 0.356660702 | 0.454107817 | 0.456834298 | 0.347073342 |
| 0.155651662 | 0.149479466 | 0.272765939 | 0.322641653 |
| 0.333047846 | 0.227431715 | 0.18457462  | 0.489755644 |
| 0.380851482 | 0.330584433 | 0.275891017 | 0.497678655 |
| 0.265213667 | 0.468960017 | 0.378539919 | 0.283241614 |
| 0.482658825 | 0.4773405   | 0.443775964 | 0.287566497 |
| 0.456508587 | 0.349270879 | 0.072663087 | 0.332530345 |
| 0.444297306 | 0.015438043 | 0.372487991 | 0.398792535 |
| 0.446187256 | 0.340802528 | 0.441006617 | 0.424421331 |
| 0.450674849 | 0.194342721 | 0.017696062 | 0.281638391 |
| 0.468443244 | 0.365270443 | 0.205564676 | 0.283463617 |
| 0.275809947 | 0.365453756 | 0.319761861 | 0.251696713 |
| 0.478886539 | 0.3707167   | 0.397233118 | 0.341196123 |
| 0.277023494 | 0.364517665 | 0.237532489 | 0.464056045 |
| 0.149093472 | 0.254282401 | 0.16551639  | 0.309493275 |
| 0.269027337 | 0.269864979 | 0.354938999 | 0.269291593 |
| 0.290086135 | 0.336526673 | 0.205170101 | 0.283693573 |
| 0.161028456 | 0.326928038 | 0.270538414 | 0.279343151 |
| 0.146821246 | 0.250830102 | 0.282176227 | 0.260180981 |
| 0.279935592 | 0.338724415 | 0.320935084 | 0.404424023 |
| 0.262174772 | 0.286709667 | 0.347375728 | 0.430674473 |
| 0.407688921 | 0.271182796 | 0.30506045  | 0.047374844 |
| 0.240208786 | 0.181233212 | 0.107048505 | 0.275315908 |
| 0.279179687 | 0.280067155 | 0.306857716 | 0.304460592 |
| 0.347291489 | 0.248442374 | 0.274206151 | 0.449715153 |
| 0.255180611 | 0.282155719 | 0.36924197  | 0.304662571 |
| 0.029605041 | 0.339676185 | 0.347044501 | 0.149254066 |
| 0.322368423 | 0.113243287 | 0.175051196 | 0.375920894 |
| 0.194693935 | 0.180099273 | 0.399417318 | 0.297160142 |
| 0.292972876 | 0.306268656 | 0.448367053 | 0.032812928 |
| 0.242389919 | 0.091238154 | 0.305970955 | 0.247299112 |
| 0.322150721 | 0.308396498 | 0.239635216 | 0.238571366 |
| 0.249828216 | 0.464494403 | 0.349091852 | 0.436856937 |
| 0.253415133 | 0.455174329 | 0.354888543 | 0.387095931 |
| 0.344756144 | 0.236754407 | 0.079837402 | 0.347276835 |
| 0.362233416 | 0.213827032 | 0.189181348 | 0.31394356  |
| 0.253549681 | 0.295326951 | 0.123813129 | 0.428948016 |
| 0.479479882 | 0.435312525 | 0.249615934 | 0.306096161 |
| 0.359634557 | 0.327742434 | 0.328919221 | 0.462712149 |
| 0.213701463 | 0.266313564 | 0.257087647 | 0.317190065 |
| 0.287959585 | 0.18272114  | 0.329117432 | 0.101150214 |
| 0.006223887 | 0.208006315 | 0.192866858 | 0.242600991 |
| 0.126799695 | 0.287820558 | 0.308927576 | 0.449463274 |
| 0.250341974 | 0.391987381 | 0.287803096 | 0.276308602 |



|             |             |             |             |
|-------------|-------------|-------------|-------------|
| 0.395131038 | 0.259569107 | 0.259412684 | 0.295871112 |
| 0.307279856 | 0.063714413 | 0.224913537 | 0.496714482 |
| 0.139093166 | 0.175216367 | 0.324074504 | 0.013281131 |
| 0.164460695 | 0.31565349  | 0.203287191 | 0.294528957 |
| 0.389214646 | 0.289949012 | 0.302380526 | 0.237529137 |
| 0.326733349 | 0.222921227 | 0.013754909 | 0.403821947 |
| 0.420795877 | 0.397649599 | 0.421529201 | 0.426330189 |
| 0.357850177 | 0.315632862 | 0.31597949  | 0.350256419 |
| 0.23025803  | 0.207555945 | 0.154482361 | 0.28623743  |
| 0.018274822 | 0.332409666 | 0.261853166 | 0.267063633 |
| 0.313589559 | 0.311563198 | 0.154726877 | 0.264090086 |
| 0.101278091 | 0.119899811 | 0.319576377 | 0.261159679 |
| 0.288755234 | 0.08594143  | 0.212920115 | 0.231011587 |
| 0.42662339  | 1           | 0.222674594 | 0.468404052 |
| 0.33037744  | 0.228355535 | 0.27899024  | 0.326613532 |
| 0.199123117 | 0.084600791 | 0.3174205   | 0.03060365  |
| 0.189873409 | 0.421212826 | 0.272264691 | 0.179412528 |
| 0.327333334 | 0.047295596 | 0.369181465 | 0.47477079  |
| 0.429382976 | 0.431980923 | 0.444286503 | 0.195515369 |
| 0.451414267 | 0.046202323 | 0.451699834 | 0.354819071 |
| 0.260760169 | 0.006566845 | 0.028294665 | 0.38659497  |
| 0.294695953 | 0.159031648 | 0.277338126 | 0.313116104 |
| 0.232118657 | 0.276663966 | 0.185937533 | 0.155831306 |
| 0.334294884 | 0.243548889 | 0.151202032 | 0.440899476 |
| 0.289041901 | 0.288846085 | 0.314829589 | 0.206585656 |
| 0.303266703 | 0.170543389 | 0.197967036 | 0.022626095 |
| 0.300540546 | 0.219834116 | 0.473619964 | 0.447415466 |
| 0.456676901 | 0.300928786 | 0.220961716 | 0.302071964 |
| 0.346611241 | 0.210482131 | 0.241217651 | 0.232096278 |
| 0.433748551 | 0.307773052 | 0.347099411 | 0.34635033  |
| 0.444050566 | 0.437909096 | 0.140512039 | 0.330596831 |
| 0.061289739 | 0.004854602 | 0.340585461 | 0.310160579 |
| 0.046439523 | 0.269366298 | 0.31904992  | 0.231304807 |
| 0.240074367 | 0.136605429 | 0.169857202 | 0.163831085 |
| 0.30605965  | 0.304899049 | 0.218379412 | 0.287568802 |
| 0.226031126 | 0.130542079 | 0.260293183 | 0.251137341 |
| 0.202211435 | 0.328057604 | 0.285203719 | 0.105493307 |
| 0.299353882 | 0.295511181 | 0.184512812 | 0.276956189 |
| 0.367894028 | 0.406281699 | 0.135421457 | 0.056500808 |
| 0.329995011 | 0.275486092 | 0.414556119 | 0.434282393 |
| 0.489548289 | 0.465792073 | 0.420630656 | 0.189919369 |
| 0.199437421 | 0.289542656 | 0.221225554 | 0.145129548 |
| 0.446978242 | 0.179307265 | 0.440015803 | 0.192001121 |
| 0.236481677 | 0.283602714 | 0.13436512  | 0.206317048 |
| 0.26432888  | 0.289204426 | 0.244731973 | 0.260504119 |
| 0.292590083 | 0.16937097  | 0.160428055 | 0.296470118 |
| 0.346204805 | 0.110093545 | 0.275869933 | 0.314431488 |
| 0.331892146 | 0.156345386 | 0.310395313 | 0.43557423  |
| 0.259193949 | 0.224444795 | 0.324999678 | 0.312696155 |
| 0.334735508 | 0.266159135 | 0.095472516 | 0.389829113 |
| 0.418131294 | 0.323612496 | 0.457975555 | 0.34414019  |
| 0.203292827 | 0.291529209 | 0.202000468 | 0.279063052 |
| 0.278670383 | 0.343816229 | 0.28140466  | 0.1860668   |
| 0.315515667 | 0.470639936 | 0.363106204 | 0.26811497  |

|             |             |             |             |
|-------------|-------------|-------------|-------------|
| 0.30676689  | 0.237852346 | 0.165933753 | 0.361220671 |
| 0.134683511 | 0.231665849 | 0.274075923 | 0.316946792 |
| 0.00498835  | 0.084238031 | 0.398436975 | 0.310696069 |
| 0.465681796 | 0.396590839 | 0.424686689 | 0.286958057 |
| 0.000989216 | 0.280560308 | 0.333290681 | 0.30895301  |
| 0.379740569 | 0.357777752 | 0.186788512 | 0.187013421 |
| 0.322269662 | 0.198965893 | 0.232180801 | 0.306987864 |
| 0.107141004 | 0.348418306 | 0.286870561 | 0.269006678 |
| 0.239594854 | 0.190802138 | 0.167100831 | 0.309519206 |
| 0.096098454 | 0.316460269 | 0.344939324 | 0.220950757 |
| 0.141600952 | 0.366082814 | 0.340245713 | 0.124921582 |
| 0.245528892 | 0.331629411 | 0.373458792 | 0.011966578 |
| 0.326164399 | 0.057001014 | 0.253016828 | 0.266194542 |
| 0.257809664 | 0.260021368 | 0.267889346 | 0.25150818  |
| 0.324707958 | 0.288319453 | 0.315303344 | 0.308513051 |
| 0.238929062 | 0.290282265 | 0.295668092 | 0.30993617  |
| 0.267514871 | 0.25352754  | 0.204383321 | 0.210265337 |
| 0.169643086 | 0.387078699 | 0.318712577 | 0.187104497 |
| 0.295272646 | 0.298348894 | 0.357550547 | 0.437524901 |
| 0.378634333 | 0.211649577 | 0.298117801 | 0.379209106 |
| 0.147758424 | 0.281551788 | 0.18900761  | 0.321254895 |
| 0.3205942   | 0.207731826 | 0.305101802 | 0.337171709 |
| 0.317980136 | 0.420504214 | 0.321122217 | 0.400175273 |
| 0.302432706 | 0.262415348 | 0.238515441 | 0.189228478 |
| 0.291279795 | 0.243912128 | 0.220482426 | 0.019989523 |
| 0.346733909 | 0.32186629  | 0.373745747 | 0.453890562 |
| 0.180224019 | 0.373239059 | 0.272760404 | 0.225517428 |
| 0.201872867 | 0.269282567 | 0.264559346 | 0.32019808  |
| 0.128697981 | 0.28731447  | 0.262249545 | 0.330151932 |
| 0.317308561 | 0.299631777 | 0.205519665 | 0.309479224 |
| 0.272711061 | 0.28716073  | 0.446101526 | 0.239506532 |
| 0.295335941 | 0.16906405  | 0.289932642 | 0.288471078 |
| 0.253096389 | 0.426361472 | 0.180688647 | 0.435026742 |
| 0.269946939 | 0.241092912 | 0.475943998 | 0.319805978 |
| 0.298462146 | 0.193773806 | 0.109792679 | 0.302750542 |
| 0.269621752 | 0.217546761 | 0.0100712   | 0.067277912 |
| 0.328890322 | 0.232591977 | 0.317172822 | 0.312474709 |
| 0.196228507 | 0.310769811 | 0.095555591 | 0.322503417 |
| 0.443730735 | 0.478157122 | 0.296930762 | 0.302765594 |
| 0.347045114 | 0.235239239 | 0.351950234 | 0.017068157 |
| 0.303407215 | 0.277375793 | 0.270107211 | 0.172754295 |
| 0.098069999 | 0.126118785 | 0.310206388 | 0.16846629  |
| 0.384937163 | 0.12164283  | 0.285721237 | 0.329402539 |
| 0.269812714 | 0.484885951 | 0.203431076 | 0.337604172 |
| 0.12330113  | 0.301609515 | 0.248778447 | 0.271074273 |
| 0.236256041 | 0.208280244 | 0.330653661 | 0.170713622 |
| 0.135734153 | 0.259222039 | 0.008455583 | 0.440639353 |
| 0.453324591 | 0.225035011 | 0.289583601 | 0.20019761  |
| 0.307403536 | 0.333682274 | 0.237722257 | 0.277636391 |
| 0.059561048 | 0.272436782 | 0.288711039 | 0.376214669 |
| 0.157315638 | 0.288598513 | 0.156197267 | 0.22455683  |
| 0.474321487 | 0.253880425 | 0.306209461 | 0.207632756 |
| 0.433821939 | 0.324192875 | 0.254443617 | 0.203544521 |
| 0.287672269 | 0.183451431 | 0.286941523 | 0.463647566 |

|             |             |             |             |
|-------------|-------------|-------------|-------------|
| 0.26112268  | 0.161504793 | 0.336784664 | 0.27484947  |
| 0.209544171 | 0.363883662 | 0.274863411 | 0.456119335 |
| 0.152853546 | 0.319034161 | 0.325871783 | 0.401022733 |
| 0.321303667 | 0.137961268 | 0.180138787 | 0.233457748 |
| 0.428803518 | 0.214339181 | 0.186834654 | 0.355152182 |
| 0.150013683 | 0.322501098 | 0.275474391 | 0.200825149 |
| 0.132338029 | 0.249930431 | 0.326337612 | 0.257310108 |
| 0.316688252 | 0.288218633 | 0.203633491 | 0.389509745 |
| 0.222192098 | 0.092374148 | 0.432484899 | 0.01412284  |
| 0.348579682 | 0.321730243 | 0.313029198 | 0.26515609  |
| 0.287912534 | 0.33180827  | 0.328436536 | 0.018729847 |
| 0.330126779 | 0.040895213 | 0.257325951 | 0.231302406 |
| 0.210461211 | 0.173421917 | 0.428867097 | 0.429856779 |
| 0.333339858 | 0.230144176 | 0.224445198 | 0.421007244 |
| 0.097162138 | 0.194128548 | 0.225078386 | 0.328223183 |
| 0.145475501 | 0.26366149  | 0.27598992  | 0.2460568   |
| 0.350117016 | 0.317985585 |             |             |
| IMPACT      | 0.014470881 | 0.334470322 | 0.01191901  |
| 0.046149797 | 0.259610428 | 0.154802706 | 0.010542485 |
| 0.030763409 | 0.253727851 | 0.132146321 | 0.213658412 |
| 0.001951748 | 0.128707156 | 0.373589945 | 0.009629391 |
| 0.304420803 | 0.006141182 | 0.029665448 | 0.034315381 |
| 0.077630629 | 0.205373185 | 0.177206504 | 0.168054156 |
| 0.202001618 | 0.09533691  | 0.185350778 | 0.302758564 |
| 0.428540541 | 0.185923111 | 0.354276477 | 0.117610683 |
| 0.298073455 | 0.280703849 | 0.271991817 | 0.002056223 |
| 0.23043633  | 0.017142785 | 0.303612293 | 0.107322356 |
| 0.153314134 | 0.224204114 | 0.162836846 | 0.09167996  |
| 0.194454847 | 0.005467254 | 0.122188369 | 0.349528351 |
| 0.201174296 | 0.106934335 | 0.015384344 | 0.332180983 |
| 0.151168608 | 0.20341752  | 0.295071741 | 0.000473442 |
| 0.23450449  | 0.155137541 | 0.201631779 | 0.398695529 |
| 0.099881018 | 0.03838869  | 0.175203772 | 0.097135822 |
| 0.280045115 | 0.302971719 | 0.157545022 | 0.149472059 |
| 0.398877861 | 0.15786252  | 0.401800993 | 0.066559499 |
| 0.15188776  | 0.004517416 | 0.075197714 | 0.028419215 |
| 0.173693765 | 0.092799323 | 0.225256295 | 0.209892932 |
| 0.331995978 | 0.386408619 | 0.128770598 | 0.376356125 |
| 0.082614275 | 0.303732747 | 0.162217728 | 0.220611433 |
| 0.273254467 | 0.018661995 | 0.319463962 | 0.411683584 |
| 0.008503905 | 0.245996989 | 0.2908753   | 0.045510906 |
| 0.345982451 | 0.18696927  | 0.225202806 | 0.154855645 |
| 0.356734688 | 0.254273615 | 0.351511599 | 0.167043525 |
| 0.207013554 | 0.020119475 | 0.341762158 | 0.31245556  |
| 0.13308987  | 0.023980465 | 0.120840852 | 0.450330726 |
| 0.293407878 | 0.417996531 | 0.348519864 | 0.267040411 |
| 0.288114309 | 0.413319013 | 0.296383445 | 0.324331603 |
| 0.123953893 | 0.423892697 | 0.075305424 | 0.007658216 |
| 0.014251518 | 0.02199668  | 0.124553999 | 0.206836502 |
| 0.428406712 | 0.208559722 | 0.060030685 | 0.122171926 |
| 0.431706794 | 0.345797084 | 0.423068894 | 0.329660245 |
| 0.005819003 | 0.185160234 | 0.286299368 | 0.086063425 |
| 0.259747438 | 0.04056944  | 0.214592112 | 0.365874311 |
| 0.275336979 | 0.394843439 | 0.043948396 | 0.353236398 |

|             |             |             |             |
|-------------|-------------|-------------|-------------|
| 0.064882586 | 0.410724853 | 0.376509815 | 0.063371854 |
| 0.395572259 | 0.359513591 | 0.436785536 | 0.394664804 |
| 0.354817486 | 0.157503096 | 0.023986682 | 0.291745692 |
| 0.395460156 | 0.014782832 | 0.444041457 | 0.460676581 |
| 0.394612177 | 0.443637051 | 0.452354504 | 0.451171408 |
| 0.398791872 | 0.021494279 | 0.024486592 | 0.204719904 |
| 0.387266864 | 0.306142459 | 0.04790676  | 0.286092039 |
| 0.288127661 | 0.164596315 | 0.383392995 | 0.140053149 |
| 0.397869094 | 0.405998212 | 0.439480827 | 0.291567929 |
| 0.158827497 | 0.201315496 | 0.32713403  | 0.327179472 |
| 0.009336693 | 0.02674234  | 0.014587017 | 0.208342009 |
| 0.14125184  | 0.081296021 | 0.137540669 | 0.254894473 |
| 0.094738386 | 0.132233597 | 0.228797028 | 0.361801941 |
| 0.017801565 | 0.280480247 | 0.061666271 | 0.059461786 |
| 0.008082678 | 0.065598505 | 0.054804539 | 0.047932708 |
| 0.134519293 | 0.121264737 | 0.370728275 | 0.438047346 |
| 0.183568779 | 0.086234627 | 0.311136703 | 0.394383933 |
| 0.329592791 | 0.305047469 | 0.123142887 | 0.002792648 |
| 0.117801592 | 0.175507115 | 0.18551718  | 0.319890965 |
| 0.087828739 | 0.077238168 | 0.271192089 | 0.374451924 |
| 0.112953905 | 0.039052355 | 0.158452757 | 0.29376487  |
| 0.065716916 | 0.137065571 | 0.386436723 | 0.254735521 |
| 8.29E-06    | 0.156193325 | 0.384121481 | 0.082326097 |
| 0.183197394 | 0.1108778   | 0.191798164 | 0.408113196 |
| 0.183533542 | 0.134414145 | 0.450664258 | 0.373521475 |
| 0.131699083 | 0.117501014 | 0.4490984   | 0.049706419 |
| 0.255371094 | 0.035373579 | 0.192737867 | 0.177898138 |
| 0.120785026 | 0.197772515 | 0.269151114 | 0.151732711 |
| 0.050925344 | 0.405870108 | 0.309330746 | 0.431753461 |
| 0.175450045 | 0.44466192  | 0.419871698 | 0.358618557 |
| 0.232446514 | 0.236616557 | 0.154503607 | 0.373223822 |
| 0.412503229 | 0.15433978  | 0.024553525 | 0.408082747 |
| 0.188149146 | 0.363391444 | 0.091416894 | 0.414754309 |
| 0.369653151 | 0.346610926 | 0.043206777 | 0.332256505 |
| 0.287778358 | 0.099056925 | 0.367100562 | 0.436732269 |
| 0.138173072 | 0.22617927  | 0.159060081 | 0.372593928 |
| 0.077801397 | 0.116704897 | 0.219040211 | 0.187320471 |
| 0.02743094  | 0.020254414 | 0.016831754 | 0.066229488 |
| 0.143533007 | 0.330862961 | 0.314960139 | 0.426530042 |
| 0.033669623 | 0.324238884 | 0.134048025 | 0.11660245  |
| 0.312902374 | 0.207682036 | 0.322047847 | 0.314299121 |
| 0.142782357 | 0.005257873 | 0.033303936 | 0.383722404 |
| 0.009481293 | 0.171923592 | 0.137402358 | 0.000551755 |
| 0.006668839 | 0.338411924 | 0.038799321 | 0.099277808 |
| 0.440025533 | 0.104341585 | 0.095897766 | 0.127690314 |
| 0.26411649  | 0.027764864 | 0.001420232 | 0.420089038 |
| 0.397548006 | 0.370680261 | 0.391415621 | 0.341408987 |
| 0.382118231 | 0.336210116 | 0.375690684 | 0.170799611 |
| 0.025448022 | 0.019798296 | 0.144731778 | 0.141499128 |
| 0.000836603 | 0.3217314   | 0.199823245 | 0.060276287 |
| 0.388707852 | 0.185115684 | 0.005675878 | 0.293313469 |
| 0.003417706 | 0.192959926 | 0.08942313  | 0.086669172 |
| 0.308592207 | 0.001504361 | 0.103589348 | 0.161869929 |
| 0.305336227 | 0.222674594 | 1           | 0.429742773 |

|             |             |             |             |
|-------------|-------------|-------------|-------------|
| 0.186754246 | 0.053190544 | 0.176503525 | 0.341412702 |
| 0.014028245 | 0.066813358 | 0.123683532 | 0.030325777 |
| 0.109002094 | 0.343564231 | 0.1754381   | 0.015936888 |
| 0.138869735 | 0.000177944 | 0.251114344 | 0.421935702 |
| 0.354069371 | 0.455018995 | 0.409782729 | 0.202384026 |
| 0.404820229 | 0.162535682 | 0.444375852 | 0.301242861 |
| 0.16739311  | 0.000116768 | 0.000863212 | 0.451707445 |
| 0.283583452 | 0.019201823 | 0.064697887 | 0.133998565 |
| 0.028222624 | 0.036454306 | 0.013119534 | 0.128295369 |
| 0.303242601 | 0.157998647 | 0.124241393 | 0.345829224 |
| 0.101976893 | 0.118488698 | 0.158783517 | 0.029726701 |
| 0.31359145  | 0.010280348 | 0.030030085 | 0.003214026 |
| 0.313918402 | 0.049417745 | 0.320354061 | 0.410573125 |
| 0.390685603 | 0.357865103 | 0.158454234 | 0.1294221   |
| 0.389604362 | 0.035934212 | 0.199438292 | 0.038084377 |
| 0.379674972 | 0.298450343 | 0.217282361 | 0.194166103 |
| 0.409355769 | 0.36049629  | 0.004655429 | 0.340680038 |
| 0.002856312 | 0.000981758 | 0.169563558 | 0.151653174 |
| 0.050929194 | 0.219765938 | 0.15081989  | 0.085366173 |
| 0.087132994 | 0.004850405 | 0.185922409 | 0.177685324 |
| 0.188154674 | 0.204621819 | 0.220843262 | 0.144253847 |
| 0.13915121  | 0.087243045 | 0.073947216 | 0.042913303 |
| 0.111529244 | 0.197408997 | 0.097880281 | 0.002536    |
| 0.260872748 | 0.285662232 | 0.011892143 | 0.069196963 |
| 0.375431701 | 0.432256597 | 0.00760579  | 0.002091563 |
| 0.154431339 | 0.149506521 | 0.444553101 | 0.404362102 |
| 0.392615682 | 0.417359106 | 0.266573038 | 0.045466225 |
| 0.012998723 | 0.211413677 | 0.252913478 | 0.050947352 |
| 0.417947982 | 0.018229914 | 0.378432076 | 0.284469466 |
| 0.043360233 | 0.070657911 | 0.0067697   | 0.024041661 |
| 0.339546883 | 0.077490771 | 0.08532447  | 0.059653681 |
| 0.136492227 | 0.197329059 | 0.008144272 | 0.082687079 |
| 0.232587135 | 0.16177272  | 0.065363926 | 0.108361737 |
| 0.259014668 | 0.10726526  | 0.387074312 | 0.332368772 |
| 0.048973426 | 0.034119777 | 0.078952732 | 0.318866374 |
| 0.393139542 | 0.276433789 | 0.006547153 | 0.361279274 |
| 0.421544732 | 0.351637681 | 0.382583317 | 0.319411085 |
| 0.028212892 | 0.252128073 | 0.205249423 | 0.231549203 |
| 0.079675465 | 0.166206929 | 0.111755975 | 0.016339332 |
| 0.199729709 | 0.343160766 | 0.329078654 | 0.059162823 |
| 0.288460359 | 0.045160846 | 0.014799638 | 0.388226578 |
| 0.137681048 | 0.017413232 | 0.166697123 | 0.401352492 |
| 0.002003899 | 0.160895361 | 0.44133566  | 0.07856082  |
| 0.40874668  | 0.428950756 | 0.327600506 | 0.084729024 |
| 0.004173504 | 0.382441792 | 0.253493335 | 0.187822584 |
| 0.333808163 | 0.228550876 | 0.056040668 | 0.018653411 |
| 0.193247094 | 0.027822183 | 0.037855866 | 0.126127647 |
| 0.128715004 | 0.247747376 | 0.102621729 | 0.092536106 |
| 0.091180423 | 0.033252258 | 0.18558229  | 0.094229445 |
| 0.12228496  | 0.136313286 | 0.249739545 | 0.12210056  |
| 0.132475273 | 0.363859181 | 0.30980341  | 0.003574204 |
| 0.289176182 | 0.340401227 | 0.367443417 | 1.02E-05    |
| 0.366875642 | 0.000592573 | 0.08977512  | 0.100790697 |
| 0.082040812 | 0.08153911  | 0.17547276  | 0.150890791 |

|             |             |             |             |
|-------------|-------------|-------------|-------------|
| 0.214047511 | 0.083863704 | 0.10951732  | 0.126678009 |
| 0.061277743 | 0.092018015 | 0.29944153  | 0.162449668 |
| 0.127300172 | 0.030929467 | 0.041783137 | 0.042938348 |
| 0.011270569 | 0.397321012 | 0.137866091 | 0.02580282  |
| 0.118154303 | 0.156237604 | 0.254365816 | 0.38923243  |
| 0.345936434 | 0.049205734 | 0.151012089 | 0.359689796 |
| 0.136083423 | 0.114159775 | 0.010547284 | 0.226152521 |
| 0.098953082 | 0.110070781 | 0.23071633  | 0.150732895 |
| 0.306700918 | 0.275815764 | 0.132400835 | 0.350104505 |
| 0.191407259 | 0.193492572 | 0.126598315 | 0.024613325 |
| 0.055109637 | 0.053612499 | 0.207206779 | 0.000320417 |
| 0.214143083 | 0.079420402 | 0.420790796 | 0.368284857 |
| 0.200934108 | 0.28944076  | 0.112419833 | 0.018003513 |
| 0.125957566 | 0.090200306 | 0.057846668 | 0.385042615 |
| 0.197284608 | 0.053702583 | 0.218814783 | 0.100841246 |
| 0.392999558 | 0.365988524 | 0.134612889 | 0.082049207 |
| 0.123109846 | 0.092849023 | 0.353713631 | 0.032568674 |
| 0.309535731 | 0.122470051 | 0.221080262 | 0.147716912 |
| 0.103625479 | 0.453462971 | 0.015218176 | 0.457491274 |
| 0.1730614   | 0.057057243 | 0.365905172 | 0.139789829 |
| 0.111577198 | 0.051219613 | 0.187796336 | 0.146910493 |
| 0.077901483 | 0.209883969 | 0.01297657  | 0.038980361 |
| 0.230154481 | 0.128222495 | 0.319164735 | 0.278397254 |
| 0.149593863 | 0.267142297 | 0.184041362 | 0.111957377 |
| 0.357936564 | 0.357425931 | 0.084620135 | 0.15095266  |
| 0.223151333 | 0.023588567 | 0.237495547 | 0.0107339   |
| 0.317180278 | 0.345510067 | 0.154122878 | 0.009423386 |
| 0.002291645 | 0.188793561 | 0.28998348  | 0.020127674 |
| 0.445799893 | 0.211828664 | 0.236133744 | 0.370605141 |
| 0.08275591  | 0.354426575 | 0.044591423 | 0.332733147 |
| 0.008973343 | 0.146337428 | 0.277986102 | 0.220418774 |
| 0.103160739 | 0.207617433 | 0.301165299 | 0.173933041 |
| 0.00499948  | 0.115359442 | 2.37E-05    | 0.266936004 |
| 0.333950423 | 0.249544737 | 0.106416244 | 0.144172727 |
| 0.185604419 | 0.300534387 | 0.096881673 | 0.281694798 |
| 0.001863298 | 0.30484778  | 0.093040271 | 0.311921261 |
| 0.159106654 | 0.217970866 | 0.016293179 | 0.230413264 |
| 0.302853191 | 0.109500148 | 0.151014722 | 0.166869697 |
| 0.39045576  | 0.306307469 | 0.077778431 | 0.125363107 |
| 0.282829964 | 0.018382462 | 0.1624477   | 0.428540429 |
| 0.06724643  | 0.16535673  | 0.421875706 | 0.065323377 |
| 0.225744411 | 0.286958133 | 0.311950784 | 0.41656755  |
| 0.024045517 | 0.135721643 | 0.378702229 | 0.372767418 |
| 0.213121875 | 0.12328849  | 0.161766828 | 0.105716785 |
| 0.340267831 | 0.024838833 | 0.158075764 | 0.235546636 |
| 0.159108467 | 0.196789545 | 0.21323851  | 0.100847079 |
| 0.007369911 | 0.051065796 | 0.142034913 | 0.056348446 |
| 0.166228464 | 0.234460243 | 0.12961585  | 0.287214116 |
| 0.049564774 | 0.005695127 | 0.34869084  | 0.024094451 |
| 0.16478591  | 0.310440399 | 0.117006586 | 0.23340742  |
| 0.093018641 | 0.203217068 | 0.15023516  | 0.000652582 |
| 0.347941492 | 0.054745873 | 0.138839309 | 0.106359743 |
| 0.150930938 | 0.008039927 | 0.348348249 | 0.450611316 |
| 0.185973703 | 0.175821476 | 0.189523623 | 0.354396172 |

|             |             |             |             |
|-------------|-------------|-------------|-------------|
| 0.14818255  | 0.20661845  | 0.174321458 | 0.290962713 |
| 0.184010246 | 0.202738005 | 0.227611588 | 0.229751032 |
| 0.268305694 | 0.095758054 |             |             |
| INCENP      | 0.172956143 | 0.519617157 | 0.151126356 |
| 0.252621393 | 0.378587751 | 0.53805592  | 0.134033113 |
| 0.235130657 | 0.471312062 | 0.410481763 | 0.475698622 |
| 0.052763212 | 0.101728952 | 0.527982063 | 0.122287304 |
| 0.465078261 | 0.080724619 | 0.206055288 | 0.123119833 |
| 0.350913456 | 0.344626872 | 0.415726237 | 0.524402406 |
| 0.354049899 | 0.30736859  | 0.493822386 | 0.457957602 |
| 0.545329462 | 0.33469157  | 0.536695105 | 0.298661182 |
| 0.475036507 | 0.389564763 | 0.45879294  | 0.057930188 |
| 0.524015022 | 0.016227235 | 0.465801758 | 0.353782456 |
| 0.198963179 | 0.443127331 | 0.475675842 | 0.355751454 |
| 0.491848264 | 0.103427596 | 0.302479296 | 0.483725881 |
| 0.471080774 | 0.407079898 | 0.163707184 | 0.545378464 |
| 0.466711142 | 0.488819532 | 0.513677261 | 0.005412549 |
| 0.353995135 | 0.099425239 | 0.257271737 | 0.530665409 |
| 0.327263826 | 0.217773119 | 0.34530383  | 0.382055581 |
| 0.475468741 | 0.463000354 | 0.373714439 | 0.468228633 |
| 0.536316359 | 0.202246105 | 0.523178681 | 0.266954209 |
| 0.504593495 | 0.096482982 | 0.277123851 | 0.192074236 |
| 0.479684452 | 0.308500865 | 0.436134509 | 0.367893862 |
| 0.516401977 | 0.528231702 | 0.366968585 | 0.519971475 |
| 0.116118011 | 0.396982949 | 0.351640069 | 0.40314029  |
| 0.462679466 | 0.170696511 | 0.519831395 | 0.52289722  |
| 0.124245618 | 0.499747136 | 0.49842095  | 0.243163662 |
| 0.538778271 | 0.338043074 | 0.51391075  | 0.211494135 |
| 0.443794423 | 0.406831697 | 0.492142082 | 0.41906254  |
| 0.397026274 | 0.173593343 | 0.516261861 | 0.372317638 |
| 0.395558397 | 0.191756228 | 0.283807123 | 0.532881642 |
| 0.525436532 | 0.547665654 | 0.521897989 | 0.46247356  |
| 0.446615131 | 0.540696356 | 0.526729659 | 0.511078094 |
| 0.225291558 | 0.53397949  | 0.329038588 | 0.095251857 |
| 0.176147837 | 0.163185886 | 0.291783086 | 0.413473279 |
| 0.547809453 | 0.471555682 | 0.333338666 | 0.326257833 |
| 0.512737719 | 0.504876516 | 0.530005545 | 0.513561937 |
| 0.102395231 | 0.293466451 | 0.459299194 | 0.433515496 |
| 0.478111329 | 0.219655728 | 0.306284861 | 0.528719494 |
| 0.486985077 | 0.517793171 | 0.316398517 | 0.525952603 |
| 0.313282543 | 0.523008819 | 0.545029252 | 0.284668556 |
| 0.531529019 | 0.519733959 | 0.529380324 | 0.473775404 |
| 0.513192582 | 0.50000895  | 0.0901985   | 0.486780841 |
| 0.514248409 | 0.020263493 | 0.540869188 | 0.540647759 |
| 0.530398116 | 0.537972259 | 0.524523898 | 0.543954961 |
| 0.531416367 | 0.168593733 | 0.035315343 | 0.368923545 |
| 0.521549694 | 0.507660096 | 0.21335575  | 0.493083096 |
| 0.430682503 | 0.539576257 | 0.521796181 | 0.385550058 |
| 0.50853805  | 0.542477189 | 0.545575095 | 0.50629169  |
| 0.435566956 | 0.425361227 | 0.437479226 | 0.50204236  |
| 0.109185755 | 0.237505679 | 0.139101105 | 0.417746715 |
| 0.493876577 | 0.276153878 | 0.522955021 | 0.429311631 |
| 0.303247423 | 0.491500519 | 0.39420451  | 0.450223296 |
| 0.141288872 | 0.542075141 | 0.303674157 | 0.305990927 |

|             |             |             |             |
|-------------|-------------|-------------|-------------|
| 0.095327205 | 0.252426894 | 0.286602524 | 0.262950025 |
| 0.339687065 | 0.312894546 | 0.5329746   | 0.535925808 |
| 0.433349375 | 0.322589479 | 0.53814419  | 0.515600989 |
| 0.472090364 | 0.458154463 | 0.348850361 | 0.029842149 |
| 0.337125752 | 0.371595962 | 0.213822333 | 0.490543995 |
| 0.278597966 | 0.328826856 | 0.473404664 | 0.473094895 |
| 0.444929102 | 0.274025816 | 0.43951104  | 0.472564553 |
| 0.279545274 | 0.397859196 | 0.520380295 | 0.51475361  |
| 0.015071144 | 0.46089656  | 0.542210769 | 0.191902704 |
| 0.438002197 | 0.164584514 | 0.312267959 | 0.530719432 |
| 0.340990936 | 0.270211078 | 0.543958836 | 0.469356728 |
| 0.446331357 | 0.321471695 | 0.528573198 | 0.055483709 |
| 0.418159512 | 0.090570635 | 0.380561852 | 0.459154846 |
| 0.383538844 | 0.390480439 | 0.376619475 | 0.359637785 |
| 0.263675766 | 0.528485018 | 0.511572026 | 0.543707537 |
| 0.441050143 | 0.527287715 | 0.537154458 | 0.525524971 |
| 0.494376681 | 0.430490704 | 0.154667366 | 0.538260835 |
| 0.534598437 | 0.378143858 | 0.177130931 | 0.524068545 |
| 0.452452159 | 0.4789243   | 0.171372565 | 0.527346638 |
| 0.507716838 | 0.506461228 | 0.230501217 | 0.450547783 |
| 0.497118033 | 0.38005785  | 0.514343461 | 0.520178168 |
| 0.407856789 | 0.418878381 | 0.404369908 | 0.471610166 |
| 0.306560889 | 0.257928051 | 0.427592719 | 0.207102464 |
| 0.014947178 | 0.184691879 | 0.158393413 | 0.243847057 |
| 0.20230962  | 0.51268893  | 0.490827602 | 0.535837216 |
| 0.214503756 | 0.511903105 | 0.359530399 | 0.372666385 |
| 0.503109213 | 0.418583289 | 0.451921048 | 0.471300022 |
| 0.373828776 | 0.046139232 | 0.19863421  | 0.532511191 |
| 0.115877509 | 0.28780451  | 0.451908315 | 0.006442549 |
| 0.11442326  | 0.521087961 | 0.198345109 | 0.295771096 |
| 0.519151383 | 0.308039867 | 0.346430678 | 0.429409794 |
| 0.452738101 | 0.194402694 | 0.008279334 | 0.527972365 |
| 0.511341732 | 0.499750572 | 0.510626795 | 0.491001458 |
| 0.503046065 | 0.507575414 | 0.499205387 | 0.523274369 |
| 0.207149768 | 0.205468276 | 0.248453797 | 0.379357083 |
| 0.011514473 | 0.486173202 | 0.393215346 | 0.256661081 |
| 0.506531626 | 0.415865661 | 0.09774381  | 0.426186005 |
| 0.064739081 | 0.23668321  | 0.429609783 | 0.316738429 |
| 0.425024123 | 0.049787218 | 0.343712339 | 0.383749052 |
| 0.506124319 | 0.468404052 | 0.429742773 | 1           |
| 0.443169465 | 0.256106767 | 0.406112847 | 0.491639073 |
| 0.154200581 | 0.154898051 | 0.484445715 | 0.066261794 |
| 0.30775321  | 0.492574155 | 0.465842141 | 0.166991107 |
| 0.398155672 | 0.020621695 | 0.488240545 | 0.530602794 |
| 0.517015445 | 0.535778245 | 0.541196649 | 0.324509865 |
| 0.536409324 | 0.119692306 | 0.542058612 | 0.524526028 |
| 0.469334551 | 0.00313815  | 0.013033816 | 0.544076063 |
| 0.477963748 | 0.149341778 | 0.277528493 | 0.504845619 |
| 0.196722002 | 0.294507464 | 0.146936486 | 0.229715467 |
| 0.545659946 | 0.313184737 | 0.21593246  | 0.509267669 |
| 0.349593525 | 0.338208718 | 0.517191278 | 0.191259632 |
| 0.500149717 | 0.121406271 | 0.188738792 | 0.015393854 |
| 0.450644906 | 0.228910311 | 0.504351204 | 0.535693688 |
| 0.517124575 | 0.477954754 | 0.427763414 | 0.449257357 |



|             |             |             |             |
|-------------|-------------|-------------|-------------|
| 0.508784579 | 0.21782041  | 0.454924996 | 0.238922237 |
| 0.534492738 | 0.47383965  | 0.438395681 | 0.438399456 |
| 0.520461908 | 0.520142787 | 0.086709579 | 0.501649298 |
| 0.040619193 | 0.003271259 | 0.527697767 | 0.381554027 |
| 0.086978828 | 0.436450711 | 0.379433616 | 0.338025434 |
| 0.323424523 | 0.085356852 | 0.304039993 | 0.281708976 |
| 0.404143135 | 0.449566122 | 0.328272737 | 0.368434016 |
| 0.338087835 | 0.172854807 | 0.302765026 | 0.251791253 |
| 0.324153223 | 0.43742061  | 0.310818421 | 0.062209102 |
| 0.527460409 | 0.492545685 | 0.135614124 | 0.285902512 |
| 0.534254527 | 0.544987979 | 0.092728536 | 0.027809267 |
| 0.394024667 | 0.397460319 | 0.534822576 | 0.539801725 |
| 0.537302048 | 0.517299881 | 0.456007916 | 0.182438313 |
| 0.153043105 | 0.414202926 | 0.350622002 | 0.150640033 |
| 0.538922685 | 0.161474897 | 0.527884639 | 0.347153169 |
| 0.22414511  | 0.341874685 | 0.080271877 | 0.174487189 |
| 0.452828285 | 0.294055625 | 0.262472595 | 0.286158891 |
| 0.399802035 | 0.30291026  | 0.117340005 | 0.313520679 |
| 0.46671969  | 0.209274846 | 0.276604092 | 0.455100954 |
| 0.494670911 | 0.318584018 | 0.509841773 | 0.487286718 |
| 0.251340903 | 0.221879491 | 0.443377984 | 0.4846386   |
| 0.543172701 | 0.488516725 | 0.066758781 | 0.527065049 |
| 0.53016612  | 0.533292222 | 0.527926752 | 0.463689274 |
| 0.183712756 | 0.457140298 | 0.365422652 | 0.418658223 |
| 0.297838377 | 0.538527821 | 0.344077713 | 0.145932013 |
| 0.401768841 | 0.496154275 | 0.518030495 | 0.266040457 |
| 0.525062068 | 0.259316317 | 0.147606929 | 0.530796089 |
| 0.215525343 | 0.183209044 | 0.486333333 | 0.514365624 |
| 0.004690203 | 0.160912686 | 0.516198389 | 0.359595839 |
| 0.515822164 | 0.532130239 | 0.502997939 | 0.396169306 |
| 0.002072619 | 0.482877329 | 0.480574248 | 0.497370935 |
| 0.530406586 | 0.486551817 | 0.251575214 | 0.142713926 |
| 0.3968879   | 0.18913751  | 0.212643992 | 0.488483674 |
| 0.205840079 | 0.529776197 | 0.305733351 | 0.327894976 |
| 0.283336284 | 0.199619747 | 0.295022089 | 0.37924033  |
| 0.177825262 | 0.352685155 | 0.453272968 | 0.415573084 |
| 0.228380908 | 0.497681421 | 0.514560991 | 0.078018951 |
| 0.422964611 | 0.49463766  | 0.510770279 | 0.00520773  |
| 0.514410345 | 0.023464294 | 0.276909514 | 0.307878969 |
| 0.291876811 | 0.292525669 | 0.338260164 | 0.382411959 |
| 0.472781163 | 0.338102141 | 0.396424687 | 0.34862223  |
| 0.251396886 | 0.354915134 | 0.482444531 | 0.493191702 |
| 0.363213524 | 0.239957428 | 0.202315485 | 0.197979453 |
| 0.11389737  | 0.53960103  | 0.363725101 | 0.176855947 |
| 0.332559732 | 0.479374131 | 0.442428926 | 0.5280359   |
| 0.493870886 | 0.229996538 | 0.429112732 | 0.547737136 |
| 0.294789466 | 0.425484031 | 0.152840538 | 0.527535573 |
| 0.357702408 | 0.268560708 | 0.528053952 | 0.464957906 |
| 0.512939254 | 0.464538043 | 0.363684746 | 0.506090382 |
| 0.47465196  | 0.430528377 | 0.443142604 | 0.149523254 |
| 0.304201398 | 0.24926404  | 0.322292977 | 0.008509039 |
| 0.468286745 | 0.432380935 | 0.547319069 | 0.519671828 |
| 0.334942267 | 0.474894226 | 0.457799344 | 0.181752273 |
| 0.404149146 | 0.293142275 | 0.254644127 | 0.536766384 |

|             |             |             |             |
|-------------|-------------|-------------|-------------|
| 0.250121286 | 0.310864461 | 0.380163286 | 0.505515248 |
| 0.520456508 | 0.509601836 | 0.318549542 | 0.369040888 |
| 0.351024582 | 0.348673166 | 0.49075806  | 0.25554963  |
| 0.518109409 | 0.238369283 | 0.489973934 | 0.382156016 |
| 0.30188602  | 0.539182513 | 0.146238514 | 0.542693481 |
| 0.400148384 | 0.250349871 | 0.497947114 | 0.445815071 |
| 0.448503282 | 0.194802403 | 0.215531977 | 0.507421872 |
| 0.330300147 | 0.400037651 | 0.02260986  | 0.079325951 |
| 0.426304973 | 0.396367137 | 0.512843591 | 0.464185601 |
| 0.302457913 | 0.424509184 | 0.195825902 | 0.424783461 |
| 0.511196405 | 0.522919635 | 0.351977636 | 0.358844831 |
| 0.4600051   | 0.193809077 | 0.544182878 | 0.024457044 |
| 0.500995299 | 0.493960872 | 0.466440352 | 0.119592307 |
| 0.054566938 | 0.24356474  | 0.510883527 | 0.161951873 |
| 0.522839569 | 0.249246026 | 0.472935916 | 0.541918825 |
| 0.300647791 | 0.52451923  | 0.190644387 | 0.503819903 |
| 0.113547633 | 0.380226009 | 0.44865741  | 0.461877611 |
| 0.298751237 | 0.342619377 | 0.473742158 | 0.279777227 |
| 0.080295843 | 0.346809886 | 0.004220191 | 0.45610355  |
| 0.499490008 | 0.393632024 | 0.322653817 | 0.394317891 |
| 0.380687934 | 0.482072549 | 0.300112392 | 0.507063413 |
| 0.030881788 | 0.43559219  | 0.313915006 | 0.532383607 |
| 0.291933579 | 0.457800504 | 0.122295036 | 0.36835708  |
| 0.497733616 | 0.34379849  | 0.366177148 | 0.381685309 |
| 0.53269952  | 0.50521062  | 0.303354272 | 0.298970018 |
| 0.488366555 | 0.152972079 | 0.510508704 | 0.525634632 |
| 0.26482475  | 0.258135789 | 0.514245138 | 0.299524981 |
| 0.358647997 | 0.499209625 | 0.499198748 | 0.518801163 |
| 0.117802165 | 0.362783804 | 0.512359041 | 0.520461005 |
| 0.399170666 | 0.205237327 | 0.286972183 | 0.292824812 |
| 0.518582498 | 0.190423945 | 0.308288179 | 0.487132117 |
| 0.251612744 | 0.416955588 | 0.470676933 | 0.248633354 |
| 0.078843673 | 0.26966502  | 0.494206227 | 0.259862589 |
| 0.397128274 | 0.451338076 | 0.300001025 | 0.466688093 |
| 0.216189206 | 0.057907187 | 0.492099163 | 0.020815366 |
| 0.507382424 | 0.492495239 | 0.364739721 | 0.432377841 |
| 0.313915803 | 0.476301586 | 0.479396766 | 0.004426528 |
| 0.498424895 | 0.076604143 | 0.390900654 | 0.293104695 |
| 0.337010179 | 0.124256712 | 0.518449376 | 0.532731557 |
| 0.458480126 | 0.422971896 | 0.409395242 | 0.520023563 |
| 0.175897572 | 0.390446619 | 0.394094452 | 0.541411707 |
| 0.261015302 | 0.485129634 | 0.495104112 | 0.452141782 |
| 0.514467645 | 0.409917163 |             |             |

|             |             |             |             |
|-------------|-------------|-------------|-------------|
| IN080C      | 0.098358211 | 0.315275121 | 0.063305727 |
| 0.216557033 | 0.246577511 | 0.22749131  | 0.081744888 |
| 0.140182065 | 0.231666242 | 0.099602444 | 0.27523447  |
| 0.052084958 | 0.08272936  | 0.407514288 | 0.080894782 |
| 0.265499314 | 0.084123328 | 0.135027619 | 0.045248956 |
| 0.136377928 | 0.237540304 | 0.230283214 | 0.18646626  |
| 0.211174311 | 0.211501639 | 0.198331598 | 0.176068858 |
| 0.405055188 | 0.142495709 | 0.31275046  | 0.084285286 |
| 0.401109949 | 0.265707129 | 0.19230162  | 0.037580066 |
| 0.222372198 | 0.008605294 | 0.383073245 | 0.245515332 |
| 0.160155628 | 0.34944778  | 0.126313273 | 0.26654934  |

|             |             |             |             |
|-------------|-------------|-------------|-------------|
| 0.152995885 | 0.06489932  | 0.076953297 | 0.254604758 |
| 0.176924456 | 0.17734788  | 0.060745659 | 0.294284493 |
| 0.165537418 | 0.29237273  | 0.229166634 | 0.006304162 |
| 0.193094746 | 0.054950321 | 0.129407935 | 0.417474798 |
| 0.246795683 | 0.177738214 | 0.108298356 | 0.135751731 |
| 0.205047506 | 0.256762423 | 0.232511549 | 0.14955492  |
| 0.436937925 | 0.138211397 | 0.285033705 | 0.163698826 |
| 0.200723485 | 0.033634743 | 0.200527251 | 0.061970018 |
| 0.196455954 | 0.224947033 | 0.251245128 | 0.189303789 |
| 0.312559302 | 0.443634438 | 0.204639178 | 0.392440117 |
| 0.071493142 | 0.219364634 | 0.211677426 | 0.303526458 |
| 0.257930525 | 0.073268095 | 0.37212391  | 0.458174612 |
| 0.045638981 | 0.166609478 | 0.272315775 | 0.11143031  |
| 0.345456757 | 0.132215403 | 0.162353729 | 0.181219242 |
| 0.288347911 | 0.230804665 | 0.375477968 | 0.307517827 |
| 0.207809361 | 0.071218472 | 0.382976687 | 0.224033757 |
| 0.287303462 | 0.091008764 | 0.204550821 | 0.367599076 |
| 0.288849855 | 0.422881493 | 0.306052971 | 0.303681693 |
| 0.230440522 | 0.434719689 | 0.334014435 | 0.340071758 |
| 0.048758443 | 0.428093364 | 0.189194517 | 0.103983397 |
| 0.068001256 | 0.136094482 | 0.13340516  | 0.311055524 |
| 0.404113311 | 0.265572461 | 0.19535678  | 0.235303384 |
| 0.404447816 | 0.369700235 | 0.413574583 | 0.34860332  |
| 0.072396077 | 0.13038923  | 0.228319449 | 0.182271403 |
| 0.29023317  | 0.109469907 | 0.208296842 | 0.42363681  |
| 0.39636328  | 0.375375521 | 0.13122571  | 0.423326726 |
| 0.134487201 | 0.475102816 | 0.349314945 | 0.211509349 |
| 0.443946416 | 0.41539297  | 0.470189056 | 0.325586326 |
| 0.419124283 | 0.238716909 | 0.030231235 | 0.311484067 |
| 0.47017995  | 0.029210542 | 0.380207962 | 0.411269966 |
| 0.403175772 | 0.383678058 | 0.455996698 | 0.431670887 |
| 0.40391653  | 0.080214033 | 0.009685576 | 0.274402049 |
| 0.421254315 | 0.39755213  | 0.147899365 | 0.205985832 |
| 0.253082985 | 0.214522859 | 0.312320448 | 0.222647026 |
| 0.473732371 | 0.387273833 | 0.389934612 | 0.299765158 |
| 0.1318945   | 0.33044378  | 0.190706476 | 0.381000389 |
| 0.089709916 | 0.129963653 | 0.062966588 | 0.257533449 |
| 0.150424042 | 0.206629683 | 0.207467194 | 0.201175186 |
| 0.231287118 | 0.165300561 | 0.174335916 | 0.314478768 |
| 0.0642658   | 0.23791961  | 0.153349768 | 0.137386637 |
| 0.102244341 | 0.170348856 | 0.235199684 | 0.22706674  |
| 0.243915439 | 0.219724679 | 0.293984561 | 0.411451428 |
| 0.179656284 | 0.189752333 | 0.301523266 | 0.449283296 |
| 0.449621444 | 0.239877009 | 0.229779776 | 0.060251762 |
| 0.212876848 | 0.112853497 | 0.123205891 | 0.206936865 |
| 0.182261535 | 0.20707111  | 0.255547573 | 0.365573954 |
| 0.19553245  | 0.093928772 | 0.207094072 | 0.407151563 |
| 0.137212972 | 0.278196314 | 0.418246181 | 0.193113952 |
| 0.012899501 | 0.240100007 | 0.382455623 | 0.154216978 |
| 0.222490074 | 0.161628044 | 0.201249462 | 0.401798099 |
| 0.166322336 | 0.174370426 | 0.409553202 | 0.338642492 |
| 0.197667963 | 0.189231749 | 0.452227757 | 0.03031631  |
| 0.17237295  | 0.14104327  | 0.315213654 | 0.116922713 |
| 0.227181887 | 0.286988535 | 0.227567254 | 0.247068136 |

|             |             |             |             |
|-------------|-------------|-------------|-------------|
| 0.128340973 | 0.431416206 | 0.344355528 | 0.441584484 |
| 0.194381853 | 0.45522753  | 0.400445718 | 0.422028909 |
| 0.283668194 | 0.157152253 | 0.107541712 | 0.382405488 |
| 0.39240755  | 0.14765038  | 0.076954911 | 0.313527708 |
| 0.148601333 | 0.301873093 | 0.141291575 | 0.454074156 |
| 0.449691208 | 0.354646614 | 0.202698805 | 0.348913462 |
| 0.398653364 | 0.221681943 | 0.345037754 | 0.458497902 |
| 0.114177758 | 0.212748851 | 0.231797175 | 0.397998615 |
| 0.1936704   | 0.186054171 | 0.291468278 | 0.115297582 |
| 0.012446852 | 0.08007928  | 0.081079122 | 0.226695862 |
| 0.183989618 | 0.214188024 | 0.287439738 | 0.437977975 |
| 0.160459002 | 0.387179169 | 0.192392182 | 0.262903148 |
| 0.361489727 | 0.191328332 | 0.224136285 | 0.267199574 |
| 0.235965337 | 0.066509588 | 0.217745763 | 0.448933565 |
| 0.038405449 | 0.213259736 | 0.173544715 | 0.016769246 |
| 0.067977759 | 0.268668435 | 0.10829267  | 0.224997576 |
| 0.43080391  | 0.215582188 | 0.194002533 | 0.121423737 |
| 0.3360798   | 0.120050793 | 0.026778242 | 0.388745845 |
| 0.373431716 | 0.349594189 | 0.367322733 | 0.347136939 |
| 0.339517798 | 0.280207214 | 0.348899104 | 0.19698723  |
| 0.134510213 | 0.078819049 | 0.185479291 | 0.24438174  |
| 0.005543664 | 0.371539711 | 0.198099527 | 0.184877528 |
| 0.323407263 | 0.235356184 | 0.078082128 | 0.225192669 |
| 0.06051852  | 0.149868644 | 0.170581676 | 0.178980352 |
| 0.310409288 | 0.03332827  | 0.185356924 | 0.193011154 |
| 0.371340702 | 0.33037744  | 0.186754246 | 0.443169465 |
| 1           | 0.104237805 | 0.257091336 | 0.354698099 |
| 0.107621201 | 0.047625553 | 0.167049418 | 0.023476143 |
| 0.128613216 | 0.359587716 | 0.183912357 | 0.094310316 |
| 0.256707356 | 0.021025516 | 0.34666542  | 0.454840121 |
| 0.361953118 | 0.447948533 | 0.446036199 | 0.225575232 |
| 0.43800471  | 0.053658301 | 0.438940713 | 0.326572369 |
| 0.154235893 | 0.005843419 | 0.020423476 | 0.415123667 |
| 0.249773566 | 0.058937949 | 0.18112081  | 0.218195637 |
| 0.191742589 | 0.1151965   | 0.093773255 | 0.205588121 |
| 0.272064179 | 0.242312957 | 0.17375198  | 0.371799166 |
| 0.220081416 | 0.206156875 | 0.166975407 | 0.09179181  |
| 0.256752035 | 0.112291079 | 0.083380644 | 0.034305476 |
| 0.309781059 | 0.117469256 | 0.374929034 | 0.41796182  |
| 0.460579847 | 0.328386138 | 0.127622244 | 0.200798627 |
| 0.346399638 | 0.087747494 | 0.170832137 | 0.0926933   |
| 0.390983699 | 0.299204831 | 0.362040913 | 0.330738179 |
| 0.460782369 | 0.423551143 | 0.066338726 | 0.356061663 |
| 0.055828512 | 0.006497758 | 0.199173906 | 0.229579917 |
| 0.024861688 | 0.21264676  | 0.284713333 | 0.119137483 |
| 0.152509325 | 0.070207634 | 0.176353792 | 0.184336525 |
| 0.266568501 | 0.231375624 | 0.231093583 | 0.194694965 |
| 0.206501434 | 0.14791945  | 0.211982593 | 0.157998795 |
| 0.114205896 | 0.278372513 | 0.219496446 | 0.042871476 |
| 0.193582078 | 0.228833885 | 0.09706762  | 0.175180539 |
| 0.416763137 | 0.431281242 | 0.078430719 | 0.064531301 |
| 0.281781527 | 0.195511552 | 0.445768961 | 0.397035834 |
| 0.438513349 | 0.47050712  | 0.37933272  | 0.172754079 |
| 0.107312672 | 0.24425852  | 0.217250737 | 0.164915173 |

|             |             |             |             |
|-------------|-------------|-------------|-------------|
| 0.434402183 | 0.059636071 | 0.395893135 | 0.191873439 |
| 0.127660549 | 0.212704173 | 0.10753165  | 0.107566788 |
| 0.241985882 | 0.198685437 | 0.225791029 | 0.136920097 |
| 0.243713634 | 0.195665133 | 0.073269903 | 0.198725195 |
| 0.312536688 | 0.147327237 | 0.172236087 | 0.166638292 |
| 0.27967985  | 0.062576942 | 0.322560154 | 0.439365216 |
| 0.146170492 | 0.097083053 | 0.187693932 | 0.28245856  |
| 0.34498158  | 0.162746051 | 0.086684192 | 0.332156382 |
| 0.42593132  | 0.297121965 | 0.413595981 | 0.3875175   |
| 0.094951962 | 0.258568509 | 0.15674665  | 0.229839731 |
| 0.169579931 | 0.221314817 | 0.183446029 | 0.081644172 |
| 0.286204216 | 0.404563528 | 0.341643469 | 0.230059029 |
| 0.211992846 | 0.091601686 | 0.049692706 | 0.347316529 |
| 0.182442815 | 0.133868028 | 0.137051017 | 0.326765695 |
| 0.009539991 | 0.126357321 | 0.405811244 | 0.245878122 |
| 0.432989194 | 0.429346313 | 0.426547635 | 0.154177385 |
| 0.00197828  | 0.277858466 | 0.313456438 | 0.252590064 |
| 0.348299847 | 0.30623541  | 0.094336488 | 0.154446881 |
| 0.328888586 | 0.086305836 | 0.187675254 | 0.196075043 |
| 0.109788334 | 0.246692506 | 0.23182295  | 0.139921168 |
| 0.207199306 | 0.069317685 | 0.19069681  | 0.228217675 |
| 0.087500844 | 0.28861248  | 0.371403661 | 0.09891358  |
| 0.16879286  | 0.367763    | 0.322073855 | 0.056713638 |
| 0.202008911 | 0.335939018 | 0.376140295 | 0.008806189 |
| 0.348553943 | 0.033310157 | 0.228392463 | 0.263637848 |
| 0.22714348  | 0.20099503  | 0.25067905  | 0.247881905 |
| 0.225254824 | 0.199141094 | 0.275322775 | 0.266518079 |
| 0.235895107 | 0.17707945  | 0.24984758  | 0.184579786 |
| 0.28138129  | 0.168267984 | 0.113145585 | 0.11239864  |
| 0.136689493 | 0.367003069 | 0.282641592 | 0.082093375 |
| 0.227496522 | 0.181360139 | 0.38785051  | 0.381827623 |
| 0.411474853 | 0.10778889  | 0.197407348 | 0.367385851 |
| 0.083905286 | 0.172696162 | 0.070306152 | 0.201867703 |
| 0.216865248 | 0.242729669 | 0.175751255 | 0.20082675  |
| 0.253602781 | 0.401096797 | 0.275867284 | 0.393529941 |
| 0.245882574 | 0.152802935 | 0.122201523 | 0.192173826 |
| 0.192097934 | 0.132694151 | 0.233893078 | 0.012794833 |
| 0.29336475  | 0.194121216 | 0.405629893 | 0.402875073 |
| 0.16344672  | 0.382480654 | 0.148207647 | 0.135628703 |
| 0.105560529 | 0.168982421 | 0.170343882 | 0.304885947 |
| 0.148483199 | 0.198493205 | 0.245589499 | 0.174999591 |
| 0.330657902 | 0.269582689 | 0.175752293 | 0.17271232  |
| 0.170117584 | 0.165357503 | 0.374580606 | 0.104082583 |
| 0.218355524 | 0.230742363 | 0.160578244 | 0.259193093 |
| 0.222466857 | 0.419324488 | 0.077366917 | 0.432927792 |
| 0.222007256 | 0.137092938 | 0.454307501 | 0.178335892 |
| 0.187250894 | 0.200262948 | 0.142821127 | 0.159338518 |
| 0.18314782  | 0.194550802 | 0.006335086 | 0.074886781 |
| 0.351035512 | 0.123915808 | 0.268111423 | 0.274491597 |
| 0.204577203 | 0.335037497 | 0.109224029 | 0.174137954 |
| 0.365834391 | 0.396111817 | 0.259885801 | 0.267523702 |
| 0.304457206 | 0.166902864 | 0.244913222 | 0.007403016 |
| 0.259166414 | 0.22694234  | 0.163563091 | 0.092243203 |
| 0.044592784 | 0.155786319 | 0.240356528 | 0.053033413 |

|             |             |             |             |
|-------------|-------------|-------------|-------------|
| 0.423775199 | 0.147335263 | 0.173007398 | 0.318960379 |
| 0.158859281 | 0.405923774 | 0.187559426 | 0.37435285  |
| 0.035441252 | 0.220931049 | 0.185577507 | 0.160489392 |
| 0.27817483  | 0.217390487 | 0.371412468 | 0.216334999 |
| 0.08234397  | 0.248828517 | 0.005315783 | 0.391132531 |
| 0.363875349 | 0.191819697 | 0.217661961 | 0.099762412 |
| 0.304959677 | 0.315376691 | 0.186867795 | 0.182469281 |
| 0.056165067 | 0.275256777 | 0.197904602 | 0.374595291 |
| 0.154766483 | 0.177119962 | 0.137637035 | 0.182331886 |
| 0.369001007 | 0.208874419 | 0.248295892 | 0.171031306 |
| 0.387656466 | 0.283630398 | 0.138658066 | 0.186362485 |
| 0.19658387  | 0.076199921 | 0.158611491 | 0.442649202 |
| 0.228991794 | 0.213231703 | 0.409427213 | 0.235702623 |
| 0.191955105 | 0.326014343 | 0.194452661 | 0.416448139 |
| 0.154690538 | 0.272560143 | 0.346519218 | 0.374723541 |
| 0.34044024  | 0.167440227 | 0.211980107 | 0.232183965 |
| 0.371017572 | 0.176856424 | 0.171969327 | 0.316885422 |
| 0.184722735 | 0.279237378 | 0.149383305 | 0.211484017 |
| 0.106862048 | 0.15159699  | 0.24472849  | 0.149428893 |
| 0.254758889 | 0.23911188  | 0.205574713 | 0.405950914 |
| 0.251612664 | 0.099052536 | 0.433426438 | 0.031475057 |
| 0.206812036 | 0.332553445 | 0.214153215 | 0.225629987 |
| 0.220401517 | 0.219009921 | 0.170308755 | 0.007323135 |
| 0.356598771 | 0.064672591 | 0.179853869 | 0.259053895 |
| 0.167635941 | 0.076869471 | 0.399011613 | 0.456654333 |
| 0.237420543 | 0.156944463 | 0.178647085 | 0.38376583  |
| 0.144465014 | 0.143752989 | 0.165129976 | 0.246938614 |
| 0.176877854 | 0.151455333 | 0.180443503 | 0.210966865 |
| 0.3071699   | 0.185344895 |             |             |
| INTS12      | 0.207010909 | 0.224946493 | 0.228378916 |
| 0.121550709 | 0.062471259 | 0.110119458 | 0.207119312 |
| 0.176944189 | 0.202345187 | 0.090748394 | 0.096466    |
| 0.146272016 | 0.006318328 | 0.198068155 | 0.179120247 |
| 0.079818172 | 0.128913402 | 0.191167056 | 0.048473026 |
| 0.147819957 | 0.063529554 | 0.055129408 | 0.150832698 |
| 0.066014706 | 0.306402198 | 0.179360271 | 0.070220495 |
| 0.214011868 | 0.033508235 | 0.094833519 | 0.0538087   |
| 0.262290252 | 0.061374498 | 0.060634291 | 0.165986327 |
| 0.106336831 | 0.004629363 | 0.321043759 | 0.094321085 |
| 0.019244742 | 0.259148946 | 0.117075658 | 0.108064823 |
| 0.119843402 | 0.204862694 | 0.046278362 | 0.092422458 |
| 0.16081177  | 0.12136812  | 0.256421229 | 0.12478028  |
| 0.100801318 | 0.158702657 | 0.156102525 | 0.00780184  |
| 0.036695768 | 0.004391915 | 0.022565438 | 0.259960759 |
| 0.16863263  | 0.138383908 | 0.046554064 | 0.156419992 |
| 0.102016978 | 0.104502524 | 0.143160521 | 0.103996061 |
| 0.232882987 | 0.019410678 | 0.107862122 | 0.087431724 |
| 0.138551694 | 0.22542372  | 0.20476849  | 0.258837122 |
| 0.086217202 | 0.119544404 | 0.078054169 | 0.047325667 |
| 0.234249974 | 0.299964935 | 0.172114135 | 0.29832029  |
| 0.020657176 | 0.057835016 | 0.057579407 | 0.12565324  |
| 0.138732951 | 0.20081223  | 0.122563224 | 0.264492168 |
| 0.213656541 | 0.121452714 | 0.138864462 | 0.25432746  |
| 0.199758708 | 0.045085147 | 0.107594487 | 0.019949698 |

|             |             |             |             |
|-------------|-------------|-------------|-------------|
| 0.073952537 | 0.070674434 | 0.297979925 | 0.153313094 |
| 0.068105702 | 0.267623997 | 0.330112583 | 0.049390341 |
| 0.072983616 | 0.239397499 | 0.057670833 | 0.138340858 |
| 0.114326554 | 0.205903145 | 0.17902592  | 0.161412346 |
| 0.071389924 | 0.223894328 | 0.129705722 | 0.201569061 |
| 0.02865296  | 0.253995624 | 0.182428488 | 0.124424782 |
| 0.242821739 | 0.122852154 | 0.065684313 | 0.185211926 |
| 0.168245956 | 0.143510113 | 0.177227593 | 0.101566058 |
| 0.150946603 | 0.302369198 | 0.257201997 | 0.16602491  |
| 0.191330767 | 0.036183965 | 0.074263577 | 0.141680327 |
| 0.121824947 | 0.207657971 | 0.037438084 | 0.317794311 |
| 0.213741764 | 0.133246493 | 0.2215741   | 0.338640415 |
| 0.167436848 | 0.243533525 | 0.200501145 | 0.156345294 |
| 0.288637686 | 0.306305301 | 0.213556174 | 0.073909704 |
| 0.270842141 | 0.142512815 | 0.045408941 | 0.187200915 |
| 0.216706371 | 0.003112761 | 0.167426468 | 0.180146922 |
| 0.257191294 | 0.137117094 | 0.21379631  | 0.198200351 |
| 0.256272863 | 0.233585207 | 0.007906172 | 0.094248102 |
| 0.282996307 | 0.189407697 | 0.093890763 | 0.080257189 |
| 0.076881029 | 0.136698013 | 0.131515887 | 0.055611543 |
| 0.260611328 | 0.173305822 | 0.1873427   | 0.160402343 |
| 0.164881027 | 0.255708787 | 0.059608816 | 0.321947114 |
| 0.147458591 | 0.212788346 | 0.243671013 | 0.158647792 |
| 0.103287788 | 0.132577262 | 0.141577669 | 0.090613159 |
| 0.147541495 | 0.154906364 | 0.043902629 | 0.073134608 |
| 0.277278192 | 0.099948385 | 0.199367632 | 0.234653004 |
| 0.134186392 | 0.286646026 | 0.112743012 | 0.115542449 |
| 0.087240093 | 0.403741655 | 0.106082523 | 0.196022231 |
| 0.090366935 | 0.237788853 | 0.128574574 | 0.215059737 |
| 0.20818708  | 0.066817973 | 0.19307361  | 0.036369376 |
| 0.069943425 | 0.056047769 | 0.018308267 | 0.075574167 |
| 0.349265349 | 0.112888962 | 0.099040933 | 0.089048106 |
| 0.186833233 | 0.223816861 | 0.076075741 | 0.289806172 |
| 0.267859346 | 0.070171238 | 0.159241924 | 0.116998281 |
| 0.076823991 | 0.141720003 | 0.146309681 | 0.048867472 |
| 0.166489452 | 0.018895639 | 0.028950812 | 0.177815521 |
| 0.043433737 | 0.044086375 | 0.181234089 | 0.089496086 |
| 0.085650189 | 0.360707108 | 0.223262912 | 0.007018498 |
| 0.074462632 | 0.026643114 | 0.113231309 | 0.111931976 |
| 0.169218284 | 0.135335725 | 0.055856302 | 0.058464368 |
| 0.238178277 | 0.256706089 | 0.178326633 | 0.210503245 |
| 0.069947175 | 0.23273862  | 0.147403786 | 0.178988078 |
| 0.136950356 | 0.070225295 | 0.011601107 | 0.148888011 |
| 0.166708414 | 0.081429391 | 0.268511736 | 0.128405909 |
| 0.096915876 | 0.085450343 | 0.041711719 | 0.210423474 |
| 0.284674951 | 0.289457358 | 0.107328585 | 0.107810771 |
| 0.165776666 | 0.166400263 | 0.156377966 | 0.236436233 |
| 0.091562869 | 0.074989009 | 0.066926867 | 0.130814805 |
| 0.2025092   | 0.049594964 | 0.229000291 | 0.016826512 |
| 0.000251912 | 0.236830529 | 0.235328553 | 0.091753625 |
| 0.022835891 | 0.09421728  | 0.10149879  | 0.230500165 |
| 0.167296859 | 0.207345529 | 0.187239636 | 0.080835631 |
| 0.243015679 | 0.074495516 | 0.061872985 | 0.08103028  |
| 0.183731714 | 0.058211259 | 0.10250615  | 0.309754479 |

|             |             |             |             |
|-------------|-------------|-------------|-------------|
| 0.250105146 | 0.031429816 | 0.152627507 | 0.007916277 |
| 0.222958388 | 0.176530334 | 0.305368251 | 0.324467685 |
| 0.165523909 | 0.32607375  | 0.221357343 | 0.112083735 |
| 0.108666556 | 0.203420259 | 0.00922271  | 0.212204046 |
| 0.244492589 | 0.237817884 | 0.248699221 | 0.284714216 |
| 0.193163243 | 0.136047666 | 0.127251381 | 0.153924365 |
| 0.182928447 | 0.245611539 | 0.034410544 | 0.098912244 |
| 0.021570719 | 0.127588233 | 0.081564557 | 0.206175942 |
| 0.10709776  | 0.149611645 | 0.168092337 | 0.07346006  |
| 0.127142973 | 0.018928643 | 0.147283099 | 0.113561887 |
| 0.100286724 | 0.153178643 | 0.065232509 | 0.058355806 |
| 0.271366023 | 0.228355535 | 0.053190544 | 0.256106767 |
| 0.104237805 | 1           | 0.086104509 | 0.105189696 |
| 0.189967183 | 0.040458001 | 0.139398193 | 0.012867435 |
| 0.056945261 | 0.264513152 | 0.078096649 | 0.206032849 |
| 0.149704744 | 0.092522571 | 0.236636816 | 0.252959965 |
| 0.270394399 | 0.203521022 | 0.222460636 | 0.036033376 |
| 0.242025455 | 0.006595685 | 0.227315794 | 0.206566135 |
| 0.089464729 | 0.008489309 | 0.022782194 | 0.171168825 |
| 0.081258776 | 0.266741892 | 0.193327558 | 0.096384637 |
| 0.128537387 | 0.252491304 | 0.168835391 | 0.034322383 |
| 0.106503545 | 0.065704804 | 0.031559452 | 0.279452865 |
| 0.13089613  | 0.126534183 | 0.127134263 | 0.256114189 |
| 0.081982745 | 0.164113481 | 0.251476979 | 0.0113049   |
| 0.096980153 | 0.295969755 | 0.348661515 | 0.24192906  |
| 0.241827876 | 0.086589303 | 0.070545698 | 0.086143805 |
| 0.168527788 | 0.268818178 | 0.060548491 | 0.26493424  |
| 0.247724838 | 0.091033916 | 0.153732724 | 0.219833009 |
| 0.220892739 | 0.243344829 | 0.17420549  | 0.134729755 |
| 0.066155921 | 0.001732335 | 0.144607152 | 0.162035766 |
| 0.026429946 | 0.076790693 | 0.194222414 | 0.133477441 |
| 0.106812957 | 0.149015757 | 0.035476536 | 0.034467332 |
| 0.12078692  | 0.096332168 | 0.048596259 | 0.191974974 |
| 0.069973316 | 0.040294548 | 0.105843411 | 0.138857596 |
| 0.085919022 | 0.258501255 | 0.30839916  | 0.16989329  |
| 0.097583278 | 0.075875296 | 0.192979577 | 0.210678521 |
| 0.161140868 | 0.181597173 | 0.155505876 | 0.04455956  |
| 0.215827399 | 0.091435134 | 0.181583472 | 0.236468676 |
| 0.2926916   | 0.244116989 | 0.28461167  | 0.079586757 |
| 0.185721034 | 0.102892751 | 0.052254692 | 0.055250376 |
| 0.224989649 | 0.270470565 | 0.251815043 | 0.040149164 |
| 0.217630582 | 0.151088261 | 0.101550534 | 0.195635621 |
| 0.062102924 | 0.173791839 | 0.09369948  | 0.251189615 |
| 0.091881456 | 0.03159548  | 0.194725014 | 0.163485703 |
| 0.172822668 | 0.020668971 | 0.191096291 | 0.141431835 |
| 0.188402892 | 0.084235313 | 0.103261615 | 0.247946705 |
| 0.230854315 | 0.239225157 | 0.169277995 | 0.126239631 |
| 0.150389551 | 0.093281458 | 0.069570288 | 0.229606485 |
| 0.197642518 | 0.094172987 | 0.26472823  | 0.162224706 |
| 0.244307341 | 0.070247184 | 0.054383849 | 0.088343887 |
| 0.171742863 | 0.11853867  | 0.125368779 | 0.220733949 |
| 0.221544235 | 0.308512875 | 0.210938486 | 0.118372791 |
| 0.097446238 | 0.265977199 | 0.27343809  | 0.175196438 |
| 0.027783145 | 0.182929999 | 0.113972831 | 0.136765297 |



|             |             |             |             |
|-------------|-------------|-------------|-------------|
| 0.003185259 | 0.011954224 | 0.195019847 | 0.107203868 |
| 0.266045422 | 0.185203728 | 0.240296107 | 0.138846758 |
| 0.000141247 | 0.082586833 | 0.098290817 | 0.087323698 |
| 0.209541024 | 0.180317638 | 0.098355105 | 0.124250457 |
| 0.176354835 | 0.258638373 | 0.118402321 | 0.104109189 |
| 0.02750699  | 0.136124398 | 0.169497533 | 0.187550568 |
| 0.093313116 | 0.269378262 | 0.030461407 | 0.136659903 |
| 0.027983196 | 0.164615218 | 0.163160111 | 0.098403134 |
| 0.026028935 | 0.182882228 | 0.171020699 | 0.17243342  |
| 0.059237629 | 0.174180518 | 0.18757001  | 0.020900739 |
| 0.09980562  | 0.078602258 | 0.087064011 | 0.086570304 |
| 0.095546803 | 0.102015479 | 0.089386214 | 0.070683651 |
| 0.146458352 | 0.143504516 | 0.104153868 | 0.13398733  |
| 0.090722604 | 0.153527399 | 0.089132846 | 0.141082478 |
| 0.064152188 | 0.179142395 | 0.308347598 | 0.355300825 |
| 0.108823358 | 0.192601999 | 0.245033443 | 0.254932691 |
| 0.13215295  | 0.1226718   | 0.201684169 | 0.258599387 |
| 0.183445283 | 0.318477273 | 0.109686254 | 0.195295776 |
| 0.044937988 | 0.099377709 | 0.228098341 | 0.126861076 |
| 0.141650153 | 0.042965566 | 0.112680552 | 0.193798796 |
| 0.145875176 | 0.275994754 | 0.231196833 | 0.220579963 |
| 0.090984588 | 0.106717101 | 0.09922416  | 0.093010065 |
| 0.185670802 | 0.242423075 | 0.052392475 | 0.043327873 |
| 0.128582989 | 0.154586323 | 0.161873453 | 0.280082714 |
| 0.036083085 | 0.207056848 | 0.106627917 | 0.193459301 |
| 0.085916596 | 0.35436576  | 0.213650882 | 0.131150781 |
| 0.020680093 | 0.141589336 | 0.074239708 | 0.142001579 |
| 0.11435286  | 0.121173743 | 0.062514247 | 0.156556437 |
| 0.140364208 | 0.226281199 | 0.300247345 | 0.234335126 |
| 0.093605662 | 0.03734299  | 0.143611351 | 0.088877217 |
| 0.089635572 | 0.213070319 | 0.215424772 | 0.210125988 |
| 0.080367313 | 0.257535348 | 0.278829474 | 0.141747884 |
| 0.130519071 | 0.065433974 | 0.017520137 | 0.119535467 |
| 0.134080441 | 0.047192669 | 0.00390003  | 0.015635209 |
| 0.122076312 | 0.101821311 | 0.17279541  | 0.132642951 |
| 0.049778458 | 0.138991606 | 0.014666194 | 0.171225454 |
| 0.287718694 | 0.321728113 | 0.10108294  | 0.184940149 |
| 0.161478495 | 0.148156197 | 0.140096635 | 0.010155464 |
| 0.091517448 | 0.077551562 | 0.085536955 | 0.15839484  |
| 0.134099773 | 0.022346949 | 0.107798896 | 0.260469808 |
| 0.169135238 | 0.019418375 | 0.138497234 | 0.110176657 |
| 0.219962083 | 0.326860905 | 0.080884067 | 0.107152999 |
| 0.210113392 | 0.16184809  | 0.068235827 | 0.096778271 |
| 0.05998415  | 0.046531459 | 0.119803255 | 0.031289818 |
| 0.139862056 | 0.073598123 | 0.018608394 | 0.314458272 |
| 0.328326319 | 0.058035523 | 0.254499718 | 0.07512236  |
| 0.12154207  | 0.191993698 | 0.070633564 | 0.082245434 |
| 0.056914378 | 0.066326413 | 0.143938428 | 0.195916859 |
| 0.032915229 | 0.121292644 | 0.098585236 | 0.062813209 |
| 0.36468622  | 0.070898847 | 0.213123293 | 0.057376939 |
| 0.247785908 | 0.18900139  | 0.264065911 | 0.056098121 |
| 0.122159264 | 0.245392432 | 0.100893532 | 0.248363559 |
| 0.101221298 | 0.030904898 | 0.131016305 | 0.117162057 |
| 0.047164156 | 0.216390757 | 0.096985722 | 0.255218067 |

|             |             |             |             |
|-------------|-------------|-------------|-------------|
| 0.064533811 | 0.147566982 | 0.123802713 | 0.221375643 |
| 0.139631696 | 0.030670613 | 0.034022296 | 0.068035422 |
| 0.268377133 | 0.128173472 | 0.046464272 | 0.166978752 |
| 0.028171058 | 0.12331003  | 0.146005725 | 0.056049345 |
| 0.09577449  | 0.129014598 | 0.090648345 | 0.21041868  |
| 0.119545528 | 0.088251814 | 0.057771021 | 0.224865429 |
| 0.072906754 | 0.063248019 | 0.24425385  | 0.001488969 |
| 0.154572176 | 0.090325254 | 0.139639303 | 0.072013457 |
| 0.25509359  | 0.146103238 | 0.17525722  | 0.038749739 |
| 0.144448001 | 0.013286208 | 0.084890535 | 0.058444645 |
| 0.049323401 | 0.215149482 | 0.249183898 | 0.196076141 |
| 0.156909376 | 0.06874636  | 0.050933029 | 0.24013547  |
| 0.016373135 | 0.046060664 | 0.059425506 | 0.135405836 |
| 0.026082066 | 0.092314543 | 0.079888882 | 0.056868863 |
| 0.157331959 | 0.144154267 |             |             |
| IP05        | 0.054970317 | 0.284238436 | 0.03605052  |
| 0.174997797 | 0.288816585 | 0.157732077 | 0.058409435 |
| 0.091841191 | 0.219869127 | 0.084754725 | 0.250126268 |
| 0.029605859 | 0.08108411  | 0.368263571 | 0.05487607  |
| 0.29088851  | 0.057801471 | 0.099285426 | 0.036737053 |
| 0.134186049 | 0.264447053 | 0.1752756   | 0.143639068 |
| 0.223229703 | 0.171135511 | 0.190109644 | 0.189660385 |
| 0.375040556 | 0.104274673 | 0.295147822 | 0.085977921 |
| 0.372468281 | 0.294463235 | 0.166593848 | 0.024248789 |
| 0.199128014 | 0.016302265 | 0.354232519 | 0.235764292 |
| 0.204962146 | 0.301807859 | 0.097209336 | 0.216326393 |
| 0.144256579 | 0.038935929 | 0.0522016   | 0.277672687 |
| 0.187357684 | 0.157379263 | 0.037421137 | 0.291470257 |
| 0.149109571 | 0.234165925 | 0.208934551 | 0.001569537 |
| 0.171517338 | 0.06394607  | 0.131134289 | 0.37039458  |
| 0.211231484 | 0.126433853 | 0.109577429 | 0.099095572 |
| 0.208377951 | 0.274394671 | 0.226505864 | 0.134254285 |
| 0.392317132 | 0.14037307  | 0.292189322 | 0.141349028 |
| 0.160746056 | 0.022304944 | 0.180695091 | 0.051827194 |
| 0.176838838 | 0.191496578 | 0.225953501 | 0.204238854 |
| 0.282111258 | 0.397484892 | 0.207894354 | 0.35249796  |
| 0.088281288 | 0.257065782 | 0.222122154 | 0.322849034 |
| 0.265319891 | 0.059707303 | 0.353954027 | 0.425090683 |
| 0.029673886 | 0.156542514 | 0.272413762 | 0.085294178 |
| 0.303956971 | 0.132158107 | 0.147847658 | 0.164220505 |
| 0.329793724 | 0.267671706 | 0.336532426 | 0.275568603 |
| 0.178257566 | 0.05546346  | 0.328658867 | 0.262450246 |
| 0.220997348 | 0.072400538 | 0.224180989 | 0.362464153 |
| 0.297508896 | 0.380466241 | 0.2854105   | 0.304594335 |
| 0.257470677 | 0.399003019 | 0.332372383 | 0.30143457  |
| 0.037895316 | 0.386126691 | 0.160506364 | 0.060200264 |
| 0.038988623 | 0.093146013 | 0.139365535 | 0.291143152 |
| 0.379307759 | 0.232263298 | 0.134371792 | 0.231239279 |
| 0.410977761 | 0.316435146 | 0.377790834 | 0.326721726 |
| 0.044640632 | 0.147317468 | 0.26704601  | 0.11954944  |
| 0.277485618 | 0.095230922 | 0.211104914 | 0.373664268 |
| 0.352924889 | 0.375454509 | 0.088748132 | 0.373315591 |
| 0.102648055 | 0.437285499 | 0.315177306 | 0.171336091 |
| 0.404277321 | 0.362352317 | 0.44642817  | 0.338376191 |

|             |             |             |             |
|-------------|-------------|-------------|-------------|
| 0.361956141 | 0.198992243 | 0.022705897 | 0.301671061 |
| 0.425411121 | 0.03156897  | 0.36024942  | 0.395362136 |
| 0.367795736 | 0.378619336 | 0.438521195 | 0.400698174 |
| 0.35658963  | 0.066742133 | 0.013927093 | 0.296572376 |
| 0.381955193 | 0.374144902 | 0.116796975 | 0.215394225 |
| 0.269015647 | 0.157966009 | 0.299377441 | 0.161149543 |
| 0.431554251 | 0.37149027  | 0.359695549 | 0.278412127 |
| 0.138464556 | 0.275227396 | 0.213715992 | 0.324386036 |
| 0.063444399 | 0.076721948 | 0.043878978 | 0.251740798 |
| 0.114775296 | 0.197442212 | 0.147817937 | 0.219953674 |
| 0.2134686   | 0.115951914 | 0.149938551 | 0.33054414  |
| 0.04644512  | 0.216093487 | 0.130897896 | 0.116045191 |
| 0.076900696 | 0.135192754 | 0.161626781 | 0.154973073 |
| 0.208946149 | 0.177248376 | 0.273212827 | 0.399317764 |
| 0.166462634 | 0.165331014 | 0.277100501 | 0.413961936 |
| 0.420423378 | 0.263877372 | 0.199957253 | 0.050165676 |
| 0.20142706  | 0.108056214 | 0.137233959 | 0.210140403 |
| 0.14636139  | 0.168313712 | 0.266192926 | 0.370607623 |
| 0.153279252 | 0.062119323 | 0.186427128 | 0.344127588 |
| 0.113731446 | 0.216746537 | 0.399965988 | 0.189864405 |
| 0.008638087 | 0.227893565 | 0.361775706 | 0.173496733 |
| 0.212067292 | 0.128693992 | 0.159458865 | 0.40264859  |
| 0.14323182  | 0.170033236 | 0.380093038 | 0.351519457 |
| 0.127695569 | 0.148737193 | 0.42464448  | 0.031073847 |
| 0.191717863 | 0.133800896 | 0.321821512 | 0.095996968 |
| 0.224609793 | 0.285254735 | 0.246319021 | 0.234475759 |
| 0.095437115 | 0.384768384 | 0.309040259 | 0.402745103 |
| 0.180353534 | 0.431382969 | 0.382876285 | 0.383766304 |
| 0.269062598 | 0.146309178 | 0.11300315  | 0.372227708 |
| 0.396546209 | 0.143649725 | 0.05886841  | 0.30278861  |
| 0.139959814 | 0.31738699  | 0.169278508 | 0.434698372 |
| 0.401336445 | 0.310827225 | 0.139023436 | 0.368058673 |
| 0.368264285 | 0.181251378 | 0.338316307 | 0.423638614 |
| 0.107862567 | 0.217780122 | 0.229706588 | 0.41810552  |
| 0.182766799 | 0.191720788 | 0.260576214 | 0.120179602 |
| 0.009965368 | 0.048642647 | 0.058462422 | 0.181444979 |
| 0.200090161 | 0.204332392 | 0.309904005 | 0.401716261 |
| 0.10911322  | 0.334399979 | 0.181803937 | 0.234920084 |
| 0.333286995 | 0.163037366 | 0.23206403  | 0.267544028 |
| 0.220465352 | 0.05981973  | 0.1509942   | 0.405861865 |
| 0.026551922 | 0.193605405 | 0.130750297 | 0.009496579 |
| 0.043288055 | 0.242862359 | 0.088435331 | 0.188208534 |
| 0.409203484 | 0.183576989 | 0.18166784  | 0.11017729  |
| 0.316237749 | 0.089604736 | 0.018996678 | 0.378306968 |
| 0.348517191 | 0.330661337 | 0.339611439 | 0.309283242 |
| 0.339542631 | 0.267440505 | 0.371959382 | 0.161849254 |
| 0.100541998 | 0.054449299 | 0.217248294 | 0.22330847  |
| 0.002924309 | 0.358483698 | 0.191634174 | 0.160116158 |
| 0.315846793 | 0.23254637  | 0.041667998 | 0.235071914 |
| 0.040139075 | 0.1506588   | 0.123668377 | 0.148341213 |
| 0.329080262 | 0.020054221 | 0.150620421 | 0.184897188 |
| 0.311198691 | 0.27899024  | 0.176503525 | 0.406112847 |
| 0.257091336 | 0.086104509 | 1           | 0.331531859 |
| 0.078155248 | 0.052136723 | 0.127833752 | 0.023482807 |

|             |             |             |             |
|-------------|-------------|-------------|-------------|
| 0.071236374 | 0.318649549 | 0.154349475 | 0.081442604 |
| 0.256833047 | 0.011192175 | 0.303342226 | 0.407040139 |
| 0.314933553 | 0.428434084 | 0.400098713 | 0.203767666 |
| 0.399934752 | 0.061503285 | 0.401194956 | 0.298412539 |
| 0.12861471  | 0.003835516 | 0.010091138 | 0.404992985 |
| 0.272604347 | 0.041342983 | 0.167548863 | 0.148264319 |
| 0.148661209 | 0.075227822 | 0.056616447 | 0.233310514 |
| 0.247353802 | 0.224049485 | 0.161889601 | 0.323435278 |
| 0.203671153 | 0.20077597  | 0.122591745 | 0.07154302  |
| 0.248322055 | 0.07829262  | 0.070395121 | 0.025311956 |
| 0.31897236  | 0.092240593 | 0.320180118 | 0.375795177 |
| 0.419347258 | 0.352407385 | 0.102525685 | 0.121854511 |
| 0.334790723 | 0.061980439 | 0.138345941 | 0.068043594 |
| 0.347355376 | 0.318775534 | 0.329584825 | 0.295573492 |
| 0.431734109 | 0.384443884 | 0.040753026 | 0.370514749 |
| 0.03225046  | 0.005309287 | 0.165882839 | 0.205310941 |
| 0.03302429  | 0.205697584 | 0.27507591  | 0.109261423 |
| 0.131386019 | 0.035977939 | 0.193339191 | 0.205873062 |
| 0.29317166  | 0.227967069 | 0.243237013 | 0.182358327 |
| 0.218575417 | 0.190664599 | 0.171019496 | 0.112381921 |
| 0.096173375 | 0.25836875  | 0.178690132 | 0.028776474 |
| 0.194651421 | 0.231847305 | 0.060969013 | 0.145410467 |
| 0.396034543 | 0.403936996 | 0.068715314 | 0.046671862 |
| 0.242590401 | 0.165979284 | 0.413664707 | 0.35414756  |
| 0.386639808 | 0.441079544 | 0.327153717 | 0.150671486 |
| 0.065739279 | 0.27783338  | 0.251599916 | 0.177273497 |
| 0.3861773   | 0.04473406  | 0.34407591  | 0.210261408 |
| 0.114158806 | 0.201102706 | 0.063691477 | 0.082744729 |
| 0.244583809 | 0.166368317 | 0.19606289  | 0.117343241 |
| 0.215858423 | 0.19508646  | 0.050464971 | 0.189719516 |
| 0.2958772   | 0.20685074  | 0.157827603 | 0.122459606 |
| 0.266866061 | 0.055340091 | 0.335910395 | 0.404781817 |
| 0.116892186 | 0.08192463  | 0.135956139 | 0.272526444 |
| 0.336516845 | 0.161438923 | 0.038243898 | 0.295821833 |
| 0.390630695 | 0.282629025 | 0.361172122 | 0.372673649 |
| 0.080523785 | 0.244371954 | 0.156136637 | 0.260502562 |
| 0.155293464 | 0.153391365 | 0.159559952 | 0.06326905  |
| 0.259917651 | 0.355958783 | 0.330801889 | 0.171157574 |
| 0.196302317 | 0.069072485 | 0.038000986 | 0.313598276 |
| 0.227171863 | 0.081450013 | 0.100417289 | 0.317256652 |
| 0.015858604 | 0.137117111 | 0.400807849 | 0.156398805 |
| 0.401613302 | 0.424268675 | 0.389067538 | 0.113730414 |
| 0.005461036 | 0.311531565 | 0.303784352 | 0.218460235 |
| 0.308907393 | 0.261540896 | 0.06395503  | 0.119041492 |
| 0.312458746 | 0.060241865 | 0.15900326  | 0.132763121 |
| 0.153948163 | 0.218338492 | 0.213589377 | 0.141668116 |
| 0.195574567 | 0.055646521 | 0.17840152  | 0.17471512  |
| 0.119632078 | 0.259436726 | 0.352744075 | 0.071264243 |
| 0.156361757 | 0.352298656 | 0.319357594 | 0.032010238 |
| 0.202954199 | 0.339540426 | 0.349151333 | 0.008753408 |
| 0.342314218 | 0.017357325 | 0.182889828 | 0.219795865 |
| 0.196914755 | 0.163835509 | 0.267367188 | 0.247251313 |
| 0.225782859 | 0.176616783 | 0.214183162 | 0.249551747 |
| 0.192760989 | 0.138951341 | 0.267870662 | 0.16952592  |

|             |             |             |             |
|-------------|-------------|-------------|-------------|
| 0.226868134 | 0.119470105 | 0.086672742 | 0.084097279 |
| 0.072226362 | 0.326187395 | 0.235636381 | 0.061490176 |
| 0.210246512 | 0.157523173 | 0.362781686 | 0.341944306 |
| 0.37761465  | 0.081120712 | 0.162767497 | 0.329557665 |
| 0.071572013 | 0.118808415 | 0.037411698 | 0.210107388 |
| 0.166481398 | 0.200399055 | 0.154860449 | 0.181403902 |
| 0.243177838 | 0.35624758  | 0.221255551 | 0.368429182 |
| 0.217627651 | 0.15323848  | 0.09584813  | 0.141396133 |
| 0.152071594 | 0.115998829 | 0.256056464 | 0.009330737 |
| 0.26518751  | 0.135919503 | 0.38412702  | 0.361628465 |
| 0.14939626  | 0.345618284 | 0.101091183 | 0.093726655 |
| 0.087454324 | 0.13839147  | 0.140470492 | 0.298387661 |
| 0.13978468  | 0.142611156 | 0.283377903 | 0.11263231  |
| 0.344551824 | 0.284153395 | 0.179961485 | 0.11787581  |
| 0.176811213 | 0.151526903 | 0.342256711 | 0.069836297 |
| 0.223598263 | 0.241412385 | 0.14602389  | 0.232199188 |
| 0.20055867  | 0.397676504 | 0.052661196 | 0.403730213 |
| 0.207209124 | 0.110689658 | 0.405729808 | 0.135311453 |
| 0.146184336 | 0.14888094  | 0.157551737 | 0.121705379 |
| 0.156387824 | 0.169806496 | 0.004852034 | 0.06145583  |
| 0.339149972 | 0.11104615  | 0.257574819 | 0.275748738 |
| 0.220774158 | 0.344258848 | 0.10003943  | 0.132062928 |
| 0.318611222 | 0.344011504 | 0.203740874 | 0.263875668 |
| 0.27141698  | 0.106437047 | 0.200687859 | 0.006750489 |
| 0.265661938 | 0.231967066 | 0.126683283 | 0.054369106 |
| 0.028984895 | 0.179623319 | 0.255873614 | 0.043892649 |
| 0.418390862 | 0.137598338 | 0.170925579 | 0.30397488  |
| 0.136232197 | 0.353640347 | 0.148097853 | 0.356461704 |
| 0.028805149 | 0.21715818  | 0.191109889 | 0.151378941 |
| 0.240611207 | 0.225037937 | 0.381784346 | 0.21055159  |
| 0.053766158 | 0.225192212 | 0.008618161 | 0.339078497 |
| 0.324338077 | 0.211520858 | 0.186953672 | 0.077185275 |
| 0.303333485 | 0.299923454 | 0.143350406 | 0.175256457 |
| 0.035941669 | 0.298042699 | 0.171306504 | 0.320022551 |
| 0.152193871 | 0.189501715 | 0.101997788 | 0.200000522 |
| 0.310790035 | 0.170951496 | 0.219211031 | 0.183913537 |
| 0.346332769 | 0.262950433 | 0.118205345 | 0.171076206 |
| 0.194312632 | 0.056857019 | 0.114603518 | 0.406461464 |
| 0.175353643 | 0.224770153 | 0.410484201 | 0.207601327 |
| 0.17810601  | 0.279294424 | 0.203801049 | 0.379241676 |
| 0.123453629 | 0.244208873 | 0.342699944 | 0.347558654 |
| 0.317264575 | 0.189188118 | 0.191967413 | 0.212309751 |
| 0.322818828 | 0.109455647 | 0.183606569 | 0.296872635 |
| 0.201047394 | 0.257745676 | 0.142070524 | 0.195508171 |
| 0.058956283 | 0.107097919 | 0.159134652 | 0.133186981 |
| 0.247780024 | 0.26646036  | 0.232697965 | 0.369240094 |
| 0.16659919  | 0.07414657  | 0.399599776 | 0.042571679 |
| 0.166653315 | 0.328810865 | 0.18104187  | 0.208288253 |
| 0.180985186 | 0.210833853 | 0.160717835 | 0.002452735 |
| 0.360072759 | 0.108531181 | 0.151404692 | 0.23787854  |
| 0.138386955 | 0.047219448 | 0.352223963 | 0.428581429 |
| 0.208131485 | 0.121481602 | 0.145051348 | 0.337302897 |
| 0.176621628 | 0.128971397 | 0.143530595 | 0.235421708 |
| 0.181116786 | 0.126518639 | 0.145096106 | 0.190141416 |

|             |             |             |             |
|-------------|-------------|-------------|-------------|
| 0.283520915 | 0.124666273 |             |             |
| IQCB1       | 0.100741171 | 0.375802492 | 0.066402687 |
| 0.183429634 | 0.353808174 | 0.370452518 | 0.080911368 |
| 0.161409934 | 0.282595799 | 0.213193207 | 0.380434077 |
| 0.033465894 | 0.178579907 | 0.434611006 | 0.085003839 |
| 0.36106353  | 0.066800808 | 0.139126559 | 0.086311564 |
| 0.22013353  | 0.332307829 | 0.390039093 | 0.306482472 |
| 0.331999128 | 0.185690069 | 0.272254746 | 0.336600351 |
| 0.461456939 | 0.281636486 | 0.384062798 | 0.149695665 |
| 0.395021608 | 0.361786626 | 0.358403443 | 0.026917708 |
| 0.374893626 | 0.022591982 | 0.396287974 | 0.298168873 |
| 0.237360403 | 0.341630286 | 0.240505001 | 0.302764346 |
| 0.264365917 | 0.051320019 | 0.172848613 | 0.331527525 |
| 0.263947386 | 0.300349091 | 0.070853487 | 0.347568245 |
| 0.302683388 | 0.315549332 | 0.280966989 | 0.003570141 |
| 0.347595922 | 0.137342999 | 0.264110563 | 0.468761208 |
| 0.235216822 | 0.189902741 | 0.227954692 | 0.250600182 |
| 0.320881549 | 0.330630419 | 0.279039828 | 0.267174591 |
| 0.4701133   | 0.249135714 | 0.346977921 | 0.201436405 |
| 0.321229218 | 0.038716309 | 0.176116856 | 0.080949865 |
| 0.350490899 | 0.271768411 | 0.391456213 | 0.335646636 |
| 0.359827399 | 0.484916768 | 0.242890196 | 0.44101707  |
| 0.145831634 | 0.347777976 | 0.339134225 | 0.308244775 |
| 0.303585834 | 0.098197745 | 0.365079311 | 0.487631499 |
| 0.060790936 | 0.270150104 | 0.310629393 | 0.119391401 |
| 0.397192547 | 0.2990235   | 0.288737186 | 0.293761753 |
| 0.36237249  | 0.334596243 | 0.432220749 | 0.293140731 |
| 0.369827671 | 0.075984141 | 0.429379751 | 0.350083802 |
| 0.368649367 | 0.094775344 | 0.267494391 | 0.429120767 |
| 0.35017684  | 0.467182315 | 0.359210505 | 0.317485282 |
| 0.346892665 | 0.472640708 | 0.345031394 | 0.39505236  |
| 0.126562082 | 0.483806271 | 0.214934552 | 0.088516154 |
| 0.078922095 | 0.153780238 | 0.25728567  | 0.308828165 |
| 0.454908355 | 0.320034966 | 0.21920313  | 0.282860708 |
| 0.447589113 | 0.42160527  | 0.47224647  | 0.370577806 |
| 0.060807106 | 0.279086762 | 0.342894054 | 0.306924302 |
| 0.334014098 | 0.136138302 | 0.326269549 | 0.46024939  |
| 0.377677194 | 0.411227286 | 0.170769687 | 0.459986436 |
| 0.211002531 | 0.500679154 | 0.400436623 | 0.21337257  |
| 0.478338796 | 0.451207564 | 0.499846606 | 0.383400204 |
| 0.453231044 | 0.318434045 | 0.069762515 | 0.338105595 |
| 0.492959317 | 0.036297674 | 0.444806983 | 0.470789052 |
| 0.448908029 | 0.428067786 | 0.502882064 | 0.489864589 |
| 0.456786093 | 0.088197991 | 0.027057467 | 0.315447117 |
| 0.457768986 | 0.383063365 | 0.21116263  | 0.338784357 |
| 0.35898283  | 0.343394093 | 0.382336787 | 0.305405137 |
| 0.502131574 | 0.431278995 | 0.455755078 | 0.326317099 |
| 0.233919528 | 0.317450146 | 0.338736179 | 0.418789895 |
| 0.078906067 | 0.135357772 | 0.058564858 | 0.285067939 |
| 0.272101916 | 0.23215941  | 0.31405886  | 0.327077439 |
| 0.238630188 | 0.293377499 | 0.344423093 | 0.372616457 |
| 0.053169675 | 0.357505481 | 0.187091859 | 0.163638112 |
| 0.076323106 | 0.147524548 | 0.225307402 | 0.237728499 |
| 0.319867011 | 0.213971513 | 0.357302877 | 0.465632735 |

|             |             |             |             |
|-------------|-------------|-------------|-------------|
| 0.321938083 | 0.171142007 | 0.347660534 | 0.47435511  |
| 0.439246163 | 0.371966754 | 0.230407201 | 0.029734062 |
| 0.256889115 | 0.24869559  | 0.24545347  | 0.359231077 |
| 0.173846162 | 0.252128704 | 0.33618329  | 0.384018941 |
| 0.254444875 | 0.149645021 | 0.332319421 | 0.418696556 |
| 0.134694678 | 0.375886824 | 0.432004345 | 0.306549579 |
| 0.006967092 | 0.30154792  | 0.41356599  | 0.220032665 |
| 0.270805045 | 0.235865459 | 0.338790817 | 0.431827934 |
| 0.303004393 | 0.294903696 | 0.476433674 | 0.381085819 |
| 0.336802966 | 0.198495146 | 0.502960853 | 0.060719845 |
| 0.328870107 | 0.115449221 | 0.312650126 | 0.238180887 |
| 0.257986103 | 0.291530194 | 0.365884406 | 0.347395136 |
| 0.128880229 | 0.479259425 | 0.377246546 | 0.487936399 |
| 0.314675816 | 0.499939681 | 0.436406168 | 0.434887307 |
| 0.341199291 | 0.302540901 | 0.214333042 | 0.393496366 |
| 0.425565793 | 0.234780256 | 0.073616587 | 0.381482809 |
| 0.27017854  | 0.356993229 | 0.195255014 | 0.474179883 |
| 0.477096549 | 0.405115101 | 0.226952559 | 0.363285758 |
| 0.371509305 | 0.260076859 | 0.39367287  | 0.510263548 |
| 0.220570258 | 0.328705263 | 0.327697256 | 0.410953553 |
| 0.190352    | 0.276564927 | 0.309171605 | 0.257241941 |
| 0.025297222 | 0.096013509 | 0.078201821 | 0.248528564 |
| 0.27532921  | 0.326547852 | 0.35241046  | 0.481584992 |
| 0.163444209 | 0.419146186 | 0.223217589 | 0.30454718  |
| 0.374144477 | 0.342151866 | 0.385161111 | 0.379114736 |
| 0.24147227  | 0.041768253 | 0.188104415 | 0.479849115 |
| 0.041226769 | 0.331406568 | 0.296477589 | 0.008236008 |
| 0.059078143 | 0.332303044 | 0.090043282 | 0.195747202 |
| 0.483178695 | 0.190753431 | 0.192540999 | 0.218877271 |
| 0.358911858 | 0.126057445 | 0.015936873 | 0.446045696 |
| 0.443234273 | 0.416009212 | 0.43583045  | 0.411189255 |
| 0.398900352 | 0.350771734 | 0.374863521 | 0.306813841 |
| 0.13655329  | 0.096762511 | 0.252653485 | 0.302886951 |
| 0.00701371  | 0.381943608 | 0.342827619 | 0.164451322 |
| 0.374322663 | 0.280943485 | 0.065394409 | 0.363067696 |
| 0.034110318 | 0.253736545 | 0.276979951 | 0.265839157 |
| 0.346748641 | 0.024465412 | 0.228017337 | 0.293537867 |
| 0.394978972 | 0.326613532 | 0.341412702 | 0.491639073 |
| 0.354698099 | 0.105189696 | 0.331531859 | 1           |
| 0.101667963 | 0.079698623 | 0.299673118 | 0.031042673 |
| 0.246934533 | 0.421753714 | 0.341185132 | 0.081258235 |
| 0.279619384 | 0.01031801  | 0.341355176 | 0.500661769 |
| 0.412235211 | 0.491906979 | 0.481261722 | 0.346452331 |
| 0.471195802 | 0.14746005  | 0.494919132 | 0.354809126 |
| 0.274270109 | 0.001760551 | 0.017999085 | 0.461288172 |
| 0.354584163 | 0.054152116 | 0.185797834 | 0.333672482 |
| 0.17345992  | 0.150066341 | 0.105968387 | 0.280511028 |
| 0.37336881  | 0.327822871 | 0.285264924 | 0.415083131 |
| 0.264897564 | 0.278877143 | 0.306765178 | 0.09200838  |
| 0.39038471  | 0.089039114 | 0.089671006 | 0.023262216 |
| 0.361250708 | 0.102245955 | 0.414231133 | 0.470597065 |
| 0.47929105  | 0.37142343  | 0.248418954 | 0.358557895 |
| 0.417245783 | 0.088121947 | 0.336143616 | 0.107977601 |
| 0.434434791 | 0.348442082 | 0.317180553 | 0.291972199 |

|             |             |             |             |
|-------------|-------------|-------------|-------------|
| 0.482095061 | 0.439569814 | 0.056105881 | 0.362114522 |
| 0.032330422 | 0.0078952   | 0.294573811 | 0.26262772  |
| 0.082140615 | 0.333339621 | 0.246043797 | 0.222626945 |
| 0.27173362  | 0.05176498  | 0.302851828 | 0.287968088 |
| 0.303448874 | 0.339933438 | 0.336206877 | 0.224833645 |
| 0.313640566 | 0.185732862 | 0.277110129 | 0.207612711 |
| 0.237295383 | 0.274221991 | 0.186309818 | 0.034733236 |
| 0.331654408 | 0.365792944 | 0.086627377 | 0.175852417 |
| 0.429011451 | 0.46899343  | 0.065251642 | 0.03134412  |
| 0.251588877 | 0.313096385 | 0.489919782 | 0.453108317 |
| 0.481388505 | 0.498763431 | 0.382147176 | 0.193374403 |
| 0.103516235 | 0.330141107 | 0.340087962 | 0.189095754 |
| 0.484723285 | 0.062909821 | 0.451834698 | 0.338114871 |
| 0.134782118 | 0.238998202 | 0.079026158 | 0.11542637  |
| 0.381626327 | 0.214351188 | 0.257929528 | 0.135072113 |
| 0.324809932 | 0.324222236 | 0.070495067 | 0.22981262  |
| 0.300072086 | 0.217594178 | 0.18364846  | 0.299573027 |
| 0.312375934 | 0.158663635 | 0.355687446 | 0.442036252 |
| 0.145086672 | 0.118693971 | 0.236179024 | 0.342522042 |
| 0.392974219 | 0.299049278 | 0.060119019 | 0.390468688 |
| 0.481293071 | 0.368405784 | 0.460109201 | 0.395996113 |
| 0.093975748 | 0.378080433 | 0.307059568 | 0.323278555 |
| 0.211250558 | 0.361088333 | 0.272136606 | 0.081958926 |
| 0.300985353 | 0.449430865 | 0.364376228 | 0.2412582   |
| 0.358315635 | 0.116822944 | 0.053592376 | 0.421980478 |
| 0.246117517 | 0.119805924 | 0.265632817 | 0.397333735 |
| 0.006674272 | 0.239239991 | 0.467707682 | 0.322921941 |
| 0.486573238 | 0.458775056 | 0.428413913 | 0.274436966 |
| 0.003155631 | 0.347991795 | 0.368037751 | 0.356864805 |
| 0.380773715 | 0.32211281  | 0.199384533 | 0.130576266 |
| 0.298830262 | 0.08006067  | 0.183438146 | 0.330163822 |
| 0.179746393 | 0.327047114 | 0.223073319 | 0.206169034 |
| 0.263191883 | 0.07954422  | 0.341295681 | 0.284537162 |
| 0.191190047 | 0.256295562 | 0.344431386 | 0.218996443 |
| 0.217456854 | 0.412325841 | 0.33481114  | 0.045043411 |
| 0.373727159 | 0.378130411 | 0.42901321  | 0.003157546 |
| 0.371438128 | 0.01877765  | 0.278141081 | 0.2951498   |
| 0.278396157 | 0.264682909 | 0.310809687 | 0.33839506  |
| 0.291150703 | 0.250778216 | 0.324582038 | 0.2797619   |
| 0.254296145 | 0.249776748 | 0.363457017 | 0.296683839 |
| 0.350979111 | 0.169793116 | 0.098303422 | 0.099845721 |
| 0.109817651 | 0.436784209 | 0.250915255 | 0.075111182 |
| 0.274116257 | 0.306205417 | 0.365771635 | 0.436528021 |
| 0.436419927 | 0.1018113   | 0.326024218 | 0.401267308 |
| 0.181450406 | 0.283557158 | 0.07578692  | 0.330184465 |
| 0.277562113 | 0.305517237 | 0.329980171 | 0.245812306 |
| 0.304361842 | 0.394023127 | 0.245560144 | 0.430329232 |
| 0.361157122 | 0.281986429 | 0.221415918 | 0.158621087 |
| 0.196277853 | 0.133511555 | 0.332552989 | 0.005052503 |
| 0.344383643 | 0.25204388  | 0.440880657 | 0.440427797 |
| 0.32544551  | 0.394719526 | 0.249857512 | 0.114219451 |
| 0.196253981 | 0.155725119 | 0.157678576 | 0.361814827 |
| 0.277592272 | 0.247246334 | 0.337737935 | 0.289229301 |
| 0.372387744 | 0.331394243 | 0.308180572 | 0.258941536 |



|             |             |             |             |
|-------------|-------------|-------------|-------------|
| 0.257004023 | 0.189875101 | 0.425485006 | 0.132330325 |
| 0.329836166 | 0.28570347  | 0.259639869 | 0.321506481 |
| 0.280593488 | 0.480338909 | 0.080354055 | 0.489922372 |
| 0.31824208  | 0.128459107 | 0.479156838 | 0.311001477 |
| 0.299595721 | 0.235113788 | 0.260204721 | 0.300744612 |
| 0.259333003 | 0.364935787 | 0.014768767 | 0.089211288 |
| 0.333584711 | 0.260433243 | 0.317070874 | 0.321977413 |
| 0.317151888 | 0.337354966 | 0.262575077 | 0.258237541 |
| 0.418676293 | 0.445572672 | 0.271839232 | 0.242426333 |
| 0.30940161  | 0.161625128 | 0.323693823 | 0.019948128 |
| 0.343626814 | 0.342584968 | 0.300013101 | 0.09208639  |
| 0.035237091 | 0.25496087  | 0.320935181 | 0.065100182 |
| 0.46691855  | 0.268800894 | 0.270615809 | 0.371694233 |
| 0.174177651 | 0.445195696 | 0.215242394 | 0.37776594  |
| 0.047287235 | 0.262839371 | 0.35615937  | 0.31078847  |
| 0.299905022 | 0.328987039 | 0.349560878 | 0.323800735 |
| 0.061565012 | 0.327020681 | 0.001987614 | 0.38730711  |
| 0.405022034 | 0.320284843 | 0.203071044 | 0.229081014 |
| 0.308555848 | 0.365564382 | 0.283106785 | 0.345944772 |
| 0.032683874 | 0.365354975 | 0.249305111 | 0.393604967 |
| 0.218837583 | 0.286661335 | 0.114997092 | 0.319104245 |
| 0.405043144 | 0.279584106 | 0.250020784 | 0.250500512 |
| 0.442897483 | 0.345630691 | 0.138450406 | 0.315980651 |
| 0.286924228 | 0.073578095 | 0.305057898 | 0.495516988 |
| 0.258707656 | 0.301780016 | 0.435092725 | 0.243848337 |
| 0.342499875 | 0.36398651  | 0.309865917 | 0.48013831  |
| 0.147857391 | 0.271541849 | 0.395507705 | 0.41540694  |
| 0.315575578 | 0.259502134 | 0.315094295 | 0.288849631 |
| 0.40787176  | 0.155822097 | 0.290322401 | 0.308854718 |
| 0.271090593 | 0.330271217 | 0.244345793 | 0.282662209 |
| 0.083543307 | 0.220979087 | 0.392880879 | 0.163313858 |
| 0.307184148 | 0.348888357 | 0.295825775 | 0.393427726 |
| 0.238924363 | 0.056988304 | 0.446933497 | 0.032760022 |
| 0.309820593 | 0.385932189 | 0.289443273 | 0.361464522 |
| 0.181873828 | 0.305167721 | 0.252775867 | 0.002480139 |
| 0.389866802 | 0.091521353 | 0.337390017 | 0.30340558  |
| 0.305495076 | 0.069686942 | 0.436265792 | 0.499661083 |
| 0.306987744 | 0.322887356 | 0.32590701  | 0.433253855 |
| 0.225379872 | 0.304774301 | 0.320432764 | 0.310588627 |
| 0.30857564  | 0.276008959 | 0.336947701 | 0.356792415 |
| 0.334233948 | 0.297683984 |             |             |
| IREB2       | 0.172799691 | 0.107020237 | 0.134249031 |
| 0.089274336 | 0.072099914 | 0.033473838 | 0.184716292 |
| 0.152931129 | 0.112231967 | 0.00970484  | 0.080553764 |
| 0.183592966 | 0.005062626 | 0.142487026 | 0.184217573 |
| 0.057385267 | 0.207498462 | 0.249642446 | 0.029617044 |
| 0.051174357 | 0.080219968 | 0.017413322 | 0.054305276 |
| 0.066687445 | 0.307594129 | 0.088328008 | 0.029225075 |
| 0.114713753 | 0.004535026 | 0.05772616  | 0.005372049 |
| 0.22848753  | 0.065217838 | 0.018407589 | 0.128379215 |
| 0.053932116 | 0.006632887 | 0.233632408 | 0.084405918 |
| 0.011437722 | 0.250798075 | 0.020005798 | 0.110616644 |
| 0.030202242 | 0.145996375 | 0.003447811 | 0.056815062 |
| 0.084252363 | 0.063185702 | 0.178055437 | 0.069961895 |

|             |             |             |             |
|-------------|-------------|-------------|-------------|
| 0.027342543 | 0.143804941 | 0.055106019 | 0.01255806  |
| 0.013982655 | 0.000845873 | 0.005368186 | 0.148063228 |
| 0.279253058 | 0.228810509 | 0.00735798  | 0.083165931 |
| 0.053177287 | 0.089550241 | 0.203213799 | 0.018860813 |
| 0.147413253 | 0.010933851 | 0.056474809 | 0.053110491 |
| 0.052973625 | 0.146712876 | 0.34142385  | 0.193231587 |
| 0.023212577 | 0.196843779 | 0.069185639 | 0.021654519 |
| 0.100626348 | 0.208575404 | 0.213494869 | 0.158134986 |
| 0.017193966 | 0.045737345 | 0.033739879 | 0.192908407 |
| 0.112241591 | 0.134040192 | 0.107508061 | 0.182267626 |
| 0.150919044 | 0.035493574 | 0.091187974 | 0.248813356 |
| 0.107499668 | 0.012310956 | 0.025605551 | 0.013675886 |
| 0.06991721  | 0.059909979 | 0.180069749 | 0.210444208 |
| 0.051190408 | 0.232396006 | 0.175513554 | 0.040184461 |
| 0.056511183 | 0.22113876  | 0.046305904 | 0.079684626 |
| 0.074234701 | 0.120377108 | 0.089356939 | 0.149297895 |
| 0.044702848 | 0.139134279 | 0.103804259 | 0.136876556 |
| 0.002088497 | 0.143712842 | 0.194018009 | 0.19234098  |
| 0.142898784 | 0.162724575 | 0.033750501 | 0.241525695 |
| 0.101574538 | 0.141876303 | 0.164093757 | 0.141828539 |
| 0.113906196 | 0.150795854 | 0.138685216 | 0.126879975 |
| 0.203497152 | 0.011519611 | 0.044706004 | 0.059128223 |
| 0.110748422 | 0.273331923 | 0.029414713 | 0.191955162 |
| 0.204349111 | 0.099368033 | 0.12087587  | 0.227187562 |
| 0.123636368 | 0.185816363 | 0.091468583 | 0.221574259 |
| 0.183498573 | 0.179292132 | 0.160110784 | 0.060370275 |
| 0.179614034 | 0.080210988 | 0.018704589 | 0.144898478 |
| 0.186057669 | 0.00463234  | 0.09234958  | 0.106195322 |
| 0.139103131 | 0.082270385 | 0.154481877 | 0.122705822 |
| 0.135831315 | 0.283291146 | 0.001499011 | 0.149544075 |
| 0.164351792 | 0.168090916 | 0.110665624 | 0.031613556 |
| 0.066075943 | 0.055639649 | 0.079782584 | 0.017693687 |
| 0.215926076 | 0.111688852 | 0.100565891 | 0.113034516 |
| 0.068787561 | 0.265527297 | 0.025960812 | 0.174725729 |
| 0.178893168 | 0.159367838 | 0.232748264 | 0.1818826   |
| 0.013077338 | 0.248590872 | 0.049484415 | 0.065118324 |
| 0.273770502 | 0.057422414 | 0.011563966 | 0.072987139 |
| 0.268048289 | 0.038485692 | 0.193166231 | 0.190751045 |
| 0.205267895 | 0.357365952 | 0.102181478 | 0.111997472 |
| 0.126247679 | 0.311819786 | 0.056677321 | 0.125459854 |
| 0.040835546 | 0.245384461 | 0.080781221 | 0.180149751 |
| 0.233168828 | 0.040898163 | 0.270704687 | 0.065481201 |
| 0.036887266 | 0.008001258 | 0.006907093 | 0.031353412 |
| 0.324531239 | 0.076127689 | 0.071465102 | 0.088024069 |
| 0.111665475 | 0.132137706 | 0.029676532 | 0.244034942 |
| 0.245368597 | 0.047801635 | 0.131720113 | 0.043290784 |
| 0.083440653 | 0.10605572  | 0.096623658 | 0.05664547  |
| 0.141937069 | 0.014060772 | 0.008990941 | 0.119742626 |
| 0.013670264 | 0.032962003 | 0.106819496 | 0.086028626 |
| 0.021936926 | 0.251324976 | 0.151762996 | 0.003134172 |
| 0.04272075  | 0.059537263 | 0.198851068 | 0.021361951 |
| 0.202098027 | 0.213921786 | 0.052107553 | 0.045371614 |
| 0.205368025 | 0.154551689 | 0.142654692 | 0.130058967 |
| 0.017755067 | 0.157856816 | 0.096223705 | 0.143978996 |

|             |             |             |             |
|-------------|-------------|-------------|-------------|
| 0.121754155 | 0.023311325 | 0.004635257 | 0.102123832 |
| 0.109237899 | 0.019309357 | 0.240360254 | 0.066243636 |
| 0.026221335 | 0.068257297 | 0.060841628 | 0.155869323 |
| 0.220406353 | 0.134471075 | 0.139257617 | 0.128478723 |
| 0.167693883 | 0.171737186 | 0.120054675 | 0.169969415 |
| 0.011670105 | 0.047077296 | 0.033936586 | 0.146262314 |
| 0.267812651 | 0.040245445 | 0.226536653 | 0.005691485 |
| 0.000262188 | 0.210303952 | 0.250074083 | 0.161197574 |
| 0.020480524 | 0.035683622 | 0.083407861 | 0.144542612 |
| 0.255308298 | 0.165424211 | 0.21291219  | 0.04858727  |
| 0.161935171 | 0.039362118 | 0.033725332 | 0.065304971 |
| 0.2493375   | 0.079589451 | 0.119043884 | 0.214120157 |
| 0.204309125 | 0.017014526 | 0.084330946 | 0.011849248 |
| 0.170585381 | 0.06866767  | 0.31019882  | 0.365874904 |
| 0.129595905 | 0.318649349 | 0.229031142 | 0.015720047 |
| 0.143923276 | 0.270385814 | 0.021538508 | 0.125101383 |
| 0.142109079 | 0.144359622 | 0.139856731 | 0.160105045 |
| 0.122961558 | 0.085152649 | 0.103556521 | 0.062685459 |
| 0.17189037  | 0.146494837 | 0.021935644 | 0.099105034 |
| 0.013590907 | 0.138724288 | 0.073851755 | 0.335662392 |
| 0.076130263 | 0.165472644 | 0.175142629 | 0.058704602 |
| 0.103475707 | 0.00538794  | 0.050294286 | 0.11960149  |
| 0.126626295 | 0.141634047 | 0.015484742 | 0.018867647 |
| 0.158127144 | 0.199123117 | 0.014028245 | 0.154200581 |
| 0.107621201 | 0.189967183 | 0.078155248 | 0.101667963 |
| 1           | 0.01003304  | 0.041452056 | 0.001186438 |
| 0.013822208 | 0.169010778 | 0.024435054 | 0.127450754 |
| 0.184042019 | 0.112859414 | 0.181546036 | 0.163537602 |
| 0.129940537 | 0.134055813 | 0.143595986 | 0.022251908 |
| 0.148302839 | 0.001156351 | 0.132742794 | 0.117982531 |
| 0.016232199 | 0.009396298 | 0.051691261 | 0.105477952 |
| 0.051282179 | 0.211777022 | 0.288287508 | 0.018764854 |
| 0.157420888 | 0.125776339 | 0.182171361 | 0.035159273 |
| 0.056730875 | 0.102629148 | 0.031919393 | 0.151409376 |
| 0.145816643 | 0.186038396 | 0.030000576 | 0.288254895 |
| 0.050543184 | 0.181675522 | 0.274561798 | 0.01978116  |
| 0.107525127 | 0.267295128 | 0.197159292 | 0.136761359 |
| 0.188556235 | 0.085375899 | 0.008952784 | 0.021267319 |
| 0.113726228 | 0.179732662 | 0.011578309 | 0.187848257 |
| 0.126150608 | 0.076615396 | 0.215987726 | 0.230685931 |
| 0.170746729 | 0.173969863 | 0.207792647 | 0.114818401 |
| 0.068571089 | 0.007764638 | 0.047647505 | 0.212369412 |
| 0.01283662  | 0.039477415 | 0.274740556 | 0.054247182 |
| 0.065186085 | 0.147714359 | 0.017059135 | 0.022342593 |
| 0.161145607 | 0.07494137  | 0.054600103 | 0.205538061 |
| 0.058919894 | 0.055038731 | 0.114936174 | 0.139556892 |
| 0.028369769 | 0.203340137 | 0.308838069 | 0.181965486 |
| 0.031308223 | 0.037959773 | 0.247178233 | 0.284495969 |
| 0.125453003 | 0.116181716 | 0.192341392 | 0.109598589 |
| 0.262346184 | 0.064181163 | 0.127946432 | 0.121363102 |
| 0.177219413 | 0.185445482 | 0.25434393  | 0.117915611 |
| 0.179350566 | 0.112624865 | 0.054675308 | 0.097000282 |
| 0.138360114 | 0.218048073 | 0.14105814  | 0.024485462 |
| 0.314472088 | 0.114631789 | 0.173539587 | 0.283203718 |

|              |             |             |             |
|--------------|-------------|-------------|-------------|
| 0.036080311  | 0.282204759 | 0.170046655 | 0.195100519 |
| 0.074091893  | 0.015326358 | 0.212237106 | 0.239874101 |
| 0.176919917  | 0.010587576 | 0.291809268 | 0.057835734 |
| 0.136815655  | 0.009768216 | 0.069764252 | 0.226735471 |
| 0.287276382  | 0.225991995 | 0.043322784 | 0.102619392 |
| 0.082746381  | 0.026732973 | 0.070288686 | 0.100346936 |
| 0.140604252  | 0.05262603  | 0.149229491 | 0.185130531 |
| 0.308269134  | 0.044411347 | 0.021606884 | 0.078377637 |
| 0.243290696  | 0.040225307 | 0.148560657 | 0.308299772 |
| 0.255375864  | 0.21712264  | 0.129283198 | 0.17795757  |
| 0.039301566  | 0.172890702 | 0.202881334 | 0.101473461 |
| 0.022066121  | 0.152006703 | 0.019785839 | 0.084502504 |
| 0.011428302  | 0.007116655 | 0.135736485 | 0.082019644 |
| 0.185267254  | 0.129571428 | 0.202779293 | 0.05767446  |
| 0.000824633  | 0.05545344  | 0.092311044 | 0.035778108 |
| 0.11653886   | 0.162708118 | 0.045365848 | 0.182619085 |
| 0.26645784   | 0.223753692 | 0.141002668 | 0.020901343 |
| 0.008715821  | 0.072734263 | 0.311039762 | 0.178512916 |
| 0.134014374  | 0.203831813 | 0.013274652 | 0.12742336  |
| 0.016929359  | 0.294066075 | 0.202346675 | 0.010602242 |
| 0.010746242  | 0.143954399 | 0.113182312 | 0.15382532  |
| 0.03404038   | 0.131204893 | 0.145266147 | 0.033437029 |
| 0.074822947  | 0.157539801 | 0.144744215 | 0.126318153 |
| 0.133373631  | 0.128953105 | 0.155731201 | 0.047490955 |
| 0.108262774  | 0.158997882 | 0.09581994  | 0.226847593 |
| 0.108922937  | 0.153258508 | 0.0666161   | 0.060637375 |
| 0.050743045  | 0.168616393 | 0.303447898 | 0.299849912 |
| 0.150707705  | 0.105956667 | 0.314379667 | 0.2378572   |
| 0.22067344   | 0.047433866 | 0.258023274 | 0.126544226 |
| 0.180080219  | 0.217962636 | 0.067011088 | 0.102382268 |
| 0.006684217  | 0.029981449 | 0.13368243  | 0.060309716 |
| 0.186965991  | 0.03729819  | 0.036328719 | 0.100380296 |
| 0.0711132801 | 0.249968351 | 0.298183976 | 0.173363017 |
| 0.054264624  | 0.048372418 | 0.012055104 | 0.147738589 |
| 0.18415826   | 0.288732292 | 0.066175615 | 0.072570903 |
| 0.134855363  | 0.053477906 | 0.097539811 | 0.155951981 |
| 0.011730185  | 0.210067512 | 0.011724577 | 0.163476426 |
| 0.007974598  | 0.239256414 | 0.335644834 | 0.070217195 |
| 0.00574457   | 0.129988978 | 0.090388936 | 0.024711923 |
| 0.079076457  | 0.066551933 | 0.038930247 | 0.117956954 |
| 0.157850761  | 0.201595979 | 0.185157133 | 0.147665507 |
| 0.036687708  | 0.039048116 | 0.045969433 | 0.091069415 |
| 0.122750228  | 0.124311514 | 0.256641699 | 0.123087093 |
| 0.054922453  | 0.287719192 | 0.226601455 | 0.08822416  |
| 0.048684923  | 0.096883631 | 0.006730568 | 0.026310304 |
| 0.090206964  | 0.013816631 | 0.000308964 | 0.014479712 |
| 0.183517709  | 0.029168908 | 0.078511192 | 0.120733814 |
| 0.043719095  | 0.188989051 | 0.005337504 | 0.105812342 |
| 0.136526695  | 0.181185278 | 0.070695922 | 0.288829461 |
| 0.168667678  | 0.185651232 | 0.061325179 | 0.006161724 |
| 0.049309288  | 0.031939059 | 0.01356328  | 0.185499558 |
| 0.18398316   | 0.008246931 | 0.057301099 | 0.212843469 |
| 0.123117949  | 0.004977415 | 0.060308912 | 0.068567008 |
| 0.260645335  | 0.190132991 | 0.125748165 | 0.102445516 |

|             |             |             |             |
|-------------|-------------|-------------|-------------|
| 0.108063517 | 0.210065429 | 0.029491774 | 0.035304521 |
| 0.053796155 | 0.032017674 | 0.139630634 | 0.022475048 |
| 0.199787343 | 0.056807288 | 0.035977641 | 0.25911565  |
| 0.170238998 | 0.031543421 | 0.319159931 | 0.008528308 |
| 0.21369016  | 0.154548503 | 0.04771255  | 0.025358033 |
| 0.108756638 | 0.053780585 | 0.228474787 | 0.129985087 |
| 0.007360028 | 0.063042202 | 0.144206521 | 0.045696528 |
| 0.209428407 | 0.035767053 | 0.271965481 | 0.012885446 |
| 0.128586752 | 0.112271244 | 0.196365447 | 0.045166757 |
| 0.053148927 | 0.291082446 | 0.017559162 | 0.160676718 |
| 0.166500601 | 0.028132933 | 0.105743947 | 0.124552046 |
| 0.025302926 | 0.151434319 | 0.036065187 | 0.156487677 |
| 0.13582624  | 0.249883243 | 0.096728542 | 0.139988418 |
| 0.234852375 | 0.031759897 | 0.018284392 | 0.077089631 |
| 0.136089859 | 0.11572057  | 0.026099137 | 0.164638372 |
| 0.016590141 | 0.167626098 | 0.048360982 | 0.081197009 |
| 0.147015786 | 0.111395537 | 0.027253348 | 0.288247838 |
| 0.157639579 | 0.06452883  | 0.04519392  | 0.240700542 |
| 0.093190329 | 0.114261559 | 0.219870832 | 0.002619865 |
| 0.075031244 | 0.081677727 | 0.185569964 | 0.04727222  |
| 0.297369073 | 0.104583051 | 0.070213914 | 0.058445178 |
| 0.124201496 | 0.013689109 | 0.047441282 | 0.054376247 |
| 0.017954257 | 0.176120121 | 0.162747963 | 0.138510281 |
| 0.139642158 | 0.014002908 | 0.009579049 | 0.147763814 |
| 0.012081734 | 0.00847173  | 0.015776383 | 0.062836777 |
| 0.014277548 | 0.018747663 | 0.020908609 | 0.016657063 |
| 0.120554014 | 0.092613919 |             |             |
| IRF7        | 0.007196465 | 0.131477324 | 0.004851288 |
| 0.00290707  | 0.066249505 | 0.027557407 | 0.01055624  |
| 0.019256303 | 0.133315115 | 0.070817414 | 0.043593982 |
| 0.001060546 | 0.005162655 | 0.149477194 | 0.006830208 |
| 0.09592862  | 0.003065578 | 0.023603391 | 0.001408282 |
| 0.004055473 | 0.059706155 | 0.017034747 | 0.06248941  |
| 0.058721995 | 0.044166018 | 0.079662729 | 0.117399097 |
| 0.14841261  | 0.011910294 | 0.082500741 | 0.005596451 |
| 0.129124657 | 0.070848513 | 0.063181867 | 0.000752218 |
| 0.061864014 | 0.002106984 | 0.14851756  | 0.037288774 |
| 0.002372712 | 0.086081274 | 0.077222956 | 0.019361811 |
| 0.127270488 | 0.003162298 | 0.011002339 | 0.161965937 |
| 0.106449595 | 0.0308117   | 0.010024263 | 0.0987624   |
| 0.082928531 | 0.06019908  | 0.143166467 | 0.00050903  |
| 0.045897739 | 0.011468493 | 0.042841732 | 0.136679295 |
| 0.032718973 | 0.013407254 | 0.066015939 | 0.038841793 |
| 0.127817954 | 0.128974617 | 0.052576853 | 0.09561686  |
| 0.142171451 | 0.029984795 | 0.154614517 | 0.000694483 |
| 0.055423899 | 0.007479399 | 0.036240715 | 0.027836366 |
| 0.047067958 | 0.024380709 | 0.043676352 | 0.055203283 |
| 0.154369806 | 0.154208169 | 0.055460963 | 0.160982084 |
| 0.010355027 | 0.099947663 | 0.030439876 | 0.07876     |
| 0.135438219 | 0.02042371  | 0.093250899 | 0.161032967 |
| 0.010784649 | 0.142940486 | 0.153847862 | 0.037408713 |
| 0.103765838 | 0.042473063 | 0.094622279 | 0.014066753 |
| 0.107170065 | 0.101798685 | 0.152975619 | 0.061606072 |
| 0.042792169 | 0.014860839 | 0.138217426 | 0.085342646 |

|             |             |             |             |
|-------------|-------------|-------------|-------------|
| 0.023303582 | 0.01174776  | 0.041677728 | 0.155906803 |
| 0.097814671 | 0.138635161 | 0.165234086 | 0.138870682 |
| 0.11088901  | 0.138404802 | 0.095284023 | 0.120291932 |
| 0.009244102 | 0.155181252 | 0.022436117 | 0.002235482 |
| 0.014759886 | 0.007000932 | 0.043369974 | 0.072489577 |
| 0.123144047 | 0.081593139 | 0.031569097 | 0.041624741 |
| 0.150931689 | 0.13669959  | 0.170341663 | 0.150200257 |
| 0.004793802 | 0.044827213 | 0.111232546 | 0.017753372 |
| 0.115230809 | 0.027683418 | 0.051320149 | 0.147427562 |
| 0.092362207 | 0.126507242 | 0.022560793 | 0.145730756 |
| 0.045449905 | 0.139526206 | 0.133949484 | 0.0226368   |
| 0.149327446 | 0.13171881  | 0.148959504 | 0.101515076 |
| 0.116702188 | 0.040789385 | 0.001046552 | 0.138621314 |
| 0.124848612 | 1.78E-05    | 0.160504194 | 0.167584208 |
| 0.154519137 | 0.154087165 | 0.165909626 | 0.146669437 |
| 0.153329076 | 0.018793937 | 0.001389505 | 0.080276112 |
| 0.157048661 | 0.099882692 | 0.01487425  | 0.112548362 |
| 0.088053516 | 0.04704978  | 0.128822119 | 0.006603435 |
| 0.147787598 | 0.13060587  | 0.159339039 | 0.1483241   |
| 0.111132264 | 0.082280654 | 0.112432388 | 0.124157119 |
| 0.002753212 | 0.0128961   | 0.010479872 | 0.088354782 |
| 0.030791976 | 0.029662223 | 0.067625646 | 0.108529613 |
| 0.034848219 | 0.057888724 | 0.05471727  | 0.111700595 |
| 0.017342986 | 0.082404216 | 0.022502269 | 0.052052381 |
| 0.003847591 | 0.03743886  | 0.010587839 | 0.004567349 |
| 0.042125518 | 0.076118626 | 0.129225717 | 0.155608098 |
| 0.075175296 | 0.036030753 | 0.113665    | 0.136065598 |
| 0.117965314 | 0.079447616 | 0.056448873 | 0.000181737 |
| 0.041387701 | 0.079128047 | 0.04334911  | 0.096665264 |
| 0.048334219 | 0.034547499 | 0.132641129 | 0.093305712 |
| 0.044920692 | 0.025410003 | 0.077296427 | 0.107898667 |
| 0.041883482 | 0.023766557 | 0.144788229 | 0.136712426 |
| 7.05E-05    | 0.067918726 | 0.119416431 | 0.011004192 |
| 0.111121761 | 0.000894342 | 0.012827337 | 0.153256826 |
| 0.051285261 | 0.039451599 | 0.139306646 | 0.090750271 |
| 0.008788871 | 0.078548867 | 0.161561156 | 0.002780519 |
| 0.095494934 | 0.000632682 | 0.060711484 | 0.101121969 |
| 0.046490635 | 0.09683981  | 0.0609324   | 0.034492723 |
| 0.023175261 | 0.153650499 | 0.101075826 | 0.141351105 |
| 0.083965595 | 0.166271112 | 0.136425624 | 0.111758149 |
| 0.060786934 | 0.135344358 | 0.011972177 | 0.135171174 |
| 0.145897271 | 0.050250599 | 0.017607415 | 0.159829783 |
| 0.136297774 | 0.148025298 | 0.006040419 | 0.147810987 |
| 0.133341751 | 0.14569949  | 0.013029864 | 0.10853576  |
| 0.092234474 | 0.028569668 | 0.120382791 | 0.158894668 |
| 0.074382033 | 0.101631458 | 0.064985701 | 0.115609063 |
| 0.034066674 | 0.028510633 | 0.098230917 | 0.022321956 |
| 2.24E-05    | 0.019192028 | 0.013301438 | 0.018087375 |
| 0.019547981 | 0.127582367 | 0.112632558 | 0.168931428 |
| 0.017221161 | 0.096067071 | 0.078248046 | 0.040250657 |
| 0.158384343 | 0.078323064 | 0.066314808 | 0.093905997 |
| 0.065324804 | 0.000100769 | 0.001673238 | 0.159786602 |
| 0.01235357  | 0.026017944 | 0.058470087 | 2.59E-05    |
| 0.007081688 | 0.154007153 | 0.03116824  | 0.050677511 |

|             |             |             |             |
|-------------|-------------|-------------|-------------|
| 0.135270989 | 0.053257465 | 0.058884881 | 0.108281932 |
| 0.070503792 | 0.011875272 | 0.000842614 | 0.165289112 |
| 0.163795578 | 0.16160368  | 0.171612836 | 0.143102823 |
| 0.176691093 | 0.105649883 | 0.141232058 | 0.046549218 |
| 0.015276424 | 0.017651455 | 0.037136435 | 0.065424986 |
| 4.28E-06    | 0.079899668 | 0.05722519  | 0.027191796 |
| 0.135077466 | 0.102782508 | 0.002572506 | 0.082514492 |
| 0.000406268 | 0.031963315 | 0.037282854 | 0.043674905 |
| 0.098373353 | 0.000987516 | 0.001456722 | 0.059402903 |
| 0.108603913 | 0.084600791 | 0.066813358 | 0.154898051 |
| 0.047625553 | 0.040458001 | 0.052136723 | 0.079698623 |
| 0.01003304  | 1           | 0.056000185 | 0.000358457 |
| 0.001414218 | 0.138337823 | 0.087024357 | 0.004042261 |
| 0.052149992 | 0.000165402 | 0.090764848 | 0.150341072 |
| 0.134430768 | 0.16736738  | 0.130852421 | 0.036202809 |
| 0.142101135 | 0.013447699 | 0.155463235 | 0.1149053   |
| 0.090945302 | 4.54E-06    | 0.004866143 | 0.15321693  |
| 0.102062761 | 0.015234084 | 0.028926004 | 0.012370985 |
| 0.004473962 | 0.018163171 | 0.006595264 | 0.019881887 |
| 0.072323791 | 0.036899995 | 0.019598719 | 0.158989409 |
| 0.04694917  | 0.038976419 | 0.067380866 | 0.022486576 |
| 0.074656392 | 0.002702529 | 0.027930979 | 0.001444793 |
| 0.089016969 | 0.038786719 | 0.141648946 | 0.145959977 |
| 0.14150135  | 0.103780728 | 0.07724264  | 0.006697412 |
| 0.133854129 | 0.019663948 | 0.026465888 | 0.019175417 |
| 0.143267604 | 0.118666712 | 0.072473373 | 0.071853077 |
| 0.157061778 | 0.142442064 | 0.003757649 | 0.140101839 |
| 6.29E-05    | 0.001554242 | 0.061249634 | 0.077426371 |
| 0.003470095 | 0.088792348 | 0.062248886 | 0.050890903 |
| 0.023773045 | 0.000564644 | 0.051814857 | 0.07135546  |
| 0.076129604 | 0.088387435 | 0.05726187  | 0.079943102 |
| 0.0408744   | 0.014456195 | 0.017021153 | 0.024444015 |
| 0.012999078 | 0.096087514 | 0.048869937 | 0.002611505 |
| 0.090246688 | 0.103176173 | 0.006262245 | 0.030008148 |
| 0.113293824 | 0.146335723 | 0.002568809 | 6.26E-05    |
| 0.069316802 | 0.093360018 | 0.151533173 | 0.146516667 |
| 0.148094936 | 0.155715442 | 0.108413296 | 0.017376624 |
| 0.005666459 | 0.063281064 | 0.076362971 | 0.005759783 |
| 0.144685825 | 0.022544284 | 0.123251217 | 0.069243735 |
| 0.030017435 | 0.024503174 | 0.00086422  | 0.016327238 |
| 0.080318217 | 0.032108072 | 0.024164112 | 0.034824771 |
| 0.055182212 | 0.027461389 | 0.008443019 | 0.034320481 |
| 0.121929448 | 0.024624736 | 0.039748258 | 0.035787574 |
| 0.094066262 | 0.032585984 | 0.151096047 | 0.12407935  |
| 0.021217413 | 0.03079989  | 0.025133238 | 0.115358952 |
| 0.14550317  | 0.1165407   | 1.26E-05    | 0.151213595 |
| 0.140384828 | 0.110141527 | 0.130162818 | 0.128784275 |
| 0.022956962 | 0.062905093 | 0.082814026 | 0.115718618 |
| 0.045518156 | 0.033056714 | 0.054139275 | 0.013440372 |
| 0.083124416 | 0.139528032 | 0.155023339 | 0.014341429 |
| 0.077772346 | 0.032222746 | 0.019702143 | 0.124899137 |
| 0.026650615 | 0.003747477 | 0.065775523 | 0.149697979 |
| 1.93E-05    | 0.01649412  | 0.166572881 | 0.01314893  |
| 0.156481142 | 0.154784913 | 0.112791182 | 0.024477325 |

|             |             |             |             |
|-------------|-------------|-------------|-------------|
| 0.005013443 | 0.147896535 | 0.070439747 | 0.059665767 |
| 0.149795526 | 0.073659641 | 0.004083893 | 0.004563322 |
| 0.060549635 | 0.016673835 | 0.012947186 | 0.00405631  |
| 0.004409056 | 0.104283265 | 0.043342623 | 0.057182656 |
| 0.033121208 | 0.041038659 | 0.0101502   | 0.022895261 |
| 0.017575044 | 0.051174096 | 0.085770869 | 0.04822467  |
| 0.020630566 | 0.156855701 | 0.155260402 | 0.001550885 |
| 0.069524636 | 0.134148758 | 0.116335903 | 6.36E-05    |
| 0.120478057 | 0.000234704 | 0.027897773 | 0.023030796 |
| 0.021301454 | 0.040105509 | 0.057318909 | 0.0398108   |
| 0.143278894 | 0.040913942 | 0.026451276 | 0.037166569 |
| 0.010037122 | 0.03874568  | 0.102908966 | 0.071130433 |
| 0.02593999  | 0.008807076 | 0.027579876 | 0.027990987 |
| 0.000811045 | 0.125603031 | 0.052462926 | 0.013974276 |
| 0.04059094  | 0.091855556 | 0.087667696 | 0.153392841 |
| 0.099916897 | 0.026996914 | 0.059497392 | 0.119132393 |
| 0.054150846 | 0.004155628 | 0.010552966 | 0.073363766 |
| 0.036702046 | 0.014579773 | 0.070202059 | 0.080499025 |
| 0.158928406 | 0.096691773 | 0.048439765 | 0.108467424 |
| 0.060661526 | 0.125595348 | 0.068816046 | 0.003201425 |
| 0.025341105 | 0.035240965 | 0.050048114 | 0.00021554  |
| 0.063692215 | 0.010952161 | 0.139649485 | 0.136208461 |
| 0.051547703 | 0.089191749 | 0.011860004 | 0.008417588 |
| 0.030001297 | 0.060104725 | 0.032784035 | 0.139435557 |
| 0.031246903 | 0.012528361 | 0.069368198 | 0.021186071 |
| 0.139779345 | 0.154486895 | 0.032851844 | 0.046656563 |
| 0.056044636 | 0.037667402 | 0.16295465  | 0.015105052 |
| 0.123381947 | 0.017444063 | 0.111755008 | 0.0488986   |
| 0.041775572 | 0.162190805 | 0.009141598 | 0.167791961 |
| 0.082112272 | 0.030213395 | 0.131712835 | 0.037136935 |
| 0.01978856  | 0.002543637 | 0.029590094 | 0.075381242 |
| 0.025623696 | 0.037412035 | 0.000471898 | 0.001272505 |
| 0.069589567 | 0.074973011 | 0.175486813 | 0.113250011 |
| 0.035339657 | 0.101638408 | 0.007193837 | 0.093550697 |
| 0.145992842 | 0.142055557 | 0.01742352  | 0.071730214 |
| 0.094253284 | 0.007288825 | 0.065574033 | 0.001850795 |
| 0.131126581 | 0.119719212 | 0.050382787 | 0.005093311 |
| 0.000776432 | 0.048523176 | 0.152387471 | 0.026142145 |
| 0.161333191 | 0.013777277 | 0.125918523 | 0.100138884 |
| 0.049445811 | 0.148711809 | 0.010926354 | 0.091960849 |
| 0.009213504 | 0.056342781 | 0.070247727 | 0.098766936 |
| 0.016129632 | 0.059766122 | 0.10001323  | 0.031021377 |
| 0.00264756  | 0.014315871 | 0.000686572 | 0.103706205 |
| 0.151270213 | 0.102084874 | 0.049799137 | 0.059473879 |
| 0.05472737  | 0.102401872 | 0.016669721 | 0.084009564 |
| 0.00026762  | 0.087468748 | 0.032121941 | 0.08754255  |
| 0.02754409  | 0.141931468 | 0.001336455 | 0.093483324 |
| 0.129131451 | 0.030362733 | 0.07473103  | 0.055525254 |
| 0.140098246 | 0.107996322 | 0.037462393 | 0.011796211 |
| 0.15471764  | 0.015409826 | 0.05642074  | 0.162030665 |
| 0.017640343 | 0.035223559 | 0.132242516 | 0.028787548 |
| 0.064489886 | 0.104835349 | 0.134051175 | 0.165083443 |
| 0.006806571 | 0.053709238 | 0.119823447 | 0.175446524 |
| 0.070979808 | 0.029339065 | 0.033043771 | 0.03715123  |



|             |             |             |             |
|-------------|-------------|-------------|-------------|
| 0.123674641 | 0.001187024 | 0.057254402 | 0.096278132 |
| 0.048498311 | 0.056811055 | 0.111192539 | 0.02873376  |
| 7.06E-05    | 0.023931005 | 0.018251405 | 0.027084352 |
| 0.073262316 | 0.070612872 | 0.031697407 | 0.100608484 |
| 0.00277022  | 0.00016109  | 0.127324255 | 0.000673038 |
| 0.036213994 | 0.068612487 | 0.032601712 | 0.074027278 |
| 0.035666106 | 0.10258814  | 0.100358855 | 8.60E-05    |
| 0.114925801 | 0.000243349 | 0.034098646 | 0.019016519 |
| 0.011993591 | 0.007364303 | 0.108120455 | 0.152768134 |
| 0.054440803 | 0.011658644 | 0.028339404 | 0.122453315 |
| 0.004910784 | 0.058136005 | 0.058720176 | 0.127532001 |
| 0.031552725 | 0.11016239  | 0.078303377 | 0.051745482 |
| 0.072786464 | 0.027757383 |             |             |
| ITGA1       | 0.039949022 | 0.416973463 | 0.034254025 |
| 0.045052668 | 0.164351132 | 0.136177344 | 0.042581544 |
| 0.06584705  | 0.345103745 | 0.144840943 | 0.174645776 |
| 0.012929776 | 0.039224675 | 0.412850258 | 0.043428119 |
| 0.246818001 | 0.021700564 | 0.066849469 | 0.050749184 |
| 0.110242376 | 0.154369289 | 0.122617238 | 0.205657508 |
| 0.150370643 | 0.196060166 | 0.243753341 | 0.227092514 |
| 0.457776227 | 0.09918761  | 0.279782542 | 0.069502855 |
| 0.389362602 | 0.18911304  | 0.171041786 | 0.010686839 |
| 0.224355747 | 0.014720723 | 0.429231362 | 0.100363399 |
| 0.046363845 | 0.333369778 | 0.157340122 | 0.089591723 |
| 0.185605853 | 0.021729459 | 0.092422541 | 0.310961335 |
| 0.23292851  | 0.126334899 | 0.057676398 | 0.31142791  |
| 0.154779145 | 0.249812436 | 0.328017557 | 0.002065684 |
| 0.111235314 | 0.039013871 | 0.096500693 | 0.466959227 |
| 0.146902553 | 0.067808832 | 0.134341401 | 0.15348745  |
| 0.291833855 | 0.30460739  | 0.202395071 | 0.152953131 |
| 0.455864449 | 0.081624835 | 0.332476713 | 0.056301108 |
| 0.190978116 | 0.029938827 | 0.138949066 | 0.093583522 |
| 0.154723643 | 0.111852629 | 0.175365201 | 0.117504463 |
| 0.406551733 | 0.498542584 | 0.179330623 | 0.477992526 |
| 0.076677324 | 0.202215075 | 0.103631885 | 0.241571689 |
| 0.327350407 | 0.067417007 | 0.292253321 | 0.479850776 |
| 0.043706788 | 0.256279432 | 0.335668041 | 0.129881559 |
| 0.383858762 | 0.131984653 | 0.210429536 | 0.063999397 |
| 0.250887703 | 0.199959863 | 0.488221752 | 0.217012223 |
| 0.155023814 | 0.072392329 | 0.472639366 | 0.181582799 |
| 0.099203453 | 0.05798853  | 0.09479229  | 0.406341903 |
| 0.265934228 | 0.441131817 | 0.402388585 | 0.337783721 |
| 0.204775511 | 0.447326097 | 0.273948029 | 0.406690901 |
| 0.074058186 | 0.492183837 | 0.100591128 | 0.025955871 |
| 0.04373345  | 0.048926556 | 0.129286379 | 0.276972313 |
| 0.411063444 | 0.241481535 | 0.086700013 | 0.117718998 |
| 0.417835809 | 0.461958258 | 0.499134423 | 0.363115084 |
| 0.025283691 | 0.120530996 | 0.193624942 | 0.125367577 |
| 0.30612937  | 0.100769574 | 0.110306862 | 0.489052337 |
| 0.326131692 | 0.375721692 | 0.076810121 | 0.486422471 |
| 0.123669926 | 0.463722052 | 0.405979024 | 0.087690653 |
| 0.478914225 | 0.462919748 | 0.454906548 | 0.274003258 |
| 0.435986482 | 0.150730804 | 0.093011696 | 0.359935294 |
| 0.438454525 | 0.005768263 | 0.43347206  | 0.45667259  |

|             |             |             |             |
|-------------|-------------|-------------|-------------|
| 0.463128624 | 0.391564391 | 0.484583716 | 0.460312311 |
| 0.471079499 | 0.065576963 | 0.032751526 | 0.20152178  |
| 0.474532693 | 0.325488922 | 0.077469681 | 0.221054323 |
| 0.237269443 | 0.186727425 | 0.371284302 | 0.105405026 |
| 0.481417297 | 0.389781978 | 0.450317123 | 0.339606019 |
| 0.218493863 | 0.298459079 | 0.21624142  | 0.446848135 |
| 0.023610517 | 0.054751803 | 0.051629688 | 0.278506944 |
| 0.121057453 | 0.107922757 | 0.152430346 | 0.244155297 |
| 0.137234035 | 0.175099887 | 0.123768118 | 0.261253346 |
| 0.076911836 | 0.249330823 | 0.093585962 | 0.115692794 |
| 0.021951726 | 0.160539929 | 0.072739896 | 0.061489781 |
| 0.133972409 | 0.267203646 | 0.328912642 | 0.443354984 |
| 0.164190518 | 0.155798305 | 0.314848096 | 0.421729703 |
| 0.387427692 | 0.187218891 | 0.220863396 | 0.003616551 |
| 0.107167543 | 0.149819383 | 0.082502623 | 0.234461869 |
| 0.207340049 | 0.121333438 | 0.253565867 | 0.28496713  |
| 0.150476002 | 0.108573779 | 0.150682416 | 0.404286133 |
| 0.156503031 | 0.104114988 | 0.383330839 | 0.255937117 |
| 0.002219418 | 0.161539043 | 0.372248308 | 0.079732104 |
| 0.275934971 | 0.053195705 | 0.081669423 | 0.4136451   |
| 0.125563861 | 0.112290724 | 0.448035327 | 0.293859007 |
| 0.136705292 | 0.260277955 | 0.488541532 | 0.046450545 |
| 0.209138889 | 0.014160341 | 0.202473515 | 0.176961268 |
| 0.165141989 | 0.245150336 | 0.178685626 | 0.096391297 |
| 0.10349691  | 0.492644837 | 0.334493209 | 0.466229388 |
| 0.141364626 | 0.487861387 | 0.394151875 | 0.38331902  |
| 0.258786808 | 0.1920775   | 0.062948059 | 0.35015418  |
| 0.397790903 | 0.117077146 | 0.085646966 | 0.39197276  |
| 0.181253371 | 0.292427293 | 0.045901869 | 0.440924862 |
| 0.456608985 | 0.452500505 | 0.068839499 | 0.29934322  |
| 0.302328728 | 0.123688883 | 0.35451959  | 0.501247259 |
| 0.150849269 | 0.195687732 | 0.122557159 | 0.331489586 |
| 0.124532396 | 0.104317912 | 0.308809679 | 0.082548627 |
| 0.002923237 | 0.065336612 | 0.050742799 | 0.072369994 |
| 0.062310663 | 0.290028773 | 0.285947464 | 0.476189442 |
| 0.070028979 | 0.374310433 | 0.232656545 | 0.104995068 |
| 0.39065983  | 0.178177988 | 0.200674342 | 0.24951622  |
| 0.21599445  | 0.006670357 | 0.04637597  | 0.4925048   |
| 0.050212504 | 0.085322462 | 0.190219077 | 0.001542604 |
| 0.032655296 | 0.380342918 | 0.116869712 | 0.205655504 |
| 0.433074168 | 0.20282409  | 0.157348535 | 0.145791892 |
| 0.240200513 | 0.064653965 | 0.000968662 | 0.460723468 |
| 0.481274697 | 0.46254188  | 0.482535266 | 0.465252388 |
| 0.433943591 | 0.352042859 | 0.340013382 | 0.185981769 |
| 0.051809664 | 0.051001833 | 0.085275303 | 0.133116513 |
| 0.005811196 | 0.288911332 | 0.174392225 | 0.118181889 |
| 0.335707354 | 0.255386149 | 0.023549929 | 0.234071175 |
| 0.009647613 | 0.069128667 | 0.167080256 | 0.110505838 |
| 0.286878035 | 0.010093713 | 0.077305347 | 0.127664147 |
| 0.393357763 | 0.3174205   | 0.123683532 | 0.484445715 |
| 0.167049418 | 0.139398193 | 0.127833752 | 0.299673118 |
| 0.041452056 | 0.056000185 | 1           | 0.011507554 |
| 0.079485754 | 0.457610617 | 0.150623628 | 0.031570651 |
| 0.167451851 | 0.003068075 | 0.321869738 | 0.492502408 |

|             |             |             |             |
|-------------|-------------|-------------|-------------|
| 0.43640568  | 0.469764598 | 0.447494777 | 0.094218634 |
| 0.454796612 | 0.056747872 | 0.48786993  | 0.366366357 |
| 0.152640981 | 0.000270194 | 0.00587434  | 0.425466319 |
| 0.202533436 | 0.075117275 | 0.114971037 | 0.114804436 |
| 0.049971829 | 0.085055092 | 0.041488877 | 0.067685947 |
| 0.256490842 | 0.120055142 | 0.077837191 | 0.456428336 |
| 0.114922359 | 0.152390185 | 0.181114555 | 0.098274482 |
| 0.233556019 | 0.027393619 | 0.099805391 | 0.002712648 |
| 0.27849975  | 0.127134364 | 0.458502355 | 0.47472851  |
| 0.445114742 | 0.26115253  | 0.137224643 | 0.143879845 |
| 0.419663375 | 0.108914949 | 0.128870663 | 0.103483145 |
| 0.446990202 | 0.250333767 | 0.247887275 | 0.259427234 |
| 0.459185839 | 0.421466502 | 0.024200541 | 0.331568201 |
| 0.004918831 | 0.002134768 | 0.172061221 | 0.228471707 |
| 0.06620675  | 0.185202904 | 0.211856862 | 0.136314782 |
| 0.123411728 | 0.016814227 | 0.109774226 | 0.094540496 |
| 0.185639558 | 0.183976656 | 0.13418426  | 0.245100916 |
| 0.107702251 | 0.060201656 | 0.081544796 | 0.086027691 |
| 0.137463092 | 0.298895075 | 0.197236792 | 0.017780952 |
| 0.215394445 | 0.205561396 | 0.035361988 | 0.128176782 |
| 0.366369602 | 0.433935144 | 0.032555683 | 0.00452801  |
| 0.230189551 | 0.152336669 | 0.450305139 | 0.463266003 |
| 0.49429639  | 0.481238534 | 0.371883133 | 0.066430386 |
| 0.037380805 | 0.198453826 | 0.154893914 | 0.043915092 |
| 0.473471387 | 0.074984384 | 0.451712312 | 0.146386881 |
| 0.102504272 | 0.082702284 | 0.016763372 | 0.062394175 |
| 0.2210451   | 0.136729433 | 0.087900554 | 0.115513759 |
| 0.135071682 | 0.08313355  | 0.033375663 | 0.128337891 |
| 0.290099933 | 0.066778728 | 0.117201649 | 0.136669382 |
| 0.310281341 | 0.129178214 | 0.319559855 | 0.420745083 |
| 0.112196547 | 0.089094187 | 0.101796241 | 0.328152314 |
| 0.385236441 | 0.249843983 | 0.01047076  | 0.429242261 |
| 0.451767992 | 0.292015097 | 0.460885126 | 0.355850359 |
| 0.085162991 | 0.177311553 | 0.149341099 | 0.202834074 |
| 0.143253547 | 0.153258217 | 0.150178365 | 0.055511144 |
| 0.299143103 | 0.482519629 | 0.374695012 | 0.073964194 |
| 0.252746112 | 0.120207646 | 0.066370257 | 0.417881849 |
| 0.071401603 | 0.048205599 | 0.179566826 | 0.397561348 |
| 0.000345332 | 0.056191158 | 0.45839075  | 0.095909398 |
| 0.493014587 | 0.422564806 | 0.395160528 | 0.124456858 |
| 0.001230321 | 0.291258921 | 0.219439005 | 0.135642573 |
| 0.397785408 | 0.294014438 | 0.095357237 | 0.036321802 |
| 0.242068853 | 0.086163421 | 0.071190675 | 0.12053144  |
| 0.089644243 | 0.295236145 | 0.169269251 | 0.167186326 |
| 0.090141508 | 0.121015908 | 0.087928376 | 0.096124126 |
| 0.090253045 | 0.193871556 | 0.296513231 | 0.135463272 |
| 0.074224846 | 0.424436744 | 0.345773405 | 0.016808495 |
| 0.18899436  | 0.390729025 | 0.397045674 | 0.002176359 |
| 0.305531465 | 0.004843407 | 0.099183966 | 0.086401067 |
| 0.083321329 | 0.110872275 | 0.171248756 | 0.098013867 |
| 0.260881431 | 0.107505519 | 0.092250064 | 0.153526005 |
| 0.061604929 | 0.115983164 | 0.225921116 | 0.169693899 |
| 0.092105229 | 0.056270437 | 0.120835492 | 0.13166331  |
| 0.024051589 | 0.428002345 | 0.229765851 | 0.07747842  |

|             |             |             |             |
|-------------|-------------|-------------|-------------|
| 0.164693252 | 0.155675811 | 0.309465327 | 0.463572519 |
| 0.369804715 | 0.136141507 | 0.16282397  | 0.385925001 |
| 0.12366911  | 0.110701029 | 0.041993969 | 0.200498829 |
| 0.134427153 | 0.08616019  | 0.209020084 | 0.211705965 |
| 0.354669505 | 0.373988334 | 0.219012542 | 0.40193634  |
| 0.132451553 | 0.214485979 | 0.124136787 | 0.036991971 |
| 0.081887435 | 0.133184275 | 0.132958594 | 0.000854102 |
| 0.25541742  | 0.088771379 | 0.406509873 | 0.450839519 |
| 0.118843677 | 0.3446261   | 0.123756225 | 0.044967857 |
| 0.10184854  | 0.200055933 | 0.122813208 | 0.343344556 |
| 0.082953912 | 0.078067093 | 0.154196693 | 0.123303619 |
| 0.327850395 | 0.347046541 | 0.118836512 | 0.138437053 |
| 0.162046979 | 0.148667652 | 0.4715001   | 0.064144976 |
| 0.261140239 | 0.062742578 | 0.265269584 | 0.137861355 |
| 0.100228566 | 0.4701804   | 0.047392519 | 0.480270277 |
| 0.157537418 | 0.139387895 | 0.46067224  | 0.177954469 |
| 0.109815981 | 0.049667764 | 0.073732701 | 0.156209475 |
| 0.11030217  | 0.124167835 | 0.011377974 | 0.037027507 |
| 0.249847205 | 0.162496012 | 0.377069536 | 0.317674499 |
| 0.097625296 | 0.296703344 | 0.072713516 | 0.161580613 |
| 0.459943394 | 0.47999501  | 0.093624854 | 0.219894334 |
| 0.297384257 | 0.049399789 | 0.260355294 | 0.018461534 |
| 0.27222137  | 0.264837361 | 0.167622776 | 0.035870668 |
| 0.013700676 | 0.079497451 | 0.258200548 | 0.081703336 |
| 0.430404575 | 0.071935079 | 0.28766926  | 0.302556029 |
| 0.180084138 | 0.475098395 | 0.057302699 | 0.285124576 |
| 0.044239829 | 0.199929596 | 0.197349146 | 0.230090998 |
| 0.076468853 | 0.114473014 | 0.272768074 | 0.081612148 |
| 0.018939247 | 0.100165555 | 0.001692473 | 0.386632426 |
| 0.457494476 | 0.167252637 | 0.213227778 | 0.148574615 |
| 0.202731969 | 0.360162694 | 0.133953054 | 0.213241304 |
| 0.005143991 | 0.20826957  | 0.132496747 | 0.352208236 |
| 0.076953632 | 0.255151964 | 0.022218736 | 0.183176819 |
| 0.449989432 | 0.133674753 | 0.258514833 | 0.108880105 |
| 0.450096897 | 0.359388991 | 0.157269022 | 0.087744283 |
| 0.316860558 | 0.068529455 | 0.144797855 | 0.498399455 |
| 0.082641807 | 0.074583109 | 0.368440137 | 0.083964702 |
| 0.142657106 | 0.356712231 | 0.273077033 | 0.506175087 |
| 0.039523754 | 0.173738174 | 0.351049789 | 0.428535002 |
| 0.243606591 | 0.077160732 | 0.093835511 | 0.099633791 |
| 0.42017819  | 0.039306581 | 0.11183946  | 0.274530449 |
| 0.0843499   | 0.230539051 | 0.256339789 | 0.083355091 |
| 0.021049548 | 0.092140691 | 0.128497561 | 0.11444079  |
| 0.184753486 | 0.179577281 | 0.09681778  | 0.338920041 |
| 0.046492141 | 0.009038111 | 0.407506435 | 0.008178364 |
| 0.182724051 | 0.238251846 | 0.157563058 | 0.152774919 |
| 0.167636591 | 0.24345175  | 0.198455467 | 0.001420015 |
| 0.362128371 | 0.014087124 | 0.141616292 | 0.082388365 |
| 0.133097547 | 0.034979551 | 0.415311135 | 0.464491733 |
| 0.235042261 | 0.133026093 | 0.128455574 | 0.447969263 |
| 0.056214606 | 0.134567074 | 0.158410506 | 0.291090183 |
| 0.084874183 | 0.174109712 | 0.177818088 | 0.126643349 |
| 0.301759963 | 0.123359641 |             |             |
| ITGA2       | 0.00290635  | 0.054707132 | 0.00632781  |

|             |             |             |             |
|-------------|-------------|-------------|-------------|
| 0.009537898 | 0.019597284 | 0.02942333  | 0.000657473 |
| 0.001614906 | 0.029772675 | 0.030941579 | 0.028078678 |
| 0.000220695 | 0.000608639 | 0.046136178 | 0.000139063 |
| 0.030988929 | 0.000212857 | 0.003096338 | 0.000268633 |
| 0.001626801 | 0.014469831 | 0.010732607 | 0.03254772  |
| 0.012020347 | 0.018180789 | 0.030901546 | 0.027475763 |
| 0.069947047 | 0.018938038 | 0.055848651 | 0.05588253  |
| 0.041178315 | 0.022606241 | 0.03700244  | 0.000928073 |
| 0.024873892 | 0.000300389 | 0.044125798 | 0.011550657 |
| 0.004284986 | 0.028552229 | 0.065762623 | 0.013111701 |
| 0.050128603 | 0.002101319 | 0.021139596 | 0.036050656 |
| 0.028649479 | 0.006845554 | 0.003842586 | 0.054650772 |
| 0.011713084 | 0.027825    | 0.068780621 | 6.54E-05    |
| 0.006723179 | 0.013645863 | 0.064510944 | 0.012590973 |
| 0.002729178 | 0.009682449 | 0.006535393 | 0.024801449 |
| 0.021902739 | 0.011039784 | 0.032275418 | 0.061073515 |
| 0.002812886 | 0.054347728 | 0.001070959 | 0.02010775  |
| 0.000409661 | 0.009495309 | 0.00397809  | 0.024985136 |
| 0.007560758 | 0.018169372 | 0.018700915 | 0.070334428 |
| 0.049124074 | 0.011733154 | 0.063525958 | 9.47E-05    |
| 0.020864069 | 0.010347713 | 0.019257662 | 0.022691954 |
| 0.000662974 | 0.045801993 | 0.059381459 | 0.000265568 |
| 0.050991376 | 0.032069214 | 0.005865971 | 0.058223821 |
| 0.00736554  | 0.067693391 | 0.00547177  | 0.030027675 |
| 0.021384124 | 0.044526507 | 0.020907602 | 0.011814698 |
| 0.004387617 | 0.059577302 | 0.022913197 | 0.016880195 |
| 0.007049035 | 0.005242625 | 0.055793625 | 0.050780719 |
| 0.066464127 | 0.049168985 | 0.024576333 | 0.031928296 |
| 0.067632275 | 0.051687242 | 0.034678754 | 0.003919422 |
| 0.063690933 | 0.015967985 | 0.000119215 | 0.002849807 |
| 0.000605481 | 0.003379151 | 0.018755865 | 0.064399375 |
| 0.020132434 | 0.008149406 | 0.011853003 | 0.046438597 |
| 0.06185485  | 0.063614917 | 0.036663142 | 0.000976006 |
| 0.007285285 | 0.04054243  | 0.007559193 | 0.022906698 |
| 0.003133501 | 0.01433471  | 0.058210803 | 0.042150983 |
| 0.044705883 | 0.006556958 | 0.049677047 | 0.00330272  |
| 0.055513655 | 0.079391356 | 0.010375967 | 0.063190148 |
| 0.064003157 | 0.058602414 | 0.039974442 | 0.055210547 |
| 0.043975151 | 4.98E-05    | 0.031370294 | 0.04660428  |
| 0.058983973 | 0.05991195  | 0.06927437  | 2.42E-05    |
| 0.05155881  | 0.060009444 | 0.066019164 | 0.062820241 |
| 0.000142715 | 0.014122057 | 0.065485976 | 0.003007302 |
| 0.000809951 | 0.048194907 | 0.022288825 | 0.050131333 |
| 0.04109639  | 0.004610784 | 0.045000682 | 0.025545003 |
| 0.060315639 | 0.032965583 | 0.017714192 | 0.05889488  |
| 0.034638485 | 0.061893842 | 0.000825304 | 0.025194522 |
| 0.005180249 | 0.016048567 | 0.050139505 | 0.006580666 |
| 0.023260257 | 0.01677146  | 0.008336759 | 0.006966325 |
| 0.022428883 | 0.0288632   | 0.004569765 | 0.01397879  |
| 0.00964978  | 0.008971976 | 0.000927348 | 0.05323727  |
| 0.002996832 | 0.004790317 | 0.008265898 | 0.008779211 |
| 0.045725279 | 0.058439519 | 0.01529326  | 0.020559938 |
| 0.043346803 | 0.047280419 | 0.034066513 | 0.019947974 |
| 0.010178317 | 0.000728851 | 0.005578078 | 0.037317836 |
|             |             |             | 0.017439458 |

|                      |                      |                      |             |
|----------------------|----------------------|----------------------|-------------|
| 0.006131107          | 0.03614932           | 0.013376905          | 0.003384131 |
| 0.02615351           | 0.03682697           | 0.026881271          | 0.002908724 |
| 0.015592042          | 0.037755595          | 0.010775667          | 0.014944162 |
| 0.04657061           | 0.036237473          | 7.46E-05 0.030807753 |             |
| 0.056536803          | 0.000731442          | 0.015642014          | 0.000743367 |
| 0.012015245          | 0.05761848           | 0.005264181          | 0.004624481 |
| 0.058986636          | 0.033027551          | 0.004794284          | 0.017629115 |
| 0.055008751          | 0.000124894          | 0.016517923          | 0.000409466 |
| 0.017241284          | 0.041635894          | 0.015248908          | 0.013967781 |
| 0.01687215           | 0.010887291          | 0.014518844          | 0.056484066 |
| 0.037738683          | 0.061473523          | 0.019055394          | 0.05771285  |
| 0.058143745          | 0.050134808          | 0.026330953          | 0.020894162 |
| 0.003828044          | 0.061322618          | 0.062848302          | 0.003610897 |
| 0.006232762          | 0.048753422          | 0.024633917          | 0.033045222 |
| 0.000421337          | 0.057998543          | 0.048142398          | 0.068518325 |
| 0.002072697          | 0.026568358          | 0.043650125          | 0.019239579 |
| 0.040232255          | 0.048930595          | 0.017883853          | 0.019760813 |
| 0.017832945          | 0.034404716          | 0.013768021          | 0.00444563  |
| 0.021237666          | 0.005402605          | 0.000568924          | 0.002468183 |
| 0.00438132           | 0.004674997          | 0.006272056          | 0.045905325 |
| 0.029510791          | 0.058639975          | 0.003273513          | 0.039189814 |
| 0.010195997          | 0.014256232          | 0.048436069          | 0.012314961 |
| 0.031566576          | 0.023022082          | 0.012845443          | 0.000581771 |
| 0.001835694          | 0.053000613          | 0.002133391          | 0.008948214 |
| 0.010111952          | 7.00E-05 0.000967741 | 0.061939044          |             |
| 0.008161473          | 0.015863254          | 0.043958465          | 0.019797988 |
| 0.0173806            | 0.026420252          | 0.024064379          | 0.003717467 |
| 6.14E-05 0.056150378 | 0.048540108          | 0.041940921          |             |
| 0.048113183          | 0.04432569           | 0.041353747          | 0.0329142   |
| 0.043877308          | 0.047833432          | 0.002009043          | 0.003297607 |
| 0.007791831          | 0.01409466           | 2.66E-06 0.033905492 |             |
| 0.009811845          | 0.008477242          | 0.038930889          | 0.013519268 |
| 0.000666124          | 0.018011914          | 0.00207856           | 0.01944966  |
| 0.004459948          | 0.003826198          | 0.020105275          | 0.000325214 |
| 0.006552565          | 0.008389347          | 0.060072122          | 0.03060365  |
| 0.030325777          | 0.066261794          | 0.023476143          | 0.012867435 |
| 0.023482807          | 0.031042673          | 0.001186438          | 0.000358457 |
| 0.011507554          | 1 0.001002351        | 0.03870002           |             |
| 0.012028432          | 0.003248974          | 0.020669023          | 0.000343606 |
| 0.044839004          | 0.057449424          | 0.070647353          | 0.061212721 |
| 0.062564036          | 0.016724115          | 0.069151251          | 0.004450448 |
| 0.063559546          | 0.054049964          | 0.039224103          | 0.001611354 |
| 0.000132619          | 0.065475669          | 0.041907805          | 0.006459624 |
| 0.008422736          | 0.023631706          | 0.002309937          | 0.006501746 |
| 0.000611021          | 0.006122739          | 0.049860981          | 0.008969635 |
| 0.002251376          | 0.05323202           | 0.011227958          | 0.007934704 |
| 0.021262075          | 0.003910886          | 0.031566019          | 0.001561334 |
| 0.00351342           | 0.000220408          | 0.025463182          | 0.010404215 |
| 0.054077124          | 0.065568917          | 0.052534362          | 0.03614051  |
| 0.038919993          | 0.004140687          | 0.038127668          | 0.012017133 |
| 0.010790017          | 0.008623623          | 0.071488215          | 0.035602935 |
| 0.025957982          | 0.033535075          | 0.051002467          | 0.054121462 |
| 0.000257923          | 0.041680903          | 0.000745065          | 0.000107084 |
| 0.067012989          | 0.01072543           | 0.000110204          | 0.02373411  |

|             |             |             |             |
|-------------|-------------|-------------|-------------|
| 0.020391145 | 0.003882498 | 0.00335439  | 0.000418998 |
| 0.013919976 | 0.011714589 | 0.019785513 | 0.018840361 |
| 0.013891053 | 0.010812127 | 0.008690814 | 0.000763715 |
| 0.005160557 | 0.001623196 | 0.001114844 | 0.029981737 |
| 0.019564015 | 2.79E-05    | 0.05564244  | 0.036193103 |
| 0.002072986 | 0.009197922 | 0.054041532 | 0.062067804 |
| 0.000148089 | 0.000615284 | 0.019791525 | 0.007702454 |
| 0.05243217  | 0.067411911 | 0.060526617 | 0.053265548 |
| 0.034401549 | 0.00113688  | 0.001802006 | 0.018305874 |
| 0.014650442 | 0.001180494 | 0.05738002  | 0.00384247  |
| 0.059617041 | 0.021248198 | 0.004363957 | 0.012179417 |
| 0.000439759 | 0.002272981 | 0.031353809 | 0.006890113 |
| 0.006273857 | 0.020141798 | 0.011932956 | 0.006878879 |
| 0.000720374 | 0.008902509 | 0.025654011 | 0.008118825 |
| 0.006567175 | 0.009043826 | 0.032381766 | 0.005239992 |
| 0.048673341 | 0.040224516 | 0.007512048 | 0.003734597 |
| 0.024099463 | 0.023742372 | 0.059300899 | 0.046081843 |
| 0.000494813 | 0.067269583 | 0.045943755 | 0.050501092 |
| 0.06548918  | 0.026651627 | 0.003863963 | 0.030479579 |
| 0.01242972  | 0.019484828 | 0.005633422 | 0.036225919 |
| 0.005790257 | 0.002150066 | 0.016644905 | 0.040627949 |
| 0.053815579 | 0.006590465 | 0.035335592 | 0.008015089 |
| 0.003455845 | 0.04495501  | 0.007628063 | 0.0013412   |
| 0.047077357 | 0.04101247  | 0.000138957 | 0.004957667 |
| 0.048135743 | 0.00603938  | 0.048976442 | 0.061139514 |
| 0.046305685 | 0.004830864 | 0.000107754 | 0.042802219 |
| 0.032862684 | 0.036781774 | 0.052774251 | 0.026171885 |
| 0.000676824 | 0.001374654 | 0.019951899 | 0.007892466 |
| 0.001692531 | 0.007292203 | 0.001932544 | 0.029451856 |
| 0.008478381 | 0.0070309   | 0.005181128 | 0.004582415 |
| 0.005415741 | 0.012922541 | 0.000905758 | 0.013611207 |
| 0.027762592 | 0.019761811 | 0.006935297 | 0.032644535 |
| 0.046430672 | 0.000825476 | 0.021210492 | 0.037172067 |
| 0.038303801 | 3.83E-07    | 0.048452375 | 0.000355503 |
| 0.004736228 | 0.009959981 | 0.005611235 | 0.003830509 |
| 0.010165454 | 0.015400123 | 0.020799293 | 0.006890389 |
| 0.016317683 | 0.013490325 | 0.005147423 | 0.007171048 |
| 0.027810212 | 0.025903183 | 0.012696566 | 0.006160347 |
| 0.008499087 | 0.010368699 | 0.000789702 | 0.053301134 |
| 0.017419179 | 0.007938999 | 0.007714621 | 0.014150309 |
| 0.026600559 | 0.071259769 | 0.034544877 | 0.013588883 |
| 0.010165503 | 0.075447555 | 0.001706313 | 0.001079263 |
| 0.001218249 | 0.043486113 | 0.007987491 | 0.004366585 |
| 0.032927831 | 0.037736261 | 0.038528381 | 0.038697023 |
| 0.016810956 | 0.042670744 | 0.022642035 | 0.014485213 |
| 0.069251427 | 0.001934922 | 0.010944522 | 0.006808763 |
| 0.013879555 | 0.000184211 | 0.019406759 | 0.011508032 |
| 0.065491837 | 0.069158207 | 0.011629776 | 0.032450485 |
| 0.038762628 | 0.002954046 | 0.079496432 | 0.022694747 |
| 0.006598399 | 0.058450122 | 0.014261766 | 0.005511857 |
| 0.018066666 | 0.025525899 | 0.050397205 | 0.043638315 |
| 0.005340756 | 0.005071725 | 0.007953121 | 0.01613596  |
| 0.046658258 | 0.006329413 | 0.054995701 | 0.007140103 |
| 0.038476761 | 0.015187243 | 0.005978536 | 0.064991717 |

|             |             |             |             |
|-------------|-------------|-------------|-------------|
| 0.002463418 | 0.063130115 | 0.014457514 | 0.008582426 |
| 0.046076788 | 0.012079051 | 0.008325194 | 0.001009159 |
| 0.012108433 | 0.022713891 | 0.003861327 | 0.021067847 |
| 4.01E-05    | 2.46E-05    | 0.022427286 | 0.008077013 |
| 0.021345346 | 0.00829108  | 0.020696312 | 0.050806783 |
| 0.009957969 | 0.06774131  | 0.057073861 | 0.002352969 |
| 0.01377263  | 0.02146582  | 0.002676649 | 0.006027378 |
| 0.003759393 | 0.044568368 | 0.050827835 | 0.050265812 |
| 0.000161578 | 0.000111326 | 0.018135849 | 0.014255686 |
| 0.00270758  | 0.052991105 | 0.007976132 | 0.04448251  |
| 0.052962452 | 0.007270661 | 0.057848072 | 0.025812948 |
| 0.040400124 | 0.000187759 | 0.011164779 | 0.001325145 |
| 0.020227712 | 0.008905498 | 0.019077427 | 0.025454727 |
| 0.013514854 | 0.000559196 | 0.004427234 | 0.037431331 |
| 0.040478223 | 0.06180634  | 0.022248072 | 9.43E-05    |
| 0.01426835  | 0.015830072 | 0.030242732 | 0.010955977 |
| 0.046173588 | 0.000196243 | 0.030630873 | 0.001437501 |
| 0.056196996 | 0.031228441 | 0.019449178 | 0.006659165 |
| 0.012737301 | 0.051792496 | 0.003142346 | 0.001408463 |
| 0.02855454  | 0.067865495 | 0.037163247 | 0.0118454   |
| 0.002464974 | 0.032474241 | 0.003064599 | 0.017575206 |
| 0.055200204 | 0.004512447 | 0.011744294 | 0.041843203 |
| 0.007348486 | 0.014403512 | 0.035820326 | 0.049048853 |
| 0.050301288 | 0.000195767 | 0.01307936  | 0.049762439 |
| 0.048429431 | 0.017107242 | 0.003818325 | 0.038460207 |
| 0.006686769 | 0.072057608 | 0.002641347 | 0.009463728 |
| 0.029267649 | 0.010425697 | 0.014753848 | 0.004268823 |
| 0.004058452 | 8.29E-05    | 0.001458085 | 0.035630774 |
| 0.006290311 | 0.013974842 | 0.030873627 | 0.016474664 |
| 0.035457157 | 0.003434776 | 0.001015482 | 0.006717934 |
| 4.02E-05    | 0.037814552 | 0.039972908 | 0.04175576  |
| 0.019377814 | 0.019156609 | 0.021100348 | 0.008576571 |
| 3.23E-05    | 0.0354923   | 0.001103407 | 0.031606568 |
| 0.007160091 | 0.001683739 | 0.000947794 | 0.007518399 |
| 0.055193748 | 0.017317555 | 0.005499541 | 0.056079375 |
| 0.046630081 | 0.001495622 | 0.022784061 | 0.011662412 |
| 0.057392875 | 0.00977887  | 0.057267076 | 0.011048235 |
| 0.044522228 | 0.035381807 | 0.007437264 | 0.030864555 |
| ITGAM       | 0.031991452 | 0.250533776 | 0.029037727 |
| 0.009134376 | 0.1196317   | 0.154236618 | 0.01030479  |
| 0.029210364 | 0.181573635 | 0.062296888 | 0.160778357 |
| 0.002431322 | 0.021453769 | 0.256174025 | 0.012070988 |
| 0.126475139 | 0.006009201 | 0.030637328 | 0.001826677 |
| 0.005990229 | 0.0823451   | 0.079865856 | 0.001826677 |
| 0.086820323 | 0.111209828 | 0.123751451 | 0.17680444  |
| 0.29095719  | 0.054221054 | 0.238232473 | 0.151420381 |
| 0.202758869 | 0.12672477  | 0.145976434 | 0.005828104 |
| 0.169481861 | 0.000317408 | 0.213441979 | 0.003282942 |
| 0.006463861 | 0.190260584 | 0.113349029 | 0.041417631 |
| 0.084253726 | 0.009086376 | 0.046009379 | 0.059506143 |
| 0.121376424 | 0.066985969 | 0.034711764 | 0.152075908 |
| 0.061350256 | 0.215970014 | 0.198393276 | 0.201273315 |
| 0.117086511 | 0.021097904 | 0.06013695  | 0.00051613  |
| 0.102247806 | 0.044915518 | 0.025610698 | 0.315444982 |
|             |             |             | 0.108681838 |



|             |             |             |             |
|-------------|-------------|-------------|-------------|
| 0.146131489 | 0.148050622 | 0.133718841 | 0.05817319  |
| 0.284848373 | 0.032731302 | 0.222288445 | 0.003394679 |
| 0.08314505  | 0.01021163  | 0.075559262 | 0.043715027 |
| 0.089274223 | 0.0862471   | 0.178840362 | 0.076962244 |
| 0.230619568 | 0.296009111 | 0.095861569 | 0.278182901 |
| 0.003874273 | 0.119531927 | 0.062447956 | 0.124539345 |
| 0.14335146  | 0.013905398 | 0.188050796 | 0.276764361 |
| 0.01918486  | 0.151275123 | 0.141338469 | 0.062993003 |
| 0.288082628 | 0.067856209 | 0.139992484 | 0.059370566 |
| 0.164075171 | 0.091328065 | 0.271716885 | 0.118757425 |
| 0.146486786 | 0.029434626 | 0.292545934 | 0.13074216  |
| 0.096314901 | 0.032736136 | 0.023289543 | 0.252582409 |
| 0.14267843  | 0.302710259 | 0.216757233 | 0.139845091 |
| 0.109305852 | 0.288828265 | 0.164337624 | 0.257653266 |
| 0.028931922 | 0.308594756 | 0.073648249 | 0.011947325 |
| 0.030729621 | 0.033579651 | 0.035355487 | 0.174759299 |
| 0.290044517 | 0.192183057 | 0.055706342 | 0.057168321 |
| 0.228290546 | 0.293371594 | 0.291494468 | 0.197340207 |
| 0.010759326 | 0.047423856 | 0.102906118 | 0.118774256 |
| 0.145675251 | 0.055388552 | 0.080249208 | 0.282267347 |
| 0.211465525 | 0.210523409 | 0.059469376 | 0.289421879 |
| 0.053561755 | 0.288476101 | 0.267669173 | 0.049446348 |
| 0.289154216 | 0.293695853 | 0.284824228 | 0.204116858 |
| 0.312422872 | 0.117098334 | 0.001034924 | 0.179151485 |
| 0.296781116 | 0.000289334 | 0.280349625 | 0.27380642  |
| 0.273105862 | 0.24084188  | 0.278960039 | 0.308874721 |
| 0.303369266 | 0.034070401 | 0.000149917 | 0.09675809  |
| 0.272191286 | 0.205448235 | 0.039156395 | 0.123607475 |
| 0.138164554 | 0.13235417  | 0.260383578 | 0.012222171 |
| 0.289318944 | 0.271059351 | 0.298179183 | 0.177618486 |
| 0.082993014 | 0.193877864 | 0.137226757 | 0.28748424  |
| 0.009335853 | 0.042472767 | 0.033708799 | 0.150558271 |
| 0.077862331 | 0.065305708 | 0.09855399  | 0.122815658 |
| 0.079530368 | 0.120912892 | 0.136399613 | 0.181589727 |
| 0.035880486 | 0.180069425 | 0.05963617  | 0.044551762 |
| 0.006448275 | 0.09195413  | 0.013258118 | 0.038278641 |
| 0.085313464 | 0.138270602 | 0.241181309 | 0.27445737  |
| 0.086462124 | 0.081964985 | 0.194356611 | 0.289199902 |
| 0.222138059 | 0.13788516  | 0.119199258 | 0.000189826 |
| 0.012605991 | 0.05864529  | 0.042062125 | 0.1882731   |
| 0.120678262 | 0.019408234 | 0.118789973 | 0.208778291 |
| 0.099319677 | 0.055494038 | 0.060985723 | 0.270624252 |
| 0.071732071 | 0.095353241 | 0.223233449 | 0.139068411 |
| 0.000306637 | 0.078372581 | 0.239412362 | 0.008000887 |
| 0.108736352 | 0.00445654  | 0.071572922 | 0.216475266 |
| 0.047442477 | 0.050065367 | 0.314072492 | 0.210848306 |
| 0.031652347 | 0.145292206 | 0.294929108 | 0.000778487 |
| 0.118505446 | 0.001471687 | 0.109195991 | 0.120378444 |
| 0.075265367 | 0.125623593 | 0.135196118 | 0.074463354 |
| 0.077001704 | 0.293636212 | 0.266874462 | 0.295455444 |
| 0.054750258 | 0.285671945 | 0.25360806  | 0.252004032 |
| 0.162015186 | 0.100676197 | 0.0233412   | 0.204456612 |
| 0.223784981 | 0.009107988 | 0.04234888  | 0.233217506 |
| 0.068672639 | 0.171118847 | 0.007178128 | 0.249019488 |

|             |             |             |             |
|-------------|-------------|-------------|-------------|
| 0.297980089 | 0.271334225 | 0.041350762 | 0.168402858 |
| 0.193561151 | 0.095134255 | 0.257474571 | 0.301992148 |
| 0.032057284 | 0.083115712 | 0.051832321 | 0.20237367  |
| 0.064621593 | 0.029994033 | 0.204748894 | 0.052433673 |
| 0.001411207 | 0.040354055 | 0.027501363 | 0.050995975 |
| 0.043403039 | 0.208167431 | 0.150200721 | 0.286577558 |
| 0.039500817 | 0.293175237 | 0.111749231 | 0.035395258 |
| 0.200082527 | 0.105927522 | 0.189099955 | 0.188425362 |
| 0.129302443 | 0.000395147 | 0.008620864 | 0.281834622 |
| 0.02371031  | 0.065047941 | 0.121078848 | 5.48E-05    |
| 0.007964909 | 0.241325193 | 0.053933033 | 0.113338581 |
| 0.287724795 | 0.114366008 | 0.066400394 | 0.043628203 |
| 0.198222942 | 0.040497805 | 0.000290022 | 0.255113342 |
| 0.280398688 | 0.2557843   | 0.276936048 | 0.278464186 |
| 0.218989363 | 0.238893693 | 0.184593423 | 0.179654077 |
| 0.018699403 | 0.027700678 | 0.018507685 | 0.058726305 |
| 8.92E-05    | 0.234002868 | 0.128598138 | 0.063799189 |
| 0.232533187 | 0.113011386 | 0.012267311 | 0.169803348 |
| 0.001291812 | 0.04758874  | 0.041861894 | 0.066008983 |
| 0.173430525 | 0.004165564 | 0.003177743 | 0.025002185 |
| 0.273458837 | 0.189873409 | 0.109002094 | 0.30775321  |
| 0.128613216 | 0.056945261 | 0.071236374 | 0.246934533 |
| 0.013822208 | 0.001414218 | 0.079485754 | 0.001002351 |
| 1           | 0.289004208 | 0.102671292 | 0.0051992   |
| 0.080060525 | 0.000861316 | 0.199098568 | 0.310540524 |
| 0.291581415 | 0.275302825 | 0.301802775 | 0.094964901 |
| 0.282306161 | 0.020962013 | 0.307770813 | 0.199730061 |
| 0.071597177 | 2.79E-05    | 0.000242906 | 0.267066016 |
| 0.113637068 | 0.046255627 | 0.057609899 | 0.060185787 |
| 0.012648474 | 0.039611947 | 0.033466448 | 0.033441622 |
| 0.243107561 | 0.098793458 | 0.044442759 | 0.264707629 |
| 0.048983959 | 0.094133972 | 0.105460556 | 0.046672815 |
| 0.224066648 | 0.00894928  | 0.043116779 | 0.000186878 |
| 0.185887128 | 0.06979789  | 0.282528126 | 0.301750581 |
| 0.283533447 | 0.182560904 | 0.07562463  | 0.046970503 |
| 0.262623936 | 0.062316621 | 0.059693723 | 0.059913617 |
| 0.277754222 | 0.122700539 | 0.157693329 | 0.148011796 |
| 0.256220074 | 0.251621053 | 0.009531485 | 0.166447312 |
| 0.001001864 | 0.000119043 | 0.112630985 | 0.136450726 |
| 0.00218471  | 0.07948482  | 0.106129496 | 0.045405948 |
| 0.060208173 | 0.003081604 | 0.053995343 | 0.051117703 |
| 0.090733361 | 0.087433509 | 0.088093154 | 0.128195813 |
| 0.057237983 | 0.003661183 | 0.071230474 | 0.044997569 |
| 0.015252107 | 0.141101137 | 0.105472652 | 0.003949669 |
| 0.133227852 | 0.139680394 | 0.021960039 | 0.088840825 |
| 0.231962327 | 0.266966265 | 0.001454377 | 0.000508791 |
| 0.139191212 | 0.079372597 | 0.290949784 | 0.299469179 |
| 0.303101914 | 0.272361518 | 0.239992883 | 0.015803839 |
| 0.023608097 | 0.096919064 | 0.104676584 | 0.013029004 |
| 0.308965502 | 0.028041871 | 0.322034103 | 0.114358845 |
| 0.049584774 | 0.034442354 | 0.005915804 | 0.032071669 |
| 0.192846679 | 0.089179709 | 0.055024902 | 0.057441854 |
| 0.055917764 | 0.053381066 | 0.014084275 | 0.061139058 |
| 0.136975505 | 0.010250997 | 0.057079619 | 0.112327438 |

|             |             |             |             |
|-------------|-------------|-------------|-------------|
| 0.198135827 | 0.022169108 | 0.182841831 | 0.231090631 |
| 0.063569698 | 0.031374226 | 0.037763904 | 0.224034024 |
| 0.218577641 | 0.155902751 | 0.002149842 | 0.266431324 |
| 0.301440979 | 0.201761494 | 0.310336876 | 0.196608748 |
| 0.039581879 | 0.130403965 | 0.079080579 | 0.089534562 |
| 0.071460658 | 0.175470547 | 0.087318922 | 0.027165364 |
| 0.183585196 | 0.282045718 | 0.194263977 | 0.053579215 |
| 0.210338162 | 0.063657225 | 0.022402001 | 0.302686485 |
| 0.017767309 | 0.008335628 | 0.124133613 | 0.247167987 |
| 3.63E-05    | 0.047130066 | 0.270833146 | 0.093433198 |
| 0.29430832  | 0.245767358 | 0.234252786 | 0.091968128 |
| 1.07E-05    | 0.164773222 | 0.139416176 | 0.084484471 |
| 0.230249359 | 0.209606662 | 0.039623477 | 0.011108202 |
| 0.149318909 | 0.052830318 | 0.010576114 | 0.025639744 |
| 0.00172295  | 0.162448619 | 0.092514748 | 0.065109124 |
| 0.052039898 | 0.046625378 | 0.047752422 | 0.089749481 |
| 0.008654179 | 0.116052338 | 0.155435435 | 0.089589058 |
| 0.011000699 | 0.218559995 | 0.155500516 | 0.009009051 |
| 0.174164982 | 0.195312221 | 0.292235508 | 0.000438248 |
| 0.196576633 | 0.001445135 | 0.062607125 | 0.063173344 |
| 0.055973255 | 0.049449997 | 0.097430525 | 0.062556301 |
| 0.116608411 | 0.048129247 | 0.078014609 | 0.099580428 |
| 0.040308511 | 0.094764945 | 0.16182109  | 0.077641422 |
| 0.072767595 | 0.035945225 | 0.073310968 | 0.075644617 |
| 0.009715051 | 0.317126274 | 0.145754477 | 0.050192187 |
| 0.102587972 | 0.088370176 | 0.187297447 | 0.286176352 |
| 0.272521225 | 0.080117494 | 0.088757687 | 0.254400813 |
| 0.008714709 | 0.007909547 | 0.019313527 | 0.140056014 |
| 0.110010541 | 0.030519375 | 0.183770828 | 0.09438575  |
| 0.174243396 | 0.222698701 | 0.154414925 | 0.259761776 |
| 0.109346249 | 0.084145622 | 0.071428723 | 0.011712074 |
| 0.036697758 | 0.060674128 | 0.082623805 | 5.36E-05    |
| 0.152066798 | 0.035160935 | 0.251505044 | 0.275067992 |
| 0.089480209 | 0.250054006 | 0.030981698 | 0.01138553  |
| 0.038713942 | 0.09464667  | 0.068195627 | 0.244522349 |
| 0.066296595 | 0.064857402 | 0.096384111 | 0.10383388  |
| 0.202972485 | 0.1853325   | 0.052633527 | 0.082314741 |
| 0.089196427 | 0.088888606 | 0.268850472 | 0.047890573 |
| 0.148690676 | 0.03567725  | 0.160169879 | 0.059352352 |
| 0.052021266 | 0.299413121 | 0.035045583 | 0.29673212  |
| 0.059852328 | 0.08179557  | 0.290249496 | 0.184424205 |
| 0.084453004 | 0.027683591 | 0.051339    | 0.105979155 |
| 0.034813486 | 0.119645103 | 0.000569248 | 0.000863283 |
| 0.144850393 | 0.068632046 | 0.179824429 | 0.172028029 |
| 0.056909378 | 0.156713122 | 0.042391208 | 0.078691485 |
| 0.286102577 | 0.300088915 | 0.017139044 | 0.109544695 |
| 0.157809796 | 0.035871251 | 0.225596661 | 0.000805459 |
| 0.140800137 | 0.166164384 | 0.059970745 | 0.019806474 |
| 0.00199091  | 0.041081332 | 0.121590948 | 0.031890805 |
| 0.257535652 | 0.032761579 | 0.141378263 | 0.26059285  |
| 0.097203011 | 0.289962209 | 0.030195129 | 0.205408248 |
| 0.002609795 | 0.113638482 | 0.139870683 | 0.114450784 |
| 0.031380824 | 0.06867135  | 0.160248586 | 0.072440144 |
| 0.007345136 | 0.028264254 | 0.001174864 | 0.226673719 |

|             |             |             |             |
|-------------|-------------|-------------|-------------|
| 0.255536791 | 0.077072725 | 0.113852684 | 0.075811749 |
| 0.128677972 | 0.235854376 | 0.019139436 | 0.184027611 |
| 0.000616093 | 0.127759763 | 0.111328369 | 0.269650144 |
| 0.015513118 | 0.093681852 | 0.009039797 | 0.087058551 |
| 0.28152407  | 0.016486926 | 0.143851099 | 0.018725018 |
| 0.297996099 | 0.244026998 | 0.090932606 | 0.046826357 |
| 0.162014739 | 0.035169911 | 0.142816465 | 0.296463804 |
| 0.055969516 | 0.057749653 | 0.2232737   | 0.027904681 |
| 0.101006288 | 0.276971043 | 0.162329139 | 0.301891095 |
| 0.011138163 | 0.115988267 | 0.236222691 | 0.242023142 |
| 0.167541458 | 0.034657365 | 0.059658786 | 0.042066799 |
| 0.273302866 | 0.01231286  | 0.034961905 | 0.153129094 |
| 0.037689123 | 0.158627696 | 0.148194899 | 0.052172026 |
| 0.002053935 | 0.050025946 | 0.145930805 | 0.063361138 |
| 0.096504868 | 0.096451983 | 0.03246783  | 0.227531446 |
| 0.026050657 | 0.001023433 | 0.264079732 | 0.00022466  |
| 0.191433907 | 0.185358982 | 0.131050059 | 0.122689307 |
| 0.107414519 | 0.121196909 | 0.08045679  | 2.04E-05    |
| 0.193651491 | 0.001737521 | 0.101439329 | 0.030673916 |
| 0.013830182 | 0.010714664 | 0.296647027 | 0.290946041 |
| 0.182255773 | 0.084266366 | 0.045344989 | 0.28014998  |
| 0.006161707 | 0.095014792 | 0.073549185 | 0.18101989  |
| 0.070125087 | 0.095814937 | 0.131563853 | 0.107091515 |
| 0.194700469 | 0.127036262 |             |             |

|             |             |             |             |
|-------------|-------------|-------------|-------------|
| ITGAX       | 0.180334512 | 0.465730115 | 0.152426621 |
| 0.180820688 | 0.314464792 | 0.435722608 | 0.164334873 |
| 0.255061069 | 0.454243506 | 0.36864956  | 0.379105178 |
| 0.060609708 | 0.095143909 | 0.45537181  | 0.160800173 |
| 0.380997896 | 0.096719612 | 0.220222569 | 0.148295344 |
| 0.346780634 | 0.291486457 | 0.332697328 | 0.456337368 |
| 0.319831696 | 0.301721745 | 0.443386815 | 0.398767302 |
| 0.466088445 | 0.250723814 | 0.431266549 | 0.214593002 |
| 0.421904698 | 0.320179165 | 0.36888097  | 0.065050783 |
| 0.449543625 | 0.028815722 | 0.445769673 | 0.291626991 |
| 0.140557407 | 0.409044475 | 0.400650608 | 0.288482992 |
| 0.408056016 | 0.106661198 | 0.248162638 | 0.416646009 |
| 0.437955836 | 0.399346724 | 0.184134912 | 0.454521036 |
| 0.419663208 | 0.429776734 | 0.442626464 | 0.006768568 |
| 0.277428665 | 0.078412576 | 0.208356576 | 0.482406485 |
| 0.304145643 | 0.224912906 | 0.295482065 | 0.423697814 |
| 0.437233578 | 0.424382843 | 0.376918217 | 0.398775388 |
| 0.458479876 | 0.175648324 | 0.441870317 | 0.214537311 |
| 0.44032131  | 0.133405299 | 0.277479768 | 0.235009413 |
| 0.412747914 | 0.291889827 | 0.373299631 | 0.304896449 |
| 0.449141382 | 0.509845683 | 0.362406999 | 0.491678441 |
| 0.138171898 | 0.335395367 | 0.304531071 | 0.368769225 |
| 0.435745523 | 0.22704782  | 0.415483265 | 0.483659479 |
| 0.175325401 | 0.434367098 | 0.438118348 | 0.2698288   |
| 0.469647634 | 0.324951485 | 0.417300986 | 0.168387528 |
| 0.372809044 | 0.335514404 | 0.489799851 | 0.361715234 |
| 0.367890984 | 0.191769655 | 0.49762598  | 0.306913815 |
| 0.306312976 | 0.191693264 | 0.244023039 | 0.449202652 |
| 0.42237934  | 0.464110419 | 0.461892621 | 0.422159816 |
| 0.357085442 | 0.459261128 | 0.419798584 | 0.470357288 |

|             |             |             |             |
|-------------|-------------|-------------|-------------|
| 0.19966521  | 0.492689225 | 0.292427566 | 0.111800583 |
| 0.195264002 | 0.193804467 | 0.314997142 | 0.398581194 |
| 0.460097669 | 0.435638619 | 0.301013748 | 0.286281869 |
| 0.43770229  | 0.481912259 | 0.492162871 | 0.445645728 |
| 0.117400566 | 0.274808463 | 0.355914784 | 0.427873718 |
| 0.424110032 | 0.259912047 | 0.245306053 | 0.50240829  |
| 0.416153679 | 0.435844938 | 0.312695352 | 0.51335341  |
| 0.356883943 | 0.469722375 | 0.46004895  | 0.250585091 |
| 0.495345729 | 0.488428514 | 0.451974387 | 0.38165461  |
| 0.464963795 | 0.390846845 | 0.13212055  | 0.444773768 |
| 0.448637937 | 0.014801896 | 0.463763261 | 0.460286736 |
| 0.4679303   | 0.44071566  | 0.465117661 | 0.466192597 |
| 0.477551812 | 0.195673102 | 0.042223497 | 0.330102768 |
| 0.48281344  | 0.421825095 | 0.257892527 | 0.391496006 |
| 0.373350744 | 0.453025992 | 0.4631911   | 0.277195989 |
| 0.48430717  | 0.458945513 | 0.469417505 | 0.449847244 |
| 0.424468315 | 0.39684218  | 0.35962466  | 0.477467055 |
| 0.122515785 | 0.225288019 | 0.152622353 | 0.415976199 |
| 0.392848384 | 0.265642639 | 0.437749445 | 0.402720946 |
| 0.289566866 | 0.467619985 | 0.322966035 | 0.372939572 |
| 0.165954201 | 0.433698085 | 0.293924278 | 0.296527127 |
| 0.100033029 | 0.271522492 | 0.233827435 | 0.232025218 |
| 0.307265002 | 0.318932282 | 0.449343046 | 0.461792374 |
| 0.402007696 | 0.299625022 | 0.453237789 | 0.450484775 |
| 0.416932688 | 0.356485278 | 0.36039541  | 0.019877661 |
| 0.259066798 | 0.336070313 | 0.179906974 | 0.411894609 |
| 0.297284841 | 0.296012253 | 0.397953932 | 0.386071206 |
| 0.372188117 | 0.3249109   | 0.366723504 | 0.437942272 |
| 0.291788836 | 0.314618653 | 0.434120988 | 0.442766023 |
| 0.01790444  | 0.369076676 | 0.448839488 | 0.194049178 |
| 0.419224638 | 0.132676023 | 0.228957175 | 0.444431769 |
| 0.294512933 | 0.259217777 | 0.46827637  | 0.399349204 |
| 0.385346023 | 0.336342591 | 0.475153973 | 0.056394789 |
| 0.388708867 | 0.06732149  | 0.332652955 | 0.412925423 |
| 0.341229665 | 0.372510213 | 0.321309422 | 0.291743067 |
| 0.251106736 | 0.485406887 | 0.45780628  | 0.463782743 |
| 0.348783849 | 0.47831824  | 0.445515144 | 0.444095384 |
| 0.434753091 | 0.38000615  | 0.126347603 | 0.433513113 |
| 0.445384026 | 0.318541001 | 0.197746342 | 0.451991222 |
| 0.393944649 | 0.39915631  | 0.171176744 | 0.445379655 |
| 0.483996178 | 0.465590501 | 0.233374251 | 0.392347427 |
| 0.409264058 | 0.325321758 | 0.45660587  | 0.488356965 |
| 0.358792851 | 0.350676426 | 0.314948002 | 0.404314964 |
| 0.282904121 | 0.240539686 | 0.420946961 | 0.183703482 |
| 0.009135001 | 0.21737555  | 0.167439397 | 0.228605652 |
| 0.164920529 | 0.440330816 | 0.418444741 | 0.467916692 |
| 0.220139935 | 0.456167619 | 0.384730473 | 0.279638506 |
| 0.436706953 | 0.382240419 | 0.371812057 | 0.405130001 |
| 0.373676207 | 0.037594573 | 0.163568383 | 0.507045573 |
| 0.144831112 | 0.224507173 | 0.450967194 | 0.004904009 |
| 0.131285885 | 0.459191568 | 0.218768037 | 0.298372232 |
| 0.451697938 | 0.302511984 | 0.314582857 | 0.370445601 |
| 0.394104561 | 0.209174926 | 0.006854642 | 0.462594424 |
| 0.473730853 | 0.465764098 | 0.47363349  | 0.475004424 |

|             |             |             |             |
|-------------|-------------|-------------|-------------|
| 0.457793013 | 0.468239826 | 0.423396882 | 0.437680984 |
| 0.212743234 | 0.225492453 | 0.190126306 | 0.317304876 |
| 0.015010029 | 0.417128205 | 0.378175484 | 0.254685022 |
| 0.435540884 | 0.404952605 | 0.110466575 | 0.388789722 |
| 0.051166272 | 0.167486479 | 0.418387382 | 0.335437489 |
| 0.391009148 | 0.060376372 | 0.223242441 | 0.297759766 |
| 0.440329009 | 0.421212826 | 0.343564231 | 0.492574155 |
| 0.359587716 | 0.264513152 | 0.318649549 | 0.421753714 |
| 0.169010778 | 0.138337823 | 0.457610617 | 0.03870002  |
| 0.289004208 | 1           | 0.411704182 | 0.151337729 |
| 0.335412493 | 0.022051451 | 0.420848788 | 0.492199055 |
| 0.457246468 | 0.456230828 | 0.460607024 | 0.24560185  |
| 0.460043239 | 0.105715921 | 0.478660185 | 0.452832697 |
| 0.380319826 | 0.001895896 | 0.018677797 | 0.453195886 |
| 0.370120644 | 0.172247481 | 0.268984853 | 0.374765394 |
| 0.177976243 | 0.293844406 | 0.182835388 | 0.187318925 |
| 0.449689478 | 0.278565015 | 0.20593388  | 0.461785875 |
| 0.309772811 | 0.336348228 | 0.459467548 | 0.221469196 |
| 0.420992509 | 0.123544304 | 0.22729329  | 0.011145645 |
| 0.403318033 | 0.240481628 | 0.492658541 | 0.472939318 |
| 0.455526052 | 0.391497029 | 0.347513984 | 0.396291907 |
| 0.466016633 | 0.226136135 | 0.374193658 | 0.250822476 |
| 0.457858083 | 0.376397628 | 0.375321541 | 0.377332145 |
| 0.447492081 | 0.446246661 | 0.107588822 | 0.417893558 |
| 0.032308838 | 0.005287948 | 0.411295161 | 0.391004822 |
| 0.140784392 | 0.359605169 | 0.344465113 | 0.381398047 |
| 0.360714872 | 0.083643326 | 0.249140491 | 0.227669955 |
| 0.346766309 | 0.378161301 | 0.268767051 | 0.394973158 |
| 0.305231596 | 0.154436027 | 0.295151951 | 0.286431009 |
| 0.363851829 | 0.398715077 | 0.29767556  | 0.083918704 |
| 0.42260483  | 0.386025234 | 0.147166816 | 0.290802405 |
| 0.437882906 | 0.454131862 | 0.111012107 | 0.022742621 |
| 0.368027974 | 0.376086495 | 0.455820063 | 0.466693131 |
| 0.505446912 | 0.472533046 | 0.421647168 | 0.192693855 |
| 0.166695082 | 0.365115674 | 0.295946497 | 0.152410298 |
| 0.467571132 | 0.185166876 | 0.468475684 | 0.283822826 |
| 0.247868329 | 0.289512218 | 0.082545636 | 0.201926627 |
| 0.370418198 | 0.299800961 | 0.243829368 | 0.2620027   |
| 0.331835821 | 0.240926593 | 0.146355689 | 0.296253955 |
| 0.40987059  | 0.150861759 | 0.275210345 | 0.453337269 |
| 0.450638403 | 0.334316187 | 0.417447979 | 0.432251585 |
| 0.25682623  | 0.250703857 | 0.338754279 | 0.454337158 |
| 0.453923171 | 0.426035694 | 0.053797259 | 0.460869682 |
| 0.465808309 | 0.427141879 | 0.476740898 | 0.417320945 |
| 0.211198273 | 0.350528955 | 0.335318613 | 0.355159028 |
| 0.315783559 | 0.443360212 | 0.359075938 | 0.169844214 |
| 0.405852547 | 0.494474075 | 0.443915116 | 0.240121541 |
| 0.453742852 | 0.282450518 | 0.170922673 | 0.476906791 |
| 0.16668007  | 0.171424982 | 0.421483911 | 0.45809998  |
| 0.003430492 | 0.133612594 | 0.45968443  | 0.329459147 |
| 0.497256388 | 0.446812788 | 0.434561174 | 0.418520135 |
| 0.002302951 | 0.400746391 | 0.378129065 | 0.370963798 |
| 0.456124166 | 0.440989844 | 0.323031495 | 0.140983141 |
| 0.366363566 | 0.198627243 | 0.200750336 | 0.399673678 |

|             |             |             |             |
|-------------|-------------|-------------|-------------|
| 0.165742471 | 0.45895702  | 0.31028281  | 0.355020705 |
| 0.27272036  | 0.241469427 | 0.240729394 | 0.333179084 |
| 0.194618376 | 0.331612894 | 0.393223422 | 0.390128975 |
| 0.157364964 | 0.451649677 | 0.433108333 | 0.089252501 |
| 0.366957553 | 0.448335175 | 0.46380236  | 0.004338256 |
| 0.411441457 | 0.028593041 | 0.261882337 | 0.255644108 |
| 0.270376189 | 0.294194535 | 0.314527085 | 0.305386404 |
| 0.428213097 | 0.318353554 | 0.313970744 | 0.312917354 |
| 0.22172714  | 0.357531633 | 0.408032972 | 0.427885148 |
| 0.277825745 | 0.226166188 | 0.22407053  | 0.217122426 |
| 0.111211578 | 0.476314575 | 0.347172795 | 0.189518377 |
| 0.331546688 | 0.435735704 | 0.39738467  | 0.469217782 |
| 0.441815158 | 0.241915931 | 0.41023197  | 0.455409401 |
| 0.264972846 | 0.357599496 | 0.178145621 | 0.443278816 |
| 0.341245385 | 0.213967648 | 0.464031925 | 0.392682928 |
| 0.456448152 | 0.417867993 | 0.348607859 | 0.454108783 |
| 0.383063924 | 0.412321279 | 0.352396611 | 0.134355871 |
| 0.261874966 | 0.274137606 | 0.26760597  | 0.007667152 |
| 0.414741486 | 0.343650038 | 0.449578043 | 0.468261789 |
| 0.283955883 | 0.43257536  | 0.356491209 | 0.16837851  |
| 0.314057853 | 0.285454258 | 0.262671894 | 0.4585602   |
| 0.192000391 | 0.299605    | 0.315274521 | 0.420354313 |
| 0.432924259 | 0.446640319 | 0.311560733 | 0.388056526 |
| 0.3658091   | 0.334267796 | 0.485003312 | 0.262593512 |
| 0.422146075 | 0.184692897 | 0.451184444 | 0.307668353 |
| 0.279442877 | 0.466489544 | 0.16847911  | 0.465377345 |
| 0.332767435 | 0.272775306 | 0.478443762 | 0.446130397 |
| 0.413092452 | 0.193195097 | 0.168348023 | 0.455521505 |
| 0.336640193 | 0.327273659 | 0.021204827 | 0.068990486 |
| 0.368120557 | 0.412617121 | 0.450208376 | 0.440293081 |
| 0.266004307 | 0.392022287 | 0.179979068 | 0.407432072 |
| 0.474582514 | 0.505184898 | 0.266541972 | 0.34965635  |
| 0.421808985 | 0.194476982 | 0.456220585 | 0.040396592 |
| 0.404930368 | 0.401653236 | 0.397552691 | 0.150202347 |
| 0.069838004 | 0.181188624 | 0.41512177  | 0.204327134 |
| 0.44751749  | 0.183925973 | 0.453190279 | 0.44838069  |
| 0.334194501 | 0.501502084 | 0.199654749 | 0.405569511 |
| 0.160308415 | 0.377683164 | 0.390668761 | 0.430713132 |
| 0.219437844 | 0.27263582  | 0.38768354  | 0.21479352  |
| 0.089857648 | 0.287073801 | 0.004936592 | 0.418965579 |
| 0.478811172 | 0.322970246 | 0.334380171 | 0.371554517 |
| 0.345823363 | 0.456483292 | 0.295090548 | 0.426293649 |
| 0.029909728 | 0.339993927 | 0.320937214 | 0.450137929 |
| 0.190509887 | 0.421495958 | 0.115351327 | 0.336885263 |
| 0.489758399 | 0.285709132 | 0.380614113 | 0.271388739 |
| 0.464119    | 0.469039121 | 0.300456876 | 0.291592937 |
| 0.451389577 | 0.180171711 | 0.43298144  | 0.491257343 |
| 0.248655189 | 0.198577388 | 0.422793186 | 0.251868774 |
| 0.307998245 | 0.459632692 | 0.432252502 | 0.496873779 |
| 0.125510278 | 0.334763021 | 0.444487254 | 0.458740998 |
| 0.368510403 | 0.189100844 | 0.226351322 | 0.253767321 |
| 0.447899203 | 0.159735184 | 0.277866206 | 0.418381973 |
| 0.190817133 | 0.393977972 | 0.442782657 | 0.233220731 |
| 0.083473581 | 0.313695049 | 0.407464414 | 0.2743907   |

|             |             |             |             |
|-------------|-------------|-------------|-------------|
| 0.353377922 | 0.365858263 | 0.261645269 | 0.415377954 |
| 0.175991611 | 0.043209586 | 0.439881501 | 0.013227    |
| 0.429298315 | 0.390201798 | 0.360144511 | 0.365825553 |
| 0.295448838 | 0.437747304 | 0.407135439 | 0.005354674 |
| 0.436048958 | 0.061871551 | 0.393160518 | 0.227076907 |
| 0.295303361 | 0.143717557 | 0.456939532 | 0.456709654 |
| 0.439286607 | 0.393030646 | 0.318927826 | 0.467145973 |
| 0.136308457 | 0.328884349 | 0.35399865  | 0.454264646 |
| 0.211884316 | 0.393117274 | 0.416573613 | 0.339781238 |
| 0.450743302 | 0.416417692 |             |             |
| ITPA        | 0.023887006 | 0.37625218  | 0.017824369 |
| 0.039025373 | 0.229381997 | 0.147586008 | 0.021222791 |
| 0.04967948  | 0.304104604 | 0.131454518 | 0.200429719 |
| 0.00448898  | 0.102588448 | 0.412395158 | 0.020953041 |
| 0.285021515 | 0.012031411 | 0.047696631 | 0.065937479 |
| 0.084291531 | 0.191943433 | 0.145794058 | 0.191211019 |
| 0.192514765 | 0.132029249 | 0.208725813 | 0.293472804 |
| 0.449832692 | 0.131470936 | 0.325069508 | 0.07340114  |
| 0.345784811 | 0.248798035 | 0.227915431 | 0.003672617 |
| 0.242163566 | 0.024704403 | 0.363683201 | 0.102342719 |
| 0.084776059 | 0.275259157 | 0.160562047 | 0.089903865 |
| 0.194407682 | 0.009266955 | 0.09867846  | 0.353998222 |
| 0.22266592  | 0.119296939 | 0.027498158 | 0.325612485 |
| 0.162239171 | 0.236446891 | 0.315077384 | 0.001852774 |
| 0.182012092 | 0.090927414 | 0.149126033 | 0.438428749 |
| 0.125717905 | 0.055636824 | 0.166674505 | 0.13023615  |
| 0.304650669 | 0.33177766  | 0.193158329 | 0.144164973 |
| 0.4354838   | 0.140298087 | 0.391822766 | 0.056048289 |
| 0.164145082 | 0.011332786 | 0.105228969 | 0.050768557 |
| 0.154033538 | 0.110096257 | 0.215692615 | 0.1714313   |
| 0.36801428  | 0.450174482 | 0.161704227 | 0.428110318 |
| 0.093228205 | 0.278818123 | 0.133827509 | 0.242149184 |
| 0.315752786 | 0.036650793 | 0.314593291 | 0.454395981 |
| 0.020082493 | 0.261594785 | 0.323082263 | 0.077951356 |
| 0.370793973 | 0.174085302 | 0.219195197 | 0.111414778 |
| 0.327976513 | 0.244048194 | 0.421516563 | 0.195105408 |
| 0.202043088 | 0.03468022  | 0.401752107 | 0.266399739 |
| 0.11701103  | 0.034625734 | 0.116015974 | 0.448876896 |
| 0.278409635 | 0.439595098 | 0.386768373 | 0.314278783 |
| 0.258699346 | 0.438123407 | 0.289674334 | 0.381213571 |
| 0.113753003 | 0.466374969 | 0.086453829 | 0.0147558   |
| 0.025835371 | 0.035771385 | 0.139396355 | 0.250915269 |
| 0.429293339 | 0.247145516 | 0.077518803 | 0.124269804 |
| 0.443394302 | 0.400547729 | 0.468515947 | 0.366806605 |
| 0.011558462 | 0.163101948 | 0.249160648 | 0.105311241 |
| 0.297016534 | 0.069070925 | 0.173178733 | 0.424159562 |
| 0.305267164 | 0.399073837 | 0.060046984 | 0.42179326  |
| 0.098672666 | 0.44872659  | 0.392387244 | 0.074913259 |
| 0.440525115 | 0.407506599 | 0.460810179 | 0.3545876   |
| 0.39984221  | 0.151263592 | 0.044978357 | 0.337682965 |
| 0.434067654 | 0.00840289  | 0.459557103 | 0.478686168 |
| 0.431895806 | 0.434058211 | 0.48746098  | 0.474042809 |
| 0.441675169 | 0.03882127  | 0.030637783 | 0.221187527 |
| 0.431600773 | 0.321426266 | 0.070983077 | 0.25928269  |



|             |             |             |             |
|-------------|-------------|-------------|-------------|
| 0.279072381 | 0.18045062  | 0.402854385 | 0.119675875 |
| 0.455246298 | 0.414372371 | 0.465562686 | 0.331383693 |
| 0.192606151 | 0.255408358 | 0.289714343 | 0.379639263 |
| 0.015152767 | 0.038689602 | 0.025401807 | 0.256639091 |
| 0.122502054 | 0.101110392 | 0.152455083 | 0.273815209 |
| 0.120944149 | 0.166869953 | 0.187745232 | 0.34287436  |
| 0.034156745 | 0.268963034 | 0.076707531 | 0.08352787  |
| 0.013113044 | 0.10346881  | 0.064051635 | 0.051304516 |
| 0.147660262 | 0.176604237 | 0.373997846 | 0.457257073 |
| 0.186173203 | 0.109374312 | 0.3240533   | 0.430391106 |
| 0.373460808 | 0.255638497 | 0.172293513 | 0.002055039 |
| 0.119160666 | 0.165707233 | 0.146653587 | 0.297617903 |
| 0.133672008 | 0.097295459 | 0.28117155  | 0.346505077 |
| 0.129736605 | 0.067545868 | 0.158763493 | 0.355805809 |
| 0.096481012 | 0.116810842 | 0.404983078 | 0.268226311 |
| 0.000433123 | 0.158816865 | 0.386909793 | 0.087712278 |
| 0.234809796 | 0.077553059 | 0.132163946 | 0.418188358 |
| 0.176301506 | 0.133321218 | 0.466416555 | 0.352742592 |
| 0.131319505 | 0.174577248 | 0.483662395 | 0.064078    |
| 0.258658042 | 0.025720195 | 0.206852982 | 0.18681967  |
| 0.142129002 | 0.242423825 | 0.24349197  | 0.129002782 |
| 0.070288356 | 0.455518369 | 0.343265264 | 0.45800877  |
| 0.161719221 | 0.480091262 | 0.41947328  | 0.380477045 |
| 0.247355212 | 0.24070083  | 0.106742235 | 0.371232837 |
| 0.412609665 | 0.143874069 | 0.042027278 | 0.422238547 |
| 0.197663501 | 0.358693989 | 0.08136305  | 0.436110432 |
| 0.425392214 | 0.394270502 | 0.057356699 | 0.339749942 |
| 0.302298911 | 0.110553286 | 0.38447798  | 0.486610389 |
| 0.139972953 | 0.224687447 | 0.14368451  | 0.375980515 |
| 0.097865372 | 0.113216029 | 0.278778338 | 0.141857364 |
| 0.008887466 | 0.038301201 | 0.028746276 | 0.075744866 |
| 0.102304095 | 0.330370499 | 0.318223027 | 0.467391162 |
| 0.051844513 | 0.363975076 | 0.1874983   | 0.105959433 |
| 0.358857182 | 0.214503583 | 0.275459222 | 0.314210049 |
| 0.189066936 | 0.004399401 | 0.035940945 | 0.444223966 |
| 0.020967778 | 0.129792849 | 0.172638272 | 0.000757917 |
| 0.013471102 | 0.367946421 | 0.063683129 | 0.141604525 |
| 0.462951939 | 0.142923786 | 0.121115159 | 0.132224369 |
| 0.271376983 | 0.042709607 | 0.000789741 | 0.452085432 |
| 0.452522072 | 0.429823506 | 0.451359388 | 0.407430854 |
| 0.426267671 | 0.361588544 | 0.371150636 | 0.179207165 |
| 0.038146139 | 0.031956107 | 0.112157806 | 0.145504327 |
| 0.001632388 | 0.322651734 | 0.213741394 | 0.085022917 |
| 0.389033787 | 0.233394543 | 0.011172723 | 0.292776345 |
| 0.004272833 | 0.123572002 | 0.119267505 | 0.114315636 |
| 0.326597849 | 0.003447347 | 0.072495709 | 0.156478675 |
| 0.347979563 | 0.272264691 | 0.1754381   | 0.465842141 |
| 0.183912357 | 0.078096649 | 0.154349475 | 0.341185132 |
| 0.024435054 | 0.087024357 | 0.150623628 | 0.012028432 |
| 0.102671292 | 0.411704182 | 1           | 0.019518651 |
| 0.15273849  | 0.000779649 | 0.284209165 | 0.467846269 |
| 0.39441265  | 0.47868033  | 0.437320504 | 0.154701189 |
| 0.432917217 | 0.110268164 | 0.478265556 | 0.32872163  |
| 0.161181397 | 3.08E-05    | 0.002062983 | 0.454170167 |

|             |             |             |             |
|-------------|-------------|-------------|-------------|
| 0.250120474 | 0.034492604 | 0.0874397   | 0.114263365 |
| 0.034114615 | 0.052670347 | 0.025018832 | 0.098098031 |
| 0.289476267 | 0.155790072 | 0.116069111 | 0.406306164 |
| 0.112546577 | 0.146389641 | 0.173199574 | 0.053095763 |
| 0.295676598 | 0.015051529 | 0.0553431   | 0.001855195 |
| 0.316507778 | 0.077835829 | 0.38650868  | 0.447443004 |
| 0.431999697 | 0.330830008 | 0.145099727 | 0.132375713 |
| 0.42521962  | 0.055582921 | 0.175683311 | 0.058431505 |
| 0.4141066   | 0.286835259 | 0.242737596 | 0.22343727  |
| 0.448516912 | 0.401911451 | 0.010462229 | 0.350400132 |
| 0.002619604 | 0.001326735 | 0.166042824 | 0.203951635 |
| 0.070151339 | 0.208417706 | 0.179612869 | 0.112818914 |
| 0.107380254 | 0.008393846 | 0.150436533 | 0.146976643 |
| 0.19705254  | 0.207979301 | 0.193928227 | 0.201391003 |
| 0.131788836 | 0.085039052 | 0.080893475 | 0.066862594 |
| 0.132347348 | 0.241521824 | 0.134266866 | 0.006449259 |
| 0.240410052 | 0.264711239 | 0.020496084 | 0.098214556 |
| 0.380168772 | 0.446564389 | 0.014564517 | 0.002404547 |
| 0.194854399 | 0.178104749 | 0.470009986 | 0.439568548 |
| 0.44606342  | 0.459174737 | 0.326908109 | 0.059739538 |
| 0.021414994 | 0.211747144 | 0.229719013 | 0.049934083 |
| 0.458048269 | 0.035045327 | 0.419365665 | 0.229910022 |
| 0.070252952 | 0.070723326 | 0.010642782 | 0.041221191 |
| 0.299995978 | 0.109388866 | 0.093598764 | 0.077432938 |
| 0.14149455  | 0.151418088 | 0.016931249 | 0.105845212 |
| 0.273375973 | 0.10944018  | 0.093431183 | 0.133840037 |
| 0.294023563 | 0.123713243 | 0.371695846 | 0.381397929 |
| 0.072151902 | 0.055544207 | 0.08178284  | 0.355524434 |
| 0.40016953  | 0.2732575   | 0.006676438 | 0.399350471 |
| 0.460815532 | 0.33683492  | 0.4235827   | 0.362945141 |
| 0.049219316 | 0.222433276 | 0.198295354 | 0.235705385 |
| 0.115715541 | 0.161261526 | 0.148449255 | 0.030848929 |
| 0.259853403 | 0.416831956 | 0.359000262 | 0.06773245  |
| 0.28358863  | 0.070892094 | 0.029000545 | 0.421646126 |
| 0.100605136 | 0.02646124  | 0.169702636 | 0.425398811 |
| 0.000852533 | 0.110482881 | 0.472891    | 0.088003784 |
| 0.4649188   | 0.437365622 | 0.364456129 | 0.109290009 |
| 0.006009598 | 0.358960364 | 0.242999536 | 0.163140462 |
| 0.375334255 | 0.272532579 | 0.078830685 | 0.025115066 |
| 0.223392732 | 0.045344446 | 0.05093081  | 0.111996069 |
| 0.098973134 | 0.28052975  | 0.139212446 | 0.128930336 |
| 0.102917725 | 0.062086068 | 0.136970639 | 0.100302021 |
| 0.123888366 | 0.171657272 | 0.27695827  | 0.128436949 |
| 0.102265382 | 0.417216302 | 0.333877077 | 0.00689556  |
| 0.26217772  | 0.373163922 | 0.406191491 | 0.000407446 |
| 0.352791144 | 0.001820585 | 0.105018567 | 0.098882204 |
| 0.090859124 | 0.106361499 | 0.192378533 | 0.123261045 |
| 0.256950631 | 0.102374377 | 0.105766457 | 0.145302498 |
| 0.060136183 | 0.116748273 | 0.286307302 | 0.166264925 |
| 0.110014309 | 0.038153315 | 0.069174597 | 0.070306207 |
| 0.015811199 | 0.428344803 | 0.181514912 | 0.041146069 |
| 0.151966731 | 0.17282019  | 0.294736064 | 0.428269126 |
| 0.37795656  | 0.074483416 | 0.171151449 | 0.371863033 |
| 0.162713701 | 0.119733914 | 0.021301533 | 0.218103021 |

|             |             |             |             |
|-------------|-------------|-------------|-------------|
| 0.128059725 | 0.099157656 | 0.230959162 | 0.172557445 |
| 0.343565595 | 0.321449528 | 0.17505052  | 0.386227115 |
| 0.174645821 | 0.223579493 | 0.118188177 | 0.028101567 |
| 0.065911714 | 0.084136694 | 0.181838721 | 9.05E-05    |
| 0.241410024 | 0.081706653 | 0.423034093 | 0.405974767 |
| 0.169902924 | 0.331654195 | 0.102379548 | 0.025719098 |
| 0.101267915 | 0.126634983 | 0.087645112 | 0.382103119 |
| 0.137548273 | 0.065303768 | 0.202032798 | 0.105613914 |
| 0.380655527 | 0.376919554 | 0.132762117 | 0.117754846 |
| 0.155382655 | 0.114818474 | 0.419351282 | 0.04523517  |
| 0.294062939 | 0.091273881 | 0.247234594 | 0.145040864 |
| 0.114780496 | 0.476518556 | 0.027563791 | 0.485065162 |
| 0.176008164 | 0.087583351 | 0.422286943 | 0.170398054 |
| 0.114378781 | 0.054966136 | 0.126467579 | 0.161258135 |
| 0.091981402 | 0.164949022 | 0.012196717 | 0.047882382 |
| 0.249359905 | 0.151306366 | 0.354539991 | 0.320706658 |
| 0.130890422 | 0.299756005 | 0.139196927 | 0.148102309 |
| 0.406572911 | 0.417790667 | 0.085861708 | 0.192650637 |
| 0.268277808 | 0.033675033 | 0.251731899 | 0.027484931 |
| 0.30445144  | 0.317560384 | 0.158428181 | 0.019854126 |
| 0.005970987 | 0.128429764 | 0.287958963 | 0.040171174 |
| 0.459249001 | 0.134120633 | 0.272234503 | 0.355874582 |
| 0.12844281  | 0.41560968  | 0.055106022 | 0.322921126 |
| 0.019991807 | 0.181919981 | 0.251374736 | 0.238251042 |
| 0.085603057 | 0.167949709 | 0.298366501 | 0.127793459 |
| 0.009618533 | 0.108970596 | 0.000726159 | 0.322037787 |
| 0.387867132 | 0.223828138 | 0.153312993 | 0.150353926 |
| 0.206427895 | 0.345458338 | 0.119357419 | 0.25873278  |
| 0.002471649 | 0.268629008 | 0.123854099 | 0.333782255 |
| 0.105463112 | 0.251680012 | 0.019015893 | 0.231949693 |
| 0.369188064 | 0.125250037 | 0.210824527 | 0.130669061 |
| 0.425898068 | 0.34545145  | 0.10621011  | 0.120439746 |
| 0.317368482 | 0.034977862 | 0.159206971 | 0.474925594 |
| 0.080462137 | 0.12336419  | 0.412429912 | 0.071228867 |
| 0.201400944 | 0.338182364 | 0.304799334 | 0.475070885 |
| 0.034186863 | 0.166496285 | 0.391607281 | 0.419091636 |
| 0.248100265 | 0.108847372 | 0.129851037 | 0.108134971 |
| 0.375540599 | 0.027019479 | 0.15822847  | 0.267101715 |
| 0.12453838  | 0.228660671 | 0.239674688 | 0.10423646  |
| 0.011070616 | 0.078251748 | 0.132765035 | 0.081548692 |
| 0.189913535 | 0.208983713 | 0.114719408 | 0.324739446 |
| 0.046298484 | 0.005824937 | 0.394321961 | 0.020470256 |
| 0.172515341 | 0.281929638 | 0.146940119 | 0.210350617 |
| 0.121412012 | 0.234715288 | 0.172551498 | 7.19E-06    |
| 0.366045153 | 0.028956599 | 0.150749878 | 0.091134553 |
| 0.148397741 | 0.015786723 | 0.3852039   | 0.476499469 |
| 0.21846491  | 0.158250544 | 0.159217324 | 0.404159832 |
| 0.103643341 | 0.173155873 | 0.169039721 | 0.29965032  |
| 0.136592527 | 0.193418695 | 0.214932606 | 0.178180139 |
| 0.284627562 | 0.1198871   |             |             |
| ITPK1       | 0.139648399 | 0.115468409 | 0.165950348 |
| 0.063292704 | 0.058249513 | 0.03991642  | 0.098752856 |
| 0.080361066 | 0.105649842 | 0.011732699 | 0.077106877 |
| 0.068639369 | 0.000970694 | 0.13405471  | 0.081909209 |

|             |             |             |             |
|-------------|-------------|-------------|-------------|
| 0.05071367  | 0.080952266 | 0.162293621 | 0.005665647 |
| 0.020180849 | 0.05348868  | 0.01103508  | 0.057532711 |
| 0.044125977 | 0.30346019  | 0.101858898 | 0.025558943 |
| 0.128099468 | 0.002475065 | 0.063309923 | 0.006229004 |
| 0.218066895 | 0.049032628 | 0.018944712 | 0.085165218 |
| 0.045187279 | 0.000602833 | 0.236924071 | 0.067836719 |
| 0.007615666 | 0.219072079 | 0.029941494 | 0.096516256 |
| 0.04048056  | 0.134148425 | 0.002043929 | 0.05034781  |
| 0.091321222 | 0.045923255 | 0.154724647 | 0.08211369  |
| 0.022744524 | 0.132897966 | 0.070100591 | 0.002241266 |
| 0.012457069 | 0.000307604 | 0.004267742 | 0.163142256 |
| 0.219762112 | 0.131051476 | 0.003718479 | 0.050548801 |
| 0.040300862 | 0.065685368 | 0.138899054 | 0.021347491 |
| 0.153465579 | 0.003604448 | 0.060532034 | 0.028490469 |
| 0.046924288 | 0.104961613 | 0.275471666 | 0.163379277 |
| 0.021901306 | 0.130619685 | 0.049114956 | 0.019635227 |
| 0.124370721 | 0.198017992 | 0.172450143 | 0.178487032 |
| 0.001899609 | 0.034632691 | 0.028082912 | 0.143755361 |
| 0.084183147 | 0.06526906  | 0.111242482 | 0.187702909 |
| 0.087896895 | 0.041690287 | 0.079160175 | 0.189128103 |
| 0.120033489 | 0.007021158 | 0.034861849 | 0.007510359 |
| 0.060950263 | 0.046381116 | 0.168868095 | 0.170989897 |
| 0.032214322 | 0.206807772 | 0.194697592 | 0.031348843 |
| 0.049251845 | 0.244907587 | 0.024238791 | 0.079733566 |
| 0.081794026 | 0.129157959 | 0.088584351 | 0.114295388 |
| 0.040731038 | 0.151973558 | 0.124156427 | 0.116785776 |
| 0.001233538 | 0.152444146 | 0.210939804 | 0.070573094 |
| 0.132745295 | 0.082623934 | 0.012834148 | 0.1815108   |
| 0.107866751 | 0.114115911 | 0.139560106 | 0.106372839 |
| 0.102062003 | 0.170226989 | 0.146568604 | 0.111501911 |
| 0.143313528 | 0.006728905 | 0.048045543 | 0.043358079 |
| 0.079538195 | 0.176346094 | 0.021889641 | 0.201716941 |
| 0.208057993 | 0.091271719 | 0.122515992 | 0.227639347 |
| 0.063159756 | 0.184020883 | 0.11290812  | 0.187121119 |
| 0.200241095 | 0.201674041 | 0.160755878 | 0.055261659 |
| 0.189349125 | 0.113828139 | 0.001390701 | 0.125412013 |
| 0.166492467 | 0.001623205 | 0.092666909 | 0.107330338 |
| 0.158849421 | 0.087357094 | 0.144338051 | 0.124842404 |
| 0.148177281 | 0.223058349 | 0.00013925  | 0.096061207 |
| 0.184031209 | 0.186571397 | 0.038790449 | 0.033811227 |
| 0.045730917 | 0.055107778 | 0.070584938 | 0.00735974  |
| 0.190365666 | 0.124525012 | 0.104047877 | 0.097996964 |
| 0.063206911 | 0.230681536 | 0.024141955 | 0.2014817   |
| 0.086926164 | 0.151776877 | 0.237075782 | 0.126273751 |
| 0.018232131 | 0.167117752 | 0.053701506 | 0.042903911 |
| 0.183962941 | 0.048085228 | 0.010896823 | 0.05863414  |
| 0.25252757  | 0.043131124 | 0.194740976 | 0.170892129 |
| 0.107482556 | 0.286867092 | 0.031600256 | 0.058729642 |
| 0.07220859  | 0.307217506 | 0.05509685  | 0.130305146 |
| 0.028982266 | 0.274548296 | 0.077326192 | 0.170510949 |
| 0.18964857  | 0.042028317 | 0.173562021 | 0.049129643 |
| 0.014219407 | 0.006994263 | 0.003995964 | 0.030269844 |
| 0.296675335 | 0.03044743  | 0.059197087 | 0.076333287 |
| 0.13252347  | 0.080179894 | 0.022885353 | 0.224796106 |

|             |             |             |             |
|-------------|-------------|-------------|-------------|
| 0.219875822 | 0.038694171 | 0.122400129 | 0.045780046 |
| 0.042145328 | 0.118407354 | 0.099875946 | 0.010603002 |
| 0.099997489 | 0.00288448  | 0.005914941 | 0.125408778 |
| 0.005184583 | 0.014745227 | 0.10701797  | 0.070721999 |
| 0.00673939  | 0.236098634 | 0.144141385 | 0.000160517 |
| 0.030502148 | 0.034959323 | 0.144343041 | 0.026311936 |
| 0.175449909 | 0.13985562  | 0.0342762   | 0.039951681 |
| 0.240299242 | 0.153538983 | 0.135902254 | 0.132175496 |
| 0.017316738 | 0.155364725 | 0.095994915 | 0.137470228 |
| 0.109763233 | 0.018826278 | 0.001506475 | 0.115104902 |
| 0.120164457 | 0.00819063  | 0.233134128 | 0.061879582 |
| 0.025873184 | 0.05851535  | 0.020047223 | 0.156797075 |
| 0.215451979 | 0.160366087 | 0.067505039 | 0.097591168 |
| 0.17044604  | 0.170961301 | 0.114391795 | 0.151699366 |
| 0.010202817 | 0.034394819 | 0.031064567 | 0.125142173 |
| 0.258534888 | 0.017472942 | 0.184183286 | 0.002691262 |
| 8.08E-05    | 0.146852115 | 0.229984877 | 0.095004345 |
| 0.013563444 | 0.036839388 | 0.075432305 | 0.147030024 |
| 0.156490467 | 0.153642427 | 0.142415388 | 0.044006494 |
| 0.17269084  | 0.023670089 | 0.030694353 | 0.049690488 |
| 0.193228832 | 0.051642967 | 0.034803016 | 0.214497046 |
| 0.180354141 | 0.011567385 | 0.055045336 | 0.003773949 |
| 0.111533754 | 0.079092638 | 0.295997178 | 0.334145262 |
| 0.110870726 | 0.341431723 | 0.232017806 | 0.018908963 |
| 0.113917579 | 0.204280523 | 0.015107239 | 0.12740895  |
| 0.135968828 | 0.132428604 | 0.134896283 | 0.156092228 |
| 0.111773968 | 0.071676233 | 0.098317375 | 0.081755705 |
| 0.10862558  | 0.138005813 | 0.012537893 | 0.079401565 |
| 0.002012004 | 0.125835089 | 0.044975261 | 0.265307737 |
| 0.064268874 | 0.11281159  | 0.101238919 | 0.03798122  |
| 0.065015438 | 0.005078121 | 0.025168181 | 0.063296783 |
| 0.084605835 | 0.100525823 | 0.014742708 | 0.009370995 |
| 0.183641688 | 0.179412528 | 0.015936888 | 0.166991107 |
| 0.094310316 | 0.206032849 | 0.081442604 | 0.081258235 |
| 0.127450754 | 0.004042261 | 0.031570651 | 0.003248974 |
| 0.0051992   | 0.151337729 | 0.019518651 | 1           |
| 0.167850998 | 0.055292599 | 0.198588254 | 0.161504998 |
| 0.156559565 | 0.133871211 | 0.152289155 | 0.019163138 |
| 0.165214343 | 0.000211355 | 0.13727043  | 0.127381342 |
| 0.018775892 | 0.007927972 | 0.005931949 | 0.114190293 |
| 0.053751873 | 0.227081797 | 0.227317854 | 0.016544044 |
| 0.074593305 | 0.106079377 | 0.106459737 | 0.025082971 |
| 0.06308269  | 0.060881503 | 0.010812625 | 0.160232803 |
| 0.116038323 | 0.112135588 | 0.028517123 | 0.221424085 |
| 0.04678855  | 0.096575051 | 0.205961756 | 0.006488227 |
| 0.077605354 | 0.281302511 | 0.215306539 | 0.144203324 |
| 0.186055444 | 0.081824375 | 0.010937026 | 0.005786669 |
| 0.096196258 | 0.198028525 | 0.00710521  | 0.179886827 |
| 0.148295626 | 0.072037109 | 0.184985142 | 0.242884555 |
| 0.160423062 | 0.183771625 | 0.121719589 | 0.110859703 |
| 0.044068721 | 0.000649536 | 0.075746477 | 0.1329357   |
| 0.001424158 | 0.032193119 | 0.245777384 | 0.031940523 |
| 0.032157488 | 0.048486534 | 0.013099614 | 0.01684345  |
| 0.136843659 | 0.058787699 | 0.037516099 | 0.141446295 |

|             |             |             |             |
|-------------|-------------|-------------|-------------|
| 0.043022445 | 0.013443533 | 0.077641667 | 0.067259728 |
| 0.005910639 | 0.212018788 | 0.309257762 | 0.093785896 |
| 0.039828557 | 0.03822863  | 0.181345911 | 0.235374804 |
| 0.131250518 | 0.119878648 | 0.04137441  | 0.036530933 |
| 0.228695883 | 0.036755305 | 0.118480308 | 0.135450341 |
| 0.185071836 | 0.175044786 | 0.236730167 | 0.03889904  |
| 0.123329667 | 0.088523806 | 0.039114992 | 0.033879272 |
| 0.136049774 | 0.193428508 | 0.150502766 | 0.020259264 |
| 0.226313783 | 0.126234195 | 0.048670424 | 0.186757536 |
| 0.031147872 | 0.182667796 | 0.109518219 | 0.250863639 |
| 0.053217278 | 0.009318953 | 0.139248067 | 0.173390894 |
| 0.153842685 | 0.005355276 | 0.212105441 | 0.045729833 |
| 0.142887732 | 0.003728857 | 0.068273789 | 0.200540399 |
| 0.233661981 | 0.164095146 | 0.06112877  | 0.076510592 |
| 0.089807737 | 0.027986915 | 0.028800454 | 0.118075829 |
| 0.126575876 | 0.054789044 | 0.164886344 | 0.134720793 |
| 0.241164919 | 0.04174583  | 0.014316885 | 0.060045156 |
| 0.144924885 | 0.047998416 | 0.081787004 | 0.218981803 |
| 0.18582992  | 0.194174783 | 0.148050171 | 0.123019479 |
| 0.038441856 | 0.156788026 | 0.184282139 | 0.092917137 |
| 0.013459044 | 0.052697264 | 0.024339814 | 0.071450142 |
| 0.012819922 | 0.00389567  | 0.124036385 | 0.050656383 |
| 0.173387556 | 0.136411628 | 0.202590813 | 0.03832989  |
| 0.000181312 | 0.054036035 | 0.085982885 | 0.046226987 |
| 0.125242405 | 0.139067044 | 0.008825385 | 0.083867643 |
| 0.212132355 | 0.235997609 | 0.050521812 | 0.010764269 |
| 0.003276855 | 0.065388392 | 0.202601361 | 0.115882892 |
| 0.086979221 | 0.166839824 | 0.006089222 | 0.12534609  |
| 0.003323319 | 0.214120265 | 0.163090064 | 0.011038992 |
| 0.003689163 | 0.113633123 | 0.119619601 | 0.116161535 |
| 0.025631396 | 0.112395931 | 0.129215133 | 0.008032116 |
| 0.07285762  | 0.041713246 | 0.075057582 | 0.096669026 |
| 0.087083838 | 0.061017172 | 0.093076899 | 0.047317445 |
| 0.089715415 | 0.119789343 | 0.095227342 | 0.16557401  |
| 0.080900578 | 0.119939671 | 0.06058277  | 0.070652269 |
| 0.042169821 | 0.147424203 | 0.2974474   | 0.311956815 |
| 0.040184244 | 0.10580173  | 0.261074181 | 0.262728376 |
| 0.127140222 | 0.042816774 | 0.218483198 | 0.146787912 |
| 0.15300458  | 0.251434438 | 0.040336993 | 0.123914243 |
| 0.002059206 | 0.010632212 | 0.090817948 | 0.076343834 |
| 0.120375067 | 0.013919517 | 0.040226062 | 0.122632923 |
| 0.066861523 | 0.236459973 | 0.241306477 | 0.166042888 |
| 0.059570116 | 0.034379429 | 0.019697153 | 0.056118777 |
| 0.182682428 | 0.229856215 | 0.045920355 | 0.041030437 |
| 0.098545601 | 0.046827342 | 0.105088877 | 0.182746331 |
| 0.008473585 | 0.180457531 | 0.007321204 | 0.109370838 |
| 0.009730746 | 0.290497264 | 0.247239207 | 0.076797841 |
| 0.004754117 | 0.100654652 | 0.0748556   | 0.033035113 |
| 0.080363596 | 0.065602947 | 0.021998206 | 0.063729793 |
| 0.104706718 | 0.216386027 | 0.183621093 | 0.149708082 |
| 0.042123248 | 0.029129036 | 0.049735169 | 0.071615785 |
| 0.075371533 | 0.131888584 | 0.204067216 | 0.126653474 |
| 0.03914894  | 0.246026557 | 0.20647967  | 0.062139576 |
| 0.040362459 | 0.025795761 | 0.005591516 | 0.025471233 |

|             |             |             |             |
|-------------|-------------|-------------|-------------|
| 0.043039553 | 0.012377495 | 3.57E-05    | 0.002120979 |
| 0.136300183 | 0.018690842 | 0.083603716 | 0.088307431 |
| 0.030521192 | 0.13256668  | 0.001318409 | 0.078892443 |
| 0.159857583 | 0.194536726 | 0.033012623 | 0.219287278 |
| 0.121933065 | 0.116534123 | 0.073579139 | 0.000586845 |
| 0.047826449 | 0.032945076 | 0.009967798 | 0.093047327 |
| 0.046839879 | 0.007897344 | 0.063324249 | 0.169365939 |
| 0.11530941  | 0.002253866 | 0.053237323 | 0.075783261 |
| 0.181733922 | 0.208066923 | 0.05407355  | 0.096583367 |
| 0.026319608 | 0.15555764  | 0.025774531 | 0.026401322 |
| 0.035409319 | 0.02617266  | 0.132579603 | 0.017999287 |
| 0.116840512 | 0.02336273  | 0.009111117 | 0.259618725 |
| 0.198920049 | 0.027187918 | 0.24073835  | 0.00662317  |
| 0.15392907  | 0.131400306 | 0.00718947  | 0.028081283 |
| 0.043233871 | 0.04861258  | 0.145186669 | 0.14135296  |
| 0.005236321 | 0.049150067 | 0.0590162   | 0.028682289 |
| 0.229301852 | 0.009666116 | 0.178688519 | 0.011021678 |
| 0.147879402 | 0.109029424 | 0.236653802 | 0.016210417 |
| 0.048060581 | 0.226090684 | 0.021244171 | 0.154011842 |
| 0.094993906 | 0.022972182 | 0.099059965 | 0.098157706 |
| 0.016533725 | 0.145378791 | 0.039236379 | 0.14677186  |
| 0.039915475 | 0.183152589 | 0.084477301 | 0.13775404  |
| 0.16139666  | 0.016635715 | 0.012282158 | 0.044101188 |
| 0.168604374 | 0.04420337  | 0.012299726 | 0.162530711 |
| 0.01267643  | 0.106660148 | 0.054413651 | 0.041489802 |
| 0.027385672 | 0.047374103 | 0.023691774 | 0.220813962 |
| 0.108658792 | 0.064179286 | 0.032381828 | 0.221311982 |
| 0.034929283 | 0.052328474 | 0.207275712 | 0.000527278 |
| 0.092576235 | 0.082384458 | 0.114695478 | 0.039637827 |
| 0.304124995 | 0.082642941 | 0.084930083 | 0.010789613 |
| 0.103011901 | 0.01200775  | 0.026236886 | 0.035425299 |
| 0.003826458 | 0.11002242  | 0.17435158  | 0.130703373 |
| 0.113204518 | 0.005249185 | 0.005347957 | 0.139069879 |
| 0.00384966  | 0.008251279 | 0.010118564 | 0.076895952 |
| 0.010374911 | 0.024240514 | 0.021380998 | 0.021235603 |
| 0.114838625 | 0.062654893 |             |             |
| KARS        | 0.145050182 | 0.286892391 | 0.103736737 |
| 0.259103788 | 0.206370165 | 0.186185112 | 0.15043604  |
| 0.184120031 | 0.225976895 | 0.092118434 | 0.23764839  |
| 0.10789865  | 0.040790616 | 0.359424256 | 0.142766161 |
| 0.216278883 | 0.146448007 | 0.206201534 | 0.05065028  |
| 0.159671058 | 0.220337743 | 0.163325124 | 0.170254453 |
| 0.191729853 | 0.265437693 | 0.195217591 | 0.141933354 |
| 0.351951659 | 0.087104489 | 0.23704676  | 0.07518314  |
| 0.404960251 | 0.206249517 | 0.143878541 | 0.080240104 |
| 0.193243625 | 0.008999677 | 0.399322578 | 0.2686304   |
| 0.114211244 | 0.359508803 | 0.115775084 | 0.286512713 |
| 0.150675873 | 0.12214464  | 0.053897019 | 0.214171445 |
| 0.175356363 | 0.18868888  | 0.102402934 | 0.24685732  |
| 0.158460513 | 0.26075085  | 0.199758243 | 0.006275064 |
| 0.130317041 | 0.027213094 | 0.08560578  | 0.374248741 |
| 0.27267275  | 0.230933775 | 0.091042572 | 0.144734071 |
| 0.173152077 | 0.227766846 | 0.237875571 | 0.142980738 |
| 0.390217425 | 0.094291489 | 0.228167488 | 0.179958291 |

|             |             |             |             |
|-------------|-------------|-------------|-------------|
| 0.204255288 | 0.0748493   | 0.258720695 | 0.097123619 |
| 0.171240183 | 0.25106567  | 0.204888183 | 0.153143162 |
| 0.287940123 | 0.420756554 | 0.232054564 | 0.37013688  |
| 0.066191689 | 0.171660142 | 0.181543964 | 0.305788489 |
| 0.243906986 | 0.128372902 | 0.315449789 | 0.426133063 |
| 0.086609278 | 0.141442285 | 0.252408128 | 0.154168397 |
| 0.297669093 | 0.100728692 | 0.141927421 | 0.11292581  |
| 0.229367946 | 0.207141704 | 0.361955449 | 0.314280619 |
| 0.168890087 | 0.12079866  | 0.367290699 | 0.166706293 |
| 0.242669328 | 0.151733636 | 0.206558063 | 0.298253263 |
| 0.252373948 | 0.360956796 | 0.270896822 | 0.299015696 |
| 0.193388511 | 0.384744797 | 0.297352678 | 0.305639967 |
| 0.032596704 | 0.382042805 | 0.236861392 | 0.155637344 |
| 0.107813455 | 0.179012724 | 0.129131973 | 0.316890638 |
| 0.3352751   | 0.239453058 | 0.235474253 | 0.268251532 |
| 0.348786961 | 0.34587711  | 0.373538257 | 0.314992331 |
| 0.133588756 | 0.101886857 | 0.202013119 | 0.173419342 |
| 0.263681716 | 0.159924295 | 0.162018045 | 0.406951041 |
| 0.379255376 | 0.318656489 | 0.165824544 | 0.415853952 |
| 0.167568881 | 0.433011436 | 0.301743296 | 0.272247173 |
| 0.416662917 | 0.391707833 | 0.416559556 | 0.243969085 |
| 0.383302196 | 0.236001253 | 0.036112814 | 0.300527341 |
| 0.417904253 | 0.022942235 | 0.315352127 | 0.348597957 |
| 0.369461579 | 0.313897944 | 0.405074134 | 0.366607875 |
| 0.360903223 | 0.137993056 | 0.010520069 | 0.2627186   |
| 0.39548653  | 0.37046139  | 0.169893105 | 0.173763984 |
| 0.204153392 | 0.200647502 | 0.256047624 | 0.171435723 |
| 0.440558024 | 0.329996574 | 0.327334737 | 0.273219513 |
| 0.145781158 | 0.340369039 | 0.147102654 | 0.364767312 |
| 0.14478984  | 0.174882111 | 0.102646997 | 0.259685631 |
| 0.12812853  | 0.254144383 | 0.19637529  | 0.171604467 |
| 0.260486912 | 0.16263186  | 0.118560114 | 0.243190282 |
| 0.112891382 | 0.183046533 | 0.209806738 | 0.197136909 |
| 0.177143061 | 0.22915852  | 0.263295743 | 0.24718455  |
| 0.24172103  | 0.276047238 | 0.227855723 | 0.358707153 |
| 0.16840553  | 0.239905721 | 0.254762501 | 0.400729927 |
| 0.4280942   | 0.192465244 | 0.260528965 | 0.095544656 |
| 0.218929868 | 0.093875515 | 0.082061223 | 0.155312766 |
| 0.238665969 | 0.239376561 | 0.220825461 | 0.286346459 |
| 0.211286493 | 0.131173585 | 0.190406147 | 0.395368418 |
| 0.186098917 | 0.230123134 | 0.364913948 | 0.163296601 |
| 0.032418591 | 0.263307538 | 0.320546841 | 0.161433508 |
| 0.231489109 | 0.103562722 | 0.12006221  | 0.35947825  |
| 0.121990207 | 0.150035197 | 0.339448115 | 0.266920842 |
| 0.152299926 | 0.22941983  | 0.399123039 | 0.02344919  |
| 0.151804636 | 0.133547309 | 0.312444779 | 0.107141443 |
| 0.261752419 | 0.292269788 | 0.179825867 | 0.208002099 |
| 0.160802962 | 0.389687019 | 0.302871183 | 0.380960422 |
| 0.169262824 | 0.407910072 | 0.331057676 | 0.36955347  |
| 0.258185935 | 0.134660789 | 0.06590422  | 0.330664537 |
| 0.344358422 | 0.135568963 | 0.125032398 | 0.255192959 |
| 0.144696376 | 0.242416857 | 0.133424615 | 0.410675103 |
| 0.424347636 | 0.332276158 | 0.230913291 | 0.305220931 |
| 0.366304497 | 0.248780323 | 0.297882834 | 0.409888424 |



|             |             |             |             |
|-------------|-------------|-------------|-------------|
| 0.110383738 | 0.19654964  | 0.214550423 | 0.349183091 |
| 0.245754585 | 0.179071557 | 0.295629182 | 0.07022412  |
| 0.003552119 | 0.125533959 | 0.14009528  | 0.252199744 |
| 0.134436394 | 0.164728909 | 0.247493394 | 0.389321668 |
| 0.223851511 | 0.342003664 | 0.218791382 | 0.266506315 |
| 0.352469996 | 0.163620304 | 0.162927178 | 0.205889739 |
| 0.262370619 | 0.10364361  | 0.256861137 | 0.432103981 |
| 0.07145409  | 0.147349452 | 0.173371567 | 0.023485808 |
| 0.133784256 | 0.231533338 | 0.170636493 | 0.290191843 |
| 0.361312373 | 0.274747937 | 0.243200786 | 0.123499834 |
| 0.284807084 | 0.181897931 | 0.028196885 | 0.350287868 |
| 0.341404063 | 0.325910684 | 0.336937918 | 0.3296741   |
| 0.311506705 | 0.23533628  | 0.304918109 | 0.181732288 |
| 0.199317758 | 0.126804957 | 0.17013402  | 0.25970727  |
| 0.011381481 | 0.313954563 | 0.177351865 | 0.24215482  |
| 0.25679378  | 0.241641023 | 0.129652175 | 0.173110929 |
| 0.113811466 | 0.094727637 | 0.18264263  | 0.196410126 |
| 0.269889005 | 0.074146718 | 0.16064956  | 0.173983318 |
| 0.345763055 | 0.327333334 | 0.138869735 | 0.398155672 |
| 0.256707356 | 0.149704744 | 0.256833047 | 0.279619384 |
| 0.184042019 | 0.052149992 | 0.167451851 | 0.020669023 |
| 0.080060525 | 0.335412493 | 0.15273849  | 0.167850998 |
| 1           | 0.049013398 | 0.341562342 | 0.40701186  |
| 0.330371246 | 0.391854456 | 0.388830805 | 0.15917367  |
| 0.394374283 | 0.029025537 | 0.382469859 | 0.304090663 |
| 0.138416281 | 0.010247523 | 0.03107877  | 0.351404671 |
| 0.212452486 | 0.098573797 | 0.236680332 | 0.173207889 |
| 0.266857644 | 0.164111383 | 0.138375156 | 0.17830685  |
| 0.209296264 | 0.220577007 | 0.133247422 | 0.348536741 |
| 0.271069368 | 0.233020676 | 0.151746431 | 0.141655607 |
| 0.187211335 | 0.184077722 | 0.132990597 | 0.040822431 |
| 0.260290088 | 0.168325741 | 0.368763743 | 0.371974615 |
| 0.420222957 | 0.264553087 | 0.104986616 | 0.148852155 |
| 0.299023215 | 0.125203232 | 0.124383594 | 0.128095051 |
| 0.351759439 | 0.256901861 | 0.350078859 | 0.347914868 |
| 0.419618558 | 0.395547116 | 0.126151264 | 0.322027149 |
| 0.07735829  | 0.007644906 | 0.192393525 | 0.238436855 |
| 0.025878984 | 0.195989098 | 0.327587465 | 0.136498491 |
| 0.161968038 | 0.116381847 | 0.14075353  | 0.149456026 |
| 0.273835886 | 0.227572809 | 0.193574204 | 0.21625054  |
| 0.199353157 | 0.169934826 | 0.224274675 | 0.192925231 |
| 0.104879692 | 0.305838929 | 0.276434646 | 0.096739621 |
| 0.169843764 | 0.187873311 | 0.159799433 | 0.214164447 |
| 0.360505477 | 0.367837192 | 0.163834805 | 0.1038064   |
| 0.303103609 | 0.1882871   | 0.376395534 | 0.34937271  |
| 0.40677102  | 0.434075971 | 0.380726912 | 0.211596221 |
| 0.163981076 | 0.232561841 | 0.182008823 | 0.190158074 |
| 0.377876139 | 0.102274142 | 0.351092474 | 0.143348659 |
| 0.1814945   | 0.27669445  | 0.152666966 | 0.173645391 |
| 0.16841149  | 0.229489468 | 0.256306582 | 0.182783114 |
| 0.253502486 | 0.131952593 | 0.134968969 | 0.25953621  |
| 0.31325667  | 0.123608276 | 0.226398161 | 0.16122923  |
| 0.267149056 | 0.060647666 | 0.265063668 | 0.427647488 |
| 0.19540402  | 0.161347615 | 0.205735891 | 0.238987635 |

|             |             |             |             |
|-------------|-------------|-------------|-------------|
| 0.293378679 | 0.130678575 | 0.092859166 | 0.296289343 |
| 0.366940744 | 0.230623754 | 0.372397325 | 0.357836787 |
| 0.149621629 | 0.210386342 | 0.130117387 | 0.218224307 |
| 0.212145952 | 0.185554406 | 0.205673538 | 0.143722457 |
| 0.300528274 | 0.392783013 | 0.323449397 | 0.266460609 |
| 0.159802922 | 0.122754743 | 0.091379298 | 0.290380017 |
| 0.161107044 | 0.199262656 | 0.121423332 | 0.270923358 |
| 0.013276762 | 0.074907867 | 0.357784861 | 0.226725969 |
| 0.402433006 | 0.377769805 | 0.408725235 | 0.1557392   |
| 0.00198937  | 0.224703532 | 0.264746548 | 0.221603478 |
| 0.314745004 | 0.286049227 | 0.090094134 | 0.225821869 |
| 0.342318469 | 0.127383753 | 0.266025164 | 0.15571323  |
| 0.107008731 | 0.215430769 | 0.27166732  | 0.183363982 |
| 0.234546408 | 0.109790609 | 0.123568248 | 0.240693648 |
| 0.078829584 | 0.313866523 | 0.363406202 | 0.085192115 |
| 0.131476466 | 0.334741664 | 0.304934032 | 0.104451141 |
| 0.153383677 | 0.313157077 | 0.328329105 | 0.027123537 |
| 0.280017547 | 0.066892234 | 0.242920755 | 0.271170377 |
| 0.252467369 | 0.22738978  | 0.236666684 | 0.227784889 |
| 0.222259375 | 0.252583971 | 0.270039757 | 0.278635443 |
| 0.256314507 | 0.200682919 | 0.201995556 | 0.197364171 |
| 0.240506682 | 0.227638308 | 0.167029283 | 0.169647158 |
| 0.168300973 | 0.308384796 | 0.318061522 | 0.127358017 |
| 0.238013048 | 0.175442808 | 0.387916634 | 0.345964752 |
| 0.362367013 | 0.152887659 | 0.193184406 | 0.319598863 |
| 0.070238923 | 0.150056778 | 0.112569507 | 0.191871018 |
| 0.232781708 | 0.20403176  | 0.14937885  | 0.210126052 |
| 0.225652244 | 0.403437643 | 0.300338855 | 0.362838481 |
| 0.216730597 | 0.153145255 | 0.110318585 | 0.240126468 |
| 0.265696711 | 0.186754842 | 0.206322861 | 0.032251802 |
| 0.26613523  | 0.198967794 | 0.340257956 | 0.376761513 |
| 0.113572945 | 0.35994428  | 0.127853024 | 0.214678055 |
| 0.093311855 | 0.222878239 | 0.221743876 | 0.248857885 |
| 0.09157765  | 0.227548691 | 0.23038951  | 0.155194872 |
| 0.27426916  | 0.230804352 | 0.162360957 | 0.189783299 |
| 0.198542055 | 0.1999502   | 0.363660348 | 0.147035819 |
| 0.176013084 | 0.197496024 | 0.142510169 | 0.268664058 |
| 0.23876386  | 0.364209594 | 0.128506753 | 0.372792569 |
| 0.219741609 | 0.186418754 | 0.430506224 | 0.168888517 |
| 0.172978546 | 0.192874199 | 0.092809477 | 0.145714365 |
| 0.214157987 | 0.136447954 | 0.004138729 | 0.062491372 |
| 0.332212077 | 0.121011497 | 0.246035616 | 0.249744626 |
| 0.179912166 | 0.322536598 | 0.058401548 | 0.19578416  |
| 0.338988152 | 0.377213865 | 0.280197798 | 0.305646694 |
| 0.293245433 | 0.217881806 | 0.199996495 | 0.007645451 |
| 0.212136137 | 0.171833965 | 0.139172309 | 0.144452776 |
| 0.095008376 | 0.113476486 | 0.210450393 | 0.09215849  |
| 0.363538889 | 0.085698686 | 0.158420021 | 0.248330414 |
| 0.197599881 | 0.390029706 | 0.211060068 | 0.305549037 |
| 0.076185343 | 0.237260002 | 0.150148935 | 0.146553959 |
| 0.263243965 | 0.181260732 | 0.335592033 | 0.156941356 |
| 0.146066689 | 0.241368773 | 0.018128374 | 0.402560881 |
| 0.357744921 | 0.169274043 | 0.267183802 | 0.082217121 |
| 0.301885131 | 0.293757365 | 0.17997755  | 0.146216408 |

|             |             |             |             |
|-------------|-------------|-------------|-------------|
| 0.086278938 | 0.212195864 | 0.217816419 | 0.327424395 |
| 0.122551585 | 0.171510371 | 0.179967984 | 0.162885273 |
| 0.367940886 | 0.203450299 | 0.274677835 | 0.157769149 |
| 0.345748793 | 0.255835784 | 0.178740544 | 0.154050152 |
| 0.172387375 | 0.123769396 | 0.130746224 | 0.398908108 |
| 0.256760838 | 0.16441948  | 0.341815861 | 0.293741885 |
| 0.14816289  | 0.295217075 | 0.158043318 | 0.377200943 |
| 0.193458352 | 0.283892212 | 0.28750743  | 0.342967066 |
| 0.327808927 | 0.143412822 | 0.155460335 | 0.236543063 |
| 0.341617159 | 0.213404206 | 0.147617949 | 0.307384216 |
| 0.147994891 | 0.259591899 | 0.135639349 | 0.202417634 |
| 0.147432255 | 0.173267188 | 0.184627459 | 0.196956808 |
| 0.251910914 | 0.227129323 | 0.201769923 | 0.392983222 |
| 0.235603424 | 0.151401589 | 0.408903632 | 0.025526026 |
| 0.185495003 | 0.263643884 | 0.221249746 | 0.189534986 |
| 0.268697598 | 0.209412312 | 0.18902156  | 0.020764558 |
| 0.319840131 | 0.055248308 | 0.160790732 | 0.250845987 |
| 0.134137725 | 0.139994142 | 0.3638906   | 0.392903759 |
| 0.218280608 | 0.113234517 | 0.130005238 | 0.348189477 |
| 0.107838428 | 0.104506882 | 0.133459544 | 0.214911468 |
| 0.121674069 | 0.13455728  | 0.144561358 | 0.160246497 |
| 0.277121569 | 0.181548716 |             |             |
| KCNAB2      | 0.158622549 | 0.012902679 | 0.178470105 |
| 0.038844615 | 0.006108184 | 0.005186354 | 0.089901839 |
| 0.048140182 | 0.012231762 | 9.64E-05    | 0.014010205 |
| 0.157410475 | 0.000909432 | 0.017184812 | 0.087171076 |
| 0.00325349  | 0.114739821 | 0.111339074 | 0.001238128 |
| 0.004373921 | 0.007140503 | 0.000854874 | 0.008096028 |
| 0.004712661 | 0.152323184 | 0.013739685 | 0.000464562 |
| 0.012417929 | 0.000483936 | 0.004809288 | 7.77E-05    |
| 0.044594063 | 0.004714667 | 0.000253651 | 0.162520623 |
| 0.004494857 | 0.000893131 | 0.045269989 | 0.013991899 |
| 0.000716719 | 0.062133506 | 0.001490567 | 0.034401402 |
| 0.001853121 | 0.190173241 | 0.000888907 | 0.002252549 |
| 0.009598883 | 0.007724221 | 0.152466009 | 0.006443296 |
| 0.001208604 | 0.034382903 | 0.004684982 | 0.003581003 |
| 3.69E-05    | 0.00629461  | 0.001799735 | 0.021710273 |
| 0.114788774 | 0.100803243 | 0.000520437 | 0.010243998 |
| 0.002079742 | 0.005301707 | 0.037559991 | 0.000673358 |
| 0.020354687 | 0.000320391 | 0.002703958 | 0.010910802 |
| 0.005331371 | 0.099623254 | 0.145964959 | 0.082856723 |
| 0.001111783 | 0.0597775   | 0.007667067 | 0.00064697  |
| 0.01310285  | 0.032148184 | 0.04701162  | 0.024147234 |
| 0.000377945 | 0.001675572 | 0.002675114 | 0.029277829 |
| 0.008719801 | 0.032746745 | 0.01438644  | 0.026272415 |
| 0.073215189 | 0.00186396  | 0.006925475 | 0.11119974  |
| 0.01468295  | 0.00026627  | 0.001381817 | 0.000596155 |
| 0.004177129 | 0.003390447 | 0.025031346 | 0.055339393 |
| 0.003497108 | 0.169241616 | 0.032521732 | 0.001550481 |
| 0.01126037  | 0.189466171 | 0.002726294 | 0.004772007 |
| 0.007596937 | 0.014285313 | 0.007154932 | 0.015980748 |
| 0.002064654 | 0.018760838 | 0.015628867 | 0.015895583 |
| 0.00243121  | 0.017792654 | 0.098411982 | 0.121825311 |
| 0.10028839  | 0.076412873 | 0.000888478 | 0.048411466 |

|             |             |             |             |
|-------------|-------------|-------------|-------------|
| 0.010176182 | 0.022652951 | 0.063253145 | 0.026522852 |
| 0.008835347 | 0.025617167 | 0.015999279 | 0.013247119 |
| 0.200787101 | 0.000402956 | 0.002523934 | 0.012200652 |
| 0.010296479 | 0.10264001  | 0.001371619 | 0.033564926 |
| 0.047228017 | 0.007843689 | 0.051213469 | 0.041954143 |
| 0.01906308  | 0.027680816 | 0.0107191   | 0.100647075 |
| 0.030019479 | 0.033949944 | 0.019954325 | 0.00353614  |
| 0.033408043 | 0.023787341 | 0.000216771 | 0.016559575 |
| 0.027028143 | 0.002215583 | 0.006758672 | 0.008394366 |
| 0.019294623 | 0.005685821 | 0.015701454 | 0.012285727 |
| 0.018067632 | 0.17039331  | 0.002769538 | 0.017824358 |
| 0.025499498 | 0.033382764 | 0.016832947 | 0.001072243 |
| 0.003817375 | 0.008061695 | 0.00511845  | 0.000652528 |
| 0.031477102 | 0.012220379 | 0.008427215 | 0.011204356 |
| 0.006046306 | 0.073347932 | 0.000254949 | 0.03627933  |
| 0.098141308 | 0.120454464 | 0.246017432 | 0.024588576 |
| 0.001079257 | 0.079895945 | 0.006714077 | 0.003102854 |
| 0.087897453 | 0.006676619 | 0.000251713 | 0.004390633 |
| 0.214210109 | 0.002431145 | 0.084452115 | 0.066163069 |
| 0.135246042 | 0.174964926 | 0.018394625 | 0.043778595 |
| 0.019803123 | 0.123120108 | 0.002948031 | 0.012473651 |
| 0.00188733  | 0.122619941 | 0.007430789 | 0.025355794 |
| 0.038384157 | 0.002453176 | 0.068485699 | 0.120460505 |
| 0.001390238 | 0.001072633 | 0.001123269 | 0.000911844 |
| 0.143224645 | 0.007973522 | 0.004693352 | 0.00761174  |
| 0.040343765 | 0.035775564 | 0.001204148 | 0.054062612 |
| 0.10609331  | 0.007786007 | 0.013978444 | 0.002244227 |
| 0.172152891 | 0.021933479 | 0.009443459 | 0.00241979  |
| 0.017907342 | 0.000617038 | 0.000194001 | 0.012021708 |
| 6.07E-05    | 0.001369578 | 0.009444597 | 0.006491384 |
| 0.000865465 | 0.084366669 | 0.016126352 | 0.003506843 |
| 0.00137561  | 0.024909553 | 0.037677692 | 0.000928001 |
| 0.054833286 | 0.031967841 | 0.003068373 | 0.004787707 |
| 0.148727399 | 0.019767327 | 0.021198248 | 0.014606353 |
| 0.000470725 | 0.017868341 | 0.008287925 | 0.020275126 |
| 0.018716808 | 0.00011872  | 0.001159583 | 0.011268303 |
| 0.010711746 | 0.000386514 | 0.180844825 | 0.003172602 |
| 0.000729414 | 0.003557795 | 0.004238857 | 0.019821937 |
| 0.039158862 | 0.021460343 | 0.047752515 | 0.011642677 |
| 0.033150258 | 0.075062628 | 0.012344705 | 0.019069294 |
| 5.98E-06    | 0.002164663 | 0.002184469 | 0.015599812 |
| 0.121553123 | 0.002346032 | 0.043099872 | 0.001293876 |
| 0.000628074 | 0.118750975 | 0.211223912 | 0.048180138 |
| 0.001310086 | 0.001099612 | 0.006058651 | 0.016622107 |
| 0.125749519 | 0.027932487 | 0.037240783 | 0.007015553 |
| 0.025849364 | 0.00145975  | 0.001447982 | 0.003938762 |
| 0.058279226 | 0.109498377 | 0.041937982 | 0.035354477 |
| 0.167287688 | 0.000815693 | 0.0096944   | 0.015289767 |
| 0.134848077 | 0.005569662 | 0.186302539 | 0.167111682 |
| 0.01156069  | 0.14762481  | 0.083273284 | 0.000581715 |
| 0.022208527 | 0.171481582 | 0.053208688 | 0.012124203 |
| 0.014805171 | 0.014818032 | 0.014526032 | 0.02190769  |
| 0.01002845  | 0.006207045 | 0.008442591 | 0.014872295 |
| 0.065474948 | 0.078343257 | 0.000717242 | 0.013435253 |

|             |             |             |             |
|-------------|-------------|-------------|-------------|
| 0.004486816 | 0.020013319 | 0.005337574 | 0.169650438 |
| 0.004425109 | 0.020811032 | 0.175024891 | 0.002809605 |
| 0.132437423 | 0.000931512 | 0.004407343 | 0.016594123 |
| 0.010656219 | 0.217531204 | 0.00287547  | 0.000328698 |
| 0.034861807 | 0.047295596 | 0.000177944 | 0.020621695 |
| 0.021025516 | 0.092522571 | 0.011192175 | 0.01031801  |
| 0.112859414 | 0.000165402 | 0.003068075 | 0.000343606 |
| 0.000861316 | 0.022051451 | 0.000779649 | 0.055292599 |
| 0.049013398 | 1           | 0.045324689 | 0.021468039 |
| 0.021064204 | 0.013371088 | 0.019853645 | 0.001247461 |
| 0.021649134 | 0.008210366 | 0.014531766 | 0.017551287 |
| 0.000286374 | 0.034898516 | 0.025302223 | 0.00952667  |
| 0.003506188 | 0.187021043 | 0.124075497 | 0.002164149 |
| 0.060814708 | 0.059778838 | 0.115791692 | 0.003287633 |
| 0.005618155 | 0.014316718 | 0.001605551 | 0.022491146 |
| 0.03007168  | 0.037131534 | 0.001798095 | 0.159460878 |
| 0.003223958 | 0.123402087 | 0.127316449 | 0.015982841 |
| 0.009448307 | 0.15279769  | 0.039923168 | 0.017264064 |
| 0.028857247 | 0.007120868 | 0.000458283 | 0.000919082 |
| 0.008993448 | 0.134969238 | 9.22E-05    | 0.117079416 |
| 0.018059427 | 0.006032478 | 0.050237829 | 0.071344921 |
| 0.021283951 | 0.028397111 | 0.191571795 | 0.011358194 |
| 0.132793691 | 0.003104239 | 0.009716625 | 0.037710135 |
| 0.000667511 | 0.001780072 | 0.081142921 | 0.004046227 |
| 0.006725391 | 0.111405669 | 0.000163802 | 0.000590712 |
| 0.026597079 | 0.006157747 | 0.003769844 | 0.034897969 |
| 0.005234164 | 0.002203064 | 0.030234172 | 0.03389956  |
| 0.000467509 | 0.049081178 | 0.154051895 | 0.152405033 |
| 0.001647911 | 0.00183154  | 0.219468964 | 0.130535397 |
| 0.016337382 | 0.011746577 | 0.050340746 | 0.129255703 |
| 0.078004757 | 0.004072836 | 0.012170671 | 0.014878646 |
| 0.027922128 | 0.02463042  | 0.057818406 | 0.01776281  |
| 0.150360775 | 0.013355346 | 0.003093186 | 0.014068683 |
| 0.016347302 | 0.139196711 | 0.020792469 | 0.000473965 |
| 0.135223534 | 0.03716308  | 0.104979712 | 0.146198876 |
| 0.001363887 | 0.102056038 | 0.043639263 | 0.120105774 |
| 0.008010001 | 0.000369896 | 0.140870568 | 0.077237291 |
| 0.028483511 | 6.29E-05    | 0.106871048 | 0.007207713 |
| 0.021224646 | 0.000300332 | 0.004138971 | 0.039571702 |
| 0.161875599 | 0.083747858 | 0.014712393 | 0.00766967  |
| 0.006431438 | 0.000550784 | 0.094857531 | 0.011740489 |
| 0.014663966 | 0.00317347  | 0.023454231 | 0.022224909 |
| 0.16984395  | 0.003503219 | 0.000111966 | 0.00573957  |
| 0.062511607 | 0.006843769 | 0.021177062 | 0.212376021 |
| 0.049525614 | 0.034955562 | 0.017607256 | 0.074748272 |
| 0.00198181  | 0.076120654 | 0.136963889 | 0.008798706 |
| 0.000842042 | 0.056924102 | 0.001022762 | 0.004893391 |
| 0.02570536  | 0.000613064 | 0.011925196 | 0.025083488 |
| 0.024001804 | 0.01384607  | 0.038754403 | 0.008134967 |
| 0.000705544 | 0.002403749 | 0.012393199 | 0.003695692 |
| 0.014682112 | 0.032552693 | 0.002793715 | 0.081850338 |
| 0.066505951 | 0.185787679 | 0.027914096 | 0.001737611 |
| 0.000226855 | 0.006517968 | 0.093432692 | 0.032274401 |
| 0.023398883 | 0.079256706 | 0.000321612 | 0.044171138 |

|             |             |             |             |
|-------------|-------------|-------------|-------------|
| 0.000185177 | 0.088324929 | 0.037418947 | 0.000181637 |
| 7.10E-05    | 0.012953721 | 0.012819627 | 0.218831688 |
| 0.00118839  | 0.012610774 | 0.016964649 | 0.0228446   |
| 0.005670117 | 0.159058494 | 0.029534808 | 0.033699184 |
| 0.031337449 | 0.019947995 | 0.021166489 | 0.005884219 |
| 0.011150931 | 0.034010855 | 0.027366849 | 0.067839302 |
| 0.040728175 | 0.035635798 | 0.004619285 | 0.00688298  |
| 0.008456882 | 0.108451661 | 0.195477685 | 0.205702287 |
| 0.086308309 | 0.010629205 | 0.115127167 | 0.213119214 |
| 0.049605733 | 0.003472758 | 0.054306006 | 0.016948002 |
| 0.026431724 | 0.140785027 | 0.00549281  | 0.014160716 |
| 0.000791453 | 0.002027795 | 0.087359273 | 0.00738967  |
| 0.052664353 | 0.002884825 | 0.002352032 | 0.024086696 |
| 0.004667801 | 0.059742825 | 0.113414407 | 0.026139579 |
| 0.006188208 | 0.001970726 | 0.000565546 | 0.056726978 |
| 0.083179441 | 0.119143288 | 0.005648531 | 0.227797533 |
| 0.020262539 | 0.012756951 | 0.009125976 | 0.026902305 |
| 0.000347625 | 0.039985261 | 0.000679259 | 0.096511696 |
| 0.000276809 | 0.115207375 | 0.155037664 | 0.004895842 |
| 0.001098578 | 0.053357617 | 0.00961467  | 0.005775202 |
| 0.00553935  | 0.003498142 | 0.002309387 | 0.020027427 |
| 0.023464308 | 0.078895577 | 0.026913081 | 0.085424684 |
| 0.00147219  | 0.004857617 | 0.003458544 | 0.012707723 |
| 0.019368864 | 0.012413768 | 0.213389202 | 0.011779581 |
| 0.003710963 | 0.141918468 | 0.039079818 | 0.013724128 |
| 0.006711086 | 0.018567408 | 0.000854532 | 0.001580952 |
| 0.0123877   | 0.000237314 | 0.001150753 | 0.000450979 |
| 0.032508297 | 0.000917322 | 0.006205019 | 0.010321197 |
| 0.003190635 | 0.023859589 | 0.000784668 | 0.015576844 |
| 0.021326051 | 0.0314891   | 0.009222331 | 0.067799549 |
| 0.025985151 | 0.119985633 | 0.009036859 | 0.000147188 |
| 0.00238115  | 0.000757252 | 0.000176084 | 0.123488829 |
| 0.110072759 | 0.000565407 | 0.003653804 | 0.09920993  |
| 0.010621202 | 0.00050905  | 0.003729311 | 0.005833094 |
| 0.074992028 | 0.034968074 | 0.032313107 | 0.012035412 |
| 0.016631347 | 0.041714271 | 0.000867101 | 0.001061398 |
| 0.008716803 | 0.001571809 | 0.01938629  | 0.001390218 |
| 0.195679419 | 0.005129027 | 0.018330452 | 0.065679494 |
| 0.03088978  | 0.000911866 | 0.107175896 | 0.00060701  |
| 0.044174673 | 0.019728728 | 0.001722555 | 0.000758489 |
| 0.140846924 | 0.003388731 | 0.066920823 | 0.024813962 |
| 0.000269872 | 0.003402906 | 0.076986414 | 0.001565933 |
| 0.046757609 | 0.001217355 | 0.059175961 | 0.000190874 |
| 0.017659467 | 0.0129952   | 0.095835969 | 0.002665407 |
| 0.0024717   | 0.207790564 | 0.000946835 | 0.018860806 |
| 0.05041437  | 0.001933787 | 0.009076079 | 0.032348578 |
| 0.000574388 | 0.024638951 | 0.001200908 | 0.017381337 |
| 0.034164908 | 0.06858007  | 0.007469008 | 0.015886718 |
| 0.045942685 | 0.001711382 | 0.000794994 | 0.009461716 |
| 0.024930015 | 0.060643212 | 0.000586426 | 0.030147929 |
| 0.000417634 | 0.027095616 | 0.003748523 | 0.00969063  |
| 0.0714499   | 0.019153189 | 0.003935329 | 0.122333902 |
| 0.025414589 | 0.006173722 | 0.003653922 | 0.051314613 |
| 0.028064563 | 0.12288029  | 0.037582208 | 0.000327608 |

|             |             |             |             |          |
|-------------|-------------|-------------|-------------|----------|
| 0.020914427 | 0.009838386 | 0.046321733 | 0.002991378 |          |
| 0.160717961 | 0.011528105 | 0.011197342 | 0.079227201 |          |
| 0.012015763 | 0.003597815 | 0.003193726 | 0.007883255 |          |
| 0.000165152 | 0.124132236 | 0.029319969 | 0.013998532 |          |
| 0.024782634 | 0.000205325 | 9.07E-05    | 0.020187658 | 5.64E-05 |
| 0.000788401 | 1.30E-05    | 0.006010547 | 0.000232072 |          |
| 0.00047198  | 0.000449266 | 0.000573036 | 0.018891913 |          |
| 0.017622916 |             |             |             |          |
| KCTD9       | 0.20067807  | 0.385863955 | 0.179570908 |          |
| 0.274202106 | 0.257251339 | 0.381893101 | 0.153340657 |          |
| 0.226521715 | 0.320612486 | 0.22987392  | 0.35828474  |          |
| 0.09004428  | 0.048744859 | 0.411024296 | 0.137300349 |          |
| 0.305728266 | 0.111016593 | 0.214977883 | 0.079822279 |          |
| 0.24376195  | 0.242915438 | 0.272928239 | 0.376714209 |          |
| 0.232404555 | 0.284302852 | 0.354636114 | 0.267179676 |          |
| 0.44296783  | 0.192686805 | 0.360983924 | 0.177120161 |          |
| 0.419634694 | 0.262011014 | 0.275990912 | 0.091423695 |          |
| 0.353963749 | 0.006081401 | 0.451455471 | 0.28031175  |          |
| 0.123581433 | 0.373523422 | 0.298992409 | 0.311821418 |          |
| 0.314259735 | 0.145982995 | 0.166470884 | 0.303103497 |          |
| 0.318689993 | 0.283359424 | 0.178558482 | 0.365703494 |          |
| 0.288460989 | 0.382121447 | 0.33863708  | 0.007538195 |          |
| 0.209624146 | 0.041783327 | 0.134309456 | 0.477918788 |          |
| 0.303768739 | 0.220999086 | 0.17896303  | 0.264088629 |          |
| 0.293950592 | 0.300291087 | 0.287174798 | 0.285963442 |          |
| 0.464043748 | 0.111840684 | 0.329329399 | 0.235318094 |          |
| 0.353900268 | 0.108749812 | 0.26676437  | 0.175363655 |          |
| 0.297229946 | 0.272408    | 0.305401969 | 0.217128739 |          |
| 0.39514473  | 0.498167795 | 0.293848554 | 0.481561612 |          |
| 0.058979176 | 0.245609715 | 0.228202335 | 0.305721276 |          |
| 0.310529478 | 0.151542739 | 0.381047427 | 0.489552284 |          |
| 0.124254808 | 0.314412168 | 0.339786161 | 0.227422015 |          |
| 0.390040459 | 0.175256512 | 0.328895769 | 0.132198528 |          |
| 0.286320079 | 0.270423143 | 0.452517974 | 0.353718479 |          |
| 0.252978013 | 0.188977319 | 0.489227158 | 0.230619804 |          |
| 0.308082524 | 0.214453598 | 0.198209934 | 0.351245224 |          |
| 0.366377887 | 0.44290777  | 0.348820471 | 0.330228303 |          |
| 0.290623987 | 0.459058108 | 0.386399597 | 0.369163858 |          |
| 0.104457293 | 0.480630223 | 0.311379592 | 0.128000664 |          |
| 0.187254522 | 0.16712557  | 0.167971781 | 0.321801187 |          |
| 0.39901237  | 0.348752843 | 0.31272316  | 0.267069822 |          |
| 0.36492     | 0.471881744 | 0.473866891 | 0.365806462 |          |
| 0.138466528 | 0.15111281  | 0.303325549 | 0.319631405 |          |
| 0.33787173  | 0.205095789 | 0.193003652 | 0.503534655 |          |
| 0.391344592 | 0.352035638 | 0.283386957 | 0.505426916 |          |
| 0.237060649 | 0.482400194 | 0.404217324 | 0.285142143 |          |
| 0.501111777 | 0.496248999 | 0.45850302  | 0.310574877 |          |
| 0.471305962 | 0.397930717 | 0.050887673 | 0.344414942 |          |
| 0.449537669 | 0.017227887 | 0.387024131 | 0.414727972 |          |
| 0.467855608 | 0.359940416 | 0.451423504 | 0.441335567 |          |
| 0.469244704 | 0.182239029 | 0.013715499 | 0.276698757 |          |
| 0.489100045 | 0.387493127 | 0.170608248 | 0.313042556 |          |
| 0.281735089 | 0.392440995 | 0.338174363 | 0.274685718 |          |
| 0.481034141 | 0.390196543 | 0.414207637 | 0.356463067 |          |

|             |             |             |             |
|-------------|-------------|-------------|-------------|
| 0.28626471  | 0.356776093 | 0.258448853 | 0.483106719 |
| 0.137965541 | 0.253702001 | 0.164124644 | 0.303064521 |
| 0.319859642 | 0.255003924 | 0.380807077 | 0.269108429 |
| 0.277238231 | 0.338607562 | 0.223472893 | 0.298101564 |
| 0.155388857 | 0.3615211   | 0.279330016 | 0.281356828 |
| 0.134276423 | 0.241905491 | 0.280484844 | 0.261476024 |
| 0.268132403 | 0.329922918 | 0.34592875  | 0.421483881 |
| 0.26897463  | 0.302740864 | 0.372775473 | 0.43943326  |
| 0.403957787 | 0.299443193 | 0.289845554 | 0.058170647 |
| 0.250689555 | 0.192762186 | 0.110512736 | 0.297726758 |
| 0.266855678 | 0.265986305 | 0.322056872 | 0.325596164 |
| 0.376871225 | 0.225667247 | 0.283399494 | 0.449662427 |
| 0.256465051 | 0.298751528 | 0.37968359  | 0.330890617 |
| 0.030714003 | 0.368191453 | 0.376849416 | 0.134082736 |
| 0.320385192 | 0.112056537 | 0.196063215 | 0.393716839 |
| 0.198230485 | 0.167073181 | 0.415462703 | 0.311752271 |
| 0.300141141 | 0.297149277 | 0.459917307 | 0.026888143 |
| 0.247675626 | 0.094501544 | 0.306779922 | 0.27333555  |
| 0.330227653 | 0.299645693 | 0.243381528 | 0.251817946 |
| 0.262433341 | 0.477488172 | 0.367768764 | 0.453491714 |
| 0.280716166 | 0.467070198 | 0.37010802  | 0.396288605 |
| 0.361044777 | 0.24752625  | 0.081399042 | 0.382165546 |
| 0.380970414 | 0.234172423 | 0.186679455 | 0.335485144 |
| 0.272605835 | 0.313939857 | 0.121021977 | 0.445118861 |
| 0.488069514 | 0.455363949 | 0.221381516 | 0.313964919 |
| 0.386362625 | 0.345675522 | 0.351305371 | 0.468094419 |
| 0.2331195   | 0.275251746 | 0.272624595 | 0.332432251 |
| 0.294420827 | 0.171835095 | 0.322597431 | 0.101983493 |
| 0.007780617 | 0.189862454 | 0.187414917 | 0.223818466 |
| 0.129032033 | 0.31387959  | 0.328847351 | 0.465268799 |
| 0.227639497 | 0.399060346 | 0.27409793  | 0.296747508 |
| 0.408074773 | 0.260676767 | 0.280206873 | 0.308327197 |
| 0.300988091 | 0.073836043 | 0.22317872  | 0.507515431 |
| 0.129748309 | 0.183663361 | 0.320343795 | 0.012389255 |
| 0.14700515  | 0.342568268 | 0.201551687 | 0.2840497   |
| 0.394291797 | 0.288030548 | 0.314989413 | 0.261266893 |
| 0.336856793 | 0.210798959 | 0.016740252 | 0.418543917 |
| 0.427478521 | 0.400243117 | 0.427956662 | 0.431213179 |
| 0.361554897 | 0.329354258 | 0.338203328 | 0.389916488 |
| 0.217725696 | 0.204544038 | 0.164816938 | 0.293229187 |
| 0.013939569 | 0.352274507 | 0.256419707 | 0.259375665 |
| 0.331294271 | 0.305376718 | 0.136502594 | 0.266269292 |
| 0.115113206 | 0.137006301 | 0.307072366 | 0.237266711 |
| 0.288859845 | 0.080708298 | 0.267129141 | 0.25089877  |
| 0.446221022 | 0.369181465 | 0.251114344 | 0.488240545 |
| 0.34666542  | 0.236636816 | 0.303342226 | 0.341355176 |
| 0.181546036 | 0.090764848 | 0.321869738 | 0.044839004 |
| 0.199098568 | 0.420848788 | 0.284209165 | 0.198588254 |
| 0.341562342 | 0.045324689 | 1           | 0.488546533 |
| 0.452197384 | 0.44656487  | 0.462932242 | 0.210854685 |
| 0.472795971 | 0.047598357 | 0.469171216 | 0.378358386 |
| 0.289993913 | 0.007273927 | 0.020473202 | 0.407816577 |
| 0.32513193  | 0.158592254 | 0.272257267 | 0.371432608 |
| 0.220945297 | 0.275389555 | 0.158865146 | 0.159360362 |



|             |             |             |             |
|-------------|-------------|-------------|-------------|
| 0.370049243 | 0.23581159  | 0.138503901 | 0.453573424 |
| 0.290795249 | 0.271664689 | 0.337882351 | 0.195035174 |
| 0.323837168 | 0.164571076 | 0.183534976 | 0.02358553  |
| 0.305663102 | 0.223392452 | 0.485176471 | 0.464876176 |
| 0.466952994 | 0.324588888 | 0.249072284 | 0.304546461 |
| 0.347932393 | 0.216155398 | 0.269115924 | 0.233294163 |
| 0.457417634 | 0.332047979 | 0.358645128 | 0.369334888 |
| 0.453626389 | 0.45403121  | 0.118810169 | 0.353248231 |
| 0.074439572 | 0.00349801  | 0.390137776 | 0.294882524 |
| 0.035469515 | 0.284931173 | 0.329009761 | 0.21518636  |
| 0.2196569   | 0.130436432 | 0.176494914 | 0.171533614 |
| 0.317564273 | 0.318744138 | 0.222057607 | 0.275247743 |
| 0.229075208 | 0.127635548 | 0.252176873 | 0.21790598  |
| 0.186130189 | 0.345362765 | 0.291089356 | 0.08889819  |
| 0.337580759 | 0.323458641 | 0.170922928 | 0.26951688  |
| 0.385525535 | 0.424170537 | 0.117833659 | 0.054968432 |
| 0.334413206 | 0.266760761 | 0.425413673 | 0.455916248 |
| 0.504462132 | 0.475428126 | 0.418996287 | 0.162842425 |
| 0.181921623 | 0.297365484 | 0.227001627 | 0.132222479 |
| 0.460289372 | 0.171635095 | 0.457198787 | 0.204274491 |
| 0.220578449 | 0.305706656 | 0.120197965 | 0.186065188 |
| 0.282495239 | 0.272008609 | 0.231568576 | 0.27835335  |
| 0.301799079 | 0.182659022 | 0.139819099 | 0.287448376 |
| 0.359336487 | 0.122977846 | 0.265030399 | 0.310088083 |
| 0.354382397 | 0.161387563 | 0.338101217 | 0.438381054 |
| 0.254261841 | 0.211404526 | 0.37398806  | 0.319215224 |
| 0.363852908 | 0.289745663 | 0.103512837 | 0.410511172 |
| 0.426558633 | 0.356357996 | 0.476810555 | 0.337635023 |
| 0.191984515 | 0.316817326 | 0.204547521 | 0.288871433 |
| 0.255826006 | 0.383287319 | 0.258914441 | 0.169747592 |
| 0.308276995 | 0.469199561 | 0.379251606 | 0.259374849 |
| 0.330495462 | 0.23583457  | 0.159723381 | 0.368894705 |
| 0.140169096 | 0.218564922 | 0.303335772 | 0.332374176 |
| 0.00639918  | 0.085910777 | 0.406032762 | 0.302812791 |
| 0.472044556 | 0.414511912 | 0.438266718 | 0.275058501 |
| 0.000857337 | 0.30479966  | 0.358198938 | 0.352012242 |
| 0.395082134 | 0.36903101  | 0.165130271 | 0.1733942   |
| 0.325887104 | 0.202302097 | 0.212402771 | 0.338322449 |
| 0.114889456 | 0.370299098 | 0.271048742 | 0.254939395 |
| 0.22751531  | 0.18050743  | 0.176399532 | 0.321275258 |
| 0.087051892 | 0.308422037 | 0.355088409 | 0.239864456 |
| 0.155412038 | 0.362279243 | 0.367151931 | 0.114982248 |
| 0.255228411 | 0.338602366 | 0.376454971 | 0.011042217 |
| 0.35273224  | 0.047524866 | 0.234037565 | 0.26824271  |
| 0.24756661  | 0.234162045 | 0.256013938 | 0.274141328 |
| 0.333859022 | 0.284349821 | 0.335760646 | 0.30612418  |
| 0.236465091 | 0.282901918 | 0.318156664 | 0.338362855 |
| 0.284908098 | 0.255098877 | 0.201596674 | 0.20391976  |
| 0.155371008 | 0.400678543 | 0.320832322 | 0.191205682 |
| 0.27560468  | 0.314755014 | 0.353733534 | 0.45985314  |
| 0.379125376 | 0.221137279 | 0.291853215 | 0.404541762 |
| 0.155965026 | 0.31176348  | 0.16973223  | 0.360826578 |
| 0.307638234 | 0.20200613  | 0.336348795 | 0.366907851 |
| 0.336890791 | 0.424974297 | 0.320610424 | 0.406936965 |

|             |             |             |             |
|-------------|-------------|-------------|-------------|
| 0.333661555 | 0.263272082 | 0.278023187 | 0.17697184  |
| 0.304551997 | 0.232587163 | 0.222847238 | 0.022399765 |
| 0.352679937 | 0.365799273 | 0.393680654 | 0.477254527 |
| 0.186703768 | 0.372030543 | 0.310674922 | 0.218829774 |
| 0.246664622 | 0.273885744 | 0.252994421 | 0.349230363 |
| 0.138696916 | 0.279451099 | 0.273204821 | 0.369224826 |
| 0.344340938 | 0.321405245 | 0.198648494 | 0.284605153 |
| 0.260152279 | 0.304836141 | 0.452024525 | 0.245726401 |
| 0.326271513 | 0.178032736 | 0.315289407 | 0.298533756 |
| 0.240709569 | 0.445190904 | 0.169180624 | 0.45249339  |
| 0.278526272 | 0.235463946 | 0.479099922 | 0.316671776 |
| 0.319748526 | 0.178290807 | 0.11733712  | 0.320610994 |
| 0.257888169 | 0.235118056 | 0.011975748 | 0.057238164 |
| 0.333925511 | 0.228382728 | 0.341969984 | 0.312444501 |
| 0.197769924 | 0.311001194 | 0.09430656  | 0.322052216 |
| 0.464285888 | 0.492989086 | 0.311984158 | 0.296989839 |
| 0.348769952 | 0.215938454 | 0.38662262  | 0.011878962 |
| 0.329475206 | 0.3036829   | 0.284587777 | 0.142053991 |
| 0.083073903 | 0.139774544 | 0.340812111 | 0.157032197 |
| 0.394904558 | 0.136802216 | 0.297534869 | 0.362372491 |
| 0.253543314 | 0.500062675 | 0.177623873 | 0.364438853 |
| 0.105502386 | 0.298267846 | 0.265218526 | 0.277492775 |
| 0.252381856 | 0.219607387 | 0.352683853 | 0.18135546  |
| 0.118273761 | 0.262929055 | 0.007335224 | 0.446676678 |
| 0.471366825 | 0.24073608  | 0.282346851 | 0.212692961 |
| 0.305731821 | 0.33678096  | 0.211473469 | 0.305913666 |
| 0.058001733 | 0.294166074 | 0.269989182 | 0.395712424 |
| 0.189512345 | 0.2956611   | 0.153792248 | 0.223400373 |
| 0.485974092 | 0.250204248 | 0.291880044 | 0.243108475 |
| 0.455561752 | 0.343317116 | 0.266610105 | 0.198019102 |
| 0.302903002 | 0.170279473 | 0.319439162 | 0.474337939 |
| 0.242385704 | 0.171338448 | 0.35567301  | 0.275712026 |
| 0.214818783 | 0.365638357 | 0.300168391 | 0.463135259 |
| 0.124706203 | 0.314458354 | 0.341616491 | 0.411681979 |
| 0.316586099 | 0.129662718 | 0.186048385 | 0.225905115 |
| 0.453505865 | 0.229351926 | 0.184309379 | 0.375471898 |
| 0.159513747 | 0.314864995 | 0.296545882 | 0.186785685 |
| 0.114731602 | 0.217052805 | 0.351610876 | 0.248905653 |
| 0.314008896 | 0.3105557   | 0.203956154 | 0.392765092 |
| 0.222110635 | 0.099901197 | 0.437938892 | 0.01288619  |
| 0.38605635  | 0.351482627 | 0.300089032 | 0.281693599 |
| 0.298882727 | 0.337693059 | 0.353277388 | 0.013406826 |
| 0.345925965 | 0.051757488 | 0.246787312 | 0.236460568 |
| 0.206425569 | 0.15621497  | 0.445264694 | 0.441137179 |
| 0.33929064  | 0.241822478 | 0.250904258 | 0.428794602 |
| 0.106084609 | 0.209788759 | 0.227382133 | 0.367954648 |
| 0.15379527  | 0.297452883 | 0.298467949 | 0.2822662   |
| 0.373822175 | 0.308471676 |             |             |
| KIF11       | 0.180150531 | 0.51206272  | 0.149966151 |
| 0.250531103 | 0.383849475 | 0.534871406 | 0.14258367  |
| 0.249057128 | 0.465719834 | 0.393201962 | 0.484468889 |
| 0.058395843 | 0.10724848  | 0.532408756 | 0.133478319 |
| 0.471122034 | 0.089602219 | 0.217931595 | 0.128248671 |
| 0.340349557 | 0.358489659 | 0.428526333 | 0.527601547 |

|             |             |             |             |
|-------------|-------------|-------------|-------------|
| 0.363429469 | 0.309277804 | 0.486164727 | 0.456150533 |
| 0.539752158 | 0.334250736 | 0.534845264 | 0.266221686 |
| 0.477464117 | 0.400332088 | 0.457263494 | 0.057778327 |
| 0.52987671  | 0.016909581 | 0.464225656 | 0.362994505 |
| 0.189472807 | 0.449807817 | 0.453163614 | 0.366952284 |
| 0.474632192 | 0.106642329 | 0.289590213 | 0.483734542 |
| 0.457573267 | 0.406971408 | 0.166437975 | 0.535998414 |
| 0.462169051 | 0.496262921 | 0.50144813  | 0.007001842 |
| 0.358579751 | 0.099205141 | 0.260870149 | 0.525737792 |
| 0.338828452 | 0.234176884 | 0.337236042 | 0.390884205 |
| 0.480480323 | 0.468202429 | 0.382928622 | 0.458942864 |
| 0.536062407 | 0.212957906 | 0.515063328 | 0.264761765 |
| 0.511849829 | 0.097653999 | 0.284273174 | 0.189970828 |
| 0.478023213 | 0.323974896 | 0.449502907 | 0.365287229 |
| 0.506805843 | 0.53087565  | 0.369960489 | 0.515108688 |
| 0.127020025 | 0.403248375 | 0.353053316 | 0.41247555  |
| 0.46871739  | 0.177795891 | 0.524180171 | 0.523593948 |
| 0.128620746 | 0.488674131 | 0.503275001 | 0.248690932 |
| 0.532839475 | 0.336805335 | 0.501657456 | 0.221499506 |
| 0.444806246 | 0.416141947 | 0.49281912  | 0.433175033 |
| 0.406656208 | 0.175249673 | 0.512876409 | 0.378887617 |
| 0.408394297 | 0.190672144 | 0.292854343 | 0.531004845 |
| 0.523169719 | 0.545932952 | 0.519908374 | 0.471421007 |
| 0.452333302 | 0.537265465 | 0.522566607 | 0.513828801 |
| 0.209026271 | 0.53068149  | 0.330693557 | 0.107803687 |
| 0.178398696 | 0.178040564 | 0.300910046 | 0.421914081 |
| 0.544786591 | 0.479264056 | 0.345260301 | 0.337594336 |
| 0.515668575 | 0.501055178 | 0.526109388 | 0.520320939 |
| 0.108668594 | 0.294037136 | 0.457626202 | 0.440957487 |
| 0.492646326 | 0.2277461   | 0.313478175 | 0.528384056 |
| 0.490610337 | 0.52173452  | 0.315547986 | 0.525940365 |
| 0.328785176 | 0.523918179 | 0.536301492 | 0.295638715 |
| 0.529312017 | 0.517118005 | 0.529317684 | 0.477725625 |
| 0.511068361 | 0.494546585 | 0.102963059 | 0.489977049 |
| 0.519339443 | 0.021706118 | 0.538469468 | 0.538662205 |
| 0.524213176 | 0.536467468 | 0.525730457 | 0.541831966 |
| 0.527229684 | 0.1723461   | 0.036527202 | 0.385136218 |
| 0.519194526 | 0.506572346 | 0.230910059 | 0.493171507 |
| 0.443157192 | 0.543487142 | 0.521341903 | 0.399504761 |
| 0.515107208 | 0.535863406 | 0.542396854 | 0.513150644 |
| 0.427200878 | 0.432094336 | 0.437009504 | 0.49842926  |
| 0.113531425 | 0.244620352 | 0.139472802 | 0.426507195 |
| 0.468767213 | 0.289754899 | 0.526805818 | 0.437391095 |
| 0.318269482 | 0.492822515 | 0.3942713   | 0.458214468 |
| 0.140927588 | 0.542232282 | 0.301831379 | 0.311402804 |
| 0.103029393 | 0.257322218 | 0.308534957 | 0.275582367 |
| 0.361647636 | 0.311919602 | 0.534589857 | 0.531242232 |
| 0.43815052  | 0.322602033 | 0.541498545 | 0.517684505 |
| 0.481750663 | 0.457835064 | 0.362499536 | 0.030413841 |
| 0.351062206 | 0.365441616 | 0.218129637 | 0.48824753  |
| 0.278758293 | 0.354437747 | 0.482648995 | 0.480394228 |
| 0.448463825 | 0.282530337 | 0.450120509 | 0.476273566 |
| 0.281171717 | 0.411305976 | 0.526486963 | 0.510865588 |
| 0.014815147 | 0.464286495 | 0.54383373  | 0.203897765 |

|             |             |             |             |
|-------------|-------------|-------------|-------------|
| 0.448671697 | 0.180909233 | 0.31718268  | 0.528660854 |
| 0.354385138 | 0.287417846 | 0.541916048 | 0.474870827 |
| 0.463191803 | 0.321158882 | 0.529495403 | 0.062250185 |
| 0.420186857 | 0.091268367 | 0.394450647 | 0.440432134 |
| 0.391713931 | 0.404878046 | 0.388568412 | 0.363918487 |
| 0.263333506 | 0.529039195 | 0.511155907 | 0.544003445 |
| 0.443168017 | 0.526441962 | 0.539215707 | 0.53055317  |
| 0.498783854 | 0.431240913 | 0.16220452  | 0.537042971 |
| 0.529937922 | 0.37273353  | 0.176451052 | 0.524452058 |
| 0.445251646 | 0.484536312 | 0.171034442 | 0.5283323   |
| 0.509478596 | 0.498284362 | 0.254179828 | 0.460069252 |
| 0.502423272 | 0.387849649 | 0.51104825  | 0.523203325 |
| 0.395191327 | 0.431867363 | 0.4083403   | 0.475672812 |
| 0.310123533 | 0.274049392 | 0.430516851 | 0.211596114 |
| 0.014266341 | 0.192022747 | 0.161869411 | 0.261208344 |
| 0.209447938 | 0.507457229 | 0.492172307 | 0.535479335 |
| 0.230933528 | 0.514244536 | 0.367451916 | 0.386783109 |
| 0.502020046 | 0.432932189 | 0.453841496 | 0.478361616 |
| 0.379352863 | 0.045333131 | 0.212036487 | 0.533567092 |
| 0.115735168 | 0.297401224 | 0.466112285 | 0.007022391 |
| 0.121319352 | 0.511755353 | 0.197686414 | 0.298209885 |
| 0.524106787 | 0.306052904 | 0.349641714 | 0.415940849 |
| 0.462841501 | 0.201699184 | 0.008893712 | 0.5231273   |
| 0.507555385 | 0.496668867 | 0.50687979  | 0.486605198 |
| 0.500697739 | 0.507069131 | 0.499786344 | 0.516446127 |
| 0.214724361 | 0.204118844 | 0.256738335 | 0.391945863 |
| 0.013564222 | 0.489648823 | 0.403173108 | 0.265213522 |
| 0.512112797 | 0.427937866 | 0.106382562 | 0.435859746 |
| 0.065450223 | 0.238238597 | 0.450500131 | 0.332322196 |
| 0.435215023 | 0.051142722 | 0.335062625 | 0.391217827 |
| 0.502640021 | 0.47477079  | 0.421935702 | 0.530602794 |
| 0.454840121 | 0.252959965 | 0.407040139 | 0.500661769 |
| 0.163537602 | 0.150341072 | 0.492502408 | 0.057449424 |
| 0.310540524 | 0.492199055 | 0.467846269 | 0.161504998 |
| 0.40701186  | 0.021468039 | 0.488546533 | 1           |
| 0.508532864 | 0.535288326 | 0.540383913 | 0.332298451 |
| 0.532896399 | 0.120273741 | 0.540126271 | 0.521688526 |
| 0.464154576 | 0.003089709 | 0.016607958 | 0.540018425 |
| 0.480218726 | 0.146730186 | 0.286471066 | 0.498489625 |
| 0.210193505 | 0.300771243 | 0.157107168 | 0.234922583 |
| 0.54105973  | 0.329321678 | 0.230614845 | 0.507009501 |
| 0.35772838  | 0.353766504 | 0.518495232 | 0.195060576 |
| 0.501801291 | 0.128829424 | 0.190816474 | 0.016954524 |
| 0.459723152 | 0.226994763 | 0.501241043 | 0.533086512 |
| 0.518819605 | 0.478784505 | 0.418058873 | 0.470141996 |
| 0.509454993 | 0.216950431 | 0.44743413  | 0.24037326  |
| 0.528769786 | 0.48111328  | 0.44987601  | 0.442028355 |
| 0.524668629 | 0.519703664 | 0.094143294 | 0.503965284 |
| 0.040909498 | 0.003960094 | 0.516983626 | 0.395789774 |
| 0.088478315 | 0.446253263 | 0.385814697 | 0.340996275 |
| 0.33544626  | 0.091387866 | 0.3091305   | 0.287422894 |
| 0.411256212 | 0.46168638  | 0.340347866 | 0.373492314 |
| 0.342302925 | 0.180982066 | 0.313656269 | 0.27211521  |
| 0.334330535 | 0.434807859 | 0.313237281 | 0.066466096 |

|             |             |             |             |
|-------------|-------------|-------------|-------------|
| 0.516263428 | 0.495077691 | 0.143177309 | 0.292140272 |
| 0.535088803 | 0.545477957 | 0.101083265 | 0.030602445 |
| 0.402101785 | 0.414404434 | 0.538744903 | 0.534807349 |
| 0.537466373 | 0.519733667 | 0.459322132 | 0.202998795 |
| 0.161957331 | 0.420578835 | 0.358246653 | 0.157991374 |
| 0.540031863 | 0.16306252  | 0.523885969 | 0.350347032 |
| 0.230742239 | 0.340602908 | 0.08891597  | 0.182927942 |
| 0.458149453 | 0.310081627 | 0.276969804 | 0.283095244 |
| 0.417087336 | 0.303591302 | 0.123763828 | 0.327109146 |
| 0.475315626 | 0.20615757  | 0.287151723 | 0.454647378 |
| 0.487032072 | 0.302192766 | 0.511004388 | 0.493324719 |
| 0.25885688  | 0.226639152 | 0.438075196 | 0.488927441 |
| 0.53842863  | 0.480226443 | 0.071136233 | 0.518688681 |
| 0.532706901 | 0.535055785 | 0.523962508 | 0.475793756 |
| 0.187073746 | 0.466672911 | 0.370674672 | 0.428560577 |
| 0.312783281 | 0.534111029 | 0.360332407 | 0.152277716 |
| 0.40852397  | 0.49986884  | 0.510848002 | 0.282121601 |
| 0.522050743 | 0.261620505 | 0.147806602 | 0.530177165 |
| 0.221115159 | 0.197344636 | 0.475858717 | 0.516752673 |
| 0.004006266 | 0.165871043 | 0.514896159 | 0.381297004 |
| 0.516618127 | 0.530038881 | 0.50533638  | 0.398357993 |
| 0.002044999 | 0.480389019 | 0.490340649 | 0.495246402 |
| 0.530188106 | 0.491503176 | 0.260107593 | 0.154333033 |
| 0.405416604 | 0.189853872 | 0.232454871 | 0.48205819  |
| 0.204943583 | 0.537670362 | 0.318957377 | 0.335569002 |
| 0.294094605 | 0.199438452 | 0.299322458 | 0.381663427 |
| 0.17983152  | 0.365961056 | 0.465141491 | 0.401894785 |
| 0.240630598 | 0.504689574 | 0.513587768 | 0.081666029 |
| 0.428656895 | 0.496352729 | 0.510846931 | 0.006141605 |
| 0.519521128 | 0.026630856 | 0.298408736 | 0.320984226 |
| 0.304456082 | 0.316782969 | 0.354130844 | 0.38204481  |
| 0.476335729 | 0.347368571 | 0.40477437  | 0.362622341 |
| 0.263839701 | 0.359248186 | 0.481790943 | 0.481497942 |
| 0.377261072 | 0.248051608 | 0.201018882 | 0.195915827 |
| 0.126274493 | 0.53690654  | 0.371820127 | 0.174834718 |
| 0.350696294 | 0.475265966 | 0.449914048 | 0.520750217 |
| 0.499054403 | 0.226454373 | 0.44381816  | 0.542509962 |
| 0.295116381 | 0.431437042 | 0.160679763 | 0.512018813 |
| 0.376933545 | 0.289364796 | 0.518390681 | 0.464454447 |
| 0.511482495 | 0.467744548 | 0.373164645 | 0.504457238 |
| 0.470772448 | 0.432683332 | 0.423451659 | 0.163386412 |
| 0.311502512 | 0.253311726 | 0.333161769 | 0.008425523 |
| 0.484695539 | 0.423587411 | 0.546688054 | 0.512936836 |
| 0.341584307 | 0.478949268 | 0.449165151 | 0.192407665 |
| 0.374173805 | 0.289182057 | 0.264641846 | 0.529047076 |
| 0.255870087 | 0.32044204  | 0.386884435 | 0.495562027 |
| 0.516719521 | 0.502369262 | 0.326345357 | 0.391102285 |
| 0.357850564 | 0.345097611 | 0.488231259 | 0.254243859 |
| 0.511538141 | 0.244453512 | 0.480547523 | 0.397697963 |
| 0.317711341 | 0.53396943  | 0.150475825 | 0.540657713 |
| 0.414351199 | 0.252572045 | 0.503042837 | 0.45315995  |
| 0.437732451 | 0.207480997 | 0.219161317 | 0.500749905 |
| 0.345976043 | 0.402500347 | 0.023833895 | 0.089357817 |
| 0.440671392 | 0.397271142 | 0.507512819 | 0.470372857 |

|             |             |             |             |
|-------------|-------------|-------------|-------------|
| 0.308611021 | 0.435530699 | 0.200115099 | 0.436405964 |
| 0.503847803 | 0.520268585 | 0.370798587 | 0.366495665 |
| 0.475895869 | 0.208729992 | 0.540391219 | 0.02610798  |
| 0.505303948 | 0.491967306 | 0.471272377 | 0.131920139 |
| 0.058704962 | 0.245764546 | 0.506891536 | 0.16160687  |
| 0.524456514 | 0.249783392 | 0.467156251 | 0.536131111 |
| 0.307513526 | 0.521812591 | 0.209029297 | 0.511361953 |
| 0.114385987 | 0.386829159 | 0.446456621 | 0.466015354 |
| 0.312700192 | 0.349032996 | 0.479231644 | 0.287632674 |
| 0.087406256 | 0.356215545 | 0.004561688 | 0.45808243  |
| 0.493377628 | 0.394992388 | 0.329524707 | 0.386881798 |
| 0.392237705 | 0.481101499 | 0.33247284  | 0.498836799 |
| 0.033398288 | 0.443350103 | 0.328582231 | 0.53210073  |
| 0.288403333 | 0.461404046 | 0.126419991 | 0.377530307 |
| 0.494966235 | 0.369945999 | 0.377101239 | 0.371076737 |
| 0.525182959 | 0.497859838 | 0.295262123 | 0.303366747 |
| 0.483909149 | 0.15700925  | 0.498969969 | 0.526042807 |
| 0.284171844 | 0.264551342 | 0.518421188 | 0.314673113 |
| 0.369367403 | 0.498062497 | 0.488533926 | 0.518521675 |
| 0.134301218 | 0.377665682 | 0.514383057 | 0.51963468  |
| 0.413319831 | 0.21552757  | 0.301547539 | 0.312859365 |
| 0.511004084 | 0.200364305 | 0.314609751 | 0.490191514 |
| 0.259424648 | 0.432689934 | 0.455987698 | 0.265297879 |
| 0.091360063 | 0.289125183 | 0.503390411 | 0.267170222 |
| 0.415232935 | 0.451419959 | 0.305385142 | 0.471040407 |
| 0.231125864 | 0.061267657 | 0.493745608 | 0.021298465 |
| 0.502444233 | 0.496389226 | 0.382403869 | 0.436644215 |
| 0.316498522 | 0.48351162  | 0.475234533 | 0.005625115 |
| 0.503535505 | 0.06716262  | 0.402005168 | 0.308212815 |
| 0.356540033 | 0.133248042 | 0.514510324 | 0.535515416 |
| 0.464039125 | 0.419345604 | 0.414338968 | 0.521108652 |
| 0.179155726 | 0.386056248 | 0.40602437  | 0.53080798  |
| 0.26711513  | 0.472068532 | 0.493141154 | 0.445211045 |
| 0.5158084   | 0.422540735 |             |             |
| KIF15       | 0.167815552 | 0.492685968 | 0.165825282 |
| 0.209980509 | 0.286903205 | 0.491764769 | 0.116280356 |
| 0.200291601 | 0.441488384 | 0.399754481 | 0.396493185 |
| 0.047016091 | 0.066435044 | 0.470680863 | 0.102310498 |
| 0.375700745 | 0.061251026 | 0.172309906 | 0.103065679 |
| 0.304907717 | 0.25365665  | 0.33888201  | 0.501392419 |
| 0.264142353 | 0.300298955 | 0.460576564 | 0.387122035 |
| 0.500221262 | 0.296391004 | 0.467359351 | 0.295506276 |
| 0.426043827 | 0.297085333 | 0.389103791 | 0.059565218 |
| 0.457434898 | 0.008908491 | 0.449643981 | 0.267481477 |
| 0.139191106 | 0.402377512 | 0.475714043 | 0.280931308 |
| 0.45420806  | 0.103653216 | 0.31688246  | 0.408498184 |
| 0.430358709 | 0.34095348  | 0.177274301 | 0.486513832 |
| 0.40134576  | 0.446781958 | 0.497271552 | 0.004925661 |
| 0.277907992 | 0.071002901 | 0.195553404 | 0.511077333 |
| 0.278966347 | 0.170453495 | 0.296235364 | 0.34273252  |
| 0.40922655  | 0.385620452 | 0.310687921 | 0.420479235 |
| 0.488781757 | 0.140260312 | 0.460116654 | 0.225657906 |
| 0.443953451 | 0.100956869 | 0.242719876 | 0.199777436 |
| 0.403828965 | 0.242446431 | 0.353000822 | 0.28154206  |

|             |             |             |             |
|-------------|-------------|-------------|-------------|
| 0.496209453 | 0.512222926 | 0.313152119 | 0.520620696 |
| 0.072333948 | 0.307266458 | 0.263174066 | 0.324142494 |
| 0.395745332 | 0.14798058  | 0.444042935 | 0.500070239 |
| 0.122120009 | 0.476476494 | 0.435034726 | 0.241932063 |
| 0.503290635 | 0.269759301 | 0.488640024 | 0.148064207 |
| 0.35380329  | 0.315150465 | 0.486057971 | 0.355878439 |
| 0.314389083 | 0.18054898  | 0.526524382 | 0.283394546 |
| 0.312815187 | 0.189659766 | 0.200569256 | 0.465798446 |
| 0.451470654 | 0.498364996 | 0.478227118 | 0.394451615 |
| 0.357178413 | 0.491731214 | 0.45788761  | 0.464939329 |
| 0.23406718  | 0.516464052 | 0.289905235 | 0.07416573  |
| 0.184795007 | 0.125284546 | 0.218678704 | 0.354571401 |
| 0.488599869 | 0.413331592 | 0.289055871 | 0.244573059 |
| 0.436663152 | 0.515643451 | 0.514710094 | 0.450350638 |
| 0.093772579 | 0.221056688 | 0.371065208 | 0.394211198 |
| 0.403834969 | 0.194845183 | 0.222238758 | 0.524872284 |
| 0.434670856 | 0.441305091 | 0.303202501 | 0.521063089 |
| 0.26585015  | 0.482523832 | 0.512662323 | 0.231586186 |
| 0.518909222 | 0.51978173  | 0.466774124 | 0.387275057 |
| 0.485756303 | 0.448747967 | 0.073242977 | 0.430650751 |
| 0.452692942 | 0.012509256 | 0.483337947 | 0.480210472 |
| 0.501746556 | 0.468769847 | 0.466226951 | 0.488218061 |
| 0.50846883  | 0.160492371 | 0.025977059 | 0.282035594 |
| 0.513469305 | 0.44837742  | 0.157536557 | 0.420184755 |
| 0.341603564 | 0.494243    | 0.460280773 | 0.321616383 |
| 0.477791965 | 0.484794299 | 0.495417988 | 0.448519576 |
| 0.400565919 | 0.389196579 | 0.360430187 | 0.512883186 |
| 0.091010731 | 0.227596235 | 0.150902748 | 0.356083909 |
| 0.485721489 | 0.214562689 | 0.476645462 | 0.348683916 |
| 0.243914717 | 0.459137426 | 0.325071126 | 0.360714849 |
| 0.156922422 | 0.486055503 | 0.270114008 | 0.280544665 |
| 0.072444414 | 0.243677372 | 0.228570464 | 0.21272658  |
| 0.257259897 | 0.316445781 | 0.471115018 | 0.477608835 |
| 0.354693425 | 0.308021613 | 0.477729655 | 0.455334713 |
| 0.403647848 | 0.370176328 | 0.305067447 | 0.021222192 |
| 0.257471006 | 0.322501771 | 0.152066306 | 0.42054903  |
| 0.279446351 | 0.255885909 | 0.390660653 | 0.3851517   |
| 0.41741533  | 0.263438298 | 0.354346817 | 0.438417142 |
| 0.277827408 | 0.313391149 | 0.447456786 | 0.464021392 |
| 0.015454542 | 0.391004571 | 0.47560925  | 0.125739742 |
| 0.38373255  | 0.113974107 | 0.247661899 | 0.464896893 |
| 0.267753373 | 0.191340864 | 0.487592959 | 0.382467431 |
| 0.395041642 | 0.328686047 | 0.479991189 | 0.037688308 |
| 0.338524163 | 0.058531142 | 0.299344479 | 0.450389937 |
| 0.324198944 | 0.317067963 | 0.288067777 | 0.270269267 |
| 0.269490659 | 0.503306919 | 0.459268257 | 0.489565084 |
| 0.363100438 | 0.486222527 | 0.467853777 | 0.461859085 |
| 0.427544855 | 0.362129218 | 0.106463737 | 0.471121312 |
| 0.468498974 | 0.317317451 | 0.19010282  | 0.463538376 |
| 0.395500755 | 0.394255029 | 0.113115857 | 0.464516194 |
| 0.489490021 | 0.50430399  | 0.173530768 | 0.362936353 |
| 0.430557547 | 0.332490863 | 0.450973707 | 0.484746064 |
| 0.371976892 | 0.331041608 | 0.313104409 | 0.387304528 |
| 0.269408665 | 0.178749147 | 0.386279755 | 0.149493812 |

|             |             |             |             |
|-------------|-------------|-------------|-------------|
| 0.012376018 | 0.181602746 | 0.156524517 | 0.177279533 |
| 0.13358516  | 0.464374313 | 0.408262667 | 0.487527002 |
| 0.175664017 | 0.463703606 | 0.316635803 | 0.286350271 |
| 0.461977526 | 0.336777707 | 0.370456565 | 0.388133312 |
| 0.326705395 | 0.03446173  | 0.153712268 | 0.51770721  |
| 0.131485529 | 0.210071316 | 0.402336058 | 0.004906558 |
| 0.108415854 | 0.497717867 | 0.205026578 | 0.283360096 |
| 0.447956126 | 0.301106956 | 0.314659047 | 0.399749054 |
| 0.373334456 | 0.17223866  | 0.005242759 | 0.475968329 |
| 0.470899033 | 0.457046837 | 0.473766535 | 0.475236362 |
| 0.447046728 | 0.450382553 | 0.419197346 | 0.501183174 |
| 0.174228884 | 0.204389873 | 0.170346991 | 0.292294646 |
| 0.011048066 | 0.409895223 | 0.311280636 | 0.22567712  |
| 0.430779274 | 0.350203426 | 0.089319556 | 0.342706574 |
| 0.063084301 | 0.176867953 | 0.376871964 | 0.247348328 |
| 0.339913408 | 0.050300249 | 0.304934398 | 0.304066354 |
| 0.484371087 | 0.429382976 | 0.354069371 | 0.517015445 |
| 0.361953118 | 0.270394399 | 0.314933553 | 0.412235211 |
| 0.129940537 | 0.134430768 | 0.43640568  | 0.070647353 |
| 0.291581415 | 0.457246468 | 0.39441265  | 0.156559565 |
| 0.330371246 | 0.021064204 | 0.452197384 | 0.508532864 |
| 1           | 0.474371677 | 0.49091594  | 0.243569004 |
| 0.491136865 | 0.088060051 | 0.50118269  | 0.484669779 |
| 0.426918482 | 0.002960661 | 0.009278804 | 0.480986487 |
| 0.390208932 | 0.171715375 | 0.23686242  | 0.472102314 |
| 0.149508294 | 0.290418066 | 0.128518081 | 0.153572663 |
| 0.488233084 | 0.230348868 | 0.147274477 | 0.486669653 |
| 0.274643748 | 0.26875184  | 0.480088711 | 0.191600696 |
| 0.422965241 | 0.100584829 | 0.186405049 | 0.010086276 |
| 0.365866672 | 0.239416047 | 0.515662825 | 0.497823965 |
| 0.465306505 | 0.389914401 | 0.401364768 | 0.401964197 |
| 0.447995578 | 0.242051488 | 0.399722893 | 0.251978735 |
| 0.503106774 | 0.386251127 | 0.369948021 | 0.394710803 |
| 0.458496163 | 0.473109933 | 0.076351671 | 0.423771544 |
| 0.037673382 | 0.001666204 | 0.498066202 | 0.326759418 |
| 0.063483074 | 0.349245076 | 0.326974139 | 0.285310958 |
| 0.258486388 | 0.082492429 | 0.22200922  | 0.199687778 |
| 0.322818225 | 0.361186767 | 0.239708005 | 0.329101309 |
| 0.250843081 | 0.109993013 | 0.235903219 | 0.200029402 |
| 0.270115783 | 0.407867091 | 0.302751866 | 0.056012567 |
| 0.471141572 | 0.412678952 | 0.12177607  | 0.259625835 |
| 0.465946717 | 0.483347235 | 0.07085146  | 0.018482397 |
| 0.352384126 | 0.315999218 | 0.469343333 | 0.504336505 |
| 0.528933187 | 0.477578826 | 0.418877978 | 0.123068154 |
| 0.136579076 | 0.327531692 | 0.261050375 | 0.095840004 |
| 0.490375244 | 0.174010538 | 0.49539339  | 0.263171854 |
| 0.19942698  | 0.278090631 | 0.06142078  | 0.149132362 |
| 0.371248141 | 0.248756291 | 0.191032404 | 0.285227276 |
| 0.311034911 | 0.224411622 | 0.103444449 | 0.256662225 |
| 0.404820853 | 0.142392248 | 0.234608046 | 0.410895652 |
| 0.452650663 | 0.314486284 | 0.431020847 | 0.430621507 |
| 0.235781863 | 0.202884226 | 0.422815383 | 0.417890475 |
| 0.484338806 | 0.446241315 | 0.062581271 | 0.503690512 |
| 0.471017338 | 0.464418851 | 0.507804773 | 0.388056129 |



|             |             |             |             |
|-------------|-------------|-------------|-------------|
| 0.175734807 | 0.370417566 | 0.286704398 | 0.329325297 |
| 0.247597493 | 0.495968426 | 0.275651273 | 0.135476431 |
| 0.355558841 | 0.485407175 | 0.472702998 | 0.205601242 |
| 0.469757016 | 0.269580947 | 0.162359311 | 0.481673604 |
| 0.141619525 | 0.162867826 | 0.476145829 | 0.449256357 |
| 0.002651055 | 0.107616772 | 0.453241108 | 0.297035411 |
| 0.493925992 | 0.465840332 | 0.451123669 | 0.352030916 |
| 0.00092371  | 0.40125557  | 0.396178647 | 0.415328    |
| 0.491828232 | 0.440549556 | 0.221770289 | 0.105022364 |
| 0.334518541 | 0.205618399 | 0.155691526 | 0.45566976  |
| 0.148905597 | 0.479654669 | 0.253756468 | 0.282356131 |
| 0.207954249 | 0.211868285 | 0.221300453 | 0.319513171 |
| 0.120931747 | 0.295125365 | 0.381530994 | 0.420061578 |
| 0.167826001 | 0.432931991 | 0.456840241 | 0.075777291 |
| 0.340851189 | 0.430169332 | 0.45335252  | 0.003700314 |
| 0.434393571 | 0.019320054 | 0.203427208 | 0.230570701 |
| 0.218401996 | 0.219036383 | 0.254739392 | 0.291278395 |
| 0.412349088 | 0.269719228 | 0.320586008 | 0.281488197 |
| 0.185570039 | 0.301416223 | 0.398689155 | 0.433526186 |
| 0.279097015 | 0.205676558 | 0.212362901 | 0.214901722 |
| 0.092230871 | 0.49629773  | 0.330721385 | 0.191106992 |
| 0.266392517 | 0.414865538 | 0.379545102 | 0.506083053 |
| 0.428445899 | 0.252261071 | 0.352144292 | 0.508042122 |
| 0.266529145 | 0.385334612 | 0.1539725   | 0.471000725 |
| 0.299119173 | 0.192422576 | 0.487442007 | 0.438773982 |
| 0.466281236 | 0.421412668 | 0.331426063 | 0.453129219 |
| 0.389985585 | 0.364814925 | 0.441030283 | 0.106098462 |
| 0.259038865 | 0.234243617 | 0.233336987 | 0.007726886 |
| 0.395435697 | 0.408044981 | 0.484550087 | 0.504557585 |
| 0.261588071 | 0.419214255 | 0.457151747 | 0.157400225 |
| 0.411798726 | 0.305345373 | 0.227771012 | 0.479643194 |
| 0.188229986 | 0.260258096 | 0.288241376 | 0.501875345 |
| 0.444892137 | 0.447598367 | 0.236545404 | 0.31650859  |
| 0.286832337 | 0.32877298  | 0.484699987 | 0.251373573 |
| 0.45800249  | 0.162336333 | 0.475704268 | 0.293015472 |
| 0.221866377 | 0.48759883  | 0.141407523 | 0.489012609 |
| 0.311236181 | 0.246083178 | 0.47501375  | 0.40136115  |
| 0.400654885 | 0.141524028 | 0.152066585 | 0.471684606 |
| 0.261947646 | 0.323193248 | 0.020792987 | 0.054082991 |
| 0.346608071 | 0.342502379 | 0.475599704 | 0.39416577  |
| 0.21635443  | 0.345614682 | 0.144918688 | 0.37469971  |
| 0.512702427 | 0.527262426 | 0.278623204 | 0.302638056 |
| 0.397746679 | 0.158170559 | 0.51825081  | 0.019302822 |
| 0.42517031  | 0.426852788 | 0.41757488  | 0.100315128 |
| 0.04751162  | 0.173848663 | 0.44165624  | 0.170111797 |
| 0.451544047 | 0.190523466 | 0.435410139 | 0.477549616 |
| 0.277302922 | 0.527531106 | 0.132951883 | 0.42262709  |
| 0.109190554 | 0.322439401 | 0.370974713 | 0.399726474 |
| 0.218527529 | 0.252464601 | 0.389901117 | 0.200362488 |
| 0.064997574 | 0.262579041 | 0.002618121 | 0.426188213 |
| 0.508813686 | 0.306202677 | 0.2964686   | 0.377753547 |
| 0.305072449 | 0.430108643 | 0.2266702   | 0.449959815 |
| 0.022887382 | 0.344240233 | 0.258682612 | 0.490556044 |
| 0.236776999 | 0.393817694 | 0.093635122 | 0.281870343 |

|             |             |             |             |
|-------------|-------------|-------------|-------------|
| 0.512552103 | 0.266541389 | 0.322889659 | 0.313276724 |
| 0.501257349 | 0.467879576 | 0.311718198 | 0.225279974 |
| 0.445582645 | 0.153889397 | 0.488990668 | 0.49833633  |
| 0.198246461 | 0.179174283 | 0.433945541 | 0.226645199 |
| 0.274832174 | 0.46358067  | 0.446639092 | 0.497994051 |
| 0.075469736 | 0.300006836 | 0.437776664 | 0.472689092 |
| 0.326698969 | 0.134338499 | 0.208542566 | 0.210046227 |
| 0.496990339 | 0.162540586 | 0.225988895 | 0.427953677 |
| 0.176601797 | 0.343981053 | 0.456832549 | 0.172451779 |
| 0.060561534 | 0.217167313 | 0.437002863 | 0.229860206 |
| 0.317892527 | 0.360684586 | 0.212769585 | 0.410763614 |
| 0.1627312   | 0.042401473 | 0.437423496 | 0.01152224  |
| 0.482906719 | 0.408417262 | 0.304975923 | 0.342672621 |
| 0.298321612 | 0.414536889 | 0.446673824 | 0.00456604  |
| 0.423115253 | 0.052657744 | 0.315576679 | 0.209937587 |
| 0.264184289 | 0.11487817  | 0.481116311 | 0.4683322   |
| 0.407987645 | 0.371227052 | 0.345822001 | 0.479816153 |
| 0.117667819 | 0.331428577 | 0.3202189   | 0.50209084  |
| 0.187267332 | 0.44935704  | 0.435772671 | 0.376577944 |
| 0.458530903 | 0.360214232 |             |             |
| KIF18A      | 0.136816966 | 0.476671467 | 0.108150395 |
| 0.235642547 | 0.408600001 | 0.503489534 | 0.113810049 |
| 0.211369512 | 0.431376275 | 0.392515757 | 0.475399928 |
| 0.041563383 | 0.127995722 | 0.508447529 | 0.104896718 |
| 0.496106664 | 0.071072234 | 0.186560092 | 0.122304297 |
| 0.329176298 | 0.385575557 | 0.439785292 | 0.481277002 |
| 0.38766863  | 0.256570615 | 0.45273889  | 0.477188091 |
| 0.514903157 | 0.351346204 | 0.53155239  | 0.277472626 |
| 0.447047216 | 0.428659484 | 0.479227942 | 0.03885335  |
| 0.518018859 | 0.021595201 | 0.452968068 | 0.379962185 |
| 0.224501155 | 0.405991314 | 0.432732097 | 0.35846062  |
| 0.479303605 | 0.077896545 | 0.279377534 | 0.502362468 |
| 0.436396693 | 0.390511341 | 0.121118986 | 0.525819024 |
| 0.474362014 | 0.448134934 | 0.475993097 | 0.005111603 |
| 0.394425597 | 0.12832572  | 0.305626601 | 0.512529306 |
| 0.301060544 | 0.205258237 | 0.375321393 | 0.349414183 |
| 0.485474393 | 0.474033529 | 0.354372653 | 0.475235013 |
| 0.507242476 | 0.250786279 | 0.519236822 | 0.248479758 |
| 0.497902137 | 0.068801155 | 0.245100073 | 0.14613868  |
| 0.492851964 | 0.300295007 | 0.446431465 | 0.407445439 |
| 0.473890636 | 0.526012795 | 0.341097707 | 0.510018299 |
| 0.153552804 | 0.438424969 | 0.378887518 | 0.405174925 |
| 0.462022638 | 0.150147607 | 0.518322758 | 0.531146298 |
| 0.095226462 | 0.475118393 | 0.499415076 | 0.199062843 |
| 0.49572661  | 0.365367693 | 0.492165052 | 0.249894172 |
| 0.468098107 | 0.450421591 | 0.4850783   | 0.406915735 |
| 0.412869034 | 0.132539725 | 0.495842221 | 0.416338547 |
| 0.411433206 | 0.149484331 | 0.329040271 | 0.530358104 |
| 0.528045113 | 0.519928494 | 0.501916931 | 0.462163987 |
| 0.486526176 | 0.511290036 | 0.515221911 | 0.47991221  |
| 0.210864895 | 0.531572861 | 0.292557678 | 0.083643804 |
| 0.132693238 | 0.148765398 | 0.322191734 | 0.388165709 |
| 0.52821869  | 0.445342619 | 0.307997237 | 0.342895804 |
| 0.516518378 | 0.48664412  | 0.529966254 | 0.505087667 |

|             |             |             |             |
|-------------|-------------|-------------|-------------|
| 0.080729466 | 0.335486573 | 0.492954022 | 0.388158268 |
| 0.486231735 | 0.187529174 | 0.354676475 | 0.519804551 |
| 0.456292096 | 0.522733332 | 0.263499179 | 0.512154345 |
| 0.299133226 | 0.52167568  | 0.507380968 | 0.270522775 |
| 0.528506128 | 0.506201223 | 0.516628476 | 0.497077308 |
| 0.483363709 | 0.468437464 | 0.100636179 | 0.469594624 |
| 0.492741945 | 0.024982258 | 0.526641031 | 0.528048512 |
| 0.508675871 | 0.53756184  | 0.52427082  | 0.520976801 |
| 0.511263941 | 0.133340682 | 0.046934207 | 0.393548451 |
| 0.519191247 | 0.4832313   | 0.211093572 | 0.517087645 |
| 0.463284665 | 0.510878249 | 0.510273713 | 0.417541533 |
| 0.519246627 | 0.51772516  | 0.522299895 | 0.495375606 |
| 0.410536265 | 0.384561262 | 0.470208678 | 0.48024115  |
| 0.088181897 | 0.197608417 | 0.09996842  | 0.401663439 |
| 0.448252248 | 0.269093139 | 0.500994889 | 0.45079672  |
| 0.291407399 | 0.453896576 | 0.422634308 | 0.478000965 |
| 0.100863353 | 0.537018325 | 0.262979103 | 0.27419004  |
| 0.084886706 | 0.207248952 | 0.294309644 | 0.246595708 |
| 0.359123803 | 0.260448    | 0.529819622 | 0.514579188 |
| 0.453583492 | 0.275085366 | 0.527956793 | 0.491627101 |
| 0.459856468 | 0.487014408 | 0.321054101 | 0.026526444 |
| 0.389334059 | 0.395762201 | 0.262557563 | 0.502550095 |
| 0.224695055 | 0.358545276 | 0.498003939 | 0.490785299 |
| 0.403285993 | 0.231414118 | 0.480980678 | 0.439479661 |
| 0.230490988 | 0.416832108 | 0.518753707 | 0.507516876 |
| 0.009013498 | 0.459204481 | 0.533337495 | 0.224909038 |
| 0.426450091 | 0.202243338 | 0.341289764 | 0.521763757 |
| 0.387449349 | 0.31668993  | 0.522496512 | 0.484470212 |
| 0.445264318 | 0.263866335 | 0.528411034 | 0.077462237 |
| 0.440587009 | 0.094665747 | 0.38909353  | 0.425335211 |
| 0.367670776 | 0.390207732 | 0.414026973 | 0.384872989 |
| 0.210081345 | 0.524090177 | 0.4775224   | 0.520764468 |
| 0.477709897 | 0.532650138 | 0.533561165 | 0.509546171 |
| 0.475561922 | 0.459713019 | 0.197924185 | 0.531757119 |
| 0.524631426 | 0.402224701 | 0.131428652 | 0.522515479 |
| 0.466940179 | 0.502767893 | 0.181121336 | 0.512335681 |
| 0.503536768 | 0.478214206 | 0.2306394   | 0.467250172 |
| 0.481855806 | 0.349286515 | 0.49263404  | 0.531255388 |
| 0.414619572 | 0.463907816 | 0.450702537 | 0.477372959 |
| 0.274665518 | 0.304462155 | 0.388694068 | 0.248665798 |
| 0.016186616 | 0.146602547 | 0.123792839 | 0.251487523 |
| 0.244111229 | 0.504719631 | 0.500187671 | 0.522504722 |
| 0.197845828 | 0.473847185 | 0.331543349 | 0.411998117 |
| 0.473202931 | 0.449820078 | 0.473153519 | 0.485561899 |
| 0.341341825 | 0.038802546 | 0.195754922 | 0.530024123 |
| 0.080061136 | 0.331585374 | 0.428325713 | 0.006219359 |
| 0.092322329 | 0.484232287 | 0.152922162 | 0.248464134 |
| 0.512306985 | 0.2556377   | 0.314141941 | 0.427466696 |
| 0.448764987 | 0.162870208 | 0.00704964  | 0.505092693 |
| 0.487957425 | 0.468381644 | 0.486967072 | 0.462837616 |
| 0.487264432 | 0.488821646 | 0.506314652 | 0.470442702 |
| 0.183646871 | 0.16113346  | 0.308156632 | 0.405707932 |
| 0.010496323 | 0.474630418 | 0.404926409 | 0.22591655  |
| 0.514587097 | 0.409019242 | 0.077047003 | 0.448402978 |

|             |             |             |             |
|-------------|-------------|-------------|-------------|
| 0.049485589 | 0.28215816  | 0.424989846 | 0.316994279 |
| 0.438685712 | 0.033502868 | 0.341949296 | 0.433302784 |
| 0.454982009 | 0.431980923 | 0.455018995 | 0.535778245 |
| 0.447948533 | 0.203521022 | 0.428434084 | 0.491906979 |
| 0.134055813 | 0.16736738  | 0.469764598 | 0.061212721 |
| 0.275302825 | 0.456230828 | 0.47868033  | 0.133871211 |
| 0.391854456 | 0.013371088 | 0.44656487  | 0.535288326 |
| 0.474371677 | 1           | 0.511441637 | 0.366814692 |
| 0.513581284 | 0.151857977 | 0.532404387 | 0.492531193 |
| 0.478050611 | 0.002570178 | 0.011926692 | 0.530946761 |
| 0.508037877 | 0.103755603 | 0.251678151 | 0.472050048 |
| 0.19121919  | 0.249658628 | 0.120463937 | 0.268000733 |
| 0.523138305 | 0.336772808 | 0.251893901 | 0.47944945  |
| 0.355614038 | 0.333850821 | 0.495930715 | 0.149592561 |
| 0.503138363 | 0.103378129 | 0.148967437 | 0.016358604 |
| 0.46298522  | 0.177761289 | 0.48106994  | 0.514272568 |
| 0.501795462 | 0.491988742 | 0.429019963 | 0.441883132 |
| 0.49253552  | 0.163931633 | 0.455785651 | 0.186481465 |
| 0.494257938 | 0.501739525 | 0.425896899 | 0.404051438 |
| 0.507395393 | 0.489038265 | 0.069227991 | 0.507776814 |
| 0.029560329 | 0.003664116 | 0.493443826 | 0.361007377 |
| 0.09629637  | 0.478763261 | 0.354836389 | 0.329618397 |
| 0.320288862 | 0.06595749  | 0.359398173 | 0.336846623 |
| 0.411878824 | 0.47637109  | 0.373542541 | 0.335242745 |
| 0.363251095 | 0.2117674   | 0.292950979 | 0.240636491 |
| 0.332380411 | 0.395536304 | 0.262375158 | 0.047400628 |
| 0.523227962 | 0.515846439 | 0.109980552 | 0.245860356 |
| 0.522092588 | 0.531683262 | 0.085714064 | 0.026243604 |
| 0.359390762 | 0.42145185  | 0.523965149 | 0.503547524 |
| 0.53277553  | 0.525831257 | 0.414001105 | 0.201208441 |
| 0.126465767 | 0.428514171 | 0.39034537  | 0.16153478  |
| 0.514639523 | 0.121795465 | 0.488681363 | 0.392104822 |
| 0.191965866 | 0.329149609 | 0.069592615 | 0.1493091   |
| 0.479262168 | 0.269602897 | 0.271311588 | 0.238182964 |
| 0.431533224 | 0.3392444   | 0.094659411 | 0.300761284 |
| 0.454589545 | 0.263156717 | 0.253331621 | 0.41757663  |
| 0.451533683 | 0.299382558 | 0.524773981 | 0.463794365 |
| 0.210852319 | 0.190331525 | 0.407524752 | 0.473744085 |
| 0.531759412 | 0.482919178 | 0.052943568 | 0.484234246 |
| 0.508938333 | 0.538017852 | 0.505552634 | 0.463754308 |
| 0.146779014 | 0.486969557 | 0.407073101 | 0.452446365 |
| 0.280906562 | 0.498849395 | 0.34101561  | 0.116712979 |
| 0.367901508 | 0.488585782 | 0.490056833 | 0.260696522 |
| 0.511194052 | 0.206807782 | 0.109163998 | 0.502795657 |
| 0.269932131 | 0.16331011  | 0.453825294 | 0.510671091 |
| 0.004265103 | 0.199877794 | 0.50149876  | 0.345324937 |
| 0.519849743 | 0.520661009 | 0.4725321   | 0.358378589 |
| 0.003339403 | 0.504160168 | 0.493963904 | 0.513167985 |
| 0.499847504 | 0.449169928 | 0.222269036 | 0.13611524  |
| 0.376388817 | 0.140870752 | 0.22576416  | 0.452292342 |
| 0.254680902 | 0.513951572 | 0.2862001   | 0.306580872 |
| 0.292613435 | 0.154152158 | 0.32732863  | 0.352129453 |
| 0.214030168 | 0.334298133 | 0.447447827 | 0.377619634 |
| 0.284108589 | 0.489896775 | 0.504466673 | 0.056763112 |

|             |             |             |             |
|-------------|-------------|-------------|-------------|
| 0.448878554 | 0.484365859 | 0.483194702 | 0.005764411 |
| 0.528650317 | 0.017713553 | 0.291526999 | 0.319078596 |
| 0.296572851 | 0.310225641 | 0.3567488   | 0.405287025 |
| 0.465452308 | 0.332230327 | 0.393890374 | 0.340370788 |
| 0.252837072 | 0.324561888 | 0.491308316 | 0.475393961 |
| 0.388244688 | 0.211777258 | 0.152957768 | 0.146906604 |
| 0.0995384   | 0.505587596 | 0.322813168 | 0.129101032 |
| 0.325433735 | 0.470673001 | 0.420859197 | 0.500377219 |
| 0.47191141  | 0.172313976 | 0.441560565 | 0.514036751 |
| 0.314635067 | 0.40579078  | 0.119505063 | 0.498901913 |
| 0.339007287 | 0.313450838 | 0.494929401 | 0.432357936 |
| 0.499557758 | 0.427059583 | 0.322114305 | 0.474036126 |
| 0.477176626 | 0.444042393 | 0.41666196  | 0.150149662 |
| 0.283909972 | 0.209045971 | 0.36368511  | 0.005595461 |
| 0.463033926 | 0.383039543 | 0.53718378  | 0.498312755 |
| 0.377652881 | 0.443649468 | 0.429050048 | 0.163778634 |
| 0.368942817 | 0.237587544 | 0.221388489 | 0.520855026 |
| 0.29704953  | 0.283167108 | 0.40756466  | 0.444158056 |
| 0.523735374 | 0.505261256 | 0.345817063 | 0.35349968  |
| 0.338185232 | 0.296993445 | 0.481823523 | 0.203913661 |
| 0.523089708 | 0.272476958 | 0.449656912 | 0.413860008 |
| 0.321847169 | 0.516253166 | 0.111884348 | 0.526346771 |
| 0.443806375 | 0.201946419 | 0.49932999  | 0.406552546 |
| 0.401794794 | 0.190156633 | 0.264325834 | 0.485380532 |
| 0.332371038 | 0.431171982 | 0.024014405 | 0.103158357 |
| 0.430448336 | 0.398729199 | 0.491344096 | 0.459586106 |
| 0.338670476 | 0.426837597 | 0.225962624 | 0.407068473 |
| 0.48835841  | 0.505542254 | 0.375803219 | 0.338254797 |
| 0.449026987 | 0.17509835  | 0.499386854 | 0.025651276 |
| 0.523632642 | 0.511608064 | 0.479368545 | 0.100843451 |
| 0.041593686 | 0.299172585 | 0.520549597 | 0.12161291  |
| 0.519251301 | 0.289492122 | 0.450304661 | 0.526432879 |
| 0.259983049 | 0.508559529 | 0.196189824 | 0.508660001 |
| 0.092160648 | 0.355578049 | 0.467367345 | 0.472719994 |
| 0.331244281 | 0.394798982 | 0.480443704 | 0.325531234 |
| 0.067067508 | 0.370479892 | 0.00462658  | 0.421490731 |
| 0.481354959 | 0.439784788 | 0.280776963 | 0.383461454 |
| 0.377050778 | 0.450146859 | 0.34059365  | 0.504461418 |
| 0.025185589 | 0.472539548 | 0.292183258 | 0.493661807 |
| 0.333097429 | 0.467656051 | 0.106520244 | 0.409534709 |
| 0.469680699 | 0.392586084 | 0.335910805 | 0.422267814 |
| 0.494487901 | 0.463199334 | 0.242818747 | 0.30499086  |
| 0.475149657 | 0.116787985 | 0.478652617 | 0.531884956 |
| 0.268421025 | 0.303790595 | 0.522146792 | 0.313840191 |
| 0.404332124 | 0.453870037 | 0.495411094 | 0.521232974 |
| 0.128010245 | 0.348131054 | 0.510841105 | 0.495062436 |
| 0.391495006 | 0.248495893 | 0.338329013 | 0.332368057 |
| 0.468919707 | 0.168442168 | 0.352070527 | 0.464630726 |
| 0.307574791 | 0.410452325 | 0.428168813 | 0.27709432  |
| 0.072512182 | 0.255657165 | 0.475053733 | 0.224902164 |
| 0.407834522 | 0.475508528 | 0.338180879 | 0.437318529 |
| 0.214934036 | 0.053142594 | 0.461704227 | 0.032768392 |
| 0.450967985 | 0.499921191 | 0.344391938 | 0.45668553  |
| 0.265882984 | 0.467846016 | 0.456190716 | 0.003255318 |

|             |             |             |             |
|-------------|-------------|-------------|-------------|
| 0.497928117 | 0.075888209 | 0.398780106 | 0.332120189 |
| 0.382834753 | 0.10099605  | 0.473662678 | 0.519993274 |
| 0.421188767 | 0.414388513 | 0.438167104 | 0.483793734 |
| 0.216672817 | 0.417020095 | 0.433812099 | 0.51157301  |
| 0.305411662 | 0.481374133 | 0.503057903 | 0.475395824 |
| 0.486993899 | 0.375842404 |             |             |
| KIF22       | 0.163876586 | 0.477201276 | 0.13763249  |
| 0.261031104 | 0.373072319 | 0.529070425 | 0.119976908 |
| 0.220555047 | 0.42095747  | 0.358717491 | 0.479949264 |
| 0.051213918 | 0.103829415 | 0.502431297 | 0.110490815 |
| 0.452012831 | 0.077695246 | 0.192934427 | 0.106460444 |
| 0.312095408 | 0.343095035 | 0.424639913 | 0.499540722 |
| 0.341170292 | 0.281804248 | 0.45287405  | 0.427777489 |
| 0.511629493 | 0.337955415 | 0.52325694  | 0.267123311 |
| 0.446026747 | 0.387715228 | 0.444668831 | 0.05158663  |
| 0.506409232 | 0.012160605 | 0.458553452 | 0.348346154 |
| 0.20022516  | 0.417585961 | 0.428446687 | 0.361597961 |
| 0.445497494 | 0.09624966  | 0.279695179 | 0.451950636 |
| 0.419624368 | 0.372923811 | 0.144466236 | 0.515000861 |
| 0.423447487 | 0.472743392 | 0.469651414 | 0.00586515  |
| 0.354810588 | 0.098281154 | 0.251161965 | 0.525511266 |
| 0.319123615 | 0.21475031  | 0.310124874 | 0.341993683 |
| 0.439041068 | 0.430504559 | 0.349064159 | 0.423669074 |
| 0.512709173 | 0.2015952   | 0.488666802 | 0.260777288 |
| 0.476698995 | 0.078059107 | 0.259019595 | 0.158883793 |
| 0.451570536 | 0.306042139 | 0.436299067 | 0.352108847 |
| 0.474599212 | 0.533056251 | 0.337413834 | 0.519292629 |
| 0.104391798 | 0.383394663 | 0.339948822 | 0.384337093 |
| 0.425436855 | 0.143255445 | 0.510877128 | 0.532398357 |
| 0.102450778 | 0.45403907  | 0.4645126   | 0.215229915 |
| 0.505549496 | 0.308538145 | 0.480628973 | 0.223771145 |
| 0.426516294 | 0.395758053 | 0.488289916 | 0.411277006 |
| 0.383849871 | 0.15242887  | 0.514935425 | 0.365465681 |
| 0.411189135 | 0.173931733 | 0.275948324 | 0.504718419 |
| 0.504052559 | 0.520298783 | 0.482458375 | 0.432403701 |
| 0.433920561 | 0.511800909 | 0.508989678 | 0.476622898 |
| 0.195022184 | 0.536508966 | 0.316735436 | 0.096035438 |
| 0.155843235 | 0.157566304 | 0.261380799 | 0.389060604 |
| 0.522135584 | 0.447720648 | 0.323971068 | 0.319877509 |
| 0.488054036 | 0.50473009  | 0.530124337 | 0.486383092 |
| 0.095395097 | 0.26978798  | 0.444215074 | 0.411502953 |
| 0.457444698 | 0.195658178 | 0.30704744  | 0.532420816 |
| 0.46821633  | 0.496505836 | 0.288813878 | 0.526344313 |
| 0.280613736 | 0.526359715 | 0.510284678 | 0.282612008 |
| 0.538253391 | 0.524873758 | 0.513827664 | 0.465260922 |
| 0.503062002 | 0.489543288 | 0.076922214 | 0.450426971 |
| 0.494700489 | 0.023113444 | 0.509207784 | 0.510142845 |
| 0.514349624 | 0.51445472  | 0.513537706 | 0.514620647 |
| 0.519575714 | 0.148540175 | 0.028595838 | 0.359688282 |
| 0.52704753  | 0.488078274 | 0.200371353 | 0.473089565 |
| 0.417023455 | 0.521310051 | 0.489006928 | 0.399653941 |
| 0.520615439 | 0.512530368 | 0.512870139 | 0.474774921 |
| 0.380938063 | 0.400646248 | 0.416712097 | 0.503694793 |
| 0.102471426 | 0.228505546 | 0.122671917 | 0.385027973 |

|             |             |             |             |
|-------------|-------------|-------------|-------------|
| 0.457273254 | 0.270198405 | 0.501251165 | 0.399354594 |
| 0.295701065 | 0.452500847 | 0.382739253 | 0.440603144 |
| 0.119425305 | 0.52625592  | 0.279903294 | 0.28031209  |
| 0.093507464 | 0.227594308 | 0.296819149 | 0.270623988 |
| 0.340692002 | 0.283304853 | 0.508603655 | 0.502797685 |
| 0.3991561   | 0.299241518 | 0.513461517 | 0.49005376  |
| 0.45341435  | 0.449924579 | 0.323987195 | 0.033819183 |
| 0.334306623 | 0.332132647 | 0.207827319 | 0.466587719 |
| 0.246680926 | 0.322087204 | 0.454172961 | 0.46682464  |
| 0.429654711 | 0.239646284 | 0.422538437 | 0.458608389 |
| 0.248050666 | 0.409665487 | 0.501978108 | 0.477045349 |
| 0.013256371 | 0.447612839 | 0.522219253 | 0.184591351 |
| 0.403420334 | 0.179505441 | 0.328256006 | 0.502388307 |
| 0.330267827 | 0.26235953  | 0.514411396 | 0.455773508 |
| 0.44121725  | 0.283062922 | 0.521598547 | 0.052683595 |
| 0.386286689 | 0.097933493 | 0.374644013 | 0.405264456 |
| 0.367238101 | 0.370489093 | 0.373222245 | 0.359669203 |
| 0.243795613 | 0.52791395  | 0.482760953 | 0.516804017 |
| 0.423373976 | 0.525872281 | 0.516515782 | 0.507257295 |
| 0.47281607  | 0.396877034 | 0.158136522 | 0.517958589 |
| 0.505906289 | 0.343465466 | 0.153285211 | 0.492315418 |
| 0.408331964 | 0.460917547 | 0.160644362 | 0.502033109 |
| 0.516345378 | 0.491639512 | 0.233425487 | 0.434266144 |
| 0.48554521  | 0.374840275 | 0.481598769 | 0.526149013 |
| 0.360113468 | 0.40519678  | 0.396411877 | 0.453582951 |
| 0.289996549 | 0.251646171 | 0.391904592 | 0.201739053 |
| 0.017720059 | 0.164303542 | 0.144190919 | 0.247861128 |
| 0.208123132 | 0.478081844 | 0.467067567 | 0.52121742  |
| 0.209441468 | 0.486424556 | 0.3225436   | 0.379302225 |
| 0.469415188 | 0.39763672  | 0.442005579 | 0.456351075 |
| 0.344612628 | 0.047517166 | 0.211702375 | 0.537438663 |
| 0.09592269  | 0.296998221 | 0.418714215 | 0.007784769 |
| 0.103791405 | 0.477050298 | 0.171440709 | 0.269160383 |
| 0.495987227 | 0.278753166 | 0.322878774 | 0.37960462  |
| 0.443643676 | 0.181340865 | 0.010093228 | 0.490014689 |
| 0.482567062 | 0.455874559 | 0.481913371 | 0.469024779 |
| 0.46141218  | 0.470285417 | 0.473279693 | 0.500409023 |
| 0.193866086 | 0.17856083  | 0.247487598 | 0.372981289 |
| 0.010425955 | 0.471608914 | 0.372759473 | 0.242623614 |
| 0.483564305 | 0.385861698 | 0.094769905 | 0.406866666 |
| 0.066200688 | 0.242401188 | 0.401384404 | 0.296942239 |
| 0.405290296 | 0.044312357 | 0.353346551 | 0.373649267 |
| 0.475550551 | 0.444286503 | 0.409782729 | 0.541196649 |
| 0.446036199 | 0.222460636 | 0.400098713 | 0.481261722 |
| 0.143595986 | 0.130852421 | 0.447494777 | 0.062564036 |
| 0.301802775 | 0.460607024 | 0.437320504 | 0.152289155 |
| 0.388830805 | 0.019853645 | 0.462932242 | 0.540383913 |
| 0.49091594  | 0.511441637 | 1           | 0.335097589 |
| 0.520308065 | 0.112755612 | 0.532830075 | 0.491044192 |
| 0.436946484 | 0.003512227 | 0.014054627 | 0.516481702 |
| 0.466798108 | 0.125783331 | 0.263879356 | 0.506520395 |
| 0.20048255  | 0.269067811 | 0.135782133 | 0.232876655 |
| 0.526366884 | 0.316089997 | 0.21680978  | 0.488208976 |
| 0.335327028 | 0.324001046 | 0.480344523 | 0.167098006 |

|             |             |             |             |
|-------------|-------------|-------------|-------------|
| 0.486198221 | 0.118784134 | 0.160740356 | 0.018146516 |
| 0.432258271 | 0.200438993 | 0.500951061 | 0.519297843 |
| 0.50668287  | 0.463675252 | 0.395708457 | 0.450113305 |
| 0.472971143 | 0.192548831 | 0.433264665 | 0.212774147 |
| 0.503419946 | 0.463409314 | 0.430446156 | 0.420174279 |
| 0.50139529  | 0.491676135 | 0.080235403 | 0.479806491 |
| 0.043773057 | 0.003475095 | 0.505216116 | 0.354301464 |
| 0.066283163 | 0.421236443 | 0.359990295 | 0.292289229 |
| 0.295319677 | 0.084932825 | 0.29636425  | 0.276047106 |
| 0.389494306 | 0.43453729  | 0.330376392 | 0.328791871 |
| 0.323492476 | 0.165742137 | 0.295130108 | 0.238033182 |
| 0.286394548 | 0.401985183 | 0.28672099  | 0.054414595 |
| 0.497884054 | 0.482203657 | 0.12846641  | 0.266129339 |
| 0.516851528 | 0.521288205 | 0.084929924 | 0.031621181 |
| 0.37270879  | 0.375711975 | 0.511752218 | 0.511288693 |
| 0.544302727 | 0.522202148 | 0.426219998 | 0.179835252 |
| 0.14542234  | 0.39697085  | 0.344240632 | 0.148725087 |
| 0.518436658 | 0.138056671 | 0.503840176 | 0.339567751 |
| 0.202525975 | 0.327248815 | 0.084631637 | 0.159033958 |
| 0.444722812 | 0.281724923 | 0.262405816 | 0.262582325 |
| 0.395130754 | 0.30222592  | 0.10467823  | 0.302285506 |
| 0.442934923 | 0.205593666 | 0.260454205 | 0.417532291 |
| 0.455201548 | 0.260268681 | 0.487924292 | 0.462456226 |
| 0.233517954 | 0.194033609 | 0.430376669 | 0.451311078 |
| 0.512320435 | 0.447401469 | 0.075659099 | 0.486367481 |
| 0.50217791  | 0.518116448 | 0.520661269 | 0.443195374 |
| 0.161268289 | 0.461960542 | 0.339086328 | 0.402488498 |
| 0.277127908 | 0.525237962 | 0.321538068 | 0.131530495 |
| 0.368994268 | 0.496656448 | 0.481148305 | 0.271016277 |
| 0.496448431 | 0.227018345 | 0.124255724 | 0.496433177 |
| 0.21677631  | 0.183654679 | 0.446314557 | 0.481906831 |
| 0.00450988  | 0.164245546 | 0.4810852   | 0.366762053 |
| 0.519220273 | 0.505173138 | 0.478757932 | 0.361134059 |
| 0.00177147  | 0.457241066 | 0.480166447 | 0.492894716 |
| 0.498381663 | 0.462142443 | 0.224582029 | 0.143363143 |
| 0.379581453 | 0.168855842 | 0.211228433 | 0.476413871 |
| 0.192884624 | 0.502683148 | 0.28927722  | 0.292173631 |
| 0.273494301 | 0.165356626 | 0.300253884 | 0.370111306 |
| 0.156000166 | 0.340832347 | 0.439577944 | 0.366157496 |
| 0.239666457 | 0.465942452 | 0.483117569 | 0.072891557 |
| 0.409199817 | 0.459531688 | 0.479135047 | 0.005439674 |
| 0.50317234  | 0.023613318 | 0.27883516  | 0.315942452 |
| 0.289284589 | 0.284357472 | 0.330723263 | 0.375656673 |
| 0.436775905 | 0.320003204 | 0.402977147 | 0.344446706 |
| 0.257283065 | 0.329136395 | 0.459750523 | 0.451458293 |
| 0.37894139  | 0.233657971 | 0.175871607 | 0.171160705 |
| 0.122221752 | 0.505851236 | 0.343359802 | 0.155287885 |
| 0.321229968 | 0.439560298 | 0.423364665 | 0.508538913 |
| 0.471767824 | 0.200624502 | 0.403179079 | 0.519300856 |
| 0.264510862 | 0.409640467 | 0.137643807 | 0.491590795 |
| 0.351102524 | 0.285166778 | 0.489742742 | 0.436042074 |
| 0.472091521 | 0.438211691 | 0.345441604 | 0.474163463 |
| 0.461322542 | 0.386946497 | 0.405096141 | 0.158819828 |
| 0.295724275 | 0.221330709 | 0.323299551 | 0.008478715 |



|             |             |             |             |
|-------------|-------------|-------------|-------------|
| 0.456872809 | 0.419682281 | 0.524854772 | 0.511987331 |
| 0.326429313 | 0.45028256  | 0.439134692 | 0.178292987 |
| 0.363254483 | 0.26076027  | 0.237969247 | 0.501683928 |
| 0.254108141 | 0.302914144 | 0.37467678  | 0.485021526 |
| 0.493844553 | 0.469095101 | 0.299071686 | 0.34580291  |
| 0.320692999 | 0.317108757 | 0.484986456 | 0.229305851 |
| 0.48802138  | 0.247508388 | 0.439073669 | 0.383793764 |
| 0.296680632 | 0.511603905 | 0.131809837 | 0.520840364 |
| 0.389449459 | 0.22215199  | 0.507808614 | 0.417098697 |
| 0.417186388 | 0.201222957 | 0.216559628 | 0.463482872 |
| 0.308914031 | 0.392543754 | 0.021172745 | 0.082776807 |
| 0.41999644  | 0.347062095 | 0.469493846 | 0.431082604 |
| 0.295399    | 0.403609437 | 0.193148689 | 0.392840616 |
| 0.502729109 | 0.522303027 | 0.362500627 | 0.334726304 |
| 0.438800037 | 0.194547683 | 0.520913848 | 0.019421793 |
| 0.481390797 | 0.470806201 | 0.439958095 | 0.113130313 |
| 0.049988752 | 0.242127931 | 0.481093478 | 0.132700738 |
| 0.496422285 | 0.251479003 | 0.420528992 | 0.519433602 |
| 0.268426124 | 0.525431201 | 0.191926879 | 0.498442835 |
| 0.088008179 | 0.352217    | 0.422911261 | 0.423194238 |
| 0.316017491 | 0.33871236  | 0.463061206 | 0.28852275  |
| 0.07851203  | 0.347542861 | 0.003551397 | 0.440949908 |
| 0.494484526 | 0.375095212 | 0.294894132 | 0.349362508 |
| 0.370835247 | 0.444288979 | 0.295034304 | 0.477567427 |
| 0.033619792 | 0.434022652 | 0.301355511 | 0.51093594  |
| 0.294189739 | 0.416906119 | 0.124582815 | 0.347286222 |
| 0.49403563  | 0.344397569 | 0.336314964 | 0.364496063 |
| 0.505144636 | 0.461295622 | 0.267967253 | 0.28780989  |
| 0.440374823 | 0.134455698 | 0.476092794 | 0.529663004 |
| 0.26878848  | 0.264943624 | 0.497805432 | 0.300189995 |
| 0.350016528 | 0.464590828 | 0.456826036 | 0.519060125 |
| 0.122091142 | 0.353619928 | 0.488035852 | 0.484251938 |
| 0.387409763 | 0.202509659 | 0.295911718 | 0.294820523 |
| 0.486019514 | 0.200386154 | 0.292572133 | 0.465054351 |
| 0.254937296 | 0.402561092 | 0.414625145 | 0.249183261 |
| 0.083822914 | 0.251128271 | 0.498641804 | 0.238937247 |
| 0.387485507 | 0.436353901 | 0.290384679 | 0.444003523 |
| 0.236874292 | 0.064398597 | 0.464080412 | 0.021965786 |
| 0.488073675 | 0.489551286 | 0.353372385 | 0.416997215 |
| 0.294221166 | 0.442707806 | 0.443916251 | 0.004715775 |
| 0.473570064 | 0.071028632 | 0.36639922  | 0.305209602 |
| 0.32920604  | 0.114217087 | 0.486887323 | 0.507551329 |
| 0.430334597 | 0.395078233 | 0.40471571  | 0.486500401 |
| 0.177835687 | 0.366947161 | 0.373511426 | 0.503334913 |
| 0.262620767 | 0.447921808 | 0.468250642 | 0.444483353 |
| 0.488094716 | 0.387043836 |             |             |
| KIF23       | 0.019292499 | 0.227376395 | 0.011681403 |
| 0.07740767  | 0.306068805 | 0.145031303 | 0.014832859 |
| 0.038216974 | 0.160244598 | 0.072337875 | 0.249145329 |
| 0.005642291 | 0.204285459 | 0.307754986 | 0.015382228 |
| 0.298732734 | 0.014631592 | 0.037082423 | 0.027713604 |
| 0.069222936 | 0.266005576 | 0.2392258   | 0.12752559  |
| 0.225652835 | 0.082899383 | 0.131330757 | 0.230787323 |
| 0.318937702 | 0.191938873 | 0.319314038 | 0.067314531 |

|             |             |             |             |
|-------------|-------------|-------------|-------------|
| 0.251567803 | 0.334214703 | 0.235568623 | 0.003680474 |
| 0.208467795 | 0.015692868 | 0.229412614 | 0.147893577 |
| 0.229471724 | 0.198469944 | 0.08780695  | 0.136046364 |
| 0.118261441 | 0.008858196 | 0.073158999 | 0.271736753 |
| 0.129692992 | 0.105170934 | 0.013328209 | 0.260590836 |
| 0.119589965 | 0.188177907 | 0.179011676 | 0.000935608 |
| 0.256651088 | 0.181786499 | 0.224532671 | 0.296404705 |
| 0.121604808 | 0.061207162 | 0.120282606 | 0.071380466 |
| 0.205972191 | 0.251192837 | 0.154852557 | 0.102654534 |
| 0.320333875 | 0.226178404 | 0.292771056 | 0.085353793 |
| 0.126044649 | 0.004096856 | 0.081589483 | 0.0181694   |
| 0.157463477 | 0.130078842 | 0.265168145 | 0.217098044 |
| 0.218031919 | 0.296098784 | 0.119069067 | 0.261491406 |
| 0.100914232 | 0.306990074 | 0.202975858 | 0.231074533 |
| 0.21248939  | 0.018230917 | 0.316381926 | 0.324691975 |
| 0.007555377 | 0.143188055 | 0.223412957 | 0.037063506 |
| 0.257939104 | 0.165760417 | 0.145229351 | 0.280994705 |
| 0.346080917 | 0.267693426 | 0.248289825 | 0.188167611 |
| 0.218342374 | 0.018012271 | 0.238253666 | 0.338902054 |
| 0.20572436  | 0.02428685  | 0.166717172 | 0.355463599 |
| 0.256303219 | 0.330323865 | 0.241691126 | 0.227592566 |
| 0.273771401 | 0.328447353 | 0.269284273 | 0.251268313 |
| 0.056556381 | 0.314543383 | 0.083631081 | 0.02009128  |
| 0.012224304 | 0.04021887  | 0.119537775 | 0.196405573 |
| 0.349683697 | 0.184739059 | 0.067070496 | 0.157784275 |
| 0.37357102  | 0.238553846 | 0.303979314 | 0.271122774 |
| 0.01042687  | 0.180630904 | 0.26651064  | 0.088676277 |
| 0.238649988 | 0.039354147 | 0.272885545 | 0.271910397 |
| 0.254966613 | 0.35040008  | 0.038401521 | 0.26229399  |
| 0.055235073 | 0.346351636 | 0.267299445 | 0.088617384 |
| 0.301109502 | 0.266902106 | 0.36850589  | 0.396400797 |
| 0.277992189 | 0.150771937 | 0.019520075 | 0.22597933  |
| 0.352879075 | 0.044504744 | 0.336465219 | 0.358572905 |
| 0.287042535 | 0.364023308 | 0.368562533 | 0.35773952  |
| 0.288101323 | 0.021123498 | 0.01614981  | 0.242931432 |
| 0.286404795 | 0.278712964 | 0.069683206 | 0.231898962 |
| 0.289904793 | 0.144492384 | 0.295105675 | 0.186733029 |
| 0.334370267 | 0.321482343 | 0.327652779 | 0.22619209  |
| 0.096404154 | 0.178168205 | 0.274382956 | 0.234008016 |
| 0.016632055 | 0.030744433 | 0.013392031 | 0.178504087 |
| 0.097755041 | 0.112740913 | 0.110421774 | 0.215124673 |
| 0.123757129 | 0.095418388 | 0.217220678 | 0.37170439  |
| 0.013512277 | 0.232410249 | 0.060301585 | 0.052684319 |
| 0.019388082 | 0.058741037 | 0.095401635 | 0.089211143 |
| 0.18644392  | 0.087603803 | 0.291035278 | 0.339265789 |
| 0.145561092 | 0.078215107 | 0.254359791 | 0.335916046 |
| 0.318990648 | 0.305201683 | 0.117857188 | 0.013039982 |
| 0.150089218 | 0.118764351 | 0.226143214 | 0.256259208 |
| 0.067059325 | 0.103842162 | 0.243586106 | 0.395917159 |
| 0.102766162 | 0.029884218 | 0.165875408 | 0.244242413 |
| 0.050623246 | 0.211808605 | 0.349676549 | 0.171890173 |
| 0.000547279 | 0.154968656 | 0.331609055 | 0.130556629 |
| 0.148058411 | 0.223909059 | 0.282548596 | 0.333645292 |
| 0.189506094 | 0.184410275 | 0.353864996 | 0.374064063 |

|             |             |             |             |
|-------------|-------------|-------------|-------------|
| 0.138310068 | 0.078320859 | 0.357062106 | 0.054985456 |
| 0.209138245 | 0.085376002 | 0.238244323 | 0.090443788 |
| 0.130390914 | 0.201674891 | 0.316010061 | 0.215614775 |
| 0.044936279 | 0.310373169 | 0.253136307 | 0.349357387 |
| 0.167494586 | 0.351291512 | 0.359221538 | 0.326067568 |
| 0.216861163 | 0.168931625 | 0.236044807 | 0.320603807 |
| 0.334367702 | 0.10803891  | 0.019592155 | 0.30435109  |
| 0.120818817 | 0.328028967 | 0.119618543 | 0.351596832 |
| 0.297528    | 0.233034128 | 0.081494098 | 0.335688418 |
| 0.285680757 | 0.113984485 | 0.292176078 | 0.351843245 |
| 0.083971729 | 0.221705234 | 0.19207176  | 0.365500352 |
| 0.08442419  | 0.171059553 | 0.173385755 | 0.229512315 |
| 0.04520882  | 0.018550098 | 0.018349315 | 0.112181465 |
| 0.253422151 | 0.225695728 | 0.281296793 | 0.331506955 |
| 0.049803392 | 0.274753262 | 0.107568375 | 0.171396196 |
| 0.238516645 | 0.186733586 | 0.314238336 | 0.304480347 |
| 0.129299725 | 0.014713564 | 0.077987878 | 0.293940043 |
| 0.006913979 | 0.270346251 | 0.107322367 | 0.003648622 |
| 0.009949157 | 0.211195782 | 0.030182413 | 0.086862596 |
| 0.384827886 | 0.085125045 | 0.088522682 | 0.078000187 |
| 0.283014123 | 0.034364894 | 0.008980465 | 0.310053585 |
| 0.278697132 | 0.258896172 | 0.270262637 | 0.232054836 |
| 0.27529739  | 0.252627594 | 0.322186543 | 0.13557717  |
| 0.034038867 | 0.016815363 | 0.209197998 | 0.165700552 |
| 0.001323604 | 0.318879019 | 0.199138812 | 0.070481119 |
| 0.328209997 | 0.162386677 | 0.011720386 | 0.278335813 |
| 0.008477534 | 0.255732747 | 0.084743298 | 0.093415091 |
| 0.307354431 | 0.002993306 | 0.124440062 | 0.17691934  |
| 0.232818301 | 0.195515369 | 0.202384026 | 0.324509865 |
| 0.225575232 | 0.036033376 | 0.203767666 | 0.346452331 |
| 0.022251908 | 0.036202809 | 0.094218634 | 0.016724115 |
| 0.094964901 | 0.24560185  | 0.154701189 | 0.019163138 |
| 0.15917367  | 0.001247461 | 0.210854685 | 0.332298451 |
| 0.243569004 | 0.366814692 | 0.335097589 | 1           |
| 0.31790379  | 0.161406267 | 0.342256161 | 0.228812239 |
| 0.112651841 | 0.000600348 | 0.004245929 | 0.362806428 |
| 0.270998193 | 0.013166647 | 0.076900578 | 0.141628508 |
| 0.06131654  | 0.031722161 | 0.019436075 | 0.224263788 |
| 0.256894202 | 0.227854565 | 0.206357777 | 0.244824477 |
| 0.117456066 | 0.138628277 | 0.107071986 | 0.025630532 |
| 0.291113527 | 0.021186819 | 0.023995234 | 0.014187986 |
| 0.307489153 | 0.036488402 | 0.222597441 | 0.308953852 |
| 0.327063495 | 0.349600452 | 0.105592787 | 0.149067828 |
| 0.299871371 | 0.026612926 | 0.173231159 | 0.029931497 |
| 0.276824444 | 0.296097794 | 0.239483102 | 0.185015055 |
| 0.348418495 | 0.292064649 | 0.00923664  | 0.305204898 |
| 0.009400825 | 0.004310451 | 0.131792962 | 0.13774182  |
| 0.032676109 | 0.207762954 | 0.153223855 | 0.066763123 |
| 0.09286726  | 0.010627472 | 0.226042359 | 0.224990601 |
| 0.203065656 | 0.203423012 | 0.292507866 | 0.11087407  |
| 0.168656214 | 0.133412013 | 0.106651055 | 0.057790225 |
| 0.0823114   | 0.154686012 | 0.086164917 | 0.004659608 |
| 0.193015209 | 0.265445644 | 0.017970784 | 0.069694886 |
| 0.342405932 | 0.360014815 | 0.015137699 | 0.0118638   |

|             |             |             |             |
|-------------|-------------|-------------|-------------|
| 0.144535507 | 0.139865447 | 0.377976412 | 0.294308443 |
| 0.296269973 | 0.346816454 | 0.22000101  | 0.084375216 |
| 0.021297568 | 0.22269275  | 0.295409831 | 0.102079898 |
| 0.330996976 | 0.01416261  | 0.280246284 | 0.302533668 |
| 0.044620788 | 0.088985569 | 0.021131924 | 0.029393895 |
| 0.33381796  | 0.091972107 | 0.132830821 | 0.050896233 |
| 0.162677479 | 0.257706886 | 0.011803693 | 0.102513745 |
| 0.207741655 | 0.219227004 | 0.073809113 | 0.087848079 |
| 0.193843294 | 0.047542437 | 0.327958927 | 0.294578513 |
| 0.051398874 | 0.030221361 | 0.07829717  | 0.25508941  |
| 0.302810496 | 0.17352881  | 0.019655689 | 0.240742998 |
| 0.3462818   | 0.304900818 | 0.286768149 | 0.304030098 |
| 0.026362632 | 0.286736018 | 0.171248416 | 0.229161507 |
| 0.084456727 | 0.146605865 | 0.114505362 | 0.019356601 |
| 0.169296099 | 0.258824403 | 0.243566673 | 0.096879192 |
| 0.221056198 | 0.031702664 | 0.011014143 | 0.291581613 |
| 0.221220771 | 0.031017867 | 0.098537929 | 0.309685203 |
| 0.005569459 | 0.25652452  | 0.341849293 | 0.12393172  |
| 0.311791177 | 0.35394572  | 0.285945159 | 0.076795456 |
| 0.004912964 | 0.317755627 | 0.284437585 | 0.185260082 |
| 0.248552175 | 0.201836583 | 0.048909235 | 0.042120769 |
| 0.203078725 | 0.023152167 | 0.07116982  | 0.124558466 |
| 0.140977351 | 0.195382195 | 0.116761132 | 0.077248933 |
| 0.119978388 | 0.020589336 | 0.271316159 | 0.10703045  |
| 0.124053555 | 0.157235151 | 0.259998344 | 0.066403819 |
| 0.199591218 | 0.295313573 | 0.243335316 | 0.00704973  |
| 0.278426245 | 0.270719072 | 0.297066778 | 0.001286639 |
| 0.346689161 | 0.003028834 | 0.139349543 | 0.158926668 |
| 0.121232639 | 0.106557566 | 0.222334053 | 0.193425987 |
| 0.167091554 | 0.093927704 | 0.148085793 | 0.164389977 |
| 0.116147111 | 0.086342011 | 0.265981845 | 0.120880284 |
| 0.215762549 | 0.047103775 | 0.032134463 | 0.031260042 |
| 0.031491512 | 0.29600801  | 0.134692357 | 0.021253121 |
| 0.14374253  | 0.113002403 | 0.251465349 | 0.270992119 |
| 0.315518167 | 0.033932566 | 0.135932669 | 0.276287311 |
| 0.083739423 | 0.106049295 | 0.011596316 | 0.170898972 |
| 0.118368511 | 0.219319003 | 0.156748173 | 0.1183678   |
| 0.209955873 | 0.239648091 | 0.13109406  | 0.286185705 |
| 0.18545893  | 0.13532633  | 0.077865294 | 0.064587207 |
| 0.067134066 | 0.047113799 | 0.281061144 | 0.000734027 |
| 0.223359468 | 0.081575577 | 0.349731814 | 0.270490031 |
| 0.22538484  | 0.260248455 | 0.087297588 | 0.030315118 |
| 0.07041043  | 0.064183077 | 0.062754263 | 0.279453501 |
| 0.257138443 | 0.076769897 | 0.260048002 | 0.08777396  |
| 0.325595368 | 0.261203732 | 0.159918711 | 0.076363389 |
| 0.113831402 | 0.075717982 | 0.245705843 | 0.027201837 |
| 0.226963967 | 0.229013318 | 0.125622012 | 0.192728786 |
| 0.138359956 | 0.338826171 | 0.01700809  | 0.351361208 |
| 0.184183152 | 0.047348845 | 0.302435129 | 0.117811205 |
| 0.098436872 | 0.107162842 | 0.258827569 | 0.100171707 |
| 0.08892564  | 0.231030786 | 0.007401301 | 0.071522005 |
| 0.268067416 | 0.090270468 | 0.209964968 | 0.230419135 |
| 0.203728139 | 0.265517435 | 0.228486318 | 0.088999962 |
| 0.243042731 | 0.25230611  | 0.13359187  | 0.149435101 |

|             |             |             |             |
|-------------|-------------|-------------|-------------|
| 0.206474816 | 0.045180586 | 0.185335121 | 0.00714983  |
| 0.26701052  | 0.270909547 | 0.124181961 | 0.017303442 |
| 0.005318238 | 0.241642297 | 0.223616187 | 0.013404694 |
| 0.372057734 | 0.252298731 | 0.143468439 | 0.308306058 |
| 0.068598427 | 0.254402534 | 0.089129881 | 0.345472886 |
| 0.006318072 | 0.136755497 | 0.234539877 | 0.155446116 |
| 0.198375991 | 0.240515631 | 0.312927825 | 0.270963401 |
| 0.012895901 | 0.177305841 | 0.000339393 | 0.220870779 |
| 0.225818743 | 0.233669163 | 0.095993632 | 0.082326975 |
| 0.219725783 | 0.233720156 | 0.133047722 | 0.20503594  |
| 0.009016088 | 0.337292432 | 0.10931345  | 0.265438227 |
| 0.172349053 | 0.157121936 | 0.037596624 | 0.219916121 |
| 0.211610691 | 0.148103647 | 0.133595807 | 0.151649189 |
| 0.278942206 | 0.213491646 | 0.055457779 | 0.165154932 |
| 0.176337191 | 0.01772056  | 0.108420998 | 0.330187939 |
| 0.111302896 | 0.258833757 | 0.391193102 | 0.106605192 |
| 0.237358103 | 0.217589155 | 0.203047566 | 0.307186062 |
| 0.06531353  | 0.158340117 | 0.329554221 | 0.275083506 |
| 0.238193727 | 0.19915304  | 0.251466551 | 0.163242236 |
| 0.245109262 | 0.052346765 | 0.182735749 | 0.213026603 |
| 0.241310171 | 0.211919507 | 0.116051557 | 0.164894717 |
| 0.023730115 | 0.061105278 | 0.171862725 | 0.058412669 |
| 0.187029156 | 0.234319314 | 0.180949465 | 0.261380216 |
| 0.120181726 | 0.023850168 | 0.294919354 | 0.056974362 |
| 0.140301713 | 0.334017879 | 0.13361669  | 0.22495985  |
| 0.089253447 | 0.162513458 | 0.109577647 | 9.25E-05    |
| 0.310536151 | 0.075318984 | 0.140047919 | 0.197741583 |
| 0.175871238 | 0.011964552 | 0.273025516 | 0.377883855 |
| 0.159724264 | 0.138707535 | 0.195878877 | 0.272257622 |
| 0.239126152 | 0.175112777 | 0.166135821 | 0.199751201 |
| 0.265484112 | 0.125637563 | 0.166586096 | 0.215204792 |
| 0.229553129 | 0.087643471 |             |             |
| KIF2C       | 0.167923322 | 0.490159594 | 0.146888325 |
| 0.264781684 | 0.363373136 | 0.520026279 | 0.126222201 |
| 0.221954104 | 0.435370716 | 0.375902292 | 0.468078629 |
| 0.053822122 | 0.090548421 | 0.507169244 | 0.113412902 |
| 0.450205196 | 0.078314552 | 0.197966477 | 0.105762082 |
| 0.324364775 | 0.335422437 | 0.403599754 | 0.503594063 |
| 0.333892674 | 0.294397802 | 0.4680166   | 0.426525319 |
| 0.520187523 | 0.324769454 | 0.518673485 | 0.284856398 |
| 0.45696068  | 0.377881558 | 0.43733863  | 0.056658604 |
| 0.501122957 | 0.011843353 | 0.461959807 | 0.349543419 |
| 0.192457725 | 0.425196297 | 0.446440621 | 0.356161066 |
| 0.466685165 | 0.103271851 | 0.281644361 | 0.457920933 |
| 0.436229836 | 0.373208887 | 0.154982889 | 0.52085005  |
| 0.433489059 | 0.471104153 | 0.485751035 | 0.005530362 |
| 0.339477305 | 0.091049674 | 0.242095485 | 0.520530011 |
| 0.318785384 | 0.210289021 | 0.318240383 | 0.344008855 |
| 0.444214554 | 0.433238498 | 0.347319313 | 0.442867263 |
| 0.515767339 | 0.188868698 | 0.493500883 | 0.262014218 |
| 0.485674114 | 0.086490985 | 0.26535836  | 0.17275088  |
| 0.453472068 | 0.297891163 | 0.41941627  | 0.346700644 |
| 0.491533305 | 0.528987269 | 0.343325767 | 0.520894966 |
| 0.101442416 | 0.377140075 | 0.330414974 | 0.385100846 |

|             |             |             |             |
|-------------|-------------|-------------|-------------|
| 0.433195309 | 0.152101066 | 0.510107109 | 0.528578058 |
| 0.110069965 | 0.469753451 | 0.476013321 | 0.227628487 |
| 0.511622088 | 0.302156944 | 0.492784099 | 0.204041234 |
| 0.421716364 | 0.394231335 | 0.488014458 | 0.412942764 |
| 0.369129611 | 0.165157291 | 0.516388294 | 0.355726007 |
| 0.39546986  | 0.185142933 | 0.273607048 | 0.50786525  |
| 0.51205269  | 0.525783249 | 0.49449052  | 0.440957739 |
| 0.433738596 | 0.519112491 | 0.514829448 | 0.481651705 |
| 0.196950741 | 0.531575905 | 0.32155225  | 0.093165658 |
| 0.165622479 | 0.1520614   | 0.260081396 | 0.390118854 |
| 0.524778233 | 0.446429474 | 0.326946443 | 0.318652151 |
| 0.490770342 | 0.505260329 | 0.527698578 | 0.492604667 |
| 0.099873681 | 0.264914679 | 0.447259519 | 0.403051687 |
| 0.459852481 | 0.20144067  | 0.295678382 | 0.53221445  |
| 0.473281113 | 0.497776122 | 0.297014135 | 0.525603144 |
| 0.285971696 | 0.518043512 | 0.521442251 | 0.284071888 |
| 0.535828822 | 0.523710416 | 0.508356924 | 0.457146095 |
| 0.496801433 | 0.494430471 | 0.078480446 | 0.460140904 |
| 0.493306596 | 0.021001772 | 0.514267721 | 0.515784169 |
| 0.513463602 | 0.517929704 | 0.50509462  | 0.518568069 |
| 0.516481537 | 0.157285617 | 0.030498992 | 0.356110937 |
| 0.526654171 | 0.493976338 | 0.192074336 | 0.477785305 |
| 0.411603476 | 0.522380517 | 0.490087721 | 0.390648763 |
| 0.512088906 | 0.517173666 | 0.518426144 | 0.483397863 |
| 0.400416068 | 0.40683515  | 0.414680434 | 0.50449107  |
| 0.104087836 | 0.233981378 | 0.132799497 | 0.388482468 |
| 0.468304076 | 0.267210854 | 0.508614354 | 0.399745844 |
| 0.293702728 | 0.458150764 | 0.370400902 | 0.432372656 |
| 0.131734531 | 0.526761937 | 0.287742851 | 0.295454459 |
| 0.095205233 | 0.237338453 | 0.29422709  | 0.261166076 |
| 0.330040484 | 0.294354787 | 0.507992496 | 0.509562188 |
| 0.402162403 | 0.312855576 | 0.518717348 | 0.492613728 |
| 0.455012391 | 0.444110269 | 0.328098718 | 0.034447009 |
| 0.339039188 | 0.33907089  | 0.198201948 | 0.462657075 |
| 0.259420887 | 0.32502694  | 0.457431193 | 0.458349904 |
| 0.439200186 | 0.248714321 | 0.424848041 | 0.452662933 |
| 0.263737968 | 0.393977736 | 0.50443463  | 0.487638165 |
| 0.014848153 | 0.458160807 | 0.524279657 | 0.179277511 |
| 0.414431518 | 0.162494821 | 0.305371624 | 0.510910296 |
| 0.321136114 | 0.252243967 | 0.517043269 | 0.448236606 |
| 0.432807329 | 0.298821836 | 0.513581874 | 0.051086181 |
| 0.384618494 | 0.092640175 | 0.371488443 | 0.421381861 |
| 0.373802599 | 0.370728606 | 0.360009499 | 0.346292765 |
| 0.25504699  | 0.522687205 | 0.484228908 | 0.521831729 |
| 0.426705638 | 0.519639461 | 0.518475346 | 0.509132039 |
| 0.473099942 | 0.401105619 | 0.146805813 | 0.524172302 |
| 0.513794661 | 0.356823595 | 0.166635814 | 0.496849379 |
| 0.424102611 | 0.459326349 | 0.152742649 | 0.508947628 |
| 0.509939668 | 0.494506303 | 0.223729749 | 0.431039967 |
| 0.487558255 | 0.375966844 | 0.483472262 | 0.51722149  |
| 0.379193174 | 0.40571208  | 0.397285711 | 0.4515513   |
| 0.299128012 | 0.24510453  | 0.398278267 | 0.188758311 |
| 0.014770961 | 0.172194565 | 0.153390785 | 0.238669535 |
| 0.194350394 | 0.481561561 | 0.468128103 | 0.515068746 |

|             |             |             |             |
|-------------|-------------|-------------|-------------|
| 0.20924873  | 0.487034453 | 0.330786077 | 0.3791441   |
| 0.483649394 | 0.392336696 | 0.429968175 | 0.447361534 |
| 0.349643412 | 0.048588143 | 0.206176397 | 0.535410834 |
| 0.106574623 | 0.280670527 | 0.420047362 | 0.007565591 |
| 0.11151527  | 0.490261615 | 0.185810309 | 0.280955665 |
| 0.494434378 | 0.292712251 | 0.338256342 | 0.402983323 |
| 0.435237522 | 0.185343835 | 0.008912846 | 0.500086815 |
| 0.479949388 | 0.466567479 | 0.480114871 | 0.468757264 |
| 0.471902412 | 0.472277806 | 0.477970088 | 0.505524282 |
| 0.198782464 | 0.190970399 | 0.245628274 | 0.37328204  |
| 0.01133717  | 0.465680543 | 0.36264641  | 0.248473919 |
| 0.481826157 | 0.391147351 | 0.096208578 | 0.397841028 |
| 0.071253582 | 0.231757501 | 0.406954767 | 0.292532096 |
| 0.399963386 | 0.048067016 | 0.35552178  | 0.375480799 |
| 0.486055319 | 0.451414267 | 0.404820229 | 0.536409324 |
| 0.43800471  | 0.242025455 | 0.399934752 | 0.471195802 |
| 0.148302839 | 0.142101135 | 0.454796612 | 0.069151251 |
| 0.282306161 | 0.460043239 | 0.432917217 | 0.165214343 |
| 0.394374283 | 0.021649134 | 0.472795971 | 0.532896399 |
| 0.491136865 | 0.513581284 | 0.520308065 | 0.31790379  |
| 1           | 0.106310326 | 0.525513686 | 0.504365262 |
| 0.450622475 | 0.004043493 | 0.012687689 | 0.521619034 |
| 0.468756809 | 0.138622543 | 0.269267969 | 0.501103683 |
| 0.199633509 | 0.282782402 | 0.135528754 | 0.221999469 |
| 0.522882604 | 0.301622627 | 0.20100265  | 0.488260311 |
| 0.341001206 | 0.319287989 | 0.488945969 | 0.177885358 |
| 0.475519234 | 0.121254725 | 0.172546979 | 0.017271831 |
| 0.427177055 | 0.215224894 | 0.503667434 | 0.514375817 |
| 0.498748043 | 0.459104262 | 0.405200599 | 0.432323768 |
| 0.476028231 | 0.207496302 | 0.424211784 | 0.226084913 |
| 0.512078061 | 0.464866775 | 0.429145948 | 0.428700571 |
| 0.501105359 | 0.500667571 | 0.083198562 | 0.485462394 |
| 0.043640664 | 0.002967116 | 0.519853279 | 0.356128378 |
| 0.066451323 | 0.423489441 | 0.367820627 | 0.299748696 |
| 0.29087328  | 0.087023016 | 0.290273989 | 0.270022086 |
| 0.392691156 | 0.435909776 | 0.318557277 | 0.336927257 |
| 0.317829141 | 0.164498639 | 0.285163243 | 0.233726762 |
| 0.28786099  | 0.417793138 | 0.299957928 | 0.05861543  |
| 0.505426157 | 0.479251656 | 0.131948204 | 0.271367183 |
| 0.519214533 | 0.525835157 | 0.089911318 | 0.031532914 |
| 0.378887864 | 0.372734047 | 0.513208412 | 0.514537472 |
| 0.541063783 | 0.515648453 | 0.433723404 | 0.175087031 |
| 0.147992435 | 0.396469025 | 0.333809332 | 0.141916841 |
| 0.515410781 | 0.151834725 | 0.500771246 | 0.3291179   |
| 0.210129691 | 0.336036024 | 0.081582454 | 0.163737519 |
| 0.433251084 | 0.281005392 | 0.255270279 | 0.280267337 |
| 0.394100028 | 0.286160864 | 0.109421606 | 0.305330668 |
| 0.451252807 | 0.204269693 | 0.265823787 | 0.417007328 |
| 0.46379402  | 0.275577428 | 0.491322767 | 0.468701455 |
| 0.241302314 | 0.206429297 | 0.446406585 | 0.450202073 |
| 0.520576056 | 0.456199687 | 0.072023531 | 0.499732747 |
| 0.503809451 | 0.516712673 | 0.516150895 | 0.443525083 |
| 0.171301918 | 0.451826887 | 0.336711794 | 0.404169464 |
| 0.279971659 | 0.519810808 | 0.318636945 | 0.138137478 |

|             |             |             |             |
|-------------|-------------|-------------|-------------|
| 0.373476547 | 0.49363862  | 0.496107119 | 0.264141912 |
| 0.494249471 | 0.241975015 | 0.138418015 | 0.498956866 |
| 0.211701035 | 0.186609429 | 0.458409586 | 0.484450787 |
| 0.004641593 | 0.150139094 | 0.486882052 | 0.349116444 |
| 0.514271522 | 0.511869422 | 0.4855032   | 0.358363739 |
| 0.00166749  | 0.459650825 | 0.475936732 | 0.493034582 |
| 0.509192028 | 0.464073841 | 0.217201217 | 0.142135757 |
| 0.380433841 | 0.180577706 | 0.212447228 | 0.47207125  |
| 0.197608792 | 0.508226194 | 0.290646861 | 0.30194105  |
| 0.267916185 | 0.181123187 | 0.278972718 | 0.366232122 |
| 0.153957967 | 0.340916974 | 0.441720545 | 0.376200486 |
| 0.234384823 | 0.471025005 | 0.497224809 | 0.076341442 |
| 0.397069594 | 0.467566234 | 0.480020044 | 0.006160593 |
| 0.501747374 | 0.023801177 | 0.268205914 | 0.30610925  |
| 0.281210687 | 0.279178868 | 0.323263854 | 0.371050649 |
| 0.448337714 | 0.323663907 | 0.395439112 | 0.340968446 |
| 0.247893094 | 0.328777523 | 0.457313748 | 0.467187849 |
| 0.363748362 | 0.235901588 | 0.188293715 | 0.18490167  |
| 0.116598731 | 0.509627565 | 0.348686149 | 0.167172114 |
| 0.315999191 | 0.446782754 | 0.424936044 | 0.508094455 |
| 0.469593793 | 0.215818819 | 0.402063904 | 0.528719816 |
| 0.270500675 | 0.407838806 | 0.14462398  | 0.500592177 |
| 0.34387243  | 0.270645102 | 0.491637592 | 0.455679868 |
| 0.484550906 | 0.446095073 | 0.348864525 | 0.479215482 |
| 0.456986998 | 0.397033006 | 0.423652276 | 0.153559447 |
| 0.304333293 | 0.232860242 | 0.312908465 | 0.009370699 |
| 0.452420738 | 0.425572999 | 0.529379051 | 0.511723811 |
| 0.313968876 | 0.451192234 | 0.452441147 | 0.184940315 |
| 0.383329055 | 0.279666184 | 0.243636208 | 0.507587202 |
| 0.240277527 | 0.297310439 | 0.368284369 | 0.487902893 |
| 0.497733442 | 0.477848438 | 0.292359468 | 0.345018611 |
| 0.322372207 | 0.329808145 | 0.486082871 | 0.239926543 |
| 0.495766345 | 0.235170838 | 0.454214443 | 0.381241843 |
| 0.290641748 | 0.511838679 | 0.137364657 | 0.51799968  |
| 0.390764983 | 0.233403588 | 0.500917715 | 0.411392087 |
| 0.414154539 | 0.184780027 | 0.204995389 | 0.473707904 |
| 0.310398033 | 0.378734592 | 0.020821683 | 0.079243439 |
| 0.41619952  | 0.35417277  | 0.485915448 | 0.433355894 |
| 0.285560987 | 0.403452064 | 0.175325196 | 0.402205875 |
| 0.504064258 | 0.522152495 | 0.362056226 | 0.340191714 |
| 0.441641451 | 0.190594266 | 0.523998278 | 0.018987475 |
| 0.486262671 | 0.472732117 | 0.443939096 | 0.112367369 |
| 0.051961954 | 0.236103422 | 0.492580631 | 0.145934516 |
| 0.500131644 | 0.239329246 | 0.434401154 | 0.517119572 |
| 0.276934737 | 0.526006145 | 0.18211891  | 0.492786039 |
| 0.099573761 | 0.354818437 | 0.418127437 | 0.428607342 |
| 0.306657128 | 0.332382625 | 0.463361932 | 0.273913091 |
| 0.079765969 | 0.33952696  | 0.004376945 | 0.439370306 |
| 0.49975448  | 0.375677862 | 0.303125271 | 0.356362347 |
| 0.366488595 | 0.44887482  | 0.287030001 | 0.477314636 |
| 0.032792447 | 0.426831702 | 0.295633867 | 0.514708734 |
| 0.296986001 | 0.429461784 | 0.121246136 | 0.343905941 |
| 0.496829753 | 0.342176428 | 0.341384587 | 0.377994339 |
| 0.506171607 | 0.469377793 | 0.284912857 | 0.271917489 |



|             |             |             |             |
|-------------|-------------|-------------|-------------|
| 0.452452698 | 0.143499182 | 0.481205669 | 0.523738231 |
| 0.259133647 | 0.252316764 | 0.497452948 | 0.301446498 |
| 0.339950963 | 0.46967844  | 0.466503735 | 0.513861488 |
| 0.115604312 | 0.351156589 | 0.486633992 | 0.494973052 |
| 0.382329105 | 0.192289597 | 0.281050649 | 0.287848992 |
| 0.4964695   | 0.196020982 | 0.286679324 | 0.47115903  |
| 0.246948465 | 0.396256833 | 0.431333297 | 0.236951077 |
| 0.080585333 | 0.24548075  | 0.478980269 | 0.245197476 |
| 0.385729986 | 0.438151637 | 0.285814324 | 0.447594192 |
| 0.221484399 | 0.06441143  | 0.468953527 | 0.021180895 |
| 0.489005635 | 0.48160243  | 0.345382583 | 0.409853083 |
| 0.303827547 | 0.452037117 | 0.465546096 | 0.005040963 |
| 0.47637819  | 0.069016863 | 0.357430291 | 0.296500055 |
| 0.322981187 | 0.120284051 | 0.493902409 | 0.510440831 |
| 0.429349703 | 0.385080589 | 0.396562123 | 0.493705092 |
| 0.167817812 | 0.362574269 | 0.36955805  | 0.516154936 |
| 0.247545907 | 0.462998869 | 0.468045292 | 0.438143949 |
| 0.49160578  | 0.379726828 |             |             |
| KIF3C       | 0.000732694 | 0.103061576 | 0.000157568 |
| 0.001689357 | 0.142767995 | 0.050210078 | 0.0008791   |
| 0.003404934 | 0.086391954 | 0.083250321 | 0.068507161 |
| 0.00159178  | 0.111938329 | 0.107534711 | 0.001102549 |
| 0.164157602 | 7.92E-05    | 0.004283694 | 0.008196659 |
| 0.010111792 | 0.117168044 | 0.087578522 | 0.044702914 |
| 0.13305042  | 0.011836835 | 0.047331688 | 0.237564948 |
| 0.133979553 | 0.075216084 | 0.148129692 | 0.018311971 |
| 0.068160576 | 0.169194054 | 0.212396749 | 0.002092153 |
| 0.101872059 | 0.027480897 | 0.067606825 | 0.037842718 |
| 0.04187199  | 0.045922096 | 0.064581219 | 0.023234266 |
| 0.076598788 | 0.001019585 | 0.03601232  | 0.197070181 |
| 0.065500852 | 0.043077694 | 0.000853669 | 0.119375579 |
| 0.076520559 | 0.043128771 | 0.103184691 | 0.000339385 |
| 0.236884216 | 0.197302711 | 0.275160193 | 0.106198171 |
| 0.016444819 | 0.007638385 | 0.085477574 | 0.043723612 |
| 0.173706182 | 0.164199086 | 0.051401688 | 0.077126528 |
| 0.108636457 | 0.129790283 | 0.194077282 | 0.004985035 |
| 0.057072387 | 0.000236455 | 0.010921336 | 0.004139479 |
| 0.103590836 | 0.024037724 | 0.113816513 | 0.182665323 |
| 0.090782929 | 0.101299873 | 0.032320601 | 0.094920684 |
| 0.063600978 | 0.229676789 | 0.089913324 | 0.075603636 |
| 0.122388141 | 0.004164315 | 0.094576701 | 0.109551535 |
| 0.001251035 | 0.108073206 | 0.113040403 | 0.006192258 |
| 0.099924036 | 0.173013865 | 0.094881239 | 0.131985485 |
| 0.20108796  | 0.145162432 | 0.102099932 | 0.034528855 |
| 0.152658308 | 0.001423397 | 0.079666769 | 0.245467691 |
| 0.049243741 | 0.001500438 | 0.043383584 | 0.198936992 |
| 0.101825151 | 0.124067049 | 0.129504444 | 0.094811758 |
| 0.158804285 | 0.116318906 | 0.077930247 | 0.108275949 |
| 0.048683638 | 0.12339313  | 0.010262711 | 0.000277753 |
| 0.000814469 | 0.004208264 | 0.085291362 | 0.055774395 |
| 0.149607009 | 0.058002785 | 0.008444763 | 0.040910679 |
| 0.179711522 | 0.084260451 | 0.12688775  | 0.10536417  |
| 0.000632797 | 0.192741259 | 0.139090925 | 0.023923043 |
| 0.101362128 | 0.007352342 | 0.186199586 | 0.087564205 |

|             |             |             |             |
|-------------|-------------|-------------|-------------|
| 0.056368074 | 0.164069117 | 0.005542927 | 0.082890761 |
| 0.025995322 | 0.110430578 | 0.110248416 | 0.009610536 |
| 0.097444125 | 0.082077322 | 0.130206088 | 0.217201719 |
| 0.083727968 | 0.030049123 | 0.01465562  | 0.096097953 |
| 0.114858048 | 0.005799696 | 0.174285319 | 0.172329066 |
| 0.105429823 | 0.175959377 | 0.153150933 | 0.1522538   |
| 0.110008932 | 0.001849371 | 0.028165796 | 0.086675029 |
| 0.09607769  | 0.068585141 | 0.015746296 | 0.155006282 |
| 0.178812048 | 0.047376978 | 0.181345411 | 0.023838613 |
| 0.111548234 | 0.128322543 | 0.156789593 | 0.09545793  |
| 0.065004766 | 0.037565726 | 0.265888864 | 0.070686405 |
| 3.90E-05    | 0.002133748 | 0.000229751 | 0.075616737 |
| 0.034439297 | 0.018463174 | 0.034481885 | 0.16639156  |
| 0.02027971  | 0.04572801  | 0.230216526 | 0.197606683 |
| 0.000485571 | 0.118002211 | 0.009266521 | 0.008680571 |
| 1.95E-05    | 0.008307194 | 0.003347067 | 0.005362193 |
| 0.054826599 | 0.017178333 | 0.172102076 | 0.146626106 |
| 0.121025705 | 0.010618412 | 0.108809454 | 0.110835671 |
| 0.091050745 | 0.167582746 | 0.030356121 | 0.001489666 |
| 0.018554935 | 0.168332977 | 0.224865483 | 0.210932643 |
| 0.011961739 | 0.015730146 | 0.117276419 | 0.173067789 |
| 0.016516563 | 0.009878324 | 0.094615254 | 0.062935275 |
| 0.009185681 | 0.05785087  | 0.124211555 | 0.108342042 |
| 0.005739535 | 0.034366688 | 0.131677843 | 0.023085421 |
| 0.060945754 | 0.046035482 | 0.09130709  | 0.134417999 |
| 0.092443398 | 0.131582798 | 0.166871537 | 0.196548115 |
| 0.022499158 | 0.019052863 | 0.14829972  | 0.04766604  |
| 0.203946674 | 0.002497583 | 0.059768624 | 0.093052284 |
| 0.025209837 | 0.064838616 | 0.203357316 | 0.071724723 |
| 0.00437463  | 0.116181424 | 0.087262541 | 0.135169859 |
| 0.089604479 | 0.139794663 | 0.155034713 | 0.104034285 |
| 0.073023035 | 0.194552624 | 0.161032593 | 0.112077677 |
| 0.139524645 | 0.02453858  | 0.001751147 | 0.201236565 |
| 0.112824596 | 0.181790568 | 0.014662764 | 0.121596457 |
| 0.089335952 | 0.086809964 | 0.010518778 | 0.148258435 |
| 0.066086784 | 0.014965784 | 0.131718007 | 0.142956061 |
| 0.061635125 | 0.134903747 | 0.082160421 | 0.143605473 |
| 0.010481489 | 0.07630877  | 0.055797608 | 0.237405157 |
| 0.017186407 | 0.00205612  | 0.000547593 | 0.020384285 |
| 0.116650622 | 0.18769366  | 0.137474851 | 0.125068366 |
| 0.004995656 | 0.085395829 | 0.041386914 | 0.032748133 |
| 0.073619232 | 0.156266201 | 0.229631215 | 0.175017808 |
| 0.032766881 | 0.000478553 | 0.001900489 | 0.094028212 |
| 0.000449876 | 0.115881922 | 0.052019962 | 4.96E-05    |
| 0.122727923 | 0.003718637 | 0.013060356 | 9.48E-05    |
| 0.012826385 | 0.013857388 | 0.057559366 | 0.175480874 |
| 0.003166733 | 0.000121774 | 0.144541832 | 0.088186929 |
| 0.130931588 | 0.131360535 | 0.100858336 | 0.136109241 |
| 0.161416755 | 0.15021385  | 0.037335656 | 0.150574113 |
| 0.001908037 | 0.073432276 | 0.047146346 | 0.002020653 |
| 0.106159235 | 0.128388643 | 0.007930787 | 0.000190791 |
| 0.063848654 | 0.00050208  | 0.215416954 | 0.190258239 |
| 0.163977117 | 0.02583341  | 0.037088261 | 0.002010514 |
| 0.003237916 | 0.010425332 | 0.047574371 | 0.160296574 |
|             |             |             | 0.062752047 |

|             |             |             |             |
|-------------|-------------|-------------|-------------|
| 0.046202323 | 0.162535682 | 0.119692306 | 0.053658301 |
| 0.006595685 | 0.061503285 | 0.14746005  | 0.001156351 |
| 0.013447699 | 0.056747872 | 0.004450448 | 0.020962013 |
| 0.105715921 | 0.110268164 | 0.000211355 | 0.029025537 |
| 0.008210366 | 0.047598357 | 0.120273741 | 0.088060051 |
| 0.151857977 | 0.112755612 | 0.161406267 | 0.106310326 |
| 1           | 0.139253608 | 0.080410928 | 0.09561184  |
| 0.001964452 | 5.44E-05    | 0.157032657 | 0.123488067 |
| 0.000698277 | 0.009677442 | 0.017410078 | 0.002582379 |
| 0.005249408 | 0.001534167 | 0.073245617 | 0.113303799 |
| 0.080964044 | 0.090615231 | 0.087062499 | 0.027668813 |
| 0.040989469 | 0.068816374 | 0.003214692 | 0.163605289 |
| 0.000214218 | 0.004053277 | 0.000353025 | 0.157218378 |
| 0.004649808 | 0.069926157 | 0.120626695 | 0.101756384 |
| 0.154949361 | 0.104758554 | 0.025806315 | 0.170218716 |
| 0.003188378 | 0.065521612 | 0.00412977  | 0.098208718 |
| 0.118824843 | 0.048077017 | 0.032263584 | 0.120194539 |
| 0.08613051  | 0.000496072 | 0.116179787 | 0.001413457 |
| 0.001108102 | 0.03715468  | 0.045487685 | 0.053296677 |
| 0.1290778   | 0.028221814 | 0.046375802 | 0.048747163 |
| 0.000709571 | 0.204753594 | 0.15829834  | 0.055343547 |
| 0.085410497 | 0.150698332 | 0.044879871 | 0.080061579 |
| 0.020124529 | 0.02322386  | 0.011190344 | 0.033448421 |
| 0.038515775 | 0.011676222 | 0.001035704 | 0.118473628 |
| 0.141764704 | 0.000408361 | 0.009660399 | 0.11018729  |
| 0.140798886 | 0.00035182  | 0.001715768 | 0.026934609 |
| 0.082086619 | 0.155389421 | 0.116139202 | 0.0999358   |
| 0.12104241  | 0.05544979  | 0.011866089 | 0.000904423 |
| 0.089934011 | 0.176212896 | 0.010792336 | 0.126816976 |
| 0.001259205 | 0.103463205 | 0.274808043 | 0.006209618 |
| 0.012348216 | 0.000240928 | 0.003251837 | 0.241290855 |
| 0.014673898 | 0.027360008 | 0.00591016  | 0.054616083 |
| 0.087424406 | 0.000376708 | 0.016902405 | 0.056783976 |
| 0.061295155 | 0.010364795 | 0.041422824 | 0.068842624 |
| 0.036567252 | 0.170767505 | 0.084187896 | 0.005895569 |
| 0.005927194 | 0.007902666 | 0.150587725 | 0.146508513 |
| 0.177243387 | 0.000415386 | 0.105447591 | 0.143979384 |
| 0.152689795 | 0.098617192 | 0.111068794 | 0.002965591 |
| 0.12088402  | 0.216660854 | 0.106709813 | 0.020161356 |
| 0.049513029 | 0.045250595 | 0.00106437  | 0.054842031 |
| 0.091998852 | 0.085685803 | 0.012635434 | 0.154434281 |
| 0.006260794 | 0.000781573 | 0.152481543 | 0.073655004 |
| 0.000557384 | 0.082229208 | 0.196535593 | 0.000268974 |
| 0.203909497 | 0.168920785 | 0.018691481 | 0.12348537  |
| 0.136489406 | 0.075085329 | 0.026551179 | 0.003638176 |
| 0.209110977 | 0.083284297 | 0.063848213 | 0.089339403 |
| 0.055659569 | 0.011983176 | 0.001719483 | 0.046486298 |
| 0.001623196 | 0.005488657 | 0.016182988 | 0.054584588 |
| 0.084696844 | 0.02303737  | 0.030375988 | 0.034371282 |
| 0.005204382 | 0.091688556 | 0.018708679 | 0.075410142 |
| 0.028085371 | 0.067218958 | 0.061952429 | 0.036412451 |
| 0.139849874 | 0.089908721 | 0.001573089 | 0.236508922 |
| 0.1324678   | 0.125816869 | 0.002519499 | 0.148545274 |
| 0.002944011 | 0.035320764 | 0.029481897 | 0.027574999 |

|             |             |             |             |
|-------------|-------------|-------------|-------------|
| 0.035786343 | 0.078319968 | 0.055934174 | 0.070835851 |
| 0.021413287 | 0.02496583  | 0.029595484 | 0.014199559 |
| 0.021871256 | 0.137929636 | 0.053540677 | 0.046592346 |
| 0.003999923 | 0.003743248 | 0.00359884  | 0.000209317 |
| 0.138296097 | 0.022299041 | 0.001358381 | 0.036788034 |
| 0.06140728  | 0.060072954 | 0.106843333 | 0.106711848 |
| 0.004736524 | 0.079398187 | 0.097039702 | 0.052750987 |
| 0.012277801 | 0.000439046 | 0.069930756 | 0.021992852 |
| 0.038848985 | 0.100855297 | 0.029003844 | 0.126872993 |
| 0.057961548 | 0.021233133 | 0.102378552 | 0.064127465 |
| 0.124371686 | 0.055187695 | 0.002253372 | 0.007293081 |
| 0.008195606 | 0.132251445 | 0.010427582 | 0.068955417 |
| 0.004980967 | 0.142080401 | 0.087828022 | 0.245616726 |
| 0.076132874 | 0.014546871 | 0.001013756 | 0.026151546 |
| 0.010494595 | 0.007572921 | 0.155768034 | 0.23450495  |
| 0.01042606  | 0.094250828 | 0.017819112 | 0.165474254 |
| 0.180954063 | 0.097233454 | 0.027020986 | 0.045798055 |
| 0.013980897 | 0.097189154 | 0.003685939 | 0.156352359 |
| 0.050676742 | 0.091283752 | 0.054037304 | 0.040486711 |
| 0.150919467 | 0.000685889 | 0.151961761 | 0.089001943 |
| 0.007729833 | 0.094146564 | 0.051099077 | 0.017756074 |
| 0.006956461 | 0.242362901 | 0.069112243 | 0.021308152 |
| 0.196496983 | 0.006192611 | 0.011546584 | 0.070615355 |
| 0.103598865 | 0.116775485 | 0.124143534 | 0.109609674 |
| 0.099345631 | 0.134959485 | 0.029570429 | 0.090477889 |
| 0.086410741 | 0.008861885 | 0.03507295  | 0.066021988 |
| 0.00298288  | 0.064957888 | 0.006898335 | 0.151510146 |
| 0.218425296 | 0.070197566 | 0.000743703 | 0.001001756 |
| 0.186546118 | 0.112347951 | 0.002507453 | 0.167708503 |
| 0.087898593 | 0.117538403 | 0.143401302 | 0.017336617 |
| 0.080383089 | 0.011642682 | 0.113041435 | 0.000734877 |
| 0.040645022 | 0.223365283 | 0.156286224 | 0.023668119 |
| 0.150308623 | 0.091419913 | 0.148156462 | 0.000734167 |
| 0.025601811 | 0.001176498 | 0.051000345 | 0.077226037 |
| 0.18693787  | 0.019091434 | 0.092455025 | 0.055302368 |
| 0.103655661 | 0.025454765 | 0.172000632 | 0.001358792 |
| 0.162159012 | 0.0223988   | 0.074897443 | 0.039937304 |
| 0.111043111 | 0.000392846 | 0.192464107 | 0.062626045 |
| 0.021499294 | 0.039491696 | 0.042303016 | 0.106562312 |
| 0.105026856 | 0.009852394 | 0.038707952 | 0.149597695 |
| 0.00112306  | 0.077761656 | 0.132142451 | 0.019777851 |
| 0.127623889 | 0.166223186 | 0.014621618 | 0.217549565 |
| 0.075272226 | 0.179517842 | 0.134268062 | 0.005047775 |
| 0.028600051 | 0.166433579 | 0.110066313 | 0.062249391 |
| 0.112506946 | 0.121452064 | 0.054396312 | 0.07770485  |
| 0.000881633 | 0.083478124 | 0.052354418 | 0.13319128  |
| 0.071565862 | 0.090996869 | 0.061641408 | 0.000353761 |
| 0.013086388 | 0.04566922  | 0.008703168 | 0.051429745 |
| 0.102003149 | 0.066195711 | 0.064872041 | 0.00447066  |
| 0.000924361 | 0.086988875 | 0.013806084 | 0.034877277 |
| 0.117146805 | 0.033071843 | 0.126871675 | 0.010899347 |
| 0.070491508 | 0.035935692 | 0.007544573 | 0.138899293 |
| 0.008923568 | 0.105527244 | 0.036428257 | 0.052726338 |
| 0.000190593 | 0.086019202 | 0.153989811 | 0.053022496 |

|             |             |             |             |
|-------------|-------------|-------------|-------------|
| 0.04584729  | 0.074827491 | 0.104564029 | 0.059564398 |
| 0.223217242 | 0.163054854 | 0.090104637 | 0.201761853 |
| 0.105677619 | 0.14706223  | 0.148380221 | 0.080960988 |
| 0.030272197 |             |             |             |
| KIF4        | 0.149152948 | 0.508416148 | 0.125982444 |
| 0.228844784 | 0.382944514 | 0.535994469 | 0.114423418 |
| 0.212353514 | 0.456833451 | 0.417421701 | 0.475007088 |
| 0.042055328 | 0.114107125 | 0.522307495 | 0.105427746 |
| 0.47787976  | 0.067083073 | 0.183810614 | 0.121196126 |
| 0.332272263 | 0.352146131 | 0.437786901 | 0.518022494 |
| 0.359602939 | 0.277770447 | 0.477160833 | 0.474611135 |
| 0.538534318 | 0.36236433  | 0.542104597 | 0.292258074 |
| 0.458209633 | 0.400913256 | 0.48010162  | 0.04316114  |
| 0.531036294 | 0.016918853 | 0.457225023 | 0.348569799 |
| 0.200349637 | 0.423238613 | 0.46997101  | 0.344766872 |
| 0.489975849 | 0.084026835 | 0.315793541 | 0.494406411 |
| 0.452715786 | 0.393979104 | 0.139599004 | 0.541821488 |
| 0.469963449 | 0.473461389 | 0.508745265 | 0.00493333  |
| 0.377952639 | 0.115670023 | 0.28399039  | 0.525350454 |
| 0.304508828 | 0.200027999 | 0.366023086 | 0.368819425 |
| 0.4860677   | 0.467019873 | 0.356282782 | 0.474799258 |
| 0.527980312 | 0.2227189   | 0.527680381 | 0.248637213 |
| 0.506247345 | 0.077299965 | 0.250070644 | 0.164211286 |
| 0.489506442 | 0.292981695 | 0.442494083 | 0.381421795 |
| 0.504575725 | 0.533199358 | 0.343453293 | 0.523739799 |
| 0.127882439 | 0.412289419 | 0.354482502 | 0.392656119 |
| 0.460974014 | 0.15080914  | 0.5184478   | 0.530939061 |
| 0.104274506 | 0.501047103 | 0.500059641 | 0.216869105 |
| 0.527831628 | 0.355229499 | 0.519028271 | 0.227771993 |
| 0.450583855 | 0.41949685  | 0.496471141 | 0.405697614 |
| 0.405055277 | 0.147919169 | 0.516496995 | 0.388687367 |
| 0.397792006 | 0.162469681 | 0.288379179 | 0.538077034 |
| 0.524954509 | 0.54189401  | 0.519807756 | 0.458371887 |
| 0.460797044 | 0.531645393 | 0.518687187 | 0.502768597 |
| 0.235491262 | 0.540110856 | 0.30006925  | 0.082188867 |
| 0.149569003 | 0.146193474 | 0.299184418 | 0.395525523 |
| 0.545568318 | 0.457556425 | 0.309947943 | 0.316768361 |
| 0.515929175 | 0.507598031 | 0.537554863 | 0.51071557  |
| 0.08398284  | 0.312199487 | 0.468896203 | 0.418758765 |
| 0.481922895 | 0.194444092 | 0.321966148 | 0.532038371 |
| 0.469826596 | 0.522505561 | 0.284472251 | 0.525147343 |
| 0.299592373 | 0.520372879 | 0.537060255 | 0.263281614 |
| 0.536049099 | 0.52140794  | 0.521922815 | 0.486419138 |
| 0.496393371 | 0.482630966 | 0.097759727 | 0.477875911 |
| 0.505919492 | 0.021390807 | 0.541826085 | 0.540727016 |
| 0.518361142 | 0.542733026 | 0.51989877  | 0.539744524 |
| 0.522827022 | 0.142282638 | 0.040590061 | 0.368098928 |
| 0.527488551 | 0.492966634 | 0.201852929 | 0.508927312 |
| 0.443478527 | 0.53703845  | 0.524645783 | 0.404965175 |
| 0.517063645 | 0.534602886 | 0.54369051  | 0.502835947 |
| 0.423556361 | 0.402912814 | 0.457912669 | 0.501099881 |
| 0.088559525 | 0.211597021 | 0.114562036 | 0.404963125 |
| 0.486108044 | 0.257840855 | 0.516760704 | 0.437682065 |
| 0.284859175 | 0.482211678 | 0.417824656 | 0.461259517 |

|             |             |             |             |
|-------------|-------------|-------------|-------------|
| 0.116853786 | 0.553293609 | 0.272086846 | 0.280429423 |
| 0.079307175 | 0.224151874 | 0.277255213 | 0.246142195 |
| 0.338474515 | 0.283555883 | 0.542500109 | 0.529270454 |
| 0.440639343 | 0.292631103 | 0.538737357 | 0.504861178 |
| 0.462324564 | 0.469740178 | 0.329359536 | 0.023583404 |
| 0.348060296 | 0.393289795 | 0.234959837 | 0.506138194 |
| 0.248533464 | 0.33173939  | 0.482075395 | 0.480528423 |
| 0.423576236 | 0.251898662 | 0.456315889 | 0.453216224 |
| 0.250811409 | 0.402294262 | 0.51974414  | 0.519492442 |
| 0.010075079 | 0.448616484 | 0.543223183 | 0.194485905 |
| 0.429901565 | 0.181651793 | 0.33341465  | 0.527485853 |
| 0.36593963  | 0.285749659 | 0.542041352 | 0.475930591 |
| 0.4581178   | 0.293236066 | 0.525094527 | 0.06597289  |
| 0.429039573 | 0.08030439  | 0.372125352 | 0.457328627 |
| 0.364489859 | 0.380249069 | 0.391586928 | 0.360940283 |
| 0.23333898  | 0.53041433  | 0.497846427 | 0.539544178 |
| 0.459195972 | 0.528712204 | 0.540249154 | 0.520150143 |
| 0.484951767 | 0.449472167 | 0.175935434 | 0.536159813 |
| 0.530906362 | 0.381396599 | 0.150002244 | 0.532846728 |
| 0.46196285  | 0.489849916 | 0.159638863 | 0.520969104 |
| 0.509909628 | 0.496830394 | 0.219828004 | 0.452386254 |
| 0.486367785 | 0.356874764 | 0.505756067 | 0.529257029 |
| 0.418270946 | 0.435982683 | 0.415490089 | 0.468700876 |
| 0.278346101 | 0.269060684 | 0.405697346 | 0.229192102 |
| 0.016915028 | 0.160058536 | 0.133394852 | 0.233102934 |
| 0.212295139 | 0.523737815 | 0.493625149 | 0.528939511 |
| 0.195101669 | 0.498361748 | 0.339867812 | 0.377882108 |
| 0.489252883 | 0.435143281 | 0.467709424 | 0.480823165 |
| 0.349785169 | 0.036304744 | 0.186698818 | 0.53600938  |
| 0.09407545  | 0.304043129 | 0.445169242 | 0.00581324  |
| 0.096087287 | 0.516223404 | 0.169627367 | 0.266134883 |
| 0.519956241 | 0.276305467 | 0.319981633 | 0.433242588 |
| 0.446052794 | 0.169104877 | 0.006595755 | 0.521542885 |
| 0.501256766 | 0.489362682 | 0.5006118   | 0.47828855  |
| 0.497727111 | 0.506354406 | 0.499055715 | 0.507430811 |
| 0.181375624 | 0.1750641   | 0.262480104 | 0.376897523 |
| 0.010673894 | 0.478396836 | 0.39585411  | 0.230779725 |
| 0.514360473 | 0.406085179 | 0.08141573  | 0.438323899 |
| 0.051383815 | 0.257826455 | 0.431560367 | 0.306269527 |
| 0.426537625 | 0.037096919 | 0.344873312 | 0.403433907 |
| 0.488133141 | 0.451699834 | 0.444375852 | 0.542058612 |
| 0.438940713 | 0.227315794 | 0.401194956 | 0.494919132 |
| 0.132742794 | 0.155463235 | 0.48786993  | 0.063559546 |
| 0.307770813 | 0.478660185 | 0.478265556 | 0.13727043  |
| 0.382469859 | 0.014531766 | 0.469171216 | 0.540126271 |
| 0.50118269  | 0.532404387 | 0.532830075 | 0.342256161 |
| 0.525513686 | 0.139253608 | 1           | 0.513766179 |
| 0.484586801 | 0.002317337 | 0.011936612 | 0.542343191 |
| 0.486826333 | 0.123557831 | 0.252747659 | 0.503316235 |
| 0.179579242 | 0.269962499 | 0.126437514 | 0.233850867 |
| 0.544946932 | 0.313961487 | 0.226305927 | 0.495935931 |
| 0.334554553 | 0.325782849 | 0.521738274 | 0.16491566  |
| 0.508159449 | 0.102476113 | 0.162114608 | 0.014080293 |
| 0.452991277 | 0.198723395 | 0.501141213 | 0.526806257 |

|             |             |             |             |
|-------------|-------------|-------------|-------------|
| 0.505397165 | 0.480137846 | 0.445363943 | 0.466999156 |
| 0.506465757 | 0.191010237 | 0.469154179 | 0.211312286 |
| 0.523286167 | 0.481997174 | 0.425020126 | 0.416461824 |
| 0.514546709 | 0.507135403 | 0.071074153 | 0.500795391 |
| 0.031922257 | 0.003235134 | 0.516303368 | 0.36555847  |
| 0.090197527 | 0.453381117 | 0.356495178 | 0.329038449 |
| 0.317625649 | 0.070576053 | 0.324276236 | 0.296697758 |
| 0.393176526 | 0.45430996  | 0.340334997 | 0.347729347 |
| 0.337473392 | 0.173872755 | 0.286822545 | 0.236752112 |
| 0.328437888 | 0.414226423 | 0.282269975 | 0.048655087 |
| 0.534142483 | 0.506813633 | 0.11444242  | 0.257677476 |
| 0.529902683 | 0.543834741 | 0.079234384 | 0.02248626  |
| 0.370569975 | 0.403435793 | 0.534687452 | 0.530792974 |
| 0.543724949 | 0.520573471 | 0.434691172 | 0.176340198 |
| 0.131283152 | 0.410690577 | 0.361104792 | 0.140368676 |
| 0.533045741 | 0.137210293 | 0.514890868 | 0.366019719 |
| 0.197552708 | 0.317012406 | 0.067661195 | 0.150835556 |
| 0.471602817 | 0.27295187  | 0.250735378 | 0.255683677 |
| 0.40496066  | 0.314557832 | 0.097010208 | 0.29394752  |
| 0.455273437 | 0.221862747 | 0.25250808  | 0.441025596 |
| 0.475339681 | 0.320574087 | 0.51763252  | 0.47485351  |
| 0.224483324 | 0.196113834 | 0.424934136 | 0.482867873 |
| 0.543419142 | 0.499878738 | 0.057941683 | 0.517158441 |
| 0.525941535 | 0.544558352 | 0.519167174 | 0.459284718 |
| 0.156932917 | 0.472061361 | 0.385268171 | 0.425015254 |
| 0.278647283 | 0.532151416 | 0.333217203 | 0.122911924 |
| 0.381191681 | 0.498736835 | 0.504976984 | 0.250624495 |
| 0.53225825  | 0.231445983 | 0.12407913  | 0.527575691 |
| 0.22630879  | 0.166282498 | 0.490893759 | 0.519485813 |
| 0.003315242 | 0.176892462 | 0.511504817 | 0.351069026 |
| 0.523184676 | 0.527291771 | 0.488404193 | 0.379106891 |
| 0.002223773 | 0.492802093 | 0.483027898 | 0.502228737 |
| 0.522751438 | 0.471385741 | 0.241096564 | 0.1264759   |
| 0.377852963 | 0.162584259 | 0.203473947 | 0.483680681 |
| 0.222143906 | 0.532482319 | 0.285130546 | 0.308700921 |
| 0.271590898 | 0.173652236 | 0.31240539  | 0.35542959  |
| 0.187481701 | 0.333240908 | 0.444141953 | 0.417645533 |
| 0.25001536  | 0.495689581 | 0.508728365 | 0.061880714 |
| 0.439539428 | 0.48980935  | 0.501414696 | 0.004533861 |
| 0.52296772  | 0.017685661 | 0.272046445 | 0.298760119 |
| 0.280153368 | 0.289439064 | 0.334702409 | 0.377745979 |
| 0.465832993 | 0.319371847 | 0.383584761 | 0.333005731 |
| 0.237406747 | 0.329698486 | 0.483767138 | 0.479577498 |
| 0.367195084 | 0.214843579 | 0.173006053 | 0.169239977 |
| 0.100057943 | 0.53399807  | 0.33858992  | 0.148759289 |
| 0.319772663 | 0.474023886 | 0.425630512 | 0.515968675 |
| 0.483491254 | 0.200457504 | 0.432322365 | 0.539498384 |
| 0.316138461 | 0.422716771 | 0.13104368  | 0.51379599  |
| 0.341736331 | 0.282315616 | 0.525786707 | 0.449088334 |
| 0.514494285 | 0.444969234 | 0.339205036 | 0.49223805  |
| 0.468582791 | 0.436561879 | 0.445210639 | 0.137149697 |
| 0.279905005 | 0.221171078 | 0.330461762 | 0.005659223 |
| 0.4658293   | 0.405358329 | 0.548283726 | 0.510676294 |
| 0.360556199 | 0.459008877 | 0.461711686 | 0.161597394 |

|             |             |             |             |
|-------------|-------------|-------------|-------------|
| 0.398807305 | 0.263527527 | 0.228959754 | 0.535183079 |
| 0.275921888 | 0.288057397 | 0.37981189  | 0.491926133 |
| 0.522214839 | 0.51192304  | 0.323625294 | 0.358694781 |
| 0.33430071  | 0.316468662 | 0.492022344 | 0.223015741 |
| 0.528447674 | 0.240248723 | 0.484474668 | 0.384888008 |
| 0.29588565  | 0.532375907 | 0.122003788 | 0.53885104  |
| 0.412654617 | 0.220759514 | 0.502139939 | 0.433284683 |
| 0.423504411 | 0.183654974 | 0.236067442 | 0.507634465 |
| 0.319793033 | 0.422245382 | 0.025620042 | 0.087233285 |
| 0.420785065 | 0.401739718 | 0.509998814 | 0.460943964 |
| 0.3081928   | 0.417575762 | 0.216042622 | 0.41173005  |
| 0.507401128 | 0.523987982 | 0.350808551 | 0.337141545 |
| 0.453187841 | 0.174985435 | 0.53762587  | 0.024918783 |
| 0.514552641 | 0.511717767 | 0.488332739 | 0.10294257  |
| 0.042604288 | 0.263067577 | 0.514598865 | 0.136585661 |
| 0.522463306 | 0.269486752 | 0.469229703 | 0.54147006  |
| 0.27506247  | 0.524861141 | 0.180077093 | 0.505892244 |
| 0.095228159 | 0.359653999 | 0.462854881 | 0.475251973 |
| 0.300120852 | 0.356767546 | 0.468781073 | 0.294316103 |
| 0.065620989 | 0.347052491 | 0.003262462 | 0.434431916 |
| 0.498243532 | 0.409803959 | 0.2965063   | 0.409237714 |
| 0.368108959 | 0.4684044   | 0.316403976 | 0.518720065 |
| 0.024161057 | 0.449567801 | 0.29401584  | 0.520665882 |
| 0.308929767 | 0.462300455 | 0.102988426 | 0.382658753 |
| 0.492324242 | 0.362574825 | 0.346109961 | 0.393152476 |
| 0.519887664 | 0.491491894 | 0.270386921 | 0.294746455 |
| 0.491511914 | 0.128720018 | 0.514087356 | 0.533531253 |
| 0.254371589 | 0.268819057 | 0.518459598 | 0.288525309 |
| 0.380122721 | 0.482287596 | 0.505939867 | 0.527064589 |
| 0.11106144  | 0.344881789 | 0.514473898 | 0.511418285 |
| 0.387093212 | 0.214495123 | 0.307337351 | 0.298489305 |
| 0.502227377 | 0.172966288 | 0.319638719 | 0.472216005 |
| 0.269467085 | 0.409598722 | 0.460720397 | 0.249963836 |
| 0.070363314 | 0.254507879 | 0.49953971  | 0.232448629 |
| 0.391217022 | 0.453084825 | 0.302161211 | 0.448234896 |
| 0.205899103 | 0.048194234 | 0.476028174 | 0.023543229 |
| 0.489103048 | 0.49527126  | 0.350099987 | 0.438148151 |
| 0.284327079 | 0.4691483   | 0.46791427  | 0.003435221 |
| 0.497916317 | 0.068502341 | 0.395882413 | 0.29728924  |
| 0.360748034 | 0.10509163  | 0.502295242 | 0.530731799 |
| 0.441625722 | 0.431559062 | 0.436090932 | 0.510362355 |
| 0.187979413 | 0.415177494 | 0.420322818 | 0.534862175 |
| 0.279079549 | 0.49465225  | 0.511485459 | 0.468340215 |
| 0.504587707 | 0.394267301 |             |             |
| KLHL7       | 0.132071654 | 0.430876219 | 0.118595811 |
| 0.192838963 | 0.267047575 | 0.387454735 | 0.105179457 |
| 0.172516458 | 0.349559777 | 0.305581354 | 0.345316941 |
| 0.04491084  | 0.060990544 | 0.437928596 | 0.093177152 |
| 0.345827593 | 0.061414212 | 0.156985501 | 0.083490664 |
| 0.264222968 | 0.25360857  | 0.298576284 | 0.391000237 |
| 0.253155354 | 0.236141938 | 0.37038233  | 0.328540268 |
| 0.488489947 | 0.241816642 | 0.390904653 | 0.220635199 |
| 0.424750199 | 0.28306737  | 0.331983686 | 0.046862299 |
| 0.384701772 | 0.009700816 | 0.462075865 | 0.269498771 |



|             |             |             |             |
|-------------|-------------|-------------|-------------|
| 0.132529173 | 0.361653268 | 0.353111388 | 0.265714662 |
| 0.373016506 | 0.08486372  | 0.218388491 | 0.360031963 |
| 0.345290424 | 0.286647285 | 0.131202786 | 0.400291456 |
| 0.343839451 | 0.358282367 | 0.385731224 | 0.003944538 |
| 0.249584045 | 0.065935756 | 0.183503341 | 0.508804596 |
| 0.242665464 | 0.159487201 | 0.251064043 | 0.275434726 |
| 0.354796562 | 0.339887151 | 0.266219752 | 0.359657654 |
| 0.494756909 | 0.138332165 | 0.3798064   | 0.189364348 |
| 0.388171123 | 0.075326686 | 0.207161492 | 0.147078164 |
| 0.352840488 | 0.221292936 | 0.309823161 | 0.260368328 |
| 0.440167876 | 0.522405533 | 0.266391428 | 0.517880999 |
| 0.084950233 | 0.28603016  | 0.243350187 | 0.295760526 |
| 0.346225393 | 0.129415909 | 0.386906097 | 0.518625354 |
| 0.095035628 | 0.375462007 | 0.381761453 | 0.189673929 |
| 0.419544099 | 0.232039261 | 0.386732774 | 0.143086201 |
| 0.317065933 | 0.303227904 | 0.488879783 | 0.318376523 |
| 0.275767537 | 0.140151605 | 0.514498958 | 0.26636333  |
| 0.287077167 | 0.148292994 | 0.207830804 | 0.406761147 |
| 0.397679007 | 0.480088211 | 0.397373314 | 0.351717129 |
| 0.33357624  | 0.492189177 | 0.392343428 | 0.400964788 |
| 0.148944536 | 0.52181066  | 0.243663172 | 0.071585783 |
| 0.133816543 | 0.114102186 | 0.207821326 | 0.300678474 |
| 0.439405831 | 0.339293482 | 0.249503756 | 0.241706681 |
| 0.410417473 | 0.502448385 | 0.522345035 | 0.385926025 |
| 0.08077786  | 0.205058877 | 0.340744757 | 0.303670473 |
| 0.362650108 | 0.161422779 | 0.218610019 | 0.529109799 |
| 0.379352341 | 0.384131358 | 0.229690631 | 0.520870911 |
| 0.235032586 | 0.503236719 | 0.447928359 | 0.215881599 |
| 0.526391758 | 0.516597386 | 0.488371999 | 0.343035756 |
| 0.483638905 | 0.371998026 | 0.076149965 | 0.36372537  |
| 0.46580839  | 0.015527703 | 0.442132761 | 0.468273379 |
| 0.506810551 | 0.408059876 | 0.492632326 | 0.483698711 |
| 0.509304418 | 0.127633838 | 0.028896233 | 0.272964136 |
| 0.520294137 | 0.381230164 | 0.143307202 | 0.370999159 |
| 0.317775487 | 0.403060663 | 0.379347524 | 0.291770064 |
| 0.500858236 | 0.422403366 | 0.465013909 | 0.38332057  |
| 0.329857865 | 0.33448798  | 0.318545194 | 0.500072197 |
| 0.077673002 | 0.181396675 | 0.110184777 | 0.305250185 |
| 0.356870262 | 0.201567914 | 0.393641871 | 0.315917158 |
| 0.223650457 | 0.361133169 | 0.27576621  | 0.324294279 |
| 0.113465252 | 0.40607785  | 0.221291196 | 0.240321793 |
| 0.073446432 | 0.191965248 | 0.221076589 | 0.191286026 |
| 0.247696133 | 0.300810978 | 0.390974098 | 0.464547488 |
| 0.318193413 | 0.248919651 | 0.405261241 | 0.454917788 |
| 0.405243492 | 0.332396809 | 0.261098571 | 0.024702197 |
| 0.265025761 | 0.274052484 | 0.147181933 | 0.352738184 |
| 0.230192572 | 0.262904671 | 0.35789042  | 0.343892543 |
| 0.340122883 | 0.206820766 | 0.331630673 | 0.442798933 |
| 0.220224391 | 0.287732839 | 0.406307572 | 0.385076706 |
| 0.012409947 | 0.354625703 | 0.402280478 | 0.139349621 |
| 0.337097515 | 0.120315977 | 0.214196    | 0.434932585 |
| 0.246044498 | 0.194846696 | 0.462396845 | 0.338556218 |
| 0.335230939 | 0.279204855 | 0.502283314 | 0.043141213 |
| 0.298910393 | 0.058524404 | 0.282673297 | 0.336780351 |

|             |             |             |             |
|-------------|-------------|-------------|-------------|
| 0.290671575 | 0.28692736  | 0.270367161 | 0.246723136 |
| 0.20141269  | 0.515731872 | 0.369862274 | 0.493999269 |
| 0.332165453 | 0.508990084 | 0.412015024 | 0.415372527 |
| 0.362392734 | 0.317666136 | 0.11008726  | 0.402952028 |
| 0.422483879 | 0.285015905 | 0.140647461 | 0.389708567 |
| 0.342544428 | 0.352209316 | 0.102395845 | 0.476033646 |
| 0.496932358 | 0.493382274 | 0.168931673 | 0.329228563 |
| 0.371042859 | 0.284582809 | 0.369060544 | 0.50683816  |
| 0.312783332 | 0.318991071 | 0.304299641 | 0.342605771 |
| 0.23272815  | 0.191116548 | 0.313793226 | 0.139890261 |
| 0.00958152  | 0.141683213 | 0.124054448 | 0.176558384 |
| 0.138231944 | 0.374788028 | 0.358816445 | 0.503769599 |
| 0.162004957 | 0.405671225 | 0.266058424 | 0.290056897 |
| 0.428574412 | 0.307804096 | 0.320540211 | 0.337139584 |
| 0.270248136 | 0.035742567 | 0.155824148 | 0.528991189 |
| 0.092589304 | 0.202164944 | 0.335562472 | 0.006216554 |
| 0.095312911 | 0.388604076 | 0.155962547 | 0.239580559 |
| 0.431903812 | 0.245491033 | 0.270713572 | 0.33169521  |
| 0.325588298 | 0.145835245 | 0.005972321 | 0.468492361 |
| 0.476313502 | 0.44700943  | 0.477458676 | 0.468036389 |
| 0.413348545 | 0.369271611 | 0.369043036 | 0.38648369  |
| 0.15276207  | 0.15565187  | 0.18901426  | 0.284638768 |
| 0.012540836 | 0.348285107 | 0.273857842 | 0.195324603 |
| 0.37094935  | 0.309119695 | 0.075963538 | 0.304493839 |
| 0.054778564 | 0.167635068 | 0.332020156 | 0.224597021 |
| 0.306126504 | 0.039527455 | 0.263442379 | 0.290692431 |
| 0.454689392 | 0.354819071 | 0.301242861 | 0.524526028 |
| 0.326572369 | 0.206566135 | 0.298412539 | 0.354809126 |
| 0.117982531 | 0.1149053   | 0.366366357 | 0.054049964 |
| 0.199730061 | 0.452832697 | 0.32872163  | 0.127381342 |
| 0.304090663 | 0.017551287 | 0.378358386 | 0.521688526 |
| 0.484669779 | 0.492531193 | 0.491044192 | 0.228812239 |
| 0.504365262 | 0.080410928 | 0.513766179 | 1           |
| 0.361090126 | 0.003329005 | 0.010657366 | 0.45229552  |
| 0.357953931 | 0.118247934 | 0.209877631 | 0.370723201 |
| 0.151955079 | 0.23649286  | 0.105386452 | 0.159147534 |
| 0.393492943 | 0.220717985 | 0.147007517 | 0.486216447 |
| 0.264263472 | 0.24413155  | 0.392846958 | 0.148704166 |
| 0.353833875 | 0.09547027  | 0.144983675 | 0.014549311 |
| 0.327462642 | 0.176633839 | 0.502612792 | 0.50542509  |
| 0.483827012 | 0.342975179 | 0.321115725 | 0.335084014 |
| 0.394340681 | 0.175076885 | 0.313162515 | 0.189076566 |
| 0.493832515 | 0.356708707 | 0.325019535 | 0.331690559 |
| 0.482452573 | 0.469360243 | 0.067883805 | 0.375170602 |
| 0.031648227 | 0.002339119 | 0.402167674 | 0.279514531 |
| 0.057203477 | 0.332967787 | 0.286287744 | 0.244569201 |
| 0.229037542 | 0.067530296 | 0.221293764 | 0.20222977  |
| 0.300462409 | 0.337026876 | 0.23573535  | 0.270073171 |
| 0.238675444 | 0.124200545 | 0.209449443 | 0.180502983 |
| 0.234588049 | 0.332718302 | 0.241245282 | 0.049901423 |
| 0.389802014 | 0.362764593 | 0.104254104 | 0.211520272 |
| 0.406742232 | 0.464776259 | 0.075261727 | 0.023791652 |
| 0.295038188 | 0.28894471  | 0.464864267 | 0.497660995 |
| 0.533723694 | 0.505356882 | 0.407062676 | 0.133762629 |

|             |             |             |             |
|-------------|-------------|-------------|-------------|
| 0.116904149 | 0.30545908  | 0.246815445 | 0.101298429 |
| 0.498477724 | 0.130820437 | 0.487422068 | 0.244730083 |
| 0.167919553 | 0.255975172 | 0.060213878 | 0.130239697 |
| 0.325123373 | 0.21691628  | 0.189033791 | 0.226554693 |
| 0.303853115 | 0.20034951  | 0.087796851 | 0.236697944 |
| 0.353591637 | 0.150698925 | 0.207719642 | 0.322037764 |
| 0.35803681  | 0.230643669 | 0.379980079 | 0.445366457 |
| 0.193320508 | 0.172531212 | 0.343763292 | 0.348960271 |
| 0.405419817 | 0.362640412 | 0.052022885 | 0.457313098 |
| 0.461024713 | 0.395101375 | 0.506050636 | 0.34985992  |
| 0.140727006 | 0.337739965 | 0.265364231 | 0.313773667 |
| 0.220909285 | 0.38938093  | 0.245453546 | 0.112427599 |
| 0.292726024 | 0.491007978 | 0.410681326 | 0.196855904 |
| 0.379659912 | 0.203459168 | 0.121384914 | 0.413190675 |
| 0.157534381 | 0.147537163 | 0.365709892 | 0.378672069 |
| 0.002900779 | 0.106195392 | 0.453844752 | 0.255868444 |
| 0.506223979 | 0.452492568 | 0.439979992 | 0.273625491 |
| 0.001034002 | 0.353612095 | 0.359085131 | 0.369584376 |
| 0.426915803 | 0.358719324 | 0.167729954 | 0.108756739 |
| 0.292067466 | 0.148679588 | 0.167827858 | 0.361002487 |
| 0.158950869 | 0.400724604 | 0.226414951 | 0.246301555 |
| 0.198031677 | 0.157381567 | 0.198310468 | 0.26978536  |
| 0.12160922  | 0.261958628 | 0.342409966 | 0.300293965 |
| 0.178551554 | 0.401367529 | 0.39347184  | 0.061716169 |
| 0.298046204 | 0.372492104 | 0.401338648 | 0.005611652 |
| 0.382269665 | 0.018541026 | 0.200388963 | 0.223175597 |
| 0.207728372 | 0.217431809 | 0.244190344 | 0.271468116 |
| 0.355791092 | 0.247572361 | 0.288037094 | 0.258357126 |
| 0.180411679 | 0.246519422 | 0.343756259 | 0.364886328 |
| 0.261905989 | 0.181355114 | 0.154811739 | 0.162368528 |
| 0.085904479 | 0.44195805  | 0.271831903 | 0.137503224 |
| 0.242241971 | 0.348347463 | 0.335764769 | 0.502426826 |
| 0.387545706 | 0.179223759 | 0.319354892 | 0.437037437 |
| 0.215418604 | 0.31454001  | 0.119145739 | 0.382075936 |
| 0.258283586 | 0.200755355 | 0.376686714 | 0.366488876 |
| 0.389495355 | 0.415894528 | 0.271384058 | 0.425565868 |
| 0.335435589 | 0.322523729 | 0.336451667 | 0.114605059 |
| 0.23570098  | 0.18989036  | 0.232082537 | 0.007529627 |
| 0.347981591 | 0.314432966 | 0.436136173 | 0.504888473 |
| 0.236306852 | 0.368445413 | 0.360964216 | 0.147719194 |
| 0.300750659 | 0.2430394   | 0.192334659 | 0.391760863 |
| 0.176709068 | 0.219986142 | 0.27237303  | 0.369262625 |
| 0.382375981 | 0.375230187 | 0.224279594 | 0.273828644 |
| 0.249342483 | 0.260024937 | 0.484255879 | 0.190682479 |
| 0.385065005 | 0.165100492 | 0.365452489 | 0.290822451 |
| 0.21958995  | 0.492936157 | 0.109624423 | 0.501819723 |
| 0.307416766 | 0.190283812 | 0.491030467 | 0.316037285 |
| 0.30252799  | 0.128031473 | 0.149798724 | 0.374521976 |
| 0.248586092 | 0.282596535 | 0.018489725 | 0.064595342 |
| 0.317349474 | 0.288969608 | 0.389776769 | 0.339653659 |
| 0.21182489  | 0.311594412 | 0.124338944 | 0.32047549  |
| 0.501169534 | 0.518270514 | 0.277032455 | 0.264696926 |
| 0.348196239 | 0.143940309 | 0.402875247 | 0.01514101  |
| 0.380471083 | 0.367127048 | 0.353493379 | 0.0879349   |

|             |             |             |             |
|-------------|-------------|-------------|-------------|
| 0.040952033 | 0.175475381 | 0.384634591 | 0.126202554 |
| 0.439492712 | 0.171898255 | 0.353136684 | 0.38911269  |
| 0.22360392  | 0.5214355   | 0.133688739 | 0.370011776 |
| 0.092132326 | 0.274322142 | 0.320406673 | 0.344752333 |
| 0.222727236 | 0.250483744 | 0.350596827 | 0.197557326 |
| 0.061909468 | 0.25523624  | 0.004264034 | 0.433139073 |
| 0.500601673 | 0.290041568 | 0.242174384 | 0.287337361 |
| 0.277034275 | 0.353519747 | 0.231517409 | 0.36502363  |
| 0.024143003 | 0.320439377 | 0.222147737 | 0.404530084 |
| 0.223162897 | 0.348851213 | 0.08498741  | 0.267784439 |
| 0.495813581 | 0.271614298 | 0.271443456 | 0.29235867  |
| 0.493006136 | 0.367679768 | 0.230096322 | 0.194057076 |
| 0.364336692 | 0.119521445 | 0.371471413 | 0.515778006 |
| 0.192769561 | 0.180559401 | 0.384678428 | 0.229694468 |
| 0.259805864 | 0.377790522 | 0.366618    | 0.507649056 |
| 0.085773403 | 0.265529397 | 0.371819081 | 0.449127532 |
| 0.289534138 | 0.142655494 | 0.207219414 | 0.220518481 |
| 0.478523854 | 0.145608615 | 0.214482749 | 0.36187198  |
| 0.182982873 | 0.303785546 | 0.346889926 | 0.174012826 |
| 0.065602953 | 0.187367207 | 0.351996205 | 0.192902911 |
| 0.296449246 | 0.335068172 | 0.215160207 | 0.37960891  |
| 0.155675866 | 0.046452064 | 0.441791031 | 0.01596788  |
| 0.370569894 | 0.358495058 | 0.262456415 | 0.305384007 |
| 0.238589944 | 0.360854368 | 0.375388142 | 0.005085995 |
| 0.371692595 | 0.045141195 | 0.276469975 | 0.221609485 |
| 0.256998374 | 0.09992084  | 0.460842182 | 0.481015142 |
| 0.330446006 | 0.288459768 | 0.303539428 | 0.461167434 |
| 0.11707157  | 0.277977924 | 0.29434128  | 0.40303559  |
| 0.178985109 | 0.36716047  | 0.361476721 | 0.324997028 |
| 0.38269596  | 0.289532941 |             |             |
| KLHL9       | 0.018039177 | 0.398080823 | 0.017078713 |
| 0.040733222 | 0.155778669 | 0.138954795 | 0.014063187 |
| 0.033001856 | 0.297507864 | 0.199410273 | 0.170356337 |
| 0.002897432 | 0.038474564 | 0.402832861 | 0.011383172 |
| 0.268239803 | 0.005210182 | 0.031117422 | 0.032591696 |
| 0.077895281 | 0.139565343 | 0.134356349 | 0.203248211 |
| 0.128179292 | 0.124097858 | 0.220893133 | 0.261565621 |
| 0.470185086 | 0.171059806 | 0.311453528 | 0.147722347 |
| 0.337466959 | 0.19073446  | 0.220937756 | 0.002663024 |
| 0.215505315 | 0.00608737  | 0.367829198 | 0.090131986 |
| 0.056070042 | 0.255096917 | 0.212430794 | 0.071604604 |
| 0.249125856 | 0.008717332 | 0.171587862 | 0.345453502 |
| 0.211750239 | 0.087958007 | 0.025606889 | 0.328373735 |
| 0.165041844 | 0.210321128 | 0.387418322 | 0.001188986 |
| 0.144045963 | 0.077281698 | 0.141873157 | 0.443516458 |
| 0.093160804 | 0.030184551 | 0.211158368 | 0.094074001 |
| 0.292535364 | 0.279895579 | 0.126297689 | 0.207611203 |
| 0.446190325 | 0.089007023 | 0.383394413 | 0.04870627  |
| 0.180108807 | 0.008021949 | 0.076848416 | 0.041086929 |
| 0.16256823  | 0.066368518 | 0.154099831 | 0.129922883 |
| 0.430121874 | 0.433897233 | 0.116711286 | 0.456513584 |
| 0.052863424 | 0.217157875 | 0.093415731 | 0.183631715 |
| 0.287398505 | 0.024575925 | 0.307160175 | 0.456148538 |
| 0.012325926 | 0.320365979 | 0.343222748 | 0.067407962 |

|             |             |             |             |
|-------------|-------------|-------------|-------------|
| 0.368855316 | 0.130525194 | 0.289199733 | 0.067156497 |
| 0.25621374  | 0.213358825 | 0.41696764  | 0.175454484 |
| 0.126300757 | 0.032921001 | 0.424814293 | 0.200151726 |
| 0.095161282 | 0.029779137 | 0.087778735 | 0.446183555 |
| 0.296375795 | 0.448829015 | 0.419392107 | 0.295384181 |
| 0.251929725 | 0.444772534 | 0.292344223 | 0.349616671 |
| 0.141853403 | 0.477759157 | 0.069401309 | 0.006455418 |
| 0.020777244 | 0.015338102 | 0.095408112 | 0.188657753 |
| 0.421626842 | 0.193712735 | 0.063428154 | 0.088799235 |
| 0.416856445 | 0.429663851 | 0.492075404 | 0.360328541 |
| 0.007623349 | 0.124696004 | 0.246546927 | 0.081175798 |
| 0.278274556 | 0.041412446 | 0.119573562 | 0.442417776 |
| 0.289352419 | 0.383921015 | 0.049356577 | 0.41237203  |
| 0.069548494 | 0.429116268 | 0.439409285 | 0.057764096 |
| 0.446417999 | 0.424790023 | 0.439228996 | 0.304593978 |
| 0.386640484 | 0.155373889 | 0.043215588 | 0.321648883 |
| 0.39088353  | 0.005544093 | 0.458938524 | 0.480795026 |
| 0.46391299  | 0.445697316 | 0.463393996 | 0.45953425  |
| 0.464871498 | 0.025666597 | 0.034024921 | 0.162696579 |
| 0.46069944  | 0.309988145 | 0.030512458 | 0.297042503 |
| 0.232034821 | 0.182159231 | 0.362321549 | 0.160543752 |
| 0.417846888 | 0.394503641 | 0.468511278 | 0.333734932 |
| 0.197861696 | 0.224174573 | 0.275208806 | 0.403651392 |
| 0.006846001 | 0.033071404 | 0.02256198  | 0.197003734 |
| 0.165986171 | 0.061541887 | 0.164459925 | 0.22069072  |
| 0.081809288 | 0.147349101 | 0.160841088 | 0.274747811 |
| 0.032220743 | 0.302696338 | 0.055809771 | 0.080416631 |
| 0.006886429 | 0.082063246 | 0.063354868 | 0.036816487 |
| 0.098638642 | 0.174213177 | 0.371438835 | 0.44145043  |
| 0.156749228 | 0.108019123 | 0.335255678 | 0.384313375 |
| 0.325553398 | 0.226817186 | 0.130973241 | 0.001437439 |
| 0.13717669  | 0.203957974 | 0.107406267 | 0.273395957 |
| 0.115086707 | 0.100148942 | 0.274044626 | 0.290950373 |
| 0.140962894 | 0.051533462 | 0.170914831 | 0.32548116  |
| 0.093742636 | 0.099765117 | 0.391093247 | 0.299963803 |
| 0.000274983 | 0.165752333 | 0.389513164 | 0.049722247 |
| 0.222134675 | 0.058552045 | 0.109887391 | 0.430873202 |
| 0.155040277 | 0.089946274 | 0.449278741 | 0.282310162 |
| 0.142398956 | 0.169706379 | 0.468181881 | 0.052197779 |
| 0.197916086 | 0.009839913 | 0.157320345 | 0.223517745 |
| 0.124242016 | 0.177908967 | 0.171375869 | 0.090957452 |
| 0.067815239 | 0.467767874 | 0.29143567  | 0.463957938 |
| 0.192006848 | 0.47003031  | 0.419271553 | 0.365844256 |
| 0.218961737 | 0.233290252 | 0.081656928 | 0.391112292 |
| 0.419970834 | 0.168643715 | 0.039149843 | 0.432684504 |
| 0.227482024 | 0.322591552 | 0.027891174 | 0.437196124 |
| 0.392736981 | 0.440746231 | 0.034857143 | 0.273288152 |
| 0.286938456 | 0.095746262 | 0.325037305 | 0.457002399 |
| 0.213276957 | 0.215008783 | 0.144523446 | 0.304210394 |
| 0.081072468 | 0.081434032 | 0.221176927 | 0.094482377 |
| 0.008132619 | 0.02735879  | 0.023196853 | 0.041425094 |
| 0.05970454  | 0.347787851 | 0.282427276 | 0.472812992 |
| 0.033142617 | 0.31962013  | 0.142724746 | 0.118411829 |
| 0.383241347 | 0.17336026  | 0.222243038 | 0.242582798 |

|             |             |             |             |
|-------------|-------------|-------------|-------------|
| 0.137108741 | 0.00233171  | 0.029067041 | 0.440195893 |
| 0.018240167 | 0.095887875 | 0.145529729 | 0.000450075 |
| 0.011939244 | 0.417728772 | 0.058131958 | 0.122669475 |
| 0.409393995 | 0.130787845 | 0.121096189 | 0.206699617 |
| 0.203809312 | 0.027228732 | 0.000241644 | 0.454401641 |
| 0.439106272 | 0.41008842  | 0.445387563 | 0.398840276 |
| 0.411481021 | 0.317598408 | 0.347371692 | 0.184366115 |
| 0.025997497 | 0.025818938 | 0.107144381 | 0.122235809 |
| 0.002541187 | 0.254630869 | 0.133246049 | 0.064144078 |
| 0.351883036 | 0.191336096 | 0.006938467 | 0.212274942 |
| 0.004968957 | 0.122379838 | 0.129389552 | 0.064562708 |
| 0.235180432 | 0.001910433 | 0.126616537 | 0.172485167 |
| 0.366752801 | 0.260760169 | 0.16739311  | 0.469334551 |
| 0.154235893 | 0.089464729 | 0.12861471  | 0.274270109 |
| 0.016232199 | 0.090945302 | 0.152640981 | 0.039224103 |
| 0.071597177 | 0.380319826 | 0.161181397 | 0.018775892 |
| 0.138416281 | 0.000286374 | 0.289993913 | 0.464154576 |
| 0.426918482 | 0.478050611 | 0.436946484 | 0.112651841 |
| 0.450622475 | 0.09561184  | 0.484586801 | 0.361090126 |
| 1           | 0.000199565 | 0.000535229 | 0.45405095  |
| 0.254587689 | 0.033365466 | 0.06531424  | 0.144318351 |
| 0.025800736 | 0.054315055 | 0.012265409 | 0.059102608 |
| 0.269748594 | 0.089817578 | 0.057650747 | 0.434169105 |
| 0.087919485 | 0.092247479 | 0.196339245 | 0.042427262 |
| 0.238755862 | 0.010029044 | 0.041209012 | 0.001648848 |
| 0.243744232 | 0.073351361 | 0.399837379 | 0.462211053 |
| 0.410217001 | 0.272792946 | 0.229432664 | 0.134776708 |
| 0.376467637 | 0.063143218 | 0.169718555 | 0.058614781 |
| 0.455151434 | 0.285578775 | 0.206442062 | 0.218119225 |
| 0.440489613 | 0.404505099 | 0.005700126 | 0.33914853  |
| 0.001996027 | 0.000226091 | 0.210142999 | 0.147861361 |
| 0.032891166 | 0.2116503   | 0.154642974 | 0.08869913  |
| 0.068469739 | 0.006702117 | 0.128348656 | 0.11175888  |
| 0.159753639 | 0.188514188 | 0.134070601 | 0.150967366 |
| 0.085860759 | 0.052464822 | 0.047243563 | 0.039316596 |
| 0.109439253 | 0.24525718  | 0.131987787 | 0.003324728 |
| 0.27491461  | 0.257955003 | 0.012738517 | 0.07099365  |
| 0.371664272 | 0.455950733 | 0.009448871 | 0.001113339 |
| 0.167816752 | 0.130309403 | 0.448694647 | 0.465696098 |
| 0.457430514 | 0.44654028  | 0.294171835 | 0.033513201 |
| 0.014146743 | 0.166439255 | 0.151488338 | 0.019103399 |
| 0.457671191 | 0.03524272  | 0.418143646 | 0.169941213 |
| 0.046597265 | 0.064029052 | 0.004608394 | 0.023043364 |
| 0.252048958 | 0.073801271 | 0.052713217 | 0.085123802 |
| 0.126122432 | 0.097860025 | 0.009386741 | 0.079941283 |
| 0.26153092  | 0.101092087 | 0.067204963 | 0.099353069 |
| 0.261695049 | 0.152007514 | 0.369576408 | 0.357843483 |
| 0.059421557 | 0.043368352 | 0.118130232 | 0.282276906 |
| 0.425247618 | 0.310281419 | 0.005466298 | 0.44503639  |
| 0.420465853 | 0.34781089  | 0.436417708 | 0.30352398  |
| 0.035444739 | 0.207924605 | 0.158898519 | 0.205469337 |
| 0.078013461 | 0.15186409  | 0.091326628 | 0.019748862 |
| 0.196207943 | 0.394047273 | 0.382419913 | 0.044086084 |
| 0.268686173 | 0.069851317 | 0.030598753 | 0.391092006 |

|             |             |             |             |
|-------------|-------------|-------------|-------------|
| 0.081180681 | 0.026335251 | 0.222137101 | 0.394391233 |
| 0.000241486 | 0.061798307 | 0.433471154 | 0.063820491 |
| 0.435519016 | 0.434106709 | 0.352777833 | 0.075647551 |
| 0.001205439 | 0.336038066 | 0.2290134   | 0.172024027 |
| 0.409729513 | 0.235088355 | 0.042547826 | 0.01482252  |
| 0.171486977 | 0.045257962 | 0.04157672  | 0.128237213 |
| 0.116185456 | 0.299795516 | 0.09437282  | 0.098666909 |
| 0.055359661 | 0.058069427 | 0.091651225 | 0.070410718 |
| 0.069846678 | 0.127628801 | 0.249757598 | 0.166836493 |
| 0.132159783 | 0.38491879  | 0.369374219 | 0.004382162 |
| 0.193457557 | 0.34931661  | 0.341091265 | 0.001015686 |
| 0.346930055 | 0.000270329 | 0.061022855 | 0.065246072 |
| 0.051021159 | 0.06826818  | 0.121692748 | 0.097610343 |
| 0.241192067 | 0.072447548 | 0.082951704 | 0.105378782 |
| 0.038181006 | 0.071599492 | 0.230988138 | 0.16768088  |
| 0.09174176  | 0.030977223 | 0.058636539 | 0.066704647 |
| 0.009099751 | 0.412433213 | 0.151041845 | 0.037417721 |
| 0.09688139  | 0.149941322 | 0.241513824 | 0.466495983 |
| 0.309755649 | 0.077693627 | 0.134451253 | 0.411757858 |
| 0.190540942 | 0.120877245 | 0.017714178 | 0.204902709 |
| 0.087076335 | 0.079908799 | 0.22134686  | 0.215477083 |
| 0.372542826 | 0.302518304 | 0.142977562 | 0.345115432 |
| 0.137807528 | 0.205379931 | 0.205269901 | 0.017825424 |
| 0.06030327  | 0.066376453 | 0.122093483 | 0.000702968 |
| 0.209337844 | 0.08851921  | 0.443675234 | 0.433709318 |
| 0.142698426 | 0.270855354 | 0.178546758 | 0.025877005 |
| 0.181802289 | 0.143071076 | 0.064681053 | 0.375619772 |
| 0.125110706 | 0.043966442 | 0.143786278 | 0.123377082 |
| 0.358239868 | 0.369899827 | 0.087320914 | 0.087466051 |
| 0.098787797 | 0.101244385 | 0.410022127 | 0.036552319 |
| 0.336582473 | 0.057388009 | 0.282116991 | 0.129469503 |
| 0.071103815 | 0.473118853 | 0.016975808 | 0.491864491 |
| 0.163716441 | 0.071154446 | 0.389166095 | 0.121529293 |
| 0.08705523  | 0.022641701 | 0.100598107 | 0.167392492 |
| 0.071417206 | 0.147617127 | 0.022953213 | 0.037379714 |
| 0.203574115 | 0.140425804 | 0.411107236 | 0.261691489 |
| 0.082380742 | 0.23097826  | 0.076323277 | 0.13172874  |
| 0.446627078 | 0.428005348 | 0.099527354 | 0.143770707 |
| 0.244362706 | 0.021789104 | 0.269667789 | 0.009116714 |
| 0.335727288 | 0.344678802 | 0.210151459 | 0.009356784 |
| 0.002234659 | 0.123917019 | 0.319775472 | 0.032636447 |
| 0.434128327 | 0.122015494 | 0.276123031 | 0.322991792 |
| 0.094221918 | 0.429156443 | 0.0256656   | 0.29275123  |
| 0.016393417 | 0.129529312 | 0.208491122 | 0.232387387 |
| 0.076344619 | 0.132933323 | 0.264829624 | 0.091858097 |
| 0.004656155 | 0.083936721 | 0.000453659 | 0.313053596 |
| 0.424594325 | 0.199401373 | 0.121427515 | 0.19320735  |
| 0.144213029 | 0.285134269 | 0.10025806  | 0.256247576 |
| 0.000784702 | 0.241369683 | 0.072367076 | 0.334100188 |
| 0.176369195 | 0.254713883 | 0.008485446 | 0.173380642 |
| 0.38082949  | 0.137071271 | 0.158130225 | 0.200662196 |
| 0.444108102 | 0.312998662 | 0.103351877 | 0.05886652  |
| 0.331314436 | 0.026140007 | 0.17609332  | 0.468313699 |
| 0.04697452  | 0.081159906 | 0.389061263 | 0.06491238  |

|             |             |             |             |
|-------------|-------------|-------------|-------------|
| 0.151958309 | 0.300360233 | 0.327547818 | 0.46276386  |
| 0.014596509 | 0.120671927 | 0.336500955 | 0.423004643 |
| 0.175726055 | 0.060683741 | 0.107479966 | 0.081332641 |
| 0.413251268 | 0.023374987 | 0.108455796 | 0.248595015 |
| 0.106321158 | 0.163998785 | 0.264335249 | 0.055182709 |
| 0.006555196 | 0.043420984 | 0.122970522 | 0.057090206 |
| 0.152235773 | 0.187809263 | 0.082635957 | 0.279827885 |
| 0.030803181 | 0.003841822 | 0.347697687 | 0.014352083 |
| 0.167335084 | 0.247650361 | 0.096558277 | 0.158274452 |
| 0.109711109 | 0.219679383 | 0.214555439 | 5.20E-05    |
| 0.331457863 | 0.010786365 | 0.101396867 | 0.077710869 |
| 0.14590067  | 0.012618823 | 0.369838666 | 0.457287085 |
| 0.171970444 | 0.134075476 | 0.186419588 | 0.399802079 |
| 0.065410398 | 0.187171501 | 0.173409181 | 0.330261092 |
| 0.093931606 | 0.259654864 | 0.226557468 | 0.175655449 |
| 0.268193223 | 0.080518727 |             |             |
| KLRA2       | 0.018989168 | 0.001664363 | 0.022687036 |
| 0.01562467  | 0.001387283 | 0.001115139 | 0.006679177 |
| 0.004326049 | 0.000869222 | 0.000663204 | 0.003837763 |
| 0.025271746 | 0.00018132  | 0.002942866 | 0.005550467 |
| 0.00094221  | 0.012049547 | 0.01128495  | 0.001441766 |
| 0.000262929 | 0.001762585 | 0.000246724 | 0.001581297 |
| 0.000702787 | 0.016544276 | 0.001796838 | 1.94E-05    |
| 0.002078767 | 6.86E-05    | 0.001444984 | 0.000112785 |
| 0.00678139  | 0.001377436 | 0.000157109 | 0.017804783 |
| 0.000831291 | 0.000174545 | 0.005647517 | 0.00354156  |
| 0.000257529 | 0.007421462 | 0.00025828  | 0.008766271 |
| 0.000492607 | 0.027754283 | 0.000391943 | 0.000538932 |
| 0.000988052 | 0.000502479 | 0.014545025 | 0.001328173 |
| 0.000126758 | 0.004812992 | 0.000801325 | 4.46E-05    |
| 0.000127146 | 0.00094461  | 0.000283804 | 0.002990426 |
| 0.015386409 | 0.010503997 | 0.000261597 | 0.000397861 |
| 0.000291148 | 0.00055391  | 0.002628588 | 0.000278321 |
| 0.003598411 | 0.000139076 | 0.000551448 | 0.00023183  |
| 0.000865515 | 0.004184742 | 0.01425561  | 0.003882183 |
| 0.000312809 | 0.00743031  | 0.001473582 | 0.000176886 |
| 0.002219445 | 0.003752379 | 0.003682263 | 0.003206264 |
| 0.000275612 | 0.000381323 | 0.000416057 | 0.003711979 |
| 0.000902897 | 0.001431062 | 0.003871729 | 0.004148474 |
| 0.003243156 | 0.000368921 | 0.00122406  | 0.009125634 |
| 0.002071468 | 0.00038363  | 0.000570451 | 0.00022618  |
| 0.000869738 | 0.001027724 | 0.002454214 | 0.009595728 |
| 0.000378866 | 0.014677018 | 0.003824742 | 0.000493373 |
| 0.004000858 | 0.01999894  | 0.000680832 | 0.001001044 |
| 0.002460815 | 0.002775927 | 0.001247924 | 0.002201183 |
| 0.000904796 | 0.003464405 | 0.004280937 | 0.001696146 |
| 0.000719187 | 0.002532764 | 0.015851713 | 0.014222833 |
| 0.00882102  | 0.005736109 | 0.000182025 | 0.004400354 |
| 0.00203366  | 0.002717378 | 0.00915095  | 0.004999308 |
| 0.001678827 | 0.003111731 | 0.002297252 | 0.00220168  |
| 0.021485398 | 0.000355502 | 0.001155088 | 0.000996414 |
| 0.001730566 | 0.005928939 | 0.00052599  | 0.00448715  |
| 0.008030529 | 0.001560865 | 0.004205864 | 0.004580489 |
| 0.001087247 | 0.004378643 | 0.002091407 | 0.0188896   |



|             |                      |                      |             |
|-------------|----------------------|----------------------|-------------|
| 0.004436892 | 0.004746071          | 0.003640609          | 0.001041131 |
| 0.004476463 | 0.007678235          | 1.45E-05 0.001945797 |             |
| 0.004088559 | 2.49E-05 0.001291789 | 0.001532785          |             |
| 0.003108558 | 0.001493067          | 0.002311002          | 0.001956018 |
| 0.002757875 | 0.011800422          | 4.79E-05 0.002778961 |             |
| 0.003903954 | 0.007002903          | 0.000924096          | 0.000654469 |
| 0.000822672 | 0.001414761          | 0.000700466          | 0.000246799 |
| 0.00405959  | 0.002097559          | 0.001373218          | 0.001872413 |
| 0.000427987 | 0.008366512          | 0.000133165          | 0.004637368 |
| 0.009346605 | 0.018367435          | 0.025814804          | 0.001863817 |
| 0.000287851 | 0.009930862          | 0.001746573          | 0.000385251 |
| 0.009828144 | 0.000588014          | 1.11E-05 0.001031535 |             |
| 0.015639526 | 0.000966974          | 0.00795063           | 0.007790124 |
| 0.019167308 | 0.0139468            | 0.004856547          | 0.0094248   |
| 0.003111996 | 0.010962675          | 0.000676837          | 0.002008203 |
| 0.000234382 | 0.015537778          | 0.001716187          | 0.003736946 |
| 0.005440139 | 0.000961898          | 0.005425955          | 0.012299106 |
| 0.000760799 | 0.000527664          | 0.000326897          | 0.000226531 |
| 0.010362983 | 0.001552706          | 0.001217065          | 0.001909507 |
| 0.008606134 | 0.001720077          | 0.000503726          | 0.006105738 |
| 0.009137057 | 0.002538243          | 0.003043589          | 0.000475733 |
| 0.007433826 | 0.007150287          | 0.002256948          | 0.000223261 |
| 0.001845249 | 5.38E-05 0.000192566 | 0.002503111          | 2.29E-05    |
| 0.000135721 | 0.00150675           | 0.001249778          | 0.000348708 |
| 0.006154492 | 0.002412455          | 9.14E-05 2.39E-05    | 0.004575991 |
| 0.006135154 | 0.000166905          | 0.0072382            | 0.003339342 |
| 0.0006785   | 0.001137659          | 0.019232678          | 0.00281615  |
| 0.002731931 | 0.00259785           | 0.00023447           | 0.002858998 |
| 0.002136467 | 0.004116788          | 0.002348896          | 1.85E-05    |
| 0.000243343 | 0.003142068          | 0.00241486           | 7.84E-05    |
| 0.016143505 | 0.000648337          | 0.000138759          | 0.000910218 |
| 0.000226018 | 0.003843835          | 0.004733738          | 0.00296397  |
| 0.005962873 | 0.001819946          | 0.007439245          | 0.014946258 |
| 0.001476217 | 0.002517317          | 7.54E-05 0.0007399   |             |
| 0.001030375 | 0.002551643          | 0.017392203          | 0.000415418 |
| 0.00351641  | 0.00041904           | 6.64E-07 0.009276262 |             |
| 0.023447575 | 0.008000153          | 0.000419027          | 0.000186807 |
| 0.000998545 | 0.002745792          | 0.014360961          | 0.003359714 |
| 0.002286696 | 0.003262667          | 0.004281263          | 0.00020283  |
| 0.000397409 | 0.000644939          | 0.004493543          | 0.005923051 |
| 0.010249738 | 0.004542042          | 0.010300638          | 0.000493603 |
| 0.000700764 | 0.000514177          | 0.014426759          | 0.000806441 |
| 0.01462897  | 0.015989194          | 0.001715602          | 0.014581631 |
| 0.012212045 | 0.000126307          | 0.003621127          | 0.014780794 |
| 0.000868303 | 0.001737101          | 0.001544726          | 0.001406678 |
| 0.001513027 | 0.001914851          | 0.001203083          | 0.000590275 |
| 0.001867777 | 0.003323856          | 0.006568791          | 0.005819316 |
| 0.000408454 | 0.003230225          | 6.07E-05 0.003197151 |             |
| 0.000363344 | 0.018791197          | 0.000948271          | 0.001812291 |
| 0.020032399 | 0.000333306          | 0.024811931          | 6.33E-05    |
| 0.000388588 | 0.00117928           | 0.001220885          | 0.019799108 |
| 0.000433716 | 0.000200186          | 0.00540521           | 0.006566845 |
| 0.000116768 | 0.00313815           | 0.005843419          | 0.008489309 |
| 0.003835516 | 0.001760551          | 0.009396298          | 4.54E-06    |

|             |             |             |             |             |
|-------------|-------------|-------------|-------------|-------------|
| 0.000270194 | 0.001611354 | 2.79E-05    | 0.001895896 | 3.08E-05    |
| 0.007927972 | 0.010247523 | 0.034898516 | 0.007273927 |             |
| 0.003089709 | 0.002960661 | 0.002570178 | 0.003512227 |             |
| 0.000600348 | 0.004043493 | 0.001964452 | 0.002317337 |             |
| 0.003329005 | 0.000199565 | 1           | 0.000101171 |             |
| 0.001991418 | 0.001624018 | 0.015417895 | 0.014350371 |             |
| 0.000951753 | 0.012255997 | 0.006519523 | 0.007734272 |             |
| 0.000822731 | 0.001280021 | 0.002418333 | 0.000206908 |             |
| 0.002966322 | 0.005472098 | 0.003386102 | 0.00029072  |             |
| 0.010013947 | 0.000668928 | 0.019727138 | 0.007179927 |             |
| 0.000537975 | 0.001468901 | 0.012961612 | 0.004596845 |             |
| 0.002743907 | 0.004582816 | 0.001600307 | 0.000120664 |             |
| 0.000197798 | 0.000957241 | 0.014480141 | 6.56E-05    |             |
| 0.010574239 | 0.00308026  | 0.002020627 | 0.008490336 |             |
| 0.011728236 | 0.003634917 | 0.00463279  | 0.016503557 |             |
| 0.002715196 | 0.005849354 | 2.84E-05    | 0.003712168 |             |
| 0.002983455 | 0.00152073  | 0.000692449 | 0.010616003 |             |
| 6.47E-05    | 0.000266067 | 0.0091645   | 9.07E-05    | 0.000303938 |
| 0.004659374 | 0.001385709 | 0.001009686 | 0.001949501 |             |
| 0.00068129  | 0.000145575 | 0.003057586 | 0.002306562 |             |
| 2.05E-05    | 0.00576746  | 0.018366595 | 0.011704098 |             |
| 0.000529155 | 0.00081148  | 0.02209698  | 0.012362803 |             |
| 0.003676163 | 0.002529931 | 0.003272128 | 0.042080907 |             |
| 0.00929043  | 0.000458899 | 0.00223576  | 0.002280985 |             |
| 0.003852952 | 0.003905528 | 0.006351246 | 0.00229744  |             |
| 0.018398284 | 0.001978759 | 0.000627733 | 0.001875024 |             |
| 0.002600163 | 0.010597557 | 0.002659916 | 0.000166551 |             |
| 0.009727691 | 0.007881391 | 0.017049401 | 0.010978824 |             |
| 0.000440087 | 0.009536634 | 0.00669994  | 0.021224807 |             |
| 0.001787206 | 0.00017158  | 0.008975886 | 0.009756464 |             |
| 0.004211383 | 0.000106948 | 0.010154852 | 0.000465721 |             |
| 0.001966378 | 0.001165843 | 0.001301947 | 0.005570722 |             |
| 0.015212119 | 0.005488209 | 0.005302757 | 0.000662225 |             |
| 0.001424301 | 7.96E-05    | 0.005780224 | 0.001722336 |             |
| 0.001921826 | 0.001009212 | 0.003432486 | 0.003054164 |             |
| 0.011388206 | 0.00152435  | 9.11E-05    | 0.001382356 |             |
| 0.005047952 | 0.001667192 | 0.001491611 | 0.0162339   |             |
| 0.003459372 | 0.003375901 | 0.003225656 | 0.013505454 |             |
| 0.000332681 | 0.005706299 | 0.010079439 | 0.001027309 |             |
| 0.000413181 | 0.009501868 | 0.000240515 | 0.000765917 |             |
| 0.000446917 | 0.000178286 | 0.00161659  | 0.00388622  |             |
| 0.002757689 | 0.003004799 | 0.005813219 | 0.00045372  |             |
| 6.37E-05    | 0.000666982 | 0.003764689 | 0.001972678 |             |
| 0.002522426 | 0.00389029  | 3.55E-05    | 0.011840588 |             |
| 0.007549005 | 0.017342876 | 0.004391719 | 0.000246641 |             |
| 5.10E-06    | 0.000986831 | 0.008441884 | 0.001997881 |             |
| 0.002330126 | 0.003960119 | 5.59E-05    | 0.007038892 |             |
| 0.000419888 | 0.01063761  | 0.006134255 | 0.000433183 |             |
| 0.000273036 | 0.001522987 | 0.002735103 | 0.024680655 |             |
| 0.000230655 | 0.001731296 | 0.00181716  | 0.000565967 |             |
| 0.001977184 | 0.019852585 | 0.003816212 | 0.007607958 |             |
| 0.004027831 | 0.00211912  | 0.002671931 | 0.002085836 |             |
| 0.001588216 | 0.003371752 | 0.007476745 | 0.010726242 |             |
| 0.00753514  | 0.002657423 | 0.000871932 | 0.001105884 |             |

|             |              |             |             |
|-------------|--------------|-------------|-------------|
| 0.00291172  | 0.015678302  | 0.014707068 | 0.015727325 |
| 0.015020256 | 0.00133457   | 0.011650533 | 0.019137233 |
| 0.004711163 | 0.000411302  | 0.006348328 | 0.002517982 |
| 0.003215533 | 0.011100965  | 0.000626394 | 0.00308181  |
| 7.39E-05    | 6.37E-05     | 0.007833336 | 0.001469162 |
| 0.001330153 | 0.000223571  | 0.005443261 | 0.000774803 |
| 0.007823046 | 0.012292321  | 0.003021081 | 0.001718458 |
| 0.000160512 | 0.000229742  | 0.015689708 | 0.014603388 |
| 0.008615773 | 0.00142312   | 0.017401995 | 0.002656117 |
| 0.002954865 | 0.002304462  | 0.004158879 | 0.000126024 |
| 0.004727634 | 0.000849746  | 0.017149583 | 0.000243649 |
| 0.012155571 | 0.01369334   | 0.001006724 | 8.81E-05    |
| 0.005975364 | 0.002246416  | 0.0013591   | 0.001393633 |
| 0.000527806 | 0.000171419  | 0.001611302 | 0.001508541 |
| 0.006969376 | 0.002737047  | 0.007174832 | 0.0005128   |
| 0.001792241 | 0.00025886   | 0.003351146 | 0.002545781 |
| 0.001943975 | 0.016061829  | 0.002028416 | 0.001035131 |
| 0.010551258 | 0.004975293  | 0.001029987 | 0.000703419 |
| 0.001948823 | 0.000135423  | 0.000290142 | 0.001310806 |
| 0.000111462 | 1.83E-05     | 2.51E-05    | 0.005641118 |
| 0.001056573 | 0.000993833  | 0.000490237 | 0.002807097 |
| 0.000275389 | 0.001763992  | 0.002839039 | 0.003530087 |
| 0.003108621 | 0.0062371    | 0.003354777 | 0.016346793 |
| 0.001782496 | 0.001416357  | 0.001021217 | 0.000384083 |
| 9.34E-05    | 0.009053641  | 0.005861723 | 7.94E-05    |
| 0.00453873  | 0.002149247  | 4.24E-05    | 0.00020199  |
| 0.001241212 | 0.004584196  | 0.004377395 | 0.003788048 |
| 0.003171354 | 0.000574118  | 0.002779024 | 8.94E-05    |
| 0.004292833 | 0.000676766  | 0.004917116 | 8.96E-05    |
| 0.025196592 | 0.001276164  | 0.000198715 | 0.000713227 |
| 0.003866841 | 0.000312251  | 0.007758323 | 0.007962259 |
| 0.005851208 | 0.001717784  | 0.000271174 | 0.000618098 |
| 0.011593869 | 0.001244103  | 0.000229698 | 0.004680828 |
| 0.000331474 | 0.000460144  | 0.005759405 | 0.000181023 |
| 0.005012    | 0.000474608  | 0.011172165 | 0.000181023 |
| 0.00252518  | 0.0004363491 | 0.000372693 |             |
| 0.000209999 | 0.00109221   | 0.008748224 | 0.000248597 |
| 0.006957569 | 0.015654447  | 0.000295433 | 0.000248597 |
| 0.00018579  | 0.000820253  | 0.00212856  | 0.002670212 |
| 0.005435724 | 0.002593485  | 0.00020262  | 0.006779237 |
| 0.005508269 | 0.008562006  | 0.00020262  | 0.001998703 |
| 0.00398623  | 0.000224691  | 0.001264494 | 0.002363843 |
| 0.000317677 | 0.010975653  | 0.000439616 | 0.001958182 |
| 0.004196726 | 0.002993336  | 6.69E-05    | 0.004478152 |
| 0.003978931 | 0.001095844  | 9.20E-05    | 0.001341018 |
| 0.009666402 | 0.001989956  | 0.000966033 | 0.009122874 |
| 0.003664024 | 0.016445355  | 0.000611083 | 0.006837242 |
| 0.019706233 | 0.002782767  | 0.004803049 | 3.38E-06    |
| 0.00193977  | 0.001748392  | 0.004150132 | 0.000649601 |
| 0.011327643 | 7.66E-05     | 0.002793854 | 0.001265461 |
| 1.69E-05    | 0.000182066  | 0.002738598 | 4.61E-05    |
| 0.000376012 | 0.004087169  | 0.00246647  | 0.002013812 |
| 0.001227099 | 0.002452609  | 1.29E-05    | 0.000354392 |
| 0.000376012 | 5.70E-05     | 0.000297023 | 1.43E-05    |
| KLRC3       | 0.002536126  | 0.000135928 |             |
| 0.050692614 | 0.001303421  |             |             |
| 0.008518892 |              |             |             |
| 0.031302861 |              |             |             |

|             |             |             |             |
|-------------|-------------|-------------|-------------|
| 0.006218155 | 0.011688591 | 0.004746594 | 0.047122907 |
| 0.025468777 | 0.009606906 | 0.000143911 | 0.015225264 |
| 0.058842302 | 0.000500029 | 0.013783057 | 0.070306146 |
| 0.006852098 | 0.067001301 | 0.060545079 | 0.000134412 |
| 0.001157585 | 0.016224276 | 0.003961175 | 0.005043204 |
| 0.012259498 | 0.049288296 | 0.007065451 | 0.002612122 |
| 0.00909265  | 0.00016827  | 0.005970179 | 0.000417999 |
| 0.025197622 | 0.011425082 | 0.001968171 | 0.02702057  |
| 0.007908134 | 8.67E-05    | 0.021778678 | 0.015280822 |
| 0.000254423 | 0.037638459 | 0.000171024 | 0.031261718 |
| 0.000547087 | 0.042726045 | 0.000270687 | 0.004525878 |
| 0.005592147 | 0.011621515 | 0.043709686 | 0.005621641 |
| 0.001845215 | 0.021841329 | 0.002297368 | 2.84E-05    |
| 0.00210141  | 0.000111042 | 0.000742426 | 0.013030262 |
| 0.068994375 | 0.092409728 | 0.000144326 | 0.018794053 |
| 0.005764846 | 0.010982018 | 0.042587921 | 0.000565685 |
| 0.013821843 | 0.001590665 | 0.00351848  | 0.000472294 |
| 0.007237595 | 0.033448997 | 0.069410328 | 0.027336517 |
| 0.002777194 | 0.062191549 | 0.016830542 | 0.002711252 |
| 0.005545503 | 0.021926486 | 0.032608388 | 0.011603889 |
| 0.00213632  | 0.005845937 | 0.006013661 | 0.033014248 |
| 0.012979584 | 0.02625632  | 0.012214299 | 0.016521777 |
| 0.041738283 | 0.001107841 | 0.00791222  | 0.043563458 |
| 0.010140835 | 0.001829726 | 0.00074471  | 0.004099535 |
| 0.008262426 | 0.007414319 | 0.018239999 | 0.03987959  |
| 0.012607408 | 0.048776671 | 0.015086063 | 0.005818926 |
| 0.014521993 | 0.041399865 | 0.005137253 | 0.006568541 |
| 0.006551835 | 0.01061631  | 0.006467456 | 0.017607687 |
| 0.003995061 | 0.012394279 | 0.00901532  | 0.01639438  |
| 0.000382964 | 0.012416694 | 0.037461403 | 0.098095219 |
| 0.020623513 | 0.079394851 | 0.005053685 | 0.044245638 |
| 0.009933379 | 0.018722902 | 0.02627693  | 0.029428926 |
| 0.012383181 | 0.01226704  | 0.011086943 | 0.012455149 |
| 0.069447739 | 0.001725926 | 0.003170222 | 0.014851377 |
| 0.015465762 | 0.06218943  | 0.005339138 | 0.017961079 |
| 0.025192206 | 0.011370925 | 0.014807385 | 0.022717469 |
| 0.02590511  | 0.020091521 | 0.005919526 | 0.05557271  |
| 0.016122219 | 0.016068486 | 0.015832501 | 0.007395587 |
| 0.018737802 | 0.008796106 | 0.000475552 | 0.015222367 |
| 0.024493906 | 0.000398549 | 0.007541378 | 0.008814904 |
| 0.010369682 | 0.006333015 | 0.015704125 | 0.011474942 |
| 0.010723021 | 0.055725311 | 7.97E-06    | 0.028545801 |
| 0.013022073 | 0.017503404 | 0.034384644 | 0.001964544 |
| 0.011016589 | 0.007224195 | 0.008695886 | 0.000383701 |
| 0.026285311 | 0.009036288 | 0.008026141 | 0.010360021 |
| 0.004929465 | 0.038881623 | 0.002224876 | 0.015177587 |
| 0.030765383 | 0.035256402 | 0.04656022  | 0.029828967 |
| 0.000203105 | 0.066989738 | 0.003216182 | 0.008886248 |
| 0.073113908 | 0.006521783 | 0.001272468 | 0.009429447 |
| 0.047096841 | 0.00313288  | 0.032572775 | 0.023531534 |
| 0.059779403 | 0.069562521 | 0.008463667 | 0.035840961 |
| 0.035132899 | 0.036671835 | 0.004792142 | 0.010523576 |
| 0.00539901  | 0.038263205 | 0.007430147 | 0.019820081 |
| 0.035239116 | 0.004193828 | 0.062095365 | 0.005872152 |

|             |             |             |             |
|-------------|-------------|-------------|-------------|
| 0.001337419 | 0.000473001 | 0.000865905 | 0.002879687 |
| 0.049553363 | 0.010133181 | 0.006758716 | 0.01315375  |
| 0.012035946 | 0.032136639 | 0.00298476  | 0.031648279 |
| 0.03776544  | 0.01236942  | 0.013480979 | 0.00231576  |
| 0.009553498 | 0.010464255 | 0.009601756 | 0.006361044 |
| 0.01851746  | 0.00216624  | 0.001144683 | 0.010197487 |
| 0.000914092 | 0.009597752 | 0.01043035  | 0.013343193 |
| 0.000906805 | 0.028407097 | 0.015317554 | 3.30E-05    |
| 0.005828379 | 0.000850903 | 0.04227693  | 0.000401343 |
| 0.036181991 | 0.036283605 | 0.011172519 | 0.007534544 |
| 0.029545762 | 0.014956535 | 0.016102278 | 0.012862511 |
| 0.001032706 | 0.014700766 | 0.009284879 | 0.017459605 |
| 0.019666858 | 0.001597876 | 0.001194343 | 0.007850593 |
| 0.008759734 | 0.000317724 | 0.043015664 | 0.00554461  |
| 0.001103308 | 0.006397201 | 0.001409678 | 0.0155849   |
| 0.024151013 | 0.009270897 | 0.067163452 | 0.019157059 |
| 0.021071696 | 0.036202508 | 0.012612842 | 0.019145654 |
| 8.58E-05    | 0.005790763 | 0.003367045 | 0.01943444  |
| 0.0459669   | 0.010515355 | 0.029454127 | 0.001165758 |
| 0.000147633 | 0.046375991 | 0.051662753 | 0.060475467 |
| 0.005543351 | 0.002377143 | 0.00884136  | 0.01218538  |
| 0.088171061 | 0.021912854 | 0.034305934 | 0.007201141 |
| 0.012125976 | 0.006610372 | 0.004845278 | 0.009325119 |
| 0.039115712 | 0.006351458 | 0.020208516 | 0.020419711 |
| 0.036295568 | 0.003138503 | 0.015054015 | 0.000832918 |
| 0.050426557 | 0.003774247 | 0.047266279 | 0.059610141 |
| 0.01669072  | 0.040218964 | 0.027915382 | 0.000135768 |
| 0.026015653 | 0.082173366 | 0.004722557 | 0.01054246  |
| 0.012991785 | 0.013752955 | 0.012007633 | 0.015302395 |
| 0.010660334 | 0.01110889  | 0.009718328 | 0.00575456  |
| 0.023110763 | 0.017604335 | 0.002363167 | 0.01401236  |
| 0.00180047  | 0.021270408 | 0.0158172   | 0.08092252  |
| 0.008213677 | 0.023260075 | 0.073474883 | 0.010960797 |
| 0.008940379 | 0.000279986 | 0.007702959 | 0.025786821 |
| 0.022503009 | 0.043677603 | 0.000136818 | 0.000661442 |
| 0.014184045 | 0.028294665 | 0.000863212 | 0.013033816 |
| 0.020423476 | 0.022782194 | 0.010091138 | 0.017999085 |
| 0.051691261 | 0.004866143 | 0.00587434  | 0.000132619 |
| 0.000242906 | 0.018677797 | 0.002062983 | 0.005931949 |
| 0.03107877  | 0.025302223 | 0.020473202 | 0.016607958 |
| 0.009278804 | 0.011926692 | 0.014054627 | 0.004245929 |
| 0.012687689 | 5.44E-05    | 0.011936612 | 0.010657366 |
| 0.000535229 | 0.000101171 | 1           | 0.008494227 |
| 0.004106399 | 0.03282532  | 0.066042909 | 0.001000379 |
| 0.043983643 | 0.029636848 | 0.072853452 | 0.008087303 |
| 0.005694939 | 0.030011056 | 0.008935935 | 0.011735924 |
| 0.023084075 | 0.050850508 | 0.002502382 | 0.059675811 |
| 0.006438567 | 0.057260751 | 0.049772955 | 0.008752141 |
| 0.01846368  | 0.030607148 | 0.01653274  | 0.012354149 |
| 0.019540474 | 0.009332876 | 0.000191699 | 0.00238415  |
| 0.013732414 | 0.030789921 | 0.000442941 | 0.038037721 |
| 0.009237347 | 0.007452055 | 0.036677423 | 0.030869073 |
| 0.01791023  | 0.015526111 | 0.091028537 | 0.010656347 |
| 0.00590832  | 0.033579691 | 0.002396049 | 0.03916322  |

|             |             |             |             |
|-------------|-------------|-------------|-------------|
| 0.000945943 | 0.00454079  | 0.044562873 | 0.008091598 |
| 0.020471758 | 0.013358776 | 0.002649778 | 0.002706928 |
| 0.022572745 | 0.008912064 | 0.010774202 | 0.031638487 |
| 0.010533543 | 0.002173807 | 0.035303961 | 0.042385443 |
| 0.000888215 | 0.020664147 | 0.047947032 | 0.062104245 |
| 0.001740072 | 0.002769116 | 0.087821189 | 0.059113862 |
| 0.013157228 | 0.010535024 | 0.025059826 | 0.019094957 |
| 0.039922185 | 0.008962751 | 0.013439677 | 0.009528541 |
| 0.016621976 | 0.019882621 | 0.031195161 | 0.029921596 |
| 0.066537315 | 0.019102435 | 0.008770659 | 0.020609932 |
| 0.013812923 | 0.035285453 | 0.013687942 | 0.003524245 |
| 0.063533426 | 0.016574076 | 0.049961488 | 0.076125345 |
| 0.004867073 | 0.080487056 | 0.052217233 | 0.022209424 |
| 0.012582872 | 0.001191137 | 0.059157219 | 0.056627536 |
| 0.018807841 | 0.000385581 | 0.056774854 | 0.008712168 |
| 0.013048047 | 7.23E-05    | 0.005498113 | 0.030385915 |
| 0.072873332 | 0.040497889 | 0.002244191 | 0.013844482 |
| 0.005922406 | 0.001628521 | 0.006067343 | 0.006314477 |
| 0.016169056 | 0.004495822 | 0.013553684 | 0.027001171 |
| 0.060934973 | 0.00619655  | 0.002972341 | 0.008799576 |
| 0.055742421 | 0.005150363 | 0.032858371 | 0.081970501 |
| 0.043075701 | 0.025642363 | 0.008272787 | 0.068425661 |
| 0.00408328  | 0.025741    | 0.032500667 | 0.011327991 |
| 0.002862283 | 0.029130259 | 0.001153879 | 0.008955931 |
| 0.000128881 | 0.001863347 | 0.013356869 | 0.033148402 |
| 0.019235725 | 0.011073001 | 0.024195672 | 0.011021953 |
| 4.51E-05    | 0.004336419 | 0.013302914 | 0.002714188 |
| 0.008535458 | 0.024332214 | 0.005874953 | 0.059445145 |
| 0.053085119 | 0.040010322 | 0.030121674 | 0.000828732 |
| 0.000122296 | 0.007602576 | 0.077413385 | 0.030915859 |
| 0.030320738 | 0.027486064 | 0.002080256 | 0.024452725 |
| 0.001238992 | 0.065404058 | 0.0346817   | 0.000461741 |
| 0.000413951 | 0.016962712 | 0.008046801 | 0.062963543 |
| 0.005568901 | 0.015030608 | 0.018045443 | 0.000463862 |
| 0.00718106  | 0.048184079 | 0.052191992 | 0.035526508 |
| 0.039073944 | 0.038389408 | 0.036767458 | 0.00610348  |
| 0.009088791 | 0.025635907 | 0.017992284 | 0.059752933 |
| 0.041028956 | 0.02363358  | 0.006524457 | 0.004252716 |
| 0.011493013 | 0.055974548 | 0.046746872 | 0.04488905  |
| 0.044190695 | 0.010637285 | 0.061263239 | 0.041860244 |
| 0.065012222 | 0.003384063 | 0.040765115 | 0.008996506 |
| 0.026951931 | 0.029863408 | 0.012667594 | 0.007887617 |
| 0.00048384  | 0.000276732 | 0.028070333 | 0.004226938 |
| 0.048033839 | 0.008464823 | 0.002987684 | 0.008111332 |
| 0.005195108 | 0.035074737 | 0.062448484 | 0.021298876 |
| 0.004940647 | 0.004541649 | 0.000699119 | 0.050140629 |
| 0.032936816 | 0.051971128 | 0.014086824 | 0.00700783  |
| 0.028084301 | 0.002102874 | 0.008291128 | 0.01256768  |
| 0.001882121 | 0.032636797 | 0.000206231 | 0.038016545 |
| 0.001033425 | 0.023294217 | 0.074674988 | 0.004745723 |
| 0.001009379 | 0.037498397 | 0.013244781 | 0.001781987 |
| 0.006226733 | 0.004943917 | 0.009026096 | 0.026658291 |
| 0.027397982 | 0.02720474  | 0.016035217 | 0.023054521 |
| 0.002006465 | 0.008495159 | 0.002931276 | 0.017208699 |

|             |                      |                      |             |
|-------------|----------------------|----------------------|-------------|
| 0.027280223 | 0.010100865          | 0.069566708          | 0.0102023   |
| 0.007521526 | 0.053767018          | 0.028330294          | 0.019866848 |
| 0.003767007 | 0.023816306          | 0.001322993          | 0.001690466 |
| 0.017401299 | 0.002347714          | 2.79E-06 0.000121111 |             |
| 0.038022358 | 0.003896192          | 0.004629792          | 0.016183947 |
| 0.009132569 | 0.031286053          | 0.000718753          | 0.01062041  |
| 0.009824015 | 0.016197987          | 0.006828371          | 0.047036366 |
| 0.028450286 | 0.083978633          | 0.005374941          | 1.98E-05    |
| 0.003805143 | 0.002245943          | 0.000949347          | 0.090355099 |
| 0.029513348 | 0.00084395           | 0.002888031          | 0.032665671 |
| 0.01191088  | 6.93E-05 0.005160695 | 0.005967752          |             |
| 0.048138913 | 0.015806746          | 0.047397759          | 0.013463967 |
| 0.005094513 | 0.036773297          | 0.004019972          | 0.004220354 |
| 0.009942028 | 0.004496084          | 0.017004463          | 0.004780907 |
| 0.080684547 | 0.00802239           | 0.000375042          | 0.03207196  |
| 0.012305121 | 0.003008862          | 0.062756637          | 0.000367273 |
| 0.047149912 | 0.020484445          | 0.007419114          | 0.001858151 |
| 0.019758328 | 0.006735857          | 0.062461776          | 0.01498503  |
| 0.000520374 | 0.005428735          | 0.023082517          | 0.006864026 |
| 0.018877851 | 0.002749116          | 0.051718972          | 0.000178681 |
| 0.009784073 | 0.011440608          | 0.021068547          | 0.006576782 |
| 0.003940783 | 0.068805435          | 0.00095298           | 0.01583424  |
| 0.065954753 | 0.005532942          | 0.011766908          | 0.025683825 |
| 0.004496782 | 0.015903211          | 0.002049503          | 0.015444512 |
| 0.054632465 | 0.051860001          | 0.011242156          | 0.010851925 |
| 0.049641785 | 0.008930676          | 0.004302289          | 0.021034572 |
| 0.010133034 | 0.027364821          | 0.002075473          | 0.01697463  |
| 0.002546599 | 0.040784553          | 0.002780763          | 0.026314231 |
| 0.042529656 | 0.026719541          | 0.005962578          | 0.06325536  |
| 0.028179095 | 0.007541584          | 0.007656467          | 0.032300407 |
| 0.025837619 | 0.009858577          | 0.025221006          | 7.63E-06    |
| 0.009627488 | 0.011877339          | 0.057567776          | 0.005734981 |
| 0.053413565 | 0.011423413          | 0.003811241          | 0.003254134 |
| 0.016735439 | 0.000174088          | 0.013262568          | 0.013396519 |
| 0.000769309 | 0.052339597          | 0.017314561          | 0.014662058 |
| 0.024147926 | 0.000589699          | 0.000478644          | 0.017328005 |
| 0.000387989 | 0.000733326          | 0.002546951          | 0.003169158 |
| 0.003212954 | 0.000139594          | 0.001562501          | 0.001295328 |
| 0.017975116 | 0.022510488          |                      |             |
| KNTC1       | 0.111113356          | 0.44079689           | 0.089961033 |
| 0.2193203   | 0.389338807          | 0.487249045          | 0.086301384 |
| 0.171449951 | 0.391897714          | 0.375741909          | 0.450355874 |
| 0.029514182 | 0.129230251          | 0.467906154          | 0.078105554 |
| 0.468112169 | 0.05238938           | 0.150274923          | 0.103908628 |
| 0.297973144 | 0.355258564          | 0.429071105          | 0.443770718 |
| 0.358520855 | 0.219673516          | 0.416814093          | 0.456705048 |
| 0.516836108 | 0.358964957          | 0.510877945          | 0.290976325 |
| 0.421777307 | 0.403717597          | 0.471463983          | 0.029566097 |
| 0.485981718 | 0.018101541          | 0.445622599          | 0.345561838 |
| 0.237638342 | 0.360394978          | 0.416988289          | 0.328156729 |
| 0.455421723 | 0.060525534          | 0.283556339          | 0.471095056 |
| 0.403014881 | 0.357883261          | 0.096470502          | 0.500857758 |
| 0.439653311 | 0.408736414          | 0.447350947          | 0.003286366 |
| 0.392307284 | 0.137679556          | 0.305320749          | 0.520547124 |

|             |             |             |             |
|-------------|-------------|-------------|-------------|
| 0.262041493 | 0.170572165 | 0.363629185 | 0.304703744 |
| 0.445729843 | 0.435124806 | 0.31313464  | 0.443262611 |
| 0.513694262 | 0.242478373 | 0.495868246 | 0.234414793 |
| 0.456038291 | 0.05055631  | 0.207654478 | 0.117479757 |
| 0.468034947 | 0.263922388 | 0.4202527   | 0.39859586  |
| 0.438824374 | 0.523846814 | 0.300300564 | 0.512959198 |
| 0.133020559 | 0.415868989 | 0.364143657 | 0.364131686 |
| 0.416471638 | 0.115441319 | 0.486530978 | 0.534156609 |
| 0.070764058 | 0.44646385  | 0.455264602 | 0.161423245 |
| 0.463679277 | 0.351511131 | 0.471756934 | 0.24887005  |
| 0.446607691 | 0.420353497 | 0.480393063 | 0.362347245 |
| 0.387672659 | 0.106159021 | 0.494985532 | 0.399912583 |
| 0.389486134 | 0.125189836 | 0.302257308 | 0.500937259 |
| 0.496080053 | 0.508475004 | 0.461542448 | 0.413746143 |
| 0.459626021 | 0.516971873 | 0.486285067 | 0.43736985  |
| 0.21829085  | 0.53881875  | 0.260653304 | 0.063253876 |
| 0.106722606 | 0.119336536 | 0.287316181 | 0.345525146 |
| 0.498764322 | 0.401593881 | 0.266370729 | 0.307376015 |
| 0.48194166  | 0.488627405 | 0.535981853 | 0.461536857 |
| 0.060916957 | 0.32336443  | 0.473357951 | 0.352739339 |
| 0.439135964 | 0.151343483 | 0.344103202 | 0.518441537 |
| 0.416317554 | 0.488835269 | 0.230146863 | 0.507599383 |
| 0.24794206  | 0.526807966 | 0.476730018 | 0.235508856 |
| 0.53250359  | 0.508210422 | 0.525233325 | 0.477697281 |
| 0.48665083  | 0.442812563 | 0.077062534 | 0.424683969 |
| 0.494253072 | 0.025261757 | 0.493904391 | 0.513157588 |
| 0.515728365 | 0.509023248 | 0.531374159 | 0.523809408 |
| 0.517303011 | 0.105576387 | 0.040351919 | 0.35255455  |
| 0.523032136 | 0.447697652 | 0.174967397 | 0.4927012   |
| 0.429277909 | 0.476205168 | 0.4782888   | 0.39760885  |
| 0.517496605 | 0.488339926 | 0.502228661 | 0.448643041 |
| 0.369938589 | 0.339577183 | 0.45531854  | 0.480832138 |
| 0.06968253  | 0.166665151 | 0.079424966 | 0.355031415 |
| 0.443153974 | 0.231714184 | 0.459478472 | 0.412188899 |
| 0.251247056 | 0.410269992 | 0.41945808  | 0.452423793 |
| 0.078725353 | 0.513015774 | 0.231612737 | 0.232098734 |
| 0.065740985 | 0.171696868 | 0.253501919 | 0.22039193  |
| 0.319124773 | 0.243074308 | 0.501051575 | 0.503360367 |
| 0.41742664  | 0.239947785 | 0.48921501  | 0.484751124 |
| 0.426401341 | 0.47312109  | 0.273655934 | 0.023273466 |
| 0.355137215 | 0.37920775  | 0.260592147 | 0.485180522 |
| 0.189745799 | 0.306788099 | 0.459825356 | 0.465886959 |
| 0.363829935 | 0.189856924 | 0.443935786 | 0.432955313 |
| 0.193295485 | 0.394064607 | 0.480516261 | 0.475811816 |
| 0.006591651 | 0.419072492 | 0.500859827 | 0.200281927 |
| 0.374337163 | 0.193422998 | 0.349657475 | 0.487226986 |
| 0.365520069 | 0.288025205 | 0.505115643 | 0.457448354 |
| 0.407667348 | 0.226604838 | 0.534598272 | 0.069582361 |
| 0.413434501 | 0.088719219 | 0.349551152 | 0.404354444 |
| 0.325902276 | 0.343457311 | 0.391535077 | 0.37134476  |
| 0.180665372 | 0.527314644 | 0.440668702 | 0.524719239 |
| 0.459294068 | 0.538396947 | 0.501083454 | 0.470622679 |
| 0.437985012 | 0.432559973 | 0.198717139 | 0.499693381 |
| 0.492671336 | 0.375761245 | 0.106155888 | 0.489813479 |



|             |             |             |             |
|-------------|-------------|-------------|-------------|
| 0.437610318 | 0.473606066 | 0.171075044 | 0.506726307 |
| 0.503575406 | 0.481710213 | 0.192511537 | 0.430494392 |
| 0.444629246 | 0.313061375 | 0.460912289 | 0.534012491 |
| 0.392271367 | 0.428728986 | 0.425964219 | 0.444727494 |
| 0.23838909  | 0.275080204 | 0.344281182 | 0.24855694  |
| 0.020490786 | 0.115294933 | 0.098863853 | 0.218218561 |
| 0.238718379 | 0.481961762 | 0.470530552 | 0.529222326 |
| 0.161313918 | 0.436579641 | 0.283873564 | 0.380793734 |
| 0.430675299 | 0.413988895 | 0.460666102 | 0.45903337  |
| 0.298305179 | 0.034481484 | 0.17176128  | 0.528150224 |
| 0.060740207 | 0.323409715 | 0.378872016 | 0.00538516  |
| 0.069254879 | 0.452602239 | 0.124284674 | 0.211279457 |
| 0.481365061 | 0.22071002  | 0.272469645 | 0.400053873 |
| 0.413846421 | 0.133476891 | 0.006474675 | 0.497263104 |
| 0.490413556 | 0.458664343 | 0.4886992   | 0.461138734 |
| 0.4472691   | 0.454033923 | 0.472337521 | 0.441670125 |
| 0.150802813 | 0.131974384 | 0.293494568 | 0.367974162 |
| 0.006787669 | 0.444435472 | 0.373494757 | 0.189822717 |
| 0.480883183 | 0.359463984 | 0.058403723 | 0.418700937 |
| 0.041076311 | 0.290457587 | 0.36948445  | 0.27376668  |
| 0.402361141 | 0.02453397  | 0.346635197 | 0.413367588 |
| 0.444420861 | 0.38659497  | 0.451707445 | 0.544076063 |
| 0.415123667 | 0.171168825 | 0.404992985 | 0.461288172 |
| 0.105477952 | 0.15321693  | 0.425466319 | 0.065475669 |
| 0.267066016 | 0.453195886 | 0.454170167 | 0.114190293 |
| 0.351404671 | 0.00952667  | 0.407816577 | 0.540018425 |
| 0.480986487 | 0.530946761 | 0.516481702 | 0.362806428 |
| 0.521619034 | 0.157032657 | 0.542343191 | 0.45229552  |
| 0.45405095  | 0.001991418 | 0.008494227 | 1           |
| 0.482481722 | 0.082850237 | 0.214581746 | 0.46449705  |
| 0.160668275 | 0.210116282 | 0.093879335 | 0.259181277 |
| 0.501802392 | 0.308561217 | 0.233678425 | 0.478921501 |
| 0.314775009 | 0.291472509 | 0.459569233 | 0.119555242 |
| 0.482579895 | 0.082995341 | 0.118284604 | 0.014065331 |
| 0.426729418 | 0.148113997 | 0.476632479 | 0.521174207 |
| 0.504400729 | 0.468545303 | 0.41693625  | 0.410839848 |
| 0.45557042  | 0.136761046 | 0.452784352 | 0.155373606 |
| 0.501345861 | 0.470455465 | 0.385054876 | 0.364232476 |
| 0.51028421  | 0.48188551  | 0.05074546  | 0.472012746 |
| 0.026287007 | 0.002955429 | 0.465950056 | 0.311280383 |
| 0.082899645 | 0.446393927 | 0.313449695 | 0.287431133 |
| 0.281361177 | 0.051627282 | 0.346937106 | 0.324130748 |
| 0.373767869 | 0.436246795 | 0.352842476 | 0.289501409 |
| 0.340468131 | 0.191899114 | 0.262620415 | 0.197823689 |
| 0.28974451  | 0.354283449 | 0.22552715  | 0.033270894 |
| 0.506262834 | 0.494757611 | 0.086842176 | 0.208819896 |
| 0.489426992 | 0.504515845 | 0.06410576  | 0.020756262 |
| 0.3151118   | 0.377292529 | 0.508549911 | 0.513439294 |
| 0.534576152 | 0.527891136 | 0.396504852 | 0.164739393 |
| 0.100242616 | 0.39420412  | 0.371789247 | 0.143225341 |
| 0.521382467 | 0.095360475 | 0.495577978 | 0.383936069 |
| 0.156747349 | 0.298248395 | 0.054992138 | 0.118383381 |
| 0.46291883  | 0.227559389 | 0.238457629 | 0.205729857 |
| 0.392800243 | 0.339717905 | 0.071504777 | 0.257846339 |

|             |             |             |             |
|-------------|-------------|-------------|-------------|
| 0.407646271 | 0.265642856 | 0.213399403 | 0.378831698 |
| 0.417735517 | 0.278531555 | 0.495440357 | 0.453516086 |
| 0.175992121 | 0.153789914 | 0.377941836 | 0.436029346 |
| 0.499699188 | 0.459236995 | 0.046638451 | 0.463394578 |
| 0.49683143  | 0.514131226 | 0.511593544 | 0.418031604 |
| 0.117419872 | 0.467255856 | 0.382698307 | 0.416436455 |
| 0.234872166 | 0.478229556 | 0.294391505 | 0.090705913 |
| 0.322925253 | 0.481623893 | 0.452538363 | 0.227495179 |
| 0.487326199 | 0.170687453 | 0.085070401 | 0.467981515 |
| 0.259653022 | 0.133451607 | 0.430707969 | 0.474617249 |
| 0.004278753 | 0.202858174 | 0.493162105 | 0.310056636 |
| 0.520882237 | 0.49348562  | 0.449666668 | 0.321790846 |
| 0.003310483 | 0.481085988 | 0.462362168 | 0.496878698 |
| 0.460149356 | 0.407937028 | 0.193510977 | 0.111408804 |
| 0.335768976 | 0.116164556 | 0.18639446  | 0.432206351 |
| 0.248567768 | 0.472931253 | 0.243766949 | 0.260421457 |
| 0.260403733 | 0.122754142 | 0.330225292 | 0.321700764 |
| 0.198224804 | 0.290878352 | 0.403242324 | 0.358496225 |
| 0.275136997 | 0.445235765 | 0.463917102 | 0.043057012 |
| 0.430173603 | 0.442979134 | 0.447188278 | 0.004133385 |
| 0.498969495 | 0.012270917 | 0.255003021 | 0.291247971 |
| 0.265299416 | 0.263807839 | 0.318836192 | 0.387586681 |
| 0.419676255 | 0.290980209 | 0.36522532  | 0.301433988 |
| 0.226385668 | 0.286267254 | 0.466531963 | 0.442826556 |
| 0.368231178 | 0.181253401 | 0.125521672 | 0.120826895 |
| 0.080729333 | 0.472216695 | 0.281669664 | 0.10646355  |
| 0.281740122 | 0.43761598  | 0.379454066 | 0.508037776 |
| 0.433914371 | 0.145789619 | 0.394821347 | 0.481373238 |
| 0.298135391 | 0.379952155 | 0.091838714 | 0.476337339 |
| 0.295386    | 0.288561698 | 0.473493832 | 0.389617421 |
| 0.460373457 | 0.406945292 | 0.28061993  | 0.443938924 |
| 0.458369381 | 0.402653669 | 0.40460826  | 0.126523218 |
| 0.247480246 | 0.171973968 | 0.341733636 | 0.004319874 |
| 0.420019952 | 0.358424866 | 0.505455075 | 0.504115881 |
| 0.367935313 | 0.404219166 | 0.407466358 | 0.133292086 |
| 0.367956178 | 0.204525135 | 0.183969508 | 0.492272454 |
| 0.299635816 | 0.249239438 | 0.382331301 | 0.422688503 |
| 0.495011072 | 0.475371016 | 0.319177719 | 0.299551577 |
| 0.297008782 | 0.262591274 | 0.478732101 | 0.173325127 |
| 0.499447233 | 0.264560259 | 0.417570447 | 0.378527213 |
| 0.284798523 | 0.528231873 | 0.088656769 | 0.537271302 |
| 0.407574102 | 0.167636805 | 0.496002441 | 0.367831062 |
| 0.379282617 | 0.17103219  | 0.267124467 | 0.45078858  |
| 0.286569527 | 0.425340638 | 0.024155385 | 0.090665908 |
| 0.390170258 | 0.360979278 | 0.453509567 | 0.416360529 |
| 0.321438985 | 0.384142696 | 0.228791097 | 0.355345478 |
| 0.492606813 | 0.50527525  | 0.338334501 | 0.294768281 |
| 0.398236724 | 0.145143753 | 0.470371681 | 0.021165111 |
| 0.492275248 | 0.491145567 | 0.450321984 | 0.076141887 |
| 0.030109887 | 0.29912423  | 0.489544369 | 0.094938237 |
| 0.486625168 | 0.295568242 | 0.411852517 | 0.50470224  |
| 0.21748322  | 0.507774541 | 0.164974751 | 0.479139481 |
| 0.067564448 | 0.314180078 | 0.450744535 | 0.435430678 |
| 0.31010711  | 0.37700634  | 0.446089897 | 0.319029048 |

|             |             |             |             |
|-------------|-------------|-------------|-------------|
| 0.050526389 | 0.34574543  | 0.003020917 | 0.414293305 |
| 0.480571016 | 0.421048143 | 0.239505528 | 0.36431739  |
| 0.33899734  | 0.411411509 | 0.291780513 | 0.488832525 |
| 0.020009515 | 0.452245094 | 0.251903171 | 0.45898659  |
| 0.33649549  | 0.423695087 | 0.091108493 | 0.379390957 |
| 0.464262562 | 0.351136238 | 0.28812564  | 0.414773221 |
| 0.503669843 | 0.42862901  | 0.211924328 | 0.288286088 |
| 0.439418312 | 0.091082528 | 0.459763785 | 0.53503201  |
| 0.233417172 | 0.297690014 | 0.490969361 | 0.275717817 |
| 0.384381343 | 0.414326844 | 0.471424084 | 0.523210869 |
| 0.102892977 | 0.305308851 | 0.47789679  | 0.464010697 |
| 0.349453195 | 0.232029525 | 0.325123969 | 0.297819563 |
| 0.473771206 | 0.149384955 | 0.330340946 | 0.424141224 |
| 0.300480088 | 0.366712521 | 0.397692008 | 0.250167886 |
| 0.055761093 | 0.212005674 | 0.45562771  | 0.188502746 |
| 0.361269007 | 0.448756357 | 0.315402722 | 0.396421662 |
| 0.194803069 | 0.045264055 | 0.457356549 | 0.033014243 |
| 0.423720352 | 0.477756567 | 0.302246094 | 0.433581555 |
| 0.231149214 | 0.417383287 | 0.413510849 | 0.00182864  |
| 0.459633609 | 0.083653336 | 0.363889771 | 0.306873845 |
| 0.348303165 | 0.076310302 | 0.468180732 | 0.522590395 |
| 0.380933912 | 0.399753522 | 0.432047273 | 0.467091795 |
| 0.220622883 | 0.410615916 | 0.404649917 | 0.483502589 |
| 0.304216164 | 0.462019588 | 0.480955227 | 0.475853029 |
| 0.450404567 | 0.333340465 |             |             |
| KPNA3       | 0.043931652 | 0.354463962 | 0.02979798  |
| 0.136273425 | 0.262269209 | 0.233589619 | 0.038025065 |
| 0.083156662 | 0.262586776 | 0.17213923  | 0.261230044 |
| 0.013437728 | 0.108156297 | 0.435218701 | 0.033433313 |
| 0.327940225 | 0.027970373 | 0.075974963 | 0.050283141 |
| 0.141593761 | 0.256651295 | 0.264905847 | 0.202068446 |
| 0.240560705 | 0.146086051 | 0.213642982 | 0.257500805 |
| 0.460287777 | 0.213760571 | 0.353481259 | 0.150396099 |
| 0.386951725 | 0.294055063 | 0.276327662 | 0.009894177 |
| 0.24983028  | 0.014017344 | 0.383024388 | 0.241281075 |
| 0.192392915 | 0.299931103 | 0.183159574 | 0.203488024 |
| 0.236259662 | 0.02439343  | 0.124630618 | 0.347344415 |
| 0.205655058 | 0.1751342   | 0.031099907 | 0.341122101 |
| 0.238962061 | 0.249936356 | 0.295937548 | 0.002807183 |
| 0.269441934 | 0.120966857 | 0.229281729 | 0.440138006 |
| 0.154219498 | 0.090292677 | 0.22022246  | 0.12955248  |
| 0.271164094 | 0.309800538 | 0.184239523 | 0.248605428 |
| 0.463755223 | 0.198885764 | 0.372867993 | 0.13472842  |
| 0.239566951 | 0.014598734 | 0.121842057 | 0.039829118 |
| 0.265401974 | 0.147210386 | 0.245074895 | 0.270465957 |
| 0.367697331 | 0.449816316 | 0.164354066 | 0.426967892 |
| 0.109382465 | 0.284752391 | 0.243411785 | 0.274778842 |
| 0.301159155 | 0.048512245 | 0.386813146 | 0.485070817 |
| 0.022388844 | 0.233335896 | 0.338198985 | 0.07248856  |
| 0.365254398 | 0.203455448 | 0.232191473 | 0.201247781 |
| 0.343007139 | 0.289286951 | 0.395411645 | 0.249826208 |
| 0.223136573 | 0.037669837 | 0.393720858 | 0.28349531  |
| 0.253727935 | 0.048854139 | 0.237046007 | 0.453723312 |
| 0.339902282 | 0.461658299 | 0.374428519 | 0.330775257 |

|             |             |             |             |
|-------------|-------------|-------------|-------------|
| 0.311315916 | 0.46741785  | 0.356368671 | 0.353234602 |
| 0.093145543 | 0.468187214 | 0.127408313 | 0.031155691 |
| 0.037212493 | 0.05820534  | 0.177270095 | 0.254128634 |
| 0.449815023 | 0.23962736  | 0.140737014 | 0.204956973 |
| 0.469253551 | 0.389878654 | 0.466853865 | 0.389638287 |
| 0.025282821 | 0.214318684 | 0.315371423 | 0.147353693 |
| 0.315385633 | 0.06272093  | 0.263340424 | 0.435642677 |
| 0.358905694 | 0.433972397 | 0.093747022 | 0.417826794 |
| 0.119563884 | 0.482964344 | 0.403961925 | 0.134454752 |
| 0.461097549 | 0.421587673 | 0.498271332 | 0.386074238 |
| 0.407656024 | 0.231335248 | 0.038891467 | 0.339183853 |
| 0.459937119 | 0.026080947 | 0.454057617 | 0.487542882 |
| 0.447641564 | 0.469222658 | 0.502616705 | 0.479008048 |
| 0.442478938 | 0.040447885 | 0.028893062 | 0.260421778 |
| 0.454213465 | 0.383733117 | 0.093515262 | 0.301541864 |
| 0.297197231 | 0.230500879 | 0.365916862 | 0.281576533 |
| 0.470547338 | 0.427225783 | 0.454130241 | 0.342769817 |
| 0.171376126 | 0.270115798 | 0.282717537 | 0.383118918 |
| 0.031358411 | 0.072862443 | 0.028039328 | 0.240756179 |
| 0.201330794 | 0.132575063 | 0.238294205 | 0.248585698 |
| 0.146904109 | 0.179622221 | 0.25735888  | 0.364707305 |
| 0.032532834 | 0.290865439 | 0.104025371 | 0.112446589 |
| 0.037644753 | 0.102491154 | 0.176891513 | 0.119781029 |
| 0.207466208 | 0.171846657 | 0.362354143 | 0.465794686 |
| 0.243767445 | 0.13566962  | 0.348392541 | 0.449971308 |
| 0.417767866 | 0.305618271 | 0.170028458 | 0.01734547  |
| 0.286902457 | 0.21356751  | 0.210782012 | 0.273063431 |
| 0.12398618  | 0.210610626 | 0.314283747 | 0.394402557 |
| 0.178531708 | 0.069844365 | 0.292106347 | 0.36381503  |
| 0.099772569 | 0.257501549 | 0.458069213 | 0.258666945 |
| 0.001938838 | 0.250754525 | 0.428423275 | 0.152005781 |
| 0.233000426 | 0.173230298 | 0.242069297 | 0.465932079 |
| 0.253508579 | 0.209377103 | 0.461227375 | 0.371774124 |
| 0.222400688 | 0.155327374 | 0.496388327 | 0.062661839 |
| 0.237866569 | 0.077511528 | 0.262410804 | 0.177916476 |
| 0.182366542 | 0.253863375 | 0.261021199 | 0.252711672 |
| 0.081004515 | 0.464299423 | 0.334925747 | 0.482608675 |
| 0.300713395 | 0.499256221 | 0.458900011 | 0.427284201 |
| 0.270502555 | 0.255046121 | 0.173036225 | 0.437607142 |
| 0.45697127  | 0.2489112   | 0.04181482  | 0.403046882 |
| 0.245220222 | 0.376145663 | 0.123988744 | 0.490756693 |
| 0.433807719 | 0.389443278 | 0.115292899 | 0.372044824 |
| 0.374378514 | 0.16175428  | 0.36938559  | 0.487677628 |
| 0.208896646 | 0.290456107 | 0.30495436  | 0.41264432  |
| 0.127791205 | 0.209565923 | 0.255821792 | 0.183382167 |
| 0.015974508 | 0.042620807 | 0.039310806 | 0.1412565   |
| 0.207219175 | 0.290231069 | 0.335267935 | 0.483685595 |
| 0.08427054  | 0.363339434 | 0.165668425 | 0.28786124  |
| 0.390872012 | 0.252595938 | 0.27535202  | 0.30011181  |
| 0.18312703  | 0.02013338  | 0.107341278 | 0.457770833 |
| 0.017733695 | 0.25154846  | 0.179861288 | 0.003190449 |
| 0.029335583 | 0.334917591 | 0.064818059 | 0.151187938 |
| 0.466575365 | 0.153756272 | 0.156589969 | 0.211401388 |
| 0.299650284 | 0.057531742 | 0.004322443 | 0.450406776 |

|             |             |             |             |
|-------------|-------------|-------------|-------------|
| 0.418063152 | 0.390868816 | 0.414389012 | 0.36736482  |
| 0.403861849 | 0.318288238 | 0.41037239  | 0.198777516 |
| 0.076052779 | 0.049619093 | 0.270459222 | 0.250900894 |
| 0.003624111 | 0.349598499 | 0.210507916 | 0.104829697 |
| 0.387819033 | 0.230372066 | 0.024199083 | 0.261914241 |
| 0.020834414 | 0.245465301 | 0.188314972 | 0.150258845 |
| 0.321105821 | 0.007900617 | 0.217888587 | 0.297519072 |
| 0.365986165 | 0.294695953 | 0.283583452 | 0.477963748 |
| 0.249773566 | 0.081258776 | 0.272604347 | 0.354584163 |
| 0.051282179 | 0.102062761 | 0.202533436 | 0.041907805 |
| 0.113637068 | 0.370120644 | 0.250120474 | 0.053751873 |
| 0.212452486 | 0.003506188 | 0.32513193  | 0.480218726 |
| 0.390208932 | 0.508037877 | 0.466798108 | 0.270998193 |
| 0.468756809 | 0.123488067 | 0.486826333 | 0.357953931 |
| 0.254587689 | 0.001624018 | 0.004106399 | 0.482481722 |
| 1           | 0.031140058 | 0.109544462 | 0.236429851 |
| 0.098926039 | 0.086929211 | 0.036940863 | 0.212479714 |
| 0.295489498 | 0.207480911 | 0.175465111 | 0.401864953 |
| 0.19515703  | 0.158888724 | 0.221870006 | 0.050115613 |
| 0.286383282 | 0.041515249 | 0.048005759 | 0.013118444 |
| 0.325784306 | 0.077343004 | 0.376087361 | 0.455972095 |
| 0.463256405 | 0.368460837 | 0.221343237 | 0.206474774 |
| 0.388837172 | 0.056891029 | 0.243929873 | 0.059443122 |
| 0.431077907 | 0.358656663 | 0.300139464 | 0.278488651 |
| 0.490497922 | 0.437497425 | 0.0208093   | 0.403661061 |
| 0.012105831 | 0.001824509 | 0.235453026 | 0.189825647 |
| 0.041135909 | 0.298394904 | 0.22301466  | 0.137075238 |
| 0.140601827 | 0.022789203 | 0.26703688  | 0.267473086 |
| 0.24944608  | 0.281115966 | 0.264536543 | 0.169056057 |
| 0.222560192 | 0.176102614 | 0.143404011 | 0.10087588  |
| 0.154779876 | 0.261508408 | 0.154861376 | 0.012761927 |
| 0.27084896  | 0.303716965 | 0.037225164 | 0.104665153 |
| 0.439443527 | 0.486718812 | 0.035905819 | 0.016023866 |
| 0.219683414 | 0.228860909 | 0.490355728 | 0.441143335 |
| 0.456102708 | 0.493493952 | 0.335860542 | 0.121112996 |
| 0.043416062 | 0.24583137  | 0.260466941 | 0.103228693 |
| 0.466645401 | 0.034568523 | 0.410817261 | 0.271336149 |
| 0.071998714 | 0.173857494 | 0.029093569 | 0.052866733 |
| 0.299241963 | 0.119869326 | 0.154729871 | 0.099973031 |
| 0.265227313 | 0.250668874 | 0.029153596 | 0.141570194 |
| 0.312795396 | 0.251637978 | 0.109163843 | 0.164013613 |
| 0.280024656 | 0.115935247 | 0.409948219 | 0.420341337 |
| 0.083199076 | 0.066372859 | 0.195741701 | 0.308875284 |
| 0.420848291 | 0.237122062 | 0.022512074 | 0.385268915 |
| 0.453579655 | 0.364223179 | 0.43129665  | 0.385269558 |
| 0.04934163  | 0.304626246 | 0.244963842 | 0.275665766 |
| 0.118353074 | 0.225418308 | 0.15740797  | 0.036182575 |
| 0.239045159 | 0.399421305 | 0.386327006 | 0.135036294 |
| 0.255565466 | 0.066799383 | 0.028528522 | 0.384597148 |
| 0.244957327 | 0.068814006 | 0.193376136 | 0.395324334 |
| 0.003547988 | 0.172831871 | 0.461349426 | 0.164699845 |
| 0.454232123 | 0.484065198 | 0.410502995 | 0.134232453 |
| 0.004672163 | 0.371832056 | 0.316867603 | 0.312194879 |
| 0.391355871 | 0.272599404 | 0.07318217  | 0.067285586 |

|             |             |             |             |
|-------------|-------------|-------------|-------------|
| 0.255513612 | 0.047851709 | 0.129597369 | 0.205972558 |
| 0.204205229 | 0.284315386 | 0.151870578 | 0.123741565 |
| 0.162952031 | 0.049154113 | 0.225908674 | 0.166374523 |
| 0.140137193 | 0.20175614  | 0.33718167  | 0.147424499 |
| 0.263373327 | 0.409192029 | 0.380854776 | 0.015547252 |
| 0.258511566 | 0.376042533 | 0.380923401 | 0.004646632 |
| 0.407853306 | 0.00539275  | 0.164742605 | 0.193423666 |
| 0.160902609 | 0.166634556 | 0.213398341 | 0.265849405 |
| 0.2548551   | 0.165865952 | 0.223518591 | 0.18475057  |
| 0.145104767 | 0.136368938 | 0.290418184 | 0.22938532  |
| 0.258256793 | 0.089881318 | 0.064777356 | 0.066999082 |
| 0.04247574  | 0.402662074 | 0.199259715 | 0.042858153 |
| 0.159417722 | 0.227113819 | 0.329831323 | 0.428205189 |
| 0.386346938 | 0.071989813 | 0.223240241 | 0.407828268 |
| 0.167353211 | 0.196949958 | 0.03452101  | 0.237466226 |
| 0.153336411 | 0.231594616 | 0.21989781  | 0.213267961 |
| 0.323214513 | 0.355698127 | 0.189632679 | 0.390274643 |
| 0.271667512 | 0.219472133 | 0.195143633 | 0.085330503 |
| 0.138094067 | 0.084233286 | 0.252581625 | 0.001881189 |
| 0.268541768 | 0.172258413 | 0.468479375 | 0.426099113 |
| 0.246162329 | 0.337594108 | 0.198167784 | 0.073698    |
| 0.172140629 | 0.135908316 | 0.098110363 | 0.373370006 |
| 0.235020126 | 0.121246021 | 0.259780819 | 0.177266854 |
| 0.403411856 | 0.352570185 | 0.199915411 | 0.148312249 |
| 0.150615982 | 0.125333646 | 0.395151127 | 0.067063322 |
| 0.304575809 | 0.217632243 | 0.207532462 | 0.263809065 |
| 0.191184203 | 0.477791304 | 0.032132738 | 0.495180009 |
| 0.282323343 | 0.084959023 | 0.436406703 | 0.158673313 |
| 0.171386309 | 0.098277969 | 0.225944045 | 0.21352447  |
| 0.164153776 | 0.266730277 | 0.014605846 | 0.085679041 |
| 0.303997097 | 0.178377086 | 0.345149744 | 0.295842754 |
| 0.229387326 | 0.318509239 | 0.153760007 | 0.181987942 |
| 0.399130163 | 0.407209173 | 0.245930677 | 0.20846053  |
| 0.290149017 | 0.073349207 | 0.256326857 | 0.009857982 |
| 0.346262611 | 0.320923935 | 0.243474537 | 0.032372478 |
| 0.011641161 | 0.265384122 | 0.323194097 | 0.031662114 |
| 0.48532781  | 0.234987732 | 0.224244459 | 0.359054133 |
| 0.11229569  | 0.414952968 | 0.106552673 | 0.38456734  |
| 0.024705512 | 0.179360599 | 0.256779517 | 0.230929472 |
| 0.244796843 | 0.29159658  | 0.373025023 | 0.256767463 |
| 0.024545198 | 0.227099245 | 0.004016808 | 0.349280297 |
| 0.38825183  | 0.290206516 | 0.151568295 | 0.167151587 |
| 0.23844416  | 0.314331023 | 0.198363089 | 0.254665855 |
| 0.010808237 | 0.328498011 | 0.124739139 | 0.365047931 |
| 0.27834629  | 0.237150185 | 0.049372702 | 0.249009342 |
| 0.359380048 | 0.257451101 | 0.19555861  | 0.306403128 |
| 0.423744407 | 0.304037895 | 0.10526555  | 0.167723778 |
| 0.265884514 | 0.034762455 | 0.211606657 | 0.48063645  |
| 0.142333059 | 0.249717752 | 0.467061527 | 0.190331625 |
| 0.263078673 | 0.313846273 | 0.276965166 | 0.454023221 |
| 0.075516839 | 0.195925148 | 0.3867634   | 0.422963182 |
| 0.270294442 | 0.190148475 | 0.261104984 | 0.224338625 |
| 0.391857101 | 0.078282222 | 0.23518594  | 0.304594069 |
| 0.261687887 | 0.234340631 | 0.193445062 | 0.179404905 |

|             |             |             |             |
|-------------|-------------|-------------|-------------|
| 0.031651372 | 0.104541172 | 0.23135029  | 0.088129676 |
| 0.228978417 | 0.287106596 | 0.232524224 | 0.35864515  |
| 0.127415687 | 0.031873156 | 0.412957863 | 0.042559036 |
| 0.187165745 | 0.341755318 | 0.150556025 | 0.276080544 |
| 0.144627228 | 0.241543383 | 0.210349697 | 0.000792008 |
| 0.389195582 | 0.057879397 | 0.193403011 | 0.243642753 |
| 0.241149741 | 0.033073439 | 0.392589878 | 0.500812577 |
| 0.206248978 | 0.197776723 | 0.269813527 | 0.397602727 |
| 0.198364733 | 0.241089024 | 0.249870916 | 0.303700334 |
| 0.234534887 | 0.244845482 | 0.263413149 | 0.297515509 |
| 0.305034766 | 0.151474032 |             |             |
| KTELC1      | 0.272091895 | 0.134119385 | 0.31099627  |
| 0.100933951 | 0.0290533   | 0.063030478 | 0.226388301 |
| 0.182073455 | 0.125551571 | 0.040976332 | 0.051976837 |
| 0.214414639 | 0.002776772 | 0.107843725 | 0.212428157 |
| 0.03111413  | 0.168451289 | 0.190548791 | 0.03644484  |
| 0.098678222 | 0.028644025 | 0.022675534 | 0.094662155 |
| 0.031401592 | 0.295467323 | 0.111462666 | 0.027818562 |
| 0.115471962 | 0.011845557 | 0.044507489 | 0.023001309 |
| 0.168066776 | 0.02579105  | 0.022146904 | 0.273136831 |
| 0.054180888 | 0.002682157 | 0.21351575  | 0.048890319 |
| 0.007455214 | 0.189517272 | 0.063326113 | 0.071664713 |
| 0.052986023 | 0.281560494 | 0.022484038 | 0.037341624 |
| 0.098796009 | 0.083167729 | 0.318931606 | 0.061417371 |
| 0.046370379 | 0.115267899 | 0.082349341 | 0.012756157 |
| 0.012526692 | 0.000292466 | 0.005983657 | 0.158878398 |
| 0.15238332  | 0.140115285 | 0.014452658 | 0.121567748 |
| 0.045966955 | 0.050701198 | 0.111054841 | 0.042055184 |
| 0.131913603 | 0.006208013 | 0.047293382 | 0.073189155 |
| 0.069834127 | 0.294851266 | 0.197199021 | 0.284682903 |
| 0.036523866 | 0.099934872 | 0.042119733 | 0.017131552 |
| 0.135465231 | 0.189977693 | 0.135194115 | 0.185406455 |
| 0.007772625 | 0.022022228 | 0.027287733 | 0.07744135  |
| 0.071166068 | 0.192275261 | 0.059788141 | 0.154680688 |
| 0.269934722 | 0.059663636 | 0.064591359 | 0.265947803 |
| 0.119358497 | 0.018569049 | 0.049485686 | 0.008071741 |
| 0.031955176 | 0.026902487 | 0.191139352 | 0.104958292 |
| 0.036664046 | 0.305321633 | 0.223387842 | 0.018177131 |
| 0.039377779 | 0.281985952 | 0.024558726 | 0.061617561 |
| 0.052902477 | 0.111375427 | 0.091569682 | 0.085442459 |
| 0.025584688 | 0.125756706 | 0.065668454 | 0.123394209 |
| 0.013374043 | 0.146592308 | 0.168192743 | 0.170623589 |
| 0.299412172 | 0.147518238 | 0.032340771 | 0.13461617  |
| 0.085489087 | 0.100237173 | 0.152556136 | 0.061842332 |
| 0.06966464  | 0.198577488 | 0.145305998 | 0.085825015 |
| 0.259460334 | 0.012443824 | 0.027008596 | 0.119556271 |
| 0.061538866 | 0.220863202 | 0.013349014 | 0.204110262 |
| 0.141085346 | 0.060734094 | 0.218562689 | 0.2312737   |
| 0.130000435 | 0.142445198 | 0.109733967 | 0.132444551 |
| 0.178086707 | 0.201283598 | 0.116347341 | 0.029788903 |
| 0.179759343 | 0.089430577 | 0.025652048 | 0.106630738 |
| 0.127666649 | 0.001438293 | 0.081055175 | 0.08721979  |
| 0.149663614 | 0.06006257  | 0.112708399 | 0.105265191 |
| 0.151368188 | 0.278155687 | 0.001527779 | 0.051214454 |

|             |             |             |             |
|-------------|-------------|-------------|-------------|
| 0.17020946  | 0.11298042  | 0.089157404 | 0.029164494 |
| 0.032839552 | 0.079534298 | 0.065694954 | 0.020516908 |
| 0.158048122 | 0.093136234 | 0.095923152 | 0.084057469 |
| 0.094979432 | 0.200207542 | 0.020557878 | 0.221470648 |
| 0.212924267 | 0.237356762 | 0.325583837 | 0.104897398 |
| 0.056594289 | 0.112542411 | 0.079318945 | 0.041431936 |
| 0.124075889 | 0.104046335 | 0.015845513 | 0.031318007 |
| 0.33668849  | 0.043593276 | 0.190704263 | 0.191682081 |
| 0.16249285  | 0.299070227 | 0.080206706 | 0.111291081 |
| 0.054149114 | 0.372630493 | 0.0470303   | 0.10367778  |
| 0.041031989 | 0.218545492 | 0.063554453 | 0.127081213 |
| 0.125482314 | 0.025701812 | 0.157895157 | 0.046926754 |
| 0.023646229 | 0.018608565 | 0.005002658 | 0.030850895 |
| 0.351547028 | 0.057769008 | 0.041080285 | 0.039259748 |
| 0.139261455 | 0.219381405 | 0.028621282 | 0.208934139 |
| 0.25414828  | 0.036883874 | 0.078335915 | 0.052513096 |
| 0.167892081 | 0.079145724 | 0.070614868 | 0.025055099 |
| 0.100651599 | 0.007218226 | 0.011072879 | 0.086220516 |
| 0.014560924 | 0.018929651 | 0.09400389  | 0.041148907 |
| 0.044961776 | 0.330316711 | 0.120906425 | 0.000942308 |
| 0.032336147 | 0.026833799 | 0.07049689  | 0.058909128 |
| 0.121265722 | 0.086766948 | 0.023750123 | 0.028981233 |
| 0.263174794 | 0.147959628 | 0.113615675 | 0.111990417 |
| 0.022445017 | 0.12728976  | 0.068379103 | 0.099036176 |
| 0.08406891  | 0.025427008 | 0.002738348 | 0.070469001 |
| 0.080976091 | 0.029489712 | 0.319162143 | 0.056429262 |
| 0.037080445 | 0.034535207 | 0.032232013 | 0.110975306 |
| 0.18745722  | 0.183044101 | 0.097071842 | 0.052726672 |
| 0.095984145 | 0.138022845 | 0.088081442 | 0.132943877 |
| 0.033406302 | 0.027065269 | 0.024065176 | 0.066644217 |
| 0.182947276 | 0.021474693 | 0.173734394 | 0.00529374  |
| 0.000545652 | 0.280970411 | 0.286351945 | 0.073588736 |
| 0.009276139 | 0.041682896 | 0.046519092 | 0.125974962 |
| 0.17057495  | 0.135441184 | 0.146103296 | 0.033005859 |
| 0.143730423 | 0.031358097 | 0.025440295 | 0.037993008 |
| 0.150216735 | 0.076877606 | 0.09150664  | 0.195898146 |
| 0.328719836 | 0.011967784 | 0.09976816  | 0.009956145 |
| 0.260001294 | 0.094881484 | 0.329390643 | 0.312428104 |
| 0.08449794  | 0.309439192 | 0.176650571 | 0.046013102 |
| 0.066069019 | 0.232848575 | 0.017049339 | 0.112135194 |
| 0.143368543 | 0.140406871 | 0.145792646 | 0.186803359 |
| 0.101664401 | 0.073437104 | 0.058666681 | 0.104639254 |
| 0.190655604 | 0.278968232 | 0.009682591 | 0.049355575 |
| 0.023715075 | 0.073423659 | 0.046026716 | 0.205419392 |
| 0.048259364 | 0.093947189 | 0.248107776 | 0.034364601 |
| 0.179143517 | 0.004866466 | 0.086042807 | 0.083815384 |
| 0.052109152 | 0.266751869 | 0.027756978 | 0.017884051 |
| 0.1832315   | 0.159031648 | 0.019201823 | 0.149341778 |
| 0.058937949 | 0.266741892 | 0.041342983 | 0.054152116 |
| 0.211777022 | 0.015234084 | 0.075117275 | 0.006459624 |
| 0.046255627 | 0.172247481 | 0.034492604 | 0.227081797 |
| 0.098573797 | 0.187021043 | 0.158592254 | 0.146730186 |
| 0.171715375 | 0.103755603 | 0.125783331 | 0.013166647 |
| 0.138622543 | 0.000698277 | 0.123557831 | 0.118247934 |



|             |             |             |             |
|-------------|-------------|-------------|-------------|
| 0.033365466 | 0.015417895 | 0.03282532  | 0.082850237 |
| 0.031140058 | 1           | 0.17724998  | 0.051832302 |
| 0.1240033   | 0.237077156 | 0.230355368 | 0.015623417 |
| 0.056448645 | 0.039371544 | 0.016683627 | 0.172647879 |
| 0.084848495 | 0.095470294 | 0.063377159 | 0.290862069 |
| 0.039180832 | 0.195704144 | 0.279492273 | 0.011662746 |
| 0.049717722 | 0.313139788 | 0.24613418  | 0.139102745 |
| 0.144131822 | 0.039852108 | 0.026319197 | 0.046910034 |
| 0.090339415 | 0.299521339 | 0.025887724 | 0.288392139 |
| 0.143984585 | 0.036672677 | 0.099770938 | 0.156819714 |
| 0.119409723 | 0.145389951 | 0.241763038 | 0.062666175 |
| 0.120023135 | 0.002823494 | 0.081151632 | 0.124660598 |
| 0.017947418 | 0.027193559 | 0.14460828  | 0.084819652 |
| 0.07613374  | 0.231265148 | 0.010772823 | 0.010923173 |
| 0.070240486 | 0.04353518  | 0.020024681 | 0.148243841 |
| 0.035095266 | 0.018128528 | 0.088400089 | 0.126576948 |
| 0.048069411 | 0.182044789 | 0.284490643 | 0.241368681 |
| 0.04102157  | 0.029264588 | 0.248167715 | 0.214314892 |
| 0.082759074 | 0.089987053 | 0.152704759 | 0.061126403 |
| 0.168510953 | 0.045943763 | 0.091917805 | 0.13485306  |
| 0.182093242 | 0.138113327 | 0.209050028 | 0.059489247 |
| 0.244838147 | 0.0540148   | 0.021956578 | 0.045688353 |
| 0.125880105 | 0.303435925 | 0.157426704 | 0.013840554 |
| 0.225879011 | 0.108626325 | 0.146375423 | 0.221723758 |
| 0.024598623 | 0.163444382 | 0.070746235 | 0.238564323 |
| 0.042385644 | 0.012605298 | 0.246155614 | 0.134685858 |
| 0.101195377 | 0.005064421 | 0.172756459 | 0.104029301 |
| 0.123850403 | 0.044160288 | 0.041691425 | 0.152755221 |
| 0.244842408 | 0.227390367 | 0.110721866 | 0.069366336 |
| 0.070932323 | 0.039970043 | 0.119975617 | 0.131803397 |
| 0.108723096 | 0.039850447 | 0.164072827 | 0.090783985 |
| 0.273900974 | 0.027450004 | 0.019275916 | 0.037148573 |
| 0.147170083 | 0.071643872 | 0.092508844 | 0.269526746 |
| 0.171574408 | 0.206728983 | 0.117693315 | 0.101570134 |
| 0.04785445  | 0.271631618 | 0.306588021 | 0.097443691 |
| 0.008628756 | 0.190053743 | 0.058207065 | 0.06527957  |
| 0.00622175  | 0.003934006 | 0.102612542 | 0.087951104 |
| 0.161929093 | 0.092719078 | 0.14970319  | 0.115136452 |
| 0.000463947 | 0.032479017 | 0.047225243 | 0.034853779 |
| 0.116679096 | 0.125231158 | 0.099904429 | 0.126641733 |
| 0.129111688 | 0.306581904 | 0.086801374 | 0.063659422 |
| 0.006555367 | 0.070329634 | 0.147038054 | 0.142808143 |
| 0.065962648 | 0.279632914 | 0.012313851 | 0.113114006 |
| 0.01162113  | 0.131008355 | 0.097314621 | 0.056818717 |
| 0.005989479 | 0.096808354 | 0.085069358 | 0.273279633 |
| 0.025306052 | 0.092588514 | 0.112472001 | 0.013923637 |
| 0.042019251 | 0.153091712 | 0.061569664 | 0.057850267 |
| 0.071321447 | 0.067986509 | 0.054863727 | 0.034766588 |
| 0.080863166 | 0.105381022 | 0.068906377 | 0.102425998 |
| 0.074234761 | 0.134302514 | 0.042451876 | 0.077996713 |
| 0.032533335 | 0.185608648 | 0.354243566 | 0.405112725 |
| 0.152242951 | 0.109170745 | 0.212858526 | 0.319464266 |
| 0.103913323 | 0.062529877 | 0.136860952 | 0.152821375 |
| 0.113226623 | 0.340638713 | 0.058508628 | 0.107363927 |

|             |             |             |             |
|-------------|-------------|-------------|-------------|
| 0.015521137 | 0.058476722 | 0.282778066 | 0.070926806 |
| 0.119165961 | 0.018971933 | 0.060944513 | 0.121907555 |
| 0.069879007 | 0.192150792 | 0.204035438 | 0.137358435 |
| 0.04568396  | 0.048423976 | 0.045787152 | 0.088392523 |
| 0.151638595 | 0.244271544 | 0.023265476 | 0.093540936 |
| 0.075709741 | 0.125308836 | 0.076421713 | 0.174222492 |
| 0.012291833 | 0.140780686 | 0.054563338 | 0.190992292 |
| 0.042419457 | 0.321344824 | 0.215505033 | 0.064032604 |
| 0.005745162 | 0.140204271 | 0.036096771 | 0.100283053 |
| 0.05133075  | 0.054895306 | 0.031944514 | 0.118468111 |
| 0.103174757 | 0.20540332  | 0.195359758 | 0.26502042  |
| 0.038196812 | 0.018004707 | 0.082405635 | 0.041792141 |
| 0.055463759 | 0.114420244 | 0.288264989 | 0.109068416 |
| 0.03069777  | 0.273104657 | 0.180874734 | 0.109448799 |
| 0.100993296 | 0.066871423 | 0.004725958 | 0.064597258 |
| 0.090092706 | 0.017522156 | 0.000920464 | 0.004936083 |
| 0.071117175 | 0.051053387 | 0.086726352 | 0.072810361 |
| 0.022687786 | 0.080901619 | 0.006336708 | 0.111562479 |
| 0.1815826   | 0.215084943 | 0.050977735 | 0.14014631  |
| 0.097724429 | 0.166624373 | 0.084604739 | 0.008590651 |
| 0.035032832 | 0.028940342 | 0.033548872 | 0.213171913 |
| 0.214987072 | 0.005522178 | 0.045086387 | 0.293697569 |
| 0.082264689 | 0.005761537 | 0.075272144 | 0.054450211 |
| 0.207451274 | 0.217912204 | 0.073770817 | 0.05130262  |
| 0.21009562  | 0.124958292 | 0.027842263 | 0.042433507 |
| 0.0294789   | 0.016221901 | 0.06092841  | 0.01153581  |
| 0.197740163 | 0.038848103 | 0.012339218 | 0.227378029 |
| 0.217260113 | 0.019253979 | 0.229716676 | 0.034060466 |
| 0.083988929 | 0.123460558 | 0.034707863 | 0.035392512 |
| 0.096621943 | 0.024862929 | 0.132765717 | 0.120792277 |
| 0.008451894 | 0.055232651 | 0.132513023 | 0.024977631 |
| 0.26699862  | 0.025865749 | 0.17096146  | 0.016420741 |
| 0.148512252 | 0.119155473 | 0.258653864 | 0.039687117 |
| 0.059887499 | 0.302306573 | 0.053111396 | 0.141210015 |
| 0.08182924  | 0.011604759 | 0.058673575 | 0.073605587 |
| 0.01693145  | 0.148600286 | 0.042256331 | 0.148637069 |
| 0.059274269 | 0.11576547  | 0.061373922 | 0.123555904 |
| 0.095839401 | 0.013493946 | 0.011552586 | 0.03304874  |
| 0.170061151 | 0.138592035 | 0.018785227 | 0.102214364 |
| 0.00813682  | 0.083564199 | 0.086941211 | 0.033571358 |
| 0.124102879 | 0.11937088  | 0.052777502 | 0.211971773 |
| 0.071645099 | 0.038445268 | 0.026543401 | 0.153268707 |
| 0.065240455 | 0.083784214 | 0.156526113 | 0.000319913 |
| 0.11334021  | 0.043106883 | 0.115403842 | 0.032443987 |
| 0.243988354 | 0.084799479 | 0.098542322 | 0.06658955  |
| 0.072471894 | 0.009929059 | 0.049706629 | 0.027414139 |
| 0.017903817 | 0.255111722 | 0.161712913 | 0.100944162 |
| 0.115133474 | 0.035956811 | 0.016707569 | 0.14506067  |
| 0.00550519  | 0.015866703 | 0.020881442 | 0.070830537 |
| 0.009098624 | 0.036982943 | 0.032420002 | 0.020162188 |
| 0.092610209 | 0.118577307 |             |             |
| L7RN6       | 0.22998441  | 0.201230156 | 0.167217763 |
| 0.232101863 | 0.130713482 | 0.114227463 | 0.266146333 |
| 0.253470374 | 0.179948076 | 0.049395607 | 0.154721676 |

|             |             |             |             |
|-------------|-------------|-------------|-------------|
| 0.222058112 | 0.02091339  | 0.245478363 | 0.262768843 |
| 0.119349183 | 0.268840482 | 0.286631436 | 0.053699545 |
| 0.146451846 | 0.142323198 | 0.083959447 | 0.114142696 |
| 0.130110692 | 0.321425879 | 0.149186801 | 0.07405044  |
| 0.227479235 | 0.03437068  | 0.132984316 | 0.035023292 |
| 0.326936153 | 0.121103366 | 0.066958348 | 0.17481727  |
| 0.118708076 | 0.01074006  | 0.333860252 | 0.195440404 |
| 0.05746826  | 0.327658821 | 0.065632758 | 0.234477102 |
| 0.082652562 | 0.21142363  | 0.025182868 | 0.119966143 |
| 0.136400907 | 0.166360211 | 0.172695734 | 0.150498518 |
| 0.095599397 | 0.212485846 | 0.121715441 | 0.010049623 |
| 0.057564871 | 0.008345407 | 0.03296173  | 0.266737801 |
| 0.300652634 | 0.298292058 | 0.03988693  | 0.145889407 |
| 0.105045959 | 0.152511063 | 0.243715527 | 0.074260885 |
| 0.265415941 | 0.04493218  | 0.128544133 | 0.14908156  |
| 0.131014869 | 0.165570356 | 0.328480793 | 0.164286512 |
| 0.09464465  | 0.26165113  | 0.136470445 | 0.078783904 |
| 0.19350872  | 0.328192345 | 0.244708712 | 0.272004879 |
| 0.0450605   | 0.092724644 | 0.119387877 | 0.25822563  |
| 0.177062679 | 0.209257244 | 0.197245277 | 0.305287747 |
| 0.175245602 | 0.081567768 | 0.160695371 | 0.221126933 |
| 0.206386062 | 0.056332002 | 0.073538532 | 0.058181348 |
| 0.136518861 | 0.115255802 | 0.286337124 | 0.268211744 |
| 0.116046505 | 0.19564808  | 0.287597413 | 0.086716763 |
| 0.157383415 | 0.223400421 | 0.136667063 | 0.172346674 |
| 0.147891168 | 0.234069888 | 0.17304519  | 0.221883857 |
| 0.097817033 | 0.258231799 | 0.19019294  | 0.228549429 |
| 0.015522909 | 0.26366857  | 0.254153525 | 0.277930368 |
| 0.178221344 | 0.27420035  | 0.097960724 | 0.306097401 |
| 0.208996556 | 0.200773268 | 0.244621099 | 0.225028693 |
| 0.217357741 | 0.259926329 | 0.255383231 | 0.211585555 |
| 0.251949251 | 0.052847042 | 0.102005451 | 0.162800037 |
| 0.179118957 | 0.243248114 | 0.083599393 | 0.311221646 |
| 0.300105938 | 0.193893206 | 0.201828778 | 0.342548699 |
| 0.187829674 | 0.312004356 | 0.190475725 | 0.288523951 |
| 0.308202086 | 0.297962452 | 0.28401568  | 0.132494443 |
| 0.295302672 | 0.163414834 | 0.036626852 | 0.224630264 |
| 0.305528442 | 0.015605571 | 0.192065294 | 0.214252263 |
| 0.253932269 | 0.177808919 | 0.274267739 | 0.237880106 |
| 0.249214972 | 0.234224527 | 0.005157259 | 0.202655631 |
| 0.283079546 | 0.270616894 | 0.215287474 | 0.082835356 |
| 0.121915725 | 0.130189605 | 0.162066951 | 0.076160609 |
| 0.336888615 | 0.215768943 | 0.205301194 | 0.186833693 |
| 0.112046511 | 0.326720887 | 0.069155315 | 0.286007515 |
| 0.260987986 | 0.227704255 | 0.182831802 | 0.237302338 |
| 0.069897309 | 0.280713455 | 0.126341214 | 0.11288855  |
| 0.285508504 | 0.124984371 | 0.053808721 | 0.140740196 |
| 0.207814482 | 0.096170757 | 0.251073368 | 0.220353233 |
| 0.288516207 | 0.32629267  | 0.219284211 | 0.264668366 |
| 0.197489464 | 0.33160499  | 0.128054126 | 0.236761915 |
| 0.105453649 | 0.270140378 | 0.155859761 | 0.294570103 |
| 0.336927573 | 0.097745975 | 0.290600677 | 0.121854901 |
| 0.115912381 | 0.043999658 | 0.034658821 | 0.079904907 |
| 0.323034362 | 0.181305438 | 0.129842635 | 0.171220213 |

| 0.170609    | 0.177895434 | 0.099837357 | 0.342075127 |
|-------------|-------------|-------------|-------------|
| 0.241056357 | 0.145735698 | 0.233572235 | 0.093989303 |
| 0.095003592 | 0.183422924 | 0.195425983 | 0.137490938 |
| 0.189984214 | 0.052590877 | 0.052125876 | 0.226465453 |
| 0.058312214 | 0.096840969 | 0.215816655 | 0.165968424 |
| 0.089003581 | 0.272790335 | 0.27143966  | 0.010298377 |
| 0.092641062 | 0.126818688 | 0.260284098 | 0.063024269 |
| 0.241780315 | 0.262627293 | 0.104925335 | 0.135524076 |
| 0.204364705 | 0.27275917  | 0.233116164 | 0.248347481 |
| 0.079469482 | 0.27951936  | 0.197320552 | 0.251553839 |
| 0.195124163 | 0.068099813 | 0.025773813 | 0.198711189 |
| 0.214072141 | 0.071575396 | 0.207558776 | 0.145826609 |
| 0.077183776 | 0.136824481 | 0.134534397 | 0.27462534  |
| 0.338645872 | 0.240809022 | 0.264858519 | 0.208528422 |
| 0.264730718 | 0.235255654 | 0.211699849 | 0.291019126 |
| 0.056819772 | 0.104886783 | 0.112253253 | 0.24249001  |
| 0.279524763 | 0.12063593  | 0.286696376 | 0.031160853 |
| 0.001154759 | 0.209485501 | 0.225283802 | 0.259085598 |
| 0.077001527 | 0.089329468 | 0.15585505  | 0.26174918  |
| 0.295913812 | 0.265972734 | 0.238273133 | 0.15623426  |
| 0.256388979 | 0.096105432 | 0.084936532 | 0.126122038 |
| 0.28230998  | 0.155696891 | 0.268028846 | 0.334730609 |
| 0.146782296 | 0.073477652 | 0.144780287 | 0.028331545 |
| 0.237523427 | 0.146030258 | 0.266836516 | 0.366704529 |
| 0.238289247 | 0.334290735 | 0.248704128 | 0.066204785 |
| 0.218155734 | 0.276243998 | 0.047355041 | 0.233650079 |
| 0.248110428 | 0.243216686 | 0.244065974 | 0.261006837 |
| 0.215404331 | 0.16100999  | 0.191401003 | 0.126171495 |
| 0.278700757 | 0.196036397 | 0.081713852 | 0.184482482 |
| 0.017040236 | 0.229946058 | 0.134076119 | 0.314014976 |
| 0.152345693 | 0.211162811 | 0.244499104 | 0.109555691 |
| 0.165779029 | 0.034136978 | 0.140060532 | 0.201954582 |
| 0.198359129 | 0.175768663 | 0.076784075 | 0.080138563 |
| 0.262215032 | 0.277338126 | 0.064697887 | 0.277528493 |
| 0.18112081  | 0.193327558 | 0.167548863 | 0.185797834 |
| 0.288287508 | 0.028926004 | 0.114971037 | 0.008422736 |
| 0.057609899 | 0.268984853 | 0.0874397   | 0.227317854 |
| 0.236680332 | 0.124075497 | 0.272257267 | 0.286471066 |
| 0.23686242  | 0.251678151 | 0.263879356 | 0.076900578 |
| 0.269267969 | 0.009677442 | 0.252747659 | 0.209877631 |
| 0.06531424  | 0.014350371 | 0.066042909 | 0.214581746 |
| 0.109544462 | 0.17724998  | 1           | 0.093468751 |
| 0.306108201 | 0.192603346 | 0.247721523 | 0.116858775 |
| 0.125839327 | 0.173145972 | 0.095242051 | 0.255535225 |
| 0.236683126 | 0.23298336  | 0.090651052 | 0.234515259 |
| 0.110595554 | 0.290963319 | 0.22282537  | 0.041795799 |
| 0.180500605 | 0.241971273 | 0.303626667 | 0.253806556 |
| 0.308217541 | 0.161360319 | 0.047839013 | 0.089824982 |
| 0.207562028 | 0.176731246 | 0.06218697  | 0.178686421 |
| 0.237635659 | 0.144830718 | 0.289824546 | 0.30394606  |
| 0.288845364 | 0.285429987 | 0.252947532 | 0.204834699 |
| 0.123861293 | 0.012534815 | 0.114438782 | 0.24313122  |
| 0.02901319  | 0.101387003 | 0.321257225 | 0.131657497 |
| 0.161168275 | 0.198002977 | 0.065513869 | 0.073755407 |

|             |             |             |             |
|-------------|-------------|-------------|-------------|
| 0.217161293 | 0.141547193 | 0.112774028 | 0.235433782 |
| 0.147160656 | 0.125254995 | 0.23599051  | 0.246489115 |
| 0.083223339 | 0.271997898 | 0.323697393 | 0.218458619 |
| 0.087145189 | 0.093585896 | 0.269816228 | 0.278479735 |
| 0.232230137 | 0.227849113 | 0.269620122 | 0.157936844 |
| 0.304987686 | 0.133874677 | 0.240868241 | 0.233700734 |
| 0.299542088 | 0.309155521 | 0.341631374 | 0.225303646 |
| 0.265693584 | 0.171394236 | 0.108486006 | 0.210575394 |
| 0.255063657 | 0.171859717 | 0.25408738  | 0.06937703  |
| 0.268136413 | 0.256092485 | 0.2629476   | 0.276849873 |
| 0.086568998 | 0.279222335 | 0.253466427 | 0.208979771 |
| 0.165178172 | 0.067791596 | 0.257080848 | 0.272968489 |
| 0.243559089 | 0.051267898 | 0.274556179 | 0.14012576  |
| 0.216293939 | 0.039819587 | 0.1468207   | 0.337074238 |
| 0.265335668 | 0.230408218 | 0.140777994 | 0.173271637 |
| 0.173591606 | 0.068709475 | 0.134665898 | 0.197839243 |
| 0.25228612  | 0.122658361 | 0.266903236 | 0.270844752 |
| 0.247879195 | 0.10840315  | 0.068630253 | 0.13429787  |
| 0.248003881 | 0.118391596 | 0.204697343 | 0.251793241 |
| 0.30706331  | 0.324959001 | 0.223366239 | 0.280972644 |
| 0.0924781   | 0.166772277 | 0.157235714 | 0.196137915 |
| 0.082831213 | 0.258441894 | 0.067701212 | 0.168900533 |
| 0.01906804  | 0.034634595 | 0.244016959 | 0.212379884 |
| 0.303222279 | 0.24274607  | 0.313454365 | 0.156088619 |
| 0.001204436 | 0.12199901  | 0.163155699 | 0.115791335 |
| 0.210427287 | 0.238698068 | 0.110644986 | 0.306715502 |
| 0.32789872  | 0.197496631 | 0.269817804 | 0.094653906 |
| 0.044430615 | 0.136334883 | 0.317171808 | 0.202438665 |
| 0.227879543 | 0.175709573 | 0.064653003 | 0.230209124 |
| 0.053307082 | 0.326251804 | 0.285019734 | 0.051571484 |
| 0.04860126  | 0.235804867 | 0.19710946  | 0.214937176 |
| 0.084488145 | 0.222282858 | 0.246153092 | 0.038518383 |
| 0.155567612 | 0.167775503 | 0.228033385 | 0.229869282 |
| 0.245028609 | 0.213268963 | 0.201346508 | 0.1482805   |
| 0.162653255 | 0.248231247 | 0.208334645 | 0.269280051 |
| 0.255610484 | 0.219552628 | 0.125104132 | 0.135955675 |
| 0.151584987 | 0.283756177 | 0.26642616  | 0.267967162 |
| 0.257034593 | 0.207039828 | 0.347282141 | 0.208103443 |
| 0.248767579 | 0.120696012 | 0.340676155 | 0.237225012 |
| 0.281737234 | 0.218266193 | 0.141466252 | 0.203695388 |
| 0.032376304 | 0.096959254 | 0.196210817 | 0.125714003 |
| 0.23706747  | 0.122303096 | 0.091621254 | 0.154317106 |
| 0.140589722 | 0.348373043 | 0.330590187 | 0.280495273 |
| 0.138131339 | 0.099027286 | 0.05553231  | 0.284389301 |
| 0.27079474  | 0.264187132 | 0.129645544 | 0.080564426 |
| 0.202670221 | 0.157584863 | 0.202104814 | 0.272658079 |
| 0.052468082 | 0.305653412 | 0.064701209 | 0.274111034 |
| 0.04685043  | 0.260290393 | 0.299845623 | 0.150072289 |
| 0.035044246 | 0.257848651 | 0.15554679  | 0.104340121 |
| 0.161538243 | 0.138893925 | 0.119620323 | 0.190135589 |
| 0.203483609 | 0.225300917 | 0.289971812 | 0.200869362 |
| 0.090527298 | 0.129764893 | 0.094034753 | 0.177898942 |
| 0.209847755 | 0.239251494 | 0.23035317  | 0.238874966 |
| 0.126440259 | 0.267273714 | 0.344189967 | 0.152226229 |

|             |             |             |             |
|-------------|-------------|-------------|-------------|
| 0.1506191   | 0.223645406 | 0.037392184 | 0.088861801 |
| 0.208404979 | 0.064635068 | 0.001809453 | 0.035776463 |
| 0.260455497 | 0.085624782 | 0.154395427 | 0.189721385 |
| 0.120506103 | 0.26227626  | 0.028425979 | 0.168756483 |
| 0.244977954 | 0.295408383 | 0.186667871 | 0.320391902 |
| 0.234288803 | 0.297986467 | 0.128448075 | 0.010563849 |
| 0.109492423 | 0.083652649 | 0.068751827 | 0.266669917 |
| 0.217048737 | 0.043913735 | 0.116622627 | 0.166974853 |
| 0.231358312 | 0.031768111 | 0.109704911 | 0.148950917 |
| 0.258229648 | 0.305134623 | 0.247423359 | 0.189555084 |
| 0.143873817 | 0.244416478 | 0.081311154 | 0.085838321 |
| 0.167087497 | 0.092684601 | 0.228337556 | 0.078870254 |
| 0.270838963 | 0.172966327 | 0.030695956 | 0.355862853 |
| 0.277649828 | 0.084326658 | 0.327035965 | 0.044513113 |
| 0.273654158 | 0.240921055 | 0.126788894 | 0.075900765 |
| 0.165395491 | 0.111960448 | 0.250619149 | 0.231256358 |
| 0.043550567 | 0.109027729 | 0.261687201 | 0.096924801 |
| 0.313738109 | 0.11275454  | 0.300330999 | 0.065642116 |
| 0.239921425 | 0.194232316 | 0.216748077 | 0.132149023 |
| 0.107913475 | 0.2232829   | 0.072081158 | 0.280488917 |
| 0.264119012 | 0.088088932 | 0.204874199 | 0.253579526 |
| 0.076005219 | 0.238364749 | 0.086872902 | 0.271610018 |
| 0.238931761 | 0.28230247  | 0.184857846 | 0.238430303 |
| 0.296879915 | 0.095721491 | 0.075552167 | 0.168673692 |
| 0.244712291 | 0.251361012 | 0.089103721 | 0.239062677 |
| 0.06705894  | 0.226958093 | 0.094299313 | 0.16833831  |
| 0.226675639 | 0.215544203 | 0.115142216 | 0.267552726 |
| 0.201263277 | 0.135742889 | 0.139241583 | 0.332891996 |
| 0.230563389 | 0.192527516 | 0.328974924 | 0.009204525 |
| 0.137706097 | 0.159982946 | 0.227062511 | 0.11307538  |
| 0.316042037 | 0.156003039 | 0.127239047 | 0.049842168 |
| 0.21668167  | 0.04820649  | 0.122966406 | 0.164275594 |
| 0.068235095 | 0.247811281 | 0.276306521 | 0.256588485 |
| 0.196841563 | 0.068133516 | 0.056273319 | 0.254692084 |
| 0.051571915 | 0.04640877  | 0.066749921 | 0.131548652 |
| 0.059442554 | 0.065536375 | 0.072885004 | 0.072320797 |
| 0.203394014 | 0.178522772 |             |             |
| LAMP2       | 0.039879959 | 0.391032526 | 0.045398997 |
| 0.049072326 | 0.170425822 | 0.229334368 | 0.01120504  |
| 0.027997893 | 0.242981721 | 0.086409828 | 0.262241815 |
| 0.0039343   | 0.015593742 | 0.422396219 | 0.009289107 |
| 0.230196814 | 0.005666213 | 0.038924178 | 0.0072822   |
| 0.028498965 | 0.131001956 | 0.108650806 | 0.242797384 |
| 0.107871746 | 0.175874312 | 0.213362199 | 0.187875593 |
| 0.488893775 | 0.084214073 | 0.380347282 | 0.059194192 |
| 0.358226961 | 0.190021344 | 0.207800339 | 0.004928488 |
| 0.236991981 | 0.000367057 | 0.368912521 | 0.086424142 |
| 0.038402134 | 0.305191348 | 0.185747866 | 0.118604735 |
| 0.172496189 | 0.016724603 | 0.064872009 | 0.24411308  |
| 0.177321552 | 0.073917368 | 0.040115343 | 0.345478286 |
| 0.089687186 | 0.310080401 | 0.332581734 | 0.00069165  |
| 0.148089631 | 0.020654587 | 0.069592024 | 0.500823495 |
| 0.151957302 | 0.049961626 | 0.038597873 | 0.081014605 |
| 0.193755056 | 0.209637287 | 0.141930581 | 0.105648718 |

|             |             |             |             |
|-------------|-------------|-------------|-------------|
| 0.490368109 | 0.028558451 | 0.330937502 | 0.046215837 |
| 0.154400801 | 0.007961574 | 0.107879768 | 0.040863864 |
| 0.117738456 | 0.10553862  | 0.210712955 | 0.10496752  |
| 0.408514462 | 0.455521907 | 0.126017899 | 0.465214938 |
| 0.005340121 | 0.170807186 | 0.075113192 | 0.187250862 |
| 0.207273591 | 0.011101078 | 0.372879905 | 0.47697372  |
| 0.01115544  | 0.236033819 | 0.257249474 | 0.075070589 |
| 0.432468504 | 0.050752035 | 0.251754608 | 0.062355788 |
| 0.238410559 | 0.163530995 | 0.395337217 | 0.226240728 |
| 0.133419719 | 0.045473559 | 0.460828426 | 0.173572756 |
| 0.158518501 | 0.057323786 | 0.036118906 | 0.407652263 |
| 0.296159454 | 0.49926641  | 0.342874652 | 0.235081041 |
| 0.200117144 | 0.496410266 | 0.34930992  | 0.354144044 |
| 0.036115448 | 0.496818619 | 0.126985332 | 0.009510355 |
| 0.033172226 | 0.021159228 | 0.02751014  | 0.219392053 |
| 0.469115706 | 0.229288615 | 0.093979523 | 0.097676636 |
| 0.383316876 | 0.466039708 | 0.479108839 | 0.334195679 |
| 0.014122593 | 0.043721331 | 0.212149742 | 0.100531946 |
| 0.238376918 | 0.047595161 | 0.112921108 | 0.471649138 |
| 0.382220829 | 0.36399801  | 0.069334107 | 0.445312835 |
| 0.050010667 | 0.487425299 | 0.467823951 | 0.096035879 |
| 0.489271788 | 0.487948538 | 0.478394352 | 0.321567273 |
| 0.475982225 | 0.249647241 | 0.0031642   | 0.275276112 |
| 0.455809324 | 0.0067962   | 0.433906409 | 0.457191705 |
| 0.482696439 | 0.428598776 | 0.454155635 | 0.490310436 |
| 0.489904356 | 0.03680698  | 0.001212756 | 0.151212618 |
| 0.483630981 | 0.392444432 | 0.020019516 | 0.233180597 |
| 0.192663181 | 0.230396853 | 0.336466093 | 0.077288341 |
| 0.447145704 | 0.437691229 | 0.464327455 | 0.287495162 |
| 0.12626379  | 0.285705824 | 0.204160747 | 0.468512474 |
| 0.008572689 | 0.066012296 | 0.044177677 | 0.176121536 |
| 0.12682077  | 0.087658451 | 0.176587366 | 0.150610044 |
| 0.113028128 | 0.144123617 | 0.141708637 | 0.268507789 |
| 0.044063211 | 0.318935399 | 0.085844615 | 0.082200225 |
| 0.009690983 | 0.111293198 | 0.039314617 | 0.048036236 |
| 0.115909454 | 0.199635491 | 0.346571959 | 0.44776053  |
| 0.104413369 | 0.156666186 | 0.336564554 | 0.440074525 |
| 0.36314238  | 0.236242832 | 0.140163404 | 0.007941384 |
| 0.039863061 | 0.068967821 | 0.042745412 | 0.237770761 |
| 0.145820778 | 0.038721574 | 0.214680646 | 0.330873072 |
| 0.205994559 | 0.047473737 | 0.107707461 | 0.399486135 |
| 0.107382068 | 0.141609772 | 0.405488557 | 0.222117802 |
| 0.001111818 | 0.185862521 | 0.417776478 | 0.013871484 |
| 0.171570549 | 0.031916637 | 0.089168394 | 0.414034354 |
| 0.04624853  | 0.049152128 | 0.472656745 | 0.296560001 |
| 0.070282055 | 0.182369652 | 0.466891487 | 0.004631419 |
| 0.134556573 | 0.017084512 | 0.187158681 | 0.155199051 |
| 0.148029398 | 0.169583104 | 0.16914242  | 0.103630699 |
| 0.125943753 | 0.479979716 | 0.35242245  | 0.496936298 |
| 0.11095532  | 0.467140878 | 0.428212369 | 0.425726374 |
| 0.254264469 | 0.131601629 | 0.026483808 | 0.413372501 |
| 0.412236477 | 0.03835486  | 0.056706679 | 0.355174785 |
| 0.122092314 | 0.274851417 | 0.014244797 | 0.458323023 |
| 0.457396484 | 0.453982788 | 0.042250605 | 0.259630076 |

|             |             |             |             |
|-------------|-------------|-------------|-------------|
| 0.373149228 | 0.171699339 | 0.344414935 | 0.4582576   |
| 0.056846137 | 0.14779365  | 0.108224599 | 0.320751361 |
| 0.120452118 | 0.036526714 | 0.237085333 | 0.038196852 |
| 0.016780957 | 0.03652967  | 0.040971473 | 0.063661006 |
| 0.049811857 | 0.282491434 | 0.254942442 | 0.482572304 |
| 0.0509387   | 0.411269107 | 0.121692715 | 0.094709915 |
| 0.377329266 | 0.123017878 | 0.238627169 | 0.248010365 |
| 0.155565279 | 0.007356721 | 0.030860861 | 0.463293815 |
| 0.023991228 | 0.08087648  | 0.130642986 | 0.001458212 |
| 0.01223779  | 0.363954808 | 0.073438143 | 0.164419111 |
| 0.421632651 | 0.178501504 | 0.140980482 | 0.082587013 |
| 0.266466668 | 0.047634589 | 0.002925775 | 0.41964317  |
| 0.401769372 | 0.359245042 | 0.400758444 | 0.386782034 |
| 0.331845215 | 0.290751221 | 0.310911872 | 0.279648133 |
| 0.024676125 | 0.033989644 | 0.040238723 | 0.114886823 |
| 0.000705616 | 0.333314107 | 0.123418176 | 0.097207291 |
| 0.319627723 | 0.156937966 | 0.013426068 | 0.182492916 |
| 0.0125705   | 0.076439821 | 0.06095961  | 0.060019182 |
| 0.216335627 | 0.004709513 | 0.094897083 | 0.054004669 |
| 0.461441728 | 0.313116104 | 0.133998565 | 0.504845619 |
| 0.218195637 | 0.096384637 | 0.148264319 | 0.333672482 |
| 0.018764854 | 0.012370985 | 0.114804436 | 0.023631706 |
| 0.060185787 | 0.374765394 | 0.114263365 | 0.016544044 |
| 0.173207889 | 0.002164149 | 0.371432608 | 0.498489625 |
| 0.472102314 | 0.472050048 | 0.506520395 | 0.141628508 |
| 0.501103683 | 0.017410078 | 0.503316235 | 0.370723201 |
| 0.144318351 | 0.000951753 | 0.001000379 | 0.46449705  |
| 0.236429851 | 0.051832302 | 0.093468751 | 1           |
| 0.025351044 | 0.065531444 | 0.019753709 | 0.049349496 |
| 0.352876544 | 0.115185188 | 0.034462188 | 0.435506944 |
| 0.092126501 | 0.103791955 | 0.163038322 | 0.0538257   |
| 0.275157637 | 0.014024794 | 0.044122579 | 0.004028675 |
| 0.236676463 | 0.098264765 | 0.43482495  | 0.488148583 |
| 0.460243078 | 0.2926493   | 0.124152354 | 0.07596364  |
| 0.341789957 | 0.093401627 | 0.073451021 | 0.082849462 |
| 0.491240457 | 0.259285752 | 0.276815488 | 0.294901299 |
| 0.4498762   | 0.452449397 | 0.009298822 | 0.315438681 |
| 0.012652923 | 0.000221887 | 0.259548358 | 0.1456346   |
| 0.002335358 | 0.14900843  | 0.1923588   | 0.039559409 |
| 0.044418808 | 0.01089234  | 0.080279254 | 0.073580819 |
| 0.169126998 | 0.162423955 | 0.132142937 | 0.132479018 |
| 0.075528008 | 0.013322946 | 0.066850768 | 0.034919745 |
| 0.02301609  | 0.257477476 | 0.182189487 | 0.003686177 |
| 0.245468493 | 0.252427756 | 0.027762812 | 0.106641474 |
| 0.438911828 | 0.479421687 | 0.003970153 | 0.004353185 |
| 0.211994126 | 0.093129497 | 0.466937108 | 0.495000912 |
| 0.496276845 | 0.461549524 | 0.349457054 | 0.01661295  |
| 0.025134602 | 0.160011159 | 0.139610319 | 0.012006877 |
| 0.492132744 | 0.039190366 | 0.481072411 | 0.143855249 |
| 0.058444827 | 0.074683191 | 0.009133779 | 0.032475336 |
| 0.254624147 | 0.103566407 | 0.074082873 | 0.123059397 |
| 0.11653732  | 0.054418174 | 0.012351997 | 0.101383641 |
| 0.257707048 | 0.027433089 | 0.085187546 | 0.104044704 |
| 0.289192062 | 0.025786333 | 0.32618485  | 0.393248058 |



|             |             |             |             |
|-------------|-------------|-------------|-------------|
| 0.091982661 | 0.04085053  | 0.10763349  | 0.257250284 |
| 0.398139982 | 0.215612647 | 0.02415555  | 0.437364827 |
| 0.448173904 | 0.358165527 | 0.498460198 | 0.296110699 |
| 0.04561404  | 0.2403739   | 0.087767332 | 0.157309728 |
| 0.079546352 | 0.247622001 | 0.083497502 | 0.030731493 |
| 0.209500003 | 0.403840242 | 0.368026392 | 0.080985381 |
| 0.268884507 | 0.079019317 | 0.032689087 | 0.398134907 |
| 0.03376814  | 0.020438965 | 0.181820913 | 0.336077937 |
| 0.00066208  | 0.039211972 | 0.400027592 | 0.094226459 |
| 0.440549895 | 0.440020434 | 0.423684343 | 0.063870871 |
| 7.61E-05    | 0.269454722 | 0.282618082 | 0.197207656 |
| 0.408562436 | 0.302617549 | 0.019093385 | 0.016589822 |
| 0.221405147 | 0.077120216 | 0.02041127  | 0.089729024 |
| 0.019727374 | 0.278318861 | 0.115466402 | 0.077390779 |
| 0.062129188 | 0.049480001 | 0.051384648 | 0.125513096 |
| 0.010542428 | 0.170420944 | 0.28296811  | 0.085017394 |
| 0.042083535 | 0.330631853 | 0.32415928  | 0.010710638 |
| 0.181398001 | 0.300171802 | 0.372185671 | 0.0003145   |
| 0.356261992 | 0.001683734 | 0.076484473 | 0.107745766 |
| 0.073459966 | 0.05953753  | 0.126544992 | 0.099824662 |
| 0.190249835 | 0.07901862  | 0.14788868  | 0.154884075 |
| 0.057755088 | 0.091572926 | 0.229154858 | 0.146875035 |
| 0.127930356 | 0.056268313 | 0.08502965  | 0.096620305 |
| 0.016842418 | 0.443902618 | 0.213334245 | 0.068845889 |
| 0.1163532   | 0.11853219  | 0.298455012 | 0.480614244 |
| 0.374029824 | 0.112581264 | 0.1051562   | 0.468898221 |
| 0.03341319  | 0.071790604 | 0.018663077 | 0.232938321 |
| 0.128340383 | 0.048793715 | 0.225322371 | 0.217916016 |
| 0.280813251 | 0.367843702 | 0.210918953 | 0.388159715 |
| 0.171431099 | 0.112688415 | 0.144891582 | 0.019579079 |
| 0.089480475 | 0.074987867 | 0.125214072 | 0.001329814 |
| 0.236084362 | 0.074336296 | 0.461015692 | 0.48454762  |
| 0.097661545 | 0.339803154 | 0.084449333 | 0.026840373 |
| 0.074204204 | 0.171016326 | 0.091285243 | 0.354144603 |
| 0.081660108 | 0.073212248 | 0.155318113 | 0.15339748  |
| 0.340609641 | 0.286669999 | 0.052107406 | 0.079648426 |
| 0.090123982 | 0.138313022 | 0.393191953 | 0.060266948 |
| 0.26806542  | 0.056773951 | 0.221346447 | 0.133966032 |
| 0.073329822 | 0.475146656 | 0.033093192 | 0.490368527 |
| 0.119803467 | 0.094803715 | 0.43785371  | 0.151405374 |
| 0.071060973 | 0.024747304 | 0.061666714 | 0.133528773 |
| 0.040044062 | 0.132083541 | 0.004292332 | 0.008964397 |
| 0.243600188 | 0.064605667 | 0.315563548 | 0.216600613 |
| 0.072425571 | 0.222950033 | 0.030909199 | 0.111585092 |
| 0.468442704 | 0.463731061 | 0.05116447  | 0.156281369 |
| 0.240198347 | 0.041151759 | 0.355007912 | 0.000703036 |
| 0.268591735 | 0.274658053 | 0.085880468 | 0.012827916 |
| 0.002703537 | 0.066355875 | 0.250753675 | 0.030785144 |
| 0.414737728 | 0.051861103 | 0.185989917 | 0.382772676 |
| 0.098573205 | 0.46845552  | 0.026661425 | 0.362773267 |
| 0.003480726 | 0.142124813 | 0.172232949 | 0.14309117  |
| 0.069883481 | 0.110626638 | 0.303369963 | 0.102406845 |
| 0.009271899 | 0.047789219 | 0.00074234  | 0.37793057  |
| 0.432195975 | 0.134232221 | 0.146667639 | 0.067022972 |

|             |             |             |             |
|-------------|-------------|-------------|-------------|
| 0.185222351 | 0.292865208 | 0.027589116 | 0.229840075 |
| 0.004621981 | 0.241180474 | 0.105117898 | 0.448561745 |
| 0.062263586 | 0.152481563 | 0.015291141 | 0.109288568 |
| 0.429021134 | 0.040543533 | 0.161689047 | 0.057292629 |
| 0.485180784 | 0.317593524 | 0.139753312 | 0.033501618 |
| 0.220365058 | 0.037986457 | 0.179177985 | 0.469286419 |
| 0.073027069 | 0.088005691 | 0.399313621 | 0.066527246 |
| 0.118200055 | 0.347761254 | 0.233882353 | 0.444660576 |
| 0.011168324 | 0.165129387 | 0.334516154 | 0.397486137 |
| 0.218767212 | 0.036380516 | 0.080067461 | 0.070279846 |
| 0.478478539 | 0.035938703 | 0.03894065  | 0.288039757 |
| 0.068261293 | 0.191341849 | 0.195891684 | 0.056845772 |
| 0.008882036 | 0.03114332  | 0.16076123  | 0.078374697 |
| 0.154994204 | 0.178928361 | 0.051396375 | 0.351110163 |
| 0.041437335 | 0.011903944 | 0.401703845 | 0.002918327 |
| 0.285204241 | 0.327740301 | 0.135508346 | 0.15083182  |
| 0.179019453 | 0.185259542 | 0.18042751  | 0.00033595  |
| 0.317095976 | 0.010873131 | 0.084400956 | 0.067907517 |
| 0.042666817 | 0.013802035 | 0.456942991 | 0.468610925 |
| 0.209735964 | 0.053239232 | 0.076602057 | 0.42207368  |
| 0.026284994 | 0.108418148 | 0.086858829 | 0.323575841 |
| 0.079772064 | 0.183314958 | 0.177774694 | 0.190411401 |
| 0.310197253 | 0.104503304 |             |             |
| LBR         | 0.149036751 | 0.125504883 | 0.112847359 |
| 0.107619022 | 0.139323814 | 0.060586189 | 0.115977362 |
| 0.100121014 | 0.106178314 | 0.012189389 | 0.156339855 |
| 0.101054216 | 0.007991175 | 0.186707683 | 0.123092835 |
| 0.109976545 | 0.123829409 | 0.21744806  | 0.011572013 |
| 0.037623656 | 0.155239682 | 0.033432246 | 0.068240383 |
| 0.112315887 | 0.275250436 | 0.09870456  | 0.047758029 |
| 0.157075363 | 0.008525797 | 0.109951687 | 0.006879662 |
| 0.269859399 | 0.135404281 | 0.039868522 | 0.068276103 |
| 0.089189187 | 0.002853638 | 0.243229887 | 0.144844961 |
| 0.025548973 | 0.281225624 | 0.025490748 | 0.207652889 |
| 0.038982066 | 0.121237694 | 0.004083728 | 0.08656338  |
| 0.085618219 | 0.076430727 | 0.123190165 | 0.110669467 |
| 0.033690044 | 0.182612047 | 0.066634294 | 0.003254831 |
| 0.036564686 | 0.002630596 | 0.014228725 | 0.184011107 |
| 0.339630873 | 0.269043923 | 0.007637868 | 0.07387284  |
| 0.071541441 | 0.119890076 | 0.228724933 | 0.025413282 |
| 0.199067472 | 0.015803257 | 0.085789505 | 0.060450191 |
| 0.078284041 | 0.071590841 | 0.329623582 | 0.103884596 |
| 0.041661968 | 0.277150106 | 0.131435757 | 0.04646693  |
| 0.115549262 | 0.236981043 | 0.219161597 | 0.175276775 |
| 0.014825284 | 0.086201987 | 0.062655799 | 0.264069689 |
| 0.130840908 | 0.072429869 | 0.185361408 | 0.229918466 |
| 0.080348673 | 0.043116895 | 0.117118234 | 0.170779022 |
| 0.140384877 | 0.016231335 | 0.039169173 | 0.034090995 |
| 0.124601254 | 0.110842656 | 0.188998791 | 0.289055917 |
| 0.08681513  | 0.16404682  | 0.185538234 | 0.084731011 |
| 0.129541392 | 0.190791889 | 0.057110633 | 0.124595638 |
| 0.128877249 | 0.170128863 | 0.109909926 | 0.18103715  |
| 0.084617369 | 0.193413008 | 0.168277802 | 0.163770432 |
| 0.001892737 | 0.180811489 | 0.240304532 | 0.142052451 |

|             |             |             |             |
|-------------|-------------|-------------|-------------|
| 0.085906126 | 0.16779295  | 0.030349015 | 0.278618862 |
| 0.158572828 | 0.165573518 | 0.170193808 | 0.219758839 |
| 0.177427925 | 0.164101244 | 0.16949053  | 0.163766507 |
| 0.158976307 | 0.01793724  | 0.086896595 | 0.071782693 |
| 0.154392319 | 0.203598785 | 0.071369312 | 0.217744235 |
| 0.270355964 | 0.162371004 | 0.095629127 | 0.240856181 |
| 0.100680143 | 0.250264512 | 0.123666065 | 0.290438978 |
| 0.222099379 | 0.208120964 | 0.227280892 | 0.121619011 |
| 0.217449866 | 0.131407497 | 0.007612041 | 0.167606293 |
| 0.258312282 | 0.011776225 | 0.132464015 | 0.153561331 |
| 0.172647613 | 0.134658942 | 0.210641945 | 0.174516273 |
| 0.165591467 | 0.192862978 | 0.000932541 | 0.22529331  |
| 0.197019911 | 0.240048566 | 0.091627795 | 0.059322089 |
| 0.116861407 | 0.084246693 | 0.113765876 | 0.026841404 |
| 0.268587392 | 0.159884134 | 0.138239852 | 0.135299155 |
| 0.061311507 | 0.277657727 | 0.05097748  | 0.190311847 |
| 0.102818855 | 0.148862396 | 0.160923887 | 0.1953043   |
| 0.016559899 | 0.310334078 | 0.062975243 | 0.088661608 |
| 0.33490023  | 0.060798728 | 0.025419806 | 0.132555864 |
| 0.155423232 | 0.070225252 | 0.197695387 | 0.157727873 |
| 0.149987478 | 0.278752453 | 0.092981381 | 0.127492135 |
| 0.199722808 | 0.230282545 | 0.088620837 | 0.172420244 |
| 0.056779479 | 0.245610921 | 0.119581534 | 0.236510543 |
| 0.313726063 | 0.08778466  | 0.266448487 | 0.106317701 |
| 0.039815463 | 0.012074211 | 0.013812028 | 0.056146559 |
| 0.239287694 | 0.067926999 | 0.10865343  | 0.168867787 |
| 0.132738711 | 0.092613283 | 0.052149199 | 0.270705826 |
| 0.184192554 | 0.108428796 | 0.198850061 | 0.057028906 |
| 0.044731639 | 0.15911851  | 0.156460919 | 0.053729826 |
| 0.147306677 | 0.02697762  | 0.019112015 | 0.177478333 |
| 0.014988266 | 0.057041622 | 0.155506817 | 0.156034393 |
| 0.023909483 | 0.172276828 | 0.203450045 | 0.002551255 |
| 0.062514295 | 0.073321874 | 0.306666875 | 0.024047345 |
| 0.25836973  | 0.250290204 | 0.106712016 | 0.088785906 |
| 0.175029184 | 0.193322664 | 0.17789184  | 0.186296964 |
| 0.031397275 | 0.209008005 | 0.156396099 | 0.217405083 |
| 0.179178673 | 0.034630209 | 0.010070078 | 0.161797562 |
| 0.166375872 | 0.01424877  | 0.161678932 | 0.098195285 |
| 0.034168045 | 0.112132804 | 0.045632289 | 0.224038441 |
| 0.259055501 | 0.148256315 | 0.1799679   | 0.201466172 |
| 0.252781897 | 0.233844833 | 0.159037208 | 0.219705631 |
| 0.011053455 | 0.083256653 | 0.069225746 | 0.228271291 |
| 0.290747426 | 0.063641169 | 0.217608447 | 0.010926862 |
| 0.000528921 | 0.137314349 | 0.18869325  | 0.245379577 |
| 0.051440653 | 0.053820729 | 0.129977056 | 0.188111456 |
| 0.265875597 | 0.211004433 | 0.182924682 | 0.0967024   |
| 0.185316842 | 0.0599575   | 0.071383438 | 0.110270499 |
| 0.245583815 | 0.094154153 | 0.142432008 | 0.243183581 |
| 0.103263459 | 0.041573935 | 0.085982564 | 0.020510572 |
| 0.119989233 | 0.081774228 | 0.205061171 | 0.313219456 |
| 0.193510021 | 0.26752855  | 0.226016246 | 0.017819565 |
| 0.220541285 | 0.249389388 | 0.046957439 | 0.162413045 |
| 0.161883949 | 0.158845911 | 0.155536048 | 0.164640697 |
| 0.146375046 | 0.112067341 | 0.158878705 | 0.086260413 |

|             |             |             |             |
|-------------|-------------|-------------|-------------|
| 0.113762189 | 0.091576156 | 0.038216567 | 0.153117862 |
| 0.011433159 | 0.217284184 | 0.104164005 | 0.336119363 |
| 0.118541713 | 0.174941486 | 0.135583988 | 0.095141635 |
| 0.081681825 | 0.014909689 | 0.045895959 | 0.126095361 |
| 0.185669845 | 0.083310609 | 0.027872385 | 0.02283843  |
| 0.185454415 | 0.232118657 | 0.028222624 | 0.196722002 |
| 0.191742589 | 0.128537387 | 0.148661209 | 0.17345992  |
| 0.157420888 | 0.004473962 | 0.049971829 | 0.002309937 |
| 0.012648474 | 0.177976243 | 0.034114615 | 0.074593305 |
| 0.266857644 | 0.060814708 | 0.220945297 | 0.210193505 |
| 0.149508294 | 0.19121919  | 0.20048255  | 0.06131654  |
| 0.199633509 | 0.002582379 | 0.179579242 | 0.151955079 |
| 0.025800736 | 0.012255997 | 0.043983643 | 0.160668275 |
| 0.098926039 | 0.1240033   | 0.306108201 | 0.025351044 |
| 1           | 0.111655688 | 0.147221459 | 0.076450647 |
| 0.097195478 | 0.183423368 | 0.046339404 | 0.164779293 |
| 0.197506074 | 0.235006253 | 0.03829976  | 0.19151017  |
| 0.090629263 | 0.134429903 | 0.169874566 | 0.05285786  |
| 0.169279872 | 0.172764389 | 0.19580367  | 0.177937867 |
| 0.243924495 | 0.149252837 | 0.014223654 | 0.024865606 |
| 0.148189442 | 0.129030114 | 0.013316003 | 0.141841345 |
| 0.159187156 | 0.136522929 | 0.303459076 | 0.283879407 |
| 0.233096421 | 0.219073805 | 0.159155806 | 0.175413492 |
| 0.081236568 | 0.010248906 | 0.072285574 | 0.208546417 |
| 0.005321236 | 0.073502209 | 0.321745776 | 0.043833299 |
| 0.07193908  | 0.090970822 | 0.041625047 | 0.047434371 |
| 0.230983075 | 0.117331502 | 0.116031816 | 0.172298877 |
| 0.094713038 | 0.050128755 | 0.157876732 | 0.12857698  |
| 0.016573325 | 0.208481771 | 0.277379397 | 0.100788292 |
| 0.05472598  | 0.073128576 | 0.219756717 | 0.263961072 |
| 0.201642393 | 0.176370768 | 0.103019241 | 0.115420345 |
| 0.271955243 | 0.078214832 | 0.189088387 | 0.155498346 |
| 0.211573325 | 0.246142405 | 0.269777466 | 0.104260231 |
| 0.167335646 | 0.177220201 | 0.103804368 | 0.096995558 |
| 0.186009014 | 0.126158872 | 0.173543402 | 0.05637233  |
| 0.247458732 | 0.155727202 | 0.133005224 | 0.229763081 |
| 0.075560288 | 0.298574023 | 0.257827091 | 0.175565643 |
| 0.12805613  | 0.022146286 | 0.144442881 | 0.292430837 |
| 0.208296355 | 0.019621001 | 0.275149468 | 0.061221336 |
| 0.154130767 | 0.005217258 | 0.11606762  | 0.288505221 |
| 0.266981806 | 0.161325053 | 0.048102836 | 0.127338954 |
| 0.124813714 | 0.039392592 | 0.083582789 | 0.118489458 |
| 0.191257429 | 0.09483064  | 0.185534765 | 0.245060234 |
| 0.212415004 | 0.099474909 | 0.035239731 | 0.121400348 |
| 0.232751989 | 0.068814777 | 0.160459854 | 0.225071252 |
| 0.251883295 | 0.231394604 | 0.157141298 | 0.271796431 |
| 0.063251314 | 0.114616036 | 0.112635759 | 0.133892412 |
| 0.041220279 | 0.107073163 | 0.02753255  | 0.11920806  |
| 0.015104391 | 0.01797666  | 0.178123952 | 0.127323801 |
| 0.219722535 | 0.190381602 | 0.265006979 | 0.055458228 |
| 0.000169831 | 0.094141288 | 0.176242747 | 0.072166137 |
| 0.142717536 | 0.199635743 | 0.024783216 | 0.159927348 |
| 0.3382596   | 0.156733225 | 0.11977638  | 0.025715351 |
| 0.014627841 | 0.097133242 | 0.332568317 | 0.154410218 |

|             |             |             |             |
|-------------|-------------|-------------|-------------|
| 0.178860721 | 0.105152794 | 0.023368782 | 0.178351934 |
| 0.015179739 | 0.351405625 | 0.291698563 | 0.010868808 |
| 0.018933211 | 0.180127688 | 0.148983581 | 0.122016219 |
| 0.064792888 | 0.170906655 | 0.185164385 | 0.020737991 |
| 0.136494486 | 0.087048142 | 0.218029423 | 0.227946466 |
| 0.20469502  | 0.162960677 | 0.232619504 | 0.089364645 |
| 0.120628797 | 0.184783496 | 0.169297365 | 0.326199096 |
| 0.185191216 | 0.150575343 | 0.105312658 | 0.078656799 |
| 0.11277101  | 0.206644694 | 0.200117964 | 0.19354357  |
| 0.133867568 | 0.139999833 | 0.32846294  | 0.170826725 |
| 0.274478152 | 0.053190574 | 0.325031643 | 0.15230808  |
| 0.243748137 | 0.14758192  | 0.086229666 | 0.145749472 |
| 0.005181311 | 0.023973947 | 0.078401317 | 0.08662995  |
| 0.222156827 | 0.060047682 | 0.049597339 | 0.117096002 |
| 0.087441889 | 0.296577731 | 0.312723138 | 0.22066838  |
| 0.08890566  | 0.054947048 | 0.01707316  | 0.152819196 |
| 0.220996022 | 0.222146385 | 0.139997053 | 0.052872459 |
| 0.198735547 | 0.045661715 | 0.155447401 | 0.188924115 |
| 0.025707898 | 0.264375112 | 0.013426296 | 0.13850692  |
| 0.007910744 | 0.176522081 | 0.294605286 | 0.100604852 |
| 0.0170103   | 0.170208766 | 0.158545894 | 0.032650866 |
| 0.126746708 | 0.092504686 | 0.059683117 | 0.112951229 |
| 0.16080489  | 0.189352912 | 0.189850457 | 0.118782345 |
| 0.061689914 | 0.082561635 | 0.048949282 | 0.17085123  |
| 0.170928315 | 0.167033074 | 0.19157793  | 0.169371933 |
| 0.095280996 | 0.221511625 | 0.272534653 | 0.100611626 |
| 0.040229224 | 0.107262883 | 0.020884664 | 0.032498717 |
| 0.08322009  | 0.032736973 | 0.000183641 | 0.014328036 |
| 0.289714487 | 0.028871115 | 0.093966597 | 0.146171402 |
| 0.08321443  | 0.250355025 | 0.008769337 | 0.096276501 |
| 0.152015308 | 0.193933172 | 0.079332007 | 0.302819131 |
| 0.206954898 | 0.219084176 | 0.087893249 | 0.001412442 |
| 0.08627098  | 0.059427171 | 0.017594197 | 0.149178375 |
| 0.084176555 | 0.023527842 | 0.085328319 | 0.108380961 |
| 0.181469304 | 0.010398697 | 0.062322425 | 0.11259517  |
| 0.201771719 | 0.203535608 | 0.145406972 | 0.183835626 |
| 0.029885913 | 0.221212239 | 0.053980362 | 0.047849804 |
| 0.097349521 | 0.071840034 | 0.229982644 | 0.063074308 |
| 0.16367349  | 0.074073672 | 0.013156855 | 0.28348932  |
| 0.175838232 | 0.060728181 | 0.284568347 | 0.008618726 |
| 0.306198712 | 0.178364993 | 0.045487808 | 0.044032451 |
| 0.107158066 | 0.114499347 | 0.255582758 | 0.184774491 |
| 0.013283749 | 0.073984098 | 0.12693877  | 0.072836883 |
| 0.204113106 | 0.03910364  | 0.253693395 | 0.017303703 |
| 0.158029965 | 0.126877621 | 0.155722393 | 0.045602093 |
| 0.061535455 | 0.194472297 | 0.026362707 | 0.202725192 |
| 0.251676486 | 0.072359842 | 0.179682035 | 0.182898317 |
| 0.051779693 | 0.166988712 | 0.052813356 | 0.185493292 |
| 0.127213823 | 0.302633657 | 0.1493792   | 0.164266517 |
| 0.311256325 | 0.061492648 | 0.045804941 | 0.136423138 |
| 0.16298724  | 0.126589695 | 0.028854229 | 0.205696029 |
| 0.042869091 | 0.230760369 | 0.047894704 | 0.135126656 |
| 0.136808417 | 0.086539109 | 0.050754175 | 0.260461141 |
| 0.213500699 | 0.121129549 | 0.078306388 | 0.295722281 |

|             |             |             |             |
|-------------|-------------|-------------|-------------|
| 0.12657292  | 0.132949987 | 0.265413259 | 0.006242463 |
| 0.10596907  | 0.162712549 | 0.230047273 | 0.079899446 |
| 0.297779443 | 0.121467133 | 0.080058944 | 0.03427047  |
| 0.186803373 | 0.020580774 | 0.066703319 | 0.110591548 |
| 0.021491726 | 0.121637306 | 0.204394329 | 0.200651363 |
| 0.160093837 | 0.013807519 | 0.013864559 | 0.18211148  |
| 0.021449221 | 0.017142683 | 0.027608944 | 0.083052857 |
| 0.0370603   | 0.028786189 | 0.035058888 | 0.040555917 |
| 0.16991329  | 0.101402978 |             |             |
| LCORL       | 0.13052984  | 0.244326424 | 0.131951406 |
| 0.08623568  | 0.072841963 | 0.075993676 | 0.120253118 |
| 0.114363304 | 0.205457986 | 0.046999824 | 0.105840884 |
| 0.105500435 | 0.00644432  | 0.242534777 | 0.11495099  |
| 0.09496933  | 0.096899213 | 0.136074885 | 0.031349146 |
| 0.078160408 | 0.073313675 | 0.046232514 | 0.126530377 |
| 0.063883206 | 0.326405709 | 0.159465088 | 0.067282461 |
| 0.248580916 | 0.025234281 | 0.125479709 | 0.026864197 |
| 0.307018418 | 0.078414639 | 0.051877334 | 0.092893223 |
| 0.106472285 | 0.002561175 | 0.345929895 | 0.074350459 |
| 0.015038224 | 0.306671475 | 0.071432287 | 0.090719387 |
| 0.079695133 | 0.127701819 | 0.026982035 | 0.11304441  |
| 0.13643345  | 0.080489602 | 0.175545845 | 0.14909357  |
| 0.062290872 | 0.202963122 | 0.163171649 | 0.005595232 |
| 0.03002237  | 0.003748349 | 0.017828519 | 0.2954663   |
| 0.207320406 | 0.119476775 | 0.027727058 | 0.104125911 |
| 0.108862484 | 0.132101753 | 0.169499798 | 0.058675791 |
| 0.279089909 | 0.017374342 | 0.129588661 | 0.06368839  |
| 0.100033327 | 0.106383161 | 0.236593486 | 0.183633474 |
| 0.057235118 | 0.125737325 | 0.087215096 | 0.034686433 |
| 0.244918175 | 0.341697313 | 0.176706022 | 0.318558413 |
| 0.016833599 | 0.066319297 | 0.043829131 | 0.170588665 |
| 0.164355684 | 0.106361562 | 0.166738819 | 0.308976921 |
| 0.109722428 | 0.10821291  | 0.164571768 | 0.237746085 |
| 0.230792822 | 0.0304851   | 0.087430902 | 0.019900975 |
| 0.097741656 | 0.078206074 | 0.324588038 | 0.204619574 |
| 0.063346822 | 0.206370714 | 0.350702544 | 0.058098895 |
| 0.064306413 | 0.174909983 | 0.044886789 | 0.172262145 |
| 0.13544097  | 0.247653613 | 0.20241433  | 0.196802493 |
| 0.075781528 | 0.267706821 | 0.163909211 | 0.240431271 |
| 0.014787466 | 0.291242422 | 0.156835323 | 0.103198844 |
| 0.120128708 | 0.097043211 | 0.043991824 | 0.231286463 |
| 0.209380479 | 0.169603781 | 0.122914131 | 0.096250957 |
| 0.194413272 | 0.323185308 | 0.289295655 | 0.207077181 |
| 0.119889304 | 0.025279365 | 0.075290134 | 0.095283723 |
| 0.15961244  | 0.17468481  | 0.035131806 | 0.351668006 |
| 0.265969852 | 0.175773909 | 0.119572534 | 0.371746115 |
| 0.105615082 | 0.297276737 | 0.225627226 | 0.140967588 |
| 0.325198053 | 0.337886756 | 0.263248991 | 0.106341254 |
| 0.311582564 | 0.119321441 | 0.029073593 | 0.219323002 |
| 0.277636477 | 0.003432813 | 0.202599606 | 0.21939889  |
| 0.287848537 | 0.173323709 | 0.261562646 | 0.242323467 |
| 0.288907154 | 0.179411703 | 0.003982649 | 0.124060994 |
| 0.314680618 | 0.234564706 | 0.073834691 | 0.077881553 |
| 0.095152258 | 0.114068177 | 0.163631493 | 0.047225443 |

|             |             |             |             |
|-------------|-------------|-------------|-------------|
| 0.317745545 | 0.20796323  | 0.222713181 | 0.191633372 |
| 0.120322848 | 0.304651258 | 0.061365203 | 0.344261466 |
| 0.096192543 | 0.130206731 | 0.200562776 | 0.193609633 |
| 0.058908672 | 0.140925357 | 0.091247699 | 0.093760975 |
| 0.175155346 | 0.10789995  | 0.03230433  | 0.105857423 |
| 0.254277705 | 0.105904589 | 0.14671901  | 0.165669729 |
| 0.100001718 | 0.307818192 | 0.094926033 | 0.100257461 |
| 0.094505035 | 0.390872634 | 0.134923644 | 0.232357951 |
| 0.063867925 | 0.255765019 | 0.163213429 | 0.266299225 |
| 0.274040721 | 0.072146684 | 0.240475623 | 0.032604159 |
| 0.052801665 | 0.033261242 | 0.014765871 | 0.077755525 |
| 0.346213433 | 0.085424781 | 0.111175605 | 0.129593167 |
| 0.154975112 | 0.13550676  | 0.055995677 | 0.34066277  |
| 0.266829747 | 0.061646255 | 0.208612718 | 0.105229045 |
| 0.041981902 | 0.124885261 | 0.186807639 | 0.038381622 |
| 0.18380188  | 0.02235258  | 0.025333376 | 0.216077552 |
| 0.033017833 | 0.038076541 | 0.222301817 | 0.127115325 |
| 0.063055347 | 0.344086077 | 0.270068724 | 0.0052313   |
| 0.067720889 | 0.024879259 | 0.160461898 | 0.070627821 |
| 0.177446642 | 0.180596709 | 0.06695784  | 0.047292931 |
| 0.219526499 | 0.298944213 | 0.21601488  | 0.257279555 |
| 0.046823072 | 0.277366162 | 0.189086711 | 0.232390916 |
| 0.166053536 | 0.053830152 | 0.010891698 | 0.187285311 |
| 0.202207923 | 0.043965118 | 0.236528351 | 0.158051844 |
| 0.061327586 | 0.114476388 | 0.029594021 | 0.260630523 |
| 0.332432434 | 0.303458454 | 0.09725584  | 0.152621173 |
| 0.217804736 | 0.156781932 | 0.189830157 | 0.287351617 |
| 0.046324841 | 0.072689105 | 0.050923806 | 0.177901251 |
| 0.202446569 | 0.04295693  | 0.260504211 | 0.013956527 |
| 0.00047218  | 0.155603216 | 0.174788656 | 0.085028813 |
| 0.021543512 | 0.103320797 | 0.125389258 | 0.272101176 |
| 0.142132282 | 0.255153005 | 0.205234264 | 0.065787453 |
| 0.271967166 | 0.063250293 | 0.067893715 | 0.10141068  |
| 0.217350324 | 0.041310846 | 0.096092647 | 0.349212275 |
| 0.179432884 | 0.028227176 | 0.121096928 | 0.008953477 |
| 0.132250973 | 0.188344718 | 0.288814352 | 0.347259049 |
| 0.217355822 | 0.329634278 | 0.216015854 | 0.056953352 |
| 0.154654933 | 0.164140244 | 0.009695832 | 0.244633669 |
| 0.27208248  | 0.262793664 | 0.27396252  | 0.304806191 |
| 0.219233842 | 0.165125124 | 0.160511904 | 0.133756334 |
| 0.112932516 | 0.122419759 | 0.02903979  | 0.084194446 |
| 0.026715925 | 0.173095355 | 0.078439603 | 0.231015923 |
| 0.141978739 | 0.169179755 | 0.118538635 | 0.087126289 |
| 0.082383902 | 0.015533783 | 0.097051321 | 0.0800043   |
| 0.140466114 | 0.089653078 | 0.045407717 | 0.042365819 |
| 0.303409615 | 0.276663966 | 0.036454306 | 0.294507464 |
| 0.1151965   | 0.252491304 | 0.075227822 | 0.150066341 |
| 0.125776339 | 0.018163171 | 0.085055092 | 0.006501746 |
| 0.039611947 | 0.293844406 | 0.052670347 | 0.106079377 |
| 0.164111383 | 0.059778838 | 0.275389555 | 0.300771243 |
| 0.290418066 | 0.249658628 | 0.269067811 | 0.031722161 |
| 0.282782402 | 0.005249408 | 0.269962499 | 0.23649286  |
| 0.054315055 | 0.006519523 | 0.029636848 | 0.210116282 |
| 0.086929211 | 0.237077156 | 0.192603346 | 0.065531444 |

|             |             |             |             |
|-------------|-------------|-------------|-------------|
| 0.111655688 | 1           | 0.112694388 | 0.03097147  |
| 0.124138121 | 0.074619748 | 0.030400388 | 0.303870374 |
| 0.105239477 | 0.136174884 | 0.081003164 | 0.235633515 |
| 0.093809284 | 0.116273411 | 0.216438813 | 0.024889923 |
| 0.136804717 | 0.274825677 | 0.364417569 | 0.281204352 |
| 0.292326134 | 0.119621758 | 0.041901501 | 0.068622077 |
| 0.203348494 | 0.251307679 | 0.041136165 | 0.229122935 |
| 0.277094059 | 0.114860788 | 0.212334535 | 0.264142766 |
| 0.274335911 | 0.287199218 | 0.115635755 | 0.171181986 |
| 0.051461678 | 0.003246147 | 0.111536446 | 0.194178236 |
| 0.013765899 | 0.06782275  | 0.239842885 | 0.073008239 |
| 0.073896514 | 0.114532443 | 0.028371278 | 0.027478773 |
| 0.139250822 | 0.092731321 | 0.054909536 | 0.209111115 |
| 0.051244727 | 0.033246478 | 0.083418058 | 0.098410793 |
| 0.050846605 | 0.276213912 | 0.329363708 | 0.101806397 |
| 0.085344624 | 0.077965565 | 0.134154422 | 0.220018392 |
| 0.208535459 | 0.227740452 | 0.101086091 | 0.043999075 |
| 0.255023126 | 0.068473658 | 0.232220748 | 0.268750212 |
| 0.33245395  | 0.296845849 | 0.328554442 | 0.068046259 |
| 0.12950588  | 0.112849604 | 0.057593928 | 0.047366373 |
| 0.27169921  | 0.205414815 | 0.287017617 | 0.03998199  |
| 0.198184563 | 0.099315012 | 0.085540655 | 0.14943475  |
| 0.074314594 | 0.194799704 | 0.09216916  | 0.216800001 |
| 0.075114416 | 0.02521821  | 0.113496335 | 0.167048583 |
| 0.211195156 | 0.016032748 | 0.185114844 | 0.086933037 |
| 0.207695241 | 0.038960132 | 0.13347448  | 0.30511412  |
| 0.236587385 | 0.16414559  | 0.097908377 | 0.157469756 |
| 0.181470898 | 0.084461676 | 0.061089871 | 0.246786907 |
| 0.246639663 | 0.12256977  | 0.301249084 | 0.217457265 |
| 0.211150883 | 0.075013096 | 0.038635661 | 0.091835274 |
| 0.167391552 | 0.087346585 | 0.113194329 | 0.177203585 |
| 0.26202819  | 0.347912806 | 0.232618186 | 0.105524233 |
| 0.099930834 | 0.212325815 | 0.196932788 | 0.210706334 |
| 0.024131176 | 0.133291174 | 0.074137749 | 0.170141407 |
| 0.002366083 | 0.011233304 | 0.233468642 | 0.091926953 |
| 0.308335473 | 0.225702096 | 0.292023559 | 0.085401402 |
| 1.77E-05    | 0.105337736 | 0.124999368 | 0.062583126 |
| 0.239245002 | 0.225030479 | 0.060292381 | 0.101848585 |
| 0.23396843  | 0.237357088 | 0.100531839 | 0.07113711  |
| 0.019554511 | 0.15408387  | 0.212930721 | 0.15541036  |
| 0.074487561 | 0.221723664 | 0.025927907 | 0.102992026 |
| 0.018873901 | 0.224453613 | 0.222726886 | 0.052569191 |
| 0.02277407  | 0.226636179 | 0.199004622 | 0.109210576 |
| 0.060743371 | 0.208219134 | 0.228599617 | 0.014592605 |
| 0.137600199 | 0.062137968 | 0.086724864 | 0.081735541 |
| 0.079851155 | 0.084582802 | 0.113051691 | 0.053412975 |
| 0.151306355 | 0.106053908 | 0.083686171 | 0.167884823 |
| 0.080823281 | 0.11460008  | 0.0976884   | 0.093811477 |
| 0.058036244 | 0.127133309 | 0.29206384  | 0.329040239 |
| 0.097741154 | 0.229002886 | 0.298314737 | 0.23631375  |
| 0.157879431 | 0.071699516 | 0.261089362 | 0.283590006 |
| 0.237066447 | 0.288423117 | 0.085302155 | 0.228781079 |
| 0.026095266 | 0.068292585 | 0.125579575 | 0.107487232 |
| 0.142977686 | 0.044118654 | 0.091170718 | 0.178056287 |



|             |             |             |             |
|-------------|-------------|-------------|-------------|
| 0.164481334 | 0.326440456 | 0.284392759 | 0.264474297 |
| 0.067439012 | 0.081346263 | 0.052884227 | 0.086187636 |
| 0.134306625 | 0.233980859 | 0.059305686 | 0.028936285 |
| 0.164654422 | 0.095340035 | 0.20279008  | 0.308938035 |
| 0.028399313 | 0.260066773 | 0.06444227  | 0.132713416 |
| 0.043523086 | 0.325318517 | 0.231055223 | 0.15476241  |
| 0.017562112 | 0.106091807 | 0.080277773 | 0.084308114 |
| 0.14503047  | 0.141268999 | 0.046573629 | 0.11219473  |
| 0.122638817 | 0.207091155 | 0.320468089 | 0.134287238 |
| 0.09742892  | 0.034195656 | 0.129668654 | 0.085121143 |
| 0.075449673 | 0.249070492 | 0.161511088 | 0.250602279 |
| 0.068431332 | 0.269057851 | 0.333438992 | 0.120367286 |
| 0.077297851 | 0.063375195 | 0.015065601 | 0.071612493 |
| 0.092471475 | 0.036469153 | 0.001756601 | 0.01398215  |
| 0.179441127 | 0.058201562 | 0.187367802 | 0.163082319 |
| 0.039912437 | 0.185915989 | 0.012857684 | 0.119086441 |
| 0.305801315 | 0.346602008 | 0.084746927 | 0.225623532 |
| 0.211150438 | 0.117529861 | 0.154439256 | 0.005051566 |
| 0.107272898 | 0.087994959 | 0.056114805 | 0.113365403 |
| 0.087606317 | 0.018071722 | 0.113241352 | 0.186586628 |
| 0.212931026 | 0.01576759  | 0.13240169  | 0.140492978 |
| 0.230687562 | 0.351366776 | 0.072690046 | 0.151615342 |
| 0.093847339 | 0.17871485  | 0.061665368 | 0.079527178 |
| 0.056560655 | 0.040191793 | 0.164285299 | 0.028264547 |
| 0.102251205 | 0.063043299 | 0.009899107 | 0.355672254 |
| 0.337219543 | 0.051088385 | 0.288536651 | 0.04184689  |
| 0.168758352 | 0.224312595 | 0.06446457  | 0.072037379 |
| 0.047113871 | 0.081806932 | 0.153594888 | 0.240510404 |
| 0.024167633 | 0.109872826 | 0.078331481 | 0.058860619 |
| 0.378835996 | 0.057789088 | 0.254559235 | 0.036364794 |
| 0.276255315 | 0.210602532 | 0.251955824 | 0.044634304 |
| 0.12908544  | 0.210387586 | 0.061002272 | 0.292210309 |
| 0.094878447 | 0.027532889 | 0.177193832 | 0.091416867 |
| 0.04095703  | 0.247552567 | 0.096400062 | 0.293059975 |
| 0.062345662 | 0.187798402 | 0.162263194 | 0.253588031 |
| 0.199710963 | 0.027599877 | 0.030836877 | 0.060686248 |
| 0.29178789  | 0.105533254 | 0.03392889  | 0.203918636 |
| 0.024432119 | 0.16443509  | 0.12580314  | 0.050864076 |
| 0.107808844 | 0.090681739 | 0.0697845   | 0.1985625   |
| 0.138799494 | 0.085326844 | 0.045272214 | 0.279496513 |
| 0.072379963 | 0.060298321 | 0.292136716 | 0.001915028 |
| 0.14167729  | 0.121733452 | 0.153777283 | 0.062531663 |
| 0.288287039 | 0.149631531 | 0.133940544 | 0.0395774   |
| 0.187691956 | 0.008247257 | 0.062533687 | 0.055825144 |
| 0.0411238   | 0.129592082 | 0.287808188 | 0.247301834 |
| 0.172994872 | 0.043727932 | 0.036978792 | 0.281704542 |
| 0.014844809 | 0.031683764 | 0.043221387 | 0.149126488 |
| 0.022543236 | 0.061988753 | 0.058769034 | 0.04118645  |
| 0.196615291 | 0.100200818 |             |             |
| LCP1        | 0.176559107 | 0.107826328 | 0.136841317 |
| 0.071600866 | 0.064794291 | 0.036049062 | 0.183011307 |
| 0.168281993 | 0.115230656 | 0.010392696 | 0.074262499 |
| 0.17598233  | 0.009224248 | 0.130190804 | 0.208420622 |
| 0.046412297 | 0.210758136 | 0.217474458 | 0.036387626 |

|             |             |             |             |
|-------------|-------------|-------------|-------------|
| 0.057282155 | 0.066722258 | 0.020700019 | 0.057505412 |
| 0.063001763 | 0.292849178 | 0.080582875 | 0.029305943 |
| 0.108401952 | 0.00542091  | 0.055532632 | 0.004709292 |
| 0.198344439 | 0.057029342 | 0.01765004  | 0.142903302 |
| 0.055087005 | 0.010877235 | 0.207164246 | 0.059626634 |
| 0.011340402 | 0.238792832 | 0.019761193 | 0.090028573 |
| 0.023012846 | 0.142173019 | 0.004953706 | 0.048459445 |
| 0.079897642 | 0.072146362 | 0.184361374 | 0.064836515 |
| 0.026026175 | 0.148494578 | 0.05202642  | 0.014101558 |
| 0.013349535 | 0.000972166 | 0.005313215 | 0.146562967 |
| 0.263115126 | 0.225228086 | 0.006686384 | 0.112537365 |
| 0.052566935 | 0.083872946 | 0.218966877 | 0.014873482 |
| 0.135220757 | 0.011509444 | 0.053236397 | 0.055020938 |
| 0.044794869 | 0.152031497 | 0.309322286 | 0.20882496  |
| 0.022497654 | 0.198543475 | 0.076471142 | 0.019299745 |
| 0.0927659   | 0.202949896 | 0.200617884 | 0.14989516  |
| 0.019276048 | 0.040162421 | 0.036638507 | 0.172109995 |
| 0.104156246 | 0.14748862  | 0.088197535 | 0.164820435 |
| 0.176344414 | 0.033427754 | 0.074544522 | 0.248989275 |
| 0.111646097 | 0.017944589 | 0.023072454 | 0.01658782  |
| 0.062855917 | 0.044483792 | 0.182247368 | 0.174639422 |
| 0.06306532  | 0.214376323 | 0.174391927 | 0.035807523 |
| 0.051717721 | 0.197398408 | 0.03733626  | 0.073478965 |
| 0.058119581 | 0.114176216 | 0.083601478 | 0.126856221 |
| 0.033557277 | 0.12893073  | 0.08157479  | 0.145581477 |
| 0.00359682  | 0.139181014 | 0.173933422 | 0.227312143 |
| 0.143207566 | 0.213805577 | 0.042491472 | 0.246586996 |
| 0.097163237 | 0.153083391 | 0.137405107 | 0.112805969 |
| 0.10038272  | 0.150782218 | 0.131554119 | 0.109542533 |
| 0.189868019 | 0.013699516 | 0.031162272 | 0.087302022 |
| 0.096907306 | 0.287935998 | 0.024570572 | 0.181223362 |
| 0.181906739 | 0.086857037 | 0.11743755  | 0.222543339 |
| 0.131789184 | 0.171969013 | 0.086241053 | 0.17834288  |
| 0.171099336 | 0.17318371  | 0.146662384 | 0.054067473 |
| 0.181697248 | 0.065522635 | 0.027497267 | 0.131499984 |
| 0.180096655 | 0.004715652 | 0.088511336 | 0.097453733 |
| 0.127973809 | 0.070950934 | 0.14233444  | 0.118750956 |
| 0.131809648 | 0.274558661 | 0.001175301 | 0.126165092 |
| 0.149170405 | 0.142866914 | 0.158394052 | 0.024651227 |
| 0.060126356 | 0.052715023 | 0.084109097 | 0.013355464 |
| 0.206551097 | 0.106367021 | 0.097714724 | 0.100958371 |
| 0.0630172   | 0.258813669 | 0.02249481  | 0.171845124 |
| 0.205649547 | 0.148088573 | 0.232386703 | 0.187415441 |
| 0.014837772 | 0.226562105 | 0.043550764 | 0.064317085 |
| 0.247457483 | 0.065635008 | 0.012407858 | 0.065278069 |
| 0.266397244 | 0.034492425 | 0.17769396  | 0.148737131 |
| 0.186951122 | 0.359346859 | 0.083616446 | 0.129959947 |
| 0.120088775 | 0.302427648 | 0.055136311 | 0.118366358 |
| 0.039329411 | 0.21087667  | 0.073072802 | 0.173883711 |
| 0.209620166 | 0.033307462 | 0.273861162 | 0.053439264 |
| 0.021509872 | 0.008464545 | 0.006950849 | 0.031285925 |
| 0.335997005 | 0.059970414 | 0.055118187 | 0.079178038 |
| 0.093027165 | 0.153692976 | 0.02287304  | 0.243492715 |
| 0.22943691  | 0.045258213 | 0.111698361 | 0.037819715 |

|             |             |             |             |
|-------------|-------------|-------------|-------------|
| 0.101463709 | 0.07449935  | 0.086785474 | 0.054252089 |
| 0.124888145 | 0.015820184 | 0.010689264 | 0.099342309 |
| 0.014314483 | 0.034107516 | 0.107076866 | 0.084559846 |
| 0.029436846 | 0.259939443 | 0.144015387 | 0.002295862 |
| 0.044167587 | 0.061211962 | 0.168208483 | 0.022586744 |
| 0.159037701 | 0.196889906 | 0.050989376 | 0.040863692 |
| 0.194875574 | 0.146919234 | 0.151917538 | 0.12198035  |
| 0.01285026  | 0.146749545 | 0.085897469 | 0.132636324 |
| 0.117357676 | 0.020858605 | 0.004767533 | 0.081556683 |
| 0.093365064 | 0.015103399 | 0.23993198  | 0.062681717 |
| 0.020053483 | 0.057556495 | 0.07189724  | 0.13358529  |
| 0.215241596 | 0.130172035 | 0.155597041 | 0.114825247 |
| 0.140579804 | 0.154765356 | 0.123016678 | 0.165509141 |
| 0.010183295 | 0.034774989 | 0.022622418 | 0.130756801 |
| 0.222891699 | 0.038593757 | 0.241419098 | 0.007722562 |
| 4.71E-05    | 0.222199073 | 0.22342643  | 0.152094538 |
| 0.021669201 | 0.036186346 | 0.071604285 | 0.132900123 |
| 0.234662965 | 0.174249934 | 0.220804924 | 0.032547568 |
| 0.13522312  | 0.038977338 | 0.035168813 | 0.065773637 |
| 0.249388948 | 0.078899149 | 0.113775691 | 0.199358959 |
| 0.212048448 | 0.018140084 | 0.095734508 | 0.011182338 |
| 0.158252995 | 0.06860889  | 0.291664445 | 0.346581331 |
| 0.1273069   | 0.295549855 | 0.174060714 | 0.012432491 |
| 0.14443206  | 0.263668915 | 0.031942822 | 0.115309859 |
| 0.144904072 | 0.146857031 | 0.141220127 | 0.16874289  |
| 0.116347278 | 0.095304218 | 0.088545976 | 0.064757884 |
| 0.164277283 | 0.13928063  | 0.013879001 | 0.071553244 |
| 0.014412746 | 0.138429046 | 0.08460755  | 0.300347285 |
| 0.074185198 | 0.15378081  | 0.200144131 | 0.064526221 |
| 0.083747336 | 0.004495817 | 0.053442996 | 0.129587005 |
| 0.126530714 | 0.162796986 | 0.009886307 | 0.012823934 |
| 0.152060396 | 0.185937533 | 0.013119534 | 0.146936486 |
| 0.093773255 | 0.168835391 | 0.056616447 | 0.105968387 |
| 0.182171361 | 0.006595264 | 0.041488877 | 0.000611021 |
| 0.033466448 | 0.182835388 | 0.025018832 | 0.106459737 |
| 0.138375156 | 0.115791692 | 0.158865146 | 0.157107168 |
| 0.128518081 | 0.120463937 | 0.135782133 | 0.019436075 |
| 0.135528754 | 0.001534167 | 0.126437514 | 0.105386452 |
| 0.012265409 | 0.007734272 | 0.072853452 | 0.093879335 |
| 0.036940863 | 0.230355368 | 0.247721523 | 0.019753709 |
| 0.147221459 | 0.112694388 | 1           | 0.059385662 |
| 0.102347238 | 0.041718337 | 0.143255765 | 0.111274429 |
| 0.187763396 | 0.029692802 | 0.286088543 | 0.055486519 |
| 0.17717598  | 0.276823096 | 0.019569903 | 0.108394698 |
| 0.249728525 | 0.196051305 | 0.132382405 | 0.176009511 |
| 0.074929565 | 0.007842968 | 0.031102699 | 0.120450633 |
| 0.178684137 | 0.014272115 | 0.186720821 | 0.116879276 |
| 0.054546321 | 0.186297559 | 0.190759235 | 0.149841423 |
| 0.153500384 | 0.207677084 | 0.090870712 | 0.078395314 |
| 0.015606343 | 0.037805914 | 0.225413837 | 0.033903786 |
| 0.028874999 | 0.227718162 | 0.066228352 | 0.091344979 |
| 0.14544291  | 0.013377725 | 0.01657439  | 0.123875175 |
| 0.057928736 | 0.04568745  | 0.222073528 | 0.05305372  |
| 0.037365512 | 0.125192149 | 0.163177671 | 0.045387951 |

|             |             |             |             |
|-------------|-------------|-------------|-------------|
| 0.172663959 | 0.273693649 | 0.191076817 | 0.026242963 |
| 0.030811123 | 0.232675281 | 0.283159499 | 0.108157368 |
| 0.102952338 | 0.159733152 | 0.093161602 | 0.241751864 |
| 0.061195857 | 0.119679377 | 0.11700077  | 0.170329418 |
| 0.168272382 | 0.249149286 | 0.118478138 | 0.193744836 |
| 0.095810713 | 0.048484272 | 0.107000956 | 0.134312224 |
| 0.197344375 | 0.146172489 | 0.022235804 | 0.295302979 |
| 0.086373501 | 0.196079266 | 0.274146229 | 0.035647061 |
| 0.284021511 | 0.1551923   | 0.158805955 | 0.053252465 |
| 0.017537758 | 0.202078062 | 0.206016774 | 0.142448967 |
| 0.006563874 | 0.247936138 | 0.075419878 | 0.136640127 |
| 0.013584171 | 0.057057183 | 0.203629081 | 0.272757852 |
| 0.197979103 | 0.033123659 | 0.114254655 | 0.072915028 |
| 0.02657389  | 0.091666591 | 0.097132134 | 0.139864666 |
| 0.045344538 | 0.147710238 | 0.170686081 | 0.291808301 |
| 0.035345366 | 0.020712066 | 0.058630769 | 0.235954455 |
| 0.045045648 | 0.158219568 | 0.291099502 | 0.273401427 |
| 0.220586293 | 0.108758676 | 0.164109515 | 0.043965262 |
| 0.177859791 | 0.178456273 | 0.111351544 | 0.015695159 |
| 0.137189886 | 0.020772973 | 0.085928162 | 0.013798822 |
| 0.008757609 | 0.131735092 | 0.110053242 | 0.183141483 |
| 0.112474352 | 0.179623584 | 0.090637162 | 0.000251244 |
| 0.046486566 | 0.072651349 | 0.025254461 | 0.10376784  |
| 0.167150057 | 0.112855439 | 0.16870374  | 0.248766111 |
| 0.216659178 | 0.113675073 | 0.028180144 | 0.005515246 |
| 0.065107516 | 0.297160982 | 0.171205658 | 0.121970692 |
| 0.208157965 | 0.01724738  | 0.125521356 | 0.02094706  |
| 0.271472172 | 0.171246828 | 0.015447891 | 0.005732384 |
| 0.13489225  | 0.086740752 | 0.179479579 | 0.038281066 |
| 0.12263988  | 0.155928825 | 0.011434893 | 0.061915831 |
| 0.172721875 | 0.137369282 | 0.107471404 | 0.125517888 |
| 0.120433646 | 0.146159965 | 0.04080392  | 0.090665837 |
| 0.131387187 | 0.081650105 | 0.204885695 | 0.115295504 |
| 0.164891552 | 0.061980708 | 0.050498932 | 0.043084136 |
| 0.154671071 | 0.314046757 | 0.305368208 | 0.187427255 |
| 0.112967462 | 0.299877059 | 0.241146084 | 0.225233939 |
| 0.044050397 | 0.234907166 | 0.120851106 | 0.186085897 |
| 0.220006049 | 0.067023196 | 0.09283912  | 0.00644296  |
| 0.031841922 | 0.150909114 | 0.056359257 | 0.19386244  |
| 0.035113307 | 0.041526727 | 0.075006679 | 0.064338477 |
| 0.231378453 | 0.297141029 | 0.173045066 | 0.047901819 |
| 0.044516214 | 0.010127811 | 0.142616623 | 0.132044903 |
| 0.280002735 | 0.056297629 | 0.0668286   | 0.126538669 |
| 0.052855382 | 0.08462397  | 0.145195038 | 0.012088375 |
| 0.214623256 | 0.012234652 | 0.134456266 | 0.008204857 |
| 0.2077983   | 0.308934119 | 0.069467948 | 0.00577659  |
| 0.142958806 | 0.075011566 | 0.031206572 | 0.0700949   |
| 0.061733821 | 0.046227751 | 0.130105424 | 0.163130131 |
| 0.185557346 | 0.18407872  | 0.150343709 | 0.031002867 |
| 0.036453667 | 0.048349789 | 0.06369128  | 0.105646943 |
| 0.119423    | 0.267913629 | 0.115187708 | 0.037682719 |
| 0.30042532  | 0.222125744 | 0.120511299 | 0.067494473 |
| 0.137101554 | 0.006446688 | 0.028111156 | 0.096830369 |
| 0.014581046 | 0.000306561 | 0.010480554 | 0.159515593 |

|             |             |             |             |
|-------------|-------------|-------------|-------------|
| 0.033459434 | 0.068597372 | 0.12366278  | 0.040154942 |
| 0.175634544 | 0.010672158 | 0.095461394 | 0.133530347 |
| 0.181346639 | 0.046909898 | 0.260212126 | 0.156201803 |
| 0.184846235 | 0.06333854  | 0.014664027 | 0.037834034 |
| 0.027687945 | 0.013500488 | 0.228657313 | 0.198898184 |
| 0.006132161 | 0.041994971 | 0.217974522 | 0.112476426 |
| 0.00520235  | 0.062160235 | 0.0691194   | 0.279087825 |
| 0.183664711 | 0.150358138 | 0.088625205 | 0.111305234 |
| 0.207799849 | 0.030780811 | 0.035849032 | 0.042498553 |
| 0.024483721 | 0.113079075 | 0.019535475 | 0.205928032 |
| 0.052623267 | 0.013765657 | 0.240063232 | 0.160815976 |
| 0.023183539 | 0.315533242 | 0.011442849 | 0.199704972 |
| 0.168224588 | 0.051233667 | 0.026904854 | 0.126577442 |
| 0.041333079 | 0.25222685  | 0.125895725 | 0.004010947 |
| 0.052371875 | 0.16785339  | 0.041706107 | 0.21029883  |
| 0.026210105 | 0.283977329 | 0.007513422 | 0.126458379 |
| 0.123558693 | 0.190966118 | 0.06902508  | 0.052565672 |
| 0.291103886 | 0.020060468 | 0.15488556  | 0.158783992 |
| 0.022689699 | 0.089616526 | 0.084877426 | 0.024257783 |
| 0.165617254 | 0.034589398 | 0.156681628 | 0.141730701 |
| 0.230337701 | 0.096151408 | 0.127563272 | 0.229428502 |
| 0.031827327 | 0.016856132 | 0.05891601  | 0.12917799  |
| 0.12227073  | 0.026827531 | 0.13806607  | 0.011552704 |
| 0.17835672  | 0.052082295 | 0.077961571 | 0.168410849 |
| 0.15527532  | 0.03754043  | 0.278063346 | 0.132122227 |
| 0.050160727 | 0.040644938 | 0.225491075 | 0.108397455 |
| 0.094674609 | 0.210749254 | 0.00085297  | 0.080958002 |
| 0.071766973 | 0.207444441 | 0.044636798 | 0.273750672 |
| 0.096780827 | 0.052000739 | 0.043645914 | 0.112680052 |
| 0.018389145 | 0.061156896 | 0.044302706 | 0.018524769 |
| 0.174044164 | 0.164436474 | 0.128944907 | 0.159803414 |
| 0.024774216 | 0.009261269 | 0.147884136 | 0.010700983 |
| 0.008834396 | 0.015680271 | 0.055741961 | 0.013918696 |
| 0.015381596 | 0.020804806 | 0.013893558 | 0.115698684 |
| 0.121536319 |             |             |             |
| LDHA        | 0.024227008 | 0.149925502 | 0.013927546 |
| 0.06725391  | 0.337308034 | 0.085371474 | 0.024659627 |
| 0.039633651 | 0.125937074 | 0.031014656 | 0.199642052 |
| 0.010891887 | 0.128572323 | 0.220482064 | 0.026738927 |
| 0.256127898 | 0.029904094 | 0.06613037  | 0.022958603 |
| 0.072229002 | 0.305759059 | 0.110881761 | 0.070591966 |
| 0.275666084 | 0.084806149 | 0.103805168 | 0.16586345  |
| 0.212983974 | 0.054712281 | 0.210359755 | 0.027958848 |
| 0.21668341  | 0.323584123 | 0.14519851  | 0.007718251 |
| 0.144073779 | 0.036251827 | 0.190357985 | 0.171259625 |
| 0.198545165 | 0.176788557 | 0.04460882  | 0.155468545 |
| 0.077038576 | 0.011824839 | 0.017147503 | 0.213579252 |
| 0.117006409 | 0.102206617 | 0.01616895  | 0.18846429  |
| 0.075768191 | 0.137063047 | 0.099560013 | 0.00025454  |
| 0.175664696 | 0.080562454 | 0.113769513 | 0.201345398 |
| 0.151319017 | 0.107824507 | 0.054690896 | 0.072874772 |
| 0.156303791 | 0.232083151 | 0.202205253 | 0.058452246 |
| 0.220045077 | 0.146856909 | 0.202740533 | 0.06397408  |
| 0.096139713 | 0.009131383 | 0.121340866 | 0.026331653 |

|             |             |                    |             |
|-------------|-------------|--------------------|-------------|
| 0.107886144 | 0.185036761 | 0.224735916        | 0.206437339 |
| 0.134142763 | 0.227157552 | 0.162551 0.1788031 |             |
| 0.111553563 | 0.2845408   | 0.193246675        | 0.282466502 |
| 0.196274985 | 0.028056903 | 0.241006934        | 0.244373529 |
| 0.014753663 | 0.079091401 | 0.170897769        | 0.042449944 |
| 0.170702481 | 0.104202127 | 0.073852144        | 0.176435825 |
| 0.329905099 | 0.256900551 | 0.186271841        | 0.182887977 |
| 0.211179898 | 0.02560917  | 0.16011326         | 0.310130064 |
| 0.16755784  | 0.036782633 | 0.163781172        | 0.248017561 |
| 0.196770677 | 0.218522654 | 0.159758356        | 0.210966043 |
| 0.222489051 | 0.229597386 | 0.212723215        | 0.186217433 |
| 0.015214595 | 0.214522628 | 0.104835053        | 0.032888389 |
| 0.014267803 | 0.063926607 | 0.111160226        | 0.221872502 |
| 0.242430009 | 0.159851732 | 0.072633361        | 0.228151814 |
| 0.302290696 | 0.153302239 | 0.206552142        | 0.202591734 |
| 0.019820036 | 0.129119308 | 0.221811323        | 0.060486467 |
| 0.197327735 | 0.06919547  | 0.270277268        | 0.193266009 |
| 0.208967039 | 0.273754054 | 0.038484519        | 0.200613177 |
| 0.071262894 | 0.267651647 | 0.162606826        | 0.126115973 |
| 0.221565308 | 0.184821493 | 0.285772783        | 0.305979577 |
| 0.199178894 | 0.11419069  | 0.015648498        | 0.190461748 |
| 0.279300763 | 0.042908254 | 0.227566534        | 0.251138925 |
| 0.193372944 | 0.250730922 | 0.287576243        | 0.249913316 |
| 0.186859946 | 0.039167004 | 0.0131275          | 0.292260157 |
| 0.199138547 | 0.229545924 | 0.090140172        | 0.149628039 |
| 0.258281603 | 0.0904191   | 0.212287556        | 0.069031705 |
| 0.271974248 | 0.236542026 | 0.214835066        | 0.166999609 |
| 0.08461364  | 0.159004281 | 0.194389667        | 0.156071258 |
| 0.030424933 | 0.032654404 | 0.018576205        | 0.197295731 |
| 0.034848849 | 0.182567986 | 0.069219976        | 0.207447404 |
| 0.177695628 | 0.066900934 | 0.127022442        | 0.313316977 |
| 0.018825076 | 0.130456236 | 0.090770913        | 0.061078558 |
| 0.037196834 | 0.074735607 | 0.065715558        | 0.082453789 |
| 0.217415228 | 0.080050193 | 0.180747478        | 0.255235464 |
| 0.13502519  | 0.083529534 | 0.168310125        | 0.269659547 |
| 0.294065871 | 0.241274374 | 0.140116025        | 0.024198161 |
| 0.096945985 | 0.057424964 | 0.137801328        | 0.16980496  |
| 0.073831636 | 0.078780615 | 0.199131871        | 0.329470584 |
| 0.072539188 | 0.035388668 | 0.117022852        | 0.195109012 |
| 0.054844821 | 0.157114626 | 0.266292639        | 0.111037045 |
| 0.002971601 | 0.141246687 | 0.233542759        | 0.174002774 |
| 0.135672731 | 0.127586413 | 0.119258468        | 0.256400932 |
| 0.092206002 | 0.174434438 | 0.243353302        | 0.330403198 |
| 0.053124857 | 0.066320518 | 0.267399858        | 0.032648516 |
| 0.199551691 | 0.107437701 | 0.287805224        | 0.049818849 |
| 0.155539321 | 0.238652985 | 0.294177387        | 0.209603618 |
| 0.041609008 | 0.214027636 | 0.20137658         | 0.240521973 |
| 0.094671741 | 0.266937562 | 0.252796422        | 0.243578712 |
| 0.19390301  | 0.120851984 | 0.13231699         | 0.228776555 |
| 0.256886817 | 0.059030119 | 0.025844707        | 0.199607025 |
| 0.089020853 | 0.260898223 | 0.173626305        | 0.270167967 |
| 0.23608188  | 0.147940888 | 0.093483163        | 0.332247291 |
| 0.23548848  | 0.114803956 | 0.243529463        | 0.269876253 |
| 0.03946643  | 0.190438227 | 0.16300762         | 0.358663044 |

|             |             |                      |             |
|-------------|-------------|----------------------|-------------|
| 0.115120221 | 0.160485874 | 0.169172157          | 0.132869699 |
| 0.015297253 | 0.026162766 | 0.02872587           | 0.17925923  |
| 0.222640894 | 0.131821672 | 0.254482266          | 0.231527181 |
| 0.080541815 | 0.209403202 | 0.129761423          | 0.123077607 |
| 0.174088691 | 0.154055842 | 0.232099066          | 0.245666753 |
| 0.157495432 | 0.034177186 | 0.077282771          | 0.224808479 |
| 0.010725269 | 0.161741634 | 0.089376272          | 0.005454324 |
| 0.014765352 | 0.123407133 | 0.040681738          | 0.1006962   |
| 0.299333023 | 0.091607037 | 0.096589982          | 0.038575341 |
| 0.270189723 | 0.062689906 | 0.023665395          | 0.230991426 |
| 0.207630669 | 0.201674707 | 0.19598492           | 0.169347988 |
| 0.221864637 | 0.194397698 | 0.280657174          | 0.08152555  |
| 0.042543127 | 0.022363972 | 0.16660812           | 0.192075284 |
| 0.001037396 | 0.291654476 | 0.218218775          | 0.104677741 |
| 0.239754342 | 0.174753027 | 0.016182855          | 0.246943132 |
| 0.010317725 | 0.120849209 | 0.048008751          | 0.133619839 |
| 0.327072072 | 0.006799234 | 0.050220772          | 0.093856325 |
| 0.151310611 | 0.155831306 | 0.128295369          | 0.229715467 |
| 0.205588121 | 0.034322383 | 0.233310514          | 0.280511028 |
| 0.035159273 | 0.019881887 | 0.067685947          | 0.006122739 |
| 0.033441622 | 0.187318925 | 0.098098031          | 0.025082971 |
| 0.17830685  | 0.003287633 | 0.159360362          | 0.234922583 |
| 0.153572663 | 0.268000733 | 0.232876655          | 0.224263788 |
| 0.221999469 | 0.073245617 | 0.233850867          | 0.159147534 |
| 0.059102608 | 0.000822731 | 0.008087303          | 0.259181277 |
| 0.212479714 | 0.015623417 | 0.116858775          | 0.049349496 |
| 0.076450647 | 0.03097147  | 0.033026 1           | 0.164974323 |
| 0.27882296  | 0.17529781  | 0.160971475          | 0.164245791 |
| 0.191850656 | 0.062142276 | 0.037592893          | 0.214818437 |
| 0.03421665  | 0.039432718 | 0.018257 0.296594518 |             |
| 0.039272405 | 0.154921707 | 0.208240831          | 0.253351724 |
| 0.312218465 | 0.040361157 | 0.055179239          | 0.240321736 |
| 0.022865524 | 0.070297255 | 0.029444298          | 0.176013163 |
| 0.244285847 | 0.231515848 | 0.166044502          | 0.26786713  |
| 0.213893473 | 0.019581256 | 0.261063781          | 0.012991275 |
| 0.01173701  | 0.077285086 | 0.153361354          | 0.045045705 |
| 0.173593736 | 0.181516991 | 0.067655485          | 0.099562842 |
| 0.011421543 | 0.200163057 | 0.216656981          | 0.243050727 |
| 0.186465009 | 0.307440589 | 0.129755195          | 0.224336007 |
| 0.17027857  | 0.140337978 | 0.072239275          | 0.056394775 |
| 0.136409759 | 0.085520378 | 0.011558477          | 0.121853377 |
| 0.177217692 | 0.035508875 | 0.092830723          | 0.257932957 |
| 0.248740785 | 0.033330283 | 0.025261554          | 0.146230638 |
| 0.137606921 | 0.270423439 | 0.188547756          | 0.206444875 |
| 0.272232207 | 0.18684723  | 0.109801902          | 0.030752564 |
| 0.269631295 | 0.316232924 | 0.176217765          | 0.223955059 |
| 0.018117176 | 0.187811907 | 0.267123415          | 0.077487456 |
| 0.108585036 | 0.035008504 | 0.061934199          | 0.233521057 |
| 0.124910006 | 0.218600284 | 0.050153445          | 0.164000664 |
| 0.168874089 | 0.02573744  | 0.143744033          | 0.183234268 |
| 0.180581895 | 0.110154593 | 0.074534716          | 0.166135944 |
| 0.021956946 | 0.244146464 | 0.253244972          | 0.06705874  |
| 0.050856036 | 0.034936611 | 0.21733832           | 0.206687779 |
| 0.102485653 | 0.015678588 | 0.146971238          | 0.256229878 |

|             |             |             |             |
|-------------|-------------|-------------|-------------|
| 0.189611883 | 0.191513785 | 0.284311653 | 0.046640309 |
| 0.20889339  | 0.153744994 | 0.228875351 | 0.121408488 |
| 0.090075327 | 0.150156286 | 0.038668237 | 0.184547345 |
| 0.203238975 | 0.181761511 | 0.141444963 | 0.138102354 |
| 0.030175303 | 0.014811791 | 0.201004919 | 0.207172857 |
| 0.028290335 | 0.049218745 | 0.226440426 | 0.021938451 |
| 0.172558181 | 0.276166986 | 0.089052661 | 0.245274755 |
| 0.274240459 | 0.230531016 | 0.05861782  | 0.009111853 |
| 0.257486849 | 0.22891503  | 0.138678207 | 0.158868691 |
| 0.163467448 | 0.040253138 | 0.066477684 | 0.240544598 |
| 0.024044749 | 0.083521866 | 0.050653274 | 0.112463267 |
| 0.123327903 | 0.170930088 | 0.107161501 | 0.20278825  |
| 0.024840653 | 0.171566424 | 0.1276242   | 0.136969634 |
| 0.195251733 | 0.249593521 | 0.02281502  | 0.095369389 |
| 0.240611174 | 0.182671822 | 0.011814814 | 0.219504747 |
| 0.236878687 | 0.243265026 | 0.003118117 | 0.245927123 |
| 0.007861949 | 0.195207373 | 0.20932766  | 0.18747917  |
| 0.146644826 | 0.295368735 | 0.18146339  | 0.143666897 |
| 0.137499064 | 0.147674919 | 0.207329406 | 0.135770016 |
| 0.114065532 | 0.230106677 | 0.111976082 | 0.164388723 |
| 0.063480637 | 0.040299574 | 0.035155832 | 0.036266859 |
| 0.195351929 | 0.142190591 | 0.026808488 | 0.193856057 |
| 0.100478738 | 0.258366285 | 0.173696024 | 0.276681563 |
| 0.031763642 | 0.132510288 | 0.173409036 | 0.029800533 |
| 0.043384547 | 0.011028556 | 0.139393486 | 0.129588441 |
| 0.149552979 | 0.098752947 | 0.081976085 | 0.14076291  |
| 0.208898665 | 0.134262409 | 0.242480489 | 0.172919579 |
| 0.121369357 | 0.032237902 | 0.084931241 | 0.086856307 |
| 0.068373207 | 0.32764356  | 0.003222026 | 0.197818993 |
| 0.041890311 | 0.236269153 | 0.185395342 | 0.139607817 |
| 0.238146868 | 0.026326644 | 0.03238734  | 0.023716562 |
| 0.054679451 | 0.088420109 | 0.193323191 | 0.123037869 |
| 0.089747181 | 0.305337206 | 0.032647475 | 0.253411943 |
| 0.199927906 | 0.160565624 | 0.078273053 | 0.165221405 |
| 0.085148717 | 0.188435449 | 0.032977805 | 0.143352754 |
| 0.217379592 | 0.074013957 | 0.207529942 | 0.203846929 |
| 0.241127719 | 0.031360828 | 0.241468695 | 0.176067421 |
| 0.059927415 | 0.245572089 | 0.102028498 | 0.067412886 |
| 0.130280529 | 0.166841081 | 0.057267856 | 0.087221263 |
| 0.140669387 | 0.001814086 | 0.052445529 | 0.276550619 |
| 0.072069135 | 0.136105565 | 0.221795036 | 0.253403072 |
| 0.295371051 | 0.118638803 | 0.079603799 | 0.153702925 |
| 0.175179005 | 0.086190152 | 0.199214688 | 0.179206844 |
| 0.062770002 | 0.10261049  | 0.006778928 | 0.181655193 |
| 0.167658101 | 0.047710521 | 0.02789912  | 0.012870108 |
| 0.158728582 | 0.162773836 | 0.021536846 | 0.290884517 |
| 0.106792518 | 0.106330172 | 0.212831471 | 0.088127539 |
| 0.177584816 | 0.115428524 | 0.26686359  | 0.010423956 |
| 0.175934625 | 0.190861812 | 0.115503423 | 0.145603334 |
| 0.243064961 | 0.29330232  | 0.234711151 | 0.024851615 |
| 0.148765539 | 0.004854253 | 0.182854016 | 0.155931571 |
| 0.217278599 | 0.116896032 | 0.029520912 | 0.275618455 |
| 0.212184464 | 0.090446233 | 0.12759047  | 0.021455256 |
| 0.279510347 | 0.150047418 | 0.177791736 | 0.069311233 |



|             |             |             |             |
|-------------|-------------|-------------|-------------|
| 0.131679211 | 0.061419725 | 0.229621488 | 0.148538096 |
| 0.08451265  | 0.153552709 | 0.078887398 | 0.183322709 |
| 0.163095042 | 0.053760821 | 0.154560494 | 0.120307946 |
| 0.029679207 | 0.052748439 | 0.242034278 | 0.166096343 |
| 0.270095039 | 0.305292644 | 0.127191204 | 0.200371865 |
| 0.161875214 | 0.136414316 | 0.223476814 | 0.100628151 |
| 0.186590641 | 0.264429821 | 0.197549737 | 0.268256807 |
| 0.222128079 | 0.163895836 | 0.192083728 | 0.156483384 |
| 0.047008671 | 0.147003624 | 0.184898004 | 0.187312181 |
| 0.225744946 | 0.075446685 | 0.224269993 | 0.032220078 |
| 0.062415968 | 0.073147436 | 0.091071508 | 0.200267708 |
| 0.236946438 | 0.196457955 | 0.239301408 | 0.104190325 |
| 0.034619988 | 0.256048359 | 0.050312408 | 0.089604645 |
| 0.270833202 | 0.154606987 | 0.207306385 | 0.095454522 |
| 0.138922411 | 0.07618261  | 0.000580463 | 0.271933541 |
| 0.137554494 | 0.135658967 | 0.163842606 | 0.086861722 |
| 0.01629002  | 0.199692795 | 0.279121678 | 0.149051502 |
| 0.064910068 | 0.074089748 | 0.192270631 | 0.189811868 |
| 0.08837808  | 0.097429907 | 0.125958707 | 0.204815785 |
| 0.068056406 | 0.099514748 | 0.144084109 | 0.184785276 |
| 0.085381544 |             |             |             |

|             |             |             |             |
|-------------|-------------|-------------|-------------|
| LENG9       | 0.072255656 | 0.434140862 | 0.060021863 |
| 0.145064693 | 0.251858192 | 0.359427389 | 0.043231547 |
| 0.100182983 | 0.307407289 | 0.231047381 | 0.310687529 |
| 0.015577848 | 0.105440179 | 0.456049001 | 0.041264084 |
| 0.285925194 | 0.028162873 | 0.082352119 | 0.055609319 |
| 0.171956619 | 0.216032572 | 0.31622762  | 0.298113493 |
| 0.218383877 | 0.186860016 | 0.252244222 | 0.291629248 |
| 0.521559729 | 0.28710311  | 0.382367365 | 0.194096359 |
| 0.400833992 | 0.258311014 | 0.324398447 | 0.01752564  |
| 0.32612936  | 0.007712346 | 0.418923165 | 0.200070627 |
| 0.177150345 | 0.338192109 | 0.274912019 | 0.213381627 |
| 0.264829811 | 0.035046231 | 0.222536394 | 0.30685793  |
| 0.240779584 | 0.228442679 | 0.057976363 | 0.37323688  |
| 0.26003493  | 0.306932132 | 0.348040493 | 0.00164917  |
| 0.281158866 | 0.106923838 | 0.206314813 | 0.530606735 |
| 0.166712197 | 0.105691487 | 0.21171287  | 0.190943021 |
| 0.267765537 | 0.283864072 | 0.197279427 | 0.252630993 |
| 0.514909877 | 0.155812612 | 0.383049868 | 0.173524094 |
| 0.274697659 | 0.02504354  | 0.130699642 | 0.064674595 |
| 0.29977546  | 0.171757906 | 0.298383576 | 0.256097659 |
| 0.428741591 | 0.515146503 | 0.177373075 | 0.503484334 |
| 0.065499176 | 0.258125493 | 0.235407479 | 0.244646935 |
| 0.279569365 | 0.055697328 | 0.371892955 | 0.52258163  |
| 0.037508231 | 0.276495908 | 0.306757585 | 0.093441156 |
| 0.454098544 | 0.231012942 | 0.304108882 | 0.191853718 |
| 0.299082019 | 0.245068856 | 0.466685154 | 0.237559621 |
| 0.268144629 | 0.059485527 | 0.493256689 | 0.256973466 |
| 0.277639011 | 0.075297595 | 0.163036917 | 0.459211146 |
| 0.314808581 | 0.519169759 | 0.395624084 | 0.297150432 |
| 0.275726269 | 0.522688029 | 0.349228402 | 0.415351656 |
| 0.164314616 | 0.539240822 | 0.167389883 | 0.039236223 |
| 0.063306703 | 0.076610033 | 0.160281097 | 0.27727974  |
| 0.498779599 | 0.269087884 | 0.160878542 | 0.179797162 |

|             |             |             |             |
|-------------|-------------|-------------|-------------|
| 0.449497535 | 0.49132882  | 0.527759051 | 0.377059226 |
| 0.033940936 | 0.19942433  | 0.285671524 | 0.255336728 |
| 0.28640839  | 0.086494923 | 0.224643476 | 0.509827249 |
| 0.388145631 | 0.414914019 | 0.142587926 | 0.498830573 |
| 0.13785899  | 0.527088251 | 0.474079545 | 0.141960044 |
| 0.527329187 | 0.510673846 | 0.524262707 | 0.355804796 |
| 0.500755093 | 0.295810385 | 0.035769487 | 0.339311172 |
| 0.501838001 | 0.019161627 | 0.485660813 | 0.508682459 |
| 0.511003656 | 0.460631806 | 0.52083909  | 0.533965901 |
| 0.519934578 | 0.059147108 | 0.01596602  | 0.206990399 |
| 0.513252488 | 0.400043353 | 0.108277285 | 0.304015418 |
| 0.266467246 | 0.319323019 | 0.405102573 | 0.261661636 |
| 0.509881589 | 0.473326445 | 0.507609558 | 0.332789352 |
| 0.206779108 | 0.313456704 | 0.290033556 | 0.484712587 |
| 0.04294015  | 0.105264886 | 0.047899084 | 0.245780632 |
| 0.315223001 | 0.140181586 | 0.288035993 | 0.244455057 |
| 0.152292746 | 0.264181691 | 0.300242369 | 0.3168908   |
| 0.050943869 | 0.340818354 | 0.14231692  | 0.125310671 |
| 0.035570935 | 0.134134498 | 0.150023249 | 0.159523853 |
| 0.200731458 | 0.226323337 | 0.379761024 | 0.502750926 |
| 0.249289144 | 0.159140236 | 0.357736753 | 0.488207131 |
| 0.415040253 | 0.309448203 | 0.185773671 | 0.015869731 |
| 0.182121555 | 0.226003196 | 0.169055095 | 0.32183596  |
| 0.174278715 | 0.159416449 | 0.267402704 | 0.36480495  |
| 0.231162847 | 0.111573497 | 0.26051133  | 0.434994588 |
| 0.125397912 | 0.281766482 | 0.43765111  | 0.285040576 |
| 0.003963727 | 0.247914888 | 0.440701444 | 0.106964093 |
| 0.221014893 | 0.141254803 | 0.286081857 | 0.456311461 |
| 0.228606418 | 0.173316219 | 0.520151451 | 0.355446326 |
| 0.294212722 | 0.213219407 | 0.529245891 | 0.032276137 |
| 0.253446531 | 0.065393476 | 0.223356933 | 0.256818564 |
| 0.191196139 | 0.226800521 | 0.259813739 | 0.245342131 |
| 0.115975605 | 0.52249986  | 0.395784765 | 0.529591459 |
| 0.267247578 | 0.528541468 | 0.460850454 | 0.450002978 |
| 0.28947038  | 0.256830126 | 0.140646424 | 0.422030023 |
| 0.454892143 | 0.201118414 | 0.06410416  | 0.41127064  |
| 0.242943329 | 0.323560077 | 0.106810775 | 0.496100595 |
| 0.504544597 | 0.47818551  | 0.122063515 | 0.324340949 |
| 0.373966292 | 0.205948292 | 0.409122218 | 0.528449147 |
| 0.212742354 | 0.245921529 | 0.247884955 | 0.384072654 |
| 0.14166826  | 0.156800962 | 0.300568641 | 0.179505229 |
| 0.025980781 | 0.067084816 | 0.056261777 | 0.13729108  |
| 0.162738013 | 0.319196595 | 0.306777239 | 0.522897617 |
| 0.095016196 | 0.441779856 | 0.177849229 | 0.219037335 |
| 0.404958499 | 0.255163149 | 0.322057783 | 0.304438889 |
| 0.203673912 | 0.022859886 | 0.115276899 | 0.514278351 |
| 0.032912089 | 0.232753222 | 0.23471073  | 0.004215273 |
| 0.0348632   | 0.397805924 | 0.087349628 | 0.187830286 |
| 0.487434318 | 0.194750041 | 0.154010068 | 0.216875732 |
| 0.301996241 | 0.080240129 | 0.006806623 | 0.484292373 |
| 0.48071029  | 0.443451236 | 0.476295015 | 0.455362994 |
| 0.414891709 | 0.364722876 | 0.3712066   | 0.309058194 |
| 0.085021332 | 0.075950939 | 0.160410758 | 0.208061716 |
| 0.003760229 | 0.370776066 | 0.24064041  | 0.112575887 |

|             |             |             |             |
|-------------|-------------|-------------|-------------|
| 0.37746454  | 0.212388702 | 0.036280403 | 0.273123212 |
| 0.025140844 | 0.204279477 | 0.212601218 | 0.163520163 |
| 0.294429344 | 0.014249154 | 0.232324381 | 0.23473697  |
| 0.454989005 | 0.334294884 | 0.303242601 | 0.545659946 |
| 0.272064179 | 0.106503545 | 0.247353802 | 0.37336881  |
| 0.056730875 | 0.072323791 | 0.256490842 | 0.049860981 |
| 0.243107561 | 0.449689478 | 0.289476267 | 0.06308269  |
| 0.209296264 | 0.005618155 | 0.370049243 | 0.54105973  |
| 0.488233084 | 0.523138305 | 0.526366884 | 0.256894202 |
| 0.522882604 | 0.113303799 | 0.544946932 | 0.393492943 |
| 0.269748594 | 0.001280021 | 0.005694939 | 0.501802392 |
| 0.295489498 | 0.056448645 | 0.125839327 | 0.352876544 |
| 0.097195478 | 0.124138121 | 0.059385662 | 0.164974323 |
| 1           | 0.204065929 | 0.159228699 | 0.467912698 |
| 0.179492667 | 0.178861356 | 0.289903317 | 0.068311851 |
| 0.334338222 | 0.048739442 | 0.064649887 | 0.011233645 |
| 0.305967695 | 0.106725865 | 0.471005883 | 0.525499591 |
| 0.50117402  | 0.334447509 | 0.262500565 | 0.309069501 |
| 0.427432702 | 0.091000551 | 0.321644925 | 0.094837886 |
| 0.502528155 | 0.282606979 | 0.291750883 | 0.294585362 |
| 0.496060758 | 0.474686822 | 0.02767507  | 0.359469408 |
| 0.023298426 | 0.002398994 | 0.300427298 | 0.199080448 |
| 0.042722815 | 0.259077618 | 0.218609599 | 0.15740704  |
| 0.174330131 | 0.033680421 | 0.21202319  | 0.192608937 |
| 0.21971546  | 0.257189096 | 0.223100851 | 0.192870821 |
| 0.205213126 | 0.094994944 | 0.176139932 | 0.117400924 |
| 0.168936607 | 0.288205461 | 0.188061543 | 0.01628081  |
| 0.321945174 | 0.319279923 | 0.051529173 | 0.128587572 |
| 0.450742017 | 0.505078113 | 0.028581041 | 0.012733669 |
| 0.235911343 | 0.218904171 | 0.511971339 | 0.519588282 |
| 0.53304092  | 0.516589531 | 0.390613599 | 0.08873957  |
| 0.063032707 | 0.236170957 | 0.234580531 | 0.08729988  |
| 0.528220535 | 0.050407554 | 0.511756663 | 0.253434411 |
| 0.088355597 | 0.175412555 | 0.036727638 | 0.066715975 |
| 0.317519571 | 0.140503875 | 0.146967565 | 0.121028476 |
| 0.229092925 | 0.238373896 | 0.037777885 | 0.151779113 |
| 0.289089248 | 0.149719612 | 0.121695368 | 0.250800924 |
| 0.336274946 | 0.164539186 | 0.365780176 | 0.440532672 |
| 0.107062887 | 0.080451733 | 0.234092347 | 0.334456264 |
| 0.432910631 | 0.290949938 | 0.044903129 | 0.462473521 |
| 0.504558561 | 0.362992913 | 0.521662146 | 0.361600331 |
| 0.064767102 | 0.307677018 | 0.228335266 | 0.236715509 |
| 0.135000403 | 0.352668505 | 0.175714334 | 0.050354293 |
| 0.276401686 | 0.472174447 | 0.40144579  | 0.147056409 |
| 0.333276586 | 0.100380581 | 0.043796501 | 0.458347217 |
| 0.145836918 | 0.07746594  | 0.284103234 | 0.411407864 |
| 0.003376335 | 0.15173754  | 0.483655686 | 0.227382944 |
| 0.514352299 | 0.483751391 | 0.446151123 | 0.216615709 |
| 0.001121738 | 0.32535791  | 0.297119284 | 0.31285915  |
| 0.425726971 | 0.330385356 | 0.13941765  | 0.064410845 |
| 0.263115411 | 0.073904646 | 0.096830453 | 0.325818567 |
| 0.129598852 | 0.298312641 | 0.153331561 | 0.143526358 |
| 0.154614211 | 0.068730266 | 0.248020182 | 0.216899541 |
| 0.108775016 | 0.201260052 | 0.316771297 | 0.242251205 |

|             |             |             |             |
|-------------|-------------|-------------|-------------|
| 0.158216846 | 0.406340008 | 0.354436638 | 0.026689639 |
| 0.295816254 | 0.377174117 | 0.442159397 | 0.001057952 |
| 0.374643897 | 0.007299002 | 0.158689108 | 0.188699886 |
| 0.168854986 | 0.150734502 | 0.194325117 | 0.249502199 |
| 0.241218463 | 0.167177782 | 0.245429806 | 0.19083428  |
| 0.151115682 | 0.18068195  | 0.300046385 | 0.263535387 |
| 0.253931615 | 0.114835347 | 0.09840734  | 0.105903529 |
| 0.059230837 | 0.487761336 | 0.23527499  | 0.069731908 |
| 0.174920593 | 0.258822702 | 0.340466725 | 0.507885783 |
| 0.428653461 | 0.11605816  | 0.236767247 | 0.46328671  |
| 0.176407349 | 0.26290506  | 0.052110468 | 0.310762069 |
| 0.192159673 | 0.189039855 | 0.320851264 | 0.228729766 |
| 0.332083908 | 0.400789349 | 0.229610671 | 0.446616493 |
| 0.298997232 | 0.225060826 | 0.25525725  | 0.079477302 |
| 0.142267722 | 0.099763151 | 0.215718808 | 0.002624582 |
| 0.267521418 | 0.246433438 | 0.479424902 | 0.504118202 |
| 0.251825821 | 0.390356182 | 0.28387277  | 0.07224744  |
| 0.247773501 | 0.174714144 | 0.10846576  | 0.401895422 |
| 0.21477447  | 0.171338161 | 0.235902453 | 0.312872077 |
| 0.38904137  | 0.354785837 | 0.197088297 | 0.178987863 |
| 0.174493435 | 0.161417669 | 0.463509415 | 0.109791417 |
| 0.311263303 | 0.175094584 | 0.262803096 | 0.221968895 |
| 0.165633791 | 0.529419432 | 0.053686916 | 0.535871666 |
| 0.228853985 | 0.116377199 | 0.493751692 | 0.254683803 |
| 0.263453151 | 0.129575091 | 0.182482645 | 0.292075845 |
| 0.16541834  | 0.303748323 | 0.013475835 | 0.045570583 |
| 0.278058474 | 0.208097422 | 0.359631749 | 0.293655978 |
| 0.199860008 | 0.291564704 | 0.189587421 | 0.202989179 |
| 0.492410998 | 0.504176197 | 0.193720787 | 0.203816471 |
| 0.283256333 | 0.094032772 | 0.33070934  | 0.010242254 |
| 0.298075394 | 0.313469212 | 0.277534019 | 0.045463876 |
| 0.016196446 | 0.185282819 | 0.286675028 | 0.049742494 |
| 0.478278867 | 0.224627962 | 0.246182417 | 0.403170436 |
| 0.137793669 | 0.502389676 | 0.104761657 | 0.369793009 |
| 0.029208041 | 0.190411458 | 0.296453605 | 0.262082235 |
| 0.201373551 | 0.231167132 | 0.331163314 | 0.222203669 |
| 0.028741704 | 0.22230416  | 5.26E-05    | 0.404939974 |
| 0.467323319 | 0.246518578 | 0.183421512 | 0.234736695 |
| 0.227299434 | 0.369666693 | 0.168193193 | 0.330153726 |
| 0.014052731 | 0.285339773 | 0.162982311 | 0.438500539 |
| 0.20401453  | 0.235080725 | 0.064004691 | 0.222073342 |
| 0.460940964 | 0.191558316 | 0.218673132 | 0.228047988 |
| 0.511472255 | 0.380359912 | 0.151260575 | 0.206920877 |
| 0.281922385 | 0.051349366 | 0.32475245  | 0.529017336 |
| 0.14884592  | 0.195757995 | 0.437593263 | 0.152352638 |
| 0.249554389 | 0.39261675  | 0.293361772 | 0.515736116 |
| 0.058927048 | 0.190430185 | 0.398950429 | 0.447254218 |
| 0.267052593 | 0.139529349 | 0.213051573 | 0.170580032 |
| 0.479714629 | 0.1089991   | 0.192699615 | 0.307116757 |
| 0.181570079 | 0.242312261 | 0.245715324 | 0.155443883 |
| 0.038075318 | 0.130478301 | 0.353697645 | 0.111787572 |
| 0.212975938 | 0.272911261 | 0.181749974 | 0.387760098 |
| 0.147998774 | 0.030559419 | 0.453478376 | 0.016775609 |
| 0.304374543 | 0.331419019 | 0.199679678 | 0.27835719  |

|                      |             |             |             |
|----------------------|-------------|-------------|-------------|
| 0.17969409           | 0.248214348 | 0.235576769 | 0.000848946 |
| 0.380323433          | 0.062891436 | 0.239540863 | 0.189972498 |
| 0.22087975           | 0.040269605 | 0.483912374 | 0.521130554 |
| 0.251151938          | 0.291066673 | 0.294670182 | 0.469395923 |
| 0.146755612          | 0.27685176  | 0.249735646 | 0.336602082 |
| 0.213029834          | 0.284442657 | 0.311628596 | 0.325818911 |
| 0.341944539          | 0.225841135 |             |             |
| LGALS3BP 0.073454932 | 0.214549845 | 0.036186867 |             |
| 0.137113162          | 0.289798384 | 0.142415761 | 0.08185047  |
| 0.131417108          | 0.17772035  | 0.060883701 | 0.231521834 |
| 0.044484441          | 0.161446342 | 0.301715814 | 0.093965618 |
| 0.244915478          | 0.095756821 | 0.127140688 | 0.057916997 |
| 0.121784291          | 0.277107748 | 0.198749456 | 0.115791198 |
| 0.243392232          | 0.154832359 | 0.137678006 | 0.166620157 |
| 0.281355625          | 0.099223493 | 0.240775725 | 0.04264317  |
| 0.302968498          | 0.294848512 | 0.148682912 | 0.027430598 |
| 0.181198434          | 0.03840969  | 0.276598051 | 0.229641228 |
| 0.194621194          | 0.272682504 | 0.065861964 | 0.22833505  |
| 0.088839955          | 0.043518722 | 0.040926302 | 0.222157544 |
| 0.140890809          | 0.18093548  | 0.040325154 | 0.216798915 |
| 0.132776263          | 0.217177473 | 0.140282061 | 0.003666966 |
| 0.185963835          | 0.081010608 | 0.142539848 | 0.287213702 |
| 0.229585183          | 0.191771728 | 0.087819484 | 0.128780343 |
| 0.183824218          | 0.253695066 | 0.261207292 | 0.095629307 |
| 0.305171436          | 0.195982491 | 0.225035654 | 0.131968505 |
| 0.136735724          | 0.030213418 | 0.189686678 | 0.053624091 |
| 0.159685871          | 0.239659249 | 0.252304966 | 0.202769163 |
| 0.193905551          | 0.329669817 | 0.207873875 | 0.260559043 |
| 0.149010964          | 0.247378889 | 0.246784275 | 0.319760598 |
| 0.236585099          | 0.084001648 | 0.283785439 | 0.331912638 |
| 0.047328807          | 0.107344512 | 0.212183571 | 0.091311052 |
| 0.239427994          | 0.158765972 | 0.096129383 | 0.237485252 |
| 0.299489676          | 0.235803574 | 0.277261139 | 0.256808431 |
| 0.229200055          | 0.053545948 | 0.25084653  | 0.259103559 |
| 0.244341538          | 0.064736109 | 0.235819922 | 0.286477822 |
| 0.217777637          | 0.295319943 | 0.217134225 | 0.264819237 |
| 0.2095052            | 0.30654902  | 0.243350484 | 0.268469521 |
| 0.032891191          | 0.299328968 | 0.147250854 | 0.117197641 |
| 0.045447098          | 0.174476552 | 0.183412894 | 0.303075316 |
| 0.300186857          | 0.232705894 | 0.143022259 | 0.239837241 |
| 0.340972366          | 0.238496137 | 0.287001303 | 0.269248788 |
| 0.062753881          | 0.169128885 | 0.198636906 | 0.153178291 |
| 0.252014226          | 0.122878662 | 0.236382692 | 0.288804133 |
| 0.29420948           | 0.310099828 | 0.090881044 | 0.304102112 |
| 0.139392281          | 0.357623141 | 0.223526932 | 0.175248477 |
| 0.310208163          | 0.276660157 | 0.360789928 | 0.300754089 |
| 0.295649838          | 0.144044171 | 0.044327023 | 0.253180245 |
| 0.375614567          | 0.042465817 | 0.284683275 | 0.308665792 |
| 0.269448138          | 0.288297743 | 0.360233084 | 0.322007332 |
| 0.271129582          | 0.077141442 | 0.015684274 | 0.312622552 |
| 0.282771682          | 0.292688966 | 0.219330592 | 0.157191677 |
| 0.264310676          | 0.133268938 | 0.261145162 | 0.14133232  |
| 0.375960658          | 0.289764084 | 0.281417535 | 0.229556285 |
| 0.106113448          | 0.259456292 | 0.178719392 | 0.24490107  |

|             |             |             |             |
|-------------|-------------|-------------|-------------|
| 0.091071898 | 0.084370269 | 0.044568404 | 0.261269377 |
| 0.079248896 | 0.234916485 | 0.121797465 | 0.216786803 |
| 0.246613225 | 0.115739714 | 0.156740356 | 0.312111381 |
| 0.046222384 | 0.161771477 | 0.126398187 | 0.098181599 |
| 0.103792878 | 0.146057413 | 0.175593808 | 0.206057773 |
| 0.258240612 | 0.153060385 | 0.223302458 | 0.314162108 |
| 0.168806619 | 0.134758738 | 0.221194623 | 0.356858342 |
| 0.386549394 | 0.219474612 | 0.227440322 | 0.045255378 |
| 0.166925285 | 0.093858335 | 0.166309876 | 0.178930539 |
| 0.142799674 | 0.180944937 | 0.21846724  | 0.340012698 |
| 0.117087706 | 0.082666106 | 0.171895693 | 0.30601311  |
| 0.102605717 | 0.2458242   | 0.328308114 | 0.136839904 |
| 0.009951318 | 0.168118586 | 0.28569303  | 0.242379311 |
| 0.191724593 | 0.196385739 | 0.18423382  | 0.301570463 |
| 0.163234649 | 0.239333682 | 0.310095807 | 0.336061516 |
| 0.140603099 | 0.133348685 | 0.347897199 | 0.044653971 |
| 0.188144532 | 0.161806353 | 0.328675543 | 0.069424882 |
| 0.200993826 | 0.303986646 | 0.270930925 | 0.258139864 |
| 0.083141322 | 0.304638306 | 0.27682968  | 0.318671232 |
| 0.141981276 | 0.345178336 | 0.304365094 | 0.321890322 |
| 0.241200042 | 0.13046495  | 0.153196064 | 0.272887823 |
| 0.295883601 | 0.106601235 | 0.056280715 | 0.242636489 |
| 0.105206776 | 0.270488856 | 0.231310734 | 0.339897149 |
| 0.338776221 | 0.223456254 | 0.230169616 | 0.352170016 |
| 0.303046851 | 0.168899784 | 0.293908347 | 0.361245472 |
| 0.073510309 | 0.188795871 | 0.198900794 | 0.379877733 |
| 0.165305403 | 0.246458349 | 0.256914115 | 0.166871621 |
| 0.012595976 | 0.065091406 | 0.059997959 | 0.259220529 |
| 0.262848939 | 0.160061491 | 0.259325645 | 0.313805238 |
| 0.152636589 | 0.300929808 | 0.195448419 | 0.205231095 |
| 0.246832481 | 0.184203472 | 0.221298424 | 0.263772281 |
| 0.230042419 | 0.059732546 | 0.188019411 | 0.323759518 |
| 0.028974257 | 0.237644159 | 0.140162897 | 0.013429847 |
| 0.054053458 | 0.174836739 | 0.082220302 | 0.178965685 |
| 0.365655446 | 0.157916835 | 0.144138906 | 0.071786771 |
| 0.323664546 | 0.108028149 | 0.034178437 | 0.290852603 |
| 0.28413669  | 0.274219363 | 0.273481761 | 0.253279305 |
| 0.275387081 | 0.243061073 | 0.300757065 | 0.12385011  |
| 0.121080076 | 0.058235724 | 0.204724857 | 0.216402637 |
| 0.004999779 | 0.337375828 | 0.226771941 | 0.170430067 |
| 0.280319411 | 0.230732007 | 0.068194056 | 0.255294585 |
| 0.03151957  | 0.148542152 | 0.132064855 | 0.211906447 |
| 0.347308649 | 0.027699258 | 0.088731845 | 0.15306834  |
| 0.236793307 | 0.243548889 | 0.157998647 | 0.313184737 |
| 0.242312957 | 0.065704804 | 0.224049485 | 0.327822871 |
| 0.102629148 | 0.036899995 | 0.120055142 | 0.008969635 |
| 0.098793458 | 0.278565015 | 0.155790072 | 0.060881503 |
| 0.220577007 | 0.014316718 | 0.23581159  | 0.329321678 |
| 0.230348868 | 0.336772808 | 0.316089997 | 0.227854565 |
| 0.301622627 | 0.080964044 | 0.313961487 | 0.220717985 |
| 0.089817578 | 0.002418333 | 0.030011056 | 0.308561217 |
| 0.207480911 | 0.039371544 | 0.173145972 | 0.115185188 |
| 0.183423368 | 0.074619748 | 0.102347238 | 0.27882296  |
| 0.204065929 | 1           | 0.270387729 | 0.245841008 |

|             |             |             |             |
|-------------|-------------|-------------|-------------|
| 0.203235624 | 0.245587925 | 0.102913136 | 0.079619693 |
| 0.233043569 | 0.100649211 | 0.078701544 | 0.032887303 |
| 0.322983418 | 0.081156863 | 0.248534724 | 0.291771058 |
| 0.345973932 | 0.306636845 | 0.073334894 | 0.146767457 |
| 0.298472652 | 0.052270643 | 0.130157765 | 0.063676338 |
| 0.251653107 | 0.250678071 | 0.308294405 | 0.239487556 |
| 0.350913372 | 0.29835764  | 0.066104223 | 0.290174292 |
| 0.036072796 | 0.017494241 | 0.104100684 | 0.236244788 |
| 0.065332834 | 0.174560444 | 0.246798138 | 0.129491046 |
| 0.192651094 | 0.048499326 | 0.199567575 | 0.215659987 |
| 0.261725212 | 0.200963423 | 0.259683234 | 0.194944601 |
| 0.245135279 | 0.215930612 | 0.239438477 | 0.185059707 |
| 0.125956096 | 0.198464886 | 0.154015027 | 0.043958978 |
| 0.132991528 | 0.185474683 | 0.083333136 | 0.159007552 |
| 0.313333334 | 0.313880165 | 0.088759131 | 0.059905977 |
| 0.229005931 | 0.194467163 | 0.345432866 | 0.265808723 |
| 0.302954311 | 0.36046495  | 0.291407343 | 0.23669089  |
| 0.096693341 | 0.260993588 | 0.263242123 | 0.263445998 |
| 0.312373331 | 0.042843495 | 0.274613243 | 0.207509709 |
| 0.130807086 | 0.175966874 | 0.109248312 | 0.109420091 |
| 0.23187325  | 0.206900054 | 0.259807284 | 0.085412854 |
| 0.214422283 | 0.225168896 | 0.073815555 | 0.200800359 |
| 0.247924315 | 0.173544734 | 0.168966197 | 0.139981508 |
| 0.218750156 | 0.048137831 | 0.26185508  | 0.347748705 |
| 0.124389331 | 0.084689801 | 0.089317081 | 0.268222175 |
| 0.249358737 | 0.121468981 | 0.055005732 | 0.212427982 |
| 0.337521006 | 0.220074922 | 0.279654405 | 0.359733758 |
| 0.088533188 | 0.211438942 | 0.167422374 | 0.226911535 |
| 0.187716434 | 0.138583007 | 0.202049721 | 0.078243546 |
| 0.275604079 | 0.308083919 | 0.235579878 | 0.223342764 |
| 0.168492177 | 0.066061017 | 0.034679631 | 0.271606416 |
| 0.230079122 | 0.095793256 | 0.075612713 | 0.276130194 |
| 0.018456805 | 0.197623017 | 0.336118752 | 0.226967162 |
| 0.336282744 | 0.326163469 | 0.316683986 | 0.147642229 |
| 0.006483895 | 0.247403313 | 0.258651183 | 0.166955169 |
| 0.23003221  | 0.24431809  | 0.118359144 | 0.164040352 |
| 0.315459214 | 0.055793802 | 0.194222562 | 0.119528462 |
| 0.118201564 | 0.174630145 | 0.250012172 | 0.14945649  |
| 0.251003373 | 0.055194721 | 0.225600491 | 0.190128716 |
| 0.161729839 | 0.280634148 | 0.321361026 | 0.060198257 |
| 0.137534456 | 0.311363283 | 0.227984228 | 0.046710561 |
| 0.213120972 | 0.287029191 | 0.317526129 | 0.006342489 |
| 0.276734191 | 0.033674653 | 0.265211871 | 0.260545272 |
| 0.259467988 | 0.23296487  | 0.314840974 | 0.240568272 |
| 0.185929829 | 0.193120692 | 0.219659493 | 0.270997659 |
| 0.253399431 | 0.168648713 | 0.236033883 | 0.131410359 |
| 0.251952336 | 0.13819163  | 0.085880871 | 0.077669133 |
| 0.124220355 | 0.269813151 | 0.235600126 | 0.057483683 |
| 0.266231285 | 0.140285534 | 0.342853387 | 0.249404136 |
| 0.359083033 | 0.067554794 | 0.187110131 | 0.237582735 |
| 0.063035938 | 0.113170393 | 0.052157878 | 0.154831741 |
| 0.205081052 | 0.260501102 | 0.125407874 | 0.121554786 |
| 0.184487933 | 0.304679282 | 0.230002679 | 0.316935955 |
| 0.198063853 | 0.134256197 | 0.058957885 | 0.199088413 |

|             |             |             |             |
|-------------|-------------|-------------|-------------|
| 0.138535499 | 0.121071576 | 0.27386954  | 0.008903959 |
| 0.260981894 | 0.10802025  | 0.290260488 | 0.265176959 |
| 0.174793981 | 0.328505105 | 0.069006318 | 0.097576332 |
| 0.050707749 | 0.102027503 | 0.157303125 | 0.231566827 |
| 0.159038988 | 0.190435067 | 0.272868336 | 0.091804814 |
| 0.273450636 | 0.220893482 | 0.231239721 | 0.15879407  |
| 0.198503332 | 0.128901568 | 0.275057972 | 0.07385164  |
| 0.158884656 | 0.282126032 | 0.107798801 | 0.226452371 |
| 0.252018026 | 0.308843778 | 0.066771783 | 0.314091968 |
| 0.194727162 | 0.116133571 | 0.353344194 | 0.156407003 |
| 0.149269973 | 0.263503287 | 0.180241873 | 0.105876807 |
| 0.194805818 | 0.181074863 | 0.003766558 | 0.087826826 |
| 0.335125607 | 0.118829363 | 0.182302936 | 0.266180385 |
| 0.261490362 | 0.346509746 | 0.164955193 | 0.131097933 |
| 0.232847441 | 0.268759322 | 0.183404259 | 0.266570078 |
| 0.26034011  | 0.159536988 | 0.15346062  | 0.016422926 |
| 0.199891047 | 0.177885342 | 0.106452306 | 0.103256669 |
| 0.047841772 | 0.170689737 | 0.177551219 | 0.046897285 |
| 0.344668347 | 0.147435383 | 0.138544133 | 0.248355547 |
| 0.155357834 | 0.27160583  | 0.256111233 | 0.307936706 |
| 0.036025412 | 0.22958593  | 0.176148293 | 0.134180807 |
| 0.251411456 | 0.226590193 | 0.322884925 | 0.244989131 |
| 0.082247007 | 0.253014591 | 0.006386223 | 0.282025091 |
| 0.235199328 | 0.17993955  | 0.197241332 | 0.068708762 |
| 0.326819055 | 0.278765317 | 0.211102263 | 0.140389851 |
| 0.054599488 | 0.257889497 | 0.225342709 | 0.256367106 |
| 0.097770828 | 0.153550248 | 0.141977458 | 0.20437726  |
| 0.243452847 | 0.173752825 | 0.245107218 | 0.111433372 |
| 0.259758697 | 0.222406982 | 0.093892567 | 0.253920625 |
| 0.153370979 | 0.066864624 | 0.094394303 | 0.330688693 |
| 0.251386775 | 0.25577707  | 0.339145187 | 0.210484395 |
| 0.204845074 | 0.246254175 | 0.151222147 | 0.312764637 |
| 0.225276167 | 0.266150883 | 0.305283799 | 0.272127183 |
| 0.350764994 | 0.261571319 | 0.227750477 | 0.254465655 |
| 0.232414866 | 0.131823076 | 0.211858938 | 0.243594548 |
| 0.207657026 | 0.296159948 | 0.104320328 | 0.28529941  |
| 0.110880945 | 0.183413821 | 0.174786619 | 0.148208408 |
| 0.251944803 | 0.215821395 | 0.253480475 | 0.331934884 |
| 0.235352086 | 0.080099466 | 0.347407791 | 0.047172452 |
| 0.136096054 | 0.284956706 | 0.230917784 | 0.211590511 |
| 0.163958703 | 0.186944042 | 0.104964374 | 0.004695679 |
| 0.314610533 | 0.108508475 | 0.203149153 | 0.263243375 |
| 0.166085444 | 0.063892951 | 0.285243523 | 0.354272456 |
| 0.212079672 | 0.13521024  | 0.13140308  | 0.279069762 |
| 0.203550325 | 0.123105635 | 0.15337555  | 0.162973818 |
| 0.222917619 | 0.086869336 | 0.126385529 | 0.158188154 |
| 0.240017345 | 0.167376068 |             |             |
| LGALS9      | 0.024716703 | 0.151084484 | 0.011145524 |
| 0.027856159 | 0.290069705 | 0.079251776 | 0.025080306 |
| 0.043019586 | 0.135512034 | 0.034541275 | 0.171404441 |
| 0.007840447 | 0.168091743 | 0.217317109 | 0.030996183 |
| 0.227524723 | 0.024175958 | 0.063278934 | 0.035451509 |
| 0.04742849  | 0.274602352 | 0.098550699 | 0.076330615 |
| 0.262642539 | 0.077712703 | 0.089822953 | 0.186269743 |



|             |             |             |             |
|-------------|-------------|-------------|-------------|
| 0.199969123 | 0.05387334  | 0.195564273 | 0.013957909 |
| 0.194648125 | 0.298330166 | 0.150506038 | 0.004050961 |
| 0.15262538  | 0.05548689  | 0.174682439 | 0.128353825 |
| 0.106667306 | 0.170962832 | 0.04325831  | 0.113481103 |
| 0.065820974 | 0.00884305  | 0.017994875 | 0.212043309 |
| 0.106373641 | 0.103496217 | 0.017504204 | 0.164220559 |
| 0.082861268 | 0.13840766  | 0.0984663   | 0.001261107 |
| 0.186723349 | 0.087705597 | 0.132719876 | 0.193006195 |
| 0.133560771 | 0.104177142 | 0.052731994 | 0.102496939 |
| 0.183001995 | 0.244641224 | 0.20744418  | 0.05671268  |
| 0.206580157 | 0.15228283  | 0.198739353 | 0.036615816 |
| 0.090520982 | 0.010710373 | 0.105079649 | 0.030913238 |
| 0.104974767 | 0.169553953 | 0.235499827 | 0.185156386 |
| 0.126728244 | 0.226340184 | 0.144872993 | 0.170710952 |
| 0.138009498 | 0.28146321  | 0.162238351 | 0.250509423 |
| 0.207554952 | 0.032953153 | 0.202259637 | 0.22563162  |
| 0.022098826 | 0.084481346 | 0.17036529  | 0.050535584 |
| 0.166134659 | 0.118299787 | 0.070257004 | 0.168698342 |
| 0.299237961 | 0.228632787 | 0.195794186 | 0.159407135 |
| 0.24272     | 0.023339962 | 0.15801879  | 0.301365569 |
| 0.141760715 | 0.02670691  | 0.112152553 | 0.242564252 |
| 0.161959734 | 0.208012824 | 0.166481944 | 0.208377765 |
| 0.200562848 | 0.210132821 | 0.164053814 | 0.204818937 |
| 0.019624058 | 0.208543606 | 0.076551027 | 0.030104089 |
| 0.016582611 | 0.073772706 | 0.116574655 | 0.218365587 |
| 0.226499628 | 0.172936746 | 0.065447603 | 0.177334992 |
| 0.283566938 | 0.152399422 | 0.202240863 | 0.202420937 |
| 0.018351429 | 0.134729162 | 0.176533878 | 0.073717085 |
| 0.206555529 | 0.078844782 | 0.250254355 | 0.185368021 |
| 0.1817376   | 0.253545002 | 0.036137243 | 0.197513431 |
| 0.09717623  | 0.246645703 | 0.151037473 | 0.09297     |
| 0.203025818 | 0.173624281 | 0.260302655 | 0.287418878 |
| 0.192077077 | 0.082054366 | 0.034910637 | 0.189475794 |
| 0.270378363 | 0.025749185 | 0.228749208 | 0.242187318 |
| 0.179270838 | 0.229942471 | 0.275218827 | 0.242231065 |
| 0.184227212 | 0.039342395 | 0.018026333 | 0.272870084 |
| 0.183350064 | 0.186250836 | 0.101888074 | 0.139272341 |
| 0.268069392 | 0.08806462  | 0.229673376 | 0.05374409  |
| 0.268139192 | 0.213730977 | 0.215387866 | 0.175464715 |
| 0.087529857 | 0.159786798 | 0.199744914 | 0.14915537  |
| 0.021393024 | 0.029451917 | 0.017470214 | 0.21147763  |
| 0.026870097 | 0.158753098 | 0.067732379 | 0.232861563 |
| 0.159852347 | 0.081018361 | 0.148966376 | 0.305394785 |
| 0.019788251 | 0.125526447 | 0.068795052 | 0.053255677 |
| 0.02367329  | 0.07831345  | 0.048186225 | 0.055772002 |
| 0.221777907 | 0.081794854 | 0.191757453 | 0.238825443 |
| 0.147934446 | 0.064544055 | 0.169482302 | 0.257245808 |
| 0.275098327 | 0.207984509 | 0.155755707 | 0.007050572 |
| 0.065221316 | 0.071028522 | 0.14406679  | 0.180554678 |
| 0.076771193 | 0.066989781 | 0.189695458 | 0.302342787 |
| 0.061534735 | 0.049718204 | 0.11636557  | 0.195578391 |
| 0.054599323 | 0.142114516 | 0.246270672 | 0.111360809 |
| 0.001133254 | 0.103752192 | 0.212778721 | 0.14177808  |
| 0.147436352 | 0.11778963  | 0.102365749 | 0.222830514 |

|             |             |             |             |
|-------------|-------------|-------------|-------------|
| 0.104874013 | 0.207076704 | 0.242780695 | 0.318829864 |
| 0.060798388 | 0.076647343 | 0.261870068 | 0.05205244  |
| 0.220381772 | 0.055797735 | 0.2465297   | 0.056207234 |
| 0.121480263 | 0.241653599 | 0.306178382 | 0.170329984 |
| 0.036723375 | 0.212026908 | 0.20174362  | 0.229708438 |
| 0.085832536 | 0.253824043 | 0.236445198 | 0.226539046 |
| 0.175970062 | 0.141425938 | 0.131817538 | 0.192688587 |
| 0.220303594 | 0.048773474 | 0.024753897 | 0.212958608 |
| 0.087309683 | 0.254067794 | 0.125562131 | 0.240474821 |
| 0.226526588 | 0.142376558 | 0.104481046 | 0.31264191  |
| 0.195719272 | 0.092590102 | 0.236254955 | 0.272896431 |
| 0.032715133 | 0.184618019 | 0.128839171 | 0.317715947 |
| 0.085988103 | 0.1530051   | 0.182713568 | 0.144184904 |
| 0.010370165 | 0.034164598 | 0.024954247 | 0.160464903 |
| 0.198190072 | 0.146799288 | 0.226383356 | 0.222787042 |
| 0.078886916 | 0.211350482 | 0.148256031 | 0.08988744  |
| 0.158802572 | 0.191026447 | 0.238227853 | 0.262339616 |
| 0.155666683 | 0.011651732 | 0.046649046 | 0.214519988 |
| 0.012825233 | 0.158618896 | 0.117384765 | 0.002429921 |
| 0.013903345 | 0.128972434 | 0.038404862 | 0.093487927 |
| 0.302185112 | 0.079357936 | 0.075702018 | 0.036653817 |
| 0.259392765 | 0.055829367 | 0.008216018 | 0.219063383 |
| 0.216256276 | 0.212398612 | 0.20576368  | 0.180257263 |
| 0.224800177 | 0.218049766 | 0.249226061 | 0.07494078  |
| 0.033426219 | 0.022293769 | 0.109031835 | 0.153035035 |
| 0.002010475 | 0.264380151 | 0.246478401 | 0.089551517 |
| 0.256056266 | 0.185381505 | 0.015967401 | 0.287533669 |
| 0.003817957 | 0.100927107 | 0.054877671 | 0.157131047 |
| 0.335620644 | 0.004656545 | 0.02278249  | 0.071391517 |
| 0.141937315 | 0.151202032 | 0.124241393 | 0.21593246  |
| 0.17375198  | 0.031559452 | 0.161889601 | 0.285264924 |
| 0.031919393 | 0.019598719 | 0.077837191 | 0.002251376 |
| 0.044442759 | 0.20593388  | 0.116069111 | 0.010812625 |
| 0.133247422 | 0.001605551 | 0.138503901 | 0.230614845 |
| 0.147274477 | 0.251893901 | 0.21680978  | 0.206357777 |
| 0.20100265  | 0.090615231 | 0.226305927 | 0.147007517 |
| 0.057650747 | 0.000206908 | 0.008935935 | 0.233678425 |
| 0.175465111 | 0.016683627 | 0.095242051 | 0.034462188 |
| 0.046339404 | 0.030400388 | 0.041718337 | 0.17529781  |
| 0.159228699 | 0.270387729 | 1           | 0.161732855 |
| 0.12709139  | 0.192686875 | 0.072021632 | 0.041206445 |
| 0.220359919 | 0.021097669 | 0.043760844 | 0.007892614 |
| 0.302451146 | 0.038131884 | 0.154616463 | 0.202618612 |
| 0.236569066 | 0.270808951 | 0.043882846 | 0.065050415 |
| 0.257100494 | 0.022418345 | 0.06668454  | 0.03012426  |
| 0.163540081 | 0.2040757   | 0.200091965 | 0.133381352 |
| 0.250293338 | 0.194232856 | 0.020061522 | 0.221261363 |
| 0.004793524 | 0.012893048 | 0.059794852 | 0.182612183 |
| 0.070429997 | 0.159553986 | 0.146278947 | 0.083790297 |
| 0.124001645 | 0.008116416 | 0.186791714 | 0.198315472 |
| 0.191644207 | 0.171930523 | 0.281639857 | 0.150403067 |
| 0.188723689 | 0.114552283 | 0.130739566 | 0.094237808 |
| 0.076039227 | 0.116668761 | 0.074861788 | 0.009977874 |
| 0.105225063 | 0.167153601 | 0.031280618 | 0.087992527 |

|             |             |             |             |
|-------------|-------------|-------------|-------------|
| 0.222523911 | 0.230472527 | 0.022315545 | 0.011078187 |
| 0.137374583 | 0.164932657 | 0.266777    | 0.182084907 |
| 0.200234483 | 0.255878348 | 0.183927182 | 0.098898391 |
| 0.03039722  | 0.225414635 | 0.297174366 | 0.115393896 |
| 0.223761257 | 0.019307046 | 0.187247567 | 0.262064718 |
| 0.075374626 | 0.068033575 | 0.024958753 | 0.061360102 |
| 0.248039078 | 0.130474889 | 0.184221226 | 0.037166288 |
| 0.142058243 | 0.135938324 | 0.026362104 | 0.123537885 |
| 0.169100873 | 0.100617968 | 0.0993959   | 0.089656411 |
| 0.152697692 | 0.027477236 | 0.225400196 | 0.234959901 |
| 0.062616678 | 0.04912311  | 0.02114385  | 0.250378562 |
| 0.191549712 | 0.114908602 | 0.009090755 | 0.14427465  |
| 0.260949868 | 0.180362398 | 0.184126852 | 0.289347344 |
| 0.045264961 | 0.184185556 | 0.180033936 | 0.205966778 |
| 0.132274357 | 0.085306129 | 0.175375747 | 0.038383944 |
| 0.202014854 | 0.213396773 | 0.158065995 | 0.117326238 |
| 0.154382397 | 0.035921818 | 0.014912619 | 0.220702477 |
| 0.125859364 | 0.0202042   | 0.053125523 | 0.24827042  |
| 0.006417054 | 0.170082755 | 0.274267081 | 0.097705966 |
| 0.245272709 | 0.241033666 | 0.203632084 | 0.074413082 |
| 0.007877604 | 0.235502256 | 0.191917869 | 0.101710678 |
| 0.154047163 | 0.166789584 | 0.061617108 | 0.043228704 |
| 0.21341763  | 0.023147667 | 0.059595513 | 0.041719384 |
| 0.066786952 | 0.129991257 | 0.166518767 | 0.11365017  |
| 0.175347131 | 0.031459014 | 0.140606427 | 0.102278195 |
| 0.135592755 | 0.180174301 | 0.22222043  | 0.03083622  |
| 0.068776874 | 0.254511319 | 0.158716559 | 0.010055222 |
| 0.250569983 | 0.231100756 | 0.24929031  | 0.000798749 |
| 0.224673297 | 0.005967852 | 0.195985052 | 0.162221769 |
| 0.159872832 | 0.16598973  | 0.285293883 | 0.137685927 |
| 0.142835066 | 0.11593333  | 0.112726254 | 0.178490237 |
| 0.106353246 | 0.114876803 | 0.217541307 | 0.089237201 |
| 0.136815619 | 0.048422918 | 0.040876837 | 0.035204718 |
| 0.028216263 | 0.205200257 | 0.134807567 | 0.023935047 |
| 0.202959504 | 0.099641312 | 0.231244032 | 0.166232971 |
| 0.273671496 | 0.030315137 | 0.154167486 | 0.155848866 |
| 0.038545908 | 0.043314403 | 0.015017286 | 0.11465097  |
| 0.14123608  | 0.121334937 | 0.105900645 | 0.067696917 |
| 0.149225442 | 0.18973923  | 0.133225992 | 0.229103742 |
| 0.139532185 | 0.139050639 | 0.028820171 | 0.05454014  |
| 0.059344228 | 0.06756345  | 0.285710326 | 0.000794702 |
| 0.195556334 | 0.026182681 | 0.213741343 | 0.168179568 |
| 0.172097847 | 0.230976389 | 0.020699259 | 0.021136962 |
| 0.016310882 | 0.047745473 | 0.086271479 | 0.189393744 |
| 0.136662833 | 0.082600446 | 0.248070711 | 0.031103388 |
| 0.232385427 | 0.196678033 | 0.170775161 | 0.107183239 |
| 0.166763949 | 0.070214326 | 0.191039745 | 0.031137125 |
| 0.133672794 | 0.147942702 | 0.083927093 | 0.162271605 |
| 0.186139306 | 0.230386477 | 0.031524039 | 0.233951369 |
| 0.158659738 | 0.062569848 | 0.241653281 | 0.129248965 |
| 0.052421126 | 0.100059459 | 0.164324786 | 0.067312991 |
| 0.081992412 | 0.152078259 | 0.00279929  | 0.058828332 |
| 0.246176296 | 0.09700135  | 0.135320808 | 0.237371358 |
| 0.218873442 | 0.286716862 | 0.148822716 | 0.090364495 |

|             |             |             |             |
|-------------|-------------|-------------|-------------|
| 0.14978032  | 0.174186676 | 0.053718801 | 0.18043338  |
| 0.190398435 | 0.058514087 | 0.100354443 | 0.01653752  |
| 0.17089515  | 0.169262677 | 0.047993773 | 0.034794892 |
| 0.009983983 | 0.136689481 | 0.139987065 | 0.025699388 |
| 0.277147497 | 0.098843623 | 0.123833261 | 0.200858917 |
| 0.102522751 | 0.171857408 | 0.113369727 | 0.23642772  |
| 0.011747437 | 0.170925291 | 0.199884731 | 0.139801013 |
| 0.088706057 | 0.208738936 | 0.238600948 | 0.211322194 |
| 0.020048208 | 0.104372159 | 0.001580425 | 0.167815906 |
| 0.147011448 | 0.192806066 | 0.1193592   | 0.038331034 |
| 0.245269901 | 0.220245619 | 0.109201491 | 0.133290135 |
| 0.010056529 | 0.24188141  | 0.161030764 | 0.164389582 |
| 0.040445657 | 0.139509219 | 0.034251226 | 0.245642108 |
| 0.147985478 | 0.074862098 | 0.176107148 | 0.044063253 |
| 0.175516846 | 0.172121698 | 0.046537069 | 0.139477151 |
| 0.138308534 | 0.03167104  | 0.058986658 | 0.241330567 |
| 0.153678836 | 0.221248967 | 0.276331161 | 0.091855497 |
| 0.226801423 | 0.171300598 | 0.139134664 | 0.231939568 |
| 0.086790865 | 0.175421142 | 0.263046451 | 0.196884336 |
| 0.263769694 | 0.216644901 | 0.163413419 | 0.174387424 |
| 0.143045269 | 0.027448173 | 0.129515621 | 0.159269031 |
| 0.160037605 | 0.241121549 | 0.083199312 | 0.222846421 |
| 0.027111054 | 0.084880488 | 0.078906567 | 0.085328503 |
| 0.191326017 | 0.183389313 | 0.154409421 | 0.218995258 |
| 0.069397052 | 0.013932348 | 0.239673379 | 0.032505822 |
| 0.082184786 | 0.227297491 | 0.171171584 | 0.198548795 |
| 0.079974649 | 0.148187652 | 0.064549454 | 0.000375563 |
| 0.25880364  | 0.055600676 | 0.170425527 | 0.120340077 |
| 0.102925742 | 0.01714648  | 0.188213378 | 0.269326655 |
| 0.159302312 | 0.071584655 | 0.068712007 | 0.19686536  |
| 0.126856573 | 0.105220369 | 0.125948677 | 0.115641685 |
| 0.205301808 | 0.065068934 | 0.109296961 | 0.121600393 |
| 0.171496647 | 0.107249644 |             |             |
| LIG1        | 0.177080192 | 0.48586895  | 0.16086416  |
| 0.204496778 | 0.295064464 | 0.460728438 | 0.140795035 |
| 0.231267572 | 0.44851016  | 0.386226468 | 0.394514001 |
| 0.056731401 | 0.068201547 | 0.482099287 | 0.124750791 |
| 0.389952525 | 0.076075403 | 0.199103138 | 0.121675221 |
| 0.307943146 | 0.274603656 | 0.333782705 | 0.497338184 |
| 0.282055133 | 0.30797953  | 0.461544291 | 0.391164416 |
| 0.493762676 | 0.274218403 | 0.453965429 | 0.250155728 |
| 0.439807775 | 0.310222291 | 0.378777468 | 0.060500867 |
| 0.456635929 | 0.012510125 | 0.457534064 | 0.288526272 |
| 0.126627239 | 0.415781326 | 0.445121899 | 0.288465513 |
| 0.455104598 | 0.110392068 | 0.277113276 | 0.424228276 |
| 0.431427464 | 0.344835888 | 0.18430621  | 0.474561564 |
| 0.418214005 | 0.447581946 | 0.487179678 | 0.009097148 |
| 0.27464525  | 0.067998987 | 0.199047405 | 0.499095576 |
| 0.293572817 | 0.19088964  | 0.306212559 | 0.358076024 |
| 0.428719917 | 0.40604355  | 0.326688579 | 0.43233157  |
| 0.489769871 | 0.154827304 | 0.456422975 | 0.21253217  |
| 0.458317836 | 0.113694373 | 0.260321855 | 0.211753894 |
| 0.401425271 | 0.258385516 | 0.355390134 | 0.28279361  |
| 0.491471232 | 0.515085301 | 0.329559478 | 0.514349152 |

|             |             |             |             |
|-------------|-------------|-------------|-------------|
| 0.093541319 | 0.322167339 | 0.266605221 | 0.344095287 |
| 0.421663054 | 0.178075218 | 0.44916487  | 0.501194878 |
| 0.139226277 | 0.474158111 | 0.460600401 | 0.262162802 |
| 0.489423911 | 0.272351992 | 0.473890285 | 0.149179947 |
| 0.360712256 | 0.338731427 | 0.488679904 | 0.377267094 |
| 0.318538903 | 0.191659521 | 0.517663602 | 0.293724642 |
| 0.313719713 | 0.192528099 | 0.227325614 | 0.468045662 |
| 0.454435642 | 0.494599991 | 0.48762665  | 0.42467907  |
| 0.375710042 | 0.487459557 | 0.456788387 | 0.471038724 |
| 0.20550454  | 0.510059583 | 0.291475804 | 0.088706837 |
| 0.197043758 | 0.142984983 | 0.246007982 | 0.36946928  |
| 0.480526608 | 0.426107676 | 0.313260941 | 0.265694311 |
| 0.446931009 | 0.504644583 | 0.51122685  | 0.470060686 |
| 0.107387894 | 0.230037267 | 0.380972062 | 0.387378879 |
| 0.433218984 | 0.216738421 | 0.231110796 | 0.522625316 |
| 0.440128471 | 0.449814949 | 0.309947573 | 0.520588025 |
| 0.303759525 | 0.481842446 | 0.500293961 | 0.248794316 |
| 0.513576652 | 0.510221819 | 0.470047228 | 0.38939577  |
| 0.47619563  | 0.434011291 | 0.100408348 | 0.448541235 |
| 0.458255691 | 0.013011945 | 0.483911758 | 0.482850223 |
| 0.494098623 | 0.471047047 | 0.470252942 | 0.485073521 |
| 0.500838543 | 0.176060388 | 0.034425024 | 0.310966933 |
| 0.509506209 | 0.4498424   | 0.182369483 | 0.42840322  |
| 0.360250132 | 0.488681941 | 0.45969187  | 0.333246542 |
| 0.48510182  | 0.477354518 | 0.493227877 | 0.471890349 |
| 0.4177865   | 0.402447045 | 0.36492911  | 0.501189722 |
| 0.099764952 | 0.238601196 | 0.155014591 | 0.37792529  |
| 0.437572984 | 0.235947192 | 0.49111091  | 0.372924142 |
| 0.266323824 | 0.464625829 | 0.317121122 | 0.372930668 |
| 0.164983072 | 0.479320521 | 0.273575392 | 0.309697679 |
| 0.086298579 | 0.25779015  | 0.261023379 | 0.214051798 |
| 0.283659734 | 0.326814861 | 0.473158606 | 0.476691385 |
| 0.372035732 | 0.313304592 | 0.485027214 | 0.460448944 |
| 0.420857759 | 0.369527115 | 0.329687916 | 0.020335002 |
| 0.300277108 | 0.329509813 | 0.161238629 | 0.415500603 |
| 0.287552977 | 0.308346829 | 0.419410459 | 0.390566072 |
| 0.423538487 | 0.285009571 | 0.381031057 | 0.442266341 |
| 0.291494858 | 0.314787831 | 0.461162856 | 0.475250248 |
| 0.015117201 | 0.407811571 | 0.47661822  | 0.150878081 |
| 0.418072212 | 0.120552448 | 0.233152011 | 0.471057253 |
| 0.293268558 | 0.215657468 | 0.482605855 | 0.386710116 |
| 0.403309275 | 0.339372195 | 0.481664794 | 0.054359432 |
| 0.351478718 | 0.060610197 | 0.320430932 | 0.433509721 |
| 0.342634197 | 0.347826048 | 0.298951298 | 0.275509672 |
| 0.269702122 | 0.503403164 | 0.457592968 | 0.489735165 |
| 0.384393413 | 0.487773209 | 0.471432306 | 0.466631618 |
| 0.430402635 | 0.380894002 | 0.111152682 | 0.475406339 |
| 0.469474327 | 0.347876895 | 0.196299806 | 0.47015703  |
| 0.415111023 | 0.411990346 | 0.122813335 | 0.47109465  |
| 0.48809628  | 0.493215053 | 0.199298287 | 0.380988011 |
| 0.438191898 | 0.338066351 | 0.448870254 | 0.489249096 |
| 0.386056409 | 0.360874902 | 0.331606536 | 0.397641534 |
| 0.282516219 | 0.20332751  | 0.399050608 | 0.15078396  |
| 0.008795571 | 0.200840458 | 0.168505163 | 0.196979015 |

|             |             |             |             |
|-------------|-------------|-------------|-------------|
| 0.139209182 | 0.459232689 | 0.42033169  | 0.490301605 |
| 0.200077954 | 0.461355461 | 0.343026223 | 0.312450421 |
| 0.474632763 | 0.361114692 | 0.363409967 | 0.395814058 |
| 0.343842151 | 0.032713753 | 0.162384979 | 0.520588598 |
| 0.140753694 | 0.214898791 | 0.426099871 | 0.004695315 |
| 0.127560996 | 0.490857685 | 0.215261259 | 0.294605205 |
| 0.454020321 | 0.30742174  | 0.335542043 | 0.414190583 |
| 0.382590687 | 0.185038773 | 0.004414177 | 0.477801368 |
| 0.47264926  | 0.46333107  | 0.476309728 | 0.471423433 |
| 0.458924952 | 0.44983852  | 0.430578554 | 0.476280832 |
| 0.198303157 | 0.216370204 | 0.19144052  | 0.322060776 |
| 0.013684049 | 0.409686273 | 0.32525672  | 0.242571071 |
| 0.440651724 | 0.383710659 | 0.1007146   | 0.354300056 |
| 0.063617536 | 0.176599334 | 0.419651502 | 0.278153196 |
| 0.357603678 | 0.053594533 | 0.28302304  | 0.333555627 |
| 0.477160081 | 0.440899476 | 0.345829224 | 0.509267669 |
| 0.371799166 | 0.279452865 | 0.323435278 | 0.415083131 |
| 0.151409376 | 0.158989409 | 0.456428336 | 0.05323202  |
| 0.264707629 | 0.461785875 | 0.406306164 | 0.160232803 |
| 0.348536741 | 0.022491146 | 0.453573424 | 0.507009501 |
| 0.486669653 | 0.47944945  | 0.488208976 | 0.244824477 |
| 0.488260311 | 0.087062499 | 0.495935931 | 0.486216447 |
| 0.434169105 | 0.002966322 | 0.011735924 | 0.478921501 |
| 0.401864953 | 0.172647879 | 0.255535225 | 0.435506944 |
| 0.164779293 | 0.303870374 | 0.143255765 | 0.160971475 |
| 0.467912698 | 0.245841008 | 0.161732855 | 1           |
| 0.29880834  | 0.290463029 | 0.487471654 | 0.206706642 |
| 0.416531465 | 0.111066872 | 0.203106564 | 0.009582474 |
| 0.378276457 | 0.248059923 | 0.51042721  | 0.491357376 |
| 0.468628381 | 0.394256077 | 0.395973331 | 0.401386902 |
| 0.452803419 | 0.242391389 | 0.383344255 | 0.256315132 |
| 0.497327915 | 0.40654549  | 0.386274583 | 0.403763136 |
| 0.470541987 | 0.47807835  | 0.090277292 | 0.43914763  |
| 0.032403921 | 0.001928244 | 0.482652238 | 0.355024282 |
| 0.074141066 | 0.373146614 | 0.343744131 | 0.313209725 |
| 0.277372781 | 0.088634298 | 0.233411044 | 0.216872143 |
| 0.343440434 | 0.388571838 | 0.255285209 | 0.351148154 |
| 0.264819792 | 0.133951098 | 0.245127275 | 0.233600862 |
| 0.300216302 | 0.417962035 | 0.312934056 | 0.067425356 |
| 0.458879615 | 0.419640678 | 0.134018364 | 0.272567036 |
| 0.466885761 | 0.485914633 | 0.090629688 | 0.02095973  |
| 0.370959389 | 0.354074837 | 0.475812385 | 0.498067124 |
| 0.52474241  | 0.482801753 | 0.428103045 | 0.154797743 |
| 0.148554336 | 0.343380166 | 0.275040449 | 0.106970249 |
| 0.491630516 | 0.189755219 | 0.486320959 | 0.267246806 |
| 0.220645429 | 0.28746566  | 0.069943918 | 0.168742025 |
| 0.370804543 | 0.271201674 | 0.20996707  | 0.291124896 |
| 0.340652126 | 0.225233183 | 0.121220921 | 0.280080675 |
| 0.43245878  | 0.149626238 | 0.260520194 | 0.411266845 |
| 0.448201332 | 0.310969281 | 0.44200162  | 0.44385012  |
| 0.248220711 | 0.226967471 | 0.420602546 | 0.428619218 |
| 0.48473039  | 0.441273115 | 0.057823478 | 0.496417795 |
| 0.474447606 | 0.464342078 | 0.496419841 | 0.412321903 |
| 0.191966882 | 0.377146376 | 0.3052057   | 0.359323301 |

|             |             |             |             |
|-------------|-------------|-------------|-------------|
| 0.278039463 | 0.465525558 | 0.305267139 | 0.152078212 |
| 0.371631196 | 0.489993432 | 0.478163092 | 0.220894077 |
| 0.45756426  | 0.282017755 | 0.176269322 | 0.477987428 |
| 0.155439028 | 0.183943019 | 0.456929653 | 0.457228321 |
| 0.00217234  | 0.108289883 | 0.459458623 | 0.305745425 |
| 0.494335034 | 0.470140658 | 0.456353585 | 0.355422892 |
| 0.001560842 | 0.409372005 | 0.406392176 | 0.417138195 |
| 0.499060191 | 0.444375689 | 0.226973681 | 0.120931887 |
| 0.347742544 | 0.209967821 | 0.188257338 | 0.419672945 |
| 0.158287073 | 0.494791937 | 0.277102089 | 0.310778552 |
| 0.22878232  | 0.229262163 | 0.214056961 | 0.319057669 |
| 0.136214919 | 0.316482948 | 0.400838682 | 0.398320235 |
| 0.190020371 | 0.453212512 | 0.473410888 | 0.080948335 |
| 0.342315328 | 0.442721465 | 0.453249835 | 0.005988042 |
| 0.442502194 | 0.023408274 | 0.228390753 | 0.243612294 |
| 0.23357198  | 0.256552832 | 0.278896826 | 0.29600763  |
| 0.440266966 | 0.29534846  | 0.325819192 | 0.297822917 |
| 0.195169695 | 0.315086601 | 0.403533086 | 0.43538191  |
| 0.286889968 | 0.213329805 | 0.218107017 | 0.218281586 |
| 0.100209489 | 0.488288557 | 0.343129    | 0.190847883 |
| 0.29048234  | 0.432286549 | 0.393525921 | 0.495092751 |
| 0.433271627 | 0.250916868 | 0.378779103 | 0.498681099 |
| 0.287407827 | 0.390740859 | 0.174672833 | 0.454339016 |
| 0.321593371 | 0.211143668 | 0.468821144 | 0.451560275 |
| 0.479926261 | 0.428381645 | 0.343730189 | 0.452161274 |
| 0.390363042 | 0.393410621 | 0.419348339 | 0.119972331 |
| 0.277477389 | 0.252413011 | 0.247353904 | 0.007457259 |
| 0.414185196 | 0.390097527 | 0.485187205 | 0.493567347 |
| 0.267494443 | 0.423015714 | 0.428683529 | 0.179054668 |
| 0.367848623 | 0.312027783 | 0.249012081 | 0.473759859 |
| 0.189248427 | 0.265712908 | 0.303627244 | 0.465002067 |
| 0.447468834 | 0.450907647 | 0.251980986 | 0.354042184 |
| 0.308798272 | 0.329886547 | 0.485428808 | 0.25271257  |
| 0.456758503 | 0.168293532 | 0.469367599 | 0.317784226 |
| 0.250543545 | 0.484359463 | 0.150657298 | 0.490391007 |
| 0.343849987 | 0.255296003 | 0.478136926 | 0.400578063 |
| 0.384112684 | 0.145741687 | 0.154071095 | 0.468109026 |
| 0.291927653 | 0.314196086 | 0.024426437 | 0.074284673 |
| 0.365141254 | 0.363323022 | 0.484425009 | 0.413964292 |
| 0.227820976 | 0.368399838 | 0.138547211 | 0.413236943 |
| 0.501154146 | 0.519641973 | 0.309772756 | 0.325633465 |
| 0.424993744 | 0.173512738 | 0.498880789 | 0.026193658 |
| 0.440834937 | 0.427660685 | 0.430418596 | 0.118353054 |
| 0.056269134 | 0.181492347 | 0.456403415 | 0.185257091 |
| 0.460132385 | 0.185302627 | 0.444473774 | 0.46370566  |
| 0.29847828  | 0.522407768 | 0.154330251 | 0.428383658 |
| 0.132461932 | 0.339752804 | 0.36742451  | 0.416339037 |
| 0.231012887 | 0.26561946  | 0.402335825 | 0.204195429 |
| 0.076511777 | 0.274019734 | 0.005219648 | 0.43076855  |
| 0.502211576 | 0.322242989 | 0.313181032 | 0.373387844 |
| 0.32119732  | 0.432452395 | 0.270608822 | 0.434673505 |
| 0.024021694 | 0.356438958 | 0.277051687 | 0.481110008 |
| 0.240171765 | 0.424787182 | 0.096121567 | 0.30594329  |
| 0.506044059 | 0.315282506 | 0.347023638 | 0.324821933 |

|             |             |             |             |
|-------------|-------------|-------------|-------------|
| 0.49184245  | 0.4601299   | 0.307239054 | 0.226808261 |
| 0.455409868 | 0.167513304 | 0.460843757 | 0.499854538 |
| 0.218549499 | 0.186419239 | 0.441768292 | 0.255986585 |
| 0.28865092  | 0.462404266 | 0.44273057  | 0.499358122 |
| 0.096068064 | 0.322489314 | 0.441719925 | 0.48344022  |
| 0.346030511 | 0.149969594 | 0.222470512 | 0.238952391 |
| 0.486507528 | 0.161876597 | 0.250011732 | 0.442155831 |
| 0.191202877 | 0.361502776 | 0.44838837  | 0.19306928  |
| 0.069224225 | 0.248810319 | 0.416444694 | 0.246468629 |
| 0.349511719 | 0.368508393 | 0.229551307 | 0.419268748 |
| 0.166764731 | 0.043994814 | 0.444622182 | 0.014292068 |
| 0.455453444 | 0.405685124 | 0.321286978 | 0.351757959 |
| 0.303128113 | 0.439272892 | 0.465121613 | 0.006107086 |
| 0.434649603 | 0.043635633 | 0.326223621 | 0.227330629 |
| 0.293398127 | 0.135131997 | 0.472229863 | 0.474192307 |
| 0.413008518 | 0.355453606 | 0.348839669 | 0.481008631 |
| 0.120664791 | 0.324293647 | 0.340981806 | 0.494739843 |
| 0.189891643 | 0.444855129 | 0.434782873 | 0.361435187 |
| 0.456278111 | 0.369323317 |             |             |
| LIN54       | 0.094513324 | 0.24909393  | 0.058966191 |
| 0.162506207 | 0.218257522 | 0.108249858 | 0.127238927 |
| 0.14826927  | 0.215759813 | 0.0610317   | 0.192914858 |
| 0.075070491 | 0.041879248 | 0.321382138 | 0.124017613 |
| 0.214780964 | 0.124269309 | 0.164958559 | 0.048367287 |
| 0.13370201  | 0.220468355 | 0.106789215 | 0.121947553 |
| 0.185392794 | 0.235967473 | 0.174722665 | 0.133434397 |
| 0.304407132 | 0.051032775 | 0.206363832 | 0.046465964 |
| 0.375048998 | 0.219350056 | 0.102242255 | 0.053658811 |
| 0.157785866 | 0.021063192 | 0.365782159 | 0.215453145 |
| 0.103426799 | 0.329727847 | 0.071025694 | 0.202687606 |
| 0.1098463   | 0.077040294 | 0.029237465 | 0.215005754 |
| 0.175098906 | 0.15462504  | 0.074256757 | 0.219944317 |
| 0.121513405 | 0.221825613 | 0.165878989 | 0.004203024 |
| 0.094547675 | 0.025085344 | 0.068934635 | 0.320622167 |
| 0.264008011 | 0.182950694 | 0.07016714  | 0.114697839 |
| 0.174781594 | 0.240782569 | 0.26217204  | 0.099976304 |
| 0.336922111 | 0.085432044 | 0.213099736 | 0.124906679 |
| 0.136071149 | 0.060942038 | 0.263336998 | 0.102109754 |
| 0.125046611 | 0.225496402 | 0.177533526 | 0.128616153 |
| 0.241794834 | 0.3805585   | 0.251484749 | 0.319994346 |
| 0.082705555 | 0.184440694 | 0.157789544 | 0.331433057 |
| 0.25365689  | 0.123217624 | 0.279444341 | 0.382017118 |
| 0.075185454 | 0.122775912 | 0.241593473 | 0.149368476 |
| 0.252693074 | 0.089292029 | 0.104122371 | 0.091776024 |
| 0.243028135 | 0.208402789 | 0.329797635 | 0.29214714  |
| 0.14218854  | 0.107228864 | 0.311154534 | 0.177327199 |
| 0.164135717 | 0.117510949 | 0.188956827 | 0.273417435 |
| 0.231744843 | 0.309997751 | 0.24409749  | 0.302134862 |
| 0.183933102 | 0.334502916 | 0.264768818 | 0.28076259  |
| 0.021058386 | 0.332123575 | 0.1888809   | 0.120326381 |
| 0.072243885 | 0.154477391 | 0.131058077 | 0.324841445 |
| 0.294930077 | 0.23117978  | 0.161652965 | 0.238850049 |
| 0.334017594 | 0.289490983 | 0.327435746 | 0.291354137 |
| 0.0976379   | 0.096044026 | 0.186585231 | 0.118672738 |



|             |             |             |             |
|-------------|-------------|-------------|-------------|
| 0.256815171 | 0.171445575 | 0.134826079 | 0.3528575   |
| 0.33534509  | 0.297941041 | 0.112760965 | 0.370948462 |
| 0.145317272 | 0.388679184 | 0.250627693 | 0.212960086 |
| 0.365818504 | 0.332915822 | 0.379581575 | 0.234357799 |
| 0.330445112 | 0.162416427 | 0.03868615  | 0.290384556 |
| 0.381242131 | 0.019595789 | 0.284141849 | 0.3146663   |
| 0.317619002 | 0.281765015 | 0.376206026 | 0.325196626 |
| 0.308421454 | 0.134055547 | 0.013011707 | 0.292354853 |
| 0.341397748 | 0.330310973 | 0.164836148 | 0.148057967 |
| 0.213890542 | 0.131129283 | 0.24057728  | 0.099982826 |
| 0.408222034 | 0.295778669 | 0.287556129 | 0.255571147 |
| 0.139730976 | 0.311854151 | 0.139767096 | 0.303962375 |
| 0.116586493 | 0.108301523 | 0.088531971 | 0.278686027 |
| 0.073664448 | 0.253557744 | 0.122045574 | 0.191156761 |
| 0.273254541 | 0.110527929 | 0.084617316 | 0.244828824 |
| 0.102214738 | 0.15126969  | 0.169999351 | 0.163224597 |
| 0.142200973 | 0.22157227  | 0.174259131 | 0.170063175 |
| 0.211867266 | 0.247992973 | 0.201943793 | 0.329005324 |
| 0.136287167 | 0.210870921 | 0.226132    | 0.369309745 |
| 0.410036379 | 0.174699228 | 0.269707937 | 0.058479171 |
| 0.163902306 | 0.072348439 | 0.075311968 | 0.142571359 |
| 0.222944627 | 0.184351596 | 0.218093515 | 0.275878464 |
| 0.150387553 | 0.100786349 | 0.141496657 | 0.352586609 |
| 0.173975964 | 0.159346086 | 0.334541588 | 0.148175859 |
| 0.022297709 | 0.210005054 | 0.282858041 | 0.171051134 |
| 0.234036279 | 0.078549657 | 0.07843067  | 0.329342199 |
| 0.095901767 | 0.139092848 | 0.302024023 | 0.268404966 |
| 0.097245407 | 0.20722688  | 0.365132129 | 0.024187224 |
| 0.151142285 | 0.116055581 | 0.327469995 | 0.074524473 |
| 0.254957181 | 0.318955252 | 0.18142118  | 0.16537805  |
| 0.131325887 | 0.340340482 | 0.279228866 | 0.332473052 |
| 0.120081753 | 0.373770831 | 0.297015872 | 0.328977181 |
| 0.24154355  | 0.108515281 | 0.057710787 | 0.291264795 |
| 0.315723114 | 0.107804994 | 0.112610507 | 0.233873108 |
| 0.10628125  | 0.239770509 | 0.149909881 | 0.371603623 |
| 0.382549107 | 0.278142932 | 0.184133383 | 0.317270652 |
| 0.326631337 | 0.195260809 | 0.285984611 | 0.378287574 |
| 0.079194943 | 0.172239045 | 0.16496815  | 0.354378864 |
| 0.239489934 | 0.166216603 | 0.295371244 | 0.06446473  |
| 0.002136657 | 0.098810719 | 0.110958152 | 0.207560878 |
| 0.124105652 | 0.146667786 | 0.246659318 | 0.344135288 |
| 0.170729817 | 0.30440925  | 0.240895882 | 0.188926066 |
| 0.312209553 | 0.130064408 | 0.1507322   | 0.204862158 |
| 0.274633697 | 0.074132374 | 0.174617065 | 0.387556254 |
| 0.067022083 | 0.115962838 | 0.138384343 | 0.013452096 |
| 0.097064534 | 0.197535086 | 0.161384611 | 0.272354104 |
| 0.338863892 | 0.249863198 | 0.228254938 | 0.08504422  |
| 0.281172485 | 0.152041249 | 0.018433021 | 0.321137886 |
| 0.315907571 | 0.308465344 | 0.30914638  | 0.297679969 |
| 0.303170958 | 0.226190975 | 0.30191431  | 0.133002816 |
| 0.160193741 | 0.094165731 | 0.148105921 | 0.205389406 |
| 0.007996961 | 0.301861975 | 0.169801154 | 0.239250022 |
| 0.246052803 | 0.258521476 | 0.088624906 | 0.186439608 |
| 0.060374237 | 0.070781364 | 0.130661321 | 0.176453556 |

|             |             |             |             |
|-------------|-------------|-------------|-------------|
| 0.295564459 | 0.051924551 | 0.083770472 | 0.128052486 |
| 0.283262209 | 0.289041901 | 0.101976893 | 0.349593525 |
| 0.220081416 | 0.13089613  | 0.203671153 | 0.264897564 |
| 0.145816643 | 0.04694917  | 0.114922359 | 0.011227958 |
| 0.048983959 | 0.309772811 | 0.112546577 | 0.116038323 |
| 0.271069368 | 0.03007168  | 0.290795249 | 0.35772838  |
| 0.274643748 | 0.355614038 | 0.335327028 | 0.117456066 |
| 0.341001206 | 0.027668813 | 0.334554553 | 0.264263472 |
| 0.087919485 | 0.005472098 | 0.023084075 | 0.314775009 |
| 0.19515703  | 0.084848495 | 0.236683126 | 0.092126501 |
| 0.197506074 | 0.105239477 | 0.111274429 | 0.164245791 |
| 0.179492667 | 0.203235624 | 0.12709139  | 0.29880834  |
| 1           | 0.238716934 | 0.096806223 | 0.13979892  |
| 0.176080588 | 0.134174395 | 0.141861955 | 0.0266304   |
| 0.273659942 | 0.151013671 | 0.317000395 | 0.32223612  |
| 0.378458901 | 0.262926098 | 0.065156044 | 0.090223316 |
| 0.289273001 | 0.098619574 | 0.081875198 | 0.108297569 |
| 0.293767339 | 0.245956769 | 0.327706842 | 0.306233215 |
| 0.381764047 | 0.346389307 | 0.097711288 | 0.309248663 |
| 0.039967761 | 0.008276947 | 0.127295224 | 0.255771382 |
| 0.040426904 | 0.156640579 | 0.321761242 | 0.126377398 |
| 0.14746865  | 0.068500439 | 0.120255397 | 0.133226911 |
| 0.289824994 | 0.196372737 | 0.179744417 | 0.236306569 |
| 0.179271416 | 0.178313666 | 0.184385787 | 0.16804151  |
| 0.09678276  | 0.277730057 | 0.241386589 | 0.080629821 |
| 0.133237905 | 0.158999511 | 0.113684725 | 0.210460947 |
| 0.320046995 | 0.323356963 | 0.145395759 | 0.073803512 |
| 0.285887083 | 0.154778205 | 0.339626128 | 0.295980295 |
| 0.352060477 | 0.397770518 | 0.347301025 | 0.20016475  |
| 0.118971475 | 0.251358161 | 0.18521263  | 0.193811393 |
| 0.329159147 | 0.093798548 | 0.299886349 | 0.13102321  |
| 0.19728913  | 0.211624569 | 0.110586303 | 0.156297987 |
| 0.161440159 | 0.235712955 | 0.222133538 | 0.155112282 |
| 0.189219885 | 0.109650124 | 0.112171494 | 0.246686956 |
| 0.297919449 | 0.114202875 | 0.231299453 | 0.118319956 |
| 0.248795528 | 0.047789812 | 0.251750028 | 0.396210361 |
| 0.181839201 | 0.145868181 | 0.113347227 | 0.242271321 |
| 0.261762068 | 0.117470759 | 0.046114163 | 0.248809311 |
| 0.334081866 | 0.199739221 | 0.315648003 | 0.360258325 |
| 0.155968369 | 0.166973708 | 0.111122196 | 0.221607768 |
| 0.224831109 | 0.11010515  | 0.196100547 | 0.13304982  |
| 0.310572194 | 0.359412328 | 0.290883223 | 0.198277914 |
| 0.142509093 | 0.111265578 | 0.082975602 | 0.262326847 |
| 0.14883296  | 0.124631624 | 0.073777724 | 0.259264581 |
| 0.014553168 | 0.070490736 | 0.344340483 | 0.156189882 |
| 0.37310453  | 0.347105066 | 0.363631248 | 0.122151048 |
| 0.004300321 | 0.224900676 | 0.240953837 | 0.143895143 |
| 0.267683221 | 0.258932007 | 0.079401865 | 0.180744304 |
| 0.345563542 | 0.103467086 | 0.215279706 | 0.090947173 |
| 0.096261829 | 0.185905844 | 0.292873828 | 0.195057802 |
| 0.209729267 | 0.110768838 | 0.097242289 | 0.172371032 |
| 0.09601126  | 0.317231434 | 0.348540984 | 0.053683209 |
| 0.091545836 | 0.324631819 | 0.277769353 | 0.070543548 |
| 0.140484104 | 0.309269447 | 0.310388541 | 0.019372086 |

|             |             |             |             |
|-------------|-------------|-------------|-------------|
| 0.254397213 | 0.048999161 | 0.199855536 | 0.206421458 |
| 0.209830544 | 0.194809851 | 0.272692588 | 0.184167632 |
| 0.221989846 | 0.205860286 | 0.184799625 | 0.282406732 |
| 0.200980844 | 0.167562373 | 0.204757453 | 0.146561736 |
| 0.16737005  | 0.158412599 | 0.153998625 | 0.14838478  |
| 0.110343033 | 0.26926332  | 0.295326583 | 0.108992505 |
| 0.259989739 | 0.132249962 | 0.375916545 | 0.293051183 |
| 0.344559266 | 0.125678497 | 0.153268498 | 0.264729162 |
| 0.051971799 | 0.09502049  | 0.078576914 | 0.165270375 |
| 0.199093552 | 0.154649391 | 0.114970626 | 0.175119475 |
| 0.207610264 | 0.365216351 | 0.276683859 | 0.337655257 |
| 0.157074502 | 0.140204578 | 0.063535955 | 0.183174334 |
| 0.182758217 | 0.192611473 | 0.199051805 | 0.019943644 |
| 0.250079606 | 0.115399452 | 0.296631263 | 0.320224501 |
| 0.089028971 | 0.34133998  | 0.068780554 | 0.144038453 |
| 0.054445744 | 0.186160783 | 0.220999795 | 0.228053837 |
| 0.06949074  | 0.169062584 | 0.231593633 | 0.084990558 |
| 0.263030722 | 0.224094118 | 0.152513787 | 0.146817143 |
| 0.211270807 | 0.187280281 | 0.33418701  | 0.100712765 |
| 0.157431932 | 0.168735212 | 0.124456612 | 0.20636394  |
| 0.206335605 | 0.327026835 | 0.10611635  | 0.330685505 |
| 0.168953632 | 0.180299775 | 0.394344266 | 0.137807624 |
| 0.124125842 | 0.157997882 | 0.079734697 | 0.097631334 |
| 0.185152244 | 0.09849146  | 0.002871366 | 0.055309583 |
| 0.328612364 | 0.101863061 | 0.219673254 | 0.261690699 |
| 0.163966044 | 0.345453579 | 0.051698804 | 0.151430751 |
| 0.283506292 | 0.325172353 | 0.183428186 | 0.327303687 |
| 0.280484505 | 0.157950076 | 0.156780468 | 0.010857136 |
| 0.196040639 | 0.156808227 | 0.090085927 | 0.115866933 |
| 0.075473945 | 0.095229755 | 0.196329249 | 0.097837415 |
| 0.343785322 | 0.064626896 | 0.155483574 | 0.221145839 |
| 0.209406391 | 0.335689157 | 0.189963345 | 0.276782554 |
| 0.076459277 | 0.255284292 | 0.131636896 | 0.125193826 |
| 0.188536213 | 0.149500963 | 0.325714505 | 0.125975424 |
| 0.111910703 | 0.191567194 | 0.021395772 | 0.355101619 |
| 0.307375097 | 0.148056738 | 0.265513866 | 0.055932425 |
| 0.319553707 | 0.28946272  | 0.147535536 | 0.117819261 |
| 0.059183635 | 0.206864481 | 0.222346602 | 0.272391425 |
| 0.078701543 | 0.173561848 | 0.13632854  | 0.160462457 |
| 0.313631082 | 0.147827244 | 0.288807778 | 0.111604165 |
| 0.294517755 | 0.237278175 | 0.156606872 | 0.140348992 |
| 0.165063879 | 0.121423951 | 0.078950576 | 0.360898069 |
| 0.202948185 | 0.139286257 | 0.319306466 | 0.223994481 |
| 0.119676153 | 0.265060482 | 0.149345558 | 0.342553534 |
| 0.179148019 | 0.285745215 | 0.277183585 | 0.311872947 |
| 0.338682345 | 0.14406299  | 0.120086106 | 0.194994123 |
| 0.280835216 | 0.127604432 | 0.137234702 | 0.28223888  |
| 0.122796391 | 0.268805749 | 0.123391136 | 0.182561088 |
| 0.102257536 | 0.154115043 | 0.110455411 | 0.205162048 |
| 0.257101105 | 0.206693356 | 0.186228173 | 0.368453294 |
| 0.16011414  | 0.096270922 | 0.38252326  | 0.027405966 |
| 0.139075409 | 0.241693452 | 0.21300023  | 0.154233367 |
| 0.236346001 | 0.209393411 | 0.149307667 | 0.010723655 |
| 0.313253394 | 0.060747382 | 0.13398112  | 0.194072361 |

|             |             |             |             |
|-------------|-------------|-------------|-------------|
| 0.104138048 | 0.102442165 | 0.315954901 | 0.356776752 |
| 0.210209531 | 0.081610724 | 0.084512375 | 0.305879409 |
| 0.096952087 | 0.075208353 | 0.102301124 | 0.185240066 |
| 0.102898053 | 0.087720061 | 0.095909439 | 0.10674544  |
| 0.250010487 | 0.132945685 |             |             |
| LPCAT3      | 0.133482566 | 0.247823711 | 0.077660152 |
| 0.147650021 | 0.208277556 | 0.140709231 | 0.170168213 |
| 0.206530374 | 0.225696746 | 0.073361795 | 0.187232994 |
| 0.098233658 | 0.074590555 | 0.307664915 | 0.189715665 |
| 0.193605378 | 0.171516341 | 0.212273919 | 0.082835528 |
| 0.167650544 | 0.213962507 | 0.144043967 | 0.128283706 |
| 0.215462511 | 0.240852951 | 0.16634002  | 0.134933504 |
| 0.291423837 | 0.064371739 | 0.197094986 | 0.041909227 |
| 0.351093701 | 0.208406993 | 0.117976392 | 0.068404147 |
| 0.166219666 | 0.03871327  | 0.347420967 | 0.223692075 |
| 0.102510687 | 0.333694716 | 0.079133615 | 0.231237551 |
| 0.101755967 | 0.09461787  | 0.038815082 | 0.197693335 |
| 0.169034278 | 0.220297736 | 0.09301972  | 0.205738341 |
| 0.143568718 | 0.234296133 | 0.154647319 | 0.0050591   |
| 0.117469877 | 0.033246673 | 0.084625616 | 0.318286285 |
| 0.273164561 | 0.261294652 | 0.077109838 | 0.19466386  |
| 0.179210745 | 0.244896077 | 0.303657928 | 0.105962588 |
| 0.320824635 | 0.115254377 | 0.20149262  | 0.137360105 |
| 0.16046533  | 0.092230252 | 0.269758614 | 0.120028072 |
| 0.153841561 | 0.2699349   | 0.201976616 | 0.1509916   |
| 0.224239375 | 0.383589687 | 0.26341439  | 0.308231045 |
| 0.12722693  | 0.176848116 | 0.200844529 | 0.326996199 |
| 0.257126909 | 0.181723088 | 0.248742258 | 0.361696923 |
| 0.124690577 | 0.113461741 | 0.218980503 | 0.166353016 |
| 0.257644074 | 0.133795266 | 0.093988157 | 0.126312952 |
| 0.231161595 | 0.182104715 | 0.341874452 | 0.273018126 |
| 0.204725816 | 0.111198337 | 0.312098655 | 0.169691003 |
| 0.195696768 | 0.121289402 | 0.203851854 | 0.259295899 |
| 0.195782092 | 0.297457234 | 0.234284746 | 0.287374295 |
| 0.156630783 | 0.317461151 | 0.225061145 | 0.299278916 |
| 0.029821258 | 0.326737637 | 0.193585046 | 0.189822161 |
| 0.099317274 | 0.254305315 | 0.195310268 | 0.354711233 |
| 0.284970583 | 0.251297475 | 0.193430642 | 0.252508016 |
| 0.315574502 | 0.28932913  | 0.317298945 | 0.27447573  |
| 0.131276654 | 0.131309321 | 0.149188264 | 0.196455976 |
| 0.248084343 | 0.204650049 | 0.15651856  | 0.344203817 |
| 0.31615021  | 0.282108922 | 0.151370224 | 0.375600109 |
| 0.219185765 | 0.375245619 | 0.235068071 | 0.22487178  |
| 0.351278754 | 0.325793317 | 0.360471723 | 0.220771431 |
| 0.335068828 | 0.153138202 | 0.070444312 | 0.287153974 |
| 0.383134019 | 0.02128534  | 0.275060267 | 0.299030989 |
| 0.298938638 | 0.255880137 | 0.364909709 | 0.319363488 |
| 0.300482864 | 0.146782395 | 0.016290135 | 0.282440276 |
| 0.321149516 | 0.297902149 | 0.283925857 | 0.125818123 |
| 0.212965139 | 0.149770218 | 0.251809104 | 0.104288654 |
| 0.410339632 | 0.283522524 | 0.281445588 | 0.243601155 |
| 0.136642881 | 0.324121478 | 0.129556621 | 0.301266673 |
| 0.160555902 | 0.138952113 | 0.094702146 | 0.311340275 |
| 0.08454783  | 0.265373925 | 0.138228963 | 0.19953095  |

|             |             |             |             |
|-------------|-------------|-------------|-------------|
| 0.283731359 | 0.154299119 | 0.110334225 | 0.235577093 |
| 0.112461498 | 0.139046804 | 0.195602321 | 0.158251648 |
| 0.172424696 | 0.247126949 | 0.188834143 | 0.233478453 |
| 0.25290905  | 0.257534696 | 0.198453489 | 0.315066226 |
| 0.176738594 | 0.198258205 | 0.210899468 | 0.367399092 |
| 0.4025239   | 0.153747229 | 0.306630121 | 0.052927832 |
| 0.144764361 | 0.089102766 | 0.094318622 | 0.142745188 |
| 0.250075593 | 0.202465646 | 0.191633965 | 0.263091657 |
| 0.139213449 | 0.163997545 | 0.157108227 | 0.366851415 |
| 0.178596166 | 0.195309487 | 0.306363431 | 0.135501952 |
| 0.029076587 | 0.177688246 | 0.26470967  | 0.218171299 |
| 0.231158093 | 0.113149737 | 0.100096585 | 0.294306727 |
| 0.120243063 | 0.195984503 | 0.302075174 | 0.270882561 |
| 0.130145735 | 0.227288942 | 0.358120808 | 0.027980196 |
| 0.168512487 | 0.118062457 | 0.311833689 | 0.08572682  |
| 0.234484834 | 0.328811639 | 0.188138813 | 0.199740641 |
| 0.131414022 | 0.334102349 | 0.293954132 | 0.320846797 |
| 0.120468857 | 0.359761232 | 0.276380586 | 0.315413028 |
| 0.246979831 | 0.122880124 | 0.075981415 | 0.251948283 |
| 0.28420357  | 0.102817925 | 0.120608682 | 0.227096084 |
| 0.114655254 | 0.219419756 | 0.202184161 | 0.340863421 |
| 0.386368999 | 0.268937759 | 0.272620555 | 0.311672621 |
| 0.295309419 | 0.193742095 | 0.294423917 | 0.381375808 |
| 0.084211487 | 0.164424371 | 0.163952515 | 0.340723506 |
| 0.219830062 | 0.21208868  | 0.327959218 | 0.095457683 |
| 0.003562779 | 0.137513338 | 0.119620162 | 0.276304762 |
| 0.155256107 | 0.145587216 | 0.230717338 | 0.327969601 |
| 0.229466045 | 0.321770766 | 0.275390288 | 0.177439442 |
| 0.281425233 | 0.171685088 | 0.154353412 | 0.210956708 |
| 0.300076888 | 0.077022384 | 0.205646326 | 0.377743981 |
| 0.077337091 | 0.140309362 | 0.185665229 | 0.014956828 |
| 0.122310066 | 0.192528837 | 0.16794089  | 0.282771917 |
| 0.345099624 | 0.249822008 | 0.196176313 | 0.086801232 |
| 0.291236329 | 0.188764194 | 0.029223075 | 0.308102774 |
| 0.324643548 | 0.319696271 | 0.315652318 | 0.314379702 |
| 0.298912446 | 0.248783799 | 0.275194494 | 0.131143612 |
| 0.194001921 | 0.121567657 | 0.139429711 | 0.215574274 |
| 0.011948551 | 0.306948836 | 0.219883351 | 0.243556573 |
| 0.244575534 | 0.267900282 | 0.131782678 | 0.208224245 |
| 0.056267419 | 0.073877084 | 0.173241779 | 0.258879066 |
| 0.315048072 | 0.072200024 | 0.073758903 | 0.121311972 |
| 0.275826569 | 0.288846085 | 0.118488698 | 0.338208718 |
| 0.206156875 | 0.126534183 | 0.20077597  | 0.278877143 |
| 0.186038396 | 0.038976419 | 0.152390185 | 0.007934704 |
| 0.094133972 | 0.336348228 | 0.146389641 | 0.112135588 |
| 0.233020676 | 0.037131534 | 0.271664689 | 0.353766504 |
| 0.26875184  | 0.333850821 | 0.324001046 | 0.138628277 |
| 0.319287989 | 0.040989469 | 0.325782849 | 0.24413155  |
| 0.092247479 | 0.003386102 | 0.050850508 | 0.291472509 |
| 0.158888724 | 0.095470294 | 0.23298336  | 0.103791955 |
| 0.235006253 | 0.136174884 | 0.187763396 | 0.191850656 |
| 0.178861356 | 0.245587925 | 0.192686875 | 0.290463029 |
| 0.238716934 | 1           | 0.119498042 | 0.158503409 |
| 0.184252761 | 0.169317818 | 0.162157033 | 0.030642405 |

|             |             |             |             |
|-------------|-------------|-------------|-------------|
| 0.286615434 | 0.153969227 | 0.318708497 | 0.315314596 |
| 0.367841263 | 0.244491481 | 0.071886508 | 0.137129936 |
| 0.308132838 | 0.104373601 | 0.106049562 | 0.119164222 |
| 0.276935121 | 0.204744056 | 0.312675495 | 0.278860569 |
| 0.359924758 | 0.323755955 | 0.141933436 | 0.271138818 |
| 0.050192206 | 0.018345886 | 0.113626318 | 0.293585464 |
| 0.090653299 | 0.157549833 | 0.299976945 | 0.190989072 |
| 0.24433169  | 0.090445822 | 0.137801962 | 0.144019844 |
| 0.255178242 | 0.189996995 | 0.188178212 | 0.275716931 |
| 0.222976241 | 0.184171475 | 0.269897946 | 0.261328833 |
| 0.156040861 | 0.25967134  | 0.235843579 | 0.113370223 |
| 0.119969363 | 0.138110908 | 0.156400934 | 0.23140098  |
| 0.291648318 | 0.300334849 | 0.175003552 | 0.077888856 |
| 0.288064076 | 0.203459882 | 0.329609927 | 0.287204945 |
| 0.346286008 | 0.380812493 | 0.359405869 | 0.266636282 |
| 0.170581706 | 0.239382319 | 0.18634227  | 0.259475842 |
| 0.325067069 | 0.098030635 | 0.306901418 | 0.141369852 |
| 0.212257212 | 0.215733766 | 0.157761184 | 0.200531017 |
| 0.16184558  | 0.26755352  | 0.276760439 | 0.133344385 |
| 0.206111108 | 0.135294907 | 0.158788032 | 0.242797905 |
| 0.270672271 | 0.10151088  | 0.229755458 | 0.183542409 |
| 0.254591745 | 0.06695013  | 0.221446973 | 0.384257885 |
| 0.195504383 | 0.169546052 | 0.107776411 | 0.268919803 |
| 0.23896231  | 0.114750876 | 0.064520038 | 0.239945308 |
| 0.340507232 | 0.182390665 | 0.313019483 | 0.360366354 |
| 0.169347981 | 0.155425757 | 0.144640833 | 0.19301785  |
| 0.249962807 | 0.142262294 | 0.259629404 | 0.150817823 |
| 0.354647861 | 0.378136512 | 0.258117078 | 0.255923026 |
| 0.15002023  | 0.123986787 | 0.085173098 | 0.279827122 |
| 0.150042792 | 0.151970743 | 0.089495413 | 0.265387715 |
| 0.013777574 | 0.098072321 | 0.342810167 | 0.239572219 |
| 0.378499971 | 0.316011674 | 0.344840964 | 0.202077202 |
| 0.003603897 | 0.202204771 | 0.211124514 | 0.142749051 |
| 0.24993754  | 0.273330395 | 0.177096263 | 0.225403349 |
| 0.35376428  | 0.110533589 | 0.245868941 | 0.119397826 |
| 0.091018966 | 0.179295445 | 0.317654743 | 0.214225654 |
| 0.2731142   | 0.126583263 | 0.137689888 | 0.219689413 |
| 0.139632545 | 0.326867051 | 0.328394803 | 0.074938707 |
| 0.079781575 | 0.327083736 | 0.237060132 | 0.101071807 |
| 0.159589293 | 0.305496429 | 0.333857343 | 0.013607442 |
| 0.226655216 | 0.072487684 | 0.273991568 | 0.245924621 |
| 0.275434213 | 0.266966708 | 0.284703331 | 0.198102634 |
| 0.20559422  | 0.246009348 | 0.21021698  | 0.282799576 |
| 0.258067897 | 0.229729257 | 0.195597614 | 0.157703962 |
| 0.19252246  | 0.202677318 | 0.171523985 | 0.162417733 |
| 0.167106636 | 0.28084448  | 0.311660081 | 0.116895342 |
| 0.295909771 | 0.159865505 | 0.376080862 | 0.281525145 |
| 0.36394753  | 0.134968574 | 0.210615291 | 0.244309435 |
| 0.059293939 | 0.114113271 | 0.1135155   | 0.150896897 |
| 0.240711158 | 0.184928165 | 0.127837578 | 0.145561754 |
| 0.196586253 | 0.360698846 | 0.299908178 | 0.346944234 |
| 0.177135387 | 0.154978893 | 0.066535957 | 0.225681254 |
| 0.191830041 | 0.209535221 | 0.205134669 | 0.020575494 |
| 0.258955144 | 0.128135083 | 0.270457768 | 0.303498927 |

|             |             |             |             |
|-------------|-------------|-------------|-------------|
| 0.118464541 | 0.361840686 | 0.074918755 | 0.15882336  |
| 0.055721878 | 0.175872496 | 0.234739667 | 0.219976908 |
| 0.085189282 | 0.24334897  | 0.2123633   | 0.108129408 |
| 0.239544703 | 0.214477433 | 0.214851363 | 0.222373635 |
| 0.244500857 | 0.186519934 | 0.339159868 | 0.135928257 |
| 0.140128761 | 0.190008427 | 0.126600893 | 0.211170249 |
| 0.256646148 | 0.317177104 | 0.136460233 | 0.316652739 |
| 0.179297049 | 0.204433023 | 0.401470295 | 0.196353903 |
| 0.176494228 | 0.261243005 | 0.096223795 | 0.124206673 |
| 0.24817678  | 0.130237377 | 0.003217468 | 0.057778366 |
| 0.318086976 | 0.149370029 | 0.201375774 | 0.281145681 |
| 0.206849569 | 0.350679017 | 0.092797955 | 0.179151208 |
| 0.277084947 | 0.32887398  | 0.176484723 | 0.331793733 |
| 0.286655344 | 0.225526033 | 0.156829466 | 0.022797233 |
| 0.167966672 | 0.142909183 | 0.107595019 | 0.190072321 |
| 0.110124052 | 0.096791066 | 0.162037834 | 0.113215024 |
| 0.326634557 | 0.073965839 | 0.162040342 | 0.216782449 |
| 0.247383891 | 0.330537401 | 0.280108385 | 0.255524905 |
| 0.103306461 | 0.279227428 | 0.148942778 | 0.143618037 |
| 0.192174754 | 0.163961462 | 0.286974959 | 0.146795303 |
| 0.149951904 | 0.219857956 | 0.013949074 | 0.352029041 |
| 0.295307689 | 0.14649446  | 0.293767531 | 0.076651303 |
| 0.32588006  | 0.31797765  | 0.210078177 | 0.122139748 |
| 0.080253271 | 0.18042202  | 0.265734702 | 0.266209217 |
| 0.06334283  | 0.162763838 | 0.181940793 | 0.179028018 |
| 0.319484965 | 0.155116021 | 0.330459136 | 0.089922247 |
| 0.287918205 | 0.255269054 | 0.158661918 | 0.221942833 |
| 0.166120685 | 0.138054256 | 0.100686991 | 0.356502854 |
| 0.276246927 | 0.156694514 | 0.2928787   | 0.233461715 |
| 0.152648607 | 0.286416269 | 0.142322625 | 0.349852934 |
| 0.248217866 | 0.29413653  | 0.279903579 | 0.296470718 |
| 0.360090658 | 0.190075009 | 0.144120522 | 0.229347888 |
| 0.267709532 | 0.162847901 | 0.168583854 | 0.260144825 |
| 0.126392237 | 0.302492146 | 0.127316229 | 0.249925972 |
| 0.158200283 | 0.257141649 | 0.156507066 | 0.22297609  |
| 0.248525655 | 0.185097837 | 0.216072795 | 0.366375591 |
| 0.21380264  | 0.097154886 | 0.382756385 | 0.018853817 |
| 0.143532528 | 0.22375644  | 0.257531659 | 0.181291074 |
| 0.235782009 | 0.205228217 | 0.123894915 | 0.014104508 |
| 0.303631328 | 0.070774946 | 0.214556187 | 0.206949328 |
| 0.13038755  | 0.13670086  | 0.319100738 | 0.346847801 |
| 0.24274527  | 0.128029032 | 0.095739802 | 0.313996488 |
| 0.111651083 | 0.096883003 | 0.133687069 | 0.166299539 |
| 0.131778941 | 0.090087404 | 0.118802495 | 0.117132684 |
| 0.252410395 | 0.218448852 |             |             |
| LPIN2       | 0.036460833 | 0.444409111 | 0.030915892 |
| 0.0494301   | 0.15588717  | 0.168482996 | 0.028400415 |
| 0.058337156 | 0.343426389 | 0.181663157 | 0.183738699 |
| 0.007402448 | 0.041167684 | 0.439818116 | 0.025626902 |
| 0.245974463 | 0.012508879 | 0.047204904 | 0.043357367 |
| 0.104169554 | 0.136355276 | 0.147451789 | 0.230900099 |
| 0.132210484 | 0.177850119 | 0.244393287 | 0.240299254 |
| 0.498003705 | 0.150047449 | 0.31465407  | 0.10835308  |
| 0.383384765 | 0.182429842 | 0.197685396 | 0.007634495 |

|             |             |             |             |
|-------------|-------------|-------------|-------------|
| 0.230890265 | 0.007263666 | 0.424043149 | 0.098795977 |
| 0.054314603 | 0.320845434 | 0.197171657 | 0.088266901 |
| 0.211848539 | 0.017568889 | 0.152638399 | 0.318088633 |
| 0.232134562 | 0.120382474 | 0.046921566 | 0.335119792 |
| 0.174103415 | 0.261961859 | 0.379591845 | 0.002320433 |
| 0.133035229 | 0.053098321 | 0.116633769 | 0.501491893 |
| 0.127872659 | 0.047430317 | 0.162465069 | 0.132569312 |
| 0.28972215  | 0.287711914 | 0.169940447 | 0.187291    |
| 0.484283058 | 0.08162706  | 0.367802364 | 0.062794543 |
| 0.184500976 | 0.019475726 | 0.110870386 | 0.072234767 |
| 0.171541039 | 0.090560308 | 0.1751203   | 0.127121954 |
| 0.45048795  | 0.507747155 | 0.149900558 | 0.511215092 |
| 0.054881789 | 0.198499705 | 0.105499331 | 0.208803531 |
| 0.305290518 | 0.043851952 | 0.312128326 | 0.498945007 |
| 0.029215456 | 0.300977745 | 0.340585799 | 0.106498074 |
| 0.41900751  | 0.139049118 | 0.257038328 | 0.071116623 |
| 0.249497845 | 0.187505497 | 0.489337855 | 0.203373626 |
| 0.145090365 | 0.056123015 | 0.498685936 | 0.182158243 |
| 0.110473737 | 0.048204908 | 0.08500224  | 0.441932396 |
| 0.284953425 | 0.483594743 | 0.428651231 | 0.313535242 |
| 0.217258636 | 0.479063118 | 0.294503227 | 0.409561685 |
| 0.120237286 | 0.524893537 | 0.092453018 | 0.01603679  |
| 0.040936671 | 0.033395605 | 0.110550885 | 0.244338604 |
| 0.445777409 | 0.237780571 | 0.084296365 | 0.096336388 |
| 0.421187368 | 0.497370098 | 0.53334541  | 0.378000339 |
| 0.01749264  | 0.121130307 | 0.206883248 | 0.12738011  |
| 0.29290015  | 0.071157947 | 0.10662952  | 0.508043886 |
| 0.334583978 | 0.381414909 | 0.078990486 | 0.492539174 |
| 0.101092612 | 0.479075278 | 0.459586844 | 0.073321624 |
| 0.501711628 | 0.491485914 | 0.473184228 | 0.291968267 |
| 0.459672596 | 0.166858851 | 0.05882441  | 0.34693152  |
| 0.445359073 | 0.007700728 | 0.473608519 | 0.491068225 |
| 0.500757969 | 0.429229144 | 0.49604871  | 0.493333923 |
| 0.514228284 | 0.047054011 | 0.0241756   | 0.172864787 |
| 0.505247489 | 0.338727327 | 0.054291727 | 0.250162757 |
| 0.227833491 | 0.200009556 | 0.384803613 | 0.138132605 |
| 0.481627289 | 0.419606009 | 0.49278984  | 0.354692964 |
| 0.209822727 | 0.29049605  | 0.235526593 | 0.476080507 |
| 0.016425789 | 0.053878497 | 0.0427246   | 0.241146606 |
| 0.172409105 | 0.083323057 | 0.17590255  | 0.228199055 |
| 0.109117734 | 0.17513487  | 0.158085459 | 0.266203334 |
| 0.060219366 | 0.288896189 | 0.079155994 | 0.101111942 |
| 0.01393678  | 0.132153199 | 0.073826327 | 0.056923689 |
| 0.114622047 | 0.246296061 | 0.367430999 | 0.471230209 |
| 0.158014697 | 0.143252102 | 0.348913167 | 0.435850899 |
| 0.371411108 | 0.204454809 | 0.181766753 | 0.002382093 |
| 0.114281469 | 0.177590171 | 0.09239346  | 0.255829872 |
| 0.178500438 | 0.111208076 | 0.257746578 | 0.29445445  |
| 0.163891221 | 0.082327802 | 0.160631246 | 0.40552088  |
| 0.138928337 | 0.11609053  | 0.401490644 | 0.281794977 |
| 0.001224898 | 0.16382951  | 0.39627141  | 0.061124424 |
| 0.251763887 | 0.058201181 | 0.108561652 | 0.433103031 |
| 0.150474524 | 0.099267717 | 0.483351906 | 0.294254085 |
| 0.179082956 | 0.244206594 | 0.508683483 | 0.042873906 |



|             |             |             |             |
|-------------|-------------|-------------|-------------|
| 0.197372305 | 0.013313003 | 0.178217407 | 0.210640378 |
| 0.143545154 | 0.210403591 | 0.172253368 | 0.100548794 |
| 0.101205007 | 0.519103125 | 0.346826916 | 0.49828391  |
| 0.172070153 | 0.506755843 | 0.423097633 | 0.396844117 |
| 0.249333414 | 0.201544354 | 0.070517323 | 0.382032223 |
| 0.418718449 | 0.151978497 | 0.068787335 | 0.424714987 |
| 0.188131372 | 0.306100142 | 0.039014438 | 0.460259505 |
| 0.465799571 | 0.491147122 | 0.056609915 | 0.283630797 |
| 0.31225851  | 0.122067992 | 0.363791733 | 0.510674759 |
| 0.179734926 | 0.187715739 | 0.130974192 | 0.322854487 |
| 0.106924663 | 0.086525106 | 0.287963683 | 0.090800124 |
| 0.006521006 | 0.050738141 | 0.039119217 | 0.056107148 |
| 0.061491237 | 0.332797234 | 0.282231917 | 0.50754201  |
| 0.050383203 | 0.390087492 | 0.190335252 | 0.111964017 |
| 0.409463773 | 0.175009157 | 0.217867134 | 0.254742555 |
| 0.182390317 | 0.004790537 | 0.04137063  | 0.50485987  |
| 0.037292851 | 0.098089641 | 0.185602788 | 0.000661834 |
| 0.023166614 | 0.430587225 | 0.095075884 | 0.178789432 |
| 0.442039627 | 0.183961468 | 0.145275551 | 0.175675642 |
| 0.239057119 | 0.047377362 | 0.000561273 | 0.478789947 |
| 0.49324797  | 0.462722421 | 0.496938411 | 0.473468884 |
| 0.435057313 | 0.358024158 | 0.344013718 | 0.212855947 |
| 0.044042939 | 0.047798908 | 0.08599934  | 0.118632622 |
| 0.005556783 | 0.292317118 | 0.155406538 | 0.094284188 |
| 0.357140604 | 0.222519045 | 0.016877487 | 0.225583772 |
| 0.008121301 | 0.093896814 | 0.16167415  | 0.093252876 |
| 0.260563153 | 0.006308207 | 0.102787591 | 0.147262357 |
| 0.427545996 | 0.314829589 | 0.158783517 | 0.517191278 |
| 0.166975407 | 0.127134263 | 0.122591745 | 0.306765178 |
| 0.030000576 | 0.067380866 | 0.181114555 | 0.021262075 |
| 0.105460556 | 0.459467548 | 0.173199574 | 0.028517123 |
| 0.151746431 | 0.001798095 | 0.337882351 | 0.518495232 |
| 0.480088711 | 0.495930715 | 0.480344523 | 0.107071986 |
| 0.488945969 | 0.068816374 | 0.521738274 | 0.392846958 |
| 0.196339245 | 0.00029072  | 0.002502382 | 0.459569233 |
| 0.221870006 | 0.063377159 | 0.090651052 | 0.163038322 |
| 0.03829976  | 0.081003164 | 0.029692802 | 0.062142276 |
| 0.289903317 | 0.102913136 | 0.072021632 | 0.487471654 |
| 0.096806223 | 0.119498042 | 1           | 0.075232328 |
| 0.250620759 | 0.019997033 | 0.071816975 | 0.002613772 |
| 0.265980068 | 0.113790561 | 0.479118212 | 0.506806598 |
| 0.458948338 | 0.270874138 | 0.194293826 | 0.178361234 |
| 0.418910937 | 0.099919451 | 0.174946936 | 0.092850661 |
| 0.491384478 | 0.25717495  | 0.238086682 | 0.256225802 |
| 0.47001234  | 0.44374332  | 0.014399487 | 0.331316353 |
| 0.004500687 | 0.000671209 | 0.202785929 | 0.196772203 |
| 0.042940946 | 0.181428764 | 0.18868182  | 0.117471568 |
| 0.103115701 | 0.013880854 | 0.112848743 | 0.099651858 |
| 0.168695492 | 0.181090023 | 0.12475135  | 0.204735017 |
| 0.100536965 | 0.048928103 | 0.073386479 | 0.068216347 |
| 0.139651358 | 0.285384761 | 0.181209026 | 0.009512305 |
| 0.242059165 | 0.232547936 | 0.024574128 | 0.107532374 |
| 0.389562476 | 0.469022197 | 0.01663334  | 0.002314466 |
| 0.216293125 | 0.140034099 | 0.475432828 | 0.506906432 |

|             |             |             |             |
|-------------|-------------|-------------|-------------|
| 0.520103132 | 0.489581435 | 0.364412349 | 0.046619322 |
| 0.029551857 | 0.17776719  | 0.145171886 | 0.029564199 |
| 0.505164038 | 0.05791979  | 0.485654769 | 0.148704873 |
| 0.075094316 | 0.07986646  | 0.011352717 | 0.041351732 |
| 0.240543268 | 0.108987736 | 0.066427653 | 0.11030301  |
| 0.125849671 | 0.098866343 | 0.021358465 | 0.101756097 |
| 0.28559172  | 0.068279816 | 0.093217579 | 0.142429685 |
| 0.308863126 | 0.154528531 | 0.347751637 | 0.411632119 |
| 0.092448527 | 0.064913947 | 0.126185529 | 0.326300646 |
| 0.419626709 | 0.284969121 | 0.011599815 | 0.476592323 |
| 0.469654851 | 0.330423725 | 0.495151598 | 0.339785881 |
| 0.061684585 | 0.190938367 | 0.150652225 | 0.191760701 |
| 0.108906186 | 0.175125244 | 0.117397187 | 0.037544342 |
| 0.263905051 | 0.476999457 | 0.397594274 | 0.0601962   |
| 0.282576353 | 0.10876445  | 0.05036795  | 0.443036824 |
| 0.065995144 | 0.040728508 | 0.211424293 | 0.411363718 |
| 6.41E-05    | 0.060196844 | 0.468220488 | 0.097266668 |
| 0.499405132 | 0.446349073 | 0.402699058 | 0.118522623 |
| 0.000716023 | 0.305766879 | 0.227700975 | 0.158211186 |
| 0.433267866 | 0.294198737 | 0.082880602 | 0.025502361 |
| 0.217312542 | 0.076150769 | 0.051513096 | 0.162192582 |
| 0.077540538 | 0.314173398 | 0.132779402 | 0.129387316 |
| 0.069883157 | 0.094342067 | 0.098605773 | 0.09216711  |
| 0.071496218 | 0.166862427 | 0.280209336 | 0.182529867 |
| 0.092738256 | 0.41655432  | 0.362383197 | 0.011860464 |
| 0.194967015 | 0.376000769 | 0.399238316 | 0.000851233 |
| 0.329288858 | 0.002218211 | 0.075934584 | 0.074832182 |
| 0.070142863 | 0.087298147 | 0.140896752 | 0.10698257  |
| 0.250615303 | 0.086969094 | 0.100338049 | 0.132320963 |
| 0.055101206 | 0.100106052 | 0.235244526 | 0.168406004 |
| 0.101106457 | 0.050385008 | 0.101036487 | 0.1138484   |
| 0.01949721  | 0.463478836 | 0.207446582 | 0.06658052  |
| 0.130615112 | 0.166122858 | 0.290221814 | 0.50690201  |
| 0.370370406 | 0.124517837 | 0.149701163 | 0.432950042 |
| 0.156312922 | 0.160875904 | 0.036352253 | 0.218551196 |
| 0.119243943 | 0.082643867 | 0.240177856 | 0.221542531 |
| 0.374452812 | 0.368405686 | 0.201392714 | 0.403878016 |
| 0.142425974 | 0.199583666 | 0.178025802 | 0.028008383 |
| 0.07156221  | 0.102119822 | 0.118145982 | 0.000253945 |
| 0.23963533  | 0.111380347 | 0.443731649 | 0.484787987 |
| 0.139182055 | 0.334880192 | 0.174894572 | 0.037964736 |
| 0.156674557 | 0.189941207 | 0.098853805 | 0.381702508 |
| 0.105141799 | 0.071558943 | 0.14418565  | 0.157712019 |
| 0.353120075 | 0.361283738 | 0.106895808 | 0.118964078 |
| 0.127685322 | 0.138676619 | 0.476913953 | 0.060667706 |
| 0.292395839 | 0.060629291 | 0.29713403  | 0.123140316 |
| 0.082957205 | 0.504069586 | 0.034271605 | 0.518462152 |
| 0.145951911 | 0.115916834 | 0.461819007 | 0.168920061 |
| 0.123722674 | 0.040269459 | 0.083325639 | 0.187891421 |
| 0.100233727 | 0.148703506 | 0.027192062 | 0.037444436 |
| 0.22784314  | 0.161512405 | 0.402429906 | 0.293797084 |
| 0.092071346 | 0.264325533 | 0.081810072 | 0.154348591 |
| 0.50096789  | 0.504758952 | 0.100288805 | 0.183346163 |
| 0.282411166 | 0.039398776 | 0.29825356  | 0.012524549 |

|             |             |             |             |
|-------------|-------------|-------------|-------------|
| 0.296866826 | 0.300765935 | 0.197526048 | 0.022847287 |
| 0.006911889 | 0.092334188 | 0.280794899 | 0.058658959 |
| 0.447922066 | 0.102956766 | 0.293301523 | 0.337453735 |
| 0.14368772  | 0.500237847 | 0.043465372 | 0.30132198  |
| 0.030441508 | 0.171047138 | 0.202852757 | 0.226088101 |
| 0.077713947 | 0.113711568 | 0.271322639 | 0.08998625  |
| 0.011281249 | 0.098878675 | 0.00042951  | 0.381885443 |
| 0.483427273 | 0.164441451 | 0.177787272 | 0.193088731 |
| 0.176840383 | 0.347301766 | 0.117614799 | 0.242469078 |
| 0.002778527 | 0.216882854 | 0.107627745 | 0.382697163 |
| 0.110502313 | 0.243231895 | 0.017101793 | 0.164154304 |
| 0.46692481  | 0.132881285 | 0.218567515 | 0.138676313 |
| 0.493482682 | 0.370568949 | 0.146277185 | 0.085557177 |
| 0.329820359 | 0.049720215 | 0.192946808 | 0.520420917 |
| 0.063444096 | 0.077972782 | 0.38782903  | 0.074296873 |
| 0.141985214 | 0.36653342  | 0.300490271 | 0.520516798 |
| 0.024039637 | 0.153708247 | 0.353080729 | 0.456812374 |
| 0.217887646 | 0.065058921 | 0.100984923 | 0.087902298 |
| 0.461983717 | 0.038052201 | 0.108642029 | 0.276435909 |
| 0.087543083 | 0.205911222 | 0.278644704 | 0.069460696 |
| 0.014621786 | 0.075920005 | 0.157642879 | 0.08870836  |
| 0.166748124 | 0.176367462 | 0.087550419 | 0.336238515 |
| 0.045364989 | 0.006135935 | 0.409379712 | 0.006988116 |
| 0.205436051 | 0.252415098 | 0.136587959 | 0.156455019 |
| 0.154639776 | 0.241690809 | 0.206376588 | 0.000493947 |
| 0.354836444 | 0.014427892 | 0.134569441 | 0.081223893 |
| 0.156385937 | 0.025756113 | 0.436760489 | 0.484313818 |
| 0.228058697 | 0.16049224  | 0.178359162 | 0.461914071 |
| 0.054484254 | 0.168766519 | 0.173487711 | 0.333821429 |
| 0.092416621 | 0.212482645 | 0.205399135 | 0.156923938 |
| 0.308452694 | 0.121545629 |             |             |
| LPXN        | 0.270134748 | 0.15947197  | 0.238263512 |
| 0.117337341 | 0.055339711 | 0.071347843 | 0.310038208 |
| 0.253469465 | 0.159743199 | 0.043839043 | 0.076864797 |
| 0.253574606 | 0.007485093 | 0.154204212 | 0.306258131 |
| 0.053029218 | 0.25554553  | 0.26712938  | 0.061534765 |
| 0.12794548  | 0.060220068 | 0.037122843 | 0.097850191 |
| 0.063853192 | 0.32556506  | 0.122203167 | 0.042663049 |
| 0.149295835 | 0.015422758 | 0.063601537 | 0.021219155 |
| 0.22912301  | 0.049697763 | 0.032627309 | 0.236717714 |
| 0.073538447 | 0.009656297 | 0.268635873 | 0.091052621 |
| 0.014055844 | 0.252203918 | 0.05840892  | 0.114095376 |
| 0.061318736 | 0.261845356 | 0.019743112 | 0.062080855 |
| 0.114968673 | 0.122866949 | 0.274579735 | 0.085270341 |
| 0.067836624 | 0.146545245 | 0.093698135 | 0.018424899 |
| 0.022037439 | 0.001823884 | 0.012107614 | 0.194060758 |
| 0.201302119 | 0.221301304 | 0.022926273 | 0.159141428 |
| 0.068004715 | 0.087965212 | 0.166425382 | 0.053594525 |
| 0.173455196 | 0.016111547 | 0.070575739 | 0.085412056 |
| 0.092862915 | 0.299378845 | 0.261991928 | 0.273826046 |
| 0.053669133 | 0.16223851  | 0.069162653 | 0.032046163 |
| 0.154050992 | 0.247629026 | 0.18582024  | 0.218566557 |
| 0.025786617 | 0.042171895 | 0.052423044 | 0.140249633 |
| 0.118611078 | 0.27568313  | 0.094479492 | 0.206349878 |

|             |             |             |             |
|-------------|-------------|-------------|-------------|
| 0.30009364  | 0.064484937 | 0.101095891 | 0.271527133 |
| 0.145481247 | 0.032964084 | 0.052935997 | 0.018082555 |
| 0.057736998 | 0.051611249 | 0.239803798 | 0.155682814 |
| 0.064030986 | 0.286750887 | 0.250651791 | 0.035498868 |
| 0.065283321 | 0.264529705 | 0.056258575 | 0.094124341 |
| 0.073175108 | 0.147199081 | 0.122476463 | 0.141476943 |
| 0.044862505 | 0.164546541 | 0.096257006 | 0.167867888 |
| 0.012600703 | 0.186496406 | 0.194488435 | 0.249547234 |
| 0.271215393 | 0.233735617 | 0.068492623 | 0.210030886 |
| 0.119486502 | 0.135193429 | 0.197198207 | 0.114517478 |
| 0.114303303 | 0.222168092 | 0.184756154 | 0.130107499 |
| 0.297175986 | 0.025844882 | 0.044732672 | 0.141875132 |
| 0.102495404 | 0.282327665 | 0.028825042 | 0.246314284 |
| 0.191353683 | 0.099266028 | 0.224104686 | 0.281894123 |
| 0.197840974 | 0.197285395 | 0.131234735 | 0.189752869 |
| 0.222741398 | 0.234905434 | 0.167631124 | 0.053767604 |
| 0.219521904 | 0.100614132 | 0.053167256 | 0.156364306 |
| 0.186160347 | 0.003790788 | 0.115424069 | 0.126303394 |
| 0.18321607  | 0.091664564 | 0.167323218 | 0.145933464 |
| 0.18432024  | 0.303334471 | 0.004551049 | 0.098046396 |
| 0.208919031 | 0.15700337  | 0.169846175 | 0.042991583 |
| 0.059089844 | 0.092454516 | 0.097612493 | 0.032342188 |
| 0.225619164 | 0.12832367  | 0.130208038 | 0.124576104 |
| 0.115285839 | 0.260376202 | 0.033565606 | 0.24490458  |
| 0.260472781 | 0.237860055 | 0.27046054  | 0.171087078 |
| 0.05218523  | 0.184640442 | 0.093816164 | 0.071647056 |
| 0.19270176  | 0.117598202 | 0.024942349 | 0.058812026 |
| 0.322699928 | 0.054804231 | 0.222394759 | 0.225275878 |
| 0.240233314 | 0.353439259 | 0.126470587 | 0.154170177 |
| 0.104720802 | 0.392910321 | 0.070399718 | 0.145984376 |
| 0.067713015 | 0.23973345  | 0.091890009 | 0.182815209 |
| 0.199439024 | 0.041914639 | 0.238164448 | 0.056554251 |
| 0.048281491 | 0.028319391 | 0.012130569 | 0.044248825 |
| 0.381187374 | 0.110792566 | 0.067411425 | 0.072023928 |
| 0.144137351 | 0.249725045 | 0.050248447 | 0.266160975 |
| 0.279371679 | 0.062092945 | 0.124028016 | 0.066626038 |
| 0.135085389 | 0.107213577 | 0.104467264 | 0.067484789 |
| 0.144035147 | 0.017061994 | 0.01777775  | 0.127878185 |
| 0.028828856 | 0.045895845 | 0.131367922 | 0.075176829 |
| 0.059816217 | 0.344773194 | 0.172687375 | 0.005338643 |
| 0.055913062 | 0.047734181 | 0.125322719 | 0.059353268 |
| 0.168173596 | 0.159085772 | 0.046076465 | 0.055181767 |
| 0.227499155 | 0.193127063 | 0.154959385 | 0.153915855 |
| 0.037734718 | 0.179113603 | 0.10384633  | 0.143997697 |
| 0.115913452 | 0.040917439 | 0.007486386 | 0.103819925 |
| 0.11855697  | 0.045407506 | 0.28429863  | 0.084977868 |
| 0.052995971 | 0.062649442 | 0.070478505 | 0.160819874 |
| 0.244668497 | 0.203446446 | 0.173958851 | 0.100471034 |
| 0.142724487 | 0.166989274 | 0.129547587 | 0.191018535 |
| 0.043746347 | 0.050576609 | 0.044885066 | 0.118359211 |
| 0.219871593 | 0.052874343 | 0.237279834 | 0.011769803 |
| 0.000437117 | 0.295473566 | 0.281263855 | 0.139142032 |
| 0.023237596 | 0.0530513   | 0.077402923 | 0.171002132 |
| 0.246728443 | 0.181489555 | 0.212324617 | 0.061869139 |

|             |             |             |             |
|-------------|-------------|-------------|-------------|
| 0.18512902  | 0.056628503 | 0.040175837 | 0.061440357 |
| 0.219275385 | 0.089354025 | 0.136806117 | 0.251305495 |
| 0.28029631  | 0.024805933 | 0.134158697 | 0.011443866 |
| 0.300377745 | 0.112441853 | 0.344351299 | 0.364399111 |
| 0.13337453  | 0.339608221 | 0.202662831 | 0.054610811 |
| 0.111236672 | 0.280193804 | 0.019665662 | 0.1542347   |
| 0.188574022 | 0.18835864  | 0.189258956 | 0.22615887  |
| 0.148540713 | 0.107703734 | 0.098254871 | 0.101229426 |
| 0.259376713 | 0.274701207 | 0.024920303 | 0.091338037 |
| 0.027737917 | 0.118777184 | 0.082503918 | 0.252865784 |
| 0.080135402 | 0.147317106 | 0.277605641 | 0.059684101 |
| 0.15013231  | 0.009665552 | 0.124704246 | 0.151647567 |
| 0.101993196 | 0.245965343 | 0.03235021  | 0.033723352 |
| 0.206605059 | 0.206585656 | 0.029726701 | 0.191259632 |
| 0.09179181  | 0.256114189 | 0.07154302  | 0.09200838  |
| 0.288254895 | 0.022486576 | 0.098274482 | 0.003910886 |
| 0.046672815 | 0.221469196 | 0.053095763 | 0.221424085 |
| 0.141655607 | 0.159460878 | 0.195035174 | 0.195060576 |
| 0.191600696 | 0.149592561 | 0.167098006 | 0.025630532 |
| 0.177885358 | 0.003214692 | 0.16491566  | 0.148704166 |
| 0.042427262 | 0.010013947 | 0.059675811 | 0.119555242 |
| 0.050115613 | 0.290862069 | 0.234515259 | 0.0538257   |
| 0.19151017  | 0.235633515 | 0.286088543 | 0.037592893 |
| 0.068311851 | 0.079619693 | 0.041206445 | 0.206706642 |
| 0.13979892  | 0.158503409 | 0.075232328 | 1           |
| 0.057113326 | 0.249298072 | 0.295161392 | 0.017443717 |
| 0.091069729 | 0.312475102 | 0.274651437 | 0.176550588 |
| 0.199054046 | 0.070293641 | 0.03165408  | 0.061453613 |
| 0.135481283 | 0.251610393 | 0.035014855 | 0.250728832 |
| 0.172069045 | 0.060818349 | 0.160018989 | 0.205938482 |
| 0.175263566 | 0.190982505 | 0.300214128 | 0.103541591 |
| 0.096858473 | 0.00683965  | 0.08125083  | 0.187979925 |
| 0.039470934 | 0.048346444 | 0.213325439 | 0.133972905 |
| 0.131659323 | 0.220849996 | 0.023661669 | 0.025621022 |
| 0.114878509 | 0.075166803 | 0.043114346 | 0.216931248 |
| 0.070929187 | 0.050622943 | 0.145235385 | 0.214524117 |
| 0.080912888 | 0.224351845 | 0.316466668 | 0.293183835 |
| 0.051461764 | 0.044907733 | 0.28731878  | 0.247038147 |
| 0.122808959 | 0.12938833  | 0.25295807  | 0.087981983 |
| 0.231796826 | 0.085634522 | 0.13774705  | 0.166005611 |
| 0.224899748 | 0.196849313 | 0.268409927 | 0.134369962 |
| 0.278283076 | 0.093438007 | 0.04528891  | 0.101039368 |
| 0.168463974 | 0.277007355 | 0.190307094 | 0.026939893 |
| 0.282521192 | 0.153737413 | 0.202103542 | 0.29206038  |
| 0.039611959 | 0.227262041 | 0.134167959 | 0.214813516 |
| 0.079535009 | 0.024464548 | 0.312134206 | 0.197904244 |
| 0.155950815 | 0.012463389 | 0.238703132 | 0.12745556  |
| 0.160524819 | 0.048688369 | 0.06995847  | 0.220364713 |
| 0.265844751 | 0.277293705 | 0.105482631 | 0.11208822  |
| 0.100822512 | 0.049381401 | 0.102269774 | 0.153316338 |
| 0.157398143 | 0.058801081 | 0.197279694 | 0.156839852 |
| 0.300298088 | 0.045644311 | 0.037117716 | 0.068431265 |
| 0.220097846 | 0.078263446 | 0.156511508 | 0.309781859 |
| 0.24986522  | 0.265538846 | 0.153062491 | 0.164473149 |

|             |             |             |             |
|-------------|-------------|-------------|-------------|
| 0.060566314 | 0.247795496 | 0.273347007 | 0.133083808 |
| 0.023016356 | 0.234236222 | 0.058277566 | 0.101146295 |
| 0.006992651 | 0.009991597 | 0.153111232 | 0.132146424 |
| 0.218368206 | 0.136638991 | 0.20396959  | 0.147880878 |
| 0.000217202 | 0.055744474 | 0.073407207 | 0.051745998 |
| 0.148387078 | 0.168734947 | 0.134310343 | 0.209039767 |
| 0.204559337 | 0.264525153 | 0.164886756 | 0.066345531 |
| 0.014372638 | 0.089064926 | 0.225546303 | 0.202459015 |
| 0.128313611 | 0.275925371 | 0.023520874 | 0.149893935 |
| 0.03014356  | 0.210116031 | 0.159647322 | 0.053996774 |
| 0.013924471 | 0.152424665 | 0.121832302 | 0.267333332 |
| 0.042587962 | 0.1420378   | 0.161314622 | 0.028191446 |
| 0.070102531 | 0.180983688 | 0.123410898 | 0.105604379 |
| 0.130541555 | 0.136162646 | 0.106628233 | 0.061909457 |
| 0.111094462 | 0.169776057 | 0.103556555 | 0.157113059 |
| 0.129389901 | 0.184662234 | 0.065935435 | 0.098580446 |
| 0.05890498  | 0.227359951 | 0.354392722 | 0.381761309 |
| 0.193722996 | 0.141891782 | 0.279625559 | 0.276030553 |
| 0.170208413 | 0.088621507 | 0.211367981 | 0.180226072 |
| 0.172161301 | 0.30780345  | 0.096662445 | 0.132360508 |
| 0.022345206 | 0.071882062 | 0.289343537 | 0.084307442 |
| 0.175219833 | 0.04286475  | 0.070272735 | 0.126409768 |
| 0.09750068  | 0.253241896 | 0.266982383 | 0.189143896 |
| 0.069499719 | 0.075853004 | 0.043872902 | 0.155272681 |
| 0.196135513 | 0.279443121 | 0.049954014 | 0.079105408 |
| 0.113977578 | 0.119303405 | 0.110300553 | 0.205394825 |
| 0.023096572 | 0.201226764 | 0.048910517 | 0.24039175  |
| 0.036620006 | 0.313266458 | 0.2647603   | 0.089494115 |
| 0.01150134  | 0.187632302 | 0.068774395 | 0.088668733 |
| 0.081639912 | 0.083099405 | 0.066343642 | 0.175664177 |
| 0.163220751 | 0.213827041 | 0.242234418 | 0.251967023 |
| 0.050365011 | 0.040429229 | 0.084624744 | 0.079004759 |
| 0.112803579 | 0.154410109 | 0.296032087 | 0.150344509 |
| 0.05939616  | 0.307367836 | 0.244274268 | 0.135543117 |
| 0.117835334 | 0.117999147 | 0.010955178 | 0.073105216 |
| 0.153713599 | 0.028514415 | 0.001605718 | 0.015091382 |
| 0.128625963 | 0.077531855 | 0.112356564 | 0.122504927 |
| 0.049834839 | 0.14839775  | 0.01222226  | 0.150597298 |
| 0.203836027 | 0.249383241 | 0.087825101 | 0.224934416 |
| 0.154421463 | 0.23183499  | 0.087916973 | 0.017280646 |
| 0.052421572 | 0.041303594 | 0.045097752 | 0.290267795 |
| 0.261721658 | 0.012578542 | 0.062989474 | 0.286067249 |
| 0.128185928 | 0.010377904 | 0.091246569 | 0.078236745 |
| 0.264945155 | 0.253366738 | 0.148427913 | 0.086055383 |
| 0.255661845 | 0.178259834 | 0.044046435 | 0.062202153 |
| 0.057974885 | 0.033714768 | 0.10530456  | 0.024691047 |
| 0.260612906 | 0.074204301 | 0.027194795 | 0.281502023 |
| 0.243582199 | 0.036579757 | 0.304095779 | 0.039523436 |
| 0.143648302 | 0.174767214 | 0.07561421  | 0.04560787  |
| 0.118778142 | 0.044627134 | 0.196446399 | 0.150845925 |
| 0.013967955 | 0.082095148 | 0.17377788  | 0.0506622   |
| 0.292856067 | 0.054277925 | 0.254535477 | 0.026327308 |
| 0.177539566 | 0.151623331 | 0.252568889 | 0.072977962 |
| 0.079155489 | 0.303858122 | 0.054622598 | 0.192250974 |

|             |             |             |             |
|-------------|-------------|-------------|-------------|
| 0.149486072 | 0.026667846 | 0.098006329 | 0.133075671 |
| 0.033482835 | 0.186025304 | 0.054131212 | 0.198467326 |
| 0.134320786 | 0.171434686 | 0.098741075 | 0.167040969 |
| 0.168803693 | 0.036260999 | 0.025644425 | 0.073999373 |
| 0.19095874  | 0.163155777 | 0.041723873 | 0.148792239 |
| 0.019682414 | 0.132626617 | 0.089350645 | 0.077683437 |
| 0.174448662 | 0.197654565 | 0.066354659 | 0.262877034 |
| 0.121071203 | 0.063493818 | 0.05892294  | 0.218156435 |
| 0.105511529 | 0.104918902 | 0.220026503 | 0.001112602 |
| 0.111518763 | 0.066814418 | 0.170310979 | 0.056117732 |
| 0.27910724  | 0.115499246 | 0.107879653 | 0.069864046 |
| 0.119262336 | 0.015561695 | 0.084501731 | 0.059012153 |
| 0.036302209 | 0.304712088 | 0.198820833 | 0.149538855 |
| 0.146145446 | 0.047080004 | 0.026023317 | 0.187361526 |
| 0.013556201 | 0.024097791 | 0.037419326 | 0.086106537 |
| 0.019878125 | 0.043726593 | 0.04430252  | 0.030056134 |
| 0.129416642 | 0.15598753  |             |             |
| LRMP        | 0.054718139 | 0.38875814  | 0.037802989 |
| 0.115208899 | 0.278945307 | 0.300891062 | 0.039697521 |
| 0.094725637 | 0.287573623 | 0.199215534 | 0.287609404 |
| 0.012044193 | 0.176352281 | 0.433625493 | 0.040342146 |
| 0.298162684 | 0.028063288 | 0.076045126 | 0.06639912  |
| 0.164789145 | 0.246583478 | 0.323876475 | 0.242945832 |
| 0.255931966 | 0.155044619 | 0.219301123 | 0.298702988 |
| 0.479735353 | 0.273733427 | 0.374628859 | 0.145990793 |
| 0.37214233  | 0.284297548 | 0.319775146 | 0.011021221 |
| 0.300496181 | 0.019347714 | 0.378663625 | 0.205466376 |
| 0.210238392 | 0.310099457 | 0.214797562 | 0.199603614 |
| 0.226773121 | 0.023720223 | 0.176865962 | 0.32741828  |
| 0.214734344 | 0.224887592 | 0.039774801 | 0.355452363 |
| 0.25243899  | 0.278643106 | 0.307023228 | 0.001828192 |
| 0.312317528 | 0.153472097 | 0.252058558 | 0.476816149 |
| 0.15872502  | 0.104828565 | 0.222237123 | 0.183146243 |
| 0.275956862 | 0.310373594 | 0.211250532 | 0.230425919 |
| 0.4722271   | 0.220426972 | 0.384576082 | 0.142226512 |
| 0.24363777  | 0.019487795 | 0.12331765  | 0.050273623 |
| 0.294414422 | 0.172106982 | 0.302750562 | 0.29195243  |
| 0.375342341 | 0.475380912 | 0.172825974 | 0.446274158 |
| 0.113563295 | 0.289486303 | 0.273705916 | 0.26408306  |
| 0.293857612 | 0.055963424 | 0.362302013 | 0.484508276 |
| 0.032283844 | 0.238136513 | 0.304335175 | 0.07987451  |
| 0.41043957  | 0.27590504  | 0.252285738 | 0.248666252 |
| 0.340169905 | 0.263129713 | 0.428577246 | 0.228026643 |
| 0.296932427 | 0.042347016 | 0.427659887 | 0.293523618 |
| 0.271115535 | 0.053947971 | 0.200087381 | 0.45843827  |
| 0.305369203 | 0.479799857 | 0.375216916 | 0.303975119 |
| 0.283640177 | 0.480670275 | 0.330013411 | 0.395974573 |
| 0.147385051 | 0.494216227 | 0.138724914 | 0.038558834 |
| 0.046461404 | 0.081692273 | 0.204472077 | 0.279465294 |
| 0.474040009 | 0.267286368 | 0.139153645 | 0.189310127 |
| 0.458813022 | 0.425493353 | 0.483782462 | 0.367333107 |
| 0.027486453 | 0.254050629 | 0.283131173 | 0.228295767 |
| 0.295412945 | 0.079833176 | 0.26923274  | 0.452973425 |
| 0.355561192 | 0.421791843 | 0.115120753 | 0.447889414 |

|             |             |             |             |
|-------------|-------------|-------------|-------------|
| 0.138725191 | 0.494680759 | 0.421228637 | 0.127157903 |
| 0.476864123 | 0.447826727 | 0.503042494 | 0.386134923 |
| 0.448598594 | 0.239906883 | 0.04686899  | 0.332064492 |
| 0.482944589 | 0.025538269 | 0.470845228 | 0.493035015 |
| 0.457822355 | 0.453812102 | 0.508237369 | 0.507210948 |
| 0.466880825 | 0.0482822   | 0.026211173 | 0.232130195 |
| 0.45884791  | 0.371777114 | 0.131412555 | 0.287737153 |
| 0.28476144  | 0.266558183 | 0.407285686 | 0.245772503 |
| 0.487701741 | 0.450002882 | 0.480465885 | 0.324351596 |
| 0.185321997 | 0.286138397 | 0.299409883 | 0.415224738 |
| 0.038641976 | 0.080782627 | 0.031815489 | 0.258185372 |
| 0.243185508 | 0.140996403 | 0.24567964  | 0.260946949 |
| 0.146016906 | 0.231397136 | 0.320407784 | 0.356543195 |
| 0.03716725  | 0.297947694 | 0.120592949 | 0.104383269 |
| 0.033133087 | 0.116097957 | 0.138569651 | 0.143451333 |
| 0.216471264 | 0.186506465 | 0.378343919 | 0.482219844 |
| 0.26001026  | 0.132334235 | 0.341238643 | 0.470436979 |
| 0.410698553 | 0.310524085 | 0.183408798 | 0.011595597 |
| 0.191702199 | 0.235720876 | 0.231024532 | 0.314744764 |
| 0.146231692 | 0.163532115 | 0.269416352 | 0.391255013 |
| 0.180813109 | 0.095963166 | 0.268673703 | 0.394944913 |
| 0.103666615 | 0.280510313 | 0.431482716 | 0.256968313 |
| 0.00216007  | 0.217947318 | 0.42617762  | 0.15097145  |
| 0.219292478 | 0.183216954 | 0.305352448 | 0.439868622 |
| 0.266219668 | 0.22756282  | 0.498656703 | 0.390315646 |
| 0.270259387 | 0.176652344 | 0.508821094 | 0.055193646 |
| 0.276701037 | 0.075628742 | 0.240722386 | 0.215778192 |
| 0.170290804 | 0.246426061 | 0.293365694 | 0.27321787  |
| 0.087332287 | 0.480757685 | 0.378691733 | 0.496960383 |
| 0.26551626  | 0.505404375 | 0.451815904 | 0.42965194  |
| 0.284363598 | 0.26729658  | 0.197215744 | 0.402190525 |
| 0.440209189 | 0.202711205 | 0.048148261 | 0.411131044 |
| 0.232431147 | 0.351103918 | 0.150720574 | 0.471722721 |
| 0.465114376 | 0.413847047 | 0.129041753 | 0.357734638 |
| 0.354061137 | 0.171989442 | 0.406210301 | 0.51027899  |
| 0.199049717 | 0.258851208 | 0.260686566 | 0.408022501 |
| 0.119321258 | 0.201407766 | 0.290001529 | 0.246107007 |
| 0.030929009 | 0.05417236  | 0.041881425 | 0.150182723 |
| 0.223283672 | 0.315425476 | 0.324968082 | 0.489206068 |
| 0.088398665 | 0.411971481 | 0.181050246 | 0.216592546 |
| 0.367525004 | 0.275399853 | 0.331506635 | 0.325154157 |
| 0.201593012 | 0.018717242 | 0.102734099 | 0.4696194   |
| 0.022278672 | 0.276500872 | 0.217937109 | 0.003098911 |
| 0.027321749 | 0.359466802 | 0.069074126 | 0.161158079 |
| 0.492508987 | 0.162952756 | 0.133215978 | 0.191421711 |
| 0.316954047 | 0.068627156 | 0.006477957 | 0.460053002 |
| 0.454271949 | 0.423701696 | 0.447335265 | 0.414028743 |
| 0.410523935 | 0.367029767 | 0.384236322 | 0.2427943   |
| 0.077471161 | 0.05878353  | 0.197896292 | 0.214812998 |
| 0.002918726 | 0.377586715 | 0.266294688 | 0.103659606 |
| 0.394741502 | 0.22414399  | 0.029064517 | 0.295456201 |
| 0.014918955 | 0.239374731 | 0.197643044 | 0.180861216 |
| 0.336376464 | 0.0095336   | 0.181792777 | 0.242531857 |
| 0.390484069 | 0.303266703 | 0.31359145  | 0.500149717 |



|             |             |             |             |
|-------------|-------------|-------------|-------------|
| 0.256752035 | 0.081982745 | 0.248322055 | 0.39038471  |
| 0.050543184 | 0.074656392 | 0.233556019 | 0.031566019 |
| 0.224066648 | 0.420992509 | 0.295676598 | 0.04678855  |
| 0.187211335 | 0.003223958 | 0.323837168 | 0.501801291 |
| 0.422965241 | 0.503138363 | 0.486198221 | 0.291113527 |
| 0.475519234 | 0.163605289 | 0.508159449 | 0.353833875 |
| 0.238755862 | 0.000668928 | 0.006438567 | 0.482579895 |
| 0.286383282 | 0.039180832 | 0.110595554 | 0.275157637 |
| 0.090629263 | 0.093809284 | 0.055486519 | 0.214818437 |
| 0.334338222 | 0.233043569 | 0.220359919 | 0.416531465 |
| 0.176080588 | 0.184252761 | 0.250620759 | 0.057113326 |
| 1           | 0.040864853 | 0.055427679 | 0.009845341 |
| 0.339424024 | 0.083460101 | 0.408208388 | 0.479780316 |
| 0.47233512  | 0.359837017 | 0.231741641 | 0.283455293 |
| 0.431136806 | 0.064787646 | 0.312814606 | 0.06708263  |
| 0.444485778 | 0.297217996 | 0.285623118 | 0.263015238 |
| 0.475933983 | 0.433604028 | 0.023796937 | 0.363778546 |
| 0.013833891 | 0.003772387 | 0.235484911 | 0.206376347 |
| 0.071670041 | 0.266224458 | 0.206755453 | 0.168264993 |
| 0.19396688  | 0.023122854 | 0.259498741 | 0.242200176 |
| 0.215130504 | 0.257004756 | 0.262175246 | 0.194452039 |
| 0.238994691 | 0.131945091 | 0.183723562 | 0.124925037 |
| 0.194287115 | 0.255521021 | 0.15519447  | 0.013753071 |
| 0.284629536 | 0.306658921 | 0.04190662  | 0.116549693 |
| 0.430496241 | 0.480967093 | 0.028324964 | 0.010957593 |
| 0.220217195 | 0.23797342  | 0.499693596 | 0.467584245 |
| 0.479315796 | 0.491362369 | 0.357794905 | 0.111407149 |
| 0.052312307 | 0.242896583 | 0.274235346 | 0.116948738 |
| 0.491456265 | 0.03569617  | 0.459120986 | 0.295580921 |
| 0.078059207 | 0.158501293 | 0.033934237 | 0.061299878 |
| 0.326237702 | 0.129668109 | 0.161293254 | 0.091654776 |
| 0.231146954 | 0.291437025 | 0.034101182 | 0.140879678 |
| 0.279966163 | 0.193535834 | 0.109917654 | 0.234344481 |
| 0.313215956 | 0.153854657 | 0.375781796 | 0.417406251 |
| 0.087826492 | 0.069469714 | 0.176421955 | 0.351462993 |
| 0.414420036 | 0.265343349 | 0.029936052 | 0.409502807 |
| 0.488355017 | 0.357272761 | 0.465210736 | 0.376467367 |
| 0.053446727 | 0.302243063 | 0.265839121 | 0.246998571 |
| 0.130994454 | 0.292692091 | 0.185708063 | 0.041519728 |
| 0.272970253 | 0.435504907 | 0.368972627 | 0.142619714 |
| 0.304593693 | 0.074858644 | 0.029992532 | 0.44039437  |
| 0.195605172 | 0.062632036 | 0.233117628 | 0.420362724 |
| 0.003889036 | 0.218732329 | 0.480891276 | 0.216576882 |
| 0.485424596 | 0.468497437 | 0.409940483 | 0.207695701 |
| 0.003849404 | 0.350289629 | 0.284714432 | 0.28811885  |
| 0.386053144 | 0.306934227 | 0.148571331 | 0.063008001 |
| 0.261957989 | 0.053985912 | 0.100053056 | 0.268695764 |
| 0.156528826 | 0.280648036 | 0.157638074 | 0.137327176 |
| 0.175531622 | 0.056481431 | 0.300597482 | 0.196382198 |
| 0.166039252 | 0.201584349 | 0.313121182 | 0.203282923 |
| 0.178146205 | 0.409588451 | 0.334893557 | 0.019422296 |
| 0.320544097 | 0.378219809 | 0.43451171  | 0.000808282 |
| 0.38006427  | 0.005936502 | 0.175793894 | 0.193888025 |
| 0.180490783 | 0.168309017 | 0.215333012 | 0.26286603  |

|             |             |             |             |
|-------------|-------------|-------------|-------------|
| 0.2361731   | 0.164318086 | 0.226877135 | 0.180648645 |
| 0.156241158 | 0.173427594 | 0.296397446 | 0.235122803 |
| 0.257620616 | 0.096493789 | 0.077703356 | 0.079214206 |
| 0.052108064 | 0.455593282 | 0.212247764 | 0.050797438 |
| 0.176741702 | 0.248275073 | 0.333709211 | 0.449902487 |
| 0.425361863 | 0.085147848 | 0.244121578 | 0.412580313 |
| 0.179760274 | 0.220426963 | 0.040979402 | 0.270119789 |
| 0.180651757 | 0.21916754  | 0.281807137 | 0.183438164 |
| 0.319533229 | 0.365132458 | 0.208141359 | 0.425295063 |
| 0.290465774 | 0.229577645 | 0.200698228 | 0.079688306 |
| 0.119498298 | 0.090430537 | 0.253072294 | 0.001335424 |
| 0.270930737 | 0.189430982 | 0.457053181 | 0.442761264 |
| 0.295816354 | 0.375799147 | 0.214768152 | 0.059074134 |
| 0.185871608 | 0.1362364   | 0.100374136 | 0.392254077 |
| 0.260675844 | 0.158170573 | 0.256194068 | 0.236886445 |
| 0.395164282 | 0.358930931 | 0.238563064 | 0.173985868 |
| 0.180127953 | 0.132629108 | 0.424363424 | 0.08309847  |
| 0.289750532 | 0.214704768 | 0.229506124 | 0.225372208 |
| 0.188001371 | 0.499987649 | 0.042231804 | 0.507081963 |
| 0.239280397 | 0.098740798 | 0.461814758 | 0.234207587 |
| 0.239713449 | 0.146430384 | 0.239908733 | 0.25642959  |
| 0.171692314 | 0.326024324 | 0.013551851 | 0.063352607 |
| 0.288775834 | 0.217769864 | 0.333708642 | 0.314302349 |
| 0.247885769 | 0.314744856 | 0.260219743 | 0.185308915 |
| 0.427687065 | 0.443858458 | 0.179834439 | 0.206990652 |
| 0.280652621 | 0.085766345 | 0.28876053  | 0.017895651 |
| 0.301202181 | 0.3124172   | 0.258441017 | 0.043719093 |
| 0.0141418   | 0.230306644 | 0.275738636 | 0.038130548 |
| 0.479834998 | 0.260944437 | 0.241033272 | 0.393852552 |
| 0.131933198 | 0.441552498 | 0.12457883  | 0.371955978 |
| 0.025929111 | 0.195026542 | 0.308854053 | 0.260369022 |
| 0.206299197 | 0.268640938 | 0.338688943 | 0.266791269 |
| 0.025569853 | 0.232877413 | 0.000384624 | 0.360344012 |
| 0.404950439 | 0.270079092 | 0.168353476 | 0.217772144 |
| 0.242915536 | 0.36333811  | 0.194412102 | 0.30899379  |
| 0.012034039 | 0.293583124 | 0.159479959 | 0.390868447 |
| 0.196497284 | 0.227536359 | 0.059850996 | 0.259075991 |
| 0.395139679 | 0.201333971 | 0.21723988  | 0.219273487 |
| 0.456499047 | 0.356103647 | 0.119537022 | 0.247143123 |
| 0.278930784 | 0.039536207 | 0.271959686 | 0.498554401 |
| 0.155965424 | 0.244435567 | 0.444434161 | 0.151891922 |
| 0.289064321 | 0.363203593 | 0.285024744 | 0.486167209 |
| 0.075344959 | 0.193404269 | 0.412288435 | 0.419842956 |
| 0.281484938 | 0.200239422 | 0.256194325 | 0.1960627   |
| 0.413399688 | 0.085328036 | 0.244390167 | 0.291539002 |
| 0.224999185 | 0.258637483 | 0.218547699 | 0.194701101 |
| 0.03423146  | 0.140592344 | 0.314250852 | 0.0973192   |
| 0.211208044 | 0.273271223 | 0.223128708 | 0.36776906  |
| 0.143966028 | 0.023713666 | 0.432473125 | 0.026012244 |
| 0.238983073 | 0.338899909 | 0.191574727 | 0.295170231 |
| 0.150442068 | 0.23080209  | 0.194660751 | 0.000327575 |
| 0.387471606 | 0.078840957 | 0.262884638 | 0.208960079 |
| 0.247152928 | 0.032806707 | 0.435249795 | 0.507793146 |
| 0.24596058  | 0.297565844 | 0.289815094 | 0.431235892 |

|             |             |             |             |
|-------------|-------------|-------------|-------------|
| 0.197515665 | 0.291444035 | 0.273198529 | 0.30448863  |
| 0.268997452 | 0.246438332 | 0.2983358   | 0.316848701 |
| 0.322513878 | 0.213398544 |             |             |
| LSM8        | 0.18551785  | 0.07884582  | 0.161750404 |
| 0.102004299 | 0.064791981 | 0.033056227 | 0.150633568 |
| 0.104624661 | 0.075828693 | 0.005540909 | 0.085297601 |
| 0.153064289 | 0.002529275 | 0.110621482 | 0.149026702 |
| 0.045168084 | 0.157817058 | 0.230839781 | 0.009285634 |
| 0.030755568 | 0.071073412 | 0.012799751 | 0.042204859 |
| 0.053624877 | 0.286245755 | 0.069767854 | 0.018491355 |
| 0.088760284 | 0.002632839 | 0.049930177 | 0.00340322  |
| 0.190581964 | 0.057077971 | 0.014145986 | 0.128504123 |
| 0.043618827 | 0.001926826 | 0.184533268 | 0.084146403 |
| 0.011146526 | 0.217042466 | 0.013480753 | 0.134288592 |
| 0.019641467 | 0.167102929 | 0.00166197  | 0.037944716 |
| 0.059766965 | 0.050432752 | 0.176887316 | 0.056495336 |
| 0.015982612 | 0.12805534  | 0.037115447 | 0.004142151 |
| 0.011313016 | 0.000277423 | 0.003547199 | 0.117675115 |
| 0.290022425 | 0.240571226 | 0.002553465 | 0.057972608 |
| 0.033228141 | 0.060329397 | 0.172273705 | 0.011366596 |
| 0.118522486 | 0.005025081 | 0.039166037 | 0.047398646 |
| 0.042134342 | 0.116524259 | 0.326821795 | 0.146437733 |
| 0.018445509 | 0.206470095 | 0.065860003 | 0.017266468 |
| 0.072850427 | 0.163084135 | 0.179388515 | 0.119388276 |
| 0.006543082 | 0.032797288 | 0.030771329 | 0.167954073 |
| 0.076206257 | 0.084705286 | 0.096339351 | 0.14439546  |
| 0.114493176 | 0.021987412 | 0.0625995   | 0.199582697 |
| 0.087766693 | 0.006154045 | 0.017716718 | 0.011897436 |
| 0.055398529 | 0.045843723 | 0.132103539 | 0.199750656 |
| 0.042045969 | 0.220801603 | 0.135975421 | 0.031883786 |
| 0.066129556 | 0.238763238 | 0.028488992 | 0.058121904 |
| 0.063201092 | 0.096964345 | 0.060673874 | 0.109161701 |
| 0.033244586 | 0.113594516 | 0.093500287 | 0.100341547 |
| 0.000485308 | 0.110051425 | 0.220127301 | 0.16827032  |
| 0.120997656 | 0.164791017 | 0.015657435 | 0.210482602 |
| 0.084012498 | 0.111069983 | 0.148915796 | 0.140329927 |
| 0.088229253 | 0.115302502 | 0.10312389  | 0.093940745 |
| 0.21250519  | 0.006142383 | 0.035416241 | 0.051904591 |
| 0.082589536 | 0.228139904 | 0.02609764  | 0.15185919  |
| 0.184577088 | 0.077996184 | 0.106371118 | 0.178092543 |
| 0.08431684  | 0.15451662  | 0.07066562  | 0.249026771 |
| 0.148244325 | 0.145830242 | 0.131098103 | 0.049987501 |
| 0.149872385 | 0.087360837 | 0.005626015 | 0.105794675 |
| 0.156943833 | 0.009083371 | 0.06800474  | 0.078714321 |
| 0.107308959 | 0.062443551 | 0.11858491  | 0.095246226 |
| 0.103478012 | 0.252392275 | 0.000125742 | 0.125627225 |
| 0.128528223 | 0.153389684 | 0.070974509 | 0.022325811 |
| 0.051190533 | 0.046430983 | 0.057908346 | 0.009669315 |
| 0.17340908  | 0.088758989 | 0.073999312 | 0.080192149 |
| 0.041872902 | 0.226875904 | 0.017654314 | 0.140657968 |
| 0.140606244 | 0.166178472 | 0.239959584 | 0.138498116 |
| 0.008499786 | 0.250165019 | 0.036224288 | 0.043590093 |
| 0.270045469 | 0.039160771 | 0.008367808 | 0.056784527 |
| 0.236961351 | 0.030266644 | 0.196212364 | 0.159943002 |

|             |             |             |             |
|-------------|-------------|-------------|-------------|
| 0.180129499 | 0.318910308 | 0.069112502 | 0.114900474 |
| 0.114576107 | 0.251954051 | 0.04033343  | 0.096195041 |
| 0.027940057 | 0.247414193 | 0.061162911 | 0.147581878 |
| 0.200124894 | 0.035141977 | 0.229459913 | 0.126103666 |
| 0.01871392  | 0.004202725 | 0.003640147 | 0.02240211  |
| 0.276820415 | 0.041796137 | 0.051670953 | 0.07835776  |
| 0.10261366  | 0.095797967 | 0.019763415 | 0.203284853 |
| 0.21417382  | 0.053451788 | 0.104774625 | 0.028267264 |
| 0.114565337 | 0.098740419 | 0.079233644 | 0.032597746 |
| 0.100450708 | 0.011485838 | 0.006495396 | 0.094845902 |
| 0.005590437 | 0.023990205 | 0.082638845 | 0.072481503 |
| 0.011856545 | 0.189908039 | 0.117013377 | 0.000471412 |
| 0.027899711 | 0.054093914 | 0.190842229 | 0.012698259 |
| 0.19228834  | 0.170022491 | 0.044347788 | 0.042488707 |
| 0.201963212 | 0.118931287 | 0.116724404 | 0.103782027 |
| 0.012101586 | 0.122026336 | 0.077705985 | 0.122955288 |
| 0.107754819 | 0.013213561 | 0.002581671 | 0.083417269 |
| 0.087083266 | 0.007961206 | 0.22694588  | 0.045136794 |
| 0.014959586 | 0.049514015 | 0.034143834 | 0.128886585 |
| 0.180399483 | 0.101009188 | 0.144855274 | 0.10306371  |
| 0.156674718 | 0.192580021 | 0.094347642 | 0.130699882 |
| 0.004850634 | 0.033921779 | 0.027835762 | 0.123578745 |
| 0.270998926 | 0.029716046 | 0.174759847 | 0.002975248 |
| 3.48E-05    | 0.180708913 | 0.247787182 | 0.176224016 |
| 0.020044425 | 0.023453704 | 0.063802545 | 0.109813231 |
| 0.256867953 | 0.140072645 | 0.155879447 | 0.047510402 |
| 0.122864638 | 0.026250376 | 0.027866431 | 0.049911809 |
| 0.203103271 | 0.144503453 | 0.138150119 | 0.168424576 |
| 0.169046004 | 0.014354108 | 0.060678909 | 0.026499508 |
| 0.162033282 | 0.046349481 | 0.276253874 | 0.334225695 |
| 0.101904296 | 0.286905066 | 0.206206468 | 0.008708555 |
| 0.133311068 | 0.289550468 | 0.073853734 | 0.09332536  |
| 0.101358267 | 0.101249841 | 0.097763672 | 0.115658014 |
| 0.084333685 | 0.061767866 | 0.080878927 | 0.058306219 |
| 0.122452229 | 0.119971393 | 0.013781951 | 0.086969158 |
| 0.010763233 | 0.128163936 | 0.055560819 | 0.341002675 |
| 0.055505297 | 0.119059622 | 0.177855941 | 0.043130176 |
| 0.117037279 | 0.003743319 | 0.027351463 | 0.089313047 |
| 0.09982847  | 0.144800898 | 0.014758286 | 0.008894759 |
| 0.13207033  | 0.170543389 | 0.010280348 | 0.121406271 |
| 0.112291079 | 0.164113481 | 0.07829262  | 0.089039114 |
| 0.181675522 | 0.002702529 | 0.027393619 | 0.001561334 |
| 0.00894928  | 0.123544304 | 0.015051529 | 0.096575051 |
| 0.184077722 | 0.123402087 | 0.164571076 | 0.128829424 |
| 0.100584829 | 0.103378129 | 0.118784134 | 0.021186819 |
| 0.121254725 | 0.000214218 | 0.102476113 | 0.09547027  |
| 0.010029044 | 0.019727138 | 0.057260751 | 0.082995341 |
| 0.041515249 | 0.195704144 | 0.290963319 | 0.014024794 |
| 0.134429903 | 0.116273411 | 0.17717598  | 0.03421665  |
| 0.048739442 | 0.100649211 | 0.021097669 | 0.111066872 |
| 0.134174395 | 0.169317818 | 0.019997033 | 0.249298072 |
| 0.040864853 | 1           | 0.220315997 | 0.048109104 |
| 0.088726878 | 0.22452638  | 0.151500145 | 0.106934691 |
| 0.154483938 | 0.071098654 | 0.0053301   | 0.012830117 |

|             |             |             |             |
|-------------|-------------|-------------|-------------|
| 0.083063124 | 0.171663036 | 0.005477239 | 0.176533812 |
| 0.098466183 | 0.061514999 | 0.204157032 | 0.2197873   |
| 0.135504801 | 0.139967952 | 0.215089149 | 0.09211784  |
| 0.132083694 | 0.010511006 | 0.041732528 | 0.162623916 |
| 0.003541576 | 0.029491004 | 0.261972807 | 0.031884769 |
| 0.049041508 | 0.125468632 | 0.012848097 | 0.01675073  |
| 0.145374408 | 0.056927885 | 0.047292318 | 0.147673775 |
| 0.051099904 | 0.028665417 | 0.122345823 | 0.113679408 |
| 0.010514179 | 0.167253253 | 0.291184364 | 0.154029564 |
| 0.023471817 | 0.028332592 | 0.276475215 | 0.274845847 |
| 0.108637709 | 0.092092694 | 0.132758077 | 0.152703245 |
| 0.234207137 | 0.041103238 | 0.099586905 | 0.093009345 |
| 0.139491186 | 0.14895468  | 0.209892729 | 0.074769118 |
| 0.200223173 | 0.10077651  | 0.04385865  | 0.07435236  |
| 0.107890341 | 0.177287497 | 0.112712061 | 0.019126704 |
| 0.274917443 | 0.122304322 | 0.17848482  | 0.265179926 |
| 0.028294408 | 0.268848581 | 0.177978545 | 0.191402792 |
| 0.062848688 | 0.008839315 | 0.193383946 | 0.229734957 |
| 0.137520739 | 0.006287122 | 0.262508351 | 0.042019141 |
| 0.107442125 | 0.003091397 | 0.052644401 | 0.193395002 |
| 0.287826325 | 0.186731691 | 0.033710804 | 0.07241857  |
| 0.060812751 | 0.016948417 | 0.122215563 | 0.072917025 |
| 0.109114938 | 0.040821742 | 0.119899354 | 0.14527898  |
| 0.275998474 | 0.040365538 | 0.013204347 | 0.059802119 |
| 0.202925205 | 0.039541803 | 0.111759078 | 0.293468872 |
| 0.201972219 | 0.166170944 | 0.098006797 | 0.214014727 |
| 0.028558842 | 0.1404907   | 0.166523724 | 0.075275759 |
| 0.014834467 | 0.114897127 | 0.013391424 | 0.059204569 |
| 0.018327004 | 0.005255988 | 0.100840732 | 0.090369693 |
| 0.141481812 | 0.104596562 | 0.177136333 | 0.041493071 |
| 2.52E-05    | 0.04015955  | 0.086320496 | 0.032815284 |
| 0.085820792 | 0.138297398 | 0.02275321  | 0.164154399 |
| 0.256437677 | 0.21500838  | 0.095093652 | 0.014666669 |
| 0.004959088 | 0.051980154 | 0.288489215 | 0.134763641 |
| 0.119971164 | 0.144309686 | 0.009120084 | 0.138245853 |
| 0.006581561 | 0.279590487 | 0.183885843 | 0.005815188 |
| 0.005796224 | 0.102268662 | 0.084522807 | 0.183329912 |
| 0.025720809 | 0.099487807 | 0.115108338 | 0.027588142 |
| 0.060167479 | 0.154248152 | 0.141587611 | 0.144612515 |
| 0.137279022 | 0.105539008 | 0.136189756 | 0.04681736  |
| 0.074173759 | 0.133377666 | 0.105240452 | 0.23965658  |
| 0.136377287 | 0.125179779 | 0.050991545 | 0.045743564 |
| 0.054935948 | 0.208496246 | 0.270359583 | 0.269795648 |
| 0.163216887 | 0.080637594 | 0.295280164 | 0.240703542 |
| 0.202169394 | 0.031896951 | 0.229780445 | 0.095546633 |
| 0.153745599 | 0.200502951 | 0.049971505 | 0.084072651 |
| 0.001985867 | 0.015900061 | 0.107602533 | 0.05087018  |
| 0.171305279 | 0.026775061 | 0.026147826 | 0.083086629 |
| 0.046957845 | 0.225995244 | 0.285040348 | 0.144693751 |
| 0.047785568 | 0.027914373 | 0.007963511 | 0.147929236 |
| 0.190874974 | 0.247374755 | 0.061227829 | 0.120411715 |
| 0.118558529 | 0.037244409 | 0.078129102 | 0.126434889 |
| 0.007840747 | 0.18677427  | 0.006824333 | 0.144184401 |
| 0.004158927 | 0.202176861 | 0.312581767 | 0.051223413 |

|             |             |             |             |
|-------------|-------------|-------------|-------------|
| 0.004259229 | 0.138350441 | 0.081086915 | 0.020926196 |
| 0.060201052 | 0.044923336 | 0.029564216 | 0.08689913  |
| 0.122116293 | 0.19143514  | 0.135175523 | 0.14050227  |
| 0.025072112 | 0.039488193 | 0.029532764 | 0.086162193 |
| 0.108341656 | 0.094390576 | 0.261989255 | 0.092632623 |
| 0.042700066 | 0.258589423 | 0.187835155 | 0.072680295 |
| 0.030438886 | 0.08904296  | 0.005405113 | 0.016821791 |
| 0.065495595 | 0.011393381 | 7.86E-05    | 0.006799476 |
| 0.175011986 | 0.015738829 | 0.051810988 | 0.086009946 |
| 0.038760184 | 0.154644285 | 0.00278705  | 0.072960266 |
| 0.102956346 | 0.140236206 | 0.048281203 | 0.24589526  |
| 0.135648842 | 0.221151979 | 0.050521061 | 0.001250789 |
| 0.035711426 | 0.022129899 | 0.006776259 | 0.180593929 |
| 0.133767233 | 0.006368432 | 0.039654397 | 0.158133822 |
| 0.095128754 | 0.002828792 | 0.036782328 | 0.055839612 |
| 0.205277765 | 0.147546691 | 0.110904339 | 0.092143341 |
| 0.048390118 | 0.174091602 | 0.021661089 | 0.021684571 |
| 0.04846858  | 0.027013761 | 0.126163707 | 0.022340988 |
| 0.208157886 | 0.042765442 | 0.021356813 | 0.224594699 |
| 0.129213841 | 0.022418692 | 0.277002206 | 0.003805034 |
| 0.206555611 | 0.12055264  | 0.024029271 | 0.018290816 |
| 0.16389883  | 0.045264048 | 0.212402289 | 0.117106448 |
| 0.004185473 | 0.038473599 | 0.146385982 | 0.030420506 |
| 0.164236662 | 0.017567759 | 0.215310575 | 0.006598656 |
| 0.09933952  | 0.082945307 | 0.171955317 | 0.028024656 |
| 0.032218313 | 0.270414008 | 0.012458515 | 0.122834207 |
| 0.179391306 | 0.027550518 | 0.087047678 | 0.122066272 |
| 0.01885689  | 0.116996835 | 0.02331371  | 0.114926866 |
| 0.10003386  | 0.233024925 | 0.074276666 | 0.101283977 |
| 0.213023632 | 0.026133357 | 0.015950021 | 0.07139558  |
| 0.109919013 | 0.143348475 | 0.011707847 | 0.135201871 |
| 0.013611932 | 0.148169174 | 0.029734685 | 0.074634405 |
| 0.168127124 | 0.072872269 | 0.026850765 | 0.271593357 |
| 0.133389961 | 0.058874467 | 0.037281659 | 0.213635661 |
| 0.106180727 | 0.149353707 | 0.183220736 | 0.001575449 |
| 0.074547676 | 0.079392689 | 0.176749334 | 0.037368868 |
| 0.304745326 | 0.075059235 | 0.050910326 | 0.054995216 |
| 0.100962203 | 0.016969078 | 0.035411701 | 0.052847517 |
| 0.007643713 | 0.162347223 | 0.139189655 | 0.109241064 |
| 0.117763218 | 0.007188369 | 0.004926485 | 0.116860687 |
| 0.00773961  | 0.005342079 | 0.009757501 | 0.046546842 |
| 0.012413307 | 0.011898128 | 0.013731265 | 0.01420446  |
| 0.108698141 | 0.078167246 |             |             |
| LY6C1       | 0.23392389  | 0.15987881  | 0.202484383 |
| 0.097634125 | 0.056529321 | 0.062943729 | 0.310141041 |
| 0.245646537 | 0.171083811 | 0.04672582  | 0.068482885 |
| 0.215297494 | 0.008570059 | 0.150127504 | 0.308084452 |
| 0.052597929 | 0.240445305 | 0.260462246 | 0.073924409 |
| 0.144244482 | 0.061074911 | 0.033181183 | 0.088836223 |
| 0.068991621 | 0.309870169 | 0.121453208 | 0.044834182 |
| 0.146596683 | 0.013521286 | 0.060416365 | 0.02087021  |
| 0.227503305 | 0.049334439 | 0.031249652 | 0.206375533 |
| 0.070228761 | 0.018027096 | 0.271188112 | 0.089768415 |
| 0.014466524 | 0.24489027  | 0.056534799 | 0.10243257  |

|             |             |             |             |
|-------------|-------------|-------------|-------------|
| 0.062755096 | 0.222867985 | 0.017654469 | 0.066670772 |
| 0.123237589 | 0.13276339  | 0.24866507  | 0.084817745 |
| 0.073603078 | 0.135394181 | 0.093113954 | 0.013804042 |
| 0.021218113 | 0.002212303 | 0.012609001 | 0.189423829 |
| 0.187360372 | 0.208221719 | 0.025628894 | 0.172276024 |
| 0.07203926  | 0.09648164  | 0.177201173 | 0.056552367 |
| 0.167682009 | 0.017563236 | 0.072860854 | 0.077667557 |
| 0.08983911  | 0.31168258  | 0.259215913 | 0.28599077  |
| 0.055308266 | 0.154676225 | 0.065140405 | 0.034656991 |
| 0.152439143 | 0.247046668 | 0.19399497  | 0.216966956 |
| 0.035318152 | 0.044136946 | 0.056262428 | 0.147697146 |
| 0.130078513 | 0.315606039 | 0.088749454 | 0.204386021 |
| 0.320586616 | 0.064174577 | 0.104545067 | 0.270703914 |
| 0.141509553 | 0.038856582 | 0.049776948 | 0.017280085 |
| 0.061129675 | 0.053041613 | 0.245113244 | 0.145995894 |
| 0.066585837 | 0.267132412 | 0.245824455 | 0.036431852 |
| 0.057395573 | 0.239719544 | 0.062762415 | 0.094440196 |
| 0.071624565 | 0.141856262 | 0.125167242 | 0.149288272 |
| 0.044405913 | 0.160310205 | 0.092239517 | 0.169665724 |
| 0.013193931 | 0.183973294 | 0.177978938 | 0.22143474  |
| 0.250505753 | 0.229080218 | 0.086473513 | 0.2159017   |
| 0.116439258 | 0.136050896 | 0.178611533 | 0.115762286 |
| 0.116527053 | 0.216651335 | 0.184011525 | 0.129424427 |
| 0.268760714 | 0.031204038 | 0.044371242 | 0.137227086 |
| 0.103644222 | 0.291556359 | 0.029353529 | 0.241733501 |
| 0.180979359 | 0.099516177 | 0.213308197 | 0.28102358  |
| 0.21664326  | 0.193103319 | 0.126702886 | 0.172174229 |
| 0.219615505 | 0.227875245 | 0.165822158 | 0.053088385 |
| 0.21221387  | 0.088868022 | 0.066748998 | 0.163707559 |
| 0.18194085  | 0.003092379 | 0.115521947 | 0.126235413 |
| 0.180010459 | 0.090206677 | 0.168628314 | 0.14380857  |
| 0.180074344 | 0.297377112 | 0.007789678 | 0.100083443 |
| 0.204788618 | 0.150588164 | 0.186403345 | 0.041463733 |
| 0.059950878 | 0.083599196 | 0.100811282 | 0.026933098 |
| 0.224704203 | 0.12745136  | 0.128957592 | 0.125767805 |
| 0.12822266  | 0.251751699 | 0.034045159 | 0.236498862 |
| 0.244454973 | 0.205157972 | 0.24234783  | 0.186134163 |
| 0.048203036 | 0.179750788 | 0.086439761 | 0.078439203 |
| 0.183849448 | 0.118231667 | 0.024589943 | 0.05960433  |
| 0.313233608 | 0.04986206  | 0.217132409 | 0.219143259 |
| 0.219813744 | 0.347196691 | 0.108160301 | 0.133447663 |
| 0.101067692 | 0.388465805 | 0.069271274 | 0.147075537 |
| 0.074680144 | 0.22636544  | 0.088709305 | 0.180990002 |
| 0.197014706 | 0.040405363 | 0.2436308   | 0.042379894 |
| 0.047509465 | 0.031891175 | 0.013466729 | 0.044192293 |
| 0.380390619 | 0.108142695 | 0.067057243 | 0.070287415 |
| 0.12536278  | 0.259134672 | 0.051410043 | 0.258199372 |
| 0.275746632 | 0.05559109  | 0.120995694 | 0.066690471 |
| 0.116707708 | 0.100714587 | 0.101253325 | 0.077428908 |
| 0.151849345 | 0.015420418 | 0.01571834  | 0.127577726 |
| 0.029415847 | 0.050932292 | 0.129755255 | 0.076447703 |
| 0.053502186 | 0.345052122 | 0.17265346  | 0.005980944 |
| 0.062605401 | 0.044468057 | 0.124406309 | 0.06126063  |
| 0.161269002 | 0.16801739  | 0.04623189  | 0.055066716 |

|             |             |             |             |
|-------------|-------------|-------------|-------------|
| 0.200160007 | 0.189242254 | 0.154872809 | 0.149393691 |
| 0.037221078 | 0.179940636 | 0.101336213 | 0.138512918 |
| 0.114613443 | 0.044291202 | 0.00780314  | 0.099994109 |
| 0.119008841 | 0.049222311 | 0.274409366 | 0.086271755 |
| 0.058042916 | 0.064019491 | 0.083214263 | 0.157688871 |
| 0.241503547 | 0.199887111 | 0.161011026 | 0.104301979 |
| 0.134331884 | 0.147025379 | 0.133689005 | 0.191821853 |
| 0.048845905 | 0.051511888 | 0.045444226 | 0.121489871 |
| 0.207080298 | 0.058649598 | 0.24760473  | 0.013179047 |
| 0.000905442 | 0.282981839 | 0.256014564 | 0.132946775 |
| 0.024121823 | 0.053558411 | 0.080435928 | 0.168347802 |
| 0.228299099 | 0.175391481 | 0.234029577 | 0.056653058 |
| 0.182797414 | 0.058870908 | 0.039157644 | 0.060798259 |
| 0.229807653 | 0.073714524 | 0.112544477 | 0.249726243 |
| 0.270086882 | 0.023742087 | 0.134565649 | 0.008581214 |
| 0.276974017 | 0.112802404 | 0.3413514   | 0.356229258 |
| 0.133670375 | 0.331611096 | 0.19206502  | 0.059228451 |
| 0.108820125 | 0.263272589 | 0.014171269 | 0.157679711 |
| 0.195382824 | 0.19828518  | 0.195708276 | 0.231602991 |
| 0.158392068 | 0.112741394 | 0.10184507  | 0.091023694 |
| 0.250099895 | 0.269428161 | 0.026013792 | 0.091029925 |
| 0.024283417 | 0.116983827 | 0.088545152 | 0.240785136 |
| 0.081181672 | 0.158602315 | 0.237301656 | 0.062423963 |
| 0.114109799 | 0.009201292 | 0.124082851 | 0.163642892 |
| 0.109614957 | 0.219074738 | 0.025866482 | 0.033483971 |
| 0.194942152 | 0.197967036 | 0.030030085 | 0.188738792 |
| 0.083380644 | 0.251476979 | 0.070395121 | 0.089671006 |
| 0.274561798 | 0.027930979 | 0.099805391 | 0.00351342  |
| 0.043116779 | 0.22729329  | 0.0553431   | 0.205961756 |
| 0.132990597 | 0.127316449 | 0.183534976 | 0.190816474 |
| 0.186405049 | 0.148967437 | 0.160740356 | 0.023995234 |
| 0.172546979 | 0.004053277 | 0.162114608 | 0.144983675 |
| 0.041209012 | 0.007179927 | 0.049772955 | 0.118284604 |
| 0.048005759 | 0.279492273 | 0.22282537  | 0.044122579 |
| 0.169874566 | 0.216438813 | 0.276823096 | 0.039432718 |
| 0.064649887 | 0.078701544 | 0.043760844 | 0.203106564 |
| 0.141861955 | 0.162157033 | 0.071816975 | 0.295161392 |
| 0.055427679 | 0.220315997 | 1           | 0.011685308 |
| 0.095407878 | 0.303430999 | 0.271155092 | 0.173171602 |
| 0.195569879 | 0.071074716 | 0.030514296 | 0.053064448 |
| 0.142140902 | 0.231336414 | 0.033585328 | 0.229454609 |
| 0.166008143 | 0.05999712  | 0.15168238  | 0.193151603 |
| 0.172781147 | 0.185397191 | 0.278052652 | 0.105187924 |
| 0.069217296 | 0.007344796 | 0.072704036 | 0.19793565  |
| 0.063574021 | 0.048890872 | 0.210065337 | 0.1639007   |
| 0.149495413 | 0.172722485 | 0.025439994 | 0.027723052 |
| 0.115096731 | 0.074748669 | 0.043214465 | 0.239874874 |
| 0.077804535 | 0.059198716 | 0.144387394 | 0.219205635 |
| 0.096086451 | 0.224332883 | 0.297876639 | 0.286095858 |
| 0.049792446 | 0.04238555  | 0.256890291 | 0.236418197 |
| 0.117481553 | 0.125398419 | 0.257678052 | 0.069394856 |
| 0.225419497 | 0.091545444 | 0.135028579 | 0.161490787 |
| 0.219922824 | 0.195490487 | 0.26476651  | 0.140403138 |
| 0.250757499 | 0.096288072 | 0.047364596 | 0.10922571  |



|             |             |             |             |
|-------------|-------------|-------------|-------------|
| 0.163763718 | 0.26457864  | 0.185231386 | 0.028020666 |
| 0.282362324 | 0.150097689 | 0.168105944 | 0.290202912 |
| 0.038211458 | 0.216387347 | 0.132387255 | 0.195837576 |
| 0.077060698 | 0.025090274 | 0.308386819 | 0.190514404 |
| 0.154795064 | 0.014065528 | 0.23131543  | 0.133353089 |
| 0.164886738 | 0.059228351 | 0.070271798 | 0.216899547 |
| 0.24379386  | 0.287470318 | 0.090689121 | 0.118907069 |
| 0.100256082 | 0.050141945 | 0.06843892  | 0.15108046  |
| 0.156192818 | 0.055957428 | 0.191185012 | 0.159849002 |
| 0.296477163 | 0.041451094 | 0.042037565 | 0.07069823  |
| 0.224776137 | 0.069988827 | 0.167926361 | 0.294970995 |
| 0.262039344 | 0.267871357 | 0.153995696 | 0.148137773 |
| 0.058426963 | 0.23793373  | 0.262668891 | 0.133648485 |
| 0.025073633 | 0.194334875 | 0.055795147 | 0.105092039 |
| 0.007169418 | 0.010776314 | 0.159204625 | 0.116776612 |
| 0.222152643 | 0.136192984 | 0.196241505 | 0.158232273 |
| 0.000606672 | 0.058703821 | 0.066553717 | 0.047275181 |
| 0.143751795 | 0.16341508  | 0.153029692 | 0.190687943 |
| 0.203187273 | 0.241104346 | 0.159629061 | 0.058023324 |
| 0.017416565 | 0.085693753 | 0.22899993  | 0.221458188 |
| 0.13597834  | 0.292799034 | 0.02327214  | 0.14027649  |
| 0.042653693 | 0.205499169 | 0.154993188 | 0.054462855 |
| 0.012526974 | 0.1578001   | 0.121958134 | 0.231304424 |
| 0.043434607 | 0.150094217 | 0.164995243 | 0.02485275  |
| 0.067709344 | 0.15188705  | 0.119820415 | 0.097344899 |
| 0.129355857 | 0.139775294 | 0.109509114 | 0.06226426  |
| 0.115492445 | 0.173458699 | 0.092314587 | 0.147172515 |
| 0.118868986 | 0.190173452 | 0.066602155 | 0.102668677 |
| 0.052460869 | 0.203059473 | 0.347579542 | 0.367953557 |
| 0.154524536 | 0.139914655 | 0.266974317 | 0.258300798 |
| 0.169254086 | 0.094222155 | 0.208926839 | 0.176919806 |
| 0.170863404 | 0.292195889 | 0.102005185 | 0.125501483 |
| 0.024340152 | 0.062626744 | 0.266225687 | 0.083591461 |
| 0.162868154 | 0.03942058  | 0.068301498 | 0.117145683 |
| 0.101034997 | 0.245473902 | 0.252619297 | 0.190646588 |
| 0.067686613 | 0.086676282 | 0.041400322 | 0.134050949 |
| 0.177989976 | 0.287684337 | 0.050759222 | 0.061936746 |
| 0.11007237  | 0.104366299 | 0.106475677 | 0.199737227 |
| 0.023643551 | 0.200348645 | 0.042779445 | 0.209176544 |
| 0.034978546 | 0.301268401 | 0.255387398 | 0.091159311 |
| 0.011211613 | 0.176648225 | 0.069743362 | 0.078226857 |
| 0.083272581 | 0.089030137 | 0.075695179 | 0.177238363 |
| 0.180474224 | 0.205162084 | 0.249325407 | 0.236548908 |
| 0.049473696 | 0.03998204  | 0.084811428 | 0.074906531 |
| 0.115310413 | 0.154920031 | 0.276114258 | 0.148666315 |
| 0.059962712 | 0.305646791 | 0.241988101 | 0.135288897 |
| 0.119081888 | 0.11086623  | 0.01148741  | 0.074442292 |
| 0.162374367 | 0.028081058 | 0.001399239 | 0.014439445 |
| 0.125393367 | 0.092394222 | 0.115539847 | 0.133626304 |
| 0.054062741 | 0.156134503 | 0.013497518 | 0.152328612 |
| 0.199507486 | 0.246044821 | 0.075350084 | 0.234792855 |
| 0.152954642 | 0.204944191 | 0.080976259 | 0.024010777 |
| 0.051034401 | 0.040212869 | 0.043998373 | 0.274166654 |
| 0.246374586 | 0.013106919 | 0.062663975 | 0.298248615 |

|             |             |             |             |
|-------------|-------------|-------------|-------------|
| 0.129933999 | 0.009925964 | 0.100154988 | 0.076647048 |
| 0.280037659 | 0.249048887 | 0.146070235 | 0.081151864 |
| 0.303003313 | 0.186015646 | 0.046049849 | 0.066913911 |
| 0.051465427 | 0.034782367 | 0.103723799 | 0.023949804 |
| 0.232444548 | 0.071473494 | 0.032002666 | 0.272587396 |
| 0.242148322 | 0.039044292 | 0.305479789 | 0.041477994 |
| 0.144452614 | 0.184109328 | 0.076292705 | 0.045260458 |
| 0.094831872 | 0.042369277 | 0.192564366 | 0.140596936 |
| 0.01259257  | 0.089359607 | 0.154722124 | 0.056593903 |
| 0.287111612 | 0.051229687 | 0.266310077 | 0.026317725 |
| 0.1738702   | 0.157018514 | 0.248297838 | 0.07867956  |
| 0.085930458 | 0.289268661 | 0.051848934 | 0.191911473 |
| 0.139917169 | 0.026724829 | 0.096245337 | 0.126159957 |
| 0.034615342 | 0.185832295 | 0.056227218 | 0.201067704 |
| 0.130787164 | 0.166553502 | 0.101656474 | 0.167967016 |
| 0.168847293 | 0.041194091 | 0.024721343 | 0.073598339 |
| 0.18304119  | 0.127532639 | 0.048042464 | 0.145247838 |
| 0.020048251 | 0.134325618 | 0.093316592 | 0.08038439  |
| 0.139541902 | 0.207621706 | 0.057708199 | 0.256509805 |
| 0.118122089 | 0.064124862 | 0.065001775 | 0.213486245 |
| 0.086321081 | 0.080774192 | 0.219551113 | 0.00126188  |
| 0.098531232 | 0.063210613 | 0.162921617 | 0.057363987 |
| 0.259440502 | 0.117635394 | 0.105353529 | 0.048782983 |
| 0.121833747 | 0.018019301 | 0.092036914 | 0.054354185 |
| 0.035420906 | 0.279273282 | 0.193507434 | 0.148022596 |
| 0.146869722 | 0.049237294 | 0.023750944 | 0.184271299 |
| 0.014957611 | 0.024833777 | 0.038924904 | 0.084851962 |
| 0.020418486 | 0.042957808 | 0.043483339 | 0.028367196 |
| 0.126186993 | 0.153978854 |             |             |
| LY6I        | 0.023829359 | 0.008110795 | 0.024582897 |
| 0.019871848 | 0.020971472 | 0.01009882  | 0.010040631 |
| 0.008215586 | 0.005227587 | 0.000466544 | 0.03046574  |
| 0.025012258 | 0.00071625  | 0.014654628 | 0.012688411 |
| 0.013014471 | 0.027519443 | 0.023563731 | 5.00E-05    |
| 0.001307105 | 0.025344491 | 0.008693822 | 0.004450651 |
| 0.015235172 | 0.029811606 | 0.006206483 | 0.003421872 |
| 0.012246269 | 0.001446067 | 0.014819607 | 0.001252248 |
| 0.02456593  | 0.022215034 | 0.005562396 | 0.02273916  |
| 0.0095703   | 1.73E-05    | 0.0173086   | 0.030862916 |
| 0.002167408 | 0.028138291 | 0.001318702 | 0.06008886  |
| 0.002084687 | 0.030584877 | 0.00027797  | 0.006431346 |
| 0.004826409 | 0.007749132 | 0.018342776 | 0.010398747 |
| 0.002144491 | 0.019650063 | 0.003188018 | 0.000106225 |
| 0.006898421 | 0.000607528 | 0.002422329 | 0.014152415 |
| 0.055447838 | 0.048259606 | 0.000156168 | 0.00506014  |
| 0.004724367 | 0.009396778 | 0.024685552 | 0.001686954 |
| 0.016641709 | 0.001877579 | 0.006071474 | 0.001609467 |
| 0.007874283 | 0.004119796 | 0.038618706 | 0.005737201 |
| 0.004878063 | 0.048621509 | 0.022365312 | 0.006618734 |
| 0.006417749 | 0.017587376 | 0.02034805  | 0.01124027  |
| 0.000521714 | 0.010105445 | 0.010740709 | 0.031335714 |
| 0.009077053 | 0.003747106 | 0.024206084 | 0.018665652 |
| 0.005285196 | 0.001813292 | 0.008410395 | 0.012119011 |
| 0.012363982 | 0.001399052 | 0.00240908  | 0.010736069 |

|             |             |             |             |
|-------------|-------------|-------------|-------------|
| 0.014328309 | 0.012636574 | 0.0119554   | 0.040147129 |
| 0.011640556 | 0.017932739 | 0.012392    | 0.012141668 |
| 0.034659192 | 0.031184907 | 0.006320539 | 0.010545274 |
| 0.016837751 | 0.014669926 | 0.006718344 | 0.013736972 |
| 0.010106159 | 0.017327317 | 0.019954276 | 0.011327501 |
| 0.000157639 | 0.013152491 | 0.045957034 | 0.038264318 |
| 0.004876814 | 0.028228332 | 0.002132332 | 0.027898486 |
| 0.016203366 | 0.012496545 | 0.018975233 | 0.036282527 |
| 0.01651999  | 0.010678496 | 0.011560071 | 0.013002076 |
| 0.021829501 | 0.001921801 | 0.010336815 | 0.006950515 |
| 0.013004438 | 0.016568134 | 0.013228208 | 0.016266183 |
| 0.030221881 | 0.016539451 | 0.007778946 | 0.017048491 |
| 0.007024268 | 0.023070996 | 0.009235995 | 0.057536554 |
| 0.017417596 | 0.0164548   | 0.02055863  | 0.016311745 |
| 0.018541902 | 0.022248556 | 6.70E-06    | 0.011912096 |
| 0.025999858 | 0.002265504 | 0.010429029 | 0.012184486 |
| 0.012647887 | 0.011828869 | 0.017265326 | 0.014655421 |
| 0.011781663 | 0.016457712 | 3.81E-05    | 0.027922169 |
| 0.014330955 | 0.026994893 | 0.008046656 | 0.00548524  |
| 0.014935904 | 0.009063345 | 0.008666394 | 0.001415354 |
| 0.022963358 | 0.013367367 | 0.00977931  | 0.009413886 |
| 0.003087634 | 0.026334601 | 0.005108389 | 0.013806735 |
| 0.016039623 | 0.018960437 | 0.02215098  | 0.015681411 |
| 0.001711765 | 0.048201573 | 0.003796221 | 0.007288647 |
| 0.051062068 | 0.003344651 | 0.003340617 | 0.015268806 |
| 0.013934735 | 0.007053428 | 0.027744345 | 0.011320869 |
| 0.034425384 | 0.026851608 | 0.008063473 | 0.051790883 |
| 0.031025719 | 0.015323131 | 0.006769501 | 0.013752811 |
| 0.005408123 | 0.03397188  | 0.011693915 | 0.020981227 |
| 0.033638765 | 0.014092393 | 0.02860105  | 0.027593321 |
| 0.002759853 | 0.000761839 | 0.002021617 | 0.005089689 |
| 0.018341535 | 0.007054933 | 0.009466801 | 0.02466104  |
| 0.01425066  | 0.005678509 | 0.004566863 | 0.023567368 |
| 0.019764634 | 0.029377601 | 0.018701117 | 0.002943885 |
| 0.011054186 | 0.019621091 | 0.014919702 | 0.004280964 |
| 0.010430345 | 0.007179794 | 0.005342228 | 0.016220653 |
| 0.001135625 | 0.006989404 | 0.0134423   | 0.020996223 |
| 0.001269056 | 0.009744243 | 0.016993203 | 0.000204261 |
| 0.005045063 | 0.002219061 | 0.050258207 | 0.000961318 |
| 0.036943775 | 0.02161761  | 0.017596944 | 0.013913053 |
| 0.020123502 | 0.014582231 | 0.014880016 | 0.016584086 |
| 0.002720969 | 0.01712526  | 0.015244763 | 0.023098395 |
| 0.023352235 | 0.002094609 | 0.002808489 | 0.015646639 |
| 0.015141878 | 0.000160734 | 0.015220266 | 0.007110937 |
| 0.001782226 | 0.009900373 | 0.001225916 | 0.02249879  |
| 0.021457574 | 0.009102774 | 0.044073539 | 0.023444231 |
| 0.031216477 | 0.047039813 | 0.0133198   | 0.017707725 |
| 0.000465997 | 0.00876712  | 0.009574904 | 0.026563777 |
| 0.039289433 | 0.009326652 | 0.015490948 | 0.002014385 |
| 0.000189623 | 0.010857714 | 0.020873477 | 0.052011346 |
| 0.014066801 | 0.003381605 | 0.011493209 | 0.013395341 |
| 0.041000472 | 0.020352586 | 0.011723158 | 0.017658343 |
| 0.012486843 | 0.005971667 | 0.010644418 | 0.011188518 |
| 0.019095237 | 0.018422238 | 0.035070597 | 0.018108638 |

|             |             |             |             |
|-------------|-------------|-------------|-------------|
| 0.006353079 | 0.009316402 | 0.007123857 | 0.000641374 |
| 0.015203627 | 0.00418228  | 0.019265147 | 0.031764623 |
| 0.018578353 | 0.023323574 | 0.022989116 | 0.000674788 |
| 0.031917497 | 0.0447213   | 0.014989687 | 0.01218254  |
| 0.010287315 | 0.009712172 | 0.009079702 | 0.009881768 |
| 0.009385373 | 0.009533696 | 0.0149763   | 0.009567274 |
| 0.010348451 | 0.006791417 | 0.007957355 | 0.017415826 |
| 0.015515084 | 0.02919485  | 0.010376834 | 0.050885652 |
| 0.010820735 | 0.011526358 | 0.028555958 | 0.010306328 |
| 0.01337961  | 0.003428879 | 0.002799476 | 0.009811769 |
| 0.019597464 | 0.018346637 | 0.001269711 | 0.001774773 |
| 0.01503482  | 0.022626095 | 0.003214026 | 0.015393854 |
| 0.034305476 | 0.0113049   | 0.025311956 | 0.023262216 |
| 0.01978116  | 0.001444793 | 0.002712648 | 0.000220408 |
| 0.000186878 | 0.011145645 | 0.001855195 | 0.006488227 |
| 0.040822431 | 0.015982841 | 0.02358553  | 0.016954524 |
| 0.010086276 | 0.016358604 | 0.018146516 | 0.014187986 |
| 0.017271831 | 0.000353025 | 0.014080293 | 0.014549311 |
| 0.001648848 | 0.000537975 | 0.008752141 | 0.014065331 |
| 0.013118444 | 0.011662746 | 0.041795799 | 0.004028675 |
| 0.05285786  | 0.024889923 | 0.019569903 | 0.018257    |
| 0.011233645 | 0.032887303 | 0.007892614 | 0.009582474 |
| 0.0266304   | 0.030642405 | 0.002613772 | 0.017443717 |
| 0.009845341 | 0.048109104 | 0.011685308 | 1           |
| 0.021541866 | 0.011576073 | 0.012170541 | 0.013983335 |
| 0.020774114 | 0.018272016 | 0.000758672 | 0.003244313 |
| 0.011339767 | 0.016133053 | 0.00101351  | 0.024280168 |
| 0.011445507 | 0.015162074 | 0.039657821 | 0.033734912 |
| 0.020137192 | 0.017469306 | 0.02474355  | 0.015698443 |
| 0.022243778 | 0.004263825 | 0.00680921  | 0.016164384 |
| 3.10E-05    | 0.00828493  | 0.041369242 | 0.002038065 |
| 0.006789402 | 0.009898799 | 0.006814692 | 0.006713482 |
| 0.029847531 | 0.012972393 | 0.020438344 | 0.010237078 |
| 0.012626284 | 0.002344559 | 0.030000594 | 0.01058161  |
| 0.000242937 | 0.016123677 | 0.030152651 | 0.015594783 |
| 0.004764327 | 0.007387502 | 0.043383192 | 0.031610187 |
| 0.022770836 | 0.016244821 | 0.006516325 | 0.033199808 |
| 0.02700281  | 0.00479854  | 0.016480418 | 0.011033948 |
| 0.016078284 | 0.021737184 | 0.02167786  | 0.013452313 |
| 0.041498842 | 0.026017496 | 0.013560994 | 0.017843356 |
| 0.014981814 | 0.007931125 | 0.013927377 | 0.008521518 |
| 0.021713039 | 0.026141116 | 0.030294199 | 0.027452596 |
| 0.010269122 | 0.040414148 | 0.048443314 | 0.018053012 |
| 0.016945632 | 0.003281681 | 0.012896027 | 0.043018328 |
| 0.016604478 | 0.002270558 | 0.028334377 | 0.004146706 |
| 0.010578116 | 7.09E-06    | 0.011131732 | 0.028407793 |
| 0.046116738 | 0.01480172  | 0.00421043  | 0.009500336 |
| 0.010223635 | 0.002681431 | 0.013794846 | 0.006845914 |
| 0.015856424 | 0.009510395 | 0.01484463  | 0.023447338 |
| 0.0190882   | 0.016261796 | 0.003366504 | 0.011952865 |
| 0.022452867 | 0.01001269  | 0.012474472 | 0.02527714  |
| 0.020732833 | 0.016576725 | 0.010907773 | 0.073600271 |
| 0.006103104 | 0.010482602 | 0.007810832 | 0.010244145 |
| 0.008290375 | 0.013136112 | 0.001658979 | 0.008835986 |

|             |             |             |             |
|-------------|-------------|-------------|-------------|
| 0.000894645 | 0.004853034 | 0.013969152 | 0.028452553 |
| 0.016679134 | 0.0172775   | 0.027158212 | 0.003353776 |
| 0.001234473 | 0.008424397 | 0.028584541 | 0.009243793 |
| 0.008804752 | 0.019104613 | 0.00065198  | 0.049709587 |
| 0.050962572 | 0.015755387 | 0.019834873 | 0.00986455  |
| 0.00029046  | 0.006752018 | 0.042491255 | 0.011978314 |
| 0.021704496 | 0.004696512 | 0.004940778 | 0.032825773 |
| 0.000624888 | 0.047269025 | 0.040152086 | 0.000475959 |
| 0.002128157 | 0.013368434 | 0.011557682 | 0.031256769 |
| 0.007874591 | 0.014260879 | 0.015273737 | 0.000135886 |
| 0.014860477 | 0.017527504 | 0.036873538 | 0.053718144 |
| 0.035213561 | 0.018336927 | 0.030937699 | 0.015256022 |
| 0.006864368 | 0.01913001  | 0.035334794 | 0.06197357  |
| 0.061814565 | 0.012651888 | 0.010140296 | 0.006137292 |
| 0.025770493 | 0.066526719 | 0.016377079 | 0.017380224 |
| 0.037101188 | 0.011031558 | 0.040145862 | 0.02147459  |
| 0.035700815 | 0.002888401 | 0.036246939 | 0.010234516 |
| 0.026515454 | 0.013194343 | 0.009797095 | 0.01336168  |
| 0.000457643 | 0.000410248 | 0.005528562 | 0.008024743 |
| 0.027147131 | 0.014133517 | 0.003704083 | 0.009523347 |
| 0.005166418 | 0.03359987  | 0.039738073 | 0.022171475 |
| 0.010054923 | 0.003109016 | 0.000869408 | 0.060342233 |
| 0.035537129 | 0.019168399 | 0.025630868 | 0.014651449 |
| 0.024170337 | 0.004228031 | 0.014565028 | 0.015052857 |
| 0.003468934 | 0.028275015 | 0.001029784 | 0.025459889 |
| 0.000741966 | 0.011632543 | 0.03320796  | 0.007760328 |
| 0.004110398 | 0.029809088 | 0.021573675 | 0.002718994 |
| 0.012061969 | 0.006492951 | 0.007056531 | 0.008186654 |
| 0.012247768 | 0.024182828 | 0.011400163 | 0.017556666 |
| 0.004611108 | 0.021081207 | 0.002280764 | 0.029008042 |
| 0.023302153 | 0.012823868 | 0.025774433 | 0.012912896 |
| 0.011576227 | 0.025835348 | 0.024821044 | 0.009485897 |
| 0.003594522 | 0.020130105 | 0.005022246 | 0.001753742 |
| 0.012372706 | 0.006232749 | 6.57E-06    | 0.000117459 |
| 0.042972296 | 0.001388013 | 0.004900612 | 0.010530325 |
| 0.013822964 | 0.025501546 | 0.001009261 | 0.004750351 |
| 0.009536374 | 0.013191751 | 0.012078429 | 0.028662819 |
| 0.020769677 | 0.052015371 | 0.00799671  | 0.002975404 |
| 0.008202625 | 0.005711404 | 0.001067868 | 0.020457043 |
| 0.004977829 | 0.004474085 | 0.006134414 | 0.005425607 |
| 0.01609469  | 0.001337807 | 0.003467065 | 0.011183814 |
| 0.01354349  | 0.013319711 | 0.027905131 | 0.024267291 |
| 0.000794636 | 0.022106841 | 0.006350683 | 0.003166737 |
| 0.026544475 | 0.013193252 | 0.028362687 | 0.01608606  |
| 0.032156742 | 0.014633117 | 6.21E-05    | 0.025581838 |
| 0.010992786 | 0.006948963 | 0.027411201 | 0.000252622 |
| 0.045275985 | 0.014361206 | 0.004005195 | 0.003662212 |
| 0.023710777 | 0.016682327 | 0.031708323 | 0.021132831 |
| 0.001298429 | 0.004407313 | 0.02503501  | 0.006858438 |
| 0.013225528 | 0.002584329 | 0.020860999 | 0.00137513  |
| 0.011579951 | 0.009110454 | 0.012765633 | 0.00569268  |
| 0.003048385 | 0.019273264 | 0.001843921 | 0.015796965 |
| 0.05122763  | 0.016407867 | 0.02119137  | 0.027902328 |
| 0.006938121 | 0.011322537 | 0.003455148 | 0.012424064 |

|             |             |             |             |
|-------------|-------------|-------------|-------------|
| 0.022527143 | 0.037757351 | 0.013105522 | 0.010924631 |
| 0.039221658 | 0.009833326 | 0.009070841 | 0.023843238 |
| 0.01225922  | 0.045273705 | 0.002071101 | 0.017371736 |
| 0.007353466 | 0.030047266 | 0.002144834 | 0.020804542 |
| 0.091734489 | 0.005962632 | 0.010233282 | 0.032275919 |
| 0.025211602 | 0.018394046 | 0.012712234 | 0.032629119 |
| 0.042863348 | 0.023031249 | 0.023193979 | 5.75E-05    |
| 0.016227282 | 0.027620646 | 0.036054854 | 0.009457268 |
| 0.042592537 | 0.010089692 | 0.004403441 | 0.002897827 |
| 0.020201085 | 0.001000201 | 0.007264571 | 0.034871408 |
| 0.001205966 | 0.016271868 | 0.018749879 | 0.017938348 |
| 0.016345905 | 0.000573784 | 0.001487422 | 0.015321256 |
| 0.000945663 | 0.001902771 | 0.002672014 | 0.005222396 |
| 0.007605196 | 0.001588559 | 0.003068008 | 0.006305956 |
| 0.024482142 | 0.011195188 |             |             |
| LYPLA1      | 0.087020545 | 0.344784144 | 0.053782709 |
| 0.151459675 | 0.345379894 | 0.283877725 | 0.092436841 |
| 0.161924916 | 0.281564679 | 0.19699621  | 0.31653525  |
| 0.034119832 | 0.17968761  | 0.401744385 | 0.098784172 |
| 0.341914296 | 0.076187914 | 0.147365555 | 0.099263879 |
| 0.234666444 | 0.340800773 | 0.323511938 | 0.246230263 |
| 0.354045041 | 0.174991267 | 0.243047829 | 0.319415594 |
| 0.419444287 | 0.212773387 | 0.320563011 | 0.124175005 |
| 0.37999059  | 0.351562651 | 0.312267828 | 0.026278425 |
| 0.323093576 | 0.048452951 | 0.381543416 | 0.305077981 |
| 0.227787334 | 0.322956154 | 0.197968902 | 0.272769167 |
| 0.239596846 | 0.047276914 | 0.128781861 | 0.320552536 |
| 0.252933486 | 0.301631714 | 0.064128207 | 0.307769183 |
| 0.298120219 | 0.258101654 | 0.252431777 | 0.0029889   |
| 0.309023382 | 0.13433983  | 0.258769047 | 0.42153527  |
| 0.213586919 | 0.189163455 | 0.227291671 | 0.256048111 |
| 0.316004627 | 0.330436958 | 0.28052607  | 0.25983012  |
| 0.42558805  | 0.260406378 | 0.330910032 | 0.175373411 |
| 0.29499643  | 0.045399023 | 0.171791896 | 0.085208903 |
| 0.339241744 | 0.260060739 | 0.344825649 | 0.340400561 |
| 0.325527912 | 0.455909399 | 0.2455058   | 0.404248442 |
| 0.21590578  | 0.347260051 | 0.34992918  | 0.310405068 |
| 0.316626364 | 0.125875539 | 0.330223091 | 0.456021326 |
| 0.072014697 | 0.235951319 | 0.304184072 | 0.115312796 |
| 0.353733661 | 0.316752918 | 0.237426147 | 0.268374281 |
| 0.349080299 | 0.335941939 | 0.413917698 | 0.261723087 |
| 0.35853754  | 0.072135609 | 0.388570479 | 0.345170196 |
| 0.310378119 | 0.086100409 | 0.303422131 | 0.405070686 |
| 0.313429214 | 0.419459728 | 0.344007569 | 0.330691264 |
| 0.332979772 | 0.429186244 | 0.299360205 | 0.372352431 |
| 0.105028289 | 0.44267717  | 0.190907241 | 0.089152544 |
| 0.071406741 | 0.16174937  | 0.318928746 | 0.313053126 |
| 0.413643026 | 0.287647017 | 0.196286231 | 0.295693002 |
| 0.437614583 | 0.377217858 | 0.437226677 | 0.35659665  |
| 0.061007691 | 0.313704923 | 0.322540828 | 0.261862558 |
| 0.314597051 | 0.146758408 | 0.323748164 | 0.422884989 |
| 0.342957769 | 0.396526422 | 0.152208135 | 0.429529739 |
| 0.235418216 | 0.462747516 | 0.354196788 | 0.199530286 |
| 0.439999014 | 0.406187239 | 0.466919084 | 0.342570717 |

|             |             |             |             |
|-------------|-------------|-------------|-------------|
| 0.406282998 | 0.256903653 | 0.096035677 | 0.341316149 |
| 0.458153521 | 0.033324905 | 0.415737612 | 0.440740087 |
| 0.408467531 | 0.397809564 | 0.480196612 | 0.448692164 |
| 0.412770225 | 0.091260031 | 0.042660674 | 0.324604443 |
| 0.418603165 | 0.349769448 | 0.240560018 | 0.305905027 |
| 0.355435381 | 0.27804735  | 0.367150287 | 0.243498792 |
| 0.477202622 | 0.395008287 | 0.417036149 | 0.319274976 |
| 0.235562123 | 0.297787799 | 0.318339825 | 0.372716868 |
| 0.080985785 | 0.113640036 | 0.052731588 | 0.298839494 |
| 0.212255186 | 0.233939042 | 0.262875954 | 0.340648666 |
| 0.233007325 | 0.260617161 | 0.306175504 | 0.34614361  |
| 0.052919532 | 0.293041695 | 0.178684523 | 0.159107184 |
| 0.082331965 | 0.148451176 | 0.202521033 | 0.205677164 |
| 0.31384945  | 0.205693096 | 0.320996145 | 0.437238428 |
| 0.340732504 | 0.152032095 | 0.308132952 | 0.443742408 |
| 0.425861422 | 0.336119478 | 0.230240142 | 0.025910872 |
| 0.25830534  | 0.254271516 | 0.256302621 | 0.322752243 |
| 0.171292352 | 0.261328408 | 0.320647095 | 0.364045088 |
| 0.205696115 | 0.152497964 | 0.327341904 | 0.385085681 |
| 0.127280043 | 0.32427739  | 0.405984323 | 0.276857974 |
| 0.007300723 | 0.27459914  | 0.379039519 | 0.269870546 |
| 0.267043933 | 0.224713728 | 0.26540831  | 0.410322931 |
| 0.296772112 | 0.332796285 | 0.437402559 | 0.372023976 |
| 0.278583681 | 0.19156795  | 0.476243599 | 0.072342663 |
| 0.341045679 | 0.107440299 | 0.303133523 | 0.210908492 |
| 0.245585338 | 0.295116022 | 0.354820683 | 0.32727665  |
| 0.105910645 | 0.440818133 | 0.34982447  | 0.444656622 |
| 0.291428686 | 0.474366412 | 0.405251678 | 0.399085802 |
| 0.306916916 | 0.301626984 | 0.214884277 | 0.360656771 |
| 0.403604878 | 0.242967285 | 0.068691122 | 0.364580325 |
| 0.267807868 | 0.332686574 | 0.227618374 | 0.445148215 |
| 0.441965042 | 0.364381202 | 0.225791068 | 0.374787625 |
| 0.338410477 | 0.220823166 | 0.378590296 | 0.485357708 |
| 0.218018092 | 0.3301996   | 0.323205333 | 0.410015477 |
| 0.178442313 | 0.321701873 | 0.309710009 | 0.26444687  |
| 0.014835211 | 0.094772668 | 0.073923428 | 0.250880298 |
| 0.286227616 | 0.285170253 | 0.330197856 | 0.443746241 |
| 0.161976537 | 0.378014399 | 0.233833445 | 0.286596974 |
| 0.350118753 | 0.345358087 | 0.343956196 | 0.344143124 |
| 0.236063989 | 0.039684828 | 0.16421813  | 0.449457859 |
| 0.040963735 | 0.304907701 | 0.282881742 | 0.006645861 |
| 0.061934822 | 0.30307572  | 0.093245302 | 0.192487357 |
| 0.460245899 | 0.182726081 | 0.179841025 | 0.211518519 |
| 0.324044572 | 0.124375659 | 0.013229957 | 0.426089392 |
| 0.426710687 | 0.408497024 | 0.417601092 | 0.389015014 |
| 0.400877318 | 0.344085016 | 0.376808359 | 0.240973408 |
| 0.137869256 | 0.094306415 | 0.27803252  | 0.304271978 |
| 0.008167993 | 0.359407643 | 0.34668603  | 0.157736072 |
| 0.364647675 | 0.285084923 | 0.060715569 | 0.357413041 |
| 0.027232879 | 0.225486887 | 0.265881129 | 0.28533541  |
| 0.362730234 | 0.024713568 | 0.166984618 | 0.276570725 |
| 0.343910868 | 0.300540546 | 0.313918402 | 0.450644906 |
| 0.309781059 | 0.096980153 | 0.31897236  | 0.361250708 |
| 0.107525127 | 0.089016969 | 0.27849975  | 0.025463182 |

|             |             |             |             |
|-------------|-------------|-------------|-------------|
| 0.185887128 | 0.403318033 | 0.316507778 | 0.077605354 |
| 0.260290088 | 0.009448307 | 0.305663102 | 0.459723152 |
| 0.365866672 | 0.46298522  | 0.432258271 | 0.307489153 |
| 0.427177055 | 0.157218378 | 0.452991277 | 0.327462642 |
| 0.243744232 | 0.001468901 | 0.01846368  | 0.426729418 |
| 0.325784306 | 0.049717722 | 0.180500605 | 0.236676463 |
| 0.169279872 | 0.136804717 | 0.108394698 | 0.296594518 |
| 0.305967695 | 0.322983418 | 0.302451146 | 0.378276457 |
| 0.273659942 | 0.286615434 | 0.265980068 | 0.091069729 |
| 0.339424024 | 0.088726878 | 0.095407878 | 0.021541866 |
| 1           | 0.098552169 | 0.37820074  | 0.429701688 |
| 0.445451392 | 0.34048744  | 0.211217106 | 0.283431565 |
| 0.41152637  | 0.074260959 | 0.278846917 | 0.095632756 |
| 0.386569025 | 0.321753387 | 0.298729944 | 0.267534028 |
| 0.455004958 | 0.401450652 | 0.060209884 | 0.355618086 |
| 0.023378891 | 0.010283088 | 0.235656009 | 0.2629679   |
| 0.136800713 | 0.331062276 | 0.242455868 | 0.259846543 |
| 0.301668311 | 0.042904265 | 0.31996006  | 0.307816008 |
| 0.300066    | 0.331176652 | 0.334527628 | 0.233609272 |
| 0.335827241 | 0.23364864  | 0.272723342 | 0.220520583 |
| 0.275163257 | 0.262677644 | 0.174353347 | 0.042085014 |
| 0.286805684 | 0.316706893 | 0.083780883 | 0.165782809 |
| 0.389407734 | 0.428833108 | 0.083887503 | 0.030647177 |
| 0.24323748  | 0.323871572 | 0.454291497 | 0.405785758 |
| 0.439201717 | 0.472901728 | 0.359887553 | 0.22941042  |
| 0.099670041 | 0.333785938 | 0.341164096 | 0.221119912 |
| 0.440457431 | 0.061589142 | 0.40479164  | 0.332663684 |
| 0.13993397  | 0.23432001  | 0.07258993  | 0.125104841 |
| 0.339536246 | 0.207433171 | 0.266100196 | 0.117742862 |
| 0.315878964 | 0.303598053 | 0.079020247 | 0.227587308 |
| 0.29332334  | 0.240004979 | 0.182490767 | 0.276709106 |
| 0.294811114 | 0.165789984 | 0.344977275 | 0.421536248 |
| 0.13436869  | 0.130971195 | 0.184705685 | 0.343656288 |
| 0.365273427 | 0.271660835 | 0.038675975 | 0.350604047 |
| 0.447565031 | 0.310830593 | 0.411869483 | 0.399301165 |
| 0.097533766 | 0.325070468 | 0.331297665 | 0.327252044 |
| 0.222355846 | 0.280798887 | 0.289482667 | 0.084726815 |
| 0.30974333  | 0.42823313  | 0.34263154  | 0.226043513 |
| 0.307531855 | 0.109295699 | 0.053196129 | 0.392271954 |
| 0.279082895 | 0.104768877 | 0.222144106 | 0.389960599 |
| 0.007594805 | 0.241144445 | 0.4588479   | 0.273369833 |
| 0.464728055 | 0.433947775 | 0.393777811 | 0.260052342 |
| 0.005610269 | 0.329819498 | 0.318908396 | 0.303430464 |
| 0.344546742 | 0.293298058 | 0.203978911 | 0.135874928 |
| 0.299700105 | 0.068026824 | 0.201251845 | 0.255857598 |
| 0.216906654 | 0.281661202 | 0.224889678 | 0.22699181  |
| 0.282979491 | 0.082693077 | 0.308914184 | 0.25157354  |
| 0.259617075 | 0.243702126 | 0.336302696 | 0.189104143 |
| 0.199221855 | 0.41142817  | 0.321654724 | 0.042318225 |
| 0.35161198  | 0.384636539 | 0.408486556 | 0.004145954 |
| 0.340099772 | 0.019073035 | 0.281336915 | 0.275468519 |
| 0.278139254 | 0.286552164 | 0.321039381 | 0.328311655 |
| 0.280013112 | 0.25706584  | 0.277699511 | 0.262690204 |
| 0.243744529 | 0.243980597 | 0.337242562 | 0.281431304 |



|             |             |             |             |
|-------------|-------------|-------------|-------------|
| 0.30180898  | 0.157567934 | 0.097125971 | 0.095901447 |
| 0.092786223 | 0.396401063 | 0.238344367 | 0.066216511 |
| 0.274112419 | 0.293585074 | 0.354754603 | 0.393879733 |
| 0.413175538 | 0.093208899 | 0.33733347  | 0.353599085 |
| 0.172829364 | 0.226382602 | 0.072407186 | 0.290103899 |
| 0.252286391 | 0.288421715 | 0.280704617 | 0.212587016 |
| 0.295973313 | 0.369440841 | 0.230253283 | 0.408697614 |
| 0.32148433  | 0.299323244 | 0.18016449  | 0.153670225 |
| 0.18172217  | 0.136317993 | 0.337241037 | 0.004757618 |
| 0.3105678   | 0.193997372 | 0.401505826 | 0.396608964 |
| 0.309739149 | 0.374495195 | 0.19268336  | 0.108376416 |
| 0.158575103 | 0.144395906 | 0.151468868 | 0.341287061 |
| 0.253616637 | 0.225138645 | 0.332951837 | 0.213039797 |
| 0.35937166  | 0.330352102 | 0.342480442 | 0.25919794  |
| 0.276573744 | 0.173653267 | 0.408047645 | 0.120513026 |
| 0.292970776 | 0.282622168 | 0.229555622 | 0.310368005 |
| 0.296572815 | 0.447602313 | 0.078166578 | 0.452477389 |
| 0.321463377 | 0.126146204 | 0.452265395 | 0.279760441 |
| 0.262226991 | 0.220183248 | 0.261282035 | 0.269991008 |
| 0.286113293 | 0.332111948 | 0.012031502 | 0.093607847 |
| 0.31403898  | 0.285338975 | 0.303407401 | 0.331295973 |
| 0.339412919 | 0.355863731 | 0.252307251 | 0.249673793 |
| 0.375249825 | 0.406691591 | 0.243156867 | 0.256123923 |
| 0.302698477 | 0.150163026 | 0.253681986 | 0.027165484 |
| 0.313563628 | 0.305524836 | 0.26812171  | 0.096470226 |
| 0.038458953 | 0.261122918 | 0.294306462 | 0.070787409 |
| 0.451797361 | 0.2380527   | 0.262231239 | 0.328356251 |
| 0.176241874 | 0.404953423 | 0.228593295 | 0.338959104 |
| 0.065677268 | 0.26105216  | 0.341683602 | 0.310525575 |
| 0.270923272 | 0.338143261 | 0.33837027  | 0.307512273 |
| 0.063306517 | 0.310771516 | 0.004215756 | 0.358767258 |
| 0.372360246 | 0.326653213 | 0.206061535 | 0.21051034  |
| 0.296397711 | 0.361719494 | 0.305902732 | 0.303763024 |
| 0.029922725 | 0.332933429 | 0.241430983 | 0.341675093 |
| 0.186851537 | 0.291598635 | 0.106951469 | 0.344882105 |
| 0.367647629 | 0.270339267 | 0.263391563 | 0.235731772 |
| 0.397425166 | 0.328039199 | 0.125590503 | 0.314119135 |
| 0.272260771 | 0.073660215 | 0.248982147 | 0.466395323 |
| 0.251931183 | 0.299087162 | 0.413508726 | 0.244172486 |
| 0.341764471 | 0.334798887 | 0.287741364 | 0.45477527  |
| 0.166184214 | 0.254451471 | 0.382481952 | 0.39370538  |
| 0.317401299 | 0.30019261  | 0.302386061 | 0.3052861   |
| 0.358698406 | 0.123436948 | 0.315760982 | 0.285710518 |
| 0.273719861 | 0.314855073 | 0.222386537 | 0.301578992 |
| 0.080046202 | 0.23522056  | 0.30146216  | 0.162997553 |
| 0.301273569 | 0.340530167 | 0.329723428 | 0.372972118 |
| 0.19772595  | 0.049185806 | 0.423775114 | 0.035760005 |
| 0.240014134 | 0.331112506 | 0.270905802 | 0.350330007 |
| 0.16798927  | 0.295957062 | 0.225424569 | 0.002441139 |
| 0.386916326 | 0.098447273 | 0.347386139 | 0.293907505 |
| 0.29727167  | 0.072085704 | 0.392649679 | 0.469058296 |
| 0.277290165 | 0.295454202 | 0.26974585  | 0.399744576 |
| 0.233171617 | 0.282748875 | 0.321901654 | 0.264200027 |
| 0.301388775 | 0.240008577 | 0.299510024 | 0.304415056 |

|             |             |             |             |
|-------------|-------------|-------------|-------------|
| 0.308468059 | 0.274786317 |             |             |
| M6PR        | 0.291605572 | 0.191687783 | 0.295239222 |
| 0.155273729 | 0.068153937 | 0.112708244 | 0.269995688 |
| 0.255195222 | 0.174970373 | 0.072655289 | 0.105825263 |
| 0.21266449  | 0.007788939 | 0.17986167  | 0.241467889 |
| 0.073979222 | 0.199776847 | 0.252572034 | 0.062368991 |
| 0.143601497 | 0.067145584 | 0.053089853 | 0.151759244 |
| 0.06990058  | 0.320783518 | 0.173571879 | 0.063566983 |
| 0.184949057 | 0.028658619 | 0.09233613  | 0.044394804 |
| 0.245751953 | 0.062534707 | 0.053098658 | 0.235798639 |
| 0.103952639 | 0.004852661 | 0.294522767 | 0.10214027  |
| 0.020164378 | 0.254098818 | 0.104731107 | 0.127335411 |
| 0.103774629 | 0.281184673 | 0.038570649 | 0.082651222 |
| 0.15802235  | 0.135283736 | 0.309005344 | 0.11428525  |
| 0.095285526 | 0.180938105 | 0.127129619 | 0.023652481 |
| 0.034080625 | 0.003230926 | 0.018350069 | 0.233660389 |
| 0.217160966 | 0.193911882 | 0.03783283  | 0.167284334 |
| 0.091345532 | 0.101688518 | 0.171690717 | 0.086228564 |
| 0.207620249 | 0.019153852 | 0.092254916 | 0.110365186 |
| 0.124572748 | 0.287058677 | 0.259944993 | 0.299045704 |
| 0.075464357 | 0.158621339 | 0.085655668 | 0.04376216  |
| 0.197828998 | 0.274478178 | 0.203468067 | 0.263371151 |
| 0.018194236 | 0.055927035 | 0.061903487 | 0.138707566 |
| 0.126654531 | 0.236567718 | 0.116937921 | 0.239171762 |
| 0.268150712 | 0.107579973 | 0.12144845  | 0.300289292 |
| 0.177539845 | 0.041161383 | 0.094593463 | 0.021681491 |
| 0.074127196 | 0.067393747 | 0.264280663 | 0.17558472  |
| 0.07338344  | 0.315748776 | 0.296435301 | 0.047605675 |
| 0.083392601 | 0.306327922 | 0.061627754 | 0.116158436 |
| 0.107714369 | 0.18122846  | 0.148260936 | 0.142347798 |
| 0.066188863 | 0.199252365 | 0.128468304 | 0.183352013 |
| 0.025375865 | 0.223906714 | 0.230421587 | 0.19300689  |
| 0.324070167 | 0.186227437 | 0.064429255 | 0.190133363 |
| 0.145982129 | 0.167220769 | 0.234863545 | 0.118194964 |
| 0.129267445 | 0.268659834 | 0.222332061 | 0.148430652 |
| 0.275283801 | 0.031222953 | 0.06923412  | 0.166908928 |
| 0.119731509 | 0.266650846 | 0.036495143 | 0.284911527 |
| 0.211487158 | 0.114249555 | 0.282290931 | 0.314146527 |
| 0.186875542 | 0.224335841 | 0.170913699 | 0.200503867 |
| 0.261228616 | 0.278251895 | 0.193978602 | 0.070759206 |
| 0.253861526 | 0.154020775 | 0.035746686 | 0.167053434 |
| 0.203948563 | 0.003167015 | 0.141906331 | 0.154031908 |
| 0.22506189  | 0.116122452 | 0.189916684 | 0.175553472 |
| 0.225626268 | 0.30922304  | 0.004018676 | 0.105341675 |
| 0.251250707 | 0.181092874 | 0.13483012  | 0.070345028 |
| 0.073922222 | 0.137214983 | 0.112926129 | 0.055854423 |
| 0.242946285 | 0.156939807 | 0.161460568 | 0.140844247 |
| 0.151293934 | 0.264164006 | 0.052054465 | 0.292459959 |
| 0.239535547 | 0.284935768 | 0.315400237 | 0.164102727 |
| 0.097951603 | 0.176947866 | 0.146817258 | 0.085803494 |
| 0.190675534 | 0.160150684 | 0.039987425 | 0.074733593 |
| 0.319385132 | 0.090786376 | 0.250259467 | 0.265868998 |
| 0.204932851 | 0.314226404 | 0.150298521 | 0.154101429 |
| 0.106478229 | 0.402360845 | 0.095074731 | 0.173333273 |

|             |             |             |             |
|-------------|-------------|-------------|-------------|
| 0.083538328 | 0.272936419 | 0.120167921 | 0.204783153 |
| 0.201744442 | 0.064228345 | 0.218061007 | 0.053050061 |
| 0.06856835  | 0.043198816 | 0.016405651 | 0.068976548 |
| 0.364440914 | 0.118422566 | 0.093905534 | 0.083865659 |
| 0.210889863 | 0.252474029 | 0.069918031 | 0.28491702  |
| 0.293046608 | 0.078320945 | 0.144068395 | 0.105001544 |
| 0.1171279   | 0.149031938 | 0.127010438 | 0.05470501  |
| 0.165503588 | 0.018516358 | 0.029340631 | 0.152201583 |
| 0.040925746 | 0.044293972 | 0.158080505 | 0.084403195 |
| 0.085405468 | 0.35523379  | 0.197821534 | 0.005211613 |
| 0.06971946  | 0.053998871 | 0.131236787 | 0.099253746 |
| 0.192592344 | 0.153560829 | 0.056201634 | 0.069325487 |
| 0.298749431 | 0.226054414 | 0.17315386  | 0.184128107 |
| 0.060764596 | 0.2065667   | 0.126121285 | 0.164341409 |
| 0.144276967 | 0.060459481 | 0.00937209  | 0.130701687 |
| 0.143532882 | 0.073570829 | 0.318103289 | 0.104426262 |
| 0.080863554 | 0.08168726  | 0.070111732 | 0.186592894 |
| 0.271288536 | 0.251884011 | 0.150344381 | 0.101941445 |
| 0.160466989 | 0.204383221 | 0.145215252 | 0.21210036  |
| 0.070251966 | 0.067331895 | 0.063205963 | 0.123731211 |
| 0.249634524 | 0.049095755 | 0.232437529 | 0.014786663 |
| 0.000206588 | 0.30569719  | 0.3125131   | 0.125307169 |
| 0.02496672  | 0.084577184 | 0.099335274 | 0.204721442 |
| 0.228569738 | 0.20059692  | 0.206854722 | 0.081747402 |
| 0.21925741  | 0.07007336  | 0.059200791 | 0.082952317 |
| 0.217613335 | 0.080848648 | 0.129990443 | 0.283829949 |
| 0.311851767 | 0.032656855 | 0.158115714 | 0.00870551  |
| 0.28416261  | 0.145784866 | 0.32205947  | 0.344319889 |
| 0.148703304 | 0.343789265 | 0.25067647  | 0.090548977 |
| 0.125201629 | 0.270802254 | 0.013258484 | 0.18134831  |
| 0.213724367 | 0.207833315 | 0.217004297 | 0.253824691 |
| 0.165325564 | 0.117491208 | 0.110728616 | 0.16068764  |
| 0.267985433 | 0.317586115 | 0.030752931 | 0.107916117 |
| 0.020739978 | 0.126119068 | 0.090180759 | 0.262153027 |
| 0.093946017 | 0.160772482 | 0.253752651 | 0.072942427 |
| 0.185343157 | 0.016864333 | 0.144855436 | 0.142543378 |
| 0.099997121 | 0.231177764 | 0.060717751 | 0.052551752 |
| 0.251268959 | 0.219834116 | 0.049417745 | 0.228910311 |
| 0.117469256 | 0.295969755 | 0.092240593 | 0.102245955 |
| 0.267295128 | 0.038786719 | 0.127134364 | 0.010404215 |
| 0.06979789  | 0.240481628 | 0.077835829 | 0.281302511 |
| 0.168325741 | 0.15279769  | 0.223392452 | 0.226994763 |
| 0.239416047 | 0.177761289 | 0.200438993 | 0.036488402 |
| 0.215224894 | 0.004649808 | 0.198723395 | 0.176633839 |
| 0.073351361 | 0.012961612 | 0.030607148 | 0.148113997 |
| 0.077343004 | 0.313139788 | 0.241971273 | 0.098264765 |
| 0.172764389 | 0.274825677 | 0.249728525 | 0.039272405 |
| 0.106725865 | 0.081156863 | 0.038131884 | 0.248059923 |
| 0.151013671 | 0.153969227 | 0.113790561 | 0.312475102 |
| 0.083460101 | 0.22452638  | 0.303430999 | 0.011576073 |
| 0.098552169 | 1           | 0.319970892 | 0.211768827 |
| 0.22616549  | 0.089739055 | 0.058366622 | 0.083379714 |
| 0.146877718 | 0.300430089 | 0.060246467 | 0.30221075  |
| 0.216105791 | 0.087832898 | 0.164857669 | 0.22036672  |

|             |             |             |             |
|-------------|-------------|-------------|-------------|
| 0.199040699 | 0.225237628 | 0.251806239 | 0.118204061 |
| 0.100002857 | 0.002317349 | 0.141239339 | 0.189533173 |
| 0.024171535 | 0.066862762 | 0.211599898 | 0.133958918 |
| 0.117952303 | 0.237166623 | 0.030768276 | 0.033040334 |
| 0.135420932 | 0.09785491  | 0.05164126  | 0.206927641 |
| 0.076001163 | 0.048760493 | 0.141741167 | 0.187742879 |
| 0.084136558 | 0.241990235 | 0.318230241 | 0.239072548 |
| 0.086703847 | 0.072589515 | 0.272137059 | 0.269348383 |
| 0.145959368 | 0.158255938 | 0.193337537 | 0.067443763 |
| 0.228209607 | 0.098301855 | 0.161490407 | 0.205983656 |
| 0.26328238  | 0.22004858  | 0.283758282 | 0.107592115 |
| 0.2636257   | 0.10680393  | 0.055465928 | 0.080385976 |
| 0.199506903 | 0.318318267 | 0.226327147 | 0.037423301 |
| 0.280026227 | 0.179023378 | 0.16677995  | 0.265443665 |
| 0.058972321 | 0.224609078 | 0.124176759 | 0.287510037 |
| 0.094353791 | 0.035688117 | 0.277938    | 0.201214095 |
| 0.169055528 | 0.018003185 | 0.246171004 | 0.157198992 |
| 0.178164656 | 0.070201638 | 0.089200289 | 0.23128554  |
| 0.285121624 | 0.278492595 | 0.180358446 | 0.119149296 |
| 0.12654755  | 0.079039215 | 0.107819621 | 0.195344519 |
| 0.178875936 | 0.088229293 | 0.237462695 | 0.155393667 |
| 0.306996976 | 0.068409819 | 0.047104458 | 0.086914186 |
| 0.211432375 | 0.121850025 | 0.15252114  | 0.297324425 |
| 0.226561476 | 0.283917522 | 0.185837593 | 0.156973493 |
| 0.091995244 | 0.297726998 | 0.315132741 | 0.153681056 |
| 0.02650067  | 0.239536051 | 0.097448483 | 0.115410614 |
| 0.006908145 | 0.011780205 | 0.171427292 | 0.140231144 |
| 0.241540761 | 0.162544931 | 0.226143135 | 0.163737574 |
| 0.000206113 | 0.075967972 | 0.102313351 | 0.084715741 |
| 0.184182481 | 0.17855325  | 0.118719372 | 0.175556637 |
| 0.185197618 | 0.315420083 | 0.144984908 | 0.104341924 |
| 0.018628191 | 0.129552528 | 0.210565717 | 0.202526787 |
| 0.122251486 | 0.297822638 | 0.031116972 | 0.177798545 |
| 0.026278641 | 0.200106943 | 0.157049813 | 0.088610615 |
| 0.022582397 | 0.162114764 | 0.146187356 | 0.251631184 |
| 0.057702903 | 0.149685894 | 0.175361609 | 0.020145105 |
| 0.091172845 | 0.138565114 | 0.112406251 | 0.111162522 |
| 0.124809154 | 0.122562076 | 0.106727033 | 0.07948961  |
| 0.146933879 | 0.178131044 | 0.131415882 | 0.16525486  |
| 0.123633238 | 0.202978596 | 0.092243849 | 0.138175931 |
| 0.075233133 | 0.232485255 | 0.338235969 | 0.377089438 |
| 0.170393461 | 0.169911258 | 0.262658174 | 0.316393155 |
| 0.163548687 | 0.12168469  | 0.207506817 | 0.224485973 |
| 0.179439796 | 0.322086287 | 0.109660205 | 0.169560577 |
| 0.038184956 | 0.111424131 | 0.309096065 | 0.127595566 |
| 0.187498425 | 0.04655296  | 0.10948376  | 0.189205852 |
| 0.120213116 | 0.264650044 | 0.250324806 | 0.205215683 |
| 0.101149837 | 0.095293406 | 0.084716954 | 0.129742402 |
| 0.227237022 | 0.288560209 | 0.056237731 | 0.06926085  |
| 0.136809148 | 0.193924186 | 0.138220158 | 0.249076871 |
| 0.032843246 | 0.205074347 | 0.090607292 | 0.249180035 |
| 0.074193746 | 0.346367448 | 0.275391357 | 0.112650168 |
| 0.018039377 | 0.193851064 | 0.083358795 | 0.148563827 |
| 0.099069889 | 0.100664057 | 0.065159119 | 0.181233831 |

|             |             |             |             |
|-------------|-------------|-------------|-------------|
| 0.164197736 | 0.262594    | 0.271367268 | 0.298335457 |
| 0.083233174 | 0.044631206 | 0.130237818 | 0.09320384  |
| 0.111557389 | 0.186448656 | 0.299214406 | 0.182660969 |
| 0.074789549 | 0.297576891 | 0.262345293 | 0.158893154 |
| 0.161200793 | 0.102141859 | 0.015328019 | 0.112141004 |
| 0.147009025 | 0.042707113 | 0.00254306  | 0.016000384 |
| 0.131235417 | 0.091055408 | 0.139671027 | 0.127386244 |
| 0.053457176 | 0.135430898 | 0.014849748 | 0.186088063 |
| 0.252022617 | 0.29103034  | 0.113591607 | 0.205382305 |
| 0.159822188 | 0.211211325 | 0.139538045 | 0.012830592 |
| 0.081413853 | 0.067371036 | 0.071629122 | 0.237447827 |
| 0.217981387 | 0.019116039 | 0.099915378 | 0.304709212 |
| 0.148076193 | 0.018033752 | 0.125078945 | 0.104511417 |
| 0.258376933 | 0.298192883 | 0.120844889 | 0.105015252 |
| 0.235351238 | 0.191316116 | 0.061688825 | 0.083379382 |
| 0.068972312 | 0.044486019 | 0.118493552 | 0.031807979 |
| 0.218412082 | 0.081822008 | 0.020486593 | 0.303016465 |
| 0.291129078 | 0.051439015 | 0.267188277 | 0.062748683 |
| 0.145500182 | 0.178900297 | 0.071575539 | 0.074079277 |
| 0.090004662 | 0.064369147 | 0.194064633 | 0.180536653 |
| 0.02831201  | 0.108315961 | 0.164330458 | 0.059245743 |
| 0.3377751   | 0.067575375 | 0.219499019 | 0.048553257 |
| 0.219361268 | 0.170100835 | 0.287356935 | 0.075078198 |
| 0.108116469 | 0.312751666 | 0.093477931 | 0.220069903 |
| 0.135387249 | 0.032866744 | 0.114663396 | 0.141057343 |
| 0.043135324 | 0.208817701 | 0.085043626 | 0.225384545 |
| 0.097773268 | 0.188294694 | 0.110951833 | 0.196764502 |
| 0.154732568 | 0.033697295 | 0.033107674 | 0.074189096 |
| 0.239006474 | 0.169199337 | 0.049491503 | 0.172228523 |
| 0.026188323 | 0.140910673 | 0.134480525 | 0.070472137 |
| 0.128029929 | 0.177813241 | 0.096921211 | 0.266253861 |
| 0.137621254 | 0.085474446 | 0.062433895 | 0.227206833 |
| 0.104608608 | 0.099614055 | 0.237064032 | 0.001317506 |
| 0.167786098 | 0.093294016 | 0.174140219 | 0.075416356 |
| 0.275155124 | 0.147509919 | 0.16554899  | 0.053506952 |
| 0.125849796 | 0.019039786 | 0.088046652 | 0.064932305 |
| 0.045443629 | 0.285944773 | 0.23004114  | 0.173715304 |
| 0.175838741 | 0.067354428 | 0.044080943 | 0.211826791 |
| 0.016816174 | 0.039027812 | 0.04965399  | 0.12820103  |
| 0.02545573  | 0.078104948 | 0.071798559 | 0.051692694 |
| 0.148421932 | 0.174327746 |             |             |

|             |             |             |             |
|-------------|-------------|-------------|-------------|
| MAD2L1      | 0.235659657 | 0.508382608 | 0.226836611 |
| 0.233407121 | 0.286817439 | 0.471278892 | 0.187098001 |
| 0.276433401 | 0.477028697 | 0.3747011   | 0.394707756 |
| 0.085258043 | 0.059774515 | 0.48732512  | 0.168284228 |
| 0.36675767  | 0.106534225 | 0.244643391 | 0.127802298 |
| 0.343702604 | 0.262497692 | 0.312567983 | 0.51307633  |
| 0.275087622 | 0.374404931 | 0.489759171 | 0.367571287 |
| 0.503205357 | 0.24435786  | 0.445334276 | 0.247093047 |
| 0.466184966 | 0.293496765 | 0.351335947 | 0.099938819 |
| 0.453341376 | 0.012387219 | 0.477148452 | 0.288393819 |
| 0.121436556 | 0.454363453 | 0.45019129  | 0.304110421 |
| 0.44268656  | 0.159400978 | 0.26299164  | 0.40266415  |
| 0.459093014 | 0.373551447 | 0.252392578 | 0.477126453 |

|             |             |             |             |
|-------------|-------------|-------------|-------------|
| 0.40599865  | 0.478080168 | 0.492123779 | 0.009441065 |
| 0.247050259 | 0.053989218 | 0.168704415 | 0.51156105  |
| 0.337043259 | 0.228783653 | 0.268490202 | 0.399370604 |
| 0.414125539 | 0.399782862 | 0.363526576 | 0.410061553 |
| 0.502130193 | 0.131847839 | 0.44434877  | 0.238584978 |
| 0.45656598  | 0.169238848 | 0.315079615 | 0.284462211 |
| 0.389736895 | 0.289022824 | 0.353438523 | 0.263964858 |
| 0.509194008 | 0.494691028 | 0.373488795 | 0.509051551 |
| 0.082102954 | 0.298715075 | 0.263379051 | 0.360409074 |
| 0.424308713 | 0.226305522 | 0.443913572 | 0.493501736 |
| 0.196433392 | 0.466353845 | 0.450756514 | 0.328408901 |
| 0.511687443 | 0.257049811 | 0.459630821 | 0.135236834 |
| 0.347483501 | 0.31430991  | 0.494908007 | 0.397102178 |
| 0.318136316 | 0.258690146 | 0.508172086 | 0.270529481 |
| 0.310813701 | 0.259148304 | 0.21471557  | 0.456080513 |
| 0.445974623 | 0.502445201 | 0.489098309 | 0.428308173 |
| 0.345126515 | 0.500723125 | 0.458925003 | 0.491183213 |
| 0.191890464 | 0.507840437 | 0.343424262 | 0.121178782 |
| 0.26356636  | 0.182882532 | 0.241232006 | 0.405731665 |
| 0.483651421 | 0.452282821 | 0.35034591  | 0.276817255 |
| 0.439299869 | 0.513530548 | 0.506038552 | 0.468967223 |
| 0.153441329 | 0.209600805 | 0.354249531 | 0.432774642 |
| 0.425355531 | 0.276148434 | 0.210386028 | 0.504190432 |
| 0.465889415 | 0.440400715 | 0.375206565 | 0.506381848 |
| 0.337474807 | 0.487108057 | 0.511167589 | 0.283344898 |
| 0.502447999 | 0.508525811 | 0.478961371 | 0.369348557 |
| 0.504514145 | 0.454444999 | 0.095426227 | 0.462599901 |
| 0.473088717 | 0.011942992 | 0.48041104  | 0.479282612 |
| 0.509577701 | 0.456994379 | 0.474338295 | 0.491227025 |
| 0.513257603 | 0.239551269 | 0.027546572 | 0.309999548 |
| 0.506725    | 0.46780388  | 0.211754604 | 0.395340393 |
| 0.342515036 | 0.497383001 | 0.459675953 | 0.297342652 |
| 0.477745095 | 0.486425632 | 0.495074688 | 0.47237303  |
| 0.436845482 | 0.446403507 | 0.333328895 | 0.508366189 |
| 0.144041649 | 0.295079938 | 0.220757107 | 0.405982066 |
| 0.445190381 | 0.268279884 | 0.491191612 | 0.361629532 |
| 0.300160385 | 0.491905238 | 0.289431894 | 0.354119495 |
| 0.233407458 | 0.460012372 | 0.334338275 | 0.355932034 |
| 0.117866024 | 0.325748947 | 0.267560226 | 0.248698805 |
| 0.287272687 | 0.39481393  | 0.457151523 | 0.484012411 |
| 0.362589094 | 0.374451506 | 0.479444692 | 0.476716359 |
| 0.435950998 | 0.347478768 | 0.374568003 | 0.029508747 |
| 0.265547451 | 0.297345173 | 0.13612148  | 0.394702854 |
| 0.361084212 | 0.295573849 | 0.395938754 | 0.377780605 |
| 0.455531162 | 0.347315763 | 0.350506474 | 0.48041253  |
| 0.358814012 | 0.310083742 | 0.455519784 | 0.459451527 |
| 0.029444608 | 0.414180504 | 0.472140149 | 0.147231642 |
| 0.431915247 | 0.107017625 | 0.212368735 | 0.469128797 |
| 0.255349783 | 0.20025914  | 0.48657857  | 0.378820819 |
| 0.390335653 | 0.407259123 | 0.483993851 | 0.038246093 |
| 0.338575387 | 0.070141872 | 0.331668848 | 0.435107664 |
| 0.373425314 | 0.364489732 | 0.282590894 | 0.270003295 |
| 0.337859551 | 0.504419715 | 0.483288053 | 0.49561818  |
| 0.343622559 | 0.485811498 | 0.462956479 | 0.474215912 |

|             |             |             |             |
|-------------|-------------|-------------|-------------|
| 0.448728709 | 0.348832272 | 0.091801187 | 0.468560063 |
| 0.468802081 | 0.318424641 | 0.268991455 | 0.455084227 |
| 0.389210367 | 0.388364736 | 0.134977675 | 0.476503077 |
| 0.490041176 | 0.512315606 | 0.223418938 | 0.376451685 |
| 0.449454983 | 0.376921479 | 0.463027414 | 0.482893644 |
| 0.358556753 | 0.329971724 | 0.305971756 | 0.398990925 |
| 0.333693795 | 0.191454536 | 0.443769651 | 0.131704789 |
| 0.007831142 | 0.264437461 | 0.228825564 | 0.216900765 |
| 0.128790556 | 0.44179278  | 0.410624897 | 0.498352969 |
| 0.241160781 | 0.48824256  | 0.386948364 | 0.292062398 |
| 0.491582104 | 0.339165668 | 0.345388377 | 0.383403271 |
| 0.391765619 | 0.048814415 | 0.184373795 | 0.495504605 |
| 0.20466448  | 0.19514503  | 0.446584946 | 0.006518727 |
| 0.174040291 | 0.498297208 | 0.286862258 | 0.36072783  |
| 0.454445117 | 0.375622112 | 0.379913604 | 0.39367378  |
| 0.393251722 | 0.242620499 | 0.007346477 | 0.486456498 |
| 0.492416444 | 0.484162458 | 0.495464637 | 0.498481344 |
| 0.46608929  | 0.459189769 | 0.42393919  | 0.506938257 |
| 0.24494949  | 0.285699866 | 0.165193484 | 0.316050837 |
| 0.017369265 | 0.421985027 | 0.328781995 | 0.296344593 |
| 0.427317483 | 0.400120475 | 0.143294015 | 0.343484106 |
| 0.091794776 | 0.14859011  | 0.420299117 | 0.299902821 |
| 0.358531156 | 0.089387332 | 0.270205177 | 0.290916514 |
| 0.510357423 | 0.473619964 | 0.320354061 | 0.504351204 |
| 0.374929034 | 0.348661515 | 0.320180118 | 0.414231133 |
| 0.197159292 | 0.141648946 | 0.458502355 | 0.054077124 |
| 0.282528126 | 0.492658541 | 0.38650868  | 0.215306539 |
| 0.368763743 | 0.039923168 | 0.485176471 | 0.501241043 |
| 0.515662825 | 0.48106994  | 0.500951061 | 0.222597441 |
| 0.503667434 | 0.069926157 | 0.501141213 | 0.502612792 |
| 0.399837379 | 0.004596845 | 0.01653274  | 0.476632479 |
| 0.376087361 | 0.24613418  | 0.303626667 | 0.43482495  |
| 0.19580367  | 0.364417569 | 0.196051305 | 0.154921707 |
| 0.471005883 | 0.248534724 | 0.154616463 | 0.51042721  |
| 0.317000395 | 0.318708497 | 0.479118212 | 0.274651437 |
| 0.408208388 | 0.151500145 | 0.271155092 | 0.012170541 |
| 0.37820074  | 0.319970892 | 1           | 0.507177651 |
| 0.486319532 | 0.384864442 | 0.361256226 | 0.392718875 |
| 0.461372269 | 0.315304549 | 0.361914467 | 0.329119765 |
| 0.514506671 | 0.382815392 | 0.404819862 | 0.438535255 |
| 0.476534    | 0.495848296 | 0.131296682 | 0.432064455 |
| 0.051120364 | 0.002643707 | 0.490858828 | 0.389482243 |
| 0.077475524 | 0.342593799 | 0.382118045 | 0.336132241 |
| 0.301832971 | 0.125280214 | 0.207046162 | 0.191579093 |
| 0.353339293 | 0.372625175 | 0.237956089 | 0.397978814 |
| 0.264659342 | 0.126104013 | 0.27711739  | 0.267475885 |
| 0.300595724 | 0.459203978 | 0.374671211 | 0.104221776 |
| 0.442406143 | 0.390213935 | 0.184314532 | 0.333972893 |
| 0.468430322 | 0.483498785 | 0.120118533 | 0.030327689 |
| 0.413792347 | 0.342465528 | 0.474188589 | 0.512915676 |
| 0.507797743 | 0.480523856 | 0.468996947 | 0.165446965 |
| 0.201119314 | 0.34714602  | 0.258995756 | 0.123776037 |
| 0.501993825 | 0.254675123 | 0.512522493 | 0.243297034 |
| 0.279172068 | 0.319742659 | 0.097101198 | 0.222203046 |

|             |             |             |             |
|-------------|-------------|-------------|-------------|
| 0.347172212 | 0.316833128 | 0.229648275 | 0.353047236 |
| 0.326280347 | 0.2077674   | 0.170511762 | 0.315899202 |
| 0.443383692 | 0.127894264 | 0.305411911 | 0.449089012 |
| 0.482612648 | 0.311715104 | 0.421152951 | 0.464644536 |
| 0.310673241 | 0.28498519  | 0.438745393 | 0.435994272 |
| 0.478566405 | 0.42350588  | 0.078553995 | 0.512924746 |
| 0.48291499  | 0.442752841 | 0.513188049 | 0.418001092 |
| 0.256593573 | 0.351573849 | 0.278973781 | 0.340324823 |
| 0.318206868 | 0.482444794 | 0.33035818  | 0.208595163 |
| 0.41621203  | 0.489055975 | 0.491791364 | 0.248787992 |
| 0.451463646 | 0.353386913 | 0.240466237 | 0.488913666 |
| 0.137849449 | 0.220661783 | 0.453919972 | 0.451413447 |
| 0.003697967 | 0.095013328 | 0.46625061  | 0.330628136 |
| 0.489141891 | 0.471418948 | 0.47894886  | 0.40053598  |
| 0.00113639  | 0.387682478 | 0.395743692 | 0.395139667 |
| 0.507437747 | 0.47619959  | 0.267792    | 0.150846899 |
| 0.382068783 | 0.279588327 | 0.202938564 | 0.435171161 |
| 0.136829948 | 0.488693301 | 0.319204561 | 0.352286754 |
| 0.247238458 | 0.298918475 | 0.200209302 | 0.35810625  |
| 0.127350517 | 0.35247215  | 0.413455498 | 0.402221395 |
| 0.152347075 | 0.456233474 | 0.471814844 | 0.124526083 |
| 0.325442167 | 0.451534132 | 0.473477844 | 0.006868979 |
| 0.423120086 | 0.039046156 | 0.239842308 | 0.255258128 |
| 0.254766753 | 0.264988141 | 0.28616751  | 0.293493159 |
| 0.445264981 | 0.323003638 | 0.339340487 | 0.325395446 |
| 0.218067819 | 0.36191744  | 0.395633339 | 0.449068855 |
| 0.27839542  | 0.263636896 | 0.29319614  | 0.293948531 |
| 0.131768823 | 0.501874501 | 0.395340951 | 0.26433679  |
| 0.319673102 | 0.432535065 | 0.421421539 | 0.513299457 |
| 0.452904844 | 0.327836763 | 0.379572488 | 0.509027696 |
| 0.248464804 | 0.386987674 | 0.231456842 | 0.469668603 |
| 0.353598394 | 0.194984759 | 0.47454176  | 0.472467294 |
| 0.474599683 | 0.464456451 | 0.395935638 | 0.47843728  |
| 0.388277818 | 0.382354798 | 0.4053754   | 0.141243889 |
| 0.31468825  | 0.317881876 | 0.235976951 | 0.014442714 |
| 0.421548776 | 0.428909956 | 0.478495199 | 0.509890281 |
| 0.238405904 | 0.454751925 | 0.423475928 | 0.217614097 |
| 0.365451064 | 0.378238854 | 0.303882737 | 0.472634337 |
| 0.160878276 | 0.313063637 | 0.297737316 | 0.496070184 |
| 0.437947453 | 0.444133736 | 0.250258827 | 0.381161293 |
| 0.342213018 | 0.393936408 | 0.493086385 | 0.325665071 |
| 0.433996801 | 0.163347089 | 0.481404614 | 0.307064078 |
| 0.257357288 | 0.493480645 | 0.212185665 | 0.493726781 |
| 0.317708592 | 0.327795908 | 0.482165922 | 0.440048115 |
| 0.427022719 | 0.171543577 | 0.132058926 | 0.470881398 |
| 0.313121329 | 0.29165845  | 0.018358551 | 0.05940898  |
| 0.373655738 | 0.362118853 | 0.484308054 | 0.42298405  |
| 0.220933371 | 0.379546081 | 0.126292756 | 0.431204727 |
| 0.514273683 | 0.507618725 | 0.298114056 | 0.3643607   |
| 0.438100602 | 0.214712713 | 0.514028577 | 0.026429804 |
| 0.411126395 | 0.397690991 | 0.39740476  | 0.161722245 |
| 0.087891325 | 0.153264665 | 0.435360083 | 0.253753339 |
| 0.457124883 | 0.159551561 | 0.45328403  | 0.463114645 |
| 0.359779268 | 0.506453644 | 0.175494383 | 0.420229609 |



|             |             |             |             |
|-------------|-------------|-------------|-------------|
| 0.178050331 | 0.378951161 | 0.351735814 | 0.400643461 |
| 0.222983137 | 0.242644943 | 0.401962669 | 0.18620796  |
| 0.110338415 | 0.272656327 | 0.006421645 | 0.471978403 |
| 0.502492173 | 0.292991675 | 0.372372979 | 0.354638087 |
| 0.342910847 | 0.46249183  | 0.252524755 | 0.419476272 |
| 0.038213925 | 0.329901302 | 0.319420449 | 0.502481117 |
| 0.202829776 | 0.412604158 | 0.131117109 | 0.285808322 |
| 0.50217626  | 0.277768249 | 0.392256486 | 0.285601914 |
| 0.513738589 | 0.489310432 | 0.382490539 | 0.240285512 |
| 0.450938625 | 0.231734179 | 0.459861381 | 0.494704224 |
| 0.239748432 | 0.170641924 | 0.43015573  | 0.265568555 |
| 0.262559001 | 0.497136051 | 0.428969686 | 0.496603363 |
| 0.109592111 | 0.352878719 | 0.440253485 | 0.493888017 |
| 0.368289134 | 0.140683842 | 0.196733216 | 0.229391755 |
| 0.514863662 | 0.196721073 | 0.230271889 | 0.460007355 |
| 0.164535776 | 0.381593598 | 0.46769958  | 0.194164441 |
| 0.091988587 | 0.284240301 | 0.421011995 | 0.305301641 |
| 0.355076765 | 0.359057441 | 0.223709551 | 0.44950077  |
| 0.185277876 | 0.059839219 | 0.470999299 | 0.010374081 |
| 0.492836965 | 0.398479064 | 0.356690925 | 0.33927733  |
| 0.365405118 | 0.449071058 | 0.474020584 | 0.010075916 |
| 0.435501302 | 0.051423123 | 0.333874446 | 0.217680698 |
| 0.259021413 | 0.182466523 | 0.503334306 | 0.476040452 |
| 0.449872074 | 0.354574688 | 0.308708359 | 0.502402267 |
| 0.107106524 | 0.293973173 | 0.30768571  | 0.497480155 |
| 0.170843469 | 0.418714964 | 0.409135218 | 0.335318085 |
| 0.476074563 | 0.410817947 |             |             |
| MAN2C1      | 0.158412628 | 0.502142709 | 0.139312136 |
| 0.225705829 | 0.353257079 | 0.518778297 | 0.119827299 |
| 0.213398423 | 0.451863333 | 0.406609835 | 0.451500908 |
| 0.04655944  | 0.096744706 | 0.50640668  | 0.110504394 |
| 0.446205688 | 0.069851675 | 0.186904167 | 0.113903841 |
| 0.32422344  | 0.32499172  | 0.405709126 | 0.512634075 |
| 0.331897071 | 0.288197256 | 0.471045603 | 0.444321755 |
| 0.52493242  | 0.336894853 | 0.517111535 | 0.282424123 |
| 0.450948325 | 0.370454472 | 0.44786367  | 0.049751502 |
| 0.508532913 | 0.014316956 | 0.458394244 | 0.327806893 |
| 0.178075423 | 0.420899638 | 0.463431133 | 0.330513059 |
| 0.471953375 | 0.092853006 | 0.3085934   | 0.46660216  |
| 0.444137319 | 0.380172    | 0.153867936 | 0.521573808 |
| 0.445937049 | 0.466498189 | 0.500057    | 0.00487126  |
| 0.343323646 | 0.098472907 | 0.253106639 | 0.521958678 |
| 0.30238148  | 0.197898848 | 0.338242479 | 0.36654322  |
| 0.463836369 | 0.442794811 | 0.347421389 | 0.455901948 |
| 0.515759493 | 0.194205732 | 0.5025158   | 0.247502072 |
| 0.491728708 | 0.086510508 | 0.253156491 | 0.176898458 |
| 0.46610648  | 0.283769383 | 0.417448515 | 0.348392122 |
| 0.498927096 | 0.530279988 | 0.337806691 | 0.523227065 |
| 0.112232677 | 0.378590242 | 0.325578124 | 0.377072041 |
| 0.443447251 | 0.155513269 | 0.494946688 | 0.524159881 |
| 0.113705634 | 0.488268076 | 0.481132253 | 0.228706029 |
| 0.518298936 | 0.3263474   | 0.503146273 | 0.201278943 |
| 0.419075969 | 0.387884772 | 0.496689165 | 0.395591254 |
| 0.378733611 | 0.160711215 | 0.520994404 | 0.35492437  |

|             |             |             |             |
|-------------|-------------|-------------|-------------|
| 0.374615893 | 0.173154614 | 0.262011777 | 0.513235569 |
| 0.502906925 | 0.527446026 | 0.506184725 | 0.442187504 |
| 0.427768645 | 0.518743955 | 0.497904329 | 0.492452866 |
| 0.224782057 | 0.534156886 | 0.300741395 | 0.084977249 |
| 0.161553046 | 0.146396018 | 0.277409846 | 0.388039244 |
| 0.52688865  | 0.446562691 | 0.306966956 | 0.300610878 |
| 0.49196267  | 0.510734292 | 0.531701064 | 0.492970648 |
| 0.090645551 | 0.281708086 | 0.436214387 | 0.414523327 |
| 0.461633098 | 0.200384412 | 0.289989173 | 0.532637766 |
| 0.461014614 | 0.497839138 | 0.289948689 | 0.52700523  |
| 0.296648357 | 0.511788276 | 0.52644979  | 0.25935826  |
| 0.532729991 | 0.522779516 | 0.505250033 | 0.453975627 |
| 0.495291758 | 0.471454603 | 0.094279179 | 0.465650973 |
| 0.491358545 | 0.018446502 | 0.521855988 | 0.520158151 |
| 0.513116303 | 0.517514733 | 0.503890248 | 0.522489693 |
| 0.519339961 | 0.15167359  | 0.036101946 | 0.346567434 |
| 0.524643497 | 0.479340669 | 0.194919802 | 0.479686505 |
| 0.415079336 | 0.523536314 | 0.504553576 | 0.376686653 |
| 0.509376429 | 0.516588647 | 0.526303375 | 0.487667462 |
| 0.415190768 | 0.401824662 | 0.424487247 | 0.505969634 |
| 0.093018699 | 0.219386732 | 0.127464423 | 0.395182847 |
| 0.476560338 | 0.250743075 | 0.502980476 | 0.412042122 |
| 0.278782315 | 0.475227883 | 0.384489353 | 0.429212249 |
| 0.130500901 | 0.529791596 | 0.274480716 | 0.28413487  |
| 0.081577074 | 0.234390305 | 0.268198549 | 0.242626515 |
| 0.319519161 | 0.295363958 | 0.517713184 | 0.511898924 |
| 0.417554407 | 0.300545127 | 0.520391507 | 0.490152777 |
| 0.447779461 | 0.435973168 | 0.329328981 | 0.024445719 |
| 0.319230853 | 0.367271597 | 0.204768611 | 0.476275051 |
| 0.260571502 | 0.314218251 | 0.453651982 | 0.45123913  |
| 0.422286215 | 0.261306478 | 0.427396704 | 0.449797255 |
| 0.262816697 | 0.378825606 | 0.498080904 | 0.49829606  |
| 0.012259777 | 0.434201032 | 0.522421007 | 0.174307153 |
| 0.42022956  | 0.161810079 | 0.30263291  | 0.507522374 |
| 0.332642169 | 0.259425005 | 0.523980287 | 0.447860317 |
| 0.444318154 | 0.305719963 | 0.514091376 | 0.055340099 |
| 0.400463376 | 0.074220988 | 0.355115186 | 0.447814538 |
| 0.357299451 | 0.36613611  | 0.360588921 | 0.330644076 |
| 0.245359157 | 0.524568007 | 0.48610435  | 0.523816449 |
| 0.423556898 | 0.518187234 | 0.517777338 | 0.504300135 |
| 0.470041492 | 0.419730632 | 0.152352559 | 0.514360069 |
| 0.510645934 | 0.356304168 | 0.164531002 | 0.509847967 |
| 0.437181669 | 0.458287183 | 0.14343268  | 0.504218155 |
| 0.506460414 | 0.499141724 | 0.213372805 | 0.427010109 |
| 0.470755169 | 0.35395846  | 0.488128806 | 0.519121238 |
| 0.397147492 | 0.405337395 | 0.382873371 | 0.444276285 |
| 0.280209662 | 0.245478364 | 0.402601904 | 0.201772113 |
| 0.014219128 | 0.170974157 | 0.143509756 | 0.22211809  |
| 0.187165869 | 0.50078421  | 0.465622001 | 0.514636687 |
| 0.196454206 | 0.488217431 | 0.338683123 | 0.352278378 |
| 0.480489978 | 0.406661614 | 0.435617093 | 0.451189172 |
| 0.347142382 | 0.037213263 | 0.182613293 | 0.533309409 |
| 0.106313115 | 0.274490721 | 0.436204036 | 0.006018796 |
| 0.103833849 | 0.506527249 | 0.182927322 | 0.275181845 |

|             |             |             |             |
|-------------|-------------|-------------|-------------|
| 0.498362774 | 0.285682914 | 0.322058468 | 0.417077468 |
| 0.426089181 | 0.175253097 | 0.00673403  | 0.50638779  |
| 0.491297507 | 0.479633988 | 0.491082145 | 0.479225034 |
| 0.482050156 | 0.489459909 | 0.475276986 | 0.503980955 |
| 0.182878461 | 0.185314541 | 0.233603723 | 0.354138575 |
| 0.012075357 | 0.4580547   | 0.371009389 | 0.234935601 |
| 0.489094592 | 0.393606382 | 0.087925311 | 0.410279756 |
| 0.056444911 | 0.227712923 | 0.420139165 | 0.293277426 |
| 0.40263907  | 0.042852606 | 0.326398132 | 0.368347234 |
| 0.485980975 | 0.447415466 | 0.410573125 | 0.535693688 |
| 0.41796182  | 0.24192906  | 0.375795177 | 0.470597065 |
| 0.136761359 | 0.145959977 | 0.47472851  | 0.065568917 |
| 0.301750581 | 0.472939318 | 0.447443004 | 0.144203324 |
| 0.371974615 | 0.017264064 | 0.464876176 | 0.533086512 |
| 0.497823965 | 0.514272568 | 0.519297843 | 0.308953852 |
| 0.514375817 | 0.120626695 | 0.526806257 | 0.50542509  |
| 0.462211053 | 0.002743907 | 0.012354149 | 0.521174207 |
| 0.455972095 | 0.139102745 | 0.253806556 | 0.488148583 |
| 0.177937867 | 0.281204352 | 0.132382405 | 0.208240831 |
| 0.525499591 | 0.291771058 | 0.202618612 | 0.491357376 |
| 0.32223612  | 0.315314596 | 0.506806598 | 0.176550588 |
| 0.479780316 | 0.106934691 | 0.173171602 | 0.013983335 |
| 0.429701688 | 0.211768827 | 0.507177651 | 1           |
| 0.493055592 | 0.450337808 | 0.423209481 | 0.449527762 |
| 0.489177566 | 0.208091395 | 0.437174994 | 0.226389757 |
| 0.514990456 | 0.452020226 | 0.411606847 | 0.412204495 |
| 0.498436702 | 0.496349003 | 0.076849996 | 0.477326663 |
| 0.035052049 | 0.003065762 | 0.50728346  | 0.36023774  |
| 0.082781158 | 0.423349339 | 0.352712465 | 0.318337438 |
| 0.30548771  | 0.076700502 | 0.291555889 | 0.264604275 |
| 0.375358668 | 0.428513142 | 0.309402168 | 0.3464673   |
| 0.310921775 | 0.15437547  | 0.275918054 | 0.232634611 |
| 0.314849881 | 0.413233886 | 0.291494135 | 0.054131885 |
| 0.509488513 | 0.474144315 | 0.12118237  | 0.262806429 |
| 0.509711141 | 0.52424394  | 0.082205136 | 0.023235779 |
| 0.368869916 | 0.378893789 | 0.514566214 | 0.520661708 |
| 0.541673939 | 0.511455315 | 0.4321382   | 0.167063639 |
| 0.138562555 | 0.387970302 | 0.328687937 | 0.129866222 |
| 0.519875599 | 0.150423344 | 0.50805027  | 0.331713317 |
| 0.20313431  | 0.309057938 | 0.069343393 | 0.156262928 |
| 0.438680821 | 0.273109295 | 0.23830398  | 0.266417405 |
| 0.38080702  | 0.280698808 | 0.103121888 | 0.2903542   |
| 0.441824544 | 0.193409437 | 0.252256538 | 0.431616265 |
| 0.466648862 | 0.312732066 | 0.489497929 | 0.464437224 |
| 0.233437979 | 0.20334971  | 0.421199518 | 0.463191815 |
| 0.522790211 | 0.47967382  | 0.061437116 | 0.50965554  |
| 0.508916024 | 0.516679963 | 0.517211791 | 0.440922589 |
| 0.166516188 | 0.439328231 | 0.353768327 | 0.396652636 |
| 0.276764646 | 0.519780448 | 0.32231642  | 0.131099326 |
| 0.378042188 | 0.498949209 | 0.492795945 | 0.243647374 |
| 0.510318893 | 0.246413625 | 0.137149931 | 0.513094124 |
| 0.199474726 | 0.170043177 | 0.483022881 | 0.49841138  |
| 0.003172916 | 0.152970786 | 0.493608306 | 0.340840634 |
| 0.517367799 | 0.507799236 | 0.478472275 | 0.372804182 |

|             |             |             |             |
|-------------|-------------|-------------|-------------|
| 0.001587589 | 0.461793686 | 0.457778783 | 0.470969844 |
| 0.511725928 | 0.463689143 | 0.239828757 | 0.125532084 |
| 0.369633989 | 0.176739953 | 0.196971244 | 0.47255     |
| 0.200797927 | 0.515994105 | 0.282547111 | 0.307216035 |
| 0.255832106 | 0.187559265 | 0.27946264  | 0.346489433 |
| 0.166158113 | 0.327460231 | 0.429976292 | 0.4119953   |
| 0.221398476 | 0.47807778  | 0.492039966 | 0.068866391 |
| 0.408625495 | 0.474379681 | 0.486824048 | 0.00463049  |
| 0.495171483 | 0.019776855 | 0.257215033 | 0.281599322 |
| 0.266047341 | 0.275564237 | 0.314863246 | 0.351685858 |
| 0.450494961 | 0.309233441 | 0.366561988 | 0.323770346 |
| 0.226776175 | 0.32387081  | 0.455949254 | 0.464922369 |
| 0.341747648 | 0.218353566 | 0.186576411 | 0.184232658 |
| 0.102798034 | 0.521025724 | 0.340794608 | 0.16292098  |
| 0.310823597 | 0.451734452 | 0.41451257  | 0.511658963 |
| 0.468147558 | 0.216646533 | 0.412798105 | 0.528171697 |
| 0.296447302 | 0.40732231  | 0.141007996 | 0.497478487 |
| 0.334575876 | 0.258242039 | 0.508467763 | 0.447207111 |
| 0.498303262 | 0.440681254 | 0.341450933 | 0.480818856 |
| 0.440556529 | 0.41512867  | 0.434098972 | 0.133501281 |
| 0.278267131 | 0.230289368 | 0.302143044 | 0.006674136 |
| 0.448543904 | 0.401868163 | 0.527180459 | 0.509808062 |
| 0.326671066 | 0.449460383 | 0.460250207 | 0.165380453 |
| 0.392411535 | 0.276228692 | 0.233769611 | 0.515307005 |
| 0.244883738 | 0.285215278 | 0.352144446 | 0.490591291 |
| 0.496751637 | 0.489319991 | 0.298875101 | 0.353380509 |
| 0.32447496  | 0.322434569 | 0.492005674 | 0.234198848 |
| 0.502997052 | 0.216037875 | 0.478946789 | 0.360821278 |
| 0.276735182 | 0.517076748 | 0.131357089 | 0.522076885 |
| 0.383532885 | 0.232779772 | 0.498674603 | 0.426939586 |
| 0.412765767 | 0.174225865 | 0.206807259 | 0.496117867 |
| 0.310368279 | 0.389627388 | 0.022618029 | 0.075250909 |
| 0.403058117 | 0.384350804 | 0.497788083 | 0.442585444 |
| 0.279385965 | 0.400177142 | 0.191572225 | 0.403811226 |
| 0.509050471 | 0.526679467 | 0.331237059 | 0.33150908  |
| 0.441781219 | 0.176403871 | 0.528461276 | 0.022620393 |
| 0.486335391 | 0.482075434 | 0.464379025 | 0.107680787 |
| 0.046490514 | 0.232208895 | 0.488475713 | 0.14897988  |
| 0.501056555 | 0.241426929 | 0.457720156 | 0.518222073 |
| 0.281134838 | 0.526973131 | 0.171761986 | 0.480539913 |
| 0.102301082 | 0.352212238 | 0.432283659 | 0.453819493 |
| 0.278910097 | 0.324503025 | 0.446553817 | 0.264828829 |
| 0.069325598 | 0.322684551 | 0.003245956 | 0.433302508 |
| 0.502248762 | 0.375344544 | 0.301594259 | 0.394137141 |
| 0.353705109 | 0.458247967 | 0.296773263 | 0.493868007 |
| 0.025607698 | 0.415255643 | 0.289457228 | 0.511601689 |
| 0.280709647 | 0.442036724 | 0.10350344  | 0.352116853 |
| 0.500282697 | 0.334990606 | 0.345158881 | 0.361641274 |
| 0.511724569 | 0.482873195 | 0.282774657 | 0.272379472 |
| 0.47571699  | 0.139943111 | 0.502837901 | 0.525829662 |
| 0.243689551 | 0.239515951 | 0.492210034 | 0.274948028 |
| 0.348049678 | 0.476369987 | 0.484013206 | 0.520757936 |
| 0.105274189 | 0.336648441 | 0.491224604 | 0.498768902 |
| 0.373598202 | 0.189873145 | 0.276318511 | 0.27587132  |

|             |             |             |             |
|-------------|-------------|-------------|-------------|
| 0.498486398 | 0.174914633 | 0.288038825 | 0.458291761 |
| 0.23828503  | 0.395645566 | 0.454861731 | 0.229268848 |
| 0.073273843 | 0.25000814  | 0.480796627 | 0.237625108 |
| 0.374115398 | 0.425890424 | 0.274823916 | 0.439323457 |
| 0.19737459  | 0.049230069 | 0.465280579 | 0.018522621 |
| 0.48587823  | 0.467891451 | 0.342839528 | 0.408296187 |
| 0.292043735 | 0.456760545 | 0.46042799  | 0.004242549 |
| 0.477567292 | 0.060769651 | 0.375511394 | 0.273408476 |
| 0.33324461  | 0.112729468 | 0.495743524 | 0.511854855 |
| 0.433597981 | 0.411562185 | 0.402072045 | 0.501935335 |
| 0.164545336 | 0.384134806 | 0.390215229 | 0.520521399 |
| 0.248149403 | 0.474174293 | 0.483783254 | 0.434053154 |
| 0.491978426 | 0.388334197 |             |             |
| MAP2K3      | 0.194364681 | 0.464327658 | 0.154390322 |
| 0.284004967 | 0.387602675 | 0.495265349 | 0.162087048 |
| 0.272169765 | 0.425237716 | 0.331009916 | 0.47816667  |
| 0.073550668 | 0.104858767 | 0.502206429 | 0.151707731 |
| 0.450374489 | 0.113863698 | 0.243546687 | 0.124378379 |
| 0.331156005 | 0.366644088 | 0.399926879 | 0.482523281 |
| 0.364663162 | 0.307834129 | 0.45353805  | 0.413349683 |
| 0.497186819 | 0.289763495 | 0.499068567 | 0.233769034 |
| 0.461767613 | 0.397504216 | 0.412701381 | 0.068863885 |
| 0.491955536 | 0.017366506 | 0.457532865 | 0.380425851 |
| 0.197604609 | 0.436998147 | 0.39313052  | 0.387703719 |
| 0.428645018 | 0.121366033 | 0.232820599 | 0.447556411 |
| 0.427072632 | 0.39458184  | 0.166823791 | 0.497332528 |
| 0.42474319  | 0.4772831   | 0.445486714 | 0.00903213  |
| 0.334371854 | 0.086862763 | 0.235178288 | 0.499206542 |
| 0.358151597 | 0.263364239 | 0.294172446 | 0.36581486  |
| 0.437210983 | 0.441156573 | 0.386956372 | 0.412190469 |
| 0.501321827 | 0.206633086 | 0.472110943 | 0.273274719 |
| 0.473386964 | 0.104385264 | 0.303336428 | 0.18750776  |
| 0.440490982 | 0.349119634 | 0.437965908 | 0.34952239  |
| 0.460498443 | 0.521340914 | 0.377733841 | 0.497070587 |
| 0.12287089  | 0.387553948 | 0.355206673 | 0.418366515 |
| 0.441421655 | 0.188133395 | 0.507336089 | 0.517011994 |
| 0.133861785 | 0.430724026 | 0.467971308 | 0.247535502 |
| 0.490439257 | 0.303583969 | 0.444658841 | 0.221344395 |
| 0.430259274 | 0.407739428 | 0.476224993 | 0.438643245 |
| 0.390854635 | 0.179026567 | 0.493964827 | 0.3671685   |
| 0.416236432 | 0.202661847 | 0.310228897 | 0.490338972 |
| 0.49628674  | 0.507205871 | 0.474481169 | 0.452599854 |
| 0.433891902 | 0.502569548 | 0.504707831 | 0.47689512  |
| 0.166444554 | 0.510675901 | 0.349233821 | 0.132253213 |
| 0.184767363 | 0.204587929 | 0.289157207 | 0.420188384 |
| 0.506247537 | 0.468233356 | 0.365413158 | 0.361878344 |
| 0.486356526 | 0.479372812 | 0.50472371  | 0.491895407 |
| 0.128160836 | 0.270238085 | 0.440660947 | 0.419935899 |
| 0.469383644 | 0.241727311 | 0.310960774 | 0.514671618 |
| 0.479113181 | 0.492254281 | 0.320040429 | 0.51649453  |
| 0.324260807 | 0.510731405 | 0.489101527 | 0.325851157 |
| 0.519685534 | 0.503696372 | 0.503021526 | 0.454272667 |
| 0.484570056 | 0.483768156 | 0.087781264 | 0.463953403 |
| 0.496407583 | 0.023546917 | 0.49541584  | 0.498895909 |

|             |             |             |             |
|-------------|-------------|-------------|-------------|
| 0.488547457 | 0.499971198 | 0.497239751 | 0.503493579 |
| 0.492465604 | 0.187076312 | 0.030727581 | 0.395133089 |
| 0.505632082 | 0.493564048 | 0.251866906 | 0.454416732 |
| 0.424749417 | 0.503181281 | 0.478709631 | 0.381958272 |
| 0.51337059  | 0.503135967 | 0.49784079  | 0.481750494 |
| 0.390391503 | 0.42400953  | 0.399048116 | 0.481927175 |
| 0.139879363 | 0.259650676 | 0.145787585 | 0.416573334 |
| 0.414298453 | 0.320278422 | 0.497984549 | 0.412117012 |
| 0.342489488 | 0.453622199 | 0.356256825 | 0.442836695 |
| 0.142302131 | 0.493930497 | 0.317107488 | 0.319066137 |
| 0.131655792 | 0.261862718 | 0.338653234 | 0.300983395 |
| 0.377124516 | 0.300508236 | 0.489381803 | 0.496305949 |
| 0.40934269  | 0.325079207 | 0.502910589 | 0.495908947 |
| 0.472449664 | 0.438767182 | 0.362925213 | 0.04314469  |
| 0.358159848 | 0.313810391 | 0.204814568 | 0.444532154 |
| 0.273968765 | 0.361709027 | 0.461660666 | 0.464506497 |
| 0.437956874 | 0.271273785 | 0.427194143 | 0.455891989 |
| 0.274998747 | 0.413782192 | 0.503472109 | 0.464229174 |
| 0.019417074 | 0.466638386 | 0.510995129 | 0.218519743 |
| 0.426568023 | 0.180725913 | 0.299819799 | 0.497687619 |
| 0.328642611 | 0.283563027 | 0.500276506 | 0.455719852 |
| 0.424327434 | 0.303203854 | 0.502980575 | 0.056139645 |
| 0.390588752 | 0.122211582 | 0.408729025 | 0.379712193 |
| 0.402148973 | 0.410678446 | 0.37775125  | 0.376083046 |
| 0.264464575 | 0.505621307 | 0.487137906 | 0.506282159 |
| 0.412643421 | 0.508403522 | 0.50553555  | 0.506463891 |
| 0.48075968  | 0.388891796 | 0.150340504 | 0.509922322 |
| 0.499385558 | 0.353364775 | 0.177152663 | 0.476604514 |
| 0.401801114 | 0.460185703 | 0.200268605 | 0.501219758 |
| 0.506810082 | 0.465141615 | 0.281633477 | 0.451244033 |
| 0.49405295  | 0.40064868  | 0.483049363 | 0.510822475 |
| 0.345659913 | 0.413216185 | 0.404850823 | 0.466230269 |
| 0.329153881 | 0.278986371 | 0.418326522 | 0.193279847 |
| 0.012843623 | 0.200039433 | 0.177177396 | 0.294485293 |
| 0.220073862 | 0.450953606 | 0.469973455 | 0.499884571 |
| 0.258392656 | 0.487052638 | 0.360905462 | 0.398598466 |
| 0.474406343 | 0.403085123 | 0.423580807 | 0.453179249 |
| 0.383613364 | 0.060951142 | 0.240901352 | 0.526103212 |
| 0.117839848 | 0.295449257 | 0.435025363 | 0.009085955 |
| 0.136469464 | 0.45674006  | 0.200238391 | 0.300915046 |
| 0.493900485 | 0.306315356 | 0.356607539 | 0.368577208 |
| 0.46087942  | 0.222335142 | 0.012758093 | 0.48412082  |
| 0.467067208 | 0.457989206 | 0.465447053 | 0.453699447 |
| 0.464494348 | 0.46416323  | 0.478190804 | 0.480725811 |
| 0.244363726 | 0.212109458 | 0.26199735  | 0.407435957 |
| 0.012623181 | 0.479062245 | 0.391948402 | 0.284927813 |
| 0.47861415  | 0.419848752 | 0.12474715  | 0.41073001  |
| 0.081088483 | 0.22601513  | 0.418529326 | 0.34351872  |
| 0.425211739 | 0.061941616 | 0.3218431   | 0.372175311 |
| 0.468448449 | 0.456676901 | 0.390685603 | 0.517124575 |
| 0.460579847 | 0.241827876 | 0.419347258 | 0.47929105  |
| 0.188556235 | 0.14150135  | 0.445114742 | 0.052534362 |
| 0.283533447 | 0.455526052 | 0.431999697 | 0.186055444 |
| 0.420222957 | 0.028857247 | 0.466952994 | 0.518819605 |

|             |             |             |             |
|-------------|-------------|-------------|-------------|
| 0.465306505 | 0.501795462 | 0.50668287  | 0.327063495 |
| 0.498748043 | 0.101756384 | 0.505397165 | 0.483827012 |
| 0.410217001 | 0.004582816 | 0.019540474 | 0.504400729 |
| 0.463256405 | 0.144131822 | 0.308217541 | 0.460243078 |
| 0.243924495 | 0.292326134 | 0.176009511 | 0.253351724 |
| 0.50117402  | 0.345973932 | 0.236569066 | 0.468628381 |
| 0.378458901 | 0.367841263 | 0.458948338 | 0.199054046 |
| 0.47233512  | 0.154483938 | 0.195569879 | 0.020774114 |
| 0.445451392 | 0.22616549  | 0.486319532 | 0.493055592 |
| 1           | 0.4661862   | 0.35941432  | 0.421351523 |
| 0.471867251 | 0.206287083 | 0.401677079 | 0.232815988 |
| 0.486780489 | 0.467202286 | 0.455788975 | 0.43911269  |
| 0.498547867 | 0.492858828 | 0.112308832 | 0.486223585 |
| 0.050709749 | 0.004624363 | 0.483254382 | 0.393751354 |
| 0.078060428 | 0.423485833 | 0.395346067 | 0.324113905 |
| 0.32727621  | 0.106882219 | 0.297222297 | 0.287509079 |
| 0.422886198 | 0.451986704 | 0.345136156 | 0.363271406 |
| 0.349660667 | 0.20177693  | 0.33544282  | 0.290961197 |
| 0.308122419 | 0.418262368 | 0.312361549 | 0.080767461 |
| 0.470138463 | 0.465736557 | 0.16448632  | 0.306168596 |
| 0.510595465 | 0.510427842 | 0.122576216 | 0.044804573 |
| 0.405169391 | 0.404422178 | 0.505703239 | 0.490452967 |
| 0.523115636 | 0.509461449 | 0.444458017 | 0.232755111 |
| 0.182746199 | 0.420039165 | 0.357716534 | 0.190375255 |
| 0.501194561 | 0.164350127 | 0.48269941  | 0.334377867 |
| 0.248029485 | 0.365595016 | 0.114234582 | 0.205414393 |
| 0.426934026 | 0.327638541 | 0.309305669 | 0.285598805 |
| 0.417919797 | 0.303315523 | 0.144488386 | 0.348539245 |
| 0.465115679 | 0.210809853 | 0.308837899 | 0.429095822 |
| 0.460273443 | 0.24888573  | 0.480367975 | 0.475206604 |
| 0.267849518 | 0.236377273 | 0.425923313 | 0.457403084 |
| 0.497445057 | 0.420815695 | 0.081932468 | 0.469741261 |
| 0.498028438 | 0.494677678 | 0.494562322 | 0.464582779 |
| 0.199132427 | 0.450767229 | 0.340728334 | 0.422646321 |
| 0.32699164  | 0.495896744 | 0.36768553  | 0.16956247  |
| 0.400033795 | 0.489502677 | 0.480574472 | 0.312840739 |
| 0.470248788 | 0.251141474 | 0.148249664 | 0.484832439 |
| 0.23443734  | 0.217622163 | 0.410240702 | 0.475159018 |
| 0.006455439 | 0.162065008 | 0.48174271  | 0.390857049 |
| 0.506223298 | 0.502078229 | 0.484849894 | 0.38262275  |
| 0.002707638 | 0.450600912 | 0.482162203 | 0.480437654 |
| 0.490944555 | 0.469574489 | 0.2451818   | 0.186679819 |
| 0.412325386 | 0.189029433 | 0.261434216 | 0.440688909 |
| 0.194598147 | 0.49236996  | 0.335821039 | 0.333583435 |
| 0.321403451 | 0.192126092 | 0.288961548 | 0.39946326  |
| 0.17278261  | 0.382258718 | 0.460984446 | 0.336645542 |
| 0.2369301   | 0.474555126 | 0.484797639 | 0.096209677 |
| 0.400536281 | 0.466933801 | 0.48190993  | 0.008544395 |
| 0.493870113 | 0.037016276 | 0.321937236 | 0.350477956 |
| 0.330905865 | 0.331973305 | 0.369046117 | 0.394674713 |
| 0.454417029 | 0.367607511 | 0.4252951   | 0.382352142 |
| 0.29657659  | 0.372078245 | 0.461849594 | 0.456994801 |
| 0.389937654 | 0.272038808 | 0.202413461 | 0.192836426 |
| 0.152515548 | 0.491261596 | 0.373710844 | 0.176679288 |

|             |             |             |             |
|-------------|-------------|-------------|-------------|
| 0.36488492  | 0.4487106   | 0.449493539 | 0.479568484 |
| 0.481554499 | 0.216481267 | 0.424889561 | 0.501468518 |
| 0.251283457 | 0.39665775  | 0.170880301 | 0.482061606 |
| 0.390969556 | 0.300857625 | 0.46560514  | 0.439928276 |
| 0.463161846 | 0.45231885  | 0.37512219  | 0.47858322  |
| 0.467273402 | 0.397819741 | 0.367563155 | 0.19781292  |
| 0.335617655 | 0.260600848 | 0.342321011 | 0.012309064 |
| 0.471488139 | 0.42120112  | 0.510304363 | 0.487631295 |
| 0.312582779 | 0.46481782  | 0.394360514 | 0.218218546 |
| 0.323047154 | 0.278565079 | 0.280959883 | 0.487891681 |
| 0.236836383 | 0.340718308 | 0.398876193 | 0.451844558 |
| 0.486769221 | 0.460060004 | 0.320625993 | 0.385284515 |
| 0.363824855 | 0.343166154 | 0.475047073 | 0.258136539 |
| 0.465427688 | 0.268152864 | 0.420753558 | 0.408325206 |
| 0.34172529  | 0.494935464 | 0.165324247 | 0.500997606 |
| 0.405141374 | 0.253661255 | 0.501333486 | 0.427495601 |
| 0.430069991 | 0.236077665 | 0.209702516 | 0.448010465 |
| 0.351824646 | 0.370027941 | 0.018191263 | 0.092814038 |
| 0.444244752 | 0.355766087 | 0.459333435 | 0.448194095 |
| 0.315818333 | 0.432646285 | 0.181639918 | 0.424325416 |
| 0.475346311 | 0.502770276 | 0.389024483 | 0.377789886 |
| 0.460429911 | 0.23714858  | 0.493205531 | 0.024768454 |
| 0.46997485  | 0.445245687 | 0.415948708 | 0.153331063 |
| 0.074376642 | 0.238751516 | 0.475656022 | 0.161760706 |
| 0.495433696 | 0.233166517 | 0.417204592 | 0.500721499 |
| 0.30720494  | 0.50766965  | 0.240822405 | 0.49588168  |
| 0.118366919 | 0.389205307 | 0.408899129 | 0.41772226  |
| 0.336754238 | 0.347601368 | 0.477175491 | 0.289975077 |
| 0.110988488 | 0.365954834 | 0.006909009 | 0.44077517  |
| 0.476100825 | 0.376002317 | 0.329625301 | 0.322359908 |
| 0.405334197 | 0.453906164 | 0.323617981 | 0.448555465 |
| 0.04671279  | 0.431059726 | 0.34712343  | 0.499715961 |
| 0.274483166 | 0.42627503  | 0.159784339 | 0.361356767 |
| 0.480579657 | 0.361632201 | 0.373474559 | 0.353992004 |
| 0.482846962 | 0.457045294 | 0.28549029  | 0.309649332 |
| 0.431130043 | 0.166619623 | 0.438227754 | 0.510848996 |
| 0.312628778 | 0.275117646 | 0.493397768 | 0.346211392 |
| 0.348268313 | 0.468629712 | 0.437789655 | 0.500819869 |
| 0.165216699 | 0.39590784  | 0.485960884 | 0.484850453 |
| 0.421793818 | 0.225942294 | 0.298866141 | 0.328612404 |
| 0.471373531 | 0.222133194 | 0.3131254   | 0.480389423 |
| 0.259985544 | 0.429779592 | 0.401705094 | 0.285261205 |
| 0.108084012 | 0.302975828 | 0.471756949 | 0.282432016 |
| 0.424762415 | 0.44486128  | 0.318943615 | 0.463370691 |
| 0.264395356 | 0.082222187 | 0.477163746 | 0.023876754 |
| 0.470619017 | 0.482712416 | 0.38855848  | 0.425883482 |
| 0.321301158 | 0.460313681 | 0.446877732 | 0.007329539 |
| 0.477855893 | 0.077614407 | 0.380021547 | 0.328506156 |
| 0.327342262 | 0.150241    | 0.482038235 | 0.50375996  |
| 0.446233175 | 0.378888358 | 0.370547827 | 0.4814507   |
| 0.183285844 | 0.339103773 | 0.364677081 | 0.484403971 |
| 0.259685192 | 0.417439165 | 0.443433331 | 0.414249773 |
| 0.486535541 | 0.412750995 |             |             |
| MAPK6       | 0.073247001 | 0.355642484 | 0.04855658  |



|             |             |             |             |
|-------------|-------------|-------------|-------------|
| 0.181504738 | 0.362851653 | 0.317098219 | 0.065030918 |
| 0.133014314 | 0.272652623 | 0.204286041 | 0.346807543 |
| 0.023422793 | 0.176412961 | 0.423997819 | 0.062841249 |
| 0.361137026 | 0.05230713  | 0.118080339 | 0.082567469 |
| 0.211475058 | 0.335403914 | 0.345832467 | 0.257306195 |
| 0.336378242 | 0.162767458 | 0.249898972 | 0.328991546 |
| 0.451806582 | 0.249870481 | 0.354426826 | 0.167704077 |
| 0.386107147 | 0.361153116 | 0.34232058  | 0.020152414 |
| 0.329720269 | 0.02851698  | 0.384827157 | 0.308122894 |
| 0.282270519 | 0.31414308  | 0.22345756  | 0.279682502 |
| 0.27163702  | 0.039156833 | 0.147364168 | 0.330206523 |
| 0.254542857 | 0.274457347 | 0.050077604 | 0.339110636 |
| 0.302742136 | 0.264802822 | 0.276690892 | 0.002667317 |
| 0.341873012 | 0.148882679 | 0.274416088 | 0.445798318 |
| 0.198553841 | 0.152840246 | 0.248521928 | 0.202226915 |
| 0.30028291  | 0.31825684  | 0.244954513 | 0.2744961   |
| 0.453893302 | 0.263717643 | 0.362312796 | 0.189955002 |
| 0.29237898  | 0.029056391 | 0.151323284 | 0.064076917 |
| 0.336485439 | 0.233070181 | 0.344709814 | 0.358559398 |
| 0.350545198 | 0.459799512 | 0.223541022 | 0.424288581 |
| 0.15335509  | 0.358026398 | 0.355726589 | 0.294584687 |
| 0.299533965 | 0.083297534 | 0.370255076 | 0.479101762 |
| 0.043709244 | 0.252726613 | 0.310159587 | 0.092641613 |
| 0.374119816 | 0.292628925 | 0.27011623  | 0.285037544 |
| 0.368284521 | 0.349421635 | 0.405511044 | 0.261438487 |
| 0.333349609 | 0.058265999 | 0.399320771 | 0.360862283 |
| 0.336996283 | 0.078529719 | 0.304226864 | 0.436668553 |
| 0.34199207  | 0.45188734  | 0.354275031 | 0.320638245 |
| 0.362121711 | 0.46103799  | 0.342755965 | 0.367120061 |
| 0.120979731 | 0.465609105 | 0.190329433 | 0.060608205 |
| 0.0604716   | 0.115465719 | 0.256684983 | 0.28921484  |
| 0.446121646 | 0.280125563 | 0.194492485 | 0.28258382  |
| 0.456880305 | 0.392291122 | 0.457958759 | 0.370564476 |
| 0.045398094 | 0.294143884 | 0.368890374 | 0.236785238 |
| 0.306404118 | 0.10951944  | 0.342935367 | 0.435219371 |
| 0.363708742 | 0.418714362 | 0.146649069 | 0.432315457 |
| 0.177769071 | 0.486064696 | 0.389313256 | 0.192364344 |
| 0.462842533 | 0.425208035 | 0.496024152 | 0.377136754 |
| 0.422739255 | 0.29673133  | 0.050685604 | 0.337084072 |
| 0.471298447 | 0.03615343  | 0.441287469 | 0.472121561 |
| 0.437229756 | 0.441342476 | 0.500073393 | 0.478732766 |
| 0.436142628 | 0.07064868  | 0.031406834 | 0.306880469 |
| 0.444752178 | 0.383182893 | 0.17441289  | 0.34012978  |
| 0.345860981 | 0.296265987 | 0.372701332 | 0.29671077  |
| 0.480997941 | 0.432417017 | 0.446093266 | 0.323408632 |
| 0.223486743 | 0.289589736 | 0.342431494 | 0.388656881 |
| 0.064405233 | 0.107521534 | 0.043239328 | 0.266033491 |
| 0.2541822   | 0.207208877 | 0.287302425 | 0.314710099 |
| 0.208206051 | 0.248495584 | 0.331448338 | 0.36712855  |
| 0.041148624 | 0.326533048 | 0.168028863 | 0.14855536  |
| 0.065176352 | 0.124692984 | 0.208306122 | 0.190849385 |
| 0.289535028 | 0.188606097 | 0.346169309 | 0.465924299 |
| 0.315332544 | 0.147661202 | 0.327832808 | 0.462523595 |
| 0.427340399 | 0.380165816 | 0.193930752 | 0.027479645 |

|             |             |             |             |
|-------------|-------------|-------------|-------------|
| 0.292380228 | 0.251824615 | 0.270845716 | 0.342663964 |
| 0.148724557 | 0.241141932 | 0.335239053 | 0.392435878 |
| 0.224129267 | 0.112739132 | 0.335631687 | 0.38471474  |
| 0.110293823 | 0.342555856 | 0.436629786 | 0.295743757 |
| 0.00511405  | 0.299102126 | 0.411366999 | 0.23108891  |
| 0.244632087 | 0.215472067 | 0.316560532 | 0.444032411 |
| 0.303235605 | 0.287907465 | 0.462717351 | 0.383376009 |
| 0.273140514 | 0.171630675 | 0.493156046 | 0.066744982 |
| 0.324015935 | 0.13074914  | 0.293466684 | 0.222786426 |
| 0.239493988 | 0.272122692 | 0.351011994 | 0.363017691 |
| 0.103620528 | 0.457511003 | 0.358509793 | 0.472708281 |
| 0.334425195 | 0.494404686 | 0.437306734 | 0.420924215 |
| 0.307303844 | 0.304904166 | 0.216910222 | 0.407478974 |
| 0.439887917 | 0.271065626 | 0.055545103 | 0.381439585 |
| 0.282002237 | 0.35548916  | 0.234250602 | 0.474656419 |
| 0.453192154 | 0.384160314 | 0.181379717 | 0.377444275 |
| 0.368522509 | 0.225070428 | 0.391888269 | 0.492173898 |
| 0.231275016 | 0.334441966 | 0.356592119 | 0.426854224 |
| 0.170988924 | 0.279833378 | 0.288141287 | 0.25624     |
| 0.023592498 | 0.070771358 | 0.062438101 | 0.2207847   |
| 0.29701173  | 0.302946054 | 0.347673828 | 0.471972874 |
| 0.131709039 | 0.387822342 | 0.193251661 | 0.319341247 |
| 0.372682324 | 0.32253994  | 0.36526374  | 0.354255817 |
| 0.215007707 | 0.039025531 | 0.154746101 | 0.461569829 |
| 0.02965795  | 0.329422186 | 0.248391397 | 0.005342508 |
| 0.045642153 | 0.32232916  | 0.07776867  | 0.173816868 |
| 0.473107707 | 0.174353315 | 0.177652972 | 0.229846911 |
| 0.325978443 | 0.100134391 | 0.011646694 | 0.445305825 |
| 0.427303587 | 0.402150553 | 0.420178732 | 0.383930257 |
| 0.401914154 | 0.335225418 | 0.397103406 | 0.262548087 |
| 0.122484332 | 0.081157025 | 0.30251952  | 0.31249736  |
| 0.0039904   | 0.376698783 | 0.317537565 | 0.137754876 |
| 0.37691444  | 0.258518741 | 0.044379925 | 0.337113628 |
| 0.029151267 | 0.280065112 | 0.237063318 | 0.237145356 |
| 0.345325113 | 0.01726381  | 0.234457062 | 0.320799216 |
| 0.367155015 | 0.300928786 | 0.357865103 | 0.477954754 |
| 0.328386138 | 0.086589303 | 0.352407385 | 0.37142343  |
| 0.085375899 | 0.103780728 | 0.26115253  | 0.03614051  |
| 0.182560904 | 0.391497029 | 0.330830008 | 0.081824375 |
| 0.264553087 | 0.007120868 | 0.324588888 | 0.478784505 |
| 0.389914401 | 0.491988742 | 0.463675252 | 0.349600452 |
| 0.459104262 | 0.154949361 | 0.480137846 | 0.342975179 |
| 0.272792946 | 0.001600307 | 0.009332876 | 0.468545303 |
| 0.368460837 | 0.039852108 | 0.161360319 | 0.2926493   |
| 0.149252837 | 0.119621758 | 0.074929565 | 0.312218465 |
| 0.334447509 | 0.306636845 | 0.270808951 | 0.394256077 |
| 0.262926098 | 0.244491481 | 0.270874138 | 0.070293641 |
| 0.359837017 | 0.071098654 | 0.071074716 | 0.018272016 |
| 0.34048744  | 0.089739055 | 0.384864442 | 0.450337808 |
| 0.4661862   | 1           | 0.242483317 | 0.271973456 |
| 0.404519529 | 0.065346284 | 0.324132218 | 0.081834826 |
| 0.418573667 | 0.355068357 | 0.309144409 | 0.282103357 |
| 0.476967823 | 0.43048337  | 0.040206839 | 0.382867881 |
| 0.022927686 | 0.004919735 | 0.276859362 | 0.22410742  |

|             |             |             |             |
|-------------|-------------|-------------|-------------|
| 0.078796467 | 0.340247048 | 0.236788171 | 0.207525602 |
| 0.231690923 | 0.037127697 | 0.329549425 | 0.330401658 |
| 0.303529649 | 0.340190427 | 0.346785956 | 0.197600426 |
| 0.327987142 | 0.233283726 | 0.24304066  | 0.167326019 |
| 0.213844067 | 0.267040965 | 0.166670027 | 0.025818025 |
| 0.326020773 | 0.361580174 | 0.065757518 | 0.144836272 |
| 0.429011938 | 0.466092382 | 0.0574295   | 0.025828332 |
| 0.235189185 | 0.301269613 | 0.480615247 | 0.434558379 |
| 0.456153684 | 0.48835879  | 0.356593751 | 0.179229665 |
| 0.076332189 | 0.325551824 | 0.354623195 | 0.192329971 |
| 0.461808502 | 0.048755232 | 0.421451275 | 0.352780517 |
| 0.112776536 | 0.242847996 | 0.056805651 | 0.093652864 |
| 0.361454245 | 0.173718669 | 0.240052209 | 0.118213874 |
| 0.320805654 | 0.353245132 | 0.055855114 | 0.203505291 |
| 0.302253598 | 0.290456899 | 0.161757204 | 0.253021201 |
| 0.304743585 | 0.151673543 | 0.377857498 | 0.424792448 |
| 0.114622081 | 0.102400195 | 0.224715424 | 0.331578493 |
| 0.399131934 | 0.280920757 | 0.037376293 | 0.375371595 |
| 0.462696376 | 0.347330241 | 0.433765713 | 0.390801295 |
| 0.076007387 | 0.367238067 | 0.312723935 | 0.335060467 |
| 0.180272109 | 0.306423473 | 0.240645894 | 0.063515535 |
| 0.276083175 | 0.416896016 | 0.371759126 | 0.2061188   |
| 0.319705039 | 0.090446004 | 0.041770908 | 0.397077509 |
| 0.300937024 | 0.094641019 | 0.233966962 | 0.391256251 |
| 0.00934274  | 0.248681718 | 0.467200654 | 0.251705217 |
| 0.468030733 | 0.46870955  | 0.413736135 | 0.224916297 |
| 0.007180085 | 0.35521112  | 0.350754177 | 0.367303711 |
| 0.370842631 | 0.293123778 | 0.141046995 | 0.111772398 |
| 0.285586764 | 0.060049542 | 0.170393922 | 0.275899246 |
| 0.220462268 | 0.292235446 | 0.190152219 | 0.183278106 |
| 0.259032112 | 0.062184135 | 0.333306272 | 0.256399872 |
| 0.214292253 | 0.225950539 | 0.337038835 | 0.190883145 |
| 0.246861922 | 0.406264278 | 0.348594173 | 0.030967651 |
| 0.351127816 | 0.376864945 | 0.410037379 | 0.003907897 |
| 0.377876608 | 0.012114395 | 0.246654246 | 0.279761512 |
| 0.255802545 | 0.235856604 | 0.293387712 | 0.361636167 |
| 0.279066534 | 0.2411472   | 0.305409741 | 0.246556262 |
| 0.230046759 | 0.223407325 | 0.360272191 | 0.29710804  |
| 0.336421325 | 0.141062975 | 0.082013377 | 0.081997599 |
| 0.074668425 | 0.411910506 | 0.224122225 | 0.057006339 |
| 0.232199323 | 0.301919919 | 0.354672917 | 0.420180368 |
| 0.415899538 | 0.084145791 | 0.297594859 | 0.390188304 |
| 0.183138061 | 0.249638732 | 0.055254006 | 0.318760834 |
| 0.229459584 | 0.287581064 | 0.297927113 | 0.227169774 |
| 0.302963017 | 0.370182508 | 0.214737736 | 0.413774321 |
| 0.367990502 | 0.277201397 | 0.215495826 | 0.13357938  |
| 0.184042791 | 0.110277076 | 0.341053024 | 0.004043389 |
| 0.302679864 | 0.231894565 | 0.442536493 | 0.423075819 |
| 0.317883357 | 0.369587689 | 0.216902071 | 0.098947179 |
| 0.195655749 | 0.141820797 | 0.129440455 | 0.367254807 |
| 0.283004645 | 0.202714929 | 0.351633662 | 0.238327757 |
| 0.390791654 | 0.345046022 | 0.301814329 | 0.21161208  |
| 0.236982411 | 0.166631963 | 0.40754916  | 0.107880639 |
| 0.324750937 | 0.312538248 | 0.231370539 | 0.321902231 |

|             |             |             |             |
|-------------|-------------|-------------|-------------|
| 0.274940575 | 0.475529739 | 0.060054022 | 0.483029602 |
| 0.327059738 | 0.104535696 | 0.451697298 | 0.247511626 |
| 0.275441044 | 0.192628346 | 0.285236179 | 0.271432817 |
| 0.233522993 | 0.348154017 | 0.013493682 | 0.091986091 |
| 0.312527147 | 0.244012991 | 0.319054432 | 0.311835005 |
| 0.335209886 | 0.337720176 | 0.239256414 | 0.234639849 |
| 0.395711612 | 0.4162756   | 0.271746743 | 0.235468321 |
| 0.287998977 | 0.123536487 | 0.276923409 | 0.019144285 |
| 0.339848768 | 0.333269936 | 0.278201158 | 0.064112533 |
| 0.026074817 | 0.301936901 | 0.329891362 | 0.050963696 |
| 0.473094947 | 0.282035812 | 0.248675625 | 0.365020859 |
| 0.141078217 | 0.420095125 | 0.183150389 | 0.375004495 |
| 0.040776857 | 0.235480801 | 0.344394979 | 0.288962538 |
| 0.302181693 | 0.358361479 | 0.365905853 | 0.335271149 |
| 0.046783008 | 0.316510728 | 0.003889509 | 0.361823682 |
| 0.387117391 | 0.349104743 | 0.178663169 | 0.206853296 |
| 0.280477121 | 0.346688013 | 0.245028843 | 0.324754876 |
| 0.023478977 | 0.371595434 | 0.205626368 | 0.367174038 |
| 0.259460729 | 0.281333137 | 0.097957845 | 0.325669103 |
| 0.372003498 | 0.274511847 | 0.224454286 | 0.305041195 |
| 0.424517737 | 0.327526614 | 0.12132061  | 0.295341536 |
| 0.267121709 | 0.054921085 | 0.268130355 | 0.478286942 |
| 0.221677258 | 0.332608697 | 0.447735041 | 0.243855861 |
| 0.335488487 | 0.337317799 | 0.301883621 | 0.459105927 |
| 0.126362484 | 0.239715592 | 0.394512217 | 0.410991411 |
| 0.300699143 | 0.279247542 | 0.320069347 | 0.287235565 |
| 0.387416923 | 0.119727536 | 0.319418769 | 0.306572143 |
| 0.309007447 | 0.283530127 | 0.223023233 | 0.273311459 |
| 0.053992964 | 0.177908646 | 0.319876049 | 0.136085094 |
| 0.289066164 | 0.361077239 | 0.327082021 | 0.379121677 |
| 0.196621546 | 0.049577066 | 0.433236563 | 0.046826536 |
| 0.258992861 | 0.366719932 | 0.234819222 | 0.366947752 |
| 0.162248204 | 0.281141759 | 0.242926307 | 0.00115467  |
| 0.388609816 | 0.122524268 | 0.293483934 | 0.307364828 |
| 0.282110321 | 0.052791755 | 0.408951604 | 0.49245417  |
| 0.260064156 | 0.285034362 | 0.310002113 | 0.403597389 |
| 0.265784079 | 0.298961694 | 0.302390148 | 0.292290803 |
| 0.320129141 | 0.273445326 | 0.320255938 | 0.363288958 |
| 0.314263289 | 0.23852614  |             |             |

|                      |             |             |             |
|----------------------|-------------|-------------|-------------|
| MARCKSL1 0.013127773 | 0.375907213 | 0.013447208 |             |
| 0.025567299          | 0.133947248 | 0.135867106 | 0.007620383 |
| 0.021251882          | 0.273854714 | 0.190853057 | 0.148606227 |
| 0.001131188          | 0.03905641  | 0.359402026 | 0.006045396 |
| 0.233227352          | 0.002318523 | 0.021270897 | 0.026461249 |
| 0.055556088          | 0.110746893 | 0.111537067 | 0.194644129 |
| 0.106777156          | 0.098736113 | 0.19557621  | 0.264312731 |
| 0.437609247          | 0.182230151 | 0.296652519 | 0.1506556   |
| 0.281130825          | 0.162183071 | 0.229294557 | 0.001303756 |
| 0.201120194          | 0.004616225 | 0.312265016 | 0.062514839 |
| 0.045767067          | 0.211885747 | 0.236174286 | 0.054880859 |
| 0.241792139          | 0.004796186 | 0.210400871 | 0.3175231   |
| 0.19250058           | 0.065552577 | 0.019486288 | 0.306932689 |
| 0.13188348           | 0.186893719 | 0.390848943 | 0.00084484  |
| 0.148321859          | 0.087797908 | 0.130288177 | 0.409391771 |

|             |             |                      |             |
|-------------|-------------|----------------------|-------------|
| 0.072425494 | 0.021650852 | 0.196745857          | 0.083743953 |
| 0.271760721 | 0.246512911 | 0.103800807          | 0.176417826 |
| 0.40040671  | 0.073142584 | 0.375181043          | 0.034520422 |
| 0.15245199  | 0.004853462 | 0.057452767          | 0.032252251 |
| 0.132310336 | 0.051595271 | 0.139601467          | 0.119453246 |
| 0.406068696 | 0.384023149 | 0.09327198           | 0.417730238 |
| 0.036093125 | 0.195611656 | 0.069384718          | 0.145179824 |
| 0.246050103 | 0.014254811 | 0.266142084          | 0.401177284 |
| 0.008255784 | 0.332125871 | 0.298076003          | 0.052222216 |
| 0.348472116 | 0.117270353 | 0.303672295          | 0.05599935  |
| 0.229602527 | 0.17660611  | 0.374131079          | 0.137782699 |
| 0.117785567 | 0.023853586 | 0.387331172          | 0.181841772 |
| 0.077485369 | 0.022090115 | 0.056691 0.420181178 |             |
| 0.25781204  | 0.41406986  | 0.389411467          | 0.243159736 |
| 0.220703063 | 0.402590883 | 0.254144666          | 0.31904699  |
| 0.192203094 | 0.438906253 | 0.054641589          | 0.003345447 |
| 0.016260337 | 0.009327038 | 0.069829753          | 0.155693028 |
| 0.391285109 | 0.170820045 | 0.048913964          | 0.065194315 |
| 0.36842619  | 0.398798271 | 0.452465327          | 0.313972159 |
| 0.004143702 | 0.104905646 | 0.216380751          | 0.064149202 |
| 0.234211302 | 0.030842744 | 0.106123078          | 0.392822619 |
| 0.244729605 | 0.338666651 | 0.039556923          | 0.364333331 |
| 0.054559055 | 0.377438739 | 0.419312185          | 0.041715915 |
| 0.398036793 | 0.382528077 | 0.388956435          | 0.281752932 |
| 0.349586539 | 0.134365685 | 0.030334988          | 0.274891947 |
| 0.34297898  | 0.004692077 | 0.433550948          | 0.445022813 |
| 0.424103232 | 0.411982122 | 0.412015001          | 0.42568069  |
| 0.431360013 | 0.018378714 | 0.028118556          | 0.126013551 |
| 0.412907263 | 0.265117855 | 0.019967165          | 0.28023022  |
| 0.199790605 | 0.166948174 | 0.344953341          | 0.124043513 |
| 0.363265288 | 0.365231212 | 0.444941998          | 0.292562278 |
| 0.177563205 | 0.187984456 | 0.272304959          | 0.366928417 |
| 0.003797526 | 0.025641062 | 0.016816776          | 0.163133693 |
| 0.15726469  | 0.045358206 | 0.149498707          | 0.19550251  |
| 0.06087451  | 0.139077652 | 0.171024924          | 0.246388988 |
| 0.02374834  | 0.295239877 | 0.0439603            | 0.059961231 |
| 0.003181059 | 0.063854364 | 0.038122007          | 0.024472058 |
| 0.076909451 | 0.14318348  | 0.361710291          | 0.404915496 |
| 0.13844927  | 0.084131961 | 0.305803443          | 0.340513285 |
| 0.270186408 | 0.208005438 | 0.102834914          | 0.000182596 |
| 0.088901847 | 0.188600816 | 0.094914726          | 0.274844164 |
| 0.093539066 | 0.060764935 | 0.234645894          | 0.257872171 |
| 0.118471458 | 0.041515429 | 0.134233994          | 0.282637549 |
| 0.073502922 | 0.076279102 | 0.340540241          | 0.287569809 |
| 0.000984331 | 0.130910483 | 0.351073068          | 0.031322526 |
| 0.181906083 | 0.043295498 | 0.101305044          | 0.379630074 |
| 0.132334587 | 0.063730916 | 0.422612426          | 0.253293295 |
| 0.119966102 | 0.144125632 | 0.41985073           | 0.046499133 |
| 0.184966764 | 0.006134594 | 0.12170393           | 0.248994372 |
| 0.09408784  | 0.141267926 | 0.153330764          | 0.069636421 |
| 0.055331186 | 0.421985642 | 0.266063267          | 0.421688173 |
| 0.151798642 | 0.419134504 | 0.379873522          | 0.319492626 |
| 0.186585248 | 0.231035714 | 0.072567497          | 0.346145346 |
| 0.374488445 | 0.132788054 | 0.029752467          | 0.414837493 |

|             |             |             |             |
|-------------|-------------|-------------|-------------|
| 0.21505521  | 0.291624027 | 0.020105982 | 0.380465902 |
| 0.346820552 | 0.410611565 | 0.02147221  | 0.229751406 |
| 0.241380603 | 0.076791307 | 0.298545921 | 0.407614975 |
| 0.184117631 | 0.179982069 | 0.109714222 | 0.260687475 |
| 0.06100385  | 0.052486073 | 0.19071151  | 0.088598101 |
| 0.012685751 | 0.020684469 | 0.016332789 | 0.030148761 |
| 0.043818746 | 0.362410931 | 0.248312351 | 0.428054054 |
| 0.022982349 | 0.289698376 | 0.115238259 | 0.075571636 |
| 0.332243957 | 0.157510089 | 0.218896075 | 0.226509969 |
| 0.11133784  | 0.001028858 | 0.017642498 | 0.386369757 |
| 0.013345001 | 0.076398932 | 0.128946361 | 0.000196899 |
| 0.006245247 | 0.417019496 | 0.043638055 | 0.096466487 |
| 0.369365054 | 0.105014559 | 0.091686932 | 0.171117422 |
| 0.175687132 | 0.019651133 | 0.001015401 | 0.413498951 |
| 0.404737265 | 0.374128472 | 0.411883784 | 0.367584255 |
| 0.37093485  | 0.300376503 | 0.301484344 | 0.174540091 |
| 0.015823146 | 0.019281655 | 0.070133192 | 0.092481692 |
| 0.001372897 | 0.224661189 | 0.11923928  | 0.047076239 |
| 0.325744393 | 0.154616319 | 0.003843126 | 0.196485922 |
| 0.002429585 | 0.110902269 | 0.091101133 | 0.052134976 |
| 0.201381524 | 0.000796791 | 0.097372157 | 0.131012812 |
| 0.332579658 | 0.220961716 | 0.158454234 | 0.427763414 |
| 0.127622244 | 0.070545698 | 0.102525685 | 0.248418954 |
| 0.008952784 | 0.07724264  | 0.137224643 | 0.038919993 |
| 0.07562463  | 0.347513984 | 0.145099727 | 0.010937026 |
| 0.104986616 | 0.000458283 | 0.249072284 | 0.418058873 |
| 0.401364768 | 0.429019963 | 0.395708457 | 0.105592787 |
| 0.405200599 | 0.104758554 | 0.445363943 | 0.321115725 |
| 0.229432664 | 0.000120664 | 0.000191699 | 0.41693625  |
| 0.221343237 | 0.026319197 | 0.047839013 | 0.124152354 |
| 0.014223654 | 0.041901501 | 0.007842968 | 0.040361157 |
| 0.262500565 | 0.073334894 | 0.043882846 | 0.395973331 |
| 0.065156044 | 0.071886508 | 0.194293826 | 0.03165408  |
| 0.231741641 | 0.0053301   | 0.030514296 | 0.000758672 |
| 0.211217106 | 0.058366622 | 0.361256226 | 0.423209481 |
| 0.35941432  | 0.242483317 | 1           | 0.116103492 |
| 0.346701839 | 0.050883321 | 0.16388057  | 0.046641275 |
| 0.420676132 | 0.240242675 | 0.166859119 | 0.176895872 |
| 0.381668721 | 0.355321461 | 0.002834831 | 0.288288093 |
| 0.001141836 | 0.000868258 | 0.192898561 | 0.120741138 |
| 0.027986228 | 0.178758724 | 0.119186556 | 0.064657414 |
| 0.049110125 | 0.003771306 | 0.107037276 | 0.091074312 |
| 0.124446768 | 0.154448565 | 0.112209303 | 0.125884381 |
| 0.068080743 | 0.031405934 | 0.034594139 | 0.025385822 |
| 0.088901165 | 0.203073792 | 0.103900039 | 0.001406778 |
| 0.267526368 | 0.24406347  | 0.008546538 | 0.055617264 |
| 0.327911044 | 0.412740391 | 0.003953488 | 0.000290165 |
| 0.135290998 | 0.110916038 | 0.406008128 | 0.435946856 |
| 0.41129846  | 0.388005254 | 0.251206764 | 0.018396704 |
| 0.008509151 | 0.134244287 | 0.132516928 | 0.011307139 |
| 0.418460953 | 0.0253538   | 0.38954926  | 0.161667699 |
| 0.034089837 | 0.040794403 | 0.002374468 | 0.015878503 |
| 0.24638521  | 0.056034041 | 0.038542462 | 0.066127313 |
| 0.096961338 | 0.083496886 | 0.005285386 | 0.058135166 |

|             |             |              |             |
|-------------|-------------|--------------|-------------|
| 0.214127037 | 0.073049829 | 0.049376956  | 0.091714408 |
| 0.236354956 | 0.154107239 | 0.335242917  | 0.300862832 |
| 0.04465082  | 0.03080394  | 0.085104419  | 0.261867763 |
| 0.394617101 | 0.325653026 | 0.003903735  | 0.426826558 |
| 0.383936334 | 0.330506152 | 0.400565679  | 0.254215679 |
| 0.025514088 | 0.185110593 | 0.150550156  | 0.167569453 |
| 0.058299592 | 0.148066354 | 0.072914833  | 0.013426355 |
| 0.164616144 | 0.347288185 | 0.339506419  | 0.032328201 |
| 0.272787215 | 0.056196444 | 0.021705891  | 0.373396073 |
| 0.052275057 | 0.015167058 | 0.240464189  | 0.369726232 |
| 0.000864674 | 0.054350392 | 0.392720018  | 0.04613479  |
| 0.389625768 | 0.385087165 | 0.301821679  | 0.059786558 |
| 0.00098833  | 0.309959145 | 0.192342193  | 0.152326796 |
| 0.372676105 | 0.207896512 | 0.03532671   | 0.007812008 |
| 0.137428415 | 0.035503756 | 0.021817751  | 0.109462932 |
| 0.080253097 | 0.272887315 | 0.071329671  | 0.076005494 |
| 0.042008803 | 0.04502037  | 0.078966497  | 0.058655225 |
| 0.053951476 | 0.098960588 | 0.200201757  | 0.17204038  |
| 0.098174794 | 0.336364022 | 0.317909603  | 0.002375401 |
| 0.189878172 | 0.30257715  | 0.311895912  | 4.26E-05    |
| 0.310738121 | 0.000672316 | 0.045625136  | 0.049864212 |
| 0.039409567 | 0.04995948  | 0.095527014  | 0.069635614 |
| 0.205583612 | 0.054416328 | 0.067384897  | 0.081295109 |
| 0.024239096 | 0.059979729 | 0.211166361  | 0.14564186  |
| 0.06584981  | 0.020569339 | 0.046336888  | 0.053031225 |
| 0.005369218 | 0.3941458   | 0.121409298  | 0.02936702  |
| 0.075479031 | 0.13794675  | 0.198575487  | 0.435683344 |
| 0.273292516 | 0.063919841 | 0.113882067  | 0.37999356  |
| 0.193449854 | 0.102877218 | 0.0111118542 | 0.191556194 |
| 0.070409694 | 0.053500102 | 0.229126295  | 0.178823929 |
| 0.347802097 | 0.254149107 | 0.116542631  | 0.306015287 |
| 0.123909543 | 0.184314612 | 0.210736006  | 0.009656258 |
| 0.043196711 | 0.0495608   | 0.099492311  | 0.002054914 |
| 0.17370981  | 0.067088488 | 0.404167074  | 0.393005847 |
| 0.132576464 | 0.235285021 | 0.159851409  | 0.014119565 |
| 0.183643852 | 0.115842165 | 0.04821271   | 0.361804433 |
| 0.114460613 | 0.031349331 | 0.117935249  | 0.10610187  |
| 0.329093974 | 0.349394413 | 0.063627679  | 0.070999432 |
| 0.07984893  | 0.082541194 | 0.368780227  | 0.029605883 |
| 0.326807798 | 0.038997093 | 0.287281107  | 0.097248311 |
| 0.053759969 | 0.438384063 | 0.012350358  | 0.453735386 |
| 0.130550721 | 0.055819957 | 0.338292318  | 0.113138219 |
| 0.070643444 | 0.015819751 | 0.084978212  | 0.163912729 |
| 0.046610011 | 0.136331232 | 0.027103557  | 0.026104484 |
| 0.162748934 | 0.121319927 | 0.382982201  | 0.228356487 |
| 0.065207435 | 0.188207233 | 0.078549704  | 0.109675803 |
| 0.417389747 | 0.389951808 | 0.06157321   | 0.111742744 |
| 0.200531663 | 0.013672369 | 0.26209867   | 0.009340627 |
| 0.303410275 | 0.342467272 | 0.17941168   | 0.005281065 |
| 0.000874315 | 0.097835094 | 0.2868956    | 0.024253469 |
| 0.387877847 | 0.117086929 | 0.26412088   | 0.311728348 |
| 0.075225435 | 0.387429808 | 0.015662441  | 0.256166071 |
| 0.009362796 | 0.105272837 | 0.204407994  | 0.220173254 |
| 0.048570641 | 0.11258058  | 0.219324326  | 0.077465471 |

|             |             |             |             |
|-------------|-------------|-------------|-------------|
| 0.002168905 | 0.058246024 | 0.000745478 | 0.264299101 |
| 0.384091754 | 0.176897548 | 0.096179825 | 0.197368923 |
| 0.115360323 | 0.256361859 | 0.066106621 | 0.267438357 |
| 9.82E-05    | 0.210997785 | 0.057983437 | 0.302273251 |
| 0.147644959 | 0.222033164 | 0.005021936 | 0.15120061  |
| 0.342423688 | 0.091518105 | 0.128246961 | 0.156010818 |
| 0.416635396 | 0.296142128 | 0.086751302 | 0.047321719 |
| 0.322659117 | 0.018719135 | 0.193538913 | 0.421207372 |
| 0.034737242 | 0.066825635 | 0.343582942 | 0.039147293 |
| 0.142270362 | 0.275898725 | 0.328663941 | 0.421439426 |
| 0.007503252 | 0.094500063 | 0.306798564 | 0.381148624 |
| 0.143090561 | 0.041728269 | 0.079988984 | 0.057195616 |
| 0.381090025 | 0.014910899 | 0.082606323 | 0.209720823 |
| 0.076997745 | 0.136676365 | 0.269492205 | 0.041258138 |
| 0.003270891 | 0.029639501 | 0.102436413 | 0.042645929 |
| 0.11792246  | 0.15624673  | 0.054900449 | 0.236309202 |
| 0.020237507 | 0.001559368 | 0.301892949 | 0.00994532  |
| 0.156967459 | 0.218969571 | 0.079407594 | 0.142005182 |
| 0.087031229 | 0.186908629 | 0.183649891 | 0.000611846 |
| 0.286451158 | 0.008932751 | 0.088302144 | 0.049353349 |
| 0.116228537 | 0.006763024 | 0.335860029 | 0.409483665 |
| 0.152185202 | 0.126456646 | 0.171874213 | 0.361295973 |
| 0.049373078 | 0.180049243 | 0.142247019 | 0.317735838 |
| 0.077323612 | 0.272762635 | 0.233864155 | 0.17568878  |
| 0.235246756 | 0.07175013  |             |             |
| MASTL       | 0.037425746 | 0.368340755 | 0.030166841 |
| 0.01374217  | 0.178435528 | 0.189160436 | 0.015894757 |
| 0.035759626 | 0.253595446 | 0.085971112 | 0.231908284 |
| 0.004475261 | 0.020846661 | 0.40185425  | 0.017593174 |
| 0.238808334 | 0.008543476 | 0.046333454 | 0.008616306 |
| 0.018208467 | 0.158400528 | 0.12487911  | 0.229807184 |
| 0.141930329 | 0.156311791 | 0.186290504 | 0.218314675 |
| 0.432965198 | 0.070924209 | 0.340323534 | 0.015449862 |
| 0.331788504 | 0.216716927 | 0.216647969 | 0.003152544 |
| 0.258333524 | 0.001212898 | 0.335774035 | 0.084736981 |
| 0.017681457 | 0.299718659 | 0.142162652 | 0.102776408 |
| 0.137389889 | 0.012671648 | 0.040373068 | 0.262223515 |
| 0.161439658 | 0.086599177 | 0.042746533 | 0.299310755 |
| 0.099448857 | 0.286066845 | 0.285914734 | 0.000838036 |
| 0.171776365 | 0.027383895 | 0.099197144 | 0.443073771 |
| 0.146647187 | 0.065475106 | 0.039860895 | 0.125781134 |
| 0.247519883 | 0.251109491 | 0.173144099 | 0.101730542 |
| 0.442105881 | 0.050298397 | 0.312566189 | 0.016941522 |
| 0.163439623 | 0.010460188 | 0.105519322 | 0.047070384 |
| 0.129719073 | 0.119504412 | 0.242638421 | 0.117077644 |
| 0.347605319 | 0.44048758  | 0.131239504 | 0.410522552 |
| 0.013395678 | 0.203706681 | 0.083704281 | 0.203280954 |
| 0.247991307 | 0.019796489 | 0.317489879 | 0.430746527 |
| 0.019979727 | 0.219461606 | 0.271131438 | 0.088773647 |
| 0.386175054 | 0.080974616 | 0.209253773 | 0.085124265 |
| 0.248364573 | 0.181393944 | 0.403982767 | 0.213704094 |
| 0.1870402   | 0.043947063 | 0.41545151  | 0.206833396 |
| 0.144660374 | 0.041329591 | 0.043114032 | 0.398392216 |
| 0.256261784 | 0.447824747 | 0.348250454 | 0.262713777 |



|             |             |             |             |
|-------------|-------------|-------------|-------------|
| 0.202760633 | 0.434326953 | 0.269461712 | 0.380170039 |
| 0.022385857 | 0.456044878 | 0.095314931 | 0.015668389 |
| 0.030528697 | 0.036208815 | 0.053960329 | 0.240363551 |
| 0.426372957 | 0.240421827 | 0.082462632 | 0.101698787 |
| 0.386665805 | 0.416581515 | 0.444982131 | 0.333207822 |
| 0.015040919 | 0.070607871 | 0.182858058 | 0.118562096 |
| 0.278343691 | 0.064701273 | 0.136171381 | 0.430803136 |
| 0.322456463 | 0.361690034 | 0.059392645 | 0.416613123 |
| 0.085422191 | 0.442551417 | 0.391801796 | 0.082275603 |
| 0.428194273 | 0.424219045 | 0.434690445 | 0.32157026  |
| 0.425112851 | 0.166660617 | 0.015551913 | 0.287596886 |
| 0.443768649 | 0.003576093 | 0.422909735 | 0.432898144 |
| 0.416914159 | 0.388689844 | 0.442122003 | 0.455955986 |
| 0.443549274 | 0.038854681 | 0.00308345  | 0.181048306 |
| 0.419018553 | 0.316632882 | 0.041319064 | 0.220476191 |
| 0.244135446 | 0.209858064 | 0.362783929 | 0.042537777 |
| 0.444680423 | 0.377670383 | 0.437848961 | 0.299909566 |
| 0.135418586 | 0.27756036  | 0.223731453 | 0.404699232 |
| 0.008114335 | 0.053669665 | 0.03661823  | 0.218427563 |
| 0.084053838 | 0.097838842 | 0.153223564 | 0.205490793 |
| 0.125109028 | 0.162403055 | 0.168047262 | 0.287883968 |
| 0.043273016 | 0.291450287 | 0.071142399 | 0.07530115  |
| 0.009828385 | 0.118312845 | 0.024905893 | 0.045319759 |
| 0.147923813 | 0.19036868  | 0.352577377 | 0.408799579 |
| 0.13672441  | 0.122168479 | 0.32688103  | 0.410720037 |
| 0.365114184 | 0.218119144 | 0.179633622 | 0.001405445 |
| 0.031346    | 0.091141558 | 0.065999106 | 0.25632784  |
| 0.146065428 | 0.052360946 | 0.226748687 | 0.330715191 |
| 0.154124733 | 0.073400258 | 0.123034812 | 0.382418015 |
| 0.107631968 | 0.140585036 | 0.378059378 | 0.216663014 |
| 0.000317388 | 0.144883286 | 0.379259043 | 0.017075838 |
| 0.206850819 | 0.033771383 | 0.088167351 | 0.370005523 |
| 0.070196216 | 0.094236816 | 0.454144505 | 0.322657914 |
| 0.061080882 | 0.187882976 | 0.455844995 | 0.010269803 |
| 0.17818906  | 0.005865696 | 0.195629648 | 0.144998865 |
| 0.135307004 | 0.202310508 | 0.220961298 | 0.098805966 |
| 0.092566409 | 0.458422453 | 0.33384617  | 0.462952494 |
| 0.105350117 | 0.444145189 | 0.404713484 | 0.397111686 |
| 0.250726254 | 0.163951526 | 0.046513909 | 0.342617155 |
| 0.3609005   | 0.02218275  | 0.052666004 | 0.375776774 |
| 0.124521099 | 0.286076444 | 0.00944831  | 0.414184788 |
| 0.421552362 | 0.394789101 | 0.064026403 | 0.284451247 |
| 0.311316014 | 0.136064942 | 0.332503089 | 0.465926835 |
| 0.056918537 | 0.176194283 | 0.104831103 | 0.31783512  |
| 0.098392927 | 0.063590325 | 0.256441879 | 0.069668721 |
| 0.006086342 | 0.04645211  | 0.034628197 | 0.079575511 |
| 0.065818853 | 0.291496551 | 0.251602456 | 0.443261896 |
| 0.062005232 | 0.391563591 | 0.158328923 | 0.081637088 |
| 0.328486775 | 0.181761037 | 0.260149937 | 0.280487506 |
| 0.166811617 | 0.001853627 | 0.016760442 | 0.427724304 |
| 0.025664122 | 0.09823859  | 0.178452905 | 0.000835815 |
| 0.014395283 | 0.338956532 | 0.068667296 | 0.15415214  |
| 0.439375935 | 0.148209227 | 0.115340073 | 0.075025381 |
| 0.273805429 | 0.050671613 | 0.000941206 | 0.397132229 |

|             |             |             |             |
|-------------|-------------|-------------|-------------|
| 0.40705055  | 0.375494707 | 0.404507429 | 0.389125397 |
| 0.3455981   | 0.333782231 | 0.30078988  | 0.214845818 |
| 0.023529517 | 0.030437743 | 0.044359112 | 0.113132445 |
| 0.002862115 | 0.315266759 | 0.172888631 | 0.095228707 |
| 0.34991885  | 0.190246587 | 0.01544475  | 0.251168348 |
| 0.002333175 | 0.074412198 | 0.089177073 | 0.090557514 |
| 0.269194833 | 0.003828552 | 0.02551367  | 0.052664054 |
| 0.385125797 | 0.302071964 | 0.1294221   | 0.449257357 |
| 0.200798627 | 0.086143805 | 0.121854511 | 0.358557895 |
| 0.021267319 | 0.006697412 | 0.143879845 | 0.004140687 |
| 0.046970503 | 0.396291907 | 0.132375713 | 0.005786669 |
| 0.148852155 | 0.000919082 | 0.304546461 | 0.470141996 |
| 0.401964197 | 0.441883132 | 0.450113305 | 0.149067828 |
| 0.432323768 | 0.025806315 | 0.466999156 | 0.335084014 |
| 0.134776708 | 0.000197798 | 0.00238415  | 0.410839848 |
| 0.206474774 | 0.046910034 | 0.089824982 | 0.07596364  |
| 0.024865606 | 0.068622077 | 0.031102699 | 0.055179239 |
| 0.309069501 | 0.146767457 | 0.065050415 | 0.401386902 |
| 0.090223316 | 0.137129936 | 0.178361234 | 0.061453613 |
| 0.283455293 | 0.012830117 | 0.053064448 | 0.003244313 |
| 0.283431565 | 0.083379714 | 0.392718875 | 0.449527762 |
| 0.421351523 | 0.271973456 | 0.116103492 | 1           |
| 0.379830679 | 0.083376377 | 0.068735449 | 0.081084811 |
| 0.418281966 | 0.238186863 | 0.252435775 | 0.236964287 |
| 0.425655217 | 0.389596035 | 0.013223835 | 0.290553537 |
| 0.002863465 | 0.00069987  | 0.17454078  | 0.190755246 |
| 0.007138282 | 0.165746689 | 0.17235265  | 0.062601624 |
| 0.079095366 | 0.004932659 | 0.104734282 | 0.088648754 |
| 0.157522448 | 0.167579993 | 0.156946225 | 0.169636863 |
| 0.088138936 | 0.009952679 | 0.079110434 | 0.058718073 |
| 0.027214913 | 0.225848483 | 0.156542438 | 0.005305395 |
| 0.206491955 | 0.23315512  | 0.028543451 | 0.106946515 |
| 0.377403571 | 0.43427767  | 0.003500586 | 0.001651877 |
| 0.201633515 | 0.12984247  | 0.456743916 | 0.439910327 |
| 0.454211744 | 0.439599509 | 0.330910263 | 0.030000073 |
| 0.028600875 | 0.171869077 | 0.164675896 | 0.016429933 |
| 0.470074404 | 0.040051738 | 0.441048402 | 0.173496895 |
| 0.065825026 | 0.054853848 | 0.007377559 | 0.040785218 |
| 0.286658294 | 0.124525326 | 0.086572338 | 0.085580504 |
| 0.122815712 | 0.057395084 | 0.01606966  | 0.106551636 |
| 0.244304408 | 0.019698034 | 0.088034884 | 0.124655845 |
| 0.258990794 | 0.02481408  | 0.309882338 | 0.380091215 |
| 0.091869581 | 0.048005183 | 0.062173085 | 0.308334796 |
| 0.361415473 | 0.230288417 | 0.008643308 | 0.385509778 |
| 0.447082973 | 0.328690273 | 0.442722316 | 0.330445601 |
| 0.048998216 | 0.227448449 | 0.132299957 | 0.170741566 |
| 0.107816305 | 0.203406756 | 0.122041305 | 0.035063944 |
| 0.244308499 | 0.415840184 | 0.311084594 | 0.084118977 |
| 0.286076953 | 0.085090024 | 0.032655312 | 0.417517979 |
| 0.037804532 | 0.016870985 | 0.174624409 | 0.375579228 |
| 0.000220668 | 0.063472709 | 0.406033494 | 0.111499067 |
| 0.433915533 | 0.3913681   | 0.370489013 | 0.084369865 |
| 3.91E-06    | 0.265266235 | 0.251495718 | 0.145077693 |
| 0.365148634 | 0.299362464 | 0.024443796 | 0.018671531 |

|             |             |             |             |
|-------------|-------------|-------------|-------------|
| 0.22296185  | 0.064420284 | 0.027071888 | 0.049656701 |
| 0.014571128 | 0.285281553 | 0.138781084 | 0.103012858 |
| 0.074481044 | 0.060314728 | 0.062122882 | 0.105285942 |
| 0.01424756  | 0.179594402 | 0.281718072 | 0.09245956  |
| 0.028125434 | 0.368483947 | 0.285797679 | 0.009954954 |
| 0.232199935 | 0.321082555 | 0.38116629  | 7.55E-05    |
| 0.332387791 | 0.001560278 | 0.105727139 | 0.101876955 |
| 0.083718473 | 0.096099875 | 0.162875529 | 0.086547695 |
| 0.197141536 | 0.079884128 | 0.114870153 | 0.157623469 |
| 0.057713808 | 0.0978692   | 0.224692447 | 0.123970551 |
| 0.114840951 | 0.049580437 | 0.079388072 | 0.08684647  |
| 0.01153889  | 0.432950143 | 0.207125099 | 0.054735696 |
| 0.154771972 | 0.120702317 | 0.2846141   | 0.419390485 |
| 0.378481257 | 0.094489629 | 0.14867251  | 0.387028477 |
| 0.025564427 | 0.038445585 | 0.022989507 | 0.183226658 |
| 0.147638129 | 0.064094493 | 0.215504222 | 0.1740631   |
| 0.295692486 | 0.340779726 | 0.210852539 | 0.371855525 |
| 0.138999439 | 0.147987841 | 0.103351241 | 0.020844222 |
| 0.067109019 | 0.082603296 | 0.147559557 | 0.000189875 |
| 0.261268276 | 0.040812365 | 0.410331061 | 0.408598435 |
| 0.13922049  | 0.336347754 | 0.046019633 | 0.023026308 |
| 0.04380887  | 0.13520766  | 0.096613207 | 0.32972357  |
| 0.105412213 | 0.074620572 | 0.152036372 | 0.112807631 |
| 0.315929084 | 0.289073782 | 0.081811411 | 0.123139316 |
| 0.114912829 | 0.113896195 | 0.381341177 | 0.051792417 |
| 0.243621412 | 0.054156485 | 0.220365296 | 0.131580922 |
| 0.090355283 | 0.435603931 | 0.034752699 | 0.456796847 |
| 0.136284105 | 0.099847884 | 0.427339279 | 0.192422827 |
| 0.061299968 | 0.025588024 | 0.082094656 | 0.139833324 |
| 0.057026402 | 0.158635371 | 0.004336934 | 0.012729012 |
| 0.253254153 | 0.099627951 | 0.300151354 | 0.26275617  |
| 0.090785574 | 0.255926842 | 0.036797704 | 0.124244559 |
| 0.410105885 | 0.422956188 | 0.041175961 | 0.16525249  |
| 0.275506654 | 0.047408848 | 0.30278066  | 0.002033971 |
| 0.264742411 | 0.278330308 | 0.104740477 | 0.022580092 |
| 0.002195604 | 0.071855752 | 0.216415842 | 0.036817673 |
| 0.406757689 | 0.037120736 | 0.215456186 | 0.337618497 |
| 0.124207046 | 0.415902049 | 0.041972741 | 0.327613708 |
| 0.003528123 | 0.158053767 | 0.203811238 | 0.191486093 |
| 0.059226114 | 0.123355377 | 0.267396621 | 0.115759673 |
| 0.01032506  | 0.051546636 | 0.000609569 | 0.338384966 |
| 0.375559042 | 0.145070298 | 0.161799186 | 0.087918061 |
| 0.197484784 | 0.313245739 | 0.046022636 | 0.22850379  |
| 0.00182044  | 0.233925965 | 0.130843702 | 0.385183535 |
| 0.031493427 | 0.179244412 | 0.007977861 | 0.155901729 |
| 0.386171589 | 0.045372376 | 0.204879495 | 0.03817827  |
| 0.421878447 | 0.31822581  | 0.111847505 | 0.045242923 |
| 0.248654349 | 0.042485136 | 0.163206759 | 0.457238898 |
| 0.091101053 | 0.093609591 | 0.37804276  | 0.061068431 |
| 0.167788288 | 0.340202375 | 0.234069383 | 0.449198618 |
| 0.020866275 | 0.168971484 | 0.347704291 | 0.37618457  |
| 0.244305432 | 0.061065567 | 0.103366473 | 0.09296803  |
| 0.392684116 | 0.01618196  | 0.052062008 | 0.246443949 |
| 0.07631138  | 0.237384721 | 0.193917716 | 0.084366103 |

|             |             |             |             |
|-------------|-------------|-------------|-------------|
| 0.009016593 | 0.054505347 | 0.16073564  | 0.083362108 |
| 0.172280187 | 0.167040553 | 0.059902136 | 0.322331635 |
| 0.032595459 | 0.003272514 | 0.373241044 | 0.002549934 |
| 0.22465059  | 0.286869621 | 0.171292066 | 0.161798135 |
| 0.146025932 | 0.205839875 | 0.149221674 | 0.000480001 |
| 0.33343815  | 0.003581401 | 0.136986535 | 0.068438212 |
| 0.045437262 | 0.016742654 | 0.403708869 | 0.454955903 |
| 0.22932473  | 0.041837433 | 0.080059472 | 0.424031362 |
| 0.017393632 | 0.131958683 | 0.137688957 | 0.264515136 |
| 0.10401418  | 0.155291668 | 0.189763874 | 0.158777179 |
| 0.299764801 | 0.134951275 |             |             |
| MATK        | 0.110072114 | 0.419029301 | 0.083669159 |
| 0.152434266 | 0.351810072 | 0.402532564 | 0.10592342  |
| 0.184973479 | 0.387799986 | 0.353697205 | 0.369904332 |
| 0.031979232 | 0.147062408 | 0.428422275 | 0.106949407 |
| 0.408898852 | 0.063942318 | 0.160322375 | 0.132322583 |
| 0.316789009 | 0.328381323 | 0.369263154 | 0.384183998 |
| 0.360361576 | 0.208919812 | 0.377888605 | 0.430465086 |
| 0.477634551 | 0.286085454 | 0.427029494 | 0.211291717 |
| 0.400205049 | 0.361134904 | 0.40722508  | 0.031298611 |
| 0.4359237   | 0.043344091 | 0.431365883 | 0.301336251 |
| 0.193771442 | 0.340076411 | 0.353618457 | 0.275254771 |
| 0.38270702  | 0.057463911 | 0.239550987 | 0.430391426 |
| 0.386223063 | 0.378887273 | 0.103165603 | 0.431852718 |
| 0.418115315 | 0.358507796 | 0.387373036 | 0.003101043 |
| 0.338845245 | 0.13164408  | 0.282512251 | 0.488293244 |
| 0.244206798 | 0.18201276  | 0.335688215 | 0.361711941 |
| 0.43882502  | 0.426634363 | 0.33391855  | 0.392051715 |
| 0.470981206 | 0.241792269 | 0.437943859 | 0.192123369 |
| 0.412910546 | 0.070351754 | 0.207117792 | 0.143575252 |
| 0.438534921 | 0.260843633 | 0.38482727  | 0.370809576 |
| 0.404323835 | 0.510965287 | 0.306228184 | 0.485119295 |
| 0.196285856 | 0.38531032  | 0.3518797   | 0.351479633 |
| 0.41357478  | 0.162308132 | 0.396385137 | 0.49908678  |
| 0.104300044 | 0.394217536 | 0.412456308 | 0.174700701 |
| 0.410548774 | 0.39068006  | 0.386933829 | 0.226435881 |
| 0.404911539 | 0.371664225 | 0.485244883 | 0.31384091  |
| 0.399527302 | 0.111724236 | 0.474773008 | 0.363863592 |
| 0.315342045 | 0.118780558 | 0.282424946 | 0.439817209 |
| 0.412009665 | 0.464548079 | 0.41803875  | 0.390980493 |
| 0.389325348 | 0.473108456 | 0.392812976 | 0.414266681 |
| 0.20366405  | 0.507686121 | 0.229485787 | 0.075685487 |
| 0.110934986 | 0.151011975 | 0.357767985 | 0.344973541 |
| 0.443412303 | 0.378998407 | 0.233857779 | 0.286294544 |
| 0.437922293 | 0.464443441 | 0.507471423 | 0.407806849 |
| 0.067176456 | 0.354808487 | 0.384902388 | 0.361743556 |
| 0.40447869  | 0.183902312 | 0.308444753 | 0.492706908 |
| 0.355805882 | 0.429758897 | 0.220772593 | 0.496404152 |
| 0.299109111 | 0.491170249 | 0.420548863 | 0.206772567 |
| 0.498749427 | 0.476475481 | 0.486994137 | 0.40904958  |
| 0.460254085 | 0.344176229 | 0.13196155  | 0.398902917 |
| 0.468750921 | 0.02131642  | 0.455455039 | 0.477910638 |
| 0.476045071 | 0.430278844 | 0.506444049 | 0.489204945 |
| 0.483568341 | 0.120399717 | 0.057887914 | 0.335757545 |

|             |             |             |             |
|-------------|-------------|-------------|-------------|
| 0.484422484 | 0.374496163 | 0.233426707 | 0.408203965 |
| 0.404240346 | 0.403108291 | 0.446838217 | 0.28776827  |
| 0.501975663 | 0.427021154 | 0.469888827 | 0.406200569 |
| 0.373726979 | 0.315020866 | 0.404941247 | 0.453161829 |
| 0.078417499 | 0.148739696 | 0.081344258 | 0.372118162 |
| 0.354795391 | 0.23086786  | 0.380961169 | 0.421828714 |
| 0.245825154 | 0.399040675 | 0.377228236 | 0.398940316 |
| 0.087639963 | 0.420347564 | 0.22506741  | 0.217546379 |
| 0.068145308 | 0.18126562  | 0.200854465 | 0.199641048 |
| 0.306381614 | 0.254618997 | 0.437717074 | 0.473992569 |
| 0.424198436 | 0.215683674 | 0.421689922 | 0.458912051 |
| 0.409526104 | 0.39127933  | 0.290178749 | 0.01507022  |
| 0.275503038 | 0.377931856 | 0.25400504  | 0.435377665 |
| 0.204034009 | 0.282201547 | 0.401848657 | 0.401981858 |
| 0.293576227 | 0.231069058 | 0.393729084 | 0.421267082 |
| 0.196635831 | 0.330127708 | 0.409842494 | 0.419657299 |
| 0.007448163 | 0.336487082 | 0.426005936 | 0.232327773 |
| 0.367945165 | 0.176536814 | 0.277681445 | 0.431555217 |
| 0.342748398 | 0.317737398 | 0.477058026 | 0.418352996 |
| 0.366178344 | 0.245211061 | 0.510447228 | 0.079119584 |
| 0.425796198 | 0.067866042 | 0.319553585 | 0.374044229 |
| 0.293119406 | 0.3413963   | 0.369342636 | 0.323906626 |
| 0.161448908 | 0.498858695 | 0.40319682  | 0.485115574 |
| 0.376623301 | 0.510605921 | 0.42901479  | 0.406400437 |
| 0.400123785 | 0.411818049 | 0.193028146 | 0.408338112 |
| 0.423763684 | 0.324333132 | 0.11307424  | 0.440911355 |
| 0.398941033 | 0.414827384 | 0.188518138 | 0.463654262 |
| 0.483868729 | 0.452592975 | 0.203650158 | 0.398142859 |
| 0.368683048 | 0.265190657 | 0.426014369 | 0.519371487 |
| 0.359796646 | 0.383051365 | 0.352116477 | 0.401190534 |
| 0.216734077 | 0.293051029 | 0.346046797 | 0.264340899 |
| 0.014189009 | 0.132847355 | 0.098158825 | 0.217002734 |
| 0.225853714 | 0.432462641 | 0.422347507 | 0.491289712 |
| 0.165797923 | 0.405470118 | 0.315855285 | 0.292563091 |
| 0.393391424 | 0.413183165 | 0.411820317 | 0.420856009 |
| 0.304771257 | 0.02848655  | 0.142730146 | 0.505140119 |
| 0.072328383 | 0.280761254 | 0.393499423 | 0.004185164 |
| 0.075566689 | 0.404522818 | 0.131710699 | 0.20867118  |
| 0.464117472 | 0.209720225 | 0.24021923  | 0.351011553 |
| 0.375867353 | 0.143538738 | 0.006040437 | 0.475930175 |
| 0.491631362 | 0.468494812 | 0.48762187  | 0.467881538 |
| 0.441082454 | 0.444063951 | 0.42001827  | 0.367215579 |
| 0.151546346 | 0.139553695 | 0.247869699 | 0.319782476 |
| 0.009364523 | 0.397490761 | 0.395342571 | 0.186337237 |
| 0.435567212 | 0.36379316  | 0.063565995 | 0.42069404  |
| 0.027845066 | 0.224953005 | 0.37098382  | 0.311085732 |
| 0.400065203 | 0.028437167 | 0.220899434 | 0.330891513 |
| 0.405957747 | 0.346611241 | 0.389604362 | 0.508784579 |
| 0.346399638 | 0.168527788 | 0.334790723 | 0.417245783 |
| 0.113726228 | 0.133854129 | 0.419663375 | 0.038127668 |
| 0.262623936 | 0.466016633 | 0.42521962  | 0.096196258 |
| 0.299023215 | 0.008993448 | 0.347932393 | 0.509454993 |
| 0.447995578 | 0.49253552  | 0.472971143 | 0.299871371 |
| 0.476028231 | 0.170218716 | 0.506465757 | 0.394340681 |

|             |             |             |             |
|-------------|-------------|-------------|-------------|
| 0.376467637 | 0.000957241 | 0.013732414 | 0.45557042  |
| 0.388837172 | 0.090339415 | 0.207562028 | 0.341789957 |
| 0.148189442 | 0.203348494 | 0.120450633 | 0.240321736 |
| 0.427432702 | 0.298472652 | 0.257100494 | 0.452803419 |
| 0.289273001 | 0.308132838 | 0.418910937 | 0.135481283 |
| 0.431136806 | 0.083063124 | 0.142140902 | 0.011339767 |
| 0.41152637  | 0.146877718 | 0.461372269 | 0.489177566 |
| 0.471867251 | 0.404519529 | 0.346701839 | 0.379830679 |
| 1           | 0.133132037 | 0.391729089 | 0.155955479 |
| 0.456608733 | 0.386661847 | 0.33279825  | 0.309179156 |
| 0.474427276 | 0.439667101 | 0.062629467 | 0.405592339 |
| 0.019416296 | 0.006682384 | 0.357358953 | 0.33053257  |
| 0.17327262  | 0.392704735 | 0.2859198   | 0.355119009 |
| 0.351937625 | 0.04590541  | 0.323615544 | 0.292123129 |
| 0.332363451 | 0.383495995 | 0.316912005 | 0.322844996 |
| 0.340577641 | 0.188102997 | 0.273402023 | 0.235979528 |
| 0.362696659 | 0.320275942 | 0.207441325 | 0.045415371 |
| 0.419347107 | 0.402224206 | 0.091737727 | 0.210945657 |
| 0.409467767 | 0.455847012 | 0.078337388 | 0.016651455 |
| 0.292315831 | 0.37959496  | 0.473240909 | 0.475865069 |
| 0.505046636 | 0.499084859 | 0.389263014 | 0.187378565 |
| 0.107891216 | 0.373073238 | 0.344859385 | 0.163802175 |
| 0.488588369 | 0.103005573 | 0.471816541 | 0.351683919 |
| 0.173579071 | 0.256639399 | 0.056019583 | 0.139309902 |
| 0.408357792 | 0.235764063 | 0.236320591 | 0.177205909 |
| 0.341075382 | 0.297297047 | 0.089568441 | 0.248095822 |
| 0.359457721 | 0.21527383  | 0.211293354 | 0.395902905 |
| 0.388057312 | 0.315830138 | 0.422489707 | 0.433849675 |
| 0.176092091 | 0.174392226 | 0.273845483 | 0.433377172 |
| 0.429301012 | 0.422495459 | 0.035016024 | 0.432211001 |
| 0.477247085 | 0.423923231 | 0.478292699 | 0.390799825 |
| 0.133017044 | 0.37411638  | 0.395856748 | 0.372860923 |
| 0.257358703 | 0.401668251 | 0.327346066 | 0.103630155 |
| 0.336881336 | 0.486202653 | 0.390023993 | 0.211863072 |
| 0.44421738  | 0.180131203 | 0.092478568 | 0.438255173 |
| 0.228124918 | 0.117523994 | 0.382391454 | 0.445474605 |
| 0.003581517 | 0.202177671 | 0.485926455 | 0.293366638 |
| 0.513414538 | 0.451591132 | 0.415255402 | 0.36047391  |
| 0.004013222 | 0.423782672 | 0.374050957 | 0.377640729 |
| 0.39774078  | 0.374486209 | 0.27744318  | 0.112416661 |
| 0.31912979  | 0.113318491 | 0.180762085 | 0.365637844 |
| 0.229458275 | 0.414965385 | 0.254844375 | 0.295711694 |
| 0.269477397 | 0.146171731 | 0.305614582 | 0.288154735 |
| 0.265647301 | 0.277798143 | 0.358574747 | 0.348873145 |
| 0.195220361 | 0.427688816 | 0.394290569 | 0.047253277 |
| 0.412014926 | 0.420767993 | 0.432361061 | 0.002844103 |
| 0.412773947 | 0.014466449 | 0.257408809 | 0.253010583 |
| 0.262384281 | 0.283523424 | 0.31961709  | 0.330783423 |
| 0.388073674 | 0.282544194 | 0.293463814 | 0.278450995 |
| 0.211170723 | 0.297387746 | 0.417355666 | 0.397487941 |
| 0.293123724 | 0.170552549 | 0.13362153  | 0.125912832 |
| 0.077713415 | 0.451246663 | 0.266809871 | 0.107549568 |
| 0.295588211 | 0.413206348 | 0.346961955 | 0.472700759 |
| 0.409795831 | 0.145045064 | 0.406219254 | 0.403424615 |

|             |             |             |             |
|-------------|-------------|-------------|-------------|
| 0.278695908 | 0.317800783 | 0.101547954 | 0.412719192 |
| 0.285870297 | 0.24877742  | 0.432200839 | 0.320858288 |
| 0.421614983 | 0.390832107 | 0.266908295 | 0.435210783 |
| 0.383350114 | 0.414761135 | 0.31924663  | 0.117157528 |
| 0.207548727 | 0.188711301 | 0.313603982 | 0.003421871 |
| 0.384683291 | 0.274028662 | 0.426906776 | 0.465510562 |
| 0.350468025 | 0.378745497 | 0.316290293 | 0.11670001  |
| 0.285716247 | 0.187811023 | 0.186838147 | 0.436343733 |
| 0.258812192 | 0.247315127 | 0.338378367 | 0.346690108 |
| 0.430326042 | 0.438672977 | 0.357602175 | 0.325924572 |
| 0.330206203 | 0.249007279 | 0.478505898 | 0.173660965 |
| 0.422473822 | 0.226401053 | 0.392801343 | 0.318915976 |
| 0.280934788 | 0.497858433 | 0.099945402 | 0.50014589  |
| 0.358721646 | 0.180606753 | 0.483329608 | 0.386637522 |
| 0.359452784 | 0.184338138 | 0.242361397 | 0.419469611 |
| 0.312644589 | 0.386146199 | 0.022307878 | 0.081985561 |
| 0.349813477 | 0.414088018 | 0.404636854 | 0.418769527 |
| 0.319514977 | 0.374367079 | 0.253877691 | 0.341967341 |
| 0.463032908 | 0.488031876 | 0.253203944 | 0.29416011  |
| 0.373583601 | 0.146324474 | 0.394659799 | 0.03888039  |
| 0.413339537 | 0.421002601 | 0.400539706 | 0.098009968 |
| 0.038106392 | 0.249316562 | 0.406647511 | 0.118884084 |
| 0.459286443 | 0.243108022 | 0.414434875 | 0.432694351 |
| 0.245954187 | 0.482847289 | 0.186372059 | 0.397163636 |
| 0.099456815 | 0.324751167 | 0.433132586 | 0.439094306 |
| 0.237593795 | 0.331094589 | 0.376632029 | 0.274235919 |
| 0.055580442 | 0.307444219 | 0.003044797 | 0.39638577  |
| 0.457730562 | 0.376191263 | 0.24924227  | 0.365266709 |
| 0.322586834 | 0.406646756 | 0.312791167 | 0.436199539 |
| 0.019491275 | 0.373388675 | 0.267194485 | 0.390186498 |
| 0.220741276 | 0.409722799 | 0.087014398 | 0.386637889 |
| 0.451465712 | 0.299781055 | 0.308016764 | 0.300004585 |
| 0.469817823 | 0.411433489 | 0.202724555 | 0.314999049 |
| 0.425345584 | 0.10426782  | 0.401271728 | 0.51410848  |
| 0.230718946 | 0.255621855 | 0.419717592 | 0.235839461 |
| 0.369183752 | 0.386261602 | 0.431120683 | 0.514948514 |
| 0.117730229 | 0.285329816 | 0.436422701 | 0.439689903 |
| 0.334966843 | 0.249271442 | 0.282429227 | 0.278678493 |
| 0.432105469 | 0.122336066 | 0.329729056 | 0.364776316 |
| 0.251398026 | 0.365851654 | 0.385012585 | 0.260096062 |
| 0.060777525 | 0.261096073 | 0.388695254 | 0.200568241 |
| 0.331606127 | 0.387972603 | 0.307739773 | 0.372071927 |
| 0.162791619 | 0.032315432 | 0.440942246 | 0.023591825 |
| 0.357933405 | 0.394464803 | 0.310837063 | 0.394584346 |
| 0.21074117  | 0.396318639 | 0.345723721 | 0.001998993 |
| 0.422617865 | 0.079194399 | 0.410815432 | 0.254297783 |
| 0.334761575 | 0.084938494 | 0.443070231 | 0.48957592  |
| 0.37744457  | 0.407401826 | 0.352789035 | 0.453893182 |
| 0.19512553  | 0.381340744 | 0.403057707 | 0.409398199 |
| 0.282474823 | 0.382071921 | 0.426729828 | 0.379048141 |
| 0.406749055 | 0.353093961 |             |             |
| MBD5        | 0.244791706 | 0.192638651 | 0.282231411 |
| 0.120904191 | 0.044445517 | 0.102700743 | 0.182999243 |
| 0.160508522 | 0.160716791 | 0.064554735 | 0.083269583 |

|             |             |             |             |
|-------------|-------------|-------------|-------------|
| 0.177205976 | 0.004263427 | 0.164599043 | 0.167268417 |
| 0.05545648  | 0.127991222 | 0.171275096 | 0.033695046 |
| 0.10371016  | 0.044208417 | 0.045331705 | 0.138921916 |
| 0.043920529 | 0.312265911 | 0.143468866 | 0.048100276 |
| 0.179526494 | 0.028206148 | 0.078100381 | 0.038780701 |
| 0.222727912 | 0.043716281 | 0.044559837 | 0.201528785 |
| 0.088400957 | 0.001122821 | 0.27190426  | 0.067384504 |
| 0.012577075 | 0.236137565 | 0.096059381 | 0.096121245 |
| 0.082747981 | 0.246154434 | 0.042776202 | 0.06269838  |
| 0.117999967 | 0.094081764 | 0.286719881 | 0.100539597 |
| 0.067672425 | 0.154769844 | 0.129320049 | 0.010019506 |
| 0.026452633 | 0.002087371 | 0.013789343 | 0.228719959 |
| 0.162290027 | 0.134016465 | 0.027100767 | 0.127714781 |
| 0.071069269 | 0.073703948 | 0.116848587 | 0.06804888  |
| 0.200917082 | 0.011782462 | 0.080742728 | 0.084188175 |
| 0.108088321 | 0.213808852 | 0.188384748 | 0.232675378 |
| 0.061009672 | 0.108508004 | 0.065629103 | 0.029968977 |
| 0.19836573  | 0.257360982 | 0.138023412 | 0.25615443  |
| 0.009004585 | 0.038039624 | 0.038755969 | 0.098001    |
| 0.099878061 | 0.149720045 | 0.101608801 | 0.222093435 |
| 0.197940105 | 0.092187278 | 0.10194815  | 0.245791045 |
| 0.176543955 | 0.02821809  | 0.085784292 | 0.015164609 |
| 0.051303495 | 0.046520781 | 0.253162006 | 0.135086003 |
| 0.052330745 | 0.274716652 | 0.298027564 | 0.032776243 |
| 0.064286404 | 0.253229986 | 0.034372918 | 0.106423084 |
| 0.086547676 | 0.175784772 | 0.141480853 | 0.120755396 |
| 0.047294915 | 0.191530369 | 0.105971102 | 0.173414471 |
| 0.022016457 | 0.216583887 | 0.176110362 | 0.141854747 |
| 0.257678574 | 0.121089246 | 0.037221576 | 0.159098411 |
| 0.140194803 | 0.122865151 | 0.164649853 | 0.07547508  |
| 0.115129538 | 0.272775617 | 0.214661716 | 0.13202554  |
| 0.210475183 | 0.020242779 | 0.049642598 | 0.139293544 |
| 0.093270053 | 0.18411616  | 0.024747493 | 0.279544731 |
| 0.193458303 | 0.103472025 | 0.209739935 | 0.298877563 |
| 0.12722642  | 0.207918659 | 0.172247375 | 0.143972492 |
| 0.248668431 | 0.275487594 | 0.176317139 | 0.056228765 |
| 0.246374272 | 0.128245135 | 0.027796492 | 0.147395275 |
| 0.187009531 | 0.002482724 | 0.133087622 | 0.142791203 |
| 0.219370337 | 0.106508407 | 0.171471448 | 0.165486518 |
| 0.22210491  | 0.225803536 | 0.002393147 | 0.068256701 |
| 0.24281855  | 0.163398667 | 0.076708626 | 0.056255032 |
| 0.054211686 | 0.123683058 | 0.104886008 | 0.045669208 |
| 0.220653845 | 0.143174748 | 0.15387055  | 0.125503167 |
| 0.113838597 | 0.239562758 | 0.039849504 | 0.296435288 |
| 0.15605634  | 0.236598991 | 0.278153187 | 0.125349936 |
| 0.090142812 | 0.11452423  | 0.117573923 | 0.059741497 |
| 0.13130719  | 0.133449434 | 0.031580286 | 0.053776653 |
| 0.298122728 | 0.081027195 | 0.181198124 | 0.196682305 |
| 0.132048829 | 0.288790062 | 0.103747254 | 0.124399869 |
| 0.070638602 | 0.390233277 | 0.084339827 | 0.15769081  |
| 0.059637388 | 0.233140497 | 0.105500181 | 0.181610462 |
| 0.175147798 | 0.0479244   | 0.173073461 | 0.045349842 |
| 0.042599205 | 0.033438749 | 0.010268518 | 0.055487671 |
| 0.346254189 | 0.079704726 | 0.067883315 | 0.069773155 |



|             |             |             |             |
|-------------|-------------|-------------|-------------|
| 0.178308708 | 0.20474186  | 0.051285449 | 0.267244528 |
| 0.255413897 | 0.06040894  | 0.127727539 | 0.083988887 |
| 0.100086864 | 0.111531677 | 0.11986171  | 0.02826585  |
| 0.125858201 | 0.014383027 | 0.024322592 | 0.138726649 |
| 0.0276631   | 0.028009927 | 0.150434398 | 0.068997407 |
| 0.076196374 | 0.345909934 | 0.182375696 | 0.002810538 |
| 0.048293237 | 0.024532721 | 0.090488596 | 0.085240776 |
| 0.142998495 | 0.10579103  | 0.040258317 | 0.04328485  |
| 0.260275996 | 0.219128042 | 0.155027515 | 0.177468917 |
| 0.044346583 | 0.189360638 | 0.117894628 | 0.154039553 |
| 0.114479158 | 0.04427267  | 0.006952609 | 0.119256443 |
| 0.130415345 | 0.044708219 | 0.281127328 | 0.098222461 |
| 0.060132515 | 0.060925679 | 0.026091766 | 0.171806421 |
| 0.250363309 | 0.255254738 | 0.101488929 | 0.08105073  |
| 0.143820397 | 0.161552254 | 0.126206559 | 0.195386608 |
| 0.054451427 | 0.048824036 | 0.043742583 | 0.100755664 |
| 0.186116855 | 0.030978296 | 0.19817062  | 0.010331599 |
| 0.000407818 | 0.238891051 | 0.251257417 | 0.080199208 |
| 0.015060612 | 0.071172453 | 0.072282312 | 0.191585515 |
| 0.163846211 | 0.187805713 | 0.148580831 | 0.057821704 |
| 0.20238103  | 0.050963954 | 0.046392939 | 0.06161062  |
| 0.1602687   | 0.063230792 | 0.110101586 | 0.265261355 |
| 0.262531793 | 0.022924695 | 0.123842719 | 0.01294123  |
| 0.225962354 | 0.145862562 | 0.304328456 | 0.318956668 |
| 0.134237046 | 0.318780582 | 0.19136454  | 0.071599763 |
| 0.091488384 | 0.20338996  | 0.01399802  | 0.168731781 |
| 0.199659203 | 0.191267215 | 0.203424892 | 0.244904841 |
| 0.146137013 | 0.108977659 | 0.093622132 | 0.146318315 |
| 0.163803801 | 0.231967386 | 0.018870173 | 0.069497214 |
| 0.025537221 | 0.107476219 | 0.059842206 | 0.198186457 |
| 0.082123545 | 0.110903824 | 0.208521552 | 0.052953903 |
| 0.174540509 | 0.012234546 | 0.117101599 | 0.085040674 |
| 0.074806733 | 0.18947365  | 0.057820555 | 0.03639228  |
| 0.254211507 | 0.210482131 | 0.035934212 | 0.21782041  |
| 0.087747494 | 0.268818178 | 0.061980439 | 0.088121947 |
| 0.179732662 | 0.019663948 | 0.108914949 | 0.012017133 |
| 0.062316621 | 0.226136135 | 0.055582921 | 0.198028525 |
| 0.125203232 | 0.134969238 | 0.216155398 | 0.216950431 |
| 0.242051488 | 0.163931633 | 0.192548831 | 0.026612926 |
| 0.207496302 | 0.003188378 | 0.191010237 | 0.175076885 |
| 0.063143218 | 0.014480141 | 0.030789921 | 0.136761046 |
| 0.056891029 | 0.299521339 | 0.176731246 | 0.093401627 |
| 0.129030114 | 0.251307679 | 0.178684137 | 0.022865524 |
| 0.091000551 | 0.052270643 | 0.022418345 | 0.242391389 |
| 0.098619574 | 0.104373601 | 0.099919451 | 0.251610393 |
| 0.064787646 | 0.171663036 | 0.231336414 | 0.016133053 |
| 0.074260959 | 0.300430089 | 0.315304549 | 0.208091395 |
| 0.206287083 | 0.065346284 | 0.050883321 | 0.083376377 |
| 0.133132037 | 1           | 0.046628864 | 0.279650794 |
| 0.215766005 | 0.064323186 | 0.136283993 | 0.20246912  |
| 0.181446209 | 0.209623789 | 0.188975346 | 0.10130197  |
| 0.106388694 | 0.002286163 | 0.126122189 | 0.133264644 |
| 0.011656346 | 0.050321586 | 0.170142894 | 0.085304912 |
| 0.079050288 | 0.211910737 | 0.021216391 | 0.019786654 |

|             |             |             |             |
|-------------|-------------|-------------|-------------|
| 0.090121965 | 0.067930083 | 0.033764182 | 0.156183994 |
| 0.045699068 | 0.021237004 | 0.091750314 | 0.117008571 |
| 0.054064975 | 0.224896845 | 0.310135057 | 0.171230277 |
| 0.073067049 | 0.055834553 | 0.211949501 | 0.202839181 |
| 0.134620156 | 0.149110705 | 0.126741769 | 0.054726474 |
| 0.195867772 | 0.062556711 | 0.149137309 | 0.204211037 |
| 0.25693964  | 0.202441061 | 0.2581023   | 0.058655049 |
| 0.20908851  | 0.073442524 | 0.035144586 | 0.04116719  |
| 0.193278477 | 0.269089082 | 0.224992534 | 0.026208019 |
| 0.195801357 | 0.120778118 | 0.123694224 | 0.18105655  |
| 0.046451542 | 0.163393654 | 0.077192488 | 0.246111501 |
| 0.066840508 | 0.021557079 | 0.186245332 | 0.1440628   |
| 0.139212858 | 0.010595545 | 0.167728805 | 0.119400333 |
| 0.159777046 | 0.054489664 | 0.07525189  | 0.211357093 |
| 0.235842503 | 0.199736043 | 0.158124752 | 0.098514476 |
| 0.118785664 | 0.067494119 | 0.124794602 | 0.19623808  |
| 0.165491988 | 0.073425226 | 0.236045873 | 0.128767702 |
| 0.229603564 | 0.053718191 | 0.032363988 | 0.057880464 |
| 0.143801516 | 0.110615283 | 0.09776736  | 0.221338601 |
| 0.191673287 | 0.268804011 | 0.16953396  | 0.112632373 |
| 0.078569847 | 0.257628628 | 0.269992884 | 0.147704054 |
| 0.015458331 | 0.204466706 | 0.094849965 | 0.105383823 |
| 0.002915444 | 0.007606323 | 0.151898479 | 0.109103774 |
| 0.222674855 | 0.14624579  | 0.210431763 | 0.119738039 |
| 0.00048671  | 0.056974498 | 0.079172264 | 0.064643401 |
| 0.177649067 | 0.166725519 | 0.086306009 | 0.117137515 |
| 0.154633958 | 0.287267256 | 0.096874852 | 0.099524586 |
| 0.013816922 | 0.110862204 | 0.147343536 | 0.140874533 |
| 0.069713948 | 0.242404389 | 0.022582948 | 0.125538531 |
| 0.012995796 | 0.149847927 | 0.137785548 | 0.081784277 |
| 0.015709035 | 0.14284463  | 0.131845417 | 0.215031291 |
| 0.043183293 | 0.133682931 | 0.157329254 | 0.01618379  |
| 0.078159412 | 0.10666449  | 0.072786504 | 0.07402918  |
| 0.079906565 | 0.077974289 | 0.067444825 | 0.050214553 |
| 0.107204859 | 0.112115545 | 0.093226183 | 0.119459846 |
| 0.082333345 | 0.12999835  | 0.06495169  | 0.102948397 |
| 0.053940582 | 0.182546261 | 0.323283898 | 0.379416587 |
| 0.143736686 | 0.166074321 | 0.239930077 | 0.281167076 |
| 0.113308518 | 0.08405865  | 0.174901173 | 0.22336471  |
| 0.157146014 | 0.339752035 | 0.079283427 | 0.170101567 |
| 0.028334996 | 0.086848102 | 0.242125661 | 0.099056524 |
| 0.133089349 | 0.033864876 | 0.091258195 | 0.16486085  |
| 0.110858288 | 0.24775058  | 0.230181388 | 0.187459703 |
| 0.06814068  | 0.06733109  | 0.078345895 | 0.092275017 |
| 0.167610095 | 0.219798535 | 0.036692889 | 0.061530232 |
| 0.107680416 | 0.154985901 | 0.13140574  | 0.246207021 |
| 0.024341578 | 0.18322365  | 0.099307439 | 0.194131066 |
| 0.068719403 | 0.346822646 | 0.203510231 | 0.102621742 |
| 0.013746076 | 0.141424318 | 0.052298669 | 0.144548794 |
| 0.086033736 | 0.088020402 | 0.040648434 | 0.131209174 |
| 0.103981463 | 0.206416005 | 0.252765649 | 0.23684485  |
| 0.068156038 | 0.026942715 | 0.114868985 | 0.065909402 |
| 0.064952271 | 0.174126377 | 0.233078239 | 0.171915575 |
| 0.052688738 | 0.258862549 | 0.243214219 | 0.128406709 |

|             |             |             |             |
|-------------|-------------|-------------|-------------|
| 0.112078928 | 0.066445192 | 0.010575766 | 0.09478882  |
| 0.097315534 | 0.03446348  | 0.001959081 | 0.008531067 |
| 0.102767453 | 0.064998558 | 0.134320889 | 0.099595995 |
| 0.032302445 | 0.107387317 | 0.010723467 | 0.131370701 |
| 0.254814832 | 0.286728445 | 0.081461042 | 0.153672394 |
| 0.135679615 | 0.160038744 | 0.129504477 | 0.005734174 |
| 0.064697102 | 0.055540528 | 0.063734362 | 0.169376146 |
| 0.150569214 | 0.012628105 | 0.074888697 | 0.236347743 |
| 0.13132863  | 0.013286435 | 0.100235271 | 0.091319024 |
| 0.192959597 | 0.290573491 | 0.070101314 | 0.088683315 |
| 0.150621601 | 0.131169972 | 0.047352155 | 0.066765018 |
| 0.048635095 | 0.029539869 | 0.094854278 | 0.022046464 |
| 0.156414437 | 0.057122441 | 0.009040673 | 0.287346749 |
| 0.286727458 | 0.035345893 | 0.238952343 | 0.054813593 |
| 0.100371528 | 0.158943425 | 0.052129925 | 0.061857101 |
| 0.074995142 | 0.047083911 | 0.13175788  | 0.181367816 |
| 0.021506163 | 0.079913512 | 0.109652343 | 0.038746712 |
| 0.336183918 | 0.048066584 | 0.18561675  | 0.034086146 |
| 0.215631693 | 0.159582443 | 0.264944633 | 0.043714346 |
| 0.087738932 | 0.252159924 | 0.086577044 | 0.206538682 |
| 0.091966357 | 0.020604897 | 0.101839825 | 0.091353651 |
| 0.03120366  | 0.194429432 | 0.06823828  | 0.21253522  |
| 0.055983067 | 0.12996037  | 0.098004673 | 0.179229176 |
| 0.120502327 | 0.018626937 | 0.02334073  | 0.048191214 |
| 0.242167854 | 0.155748852 | 0.027432442 | 0.141030055 |
| 0.017051628 | 0.103594318 | 0.112905567 | 0.041439975 |
| 0.123931773 | 0.108270304 | 0.087812495 | 0.193788802 |
| 0.09317225  | 0.06138191  | 0.036054562 | 0.197704735 |
| 0.07956668  | 0.082609703 | 0.207973334 | 0.000470811 |
| 0.153024915 | 0.072511614 | 0.128292121 | 0.050536705 |
| 0.263463656 | 0.11060737  | 0.136717454 | 0.065919844 |
| 0.112426777 | 0.00832062  | 0.064026114 | 0.044257249 |
| 0.033959224 | 0.21848114  | 0.224094482 | 0.160101542 |
| 0.135444133 | 0.053272707 | 0.036876963 | 0.209582714 |
| 0.010127659 | 0.031355817 | 0.039206368 | 0.108812348 |
| 0.017354519 | 0.066139037 | 0.058550966 | 0.041548528 |
| 0.135210456 | 0.130581842 |             |             |
| MBNL3       | 0.018241098 | 0.368271843 | 0.016117578 |
| 0.018166822 | 0.211262931 | 0.175813081 | 0.007686778 |
| 0.022728305 | 0.268345913 | 0.128660524 | 0.206999833 |
| 0.000956745 | 0.055937075 | 0.385160767 | 0.007013172 |
| 0.264450305 | 0.002984302 | 0.027160346 | 0.024088798 |
| 0.031679611 | 0.157076515 | 0.116605262 | 0.194251201 |
| 0.159006411 | 0.10844945  | 0.190920002 | 0.294015638 |
| 0.453730659 | 0.093822511 | 0.357635008 | 0.054535923 |
| 0.297814882 | 0.228523604 | 0.264312913 | 0.001164004 |
| 0.238522029 | 0.004710472 | 0.314303222 | 0.080595429 |
| 0.048682612 | 0.237174247 | 0.192700138 | 0.080169589 |
| 0.192848026 | 0.005168123 | 0.075615364 | 0.31859999  |
| 0.198482007 | 0.09237071  | 0.019599399 | 0.336177764 |
| 0.131775171 | 0.231208697 | 0.332146136 | 0.000488404 |
| 0.213949418 | 0.061783786 | 0.143507824 | 0.436857467 |
| 0.101070419 | 0.036286639 | 0.079582335 | 0.101864794 |
| 0.267143714 | 0.281451022 | 0.150993483 | 0.136085604 |

|             |             |             |             |
|-------------|-------------|-------------|-------------|
| 0.4207715   | 0.069682396 | 0.401181708 | 0.027237992 |
| 0.145429172 | 0.005328706 | 0.075126811 | 0.033263417 |
| 0.145644907 | 0.085811047 | 0.214635722 | 0.1678887   |
| 0.365136556 | 0.41011841  | 0.123013612 | 0.411367122 |
| 0.024697689 | 0.257685491 | 0.109179174 | 0.190002499 |
| 0.253709482 | 0.012987758 | 0.31108803  | 0.423575567 |
| 0.009707742 | 0.270968485 | 0.276677478 | 0.05300941  |
| 0.381533196 | 0.119955625 | 0.248786671 | 0.094110966 |
| 0.308925186 | 0.204238414 | 0.378219011 | 0.163222716 |
| 0.191009108 | 0.023626608 | 0.385586007 | 0.254839054 |
| 0.120596183 | 0.027248814 | 0.051990761 | 0.448670564 |
| 0.270663692 | 0.440549165 | 0.359893842 | 0.24700771  |
| 0.241469784 | 0.432182102 | 0.287635598 | 0.351849589 |
| 0.078762389 | 0.455309792 | 0.075657021 | 0.004665875 |
| 0.018438526 | 0.018025443 | 0.064455726 | 0.203046165 |
| 0.438331528 | 0.218254392 | 0.061835745 | 0.09194426  |
| 0.407650756 | 0.394285641 | 0.450733856 | 0.327305366 |
| 0.005953498 | 0.109699973 | 0.239459593 | 0.090204044 |
| 0.244975323 | 0.041611117 | 0.164498211 | 0.396064032 |
| 0.285945937 | 0.376943571 | 0.050409472 | 0.384891656 |
| 0.061825495 | 0.423739217 | 0.411219744 | 0.057129341 |
| 0.418790064 | 0.395864076 | 0.437275263 | 0.363622057 |
| 0.390545645 | 0.160108116 | 0.009179801 | 0.284560108 |
| 0.405017247 | 0.004911118 | 0.45411665  | 0.469025909 |
| 0.423983027 | 0.436654061 | 0.452813828 | 0.473215324 |
| 0.435558575 | 0.023548225 | 0.008850049 | 0.167040615 |
| 0.413726932 | 0.306739954 | 0.029218401 | 0.264636522 |
| 0.245006834 | 0.185623546 | 0.389232544 | 0.065718199 |
| 0.408460892 | 0.41980462  | 0.46661134  | 0.289257853 |
| 0.158733064 | 0.220078565 | 0.298989648 | 0.371329938 |
| 0.004462789 | 0.031603127 | 0.018594414 | 0.197276966 |
| 0.115291888 | 0.070967548 | 0.147594356 | 0.223064536 |
| 0.087619989 | 0.152150982 | 0.222242009 | 0.326828617 |
| 0.022784906 | 0.293128401 | 0.061847085 | 0.058311929 |
| 0.004236897 | 0.074973219 | 0.022782981 | 0.02605392  |
| 0.11569811  | 0.141452935 | 0.383203873 | 0.446158848 |
| 0.155880313 | 0.092337335 | 0.318120971 | 0.403424724 |
| 0.321173983 | 0.268010102 | 0.123808592 | 0.000754756 |
| 0.041133725 | 0.139378118 | 0.109409319 | 0.312794806 |
| 0.103451    | 0.036969369 | 0.239280408 | 0.340818713 |
| 0.125272017 | 0.045012784 | 0.136824939 | 0.323420031 |
| 0.072865333 | 0.118646792 | 0.377286661 | 0.255063982 |
| 2.54E-05    | 0.138428145 | 0.382698535 | 0.0253331   |
| 0.177122354 | 0.040316571 | 0.099913271 | 0.39519322  |
| 0.08502326  | 0.094007416 | 0.471215334 | 0.340855626 |
| 0.064308894 | 0.140854031 | 0.455526988 | 0.01973383  |
| 0.227410858 | 0.011236412 | 0.166143737 | 0.207739498 |
| 0.112780609 | 0.178354219 | 0.228831238 | 0.123057196 |
| 0.063527216 | 0.432435509 | 0.327872606 | 0.450027387 |
| 0.136988945 | 0.448889147 | 0.409688053 | 0.36209089  |
| 0.230700226 | 0.220690836 | 0.058463033 | 0.365442822 |
| 0.398543312 | 0.056075476 | 0.030019631 | 0.412860069 |
| 0.175033251 | 0.330038016 | 0.030504232 | 0.409177531 |
| 0.395620972 | 0.389146669 | 0.033887279 | 0.295117785 |

|             |             |             |             |
|-------------|-------------|-------------|-------------|
| 0.28414616  | 0.101011468 | 0.368196343 | 0.447674064 |
| 0.0861834   | 0.184621324 | 0.124429539 | 0.339287988 |
| 0.07605937  | 0.059450836 | 0.230405426 | 0.100419417 |
| 0.015401585 | 0.023827803 | 0.019116133 | 0.053619741 |
| 0.081734739 | 0.353564347 | 0.289978981 | 0.446132105 |
| 0.032481978 | 0.354800328 | 0.131345222 | 0.076028904 |
| 0.324446937 | 0.185590847 | 0.302351297 | 0.304116416 |
| 0.144734333 | 0.001586507 | 0.013415078 | 0.4053267   |
| 0.012850332 | 0.10755694  | 0.143915246 | 0.000165314 |
| 0.005674087 | 0.377172331 | 0.04431493  | 0.109575355 |
| 0.439054532 | 0.117213218 | 0.094223628 | 0.109132061 |
| 0.250473441 | 0.028739792 | 0.00037374  | 0.426398094 |
| 0.41991703  | 0.386987104 | 0.417852575 | 0.377993826 |
| 0.378547387 | 0.345020182 | 0.336262393 | 0.195208936 |
| 0.017121739 | 0.023336987 | 0.057895535 | 0.110505641 |
| 0.000491165 | 0.312472598 | 0.1838831   | 0.060772066 |
| 0.372483064 | 0.172752942 | 0.005010474 | 0.267618969 |
| 0.001639789 | 0.114147447 | 0.0653634   | 0.078185226 |
| 0.273766875 | 0.001196816 | 0.046628791 | 0.067971957 |
| 0.346922983 | 0.241217651 | 0.199438292 | 0.454924996 |
| 0.170832137 | 0.060548491 | 0.138345941 | 0.336143616 |
| 0.011578309 | 0.026465888 | 0.128870663 | 0.010790017 |
| 0.059693723 | 0.374193658 | 0.175683311 | 0.00710521  |
| 0.124383594 | 9.22E-05    | 0.269115924 | 0.44743413  |
| 0.399722893 | 0.455785651 | 0.433264665 | 0.173231159 |
| 0.424211784 | 0.065521612 | 0.469154179 | 0.313162515 |
| 0.169718555 | 6.56E-05    | 0.000442941 | 0.452784352 |
| 0.243929873 | 0.025887724 | 0.06218697  | 0.073451021 |
| 0.013316003 | 0.041136165 | 0.014272115 | 0.070297255 |
| 0.321644925 | 0.130157765 | 0.06668454  | 0.383344255 |
| 0.081875198 | 0.106049562 | 0.174946936 | 0.035014855 |
| 0.312814606 | 0.005477239 | 0.033585328 | 0.00101351  |
| 0.278846917 | 0.060246467 | 0.361914467 | 0.437174994 |
| 0.401677079 | 0.324132218 | 0.16388057  | 0.068735449 |
| 0.391729089 | 0.046628864 | 1           | 0.047287425 |
| 0.415408117 | 0.259515196 | 0.211740217 | 0.20013656  |
| 0.409734779 | 0.379858564 | 0.004346463 | 0.309911425 |
| 0.001479659 | 0.000268793 | 0.180438593 | 0.149671026 |
| 0.019208085 | 0.179134667 | 0.142882727 | 0.067879408 |
| 0.067871622 | 0.002891824 | 0.140279379 | 0.127371036 |
| 0.157903141 | 0.176855004 | 0.17456717  | 0.146732959 |
| 0.106949629 | 0.024929671 | 0.064906073 | 0.03659899  |
| 0.047040121 | 0.205823457 | 0.109493882 | 0.001667264 |
| 0.259205273 | 0.273512106 | 0.012690841 | 0.074042483 |
| 0.375761456 | 0.440527552 | 0.002379171 | 0.000449072 |
| 0.159031804 | 0.133621887 | 0.451528818 | 0.442676353 |
| 0.425770165 | 0.419149815 | 0.287103464 | 0.019273663 |
| 0.0126327   | 0.175446949 | 0.205915018 | 0.015590383 |
| 0.445651113 | 0.022077266 | 0.420208379 | 0.234093515 |
| 0.044227004 | 0.05401104  | 0.00298954  | 0.023279053 |
| 0.321459389 | 0.077881938 | 0.067228557 | 0.064850579 |
| 0.113161676 | 0.092317001 | 0.007915736 | 0.075600105 |
| 0.227390346 | 0.046809876 | 0.063416438 | 0.121387737 |
| 0.277032975 | 0.060291734 | 0.35547624  | 0.333732672 |

|             |             |             |             |
|-------------|-------------|-------------|-------------|
| 0.054250601 | 0.033038608 | 0.059555338 | 0.321760861 |
| 0.400068048 | 0.287820567 | 0.004030824 | 0.403019345 |
| 0.441363476 | 0.35482738  | 0.420779844 | 0.302191299 |
| 0.030243861 | 0.228675981 | 0.173221361 | 0.186341074 |
| 0.074219474 | 0.18541017  | 0.102581543 | 0.017565353 |
| 0.206455652 | 0.370377297 | 0.334713146 | 0.052355381 |
| 0.310071832 | 0.053982225 | 0.017930721 | 0.417267908 |
| 0.052771962 | 0.008791257 | 0.191903746 | 0.398231555 |
| 0.000337223 | 0.089241629 | 0.43576575  | 0.068849913 |
| 0.426860022 | 0.416029893 | 0.339333514 | 0.076428951 |
| 0.001148053 | 0.341491305 | 0.234845994 | 0.169466142 |
| 0.360398135 | 0.252589792 | 0.028690229 | 0.00919379  |
| 0.184591422 | 0.036709544 | 0.01559665  | 0.067676363 |
| 0.035823847 | 0.265420657 | 0.096989427 | 0.084596339 |
| 0.07279179  | 0.039329592 | 0.077832446 | 0.092860869 |
| 0.040847072 | 0.132264356 | 0.2348441   | 0.123889674 |
| 0.046033981 | 0.360590141 | 0.300704857 | 0.003348894 |
| 0.267052907 | 0.321556028 | 0.381130951 | 0.000222517 |
| 0.346998003 | 0.000224588 | 0.074909389 | 0.083833645 |
| 0.069586843 | 0.067495265 | 0.145488935 | 0.106817153 |
| 0.205239803 | 0.074397199 | 0.102205547 | 0.116105486 |
| 0.042405147 | 0.092732901 | 0.275847484 | 0.152929427 |
| 0.104972668 | 0.029789032 | 0.051665164 | 0.054772456 |
| 0.005494775 | 0.435195378 | 0.149632549 | 0.033298834 |
| 0.110171274 | 0.148755357 | 0.253233393 | 0.427673696 |
| 0.352655814 | 0.063164816 | 0.134466425 | 0.385131947 |
| 0.070118602 | 0.06322263  | 0.010638979 | 0.224327232 |
| 0.102370225 | 0.048414253 | 0.258915142 | 0.154905717 |
| 0.311981657 | 0.286073059 | 0.145827693 | 0.362131535 |
| 0.174431483 | 0.175285944 | 0.145737169 | 0.009592145 |
| 0.05151056  | 0.055935686 | 0.157851929 | 0.000254913 |
| 0.210628895 | 0.043217362 | 0.422964663 | 0.399698806 |
| 0.18161027  | 0.298343865 | 0.058432391 | 0.011987237 |
| 0.072185575 | 0.10578178  | 0.061006556 | 0.389137812 |
| 0.141082669 | 0.053463223 | 0.17449616  | 0.101196377 |
| 0.372483081 | 0.357904367 | 0.091635419 | 0.082710458 |
| 0.11039276  | 0.098829059 | 0.378391387 | 0.037996479 |
| 0.30740588  | 0.063646655 | 0.25143927  | 0.118567196 |
| 0.082092021 | 0.46955596  | 0.017891116 | 0.475515726 |
| 0.137683764 | 0.064985687 | 0.381153214 | 0.154977558 |
| 0.072382198 | 0.021860356 | 0.122523612 | 0.158832292 |
| 0.044347276 | 0.188828153 | 0.006608928 | 0.01362477  |
| 0.209312958 | 0.121022841 | 0.33108446  | 0.264784709 |
| 0.112276198 | 0.23813014  | 0.081642977 | 0.110929445 |
| 0.403556893 | 0.399461891 | 0.033605578 | 0.141677429 |
| 0.218874964 | 0.022432539 | 0.277569161 | 0.007000717 |
| 0.290119298 | 0.336444418 | 0.108122979 | 0.008343432 |
| 0.001124036 | 0.115243138 | 0.270913314 | 0.023634719 |
| 0.428020112 | 0.084235806 | 0.245180755 | 0.383128957 |
| 0.088904936 | 0.393798057 | 0.026544068 | 0.319105287 |
| 0.003897812 | 0.14311311  | 0.256570108 | 0.209800971 |
| 0.050672146 | 0.153972391 | 0.269260029 | 0.133439287 |
| 0.003541646 | 0.047491145 | 0.000364639 | 0.287438117 |
| 0.36823191  | 0.200220458 | 0.115099499 | 0.119054647 |

|             |             |             |             |
|-------------|-------------|-------------|-------------|
| 0.167637887 | 0.308794554 | 0.037082329 | 0.285418954 |
| 0.000639049 | 0.262916881 | 0.092962203 | 0.340153456 |
| 0.060346932 | 0.200552848 | 0.006801813 | 0.187669138 |
| 0.346501169 | 0.042702654 | 0.154572876 | 0.06381229  |
| 0.431482853 | 0.334335355 | 0.093204493 | 0.05341408  |
| 0.290773729 | 0.021380245 | 0.187403414 | 0.445046394 |
| 0.058841043 | 0.119964445 | 0.397585018 | 0.049374164 |
| 0.188057977 | 0.319206958 | 0.310391055 | 0.440819034 |
| 0.010081369 | 0.130685146 | 0.369867697 | 0.386547221 |
| 0.201421585 | 0.074253155 | 0.108021802 | 0.07735301  |
| 0.38081345  | 0.012085022 | 0.078415595 | 0.241263239 |
| 0.1023422   | 0.189111072 | 0.24252722  | 0.076727838 |
| 0.003003722 | 0.037745777 | 0.126335662 | 0.056921595 |
| 0.146045273 | 0.188818667 | 0.075808115 | 0.29039509  |
| 0.02052958  | 0.001991311 | 0.357203415 | 0.006392456 |
| 0.192875983 | 0.291983073 | 0.119251892 | 0.199054847 |
| 0.103519857 | 0.194570482 | 0.151115911 | 0.000285119 |
| 0.326588791 | 0.016396646 | 0.12850381  | 0.060544429 |
| 0.066166294 | 0.006726162 | 0.378637562 | 0.452349871 |
| 0.198808532 | 0.080505186 | 0.092360423 | 0.381115207 |
| 0.047207724 | 0.193450778 | 0.144672923 | 0.30791913  |
| 0.137569485 | 0.211744034 | 0.23502513  | 0.213851618 |
| 0.272725737 | 0.104430796 |             |             |

|             |             |             |             |
|-------------|-------------|-------------|-------------|
| MCCC1       | 0.2230616   | 0.204288945 | 0.233337414 |
| 0.116215427 | 0.051420639 | 0.096953456 | 0.18492097  |
| 0.168944572 | 0.176137412 | 0.057933933 | 0.086379927 |
| 0.168353085 | 0.006183281 | 0.186022031 | 0.17523073  |
| 0.060027965 | 0.144224685 | 0.177142982 | 0.040698658 |
| 0.1060996   | 0.052160988 | 0.048187923 | 0.123377722 |
| 0.052936062 | 0.325970699 | 0.13539706  | 0.050120031 |
| 0.196214306 | 0.026446597 | 0.089835511 | 0.033853426 |
| 0.249338522 | 0.049825219 | 0.045325138 | 0.180672087 |
| 0.088120794 | 0.002608624 | 0.295359443 | 0.077289738 |
| 0.014719041 | 0.262919673 | 0.082500323 | 0.10476516  |
| 0.076217606 | 0.219667566 | 0.035305701 | 0.075136177 |
| 0.114985787 | 0.103284523 | 0.243358488 | 0.112570373 |
| 0.070028233 | 0.17237069  | 0.133100481 | 0.009264737 |
| 0.028758103 | 0.002806733 | 0.01546417  | 0.246848802 |
| 0.178728995 | 0.149766071 | 0.027423702 | 0.132587209 |
| 0.075694664 | 0.092145186 | 0.140614521 | 0.065419372 |
| 0.220089526 | 0.014735684 | 0.093308405 | 0.087096463 |
| 0.103616413 | 0.198117374 | 0.217729128 | 0.210411743 |
| 0.062604767 | 0.122857087 | 0.071684893 | 0.034027659 |
| 0.205003556 | 0.28449927  | 0.150900795 | 0.271425016 |
| 0.01375418  | 0.043089851 | 0.046955166 | 0.125593557 |
| 0.12068284  | 0.159085241 | 0.118485992 | 0.246654958 |
| 0.192405136 | 0.084269463 | 0.117088127 | 0.242341418 |
| 0.191938582 | 0.032465178 | 0.075975344 | 0.01863304  |
| 0.064450295 | 0.051460924 | 0.275780075 | 0.157148084 |
| 0.060371745 | 0.238083825 | 0.310921059 | 0.037429806 |
| 0.069753579 | 0.227391673 | 0.042316123 | 0.122948269 |
| 0.094320987 | 0.193430621 | 0.155494103 | 0.143423743 |
| 0.05076457  | 0.211203061 | 0.120740644 | 0.194869077 |
| 0.01947531  | 0.23618419  | 0.173860828 | 0.154116606 |

| 0.221201    | 0.140833127 | 0.046790413 | 0.192356548 |
|-------------|-------------|-------------|-------------|
| 0.158225093 | 0.139231936 | 0.164737954 | 0.087445736 |
| 0.136387862 | 0.283729512 | 0.233278958 | 0.152945963 |
| 0.200429992 | 0.024313829 | 0.052216742 | 0.137716232 |
| 0.111061924 | 0.188701368 | 0.02896708  | 0.298316741 |
| 0.217121982 | 0.122520087 | 0.196043246 | 0.323488635 |
| 0.137943824 | 0.23453459  | 0.182211891 | 0.150279117 |
| 0.270235252 | 0.29179523  | 0.201295209 | 0.069306474 |
| 0.266921597 | 0.12023402  | 0.030083304 | 0.170264746 |
| 0.215889442 | 0.003134145 | 0.15090851  | 0.162402762 |
| 0.235342203 | 0.122232603 | 0.197539312 | 0.186575036 |
| 0.238115634 | 0.215023193 | 0.002879794 | 0.082301309 |
| 0.260188352 | 0.184577856 | 0.096409153 | 0.055857777 |
| 0.060451222 | 0.116002156 | 0.121962461 | 0.045740752 |
| 0.25255744  | 0.161898049 | 0.171230377 | 0.14392472  |
| 0.109579289 | 0.268776584 | 0.041704915 | 0.307252251 |
| 0.163433708 | 0.211178698 | 0.236326522 | 0.155191517 |
| 0.078849926 | 0.129416045 | 0.108913952 | 0.065863033 |
| 0.143236133 | 0.127407059 | 0.033270288 | 0.068548185 |
| 0.29599757  | 0.076176546 | 0.181282708 | 0.183224703 |
| 0.145585782 | 0.313397595 | 0.109278438 | 0.134269073 |
| 0.08280265  | 0.398472459 | 0.096533594 | 0.179042395 |
| 0.065762095 | 0.246348655 | 0.119578591 | 0.210189927 |
| 0.208547207 | 0.051099418 | 0.206701136 | 0.046405697 |
| 0.046613192 | 0.034178297 | 0.012536836 | 0.056386928 |
| 0.363106774 | 0.086927679 | 0.072259341 | 0.086619967 |
| 0.159130753 | 0.195175133 | 0.054401497 | 0.295472132 |
| 0.26813767  | 0.066271816 | 0.149243856 | 0.079678214 |
| 0.09168797  | 0.110141707 | 0.136115281 | 0.03754677  |
| 0.141128452 | 0.019384583 | 0.025617283 | 0.157961653 |
| 0.031001793 | 0.035563204 | 0.170126063 | 0.086800566 |
| 0.07344596  | 0.35375801  | 0.207746121 | 0.003201687 |
| 0.053716084 | 0.030816302 | 0.113873528 | 0.076829484 |
| 0.146922664 | 0.135406515 | 0.046413979 | 0.050459209 |
| 0.235476747 | 0.239690808 | 0.178388751 | 0.197624193 |
| 0.045420205 | 0.214556385 | 0.135152639 | 0.17558104  |
| 0.128900096 | 0.046210292 | 0.008543076 | 0.135076237 |
| 0.14867399  | 0.046211145 | 0.267212272 | 0.112431968 |
| 0.059410357 | 0.074756735 | 0.037013466 | 0.19562779  |
| 0.279390159 | 0.263521224 | 0.120499887 | 0.104230018 |
| 0.165452459 | 0.158693529 | 0.148895192 | 0.223328992 |
| 0.051364852 | 0.052862976 | 0.04781805  | 0.126137369 |
| 0.181895353 | 0.039243218 | 0.229992922 | 0.012641012 |
| 0.000514587 | 0.220247115 | 0.225380455 | 0.096735765 |
| 0.019685826 | 0.07513345  | 0.086785914 | 0.212354914 |
| 0.172920505 | 0.212344188 | 0.17800915  | 0.062528339 |
| 0.219590631 | 0.056786771 | 0.049312026 | 0.069210755 |
| 0.191094048 | 0.06597473  | 0.117279262 | 0.290969087 |
| 0.223133703 | 0.026361482 | 0.126535599 | 0.010359581 |
| 0.21003088  | 0.153519623 | 0.313995481 | 0.343428815 |
| 0.159421179 | 0.334218403 | 0.189989681 | 0.065730036 |
| 0.115438881 | 0.204487389 | 0.015991336 | 0.189344407 |
| 0.222298457 | 0.214575401 | 0.224563157 | 0.264772851 |
| 0.16816707  | 0.127723177 | 0.11244451  | 0.130849977 |



|             |             |             |             |
|-------------|-------------|-------------|-------------|
| 0.169303153 | 0.214901662 | 0.022862268 | 0.076907336 |
| 0.030222248 | 0.131411459 | 0.069650495 | 0.212564129 |
| 0.098913796 | 0.130056112 | 0.198336917 | 0.059339269 |
| 0.140921434 | 0.013385217 | 0.115359148 | 0.09944567  |
| 0.09818382  | 0.173378592 | 0.050543344 | 0.03812951  |
| 0.265080581 | 0.232096278 | 0.038084377 | 0.238922237 |
| 0.0926933   | 0.26493424  | 0.068043594 | 0.107977601 |
| 0.187848257 | 0.019175417 | 0.103483145 | 0.008623623 |
| 0.059913617 | 0.250822476 | 0.058431505 | 0.179886827 |
| 0.128095051 | 0.117079416 | 0.233294163 | 0.24037326  |
| 0.251978735 | 0.186481465 | 0.212774147 | 0.029931497 |
| 0.226084913 | 0.00412977  | 0.211312286 | 0.189076566 |
| 0.058614781 | 0.010574239 | 0.038037721 | 0.155373606 |
| 0.059443122 | 0.288392139 | 0.178686421 | 0.082849462 |
| 0.141841345 | 0.229122935 | 0.186720821 | 0.029444298 |
| 0.094837886 | 0.063676338 | 0.03012426  | 0.256315132 |
| 0.108297569 | 0.119164222 | 0.092850661 | 0.250728832 |
| 0.06708263  | 0.176533812 | 0.229454609 | 0.024280168 |
| 0.095632756 | 0.30221075  | 0.329119765 | 0.226389757 |
| 0.232815988 | 0.081834826 | 0.046641275 | 0.081084811 |
| 0.155955479 | 0.279650794 | 0.047287425 | 1           |
| 0.227888021 | 0.073034388 | 0.16330262  | 0.22305595  |
| 0.207070301 | 0.230950257 | 0.188304202 | 0.119408687 |
| 0.094858555 | 0.003511705 | 0.110037274 | 0.161180265 |
| 0.017215419 | 0.053468035 | 0.199457    | 0.094192155 |
| 0.092830887 | 0.191508918 | 0.024730367 | 0.023866174 |
| 0.098933854 | 0.073994157 | 0.040388698 | 0.185341488 |
| 0.05500543  | 0.029784909 | 0.108572961 | 0.132416649 |
| 0.061742304 | 0.24123977  | 0.321865062 | 0.172311571 |
| 0.069616276 | 0.056616145 | 0.206838894 | 0.212028604 |
| 0.153875691 | 0.168339953 | 0.136609896 | 0.059342448 |
| 0.223234435 | 0.070514147 | 0.171421353 | 0.218767706 |
| 0.277148487 | 0.229650164 | 0.287339831 | 0.074867671 |
| 0.207818699 | 0.082010454 | 0.041501074 | 0.055805091 |
| 0.213595332 | 0.229099355 | 0.242549357 | 0.029871978 |
| 0.1959227   | 0.126599583 | 0.131347037 | 0.188473175 |
| 0.049062552 | 0.171356453 | 0.092860265 | 0.217664227 |
| 0.072965804 | 0.025495533 | 0.188016001 | 0.152579513 |
| 0.161432493 | 0.012608631 | 0.172840563 | 0.12148414  |
| 0.178440305 | 0.051963341 | 0.089356293 | 0.24112523  |
| 0.23086314  | 0.197857901 | 0.132369717 | 0.120098472 |
| 0.133119678 | 0.064445942 | 0.105422812 | 0.205506591 |
| 0.190095372 | 0.084042808 | 0.252836697 | 0.158671519 |
| 0.220329321 | 0.055986806 | 0.037031566 | 0.06350876  |
| 0.154139137 | 0.102878041 | 0.111758545 | 0.213528769 |
| 0.228242763 | 0.296670558 | 0.18507537  | 0.125870104 |
| 0.076506856 | 0.22663782  | 0.228524265 | 0.166737092 |
| 0.019586498 | 0.189942901 | 0.082406859 | 0.123586049 |
| 0.003890739 | 0.009834732 | 0.177375454 | 0.118513926 |
| 0.250979206 | 0.167453974 | 0.235421994 | 0.123291289 |
| 0.000187037 | 0.069294421 | 0.083954563 | 0.064390883 |
| 0.190589272 | 0.188251038 | 0.094599927 | 0.134575301 |
| 0.190294318 | 0.269290004 | 0.111088161 | 0.093667837 |
| 0.0152528   | 0.115000747 | 0.179564096 | 0.14753501  |

|             |             |             |             |
|-------------|-------------|-------------|-------------|
| 0.08476474  | 0.241668063 | 0.026461387 | 0.132564442 |
| 0.018100879 | 0.184143646 | 0.165092189 | 0.072666796 |
| 0.017203146 | 0.168453993 | 0.147141001 | 0.197952528 |
| 0.047400173 | 0.156398197 | 0.1835181   | 0.014807362 |
| 0.092049001 | 0.107330897 | 0.08755782  | 0.085696433 |
| 0.094476011 | 0.092450772 | 0.080063244 | 0.057167928 |
| 0.113133621 | 0.123323916 | 0.099832646 | 0.129937012 |
| 0.098583908 | 0.139795761 | 0.068915068 | 0.100610233 |
| 0.060237645 | 0.18671233  | 0.330139125 | 0.376597911 |
| 0.148295742 | 0.184235506 | 0.270433704 | 0.274249434 |
| 0.127002141 | 0.085251181 | 0.209559351 | 0.23627557  |
| 0.187539198 | 0.328029116 | 0.088684676 | 0.181932419 |
| 0.026864105 | 0.085612049 | 0.217694456 | 0.096101312 |
| 0.142137314 | 0.039833986 | 0.087260853 | 0.146504949 |
| 0.122668612 | 0.276213131 | 0.259454801 | 0.215690518 |
| 0.072152877 | 0.070664871 | 0.066357299 | 0.106266678 |
| 0.165812451 | 0.232090543 | 0.043981396 | 0.056338351 |
| 0.121281929 | 0.140532544 | 0.147603562 | 0.260954865 |
| 0.027188893 | 0.21447498  | 0.08086607  | 0.187258284 |
| 0.057568532 | 0.338313986 | 0.217464872 | 0.116983948 |
| 0.015393666 | 0.151106721 | 0.060167429 | 0.122004112 |
| 0.101961799 | 0.102400177 | 0.0496361   | 0.138164454 |
| 0.115946443 | 0.201231288 | 0.275421341 | 0.221346405 |
| 0.067184083 | 0.033425497 | 0.108647692 | 0.072665387 |
| 0.078838427 | 0.19487033  | 0.220366631 | 0.192007215 |
| 0.057750997 | 0.280310928 | 0.274672524 | 0.130210409 |
| 0.113780197 | 0.083724927 | 0.012690531 | 0.089505058 |
| 0.1117282   | 0.037191887 | 0.001850368 | 0.010513158 |
| 0.128051685 | 0.069170365 | 0.144348855 | 0.122456879 |
| 0.04023965  | 0.136098189 | 0.013196084 | 0.130066196 |
| 0.264693449 | 0.304105303 | 0.08659624  | 0.187927336 |
| 0.160793125 | 0.16829146  | 0.127819817 | 0.007077403 |
| 0.069211117 | 0.057741556 | 0.060174101 | 0.178473291 |
| 0.152137155 | 0.014699688 | 0.077316349 | 0.212928421 |
| 0.154280227 | 0.014452298 | 0.104962419 | 0.105254015 |
| 0.220897646 | 0.306986702 | 0.089089399 | 0.105693341 |
| 0.15194196  | 0.150850639 | 0.050704078 | 0.06799253  |
| 0.054927655 | 0.034741112 | 0.115230039 | 0.025881022 |
| 0.160876357 | 0.065147593 | 0.010643223 | 0.311779354 |
| 0.298021733 | 0.039066124 | 0.270242489 | 0.051031383 |
| 0.127517353 | 0.185894329 | 0.061668614 | 0.060545309 |
| 0.078272465 | 0.050558587 | 0.145026156 | 0.196646061 |
| 0.021280092 | 0.081169656 | 0.121921981 | 0.04503769  |
| 0.348774978 | 0.05136878  | 0.22116126  | 0.033869601 |
| 0.230942206 | 0.178556724 | 0.267697701 | 0.055084202 |
| 0.097386998 | 0.229600081 | 0.078025218 | 0.231264939 |
| 0.107215522 | 0.025060211 | 0.121870388 | 0.101094456 |
| 0.035426433 | 0.214973868 | 0.069602414 | 0.236479047 |
| 0.071315992 | 0.151203274 | 0.117204062 | 0.200075066 |
| 0.153636771 | 0.025324077 | 0.027258186 | 0.058235178 |
| 0.251434667 | 0.152734574 | 0.033064936 | 0.161395449 |
| 0.019955507 | 0.12529593  | 0.108303281 | 0.052908175 |
| 0.142319524 | 0.124591447 | 0.086209735 | 0.194665202 |
| 0.103066708 | 0.066142367 | 0.044991542 | 0.230246631 |

|             |             |             |             |
|-------------|-------------|-------------|-------------|
| 0.090374487 | 0.083514757 | 0.239363502 | 0.000815269 |
| 0.138674055 | 0.084083191 | 0.140033219 | 0.056724023 |
| 0.281377765 | 0.1132579   | 0.12151677  | 0.056806415 |
| 0.13449519  | 0.011512105 | 0.073236039 | 0.05269125  |
| 0.03779568  | 0.207873229 | 0.244208897 | 0.184336742 |
| 0.148980186 | 0.05465191  | 0.036759569 | 0.229869342 |
| 0.012712389 | 0.032554503 | 0.041990848 | 0.116907743 |
| 0.020756164 | 0.0606822   | 0.058168731 | 0.042221176 |
| 0.155379932 | 0.138910911 |             |             |
| MCM10       | 0.155106452 | 0.489965829 | 0.145271491 |
| 0.22449244  | 0.314447761 | 0.503053516 | 0.109847645 |
| 0.19635159  | 0.433520695 | 0.397268534 | 0.42515238  |
| 0.044135586 | 0.074018715 | 0.487784504 | 0.0959172   |
| 0.412756806 | 0.05969684  | 0.170823591 | 0.100824323 |
| 0.300839909 | 0.285177036 | 0.370463758 | 0.504396884 |
| 0.287860536 | 0.284845402 | 0.461138907 | 0.408544255 |
| 0.510118622 | 0.320329355 | 0.492264921 | 0.296341775 |
| 0.434914754 | 0.330365857 | 0.417377935 | 0.050110666 |
| 0.47722769  | 0.009069493 | 0.459095376 | 0.29727682  |
| 0.155863052 | 0.404150511 | 0.468370619 | 0.304587806 |
| 0.469908536 | 0.094112099 | 0.310623091 | 0.435665229 |
| 0.425935736 | 0.340655612 | 0.155463036 | 0.502527247 |
| 0.417204507 | 0.450962093 | 0.498536185 | 0.005238705 |
| 0.30846949  | 0.081560535 | 0.221357754 | 0.523172    |
| 0.282744814 | 0.173523455 | 0.317802086 | 0.328999303 |
| 0.427710689 | 0.404997841 | 0.311254289 | 0.440846035 |
| 0.502337318 | 0.162341443 | 0.478401556 | 0.229701817 |
| 0.466136727 | 0.084056444 | 0.237955632 | 0.173174245 |
| 0.42560826  | 0.251917961 | 0.376121703 | 0.30814615  |
| 0.496715034 | 0.525245463 | 0.311681469 | 0.529444471 |
| 0.082751014 | 0.338608779 | 0.283845091 | 0.341004198 |
| 0.410329853 | 0.137429629 | 0.47544088  | 0.521349494 |
| 0.104389362 | 0.482115951 | 0.458441919 | 0.222954291 |
| 0.504053632 | 0.280645729 | 0.503037021 | 0.169447466 |
| 0.381482704 | 0.352744273 | 0.491774408 | 0.375470495 |
| 0.32958415  | 0.162110945 | 0.52817752  | 0.315057221 |
| 0.344201503 | 0.173876854 | 0.22883027  | 0.488623509 |
| 0.481623511 | 0.511657403 | 0.489182345 | 0.413992864 |
| 0.397281118 | 0.503277218 | 0.48419319  | 0.467928436 |
| 0.22167547  | 0.533263343 | 0.288978062 | 0.072560528 |
| 0.164064423 | 0.121927973 | 0.229962559 | 0.357341985 |
| 0.50503861  | 0.418404198 | 0.296158275 | 0.266814601 |
| 0.461979248 | 0.518663402 | 0.531631155 | 0.471193981 |
| 0.086401304 | 0.238829377 | 0.410588845 | 0.382515081 |
| 0.430481487 | 0.181723136 | 0.252983447 | 0.535687432 |
| 0.446427791 | 0.468714781 | 0.285764533 | 0.526588096 |
| 0.263028686 | 0.505606883 | 0.519355052 | 0.242914334 |
| 0.533845668 | 0.528121102 | 0.490276486 | 0.420349544 |
| 0.494974979 | 0.466003821 | 0.076032533 | 0.440911666 |
| 0.466517041 | 0.015593441 | 0.49972573  | 0.498924774 |
| 0.517547311 | 0.496264998 | 0.492739752 | 0.501559273 |
| 0.522294291 | 0.144935528 | 0.02944304  | 0.308332816 |
| 0.529297393 | 0.4651011   | 0.15724565  | 0.45732714  |
| 0.372096573 | 0.508848128 | 0.472372227 | 0.366455921 |

|             |             |             |             |
|-------------|-------------|-------------|-------------|
| 0.49837926  | 0.497488106 | 0.507925581 | 0.466038386 |
| 0.397665761 | 0.386964981 | 0.391394498 | 0.515015004 |
| 0.08395827  | 0.219329528 | 0.130829278 | 0.359381427 |
| 0.480908576 | 0.223325839 | 0.496315704 | 0.369249324 |
| 0.252611701 | 0.452805179 | 0.349168636 | 0.392894885 |
| 0.134024592 | 0.51455356  | 0.260586671 | 0.279171929 |
| 0.072770916 | 0.226149947 | 0.254414535 | 0.219305574 |
| 0.280885079 | 0.298662252 | 0.493663401 | 0.490603303 |
| 0.372929631 | 0.298605799 | 0.499670218 | 0.467185322 |
| 0.421069836 | 0.40549589  | 0.30213768  | 0.02331111  |
| 0.303051457 | 0.338821733 | 0.174149011 | 0.443515856 |
| 0.255724891 | 0.288258959 | 0.426378492 | 0.416987581 |
| 0.424927569 | 0.242774911 | 0.392242136 | 0.445803095 |
| 0.259190591 | 0.343515166 | 0.474961036 | 0.483447491 |
| 0.012208952 | 0.419990335 | 0.500194179 | 0.142515323 |
| 0.394831818 | 0.134271055 | 0.275106317 | 0.487825121 |
| 0.298363516 | 0.214069043 | 0.500590499 | 0.408223151 |
| 0.41470055  | 0.303594202 | 0.504020185 | 0.047430746 |
| 0.356422876 | 0.065047259 | 0.322383638 | 0.441205462 |
| 0.337041311 | 0.331683071 | 0.316822842 | 0.296870917 |
| 0.250871372 | 0.522436045 | 0.462351165 | 0.505086715 |
| 0.404830812 | 0.510101093 | 0.493842212 | 0.481659617 |
| 0.441143226 | 0.387187    | 0.125705706 | 0.499467144 |
| 0.490116534 | 0.342898707 | 0.166671099 | 0.484264526 |
| 0.418439317 | 0.427705705 | 0.117726169 | 0.48453795  |
| 0.501831238 | 0.509143909 | 0.183058878 | 0.38920511  |
| 0.453438901 | 0.34065516  | 0.459125673 | 0.507025543 |
| 0.38876511  | 0.370425116 | 0.353993633 | 0.410835249 |
| 0.269256406 | 0.203052247 | 0.378612586 | 0.165787015 |
| 0.013586409 | 0.164104052 | 0.143434768 | 0.19110282  |
| 0.15441857  | 0.479264395 | 0.435360421 | 0.511237793 |
| 0.177784907 | 0.467034482 | 0.309818305 | 0.330944739 |
| 0.472253114 | 0.362493049 | 0.396797828 | 0.413081728 |
| 0.321994886 | 0.034619717 | 0.167028908 | 0.532063826 |
| 0.109559805 | 0.23924063  | 0.403644789 | 0.005379686 |
| 0.101170899 | 0.498135336 | 0.183177804 | 0.268342195 |
| 0.467026282 | 0.283938697 | 0.317090094 | 0.414463527 |
| 0.392184535 | 0.162881643 | 0.005303284 | 0.486477521 |
| 0.48114542  | 0.457034952 | 0.483802065 | 0.475985124 |
| 0.456727427 | 0.455578889 | 0.444995526 | 0.499339679 |
| 0.171705043 | 0.183699306 | 0.205472994 | 0.325237451 |
| 0.010446304 | 0.426728019 | 0.32466571  | 0.221771412 |
| 0.454957465 | 0.36175174  | 0.082661933 | 0.36315247  |
| 0.061650317 | 0.206716391 | 0.392208975 | 0.254156302 |
| 0.35942192  | 0.042031314 | 0.339314958 | 0.348443508 |
| 0.482168605 | 0.433748551 | 0.379674972 | 0.534492738 |
| 0.390983699 | 0.247724838 | 0.347355376 | 0.434434791 |
| 0.126150608 | 0.143267604 | 0.446990202 | 0.071488215 |
| 0.277754222 | 0.457858083 | 0.4141066   | 0.148295626 |
| 0.351759439 | 0.018059427 | 0.457417634 | 0.528769786 |
| 0.503106774 | 0.494257938 | 0.503419946 | 0.276824444 |
| 0.512078061 | 0.098208718 | 0.523286167 | 0.493832515 |
| 0.455151434 | 0.00308026  | 0.009237347 | 0.501345861 |
| 0.431077907 | 0.143984585 | 0.237635659 | 0.491240457 |

|             |             |             |             |
|-------------|-------------|-------------|-------------|
| 0.159187156 | 0.277094059 | 0.116879276 | 0.176013163 |
| 0.502528155 | 0.251653107 | 0.163540081 | 0.497327915 |
| 0.293767339 | 0.276935121 | 0.491384478 | 0.172069045 |
| 0.444485778 | 0.098466183 | 0.166008143 | 0.011445507 |
| 0.386569025 | 0.216105791 | 0.514506671 | 0.514990456 |
| 0.486780489 | 0.418573667 | 0.420676132 | 0.418281966 |
| 0.456608733 | 0.215766005 | 0.415408117 | 0.227888021 |
| 1           | 0.427263855 | 0.389498436 | 0.403480419 |
| 0.480597522 | 0.484209874 | 0.06993064  | 0.453050286 |
| 0.035023966 | 0.001731983 | 0.514455599 | 0.327345268 |
| 0.059953183 | 0.389106422 | 0.334216117 | 0.281332897 |
| 0.258462308 | 0.077067825 | 0.25344035  | 0.230820994 |
| 0.346295021 | 0.395469676 | 0.271655457 | 0.318758216 |
| 0.271411927 | 0.12912921  | 0.240394626 | 0.2011078   |
| 0.271825731 | 0.406091745 | 0.290807674 | 0.049258161 |
| 0.495008436 | 0.4506733   | 0.114218608 | 0.248857573 |
| 0.490291898 | 0.505472262 | 0.071241487 | 0.020504933 |
| 0.353710083 | 0.339106851 | 0.490156368 | 0.512813134 |
| 0.542706042 | 0.50269067  | 0.416472761 | 0.136034802 |
| 0.127901383 | 0.350902608 | 0.289663173 | 0.102921728 |
| 0.506710482 | 0.154125539 | 0.5015977   | 0.292352595 |
| 0.189237796 | 0.291117934 | 0.061432282 | 0.140859875 |
| 0.401536847 | 0.248405372 | 0.20571453  | 0.273589462 |
| 0.348182122 | 0.248366288 | 0.094323023 | 0.26560722  |
| 0.424027681 | 0.170968357 | 0.235607253 | 0.399798097 |
| 0.449072405 | 0.296589577 | 0.463410771 | 0.443055042 |
| 0.224306559 | 0.191279444 | 0.439511193 | 0.426466138 |
| 0.505056626 | 0.458229005 | 0.061091062 | 0.503787834 |
| 0.483655076 | 0.496272844 | 0.519587853 | 0.408183616 |
| 0.159802276 | 0.412208445 | 0.310529432 | 0.363935372 |
| 0.248225059 | 0.502804343 | 0.281466674 | 0.124052449 |
| 0.349514852 | 0.492018923 | 0.48371976  | 0.218164859 |
| 0.481903952 | 0.244704828 | 0.142119812 | 0.486744812 |
| 0.170322328 | 0.166622901 | 0.476372635 | 0.465553622 |
| 0.002600311 | 0.123385654 | 0.465503596 | 0.307409567 |
| 0.507909296 | 0.486959806 | 0.462530895 | 0.337572072 |
| 0.001206963 | 0.431200094 | 0.4329993   | 0.457545652 |
| 0.50342428  | 0.442930335 | 0.202898227 | 0.109789313 |
| 0.342008942 | 0.183266656 | 0.172824552 | 0.45923993  |
| 0.17381243  | 0.499263013 | 0.255522881 | 0.278334519 |
| 0.220887054 | 0.186040238 | 0.243295822 | 0.32442416  |
| 0.130386084 | 0.302795498 | 0.403287306 | 0.402322148 |
| 0.208664868 | 0.448954995 | 0.47959503  | 0.066608956 |
| 0.363670109 | 0.443564895 | 0.458021413 | 0.004723927 |
| 0.469808382 | 0.017643804 | 0.221180508 | 0.253193106 |
| 0.2320079   | 0.236714934 | 0.274736849 | 0.318275466 |
| 0.42802996  | 0.281415213 | 0.345008402 | 0.29536531  |
| 0.198631153 | 0.295870426 | 0.421925728 | 0.444922493 |
| 0.312837123 | 0.20406426  | 0.187109646 | 0.188055375 |
| 0.092623514 | 0.500328661 | 0.326035363 | 0.166734306 |
| 0.274648412 | 0.427782735 | 0.390341932 | 0.5175962   |
| 0.438683437 | 0.223369209 | 0.36892646  | 0.51984015  |
| 0.281878138 | 0.397572255 | 0.139254182 | 0.478934494 |
| 0.306416649 | 0.225038666 | 0.488219024 | 0.449812008 |

|             |             |             |             |
|-------------|-------------|-------------|-------------|
| 0.479942411 | 0.42464142  | 0.326241947 | 0.457294869 |
| 0.415283    | 0.380245902 | 0.448359206 | 0.116274967 |
| 0.269863711 | 0.218874925 | 0.262945995 | 0.006867886 |
| 0.417228605 | 0.409071088 | 0.509339489 | 0.516071428 |
| 0.287902993 | 0.423069296 | 0.467757332 | 0.161436503 |
| 0.40739545  | 0.285240264 | 0.221299758 | 0.492679089 |
| 0.215936958 | 0.25854513  | 0.317534024 | 0.493468184 |
| 0.469458315 | 0.462913211 | 0.252103622 | 0.319546153 |
| 0.28772756  | 0.314392406 | 0.489129228 | 0.229354492 |
| 0.48463952  | 0.186707451 | 0.467840383 | 0.330850895 |
| 0.242512607 | 0.50187259  | 0.125698674 | 0.509889967 |
| 0.350947498 | 0.224507658 | 0.489608269 | 0.391314535 |
| 0.389620944 | 0.144991209 | 0.176209814 | 0.473121904 |
| 0.2715473   | 0.349010672 | 0.02344474  | 0.067931789 |
| 0.37114183  | 0.344525664 | 0.486097037 | 0.405798582 |
| 0.239211052 | 0.363138547 | 0.154463838 | 0.383228357 |
| 0.518091086 | 0.530557146 | 0.318925921 | 0.306269759 |
| 0.413616066 | 0.158944874 | 0.522765216 | 0.018341843 |
| 0.462642559 | 0.457401014 | 0.443863892 | 0.093751304 |
| 0.042295449 | 0.205025816 | 0.473315491 | 0.146462747 |
| 0.473364605 | 0.215093791 | 0.433886372 | 0.49440544  |
| 0.261741707 | 0.533265675 | 0.140939145 | 0.454523932 |
| 0.095554021 | 0.322520367 | 0.391216473 | 0.415879357 |
| 0.253405208 | 0.287103701 | 0.419628806 | 0.230103786 |
| 0.062468584 | 0.289485398 | 0.003176206 | 0.433641613 |
| 0.511539289 | 0.341235199 | 0.285122421 | 0.375667982 |
| 0.320123218 | 0.428250754 | 0.253021846 | 0.466068868 |
| 0.022581243 | 0.385214085 | 0.258221204 | 0.498873878 |
| 0.278882995 | 0.413831537 | 0.092317056 | 0.308252187 |
| 0.508414593 | 0.31027636  | 0.31763437  | 0.357397507 |
| 0.508459219 | 0.460858858 | 0.285682251 | 0.230814171 |
| 0.452026909 | 0.136547846 | 0.489049359 | 0.518432018 |
| 0.212424914 | 0.207807182 | 0.464388495 | 0.253053651 |
| 0.304527284 | 0.458172793 | 0.460380319 | 0.513022638 |
| 0.083853188 | 0.310787523 | 0.457218582 | 0.482790663 |
| 0.339935926 | 0.153508427 | 0.242196684 | 0.240124602 |
| 0.495520428 | 0.166730611 | 0.250644792 | 0.443912085 |
| 0.210196524 | 0.356007377 | 0.443806927 | 0.191385296 |
| 0.061556568 | 0.214365823 | 0.452462775 | 0.220742585 |
| 0.342219588 | 0.392828694 | 0.237556078 | 0.418150334 |
| 0.17694024  | 0.046101659 | 0.444228255 | 0.016029522 |
| 0.47837044  | 0.439945619 | 0.308263451 | 0.368784136 |
| 0.287732988 | 0.427709582 | 0.461446598 | 0.004262523 |
| 0.444565747 | 0.05250505  | 0.323644625 | 0.24375921  |
| 0.295956582 | 0.107679347 | 0.480814654 | 0.487393563 |
| 0.405205038 | 0.371552286 | 0.382084505 | 0.483310844 |
| 0.137288356 | 0.352095145 | 0.348655569 | 0.512577538 |
| 0.21186454  | 0.469931455 | 0.458646153 | 0.410478404 |
| 0.468249213 | 0.353033516 |             |             |
| MCM2        | 0.061412412 | 0.352057936 | 0.040199148 |
| 0.165213966 | 0.300327993 | 0.264184475 | 0.060025963 |
| 0.11475732  | 0.267478189 | 0.190177249 | 0.30436082  |
| 0.023299032 | 0.111337764 | 0.437281723 | 0.054090108 |
| 0.342644629 | 0.044670611 | 0.109340384 | 0.06618102  |

|             |             |             |             |
|-------------|-------------|-------------|-------------|
| 0.171740522 | 0.305642218 | 0.293655513 | 0.237898007 |
| 0.28164784  | 0.160782533 | 0.230289948 | 0.286924695 |
| 0.451354451 | 0.216365548 | 0.334287426 | 0.147738407 |
| 0.400437057 | 0.320904485 | 0.298448558 | 0.015268709 |
| 0.291528478 | 0.017882993 | 0.39690844  | 0.293384286 |
| 0.192542082 | 0.315936088 | 0.200777044 | 0.251056721 |
| 0.268200024 | 0.036286431 | 0.126276168 | 0.339266597 |
| 0.220620677 | 0.210786072 | 0.044466567 | 0.330391096 |
| 0.274777581 | 0.25472168  | 0.286295047 | 0.004669774 |
| 0.285889229 | 0.111320226 | 0.239514897 | 0.437008039 |
| 0.171725922 | 0.126596302 | 0.24009546  | 0.161634981 |
| 0.280640454 | 0.310817244 | 0.195552447 | 0.277844715 |
| 0.463639294 | 0.226172616 | 0.354056369 | 0.151148653 |
| 0.290756178 | 0.023631289 | 0.139079989 | 0.052484666 |
| 0.297728443 | 0.189499053 | 0.282980372 | 0.294723585 |
| 0.363380613 | 0.458263311 | 0.186301044 | 0.427711026 |
| 0.137078292 | 0.316105256 | 0.272544733 | 0.287013299 |
| 0.309362074 | 0.072748969 | 0.382650171 | 0.487170017 |
| 0.034667564 | 0.240345863 | 0.342718708 | 0.08457568  |
| 0.358652524 | 0.2220376   | 0.258834646 | 0.216068974 |
| 0.330098169 | 0.342647812 | 0.40377916  | 0.266731392 |
| 0.25502356  | 0.053613559 | 0.398117585 | 0.313039846 |
| 0.293548721 | 0.066663259 | 0.292158277 | 0.438831958 |
| 0.329843364 | 0.454130059 | 0.371411351 | 0.346267173 |
| 0.353518904 | 0.461558644 | 0.350694826 | 0.356978109 |
| 0.092973263 | 0.465497713 | 0.160361236 | 0.049424248 |
| 0.052342143 | 0.083894334 | 0.21350752  | 0.269845476 |
| 0.437269796 | 0.24443961  | 0.182338542 | 0.256521877 |
| 0.466008085 | 0.391073019 | 0.464562596 | 0.393279965 |
| 0.039756508 | 0.235540502 | 0.35523026  | 0.179775345 |
| 0.327478148 | 0.088553646 | 0.295030417 | 0.44233935  |
| 0.365912263 | 0.429219883 | 0.120868411 | 0.42760825  |
| 0.159111825 | 0.485330511 | 0.392685005 | 0.177809357 |
| 0.463108108 | 0.423650578 | 0.495482282 | 0.367291723 |
| 0.40940843  | 0.268572452 | 0.059496802 | 0.34807421  |
| 0.463906863 | 0.028895174 | 0.441790029 | 0.477445211 |
| 0.443732534 | 0.453918414 | 0.502786569 | 0.470169923 |
| 0.438536351 | 0.058684444 | 0.035250898 | 0.285455854 |
| 0.455212137 | 0.385573246 | 0.12746086  | 0.336732103 |
| 0.317450007 | 0.271430432 | 0.35697084  | 0.31652922  |
| 0.480166575 | 0.416375282 | 0.444483786 | 0.346292587 |
| 0.207040809 | 0.284722812 | 0.311136885 | 0.386620725 |
| 0.045793334 | 0.098032376 | 0.037012939 | 0.253923745 |
| 0.214919904 | 0.175576134 | 0.280495694 | 0.282680288 |
| 0.18291798  | 0.214940975 | 0.271100274 | 0.353613361 |
| 0.039954513 | 0.309736133 | 0.134046952 | 0.150945427 |
| 0.057707823 | 0.118026948 | 0.231403913 | 0.152805088 |
| 0.259063912 | 0.188735114 | 0.349382478 | 0.456792067 |
| 0.281501315 | 0.147826161 | 0.340023022 | 0.450539225 |
| 0.433210875 | 0.337828749 | 0.189453401 | 0.023463035 |
| 0.35716366  | 0.234659095 | 0.224629703 | 0.298486905 |
| 0.139223836 | 0.284107484 | 0.338452613 | 0.383513726 |
| 0.21705503  | 0.096314275 | 0.340527591 | 0.376065567 |
| 0.111704581 | 0.294499886 | 0.45690401  | 0.28805296  |

|             |             |             |             |
|-------------|-------------|-------------|-------------|
| 0.003265882 | 0.301542084 | 0.420896215 | 0.197516224 |
| 0.249331165 | 0.191741968 | 0.249612493 | 0.46158326  |
| 0.286302595 | 0.251988771 | 0.449888225 | 0.359901016 |
| 0.24993091  | 0.169379563 | 0.494045405 | 0.084052738 |
| 0.273508118 | 0.088775599 | 0.276105719 | 0.197026914 |
| 0.225720161 | 0.272405786 | 0.297777504 | 0.290595133 |
| 0.091078413 | 0.466850029 | 0.333266129 | 0.478175826 |
| 0.347670823 | 0.497367165 | 0.449560481 | 0.427201449 |
| 0.27429558  | 0.289063844 | 0.182924278 | 0.42932809  |
| 0.447614956 | 0.279889398 | 0.049818784 | 0.391392552 |
| 0.284194115 | 0.368872524 | 0.144191904 | 0.489943363 |
| 0.440637733 | 0.388473565 | 0.156569521 | 0.372845424 |
| 0.379185821 | 0.200166914 | 0.362981024 | 0.490860801 |
| 0.240056882 | 0.346390848 | 0.35491007  | 0.411399632 |
| 0.153764917 | 0.260179333 | 0.267484799 | 0.19046558  |
| 0.012726685 | 0.061312826 | 0.056708554 | 0.185094656 |
| 0.227762956 | 0.275152806 | 0.334576933 | 0.482513245 |
| 0.120106261 | 0.365149655 | 0.181724173 | 0.351843352 |
| 0.397410236 | 0.29463774  | 0.30074106  | 0.302666587 |
| 0.198594982 | 0.026918565 | 0.143380086 | 0.466153554 |
| 0.025512042 | 0.272893635 | 0.220955529 | 0.005296018 |
| 0.046748396 | 0.326090708 | 0.075993412 | 0.168746608 |
| 0.46246436  | 0.168576953 | 0.176096013 | 0.243244343 |
| 0.300000974 | 0.081393672 | 0.00549148  | 0.447042847 |
| 0.418093197 | 0.394003614 | 0.415590537 | 0.372023285 |
| 0.404054902 | 0.312525301 | 0.403618049 | 0.228306837 |
| 0.105910206 | 0.066849338 | 0.314474454 | 0.313028299 |
| 0.004732512 | 0.345809855 | 0.249942846 | 0.122144798 |
| 0.375016756 | 0.247207985 | 0.037756075 | 0.280995457 |
| 0.030099385 | 0.250033515 | 0.243780438 | 0.193860466 |
| 0.324422711 | 0.01308124  | 0.242642226 | 0.352734749 |
| 0.367672724 | 0.307773052 | 0.298450343 | 0.47383965  |
| 0.299204831 | 0.091033916 | 0.318775534 | 0.348442082 |
| 0.076615396 | 0.118666712 | 0.250333767 | 0.035602935 |
| 0.122700539 | 0.376397628 | 0.286835259 | 0.072037109 |
| 0.256901861 | 0.006032478 | 0.332047979 | 0.48111328  |
| 0.386251127 | 0.501739525 | 0.463409314 | 0.296097794 |
| 0.464866775 | 0.118824843 | 0.481997174 | 0.356708707 |
| 0.285578775 | 0.002020627 | 0.007452055 | 0.470455465 |
| 0.358656663 | 0.036672677 | 0.144830718 | 0.259285752 |
| 0.136522929 | 0.114860788 | 0.054546321 | 0.244285847 |
| 0.282606979 | 0.250678071 | 0.2040757   | 0.40654549  |
| 0.245956769 | 0.204744056 | 0.25717495  | 0.060818349 |
| 0.297217996 | 0.061514999 | 0.05999712  | 0.015162074 |
| 0.321753387 | 0.087832898 | 0.382815392 | 0.452020226 |
| 0.467202286 | 0.355068357 | 0.240242675 | 0.238186863 |
| 0.386661847 | 0.064323186 | 0.259515196 | 0.073034388 |
| 0.427263855 | 1           | 0.314122163 | 0.292299966 |
| 0.49569836  | 0.44088784  | 0.034471244 | 0.406232896 |
| 0.01586127  | 0.002796654 | 0.268434204 | 0.205105677 |
| 0.050989036 | 0.349968362 | 0.240428083 | 0.173816077 |
| 0.176898151 | 0.033984529 | 0.296695573 | 0.300306411 |
| 0.281067183 | 0.332861516 | 0.305862938 | 0.183812411 |
| 0.264682849 | 0.218838839 | 0.178940675 | 0.140535328 |



|             |             |             |             |
|-------------|-------------|-------------|-------------|
| 0.181513999 | 0.276363293 | 0.171494191 | 0.02198131  |
| 0.303467087 | 0.34154679  | 0.055742336 | 0.120637115 |
| 0.43433859  | 0.478827056 | 0.059815097 | 0.024568558 |
| 0.23597806  | 0.282556582 | 0.486000435 | 0.435895227 |
| 0.458979032 | 0.49814636  | 0.349567478 | 0.168325569 |
| 0.062286911 | 0.287068283 | 0.299771574 | 0.132875124 |
| 0.464622626 | 0.047376253 | 0.407907071 | 0.295438507 |
| 0.095728465 | 0.216001508 | 0.044195316 | 0.076884648 |
| 0.311406719 | 0.149862674 | 0.199491938 | 0.114230141 |
| 0.328906738 | 0.265845015 | 0.046116423 | 0.187454878 |
| 0.326967577 | 0.273928491 | 0.146948622 | 0.195866127 |
| 0.283450551 | 0.128343336 | 0.3960089   | 0.435077654 |
| 0.101089447 | 0.093324302 | 0.233288952 | 0.307602046 |
| 0.409028313 | 0.257149468 | 0.028845218 | 0.38002461  |
| 0.452139397 | 0.349903266 | 0.429129412 | 0.39659135  |
| 0.064907606 | 0.349060588 | 0.277675522 | 0.333004474 |
| 0.160228412 | 0.254506501 | 0.202809956 | 0.054497612 |
| 0.254468565 | 0.411367199 | 0.386053324 | 0.177227048 |
| 0.271064216 | 0.082158858 | 0.040869133 | 0.37784471  |
| 0.281233472 | 0.100731671 | 0.21691345  | 0.387127788 |
| 0.003827461 | 0.179397436 | 0.456716311 | 0.203850611 |
| 0.457385922 | 0.477191749 | 0.418757857 | 0.165557128 |
| 0.006079122 | 0.356402328 | 0.334244411 | 0.355899896 |
| 0.392247119 | 0.279780635 | 0.091635549 | 0.097857038 |
| 0.270027799 | 0.055856203 | 0.186109269 | 0.224146568 |
| 0.238400216 | 0.287612652 | 0.171437024 | 0.163279029 |
| 0.208982753 | 0.058721744 | 0.242050803 | 0.201634396 |
| 0.161795029 | 0.220612059 | 0.351807596 | 0.16149189  |
| 0.305393877 | 0.416825191 | 0.382993834 | 0.024345063 |
| 0.285494407 | 0.379991865 | 0.380739491 | 0.009195929 |
| 0.396419058 | 0.009886448 | 0.215717618 | 0.240380642 |
| 0.205157583 | 0.222413365 | 0.251807446 | 0.299715392 |
| 0.271518655 | 0.213811873 | 0.265959773 | 0.216565866 |
| 0.181877191 | 0.171238282 | 0.307308911 | 0.267540189 |
| 0.301560909 | 0.119486704 | 0.074998109 | 0.077155349 |
| 0.060081445 | 0.394664196 | 0.217587958 | 0.049454798 |
| 0.197228596 | 0.270840382 | 0.345330012 | 0.423293509 |
| 0.388907662 | 0.080852356 | 0.269189476 | 0.398442212 |
| 0.190384577 | 0.222914758 | 0.050883202 | 0.268276479 |
| 0.197080379 | 0.281299536 | 0.246795335 | 0.236901277 |
| 0.322783966 | 0.369530639 | 0.20630522  | 0.391965855 |
| 0.308880563 | 0.262662486 | 0.212655224 | 0.11921692  |
| 0.181701149 | 0.098084706 | 0.294634576 | 0.00308972  |
| 0.281235523 | 0.199457326 | 0.458557277 | 0.424754846 |
| 0.265386091 | 0.34573955  | 0.21600754  | 0.106376512 |
| 0.177469319 | 0.149368378 | 0.115126449 | 0.355898428 |
| 0.24305655  | 0.154151859 | 0.305656829 | 0.202925442 |
| 0.386432908 | 0.34216399  | 0.236742632 | 0.194079024 |
| 0.192109407 | 0.140834979 | 0.401399469 | 0.086082861 |
| 0.308734012 | 0.250680772 | 0.209868885 | 0.32657582  |
| 0.242514872 | 0.468053008 | 0.046968673 | 0.487558545 |
| 0.345357328 | 0.096168183 | 0.445158097 | 0.191552605 |
| 0.198010053 | 0.125348613 | 0.235569744 | 0.241280744 |
| 0.208350349 | 0.284085344 | 0.017989843 | 0.120487177 |

|             |             |             |             |
|-------------|-------------|-------------|-------------|
| 0.318472833 | 0.212352216 | 0.342637872 | 0.30262439  |
| 0.2657118   | 0.331850006 | 0.154035424 | 0.230250652 |
| 0.397767026 | 0.411056904 | 0.311811025 | 0.228018263 |
| 0.305146711 | 0.103810151 | 0.250153618 | 0.014616838 |
| 0.342659232 | 0.313746388 | 0.282824488 | 0.05103132  |
| 0.020299183 | 0.281468282 | 0.328393234 | 0.04353096  |
| 0.477594265 | 0.229311075 | 0.224193732 | 0.341288475 |
| 0.127331178 | 0.420305308 | 0.142338898 | 0.379193785 |
| 0.037393257 | 0.194347194 | 0.284325028 | 0.269093198 |
| 0.294601064 | 0.325327542 | 0.374069243 | 0.279700405 |
| 0.039471562 | 0.274549386 | 0.00737362  | 0.364795494 |
| 0.391754677 | 0.330229698 | 0.170270747 | 0.184582272 |
| 0.25126618  | 0.317845464 | 0.259308227 | 0.278882879 |
| 0.016565902 | 0.350741143 | 0.162265931 | 0.362494539 |
| 0.292500237 | 0.280836315 | 0.066163125 | 0.292528446 |
| 0.367849588 | 0.335168545 | 0.214390543 | 0.336594948 |
| 0.417370544 | 0.301351414 | 0.11326326  | 0.191374687 |
| 0.262227081 | 0.04735362  | 0.23090887  | 0.480445597 |
| 0.188896029 | 0.278032834 | 0.45736071  | 0.25125607  |
| 0.295560124 | 0.316966528 | 0.272478537 | 0.456702614 |
| 0.1116894   | 0.212605035 | 0.379674324 | 0.422746975 |
| 0.285033615 | 0.224697261 | 0.298321165 | 0.285678108 |
| 0.389199422 | 0.102901886 | 0.274887615 | 0.313540372 |
| 0.299530872 | 0.244117767 | 0.195326174 | 0.225550448 |
| 0.047148501 | 0.140443823 | 0.261799526 | 0.11415388  |
| 0.278246589 | 0.330646144 | 0.274757502 | 0.36787804  |
| 0.158600632 | 0.04487616  | 0.420258589 | 0.054183619 |
| 0.216612321 | 0.33086991  | 0.191367561 | 0.310636431 |
| 0.15815455  | 0.264665594 | 0.25443678  | 0.002163954 |
| 0.390607294 | 0.058050918 | 0.22853289  | 0.293206751 |
| 0.272749214 | 0.051713599 | 0.392226889 | 0.497353552 |
| 0.212426645 | 0.214216201 | 0.295118739 | 0.402091158 |
| 0.217704644 | 0.254337735 | 0.286833741 | 0.293729436 |
| 0.253269596 | 0.269689482 | 0.290674171 | 0.31830153  |
| 0.305720587 | 0.185156184 |             |             |
| MCM3        | 0.192648006 | 0.318759339 | 0.131110234 |
| 0.300293415 | 0.289945446 | 0.296644928 | 0.17452449  |
| 0.257564179 | 0.246963652 | 0.141014803 | 0.350904044 |
| 0.115437761 | 0.074759345 | 0.39661582  | 0.170695728 |
| 0.288329541 | 0.167464836 | 0.250144713 | 0.080600804 |
| 0.206922764 | 0.294809288 | 0.260957867 | 0.271372449 |
| 0.267637079 | 0.260886343 | 0.25889845  | 0.220438516 |
| 0.39106384  | 0.149603724 | 0.297919644 | 0.107289186 |
| 0.415275173 | 0.289635456 | 0.22607553  | 0.085761971 |
| 0.295561997 | 0.011977768 | 0.412424087 | 0.328192662 |
| 0.154218792 | 0.375149907 | 0.181191076 | 0.362057239 |
| 0.216985478 | 0.138854452 | 0.095089233 | 0.252827088 |
| 0.236551077 | 0.264881187 | 0.131700934 | 0.283603444 |
| 0.233584936 | 0.320225294 | 0.226823762 | 0.01333566  |
| 0.20602883  | 0.045460458 | 0.132151853 | 0.41746712  |
| 0.324002742 | 0.293643586 | 0.137927032 | 0.220961006 |
| 0.239070457 | 0.267951492 | 0.293647399 | 0.206608408 |
| 0.427101644 | 0.144806026 | 0.257535058 | 0.230084097 |
| 0.285481022 | 0.089130222 | 0.271760344 | 0.124945424 |

|             |             |             |             |
|-------------|-------------|-------------|-------------|
| 0.248631658 | 0.335910171 | 0.313594561 | 0.218047286 |
| 0.31782365  | 0.457683384 | 0.28579482  | 0.405812341 |
| 0.087663507 | 0.250273106 | 0.25626268  | 0.321545125 |
| 0.265944881 | 0.155786145 | 0.340588291 | 0.457731137 |
| 0.109799429 | 0.207980544 | 0.27494244  | 0.181902112 |
| 0.337606282 | 0.159471864 | 0.220925125 | 0.177398036 |
| 0.279188791 | 0.28130887  | 0.395366733 | 0.352064374 |
| 0.261033302 | 0.145938498 | 0.405109822 | 0.244195097 |
| 0.346643693 | 0.181703636 | 0.256977657 | 0.333584902 |
| 0.308091804 | 0.403265892 | 0.299971311 | 0.30465021  |
| 0.276419552 | 0.420705987 | 0.328355483 | 0.342995466 |
| 0.06020062  | 0.42478391  | 0.303948909 | 0.192307094 |
| 0.148523572 | 0.237422723 | 0.18272513  | 0.327175915 |
| 0.372782476 | 0.314145982 | 0.322257417 | 0.329080386 |
| 0.371851099 | 0.38608399  | 0.412657295 | 0.340346792 |
| 0.156591348 | 0.150914967 | 0.280230271 | 0.275157054 |
| 0.306469979 | 0.208831485 | 0.227983734 | 0.440076443 |
| 0.39953341  | 0.341978013 | 0.23595058  | 0.450100461 |
| 0.232720161 | 0.466950637 | 0.338627206 | 0.331920992 |
| 0.450192917 | 0.428690603 | 0.450107458 | 0.288629393 |
| 0.425660783 | 0.332125315 | 0.050752715 | 0.316561296 |
| 0.45545837  | 0.028348061 | 0.354553568 | 0.386309087 |
| 0.40407743  | 0.346199268 | 0.439560998 | 0.410200809 |
| 0.403734908 | 0.171396816 | 0.013101135 | 0.320793021 |
| 0.428444272 | 0.386710563 | 0.240689519 | 0.257075061 |
| 0.280712431 | 0.30404982  | 0.289839544 | 0.264327144 |
| 0.475515805 | 0.366624846 | 0.370914984 | 0.297405879 |
| 0.206098369 | 0.36194686  | 0.221892574 | 0.401565258 |
| 0.176767918 | 0.235556945 | 0.125038454 | 0.28132244  |
| 0.203956335 | 0.3226478   | 0.30130401  | 0.249888252 |
| 0.327801457 | 0.253719229 | 0.194809684 | 0.294077335 |
| 0.107879075 | 0.276967773 | 0.264637265 | 0.247919963 |
| 0.194036809 | 0.223879833 | 0.347731795 | 0.320665501 |
| 0.334747677 | 0.279894534 | 0.272777787 | 0.394316304 |
| 0.241304585 | 0.247218064 | 0.297445693 | 0.439413925 |
| 0.444863149 | 0.28139784  | 0.278459852 | 0.086504213 |
| 0.277188502 | 0.143096831 | 0.12646583  | 0.242546735 |
| 0.239211882 | 0.304784636 | 0.294796669 | 0.314288681 |
| 0.30403283  | 0.182880582 | 0.268032109 | 0.430813478 |
| 0.192227901 | 0.332725416 | 0.39193486  | 0.245977131 |
| 0.031006123 | 0.34260812  | 0.350927057 | 0.202737596 |
| 0.273537345 | 0.15609211  | 0.200332714 | 0.37955775  |
| 0.195462498 | 0.211483597 | 0.38388836  | 0.297269967 |
| 0.253741879 | 0.242184647 | 0.437785141 | 0.035111982 |
| 0.225361159 | 0.173037525 | 0.34757608  | 0.16994435  |
| 0.329354573 | 0.315942535 | 0.264687047 | 0.298505684 |
| 0.20022057  | 0.43002442  | 0.340495558 | 0.421453129 |
| 0.242880276 | 0.443102595 | 0.362752275 | 0.39993379  |
| 0.32050638  | 0.203450553 | 0.099383269 | 0.35367789  |
| 0.366483581 | 0.195837936 | 0.13335561  | 0.287812825 |
| 0.206293373 | 0.285505491 | 0.189723575 | 0.435197147 |
| 0.461751987 | 0.367815514 | 0.310965896 | 0.318864956 |
| 0.381629251 | 0.33707779  | 0.330414966 | 0.449836823 |
| 0.159065636 | 0.270132944 | 0.282941021 | 0.365177938 |

|             |             |             |             |
|-------------|-------------|-------------|-------------|
| 0.289585322 | 0.228503673 | 0.319236004 | 0.113401034 |
| 0.007898565 | 0.169041551 | 0.170415741 | 0.32341119  |
| 0.189300336 | 0.228862242 | 0.295516642 | 0.429167273 |
| 0.280922476 | 0.384952714 | 0.246472752 | 0.333978183 |
| 0.372859547 | 0.246804729 | 0.254819957 | 0.287329925 |
| 0.28527587  | 0.100641851 | 0.299589738 | 0.464628324 |
| 0.08974048  | 0.222807998 | 0.267129299 | 0.019078404 |
| 0.150458154 | 0.265371588 | 0.156760471 | 0.280943901 |
| 0.400403225 | 0.26868354  | 0.276796182 | 0.175427693 |
| 0.339085835 | 0.225253658 | 0.030586837 | 0.379286683 |
| 0.378069875 | 0.357553934 | 0.374253673 | 0.366194066 |
| 0.336600731 | 0.266805593 | 0.319621581 | 0.280733439 |
| 0.252317695 | 0.166347556 | 0.208046333 | 0.333291995 |
| 0.012184108 | 0.341871164 | 0.267055143 | 0.26806526  |
| 0.289304537 | 0.289826015 | 0.161000616 | 0.256469757 |
| 0.114669404 | 0.145185996 | 0.265478981 | 0.278158301 |
| 0.293056103 | 0.081409582 | 0.220274821 | 0.238964209 |
| 0.382865709 | 0.347099411 | 0.217282361 | 0.438395681 |
| 0.362040913 | 0.153732724 | 0.329584825 | 0.317180553 |
| 0.215987726 | 0.072473373 | 0.247887275 | 0.025957982 |
| 0.157693329 | 0.375321541 | 0.242737596 | 0.184985142 |
| 0.350078859 | 0.050237829 | 0.358645128 | 0.44987601  |
| 0.369948021 | 0.425896899 | 0.430446156 | 0.239483102 |
| 0.429145948 | 0.048077017 | 0.425020126 | 0.325019535 |
| 0.206442062 | 0.008490336 | 0.036677423 | 0.385054876 |
| 0.300139464 | 0.099770938 | 0.289824546 | 0.276815488 |
| 0.303459076 | 0.212334535 | 0.186297559 | 0.231515848 |
| 0.291750883 | 0.308294405 | 0.200091965 | 0.386274583 |
| 0.327706842 | 0.312675495 | 0.238086682 | 0.160018989 |
| 0.285623118 | 0.204157032 | 0.15168238  | 0.039657821 |
| 0.298729944 | 0.164857669 | 0.404819862 | 0.411606847 |
| 0.455788975 | 0.309144409 | 0.166859119 | 0.252435775 |
| 0.33279825  | 0.136283993 | 0.211740217 | 0.16330262  |
| 0.389498436 | 0.314122163 | 1           | 0.348168752 |
| 0.44867908  | 0.425925338 | 0.14574166  | 0.330653602 |
| 0.082523067 | 0.00835089  | 0.281131227 | 0.28670342  |
| 0.03830499  | 0.268330707 | 0.317246811 | 0.192837989 |
| 0.230571281 | 0.14249308  | 0.194803846 | 0.205306109 |
| 0.336139445 | 0.314746318 | 0.270858687 | 0.238893671 |
| 0.266937263 | 0.196330542 | 0.30810279  | 0.26992169  |
| 0.16785625  | 0.306608334 | 0.267901143 | 0.1044925   |
| 0.25320297  | 0.283498986 | 0.192083965 | 0.258492756 |
| 0.387155575 | 0.40375359  | 0.161082206 | 0.097954565 |
| 0.310613405 | 0.275877086 | 0.417497721 | 0.39164103  |
| 0.446577801 | 0.463052408 | 0.408302053 | 0.262308618 |
| 0.204344475 | 0.308716997 | 0.26036239  | 0.228882859 |
| 0.422222935 | 0.123867617 | 0.396184706 | 0.212854648 |
| 0.22372652  | 0.323684763 | 0.184194424 | 0.211756395 |
| 0.258016502 | 0.298278803 | 0.322928739 | 0.211482424 |
| 0.328917388 | 0.210372457 | 0.161562854 | 0.322377699 |
| 0.321715188 | 0.152106365 | 0.285756296 | 0.253984159 |
| 0.289558943 | 0.096268046 | 0.287763326 | 0.444561781 |
| 0.232567126 | 0.194349775 | 0.282829696 | 0.272147232 |
| 0.322367607 | 0.203471327 | 0.119400128 | 0.333504309 |

|             |             |             |             |
|-------------|-------------|-------------|-------------|
| 0.410045101 | 0.289181014 | 0.41484164  | 0.377804718 |
| 0.174207182 | 0.308717061 | 0.192502536 | 0.294562848 |
| 0.279660857 | 0.294068538 | 0.288076839 | 0.174148251 |
| 0.316879953 | 0.427881861 | 0.342520078 | 0.338198871 |
| 0.252975946 | 0.164043061 | 0.110045015 | 0.33380614  |
| 0.197607152 | 0.242935119 | 0.191957586 | 0.303923674 |
| 0.012448384 | 0.116916353 | 0.390628396 | 0.342631406 |
| 0.438485164 | 0.404037816 | 0.429862514 | 0.242133395 |
| 0.002308399 | 0.263493151 | 0.3491742   | 0.315905286 |
| 0.348670094 | 0.313513298 | 0.151802122 | 0.254788489 |
| 0.340018502 | 0.142829378 | 0.297194939 | 0.253462976 |
| 0.119819031 | 0.285359864 | 0.297620584 | 0.238517377 |
| 0.302014102 | 0.121555476 | 0.197894234 | 0.334757663 |
| 0.107771182 | 0.329843335 | 0.364305405 | 0.143657207 |
| 0.178616515 | 0.362336042 | 0.316172026 | 0.12192494  |
| 0.241256741 | 0.327895569 | 0.367191071 | 0.018398803 |
| 0.311649671 | 0.073102368 | 0.322002265 | 0.351262437 |
| 0.324525287 | 0.300862417 | 0.31486798  | 0.306582751 |
| 0.281564325 | 0.318878378 | 0.371414236 | 0.347954625 |
| 0.326430603 | 0.288732604 | 0.291224512 | 0.271066253 |
| 0.338137871 | 0.279168819 | 0.162458057 | 0.16427116  |
| 0.218732076 | 0.354521561 | 0.320845663 | 0.136157347 |
| 0.318285386 | 0.260117658 | 0.39805143  | 0.384392718 |
| 0.399352331 | 0.150782609 | 0.277928654 | 0.353570365 |
| 0.112710902 | 0.244097888 | 0.154067192 | 0.280151586 |
| 0.337379201 | 0.27674766  | 0.242634666 | 0.272253509 |
| 0.247502021 | 0.418771274 | 0.310130134 | 0.392338863 |
| 0.318972542 | 0.219084792 | 0.170096663 | 0.279122726 |
| 0.316621525 | 0.20551374  | 0.278571585 | 0.026611114 |
| 0.336718016 | 0.294022847 | 0.372972672 | 0.40938411  |
| 0.181732235 | 0.385655874 | 0.196998322 | 0.246527283 |
| 0.143636472 | 0.218340734 | 0.254764829 | 0.281953191 |
| 0.145578372 | 0.311915479 | 0.313383821 | 0.249565607 |
| 0.297959072 | 0.25206671  | 0.226957937 | 0.280945594 |
| 0.270351781 | 0.246007882 | 0.395897333 | 0.19856474  |
| 0.249538101 | 0.258257815 | 0.20303541  | 0.341823475 |
| 0.313992031 | 0.404072913 | 0.163157609 | 0.41468264  |
| 0.288056688 | 0.190637863 | 0.463676439 | 0.267596304 |
| 0.274010976 | 0.271596063 | 0.138300586 | 0.227198227 |
| 0.279720215 | 0.215477437 | 0.007515126 | 0.085925708 |
| 0.350548791 | 0.181659618 | 0.267165282 | 0.277903804 |
| 0.245841418 | 0.327922602 | 0.105016937 | 0.281303245 |
| 0.377823076 | 0.416747947 | 0.356339702 | 0.300745148 |
| 0.31656498  | 0.27743331  | 0.27582859  | 0.014206813 |
| 0.276707277 | 0.240464594 | 0.214094749 | 0.185540524 |
| 0.106815366 | 0.158294996 | 0.27672272  | 0.11376176  |
| 0.394307601 | 0.14105207  | 0.211247608 | 0.292246229 |
| 0.222886763 | 0.4275464   | 0.280606723 | 0.338835394 |
| 0.088143287 | 0.291418842 | 0.22879466  | 0.219565535 |
| 0.332581651 | 0.24805746  | 0.343970283 | 0.225919031 |
| 0.165211692 | 0.313626302 | 0.0127337   | 0.421457661 |
| 0.387310359 | 0.233283599 | 0.263959775 | 0.136933867 |
| 0.338520254 | 0.320412155 | 0.25274734  | 0.231553303 |
| 0.091976968 | 0.295423238 | 0.307237643 | 0.362965196 |

|             |             |             |             |
|-------------|-------------|-------------|-------------|
| 0.170931253 | 0.241401851 | 0.219859206 | 0.231479861 |
| 0.403384646 | 0.274127912 | 0.28324943  | 0.209032254 |
| 0.387398462 | 0.28759471  | 0.183699318 | 0.239287502 |
| 0.217187237 | 0.148124154 | 0.213892694 | 0.43831473  |
| 0.333019773 | 0.227578173 | 0.366524606 | 0.347643194 |
| 0.22083973  | 0.335879881 | 0.220726945 | 0.418527872 |
| 0.234076525 | 0.342840168 | 0.317037444 | 0.375997603 |
| 0.33860288  | 0.192887131 | 0.226443255 | 0.29968768  |
| 0.377731129 | 0.262165516 | 0.213713989 | 0.328243114 |
| 0.197713269 | 0.322836792 | 0.19154447  | 0.272863125 |
| 0.170765899 | 0.258330685 | 0.303876129 | 0.249054099 |
| 0.342394433 | 0.304013793 | 0.258672159 | 0.414098586 |
| 0.319162699 | 0.14986678  | 0.439419577 | 0.026181704 |
| 0.2881886   | 0.331439952 | 0.319425902 | 0.281968284 |
| 0.261039384 | 0.287193593 | 0.260535647 | 0.018691845 |
| 0.334795105 | 0.070122034 | 0.243210202 | 0.315582738 |
| 0.206654695 | 0.166481178 | 0.40060415  | 0.431148528 |
| 0.292761624 | 0.194152522 | 0.206895068 | 0.384631412 |
| 0.145752498 | 0.168151019 | 0.202623614 | 0.261823249 |
| 0.182651778 | 0.204021939 | 0.231226088 | 0.242764674 |
| 0.304506432 | 0.286061902 |             |             |
| MCM4        | 0.228155346 | 0.332509899 | 0.191281926 |
| 0.320445579 | 0.23800042  | 0.305564359 | 0.1931747   |
| 0.254654851 | 0.257914836 | 0.160306277 | 0.324051043 |
| 0.13543261  | 0.040956825 | 0.377392647 | 0.176198646 |
| 0.261554544 | 0.163600244 | 0.256833908 | 0.072396643 |
| 0.220133646 | 0.235854532 | 0.222430969 | 0.298986953 |
| 0.216424361 | 0.29565381  | 0.296153299 | 0.204696386 |
| 0.3890452   | 0.13645195  | 0.291385498 | 0.127932683 |
| 0.410728561 | 0.237618827 | 0.209165422 | 0.122438055 |
| 0.287083243 | 0.006303078 | 0.429762048 | 0.288309937 |
| 0.115100106 | 0.373491365 | 0.215062204 | 0.330007969 |
| 0.242154348 | 0.184087054 | 0.106590084 | 0.243237029 |
| 0.262608336 | 0.252637975 | 0.185061651 | 0.295665307 |
| 0.229789325 | 0.335131817 | 0.255310264 | 0.011282125 |
| 0.166523332 | 0.029181742 | 0.101851547 | 0.425221267 |
| 0.323938577 | 0.266043132 | 0.130434783 | 0.225109171 |
| 0.232468075 | 0.252488465 | 0.278173467 | 0.218900358 |
| 0.421158943 | 0.09688037  | 0.257206666 | 0.230414097 |
| 0.296595126 | 0.125130002 | 0.292062876 | 0.171944953 |
| 0.236869803 | 0.296511289 | 0.268820536 | 0.180563738 |
| 0.340504674 | 0.458697675 | 0.290651007 | 0.42796831  |
| 0.055200286 | 0.209113742 | 0.207698401 | 0.297401005 |
| 0.263647292 | 0.168889428 | 0.333833064 | 0.452427873 |
| 0.136619287 | 0.232679557 | 0.281575536 | 0.226247781 |
| 0.340920299 | 0.132775687 | 0.245019845 | 0.118917853 |
| 0.246050147 | 0.242296047 | 0.406733927 | 0.348737667 |
| 0.216610594 | 0.202452258 | 0.436348856 | 0.197412845 |
| 0.295229655 | 0.238278706 | 0.201348277 | 0.307223068 |
| 0.30987283  | 0.393825884 | 0.297226904 | 0.291879499 |
| 0.246942322 | 0.414335595 | 0.336513537 | 0.332003825 |
| 0.063582044 | 0.426621532 | 0.328302452 | 0.179401029 |
| 0.197874409 | 0.207498577 | 0.147362057 | 0.30455714  |
| 0.353601984 | 0.310136469 | 0.331830372 | 0.286229641 |

|             |             |             |             |
|-------------|-------------|-------------|-------------|
| 0.334355204 | 0.414553808 | 0.41759693  | 0.318348255 |
| 0.183827105 | 0.119148762 | 0.257993326 | 0.275745223 |
| 0.294014339 | 0.224511454 | 0.172981715 | 0.458511676 |
| 0.387589659 | 0.30690888  | 0.277568849 | 0.467209288 |
| 0.227080235 | 0.450211436 | 0.348150322 | 0.327955716 |
| 0.458539681 | 0.449884953 | 0.425251509 | 0.25867886  |
| 0.431636825 | 0.356282856 | 0.043185163 | 0.303582673 |
| 0.424245883 | 0.018919631 | 0.336104858 | 0.365942548 |
| 0.415567944 | 0.319242383 | 0.413522178 | 0.392318142 |
| 0.412814275 | 0.208461984 | 0.010296623 | 0.273826736 |
| 0.44216366  | 0.372118575 | 0.190511419 | 0.248650129 |
| 0.243307542 | 0.320638425 | 0.267707172 | 0.237466599 |
| 0.453733127 | 0.351096838 | 0.359280504 | 0.297786176 |
| 0.231792428 | 0.360398442 | 0.200828264 | 0.434038459 |
| 0.187331398 | 0.276711411 | 0.179424247 | 0.276190848 |
| 0.234170801 | 0.291511315 | 0.31912517  | 0.225399501 |
| 0.30690072  | 0.271642348 | 0.167573801 | 0.256367604 |
| 0.162556921 | 0.282276721 | 0.293557872 | 0.2882716   |
| 0.19559396  | 0.248072857 | 0.317087942 | 0.293712924 |
| 0.274348269 | 0.332613221 | 0.270991791 | 0.377810619 |
| 0.221381676 | 0.302090988 | 0.303579732 | 0.412807679 |
| 0.404110693 | 0.251309809 | 0.284530059 | 0.094857767 |
| 0.241403612 | 0.137360363 | 0.089004555 | 0.229238526 |
| 0.279773444 | 0.271236572 | 0.276720096 | 0.282191271 |
| 0.344964291 | 0.211665416 | 0.240176292 | 0.431624314 |
| 0.246446237 | 0.279785701 | 0.356375675 | 0.258381583 |
| 0.047175669 | 0.34911137  | 0.326378077 | 0.146262062 |
| 0.28260647  | 0.103279191 | 0.157815919 | 0.360504769 |
| 0.157707692 | 0.154141494 | 0.364457082 | 0.266515199 |
| 0.238653169 | 0.287827151 | 0.417223535 | 0.022791875 |
| 0.200648679 | 0.130094599 | 0.311589009 | 0.194808628 |
| 0.336483326 | 0.291721332 | 0.212696612 | 0.241689301 |
| 0.260387994 | 0.428647031 | 0.323391196 | 0.406763119 |
| 0.226577471 | 0.426081778 | 0.333379811 | 0.372631034 |
| 0.320560634 | 0.189382849 | 0.065443758 | 0.333208696 |
| 0.347124924 | 0.189408555 | 0.191745781 | 0.267294472 |
| 0.211483495 | 0.262304395 | 0.136738107 | 0.414247351 |
| 0.457999967 | 0.397678616 | 0.257453933 | 0.282322014 |
| 0.354902885 | 0.349908969 | 0.306394639 | 0.427520544 |
| 0.172344758 | 0.237778103 | 0.246195101 | 0.312835513 |
| 0.317845423 | 0.169640849 | 0.310891913 | 0.078475211 |
| 0.005502485 | 0.204256418 | 0.218227905 | 0.263093452 |
| 0.126407342 | 0.234114461 | 0.28133038  | 0.419245387 |
| 0.273615491 | 0.3701595   | 0.256665266 | 0.295165772 |
| 0.379833839 | 0.214152081 | 0.224106919 | 0.25703225  |
| 0.293647393 | 0.109925486 | 0.271924975 | 0.470716049 |
| 0.13797311  | 0.163677104 | 0.269444237 | 0.01791701  |
| 0.185770222 | 0.275814976 | 0.207380093 | 0.310869211 |
| 0.359863131 | 0.308444721 | 0.318044725 | 0.197158092 |
| 0.309529798 | 0.247523041 | 0.026919905 | 0.371817566 |
| 0.377242634 | 0.355658662 | 0.376432531 | 0.381437816 |
| 0.323334459 | 0.261870411 | 0.28902373  | 0.315599963 |
| 0.26205493  | 0.213632555 | 0.158090274 | 0.295569338 |
| 0.014609868 | 0.312768381 | 0.226837715 | 0.290191043 |

|             |             |             |             |
|-------------|-------------|-------------|-------------|
| 0.269502102 | 0.282699215 | 0.180747078 | 0.220865927 |
| 0.160040802 | 0.110229143 | 0.2661402   | 0.238947887 |
| 0.258312237 | 0.110979249 | 0.237142751 | 0.210824088 |
| 0.404821002 | 0.34635033  | 0.194166103 | 0.438399456 |
| 0.330738179 | 0.219833009 | 0.295573492 | 0.291972199 |
| 0.230685931 | 0.071853077 | 0.259427234 | 0.033535075 |
| 0.148011796 | 0.377332145 | 0.22343727  | 0.242884555 |
| 0.347914868 | 0.071344921 | 0.369334888 | 0.442028355 |
| 0.394710803 | 0.404051438 | 0.420174279 | 0.185015055 |
| 0.428700571 | 0.032263584 | 0.416461824 | 0.331690559 |
| 0.218119225 | 0.011728236 | 0.030869073 | 0.364232476 |
| 0.278488651 | 0.156819714 | 0.30394606  | 0.294901299 |
| 0.283879407 | 0.264142766 | 0.190759235 | 0.166044502 |
| 0.294585362 | 0.239487556 | 0.133381352 | 0.403763136 |
| 0.306233215 | 0.278860569 | 0.256225802 | 0.205938482 |
| 0.263015238 | 0.2197873   | 0.193151603 | 0.033734912 |
| 0.267534028 | 0.22036672  | 0.438535255 | 0.412204495 |
| 0.43911269  | 0.282103357 | 0.176895872 | 0.236964287 |
| 0.309179156 | 0.20246912  | 0.20013656  | 0.22305595  |
| 0.403480419 | 0.292299966 | 0.348168752 | 1           |
| 0.424588279 | 0.423123669 | 0.163054289 | 0.307996941 |
| 0.102405346 | 0.00502881  | 0.320707199 | 0.279340252 |
| 0.028798276 | 0.242018209 | 0.332276344 | 0.188456933 |
| 0.202342282 | 0.17217955  | 0.15140891  | 0.154147728 |
| 0.314016507 | 0.286164879 | 0.209156553 | 0.252077895 |
| 0.219718432 | 0.14306312  | 0.265587943 | 0.238594181 |
| 0.150390193 | 0.326635985 | 0.304309525 | 0.125637891 |
| 0.262914843 | 0.263750616 | 0.217212029 | 0.283528651 |
| 0.360446637 | 0.382239583 | 0.167209976 | 0.094049448 |
| 0.324746971 | 0.238769663 | 0.38575437  | 0.39858912  |
| 0.456131628 | 0.443730274 | 0.409663542 | 0.200003393 |
| 0.221515445 | 0.279561064 | 0.206080545 | 0.168987219 |
| 0.411346006 | 0.179288085 | 0.403781846 | 0.169564788 |
| 0.246976488 | 0.32903758  | 0.174742433 | 0.224568386 |
| 0.22649005  | 0.292885607 | 0.266859552 | 0.277668691 |
| 0.290297552 | 0.157613201 | 0.181613448 | 0.314517594 |
| 0.328149927 | 0.113192125 | 0.294466516 | 0.258154395 |
| 0.300156847 | 0.109065118 | 0.27731163  | 0.426002286 |
| 0.271108469 | 0.22764708  | 0.336949498 | 0.262870005 |
| 0.308830054 | 0.212139236 | 0.130265597 | 0.350802483 |
| 0.384891315 | 0.284410151 | 0.425173271 | 0.329928311 |
| 0.214349975 | 0.273953006 | 0.16257267  | 0.262179442 |
| 0.270878725 | 0.306666159 | 0.255833362 | 0.205520491 |
| 0.301163745 | 0.432985269 | 0.34704925  | 0.301288317 |
| 0.253248141 | 0.218866173 | 0.166503063 | 0.319477984 |
| 0.141765694 | 0.266441881 | 0.218769899 | 0.276868897 |
| 0.010765332 | 0.073415954 | 0.365690959 | 0.299788989 |
| 0.430615945 | 0.380888565 | 0.421266434 | 0.239401982 |
| 0.001010302 | 0.247811326 | 0.325005827 | 0.304485321 |
| 0.352552835 | 0.321040715 | 0.140946711 | 0.235149395 |
| 0.321436145 | 0.204778638 | 0.261672303 | 0.266451441 |
| 0.098329367 | 0.298996651 | 0.289721793 | 0.247369622 |
| 0.250830488 | 0.171694157 | 0.148824749 | 0.325288487 |
| 0.076239843 | 0.320959881 | 0.334449406 | 0.16432523  |



|             |             |             |             |
|-------------|-------------|-------------|-------------|
| 0.13930704  | 0.334160991 | 0.31086553  | 0.152203469 |
| 0.205075145 | 0.306977493 | 0.343802551 | 0.021007814 |
| 0.296278706 | 0.079751728 | 0.257959746 | 0.29587711  |
| 0.272282365 | 0.248190364 | 0.260464514 | 0.261217438 |
| 0.288326564 | 0.302182324 | 0.340748501 | 0.322783436 |
| 0.27505716  | 0.281368884 | 0.268915121 | 0.288928347 |
| 0.278793195 | 0.294615967 | 0.204777615 | 0.219037575 |
| 0.207029071 | 0.346855855 | 0.321714648 | 0.196442142 |
| 0.285257424 | 0.260921755 | 0.366697024 | 0.401226865 |
| 0.362884029 | 0.206033123 | 0.252754188 | 0.357749241 |
| 0.108160561 | 0.247352002 | 0.190213374 | 0.29558731  |
| 0.313484904 | 0.203913303 | 0.25561718  | 0.319107578 |
| 0.263967496 | 0.418346238 | 0.31413969  | 0.379041281 |
| 0.295614716 | 0.212989587 | 0.200890001 | 0.238969534 |
| 0.339943212 | 0.243356655 | 0.216113053 | 0.038462526 |
| 0.321213235 | 0.33379867  | 0.352580306 | 0.428705877 |
| 0.14514988  | 0.361826521 | 0.228996123 | 0.273455908 |
| 0.173710709 | 0.277719113 | 0.277888147 | 0.275645918 |
| 0.108774391 | 0.296664757 | 0.263644483 | 0.287954141 |
| 0.282522515 | 0.253691181 | 0.18138151  | 0.268110278 |
| 0.2543093   | 0.293030293 | 0.409224627 | 0.246772162 |
| 0.253806048 | 0.189246999 | 0.233787771 | 0.299317072 |
| 0.257871053 | 0.39381749  | 0.198071212 | 0.40098467  |
| 0.252683437 | 0.23598858  | 0.452485746 | 0.267044918 |
| 0.27853168  | 0.208695692 | 0.097489098 | 0.241289298 |
| 0.254279447 | 0.182858659 | 0.007448432 | 0.058281676 |
| 0.322664999 | 0.17739746  | 0.272423386 | 0.268209556 |
| 0.188917878 | 0.290953392 | 0.070675844 | 0.290044118 |
| 0.405096062 | 0.441162455 | 0.328109913 | 0.301566439 |
| 0.314164572 | 0.26486754  | 0.304583217 | 0.010562783 |
| 0.267763651 | 0.233324269 | 0.214603243 | 0.18431326  |
| 0.122034828 | 0.118512908 | 0.280399741 | 0.15988065  |
| 0.360052071 | 0.106715709 | 0.229298129 | 0.291124804 |
| 0.24772824  | 0.452628578 | 0.215803984 | 0.319248046 |
| 0.113895941 | 0.289531309 | 0.207793352 | 0.21434633  |
| 0.270334185 | 0.197049439 | 0.325109265 | 0.166080944 |
| 0.173238344 | 0.261075692 | 0.013491058 | 0.4362933   |
| 0.422127093 | 0.202035924 | 0.279031513 | 0.144923236 |
| 0.307455709 | 0.305803221 | 0.197888892 | 0.229455922 |
| 0.09401966  | 0.257303635 | 0.283775459 | 0.360121815 |
| 0.156245594 | 0.242464865 | 0.208829194 | 0.192205101 |
| 0.44206946  | 0.232546126 | 0.277701389 | 0.202368003 |
| 0.399246399 | 0.288201446 | 0.246438911 | 0.185376381 |
| 0.230450658 | 0.191359245 | 0.231232807 | 0.427883049 |
| 0.278203225 | 0.164927704 | 0.32406315  | 0.316001599 |
| 0.176987579 | 0.334256545 | 0.227347827 | 0.413183583 |
| 0.172232793 | 0.32540419  | 0.283926159 | 0.370666728 |
| 0.310318599 | 0.130586454 | 0.167751523 | 0.236634976 |
| 0.402588047 | 0.271081294 | 0.165289907 | 0.340815    |
| 0.146148731 | 0.294603542 | 0.222576923 | 0.200769629 |
| 0.15610603  | 0.225499015 | 0.286878303 | 0.271006711 |
| 0.310070715 | 0.278508118 | 0.204528094 | 0.392823549 |
| 0.26375848  | 0.153473038 | 0.421272901 | 0.014174346 |
| 0.320176223 | 0.307448507 | 0.295908419 | 0.243479801 |

|             |             |             |             |
|-------------|-------------|-------------|-------------|
| 0.301234237 | 0.289757231 | 0.299302918 | 0.02482678  |
| 0.300776841 | 0.054766147 | 0.210272564 | 0.250396955 |
| 0.168999975 | 0.196700834 | 0.405060434 | 0.401780419 |
| 0.298771252 | 0.180615702 | 0.188380558 | 0.384188837 |
| 0.09806219  | 0.152309565 | 0.176825944 | 0.28805538  |
| 0.13175534  | 0.219997564 | 0.22612447  | 0.223492356 |
| 0.317423134 | 0.276478955 |             |             |
| MCM5        | 0.166206407 | 0.457943256 | 0.127210139 |
| 0.263237063 | 0.400926398 | 0.481778185 | 0.146167948 |
| 0.248666485 | 0.419663185 | 0.345128871 | 0.476601522 |
| 0.062370895 | 0.113018194 | 0.503450797 | 0.136576292 |
| 0.478849014 | 0.099764955 | 0.226181215 | 0.125491291 |
| 0.322875515 | 0.390435512 | 0.416694192 | 0.471248911 |
| 0.382654369 | 0.280852292 | 0.445901013 | 0.436022209 |
| 0.495598256 | 0.305126117 | 0.503992132 | 0.235317282 |
| 0.455660969 | 0.420151655 | 0.434505581 | 0.053139953 |
| 0.498521888 | 0.0200858   | 0.456767707 | 0.397114058 |
| 0.202724938 | 0.422254229 | 0.390881666 | 0.384873326 |
| 0.444880271 | 0.101981404 | 0.234680501 | 0.474314707 |
| 0.420938078 | 0.387427676 | 0.142759747 | 0.499481579 |
| 0.445530491 | 0.457010851 | 0.446262367 | 0.008016323 |
| 0.358458189 | 0.10130874  | 0.267083241 | 0.497927586 |
| 0.335430424 | 0.245379286 | 0.327909189 | 0.352399906 |
| 0.460030849 | 0.459703336 | 0.371842284 | 0.43853229  |
| 0.498633605 | 0.234849013 | 0.483569336 | 0.258046921 |
| 0.491941421 | 0.086870068 | 0.279535623 | 0.163488231 |
| 0.459438251 | 0.332903359 | 0.4405218   | 0.373968268 |
| 0.455860828 | 0.521829304 | 0.361057823 | 0.496767799 |
| 0.148912259 | 0.416175822 | 0.364747337 | 0.4205468   |
| 0.455751215 | 0.1763661   | 0.514310003 | 0.523396958 |
| 0.115603205 | 0.43923035  | 0.489412425 | 0.224642139 |
| 0.47834519  | 0.323026562 | 0.453209744 | 0.236164111 |
| 0.447645441 | 0.442307939 | 0.476987225 | 0.435028687 |
| 0.396591776 | 0.156835732 | 0.487221544 | 0.39380075  |
| 0.418935341 | 0.17531257  | 0.336741365 | 0.503222551 |
| 0.511559692 | 0.504707492 | 0.481977615 | 0.466787157 |
| 0.467073582 | 0.498524182 | 0.507448168 | 0.471187766 |
| 0.16798478  | 0.515396188 | 0.320652528 | 0.115060621 |
| 0.156886617 | 0.183002298 | 0.31086452  | 0.405511124 |
| 0.507177853 | 0.452400245 | 0.345509242 | 0.368167185 |
| 0.501416019 | 0.474481262 | 0.512377517 | 0.501618166 |
| 0.108559749 | 0.298540847 | 0.470452701 | 0.391427374 |
| 0.488829353 | 0.217772747 | 0.338038273 | 0.513965945 |
| 0.466895879 | 0.507788186 | 0.286169437 | 0.510357463 |
| 0.321131177 | 0.515781704 | 0.485014564 | 0.310565403 |
| 0.519662919 | 0.498465654 | 0.506115973 | 0.473154279 |
| 0.477406804 | 0.469627888 | 0.104477552 | 0.46791392  |
| 0.491477069 | 0.025700677 | 0.501915875 | 0.506723099 |
| 0.492991433 | 0.513851509 | 0.511545003 | 0.503096854 |
| 0.495145927 | 0.161740563 | 0.040709126 | 0.411245809 |
| 0.508880266 | 0.485752877 | 0.239243517 | 0.484713986 |
| 0.45118544  | 0.501144277 | 0.484313803 | 0.410023936 |
| 0.51834631  | 0.499055553 | 0.499819735 | 0.490995181 |
| 0.395797566 | 0.403321336 | 0.429833073 | 0.473320584 |

|             |             |             |             |
|-------------|-------------|-------------|-------------|
| 0.115199214 | 0.230230965 | 0.12079254  | 0.411653542 |
| 0.405112978 | 0.305972199 | 0.497254171 | 0.434549533 |
| 0.329133416 | 0.442759788 | 0.376296226 | 0.462920255 |
| 0.119950504 | 0.507379172 | 0.288147903 | 0.305672968 |
| 0.116746705 | 0.234743707 | 0.340315586 | 0.278197401 |
| 0.384646234 | 0.277506066 | 0.501324369 | 0.496601775 |
| 0.432335428 | 0.300384579 | 0.512144344 | 0.488595582 |
| 0.471417266 | 0.460162259 | 0.348625475 | 0.037046244 |
| 0.403023435 | 0.345448989 | 0.233536537 | 0.462024702 |
| 0.245426745 | 0.393799836 | 0.49063061  | 0.478717085 |
| 0.420699779 | 0.252346131 | 0.465546508 | 0.446682212 |
| 0.252778178 | 0.419610969 | 0.513783354 | 0.480476227 |
| 0.013691131 | 0.472871202 | 0.518127377 | 0.237521263 |
| 0.436409015 | 0.199673716 | 0.311507774 | 0.507933109 |
| 0.362790161 | 0.312831848 | 0.500836059 | 0.467559433 |
| 0.42979986  | 0.27871784  | 0.514675636 | 0.07474832  |
| 0.412162046 | 0.109085014 | 0.412604437 | 0.381940269 |
| 0.396390174 | 0.411912954 | 0.399428188 | 0.382404187 |
| 0.233101491 | 0.512967943 | 0.471362248 | 0.507208873 |
| 0.452178223 | 0.519190742 | 0.51606488  | 0.506191706 |
| 0.476489965 | 0.421605425 | 0.175712174 | 0.519353033 |
| 0.506939178 | 0.379244673 | 0.152190928 | 0.493101715 |
| 0.433317424 | 0.484519445 | 0.189131928 | 0.505527751 |
| 0.502059168 | 0.463112554 | 0.271672896 | 0.465535214 |
| 0.490430054 | 0.377478025 | 0.477529579 | 0.5208953   |
| 0.374294785 | 0.4543024   | 0.439165871 | 0.473108832 |
| 0.307176374 | 0.309628679 | 0.398513923 | 0.215237742 |
| 0.012359031 | 0.174639122 | 0.152523223 | 0.286875415 |
| 0.236212853 | 0.463991856 | 0.486252421 | 0.509610664 |
| 0.240692012 | 0.471521507 | 0.349330343 | 0.430340623 |
| 0.472784657 | 0.432098701 | 0.438431944 | 0.466616802 |
| 0.363276386 | 0.050398434 | 0.230834083 | 0.526811474 |
| 0.097252061 | 0.315636196 | 0.431962849 | 0.008452834 |
| 0.121476753 | 0.456125639 | 0.175544022 | 0.274336315 |
| 0.499369593 | 0.277852033 | 0.343085943 | 0.393600069 |
| 0.454928906 | 0.195967309 | 0.009796722 | 0.487317482 |
| 0.47084767  | 0.455121975 | 0.470178133 | 0.450885284 |
| 0.471144423 | 0.465563069 | 0.49257996  | 0.458410273 |
| 0.221120446 | 0.184031806 | 0.303889228 | 0.426269078 |
| 0.012988551 | 0.471748501 | 0.397949529 | 0.261916431 |
| 0.493158031 | 0.42432475  | 0.10470778  | 0.427721398 |
| 0.067745616 | 0.252119274 | 0.437455244 | 0.338729643 |
| 0.435720592 | 0.047766788 | 0.331181247 | 0.418588742 |
| 0.45178565  | 0.444050566 | 0.409355769 | 0.520461908 |
| 0.460782369 | 0.220892739 | 0.431734109 | 0.482095061 |
| 0.170746729 | 0.157061778 | 0.459185839 | 0.051002467 |
| 0.256220074 | 0.447492081 | 0.448516912 | 0.160423062 |
| 0.419618558 | 0.021283951 | 0.453626389 | 0.524668629 |
| 0.458496163 | 0.507395393 | 0.50139529  | 0.348418495 |
| 0.501105359 | 0.120194539 | 0.514546709 | 0.482452573 |
| 0.440489613 | 0.003634917 | 0.01791023  | 0.51028421  |
| 0.490497922 | 0.119409723 | 0.288845364 | 0.4498762   |
| 0.233096421 | 0.274335911 | 0.149841423 | 0.26786713  |
| 0.496060758 | 0.350913372 | 0.250293338 | 0.470541987 |

|             |             |                      |             |
|-------------|-------------|----------------------|-------------|
| 0.381764047 | 0.359924758 | 0.47001234           | 0.175263566 |
| 0.475933983 | 0.135504801 | 0.172781147          | 0.020137192 |
| 0.455004958 | 0.199040699 | 0.476534 0.498436702 |             |
| 0.498547867 | 0.476967823 | 0.381668721          | 0.425655217 |
| 0.474427276 | 0.181446209 | 0.409734779          | 0.207070301 |
| 0.480597522 | 0.49569836  | 0.44867908           | 0.424588279 |
| 1           | 0.487231908 | 0.095806764          | 0.501504439 |
| 0.039079961 | 0.004507081 | 0.478681712          | 0.382589634 |
| 0.085720889 | 0.46382663  | 0.382771906          | 0.327451694 |
| 0.325555713 | 0.089516612 | 0.333482898          | 0.320612855 |
| 0.429221459 | 0.478010141 | 0.369875024          | 0.34863172  |
| 0.361420264 | 0.225378695 | 0.315855042          | 0.277128818 |
| 0.317929347 | 0.406266475 | 0.288117097          | 0.067489218 |
| 0.485559154 | 0.48954598  | 0.141671029          | 0.27627967  |
| 0.513642809 | 0.516678854 | 0.116926327          | 0.039342654 |
| 0.385330172 | 0.425735316 | 0.511442334          | 0.485217744 |
| 0.523720177 | 0.5200823   | 0.425776216          | 0.238929696 |
| 0.157999172 | 0.431795565 | 0.379392751          | 0.183638738 |
| 0.500945019 | 0.144394575 | 0.474244168          | 0.361241745 |
| 0.224664163 | 0.354775431 | 0.096608105          | 0.183034291 |
| 0.447051677 | 0.306889945 | 0.30365279           | 0.261381145 |
| 0.448039413 | 0.314778815 | 0.123986182          | 0.338398103 |
| 0.469118683 | 0.242647116 | 0.291373256          | 0.408491007 |
| 0.444959063 | 0.257026461 | 0.502302308          | 0.471671321 |
| 0.242722588 | 0.219357375 | 0.416951352          | 0.459103021 |
| 0.507416734 | 0.437673042 | 0.066607116          | 0.464200716 |
| 0.497254215 | 0.5117322   | 0.492690504          | 0.471097157 |
| 0.174953884 | 0.474234628 | 0.374447142          | 0.452369491 |
| 0.314748003 | 0.478118315 | 0.363296563          | 0.14707705  |
| 0.382777683 | 0.487144717 | 0.479892908          | 0.29910187  |
| 0.475021461 | 0.226668282 | 0.129724988          | 0.481833691 |
| 0.265483561 | 0.203766662 | 0.414646908          | 0.486573869 |
| 0.005028481 | 0.178828864 | 0.485283029          | 0.370987487 |
| 0.509607507 | 0.507396748 | 0.477473133          | 0.358401796 |
| 0.003238582 | 0.474513849 | 0.496219215          | 0.498296134 |
| 0.490947825 | 0.454042737 | 0.223383665          | 0.173998176 |
| 0.398582795 | 0.162718788 | 0.271606571          | 0.424935768 |
| 0.232975253 | 0.504397357 | 0.320024319          | 0.326990479 |
| 0.31801121  | 0.172097152 | 0.300702702          | 0.371770134 |
| 0.194803203 | 0.366860732 | 0.464339131          | 0.334818217 |
| 0.279717814 | 0.484183534 | 0.497398117          | 0.077179822 |
| 0.417034547 | 0.474621978 | 0.472777752          | 0.009896446 |
| 0.512474693 | 0.029047131 | 0.324455446          | 0.347340571 |
| 0.323876667 | 0.343219572 | 0.375741684          | 0.401304395 |
| 0.465252936 | 0.362636631 | 0.414844643          | 0.371782656 |
| 0.28385843  | 0.344986546 | 0.471904858          | 0.460733287 |
| 0.399458671 | 0.246950592 | 0.1736731            | 0.165710034 |
| 0.13053243  | 0.485271698 | 0.350417863          | 0.148768426 |
| 0.355615823 | 0.455101101 | 0.438519298          | 0.482081141 |
| 0.471844231 | 0.18886636  | 0.439712916          | 0.49786759  |
| 0.279368126 | 0.396560626 | 0.147489159          | 0.474659478 |
| 0.372412453 | 0.326295598 | 0.460398372          | 0.439500447 |
| 0.477229454 | 0.438283886 | 0.349541146          | 0.468250141 |
| 0.466205911 | 0.423210736 | 0.375587618          | 0.187850874 |

|             |             |             |             |
|-------------|-------------|-------------|-------------|
| 0.323002794 | 0.236975211 | 0.363352659 | 0.009021069 |
| 0.475990384 | 0.390303075 | 0.519031592 | 0.486498225 |
| 0.340636961 | 0.449320474 | 0.396382964 | 0.204688196 |
| 0.321976485 | 0.255341252 | 0.257393509 | 0.490654394 |
| 0.264142797 | 0.31158862  | 0.411092617 | 0.426258571 |
| 0.498799166 | 0.473913327 | 0.336775754 | 0.379288498 |
| 0.354094706 | 0.315890823 | 0.473259818 | 0.225744309 |
| 0.486204869 | 0.278082328 | 0.420656063 | 0.433561981 |
| 0.347900858 | 0.494939109 | 0.138399536 | 0.506689467 |
| 0.44564694  | 0.225642735 | 0.500020288 | 0.405099825 |
| 0.394846205 | 0.214530083 | 0.236285959 | 0.451537235 |
| 0.354063103 | 0.390138504 | 0.021526587 | 0.111678984 |
| 0.448899016 | 0.372702989 | 0.46991568  | 0.453618632 |
| 0.332225638 | 0.43776448  | 0.192379207 | 0.424208781 |
| 0.473089012 | 0.496715113 | 0.411016491 | 0.364868708 |
| 0.463990832 | 0.214493723 | 0.481045802 | 0.025809895 |
| 0.500712021 | 0.471330884 | 0.445910471 | 0.132838704 |
| 0.06067571  | 0.272912146 | 0.499171634 | 0.140813001 |
| 0.504259612 | 0.25312243  | 0.424656158 | 0.498818118 |
| 0.28420659  | 0.501959797 | 0.230902815 | 0.504266783 |
| 0.108488137 | 0.374742841 | 0.427848686 | 0.442398529 |
| 0.353140544 | 0.378578331 | 0.484732361 | 0.311467264 |
| 0.094579127 | 0.378536496 | 0.007516495 | 0.432229588 |
| 0.471933932 | 0.41331526  | 0.30732336  | 0.336096765 |
| 0.398658324 | 0.44293459  | 0.359382073 | 0.458503219 |
| 0.037211263 | 0.459106449 | 0.323266821 | 0.487561012 |
| 0.307563111 | 0.45311519  | 0.133673239 | 0.392748392 |
| 0.467893208 | 0.410677779 | 0.358073848 | 0.392569171 |
| 0.476287976 | 0.445567487 | 0.256233455 | 0.299390157 |
| 0.444811062 | 0.142646554 | 0.435340165 | 0.519308599 |
| 0.305575939 | 0.295925052 | 0.50856032  | 0.354739456 |
| 0.379114798 | 0.449635624 | 0.45324214  | 0.50746079  |
| 0.163133138 | 0.38135025  | 0.492552446 | 0.485423894 |
| 0.413339896 | 0.247063346 | 0.329379114 | 0.354998896 |
| 0.45831366  | 0.200394138 | 0.338738062 | 0.474572244 |
| 0.296223364 | 0.424686444 | 0.398197699 | 0.295552268 |
| 0.098411013 | 0.286103358 | 0.459983973 | 0.257738159 |
| 0.433193233 | 0.463697962 | 0.338621767 | 0.449024955 |
| 0.246168067 | 0.073189639 | 0.465208748 | 0.031499686 |
| 0.443915837 | 0.48959674  | 0.370429981 | 0.440067987 |
| 0.292923031 | 0.46703042  | 0.45369709  | 0.006448494 |
| 0.489268987 | 0.06966461  | 0.386296009 | 0.350225207 |
| 0.365998657 | 0.132827468 | 0.466410332 | 0.508248123 |
| 0.426597461 | 0.373773634 | 0.40052662  | 0.475642826 |
| 0.203998622 | 0.363974717 | 0.402457422 | 0.486087218 |
| 0.282397781 | 0.43744009  | 0.461481852 | 0.43426447  |
| 0.481301092 | 0.387276837 |             |             |
| MCM6        | 0.185168361 | 0.450118604 | 0.15556385  |
| 0.270438919 | 0.344366399 | 0.471923072 | 0.147167537 |
| 0.245860791 | 0.406583159 | 0.325455789 | 0.442702461 |
| 0.068486415 | 0.08143422  | 0.479780996 | 0.132541872 |
| 0.416300696 | 0.097852471 | 0.220949801 | 0.113222892 |
| 0.301371175 | 0.323481293 | 0.364030757 | 0.467342732 |
| 0.317469622 | 0.298696762 | 0.43733394  | 0.383421316 |

|             |             |             |             |
|-------------|-------------|-------------|-------------|
| 0.479273102 | 0.272502328 | 0.470745734 | 0.237567648 |
| 0.441459857 | 0.354844764 | 0.385046499 | 0.066618877 |
| 0.461164023 | 0.012111569 | 0.462546161 | 0.345833974 |
| 0.169373786 | 0.414884938 | 0.393455883 | 0.354592603 |
| 0.424782328 | 0.11969471  | 0.230027559 | 0.420572898 |
| 0.407255933 | 0.357491303 | 0.16430399  | 0.474103463 |
| 0.403715146 | 0.454061974 | 0.440170123 | 0.008455008 |
| 0.301872688 | 0.073897057 | 0.210076762 | 0.503770083 |
| 0.329481175 | 0.230311452 | 0.281682023 | 0.328671369 |
| 0.406821105 | 0.407504329 | 0.345395667 | 0.400356517 |
| 0.49325732  | 0.176329287 | 0.448173931 | 0.257326959 |
| 0.450729613 | 0.099365427 | 0.281064838 | 0.179880415 |
| 0.404062289 | 0.307458096 | 0.392650465 | 0.312174346 |
| 0.453487326 | 0.521406948 | 0.346105803 | 0.506501048 |
| 0.09751224  | 0.349803371 | 0.308753832 | 0.378731621 |
| 0.410363042 | 0.167909275 | 0.481765534 | 0.519203371 |
| 0.122438228 | 0.423257277 | 0.447812705 | 0.238252022 |
| 0.470991171 | 0.266282872 | 0.43860402  | 0.186748492 |
| 0.391445313 | 0.373353328 | 0.477318453 | 0.413123838 |
| 0.341541802 | 0.176721396 | 0.503791488 | 0.327181333 |
| 0.377918888 | 0.198766843 | 0.271903098 | 0.464755446 |
| 0.473685574 | 0.486942275 | 0.456625991 | 0.424825784 |
| 0.403302167 | 0.489614354 | 0.484724624 | 0.451560312 |
| 0.161847119 | 0.51428861  | 0.328034692 | 0.112496038 |
| 0.180905369 | 0.171049626 | 0.246324355 | 0.383649823 |
| 0.481426159 | 0.433460962 | 0.345206489 | 0.321744126 |
| 0.45662602  | 0.489950338 | 0.509910495 | 0.469627929 |
| 0.119107455 | 0.234823831 | 0.415511695 | 0.382910014 |
| 0.439167567 | 0.217222686 | 0.27318982  | 0.521902745 |
| 0.457956802 | 0.462860767 | 0.305550145 | 0.520248605 |
| 0.290902654 | 0.509245436 | 0.477116882 | 0.300244234 |
| 0.524286318 | 0.511419819 | 0.493152552 | 0.419980786 |
| 0.486282927 | 0.468293827 | 0.075362615 | 0.439002351 |
| 0.475743731 | 0.019681317 | 0.471825177 | 0.476356717 |
| 0.497218554 | 0.476800229 | 0.492691433 | 0.481084395 |
| 0.499186864 | 0.175419785 | 0.027291484 | 0.354214891 |
| 0.51428824  | 0.471863971 | 0.206343818 | 0.433438529 |
| 0.383870448 | 0.48793688  | 0.448516344 | 0.368767171 |
| 0.507725927 | 0.479350507 | 0.477231682 | 0.459371707 |
| 0.375110996 | 0.402789613 | 0.371569704 | 0.492635398 |
| 0.12315474  | 0.250230695 | 0.144843152 | 0.378752522 |
| 0.411904626 | 0.283033508 | 0.483429212 | 0.372510012 |
| 0.308217694 | 0.431570323 | 0.32463508  | 0.405755518 |
| 0.142385344 | 0.475557301 | 0.295963554 | 0.308476649 |
| 0.117247827 | 0.248643252 | 0.317867807 | 0.267391236 |
| 0.332818829 | 0.30439552  | 0.464071268 | 0.472544245 |
| 0.371923749 | 0.316788277 | 0.481989741 | 0.467927074 |
| 0.441695536 | 0.407103936 | 0.332437506 | 0.039818953 |
| 0.341988004 | 0.294302772 | 0.178170166 | 0.414191153 |
| 0.264034747 | 0.335607359 | 0.43352085  | 0.427250169 |
| 0.431095106 | 0.252547465 | 0.398617069 | 0.454764524 |
| 0.267989899 | 0.373126207 | 0.47824569  | 0.446788435 |
| 0.018352767 | 0.44722888  | 0.485555208 | 0.180763579 |
| 0.403380606 | 0.15116209  | 0.270331571 | 0.476196486 |

|             |             |             |             |
|-------------|-------------|-------------|-------------|
| 0.297392898 | 0.240072421 | 0.474897178 | 0.414485999 |
| 0.393423232 | 0.296988847 | 0.499167505 | 0.049333854 |
| 0.35206252  | 0.102921031 | 0.370651358 | 0.373039388 |
| 0.378275399 | 0.372357565 | 0.334064315 | 0.332889502 |
| 0.262635561 | 0.508667267 | 0.457632157 | 0.489160425 |
| 0.394905084 | 0.505857694 | 0.47888101  | 0.479766804 |
| 0.447383491 | 0.363539004 | 0.127821092 | 0.490789711 |
| 0.476096008 | 0.335822161 | 0.175482387 | 0.452973122 |
| 0.388262205 | 0.428964031 | 0.160926926 | 0.478799186 |
| 0.505645235 | 0.47721435  | 0.242590273 | 0.412187627 |
| 0.469675781 | 0.3773489   | 0.451384028 | 0.505299968 |
| 0.337825075 | 0.382003285 | 0.375016206 | 0.429360206 |
| 0.311314587 | 0.236833637 | 0.389440049 | 0.162675914 |
| 0.010749575 | 0.18768951  | 0.171968177 | 0.252260974 |
| 0.18182942  | 0.430558    | 0.437753011 | 0.502211288 |
| 0.232405015 | 0.460477857 | 0.330154938 | 0.37413151  |
| 0.462702015 | 0.364734216 | 0.385474846 | 0.416019772 |
| 0.353032607 | 0.054184515 | 0.217206624 | 0.529410641 |
| 0.117672309 | 0.257962642 | 0.401999385 | 0.008096861 |
| 0.130694698 | 0.445424387 | 0.196540699 | 0.288620146 |
| 0.46150873  | 0.297826246 | 0.34686011  | 0.366979409 |
| 0.419130981 | 0.202633393 | 0.009650004 | 0.463391898 |
| 0.464037482 | 0.435315204 | 0.465008115 | 0.455634943 |
| 0.43997143  | 0.431958872 | 0.446452012 | 0.467298639 |
| 0.224929831 | 0.205475247 | 0.235115965 | 0.371976345 |
| 0.01225972  | 0.440823855 | 0.34444201  | 0.265028546 |
| 0.445352225 | 0.386253202 | 0.114618933 | 0.367096356 |
| 0.084243922 | 0.205511259 | 0.395212255 | 0.298380945 |
| 0.381108073 | 0.059107537 | 0.322147863 | 0.357621053 |
| 0.457969722 | 0.437909096 | 0.36049629  | 0.520142787 |
| 0.423551143 | 0.243344829 | 0.384443884 | 0.439569814 |
| 0.173969863 | 0.142442064 | 0.421466502 | 0.054121462 |
| 0.251621053 | 0.446246661 | 0.401911451 | 0.183771625 |
| 0.395547116 | 0.028397111 | 0.45403121  | 0.519703664 |
| 0.473109933 | 0.489038265 | 0.491676135 | 0.292064649 |
| 0.500667571 | 0.08613051  | 0.507135403 | 0.469360243 |
| 0.404505099 | 0.00463279  | 0.015526111 | 0.48188551  |
| 0.437497425 | 0.145389951 | 0.285429987 | 0.452449397 |
| 0.219073805 | 0.287199218 | 0.153500384 | 0.213893473 |
| 0.474686822 | 0.29835764  | 0.194232856 | 0.47807835  |
| 0.346389307 | 0.323755955 | 0.44374332  | 0.190982505 |
| 0.433604028 | 0.139967952 | 0.185397191 | 0.017469306 |
| 0.401450652 | 0.225237628 | 0.495848296 | 0.496349003 |
| 0.492858828 | 0.43048337  | 0.355321461 | 0.389596035 |
| 0.439667101 | 0.209623789 | 0.379858564 | 0.230950257 |
| 0.484209874 | 0.44088784  | 0.425925338 | 0.423123669 |
| 0.487231908 | 1           | 0.101366133 | 0.459254255 |
| 0.047945848 | 0.00313887  | 0.480854297 | 0.357307723 |
| 0.060545404 | 0.393427044 | 0.371763322 | 0.289022261 |
| 0.281132198 | 0.104990668 | 0.262633831 | 0.253526193 |
| 0.390456029 | 0.421579492 | 0.304543564 | 0.333255596 |
| 0.304564578 | 0.175918017 | 0.289700099 | 0.251173294 |
| 0.267512646 | 0.406596614 | 0.305649536 | 0.073018958 |
| 0.453926284 | 0.442019712 | 0.151587291 | 0.283740017 |

|             |             |             |             |
|-------------|-------------|-------------|-------------|
| 0.486786058 | 0.488965013 | 0.109176702 | 0.038925067 |
| 0.381347579 | 0.36555638  | 0.479222725 | 0.48756294  |
| 0.528500243 | 0.506940421 | 0.42290378  | 0.194399137 |
| 0.166561493 | 0.379659459 | 0.316478398 | 0.152194458 |
| 0.494088251 | 0.164827263 | 0.480265819 | 0.297055194 |
| 0.228390784 | 0.341111544 | 0.098586664 | 0.183981376 |
| 0.391298291 | 0.295665562 | 0.266662074 | 0.285866575 |
| 0.387423214 | 0.265217962 | 0.129940366 | 0.319206997 |
| 0.444309381 | 0.188005577 | 0.285908968 | 0.393477216 |
| 0.438018856 | 0.240261291 | 0.454460005 | 0.453718217 |
| 0.254197555 | 0.221643928 | 0.43389924  | 0.42086497  |
| 0.478266294 | 0.402700748 | 0.076325688 | 0.459523158 |
| 0.471201243 | 0.473230659 | 0.499812618 | 0.429841105 |
| 0.187483896 | 0.419743595 | 0.304877441 | 0.389057177 |
| 0.29321011  | 0.471053524 | 0.323941099 | 0.157578269 |
| 0.368247975 | 0.488071973 | 0.46695162  | 0.276841923 |
| 0.442202396 | 0.245932547 | 0.15054824  | 0.458023592 |
| 0.201471582 | 0.209072946 | 0.401716927 | 0.44483158  |
| 0.005330767 | 0.132880545 | 0.453129781 | 0.347255999 |
| 0.503352595 | 0.477578282 | 0.464678317 | 0.343276318 |
| 0.002069032 | 0.421371398 | 0.453340698 | 0.458683234 |
| 0.478808293 | 0.444901254 | 0.205622334 | 0.163485977 |
| 0.378409824 | 0.190250814 | 0.235410471 | 0.41781896  |
| 0.174746892 | 0.476366127 | 0.302375796 | 0.303857577 |
| 0.277625495 | 0.188269286 | 0.24882589  | 0.364588013 |
| 0.142204454 | 0.349804548 | 0.430970504 | 0.328182175 |
| 0.223694337 | 0.446426508 | 0.470721896 | 0.090005868 |
| 0.358371767 | 0.43707455  | 0.449647199 | 0.008796893 |
| 0.466814043 | 0.03246784  | 0.278533854 | 0.311331376 |
| 0.28886829  | 0.289969617 | 0.3232892   | 0.354557996 |
| 0.433181011 | 0.336207275 | 0.393409461 | 0.346858554 |
| 0.257450586 | 0.334656743 | 0.426926719 | 0.436527758 |
| 0.354971709 | 0.249506629 | 0.197644963 | 0.192122382 |
| 0.132992751 | 0.468457568 | 0.353049341 | 0.176186012 |
| 0.322918069 | 0.420226092 | 0.419373579 | 0.489154434 |
| 0.446564584 | 0.217955267 | 0.384094902 | 0.488059489 |
| 0.245283521 | 0.388952986 | 0.163188584 | 0.459587139 |
| 0.354138691 | 0.264091315 | 0.442286023 | 0.438273059 |
| 0.446310101 | 0.430567081 | 0.352416642 | 0.451195757 |
| 0.432458438 | 0.369946823 | 0.373278328 | 0.170319027 |
| 0.321549918 | 0.244260086 | 0.299288656 | 0.012079979 |
| 0.436337493 | 0.417210377 | 0.489070509 | 0.496795192 |
| 0.279679565 | 0.433269075 | 0.39404971  | 0.208846163 |
| 0.328392618 | 0.28134179  | 0.261767786 | 0.462798931 |
| 0.210608275 | 0.30516758  | 0.357175891 | 0.444076938 |
| 0.459169095 | 0.436063218 | 0.274667216 | 0.347851752 |
| 0.32215986  | 0.329599685 | 0.477050982 | 0.248037527 |
| 0.447839336 | 0.229311953 | 0.410924004 | 0.375408068 |
| 0.298941994 | 0.486053959 | 0.154092578 | 0.495191731 |
| 0.375868129 | 0.241201242 | 0.496863163 | 0.388153107 |
| 0.393127831 | 0.193406074 | 0.180977565 | 0.430375416 |
| 0.311039474 | 0.332742343 | 0.017485232 | 0.082629809 |
| 0.407595461 | 0.324647611 | 0.448494811 | 0.410370496 |
| 0.270586561 | 0.392946364 | 0.1491517   | 0.401285239 |



|             |             |             |             |
|-------------|-------------|-------------|-------------|
| 0.486800621 | 0.510113345 | 0.372644153 | 0.3466267   |
| 0.430547188 | 0.21020117  | 0.479760889 | 0.020444894 |
| 0.447828525 | 0.423139168 | 0.398943976 | 0.132825078 |
| 0.067355644 | 0.213298563 | 0.460004757 | 0.156682834 |
| 0.466150635 | 0.207808764 | 0.397453867 | 0.472775693 |
| 0.283606616 | 0.516604871 | 0.199347693 | 0.464994487 |
| 0.11129927  | 0.354706114 | 0.372226596 | 0.387954434 |
| 0.305615873 | 0.309658745 | 0.445029918 | 0.252352044 |
| 0.098836504 | 0.328972543 | 0.006857952 | 0.443494772 |
| 0.487828838 | 0.346290207 | 0.309205669 | 0.30864074  |
| 0.364888031 | 0.422174841 | 0.285087298 | 0.421156397 |
| 0.039435274 | 0.398514728 | 0.306360795 | 0.480835895 |
| 0.270287219 | 0.404159242 | 0.138084456 | 0.321351191 |
| 0.490383696 | 0.34009738  | 0.342849088 | 0.348038276 |
| 0.483539692 | 0.43393918  | 0.283178136 | 0.260977138 |
| 0.412034561 | 0.158526036 | 0.423942604 | 0.509716689 |
| 0.272118648 | 0.238029449 | 0.464578695 | 0.317845927 |
| 0.3091122   | 0.444428516 | 0.416426967 | 0.49943772  |
| 0.134649771 | 0.36181662  | 0.451556553 | 0.466876968 |
| 0.381479872 | 0.185942754 | 0.26255912  | 0.289209774 |
| 0.470138778 | 0.206207621 | 0.274958858 | 0.459727101 |
| 0.232611458 | 0.38664918  | 0.390101198 | 0.239950066 |
| 0.092904008 | 0.260072524 | 0.436867636 | 0.259410411 |
| 0.388852149 | 0.408575918 | 0.27662011  | 0.435790214 |
| 0.228831347 | 0.076519224 | 0.455788837 | 0.021450212 |
| 0.453642489 | 0.449080619 | 0.347161285 | 0.384070185 |
| 0.309978271 | 0.433098458 | 0.443878533 | 0.007464702 |
| 0.445909503 | 0.063194148 | 0.331348857 | 0.294320777 |
| 0.299562013 | 0.140749943 | 0.461815822 | 0.481569988 |
| 0.410640287 | 0.336320564 | 0.352639044 | 0.460543857 |
| 0.157193562 | 0.31370428  | 0.331631361 | 0.47390185  |
| 0.2242634   | 0.412225673 | 0.418023462 | 0.38938331  |
| 0.45934252  | 0.370423999 |             |             |
| MED10       | 0.193181373 | 0.061325467 | 0.155361769 |
| 0.073798569 | 0.036272155 | 0.017584268 | 0.212696348 |
| 0.148381432 | 0.068596303 | 0.00411168  | 0.045948844 |
| 0.270215845 | 0.002407868 | 0.078832614 | 0.227267236 |
| 0.025375131 | 0.258441974 | 0.237604618 | 0.020616372 |
| 0.037902878 | 0.043400609 | 0.008502735 | 0.031834465 |
| 0.035463171 | 0.279301676 | 0.053898998 | 0.011412821 |
| 0.059637711 | 0.001368604 | 0.026211084 | 0.001755036 |
| 0.149292002 | 0.031901024 | 0.006456509 | 0.187727005 |
| 0.028280495 | 0.004563657 | 0.154115047 | 0.049644502 |
| 0.004858073 | 0.185093134 | 0.008846089 | 0.077405781 |
| 0.012300572 | 0.188475616 | 0.001082488 | 0.02418658  |
| 0.048291198 | 0.0407794   | 0.208055386 | 0.03375076  |
| 0.012509617 | 0.098087563 | 0.026422915 | 0.014809386 |
| 0.004930651 | 0.000802827 | 0.001593265 | 0.085907805 |
| 0.237402681 | 0.218226784 | 0.002334936 | 0.063270581 |
| 0.025540309 | 0.045929096 | 0.149698284 | 0.007397952 |
| 0.083049103 | 0.00470639  | 0.023694794 | 0.038324701 |
| 0.029544236 | 0.172351837 | 0.302837696 | 0.192814957 |
| 0.01051841  | 0.158934165 | 0.040122687 | 0.008450395 |
| 0.054822456 | 0.130871464 | 0.156385364 | 0.093585772 |

|             |             |                     |             |
|-------------|-------------|---------------------|-------------|
| 0.009997649 | 0.019287684 | 0.017704606         | 0.125459778 |
| 0.063357152 | 0.138137844 | 0.05554313          | 0.105597434 |
| 0.172474443 | 0.015552277 | 0.046151776         | 0.245401965 |
| 0.060679121 | 0.005608811 | 0.010265246         | 0.006952057 |
| 0.031972277 | 0.027233921 | 0.114507257         | 0.15014026  |
| 0.028688659 | 0.253110587 | 0.112803814         | 0.016833541 |
| 0.033602882 | 0.22199135  | 0.025816511         | 0.03573342  |
| 0.035350675 | 0.063937487 | 0.045810374         | 0.088610146 |
| 0.017735588 | 0.076425273 | 0.05311841          | 0.083310195 |
| 0.000261256 | 0.080398209 | 0.158740617         | 0.257231221 |
| 0.1494542   | 0.182735387 | 0.020545089         | 0.177452185 |
| 0.051316403 | 0.0933743   | 0.129210059         | 0.093534243 |
| 0.056806559 | 0.093233486 | 0.076414489         | 0.068130405 |
| 0.244442416 | 0.0047905   | 0.017239089         | 0.046594926 |
| 0.062995852 | 0.264109797 | 0.01273137          | 0.120843915 |
| 0.132576712 | 0.048790317 | 0.100662363         | 0.14967271  |
| 0.098926823 | 0.108944259 | 0.046739312         | 0.184021114 |
| 0.109917784 | 0.112443516 | 0.088268443         | 0.026112007 |
| 0.113730123 | 0.047168654 | 0.018160842         | 0.085778273 |
| 0.112121158 | 0.003319105 | 0.044312101         | 0.051327944 |
| 0.077433258 | 0.036368711 | 0.083469702         | 0.063759926 |
| 0.07659328  | 0.292777493 | 0.000565325         | 0.091119192 |
| 0.095602737 | 0.0998596   | 0.10360572          | 0.011534664 |
| 0.03271226  | 0.031211857 | 0.040130819         | 0.007202579 |
| 0.133508353 | 0.057284286 | 0.049857596         | 0.061781396 |
| 0.039558463 | 0.199873824 | 0.009077194         | 0.113327468 |
| 0.21469285  | 0.159715167 | 0.269167451         | 0.125071373 |
| 0.005936962 | 0.203329124 | 0.02625924          | 0.033366107 |
| 0.225492579 | 0.03582274  | 0.003937068         | 0.033541947 |
| 0.302940391 | 0.016153971 | 0.159146371         | 0.155714042 |
| 0.236695236 | 0.347309136 | 0.082515498         | 0.110384487 |
| 0.085470682 | 0.273100378 | 0.024838955         | 0.064978692 |
| 0.020230391 | 0.209085592 | 0.040237166         | 0.10543397  |
| 0.148990958 | 0.016384079 | 0.22643757          | 0.081426014 |
| 0.016970818 | 0.002871983 | 0.002294751         | 0.012444077 |
| 0.3033681   | 0.054094524 | 0.033338364         | 0.043294113 |
| 0.077287845 | 0.12626352  | 0.012711945         | 0.170244586 |
| 0.223700877 | 0.027736884 | 0.068176574         | 0.018965731 |
| 0.151285025 | 0.061460757 | 0.048256858         | 0.038113961 |
| 0.092698381 | 0.007873746 | 0.003627915         | 0.060062207 |
| 0.005578118 | 0.017811203 | 0.054444987         | 0.043286163 |
| 0.012797403 | 0.21626187  | 0.0832011           | 0.001139756 |
| 0.019850353 | 0.046991431 | 0.13223652          | 0.009505947 |
| 0.145458474 | 0.145245767 | 0.025697776         | 0.023182593 |
| 0.193218411 | 0.088923602 | 0.086615654         | 0.069645121 |
| 0.006248994 | 0.087013582 | 0.046791919         | 0.082690912 |
| 0.07563451  | 0.008757231 | 0.001587972         | 0.049054305 |
| 0.053874112 | 0.007751706 | 0.262904012         | 0.029474912 |
| 0.010243087 | 0.029814629 | 0.038775771         | 0.084834937 |
| 0.140273131 | 0.080112042 | 0.131374193         | 0.069248217 |
| 0.10064879  | 0.134573866 | 0.065699766         | 0.097703694 |
| 0.004670342 | 0.020756482 | 0.014401 0.07935543 |             |
| 0.223004038 | 0.024865695 | 0.163249815         | 0.002126704 |
| 0.001177412 | 0.226487696 | 0.269072102         | 0.130613278 |

|             |             |             |             |
|-------------|-------------|-------------|-------------|
| 0.010669433 | 0.01447112  | 0.040530794 | 0.078216206 |
| 0.250479924 | 0.104348192 | 0.164855656 | 0.026672748 |
| 0.094298552 | 0.018905045 | 0.014108755 | 0.031875185 |
| 0.191573799 | 0.097671085 | 0.121287083 | 0.13317748  |
| 0.241187612 | 0.008174654 | 0.056331449 | 0.017880007 |
| 0.213445649 | 0.034192203 | 0.311068774 | 0.330284045 |
| 0.068998303 | 0.276251625 | 0.175764557 | 0.006491836 |
| 0.088747092 | 0.277604446 | 0.033069024 | 0.065978143 |
| 0.081666399 | 0.084601774 | 0.080087313 | 0.100985577 |
| 0.065970498 | 0.046287463 | 0.051219383 | 0.037782467 |
| 0.163199936 | 0.135328472 | 0.009169268 | 0.057328844 |
| 0.018525372 | 0.081120315 | 0.042925664 | 0.311942669 |
| 0.03595502  | 0.109758524 | 0.241302665 | 0.029757545 |
| 0.134456349 | 0.001441051 | 0.035994214 | 0.087275217 |
| 0.072577876 | 0.213313202 | 0.007114428 | 0.007145963 |
| 0.100371477 | 0.140512039 | 0.004655429 | 0.086709579 |
| 0.066338726 | 0.17420549  | 0.040753026 | 0.056105881 |
| 0.207792647 | 0.003757649 | 0.024200541 | 0.000257923 |
| 0.009531485 | 0.107588822 | 0.010462229 | 0.121719589 |
| 0.126151264 | 0.191571795 | 0.118810169 | 0.094143294 |
| 0.076351671 | 0.069227991 | 0.080235403 | 0.00923664  |
| 0.083198562 | 0.000496072 | 0.071074153 | 0.067883805 |
| 0.005700126 | 0.016503557 | 0.091028537 | 0.05074546  |
| 0.0208093   | 0.241763038 | 0.252947532 | 0.009298822 |
| 0.159155806 | 0.115635755 | 0.207677084 | 0.019581256 |
| 0.02767507  | 0.066104223 | 0.020061522 | 0.090277292 |
| 0.097711288 | 0.141933436 | 0.014399487 | 0.300214128 |
| 0.023796937 | 0.215089149 | 0.278052652 | 0.02474355  |
| 0.060209884 | 0.251806239 | 0.131296682 | 0.076849996 |
| 0.112308832 | 0.040206839 | 0.002834831 | 0.013223835 |
| 0.062629467 | 0.188975346 | 0.004346463 | 0.188304202 |
| 0.06993064  | 0.034471244 | 0.14574166  | 0.163054289 |
| 0.095806764 | 0.101366133 | 1           | 0.058409357 |
| 0.100997472 | 0.013536145 | 0.024072822 | 0.161048865 |
| 0.010378629 | 0.016722263 | 0.204624427 | 0.037886334 |
| 0.050427665 | 0.1959916   | 0.006347445 | 0.008600228 |
| 0.097330662 | 0.03709538  | 0.026450569 | 0.157771376 |
| 0.032217944 | 0.029435005 | 0.088398156 | 0.126590026 |
| 0.018417182 | 0.141857459 | 0.274347601 | 0.250291613 |
| 0.012276049 | 0.014691165 | 0.280747847 | 0.260006111 |
| 0.066118225 | 0.058219747 | 0.222757187 | 0.152208898 |
| 0.202486563 | 0.035716814 | 0.066610365 | 0.066033228 |
| 0.107306414 | 0.107810621 | 0.179628255 | 0.102756098 |
| 0.20421593  | 0.065124787 | 0.025678793 | 0.080214275 |
| 0.076985458 | 0.23340513  | 0.083835723 | 0.009332466 |
| 0.296319782 | 0.078169562 | 0.229764316 | 0.286464368 |
| 0.01482596  | 0.253647542 | 0.129062789 | 0.170202016 |
| 0.040754635 | 0.006419895 | 0.235986301 | 0.1953068   |
| 0.108173007 | 0.00347974  | 0.247758384 | 0.038387183 |
| 0.084296911 | 0.005036123 | 0.029818941 | 0.146131949 |
| 0.280586471 | 0.206481474 | 0.027975677 | 0.057434031 |
| 0.038507345 | 0.010640325 | 0.10533395  | 0.053972643 |
| 0.077683139 | 0.021887599 | 0.088412265 | 0.111941863 |
| 0.313592215 | 0.019558834 | 0.00873779  | 0.038681417 |

|             |             |             |             |
|-------------|-------------|-------------|-------------|
| 0.206269727 | 0.022275804 | 0.108994222 | 0.337477779 |
| 0.191867444 | 0.144351466 | 0.070396488 | 0.152521609 |
| 0.017950459 | 0.163883598 | 0.218853829 | 0.055209832 |
| 0.009894233 | 0.175973092 | 0.008999171 | 0.041808847 |
| 0.012477272 | 0.002982615 | 0.072431651 | 0.072438512 |
| 0.111079654 | 0.066353308 | 0.126655953 | 0.046618129 |
| 5.12E-05    | 0.022529497 | 0.04840901  | 0.014882785 |
| 0.063196896 | 0.110663221 | 0.04435747  | 0.190924447 |
| 0.195123872 | 0.239554272 | 0.126228701 | 0.012116367 |
| 0.003274795 | 0.037795134 | 0.26301182  | 0.13935593  |
| 0.092840537 | 0.202031181 | 0.006176827 | 0.093646916 |
| 0.008749425 | 0.233802701 | 0.131850982 | 0.005422025 |
| 0.003482313 | 0.080795416 | 0.058108883 | 0.221644946 |
| 0.01525048  | 0.074744328 | 0.085959589 | 0.044385664 |
| 0.033757786 | 0.258031353 | 0.109644878 | 0.087825536 |
| 0.098025953 | 0.096022647 | 0.102306323 | 0.024122974 |
| 0.061467279 | 0.111566339 | 0.061454273 | 0.174113032 |
| 0.092219888 | 0.114771663 | 0.031473458 | 0.031886332 |
| 0.028317354 | 0.159730018 | 0.312203205 | 0.310623017 |
| 0.201123333 | 0.057352019 | 0.262170473 | 0.256094295 |
| 0.175698609 | 0.02431222  | 0.175426742 | 0.070506115 |
| 0.111634168 | 0.216600811 | 0.039539962 | 0.053831665 |
| 0.002302388 | 0.016283096 | 0.161829561 | 0.0304312   |
| 0.150165852 | 0.023545544 | 0.017156453 | 0.062750856 |
| 0.035049576 | 0.175358583 | 0.25411298  | 0.106176624 |
| 0.02637745  | 0.024076759 | 0.004590757 | 0.154296477 |
| 0.1448585   | 0.273477801 | 0.034594078 | 0.127817417 |
| 0.087186519 | 0.036642188 | 0.046825187 | 0.092530423 |
| 0.004219615 | 0.141632058 | 0.005760647 | 0.174977211 |
| 0.003231102 | 0.206333365 | 0.313503338 | 0.032582533 |
| 0.00180152  | 0.111642102 | 0.047770492 | 0.015964285 |
| 0.035797131 | 0.030219849 | 0.023478181 | 0.093220547 |
| 0.1133559   | 0.160607316 | 0.116256564 | 0.135604869 |
| 0.014114961 | 0.022802707 | 0.023847039 | 0.051688516 |
| 0.081044752 | 0.064665712 | 0.289690391 | 0.063014952 |
| 0.026295174 | 0.279288857 | 0.146998973 | 0.064253656 |
| 0.033229938 | 0.092261171 | 0.00226814  | 0.012846005 |
| 0.07096458  | 0.005266477 | 1.28E-05    | 0.007950102 |
| 0.120228278 | 0.015664158 | 0.038968455 | 0.071142364 |
| 0.022369946 | 0.119836635 | 0.00238762  | 0.070046788 |
| 0.080846039 | 0.114938448 | 0.045252681 | 0.217526978 |
| 0.111811891 | 0.193821278 | 0.033326205 | 0.005372933 |
| 0.019921948 | 0.011574465 | 0.005808818 | 0.239001201 |
| 0.258400669 | 0.002547057 | 0.023715914 | 0.220296152 |
| 0.062436509 | 0.001438159 | 0.032115912 | 0.032097049 |
| 0.232121876 | 0.12047036  | 0.116505555 | 0.052903697 |
| 0.111472465 | 0.152954486 | 0.012276057 | 0.016636045 |
| 0.033745982 | 0.013220634 | 0.076993247 | 0.009912385 |
| 0.26254115  | 0.036851772 | 0.038251297 | 0.184289419 |
| 0.106853898 | 0.011867602 | 0.278768715 | 0.003755944 |
| 0.149901987 | 0.097843875 | 0.033335862 | 0.010014255 |
| 0.16689331  | 0.022874863 | 0.192963214 | 0.078305215 |
| 0.00181361  | 0.031278485 | 0.1612237   | 0.021332287 |
| 0.14440898  | 0.019245934 | 0.218200016 | 0.004056497 |

|             |             |             |             |
|-------------|-------------|-------------|-------------|
| 0.071984268 | 0.066459906 | 0.170355072 | 0.029759098 |
| 0.025610788 | 0.327554445 | 0.007668478 | 0.091427835 |
| 0.137619886 | 0.012549992 | 0.050752985 | 0.086622212 |
| 0.010772323 | 0.097636582 | 0.014754466 | 0.090624724 |
| 0.138541697 | 0.18966032  | 0.049740204 | 0.076668648 |
| 0.165931247 | 0.017424802 | 0.008504475 | 0.047103963 |
| 0.08075041  | 0.128057095 | 0.012586684 | 0.099969017 |
| 0.006354036 | 0.11741012  | 0.025777414 | 0.053522916 |
| 0.200468654 | 0.102178039 | 0.016909888 | 0.264802173 |
| 0.101761592 | 0.031307194 | 0.02510954  | 0.160517411 |
| 0.089593274 | 0.137286973 | 0.138700062 | 0.000777804 |
| 0.048684999 | 0.041017242 | 0.149109648 | 0.02212361  |
| 0.264152633 | 0.061649662 | 0.039331404 | 0.114478367 |
| 0.068230368 | 0.007503677 | 0.029401485 | 0.033549271 |
| 0.008330368 | 0.217176373 | 0.101290977 | 0.073465236 |
| 0.097725812 | 0.007396707 | 0.003291113 | 0.089914878 |
| 0.005104201 | 0.002670125 | 0.006456872 | 0.029702946 |
| 0.005754141 | 0.006651768 | 0.007916997 | 0.005603735 |
| 0.073011052 | 0.070158892 |             |             |
| MELK        | 0.096767419 | 0.385948456 | 0.069238244 |
| 0.204959667 | 0.34432718  | 0.338455676 | 0.097152643 |
| 0.165156589 | 0.30081578  | 0.254479719 | 0.361802814 |
| 0.037565096 | 0.107663474 | 0.443736447 | 0.088704453 |
| 0.395373423 | 0.067603743 | 0.158356689 | 0.09065914  |
| 0.249806342 | 0.340187572 | 0.324985479 | 0.316564707 |
| 0.328694425 | 0.193543401 | 0.318611081 | 0.34727314  |
| 0.47056813  | 0.235153532 | 0.37832657  | 0.186612039 |
| 0.423552196 | 0.35726257  | 0.344867185 | 0.029526449 |
| 0.367326308 | 0.023149025 | 0.43489293  | 0.339462223 |
| 0.205047632 | 0.343783941 | 0.27285176  | 0.302080828 |
| 0.342159614 | 0.059240974 | 0.160128257 | 0.380304372 |
| 0.309325703 | 0.290392781 | 0.078265025 | 0.373043931 |
| 0.346618997 | 0.308316949 | 0.313219151 | 0.004356014 |
| 0.303997084 | 0.101540222 | 0.243046686 | 0.469866825 |
| 0.2338884   | 0.17479643  | 0.278358687 | 0.237950803 |
| 0.352505405 | 0.359136883 | 0.269981241 | 0.342401572 |
| 0.480742413 | 0.224095802 | 0.369694231 | 0.191389765 |
| 0.366752979 | 0.048771275 | 0.192206839 | 0.096492737 |
| 0.366212888 | 0.247560748 | 0.337329774 | 0.334063585 |
| 0.392234816 | 0.49478293  | 0.263600481 | 0.466868567 |
| 0.148542378 | 0.356013809 | 0.318792747 | 0.329293459 |
| 0.346611081 | 0.121037769 | 0.390464467 | 0.510064694 |
| 0.066768921 | 0.315723499 | 0.370979647 | 0.136166179 |
| 0.385639886 | 0.270752653 | 0.328929981 | 0.213299676 |
| 0.371820373 | 0.383249171 | 0.446922689 | 0.317647914 |
| 0.311997973 | 0.091965543 | 0.444511015 | 0.343635507 |
| 0.330923124 | 0.108149111 | 0.322759071 | 0.433016623 |
| 0.396303447 | 0.467436387 | 0.385940583 | 0.355001523 |
| 0.392837769 | 0.479946337 | 0.385856025 | 0.383744636 |
| 0.122225798 | 0.493456189 | 0.22415218  | 0.074163958 |
| 0.08880121  | 0.124697267 | 0.266327444 | 0.294277331 |
| 0.444378704 | 0.318824208 | 0.239461518 | 0.309541081 |
| 0.458392844 | 0.433384233 | 0.492580446 | 0.391588153 |
| 0.065956587 | 0.270630783 | 0.399928776 | 0.258627544 |

|             |             |             |             |
|-------------|-------------|-------------|-------------|
| 0.371384409 | 0.142407592 | 0.310660579 | 0.48108236  |
| 0.379545198 | 0.417726972 | 0.18387799  | 0.473933791 |
| 0.225706177 | 0.504250249 | 0.412633055 | 0.231225664 |
| 0.496891547 | 0.46278616  | 0.506165572 | 0.380698917 |
| 0.444516811 | 0.341240092 | 0.078192441 | 0.3638527   |
| 0.477856091 | 0.025689554 | 0.448180377 | 0.481696611 |
| 0.471708788 | 0.44066014  | 0.513439436 | 0.483591631 |
| 0.467694933 | 0.099629645 | 0.041178243 | 0.337369705 |
| 0.485146506 | 0.394430879 | 0.177647511 | 0.387167225 |
| 0.36750186  | 0.34971433  | 0.366780816 | 0.320787239 |
| 0.503727229 | 0.429600923 | 0.457832022 | 0.358180311 |
| 0.290125038 | 0.313518971 | 0.355489015 | 0.430405647 |
| 0.074854274 | 0.143184029 | 0.065931801 | 0.30102913  |
| 0.284265655 | 0.232087014 | 0.353399387 | 0.348532401 |
| 0.24199646  | 0.301040101 | 0.305540138 | 0.375895591 |
| 0.064960349 | 0.375971366 | 0.200546373 | 0.212770069 |
| 0.08337882  | 0.149170832 | 0.257082846 | 0.199789715 |
| 0.303472189 | 0.234390378 | 0.372921349 | 0.471879183 |
| 0.346651866 | 0.198365343 | 0.372862655 | 0.466831967 |
| 0.440207851 | 0.381690097 | 0.239063375 | 0.029743908 |
| 0.36594908  | 0.283408271 | 0.22453246  | 0.361202909 |
| 0.180112683 | 0.319815361 | 0.395275062 | 0.380346525 |
| 0.284085018 | 0.156392639 | 0.385304217 | 0.411460609 |
| 0.157687228 | 0.331650397 | 0.444602147 | 0.362895148 |
| 0.00730429  | 0.36714503  | 0.416096287 | 0.226039987 |
| 0.318414207 | 0.176733279 | 0.256848546 | 0.461138379 |
| 0.305396348 | 0.278147395 | 0.462065466 | 0.369706246 |
| 0.300322486 | 0.212112796 | 0.508595189 | 0.076679792 |
| 0.336906746 | 0.09960375  | 0.325070679 | 0.27018635  |
| 0.294993554 | 0.313795708 | 0.334675739 | 0.329612679 |
| 0.139627151 | 0.490916038 | 0.35663865  | 0.489572968 |
| 0.384430341 | 0.514624971 | 0.440497719 | 0.430226712 |
| 0.348816942 | 0.343587781 | 0.171097648 | 0.418072906 |
| 0.449047751 | 0.323409685 | 0.086751014 | 0.388494714 |
| 0.350332411 | 0.39081499  | 0.177224466 | 0.494079364 |
| 0.47578042  | 0.42834197  | 0.197245384 | 0.369688878 |
| 0.376712041 | 0.263425183 | 0.379639065 | 0.510554019 |
| 0.302323001 | 0.385860133 | 0.391015184 | 0.403123787 |
| 0.217110011 | 0.286288859 | 0.303220836 | 0.198389719 |
| 0.010847049 | 0.102428403 | 0.09228992  | 0.228151944 |
| 0.230602377 | 0.343823264 | 0.387073035 | 0.498063545 |
| 0.16629948  | 0.389733167 | 0.244707168 | 0.372756014 |
| 0.415373406 | 0.344391147 | 0.350358424 | 0.363832822 |
| 0.255062796 | 0.039998959 | 0.175790664 | 0.501576471 |
| 0.050841206 | 0.279272281 | 0.297303511 | 0.007141247 |
| 0.075337343 | 0.348852142 | 0.10474262  | 0.205336645 |
| 0.463747675 | 0.205897439 | 0.241430327 | 0.308482455 |
| 0.341836059 | 0.12720499  | 0.00730328  | 0.46749675  |
| 0.453184561 | 0.429300632 | 0.450826574 | 0.417974456 |
| 0.42368988  | 0.337705091 | 0.3939902   | 0.309240889 |
| 0.153577992 | 0.11172507  | 0.30686719  | 0.361132018 |
| 0.006478816 | 0.353664706 | 0.313005993 | 0.177522457 |
| 0.375880309 | 0.316710086 | 0.060599388 | 0.33900569  |
| 0.043551731 | 0.236718748 | 0.311683871 | 0.257484702 |

|             |             |             |             |
|-------------|-------------|-------------|-------------|
| 0.344794811 | 0.0259396   | 0.264543587 | 0.37145153  |
| 0.399845182 | 0.330596831 | 0.340680038 | 0.501649298 |
| 0.356061663 | 0.134729755 | 0.370514749 | 0.362114522 |
| 0.114818401 | 0.140101839 | 0.331568201 | 0.041680903 |
| 0.166447312 | 0.417893558 | 0.350400132 | 0.110859703 |
| 0.322027149 | 0.011358194 | 0.353248231 | 0.503965284 |
| 0.423771544 | 0.507776814 | 0.479806491 | 0.305204898 |
| 0.485462394 | 0.116179787 | 0.500795391 | 0.375170602 |
| 0.33914853  | 0.002715196 | 0.010656347 | 0.472012746 |
| 0.403661061 | 0.062666175 | 0.204834699 | 0.315438681 |
| 0.175413492 | 0.171181986 | 0.090870712 | 0.261063781 |
| 0.359469408 | 0.290174292 | 0.221261363 | 0.43914763  |
| 0.309248663 | 0.271138818 | 0.331316353 | 0.103541591 |
| 0.363778546 | 0.09211784  | 0.105187924 | 0.015698443 |
| 0.355618086 | 0.118204061 | 0.432064455 | 0.477326663 |
| 0.486223585 | 0.382867881 | 0.288288093 | 0.290553537 |
| 0.405592339 | 0.10130197  | 0.309911425 | 0.119408687 |
| 0.453050286 | 0.406232896 | 0.330653602 | 0.307996941 |
| 0.501504439 | 0.459254255 | 0.058409357 | 1           |
| 0.023763805 | 0.00381293  | 0.342107994 | 0.268834175 |
| 0.075371524 | 0.39232814  | 0.278242509 | 0.249059713 |
| 0.244905562 | 0.050528289 | 0.312541313 | 0.309474127 |
| 0.345209797 | 0.384426733 | 0.327499732 | 0.241522538 |
| 0.31776342  | 0.229829858 | 0.238396868 | 0.195717599 |
| 0.239484393 | 0.307063766 | 0.201911024 | 0.04082524  |
| 0.37410299  | 0.390221277 | 0.088226485 | 0.181479346 |
| 0.430494709 | 0.477782742 | 0.088877093 | 0.031578354 |
| 0.2657224   | 0.339318337 | 0.485851389 | 0.461687101 |
| 0.493080558 | 0.513904613 | 0.384759437 | 0.200083466 |
| 0.097717237 | 0.352710319 | 0.333853904 | 0.167437766 |
| 0.482492371 | 0.082624614 | 0.442296427 | 0.320835834 |
| 0.149618391 | 0.28264429  | 0.064190184 | 0.121789165 |
| 0.357008963 | 0.2097926   | 0.247256475 | 0.169769388 |
| 0.370616768 | 0.282882707 | 0.078774419 | 0.249060259 |
| 0.345687833 | 0.26818231  | 0.20594767  | 0.281585021 |
| 0.314786739 | 0.185464512 | 0.396842481 | 0.453692877 |
| 0.15298409  | 0.146947463 | 0.294811233 | 0.337824302 |
| 0.410461865 | 0.327244006 | 0.038789203 | 0.409722657 |
| 0.466619847 | 0.389079297 | 0.461887493 | 0.395400942 |
| 0.109351775 | 0.385349486 | 0.321123963 | 0.383101039 |
| 0.224303929 | 0.333151783 | 0.271045794 | 0.090700149 |
| 0.288416099 | 0.454052667 | 0.404348457 | 0.224612827 |
| 0.34559765  | 0.133061138 | 0.073589683 | 0.399030976 |
| 0.279148623 | 0.134074339 | 0.289139064 | 0.391548968 |
| 0.005511866 | 0.175291394 | 0.472762961 | 0.258243823 |
| 0.491268604 | 0.479313024 | 0.436911808 | 0.246301206 |
| 0.005926491 | 0.38773642  | 0.387367795 | 0.405672121 |
| 0.406038369 | 0.31200987  | 0.145390809 | 0.131282463 |
| 0.290133482 | 0.090812778 | 0.221495509 | 0.289668758 |
| 0.251628022 | 0.360611339 | 0.228717654 | 0.236141471 |
| 0.264168608 | 0.100843777 | 0.261230653 | 0.269825584 |
| 0.191596798 | 0.263511013 | 0.349955903 | 0.225099845 |
| 0.269134173 | 0.424857867 | 0.382708952 | 0.043444551 |
| 0.335105862 | 0.394370058 | 0.405901239 | 0.009382744 |

|             |             |             |             |
|-------------|-------------|-------------|-------------|
| 0.399497275 | 0.0169998   | 0.258307654 | 0.2826021   |
| 0.259324392 | 0.270578527 | 0.305293293 | 0.346888027 |
| 0.351122325 | 0.279744027 | 0.317813389 | 0.277782946 |
| 0.223792517 | 0.244511275 | 0.373476716 | 0.352700632 |
| 0.32682449  | 0.16901461  | 0.104019435 | 0.10783117  |
| 0.082910265 | 0.417881271 | 0.245018606 | 0.083221322 |
| 0.261500586 | 0.352121887 | 0.36107862  | 0.45513857  |
| 0.40458879  | 0.110063795 | 0.337000345 | 0.41152496  |
| 0.22376244  | 0.27215564  | 0.083589543 | 0.354664564 |
| 0.258860379 | 0.285904095 | 0.326799633 | 0.30999701  |
| 0.351171489 | 0.399235794 | 0.232461937 | 0.420495066 |
| 0.373170916 | 0.335375074 | 0.271660639 | 0.147101392 |
| 0.236995057 | 0.153464233 | 0.32357358  | 0.005664327 |
| 0.350823733 | 0.264964928 | 0.452963113 | 0.458839484 |
| 0.288323456 | 0.372047952 | 0.273828449 | 0.141968796 |
| 0.232808701 | 0.184120322 | 0.169476193 | 0.364027629 |
| 0.238063993 | 0.216189203 | 0.352601592 | 0.280329146 |
| 0.386803838 | 0.363267076 | 0.288120834 | 0.261762912 |
| 0.268151975 | 0.209998486 | 0.445982412 | 0.13713771  |
| 0.375348649 | 0.264911608 | 0.28948386  | 0.365018057 |
| 0.289257539 | 0.487570261 | 0.08117954  | 0.499820741 |
| 0.382993105 | 0.137596937 | 0.476748947 | 0.272698107 |
| 0.280116908 | 0.162639989 | 0.229593089 | 0.321945526 |
| 0.271622774 | 0.320052709 | 0.017699912 | 0.109098554 |
| 0.34546573  | 0.285812783 | 0.356788504 | 0.342167922 |
| 0.30203473  | 0.338015933 | 0.165795878 | 0.303895195 |
| 0.43703369  | 0.456485222 | 0.332055942 | 0.267426439 |
| 0.334282107 | 0.145628146 | 0.327504441 | 0.020922876 |
| 0.397393657 | 0.370023016 | 0.339835519 | 0.082280075 |
| 0.03691409  | 0.271205782 | 0.394448414 | 0.08187682  |
| 0.475707139 | 0.22478524  | 0.306544924 | 0.370263734 |
| 0.185515365 | 0.464000046 | 0.179417974 | 0.386544486 |
| 0.069652498 | 0.270081575 | 0.34465905  | 0.339997759 |
| 0.307259408 | 0.345530146 | 0.381898674 | 0.284819015 |
| 0.061961895 | 0.319112153 | 0.008255447 | 0.400813699 |
| 0.436612563 | 0.367882114 | 0.202743317 | 0.242404373 |
| 0.3051716   | 0.350140543 | 0.287343639 | 0.348859509 |
| 0.025342225 | 0.38575815  | 0.226020039 | 0.379591056 |
| 0.281014609 | 0.353841817 | 0.095743192 | 0.338707537 |
| 0.41923666  | 0.347790126 | 0.245402999 | 0.358184638 |
| 0.449427233 | 0.33494783  | 0.159010433 | 0.240700533 |
| 0.328023343 | 0.082995049 | 0.304301125 | 0.503634177 |
| 0.235176265 | 0.282638079 | 0.436487383 | 0.293855676 |
| 0.325235249 | 0.350358171 | 0.346803003 | 0.487521327 |
| 0.135167668 | 0.276412671 | 0.380649513 | 0.440263058 |
| 0.306688049 | 0.24032953  | 0.297969459 | 0.311661039 |
| 0.422525953 | 0.13513862  | 0.309224789 | 0.345659046 |
| 0.292397214 | 0.311596226 | 0.276707696 | 0.257189004 |
| 0.063171639 | 0.198107605 | 0.323643125 | 0.172435915 |
| 0.3352085   | 0.390008986 | 0.313107188 | 0.388075771 |
| 0.185881001 | 0.056164526 | 0.446241426 | 0.045121881 |
| 0.295312589 | 0.382271711 | 0.257859532 | 0.361556724 |
| 0.189329469 | 0.341962879 | 0.331698335 | 0.003141175 |
| 0.390858137 | 0.073958924 | 0.295324859 | 0.308315164 |



|             |             |             |             |
|-------------|-------------|-------------|-------------|
| 0.291328008 | 0.081462677 | 0.426480884 | 0.501482813 |
| 0.294054107 | 0.278740301 | 0.320538866 | 0.430927153 |
| 0.211844084 | 0.294701132 | 0.327972172 | 0.351741638 |
| 0.260611148 | 0.332553258 | 0.351308833 | 0.358355581 |
| 0.344975991 | 0.259514837 |             |             |
| MFSD1       | 0.130600751 | 0.023851209 | 0.182504742 |
| 0.070126313 | 0.020441782 | 0.024864105 | 0.041484824 |
| 0.029344481 | 0.016178723 | 0.001000037 | 0.051460873 |
| 0.08323845  | 0.000137415 | 0.031899001 | 0.0416939   |
| 0.010541518 | 0.06423985  | 0.071842502 | 0.000107716 |
| 0.002240052 | 0.018076232 | 0.006600518 | 0.015833906 |
| 0.011475517 | 0.138113561 | 0.020582871 | 0.003179339 |
| 0.029400447 | 0.001113538 | 0.022194604 | 0.000624371 |
| 0.06014692  | 0.016538155 | 0.004589522 | 0.154976612 |
| 0.014500001 | 0.000442112 | 0.054263838 | 0.029239976 |
| 0.002381121 | 0.076409406 | 0.004902583 | 0.091964098 |
| 0.004437377 | 0.137993694 | 0.00056095  | 0.006311581 |
| 0.014323358 | 0.014657636 | 0.101462256 | 0.020112477 |
| 0.002583231 | 0.060102839 | 0.010505822 | 8.06E-05    |
| 0.003919785 | 0.000814406 | 0.000429823 | 0.042745338 |
| 0.143795324 | 0.102579174 | 8.46E-05    | 0.011563379 |
| 0.004814593 | 0.010291229 | 0.050044734 | 0.001792133 |
| 0.040627285 | 0.000507928 | 0.009656313 | 0.007497411 |
| 0.011152149 | 0.037248806 | 0.13091403  | 0.045054798 |
| 0.004629111 | 0.092011307 | 0.028470684 | 0.003957423 |
| 0.022177143 | 0.048507577 | 0.052302093 | 0.03768193  |
| 0.000163934 | 0.006161957 | 0.009739351 | 0.046351456 |
| 0.012449189 | 0.012955369 | 0.039345395 | 0.045289945 |
| 0.030451802 | 0.004759422 | 0.011577104 | 0.063293344 |
| 0.034500459 | 0.000721222 | 0.005646606 | 0.005732995 |
| 0.014125597 | 0.008955684 | 0.034491606 | 0.078833568 |
| 0.01214341  | 0.109037731 | 0.047301127 | 0.007375308 |
| 0.046112702 | 0.180683974 | 0.004647572 | 0.014975714 |
| 0.021690665 | 0.034176897 | 0.0132044   | 0.020537257 |
| 0.007093291 | 0.041099531 | 0.040182637 | 0.026607977 |
| 7.75E-05    | 0.03460634  | 0.150857965 | 0.088887664 |
| 0.054919555 | 0.066648185 | 0.001256416 | 0.065165663 |
| 0.030811607 | 0.03243033  | 0.060327314 | 0.045885627 |
| 0.021971874 | 0.040381735 | 0.029561225 | 0.022822548 |
| 0.113915394 | 0.000543957 | 0.009291601 | 0.0234085   |
| 0.016879168 | 0.064566166 | 0.007433779 | 0.05023558  |
| 0.079567966 | 0.021084821 | 0.04690097  | 0.057091735 |
| 0.012956883 | 0.053015682 | 0.025824162 | 0.135344777 |
| 0.050976561 | 0.055296404 | 0.042354613 | 0.016043594 |
| 0.059428099 | 0.066358306 | 5.76E-05    | 0.023719123 |
| 0.053880841 | 0.004024093 | 0.018160602 | 0.021236146 |
| 0.03565353  | 0.017923679 | 0.032094592 | 0.030608685 |
| 0.033826232 | 0.099364349 | 0.002783636 | 0.028477462 |
| 0.042573249 | 0.066100656 | 0.014628526 | 0.005129798 |
| 0.011222785 | 0.020055798 | 0.014516245 | 0.001139604 |
| 0.051103677 | 0.031080465 | 0.021233331 | 0.016914111 |
| 0.00688636  | 0.082942538 | 0.003505621 | 0.055140699 |
| 0.079508148 | 0.10338393  | 0.168476285 | 0.029683714 |
| 0.005399369 | 0.094194551 | 0.010776328 | 0.006174541 |

|             |             |             |             |
|-------------|-------------|-------------|-------------|
| 0.102877902 | 0.009676276 | 0.002418837 | 0.014659142 |
| 0.115540335 | 0.011039529 | 0.105665844 | 0.0448917   |
| 0.097070269 | 0.128773671 | 0.015519315 | 0.111349035 |
| 0.033527875 | 0.091457554 | 0.01048573  | 0.028403642 |
| 0.004460113 | 0.135032876 | 0.017955739 | 0.04814498  |
| 0.062252358 | 0.012703893 | 0.064612165 | 0.074635728 |
| 0.001909898 | 0.000231297 | 0.000280235 | 0.005768111 |
| 0.109671061 | 0.007036889 | 0.009781083 | 0.028083305 |
| 0.055402668 | 0.022643104 | 0.003133952 | 0.073920601 |
| 0.082070954 | 0.033971871 | 0.030222646 | 0.005449932 |
| 0.080409204 | 0.03778297  | 0.026240452 | 0.002730114 |
| 0.018351872 | 0.000882756 | 0.004380961 | 0.027473268 |
| 0.000565763 | 0.003328985 | 0.026143877 | 0.022118303 |
| 0.001455699 | 0.061194374 | 0.033057553 | 0.000817466 |
| 0.00409333  | 0.00880566  | 0.066257011 | 0.002930637 |
| 0.073484647 | 0.036329568 | 0.012225068 | 0.017085107 |
| 0.140240159 | 0.035719842 | 0.040342942 | 0.033961671 |
| 0.002222493 | 0.03464706  | 0.024020758 | 0.044205682 |
| 0.040565234 | 0.00152373  | 0.000261336 | 0.028601204 |
| 0.026496933 | 0.000238013 | 0.121033237 | 0.009656517 |
| 0.001963565 | 0.010274825 | 0.001944516 | 0.041681932 |
| 0.062447063 | 0.034013969 | 0.055209376 | 0.025472742 |
| 0.067593871 | 0.128284492 | 0.028581201 | 0.035568752 |
| 0.000543327 | 0.005557287 | 0.006655078 | 0.036608995 |
| 0.131850657 | 0.005186961 | 0.048272934 | 0.000315307 |
| 0.000144476 | 0.063653607 | 0.131579069 | 0.073361176 |
| 0.007381122 | 0.005468588 | 0.014956091 | 0.031901945 |
| 0.099575741 | 0.054896692 | 0.030547988 | 0.017416713 |
| 0.035581706 | 0.004103105 | 0.00958312  | 0.013056762 |
| 0.058884238 | 0.065970542 | 0.061474741 | 0.051902005 |
| 0.073246096 | 0.005522499 | 0.012561866 | 0.009113077 |
| 0.0623574   | 0.012234404 | 0.120336103 | 0.142371235 |
| 0.02889303  | 0.130391989 | 0.07662815  | 0.00126251  |
| 0.051616709 | 0.154835925 | 0.093441875 | 0.0250391   |
| 0.025194585 | 0.023289959 | 0.023598775 | 0.031931705 |
| 0.01712435  | 0.015365292 | 0.019892518 | 0.036154542 |
| 0.043718283 | 0.049858505 | 0.002613907 | 0.021584334 |
| 0.001068771 | 0.053114932 | 0.012160762 | 0.156858875 |
| 0.013042913 | 0.021090963 | 0.119891449 | 0.008876307 |
| 0.096176565 | 0.001299976 | 0.004502674 | 0.016089995 |
| 0.02219297  | 0.148293466 | 0.004179599 | 0.001227608 |
| 0.057668901 | 0.061289739 | 0.002856312 | 0.040619193 |
| 0.055828512 | 0.066155921 | 0.03225046  | 0.032330422 |
| 0.068571089 | 6.29E-05    | 0.004918831 | 0.000745065 |
| 0.001001864 | 0.032308838 | 0.002619604 | 0.044068721 |
| 0.07735829  | 0.132793691 | 0.074439572 | 0.040909498 |
| 0.037673382 | 0.029560329 | 0.043773057 | 0.009400825 |
| 0.043640664 | 0.001413457 | 0.031922257 | 0.031648227 |
| 0.001996027 | 0.005849354 | 0.00590832  | 0.026287007 |
| 0.012105831 | 0.120023135 | 0.123861293 | 0.012652923 |
| 0.081236568 | 0.051461678 | 0.078395314 | 0.012991275 |
| 0.023298426 | 0.036072796 | 0.004793524 | 0.032403921 |
| 0.039967761 | 0.050192206 | 0.004500687 | 0.096858473 |
| 0.013833891 | 0.132083694 | 0.069217296 | 0.022243778 |

|             |             |             |             |
|-------------|-------------|-------------|-------------|
| 0.023378891 | 0.100002857 | 0.051120364 | 0.035052049 |
| 0.050709749 | 0.022927686 | 0.001141836 | 0.002863465 |
| 0.019416296 | 0.106388694 | 0.001479659 | 0.094858555 |
| 0.035023966 | 0.01586127  | 0.082523067 | 0.102405346 |
| 0.039079961 | 0.047945848 | 0.100997472 | 0.023763805 |
| 1           | 0.002721717 | 0.023100279 | 0.035958075 |
| 0.000103996 | 0.005330426 | 0.102329174 | 0.003486016 |
| 0.009288011 | 0.050991664 | 0.002294626 | 0.002746193 |
| 0.044291905 | 0.0122315   | 0.012980568 | 0.029924851 |
| 0.01238403  | 0.001240799 | 0.058273499 | 0.02421454  |
| 0.000200595 | 0.055925081 | 0.138554401 | 0.067667166 |
| 0.00765691  | 0.008021811 | 0.171144115 | 0.12034547  |
| 0.041827213 | 0.029410984 | 0.015333547 | 0.067121298 |
| 0.082818731 | 0.005384524 | 0.029086489 | 0.031345727 |
| 0.04654853  | 0.04436668  | 0.07165732  | 0.013745899 |
| 0.124497148 | 0.028570272 | 0.010199488 | 0.023585417 |
| 0.034255661 | 0.06321494  | 0.0417562   | 0.004543046 |
| 0.089782068 | 0.062296746 | 0.104018643 | 0.096687962 |
| 0.00861085  | 0.098961579 | 0.068511099 | 0.107083163 |
| 0.016051364 | 0.002612946 | 0.068536156 | 0.08298918  |
| 0.034910021 | 0.000739314 | 0.085892409 | 0.011368615 |
| 0.035681429 | 8.31E-05    | 0.012734684 | 0.061872567 |
| 0.148068725 | 0.050317081 | 0.023753496 | 0.015418323 |
| 0.01703221  | 0.003387245 | 0.085400814 | 0.022561583 |
| 0.032274796 | 0.013335101 | 0.044577734 | 0.034583236 |
| 0.103733486 | 0.016442569 | 0.001430319 | 0.011024681 |
| 0.049987402 | 0.027565815 | 0.0215977   | 0.124062984 |
| 0.055102677 | 0.047163804 | 0.02870015  | 0.127591422 |
| 0.008908156 | 0.050372912 | 0.061866042 | 0.021507461 |
| 0.003113579 | 0.042866256 | 0.0039512   | 0.012405889 |
| 0.012057421 | 0.001572328 | 0.024659826 | 0.054969759 |
| 0.040212893 | 0.031635805 | 0.068126175 | 0.011298667 |
| 0.001955672 | 0.008428563 | 0.036726175 | 0.014824774 |
| 0.024998301 | 0.052224916 | 0.002156779 | 0.092419838 |
| 0.102176179 | 0.135008549 | 0.023928095 | 0.00420678  |
| 7.85E-05    | 0.013148547 | 0.093960742 | 0.026226634 |
| 0.032728641 | 0.036511868 | 0.003476051 | 0.086134657 |
| 5.91E-05    | 0.102695139 | 0.063236992 | 0.001431394 |
| 0.000669406 | 0.021263622 | 0.02151896  | 0.173830792 |
| 0.006380813 | 0.022544243 | 0.034896723 | 0.001480291 |
| 0.018575078 | 0.08551763  | 0.045944016 | 0.079045171 |
| 0.055660012 | 0.020376704 | 0.034697192 | 0.018909521 |
| 0.013681207 | 0.036543815 | 0.067535465 | 0.110786768 |
| 0.091788341 | 0.039825938 | 0.013814788 | 0.012671435 |
| 0.032156309 | 0.154925945 | 0.132006354 | 0.143479628 |
| 0.088479649 | 0.026286388 | 0.129726998 | 0.173289776 |
| 0.060981385 | 0.005689499 | 0.08122956  | 0.031828325 |
| 0.053217949 | 0.115107358 | 0.00917227  | 0.034054701 |
| 0.000140184 | 0.000988051 | 0.038751582 | 0.020067807 |
| 0.06329174  | 0.009105716 | 0.008609365 | 0.029837277 |
| 0.008988903 | 0.088903166 | 0.128467681 | 0.04991021  |
| 0.018579997 | 0.003103501 | 0.002786901 | 0.093546966 |
| 0.097718737 | 0.080510759 | 0.018211831 | 0.080738036 |
| 0.038238126 | 0.023479882 | 0.025643885 | 0.047793694 |

|             |             |             |             |
|-------------|-------------|-------------|-------------|
| 0.001435813 | 0.069879798 | 0.002031614 | 0.071231398 |
| 0.001814983 | 0.087154428 | 0.120216951 | 0.014228215 |
| 0.001131558 | 0.080823103 | 0.023775551 | 0.015198166 |
| 0.016232907 | 0.0092684   | 0.005507145 | 0.01656898  |
| 0.02531128  | 0.096097832 | 0.036480851 | 0.08416721  |
| 0.006087959 | 0.020170864 | 0.006929207 | 0.027921208 |
| 0.026202259 | 0.028394739 | 0.150477926 | 0.026810013 |
| 0.008024354 | 0.113499165 | 0.061585195 | 0.025267985 |
| 0.014430542 | 0.041770086 | 0.001286035 | 0.003859564 |
| 0.014825865 | 0.004048072 | 4.89E-05    | 0.000119919 |
| 0.063169686 | 0.001549441 | 0.011082305 | 0.015893341 |
| 0.010005191 | 0.037045432 | 0.000346197 | 0.012826697 |
| 0.035121884 | 0.047261286 | 0.015140994 | 0.068995709 |
| 0.034558905 | 0.135687165 | 0.024787001 | 0.000587412 |
| 0.007952417 | 0.005216428 | 0.001234848 | 0.070867683 |
| 0.038120193 | 0.001241306 | 0.00871228  | 0.044897203 |
| 0.02461453  | 0.00056698  | 0.006286175 | 0.021905085 |
| 0.052831516 | 0.049814238 | 0.037598641 | 0.037074976 |
| 0.003676689 | 0.050461736 | 0.005042998 | 0.002938235 |
| 0.031150387 | 0.006512759 | 0.04374121  | 0.009250749 |
| 0.129618696 | 0.015830488 | 0.000344694 | 0.085172689 |
| 0.042441649 | 0.003769772 | 0.095616169 | 0.000417547 |
| 0.075678178 | 0.03364327  | 0.002040552 | 0.005139669 |
| 0.072127143 | 0.013684962 | 0.077146252 | 0.057157494 |
| 0.001107899 | 0.005073488 | 0.090975249 | 0.003959319 |
| 0.058894626 | 0.001789335 | 0.053665545 | 0.001285023 |
| 0.035235469 | 0.025005185 | 0.090563895 | 0.008232848 |
| 0.005244132 | 0.116571108 | 0.004712322 | 0.034579845 |
| 0.077583174 | 0.009908157 | 0.026733444 | 0.040596022 |
| 0.003477661 | 0.038578294 | 0.004704292 | 0.02997277  |
| 0.028250281 | 0.084077978 | 0.019655958 | 0.025798116 |
| 0.070546882 | 0.004787591 | 0.004586048 | 0.018353926 |
| 0.044656506 | 0.125444175 | 0.001322052 | 0.044333041 |
| 0.002960813 | 0.04544084  | 0.006701654 | 0.019916224 |
| 0.029523697 | 0.014100594 | 0.020734731 | 0.108646602 |
| 0.03442922  | 0.018706506 | 0.008598669 | 0.081444653 |
| 0.081081107 | 0.089980411 | 0.060048571 | 6.05E-05    |
| 0.056003678 | 0.038460213 | 0.068652011 | 0.009824692 |
| 0.179379871 | 0.015389737 | 0.013120889 | 0.006936167 |
| 0.026716197 | 0.006256369 | 0.007634623 | 0.023506087 |
| 0.000382222 | 0.062357912 | 0.057099094 | 0.031987789 |
| 0.040153556 | 0.000856153 | 0.001195749 | 0.037141697 |
| 0.0005157   | 0.00099758  | 0.001245351 | 0.014662334 |
| 0.003766382 | 0.002714957 | 0.003046479 | 0.006294377 |
| 0.043976054 | 0.02635503  |             |             |
| MGA         | 0.005795903 | 0.002388361 | 0.003313506 |
| 0.001781543 | 0.009551435 | 0.00161174  | 0.007255115 |
| 0.004112738 | 0.003112274 | 0.000463671 | 0.005218881 |
| 0.007148006 | 0.002446713 | 0.003248289 | 0.014041389 |
| 0.003936525 | 0.0126884   | 0.01043593  | 3.89E-05    |
| 0.000987357 | 0.01091475  | 0.002122797 | 0.000821597 |
| 0.010898782 | 0.005686254 | 0.001602012 | 0.002463445 |
| 0.00246839  | 0.000174338 | 0.002615451 | 0.000523405 |
| 0.00511691  | 0.007838848 | 0.001683163 | 0.004350348 |

|             |             |             |             |
|-------------|-------------|-------------|-------------|
| 0.003485773 | 0.000925718 | 0.003970762 | 0.006675706 |
| 0.000943066 | 0.006815676 | 0.000878438 | 0.010451562 |
| 0.000491239 | 0.004132266 | 0.000574362 | 0.00292558  |
| 0.00226668  | 0.008960156 | 0.00391482  | 0.002334852 |
| 0.001211336 | 0.004121496 | 7.44E-05    | 0.001121915 |
| 0.002660691 | 0.001113383 | 0.002158248 | 0.00302377  |
| 0.013828485 | 0.022533658 | 0.000120875 | 0.009281115 |
| 0.003407779 | 0.006494078 | 0.01652254  | 0.000177264 |
| 0.003172575 | 0.003241899 | 0.001839539 | 0.000206328 |
| 0.002138774 | 0.004469931 | 0.012107611 | 0.004318182 |
| 0.002388678 | 0.0197577   | 0.008568753 | 0.004982616 |
| 0.00078924  | 0.005021867 | 0.009784822 | 0.002215119 |
| 0.007178973 | 0.005534845 | 0.006703627 | 0.013269429 |
| 0.005420765 | 0.006558067 | 0.00353444  | 0.003810588 |
| 0.009204218 | 0.000355646 | 0.002390795 | 0.004638322 |
| 0.002728761 | 0.004192209 | 0.00036907  | 0.00695085  |
| 0.006599712 | 0.004712293 | 0.00446451  | 0.008014486 |
| 0.011287045 | 0.004440803 | 0.002550749 | 0.006093622 |
| 0.006189339 | 0.004950743 | 0.004116096 | 0.002787911 |
| 0.00238173  | 0.002748343 | 0.001671857 | 0.005406368 |
| 0.002194024 | 0.003245616 | 0.002704996 | 0.005047181 |
| 0.000498637 | 0.00296214  | 0.007780601 | 0.018541573 |
| 0.001487309 | 0.024951446 | 0.007690356 | 0.013394022 |
| 0.003560138 | 0.004921702 | 0.003547155 | 0.012629753 |
| 0.005483947 | 0.002115215 | 0.002643053 | 0.002960151 |
| 0.008213975 | 0.005350901 | 0.00192074  | 0.005703438 |
| 0.004841906 | 0.013241491 | 0.007557092 | 0.003359849 |
| 0.005056171 | 0.00443966  | 0.001836867 | 0.004483593 |
| 0.008298581 | 0.005265344 | 0.001259914 | 0.011612496 |
| 0.003544661 | 0.002959658 | 0.004781387 | 0.004621465 |
| 0.004065703 | 0.002147378 | 0.000586567 | 0.004012192 |
| 0.006890013 | 0.001378736 | 0.002761813 | 0.003027178 |
| 0.002209689 | 0.002278437 | 0.005052942 | 0.003678745 |
| 0.002251182 | 0.007436004 | 6.94E-05    | 0.012504217 |
| 0.002488654 | 0.004283788 | 0.01769464  | 0.000864396 |
| 0.006762205 | 0.001717708 | 0.004508219 | 6.37E-05    |
| 0.006759464 | 0.00305169  | 0.002493247 | 0.002375858 |
| 0.001963905 | 0.006343248 | 0.002288313 | 0.002442281 |
| 0.006850059 | 0.003393253 | 0.003896786 | 0.010607981 |
| 0.000167197 | 0.019378744 | 0.000461336 | 0.006979401 |
| 0.017612201 | 0.001929925 | 0.001638861 | 0.005359507 |
| 0.003401495 | 0.000981219 | 0.007605411 | 0.002611347 |
| 0.011110771 | 0.009106975 | 0.001257295 | 0.011223143 |
| 0.01312415  | 0.003643488 | 0.001735791 | 0.003735566 |
| 0.004329015 | 0.004641858 | 0.002060315 | 0.005526172 |
| 0.009312801 | 0.002867999 | 0.013551349 | 0.00305946  |
| 0.00041983  | 0.000679291 | 0.002950793 | 0.002161609 |
| 0.006364859 | 0.002364226 | 0.002541636 | 0.006592148 |
| 0.001298457 | 0.007156092 | 0.001530477 | 0.005857859 |
| 0.004280487 | 0.005661316 | 0.003890088 | 0.000555777 |
| 0.003323961 | 0.002409695 | 0.003033586 | 0.008236292 |
| 0.004695204 | 0.000823627 | 0.001215573 | 0.003298587 |
| 0.000733318 | 0.012331757 | 0.00376627  | 0.008264343 |
| 0.000267367 | 0.00300241  | 0.004571763 | 7.54E-05    |

|             |             |             |             |
|-------------|-------------|-------------|-------------|
| 0.006931858 | 0.000679727 | 0.01469487  | 0.000738097 |
| 0.007708413 | 0.011673983 | 0.009752841 | 0.005520399 |
| 0.002617096 | 0.003332681 | 0.004936637 | 0.003501748 |
| 0.00062175  | 0.004278648 | 0.003226607 | 0.004700509 |
| 0.006041796 | 0.001392147 | 0.004493954 | 0.002110848 |
| 0.003071632 | 0.000201601 | 0.004228451 | 0.002368309 |
| 0.000474442 | 0.003282093 | 0.001904332 | 0.004274736 |
| 0.005573784 | 0.001522395 | 0.017322912 | 0.00881063  |
| 0.005071359 | 0.006964191 | 0.005387807 | 0.005719268 |
| 0.000359427 | 0.00327851  | 0.00224162  | 0.009091696 |
| 0.008244526 | 0.012405804 | 0.007475757 | 0.004813315 |
| 3.65E-05    | 0.005263531 | 0.004612695 | 0.021876618 |
| 0.010681323 | 0.00109132  | 0.004599227 | 0.002968751 |
| 0.01501745  | 0.005808418 | 0.009980136 | 0.002475865 |
| 0.001993472 | 0.004499533 | 0.004181872 | 0.005819055 |
| 0.009890391 | 0.004529091 | 0.006467655 | 0.004209538 |
| 0.00262115  | 0.004077508 | 0.004209017 | 0.005721099 |
| 0.004909366 | 0.00069022  | 0.004435474 | 0.007789272 |
| 0.006472428 | 0.00468145  | 0.003523814 | 0.001108922 |
| 0.009373338 | 0.013896387 | 0.009888029 | 0.00357499  |
| 0.004226141 | 0.004742986 | 0.003546647 | 0.004031615 |
| 0.004164703 | 0.006116113 | 0.004327822 | 0.0012659   |
| 0.003827984 | 0.002022397 | 0.003084087 | 0.004980304 |
| 0.000342696 | 0.008503103 | 0.012227289 | 0.01289451  |
| 0.003681952 | 0.006809106 | 0.00915183  | 0.00918407  |
| 0.001140339 | 0.001050856 | 0.001573433 | 0.012166543 |
| 0.013660004 | 0.006823122 | 1.42E-05    | 0.000446713 |
| 0.00224653  | 0.004854602 | 0.000981758 | 0.003271259 |
| 0.006497758 | 0.001732335 | 0.005309287 | 0.0078952   |
| 0.007764638 | 0.001554242 | 0.002134768 | 0.000107084 |
| 0.000119043 | 0.005287948 | 0.001326735 | 0.000649536 |
| 0.007644906 | 0.003104239 | 0.00349801  | 0.003960094 |
| 0.001666204 | 0.003664116 | 0.003475095 | 0.004310451 |
| 0.002967116 | 0.001108102 | 0.003235134 | 0.002339119 |
| 0.000226091 | 2.84E-05    | 0.033579691 | 0.002955429 |
| 0.001824509 | 0.002823494 | 0.012534815 | 0.000221887 |
| 0.010248906 | 0.003246147 | 0.015606343 | 0.01173701  |
| 0.002398994 | 0.017494241 | 0.012893048 | 0.001928244 |
| 0.008276947 | 0.018345886 | 0.000671209 | 0.00683965  |
| 0.003772387 | 0.010511006 | 0.007344796 | 0.004263825 |
| 0.010283088 | 0.002317349 | 0.002643707 | 0.003065762 |
| 0.004624363 | 0.004919735 | 0.000868258 | 0.00069987  |
| 0.006682384 | 0.002286163 | 0.000268793 | 0.003511705 |
| 0.001731983 | 0.002796654 | 0.00835089  | 0.00502881  |
| 0.004507081 | 0.00313887  | 0.013536145 | 0.00381293  |
| 0.002721717 | 1           | 0.000222229 | 0.01042979  |
| 0.003064871 | 0.002665655 | 0.009230015 | 0.006248658 |
| 0.018259883 | 0.001403964 | 0.005109107 | 0.004270342 |
| 0.008142584 | 0.003330261 | 0.008598652 | 0.010278275 |
| 0.010941203 | 0.002192762 | 0.016312392 | 0.0117694   |
| 0.000663635 | 0.003279213 | 0.005004301 | 0.009762323 |
| 0.00066206  | 0.001400404 | 0.01195235  | 0.009504986 |
| 0.00401456  | 0.003021353 | 0.005482978 | 0.005577012 |
| 0.006258411 | 0.004029602 | 0.004211814 | 0.002157729 |

|             |             |             |             |             |
|-------------|-------------|-------------|-------------|-------------|
| 0.003390124 | 0.005300127 | 0.005560866 | 0.01226094  |             |
| 0.011025473 | 0.010609028 | 0.008539529 | 0.01970118  |             |
| 0.00352742  | 0.002149638 | 0.003309734 | 0.005348711 |             |
| 0.010974881 | 0.005204098 | 0.009942956 | 0.014917203 |             |
| 0.003681724 | 0.015820547 | 0.021850281 | 0.002057735 |             |
| 0.004772176 | 0.001694997 | 0.008834071 | 0.012694645 |             |
| 0.00366937  | 0.00127812  | 0.01004471  | 0.004223608 |             |
| 0.004080648 | 0.000213425 | 0.002518086 | 0.00727037  |             |
| 0.009660686 | 0.006194497 | 5.56E-05    | 0.007210188 |             |
| 0.001986414 | 0.00084948  | 0.001342592 | 0.001194937 |             |
| 0.005318031 | 0.001656915 | 0.002890611 | 0.008595723 |             |
| 0.007932149 | 0.002822593 | 0.004410158 | 0.004395979 |             |
| 0.013159365 | 0.001829532 | 0.012678051 | 0.010462976 |             |
| 0.012390571 | 0.005835563 | 0.001809903 | 0.018691905 |             |
| 0.002240255 | 0.002298223 | 0.001905714 | 0.004444195 |             |
| 0.004522767 | 0.002858104 | 6.64E-05    | 0.004464675 |             |
| 0.000428249 | 0.008217776 | 0.005575094 | 0.0088329   |             |
| 0.005664251 | 0.003609703 | 0.005318824 | 0.006441592 |             |
| 4.16E-06    | 0.003019603 | 0.004342027 | 0.0010171   |             |
| 0.00140325  | 0.006207073 | 0.006243448 | 0.014376832 |             |
| 0.01460038  | 0.00272505  | 0.007466511 | 0.000266992 |             |
| 0.000638944 | 0.001542001 | 0.019003138 | 0.009855121 |             |
| 0.016116164 | 0.002978358 | 0.003017961 | 0.007560192 |             |
| 0.006882146 | 0.014362731 | 0.008913839 | 0.000261431 |             |
| 0.000321391 | 0.005449144 | 0.001753473 | 0.008837422 |             |
| 0.005513902 | 0.006378522 | 0.006903609 | 3.02E-05    |             |
| 0.002726416 | 0.008718077 | 0.020251114 | 0.01394189  |             |
| 0.018715435 | 0.013922734 | 0.018331712 | 0.004374679 |             |
| 0.002611585 | 0.008000461 | 0.005662502 | 0.01696251  |             |
| 0.016031508 | 0.007521041 | 0.003878867 | 0.001693972 |             |
| 0.005185788 | 0.010770325 | 0.004731239 | 0.003813163 |             |
| 0.00757826  | 0.003401691 | 0.010035775 | 0.004129361 |             |
| 0.020597346 | 0.001577752 | 0.010150188 | 0.001801102 |             |
| 0.008771047 | 0.002437169 | 0.005981114 | 0.001634239 |             |
| 0.000289691 | 5.98E-05    | 0.002044074 | 0.002000026 |             |
| 0.01019542  | 0.005407788 | 0.00121899  | 0.000794735 |             |
| 0.001705    | 0.00700531  | 0.010121931 | 0.006764319 |             |
| 0.002461871 | 0.003264551 | 0.002377734 | 0.014184739 |             |
| 0.005099532 | 0.00757751  | 0.012131208 | 0.002188092 |             |
| 0.007433903 | 0.000336276 | 0.002458479 | 0.002497745 |             |
| 0.002887211 | 0.00981581  | 8.46E-05    | 0.004025082 |             |
| 0.002068091 | 0.001501942 | 0.010447274 | 0.001925971 |             |
| 0.00201154  | 0.011373809 | 0.008010311 | 0.000435669 |             |
| 0.00316032  | 0.002927771 | 0.014262762 | 0.005756421 |             |
| 0.013033059 | 0.004465866 | 0.003801681 | 0.003150826 |             |
| 0.000721578 | 0.008734562 | 0.000675373 | 0.006274554 |             |
| 0.011902916 | 0.00321618  | 0.009344648 | 0.002946677 |             |
| 0.003910821 | 0.007624145 | 0.006800506 | 0.0084382   |             |
| 0.001587522 | 0.014038329 | 0.00389312  | 0.000666756 |             |
| 0.007292682 | 0.002638224 | 8.17E-06    | 9.56E-05    | 0.012207394 |
| 0.003820119 | 0.000993146 | 0.007582126 | 0.011809956 |             |
| 0.012742757 | 0.002382637 | 0.001958677 | 0.001668092 |             |
| 0.003079167 | 0.001236515 | 0.011967055 | 0.006050955 |             |
| 0.016524377 | 0.001077566 | 1.60E-05    | 0.001486456 |             |

|             |             |             |             |
|-------------|-------------|-------------|-------------|
| 0.001316647 | 0.000287497 | 0.016163107 | 0.0050355   |
| 0.001989536 | 0.000826951 | 0.004176586 | 0.004527488 |
| 0.000365151 | 0.00250339  | 0.002660719 | 0.010060686 |
| 0.002763069 | 0.019862879 | 0.004612889 | 0.001026136 |
| 0.011680466 | 0.004876798 | 0.003030836 | 0.004531928 |
| 0.004467994 | 0.006057413 | 0.006246245 | 0.013566559 |
| 0.005355703 | 6.74E-06    | 0.005161764 | 0.001960568 |
| 0.003478011 | 0.011382626 | 3.19E-05    | 0.017496667 |
| 0.008848109 | 0.003256971 | 0.001309521 | 0.007719944 |
| 0.003744496 | 0.01734295  | 0.003412521 | 0.000160505 |
| 0.002408187 | 0.007704374 | 0.007645163 | 0.002843518 |
| 0.00085801  | 0.012742284 | 0.000159138 | 0.002229241 |
| 0.004639562 | 0.002565715 | 0.0079449   | 0.001863693 |
| 0.007213885 | 0.000294213 | 0.004295367 | 0.021580481 |
| 0.007209199 | 0.004643839 | 0.006536245 | 0.005586922 |
| 0.003814318 | 0.001161531 | 0.004295745 | 0.021467352 |
| 0.011563045 | 0.005575224 | 0.002498715 | 0.015369792 |
| 0.016420871 | 0.003904838 | 0.010411723 | 0.001682265 |
| 0.006340472 | 0.00264104  | 0.003564437 | 0.003843884 |
| 0.014805095 | 0.000705109 | 0.01906256  | 0.010725918 |
| 0.008819973 | 0.002171554 | 0.011711655 | 0.007397442 |
| 0.00445802  | 0.008260256 | 0.007443957 | 0.008175114 |
| 0.002764965 | 0.006412166 | 5.46E-05    | 0.002224958 |
| 0.005098315 | 0.015868053 | 0.003664207 | 0.0070554   |
| 0.003297517 | 0.000367144 | 0.000368856 | 0.007587245 |
| 0.000973351 | 0.012580499 | 0.006899789 | 0.000537051 |
| 0.005339328 | 0.004443471 | 0.004524091 | 0.00715626  |
| 0.000579842 | 0.000416248 | 0.004355859 | 0.001022841 |
| 0.001042673 | 0.002495722 | 0.000769752 | 0.006525592 |
| 0.000598366 | 0.000685617 | 0.001101171 | 0.005233617 |
| 0.006764517 |             |             |             |
| MIB2        | 0.064041615 | 0.419478924 | 0.065167002 |
| 0.138385356 | 0.154656358 | 0.232551925 | 0.036726592 |
| 0.072758406 | 0.287892113 | 0.162806257 | 0.217254456 |
| 0.018277485 | 0.026215561 | 0.437169269 | 0.028983759 |
| 0.231608635 | 0.021254477 | 0.065168239 | 0.029681534 |
| 0.113357194 | 0.129873433 | 0.166896521 | 0.234933753 |
| 0.114657018 | 0.218137005 | 0.247027057 | 0.183961524 |
| 0.499436629 | 0.158310568 | 0.328088523 | 0.167785007 |
| 0.410392231 | 0.175037488 | 0.185711531 | 0.021432903 |
| 0.217760548 | 0.001208002 | 0.440044108 | 0.135761633 |
| 0.078759876 | 0.338628369 | 0.21062966  | 0.145050091 |
| 0.211738927 | 0.042835353 | 0.145016475 | 0.265991351 |
| 0.211912792 | 0.124993367 | 0.058669519 | 0.340919243 |
| 0.166701102 | 0.29105569  | 0.358973564 | 0.002744543 |
| 0.139494079 | 0.035380157 | 0.09493044  | 0.514144054 |
| 0.159807815 | 0.065868609 | 0.133268719 | 0.109193179 |
| 0.215664004 | 0.232095595 | 0.155114145 | 0.193711432 |
| 0.505724974 | 0.064142986 | 0.332207594 | 0.114456451 |
| 0.197136543 | 0.025515999 | 0.135555926 | 0.068633561 |
| 0.178473365 | 0.102451963 | 0.168844602 | 0.130767528 |
| 0.454415566 | 0.496961287 | 0.153173504 | 0.515305162 |
| 0.022457065 | 0.165856311 | 0.117000964 | 0.207827763 |
| 0.247083149 | 0.039913301 | 0.355745073 | 0.516793702 |



|             |             |             |             |
|-------------|-------------|-------------|-------------|
| 0.029508779 | 0.258346665 | 0.298362624 | 0.10925977  |
| 0.425415533 | 0.099542061 | 0.251231651 | 0.075081566 |
| 0.229815483 | 0.174132932 | 0.449754917 | 0.239664363 |
| 0.126375293 | 0.071431626 | 0.507938818 | 0.156570857 |
| 0.168857006 | 0.075867452 | 0.097460163 | 0.407580888 |
| 0.304461717 | 0.495584649 | 0.385361474 | 0.281304822 |
| 0.204386358 | 0.506397461 | 0.347844175 | 0.371996205 |
| 0.09068235  | 0.521749181 | 0.1333498   | 0.025695424 |
| 0.063474412 | 0.039766517 | 0.074356757 | 0.238927165 |
| 0.450079239 | 0.235687067 | 0.133094011 | 0.115456371 |
| 0.39674163  | 0.502243461 | 0.516798673 | 0.362932574 |
| 0.033469236 | 0.086765953 | 0.214502379 | 0.145073016 |
| 0.26038369  | 0.067481467 | 0.111872457 | 0.520584735 |
| 0.391275849 | 0.370460435 | 0.11521059  | 0.497732179 |
| 0.086263985 | 0.502414205 | 0.474388207 | 0.111658309 |
| 0.527144845 | 0.52154146  | 0.490934186 | 0.28308988  |
| 0.484587387 | 0.233267264 | 0.016660489 | 0.322654697 |
| 0.456492604 | 0.007898165 | 0.439709883 | 0.46893628  |
| 0.517204546 | 0.425851272 | 0.47773637  | 0.486750073 |
| 0.51459351  | 0.056915828 | 0.008116104 | 0.16451147  |
| 0.527432833 | 0.401388258 | 0.047919938 | 0.234560589 |
| 0.192403562 | 0.227352616 | 0.334531094 | 0.200278845 |
| 0.476281974 | 0.434168212 | 0.467855405 | 0.323718136 |
| 0.166324561 | 0.315033473 | 0.191441267 | 0.504921291 |
| 0.032516675 | 0.099714857 | 0.064681691 | 0.207343197 |
| 0.230394876 | 0.096799157 | 0.228992604 | 0.166556518 |
| 0.124796831 | 0.176989149 | 0.15005365  | 0.249931123 |
| 0.076037882 | 0.289165324 | 0.106408393 | 0.117429592 |
| 0.030398596 | 0.147400475 | 0.131901848 | 0.099219835 |
| 0.116567904 | 0.268311014 | 0.332926208 | 0.460937499 |
| 0.144082183 | 0.192342714 | 0.337679757 | 0.448365282 |
| 0.384272122 | 0.209280758 | 0.168807373 | 0.019102592 |
| 0.151775191 | 0.132367162 | 0.070598467 | 0.218473197 |
| 0.19437995  | 0.121972049 | 0.234887659 | 0.295552015 |
| 0.214647004 | 0.078255819 | 0.172869351 | 0.425334241 |
| 0.148583706 | 0.162974135 | 0.413473811 | 0.245801874 |
| 0.005373821 | 0.208410833 | 0.410128157 | 0.049362881 |
| 0.212943408 | 0.06121055  | 0.136188711 | 0.439325973 |
| 0.122368916 | 0.078072894 | 0.460910843 | 0.273628763 |
| 0.182027381 | 0.241719744 | 0.488565158 | 0.015393107 |
| 0.140592649 | 0.038847238 | 0.193990113 | 0.181100667 |
| 0.172571465 | 0.195300864 | 0.146398397 | 0.133501595 |
| 0.145766242 | 0.508585521 | 0.350822751 | 0.500182284 |
| 0.184891136 | 0.498583186 | 0.422400827 | 0.423763853 |
| 0.256820391 | 0.156295189 | 0.052285788 | 0.420385309 |
| 0.43224526  | 0.151076195 | 0.086963912 | 0.364238775 |
| 0.174815072 | 0.276087823 | 0.042525311 | 0.480073578 |
| 0.483137405 | 0.49991747  | 0.070221134 | 0.267701748 |
| 0.371242957 | 0.166845929 | 0.346214537 | 0.482220785 |
| 0.162508193 | 0.161151135 | 0.167265013 | 0.322832416 |
| 0.146033461 | 0.077178146 | 0.272625095 | 0.062552538 |
| 0.009684313 | 0.057515248 | 0.061071755 | 0.078613582 |
| 0.067036524 | 0.274206021 | 0.263839663 | 0.506778883 |
| 0.070434106 | 0.396524306 | 0.158608559 | 0.169298501 |

|             |             |             |             |
|-------------|-------------|-------------|-------------|
| 0.43317186  | 0.140965099 | 0.194028708 | 0.223515039 |
| 0.184845456 | 0.02017315  | 0.082706776 | 0.513657141 |
| 0.045299989 | 0.11023326  | 0.149154492 | 0.003327154 |
| 0.038589516 | 0.389199863 | 0.115528033 | 0.211519853 |
| 0.415494598 | 0.229264375 | 0.184099337 | 0.180397717 |
| 0.246430462 | 0.061826145 | 0.00302639  | 0.454142055 |
| 0.443193381 | 0.406068388 | 0.446575688 | 0.432267008 |
| 0.37884669  | 0.29513953  | 0.332073541 | 0.253610172 |
| 0.069130394 | 0.069390757 | 0.097193953 | 0.147397757 |
| 0.003342208 | 0.306822903 | 0.120065977 | 0.120633392 |
| 0.314963419 | 0.19089583  | 0.032535102 | 0.171857193 |
| 0.044068523 | 0.105722681 | 0.148513329 | 0.088664417 |
| 0.221131398 | 0.016291409 | 0.218365643 | 0.162411643 |
| 0.475585707 | 0.340585461 | 0.169563558 | 0.527697767 |
| 0.199173906 | 0.144607152 | 0.165882839 | 0.294573811 |
| 0.047647505 | 0.061249634 | 0.172061221 | 0.067012989 |
| 0.112630985 | 0.411295161 | 0.166042824 | 0.075746477 |
| 0.192393525 | 0.009716625 | 0.390137776 | 0.516983626 |
| 0.498066202 | 0.493443826 | 0.505216116 | 0.131792962 |
| 0.519853279 | 0.03715468  | 0.516303368 | 0.402167674 |
| 0.210142999 | 0.003712168 | 0.002396049 | 0.465950056 |
| 0.235453026 | 0.081151632 | 0.114438782 | 0.259548358 |
| 0.072285574 | 0.111536446 | 0.037805914 | 0.077285086 |
| 0.300427298 | 0.104100684 | 0.059794852 | 0.482652238 |
| 0.127295224 | 0.113626318 | 0.202785929 | 0.08125083  |
| 0.235484911 | 0.041732528 | 0.072704036 | 0.00680921  |
| 0.235656009 | 0.141239339 | 0.490858828 | 0.50728346  |
| 0.483254382 | 0.276859362 | 0.192898561 | 0.17454078  |
| 0.357358953 | 0.126122189 | 0.180438593 | 0.110037274 |
| 0.514455599 | 0.268434204 | 0.281131227 | 0.320707199 |
| 0.478681712 | 0.480854297 | 0.024072822 | 0.342107994 |
| 0.023100279 | 0.000222229 | 1           | 0.170506004 |
| 0.011087586 | 0.172203701 | 0.224267073 | 0.089723935 |
| 0.08272771  | 0.037923674 | 0.109148603 | 0.101537872 |
| 0.1883804   | 0.174698464 | 0.120072292 | 0.168746026 |
| 0.107469322 | 0.052404558 | 0.092464393 | 0.06728331  |
| 0.0882876   | 0.314698456 | 0.228858119 | 0.015934645 |
| 0.242964381 | 0.230736351 | 0.045074639 | 0.128540314 |
| 0.426661871 | 0.480355989 | 0.024825982 | 0.012992166 |
| 0.243561649 | 0.130015901 | 0.464621126 | 0.508502528 |
| 0.530442984 | 0.493326824 | 0.387906573 | 0.049475788 |
| 0.049495521 | 0.171002628 | 0.128641254 | 0.037584595 |
| 0.498339551 | 0.069944193 | 0.485774671 | 0.125755501 |
| 0.08261833  | 0.135259644 | 0.026427289 | 0.049344748 |
| 0.212318001 | 0.117050469 | 0.084681326 | 0.162737447 |
| 0.155567162 | 0.110563385 | 0.031668417 | 0.120017823 |
| 0.296269256 | 0.085632718 | 0.108412505 | 0.147915663 |
| 0.310191403 | 0.101193401 | 0.330471049 | 0.425356144 |
| 0.11378533  | 0.067801121 | 0.240835544 | 0.263132234 |
| 0.411692754 | 0.222384184 | 0.037705071 | 0.46661856  |
| 0.446362197 | 0.328370776 | 0.513936588 | 0.318359471 |
| 0.07140175  | 0.205319285 | 0.118022675 | 0.17621251  |
| 0.101346815 | 0.230577529 | 0.100263473 | 0.047333    |
| 0.240493831 | 0.450990634 | 0.417194347 | 0.095369589 |

|             |             |             |             |
|-------------|-------------|-------------|-------------|
| 0.242332389 | 0.11148225  | 0.061946032 | 0.392573732 |
| 0.079823516 | 0.077315791 | 0.206111692 | 0.346265477 |
| 0.001694699 | 0.050254312 | 0.425691509 | 0.129206909 |
| 0.476671462 | 0.459020516 | 0.441322569 | 0.117313027 |
| 0.000289433 | 0.275668663 | 0.262169705 | 0.230973958 |
| 0.44002251  | 0.301469512 | 0.058077828 | 0.045098139 |
| 0.235649676 | 0.104313659 | 0.072353083 | 0.21538851  |
| 0.076221404 | 0.288628539 | 0.136429778 | 0.106584075 |
| 0.085450413 | 0.086808502 | 0.104311085 | 0.143607744 |
| 0.039439573 | 0.188242309 | 0.300206568 | 0.157531968 |
| 0.115183075 | 0.365770045 | 0.372583756 | 0.026486232 |
| 0.154895331 | 0.33724312  | 0.375378854 | 0.003026178 |
| 0.341335299 | 0.006971395 | 0.087655191 | 0.117058415 |
| 0.09384454  | 0.087773327 | 0.131038183 | 0.147345033 |
| 0.229980327 | 0.114465918 | 0.170544302 | 0.15661126  |
| 0.087622455 | 0.112011168 | 0.220448696 | 0.191166808 |
| 0.154826183 | 0.089019425 | 0.123130442 | 0.140227858 |
| 0.04263154  | 0.43491643  | 0.237371003 | 0.093999495 |
| 0.12452015  | 0.170513818 | 0.31669322  | 0.512254491 |
| 0.366663262 | 0.152356127 | 0.140295738 | 0.468997648 |
| 0.11279146  | 0.17459531  | 0.051464792 | 0.230455708 |
| 0.127068413 | 0.105388041 | 0.209409326 | 0.262929755 |
| 0.317491502 | 0.399188592 | 0.2280868   | 0.403984504 |
| 0.190234307 | 0.142511886 | 0.219094062 | 0.053079675 |
| 0.128791275 | 0.109677586 | 0.114911677 | 0.004652293 |
| 0.235933444 | 0.212867776 | 0.458139149 | 0.516378201 |
| 0.118236545 | 0.344463767 | 0.244239028 | 0.076466651 |
| 0.207306443 | 0.237107835 | 0.115626426 | 0.358548825 |
| 0.099350877 | 0.104976759 | 0.152136575 | 0.231776125 |
| 0.342400178 | 0.310724238 | 0.090162993 | 0.115061366 |
| 0.108837122 | 0.164396926 | 0.451907549 | 0.091242712 |
| 0.275695012 | 0.088766694 | 0.243030662 | 0.15466038  |
| 0.098095582 | 0.4916458   | 0.045981857 | 0.504594356 |
| 0.153750434 | 0.127314755 | 0.467291364 | 0.144475872 |
| 0.158331292 | 0.055518198 | 0.078521094 | 0.194060019 |
| 0.099386121 | 0.150900331 | 0.008442669 | 0.028457752 |
| 0.245277619 | 0.11669232  | 0.365034455 | 0.243453976 |
| 0.096405346 | 0.243462115 | 0.056358342 | 0.151948862 |
| 0.507484732 | 0.506200985 | 0.168215868 | 0.190401504 |
| 0.266619554 | 0.06456394  | 0.322794767 | 0.003415448 |
| 0.278323302 | 0.263865391 | 0.189840838 | 0.030267309 |
| 0.014467474 | 0.098816728 | 0.279589883 | 0.057195601 |
| 0.430793126 | 0.104790173 | 0.219587766 | 0.343889444 |
| 0.131179289 | 0.516801492 | 0.051413588 | 0.329726153 |
| 0.027018378 | 0.161907558 | 0.159146135 | 0.159800847 |
| 0.133440571 | 0.13077292  | 0.306799088 | 0.107951614 |
| 0.024717441 | 0.127078103 | 0.001406916 | 0.422163294 |
| 0.496090249 | 0.148259368 | 0.181130636 | 0.142880605 |
| 0.187680591 | 0.312474837 | 0.093273713 | 0.210989301 |
| 0.011500454 | 0.220085026 | 0.109196443 | 0.425792799 |
| 0.169845126 | 0.189909786 | 0.042916665 | 0.1190604   |
| 0.483045008 | 0.138179104 | 0.195280271 | 0.193167579 |
| 0.50199929  | 0.33297812  | 0.179736709 | 0.084024719 |
| 0.252106406 | 0.0604759   | 0.214874023 | 0.498848586 |

|             |             |             |             |
|-------------|-------------|-------------|-------------|
| 0.086540028 | 0.097315785 | 0.389880713 | 0.11896481  |
| 0.124779538 | 0.362420163 | 0.249264632 | 0.480581327 |
| 0.030406423 | 0.175459018 | 0.331591204 | 0.438625097 |
| 0.222977338 | 0.058097745 | 0.110628554 | 0.102426786 |
| 0.502091883 | 0.085385678 | 0.098298113 | 0.310603219 |
| 0.098754468 | 0.191131968 | 0.225872273 | 0.074013683 |
| 0.024298499 | 0.069661407 | 0.205051504 | 0.09941727  |
| 0.171356202 | 0.185724954 | 0.098386005 | 0.3677846   |
| 0.0892802   | 0.031232824 | 0.425639076 | 0.008313205 |
| 0.244459161 | 0.283335136 | 0.132089222 | 0.157574538 |
| 0.205627343 | 0.216063198 | 0.2272604   | 0.002066707 |
| 0.329745534 | 0.023284364 | 0.114178485 | 0.118509368 |
| 0.121312248 | 0.040421003 | 0.460346123 | 0.477576019 |
| 0.212020866 | 0.143234917 | 0.175749689 | 0.441620902 |
| 0.061887664 | 0.147807672 | 0.136667843 | 0.332972732 |
| 0.090450975 | 0.217114325 | 0.198753199 | 0.198774508 |
| 0.311413596 | 0.130960416 |             |             |
| MLF2        | 0.170419104 | 0.297838088 | 0.107559685 |
| 0.136543931 | 0.205231081 | 0.186175552 | 0.212416712 |
| 0.275544197 | 0.274720116 | 0.126927082 | 0.213357305 |
| 0.103614758 | 0.068370274 | 0.340968213 | 0.227417366 |
| 0.201530325 | 0.175376751 | 0.250389472 | 0.120614289 |
| 0.206145641 | 0.216022908 | 0.163759752 | 0.204348735 |
| 0.228064865 | 0.26306903  | 0.21106152  | 0.181890499 |
| 0.331019733 | 0.086549416 | 0.199332059 | 0.06219756  |
| 0.37306625  | 0.201891765 | 0.15335884  | 0.077398472 |
| 0.218166351 | 0.039641413 | 0.393514748 | 0.224055797 |
| 0.080445702 | 0.354278698 | 0.136758758 | 0.219166732 |
| 0.16217726  | 0.113307944 | 0.068048511 | 0.209345035 |
| 0.217686845 | 0.25982689  | 0.140847608 | 0.218070315 |
| 0.209457379 | 0.24868746  | 0.200010013 | 0.015326493 |
| 0.132203357 | 0.03318768  | 0.097018945 | 0.365255272 |
| 0.253017222 | 0.262067734 | 0.118525904 | 0.280123952 |
| 0.219914376 | 0.247990477 | 0.291739438 | 0.169078276 |
| 0.356522783 | 0.117948109 | 0.22204763  | 0.144936404 |
| 0.221887791 | 0.138961739 | 0.247069113 | 0.176396409 |
| 0.19761391  | 0.271871558 | 0.226323169 | 0.162018416 |
| 0.280695141 | 0.433107498 | 0.271693932 | 0.370508084 |
| 0.134762564 | 0.191820726 | 0.198841433 | 0.285914213 |
| 0.275756841 | 0.249598583 | 0.242409912 | 0.399405994 |
| 0.187004619 | 0.169019226 | 0.247491689 | 0.207629096 |
| 0.292001076 | 0.165254584 | 0.152543786 | 0.111044762 |
| 0.207054565 | 0.202424137 | 0.402908014 | 0.252048802 |
| 0.229200326 | 0.151961957 | 0.379100649 | 0.176560632 |
| 0.196656069 | 0.153686459 | 0.199555451 | 0.281041177 |
| 0.205415894 | 0.332523282 | 0.28094464  | 0.300822996 |
| 0.189944699 | 0.348010646 | 0.223230914 | 0.33657394  |
| 0.054126097 | 0.37554896  | 0.216930424 | 0.185945951 |
| 0.159972579 | 0.264038859 | 0.236651506 | 0.339031899 |
| 0.302956848 | 0.270383689 | 0.244843867 | 0.248955839 |
| 0.318900648 | 0.354898251 | 0.371680731 | 0.301522584 |
| 0.154626317 | 0.149505203 | 0.179429603 | 0.255583046 |
| 0.256859369 | 0.260771172 | 0.152975056 | 0.400957704 |
| 0.323647611 | 0.282852136 | 0.213735506 | 0.432522459 |

|             |             |             |             |
|-------------|-------------|-------------|-------------|
| 0.306204154 | 0.397078089 | 0.278859837 | 0.230229367 |
| 0.39530362  | 0.379445902 | 0.377712944 | 0.20430852  |
| 0.376321726 | 0.193950295 | 0.116542606 | 0.3127435   |
| 0.393487421 | 0.013862094 | 0.307698013 | 0.328922195 |
| 0.348362031 | 0.273410286 | 0.388934655 | 0.348608494 |
| 0.35617505  | 0.196715895 | 0.023990247 | 0.260761114 |
| 0.373049584 | 0.298772132 | 0.314559413 | 0.174149083 |
| 0.22285438  | 0.209443852 | 0.271100555 | 0.134931725 |
| 0.436827859 | 0.303626161 | 0.320721945 | 0.280169678 |
| 0.212523128 | 0.346534923 | 0.162992414 | 0.362330336 |
| 0.173087675 | 0.181317489 | 0.124485319 | 0.312093897 |
| 0.134044083 | 0.270391403 | 0.215167443 | 0.23865516  |
| 0.272493896 | 0.234220807 | 0.139984002 | 0.216081967 |
| 0.140276052 | 0.179921852 | 0.226440911 | 0.222958889 |
| 0.165194371 | 0.265572969 | 0.216013808 | 0.211039067 |
| 0.267596244 | 0.317025076 | 0.221647519 | 0.342902782 |
| 0.229691903 | 0.202337583 | 0.23593481  | 0.384569619 |
| 0.392105018 | 0.176900853 | 0.305043307 | 0.031263077 |
| 0.173976914 | 0.135068947 | 0.100588751 | 0.180777944 |
| 0.287900655 | 0.250203869 | 0.220460378 | 0.237518978 |
| 0.202197757 | 0.246653672 | 0.202866394 | 0.402524721 |
| 0.208957705 | 0.201137353 | 0.316388691 | 0.19387549  |
| 0.028359162 | 0.220170372 | 0.277082251 | 0.204249073 |
| 0.260710476 | 0.098539361 | 0.105438751 | 0.311074467 |
| 0.164423551 | 0.204796813 | 0.330483727 | 0.246133133 |
| 0.196629143 | 0.295165944 | 0.390773581 | 0.042235653 |
| 0.212614484 | 0.09058473  | 0.258552709 | 0.149764431 |
| 0.247732842 | 0.307973194 | 0.19846019  | 0.19621824  |
| 0.161393927 | 0.383120407 | 0.311942625 | 0.352205277 |
| 0.163731306 | 0.392516337 | 0.290360036 | 0.324577055 |
| 0.245141781 | 0.178289569 | 0.071271734 | 0.26521766  |
| 0.298004378 | 0.164669983 | 0.144787361 | 0.257027398 |
| 0.174604709 | 0.22024265  | 0.192497422 | 0.357834168 |
| 0.420379069 | 0.333304278 | 0.276873637 | 0.283544884 |
| 0.287530526 | 0.227021176 | 0.30512492  | 0.414305745 |
| 0.139362895 | 0.203058002 | 0.180856357 | 0.310867109 |
| 0.225534269 | 0.205101935 | 0.35451     | 0.098087119 |
| 0.002649577 | 0.204968164 | 0.157624418 | 0.253096257 |
| 0.12810655  | 0.178915011 | 0.22425408  | 0.370369508 |
| 0.251310148 | 0.343171465 | 0.293173669 | 0.187855645 |
| 0.32527811  | 0.22370064  | 0.178631702 | 0.219227487 |
| 0.295344202 | 0.051070971 | 0.168054488 | 0.427158549 |
| 0.118881157 | 0.139763218 | 0.274634596 | 0.007289513 |
| 0.156006223 | 0.244574278 | 0.194865466 | 0.299595678 |
| 0.351847317 | 0.273984089 | 0.218356312 | 0.147342747 |
| 0.264124932 | 0.215090948 | 0.012875751 | 0.342510952 |
| 0.375777589 | 0.36823577  | 0.371972756 | 0.376047183 |
| 0.33553317  | 0.269306083 | 0.275112485 | 0.191581602 |
| 0.238041259 | 0.183123443 | 0.133620765 | 0.236805748 |
| 0.017533658 | 0.283768724 | 0.25463109  | 0.231685385 |
| 0.257032493 | 0.284152693 | 0.149578681 | 0.225751902 |
| 0.05501847  | 0.078440789 | 0.26044747  | 0.310761694 |
| 0.284363821 | 0.082861557 | 0.087205909 | 0.156152587 |
| 0.323818909 | 0.310160579 | 0.151653174 | 0.381554027 |

|             |             |             |             |
|-------------|-------------|-------------|-------------|
| 0.229579917 | 0.162035766 | 0.205310941 | 0.26262772  |
| 0.212369412 | 0.077426371 | 0.228471707 | 0.01072543  |
| 0.136450726 | 0.391004822 | 0.203951635 | 0.1329357   |
| 0.238436855 | 0.037710135 | 0.294882524 | 0.395789774 |
| 0.326759418 | 0.361007377 | 0.354301464 | 0.13774182  |
| 0.356128378 | 0.045487685 | 0.36555847  | 0.279514531 |
| 0.147861361 | 0.002983455 | 0.03916322  | 0.311280383 |
| 0.189825647 | 0.124660598 | 0.24313122  | 0.1456346   |
| 0.208546417 | 0.194178236 | 0.225413837 | 0.153361354 |
| 0.199080448 | 0.236244788 | 0.182612183 | 0.355024282 |
| 0.255771382 | 0.293585464 | 0.196772203 | 0.187979925 |
| 0.206376347 | 0.162623916 | 0.19793565  | 0.016164384 |
| 0.2629679   | 0.189533173 | 0.389482243 | 0.36023774  |
| 0.393751354 | 0.22410742  | 0.120741138 | 0.190755246 |
| 0.33053257  | 0.133264644 | 0.149671026 | 0.161180265 |
| 0.327345268 | 0.205105677 | 0.28670342  | 0.279340252 |
| 0.382589634 | 0.357307723 | 0.161048865 | 0.268834175 |
| 0.035958075 | 0.01042979  | 0.170506004 | 1           |
| 0.117001083 | 0.195294129 | 0.276682288 | 0.266246843 |
| 0.287501123 | 0.101117507 | 0.142389913 | 0.148385012 |
| 0.24903725  | 0.235112592 | 0.186199511 | 0.298399397 |
| 0.222745338 | 0.165685685 | 0.267820899 | 0.320491886 |
| 0.24566554  | 0.28575775  | 0.256202726 | 0.134064236 |
| 0.169651622 | 0.181558612 | 0.175034328 | 0.239879573 |
| 0.295165232 | 0.323829253 | 0.179032903 | 0.049882848 |
| 0.295543804 | 0.266817365 | 0.351482332 | 0.336853322 |
| 0.399400399 | 0.40662958  | 0.391338589 | 0.269669627 |
| 0.193197705 | 0.242968991 | 0.19383102  | 0.204012463 |
| 0.36524284  | 0.143587736 | 0.354352156 | 0.15248847  |
| 0.242485045 | 0.223040436 | 0.137780445 | 0.237456246 |
| 0.17931533  | 0.280180787 | 0.255587481 | 0.162825367 |
| 0.230359958 | 0.139855997 | 0.196011364 | 0.26686211  |
| 0.285944439 | 0.088463202 | 0.258762219 | 0.254556588 |
| 0.275276356 | 0.124701238 | 0.230064222 | 0.395645168 |
| 0.212108608 | 0.228108674 | 0.157110452 | 0.284429664 |
| 0.265288604 | 0.167857984 | 0.054774414 | 0.296217028 |
| 0.36526658  | 0.193452067 | 0.361215883 | 0.356305983 |
| 0.199137921 | 0.181176194 | 0.181970327 | 0.225336823 |
| 0.298249778 | 0.193528575 | 0.313238761 | 0.190992279 |
| 0.366018539 | 0.431331692 | 0.293888305 | 0.241111803 |
| 0.195335031 | 0.184838596 | 0.129394947 | 0.314607206 |
| 0.125962628 | 0.171888853 | 0.150951156 | 0.289574103 |
| 0.006204218 | 0.084554619 | 0.367641916 | 0.260609899 |
| 0.418771104 | 0.332376027 | 0.359613252 | 0.270553651 |
| 0.003175243 | 0.202303956 | 0.213593895 | 0.176714556 |
| 0.298117345 | 0.286060022 | 0.247791857 | 0.200132467 |
| 0.315855583 | 0.134551474 | 0.24016556  | 0.165473879 |
| 0.087831399 | 0.218122992 | 0.283278678 | 0.280725535 |
| 0.267435335 | 0.1710661   | 0.130048738 | 0.240027225 |
| 0.146328872 | 0.290265682 | 0.307288948 | 0.136680764 |
| 0.089854567 | 0.353320124 | 0.26398337  | 0.112616355 |
| 0.192082686 | 0.319998027 | 0.349428089 | 0.010622434 |
| 0.226975973 | 0.067130265 | 0.267616225 | 0.224305842 |
| 0.256058226 | 0.296462229 | 0.268724299 | 0.202704355 |

|             |             |             |             |
|-------------|-------------|-------------|-------------|
| 0.244115099 | 0.275846243 | 0.219746507 | 0.260470103 |
| 0.224967693 | 0.285225888 | 0.21983442  | 0.215101567 |
| 0.189606348 | 0.210924422 | 0.201614166 | 0.200294961 |
| 0.152833729 | 0.319341499 | 0.308935078 | 0.133247336 |
| 0.296675967 | 0.229800232 | 0.355373189 | 0.337881724 |
| 0.362263899 | 0.171344497 | 0.267750026 | 0.279452321 |
| 0.108458998 | 0.177034838 | 0.176627874 | 0.204183595 |
| 0.287637571 | 0.170354848 | 0.193655945 | 0.193362705 |
| 0.235808616 | 0.375871722 | 0.299610506 | 0.360260923 |
| 0.211866182 | 0.223987319 | 0.115523868 | 0.184271026 |
| 0.213965055 | 0.228163359 | 0.195090916 | 0.014926696 |
| 0.258479317 | 0.17435795  | 0.290985649 | 0.352114689 |
| 0.141307596 | 0.358092407 | 0.123750765 | 0.177493556 |
| 0.095617962 | 0.221170593 | 0.240676702 | 0.246284717 |
| 0.091910531 | 0.257732624 | 0.220382969 | 0.166016765 |
| 0.246698748 | 0.235275029 | 0.228104646 | 0.311044539 |
| 0.294423708 | 0.214240881 | 0.399677571 | 0.191508401 |
| 0.176290299 | 0.152074036 | 0.182597243 | 0.219215485 |
| 0.262997348 | 0.354145385 | 0.173573848 | 0.35579383  |
| 0.209681615 | 0.224424317 | 0.430719567 | 0.26480159  |
| 0.231831843 | 0.215273283 | 0.091444822 | 0.197236676 |
| 0.293638773 | 0.151698477 | 0.007625187 | 0.065917187 |
| 0.274020645 | 0.221690878 | 0.247709195 | 0.28840509  |
| 0.19431847  | 0.324552365 | 0.094758769 | 0.270919532 |
| 0.341424841 | 0.393066007 | 0.194023576 | 0.309904234 |
| 0.297885111 | 0.225828213 | 0.190103633 | 0.041829717 |
| 0.192110522 | 0.169622597 | 0.165874233 | 0.216577879 |
| 0.11807978  | 0.098187249 | 0.194859674 | 0.165997834 |
| 0.341229657 | 0.085280165 | 0.210343206 | 0.225560286 |
| 0.267330768 | 0.394064368 | 0.266983107 | 0.242393116 |
| 0.168021672 | 0.281834647 | 0.184963038 | 0.208897992 |
| 0.172095456 | 0.168384757 | 0.261244669 | 0.136524386 |
| 0.148975211 | 0.207939536 | 0.012931554 | 0.383804653 |
| 0.362474142 | 0.171408537 | 0.301544754 | 0.135443968 |
| 0.269564792 | 0.333851462 | 0.254165327 | 0.173257951 |
| 0.056550747 | 0.184615089 | 0.294942133 | 0.288567728 |
| 0.079516467 | 0.223551945 | 0.152825639 | 0.211132491 |
| 0.390377405 | 0.197169122 | 0.342069307 | 0.118132603 |
| 0.338224929 | 0.289777171 | 0.185494164 | 0.224257898 |
| 0.202563572 | 0.171137343 | 0.161073862 | 0.400209133 |
| 0.260185344 | 0.138276428 | 0.28846159  | 0.233077156 |
| 0.175738213 | 0.32513545  | 0.179929166 | 0.400811975 |
| 0.215306987 | 0.276735358 | 0.280150968 | 0.344444408 |
| 0.319135103 | 0.167098359 | 0.144897773 | 0.223265347 |
| 0.319394766 | 0.146166726 | 0.192072933 | 0.267328815 |
| 0.120717172 | 0.282852688 | 0.181196806 | 0.231831635 |
| 0.134239651 | 0.333113475 | 0.196371866 | 0.249572698 |
| 0.271498388 | 0.207493511 | 0.202337527 | 0.367813562 |
| 0.177192583 | 0.066719839 | 0.399517913 | 0.01128408  |
| 0.196477881 | 0.205311545 | 0.290561489 | 0.215054613 |
| 0.237132141 | 0.25717558  | 0.193688222 | 0.013343132 |
| 0.299470058 | 0.045072117 | 0.255017141 | 0.183812067 |
| 0.176734491 | 0.176989912 | 0.350987298 | 0.367411962 |
| 0.265021436 | 0.179590107 | 0.131735498 | 0.354838853 |

|             |             |             |             |
|-------------|-------------|-------------|-------------|
| 0.091760906 | 0.131328647 | 0.179958952 | 0.198203573 |
| 0.125872643 | 0.146051233 | 0.174780852 | 0.141919342 |
| 0.257516011 | 0.287082054 |             |             |
| MMD         | 0.005489745 | 0.089336863 | 0.002679048 |
| 0.000488807 | 0.083599308 | 0.015092179 | 0.019458817 |
| 0.018205886 | 0.142701633 | 0.058395157 | 0.023576897 |
| 0.001073805 | 0.022061746 | 0.07073466  | 0.029427151 |
| 0.081803141 | 0.007713745 | 0.026137995 | 0.010490937 |
| 0.012111792 | 0.07939899  | 0.019451169 | 0.02202585  |
| 0.138132683 | 0.030750944 | 0.052855774 | 0.138689723 |
| 0.081277921 | 0.006903695 | 0.047462007 | 0.001266839 |
| 0.072332615 | 0.079825585 | 0.056844047 | 0.001295868 |
| 0.053017865 | 0.083016257 | 0.087438764 | 0.030904703 |
| 0.003596983 | 0.061727504 | 0.029480513 | 0.014465411 |
| 0.045532647 | 0.001682573 | 0.00519587  | 0.138100354 |
| 0.103561769 | 0.090283911 | 0.010965437 | 0.065226611 |
| 0.077552474 | 0.030586602 | 0.058673004 | 4.50E-05    |
| 0.050245719 | 0.031808027 | 0.067944732 | 0.077128595 |
| 0.028469547 | 0.02992422  | 0.043591832 | 0.151798918 |
| 0.163775118 | 0.186799236 | 0.132072377 | 0.05015425  |
| 0.067211608 | 0.053004159 | 0.105791104 | 0.000721614 |
| 0.043973186 | 0.028546705 | 0.040609187 | 0.067942592 |
| 0.063335324 | 0.040951442 | 0.055455744 | 0.099472756 |
| 0.063208291 | 0.106567275 | 0.09160741  | 0.083898858 |
| 0.100505987 | 0.131442297 | 0.068647953 | 0.107459335 |
| 0.177613326 | 0.074096456 | 0.037867846 | 0.086770054 |
| 0.062485045 | 0.062727271 | 0.097773872 | 0.039803238 |
| 0.065413877 | 0.163775406 | 0.03005227  | 0.029275591 |
| 0.124661966 | 0.085362601 | 0.13139047  | 0.029999503 |
| 0.126933349 | 0.016272395 | 0.077077682 | 0.108163354 |
| 0.013846049 | 0.009251714 | 0.04377114  | 0.105898612 |
| 0.046732595 | 0.066657326 | 0.100575367 | 0.119842481 |
| 0.065157687 | 0.070025081 | 0.03512531  | 0.111640195 |
| 0.004407432 | 0.090321941 | 0.014739941 | 0.006751273 |
| 0.008717726 | 0.042125875 | 0.213090935 | 0.106660576 |
| 0.076542367 | 0.064551639 | 0.011969563 | 0.04930002  |
| 0.120638691 | 0.07211023  | 0.098248008 | 0.077028834 |
| 0.006189498 | 0.176054337 | 0.051222106 | 0.039146759 |
| 0.085844345 | 0.079651426 | 0.070587135 | 0.080722928 |
| 0.040994094 | 0.095574403 | 0.015596654 | 0.097685701 |
| 0.12354119  | 0.081127672 | 0.056787649 | 0.014054249 |
| 0.080459169 | 0.067524587 | 0.086866755 | 0.078189715 |
| 0.067999447 | 0.010828999 | 0.020210013 | 0.115781628 |
| 0.085663095 | 0.000271449 | 0.102331701 | 0.10322902  |
| 0.073870462 | 0.07748949  | 0.119416107 | 0.092934709 |
| 0.076400255 | 0.030086984 | 0.020305563 | 0.094537319 |
| 0.073529713 | 0.042242059 | 0.089773211 | 0.05012035  |
| 0.116489887 | 0.021855626 | 0.131550741 | 0.001274638 |
| 0.107345026 | 0.077295679 | 0.093140446 | 0.08123146  |
| 0.13546884  | 0.053649446 | 0.104196344 | 0.06165185  |
| 0.005917349 | 0.004722332 | 0.008166922 | 0.166030877 |
| 0.009555525 | 0.043735101 | 0.016577691 | 0.199563296 |
| 0.044405948 | 0.054313216 | 0.061722172 | 0.092935176 |
| 0.021655637 | 0.032675062 | 0.02937947  | 0.024316174 |



|             |             |             |             |
|-------------|-------------|-------------|-------------|
| 0.004645253 | 0.047816982 | 0.00192385  | 0.005729241 |
| 0.052549305 | 0.055104433 | 0.075009947 | 0.104190039 |
| 0.135629205 | 0.020055129 | 0.054933894 | 0.086249511 |
| 0.086372841 | 0.05122227  | 0.094311013 | 6.30E-05    |
| 0.007810547 | 0.109765418 | 0.082495157 | 0.08913461  |
| 0.060044817 | 0.017884887 | 0.073039651 | 0.07339571  |
| 0.009464623 | 0.077765489 | 0.051157522 | 0.071259173 |
| 0.038995838 | 0.017882281 | 0.067945312 | 0.067330798 |
| 0.000196323 | 0.019049327 | 0.06196846  | 0.048500616 |
| 0.103407104 | 0.001979691 | 0.010118965 | 0.083912849 |
| 0.036765031 | 0.134289445 | 0.099762386 | 0.114741467 |
| 0.00466994  | 0.065072655 | 0.113131942 | 0.007689435 |
| 0.21906445  | 0.000370776 | 0.060971633 | 0.068257148 |
| 0.035108624 | 0.112323955 | 0.102837202 | 0.036474078 |
| 0.008908032 | 0.088349732 | 0.076141271 | 0.079660484 |
| 0.031734129 | 0.109101575 | 0.073041081 | 0.059598056 |
| 0.065222359 | 0.129647766 | 0.035163822 | 0.048274077 |
| 0.082762145 | 0.007025341 | 0.020017707 | 0.11564546  |
| 0.092616607 | 0.094871444 | 0.012423414 | 0.077695563 |
| 0.087983174 | 0.070102481 | 0.023212253 | 0.121485231 |
| 0.036026576 | 0.012540759 | 0.115050082 | 0.124019983 |
| 0.047551354 | 0.077639631 | 0.035534165 | 0.11154807  |
| 0.022646312 | 0.08771896  | 0.118672662 | 0.09099022  |
| 7.48E-05    | 0.024898824 | 0.008655276 | 0.032474159 |
| 0.046906769 | 0.089198768 | 0.102313336 | 0.084271936 |
| 0.019705295 | 0.070953883 | 0.159450093 | 0.0107597   |
| 0.060250453 | 0.12043218  | 0.080675899 | 0.098119327 |
| 0.092393426 | 0.000118945 | 0.00098037  | 0.093583324 |
| 0.019796917 | 0.027874672 | 0.086210279 | 0.000100777 |
| 0.006675899 | 0.081630063 | 0.033556109 | 0.045327773 |
| 0.119681556 | 0.037101655 | 0.023790868 | 0.043367583 |
| 0.064753234 | 0.024383289 | 7.56E-05    | 0.119387662 |
| 0.149370506 | 0.166212635 | 0.142540146 | 0.130749137 |
| 0.169125552 | 0.159602253 | 0.106493057 | 0.015956633 |
| 0.011190204 | 0.017173054 | 0.030047279 | 0.03820765  |
| 0.000220163 | 0.072934185 | 0.16579445  | 0.028176158 |
| 0.10719276  | 0.126614483 | 0.003433738 | 0.170219969 |
| 0.000463009 | 0.018039746 | 0.036853307 | 0.110771048 |
| 0.179093955 | 0.002585663 | 0.000175334 | 0.015543781 |
| 0.042491573 | 0.046439523 | 0.050929194 | 0.086978828 |
| 0.024861688 | 0.026429946 | 0.03302429  | 0.082140615 |
| 0.01283662  | 0.003470095 | 0.06620675  | 0.000110204 |
| 0.00218471  | 0.140784392 | 0.070151339 | 0.001424158 |
| 0.025878984 | 0.000667511 | 0.035469515 | 0.088478315 |
| 0.063483074 | 0.09629637  | 0.066283163 | 0.032676109 |
| 0.066451323 | 0.053296677 | 0.090197527 | 0.057203477 |
| 0.032891166 | 0.00152073  | 0.000945943 | 0.082899645 |
| 0.041135909 | 0.017947418 | 0.02901319  | 0.002335358 |
| 0.005321236 | 0.013765899 | 0.033903786 | 0.045045705 |
| 0.042722815 | 0.065332834 | 0.070429997 | 0.074141066 |
| 0.040426904 | 0.090653299 | 0.042940946 | 0.039470934 |
| 0.071670041 | 0.003541576 | 0.063574021 | 3.10E-05    |
| 0.136800713 | 0.024171535 | 0.077475524 | 0.082781158 |
| 0.078060428 | 0.078796467 | 0.027986228 | 0.007138282 |

|             |             |             |             |
|-------------|-------------|-------------|-------------|
| 0.17327262  | 0.011656346 | 0.019208085 | 0.017215419 |
| 0.059953183 | 0.050989036 | 0.03830499  | 0.028798276 |
| 0.085720889 | 0.060545404 | 0.010378629 | 0.075371524 |
| 0.000103996 | 0.003064871 | 0.011087586 | 0.117001083 |
| 1           | 0.066539881 | 0.044795622 | 0.19869345  |
| 0.165237102 | 0.000134187 | 0.094388174 | 0.07618656  |
| 0.055726244 | 0.056306046 | 0.07044934  | 0.176635979 |
| 0.100007505 | 0.018197681 | 0.045389481 | 0.055633076 |
| 0.041326134 | 0.05595592  | 0.025274328 | 0.010375728 |
| 0.04308114  | 0.04020343  | 0.009205894 | 0.035605413 |
| 0.053636251 | 0.071064025 | 0.005998193 | 0.000110401 |
| 0.043834552 | 0.100559067 | 0.089815354 | 0.073663711 |
| 0.081626563 | 0.097319177 | 0.072247861 | 0.033910119 |
| 0.009283864 | 0.099023316 | 0.106053176 | 0.033527328 |
| 0.082007718 | 0.018688832 | 0.07836821  | 0.107093508 |
| 0.05059554  | 0.016019758 | 0.001199348 | 0.040042567 |
| 0.078594499 | 0.045756473 | 0.045053048 | 0.010207405 |
| 0.035067036 | 0.02682075  | 0.020753546 | 0.035767623 |
| 0.056426507 | 0.01947586  | 0.036134517 | 0.075187723 |
| 0.085630098 | 0.068395041 | 0.07924407  | 0.081986987 |
| 0.023805194 | 0.053006701 | 0.002414082 | 0.172057965 |
| 0.078872658 | 0.098104657 | 0.000166484 | 0.071805862 |
| 0.105897529 | 0.047558834 | 0.069911556 | 0.113552448 |
| 0.039372564 | 0.0291369   | 0.18352796  | 0.082278762 |
| 0.080772475 | 0.017363132 | 0.123614318 | 0.023127286 |
| 0.143647869 | 0.121936216 | 0.067368457 | 0.017687244 |
| 0.076562571 | 0.03077434  | 0.017767426 | 0.118545968 |
| 0.034252902 | 0.001378848 | 0.03778326  | 0.148454656 |
| 0.00012085  | 0.058872767 | 0.15415418  | 0.016178087 |
| 0.129976804 | 0.083974702 | 0.059140831 | 0.077367912 |
| 0.002922695 | 0.114433151 | 0.029989556 | 0.01572158  |
| 0.055883174 | 0.056217392 | 0.05272093  | 0.00784517  |
| 0.072289603 | 0.009854486 | 0.011899787 | 0.002905659 |
| 0.007354537 | 0.050590891 | 0.075083871 | 0.137190362 |
| 0.073628121 | 0.066004994 | 0.026870125 | 0.02086659  |
| 0.150649341 | 0.05048675  | 0.059146551 | 0.043997702 |
| 0.003690506 | 0.144179684 | 0.062462623 | 0.003124074 |
| 0.116978919 | 0.147727967 | 0.124046098 | 0.000217875 |
| 0.053082254 | 0.000454455 | 0.049965558 | 0.021771502 |
| 0.044007045 | 0.072674981 | 0.106088131 | 0.029693019 |
| 0.085016926 | 0.046749694 | 0.011414435 | 0.036898481 |
| 0.01685912  | 0.063817767 | 0.085392931 | 0.056527516 |
| 0.012659724 | 0.009858799 | 0.03352295  | 0.028634281 |
| 0.000839891 | 0.094550536 | 0.043945665 | 0.013340559 |
| 0.081966232 | 0.072635592 | 0.071776373 | 0.074968905 |
| 0.098468488 | 0.021235834 | 0.103323894 | 0.045575622 |
| 0.007825381 | 0.001117792 | 0.007753064 | 0.046527784 |
| 0.034359286 | 0.012390704 | 0.060140198 | 0.019506765 |
| 0.103736964 | 0.064847814 | 0.040083574 | 0.104309834 |
| 0.030890952 | 0.187674258 | 0.015164661 | 0.003997758 |
| 0.009883062 | 0.057805402 | 0.076499998 | 0.000314497 |
| 0.058290344 | 0.002107941 | 0.063367957 | 0.064967458 |
| 0.085293601 | 0.085589134 | 0.0023879   | 0.003147992 |
| 0.006624647 | 0.025052029 | 0.033218284 | 0.09108014  |

|             |             |             |             |
|-------------|-------------|-------------|-------------|
| 0.037579435 | 0.022633731 | 0.063042565 | 0.006483987 |
| 0.090833368 | 0.147538329 | 0.155590623 | 0.067551327 |
| 0.152114555 | 0.033960899 | 0.126363123 | 0.016537595 |
| 0.063285523 | 0.02105977  | 0.081742042 | 0.030425711 |
| 0.059413121 | 0.104582236 | 0.01855486  | 0.094889331 |
| 0.056223512 | 0.049498099 | 0.096452115 | 0.08711791  |
| 0.020935732 | 0.013277153 | 0.057370469 | 0.049718447 |
| 0.052074691 | 0.05702818  | 0.000289026 | 0.001473093 |
| 0.057937425 | 0.212682681 | 0.090664237 | 0.179712454 |
| 0.097486695 | 0.135335138 | 0.040510005 | 0.048601344 |
| 0.071162852 | 0.086420812 | 0.003168085 | 0.09091783  |
| 0.072949037 | 0.010297787 | 0.025714103 | 0.026026699 |
| 0.059718709 | 0.075294515 | 0.028484844 | 0.019428352 |
| 0.002671153 | 0.04155196  | 0.057737849 | 0.058656784 |
| 0.110876071 | 0.009203873 | 0.164785514 | 0.061326183 |
| 0.100603789 | 0.076770749 | 0.032756896 | 0.043941046 |
| 0.021282091 | 0.108567402 | 0.136019169 | 0.150811648 |
| 0.006466596 | 0.0627232   | 0.052365427 | 0.037315813 |
| 0.004395741 | 0.017615126 | 0.000508775 | 0.059664731 |
| 0.07842824  | 0.103775506 | 0.074493642 | 0.060950387 |
| 0.072422851 | 0.151978123 | 0.026660107 | 0.071199567 |
| 0.000102829 | 0.052782154 | 0.064868743 | 0.039353937 |
| 0.002787474 | 0.137909216 | 0.002057071 | 0.194543359 |
| 0.073635981 | 0.010491724 | 0.125924654 | 0.009259229 |
| 0.074452357 | 0.124783023 | 0.02954913  | 0.051841194 |
| 0.151063034 | 0.02491553  | 0.028834121 | 0.109543207 |
| 0.031857501 | 0.040656611 | 0.080212374 | 0.015306656 |
| 0.102813537 | 0.07987937  | 0.115201792 | 0.12906517  |
| 0.016951843 | 0.041609518 | 0.114195849 | 0.091275992 |
| 0.080843409 | 0.111388027 | 0.032071548 | 0.04546638  |
| 0.050988457 | 0.000650657 | 0.080813482 | 0.044131531 |
| 0.03800749  | 0.094505743 | 0.108832656 | 0.074043008 |
| 0.000549744 | 0.065886055 | 0.012888423 | 0.046761513 |
| 0.052985341 | 0.058827313 | 0.074524273 | 0.066478608 |
| 0.002240928 | 4.30E-05    | 0.088615941 | 0.000627391 |
| 0.01706431  | 0.041130233 | 0.063067363 | 0.0727846   |
| 0.021399067 | 0.083060981 | 0.026938984 | 0.000407387 |
| 0.115293904 | 0.002588143 | 0.158456481 | 0.014811231 |
| 0.013345353 | 0.007388783 | 0.068817844 | 0.097583214 |
| 0.083009663 | 0.021002539 | 0.013114203 | 0.091411234 |
| 0.006897096 | 0.077858572 | 0.094301689 | 0.047766505 |
| 0.06382296  | 0.037484976 | 0.058285783 | 0.029431382 |
| 0.065092725 | 0.059882747 |             |             |
| MND1        | 0.028852416 | 0.335554965 | 0.018215598 |
| 0.078362867 | 0.251003809 | 0.160956452 | 0.033560482 |
| 0.063395145 | 0.267145385 | 0.152479748 | 0.21497652  |
| 0.009994016 | 0.097360509 | 0.404792634 | 0.031801339 |
| 0.334489113 | 0.022358125 | 0.061927023 | 0.049094295 |
| 0.121805458 | 0.248144916 | 0.206900003 | 0.169468324 |
| 0.217078308 | 0.128376425 | 0.204838868 | 0.262741729 |
| 0.423870392 | 0.161226    | 0.315820645 | 0.098223553 |
| 0.361773968 | 0.295023696 | 0.221945594 | 0.005905469 |
| 0.227835727 | 0.023883399 | 0.361379285 | 0.194434016 |
| 0.132588474 | 0.27762705  | 0.135230526 | 0.147654039 |

|             |             |             |             |
|-------------|-------------|-------------|-------------|
| 0.191016929 | 0.01570998  | 0.094918657 | 0.366097647 |
| 0.201092795 | 0.145950837 | 0.024825262 | 0.31394543  |
| 0.2031068   | 0.214344181 | 0.27710959  | 0.002039844 |
| 0.215827947 | 0.110260329 | 0.210638728 | 0.397903587 |
| 0.134763076 | 0.071213549 | 0.203295925 | 0.118918018 |
| 0.300954722 | 0.33152354  | 0.183687602 | 0.211959613 |
| 0.424700756 | 0.191573871 | 0.356868318 | 0.08625346  |
| 0.207198392 | 0.012934811 | 0.111504149 | 0.040547255 |
| 0.230443591 | 0.120026266 | 0.21318281  | 0.23003695  |
| 0.339210495 | 0.42358115  | 0.159281451 | 0.392443144 |
| 0.151124023 | 0.297440462 | 0.198306688 | 0.276183814 |
| 0.327735437 | 0.050066802 | 0.344036122 | 0.448221651 |
| 0.021323484 | 0.227105015 | 0.350953277 | 0.070865659 |
| 0.329022187 | 0.196022371 | 0.201427354 | 0.16058914  |
| 0.338121432 | 0.303091061 | 0.386349173 | 0.229177317 |
| 0.189242784 | 0.035082831 | 0.360264366 | 0.291639015 |
| 0.179132365 | 0.035140047 | 0.216151997 | 0.436147867 |
| 0.316656456 | 0.419741754 | 0.371143569 | 0.348795266 |
| 0.307456488 | 0.423474369 | 0.310973206 | 0.341337038 |
| 0.075063184 | 0.434039315 | 0.092334471 | 0.02449161  |
| 0.025792927 | 0.047697482 | 0.191751059 | 0.247226163 |
| 0.413519444 | 0.219645258 | 0.097827987 | 0.16854295  |
| 0.465781607 | 0.355151606 | 0.439704322 | 0.376474234 |
| 0.018178189 | 0.214513431 | 0.293350563 | 0.112202068 |
| 0.330471619 | 0.063162606 | 0.22329967  | 0.403291408 |
| 0.312278102 | 0.425640931 | 0.064659414 | 0.387247732 |
| 0.115892589 | 0.441954356 | 0.363259261 | 0.097514155 |
| 0.419940133 | 0.378564601 | 0.459400723 | 0.366715717 |
| 0.362995324 | 0.161005567 | 0.070644419 | 0.342470349 |
| 0.425251695 | 0.020404398 | 0.43291854  | 0.46303085  |
| 0.408309174 | 0.440368268 | 0.481993452 | 0.442600026 |
| 0.404825378 | 0.036022582 | 0.04562214  | 0.272146576 |
| 0.415103375 | 0.333943163 | 0.08744768  | 0.287196712 |
| 0.317638172 | 0.171006536 | 0.363285354 | 0.202640671 |
| 0.445182117 | 0.383704724 | 0.425560748 | 0.338491579 |
| 0.179292376 | 0.241772802 | 0.290227607 | 0.34278437  |
| 0.020587048 | 0.047605568 | 0.022827873 | 0.253821631 |
| 0.135682908 | 0.11784155  | 0.173550972 | 0.280334396 |
| 0.139442644 | 0.143314311 | 0.209087565 | 0.355404265 |
| 0.029748722 | 0.268898968 | 0.074951109 | 0.095194918 |
| 0.027146063 | 0.094795677 | 0.128296467 | 0.082333508 |
| 0.176070323 | 0.15817217  | 0.347565148 | 0.433152373 |
| 0.225206237 | 0.117257591 | 0.324963544 | 0.410060463 |
| 0.397084363 | 0.276123229 | 0.175075225 | 0.008744006 |
| 0.246660161 | 0.208700095 | 0.195139824 | 0.272024104 |
| 0.114723084 | 0.199042416 | 0.323510735 | 0.37253615  |
| 0.134942829 | 0.064004123 | 0.257800927 | 0.328443638 |
| 0.094812046 | 0.187805353 | 0.428458102 | 0.259578942 |
| 0.000945795 | 0.201361692 | 0.399359654 | 0.155605207 |
| 0.251218044 | 0.154832568 | 0.170826953 | 0.441934369 |
| 0.229166349 | 0.214431059 | 0.431258184 | 0.362897947 |
| 0.172790702 | 0.146691579 | 0.472490233 | 0.083696637 |
| 0.244566966 | 0.04111864  | 0.253187132 | 0.143138832 |
| 0.171813068 | 0.261058994 | 0.262849267 | 0.188314105 |

|             |             |             |             |
|-------------|-------------|-------------|-------------|
| 0.063438421 | 0.436924218 | 0.301503094 | 0.448373015 |
| 0.253364591 | 0.47184804  | 0.434044594 | 0.392080627 |
| 0.255368041 | 0.23356824  | 0.168806126 | 0.395552618 |
| 0.42798479  | 0.205603206 | 0.038054332 | 0.404155331 |
| 0.220137482 | 0.375317036 | 0.092532439 | 0.457141933 |
| 0.393592626 | 0.355971645 | 0.094637391 | 0.372180496 |
| 0.328760744 | 0.12160101  | 0.346060055 | 0.469535897 |
| 0.193601732 | 0.283852486 | 0.253105872 | 0.394150247 |
| 0.110960206 | 0.21694771  | 0.243817265 | 0.175816149 |
| 0.008625878 | 0.033604533 | 0.029762276 | 0.112051429 |
| 0.172612289 | 0.286314823 | 0.333286765 | 0.449664642 |
| 0.066381824 | 0.32477039  | 0.179058912 | 0.230200178 |
| 0.360832177 | 0.233563681 | 0.262433425 | 0.293421691 |
| 0.175638824 | 0.010981954 | 0.075503898 | 0.425036153 |
| 0.016590463 | 0.197604749 | 0.158613703 | 0.002649246 |
| 0.023980171 | 0.318591465 | 0.059746804 | 0.136342146 |
| 0.450084785 | 0.133446876 | 0.141218696 | 0.185015894 |
| 0.272634592 | 0.044528943 | 0.00213757  | 0.434641279 |
| 0.408165209 | 0.389632707 | 0.404369271 | 0.353627456 |
| 0.408925458 | 0.321428213 | 0.402665882 | 0.158636872 |
| 0.054082621 | 0.034818278 | 0.247272857 | 0.207976107 |
| 0.003750802 | 0.314149998 | 0.195162696 | 0.094760337 |
| 0.38233062  | 0.245685878 | 0.016849941 | 0.280333232 |
| 0.010658468 | 0.189998254 | 0.17689564  | 0.133081083 |
| 0.335544811 | 0.005115654 | 0.138458398 | 0.257013017 |
| 0.318446979 | 0.269366298 | 0.219765938 | 0.436450711 |
| 0.21264676  | 0.076790693 | 0.205697584 | 0.333339621 |
| 0.039477415 | 0.088792348 | 0.185202904 | 0.02373411  |
| 0.07948482  | 0.359605169 | 0.208417706 | 0.032193119 |
| 0.195989098 | 0.001780072 | 0.284931173 | 0.446253263 |
| 0.349245076 | 0.478763261 | 0.421236443 | 0.207762954 |
| 0.423489441 | 0.1290778   | 0.453381117 | 0.332967787 |
| 0.2116503   | 0.000692449 | 0.00454079  | 0.446393927 |
| 0.298394904 | 0.027193559 | 0.101387003 | 0.14900843  |
| 0.073502209 | 0.06782275  | 0.028874999 | 0.173593736 |
| 0.259077618 | 0.174560444 | 0.159553986 | 0.373146614 |
| 0.156640579 | 0.157549833 | 0.181428764 | 0.048346444 |
| 0.266224458 | 0.029491004 | 0.048890872 | 0.00828493  |
| 0.331062276 | 0.066862762 | 0.342593799 | 0.423349339 |
| 0.423485833 | 0.340247048 | 0.178758724 | 0.165746689 |
| 0.392704735 | 0.050321586 | 0.179134667 | 0.053468035 |
| 0.389106422 | 0.349968362 | 0.268330707 | 0.242018209 |
| 0.46382663  | 0.393427044 | 0.016722263 | 0.39232814  |
| 0.005330426 | 0.002665655 | 0.172203701 | 0.195294129 |
| 0.066539881 | 1           | 0.205852389 | 0.139903162 |
| 0.138006544 | 0.013424049 | 0.246048385 | 0.235185673 |
| 0.238683323 | 0.248530921 | 0.233355817 | 0.179438577 |
| 0.191439472 | 0.162596775 | 0.109585869 | 0.089883574 |
| 0.159586296 | 0.243909992 | 0.136204818 | 0.010853931 |
| 0.239454657 | 0.271336398 | 0.026485134 | 0.093154437 |
| 0.394235086 | 0.449560427 | 0.035996854 | 0.010066249 |
| 0.198850729 | 0.208796618 | 0.462098678 | 0.403519166 |
| 0.419293896 | 0.466972434 | 0.305352817 | 0.116295231 |
| 0.030965543 | 0.250737174 | 0.245714139 | 0.085372957 |

|             |             |             |             |
|-------------|-------------|-------------|-------------|
| 0.433672388 | 0.033545155 | 0.373134341 | 0.241318367 |
| 0.069459549 | 0.124923117 | 0.018738974 | 0.042986601 |
| 0.291708876 | 0.114918434 | 0.123390111 | 0.083195102 |
| 0.226952417 | 0.186257198 | 0.023615083 | 0.130258575 |
| 0.297443965 | 0.218480837 | 0.102534325 | 0.130369604 |
| 0.257066861 | 0.113629311 | 0.397131297 | 0.398693459 |
| 0.075102598 | 0.059480787 | 0.127494638 | 0.312285507 |
| 0.395264499 | 0.244443258 | 0.010836117 | 0.355921629 |
| 0.428060763 | 0.338509628 | 0.389405646 | 0.382094662 |
| 0.047387709 | 0.258621551 | 0.239100098 | 0.287697212 |
| 0.123094249 | 0.155706629 | 0.145228851 | 0.031550839 |
| 0.236149805 | 0.384164535 | 0.35507519  | 0.099932303 |
| 0.244060246 | 0.063661539 | 0.028008255 | 0.369305919 |
| 0.22013731  | 0.050390319 | 0.155857406 | 0.401963081 |
| 0.001557606 | 0.15229654  | 0.451191403 | 0.11976259  |
| 0.432143198 | 0.451021555 | 0.370959854 | 0.109765738 |
| 0.005365079 | 0.372589795 | 0.28672351  | 0.22553514  |
| 0.36135754  | 0.246355738 | 0.069162788 | 0.051608951 |
| 0.23763014  | 0.040266003 | 0.119495224 | 0.139455174 |
| 0.230607871 | 0.278212144 | 0.150627216 | 0.134887582 |
| 0.135134236 | 0.052549532 | 0.179180522 | 0.111481061 |
| 0.160530208 | 0.187351748 | 0.322217428 | 0.121018839 |
| 0.224146579 | 0.416332976 | 0.363679229 | 0.010177713 |
| 0.242396436 | 0.386750873 | 0.36072161  | 0.00506792  |
| 0.382079238 | 0.003660925 | 0.140376559 | 0.141295134 |
| 0.126501779 | 0.157285152 | 0.220716264 | 0.195518154 |
| 0.260061312 | 0.131883465 | 0.148571312 | 0.170133946 |
| 0.104204019 | 0.101938842 | 0.274063145 | 0.180102191 |
| 0.184586889 | 0.062861764 | 0.057005417 | 0.058818633 |
| 0.026885511 | 0.374764732 | 0.179018373 | 0.035267638 |
| 0.162682775 | 0.187612538 | 0.302493495 | 0.391582721 |
| 0.356269439 | 0.063198788 | 0.203386185 | 0.362103953 |
| 0.160348411 | 0.135893179 | 0.02591627  | 0.201253894 |
| 0.125764657 | 0.19786668  | 0.185183812 | 0.195674523 |
| 0.332069334 | 0.325417728 | 0.168680411 | 0.362750982 |
| 0.192253334 | 0.221548272 | 0.144185007 | 0.063245507 |
| 0.098158797 | 0.083261602 | 0.226593473 | 0.000745266 |
| 0.264934404 | 0.102185669 | 0.433490618 | 0.38263774  |
| 0.216574424 | 0.310764675 | 0.143615011 | 0.053693341 |
| 0.118416865 | 0.120333176 | 0.090311374 | 0.348869471 |
| 0.198064743 | 0.085707261 | 0.235200895 | 0.11796153  |
| 0.379400815 | 0.356072863 | 0.189775495 | 0.132550986 |
| 0.149792776 | 0.109405952 | 0.377286759 | 0.045535445 |
| 0.295061949 | 0.165051003 | 0.206226049 | 0.217855425 |
| 0.160263313 | 0.445152765 | 0.024324931 | 0.46308873  |
| 0.255773733 | 0.078866611 | 0.406999195 | 0.134963135 |
| 0.117315596 | 0.070918068 | 0.198507987 | 0.172537289 |
| 0.150107592 | 0.220228498 | 0.015292075 | 0.089144718 |
| 0.293630623 | 0.181881103 | 0.343980794 | 0.312290546 |
| 0.198202482 | 0.325734463 | 0.138580537 | 0.151417686 |
| 0.363733292 | 0.373749134 | 0.185534476 | 0.203222237 |
| 0.29194711  | 0.053669165 | 0.221692005 | 0.013559219 |
| 0.346262494 | 0.318528559 | 0.217748989 | 0.026807401 |
| 0.008752159 | 0.228615642 | 0.310922043 | 0.033348298 |

|             |             |             |             |
|-------------|-------------|-------------|-------------|
| 0.467349246 | 0.17643378  | 0.240484697 | 0.318690039 |
| 0.11486919  | 0.376771789 | 0.087656348 | 0.346910292 |
| 0.025724593 | 0.1755368   | 0.237341511 | 0.233425304 |
| 0.180948899 | 0.245790605 | 0.343078183 | 0.203895386 |
| 0.017522423 | 0.17967047  | 0.003828496 | 0.316642889 |
| 0.356379494 | 0.259142646 | 0.146536407 | 0.152841835 |
| 0.226435817 | 0.307354806 | 0.214049347 | 0.228484309 |
| 0.006299689 | 0.317029125 | 0.115961293 | 0.318162575 |
| 0.201725843 | 0.266271106 | 0.028976094 | 0.25111912  |
| 0.325830301 | 0.245305085 | 0.199770091 | 0.237811472 |
| 0.381637689 | 0.288885504 | 0.09040132  | 0.130734106 |
| 0.284815092 | 0.032750322 | 0.158894806 | 0.456271639 |
| 0.113491341 | 0.199194365 | 0.442277038 | 0.151998397 |
| 0.238734412 | 0.285404052 | 0.28069302  | 0.439022904 |
| 0.068819382 | 0.178866164 | 0.375880917 | 0.398927666 |
| 0.257005866 | 0.181569085 | 0.226167482 | 0.205472478 |
| 0.345762447 | 0.048789003 | 0.213335959 | 0.271913732 |
| 0.230843424 | 0.23323716  | 0.19289697  | 0.159225834 |
| 0.025124198 | 0.092087669 | 0.163295286 | 0.08328107  |
| 0.227595615 | 0.256551421 | 0.201898108 | 0.321121875 |
| 0.081607465 | 0.017753427 | 0.376983073 | 0.041818327 |
| 0.150283496 | 0.304027191 | 0.142025254 | 0.220224155 |
| 0.121938334 | 0.243038421 | 0.188493641 | 0.000828094 |
| 0.390095147 | 0.035882506 | 0.18003526  | 0.192309027 |
| 0.219740532 | 0.026570954 | 0.351176459 | 0.474804054 |
| 0.193474394 | 0.164805473 | 0.215348659 | 0.379043704 |
| 0.172853659 | 0.208688759 | 0.244802641 | 0.275749155 |
| 0.199569617 | 0.193064043 | 0.213792972 | 0.221558112 |
| 0.285529518 | 0.118457833 |             |             |
| MNS1        | 0.224190241 | 0.282415726 | 0.17015878  |
| 0.290184299 | 0.223895584 | 0.218544119 | 0.242252943 |
| 0.274272505 | 0.237655285 | 0.116270534 | 0.262231767 |
| 0.164272062 | 0.041504402 | 0.331576116 | 0.231881608 |
| 0.217882442 | 0.222141332 | 0.296045246 | 0.076985334 |
| 0.218657403 | 0.232557152 | 0.170334055 | 0.214275942 |
| 0.217747072 | 0.297643219 | 0.238020693 | 0.163051691 |
| 0.328315612 | 0.087769577 | 0.217350792 | 0.085979033 |
| 0.388697733 | 0.214119992 | 0.154958016 | 0.139613589 |
| 0.224129696 | 0.014026224 | 0.4013548   | 0.2913805   |
| 0.110432057 | 0.360451319 | 0.14630561  | 0.317934286 |
| 0.179867479 | 0.18929101  | 0.064492668 | 0.199205281 |
| 0.224717954 | 0.251554067 | 0.175552368 | 0.226221643 |
| 0.192088392 | 0.265685919 | 0.190980712 | 0.008786047 |
| 0.129996738 | 0.024380948 | 0.083019885 | 0.362622451 |
| 0.318529738 | 0.308095231 | 0.100859342 | 0.217615576 |
| 0.192753286 | 0.223789382 | 0.286032313 | 0.167902122 |
| 0.361595013 | 0.091910233 | 0.203814086 | 0.218027681 |
| 0.242164448 | 0.148598168 | 0.305855456 | 0.177643813 |
| 0.196528824 | 0.315159301 | 0.231117477 | 0.162702329 |
| 0.279357541 | 0.416048937 | 0.297053913 | 0.366874474 |
| 0.076059019 | 0.184396986 | 0.205702213 | 0.296369286 |
| 0.235015013 | 0.218458969 | 0.267078816 | 0.402790517 |
| 0.166384776 | 0.166727503 | 0.23051621  | 0.219710547 |
| 0.286901295 | 0.120325887 | 0.166402831 | 0.10784383  |

|             |             |             |             |
|-------------|-------------|-------------|-------------|
| 0.214779066 | 0.216602243 | 0.368598857 | 0.312803669 |
| 0.200165501 | 0.200735492 | 0.37398104  | 0.173782114 |
| 0.252112016 | 0.235498253 | 0.216843652 | 0.263691206 |
| 0.245706857 | 0.331999869 | 0.254772073 | 0.277643189 |
| 0.203002365 | 0.355959763 | 0.265256886 | 0.299152525 |
| 0.041172861 | 0.36540607  | 0.313250676 | 0.226913801 |
| 0.186526123 | 0.262922354 | 0.165337865 | 0.320570748 |
| 0.302195961 | 0.26720174  | 0.307341155 | 0.307929898 |
| 0.30655273  | 0.348494715 | 0.358126716 | 0.287351769 |
| 0.212753161 | 0.114297101 | 0.210911368 | 0.238868772 |
| 0.251250652 | 0.258528447 | 0.159853399 | 0.401680148 |
| 0.355505068 | 0.276538487 | 0.252593939 | 0.422794671 |
| 0.246714364 | 0.404140759 | 0.28235781  | 0.336644549 |
| 0.403154017 | 0.387242888 | 0.380821631 | 0.207229291 |
| 0.376969371 | 0.275174127 | 0.052535287 | 0.289141354 |
| 0.387742961 | 0.021079932 | 0.287004732 | 0.315196719 |
| 0.352586548 | 0.271267613 | 0.373836848 | 0.337823083 |
| 0.347528527 | 0.232071041 | 0.011863098 | 0.276360306 |
| 0.38081158  | 0.336823683 | 0.243156922 | 0.186633357 |
| 0.215323006 | 0.238712038 | 0.236735283 | 0.16367311  |
| 0.421160037 | 0.304130515 | 0.302785748 | 0.25516403  |
| 0.20040388  | 0.348564465 | 0.158134468 | 0.369039678 |
| 0.230531025 | 0.249683969 | 0.172123322 | 0.26791667  |
| 0.156016638 | 0.324423174 | 0.236016187 | 0.20623209  |
| 0.325777127 | 0.217105441 | 0.12682576  | 0.215617026 |
| 0.158498417 | 0.199863497 | 0.300428344 | 0.276768432 |
| 0.25110496  | 0.274063802 | 0.288599862 | 0.299869969 |
| 0.277332046 | 0.325039144 | 0.201814178 | 0.333201977 |
| 0.202445027 | 0.272855603 | 0.232197807 | 0.37712036  |
| 0.395329902 | 0.201397285 | 0.286829643 | 0.106426766 |
| 0.211864495 | 0.108685564 | 0.080574203 | 0.175285945 |
| 0.291967521 | 0.265931845 | 0.230512958 | 0.237381086 |
| 0.265235046 | 0.215204421 | 0.202195923 | 0.397967354 |
| 0.231738116 | 0.241150029 | 0.319151843 | 0.194996117 |
| 0.06198415  | 0.297966664 | 0.280916337 | 0.186162786 |
| 0.255223812 | 0.09532148  | 0.114816619 | 0.320081218 |
| 0.129495817 | 0.164115795 | 0.312643201 | 0.229076983 |
| 0.175958342 | 0.277552984 | 0.372378166 | 0.022080242 |
| 0.181455487 | 0.144245409 | 0.308082446 | 0.139917302 |
| 0.324980735 | 0.291584874 | 0.191989005 | 0.224735427 |
| 0.220868477 | 0.371163508 | 0.294827738 | 0.348789672 |
| 0.176620465 | 0.380679812 | 0.288138775 | 0.331376456 |
| 0.27342096  | 0.153184418 | 0.059347882 | 0.285412875 |
| 0.306375222 | 0.156042123 | 0.184941762 | 0.227997609 |
| 0.169108069 | 0.21433796  | 0.176247482 | 0.370462989 |
| 0.417505254 | 0.33118467  | 0.291706613 | 0.266735082 |
| 0.324486519 | 0.311628813 | 0.283763451 | 0.38736349  |
| 0.131985786 | 0.206450347 | 0.214862293 | 0.308445914 |
| 0.316193319 | 0.190718003 | 0.315097733 | 0.071586224 |
| 0.003095057 | 0.213088755 | 0.221621438 | 0.29953938  |
| 0.132350583 | 0.171095954 | 0.237825807 | 0.362701898 |
| 0.304959309 | 0.332367042 | 0.261156035 | 0.262209367 |
| 0.335279906 | 0.18803653  | 0.177906622 | 0.213769527 |
| 0.290606421 | 0.134739152 | 0.284477727 | 0.42422619  |



|             |             |             |             |
|-------------|-------------|-------------|-------------|
| 0.137898713 | 0.142573942 | 0.236168466 | 0.020634107 |
| 0.210663522 | 0.223959046 | 0.218710875 | 0.329675973 |
| 0.326867569 | 0.312926133 | 0.294154014 | 0.148720495 |
| 0.274202369 | 0.275977672 | 0.035486749 | 0.329368916 |
| 0.338235787 | 0.325915497 | 0.334330068 | 0.340604685 |
| 0.298887431 | 0.226840721 | 0.268081967 | 0.227888437 |
| 0.291393332 | 0.215513663 | 0.157236319 | 0.285103071 |
| 0.017024742 | 0.285181852 | 0.219609556 | 0.302941716 |
| 0.226099842 | 0.271251038 | 0.202019752 | 0.196529707 |
| 0.147167956 | 0.084763628 | 0.23126207  | 0.264888469 |
| 0.245086915 | 0.132605417 | 0.156248888 | 0.171242417 |
| 0.339336797 | 0.31904992  | 0.15081989  | 0.379433616 |
| 0.284713333 | 0.194222414 | 0.27507591  | 0.246043797 |
| 0.274740556 | 0.062248886 | 0.211856862 | 0.020391145 |
| 0.106129496 | 0.344465113 | 0.179612869 | 0.245777384 |
| 0.327587465 | 0.081142921 | 0.329009761 | 0.385814697 |
| 0.326974139 | 0.354836389 | 0.359990295 | 0.153223855 |
| 0.367820627 | 0.028221814 | 0.356495178 | 0.286287744 |
| 0.154642974 | 0.010616003 | 0.044562873 | 0.313449695 |
| 0.22301466  | 0.14460828  | 0.321257225 | 0.1923588   |
| 0.321745776 | 0.239842885 | 0.227718162 | 0.181516991 |
| 0.218609599 | 0.246798138 | 0.146278947 | 0.343744131 |
| 0.321761242 | 0.299976945 | 0.18868182  | 0.213325439 |
| 0.206755453 | 0.261972807 | 0.210065337 | 0.041369242 |
| 0.242455868 | 0.211599898 | 0.382118045 | 0.352712465 |
| 0.395346067 | 0.236788171 | 0.119186556 | 0.17235265  |
| 0.2859198   | 0.170142894 | 0.142882727 | 0.199457    |
| 0.334216117 | 0.240428083 | 0.317246811 | 0.332276344 |
| 0.382771906 | 0.371763322 | 0.204624427 | 0.278242509 |
| 0.102329174 | 0.009230015 | 0.224267073 | 0.276682288 |
| 0.044795622 | 0.205852389 | 1           | 0.200929096 |
| 0.225623845 | 0.169474127 | 0.138952739 | 0.147518773 |
| 0.306045662 | 0.25319633  | 0.197331355 | 0.251156323 |
| 0.231348492 | 0.181779886 | 0.290868829 | 0.276967251 |
| 0.148515435 | 0.309758958 | 0.302382453 | 0.170196857 |
| 0.191968266 | 0.198980665 | 0.244377867 | 0.284656569 |
| 0.316000525 | 0.326830084 | 0.237467543 | 0.120505897 |
| 0.309374373 | 0.226058085 | 0.337806913 | 0.332341247 |
| 0.395667915 | 0.403944346 | 0.387789206 | 0.258455818 |
| 0.247803315 | 0.271264935 | 0.194240673 | 0.233805698 |
| 0.352897231 | 0.173561156 | 0.344030411 | 0.147331199 |
| 0.275927939 | 0.337408829 | 0.211055747 | 0.271217077 |
| 0.177303339 | 0.307655275 | 0.305301316 | 0.240312467 |
| 0.270606406 | 0.136744865 | 0.227058368 | 0.331215577 |
| 0.29166388  | 0.109844492 | 0.313326332 | 0.224459197 |
| 0.269941388 | 0.087690275 | 0.224073845 | 0.40422915  |
| 0.269994071 | 0.254931545 | 0.239763589 | 0.231224808 |
| 0.261417794 | 0.156779174 | 0.114513904 | 0.287536556 |
| 0.342549007 | 0.209406455 | 0.360675704 | 0.328551439 |
| 0.235668829 | 0.21385892  | 0.146551458 | 0.23937707  |
| 0.296719111 | 0.222589949 | 0.275456038 | 0.235044887 |
| 0.321836122 | 0.399794658 | 0.304162072 | 0.321667041 |
| 0.188823076 | 0.198485161 | 0.162028642 | 0.278169876 |
| 0.149975513 | 0.259044983 | 0.150806956 | 0.248369974 |

|             |             |             |             |
|-------------|-------------|-------------|-------------|
| 0.016705033 | 0.07146119  | 0.336445145 | 0.277905105 |
| 0.393798002 | 0.338804147 | 0.385008323 | 0.226159428 |
| 0.002038434 | 0.201905357 | 0.265090586 | 0.231676673 |
| 0.295412262 | 0.279773324 | 0.148723831 | 0.293187669 |
| 0.333394837 | 0.1806155   | 0.307820457 | 0.186493086 |
| 0.098051672 | 0.226775545 | 0.312337257 | 0.266482969 |
| 0.289589827 | 0.16962091  | 0.127546625 | 0.30565046  |
| 0.095293102 | 0.319150762 | 0.326738269 | 0.11505759  |
| 0.109083523 | 0.31375822  | 0.274160805 | 0.171984732 |
| 0.171659296 | 0.294548947 | 0.318365506 | 0.029362591 |
| 0.23066858  | 0.107723205 | 0.284819201 | 0.300740868 |
| 0.302874896 | 0.27734845  | 0.274993718 | 0.247927779 |
| 0.249247015 | 0.322541915 | 0.30223357  | 0.325089201 |
| 0.302592853 | 0.2855444   | 0.226792016 | 0.245572674 |
| 0.243829608 | 0.308560147 | 0.218253378 | 0.224183942 |
| 0.223755099 | 0.29487834  | 0.332553699 | 0.182978614 |
| 0.303804186 | 0.221708382 | 0.371480735 | 0.334943449 |
| 0.344554819 | 0.196823408 | 0.237627095 | 0.293465112 |
| 0.080176528 | 0.182988278 | 0.190671175 | 0.236004356 |
| 0.302406293 | 0.193000259 | 0.189468962 | 0.246550652 |
| 0.210373303 | 0.397186287 | 0.314799746 | 0.352481048 |
| 0.247500498 | 0.190379096 | 0.130880721 | 0.28182453  |
| 0.33182264  | 0.254816296 | 0.2138819   | 0.0489424   |
| 0.27931885  | 0.248316522 | 0.297659721 | 0.365612158 |
| 0.118687597 | 0.351757128 | 0.14566393  | 0.281320253 |
| 0.11264381  | 0.25860119  | 0.287778812 | 0.22841938  |
| 0.085454857 | 0.30407175  | 0.252647854 | 0.195024107 |
| 0.239327225 | 0.211318243 | 0.194576195 | 0.261853484 |
| 0.27535218  | 0.27191055  | 0.371890808 | 0.235958031 |
| 0.187420151 | 0.197294997 | 0.173741433 | 0.280857184 |
| 0.281241368 | 0.34135876  | 0.216285027 | 0.343583672 |
| 0.229520088 | 0.233768246 | 0.420404431 | 0.23428447  |
| 0.238830225 | 0.241955632 | 0.086404336 | 0.182899183 |
| 0.281372964 | 0.144388565 | 0.004986938 | 0.056421381 |
| 0.298501937 | 0.163220317 | 0.231516981 | 0.241358737 |
| 0.197864804 | 0.300348863 | 0.062633284 | 0.260382112 |
| 0.337285188 | 0.383200926 | 0.284203029 | 0.31149105  |
| 0.276648273 | 0.293083643 | 0.213567888 | 0.0140042   |
| 0.206641053 | 0.17296034  | 0.156041142 | 0.22927001  |
| 0.161036655 | 0.103529335 | 0.217963248 | 0.170534659 |
| 0.32555966  | 0.080974248 | 0.187213853 | 0.22103603  |
| 0.254367776 | 0.392571691 | 0.268738929 | 0.256491198 |
| 0.147184037 | 0.291692864 | 0.172073097 | 0.177771393 |
| 0.25358713  | 0.181192995 | 0.28628688  | 0.150191312 |
| 0.217873043 | 0.256381744 | 0.02372666  | 0.405722818 |
| 0.363939255 | 0.176700511 | 0.299493909 | 0.10503617  |
| 0.30763388  | 0.29706149  | 0.200042445 | 0.169893028 |
| 0.119606775 | 0.211021629 | 0.299621457 | 0.304846169 |
| 0.108971071 | 0.208768173 | 0.244567623 | 0.183265169 |
| 0.386495873 | 0.202357345 | 0.297015595 | 0.153880365 |
| 0.335036426 | 0.259740154 | 0.213666563 | 0.19451811  |
| 0.182111615 | 0.204079537 | 0.159684578 | 0.379857744 |
| 0.307097698 | 0.158585432 | 0.291322828 | 0.328618615 |
| 0.155913727 | 0.299068359 | 0.173939611 | 0.367434657 |

|             |             |             |             |
|-------------|-------------|-------------|-------------|
| 0.23321731  | 0.318835886 | 0.257298029 | 0.326912047 |
| 0.309042537 | 0.151596389 | 0.147606892 | 0.248504779 |
| 0.333057585 | 0.262395861 | 0.163296103 | 0.286853049 |
| 0.1346435   | 0.281868568 | 0.169898731 | 0.228276497 |
| 0.192291186 | 0.256706511 | 0.211375386 | 0.291925379 |
| 0.29626711  | 0.246947182 | 0.221075446 | 0.38033091  |
| 0.26156462  | 0.170226916 | 0.397154733 | 0.015655427 |
| 0.236145157 | 0.247654704 | 0.293626899 | 0.213896892 |
| 0.289388819 | 0.251994054 | 0.230709021 | 0.027999145 |
| 0.287223646 | 0.068106919 | 0.204089541 | 0.247158451 |
| 0.142098159 | 0.223693567 | 0.355418958 | 0.355786871 |
| 0.262309211 | 0.142604962 | 0.133927688 | 0.337710257 |
| 0.099772512 | 0.11454558  | 0.14684805  | 0.212813058 |
| 0.120427463 | 0.154257114 | 0.165785689 | 0.165097509 |
| 0.261065718 | 0.255134683 |             |             |
| MPDU1       | 0.039110884 | 0.291552933 | 0.029346372 |
| 0.025368743 | 0.157648467 | 0.074791734 | 0.066724794 |
| 0.075277548 | 0.315368332 | 0.083201407 | 0.112097747 |
| 0.016078836 | 0.0424352   | 0.285522295 | 0.072038461 |
| 0.1850822   | 0.038811638 | 0.09905766  | 0.078124102 |
| 0.121558785 | 0.150255185 | 0.059071446 | 0.117333651 |
| 0.177744811 | 0.175926813 | 0.188440707 | 0.184804503 |
| 0.302215722 | 0.034604443 | 0.169497355 | 0.031888865 |
| 0.307469041 | 0.160612608 | 0.108324144 | 0.014367645 |
| 0.149761429 | 0.090672297 | 0.348734264 | 0.090544481 |
| 0.037727129 | 0.268866772 | 0.093100445 | 0.070830474 |
| 0.130976907 | 0.019689897 | 0.032097414 | 0.251992701 |
| 0.22850541  | 0.126841043 | 0.059873396 | 0.210892161 |
| 0.117273358 | 0.167429081 | 0.20379278  | 0.001507301 |
| 0.076394092 | 0.027587458 | 0.060856612 | 0.31640284  |
| 0.141759025 | 0.092069589 | 0.08703193  | 0.195924379 |
| 0.251231346 | 0.294699481 | 0.256332345 | 0.103233646 |
| 0.297402393 | 0.068797763 | 0.242397675 | 0.036145949 |
| 0.130908392 | 0.06215209  | 0.169060317 | 0.154382206 |
| 0.108128363 | 0.126512172 | 0.134687704 | 0.111451098 |
| 0.26417174  | 0.38268973  | 0.227557405 | 0.338062953 |
| 0.135294591 | 0.184175383 | 0.095853486 | 0.256811656 |
| 0.322546889 | 0.127188646 | 0.184648734 | 0.346501074 |
| 0.093069459 | 0.168033281 | 0.258996221 | 0.150017703 |
| 0.256036235 | 0.125181398 | 0.114072641 | 0.044359992 |
| 0.222861283 | 0.169227035 | 0.392181445 | 0.164042068 |
| 0.158922016 | 0.083615982 | 0.330644144 | 0.160264386 |
| 0.062268328 | 0.063652764 | 0.094024911 | 0.283063247 |
| 0.175993478 | 0.282003938 | 0.289474333 | 0.302843975 |
| 0.153211794 | 0.296435998 | 0.178523918 | 0.314026707 |
| 0.038222998 | 0.338299074 | 0.093134187 | 0.034657365 |
| 0.049987574 | 0.073420743 | 0.174465936 | 0.288179599 |
| 0.270157953 | 0.2104061   | 0.078298133 | 0.133151363 |
| 0.314736428 | 0.310643376 | 0.348420975 | 0.266883302 |
| 0.034465389 | 0.122004952 | 0.139664611 | 0.089821632 |
| 0.236935716 | 0.174937972 | 0.099550622 | 0.345173046 |
| 0.228973129 | 0.269264456 | 0.076532153 | 0.377048172 |
| 0.184767295 | 0.329957573 | 0.247969963 | 0.085950881 |
| 0.341190788 | 0.315887117 | 0.325648308 | 0.191655904 |

|             |             |                     |             |
|-------------|-------------|---------------------|-------------|
| 0.303785994 | 0.088924257 | 0.099712007         | 0.311622896 |
| 0.32047867  | 0.004838894 | 0.300729705         | 0.316878394 |
| 0.310126307 | 0.255535875 | 0.364433 0.31508427 |             |
| 0.313379692 | 0.106753711 | 0.045999526         | 0.20964871  |
| 0.323943904 | 0.22592581  | 0.124268392         | 0.137759845 |
| 0.204199934 | 0.106935494 | 0.283945335         | 0.038340211 |
| 0.374606371 | 0.274196614 | 0.303008357         | 0.259254729 |
| 0.232348735 | 0.249479454 | 0.15952583          | 0.300533225 |
| 0.038012564 | 0.046287307 | 0.057518399         | 0.320741198 |
| 0.052241664 | 0.138915576 | 0.093233029         | 0.256637267 |
| 0.155983536 | 0.140962104 | 0.083850956         | 0.205423251 |
| 0.098333496 | 0.133369584 | 0.113521981         | 0.120503637 |
| 0.033024916 | 0.187824801 | 0.042828642         | 0.044346121 |
| 0.133197827 | 0.252284708 | 0.21318061          | 0.325431137 |
| 0.171469234 | 0.133670467 | 0.203206061         | 0.320553752 |
| 0.313548462 | 0.131538962 | 0.251308102         | 0.00322682  |
| 0.064188512 | 0.104414367 | 0.06895372          | 0.165928118 |
| 0.227420884 | 0.085112295 | 0.195104883         | 0.205733379 |
| 0.090628596 | 0.143893445 | 0.103440957         | 0.3108719   |
| 0.164081743 | 0.063643197 | 0.263209423         | 0.180393151 |
| 0.004732456 | 0.114405649 | 0.238079015         | 0.115348662 |
| 0.258223518 | 0.034496611 | 0.036298782         | 0.290578939 |
| 0.08254289  | 0.116991383 | 0.307450643         | 0.238838422 |
| 0.062349129 | 0.249198075 | 0.359722288         | 0.036894639 |
| 0.224514122 | 0.017548875 | 0.192216603         | 0.128596491 |
| 0.152171839 | 0.271578329 | 0.158258683         | 0.081584825 |
| 0.082050322 | 0.337756131 | 0.263574137         | 0.306169703 |
| 0.078521512 | 0.361899387 | 0.257846298         | 0.256030811 |
| 0.204345538 | 0.163893153 | 0.044118239         | 0.221715256 |
| 0.280582408 | 0.08903885  | 0.097669143         | 0.27328542  |
| 0.152432176 | 0.223224028 | 0.091884438         | 0.307258121 |
| 0.349582844 | 0.301451299 | 0.067733711         | 0.269912302 |
| 0.203407088 | 0.093313147 | 0.295814329         | 0.380410354 |
| 0.099125009 | 0.155208919 | 0.088236641         | 0.286879357 |
| 0.127303055 | 0.105052237 | 0.320168445         | 0.070493861 |
| 0.00107308  | 0.08953478  | 0.061191714         | 0.091351897 |
| 0.058329336 | 0.19217658  | 0.234570252         | 0.326127741 |
| 0.087130952 | 0.273541122 | 0.307426255         | 0.056466948 |
| 0.277774363 | 0.163711858 | 0.145848222         | 0.196673702 |
| 0.253247158 | 0.00890781  | 0.029782171         | 0.371172479 |
| 0.073837859 | 0.053168108 | 0.180858849         | 0.000886117 |
| 0.037932278 | 0.252049636 | 0.146781296         | 0.213131143 |
| 0.325319175 | 0.198166296 | 0.14208487          | 0.09092877  |
| 0.203379394 | 0.092191172 | 0.001587998         | 0.345968546 |
| 0.388007562 | 0.39463842  | 0.383094968         | 0.37393951  |
| 0.374060141 | 0.297213376 | 0.274457077         | 0.106635807 |
| 0.061987022 | 0.068335395 | 0.064343251         | 0.123007495 |
| 0.004718217 | 0.231833362 | 0.203666628         | 0.135745626 |
| 0.251598641 | 0.276571708 | 0.024956244         | 0.223355374 |
| 0.006110986 | 0.035155657 | 0.107388457         | 0.164404726 |
| 0.296598455 | 0.015414348 | 0.024384199         | 0.069101757 |
| 0.247761499 | 0.231304807 | 0.085366173         | 0.338025434 |
| 0.119137483 | 0.133477441 | 0.109261423         | 0.222626945 |
| 0.054247182 | 0.050890903 | 0.136314782         | 0.003882498 |

|             |             |             |             |
|-------------|-------------|-------------|-------------|
| 0.045405948 | 0.381398047 | 0.112818914 | 0.031940523 |
| 0.136498491 | 0.004046227 | 0.21518636  | 0.340996275 |
| 0.285310958 | 0.329618397 | 0.292289229 | 0.066763123 |
| 0.299748696 | 0.046375802 | 0.329038449 | 0.244569201 |
| 0.08869913  | 6.47E-05    | 0.008091598 | 0.287431133 |
| 0.137075238 | 0.084819652 | 0.131657497 | 0.039559409 |
| 0.043833299 | 0.073008239 | 0.066228352 | 0.067655485 |
| 0.15740704  | 0.129491046 | 0.083790297 | 0.313209725 |
| 0.126377398 | 0.190989072 | 0.117471568 | 0.133972905 |
| 0.168264993 | 0.031884769 | 0.1639007   | 0.002038065 |
| 0.259846543 | 0.133958918 | 0.336132241 | 0.318337438 |
| 0.324113905 | 0.207525602 | 0.064657414 | 0.062601624 |
| 0.355119009 | 0.085304912 | 0.067879408 | 0.094192155 |
| 0.281332897 | 0.173816077 | 0.192837989 | 0.188456933 |
| 0.327451694 | 0.289022261 | 0.037886334 | 0.249059713 |
| 0.003486016 | 0.006248658 | 0.089723935 | 0.266246843 |
| 0.19869345  | 0.139903162 | 0.200929096 | 1           |
| 0.154492134 | 0.012728166 | 0.096893153 | 0.091528752 |
| 0.179749347 | 0.150685095 | 0.124480002 | 0.322533758 |
| 0.132806948 | 0.083763437 | 0.096698295 | 0.108827347 |
| 0.161770416 | 0.246000678 | 0.167613104 | 0.036509143 |
| 0.132563149 | 0.126742719 | 0.049400381 | 0.149490785 |
| 0.237632466 | 0.279839653 | 0.057944247 | 0.00543516  |
| 0.209039795 | 0.16135808  | 0.307698422 | 0.299195977 |
| 0.341769915 | 0.354007351 | 0.306632561 | 0.088335185 |
| 0.041869839 | 0.202563057 | 0.155812582 | 0.078566448 |
| 0.314695099 | 0.09057111  | 0.307056712 | 0.129402217 |
| 0.157692838 | 0.072970909 | 0.020014779 | 0.112544529 |
| 0.15295155  | 0.158830345 | 0.114737526 | 0.09276876  |
| 0.105991108 | 0.062603098 | 0.062327571 | 0.139252975 |
| 0.23252019  | 0.053324517 | 0.145032793 | 0.13642067  |
| 0.262735878 | 0.116178416 | 0.224693549 | 0.323268942 |
| 0.117427712 | 0.144701124 | 0.041048087 | 0.306429991 |
| 0.256014162 | 0.175076862 | 0.0048434   | 0.279008059 |
| 0.32877077  | 0.170992245 | 0.305520997 | 0.312441472 |
| 0.133935331 | 0.106495244 | 0.159597764 | 0.182936809 |
| 0.195635343 | 0.086962221 | 0.204710095 | 0.089719865 |
| 0.334552944 | 0.39166327  | 0.272424552 | 0.076218125 |
| 0.170014015 | 0.124113251 | 0.083435273 | 0.306333158 |
| 0.063909542 | 0.030954634 | 0.102288826 | 0.309587245 |
| 0.001727637 | 0.049348225 | 0.37651771  | 0.062677409 |
| 0.393298109 | 0.301083837 | 0.279774579 | 0.119946506 |
| 0.005672272 | 0.229255753 | 0.139173133 | 0.080252608 |
| 0.254753132 | 0.221650499 | 0.130791808 | 0.044576752 |
| 0.24055956  | 0.076673633 | 0.066902892 | 0.054000782 |
| 0.068032339 | 0.185200027 | 0.213220335 | 0.243805452 |
| 0.134123392 | 0.172797085 | 0.061639562 | 0.09128392  |
| 0.159553509 | 0.197899776 | 0.23333999  | 0.075252765 |
| 0.032565374 | 0.35299189  | 0.244441131 | 0.019940163 |
| 0.159089252 | 0.33784041  | 0.329029651 | 0.002114378 |
| 0.193102375 | 0.008412068 | 0.115212123 | 0.082342292 |
| 0.102789954 | 0.137985232 | 0.201122549 | 0.077518473 |
| 0.229762811 | 0.131480325 | 0.068586695 | 0.14729155  |
| 0.056851135 | 0.152776145 | 0.188658388 | 0.147036342 |

|             |             |             |             |
|-------------|-------------|-------------|-------------|
| 0.054319239 | 0.054779291 | 0.144824375 | 0.141498133 |
| 0.020499308 | 0.295303407 | 0.207619249 | 0.08117306  |
| 0.194680524 | 0.149381942 | 0.272949784 | 0.305991438 |
| 0.30371024  | 0.122473771 | 0.169985458 | 0.230140244 |
| 0.069389737 | 0.053697632 | 0.042313858 | 0.151196072 |
| 0.129977089 | 0.051088409 | 0.147296597 | 0.131976348 |
| 0.261287437 | 0.291342181 | 0.194624423 | 0.326156754 |
| 0.105772545 | 0.229263537 | 0.059076016 | 0.03505081  |
| 0.073102666 | 0.182548262 | 0.131662969 | 0.001441718 |
| 0.194486214 | 0.043284545 | 0.254049088 | 0.301176204 |
| 0.086041675 | 0.291176587 | 0.041461476 | 0.035585706 |
| 0.043560182 | 0.165867402 | 0.146057678 | 0.248746152 |
| 0.045907904 | 0.07513367  | 0.150427655 | 0.050215622 |
| 0.242995193 | 0.283014086 | 0.133042655 | 0.152714368 |
| 0.23982125  | 0.148693862 | 0.389490217 | 0.072164086 |
| 0.167023561 | 0.053326681 | 0.190857046 | 0.107653676 |
| 0.127556541 | 0.336178351 | 0.071505933 | 0.327634638 |
| 0.128277445 | 0.1693102   | 0.359252107 | 0.170172523 |
| 0.086400643 | 0.05748249  | 0.053072187 | 0.109779803 |
| 0.119092485 | 0.081685786 | 0.005271324 | 0.027163837 |
| 0.204986501 | 0.181090863 | 0.265038013 | 0.321091657 |
| 0.115367108 | 0.302396405 | 0.061701224 | 0.153845418 |
| 0.305241418 | 0.346223288 | 0.047240628 | 0.262155523 |
| 0.243541243 | 0.050260119 | 0.142299538 | 0.044713913 |
| 0.175938016 | 0.168830792 | 0.079927407 | 0.052205401 |
| 0.025526021 | 0.053066998 | 0.181466096 | 0.141838363 |
| 0.322734411 | 0.037961974 | 0.265429373 | 0.201529871 |
| 0.241867758 | 0.338557443 | 0.074886736 | 0.184786791 |
| 0.102257011 | 0.243376675 | 0.170644184 | 0.200544671 |
| 0.043127184 | 0.104073332 | 0.206547081 | 0.063452521 |
| 0.027200524 | 0.072102462 | 0.008038818 | 0.295011516 |
| 0.329781054 | 0.147770504 | 0.239019028 | 0.087944571 |
| 0.20745863  | 0.338386532 | 0.100346592 | 0.143708802 |
| 0.007150171 | 0.144560023 | 0.166856867 | 0.215298013 |
| 0.029603715 | 0.236659893 | 0.028316502 | 0.202659754 |
| 0.329997955 | 0.070737283 | 0.302858907 | 0.055461253 |
| 0.301532641 | 0.300059477 | 0.146553596 | 0.101074726 |
| 0.261514531 | 0.099132449 | 0.082762931 | 0.365239554 |
| 0.09341562  | 0.068593721 | 0.256449086 | 0.071169929 |
| 0.125115592 | 0.279688243 | 0.207376077 | 0.384904162 |
| 0.055194402 | 0.172301723 | 0.27325241  | 0.318315855 |
| 0.241162456 | 0.092205455 | 0.05808885  | 0.09714722  |
| 0.265200836 | 0.022789318 | 0.11056549  | 0.208322631 |
| 0.057685987 | 0.224888935 | 0.211547388 | 0.106929846 |
| 0.019978436 | 0.119186486 | 0.057402385 | 0.153480853 |
| 0.172604342 | 0.149887809 | 0.101738166 | 0.279436755 |
| 0.031042131 | 0.007432956 | 0.332428761 | 0.006600291 |
| 0.107760468 | 0.157175826 | 0.165765786 | 0.139049121 |
| 0.144471216 | 0.216443481 | 0.133933078 | 0.001031995 |
| 0.289616747 | 0.026544053 | 0.159842835 | 0.05472212  |
| 0.07945063  | 0.040940654 | 0.291396363 | 0.32774908  |
| 0.218656373 | 0.09199059  | 0.055378134 | 0.317429509 |
| 0.046424256 | 0.084657125 | 0.108689934 | 0.186660866 |
| 0.067588305 | 0.103926758 | 0.118691852 | 0.07634018  |

|             |             |             |             |
|-------------|-------------|-------------|-------------|
| 0.22318703  | 0.130183908 |             |             |
| MPO         | 0.052347601 | 0.262195027 | 0.034429197 |
| 0.036634842 | 0.201493916 | 0.088657454 | 0.069359021 |
| 0.085198412 | 0.264084022 | 0.057953239 | 0.145469573 |
| 0.023962088 | 0.0640727   | 0.28134519  | 0.084535571 |
| 0.194520091 | 0.055650117 | 0.115465474 | 0.063066675 |
| 0.110203974 | 0.191237727 | 0.079541144 | 0.114201171 |
| 0.211206703 | 0.181211449 | 0.164142611 | 0.174914765 |
| 0.286406851 | 0.039598876 | 0.188181705 | 0.024191199 |
| 0.300796403 | 0.200156883 | 0.116611071 | 0.018862594 |
| 0.166485719 | 0.06715841  | 0.315919778 | 0.11171059  |
| 0.058022469 | 0.283573604 | 0.072594893 | 0.105657648 |
| 0.095445661 | 0.024722413 | 0.027110353 | 0.226715069 |
| 0.190764793 | 0.147099519 | 0.06122639  | 0.207160581 |
| 0.099218963 | 0.191419681 | 0.163480381 | 0.001136444 |
| 0.095517192 | 0.033848797 | 0.066475795 | 0.304987795 |
| 0.188415048 | 0.139987754 | 0.061623613 | 0.202585623 |
| 0.224977427 | 0.285338986 | 0.303877391 | 0.075349599 |
| 0.291546154 | 0.080958104 | 0.223294805 | 0.052134619 |
| 0.127006409 | 0.053153906 | 0.195924949 | 0.126351116 |
| 0.111439505 | 0.188836307 | 0.18662688  | 0.127212793 |
| 0.220781191 | 0.36892387  | 0.241494922 | 0.299480913 |
| 0.131899135 | 0.20090443  | 0.120471333 | 0.296825291 |
| 0.291853486 | 0.108302477 | 0.202627311 | 0.332028243 |
| 0.088523414 | 0.128992364 | 0.225874916 | 0.140968436 |
| 0.253775222 | 0.126185453 | 0.094707003 | 0.072947122 |
| 0.246711233 | 0.177200933 | 0.356612761 | 0.195418972 |
| 0.208004235 | 0.080545682 | 0.299609015 | 0.18756747  |
| 0.093773222 | 0.071349624 | 0.101462348 | 0.272331469 |
| 0.177247969 | 0.278737217 | 0.247636063 | 0.283283803 |
| 0.153278851 | 0.292772992 | 0.184913923 | 0.312191423 |
| 0.026308345 | 0.318942381 | 0.118512313 | 0.060540547 |
| 0.048157999 | 0.113513578 | 0.166062859 | 0.328955658 |
| 0.278184161 | 0.229632045 | 0.090466852 | 0.171328416 |
| 0.318239129 | 0.281169766 | 0.316772079 | 0.255232079 |
| 0.044436214 | 0.121504012 | 0.139415024 | 0.115532028 |
| 0.239104984 | 0.187817988 | 0.129702124 | 0.321318138 |
| 0.248791549 | 0.276228385 | 0.076706167 | 0.355542469 |
| 0.181059291 | 0.338859065 | 0.227304754 | 0.117715713 |
| 0.32449418  | 0.299363232 | 0.331603456 | 0.219734305 |
| 0.30693672  | 0.099472437 | 0.081506226 | 0.286354705 |
| 0.346989378 | 0.010499206 | 0.28614925  | 0.302244813 |
| 0.28400794  | 0.248255157 | 0.358973559 | 0.314731628 |
| 0.290374205 | 0.111341555 | 0.025359447 | 0.250950407 |
| 0.297272841 | 0.238733827 | 0.166836901 | 0.127266351 |
| 0.228277262 | 0.115221694 | 0.284354568 | 0.040992997 |
| 0.382683941 | 0.272967862 | 0.287029837 | 0.23700324  |
| 0.17198204  | 0.266001739 | 0.157193729 | 0.278663591 |
| 0.053827903 | 0.055487327 | 0.060092002 | 0.32938718  |
| 0.046280769 | 0.191181187 | 0.086090204 | 0.250939505 |
| 0.20728259  | 0.134541787 | 0.094020293 | 0.232403575 |
| 0.086383931 | 0.133066666 | 0.131165293 | 0.108385348 |
| 0.049186871 | 0.197752407 | 0.054364851 | 0.078332059 |
| 0.185307527 | 0.221924318 | 0.206512773 | 0.31625648  |

|             |             |             |             |
|-------------|-------------|-------------|-------------|
| 0.166579749 | 0.139018639 | 0.201198246 | 0.335285901 |
| 0.345671477 | 0.148284227 | 0.279287306 | 0.008943773 |
| 0.057300888 | 0.078833976 | 0.075748697 | 0.166948931 |
| 0.217829516 | 0.086576156 | 0.184165897 | 0.245693904 |
| 0.092651842 | 0.140283858 | 0.09987681  | 0.32202328  |
| 0.151868551 | 0.094452439 | 0.270819428 | 0.14635737  |
| 0.007238855 | 0.118531107 | 0.24455737  | 0.141196049 |
| 0.234586264 | 0.057069622 | 0.052980407 | 0.278850463 |
| 0.079707653 | 0.142511264 | 0.309567254 | 0.28169543  |
| 0.070496364 | 0.214654948 | 0.35347631  | 0.027321247 |
| 0.222724428 | 0.032654277 | 0.24756926  | 0.094815402 |
| 0.173575784 | 0.299743078 | 0.204212618 | 0.107953756 |
| 0.086441928 | 0.321423073 | 0.279853947 | 0.30497512  |
| 0.069072911 | 0.349347893 | 0.261793657 | 0.274783468 |
| 0.228907779 | 0.137116143 | 0.060328281 | 0.217432035 |
| 0.270981721 | 0.059616957 | 0.092423573 | 0.252108651 |
| 0.110998889 | 0.222539891 | 0.11667452  | 0.307613999 |
| 0.353507694 | 0.262458054 | 0.108359412 | 0.302456642 |
| 0.226658804 | 0.121489177 | 0.305269721 | 0.378794712 |
| 0.061833969 | 0.153420722 | 0.091833944 | 0.322134915 |
| 0.147609322 | 0.128653744 | 0.322264808 | 0.087979173 |
| 0.002442893 | 0.093263642 | 0.066481969 | 0.145041738 |
| 0.088449863 | 0.172294095 | 0.237093173 | 0.309939367 |
| 0.120133894 | 0.299495831 | 0.295234534 | 0.064876422 |
| 0.247323144 | 0.170990313 | 0.174708228 | 0.225943934 |
| 0.271174059 | 0.01899819  | 0.056714625 | 0.350669157 |
| 0.062354837 | 0.075690342 | 0.183543002 | 0.00291376  |
| 0.03993216  | 0.209961295 | 0.132058475 | 0.218904022 |
| 0.346771128 | 0.191805124 | 0.13803835  | 0.056855452 |
| 0.255088801 | 0.117836221 | 0.007328844 | 0.318943399 |
| 0.353540486 | 0.355434575 | 0.341406773 | 0.338169898 |
| 0.3318812   | 0.299209685 | 0.272436645 | 0.111703625 |
| 0.070154996 | 0.063824518 | 0.072108818 | 0.136239559 |
| 0.005552437 | 0.279183635 | 0.243519181 | 0.165328007 |
| 0.257940079 | 0.269345859 | 0.0382396   | 0.256830169 |
| 0.009724006 | 0.042353962 | 0.098866682 | 0.192898653 |
| 0.340732073 | 0.020792881 | 0.025839247 | 0.061920884 |
| 0.239770873 | 0.240074367 | 0.087132994 | 0.323424523 |
| 0.152509325 | 0.106812957 | 0.131386019 | 0.27173362  |
| 0.065186085 | 0.023773045 | 0.123411728 | 0.00335439  |
| 0.060208173 | 0.360714872 | 0.107380254 | 0.032157488 |
| 0.161968038 | 0.006725391 | 0.2196569   | 0.33544626  |
| 0.258486388 | 0.320288862 | 0.295319677 | 0.09286726  |
| 0.29087328  | 0.048747163 | 0.317625649 | 0.229037542 |
| 0.068469739 | 0.000266067 | 0.020471758 | 0.281361177 |
| 0.140601827 | 0.07613374  | 0.161168275 | 0.044418808 |
| 0.07193908  | 0.073896514 | 0.091344979 | 0.099562842 |
| 0.174330131 | 0.192651094 | 0.124001645 | 0.277372781 |
| 0.14746865  | 0.24433169  | 0.103115701 | 0.131659323 |
| 0.19396688  | 0.049041508 | 0.149495413 | 0.006789402 |
| 0.301668311 | 0.117952303 | 0.301832971 | 0.30548771  |
| 0.32727621  | 0.231690923 | 0.049110125 | 0.079095366 |
| 0.351937625 | 0.079050288 | 0.067871622 | 0.092830887 |
| 0.258462308 | 0.176898151 | 0.230571281 | 0.202342282 |



|             |             |             |             |
|-------------|-------------|-------------|-------------|
| 0.325555713 | 0.281132198 | 0.050427665 | 0.244905562 |
| 0.009288011 | 0.018259883 | 0.08272771  | 0.287501123 |
| 0.165237102 | 0.138006544 | 0.225623845 | 0.154492134 |
| 1           | 0.020413403 | 0.1092658   | 0.102113391 |
| 0.205504816 | 0.158886542 | 0.161957208 | 0.307722372 |
| 0.160674093 | 0.093836896 | 0.144306827 | 0.135904732 |
| 0.138045139 | 0.223146816 | 0.168707623 | 0.041027755 |
| 0.1203446   | 0.130161384 | 0.067827877 | 0.173051966 |
| 0.253321356 | 0.278624212 | 0.064626425 | 0.014059461 |
| 0.223543906 | 0.161793815 | 0.314502798 | 0.279608268 |
| 0.325247379 | 0.353172503 | 0.310987772 | 0.118092068 |
| 0.060359951 | 0.233524534 | 0.189569299 | 0.124819603 |
| 0.311556028 | 0.074539778 | 0.301139318 | 0.152892322 |
| 0.169633717 | 0.087522096 | 0.041398761 | 0.133889138 |
| 0.177460066 | 0.205352012 | 0.172012711 | 0.087052493 |
| 0.123448829 | 0.078351442 | 0.069715413 | 0.175173169 |
| 0.226386624 | 0.057063599 | 0.166036019 | 0.144417033 |
| 0.255089062 | 0.070959727 | 0.219120995 | 0.337480903 |
| 0.138742152 | 0.13243044  | 0.037392639 | 0.315544355 |
| 0.23860499  | 0.146793524 | 0.012818208 | 0.242334957 |
| 0.33903685  | 0.173841035 | 0.294952375 | 0.336258107 |
| 0.133369206 | 0.12562003  | 0.152359274 | 0.183299103 |
| 0.219815837 | 0.10195792  | 0.235230863 | 0.101632018 |
| 0.35636174  | 0.376209007 | 0.238875181 | 0.123133323 |
| 0.174754754 | 0.110695992 | 0.065276889 | 0.307664717 |
| 0.077831169 | 0.04186483  | 0.085210051 | 0.301161227 |
| 0.004633416 | 0.073778823 | 0.365084534 | 0.099581822 |
| 0.381488365 | 0.295577433 | 0.292827425 | 0.134170473 |
| 0.00301166  | 0.220309081 | 0.164780806 | 0.083491755 |
| 0.229344177 | 0.2468243   | 0.168367405 | 0.071483231 |
| 0.292736975 | 0.075382508 | 0.087064449 | 0.062619646 |
| 0.063574633 | 0.174045507 | 0.260730278 | 0.230623888 |
| 0.175438763 | 0.130970523 | 0.089242094 | 0.121928266 |
| 0.15240846  | 0.246098057 | 0.267064805 | 0.057352666 |
| 0.033290554 | 0.339133495 | 0.214871326 | 0.029125408 |
| 0.188354863 | 0.325800867 | 0.34516087  | 0.002184938 |
| 0.203010407 | 0.016248845 | 0.172229372 | 0.127448948 |
| 0.154871862 | 0.173101453 | 0.261304449 | 0.098340826 |
| 0.201237477 | 0.152041623 | 0.095978329 | 0.20502815  |
| 0.096022796 | 0.174938815 | 0.20179002  | 0.131628704 |
| 0.080607537 | 0.07834392  | 0.136988705 | 0.129395254 |
| 0.043770318 | 0.293436543 | 0.239241004 | 0.082900286 |
| 0.257441712 | 0.12916401  | 0.310883123 | 0.275112258 |
| 0.34415753  | 0.109822018 | 0.180315974 | 0.221222473 |
| 0.045425467 | 0.057164943 | 0.042427449 | 0.150513131 |
| 0.173442262 | 0.077322109 | 0.141340023 | 0.114245225 |
| 0.218449386 | 0.30618841  | 0.229597211 | 0.339149105 |
| 0.118548643 | 0.186411784 | 0.043160394 | 0.065885892 |
| 0.086910229 | 0.178200037 | 0.177799293 | 0.003235581 |
| 0.227442974 | 0.04601512  | 0.250627487 | 0.281134351 |
| 0.098401634 | 0.32955547  | 0.03704637  | 0.043511465 |
| 0.032043026 | 0.136518158 | 0.168423602 | 0.2333895   |
| 0.056686378 | 0.111967651 | 0.184510612 | 0.051612711 |
| 0.242517446 | 0.251308967 | 0.157900582 | 0.164385899 |

|             |             |             |             |
|-------------|-------------|-------------|-------------|
| 0.256174069 | 0.152827623 | 0.347457556 | 0.078039059 |
| 0.147656637 | 0.082940539 | 0.153265898 | 0.13214442  |
| 0.162986847 | 0.320051679 | 0.08597205  | 0.312288774 |
| 0.132395717 | 0.173945135 | 0.369868198 | 0.203056879 |
| 0.093807552 | 0.111692132 | 0.067057892 | 0.09626567  |
| 0.13553049  | 0.099348735 | 0.003150833 | 0.028340673 |
| 0.255869671 | 0.148826123 | 0.213862224 | 0.316461445 |
| 0.149670836 | 0.338303363 | 0.088934852 | 0.138861554 |
| 0.270188463 | 0.319383389 | 0.055077185 | 0.283807617 |
| 0.256825304 | 0.081934826 | 0.143354439 | 0.031338241 |
| 0.164512404 | 0.158723148 | 0.066746381 | 0.073566646 |
| 0.034712621 | 0.058524657 | 0.154856778 | 0.113118533 |
| 0.322138542 | 0.0461606   | 0.213584796 | 0.214095456 |
| 0.24209292  | 0.309370758 | 0.121740295 | 0.214074298 |
| 0.066687633 | 0.270460118 | 0.182343595 | 0.177110628 |
| 0.064545705 | 0.122663156 | 0.233531463 | 0.092194217 |
| 0.042361301 | 0.101398233 | 0.003787472 | 0.295532482 |
| 0.28423975  | 0.145417298 | 0.25637106  | 0.065121989 |
| 0.271648166 | 0.347837021 | 0.118197505 | 0.139616814 |
| 0.017894741 | 0.164356975 | 0.223947382 | 0.229717697 |
| 0.026853716 | 0.191257797 | 0.053155705 | 0.207260619 |
| 0.299799508 | 0.070314064 | 0.321303424 | 0.04301697  |
| 0.28120057  | 0.288425621 | 0.133218885 | 0.146940563 |
| 0.211020783 | 0.101946474 | 0.077267276 | 0.352488492 |
| 0.149108159 | 0.097002107 | 0.273482614 | 0.08970193  |
| 0.145841933 | 0.278378735 | 0.175151061 | 0.361558784 |
| 0.093401321 | 0.217231946 | 0.289443628 | 0.288327169 |
| 0.303469146 | 0.122603722 | 0.074928354 | 0.126696543 |
| 0.244674399 | 0.043357676 | 0.110692006 | 0.212032456 |
| 0.069545076 | 0.285315176 | 0.162170482 | 0.155699952 |
| 0.044733082 | 0.144300225 | 0.076397868 | 0.177154337 |
| 0.19918764  | 0.164400063 | 0.121384695 | 0.306398588 |
| 0.063144523 | 0.01835403  | 0.344698731 | 0.00803418  |
| 0.121650058 | 0.191628582 | 0.225983014 | 0.156081603 |
| 0.162760771 | 0.205881239 | 0.105179603 | 0.002144478 |
| 0.307276465 | 0.044645859 | 0.193128405 | 0.080731527 |
| 0.085792106 | 0.046013582 | 0.297968355 | 0.331522829 |
| 0.245248543 | 0.097015246 | 0.057449031 | 0.311984338 |
| 0.06413954  | 0.08149837  | 0.106454198 | 0.164775637 |
| 0.093484748 | 0.080619771 | 0.109016619 | 0.084019463 |
| 0.240246218 | 0.160607602 |             |             |
| MPP5        | 0.216596468 | 0.05684243  | 0.210050516 |
| 0.033884525 | 0.027513096 | 0.025734744 | 0.104376291 |
| 0.08564756  | 0.046722507 | 0.003441951 | 0.055343695 |
| 0.147388681 | 0.000264136 | 0.07730479  | 0.105003046 |
| 0.021529747 | 0.116259143 | 0.164314706 | 0.002444396 |
| 0.004346292 | 0.030359664 | 0.007547004 | 0.039066194 |
| 0.020509268 | 0.266050965 | 0.044070829 | 0.008911019 |
| 0.061477302 | 0.001229946 | 0.032090014 | 0.000718797 |
| 0.131398484 | 0.026144063 | 0.007517777 | 0.109308761 |
| 0.027895248 | 7.20E-05    | 0.129375023 | 0.039026836 |
| 0.001187048 | 0.16108307  | 0.011189285 | 0.080260747 |
| 0.012026384 | 0.216337786 | 0.000878181 | 0.018092712 |
| 0.032276504 | 0.024246506 | 0.203107154 | 0.034034179 |

|             |             |             |             |
|-------------|-------------|-------------|-------------|
| 0.008558603 | 0.11310347  | 0.029029655 | 0.005262938 |
| 0.005699755 | 0.000633289 | 0.001272761 | 0.087941092 |
| 0.21710733  | 0.162978903 | 0.000832844 | 0.032487689 |
| 0.01680291  | 0.029219124 | 0.09223415  | 0.006256177 |
| 0.087080326 | 0.001692572 | 0.022291217 | 0.011870032 |
| 0.025070164 | 0.097472546 | 0.232861137 | 0.112816218 |
| 0.008079641 | 0.122263302 | 0.037172014 | 0.005842574 |
| 0.056919576 | 0.113542486 | 0.099784553 | 0.090009399 |
| 0.00044971  | 0.013969255 | 0.010668795 | 0.083409018 |
| 0.038326655 | 0.04668504  | 0.064075302 | 0.100039364 |
| 0.087562443 | 0.015678478 | 0.036254908 | 0.186665284 |
| 0.063540356 | 0.002025101 | 0.013703174 | 0.005261148 |
| 0.02454386  | 0.020747452 | 0.091204192 | 0.146606535 |
| 0.019210598 | 0.213125598 | 0.111026646 | 0.013115711 |
| 0.041101038 | 0.230778068 | 0.010002299 | 0.034305417 |
| 0.036823039 | 0.068988551 | 0.040322181 | 0.060225275 |
| 0.016500534 | 0.08006862  | 0.060077266 | 0.069048099 |
| 0.000172795 | 0.078719565 | 0.161871097 | 0.139450615 |
| 0.143436059 | 0.108291666 | 0.004714146 | 0.122137209 |
| 0.053638767 | 0.07841343  | 0.13546247  | 0.063883877 |
| 0.047608651 | 0.095295881 | 0.072264332 | 0.062738948 |
| 0.206440028 | 0.001612389 | 0.017156606 | 0.037797228 |
| 0.048717946 | 0.151497407 | 0.010039149 | 0.115655163 |
| 0.141318714 | 0.0442696   | 0.093466702 | 0.132938963 |
| 0.047398886 | 0.104470786 | 0.053774888 | 0.170928374 |
| 0.105999599 | 0.115329478 | 0.083428438 | 0.026426913 |
| 0.115629953 | 0.067060709 | 0.000845645 | 0.064620147 |
| 0.105096779 | 0.000853921 | 0.042453521 | 0.049226826 |
| 0.079385782 | 0.038428478 | 0.072622098 | 0.06361999  |
| 0.079082221 | 0.208139104 | 0.000287643 | 0.060752704 |
| 0.096055766 | 0.106047916 | 0.036293922 | 0.012800906 |
| 0.024281897 | 0.038444575 | 0.033508479 | 0.003948955 |
| 0.114678495 | 0.057643057 | 0.049902187 | 0.052370587 |
| 0.022650458 | 0.184859406 | 0.008313126 | 0.11886659  |
| 0.090926334 | 0.192130765 | 0.292891962 | 0.073649146 |
| 0.007564762 | 0.14548084  | 0.031569081 | 0.018275668 |
| 0.173994092 | 0.029387888 | 0.004273714 | 0.030012452 |
| 0.261455338 | 0.021395247 | 0.12817196  | 0.119639318 |
| 0.135952053 | 0.276471279 | 0.03966761  | 0.07614673  |
| 0.063849689 | 0.233790835 | 0.026269012 | 0.059286097 |
| 0.011703639 | 0.208288757 | 0.04286418  | 0.097276561 |
| 0.126629068 | 0.017956767 | 0.152493948 | 0.035021654 |
| 0.007353057 | 0.001710115 | 0.00110466  | 0.012084967 |
| 0.239907078 | 0.025274993 | 0.027767451 | 0.041963274 |
| 0.107971289 | 0.072539569 | 0.010304601 | 0.160850537 |
| 0.177977899 | 0.03225271  | 0.067637663 | 0.017202063 |
| 0.032730642 | 0.064438735 | 0.050410256 | 0.005203903 |
| 0.060670681 | 0.001992209 | 0.003770736 | 0.056430196 |
| 0.002496609 | 0.008633828 | 0.053431087 | 0.035758481 |
| 0.003430744 | 0.17707409  | 0.074510661 | 7.39E-05    |
| 0.01082108  | 0.013201263 | 0.103480098 | 0.009013276 |
| 0.123789771 | 0.092456391 | 0.019660617 | 0.019920628 |
| 0.24659013  | 0.08550262  | 0.078162794 | 0.07091932  |
| 0.006055606 | 0.077772356 | 0.047719985 | 0.084658453 |

|             |             |             |             |
|-------------|-------------|-------------|-------------|
| 0.065935047 | 0.006143771 | 0.000577015 | 0.055643081 |
| 0.051239091 | 0.001399689 | 0.227007348 | 0.026959701 |
| 0.007359248 | 0.025765686 | 0.004091923 | 0.082456719 |
| 0.129224489 | 0.08199695  | 0.096418287 | 0.052105316 |
| 0.109377036 | 0.152471778 | 0.054190159 | 0.083474964 |
| 0.002370688 | 0.015884456 | 0.012644164 | 0.063287914 |
| 0.196595127 | 0.010101929 | 0.116811281 | 0.000785479 |
| 4.32E-05    | 0.169697588 | 0.263865812 | 0.095955579 |
| 0.006587928 | 0.014645361 | 0.031396482 | 0.076583718 |
| 0.200889486 | 0.101717663 | 0.088338151 | 0.026905304 |
| 0.092573097 | 0.012571368 | 0.013944246 | 0.027040816 |
| 0.130541871 | 0.024497673 | 0.038887396 | 0.120441371 |
| 0.189976525 | 0.006843782 | 0.038284571 | 0.006718757 |
| 0.156346685 | 0.034274621 | 0.252104348 | 0.281237829 |
| 0.060696818 | 0.249984206 | 0.159757778 | 0.005199972 |
| 0.078468588 | 0.216277411 | 0.010824743 | 0.057127758 |
| 0.064775023 | 0.062443512 | 0.064553112 | 0.082158246 |
| 0.047488842 | 0.034783362 | 0.041139473 | 0.052468005 |
| 0.095608124 | 0.108297567 | 0.004658198 | 0.043415755 |
| 0.004682778 | 0.073719402 | 0.025080202 | 0.260932736 |
| 0.031810744 | 0.065198151 | 0.200425077 | 0.019731434 |
| 0.068842416 | 0.001757041 | 0.019362002 | 0.043770854 |
| 0.045846891 | 0.154059828 | 0.004541793 | 0.003828637 |
| 0.117136799 | 0.136605429 | 0.004850405 | 0.085356852 |
| 0.070207634 | 0.149015757 | 0.035977939 | 0.05176498  |
| 0.147714359 | 0.000564644 | 0.016814227 | 0.000418998 |
| 0.003081604 | 0.083643326 | 0.008393846 | 0.048486534 |
| 0.116381847 | 0.111405669 | 0.130436432 | 0.091387866 |
| 0.082492429 | 0.06595749  | 0.084932825 | 0.010627472 |
| 0.087023016 | 0.000709571 | 0.070576053 | 0.067530296 |
| 0.006702117 | 0.0091645   | 0.013358776 | 0.051627282 |
| 0.022789203 | 0.231265148 | 0.198002977 | 0.01089234  |
| 0.090970822 | 0.114532443 | 0.14544291  | 0.011421543 |
| 0.033680421 | 0.048499326 | 0.008116416 | 0.088634298 |
| 0.068500439 | 0.090445822 | 0.013880854 | 0.220849996 |
| 0.023122854 | 0.125468632 | 0.172722485 | 0.009898799 |
| 0.042904265 | 0.237166623 | 0.125280214 | 0.076700502 |
| 0.106882219 | 0.037127697 | 0.003771306 | 0.004932659 |
| 0.04590541  | 0.211910737 | 0.002891824 | 0.191508918 |
| 0.077067825 | 0.033984529 | 0.14249308  | 0.17217955  |
| 0.089516612 | 0.104990668 | 0.1959916   | 0.050528289 |
| 0.050991664 | 0.001403964 | 0.037923674 | 0.101117507 |
| 0.000134187 | 0.013424049 | 0.169474127 | 0.012728166 |
| 0.020413403 | 1           | 0.004356035 | 0.00570451  |
| 0.074849641 | 0.030612791 | 0.021030162 | 0.084913153 |
| 0.017455603 | 0.003295151 | 0.062972584 | 0.068312962 |
| 0.001445996 | 0.123611238 | 0.274334927 | 0.125160289 |
| 0.014343416 | 0.017544467 | 0.254774271 | 0.212739631 |
| 0.071298865 | 0.061676002 | 0.03346458  | 0.041602215 |
| 0.174080868 | 0.021153003 | 0.065080223 | 0.069767326 |
| 0.105508047 | 0.096735635 | 0.161309987 | 0.035906167 |
| 0.191603014 | 0.043350089 | 0.018027741 | 0.020966082 |
| 0.077400931 | 0.191940166 | 0.084898153 | 0.007409858 |
| 0.193487588 | 0.064935622 | 0.09042863  | 0.183896303 |

|             |             |             |             |
|-------------|-------------|-------------|-------------|
| 0.015243515 | 0.192242502 | 0.088355553 | 0.190964779 |
| 0.033368704 | 0.003493619 | 0.150062031 | 0.151186645 |
| 0.093812717 | 0.001017749 | 0.185507437 | 0.02573276  |
| 0.069257821 | 0.000944098 | 0.028438781 | 0.126431396 |
| 0.255823935 | 0.123566813 | 0.039022831 | 0.039375823 |
| 0.039080764 | 0.009792867 | 0.057120796 | 0.056099469 |
| 0.07093251  | 0.026804496 | 0.092352379 | 0.085226212 |
| 0.214567178 | 0.024044224 | 0.004696455 | 0.027415389 |
| 0.126336662 | 0.030104678 | 0.060102463 | 0.250624844 |
| 0.126892322 | 0.117632263 | 0.066735616 | 0.134398521 |
| 0.018247691 | 0.134347824 | 0.179406826 | 0.048959965 |
| 0.004393042 | 0.08880958  | 0.010258623 | 0.032987357 |
| 0.003949171 | 0.001561001 | 0.056685778 | 0.066336763 |
| 0.092350617 | 0.062414222 | 0.12494983  | 0.024473043 |
| 0.000442977 | 0.018736243 | 0.055798227 | 0.019433257 |
| 0.067621252 | 0.103498376 | 0.004471624 | 0.104363699 |
| 0.154300636 | 0.266449071 | 0.054833377 | 0.00423287  |
| 0.000395901 | 0.038763334 | 0.177284491 | 0.069372108 |
| 0.05388365  | 0.123222497 | 0.002857037 | 0.09044106  |
| 0.000523358 | 0.187789364 | 0.115677489 | 0.004678637 |
| 0.002011251 | 0.061296645 | 0.055135129 | 0.191920462 |
| 0.012012471 | 0.052534613 | 0.069821363 | 0.008531408 |
| 0.037522901 | 0.101528562 | 0.076340437 | 0.079983704 |
| 0.068584335 | 0.055350707 | 0.064400128 | 0.020189073 |
| 0.044338455 | 0.074647312 | 0.073324869 | 0.148926857 |
| 0.074098684 | 0.077934199 | 0.026522625 | 0.024398227 |
| 0.03422289  | 0.155243315 | 0.267227215 | 0.287468998 |
| 0.078090138 | 0.056420474 | 0.239330675 | 0.265512296 |
| 0.116306907 | 0.016054813 | 0.148114655 | 0.073367281 |
| 0.095527241 | 0.21396653  | 0.024401604 | 0.064718567 |
| 0.000412292 | 0.005739582 | 0.124887051 | 0.028869409 |
| 0.131229862 | 0.013285255 | 0.01738201  | 0.071778244 |
| 0.02895468  | 0.159867955 | 0.234577695 | 0.090282308 |
| 0.025695126 | 0.012325875 | 0.006940142 | 0.077882715 |
| 0.146569096 | 0.181012175 | 0.025015224 | 0.039991488 |
| 0.074826184 | 0.031817489 | 0.051334834 | 0.096560678 |
| 0.003497802 | 0.119692283 | 0.003656141 | 0.140341422 |
| 0.002920536 | 0.207204312 | 0.25145297  | 0.030957449 |
| 0.001910631 | 0.096603752 | 0.035709657 | 0.022433128 |
| 0.032870886 | 0.023453709 | 0.010060034 | 0.058557837 |
| 0.056468834 | 0.14147698  | 0.093882235 | 0.131815071 |
| 0.015220435 | 0.015260677 | 0.021217756 | 0.045282967 |
| 0.0505746   | 0.061068351 | 0.246146528 | 0.06189088  |
| 0.019882687 | 0.220417011 | 0.128945794 | 0.04708653  |
| 0.019096103 | 0.029882438 | 0.001770216 | 0.011576178 |
| 0.029030837 | 0.005402045 | 1.92E-05    | 0.001270696 |
| 0.101662136 | 0.00653855  | 0.034820465 | 0.043133624 |
| 0.012799877 | 0.078221647 | 0.000461355 | 0.048918855 |
| 0.083750843 | 0.109319896 | 0.030160991 | 0.144125564 |
| 0.090525359 | 0.176311113 | 0.045635927 | 0.000185068 |
| 0.020526922 | 0.01256337  | 0.004513638 | 0.152538469 |
| 0.065292024 | 0.002198186 | 0.023441999 | 0.129040734 |
| 0.054322678 | 0.000733964 | 0.020920216 | 0.035640016 |
| 0.138881498 | 0.117398698 | 0.058679213 | 0.058730444 |

|             |             |             |             |
|-------------|-------------|-------------|-------------|
| 0.013957319 | 0.098416354 | 0.009219963 | 0.010477811 |
| 0.028475645 | 0.010471557 | 0.071296985 | 0.009525991 |
| 0.185341807 | 0.016690696 | 0.003772837 | 0.173370637 |
| 0.101937725 | 0.008628275 | 0.202132454 | 0.002394867 |
| 0.111333568 | 0.068652624 | 0.00788402  | 0.01015778  |
| 0.037691024 | 0.023478432 | 0.138238708 | 0.093027182 |
| 0.001790398 | 0.019299656 | 0.056911731 | 0.011306998 |
| 0.139229461 | 0.007376148 | 0.139019625 | 0.002664808 |
| 0.075046727 | 0.053661338 | 0.163771814 | 0.009031121 |
| 0.018385718 | 0.25044647  | 0.00976562  | 0.081507939 |
| 0.105439094 | 0.010548505 | 0.049866118 | 0.070999827 |
| 0.007589903 | 0.088673402 | 0.012512594 | 0.076646533 |
| 0.053641853 | 0.160375723 | 0.041329786 | 0.069756104 |
| 0.128437467 | 0.007882565 | 0.007495264 | 0.03282299  |
| 0.091341724 | 0.060259311 | 0.004227181 | 0.095813316 |
| 0.005272591 | 0.084301942 | 0.020215939 | 0.031656827 |
| 0.050574857 | 0.044662194 | 0.021120567 | 0.188234764 |
| 0.081580306 | 0.025673393 | 0.012582504 | 0.147056676 |
| 0.047849598 | 0.060092981 | 0.119795125 | 0.000179617 |
| 0.067678443 | 0.045948176 | 0.11465789  | 0.017780506 |
| 0.274324477 | 0.04509905  | 0.039099853 | 0.056687175 |
| 0.053087926 | 0.001267395 | 0.015749264 | 0.025988396 |
| 0.001518992 | 0.151270956 | 0.100719636 | 0.069281956 |
| 0.074345903 | 0.001556156 | 0.002368411 | 0.082832055 |
| 0.000885652 | 0.002579047 | 0.004436937 | 0.032478292 |
| 0.004582904 | 0.007838957 | 0.008217735 | 0.007628823 |
| 0.06812922  | 0.051990554 |             |             |
| MPP6        | 0.010659946 | 0.227586223 | 0.00678693  |
| 0.04073932  | 0.294701867 | 0.102123964 | 0.013659779 |
| 0.029114945 | 0.185205011 | 0.090890294 | 0.184223268 |
| 0.003196499 | 0.173952767 | 0.28356322  | 0.014239282 |
| 0.321148989 | 0.010426489 | 0.033858511 | 0.034988121 |
| 0.084741164 | 0.276163283 | 0.172629918 | 0.105283099 |
| 0.259007994 | 0.068338738 | 0.136247883 | 0.270183527 |
| 0.302848085 | 0.137023587 | 0.272086224 | 0.062605656 |
| 0.240541537 | 0.328570604 | 0.229964552 | 0.00184407  |
| 0.190945106 | 0.048828793 | 0.228664213 | 0.136709596 |
| 0.179063118 | 0.17793813  | 0.088813867 | 0.101083183 |
| 0.138969311 | 0.004926975 | 0.059677327 | 0.326783586 |
| 0.15076585  | 0.105534135 | 0.01033183  | 0.251605364 |
| 0.136328574 | 0.140973314 | 0.183238263 | 0.000408609 |
| 0.234535287 | 0.190914863 | 0.2368864   | 0.269220391 |
| 0.091725531 | 0.048162047 | 0.161807067 | 0.085979734 |
| 0.26114871  | 0.303694338 | 0.156932247 | 0.123198881 |
| 0.290935587 | 0.229296986 | 0.307115393 | 0.052088882 |
| 0.139068033 | 0.004228041 | 0.070232793 | 0.020565404 |
| 0.165491826 | 0.103959837 | 0.216563291 | 0.23863448  |
| 0.21519349  | 0.284432134 | 0.12331525  | 0.25241104  |
| 0.184426653 | 0.344352641 | 0.194076652 | 0.240721621 |
| 0.264724874 | 0.024507408 | 0.268269518 | 0.309403537 |
| 0.00837738  | 0.158659053 | 0.258346289 | 0.035087226 |
| 0.230073469 | 0.205082352 | 0.142572959 | 0.20299143  |
| 0.362356824 | 0.303288772 | 0.257351115 | 0.15631578  |
| 0.219071674 | 0.015700323 | 0.222058195 | 0.355510697 |

|             |             |             |             |
|-------------|-------------|-------------|-------------|
| 0.133432166 | 0.01775097  | 0.182427445 | 0.36093004  |
| 0.252313497 | 0.296899486 | 0.262164063 | 0.26172562  |
| 0.294442497 | 0.299590637 | 0.236120771 | 0.247560866 |
| 0.055919807 | 0.298940872 | 0.061192431 | 0.011452157 |
| 0.008786814 | 0.029366944 | 0.176497148 | 0.18820173  |
| 0.320862986 | 0.162618608 | 0.050264468 | 0.158334956 |
| 0.389503942 | 0.220762812 | 0.300537221 | 0.26947258  |
| 0.006579533 | 0.238357453 | 0.279151111 | 0.064960483 |
| 0.253757481 | 0.039991393 | 0.275115342 | 0.25655501  |
| 0.20978195  | 0.355375857 | 0.027954469 | 0.248556338 |
| 0.072077622 | 0.315301631 | 0.2464694   | 0.067508106 |
| 0.280641001 | 0.240702534 | 0.343707394 | 0.368659427 |
| 0.240604577 | 0.110974919 | 0.047208545 | 0.247674612 |
| 0.315200808 | 0.028796473 | 0.334963595 | 0.357261079 |
| 0.272498004 | 0.353953703 | 0.367602952 | 0.334537636 |
| 0.268599018 | 0.018562764 | 0.049663555 | 0.255395805 |
| 0.270464899 | 0.237270408 | 0.067766871 | 0.246565792 |
| 0.318166383 | 0.119034525 | 0.30526131  | 0.126854169 |
| 0.317049869 | 0.296131686 | 0.315358005 | 0.236230327 |
| 0.132131337 | 0.150816143 | 0.309342948 | 0.208989936 |
| 0.009948381 | 0.019018296 | 0.009265159 | 0.202279409 |
| 0.074678327 | 0.097228323 | 0.096093126 | 0.27525475  |
| 0.10551685  | 0.094901574 | 0.198719553 | 0.359190123 |
| 0.011851967 | 0.206842477 | 0.051539574 | 0.051725058 |
| 0.012752047 | 0.050609967 | 0.060438746 | 0.048880372 |
| 0.167049874 | 0.081052665 | 0.28083784  | 0.332739617 |
| 0.189676001 | 0.064621304 | 0.240099672 | 0.30302799  |
| 0.29557506  | 0.286565855 | 0.117883719 | 0.004922301 |
| 0.149854287 | 0.163984615 | 0.246674336 | 0.264658166 |
| 0.060506799 | 0.106178119 | 0.266207886 | 0.356317281 |
| 0.076308691 | 0.033992225 | 0.176552779 | 0.211465648 |
| 0.04854828  | 0.141226354 | 0.325757762 | 0.191770377 |
| 0.000137925 | 0.141551475 | 0.306424686 | 0.160497309 |
| 0.173755731 | 0.161311814 | 0.174610733 | 0.335978384 |
| 0.190464607 | 0.210066159 | 0.334812707 | 0.365772831 |
| 0.103091941 | 0.075012396 | 0.351321213 | 0.089001591 |
| 0.270390037 | 0.040733833 | 0.21999884  | 0.106145178 |
| 0.121358346 | 0.210580512 | 0.31408678  | 0.169606225 |
| 0.030521195 | 0.296001388 | 0.223401982 | 0.32431911  |
| 0.169201048 | 0.34723975  | 0.339908449 | 0.288100001 |
| 0.203229252 | 0.222670323 | 0.234644216 | 0.294310961 |
| 0.334161946 | 0.124346879 | 0.016731962 | 0.326702553 |
| 0.167951313 | 0.34087337  | 0.1080714   | 0.334224788 |
| 0.268293398 | 0.222155215 | 0.057908619 | 0.34764843  |
| 0.235069682 | 0.079346582 | 0.284244658 | 0.346604962 |
| 0.116282317 | 0.262462443 | 0.190510525 | 0.358582843 |
| 0.069928359 | 0.199145309 | 0.16988304  | 0.243001652 |
| 0.018148297 | 0.01580664  | 0.01341117  | 0.092079943 |
| 0.217392723 | 0.238037635 | 0.29984017  | 0.314257574 |
| 0.039256382 | 0.231887342 | 0.127475022 | 0.142978531 |
| 0.230190927 | 0.220788185 | 0.294042479 | 0.291561589 |
| 0.125491184 | 0.007425651 | 0.042204236 | 0.280256713 |
| 0.006242944 | 0.206740156 | 0.114934728 | 0.001652791 |
| 0.007825926 | 0.217197469 | 0.027850336 | 0.074970262 |

|             |             |             |             |
|-------------|-------------|-------------|-------------|
| 0.371626273 | 0.072370738 | 0.081013867 | 0.099634486 |
| 0.238451678 | 0.026951242 | 0.002355111 | 0.323402176 |
| 0.295061424 | 0.284293219 | 0.285954876 | 0.237683922 |
| 0.315795227 | 0.272490644 | 0.343304273 | 0.10178888  |
| 0.025186245 | 0.013531628 | 0.228161641 | 0.169123803 |
| 0.001644769 | 0.273084561 | 0.217452841 | 0.057423974 |
| 0.332191572 | 0.187024643 | 0.006048668 | 0.305798616 |
| 0.00324692  | 0.208883216 | 0.090824134 | 0.10274992  |
| 0.333521096 | 0.001533267 | 0.078940431 | 0.176894971 |
| 0.19450657  | 0.169857202 | 0.185922409 | 0.304039993 |
| 0.176353792 | 0.035476536 | 0.193339191 | 0.302851828 |
| 0.017059135 | 0.051814857 | 0.109774226 | 0.013919976 |
| 0.053995343 | 0.249140491 | 0.150436533 | 0.013099614 |
| 0.14075353  | 0.000163802 | 0.176494914 | 0.3091305   |
| 0.22200922  | 0.359398173 | 0.29636425  | 0.226042359 |
| 0.290273989 | 0.204753594 | 0.324276236 | 0.221293764 |
| 0.128348656 | 9.07E-05    | 0.002649778 | 0.346937106 |
| 0.26703688  | 0.010772823 | 0.065513869 | 0.080279254 |
| 0.041625047 | 0.028371278 | 0.013377725 | 0.200163057 |
| 0.21202319  | 0.199567575 | 0.186791714 | 0.233411044 |
| 0.120255397 | 0.137801962 | 0.112848743 | 0.023661669 |
| 0.259498741 | 0.012848097 | 0.025439994 | 0.006814692 |
| 0.31996006  | 0.030768276 | 0.207046162 | 0.291555889 |
| 0.297222297 | 0.329549425 | 0.107037276 | 0.104734282 |
| 0.323615544 | 0.021216391 | 0.140279379 | 0.024730367 |
| 0.25344035  | 0.296695573 | 0.194803846 | 0.15140891  |
| 0.333482898 | 0.262633831 | 0.006347445 | 0.312541313 |
| 0.002294626 | 0.005109107 | 0.109148603 | 0.142389913 |
| 0.094388174 | 0.246048385 | 0.138952739 | 0.096893153 |
| 0.1092658   | 0.004356035 | 1           | 0.236295905 |
| 0.20110761  | 0.214139949 | 0.286067325 | 0.129525072 |
| 0.179410584 | 0.157556679 | 0.080708174 | 0.051718481 |
| 0.117500189 | 0.150680804 | 0.070538096 | 0.003875711 |
| 0.196290772 | 0.244729862 | 0.012119902 | 0.056386651 |
| 0.300596026 | 0.334374621 | 0.016246735 | 0.005180795 |
| 0.124237037 | 0.1635696   | 0.353647739 | 0.273147246 |
| 0.27514326  | 0.335153246 | 0.19542317  | 0.082793057 |
| 0.012918813 | 0.243917902 | 0.305034776 | 0.092096382 |
| 0.305086224 | 0.013525753 | 0.25261089  | 0.323475846 |
| 0.042092256 | 0.073739845 | 0.009199197 | 0.02686597  |
| 0.313519495 | 0.077034151 | 0.117702202 | 0.040984271 |
| 0.165163398 | 0.204382551 | 0.009627748 | 0.092934301 |
| 0.201880578 | 0.249594998 | 0.065662126 | 0.083386247 |
| 0.186828407 | 0.076729204 | 0.336503923 | 0.276666618 |
| 0.041022896 | 0.034398721 | 0.053077    | 0.272738222 |
| 0.304107361 | 0.20516796  | 0.004706899 | 0.232658927 |
| 0.325685319 | 0.276309936 | 0.258035227 | 0.304788399 |
| 0.024721593 | 0.242708561 | 0.237227136 | 0.260460821 |
| 0.087498333 | 0.10723697  | 0.126313178 | 0.016087138 |
| 0.171227648 | 0.255420071 | 0.242583223 | 0.070677736 |
| 0.213784131 | 0.03008232  | 0.010911676 | 0.284894929 |
| 0.236512263 | 0.018957136 | 0.104356253 | 0.33574054  |
| 0.002784295 | 0.229864913 | 0.36043527  | 0.073513818 |
| 0.310543518 | 0.34457771  | 0.252077412 | 0.069788984 |



|             |             |             |             |
|-------------|-------------|-------------|-------------|
| 0.009947516 | 0.353393625 | 0.237577538 | 0.160325287 |
| 0.233143297 | 0.170983638 | 0.050258951 | 0.02903657  |
| 0.182196199 | 0.016815707 | 0.065658767 | 0.084485729 |
| 0.219525878 | 0.190234104 | 0.109777721 | 0.099199442 |
| 0.121411878 | 0.024400093 | 0.213683957 | 0.078691628 |
| 0.211158791 | 0.134419194 | 0.239872086 | 0.068972481 |
| 0.17118366  | 0.319848592 | 0.253059913 | 0.003516328 |
| 0.28301634  | 0.305880294 | 0.284065243 | 0.001440789 |
| 0.319065972 | 0.001192398 | 0.123689883 | 0.121373175 |
| 0.104601516 | 0.116049335 | 0.225328108 | 0.160042499 |
| 0.187814517 | 0.094471504 | 0.100895255 | 0.133894711 |
| 0.077907712 | 0.07827886  | 0.26218014  | 0.136909327 |
| 0.138049894 | 0.030593075 | 0.02689333  | 0.026090171 |
| 0.012574066 | 0.276271023 | 0.109592746 | 0.015636087 |
| 0.13484545  | 0.128219086 | 0.223178132 | 0.257464365 |
| 0.282488372 | 0.028103729 | 0.160364043 | 0.244532263 |
| 0.106026646 | 0.07232805  | 0.008140881 | 0.162327694 |
| 0.090623217 | 0.16576059  | 0.149760571 | 0.111833933 |
| 0.240041127 | 0.2133819   | 0.102725437 | 0.272507854 |
| 0.158913904 | 0.196617001 | 0.072649894 | 0.038970131 |
| 0.054149249 | 0.047455623 | 0.280062471 | 0.000177062 |
| 0.204094349 | 0.047676306 | 0.325684275 | 0.248163221 |
| 0.220881902 | 0.230037905 | 0.068248572 | 0.020743864 |
| 0.063081463 | 0.056968546 | 0.051960335 | 0.280599688 |
| 0.224934011 | 0.050834089 | 0.250498305 | 0.055749003 |
| 0.329029796 | 0.304270166 | 0.185425456 | 0.080288959 |
| 0.132834561 | 0.066576132 | 0.252046396 | 0.02129897  |
| 0.244088758 | 0.174343487 | 0.140784662 | 0.186186818 |
| 0.139651874 | 0.331654763 | 0.012236766 | 0.33946121  |
| 0.212807114 | 0.042616209 | 0.280290924 | 0.107216024 |
| 0.072667222 | 0.063797406 | 0.251563005 | 0.101851224 |
| 0.09423125  | 0.204034467 | 0.008324704 | 0.066417198 |
| 0.24024411  | 0.129840277 | 0.236143164 | 0.266744443 |
| 0.206461965 | 0.280091203 | 0.20868306  | 0.094162117 |
| 0.228445734 | 0.236545715 | 0.097616615 | 0.149911611 |
| 0.203787087 | 0.026543451 | 0.147350305 | 0.013905676 |
| 0.283612314 | 0.28810608  | 0.129996294 | 0.011824144 |
| 0.003376523 | 0.24668579  | 0.243071314 | 0.015592786 |
| 0.375080193 | 0.19755157  | 0.18565818  | 0.269281434 |
| 0.071405793 | 0.235223534 | 0.068156131 | 0.287696837 |
| 0.010146807 | 0.139400124 | 0.267329863 | 0.20767699  |
| 0.132648324 | 0.259788865 | 0.284438723 | 0.218644665 |
| 0.007495226 | 0.14505173  | 0.001582268 | 0.195181525 |
| 0.219730091 | 0.287898003 | 0.089975299 | 0.098769028 |
| 0.197656553 | 0.241381123 | 0.144456001 | 0.209773834 |
| 0.003357764 | 0.31875708  | 0.091075612 | 0.214460108 |
| 0.146118783 | 0.212364862 | 0.018001625 | 0.287863241 |
| 0.19343717  | 0.144368018 | 0.13755447  | 0.161068517 |
| 0.257501642 | 0.216766374 | 0.048301109 | 0.138908828 |
| 0.221677181 | 0.015026669 | 0.096910482 | 0.32429659  |
| 0.089215135 | 0.222913708 | 0.372884677 | 0.089386281 |
| 0.262681369 | 0.195167431 | 0.241437258 | 0.310536074 |
| 0.051239748 | 0.129743714 | 0.328920649 | 0.274605259 |
| 0.210397364 | 0.213754127 | 0.21230958  | 0.160082021 |

|             |             |              |             |
|-------------|-------------|--------------|-------------|
| 0.21708734  | 0.023087093 | 0.206318288  | 0.189305171 |
| 0.232291435 | 0.199021906 | 0.138320327  | 0.152305494 |
| 0.012154384 | 0.055877082 | 0.104147783  | 0.052574622 |
| 0.179760035 | 0.248264443 | 0.196076728  | 0.226271273 |
| 0.055978218 | 0.009153945 | 0.269003812  | 0.058174816 |
| 0.099594083 | 0.276045787 | 0.111863358  | 0.224692873 |
| 0.06732896  | 0.179189909 | 0.115089289  | 0.00050502  |
| 0.324820978 | 0.060402144 | 0.154154792  | 0.155624627 |
| 0.178902594 | 0.008970934 | 0.2393691    | 0.361457897 |
| 0.146179748 | 0.127970286 | 0.162028305  | 0.259693469 |
| 0.216550241 | 0.18500937  | 0.193479682  | 0.192125452 |
| 0.235932236 | 0.139959025 | 0.176398494  | 0.195255273 |
| 0.213402107 | 0.07675254  |              |             |
| MRPL14      | 0.012582441 | 0.199536025  | 0.007062327 |
| 0.048790387 | 0.306325333 | 0.08973641   | 0.01810465  |
| 0.037787126 | 0.168609897 | 0.0711101143 | 0.18381861  |
| 0.004600446 | 0.175180656 | 0.27650926   | 0.01793588  |
| 0.304032345 | 0.015351574 | 0.042408365  | 0.039237563 |
| 0.076486565 | 0.286054881 | 0.152844386  | 0.096371329 |
| 0.260226315 | 0.068754999 | 0.124902836  | 0.240666867 |
| 0.274343416 | 0.108882378 | 0.248132167  | 0.052073453 |
| 0.23702407  | 0.328454442 | 0.19828301   | 0.00250023  |
| 0.170719713 | 0.057314722 | 0.220646905  | 0.148348789 |
| 0.187334818 | 0.173978698 | 0.074701978  | 0.106069913 |
| 0.128429487 | 0.006108305 | 0.043458732  | 0.3045637   |
| 0.142618143 | 0.100838106 | 0.010703878  | 0.22629241  |
| 0.129147586 | 0.137602818 | 0.160081096  | 0.00120434  |
| 0.214251642 | 0.15588345  | 0.206297613  | 0.245571328 |
| 0.10029515  | 0.056350916 | 0.143046094  | 0.077509331 |
| 0.232328932 | 0.285190047 | 0.159783746  | 0.111165747 |
| 0.27107766  | 0.233343144 | 0.282690905  | 0.058629482 |
| 0.123489171 | 0.005123147 | 0.078960922  | 0.02122787  |
| 0.145563344 | 0.114744238 | 0.210199237  | 0.22535005  |
| 0.193410788 | 0.268134644 | 0.128574112  | 0.231785034 |
| 0.180766176 | 0.334349798 | 0.196512897  | 0.247886674 |
| 0.249949611 | 0.027964592 | 0.263372489  | 0.293650327 |
| 0.009551061 | 0.140195113 | 0.245577298  | 0.037075028 |
| 0.205798671 | 0.176893758 | 0.122817861  | 0.202931373 |
| 0.356239023 | 0.304447789 | 0.233880132  | 0.163354971 |
| 0.204072705 | 0.016488002 | 0.201030153  | 0.349978743 |
| 0.13746987  | 0.019563696 | 0.208746903  | 0.331427081 |
| 0.238496965 | 0.275110171 | 0.237670854  | 0.256697214 |
| 0.292508418 | 0.277070006 | 0.231986309  | 0.225007134 |
| 0.045776295 | 0.272733579 | 0.06643608   | 0.015609611 |
| 0.010620902 | 0.036048831 | 0.169028527  | 0.190026688 |
| 0.292494068 | 0.165625167 | 0.05900127   | 0.174877192 |
| 0.365631868 | 0.198163337 | 0.274126063  | 0.265135966 |
| 0.008853307 | 0.211852907 | 0.279629032  | 0.05941829  |
| 0.246878574 | 0.045619944 | 0.27715432   | 0.236816851 |
| 0.208989484 | 0.329391809 | 0.031054183  | 0.232837887 |
| 0.073559804 | 0.299936448 | 0.220435039  | 0.078156604 |
| 0.262556571 | 0.221103325 | 0.328486749  | 0.351966349 |
| 0.224213145 | 0.109951111 | 0.039270958  | 0.236889333 |
| 0.301937868 | 0.030314739 | 0.307173291  | 0.329379116 |

|             |             |             |             |
|-------------|-------------|-------------|-------------|
| 0.249362952 | 0.331281325 | 0.346636316 | 0.307547951 |
| 0.245769227 | 0.02265016  | 0.041015448 | 0.271718334 |
| 0.251395482 | 0.235056497 | 0.077796062 | 0.228259391 |
| 0.303362874 | 0.10646458  | 0.273774573 | 0.123447533 |
| 0.304610828 | 0.277994546 | 0.288030199 | 0.231195445 |
| 0.119730428 | 0.152531502 | 0.279580221 | 0.189969771 |
| 0.014208074 | 0.02168055  | 0.010472667 | 0.197817694 |
| 0.064802016 | 0.1129626   | 0.095904941 | 0.260306602 |
| 0.11826458  | 0.085242193 | 0.175800508 | 0.357176526 |
| 0.012693003 | 0.183754595 | 0.055848862 | 0.058575283 |
| 0.018629077 | 0.05394729  | 0.075446194 | 0.053482339 |
| 0.180869958 | 0.079896519 | 0.257508482 | 0.310837519 |
| 0.175810216 | 0.06539101  | 0.225157891 | 0.296581395 |
| 0.295752664 | 0.278244454 | 0.120284003 | 0.00654553  |
| 0.17592484  | 0.135318961 | 0.236907724 | 0.234994122 |
| 0.060469789 | 0.119701911 | 0.269101572 | 0.3487208   |
| 0.077559418 | 0.032401983 | 0.16968879  | 0.204299726 |
| 0.049007742 | 0.143781524 | 0.320502477 | 0.179203788 |
| 0.000196053 | 0.149069703 | 0.285119599 | 0.17817553  |
| 0.170136673 | 0.153649884 | 0.163089546 | 0.317161713 |
| 0.194488075 | 0.207459866 | 0.303700155 | 0.345847195 |
| 0.096576399 | 0.073117695 | 0.328579198 | 0.101394033 |
| 0.247285705 | 0.065955616 | 0.233467863 | 0.089111394 |
| 0.125887724 | 0.225743268 | 0.303147138 | 0.184822634 |
| 0.031910767 | 0.272689045 | 0.215891421 | 0.297933967 |
| 0.171042028 | 0.3260884   | 0.319302434 | 0.273820392 |
| 0.188794907 | 0.203681925 | 0.206199574 | 0.285060206 |
| 0.313163097 | 0.146421724 | 0.01723663  | 0.293111301 |
| 0.153806723 | 0.339505381 | 0.14924997  | 0.319218847 |
| 0.25694946  | 0.19859184  | 0.068604885 | 0.344614653 |
| 0.23761965  | 0.084914844 | 0.271377256 | 0.324192301 |
| 0.101609558 | 0.257988469 | 0.195318534 | 0.357566835 |
| 0.077487876 | 0.202095864 | 0.169609612 | 0.211517296 |
| 0.014209499 | 0.01874627  | 0.016258317 | 0.107244096 |
| 0.230136065 | 0.207429812 | 0.289643479 | 0.29668958  |
| 0.04717193  | 0.220197645 | 0.127474662 | 0.157893383 |
| 0.224824612 | 0.2081632   | 0.267094702 | 0.280546273 |
| 0.131082795 | 0.009777436 | 0.04864989  | 0.266565425 |
| 0.007037981 | 0.212978736 | 0.109404409 | 0.001678045 |
| 0.01005679  | 0.191130758 | 0.02976292  | 0.077956057 |
| 0.347358738 | 0.074499746 | 0.087975819 | 0.090623367 |
| 0.246087114 | 0.03109008  | 0.00319434  | 0.295853728 |
| 0.266870914 | 0.257768106 | 0.259452025 | 0.212969115 |
| 0.291721468 | 0.239414046 | 0.333988004 | 0.093127824 |
| 0.033998519 | 0.015898231 | 0.245536418 | 0.188079148 |
| 0.001449335 | 0.271238944 | 0.21095026  | 0.064397546 |
| 0.314626214 | 0.190722119 | 0.007984764 | 0.283364588 |
| 0.004340124 | 0.204236088 | 0.08571762  | 0.113039592 |
| 0.32750857  | 0.002230367 | 0.071280614 | 0.189885564 |
| 0.180348122 | 0.163831085 | 0.177685324 | 0.281708976 |
| 0.184336525 | 0.034467332 | 0.205873062 | 0.287968088 |
| 0.022342593 | 0.07135546  | 0.094540496 | 0.011714589 |
| 0.051117703 | 0.227669955 | 0.146976643 | 0.01684345  |
| 0.149456026 | 0.000590712 | 0.171533614 | 0.287422894 |

|             |             |             |             |
|-------------|-------------|-------------|-------------|
| 0.199687778 | 0.336846623 | 0.276047106 | 0.224990601 |
| 0.270022086 | 0.15829834  | 0.296697758 | 0.20222977  |
| 0.11175888  | 0.000303938 | 0.002706928 | 0.324130748 |
| 0.267473086 | 0.010923173 | 0.073755407 | 0.073580819 |
| 0.047434371 | 0.027478773 | 0.01657439  | 0.216656981 |
| 0.192608937 | 0.215659987 | 0.198315472 | 0.216872143 |
| 0.133226911 | 0.144019844 | 0.099651858 | 0.025621022 |
| 0.242200176 | 0.01675073  | 0.027723052 | 0.006713482 |
| 0.307816008 | 0.033040334 | 0.191579093 | 0.264604275 |
| 0.287509079 | 0.330401658 | 0.091074312 | 0.088648754 |
| 0.292123129 | 0.019786654 | 0.127371036 | 0.023866174 |
| 0.230820994 | 0.300306411 | 0.205306109 | 0.154147728 |
| 0.320612855 | 0.253526193 | 0.008600228 | 0.309474127 |
| 0.002746193 | 0.004270342 | 0.101537872 | 0.148385012 |
| 0.07618656  | 0.235185673 | 0.147518773 | 0.091528752 |
| 0.102113391 | 0.00570451  | 0.236295905 | 1           |
| 0.217340373 | 0.219392248 | 0.296168728 | 0.127560807 |
| 0.186204725 | 0.197935948 | 0.0898107   | 0.061613828 |
| 0.110937137 | 0.145919129 | 0.072244041 | 0.005536214 |
| 0.173170548 | 0.239033215 | 0.015078023 | 0.061933736 |
| 0.287654853 | 0.312448362 | 0.021518223 | 0.008020959 |
| 0.131924939 | 0.172718837 | 0.333892645 | 0.24702736  |
| 0.253543173 | 0.318685826 | 0.193041891 | 0.103589525 |
| 0.015856911 | 0.242199337 | 0.316287287 | 0.111484003 |
| 0.280990456 | 0.014769905 | 0.227762719 | 0.306841198 |
| 0.049093196 | 0.083471087 | 0.013293429 | 0.033057938 |
| 0.287482663 | 0.085344442 | 0.135055797 | 0.042916912 |
| 0.171840017 | 0.222670253 | 0.013119283 | 0.101337746 |
| 0.209871855 | 0.260938832 | 0.077231265 | 0.07624194  |
| 0.175767297 | 0.059992807 | 0.326851653 | 0.269085312 |
| 0.043311002 | 0.038196418 | 0.053602418 | 0.256500537 |
| 0.276818866 | 0.172045531 | 0.00545394  | 0.207795323 |
| 0.304040081 | 0.256329042 | 0.234156433 | 0.307205409 |
| 0.028676846 | 0.238235194 | 0.215744407 | 0.273938591 |
| 0.096630754 | 0.095998434 | 0.133379148 | 0.020004325 |
| 0.169717955 | 0.236859475 | 0.232570093 | 0.079913244 |
| 0.18395607  | 0.030016603 | 0.011735231 | 0.253984201 |
| 0.252542494 | 0.021948983 | 0.083052763 | 0.304270239 |
| 0.004521899 | 0.220168541 | 0.337074238 | 0.07713131  |
| 0.288904855 | 0.330057533 | 0.243992334 | 0.066551168 |
| 0.019026808 | 0.3372908   | 0.238059586 | 0.162543062 |
| 0.219819127 | 0.16334623  | 0.04536209  | 0.037666109 |
| 0.188314564 | 0.017339057 | 0.077983072 | 0.070332781 |
| 0.193008915 | 0.175854777 | 0.119843921 | 0.099612846 |
| 0.138713436 | 0.024630436 | 0.196786636 | 0.085492002 |
| 0.199766332 | 0.145652742 | 0.24106114  | 0.054968084 |
| 0.188001358 | 0.302751533 | 0.245291871 | 0.004580781 |
| 0.259145234 | 0.282662278 | 0.266097949 | 0.002380264 |
| 0.308427067 | 0.002141159 | 0.138839024 | 0.137170646 |
| 0.116074693 | 0.127322006 | 0.240661521 | 0.178084082 |
| 0.189632482 | 0.105237984 | 0.111213068 | 0.144845322 |
| 0.089463916 | 0.0871339   | 0.262890595 | 0.12834966  |
| 0.150924756 | 0.033990048 | 0.028326596 | 0.026328436 |
| 0.016165765 | 0.246883631 | 0.112916005 | 0.016185761 |

|             |             |             |             |
|-------------|-------------|-------------|-------------|
| 0.142904073 | 0.130847922 | 0.22852163  | 0.232073679 |
| 0.274350313 | 0.026712451 | 0.154152065 | 0.222845923 |
| 0.1021587   | 0.076764453 | 0.010392429 | 0.154555475 |
| 0.10050073  | 0.175273002 | 0.132303797 | 0.107812324 |
| 0.217773375 | 0.207201517 | 0.106299171 | 0.253603379 |
| 0.171757665 | 0.181472041 | 0.061871445 | 0.049216002 |
| 0.061455524 | 0.050439809 | 0.289575813 | 0.000172293 |
| 0.197750657 | 0.049613811 | 0.302962121 | 0.227178693 |
| 0.198450097 | 0.224501023 | 0.055981928 | 0.025507027 |
| 0.05353502  | 0.056151733 | 0.059688337 | 0.259228368 |
| 0.203190872 | 0.054833051 | 0.273036695 | 0.049086839 |
| 0.314269251 | 0.273916069 | 0.179114999 | 0.083384542 |
| 0.138188546 | 0.067748582 | 0.234259132 | 0.022802932 |
| 0.216751588 | 0.199002789 | 0.120519118 | 0.194613647 |
| 0.159806494 | 0.305173244 | 0.014821059 | 0.314115174 |
| 0.217558495 | 0.043721451 | 0.26762729  | 0.097908189 |
| 0.076599566 | 0.073826509 | 0.233776415 | 0.089705829 |
| 0.100903932 | 0.178067226 | 0.009236567 | 0.089415249 |
| 0.245717113 | 0.1129858   | 0.212790811 | 0.25280965  |
| 0.21115645  | 0.285018413 | 0.175149486 | 0.102166359 |
| 0.205030087 | 0.216078112 | 0.111134132 | 0.161148842 |
| 0.201876958 | 0.031953872 | 0.129635307 | 0.018083508 |
| 0.26862174  | 0.254598705 | 0.111669089 | 0.015491782 |
| 0.005031439 | 0.245222948 | 0.237282285 | 0.016751784 |
| 0.357351458 | 0.192249562 | 0.161444766 | 0.251087371 |
| 0.073529128 | 0.218714631 | 0.08446823  | 0.286334608 |
| 0.012180854 | 0.143231749 | 0.232479905 | 0.178099439 |
| 0.15051651  | 0.262767789 | 0.293463098 | 0.222689536 |
| 0.010738299 | 0.152341732 | 0.00486361  | 0.188816738 |
| 0.200769834 | 0.278458395 | 0.091677092 | 0.079215688 |
| 0.209195065 | 0.223333468 | 0.145379872 | 0.180938893 |
| 0.00472521  | 0.317815753 | 0.100971354 | 0.198517903 |
| 0.14837837  | 0.198784926 | 0.024685026 | 0.2773042   |
| 0.178381832 | 0.157415972 | 0.139858192 | 0.165200284 |
| 0.23310016  | 0.193495855 | 0.045951716 | 0.14598458  |
| 0.194138198 | 0.017414173 | 0.081454025 | 0.301278287 |
| 0.100329447 | 0.239234641 | 0.358879707 | 0.104142128 |
| 0.248240834 | 0.184198373 | 0.21002069  | 0.284494081 |
| 0.068767719 | 0.145491049 | 0.306420488 | 0.263951856 |
| 0.223205762 | 0.225551855 | 0.21707496  | 0.173510428 |
| 0.196819566 | 0.025544332 | 0.224363486 | 0.192751278 |
| 0.24413499  | 0.197038519 | 0.117301117 | 0.169600041 |
| 0.014566666 | 0.06525815  | 0.094650255 | 0.058287532 |
| 0.195051185 | 0.245037841 | 0.204408258 | 0.230197975 |
| 0.066317899 | 0.012409092 | 0.266385756 | 0.071282948 |
| 0.090423537 | 0.269042555 | 0.115327202 | 0.230426905 |
| 0.069740765 | 0.174924993 | 0.11076676  | 0.000236525 |
| 0.304618779 | 0.069569933 | 0.136874481 | 0.168265118 |
| 0.167354225 | 0.011784425 | 0.220453392 | 0.339532468 |
| 0.140062981 | 0.112675457 | 0.149009488 | 0.234482248 |
| 0.227734577 | 0.152319783 | 0.169404483 | 0.179578467 |
| 0.229533677 | 0.123211687 | 0.15423648  | 0.177702871 |
| 0.195266541 | 0.075393791 |             |             |
| MRPL18      | 0.111069136 | 0.290765712 | 0.071158788 |

|             |             |             |             |
|-------------|-------------|-------------|-------------|
| 0.21375554  | 0.261811783 | 0.191526538 | 0.133375781 |
| 0.179808515 | 0.241546992 | 0.111256044 | 0.249294934 |
| 0.070553997 | 0.076040786 | 0.368292637 | 0.128138416 |
| 0.24905454  | 0.12467916  | 0.190040029 | 0.071391858 |
| 0.186841534 | 0.270589937 | 0.191738968 | 0.170899425 |
| 0.25452282  | 0.219611725 | 0.195398217 | 0.186097648 |
| 0.361900873 | 0.102994493 | 0.252851181 | 0.08659369  |
| 0.395020141 | 0.2532377   | 0.178778445 | 0.052985332 |
| 0.21393869  | 0.025396642 | 0.389290573 | 0.299521704 |
| 0.166889277 | 0.337734482 | 0.126112072 | 0.279774843 |
| 0.173688832 | 0.082675882 | 0.060091994 | 0.254182812 |
| 0.193342154 | 0.227033127 | 0.075554154 | 0.262415108 |
| 0.200907356 | 0.245516155 | 0.205795736 | 0.004739852 |
| 0.173470457 | 0.051027143 | 0.128854049 | 0.373272908 |
| 0.24268662  | 0.217647563 | 0.129039172 | 0.168272595 |
| 0.204561894 | 0.269908239 | 0.255564696 | 0.173419757 |
| 0.388442635 | 0.147247853 | 0.262467659 | 0.180484765 |
| 0.217965381 | 0.062858518 | 0.229689239 | 0.08787883  |
| 0.211210115 | 0.256476447 | 0.235283503 | 0.216497844 |
| 0.286549573 | 0.422190464 | 0.239439119 | 0.367339682 |
| 0.118648997 | 0.229417003 | 0.249383388 | 0.32878345  |
| 0.277161762 | 0.136854385 | 0.319817398 | 0.429733763 |
| 0.07973257  | 0.153380225 | 0.273865076 | 0.129691859 |
| 0.300052633 | 0.155614662 | 0.154146169 | 0.157069217 |
| 0.279495278 | 0.25607746  | 0.367005594 | 0.291280656 |
| 0.218285054 | 0.092953307 | 0.353477272 | 0.224391428 |
| 0.254512001 | 0.119532695 | 0.271875076 | 0.330586158 |
| 0.265541969 | 0.366432258 | 0.287408005 | 0.320161957 |
| 0.239371073 | 0.38778436  | 0.300728127 | 0.316690816 |
| 0.044349578 | 0.387822823 | 0.214891226 | 0.125712755 |
| 0.086859202 | 0.176191296 | 0.195114561 | 0.322865508 |
| 0.350912678 | 0.248227852 | 0.218211152 | 0.297556279 |
| 0.38321359  | 0.335042434 | 0.382091847 | 0.330892594 |
| 0.100603709 | 0.164344599 | 0.24639905  | 0.181087754 |
| 0.280613258 | 0.157085958 | 0.219524311 | 0.395307404 |
| 0.360239298 | 0.346051625 | 0.1552188   | 0.407161384 |
| 0.190689409 | 0.435895237 | 0.303360331 | 0.247269001 |
| 0.412937669 | 0.377380054 | 0.430870253 | 0.281265106 |
| 0.37349198  | 0.22777625  | 0.048605304 | 0.318133954 |
| 0.424180634 | 0.028513287 | 0.341202643 | 0.374449242 |
| 0.369315373 | 0.340408103 | 0.429477874 | 0.384158472 |
| 0.361419881 | 0.119911619 | 0.019859913 | 0.292763749 |
| 0.390403251 | 0.361858746 | 0.20474515  | 0.205995804 |
| 0.241646954 | 0.203052568 | 0.286242871 | 0.180719207 |
| 0.448099095 | 0.348215395 | 0.346401512 | 0.289233355 |
| 0.170770833 | 0.31796725  | 0.192116131 | 0.345261752 |
| 0.12447761  | 0.137965412 | 0.071840392 | 0.283215462 |
| 0.137701417 | 0.257413967 | 0.20332779  | 0.222361163 |
| 0.249694996 | 0.176680231 | 0.159495981 | 0.285699619 |
| 0.081604338 | 0.194149908 | 0.20083847  | 0.18260843  |
| 0.14820106  | 0.193349624 | 0.239629453 | 0.220303289 |
| 0.269847437 | 0.237373037 | 0.250856134 | 0.382751563 |
| 0.219760734 | 0.198634469 | 0.266013316 | 0.413840833 |
| 0.432107433 | 0.2351657   | 0.251758731 | 0.061917359 |

|             |             |             |             |
|-------------|-------------|-------------|-------------|
| 0.253583293 | 0.13184407  | 0.135742224 | 0.192149893 |
| 0.204681335 | 0.255038295 | 0.248273363 | 0.318436267 |
| 0.191487012 | 0.128814259 | 0.23242442  | 0.378435981 |
| 0.157753026 | 0.249789572 | 0.381459151 | 0.188112484 |
| 0.01952276  | 0.266313893 | 0.333560184 | 0.225777172 |
| 0.24148095  | 0.133840691 | 0.149006657 | 0.378690853 |
| 0.170189935 | 0.211516108 | 0.360529234 | 0.307709555 |
| 0.165575552 | 0.203673971 | 0.419142963 | 0.038852423 |
| 0.207621563 | 0.145036441 | 0.320311733 | 0.125572709 |
| 0.256526064 | 0.313749458 | 0.230673054 | 0.260508563 |
| 0.12358991  | 0.392058547 | 0.314168286 | 0.389190859 |
| 0.210458256 | 0.425962993 | 0.350718767 | 0.370891034 |
| 0.263649558 | 0.179834791 | 0.10407761  | 0.340900181 |
| 0.366042396 | 0.181718299 | 0.092775615 | 0.284901072 |
| 0.181988182 | 0.282465194 | 0.207626362 | 0.420264657 |
| 0.421499154 | 0.323825776 | 0.229957883 | 0.346360271 |
| 0.355393179 | 0.226454136 | 0.327818615 | 0.428354308 |
| 0.139575846 | 0.241030252 | 0.261365787 | 0.387789672 |
| 0.213971179 | 0.238711868 | 0.302801993 | 0.117294241 |
| 0.005100609 | 0.107177574 | 0.107867277 | 0.262589146 |
| 0.196139079 | 0.187037503 | 0.281482403 | 0.39928817  |
| 0.199659004 | 0.342121312 | 0.230020912 | 0.283466399 |
| 0.348272773 | 0.212102014 | 0.205127531 | 0.239516833 |
| 0.263029062 | 0.079665947 | 0.21172169  | 0.428918728 |
| 0.053304496 | 0.194033216 | 0.19447838  | 0.012870578 |
| 0.100983705 | 0.242198512 | 0.135864345 | 0.247692541 |
| 0.391337462 | 0.234187571 | 0.214432666 | 0.147714885 |
| 0.302405007 | 0.157210318 | 0.020430214 | 0.371930227 |
| 0.361757436 | 0.348434756 | 0.355192012 | 0.335886518 |
| 0.344347976 | 0.26409562  | 0.341583567 | 0.178024112 |
| 0.187441923 | 0.113815054 | 0.230548414 | 0.290922417 |
| 0.007968942 | 0.334041921 | 0.229741257 | 0.205227056 |
| 0.29234395  | 0.261663223 | 0.092919905 | 0.218054408 |
| 0.065796108 | 0.134139254 | 0.196811438 | 0.236408761 |
| 0.317398944 | 0.049743095 | 0.148285084 | 0.216839886 |
| 0.324009655 | 0.30605965  | 0.188154674 | 0.404143135 |
| 0.266568501 | 0.12078692  | 0.29317166  | 0.303448874 |
| 0.161145607 | 0.076129604 | 0.185639558 | 0.019785513 |
| 0.090733361 | 0.346766309 | 0.19705254  | 0.136843659 |
| 0.273835886 | 0.026597079 | 0.317564273 | 0.411256212 |
| 0.322818225 | 0.411878824 | 0.389494306 | 0.203065656 |
| 0.392691156 | 0.055343547 | 0.393176526 | 0.300462409 |
| 0.159753639 | 0.004659374 | 0.022572745 | 0.373767869 |
| 0.24944608  | 0.070240486 | 0.217161293 | 0.169126998 |
| 0.230983075 | 0.139250822 | 0.123875175 | 0.243050727 |
| 0.21971546  | 0.261725212 | 0.191644207 | 0.343440434 |
| 0.289824994 | 0.255178242 | 0.168695492 | 0.114878509 |
| 0.215130504 | 0.145374408 | 0.115096731 | 0.029847531 |
| 0.300066    | 0.135420932 | 0.353339293 | 0.375358668 |
| 0.422886198 | 0.303529649 | 0.124446768 | 0.157522448 |
| 0.332363451 | 0.090121965 | 0.157903141 | 0.098933854 |
| 0.346295021 | 0.281067183 | 0.336139445 | 0.314016507 |
| 0.429221459 | 0.390456029 | 0.097330662 | 0.345209797 |
| 0.044291905 | 0.008142584 | 0.1883804   | 0.24903725  |

|             |             |             |             |
|-------------|-------------|-------------|-------------|
| 0.055726244 | 0.238683323 | 0.306045662 | 0.179749347 |
| 0.205504816 | 0.074849641 | 0.20110761  | 0.217340373 |
| 1           | 0.266561855 | 0.248261566 | 0.229173393 |
| 0.264545731 | 0.243910335 | 0.248112895 | 0.207769529 |
| 0.149691402 | 0.28731359  | 0.226391634 | 0.075754946 |
| 0.193647925 | 0.220618253 | 0.12448532  | 0.188491296 |
| 0.366723323 | 0.380803244 | 0.145446445 | 0.071217795 |
| 0.281486018 | 0.236984046 | 0.395895606 | 0.351380201 |
| 0.400669935 | 0.442966598 | 0.366357459 | 0.242176872 |
| 0.132329589 | 0.27384511  | 0.24366508  | 0.235913825 |
| 0.383525203 | 0.077865594 | 0.349634964 | 0.201433886 |
| 0.16726024  | 0.278174402 | 0.11672846  | 0.160190858 |
| 0.204976601 | 0.212701163 | 0.276783297 | 0.14399369  |
| 0.281173282 | 0.193705757 | 0.117062996 | 0.251106327 |
| 0.314632357 | 0.188222966 | 0.215657661 | 0.18488883  |
| 0.275834285 | 0.083369275 | 0.299068126 | 0.422544785 |
| 0.158376019 | 0.153625836 | 0.18202698  | 0.275067918 |
| 0.312622272 | 0.157742664 | 0.053714902 | 0.298504976 |
| 0.386200141 | 0.247902014 | 0.366215616 | 0.382904017 |
| 0.125216052 | 0.237617409 | 0.188521732 | 0.264516627 |
| 0.2189829   | 0.190586702 | 0.23954376  | 0.119038675 |
| 0.308380315 | 0.392334356 | 0.329495531 | 0.251262379 |
| 0.182781229 | 0.104179767 | 0.070077189 | 0.310655529 |
| 0.228250454 | 0.148756898 | 0.131602769 | 0.306017631 |
| 0.015172242 | 0.123719906 | 0.393604829 | 0.224516016 |
| 0.4170603   | 0.398705112 | 0.397000748 | 0.179395963 |
| 0.006853727 | 0.269061219 | 0.269004752 | 0.245016077 |
| 0.314058639 | 0.278983806 | 0.112435176 | 0.201088332 |
| 0.336942537 | 0.090891345 | 0.257591243 | 0.16004256  |
| 0.153817396 | 0.220276834 | 0.260820294 | 0.201824313 |
| 0.276444399 | 0.094518025 | 0.17330685  | 0.242157251 |
| 0.144733814 | 0.296356297 | 0.35859849  | 0.099520791 |
| 0.160271791 | 0.362886218 | 0.314254111 | 0.071521187 |
| 0.201672389 | 0.340616095 | 0.351160121 | 0.017485616 |
| 0.301131327 | 0.043241428 | 0.264423652 | 0.281524991 |
| 0.275387106 | 0.256992944 | 0.274161203 | 0.279628538 |
| 0.239248119 | 0.271352207 | 0.270621334 | 0.265075483 |
| 0.260598533 | 0.220863653 | 0.239990766 | 0.224137152 |
| 0.260081345 | 0.19479675  | 0.132504928 | 0.129568836 |
| 0.125102118 | 0.321864616 | 0.28301773  | 0.092777193 |
| 0.249014887 | 0.213956597 | 0.384409094 | 0.345458471 |
| 0.378329057 | 0.116810358 | 0.23481638  | 0.315529779 |
| 0.096058768 | 0.163386968 | 0.089722653 | 0.216507865 |
| 0.232616581 | 0.230969466 | 0.172431422 | 0.191301678 |
| 0.244628799 | 0.382554302 | 0.266261062 | 0.374058004 |
| 0.255974535 | 0.197413779 | 0.118994964 | 0.210385485 |
| 0.235733288 | 0.164865443 | 0.260864645 | 0.01710138  |
| 0.268174373 | 0.183815257 | 0.353372691 | 0.367185803 |
| 0.161340719 | 0.362455197 | 0.124605346 | 0.168277117 |
| 0.10250409  | 0.18106943  | 0.190654999 | 0.276235613 |
| 0.131468298 | 0.221996794 | 0.281009097 | 0.14860754  |
| 0.309152391 | 0.266511526 | 0.226517136 | 0.204792233 |
| 0.234587919 | 0.180557357 | 0.370784015 | 0.129880455 |
| 0.196954942 | 0.249730509 | 0.152101488 | 0.290556806 |



|             |             |             |             |
|-------------|-------------|-------------|-------------|
| 0.279706197 | 0.384782061 | 0.103907285 | 0.390475026 |
| 0.261262566 | 0.158475091 | 0.428949909 | 0.18556062  |
| 0.197734569 | 0.205826202 | 0.144008649 | 0.168127669 |
| 0.247071277 | 0.179686515 | 0.005956458 | 0.079444901 |
| 0.334500445 | 0.164367273 | 0.259862513 | 0.284641888 |
| 0.2493367   | 0.352699954 | 0.097325623 | 0.212394842 |
| 0.331523    | 0.368846061 | 0.268929926 | 0.305944363 |
| 0.295791227 | 0.18557723  | 0.192532489 | 0.014518603 |
| 0.23590856  | 0.198223682 | 0.161393534 | 0.123341936 |
| 0.073042596 | 0.168898663 | 0.233466694 | 0.080364515 |
| 0.395946115 | 0.123595871 | 0.18058186  | 0.269736224 |
| 0.18937807  | 0.378215769 | 0.23218372  | 0.317668818 |
| 0.079227155 | 0.248226479 | 0.197841046 | 0.183719531 |
| 0.273518062 | 0.242662153 | 0.350801444 | 0.207823763 |
| 0.112491603 | 0.27200203  | 0.019285907 | 0.374999311 |
| 0.346993145 | 0.2270498   | 0.243733375 | 0.10411807  |
| 0.310527361 | 0.315870277 | 0.214810856 | 0.177177431 |
| 0.058656799 | 0.245838036 | 0.22509317  | 0.313676255 |
| 0.146649755 | 0.207684029 | 0.156971179 | 0.224660517 |
| 0.347185905 | 0.228236008 | 0.274977931 | 0.194841104 |
| 0.34705308  | 0.272086912 | 0.150746549 | 0.211807806 |
| 0.197256202 | 0.095105112 | 0.145481092 | 0.412132768 |
| 0.259137812 | 0.223470739 | 0.370811092 | 0.293260666 |
| 0.201901631 | 0.297627439 | 0.185282563 | 0.3923751   |
| 0.201487733 | 0.273540608 | 0.319928503 | 0.357256522 |
| 0.336355851 | 0.213394551 | 0.201883524 | 0.274444193 |
| 0.327597157 | 0.160573843 | 0.217987924 | 0.304038924 |
| 0.202702699 | 0.273131488 | 0.148330325 | 0.252436292 |
| 0.108716844 | 0.198210549 | 0.192321807 | 0.182702464 |
| 0.273137188 | 0.269587318 | 0.271662239 | 0.38755531  |
| 0.211624798 | 0.103759822 | 0.414767717 | 0.036710625 |
| 0.178868903 | 0.27933627  | 0.229185965 | 0.243656472 |
| 0.221063314 | 0.225738794 | 0.19139787  | 0.008079043 |
| 0.346632863 | 0.089544055 | 0.207211013 | 0.278037746 |
| 0.173370283 | 0.109243459 | 0.357890513 | 0.413001065 |
| 0.22479214  | 0.147400861 | 0.159075088 | 0.348750124 |
| 0.164532736 | 0.142522825 | 0.176684874 | 0.224643707 |
| 0.17798943  | 0.155949032 | 0.17588802  | 0.196110578 |
| 0.280064176 | 0.198395711 |             |             |
| MRPL20      | 0.054812974 | 0.333040735 | 0.033078263 |
| 0.112285875 | 0.252019174 | 0.174868168 | 0.060899432 |
| 0.107312235 | 0.26915621  | 0.130202219 | 0.228031234 |
| 0.023880669 | 0.089490593 | 0.41965345  | 0.05899619  |
| 0.303645988 | 0.049075445 | 0.100871733 | 0.063658715 |
| 0.132373582 | 0.245468019 | 0.201648558 | 0.174281245 |
| 0.222521556 | 0.171964505 | 0.206797868 | 0.22693982  |
| 0.420723414 | 0.131764469 | 0.303586544 | 0.086708821 |
| 0.395664274 | 0.281638463 | 0.199851281 | 0.015207296 |
| 0.219262548 | 0.021914841 | 0.394090635 | 0.222226484 |
| 0.130388025 | 0.322989596 | 0.13224488  | 0.187086444 |
| 0.17906985  | 0.03278458  | 0.077198397 | 0.32524518  |
| 0.203958439 | 0.17235038  | 0.038788098 | 0.301312243 |
| 0.205276506 | 0.249568177 | 0.260106261 | 0.00440544  |
| 0.195057521 | 0.075584769 | 0.165318169 | 0.413483107 |

|             |             |             |             |
|-------------|-------------|-------------|-------------|
| 0.184124527 | 0.115942643 | 0.167014838 | 0.13941884  |
| 0.268206902 | 0.318713999 | 0.222888938 | 0.194804563 |
| 0.435787381 | 0.169196209 | 0.330079144 | 0.121037454 |
| 0.207479925 | 0.026101721 | 0.159489961 | 0.058770094 |
| 0.213167803 | 0.160153329 | 0.219989331 | 0.21363054  |
| 0.335932055 | 0.451709603 | 0.196557797 | 0.406757875 |
| 0.128094155 | 0.270242077 | 0.209739559 | 0.306357566 |
| 0.319134826 | 0.076204474 | 0.353596085 | 0.468506681 |
| 0.038756774 | 0.205307927 | 0.334069046 | 0.099653125 |
| 0.336108574 | 0.172566873 | 0.178790405 | 0.157485315 |
| 0.321111953 | 0.275394694 | 0.401486499 | 0.269749809 |
| 0.199568534 | 0.053624021 | 0.381934515 | 0.260200063 |
| 0.208450447 | 0.057013229 | 0.221185965 | 0.409667793 |
| 0.305483968 | 0.422748191 | 0.353393271 | 0.351760037 |
| 0.277851984 | 0.432883573 | 0.320714542 | 0.354981811 |
| 0.05921472  | 0.441509292 | 0.12614629  | 0.052242862 |
| 0.046738861 | 0.087610442 | 0.186441328 | 0.290705877 |
| 0.406062962 | 0.253498928 | 0.145320566 | 0.204915968 |
| 0.446819339 | 0.371591252 | 0.44115433  | 0.384841797 |
| 0.039768125 | 0.182047633 | 0.267775046 | 0.140411054 |
| 0.326006823 | 0.09587623  | 0.212028595 | 0.425734826 |
| 0.35672146  | 0.408257006 | 0.096452905 | 0.422593125 |
| 0.14653363  | 0.467416668 | 0.358416793 | 0.141293382 |
| 0.442269933 | 0.403685312 | 0.473290421 | 0.343120723 |
| 0.393744921 | 0.180778187 | 0.056932193 | 0.349769712 |
| 0.452621517 | 0.021847555 | 0.415003703 | 0.449081612 |
| 0.41704622  | 0.418015712 | 0.485790252 | 0.444213778 |
| 0.413851361 | 0.062324215 | 0.030495157 | 0.292540411 |
| 0.43149978  | 0.36406318  | 0.13040655  | 0.250825441 |
| 0.293754723 | 0.188485735 | 0.345459259 | 0.204668201 |
| 0.476222661 | 0.390287417 | 0.416129849 | 0.343223108 |
| 0.173362023 | 0.296041914 | 0.243542467 | 0.367910639 |
| 0.047259482 | 0.07836529  | 0.040173746 | 0.27888441  |
| 0.137874501 | 0.161141625 | 0.196441462 | 0.258473436 |
| 0.186135016 | 0.161587268 | 0.185861981 | 0.342778863 |
| 0.04907114  | 0.245723232 | 0.110377399 | 0.121243288 |
| 0.057461524 | 0.138169554 | 0.17887012  | 0.121531418 |
| 0.212632902 | 0.201068062 | 0.323819506 | 0.435672492 |
| 0.219168973 | 0.152650829 | 0.323700247 | 0.441403565 |
| 0.435902522 | 0.254673067 | 0.216783269 | 0.018509314 |
| 0.247668932 | 0.166495971 | 0.164170373 | 0.236945983 |
| 0.156012734 | 0.221512092 | 0.303009377 | 0.364552625 |
| 0.160596051 | 0.087512811 | 0.248845028 | 0.377067239 |
| 0.124303339 | 0.213076836 | 0.437532643 | 0.234118644 |
| 0.003740389 | 0.217381919 | 0.391249836 | 0.168591226 |
| 0.261063421 | 0.143056769 | 0.16243617  | 0.433142476 |
| 0.20864355  | 0.206739621 | 0.424659081 | 0.352476304 |
| 0.181979532 | 0.183318688 | 0.477680834 | 0.060547663 |
| 0.218212578 | 0.071386963 | 0.290377237 | 0.136513908 |
| 0.205739534 | 0.299230627 | 0.245155846 | 0.212121764 |
| 0.092321986 | 0.446069738 | 0.329601359 | 0.449019703 |
| 0.230211447 | 0.478560464 | 0.417376705 | 0.407870925 |
| 0.270483182 | 0.208631814 | 0.130304542 | 0.393762735 |
| 0.418035072 | 0.196107662 | 0.05811537  | 0.369378385 |

|             |             |             |             |
|-------------|-------------|-------------|-------------|
| 0.199332473 | 0.350162492 | 0.130045908 | 0.465557276 |
| 0.433604564 | 0.364443743 | 0.144095856 | 0.379540924 |
| 0.360961483 | 0.15738242  | 0.357113878 | 0.480614125 |
| 0.161650404 | 0.249138566 | 0.244677794 | 0.407575751 |
| 0.151891649 | 0.209325713 | 0.286795139 | 0.142197469 |
| 0.00621622  | 0.058515011 | 0.0514573   | 0.158612887 |
| 0.173800384 | 0.253394908 | 0.320756407 | 0.458410386 |
| 0.109183637 | 0.358069357 | 0.209960419 | 0.244366432 |
| 0.381653262 | 0.226054665 | 0.236949008 | 0.285687505 |
| 0.221346397 | 0.022528601 | 0.109047063 | 0.455086735 |
| 0.02943429  | 0.195824574 | 0.177566991 | 0.003626539 |
| 0.044547719 | 0.302234337 | 0.089234577 | 0.186122422 |
| 0.449932299 | 0.179315561 | 0.177488584 | 0.164625026 |
| 0.303910614 | 0.074633315 | 0.005048304 | 0.426185289 |
| 0.410776927 | 0.391950199 | 0.406677547 | 0.367767482 |
| 0.39975944  | 0.310440893 | 0.390570395 | 0.170128275 |
| 0.096652298 | 0.060688322 | 0.224551339 | 0.232831572 |
| 0.006233759 | 0.339855709 | 0.201102803 | 0.138227294 |
| 0.365068855 | 0.268092624 | 0.037899584 | 0.262223276 |
| 0.022815974 | 0.160875935 | 0.190704844 | 0.173725646 |
| 0.34105689  | 0.01434     | 0.134258369 | 0.23630696  |
| 0.3460169   | 0.304899049 | 0.204621819 | 0.449566122 |
| 0.231375624 | 0.096332168 | 0.227967069 | 0.339933438 |
| 0.07494137  | 0.088387435 | 0.183976656 | 0.018840361 |
| 0.087433509 | 0.378161301 | 0.207979301 | 0.058787699 |
| 0.227572809 | 0.006157747 | 0.318744138 | 0.46168638  |
| 0.361186767 | 0.47637109  | 0.43453729  | 0.203423012 |
| 0.435909776 | 0.085410497 | 0.45430996  | 0.337026876 |
| 0.188514188 | 0.001385709 | 0.008912064 | 0.436246795 |
| 0.281115966 | 0.04353518  | 0.141547193 | 0.162423955 |
| 0.117331502 | 0.092731321 | 0.057928736 | 0.186465009 |
| 0.257189096 | 0.200963423 | 0.171930523 | 0.388571838 |
| 0.196372737 | 0.189996995 | 0.181090023 | 0.075166803 |
| 0.257004756 | 0.056927885 | 0.074748669 | 0.012972393 |
| 0.331176652 | 0.09785491  | 0.372625175 | 0.428513142 |
| 0.451986704 | 0.340190427 | 0.154448565 | 0.167579993 |
| 0.383495995 | 0.067930083 | 0.176855004 | 0.073994157 |
| 0.395469676 | 0.332861516 | 0.314746318 | 0.286164879 |
| 0.478010141 | 0.421579492 | 0.03709538  | 0.384426733 |
| 0.0122315   | 0.003330261 | 0.174698464 | 0.235112592 |
| 0.056306046 | 0.248530921 | 0.25319633  | 0.150685095 |
| 0.158886542 | 0.030612791 | 0.214139949 | 0.219392248 |
| 0.266561855 | 1           | 0.228129889 | 0.209680305 |
| 0.207287785 | 0.187121656 | 0.153435071 | 0.135058517 |
| 0.160915871 | 0.271898581 | 0.178794318 | 0.025762856 |
| 0.211864628 | 0.252069249 | 0.052581915 | 0.134014229 |
| 0.404831055 | 0.446540734 | 0.061387124 | 0.021421553 |
| 0.247925566 | 0.226112317 | 0.462486599 | 0.406490469 |
| 0.440108748 | 0.484074771 | 0.356009841 | 0.160751504 |
| 0.059881908 | 0.256542335 | 0.235291336 | 0.123549138 |
| 0.441101567 | 0.051222902 | 0.387894586 | 0.211377311 |
| 0.106511793 | 0.166344697 | 0.042952069 | 0.076650617 |
| 0.261544695 | 0.160928581 | 0.16992409  | 0.109580888 |
| 0.246424948 | 0.190706854 | 0.048889162 | 0.170751336 |

|             |             |             |             |
|-------------|-------------|-------------|-------------|
| 0.328629052 | 0.18382789  | 0.145531384 | 0.153629948 |
| 0.278141962 | 0.099164574 | 0.371059985 | 0.431354866 |
| 0.110158586 | 0.086184306 | 0.151944553 | 0.315485449 |
| 0.378923686 | 0.206896102 | 0.021462706 | 0.352115223 |
| 0.438217076 | 0.315534744 | 0.405473613 | 0.408923584 |
| 0.075841551 | 0.24159559  | 0.210665231 | 0.273238002 |
| 0.160115796 | 0.171729508 | 0.17951152  | 0.056498762 |
| 0.282470092 | 0.413868683 | 0.36277239  | 0.146016856 |
| 0.226489149 | 0.085583114 | 0.042645091 | 0.366136693 |
| 0.204481485 | 0.08220423  | 0.144882533 | 0.378875904 |
| 0.003584028 | 0.133256306 | 0.44851269  | 0.163230581 |
| 0.452312372 | 0.449876604 | 0.406268786 | 0.135735101 |
| 0.005855133 | 0.335517947 | 0.29495608  | 0.230580504 |
| 0.368828083 | 0.279558453 | 0.085950206 | 0.089382937 |
| 0.28801841  | 0.061565144 | 0.159972625 | 0.150602546 |
| 0.158913731 | 0.272816192 | 0.199504733 | 0.156289075 |
| 0.178313362 | 0.071612088 | 0.170493412 | 0.154701405 |
| 0.142749674 | 0.241732194 | 0.354249698 | 0.114065042 |
| 0.191054972 | 0.41872947  | 0.361319488 | 0.024351513 |
| 0.218594547 | 0.378963409 | 0.376861346 | 0.007378956 |
| 0.366182251 | 0.011455276 | 0.183080186 | 0.185043581 |
| 0.171678846 | 0.195591091 | 0.248597765 | 0.221212658 |
| 0.264946673 | 0.18047096  | 0.19484865  | 0.213811031 |
| 0.151210828 | 0.14575585  | 0.272499332 | 0.194381257 |
| 0.216247888 | 0.099934008 | 0.087392271 | 0.087804867 |
| 0.055142273 | 0.375940259 | 0.232721531 | 0.056694082 |
| 0.203291398 | 0.196684551 | 0.355626776 | 0.396265093 |
| 0.390137405 | 0.086457459 | 0.216462744 | 0.364752986 |
| 0.134717805 | 0.162318359 | 0.048452406 | 0.205003018 |
| 0.167252944 | 0.207718043 | 0.178346171 | 0.205544587 |
| 0.306557308 | 0.36709161  | 0.220681376 | 0.386616945 |
| 0.217597434 | 0.201821653 | 0.133085713 | 0.101019651 |
| 0.141272391 | 0.116908154 | 0.223255666 | 0.002953858 |
| 0.281730693 | 0.138053607 | 0.420226951 | 0.399186212 |
| 0.191743176 | 0.350385986 | 0.135756793 | 0.087600438 |
| 0.110155449 | 0.151517284 | 0.133989236 | 0.335131655 |
| 0.163855861 | 0.131094992 | 0.245969828 | 0.13338798  |
| 0.367104288 | 0.327278666 | 0.194920295 | 0.167623985 |
| 0.175177635 | 0.141488518 | 0.397799375 | 0.073685452 |
| 0.261770448 | 0.185834434 | 0.193812771 | 0.239509815 |
| 0.201678055 | 0.443908962 | 0.045475184 | 0.459533684 |
| 0.250274329 | 0.113384836 | 0.443797214 | 0.151588541 |
| 0.147907976 | 0.11055727  | 0.16490504  | 0.174754121 |
| 0.182553261 | 0.197197288 | 0.009880834 | 0.082152972 |
| 0.322105356 | 0.171060733 | 0.323232905 | 0.313954239 |
| 0.207075301 | 0.351498481 | 0.117609985 | 0.183273013 |
| 0.374020185 | 0.398125166 | 0.220150117 | 0.252586535 |
| 0.316047491 | 0.092172101 | 0.224906131 | 0.015605149 |
| 0.309528413 | 0.272870569 | 0.189476668 | 0.055243269 |
| 0.023678874 | 0.191870932 | 0.290715257 | 0.051084496 |
| 0.460183424 | 0.153253489 | 0.223351485 | 0.315262138 |
| 0.151861036 | 0.404390234 | 0.137902018 | 0.355366456 |
| 0.041132198 | 0.214823053 | 0.20557013  | 0.200783925 |
| 0.21052617  | 0.236648816 | 0.361859704 | 0.200330119 |

|             |             |             |             |
|-------------|-------------|-------------|-------------|
| 0.040533719 | 0.202059177 | 0.007681494 | 0.362502887 |
| 0.374668959 | 0.234357799 | 0.192779971 | 0.130375433 |
| 0.26866616  | 0.325820172 | 0.217118894 | 0.199281418 |
| 0.016052216 | 0.29450484  | 0.160224844 | 0.337980293 |
| 0.172878827 | 0.243240025 | 0.060490712 | 0.226077123 |
| 0.359313921 | 0.239432295 | 0.244803651 | 0.210246604 |
| 0.391803499 | 0.297426659 | 0.117381642 | 0.16028703  |
| 0.255484849 | 0.055642001 | 0.156364176 | 0.466851184 |
| 0.160131146 | 0.201191906 | 0.433003905 | 0.195926    |
| 0.218432737 | 0.313060201 | 0.244803101 | 0.446018332 |
| 0.109073348 | 0.231744056 | 0.368991288 | 0.410537111 |
| 0.306312372 | 0.183667646 | 0.210590064 | 0.222608756 |
| 0.36095391  | 0.079367281 | 0.213690065 | 0.306451956 |
| 0.207323716 | 0.265143591 | 0.182049775 | 0.188537049 |
| 0.04715427  | 0.13798115  | 0.179031506 | 0.12153027  |
| 0.25735269  | 0.243780437 | 0.216057163 | 0.371820577 |
| 0.121804051 | 0.03618179  | 0.418791346 | 0.030567349 |
| 0.166521379 | 0.306890348 | 0.18026631  | 0.230546665 |
| 0.166315617 | 0.254826099 | 0.188086294 | 0.002207881 |
| 0.385581645 | 0.044696581 | 0.187640681 | 0.219090466 |
| 0.213424502 | 0.050835413 | 0.375324124 | 0.475120051 |
| 0.22098999  | 0.154735639 | 0.190917533 | 0.387537029 |
| 0.158556781 | 0.17533856  | 0.210328548 | 0.269560287 |
| 0.18354391  | 0.177284885 | 0.19989925  | 0.205689143 |
| 0.295441487 | 0.15458958  |             |             |
| MRPL27      | 0.036358011 | 0.228489869 | 0.018268597 |
| 0.104418925 | 0.315148684 | 0.151541281 | 0.040996038 |
| 0.079438721 | 0.181374311 | 0.086826954 | 0.231162915 |
| 0.016492047 | 0.212711374 | 0.317498032 | 0.043878543 |
| 0.303762983 | 0.041846621 | 0.075878551 | 0.054872988 |
| 0.116664633 | 0.299385991 | 0.243488632 | 0.119510634 |
| 0.268483469 | 0.107305615 | 0.142326559 | 0.218545122 |
| 0.311014982 | 0.14961325  | 0.278377481 | 0.06448761  |
| 0.288337668 | 0.339103833 | 0.205410581 | 0.009372367 |
| 0.197059751 | 0.041495834 | 0.264797384 | 0.232009448 |
| 0.238992122 | 0.2324234   | 0.084208312 | 0.194830828 |
| 0.121480672 | 0.019731229 | 0.058976437 | 0.282899312 |
| 0.146714937 | 0.161795106 | 0.020472638 | 0.247864413 |
| 0.166527119 | 0.190596915 | 0.168990853 | 0.002339878 |
| 0.259139015 | 0.151692982 | 0.230839675 | 0.29496677  |
| 0.156377345 | 0.112862054 | 0.145943114 | 0.107320116 |
| 0.222850228 | 0.285521149 | 0.203240718 | 0.137046211 |
| 0.321638636 | 0.275402172 | 0.277782512 | 0.108195777 |
| 0.156410833 | 0.012875469 | 0.121093258 | 0.030911787 |
| 0.199229916 | 0.167378058 | 0.24994519  | 0.26868006  |
| 0.217036215 | 0.321485676 | 0.163015642 | 0.27091238  |
| 0.187593216 | 0.311616833 | 0.275411062 | 0.289174962 |
| 0.255943895 | 0.050693016 | 0.308930371 | 0.343170458 |
| 0.021818729 | 0.136121634 | 0.248828998 | 0.057023398 |
| 0.247833707 | 0.208396422 | 0.125596345 | 0.291311345 |
| 0.350592628 | 0.291651384 | 0.274238195 | 0.221308902 |
| 0.239632969 | 0.029151887 | 0.247832676 | 0.326953493 |
| 0.242515863 | 0.035711005 | 0.27139938  | 0.343289191 |
| 0.255622765 | 0.319294076 | 0.251018749 | 0.276443686 |

|             |             |             |             |
|-------------|-------------|-------------|-------------|
| 0.274902918 | 0.325759858 | 0.266021211 | 0.266567984 |
| 0.049704127 | 0.317504937 | 0.10227585  | 0.049022814 |
| 0.024405234 | 0.088358377 | 0.205918575 | 0.24420078  |
| 0.331637049 | 0.205822127 | 0.107956938 | 0.216291479 |
| 0.387462358 | 0.241698258 | 0.310614984 | 0.292575099 |
| 0.026809577 | 0.237114318 | 0.261461707 | 0.119321004 |
| 0.269740163 | 0.069073593 | 0.301593824 | 0.288000244 |
| 0.271953804 | 0.356776592 | 0.063230968 | 0.28773222  |
| 0.110081748 | 0.360160681 | 0.251695857 | 0.124400521 |
| 0.31392203  | 0.274149374 | 0.378350106 | 0.363035767 |
| 0.282982886 | 0.142651294 | 0.04554578  | 0.262057088 |
| 0.367951819 | 0.046498553 | 0.327950798 | 0.355022778 |
| 0.289444356 | 0.34792632  | 0.386572896 | 0.350086158 |
| 0.287387529 | 0.038686668 | 0.030130447 | 0.302493361 |
| 0.296032496 | 0.289152501 | 0.143415017 | 0.215681422 |
| 0.30703594  | 0.142313097 | 0.291493196 | 0.195931849 |
| 0.365592772 | 0.313729973 | 0.317122135 | 0.249976289 |
| 0.117146147 | 0.210735601 | 0.248555974 | 0.23944873  |
| 0.039305805 | 0.051650609 | 0.021123656 | 0.23098322  |
| 0.098525783 | 0.160726501 | 0.135706538 | 0.247634779 |
| 0.172094118 | 0.115034973 | 0.2192193   | 0.36570968  |
| 0.023170098 | 0.20051619  | 0.085648347 | 0.076185312 |
| 0.049585237 | 0.087465407 | 0.151630828 | 0.13055934  |
| 0.230481345 | 0.113887481 | 0.26945415  | 0.342523197 |
| 0.201938356 | 0.09906472  | 0.250081175 | 0.352446835 |
| 0.362547887 | 0.276605006 | 0.165564059 | 0.021902787 |
| 0.226280458 | 0.146291345 | 0.256794131 | 0.228583546 |
| 0.092945722 | 0.185268749 | 0.264172863 | 0.379810433 |
| 0.107322318 | 0.054762135 | 0.22749729  | 0.269693813 |
| 0.07109795  | 0.249389305 | 0.359616247 | 0.172374911 |
| 0.002293999 | 0.173481088 | 0.321547455 | 0.238316506 |
| 0.188326199 | 0.244567471 | 0.243112653 | 0.34291425  |
| 0.229689227 | 0.275742232 | 0.340920939 | 0.371244053 |
| 0.154641656 | 0.100913769 | 0.37066508  | 0.079908039 |
| 0.225744274 | 0.117546741 | 0.28963706  | 0.089559252 |
| 0.168084461 | 0.264892347 | 0.310069765 | 0.278158774 |
| 0.054477209 | 0.319543809 | 0.262134409 | 0.345143575 |
| 0.206459463 | 0.367779103 | 0.34868849  | 0.330646341 |
| 0.233246878 | 0.1848106   | 0.238970851 | 0.314833879 |
| 0.33800188  | 0.152320209 | 0.030308828 | 0.296760578 |
| 0.150113592 | 0.330423749 | 0.199292028 | 0.364660881 |
| 0.319259087 | 0.235074232 | 0.14989938  | 0.373784168 |
| 0.296700007 | 0.127987959 | 0.301416817 | 0.372681288 |
| 0.112347205 | 0.241949104 | 0.260558704 | 0.394214206 |
| 0.115068124 | 0.274195001 | 0.212867837 | 0.243443539 |
| 0.020122001 | 0.033971137 | 0.030700424 | 0.187654151 |
| 0.312960386 | 0.203418029 | 0.296654025 | 0.337820708 |
| 0.090271928 | 0.279650442 | 0.154665379 | 0.240411097 |
| 0.259139946 | 0.223691187 | 0.270636481 | 0.294327599 |
| 0.173546907 | 0.027015124 | 0.120450847 | 0.319318521 |
| 0.013162578 | 0.295145542 | 0.131990614 | 0.005881899 |
| 0.026365573 | 0.203444885 | 0.0478942   | 0.119604059 |
| 0.391000352 | 0.111327609 | 0.117433872 | 0.105759834 |
| 0.298933924 | 0.056902971 | 0.01190725  | 0.321537589 |

|             |             |             |             |
|-------------|-------------|-------------|-------------|
| 0.297444744 | 0.284437525 | 0.288363554 | 0.250219834 |
| 0.303970172 | 0.259633439 | 0.342957634 | 0.12199661  |
| 0.072206295 | 0.034198602 | 0.290028876 | 0.227023881 |
| 0.003186208 | 0.324356562 | 0.224176879 | 0.104869645 |
| 0.325217823 | 0.213888613 | 0.027426411 | 0.28573447  |
| 0.015176388 | 0.238499449 | 0.135871052 | 0.169626732 |
| 0.351090536 | 0.008732263 | 0.118917315 | 0.224423365 |
| 0.231805953 | 0.218379412 | 0.220843262 | 0.328272737 |
| 0.231093583 | 0.048596259 | 0.243237013 | 0.336206877 |
| 0.054600103 | 0.05726187  | 0.13418426  | 0.013891053 |
| 0.088093154 | 0.268767051 | 0.193928227 | 0.037516099 |
| 0.193574204 | 0.003769844 | 0.222057607 | 0.340347866 |
| 0.239708005 | 0.373542541 | 0.330376392 | 0.292507866 |
| 0.318557277 | 0.150698332 | 0.340334997 | 0.23573535  |
| 0.134070601 | 0.001009686 | 0.010774202 | 0.352842476 |
| 0.264536543 | 0.020024681 | 0.112774028 | 0.132142937 |
| 0.116031816 | 0.054909536 | 0.04568745  | 0.307440589 |
| 0.223100851 | 0.259683234 | 0.281639857 | 0.255285209 |
| 0.179744417 | 0.188178212 | 0.12475135  | 0.043114346 |
| 0.262175246 | 0.047292318 | 0.043214465 | 0.020438344 |
| 0.334527628 | 0.05164126  | 0.237956089 | 0.309402168 |
| 0.345136156 | 0.346785956 | 0.112209303 | 0.156946225 |
| 0.316912005 | 0.033764182 | 0.17456717  | 0.040388698 |
| 0.271655457 | 0.305862938 | 0.270858687 | 0.209156553 |
| 0.369875024 | 0.304543564 | 0.026450569 | 0.327499732 |
| 0.012980568 | 0.008598652 | 0.120072292 | 0.186199511 |
| 0.07044934  | 0.233355817 | 0.197331355 | 0.124480002 |
| 0.161957208 | 0.021030162 | 0.286067325 | 0.296168728 |
| 0.248261566 | 0.228129889 | 1           | 0.154460851 |
| 0.256616089 | 0.242890034 | 0.17177737  | 0.119095316 |
| 0.13699169  | 0.182396142 | 0.110650768 | 0.016258231 |
| 0.173670556 | 0.237951852 | 0.038600825 | 0.09880307  |
| 0.336474781 | 0.352584638 | 0.047071648 | 0.025992342 |
| 0.180670415 | 0.210028772 | 0.376796958 | 0.287223799 |
| 0.306699105 | 0.370719635 | 0.252747827 | 0.178505563 |
| 0.045565494 | 0.263582686 | 0.305491194 | 0.190776962 |
| 0.329881719 | 0.024346739 | 0.277132405 | 0.279337556 |
| 0.075648367 | 0.146694591 | 0.044595072 | 0.057378925 |
| 0.289644167 | 0.132384306 | 0.198174953 | 0.063888249 |
| 0.234759907 | 0.287396724 | 0.033294221 | 0.145526607 |
| 0.244740504 | 0.277366336 | 0.112308868 | 0.125730821 |
| 0.208813524 | 0.065649205 | 0.323290795 | 0.330175112 |
| 0.074595765 | 0.054506101 | 0.097349776 | 0.275180431 |
| 0.295737802 | 0.160693211 | 0.02283557  | 0.235184011 |
| 0.351006987 | 0.272073847 | 0.285655788 | 0.3522523   |
| 0.046997154 | 0.256842573 | 0.229150389 | 0.264183415 |
| 0.130419428 | 0.142379193 | 0.164348462 | 0.036988267 |
| 0.218041209 | 0.289831127 | 0.257171586 | 0.152891667 |
| 0.19673034  | 0.044760432 | 0.019415871 | 0.287354274 |
| 0.311445833 | 0.059040794 | 0.096707658 | 0.315412218 |
| 0.008699689 | 0.270453988 | 0.36233968  | 0.167587657 |
| 0.336309537 | 0.361543298 | 0.304909955 | 0.116636799 |
| 0.010858408 | 0.315665358 | 0.279746217 | 0.211458331 |
| 0.252195652 | 0.215436525 | 0.079584258 | 0.090849374 |

|             |             |             |             |
|-------------|-------------|-------------|-------------|
| 0.25118705  | 0.031902432 | 0.14940526  | 0.128967112 |
| 0.197411588 | 0.197278752 | 0.170430879 | 0.11803383  |
| 0.205527885 | 0.034551615 | 0.282981222 | 0.146031808 |
| 0.206396352 | 0.207174509 | 0.29990762  | 0.075429067 |
| 0.224139352 | 0.330986667 | 0.2622106   | 0.016976977 |
| 0.25500356  | 0.304479823 | 0.310944074 | 0.004997181 |
| 0.330074014 | 0.009399748 | 0.210680754 | 0.218378257 |
| 0.19960934  | 0.194861505 | 0.279791144 | 0.257334715 |
| 0.197564518 | 0.157940231 | 0.195948667 | 0.204683054 |
| 0.182681451 | 0.124681591 | 0.265622494 | 0.148436886 |
| 0.259570785 | 0.083487885 | 0.048148417 | 0.044951285 |
| 0.05539102  | 0.285990968 | 0.169688504 | 0.030457377 |
| 0.195189559 | 0.158257438 | 0.295697258 | 0.268984109 |
| 0.335676088 | 0.043638575 | 0.195210237 | 0.262189188 |
| 0.10092218  | 0.120893584 | 0.026386646 | 0.166728315 |
| 0.147272655 | 0.284710777 | 0.141868329 | 0.129274694 |
| 0.219497966 | 0.269956739 | 0.162537682 | 0.306301604 |
| 0.216321716 | 0.163364377 | 0.083880996 | 0.118468434 |
| 0.107003151 | 0.075513033 | 0.300099425 | 0.002247168 |
| 0.247386874 | 0.099133431 | 0.335702771 | 0.273369859 |
| 0.247017585 | 0.287066616 | 0.089237655 | 0.062153099 |
| 0.071013297 | 0.080231775 | 0.09559072  | 0.269446449 |
| 0.247361661 | 0.123720858 | 0.28596804  | 0.093040803 |
| 0.321616447 | 0.267778103 | 0.24407144  | 0.128130333 |
| 0.160031219 | 0.095429912 | 0.271584487 | 0.045761444 |
| 0.211641687 | 0.2980079   | 0.124667561 | 0.243204177 |
| 0.224376619 | 0.338627367 | 0.029795603 | 0.349233554 |
| 0.241228213 | 0.070045256 | 0.331440858 | 0.127749077 |
| 0.129472346 | 0.1634951   | 0.275465599 | 0.125549727 |
| 0.162737428 | 0.242691016 | 0.006936242 | 0.109037766 |
| 0.306595894 | 0.140538605 | 0.218172189 | 0.271170904 |
| 0.291140421 | 0.323682116 | 0.221008691 | 0.124227156 |
| 0.243762431 | 0.264224651 | 0.195459573 | 0.206922592 |
| 0.245481099 | 0.085454066 | 0.163410601 | 0.01583974  |
| 0.261489024 | 0.242211702 | 0.148936361 | 0.044525908 |
| 0.016951868 | 0.273362889 | 0.228776101 | 0.025330405 |
| 0.384173345 | 0.225805668 | 0.158679745 | 0.278274299 |
| 0.103345397 | 0.267497146 | 0.167809735 | 0.331586598 |
| 0.02037399  | 0.181365424 | 0.220690555 | 0.166717962 |
| 0.257142937 | 0.29733864  | 0.333818128 | 0.307192931 |
| 0.03379826  | 0.24634105  | 0.005436632 | 0.249761482 |
| 0.238838063 | 0.251534311 | 0.134569144 | 0.095466635 |
| 0.267693437 | 0.261078078 | 0.219630757 | 0.17806427  |
| 0.019002036 | 0.320888473 | 0.148357471 | 0.254196058 |
| 0.170531673 | 0.186208375 | 0.06831236  | 0.24955193  |
| 0.227137383 | 0.218331227 | 0.184185301 | 0.18359783  |
| 0.274369639 | 0.222095344 | 0.068404505 | 0.226718029 |
| 0.185816094 | 0.032102535 | 0.115484613 | 0.345723308 |
| 0.179593629 | 0.315926748 | 0.38810369  | 0.186059228 |
| 0.266346565 | 0.229005015 | 0.196196109 | 0.324871105 |
| 0.141045517 | 0.201988981 | 0.33367138  | 0.292187113 |
| 0.287983672 | 0.297473427 | 0.296980885 | 0.260790489 |
| 0.240945315 | 0.0749195   | 0.265898914 | 0.235784714 |
| 0.296447962 | 0.250818813 | 0.119374984 | 0.260829021 |



|             |             |             |             |
|-------------|-------------|-------------|-------------|
| 0.048646391 | 0.121199526 | 0.176160949 | 0.090017548 |
| 0.233202377 | 0.249521343 | 0.283193013 | 0.293477589 |
| 0.158823131 | 0.040444371 | 0.324660746 | 0.072424998 |
| 0.125549412 | 0.310477354 | 0.166224569 | 0.247576091 |
| 0.111894518 | 0.192005793 | 0.120446092 | 0.00116375  |
| 0.334641276 | 0.094673079 | 0.202713364 | 0.276455618 |
| 0.220133026 | 0.030866858 | 0.275437912 | 0.384080737 |
| 0.17987293  | 0.155642375 | 0.191512619 | 0.281631729 |
| 0.278211231 | 0.185152007 | 0.211348808 | 0.190008103 |
| 0.29530176  | 0.125038416 | 0.171187623 | 0.220904312 |
| 0.238031442 | 0.130303293 |             |             |
| MRPL4       | 0.162448206 | 0.305582674 | 0.118813529 |
| 0.113388015 | 0.181555479 | 0.178981252 | 0.223830991 |
| 0.253479687 | 0.295567097 | 0.154104823 | 0.183378207 |
| 0.092803322 | 0.05538716  | 0.309082406 | 0.233109638 |
| 0.187278275 | 0.15514316  | 0.239028659 | 0.136262484 |
| 0.255151322 | 0.183092187 | 0.139914842 | 0.202629056 |
| 0.211544688 | 0.262937366 | 0.235234006 | 0.184849832 |
| 0.319057102 | 0.077285037 | 0.18256448  | 0.073039253 |
| 0.351065947 | 0.172971575 | 0.146308969 | 0.08469524  |
| 0.210801949 | 0.055787095 | 0.393045089 | 0.194933544 |
| 0.070137984 | 0.330848113 | 0.156053187 | 0.183684096 |
| 0.180195866 | 0.112375344 | 0.073348649 | 0.205552259 |
| 0.252767991 | 0.278588435 | 0.160853794 | 0.209708842 |
| 0.222610926 | 0.224286258 | 0.205489001 | 0.008114282 |
| 0.114426038 | 0.02965826  | 0.08774623  | 0.356325849 |
| 0.229954898 | 0.229659864 | 0.12782027  | 0.313082681 |
| 0.228103302 | 0.245008813 | 0.293371541 | 0.181965202 |
| 0.333046756 | 0.098337855 | 0.212305538 | 0.126578884 |
| 0.223287971 | 0.182269172 | 0.24538518  | 0.232215765 |
| 0.198804609 | 0.236753789 | 0.195883147 | 0.155811887 |
| 0.286104804 | 0.42094475  | 0.286688386 | 0.374429694 |
| 0.136939759 | 0.176453712 | 0.187161387 | 0.25748053  |
| 0.269987539 | 0.302465045 | 0.205602689 | 0.379108674 |
| 0.2325938   | 0.185242612 | 0.233614485 | 0.231926153 |
| 0.285160014 | 0.178495799 | 0.159485226 | 0.084934693 |
| 0.196117461 | 0.182424042 | 0.410538451 | 0.223081013 |
| 0.215888478 | 0.178106203 | 0.385968211 | 0.15652207  |
| 0.155343486 | 0.167759337 | 0.177464373 | 0.261097616 |
| 0.196736164 | 0.309327705 | 0.276196244 | 0.2816389   |
| 0.170338414 | 0.327828027 | 0.199155363 | 0.325736747 |
| 0.064526128 | 0.364665037 | 0.207908533 | 0.154269328 |
| 0.173869223 | 0.237911088 | 0.254865819 | 0.315325313 |
| 0.281134547 | 0.259309755 | 0.217042099 | 0.219493722 |
| 0.29175772  | 0.359930152 | 0.365520394 | 0.272082261 |
| 0.151332628 | 0.158037459 | 0.16479154  | 0.259058857 |
| 0.234911301 | 0.282326289 | 0.129500485 | 0.39577002  |
| 0.287862151 | 0.254975048 | 0.228337868 | 0.43146295  |
| 0.325052551 | 0.36793914  | 0.271851145 | 0.201219594 |
| 0.385043048 | 0.373884549 | 0.347209228 | 0.174537794 |
| 0.361070251 | 0.181758755 | 0.13462057  | 0.30251894  |
| 0.355092695 | 0.009932341 | 0.290625952 | 0.309320171 |
| 0.341808413 | 0.247479919 | 0.364246381 | 0.327297556 |
| 0.346893346 | 0.216585115 | 0.033343114 | 0.229594854 |

|             |             |             |             |
|-------------|-------------|-------------|-------------|
| 0.364372475 | 0.268985111 | 0.293925697 | 0.163744013 |
| 0.202707345 | 0.203504857 | 0.258970253 | 0.104816955 |
| 0.4067002   | 0.28674905  | 0.30580339  | 0.257726685 |
| 0.258522916 | 0.320517508 | 0.157137072 | 0.364659531 |
| 0.163496634 | 0.170373592 | 0.140005673 | 0.302259125 |
| 0.143744615 | 0.24073727  | 0.20330443  | 0.24107132  |
| 0.244608865 | 0.251585609 | 0.130232235 | 0.187494953 |
| 0.162871114 | 0.171815582 | 0.240047155 | 0.232493292 |
| 0.143861463 | 0.268697099 | 0.158134374 | 0.173976531 |
| 0.218645899 | 0.341749903 | 0.20129104  | 0.327244609 |
| 0.234023263 | 0.206138159 | 0.211205572 | 0.351518676 |
| 0.345991036 | 0.159415569 | 0.287017534 | 0.022923262 |
| 0.142309872 | 0.151787986 | 0.090201438 | 0.178659892 |
| 0.31176424  | 0.21066623  | 0.205132155 | 0.197756578 |
| 0.190595101 | 0.287635712 | 0.184394925 | 0.380063791 |
| 0.226178401 | 0.160224833 | 0.275649126 | 0.202288543 |
| 0.031819306 | 0.200491676 | 0.24845939  | 0.190758479 |
| 0.269243047 | 0.069381026 | 0.084080633 | 0.289883534 |
| 0.141617633 | 0.181901143 | 0.311033628 | 0.214104422 |
| 0.168299636 | 0.322133369 | 0.366859328 | 0.036581648 |
| 0.221592064 | 0.06339686  | 0.227088427 | 0.17667532  |
| 0.237523007 | 0.273616875 | 0.173486001 | 0.169437571 |
| 0.169530561 | 0.366399804 | 0.292306419 | 0.327382407 |
| 0.153812977 | 0.371603123 | 0.259624607 | 0.287004685 |
| 0.240675246 | 0.182469746 | 0.059201628 | 0.23613697  |
| 0.278789938 | 0.162816065 | 0.175229618 | 0.242333605 |
| 0.192501526 | 0.195342541 | 0.179758947 | 0.327467136 |
| 0.401741438 | 0.34136932  | 0.219996294 | 0.245585309 |
| 0.246206135 | 0.202482425 | 0.290875732 | 0.390083883 |
| 0.165952791 | 0.183568217 | 0.161167824 | 0.275076834 |
| 0.222403819 | 0.181195614 | 0.349120816 | 0.091148062 |
| 0.002092894 | 0.217665173 | 0.164433093 | 0.206331835 |
| 0.102799025 | 0.185270664 | 0.21928765  | 0.348030121 |
| 0.221134246 | 0.31801882  | 0.312827496 | 0.150008004 |
| 0.310836821 | 0.209524522 | 0.165283959 | 0.203865905 |
| 0.287651147 | 0.045722816 | 0.128878171 | 0.415307395 |
| 0.152079872 | 0.108782246 | 0.278275899 | 0.005386049 |
| 0.161093412 | 0.249645249 | 0.217533855 | 0.301977852 |
| 0.319050944 | 0.283901259 | 0.221049975 | 0.171032095 |
| 0.227554516 | 0.216458453 | 0.009114724 | 0.337504373 |
| 0.380528578 | 0.376961596 | 0.377634734 | 0.390922109 |
| 0.335596607 | 0.265809505 | 0.250244707 | 0.192262075 |
| 0.224473944 | 0.210386193 | 0.109819547 | 0.206001785 |
| 0.016336836 | 0.248329986 | 0.248236944 | 0.226183468 |
| 0.227489577 | 0.2856081   | 0.133347804 | 0.215509291 |
| 0.048168735 | 0.063015148 | 0.256885295 | 0.297071504 |
| 0.253707748 | 0.088222929 | 0.077730408 | 0.137507613 |
| 0.312539541 | 0.287568802 | 0.144253847 | 0.368434016 |
| 0.194694965 | 0.191974974 | 0.182358327 | 0.224833645 |
| 0.205538061 | 0.079943102 | 0.245100916 | 0.010812127 |
| 0.128195813 | 0.394973158 | 0.201391003 | 0.141446295 |
| 0.21625054  | 0.034897969 | 0.275247743 | 0.373492314 |
| 0.329101309 | 0.335242745 | 0.328791871 | 0.11087407  |
| 0.336927257 | 0.044879871 | 0.347729347 | 0.270073171 |

|             |             |             |             |
|-------------|-------------|-------------|-------------|
| 0.150967366 | 0.001949501 | 0.031638487 | 0.289501409 |
| 0.169056057 | 0.148243841 | 0.235433782 | 0.132479018 |
| 0.172298877 | 0.209111115 | 0.222073528 | 0.129755195 |
| 0.192870821 | 0.194944601 | 0.150403067 | 0.351148154 |
| 0.236306569 | 0.275716931 | 0.204735017 | 0.216931248 |
| 0.194452039 | 0.147673775 | 0.239874874 | 0.010237078 |
| 0.233609272 | 0.206927641 | 0.397978814 | 0.3464673   |
| 0.363271406 | 0.197600426 | 0.125884381 | 0.169636863 |
| 0.322844996 | 0.156183994 | 0.146732959 | 0.185341488 |
| 0.318758216 | 0.183812411 | 0.238893671 | 0.252077895 |
| 0.34863172  | 0.333255596 | 0.157771376 | 0.241522538 |
| 0.029924851 | 0.010278275 | 0.168746026 | 0.298399397 |
| 0.176635979 | 0.179438577 | 0.251156323 | 0.322533758 |
| 0.307722372 | 0.084913153 | 0.129525072 | 0.127560807 |
| 0.229173393 | 0.209680305 | 0.154460851 | 1           |
| 0.215196236 | 0.144734009 | 0.243661911 | 0.294088467 |
| 0.263365823 | 0.289499577 | 0.253122597 | 0.144965951 |
| 0.173444925 | 0.16354704  | 0.167545365 | 0.243230627 |
| 0.261814301 | 0.294426976 | 0.181546132 | 0.034910199 |
| 0.268942153 | 0.246500239 | 0.316733841 | 0.32782963  |
| 0.387783645 | 0.377892744 | 0.371792471 | 0.218828661 |
| 0.180084893 | 0.233571963 | 0.171561613 | 0.181644594 |
| 0.341753818 | 0.173644593 | 0.346814011 | 0.137964308 |
| 0.257250509 | 0.21350143  | 0.107931666 | 0.242259449 |
| 0.162584777 | 0.259118271 | 0.216816082 | 0.176197004 |
| 0.196537022 | 0.118917346 | 0.205528346 | 0.24542978  |
| 0.255614077 | 0.078708435 | 0.249463601 | 0.278074646 |
| 0.279982064 | 0.172978191 | 0.20364114  | 0.36391967  |
| 0.215852961 | 0.261564388 | 0.150633013 | 0.271373144 |
| 0.250381982 | 0.181290158 | 0.038995112 | 0.299410556 |
| 0.339789186 | 0.177914182 | 0.351036546 | 0.312268595 |
| 0.225561776 | 0.153517141 | 0.184159571 | 0.206278142 |
| 0.291558942 | 0.18727483  | 0.302323236 | 0.200234389 |
| 0.357855128 | 0.427952948 | 0.287921903 | 0.198496375 |
| 0.197808204 | 0.21489964  | 0.163730642 | 0.303834186 |
| 0.105286429 | 0.147810306 | 0.166558099 | 0.273663203 |
| 0.005671896 | 0.070277785 | 0.353798837 | 0.212601282 |
| 0.409579908 | 0.306735567 | 0.330878372 | 0.296555948 |
| 0.003432052 | 0.19103376  | 0.183595609 | 0.15853394  |
| 0.282025914 | 0.265199785 | 0.282896168 | 0.169309674 |
| 0.28188516  | 0.153480876 | 0.200067901 | 0.161566686 |
| 0.089509584 | 0.21462284  | 0.272785979 | 0.313472505 |
| 0.245575822 | 0.224013124 | 0.115323168 | 0.221691973 |
| 0.168639275 | 0.25104263  | 0.263538151 | 0.16104199  |
| 0.065431792 | 0.331547122 | 0.247901782 | 0.111921149 |
| 0.179134523 | 0.310620762 | 0.334666756 | 0.008835789 |
| 0.191949145 | 0.055239946 | 0.219004947 | 0.181401788 |
| 0.224762212 | 0.256326922 | 0.237660848 | 0.176872679 |
| 0.250117258 | 0.26294167  | 0.180959546 | 0.228344288 |
| 0.183500374 | 0.286476138 | 0.209211357 | 0.233374533 |
| 0.145643056 | 0.194344284 | 0.224141566 | 0.228324699 |
| 0.114162655 | 0.308251831 | 0.284937302 | 0.157486516 |
| 0.271617375 | 0.244467376 | 0.318045199 | 0.336641789 |
| 0.328086183 | 0.197532182 | 0.260195988 | 0.262910763 |

|             |             |             |             |
|-------------|-------------|-------------|-------------|
| 0.110744631 | 0.158940656 | 0.179384145 | 0.213899777 |
| 0.249145722 | 0.124177832 | 0.205317767 | 0.197592797 |
| 0.234593913 | 0.353725021 | 0.272011083 | 0.348327658 |
| 0.194903527 | 0.246362956 | 0.126861049 | 0.139788143 |
| 0.196412124 | 0.256179635 | 0.16453431  | 0.013820194 |
| 0.237037929 | 0.166108744 | 0.263951708 | 0.347819659 |
| 0.128782623 | 0.331865559 | 0.123378381 | 0.157941074 |
| 0.108386286 | 0.243204947 | 0.236994473 | 0.2353724   |
| 0.076355694 | 0.236531745 | 0.193099124 | 0.170613904 |
| 0.225145034 | 0.235132225 | 0.227550288 | 0.295782188 |
| 0.310576694 | 0.234845865 | 0.409664575 | 0.208987899 |
| 0.177388983 | 0.120487138 | 0.208434563 | 0.183552847 |
| 0.227848867 | 0.341404156 | 0.18358007  | 0.33586427  |
| 0.186439088 | 0.236119263 | 0.406000621 | 0.273461451 |
| 0.242183107 | 0.178026073 | 0.078053043 | 0.210531274 |
| 0.282357181 | 0.139501788 | 0.007661001 | 0.047959728 |
| 0.226751969 | 0.261295228 | 0.249803829 | 0.278353339 |
| 0.178879637 | 0.289161816 | 0.087254911 | 0.267288912 |
| 0.346615554 | 0.397019335 | 0.149762631 | 0.290410899 |
| 0.262196845 | 0.191364569 | 0.191349613 | 0.051099754 |
| 0.179798545 | 0.165485625 | 0.165897522 | 0.201327225 |
| 0.118770134 | 0.082622157 | 0.192547298 | 0.218714281 |
| 0.311674165 | 0.068070421 | 0.243664348 | 0.205888659 |
| 0.291637716 | 0.394622218 | 0.215181926 | 0.200373009 |
| 0.232306454 | 0.289879485 | 0.188230249 | 0.222243639 |
| 0.126534894 | 0.144622991 | 0.220104764 | 0.107799195 |
| 0.132296557 | 0.179090511 | 0.015049228 | 0.368915795 |
| 0.375154656 | 0.163985506 | 0.300029824 | 0.155842209 |
| 0.244717159 | 0.334014238 | 0.206808091 | 0.17694925  |
| 0.04546184  | 0.159813643 | 0.272272866 | 0.264411024 |
| 0.065932361 | 0.238779174 | 0.12924071  | 0.20496885  |
| 0.400743608 | 0.157750525 | 0.33012218  | 0.111331517 |
| 0.334587568 | 0.299161993 | 0.20870681  | 0.21264916  |
| 0.224502399 | 0.191822971 | 0.168141009 | 0.38188005  |
| 0.213995504 | 0.110633431 | 0.251346923 | 0.19525915  |
| 0.156821914 | 0.316438748 | 0.194266684 | 0.392919684 |
| 0.163985479 | 0.245564051 | 0.25647201  | 0.329573647 |
| 0.269791594 | 0.146407101 | 0.113162713 | 0.181760094 |
| 0.316258895 | 0.11775627  | 0.179214778 | 0.241983231 |
| 0.098158651 | 0.262154039 | 0.217882451 | 0.192761721 |
| 0.099250597 | 0.31078178  | 0.173562367 | 0.256681072 |
| 0.236456796 | 0.194363204 | 0.18879406  | 0.332338396 |
| 0.12713059  | 0.048408926 | 0.373054874 | 0.008364388 |
| 0.19569117  | 0.183035526 | 0.265808789 | 0.195313854 |
| 0.225760835 | 0.256146187 | 0.204364698 | 0.010090107 |
| 0.274646925 | 0.049426044 | 0.258827733 | 0.141103945 |
| 0.147913076 | 0.17388648  | 0.339967796 | 0.335740503 |
| 0.269848662 | 0.185256333 | 0.118414886 | 0.344417542 |
| 0.075599009 | 0.132812584 | 0.173117048 | 0.199969368 |
| 0.107031145 | 0.153581791 | 0.173504241 | 0.131614837 |
| 0.24214011  | 0.2808994   |             |             |
| MRPS11      | 0.03476758  | 0.24569908  | 0.02194697  |
| 0.077902711 | 0.304655139 | 0.103594955 | 0.052005428 |
| 0.07551614  | 0.220855145 | 0.065878604 | 0.199130469 |

|             |             |             |             |
|-------------|-------------|-------------|-------------|
| 0.018015459 | 0.112212605 | 0.307203592 | 0.054538791 |
| 0.274175446 | 0.047186379 | 0.089575553 | 0.048826134 |
| 0.131519483 | 0.276404743 | 0.131796815 | 0.110541969 |
| 0.271754892 | 0.136324412 | 0.165094171 | 0.204907604 |
| 0.310202867 | 0.069373258 | 0.243093865 | 0.048465331 |
| 0.307506551 | 0.294854059 | 0.15724054  | 0.014105102 |
| 0.179663017 | 0.056469494 | 0.299281558 | 0.170086167 |
| 0.174456385 | 0.256802216 | 0.076521133 | 0.143233826 |
| 0.118975771 | 0.020471133 | 0.034049677 | 0.274727958 |
| 0.185388939 | 0.152526987 | 0.030979172 | 0.24900937  |
| 0.124753533 | 0.186316013 | 0.168649194 | 0.000765708 |
| 0.149800259 | 0.073014456 | 0.124041415 | 0.305644845 |
| 0.179212999 | 0.118521105 | 0.095468901 | 0.123955883 |
| 0.222754885 | 0.300398162 | 0.260466543 | 0.094912325 |
| 0.313579933 | 0.151929684 | 0.269065627 | 0.081915345 |
| 0.133883198 | 0.022397647 | 0.164310386 | 0.060526748 |
| 0.141985216 | 0.191685852 | 0.221618305 | 0.193902985 |
| 0.223861783 | 0.348037679 | 0.218892083 | 0.29106916  |
| 0.154017177 | 0.282458804 | 0.215905259 | 0.325588694 |
| 0.282127787 | 0.069493143 | 0.274309685 | 0.351513266 |
| 0.033666884 | 0.134016751 | 0.246085377 | 0.080578949 |
| 0.25517971  | 0.159140584 | 0.112750411 | 0.153564131 |
| 0.34214037  | 0.259869032 | 0.308375538 | 0.216028285 |
| 0.219973724 | 0.046691508 | 0.269431429 | 0.284099066 |
| 0.140637154 | 0.054313314 | 0.197757598 | 0.324460723 |
| 0.236929885 | 0.307577254 | 0.250252879 | 0.291577627 |
| 0.233175621 | 0.321701277 | 0.254121295 | 0.28134379  |
| 0.032192309 | 0.324047544 | 0.124663254 | 0.048626288 |
| 0.027743397 | 0.092705572 | 0.183089834 | 0.295600368 |
| 0.319657618 | 0.216859402 | 0.09167059  | 0.2244621   |
| 0.377854179 | 0.257569416 | 0.319876484 | 0.279497705 |
| 0.031132603 | 0.178572294 | 0.229393212 | 0.099775081 |
| 0.256376    | 0.112796392 | 0.218572835 | 0.305875464 |
| 0.272893162 | 0.334674161 | 0.062125375 | 0.320782492 |
| 0.116093739 | 0.365332589 | 0.247026103 | 0.134265403 |
| 0.331943535 | 0.289821509 | 0.377371121 | 0.312108649 |
| 0.297753657 | 0.134593709 | 0.042831948 | 0.279693646 |
| 0.366572575 | 0.031087716 | 0.317714674 | 0.344229688 |
| 0.29599661  | 0.316944499 | 0.391570368 | 0.344010643 |
| 0.290959764 | 0.066784757 | 0.025983815 | 0.304379029 |
| 0.305899182 | 0.289435412 | 0.141948943 | 0.178942394 |
| 0.277859367 | 0.122388178 | 0.29125823  | 0.083832565 |
| 0.382007523 | 0.316431073 | 0.310078214 | 0.245009719 |
| 0.148404149 | 0.233381816 | 0.214741469 | 0.257217302 |
| 0.048878021 | 0.045514349 | 0.033394741 | 0.279528034 |
| 0.067643853 | 0.196035552 | 0.099359284 | 0.262259382 |
| 0.201174004 | 0.109384633 | 0.127249781 | 0.31973103  |
| 0.040949468 | 0.167557175 | 0.119961963 | 0.095682008 |
| 0.053532199 | 0.125831034 | 0.08471106  | 0.10081803  |
| 0.212140074 | 0.151290022 | 0.239706751 | 0.352136002 |
| 0.172083974 | 0.123392206 | 0.227112423 | 0.360419181 |
| 0.370128965 | 0.234819277 | 0.205850938 | 0.019528747 |
| 0.126550096 | 0.103027369 | 0.149277078 | 0.20379302  |
| 0.136409624 | 0.120957758 | 0.240816718 | 0.337117771 |

|             |             |             |             |
|-------------|-------------|-------------|-------------|
| 0.101289822 | 0.06968811  | 0.138157153 | 0.291389336 |
| 0.100265848 | 0.144692579 | 0.330925063 | 0.167966005 |
| 0.004998914 | 0.164056086 | 0.296588346 | 0.220059169 |
| 0.207832233 | 0.109436969 | 0.113968105 | 0.338110327 |
| 0.127856778 | 0.18998453  | 0.334488571 | 0.352747897 |
| 0.086511613 | 0.134844217 | 0.373926247 | 0.045118604 |
| 0.241787865 | 0.086656581 | 0.299031315 | 0.089263104 |
| 0.187613343 | 0.296673273 | 0.272259765 | 0.19221388  |
| 0.066665442 | 0.322443911 | 0.279382774 | 0.333895841 |
| 0.128161676 | 0.374752437 | 0.319746561 | 0.310690278 |
| 0.242856619 | 0.159193302 | 0.121838471 | 0.28702707  |
| 0.3336999   | 0.107008009 | 0.050401537 | 0.278210878 |
| 0.130958382 | 0.299378726 | 0.206205749 | 0.35701292  |
| 0.344731775 | 0.249392137 | 0.115436521 | 0.367673257 |
| 0.281368408 | 0.133145132 | 0.324619956 | 0.382455497 |
| 0.086142051 | 0.208560386 | 0.162953935 | 0.402262431 |
| 0.146338785 | 0.196865779 | 0.26116576  | 0.145279142 |
| 0.009008871 | 0.048932105 | 0.04515845  | 0.1646517   |
| 0.199565571 | 0.189252077 | 0.302204111 | 0.334292573 |
| 0.097077047 | 0.291935574 | 0.210297192 | 0.138912107 |
| 0.263051922 | 0.182647721 | 0.23371591  | 0.271492716 |
| 0.22455482  | 0.035052269 | 0.085622714 | 0.342738575 |
| 0.025845161 | 0.158237282 | 0.141185106 | 0.004427041 |
| 0.029464433 | 0.207165357 | 0.078090173 | 0.161535274 |
| 0.380026872 | 0.150414362 | 0.137357115 | 0.077421433 |
| 0.296263003 | 0.084986407 | 0.013801198 | 0.337152666 |
| 0.327677908 | 0.321156158 | 0.315423028 | 0.286477503 |
| 0.331071366 | 0.278220893 | 0.341603522 | 0.117789693 |
| 0.074572058 | 0.041060081 | 0.176019167 | 0.196392598 |
| 0.002139093 | 0.330678478 | 0.24589133  | 0.137801367 |
| 0.297223358 | 0.246383225 | 0.027779132 | 0.2769156   |
| 0.013486228 | 0.113588905 | 0.098444566 | 0.165807383 |
| 0.37208085  | 0.013331129 | 0.063654513 | 0.128396009 |
| 0.235665569 | 0.226031126 | 0.13915121  | 0.338087835 |
| 0.206501434 | 0.069973316 | 0.218575417 | 0.313640566 |
| 0.058919894 | 0.0408744   | 0.107702251 | 0.008690814 |
| 0.057237983 | 0.305231596 | 0.131788836 | 0.043022445 |
| 0.199353157 | 0.005234164 | 0.229075208 | 0.342302925 |
| 0.250843081 | 0.363251095 | 0.323492476 | 0.168656214 |
| 0.317829141 | 0.080061579 | 0.337473392 | 0.238675444 |
| 0.085860759 | 0.00068129  | 0.010533543 | 0.340468131 |
| 0.222560192 | 0.035095266 | 0.147160656 | 0.075528008 |
| 0.094713038 | 0.051244727 | 0.05305372  | 0.224336007 |
| 0.205213126 | 0.245135279 | 0.188723689 | 0.264819792 |
| 0.179271416 | 0.222976241 | 0.100536965 | 0.070929187 |
| 0.238994691 | 0.051099904 | 0.077804535 | 0.012626284 |
| 0.335827241 | 0.076001163 | 0.264659342 | 0.310921775 |
| 0.349660667 | 0.327987142 | 0.068080743 | 0.088138936 |
| 0.340577641 | 0.045699068 | 0.106949629 | 0.05500543  |
| 0.271411927 | 0.264682849 | 0.266937263 | 0.219718432 |
| 0.361420264 | 0.304564578 | 0.032217944 | 0.31776342  |
| 0.01238403  | 0.010941203 | 0.107469322 | 0.222745338 |
| 0.100007505 | 0.191439472 | 0.231348492 | 0.132806948 |
| 0.160674093 | 0.017455603 | 0.179410584 | 0.186204725 |

|             |             |             |             |
|-------------|-------------|-------------|-------------|
| 0.264545731 | 0.207287785 | 0.256616089 | 0.215196236 |
| 1           | 0.192307746 | 0.15508631  | 0.113495397 |
| 0.119562513 | 0.21175746  | 0.135613015 | 0.024972299 |
| 0.158617461 | 0.192712636 | 0.046761561 | 0.133284966 |
| 0.316448299 | 0.328937335 | 0.05785756  | 0.022892963 |
| 0.206345958 | 0.169160132 | 0.354947912 | 0.288434649 |
| 0.317697139 | 0.375978317 | 0.280372306 | 0.144551526 |
| 0.046289256 | 0.291639204 | 0.284760068 | 0.195643723 |
| 0.322733537 | 0.038752657 | 0.289201024 | 0.23717595  |
| 0.118133762 | 0.132556421 | 0.04363793  | 0.088995527 |
| 0.237597037 | 0.161731709 | 0.204443416 | 0.078572738 |
| 0.167370013 | 0.17607927  | 0.044246135 | 0.169030656 |
| 0.248203326 | 0.174890608 | 0.145629731 | 0.112863161 |
| 0.24755143  | 0.060552996 | 0.293699178 | 0.346124335 |
| 0.098570021 | 0.086346558 | 0.061897931 | 0.298344102 |
| 0.282134548 | 0.154493003 | 0.015406622 | 0.241893178 |
| 0.351935853 | 0.229115902 | 0.292605142 | 0.355943587 |
| 0.08088116  | 0.198128182 | 0.176484798 | 0.251933989 |
| 0.16772451  | 0.114349733 | 0.193068978 | 0.061238659 |
| 0.276293794 | 0.324217004 | 0.26844802  | 0.135747416 |
| 0.184666241 | 0.062403795 | 0.032909042 | 0.294511444 |
| 0.202158279 | 0.044359236 | 0.082942433 | 0.311723836 |
| 0.013947046 | 0.154375928 | 0.38323662  | 0.114668636 |
| 0.365413349 | 0.35781898  | 0.313878408 | 0.113548684 |
| 0.010059605 | 0.30016987  | 0.234886376 | 0.144299428 |
| 0.243384147 | 0.229138695 | 0.090043261 | 0.086871392 |
| 0.292302166 | 0.045088289 | 0.112474958 | 0.083013898 |
| 0.134800812 | 0.18156547  | 0.218718569 | 0.168147244 |
| 0.203301535 | 0.06114864  | 0.174412651 | 0.138772958 |
| 0.194835557 | 0.236169887 | 0.298420932 | 0.056261588 |
| 0.094825551 | 0.338572667 | 0.256056476 | 0.020812261 |
| 0.227545196 | 0.330276023 | 0.337357577 | 0.003588593 |
| 0.278070342 | 0.011651229 | 0.186437289 | 0.180445361 |
| 0.179043582 | 0.163416357 | 0.299487908 | 0.187213301 |
| 0.208714815 | 0.161204393 | 0.137656234 | 0.221181087 |
| 0.146833477 | 0.151460029 | 0.260339762 | 0.153015623 |
| 0.146024376 | 0.076345908 | 0.077944039 | 0.071488466 |
| 0.044318043 | 0.288844799 | 0.200520943 | 0.04870765  |
| 0.227571409 | 0.143414906 | 0.324260222 | 0.276462454 |
| 0.353766114 | 0.065312104 | 0.170280795 | 0.249417886 |
| 0.061270162 | 0.076664991 | 0.027166535 | 0.183228435 |
| 0.155190195 | 0.146704655 | 0.144820085 | 0.124958088 |
| 0.221990419 | 0.29651924  | 0.18925953  | 0.337665702 |
| 0.180341259 | 0.179735351 | 0.055113824 | 0.094666523 |
| 0.100793817 | 0.115599445 | 0.275708878 | 0.00381994  |
| 0.239459958 | 0.069650058 | 0.30805317  | 0.286334806 |
| 0.142642201 | 0.318054189 | 0.052033299 | 0.050865609 |
| 0.049742091 | 0.103368326 | 0.127332284 | 0.266405658 |
| 0.120141526 | 0.109861123 | 0.284023939 | 0.064179557 |
| 0.309332411 | 0.278975929 | 0.20792828  | 0.117794358 |
| 0.219956423 | 0.129894323 | 0.309950174 | 0.053618218 |
| 0.188742318 | 0.201726192 | 0.134124586 | 0.196891569 |
| 0.201995692 | 0.345045313 | 0.049694022 | 0.342750834 |
| 0.186280425 | 0.104986101 | 0.354055247 | 0.149492191 |

|             |             |             |             |
|-------------|-------------|-------------|-------------|
| 0.117078127 | 0.141475893 | 0.151473344 | 0.090649791 |
| 0.146309498 | 0.142576606 | 0.004847643 | 0.058555761 |
| 0.300296578 | 0.124630228 | 0.220314507 | 0.303601843 |
| 0.226650707 | 0.356099513 | 0.126576293 | 0.124955682 |
| 0.256765254 | 0.289147192 | 0.107101779 | 0.263005035 |
| 0.244566683 | 0.075087993 | 0.150788229 | 0.017953951 |
| 0.221657527 | 0.205952276 | 0.08980732  | 0.049044862 |
| 0.023930438 | 0.149525865 | 0.211222442 | 0.051138362 |
| 0.375009821 | 0.106185316 | 0.182425451 | 0.26243847  |
| 0.151965919 | 0.289622336 | 0.144361464 | 0.289080702 |
| 0.034534202 | 0.236677607 | 0.216781302 | 0.168455863 |
| 0.143320951 | 0.209249502 | 0.318912459 | 0.172930765 |
| 0.037896657 | 0.175466643 | 0.006498415 | 0.275719562 |
| 0.264304522 | 0.221783633 | 0.183067679 | 0.068198282 |
| 0.299270494 | 0.309798804 | 0.13256109  | 0.16486368  |
| 0.021930924 | 0.264851114 | 0.183627859 | 0.245130377 |
| 0.079358219 | 0.195421708 | 0.070898466 | 0.250211162 |
| 0.256141321 | 0.117731396 | 0.234726546 | 0.109405372 |
| 0.284261035 | 0.256040592 | 0.09662012  | 0.194703843 |
| 0.197521923 | 0.054236245 | 0.079716552 | 0.355355429 |
| 0.158446911 | 0.193820495 | 0.354528204 | 0.136179539 |
| 0.193224517 | 0.249634469 | 0.19592189  | 0.343638934 |
| 0.116621386 | 0.218916958 | 0.326870903 | 0.298051432 |
| 0.30917993  | 0.21804069  | 0.155203214 | 0.173602968 |
| 0.247687815 | 0.056721566 | 0.190846511 | 0.242826592 |
| 0.165140408 | 0.268616863 | 0.138762032 | 0.195393967 |
| 0.038916577 | 0.115226794 | 0.103822982 | 0.131131217 |
| 0.225741646 | 0.244502335 | 0.228246367 | 0.315481362 |
| 0.102830416 | 0.031768304 | 0.35323392  | 0.033517532 |
| 0.123935047 | 0.274583171 | 0.18860911  | 0.213026427 |
| 0.1378823   | 0.198879621 | 0.118864299 | 0.000931757 |
| 0.341621661 | 0.124952582 | 0.164909428 | 0.168306162 |
| 0.120063353 | 0.033552655 | 0.293998464 | 0.370310772 |
| 0.211214804 | 0.111938588 | 0.103164789 | 0.293070897 |
| 0.164732522 | 0.112427933 | 0.132786267 | 0.189430409 |
| 0.175414928 | 0.101297368 | 0.129641371 | 0.139984318 |
| 0.248314715 | 0.119724624 |             |             |
| MRPS18A     | 0.023681893 | 0.110739353 | 0.01115049  |
| 0.014899108 | 0.251905061 | 0.0416431   | 0.042688725 |
| 0.047936365 | 0.117284368 | 0.02563026  | 0.123376763 |
| 0.010777119 | 0.020428289 | 0.181559384 | 0.041013189 |
| 0.202084953 | 0.035225067 | 0.092742754 | 0.015420693 |
| 0.015689897 | 0.259633775 | 0.047836856 | 0.047696667 |
| 0.234581127 | 0.081309657 | 0.084894247 | 0.129162291 |
| 0.153863784 | 0.010458684 | 0.124814454 | 0.004040351 |
| 0.196997937 | 0.242041592 | 0.086624819 | 0.005524206 |
| 0.095757494 | 0.025388797 | 0.179682614 | 0.167343284 |
| 0.024607104 | 0.153510522 | 0.02975644  | 0.115322705 |
| 0.07178873  | 0.01434863  | 0.002808786 | 0.192413147 |
| 0.108020552 | 0.088649916 | 0.017839711 | 0.125890761 |
| 0.077658205 | 0.096626281 | 0.07535667  | 0.000469387 |
| 0.101650127 | 0.022052493 | 0.076826044 | 0.144746238 |
| 0.13188345  | 0.106519551 | 0.030397485 | 0.069676563 |
| 0.142115546 | 0.218991257 | 0.187123726 | 0.05844717  |



|             |             |             |             |
|-------------|-------------|-------------|-------------|
| 0.16621521  | 0.081909831 | 0.153156033 | 0.012160257 |
| 0.081794735 | 0.018752464 | 0.1331478   | 0.03852261  |
| 0.076827054 | 0.153586638 | 0.138951984 | 0.1497975   |
| 0.104621566 | 0.189166176 | 0.169328532 | 0.142526075 |
| 0.041124813 | 0.232641137 | 0.141172896 | 0.266099387 |
| 0.200441524 | 0.052113591 | 0.175102952 | 0.200366439 |
| 0.026760727 | 0.065398678 | 0.171708304 | 0.055232447 |
| 0.112700888 | 0.070313074 | 0.049762759 | 0.086201025 |
| 0.25358326  | 0.239783887 | 0.159414146 | 0.165677915 |
| 0.142585298 | 0.031905211 | 0.12368584  | 0.231187367 |
| 0.100002989 | 0.038444665 | 0.151205818 | 0.184985731 |
| 0.15139926  | 0.154873268 | 0.136615536 | 0.220719227 |
| 0.192441447 | 0.167246586 | 0.158357484 | 0.146587357 |
| 0.002433583 | 0.161892907 | 0.085479091 | 0.028580777 |
| 0.019319608 | 0.06563536  | 0.105473648 | 0.197457299 |
| 0.163224224 | 0.133905505 | 0.07791418  | 0.223654679 |
| 0.244037455 | 0.114604621 | 0.163097527 | 0.189410225 |
| 0.027079402 | 0.0983687   | 0.189853254 | 0.038658213 |
| 0.187065349 | 0.091536935 | 0.194757104 | 0.155554601 |
| 0.165173993 | 0.213791129 | 0.038672095 | 0.168038626 |
| 0.095999919 | 0.20688114  | 0.111978769 | 0.120584245 |
| 0.173159863 | 0.138259232 | 0.219225181 | 0.208290384 |
| 0.143081022 | 0.07406473  | 0.007945515 | 0.185880985 |
| 0.211779004 | 0.005526472 | 0.170274127 | 0.193210686 |
| 0.148724017 | 0.188111518 | 0.233527505 | 0.180328445 |
| 0.140214006 | 0.056582106 | 0.006818822 | 0.292542953 |
| 0.159309853 | 0.175076597 | 0.086475143 | 0.119389787 |
| 0.213130244 | 0.060647382 | 0.156927467 | 0.012667039 |
| 0.226486862 | 0.168009901 | 0.158293237 | 0.162072414 |
| 0.093411754 | 0.142672464 | 0.147156471 | 0.115927575 |
| 0.021098703 | 0.030621727 | 0.021318768 | 0.197838142 |
| 0.016698645 | 0.180977503 | 0.057794617 | 0.194889705 |
| 0.176000657 | 0.054821635 | 0.074391174 | 0.242685718 |
| 0.026625251 | 0.082729664 | 0.086354798 | 0.083548112 |
| 0.044301915 | 0.084347272 | 0.031632355 | 0.037613377 |
| 0.193571899 | 0.085402994 | 0.13075647  | 0.194022893 |
| 0.128570915 | 0.078899051 | 0.130762291 | 0.211855091 |
| 0.255527653 | 0.16771489  | 0.149714046 | 0.003883337 |
| 0.068275052 | 0.052340478 | 0.097570988 | 0.115534674 |
| 0.078223026 | 0.08150556  | 0.1947568   | 0.229316079 |
| 0.058893954 | 0.04358509  | 0.113345771 | 0.159084057 |
| 0.06378665  | 0.095149092 | 0.221263057 | 0.098265372 |
| 0.000909922 | 0.133081541 | 0.167831647 | 0.077431813 |
| 0.155154573 | 0.019829383 | 0.034543472 | 0.208116393 |
| 0.054675364 | 0.160888351 | 0.169489094 | 0.229599631 |
| 0.008660747 | 0.07240353  | 0.211890311 | 0.014035663 |
| 0.172241235 | 0.019118805 | 0.258128079 | 0.039250742 |
| 0.157118638 | 0.256105752 | 0.208288426 | 0.149091415 |
| 0.037118168 | 0.168143273 | 0.148968702 | 0.175019212 |
| 0.091607573 | 0.213763492 | 0.185730512 | 0.180164439 |
| 0.143059431 | 0.116136518 | 0.048600291 | 0.178752863 |
| 0.198445566 | 0.020123454 | 0.030202171 | 0.157129218 |
| 0.096516412 | 0.222768357 | 0.047237725 | 0.2170919   |
| 0.188051146 | 0.111607098 | 0.092492102 | 0.286550292 |

|             |             |             |             |
|-------------|-------------|-------------|-------------|
| 0.182786812 | 0.08753846  | 0.185458576 | 0.217397162 |
| 0.034838256 | 0.189143015 | 0.149709216 | 0.289058286 |
| 0.116768165 | 0.150432471 | 0.159946465 | 0.065044895 |
| 0.000487419 | 0.036139105 | 0.037483893 | 0.159999584 |
| 0.147527052 | 0.094120543 | 0.20953896  | 0.185158916 |
| 0.092887553 | 0.148317472 | 0.152459296 | 0.122971517 |
| 0.162278942 | 0.138699695 | 0.137871236 | 0.178654905 |
| 0.161827805 | 0.005365674 | 0.017315886 | 0.190580294 |
| 0.0175024   | 0.094498298 | 0.085326153 | 0.000819093 |
| 0.025529531 | 0.093304257 | 0.053932154 | 0.105763674 |
| 0.225700662 | 0.092678265 | 0.113139553 | 0.044732251 |
| 0.199092564 | 0.066642131 | 0.001727348 | 0.186762242 |
| 0.170558209 | 0.173712969 | 0.164259424 | 0.138050797 |
| 0.200411958 | 0.144177426 | 0.236357916 | 0.047667343 |
| 0.051489822 | 0.031407988 | 0.138344657 | 0.200837505 |
| 0.00043176  | 0.202075482 | 0.178304134 | 0.111528002 |
| 0.187396475 | 0.196055193 | 0.017042594 | 0.188666394 |
| 0.002732282 | 0.066488359 | 0.048682812 | 0.144812853 |
| 0.27912576  | 0.008024475 | 0.006685732 | 0.06555825  |
| 0.108709547 | 0.130542079 | 0.087243045 | 0.172854807 |
| 0.14791945  | 0.040294548 | 0.190664599 | 0.185732862 |
| 0.055038731 | 0.014456195 | 0.060201656 | 0.000763715 |
| 0.003661183 | 0.154436027 | 0.085039052 | 0.013443533 |
| 0.169934826 | 0.002203064 | 0.127635548 | 0.180982066 |
| 0.109993013 | 0.2117674   | 0.165742137 | 0.133412013 |
| 0.164498639 | 0.020124529 | 0.173872755 | 0.124200545 |
| 0.052464822 | 0.000145575 | 0.002173807 | 0.191899114 |
| 0.176102614 | 0.018128528 | 0.125254995 | 0.013322946 |
| 0.050128755 | 0.033246478 | 0.037365512 | 0.17027857  |
| 0.094994944 | 0.215930612 | 0.114552283 | 0.133951098 |
| 0.178313666 | 0.184171475 | 0.048928103 | 0.050622943 |
| 0.131945091 | 0.028665417 | 0.059198716 | 0.002344559 |
| 0.23364864  | 0.048760493 | 0.126104013 | 0.15437547  |
| 0.20177693  | 0.233283726 | 0.031405934 | 0.009952679 |
| 0.188102997 | 0.021237004 | 0.024929671 | 0.029784909 |
| 0.12912921  | 0.218838839 | 0.196330542 | 0.14306312  |
| 0.225378695 | 0.175918017 | 0.029435005 | 0.229829858 |
| 0.001240799 | 0.002192762 | 0.052404558 | 0.165685685 |
| 0.018197681 | 0.162596775 | 0.181779886 | 0.083763437 |
| 0.093836896 | 0.003295151 | 0.157556679 | 0.197935948 |
| 0.243910335 | 0.187121656 | 0.242890034 | 0.144734009 |
| 0.192307746 | 1           | 0.111370776 | 0.087756476 |
| 0.016453858 | 0.1300931   | 0.085388257 | 0.020804812 |
| 0.085376214 | 0.131909892 | 0.040386099 | 0.093014328 |
| 0.186005233 | 0.18594826  | 0.022637686 | 0.006575364 |
| 0.141695411 | 0.154953537 | 0.205663429 | 0.13630157  |
| 0.160070103 | 0.22424304  | 0.164410211 | 0.114325364 |
| 0.032175301 | 0.233246149 | 0.255493247 | 0.096186073 |
| 0.165806737 | 0.029177722 | 0.130562485 | 0.186105237 |
| 0.101953794 | 0.105721987 | 0.014154378 | 0.083339177 |
| 0.147463564 | 0.127652927 | 0.198868926 | 0.050859582 |
| 0.164718209 | 0.075689243 | 0.042463281 | 0.152557492 |
| 0.191332752 | 0.077992879 | 0.135987448 | 0.057020111 |
| 0.131322081 | 0.010609012 | 0.201480846 | 0.217557321 |

|             |             |             |             |
|-------------|-------------|-------------|-------------|
| 0.069260761 | 0.079503174 | 0.024793542 | 0.17851753  |
| 0.156235974 | 0.077062129 | 0.001389208 | 0.109301855 |
| 0.194024212 | 0.132579566 | 0.136492056 | 0.263448994 |
| 0.066039008 | 0.141878367 | 0.140188384 | 0.237639869 |
| 0.147004351 | 0.044993582 | 0.1659666   | 0.055182008 |
| 0.179082302 | 0.173424339 | 0.156576477 | 0.114980318 |
| 0.084802893 | 0.036232107 | 0.025142228 | 0.142343733 |
| 0.148942481 | 0.016171857 | 0.031345232 | 0.179689082 |
| 0.003200473 | 0.08939307  | 0.225921258 | 0.057786623 |
| 0.201014342 | 0.215428765 | 0.185316739 | 0.047329101 |
| 0.015652113 | 0.212086343 | 0.17001185  | 0.100074083 |
| 0.132426314 | 0.123285534 | 0.009509783 | 0.05975281  |
| 0.210415244 | 0.025180341 | 0.081889922 | 0.005703476 |
| 0.029229179 | 0.104922607 | 0.180240719 | 0.1350889   |
| 0.203816576 | 0.040051401 | 0.051133998 | 0.090981199 |
| 0.053338611 | 0.186272371 | 0.219517891 | 0.01583763  |
| 0.038213739 | 0.222317931 | 0.172729382 | 0.012044206 |
| 0.14371234  | 0.206604092 | 0.18199342  | 0.003625103 |
| 0.184968949 | 0.005476048 | 0.182607285 | 0.16215776  |
| 0.159426073 | 0.169830843 | 0.272762902 | 0.139034805 |
| 0.159295316 | 0.157033945 | 0.104951454 | 0.178707997 |
| 0.10236458  | 0.110640889 | 0.179928943 | 0.098937566 |
| 0.112135639 | 0.054604099 | 0.046199156 | 0.03927443  |
| 0.009818081 | 0.134728993 | 0.130877472 | 0.027270948 |
| 0.184645828 | 0.096631417 | 0.226865603 | 0.129993784 |
| 0.20639971  | 0.030703976 | 0.13028448  | 0.120199222 |
| 0.009890789 | 0.008909419 | 0.016969875 | 0.097724584 |
| 0.1171897   | 0.079524995 | 0.063243423 | 0.078457268 |
| 0.127255816 | 0.17197684  | 0.117601864 | 0.184102573 |
| 0.125975319 | 0.135458175 | 0.02318989  | 0.048325581 |
| 0.095068489 | 0.085556356 | 0.254411701 | 0.00089606  |
| 0.160744827 | 0.015923628 | 0.172278127 | 0.138044524 |
| 0.093934037 | 0.184810279 | 0.005718887 | 0.037475875 |
| 0.009230854 | 0.058430294 | 0.10354057  | 0.140988918 |
| 0.072034136 | 0.067943737 | 0.255162495 | 0.016224415 |
| 0.195305956 | 0.165810404 | 0.137904585 | 0.089279202 |
| 0.175661529 | 0.080678262 | 0.163988421 | 0.033061075 |
| 0.109909722 | 0.14129903  | 0.060330068 | 0.1920807   |
| 0.210684496 | 0.181176384 | 0.037000348 | 0.183866811 |
| 0.186722304 | 0.065751087 | 0.200090817 | 0.071607119 |
| 0.035257636 | 0.037488348 | 0.106906    | 0.045729693 |
| 0.087177789 | 0.079723577 | 0.00064954  | 0.018537619 |
| 0.231780391 | 0.077944974 | 0.123609767 | 0.202519935 |
| 0.199553313 | 0.276719808 | 0.021547758 | 0.099903073 |
| 0.115163142 | 0.137099149 | 0.053530698 | 0.214829597 |
| 0.173861674 | 0.056034145 | 0.059538515 | 0.004420962 |
| 0.155822483 | 0.121829306 | 0.034298103 | 0.035726717 |
| 0.008392053 | 0.125584363 | 0.153593523 | 0.037402633 |
| 0.23315275  | 0.021557552 | 0.100293765 | 0.134507349 |
| 0.103638495 | 0.142028019 | 0.10456111  | 0.189348414 |
| 0.011031836 | 0.173818455 | 0.129754534 | 0.104027049 |
| 0.091848462 | 0.197720597 | 0.239795313 | 0.146053153 |
| 0.030422048 | 0.070637029 | 0.016960383 | 0.156158486 |
| 0.127330938 | 0.19777871  | 0.123333164 | 0.021044346 |

|             |             |             |             |
|-------------|-------------|-------------|-------------|
| 0.233893692 | 0.170304159 | 0.046329114 | 0.079794649 |
| 0.003541818 | 0.210119537 | 0.137400723 | 0.116224338 |
| 0.027665473 | 0.149444985 | 0.018063498 | 0.217595865 |
| 0.11951175  | 0.051681357 | 0.164647088 | 0.049332433 |
| 0.131441739 | 0.122526176 | 0.049613479 | 0.061681896 |
| 0.110832413 | 0.040587274 | 0.030521956 | 0.193838011 |
| 0.143679611 | 0.188883085 | 0.235562219 | 0.144361719 |
| 0.15074013  | 0.12304635  | 0.106677564 | 0.181724044 |
| 0.090860138 | 0.180533956 | 0.197199553 | 0.175460289 |
| 0.235774638 | 0.197237153 | 0.119490996 | 0.195835043 |
| 0.110920827 | 0.010704141 | 0.115703559 | 0.16418648  |
| 0.160469131 | 0.186092423 | 0.062774337 | 0.200925747 |
| 0.007159761 | 0.069974968 | 0.03439046  | 0.101960179 |
| 0.210507494 | 0.190070315 | 0.179722768 | 0.200591287 |
| 0.029862179 | 0.006851667 | 0.211489034 | 0.015277032 |
| 0.048553993 | 0.174160648 | 0.12887322  | 0.164068979 |
| 0.085225689 | 0.140839152 | 0.077229327 | 0.000423288 |
| 0.221191496 | 0.016710156 | 0.10435935  | 0.127507421 |
| 0.019342236 | 0.0268002   | 0.139457129 | 0.215557048 |
| 0.113834634 | 0.012138043 | 0.029196118 | 0.145449583 |
| 0.036599671 | 0.057833655 | 0.081898562 | 0.09712715  |
| 0.130268596 | 0.054869594 | 0.070107821 | 0.085125882 |
| 0.133190015 | 0.067429409 |             |             |
| MRPS23      | 0.094414542 | 0.211768317 | 0.065035173 |
| 0.116999334 | 0.221798523 | 0.101271357 | 0.097100488 |
| 0.126641959 | 0.188452481 | 0.033819115 | 0.196812946 |
| 0.061831662 | 0.056203355 | 0.273063649 | 0.108753499 |
| 0.17056485  | 0.113539778 | 0.158686187 | 0.042134345 |
| 0.097166658 | 0.200469748 | 0.090649371 | 0.109178292 |
| 0.186467303 | 0.226334024 | 0.142912171 | 0.117128243 |
| 0.257172995 | 0.038664908 | 0.189987284 | 0.025096287 |
| 0.311396145 | 0.203734474 | 0.09262744  | 0.052695745 |
| 0.149739478 | 0.021595227 | 0.299895935 | 0.14120062  |
| 0.094762336 | 0.30590525  | 0.054807929 | 0.174733714 |
| 0.07123607  | 0.06126121  | 0.021298976 | 0.163560109 |
| 0.149680099 | 0.137704242 | 0.07867855  | 0.188468934 |
| 0.073375775 | 0.230110895 | 0.125929055 | 0.002455697 |
| 0.084262727 | 0.022083882 | 0.047559913 | 0.286633193 |
| 0.289001012 | 0.215072093 | 0.035768195 | 0.135761778 |
| 0.142054316 | 0.209952436 | 0.306086344 | 0.048678247 |
| 0.283244879 | 0.067126984 | 0.179101289 | 0.106833376 |
| 0.102355295 | 0.050998419 | 0.271274237 | 0.104781655 |
| 0.083624113 | 0.275892793 | 0.206343035 | 0.102823684 |
| 0.185938948 | 0.339752311 | 0.257707144 | 0.265781247 |
| 0.061151278 | 0.16351493  | 0.137663755 | 0.313969732 |
| 0.210572511 | 0.092053601 | 0.234732477 | 0.319441808 |
| 0.070625497 | 0.090041154 | 0.173708684 | 0.143031852 |
| 0.23735594  | 0.076745052 | 0.076086688 | 0.093481397 |
| 0.225784149 | 0.157833836 | 0.290098436 | 0.25842848  |
| 0.176663416 | 0.100700809 | 0.270181511 | 0.165158879 |
| 0.144497076 | 0.120745603 | 0.117381802 | 0.227726128 |
| 0.174222702 | 0.267365923 | 0.188874244 | 0.236713936 |
| 0.136524648 | 0.285764441 | 0.213732375 | 0.263051395 |
| 0.016919879 | 0.28609613  | 0.201445256 | 0.131992555 |

|             |             |             |             |
|-------------|-------------|-------------|-------------|
| 0.065149964 | 0.176830863 | 0.102019463 | 0.345956395 |
| 0.262524196 | 0.241530599 | 0.14056646  | 0.220090088 |
| 0.278058605 | 0.250237145 | 0.271580936 | 0.234328912 |
| 0.083483874 | 0.073800587 | 0.135304888 | 0.126168925 |
| 0.20627892  | 0.196008857 | 0.125697383 | 0.298079956 |
| 0.302087574 | 0.24774976  | 0.102297475 | 0.332281637 |
| 0.131060943 | 0.343916266 | 0.205386497 | 0.208328428 |
| 0.313838193 | 0.28999486  | 0.329891452 | 0.213059378 |
| 0.310912094 | 0.142846347 | 0.024962395 | 0.240710622 |
| 0.357403429 | 0.020810227 | 0.241007674 | 0.26130954  |
| 0.259598454 | 0.225535154 | 0.323458123 | 0.288999722 |
| 0.261808105 | 0.144054395 | 0.004865558 | 0.265080958 |
| 0.278657479 | 0.285494544 | 0.180281207 | 0.104132283 |
| 0.189048104 | 0.11677998  | 0.224152247 | 0.05570265  |
| 0.370478723 | 0.265517429 | 0.247391103 | 0.202048254 |
| 0.106957933 | 0.305756504 | 0.113483582 | 0.265772294 |
| 0.121509513 | 0.099265609 | 0.095035742 | 0.279261181 |
| 0.049648749 | 0.279781856 | 0.088049335 | 0.170495012 |
| 0.2916761   | 0.107497435 | 0.071704629 | 0.223777183 |
| 0.100074779 | 0.121095371 | 0.185977569 | 0.12691718  |
| 0.11974655  | 0.234710448 | 0.109125174 | 0.180339122 |
| 0.223583253 | 0.223499372 | 0.17304673  | 0.28579964  |
| 0.111281277 | 0.191237938 | 0.183508279 | 0.3462126   |
| 0.373508779 | 0.150833717 | 0.280381288 | 0.055510859 |
| 0.069688732 | 0.04136066  | 0.056537904 | 0.128246277 |
| 0.230671827 | 0.098098802 | 0.15970536  | 0.258805376 |
| 0.124778479 | 0.105110047 | 0.078031282 | 0.340091007 |
| 0.158433356 | 0.13192406  | 0.273795209 | 0.108885764 |
| 0.027926377 | 0.151206087 | 0.237098728 | 0.134893615 |
| 0.185374495 | 0.073587519 | 0.072261495 | 0.257692456 |
| 0.062838802 | 0.109429104 | 0.274015202 | 0.264334078 |
| 0.072560463 | 0.193515432 | 0.31695274  | 0.010689619 |
| 0.144073371 | 0.12071679  | 0.312039449 | 0.059588435 |
| 0.222754869 | 0.303865481 | 0.186689845 | 0.139791107 |
| 0.132406991 | 0.288633201 | 0.285459849 | 0.28464283  |
| 0.061752636 | 0.317506339 | 0.246111191 | 0.288185764 |
| 0.233495937 | 0.081385781 | 0.046627393 | 0.224875121 |
| 0.252761895 | 0.051929024 | 0.110962542 | 0.189487218 |
| 0.067340459 | 0.195005548 | 0.16953145  | 0.304367229 |
| 0.358376438 | 0.228225578 | 0.179405691 | 0.29057793  |
| 0.28365736  | 0.200476633 | 0.282092952 | 0.337485789 |
| 0.036737232 | 0.122005244 | 0.091655947 | 0.331319219 |
| 0.224223637 | 0.118461924 | 0.306070136 | 0.060177013 |
| 0.004653622 | 0.108719019 | 0.11058628  | 0.225652114 |
| 0.113666608 | 0.123682219 | 0.210044216 | 0.286769349 |
| 0.186223365 | 0.312005591 | 0.239218021 | 0.099029554 |
| 0.238589828 | 0.117960626 | 0.154566922 | 0.203226929 |
| 0.287894843 | 0.083742476 | 0.154619345 | 0.333005161 |
| 0.067684562 | 0.09467786  | 0.141873385 | 0.013556571 |
| 0.067694401 | 0.159395647 | 0.153101976 | 0.268391844 |
| 0.315731349 | 0.238122117 | 0.17807387  | 0.037765238 |
| 0.303555927 | 0.181635535 | 0.05010993  | 0.266637173 |
| 0.279478925 | 0.27247919  | 0.268109179 | 0.270896213 |
| 0.251317076 | 0.222953947 | 0.2462534   | 0.12767222  |

|             |             |             |             |
|-------------|-------------|-------------|-------------|
| 0.12477347  | 0.079225235 | 0.078218963 | 0.160775427 |
| 0.005122364 | 0.319084831 | 0.199678615 | 0.247093271 |
| 0.217732572 | 0.229100197 | 0.088380325 | 0.195002597 |
| 0.042962028 | 0.048007442 | 0.08002448  | 0.177760532 |
| 0.300005561 | 0.052666249 | 0.044674613 | 0.060940559 |
| 0.249130026 | 0.260293183 | 0.073947216 | 0.302765026 |
| 0.211982593 | 0.105843411 | 0.171019496 | 0.277110129 |
| 0.114936174 | 0.017021153 | 0.081544796 | 0.005160557 |
| 0.071230474 | 0.295151951 | 0.080893475 | 0.077641667 |
| 0.224274675 | 0.030234172 | 0.252176873 | 0.313656269 |
| 0.235903219 | 0.292950979 | 0.295130108 | 0.106651055 |
| 0.285163243 | 0.02322386  | 0.286822545 | 0.209449443 |
| 0.047243563 | 0.003057586 | 0.035303961 | 0.262620415 |
| 0.143404011 | 0.088400089 | 0.23599051  | 0.066850768 |
| 0.157876732 | 0.083418058 | 0.125192149 | 0.140337978 |
| 0.176139932 | 0.239438477 | 0.130739566 | 0.245127275 |
| 0.184385787 | 0.269897946 | 0.073386479 | 0.145235385 |
| 0.183723562 | 0.122345823 | 0.144387394 | 0.030000594 |
| 0.272723342 | 0.141741167 | 0.27711739  | 0.275918054 |
| 0.33544282  | 0.24304066  | 0.034594139 | 0.079110434 |
| 0.273402023 | 0.091750314 | 0.064906073 | 0.108572961 |
| 0.240394626 | 0.178940675 | 0.30810279  | 0.265587943 |
| 0.315855042 | 0.289700099 | 0.088398156 | 0.238396868 |
| 0.058273499 | 0.016312392 | 0.092464393 | 0.267820899 |
| 0.045389481 | 0.109585869 | 0.290868829 | 0.096698295 |
| 0.144306827 | 0.062972584 | 0.080708174 | 0.0898107   |
| 0.248112895 | 0.153435071 | 0.17177737  | 0.243661911 |
| 0.15508631  | 0.111370776 | 1           | 0.15692469  |
| 0.076839959 | 0.226151407 | 0.218622048 | 0.068453036 |
| 0.101352186 | 0.125218971 | 0.125613859 | 0.237263797 |
| 0.272414674 | 0.266253871 | 0.096463046 | 0.067201751 |
| 0.274592164 | 0.127839006 | 0.294746735 | 0.251314919 |
| 0.303636398 | 0.337288939 | 0.331666462 | 0.157219049 |
| 0.115254927 | 0.23238539  | 0.183221395 | 0.201965519 |
| 0.287295907 | 0.080373184 | 0.278173516 | 0.125854028 |
| 0.206378729 | 0.142628071 | 0.128554242 | 0.176232554 |
| 0.154681061 | 0.268865485 | 0.251015942 | 0.123952617 |
| 0.132467797 | 0.099064859 | 0.096602096 | 0.235933462 |
| 0.236032683 | 0.062495967 | 0.22511199  | 0.119173988 |
| 0.240030695 | 0.030095036 | 0.195011342 | 0.347462106 |
| 0.19285441  | 0.133755425 | 0.059055032 | 0.247365546 |
| 0.205644603 | 0.092805988 | 0.066338428 | 0.203482835 |
| 0.310358148 | 0.162488071 | 0.279504122 | 0.326124503 |
| 0.161131169 | 0.140854581 | 0.087058191 | 0.167635125 |
| 0.231033815 | 0.115241297 | 0.215000563 | 0.144550788 |
| 0.333008133 | 0.3303495   | 0.222881154 | 0.215685208 |
| 0.136973024 | 0.106103514 | 0.069052558 | 0.25185807  |
| 0.09174051  | 0.089009273 | 0.058235536 | 0.228554479 |
| 0.025822461 | 0.07109629  | 0.305664154 | 0.167163778 |
| 0.33716732  | 0.284538001 | 0.31951123  | 0.125121178 |
| 0.002537267 | 0.179861572 | 0.201620356 | 0.099278321 |
| 0.210369691 | 0.261903566 | 0.113926915 | 0.159091307 |
| 0.360050891 | 0.104078799 | 0.135566869 | 0.075934388 |
| 0.042825507 | 0.147027593 | 0.314879287 | 0.184103873 |

|             |             |             |             |
|-------------|-------------|-------------|-------------|
| 0.21223361  | 0.099554089 | 0.100615584 | 0.193289428 |
| 0.078366056 | 0.327876518 | 0.304429149 | 0.0378264   |
| 0.040600864 | 0.276726687 | 0.196046381 | 0.072710209 |
| 0.149147644 | 0.262283173 | 0.315900666 | 0.004967952 |
| 0.203253938 | 0.055569658 | 0.223158503 | 0.213578708 |
| 0.216703892 | 0.174510894 | 0.286000255 | 0.136934521 |
| 0.16916853  | 0.182453679 | 0.165317777 | 0.298605928 |
| 0.196400826 | 0.201324924 | 0.191027068 | 0.114574596 |
| 0.131023428 | 0.143657565 | 0.163439349 | 0.150798403 |
| 0.134009064 | 0.254063915 | 0.305320694 | 0.118137544 |
| 0.296636805 | 0.102737747 | 0.367914251 | 0.242598438 |
| 0.35762849  | 0.123551267 | 0.139832077 | 0.216728862 |
| 0.02558593  | 0.070665975 | 0.063698356 | 0.149327563 |
| 0.232441873 | 0.112048054 | 0.114064405 | 0.117500823 |
| 0.155720732 | 0.336736292 | 0.298381215 | 0.326881407 |
| 0.145577072 | 0.107690234 | 0.033567576 | 0.1674358   |
| 0.145966648 | 0.190447332 | 0.194470893 | 0.022306131 |
| 0.238276876 | 0.085921494 | 0.238642758 | 0.268913265 |
| 0.06848062  | 0.356196418 | 0.037764219 | 0.093715514 |
| 0.030296187 | 0.150514661 | 0.230902525 | 0.198141566 |
| 0.052096186 | 0.173693317 | 0.218974595 | 0.065016383 |
| 0.219581988 | 0.182738377 | 0.131033449 | 0.143450594 |
| 0.228952674 | 0.187809878 | 0.292692593 | 0.105466386 |
| 0.115916477 | 0.144628471 | 0.102325853 | 0.16136195  |
| 0.194824103 | 0.282913344 | 0.132739865 | 0.27774704  |
| 0.117852403 | 0.194580967 | 0.366941173 | 0.179413993 |
| 0.125284973 | 0.225917435 | 0.061194246 | 0.068758777 |
| 0.144155039 | 0.079859796 | 0.001507609 | 0.030228278 |
| 0.308294604 | 0.072293436 | 0.157943714 | 0.246469113 |
| 0.145028498 | 0.327818379 | 0.064984256 | 0.124796766 |
| 0.237489756 | 0.28866104  | 0.097589762 | 0.317609774 |
| 0.247865075 | 0.156907795 | 0.143231073 | 0.011134997 |
| 0.13764555  | 0.120403338 | 0.049214103 | 0.121482798 |
| 0.073522869 | 0.057404548 | 0.134029855 | 0.095084945 |
| 0.291127298 | 0.049398257 | 0.128825941 | 0.211687111 |
| 0.224361919 | 0.289690961 | 0.197397613 | 0.247622725 |
| 0.048873215 | 0.275028426 | 0.128649142 | 0.102343045 |
| 0.127354529 | 0.117825096 | 0.276448785 | 0.105299654 |
| 0.103844057 | 0.146342991 | 0.006342857 | 0.320610587 |
| 0.251551142 | 0.11142752  | 0.276181974 | 0.03637395  |
| 0.340202596 | 0.2976167   | 0.101327331 | 0.106540049 |
| 0.079766609 | 0.170047411 | 0.283697124 | 0.250919961 |
| 0.03417371  | 0.123287347 | 0.16486443  | 0.141346346 |
| 0.279968554 | 0.07154656  | 0.301189261 | 0.04558719  |
| 0.25651234  | 0.233547375 | 0.149218884 | 0.172327984 |
| 0.130424316 | 0.130235247 | 0.061309421 | 0.312339001 |
| 0.22487112  | 0.117589273 | 0.268445808 | 0.137893187 |
| 0.109170788 | 0.265699696 | 0.118256611 | 0.302042655 |
| 0.164473442 | 0.298658519 | 0.256948543 | 0.25459113  |
| 0.363726336 | 0.121949152 | 0.086208869 | 0.142050614 |
| 0.236538415 | 0.132113611 | 0.097148282 | 0.241701324 |
| 0.07466642  | 0.298171919 | 0.103639489 | 0.176262779 |
| 0.118014062 | 0.155238792 | 0.103662054 | 0.223845307 |
| 0.228559906 | 0.167933682 | 0.136212558 | 0.357272345 |

|             |             |             |             |
|-------------|-------------|-------------|-------------|
| 0.178482822 | 0.085350044 | 0.36263391  | 0.012156755 |
| 0.147577704 | 0.227965372 | 0.268978069 | 0.150119181 |
| 0.237774715 | 0.173143981 | 0.09449483  | 0.007406913 |
| 0.273076615 | 0.096492827 | 0.134861817 | 0.13314418  |
| 0.065658858 | 0.078558248 | 0.299402002 | 0.309040366 |
| 0.240153597 | 0.078257648 | 0.05365989  | 0.275035928 |
| 0.078784269 | 0.052035567 | 0.064950344 | 0.145829117 |
| 0.088949685 | 0.058496801 | 0.079874118 | 0.081935669 |
| 0.236646089 | 0.160562037 |             |             |
| MS4A4B      | 0.115702583 | 0.184065607 | 0.067499991 |
| 0.061195549 | 0.146612809 | 0.062355984 | 0.146180345 |
| 0.16614174  | 0.192154292 | 0.025866393 | 0.131274652 |
| 0.088463863 | 0.030334999 | 0.243565178 | 0.164821486 |
| 0.127521126 | 0.144211695 | 0.212474021 | 0.054478754 |
| 0.076812112 | 0.156337526 | 0.04951002  | 0.097967705 |
| 0.146424947 | 0.254598261 | 0.129244461 | 0.08796172  |
| 0.204923802 | 0.018108197 | 0.12362334  | 0.010937092 |
| 0.295710847 | 0.14343721  | 0.055943037 | 0.052432301 |
| 0.113583172 | 0.025387416 | 0.296910996 | 0.109173426 |
| 0.028318662 | 0.309777709 | 0.040778394 | 0.121285161 |
| 0.057714439 | 0.068689042 | 0.012129443 | 0.135796902 |
| 0.134639931 | 0.105015422 | 0.113320441 | 0.133943836 |
| 0.060423781 | 0.201638858 | 0.106043357 | 0.014898451 |
| 0.046495716 | 0.008266687 | 0.025421791 | 0.238156194 |
| 0.275101545 | 0.226911711 | 0.027367875 | 0.158851401 |
| 0.13532673  | 0.190232925 | 0.297139013 | 0.042676443 |
| 0.238018157 | 0.045706884 | 0.132408708 | 0.056775512 |
| 0.093124964 | 0.093750001 | 0.296516126 | 0.161911185 |
| 0.05872485  | 0.242407756 | 0.1473894   | 0.060329575 |
| 0.163150408 | 0.318142053 | 0.251884076 | 0.238650754 |
| 0.066067751 | 0.119699652 | 0.076475265 | 0.282710876 |
| 0.21526424  | 0.144377799 | 0.173548459 | 0.278776214 |
| 0.12991758  | 0.079069172 | 0.170810184 | 0.216418442 |
| 0.185045554 | 0.050773675 | 0.057209259 | 0.044633302 |
| 0.15687332  | 0.12605143  | 0.285730676 | 0.243319116 |
| 0.130272993 | 0.143687126 | 0.249841037 | 0.109956702 |
| 0.0904853   | 0.126404724 | 0.088338034 | 0.17582184  |
| 0.127946421 | 0.213638374 | 0.174475062 | 0.24617646  |
| 0.103143878 | 0.227319302 | 0.152658465 | 0.245890485 |
| 0.010068244 | 0.243691746 | 0.1629032   | 0.154050013 |
| 0.102051535 | 0.188050543 | 0.09881428  | 0.337914393 |
| 0.193328527 | 0.233510605 | 0.152872274 | 0.183818311 |
| 0.223998851 | 0.225718273 | 0.237448203 | 0.217996552 |
| 0.117364662 | 0.047130683 | 0.091224071 | 0.102155806 |
| 0.207028034 | 0.271052605 | 0.07701588  | 0.274791789 |
| 0.259311476 | 0.194300488 | 0.108187142 | 0.316203148 |
| 0.18942795  | 0.288077883 | 0.161039641 | 0.188517222 |
| 0.270263347 | 0.254254027 | 0.268019524 | 0.140755971 |
| 0.266578767 | 0.094559544 | 0.05915525  | 0.235325128 |
| 0.302170819 | 0.008625069 | 0.192643867 | 0.209450724 |
| 0.21898937  | 0.16974128  | 0.275225435 | 0.228343035 |
| 0.225788496 | 0.204319497 | 0.007263244 | 0.245508442 |
| 0.244473428 | 0.223830053 | 0.201224724 | 0.077862441 |
| 0.154406649 | 0.091355695 | 0.179537795 | 0.036415325 |



|             |             |             |             |
|-------------|-------------|-------------|-------------|
| 0.338956466 | 0.199487312 | 0.199901575 | 0.202632065 |
| 0.114895637 | 0.313214264 | 0.077923775 | 0.23884029  |
| 0.125114846 | 0.113661799 | 0.127416046 | 0.292594262 |
| 0.027490845 | 0.269920259 | 0.083436904 | 0.16026318  |
| 0.292258745 | 0.103931313 | 0.042403569 | 0.164790809 |
| 0.157576784 | 0.086757944 | 0.164659371 | 0.165264284 |
| 0.128257428 | 0.300677362 | 0.107711914 | 0.115848474 |
| 0.209876311 | 0.280366665 | 0.135546481 | 0.228711979 |
| 0.09760974  | 0.188682474 | 0.153912349 | 0.292048707 |
| 0.339780973 | 0.091208263 | 0.332044724 | 0.023572971 |
| 0.062336015 | 0.031116779 | 0.032411054 | 0.087896239 |
| 0.284343284 | 0.116213176 | 0.145002838 | 0.180297867 |
| 0.115826794 | 0.157130801 | 0.069204517 | 0.325279156 |
| 0.203404459 | 0.084426215 | 0.229014633 | 0.096863473 |
| 0.024010483 | 0.125416413 | 0.18224229  | 0.120282837 |
| 0.218329967 | 0.03951452  | 0.029780688 | 0.206410451 |
| 0.052740255 | 0.092741954 | 0.213524482 | 0.188794536 |
| 0.061290603 | 0.253604493 | 0.271671804 | 0.019840664 |
| 0.117524362 | 0.060614231 | 0.267720993 | 0.049564532 |
| 0.20315313  | 0.323003558 | 0.131064168 | 0.085992574 |
| 0.142428944 | 0.257855234 | 0.237600055 | 0.231941001 |
| 0.044030187 | 0.271552432 | 0.190372494 | 0.236381808 |
| 0.189704295 | 0.071440334 | 0.023285359 | 0.171782468 |
| 0.193790779 | 0.047149891 | 0.153797981 | 0.156819251 |
| 0.061359966 | 0.156488115 | 0.116476037 | 0.249546694 |
| 0.318058165 | 0.203652773 | 0.17627385  | 0.239034315 |
| 0.227357381 | 0.167459055 | 0.222595583 | 0.300216014 |
| 0.031419254 | 0.10739359  | 0.064871979 | 0.254954853 |
| 0.21748364  | 0.094705335 | 0.319610054 | 0.031106674 |
| 0.000559802 | 0.176174465 | 0.146877463 | 0.19896445  |
| 0.056996794 | 0.095760448 | 0.165888279 | 0.248357093 |
| 0.224508599 | 0.263085544 | 0.29715503  | 0.070049963 |
| 0.225495866 | 0.108399784 | 0.094491475 | 0.154194536 |
| 0.305451795 | 0.037808187 | 0.101684473 | 0.308874424 |
| 0.120942268 | 0.051358892 | 0.159870161 | 0.006496577 |
| 0.103292539 | 0.137591153 | 0.209122063 | 0.307736724 |
| 0.255290122 | 0.25991076  | 0.192659975 | 0.032894451 |
| 0.241538664 | 0.203236994 | 0.012394985 | 0.222930974 |
| 0.254787985 | 0.256909358 | 0.249466739 | 0.25882092  |
| 0.232196339 | 0.186372886 | 0.197938505 | 0.092869256 |
| 0.146510812 | 0.105723737 | 0.049564333 | 0.144184507 |
| 0.008995614 | 0.234805604 | 0.169150323 | 0.269241019 |
| 0.177465452 | 0.265012265 | 0.111313946 | 0.155713799 |
| 0.034530907 | 0.020789001 | 0.097327741 | 0.207724724 |
| 0.256879183 | 0.062423825 | 0.020189652 | 0.046292969 |
| 0.21513226  | 0.251137341 | 0.042913303 | 0.251791253 |
| 0.157998795 | 0.138857596 | 0.112381921 | 0.207612711 |
| 0.139556892 | 0.024444015 | 0.086027691 | 0.001623196 |
| 0.044997569 | 0.286431009 | 0.066862594 | 0.067259728 |
| 0.192925231 | 0.03389956  | 0.21790598  | 0.27211521  |
| 0.200029402 | 0.240636491 | 0.238033182 | 0.057790225 |
| 0.233726762 | 0.011190344 | 0.236752112 | 0.180502983 |
| 0.039316596 | 0.002306562 | 0.042385443 | 0.197823689 |
| 0.10087588  | 0.126576948 | 0.246489115 | 0.034919745 |

|             |             |             |             |
|-------------|-------------|-------------|-------------|
| 0.12857698  | 0.098410793 | 0.163177671 | 0.072239275 |
| 0.117400924 | 0.185059707 | 0.094237808 | 0.233600862 |
| 0.16804151  | 0.261328833 | 0.068216347 | 0.214524117 |
| 0.124925037 | 0.113679408 | 0.219205635 | 0.01058161  |
| 0.220520583 | 0.187742879 | 0.267475885 | 0.232634611 |
| 0.290961197 | 0.167326019 | 0.025385822 | 0.058718073 |
| 0.235979528 | 0.117008571 | 0.03659899  | 0.132416649 |
| 0.2011078   | 0.140535328 | 0.26992169  | 0.238594181 |
| 0.277128818 | 0.251173294 | 0.126590026 | 0.195717599 |
| 0.02421454  | 0.0117694   | 0.06728331  | 0.320491886 |
| 0.055633076 | 0.089883574 | 0.276967251 | 0.108827347 |
| 0.135904732 | 0.068312962 | 0.051718481 | 0.061613828 |
| 0.207769529 | 0.135058517 | 0.119095316 | 0.294088467 |
| 0.113495397 | 0.087756476 | 0.15692469  | 1           |
| 0.096594858 | 0.223659854 | 0.244563729 | 0.104991161 |
| 0.068516827 | 0.088542144 | 0.153627586 | 0.255879705 |
| 0.205570034 | 0.210577023 | 0.13590692  | 0.048360508 |
| 0.289392608 | 0.143931934 | 0.243170125 | 0.208650145 |
| 0.270608922 | 0.296394681 | 0.326150335 | 0.180215205 |
| 0.125480002 | 0.183067444 | 0.128406818 | 0.13938053  |
| 0.244572203 | 0.137814132 | 0.232792336 | 0.07553055  |
| 0.269019134 | 0.103702768 | 0.118066992 | 0.232381554 |
| 0.101146248 | 0.304743477 | 0.214410339 | 0.132224495 |
| 0.118128011 | 0.048748276 | 0.148766521 | 0.241579415 |
| 0.240373972 | 0.028165866 | 0.263765279 | 0.108669489 |
| 0.203751721 | 0.028901355 | 0.149615234 | 0.319603228 |
| 0.221032497 | 0.186642986 | 0.043407614 | 0.223236926 |
| 0.161538223 | 0.073419218 | 0.03839372  | 0.173897108 |
| 0.259747393 | 0.116166231 | 0.235233832 | 0.3127594   |
| 0.225963178 | 0.09309198  | 0.071471824 | 0.149358655 |
| 0.291389328 | 0.074731475 | 0.245021567 | 0.208851612 |
| 0.356670466 | 0.326903217 | 0.193241664 | 0.183423941 |
| 0.100429101 | 0.150047561 | 0.11793068  | 0.210162485 |
| 0.050478842 | 0.102894797 | 0.046837525 | 0.194679963 |
| 0.005390871 | 0.03190482  | 0.259136089 | 0.129952339 |
| 0.302616259 | 0.22548081  | 0.274231389 | 0.113865643 |
| 0.002073141 | 0.130999894 | 0.147875065 | 0.063774691 |
| 0.191331342 | 0.234723699 | 0.125785969 | 0.143092111 |
| 0.321166591 | 0.137264575 | 0.143558036 | 0.042386194 |
| 0.024699167 | 0.137305075 | 0.344449061 | 0.229817382 |
| 0.188552703 | 0.17209877  | 0.04423655  | 0.143246937 |
| 0.061921143 | 0.327185954 | 0.274601833 | 0.02980541  |
| 0.027711271 | 0.266808018 | 0.175701203 | 0.081156398 |
| 0.102715331 | 0.23659086  | 0.263366194 | 0.010443052 |
| 0.151299201 | 0.07100231  | 0.212769944 | 0.154985074 |
| 0.174324312 | 0.20676648  | 0.258712438 | 0.080469004 |
| 0.175886372 | 0.18256373  | 0.11455047  | 0.258701549 |
| 0.128362933 | 0.201458867 | 0.141393339 | 0.09337355  |
| 0.081295216 | 0.126841676 | 0.21466117  | 0.198894562 |
| 0.115547103 | 0.205605272 | 0.314521933 | 0.139669267 |
| 0.30351013  | 0.095515327 | 0.330064143 | 0.206025654 |
| 0.299473674 | 0.150681389 | 0.13583312  | 0.168431331 |
| 0.027039482 | 0.054625877 | 0.104946468 | 0.102500644 |
| 0.243815893 | 0.07763462  | 0.084727717 | 0.113642818 |

|             |             |             |             |
|-------------|-------------|-------------|-------------|
| 0.145873493 | 0.309012186 | 0.309539069 | 0.269683874 |
| 0.097014882 | 0.112918687 | 0.024974805 | 0.131827155 |
| 0.138060174 | 0.252362937 | 0.133797026 | 0.014854283 |
| 0.217395386 | 0.054819482 | 0.182870643 | 0.226367227 |
| 0.04484932  | 0.305784508 | 0.024773759 | 0.103766699 |
| 0.017337341 | 0.180375491 | 0.285349834 | 0.150821926 |
| 0.02510955  | 0.144378777 | 0.15900021  | 0.041972036 |
| 0.162381528 | 0.146427356 | 0.098861471 | 0.195041062 |
| 0.240374621 | 0.177644779 | 0.28320554  | 0.11213091  |
| 0.085913813 | 0.072363338 | 0.094124322 | 0.131054425 |
| 0.183522206 | 0.228041941 | 0.170524898 | 0.22932625  |
| 0.104567685 | 0.240771641 | 0.334968762 | 0.165828585 |
| 0.08397851  | 0.138957183 | 0.027916808 | 0.059263684 |
| 0.143246584 | 0.04521794  | 0.002161307 | 0.037994186 |
| 0.263109058 | 0.078171441 | 0.146688075 | 0.237583459 |
| 0.09632343  | 0.310998839 | 0.031217192 | 0.160266692 |
| 0.210107399 | 0.265044686 | 0.078481431 | 0.334380436 |
| 0.260490549 | 0.157908797 | 0.10841271  | 0.027721541 |
| 0.110423387 | 0.086012314 | 0.039841754 | 0.162082053 |
| 0.099885166 | 0.02850131  | 0.109252365 | 0.161992841 |
| 0.237719853 | 0.021991239 | 0.127166899 | 0.143193762 |
| 0.294093095 | 0.267977651 | 0.184206085 | 0.181707322 |
| 0.092345029 | 0.275294916 | 0.085546929 | 0.095862736 |
| 0.075780756 | 0.075538488 | 0.214225194 | 0.057935026 |
| 0.121531206 | 0.092052199 | 0.01269003  | 0.307223068 |
| 0.234874026 | 0.079129298 | 0.322831015 | 0.030320129 |
| 0.290861142 | 0.263799289 | 0.118427956 | 0.071583241 |
| 0.053584854 | 0.116406343 | 0.293301151 | 0.19624689  |
| 0.017729762 | 0.128852669 | 0.106670415 | 0.122480759 |
| 0.2724981   | 0.077199016 | 0.358851269 | 0.027786903 |
| 0.210920262 | 0.198780594 | 0.154413101 | 0.108423914 |
| 0.123113848 | 0.197070345 | 0.043815121 | 0.277159357 |
| 0.204197277 | 0.065479892 | 0.201328914 | 0.126721745 |
| 0.080059437 | 0.242396407 | 0.091630086 | 0.276664549 |
| 0.173588538 | 0.294982097 | 0.201074647 | 0.234829567 |
| 0.336513952 | 0.081784039 | 0.052718909 | 0.126770709 |
| 0.197863881 | 0.083777631 | 0.07733018  | 0.216189454 |
| 0.042844382 | 0.275417646 | 0.095603199 | 0.151625527 |
| 0.106174119 | 0.196760055 | 0.061008032 | 0.259799391 |
| 0.22682064  | 0.114662735 | 0.088049186 | 0.316539088 |
| 0.105563881 | 0.050622171 | 0.320936419 | 0.005482502 |
| 0.10506163  | 0.147210458 | 0.260978851 | 0.108501279 |
| 0.236588505 | 0.177535087 | 0.093773577 | 0.014796925 |
| 0.226881703 | 0.022450848 | 0.118011902 | 0.083495202 |
| 0.059974449 | 0.119113727 | 0.244616851 | 0.254283504 |
| 0.223072536 | 0.051552379 | 0.032436293 | 0.244828324 |
| 0.034944729 | 0.031798231 | 0.053859407 | 0.11459958  |
| 0.046361505 | 0.045133436 | 0.059906965 | 0.04336436  |
| 0.187212962 | 0.157492991 |             |             |
| MT2         | 0.024996291 | 0.278868173 | 0.015824554 |
| 0.004805071 | 0.159815325 | 0.075195257 | 0.032748772 |
| 0.05065346  | 0.293404412 | 0.100180255 | 0.111839447 |
| 0.003804483 | 0.018224401 | 0.291154662 | 0.037129169 |
| 0.202581827 | 0.014283008 | 0.064532394 | 0.013264241 |

|             |             |             |             |
|-------------|-------------|-------------|-------------|
| 0.017374167 | 0.156396286 | 0.056464813 | 0.129282302 |
| 0.186108928 | 0.123093046 | 0.163790362 | 0.227870794 |
| 0.301260529 | 0.025039067 | 0.187378962 | 0.006514318 |
| 0.266821869 | 0.181204563 | 0.13855548  | 0.003014265 |
| 0.155798945 | 0.017044104 | 0.295679305 | 0.07733741  |
| 0.007458678 | 0.232145181 | 0.102548237 | 0.054578355 |
| 0.132507788 | 0.008427577 | 0.019036245 | 0.279227966 |
| 0.199035256 | 0.103276435 | 0.03555964  | 0.206642582 |
| 0.123039757 | 0.158481323 | 0.21695759  | 0.000827419 |
| 0.104996076 | 0.024605233 | 0.088098497 | 0.301218248 |
| 0.105431809 | 0.062218334 | 0.058563781 | 0.192544707 |
| 0.294334594 | 0.30115465  | 0.214193532 | 0.123478644 |
| 0.287215406 | 0.058966763 | 0.268819061 | 0.005872953 |
| 0.128294623 | 0.0301057   | 0.109841232 | 0.094764263 |
| 0.12509398  | 0.099382837 | 0.148717393 | 0.125721206 |
| 0.257846257 | 0.355195959 | 0.166031383 | 0.31393608  |
| 0.03831594  | 0.215797809 | 0.095085052 | 0.220723658 |
| 0.32116641  | 0.068760723 | 0.183025431 | 0.325517805 |
| 0.056074428 | 0.195663014 | 0.267734439 | 0.105482733 |
| 0.250057442 | 0.127376583 | 0.133621105 | 0.049230169 |
| 0.234404167 | 0.179151081 | 0.36478724  | 0.139098622 |
| 0.176604487 | 0.04478273  | 0.300652772 | 0.194599381 |
| 0.063625012 | 0.032708406 | 0.064104389 | 0.310428187 |
| 0.177891431 | 0.287241715 | 0.307382746 | 0.28624419  |
| 0.183532411 | 0.2858376   | 0.163879352 | 0.309199313 |
| 0.013071114 | 0.331169713 | 0.063085156 | 0.015093401 |
| 0.033890031 | 0.051278475 | 0.145922091 | 0.242450246 |
| 0.275495055 | 0.208894662 | 0.063395094 | 0.107972606 |
| 0.319546634 | 0.290395339 | 0.342641536 | 0.273646994 |
| 0.017206959 | 0.125571522 | 0.150335566 | 0.082500521 |
| 0.245586451 | 0.118813656 | 0.115303314 | 0.314443676 |
| 0.204051346 | 0.277264528 | 0.054273213 | 0.333810471 |
| 0.163793073 | 0.309338512 | 0.2508699   | 0.05748159  |
| 0.311885406 | 0.288908817 | 0.316213451 | 0.216517678 |
| 0.281863726 | 0.077751519 | 0.021807109 | 0.29206684  |
| 0.30772657  | 0.000889725 | 0.323760907 | 0.329581388 |
| 0.295036367 | 0.27649803  | 0.357548131 | 0.317789623 |
| 0.309817858 | 0.061867321 | 0.011843878 | 0.19875308  |
| 0.302186881 | 0.19991934  | 0.084701628 | 0.171951671 |
| 0.235016395 | 0.103303824 | 0.304329038 | 0.010105284 |
| 0.352658099 | 0.268140271 | 0.316977568 | 0.278235904 |
| 0.205847892 | 0.214181694 | 0.200028921 | 0.270346699 |
| 0.011577582 | 0.032248693 | 0.031531978 | 0.288341667 |
| 0.044695562 | 0.100470373 | 0.104906595 | 0.286079617 |
| 0.114495538 | 0.138114632 | 0.120179155 | 0.23061916  |
| 0.053232414 | 0.154337574 | 0.069249857 | 0.086185726 |
| 0.011705626 | 0.125646658 | 0.015609701 | 0.020404404 |
| 0.133233392 | 0.18170388  | 0.251870702 | 0.322712001 |
| 0.191315425 | 0.089181469 | 0.224645515 | 0.309613216 |
| 0.285079283 | 0.146613003 | 0.202996159 | 0.000161213 |
| 0.030153523 | 0.133357825 | 0.081162355 | 0.198975432 |
| 0.153302554 | 0.056056518 | 0.212515728 | 0.220578783 |
| 0.081723907 | 0.10729829  | 0.123383886 | 0.276211559 |
| 0.113085536 | 0.069030455 | 0.269991824 | 0.202031088 |

|             |             |             |             |
|-------------|-------------|-------------|-------------|
| 0.000229603 | 0.102739443 | 0.248461923 | 0.037127048 |
| 0.236117637 | 0.00980051  | 0.031324128 | 0.282501364 |
| 0.076100756 | 0.137604779 | 0.320572088 | 0.257553041 |
| 0.024974786 | 0.194172551 | 0.361532101 | 0.013665477 |
| 0.249935082 | 0.002728951 | 0.16475382  | 0.149184071 |
| 0.110124579 | 0.243738579 | 0.184155958 | 0.078958682 |
| 0.05611429  | 0.331737986 | 0.254478241 | 0.308750645 |
| 0.089711649 | 0.355325973 | 0.275492063 | 0.254131352 |
| 0.186249831 | 0.208876986 | 0.036608711 | 0.222585889 |
| 0.276065237 | 0.022767955 | 0.054164242 | 0.313742949 |
| 0.163574037 | 0.251682549 | 0.015932975 | 0.295367094 |
| 0.314356042 | 0.283105326 | 0.058869684 | 0.271660613 |
| 0.18681355  | 0.075676442 | 0.287710502 | 0.37610713  |
| 0.082918332 | 0.176506845 | 0.089985026 | 0.272169566 |
| 0.081595363 | 0.092234768 | 0.277522059 | 0.075584808 |
| 0.000508957 | 0.064144476 | 0.033487286 | 0.071642957 |
| 0.062968028 | 0.234680267 | 0.230250222 | 0.324993158 |
| 0.060209065 | 0.259564875 | 0.253474139 | 0.052716421 |
| 0.255939702 | 0.203686323 | 0.178508743 | 0.216647199 |
| 0.193652923 | 0.000570109 | 0.00511653  | 0.337045214 |
| 0.039291967 | 0.063454192 | 0.196042056 | 9.28E-05    |
| 0.018085431 | 0.270463059 | 0.084883377 | 0.143322003 |
| 0.335479668 | 0.131865251 | 0.101795828 | 0.096444744 |
| 0.202934869 | 0.054162496 | 0.000107269 | 0.332374819 |
| 0.377177329 | 0.376793251 | 0.372994362 | 0.34580179  |
| 0.369504107 | 0.311355467 | 0.281967354 | 0.103767718 |
| 0.032134394 | 0.042395202 | 0.050757915 | 0.112618589 |
| 0.001127554 | 0.221917168 | 0.20821377  | 0.086224812 |
| 0.297223307 | 0.255335476 | 0.012048776 | 0.259533817 |
| 0.000513733 | 0.043518855 | 0.089148627 | 0.152115409 |
| 0.29732018  | 0.00437819  | 0.004200227 | 0.043863335 |
| 0.227153097 | 0.202211435 | 0.111529244 | 0.324153223 |
| 0.114205896 | 0.085919022 | 0.096173375 | 0.237295383 |
| 0.028369769 | 0.012999078 | 0.137463092 | 0.001114844 |
| 0.015252107 | 0.363851829 | 0.132347348 | 0.005910639 |
| 0.104879692 | 0.000467509 | 0.186130189 | 0.334330535 |
| 0.270115783 | 0.332380411 | 0.286394548 | 0.0823114   |
| 0.28786099  | 0.033448421 | 0.328437888 | 0.234588049 |
| 0.109439253 | 2.05E-05    | 0.000888215 | 0.28974451  |
| 0.154779876 | 0.048069411 | 0.083223339 | 0.02301609  |
| 0.016573325 | 0.050846605 | 0.045387951 | 0.056394775 |
| 0.168936607 | 0.125956096 | 0.076039227 | 0.300216302 |
| 0.09678276  | 0.156040861 | 0.139651358 | 0.080912888 |
| 0.194287115 | 0.010514179 | 0.096086451 | 0.000242937 |
| 0.275163257 | 0.084136558 | 0.300595724 | 0.314849881 |
| 0.308122419 | 0.213844067 | 0.088901165 | 0.027214913 |
| 0.362696659 | 0.054064975 | 0.047040121 | 0.061742304 |
| 0.271825731 | 0.181513999 | 0.16785625  | 0.150390193 |
| 0.317929347 | 0.267512646 | 0.018417182 | 0.239484393 |
| 0.000200595 | 0.000663635 | 0.0882876   | 0.24566554  |
| 0.041326134 | 0.159586296 | 0.148515435 | 0.161770416 |
| 0.138045139 | 0.001445996 | 0.117500189 | 0.110937137 |
| 0.149691402 | 0.160915871 | 0.13699169  | 0.263365823 |
| 0.119562513 | 0.016453858 | 0.076839959 | 0.096594858 |

| 1           | 0.187137854 | 0.114940975 | 0.012749853 |
|-------------|-------------|-------------|-------------|
| 0.140840371 | 0.149674344 | 0.026047524 | 0.103477591 |
| 0.230227284 | 0.286921701 | 0.0078302   | 0.000319408 |
| 0.174316481 | 0.180090259 | 0.32061182  | 0.295429898 |
| 0.322125598 | 0.337851968 | 0.266596714 | 0.055681803 |
| 0.025266193 | 0.180483926 | 0.167649612 | 0.028492092 |
| 0.317658934 | 0.052113457 | 0.296463502 | 0.160529801 |
| 0.097962761 | 0.048123859 | 0.004415338 | 0.068019734 |
| 0.191912313 | 0.124057165 | 0.08812182  | 0.060649129 |
| 0.101597236 | 0.05025331  | 0.033589918 | 0.100479284 |
| 0.213389925 | 0.024341053 | 0.097970281 | 0.128814294 |
| 0.221468416 | 0.057461441 | 0.251100664 | 0.289002653 |
| 0.07648857  | 0.087598587 | 0.028024363 | 0.322559486 |
| 0.266220995 | 0.217006273 | 0.000525047 | 0.276743531 |
| 0.328376285 | 0.192795911 | 0.292336317 | 0.308679136 |
| 0.076124543 | 0.120079123 | 0.199633716 | 0.187163503 |
| 0.153025866 | 0.090142846 | 0.183307831 | 0.049721321 |
| 0.281394495 | 0.357193779 | 0.249538909 | 0.055962467 |
| 0.199345324 | 0.095632114 | 0.043310412 | 0.322814995 |
| 0.048042444 | 0.00900752  | 0.123504306 | 0.346032044 |
| 7.05E-05    | 0.056180739 | 0.376778364 | 0.059447692 |
| 0.368313674 | 0.298528236 | 0.247898444 | 0.099053551 |
| 0.001278524 | 0.252290352 | 0.139622218 | 0.082768884 |
| 0.256475862 | 0.197500232 | 0.038364067 | 0.017006111 |
| 0.192245145 | 0.046159985 | 0.028886746 | 0.014129196 |
| 0.013340961 | 0.196035989 | 0.157481572 | 0.185843725 |
| 0.102578029 | 0.110435745 | 0.039428809 | 0.0712359   |
| 0.05383769  | 0.155677378 | 0.208859704 | 0.090470792 |
| 0.01661142  | 0.354858466 | 0.233837382 | 0.007977097 |
| 0.201545121 | 0.325451022 | 0.315794997 | 6.20E-05    |
| 0.213627047 | 0.001270158 | 0.099716458 | 0.06553614  |
| 0.07632465  | 0.128879212 | 0.183884021 | 0.075551682 |
| 0.212374001 | 0.097364694 | 0.059908504 | 0.114924575 |
| 0.040989546 | 0.122935454 | 0.199438992 | 0.129688539 |
| 0.054833533 | 0.034595782 | 0.087179256 | 0.084297827 |
| 0.004975735 | 0.304450187 | 0.155851474 | 0.044773425 |
| 0.161671977 | 0.147781627 | 0.227705566 | 0.29589888  |
| 0.291187987 | 0.0764394   | 0.181103939 | 0.230159091 |
| 0.02169713  | 0.012357275 | 0.028655642 | 0.141137853 |
| 0.117891857 | 0.03702612  | 0.165210101 | 0.116684768 |
| 0.274612994 | 0.246654648 | 0.153593483 | 0.294360033 |
| 0.105416588 | 0.242091664 | 0.069156086 | 0.012733742 |
| 0.047542907 | 0.118430805 | 0.135345766 | 1.85E-05    |
| 0.186465591 | 0.018694558 | 0.263970984 | 0.275517718 |
| 0.12325845  | 0.255876922 | 0.018902496 | 0.016724881 |
| 0.029778852 | 0.11146074  | 0.099456109 | 0.274489406 |
| 0.068095545 | 0.055968334 | 0.145335537 | 0.04467121  |
| 0.259216798 | 0.29349678  | 0.129534427 | 0.156918977 |
| 0.19388756  | 0.10185473  | 0.35368248  | 0.048594288 |
| 0.193218156 | 0.041871002 | 0.208553357 | 0.098688902 |
| 0.113397363 | 0.336936124 | 0.040167706 | 0.336046806 |
| 0.131324004 | 0.11337914  | 0.331331616 | 0.167207725 |
| 0.054792534 | 0.018253352 | 0.071549775 | 0.125740963 |
| 0.08762044  | 0.108461094 | 0.002360173 | 0.006937511 |

|             |             |             |             |
|-------------|-------------|-------------|-------------|
| 0.182434724 | 0.199234153 | 0.271349346 | 0.318748328 |
| 0.113274893 | 0.278919578 | 0.033612838 | 0.152502551 |
| 0.289127533 | 0.317723799 | 0.022282981 | 0.196895145 |
| 0.241035004 | 0.032785538 | 0.145849909 | 0.011504423 |
| 0.206166454 | 0.20886454  | 0.078960623 | 0.031724796 |
| 0.00353638  | 0.069718907 | 0.19058356  | 0.0809133   |
| 0.337914615 | 0.023207737 | 0.274288682 | 0.213826492 |
| 0.180678844 | 0.306283881 | 0.054098141 | 0.190777286 |
| 0.017447664 | 0.192328786 | 0.197442394 | 0.238198246 |
| 0.029318786 | 0.121890508 | 0.195725561 | 0.078807809 |
| 0.010812838 | 0.034539439 | 0.000375092 | 0.2472893   |
| 0.294896593 | 0.162701722 | 0.169539569 | 0.101896976 |
| 0.171405484 | 0.308237594 | 0.049787843 | 0.177897326 |
| 0.000495244 | 0.161183049 | 0.137582859 | 0.205147636 |
| 0.016828711 | 0.241031523 | 0.005679101 | 0.229468011 |
| 0.289254265 | 0.036523045 | 0.251190136 | 0.033760957 |
| 0.290572576 | 0.280183783 | 0.092317898 | 0.052022047 |
| 0.285608219 | 0.057260928 | 0.103513235 | 0.363405273 |
| 0.07201894  | 0.076839726 | 0.267244126 | 0.053494345 |
| 0.164004011 | 0.263879736 | 0.24084388  | 0.378688132 |
| 0.028112779 | 0.144282718 | 0.28329312  | 0.317668503 |
| 0.213409237 | 0.096012393 | 0.074117786 | 0.092353147 |
| 0.246891961 | 0.004779866 | 0.090145583 | 0.182170829 |
| 0.066418611 | 0.212858841 | 0.217042103 | 0.099637709 |
| 0.002486642 | 0.099142976 | 0.060206235 | 0.101941259 |
| 0.164324059 | 0.147134928 | 0.086584166 | 0.246188317 |
| 0.011726543 | 0.000457826 | 0.301718156 | 0.001112398 |
| 0.099937757 | 0.159584015 | 0.147479237 | 0.159646649 |
| 0.098638381 | 0.224854932 | 0.122000128 | 6.08E-06    |
| 0.283475247 | 0.003355927 | 0.1700976   | 0.04448039  |
| 0.02910696  | 0.022619031 | 0.266180151 | 0.334119404 |
| 0.205556204 | 0.040201612 | 0.042772666 | 0.303082162 |
| 0.010066419 | 0.120562847 | 0.14795392  | 0.189968314 |
| 0.084909748 | 0.12622825  | 0.158933051 | 0.089394314 |
| 0.206637662 | 0.131963691 |             |             |
| MTBP        | 0.195269645 | 0.35533278  | 0.177449717 |
| 0.219779759 | 0.213960759 | 0.287009131 | 0.191127082 |
| 0.231831263 | 0.307894127 | 0.210898466 | 0.275022584 |
| 0.103512301 | 0.036869018 | 0.361220379 | 0.171887136 |
| 0.256709948 | 0.127440743 | 0.233358978 | 0.092943856 |
| 0.259885177 | 0.208743987 | 0.196849285 | 0.306234582 |
| 0.208984751 | 0.283679672 | 0.329088661 | 0.226183749 |
| 0.390113023 | 0.129956741 | 0.279829113 | 0.14509838  |
| 0.396964142 | 0.213825985 | 0.212017034 | 0.104120068 |
| 0.289011797 | 0.012298308 | 0.439645094 | 0.250068739 |
| 0.093626667 | 0.353039772 | 0.252803836 | 0.259356889 |
| 0.283059075 | 0.155297485 | 0.121978172 | 0.266169879 |
| 0.308344984 | 0.269762537 | 0.196561698 | 0.308107584 |
| 0.266331404 | 0.314226111 | 0.292596297 | 0.006779729 |
| 0.155096521 | 0.030063255 | 0.105238874 | 0.426079736 |
| 0.276063897 | 0.2163272   | 0.161976838 | 0.263658451 |
| 0.264995519 | 0.274953038 | 0.275712976 | 0.25859707  |
| 0.409322734 | 0.093781332 | 0.277211205 | 0.180744126 |
| 0.313513461 | 0.152422014 | 0.271654683 | 0.21833576  |

|             |             |             |             |
|-------------|-------------|-------------|-------------|
| 0.252197804 | 0.243609187 | 0.23740108  | 0.18223991  |
| 0.361940883 | 0.462061547 | 0.296614246 | 0.446437272 |
| 0.069574226 | 0.207452299 | 0.19484655  | 0.283885342 |
| 0.294957608 | 0.2090306   | 0.306728713 | 0.445358595 |
| 0.167394337 | 0.272797001 | 0.30605848  | 0.250399663 |
| 0.340566471 | 0.157518284 | 0.268577862 | 0.09394372  |
| 0.242475454 | 0.235893936 | 0.43366568  | 0.308020262 |
| 0.211765812 | 0.216679884 | 0.455902486 | 0.187918296 |
| 0.228282297 | 0.224613551 | 0.189286477 | 0.305101459 |
| 0.305266328 | 0.381524852 | 0.315972419 | 0.309583448 |
| 0.239769401 | 0.403001835 | 0.31970928  | 0.338691322 |
| 0.085380363 | 0.431076703 | 0.281400904 | 0.131363841 |
| 0.203432115 | 0.172126686 | 0.178078604 | 0.30039482  |
| 0.34085298  | 0.303972631 | 0.283419277 | 0.246754733 |
| 0.325354971 | 0.432658733 | 0.430316996 | 0.315684411 |
| 0.157192998 | 0.139339671 | 0.249973763 | 0.275922203 |
| 0.297932615 | 0.234354662 | 0.155680868 | 0.466609541 |
| 0.346257999 | 0.297202431 | 0.279215665 | 0.477968187 |
| 0.258603009 | 0.42902256  | 0.351746672 | 0.262165356 |
| 0.457308395 | 0.451775933 | 0.405086737 | 0.245004898 |
| 0.421169757 | 0.316366087 | 0.071205346 | 0.319577901 |
| 0.396338248 | 0.011115141 | 0.337983968 | 0.364485717 |
| 0.421739299 | 0.307274556 | 0.407186258 | 0.384696222 |
| 0.419075744 | 0.211152992 | 0.020583737 | 0.250210668 |
| 0.445701234 | 0.336109967 | 0.180835519 | 0.25320927  |
| 0.239496519 | 0.31610801  | 0.287884619 | 0.196964977 |
| 0.439352591 | 0.341298857 | 0.361871384 | 0.312905229 |
| 0.295487449 | 0.336214944 | 0.211216605 | 0.443957851 |
| 0.149245725 | 0.237232437 | 0.179109592 | 0.295033441 |
| 0.250807724 | 0.244163509 | 0.313726927 | 0.247732504 |
| 0.263350324 | 0.304502217 | 0.169561421 | 0.242833418 |
| 0.186212527 | 0.281656866 | 0.279436144 | 0.293285343 |
| 0.145298936 | 0.255541812 | 0.232086186 | 0.214688939 |
| 0.229913363 | 0.356252139 | 0.280482765 | 0.375297845 |
| 0.246294624 | 0.293445959 | 0.306059953 | 0.389322635 |
| 0.368589223 | 0.235786573 | 0.28820727  | 0.046478506 |
| 0.219547683 | 0.175632961 | 0.091056175 | 0.242343406 |
| 0.294622224 | 0.252014136 | 0.278968331 | 0.259675914 |
| 0.316228765 | 0.254239401 | 0.243359216 | 0.414985626 |
| 0.271209625 | 0.222806756 | 0.328531494 | 0.289375828 |
| 0.036319275 | 0.316878394 | 0.30844362  | 0.140588807 |
| 0.311199368 | 0.077388621 | 0.128881854 | 0.351793181 |
| 0.161381055 | 0.152869179 | 0.359701718 | 0.256584457 |
| 0.224696059 | 0.319588206 | 0.412065767 | 0.02932294  |
| 0.225392346 | 0.074238003 | 0.271146067 | 0.24381698  |
| 0.310473878 | 0.283487042 | 0.197218969 | 0.206705577 |
| 0.248874347 | 0.429589839 | 0.313247274 | 0.395100023 |
| 0.233788988 | 0.42252024  | 0.315989028 | 0.342432798 |
| 0.314239719 | 0.219090263 | 0.061434805 | 0.315200485 |
| 0.338489207 | 0.21480375  | 0.212168349 | 0.282973209 |
| 0.256340627 | 0.262382143 | 0.121291701 | 0.394591046 |
| 0.446501308 | 0.420160666 | 0.199627272 | 0.272243976 |
| 0.319890741 | 0.289927398 | 0.303459239 | 0.423664526 |
| 0.226030289 | 0.238976848 | 0.233709591 | 0.286486546 |



|             |             |             |             |
|-------------|-------------|-------------|-------------|
| 0.286970903 | 0.163013385 | 0.314875773 | 0.08164287  |
| 0.00357035  | 0.211281571 | 0.20376346  | 0.202854073 |
| 0.102670811 | 0.259340209 | 0.286774238 | 0.413613916 |
| 0.226719048 | 0.349590359 | 0.289086089 | 0.243484924 |
| 0.378936184 | 0.225129058 | 0.216826393 | 0.252117117 |
| 0.299400625 | 0.066597105 | 0.184063875 | 0.472389708 |
| 0.163975069 | 0.13546404  | 0.290999297 | 0.009868314 |
| 0.176391205 | 0.299696437 | 0.230436659 | 0.301503336 |
| 0.344869364 | 0.304006521 | 0.308232991 | 0.252172277 |
| 0.27769494  | 0.221695248 | 0.010567292 | 0.384537356 |
| 0.40177592  | 0.384150555 | 0.403459953 | 0.412714599 |
| 0.345175971 | 0.288641231 | 0.293282725 | 0.309434323 |
| 0.230107678 | 0.227688145 | 0.142304491 | 0.263917249 |
| 0.014596348 | 0.290928161 | 0.230565057 | 0.260747165 |
| 0.273627511 | 0.298213685 | 0.141168754 | 0.226450976 |
| 0.104579788 | 0.096598937 | 0.292961708 | 0.236442315 |
| 0.25725704  | 0.094792699 | 0.19537576  | 0.209717944 |
| 0.396123024 | 0.328057604 | 0.197408997 | 0.43742061  |
| 0.278372513 | 0.258501255 | 0.25836875  | 0.274221991 |
| 0.203340137 | 0.096087514 | 0.298895075 | 0.029981737 |
| 0.141101137 | 0.398715077 | 0.241521824 | 0.212018788 |
| 0.305838929 | 0.049081178 | 0.345362765 | 0.434807859 |
| 0.407867091 | 0.395536304 | 0.401985183 | 0.154686012 |
| 0.417793138 | 0.038515775 | 0.414226423 | 0.332718302 |
| 0.24525718  | 0.00576746  | 0.020664147 | 0.354283449 |
| 0.261508408 | 0.182044789 | 0.271997898 | 0.257477476 |
| 0.208481771 | 0.276213912 | 0.172663959 | 0.136409759 |
| 0.288205461 | 0.198464886 | 0.116668761 | 0.417962035 |
| 0.277730057 | 0.25967134  | 0.285384761 | 0.224351845 |
| 0.255521021 | 0.167253253 | 0.224332883 | 0.016123677 |
| 0.262677644 | 0.241990235 | 0.459203978 | 0.413233886 |
| 0.418262368 | 0.267040965 | 0.203073792 | 0.225848483 |
| 0.320275942 | 0.224896845 | 0.205823457 | 0.24123977  |
| 0.406091745 | 0.276363293 | 0.306608334 | 0.326635985 |
| 0.406266475 | 0.406596614 | 0.141857459 | 0.307063766 |
| 0.055925081 | 0.003279213 | 0.314698456 | 0.28575775  |
| 0.05595592  | 0.243909992 | 0.309758958 | 0.246000678 |
| 0.223146816 | 0.123611238 | 0.150680804 | 0.145919129 |
| 0.28731359  | 0.271898581 | 0.182396142 | 0.289499577 |
| 0.21175746  | 0.1300931   | 0.226151407 | 0.223659854 |
| 0.187137854 | 1           | 0.28928981  | 0.118554372 |
| 0.279682148 | 0.252979189 | 0.181804075 | 0.268185821 |
| 0.328823079 | 0.364908033 | 0.154453124 | 0.049627121 |
| 0.309592071 | 0.246606564 | 0.368247087 | 0.403142952 |
| 0.457918399 | 0.43033827  | 0.395674253 | 0.167348253 |
| 0.184923787 | 0.269405126 | 0.191940609 | 0.134077047 |
| 0.403592258 | 0.2067028   | 0.406160151 | 0.164890931 |
| 0.246190314 | 0.287084972 | 0.111498952 | 0.21098021  |
| 0.218914981 | 0.261434786 | 0.213998129 | 0.27505757  |
| 0.261013224 | 0.139254732 | 0.173258704 | 0.277524047 |
| 0.323451065 | 0.107105668 | 0.270560483 | 0.285104065 |
| 0.323591059 | 0.168577378 | 0.278988289 | 0.40331663  |
| 0.255582455 | 0.250771504 | 0.30843871  | 0.282229277 |
| 0.30833231  | 0.247341981 | 0.068622093 | 0.370125795 |

|             |             |             |             |
|-------------|-------------|-------------|-------------|
| 0.375537983 | 0.279993886 | 0.424387532 | 0.307599248 |
| 0.224824975 | 0.242095007 | 0.185170682 | 0.258171383 |
| 0.266382403 | 0.290193184 | 0.257412849 | 0.196055531 |
| 0.301463137 | 0.446514978 | 0.352466802 | 0.228003834 |
| 0.26816698  | 0.249958062 | 0.198485585 | 0.325553508 |
| 0.123813373 | 0.209776213 | 0.254121539 | 0.285049968 |
| 0.006150158 | 0.065121007 | 0.37147069  | 0.237708158 |
| 0.438184832 | 0.36633949  | 0.393096497 | 0.265033293 |
| 0.001414424 | 0.258436348 | 0.284691671 | 0.27578398  |
| 0.352028946 | 0.318615127 | 0.165598841 | 0.174616424 |
| 0.297094767 | 0.212375423 | 0.217077252 | 0.253445048 |
| 0.113246662 | 0.312703225 | 0.269718555 | 0.281137804 |
| 0.223302285 | 0.224902676 | 0.132511289 | 0.27628191  |
| 0.098604004 | 0.285884418 | 0.310380665 | 0.207679427 |
| 0.116093832 | 0.338080407 | 0.325270113 | 0.124629044 |
| 0.204750202 | 0.315548136 | 0.340864046 | 0.015611646 |
| 0.282224953 | 0.052716381 | 0.211162907 | 0.225629411 |
| 0.225891158 | 0.226894561 | 0.233679556 | 0.225772436 |
| 0.314504709 | 0.280174658 | 0.265077159 | 0.270902653 |
| 0.201890123 | 0.274759947 | 0.266583848 | 0.314676522 |
| 0.212534568 | 0.238722362 | 0.224244537 | 0.234393064 |
| 0.1286826   | 0.349971446 | 0.300189442 | 0.204782873 |
| 0.259028287 | 0.291441046 | 0.328816564 | 0.414708864 |
| 0.336382796 | 0.234061925 | 0.265165985 | 0.347096257 |
| 0.136709739 | 0.232942748 | 0.188208079 | 0.305896927 |
| 0.269462941 | 0.157422594 | 0.278403986 | 0.329697084 |
| 0.301614555 | 0.395712135 | 0.294383639 | 0.372747397 |
| 0.270476346 | 0.259548529 | 0.231219195 | 0.159335371 |
| 0.286378094 | 0.260948142 | 0.187372068 | 0.022754244 |
| 0.302020428 | 0.290579533 | 0.336289741 | 0.432011055 |
| 0.147190844 | 0.338848133 | 0.236404824 | 0.220273427 |
| 0.19980003  | 0.294777726 | 0.258577412 | 0.293305478 |
| 0.100564087 | 0.249564525 | 0.232960857 | 0.287106556 |
| 0.287223197 | 0.285758247 | 0.189052558 | 0.274272975 |
| 0.269328533 | 0.298280043 | 0.436433884 | 0.24632824  |
| 0.271485702 | 0.143453492 | 0.281106434 | 0.255887357 |
| 0.2236395   | 0.396583241 | 0.186632756 | 0.398622686 |
| 0.245458384 | 0.251487004 | 0.439046963 | 0.278741253 |
| 0.278926763 | 0.150989462 | 0.090936867 | 0.276632709 |
| 0.250975829 | 0.179599537 | 0.009550245 | 0.052464919 |
| 0.287828211 | 0.232765765 | 0.307531286 | 0.290856267 |
| 0.17507633  | 0.28528386  | 0.070949994 | 0.306045004 |
| 0.424583554 | 0.45749629  | 0.255825967 | 0.29612653  |
| 0.310513993 | 0.202714275 | 0.308237927 | 0.018094001 |
| 0.271740061 | 0.245624514 | 0.242020068 | 0.158268607 |
| 0.102955147 | 0.110758446 | 0.294048351 | 0.203911379 |
| 0.34884842  | 0.095364473 | 0.283709027 | 0.289258956 |
| 0.27301058  | 0.464836289 | 0.165795172 | 0.288546862 |
| 0.163740138 | 0.291847305 | 0.223182596 | 0.252107728 |
| 0.195692844 | 0.180725928 | 0.29603052  | 0.136393998 |
| 0.13037567  | 0.223603524 | 0.013650891 | 0.420917461 |
| 0.447979498 | 0.209623836 | 0.288075271 | 0.187193056 |
| 0.273193675 | 0.314880345 | 0.191791772 | 0.246622551 |
| 0.052466217 | 0.234122665 | 0.253245427 | 0.334851025 |

|             |             |             |             |
|-------------|-------------|-------------|-------------|
| 0.138929515 | 0.284065791 | 0.139190659 | 0.205325192 |
| 0.461840399 | 0.216634607 | 0.291487165 | 0.205151798 |
| 0.406428931 | 0.308443048 | 0.27583899  | 0.170777119 |
| 0.278248933 | 0.198115473 | 0.251793284 | 0.428404011 |
| 0.218198251 | 0.13486541  | 0.298393839 | 0.255834185 |
| 0.175166979 | 0.335564848 | 0.261671747 | 0.426772829 |
| 0.126043788 | 0.282295641 | 0.289367834 | 0.37595408  |
| 0.280850781 | 0.119840064 | 0.143595501 | 0.202525598 |
| 0.405635101 | 0.180231965 | 0.17037341  | 0.329281846 |
| 0.13011427  | 0.276505202 | 0.278805909 | 0.16978568  |
| 0.101011294 | 0.219913282 | 0.253395048 | 0.260165142 |
| 0.279499277 | 0.266208278 | 0.190968367 | 0.357960739 |
| 0.164861559 | 0.084142415 | 0.400689885 | 0.01362041  |
| 0.306227559 | 0.2742792   | 0.266288314 | 0.233356138 |
| 0.282832714 | 0.30605458  | 0.326934361 | 0.016387417 |
| 0.300233003 | 0.046253091 | 0.224707157 | 0.191257226 |
| 0.166977805 | 0.179101395 | 0.396770227 | 0.387002193 |
| 0.302087039 | 0.198319685 | 0.184401269 | 0.389169657 |
| 0.084380849 | 0.169628547 | 0.195538533 | 0.309286212 |
| 0.118923421 | 0.24846463  | 0.242159508 | 0.213656695 |
| 0.320144824 | 0.271509436 |             |             |
| MTCH1       | 0.326969404 | 0.248243603 | 0.306463759 |
| 0.263291276 | 0.134023593 | 0.200181834 | 0.291670333 |
| 0.296169033 | 0.220617832 | 0.110270823 | 0.203420173 |
| 0.245149423 | 0.016512082 | 0.256570827 | 0.267482904 |
| 0.14808865  | 0.236979068 | 0.310468999 | 0.06824611  |
| 0.192587177 | 0.137017299 | 0.116907548 | 0.231173149 |
| 0.129487306 | 0.334863085 | 0.244684532 | 0.116476062 |
| 0.261870935 | 0.065332042 | 0.174491206 | 0.074595514 |
| 0.320749094 | 0.130516874 | 0.109770802 | 0.23369992  |
| 0.18723605  | 0.004876034 | 0.357468064 | 0.191510873 |
| 0.047593705 | 0.317074789 | 0.155089284 | 0.238577283 |
| 0.162894649 | 0.306000358 | 0.066169056 | 0.147701474 |
| 0.212837737 | 0.19745678  | 0.31220916  | 0.194421293 |
| 0.151133565 | 0.271579529 | 0.189374314 | 0.018218689 |
| 0.077583641 | 0.009351618 | 0.043442125 | 0.310384748 |
| 0.310805336 | 0.2770352   | 0.068603242 | 0.212996256 |
| 0.153220451 | 0.168425154 | 0.241387599 | 0.141326598 |
| 0.293087348 | 0.043092729 | 0.158915471 | 0.174838804 |
| 0.211666896 | 0.246660228 | 0.326114484 | 0.275139903 |
| 0.141346512 | 0.25114066  | 0.164883605 | 0.090288098 |
| 0.253849614 | 0.352893863 | 0.269828132 | 0.330637971 |
| 0.032043345 | 0.111665221 | 0.116851517 | 0.223575541 |
| 0.194688152 | 0.240017    | 0.214077468 | 0.325002183 |
| 0.24364816  | 0.164137766 | 0.197388078 | 0.317142798 |
| 0.241813277 | 0.073029252 | 0.159539257 | 0.052858242 |
| 0.140313052 | 0.136116152 | 0.325895009 | 0.282172206 |
| 0.13313029  | 0.324578197 | 0.35893836  | 0.100501738 |
| 0.175367952 | 0.334575794 | 0.118180538 | 0.181979418 |
| 0.196271485 | 0.26260866  | 0.204589183 | 0.219998915 |
| 0.133895274 | 0.283220595 | 0.223351132 | 0.24391175  |
| 0.038097101 | 0.303590076 | 0.319183569 | 0.249892138 |
| 0.311262656 | 0.240014024 | 0.099428096 | 0.262898656 |
| 0.222493955 | 0.245742124 | 0.318589537 | 0.207060031 |

|             |             |             |             |
|-------------|-------------|-------------|-------------|
| 0.203456105 | 0.331283635 | 0.298731576 | 0.220515724 |
| 0.29858527  | 0.060080101 | 0.139393399 | 0.237437093 |
| 0.204760642 | 0.292377427 | 0.083271794 | 0.361319712 |
| 0.2888655   | 0.187872321 | 0.317617281 | 0.383042823 |
| 0.232338379 | 0.315362829 | 0.238039618 | 0.305231094 |
| 0.342652765 | 0.352580625 | 0.282544808 | 0.142738885 |
| 0.32944366  | 0.256848564 | 0.04575967  | 0.22939531  |
| 0.293280606 | 0.009041268 | 0.21159859  | 0.230353365 |
| 0.300516567 | 0.18623929  | 0.274503856 | 0.256048045 |
| 0.300096576 | 0.314035066 | 0.006271045 | 0.18662963  |
| 0.329304913 | 0.258977345 | 0.180684904 | 0.138502984 |
| 0.143699261 | 0.229547683 | 0.179205142 | 0.123701854 |
| 0.330852552 | 0.226964951 | 0.233664879 | 0.219270973 |
| 0.196932444 | 0.317147641 | 0.105039917 | 0.356456463 |
| 0.262669213 | 0.343140429 | 0.308364449 | 0.232823813 |
| 0.156125733 | 0.264437654 | 0.230550215 | 0.145717326 |
| 0.282755092 | 0.224716314 | 0.083161941 | 0.145546086 |
| 0.294614912 | 0.171395146 | 0.311814531 | 0.321656856 |
| 0.256970932 | 0.328509324 | 0.25364472  | 0.259722276 |
| 0.191540045 | 0.391597845 | 0.169002662 | 0.247891095 |
| 0.14219471  | 0.33824296  | 0.204498316 | 0.28623543  |
| 0.288401128 | 0.133065132 | 0.288344323 | 0.09526304  |
| 0.137594714 | 0.077203609 | 0.037017142 | 0.130713449 |
| 0.347241763 | 0.203229047 | 0.171302909 | 0.164890846 |
| 0.301097262 | 0.274946845 | 0.137223595 | 0.354770787 |
| 0.321802073 | 0.164029634 | 0.223091901 | 0.171704973 |
| 0.108426099 | 0.251830302 | 0.203466239 | 0.095735009 |
| 0.237936872 | 0.048674018 | 0.070457168 | 0.229248701 |
| 0.081266336 | 0.087878519 | 0.233773621 | 0.159517456 |
| 0.154616421 | 0.338674835 | 0.281856897 | 0.010986153 |
| 0.121141598 | 0.087725563 | 0.227430202 | 0.141955898 |
| 0.291324111 | 0.232935498 | 0.11653268  | 0.135090459 |
| 0.332804431 | 0.308187238 | 0.236744678 | 0.269893581 |
| 0.121130866 | 0.291022356 | 0.201296632 | 0.247119629 |
| 0.235439474 | 0.108944089 | 0.025393953 | 0.209790087 |
| 0.217320162 | 0.1160224   | 0.314376414 | 0.167624076 |
| 0.133579043 | 0.153242127 | 0.092699417 | 0.275174296 |
| 0.350684161 | 0.312648479 | 0.236422629 | 0.181797479 |
| 0.252622744 | 0.308121758 | 0.206249111 | 0.297072773 |
| 0.111304965 | 0.135478472 | 0.132983906 | 0.194270726 |
| 0.330097503 | 0.100105688 | 0.26958076  | 0.033543984 |
| 0.001628576 | 0.311693068 | 0.331741637 | 0.213662994 |
| 0.058274923 | 0.146004784 | 0.176104422 | 0.287142087 |
| 0.308752963 | 0.270665894 | 0.257493052 | 0.173956821 |
| 0.285435771 | 0.129109396 | 0.120122826 | 0.153712425 |
| 0.282246935 | 0.122553669 | 0.24221919  | 0.363455526 |
| 0.270875343 | 0.076378644 | 0.225346318 | 0.020785032 |
| 0.307993582 | 0.193744735 | 0.318013709 | 0.35499614  |
| 0.226981194 | 0.347707013 | 0.324691323 | 0.136776752 |
| 0.213794375 | 0.321696812 | 0.026970208 | 0.253088234 |
| 0.277165625 | 0.265634285 | 0.278893592 | 0.307332869 |
| 0.223646301 | 0.185711533 | 0.185374788 | 0.244407189 |
| 0.308797725 | 0.308578821 | 0.073642542 | 0.196066666 |
| 0.026609082 | 0.212632564 | 0.150391452 | 0.333773903 |

|             |             |             |             |
|-------------|-------------|-------------|-------------|
| 0.16778907  | 0.2320308   | 0.289430668 | 0.133467975 |
| 0.231699578 | 0.043039144 | 0.217791689 | 0.201009965 |
| 0.171784675 | 0.222350309 | 0.131583743 | 0.109125543 |
| 0.319144556 | 0.285203719 | 0.097880281 | 0.310818421 |
| 0.219496446 | 0.30839916  | 0.178690132 | 0.186309818 |
| 0.308838069 | 0.048869937 | 0.197236792 | 0.019564015 |
| 0.105472652 | 0.29767556  | 0.134266866 | 0.309257762 |
| 0.276434646 | 0.154051895 | 0.291089356 | 0.313237281 |
| 0.302751866 | 0.262375158 | 0.28672099  | 0.086164917 |
| 0.299957928 | 0.011676222 | 0.282269975 | 0.241245282 |
| 0.131987787 | 0.018366595 | 0.047947032 | 0.22552715  |
| 0.154861376 | 0.284490643 | 0.323697393 | 0.182189487 |
| 0.277379397 | 0.329363708 | 0.273693649 | 0.085520378 |
| 0.188061543 | 0.154015027 | 0.074861788 | 0.312934056 |
| 0.241386589 | 0.235843579 | 0.181209026 | 0.316466668 |
| 0.15519447  | 0.291184364 | 0.297876639 | 0.030152651 |
| 0.174353347 | 0.318230241 | 0.374671211 | 0.291494135 |
| 0.312361549 | 0.166670027 | 0.103900039 | 0.156542438 |
| 0.207441325 | 0.310135057 | 0.109493882 | 0.321865062 |
| 0.290807674 | 0.171494191 | 0.267901143 | 0.304309525 |
| 0.288117097 | 0.305649536 | 0.274347601 | 0.201911024 |
| 0.138554401 | 0.005004301 | 0.228858119 | 0.256202726 |
| 0.025274328 | 0.136204818 | 0.302382453 | 0.167613104 |
| 0.168707623 | 0.274334927 | 0.070538096 | 0.072244041 |
| 0.226391634 | 0.178794318 | 0.110650768 | 0.253122597 |
| 0.135613015 | 0.085388257 | 0.218622048 | 0.244563729 |
| 0.114940975 | 0.28928981  | 1           | 0.237307094 |
| 0.158181308 | 0.144796629 | 0.315780414 | 0.326723512 |
| 0.226715779 | 0.241418923 | 0.236166247 | 0.113858415 |
| 0.308101747 | 0.161252283 | 0.245041321 | 0.281022198 |
| 0.344260819 | 0.310166008 | 0.344940292 | 0.16927291  |
| 0.311076935 | 0.18775371  | 0.11088756  | 0.130751334 |
| 0.282828513 | 0.304334282 | 0.298569229 | 0.081367583 |
| 0.315341133 | 0.27365827  | 0.227631551 | 0.300486384 |
| 0.121182969 | 0.303478415 | 0.209715809 | 0.335425289 |
| 0.183180392 | 0.07304931  | 0.286034452 | 0.295123011 |
| 0.256621827 | 0.045013485 | 0.315327423 | 0.214656591 |
| 0.243756649 | 0.086306208 | 0.165442113 | 0.317396132 |
| 0.34097259  | 0.303029497 | 0.271768125 | 0.186354815 |
| 0.192773406 | 0.134204007 | 0.162850417 | 0.255536098 |
| 0.25753857  | 0.168145135 | 0.314634867 | 0.225420798 |
| 0.317526347 | 0.147751481 | 0.08901748  | 0.160668985 |
| 0.277522478 | 0.208519089 | 0.21811022  | 0.315225611 |
| 0.265932871 | 0.35135328  | 0.247893623 | 0.261223141 |
| 0.160249096 | 0.306949064 | 0.295298717 | 0.216112564 |
| 0.064398933 | 0.326501691 | 0.154661422 | 0.175590686 |
| 0.008913897 | 0.029074489 | 0.242898474 | 0.236386176 |
| 0.317795113 | 0.243047813 | 0.310103342 | 0.213403676 |
| 0.00026225  | 0.142066039 | 0.199950551 | 0.170403904 |
| 0.250408001 | 0.263826907 | 0.140513693 | 0.256420779 |
| 0.27328875  | 0.319840999 | 0.237063775 | 0.179720721 |
| 0.045368015 | 0.212436801 | 0.28819083  | 0.252851433 |
| 0.192799603 | 0.276626493 | 0.069679063 | 0.267716093 |
| 0.042576967 | 0.291919729 | 0.252024933 | 0.123851526 |

|             |             |             |             |
|-------------|-------------|-------------|-------------|
| 0.059399653 | 0.228759998 | 0.222513542 | 0.268602198 |
| 0.112844698 | 0.211203799 | 0.240492913 | 0.031250367 |
| 0.175698412 | 0.154056669 | 0.19643018  | 0.207523982 |
| 0.209968809 | 0.198424643 | 0.183949534 | 0.151309826 |
| 0.219914811 | 0.25752749  | 0.235372814 | 0.26769235  |
| 0.215548614 | 0.260109372 | 0.163041344 | 0.20930942  |
| 0.159781954 | 0.321064862 | 0.31279802  | 0.326596605 |
| 0.250168798 | 0.237091554 | 0.321615968 | 0.31370393  |
| 0.248322377 | 0.183457798 | 0.279809947 | 0.294399323 |
| 0.252872553 | 0.307377243 | 0.180633644 | 0.242580337 |
| 0.063072034 | 0.172536361 | 0.307578484 | 0.20247111  |
| 0.276203655 | 0.111014057 | 0.173092772 | 0.27296545  |
| 0.189065632 | 0.340203705 | 0.319967316 | 0.276178873 |
| 0.178938172 | 0.147780363 | 0.134795974 | 0.22452102  |
| 0.326770064 | 0.318065238 | 0.118897874 | 0.076776718 |
| 0.233732872 | 0.273473234 | 0.216454318 | 0.323668578 |
| 0.070119365 | 0.274267079 | 0.157534373 | 0.33094397  |
| 0.115094973 | 0.333999072 | 0.332198639 | 0.181383695 |
| 0.044913135 | 0.277225481 | 0.157512011 | 0.223396332 |
| 0.174735303 | 0.166004127 | 0.113472246 | 0.248622272 |
| 0.222712484 | 0.316073131 | 0.328649793 | 0.319506541 |
| 0.151419888 | 0.099026347 | 0.18339759  | 0.187598143 |
| 0.18693166  | 0.263020175 | 0.30946932  | 0.263750825 |
| 0.149219907 | 0.319609109 | 0.345570917 | 0.225502729 |
| 0.219012969 | 0.170513455 | 0.038732708 | 0.172265413 |
| 0.217480853 | 0.091891737 | 0.004106087 | 0.032873189 |
| 0.231431012 | 0.130703073 | 0.198030197 | 0.19708921  |
| 0.104906532 | 0.214774933 | 0.0314638   | 0.252055562 |
| 0.315330749 | 0.356146747 | 0.220688499 | 0.279779265 |
| 0.249211426 | 0.297945362 | 0.222476284 | 0.011175033 |
| 0.156664897 | 0.131017189 | 0.131869085 | 0.272098186 |
| 0.219428728 | 0.047734609 | 0.174370437 | 0.274143066 |
| 0.22507625  | 0.043266665 | 0.177422271 | 0.18292584  |
| 0.294038627 | 0.365283229 | 0.187470901 | 0.197928335 |
| 0.200772223 | 0.259669721 | 0.116887013 | 0.14059062  |
| 0.155681221 | 0.098034548 | 0.213020829 | 0.076503669 |
| 0.2598765   | 0.163377354 | 0.021133011 | 0.371517502 |
| 0.34787952  | 0.104985765 | 0.31468714  | 0.097008871 |
| 0.237213125 | 0.230273622 | 0.134975354 | 0.134974801 |
| 0.12897418  | 0.136720035 | 0.26854708  | 0.255389761 |
| 0.068252688 | 0.170541036 | 0.225860931 | 0.110499714 |
| 0.388910243 | 0.138293335 | 0.27700304  | 0.100566145 |
| 0.289676009 | 0.218317962 | 0.309607359 | 0.12016027  |
| 0.164843555 | 0.313931918 | 0.153547562 | 0.302125805 |
| 0.229762093 | 0.076750282 | 0.18893194  | 0.243932514 |
| 0.091278006 | 0.260830765 | 0.142938024 | 0.299940495 |
| 0.158892655 | 0.280925829 | 0.184369029 | 0.263511807 |
| 0.244426673 | 0.06915616  | 0.079407961 | 0.14968994  |
| 0.307157123 | 0.274029093 | 0.089701069 | 0.262627226 |
| 0.064449341 | 0.227197585 | 0.179805891 | 0.131105637 |
| 0.203469568 | 0.224121786 | 0.18205122  | 0.319234674 |
| 0.229445956 | 0.165327765 | 0.118674212 | 0.300502973 |
| 0.202477874 | 0.164570096 | 0.313600806 | 0.004793374 |
| 0.253431565 | 0.182733028 | 0.259419632 | 0.139971891 |

|             |             |             |             |
|-------------|-------------|-------------|-------------|
| 0.340407219 | 0.222634723 | 0.241070138 | 0.067296587 |
| 0.20107336  | 0.029606651 | 0.145433199 | 0.144822425 |
| 0.092370706 | 0.311535506 | 0.303578659 | 0.259834588 |
| 0.250017974 | 0.11249537  | 0.094564029 | 0.284823395 |
| 0.040575841 | 0.077918189 | 0.098581094 | 0.20162508  |
| 0.058957648 | 0.13497216  | 0.131749102 | 0.111223738 |
| 0.237711447 | 0.241904462 |             |             |
| MTCH2       | 0.163619789 | 0.04522867  | 0.13884858  |
| 0.043924437 | 0.023696332 | 0.009945744 | 0.181189923 |
| 0.101117213 | 0.058052035 | 0.002770272 | 0.027549365 |
| 0.200271793 | 0.000940569 | 0.05419742  | 0.186140793 |
| 0.015907337 | 0.199633899 | 0.218412905 | 0.01536597  |
| 0.028723101 | 0.029221835 | 0.003238973 | 0.02055557  |
| 0.025880222 | 0.243889004 | 0.043583268 | 0.006969059 |
| 0.04080647  | 0.000161398 | 0.014863763 | 0.00082051  |
| 0.116917934 | 0.019751186 | 0.003208153 | 0.152277134 |
| 0.016988246 | 0.004982231 | 0.126900576 | 0.037782565 |
| 0.002255965 | 0.14595087  | 0.005826051 | 0.054026777 |
| 0.008958341 | 0.159710752 | 1.29E-05    | 0.016450387 |
| 0.041979235 | 0.032634959 | 0.193984907 | 0.022188008 |
| 0.009060556 | 0.066900402 | 0.018249641 | 0.007822349 |
| 0.002308819 | 0.001536791 | 0.000566437 | 0.061418473 |
| 0.186803885 | 0.178062145 | 0.001069482 | 0.0555605   |
| 0.018264261 | 0.034177441 | 0.124405007 | 0.005475851 |
| 0.057193049 | 0.002026786 | 0.015058996 | 0.022845918 |
| 0.021169993 | 0.195375826 | 0.268301678 | 0.207655443 |
| 0.007070218 | 0.119892691 | 0.023720386 | 0.005395516 |
| 0.040534617 | 0.099820394 | 0.138222361 | 0.071450896 |
| 0.007312072 | 0.012126615 | 0.011847376 | 0.099187934 |
| 0.051352418 | 0.127186279 | 0.034954117 | 0.077653924 |
| 0.188782953 | 0.01052537  | 0.03421467  | 0.229276133 |
| 0.042030752 | 0.003040153 | 0.005972214 | 0.002744398 |
| 0.02093116  | 0.017934112 | 0.090909281 | 0.109867053 |
| 0.018555393 | 0.244220391 | 0.087136122 | 0.010091978 |
| 0.019482947 | 0.206583017 | 0.015783309 | 0.022589888 |
| 0.023495044 | 0.042441704 | 0.032933134 | 0.069877146 |
| 0.010912649 | 0.052721884 | 0.03563682  | 0.06030848  |
| 0.000533537 | 0.057237663 | 0.130044996 | 0.173156682 |
| 0.138832321 | 0.146281045 | 0.0144879   | 0.142835278 |
| 0.033105383 | 0.068017897 | 0.102781042 | 0.074303703 |
| 0.038348708 | 0.070115372 | 0.055429709 | 0.048077559 |
| 0.231367896 | 0.002739938 | 0.010777903 | 0.032277809 |
| 0.044059236 | 0.256371065 | 0.007444369 | 0.09210355  |
| 0.096200146 | 0.031909192 | 0.088085833 | 0.117907793 |
| 0.092080406 | 0.077389108 | 0.031529233 | 0.148234649 |
| 0.082147104 | 0.08442303  | 0.061392201 | 0.014866203 |
| 0.082821663 | 0.032209683 | 0.014099627 | 0.067537833 |
| 0.077720922 | 0.001582433 | 0.029057584 | 0.034033498 |
| 0.056161965 | 0.02252322  | 0.058910314 | 0.042414814 |
| 0.05454696  | 0.290409618 | 0.000644207 | 0.06763077  |
| 0.071014179 | 0.071106697 | 0.068540102 | 0.006562651 |
| 0.021361652 | 0.01944446  | 0.02664364  | 0.002549693 |
| 0.098345183 | 0.038737866 | 0.03282671  | 0.04538357  |
| 0.036838336 | 0.15762347  | 0.005074058 | 0.086395902 |

|             |             |             |             |
|-------------|-------------|-------------|-------------|
| 0.162519076 | 0.130230252 | 0.256206818 | 0.105373804 |
| 0.002732235 | 0.166220551 | 0.017386855 | 0.025195993 |
| 0.181475621 | 0.026410867 | 0.001872111 | 0.020246577 |
| 0.307509637 | 0.008720653 | 0.142466887 | 0.142876529 |
| 0.177678122 | 0.317705265 | 0.045562726 | 0.061616673 |
| 0.059144788 | 0.249339544 | 0.014593639 | 0.045474802 |
| 0.015637718 | 0.182486372 | 0.025978834 | 0.074878195 |
| 0.108819011 | 0.009369896 | 0.192931057 | 0.057986418 |
| 0.008964793 | 0.001694486 | 0.000936753 | 0.007039211 |
| 0.281910527 | 0.03241189  | 0.022472704 | 0.026136404 |
| 0.056520425 | 0.118951446 | 0.008076916 | 0.129407447 |
| 0.211412239 | 0.016172144 | 0.045058259 | 0.012864235 |
| 0.142696989 | 0.045676204 | 0.030729975 | 0.025438332 |
| 0.076822677 | 0.003262194 | 0.001115806 | 0.041776672 |
| 0.002403212 | 0.012346305 | 0.035624593 | 0.027459265 |
| 0.005521397 | 0.198415746 | 0.058824933 | 0.000355802 |
| 0.014485716 | 0.028030183 | 0.097685446 | 0.006731928 |
| 0.118010844 | 0.116105473 | 0.015407028 | 0.014748646 |
| 0.164302489 | 0.063480399 | 0.062102045 | 0.046601198 |
| 0.003549883 | 0.062530975 | 0.029587921 | 0.055285613 |
| 0.054378561 | 0.005689643 | 0.000457071 | 0.031870456 |
| 0.037106493 | 0.004740038 | 0.255221779 | 0.018699511 |
| 0.00766571  | 0.018679107 | 0.027470279 | 0.059428962 |
| 0.105201602 | 0.060546108 | 0.09531058  | 0.048397209 |
| 0.069177289 | 0.101120169 | 0.047125912 | 0.069980178 |
| 0.002851038 | 0.013523656 | 0.009239508 | 0.055441145 |
| 0.191864577 | 0.015277093 | 0.136245744 | 0.000843114 |
| 0.002690487 | 0.213227864 | 0.251692961 | 0.098790058 |
| 0.005866485 | 0.008511409 | 0.027864036 | 0.054474204 |
| 0.211366177 | 0.073221698 | 0.15193198  | 0.016288225 |
| 0.071704501 | 0.012490475 | 0.00771517  | 0.019256219 |
| 0.163710801 | 0.073243822 | 0.066614713 | 0.102189744 |
| 0.252598581 | 0.003591954 | 0.044090147 | 0.009475845 |
| 0.189379736 | 0.023838813 | 0.309892764 | 0.296265368 |
| 0.045672593 | 0.248836083 | 0.15404935  | 0.004999459 |
| 0.060270467 | 0.254585027 | 0.025210041 | 0.048046274 |
| 0.06242255  | 0.066534888 | 0.061153274 | 0.079878156 |
| 0.051025519 | 0.033048683 | 0.036313394 | 0.025247146 |
| 0.116181446 | 0.134546602 | 0.004824087 | 0.04287268  |
| 0.014179551 | 0.054914275 | 0.030781455 | 0.272822922 |
| 0.022802014 | 0.091550927 | 0.174384024 | 0.019474732 |
| 0.089345447 | 0.000253972 | 0.02115627  | 0.072415201 |
| 0.052521867 | 0.171875884 | 0.00297726  | 0.003201131 |
| 0.072794927 | 0.105493307 | 0.002536    | 0.062209102 |
| 0.042871476 | 0.16989329  | 0.028776474 | 0.034733236 |
| 0.181965486 | 0.002611505 | 0.017780952 | 2.79E-05    |
| 0.003949669 | 0.083918704 | 0.006449259 | 0.093785896 |
| 0.096739621 | 0.152405033 | 0.08889819  | 0.066466096 |
| 0.056012567 | 0.047400628 | 0.054414595 | 0.004659608 |
| 0.05861543  | 0.001035704 | 0.048655087 | 0.049901423 |
| 0.003324728 | 0.011704098 | 0.062104245 | 0.033270894 |
| 0.012761927 | 0.241368681 | 0.218458619 | 0.003686177 |
| 0.100788292 | 0.101806397 | 0.191076817 | 0.011558477 |
| 0.01628081  | 0.043958978 | 0.009977874 | 0.067425356 |



|             |             |             |             |
|-------------|-------------|-------------|-------------|
| 0.080629821 | 0.113370223 | 0.009512305 | 0.293183835 |
| 0.013753071 | 0.154029564 | 0.286095858 | 0.015594783 |
| 0.042085014 | 0.239072548 | 0.104221776 | 0.054131885 |
| 0.080767461 | 0.025818025 | 0.001406778 | 0.005305395 |
| 0.045415371 | 0.171230277 | 0.001667264 | 0.172311571 |
| 0.049258161 | 0.02198131  | 0.1044925   | 0.125637891 |
| 0.067489218 | 0.073018958 | 0.250291613 | 0.04082524  |
| 0.067667166 | 0.009762323 | 0.015934645 | 0.134064236 |
| 0.010375728 | 0.010853931 | 0.170196857 | 0.036509143 |
| 0.041027755 | 0.125160289 | 0.003875711 | 0.005536214 |
| 0.075754946 | 0.025762856 | 0.016258231 | 0.144965951 |
| 0.024972299 | 0.020804812 | 0.068453036 | 0.104991161 |
| 0.012749853 | 0.118554372 | 0.237307094 | 1           |
| 0.00728855  | 0.007916606 | 0.256381853 | 0.227406194 |
| 0.043078618 | 0.03776565  | 0.183534244 | 0.110085535 |
| 0.165552017 | 0.026081538 | 0.043346733 | 0.04573222  |
| 0.078940437 | 0.078092728 | 0.141433943 | 0.068606875 |
| 0.17897308  | 0.049775362 | 0.016428388 | 0.054371116 |
| 0.05223295  | 0.233237458 | 0.059775139 | 0.005358627 |
| 0.281718686 | 0.066180487 | 0.148313829 | 0.276580423 |
| 0.007874448 | 0.209699638 | 0.100361772 | 0.150956596 |
| 0.027971488 | 0.002769985 | 0.238955558 | 0.161500335 |
| 0.082874203 | 0.00176299  | 0.217602161 | 0.029836921 |
| 0.065794111 | 0.003600022 | 0.018873629 | 0.109523476 |
| 0.247129348 | 0.211168847 | 0.015402966 | 0.041620018 |
| 0.025174408 | 0.006675985 | 0.055440578 | 0.038532482 |
| 0.052749905 | 0.01213138  | 0.063272796 | 0.081605925 |
| 0.312307383 | 0.010509314 | 0.006100762 | 0.027823494 |
| 0.181459758 | 0.013240773 | 0.089645936 | 0.327344459 |
| 0.162067612 | 0.113434954 | 0.053124927 | 0.115057072 |
| 0.010574881 | 0.156620253 | 0.224465902 | 0.037528271 |
| 0.005415661 | 0.109594823 | 0.005616747 | 0.028240463 |
| 0.010991652 | 0.001193062 | 0.052818394 | 0.043000512 |
| 0.08397069  | 0.046036322 | 0.092686757 | 0.033671487 |
| 0.000127998 | 0.014542842 | 0.029692914 | 0.008755947 |
| 0.044197802 | 0.079618792 | 0.030805712 | 0.131313885 |
| 0.15493357  | 0.217584995 | 0.082938026 | 0.005642957 |
| 0.001921144 | 0.024696434 | 0.224233156 | 0.134418987 |
| 0.075611622 | 0.213794215 | 0.002504172 | 0.070629721 |
| 0.006522579 | 0.18593031  | 0.096439596 | 0.003120433 |
| 0.001171392 | 0.059355545 | 0.042704604 | 0.181384457 |
| 0.008903611 | 0.057541404 | 0.061884346 | 0.041560712 |
| 0.019909098 | 0.198384173 | 0.079568637 | 0.061061458 |
| 0.073353409 | 0.07535872  | 0.076033301 | 0.016767553 |
| 0.04833505  | 0.094307593 | 0.040987658 | 0.131148748 |
| 0.063968195 | 0.097026709 | 0.020770911 | 0.025796564 |
| 0.016393272 | 0.136187654 | 0.301986314 | 0.30023403  |
| 0.119393952 | 0.038621423 | 0.21292216  | 0.242641455 |
| 0.137505225 | 0.018950253 | 0.133767401 | 0.050989444 |
| 0.079306688 | 0.203364676 | 0.030248053 | 0.036027524 |
| 0.000985306 | 0.007807243 | 0.131788883 | 0.021853817 |
| 0.110490908 | 0.010385007 | 0.011001078 | 0.048977479 |
| 0.025246054 | 0.13652857  | 0.202955982 | 0.079517632 |
| 0.017352433 | 0.020015977 | 0.002754205 | 0.094568485 |

|             |             |             |             |
|-------------|-------------|-------------|-------------|
| 0.121124287 | 0.264155643 | 0.022413473 | 0.112279348 |
| 0.059940465 | 0.020239679 | 0.029629183 | 0.068587713 |
| 0.002169912 | 0.105437364 | 0.002533286 | 0.119274045 |
| 0.001545644 | 0.188982691 | 0.276835132 | 0.021694591 |
| 0.000568298 | 0.086074013 | 0.033150858 | 0.008705958 |
| 0.023450536 | 0.02143642  | 0.017090427 | 0.074999789 |
| 0.101160636 | 0.144126084 | 0.09356353  | 0.12581898  |
| 0.008450051 | 0.011990754 | 0.017802168 | 0.03538253  |
| 0.063246848 | 0.0451938   | 0.275604226 | 0.042675576 |
| 0.017952045 | 0.263791743 | 0.110747842 | 0.047533543 |
| 0.01966837  | 0.050613432 | 0.001011188 | 0.00876414  |
| 0.048822939 | 0.002717296 | 0.000104902 | 0.003797109 |
| 0.084351679 | 0.013815348 | 0.028677864 | 0.055481493 |
| 0.015964906 | 0.092444137 | 0.000904079 | 0.057680044 |
| 0.060293456 | 0.088610303 | 0.023786581 | 0.187848194 |
| 0.083667735 | 0.154896501 | 0.02056677  | 0.004393686 |
| 0.012038584 | 0.00633778  | 0.002526979 | 0.196479305 |
| 0.203270291 | 0.001224446 | 0.015976075 | 0.240498318 |
| 0.042716672 | 0.000317763 | 0.026374158 | 0.01941644  |
| 0.216604413 | 0.092686188 | 0.074814534 | 0.032202317 |
| 0.109858396 | 0.130661934 | 0.007693269 | 0.011976624 |
| 0.016345455 | 0.008352915 | 0.052918857 | 0.005450107 |
| 0.203947815 | 0.01874296  | 0.044045793 | 0.145795041 |
| 0.085269526 | 0.00773268  | 0.246158681 | 0.001838654 |
| 0.112554961 | 0.07688093  | 0.01748074  | 0.005709386 |
| 0.121739553 | 0.013137105 | 0.154290253 | 0.052532094 |
| 0.000264004 | 0.025151565 | 0.10768362  | 0.015370964 |
| 0.115594134 | 0.009204495 | 0.187974372 | 0.001882255 |
| 0.051450823 | 0.050715815 | 0.155786625 | 0.016295103 |
| 0.019163644 | 0.321002715 | 0.004383816 | 0.066237004 |
| 0.101131553 | 0.007482115 | 0.032280352 | 0.068438889 |
| 0.006353334 | 0.072479606 | 0.009874396 | 0.066910551 |
| 0.087738484 | 0.146422544 | 0.032813707 | 0.056543987 |
| 0.123095967 | 0.012003642 | 0.004267536 | 0.033534654 |
| 0.05883058  | 0.072980478 | 0.006935261 | 0.073804228 |
| 0.003535267 | 0.08557207  | 0.020746567 | 0.038178338 |
| 0.127438437 | 0.070193693 | 0.00786319  | 0.24268116  |
| 0.075860559 | 0.021887689 | 0.017476024 | 0.12180318  |
| 0.045512987 | 0.086583656 | 0.104759807 | 0.000244765 |
| 0.032584251 | 0.024591755 | 0.112197557 | 0.014533938 |
| 0.223038078 | 0.048542495 | 0.030836957 | 0.081092761 |
| 0.048323957 | 0.005081632 | 0.021620011 | 0.017871271 |
| 0.00367061  | 0.184144197 | 0.07365819  | 0.049457658 |
| 0.075407049 | 0.003605589 | 0.001094447 | 0.064989665 |
| 0.002367742 | 0.001328829 | 0.003897901 | 0.020190527 |
| 0.003143292 | 0.003934157 | 0.004443706 | 0.002770565 |
| 0.0527053   | 0.053417758 |             |             |
| MTERFD1     | 0.035396902 | 0.430418294 | 0.031220306 |
| 0.09016474  | 0.1994003   | 0.248256525 | 0.024836037 |
| 0.056926821 | 0.313435783 | 0.240790559 | 0.217570586 |
| 0.006428358 | 0.070040856 | 0.438497374 | 0.021304252 |
| 0.289935549 | 0.011971692 | 0.049719976 | 0.044809921 |
| 0.139323915 | 0.167643589 | 0.228107357 | 0.218716802 |
| 0.170846545 | 0.151613643 | 0.245734573 | 0.265067675 |

|             |             |             |             |
|-------------|-------------|-------------|-------------|
| 0.517943801 | 0.235240079 | 0.363453459 | 0.213842661 |
| 0.381740277 | 0.22490162  | 0.273579031 | 0.00718352  |
| 0.2475525   | 0.008327041 | 0.406874219 | 0.156390007 |
| 0.129285786 | 0.296758159 | 0.245638795 | 0.141054033 |
| 0.261154882 | 0.017701085 | 0.203522193 | 0.345904869 |
| 0.235037143 | 0.162612718 | 0.033437895 | 0.377036657 |
| 0.232294907 | 0.254246218 | 0.378415786 | 0.000671812 |
| 0.224827772 | 0.103431609 | 0.194646731 | 0.502961522 |
| 0.12496389  | 0.05640354  | 0.238891215 | 0.133581417 |
| 0.283273359 | 0.297245248 | 0.163020655 | 0.257701851 |
| 0.4966134   | 0.133682124 | 0.406814242 | 0.101688467 |
| 0.231759098 | 0.014287268 | 0.101860484 | 0.048120011 |
| 0.25477326  | 0.100310968 | 0.198839803 | 0.218579671 |
| 0.443774245 | 0.48573272  | 0.148999446 | 0.495951828 |
| 0.067154597 | 0.236952255 | 0.177718903 | 0.224937465 |
| 0.295786115 | 0.03863649  | 0.356026856 | 0.508350724 |
| 0.021058546 | 0.293945606 | 0.335472605 | 0.075171506 |
| 0.42587898  | 0.19856797  | 0.274312441 | 0.128511166 |
| 0.301810116 | 0.227525287 | 0.452298335 | 0.208015399 |
| 0.187262366 | 0.040030363 | 0.469167029 | 0.227411599 |
| 0.18079392  | 0.044059588 | 0.144221776 | 0.475643854 |
| 0.326118469 | 0.499841439 | 0.41933791  | 0.307513533 |
| 0.25741862  | 0.50423491  | 0.343376043 | 0.387741452 |
| 0.165796581 | 0.526106677 | 0.103474914 | 0.015134696 |
| 0.035795575 | 0.034406081 | 0.1403233   | 0.235912604 |
| 0.48285726  | 0.229786407 | 0.103464416 | 0.130634681 |
| 0.458952854 | 0.469968454 | 0.527688887 | 0.378181814 |
| 0.01583448  | 0.185830012 | 0.264250519 | 0.153683982 |
| 0.288217545 | 0.053270081 | 0.180515825 | 0.488752138 |
| 0.345097808 | 0.423420606 | 0.090972601 | 0.466118121 |
| 0.099497585 | 0.494974398 | 0.474348011 | 0.089293865 |
| 0.505768354 | 0.480183265 | 0.503132425 | 0.350847893 |
| 0.45231396  | 0.212530394 | 0.036962368 | 0.345109805 |
| 0.457891013 | 0.011140841 | 0.491609304 | 0.517937451 |
| 0.506276359 | 0.477855336 | 0.514659881 | 0.51710197  |
| 0.505162715 | 0.033953986 | 0.027448201 | 0.188754453 |
| 0.504303289 | 0.372107119 | 0.059795809 | 0.286458632 |
| 0.252215042 | 0.23531482  | 0.400431221 | 0.218863586 |
| 0.475475723 | 0.457911955 | 0.506267389 | 0.337572393 |
| 0.194221557 | 0.264999261 | 0.27692504  | 0.45360888  |
| 0.017710315 | 0.060239077 | 0.029527181 | 0.227759745 |
| 0.259210076 | 0.085334008 | 0.223792266 | 0.229017931 |
| 0.108477102 | 0.196029532 | 0.245973583 | 0.31241633  |
| 0.038274222 | 0.315609251 | 0.090239341 | 0.093201081 |
| 0.016442416 | 0.102108345 | 0.100672199 | 0.083268212 |
| 0.133535859 | 0.196941814 | 0.387214244 | 0.495271715 |
| 0.215851724 | 0.135318137 | 0.35228599  | 0.448976642 |
| 0.380455573 | 0.262882336 | 0.155122699 | 0.006245865 |
| 0.180564795 | 0.242408689 | 0.154953592 | 0.29349816  |
| 0.140784    | 0.134432293 | 0.276003451 | 0.345561825 |
| 0.163303875 | 0.073676568 | 0.235664343 | 0.381422856 |
| 0.106806649 | 0.185473891 | 0.429080474 | 0.287935421 |
| 0.001041677 | 0.19688801  | 0.434207533 | 0.084745638 |
| 0.22432729  | 0.100418201 | 0.19868056  | 0.471070843 |

|             |             |             |             |
|-------------|-------------|-------------|-------------|
| 0.201353459 | 0.1399985   | 0.503835483 | 0.336759864 |
| 0.201718669 | 0.185670157 | 0.517252367 | 0.042690015 |
| 0.217202561 | 0.028975315 | 0.196357014 | 0.237261646 |
| 0.153425931 | 0.205809796 | 0.203261019 | 0.176870275 |
| 0.085568613 | 0.508085331 | 0.350242631 | 0.514559818 |
| 0.259138285 | 0.520610282 | 0.460411245 | 0.419881623 |
| 0.266451405 | 0.246857857 | 0.121740194 | 0.429422577 |
| 0.46747813  | 0.207601798 | 0.048627871 | 0.436347833 |
| 0.25229232  | 0.340497315 | 0.065365293 | 0.488920426 |
| 0.459843834 | 0.472855883 | 0.06589966  | 0.315292933 |
| 0.34165918  | 0.128558401 | 0.385914319 | 0.507869332 |
| 0.245156981 | 0.225159679 | 0.224747128 | 0.366212507 |
| 0.107281622 | 0.131333381 | 0.262448939 | 0.148887948 |
| 0.017062305 | 0.037527798 | 0.031870381 | 0.07989409  |
| 0.117418495 | 0.343542846 | 0.317569412 | 0.513824505 |
| 0.053327006 | 0.384108271 | 0.161258621 | 0.184496523 |
| 0.406736837 | 0.212224363 | 0.261389342 | 0.279776059 |
| 0.172051904 | 0.009430525 | 0.06302937  | 0.491411558 |
| 0.02134771  | 0.166528064 | 0.171641017 | 0.001879246 |
| 0.020220344 | 0.418564308 | 0.070271728 | 0.152251617 |
| 0.46615918  | 0.162707106 | 0.13863172  | 0.242386846 |
| 0.256086588 | 0.043397768 | 0.001365715 | 0.495816301 |
| 0.476706152 | 0.443239633 | 0.476283523 | 0.438243184 |
| 0.433116401 | 0.354818097 | 0.383730406 | 0.221389067 |
| 0.049049647 | 0.045808295 | 0.15817377  | 0.168703126 |
| 0.0020829   | 0.324075033 | 0.174693443 | 0.085338611 |
| 0.376215539 | 0.206107924 | 0.014928094 | 0.240085064 |
| 0.012244197 | 0.181521902 | 0.172621997 | 0.108409637 |
| 0.27741602  | 0.00530346  | 0.209911943 | 0.229222505 |
| 0.417183938 | 0.299353882 | 0.260872748 | 0.527460409 |
| 0.193582078 | 0.097583278 | 0.194651421 | 0.331654408 |
| 0.031308223 | 0.090246688 | 0.215394445 | 0.05564244  |
| 0.133227852 | 0.42260483  | 0.240410052 | 0.039828557 |
| 0.169843764 | 0.001647911 | 0.337580759 | 0.516263428 |
| 0.471141572 | 0.523227962 | 0.497884054 | 0.193015209 |
| 0.505426157 | 0.118473628 | 0.534142483 | 0.389802014 |
| 0.27491461  | 0.000529155 | 0.001740072 | 0.506262834 |
| 0.27084896  | 0.04102157  | 0.087145189 | 0.245468493 |
| 0.05472598  | 0.085344624 | 0.026242963 | 0.121853377 |
| 0.321945174 | 0.132991528 | 0.105225063 | 0.458879615 |
| 0.133237905 | 0.119969363 | 0.242059165 | 0.051461764 |
| 0.284629536 | 0.023471817 | 0.049792446 | 0.004764327 |
| 0.286805684 | 0.086703847 | 0.442406143 | 0.509488513 |
| 0.470138463 | 0.326020773 | 0.267526368 | 0.206491955 |
| 0.419347107 | 0.073067049 | 0.259205273 | 0.069616276 |
| 0.495008436 | 0.303467087 | 0.25320297  | 0.262914843 |
| 0.485559154 | 0.453926284 | 0.012276049 | 0.37410299  |
| 0.00765691  | 0.00066206  | 0.242964381 | 0.169651622 |
| 0.04308114  | 0.239454657 | 0.191968266 | 0.132563149 |
| 0.1203446   | 0.014343416 | 0.196290772 | 0.173170548 |
| 0.193647925 | 0.211864628 | 0.173670556 | 0.173444925 |
| 0.158617461 | 0.085376214 | 0.101352186 | 0.068516827 |
| 0.140840371 | 0.279682148 | 0.158181308 | 0.00728855  |
| 1           | 0.271605224 | 0.025188189 | 0.09473035  |

|             |             |             |             |
|-------------|-------------|-------------|-------------|
| 0.430735229 | 0.50032195  | 0.017758685 | 0.004541537 |
| 0.200589774 | 0.177006661 | 0.495997215 | 0.508804062 |
| 0.50789427  | 0.499140574 | 0.345275546 | 0.057311339 |
| 0.02968145  | 0.202734164 | 0.185035881 | 0.048970358 |
| 0.504906472 | 0.038023441 | 0.476442592 | 0.212661753 |
| 0.060367    | 0.125178575 | 0.012852739 | 0.036198086 |
| 0.282338954 | 0.095307837 | 0.090394631 | 0.101425569 |
| 0.18557343  | 0.17748942  | 0.019091419 | 0.101564228 |
| 0.281577897 | 0.160738837 | 0.084429753 | 0.172802695 |
| 0.31534927  | 0.174074154 | 0.387679726 | 0.410658761 |
| 0.076484555 | 0.055544562 | 0.185067723 | 0.316449852 |
| 0.45097828  | 0.291167632 | 0.014808388 | 0.468339826 |
| 0.47640514  | 0.370821347 | 0.492310848 | 0.339516289 |
| 0.045642934 | 0.243320425 | 0.212763433 | 0.216706772 |
| 0.093564286 | 0.238474504 | 0.120241743 | 0.026909219 |
| 0.236309373 | 0.440296555 | 0.413213972 | 0.084089577 |
| 0.293235536 | 0.076055934 | 0.0329935   | 0.43506721  |
| 0.136698292 | 0.045825317 | 0.250487935 | 0.416622003 |
| 0.001067376 | 0.113726292 | 0.480795732 | 0.124596604 |
| 0.491015211 | 0.484842067 | 0.412027739 | 0.139399844 |
| 0.00166836  | 0.357304869 | 0.267008838 | 0.261884298 |
| 0.426584307 | 0.282696463 | 0.078324278 | 0.033493758 |
| 0.220820992 | 0.055303933 | 0.0690942   | 0.222330281 |
| 0.165318021 | 0.30231471  | 0.121393004 | 0.111276091 |
| 0.103592185 | 0.06062895  | 0.178404711 | 0.132572043 |
| 0.104967958 | 0.162264031 | 0.291214066 | 0.213509644 |
| 0.161679243 | 0.407689871 | 0.380016851 | 0.01064465  |
| 0.226855588 | 0.382863057 | 0.405860845 | 0.001210379 |
| 0.377942309 | 0.001867586 | 0.099824968 | 0.119832562 |
| 0.104055553 | 0.105267575 | 0.152421439 | 0.183548268 |
| 0.248662796 | 0.117341016 | 0.158165076 | 0.140367415 |
| 0.084749179 | 0.113386511 | 0.268668525 | 0.224271866 |
| 0.170654238 | 0.06493426  | 0.074185256 | 0.081790843 |
| 0.022061966 | 0.462474729 | 0.18950019  | 0.049804699 |
| 0.124149619 | 0.218140133 | 0.298114863 | 0.503999942 |
| 0.376752671 | 0.093919383 | 0.185812439 | 0.45355014  |
| 0.19059662  | 0.181312964 | 0.028510708 | 0.246853375 |
| 0.115103018 | 0.134836394 | 0.251572601 | 0.220945266 |
| 0.363133179 | 0.359598807 | 0.179702037 | 0.412995245 |
| 0.222359227 | 0.210620487 | 0.254615372 | 0.040430978 |
| 0.097930478 | 0.081297446 | 0.163608494 | 0.000555617 |
| 0.242933341 | 0.162887013 | 0.483970077 | 0.486616879 |
| 0.210249756 | 0.336883132 | 0.23762617  | 0.045516078 |
| 0.241799496 | 0.159695721 | 0.081899243 | 0.408055163 |
| 0.184563828 | 0.093246074 | 0.18017514  | 0.212282588 |
| 0.395871107 | 0.386954081 | 0.151758661 | 0.122574405 |
| 0.124058797 | 0.130367187 | 0.450648221 | 0.064538809 |
| 0.33244532  | 0.121388014 | 0.27268935  | 0.17701282  |
| 0.116120461 | 0.52483887  | 0.026604359 | 0.533554771 |
| 0.205933668 | 0.0893049   | 0.450276953 | 0.163556002 |
| 0.171882394 | 0.059298332 | 0.161287212 | 0.23977586  |
| 0.117586556 | 0.243145183 | 0.017009046 | 0.042406864 |
| 0.248347017 | 0.190328506 | 0.398253913 | 0.289435047 |
| 0.153647552 | 0.270961834 | 0.13448081  | 0.156591165 |

|             |             |             |             |
|-------------|-------------|-------------|-------------|
| 0.48218617  | 0.476400576 | 0.153263663 | 0.177813742 |
| 0.26431625  | 0.046605409 | 0.304630611 | 0.009306515 |
| 0.329228364 | 0.339234534 | 0.263904786 | 0.019720754 |
| 0.006146038 | 0.181711537 | 0.317552687 | 0.037003587 |
| 0.477677898 | 0.182660435 | 0.270072997 | 0.381395462 |
| 0.11233025  | 0.476726031 | 0.053694105 | 0.344220646 |
| 0.022081302 | 0.162814812 | 0.247992204 | 0.236442191 |
| 0.141278676 | 0.198289573 | 0.314990878 | 0.165461754 |
| 0.011688394 | 0.158322684 | 0.000420379 | 0.365507132 |
| 0.460318952 | 0.23335899  | 0.149462458 | 0.226492746 |
| 0.189140431 | 0.339426361 | 0.133149373 | 0.276461678 |
| 0.003955759 | 0.269538315 | 0.098651344 | 0.393940308 |
| 0.221259887 | 0.239087491 | 0.02539189  | 0.195545583 |
| 0.426450496 | 0.173420043 | 0.18502124  | 0.257525507 |
| 0.494363916 | 0.360511838 | 0.129365965 | 0.124811174 |
| 0.316438131 | 0.033231522 | 0.258144976 | 0.512865152 |
| 0.086928162 | 0.150318254 | 0.435983929 | 0.112820802 |
| 0.205405906 | 0.351045093 | 0.323317127 | 0.503545733 |
| 0.030247674 | 0.15263068  | 0.386302447 | 0.446859683 |
| 0.221485521 | 0.109453962 | 0.171723559 | 0.133690697 |
| 0.460514376 | 0.053498037 | 0.166464841 | 0.287814626 |
| 0.165844974 | 0.202047645 | 0.261424162 | 0.104616857 |
| 0.014746714 | 0.075433914 | 0.224460976 | 0.075881332 |
| 0.172691624 | 0.227568073 | 0.14889672  | 0.340081003 |
| 0.071848952 | 0.012514136 | 0.411920959 | 0.021046111 |
| 0.212103818 | 0.306088823 | 0.12598408  | 0.217947466 |
| 0.141798639 | 0.227685875 | 0.20989312  | 0.000133421 |
| 0.373806716 | 0.038300524 | 0.173011807 | 0.13895388  |
| 0.181617643 | 0.021842315 | 0.439342285 | 0.509080252 |
| 0.211582294 | 0.218453501 | 0.252483647 | 0.445883492 |
| 0.123267866 | 0.256305353 | 0.227748958 | 0.347992214 |
| 0.16603761  | 0.276766034 | 0.27305835  | 0.276635934 |
| 0.318864221 | 0.138822693 |             |             |
| MTHFD2      | 0.038396001 | 0.377380138 | 0.026096221 |
| 0.105387372 | 0.246478384 | 0.247514966 | 0.028337998 |
| 0.071621888 | 0.270404348 | 0.186756682 | 0.250379501 |
| 0.008418737 | 0.122337451 | 0.444709409 | 0.025311298 |
| 0.3188483   | 0.017924956 | 0.059211239 | 0.052526136 |
| 0.123577716 | 0.222773312 | 0.276233452 | 0.213160883 |
| 0.211900639 | 0.137932287 | 0.213964442 | 0.269990726 |
| 0.479888279 | 0.257870275 | 0.373063309 | 0.148716514 |
| 0.374223053 | 0.279110276 | 0.290474998 | 0.00619738  |
| 0.258724511 | 0.012360782 | 0.375722849 | 0.195239256 |
| 0.171453853 | 0.293597051 | 0.199311191 | 0.172892682 |
| 0.232493623 | 0.017705984 | 0.159396707 | 0.351102188 |
| 0.204269838 | 0.166091444 | 0.027712454 | 0.352805694 |
| 0.237932767 | 0.260231031 | 0.321514267 | 0.00288723  |
| 0.281742663 | 0.140071221 | 0.240933629 | 0.460564775 |
| 0.140235421 | 0.073916241 | 0.235687104 | 0.126376681 |
| 0.279395826 | 0.30741172  | 0.172591192 | 0.237597845 |
| 0.477853565 | 0.200998221 | 0.392732786 | 0.11568762  |
| 0.226633092 | 0.011171858 | 0.105821384 | 0.036540473 |
| 0.253779449 | 0.127410395 | 0.243525836 | 0.255069579 |
| 0.386816914 | 0.458034076 | 0.149452053 | 0.442106711 |

|             |             |             |             |
|-------------|-------------|-------------|-------------|
| 0.094461167 | 0.280674983 | 0.215221648 | 0.248678926 |
| 0.292438008 | 0.038438568 | 0.382986595 | 0.487441133 |
| 0.018550568 | 0.256246122 | 0.334010522 | 0.068628343 |
| 0.387410846 | 0.214173313 | 0.246471248 | 0.202266823 |
| 0.336842109 | 0.266840475 | 0.407074277 | 0.233191534 |
| 0.221850234 | 0.033055132 | 0.410907618 | 0.278428527 |
| 0.237084545 | 0.039829013 | 0.193739718 | 0.471684852 |
| 0.330757949 | 0.481500903 | 0.388815761 | 0.316705038 |
| 0.294030043 | 0.480520627 | 0.349607863 | 0.372625916 |
| 0.126781399 | 0.487094125 | 0.108979097 | 0.022946338 |
| 0.033517164 | 0.047312046 | 0.160253744 | 0.242948626 |
| 0.467919716 | 0.2438704   | 0.122267674 | 0.164075999 |
| 0.469869603 | 0.411944485 | 0.484520368 | 0.388602638 |
| 0.018457332 | 0.210323805 | 0.291862805 | 0.155770412 |
| 0.311876542 | 0.053736357 | 0.245393705 | 0.44576748  |
| 0.352421226 | 0.433859902 | 0.086357673 | 0.425789297 |
| 0.107056384 | 0.48819022  | 0.427683597 | 0.107910559 |
| 0.468886645 | 0.434517718 | 0.502076628 | 0.395513283 |
| 0.422968113 | 0.217321871 | 0.040875876 | 0.331845068 |
| 0.46636323  | 0.02249874  | 0.476135268 | 0.504790319 |
| 0.462602045 | 0.481235817 | 0.508247313 | 0.500495777 |
| 0.46419412  | 0.032501377 | 0.029233859 | 0.233467885 |
| 0.463650986 | 0.375673373 | 0.0812974   | 0.296532111 |
| 0.28773299  | 0.238057465 | 0.38871312  | 0.276666323 |
| 0.472979202 | 0.441296642 | 0.481720222 | 0.342003722 |
| 0.165962247 | 0.266029972 | 0.2949669   | 0.399367385 |
| 0.02230297  | 0.064347517 | 0.024513404 | 0.228785691 |
| 0.21773759  | 0.108358882 | 0.237330666 | 0.245003437 |
| 0.12835546  | 0.188880118 | 0.280573638 | 0.365643026 |
| 0.028852439 | 0.314004564 | 0.088137682 | 0.095089257 |
| 0.023763578 | 0.094886851 | 0.14461237  | 0.103153726 |
| 0.182921212 | 0.167965769 | 0.388895293 | 0.477919443 |
| 0.225600223 | 0.122877377 | 0.359429354 | 0.454430473 |
| 0.404404468 | 0.295425854 | 0.158881057 | 0.00897461  |
| 0.243906566 | 0.225390447 | 0.215287763 | 0.29522311  |
| 0.11931976  | 0.178140205 | 0.304499675 | 0.393295225 |
| 0.168534987 | 0.066621075 | 0.274322953 | 0.369050363 |
| 0.092435904 | 0.241786367 | 0.456988744 | 0.269566236 |
| 0.000688669 | 0.217873644 | 0.437511152 | 0.123523234 |
| 0.225605468 | 0.154292543 | 0.265704072 | 0.463004759 |
| 0.263521866 | 0.190620801 | 0.485959489 | 0.372292474 |
| 0.240914935 | 0.156067131 | 0.504639982 | 0.073982447 |
| 0.232158913 | 0.059111498 | 0.235212265 | 0.193732357 |
| 0.161087626 | 0.234809782 | 0.252851955 | 0.229984821 |
| 0.077590496 | 0.479813966 | 0.346654758 | 0.499303297 |
| 0.292778867 | 0.504620065 | 0.468351058 | 0.431259361 |
| 0.265238431 | 0.259435768 | 0.179191956 | 0.436311475 |
| 0.455443855 | 0.22535493  | 0.038149385 | 0.426564248 |
| 0.239247509 | 0.378620901 | 0.100219555 | 0.487118314 |
| 0.440884143 | 0.409613986 | 0.096088167 | 0.354439378 |
| 0.364016958 | 0.144083845 | 0.377417188 | 0.49800283  |
| 0.209152801 | 0.265423848 | 0.271300596 | 0.398968109 |
| 0.110715658 | 0.176000948 | 0.25375622  | 0.19685012  |
| 0.021981013 | 0.037371505 | 0.031275192 | 0.114610701 |

|             |             |             |             |
|-------------|-------------|-------------|-------------|
| 0.181692278 | 0.322172343 | 0.331397236 | 0.498390917 |
| 0.067544658 | 0.378987882 | 0.155846553 | 0.2407896   |
| 0.389168589 | 0.246087474 | 0.289695111 | 0.316453124 |
| 0.173112235 | 0.011437664 | 0.08637184  | 0.461981184 |
| 0.015787356 | 0.247270732 | 0.17578994  | 0.002393102 |
| 0.021486097 | 0.36370695  | 0.057184742 | 0.140001943 |
| 0.478731492 | 0.144010782 | 0.138133041 | 0.206876884 |
| 0.293285845 | 0.045854483 | 0.002307444 | 0.460251726 |
| 0.433747432 | 0.402632541 | 0.432091894 | 0.38506794  |
| 0.407893609 | 0.334759017 | 0.396457147 | 0.205049358 |
| 0.060611534 | 0.042700371 | 0.220946246 | 0.209979915 |
| 0.003130833 | 0.348112648 | 0.202655963 | 0.089854711 |
| 0.398413799 | 0.217288885 | 0.018581657 | 0.26924975  |
| 0.01349443  | 0.250702244 | 0.184098938 | 0.135394813 |
| 0.311093494 | 0.00501319  | 0.201286703 | 0.289754481 |
| 0.382225332 | 0.295511181 | 0.285662232 | 0.492545685 |
| 0.228833885 | 0.075875296 | 0.231847305 | 0.365792944 |
| 0.037959773 | 0.103176173 | 0.205561396 | 0.036193103 |
| 0.139680394 | 0.386025234 | 0.264711239 | 0.03822863  |
| 0.187873311 | 0.00183154  | 0.323458641 | 0.495077691 |
| 0.412678952 | 0.515846439 | 0.482203657 | 0.265445644 |
| 0.479251656 | 0.141764704 | 0.506813633 | 0.362764593 |
| 0.257955003 | 0.00081148  | 0.002769116 | 0.494757611 |
| 0.303716965 | 0.029264588 | 0.093585896 | 0.252427756 |
| 0.073128576 | 0.077965565 | 0.030811123 | 0.177217692 |
| 0.319279923 | 0.185474683 | 0.167153601 | 0.419640678 |
| 0.158999511 | 0.138110908 | 0.232547936 | 0.044907733 |
| 0.306658921 | 0.028332592 | 0.04238555  | 0.007387502 |
| 0.316706893 | 0.072589515 | 0.390213935 | 0.474144315 |
| 0.465736557 | 0.361580174 | 0.24406347  | 0.23315512  |
| 0.402224206 | 0.055834553 | 0.273512106 | 0.056616145 |
| 0.4506733   | 0.34154679  | 0.283498986 | 0.263750616 |
| 0.48954598  | 0.442019712 | 0.014691165 | 0.390221277 |
| 0.008021811 | 0.001400404 | 0.230736351 | 0.181558612 |
| 0.04020343  | 0.271336398 | 0.198980665 | 0.126742719 |
| 0.130161384 | 0.017544467 | 0.244729862 | 0.239033215 |
| 0.220618253 | 0.252069249 | 0.237951852 | 0.16354704  |
| 0.192712636 | 0.131909892 | 0.125218971 | 0.088542144 |
| 0.149674344 | 0.252979189 | 0.144796629 | 0.007916606 |
| 0.271605224 | 1           | 0.028183706 | 0.094995118 |
| 0.442965892 | 0.499482243 | 0.021940458 | 0.008248526 |
| 0.206334861 | 0.21622112  | 0.506183097 | 0.46574378  |
| 0.470624273 | 0.493077093 | 0.33375971  | 0.091212735 |
| 0.034623689 | 0.222688698 | 0.241628    | 0.075334278 |
| 0.488168467 | 0.030663955 | 0.434202502 | 0.262795249 |
| 0.061720765 | 0.138372115 | 0.020714172 | 0.040777961 |
| 0.319676465 | 0.10778311  | 0.124486443 | 0.090540988 |
| 0.231940186 | 0.248196071 | 0.02129621  | 0.116880434 |
| 0.298601006 | 0.211746829 | 0.094226958 | 0.169117157 |
| 0.286376052 | 0.130187507 | 0.410296406 | 0.412360847 |
| 0.074060227 | 0.053018864 | 0.183352735 | 0.321324629 |
| 0.435025871 | 0.25985323  | 0.019593434 | 0.411494244 |
| 0.473132823 | 0.385024505 | 0.450804073 | 0.373874802 |
| 0.041592093 | 0.294247226 | 0.237760738 | 0.251305361 |



|             |             |             |             |
|-------------|-------------|-------------|-------------|
| 0.103744058 | 0.23792011  | 0.141399309 | 0.02804012  |
| 0.232783375 | 0.408099569 | 0.386730208 | 0.110820819 |
| 0.282821596 | 0.06368626  | 0.024938453 | 0.412461437 |
| 0.193482784 | 0.05591143  | 0.211156029 | 0.413529392 |
| 0.001823157 | 0.173985659 | 0.468132961 | 0.159196474 |
| 0.463697677 | 0.482367038 | 0.407159404 | 0.138784872 |
| 0.004213911 | 0.37224846  | 0.307151657 | 0.292885502 |
| 0.405832527 | 0.283405525 | 0.077591839 | 0.046891076 |
| 0.235382871 | 0.045154074 | 0.095927763 | 0.215564952 |
| 0.170253649 | 0.298700728 | 0.134495544 | 0.10711583  |
| 0.134624183 | 0.046172559 | 0.229847981 | 0.149654433 |
| 0.128062508 | 0.183279481 | 0.316944049 | 0.171135221 |
| 0.242751177 | 0.410875796 | 0.37227293  | 0.011254828 |
| 0.264611773 | 0.370042407 | 0.39454074  | 0.0020139   |
| 0.412513812 | 0.003044437 | 0.140665744 | 0.162978819 |
| 0.136964113 | 0.141765185 | 0.19303067  | 0.231606587 |
| 0.251388202 | 0.138630226 | 0.199444244 | 0.165751026 |
| 0.116826732 | 0.124372657 | 0.291987823 | 0.211588146 |
| 0.237306107 | 0.07132962  | 0.060342881 | 0.063168319 |
| 0.033294826 | 0.431761376 | 0.189558786 | 0.039321104 |
| 0.146486498 | 0.221337664 | 0.314585361 | 0.449401656 |
| 0.389562083 | 0.070186794 | 0.206139702 | 0.423324048 |
| 0.20320998  | 0.21226129  | 0.029944154 | 0.231971175 |
| 0.141430866 | 0.209521703 | 0.232877909 | 0.205777901 |
| 0.337824286 | 0.347531783 | 0.182804894 | 0.393417592 |
| 0.256492738 | 0.210762257 | 0.2087438   | 0.062078826 |
| 0.110298509 | 0.074245433 | 0.221883244 | 0.000564267 |
| 0.26333083  | 0.16657026  | 0.480507458 | 0.438648566 |
| 0.262659378 | 0.338279572 | 0.213008043 | 0.054427703 |
| 0.184238115 | 0.130280023 | 0.086472322 | 0.389497041 |
| 0.247420693 | 0.109274467 | 0.227883394 | 0.196117955 |
| 0.408163163 | 0.363566197 | 0.182290886 | 0.138661735 |
| 0.13279712  | 0.115887498 | 0.404350476 | 0.059274643 |
| 0.317327008 | 0.182610352 | 0.226913975 | 0.223318959 |
| 0.158786673 | 0.494011545 | 0.026083797 | 0.513914424 |
| 0.250589162 | 0.078176156 | 0.438380282 | 0.163648034 |
| 0.170108845 | 0.086189213 | 0.218227952 | 0.226825704 |
| 0.137314833 | 0.275062826 | 0.018848607 | 0.083603784 |
| 0.285165681 | 0.178002641 | 0.358025987 | 0.293110173 |
| 0.199647276 | 0.298984218 | 0.179012866 | 0.170183302 |
| 0.421172105 | 0.423617598 | 0.20353829  | 0.187651865 |
| 0.280305622 | 0.060068353 | 0.282075354 | 0.013781994 |
| 0.34607735  | 0.341016263 | 0.258473827 | 0.025497434 |
| 0.007621006 | 0.241604104 | 0.31856865  | 0.028147915 |
| 0.487083412 | 0.250160691 | 0.234255435 | 0.381602905 |
| 0.106082607 | 0.429410738 | 0.085746466 | 0.384880956 |
| 0.018917046 | 0.166909363 | 0.258099309 | 0.231240684 |
| 0.205483624 | 0.255983681 | 0.352391384 | 0.238446938 |
| 0.016391418 | 0.205630604 | 0.001251002 | 0.344451306 |
| 0.398744128 | 0.26854326  | 0.14263146  | 0.194244696 |
| 0.219702378 | 0.320128827 | 0.182525166 | 0.268779937 |
| 0.006034374 | 0.32080707  | 0.114855519 | 0.380411977 |
| 0.262808079 | 0.23335336  | 0.035894547 | 0.231170382 |
| 0.372474192 | 0.239298283 | 0.187244253 | 0.276443106 |

|             |             |             |             |
|-------------|-------------|-------------|-------------|
| 0.446294461 | 0.321347914 | 0.103071795 | 0.163135544 |
| 0.282831136 | 0.02970124  | 0.236089949 | 0.492002651 |
| 0.120029726 | 0.220749798 | 0.465105703 | 0.148130602 |
| 0.258878441 | 0.329947556 | 0.292102784 | 0.470596199 |
| 0.055992123 | 0.178940255 | 0.398582043 | 0.431009403 |
| 0.255619522 | 0.162291798 | 0.244166756 | 0.184883829 |
| 0.409399772 | 0.064497887 | 0.22256377  | 0.297692356 |
| 0.237546644 | 0.227661961 | 0.209002433 | 0.153968781 |
| 0.022258264 | 0.095443217 | 0.249497845 | 0.076353164 |
| 0.206831231 | 0.252762194 | 0.190390601 | 0.34802544  |
| 0.108404484 | 0.019750795 | 0.410222378 | 0.041051696 |
| 0.197253542 | 0.34034756  | 0.142402912 | 0.257215814 |
| 0.134114386 | 0.234344871 | 0.198800842 | 0.00020828  |
| 0.384627587 | 0.044506503 | 0.189510443 | 0.201744164 |
| 0.247843457 | 0.02447075  | 0.40736979  | 0.510019629 |
| 0.208407847 | 0.214828917 | 0.299437688 | 0.414011212 |
| 0.178777364 | 0.26247959  | 0.25414642  | 0.320055703 |
| 0.229382907 | 0.255333103 | 0.274570766 | 0.300012119 |
| 0.30477507  | 0.14831462  |             |             |
| MTPN        | 0.225043652 | 0.095272967 | 0.176080601 |
| 0.1428042   | 0.053591665 | 0.036137111 | 0.231239312 |
| 0.186765397 | 0.092206081 | 0.010118173 | 0.074917627 |
| 0.29002158  | 0.004525533 | 0.119511444 | 0.238345527 |
| 0.041719616 | 0.28102665  | 0.223700596 | 0.024593812 |
| 0.058926689 | 0.057961091 | 0.021008038 | 0.052052326 |
| 0.046618766 | 0.318316311 | 0.077834105 | 0.020329421 |
| 0.099808871 | 0.005647989 | 0.050287001 | 0.006771446 |
| 0.198262605 | 0.048413393 | 0.01430033  | 0.236277734 |
| 0.045763546 | 0.003391986 | 0.203183992 | 0.075145258 |
| 0.013139989 | 0.231753007 | 0.017955636 | 0.112953768 |
| 0.022428578 | 0.240847563 | 0.004892046 | 0.039113426 |
| 0.066684623 | 0.064861511 | 0.207336452 | 0.059698491 |
| 0.023939156 | 0.139656517 | 0.047679672 | 0.014999046 |
| 0.010798808 | 0.000230947 | 0.004577005 | 0.134987819 |
| 0.273084546 | 0.217823865 | 0.005963871 | 0.069549655 |
| 0.037701577 | 0.062807052 | 0.170706424 | 0.015813308 |
| 0.129983242 | 0.008821259 | 0.043281881 | 0.074321714 |
| 0.043410152 | 0.166305189 | 0.320613492 | 0.183199202 |
| 0.021884309 | 0.181638257 | 0.06020984  | 0.015782012 |
| 0.089252749 | 0.182777466 | 0.177279945 | 0.141193523 |
| 0.011090345 | 0.030243798 | 0.033969918 | 0.152674992 |
| 0.081568935 | 0.144651645 | 0.091575963 | 0.156684897 |
| 0.159331889 | 0.028422634 | 0.06699265  | 0.241045584 |
| 0.099757838 | 0.011083759 | 0.021906488 | 0.01499248  |
| 0.050573654 | 0.040180631 | 0.156563347 | 0.188472183 |
| 0.040262599 | 0.248497612 | 0.16472335  | 0.027620488 |
| 0.059628669 | 0.243030602 | 0.040747948 | 0.062728334 |
| 0.059878491 | 0.106320548 | 0.072042319 | 0.112035459 |
| 0.030537108 | 0.122786021 | 0.088328562 | 0.117303007 |
| 0.002459005 | 0.12627675  | 0.198832282 | 0.291581004 |
| 0.163231468 | 0.218500906 | 0.027956568 | 0.210647044 |
| 0.088147994 | 0.122447083 | 0.153008906 | 0.111921732 |
| 0.088160197 | 0.141264125 | 0.119292008 | 0.099965545 |
| 0.271733337 | 0.009353824 | 0.030896978 | 0.077425296 |

|             |             |             |             |
|-------------|-------------|-------------|-------------|
| 0.08459782  | 0.245805567 | 0.020262317 | 0.174233726 |
| 0.187696295 | 0.078201215 | 0.133770738 | 0.205205064 |
| 0.097441935 | 0.162026255 | 0.082382956 | 0.211482521 |
| 0.164003131 | 0.167939232 | 0.135697062 | 0.046505946 |
| 0.168838489 | 0.079425069 | 0.015067259 | 0.11498259  |
| 0.162751398 | 0.007071303 | 0.075307198 | 0.085773972 |
| 0.122656065 | 0.065266735 | 0.125888671 | 0.104526467 |
| 0.121396682 | 0.275030705 | 0.000429523 | 0.110081166 |
| 0.14569522  | 0.15032227  | 0.123492025 | 0.02290724  |
| 0.047774584 | 0.050813023 | 0.064215352 | 0.019306162 |
| 0.184944125 | 0.095381424 | 0.084381281 | 0.088350616 |
| 0.050234719 | 0.247342946 | 0.017698841 | 0.1678972   |
| 0.264576991 | 0.189151595 | 0.274788739 | 0.14504825  |
| 0.017610021 | 0.219306895 | 0.042277024 | 0.044249259 |
| 0.245778599 | 0.049250664 | 0.009628922 | 0.053618422 |
| 0.292364919 | 0.032841181 | 0.185103975 | 0.166062846 |
| 0.278475818 | 0.356664641 | 0.12645133  | 0.177590885 |
| 0.101730977 | 0.307365365 | 0.045443882 | 0.103759473 |
| 0.027767913 | 0.251576582 | 0.066344661 | 0.15464988  |
| 0.197107609 | 0.030900786 | 0.239526672 | 0.132870363 |
| 0.03101535  | 0.007013289 | 0.005263716 | 0.024003004 |
| 0.326893029 | 0.075747553 | 0.050336441 | 0.07078001  |
| 0.110646853 | 0.119470391 | 0.023016506 | 0.22668635  |
| 0.240059026 | 0.052717872 | 0.105559934 | 0.032883307 |
| 0.179429147 | 0.088247961 | 0.081460482 | 0.049632    |
| 0.10858089  | 0.015917951 | 0.011109823 | 0.096237677 |
| 0.011657963 | 0.027085394 | 0.091102433 | 0.067947233 |
| 0.027142132 | 0.243749668 | 0.126689153 | 0.00135593  |
| 0.028417276 | 0.079247676 | 0.164068636 | 0.017496918 |
| 0.175492315 | 0.16521552  | 0.038571192 | 0.042999943 |
| 0.230973932 | 0.13495694  | 0.126419999 | 0.112710289 |
| 0.015231776 | 0.131815187 | 0.079357172 | 0.126109098 |
| 0.10771306  | 0.014703828 | 0.00386056  | 0.083839683 |
| 0.088755029 | 0.015984027 | 0.265602895 | 0.050999834 |
| 0.016748383 | 0.048612467 | 0.056494872 | 0.130611823 |
| 0.197388057 | 0.124269627 | 0.17373232  | 0.096496249 |
| 0.149168838 | 0.175621459 | 0.099326297 | 0.14244846  |
| 0.01060216  | 0.030878478 | 0.026984646 | 0.114597556 |
| 0.254563169 | 0.036761158 | 0.196348446 | 0.004939672 |
| 4.30E-05    | 0.211225649 | 0.266593255 | 0.146116181 |
| 0.020504522 | 0.028175517 | 0.062099258 | 0.122067718 |
| 0.244354407 | 0.152133452 | 0.171990084 | 0.050893786 |
| 0.136373514 | 0.026760729 | 0.026643587 | 0.049821264 |
| 0.214753768 | 0.157748363 | 0.188541982 | 0.187637507 |
| 0.21932672  | 0.017917366 | 0.069516577 | 0.025415683 |
| 0.238644044 | 0.059032973 | 0.315921366 | 0.362750838 |
| 0.105889097 | 0.318786486 | 0.205109947 | 0.014265839 |
| 0.124330596 | 0.278319623 | 0.061166025 | 0.102459143 |
| 0.118906021 | 0.118534177 | 0.116767681 | 0.141338009 |
| 0.094628137 | 0.069673992 | 0.078560966 | 0.064554066 |
| 0.209591191 | 0.156721348 | 0.017541394 | 0.073396272 |
| 0.019820745 | 0.120998801 | 0.054930262 | 0.328566881 |
| 0.058414383 | 0.125136002 | 0.284675515 | 0.042839649 |
| 0.19524406  | 0.004989654 | 0.053931595 | 0.094616782 |

|             |             |             |             |
|-------------|-------------|-------------|-------------|
| 0.094652568 | 0.24508099  | 0.022492428 | 0.015714254 |
| 0.153152645 | 0.184512812 | 0.011892143 | 0.135614124 |
| 0.09706762  | 0.192979577 | 0.060969013 | 0.086627377 |
| 0.247178233 | 0.006262245 | 0.035361988 | 0.002072986 |
| 0.021960039 | 0.147166816 | 0.020496084 | 0.181345911 |
| 0.159799433 | 0.219468964 | 0.170922928 | 0.143177309 |
| 0.12177607  | 0.109980552 | 0.12846641  | 0.017970784 |
| 0.131948204 | 0.000408361 | 0.11444242  | 0.104254104 |
| 0.012738517 | 0.02209698  | 0.087821189 | 0.086842176 |
| 0.037225164 | 0.248167715 | 0.269816228 | 0.027762812 |
| 0.219756717 | 0.134154422 | 0.232675281 | 0.035508875 |
| 0.051529173 | 0.083333136 | 0.031280618 | 0.134018364 |
| 0.113684725 | 0.156400934 | 0.024574128 | 0.28731878  |
| 0.04190662  | 0.276475215 | 0.256890291 | 0.043383192 |
| 0.083780883 | 0.272137059 | 0.184314532 | 0.12118237  |
| 0.16448632  | 0.065757518 | 0.008546538 | 0.028543451 |
| 0.091737727 | 0.211949501 | 0.012690841 | 0.206838894 |
| 0.114218608 | 0.055742336 | 0.192083965 | 0.217212029 |
| 0.141671029 | 0.151587291 | 0.280747847 | 0.088226485 |
| 0.171144115 | 0.01195235  | 0.045074639 | 0.175034328 |
| 0.009205894 | 0.026485134 | 0.244377867 | 0.049400381 |
| 0.067827877 | 0.254774271 | 0.012119902 | 0.015078023 |
| 0.12448532  | 0.052581915 | 0.038600825 | 0.167545365 |
| 0.046761561 | 0.040386099 | 0.125613859 | 0.153627586 |
| 0.026047524 | 0.181804075 | 0.315780414 | 0.256381853 |
| 0.025188189 | 0.028183706 | 1           | 0.281731459 |
| 0.107484985 | 0.097207453 | 0.22622206  | 0.187501938 |
| 0.241719278 | 0.043121756 | 0.105906463 | 0.108373498 |
| 0.159790553 | 0.15660933  | 0.232449641 | 0.122267871 |
| 0.257181509 | 0.086174429 | 0.037382368 | 0.108466426 |
| 0.120947073 | 0.220542997 | 0.130866882 | 0.016504571 |
| 0.285275093 | 0.12583813  | 0.286625251 | 0.263766363 |
| 0.027753376 | 0.265317354 | 0.144723753 | 0.204174158 |
| 0.054970351 | 0.015075429 | 0.24665263  | 0.212260544 |
| 0.141033411 | 0.007984278 | 0.255386209 | 0.055334194 |
| 0.119379761 | 0.009368503 | 0.05156545  | 0.19652602  |
| 0.297448286 | 0.194640635 | 0.059683735 | 0.079931675 |
| 0.066783229 | 0.020537264 | 0.17429619  | 0.089396493 |
| 0.118443828 | 0.042282033 | 0.138140996 | 0.145433982 |
| 0.297210058 | 0.035615842 | 0.01355923  | 0.053108785 |
| 0.204937963 | 0.041030186 | 0.114321304 | 0.307823039 |
| 0.219499723 | 0.191902604 | 0.107407761 | 0.175002152 |
| 0.033276336 | 0.17433913  | 0.205485032 | 0.087049364 |
| 0.018548814 | 0.226275456 | 0.01777641  | 0.06540976  |
| 0.018800939 | 0.006549413 | 0.107982943 | 0.117363304 |
| 0.157654151 | 0.10610922  | 0.181133273 | 0.070266131 |
| 6.58E-05    | 0.039008592 | 0.077117719 | 0.029420597 |
| 0.099895955 | 0.149343582 | 0.056839484 | 0.244875925 |
| 0.237955952 | 0.258341413 | 0.157957174 | 0.031310508 |
| 0.006575719 | 0.059619907 | 0.275395784 | 0.139928572 |
| 0.10480905  | 0.189550655 | 0.014933515 | 0.124172047 |
| 0.011695384 | 0.265683219 | 0.172414018 | 0.013025239 |
| 0.008766083 | 0.111406639 | 0.088592335 | 0.26814717  |
| 0.025445108 | 0.103361973 | 0.124520406 | 0.036968282 |

|             |             |             |             |
|-------------|-------------|-------------|-------------|
| 0.058856933 | 0.267586702 | 0.120308869 | 0.113031889 |
| 0.12059111  | 0.10098183  | 0.119578932 | 0.046947137 |
| 0.079687693 | 0.123808357 | 0.094954617 | 0.207523386 |
| 0.146208982 | 0.130836703 | 0.049896618 | 0.046983436 |
| 0.054776255 | 0.214979935 | 0.323973366 | 0.329881071 |
| 0.269658129 | 0.093589459 | 0.305218715 | 0.276621351 |
| 0.189948378 | 0.035545443 | 0.224384424 | 0.113518214 |
| 0.1571684   | 0.246477293 | 0.04922669  | 0.09309062  |
| 0.005255382 | 0.034750949 | 0.192339911 | 0.051125717 |
| 0.171583149 | 0.04114191  | 0.031654223 | 0.090201074 |
| 0.054794413 | 0.232170348 | 0.296030935 | 0.152239036 |
| 0.043364903 | 0.031081338 | 0.012194839 | 0.213488007 |
| 0.169981349 | 0.2714737   | 0.048229929 | 0.154741185 |
| 0.116182016 | 0.077237059 | 0.081609548 | 0.143343651 |
| 0.009499208 | 0.189278018 | 0.016410936 | 0.227640683 |
| 0.010272012 | 0.244300168 | 0.319988476 | 0.057160137 |
| 0.005385307 | 0.160165171 | 0.066942826 | 0.037641687 |
| 0.060483474 | 0.049413018 | 0.03648164  | 0.097612505 |
| 0.121708048 | 0.195797171 | 0.159946555 | 0.155593901 |
| 0.027827517 | 0.043128526 | 0.038970015 | 0.070003293 |
| 0.091887764 | 0.104873967 | 0.278937171 | 0.103020106 |
| 0.036396382 | 0.292030109 | 0.201473196 | 0.08212292  |
| 0.06345709  | 0.139966707 | 0.005867659 | 0.023553697 |
| 0.097380169 | 0.012794723 | 0.000230359 | 0.011045275 |
| 0.155930559 | 0.022864694 | 0.062043912 | 0.091712811 |
| 0.034822873 | 0.147016896 | 0.005452666 | 0.08132262  |
| 0.126122039 | 0.16704582  | 0.080039187 | 0.240860187 |
| 0.140580491 | 0.245042627 | 0.060134796 | 0.004488097 |
| 0.035804267 | 0.023708548 | 0.014118092 | 0.265161332 |
| 0.266337581 | 0.006634202 | 0.040945564 | 0.198387553 |
| 0.09760576  | 0.00498582  | 0.045722722 | 0.058760098 |
| 0.232913951 | 0.174431614 | 0.15083499  | 0.086312276 |
| 0.111468855 | 0.174884764 | 0.021626059 | 0.024836515 |
| 0.06392521  | 0.021192102 | 0.113129623 | 0.019226204 |
| 0.298607458 | 0.06454756  | 0.028452838 | 0.243131794 |
| 0.155760146 | 0.019536242 | 0.297469649 | 0.009081708 |
| 0.182561178 | 0.130880944 | 0.04582197  | 0.020510547 |
| 0.217266851 | 0.039619834 | 0.209140741 | 0.124867644 |
| 0.006866171 | 0.042057761 | 0.231234437 | 0.028612444 |
| 0.200142623 | 0.032217214 | 0.233222085 | 0.011227037 |
| 0.116340553 | 0.097443948 | 0.204357351 | 0.050120855 |
| 0.03952688  | 0.304635565 | 0.01721854  | 0.136458579 |
| 0.151238056 | 0.022310544 | 0.083374111 | 0.123544066 |
| 0.016960876 | 0.138162328 | 0.027101654 | 0.132723575 |
| 0.159666718 | 0.2211006   | 0.07691149  | 0.114357128 |
| 0.200848442 | 0.027176393 | 0.017808958 | 0.062984329 |
| 0.129063927 | 0.20928858  | 0.021256534 | 0.138914764 |
| 0.01331503  | 0.143008041 | 0.040325468 | 0.068226876 |
| 0.249977963 | 0.126566694 | 0.03920955  | 0.272631407 |
| 0.123873093 | 0.048917168 | 0.042116454 | 0.21505481  |
| 0.152379486 | 0.198921257 | 0.191339041 | 0.001522242 |
| 0.080595681 | 0.070222816 | 0.171741517 | 0.034562969 |
| 0.312906564 | 0.080323713 | 0.057482349 | 0.108257187 |
| 0.098257629 | 0.017876221 | 0.040933462 | 0.06023507  |

|             |             |             |             |
|-------------|-------------|-------------|-------------|
| 0.015789608 | 0.247425353 | 0.152578596 | 0.115114832 |
| 0.127128942 | 0.016866806 | 0.009880327 | 0.132292928 |
| 0.01037197  | 0.007513855 | 0.013279624 | 0.052661321 |
| 0.012373581 | 0.014159414 | 0.016021394 | 0.013706773 |
| 0.10891843  | 0.088591874 |             |             |
| MTVR2       | 0.263921101 | 0.216417056 | 0.207047255 |
| 0.205253038 | 0.12050613  | 0.132821548 | 0.267816718 |
| 0.279044061 | 0.194005254 | 0.060647754 | 0.155581713 |
| 0.214487852 | 0.021841164 | 0.243031241 | 0.266787162 |
| 0.105413285 | 0.257772189 | 0.284141333 | 0.067150659 |
| 0.15871648  | 0.123100986 | 0.086160183 | 0.141160095 |
| 0.12223951  | 0.332494522 | 0.156003483 | 0.08125709  |
| 0.233433423 | 0.038782286 | 0.129401313 | 0.0396643   |
| 0.314332194 | 0.108995338 | 0.071777495 | 0.195088518 |
| 0.130431121 | 0.010268407 | 0.335659797 | 0.163945826 |
| 0.047109504 | 0.323286426 | 0.083561503 | 0.205900288 |
| 0.091829185 | 0.229693715 | 0.034120312 | 0.11089929  |
| 0.147246089 | 0.177324537 | 0.214555141 | 0.148195187 |
| 0.104377867 | 0.21989018  | 0.133461575 | 0.015479952 |
| 0.057287928 | 0.007881822 | 0.031238232 | 0.281866944 |
| 0.273518546 | 0.286450322 | 0.041932426 | 0.181772447 |
| 0.105440187 | 0.142501593 | 0.233116946 | 0.082271702 |
| 0.266302599 | 0.039769543 | 0.128847452 | 0.146077394 |
| 0.134284312 | 0.202699271 | 0.304308651 | 0.20533821  |
| 0.099149895 | 0.253494921 | 0.140311353 | 0.073790026 |
| 0.208232466 | 0.33776527  | 0.236776329 | 0.289956102 |
| 0.037967901 | 0.088875367 | 0.113792446 | 0.22189016  |
| 0.169270005 | 0.226279078 | 0.178370763 | 0.304475451 |
| 0.215103661 | 0.092973507 | 0.150549365 | 0.237154987 |
| 0.221609577 | 0.062681198 | 0.087126354 | 0.052456983 |
| 0.119856099 | 0.102978002 | 0.304414931 | 0.23384075  |
| 0.123693092 | 0.225651828 | 0.314524084 | 0.081772315 |
| 0.146273559 | 0.248709648 | 0.112121513 | 0.168887783 |
| 0.13265624  | 0.238259987 | 0.17959034  | 0.202580246 |
| 0.093292569 | 0.25994025  | 0.172864189 | 0.239217765 |
| 0.022434824 | 0.274984035 | 0.262874527 | 0.273084691 |
| 0.225149834 | 0.281205635 | 0.100095662 | 0.291739817 |
| 0.207779523 | 0.206491897 | 0.255797661 | 0.194400278 |
| 0.200449816 | 0.285754233 | 0.26595464  | 0.203968839 |
| 0.263958362 | 0.052278568 | 0.095002315 | 0.199628367 |
| 0.161967389 | 0.272199067 | 0.071710859 | 0.324406214 |
| 0.28812195  | 0.179072649 | 0.24476733  | 0.361083484 |
| 0.207313918 | 0.306135262 | 0.20097333  | 0.266152977 |
| 0.315857415 | 0.315723407 | 0.275481897 | 0.118545996 |
| 0.311317191 | 0.170949653 | 0.038797633 | 0.220164653 |
| 0.298398179 | 0.010412805 | 0.194786861 | 0.212434218 |
| 0.263358477 | 0.169929437 | 0.266763169 | 0.240542053 |
| 0.264721963 | 0.266008358 | 0.00456174  | 0.167036591 |
| 0.291276506 | 0.254734709 | 0.224208661 | 0.084910018 |
| 0.112093696 | 0.145912494 | 0.165257525 | 0.074477951 |
| 0.332869126 | 0.217140861 | 0.211949575 | 0.184858639 |
| 0.130071569 | 0.332755467 | 0.070423282 | 0.311016024 |
| 0.277505512 | 0.256698821 | 0.217267427 | 0.231203294 |
| 0.087812153 | 0.264685491 | 0.144463544 | 0.115808683 |

|             |             |             |             |
|-------------|-------------|-------------|-------------|
| 0.26388508  | 0.156578848 | 0.05888139  | 0.124697295 |
| 0.236432501 | 0.102367353 | 0.266676277 | 0.230383305 |
| 0.263187635 | 0.339200118 | 0.20204754  | 0.253813672 |
| 0.18307896  | 0.365695061 | 0.129842826 | 0.236276774 |
| 0.110308733 | 0.263952411 | 0.153612586 | 0.292750399 |
| 0.309784917 | 0.095273592 | 0.280013912 | 0.090680259 |
| 0.094137293 | 0.048541476 | 0.03142773  | 0.088351159 |
| 0.355070598 | 0.156824062 | 0.118026862 | 0.150791716 |
| 0.190733237 | 0.21655966  | 0.095006379 | 0.35447287  |
| 0.252625914 | 0.137291715 | 0.216546786 | 0.104207246 |
| 0.104081993 | 0.17416776  | 0.186945015 | 0.109801643 |
| 0.179292433 | 0.047406804 | 0.053006424 | 0.211922583 |
| 0.059895211 | 0.087072924 | 0.220053262 | 0.150904573 |
| 0.104818051 | 0.314275034 | 0.270245794 | 0.007613267 |
| 0.09735229  | 0.113861723 | 0.21262835  | 0.081838689 |
| 0.229807627 | 0.233993979 | 0.100033406 | 0.125850741 |
| 0.223224327 | 0.279717832 | 0.243458878 | 0.247990765 |
| 0.075386277 | 0.277750499 | 0.188072242 | 0.241123099 |
| 0.184853494 | 0.072784384 | 0.021654245 | 0.185466726 |
| 0.203019368 | 0.075469989 | 0.226742252 | 0.145929125 |
| 0.081297683 | 0.123077545 | 0.133379564 | 0.260244262 |
| 0.346816499 | 0.26320171  | 0.252494073 | 0.183610958 |
| 0.241488508 | 0.242254417 | 0.213617614 | 0.290865099 |
| 0.062374101 | 0.095790357 | 0.097247341 | 0.216381267 |
| 0.26512726  | 0.099019588 | 0.301468745 | 0.030615728 |
| 0.001532478 | 0.251420594 | 0.252900116 | 0.232060987 |
| 0.063740917 | 0.093641572 | 0.139400488 | 0.263509493 |
| 0.289950894 | 0.275111619 | 0.238845568 | 0.125969012 |
| 0.25507457  | 0.099474135 | 0.089646164 | 0.118381776 |
| 0.276330466 | 0.130523078 | 0.224540719 | 0.341738981 |
| 0.188661123 | 0.06616686  | 0.171814847 | 0.018479901 |
| 0.242834929 | 0.160863453 | 0.286336285 | 0.373747062 |
| 0.231347378 | 0.34888164  | 0.228570507 | 0.073995487 |
| 0.202633765 | 0.292684986 | 0.038984453 | 0.233930075 |
| 0.262090856 | 0.255284584 | 0.259402623 | 0.28549898  |
| 0.216037785 | 0.16803278  | 0.174100591 | 0.154196791 |
| 0.285123542 | 0.239083633 | 0.059137352 | 0.161119315 |
| 0.01878106  | 0.216807799 | 0.141333559 | 0.287287693 |
| 0.148242369 | 0.196460138 | 0.261055874 | 0.110870822 |
| 0.155620565 | 0.03045966  | 0.14958119  | 0.207401921 |
| 0.178480692 | 0.196608493 | 0.069699258 | 0.069623505 |
| 0.280325235 | 0.276956189 | 0.069196963 | 0.285902512 |
| 0.175180539 | 0.210678521 | 0.145410467 | 0.175852417 |
| 0.284495969 | 0.030008148 | 0.128176782 | 0.009197922 |
| 0.088840825 | 0.290802405 | 0.098214556 | 0.235374804 |
| 0.214164447 | 0.130535397 | 0.26951688  | 0.292140272 |
| 0.259625835 | 0.245860356 | 0.266129339 | 0.069694886 |
| 0.271367183 | 0.009660399 | 0.257677476 | 0.211520272 |
| 0.07099365  | 0.012362803 | 0.059113862 | 0.208819896 |
| 0.104665153 | 0.214314892 | 0.278479735 | 0.106641474 |
| 0.263961072 | 0.220018392 | 0.283159499 | 0.092830723 |
| 0.128587572 | 0.159007552 | 0.087992527 | 0.272567036 |
| 0.210460947 | 0.23140098  | 0.107532374 | 0.247038147 |
| 0.116549693 | 0.274845847 | 0.236418197 | 0.031610187 |

|             |             |             |             |
|-------------|-------------|-------------|-------------|
| 0.165782809 | 0.269348383 | 0.333972893 | 0.262806429 |
| 0.306168596 | 0.144836272 | 0.055617264 | 0.106946515 |
| 0.210945657 | 0.202839181 | 0.074042483 | 0.212028604 |
| 0.248857573 | 0.120637115 | 0.258492756 | 0.283528651 |
| 0.27627967  | 0.283740017 | 0.260006111 | 0.181479346 |
| 0.12034547  | 0.009504986 | 0.128540314 | 0.239879573 |
| 0.035605413 | 0.093154437 | 0.284656569 | 0.149490785 |
| 0.173051966 | 0.212739631 | 0.056386651 | 0.061933736 |
| 0.188491296 | 0.134014229 | 0.09880307  | 0.243230627 |
| 0.133284966 | 0.093014328 | 0.237263797 | 0.255879705 |
| 0.103477591 | 0.268185821 | 0.326723512 | 0.227406194 |
| 0.09473035  | 0.094995118 | 0.281731459 | 1           |
| 0.216783966 | 0.22138981  | 0.228021445 | 0.121015438 |
| 0.297427686 | 0.135903663 | 0.23495956  | 0.245766302 |
| 0.312407035 | 0.299612449 | 0.352107044 | 0.193025943 |
| 0.28624123  | 0.159389479 | 0.099338344 | 0.177930858 |
| 0.260458875 | 0.20100958  | 0.272940393 | 0.065516514 |
| 0.278528681 | 0.230182138 | 0.248574708 | 0.289384169 |
| 0.08745996  | 0.277880878 | 0.224535453 | 0.213669371 |
| 0.140858053 | 0.06764193  | 0.273943805 | 0.259244359 |
| 0.223920151 | 0.03715813  | 0.274617266 | 0.176876873 |
| 0.223582522 | 0.054520864 | 0.134210483 | 0.319051245 |
| 0.267037938 | 0.248010977 | 0.149508413 | 0.176896214 |
| 0.170505731 | 0.080882936 | 0.135900281 | 0.214610025 |
| 0.253161741 | 0.116675205 | 0.282968318 | 0.249512659 |
| 0.260511022 | 0.102874836 | 0.069371572 | 0.122808065 |
| 0.255358684 | 0.139722199 | 0.213272639 | 0.273420428 |
| 0.311136512 | 0.340958734 | 0.221941581 | 0.256408478 |
| 0.106007539 | 0.205313303 | 0.190154016 | 0.207687974 |
| 0.060249771 | 0.247856397 | 0.084645508 | 0.169342275 |
| 0.016274613 | 0.030535704 | 0.242340805 | 0.224233848 |
| 0.310606312 | 0.231245141 | 0.300950794 | 0.192726467 |
| 0.000783933 | 0.110554064 | 0.14286132  | 0.110722666 |
| 0.216307449 | 0.241487152 | 0.153239838 | 0.266506157 |
| 0.297582099 | 0.220009405 | 0.218286871 | 0.117915854 |
| 0.032400095 | 0.135309391 | 0.285060751 | 0.215260582 |
| 0.207609353 | 0.201781274 | 0.064022977 | 0.241185986 |
| 0.049259832 | 0.293364098 | 0.249324133 | 0.072122747 |
| 0.037061855 | 0.229169156 | 0.184653728 | 0.236314019 |
| 0.090179329 | 0.212513258 | 0.253213483 | 0.019329345 |
| 0.140973186 | 0.164467688 | 0.203941624 | 0.200635568 |
| 0.220779872 | 0.19561464  | 0.181247451 | 0.134216503 |
| 0.153348515 | 0.233203518 | 0.19871485  | 0.241666472 |
| 0.229444611 | 0.247285989 | 0.124299481 | 0.143106548 |
| 0.135088274 | 0.284132822 | 0.301053076 | 0.308328647 |
| 0.257550816 | 0.221070513 | 0.338572969 | 0.23294088  |
| 0.240640233 | 0.133215083 | 0.315671243 | 0.253074862 |
| 0.277845185 | 0.253090997 | 0.149367323 | 0.208413173 |
| 0.036501904 | 0.113973494 | 0.238286601 | 0.139496593 |
| 0.250758875 | 0.099534833 | 0.113606243 | 0.156922758 |
| 0.14240597  | 0.341179798 | 0.328375922 | 0.282903771 |
| 0.141121829 | 0.106146226 | 0.067411593 | 0.236484134 |
| 0.251790579 | 0.266029117 | 0.110909795 | 0.072185301 |
| 0.183794812 | 0.184313956 | 0.194739546 | 0.284462691 |



|             |             |             |             |
|-------------|-------------|-------------|-------------|
| 0.053545053 | 0.301936482 | 0.078397139 | 0.25729033  |
| 0.058863956 | 0.283541342 | 0.284959484 | 0.155325818 |
| 0.033166388 | 0.271157589 | 0.14064202  | 0.13299614  |
| 0.152733442 | 0.137260211 | 0.113471628 | 0.213207355 |
| 0.21385324  | 0.234192586 | 0.30917321  | 0.245892279 |
| 0.09180544  | 0.103690369 | 0.107722738 | 0.148273051 |
| 0.188742543 | 0.244550073 | 0.267732125 | 0.241194452 |
| 0.108956188 | 0.287124313 | 0.346960559 | 0.188488234 |
| 0.18865399  | 0.220187214 | 0.032525034 | 0.109423576 |
| 0.204401922 | 0.068060007 | 0.00204515  | 0.027730542 |
| 0.219892259 | 0.100121404 | 0.157973729 | 0.185244995 |
| 0.106409239 | 0.232189523 | 0.032422106 | 0.185567523 |
| 0.267991978 | 0.320443392 | 0.156896718 | 0.291567365 |
| 0.221544526 | 0.292900368 | 0.139708661 | 0.014014773 |
| 0.098629903 | 0.081151481 | 0.075969589 | 0.283245753 |
| 0.223518888 | 0.036209727 | 0.108809408 | 0.203200224 |
| 0.221759099 | 0.031636421 | 0.117928656 | 0.150649898 |
| 0.268411932 | 0.327045896 | 0.228771031 | 0.169921928 |
| 0.168594867 | 0.231897629 | 0.086741713 | 0.095591398 |
| 0.131347242 | 0.081007045 | 0.195782448 | 0.067606864 |
| 0.261523302 | 0.14643926  | 0.019199098 | 0.359456208 |
| 0.299943037 | 0.076470536 | 0.324453021 | 0.057582637 |
| 0.234922083 | 0.248551242 | 0.117300367 | 0.088048905 |
| 0.149290353 | 0.098762973 | 0.267520375 | 0.235619648 |
| 0.037968227 | 0.114387473 | 0.258752223 | 0.092543423 |
| 0.346866958 | 0.094464798 | 0.298787571 | 0.057905125 |
| 0.256697455 | 0.210841392 | 0.240831309 | 0.141806204 |
| 0.113261693 | 0.247661242 | 0.091573116 | 0.285083877 |
| 0.237810244 | 0.07226322  | 0.185862612 | 0.209728559 |
| 0.072892231 | 0.260463704 | 0.090197571 | 0.282788116 |
| 0.19685021  | 0.254390737 | 0.1783747   | 0.243308815 |
| 0.268362619 | 0.079047927 | 0.065480853 | 0.1377306   |
| 0.262250061 | 0.235439486 | 0.083370051 | 0.225169008 |
| 0.051655535 | 0.210200384 | 0.109501207 | 0.145771255 |
| 0.209779695 | 0.240693166 | 0.132947317 | 0.278900323 |
| 0.192674594 | 0.125865174 | 0.117675764 | 0.322905816 |
| 0.21186745  | 0.151373591 | 0.326717604 | 0.00427444  |
| 0.167265529 | 0.141666488 | 0.242891939 | 0.115010129 |
| 0.313964668 | 0.161271358 | 0.138390893 | 0.043849426 |
| 0.197947642 | 0.044969537 | 0.134659513 | 0.129146778 |
| 0.066740165 | 0.258586536 | 0.288475953 | 0.250645416 |
| 0.205473148 | 0.088705473 | 0.057774798 | 0.264063604 |
| 0.04015825  | 0.051702086 | 0.068453296 | 0.135157153 |
| 0.053089109 | 0.074247664 | 0.084094685 | 0.072940928 |
| 0.199636526 | 0.218423717 |             |             |
| MXD3        | 0.129468609 | 0.41253734  | 0.100496708 |
| 0.259901911 | 0.366938076 | 0.449893382 | 0.098414148 |
| 0.184269245 | 0.331401704 | 0.280534353 | 0.442701154 |
| 0.044262338 | 0.109136272 | 0.461900749 | 0.09083243  |
| 0.421273566 | 0.071399848 | 0.167412693 | 0.085511557 |
| 0.26414721  | 0.344230992 | 0.396445031 | 0.398730583 |
| 0.329336339 | 0.220449898 | 0.367610966 | 0.374387691 |
| 0.500934487 | 0.301811688 | 0.461289216 | 0.22786373  |
| 0.433686994 | 0.378903768 | 0.39906299  | 0.040033374 |

|             |             |             |             |
|-------------|-------------|-------------|-------------|
| 0.437280071 | 0.011900027 | 0.446413103 | 0.348742393 |
| 0.224528845 | 0.365099552 | 0.336420079 | 0.354480808 |
| 0.373626022 | 0.076913148 | 0.213279925 | 0.398803036 |
| 0.342145562 | 0.323040139 | 0.101026968 | 0.441425173 |
| 0.365689223 | 0.39327599  | 0.373365885 | 0.004541858 |
| 0.343042814 | 0.103136029 | 0.246548431 | 0.510970741 |
| 0.281697177 | 0.198462516 | 0.272206709 | 0.265184825 |
| 0.372189887 | 0.377722484 | 0.300515178 | 0.357177257 |
| 0.512313343 | 0.208532742 | 0.419245727 | 0.243790437 |
| 0.408561482 | 0.052515627 | 0.220016743 | 0.109436425 |
| 0.397372521 | 0.285399263 | 0.401545105 | 0.34263008  |
| 0.41682487  | 0.519911188 | 0.288682251 | 0.497567503 |
| 0.105786915 | 0.366099272 | 0.331929505 | 0.351224429 |
| 0.361905604 | 0.111455733 | 0.46123774  | 0.532266919 |
| 0.071072623 | 0.363166904 | 0.398526408 | 0.15958628  |
| 0.424544763 | 0.274235177 | 0.394486745 | 0.238516436 |
| 0.398686424 | 0.381939894 | 0.464584186 | 0.36943323  |
| 0.348982337 | 0.111973896 | 0.483956426 | 0.355722389 |
| 0.402963632 | 0.138019706 | 0.284185335 | 0.440304929 |
| 0.451848959 | 0.501758984 | 0.395638239 | 0.374795916 |
| 0.409298434 | 0.513073877 | 0.454966636 | 0.404294702 |
| 0.144498883 | 0.525051392 | 0.277308642 | 0.086932647 |
| 0.111461155 | 0.140793261 | 0.235478386 | 0.331512372 |
| 0.473506079 | 0.376261116 | 0.283211766 | 0.315724073 |
| 0.453092265 | 0.474910548 | 0.517191631 | 0.416741409 |
| 0.078345829 | 0.254365639 | 0.422471508 | 0.331264193 |
| 0.402148349 | 0.154920723 | 0.316642276 | 0.513673071 |
| 0.40999671  | 0.439262815 | 0.225424096 | 0.504421099 |
| 0.22852733  | 0.533015779 | 0.448494585 | 0.265713725 |
| 0.52866757  | 0.505112393 | 0.526713419 | 0.431729107 |
| 0.489067339 | 0.431587637 | 0.059820799 | 0.377368188 |
| 0.504744121 | 0.029736207 | 0.463016625 | 0.495496436 |
| 0.503388801 | 0.45015106  | 0.523425659 | 0.512688602 |
| 0.503386884 | 0.114122049 | 0.025935222 | 0.344404342 |
| 0.515478564 | 0.425564695 | 0.179114767 | 0.424608648 |
| 0.385941487 | 0.439975666 | 0.411829817 | 0.380902466 |
| 0.522743137 | 0.45531408  | 0.481826031 | 0.399600259 |
| 0.305175865 | 0.337759869 | 0.38053402  | 0.475541952 |
| 0.089410974 | 0.185096441 | 0.087307975 | 0.323781671 |
| 0.370707724 | 0.25410961  | 0.421601819 | 0.353182896 |
| 0.270828198 | 0.358858428 | 0.348069526 | 0.411460147 |
| 0.080819351 | 0.45376884  | 0.237246951 | 0.231065876 |
| 0.09054997  | 0.17485269  | 0.286256921 | 0.255214128 |
| 0.328323028 | 0.252133088 | 0.433447615 | 0.490347201 |
| 0.351023997 | 0.242939413 | 0.439955623 | 0.490286627 |
| 0.447363106 | 0.426591943 | 0.267716979 | 0.041162594 |
| 0.336443044 | 0.281535784 | 0.213345721 | 0.407861389 |
| 0.194853352 | 0.305421863 | 0.411967944 | 0.433467697 |
| 0.359507826 | 0.176594925 | 0.39207921  | 0.446395063 |
| 0.187487568 | 0.398507884 | 0.452689537 | 0.398304838 |
| 0.010414798 | 0.409752293 | 0.453632664 | 0.19482032  |
| 0.338496057 | 0.189158897 | 0.323869836 | 0.46612054  |
| 0.305264328 | 0.258688647 | 0.489955708 | 0.416555819 |
| 0.37374851  | 0.228228799 | 0.525295169 | 0.053323864 |

|             |             |             |             |
|-------------|-------------|-------------|-------------|
| 0.343732044 | 0.116520397 | 0.355884749 | 0.313972202 |
| 0.330073893 | 0.330471877 | 0.359573233 | 0.359105447 |
| 0.187068274 | 0.518673291 | 0.401914574 | 0.518989249 |
| 0.393548279 | 0.529834312 | 0.452958043 | 0.4546981   |
| 0.41001516  | 0.34699117  | 0.169410552 | 0.456334322 |
| 0.456389979 | 0.303238657 | 0.108598071 | 0.417467586 |
| 0.350941992 | 0.419321508 | 0.165476259 | 0.509418572 |
| 0.508808266 | 0.464062226 | 0.220529727 | 0.398773597 |
| 0.431266244 | 0.331145173 | 0.408756073 | 0.527076918 |
| 0.2980878   | 0.381421138 | 0.391530312 | 0.413033274 |
| 0.253216002 | 0.256428164 | 0.316704408 | 0.200279537 |
| 0.018496955 | 0.120763055 | 0.112132322 | 0.247312561 |
| 0.230111368 | 0.397602258 | 0.420665634 | 0.52087419  |
| 0.187024612 | 0.428717673 | 0.260100644 | 0.384318491 |
| 0.427503696 | 0.356134795 | 0.404853371 | 0.412571676 |
| 0.287470264 | 0.052113253 | 0.215548561 | 0.526310956 |
| 0.06234448  | 0.307244124 | 0.337320817 | 0.00942152  |
| 0.082733654 | 0.379365681 | 0.124731872 | 0.219604059 |
| 0.476394831 | 0.22319521  | 0.273974384 | 0.311823507 |
| 0.400171401 | 0.150964765 | 0.012202144 | 0.477110656 |
| 0.466812933 | 0.435288395 | 0.464009799 | 0.441351811 |
| 0.415502144 | 0.389767159 | 0.422346583 | 0.406514035 |
| 0.169897767 | 0.133944004 | 0.271947514 | 0.362041776 |
| 0.00802974  | 0.419832967 | 0.335303647 | 0.207353408 |
| 0.42247621  | 0.331054698 | 0.077948453 | 0.365925257 |
| 0.061459749 | 0.253706985 | 0.33441396  | 0.264655414 |
| 0.367519483 | 0.033913028 | 0.339080724 | 0.364120053 |
| 0.447532709 | 0.367894028 | 0.375431701 | 0.534254527 |
| 0.416763137 | 0.161140868 | 0.396034543 | 0.429011451 |
| 0.125453003 | 0.113293824 | 0.366369602 | 0.054041532 |
| 0.231962327 | 0.437882906 | 0.380168772 | 0.131250518 |
| 0.360505477 | 0.016337382 | 0.385525535 | 0.535088803 |
| 0.465946717 | 0.522092588 | 0.516851528 | 0.342405932 |
| 0.519214533 | 0.11018729  | 0.529902683 | 0.406742232 |
| 0.371664272 | 0.003676163 | 0.013157228 | 0.489426992 |
| 0.439443527 | 0.082759074 | 0.232230137 | 0.438911828 |
| 0.201642393 | 0.208535459 | 0.108157368 | 0.257932957 |
| 0.450742017 | 0.313333334 | 0.222523911 | 0.466885761 |
| 0.320046995 | 0.291648318 | 0.389562476 | 0.122808959 |
| 0.430496241 | 0.108637709 | 0.117481553 | 0.022770836 |
| 0.389407734 | 0.145959368 | 0.468430322 | 0.509711141 |
| 0.510595465 | 0.429011938 | 0.327911044 | 0.377403571 |
| 0.409467767 | 0.134620156 | 0.375761456 | 0.153875691 |
| 0.490291898 | 0.43433859  | 0.387155575 | 0.360446637 |
| 0.513642809 | 0.486786058 | 0.066118225 | 0.430494709 |
| 0.041827213 | 0.00401456  | 0.426661871 | 0.295165232 |
| 0.053636251 | 0.394235086 | 0.316000525 | 0.237632466 |
| 0.253321356 | 0.071298865 | 0.300596026 | 0.287654853 |
| 0.366723323 | 0.404831055 | 0.336474781 | 0.261814301 |
| 0.316448299 | 0.186005233 | 0.272414674 | 0.205570034 |
| 0.230227284 | 0.328823079 | 0.226715779 | 0.043078618 |
| 0.430735229 | 0.442965892 | 0.107484985 | 0.216783966 |
| 1           | 0.500513239 | 0.079295878 | 0.037560669 |
| 0.311622095 | 0.337411592 | 0.504823882 | 0.498328504 |

|             |             |             |             |
|-------------|-------------|-------------|-------------|
| 0.529143716 | 0.529743402 | 0.40914893  | 0.181612522 |
| 0.12131549  | 0.371524956 | 0.341032607 | 0.161984844 |
| 0.514929622 | 0.096431523 | 0.485630381 | 0.332884273 |
| 0.165485571 | 0.310676565 | 0.082099917 | 0.132998847 |
| 0.408095654 | 0.241882447 | 0.26233948  | 0.208706726 |
| 0.383835914 | 0.304150458 | 0.084088574 | 0.275235165 |
| 0.385181518 | 0.232640224 | 0.227285437 | 0.334584628 |
| 0.373699985 | 0.191457348 | 0.437400901 | 0.467933961 |
| 0.187954822 | 0.153814129 | 0.368687003 | 0.380728478 |
| 0.438809268 | 0.36821269  | 0.06955158  | 0.439706882 |
| 0.490484824 | 0.457218198 | 0.504656363 | 0.391107327 |
| 0.123473759 | 0.439889213 | 0.309661712 | 0.379791709 |
| 0.237226866 | 0.441119354 | 0.281159233 | 0.103979591 |
| 0.301962516 | 0.476601131 | 0.414186336 | 0.262439082 |
| 0.417096266 | 0.162019633 | 0.085386046 | 0.424066146 |
| 0.244794265 | 0.162272606 | 0.350412372 | 0.408423817 |
| 0.006394122 | 0.178274176 | 0.4756673   | 0.328695241 |
| 0.511163964 | 0.488940445 | 0.465001929 | 0.288846215 |
| 0.002343939 | 0.413612106 | 0.450028739 | 0.462910491 |
| 0.427722659 | 0.384821443 | 0.168056596 | 0.143374024 |
| 0.33486078  | 0.120404478 | 0.212599546 | 0.397751388 |
| 0.200282196 | 0.420612432 | 0.252851947 | 0.240650821 |
| 0.266952924 | 0.112448199 | 0.298511964 | 0.332647331 |
| 0.153922033 | 0.302169964 | 0.394288488 | 0.272437158 |
| 0.257372249 | 0.418115956 | 0.416414358 | 0.057930669 |
| 0.372618927 | 0.391439424 | 0.42486757  | 0.006613118 |
| 0.455837788 | 0.021068153 | 0.273687193 | 0.319736584 |
| 0.284145244 | 0.267942844 | 0.317495743 | 0.373397331 |
| 0.372894412 | 0.296269323 | 0.387133855 | 0.319880253 |
| 0.259905511 | 0.278828133 | 0.415887739 | 0.389790602 |
| 0.382491782 | 0.207431626 | 0.125661241 | 0.122786455 |
| 0.113818431 | 0.45186385  | 0.284151718 | 0.111083839 |
| 0.288389558 | 0.37369561  | 0.372703635 | 0.489873391 |
| 0.427413634 | 0.140239454 | 0.35158252  | 0.448806094 |
| 0.218566164 | 0.349339192 | 0.100147621 | 0.421544847 |
| 0.307616987 | 0.301035926 | 0.398577605 | 0.361465782 |
| 0.38949268  | 0.424674728 | 0.284216541 | 0.44368713  |
| 0.426968157 | 0.329631653 | 0.325433998 | 0.167287863 |
| 0.271296413 | 0.17223521  | 0.33142692  | 0.008396663 |
| 0.403221107 | 0.3570659   | 0.472629524 | 0.497469667 |
| 0.308511319 | 0.394907232 | 0.354252815 | 0.160908502 |
| 0.290154078 | 0.200136623 | 0.196986214 | 0.422907072 |
| 0.255882958 | 0.268564997 | 0.368963846 | 0.386072716 |
| 0.437513011 | 0.39959083  | 0.28423837  | 0.284155088 |
| 0.27673353  | 0.25504567  | 0.462651233 | 0.175927535 |
| 0.422494623 | 0.274346678 | 0.34014819  | 0.381339669 |
| 0.291387698 | 0.510214551 | 0.100627675 | 0.522483198 |
| 0.375453255 | 0.167115351 | 0.502904916 | 0.334113611 |
| 0.344373311 | 0.197794047 | 0.22873593  | 0.37405099  |
| 0.275038501 | 0.363024605 | 0.016980455 | 0.088845309 |
| 0.388122632 | 0.281848495 | 0.384040144 | 0.367564059 |
| 0.299723092 | 0.362361617 | 0.184764396 | 0.325798098 |
| 0.475289891 | 0.494393845 | 0.360455564 | 0.291001334 |
| 0.375133537 | 0.176348408 | 0.423726562 | 0.014765044 |

|             |             |             |             |
|-------------|-------------|-------------|-------------|
| 0.431695617 | 0.414776563 | 0.370562085 | 0.093597431 |
| 0.041809309 | 0.257263659 | 0.426109018 | 0.090454269 |
| 0.477788756 | 0.252089668 | 0.33524867  | 0.448851789 |
| 0.208262743 | 0.500728578 | 0.190886346 | 0.454815169 |
| 0.062095818 | 0.301271894 | 0.377742292 | 0.355243005 |
| 0.338637889 | 0.34339211  | 0.428532023 | 0.304812856 |
| 0.071864537 | 0.350120915 | 0.004167809 | 0.429549587 |
| 0.466721663 | 0.361472539 | 0.236500261 | 0.269364343 |
| 0.342657524 | 0.365966049 | 0.274440177 | 0.405539999 |
| 0.034999351 | 0.419389863 | 0.261817299 | 0.426743575 |
| 0.297780749 | 0.356378993 | 0.122715755 | 0.325885337 |
| 0.458893471 | 0.334559581 | 0.274555572 | 0.354640169 |
| 0.488924494 | 0.371102704 | 0.200964201 | 0.271224325 |
| 0.356827958 | 0.098490832 | 0.381932281 | 0.525057248 |
| 0.262993284 | 0.28734729  | 0.447907392 | 0.301250976 |
| 0.334083648 | 0.37914706  | 0.383162108 | 0.506124762 |
| 0.130555994 | 0.316561535 | 0.426167032 | 0.45162684  |
| 0.347762803 | 0.217417299 | 0.303773428 | 0.301043813 |
| 0.466580432 | 0.188066573 | 0.28654013  | 0.403607018 |
| 0.276223057 | 0.355466937 | 0.319512747 | 0.255242212 |
| 0.080622284 | 0.21081839  | 0.431602012 | 0.197711422 |
| 0.357123285 | 0.413195378 | 0.29894185  | 0.409163089 |
| 0.241506801 | 0.074233442 | 0.466783918 | 0.032340887 |
| 0.398424177 | 0.453669696 | 0.305593454 | 0.387528371 |
| 0.238609495 | 0.375283875 | 0.369711412 | 0.00389484  |
| 0.416996949 | 0.080245224 | 0.319388785 | 0.327351119 |
| 0.309306157 | 0.091110514 | 0.468379529 | 0.517504036 |
| 0.353891114 | 0.322294309 | 0.371384767 | 0.459245643 |
| 0.199131441 | 0.323570364 | 0.333542104 | 0.417793806 |
| 0.271501894 | 0.376128583 | 0.399116796 | 0.416092494 |
| 0.413068213 | 0.314117937 |             |             |
| MYBL2       | 0.125085784 | 0.44608173  | 0.099470471 |
| 0.230934511 | 0.383031231 | 0.495506937 | 0.094876713 |
| 0.186742367 | 0.391841703 | 0.361512668 | 0.463908582 |
| 0.036023402 | 0.119563451 | 0.481763758 | 0.086400024 |
| 0.469560269 | 0.059672914 | 0.16300782  | 0.103315608 |
| 0.289328874 | 0.359048423 | 0.43530847  | 0.462977087 |
| 0.352882938 | 0.234626015 | 0.420296081 | 0.444872978 |
| 0.5154841   | 0.35750257  | 0.514941114 | 0.267930842 |
| 0.42985857  | 0.405119427 | 0.463171588 | 0.033103054 |
| 0.494406702 | 0.014589902 | 0.451637034 | 0.352440771 |
| 0.214410612 | 0.378025206 | 0.410728015 | 0.342908546 |
| 0.447939943 | 0.069681237 | 0.276532607 | 0.466634505 |
| 0.394874413 | 0.350418474 | 0.107066477 | 0.499059145 |
| 0.432567568 | 0.429060333 | 0.449922554 | 0.004936569 |
| 0.384016316 | 0.12401465  | 0.291171344 | 0.522621638 |
| 0.279589605 | 0.184495117 | 0.345648793 | 0.308024056 |
| 0.445630693 | 0.433463348 | 0.317953299 | 0.439041913 |
| 0.519840859 | 0.233761496 | 0.488652687 | 0.237165178 |
| 0.467321817 | 0.054616303 | 0.219822633 | 0.122300079 |
| 0.458606802 | 0.276833396 | 0.427935807 | 0.378470467 |
| 0.446401802 | 0.529297955 | 0.304465157 | 0.515371076 |
| 0.125859554 | 0.409015457 | 0.348632027 | 0.369830982 |
| 0.419358797 | 0.120004821 | 0.500578445 | 0.53852203  |

|             |             |             |             |
|-------------|-------------|-------------|-------------|
| 0.076026741 | 0.446203393 | 0.46415218  | 0.175036394 |
| 0.470277292 | 0.328259629 | 0.474317734 | 0.244487675 |
| 0.437628883 | 0.42092747  | 0.483124576 | 0.385171797 |
| 0.382384029 | 0.116215325 | 0.500848234 | 0.391810313 |
| 0.404690601 | 0.134311682 | 0.297105439 | 0.502257933 |
| 0.502603796 | 0.511658736 | 0.468548949 | 0.424106124 |
| 0.46101899  | 0.519451836 | 0.494245377 | 0.447377928 |
| 0.198524713 | 0.54084141  | 0.272800676 | 0.073384327 |
| 0.117355619 | 0.128664874 | 0.275134628 | 0.354402548 |
| 0.503608785 | 0.414298913 | 0.287919811 | 0.313385871 |
| 0.485558228 | 0.493765359 | 0.537226261 | 0.47484115  |
| 0.069851402 | 0.299860709 | 0.468813084 | 0.361903151 |
| 0.454355336 | 0.159569407 | 0.335636546 | 0.525761271 |
| 0.433608365 | 0.494578952 | 0.239466192 | 0.513662823 |
| 0.25793277  | 0.531963637 | 0.483843901 | 0.25191332  |
| 0.536001718 | 0.514619335 | 0.526835082 | 0.47718254  |
| 0.492505349 | 0.45593553  | 0.081740628 | 0.431768753 |
| 0.500488642 | 0.025608952 | 0.497663915 | 0.51045481  |
| 0.51811604  | 0.513184817 | 0.530888321 | 0.522668526 |
| 0.521106796 | 0.113796788 | 0.037706012 | 0.361654839 |
| 0.527764125 | 0.459940782 | 0.179586113 | 0.495130278 |
| 0.431954778 | 0.494370723 | 0.477430484 | 0.422880002 |
| 0.52409591  | 0.490423146 | 0.500117439 | 0.462368801 |
| 0.365808723 | 0.357674219 | 0.444842878 | 0.487799091 |
| 0.075510051 | 0.184903306 | 0.088257995 | 0.360354519 |
| 0.434394951 | 0.243519457 | 0.480817419 | 0.408655401 |
| 0.266062039 | 0.419920653 | 0.406285233 | 0.453445161 |
| 0.086480666 | 0.523440736 | 0.236555921 | 0.24722091  |
| 0.073717972 | 0.18405512  | 0.283845537 | 0.234777232 |
| 0.334752103 | 0.253207007 | 0.505816408 | 0.498948062 |
| 0.409695598 | 0.253919295 | 0.503071776 | 0.487966098 |
| 0.434833225 | 0.467937982 | 0.287966312 | 0.025965426 |
| 0.369272578 | 0.360894025 | 0.244777466 | 0.476490321 |
| 0.199878846 | 0.33082951  | 0.467702807 | 0.470056228 |
| 0.388825869 | 0.200109681 | 0.450628378 | 0.44382599  |
| 0.205635769 | 0.406648794 | 0.493728849 | 0.476171488 |
| 0.007354348 | 0.435657372 | 0.510336281 | 0.195880502 |
| 0.387571463 | 0.199646899 | 0.346586231 | 0.492801794 |
| 0.364371646 | 0.285165537 | 0.502263465 | 0.457033342 |
| 0.432376412 | 0.236866687 | 0.535556045 | 0.069611674 |
| 0.399480809 | 0.089693605 | 0.362268984 | 0.393888711 |
| 0.340045625 | 0.354094275 | 0.390221966 | 0.364440951 |
| 0.195659175 | 0.533233291 | 0.448005932 | 0.528338993 |
| 0.456035085 | 0.539083365 | 0.509151539 | 0.485616388 |
| 0.446475247 | 0.423483218 | 0.190368082 | 0.509651073 |
| 0.495549145 | 0.366549089 | 0.114919137 | 0.49253366  |
| 0.428002359 | 0.474873694 | 0.155417976 | 0.510333453 |
| 0.508897845 | 0.484926102 | 0.210698984 | 0.434985561 |
| 0.461681876 | 0.333269673 | 0.459113774 | 0.536767867 |
| 0.378802294 | 0.433885954 | 0.425118204 | 0.446646596 |
| 0.251390802 | 0.272839951 | 0.352328312 | 0.231426408 |
| 0.018875866 | 0.127046244 | 0.109704451 | 0.230329445 |
| 0.229098179 | 0.47818174  | 0.46837105  | 0.533017438 |
| 0.178136004 | 0.448156248 | 0.290851056 | 0.397763699 |

|             |             |             |             |
|-------------|-------------|-------------|-------------|
| 0.444153969 | 0.414974742 | 0.453370218 | 0.459381167 |
| 0.306373334 | 0.03552448  | 0.188793515 | 0.534152581 |
| 0.067157926 | 0.321565789 | 0.391668543 | 0.006175655 |
| 0.079337296 | 0.455248223 | 0.132945369 | 0.224026754 |
| 0.483119306 | 0.231879489 | 0.288733873 | 0.391960541 |
| 0.423699922 | 0.143716427 | 0.006870948 | 0.492343602 |
| 0.487018595 | 0.454704283 | 0.486315446 | 0.460847026 |
| 0.448051968 | 0.452448891 | 0.472838359 | 0.455191212 |
| 0.16207397  | 0.140035043 | 0.28796574  | 0.377519655 |
| 0.009049895 | 0.449211023 | 0.36833463  | 0.204020974 |
| 0.484865139 | 0.369055617 | 0.068629028 | 0.414665481 |
| 0.04807548  | 0.280477583 | 0.390362025 | 0.279528287 |
| 0.402500664 | 0.028029205 | 0.352738522 | 0.41449098  |
| 0.453784476 | 0.406281699 | 0.432256597 | 0.544987979 |
| 0.431281242 | 0.181597173 | 0.403936996 | 0.46899343  |
| 0.116181716 | 0.146335723 | 0.433935144 | 0.062067804 |
| 0.266966265 | 0.454131862 | 0.446564389 | 0.119878648 |
| 0.367837192 | 0.011746577 | 0.424170537 | 0.545477957 |
| 0.483347235 | 0.531683262 | 0.521288205 | 0.360014815 |
| 0.525835157 | 0.140798886 | 0.543834741 | 0.464776259 |
| 0.455950733 | 0.002529931 | 0.010535024 | 0.504515845 |
| 0.486718812 | 0.089987053 | 0.227849113 | 0.479421687 |
| 0.176370768 | 0.227740452 | 0.102952338 | 0.248740785 |
| 0.505078113 | 0.313880165 | 0.230472527 | 0.485914633 |
| 0.323356963 | 0.300334849 | 0.469022197 | 0.12938833  |
| 0.480967093 | 0.092092694 | 0.125398419 | 0.016244821 |
| 0.428833108 | 0.158255938 | 0.483498785 | 0.52424394  |
| 0.510427842 | 0.466092382 | 0.412740391 | 0.43427767  |
| 0.455847012 | 0.149110705 | 0.440527552 | 0.168339953 |
| 0.505472262 | 0.478827056 | 0.40375359  | 0.382239583 |
| 0.516678854 | 0.488965013 | 0.058219747 | 0.477782742 |
| 0.029410984 | 0.003021353 | 0.480355989 | 0.323829253 |
| 0.071064025 | 0.449560427 | 0.326830084 | 0.279839653 |
| 0.278624212 | 0.061676002 | 0.334374621 | 0.312448362 |
| 0.380803244 | 0.446540734 | 0.352584638 | 0.294426976 |
| 0.328937335 | 0.18594826  | 0.266253871 | 0.210577023 |
| 0.286921701 | 0.364908033 | 0.241418923 | 0.03776565  |
| 0.50032195  | 0.499482243 | 0.097207453 | 0.22138981  |
| 0.500513239 | 1           | 0.070233663 | 0.024386736 |
| 0.332348195 | 0.382958012 | 0.511688143 | 0.515298474 |
| 0.541189301 | 0.532940199 | 0.405699677 | 0.175250676 |
| 0.112079485 | 0.39413743  | 0.363988047 | 0.13976686  |
| 0.526712708 | 0.105161804 | 0.498070307 | 0.369552313 |
| 0.16636307  | 0.302570786 | 0.063584358 | 0.127226818 |
| 0.460662374 | 0.244090774 | 0.246879411 | 0.220060553 |
| 0.406922932 | 0.323599795 | 0.078326481 | 0.273899961 |
| 0.424633645 | 0.245543017 | 0.227247816 | 0.38019949  |
| 0.418165875 | 0.26062969  | 0.497844283 | 0.462139243 |
| 0.190810895 | 0.162067933 | 0.400204938 | 0.436139658 |
| 0.504329492 | 0.452117971 | 0.055191088 | 0.463297395 |
| 0.497894396 | 0.521429485 | 0.516308812 | 0.430659283 |
| 0.125519536 | 0.476926928 | 0.368767825 | 0.419254664 |
| 0.247434265 | 0.48726366  | 0.301747746 | 0.099999819 |
| 0.331323807 | 0.487686366 | 0.459208368 | 0.243627635 |

|             |             |             |             |
|-------------|-------------|-------------|-------------|
| 0.486051051 | 0.18369764  | 0.093428466 | 0.472200423 |
| 0.24964839  | 0.154040527 | 0.43181362  | 0.476428722 |
| 0.003559404 | 0.189313641 | 0.487326617 | 0.331161006 |
| 0.521290651 | 0.492019102 | 0.45755134  | 0.320879369 |
| 0.00252548  | 0.472969333 | 0.47864866  | 0.50144026  |
| 0.474412978 | 0.422918623 | 0.191673412 | 0.121484419 |
| 0.346982793 | 0.127726551 | 0.203137578 | 0.443256736 |
| 0.22956269  | 0.489311947 | 0.25634016  | 0.265556574 |
| 0.261066211 | 0.13009657  | 0.316788116 | 0.330250133 |
| 0.178028494 | 0.307649675 | 0.420499396 | 0.35084484  |
| 0.2843883   | 0.453957871 | 0.474306159 | 0.049551134 |
| 0.422409886 | 0.445951858 | 0.450234364 | 0.005226111 |
| 0.508793327 | 0.015078223 | 0.267842072 | 0.302477993 |
| 0.271490123 | 0.278206496 | 0.325468409 | 0.380147735 |
| 0.426814369 | 0.299525056 | 0.38140994  | 0.317064578 |
| 0.235871152 | 0.290497324 | 0.460634665 | 0.43755439  |
| 0.381633794 | 0.194631226 | 0.134065501 | 0.12969823  |
| 0.094465603 | 0.477828491 | 0.298281839 | 0.11502001  |
| 0.294990539 | 0.430863231 | 0.392248512 | 0.50944612  |
| 0.442767235 | 0.15514793  | 0.400928398 | 0.492756309 |
| 0.291748371 | 0.395141038 | 0.104599245 | 0.469072151 |
| 0.315634188 | 0.303962171 | 0.467624496 | 0.409336867 |
| 0.464813806 | 0.415974362 | 0.298730053 | 0.443122883 |
| 0.453947362 | 0.396801665 | 0.401862127 | 0.139556465 |
| 0.264965167 | 0.181753507 | 0.340380827 | 0.004974636 |
| 0.437556783 | 0.373926739 | 0.514506331 | 0.507670274 |
| 0.358276245 | 0.413815506 | 0.424168619 | 0.150819863 |
| 0.355162402 | 0.216789996 | 0.19870216  | 0.490084487 |
| 0.291070119 | 0.261154827 | 0.380984461 | 0.435467565 |
| 0.494069929 | 0.468148625 | 0.307546344 | 0.318004737 |
| 0.296394544 | 0.270193999 | 0.478812325 | 0.182860572 |
| 0.497605626 | 0.258707369 | 0.417219131 | 0.392759721 |
| 0.29250745  | 0.524195273 | 0.096929044 | 0.537326536 |
| 0.41492737  | 0.177942559 | 0.503309023 | 0.374276443 |
| 0.371495868 | 0.175468285 | 0.252170228 | 0.451299379 |
| 0.294247351 | 0.413486026 | 0.024023403 | 0.097679624 |
| 0.405330819 | 0.349289086 | 0.458265406 | 0.418394111 |
| 0.309691015 | 0.390801295 | 0.212410776 | 0.371115956 |
| 0.495998666 | 0.51000445  | 0.366840161 | 0.304022549 |
| 0.417814334 | 0.160431267 | 0.484527808 | 0.019705277 |
| 0.499171405 | 0.488976588 | 0.455180229 | 0.085979116 |
| 0.034236354 | 0.285013258 | 0.491364206 | 0.100422237 |
| 0.488283787 | 0.284353923 | 0.407771463 | 0.504163522 |
| 0.227408912 | 0.513940577 | 0.174966861 | 0.491490007 |
| 0.070375472 | 0.319647503 | 0.435558603 | 0.432006313 |
| 0.324039852 | 0.370528413 | 0.455656991 | 0.314157742 |
| 0.058071405 | 0.349405781 | 0.003414917 | 0.42510868  |
| 0.483987977 | 0.409017096 | 0.251807941 | 0.354014332 |
| 0.348618086 | 0.412683006 | 0.311001445 | 0.479108943 |
| 0.02303973  | 0.455478878 | 0.264098747 | 0.474249897 |
| 0.335307255 | 0.424591689 | 0.097027014 | 0.371178337 |
| 0.472008325 | 0.374331902 | 0.300197776 | 0.405247832 |
| 0.504194629 | 0.427974912 | 0.21957521  | 0.277029852 |
| 0.435651758 | 0.10023885  | 0.459044556 | 0.538198432 |



|             |             |             |             |
|-------------|-------------|-------------|-------------|
| 0.248139073 | 0.289754957 | 0.497683749 | 0.292285486 |
| 0.378789216 | 0.423360662 | 0.460810035 | 0.524280985 |
| 0.112670091 | 0.322620411 | 0.479681838 | 0.466790853 |
| 0.362346794 | 0.223008217 | 0.326426977 | 0.307720845 |
| 0.478686656 | 0.165333488 | 0.318209348 | 0.438432932 |
| 0.293503877 | 0.379302523 | 0.391371378 | 0.252073086 |
| 0.066537555 | 0.222408273 | 0.470030128 | 0.198871952 |
| 0.378406248 | 0.445351694 | 0.305987533 | 0.409110125 |
| 0.211517004 | 0.051522222 | 0.461199166 | 0.030563189 |
| 0.436982992 | 0.484350041 | 0.317255057 | 0.426550211 |
| 0.246378802 | 0.429526935 | 0.42761701  | 0.002918343 |
| 0.465227551 | 0.067282195 | 0.359513471 | 0.31891056  |
| 0.361783458 | 0.087387814 | 0.47093395  | 0.524612131 |
| 0.389454684 | 0.384621703 | 0.433614371 | 0.471520312 |
| 0.204597444 | 0.394293113 | 0.402651039 | 0.485649647 |
| 0.290749862 | 0.458769226 | 0.478566305 | 0.464675245 |
| 0.458885294 | 0.344462769 |             |             |
| MYCBP       | 0.125936207 | 0.063563617 | 0.088212039 |
| 0.021569199 | 0.058518428 | 0.015523146 | 0.198754913 |
| 0.104522863 | 0.081301596 | 0.005750272 | 0.051247877 |
| 0.125892625 | 0.001088906 | 0.08924618  | 0.199352845 |
| 0.045026151 | 0.165356574 | 0.259063998 | 0.007156889 |
| 0.015544236 | 0.076841595 | 0.007847787 | 0.027481838 |
| 0.061325019 | 0.22979846  | 0.063964521 | 0.018374544 |
| 0.066480802 | 0.000704922 | 0.030826878 | 0.000704209 |
| 0.169695256 | 0.053385435 | 0.009864295 | 0.068350217 |
| 0.032909508 | 0.004866769 | 0.171542221 | 0.083505043 |
| 0.002736143 | 0.183162219 | 0.008555614 | 0.094152138 |
| 0.018805567 | 0.120968034 | 9.89E-05    | 0.042410851 |
| 0.063318911 | 0.051608897 | 0.143610294 | 0.041693273 |
| 0.018789931 | 0.081821501 | 0.028258556 | 0.001925659 |
| 0.008194623 | 0.000187394 | 0.003881793 | 0.085247326 |
| 0.220957638 | 0.21662033  | 0.002491915 | 0.068389494 |
| 0.040147317 | 0.071450291 | 0.171328782 | 0.01297662  |
| 0.090032741 | 0.006283133 | 0.032275446 | 0.011879251 |
| 0.04351413  | 0.151625276 | 0.302737265 | 0.171060071 |
| 0.018102558 | 0.167685042 | 0.046210035 | 0.017515632 |
| 0.057212916 | 0.138785624 | 0.186384596 | 0.095333803 |
| 0.009016009 | 0.035522077 | 0.028305563 | 0.177104234 |
| 0.095973541 | 0.150502324 | 0.068745844 | 0.118945232 |
| 0.155860547 | 0.018508803 | 0.070117691 | 0.208403642 |
| 0.058644248 | 0.007646644 | 0.011727652 | 0.008303245 |
| 0.052251207 | 0.054976201 | 0.122600079 | 0.167595292 |
| 0.03691072  | 0.207948197 | 0.104914395 | 0.031530476 |
| 0.039376567 | 0.171379358 | 0.041353234 | 0.047619332 |
| 0.051386464 | 0.068911765 | 0.056411226 | 0.129694535 |
| 0.033457516 | 0.083480414 | 0.067114832 | 0.087181554 |
| 0.000211753 | 0.085539236 | 0.146159387 | 0.146648161 |
| 0.103533677 | 0.155562718 | 0.030320634 | 0.198896328 |
| 0.059667532 | 0.091879716 | 0.11982356  | 0.147965063 |
| 0.082597179 | 0.085935832 | 0.084442226 | 0.086116247 |
| 0.195759765 | 0.009062106 | 0.033582415 | 0.037053909 |
| 0.089613961 | 0.263181882 | 0.025812793 | 0.122775323 |
| 0.13454189  | 0.069636888 | 0.081806154 | 0.148934044 |

|             |             |             |             |
|-------------|-------------|-------------|-------------|
| 0.123702736 | 0.12091307  | 0.048308694 | 0.199568777 |
| 0.116012067 | 0.107412035 | 0.104583058 | 0.038845279 |
| 0.106419702 | 0.048575079 | 0.010282516 | 0.112124549 |
| 0.122487063 | 0.001387604 | 0.053981864 | 0.064345488 |
| 0.082319164 | 0.049466545 | 0.104133884 | 0.071772281 |
| 0.077114732 | 0.25621053  | 0.001362249 | 0.143319953 |
| 0.101616121 | 0.110904618 | 0.089908059 | 0.019914603 |
| 0.054797269 | 0.031003619 | 0.050163414 | 0.002864062 |
| 0.148800511 | 0.064796062 | 0.05659446  | 0.077966871 |
| 0.057735181 | 0.180954329 | 0.016967658 | 0.102127943 |
| 0.090570794 | 0.114438512 | 0.173771441 | 0.159041892 |
| 0.003940387 | 0.232788728 | 0.027013596 | 0.056214561 |
| 0.248627834 | 0.034178349 | 0.005894402 | 0.050725057 |
| 0.219224042 | 0.019851247 | 0.157209466 | 0.176781765 |
| 0.171837946 | 0.291484371 | 0.033286182 | 0.06079422  |
| 0.110857878 | 0.229615703 | 0.030722271 | 0.077777127 |
| 0.036042219 | 0.191076131 | 0.047196108 | 0.115291683 |
| 0.177043091 | 0.026567493 | 0.242398044 | 0.021360875 |
| 0.017063574 | 0.005632452 | 0.004635642 | 0.018063474 |
| 0.250179733 | 0.058482068 | 0.05629512  | 0.061020174 |
| 0.066452993 | 0.120118099 | 0.024786295 | 0.157612506 |
| 0.203412884 | 0.033764915 | 0.088075795 | 0.027235007 |
| 0.026529556 | 0.085082598 | 0.060972031 | 0.028674604 |
| 0.125225419 | 0.003780995 | 0.002586812 | 0.082195328 |
| 0.005709406 | 0.035469591 | 0.06173396  | 0.060572646 |
| 0.003512501 | 0.178195332 | 0.098720914 | 0.001375674 |
| 0.034889505 | 0.013413667 | 0.176608429 | 0.010409092 |
| 0.180257461 | 0.193228285 | 0.040790285 | 0.034191293 |
| 0.128962374 | 0.096237916 | 0.086096028 | 0.078742342 |
| 0.012896519 | 0.103436626 | 0.061168731 | 0.093783148 |
| 0.08750824  | 0.01656689  | 0.002456567 | 0.063840617 |
| 0.072717868 | 0.004438972 | 0.19834662  | 0.040095041 |
| 0.020374148 | 0.047925159 | 0.017541504 | 0.105391943 |
| 0.14138927  | 0.077018953 | 0.129288988 | 0.102082724 |
| 0.114464737 | 0.121808854 | 0.077551328 | 0.113374062 |
| 0.007067467 | 0.043582548 | 0.030314682 | 0.109990357 |
| 0.227485698 | 0.04579695  | 0.164663938 | 0.003280425 |
| 0.002111541 | 0.180832106 | 0.211715284 | 0.155538703 |
| 0.018563963 | 0.018342504 | 0.062973537 | 0.088839445 |
| 0.246779614 | 0.098434462 | 0.198792423 | 0.047067622 |
| 0.10731672  | 0.031180944 | 0.019911856 | 0.042561423 |
| 0.204965157 | 0.024620801 | 0.034706539 | 0.141912823 |
| 0.169867986 | 0.011242292 | 0.061288115 | 0.005303549 |
| 0.18548766  | 0.036397679 | 0.262254984 | 0.290590682 |
| 0.084942323 | 0.236940207 | 0.193495821 | 0.011671883 |
| 0.098999426 | 0.245353107 | 0.007400616 | 0.08261358  |
| 0.092722676 | 0.099604805 | 0.090035426 | 0.102430978 |
| 0.088624734 | 0.055382397 | 0.078487447 | 0.030480147 |
| 0.120084054 | 0.108752014 | 0.019756843 | 0.098033218 |
| 0.004436149 | 0.092038923 | 0.058481761 | 0.297788635 |
| 0.048595926 | 0.149596695 | 0.138472523 | 0.043799662 |
| 0.026036942 | 0.002806329 | 0.03616041  | 0.110828161 |
| 0.105561154 | 0.106002099 | 0.002905023 | 0.009264956 |
| 0.0882386   | 0.135421457 | 0.00760579  | 0.092728536 |

|             |             |             |             |
|-------------|-------------|-------------|-------------|
| 0.078430719 | 0.155505876 | 0.068715314 | 0.065251642 |
| 0.192341392 | 0.002568809 | 0.032555683 | 0.000148089 |
| 0.001454377 | 0.111012107 | 0.014564517 | 0.04137441  |
| 0.163834805 | 0.050340746 | 0.117833659 | 0.101083265 |
| 0.07085146  | 0.085714064 | 0.084929924 | 0.015137699 |
| 0.089911318 | 0.00035182  | 0.079234384 | 0.075261727 |
| 0.009448871 | 0.003272128 | 0.025059826 | 0.06410576  |
| 0.035905819 | 0.152704759 | 0.269620122 | 0.003970153 |
| 0.103019241 | 0.101086091 | 0.159733152 | 0.033330283 |
| 0.028581041 | 0.088759131 | 0.022315545 | 0.090629688 |
| 0.145395759 | 0.175003552 | 0.01663334  | 0.25295807  |
| 0.028324964 | 0.132758077 | 0.257678052 | 0.006516325 |
| 0.083887503 | 0.193337537 | 0.120118533 | 0.082205136 |
| 0.122576216 | 0.0574295   | 0.003953488 | 0.003500586 |
| 0.078337388 | 0.126741769 | 0.002379171 | 0.136609896 |
| 0.071241487 | 0.059815097 | 0.161082206 | 0.167209976 |
| 0.116926327 | 0.109176702 | 0.222757187 | 0.088877093 |
| 0.015333547 | 0.005482978 | 0.024825982 | 0.179032903 |
| 0.005998193 | 0.035996854 | 0.237467543 | 0.057944247 |
| 0.064626425 | 0.03346458  | 0.016246735 | 0.021518223 |
| 0.145446445 | 0.061387124 | 0.047071648 | 0.181546132 |
| 0.05785756  | 0.022637686 | 0.096463046 | 0.13590692  |
| 0.0078302   | 0.154453124 | 0.236166247 | 0.183534244 |
| 0.017758685 | 0.021940458 | 0.22622206  | 0.228021445 |
| 0.079295878 | 0.070233663 | 1           | 0.043631168 |
| 0.200052586 | 0.055479647 | 0.079753787 | 0.068135915 |
| 0.108721328 | 0.128184464 | 0.173002641 | 0.108427445 |
| 0.153035706 | 0.103448362 | 0.045413537 | 0.063802117 |
| 0.082348014 | 0.194755831 | 0.079972792 | 0.018629978 |
| 0.296540889 | 0.105261962 | 0.069430805 | 0.283637802 |
| 0.021426996 | 0.247369861 | 0.167928449 | 0.146592441 |
| 0.072245793 | 0.005826922 | 0.222189949 | 0.227201013 |
| 0.134648541 | 0.005449283 | 0.266845782 | 0.036347861 |
| 0.090044207 | 0.002793009 | 0.046729669 | 0.169070242 |
| 0.237622949 | 0.237056746 | 0.021180859 | 0.06970812  |
| 0.049053796 | 0.014876594 | 0.013757711 | 0.054892275 |
| 0.087435804 | 0.02914953  | 0.085835393 | 0.142945517 |
| 0.291882612 | 0.029897642 | 0.018691114 | 0.072859744 |
| 0.238861027 | 0.019335255 | 0.138330001 | 0.295828667 |
| 0.202526951 | 0.148609021 | 0.08386389  | 0.159491393 |
| 0.020013944 | 0.131390246 | 0.18611919  | 0.059294003 |
| 0.020716359 | 0.068333687 | 0.009664581 | 0.055723567 |
| 0.003365007 | 0.004900138 | 0.092689224 | 0.055921    |
| 0.123256913 | 0.086152081 | 0.138028978 | 0.04020627  |
| 0.000502022 | 0.039297476 | 0.06513067  | 0.02333042  |
| 0.068508542 | 0.103506317 | 0.011260158 | 0.146682933 |
| 0.216834203 | 0.160768639 | 0.117368577 | 0.002628037 |
| 0.004774972 | 0.045124868 | 0.291295988 | 0.188714369 |
| 0.134494139 | 0.18550548  | 0.004559628 | 0.087180813 |
| 0.00712778  | 0.24553388  | 0.163692487 | 0.004232744 |
| 0.003819474 | 0.105334142 | 0.080088314 | 0.125892348 |
| 0.02216644  | 0.104665992 | 0.094032327 | 0.06713719  |
| 0.048020937 | 0.076117464 | 0.142035891 | 0.108693399 |
| 0.123081179 | 0.13836066  | 0.145679317 | 0.038694305 |

|             |             |                    |             |
|-------------|-------------|--------------------|-------------|
| 0.087002208 | 0.147654065 | 0.065666386        | 0.194705731 |
| 0.094662525 | 0.114926843 | 0.04465144         | 0.04631815  |
| 0.037414351 | 0.144294507 | 0.228977735        | 0.219560326 |
| 0.045265816 | 0.058471055 | 0.238408936        | 0.16950509  |
| 0.201492803 | 0.034832067 | 0.194597918        | 0.071769537 |
| 0.118905391 | 0.153388467 | 0.057791293        | 0.056332938 |
| 0.001297096 | 0.003883328 | 0.104897066        | 0.036754254 |
| 0.139404078 | 0.023787227 | 0.017458832        | 0.071832224 |
| 0.047692387 | 0.179865347 | 0.219059085        | 0.115240796 |
| 0.034433683 | 0.043655745 | 0.005094183        | 0.093593896 |
| 0.162686024 | 0.268681212 | 0.06141083         | 0.025042797 |
| 0.104383751 | 0.013329856 | 0.058800791        | 0.093070736 |
| 0.007463459 | 0.146718727 | 0.001920535        | 0.134190379 |
| 0.001771725 | 0.173660216 | 0.291532148        | 0.039375379 |
| 0.003557371 | 0.096628651 | 0.077465634        | 0.009771313 |
| 0.050179032 | 0.044504397 | 0.038926553        | 0.100977461 |
| 0.15256223  | 0.150707425 | 0.123703677        | 0.100157464 |
| 0.021133137 | 0.032660821 | 0.025860348        | 0.088994451 |
| 0.1193519   | 0.074714842 | 0.21426647         | 0.073330443 |
| 0.054974552 | 0.230089251 | 0.154399465        | 0.057577783 |
| 0.019711933 | 0.033444057 | 0.005585171        | 0.014451298 |
| 0.079962606 | 0.008346853 | 5.79E-05 0.0049379 |             |
| 0.15464741  | 0.026465634 | 0.051197167        | 0.09692657  |
| 0.041791965 | 0.166141695 | 0.001081993        | 0.085230339 |
| 0.076978755 | 0.109579191 | 0.03305118         | 0.259940095 |
| 0.132998539 | 0.166543418 | 0.028316356        | 0.002006069 |
| 0.033896037 | 0.018231425 | 0.006923386        | 0.18153493  |
| 0.070628866 | 0.007501441 | 0.038384877        | 0.200715551 |
| 0.083162934 | 0.000861117 | 0.043016751        | 0.035739898 |
| 0.230905383 | 0.115439577 | 0.108140458        | 0.066880948 |
| 0.043182748 | 0.17625568  | 0.019911014        | 0.02759181  |
| 0.038485056 | 0.028507859 | 0.107329078        | 0.018196183 |
| 0.18496965  | 0.029282234 | 0.043361445        | 0.180799392 |
| 0.105412545 | 0.027480381 | 0.269562535        | 0.0036539   |
| 0.181728093 | 0.110185058 | 0.021631326        | 0.0131815   |
| 0.035716187 | 0.039644302 | 0.18529803         | 0.073766175 |
| 0.002083154 | 0.055047275 | 0.045023475        | 0.043003174 |
| 0.128147366 | 0.017030946 | 0.232481428        | 0.005587428 |
| 0.070957833 | 0.068736785 | 0.13272098         | 0.016981857 |
| 0.036276787 | 0.264299861 | 0.007229021        | 0.103312055 |
| 0.15589445  | 0.025167733 | 0.07141355         | 0.13045488  |
| 0.020681933 | 0.089497919 | 0.021834008        | 0.101082071 |
| 0.120597238 | 0.20104046  | 0.06464464         | 0.088204646 |
| 0.187694711 | 0.036201951 | 0.016208959        | 0.086617558 |
| 0.075470695 | 0.03249728  | 0.016903642        | 0.112349254 |
| 0.017002363 | 0.133472956 | 0.028487296        | 0.083813195 |
| 0.047258684 | 0.086302091 | 0.012573714        | 0.260848476 |
| 0.137103294 | 0.055103304 | 0.045872561        | 0.16744022  |
| 0.033918372 | 0.033073489 | 0.149430679        | 0.00122479  |
| 0.0368337   | 0.052908478 | 0.144321952        | 0.034193245 |
| 0.219171163 | 0.078960288 | 0.05099368         | 0.025740979 |
| 0.095681173 | 0.003254155 | 0.039262884        | 0.046192926 |
| 0.00408438  | 0.17694212  | 0.098074252        | 0.089342632 |
| 0.094636627 | 0.002376557 | 0.002822766        | 0.094138705 |

|             |             |             |             |
|-------------|-------------|-------------|-------------|
| 0.004001093 | 0.004479951 | 0.012622198 | 0.03449725  |
| 0.011455494 | 0.009553531 | 0.010684732 | 0.009074897 |
| 0.081118313 | 0.061221255 |             |             |
| MYD88       | 0.109544441 | 0.013055372 | 0.089388505 |
| 0.052070034 | 0.03132383  | 0.010880034 | 0.078114285 |
| 0.046623808 | 0.010935834 | 0.000580065 | 0.045107173 |
| 0.137841036 | 0.000343911 | 0.028723244 | 0.079954721 |
| 0.015638608 | 0.136803335 | 0.125225456 | 0.000362765 |
| 0.002858943 | 0.039900866 | 0.005037458 | 0.008190741 |
| 0.022384323 | 0.107063793 | 0.015408696 | 0.002644291 |
| 0.018433078 | 0.000124867 | 0.014822934 | 9.06E-05    |
| 0.062167915 | 0.027566646 | 0.002724187 | 0.098264236 |
| 0.012085777 | 0.000125504 | 0.0482664   | 0.054515195 |
| 0.002860835 | 0.073412629 | 0.000802171 | 0.101099481 |
| 0.002919407 | 0.125249731 | 0.002025542 | 0.007866484 |
| 0.011289868 | 0.015043702 | 0.071570109 | 0.013704381 |
| 0.00272853  | 0.043178976 | 0.003995683 | 0.000879354 |
| 0.003705419 | 0.000666169 | 0.000644796 | 0.025414375 |
| 0.161552275 | 0.157548905 | 0.000141354 | 0.010433323 |
| 0.005194226 | 0.014125416 | 0.061434511 | 0.00149549  |
| 0.030614598 | 0.001734401 | 0.006662067 | 0.009052262 |
| 0.011460838 | 0.04074583  | 0.156214663 | 0.033999154 |
| 0.00441126  | 0.123698503 | 0.029049916 | 0.005905574 |
| 0.01179527  | 0.038527696 | 0.064697061 | 0.023129085 |
| 0.000777158 | 0.010602043 | 0.013341    | 0.072050085 |
| 0.016831034 | 0.02668713  | 0.039015971 | 0.037866584 |
| 0.035768147 | 0.001830628 | 0.014008659 | 0.062632315 |
| 0.018497673 | 0.000740817 | 0.001936608 | 0.007849644 |
| 0.018793974 | 0.019324491 | 0.025002782 | 0.100915468 |
| 0.013769395 | 0.09134731  | 0.026441892 | 0.012059209 |
| 0.04681488  | 0.125958477 | 0.016827605 | 0.012012231 |
| 0.022211554 | 0.023259157 | 0.009859529 | 0.031793522 |
| 0.011313319 | 0.029596557 | 0.036464192 | 0.020892517 |
| 0.002840473 | 0.022735733 | 0.127161502 | 0.148116021 |
| 0.042089302 | 0.102624423 | 0.003501962 | 0.075254777 |
| 0.021452385 | 0.032569038 | 0.074698373 | 0.08596733  |
| 0.02484697  | 0.020858803 | 0.019821309 | 0.024367266 |
| 0.151579293 | 0.001127201 | 0.013314562 | 0.015331552 |
| 0.025263195 | 0.085145908 | 0.013846763 | 0.034996689 |
| 0.069904384 | 0.022668301 | 0.034956225 | 0.041058342 |
| 0.0223905   | 0.045504404 | 0.013203741 | 0.174602608 |
| 0.036904371 | 0.034059929 | 0.0382867   | 0.01710464  |
| 0.038084148 | 0.04408442  | 0.000187232 | 0.025581071 |
| 0.049364341 | 0.00604179  | 0.013266519 | 0.01688938  |
| 0.022941383 | 0.015177995 | 0.029996567 | 0.021773804 |
| 0.020334801 | 0.107494732 | 0.000390486 | 0.060911236 |
| 0.02934877  | 0.059371721 | 0.030784728 | 0.005014754 |
| 0.017581265 | 0.013099732 | 0.010947087 | 0.001357754 |
| 0.048810093 | 0.0219364   | 0.013749263 | 0.018113461 |
| 0.005994154 | 0.076307756 | 0.003473665 | 0.029998821 |
| 0.087530357 | 0.092638336 | 0.111324758 | 0.038932638 |
| 0.001082186 | 0.152052262 | 0.008966704 | 0.010065059 |
| 0.152002845 | 0.006618573 | 0.00142721  | 0.019769629 |
| 0.081084661 | 0.006610646 | 0.090930212 | 0.061117035 |

|             |             |             |             |
|-------------|-------------|-------------|-------------|
| 0.17585825  | 0.117543922 | 0.02972504  | 0.091068264 |
| 0.063637429 | 0.065678589 | 0.007172014 | 0.022290101 |
| 0.006208827 | 0.10684311  | 0.014893496 | 0.042948465 |
| 0.075022929 | 0.013561318 | 0.08266788  | 0.12494778  |
| 0.007247319 | 0.000267055 | 0.000975205 | 0.003943888 |
| 0.080315657 | 0.021427837 | 0.015925735 | 0.03156519  |
| 0.040805527 | 0.022556793 | 0.006191431 | 0.058495645 |
| 0.067068697 | 0.034600054 | 0.033325885 | 0.004017159 |
| 0.045459084 | 0.049029556 | 0.022529694 | 0.010192282 |
| 0.026096905 | 0.002879959 | 0.002869514 | 0.026558964 |
| 0.000956677 | 0.009817789 | 0.017645878 | 0.025244455 |
| 0.00104988  | 0.039058826 | 0.028078676 | 0.00029855  |
| 0.005522974 | 0.028910783 | 0.105023054 | 0.000235498 |
| 0.09444126  | 0.064593355 | 0.018692427 | 0.022836992 |
| 0.082776689 | 0.02620021  | 0.031057254 | 0.025619677 |
| 0.003085004 | 0.030240442 | 0.021601731 | 0.04097233  |
| 0.037832161 | 0.001692383 | 0.000873531 | 0.026221519 |
| 0.02415407  | 0.000453599 | 0.082970687 | 0.007382281 |
| 0.00208234  | 0.013867177 | 0.005137931 | 0.039424082 |
| 0.048803151 | 0.017579548 | 0.099311545 | 0.037965137 |
| 0.06754797  | 0.113344168 | 0.022951427 | 0.031684833 |
| 0.000237042 | 0.012023774 | 0.014236555 | 0.046270043 |
| 0.143431186 | 0.016309047 | 0.045379779 | 0.000636567 |
| 1.71E-05    | 0.06784811  | 0.130825985 | 0.131372164 |
| 0.014512957 | 0.002438405 | 0.018762342 | 0.025227134 |
| 0.161764969 | 0.03919782  | 0.040461647 | 0.033695019 |
| 0.031255307 | 0.006056294 | 0.007962621 | 0.014492262 |
| 0.067886592 | 0.088248924 | 0.063870657 | 0.041625397 |
| 0.054365344 | 0.008356309 | 0.012320659 | 0.021307826 |
| 0.098635913 | 0.005198732 | 0.094619394 | 0.124558997 |
| 0.027379766 | 0.099015262 | 0.088243635 | 0.000829954 |
| 0.057210903 | 0.163074371 | 0.0605309   | 0.019669096 |
| 0.017858314 | 0.017871008 | 0.016390598 | 0.019494091 |
| 0.01608337  | 0.011092705 | 0.02441023  | 0.016875567 |
| 0.065353243 | 0.040420737 | 0.009566775 | 0.047464369 |
| 0.002705984 | 0.049671459 | 0.016512078 | 0.183069996 |
| 0.012893454 | 0.034292642 | 0.139282069 | 0.011327885 |
| 0.073052909 | 0.001644123 | 0.006298042 | 0.032300375 |
| 0.03363791  | 0.123795649 | 0.003859388 | 0.002683066 |
| 0.032707526 | 0.056500808 | 0.002091563 | 0.027809267 |
| 0.064531301 | 0.04455956  | 0.046671862 | 0.03134412  |
| 0.109598589 | 6.26E-05    | 0.00452801  | 0.000615284 |
| 0.000508791 | 0.022742621 | 0.002404547 | 0.036530933 |
| 0.1038064   | 0.129255703 | 0.054968432 | 0.030602445 |
| 0.018482397 | 0.026243604 | 0.031621181 | 0.0118638   |
| 0.031532914 | 0.001715768 | 0.02248626  | 0.023791652 |
| 0.001113339 | 0.042080907 | 0.019094957 | 0.020756262 |
| 0.016023866 | 0.061126403 | 0.157936844 | 0.004353185 |
| 0.115420345 | 0.043999075 | 0.093161602 | 0.025261554 |
| 0.012733669 | 0.059905977 | 0.011078187 | 0.02095973  |
| 0.073803512 | 0.077888856 | 0.002314466 | 0.087981983 |
| 0.010957593 | 0.152703245 | 0.069394856 | 0.033199808 |
| 0.030647177 | 0.067443763 | 0.030327689 | 0.023235779 |
| 0.044804573 | 0.025828332 | 0.000290165 | 0.001651877 |

|             |             |             |             |
|-------------|-------------|-------------|-------------|
| 0.016651455 | 0.054726474 | 0.000449072 | 0.059342448 |
| 0.020504933 | 0.024568558 | 0.097954565 | 0.094049448 |
| 0.039342654 | 0.038925067 | 0.152208898 | 0.031578354 |
| 0.067121298 | 0.005577012 | 0.012992166 | 0.049882848 |
| 0.000110401 | 0.010066249 | 0.120505897 | 0.00543516  |
| 0.014059461 | 0.041602215 | 0.005180795 | 0.008020959 |
| 0.071217795 | 0.021421553 | 0.025992342 | 0.034910199 |
| 0.022892963 | 0.006575364 | 0.067201751 | 0.048360508 |
| 0.000319408 | 0.049627121 | 0.113858415 | 0.110085535 |
| 0.004541537 | 0.008248526 | 0.187501938 | 0.121015438 |
| 0.037560669 | 0.024386736 | 0.043631168 | 1           |
| 0.090333331 | 0.011411397 | 0.025992278 | 0.01801325  |
| 0.031775484 | 0.042241669 | 0.061111757 | 0.052592146 |
| 0.133230117 | 0.044450346 | 0.01905633  | 0.047539381 |
| 0.024818205 | 0.058132585 | 0.023397176 | 0.006592273 |
| 0.116830935 | 0.074407176 | 0.13017455  | 0.137212884 |
| 0.007915143 | 0.130898405 | 0.122752066 | 0.082243278 |
| 0.032293532 | 0.003275386 | 0.104237201 | 0.125864897 |
| 0.046022068 | 0.002658065 | 0.126705792 | 0.008516331 |
| 0.025121547 | 0.001011244 | 0.014276103 | 0.064522073 |
| 0.135662662 | 0.068705998 | 0.015788743 | 0.014787733 |
| 0.013172963 | 0.001345148 | 0.05263438  | 0.011162751 |
| 0.026216016 | 0.010136181 | 0.026627808 | 0.049095793 |
| 0.111227737 | 0.018759973 | 0.002458115 | 0.023661245 |
| 0.083641134 | 0.01279786  | 0.038701145 | 0.151437252 |
| 0.057645594 | 0.037068948 | 0.024060988 | 0.165685068 |
| 0.004408368 | 0.03520646  | 0.054255076 | 0.01352694  |
| 0.011506921 | 0.061900998 | 0.000783748 | 0.011076889 |
| 0.021252214 | 0.002720986 | 0.022654524 | 0.053538724 |
| 0.032387865 | 0.029921344 | 0.058899279 | 0.009511333 |
| 0.000113323 | 0.010005752 | 0.043036408 | 0.014517684 |
| 0.017767886 | 0.043143089 | 0.001528012 | 0.146833596 |
| 0.116088701 | 0.080202306 | 0.065095414 | 0.001570412 |
| 0.000713512 | 0.010422614 | 0.135768895 | 0.039730214 |
| 0.064232106 | 0.029707118 | 0.003161173 | 0.076508248 |
| 0.000749665 | 0.138847239 | 0.08158554  | 0.000748887 |
| 0.002275003 | 0.023987942 | 0.023014407 | 0.148847455 |
| 0.006567508 | 0.025149113 | 0.028061095 | 0.018951303 |
| 0.020118221 | 0.132739838 | 0.089407099 | 0.109791639 |
| 0.085462678 | 0.05255253  | 0.068754682 | 0.026136731 |
| 0.018801221 | 0.061702985 | 0.070259114 | 0.142916317 |
| 0.111179342 | 0.043743759 | 0.014856714 | 0.012248536 |
| 0.03872555  | 0.144049091 | 0.088282905 | 0.082946262 |
| 0.09587713  | 0.014845497 | 0.120410776 | 0.096236392 |
| 0.096114158 | 0.006312464 | 0.090854496 | 0.017549981 |
| 0.049226604 | 0.055445017 | 0.014210802 | 0.020228457 |
| 0.000290596 | 0.001099895 | 0.044962765 | 0.013832246 |
| 0.080580937 | 0.020387666 | 0.00320207  | 0.025975984 |
| 0.007178291 | 0.078275226 | 0.119114428 | 0.04019961  |
| 0.018989477 | 0.004579751 | 0.000228949 | 0.140850545 |
| 0.11914497  | 0.088276189 | 0.03622093  | 0.09408888  |
| 0.046126652 | 0.012501029 | 0.02074989  | 0.029342558 |
| 0.001672483 | 0.063205847 | 0.000622343 | 0.109683005 |
| 3.38E-06    | 0.055800389 | 0.145046728 | 0.009423914 |

|             |             |             |             |
|-------------|-------------|-------------|-------------|
| 0.001399109 | 0.077844922 | 0.041778351 | 0.004980699 |
| 0.016027908 | 0.00778487  | 0.01047859  | 0.025837362 |
| 0.039406367 | 0.068454706 | 0.02608327  | 0.052890109 |
| 0.004281753 | 0.033066909 | 0.002399715 | 0.05365066  |
| 0.060660514 | 0.019841813 | 0.132963904 | 0.019865154 |
| 0.01905384  | 0.08866041  | 0.053543147 | 0.018088229 |
| 0.00857584  | 0.041940996 | 0.002313002 | 0.002014602 |
| 0.027166824 | 0.003045275 | 0.000503632 | 0.001624454 |
| 0.08850681  | 0.001572601 | 0.007787644 | 0.020716951 |
| 0.019229202 | 0.057502742 | 0.000222253 | 0.01844307  |
| 0.017952143 | 0.027804521 | 0.027347082 | 0.098067489 |
| 0.044568292 | 0.165633378 | 0.010673035 | 0.000419647 |
| 0.009256358 | 0.003834885 | 0.000771391 | 0.111945571 |
| 0.058672366 | 0.002979523 | 0.009740424 | 0.039548948 |
| 0.025398519 | 0.000469327 | 0.003999383 | 0.013905181 |
| 0.059592532 | 0.031378616 | 0.079999088 | 0.037869745 |
| 0.005853977 | 0.059507979 | 0.004398411 | 0.002862097 |
| 0.045201175 | 0.013547501 | 0.057245958 | 0.014493931 |
| 0.199432993 | 0.023951515 | 0.014583184 | 0.069439574 |
| 0.024881793 | 0.007333313 | 0.09649427  | 0.000999719 |
| 0.104804241 | 0.028425773 | 0.005882644 | 0.0024858   |
| 0.095142754 | 0.01961157  | 0.098050237 | 0.03624796  |
| 0.001275187 | 0.007280561 | 0.087764915 | 0.008706657 |
| 0.033620949 | 0.005610435 | 0.066600779 | 0.002006254 |
| 0.01936569  | 0.01460064  | 0.049296506 | 0.008838113 |
| 0.003430369 | 0.115542708 | 0.001146936 | 0.027766556 |
| 0.125775558 | 0.018996178 | 0.028708908 | 0.086417685 |
| 0.005910295 | 0.025738525 | 0.002756354 | 0.022492792 |
| 0.096794846 | 0.114378616 | 0.019893351 | 0.021356887 |
| 0.095361138 | 0.015157845 | 0.009192487 | 0.04730271  |
| 0.023729824 | 0.077476564 | 0.003816459 | 0.046744802 |
| 0.008421965 | 0.059476801 | 0.002254417 | 0.046058256 |
| 0.053343139 | 0.024859414 | 0.010860173 | 0.119546067 |
| 0.061825217 | 0.026799582 | 0.020235077 | 0.077064403 |
| 0.079497637 | 0.094477213 | 0.055379071 | 0.001027828 |
| 0.024766672 | 0.03611291  | 0.078024074 | 0.012470279 |
| 0.137613582 | 0.019156048 | 0.013092836 | 0.02752035  |
| 0.031524138 | 0.005832623 | 0.009338631 | 0.044740018 |
| 0.000693272 | 0.094991126 | 0.036518709 | 0.028881429 |
| 0.03338581  | 0.000344972 | 0.000754546 | 0.026096865 |
| 0.001429635 | 0.000186512 | 0.001630559 | 0.008358608 |
| 0.005697655 | 0.001182281 | 0.001647379 | 0.004347512 |
| 0.034285279 | 0.023164022 |             |             |
| NANS        | 0.244066169 | 0.299768515 | 0.184747347 |
| 0.249439889 | 0.206549768 | 0.23808784  | 0.24132487  |
| 0.302730671 | 0.251143527 | 0.129657579 | 0.264843285 |
| 0.15882093  | 0.04143568  | 0.344805572 | 0.229906248 |
| 0.21390352  | 0.207704134 | 0.290012631 | 0.087811847 |
| 0.212921136 | 0.210639402 | 0.175537799 | 0.252848321 |
| 0.203757439 | 0.305576094 | 0.255903251 | 0.171761097 |
| 0.340649464 | 0.096987996 | 0.229327079 | 0.086256761 |
| 0.387966234 | 0.202869877 | 0.161323608 | 0.13307816  |
| 0.238509556 | 0.011647429 | 0.409709204 | 0.251886763 |
| 0.086141559 | 0.367523752 | 0.167520635 | 0.279873228 |



|             |             |             |             |
|-------------|-------------|-------------|-------------|
| 0.19155935  | 0.19008034  | 0.078677415 | 0.204573149 |
| 0.236394278 | 0.242796379 | 0.199021973 | 0.237174619 |
| 0.200590309 | 0.296298782 | 0.208052469 | 0.020395748 |
| 0.129562018 | 0.022555494 | 0.080160151 | 0.382211433 |
| 0.316635701 | 0.290324227 | 0.105248081 | 0.24383157  |
| 0.206828696 | 0.22810561  | 0.287413252 | 0.179977827 |
| 0.373691489 | 0.08710538  | 0.210568946 | 0.189394278 |
| 0.247140596 | 0.162518314 | 0.302081314 | 0.200956165 |
| 0.196963205 | 0.298615748 | 0.235137568 | 0.149079622 |
| 0.300307525 | 0.4336788   | 0.292766411 | 0.389750079 |
| 0.066701659 | 0.178955196 | 0.187417325 | 0.280539675 |
| 0.245183017 | 0.221172982 | 0.269099693 | 0.411695615 |
| 0.183207117 | 0.191442841 | 0.242687346 | 0.247935164 |
| 0.304183653 | 0.122323837 | 0.188258546 | 0.099979244 |
| 0.208576194 | 0.203636704 | 0.389965442 | 0.311703161 |
| 0.202226724 | 0.214040521 | 0.402967323 | 0.166756078 |
| 0.24024716  | 0.234642822 | 0.187755025 | 0.268332643 |
| 0.245918084 | 0.346361265 | 0.270191778 | 0.271615181 |
| 0.201531055 | 0.364904846 | 0.267643814 | 0.315693912 |
| 0.051172519 | 0.384207088 | 0.302647384 | 0.221702106 |
| 0.221438284 | 0.25675716  | 0.161032127 | 0.312141454 |
| 0.306814351 | 0.29509501  | 0.323908572 | 0.267835742 |
| 0.298611343 | 0.377626493 | 0.376715257 | 0.2935052   |
| 0.215640599 | 0.108057756 | 0.201629581 | 0.266426016 |
| 0.26105288  | 0.269363926 | 0.143116614 | 0.421797779 |
| 0.355837208 | 0.27024903  | 0.281284532 | 0.444342324 |
| 0.26218592  | 0.408835808 | 0.299033299 | 0.309331286 |
| 0.416895534 | 0.409301537 | 0.382657121 | 0.208105643 |
| 0.397445745 | 0.279081131 | 0.05903745  | 0.291086411 |
| 0.392376056 | 0.015340115 | 0.29800201  | 0.32253372  |
| 0.368400195 | 0.27289294  | 0.376604384 | 0.347874664 |
| 0.37080028  | 0.243098504 | 0.011184074 | 0.258334214 |
| 0.397051385 | 0.33082568  | 0.242061724 | 0.194189827 |
| 0.212901303 | 0.258457666 | 0.242973667 | 0.17482011  |
| 0.429504447 | 0.309537834 | 0.317920233 | 0.266719344 |
| 0.215091662 | 0.363260481 | 0.160019819 | 0.396180096 |
| 0.223111676 | 0.274721637 | 0.191500271 | 0.277291608 |
| 0.174402519 | 0.301401912 | 0.27040608  | 0.211022669 |
| 0.30981821  | 0.249525671 | 0.133669184 | 0.216295858 |
| 0.180370562 | 0.217679356 | 0.287877061 | 0.287717076 |
| 0.222157352 | 0.282091869 | 0.292325011 | 0.273733302 |
| 0.266483398 | 0.351005134 | 0.222980347 | 0.338500065 |
| 0.202658812 | 0.278913214 | 0.251889639 | 0.384980009 |
| 0.385491683 | 0.19644536  | 0.297533574 | 0.071702771 |
| 0.200236026 | 0.115105336 | 0.075590801 | 0.185537325 |
| 0.309092568 | 0.259201338 | 0.235873675 | 0.232899903 |
| 0.292965034 | 0.239808996 | 0.20090031  | 0.417723522 |
| 0.251208148 | 0.230844553 | 0.317607942 | 0.215370553 |
| 0.053869227 | 0.289456833 | 0.282636267 | 0.157687131 |
| 0.26810191  | 0.090281144 | 0.116225659 | 0.314624644 |
| 0.140528673 | 0.152759814 | 0.323412629 | 0.227524724 |
| 0.208318512 | 0.309598313 | 0.381007676 | 0.023888439 |
| 0.18230282  | 0.12330347  | 0.286085245 | 0.162136999 |
| 0.305072938 | 0.291048974 | 0.185258819 | 0.208423268 |

|             |             |             |             |
|-------------|-------------|-------------|-------------|
| 0.247047182 | 0.389430017 | 0.307815903 | 0.359516594 |
| 0.177769747 | 0.388308806 | 0.289896066 | 0.333600604 |
| 0.279114767 | 0.162183861 | 0.053037735 | 0.283460626 |
| 0.301683877 | 0.170121748 | 0.20297918  | 0.236505615 |
| 0.175660719 | 0.220296838 | 0.16045925  | 0.367746195 |
| 0.43145366  | 0.357431754 | 0.283472994 | 0.25116676  |
| 0.316618044 | 0.313986647 | 0.28589283  | 0.397859489 |
| 0.141946065 | 0.200683953 | 0.19685273  | 0.289714641 |
| 0.303093321 | 0.163785272 | 0.328164358 | 0.068284442 |
| 0.00351938  | 0.243458805 | 0.23362217  | 0.270125253 |
| 0.112384161 | 0.190984757 | 0.237791861 | 0.377032543 |
| 0.298187185 | 0.347104158 | 0.275371078 | 0.235073583 |
| 0.346186197 | 0.195300054 | 0.181834761 | 0.220209647 |
| 0.298988085 | 0.096929414 | 0.241472137 | 0.439851238 |
| 0.162484667 | 0.134492616 | 0.267895466 | 0.013376312 |
| 0.214001366 | 0.244609729 | 0.225661367 | 0.332744503 |
| 0.328888897 | 0.319765461 | 0.295670642 | 0.160811998 |
| 0.281005924 | 0.271952132 | 0.023810611 | 0.334127441 |
| 0.354802446 | 0.339735081 | 0.353685901 | 0.364260928 |
| 0.304314879 | 0.234145459 | 0.257524542 | 0.256908734 |
| 0.293736535 | 0.237099233 | 0.128076667 | 0.264062469 |
| 0.016981876 | 0.277351965 | 0.221061193 | 0.297448981 |
| 0.230994291 | 0.280581739 | 0.210222337 | 0.200808559 |
| 0.131003158 | 0.080057499 | 0.252684669 | 0.268290346 |
| 0.241757353 | 0.12999417  | 0.14822827  | 0.164607619 |
| 0.363424471 | 0.329995011 | 0.154431339 | 0.394024667 |
| 0.281781527 | 0.215827399 | 0.242590401 | 0.251588877 |
| 0.262346184 | 0.069316802 | 0.230189551 | 0.019791525 |
| 0.139191212 | 0.368027974 | 0.194854399 | 0.228695883 |
| 0.303103609 | 0.078004757 | 0.334413206 | 0.402101785 |
| 0.352384126 | 0.359390762 | 0.37270879  | 0.144535507 |
| 0.378887864 | 0.026934609 | 0.370569975 | 0.295038188 |
| 0.167816752 | 0.00929043  | 0.039922185 | 0.3151118   |
| 0.219683414 | 0.168510953 | 0.304987686 | 0.211994126 |
| 0.271955243 | 0.255023126 | 0.241751864 | 0.146230638 |
| 0.235911343 | 0.229005931 | 0.137374583 | 0.370959389 |
| 0.285887083 | 0.288064076 | 0.216293125 | 0.231796826 |
| 0.220217195 | 0.234207137 | 0.225419497 | 0.02700281  |
| 0.24323748  | 0.228209607 | 0.413792347 | 0.368869916 |
| 0.405169391 | 0.235189185 | 0.135290998 | 0.201633515 |
| 0.292315831 | 0.195867772 | 0.159031804 | 0.223234435 |
| 0.353710083 | 0.23597806  | 0.310613405 | 0.324746971 |
| 0.385330172 | 0.381347579 | 0.202486563 | 0.2657224   |
| 0.082818731 | 0.006258411 | 0.243561649 | 0.295543804 |
| 0.043834552 | 0.198850729 | 0.309374373 | 0.209039795 |
| 0.223543906 | 0.174080868 | 0.124237037 | 0.131924939 |
| 0.281486018 | 0.247925566 | 0.180670415 | 0.268942153 |
| 0.206345958 | 0.141695411 | 0.274592164 | 0.289392608 |
| 0.174316481 | 0.309592071 | 0.308101747 | 0.165552017 |
| 0.200589774 | 0.206334861 | 0.241719278 | 0.297427686 |
| 0.311622095 | 0.332348195 | 0.200052586 | 0.090333331 |
| 1           | 0.235364592 | 0.345080247 | 0.351899209 |
| 0.41638776  | 0.406526659 | 0.403940777 | 0.233336838 |
| 0.249292051 | 0.251110391 | 0.18113347  | 0.186598666 |

|             |             |             |             |
|-------------|-------------|-------------|-------------|
| 0.369617241 | 0.196822053 | 0.366301623 | 0.139395067 |
| 0.278845137 | 0.291356082 | 0.19706348  | 0.26660025  |
| 0.183095948 | 0.312168196 | 0.268833803 | 0.25324142  |
| 0.247254158 | 0.134325099 | 0.230119134 | 0.30941164  |
| 0.294415796 | 0.085632013 | 0.307926304 | 0.253086498 |
| 0.274143928 | 0.10270891  | 0.226145256 | 0.40057207  |
| 0.276964464 | 0.256031373 | 0.255481099 | 0.243780495 |
| 0.265869104 | 0.173506833 | 0.112369378 | 0.310326974 |
| 0.35229491  | 0.222441092 | 0.382200196 | 0.323291364 |
| 0.244953523 | 0.212733283 | 0.146141735 | 0.229856126 |
| 0.298488326 | 0.245059399 | 0.27758115  | 0.241095652 |
| 0.324948898 | 0.42035373  | 0.310128943 | 0.29279047  |
| 0.208566928 | 0.231193936 | 0.181483411 | 0.293930982 |
| 0.118682075 | 0.260872657 | 0.174248975 | 0.255273012 |
| 0.009540658 | 0.06318772  | 0.339803915 | 0.291029294 |
| 0.405241987 | 0.336931211 | 0.383621991 | 0.249387489 |
| 0.001517927 | 0.20308621  | 0.26092298  | 0.229897113 |
| 0.314501181 | 0.288408009 | 0.176099335 | 0.24979046  |
| 0.311398347 | 0.206275957 | 0.261205553 | 0.210866674 |
| 0.075181993 | 0.250232078 | 0.305211658 | 0.266959784 |
| 0.258251937 | 0.196180334 | 0.122559719 | 0.301821733 |
| 0.082608625 | 0.317207783 | 0.308136073 | 0.14072384  |
| 0.10248139  | 0.318415433 | 0.273230742 | 0.172908287 |
| 0.176851899 | 0.289398045 | 0.327085738 | 0.019704715 |
| 0.237141496 | 0.101714069 | 0.261837796 | 0.266731781 |
| 0.26713528  | 0.26460227  | 0.25674939  | 0.222778748 |
| 0.260404245 | 0.297463573 | 0.289282777 | 0.305035072 |
| 0.263675372 | 0.297858119 | 0.229308408 | 0.244125876 |
| 0.227048254 | 0.289057973 | 0.233983692 | 0.242843137 |
| 0.222488406 | 0.313154012 | 0.330530451 | 0.200553838 |
| 0.296597479 | 0.237265148 | 0.358371243 | 0.356017389 |
| 0.347840159 | 0.214594959 | 0.244648653 | 0.30601784  |
| 0.093218732 | 0.209630824 | 0.228704557 | 0.242709622 |
| 0.318729285 | 0.174285858 | 0.214101666 | 0.263924076 |
| 0.224863076 | 0.398523581 | 0.320378362 | 0.35538755  |
| 0.248363629 | 0.19804631  | 0.149428246 | 0.238608698 |
| 0.30701483  | 0.266350161 | 0.18924436  | 0.036334862 |
| 0.286717651 | 0.269929446 | 0.301458852 | 0.381639754 |
| 0.120903506 | 0.351653098 | 0.167946345 | 0.269841015 |
| 0.126493658 | 0.276882964 | 0.296880557 | 0.237328954 |
| 0.083711835 | 0.297925517 | 0.233010443 | 0.227004877 |
| 0.235307905 | 0.213382039 | 0.178708389 | 0.292245109 |
| 0.271728102 | 0.27829166  | 0.392089423 | 0.253501583 |
| 0.199012022 | 0.161736689 | 0.200407311 | 0.251264771 |
| 0.260632727 | 0.351991476 | 0.228445531 | 0.356192991 |
| 0.213554702 | 0.252408571 | 0.431259852 | 0.263293305 |
| 0.263060379 | 0.222019717 | 0.077334972 | 0.206583873 |
| 0.271243097 | 0.146095291 | 0.006992076 | 0.058852985 |
| 0.287384488 | 0.175586431 | 0.242328598 | 0.253829785 |
| 0.174115644 | 0.281722358 | 0.063962316 | 0.287932437 |
| 0.364454654 | 0.410305788 | 0.267753169 | 0.303631232 |
| 0.292231093 | 0.283150357 | 0.244402036 | 0.018481998 |
| 0.213836758 | 0.182791958 | 0.172490187 | 0.236868483 |
| 0.155198521 | 0.091322845 | 0.225570275 | 0.190958266 |

|             |             |             |             |
|-------------|-------------|-------------|-------------|
| 0.325870131 | 0.081214761 | 0.207198383 | 0.236399786 |
| 0.275085518 | 0.419221056 | 0.249135108 | 0.260476646 |
| 0.155710996 | 0.292364702 | 0.173760264 | 0.190148173 |
| 0.214865181 | 0.164164835 | 0.274157437 | 0.134431899 |
| 0.20371577  | 0.223055665 | 0.017239208 | 0.416831131 |
| 0.388089419 | 0.164675754 | 0.297735887 | 0.125054672 |
| 0.291909195 | 0.301522907 | 0.201678144 | 0.184618676 |
| 0.098844984 | 0.204509149 | 0.306574448 | 0.316641054 |
| 0.10458494  | 0.216926844 | 0.217152105 | 0.176807924 |
| 0.419138565 | 0.200137492 | 0.300191469 | 0.145351617 |
| 0.355701305 | 0.272034448 | 0.232670495 | 0.190125326 |
| 0.20117346  | 0.221945745 | 0.184611184 | 0.394135864 |
| 0.279696643 | 0.136777604 | 0.282393992 | 0.287580679 |
| 0.15288447  | 0.322541156 | 0.187189191 | 0.385960817 |
| 0.202997664 | 0.320211868 | 0.255774605 | 0.342355255 |
| 0.300351332 | 0.128569773 | 0.139027198 | 0.218492436 |
| 0.355270235 | 0.237465646 | 0.157042266 | 0.297011416 |
| 0.115189568 | 0.285837942 | 0.194772382 | 0.203251921 |
| 0.170549483 | 0.279730338 | 0.233623223 | 0.291271394 |
| 0.292703255 | 0.229533479 | 0.188050637 | 0.379009538 |
| 0.242321187 | 0.126226758 | 0.4031018   | 0.009664688 |
| 0.263142396 | 0.24595381  | 0.302878007 | 0.213409962 |
| 0.287144163 | 0.26884086  | 0.248693525 | 0.027188543 |
| 0.275825791 | 0.048459509 | 0.208077015 | 0.208950767 |
| 0.149224029 | 0.232856798 | 0.369271401 | 0.361379621 |
| 0.286888767 | 0.164723821 | 0.142173296 | 0.353569303 |
| 0.079355285 | 0.121187578 | 0.1530855   | 0.232489602 |
| 0.109172281 | 0.169506424 | 0.184515088 | 0.163955173 |
| 0.271625031 | 0.287876516 |             |             |
| NAT5        | 0.043447244 | 0.304345125 | 0.022671189 |
| 0.056925729 | 0.233394167 | 0.113598228 | 0.061938938 |
| 0.105399579 | 0.275511936 | 0.101866825 | 0.186965546 |
| 0.019184236 | 0.101673938 | 0.379516898 | 0.06599847  |
| 0.269780983 | 0.046322628 | 0.094224379 | 0.084373212 |
| 0.107930829 | 0.230775046 | 0.139202982 | 0.155992006 |
| 0.219383859 | 0.159281617 | 0.187211845 | 0.22833306  |
| 0.366471609 | 0.087986912 | 0.252930259 | 0.047457196 |
| 0.356831345 | 0.256685861 | 0.16163579  | 0.010822015 |
| 0.201787171 | 0.049123003 | 0.361254459 | 0.152152344 |
| 0.082684814 | 0.299653519 | 0.100817274 | 0.118173363 |
| 0.147888041 | 0.02257055  | 0.055073105 | 0.311501009 |
| 0.199225621 | 0.146852746 | 0.040678    | 0.258794292 |
| 0.168659632 | 0.222805765 | 0.229828687 | 0.006898567 |
| 0.14205579  | 0.063349645 | 0.132360943 | 0.365213598 |
| 0.17027183  | 0.101839204 | 0.14117956  | 0.146887289 |
| 0.278155528 | 0.326560159 | 0.24137808  | 0.141139187 |
| 0.379419321 | 0.162301741 | 0.303241975 | 0.069613048 |
| 0.159735272 | 0.029309177 | 0.158030798 | 0.074001426 |
| 0.157358489 | 0.156927699 | 0.205440615 | 0.160778516 |
| 0.29355436  | 0.420913486 | 0.202016332 | 0.364184983 |
| 0.16131102  | 0.263137046 | 0.16041843  | 0.297128911 |
| 0.330776899 | 0.089703988 | 0.288726789 | 0.415307747 |
| 0.047855421 | 0.19027391  | 0.314713233 | 0.112860949 |
| 0.295581937 | 0.165918718 | 0.150107072 | 0.120448323 |

|             |             |             |             |
|-------------|-------------|-------------|-------------|
| 0.301884879 | 0.256389133 | 0.387895389 | 0.234758677 |
| 0.192212186 | 0.054101493 | 0.344971411 | 0.248369972 |
| 0.13254144  | 0.049642423 | 0.180135684 | 0.369721213 |
| 0.248657296 | 0.366495555 | 0.331486438 | 0.347067371 |
| 0.24492441  | 0.37172971  | 0.256313859 | 0.345046811 |
| 0.056730857 | 0.394748099 | 0.104912368 | 0.048915278 |
| 0.042564566 | 0.089839178 | 0.199008514 | 0.295548581 |
| 0.350686964 | 0.254340758 | 0.107331058 | 0.175270399 |
| 0.406425769 | 0.332549682 | 0.397618127 | 0.353984846 |
| 0.03423596  | 0.169499535 | 0.22216415  | 0.118810592 |
| 0.317359937 | 0.121043253 | 0.168346442 | 0.381288881 |
| 0.303051058 | 0.362091181 | 0.077927611 | 0.392304926 |
| 0.15220841  | 0.4112046   | 0.3034659   | 0.113326309 |
| 0.389605934 | 0.353513212 | 0.41677406  | 0.301139895 |
| 0.350927883 | 0.131921828 | 0.091731704 | 0.339704631 |
| 0.409884392 | 0.012109547 | 0.376887194 | 0.401439836 |
| 0.361426747 | 0.360329441 | 0.444904448 | 0.395299789 |
| 0.367764162 | 0.07173895  | 0.038786489 | 0.287587985 |
| 0.376238155 | 0.302134244 | 0.151428046 | 0.212951996 |
| 0.28568897  | 0.148319429 | 0.333089644 | 0.124337749 |
| 0.443471399 | 0.341903548 | 0.375838847 | 0.325283822 |
| 0.181689774 | 0.279743277 | 0.227124775 | 0.32388063  |
| 0.042004562 | 0.056800056 | 0.039565637 | 0.302110555 |
| 0.087978373 | 0.161628414 | 0.13767763  | 0.280575068 |
| 0.184461039 | 0.144183807 | 0.144292217 | 0.319000483 |
| 0.053640883 | 0.203860745 | 0.097261507 | 0.117796402 |
| 0.04483032  | 0.147103878 | 0.120384952 | 0.082972205 |
| 0.202815812 | 0.200669055 | 0.297149592 | 0.390186519 |
| 0.184360228 | 0.12897371  | 0.282950901 | 0.401319642 |
| 0.401868011 | 0.213967774 | 0.236589101 | 0.006939052 |
| 0.173584597 | 0.144214915 | 0.146313365 | 0.223620443 |
| 0.163635581 | 0.181019966 | 0.284114368 | 0.319956556 |
| 0.128906542 | 0.093732763 | 0.185287991 | 0.350742277 |
| 0.12374196  | 0.140879618 | 0.38189696  | 0.220731826 |
| 0.002519496 | 0.171979809 | 0.333666209 | 0.166386891 |
| 0.27078676  | 0.101261115 | 0.107671904 | 0.373417828 |
| 0.190377317 | 0.194509944 | 0.382272779 | 0.325578458 |
| 0.139714843 | 0.192648122 | 0.43613818  | 0.089440872 |
| 0.237035119 | 0.047683711 | 0.264580114 | 0.122919631 |
| 0.17930149  | 0.315256709 | 0.238650262 | 0.156322085 |
| 0.080302598 | 0.402563406 | 0.308015215 | 0.393100151 |
| 0.16629089  | 0.43340443  | 0.363053075 | 0.353122809 |
| 0.243686364 | 0.199785746 | 0.106135025 | 0.324266755 |
| 0.358383183 | 0.161484725 | 0.059610436 | 0.345365921 |
| 0.165748819 | 0.328878596 | 0.132894084 | 0.401284554 |
| 0.396367886 | 0.322162365 | 0.125567474 | 0.358374867 |
| 0.298556832 | 0.128528124 | 0.337672007 | 0.449624557 |
| 0.128316172 | 0.235672247 | 0.168923551 | 0.373960266 |
| 0.133118535 | 0.183907983 | 0.301577642 | 0.13103316  |
| 0.00373336  | 0.067305578 | 0.050183878 | 0.126784802 |
| 0.133127302 | 0.239423962 | 0.297985811 | 0.409513401 |
| 0.099271947 | 0.328319818 | 0.244445542 | 0.152445107 |
| 0.336646056 | 0.213360973 | 0.215911186 | 0.278139432 |
| 0.235019397 | 0.011422252 | 0.067526558 | 0.41474551  |

|             |             |             |             |
|-------------|-------------|-------------|-------------|
| 0.035973277 | 0.144375601 | 0.185893128 | 0.00197613  |
| 0.038744555 | 0.278009168 | 0.092452396 | 0.18130636  |
| 0.417808094 | 0.167854698 | 0.154188101 | 0.124077199 |
| 0.283056736 | 0.074964756 | 0.002474877 | 0.38851811  |
| 0.395589462 | 0.386644236 | 0.392754308 | 0.357130912 |
| 0.390077155 | 0.309732775 | 0.35330968  | 0.138332253 |
| 0.084028569 | 0.052446222 | 0.157107289 | 0.186837261 |
| 0.005499478 | 0.306204866 | 0.224025922 | 0.132371916 |
| 0.345022258 | 0.289154716 | 0.03246845  | 0.275944969 |
| 0.010596043 | 0.107609781 | 0.168867569 | 0.173298389 |
| 0.351191654 | 0.011808707 | 0.064651341 | 0.173417257 |
| 0.295871705 | 0.275486092 | 0.149506521 | 0.397460319 |
| 0.195511552 | 0.091435134 | 0.165979284 | 0.313096385 |
| 0.064181163 | 0.093360018 | 0.152336669 | 0.007702454 |
| 0.079372597 | 0.376086495 | 0.178104749 | 0.036755305 |
| 0.1882871   | 0.004072836 | 0.266760761 | 0.414404434 |
| 0.315999218 | 0.42145185  | 0.375711975 | 0.139865447 |
| 0.372734047 | 0.082086619 | 0.403435793 | 0.28894471  |
| 0.130309403 | 0.000458899 | 0.008962751 | 0.377292529 |
| 0.228860909 | 0.045943763 | 0.133874677 | 0.093129497 |
| 0.078214832 | 0.068473658 | 0.061195857 | 0.137606921 |
| 0.218904171 | 0.194467163 | 0.164932657 | 0.354074837 |
| 0.154778205 | 0.203459882 | 0.140034099 | 0.085634522 |
| 0.23797342  | 0.041103238 | 0.091545444 | 0.00479854  |
| 0.323871572 | 0.098301855 | 0.342465528 | 0.378893789 |
| 0.404422178 | 0.301269613 | 0.110916038 | 0.12984247  |
| 0.37959496  | 0.062556711 | 0.133621887 | 0.070514147 |
| 0.339106851 | 0.282556582 | 0.275877086 | 0.238769663 |
| 0.425735316 | 0.36555638  | 0.035716814 | 0.339318337 |
| 0.005384524 | 0.004029602 | 0.130015901 | 0.266817365 |
| 0.100559067 | 0.208796618 | 0.226058085 | 0.16135808  |
| 0.161793815 | 0.021153003 | 0.1635696   | 0.172718837 |
| 0.236984046 | 0.226112317 | 0.210028772 | 0.246500239 |
| 0.169160132 | 0.154953537 | 0.127839006 | 0.143931934 |
| 0.180090259 | 0.246606564 | 0.161252283 | 0.026081538 |
| 0.177006661 | 0.21622112  | 0.043121756 | 0.135903663 |
| 0.337411592 | 0.382958012 | 0.055479647 | 0.011411397 |
| 0.235364592 | 1           | 0.416131011 | 0.356801335 |
| 0.392793901 | 0.43467609  | 0.335846012 | 0.155122076 |
| 0.050066918 | 0.239246434 | 0.233417237 | 0.108860686 |
| 0.394936509 | 0.056334856 | 0.347536591 | 0.197003763 |
| 0.120171747 | 0.107931618 | 0.033428813 | 0.084576729 |
| 0.240211883 | 0.169886453 | 0.148294025 | 0.089881576 |
| 0.174700435 | 0.150339117 | 0.050329974 | 0.160790207 |
| 0.301801052 | 0.123956154 | 0.148515069 | 0.134381422 |
| 0.26172873  | 0.098361995 | 0.32587318  | 0.390451296 |
| 0.105663703 | 0.094396681 | 0.086455982 | 0.331315888 |
| 0.32891954  | 0.197012937 | 0.011519039 | 0.312909756 |
| 0.405606387 | 0.266806046 | 0.355503411 | 0.399021014 |
| 0.086316112 | 0.19876136  | 0.187497778 | 0.262017092 |
| 0.18550951  | 0.120086593 | 0.20654289  | 0.06438979  |
| 0.303949575 | 0.400146052 | 0.317577301 | 0.106076512 |
| 0.211761002 | 0.089904411 | 0.046355568 | 0.348609918 |
| 0.14441086  | 0.057023156 | 0.114395713 | 0.368073947 |

|             |             |             |             |
|-------------|-------------|-------------|-------------|
| 0.001984152 | 0.112704693 | 0.425287204 | 0.126031567 |
| 0.425228926 | 0.390243636 | 0.350084809 | 0.132077071 |
| 0.009494854 | 0.30678851  | 0.238916708 | 0.142154941 |
| 0.325057305 | 0.259880851 | 0.107842932 | 0.068685846 |
| 0.27021037  | 0.058428864 | 0.124921886 | 0.096343589 |
| 0.115270759 | 0.248908274 | 0.211235449 | 0.181598599 |
| 0.153415985 | 0.08929683  | 0.129468853 | 0.111854502 |
| 0.163564823 | 0.233306173 | 0.314802721 | 0.094323679 |
| 0.124419895 | 0.411443063 | 0.312841602 | 0.019490071 |
| 0.219238422 | 0.363302084 | 0.364227812 | 0.004039206 |
| 0.310812303 | 0.010150193 | 0.16359978  | 0.131707647 |
| 0.134956106 | 0.17945231  | 0.257370982 | 0.152505077 |
| 0.263776508 | 0.145423596 | 0.12365954  | 0.194047892 |
| 0.106962401 | 0.145530425 | 0.256060402 | 0.152423066 |
| 0.139147325 | 0.069316023 | 0.092885977 | 0.089076087 |
| 0.039898147 | 0.345070296 | 0.220482161 | 0.053474772 |
| 0.217584518 | 0.164478778 | 0.327718409 | 0.34758148  |
| 0.366806784 | 0.082086052 | 0.190684171 | 0.30075679  |
| 0.133918674 | 0.116878911 | 0.048079269 | 0.174819198 |
| 0.171842895 | 0.148490279 | 0.167528844 | 0.167048663 |
| 0.294048761 | 0.329043498 | 0.21162522  | 0.354609106 |
| 0.157320978 | 0.219451039 | 0.086211375 | 0.071591097 |
| 0.093927729 | 0.128807458 | 0.206587077 | 0.001288108 |
| 0.263267876 | 0.083132735 | 0.355673094 | 0.342791163 |
| 0.159314566 | 0.329657101 | 0.081991915 | 0.059411386 |
| 0.06787463  | 0.136776761 | 0.139233998 | 0.30371258  |
| 0.121760895 | 0.101722341 | 0.224971261 | 0.087518961 |
| 0.324100095 | 0.310696718 | 0.180503587 | 0.163490359 |
| 0.203681532 | 0.128652837 | 0.3828911   | 0.057230013 |
| 0.225596992 | 0.128043876 | 0.186315931 | 0.180446355 |
| 0.16833587  | 0.397932591 | 0.050442409 | 0.409928578 |
| 0.199105071 | 0.120088603 | 0.409954394 | 0.163532467 |
| 0.118953728 | 0.094899074 | 0.124550806 | 0.135944628 |
| 0.160365807 | 0.146279307 | 0.010609489 | 0.086580763 |
| 0.290961505 | 0.16956794  | 0.296717584 | 0.330803355 |
| 0.166269281 | 0.353602736 | 0.114335297 | 0.176865104 |
| 0.331501322 | 0.362611563 | 0.134551344 | 0.258245744 |
| 0.306801332 | 0.074034342 | 0.188788483 | 0.038792385 |
| 0.26866516  | 0.241401323 | 0.148320077 | 0.058752616 |
| 0.022612648 | 0.134641111 | 0.251047011 | 0.065889372 |
| 0.416808543 | 0.11156804  | 0.233621014 | 0.274765957 |
| 0.178215262 | 0.364937771 | 0.12772302  | 0.299241517 |
| 0.051298618 | 0.225897269 | 0.200913341 | 0.210648201 |
| 0.127796871 | 0.170010638 | 0.307481678 | 0.140006782 |
| 0.033947495 | 0.146342766 | 0.006020257 | 0.324820342 |
| 0.335497788 | 0.206139035 | 0.201837595 | 0.116595592 |
| 0.256372496 | 0.325781366 | 0.208474401 | 0.182463295 |
| 0.009895289 | 0.251403194 | 0.177169001 | 0.283463545 |
| 0.094961511 | 0.249499374 | 0.042900764 | 0.242609631 |
| 0.330070153 | 0.190938935 | 0.273303384 | 0.128226201 |
| 0.343864579 | 0.288888456 | 0.108460405 | 0.148510014 |
| 0.260846231 | 0.063901023 | 0.111501637 | 0.427343557 |
| 0.128502196 | 0.14260189  | 0.373479923 | 0.134087482 |
| 0.187030833 | 0.302543604 | 0.23058577  | 0.422951063 |

|             |             |             |             |
|-------------|-------------|-------------|-------------|
| 0.104225488 | 0.22352616  | 0.345919823 | 0.378031493 |
| 0.303739008 | 0.164546721 | 0.158252566 | 0.173262065 |
| 0.306465851 | 0.04606994  | 0.199141623 | 0.269316212 |
| 0.150393838 | 0.267417081 | 0.181307903 | 0.166867588 |
| 0.035502235 | 0.155001811 | 0.12350272  | 0.128184294 |
| 0.246748811 | 0.207196073 | 0.167583447 | 0.33815957  |
| 0.078876904 | 0.017334036 | 0.386384391 | 0.026632531 |
| 0.13655061  | 0.25077809  | 0.188326037 | 0.200029027 |
| 0.145611939 | 0.24776567  | 0.16121744  | 0.001610082 |
| 0.354586448 | 0.030992274 | 0.173732017 | 0.140486494 |
| 0.179368161 | 0.045982537 | 0.330876571 | 0.426400263 |
| 0.222944493 | 0.136777458 | 0.135133565 | 0.357535403 |
| 0.116383568 | 0.138362431 | 0.181755829 | 0.231483422 |
| 0.143201002 | 0.134747638 | 0.159844974 | 0.131787046 |
| 0.260674091 | 0.135830065 |             |             |
| NCAPD2      | 0.132943535 | 0.449101469 | 0.099406435 |
| 0.225670612 | 0.406332876 | 0.497842684 | 0.106850752 |
| 0.208328305 | 0.402645374 | 0.359079929 | 0.475924655 |
| 0.039821966 | 0.143842069 | 0.490786852 | 0.101778836 |
| 0.482099641 | 0.070247748 | 0.179322686 | 0.118858311 |
| 0.298830734 | 0.383816368 | 0.452999851 | 0.467558973 |
| 0.38207438  | 0.239997049 | 0.422047258 | 0.462512209 |
| 0.503762141 | 0.35943914  | 0.520765473 | 0.244832792 |
| 0.425708619 | 0.427573693 | 0.472520177 | 0.034389442 |
| 0.509480963 | 0.020690936 | 0.44496552  | 0.366990979 |
| 0.224015829 | 0.389220106 | 0.400200084 | 0.355151666 |
| 0.438624368 | 0.071686677 | 0.270899941 | 0.478820304 |
| 0.402354988 | 0.375998996 | 0.111362853 | 0.501204306 |
| 0.447275035 | 0.440335455 | 0.444799641 | 0.006218632 |
| 0.402227338 | 0.134265452 | 0.308610694 | 0.512310582 |
| 0.295425493 | 0.206872097 | 0.352611455 | 0.336921014 |
| 0.464734531 | 0.455027614 | 0.34512889  | 0.436427075 |
| 0.509779526 | 0.262501576 | 0.496171861 | 0.242566398 |
| 0.475509654 | 0.060085563 | 0.233277143 | 0.129837528 |
| 0.473206907 | 0.302108615 | 0.455163272 | 0.397502247 |
| 0.442476237 | 0.525793506 | 0.322825543 | 0.502679018 |
| 0.152903963 | 0.431467252 | 0.373178166 | 0.392184036 |
| 0.438529303 | 0.137239734 | 0.504862083 | 0.529817696 |
| 0.086874144 | 0.444298616 | 0.473332212 | 0.185091378 |
| 0.473943268 | 0.35854654  | 0.464475841 | 0.269329121 |
| 0.457172548 | 0.438393853 | 0.480508549 | 0.397495501 |
| 0.416987017 | 0.119716965 | 0.489773681 | 0.414835602 |
| 0.42030138  | 0.136594513 | 0.319869009 | 0.51027909  |
| 0.503110515 | 0.501573792 | 0.474166767 | 0.440170722 |
| 0.471927379 | 0.508214567 | 0.492732874 | 0.461760573 |
| 0.202158401 | 0.531061271 | 0.279650227 | 0.086768979 |
| 0.123651226 | 0.152839726 | 0.310958541 | 0.37646528  |
| 0.509214274 | 0.435909861 | 0.3002145   | 0.334113441 |
| 0.497563978 | 0.481682822 | 0.526752435 | 0.48550519  |
| 0.07662179  | 0.326951323 | 0.472752924 | 0.387523201 |
| 0.473122199 | 0.178043721 | 0.358488351 | 0.51556     |
| 0.439941382 | 0.504885836 | 0.248801493 | 0.508158449 |
| 0.2871571   | 0.525668839 | 0.480731886 | 0.263441927 |
| 0.525176484 | 0.502658025 | 0.520879408 | 0.491592191 |



|             |             |             |             |
|-------------|-------------|-------------|-------------|
| 0.485820854 | 0.449807634 | 0.100406736 | 0.444945044 |
| 0.500324397 | 0.027205966 | 0.505101937 | 0.505617844 |
| 0.503867469 | 0.517357266 | 0.527809322 | 0.515939102 |
| 0.509802152 | 0.123321236 | 0.041794118 | 0.38767211  |
| 0.514405813 | 0.462909308 | 0.216662381 | 0.49670019  |
| 0.456587971 | 0.497302925 | 0.493185679 | 0.421091561 |
| 0.524270429 | 0.495917831 | 0.500840867 | 0.473808824 |
| 0.374006355 | 0.369819871 | 0.457697732 | 0.475331506 |
| 0.085429695 | 0.190682982 | 0.090822621 | 0.385290489 |
| 0.422100177 | 0.266003995 | 0.483059832 | 0.435708808 |
| 0.287610181 | 0.434831364 | 0.425367833 | 0.473875461 |
| 0.08925875  | 0.522468767 | 0.246443054 | 0.254149296 |
| 0.082325116 | 0.194700255 | 0.296009939 | 0.251399358 |
| 0.36521986  | 0.251542906 | 0.515621581 | 0.492450673 |
| 0.434205607 | 0.255502791 | 0.509499213 | 0.486856367 |
| 0.446476557 | 0.477437217 | 0.310308326 | 0.025198009 |
| 0.375480248 | 0.372386482 | 0.267618146 | 0.49043949  |
| 0.207875913 | 0.352418457 | 0.481133516 | 0.486640582 |
| 0.386584892 | 0.218499666 | 0.465737071 | 0.443197972 |
| 0.211527568 | 0.426314764 | 0.502688892 | 0.480382183 |
| 0.007671572 | 0.435774016 | 0.515789962 | 0.224644391 |
| 0.404932079 | 0.218148718 | 0.360828454 | 0.496323469 |
| 0.393153309 | 0.321305343 | 0.504038742 | 0.477666259 |
| 0.453098738 | 0.243890699 | 0.531831448 | 0.082212528 |
| 0.425985738 | 0.098425735 | 0.382882673 | 0.393103727 |
| 0.350514751 | 0.38047821  | 0.418216936 | 0.387044703 |
| 0.19697264  | 0.525426257 | 0.461713665 | 0.519699335 |
| 0.460828465 | 0.533362224 | 0.516333686 | 0.49438599  |
| 0.460432013 | 0.440151566 | 0.208736647 | 0.509435369 |
| 0.498692699 | 0.374377384 | 0.118127432 | 0.502049304 |
| 0.431547615 | 0.490375241 | 0.182301047 | 0.501838258 |
| 0.505482816 | 0.470212615 | 0.239491813 | 0.456268966 |
| 0.467469927 | 0.341078638 | 0.474194598 | 0.536090537 |
| 0.375773814 | 0.451059806 | 0.434167953 | 0.464015099 |
| 0.259028223 | 0.304070376 | 0.371085632 | 0.258034247 |
| 0.018512051 | 0.138821629 | 0.114335001 | 0.256387747 |
| 0.253213619 | 0.485679424 | 0.482225753 | 0.524579052 |
| 0.196228593 | 0.460818689 | 0.313634888 | 0.403235083 |
| 0.445815716 | 0.445133921 | 0.472250328 | 0.483189548 |
| 0.326627907 | 0.036106475 | 0.198899611 | 0.527247357 |
| 0.070380145 | 0.346036871 | 0.417124175 | 0.006438147 |
| 0.085237826 | 0.455921482 | 0.13721816  | 0.232010666 |
| 0.498924498 | 0.236298146 | 0.291991099 | 0.385323375 |
| 0.446186198 | 0.155794975 | 0.007723746 | 0.485098985 |
| 0.484429419 | 0.454290779 | 0.482873363 | 0.457821373 |
| 0.459739898 | 0.470571303 | 0.484651501 | 0.452557728 |
| 0.176369288 | 0.146619121 | 0.301345436 | 0.394523979 |
| 0.009982831 | 0.466631544 | 0.403293991 | 0.215831984 |
| 0.502363685 | 0.392888354 | 0.076513968 | 0.445521452 |
| 0.045433268 | 0.288594995 | 0.41388533  | 0.314880019 |
| 0.431015502 | 0.030383475 | 0.32765249  | 0.422997959 |
| 0.441317053 | 0.414556119 | 0.444553101 | 0.534822576 |
| 0.445768961 | 0.181583472 | 0.413664707 | 0.489919782 |
| 0.127946432 | 0.151533173 | 0.450305139 | 0.05243217  |

|             |             |             |             |
|-------------|-------------|-------------|-------------|
| 0.290949784 | 0.455820063 | 0.470009986 | 0.118480308 |
| 0.376395534 | 0.012170671 | 0.425413673 | 0.538744903 |
| 0.469343333 | 0.523965149 | 0.511752218 | 0.377976412 |
| 0.513208412 | 0.155389421 | 0.534687452 | 0.464864267 |
| 0.448694647 | 0.00223576  | 0.013439677 | 0.508549911 |
| 0.490355728 | 0.091917805 | 0.240868241 | 0.466937108 |
| 0.189088387 | 0.232220748 | 0.119679377 | 0.270423439 |
| 0.511971339 | 0.345432866 | 0.266777    | 0.475812385 |
| 0.339626128 | 0.329609927 | 0.475432828 | 0.13774705  |
| 0.499693596 | 0.099586905 | 0.135028579 | 0.016480418 |
| 0.454291497 | 0.161490407 | 0.474188589 | 0.514566214 |
| 0.505703239 | 0.480615247 | 0.406008128 | 0.456743916 |
| 0.473240909 | 0.149137309 | 0.451528818 | 0.171421353 |
| 0.490156368 | 0.486000435 | 0.417497721 | 0.38575437  |
| 0.511442334 | 0.479222725 | 0.066610365 | 0.485851389 |
| 0.029086489 | 0.004211814 | 0.464621126 | 0.351482332 |
| 0.089815354 | 0.462098678 | 0.337806913 | 0.307698422 |
| 0.314502798 | 0.065080223 | 0.353647739 | 0.333892645 |
| 0.395895606 | 0.462486599 | 0.376796958 | 0.316733841 |
| 0.354947912 | 0.205663429 | 0.294746735 | 0.243170125 |
| 0.32061182  | 0.368247087 | 0.245041321 | 0.043346733 |
| 0.495997215 | 0.506183097 | 0.105906463 | 0.23495956  |
| 0.504823882 | 0.511688143 | 0.079753787 | 0.025992278 |
| 0.345080247 | 0.416131011 | 1           | 0.503046569 |
| 0.531537077 | 0.528314496 | 0.406146788 | 0.205227251 |
| 0.123352224 | 0.413518968 | 0.390425592 | 0.162954222 |
| 0.519952857 | 0.108511353 | 0.49010707  | 0.39144685  |
| 0.180741757 | 0.308997111 | 0.072356119 | 0.142325024 |
| 0.479317894 | 0.266160902 | 0.27229024  | 0.21717992  |
| 0.424429525 | 0.347585758 | 0.089244092 | 0.291445818 |
| 0.435212623 | 0.251753493 | 0.243189683 | 0.403256167 |
| 0.427317203 | 0.268595182 | 0.50550534  | 0.460788687 |
| 0.20026231  | 0.17352305  | 0.382520982 | 0.460641046 |
| 0.506217951 | 0.457082322 | 0.056754741 | 0.456126852 |
| 0.497214189 | 0.524967685 | 0.505295392 | 0.451825284 |
| 0.134784821 | 0.486342664 | 0.395259188 | 0.437748478 |
| 0.272766313 | 0.490906279 | 0.335949112 | 0.109514473 |
| 0.353280554 | 0.48770462  | 0.458957467 | 0.263217614 |
| 0.498715809 | 0.189852329 | 0.095449107 | 0.485607643 |
| 0.264616771 | 0.160433695 | 0.428115141 | 0.492574643 |
| 0.003821672 | 0.212703133 | 0.487378809 | 0.359553687 |
| 0.519345067 | 0.497215264 | 0.453142586 | 0.350567621 |
| 0.003298263 | 0.483695361 | 0.486945028 | 0.49702086  |
| 0.475859949 | 0.436412157 | 0.22460328  | 0.135305596 |
| 0.365081563 | 0.129462563 | 0.222270098 | 0.442289085 |
| 0.235703762 | 0.496802292 | 0.278579645 | 0.287074809 |
| 0.289540263 | 0.136797708 | 0.340045883 | 0.34529504  |
| 0.205542513 | 0.326831397 | 0.434777742 | 0.355389925 |
| 0.287671994 | 0.470619461 | 0.474650701 | 0.053735286 |
| 0.449899073 | 0.460119036 | 0.466878529 | 0.005157662 |
| 0.516224667 | 0.017853438 | 0.299123835 | 0.32215586  |
| 0.297479733 | 0.312133256 | 0.355883974 | 0.397318074 |
| 0.440330785 | 0.319483136 | 0.392448401 | 0.336560346 |
| 0.25642983  | 0.315283488 | 0.479149784 | 0.440512871 |

|             |             |             |             |
|-------------|-------------|-------------|-------------|
| 0.398204071 | 0.204898297 | 0.139128206 | 0.132483526 |
| 0.105000011 | 0.486783332 | 0.311066357 | 0.116885976 |
| 0.324139991 | 0.446998228 | 0.407620222 | 0.495363894 |
| 0.460737272 | 0.155893345 | 0.429438212 | 0.489732996 |
| 0.304136809 | 0.404589109 | 0.113686869 | 0.471480044 |
| 0.341851781 | 0.327277115 | 0.476843335 | 0.402384712 |
| 0.471442017 | 0.413328352 | 0.312669402 | 0.453103281 |
| 0.466363272 | 0.416922711 | 0.383606557 | 0.154122073 |
| 0.269226564 | 0.193386687 | 0.364890439 | 0.004818826 |
| 0.457358606 | 0.366421984 | 0.516696198 | 0.493204285 |
| 0.383168799 | 0.430019832 | 0.40673979  | 0.155965269 |
| 0.334799981 | 0.215186112 | 0.21261405  | 0.497020858 |
| 0.307027298 | 0.282161827 | 0.40176492  | 0.430691652 |
| 0.502465175 | 0.476996386 | 0.341695974 | 0.349523514 |
| 0.324609765 | 0.276075238 | 0.475122302 | 0.189843454 |
| 0.496774077 | 0.27826477  | 0.420518443 | 0.406756876 |
| 0.320126007 | 0.516180221 | 0.105539503 | 0.528697729 |
| 0.431407839 | 0.187464624 | 0.502550593 | 0.401438551 |
| 0.389725571 | 0.202713665 | 0.269820645 | 0.460510021 |
| 0.322529209 | 0.433247613 | 0.025016417 | 0.109395586 |
| 0.424496997 | 0.375116405 | 0.45922948  | 0.441688306 |
| 0.33649258  | 0.415414262 | 0.242348475 | 0.389939239 |
| 0.482029913 | 0.500831621 | 0.370245538 | 0.323128277 |
| 0.43656948  | 0.177512515 | 0.483181848 | 0.026286058 |
| 0.503861697 | 0.493574213 | 0.46327285  | 0.10164889  |
| 0.039578554 | 0.296441286 | 0.490746189 | 0.107119987 |
| 0.499325294 | 0.299490995 | 0.419594084 | 0.512084822 |
| 0.245475777 | 0.503333275 | 0.204794667 | 0.502273686 |
| 0.078497761 | 0.341968161 | 0.455123279 | 0.451264934 |
| 0.336773029 | 0.388312639 | 0.466641779 | 0.33505499  |
| 0.065789274 | 0.370405521 | 0.003538866 | 0.420114057 |
| 0.470710541 | 0.422920817 | 0.26664693  | 0.36437519  |
| 0.371736672 | 0.430270436 | 0.349666279 | 0.487372887 |
| 0.025290404 | 0.467611814 | 0.292068044 | 0.477144992 |
| 0.320144579 | 0.438514547 | 0.106666126 | 0.399761416 |
| 0.463136641 | 0.394249619 | 0.323058182 | 0.390403709 |
| 0.491738577 | 0.439341396 | 0.220483761 | 0.312676512 |
| 0.446327768 | 0.107547134 | 0.460199719 | 0.533291351 |
| 0.27457706  | 0.309745789 | 0.5072595   | 0.30569867  |
| 0.406529255 | 0.435881047 | 0.466359614 | 0.521499538 |
| 0.135354848 | 0.343665441 | 0.496241482 | 0.469929251 |
| 0.3877264   | 0.252410328 | 0.349495675 | 0.333536877 |
| 0.462792442 | 0.170506685 | 0.34818211  | 0.445475825 |
| 0.309637662 | 0.407253478 | 0.395177261 | 0.285521593 |
| 0.076220009 | 0.259042608 | 0.485997928 | 0.214147502 |
| 0.400865616 | 0.455485591 | 0.328359072 | 0.42196095  |
| 0.227936627 | 0.05277243  | 0.461054218 | 0.033402746 |
| 0.438142596 | 0.493775835 | 0.345552833 | 0.450375181 |
| 0.251389178 | 0.445284889 | 0.421133913 | 0.003199888 |
| 0.480120852 | 0.071927165 | 0.396060683 | 0.334352925 |
| 0.388803655 | 0.09575579  | 0.463698425 | 0.520560042 |
| 0.410152719 | 0.411500965 | 0.440534238 | 0.467470835 |
| 0.222269826 | 0.407337562 | 0.428031862 | 0.483044131 |
| 0.315426517 | 0.449599023 | 0.486844553 | 0.465633167 |

|             |             |             |             |
|-------------|-------------|-------------|-------------|
| 0.468008837 | 0.373414631 |             |             |
| NCAPG2      | 0.147830583 | 0.4993543   | 0.134461154 |
| 0.21197888  | 0.331661269 | 0.516657539 | 0.105871112 |
| 0.195420927 | 0.445158654 | 0.41588661  | 0.434948104 |
| 0.039325638 | 0.088805653 | 0.496146702 | 0.095015291 |
| 0.428584758 | 0.057394169 | 0.167208901 | 0.10851417  |
| 0.309110931 | 0.298649356 | 0.39298342  | 0.510562768 |
| 0.306743239 | 0.276898945 | 0.465048949 | 0.435531099 |
| 0.520231328 | 0.341660814 | 0.50865966  | 0.299262807 |
| 0.436252635 | 0.34711286  | 0.442325246 | 0.044517529 |
| 0.495787842 | 0.01178227  | 0.456794203 | 0.301946343 |
| 0.168314297 | 0.40542729  | 0.478190456 | 0.306385653 |
| 0.476580601 | 0.084753792 | 0.328576969 | 0.454285571 |
| 0.436611314 | 0.360014909 | 0.146623604 | 0.515984786 |
| 0.436634441 | 0.455658409 | 0.506443007 | 0.004740397 |
| 0.332388306 | 0.095528904 | 0.2443021   | 0.52792698  |
| 0.28144533  | 0.1750875   | 0.339831299 | 0.34708879  |
| 0.449387623 | 0.424641258 | 0.323428012 | 0.452009493 |
| 0.507681605 | 0.181076295 | 0.49782123  | 0.232105066 |
| 0.476293046 | 0.079271574 | 0.234315301 | 0.168733322 |
| 0.448474264 | 0.25804321  | 0.396348448 | 0.33150537  |
| 0.499911776 | 0.529961648 | 0.316919257 | 0.530681529 |
| 0.096343905 | 0.359941453 | 0.30402279  | 0.351001533 |
| 0.425260677 | 0.138492728 | 0.48186169  | 0.524333969 |
| 0.10277647  | 0.494333887 | 0.468582848 | 0.216946533 |
| 0.514268809 | 0.313132865 | 0.512042048 | 0.186930653 |
| 0.401644276 | 0.366784265 | 0.497554232 | 0.374771005 |
| 0.356440587 | 0.152355847 | 0.528026147 | 0.336136922 |
| 0.353291779 | 0.163768612 | 0.238790709 | 0.505438264 |
| 0.489644432 | 0.520936945 | 0.499832053 | 0.422869939 |
| 0.41148169  | 0.510796045 | 0.488021146 | 0.481196473 |
| 0.243351948 | 0.539163777 | 0.283756668 | 0.0710232   |
| 0.15530384  | 0.125952892 | 0.253279451 | 0.366365358 |
| 0.518604031 | 0.429165254 | 0.290067415 | 0.272560617 |
| 0.476960609 | 0.51960242  | 0.537295031 | 0.479940424 |
| 0.080243436 | 0.266416915 | 0.422711375 | 0.399402432 |
| 0.442247357 | 0.182231969 | 0.271243076 | 0.535956689 |
| 0.447392361 | 0.482952001 | 0.281196685 | 0.52808462  |
| 0.272968551 | 0.51029844  | 0.526478107 | 0.237860398 |
| 0.535641448 | 0.527920598 | 0.496783329 | 0.439650432 |
| 0.49800514  | 0.463007279 | 0.084937445 | 0.450182959 |
| 0.476536902 | 0.01676151  | 0.514860501 | 0.512407415 |
| 0.519667735 | 0.509549622 | 0.502149071 | 0.514647499 |
| 0.526249271 | 0.139327518 | 0.03333433  | 0.319124387 |
| 0.529767137 | 0.467036109 | 0.169612442 | 0.471628552 |
| 0.391799989 | 0.516975166 | 0.493539467 | 0.370020378 |
| 0.504683327 | 0.509534345 | 0.521617147 | 0.474777162 |
| 0.407809615 | 0.387225246 | 0.415229572 | 0.513298059 |
| 0.080859837 | 0.208656035 | 0.12109065  | 0.372131794 |
| 0.491550878 | 0.225837081 | 0.497835938 | 0.391446278 |
| 0.254481422 | 0.46603454  | 0.378040919 | 0.411596488 |
| 0.124775905 | 0.527361028 | 0.25834342  | 0.270040397 |
| 0.068554088 | 0.2211676   | 0.24697466  | 0.220736464 |
| 0.2916643   | 0.289511351 | 0.511854399 | 0.503284877 |

|             |             |             |             |
|-------------|-------------|-------------|-------------|
| 0.395775478 | 0.28865794  | 0.5105731   | 0.476876563 |
| 0.428254749 | 0.42256677  | 0.306809338 | 0.020089046 |
| 0.302703782 | 0.365310874 | 0.194820683 | 0.468576345 |
| 0.250646765 | 0.290069746 | 0.437900065 | 0.433611729 |
| 0.415204731 | 0.246105722 | 0.407333364 | 0.446727965 |
| 0.252048897 | 0.356137875 | 0.483992562 | 0.496518809 |
| 0.01042534  | 0.415647982 | 0.511386368 | 0.154267866 |
| 0.402145947 | 0.145736004 | 0.29548317  | 0.496909009 |
| 0.321292833 | 0.234511935 | 0.516260888 | 0.428576954 |
| 0.431623835 | 0.299069258 | 0.513164459 | 0.053355494 |
| 0.383278224 | 0.064776303 | 0.32900737  | 0.458177334 |
| 0.335527132 | 0.341032991 | 0.338555303 | 0.312014084 |
| 0.239341054 | 0.527535379 | 0.474057605 | 0.515249433 |
| 0.418549927 | 0.517476942 | 0.50643857  | 0.489763143 |
| 0.452200773 | 0.410844557 | 0.142214664 | 0.505393446 |
| 0.500190021 | 0.351696184 | 0.157340974 | 0.502560925 |
| 0.433272411 | 0.444642024 | 0.128898006 | 0.491833213 |
| 0.505557615 | 0.50904999  | 0.187777025 | 0.404423035 |
| 0.455571928 | 0.336292238 | 0.475888823 | 0.516718731 |
| 0.401811621 | 0.384869906 | 0.363854901 | 0.424912759 |
| 0.262484394 | 0.218667985 | 0.386397879 | 0.190168835 |
| 0.015240295 | 0.159083947 | 0.133475528 | 0.196040193 |
| 0.169117351 | 0.501322629 | 0.451361868 | 0.516714672 |
| 0.175161025 | 0.47750784  | 0.317658145 | 0.330810148 |
| 0.472650836 | 0.386776647 | 0.422398448 | 0.435778452 |
| 0.327125097 | 0.031710802 | 0.163366204 | 0.53387973  |
| 0.101560586 | 0.257276326 | 0.419202794 | 0.004885544 |
| 0.093349205 | 0.509443297 | 0.174150182 | 0.262078176 |
| 0.483643795 | 0.275869839 | 0.307247443 | 0.421236644 |
| 0.405185449 | 0.159004803 | 0.005166262 | 0.498221643 |
| 0.491073333 | 0.469994307 | 0.492763045 | 0.482848831 |
| 0.47074043  | 0.477503033 | 0.458556325 | 0.501952171 |
| 0.167008521 | 0.176573847 | 0.215078818 | 0.32976772  |
| 0.010095393 | 0.44077319  | 0.348886632 | 0.216575669 |
| 0.474441023 | 0.371727097 | 0.077544845 | 0.389509999 |
| 0.051824328 | 0.221907376 | 0.403086759 | 0.267952043 |
| 0.378920612 | 0.03764386  | 0.331011207 | 0.359672849 |
| 0.482549337 | 0.434282393 | 0.404362102 | 0.539801725 |
| 0.397035834 | 0.236468676 | 0.35414756  | 0.453108317 |
| 0.121363102 | 0.146516667 | 0.463266003 | 0.067411911 |
| 0.299469179 | 0.466693131 | 0.439568548 | 0.135450341 |
| 0.34937271  | 0.014878646 | 0.455916248 | 0.534807349 |
| 0.504336505 | 0.503547524 | 0.511288693 | 0.294308443 |
| 0.514537472 | 0.116139202 | 0.530792974 | 0.497660995 |
| 0.465696098 | 0.002280985 | 0.009528541 | 0.513439294 |
| 0.441143335 | 0.13485306  | 0.233700734 | 0.495000912 |
| 0.155498346 | 0.268750212 | 0.11700077  | 0.188547756 |
| 0.519588282 | 0.265808723 | 0.182084907 | 0.498067124 |
| 0.295980295 | 0.287204945 | 0.506906432 | 0.166005611 |
| 0.467584245 | 0.093009345 | 0.161490787 | 0.011033948 |
| 0.405785758 | 0.205983656 | 0.512915676 | 0.520661708 |
| 0.490452967 | 0.434558379 | 0.435946856 | 0.439910327 |
| 0.475865069 | 0.204211037 | 0.442676353 | 0.218767706 |
| 0.512813134 | 0.435895227 | 0.39164103  | 0.39858912  |

|             |             |             |             |
|-------------|-------------|-------------|-------------|
| 0.485217744 | 0.48756294  | 0.066033228 | 0.461687101 |
| 0.031345727 | 0.002157729 | 0.508502528 | 0.336853322 |
| 0.073663711 | 0.403519166 | 0.332341247 | 0.299195977 |
| 0.279608268 | 0.069767326 | 0.273147246 | 0.24702736  |
| 0.351380201 | 0.406490469 | 0.287223799 | 0.32782963  |
| 0.288434649 | 0.13630157  | 0.251314919 | 0.208650145 |
| 0.295429898 | 0.403142952 | 0.281022198 | 0.04573222  |
| 0.508804062 | 0.46574378  | 0.108373498 | 0.245766302 |
| 0.498328504 | 0.515298474 | 0.068135915 | 0.01801325  |
| 0.351899209 | 0.356801335 | 0.503046569 | 1           |
| 0.54530041  | 0.508093789 | 0.418861275 | 0.141506739 |
| 0.123487236 | 0.363816201 | 0.308782334 | 0.109726747 |
| 0.513741253 | 0.143782594 | 0.507592676 | 0.315697053 |
| 0.186257213 | 0.288051118 | 0.058559414 | 0.138681805 |
| 0.425636074 | 0.250012715 | 0.211602395 | 0.258599813 |
| 0.356222184 | 0.269070719 | 0.090629051 | 0.265087094 |
| 0.425977939 | 0.181186222 | 0.232628768 | 0.418138207 |
| 0.458686267 | 0.31949411  | 0.477730049 | 0.448329722 |
| 0.218228142 | 0.1871465   | 0.421373313 | 0.448253776 |
| 0.516705573 | 0.480013916 | 0.056828176 | 0.510704622 |
| 0.497987672 | 0.510822168 | 0.52277507  | 0.419582676 |
| 0.154019328 | 0.424895179 | 0.337000578 | 0.375659441 |
| 0.252260058 | 0.515539429 | 0.294898564 | 0.118439233 |
| 0.358598476 | 0.497152137 | 0.486756789 | 0.21926152  |
| 0.505893465 | 0.237667205 | 0.13152895  | 0.504955009 |
| 0.180188037 | 0.156664372 | 0.490612522 | 0.485762187 |
| 0.002514641 | 0.141084803 | 0.480978263 | 0.317591449 |
| 0.516169875 | 0.496442074 | 0.466095755 | 0.356687659 |
| 0.001457733 | 0.449898084 | 0.439955521 | 0.463017653 |
| 0.507639533 | 0.450817762 | 0.223671861 | 0.107479453 |
| 0.347218734 | 0.172110872 | 0.171535661 | 0.470680029 |
| 0.185429346 | 0.509450993 | 0.258599107 | 0.284864235 |
| 0.230458725 | 0.180042763 | 0.266851246 | 0.327913988 |
| 0.150077353 | 0.304312395 | 0.408131286 | 0.424109108 |
| 0.213220842 | 0.462549557 | 0.482634555 | 0.061152615 |
| 0.391685069 | 0.457258538 | 0.473865998 | 0.003755207 |
| 0.481886265 | 0.015793188 | 0.230099214 | 0.257645775 |
| 0.240409994 | 0.246622876 | 0.287343918 | 0.330457988 |
| 0.436010744 | 0.285127465 | 0.346530361 | 0.298530446 |
| 0.202756726 | 0.30409053  | 0.441442191 | 0.453617366 |
| 0.321250097 | 0.199227174 | 0.179141686 | 0.178759544 |
| 0.089149501 | 0.515458921 | 0.32437445  | 0.15704203  |
| 0.283589858 | 0.443442985 | 0.395368689 | 0.520549807 |
| 0.451714783 | 0.213331316 | 0.387265868 | 0.524803558 |
| 0.301523236 | 0.408616476 | 0.131896524 | 0.491299581 |
| 0.311819715 | 0.234660852 | 0.510115927 | 0.440188755 |
| 0.492639104 | 0.426467838 | 0.325065416 | 0.467905119 |
| 0.428070657 | 0.399795249 | 0.451856916 | 0.114413146 |
| 0.259954513 | 0.214670009 | 0.277799615 | 0.005476115 |
| 0.427714478 | 0.39992787  | 0.519234189 | 0.516204882 |
| 0.315039707 | 0.432596739 | 0.466487789 | 0.150391793 |
| 0.412232564 | 0.272529738 | 0.216902678 | 0.509124508 |
| 0.236141973 | 0.263186185 | 0.329701232 | 0.496948322 |
| 0.485053479 | 0.481465055 | 0.275082242 | 0.329548474 |

|             |             |             |             |
|-------------|-------------|-------------|-------------|
| 0.300289296 | 0.310625453 | 0.493807028 | 0.223737273 |
| 0.499591877 | 0.196574091 | 0.482084307 | 0.335777522 |
| 0.250979652 | 0.511091768 | 0.120373277 | 0.518250469 |
| 0.361795146 | 0.219983036 | 0.494148241 | 0.410383547 |
| 0.404085036 | 0.154035842 | 0.194757762 | 0.491265008 |
| 0.282000547 | 0.376585136 | 0.025515553 | 0.07042197  |
| 0.378744092 | 0.370402112 | 0.494674226 | 0.423115185 |
| 0.257245764 | 0.375803766 | 0.180875083 | 0.38759546  |
| 0.51900691  | 0.532423459 | 0.312113609 | 0.309473963 |
| 0.420875409 | 0.157020253 | 0.529752902 | 0.021547605 |
| 0.475169394 | 0.476884337 | 0.461818758 | 0.09277053  |
| 0.039335807 | 0.219984339 | 0.481515938 | 0.140870196 |
| 0.486912092 | 0.234700566 | 0.451587249 | 0.511726349 |
| 0.263682352 | 0.532842702 | 0.147669639 | 0.465288027 |
| 0.092943291 | 0.331308647 | 0.41936702  | 0.439874513 |
| 0.256082297 | 0.302853766 | 0.426693366 | 0.246344755 |
| 0.058466377 | 0.300782759 | 0.002499246 | 0.43016456  |
| 0.509627171 | 0.359715988 | 0.284934566 | 0.402261674 |
| 0.328708984 | 0.443465102 | 0.268530544 | 0.490421728 |
| 0.020556231 | 0.399356237 | 0.265433389 | 0.504118113 |
| 0.280804922 | 0.427963608 | 0.089863659 | 0.330622566 |
| 0.505948215 | 0.316981449 | 0.32411284  | 0.359764514 |
| 0.512763361 | 0.476113587 | 0.277647046 | 0.253395845 |
| 0.470799077 | 0.1296172   | 0.507978695 | 0.526058655 |
| 0.217832537 | 0.221541872 | 0.477650754 | 0.250241961 |
| 0.328779739 | 0.46751423  | 0.48094763  | 0.522111447 |
| 0.086457003 | 0.313314688 | 0.475624491 | 0.490644254 |
| 0.349154479 | 0.169007175 | 0.258027991 | 0.249013931 |
| 0.497183887 | 0.160809933 | 0.270424478 | 0.44573681  |
| 0.223229484 | 0.3698525   | 0.458236921 | 0.204553664 |
| 0.06005243  | 0.225770935 | 0.470806125 | 0.219039939 |
| 0.348263495 | 0.404645275 | 0.251262809 | 0.422810759 |
| 0.177697522 | 0.041320414 | 0.451295949 | 0.017104566 |
| 0.482795136 | 0.452531745 | 0.318429675 | 0.389119131 |
| 0.279698975 | 0.437477746 | 0.455216532 | 0.003356169 |
| 0.459202735 | 0.057515206 | 0.350924585 | 0.249351597 |
| 0.316648821 | 0.100952554 | 0.48792339  | 0.49946641  |
| 0.417912115 | 0.402997556 | 0.402936227 | 0.492988729 |
| 0.151172858 | 0.38095006  | 0.374949462 | 0.521514728 |
| 0.233099888 | 0.481331619 | 0.480687579 | 0.429252199 |
| 0.478490541 | 0.367944704 |             |             |
| NCAPH       | 0.202745287 | 0.52807242  | 0.180401465 |
| 0.255863779 | 0.354272887 | 0.530645254 | 0.158274192 |
| 0.259880752 | 0.48166881  | 0.399568667 | 0.465888427 |
| 0.068539059 | 0.085698913 | 0.532067023 | 0.145364639 |
| 0.445255357 | 0.095563469 | 0.230117863 | 0.126772664 |
| 0.350240042 | 0.328876543 | 0.394755092 | 0.539719072 |
| 0.335071245 | 0.340938724 | 0.503397712 | 0.433210731 |
| 0.544979832 | 0.310191512 | 0.519418897 | 0.272988918 |
| 0.488607854 | 0.368204905 | 0.429922513 | 0.072822321 |
| 0.517648136 | 0.014104905 | 0.483307348 | 0.345017684 |
| 0.166269772 | 0.464861906 | 0.469754399 | 0.355790349 |
| 0.480061881 | 0.127424171 | 0.290468553 | 0.46644631  |
| 0.470343682 | 0.402347951 | 0.198777745 | 0.533180088 |

|             |             |             |             |
|-------------|-------------|-------------|-------------|
| 0.452914984 | 0.504717415 | 0.516009443 | 0.007312216 |
| 0.322571518 | 0.080783065 | 0.228437547 | 0.538226478 |
| 0.346796457 | 0.235525246 | 0.319381507 | 0.398460371 |
| 0.467464317 | 0.453353631 | 0.381734908 | 0.455881907 |
| 0.542191834 | 0.180889384 | 0.503937428 | 0.263720296 |
| 0.509428867 | 0.120588687 | 0.301155962 | 0.223226811 |
| 0.458288067 | 0.316921923 | 0.42313268  | 0.333498111 |
| 0.525905696 | 0.522090724 | 0.378506703 | 0.5226054   |
| 0.107355891 | 0.371238458 | 0.323750147 | 0.402666502 |
| 0.463226848 | 0.194006445 | 0.512528774 | 0.526902904 |
| 0.150559592 | 0.496490242 | 0.498998331 | 0.280439038 |
| 0.54284687  | 0.309541288 | 0.505813302 | 0.188711596 |
| 0.418244417 | 0.387746192 | 0.505405411 | 0.43367174  |
| 0.378943178 | 0.207534026 | 0.516672165 | 0.344005362 |
| 0.383384076 | 0.219578118 | 0.266727278 | 0.519568291 |
| 0.513839685 | 0.548499664 | 0.525021074 | 0.468095632 |
| 0.423768467 | 0.542640553 | 0.518398375 | 0.520281442 |
| 0.206524058 | 0.539864621 | 0.345436256 | 0.112820493 |
| 0.208981092 | 0.179521292 | 0.278810715 | 0.425108669 |
| 0.540503044 | 0.480119983 | 0.355506187 | 0.32235258  |
| 0.502727585 | 0.520592972 | 0.536110528 | 0.516591382 |
| 0.125190887 | 0.263984411 | 0.43244961  | 0.447315539 |
| 0.481145807 | 0.245817841 | 0.278552017 | 0.525866563 |
| 0.498060744 | 0.507752559 | 0.342281426 | 0.525205153 |
| 0.334606279 | 0.527458697 | 0.546903149 | 0.299786873 |
| 0.526423551 | 0.52261689  | 0.52775378  | 0.449712211 |
| 0.525274246 | 0.499905653 | 0.099826581 | 0.493490051 |
| 0.518081729 | 0.017948965 | 0.533721794 | 0.533943919 |
| 0.537387324 | 0.524553589 | 0.522774595 | 0.540675413 |
| 0.539919669 | 0.196671966 | 0.033259941 | 0.364436683 |
| 0.530407833 | 0.510141589 | 0.221909684 | 0.472575786 |
| 0.414928646 | 0.546672853 | 0.512763055 | 0.374831985 |
| 0.511781527 | 0.535062594 | 0.542223362 | 0.512423193 |
| 0.441602052 | 0.448913151 | 0.408716662 | 0.512002671 |
| 0.124608589 | 0.26867836  | 0.169311816 | 0.426875484 |
| 0.47933674  | 0.286883365 | 0.531002219 | 0.41686973  |
| 0.31828467  | 0.505319567 | 0.361901297 | 0.429427241 |
| 0.173703848 | 0.531470597 | 0.320660136 | 0.334648961 |
| 0.109597341 | 0.285801009 | 0.301705053 | 0.273075155 |
| 0.339764403 | 0.348577268 | 0.52145971  | 0.53061349  |
| 0.418320996 | 0.351555724 | 0.536545369 | 0.51758595  |
| 0.478641245 | 0.428978218 | 0.373655318 | 0.032079304 |
| 0.327538281 | 0.347962351 | 0.186591826 | 0.46610315  |
| 0.312878652 | 0.340191795 | 0.463088629 | 0.454773345 |
| 0.4677723   | 0.308767198 | 0.42472254  | 0.49175392  |
| 0.31480999  | 0.383959102 | 0.516677286 | 0.50712967  |
| 0.019682167 | 0.462855113 | 0.535596522 | 0.182209802 |
| 0.45382802  | 0.15227373  | 0.283028628 | 0.524718492 |
| 0.319902008 | 0.255276467 | 0.538561749 | 0.450638983 |
| 0.44871155  | 0.358045835 | 0.529018386 | 0.052017731 |
| 0.396577452 | 0.084145313 | 0.381063098 | 0.452035372 |
| 0.397311941 | 0.397257512 | 0.354900182 | 0.334670876 |
| 0.296970964 | 0.537356967 | 0.514729937 | 0.544566721 |
| 0.417496161 | 0.528116071 | 0.528441184 | 0.527466255 |



|             |             |             |             |
|-------------|-------------|-------------|-------------|
| 0.495863147 | 0.409558842 | 0.134592153 | 0.530844563 |
| 0.52547516  | 0.358804179 | 0.211270546 | 0.51433301  |
| 0.437315159 | 0.460507144 | 0.154093446 | 0.527072573 |
| 0.511878449 | 0.520899894 | 0.245175565 | 0.439687216 |
| 0.500028912 | 0.396452845 | 0.506795814 | 0.523824844 |
| 0.393588836 | 0.403928553 | 0.381290148 | 0.459545083 |
| 0.327663715 | 0.244865829 | 0.444190289 | 0.180398096 |
| 0.011863154 | 0.218066704 | 0.187768132 | 0.248405306 |
| 0.178564184 | 0.497967842 | 0.47532481  | 0.539169437 |
| 0.238369353 | 0.519795927 | 0.379856003 | 0.363309313 |
| 0.5150265   | 0.404792673 | 0.423485779 | 0.453612496 |
| 0.391136342 | 0.048470895 | 0.209132156 | 0.526536335 |
| 0.145604833 | 0.261988049 | 0.467495548 | 0.007324228 |
| 0.141114756 | 0.523683343 | 0.231615867 | 0.327358163 |
| 0.513024286 | 0.338466432 | 0.371383553 | 0.421621046 |
| 0.447724381 | 0.219249824 | 0.00854412  | 0.526435447 |
| 0.516741408 | 0.505895233 | 0.517475454 | 0.505059181 |
| 0.501922856 | 0.502550756 | 0.485979628 | 0.532185394 |
| 0.227721632 | 0.234356944 | 0.225576024 | 0.373065009 |
| 0.015434294 | 0.477618678 | 0.380247815 | 0.282464472 |
| 0.493618826 | 0.426069083 | 0.120370688 | 0.408448553 |
| 0.078069719 | 0.207047774 | 0.450746547 | 0.322253964 |
| 0.414607292 | 0.064135323 | 0.329533159 | 0.362836125 |
| 0.523327612 | 0.489548289 | 0.392615682 | 0.537302048 |
| 0.438513349 | 0.2926916   | 0.386639808 | 0.481388505 |
| 0.177219413 | 0.148094936 | 0.49429639  | 0.060526617 |
| 0.303101914 | 0.505446912 | 0.44606342  | 0.185071836 |
| 0.40677102  | 0.027922128 | 0.504462132 | 0.537466373 |
| 0.528933187 | 0.53277553  | 0.544302727 | 0.296269973 |
| 0.541063783 | 0.0999358   | 0.543724949 | 0.533723694 |
| 0.457430514 | 0.003852952 | 0.016621976 | 0.534576152 |
| 0.456102708 | 0.182093242 | 0.299542088 | 0.496276845 |
| 0.211573325 | 0.33245395  | 0.170329418 | 0.206444875 |
| 0.53304092  | 0.302954311 | 0.200234483 | 0.52474241  |
| 0.352060477 | 0.346286008 | 0.520103132 | 0.224899748 |
| 0.479315796 | 0.139491186 | 0.219922824 | 0.016078284 |
| 0.439201717 | 0.26328238  | 0.507797743 | 0.541673939 |
| 0.523115636 | 0.456153684 | 0.41129846  | 0.454211744 |
| 0.505046636 | 0.25693964  | 0.425770165 | 0.277148487 |
| 0.542706042 | 0.458979032 | 0.446577801 | 0.456131628 |
| 0.523720177 | 0.528500243 | 0.107306414 | 0.493080558 |
| 0.04654853  | 0.003390124 | 0.530442984 | 0.399400399 |
| 0.081626563 | 0.419293896 | 0.395667915 | 0.341769915 |
| 0.325247379 | 0.105508047 | 0.27514326  | 0.253543173 |
| 0.400669935 | 0.440108748 | 0.306699105 | 0.387783645 |
| 0.317697139 | 0.160070103 | 0.303636398 | 0.270608922 |
| 0.322125598 | 0.457918399 | 0.344260819 | 0.078940437 |
| 0.50789427  | 0.470624273 | 0.159790553 | 0.312407035 |
| 0.529143716 | 0.541189301 | 0.108721328 | 0.031775484 |
| 0.41638776  | 0.392793901 | 0.531537077 | 0.54530041  |
| 1           | 0.521920444 | 0.47552017  | 0.188851102 |
| 0.17803675  | 0.403447602 | 0.325571289 | 0.144894811 |
| 0.543756992 | 0.19646366  | 0.536945647 | 0.314930419 |
| 0.250488724 | 0.343883175 | 0.092844468 | 0.197942875 |

|             |                      |             |             |
|-------------|----------------------|-------------|-------------|
| 0.427211536 | 0.317705193          | 0.263603072 | 0.31739931  |
| 0.394444548 | 0.268825781          | 0.139598366 | 0.331270627 |
| 0.477366254 | 0.179136016          | 0.299098235 | 0.461259352 |
| 0.499588282 | 0.310975248          | 0.492605413 | 0.498107057 |
| 0.283399547 | 0.249965679          | 0.458760702 | 0.479524956 |
| 0.535123154 | 0.473818 0.076696069 | 0.53450677  |             |
| 0.530021665 | 0.518309636          | 0.53802458  | 0.466016137 |
| 0.212969824 | 0.437153273          | 0.340990482 | 0.405158894 |
| 0.318903898 | 0.533993662          | 0.352890165 | 0.173002207 |
| 0.419149803 | 0.500260703          | 0.521529975 | 0.276511188 |
| 0.511408338 | 0.298156981          | 0.181234839 | 0.530254231 |
| 0.191571256 | 0.211870524          | 0.485577262 | 0.506308735 |
| 0.003983804 | 0.137138516          | 0.511331082 | 0.36986709  |
| 0.516545654 | 0.525729324          | 0.512630632 | 0.404454813 |
| 0.001509488 | 0.458538334          | 0.471473165 | 0.47525891  |
| 0.539801789 | 0.50047419           | 0.261237208 | 0.155817116 |
| 0.407089126 | 0.224851378          | 0.22666337  | 0.483995469 |
| 0.183735986 | 0.53698237           | 0.324659702 | 0.346579219 |
| 0.279837791 | 0.235153124          | 0.264459823 | 0.382898939 |
| 0.15841988  | 0.369532074          | 0.460427763 | 0.412859991 |
| 0.211361376 | 0.500299683          | 0.516131288 | 0.097333326 |
| 0.397263928 | 0.493975024          | 0.510511358 | 0.006672439 |
| 0.500144837 | 0.0308481            | 0.280362137 | 0.304041186 |
| 0.291183106 | 0.300922717          | 0.334067596 | 0.356991815 |
| 0.477556848 | 0.345769408          | 0.392922203 | 0.358178406 |
| 0.251994566 | 0.364766461          | 0.461169385 | 0.485697023 |
| 0.349316907 | 0.260522391          | 0.23563349  | 0.232953043 |
| 0.13048983  | 0.540641731          | 0.390135283 | 0.208971457 |
| 0.344871456 | 0.469574521          | 0.451696273 | 0.53627959  |
| 0.495214308 | 0.266602067          | 0.427710586 | 0.550727797 |
| 0.282254017 | 0.426153008          | 0.185524822 | 0.513272835 |
| 0.375161982 | 0.258583611          | 0.516969659 | 0.48590906  |
| 0.513607784 | 0.481307481          | 0.390741803 | 0.509988206 |
| 0.451815205 | 0.422924923          | 0.435041059 | 0.158941495 |
| 0.323358712 | 0.280019056          | 0.301850687 | 0.010810102 |
| 0.474804107 | 0.441818124          | 0.5405684   | 0.530232765 |
| 0.30676032  | 0.482958315          | 0.462037508 | 0.207252927 |
| 0.387950622 | 0.328732631          | 0.283264886 | 0.524138737 |
| 0.222094619 | 0.324297884          | 0.361013678 | 0.515397744 |
| 0.5030373   | 0.495484899          | 0.300660373 | 0.392378167 |
| 0.356286067 | 0.371811447          | 0.50092591  | 0.284294331 |
| 0.500309447 | 0.216464318          | 0.495351284 | 0.375371178 |
| 0.299071212 | 0.536213147          | 0.172877713 | 0.540981167 |
| 0.388339664 | 0.283300878          | 0.507354325 | 0.456780096 |
| 0.441908579 | 0.194776888          | 0.18680397  | 0.504452139 |
| 0.3379871   | 0.368570474          | 0.021648035 | 0.077564611 |
| 0.428102902 | 0.389809048          | 0.516031571 | 0.462862657 |
| 0.27851911  | 0.424250843          | 0.170342847 | 0.442876895 |
| 0.525069407 | 0.520912759          | 0.356413624 | 0.373314836 |
| 0.474430062 | 0.214596955          | 0.550993133 | 0.024854893 |
| 0.486202381 | 0.472094086          | 0.458529638 | 0.14199118  |
| 0.068357141 | 0.213175647          | 0.497058101 | 0.193244569 |
| 0.514995623 | 0.218074663          | 0.474088902 | 0.525638674 |
| 0.329936844 | 0.522820299          | 0.196594676 | 0.4932827   |

|             |             |             |             |
|-------------|-------------|-------------|-------------|
| 0.134739614 | 0.391164541 | 0.420982692 | 0.452774405 |
| 0.287606928 | 0.314824022 | 0.465169943 | 0.252704624 |
| 0.096354817 | 0.333782622 | 0.005154791 | 0.477512454 |
| 0.503523194 | 0.365323405 | 0.351675608 | 0.383866427 |
| 0.382827642 | 0.486137983 | 0.305669558 | 0.483725154 |
| 0.0360209   | 0.412380352 | 0.329277092 | 0.540447561 |
| 0.266199308 | 0.455096203 | 0.130129188 | 0.348236272 |
| 0.504080715 | 0.343570816 | 0.389069313 | 0.352522697 |
| 0.539019224 | 0.508772909 | 0.334260874 | 0.280245936 |
| 0.484790522 | 0.183945929 | 0.50147105  | 0.530873064 |
| 0.272685314 | 0.231409221 | 0.501467229 | 0.305232936 |
| 0.333995457 | 0.511373462 | 0.481093577 | 0.525876488 |
| 0.124920675 | 0.376589242 | 0.501051744 | 0.525929327 |
| 0.405290275 | 0.186474454 | 0.264984128 | 0.286560368 |
| 0.531174984 | 0.20642378  | 0.284533931 | 0.494510675 |
| 0.226407629 | 0.422670924 | 0.473413081 | 0.239738563 |
| 0.093541412 | 0.286438158 | 0.487594801 | 0.285206404 |
| 0.40206945  | 0.430181327 | 0.278937285 | 0.476474987 |
| 0.219331941 | 0.063805517 | 0.499293303 | 0.017012693 |
| 0.517448631 | 0.475314593 | 0.379418149 | 0.4079025   |
| 0.34332231  | 0.483280159 | 0.492867629 | 0.007358408 |
| 0.493057026 | 0.061152392 | 0.38187947  | 0.281482172 |
| 0.326051233 | 0.151425977 | 0.527409883 | 0.530172558 |
| 0.46924189  | 0.401250254 | 0.385143914 | 0.530956217 |
| 0.15135576  | 0.360013075 | 0.376661605 | 0.536991716 |
| 0.231851647 | 0.469741819 | 0.475574398 | 0.417615911 |
| 0.517959958 | 0.424076336 |             |             |
| NDC80       | 0.182511211 | 0.485032178 | 0.143576383 |
| 0.273144017 | 0.410152768 | 0.501467792 | 0.162045413 |
| 0.265485948 | 0.448387623 | 0.363657928 | 0.487161704 |
| 0.069193483 | 0.113043538 | 0.520798851 | 0.153036964 |
| 0.486012032 | 0.10981826  | 0.243385331 | 0.130462669 |
| 0.35283853  | 0.395721222 | 0.421520456 | 0.491016392 |
| 0.394341853 | 0.305152708 | 0.471836991 | 0.448789526 |
| 0.517676015 | 0.307460736 | 0.519191601 | 0.247319578 |
| 0.47735403  | 0.425466666 | 0.443667642 | 0.062832859 |
| 0.516077796 | 0.022086822 | 0.457453773 | 0.406135675 |
| 0.209885388 | 0.446614391 | 0.412222933 | 0.397398191 |
| 0.459596353 | 0.113411494 | 0.245265232 | 0.486803369 |
| 0.449742435 | 0.416889254 | 0.161330405 | 0.5208831   |
| 0.462117327 | 0.477899278 | 0.466720316 | 0.007119749 |
| 0.360079505 | 0.100481313 | 0.266637099 | 0.500862882 |
| 0.355235475 | 0.262544387 | 0.332041023 | 0.384132316 |
| 0.477219513 | 0.476972829 | 0.398269457 | 0.450864942 |
| 0.518952637 | 0.230750973 | 0.500422311 | 0.274630528 |
| 0.510931802 | 0.101736502 | 0.301502516 | 0.187278105 |
| 0.479099014 | 0.351248337 | 0.454417892 | 0.383960005 |
| 0.478494223 | 0.521427849 | 0.386761626 | 0.496798633 |
| 0.152693689 | 0.422020683 | 0.378109017 | 0.440061458 |
| 0.475697151 | 0.197505406 | 0.524899415 | 0.518258388 |
| 0.134446302 | 0.457285949 | 0.504194963 | 0.247364302 |
| 0.50385802  | 0.338770767 | 0.467351843 | 0.235652302 |
| 0.459560999 | 0.444707438 | 0.480040193 | 0.449109397 |
| 0.414719038 | 0.176260493 | 0.49022639  | 0.398078296 |

|             |             |             |             |
|-------------|-------------|-------------|-------------|
| 0.425033365 | 0.194991681 | 0.337645875 | 0.519122737 |
| 0.526162388 | 0.524998721 | 0.5017799   | 0.483782635 |
| 0.468795444 | 0.520018783 | 0.521947307 | 0.49662316  |
| 0.17589889  | 0.51189215  | 0.342480545 | 0.125857471 |
| 0.174110508 | 0.201218188 | 0.327216125 | 0.431563052 |
| 0.527702355 | 0.474422738 | 0.358627739 | 0.381122193 |
| 0.517427638 | 0.476375833 | 0.508919197 | 0.516191049 |
| 0.120993325 | 0.308901156 | 0.473877528 | 0.42178053  |
| 0.501743279 | 0.241829909 | 0.339832784 | 0.513812047 |
| 0.486602905 | 0.521910658 | 0.309197407 | 0.513024319 |
| 0.345512686 | 0.514173642 | 0.506905879 | 0.325163973 |
| 0.517859435 | 0.499060165 | 0.522110438 | 0.481449661 |
| 0.48914217  | 0.486588355 | 0.111276058 | 0.488918321 |
| 0.512276639 | 0.025876976 | 0.520908466 | 0.524693965 |
| 0.502366636 | 0.526789089 | 0.518879388 | 0.523968699 |
| 0.501589701 | 0.181458528 | 0.041326008 | 0.421114465 |
| 0.505661539 | 0.504299799 | 0.258653965 | 0.489871178 |
| 0.460856442 | 0.519238047 | 0.506071332 | 0.396930755 |
| 0.514246902 | 0.520320476 | 0.519869864 | 0.507215918 |
| 0.421594112 | 0.426640005 | 0.436930137 | 0.475922615 |
| 0.12947466  | 0.245566159 | 0.137080309 | 0.437061441 |
| 0.425740537 | 0.323270155 | 0.509090548 | 0.450943442 |
| 0.346824787 | 0.468414833 | 0.383253701 | 0.469486397 |
| 0.137378471 | 0.518694314 | 0.31419663  | 0.323747628 |
| 0.126660842 | 0.258685206 | 0.336468765 | 0.295215349 |
| 0.393859056 | 0.301043147 | 0.514580755 | 0.518582252 |
| 0.450233809 | 0.323268243 | 0.528303964 | 0.50955398  |
| 0.489691481 | 0.46612478  | 0.373832953 | 0.040109536 |
| 0.387929297 | 0.356288248 | 0.231967502 | 0.475038767 |
| 0.271570279 | 0.392902058 | 0.496102562 | 0.488833841 |
| 0.436080443 | 0.280183163 | 0.468021825 | 0.462777943 |
| 0.278079991 | 0.427343209 | 0.526275997 | 0.494422104 |
| 0.017078735 | 0.483318621 | 0.533718203 | 0.24547616  |
| 0.456599278 | 0.194383408 | 0.31088164  | 0.525141133 |
| 0.359891236 | 0.318667454 | 0.522351548 | 0.482654331 |
| 0.442405376 | 0.305031623 | 0.518467214 | 0.069993438 |
| 0.429116277 | 0.111963305 | 0.426490568 | 0.40379434  |
| 0.41450384  | 0.429324359 | 0.407125498 | 0.388734899 |
| 0.253161255 | 0.510019208 | 0.496192045 | 0.527186435 |
| 0.45062821  | 0.516579519 | 0.530932744 | 0.524003669 |
| 0.499171366 | 0.430232474 | 0.173774238 | 0.531532834 |
| 0.524950581 | 0.381560759 | 0.172920372 | 0.508908445 |
| 0.444177017 | 0.491593823 | 0.199571921 | 0.523677395 |
| 0.501493847 | 0.469141625 | 0.284075859 | 0.478474084 |
| 0.505090275 | 0.395910685 | 0.501640965 | 0.516044218 |
| 0.385168701 | 0.455570054 | 0.438902726 | 0.489163846 |
| 0.328207137 | 0.315410517 | 0.42640472  | 0.219233797 |
| 0.01221209  | 0.194486935 | 0.16807436  | 0.29908142  |
| 0.237953414 | 0.4802153   | 0.500650036 | 0.519566537 |
| 0.255945005 | 0.496469018 | 0.37701461  | 0.424393163 |
| 0.491484228 | 0.442326439 | 0.450120995 | 0.479770082 |
| 0.389456683 | 0.057026183 | 0.24036801  | 0.525207444 |
| 0.112547451 | 0.315930663 | 0.456335899 | 0.009191113 |
| 0.133902369 | 0.478589079 | 0.197066413 | 0.298934579 |

|             |             |             |             |
|-------------|-------------|-------------|-------------|
| 0.517795728 | 0.302312883 | 0.36170693  | 0.404325985 |
| 0.47189208  | 0.21642719  | 0.011364186 | 0.510009951 |
| 0.489542836 | 0.481866026 | 0.487455743 | 0.4635583   |
| 0.493884461 | 0.491765415 | 0.508267021 | 0.481956223 |
| 0.237072094 | 0.20531797  | 0.297569837 | 0.430588573 |
| 0.014537954 | 0.491678563 | 0.416731951 | 0.28234402  |
| 0.5072493   | 0.444139533 | 0.115918474 | 0.443215101 |
| 0.072772149 | 0.246003392 | 0.453068667 | 0.359053195 |
| 0.453172214 | 0.056314418 | 0.329830349 | 0.410378785 |
| 0.47546613  | 0.465792073 | 0.417359106 | 0.517299881 |
| 0.47050712  | 0.244116989 | 0.441079544 | 0.498763431 |
| 0.185445482 | 0.155715442 | 0.481238534 | 0.053265548 |
| 0.272361518 | 0.472533046 | 0.459174737 | 0.175044786 |
| 0.434075971 | 0.02463042  | 0.475428126 | 0.519733667 |
| 0.477578826 | 0.525831257 | 0.522202148 | 0.346816454 |
| 0.515648453 | 0.12104241  | 0.520573471 | 0.505356882 |
| 0.44654028  | 0.003905528 | 0.019882621 | 0.527891136 |
| 0.493493952 | 0.138113327 | 0.309155521 | 0.461549524 |
| 0.246142405 | 0.296845849 | 0.168272382 | 0.272232207 |
| 0.516589531 | 0.36046495  | 0.255878348 | 0.482801753 |
| 0.397770518 | 0.380812493 | 0.489581435 | 0.196849313 |
| 0.491362369 | 0.14895468  | 0.195490487 | 0.021737184 |
| 0.472901728 | 0.22004858  | 0.480523856 | 0.511455315 |
| 0.509461449 | 0.48835879  | 0.388005254 | 0.439599509 |
| 0.499084859 | 0.202441061 | 0.419149815 | 0.229650164 |
| 0.50269067  | 0.49814636  | 0.463052408 | 0.443730274 |
| 0.5200823   | 0.506940421 | 0.107810621 | 0.513904613 |
| 0.04436668  | 0.005300127 | 0.493326824 | 0.40662958  |
| 0.097319177 | 0.466972434 | 0.403944346 | 0.354007351 |
| 0.353172503 | 0.096735635 | 0.335153246 | 0.318685826 |
| 0.442966598 | 0.484074771 | 0.370719635 | 0.377892744 |
| 0.375978317 | 0.22424304  | 0.337288939 | 0.296394681 |
| 0.337851968 | 0.43033827  | 0.310166008 | 0.078092728 |
| 0.499140574 | 0.493077093 | 0.15660933  | 0.299612449 |
| 0.529743402 | 0.532940199 | 0.128184464 | 0.042241669 |
| 0.406526659 | 0.43467609  | 0.528314496 | 0.508093789 |
| 0.521920444 | 1           | 0.450153205 | 0.246640259 |
| 0.17493652  | 0.448889298 | 0.384359945 | 0.196738442 |
| 0.520299342 | 0.161437019 | 0.496383216 | 0.365693329 |
| 0.246895357 | 0.374175399 | 0.105073509 | 0.203087705 |
| 0.455170608 | 0.327981126 | 0.317568972 | 0.281204269 |
| 0.451648115 | 0.315848351 | 0.139317269 | 0.35695896  |
| 0.483520298 | 0.237938039 | 0.310028002 | 0.438685746 |
| 0.473206121 | 0.277532125 | 0.512340432 | 0.493085187 |
| 0.264880263 | 0.241805499 | 0.424895836 | 0.482456794 |
| 0.524686999 | 0.455443975 | 0.072135727 | 0.487545341 |
| 0.518557869 | 0.520744923 | 0.498527312 | 0.487483865 |
| 0.195926224 | 0.474702119 | 0.383809502 | 0.457414816 |
| 0.336652062 | 0.501443455 | 0.384329631 | 0.164301416 |
| 0.411248959 | 0.48992432  | 0.50023937  | 0.313691132 |
| 0.495949495 | 0.250789512 | 0.146130714 | 0.506885934 |
| 0.261920763 | 0.212141804 | 0.435312324 | 0.506198383 |
| 0.005927219 | 0.179820759 | 0.507841651 | 0.387495399 |
| 0.509463992 | 0.525332797 | 0.498814031 | 0.390433483 |

|             |             |             |             |
|-------------|-------------|-------------|-------------|
| 0.002925673 | 0.485331994 | 0.502701471 | 0.500981767 |
| 0.508721091 | 0.479105889 | 0.251755585 | 0.186122236 |
| 0.421647671 | 0.180904249 | 0.278099839 | 0.447400995 |
| 0.234008842 | 0.519116124 | 0.3425289   | 0.353936184 |
| 0.333443117 | 0.194637728 | 0.305674054 | 0.39349394  |
| 0.205128192 | 0.386265681 | 0.480795663 | 0.356511358 |
| 0.261362478 | 0.503029707 | 0.511840859 | 0.088428859 |
| 0.429675287 | 0.497929699 | 0.498339453 | 0.009369584 |
| 0.519907304 | 0.03293233  | 0.33515364  | 0.356574538 |
| 0.340395964 | 0.354808728 | 0.389205572 | 0.41238579  |
| 0.482122898 | 0.380939676 | 0.424596782 | 0.389319155 |
| 0.297899575 | 0.370515416 | 0.487001725 | 0.484653956 |
| 0.399986225 | 0.266627565 | 0.195621634 | 0.187114917 |
| 0.139992312 | 0.509747681 | 0.374146797 | 0.168634294 |
| 0.376095904 | 0.474246591 | 0.459067143 | 0.493564024 |
| 0.494850064 | 0.211679659 | 0.457374535 | 0.51802728  |
| 0.280044581 | 0.408046123 | 0.161973209 | 0.500383917 |
| 0.389677312 | 0.321948316 | 0.484495287 | 0.455319833 |
| 0.496117593 | 0.4629015   | 0.373083349 | 0.49452289  |
| 0.478765209 | 0.440631563 | 0.387145146 | 0.197080303 |
| 0.336750265 | 0.261690578 | 0.368356989 | 0.010719684 |
| 0.491789933 | 0.405593867 | 0.534009241 | 0.490346799 |
| 0.344233291 | 0.474914037 | 0.410181885 | 0.214149348 |
| 0.337841232 | 0.27694833  | 0.277568226 | 0.51100821  |
| 0.260582425 | 0.335077629 | 0.418972533 | 0.449496521 |
| 0.514727371 | 0.493803195 | 0.35459265  | 0.399683259 |
| 0.380025287 | 0.34351567  | 0.476524013 | 0.250624621 |
| 0.497431313 | 0.280567896 | 0.44581569  | 0.436029813 |
| 0.357613096 | 0.516368122 | 0.156201111 | 0.523433912 |
| 0.446443948 | 0.251407004 | 0.499159906 | 0.436007204 |
| 0.423192254 | 0.229316276 | 0.234522958 | 0.474184119 |
| 0.375792872 | 0.39881324  | 0.021127509 | 0.103666742 |
| 0.462969588 | 0.395799029 | 0.489098582 | 0.47567031  |
| 0.341906848 | 0.456991446 | 0.198669443 | 0.441316706 |
| 0.473920693 | 0.499512425 | 0.40253834  | 0.387719554 |
| 0.481309063 | 0.229946753 | 0.501828804 | 0.027361667 |
| 0.506377575 | 0.480263638 | 0.452942003 | 0.147351202 |
| 0.069016777 | 0.267455554 | 0.507186273 | 0.161605478 |
| 0.521503297 | 0.251460298 | 0.45043915  | 0.517427606 |
| 0.311763681 | 0.503141389 | 0.243956267 | 0.514197205 |
| 0.125009292 | 0.400922237 | 0.444697959 | 0.460470255 |
| 0.350895637 | 0.379383435 | 0.496714982 | 0.311643875 |
| 0.104565761 | 0.38925878  | 0.007432844 | 0.448039087 |
| 0.474679511 | 0.417107344 | 0.334052217 | 0.352363045 |
| 0.417857079 | 0.472487851 | 0.36144124  | 0.475777221 |
| 0.042057492 | 0.460025554 | 0.345847567 | 0.509797112 |
| 0.295533057 | 0.468033715 | 0.146211862 | 0.401833725 |
| 0.473260019 | 0.399500602 | 0.384734843 | 0.386331019 |
| 0.497849262 | 0.475693262 | 0.282805522 | 0.318361276 |
| 0.466121545 | 0.161044183 | 0.456447832 | 0.515361352 |
| 0.318974298 | 0.294907653 | 0.520615101 | 0.359717083 |
| 0.384648846 | 0.476282496 | 0.47174759  | 0.505649679 |
| 0.169755894 | 0.397869961 | 0.511077156 | 0.505686833 |
| 0.431930053 | 0.250978933 | 0.323878897 | 0.356528193 |

|             |             |             |             |
|-------------|-------------|-------------|-------------|
| 0.482508766 | 0.212716733 | 0.342131165 | 0.491245578 |
| 0.289320889 | 0.446243476 | 0.425277301 | 0.30331616  |
| 0.107044175 | 0.307344731 | 0.476131633 | 0.282060423 |
| 0.442644514 | 0.475669685 | 0.34721525  | 0.471279097 |
| 0.253866339 | 0.07757248  | 0.488430493 | 0.0286882   |
| 0.469517182 | 0.500552009 | 0.393176244 | 0.450307936 |
| 0.315774425 | 0.487127979 | 0.468072328 | 0.006890033 |
| 0.50903489  | 0.077484653 | 0.410496543 | 0.349783369 |
| 0.367368612 | 0.145987292 | 0.493190491 | 0.526276878 |
| 0.454954259 | 0.39514896  | 0.401065543 | 0.500836821 |
| 0.201833281 | 0.372361325 | 0.409924004 | 0.506176208 |
| 0.284231542 | 0.448304944 | 0.472306786 | 0.439739025 |
| 0.505861919 | 0.414376759 |             |             |
| NDE1        | 0.260324445 | 0.39420914  | 0.213539044 |
| 0.268723618 | 0.294300785 | 0.391997189 | 0.230240143 |
| 0.32622646  | 0.379292431 | 0.248521535 | 0.380369177 |
| 0.124914345 | 0.067237194 | 0.417610124 | 0.220879471 |
| 0.329607833 | 0.172020191 | 0.298307799 | 0.127611169 |
| 0.302751909 | 0.282300161 | 0.283479172 | 0.408804814 |
| 0.285896314 | 0.345521099 | 0.396102701 | 0.29871356  |
| 0.405641125 | 0.183602555 | 0.375529771 | 0.161294785 |
| 0.414203561 | 0.29359503  | 0.28362102  | 0.119717366 |
| 0.386957901 | 0.015946779 | 0.43955758  | 0.313970555 |
| 0.12579745  | 0.414640893 | 0.307803111 | 0.341233125 |
| 0.326685454 | 0.18290087  | 0.162806941 | 0.334132983 |
| 0.372603344 | 0.357281021 | 0.232722041 | 0.389000481 |
| 0.332007868 | 0.431305595 | 0.359012025 | 0.014531559 |
| 0.219276565 | 0.044906429 | 0.142927704 | 0.446243919 |
| 0.372760733 | 0.303079019 | 0.196255012 | 0.3615154   |
| 0.340327021 | 0.354600299 | 0.379310765 | 0.3071633   |
| 0.427632755 | 0.135322261 | 0.356786486 | 0.250537526 |
| 0.383658104 | 0.172576127 | 0.345423107 | 0.252156953 |
| 0.326144753 | 0.348528555 | 0.346795653 | 0.240531635 |
| 0.387305383 | 0.482871678 | 0.379814085 | 0.452768335 |
| 0.092622424 | 0.278460301 | 0.270516785 | 0.372150662 |
| 0.371382485 | 0.247952041 | 0.400229915 | 0.461091217 |
| 0.204238299 | 0.336641538 | 0.376311133 | 0.305748178 |
| 0.412190111 | 0.216951236 | 0.333252893 | 0.147428899 |
| 0.321510934 | 0.299525524 | 0.445844434 | 0.400887684 |
| 0.309818183 | 0.244053039 | 0.465334606 | 0.257144021 |
| 0.32605104  | 0.263270938 | 0.23994084  | 0.375189948 |
| 0.38130636  | 0.413384472 | 0.386427209 | 0.385846779 |
| 0.309761586 | 0.421571705 | 0.402295659 | 0.412618677 |
| 0.114076393 | 0.449664211 | 0.362902533 | 0.19163089  |
| 0.253723332 | 0.260577053 | 0.238126156 | 0.401796508 |
| 0.401518483 | 0.424254333 | 0.378268907 | 0.32106403  |
| 0.381150214 | 0.44362771  | 0.443012822 | 0.406627752 |
| 0.196455044 | 0.184343782 | 0.313596058 | 0.399440653 |
| 0.384503008 | 0.305721132 | 0.212114895 | 0.476671056 |
| 0.425358697 | 0.383117616 | 0.358265753 | 0.493434645 |
| 0.340201571 | 0.453319034 | 0.397575907 | 0.336442687 |
| 0.471059244 | 0.465844765 | 0.428862776 | 0.330347742 |
| 0.447666699 | 0.404693512 | 0.084085614 | 0.401395003 |
| 0.429652893 | 0.016134559 | 0.390314426 | 0.394376238 |

|             |             |             |             |
|-------------|-------------|-------------|-------------|
| 0.430930854 | 0.380260553 | 0.427726963 | 0.409433399 |
| 0.436126361 | 0.260776999 | 0.020251886 | 0.335102727 |
| 0.454339781 | 0.419490351 | 0.280723236 | 0.322077443 |
| 0.32157216  | 0.414023118 | 0.380375159 | 0.267780274 |
| 0.467603227 | 0.407612165 | 0.399222878 | 0.402385135 |
| 0.342584176 | 0.414676644 | 0.274735716 | 0.454378906 |
| 0.205240943 | 0.308518843 | 0.212980977 | 0.389091898 |
| 0.318004766 | 0.333179573 | 0.411735808 | 0.324763859 |
| 0.354011523 | 0.403359939 | 0.238745101 | 0.330969744 |
| 0.210170491 | 0.366141297 | 0.348994526 | 0.34397899  |
| 0.185760007 | 0.320262971 | 0.320313321 | 0.306789582 |
| 0.331603106 | 0.347423231 | 0.372323225 | 0.403450386 |
| 0.320405088 | 0.350914828 | 0.399676855 | 0.422674076 |
| 0.412868912 | 0.31118149  | 0.379638395 | 0.053124445 |
| 0.263749467 | 0.215171967 | 0.126661671 | 0.321447609 |
| 0.325004272 | 0.314212846 | 0.352975577 | 0.35170907  |
| 0.404064848 | 0.320280901 | 0.312957155 | 0.443897563 |
| 0.319803472 | 0.321120232 | 0.403644388 | 0.358094088 |
| 0.040825866 | 0.391187586 | 0.401310142 | 0.183591199 |
| 0.383996138 | 0.123248862 | 0.194674914 | 0.395949732 |
| 0.22679004  | 0.215268195 | 0.401102611 | 0.349617177 |
| 0.331098518 | 0.337651239 | 0.435465122 | 0.03461135  |
| 0.29667025  | 0.117131997 | 0.360711824 | 0.29996     |
| 0.384134785 | 0.379227708 | 0.277730748 | 0.288979459 |
| 0.309605525 | 0.447941662 | 0.423716788 | 0.416922767 |
| 0.285809352 | 0.441820179 | 0.392454505 | 0.418268849 |
| 0.411367443 | 0.278615997 | 0.087949354 | 0.399485887 |
| 0.394627246 | 0.259577922 | 0.24264331  | 0.364818748 |
| 0.298265427 | 0.343033497 | 0.18715777  | 0.410658435 |
| 0.473032011 | 0.423858879 | 0.301491679 | 0.363674871 |
| 0.416997027 | 0.388360452 | 0.402021439 | 0.450170505 |
| 0.251340923 | 0.301654918 | 0.288874587 | 0.377642382 |
| 0.353237319 | 0.215737639 | 0.407170733 | 0.120328831 |
| 0.006516066 | 0.271837584 | 0.245233821 | 0.291618911 |
| 0.151550302 | 0.337213954 | 0.365207979 | 0.433316448 |
| 0.306944024 | 0.426844756 | 0.370803695 | 0.302565611 |
| 0.410646666 | 0.306168402 | 0.302093555 | 0.347048281 |
| 0.392788877 | 0.077735341 | 0.242685153 | 0.487068459 |
| 0.185409092 | 0.199768177 | 0.39672064  | 0.010501791 |
| 0.201857804 | 0.371979628 | 0.26448369  | 0.344041094 |
| 0.398304289 | 0.344103775 | 0.365003607 | 0.279453838 |
| 0.391267605 | 0.285978466 | 0.016660665 | 0.397109465 |
| 0.416927151 | 0.39617229  | 0.416749896 | 0.425354869 |
| 0.385599279 | 0.380884343 | 0.374988326 | 0.410240731 |
| 0.30002218  | 0.277302572 | 0.173785386 | 0.335768494 |
| 0.018330553 | 0.398709536 | 0.326341433 | 0.330358556 |
| 0.369038946 | 0.384867029 | 0.191095469 | 0.316304469 |
| 0.114470331 | 0.13348858  | 0.370924795 | 0.336450243 |
| 0.350374965 | 0.114004777 | 0.226293365 | 0.25537974  |
| 0.415247996 | 0.420630656 | 0.266573038 | 0.456007916 |
| 0.37933272  | 0.28461167  | 0.327153717 | 0.382147176 |
| 0.25434393  | 0.108413296 | 0.371883133 | 0.034401549 |
| 0.239992883 | 0.421647168 | 0.326908109 | 0.236730167 |
| 0.380726912 | 0.057818406 | 0.418996287 | 0.459322132 |



|             |             |             |             |
|-------------|-------------|-------------|-------------|
| 0.418877978 | 0.414001105 | 0.426219998 | 0.22000101  |
| 0.433723404 | 0.05544979  | 0.434691172 | 0.407062676 |
| 0.294171835 | 0.006351246 | 0.031195161 | 0.396504852 |
| 0.335860542 | 0.209050028 | 0.341631374 | 0.349457054 |
| 0.269777466 | 0.328554442 | 0.249149286 | 0.18684723  |
| 0.390613599 | 0.291407343 | 0.183927182 | 0.428103045 |
| 0.347301025 | 0.359405869 | 0.364412349 | 0.268409927 |
| 0.357794905 | 0.209892729 | 0.26476651  | 0.02167786  |
| 0.359887553 | 0.283758282 | 0.468996947 | 0.4321382   |
| 0.444458017 | 0.356593751 | 0.251206764 | 0.330910263 |
| 0.389263014 | 0.2581023   | 0.287103464 | 0.287339831 |
| 0.416472761 | 0.349567478 | 0.408302053 | 0.409663542 |
| 0.425776216 | 0.42290378  | 0.179628255 | 0.384759437 |
| 0.07165732  | 0.005560866 | 0.387906573 | 0.391338589 |
| 0.072247861 | 0.305352817 | 0.387789206 | 0.306632561 |
| 0.310987772 | 0.161309987 | 0.19542317  | 0.193041891 |
| 0.366357459 | 0.356009841 | 0.252747827 | 0.371792471 |
| 0.280372306 | 0.164410211 | 0.331666462 | 0.326150335 |
| 0.266596714 | 0.395674253 | 0.344940292 | 0.141433943 |
| 0.345275546 | 0.33375971  | 0.232449641 | 0.352107044 |
| 0.40914893  | 0.405699677 | 0.173002641 | 0.061111757 |
| 0.403940777 | 0.335846012 | 0.406146788 | 0.418861275 |
| 0.47552017  | 0.450153205 | 1           | 0.239725303 |
| 0.249934562 | 0.3461896   | 0.26363026  | 0.191787993 |
| 0.42866995  | 0.229724753 | 0.429651648 | 0.225261955 |
| 0.30898239  | 0.346542632 | 0.161210224 | 0.273311554 |
| 0.303068655 | 0.361111573 | 0.298967163 | 0.31591252  |
| 0.333044708 | 0.207396665 | 0.218366599 | 0.359232918 |
| 0.409154778 | 0.127323619 | 0.344841828 | 0.393929786 |
| 0.409784022 | 0.200976421 | 0.35858355  | 0.421697242 |
| 0.321715086 | 0.29313858  | 0.367256021 | 0.382056529 |
| 0.387716958 | 0.312110593 | 0.102385341 | 0.392662486 |
| 0.412286384 | 0.366278398 | 0.444330541 | 0.397443271 |
| 0.269275584 | 0.323555491 | 0.241883705 | 0.326150706 |
| 0.353742607 | 0.399454081 | 0.360402404 | 0.242930969 |
| 0.397343881 | 0.466645604 | 0.403089442 | 0.316862188 |
| 0.360051424 | 0.303359106 | 0.212164845 | 0.399608558 |
| 0.156342351 | 0.261188905 | 0.31799164  | 0.375067086 |
| 0.007740894 | 0.100067704 | 0.395308954 | 0.368780926 |
| 0.459514078 | 0.402373693 | 0.423320418 | 0.372121857 |
| 0.001749113 | 0.329422207 | 0.37526543  | 0.348785126 |
| 0.41059927  | 0.424578642 | 0.260133103 | 0.2268368   |
| 0.393551568 | 0.24998452  | 0.269265138 | 0.35005084  |
| 0.120478462 | 0.399948206 | 0.358361476 | 0.346834469 |
| 0.305431998 | 0.253011852 | 0.195785922 | 0.381637511 |
| 0.127782266 | 0.383633648 | 0.401824839 | 0.269817331 |
| 0.146024869 | 0.397177096 | 0.394588036 | 0.15718528  |
| 0.291047857 | 0.389155257 | 0.411810408 | 0.011701632 |
| 0.370503474 | 0.071365289 | 0.302830195 | 0.310977061 |
| 0.313914237 | 0.315251291 | 0.324877269 | 0.304759991 |
| 0.388078003 | 0.36059187  | 0.367156465 | 0.366630917 |
| 0.288200264 | 0.383419361 | 0.356886144 | 0.378510588 |
| 0.302291687 | 0.311262477 | 0.268031128 | 0.255727635 |
| 0.198319899 | 0.406222544 | 0.389851849 | 0.241266792 |

|             |             |             |             |
|-------------|-------------|-------------|-------------|
| 0.362753492 | 0.366856026 | 0.413185117 | 0.424280734 |
| 0.416518595 | 0.269897907 | 0.358063234 | 0.408816158 |
| 0.174574075 | 0.326111025 | 0.24249231  | 0.388935443 |
| 0.391847044 | 0.223960867 | 0.37005758  | 0.387650072 |
| 0.370978132 | 0.417130242 | 0.391559709 | 0.416068107 |
| 0.36507541  | 0.317800285 | 0.273407376 | 0.216804592 |
| 0.3455405   | 0.317335514 | 0.256984167 | 0.023917981 |
| 0.404138645 | 0.384477277 | 0.397907497 | 0.440258996 |
| 0.208100778 | 0.419892813 | 0.297339456 | 0.262763372 |
| 0.23792411  | 0.31177195  | 0.332786134 | 0.382098101 |
| 0.14354677  | 0.359070478 | 0.314010107 | 0.381808815 |
| 0.372539989 | 0.356795493 | 0.257097791 | 0.384302965 |
| 0.357362033 | 0.365548456 | 0.446411139 | 0.313496775 |
| 0.340937459 | 0.200484592 | 0.35006951  | 0.325226257 |
| 0.30794538  | 0.41567963  | 0.239423178 | 0.418575673 |
| 0.303904858 | 0.312642128 | 0.467467048 | 0.398681936 |
| 0.39265451  | 0.244931202 | 0.126711906 | 0.359802552 |
| 0.336877517 | 0.251631627 | 0.011329994 | 0.066473222 |
| 0.382202459 | 0.293567629 | 0.372457621 | 0.381583202 |
| 0.239472895 | 0.377833845 | 0.11741282  | 0.395599999 |
| 0.432356909 | 0.471683247 | 0.322041723 | 0.379878755 |
| 0.409744305 | 0.284704869 | 0.405352942 | 0.026376197 |
| 0.343230259 | 0.315379802 | 0.302624797 | 0.224644661 |
| 0.130898182 | 0.144589837 | 0.35946832  | 0.230104782 |
| 0.394304643 | 0.140527243 | 0.348504547 | 0.388235595 |
| 0.350658744 | 0.476256436 | 0.257597794 | 0.387391403 |
| 0.173126763 | 0.384739743 | 0.295982701 | 0.321550716 |
| 0.261669432 | 0.240938206 | 0.385989961 | 0.195190553 |
| 0.169943674 | 0.293007541 | 0.010557449 | 0.434411433 |
| 0.446727968 | 0.261016847 | 0.364429865 | 0.240692103 |
| 0.371072475 | 0.403031865 | 0.26954949  | 0.32706148  |
| 0.071115383 | 0.308062621 | 0.368090656 | 0.423270401 |
| 0.168685987 | 0.342229884 | 0.201645666 | 0.269485842 |
| 0.47144838  | 0.272044459 | 0.38519001  | 0.232513948 |
| 0.422021876 | 0.396908115 | 0.321918743 | 0.26610818  |
| 0.344515194 | 0.239728333 | 0.336408757 | 0.450780571 |
| 0.310036189 | 0.18847423  | 0.38034245  | 0.319070555 |
| 0.242459585 | 0.42189442  | 0.327830623 | 0.447381449 |
| 0.185394475 | 0.389380055 | 0.385387089 | 0.408726152 |
| 0.389951    | 0.168793062 | 0.202216147 | 0.267800477 |
| 0.414867809 | 0.243917424 | 0.23117936  | 0.420980271 |
| 0.167921583 | 0.388848238 | 0.340003148 | 0.245474057 |
| 0.146559582 | 0.335588229 | 0.372712102 | 0.333880807 |
| 0.376078538 | 0.336340493 | 0.247968569 | 0.421712925 |
| 0.25320494  | 0.102000608 | 0.429175234 | 0.012512646 |
| 0.411258204 | 0.36908445  | 0.386074133 | 0.322911841 |
| 0.353464305 | 0.39720844  | 0.378737521 | 0.016751936 |
| 0.386780408 | 0.06154937  | 0.31873844  | 0.254961607 |
| 0.233851708 | 0.219616096 | 0.42037237  | 0.412600268 |
| 0.4142088   | 0.289232354 | 0.246262718 | 0.414233064 |
| 0.118029513 | 0.226458596 | 0.257428259 | 0.386339835 |
| 0.17081014  | 0.301950543 | 0.321550846 | 0.27962427  |
| 0.413133106 | 0.403441725 |             |             |
| NDUFA9      | 0.077190727 | 0.117298856 | 0.036773077 |

|             |             |             |             |
|-------------|-------------|-------------|-------------|
| 0.048500348 | 0.18993537  | 0.043285591 | 0.106115357 |
| 0.106763099 | 0.128501077 | 0.016214592 | 0.133054476 |
| 0.053883943 | 0.033058058 | 0.196672586 | 0.118645709 |
| 0.149973469 | 0.103030863 | 0.1970653   | 0.030085867 |
| 0.044823691 | 0.224922297 | 0.039073721 | 0.062012098 |
| 0.187964085 | 0.170068368 | 0.091774044 | 0.08228043  |
| 0.14885418  | 0.010505708 | 0.106390756 | 0.00531696  |
| 0.245071425 | 0.193174656 | 0.053270551 | 0.024473071 |
| 0.094899438 | 0.028767292 | 0.221467499 | 0.152376599 |
| 0.033274898 | 0.238419571 | 0.022287483 | 0.145703071 |
| 0.044712828 | 0.047185086 | 0.004022736 | 0.134849894 |
| 0.099239646 | 0.091458313 | 0.063444456 | 0.105980254 |
| 0.053649335 | 0.145615983 | 0.065113709 | 0.007620297 |
| 0.05795302  | 0.009785446 | 0.034045429 | 0.161197811 |
| 0.245072676 | 0.224207887 | 0.01893534  | 0.109717129 |
| 0.121760446 | 0.185219817 | 0.261271188 | 0.038045657 |
| 0.180796111 | 0.052245181 | 0.109501874 | 0.040939253 |
| 0.084985628 | 0.055282845 | 0.249879542 | 0.089334922 |
| 0.059226127 | 0.248748655 | 0.151280474 | 0.079558203 |
| 0.10397215  | 0.23098532  | 0.219998645 | 0.156987862 |
| 0.076180085 | 0.15136908  | 0.09421532  | 0.303753857 |
| 0.196629264 | 0.09860916  | 0.168113575 | 0.217775124 |
| 0.079837323 | 0.051385081 | 0.155804082 | 0.137402035 |
| 0.121945239 | 0.040215147 | 0.037914638 | 0.057323301 |
| 0.178503337 | 0.171718877 | 0.194843712 | 0.239268023 |
| 0.132452328 | 0.088856941 | 0.154917654 | 0.14833985  |
| 0.10989106  | 0.086602654 | 0.102884217 | 0.149630259 |
| 0.12631459  | 0.159533223 | 0.13045832  | 0.235479066 |
| 0.12919935  | 0.172713013 | 0.140823695 | 0.176441058 |
| 0.0033526   | 0.172435574 | 0.139932182 | 0.100533352 |
| 0.058314628 | 0.162187612 | 0.083371803 | 0.288517747 |
| 0.153231221 | 0.185213363 | 0.13473207  | 0.242401662 |
| 0.213277668 | 0.137526295 | 0.168033465 | 0.191770144 |
| 0.090158337 | 0.048729546 | 0.113694685 | 0.066761991 |
| 0.204674115 | 0.204080982 | 0.119934196 | 0.189453    |
| 0.214072701 | 0.187075612 | 0.070283561 | 0.216099194 |
| 0.158603316 | 0.230663039 | 0.10767742  | 0.199259927 |
| 0.195031473 | 0.169017229 | 0.224861942 | 0.152659366 |
| 0.181907459 | 0.080589791 | 0.036889327 | 0.200384108 |
| 0.250297615 | 0.011452779 | 0.150911965 | 0.169716574 |
| 0.153150276 | 0.150925375 | 0.230957889 | 0.17527269  |
| 0.152596745 | 0.142582734 | 0.00766583  | 0.306412799 |
| 0.17384585  | 0.192573112 | 0.149586555 | 0.08025753  |
| 0.183438377 | 0.067380387 | 0.143037977 | 0.031087349 |
| 0.272479027 | 0.155006458 | 0.146945658 | 0.17153734  |
| 0.083775422 | 0.232124205 | 0.084329015 | 0.147874485 |
| 0.071953194 | 0.080952851 | 0.072647805 | 0.255229779 |
| 0.012234272 | 0.287442307 | 0.064325746 | 0.164958198 |
| 0.295673999 | 0.067087555 | 0.042803231 | 0.187956795 |
| 0.083936028 | 0.06960736  | 0.132942607 | 0.136742628 |
| 0.101443277 | 0.200604369 | 0.094225164 | 0.080067912 |
| 0.253839499 | 0.16674122  | 0.110306058 | 0.180544169 |
| 0.102962138 | 0.139687979 | 0.127718742 | 0.237186241 |
| 0.314557384 | 0.107126098 | 0.274431156 | 0.024503959 |

|             |             |             |             |
|-------------|-------------|-------------|-------------|
| 0.070113321 | 0.026914119 | 0.041122882 | 0.079151475 |
| 0.17052824  | 0.103498857 | 0.159666869 | 0.196848313 |
| 0.086895862 | 0.09960122  | 0.085486709 | 0.232098213 |
| 0.131164433 | 0.102671301 | 0.214857395 | 0.077329045 |
| 0.01228428  | 0.136776548 | 0.158813159 | 0.12345082  |
| 0.190696546 | 0.050053182 | 0.024772553 | 0.183264689 |
| 0.043818361 | 0.132828561 | 0.162592721 | 0.197469458 |
| 0.034323211 | 0.142251998 | 0.218841495 | 0.02179065  |
| 0.120493358 | 0.064424344 | 0.309728954 | 0.028545273 |
| 0.205078167 | 0.32680789  | 0.165866632 | 0.111952519 |
| 0.085550141 | 0.188359245 | 0.175991405 | 0.180279056 |
| 0.050533535 | 0.218532311 | 0.169690092 | 0.204066549 |
| 0.166791755 | 0.071395816 | 0.029206486 | 0.155731359 |
| 0.170835214 | 0.034646746 | 0.086393174 | 0.129157077 |
| 0.057000684 | 0.166631183 | 0.10134878  | 0.216793357 |
| 0.233076042 | 0.125187271 | 0.187848367 | 0.263217819 |
| 0.210452723 | 0.147257352 | 0.179328858 | 0.238853091 |
| 0.018932595 | 0.140985249 | 0.094221196 | 0.262966027 |
| 0.191877971 | 0.125584334 | 0.233774733 | 0.031235342 |
| 0.000357689 | 0.113362882 | 0.103468756 | 0.245163598 |
| 0.092816762 | 0.070445484 | 0.166734259 | 0.190649434 |
| 0.214415234 | 0.189952839 | 0.235474448 | 0.103825586 |
| 0.174779558 | 0.117867968 | 0.09698395  | 0.151525401 |
| 0.247875163 | 0.029385412 | 0.083020434 | 0.226490492 |
| 0.060786547 | 0.066808247 | 0.12094416  | 0.005696588 |
| 0.07644831  | 0.086007073 | 0.128597498 | 0.213775361 |
| 0.222910014 | 0.171759652 | 0.166030296 | 0.026303476 |
| 0.234071809 | 0.16143616  | 0.011170788 | 0.172992263 |
| 0.179976474 | 0.184607602 | 0.173342552 | 0.165338841 |
| 0.18703545  | 0.141565146 | 0.199949308 | 0.058442002 |
| 0.098168094 | 0.065462679 | 0.070972677 | 0.192805251 |
| 0.00524997  | 0.214875205 | 0.169832279 | 0.228653131 |
| 0.165468797 | 0.245778823 | 0.070934313 | 0.161291873 |
| 0.020728633 | 0.02718801  | 0.067342712 | 0.201988867 |
| 0.270748995 | 0.032815226 | 0.014736385 | 0.043202034 |
| 0.138468226 | 0.189919369 | 0.045466225 | 0.182438313 |
| 0.172754079 | 0.079586757 | 0.150671486 | 0.193374403 |
| 0.117915611 | 0.017376624 | 0.066430386 | 0.00113688  |
| 0.015803839 | 0.192693855 | 0.059739538 | 0.03889904  |
| 0.211596221 | 0.01776281  | 0.162842425 | 0.202998795 |
| 0.123068154 | 0.201208441 | 0.179835252 | 0.084375216 |
| 0.175087031 | 0.011866089 | 0.176340198 | 0.133762629 |
| 0.033513201 | 0.00229744  | 0.029921596 | 0.164739393 |
| 0.121112996 | 0.059489247 | 0.225303646 | 0.01661295  |
| 0.104260231 | 0.068046259 | 0.118478138 | 0.109801902 |
| 0.08873957  | 0.23669089  | 0.098898391 | 0.154797743 |
| 0.20016475  | 0.266636282 | 0.046619322 | 0.134369962 |
| 0.111407149 | 0.074769118 | 0.140403138 | 0.013452313 |
| 0.22941042  | 0.107592115 | 0.165446965 | 0.167063639 |
| 0.232755111 | 0.179229665 | 0.018396704 | 0.030000073 |
| 0.187378565 | 0.058655049 | 0.019273663 | 0.074867671 |
| 0.136034802 | 0.168325569 | 0.262308618 | 0.200003393 |
| 0.238929696 | 0.194399137 | 0.102756098 | 0.200083466 |
| 0.013745899 | 0.01226094  | 0.049475788 | 0.269669627 |

|             |             |             |             |
|-------------|-------------|-------------|-------------|
| 0.033910119 | 0.116295231 | 0.258455818 | 0.088335185 |
| 0.118092068 | 0.035906167 | 0.082793057 | 0.103589525 |
| 0.242176872 | 0.160751504 | 0.178505563 | 0.218828661 |
| 0.144551526 | 0.114325364 | 0.157219049 | 0.180215205 |
| 0.055681803 | 0.167348253 | 0.16927291  | 0.068606875 |
| 0.057311339 | 0.091212735 | 0.122267871 | 0.193025943 |
| 0.181612522 | 0.175250676 | 0.108427445 | 0.052592146 |
| 0.233336838 | 0.155122076 | 0.205227251 | 0.141506739 |
| 0.188851102 | 0.246640259 | 0.239725303 | 1           |
| 0.099001569 | 0.211412151 | 0.174197638 | 0.136025386 |
| 0.181630095 | 0.081204226 | 0.152466441 | 0.10347998  |
| 0.210852231 | 0.115806755 | 0.077719122 | 0.193738912 |
| 0.106189373 | 0.266750425 | 0.267206613 | 0.092025655 |
| 0.157690017 | 0.045525651 | 0.117162056 | 0.247512923 |
| 0.220615052 | 0.042899592 | 0.238188719 | 0.071735287 |
| 0.143884217 | 0.011644174 | 0.150295232 | 0.271060896 |
| 0.163655737 | 0.147440945 | 0.027094611 | 0.181577205 |
| 0.131244429 | 0.054543461 | 0.020312594 | 0.109284245 |
| 0.203702128 | 0.103357171 | 0.158195584 | 0.302272526 |
| 0.158473861 | 0.111583703 | 0.084679851 | 0.188619998 |
| 0.266326347 | 0.050811031 | 0.23653023  | 0.155002851 |
| 0.274365521 | 0.229252006 | 0.149108743 | 0.203792939 |
| 0.073617602 | 0.085824126 | 0.067597598 | 0.149109353 |
| 0.076495805 | 0.063960047 | 0.027557993 | 0.163174834 |
| 0.006805351 | 0.044214787 | 0.213813548 | 0.111218723 |
| 0.225752407 | 0.197371109 | 0.222221376 | 0.069956774 |
| 0.004360519 | 0.13735576  | 0.165187517 | 0.070368891 |
| 0.139089105 | 0.172065673 | 0.049769423 | 0.116715022 |
| 0.297027291 | 0.074340457 | 0.136645422 | 0.019092103 |
| 0.034684094 | 0.107905956 | 0.317348654 | 0.197144773 |
| 0.226514424 | 0.094493012 | 0.039086285 | 0.127962812 |
| 0.059711446 | 0.306078965 | 0.275131558 | 0.013340712 |
| 0.038419473 | 0.231243609 | 0.15551734  | 0.049901523 |
| 0.107660327 | 0.208193125 | 0.200981639 | 0.017638895 |
| 0.154462763 | 0.046553037 | 0.262997488 | 0.197700897 |
| 0.20258454  | 0.245477223 | 0.310048876 | 0.105540565 |
| 0.157471793 | 0.192374385 | 0.125734073 | 0.270873402 |
| 0.145970352 | 0.163206632 | 0.141072625 | 0.082197605 |
| 0.109179523 | 0.115368522 | 0.120029272 | 0.103943946 |
| 0.072419629 | 0.140860478 | 0.241821019 | 0.075632579 |
| 0.299752026 | 0.080419104 | 0.29494621  | 0.135471477 |
| 0.247689152 | 0.07465915  | 0.13707903  | 0.121197481 |
| 0.016229072 | 0.026770488 | 0.059500834 | 0.080630834 |
| 0.217618164 | 0.088529441 | 0.054910501 | 0.090408795 |
| 0.111937993 | 0.240766323 | 0.232160201 | 0.207227494 |
| 0.098670069 | 0.106136963 | 0.015211284 | 0.117464655 |
| 0.141099367 | 0.182544444 | 0.199405317 | 0.01021398  |
| 0.208039355 | 0.026600282 | 0.154766343 | 0.153478805 |
| 0.053810636 | 0.244050732 | 0.010807097 | 0.080934857 |
| 0.00685724  | 0.10530972  | 0.226771827 | 0.117477996 |
| 0.034633531 | 0.124438373 | 0.207730449 | 0.020037551 |
| 0.151131127 | 0.122567443 | 0.112519684 | 0.164348029 |
| 0.221230741 | 0.126167736 | 0.19313255  | 0.070696057 |
| 0.075006853 | 0.102561264 | 0.056120969 | 0.185079248 |

|             |             |             |             |
|-------------|-------------|-------------|-------------|
| 0.231585896 | 0.172164238 | 0.113878071 | 0.176530104 |
| 0.144101335 | 0.154320039 | 0.25735103  | 0.111677644 |
| 0.039673823 | 0.100803962 | 0.046862667 | 0.040751917 |
| 0.117983638 | 0.05020392  | 0.001001478 | 0.045962248 |
| 0.28592031  | 0.064484479 | 0.10838293  | 0.210741626 |
| 0.136434976 | 0.318086031 | 0.025147679 | 0.13463945  |
| 0.129561595 | 0.168975807 | 0.07706414  | 0.305887659 |
| 0.236774797 | 0.146444404 | 0.067124624 | 0.012891552 |
| 0.115353723 | 0.079856393 | 0.026296775 | 0.121292642 |
| 0.054160153 | 0.051270381 | 0.106256951 | 0.091928082 |
| 0.214243803 | 0.021794473 | 0.089705012 | 0.113813824 |
| 0.206526912 | 0.174145705 | 0.179798042 | 0.183374326 |
| 0.044176552 | 0.23613749  | 0.084364207 | 0.085367878 |
| 0.090045775 | 0.119297404 | 0.233494687 | 0.095180531 |
| 0.09545459  | 0.081467687 | 0.022086188 | 0.224598238 |
| 0.148891504 | 0.106333137 | 0.236477526 | 0.014941528 |
| 0.302763185 | 0.197459118 | 0.106095413 | 0.056541832 |
| 0.038647013 | 0.148739604 | 0.256106541 | 0.141525073 |
| 0.018242263 | 0.121702267 | 0.07193881  | 0.152843581 |
| 0.16514711  | 0.075935246 | 0.282585727 | 0.025984057 |
| 0.138355362 | 0.130857491 | 0.087032263 | 0.07457033  |
| 0.091194033 | 0.126710101 | 0.026376984 | 0.211019396 |
| 0.236246234 | 0.114484496 | 0.200506241 | 0.172485265 |
| 0.103839222 | 0.161399551 | 0.073447669 | 0.200715975 |
| 0.170017667 | 0.284244271 | 0.180827119 | 0.179146762 |
| 0.328944836 | 0.132991415 | 0.083591135 | 0.195459583 |
| 0.126030343 | 0.053781945 | 0.070873205 | 0.185404553 |
| 0.080994985 | 0.260167237 | 0.056019264 | 0.212202893 |
| 0.079521323 | 0.139375106 | 0.04236807  | 0.208338401 |
| 0.256362018 | 0.14226678  | 0.120575263 | 0.263769511 |
| 0.085899738 | 0.045098316 | 0.255552256 | 0.013706122 |
| 0.065876329 | 0.153545972 | 0.227572835 | 0.124467042 |
| 0.170056484 | 0.156850237 | 0.075216728 | 0.010693914 |
| 0.215354822 | 0.021703052 | 0.110312584 | 0.114747351 |
| 0.050060063 | 0.085568346 | 0.168490802 | 0.215289507 |
| 0.163396018 | 0.025659002 | 0.021670172 | 0.17343331  |
| 0.04847016  | 0.03033977  | 0.059808388 | 0.081015183 |
| 0.071532329 | 0.034118471 | 0.050111565 | 0.04622652  |
| 0.150276816 | 0.114407935 |             |             |

|             |             |             |             |
|-------------|-------------|-------------|-------------|
| NDUFB7      | 0.199540401 | 0.109222526 | 0.172625373 |
| 0.105308674 | 0.062887816 | 0.040402971 | 0.16439085  |
| 0.147360469 | 0.102179882 | 0.009492979 | 0.085194718 |
| 0.202340055 | 0.00507336  | 0.135480373 | 0.17521553  |
| 0.04847763  | 0.203849861 | 0.21854211  | 0.020798505 |
| 0.0474117   | 0.066697167 | 0.020359371 | 0.060693144 |
| 0.054326909 | 0.32000405  | 0.081798161 | 0.026013214 |
| 0.114339681 | 0.006130279 | 0.061238111 | 0.00597407  |
| 0.211831906 | 0.057749214 | 0.018595295 | 0.166261054 |
| 0.055864992 | 0.003276644 | 0.214848236 | 0.068686434 |
| 0.012218202 | 0.246685204 | 0.021687843 | 0.110643818 |
| 0.025477348 | 0.17421103  | 0.005168925 | 0.046962139 |
| 0.072973386 | 0.05669335  | 0.20313075  | 0.068714463 |
| 0.022177495 | 0.156365859 | 0.055393852 | 0.011412553 |
| 0.013743258 | 0.0007164   | 0.004823268 | 0.152308034 |

|             |             |             |             |
|-------------|-------------|-------------|-------------|
| 0.283897027 | 0.224832497 | 0.005818024 | 0.08046319  |
| 0.045983095 | 0.073426552 | 0.187001686 | 0.01556067  |
| 0.146438413 | 0.008585731 | 0.052570408 | 0.064649743 |
| 0.047849256 | 0.129875542 | 0.318104196 | 0.17902404  |
| 0.021841505 | 0.196422531 | 0.073693543 | 0.01798631  |
| 0.100014532 | 0.202297981 | 0.184285597 | 0.15603404  |
| 0.010532035 | 0.037040339 | 0.030540854 | 0.165624014 |
| 0.091784866 | 0.10795941  | 0.10243291  | 0.173682737 |
| 0.138987431 | 0.034286317 | 0.075629088 | 0.242996758 |
| 0.114990609 | 0.011394299 | 0.026447163 | 0.014941186 |
| 0.059872168 | 0.046045129 | 0.174350233 | 0.19793926  |
| 0.050683221 | 0.233642135 | 0.180971602 | 0.034204721 |
| 0.061675122 | 0.232250028 | 0.033955913 | 0.074756497 |
| 0.068281075 | 0.122575368 | 0.083823654 | 0.122734623 |
| 0.036163614 | 0.139552507 | 0.096683439 | 0.136254152 |
| 0.002810103 | 0.143115194 | 0.201791986 | 0.22175292  |
| 0.145550876 | 0.176754091 | 0.025830922 | 0.227153522 |
| 0.103242713 | 0.140288249 | 0.151784315 | 0.118101658 |
| 0.101910953 | 0.157143218 | 0.135180366 | 0.113158797 |
| 0.204066017 | 0.009254171 | 0.03592192  | 0.069721535 |
| 0.096064071 | 0.247910808 | 0.024855154 | 0.190942572 |
| 0.202348269 | 0.090166284 | 0.117577967 | 0.223805935 |
| 0.102727699 | 0.181001173 | 0.094738724 | 0.209613002 |
| 0.180567839 | 0.184684895 | 0.153474114 | 0.056805354 |
| 0.188283056 | 0.084814855 | 0.013960456 | 0.126669227 |
| 0.184439286 | 0.005753298 | 0.089774318 | 0.100229659 |
| 0.137538753 | 0.076580862 | 0.142705622 | 0.121632406 |
| 0.13830094  | 0.265347618 | 0.00051496  | 0.122026658 |
| 0.160264262 | 0.162433854 | 0.106687624 | 0.027863275 |
| 0.057329868 | 0.059122412 | 0.078225532 | 0.017172958 |
| 0.206216212 | 0.109460573 | 0.099310319 | 0.100670865 |
| 0.054877296 | 0.265135219 | 0.022522229 | 0.18333564  |
| 0.196677976 | 0.174210784 | 0.266791012 | 0.159665426 |
| 0.016437551 | 0.22745141  | 0.047526723 | 0.053107257 |
| 0.253052581 | 0.058726986 | 0.011770599 | 0.064449121 |
| 0.277523767 | 0.039946321 | 0.184618017 | 0.158624091 |
| 0.198801616 | 0.358097752 | 0.098504737 | 0.146206523 |
| 0.115073606 | 0.309808284 | 0.055684839 | 0.119431756 |
| 0.03358521  | 0.24571592  | 0.07883556  | 0.174835883 |
| 0.215520811 | 0.037343764 | 0.25364145  | 0.088422414 |
| 0.024944945 | 0.006980799 | 0.005350383 | 0.030493079 |
| 0.328375442 | 0.059827277 | 0.057202895 | 0.083431205 |
| 0.114483548 | 0.12566613  | 0.023385317 | 0.247293968 |
| 0.239307008 | 0.051803351 | 0.120202451 | 0.038132383 |
| 0.119660205 | 0.092579393 | 0.094033203 | 0.040980639 |
| 0.117964219 | 0.015794301 | 0.011529391 | 0.107826871 |
| 0.011683216 | 0.025753895 | 0.107671361 | 0.081544282 |
| 0.027321803 | 0.251540225 | 0.144715229 | 0.001274032 |
| 0.034887425 | 0.066332422 | 0.176953212 | 0.021503789 |
| 0.177225949 | 0.179536178 | 0.047903731 | 0.040010185 |
| 0.230160325 | 0.151970171 | 0.145862849 | 0.12919848  |
| 0.013667344 | 0.149407115 | 0.092736828 | 0.1433727   |
| 0.118393672 | 0.018697425 | 0.004119561 | 0.094160108 |
| 0.10046387  | 0.014376634 | 0.257054995 | 0.062159148 |

|             |             |             |             |
|-------------|-------------|-------------|-------------|
| 0.019550344 | 0.057670834 | 0.047453677 | 0.1458829   |
| 0.217798736 | 0.13788894  | 0.143839037 | 0.110462974 |
| 0.161776598 | 0.183729931 | 0.114925565 | 0.162501776 |
| 0.009381913 | 0.036073889 | 0.026210911 | 0.129784462 |
| 0.251604343 | 0.032387758 | 0.215647479 | 0.005381238 |
| 0.000122066 | 0.211132001 | 0.252345916 | 0.154210355 |
| 0.019091019 | 0.035351259 | 0.06991686  | 0.138352432 |
| 0.244538731 | 0.173079015 | 0.183277196 | 0.040842433 |
| 0.147184535 | 0.033373979 | 0.034214029 | 0.061259472 |
| 0.226434438 | 0.107827098 | 0.149871552 | 0.205088478 |
| 0.205992771 | 0.017608482 | 0.08037197  | 0.021046894 |
| 0.16614543  | 0.069351205 | 0.303961487 | 0.36340439  |
| 0.12430383  | 0.314757689 | 0.2004833   | 0.012364013 |
| 0.142512733 | 0.272440529 | 0.042174322 | 0.116425005 |
| 0.136007986 | 0.134711791 | 0.133199252 | 0.158757996 |
| 0.108059288 | 0.083799777 | 0.089531087 | 0.074512916 |
| 0.15612735  | 0.137080519 | 0.015087719 | 0.076734266 |
| 0.019574809 | 0.138177912 | 0.065511609 | 0.324753833 |
| 0.071479012 | 0.13457684  | 0.211842127 | 0.053793582 |
| 0.13346263  | 0.005094857 | 0.045669598 | 0.100416163 |
| 0.110326871 | 0.174543621 | 0.016698855 | 0.014106564 |
| 0.168426591 | 0.199437421 | 0.012998723 | 0.153043105 |
| 0.107312672 | 0.185721034 | 0.065739279 | 0.103516235 |
| 0.179350566 | 0.005666459 | 0.037380805 | 0.001802006 |
| 0.023608097 | 0.166695082 | 0.021414994 | 0.123329667 |
| 0.163981076 | 0.150360775 | 0.181921623 | 0.161957331 |
| 0.136579076 | 0.126465767 | 0.14542234  | 0.021297568 |
| 0.147992435 | 0.000904423 | 0.131283152 | 0.116904149 |
| 0.014146743 | 0.018398284 | 0.066537315 | 0.100242616 |
| 0.043416062 | 0.244838147 | 0.265693584 | 0.025134602 |
| 0.167335646 | 0.12950588  | 0.193744836 | 0.030752564 |
| 0.063032707 | 0.096693341 | 0.03039722  | 0.148554336 |
| 0.118971475 | 0.170581706 | 0.029551857 | 0.278283076 |
| 0.052312307 | 0.200223173 | 0.250757499 | 0.041498842 |
| 0.099670041 | 0.2636257   | 0.201119314 | 0.138562555 |
| 0.182746199 | 0.076332189 | 0.008509151 | 0.028600875 |
| 0.107891216 | 0.20908851  | 0.0126327   | 0.207818699 |
| 0.127901383 | 0.062286911 | 0.204344475 | 0.221515445 |
| 0.157999172 | 0.166561493 | 0.20421593  | 0.097717237 |
| 0.124497148 | 0.011025473 | 0.049495521 | 0.193197705 |
| 0.009283864 | 0.030965543 | 0.247803315 | 0.041869839 |
| 0.060359951 | 0.191603014 | 0.012918813 | 0.015856911 |
| 0.132329589 | 0.059881908 | 0.045565494 | 0.180084893 |
| 0.046289256 | 0.032175301 | 0.115254927 | 0.125480002 |
| 0.025266193 | 0.184923787 | 0.311076935 | 0.17897308  |
| 0.02968145  | 0.034623689 | 0.257181509 | 0.28624123  |
| 0.12131549  | 0.112079485 | 0.153035706 | 0.133230117 |
| 0.249292051 | 0.050066918 | 0.123352224 | 0.123487236 |
| 0.17803675  | 0.17493652  | 0.249934562 | 0.099001569 |
| 1           | 0.094269443 | 0.04446924  | 0.088526303 |
| 0.139287574 | 0.204601109 | 0.149160751 | 0.020931969 |
| 0.279941183 | 0.098207566 | 0.215512687 | 0.259737726 |
| 0.035628523 | 0.276556956 | 0.154533404 | 0.197162427 |
| 0.058513272 | 0.014696062 | 0.188936176 | 0.217609452 |



|             |             |             |             |
|-------------|-------------|-------------|-------------|
| 0.149537498 | 0.00702467  | 0.252463071 | 0.059414566 |
| 0.129947925 | 0.008991346 | 0.061261806 | 0.213228447 |
| 0.296359874 | 0.187722673 | 0.045035063 | 0.095540932 |
| 0.077927446 | 0.025955272 | 0.139733759 | 0.10182569  |
| 0.137565263 | 0.051051871 | 0.155647795 | 0.164298308 |
| 0.283327059 | 0.041913199 | 0.016611169 | 0.059248358 |
| 0.213359157 | 0.049559057 | 0.127819618 | 0.292993106 |
| 0.239335097 | 0.212232087 | 0.117410329 | 0.182372015 |
| 0.041825975 | 0.177308114 | 0.188173688 | 0.10430008  |
| 0.01568562  | 0.160545071 | 0.021786112 | 0.079657638 |
| 0.015190239 | 0.006793647 | 0.125149176 | 0.103537406 |
| 0.178083438 | 0.120020038 | 0.195714804 | 0.062821967 |
| 0.000101668 | 0.046681983 | 0.086617999 | 0.031923051 |
| 0.111647021 | 0.168267525 | 0.054719461 | 0.180922009 |
| 0.252861551 | 0.245804986 | 0.11884767  | 0.029697454 |
| 0.005808369 | 0.068278865 | 0.285204124 | 0.145028556 |
| 0.109138846 | 0.18453163  | 0.014454959 | 0.133404961 |
| 0.011035733 | 0.278466282 | 0.185858968 | 0.012796931 |
| 0.00767795  | 0.127094978 | 0.096576328 | 0.196264698 |
| 0.033212644 | 0.117047062 | 0.143881127 | 0.017679069 |
| 0.06961386  | 0.189842222 | 0.13160009  | 0.120712153 |
| 0.123132105 | 0.106620886 | 0.133770659 | 0.04168328  |
| 0.08804394  | 0.127569203 | 0.097103525 | 0.221350969 |
| 0.119238754 | 0.141312425 | 0.05917428  | 0.050869591 |
| 0.050283287 | 0.180812316 | 0.317667486 | 0.321587975 |
| 0.213058029 | 0.110760576 | 0.315142643 | 0.269985517 |
| 0.207202799 | 0.038747058 | 0.239308455 | 0.128151261 |
| 0.178735261 | 0.238770686 | 0.05854722  | 0.105735446 |
| 0.005390337 | 0.03290931  | 0.142641533 | 0.058744084 |
| 0.187528959 | 0.037103862 | 0.038362989 | 0.092763516 |
| 0.06409151  | 0.246822963 | 0.309736545 | 0.170457425 |
| 0.049379829 | 0.036646693 | 0.012228573 | 0.162981409 |
| 0.162704995 | 0.266968843 | 0.056240689 | 0.101269192 |
| 0.127712178 | 0.062902865 | 0.094139631 | 0.158110584 |
| 0.010558777 | 0.211141129 | 0.015556066 | 0.159971708 |
| 0.009571311 | 0.233673886 | 0.315782134 | 0.068795017 |
| 0.005646427 | 0.142067427 | 0.075091879 | 0.033781008 |
| 0.072330422 | 0.058649417 | 0.033052671 | 0.108580247 |
| 0.130912199 | 0.196604566 | 0.176846301 | 0.158087922 |
| 0.033533072 | 0.037084723 | 0.046080406 | 0.074121278 |
| 0.09910179  | 0.120999758 | 0.272517184 | 0.119043225 |
| 0.040816598 | 0.296755512 | 0.22393816  | 0.09781598  |
| 0.054642462 | 0.120502648 | 0.005844689 | 0.026785434 |
| 0.081821989 | 0.014200664 | 0.000197938 | 0.009629462 |
| 0.170208678 | 0.023144517 | 0.070849509 | 0.105068607 |
| 0.035139965 | 0.162611768 | 0.006328089 | 0.087831091 |
| 0.140668894 | 0.184605617 | 0.06066014  | 0.24806881  |
| 0.155096762 | 0.201363172 | 0.070271167 | 0.004316136 |
| 0.042569287 | 0.029830814 | 0.013371778 | 0.201785081 |
| 0.186515896 | 0.006339087 | 0.046426343 | 0.189802462 |
| 0.113743963 | 0.005414886 | 0.053617951 | 0.071103581 |
| 0.241451948 | 0.190896282 | 0.126767687 | 0.098907513 |
| 0.083242347 | 0.184679989 | 0.027264965 | 0.030709952 |
| 0.052996494 | 0.025575139 | 0.124946148 | 0.020872993 |

|             |             |             |             |
|-------------|-------------|-------------|-------------|
| 0.215433022 | 0.055436188 | 0.014907691 | 0.255071574 |
| 0.168679745 | 0.023292448 | 0.303514475 | 0.009127125 |
| 0.198758574 | 0.149232755 | 0.042196418 | 0.026295811 |
| 0.152468375 | 0.046086672 | 0.227427045 | 0.141257303 |
| 0.00622244  | 0.047970225 | 0.178775178 | 0.034389315 |
| 0.21608522  | 0.02716826  | 0.251158638 | 0.009662925 |
| 0.132236078 | 0.112812742 | 0.204736758 | 0.047464197 |
| 0.047400779 | 0.291863277 | 0.020622136 | 0.155506682 |
| 0.161468923 | 0.023585706 | 0.09678862  | 0.098284544 |
| 0.0219718   | 0.156700508 | 0.03319561  | 0.151166542 |
| 0.126921793 | 0.23431008  | 0.091913847 | 0.129578232 |
| 0.221728916 | 0.024431472 | 0.016568489 | 0.061040102 |
| 0.142434218 | 0.160647405 | 0.019514457 | 0.147281452 |
| 0.011997349 | 0.163921437 | 0.046638913 | 0.068519345 |
| 0.205369185 | 0.108638927 | 0.037596973 | 0.271146149 |
| 0.134225941 | 0.055155349 | 0.035379481 | 0.233239164 |
| 0.126379601 | 0.143844408 | 0.210143176 | 0.001424215 |
| 0.091578811 | 0.081163907 | 0.191156231 | 0.041410706 |
| 0.312814932 | 0.092669185 | 0.060426218 | 0.071569023 |
| 0.112885437 | 0.014925305 | 0.044981654 | 0.050696308 |
| 0.015985815 | 0.174301624 | 0.171202541 | 0.132604827 |
| 0.141613539 | 0.017182061 | 0.009906615 | 0.149661008 |
| 0.009677548 | 0.008080981 | 0.013323408 | 0.060928477 |
| 0.012508147 | 0.017419782 | 0.020285931 | 0.016262658 |
| 0.121424662 | 0.099857728 |             |             |
| NDUFB8      | 0.077217397 | 0.30881518  | 0.048722109 |
| 0.154323244 | 0.275050174 | 0.193223654 | 0.096994299 |
| 0.137219396 | 0.259848416 | 0.127555945 | 0.237466934 |
| 0.041608587 | 0.108414494 | 0.370053788 | 0.098289113 |
| 0.279552039 | 0.084875353 | 0.142042873 | 0.071191408 |
| 0.209729457 | 0.279287801 | 0.216138073 | 0.162774902 |
| 0.283510783 | 0.185545219 | 0.201720304 | 0.214081946 |
| 0.379721726 | 0.121876118 | 0.274602936 | 0.092451818 |
| 0.377777573 | 0.273630892 | 0.205497725 | 0.032657319 |
| 0.222588012 | 0.040869786 | 0.375288309 | 0.276617489 |
| 0.195974753 | 0.31993811  | 0.129883531 | 0.244029797 |
| 0.175009747 | 0.050823379 | 0.069914222 | 0.288002119 |
| 0.205429659 | 0.237358483 | 0.055272518 | 0.285773914 |
| 0.212523777 | 0.23347418  | 0.218243393 | 0.001774659 |
| 0.203364286 | 0.078848167 | 0.167371114 | 0.382273431 |
| 0.208918549 | 0.177054487 | 0.150938748 | 0.180872592 |
| 0.239351482 | 0.304794705 | 0.260572032 | 0.182118484 |
| 0.391732842 | 0.181274176 | 0.292858437 | 0.145022228 |
| 0.221606181 | 0.045957413 | 0.191604315 | 0.075855669 |
| 0.239748762 | 0.226096658 | 0.24477048  | 0.257276265 |
| 0.293083169 | 0.426070403 | 0.229487253 | 0.371812871 |
| 0.168021194 | 0.256839144 | 0.283996953 | 0.330166813 |
| 0.303982796 | 0.11829347  | 0.319021149 | 0.43021186  |
| 0.064586989 | 0.166704568 | 0.288073036 | 0.108334926 |
| 0.315161043 | 0.209455455 | 0.158009139 | 0.187954624 |
| 0.317878703 | 0.264692459 | 0.380750287 | 0.261443402 |
| 0.252118379 | 0.068351905 | 0.354014009 | 0.253270498 |
| 0.238765333 | 0.085047757 | 0.27078705  | 0.364310378 |
| 0.275344702 | 0.377989476 | 0.306447499 | 0.328420792 |

|             |             |             |             |
|-------------|-------------|-------------|-------------|
| 0.24800251  | 0.395390367 | 0.297025288 | 0.334392758 |
| 0.053590495 | 0.401415079 | 0.171638304 | 0.089749219 |
| 0.060316473 | 0.146967043 | 0.241118803 | 0.319622117 |
| 0.374618727 | 0.243676613 | 0.166544127 | 0.271037575 |
| 0.414336004 | 0.338961944 | 0.397205129 | 0.332157986 |
| 0.065649071 | 0.223936154 | 0.248472786 | 0.180977989 |
| 0.291159222 | 0.130214588 | 0.248246633 | 0.393823984 |
| 0.33701212  | 0.373127108 | 0.124375008 | 0.403222079 |
| 0.184418479 | 0.438009378 | 0.315328741 | 0.1923137   |
| 0.413372645 | 0.375172936 | 0.44023841  | 0.313878789 |
| 0.372965712 | 0.200337245 | 0.065445493 | 0.325983698 |
| 0.429366067 | 0.03474203  | 0.369469535 | 0.400568267 |
| 0.375233025 | 0.363065787 | 0.450381055 | 0.40554073  |
| 0.369736784 | 0.087326138 | 0.031365834 | 0.296155589 |
| 0.389926116 | 0.347089478 | 0.197034975 | 0.214344949 |
| 0.275056925 | 0.195065679 | 0.321290597 | 0.167180971 |
| 0.451780884 | 0.364281333 | 0.369512566 | 0.293541548 |
| 0.178414361 | 0.291397088 | 0.218678166 | 0.341341799 |
| 0.085982247 | 0.097913849 | 0.050347587 | 0.295759061 |
| 0.139130913 | 0.217073028 | 0.18499384  | 0.251991144 |
| 0.216875238 | 0.176100442 | 0.190729927 | 0.312882524 |
| 0.061462187 | 0.205021233 | 0.165655086 | 0.142132807 |
| 0.098180105 | 0.161528178 | 0.172242753 | 0.182310723 |
| 0.253659564 | 0.208124952 | 0.274957305 | 0.404794157 |
| 0.245342185 | 0.166226497 | 0.275533434 | 0.416259539 |
| 0.423482884 | 0.246838906 | 0.237317997 | 0.039526709 |
| 0.218712259 | 0.165460057 | 0.176794729 | 0.214689507 |
| 0.17870395  | 0.222177497 | 0.260381316 | 0.344267354 |
| 0.157271045 | 0.118289388 | 0.238617818 | 0.363970997 |
| 0.136198638 | 0.241771538 | 0.383715014 | 0.196477287 |
| 0.011332891 | 0.227960127 | 0.348853377 | 0.259979045 |
| 0.243486001 | 0.154542489 | 0.167609672 | 0.393946697 |
| 0.190152252 | 0.251472574 | 0.389520229 | 0.348585955 |
| 0.169143262 | 0.184334944 | 0.439126325 | 0.050563683 |
| 0.245804187 | 0.107972391 | 0.308758379 | 0.135619559 |
| 0.218810694 | 0.306409257 | 0.258679208 | 0.266100308 |
| 0.096629243 | 0.402468715 | 0.319940066 | 0.405665844 |
| 0.217116663 | 0.442235754 | 0.370721551 | 0.372849639 |
| 0.274935622 | 0.204111419 | 0.144815842 | 0.342384623 |
| 0.38415704  | 0.176393291 | 0.072751383 | 0.318279423 |
| 0.195508364 | 0.307289514 | 0.211584817 | 0.425616122 |
| 0.417422663 | 0.328968899 | 0.193907374 | 0.369967706 |
| 0.336280982 | 0.184430413 | 0.350416943 | 0.44808808  |
| 0.156865034 | 0.250413949 | 0.261852438 | 0.40876928  |
| 0.175944067 | 0.267361122 | 0.297677386 | 0.169425323 |
| 0.008879596 | 0.080103872 | 0.071952058 | 0.230172443 |
| 0.232157756 | 0.215150348 | 0.309207116 | 0.407089908 |
| 0.151155453 | 0.346534141 | 0.23003158  | 0.248324767 |
| 0.334532213 | 0.238029086 | 0.233359759 | 0.268610717 |
| 0.246540186 | 0.057696003 | 0.163732288 | 0.425246823 |
| 0.038123016 | 0.21511893  | 0.19771768  | 0.009014577 |
| 0.066259304 | 0.260714646 | 0.107757913 | 0.209334026 |
| 0.421145922 | 0.197618512 | 0.177399365 | 0.15193518  |
| 0.307247588 | 0.120557359 | 0.017773893 | 0.396054838 |

|             |             |             |             |
|-------------|-------------|-------------|-------------|
| 0.387662439 | 0.374898511 | 0.37785377  | 0.35271631  |
| 0.373679897 | 0.303966152 | 0.364660554 | 0.165819143 |
| 0.134397633 | 0.084390553 | 0.242629306 | 0.264372728 |
| 0.006282947 | 0.346771151 | 0.257105161 | 0.167176601 |
| 0.321231115 | 0.264722872 | 0.060556781 | 0.258669137 |
| 0.035355694 | 0.153603441 | 0.194036893 | 0.231658619 |
| 0.354251475 | 0.029794822 | 0.136941918 | 0.211319471 |
| 0.314011237 | 0.289542656 | 0.211413677 | 0.414202926 |
| 0.24425852  | 0.102892751 | 0.27783338  | 0.330141107 |
| 0.112624865 | 0.063281064 | 0.198453826 | 0.018305874 |
| 0.096919064 | 0.365115674 | 0.211747144 | 0.088523806 |
| 0.232561841 | 0.013355346 | 0.297365484 | 0.420578835 |
| 0.327531692 | 0.428514171 | 0.39697085  | 0.22269275  |
| 0.396469025 | 0.089934011 | 0.410690577 | 0.30545908  |
| 0.166439255 | 0.001978759 | 0.019102435 | 0.39420412  |
| 0.24583137  | 0.0540148   | 0.171394236 | 0.160011159 |
| 0.177220201 | 0.112849604 | 0.095810713 | 0.269631295 |
| 0.236170957 | 0.260993588 | 0.225414635 | 0.343380166 |
| 0.251358161 | 0.239382319 | 0.17776719  | 0.093438007 |
| 0.242896583 | 0.10077651  | 0.096288072 | 0.026017496 |
| 0.333785938 | 0.10680393  | 0.34714602  | 0.387970302 |
| 0.420039165 | 0.325551824 | 0.134244287 | 0.171869077 |
| 0.373073238 | 0.073442524 | 0.175446949 | 0.082010454 |
| 0.350902608 | 0.287068283 | 0.308716997 | 0.279561064 |
| 0.431795565 | 0.379659459 | 0.065124787 | 0.352710319 |
| 0.028570272 | 0.010609028 | 0.171002628 | 0.242968991 |
| 0.099023316 | 0.250737174 | 0.271264935 | 0.202563057 |
| 0.233524534 | 0.043350089 | 0.243917902 | 0.242199337 |
| 0.27384511  | 0.256542335 | 0.263582686 | 0.233571963 |
| 0.291639204 | 0.233246149 | 0.23238539  | 0.183067444 |
| 0.180483926 | 0.269405126 | 0.18775371  | 0.049775362 |
| 0.202734164 | 0.222688698 | 0.086174429 | 0.159389479 |
| 0.371524956 | 0.39413743  | 0.103448362 | 0.044450346 |
| 0.251110391 | 0.239246434 | 0.413518968 | 0.363816201 |
| 0.403447602 | 0.448889298 | 0.3461896   | 0.211412151 |
| 0.094269443 | 1           | 0.265726922 | 0.232184892 |
| 0.396637976 | 0.05766946  | 0.362158782 | 0.238988915 |
| 0.134743899 | 0.229879332 | 0.079995167 | 0.122461021 |
| 0.234904186 | 0.183871721 | 0.248039988 | 0.113035536 |
| 0.262496364 | 0.217347869 | 0.082389829 | 0.206715848 |
| 0.295467376 | 0.213363709 | 0.168950502 | 0.19322531  |
| 0.283848083 | 0.103815551 | 0.320250081 | 0.414806822 |
| 0.129541821 | 0.123466491 | 0.145226865 | 0.309426912 |
| 0.33384711  | 0.177455388 | 0.036246181 | 0.310809782 |
| 0.406865838 | 0.265121777 | 0.372647159 | 0.388241433 |
| 0.099532859 | 0.238536491 | 0.232734359 | 0.262120277 |
| 0.189489714 | 0.189990383 | 0.228986091 | 0.084465536 |
| 0.306440396 | 0.398541732 | 0.328867751 | 0.209533395 |
| 0.206407548 | 0.088719515 | 0.049966111 | 0.34174958  |
| 0.253607404 | 0.102158015 | 0.142215519 | 0.343719129 |
| 0.01196337  | 0.168149532 | 0.425433509 | 0.203373783 |
| 0.432248763 | 0.412540629 | 0.384875324 | 0.185837241 |
| 0.006047319 | 0.303271286 | 0.265638974 | 0.23544108  |
| 0.31266365  | 0.275387551 | 0.132785532 | 0.150551185 |

|             |             |             |             |
|-------------|-------------|-------------|-------------|
| 0.320280741 | 0.069245881 | 0.201562535 | 0.16880525  |
| 0.187203184 | 0.227714488 | 0.236674708 | 0.191641241 |
| 0.26028365  | 0.082530577 | 0.220152221 | 0.21140066  |
| 0.207858738 | 0.265556625 | 0.345433621 | 0.111838865 |
| 0.153263903 | 0.3840696   | 0.312738456 | 0.046212909 |
| 0.235123046 | 0.368304153 | 0.374653539 | 0.008714864 |
| 0.313298241 | 0.024306571 | 0.242511486 | 0.248994638 |
| 0.25318418  | 0.239783281 | 0.275475325 | 0.272546004 |
| 0.238102035 | 0.234271129 | 0.230948092 | 0.240265168 |
| 0.22846615  | 0.197838202 | 0.257283771 | 0.222951062 |
| 0.237705958 | 0.151044535 | 0.106539629 | 0.104064143 |
| 0.088525011 | 0.346154327 | 0.249497468 | 0.071065959 |
| 0.23314851  | 0.22014883  | 0.365700708 | 0.354586318 |
| 0.390845744 | 0.097657522 | 0.246725878 | 0.320299571 |
| 0.102925561 | 0.150014252 | 0.061370554 | 0.216390899 |
| 0.198308431 | 0.226732031 | 0.185681982 | 0.174370218 |
| 0.265810479 | 0.366831164 | 0.235705031 | 0.389076627 |
| 0.24849295  | 0.218568912 | 0.119953301 | 0.163226344 |
| 0.17671669  | 0.141382786 | 0.276755056 | 0.008910369 |
| 0.272450292 | 0.147768975 | 0.368742279 | 0.368189984 |
| 0.200277915 | 0.361542459 | 0.122887284 | 0.113108035 |
| 0.10466813  | 0.151501866 | 0.155033955 | 0.30131004  |
| 0.163239823 | 0.190477546 | 0.278030597 | 0.14083593  |
| 0.333302274 | 0.302458423 | 0.272294224 | 0.190871327 |
| 0.230904378 | 0.160473174 | 0.37889526  | 0.101666178 |
| 0.217803094 | 0.254064449 | 0.167864998 | 0.268825638 |
| 0.263537537 | 0.407071696 | 0.074041981 | 0.410109788 |
| 0.259503098 | 0.135654032 | 0.427387631 | 0.191969489 |
| 0.191837039 | 0.192837942 | 0.185875366 | 0.174360388 |
| 0.237841341 | 0.216353517 | 0.007679976 | 0.0778788   |
| 0.326483482 | 0.197881217 | 0.274313711 | 0.315267041 |
| 0.287875195 | 0.363669479 | 0.144573702 | 0.188883879 |
| 0.336964534 | 0.371453514 | 0.213725941 | 0.283519673 |
| 0.290888364 | 0.141197407 | 0.198067224 | 0.018137908 |
| 0.252795818 | 0.227571989 | 0.174870721 | 0.090542349 |
| 0.045665307 | 0.196362172 | 0.241290246 | 0.06583598  |
| 0.419857151 | 0.145059685 | 0.207778191 | 0.290797018 |
| 0.175971003 | 0.373969753 | 0.206512117 | 0.321703557 |
| 0.06437537  | 0.245865888 | 0.237674519 | 0.211124358 |
| 0.23646406  | 0.264459151 | 0.344852952 | 0.231395878 |
| 0.073290934 | 0.267523987 | 0.009711471 | 0.352700089 |
| 0.345997262 | 0.252131127 | 0.220475317 | 0.124480734 |
| 0.302800014 | 0.340057389 | 0.219898344 | 0.198489089 |
| 0.040418417 | 0.263433711 | 0.197833125 | 0.312051255 |
| 0.139792676 | 0.216927785 | 0.114939709 | 0.260213235 |
| 0.339064731 | 0.211640863 | 0.265086043 | 0.188987667 |
| 0.357833119 | 0.295924155 | 0.131617105 | 0.240220569 |
| 0.225559582 | 0.072415249 | 0.153849664 | 0.427943866 |
| 0.227203823 | 0.244208386 | 0.390930481 | 0.238376536 |
| 0.237398272 | 0.301000978 | 0.215969108 | 0.412931428 |
| 0.167070395 | 0.242370081 | 0.349761183 | 0.361788866 |
| 0.32465439  | 0.254634573 | 0.220688894 | 0.264782352 |
| 0.326959252 | 0.119597008 | 0.243938402 | 0.287310006 |
| 0.220056061 | 0.281017508 | 0.167261235 | 0.258137538 |

|             |             |             |             |
|-------------|-------------|-------------|-------------|
| 0.080261657 | 0.180833265 | 0.195210059 | 0.151124077 |
| 0.24410666  | 0.275309784 | 0.299087932 | 0.368710492 |
| 0.174729674 | 0.064888277 | 0.409527936 | 0.036110712 |
| 0.167862011 | 0.29230873  | 0.21157071  | 0.256006955 |
| 0.183394351 | 0.229769267 | 0.172241743 | 0.003540208 |
| 0.373114182 | 0.110845    | 0.24583587  | 0.26198229  |
| 0.194209201 | 0.073122206 | 0.362713091 | 0.431700201 |
| 0.234664235 | 0.177116308 | 0.175811005 | 0.363627432 |
| 0.186411868 | 0.176735947 | 0.2131768   | 0.232244231 |
| 0.217727499 | 0.162122473 | 0.194772676 | 0.214221592 |
| 0.29343911  | 0.194196336 |             |             |
| NDUFS8      | 0.036293779 | 0.252384621 | 0.01883277  |
| 0.09660951  | 0.315298958 | 0.165407103 | 0.043379294 |
| 0.084595832 | 0.207300756 | 0.109949106 | 0.220645564 |
| 0.014008007 | 0.233627727 | 0.32974632  | 0.045920686 |
| 0.304009983 | 0.039052578 | 0.0772483   | 0.070198362 |
| 0.138132669 | 0.28519703  | 0.248659359 | 0.125548552 |
| 0.289784464 | 0.108888798 | 0.155439585 | 0.240853415 |
| 0.33272295  | 0.160598964 | 0.284868435 | 0.077706319 |
| 0.295673817 | 0.327627044 | 0.228619139 | 0.009065993 |
| 0.20368676  | 0.060663331 | 0.280851307 | 0.231998293 |
| 0.259352625 | 0.236503922 | 0.103507927 | 0.186817798 |
| 0.144541295 | 0.018192221 | 0.071511134 | 0.303349767 |
| 0.168472517 | 0.19108467  | 0.021850993 | 0.265101486 |
| 0.198868927 | 0.192779075 | 0.18858788  | 0.001790102 |
| 0.276087305 | 0.169823286 | 0.253936563 | 0.316754264 |
| 0.148330938 | 0.111098017 | 0.180086496 | 0.128678452 |
| 0.241491372 | 0.305661311 | 0.213112131 | 0.158296086 |
| 0.335124421 | 0.295482762 | 0.304381329 | 0.110637986 |
| 0.169739786 | 0.015468898 | 0.119735717 | 0.036224749 |
| 0.223937895 | 0.167045005 | 0.245764436 | 0.301205596 |
| 0.237321851 | 0.34297454  | 0.171788475 | 0.2947144   |
| 0.215811076 | 0.319414613 | 0.302830778 | 0.290185465 |
| 0.273947012 | 0.059912211 | 0.303643909 | 0.359862576 |
| 0.026285347 | 0.154013564 | 0.260993062 | 0.059718034 |
| 0.267006007 | 0.256156966 | 0.136488914 | 0.290689925 |
| 0.364977317 | 0.287917161 | 0.299439748 | 0.208430046 |
| 0.266230009 | 0.029524661 | 0.268982831 | 0.329120973 |
| 0.233069179 | 0.036434913 | 0.283924248 | 0.364375333 |
| 0.257881709 | 0.335226741 | 0.270934713 | 0.28537366  |
| 0.273601621 | 0.34144935  | 0.269126743 | 0.286838894 |
| 0.069308555 | 0.339814194 | 0.10290479  | 0.044576568 |
| 0.027399898 | 0.090922495 | 0.245158943 | 0.253318511 |
| 0.348318102 | 0.215028163 | 0.108767752 | 0.218613    |
| 0.402332159 | 0.26310676  | 0.334724252 | 0.301473894 |
| 0.025992676 | 0.282489236 | 0.263889406 | 0.136657656 |
| 0.271993289 | 0.073179392 | 0.314912199 | 0.306364166 |
| 0.272215046 | 0.364437691 | 0.072299716 | 0.309195823 |
| 0.125364903 | 0.373701421 | 0.270539079 | 0.120017027 |
| 0.333654755 | 0.29201718  | 0.393188442 | 0.36669985  |
| 0.300159659 | 0.149611546 | 0.054436601 | 0.276866959 |
| 0.377619405 | 0.041662479 | 0.351106534 | 0.376840569 |
| 0.309683575 | 0.361898404 | 0.40704793  | 0.371478344 |
| 0.308566505 | 0.040154367 | 0.039496227 | 0.292618318 |

|             |             |             |             |
|-------------|-------------|-------------|-------------|
| 0.314645428 | 0.29228263  | 0.158848193 | 0.220371071 |
| 0.306602508 | 0.154390288 | 0.316407616 | 0.183393342 |
| 0.38088106  | 0.335218798 | 0.341501504 | 0.260558077 |
| 0.135209371 | 0.214955036 | 0.263518013 | 0.25768007  |
| 0.040390712 | 0.051308397 | 0.021035445 | 0.244687382 |
| 0.117683144 | 0.152695314 | 0.148131848 | 0.265621976 |
| 0.162980692 | 0.135151563 | 0.247824832 | 0.368512329 |
| 0.024568767 | 0.205614967 | 0.094620602 | 0.080148558 |
| 0.045543053 | 0.090343508 | 0.132714629 | 0.123183268 |
| 0.228739932 | 0.122539649 | 0.285030633 | 0.367423721 |
| 0.230196828 | 0.098366652 | 0.257503798 | 0.367631005 |
| 0.363086118 | 0.277663623 | 0.168218405 | 0.01620531  |
| 0.222490403 | 0.180226786 | 0.287331956 | 0.24544583  |
| 0.100531009 | 0.18052573  | 0.267641673 | 0.377241551 |
| 0.105225987 | 0.064552203 | 0.240975147 | 0.281070124 |
| 0.074713262 | 0.243292422 | 0.363057055 | 0.188566681 |
| 0.002117525 | 0.171998651 | 0.328882308 | 0.260390821 |
| 0.197112887 | 0.214870087 | 0.246183751 | 0.356961019 |
| 0.255427342 | 0.293975648 | 0.363669736 | 0.378347407 |
| 0.16299553  | 0.111526219 | 0.390749911 | 0.094684897 |
| 0.251561088 | 0.112200988 | 0.275540592 | 0.113392637 |
| 0.161697998 | 0.267858532 | 0.306930232 | 0.294075894 |
| 0.054585435 | 0.33788075  | 0.2798126   | 0.360212517 |
| 0.229339608 | 0.387947496 | 0.358033367 | 0.33285034  |
| 0.237131147 | 0.217532021 | 0.247819721 | 0.319905843 |
| 0.353364128 | 0.180123335 | 0.032009349 | 0.318169573 |
| 0.17861116  | 0.341815661 | 0.238300444 | 0.37422931  |
| 0.337795445 | 0.256650947 | 0.142543626 | 0.375779549 |
| 0.291147922 | 0.121259337 | 0.326956891 | 0.393272256 |
| 0.138578275 | 0.251070443 | 0.270064521 | 0.403219043 |
| 0.111908869 | 0.283647686 | 0.230463957 | 0.274853082 |
| 0.020358949 | 0.037383431 | 0.030317414 | 0.181448282 |
| 0.317809625 | 0.225326106 | 0.311683737 | 0.356829007 |
| 0.086966968 | 0.29445162  | 0.167649227 | 0.227168401 |
| 0.271218664 | 0.248010035 | 0.279271616 | 0.307006036 |
| 0.183256191 | 0.024939953 | 0.104871253 | 0.338911838 |
| 0.014424527 | 0.298388863 | 0.149992415 | 0.004472379 |
| 0.025642828 | 0.227580555 | 0.050682819 | 0.122846805 |
| 0.406732343 | 0.116624321 | 0.115430444 | 0.127550488 |
| 0.297996762 | 0.058622816 | 0.009817707 | 0.347546314 |
| 0.327771648 | 0.314834326 | 0.318439007 | 0.278310905 |
| 0.332417475 | 0.285150941 | 0.355743711 | 0.127535256 |
| 0.076293843 | 0.039619797 | 0.291366184 | 0.230004824 |
| 0.002580491 | 0.331783499 | 0.25296969  | 0.100214905 |
| 0.338724579 | 0.223429493 | 0.02526062  | 0.300315503 |
| 0.012297212 | 0.246583405 | 0.148670862 | 0.189993118 |
| 0.363544179 | 0.008575746 | 0.115339914 | 0.242282162 |
| 0.244198585 | 0.221225554 | 0.252913478 | 0.350622002 |
| 0.217250737 | 0.052254692 | 0.251599916 | 0.340087962 |
| 0.054675308 | 0.076362971 | 0.154893914 | 0.014650442 |
| 0.104676584 | 0.295946497 | 0.229719013 | 0.039114992 |
| 0.182008823 | 0.003093186 | 0.227001627 | 0.358246653 |
| 0.261050375 | 0.39034537  | 0.344240632 | 0.295409831 |
| 0.333809332 | 0.176212896 | 0.361104792 | 0.246815445 |

|             |             |             |             |
|-------------|-------------|-------------|-------------|
| 0.151488338 | 0.000627733 | 0.008770659 | 0.371789247 |
| 0.260466941 | 0.021956578 | 0.108486006 | 0.139610319 |
| 0.103804368 | 0.057593928 | 0.048484272 | 0.316232924 |
| 0.234580531 | 0.263242123 | 0.297174366 | 0.275040449 |
| 0.18521263  | 0.18634227  | 0.145171886 | 0.04528891  |
| 0.274235346 | 0.04385865  | 0.047364596 | 0.013560994 |
| 0.341164096 | 0.055465928 | 0.258995756 | 0.328687937 |
| 0.357716534 | 0.354623195 | 0.132516928 | 0.164675896 |
| 0.344859385 | 0.035144586 | 0.205915018 | 0.041501074 |
| 0.289663173 | 0.299771574 | 0.26036239  | 0.206080545 |
| 0.379392751 | 0.316478398 | 0.025678793 | 0.333853904 |
| 0.010199488 | 0.008539529 | 0.128641254 | 0.19383102  |
| 0.106053176 | 0.245714139 | 0.194240673 | 0.155812582 |
| 0.189569299 | 0.018027741 | 0.305034776 | 0.316287287 |
| 0.24366508  | 0.235291336 | 0.305491194 | 0.171561613 |
| 0.284760068 | 0.255493247 | 0.183221395 | 0.128406818 |
| 0.167649612 | 0.191940609 | 0.11088756  | 0.016428388 |
| 0.185035881 | 0.241628    | 0.037382368 | 0.099338344 |
| 0.341032607 | 0.363988047 | 0.045413537 | 0.01905633  |
| 0.18113347  | 0.233417237 | 0.390425592 | 0.308782334 |
| 0.325571289 | 0.384359945 | 0.26363026  | 0.174197638 |
| 0.04446924  | 0.265726922 | 1           | 0.200696612 |
| 0.347034866 | 0.025345856 | 0.298708229 | 0.304261922 |
| 0.077785883 | 0.153089249 | 0.039220275 | 0.060814604 |
| 0.295317016 | 0.127608096 | 0.197265865 | 0.063659592 |
| 0.23488659  | 0.315331402 | 0.035575124 | 0.136767305 |
| 0.246854928 | 0.292634763 | 0.110023899 | 0.150697395 |
| 0.231143892 | 0.091780848 | 0.334245615 | 0.33680073  |
| 0.072203001 | 0.060419448 | 0.100370116 | 0.301243121 |
| 0.312794668 | 0.180055165 | 0.017791952 | 0.258439321 |
| 0.37165897  | 0.27863916  | 0.304232998 | 0.356564363 |
| 0.049058724 | 0.248726295 | 0.265067953 | 0.265022341 |
| 0.130927351 | 0.157332387 | 0.181078867 | 0.036301871 |
| 0.233308683 | 0.311301406 | 0.274606141 | 0.14504807  |
| 0.21361318  | 0.047689167 | 0.020447613 | 0.312855901 |
| 0.311524614 | 0.052367883 | 0.114963796 | 0.339199264 |
| 0.009493332 | 0.286539389 | 0.390478711 | 0.165416659 |
| 0.36183944  | 0.376563834 | 0.31177949  | 0.143010961 |
| 0.015386897 | 0.334634244 | 0.265085332 | 0.222087243 |
| 0.265776807 | 0.224519887 | 0.102478156 | 0.08425494  |
| 0.250193467 | 0.032472145 | 0.136850575 | 0.139013906 |
| 0.213127925 | 0.205266565 | 0.168388311 | 0.126719757 |
| 0.219231702 | 0.039723303 | 0.301362771 | 0.154369422 |
| 0.257550268 | 0.199840195 | 0.291038538 | 0.096695745 |
| 0.209404738 | 0.348427877 | 0.271274264 | 0.016087726 |
| 0.269440947 | 0.323306161 | 0.335539993 | 0.003194571 |
| 0.328793601 | 0.007885771 | 0.207839182 | 0.211646127 |
| 0.205075687 | 0.197882362 | 0.273616609 | 0.274158239 |
| 0.210759321 | 0.167803279 | 0.192572044 | 0.192077723 |
| 0.176637276 | 0.142808309 | 0.281663139 | 0.171201936 |
| 0.248282044 | 0.08098708  | 0.051971298 | 0.048505419 |
| 0.046716065 | 0.309837055 | 0.169459536 | 0.031734003 |
| 0.190981244 | 0.190435392 | 0.297689582 | 0.291449783 |
| 0.348514743 | 0.0475478   | 0.213899305 | 0.27387499  |



|             |             |             |             |
|-------------|-------------|-------------|-------------|
| 0.129526085 | 0.13635122  | 0.027804905 | 0.18298263  |
| 0.146049345 | 0.259791588 | 0.162084134 | 0.129603619 |
| 0.239993178 | 0.276403805 | 0.161715531 | 0.325247719 |
| 0.239902955 | 0.194350999 | 0.099340331 | 0.103861559 |
| 0.10414003  | 0.078833565 | 0.30226462  | 0.001712356 |
| 0.242368356 | 0.105892674 | 0.345876624 | 0.292047297 |
| 0.274837693 | 0.299005003 | 0.097118666 | 0.055845811 |
| 0.086573008 | 0.085070266 | 0.093691659 | 0.292739215 |
| 0.258244495 | 0.128621497 | 0.282521523 | 0.106105577 |
| 0.338917461 | 0.295691733 | 0.278550563 | 0.138991129 |
| 0.173162719 | 0.100839419 | 0.299019979 | 0.051079734 |
| 0.224368767 | 0.296701483 | 0.143272226 | 0.236419238 |
| 0.230687955 | 0.364428597 | 0.031535693 | 0.371048367 |
| 0.249412253 | 0.073653547 | 0.345945876 | 0.147383155 |
| 0.156744665 | 0.165443244 | 0.289532666 | 0.149840511 |
| 0.175266113 | 0.264724191 | 0.00924448  | 0.105831688 |
| 0.293426    | 0.176376765 | 0.238367214 | 0.290820519 |
| 0.314591207 | 0.330162328 | 0.251997238 | 0.139267002 |
| 0.265858433 | 0.287044634 | 0.175637942 | 0.211588341 |
| 0.243965928 | 0.080796    | 0.171796213 | 0.025482971 |
| 0.264764589 | 0.254584929 | 0.168138739 | 0.044507687 |
| 0.016973707 | 0.285096434 | 0.239237637 | 0.029225824 |
| 0.400287631 | 0.239578047 | 0.182227417 | 0.295580243 |
| 0.111548325 | 0.288798553 | 0.166431519 | 0.325600955 |
| 0.025811676 | 0.191503155 | 0.250145145 | 0.192961998 |
| 0.233849302 | 0.30706311  | 0.328186067 | 0.307610525 |
| 0.03109659  | 0.252912707 | 0.00463313  | 0.257942879 |
| 0.260669831 | 0.277718862 | 0.140006901 | 0.122078172 |
| 0.263226199 | 0.286454331 | 0.218027899 | 0.195291194 |
| 0.01553313  | 0.312229681 | 0.148203027 | 0.261074504 |
| 0.17138585  | 0.201679432 | 0.06563621  | 0.279471673 |
| 0.246942404 | 0.213888288 | 0.193423027 | 0.198744915 |
| 0.297418366 | 0.249705339 | 0.075028185 | 0.261366834 |
| 0.211014689 | 0.032622707 | 0.136942401 | 0.366832784 |
| 0.174140332 | 0.319057445 | 0.392464882 | 0.176457498 |
| 0.288683654 | 0.248490503 | 0.219111113 | 0.351008366 |
| 0.130653825 | 0.194202139 | 0.350579512 | 0.31240399  |
| 0.284479848 | 0.314344129 | 0.293110784 | 0.253416627 |
| 0.257745218 | 0.065726818 | 0.303694035 | 0.240287619 |
| 0.301316098 | 0.250397418 | 0.140558598 | 0.267132926 |
| 0.039021963 | 0.135867253 | 0.184775514 | 0.09107681  |
| 0.222094362 | 0.251782936 | 0.301474387 | 0.299538343 |
| 0.139664088 | 0.031318055 | 0.340222137 | 0.071038464 |
| 0.130124759 | 0.304642165 | 0.164173478 | 0.271655424 |
| 0.110641059 | 0.19934428  | 0.125154815 | 0.000541357 |
| 0.345805966 | 0.117350145 | 0.231859179 | 0.257193248 |
| 0.231651933 | 0.03015457  | 0.293490256 | 0.398259294 |
| 0.191601523 | 0.188112623 | 0.210695674 | 0.299711416 |
| 0.289986006 | 0.215844662 | 0.236534728 | 0.208125684 |
| 0.313588327 | 0.146384817 | 0.195057787 | 0.240248897 |
| 0.246061643 | 0.145851784 |             |             |
| NDUFV2      | 0.064332536 | 0.092270381 | 0.036265581 |
| 0.050223167 | 0.236253027 | 0.045843838 | 0.078648396 |
| 0.077529557 | 0.098747165 | 0.011250145 | 0.136626378 |

|             |             |             |             |
|-------------|-------------|-------------|-------------|
| 0.032116118 | 0.036074511 | 0.145288996 | 0.08862546  |
| 0.13545284  | 0.083073086 | 0.152595632 | 0.016753283 |
| 0.046245134 | 0.22516728  | 0.040042147 | 0.040520234 |
| 0.211806281 | 0.137517485 | 0.076912231 | 0.073522318 |
| 0.12136441  | 0.007485139 | 0.102553229 | 0.005612489 |
| 0.192438115 | 0.196782152 | 0.051985693 | 0.024161668 |
| 0.082266898 | 0.032841293 | 0.169749538 | 0.155652176 |
| 0.070119071 | 0.188962333 | 0.017149274 | 0.164378026 |
| 0.032814286 | 0.038465223 | 0.002325009 | 0.107851176 |
| 0.093599198 | 0.110588055 | 0.044649197 | 0.103086653 |
| 0.042951295 | 0.120224089 | 0.044491651 | 0.000575406 |
| 0.064329862 | 0.011321056 | 0.034525785 | 0.132974985 |
| 0.234385461 | 0.21801049  | 0.010454944 | 0.08980865  |
| 0.086078005 | 0.158539575 | 0.268449515 | 0.024059942 |
| 0.139754612 | 0.043869131 | 0.097008313 | 0.041575112 |
| 0.059312121 | 0.041778972 | 0.229828195 | 0.07035932  |
| 0.055837748 | 0.270383963 | 0.158205792 | 0.107309138 |
| 0.073781595 | 0.181009842 | 0.226182484 | 0.120184032 |
| 0.053531102 | 0.152271983 | 0.141774878 | 0.295095261 |
| 0.148714936 | 0.074527956 | 0.147392842 | 0.172777799 |
| 0.058184784 | 0.032946698 | 0.102081274 | 0.08987617  |
| 0.106994519 | 0.047962564 | 0.026225398 | 0.079428642 |
| 0.199290392 | 0.147182855 | 0.146263631 | 0.190660041 |
| 0.153541221 | 0.067325184 | 0.11672193  | 0.159042972 |
| 0.120365387 | 0.087166971 | 0.104331894 | 0.124861535 |
| 0.108990692 | 0.127456645 | 0.087732423 | 0.169582716 |
| 0.106008228 | 0.143983329 | 0.13405234  | 0.139025142 |
| 0.002286394 | 0.135378251 | 0.158826934 | 0.086460879 |
| 0.039289771 | 0.163680092 | 0.080192433 | 0.270856717 |
| 0.137004565 | 0.153977046 | 0.103060225 | 0.252636124 |
| 0.182693916 | 0.102964249 | 0.127053002 | 0.13240755  |
| 0.072748835 | 0.060241843 | 0.106141741 | 0.068846882 |
| 0.138523399 | 0.171952    | 0.142591896 | 0.14283042  |
| 0.182201274 | 0.15788953  | 0.063933894 | 0.170453328 |
| 0.109731189 | 0.195865557 | 0.084206602 | 0.194670475 |
| 0.160145889 | 0.134137517 | 0.194105446 | 0.153023355 |
| 0.153208879 | 0.08220944  | 0.011275537 | 0.147994845 |
| 0.213399688 | 0.018668921 | 0.121118795 | 0.137684595 |
| 0.11948474  | 0.123417139 | 0.19094628  | 0.149045597 |
| 0.114835701 | 0.11795714  | 0.003719986 | 0.271515481 |
| 0.132701059 | 0.177462086 | 0.144341212 | 0.057859288 |
| 0.154765896 | 0.053403859 | 0.122876214 | 0.013849165 |
| 0.220103495 | 0.145762352 | 0.116765327 | 0.110634105 |
| 0.064577954 | 0.184163146 | 0.075974287 | 0.114276278 |
| 0.064136006 | 0.062898206 | 0.057564587 | 0.217530127 |
| 0.011603008 | 0.294569594 | 0.040526027 | 0.140408699 |
| 0.276169623 | 0.051213677 | 0.044675951 | 0.176174428 |
| 0.059566895 | 0.052069543 | 0.157350247 | 0.09345103  |
| 0.095025706 | 0.159959117 | 0.042298582 | 0.09227638  |
| 0.222122671 | 0.119662814 | 0.083099406 | 0.160145689 |
| 0.086446171 | 0.123571249 | 0.092256918 | 0.206820436 |
| 0.263033087 | 0.114338806 | 0.21288486  | 0.038051288 |
| 0.031300011 | 0.020220642 | 0.047639042 | 0.0718845   |
| 0.138851372 | 0.05437589  | 0.112783313 | 0.195134492 |

|             |             |             |             |
|-------------|-------------|-------------|-------------|
| 0.061587874 | 0.069503868 | 0.058093215 | 0.186461665 |
| 0.096544512 | 0.108255784 | 0.167105168 | 0.051599089 |
| 0.015543848 | 0.110783481 | 0.13061264  | 0.111765169 |
| 0.124193874 | 0.035793611 | 0.027588811 | 0.152797249 |
| 0.023929704 | 0.123178775 | 0.139715059 | 0.207240859 |
| 0.016215897 | 0.095191321 | 0.175848309 | 0.007684975 |
| 0.121856734 | 0.092683409 | 0.300345612 | 0.020989204 |
| 0.186132473 | 0.269834337 | 0.174714182 | 0.152082552 |
| 0.070691379 | 0.13960433  | 0.163738442 | 0.143872888 |
| 0.036994307 | 0.177914446 | 0.136975993 | 0.166276909 |
| 0.158782269 | 0.051117782 | 0.026599331 | 0.125715593 |
| 0.150429947 | 0.016625828 | 0.068136611 | 0.095073017 |
| 0.039317717 | 0.137639801 | 0.135198538 | 0.177408202 |
| 0.19921534  | 0.092558797 | 0.15958164  | 0.245150579 |
| 0.182994549 | 0.142835591 | 0.176732308 | 0.190657443 |
| 0.012301867 | 0.099029066 | 0.087208142 | 0.270356462 |
| 0.186948588 | 0.119960296 | 0.199182147 | 0.041473831 |
| 0.002331271 | 0.075302697 | 0.080227866 | 0.261055585 |
| 0.139987325 | 0.053874605 | 0.160838343 | 0.144907575 |
| 0.171278049 | 0.170670794 | 0.185108689 | 0.079317945 |
| 0.122561801 | 0.087744645 | 0.108493973 | 0.145901271 |
| 0.22673     | 0.056180495 | 0.070402973 | 0.176626472 |
| 0.041204789 | 0.076133568 | 0.082567973 | 0.006240569 |
| 0.049467317 | 0.060568092 | 0.099598043 | 0.17845716  |
| 0.193475965 | 0.149219752 | 0.127702257 | 0.015093657 |
| 0.23496555  | 0.158071376 | 0.045220835 | 0.143416414 |
| 0.144346291 | 0.147661498 | 0.133606656 | 0.130196614 |
| 0.148973251 | 0.127010628 | 0.177308211 | 0.051771926 |
| 0.084453411 | 0.055646347 | 0.068538584 | 0.163586605 |
| 0.001710111 | 0.233779808 | 0.184548254 | 0.205817396 |
| 0.131130374 | 0.182824017 | 0.055879946 | 0.155151416 |
| 0.016444904 | 0.031781492 | 0.035269943 | 0.183589361 |
| 0.267182609 | 0.03322542  | 0.010857754 | 0.023267482 |
| 0.107131727 | 0.145129548 | 0.050947352 | 0.150640033 |
| 0.164915173 | 0.055250376 | 0.177273497 | 0.189095754 |
| 0.097000282 | 0.005759783 | 0.043915092 | 0.001180494 |
| 0.013029004 | 0.152410298 | 0.049934083 | 0.033879272 |
| 0.190158074 | 0.014068683 | 0.132222479 | 0.157991374 |
| 0.095840004 | 0.16153478  | 0.148725087 | 0.102079898 |
| 0.141916841 | 0.010792336 | 0.140368676 | 0.101298429 |
| 0.019103399 | 0.001875024 | 0.020609932 | 0.143225341 |
| 0.103228693 | 0.045688353 | 0.210575394 | 0.012006877 |
| 0.096995558 | 0.047366373 | 0.107000956 | 0.176217765 |
| 0.08729988  | 0.263445998 | 0.115393896 | 0.106970249 |
| 0.193811393 | 0.259475842 | 0.029564199 | 0.101039368 |
| 0.116948738 | 0.07435236  | 0.10922571  | 0.017843356 |
| 0.221119912 | 0.080385976 | 0.123776037 | 0.129866222 |
| 0.190375255 | 0.192329971 | 0.011307139 | 0.016429933 |
| 0.163802175 | 0.04116719  | 0.015590383 | 0.055805091 |
| 0.102921728 | 0.132875124 | 0.228882859 | 0.168987219 |
| 0.183638738 | 0.152194458 | 0.080214275 | 0.167437766 |
| 0.023585417 | 0.01970118  | 0.037584595 | 0.204012463 |
| 0.033527328 | 0.085372957 | 0.233805698 | 0.078566448 |
| 0.124819603 | 0.020966082 | 0.092096382 | 0.111484003 |

|             |             |             |             |
|-------------|-------------|-------------|-------------|
| 0.235913825 | 0.123549138 | 0.190776962 | 0.181644594 |
| 0.195643723 | 0.096186073 | 0.201965519 | 0.13938053  |
| 0.028492092 | 0.134077047 | 0.130751334 | 0.054371116 |
| 0.048970358 | 0.075334278 | 0.108466426 | 0.177930858 |
| 0.161984844 | 0.13976686  | 0.063802117 | 0.047539381 |
| 0.186598666 | 0.108860686 | 0.162954222 | 0.109726747 |
| 0.144894811 | 0.196738442 | 0.191787993 | 0.136025386 |
| 0.088526303 | 0.232184892 | 0.200696612 | 1           |
| 0.13978159  | 0.049147179 | 0.126063127 | 0.122968873 |
| 0.182320556 | 0.13743405  | 0.065350498 | 0.17184019  |
| 0.102974097 | 0.223652136 | 0.301946316 | 0.07360016  |
| 0.121559671 | 0.058448903 | 0.094994474 | 0.218294085 |
| 0.157487612 | 0.047280417 | 0.2007803   | 0.073014313 |
| 0.142493289 | 0.006549129 | 0.122386726 | 0.219484987 |
| 0.136887027 | 0.11560781  | 0.018777306 | 0.16184618  |
| 0.105877322 | 0.040337864 | 0.021708404 | 0.080590956 |
| 0.17132801  | 0.081796508 | 0.126682467 | 0.240939038 |
| 0.130252024 | 0.098641055 | 0.076766615 | 0.152104538 |
| 0.208684352 | 0.052669577 | 0.200049505 | 0.123897489 |
| 0.239504402 | 0.176360125 | 0.118476042 | 0.216358299 |
| 0.065761975 | 0.0551077   | 0.042046518 | 0.124954726 |
| 0.095872881 | 0.033031919 | 0.018722893 | 0.129539865 |
| 0.036936678 | 0.069648862 | 0.185854686 | 0.107528731 |
| 0.187860557 | 0.170058229 | 0.187641135 | 0.073849038 |
| 0.00453096  | 0.127989145 | 0.143433695 | 0.066724063 |
| 0.093083048 | 0.151637246 | 0.039740627 | 0.119090719 |
| 0.296838297 | 0.054540003 | 0.08915468  | 0.015699129 |
| 0.027249004 | 0.067252893 | 0.286762386 | 0.161312312 |
| 0.265142826 | 0.059888898 | 0.050767548 | 0.161904689 |
| 0.064006346 | 0.275818632 | 0.227753213 | 0.009369006 |
| 0.017222125 | 0.171197201 | 0.110435824 | 0.049109693 |
| 0.112423688 | 0.17353127  | 0.189214876 | 0.005129894 |
| 0.123750282 | 0.031257488 | 0.24622425  | 0.23106355  |
| 0.248326193 | 0.186314212 | 0.312170665 | 0.137469401 |
| 0.110429008 | 0.186254974 | 0.139785037 | 0.270278969 |
| 0.190135734 | 0.171124592 | 0.143002581 | 0.080437677 |
| 0.113690077 | 0.122920847 | 0.099189589 | 0.082210651 |
| 0.056797898 | 0.117653655 | 0.206063823 | 0.068642566 |
| 0.275901691 | 0.070554813 | 0.274392215 | 0.103101552 |
| 0.236101526 | 0.059317357 | 0.107187127 | 0.094785178 |
| 0.005419637 | 0.014992566 | 0.033960765 | 0.091183523 |
| 0.17962887  | 0.068536994 | 0.050965195 | 0.056004395 |
| 0.074308672 | 0.204315934 | 0.196278654 | 0.198095718 |
| 0.117493972 | 0.077607937 | 0.009973924 | 0.103111735 |
| 0.124504385 | 0.146833786 | 0.231241275 | 0.014321187 |
| 0.166631768 | 0.021291125 | 0.123494026 | 0.124041876 |
| 0.054114758 | 0.233854086 | 0.005132112 | 0.05801969  |
| 0.004820849 | 0.074290483 | 0.18213695  | 0.102472276 |
| 0.037326187 | 0.14832318  | 0.237253616 | 0.018091513 |
| 0.14040246  | 0.107650784 | 0.13788508  | 0.102409315 |
| 0.223842324 | 0.125506886 | 0.150900797 | 0.067420738 |
| 0.05750044  | 0.15668986  | 0.038082217 | 0.159340068 |
| 0.231114403 | 0.145582893 | 0.102221968 | 0.139446793 |
| 0.10618023  | 0.128451896 | 0.211344055 | 0.107301474 |

|             |             |             |             |
|-------------|-------------|-------------|-------------|
| 0.052804415 | 0.125810757 | 0.062318537 | 0.029141906 |
| 0.10089279  | 0.055854581 | 0.00013839  | 0.02002788  |
| 0.257905406 | 0.050471474 | 0.070581947 | 0.181487346 |
| 0.193737431 | 0.286149945 | 0.028886507 | 0.081106972 |
| 0.096320368 | 0.130967512 | 0.038477838 | 0.280747617 |
| 0.160738606 | 0.138836853 | 0.053268207 | 0.00599285  |
| 0.079071439 | 0.062505649 | 0.014507654 | 0.096441236 |
| 0.037788446 | 0.057379905 | 0.078408405 | 0.066314035 |
| 0.179357632 | 0.018857299 | 0.065987777 | 0.114645681 |
| 0.164673349 | 0.133350698 | 0.18564339  | 0.164012808 |
| 0.022595827 | 0.234351034 | 0.094768175 | 0.060265533 |
| 0.088418289 | 0.128960315 | 0.219011463 | 0.12002652  |
| 0.087164113 | 0.079563554 | 0.009829646 | 0.179652937 |
| 0.111903383 | 0.10469935  | 0.198943747 | 0.009553862 |
| 0.320130831 | 0.190361692 | 0.043180617 | 0.05265961  |
| 0.050508847 | 0.139684911 | 0.248407134 | 0.120034049 |
| 0.010525108 | 0.080814223 | 0.090161584 | 0.14272038  |
| 0.124779862 | 0.027922611 | 0.223375966 | 0.016464955 |
| 0.113216125 | 0.121567668 | 0.081238672 | 0.093294675 |
| 0.06326186  | 0.094942866 | 0.021008543 | 0.164412666 |
| 0.241251049 | 0.155462649 | 0.175271225 | 0.148871848 |
| 0.097124652 | 0.135212189 | 0.060513377 | 0.154284563 |
| 0.148763878 | 0.247908727 | 0.166991541 | 0.129973634 |
| 0.306367765 | 0.171011425 | 0.076179    | 0.166691059 |
| 0.098805692 | 0.050149766 | 0.072729762 | 0.156930143 |
| 0.083702933 | 0.240430838 | 0.042976912 | 0.231509394 |
| 0.054014103 | 0.108032717 | 0.042031992 | 0.189175054 |
| 0.195569052 | 0.152466874 | 0.161690758 | 0.23552623  |
| 0.084157677 | 0.046669997 | 0.226974585 | 0.01219718  |
| 0.065026284 | 0.163562292 | 0.212973251 | 0.127302425 |
| 0.152837718 | 0.11058284  | 0.046269378 | 0.003215345 |
| 0.190996237 | 0.095447891 | 0.114497816 | 0.120274378 |
| 0.023879343 | 0.054976978 | 0.151367029 | 0.174165745 |
| 0.155236525 | 0.02019331  | 0.013731795 | 0.134597438 |
| 0.055124    | 0.028723512 | 0.041648532 | 0.063654552 |
| 0.09702845  | 0.023009666 | 0.038673299 | 0.05321398  |
| 0.138642786 | 0.104973399 |             |             |
| NEIL3       | 0.157355422 | 0.490670821 | 0.12980285  |
| 0.228096408 | 0.36931062  | 0.522649238 | 0.119401705 |
| 0.220831056 | 0.439086007 | 0.386542325 | 0.46770091  |
| 0.046865632 | 0.110037234 | 0.509993749 | 0.111937957 |
| 0.457939097 | 0.072998599 | 0.189532161 | 0.118115615 |
| 0.314421518 | 0.34327911  | 0.427314068 | 0.510024778 |
| 0.346411079 | 0.278895472 | 0.458205661 | 0.449322176 |
| 0.519275705 | 0.348059342 | 0.523948683 | 0.261840803 |
| 0.448475447 | 0.388577217 | 0.456623606 | 0.045689374 |
| 0.517339769 | 0.015306794 | 0.456986852 | 0.340285131 |
| 0.186685994 | 0.419800776 | 0.44322654  | 0.343368364 |
| 0.45856324  | 0.088878029 | 0.297928974 | 0.469851419 |
| 0.429835626 | 0.380974064 | 0.144435929 | 0.5182503   |
| 0.446615545 | 0.471349107 | 0.485445841 | 0.006352906 |
| 0.361819947 | 0.105899835 | 0.266618241 | 0.523404737 |
| 0.308869747 | 0.208048131 | 0.336968762 | 0.363090293 |
| 0.465770168 | 0.448254343 | 0.352132402 | 0.445227019 |

|             |             |             |             |
|-------------|-------------|-------------|-------------|
| 0.513829763 | 0.213323781 | 0.501639246 | 0.245589798 |
| 0.490572771 | 0.079116279 | 0.252198109 | 0.163570031 |
| 0.465199983 | 0.296885284 | 0.437067836 | 0.358031937 |
| 0.485298267 | 0.534108969 | 0.336392387 | 0.520262454 |
| 0.121341167 | 0.393618945 | 0.337063739 | 0.384455653 |
| 0.444122602 | 0.151455838 | 0.505115014 | 0.529372106 |
| 0.107693519 | 0.476313453 | 0.482257619 | 0.220712571 |
| 0.511233176 | 0.332755478 | 0.493774372 | 0.222631453 |
| 0.430504913 | 0.402409415 | 0.495413442 | 0.405383243 |
| 0.394329153 | 0.150850856 | 0.516155003 | 0.371753759 |
| 0.395654076 | 0.164454947 | 0.276118662 | 0.516259115 |
| 0.505012488 | 0.526038881 | 0.500476437 | 0.445729813 |
| 0.440820688 | 0.515260498 | 0.500775591 | 0.491150633 |
| 0.215447835 | 0.53710442  | 0.299382004 | 0.0907831   |
| 0.154512031 | 0.154846223 | 0.284454342 | 0.391024254 |
| 0.526942992 | 0.452813383 | 0.314495033 | 0.311590599 |
| 0.497049955 | 0.506602611 | 0.533343313 | 0.497327408 |
| 0.089921658 | 0.289590267 | 0.444872908 | 0.418231754 |
| 0.472283333 | 0.197997932 | 0.308808531 | 0.532216846 |
| 0.462934341 | 0.503693558 | 0.283441235 | 0.526239942 |
| 0.299561909 | 0.520629896 | 0.517413043 | 0.266529707 |
| 0.53411145  | 0.521439704 | 0.508436297 | 0.468501498 |
| 0.498339209 | 0.470679079 | 0.099599752 | 0.462799557 |
| 0.495687687 | 0.021248591 | 0.521667426 | 0.520427549 |
| 0.513196965 | 0.521267165 | 0.513891935 | 0.522171858 |
| 0.520872989 | 0.146024582 | 0.036189049 | 0.362135757 |
| 0.525005416 | 0.480620684 | 0.207094302 | 0.485063594 |
| 0.429448884 | 0.526192479 | 0.505213192 | 0.397847374 |
| 0.519393239 | 0.514961389 | 0.524414757 | 0.489793594 |
| 0.401427143 | 0.401476489 | 0.433122956 | 0.501632274 |
| 0.093697613 | 0.218377072 | 0.118702877 | 0.396229201 |
| 0.460080785 | 0.261262153 | 0.506794875 | 0.42032545  |
| 0.288680892 | 0.471120264 | 0.397763722 | 0.445957475 |
| 0.119450674 | 0.534464699 | 0.26872242  | 0.279199958 |
| 0.084547935 | 0.227630392 | 0.285296533 | 0.252863166 |
| 0.340356037 | 0.282738721 | 0.523107432 | 0.509872093 |
| 0.420178788 | 0.29060756  | 0.524510143 | 0.492662255 |
| 0.454992558 | 0.44884534  | 0.330876541 | 0.024749922 |
| 0.336511227 | 0.363657698 | 0.220318353 | 0.48201097  |
| 0.248544397 | 0.332632248 | 0.465518044 | 0.466627751 |
| 0.421271002 | 0.254043375 | 0.438722045 | 0.454713662 |
| 0.250946345 | 0.399537718 | 0.506053517 | 0.495159063 |
| 0.010836508 | 0.437658431 | 0.525898789 | 0.189396707 |
| 0.421411399 | 0.17939508  | 0.323990531 | 0.507403325 |
| 0.353871318 | 0.277684582 | 0.523921202 | 0.460281046 |
| 0.46116869  | 0.291653878 | 0.522756267 | 0.064571728 |
| 0.406635899 | 0.082376653 | 0.368832549 | 0.429374218 |
| 0.359581146 | 0.376176672 | 0.380162746 | 0.348852623 |
| 0.236300072 | 0.529891845 | 0.486190326 | 0.52375079  |
| 0.435481885 | 0.525563183 | 0.522663986 | 0.509026405 |
| 0.473087585 | 0.424454092 | 0.167126292 | 0.517573479 |
| 0.509297139 | 0.358951022 | 0.152367006 | 0.511412149 |
| 0.431598184 | 0.471172417 | 0.153656788 | 0.505282903 |
| 0.511785101 | 0.493470344 | 0.230320088 | 0.438996072 |

|             |             |             |             |
|-------------|-------------|-------------|-------------|
| 0.477583235 | 0.358799028 | 0.487865066 | 0.528705601 |
| 0.385058816 | 0.419383909 | 0.396238078 | 0.453802754 |
| 0.278148226 | 0.261042014 | 0.399406113 | 0.215963289 |
| 0.015827771 | 0.16660235  | 0.137800415 | 0.238217893 |
| 0.204126135 | 0.499382049 | 0.472950752 | 0.521155297 |
| 0.203523987 | 0.48967648  | 0.335053586 | 0.369514909 |
| 0.475369499 | 0.421592699 | 0.448966291 | 0.466826952 |
| 0.346339321 | 0.036967197 | 0.194154516 | 0.536119066 |
| 0.096771318 | 0.297121975 | 0.43998732  | 0.006368316 |
| 0.101326624 | 0.494714144 | 0.170715523 | 0.266832474 |
| 0.504876147 | 0.274458351 | 0.316960122 | 0.401971544 |
| 0.440346811 | 0.174018544 | 0.007237127 | 0.500859519 |
| 0.489764828 | 0.471862001 | 0.489925152 | 0.476125256 |
| 0.477528622 | 0.488099912 | 0.479142632 | 0.496335295 |
| 0.186549462 | 0.176585132 | 0.24857545  | 0.368140033 |
| 0.012057455 | 0.467329056 | 0.384684088 | 0.234777527 |
| 0.497631113 | 0.398485519 | 0.089243689 | 0.423834336 |
| 0.054300476 | 0.243618137 | 0.428971361 | 0.306117164 |
| 0.414521488 | 0.040040578 | 0.32829691  | 0.385548721 |
| 0.477789435 | 0.446978242 | 0.417947982 | 0.538922685 |
| 0.434402183 | 0.224989649 | 0.3861773   | 0.484723285 |
| 0.138360114 | 0.144685825 | 0.473471387 | 0.05738002  |
| 0.308965502 | 0.467571132 | 0.458048269 | 0.136049774 |
| 0.377876139 | 0.016347302 | 0.460289372 | 0.540031863 |
| 0.490375244 | 0.514639523 | 0.518436658 | 0.330996976 |
| 0.515410781 | 0.126816976 | 0.533045741 | 0.498477724 |
| 0.457671191 | 0.002600163 | 0.013812923 | 0.521382467 |
| 0.466645401 | 0.125880105 | 0.255063657 | 0.492132744 |
| 0.186009014 | 0.27169921  | 0.134312224 | 0.223955059 |
| 0.528220535 | 0.312373331 | 0.223761257 | 0.491630516 |
| 0.329159147 | 0.325067069 | 0.505164038 | 0.168463974 |
| 0.491456265 | 0.107890341 | 0.163763718 | 0.014981814 |
| 0.440457431 | 0.199506903 | 0.501993825 | 0.519875599 |
| 0.501194561 | 0.461808502 | 0.418460953 | 0.470074404 |
| 0.488588369 | 0.193278477 | 0.445651113 | 0.213595332 |
| 0.506710482 | 0.464622626 | 0.422222935 | 0.411346006 |
| 0.500945019 | 0.494088251 | 0.076985458 | 0.482492371 |
| 0.034255661 | 0.00352742  | 0.498339551 | 0.36524284  |
| 0.082007718 | 0.433672388 | 0.352897231 | 0.314695099 |
| 0.311556028 | 0.077400931 | 0.305086224 | 0.280990456 |
| 0.383525203 | 0.441101567 | 0.329881719 | 0.341753818 |
| 0.322733537 | 0.165806737 | 0.287295907 | 0.244572203 |
| 0.317658934 | 0.403592258 | 0.282828513 | 0.05223295  |
| 0.504906472 | 0.488168467 | 0.120947073 | 0.260458875 |
| 0.514929622 | 0.526712708 | 0.082348014 | 0.024818205 |
| 0.369617241 | 0.394936509 | 0.519952857 | 0.513741253 |
| 0.543756992 | 0.520299342 | 0.42866995  | 0.181630095 |
| 0.139287574 | 0.396637976 | 0.347034866 | 0.13978159  |
| 1           | 0.139649103 | 0.503383073 | 0.346863623 |
| 0.200635343 | 0.309296507 | 0.07470054  | 0.155919607 |
| 0.454500714 | 0.279270853 | 0.252509897 | 0.254215213 |
| 0.397177496 | 0.299866261 | 0.101879183 | 0.296137454 |
| 0.446882761 | 0.202078779 | 0.255627626 | 0.430384962 |
| 0.458849322 | 0.293603341 | 0.496564658 | 0.465752898 |

|             |             |             |             |
|-------------|-------------|-------------|-------------|
| 0.229117519 | 0.196181138 | 0.414672428 | 0.468378091 |
| 0.521580639 | 0.472561242 | 0.064423601 | 0.498130196 |
| 0.511630031 | 0.52514386  | 0.518401171 | 0.45126419  |
| 0.159622207 | 0.458712988 | 0.363218605 | 0.409768943 |
| 0.281807224 | 0.520436432 | 0.331917214 | 0.128196444 |
| 0.37694684  | 0.500936605 | 0.485976044 | 0.256861371 |
| 0.512765758 | 0.232954343 | 0.1255948   | 0.511530062 |
| 0.212387505 | 0.174761151 | 0.468006937 | 0.50058826  |
| 0.003148963 | 0.168209683 | 0.492751915 | 0.360247054 |
| 0.521524745 | 0.508409249 | 0.478038263 | 0.373740959 |
| 0.001892498 | 0.467316289 | 0.473405312 | 0.481448704 |
| 0.507915835 | 0.466062629 | 0.242148881 | 0.132573777 |
| 0.374614255 | 0.16604694  | 0.208162422 | 0.473034952 |
| 0.200638226 | 0.519315235 | 0.287815581 | 0.30320326  |
| 0.268286701 | 0.173404834 | 0.298457436 | 0.353322459 |
| 0.172211237 | 0.335360261 | 0.438613426 | 0.395515637 |
| 0.241427121 | 0.481576609 | 0.490123845 | 0.066851707 |
| 0.423095251 | 0.472315485 | 0.487068382 | 0.004768845 |
| 0.506514126 | 0.020537692 | 0.276414863 | 0.299259105 |
| 0.280274287 | 0.292715223 | 0.331421772 | 0.364120438 |
| 0.451109696 | 0.315847544 | 0.381945258 | 0.334835271 |
| 0.240666744 | 0.327400873 | 0.465137085 | 0.455099563 |
| 0.364519173 | 0.219360007 | 0.174817221 | 0.170739639 |
| 0.11002195  | 0.517568727 | 0.340081508 | 0.151065113 |
| 0.322552028 | 0.452888872 | 0.419756423 | 0.509679769 |
| 0.474143682 | 0.200345072 | 0.421605876 | 0.522427432 |
| 0.298436362 | 0.420416193 | 0.13847832  | 0.490243982 |
| 0.3487122   | 0.282717374 | 0.503581775 | 0.43768234  |
| 0.493686007 | 0.437981153 | 0.342308576 | 0.477963554 |
| 0.451529876 | 0.414450295 | 0.417185281 | 0.144781748 |
| 0.280049535 | 0.222198937 | 0.320600577 | 0.006144922 |
| 0.460756858 | 0.398440388 | 0.529500309 | 0.508183967 |
| 0.344211321 | 0.451238022 | 0.447230838 | 0.167474257 |
| 0.369215489 | 0.260221169 | 0.234107016 | 0.512195024 |
| 0.262316466 | 0.292365287 | 0.367827316 | 0.482313237 |
| 0.500489593 | 0.485462115 | 0.311059987 | 0.362728396 |
| 0.326974918 | 0.311449307 | 0.489607355 | 0.224714514 |
| 0.500949897 | 0.233113123 | 0.462939357 | 0.377325359 |
| 0.293791324 | 0.512771768 | 0.127201248 | 0.521943875 |
| 0.398845237 | 0.222814407 | 0.505332374 | 0.4292328   |
| 0.410767888 | 0.189329705 | 0.221228655 | 0.487669672 |
| 0.31738845  | 0.402605725 | 0.024794302 | 0.088667998 |
| 0.416550562 | 0.379801556 | 0.487977981 | 0.446169055 |
| 0.294441018 | 0.409275835 | 0.206156376 | 0.407040114 |
| 0.504530579 | 0.52350683  | 0.349733158 | 0.33372315  |
| 0.44886474  | 0.184540994 | 0.524641665 | 0.024432208 |
| 0.493744174 | 0.486775484 | 0.468050065 | 0.111440967 |
| 0.046187833 | 0.245250845 | 0.489441393 | 0.137040065 |
| 0.504551322 | 0.257256667 | 0.446788119 | 0.521632507 |
| 0.275488954 | 0.524745125 | 0.187538629 | 0.494537521 |
| 0.094966461 | 0.354311933 | 0.438136772 | 0.453069728 |
| 0.298756784 | 0.339764206 | 0.456695755 | 0.284614197 |
| 0.07146109  | 0.341458445 | 0.003195033 | 0.434186652 |
| 0.495297902 | 0.385430587 | 0.297232295 | 0.38536804  |



|             |             |             |             |
|-------------|-------------|-------------|-------------|
| 0.365363192 | 0.45440273  | 0.319779248 | 0.492378932 |
| 0.026600653 | 0.433310816 | 0.298995752 | 0.510306747 |
| 0.289312402 | 0.441013492 | 0.107705133 | 0.364841146 |
| 0.494215375 | 0.36004401  | 0.345592814 | 0.363584462 |
| 0.504220909 | 0.474091651 | 0.265984909 | 0.288374306 |
| 0.467505541 | 0.133180639 | 0.493267083 | 0.532107188 |
| 0.260600081 | 0.258002437 | 0.501253781 | 0.287633985 |
| 0.365660117 | 0.472164967 | 0.476576379 | 0.524884896 |
| 0.118358478 | 0.347292866 | 0.497010959 | 0.495675349 |
| 0.386008169 | 0.205880518 | 0.298603148 | 0.29515314  |
| 0.487258278 | 0.18029887  | 0.304146724 | 0.461919788 |
| 0.256265472 | 0.40742797  | 0.43638642  | 0.248734643 |
| 0.07857449  | 0.261579623 | 0.496025117 | 0.235209031 |
| 0.388461349 | 0.432787764 | 0.287489187 | 0.441468453 |
| 0.214760817 | 0.051679276 | 0.46536449  | 0.022246892 |
| 0.481315217 | 0.481200446 | 0.353980794 | 0.421298637 |
| 0.285591943 | 0.457846787 | 0.450850008 | 0.004355909 |
| 0.482420657 | 0.061158366 | 0.385346837 | 0.293767564 |
| 0.356481511 | 0.111583532 | 0.489440711 | 0.514881747 |
| 0.435412827 | 0.413406703 | 0.419717662 | 0.497606776 |
| 0.176076323 | 0.388908131 | 0.40315553  | 0.512331235 |
| 0.266222911 | 0.46560377  | 0.487016035 | 0.442715214 |
| 0.490970904 | 0.394335468 |             |             |
| NGFRAP1     | 0.219304188 | 0.139858615 | 0.215490364 |
| 0.085289684 | 0.03096558  | 0.048143564 | 0.243674571 |
| 0.184991036 | 0.138920353 | 0.036383557 | 0.048764899 |
| 0.216200217 | 0.00289123  | 0.127503056 | 0.224184201 |
| 0.036259882 | 0.178963674 | 0.200270861 | 0.043584348 |
| 0.08836875  | 0.035079232 | 0.021516757 | 0.079609229 |
| 0.035823271 | 0.305059811 | 0.104895498 | 0.027805217 |
| 0.125347535 | 0.009820273 | 0.046681223 | 0.016390712 |
| 0.197140886 | 0.029209527 | 0.020535285 | 0.190109754 |
| 0.049451248 | 0.00412506  | 0.242970095 | 0.057040302 |
| 0.005978348 | 0.213362103 | 0.049134277 | 0.070708421 |
| 0.051878342 | 0.233220986 | 0.015129823 | 0.048281906 |
| 0.090521909 | 0.073638918 | 0.250113816 | 0.067025224 |
| 0.048093457 | 0.119039681 | 0.088024105 | 0.024824759 |
| 0.012600565 | 0.000221375 | 0.006932755 | 0.165813561 |
| 0.153212517 | 0.141068605 | 0.01686836  | 0.106675071 |
| 0.051063712 | 0.064880882 | 0.115664079 | 0.044498566 |
| 0.147412621 | 0.008772697 | 0.054624429 | 0.05326108  |
| 0.070253115 | 0.262282075 | 0.215861499 | 0.235656088 |
| 0.034849196 | 0.097647648 | 0.039586213 | 0.01777963  |
| 0.145673922 | 0.210203422 | 0.135522978 | 0.197959034 |
| 0.013475963 | 0.025321934 | 0.027421218 | 0.099748974 |
| 0.09436616  | 0.210435293 | 0.073343084 | 0.175531684 |
| 0.238693522 | 0.055415941 | 0.086256257 | 0.260525253 |
| 0.120837492 | 0.017905402 | 0.043469532 | 0.008470549 |
| 0.038450166 | 0.03375268  | 0.209257879 | 0.125294723 |
| 0.034342967 | 0.259024949 | 0.230297533 | 0.020512463 |
| 0.038486117 | 0.221661951 | 0.034417301 | 0.073176598 |
| 0.058066911 | 0.122003992 | 0.107822738 | 0.116264397 |
| 0.030262298 | 0.137435679 | 0.077233748 | 0.136174122 |
| 0.009237094 | 0.159480725 | 0.140690079 | 0.169361557 |

|             |             |             |             |
|-------------|-------------|-------------|-------------|
| 0.247901866 | 0.139631065 | 0.039510342 | 0.156648733 |
| 0.093345775 | 0.104104277 | 0.151996734 | 0.070585849 |
| 0.087285394 | 0.203478638 | 0.160577334 | 0.108020246 |
| 0.241590462 | 0.013904936 | 0.030330732 | 0.091657349 |
| 0.081196034 | 0.206193721 | 0.015597198 | 0.220556713 |
| 0.158469402 | 0.076173968 | 0.18103869  | 0.247962034 |
| 0.138436804 | 0.160671943 | 0.115187855 | 0.133159424 |
| 0.193111691 | 0.209512711 | 0.134000069 | 0.036950555 |
| 0.185651582 | 0.075346444 | 0.038042018 | 0.13120818  |
| 0.145387605 | 0.001331906 | 0.092528497 | 0.101799731 |
| 0.16202848  | 0.072649673 | 0.133322935 | 0.11641398  |
| 0.161462189 | 0.245367886 | 0.004346469 | 0.064900977 |
| 0.1865811   | 0.12853148  | 0.094124459 | 0.031221002 |
| 0.037642681 | 0.069116862 | 0.073920786 | 0.024572947 |
| 0.18255998  | 0.101525427 | 0.106733146 | 0.10608214  |
| 0.093546544 | 0.221182992 | 0.021625659 | 0.225090004 |
| 0.178504639 | 0.205164819 | 0.247978678 | 0.129283509 |
| 0.04025741  | 0.116901417 | 0.076876992 | 0.045908207 |
| 0.127404442 | 0.089718327 | 0.01473698  | 0.040446457 |
| 0.336491518 | 0.040182072 | 0.159375213 | 0.196319372 |
| 0.169447068 | 0.317224678 | 0.100212859 | 0.092349944 |
| 0.062255475 | 0.388172738 | 0.055393853 | 0.116337712 |
| 0.043740621 | 0.224035903 | 0.074598735 | 0.144083657 |
| 0.154737363 | 0.026086353 | 0.188775655 | 0.034573806 |
| 0.038899059 | 0.019921455 | 0.006444705 | 0.028986984 |
| 0.356576446 | 0.084030712 | 0.050264329 | 0.049313327 |
| 0.123442373 | 0.195708056 | 0.035627459 | 0.22511942  |
| 0.265859529 | 0.035921438 | 0.098607832 | 0.052635564 |
| 0.098707741 | 0.083231275 | 0.083152788 | 0.035141221 |
| 0.122356389 | 0.008847275 | 0.009763461 | 0.104288414 |
| 0.018758342 | 0.024910643 | 0.102843586 | 0.050201411 |
| 0.041366865 | 0.33906258  | 0.139120501 | 0.004051451 |
| 0.033959446 | 0.025056894 | 0.087326442 | 0.048496027 |
| 0.122746988 | 0.11752252  | 0.025707133 | 0.030460583 |
| 0.218045438 | 0.165474522 | 0.120636325 | 0.126083461 |
| 0.027105155 | 0.146665541 | 0.081719108 | 0.114937059 |
| 0.087127123 | 0.028732949 | 0.003636618 | 0.085721964 |
| 0.095632131 | 0.036665953 | 0.285294216 | 0.06805464  |
| 0.042226022 | 0.046499142 | 0.033938628 | 0.131210477 |
| 0.20310038  | 0.189993268 | 0.105130046 | 0.070577919 |
| 0.114495418 | 0.120753879 | 0.09672401  | 0.153353145 |
| 0.037599331 | 0.03487056  | 0.029935009 | 0.083491211 |
| 0.17078072  | 0.029291974 | 0.19126235  | 0.00556415  |
| 0.001379832 | 0.246496534 | 0.249630266 | 0.080077645 |
| 0.010756553 | 0.042216287 | 0.056965026 | 0.14451007  |
| 0.177322354 | 0.142013671 | 0.17099955  | 0.043853374 |
| 0.169370672 | 0.035548431 | 0.023536279 | 0.040187986 |
| 0.172550658 | 0.049697614 | 0.08595743  | 0.218229448 |
| 0.267555591 | 0.013212003 | 0.094474093 | 0.00790223  |
| 0.267721827 | 0.101171741 | 0.339928982 | 0.331329561 |
| 0.099637652 | 0.320400539 | 0.184239466 | 0.050376398 |
| 0.076112412 | 0.20408836  | 0.007191434 | 0.1277644   |
| 0.157851725 | 0.157392099 | 0.161633739 | 0.196530622 |
| 0.121956468 | 0.080266154 | 0.07479559  | 0.079384945 |

|             |             |             |             |
|-------------|-------------|-------------|-------------|
| 0.192097705 | 0.23027209  | 0.015122999 | 0.06221231  |
| 0.022493342 | 0.082567298 | 0.046271568 | 0.208720168 |
| 0.059566845 | 0.116092458 | 0.219093963 | 0.035000809 |
| 0.143006907 | 0.005602764 | 0.096202936 | 0.091460465 |
| 0.067974526 | 0.198656011 | 0.025788546 | 0.024485835 |
| 0.187506822 | 0.179307265 | 0.018229914 | 0.161474897 |
| 0.059636071 | 0.270470565 | 0.04473406  | 0.062909821 |
| 0.218048073 | 0.022544284 | 0.074984384 | 0.00384247  |
| 0.028041871 | 0.185166876 | 0.035045327 | 0.193428508 |
| 0.102274142 | 0.139196711 | 0.171635095 | 0.16306252  |
| 0.174010538 | 0.121795465 | 0.138056671 | 0.01416261  |
| 0.151834725 | 0.001259205 | 0.137210293 | 0.130820437 |
| 0.03524272  | 0.010597557 | 0.035285453 | 0.095360475 |
| 0.034568523 | 0.303435925 | 0.171859717 | 0.039190366 |
| 0.126158872 | 0.205414815 | 0.197344375 | 0.018117176 |
| 0.050407554 | 0.042843495 | 0.019307046 | 0.189755219 |
| 0.093798548 | 0.098030635 | 0.05791979  | 0.277007355 |
| 0.03569617  | 0.177287497 | 0.26457864  | 0.007931125 |
| 0.061589142 | 0.318318267 | 0.254675123 | 0.150423344 |
| 0.164350127 | 0.048755232 | 0.0253538   | 0.040051738 |
| 0.103005573 | 0.269089082 | 0.022077266 | 0.229099355 |
| 0.154125539 | 0.047376253 | 0.123867617 | 0.179288085 |
| 0.144394575 | 0.164827263 | 0.23340513  | 0.082624614 |
| 0.06321494  | 0.002149638 | 0.069944193 | 0.143587736 |
| 0.018688832 | 0.033545155 | 0.173561156 | 0.09057111  |
| 0.074539778 | 0.191940166 | 0.013525753 | 0.014769905 |
| 0.077865594 | 0.051222902 | 0.024346739 | 0.173644593 |
| 0.038752657 | 0.029177722 | 0.080373184 | 0.137814132 |
| 0.052113457 | 0.2067028   | 0.304334282 | 0.233237458 |
| 0.038023441 | 0.030663955 | 0.220542997 | 0.20100958  |
| 0.096431523 | 0.105161804 | 0.194755831 | 0.058132585 |
| 0.196822053 | 0.056334856 | 0.108511353 | 0.143782594 |
| 0.19646366  | 0.161437019 | 0.229724753 | 0.081204226 |
| 0.204601109 | 0.05766946  | 0.025345856 | 0.049147179 |
| 0.139649103 | 1           | 0.160824555 | 0.015049904 |
| 0.214112333 | 0.10551306  | 0.131298299 | 0.210714547 |
| 0.024135818 | 0.158666259 | 0.077054352 | 0.21250333  |
| 0.053025362 | 0.012858466 | 0.241180024 | 0.138532535 |
| 0.13249734  | 0.007189022 | 0.176299451 | 0.08529569  |
| 0.130782957 | 0.039010963 | 0.053967939 | 0.180312948 |
| 0.220611654 | 0.223595712 | 0.101973711 | 0.080690686 |
| 0.082882768 | 0.036562186 | 0.071303881 | 0.13929829  |
| 0.122744253 | 0.045799952 | 0.171062802 | 0.118106255 |
| 0.252420993 | 0.029613161 | 0.022608963 | 0.046280417 |
| 0.153204928 | 0.053688962 | 0.098874283 | 0.247852319 |
| 0.193345639 | 0.226544329 | 0.136148899 | 0.101040055 |
| 0.040527491 | 0.22476542  | 0.272788634 | 0.10386965  |
| 0.012820668 | 0.204212364 | 0.047852159 | 0.077662343 |
| 0.002667773 | 0.004278972 | 0.119259571 | 0.078880733 |
| 0.179134601 | 0.10986796  | 0.169116785 | 0.093719169 |
| 6.60E-05    | 0.041226412 | 0.051567362 | 0.036430224 |
| 0.134323854 | 0.1339943   | 0.073127891 | 0.133081645 |
| 0.150439874 | 0.276911844 | 0.1161939   | 0.044574498 |
| 0.009581782 | 0.076574557 | 0.168818742 | 0.146496528 |

|             |             |             |             |
|-------------|-------------|-------------|-------------|
| 0.073812522 | 0.281981758 | 0.011332192 | 0.095387302 |
| 0.014987588 | 0.160175906 | 0.123332246 | 0.043070151 |
| 0.010389759 | 0.121689498 | 0.108197983 | 0.210930666 |
| 0.024480359 | 0.112330935 | 0.122257626 | 0.036640759 |
| 0.05391009  | 0.135190048 | 0.071077927 | 0.061254471 |
| 0.073454155 | 0.084787002 | 0.06217224  | 0.035619136 |
| 0.0927026   | 0.113662878 | 0.066102743 | 0.102599823 |
| 0.071123855 | 0.120922257 | 0.04183513  | 0.073641708 |
| 0.034898362 | 0.158800287 | 0.344987555 | 0.386728065 |
| 0.129558104 | 0.114035018 | 0.233464789 | 0.273043917 |
| 0.106569954 | 0.063174413 | 0.162691817 | 0.161357102 |
| 0.126626034 | 0.319480456 | 0.062766908 | 0.114882804 |
| 0.01883801  | 0.049802221 | 0.261404779 | 0.058798828 |
| 0.116434135 | 0.024863155 | 0.04888605  | 0.119880624 |
| 0.08507957  | 0.212060516 | 0.221352334 | 0.148409613 |
| 0.043847235 | 0.054966738 | 0.0394702   | 0.093249214 |
| 0.153430029 | 0.249383964 | 0.027425203 | 0.058190664 |
| 0.085424373 | 0.097097473 | 0.089816702 | 0.182841945 |
| 0.013188245 | 0.153373063 | 0.043419336 | 0.205853134 |
| 0.031271673 | 0.337047555 | 0.224122467 | 0.070748562 |
| 0.00648868  | 0.11707078  | 0.040800252 | 0.071259983 |
| 0.061533023 | 0.065551498 | 0.034724288 | 0.124320236 |
| 0.104557232 | 0.175100772 | 0.212154073 | 0.199107512 |
| 0.038881289 | 0.02031771  | 0.073886797 | 0.052093436 |
| 0.067230751 | 0.126072426 | 0.233577042 | 0.123871652 |
| 0.04057395  | 0.274961459 | 0.200503091 | 0.087465643 |
| 0.076144903 | 0.056925895 | 0.005656622 | 0.055908333 |
| 0.097161183 | 0.016343572 | 0.001167229 | 0.010664649 |
| 0.092790115 | 0.053258098 | 0.103364413 | 0.091808225 |
| 0.025567404 | 0.106135872 | 0.005230911 | 0.119041395 |
| 0.187871247 | 0.223262778 | 0.067962787 | 0.174941378 |
| 0.124859628 | 0.1559893   | 0.075746606 | 0.010861565 |
| 0.041745893 | 0.030697953 | 0.03539445  | 0.206445625 |
| 0.203444713 | 0.00737935  | 0.051766357 | 0.254891433 |
| 0.099811431 | 0.005862023 | 0.076878354 | 0.057948696 |
| 0.223406849 | 0.229995395 | 0.080688986 | 0.063364517 |
| 0.216967741 | 0.129707658 | 0.026217667 | 0.04413109  |
| 0.035274718 | 0.019803014 | 0.078705528 | 0.012959386 |
| 0.190921139 | 0.041329571 | 0.030889878 | 0.249191672 |
| 0.2285246   | 0.023303866 | 0.25544815  | 0.030137682 |
| 0.098007449 | 0.133238583 | 0.048674618 | 0.030791255 |
| 0.071716261 | 0.028518704 | 0.124125924 | 0.125216912 |
| 0.010695733 | 0.063218492 | 0.104060506 | 0.030577657 |
| 0.272545949 | 0.041028849 | 0.201642289 | 0.020956662 |
| 0.153950936 | 0.121288734 | 0.24619789  | 0.033739862 |
| 0.067390124 | 0.264447602 | 0.04085859  | 0.159350502 |
| 0.087666524 | 0.013900227 | 0.073406078 | 0.093029522 |
| 0.01934378  | 0.154348213 | 0.041907832 | 0.166184312 |
| 0.077382776 | 0.128773688 | 0.072624889 | 0.143651763 |
| 0.119014344 | 0.017719007 | 0.014901508 | 0.044672964 |
| 0.174523852 | 0.109376448 | 0.02441841  | 0.123978558 |
| 0.011536131 | 0.091385595 | 0.077763463 | 0.040732989 |
| 0.110581962 | 0.122812977 | 0.041550529 | 0.191978258 |
| 0.082377423 | 0.040817846 | 0.032388524 | 0.172643327 |

|             |             |             |             |
|-------------|-------------|-------------|-------------|
| 0.059043799 | 0.070061309 | 0.176500177 | 0.000463348 |
| 0.08286199  | 0.046663486 | 0.106592266 | 0.033798072 |
| 0.250867973 | 0.087250294 | 0.100352028 | 0.08225963  |
| 0.089075734 | 0.005270909 | 0.047255273 | 0.034146127 |
| 0.023219536 | 0.259106292 | 0.165309952 | 0.118788348 |
| 0.108861517 | 0.028428457 | 0.016983609 | 0.15716117  |
| 0.006834208 | 0.01518985  | 0.024309774 | 0.074734689 |
| 0.009949397 | 0.035519578 | 0.031135405 | 0.018887752 |
| 0.100640115 | 0.099902998 |             |             |
| NMRAL1      | 0.173187127 | 0.492838577 | 0.157495761 |
| 0.220843895 | 0.326268628 | 0.516303658 | 0.124227884 |
| 0.21822187  | 0.443859445 | 0.382588293 | 0.432602414 |
| 0.050483099 | 0.089276502 | 0.48535521  | 0.115995551 |
| 0.404496622 | 0.073232356 | 0.187164594 | 0.111728315 |
| 0.319528146 | 0.291431576 | 0.382179426 | 0.504513623 |
| 0.304256989 | 0.298413934 | 0.459663835 | 0.410716039 |
| 0.507494863 | 0.314753143 | 0.493122075 | 0.269864603 |
| 0.435607643 | 0.335720835 | 0.415872914 | 0.058834906 |
| 0.487092525 | 0.012483379 | 0.45293491  | 0.297161587 |
| 0.164721059 | 0.416190519 | 0.451973376 | 0.314720649 |
| 0.438141364 | 0.101640306 | 0.303477551 | 0.426321501 |
| 0.432687029 | 0.376073535 | 0.169714721 | 0.500615856 |
| 0.413859583 | 0.466309262 | 0.482517637 | 0.004903113 |
| 0.312715814 | 0.08471164  | 0.220772182 | 0.519825846 |
| 0.303628576 | 0.20028995  | 0.297199347 | 0.371080038 |
| 0.429524477 | 0.412672228 | 0.345911332 | 0.412255324 |
| 0.498130192 | 0.168406082 | 0.474023877 | 0.244854036 |
| 0.460065374 | 0.097223874 | 0.257309975 | 0.192344481 |
| 0.43183     | 0.281056931 | 0.400534029 | 0.315221903 |
| 0.484580032 | 0.526012398 | 0.334968112 | 0.519704353 |
| 0.092788588 | 0.341098441 | 0.304092328 | 0.356921844 |
| 0.415746755 | 0.157293562 | 0.466500617 | 0.512047253 |
| 0.125132432 | 0.46373219  | 0.445304773 | 0.238973735 |
| 0.512223563 | 0.303629361 | 0.476451521 | 0.184337788 |
| 0.387924891 | 0.343609465 | 0.494176237 | 0.378680609 |
| 0.36365954  | 0.173057312 | 0.524579638 | 0.319515864 |
| 0.353442971 | 0.186737029 | 0.227941138 | 0.483680537 |
| 0.467200166 | 0.509692613 | 0.480906566 | 0.412476254 |
| 0.381174613 | 0.501631527 | 0.472000515 | 0.4820058   |
| 0.221255722 | 0.526120808 | 0.305587237 | 0.09103473  |
| 0.177178808 | 0.15480416  | 0.252232556 | 0.383930519 |
| 0.506925745 | 0.439553728 | 0.303457211 | 0.277663766 |
| 0.460367374 | 0.513409622 | 0.521295307 | 0.465018829 |
| 0.098631382 | 0.252283453 | 0.390734779 | 0.4306062   |
| 0.428544773 | 0.209743839 | 0.257971044 | 0.529092743 |
| 0.449760748 | 0.465223935 | 0.305051241 | 0.52838857  |
| 0.289760516 | 0.501493452 | 0.511178495 | 0.253470732 |
| 0.52699021  | 0.523129487 | 0.484451691 | 0.420721724 |
| 0.497848531 | 0.459132185 | 0.083717772 | 0.443578938 |
| 0.476078728 | 0.016894195 | 0.49754065  | 0.494236895 |
| 0.504490308 | 0.484659428 | 0.487162221 | 0.504230712 |
| 0.51336194  | 0.163344248 | 0.027427684 | 0.317502936 |
| 0.516458756 | 0.462678143 | 0.196147328 | 0.432928205 |
| 0.378164384 | 0.508855494 | 0.483496307 | 0.336756083 |

|             |             |             |             |
|-------------|-------------|-------------|-------------|
| 0.500051095 | 0.499752662 | 0.506510287 | 0.460114153 |
| 0.397660263 | 0.401937185 | 0.384280611 | 0.510885311 |
| 0.102927838 | 0.229707182 | 0.142746742 | 0.38371786  |
| 0.471261423 | 0.245948077 | 0.479186331 | 0.380201313 |
| 0.273838709 | 0.470200498 | 0.356490016 | 0.395371693 |
| 0.145167872 | 0.498875973 | 0.28375034  | 0.278522314 |
| 0.084044053 | 0.247237796 | 0.246783434 | 0.2469348   |
| 0.298800153 | 0.305902922 | 0.489029947 | 0.492268559 |
| 0.383752219 | 0.306059596 | 0.492704802 | 0.475739862 |
| 0.429188067 | 0.399842253 | 0.328149777 | 0.025116277 |
| 0.268512814 | 0.329927597 | 0.177670968 | 0.445465507 |
| 0.27599335  | 0.277293997 | 0.411180947 | 0.421454508 |
| 0.415723012 | 0.272332052 | 0.376698879 | 0.453052588 |
| 0.272327931 | 0.356330512 | 0.467680449 | 0.465613568 |
| 0.015662369 | 0.402088399 | 0.494469146 | 0.15629675  |
| 0.397586547 | 0.143423818 | 0.283791028 | 0.478055288 |
| 0.29478698  | 0.230293491 | 0.505922361 | 0.421114387 |
| 0.423619572 | 0.318118112 | 0.499573964 | 0.043010277 |
| 0.371128909 | 0.072780335 | 0.334211528 | 0.433935217 |
| 0.343364526 | 0.347774707 | 0.330978789 | 0.30938775  |
| 0.261196087 | 0.514737484 | 0.480301464 | 0.503797238 |
| 0.376236342 | 0.503181992 | 0.487702885 | 0.482673435 |
| 0.455785163 | 0.377698854 | 0.130886597 | 0.482847495 |
| 0.482078518 | 0.315517669 | 0.180059019 | 0.478387676 |
| 0.39401178  | 0.419961563 | 0.14134393  | 0.479525585 |
| 0.505726556 | 0.498005907 | 0.209847481 | 0.397255327 |
| 0.45039119  | 0.352539129 | 0.474847109 | 0.506709063 |
| 0.357803376 | 0.35647577  | 0.3363974   | 0.419480924 |
| 0.28029777  | 0.214511383 | 0.403354816 | 0.181149969 |
| 0.01513285  | 0.183957931 | 0.153662002 | 0.214030315 |
| 0.167215748 | 0.47449804  | 0.434595131 | 0.499770623 |
| 0.197175506 | 0.48526872  | 0.335128679 | 0.308748506 |
| 0.460917446 | 0.372011176 | 0.408696598 | 0.425592458 |
| 0.347581537 | 0.040634212 | 0.178638928 | 0.527378333 |
| 0.120467336 | 0.247448179 | 0.428345559 | 0.006080168 |
| 0.10872674  | 0.491194819 | 0.195936385 | 0.284818801 |
| 0.47591412  | 0.296384426 | 0.314331772 | 0.377430702 |
| 0.411965236 | 0.186249324 | 0.008241534 | 0.485671528 |
| 0.482428464 | 0.466746442 | 0.482526215 | 0.481439789 |
| 0.459069182 | 0.475473062 | 0.441840969 | 0.504164096 |
| 0.186709965 | 0.199793263 | 0.193189491 | 0.319243226 |
| 0.011896483 | 0.445097352 | 0.356031963 | 0.239516191 |
| 0.45799802  | 0.373886318 | 0.097263313 | 0.384386136 |
| 0.06023173  | 0.198047264 | 0.395328071 | 0.2849704   |
| 0.379413873 | 0.050914411 | 0.303525185 | 0.31844416  |
| 0.482871012 | 0.440015803 | 0.378432076 | 0.527884639 |
| 0.395893135 | 0.251815043 | 0.34407591  | 0.451834698 |
| 0.14105814  | 0.123251217 | 0.451712312 | 0.059617041 |
| 0.322034103 | 0.468475684 | 0.419365665 | 0.150502766 |
| 0.351092474 | 0.020792469 | 0.457198787 | 0.523885969 |
| 0.49539339  | 0.488681363 | 0.503840176 | 0.280246284 |
| 0.500771246 | 0.103463205 | 0.514890868 | 0.487422068 |
| 0.418143646 | 0.002659916 | 0.013687942 | 0.495577978 |
| 0.410817261 | 0.157426704 | 0.25408738  | 0.481072411 |

|             |             |             |             |
|-------------|-------------|-------------|-------------|
| 0.173543402 | 0.287017617 | 0.146172489 | 0.187811907 |
| 0.511756663 | 0.274613243 | 0.187247567 | 0.486320959 |
| 0.299886349 | 0.306901418 | 0.485654769 | 0.190307094 |
| 0.459120986 | 0.112712061 | 0.185231386 | 0.013927377 |
| 0.40479164  | 0.226327147 | 0.512522493 | 0.50805027  |
| 0.48269941  | 0.421451275 | 0.38954926  | 0.441048402 |
| 0.471816541 | 0.224992534 | 0.420208379 | 0.242549357 |
| 0.5015977   | 0.407907071 | 0.396184706 | 0.403781846 |
| 0.474244168 | 0.480265819 | 0.083835723 | 0.442296427 |
| 0.0417562   | 0.003309734 | 0.485774671 | 0.354352156 |
| 0.07836821  | 0.373134341 | 0.344030411 | 0.307056712 |
| 0.301139318 | 0.084898153 | 0.25261089  | 0.227762719 |
| 0.349634964 | 0.387894586 | 0.277132405 | 0.346814011 |
| 0.289201024 | 0.130562485 | 0.278173516 | 0.232792336 |
| 0.296463502 | 0.406160151 | 0.298569229 | 0.059775139 |
| 0.476442592 | 0.434202502 | 0.130866882 | 0.272940393 |
| 0.485630381 | 0.498070307 | 0.079972792 | 0.023397176 |
| 0.366301623 | 0.347536591 | 0.49010707  | 0.507592676 |
| 0.536945647 | 0.496383216 | 0.429651648 | 0.152466441 |
| 0.149160751 | 0.362158782 | 0.298708229 | 0.126063127 |
| 0.503383073 | 0.160824555 | 1           | 0.298311138 |
| 0.210474862 | 0.296652482 | 0.075517602 | 0.163654281 |
| 0.407022336 | 0.275544378 | 0.227845824 | 0.271197815 |
| 0.341209634 | 0.259007257 | 0.111133901 | 0.281363236 |
| 0.418122045 | 0.159384677 | 0.251186909 | 0.437588109 |
| 0.464036641 | 0.301233664 | 0.450427658 | 0.448449586 |
| 0.243726342 | 0.206802363 | 0.403572028 | 0.448490875 |
| 0.494016119 | 0.450311661 | 0.070431386 | 0.497773077 |
| 0.492529729 | 0.483000076 | 0.515183167 | 0.417086936 |
| 0.177578497 | 0.401693319 | 0.316516587 | 0.355249972 |
| 0.272677581 | 0.518331111 | 0.311757416 | 0.140933325 |
| 0.378875813 | 0.498793596 | 0.472043505 | 0.239443556 |
| 0.493093214 | 0.259777244 | 0.14750902  | 0.501174045 |
| 0.166532505 | 0.170536694 | 0.465501048 | 0.471649134 |
| 0.003543516 | 0.136763226 | 0.472558922 | 0.343054123 |
| 0.51090148  | 0.481146749 | 0.465238264 | 0.384946611 |
| 0.001175583 | 0.423011686 | 0.424958882 | 0.432549181 |
| 0.491853292 | 0.461404586 | 0.259748105 | 0.125705863 |
| 0.363702913 | 0.193607003 | 0.17847174  | 0.475330228 |
| 0.162346426 | 0.490060061 | 0.28100429  | 0.300578578 |
| 0.244331078 | 0.199415228 | 0.263766321 | 0.34973855  |
| 0.146170519 | 0.322177302 | 0.407905702 | 0.40790593  |
| 0.181051273 | 0.45321627  | 0.459656929 | 0.079289334 |
| 0.381841359 | 0.449960108 | 0.478022398 | 0.003575076 |
| 0.457452468 | 0.022912353 | 0.243634009 | 0.267521187 |
| 0.257863283 | 0.25566048  | 0.295190737 | 0.325562935 |
| 0.422254453 | 0.295990455 | 0.352245223 | 0.314679901 |
| 0.222655037 | 0.329525613 | 0.429106674 | 0.440873928 |
| 0.316764257 | 0.224668699 | 0.204209234 | 0.202353416 |
| 0.110657512 | 0.510801187 | 0.345633503 | 0.181522066 |
| 0.304338981 | 0.429786211 | 0.40461809  | 0.50605914  |
| 0.458738044 | 0.235914254 | 0.386390396 | 0.510776632 |
| 0.26123006  | 0.400455906 | 0.152252836 | 0.483592305 |
| 0.33316978  | 0.227823756 | 0.501232781 | 0.425633435 |

|             |             |             |             |
|-------------|-------------|-------------|-------------|
| 0.469726822 | 0.434737654 | 0.348104768 | 0.472409923 |
| 0.418949279 | 0.380318796 | 0.410166324 | 0.130616641 |
| 0.269604731 | 0.238389905 | 0.272216793 | 0.008089451 |
| 0.428650984 | 0.40548413  | 0.49839058  | 0.506470261 |
| 0.295576529 | 0.444953339 | 0.43739624  | 0.163128207 |
| 0.378224133 | 0.285043539 | 0.240181752 | 0.492515826 |
| 0.215671624 | 0.294148626 | 0.323664995 | 0.499176943 |
| 0.465353912 | 0.46051572  | 0.278692959 | 0.345368871 |
| 0.318029567 | 0.332223981 | 0.490288005 | 0.252362104 |
| 0.464259376 | 0.196199263 | 0.467291644 | 0.323586398 |
| 0.257541199 | 0.498869934 | 0.146215956 | 0.500558207 |
| 0.337016087 | 0.247697282 | 0.494614579 | 0.436883311 |
| 0.425999749 | 0.182657675 | 0.179675941 | 0.475161259 |
| 0.295310591 | 0.360941583 | 0.021156345 | 0.062271062 |
| 0.380793742 | 0.361625307 | 0.470222923 | 0.422001458 |
| 0.256062171 | 0.379042468 | 0.180877346 | 0.385539934 |
| 0.508525677 | 0.529630468 | 0.296220232 | 0.324839914 |
| 0.421156171 | 0.182529157 | 0.522566717 | 0.022186492 |
| 0.440170693 | 0.442199824 | 0.424167107 | 0.116547741 |
| 0.052491446 | 0.195725459 | 0.446222873 | 0.161832495 |
| 0.472466009 | 0.215123464 | 0.439677218 | 0.500302266 |
| 0.289363098 | 0.528039135 | 0.169029679 | 0.452518725 |
| 0.105760746 | 0.3503986   | 0.40454927  | 0.419371992 |
| 0.249851235 | 0.28456566  | 0.416878719 | 0.236548281 |
| 0.074583189 | 0.300880507 | 0.002411019 | 0.434476197 |
| 0.502171164 | 0.330910004 | 0.309075899 | 0.374804147 |
| 0.342003747 | 0.453059123 | 0.262944843 | 0.467643707 |
| 0.02911492  | 0.375214771 | 0.294130534 | 0.503188311 |
| 0.238002843 | 0.403992348 | 0.112261445 | 0.315654541 |
| 0.509090566 | 0.287938072 | 0.344771113 | 0.309261355 |
| 0.502904114 | 0.480367794 | 0.29877694  | 0.273306089 |
| 0.449776683 | 0.152724159 | 0.489630675 | 0.51431536  |
| 0.236604083 | 0.212368826 | 0.459558409 | 0.250683313 |
| 0.312258647 | 0.476015471 | 0.453241765 | 0.512335534 |
| 0.099761704 | 0.329212848 | 0.466296259 | 0.47888594  |
| 0.362818458 | 0.168020389 | 0.242459771 | 0.244536239 |
| 0.491961511 | 0.182237028 | 0.256219319 | 0.441707733 |
| 0.202198116 | 0.384480036 | 0.447049985 | 0.212367771 |
| 0.076709973 | 0.252780361 | 0.477388242 | 0.245520765 |
| 0.348112322 | 0.388914938 | 0.24727382  | 0.431269417 |
| 0.19722643  | 0.049939063 | 0.455529222 | 0.013796438 |
| 0.494354947 | 0.441864942 | 0.34473828  | 0.378435154 |
| 0.301716695 | 0.431274687 | 0.431178355 | 0.004696311 |
| 0.450546937 | 0.064062526 | 0.362673501 | 0.243647112 |
| 0.294966294 | 0.118823983 | 0.491857282 | 0.487902911 |
| 0.437028683 | 0.403783191 | 0.367370501 | 0.49163317  |
| 0.142186681 | 0.351839456 | 0.349762959 | 0.499891541 |
| 0.22338441  | 0.437145262 | 0.4507718   | 0.400159008 |
| 0.480220724 | 0.397510278 |             |             |
| NR1D2       | 0.018494298 | 0.260074697 | 0.010753409 |
| 0.064231015 | 0.302181707 | 0.16466689  | 0.018843326 |
| 0.045604132 | 0.203798882 | 0.133531528 | 0.209769093 |
| 0.004407653 | 0.26346858  | 0.31729418  | 0.019618325 |
| 0.316634528 | 0.014341017 | 0.039864013 | 0.050641541 |



|             |             |             |             |
|-------------|-------------|-------------|-------------|
| 0.114187857 | 0.262165152 | 0.269463778 | 0.127618396 |
| 0.254354959 | 0.079701218 | 0.149572983 | 0.282781217 |
| 0.343907584 | 0.22547395  | 0.311351925 | 0.098354913 |
| 0.260741754 | 0.32782409  | 0.26684374  | 0.00313516  |
| 0.213459111 | 0.048588339 | 0.2512405   | 0.180014723 |
| 0.264853136 | 0.198541397 | 0.115422549 | 0.137681897 |
| 0.148857898 | 0.007819557 | 0.105651061 | 0.327564662 |
| 0.163881835 | 0.158592672 | 0.012618238 | 0.279949691 |
| 0.194217913 | 0.171420666 | 0.209523401 | 0.000602171 |
| 0.318399221 | 0.263973179 | 0.324644517 | 0.314557416 |
| 0.102841344 | 0.060058263 | 0.21641808  | 0.107317869 |
| 0.262554507 | 0.304451331 | 0.168581413 | 0.170032675 |
| 0.329171123 | 0.30656016  | 0.337345239 | 0.087837059 |
| 0.159013232 | 0.006452465 | 0.076606568 | 0.023457445 |
| 0.238014439 | 0.112194628 | 0.243035233 | 0.314264926 |
| 0.245153343 | 0.321334651 | 0.130421076 | 0.289347234 |
| 0.201928828 | 0.339277532 | 0.275927295 | 0.24235634  |
| 0.263454515 | 0.032000964 | 0.293014303 | 0.343895291 |
| 0.01246687  | 0.176704294 | 0.260239145 | 0.039597064 |
| 0.272822122 | 0.290667604 | 0.161498646 | 0.301819762 |
| 0.373552838 | 0.285637318 | 0.287460194 | 0.166062405 |
| 0.25381297  | 0.017647517 | 0.259998969 | 0.356156929 |
| 0.200947971 | 0.020975161 | 0.227103801 | 0.391544135 |
| 0.263919151 | 0.340692605 | 0.282967883 | 0.25976464  |
| 0.2898887   | 0.340189385 | 0.259053769 | 0.278715078 |
| 0.10154443  | 0.3405589   | 0.070777571 | 0.017422696 |
| 0.014661408 | 0.044942044 | 0.223818935 | 0.205559724 |
| 0.363635874 | 0.187869015 | 0.069625229 | 0.158456301 |
| 0.406839584 | 0.260004534 | 0.337789571 | 0.289254924 |
| 0.010058472 | 0.315073462 | 0.278597969 | 0.11291094  |
| 0.256395144 | 0.043394116 | 0.31065895  | 0.291842956 |
| 0.238843979 | 0.371797063 | 0.047844425 | 0.28505151  |
| 0.088855309 | 0.353873894 | 0.285718919 | 0.073191159 |
| 0.319522536 | 0.280508303 | 0.380979438 | 0.394541298 |
| 0.284774058 | 0.130366275 | 0.049456168 | 0.260171043 |
| 0.354339099 | 0.037879227 | 0.372169075 | 0.391769896 |
| 0.309626946 | 0.383825128 | 0.399463728 | 0.379216004 |
| 0.310522925 | 0.021097394 | 0.046630674 | 0.246108199 |
| 0.306216579 | 0.266065214 | 0.097219703 | 0.252427296 |
| 0.315574949 | 0.143593514 | 0.338362609 | 0.186839399 |
| 0.351449131 | 0.338184745 | 0.3578988   | 0.251540206 |
| 0.133455074 | 0.174300332 | 0.316012958 | 0.247536776 |
| 0.016272918 | 0.030050983 | 0.011697792 | 0.2099191   |
| 0.131650166 | 0.100269285 | 0.132559753 | 0.269820362 |
| 0.110111182 | 0.121977698 | 0.297786935 | 0.376126869 |
| 0.014127309 | 0.232281873 | 0.060392606 | 0.053777679 |
| 0.017581067 | 0.058816423 | 0.085922571 | 0.079611187 |
| 0.171407898 | 0.094594304 | 0.313949164 | 0.370466615 |
| 0.226112923 | 0.073273439 | 0.264717154 | 0.343920191 |
| 0.317046184 | 0.302612428 | 0.12547469  | 0.006837438 |
| 0.184424033 | 0.222424452 | 0.330485823 | 0.289041985 |
| 0.07201639  | 0.131074705 | 0.263937863 | 0.381793819 |
| 0.089618197 | 0.043426012 | 0.234240713 | 0.246470578 |
| 0.054599867 | 0.217592517 | 0.350681736 | 0.20432356  |

|             |             |             |             |
|-------------|-------------|-------------|-------------|
| 0.000170919 | 0.145268055 | 0.33665164  | 0.192420438 |
| 0.173921007 | 0.226182063 | 0.287980894 | 0.357237323 |
| 0.271465553 | 0.270050901 | 0.380198584 | 0.387590059 |
| 0.16688618  | 0.089046598 | 0.387160612 | 0.097827575 |
| 0.269472008 | 0.066084365 | 0.221724826 | 0.127144014 |
| 0.123966771 | 0.213960539 | 0.320152116 | 0.251119038 |
| 0.038768714 | 0.332860329 | 0.262988822 | 0.363677442 |
| 0.233479176 | 0.381097063 | 0.370704651 | 0.319707998 |
| 0.220687243 | 0.235230968 | 0.310523114 | 0.319985699 |
| 0.358647703 | 0.175149625 | 0.019951625 | 0.350713885 |
| 0.185122163 | 0.352320052 | 0.161862111 | 0.362904687 |
| 0.309320184 | 0.257901953 | 0.084251573 | 0.353150474 |
| 0.260820426 | 0.092147584 | 0.32208064  | 0.382164426 |
| 0.154602082 | 0.244961509 | 0.249663908 | 0.377276234 |
| 0.075900782 | 0.244439313 | 0.193266466 | 0.341128922 |
| 0.034864084 | 0.01962629  | 0.015537422 | 0.11403159  |
| 0.297824161 | 0.265890141 | 0.308337093 | 0.352160123 |
| 0.045694883 | 0.275240069 | 0.13230205  | 0.187032975 |
| 0.25319658  | 0.245762427 | 0.32319367  | 0.317124601 |
| 0.138217079 | 0.011118613 | 0.062110955 | 0.315489547 |
| 0.007545525 | 0.302595218 | 0.128480258 | 0.001967439 |
| 0.010899476 | 0.249004649 | 0.032052431 | 0.086253543 |
| 0.407193274 | 0.085030196 | 0.085606275 | 0.135985236 |
| 0.266446274 | 0.030305684 | 0.004445244 | 0.352886004 |
| 0.327992417 | 0.311384972 | 0.318409246 | 0.271572249 |
| 0.333007563 | 0.300428058 | 0.354454825 | 0.127981151 |
| 0.038460616 | 0.022212486 | 0.273422576 | 0.178041394 |
| 0.001669675 | 0.309050699 | 0.227189675 | 0.06243899  |
| 0.358447325 | 0.187627467 | 0.009910181 | 0.318135372 |
| 0.005104067 | 0.299071967 | 0.124830013 | 0.133196921 |
| 0.340613487 | 0.002625085 | 0.119069886 | 0.234786397 |
| 0.232993759 | 0.192001121 | 0.284469466 | 0.347153169 |
| 0.191873439 | 0.040149164 | 0.210261408 | 0.338114871 |
| 0.024485462 | 0.069243735 | 0.146386881 | 0.021248198 |
| 0.114358845 | 0.283822826 | 0.229910022 | 0.020259264 |
| 0.143348659 | 0.000473965 | 0.204274491 | 0.350347032 |
| 0.263171854 | 0.392104822 | 0.339567751 | 0.302533668 |
| 0.3291179   | 0.274808043 | 0.366019719 | 0.244730083 |
| 0.169941213 | 0.000166551 | 0.003524245 | 0.383936069 |
| 0.271336149 | 0.013840554 | 0.06937703  | 0.143855249 |
| 0.05637233  | 0.03998199  | 0.022235804 | 0.267123415 |
| 0.253434411 | 0.207509709 | 0.262064718 | 0.267246806 |
| 0.13102321  | 0.141369852 | 0.148704873 | 0.026939893 |
| 0.295580921 | 0.019126704 | 0.028020666 | 0.008521518 |
| 0.332663684 | 0.037423301 | 0.243297034 | 0.331713317 |
| 0.334377867 | 0.352780517 | 0.161667699 | 0.173496895 |
| 0.351683919 | 0.026208019 | 0.234093515 | 0.029871978 |
| 0.292352595 | 0.295438507 | 0.212854648 | 0.169564788 |
| 0.361241745 | 0.297055194 | 0.009332466 | 0.320835834 |
| 0.004543046 | 0.005348711 | 0.125755501 | 0.15248847  |
| 0.107093508 | 0.241318367 | 0.147331199 | 0.129402217 |
| 0.152892322 | 0.007409858 | 0.323475846 | 0.306841198 |
| 0.201433886 | 0.211377311 | 0.279337556 | 0.137964308 |
| 0.23717595  | 0.186105237 | 0.125854028 | 0.07553055  |

|             |             |             |             |
|-------------|-------------|-------------|-------------|
| 0.160529801 | 0.164890931 | 0.081367583 | 0.005358627 |
| 0.212661753 | 0.262795249 | 0.016504571 | 0.065516514 |
| 0.332884273 | 0.369552313 | 0.018629978 | 0.006592273 |
| 0.139395067 | 0.197003763 | 0.39144685  | 0.315697053 |
| 0.314930419 | 0.365693329 | 0.225261955 | 0.10347998  |
| 0.020931969 | 0.238988915 | 0.304261922 | 0.122968873 |
| 0.346863623 | 0.015049904 | 0.298311138 | 1           |
| 0.045391384 | 0.10542597  | 0.014962124 | 0.029460633 |
| 0.340133157 | 0.084287206 | 0.128259259 | 0.047037932 |
| 0.1933168   | 0.313607442 | 0.014296854 | 0.093950544 |
| 0.21214607  | 0.299083147 | 0.069276453 | 0.130080695 |
| 0.214974559 | 0.10986003  | 0.352443169 | 0.30086099  |
| 0.046527153 | 0.034862784 | 0.084809352 | 0.298626426 |
| 0.329933624 | 0.220468204 | 0.009704254 | 0.269421465 |
| 0.367504104 | 0.305480716 | 0.301257432 | 0.318433254 |
| 0.027392195 | 0.256397972 | 0.282888754 | 0.248905476 |
| 0.089278232 | 0.154065098 | 0.130107965 | 0.017715591 |
| 0.189416722 | 0.287762067 | 0.265698067 | 0.090091132 |
| 0.245022212 | 0.035220695 | 0.012024549 | 0.326557337 |
| 0.283929284 | 0.027474442 | 0.130952881 | 0.360802987 |
| 0.004546672 | 0.324296479 | 0.390769145 | 0.122670008 |
| 0.346986493 | 0.373711246 | 0.282941763 | 0.114832868 |
| 0.010276794 | 0.36192679  | 0.251871547 | 0.210670257 |
| 0.262870556 | 0.199948826 | 0.083527054 | 0.039915647 |
| 0.197122727 | 0.021149832 | 0.079083964 | 0.145333971 |
| 0.238227486 | 0.207964252 | 0.114932864 | 0.097531387 |
| 0.148079833 | 0.02687081  | 0.324379716 | 0.110450659 |
| 0.25226952  | 0.144135823 | 0.249840772 | 0.114923237 |
| 0.214625217 | 0.335508504 | 0.263446986 | 0.005969017 |
| 0.304172603 | 0.316682225 | 0.324222428 | 0.000800528 |
| 0.340483439 | 0.001912359 | 0.141315354 | 0.14919743  |
| 0.138411503 | 0.136705487 | 0.222250147 | 0.234695466 |
| 0.193248528 | 0.112067918 | 0.146065896 | 0.142320643 |
| 0.115308073 | 0.09751081  | 0.284941837 | 0.155198214 |
| 0.208926188 | 0.047397628 | 0.033172643 | 0.032398299 |
| 0.021418727 | 0.322441918 | 0.126002224 | 0.019925752 |
| 0.14041641  | 0.170895432 | 0.244737582 | 0.296955697 |
| 0.320154231 | 0.035338885 | 0.188847667 | 0.281601179 |
| 0.151502087 | 0.126540517 | 0.013496211 | 0.185744448 |
| 0.103252207 | 0.221354678 | 0.178836856 | 0.119741647 |
| 0.253645819 | 0.240048477 | 0.120363363 | 0.306721278 |
| 0.21106991  | 0.188017001 | 0.114655008 | 0.05413203  |
| 0.065515264 | 0.051194841 | 0.270660856 | 7.94E-05    |
| 0.21643814  | 0.084982871 | 0.358297034 | 0.286416481 |
| 0.318086506 | 0.263673051 | 0.110648653 | 0.028679498 |
| 0.104929023 | 0.066596783 | 0.057726907 | 0.315442509 |
| 0.321612555 | 0.082985515 | 0.252409084 | 0.102482446 |
| 0.353429974 | 0.319436598 | 0.248785342 | 0.101323017 |
| 0.135727127 | 0.077575561 | 0.284165161 | 0.032334912 |
| 0.257494505 | 0.24341035  | 0.160041646 | 0.190073329 |
| 0.162362558 | 0.373062034 | 0.014958656 | 0.379196642 |
| 0.221695293 | 0.049744847 | 0.316320039 | 0.128604711 |
| 0.129889763 | 0.104150116 | 0.340355995 | 0.15522834  |
| 0.129153368 | 0.309042207 | 0.012164912 | 0.080538793 |

|             |             |             |             |
|-------------|-------------|-------------|-------------|
| 0.248726393 | 0.177171302 | 0.251588041 | 0.274867291 |
| 0.275580085 | 0.285358265 | 0.323891874 | 0.107415675 |
| 0.267086999 | 0.276282633 | 0.130915631 | 0.156130213 |
| 0.213907736 | 0.041645753 | 0.180406755 | 0.018312842 |
| 0.287781648 | 0.303266859 | 0.186690175 | 0.018376764 |
| 0.005151636 | 0.320008366 | 0.248595029 | 0.017278834 |
| 0.402367123 | 0.303782155 | 0.195149048 | 0.314436409 |
| 0.078749468 | 0.27389994  | 0.097164244 | 0.316840349 |
| 0.013014035 | 0.149246514 | 0.279189782 | 0.207003559 |
| 0.184793991 | 0.29815799  | 0.29851302  | 0.306785007 |
| 0.010990042 | 0.204154084 | 0.000854945 | 0.222747462 |
| 0.252084554 | 0.280347951 | 0.100232492 | 0.151231025 |
| 0.208284695 | 0.269783466 | 0.183058449 | 0.235773807 |
| 0.005263109 | 0.322895783 | 0.102738884 | 0.254240546 |
| 0.197860561 | 0.204075759 | 0.0303232   | 0.270538573 |
| 0.229230662 | 0.180738517 | 0.148530195 | 0.208511991 |
| 0.300962606 | 0.250290515 | 0.058561002 | 0.218004953 |
| 0.233087535 | 0.017323868 | 0.154385919 | 0.360686663 |
| 0.110265088 | 0.296554977 | 0.396930474 | 0.115804946 |
| 0.303387289 | 0.23253418  | 0.256167178 | 0.346783614 |
| 0.065684867 | 0.141754482 | 0.356406814 | 0.304584518 |
| 0.227454216 | 0.272055148 | 0.29134908  | 0.196505519 |
| 0.255829162 | 0.038835105 | 0.274016345 | 0.208550255 |
| 0.29700423  | 0.213174112 | 0.154994901 | 0.200030822 |
| 0.017663071 | 0.084859069 | 0.183313526 | 0.057698598 |
| 0.180656773 | 0.24546817  | 0.249906176 | 0.256796749 |
| 0.091098967 | 0.013252795 | 0.304488343 | 0.061412294 |
| 0.127220847 | 0.304074353 | 0.126062626 | 0.256631195 |
| 0.079652174 | 0.186115195 | 0.119563289 | 0.000717368 |
| 0.338196312 | 0.095251934 | 0.216827699 | 0.205090896 |
| 0.242617515 | 0.013026223 | 0.282184009 | 0.397032454 |
| 0.16899427  | 0.21414754  | 0.247101688 | 0.294623391 |
| 0.293392129 | 0.27211777  | 0.262495716 | 0.220198897 |
| 0.335130703 | 0.164215444 | 0.217162475 | 0.269355166 |
| 0.238054551 | 0.114304709 |             |             |
| NSBP1       | 0.244891416 | 0.171056916 | 0.178896272 |
| 0.15294065  | 0.092818264 | 0.079408238 | 0.323481442 |
| 0.286997716 | 0.174289264 | 0.042149766 | 0.10433074  |
| 0.240044792 | 0.015681317 | 0.193119721 | 0.323119611 |
| 0.079840568 | 0.297644256 | 0.303588465 | 0.070999312 |
| 0.147786267 | 0.101282429 | 0.051905551 | 0.093931014 |
| 0.103385236 | 0.32306485  | 0.129373402 | 0.056301163 |
| 0.176182208 | 0.019355391 | 0.088135408 | 0.023272954 |
| 0.276705761 | 0.080547933 | 0.043129327 | 0.198995812 |
| 0.088292372 | 0.018345091 | 0.300552335 | 0.141617327 |
| 0.031683348 | 0.291628725 | 0.053388515 | 0.162597593 |
| 0.065684328 | 0.223283866 | 0.017657574 | 0.089631478 |
| 0.127476876 | 0.156409297 | 0.206942518 | 0.109786426 |
| 0.083345562 | 0.1731263   | 0.098169896 | 0.016672507 |
| 0.034674821 | 0.004527119 | 0.020021193 | 0.218180809 |
| 0.259413691 | 0.279194468 | 0.030380293 | 0.165629817 |
| 0.08658155  | 0.12658524  | 0.230872068 | 0.059804918 |
| 0.206192701 | 0.030782866 | 0.095238896 | 0.109993322 |
| 0.102459126 | 0.246363484 | 0.319967926 | 0.223259787 |

|             |             |             |             |
|-------------|-------------|-------------|-------------|
| 0.069649571 | 0.22287681  | 0.098521545 | 0.053842206 |
| 0.161268494 | 0.284669722 | 0.235279536 | 0.234405293 |
| 0.045981025 | 0.066638006 | 0.089127818 | 0.213416045 |
| 0.156984336 | 0.288093281 | 0.134128946 | 0.247901977 |
| 0.260751841 | 0.066028254 | 0.129115681 | 0.259556617 |
| 0.164927825 | 0.048069037 | 0.053834584 | 0.034703566 |
| 0.096867029 | 0.080433427 | 0.261675367 | 0.209168898 |
| 0.093358771 | 0.231113559 | 0.255565707 | 0.058651594 |
| 0.09930264  | 0.234902418 | 0.102905679 | 0.125925713 |
| 0.101508631 | 0.177564326 | 0.142328606 | 0.188711184 |
| 0.066269807 | 0.198678963 | 0.132489172 | 0.197805736 |
| 0.012638217 | 0.21421518  | 0.219896899 | 0.283930089 |
| 0.222837108 | 0.290757483 | 0.101459056 | 0.277850794 |
| 0.152622182 | 0.177186644 | 0.224532794 | 0.176605735 |
| 0.160743683 | 0.226422759 | 0.20997855  | 0.167425218 |
| 0.286799131 | 0.04215368  | 0.066782656 | 0.152920733 |
| 0.140788222 | 0.294304101 | 0.052742371 | 0.266965134 |
| 0.237906983 | 0.139362604 | 0.215358454 | 0.308029335 |
| 0.220211748 | 0.246276947 | 0.14653017  | 0.238949462 |
| 0.255371394 | 0.252425631 | 0.218385249 | 0.086021343 |
| 0.247257602 | 0.115729226 | 0.054164628 | 0.194406571 |
| 0.240423514 | 0.008203274 | 0.146001971 | 0.161803927 |
| 0.205702171 | 0.124695582 | 0.21632236  | 0.182394901 |
| 0.204305758 | 0.286624931 | 0.006223378 | 0.157795898 |
| 0.233379064 | 0.204338303 | 0.237097731 | 0.055582872 |
| 0.087546639 | 0.09800271  | 0.127157317 | 0.043571908 |
| 0.280577911 | 0.164840172 | 0.158494163 | 0.155099005 |
| 0.116624444 | 0.299132923 | 0.047027726 | 0.24937951  |
| 0.291754554 | 0.222879628 | 0.211447508 | 0.226182291 |
| 0.05123874  | 0.25108364  | 0.101782655 | 0.096674333 |
| 0.247801137 | 0.118500226 | 0.035357718 | 0.0969126   |
| 0.265229772 | 0.063081072 | 0.244778344 | 0.227298407 |
| 0.289476215 | 0.35942273  | 0.16659632  | 0.199311814 |
| 0.157072129 | 0.363640636 | 0.092336717 | 0.185857693 |
| 0.089706015 | 0.249996026 | 0.116117027 | 0.236898803 |
| 0.270118532 | 0.062505665 | 0.28811641  | 0.075244009 |
| 0.077547364 | 0.034943796 | 0.02300094  | 0.056855261 |
| 0.363524434 | 0.149722074 | 0.094530603 | 0.114339869 |
| 0.141613979 | 0.223827071 | 0.071659827 | 0.302244721 |
| 0.265013999 | 0.093793731 | 0.171145364 | 0.073892395 |
| 0.112278201 | 0.135970584 | 0.138937217 | 0.121877904 |
| 0.176023362 | 0.02993381  | 0.028203761 | 0.168115269 |
| 0.043122717 | 0.077502534 | 0.164602938 | 0.118091121 |
| 0.06810759  | 0.310936475 | 0.216248771 | 0.009092008 |
| 0.078079094 | 0.094850801 | 0.19838309  | 0.055978878 |
| 0.202535522 | 0.233623763 | 0.073354559 | 0.094728277 |
| 0.204473325 | 0.222176129 | 0.195235958 | 0.188708077 |
| 0.052873432 | 0.223740851 | 0.13995261  | 0.187746265 |
| 0.153197711 | 0.053617281 | 0.014679104 | 0.139305674 |
| 0.15778425  | 0.060370613 | 0.245302929 | 0.109428518 |
| 0.063126901 | 0.09684756  | 0.135208386 | 0.207340052 |
| 0.288810423 | 0.207537328 | 0.235104202 | 0.157875803 |
| 0.193526063 | 0.191299911 | 0.172457235 | 0.237806277 |
| 0.047888678 | 0.073939617 | 0.072741978 | 0.182178885 |

|             |             |             |             |
|-------------|-------------|-------------|-------------|
| 0.250490587 | 0.092207032 | 0.282854043 | 0.021137878 |
| 0.000190944 | 0.262392003 | 0.251067652 | 0.211099562 |
| 0.049127571 | 0.06616829  | 0.115779755 | 0.207229196 |
| 0.286972606 | 0.219463773 | 0.256637    | 0.097105379 |
| 0.213591546 | 0.077111939 | 0.057260907 | 0.091677801 |
| 0.277837969 | 0.114608496 | 0.183085656 | 0.287702795 |
| 0.203710884 | 0.044792377 | 0.142692432 | 0.014617705 |
| 0.274819851 | 0.120606317 | 0.314757602 | 0.377803617 |
| 0.181636205 | 0.34273205  | 0.22673808  | 0.056404982 |
| 0.167233837 | 0.29077227  | 0.02791315  | 0.188057806 |
| 0.217692675 | 0.218734905 | 0.215312813 | 0.241496446 |
| 0.18531209  | 0.135017824 | 0.143192572 | 0.099445491 |
| 0.30241241  | 0.245245787 | 0.049341255 | 0.138893431 |
| 0.019944678 | 0.173357548 | 0.117720434 | 0.29921124  |
| 0.113322493 | 0.198379306 | 0.264095684 | 0.084848066 |
| 0.135511161 | 0.01771792  | 0.132285675 | 0.208022544 |
| 0.1604642   | 0.211935055 | 0.039148072 | 0.051680877 |
| 0.217613538 | 0.236481677 | 0.043360233 | 0.22414511  |
| 0.127660549 | 0.217630582 | 0.114158806 | 0.134782118 |
| 0.314472088 | 0.030017435 | 0.102504272 | 0.004363957 |
| 0.049584774 | 0.247868329 | 0.070252952 | 0.226313783 |
| 0.1814945   | 0.135223534 | 0.220578449 | 0.230742239 |
| 0.19942698  | 0.191965866 | 0.202525975 | 0.044620788 |
| 0.210129691 | 0.006209618 | 0.197552708 | 0.167919553 |
| 0.046597265 | 0.009727691 | 0.063533426 | 0.156747349 |
| 0.071998714 | 0.225879011 | 0.268136413 | 0.058444827 |
| 0.247458732 | 0.198184563 | 0.295302979 | 0.077487456 |
| 0.088355597 | 0.130807086 | 0.075374626 | 0.220645429 |
| 0.19728913  | 0.212257212 | 0.075094316 | 0.282521192 |
| 0.078059207 | 0.274917443 | 0.282362324 | 0.021713039 |
| 0.13993397  | 0.280026227 | 0.279172068 | 0.20313431  |
| 0.248029485 | 0.112776536 | 0.034089837 | 0.065825026 |
| 0.173579071 | 0.195801357 | 0.044227004 | 0.1959227   |
| 0.189237796 | 0.095728465 | 0.22372652  | 0.246976488 |
| 0.224664163 | 0.228390784 | 0.296319782 | 0.149618391 |
| 0.089782068 | 0.010974881 | 0.08261833  | 0.242485045 |
| 0.05059554  | 0.069459549 | 0.275927939 | 0.157692838 |
| 0.169633717 | 0.193487588 | 0.042092256 | 0.049093196 |
| 0.16726024  | 0.106511793 | 0.075648367 | 0.257250509 |
| 0.118133762 | 0.101953794 | 0.206378729 | 0.269019134 |
| 0.097962761 | 0.246190314 | 0.315341133 | 0.281718686 |
| 0.060367    | 0.061720765 | 0.285275093 | 0.278528681 |
| 0.165485571 | 0.16636307  | 0.296540889 | 0.116830935 |
| 0.278845137 | 0.120171747 | 0.180741757 | 0.186257213 |
| 0.250488724 | 0.246895357 | 0.30898239  | 0.210852231 |
| 0.279941183 | 0.134743899 | 0.077785883 | 0.182320556 |
| 0.200635343 | 0.214112333 | 0.210474862 | 0.045391384 |
| 1           | 0.207045069 | 0.240116262 | 0.31670314  |
| 0.056103815 | 0.265310157 | 0.207789196 | 0.199308744 |
| 0.117754116 | 0.045329334 | 0.319514739 | 0.24429676  |
| 0.202798861 | 0.028582971 | 0.274801739 | 0.140335096 |
| 0.190814331 | 0.045459102 | 0.102100733 | 0.275902844 |
| 0.26533431  | 0.274196076 | 0.103602223 | 0.150420027 |
| 0.12828502  | 0.053813981 | 0.094833473 | 0.163120983 |

|             |             |             |             |
|-------------|-------------|-------------|-------------|
| 0.199646133 | 0.080711963 | 0.21835755  | 0.221995803 |
| 0.291011126 | 0.066506226 | 0.054640282 | 0.101552115 |
| 0.259164364 | 0.085892309 | 0.205621021 | 0.297458312 |
| 0.305079688 | 0.295954437 | 0.181986049 | 0.223920462 |
| 0.068801111 | 0.196866247 | 0.203473227 | 0.160012104 |
| 0.050361866 | 0.233309886 | 0.053821157 | 0.133445858 |
| 0.014970069 | 0.021309132 | 0.199344318 | 0.170211087 |
| 0.260362512 | 0.1817507   | 0.249529075 | 0.16682445  |
| 0.001302957 | 0.085631418 | 0.105937583 | 0.072305736 |
| 0.168455599 | 0.202356958 | 0.14402913  | 0.272475499 |
| 0.278687313 | 0.220206661 | 0.22750158  | 0.068791448 |
| 0.02641952  | 0.105036807 | 0.300763231 | 0.224944396 |
| 0.201087265 | 0.238458815 | 0.040732948 | 0.191839707 |
| 0.054016479 | 0.284924312 | 0.220326665 | 0.047438072 |
| 0.024724007 | 0.197217442 | 0.152650492 | 0.238464745 |
| 0.061743518 | 0.184867303 | 0.206224857 | 0.030985142 |
| 0.103169456 | 0.184137343 | 0.186540011 | 0.165198162 |
| 0.199699708 | 0.193883466 | 0.163026665 | 0.104077492 |
| 0.141188431 | 0.22795364  | 0.147583509 | 0.212924682 |
| 0.194922684 | 0.226111213 | 0.092906137 | 0.11553404  |
| 0.09487132  | 0.252170544 | 0.317816662 | 0.319744289 |
| 0.21973283  | 0.166083282 | 0.320717274 | 0.236079693 |
| 0.222163526 | 0.108496262 | 0.28406439  | 0.19509631  |
| 0.229783722 | 0.24864042  | 0.124613709 | 0.152216368 |
| 0.026894557 | 0.078060467 | 0.247247078 | 0.099484363 |
| 0.215006742 | 0.075313022 | 0.074853612 | 0.124719258 |
| 0.11505978  | 0.29666402  | 0.305814015 | 0.234067568 |
| 0.101209136 | 0.092700302 | 0.041322168 | 0.219099101 |
| 0.228027514 | 0.297458207 | 0.088669787 | 0.074594367 |
| 0.156208154 | 0.125211503 | 0.143147977 | 0.224258249 |
| 0.035630967 | 0.257772986 | 0.044605579 | 0.251912516 |
| 0.034727472 | 0.27435114  | 0.304938044 | 0.115238152 |
| 0.019701443 | 0.231940819 | 0.113706107 | 0.08170972  |
| 0.117270079 | 0.109651799 | 0.104489562 | 0.19828717  |
| 0.210133985 | 0.218845983 | 0.267049466 | 0.22440922  |
| 0.062690655 | 0.081703268 | 0.083253669 | 0.12103816  |
| 0.177187392 | 0.189116851 | 0.270981829 | 0.184939339 |
| 0.089076533 | 0.301624831 | 0.292717927 | 0.147065155 |
| 0.140437639 | 0.181386741 | 0.02148651  | 0.076365214 |
| 0.201146603 | 0.041515611 | 0.001546801 | 0.027000508 |
| 0.193785882 | 0.089757903 | 0.126986957 | 0.167981833 |
| 0.089810021 | 0.220274129 | 0.020587757 | 0.167941991 |
| 0.209754104 | 0.261883847 | 0.122664565 | 0.301778251 |
| 0.197496927 | 0.27178324  | 0.09595945  | 0.020430439 |
| 0.07343323  | 0.055479523 | 0.050142057 | 0.30786419  |
| 0.264712839 | 0.024654079 | 0.083828811 | 0.231455592 |
| 0.175460682 | 0.017786282 | 0.102746558 | 0.106343158 |
| 0.292768818 | 0.268523393 | 0.226349229 | 0.127753468 |
| 0.232694142 | 0.234295043 | 0.060197287 | 0.073026613 |
| 0.098996825 | 0.059766582 | 0.162304287 | 0.046574312 |
| 0.285387759 | 0.119420135 | 0.036117582 | 0.312886148 |
| 0.248917448 | 0.057900363 | 0.337146707 | 0.03913139  |
| 0.220462544 | 0.217023626 | 0.105718815 | 0.055020218 |
| 0.139563839 | 0.069336685 | 0.244170536 | 0.175778746 |

|             |             |             |             |
|-------------|-------------|-------------|-------------|
| 0.022073306 | 0.096816586 | 0.229247594 | 0.078074865 |
| 0.291899035 | 0.078716479 | 0.307281853 | 0.039604829 |
| 0.196447595 | 0.173319791 | 0.230494826 | 0.11729074  |
| 0.093251999 | 0.268092612 | 0.05526534  | 0.230382556 |
| 0.215321642 | 0.053595272 | 0.14242523  | 0.194679469 |
| 0.052963395 | 0.212680195 | 0.066722029 | 0.231406897 |
| 0.212849135 | 0.241351507 | 0.14024454  | 0.199087447 |
| 0.247605576 | 0.072467547 | 0.045405265 | 0.121927713 |
| 0.200885653 | 0.182267228 | 0.073437653 | 0.193168748 |
| 0.038819761 | 0.19050355  | 0.088801673 | 0.134087838 |
| 0.190387049 | 0.246831069 | 0.079159656 | 0.278374989 |
| 0.164890273 | 0.094593378 | 0.105920056 | 0.27883472  |
| 0.155760842 | 0.132999287 | 0.277842185 | 0.003903239 |
| 0.1095391   | 0.103524338 | 0.207509848 | 0.08452014  |
| 0.294714286 | 0.136751668 | 0.107850334 | 0.049058786 |
| 0.166078315 | 0.034897842 | 0.112077577 | 0.103038914 |
| 0.050994559 | 0.28765818  | 0.227471517 | 0.194937746 |
| 0.179522169 | 0.057318441 | 0.034608479 | 0.211830587 |
| 0.03020851  | 0.032037715 | 0.049978108 | 0.100804441 |
| 0.03708963  | 0.047867058 | 0.053273183 | 0.043106193 |
| 0.159332679 | 0.176220955 |             |             |
| NSMCE2      | 0.092299778 | 0.239861439 | 0.082178788 |
| 0.169519099 | 0.195283495 | 0.098729112 | 0.093743285 |
| 0.102681303 | 0.200178247 | 0.038711829 | 0.190440251 |
| 0.064482786 | 0.02010685  | 0.298011484 | 0.085474125 |
| 0.182384461 | 0.095618643 | 0.161390053 | 0.025413298 |
| 0.098394975 | 0.182231857 | 0.067347905 | 0.11632865  |
| 0.152286905 | 0.266360815 | 0.176540755 | 0.10791968  |
| 0.294110442 | 0.032376774 | 0.195629489 | 0.041404548 |
| 0.366158403 | 0.183254169 | 0.088081585 | 0.062670188 |
| 0.139627566 | 0.007482961 | 0.363155394 | 0.161123317 |
| 0.083504008 | 0.326437665 | 0.070823246 | 0.18295518  |
| 0.102829223 | 0.075003979 | 0.020230181 | 0.177971618 |
| 0.171882643 | 0.106088776 | 0.087926979 | 0.21469099  |
| 0.072779476 | 0.222767262 | 0.158227252 | 0.001849321 |
| 0.068273679 | 0.012446345 | 0.035851111 | 0.318610142 |
| 0.279078645 | 0.172387966 | 0.038271424 | 0.095382504 |
| 0.13734077  | 0.198376927 | 0.246035712 | 0.064363336 |
| 0.324283097 | 0.04111306  | 0.19201592  | 0.113561893 |
| 0.120129285 | 0.053359205 | 0.285106114 | 0.110476937 |
| 0.082132459 | 0.222136414 | 0.157145295 | 0.092944254 |
| 0.237011157 | 0.365748724 | 0.25155299  | 0.31697828  |
| 0.032543293 | 0.147006835 | 0.105361419 | 0.305384944 |
| 0.211682472 | 0.078858199 | 0.269060322 | 0.3689158   |
| 0.059267859 | 0.110103522 | 0.205633081 | 0.151090817 |
| 0.252242555 | 0.048599044 | 0.097971796 | 0.053747375 |
| 0.213130572 | 0.16869415  | 0.310313036 | 0.285135161 |
| 0.117696574 | 0.12777247  | 0.312754975 | 0.143107822 |
| 0.131735873 | 0.157201594 | 0.112522108 | 0.244538943 |
| 0.218411816 | 0.29806482  | 0.21608081  | 0.25908369  |
| 0.15235789  | 0.326925803 | 0.269031138 | 0.255182345 |
| 0.013511256 | 0.319495929 | 0.227700713 | 0.091267345 |
| 0.072159366 | 0.10846533  | 0.066831797 | 0.311828616 |
| 0.282185086 | 0.213823063 | 0.153894665 | 0.225601371 |



|             |             |             |             |
|-------------|-------------|-------------|-------------|
| 0.296712242 | 0.289630523 | 0.311073807 | 0.259359031 |
| 0.085005059 | 0.051044517 | 0.166324762 | 0.083706991 |
| 0.212963792 | 0.169290119 | 0.107021802 | 0.347918815 |
| 0.342945255 | 0.265623109 | 0.106913617 | 0.367450884 |
| 0.103984559 | 0.377614728 | 0.247554535 | 0.233751935 |
| 0.364989094 | 0.337839928 | 0.362734454 | 0.205929524 |
| 0.333492299 | 0.184938146 | 0.012863365 | 0.260748848 |
| 0.36090849  | 0.015595055 | 0.258072556 | 0.288212876 |
| 0.312466872 | 0.257234667 | 0.346826321 | 0.307230433 |
| 0.298575591 | 0.151229155 | 0.004117474 | 0.247643639 |
| 0.337590065 | 0.339961391 | 0.097056979 | 0.125857497 |
| 0.170487261 | 0.126333967 | 0.212040054 | 0.062404491 |
| 0.38363353  | 0.289861393 | 0.267182192 | 0.222824157 |
| 0.124053814 | 0.312672679 | 0.113461831 | 0.312798898 |
| 0.105788977 | 0.111528066 | 0.115554052 | 0.245929167 |
| 0.057934397 | 0.251107809 | 0.105803902 | 0.149005989 |
| 0.26915361  | 0.098805677 | 0.05755281  | 0.207043673 |
| 0.124263319 | 0.138554723 | 0.202229273 | 0.169331915 |
| 0.119899008 | 0.23996165  | 0.119382432 | 0.140921681 |
| 0.179127884 | 0.266885768 | 0.176813244 | 0.312730034 |
| 0.100932984 | 0.250971201 | 0.203508194 | 0.3546523   |
| 0.383440466 | 0.157264589 | 0.249280776 | 0.082305366 |
| 0.094766951 | 0.039144779 | 0.038184083 | 0.121602134 |
| 0.246258954 | 0.104601576 | 0.180869053 | 0.247899481 |
| 0.162638448 | 0.087552035 | 0.085818802 | 0.350338368 |
| 0.18965249  | 0.114335483 | 0.3052255   | 0.129672274 |
| 0.033530404 | 0.210855048 | 0.264239889 | 0.096323123 |
| 0.19857703  | 0.042411456 | 0.051161478 | 0.309733873 |
| 0.048164581 | 0.070209468 | 0.282016201 | 0.236101476 |
| 0.057831328 | 0.214492647 | 0.338047728 | 0.007663802 |
| 0.119976394 | 0.103668572 | 0.306093493 | 0.068124612 |
| 0.261640606 | 0.278770377 | 0.145864128 | 0.118870519 |
| 0.164146421 | 0.321548152 | 0.27229048  | 0.314041276 |
| 0.072548957 | 0.34980369  | 0.271343687 | 0.310763916 |
| 0.23286069  | 0.081629323 | 0.028287989 | 0.278657093 |
| 0.300077493 | 0.063890751 | 0.137463125 | 0.200172624 |
| 0.085410987 | 0.201784631 | 0.106077425 | 0.353655845 |
| 0.379461342 | 0.277943154 | 0.120127705 | 0.275199885 |
| 0.327405914 | 0.219066365 | 0.272097088 | 0.347132617 |
| 0.047560637 | 0.132843547 | 0.110513904 | 0.326788904 |
| 0.272981071 | 0.089498456 | 0.281945458 | 0.032593715 |
| 0.002162706 | 0.102153784 | 0.135399141 | 0.178940072 |
| 0.07571677  | 0.127633879 | 0.221351676 | 0.324236604 |
| 0.170651133 | 0.299869371 | 0.214906804 | 0.124647608 |
| 0.301869705 | 0.096430784 | 0.1307574   | 0.174208703 |
| 0.268926783 | 0.100433265 | 0.143170589 | 0.378282137 |
| 0.079653347 | 0.06852107  | 0.116645025 | 0.013089404 |
| 0.077488035 | 0.184650715 | 0.190210548 | 0.302298347 |
| 0.304092657 | 0.290059702 | 0.247414498 | 0.05276037  |
| 0.264155741 | 0.174605049 | 0.031727593 | 0.300861862 |
| 0.29277329  | 0.282374275 | 0.285500769 | 0.284451919 |
| 0.269521576 | 0.20001021  | 0.271947317 | 0.142848363 |
| 0.125571829 | 0.090497022 | 0.085088486 | 0.183523701 |
| 0.004560862 | 0.294555386 | 0.140152868 | 0.263132329 |

|             |             |             |             |
|-------------|-------------|-------------|-------------|
| 0.208669612 | 0.221100474 | 0.07521604  | 0.147953009 |
| 0.077286498 | 0.04203564  | 0.073946576 | 0.128811093 |
| 0.249821324 | 0.054859298 | 0.07474948  | 0.072981899 |
| 0.292937467 | 0.283602714 | 0.070657911 | 0.341874685 |
| 0.212704173 | 0.151088261 | 0.201102706 | 0.238998202 |
| 0.114631789 | 0.024503174 | 0.082702284 | 0.012179417 |
| 0.034442354 | 0.289512218 | 0.070723326 | 0.126234195 |
| 0.27669445  | 0.03716308  | 0.305706656 | 0.340602908 |
| 0.278090631 | 0.329149609 | 0.327248815 | 0.088985569 |
| 0.336036024 | 0.012348216 | 0.317012406 | 0.255975172 |
| 0.064029052 | 0.007881391 | 0.016574076 | 0.298248395 |
| 0.173857494 | 0.108626325 | 0.256092485 | 0.074683191 |
| 0.155727202 | 0.099315012 | 0.086373501 | 0.108585036 |
| 0.175412555 | 0.175966874 | 0.068033575 | 0.28746566  |
| 0.211624569 | 0.215733766 | 0.07986646  | 0.153737413 |
| 0.158501293 | 0.122304322 | 0.150097689 | 0.026141116 |
| 0.23432001  | 0.179023378 | 0.319742659 | 0.309057938 |
| 0.365595016 | 0.242847996 | 0.040794403 | 0.054853848 |
| 0.256639399 | 0.120778118 | 0.05401104  | 0.126599583 |
| 0.291117934 | 0.216001508 | 0.323684763 | 0.32903758  |
| 0.354775431 | 0.341111544 | 0.078169562 | 0.28264429  |
| 0.062296746 | 0.005204098 | 0.135259644 | 0.223040436 |
| 0.016019758 | 0.124923117 | 0.337408829 | 0.072970909 |
| 0.087522096 | 0.064935622 | 0.073739845 | 0.083471087 |
| 0.278174402 | 0.166344697 | 0.146694591 | 0.21350143  |
| 0.132556421 | 0.105721987 | 0.142628071 | 0.103702768 |
| 0.048123859 | 0.287084972 | 0.27365827  | 0.066180487 |
| 0.125178575 | 0.138372115 | 0.12583813  | 0.230182138 |
| 0.310676565 | 0.302570786 | 0.105261962 | 0.074407176 |
| 0.291356082 | 0.107931618 | 0.308997111 | 0.288051118 |
| 0.343883175 | 0.374175399 | 0.346542632 | 0.115806755 |
| 0.098207566 | 0.229879332 | 0.153089249 | 0.13743405  |
| 0.309296507 | 0.10551306  | 0.296652482 | 0.10542597  |
| 0.207045069 | 1           | 0.099010494 | 0.164106168 |
| 0.134991401 | 0.231064426 | 0.211632803 | 0.190774454 |
| 0.147333648 | 0.069800264 | 0.092276682 | 0.244826915 |
| 0.276881673 | 0.070304658 | 0.236769161 | 0.09168475  |
| 0.253376538 | 0.027344576 | 0.221252586 | 0.380018763 |
| 0.204228427 | 0.149167429 | 0.09551544  | 0.208456235 |
| 0.24160273  | 0.099950496 | 0.054293521 | 0.242189088 |
| 0.308960738 | 0.180285709 | 0.31360277  | 0.314008571 |
| 0.174136818 | 0.147844291 | 0.072238674 | 0.18358767  |
| 0.202821195 | 0.113030585 | 0.162946159 | 0.148642884 |
| 0.292115417 | 0.341092359 | 0.284554414 | 0.191018923 |
| 0.127361774 | 0.118798475 | 0.095866825 | 0.239811506 |
| 0.089122177 | 0.099392633 | 0.067910226 | 0.221039165 |
| 0.021619767 | 0.038591726 | 0.313051989 | 0.109032891 |
| 0.352915801 | 0.329335867 | 0.365145942 | 0.081552025 |
| 0.002060545 | 0.194767668 | 0.225106477 | 0.129156741 |
| 0.253316176 | 0.252864852 | 0.047509265 | 0.143472267 |
| 0.34755524  | 0.130572307 | 0.139324699 | 0.068664016 |
| 0.053214344 | 0.16429258  | 0.283821965 | 0.1748541   |
| 0.176849888 | 0.113197128 | 0.062005566 | 0.181081355 |
| 0.047226741 | 0.313187153 | 0.327724827 | 0.034811952 |

|             |             |             |             |
|-------------|-------------|-------------|-------------|
| 0.049336453 | 0.27974274  | 0.25816408  | 0.069099332 |
| 0.113653856 | 0.276109455 | 0.292412888 | 0.014121478 |
| 0.226299324 | 0.046107262 | 0.169557202 | 0.196495349 |
| 0.177573364 | 0.137977949 | 0.233878344 | 0.131571452 |
| 0.193381402 | 0.189739031 | 0.170787481 | 0.282080953 |
| 0.155031158 | 0.166667449 | 0.184672511 | 0.144717464 |
| 0.117275967 | 0.148431131 | 0.184212796 | 0.182558802 |
| 0.09648434  | 0.25440886  | 0.310980739 | 0.145086641 |
| 0.234482537 | 0.106604138 | 0.372423516 | 0.288202966 |
| 0.328187763 | 0.157948156 | 0.116827262 | 0.26335055  |
| 0.025766433 | 0.065198541 | 0.060003576 | 0.171795395 |
| 0.187085581 | 0.088299197 | 0.109541544 | 0.176924577 |
| 0.179276725 | 0.371411253 | 0.289009223 | 0.331412969 |
| 0.14981     | 0.107759638 | 0.049151216 | 0.142894067 |
| 0.199277264 | 0.20251303  | 0.168174726 | 0.03365875  |
| 0.225218299 | 0.104247353 | 0.27796693  | 0.325495027 |
| 0.050164117 | 0.336154183 | 0.048898572 | 0.118526558 |
| 0.042606362 | 0.217734842 | 0.233779477 | 0.211181895 |
| 0.037886978 | 0.136908211 | 0.211302638 | 0.067893584 |
| 0.239639848 | 0.197959946 | 0.088755603 | 0.111192534 |
| 0.190853057 | 0.219416434 | 0.320965249 | 0.112661614 |
| 0.139336764 | 0.117566975 | 0.114070284 | 0.184580718 |
| 0.168541326 | 0.310856439 | 0.127268385 | 0.308636251 |
| 0.13406941  | 0.199602891 | 0.380544047 | 0.127000339 |
| 0.099064662 | 0.120294101 | 0.044144155 | 0.070670801 |
| 0.116799023 | 0.063567565 | 0.001470798 | 0.023710452 |
| 0.304154874 | 0.059334092 | 0.197318895 | 0.222482563 |
| 0.114902111 | 0.30538422  | 0.026776975 | 0.131291643 |
| 0.282706117 | 0.324599805 | 0.125618605 | 0.319576838 |
| 0.246105298 | 0.127259598 | 0.157458628 | 0.003880227 |
| 0.165402975 | 0.132630658 | 0.051787614 | 0.084183881 |
| 0.065830304 | 0.05401172  | 0.175552994 | 0.10476866  |
| 0.310102626 | 0.037626975 | 0.132854265 | 0.213114673 |
| 0.202008016 | 0.336821364 | 0.123648024 | 0.259421455 |
| 0.050300214 | 0.24737206  | 0.110984138 | 0.096733285 |
| 0.131471781 | 0.114393846 | 0.310481855 | 0.086090247 |
| 0.095400259 | 0.128383131 | 0.01400402  | 0.366171108 |
| 0.310795948 | 0.119650945 | 0.27151905  | 0.032324323 |
| 0.306529813 | 0.273213273 | 0.069460233 | 0.105159179 |
| 0.070879283 | 0.178943127 | 0.213497774 | 0.27626868  |
| 0.051520326 | 0.1387703   | 0.134558236 | 0.120281895 |
| 0.321448705 | 0.076960014 | 0.263899307 | 0.073482148 |
| 0.292814618 | 0.228294904 | 0.189329638 | 0.093547449 |
| 0.13844702  | 0.137971654 | 0.063450536 | 0.33685071  |
| 0.177904049 | 0.100147617 | 0.28976868  | 0.16427048  |
| 0.086852468 | 0.25759874  | 0.130368444 | 0.316817575 |
| 0.110332485 | 0.278982252 | 0.246432126 | 0.289069488 |
| 0.314266728 | 0.080155773 | 0.066779181 | 0.131370294 |
| 0.289056039 | 0.12471635  | 0.075314259 | 0.280227698 |
| 0.06953224  | 0.239025103 | 0.114746355 | 0.124386931 |
| 0.080948069 | 0.091995101 | 0.078040081 | 0.220327381 |
| 0.225244552 | 0.190901658 | 0.11849766  | 0.369697755 |
| 0.130693268 | 0.105372516 | 0.376319171 | 0.012470887 |
| 0.153492019 | 0.233188087 | 0.20003809  | 0.133467828 |

|             |             |             |             |
|-------------|-------------|-------------|-------------|
| 0.278536439 | 0.180504727 | 0.142485121 | 0.008391468 |
| 0.280492206 | 0.06817636  | 0.088033806 | 0.127287013 |
| 0.051034729 | 0.081018244 | 0.321620911 | 0.3277319   |
| 0.203391742 | 0.051062757 | 0.051224914 | 0.289698973 |
| 0.059154228 | 0.043899639 | 0.052635409 | 0.180796921 |
| 0.060545222 | 0.078291392 | 0.080410436 | 0.088531016 |
| 0.245251235 | 0.110666594 |             |             |
| NT5C3       | 0.203266171 | 0.046376129 | 0.150743703 |
| 0.061736279 | 0.059093414 | 0.027246865 | 0.136858953 |
| 0.106877122 | 0.043149122 | 0.002063616 | 0.081473167 |
| 0.150778772 | 0.002083456 | 0.08025392  | 0.146753659 |
| 0.03238992  | 0.168483519 | 0.213465172 | 0.004452875 |
| 0.012553629 | 0.064915964 | 0.012094977 | 0.02996742  |
| 0.046024143 | 0.228496579 | 0.041687097 | 0.011371234 |
| 0.055943111 | 0.001143857 | 0.037509864 | 0.000861254 |
| 0.136931047 | 0.050586671 | 0.009092356 | 0.111021985 |
| 0.033538279 | 0.000764843 | 0.121107954 | 0.070073844 |
| 0.007133684 | 0.172648504 | 0.006239446 | 0.131133044 |
| 0.009132833 | 0.162073195 | 0.000278424 | 0.022646525 |
| 0.034258816 | 0.039713088 | 0.148376675 | 0.036409039 |
| 0.009565659 | 0.113892456 | 0.018682455 | 0.004810845 |
| 0.009387919 | 7.39E-06    | 0.002268067 | 0.077888912 |
| 0.288646851 | 0.266449844 | 0.000807347 | 0.042505606 |
| 0.019732046 | 0.041174458 | 0.150492618 | 0.00508553  |
| 0.081389635 | 0.004153294 | 0.023742269 | 0.026100804 |
| 0.02589888  | 0.092236337 | 0.289476527 | 0.099674005 |
| 0.011145942 | 0.223189694 | 0.067025778 | 0.012620825 |
| 0.040382995 | 0.112327293 | 0.142378525 | 0.072990027 |
| 0.002918087 | 0.025327909 | 0.026920518 | 0.138032334 |
| 0.048863488 | 0.062803555 | 0.076880307 | 0.097958837 |
| 0.092836603 | 0.01070454  | 0.037792284 | 0.159000866 |
| 0.058628371 | 0.004096879 | 0.009022272 | 0.014647517 |
| 0.042773934 | 0.033647522 | 0.08340081  | 0.178273261 |
| 0.039558055 | 0.176249421 | 0.085027193 | 0.025979949 |
| 0.071640637 | 0.203483852 | 0.022908458 | 0.037579676 |
| 0.041902094 | 0.066206887 | 0.034962988 | 0.075356351 |
| 0.022995989 | 0.077212857 | 0.068345963 | 0.071649854 |
| 0.000349668 | 0.071131617 | 0.200865045 | 0.216089834 |
| 0.108016994 | 0.194139016 | 0.010817145 | 0.178001252 |
| 0.057750488 | 0.097017217 | 0.141441227 | 0.123183706 |
| 0.061001557 | 0.071125235 | 0.063615111 | 0.06526247  |
| 0.228785224 | 0.003924029 | 0.023370191 | 0.050000172 |
| 0.061617025 | 0.198677445 | 0.02341237  | 0.098782751 |
| 0.149016056 | 0.054379645 | 0.087301983 | 0.12033441  |
| 0.065368061 | 0.113300182 | 0.042391727 | 0.241318603 |
| 0.098850086 | 0.096398092 | 0.094831877 | 0.039612154 |
| 0.108244838 | 0.069481083 | 0.002197063 | 0.068711063 |
| 0.123554218 | 0.009171553 | 0.04360017  | 0.051077899 |
| 0.066820849 | 0.041048502 | 0.081898314 | 0.065418293 |
| 0.065818875 | 0.220645404 | 0.000347205 | 0.110506293 |
| 0.081703292 | 0.11830982  | 0.077046192 | 0.013138215 |
| 0.03928393  | 0.034750192 | 0.038527017 | 0.005054561 |
| 0.129216589 | 0.061675839 | 0.04757374  | 0.053674133 |
| 0.021589466 | 0.189234406 | 0.010802685 | 0.090460514 |

|             |             |             |             |
|-------------|-------------|-------------|-------------|
| 0.128078744 | 0.168278373 | 0.209873718 | 0.104378446 |
| 0.00466734  | 0.252804775 | 0.02687061  | 0.030233263 |
| 0.263408377 | 0.027480418 | 0.005965594 | 0.046814768 |
| 0.180546235 | 0.019589601 | 0.164038207 | 0.118941376 |
| 0.193561405 | 0.268921415 | 0.044767659 | 0.124962617 |
| 0.120409383 | 0.176175992 | 0.026611384 | 0.064560556 |
| 0.017243843 | 0.189396082 | 0.042258249 | 0.113647749 |
| 0.163217601 | 0.026539311 | 0.19258288  | 0.105712218 |
| 0.008813933 | 0.001740308 | 0.002849635 | 0.014232599 |
| 0.208941585 | 0.034248198 | 0.035673669 | 0.065995148 |
| 0.083151696 | 0.072531667 | 0.013262372 | 0.158336008 |
| 0.151925589 | 0.05590639  | 0.07838392  | 0.015338933 |
| 0.074631697 | 0.073296222 | 0.055904072 | 0.0188846   |
| 0.068242776 | 0.008403099 | 0.006175097 | 0.061691681 |
| 0.003613944 | 0.021596436 | 0.056188994 | 0.059764531 |
| 0.006601385 | 0.127669027 | 0.07994635  | 0.000193749 |
| 0.018647025 | 0.056794816 | 0.175289508 | 0.005697484 |
| 0.153953278 | 0.144846197 | 0.040627338 | 0.041910665 |
| 0.172889684 | 0.078682829 | 0.091920198 | 0.07120111  |
| 0.007189707 | 0.082607977 | 0.054013247 | 0.094961566 |
| 0.084005937 | 0.007262471 | 0.001793809 | 0.0573119   |
| 0.056742003 | 0.002673333 | 0.176917335 | 0.027280611 |
| 0.007051642 | 0.035690716 | 0.022225042 | 0.089686728 |
| 0.133019091 | 0.059128418 | 0.170393028 | 0.083101531 |
| 0.12902946  | 0.186060276 | 0.068052735 | 0.092134828 |
| 0.001876284 | 0.022960307 | 0.020139879 | 0.099536372 |
| 0.233186673 | 0.02521541  | 0.134791832 | 0.00244344  |
| 0.000166473 | 0.164191247 | 0.22474574  | 0.198398153 |
| 0.022051042 | 0.013205457 | 0.045444711 | 0.073939889 |
| 0.268878633 | 0.112457282 | 0.114314738 | 0.038688814 |
| 0.079844949 | 0.019087859 | 0.022250009 | 0.041791785 |
| 0.167468205 | 0.11203058  | 0.098536661 | 0.114294615 |
| 0.133314892 | 0.0152766   | 0.045506414 | 0.020535768 |
| 0.147691395 | 0.024745767 | 0.202237791 | 0.266783403 |
| 0.076474401 | 0.218041543 | 0.153513469 | 0.003438626 |
| 0.125874505 | 0.277939885 | 0.07108619  | 0.057382335 |
| 0.063039782 | 0.062629222 | 0.059982511 | 0.071790805 |
| 0.051622608 | 0.040958735 | 0.055186788 | 0.043423745 |
| 0.119288148 | 0.097012524 | 0.010012866 | 0.071251343 |
| 0.004748303 | 0.11222749  | 0.049017839 | 0.312187859 |
| 0.039716719 | 0.08974289  | 0.214747441 | 0.034758626 |
| 0.081906684 | 0.003074208 | 0.019629512 | 0.085584477 |
| 0.083040662 | 0.156218846 | 0.006683918 | 0.004820874 |
| 0.091275774 | 0.13436512  | 0.0067697   | 0.080271877 |
| 0.10753165  | 0.101550534 | 0.063691477 | 0.079026158 |
| 0.173539587 | 0.00086422  | 0.016763372 | 0.000439759 |
| 0.005915804 | 0.082545636 | 0.010642782 | 0.048670424 |
| 0.152666966 | 0.104979712 | 0.120197965 | 0.08891597  |
| 0.06142078  | 0.069592615 | 0.084631637 | 0.021131924 |
| 0.081582454 | 0.000240928 | 0.067661195 | 0.060213878 |
| 0.004608394 | 0.017049401 | 0.049961488 | 0.054992138 |
| 0.029093569 | 0.146375423 | 0.2629476   | 0.009133779 |
| 0.133005224 | 0.085540655 | 0.196079266 | 0.035008504 |
| 0.036727638 | 0.109248312 | 0.024958753 | 0.069943918 |

|             |             |             |             |
|-------------|-------------|-------------|-------------|
| 0.110586303 | 0.157761184 | 0.011352717 | 0.202103542 |
| 0.033934237 | 0.17848482  | 0.168105944 | 0.030294199 |
| 0.07258993  | 0.16677995  | 0.097101198 | 0.069343393 |
| 0.114234582 | 0.056805651 | 0.002374468 | 0.007377559 |
| 0.056019583 | 0.123694224 | 0.00298954  | 0.131347037 |
| 0.061432282 | 0.044195316 | 0.184194424 | 0.174742433 |
| 0.096608105 | 0.098586664 | 0.229764316 | 0.064190184 |
| 0.104018643 | 0.009942956 | 0.026427289 | 0.137780445 |
| 0.001199348 | 0.018738974 | 0.211055747 | 0.020014779 |
| 0.041398761 | 0.09042863  | 0.009199197 | 0.013293429 |
| 0.11672846  | 0.042952069 | 0.044595072 | 0.107931666 |
| 0.04363793  | 0.014154378 | 0.128554242 | 0.118066992 |
| 0.004415338 | 0.111498952 | 0.227631551 | 0.148313829 |
| 0.012852739 | 0.020714172 | 0.286625251 | 0.248574708 |
| 0.082099917 | 0.063584358 | 0.069430805 | 0.13017455  |
| 0.19706348  | 0.033428813 | 0.072356119 | 0.058559414 |
| 0.092844468 | 0.105073509 | 0.161210224 | 0.077719122 |
| 0.215512687 | 0.079995167 | 0.039220275 | 0.065350498 |
| 0.07470054  | 0.131298299 | 0.075517602 | 0.014962124 |
| 0.240116262 | 0.099010494 | 1           | 0.248851211 |
| 0.022288517 | 0.264529235 | 0.187596086 | 0.141649926 |
| 0.050849192 | 0.00809223  | 0.185158977 | 0.208258623 |
| 0.103430236 | 0.002665488 | 0.235363112 | 0.03365123  |
| 0.074083682 | 0.000675804 | 0.034863513 | 0.14589318  |
| 0.253551845 | 0.137034992 | 0.0238344   | 0.054061292 |
| 0.038060431 | 0.008302405 | 0.122336743 | 0.041790933 |
| 0.079600946 | 0.027860662 | 0.079754175 | 0.118352161 |
| 0.226885823 | 0.033920724 | 0.008156466 | 0.043546508 |
| 0.178108968 | 0.032762491 | 0.099517585 | 0.274284722 |
| 0.161041525 | 0.114282375 | 0.061291924 | 0.236368914 |
| 0.018959416 | 0.097945314 | 0.117088906 | 0.051107343 |
| 0.011977592 | 0.085177694 | 0.006305876 | 0.038895937 |
| 0.020122456 | 0.00566763  | 0.067544547 | 0.110436224 |
| 0.096345002 | 0.071375316 | 0.132400444 | 0.035860594 |
| 0.000265032 | 0.025573581 | 0.073464499 | 0.024099726 |
| 0.054973777 | 0.115615444 | 0.013092707 | 0.173022332 |
| 0.223609126 | 0.176479842 | 0.079734317 | 0.007354922 |
| 0.001396406 | 0.03393664  | 0.264297455 | 0.094891309 |
| 0.114964903 | 0.092554984 | 0.007423983 | 0.13760824  |
| 0.002770655 | 0.26390958  | 0.151667274 | 0.002698065 |
| 0.002736181 | 0.070793621 | 0.052350067 | 0.208086859 |
| 0.020996333 | 0.064962172 | 0.086131055 | 0.012558227 |
| 0.044587047 | 0.126852219 | 0.153240064 | 0.154365486 |
| 0.144293783 | 0.102204179 | 0.131808282 | 0.041324539 |
| 0.049032034 | 0.11455197  | 0.108441025 | 0.235054516 |
| 0.152080837 | 0.114203701 | 0.038802155 | 0.027524578 |
| 0.058513387 | 0.201840766 | 0.212343364 | 0.20041548  |
| 0.14681902  | 0.053980883 | 0.256015853 | 0.196996974 |
| 0.199623397 | 0.020979635 | 0.194395052 | 0.057356548 |
| 0.12850852  | 0.139137906 | 0.037509243 | 0.054161588 |
| 0.000542068 | 0.008436256 | 0.1042839   | 0.033985178 |
| 0.181549186 | 0.028168649 | 0.016354036 | 0.050978893 |
| 0.025935264 | 0.172018468 | 0.259705014 | 0.105503938 |
| 0.040606233 | 0.01569294  | 0.003447316 | 0.150571438 |

|             |             |             |             |
|-------------|-------------|-------------|-------------|
| 0.16244362  | 0.193131492 | 0.058279315 | 0.092951721 |
| 0.101929625 | 0.024433583 | 0.052453068 | 0.080461927 |
| 0.006081116 | 0.154137015 | 0.002222432 | 0.135895241 |
| 0.001494224 | 0.131956652 | 0.285919223 | 0.032317126 |
| 0.003459777 | 0.151213507 | 0.07281149  | 0.015657881 |
| 0.041361596 | 0.025973232 | 0.024895431 | 0.077017791 |
| 0.09821994  | 0.140701952 | 0.085205075 | 0.114608342 |
| 0.013896455 | 0.042717262 | 0.014535546 | 0.073185545 |
| 0.105945106 | 0.060873691 | 0.253330146 | 0.060774759 |
| 0.030625808 | 0.204007042 | 0.139682327 | 0.06341145  |
| 0.026262675 | 0.072826988 | 0.0043901   | 0.009595607 |
| 0.053579331 | 0.008531529 | 0.000150514 | 0.005034934 |
| 0.157483246 | 0.008500879 | 0.027245945 | 0.062388297 |
| 0.035549328 | 0.126610157 | 0.001759331 | 0.054569593 |
| 0.061422406 | 0.089741402 | 0.03221052  | 0.202991779 |
| 0.106949473 | 0.257184252 | 0.035154815 | 0.000785259 |
| 0.021918291 | 0.012815072 | 0.003487588 | 0.207576862 |
| 0.095998998 | 0.004460659 | 0.023363076 | 0.109519803 |
| 0.066441568 | 0.001464877 | 0.018988751 | 0.041220863 |
| 0.163778501 | 0.095965088 | 0.134838649 | 0.077720887 |
| 0.018824383 | 0.142896065 | 0.014316743 | 0.011950692 |
| 0.048862506 | 0.021449259 | 0.102902672 | 0.022642624 |
| 0.246197268 | 0.034579949 | 0.011249205 | 0.165551648 |
| 0.076757667 | 0.014365681 | 0.226296524 | 0.001645131 |
| 0.195747617 | 0.086970319 | 0.013527806 | 0.010902891 |
| 0.150556817 | 0.036350575 | 0.219869355 | 0.088455944 |
| 0.001621941 | 0.021512013 | 0.116717258 | 0.021997232 |
| 0.106416999 | 0.009379553 | 0.17641701  | 0.002760061 |
| 0.062921713 | 0.053665791 | 0.118687096 | 0.024538302 |
| 0.016548735 | 0.236360911 | 0.007177104 | 0.082704836 |
| 0.201904304 | 0.027591631 | 0.064082972 | 0.109588524 |
| 0.015002107 | 0.086645606 | 0.012012213 | 0.074981492 |
| 0.125666728 | 0.224453441 | 0.055466119 | 0.065816174 |
| 0.201667098 | 0.02561909  | 0.015143499 | 0.065796539 |
| 0.069349148 | 0.105727424 | 0.009799653 | 0.106053441 |
| 0.011244237 | 0.13928039  | 0.014389184 | 0.080012128 |
| 0.124760845 | 0.075347237 | 0.027065732 | 0.235849921 |
| 0.11652812  | 0.04270399  | 0.031530406 | 0.173517419 |
| 0.098121116 | 0.119991738 | 0.140990283 | 0.000995702 |
| 0.060402262 | 0.068337297 | 0.17914499  | 0.029902477 |
| 0.25813987  | 0.052147538 | 0.029164319 | 0.03713925  |
| 0.073142738 | 0.013289643 | 0.029682929 | 0.05323562  |
| 0.003876073 | 0.154145272 | 0.099310724 | 0.077444739 |
| 0.098149732 | 0.003154723 | 0.002685625 | 0.078452618 |
| 0.004373221 | 0.002933315 | 0.006005264 | 0.026976522 |
| 0.011721758 | 0.005637648 | 0.008139936 | 0.009763952 |
| 0.078598151 | 0.074111481 |             |             |
| NT5C3L      | 0.212810277 | 0.127286161 | 0.146050918 |
| 0.127201454 | 0.07989668  | 0.047400762 | 0.28864896  |
| 0.243523366 | 0.137591824 | 0.020531127 | 0.082978173 |
| 0.243337912 | 0.011657122 | 0.15434367  | 0.300599962 |
| 0.063438966 | 0.305292602 | 0.265479219 | 0.051254298 |
| 0.104218992 | 0.084813389 | 0.03241611  | 0.061830446 |
| 0.077397147 | 0.31118423  | 0.101570536 | 0.037075511 |

|             |             |             |             |
|-------------|-------------|-------------|-------------|
| 0.131628341 | 0.009364749 | 0.066152722 | 0.010995608 |
| 0.239522501 | 0.071330807 | 0.023220751 | 0.194053016 |
| 0.061748352 | 0.01662832  | 0.252008291 | 0.110229228 |
| 0.022788037 | 0.264891077 | 0.026406951 | 0.132099537 |
| 0.034387795 | 0.202252402 | 0.007908622 | 0.066721069 |
| 0.10183662  | 0.114868288 | 0.176208948 | 0.081586043 |
| 0.049333298 | 0.151019337 | 0.065663141 | 0.013896128 |
| 0.020249121 | 0.002312601 | 0.011023261 | 0.168878637 |
| 0.272793626 | 0.253890213 | 0.014974394 | 0.120836118 |
| 0.066071984 | 0.10468995  | 0.230944934 | 0.031695374 |
| 0.161143005 | 0.020665411 | 0.068054098 | 0.089176867 |
| 0.064047562 | 0.209120091 | 0.336918593 | 0.217958023 |
| 0.042296815 | 0.201754864 | 0.078462866 | 0.034180197 |
| 0.115439879 | 0.234063337 | 0.230286078 | 0.179255293 |
| 0.03653236  | 0.052622804 | 0.064864707 | 0.207237012 |
| 0.13124826  | 0.240781062 | 0.109537795 | 0.199396155 |
| 0.223261125 | 0.043302465 | 0.100121879 | 0.256127296 |
| 0.125839265 | 0.029517353 | 0.03034765  | 0.025515771 |
| 0.080507612 | 0.062920938 | 0.210388427 | 0.200649936 |
| 0.066669406 | 0.22595448  | 0.19931031  | 0.046553138 |
| 0.074539535 | 0.20830861  | 0.077951531 | 0.09270522  |
| 0.079326197 | 0.13540732  | 0.104503151 | 0.161873115 |
| 0.047935871 | 0.154548756 | 0.106319587 | 0.160284835 |
| 0.005471014 | 0.164204275 | 0.189789272 | 0.289068015 |
| 0.176688076 | 0.27778505  | 0.074235294 | 0.268316878 |
| 0.116598366 | 0.159043313 | 0.177426407 | 0.143972193 |
| 0.128027041 | 0.172459304 | 0.158938386 | 0.134887213 |
| 0.267120761 | 0.026315316 | 0.046883377 | 0.110963782 |
| 0.119022588 | 0.293924664 | 0.036365884 | 0.212768972 |
| 0.208723477 | 0.110149817 | 0.161548136 | 0.253891695 |
| 0.172189393 | 0.202525199 | 0.105131127 | 0.202628308 |
| 0.203631228 | 0.199880885 | 0.176913786 | 0.06764303  |
| 0.201432831 | 0.079810162 | 0.040820297 | 0.161792697 |
| 0.203737939 | 0.007821404 | 0.10813932  | 0.121199311 |
| 0.155717863 | 0.091920785 | 0.173267973 | 0.140175822 |
| 0.154610565 | 0.282390124 | 0.003375266 | 0.154580589 |
| 0.181068902 | 0.17313467  | 0.21207339  | 0.035407049 |
| 0.074971499 | 0.05945885  | 0.097657978 | 0.02502584  |
| 0.2376628   | 0.127416526 | 0.116926457 | 0.124106206 |
| 0.083227545 | 0.275492779 | 0.031152805 | 0.195521255 |
| 0.283949381 | 0.181110556 | 0.223169469 | 0.211243184 |
| 0.025953009 | 0.245823513 | 0.060938931 | 0.079967615 |
| 0.267034081 | 0.073855437 | 0.019379673 | 0.080131513 |
| 0.267393935 | 0.043501147 | 0.197155248 | 0.182404677 |
| 0.288204338 | 0.365965697 | 0.135838268 | 0.179334801 |
| 0.129536897 | 0.328675494 | 0.066381075 | 0.144326576 |
| 0.058879308 | 0.240085243 | 0.088853357 | 0.198770775 |
| 0.243644716 | 0.044625323 | 0.289903487 | 0.084829521 |
| 0.05066229  | 0.017747822 | 0.013933306 | 0.038789106 |
| 0.347673136 | 0.11323088  | 0.075302241 | 0.096065306 |
| 0.105774718 | 0.171807511 | 0.044265697 | 0.263003243 |
| 0.253675769 | 0.069997233 | 0.138636755 | 0.050752285 |
| 0.128861043 | 0.101152876 | 0.107322681 | 0.10199768  |
| 0.153566762 | 0.023582146 | 0.016840487 | 0.130627068 |



|             |             |             |             |
|-------------|-------------|-------------|-------------|
| 0.025718464 | 0.058596466 | 0.125300882 | 0.099851537 |
| 0.042428052 | 0.275330188 | 0.172277036 | 0.0052566   |
| 0.054937243 | 0.091391428 | 0.198801587 | 0.02835655  |
| 0.193803416 | 0.22752676  | 0.05968137  | 0.069210949 |
| 0.196567874 | 0.173350154 | 0.164095382 | 0.145754768 |
| 0.02888048  | 0.177995316 | 0.107478803 | 0.155244571 |
| 0.134472321 | 0.029625683 | 0.009291918 | 0.106797365 |
| 0.121794637 | 0.034239746 | 0.245286045 | 0.078746243 |
| 0.033852087 | 0.075467174 | 0.115560347 | 0.167142387 |
| 0.242702012 | 0.154345765 | 0.215379107 | 0.14009457  |
| 0.168275995 | 0.165886815 | 0.14160817  | 0.193174914 |
| 0.023614673 | 0.049779664 | 0.046981944 | 0.15960012  |
| 0.25640741  | 0.072926735 | 0.258008608 | 0.013173096 |
| 0.000197697 | 0.218596127 | 0.228968233 | 0.189177917 |
| 0.038466927 | 0.044608662 | 0.093529364 | 0.160422767 |
| 0.256677424 | 0.185382418 | 0.24599498  | 0.06927309  |
| 0.16949613  | 0.050156939 | 0.041304671 | 0.07520303  |
| 0.270949188 | 0.121257379 | 0.169584346 | 0.235147196 |
| 0.205642039 | 0.031152138 | 0.099820786 | 0.015265818 |
| 0.243974725 | 0.083420978 | 0.313573199 | 0.371642122 |
| 0.147702496 | 0.324442668 | 0.215460224 | 0.028385046 |
| 0.155870462 | 0.265314322 | 0.038101131 | 0.144174049 |
| 0.170111392 | 0.173342546 | 0.166377916 | 0.190883525 |
| 0.145482086 | 0.106974308 | 0.116585118 | 0.070020188 |
| 0.259721951 | 0.193779137 | 0.034596808 | 0.103408437 |
| 0.019389515 | 0.154015893 | 0.089977664 | 0.321385324 |
| 0.088878554 | 0.182911433 | 0.254802464 | 0.072400217 |
| 0.124652358 | 0.009823326 | 0.088794228 | 0.168182093 |
| 0.146547468 | 0.210684567 | 0.02212333  | 0.029621127 |
| 0.171424679 | 0.206317048 | 0.024041661 | 0.174487189 |
| 0.107566788 | 0.195635621 | 0.082744729 | 0.11542637  |
| 0.283203718 | 0.016327238 | 0.062394175 | 0.002272981 |
| 0.032071669 | 0.201926627 | 0.041221191 | 0.186757536 |
| 0.173645391 | 0.146198876 | 0.186065188 | 0.182927942 |
| 0.149132362 | 0.1493091   | 0.159033958 | 0.029393895 |
| 0.163737519 | 0.003251837 | 0.150835556 | 0.130239697 |
| 0.023043364 | 0.010978824 | 0.076125345 | 0.118383381 |
| 0.052866733 | 0.221723758 | 0.276849873 | 0.032475336 |
| 0.229763081 | 0.14943475  | 0.274146229 | 0.061934199 |
| 0.066715975 | 0.109420091 | 0.061360102 | 0.168742025 |
| 0.156297987 | 0.200531017 | 0.041351732 | 0.29206038  |
| 0.061299878 | 0.265179926 | 0.290202912 | 0.027452596 |
| 0.125104841 | 0.265443665 | 0.222203046 | 0.156262928 |
| 0.205414393 | 0.093652864 | 0.015878503 | 0.040785218 |
| 0.139309902 | 0.18105655  | 0.023279053 | 0.188473175 |
| 0.140859875 | 0.076884648 | 0.211756395 | 0.224568386 |
| 0.183034291 | 0.183981376 | 0.286464368 | 0.121789165 |
| 0.096687962 | 0.014917203 | 0.049344748 | 0.237456246 |
| 0.040042567 | 0.042986601 | 0.271217077 | 0.112544529 |
| 0.133889138 | 0.183896303 | 0.02686597  | 0.033057938 |
| 0.160190858 | 0.076650617 | 0.057378925 | 0.242259449 |
| 0.088995527 | 0.083339177 | 0.176232554 | 0.232381554 |
| 0.068019734 | 0.21098021  | 0.300486384 | 0.276580423 |
| 0.036198086 | 0.040777961 | 0.263766363 | 0.289384169 |

|             |             |             |             |
|-------------|-------------|-------------|-------------|
| 0.132998847 | 0.127226818 | 0.283637802 | 0.137212884 |
| 0.26660025  | 0.084576729 | 0.142325024 | 0.138681805 |
| 0.197942875 | 0.203087705 | 0.273311554 | 0.193738912 |
| 0.259737726 | 0.122461021 | 0.060814604 | 0.17184019  |
| 0.155919607 | 0.210714547 | 0.163654281 | 0.029460633 |
| 0.31670314  | 0.164106168 | 0.248851211 | 1           |
| 0.042635925 | 0.286175992 | 0.181755831 | 0.185418464 |
| 0.085244286 | 0.02968136  | 0.292741115 | 0.232887961 |
| 0.176735726 | 0.018350887 | 0.277615084 | 0.094928895 |
| 0.157454736 | 0.023768654 | 0.077177411 | 0.240471965 |
| 0.279352875 | 0.229258493 | 0.063123827 | 0.125585172 |
| 0.093717599 | 0.034473775 | 0.097256602 | 0.116968074 |
| 0.159935468 | 0.057814135 | 0.169353494 | 0.198978641 |
| 0.309748497 | 0.045487919 | 0.033497704 | 0.081760828 |
| 0.254880791 | 0.05220279  | 0.167677398 | 0.294584976 |
| 0.289902669 | 0.247378625 | 0.140237961 | 0.199020274 |
| 0.04950304  | 0.184848409 | 0.194192156 | 0.123598497 |
| 0.03723316  | 0.201847805 | 0.027106699 | 0.102692426 |
| 0.018945271 | 0.014953027 | 0.159425193 | 0.140985429 |
| 0.212566693 | 0.143262994 | 0.212257852 | 0.121521144 |
| 0.000938169 | 0.06425555  | 0.090838877 | 0.043004225 |
| 0.126454034 | 0.176761385 | 0.115534226 | 0.264013213 |
| 0.276813202 | 0.215018148 | 0.201576127 | 0.04111004  |
| 0.016278745 | 0.078785177 | 0.319526898 | 0.201682803 |
| 0.168044753 | 0.224200417 | 0.027024347 | 0.151905157 |
| 0.039458071 | 0.293008208 | 0.204188285 | 0.024079004 |
| 0.014462996 | 0.16203289  | 0.117899323 | 0.23045488  |
| 0.043073641 | 0.153050443 | 0.171705471 | 0.032065673 |
| 0.079659407 | 0.211655171 | 0.160982467 | 0.138363002 |
| 0.169765714 | 0.161804635 | 0.166076289 | 0.076544666 |
| 0.11661776  | 0.181653159 | 0.113862604 | 0.22353368  |
| 0.175275955 | 0.177609357 | 0.076201085 | 0.072778956 |
| 0.071316831 | 0.222896086 | 0.314687951 | 0.308445473 |
| 0.222920686 | 0.126286847 | 0.31559815  | 0.237281005 |
| 0.233625729 | 0.067451645 | 0.266156568 | 0.144782242 |
| 0.202248766 | 0.227732228 | 0.088127227 | 0.113151983 |
| 0.013048835 | 0.048540477 | 0.206679422 | 0.07046306  |
| 0.188965155 | 0.059116293 | 0.046266096 | 0.098732052 |
| 0.083251077 | 0.264086487 | 0.302466855 | 0.197159386 |
| 0.067028918 | 0.059570956 | 0.019344992 | 0.214939414 |
| 0.183354173 | 0.303732922 | 0.070830185 | 0.091345855 |
| 0.141770746 | 0.083391816 | 0.107211045 | 0.173510736 |
| 0.020895712 | 0.232506584 | 0.022325135 | 0.219436068 |
| 0.016333143 | 0.239157493 | 0.323822944 | 0.084908533 |
| 0.01118981  | 0.196407531 | 0.095439054 | 0.046439452 |
| 0.090240723 | 0.080643521 | 0.078624844 | 0.152659178 |
| 0.183991585 | 0.208840043 | 0.214830609 | 0.178522594 |
| 0.042622258 | 0.066178779 | 0.057989934 | 0.089966121 |
| 0.144958787 | 0.144344719 | 0.251872452 | 0.140006234 |
| 0.059880938 | 0.305035589 | 0.25068651  | 0.110467895 |
| 0.097314382 | 0.170348522 | 0.01335078  | 0.042848128 |
| 0.163545167 | 0.024403954 | 0.000671994 | 0.019595433 |
| 0.185800574 | 0.05625636  | 0.090505232 | 0.144517585 |
| 0.067656736 | 0.207633355 | 0.013434956 | 0.116915262 |

|             |             |             |             |
|-------------|-------------|-------------|-------------|
| 0.156531233 | 0.206593268 | 0.090762612 | 0.300631806 |
| 0.177996606 | 0.252076669 | 0.069596634 | 0.01550617  |
| 0.053405354 | 0.037627118 | 0.025915546 | 0.29530337  |
| 0.264173386 | 0.014846659 | 0.060773966 | 0.230017977 |
| 0.139594714 | 0.009970328 | 0.07673684  | 0.080242521 |
| 0.29077881  | 0.21212986  | 0.212453272 | 0.106577966 |
| 0.189209326 | 0.229895437 | 0.038149608 | 0.045339991 |
| 0.078778906 | 0.040501012 | 0.143386443 | 0.033095433 |
| 0.286152222 | 0.092411974 | 0.036491939 | 0.272874584 |
| 0.192294245 | 0.035233148 | 0.334989788 | 0.019521389 |
| 0.222818034 | 0.186144005 | 0.081705416 | 0.032951966 |
| 0.160824393 | 0.05592679  | 0.244469149 | 0.141175453 |
| 0.011150586 | 0.072325204 | 0.226521474 | 0.054759283 |
| 0.235099306 | 0.052413193 | 0.300721593 | 0.020730919 |
| 0.147831051 | 0.137371481 | 0.206908077 | 0.09287767  |
| 0.066789421 | 0.289103472 | 0.028701999 | 0.18306317  |
| 0.190239798 | 0.039336299 | 0.11392739  | 0.159168967 |
| 0.034182086 | 0.17558789  | 0.045911762 | 0.182393809 |
| 0.21074366  | 0.247044841 | 0.113168738 | 0.155370143 |
| 0.246186828 | 0.057794854 | 0.03111703  | 0.09786721  |
| 0.151852504 | 0.168131621 | 0.050254672 | 0.166075671 |
| 0.025808019 | 0.186001974 | 0.062620649 | 0.113358787 |
| 0.208463944 | 0.209176233 | 0.051092052 | 0.295204094 |
| 0.155813356 | 0.070019369 | 0.080597785 | 0.253322664 |
| 0.144886839 | 0.139762346 | 0.240606065 | 0.002708495 |
| 0.083026983 | 0.086740225 | 0.199881455 | 0.056674552 |
| 0.291005584 | 0.116716128 | 0.071988577 | 0.055733658 |
| 0.139508564 | 0.029814784 | 0.081299898 | 0.082239699 |
| 0.03241372  | 0.259687904 | 0.184521758 | 0.15475049  |
| 0.163234425 | 0.034345255 | 0.01783782  | 0.168672522 |
| 0.021754196 | 0.016515029 | 0.029295614 | 0.071553326 |
| 0.025071625 | 0.023443183 | 0.028408249 | 0.0234835   |
| 0.133932404 | 0.133548094 |             |             |
| NT5E        | 0.036585906 | 0.350203841 | 0.023873441 |
| 0.095083809 | 0.285914011 | 0.273334336 | 0.027370308 |
| 0.070860895 | 0.255818712 | 0.198964808 | 0.272966906 |
| 0.0074529   | 0.224459011 | 0.404509495 | 0.027751616 |
| 0.31736702  | 0.018846888 | 0.05782136  | 0.060917397 |
| 0.140854599 | 0.262278027 | 0.35290828  | 0.213669744 |
| 0.26575415  | 0.118722228 | 0.192522683 | 0.314526615 |
| 0.444578114 | 0.322098038 | 0.371188122 | 0.141598683 |
| 0.332607264 | 0.304021645 | 0.348416465 | 0.005692727 |
| 0.289834799 | 0.023697488 | 0.330283434 | 0.206159376 |
| 0.233331525 | 0.26597093  | 0.196970147 | 0.184312568 |
| 0.21917512  | 0.015164204 | 0.184145756 | 0.342277345 |
| 0.190866956 | 0.200446303 | 0.026273518 | 0.337156976 |
| 0.253769245 | 0.240793748 | 0.285856561 | 0.001492085 |
| 0.36616162  | 0.229489396 | 0.330275376 | 0.424657611 |
| 0.129854735 | 0.082549172 | 0.255628565 | 0.155434432 |
| 0.284844158 | 0.312929032 | 0.181767955 | 0.236276561 |
| 0.434216389 | 0.281085925 | 0.382882631 | 0.122827231 |
| 0.235649055 | 0.010978119 | 0.095291348 | 0.033224035 |
| 0.301987424 | 0.145196115 | 0.298307007 | 0.32329054  |
| 0.338581083 | 0.421855749 | 0.144400182 | 0.394546145 |

|             |             |             |             |
|-------------|-------------|-------------|-------------|
| 0.150369992 | 0.316268034 | 0.278928204 | 0.247410352 |
| 0.286136626 | 0.041486682 | 0.350915293 | 0.44116806  |
| 0.020291206 | 0.230310108 | 0.302943522 | 0.059328863 |
| 0.36702569  | 0.30585871  | 0.242825215 | 0.299619719 |
| 0.354320384 | 0.284816029 | 0.379422277 | 0.207007579 |
| 0.299641226 | 0.02867427  | 0.369276837 | 0.327268211 |
| 0.268688533 | 0.0364931   | 0.215595463 | 0.455567145 |
| 0.304087407 | 0.445242759 | 0.357916568 | 0.29307884  |
| 0.306436125 | 0.441532639 | 0.311587229 | 0.359086755 |
| 0.1538151   | 0.449169859 | 0.107774704 | 0.026091864 |
| 0.029840731 | 0.05922809  | 0.218020469 | 0.240379731 |
| 0.4500751   | 0.234342275 | 0.113074006 | 0.179433104 |
| 0.454749058 | 0.370653437 | 0.442995031 | 0.352956074 |
| 0.017114041 | 0.298509473 | 0.299767648 | 0.185480719 |
| 0.294246899 | 0.056801118 | 0.31223016  | 0.399802724 |
| 0.314007018 | 0.420175813 | 0.083560334 | 0.386792334 |
| 0.120835284 | 0.45023251  | 0.386913816 | 0.105209101 |
| 0.423510109 | 0.390518483 | 0.467419432 | 0.408423411 |
| 0.39034747  | 0.210434472 | 0.057031801 | 0.309865458 |
| 0.443214614 | 0.031712999 | 0.45451602  | 0.475135824 |
| 0.414384837 | 0.451097522 | 0.479752407 | 0.475306205 |
| 0.421884075 | 0.031410328 | 0.036835197 | 0.234023638 |
| 0.411592322 | 0.335392119 | 0.10955997  | 0.304626195 |
| 0.307974986 | 0.243385015 | 0.395618834 | 0.275776602 |
| 0.442188121 | 0.415931926 | 0.453637055 | 0.309926191 |
| 0.168076742 | 0.239233143 | 0.331638157 | 0.356276568 |
| 0.023257195 | 0.058235638 | 0.020009134 | 0.232291274 |
| 0.222337038 | 0.117387836 | 0.222610993 | 0.266780128 |
| 0.123120807 | 0.201348581 | 0.362997568 | 0.376565182 |
| 0.023673244 | 0.295278727 | 0.090029005 | 0.084088561 |
| 0.022902011 | 0.084850717 | 0.128957874 | 0.118290499 |
| 0.210097786 | 0.143195293 | 0.378566455 | 0.450182884 |
| 0.269639315 | 0.103944362 | 0.332548271 | 0.426724209 |
| 0.37861975  | 0.329129019 | 0.154613295 | 0.008366221 |
| 0.215231322 | 0.267792067 | 0.300318977 | 0.326146515 |
| 0.106817989 | 0.169350626 | 0.281131732 | 0.401781284 |
| 0.152385319 | 0.072870885 | 0.291323134 | 0.337773509 |
| 0.079723323 | 0.284089688 | 0.418369132 | 0.249357256 |
| 0.000673877 | 0.202683546 | 0.410871532 | 0.161287838 |
| 0.206672159 | 0.235446611 | 0.353605709 | 0.42363866  |
| 0.314850921 | 0.262451727 | 0.471767335 | 0.397350233 |
| 0.271084245 | 0.136116105 | 0.476816633 | 0.084367938 |
| 0.28788806  | 0.063188385 | 0.229216734 | 0.202042705 |
| 0.148231317 | 0.227533345 | 0.319111241 | 0.273367062 |
| 0.063595955 | 0.439990203 | 0.333618667 | 0.465639285 |
| 0.292112329 | 0.470421363 | 0.443535787 | 0.402161089 |
| 0.261581397 | 0.291037135 | 0.278341205 | 0.38916328  |
| 0.422122905 | 0.213440998 | 0.032170737 | 0.413929754 |
| 0.240889883 | 0.367406185 | 0.130880865 | 0.445413859 |
| 0.406648115 | 0.363982729 | 0.111712613 | 0.358503513 |
| 0.325605225 | 0.141481541 | 0.374495293 | 0.473649093 |
| 0.206727035 | 0.285387161 | 0.284105724 | 0.395911601 |
| 0.095172398 | 0.230646796 | 0.243380864 | 0.317665181 |
| 0.038331319 | 0.036454149 | 0.027640249 | 0.134009668 |

|             |             |             |             |
|-------------|-------------|-------------|-------------|
| 0.260335775 | 0.319034156 | 0.322890121 | 0.452990488 |
| 0.068646796 | 0.362780264 | 0.153495115 | 0.230691934 |
| 0.333584578 | 0.298334197 | 0.350116629 | 0.33367329  |
| 0.165399065 | 0.012094558 | 0.090202491 | 0.416315328 |
| 0.013026149 | 0.322540746 | 0.195973518 | 0.002719124 |
| 0.018698557 | 0.33378888  | 0.048031176 | 0.122475731 |
| 0.475160192 | 0.122758355 | 0.11185498  | 0.193490151 |
| 0.296739378 | 0.047770657 | 0.004122988 | 0.431424868 |
| 0.413214058 | 0.385564775 | 0.406431708 | 0.362546325 |
| 0.388577182 | 0.349996917 | 0.380506835 | 0.206260564 |
| 0.056218587 | 0.039343359 | 0.246572283 | 0.212293109 |
| 0.003377233 | 0.350089975 | 0.260354759 | 0.080155665 |
| 0.4004846   | 0.207081106 | 0.018302702 | 0.309345869 |
| 0.009699848 | 0.309198155 | 0.190050625 | 0.159964015 |
| 0.33451613  | 0.004747005 | 0.184154942 | 0.278883987 |
| 0.337785837 | 0.26432888  | 0.339546883 | 0.452828285 |
| 0.241985882 | 0.062102924 | 0.244583809 | 0.381626327 |
| 0.036080311 | 0.080318217 | 0.2210451   | 0.031353809 |
| 0.192846679 | 0.370418198 | 0.299995978 | 0.031147872 |
| 0.16841149  | 0.001363887 | 0.282495239 | 0.458149453 |
| 0.371248141 | 0.479262168 | 0.444722812 | 0.33381796  |
| 0.433251084 | 0.241290855 | 0.471602817 | 0.325123373 |
| 0.252048958 | 0.000440087 | 0.004867073 | 0.46291883  |
| 0.299241963 | 0.024598623 | 0.086568998 | 0.254624147 |
| 0.075560288 | 0.074314594 | 0.035647061 | 0.233521057 |
| 0.317519571 | 0.23187325  | 0.248039078 | 0.370804543 |
| 0.161440159 | 0.16184558  | 0.240543268 | 0.039611959 |
| 0.326237702 | 0.028294408 | 0.038211458 | 0.010269122 |
| 0.339536246 | 0.058972321 | 0.347172212 | 0.438680821 |
| 0.426934026 | 0.361454245 | 0.24638521  | 0.286658294 |
| 0.408357792 | 0.046451542 | 0.321459389 | 0.049062552 |
| 0.401536847 | 0.311406719 | 0.258016502 | 0.22649005  |
| 0.447051677 | 0.391298291 | 0.01482596  | 0.357008963 |
| 0.00861085  | 0.003681724 | 0.212318001 | 0.17931533  |
| 0.078594499 | 0.291708876 | 0.177303339 | 0.15295155  |
| 0.177460066 | 0.015243515 | 0.313519495 | 0.287482663 |
| 0.204976601 | 0.261544695 | 0.289644167 | 0.162584777 |
| 0.237597037 | 0.147463564 | 0.154681061 | 0.101146248 |
| 0.191912313 | 0.218914981 | 0.121182969 | 0.007874448 |
| 0.282338954 | 0.319676465 | 0.027753376 | 0.08745996  |
| 0.408095654 | 0.460662374 | 0.021426996 | 0.007915143 |
| 0.183095948 | 0.240211883 | 0.479317894 | 0.425636074 |
| 0.427211536 | 0.455170608 | 0.303068655 | 0.106189373 |
| 0.035628523 | 0.234904186 | 0.295317016 | 0.102974097 |
| 0.454500714 | 0.024135818 | 0.407022336 | 0.340133157 |
| 0.056103815 | 0.134991401 | 0.022288517 | 0.042635925 |
| 1           | 0.103991828 | 0.144615256 | 0.070765631 |
| 0.239113091 | 0.319611856 | 0.021275097 | 0.119046839 |
| 0.258847781 | 0.242858491 | 0.086778163 | 0.196600779 |
| 0.270123718 | 0.150615569 | 0.386792905 | 0.378044001 |
| 0.066199432 | 0.052133164 | 0.15335362  | 0.334438455 |
| 0.402222519 | 0.267988668 | 0.021307845 | 0.370279449 |
| 0.455691703 | 0.364905651 | 0.413283031 | 0.35936048  |
| 0.036659919 | 0.319569548 | 0.302768994 | 0.256591872 |

|             |             |             |             |
|-------------|-------------|-------------|-------------|
| 0.108370697 | 0.259362527 | 0.164838191 | 0.027185943 |
| 0.230126599 | 0.38145889  | 0.337410262 | 0.121557526 |
| 0.295889173 | 0.055254384 | 0.019879828 | 0.410537039 |
| 0.235470294 | 0.049053792 | 0.22102978  | 0.415100094 |
| 0.00239087  | 0.281778659 | 0.45485292  | 0.187668143 |
| 0.437861627 | 0.445087319 | 0.367029684 | 0.16835773  |
| 0.004233807 | 0.36710617  | 0.286488393 | 0.287925419 |
| 0.355373951 | 0.267339383 | 0.116169961 | 0.049742743 |
| 0.227946838 | 0.036808519 | 0.095223275 | 0.24600839  |
| 0.202852987 | 0.271387732 | 0.131086201 | 0.116398205 |
| 0.157897427 | 0.039944028 | 0.338255012 | 0.160089029 |
| 0.19504256  | 0.171707178 | 0.293885396 | 0.190878883 |
| 0.235615454 | 0.393093466 | 0.321533565 | 0.011078704 |
| 0.341778127 | 0.360380346 | 0.39320526  | 0.000873064 |
| 0.388788996 | 0.003113786 | 0.166278344 | 0.180422654 |
| 0.160809588 | 0.162252669 | 0.206879798 | 0.259919523 |
| 0.224489606 | 0.14216861  | 0.204890287 | 0.16035965  |
| 0.13715423  | 0.136404521 | 0.294625135 | 0.214273587 |
| 0.262992862 | 0.073605209 | 0.052126731 | 0.053524646 |
| 0.036571196 | 0.419195825 | 0.172024089 | 0.033218627 |
| 0.153039138 | 0.230226837 | 0.293697053 | 0.405113746 |
| 0.384879423 | 0.059506529 | 0.241434716 | 0.380338309 |
| 0.204087375 | 0.210557141 | 0.026985852 | 0.241719657 |
| 0.150968967 | 0.248939002 | 0.259503056 | 0.166540292 |
| 0.31175225  | 0.316728055 | 0.167479007 | 0.379753977 |
| 0.271961685 | 0.23277133  | 0.193994067 | 0.067642599 |
| 0.099232938 | 0.067167065 | 0.272640856 | 0.000311401 |
| 0.25659217  | 0.152310447 | 0.44303212  | 0.392088287 |
| 0.351685618 | 0.32851301  | 0.206246183 | 0.046468498 |
| 0.174969389 | 0.104198471 | 0.076544982 | 0.376063385 |
| 0.337468241 | 0.123087985 | 0.254600728 | 0.197628309 |
| 0.392204939 | 0.355109027 | 0.248801544 | 0.15176934  |
| 0.153758782 | 0.103753817 | 0.372228727 | 0.058424487 |
| 0.297841449 | 0.227060243 | 0.213026175 | 0.230802119 |
| 0.178742127 | 0.465059164 | 0.026296346 | 0.477593155 |
| 0.260983626 | 0.071603714 | 0.409442927 | 0.197005721 |
| 0.190850126 | 0.120685912 | 0.312028833 | 0.242130255 |
| 0.15814224  | 0.367424021 | 0.017875101 | 0.082429517 |
| 0.275640956 | 0.217277645 | 0.319250906 | 0.298104467 |
| 0.261631494 | 0.298570938 | 0.320107555 | 0.163899351 |
| 0.376637571 | 0.384608414 | 0.182538343 | 0.17576989  |
| 0.262288658 | 0.064504964 | 0.260639216 | 0.016784312 |
| 0.320754497 | 0.336797487 | 0.275964624 | 0.028674182 |
| 0.007646212 | 0.296610601 | 0.279676406 | 0.024687506 |
| 0.465170943 | 0.331676273 | 0.230352491 | 0.376529605 |
| 0.101629259 | 0.382314635 | 0.107593231 | 0.366511502 |
| 0.01816547  | 0.166060426 | 0.325366029 | 0.267866855 |
| 0.217576874 | 0.305626297 | 0.327194959 | 0.310850503 |
| 0.016169689 | 0.23651214  | 7.61E-05    | 0.306029642 |
| 0.351294547 | 0.30265138  | 0.132707889 | 0.224327961 |
| 0.220455786 | 0.322370448 | 0.220144581 | 0.308745311 |
| 0.006965053 | 0.317990167 | 0.127236304 | 0.35035042  |
| 0.239506257 | 0.227849722 | 0.039591981 | 0.283623056 |
| 0.331829452 | 0.229678484 | 0.182342647 | 0.246129207 |

|             |             |             |             |
|-------------|-------------|-------------|-------------|
| 0.408081934 | 0.31665115  | 0.088667832 | 0.231487162 |
| 0.274457917 | 0.025852091 | 0.255833249 | 0.45904477  |
| 0.138364279 | 0.279604845 | 0.44570812  | 0.142205058 |
| 0.332884322 | 0.312679088 | 0.288378452 | 0.443851074 |
| 0.067212724 | 0.166914838 | 0.401050934 | 0.388215104 |
| 0.254130196 | 0.229448642 | 0.306832535 | 0.210683556 |
| 0.362703442 | 0.066747547 | 0.266442208 | 0.260865862 |
| 0.279261166 | 0.238011946 | 0.199056377 | 0.198895838 |
| 0.027195511 | 0.113695164 | 0.295269991 | 0.072211302 |
| 0.200035079 | 0.275915112 | 0.232958727 | 0.322009461 |
| 0.125863058 | 0.018214461 | 0.381048328 | 0.042727957 |
| 0.200342657 | 0.336894758 | 0.161241821 | 0.302091064 |
| 0.115914868 | 0.219122422 | 0.177314137 | 4.24E-05    |
| 0.37795651  | 0.066139642 | 0.259321296 | 0.224523053 |
| 0.296954621 | 0.022293468 | 0.380386162 | 0.483465061 |
| 0.210587035 | 0.288687174 | 0.332820742 | 0.390936961 |
| 0.243141833 | 0.332602354 | 0.315243307 | 0.284929653 |
| 0.323562654 | 0.248993803 | 0.306656188 | 0.341547905 |
| 0.29628979  | 0.175614782 |             |             |
| NTAN1       | 0.237538662 | 0.214654279 | 0.1541014   |
| 0.190908269 | 0.148195573 | 0.131414054 | 0.263184549 |
| 0.288611148 | 0.19494285  | 0.056947453 | 0.174077836 |
| 0.207334066 | 0.034853932 | 0.267206418 | 0.282571558 |
| 0.129055713 | 0.275540731 | 0.293280465 | 0.071775823 |
| 0.146305539 | 0.16268138  | 0.107204599 | 0.135690068 |
| 0.154630718 | 0.309470653 | 0.149181632 | 0.091512397 |
| 0.242851507 | 0.044134815 | 0.147024395 | 0.032649943 |
| 0.331173179 | 0.139201065 | 0.081096094 | 0.148277235 |
| 0.141108778 | 0.015538335 | 0.335443161 | 0.195389793 |
| 0.056476677 | 0.341942152 | 0.072403276 | 0.235556298 |
| 0.085914056 | 0.190955871 | 0.031915204 | 0.131934443 |
| 0.139029407 | 0.18985898  | 0.171729611 | 0.157505632 |
| 0.111249152 | 0.234669417 | 0.129675611 | 0.017247195 |
| 0.072601484 | 0.011935156 | 0.042802803 | 0.284283946 |
| 0.303052964 | 0.324963097 | 0.047799436 | 0.190079431 |
| 0.123859598 | 0.172368027 | 0.270204675 | 0.083322517 |
| 0.281204742 | 0.061524812 | 0.141994883 | 0.152111783 |
| 0.145399201 | 0.162166699 | 0.315867423 | 0.162360174 |
| 0.111391304 | 0.291890602 | 0.170548175 | 0.090455206 |
| 0.200317179 | 0.351013988 | 0.246305385 | 0.282860446 |
| 0.064501829 | 0.111556598 | 0.136639286 | 0.270047177 |
| 0.196878561 | 0.224007512 | 0.204954503 | 0.319342709 |
| 0.191691984 | 0.089507642 | 0.172669586 | 0.223846874 |
| 0.223065185 | 0.075628729 | 0.082471922 | 0.076991588 |
| 0.149536306 | 0.128720242 | 0.309432248 | 0.271498068 |
| 0.151377781 | 0.183348305 | 0.301345715 | 0.104683069 |
| 0.177766037 | 0.201753037 | 0.144228979 | 0.190498642 |
| 0.15060723  | 0.252521627 | 0.189707294 | 0.236364416 |
| 0.111878547 | 0.271892208 | 0.187157413 | 0.257965795 |
| 0.020260873 | 0.283247218 | 0.246083099 | 0.304554827 |
| 0.182985597 | 0.32374107  | 0.128448006 | 0.329847561 |
| 0.225979866 | 0.230642013 | 0.25688732  | 0.232222674 |
| 0.234682148 | 0.274653309 | 0.272976713 | 0.230582624 |
| 0.24391279  | 0.067583447 | 0.108859851 | 0.205331691 |

|             |             |             |             |
|-------------|-------------|-------------|-------------|
| 0.199721015 | 0.265826984 | 0.097515672 | 0.324218061 |
| 0.307541446 | 0.210169402 | 0.207785301 | 0.359645314 |
| 0.230280796 | 0.329094994 | 0.201273452 | 0.279728888 |
| 0.319031254 | 0.310020291 | 0.301279896 | 0.147915221 |
| 0.315166527 | 0.162898818 | 0.057227005 | 0.241185869 |
| 0.332454729 | 0.015934015 | 0.21238904  | 0.232827684 |
| 0.264292124 | 0.192013862 | 0.296001792 | 0.259587702 |
| 0.26737294  | 0.234086611 | 0.006595791 | 0.21926424  |
| 0.292743838 | 0.269878995 | 0.283317984 | 0.095197802 |
| 0.141923816 | 0.147334571 | 0.185854504 | 0.090360588 |
| 0.363804094 | 0.229656833 | 0.225957693 | 0.207124028 |
| 0.121702125 | 0.344798221 | 0.082811291 | 0.2965864   |
| 0.261649621 | 0.229194948 | 0.166744301 | 0.265314655 |
| 0.07677585  | 0.297189823 | 0.144279585 | 0.137072738 |
| 0.293224731 | 0.150569416 | 0.069661124 | 0.160110603 |
| 0.189967959 | 0.107105788 | 0.242021925 | 0.21346385  |
| 0.271349359 | 0.324546655 | 0.2375945   | 0.278973328 |
| 0.237985544 | 0.324077015 | 0.147318066 | 0.253698159 |
| 0.128875248 | 0.245076069 | 0.17278837  | 0.318894616 |
| 0.357388162 | 0.109703228 | 0.315631679 | 0.087352628 |
| 0.118691987 | 0.054423283 | 0.045491621 | 0.096748243 |
| 0.318756426 | 0.200801074 | 0.140484037 | 0.189154789 |
| 0.177067585 | 0.207347656 | 0.117872131 | 0.365733231 |
| 0.230953486 | 0.170806373 | 0.25080851  | 0.105399847 |
| 0.073313692 | 0.180961279 | 0.210657402 | 0.155155341 |
| 0.20458966  | 0.07374152  | 0.066808077 | 0.233830802 |
| 0.080115927 | 0.127916741 | 0.239636356 | 0.188020892 |
| 0.123095973 | 0.280084731 | 0.296152217 | 0.015025947 |
| 0.11431262  | 0.12493775  | 0.267827718 | 0.073241022 |
| 0.238499228 | 0.286846133 | 0.130027722 | 0.151608162 |
| 0.192173578 | 0.29423661  | 0.257644238 | 0.268351986 |
| 0.087444211 | 0.299458716 | 0.214314366 | 0.270768516 |
| 0.208898123 | 0.083759873 | 0.034841243 | 0.20456614  |
| 0.221819976 | 0.079958838 | 0.18852823  | 0.165473664 |
| 0.085219801 | 0.15207186  | 0.155019115 | 0.285853874 |
| 0.358555204 | 0.250606819 | 0.317734506 | 0.230044717 |
| 0.26898939  | 0.242093136 | 0.232928724 | 0.320130437 |
| 0.061707973 | 0.120935237 | 0.117217657 | 0.25794161  |
| 0.253859072 | 0.143262485 | 0.314275524 | 0.044057194 |
| 0.001587276 | 0.227512504 | 0.213134741 | 0.286258428 |
| 0.092430241 | 0.103187918 | 0.165607776 | 0.280981672 |
| 0.315309551 | 0.293628971 | 0.261200491 | 0.155934332 |
| 0.260929602 | 0.125492976 | 0.104778159 | 0.147207549 |
| 0.296615984 | 0.114892818 | 0.254933395 | 0.349739266 |
| 0.139482725 | 0.092724764 | 0.184848336 | 0.019988788 |
| 0.222828177 | 0.159817225 | 0.244118558 | 0.353020131 |
| 0.26781569  | 0.313061172 | 0.22595745  | 0.070189135 |
| 0.244142056 | 0.277542995 | 0.040256262 | 0.247360193 |
| 0.271681469 | 0.266132601 | 0.266844423 | 0.283316798 |
| 0.234307771 | 0.186732278 | 0.203793855 | 0.139448442 |
| 0.279408671 | 0.19352048  | 0.085422632 | 0.192819794 |
| 0.020948558 | 0.250248464 | 0.170162451 | 0.298879806 |
| 0.177875091 | 0.232933261 | 0.253213718 | 0.135323591 |
| 0.124217082 | 0.040874526 | 0.172222713 | 0.249213823 |



|             |             |             |             |
|-------------|-------------|-------------|-------------|
| 0.227067559 | 0.158500729 | 0.068930757 | 0.087163264 |
| 0.272489802 | 0.289204426 | 0.077490771 | 0.294055625 |
| 0.198685437 | 0.173791839 | 0.166368317 | 0.214351188 |
| 0.282204759 | 0.032108072 | 0.136729433 | 0.006890113 |
| 0.089179709 | 0.299800961 | 0.109388866 | 0.182667796 |
| 0.229489468 | 0.102056038 | 0.272008609 | 0.310081627 |
| 0.248756291 | 0.269602897 | 0.281724923 | 0.091972107 |
| 0.281005392 | 0.014673898 | 0.27295187  | 0.21691628  |
| 0.073801271 | 0.009536634 | 0.080487056 | 0.227559389 |
| 0.119869326 | 0.163444382 | 0.279222335 | 0.103566407 |
| 0.298574023 | 0.194799704 | 0.284021511 | 0.124910006 |
| 0.140503875 | 0.206900054 | 0.130474889 | 0.271201674 |
| 0.235712955 | 0.26755352  | 0.108987736 | 0.227262041 |
| 0.129668109 | 0.268848581 | 0.216387347 | 0.040414148 |
| 0.207433171 | 0.224609078 | 0.316833128 | 0.273109295 |
| 0.327638541 | 0.173718669 | 0.056034041 | 0.124525326 |
| 0.235764063 | 0.163393654 | 0.077881938 | 0.171356453 |
| 0.248405372 | 0.149862674 | 0.298278803 | 0.292885607 |
| 0.306889945 | 0.295665562 | 0.253647542 | 0.2097926   |
| 0.098961579 | 0.015820547 | 0.117050469 | 0.280180787 |
| 0.045756473 | 0.114918434 | 0.307655275 | 0.158830345 |
| 0.205352012 | 0.192242502 | 0.077034151 | 0.085344442 |
| 0.212701163 | 0.160928581 | 0.132384306 | 0.259118271 |
| 0.161731709 | 0.127652927 | 0.268865485 | 0.304743477 |
| 0.124057165 | 0.261434786 | 0.303478415 | 0.209699638 |
| 0.095307837 | 0.10778311  | 0.265317354 | 0.277880878 |
| 0.241882447 | 0.244090774 | 0.247369861 | 0.130898405 |
| 0.312168196 | 0.169886453 | 0.266160902 | 0.250012715 |
| 0.317705193 | 0.327981126 | 0.361111573 | 0.266750425 |
| 0.276556956 | 0.183871721 | 0.127608096 | 0.223652136 |
| 0.279270853 | 0.158666259 | 0.275544378 | 0.084287206 |
| 0.265310157 | 0.231064426 | 0.264529235 | 0.286175992 |
| 0.103991828 | 1           | 0.273445185 | 0.180464283 |
| 0.179512032 | 0.083810819 | 0.259163332 | 0.282717636 |
| 0.251061016 | 0.049887564 | 0.279188706 | 0.172495348 |
| 0.224435595 | 0.049486522 | 0.158663956 | 0.351036518 |
| 0.258052753 | 0.228461133 | 0.131306748 | 0.204787376 |
| 0.185203174 | 0.08224587  | 0.130910472 | 0.210004928 |
| 0.280365377 | 0.134834186 | 0.284343063 | 0.3006578   |
| 0.233269851 | 0.12319809  | 0.087308253 | 0.148381785 |
| 0.279517132 | 0.137053538 | 0.250981315 | 0.250615897 |
| 0.338718725 | 0.352241076 | 0.224373118 | 0.296472701 |
| 0.110775363 | 0.16967021  | 0.144449723 | 0.22507985  |
| 0.085990514 | 0.252250716 | 0.079419863 | 0.195006233 |
| 0.013452997 | 0.046567001 | 0.26752076  | 0.266435102 |
| 0.327272937 | 0.253819449 | 0.321118422 | 0.195530443 |
| 0.001098101 | 0.131898946 | 0.170261911 | 0.11977391  |
| 0.22411985  | 0.258806323 | 0.168547967 | 0.296846741 |
| 0.336556771 | 0.182006815 | 0.272816028 | 0.112815154 |
| 0.043567902 | 0.151648239 | 0.32871587  | 0.222445214 |
| 0.248036141 | 0.172190762 | 0.081373999 | 0.242047074 |
| 0.067876075 | 0.335963518 | 0.295090889 | 0.06526758  |
| 0.053782313 | 0.263390468 | 0.198990571 | 0.203818499 |
| 0.109533411 | 0.239527179 | 0.274659723 | 0.024222587 |

|             |             |             |             |
|-------------|-------------|-------------|-------------|
| 0.169016532 | 0.162186509 | 0.26649274  | 0.240735574 |
| 0.26438303  | 0.257787123 | 0.226900718 | 0.156795671 |
| 0.171064772 | 0.25727012  | 0.218711645 | 0.273742782 |
| 0.270116253 | 0.250234283 | 0.138949582 | 0.140469165 |
| 0.170117035 | 0.279147616 | 0.252061127 | 0.249027787 |
| 0.279152151 | 0.232706835 | 0.352601542 | 0.187599966 |
| 0.281305555 | 0.136217133 | 0.352203623 | 0.250047665 |
| 0.312799828 | 0.201011533 | 0.175102498 | 0.213430397 |
| 0.042159981 | 0.118377155 | 0.211446838 | 0.133605665 |
| 0.282277481 | 0.145971675 | 0.110601864 | 0.14704126  |
| 0.153248841 | 0.35543848  | 0.343474649 | 0.298326215 |
| 0.150745091 | 0.117482616 | 0.059699296 | 0.282918109 |
| 0.248868576 | 0.258403855 | 0.147518973 | 0.053448645 |
| 0.224437414 | 0.157595586 | 0.215103036 | 0.279724346 |
| 0.069981925 | 0.328280848 | 0.072471541 | 0.252466052 |
| 0.04924199  | 0.235340418 | 0.296837153 | 0.16620524  |
| 0.045787457 | 0.285799953 | 0.169774182 | 0.116630269 |
| 0.17410182  | 0.150796168 | 0.146572607 | 0.243998727 |
| 0.231753161 | 0.212531267 | 0.308231334 | 0.205092573 |
| 0.098277382 | 0.137076488 | 0.10518668  | 0.185554474 |
| 0.234143053 | 0.258064703 | 0.232949183 | 0.259150741 |
| 0.138445463 | 0.266203537 | 0.369112732 | 0.194749978 |
| 0.17374755  | 0.2641262   | 0.046715951 | 0.107209936 |
| 0.240200018 | 0.082150191 | 0.00253682  | 0.043226666 |
| 0.273094452 | 0.109309148 | 0.16382997  | 0.21553651  |
| 0.137213929 | 0.28584672  | 0.044974874 | 0.194813548 |
| 0.257334835 | 0.312343791 | 0.186009268 | 0.323450778 |
| 0.260927499 | 0.317171182 | 0.140488282 | 0.018925566 |
| 0.119040034 | 0.093951501 | 0.083263841 | 0.299748259 |
| 0.208578667 | 0.050538954 | 0.120063625 | 0.161527384 |
| 0.252368498 | 0.041886058 | 0.123400799 | 0.1644762   |
| 0.274651072 | 0.317761463 | 0.297961369 | 0.20434624  |
| 0.143770789 | 0.259151955 | 0.098990629 | 0.106980343 |
| 0.171710435 | 0.105552881 | 0.233104299 | 0.094091454 |
| 0.262426065 | 0.181227136 | 0.020129004 | 0.361240002 |
| 0.283518738 | 0.093889698 | 0.333034169 | 0.057883379 |
| 0.286137022 | 0.265775227 | 0.175547166 | 0.091434645 |
| 0.146285968 | 0.120801602 | 0.294479674 | 0.245138264 |
| 0.044486505 | 0.124372592 | 0.253926041 | 0.118859027 |
| 0.32622453  | 0.131770321 | 0.330807747 | 0.063561429 |
| 0.254541333 | 0.213599906 | 0.199083561 | 0.1690115   |
| 0.121905253 | 0.213279648 | 0.087461567 | 0.305193684 |
| 0.294151741 | 0.099631234 | 0.220297956 | 0.246321094 |
| 0.097438069 | 0.264626765 | 0.09669943  | 0.29868836  |
| 0.27196319  | 0.297973551 | 0.20713932  | 0.256285239 |
| 0.325189636 | 0.115508758 | 0.094025882 | 0.18858048  |
| 0.252236455 | 0.241073347 | 0.109117356 | 0.242028749 |
| 0.074543938 | 0.260296759 | 0.103482722 | 0.201630137 |
| 0.249203437 | 0.287259153 | 0.145554077 | 0.271452988 |
| 0.226930697 | 0.142719295 | 0.148635915 | 0.348417687 |
| 0.250907361 | 0.155309662 | 0.348095885 | 0.006994186 |
| 0.153390948 | 0.169779159 | 0.273716078 | 0.1361244   |
| 0.298381751 | 0.173542529 | 0.12822526  | 0.043735477 |
| 0.233613024 | 0.041196539 | 0.162857082 | 0.172430048 |

|             |             |             |             |
|-------------|-------------|-------------|-------------|
| 0.095013698 | 0.247090393 | 0.291627557 | 0.280293762 |
| 0.223711277 | 0.093865563 | 0.068387166 | 0.277057497 |
| 0.058999938 | 0.059044131 | 0.087646457 | 0.137453572 |
| 0.07441433  | 0.073064584 | 0.090043725 | 0.081012017 |
| 0.21564292  | 0.230999122 |             |             |
| NUBP1       | 0.113525602 | 0.172945152 | 0.060489384 |
| 0.176448137 | 0.235041815 | 0.095928353 | 0.143527616 |
| 0.171668845 | 0.154616606 | 0.034827453 | 0.195134411 |
| 0.101140584 | 0.069561161 | 0.252219922 | 0.157127243 |
| 0.182567032 | 0.177707112 | 0.186705591 | 0.04707943  |
| 0.121650614 | 0.237533071 | 0.112476923 | 0.089848917 |
| 0.199891546 | 0.211327941 | 0.126261857 | 0.103446205 |
| 0.221234949 | 0.041708121 | 0.169691829 | 0.026665854 |
| 0.303501919 | 0.224878284 | 0.081064592 | 0.066870641 |
| 0.133658702 | 0.029196324 | 0.277007671 | 0.220638319 |
| 0.128649352 | 0.29126457  | 0.040742475 | 0.235715217 |
| 0.063807833 | 0.086089447 | 0.018420868 | 0.15867157  |
| 0.127445881 | 0.160522498 | 0.070258248 | 0.166173486 |
| 0.089372954 | 0.203070924 | 0.101116749 | 0.004920169 |
| 0.093526916 | 0.027319462 | 0.062963579 | 0.240242271 |
| 0.297659458 | 0.251639512 | 0.044755575 | 0.112798275 |
| 0.130985123 | 0.202240318 | 0.286292168 | 0.060892692 |
| 0.255346744 | 0.100474825 | 0.155193553 | 0.133692939 |
| 0.10511141  | 0.060659621 | 0.277766354 | 0.08653002  |
| 0.102833783 | 0.288125414 | 0.196663094 | 0.125153298 |
| 0.15560883  | 0.298958184 | 0.249458744 | 0.22446801  |
| 0.09675574  | 0.171701015 | 0.182537396 | 0.332903503 |
| 0.203066728 | 0.124032193 | 0.237264047 | 0.292457828 |
| 0.07883195  | 0.073179892 | 0.172198139 | 0.133347509 |
| 0.19208076  | 0.085318938 | 0.063300985 | 0.130848506 |
| 0.225127827 | 0.183110619 | 0.246656228 | 0.282088194 |
| 0.15929089  | 0.097584097 | 0.222697475 | 0.173781783 |
| 0.192925588 | 0.115406481 | 0.197844603 | 0.205918446 |
| 0.175997696 | 0.234040752 | 0.16645191  | 0.244612955 |
| 0.148988574 | 0.25411396  | 0.21141663  | 0.22622963  |
| 0.01312926  | 0.245361674 | 0.198771732 | 0.193702222 |
| 0.069924545 | 0.23649758  | 0.134209902 | 0.328817692 |
| 0.230484622 | 0.218111132 | 0.167419125 | 0.259470913 |
| 0.270045276 | 0.203569142 | 0.233771849 | 0.225074615 |
| 0.121575248 | 0.093317384 | 0.146058898 | 0.131686041 |
| 0.214245427 | 0.186956039 | 0.148233793 | 0.260365019 |
| 0.291256862 | 0.242066136 | 0.109125804 | 0.286685445 |
| 0.144814871 | 0.316554462 | 0.171601505 | 0.237786194 |
| 0.276335493 | 0.24722709  | 0.307035563 | 0.208994707 |
| 0.264074816 | 0.136262419 | 0.033012346 | 0.226931378 |
| 0.330997164 | 0.034185091 | 0.21017976  | 0.234699644 |
| 0.224770055 | 0.211084973 | 0.299043904 | 0.252315898 |
| 0.220915483 | 0.139213528 | 0.008249367 | 0.304463139 |
| 0.245702032 | 0.276970323 | 0.236178696 | 0.103829596 |
| 0.197370117 | 0.103506253 | 0.190624155 | 0.083967328 |
| 0.342059943 | 0.232142546 | 0.211007656 | 0.191605424 |
| 0.093597851 | 0.283234767 | 0.107973966 | 0.220080722 |
| 0.162773412 | 0.1165055   | 0.085568855 | 0.262921273 |
| 0.048134736 | 0.308305638 | 0.09185201  | 0.16640137  |

|             |             |             |             |
|-------------|-------------|-------------|-------------|
| 0.317808808 | 0.088053201 | 0.075442302 | 0.22744215  |
| 0.088454872 | 0.108585153 | 0.175370529 | 0.136251613 |
| 0.190887843 | 0.217265174 | 0.187157377 | 0.241584243 |
| 0.252377084 | 0.195543207 | 0.151271418 | 0.253534184 |
| 0.116516176 | 0.185852833 | 0.169771874 | 0.314707719 |
| 0.375243588 | 0.151667174 | 0.273048614 | 0.092491026 |
| 0.130541323 | 0.047874388 | 0.079098751 | 0.111174893 |
| 0.198158272 | 0.172007286 | 0.171153959 | 0.259747433 |
| 0.121039581 | 0.096813477 | 0.114633963 | 0.301919333 |
| 0.144749069 | 0.185231553 | 0.271846437 | 0.097497118 |
| 0.033645522 | 0.170975544 | 0.222883946 | 0.220526787 |
| 0.185908248 | 0.110458042 | 0.089012464 | 0.247866486 |
| 0.084397016 | 0.163043039 | 0.235013489 | 0.256132988 |
| 0.086400761 | 0.159314197 | 0.286524871 | 0.020503263 |
| 0.132915254 | 0.185390326 | 0.350210018 | 0.043768928 |
| 0.243337473 | 0.319835025 | 0.19306755  | 0.195872446 |
| 0.117917311 | 0.254487172 | 0.243122568 | 0.255294671 |
| 0.086451984 | 0.289587221 | 0.231859492 | 0.275579718 |
| 0.221482647 | 0.076561772 | 0.067741408 | 0.2196537   |
| 0.239322032 | 0.069463953 | 0.099418753 | 0.168243251 |
| 0.067566286 | 0.196339251 | 0.218319757 | 0.291373518 |
| 0.315808963 | 0.187677755 | 0.263955994 | 0.300846746 |
| 0.286858533 | 0.202711996 | 0.242946046 | 0.304569324 |
| 0.044852947 | 0.140013932 | 0.143168286 | 0.331363643 |
| 0.237109561 | 0.190913121 | 0.267240861 | 0.074462443 |
| 0.004032197 | 0.10162545  | 0.112090593 | 0.289834574 |
| 0.172676247 | 0.101181541 | 0.208583324 | 0.257875676 |
| 0.211455625 | 0.267013359 | 0.222787729 | 0.174224562 |
| 0.224121877 | 0.116553874 | 0.139759822 | 0.190547256 |
| 0.272180936 | 0.115835449 | 0.23973708  | 0.297807573 |
| 0.058885277 | 0.138183172 | 0.121916996 | 0.02126079  |
| 0.103465971 | 0.12710735  | 0.139517292 | 0.251764207 |
| 0.289435027 | 0.217368774 | 0.190665055 | 0.046273955 |
| 0.294121907 | 0.180480105 | 0.056398858 | 0.235746137 |
| 0.235407532 | 0.231677537 | 0.225575608 | 0.220234154 |
| 0.226052114 | 0.184406383 | 0.245448308 | 0.102698033 |
| 0.179457377 | 0.088143463 | 0.142094511 | 0.198523326 |
| 0.007941743 | 0.297149956 | 0.184813708 | 0.258239637 |
| 0.201511843 | 0.233020004 | 0.124244476 | 0.181231025 |
| 0.067257053 | 0.068776278 | 0.108005094 | 0.209169946 |
| 0.297029865 | 0.068076215 | 0.063957473 | 0.095193178 |
| 0.210841266 | 0.244731973 | 0.08532447  | 0.262472595 |
| 0.225791029 | 0.09369948  | 0.19606289  | 0.257929528 |
| 0.170046655 | 0.024164112 | 0.087900554 | 0.006273857 |
| 0.055024902 | 0.243829368 | 0.093598764 | 0.109518219 |
| 0.256306582 | 0.043639263 | 0.231568576 | 0.276969804 |
| 0.191032404 | 0.271311588 | 0.262405816 | 0.132830821 |
| 0.255270279 | 0.027360008 | 0.250735378 | 0.189033791 |
| 0.052713217 | 0.00669994  | 0.052217233 | 0.238457629 |
| 0.154729871 | 0.070746235 | 0.253466427 | 0.074082873 |
| 0.257827091 | 0.09216916  | 0.1551923   | 0.218600284 |
| 0.146967565 | 0.259807284 | 0.184221226 | 0.20996707  |
| 0.222133538 | 0.276760439 | 0.066427653 | 0.134167959 |
| 0.161293254 | 0.177978545 | 0.132387255 | 0.048443314 |

|             |             |             |             |
|-------------|-------------|-------------|-------------|
| 0.266100196 | 0.124176759 | 0.229648275 | 0.23830398  |
| 0.309305669 | 0.240052209 | 0.038542462 | 0.086572338 |
| 0.236320591 | 0.077192488 | 0.067228557 | 0.092860265 |
| 0.20571453  | 0.199491938 | 0.322928739 | 0.266859552 |
| 0.30365279  | 0.266662074 | 0.129062789 | 0.247256475 |
| 0.068511099 | 0.021850281 | 0.084681326 | 0.255587481 |
| 0.045053048 | 0.123390111 | 0.305301316 | 0.114737526 |
| 0.172012711 | 0.088355553 | 0.117702202 | 0.135055797 |
| 0.276783297 | 0.16992409  | 0.198174953 | 0.216816082 |
| 0.204443416 | 0.198868926 | 0.251015942 | 0.214410339 |
| 0.08812182  | 0.213998129 | 0.209715809 | 0.100361772 |
| 0.090394631 | 0.124486443 | 0.144723753 | 0.224535453 |
| 0.26233948  | 0.246879411 | 0.167928449 | 0.122752066 |
| 0.268833803 | 0.148294025 | 0.27229024  | 0.211602395 |
| 0.263603072 | 0.317568972 | 0.298967163 | 0.267206613 |
| 0.154533404 | 0.248039988 | 0.197265865 | 0.301946316 |
| 0.252509897 | 0.077054352 | 0.227845824 | 0.128259259 |
| 0.207789196 | 0.211632803 | 0.187596086 | 0.181755831 |
| 0.144615256 | 0.273445185 | 1           | 0.122857806 |
| 0.181541009 | 0.128527748 | 0.135028675 | 0.264615484 |
| 0.244891586 | 0.10901632  | 0.242186793 | 0.113506448 |
| 0.202810619 | 0.027997346 | 0.191735634 | 0.336861094 |
| 0.188603604 | 0.135289615 | 0.08018965  | 0.213121019 |
| 0.187890699 | 0.076068789 | 0.08381036  | 0.165817336 |
| 0.273584188 | 0.150644284 | 0.235684996 | 0.329808775 |
| 0.156034702 | 0.15028327  | 0.097041541 | 0.190980855 |
| 0.240888699 | 0.096660974 | 0.214815957 | 0.147847856 |
| 0.299339165 | 0.286321834 | 0.205520212 | 0.265994048 |
| 0.110932489 | 0.090056674 | 0.065508636 | 0.206572969 |
| 0.16533152  | 0.143367944 | 0.045263985 | 0.202330474 |
| 0.030399489 | 0.097523371 | 0.273440149 | 0.212671064 |
| 0.295009647 | 0.26942758  | 0.301828623 | 0.130228468 |
| 0.004413775 | 0.175101974 | 0.218683274 | 0.117713438 |
| 0.187999799 | 0.232745028 | 0.100693691 | 0.249910934 |
| 0.359149269 | 0.091680933 | 0.244802944 | 0.079076111 |
| 0.074184675 | 0.134606643 | 0.32650438  | 0.18069747  |
| 0.262942432 | 0.085125196 | 0.124733591 | 0.201222716 |
| 0.107011654 | 0.343764055 | 0.323907423 | 0.033827626 |
| 0.076996173 | 0.261354911 | 0.195351622 | 0.096201797 |
| 0.135333201 | 0.247447641 | 0.269178766 | 0.017051202 |
| 0.204989441 | 0.084569273 | 0.266691668 | 0.264077246 |
| 0.276045167 | 0.231760239 | 0.316160396 | 0.195347239 |
| 0.167807375 | 0.218306689 | 0.208740846 | 0.321675064 |
| 0.28448321  | 0.182530762 | 0.180100957 | 0.109504944 |
| 0.196533441 | 0.193626886 | 0.139538119 | 0.125781725 |
| 0.188476249 | 0.20668174  | 0.29205637  | 0.100297204 |
| 0.307052186 | 0.105667526 | 0.363508232 | 0.2025202   |
| 0.323768892 | 0.099330703 | 0.145314992 | 0.18920575  |
| 0.030375817 | 0.077399794 | 0.082707839 | 0.128342343 |
| 0.232012447 | 0.192456126 | 0.086233111 | 0.117640282 |
| 0.138320822 | 0.314981005 | 0.281278154 | 0.286960854 |
| 0.150709604 | 0.10294276  | 0.035219608 | 0.274040331 |
| 0.181303287 | 0.184089373 | 0.225699552 | 0.031894824 |
| 0.241302524 | 0.101015697 | 0.222356325 | 0.230778553 |

|             |             |             |             |
|-------------|-------------|-------------|-------------|
| 0.086353085 | 0.320837302 | 0.042008832 | 0.154383477 |
| 0.030232111 | 0.134501564 | 0.234827188 | 0.168687476 |
| 0.070733536 | 0.220572119 | 0.243557772 | 0.064991929 |
| 0.206605674 | 0.162000407 | 0.17509171  | 0.152406515 |
| 0.22078773  | 0.167232116 | 0.248329842 | 0.099834363 |
| 0.10659282  | 0.226792784 | 0.078055954 | 0.202396718 |
| 0.248364985 | 0.244846675 | 0.122988033 | 0.245973873 |
| 0.14699115  | 0.171991401 | 0.331314253 | 0.140082691 |
| 0.127265726 | 0.281988142 | 0.088415176 | 0.067850881 |
| 0.198652971 | 0.09405852  | 0.001540056 | 0.060531671 |
| 0.334748017 | 0.080215455 | 0.140069527 | 0.230373695 |
| 0.198542611 | 0.337966717 | 0.068775735 | 0.12345257  |
| 0.194130377 | 0.238698146 | 0.173674941 | 0.326394961 |
| 0.24858002  | 0.222703327 | 0.115536971 | 0.012008799 |
| 0.140466168 | 0.110947355 | 0.059927219 | 0.166499644 |
| 0.105177153 | 0.090324288 | 0.134433383 | 0.082671434 |
| 0.274902764 | 0.063992166 | 0.105561874 | 0.180332223 |
| 0.203546709 | 0.245213838 | 0.292204508 | 0.249115439 |
| 0.062423769 | 0.260878882 | 0.113538742 | 0.091834604 |
| 0.218071481 | 0.149754311 | 0.295713025 | 0.150591336 |
| 0.159189167 | 0.219751784 | 0.018392132 | 0.294100569 |
| 0.211605073 | 0.121595323 | 0.259357293 | 0.03533678  |
| 0.355860473 | 0.252300505 | 0.158404339 | 0.087228097 |
| 0.115472764 | 0.186767444 | 0.273655429 | 0.219383226 |
| 0.054096245 | 0.122141617 | 0.218265397 | 0.149305817 |
| 0.23040383  | 0.126986998 | 0.282770546 | 0.071443216 |
| 0.211831652 | 0.184841459 | 0.124178968 | 0.198139961 |
| 0.109445113 | 0.124365468 | 0.054622427 | 0.277447683 |
| 0.279694277 | 0.170568232 | 0.264966975 | 0.240284963 |
| 0.118376708 | 0.218720491 | 0.100774125 | 0.260347585 |
| 0.284500606 | 0.311857935 | 0.237084366 | 0.227848453 |
| 0.368640947 | 0.190594128 | 0.134493585 | 0.223017304 |
| 0.197832899 | 0.180273721 | 0.142087585 | 0.239152908 |
| 0.126048514 | 0.291486819 | 0.078212779 | 0.250249902 |
| 0.173867747 | 0.195755338 | 0.114025254 | 0.220404277 |
| 0.25570735  | 0.182108481 | 0.212323846 | 0.336644724 |
| 0.256965605 | 0.14114017  | 0.331379257 | 0.027684051 |
| 0.117862482 | 0.226663149 | 0.254080024 | 0.146916784 |
| 0.22555856  | 0.16742265  | 0.094664522 | 0.014787644 |
| 0.266323853 | 0.101821591 | 0.147178274 | 0.228784412 |
| 0.094922653 | 0.116098901 | 0.252829913 | 0.285428413 |
| 0.204656595 | 0.074698861 | 0.065788172 | 0.236158172 |
| 0.120012025 | 0.058697074 | 0.084228266 | 0.123383814 |
| 0.122702821 | 0.051275552 | 0.071327403 | 0.088930362 |
| 0.21187731  | 0.150605346 |             |             |
| NUCKS1      | 0.21763002  | 0.227330961 | 0.226691588 |
| 0.21100155  | 0.079578767 | 0.124416495 | 0.181715572 |
| 0.178498507 | 0.184757014 | 0.069571064 | 0.125741878 |
| 0.162899986 | 0.007510032 | 0.231733177 | 0.153736425 |
| 0.090212601 | 0.142101725 | 0.19457409  | 0.034737844 |
| 0.123385571 | 0.080162633 | 0.066374865 | 0.146105028 |
| 0.072987054 | 0.32727632  | 0.160502858 | 0.068047617 |
| 0.240070555 | 0.039445802 | 0.122616055 | 0.05675037  |
| 0.299673577 | 0.076858974 | 0.065497056 | 0.172489336 |

|             |             |             |             |
|-------------|-------------|-------------|-------------|
| 0.110701171 | 0.001636484 | 0.338238948 | 0.12167124  |
| 0.032158347 | 0.28989853  | 0.103612029 | 0.151790037 |
| 0.110138128 | 0.221892618 | 0.041203027 | 0.102259688 |
| 0.136828919 | 0.112843303 | 0.212115156 | 0.147505783 |
| 0.091114986 | 0.194757356 | 0.159030562 | 0.010817181 |
| 0.045002728 | 0.005075851 | 0.024541508 | 0.285418462 |
| 0.201931672 | 0.159826315 | 0.041784636 | 0.116647575 |
| 0.089542856 | 0.111483502 | 0.145484912 | 0.092258539 |
| 0.269479255 | 0.022349309 | 0.123747036 | 0.120484675 |
| 0.130069463 | 0.161185266 | 0.23328336  | 0.180765906 |
| 0.084827184 | 0.146765413 | 0.093463551 | 0.053746113 |
| 0.242954837 | 0.319707492 | 0.166493831 | 0.310697083 |
| 0.014167508 | 0.064918856 | 0.067946308 | 0.156547166 |
| 0.139796575 | 0.140827045 | 0.169738143 | 0.300534383 |
| 0.146777963 | 0.105613429 | 0.14845998  | 0.215700691 |
| 0.220222598 | 0.039078828 | 0.104992046 | 0.028494276 |
| 0.092056544 | 0.08225193  | 0.293466792 | 0.198635241 |
| 0.071562319 | 0.224379464 | 0.336030706 | 0.058476999 |
| 0.108025093 | 0.239679512 | 0.07154991  | 0.161460035 |
| 0.135372806 | 0.240083173 | 0.185412248 | 0.175491492 |
| 0.08306772  | 0.261857805 | 0.175370733 | 0.212298466 |
| 0.022921563 | 0.277264592 | 0.217453571 | 0.143478322 |
| 0.214525896 | 0.129988656 | 0.051278525 | 0.209664897 |
| 0.200384547 | 0.158658507 | 0.208432432 | 0.127986743 |
| 0.17956777  | 0.309359835 | 0.273859383 | 0.191572727 |
| 0.197893156 | 0.032525584 | 0.090032938 | 0.134314187 |
| 0.138594641 | 0.175698786 | 0.048424774 | 0.336629203 |
| 0.270959028 | 0.162478785 | 0.209903489 | 0.353154132 |
| 0.128663502 | 0.287854581 | 0.223406426 | 0.200792547 |
| 0.320171933 | 0.331325663 | 0.257428106 | 0.100571097 |
| 0.302517942 | 0.178513186 | 0.019780608 | 0.198069521 |
| 0.260278936 | 0.005520616 | 0.188918191 | 0.206991972 |
| 0.282046729 | 0.16895077  | 0.244562024 | 0.229314942 |
| 0.27695418  | 0.206517241 | 0.00337864  | 0.109736089 |
| 0.309933598 | 0.246376943 | 0.089969566 | 0.087608565 |
| 0.08245378  | 0.143242322 | 0.144026381 | 0.079192785 |
| 0.295031278 | 0.207182497 | 0.209574978 | 0.175572421 |
| 0.124102266 | 0.290216994 | 0.062677411 | 0.337029431 |
| 0.170250392 | 0.237546879 | 0.220747345 | 0.163331898 |
| 0.104798194 | 0.159055451 | 0.151466485 | 0.082686709 |
| 0.16963522  | 0.135064979 | 0.047903962 | 0.097565842 |
| 0.249035647 | 0.107851505 | 0.206597962 | 0.220822377 |
| 0.165668302 | 0.288114153 | 0.167436898 | 0.158639913 |
| 0.107778775 | 0.381638155 | 0.124214619 | 0.22457516  |
| 0.081513441 | 0.270424105 | 0.152077448 | 0.25726236  |
| 0.25570559  | 0.082536775 | 0.200172907 | 0.081394095 |
| 0.092408677 | 0.045256054 | 0.020249469 | 0.077539567 |
| 0.330000884 | 0.12267323  | 0.10542981  | 0.12246722  |
| 0.208741482 | 0.160679327 | 0.083253624 | 0.321891675 |
| 0.250727999 | 0.098238801 | 0.201963339 | 0.108100251 |
| 0.082611158 | 0.174403487 | 0.181839626 | 0.050674753 |
| 0.155973558 | 0.025475809 | 0.041557192 | 0.211336985 |
| 0.045145524 | 0.04497601  | 0.206903063 | 0.11516296  |
| 0.090183512 | 0.321414228 | 0.251567415 | 0.005119121 |

|             |             |             |             |
|-------------|-------------|-------------|-------------|
| 0.068104444 | 0.062807963 | 0.149937098 | 0.090171824 |
| 0.188114896 | 0.160141379 | 0.065358248 | 0.080480428 |
| 0.24088318  | 0.27950044  | 0.206886781 | 0.243969413 |
| 0.076083448 | 0.263506881 | 0.181236011 | 0.223732741 |
| 0.153254562 | 0.064261173 | 0.013454167 | 0.192126151 |
| 0.201072532 | 0.077265329 | 0.236699226 | 0.141247759 |
| 0.084364671 | 0.107387265 | 0.052027861 | 0.252943007 |
| 0.31943382  | 0.296342581 | 0.128957894 | 0.137172912 |
| 0.225594874 | 0.205211975 | 0.178601204 | 0.262215394 |
| 0.072224041 | 0.081185559 | 0.08511738  | 0.168905956 |
| 0.22510105  | 0.053724188 | 0.236941116 | 0.017356056 |
| 0.000992696 | 0.19866005  | 0.233734142 | 0.122595152 |
| 0.032600452 | 0.093457613 | 0.119122879 | 0.262220113 |
| 0.187405698 | 0.239443032 | 0.172217227 | 0.115805596 |
| 0.271858914 | 0.070999705 | 0.070202258 | 0.089736981 |
| 0.201360641 | 0.096353623 | 0.15558894  | 0.335678342 |
| 0.187697054 | 0.044047065 | 0.127757898 | 0.015670598 |
| 0.205873862 | 0.177606376 | 0.286510474 | 0.341195762 |
| 0.195822982 | 0.345739262 | 0.230597909 | 0.091808445 |
| 0.145444458 | 0.203662175 | 0.017830883 | 0.229159674 |
| 0.247001443 | 0.235292543 | 0.249628538 | 0.276290539 |
| 0.198470714 | 0.139844506 | 0.154782207 | 0.162267182 |
| 0.201061057 | 0.211732808 | 0.045796775 | 0.123909048 |
| 0.014588811 | 0.16740767  | 0.080741715 | 0.224429995 |
| 0.127146053 | 0.147330065 | 0.184668542 | 0.073502259 |
| 0.202824602 | 0.026651    | 0.124094426 | 0.109317195 |
| 0.119030612 | 0.155919425 | 0.0996827   | 0.068657937 |
| 0.303040011 | 0.260504119 | 0.059653681 | 0.286158891 |
| 0.136920097 | 0.251189615 | 0.117343241 | 0.135072113 |
| 0.195100519 | 0.034824771 | 0.115513759 | 0.020141798 |
| 0.057441854 | 0.2620027   | 0.077432938 | 0.250863639 |
| 0.182783114 | 0.120105774 | 0.27835335  | 0.283095244 |
| 0.285227276 | 0.238182964 | 0.262582325 | 0.050896233 |
| 0.280267337 | 0.00591016  | 0.255683677 | 0.226554693 |
| 0.085123802 | 0.021224807 | 0.022209424 | 0.205729857 |
| 0.099973031 | 0.238564323 | 0.208979771 | 0.123059397 |
| 0.175565643 | 0.216800001 | 0.158805955 | 0.050153445 |
| 0.121028476 | 0.085412854 | 0.037166288 | 0.291124896 |
| 0.155112282 | 0.133344385 | 0.11030301  | 0.214813516 |
| 0.091654776 | 0.191402792 | 0.195837576 | 0.018053012 |
| 0.117742862 | 0.287510037 | 0.353047236 | 0.266417405 |
| 0.285598805 | 0.118213874 | 0.066127313 | 0.085580504 |
| 0.177205909 | 0.246111501 | 0.064850579 | 0.217664227 |
| 0.273589462 | 0.114230141 | 0.211482424 | 0.277668691 |
| 0.261381145 | 0.285866575 | 0.170202016 | 0.169769388 |
| 0.107083163 | 0.002057735 | 0.162737447 | 0.162825367 |
| 0.010207405 | 0.083195102 | 0.240312467 | 0.09276876  |
| 0.087052493 | 0.190964779 | 0.040984271 | 0.042916912 |
| 0.14399369  | 0.109580888 | 0.063888249 | 0.176197004 |
| 0.078572738 | 0.050859582 | 0.123952617 | 0.132224495 |
| 0.060649129 | 0.27505757  | 0.335425289 | 0.150956596 |
| 0.101425569 | 0.090540988 | 0.204174158 | 0.213669371 |
| 0.208706726 | 0.220060553 | 0.146592441 | 0.082243278 |
| 0.25324142  | 0.089881576 | 0.21717992  | 0.258599813 |



|             |             |             |             |
|-------------|-------------|-------------|-------------|
| 0.31739931  | 0.281204269 | 0.31591252  | 0.092025655 |
| 0.197162427 | 0.113035536 | 0.063659592 | 0.07360016  |
| 0.254215213 | 0.21250333  | 0.271197815 | 0.047037932 |
| 0.199308744 | 0.190774454 | 0.141649926 | 0.185418464 |
| 0.070765631 | 0.180464283 | 0.122857806 | 1           |
| 0.111489942 | 0.042772937 | 0.179216862 | 0.184129185 |
| 0.206222285 | 0.029966965 | 0.199342166 | 0.12437283  |
| 0.202348244 | 0.051623028 | 0.128764308 | 0.28767784  |
| 0.220921481 | 0.194655812 | 0.208561783 | 0.133619401 |
| 0.175290689 | 0.081947302 | 0.116083309 | 0.238453412 |
| 0.2253958   | 0.117551679 | 0.290787494 | 0.194062432 |
| 0.208010289 | 0.091175079 | 0.04940536  | 0.098134665 |
| 0.161800124 | 0.131579032 | 0.119700322 | 0.203470928 |
| 0.226920065 | 0.314009354 | 0.236928214 | 0.157775709 |
| 0.094804105 | 0.204538393 | 0.208587186 | 0.186727309 |
| 0.03984944  | 0.217612747 | 0.097817613 | 0.148552084 |
| 0.00812771  | 0.015278907 | 0.21414342  | 0.132760641 |
| 0.284402947 | 0.224046874 | 0.28716687  | 0.119031732 |
| 0.000117445 | 0.100379518 | 0.126160229 | 0.114150371 |
| 0.233309465 | 0.207131256 | 0.068946183 | 0.155852896 |
| 0.218405226 | 0.245507941 | 0.142798933 | 0.112891126 |
| 0.028747004 | 0.137265304 | 0.188146576 | 0.149969339 |
| 0.110797411 | 0.199983222 | 0.038398796 | 0.170309644 |
| 0.021336768 | 0.210335231 | 0.208244156 | 0.074900888 |
| 0.038338944 | 0.197631679 | 0.197651981 | 0.182299003 |
| 0.063432249 | 0.186034714 | 0.208427583 | 0.023503071 |
| 0.134455104 | 0.0983888   | 0.107630009 | 0.126682704 |
| 0.121936046 | 0.107614039 | 0.103965137 | 0.096582567 |
| 0.140572444 | 0.159572628 | 0.153248097 | 0.163655203 |
| 0.129164088 | 0.155114726 | 0.098220837 | 0.137324003 |
| 0.098219654 | 0.209021002 | 0.293058779 | 0.328382709 |
| 0.155727678 | 0.209091809 | 0.281632486 | 0.245553482 |
| 0.140262427 | 0.112530208 | 0.250750589 | 0.275064344 |
| 0.219301939 | 0.292113292 | 0.101645675 | 0.228711163 |
| 0.037778681 | 0.105038586 | 0.20162211  | 0.132168962 |
| 0.160585436 | 0.063569929 | 0.104429716 | 0.191666329 |
| 0.147049245 | 0.31396317  | 0.267620051 | 0.246949223 |
| 0.113911901 | 0.086694579 | 0.09341438  | 0.136398561 |
| 0.227909123 | 0.21948752  | 0.069243395 | 0.065866981 |
| 0.144463133 | 0.19968336  | 0.19846594  | 0.306406037 |
| 0.038828256 | 0.242019864 | 0.109762059 | 0.229058094 |
| 0.082892305 | 0.346908859 | 0.219563538 | 0.149360724 |
| 0.025747256 | 0.167284804 | 0.096473947 | 0.1485841   |
| 0.141366695 | 0.129292872 | 0.060380356 | 0.138310647 |
| 0.127915875 | 0.211538663 | 0.300273578 | 0.214388426 |
| 0.095991674 | 0.060516019 | 0.11567228  | 0.117277337 |
| 0.108483518 | 0.238441203 | 0.201441455 | 0.238635267 |
| 0.090585217 | 0.248234468 | 0.311282238 | 0.126499531 |
| 0.134800047 | 0.090691864 | 0.022016204 | 0.106008486 |
| 0.124848456 | 0.05267518  | 0.002220895 | 0.018134677 |
| 0.165994851 | 0.072408586 | 0.175281139 | 0.139616129 |
| 0.059407811 | 0.165163551 | 0.015386866 | 0.156437883 |
| 0.296534146 | 0.330079164 | 0.147828579 | 0.212941668 |
| 0.183094562 | 0.179176309 | 0.150843485 | 0.004714521 |

|             |             |             |             |
|-------------|-------------|-------------|-------------|
| 0.101126147 | 0.081043113 | 0.078956447 | 0.15569113  |
| 0.139652205 | 0.029301084 | 0.114440476 | 0.181111742 |
| 0.201186642 | 0.025949276 | 0.111491886 | 0.138518483 |
| 0.200719459 | 0.342954691 | 0.100613557 | 0.15026373  |
| 0.127624593 | 0.159473076 | 0.067343367 | 0.081065145 |
| 0.100182284 | 0.059450344 | 0.168787367 | 0.045042815 |
| 0.166078978 | 0.09696985  | 0.015979593 | 0.348951731 |
| 0.332159323 | 0.063756637 | 0.258443947 | 0.05654207  |
| 0.156598636 | 0.199244579 | 0.068346795 | 0.082141663 |
| 0.088034011 | 0.083828846 | 0.153655996 | 0.236053414 |
| 0.049208228 | 0.103542829 | 0.150012218 | 0.061658976 |
| 0.366640239 | 0.081702373 | 0.214604832 | 0.072315388 |
| 0.268724619 | 0.189777272 | 0.26080924  | 0.063398116 |
| 0.110740804 | 0.208082033 | 0.09605137  | 0.271780423 |
| 0.13017181  | 0.045821257 | 0.168693521 | 0.159052701 |
| 0.051051329 | 0.232777351 | 0.088942463 | 0.266841559 |
| 0.085091855 | 0.179316583 | 0.148694936 | 0.241115851 |
| 0.179974046 | 0.036504243 | 0.045130236 | 0.085732419 |
| 0.293340552 | 0.183423762 | 0.050652013 | 0.209027746 |
| 0.038691572 | 0.137817149 | 0.114273473 | 0.069724523 |
| 0.113877054 | 0.117711706 | 0.106812683 | 0.199964884 |
| 0.137953935 | 0.105180984 | 0.070078009 | 0.273299184 |
| 0.124078767 | 0.125819737 | 0.284466084 | 0.002884718 |
| 0.163900865 | 0.122277084 | 0.146015544 | 0.082401868 |
| 0.298396383 | 0.136898641 | 0.168306053 | 0.044069014 |
| 0.168484152 | 0.021152487 | 0.076064063 | 0.089234799 |
| 0.050470784 | 0.201782451 | 0.279084193 | 0.231619115 |
| 0.154363479 | 0.063025824 | 0.056733113 | 0.253723952 |
| 0.023551055 | 0.045286976 | 0.05441848  | 0.150196846 |
| 0.032730757 | 0.088976257 | 0.079477141 | 0.070231248 |
| 0.179275984 | 0.135658537 |             |             |
| NUDT1       | 0.049615596 | 0.288194052 | 0.029613615 |
| 0.109216646 | 0.254393905 | 0.125861945 | 0.059619881 |
| 0.08993278  | 0.231202436 | 0.079553719 | 0.231283366 |
| 0.030130149 | 0.06460356  | 0.383813658 | 0.060240563 |
| 0.293266583 | 0.054482888 | 0.101961716 | 0.041965691 |
| 0.097787683 | 0.262788664 | 0.153430276 | 0.152289527 |
| 0.211068412 | 0.173879686 | 0.18691814  | 0.193086101 |
| 0.370898109 | 0.088871493 | 0.275493787 | 0.053822764 |
| 0.379701414 | 0.283921259 | 0.160662071 | 0.016441281 |
| 0.203821373 | 0.015061117 | 0.364255242 | 0.195611468 |
| 0.105171989 | 0.315465996 | 0.092486998 | 0.174705143 |
| 0.142431406 | 0.033594632 | 0.04553859  | 0.290630259 |
| 0.176263056 | 0.130516656 | 0.041383822 | 0.270207677 |
| 0.138523463 | 0.235769268 | 0.213920455 | 0.00406285  |
| 0.142095167 | 0.049825148 | 0.117418446 | 0.365227447 |
| 0.205443729 | 0.120209058 | 0.106138403 | 0.105601406 |
| 0.23462627  | 0.291741375 | 0.222930815 | 0.125833444 |
| 0.398021848 | 0.133249202 | 0.281685829 | 0.102421299 |
| 0.174106085 | 0.022166245 | 0.177327802 | 0.054906815 |
| 0.151888369 | 0.183541285 | 0.219135995 | 0.15652447  |
| 0.28611491  | 0.409805296 | 0.19717281  | 0.354639348 |
| 0.102712469 | 0.253797635 | 0.159373722 | 0.318845583 |
| 0.292478278 | 0.063892172 | 0.343084542 | 0.427298353 |

|             |             |             |             |
|-------------|-------------|-------------|-------------|
| 0.032182234 | 0.165192743 | 0.306843588 | 0.099875306 |
| 0.292916053 | 0.113401498 | 0.147935573 | 0.129185147 |
| 0.30305188  | 0.278398581 | 0.35542347  | 0.290909684 |
| 0.170674601 | 0.059476556 | 0.334632436 | 0.248740749 |
| 0.179208331 | 0.064323723 | 0.189181007 | 0.362061869 |
| 0.287710334 | 0.378186153 | 0.304780617 | 0.339892885 |
| 0.260600735 | 0.39086775  | 0.305959641 | 0.31799016  |
| 0.031353343 | 0.389623156 | 0.137049454 | 0.059064996 |
| 0.03700243  | 0.085775177 | 0.134517272 | 0.291854723 |
| 0.366032672 | 0.234776222 | 0.121942251 | 0.218244749 |
| 0.418320949 | 0.322307623 | 0.386653372 | 0.353930107 |
| 0.041362118 | 0.125512611 | 0.25333426  | 0.104797044 |
| 0.320340532 | 0.102317564 | 0.184810001 | 0.383834571 |
| 0.346461286 | 0.382530217 | 0.072743157 | 0.380721504 |
| 0.113560872 | 0.434607861 | 0.309417297 | 0.161355589 |
| 0.39874978  | 0.360320468 | 0.437438561 | 0.323228677 |
| 0.355555349 | 0.173068127 | 0.049731173 | 0.322117194 |
| 0.427425268 | 0.022387659 | 0.362295777 | 0.398354513 |
| 0.367278234 | 0.375949711 | 0.44552634  | 0.396571931 |
| 0.361142642 | 0.068589169 | 0.019809043 | 0.313064041 |
| 0.385503131 | 0.350106115 | 0.114112    | 0.223333213 |
| 0.284848075 | 0.164242593 | 0.303450114 | 0.157545592 |
| 0.444713709 | 0.347694306 | 0.362645976 | 0.308469439 |
| 0.147378508 | 0.284273475 | 0.215500593 | 0.325273848 |
| 0.047107431 | 0.067691375 | 0.043445866 | 0.266347343 |
| 0.08780596  | 0.189510406 | 0.139997931 | 0.236450945 |
| 0.216773086 | 0.121209696 | 0.125640212 | 0.326882967 |
| 0.050311441 | 0.219954979 | 0.111159334 | 0.126114926 |
| 0.064761862 | 0.143238683 | 0.166624317 | 0.120037483 |
| 0.225874184 | 0.188305798 | 0.28171717  | 0.387821147 |
| 0.158669579 | 0.158300185 | 0.29051777  | 0.406080966 |
| 0.434103302 | 0.23943225  | 0.225004497 | 0.026530926 |
| 0.209367539 | 0.105207452 | 0.118462247 | 0.205932109 |
| 0.150912543 | 0.200980422 | 0.290019093 | 0.35625676  |
| 0.154573356 | 0.071762424 | 0.187129182 | 0.351859468 |
| 0.122640283 | 0.179482951 | 0.413120207 | 0.20098302  |
| 0.004636542 | 0.221419099 | 0.36147277  | 0.153626835 |
| 0.252123584 | 0.120219699 | 0.122500632 | 0.400810184 |
| 0.147064184 | 0.168922514 | 0.376107839 | 0.334622308 |
| 0.128212504 | 0.164551348 | 0.432321864 | 0.052178149 |
| 0.193896403 | 0.070713264 | 0.320034161 | 0.096695132 |
| 0.225117358 | 0.307103709 | 0.242734602 | 0.172273832 |
| 0.091848964 | 0.401214412 | 0.29531839  | 0.407445499 |
| 0.170267591 | 0.432905243 | 0.384354249 | 0.386993584 |
| 0.263185253 | 0.161715191 | 0.103045568 | 0.365004374 |
| 0.381726386 | 0.127408582 | 0.060906433 | 0.320778974 |
| 0.145191362 | 0.325566857 | 0.102202948 | 0.435557521 |
| 0.397607396 | 0.313879443 | 0.138790207 | 0.370322281 |
| 0.357951318 | 0.168039879 | 0.319337525 | 0.438458897 |
| 0.103694089 | 0.247782798 | 0.195888724 | 0.395861018 |
| 0.169276521 | 0.185472313 | 0.263648466 | 0.100692916 |
| 0.004114872 | 0.056737829 | 0.059077899 | 0.155145322 |
| 0.145704844 | 0.21066222  | 0.304200648 | 0.411638131 |
| 0.118264909 | 0.328935958 | 0.201680032 | 0.218890996 |

|             |             |             |             |
|-------------|-------------|-------------|-------------|
| 0.347324    | 0.182775877 | 0.214647057 | 0.267883773 |
| 0.221068619 | 0.027958888 | 0.122396702 | 0.413888497 |
| 0.029780233 | 0.157773796 | 0.152113424 | 0.006971196 |
| 0.045766287 | 0.249950526 | 0.090939961 | 0.190017532 |
| 0.414816416 | 0.176704243 | 0.184732152 | 0.106140134 |
| 0.299791311 | 0.085950195 | 0.007426455 | 0.379284906 |
| 0.357005523 | 0.342449332 | 0.351878787 | 0.319085803 |
| 0.352049406 | 0.2708457   | 0.363978969 | 0.149807198 |
| 0.08675694  | 0.046539327 | 0.194846523 | 0.223427155 |
| 0.005525039 | 0.327337442 | 0.190021533 | 0.159212664 |
| 0.32621683  | 0.262518167 | 0.040502901 | 0.241767435 |
| 0.027392788 | 0.119736372 | 0.149649947 | 0.140891307 |
| 0.331888716 | 0.015837572 | 0.110374504 | 0.188162371 |
| 0.309769306 | 0.292590083 | 0.136492227 | 0.399802035 |
| 0.243713634 | 0.091881456 | 0.215858423 | 0.324809932 |
| 0.074091893 | 0.055182212 | 0.135071682 | 0.011932956 |
| 0.055917764 | 0.331835821 | 0.14149455  | 0.053217278 |
| 0.253502486 | 0.008010001 | 0.301799079 | 0.417087336 |
| 0.311034911 | 0.431533224 | 0.395130754 | 0.162677479 |
| 0.394100028 | 0.054616083 | 0.40496066  | 0.303853115 |
| 0.126122432 | 0.001787206 | 0.012582872 | 0.392800243 |
| 0.265227313 | 0.042385644 | 0.165178172 | 0.11653732  |
| 0.12805613  | 0.075114416 | 0.053252465 | 0.164000664 |
| 0.229092925 | 0.214422283 | 0.142058243 | 0.340652126 |
| 0.189219885 | 0.206111108 | 0.125849671 | 0.079535009 |
| 0.231146954 | 0.062848688 | 0.077060698 | 0.016945632 |
| 0.315878964 | 0.094353791 | 0.326280347 | 0.38080702  |
| 0.417919797 | 0.320805654 | 0.096961338 | 0.122815712 |
| 0.341075382 | 0.066840508 | 0.113161676 | 0.072965804 |
| 0.348182122 | 0.328906738 | 0.328917388 | 0.290297552 |
| 0.448039413 | 0.387423214 | 0.040754635 | 0.370616768 |
| 0.016051364 | 0.004772176 | 0.155567162 | 0.230359958 |
| 0.035067036 | 0.226952417 | 0.270606406 | 0.105991108 |
| 0.123448829 | 0.033368704 | 0.165163398 | 0.171840017 |
| 0.281173282 | 0.246424948 | 0.234759907 | 0.196537022 |
| 0.167370013 | 0.164718209 | 0.132467797 | 0.118128011 |
| 0.101597236 | 0.261013224 | 0.183180392 | 0.027971488 |
| 0.18557343  | 0.231940186 | 0.054970351 | 0.140858053 |
| 0.383835914 | 0.406922932 | 0.072245793 | 0.032293532 |
| 0.247254158 | 0.174700435 | 0.424429525 | 0.356222184 |
| 0.394444548 | 0.451648115 | 0.333044708 | 0.157690017 |
| 0.058513272 | 0.262496364 | 0.23488659  | 0.121559671 |
| 0.397177496 | 0.053025362 | 0.341209634 | 0.1933168   |
| 0.117754116 | 0.147333648 | 0.050849192 | 0.085244286 |
| 0.239113091 | 0.179512032 | 0.181541009 | 0.111489942 |
| 1           | 0.137859705 | 0.047536914 | 0.197535423 |
| 0.320205426 | 0.148759612 | 0.164032508 | 0.104749447 |
| 0.250979274 | 0.054321211 | 0.338048107 | 0.419732226 |
| 0.122238949 | 0.089093302 | 0.115217852 | 0.280041895 |
| 0.335677047 | 0.168396919 | 0.025409024 | 0.299544228 |
| 0.397947768 | 0.286341061 | 0.35904537  | 0.397964668 |
| 0.083263446 | 0.241981358 | 0.1470057   | 0.274860071 |
| 0.174415275 | 0.131776867 | 0.177201541 | 0.067477571 |
| 0.2707973   | 0.375203733 | 0.324785595 | 0.146991979 |

|             |             |             |             |
|-------------|-------------|-------------|-------------|
| 0.194213483 | 0.078900615 | 0.044384889 | 0.319211291 |
| 0.177019518 | 0.085258383 | 0.104154017 | 0.332978337 |
| 0.004190645 | 0.10357572  | 0.400394604 | 0.140387164 |
| 0.406675806 | 0.412501645 | 0.38957735  | 0.098111488 |
| 0.00390538  | 0.302447896 | 0.302143689 | 0.176040377 |
| 0.327034553 | 0.264942262 | 0.060265104 | 0.100327358 |
| 0.301123726 | 0.063282339 | 0.170716425 | 0.102963685 |
| 0.135667677 | 0.249088475 | 0.222110123 | 0.156768069 |
| 0.159049248 | 0.066658496 | 0.128735611 | 0.131375032 |
| 0.101853709 | 0.262872225 | 0.368361845 | 0.066407743 |
| 0.165471276 | 0.385155196 | 0.333256853 | 0.026297392 |
| 0.196884847 | 0.351187953 | 0.339813768 | 0.013857208 |
| 0.345528811 | 0.015710211 | 0.186938936 | 0.182074701 |
| 0.159336207 | 0.176381859 | 0.269686411 | 0.177089509 |
| 0.247605956 | 0.161894299 | 0.166561391 | 0.243576008 |
| 0.145853269 | 0.128311288 | 0.250544941 | 0.157210214 |
| 0.189775158 | 0.095090982 | 0.086326946 | 0.085634593 |
| 0.060415848 | 0.326532502 | 0.241891914 | 0.058326092 |
| 0.22439157  | 0.137036112 | 0.357995771 | 0.343256371 |
| 0.367182215 | 0.082250662 | 0.168256197 | 0.324142823 |
| 0.084976748 | 0.111991881 | 0.040446667 | 0.181129824 |
| 0.178397119 | 0.195845342 | 0.147500419 | 0.194139321 |
| 0.26678811  | 0.356169763 | 0.226874444 | 0.354110961 |
| 0.169279431 | 0.173792602 | 0.083164817 | 0.116809084 |
| 0.137135351 | 0.122278055 | 0.238760248 | 0.004558562 |
| 0.288485075 | 0.100425984 | 0.383323123 | 0.355436132 |
| 0.134739688 | 0.335424931 | 0.090368609 | 0.089630916 |
| 0.066223659 | 0.14295992  | 0.148934447 | 0.284554725 |
| 0.119504407 | 0.114334171 | 0.254001967 | 0.091627863 |
| 0.328482703 | 0.282585649 | 0.153259654 | 0.134523916 |
| 0.174651836 | 0.139132842 | 0.349513066 | 0.057621751 |
| 0.225268068 | 0.168807796 | 0.156500329 | 0.243956949 |
| 0.18027892  | 0.390073359 | 0.051774688 | 0.407696546 |
| 0.226468036 | 0.114026156 | 0.412449926 | 0.136738581 |
| 0.102162863 | 0.107346571 | 0.12467326  | 0.112653027 |
| 0.149423414 | 0.13931334  | 0.006678561 | 0.080918051 |
| 0.347436232 | 0.112281823 | 0.27860342  | 0.288198065 |
| 0.167383715 | 0.355438374 | 0.079611557 | 0.155460034 |
| 0.322193932 | 0.349178374 | 0.202263374 | 0.26400916  |
| 0.310224352 | 0.094653118 | 0.196993214 | 0.010044806 |
| 0.284536341 | 0.237251852 | 0.132275751 | 0.056183351 |
| 0.026774609 | 0.146492617 | 0.260147881 | 0.049696367 |
| 0.418760737 | 0.106250374 | 0.18517096  | 0.278080913 |
| 0.149487321 | 0.357530318 | 0.133118675 | 0.349081438 |
| 0.03141145  | 0.215101497 | 0.181000745 | 0.172993346 |
| 0.204821889 | 0.188785962 | 0.364619185 | 0.164542117 |
| 0.047135583 | 0.182972104 | 0.008738994 | 0.344618509 |
| 0.326908095 | 0.209630793 | 0.19901715  | 0.077522722 |
| 0.29048294  | 0.294069595 | 0.190341363 | 0.166499712 |
| 0.021933706 | 0.292888081 | 0.171971813 | 0.312110257 |
| 0.128321641 | 0.219229836 | 0.063168018 | 0.211771359 |
| 0.316767338 | 0.214748742 | 0.242362258 | 0.152151597 |
| 0.33953249  | 0.256417121 | 0.110221915 | 0.122475304 |
| 0.213320493 | 0.061705306 | 0.099195327 | 0.418505296 |

|             |             |             |             |
|-------------|-------------|-------------|-------------|
| 0.160941868 | 0.169022148 | 0.408830621 | 0.188928362 |
| 0.174608515 | 0.276545563 | 0.202415499 | 0.395026624 |
| 0.122694178 | 0.248969643 | 0.337848146 | 0.361767084 |
| 0.31990091  | 0.155785897 | 0.17547283  | 0.207142545 |
| 0.316781435 | 0.084045512 | 0.159691862 | 0.29495509  |
| 0.177467167 | 0.269112437 | 0.144720423 | 0.172487729 |
| 0.057652159 | 0.11196763  | 0.133502984 | 0.134074693 |
| 0.270640401 | 0.240346947 | 0.178095457 | 0.359222795 |
| 0.124021928 | 0.050086909 | 0.390217219 | 0.036528973 |
| 0.151367853 | 0.301312033 | 0.189038115 | 0.193414911 |
| 0.173982713 | 0.230931098 | 0.171513148 | 0.004499027 |
| 0.368859512 | 0.035306905 | 0.138846912 | 0.204737388 |
| 0.157616151 | 0.050398471 | 0.339125069 | 0.435188779 |
| 0.205195627 | 0.098371251 | 0.136247542 | 0.351155026 |
| 0.13623092  | 0.113033233 | 0.150703915 | 0.231351868 |
| 0.14382862  | 0.128512717 | 0.142308328 | 0.14704266  |
| 0.27715895  | 0.112331621 |             |             |
| NUDT21      | 0.015352234 | 0.211059238 | 0.009503877 |
| 0.029144002 | 0.318905561 | 0.122811034 | 0.009977653 |
| 0.026139581 | 0.163774045 | 0.057137724 | 0.215831956 |
| 0.001786496 | 0.132458245 | 0.284021731 | 0.009908236 |
| 0.27651994  | 0.006910445 | 0.034353379 | 0.022068739 |
| 0.035353214 | 0.253834393 | 0.120720494 | 0.112379589 |
| 0.241424887 | 0.072270348 | 0.123361117 | 0.244223196 |
| 0.294233649 | 0.07822031  | 0.289316278 | 0.031491031 |
| 0.226475354 | 0.31996894  | 0.221082572 | 0.001487243 |
| 0.186302998 | 0.018153718 | 0.212247643 | 0.120645746 |
| 0.121807325 | 0.175824873 | 0.085476319 | 0.106348925 |
| 0.116194858 | 0.004850153 | 0.032417356 | 0.270006409 |
| 0.140140229 | 0.091548538 | 0.011275578 | 0.244223687 |
| 0.102277783 | 0.167217593 | 0.168745669 | 0.000528381 |
| 0.248114326 | 0.095438604 | 0.165928833 | 0.274222325 |
| 0.106619508 | 0.054456762 | 0.065385128 | 0.076852172 |
| 0.204513298 | 0.256650602 | 0.163573064 | 0.087455939 |
| 0.284973765 | 0.120776203 | 0.298861231 | 0.036776488 |
| 0.1046572   | 0.004345937 | 0.076571681 | 0.020584172 |
| 0.129640901 | 0.121960429 | 0.246482901 | 0.222034049 |
| 0.200547898 | 0.277064864 | 0.125300664 | 0.244072262 |
| 0.059018077 | 0.318339482 | 0.174848018 | 0.224599576 |
| 0.211643125 | 0.014289939 | 0.275810538 | 0.29887984  |
| 0.008104198 | 0.141246313 | 0.205936109 | 0.034723088 |
| 0.239727416 | 0.123599014 | 0.131688477 | 0.176278722 |
| 0.360176135 | 0.253299778 | 0.234971882 | 0.154398738 |
| 0.229305653 | 0.015196038 | 0.21806747  | 0.347205173 |
| 0.160023642 | 0.021273652 | 0.101198945 | 0.340024901 |
| 0.225837306 | 0.299657442 | 0.227467654 | 0.212220476 |
| 0.262459426 | 0.297456984 | 0.24191137  | 0.238078432 |
| 0.036949885 | 0.291277724 | 0.07550987  | 0.009107014 |
| 0.012406431 | 0.031039637 | 0.085947605 | 0.192902107 |
| 0.320427346 | 0.187394431 | 0.06078306  | 0.149448142 |
| 0.348905516 | 0.218037829 | 0.282531818 | 0.251195396 |
| 0.007570129 | 0.136123853 | 0.255916215 | 0.068912804 |
| 0.212868093 | 0.042687223 | 0.270761608 | 0.244833037 |
| 0.225010634 | 0.319525123 | 0.038642121 | 0.245523916 |

|             |             |             |             |
|-------------|-------------|-------------|-------------|
| 0.057828179 | 0.316087673 | 0.242541517 | 0.073530578 |
| 0.277728269 | 0.241450132 | 0.342819878 | 0.37597795  |
| 0.255919127 | 0.128209616 | 0.009117389 | 0.216011386 |
| 0.32242788  | 0.017364979 | 0.32068843  | 0.337824753 |
| 0.262256686 | 0.338462499 | 0.34755724  | 0.3350663   |
| 0.265235787 | 0.022158334 | 0.010408176 | 0.232555997 |
| 0.260296509 | 0.250748959 | 0.050152636 | 0.212491502 |
| 0.274845532 | 0.120246284 | 0.289745961 | 0.068537853 |
| 0.310776643 | 0.312119714 | 0.310471553 | 0.21310018  |
| 0.100923709 | 0.164091016 | 0.272618724 | 0.210928147 |
| 0.008974269 | 0.025374816 | 0.012011366 | 0.182318286 |
| 0.058163574 | 0.107745354 | 0.101170831 | 0.225885141 |
| 0.111474675 | 0.094678635 | 0.21003832  | 0.367246446 |
| 0.012750431 | 0.198519299 | 0.061308883 | 0.047851279 |
| 0.009595351 | 0.055409075 | 0.034475575 | 0.035566714 |
| 0.171766919 | 0.081489953 | 0.277114035 | 0.328246509 |
| 0.151376605 | 0.066234821 | 0.228509074 | 0.322775465 |
| 0.288877641 | 0.292290859 | 0.109451817 | 0.003663429 |
| 0.063709774 | 0.094044346 | 0.162557869 | 0.253896702 |
| 0.065113443 | 0.044371408 | 0.228866861 | 0.367919618 |
| 0.084849482 | 0.029528176 | 0.136043063 | 0.22449559  |
| 0.045538655 | 0.156117772 | 0.317196689 | 0.168334886 |
| 0.000202856 | 0.132507878 | 0.296377305 | 0.070768691 |
| 0.136635771 | 0.087775386 | 0.122599832 | 0.304997379 |
| 0.09922279  | 0.156027694 | 0.333376284 | 0.36354438  |
| 0.057820321 | 0.075766088 | 0.334896476 | 0.034738112 |
| 0.230404884 | 0.052173606 | 0.21499833  | 0.096518992 |
| 0.111783397 | 0.201171566 | 0.308137196 | 0.200053182 |
| 0.039347049 | 0.280926143 | 0.252863405 | 0.313859827 |
| 0.126394651 | 0.330027114 | 0.324772949 | 0.286440066 |
| 0.196664896 | 0.179799982 | 0.106966201 | 0.287252607 |
| 0.311558751 | 0.064222645 | 0.017606828 | 0.28953086  |
| 0.123091314 | 0.324253571 | 0.102209508 | 0.315806084 |
| 0.280714557 | 0.213077597 | 0.055267194 | 0.327586164 |
| 0.248573013 | 0.095820152 | 0.300898937 | 0.329875225 |
| 0.049861463 | 0.201979891 | 0.159127218 | 0.360357799 |
| 0.075122366 | 0.110384453 | 0.18035843  | 0.141770826 |
| 0.023069906 | 0.018654731 | 0.01631322  | 0.103694127 |
| 0.194462004 | 0.223226341 | 0.27747274  | 0.307127782 |
| 0.041967621 | 0.258362476 | 0.111925694 | 0.102833038 |
| 0.217395254 | 0.187491123 | 0.308638418 | 0.303354551 |
| 0.133329343 | 0.006183281 | 0.024832792 | 0.272914394 |
| 0.00722986  | 0.178606476 | 0.106068893 | 0.000670751 |
| 0.005840718 | 0.203188928 | 0.028625051 | 0.079685086 |
| 0.363661314 | 0.080226605 | 0.076774708 | 0.061021243 |
| 0.275346281 | 0.031796862 | 0.003917007 | 0.294361708 |
| 0.27289547  | 0.256066152 | 0.264330978 | 0.224630382 |
| 0.274236236 | 0.251614692 | 0.313887127 | 0.119522661 |
| 0.022513656 | 0.017567622 | 0.110828041 | 0.154438583 |
| 0.000278668 | 0.311695422 | 0.219448704 | 0.061503856 |
| 0.32058297  | 0.16211605  | 0.006189842 | 0.28660969  |
| 0.00235074  | 0.156378043 | 0.046736802 | 0.105554753 |
| 0.314900254 | 0.001630388 | 0.0409337   | 0.078916219 |
| 0.20569409  | 0.16937097  | 0.197329059 | 0.30291026  |

|             |             |             |             |
|-------------|-------------|-------------|-------------|
| 0.195665133 | 0.03159548  | 0.19508646  | 0.32422236  |
| 0.015326358 | 0.027461389 | 0.08313355  | 0.006878879 |
| 0.053381066 | 0.240926593 | 0.151418088 | 0.009318953 |
| 0.131952593 | 0.000369896 | 0.182659022 | 0.303591302 |
| 0.224411622 | 0.3392444   | 0.30222592  | 0.257706886 |
| 0.286160864 | 0.087424406 | 0.314557832 | 0.20034951  |
| 0.097860025 | 0.00017158  | 0.001191137 | 0.339717905 |
| 0.250668874 | 0.012605298 | 0.067791596 | 0.054418174 |
| 0.022146286 | 0.02521821  | 0.017537758 | 0.168874089 |
| 0.238373896 | 0.225168896 | 0.135938324 | 0.225233183 |
| 0.109650124 | 0.135294907 | 0.098866343 | 0.024464548 |
| 0.291437025 | 0.008839315 | 0.025090274 | 0.003281681 |
| 0.303598053 | 0.035688117 | 0.2077674   | 0.280698808 |
| 0.303315523 | 0.353245132 | 0.083496886 | 0.057395084 |
| 0.297297047 | 0.021557079 | 0.092317001 | 0.025495533 |
| 0.248366288 | 0.265845015 | 0.210372457 | 0.157613201 |
| 0.314778815 | 0.265217962 | 0.006419895 | 0.282882707 |
| 0.002612946 | 0.001694997 | 0.110563385 | 0.139855997 |
| 0.02682075  | 0.186257198 | 0.136744865 | 0.062603098 |
| 0.078351442 | 0.003493619 | 0.204382551 | 0.222670253 |
| 0.193705757 | 0.190706854 | 0.287396724 | 0.118917346 |
| 0.17607927  | 0.075689243 | 0.099064859 | 0.048748276 |
| 0.05025331  | 0.139254732 | 0.07304931  | 0.002769985 |
| 0.17748942  | 0.248196071 | 0.015075429 | 0.06764193  |
| 0.304150458 | 0.323599795 | 0.005826922 | 0.003275386 |
| 0.134325099 | 0.150339117 | 0.347585758 | 0.269070719 |
| 0.268825781 | 0.315848351 | 0.207396665 | 0.045525651 |
| 0.014696062 | 0.217347869 | 0.315331402 | 0.058448903 |
| 0.299866261 | 0.012858466 | 0.259007257 | 0.313607442 |
| 0.045329334 | 0.069800264 | 0.00809223  | 0.02968136  |
| 0.319611856 | 0.083810819 | 0.128527748 | 0.042772937 |
| 0.137859705 | 1           | 0.010860629 | 0.088088096 |
| 0.190206973 | 0.109930912 | 0.069565255 | 0.09186352  |
| 0.196114181 | 0.029283253 | 0.31217325  | 0.262237169 |
| 0.043321541 | 0.029779751 | 0.038177709 | 0.268358655 |
| 0.279963603 | 0.171197246 | 0.005206594 | 0.223903706 |
| 0.326874947 | 0.272051099 | 0.260236648 | 0.289022804 |
| 0.026521766 | 0.246407711 | 0.186437009 | 0.223330899 |
| 0.082219626 | 0.129307409 | 0.121678205 | 0.018354978 |
| 0.172159219 | 0.2427979   | 0.229271214 | 0.080532086 |
| 0.213314707 | 0.02969031  | 0.009904068 | 0.281009584 |
| 0.125274235 | 0.01002303  | 0.089415188 | 0.303018442 |
| 0.00530108  | 0.174066811 | 0.338510944 | 0.079196335 |
| 0.298739889 | 0.331417072 | 0.253232483 | 0.064176778 |
| 0.007542382 | 0.320688442 | 0.239184422 | 0.166112962 |
| 0.2245386   | 0.18456036  | 0.029799872 | 0.019077128 |
| 0.189968072 | 0.019854729 | 0.026282725 | 0.050950021 |
| 0.061006415 | 0.17072882  | 0.110100068 | 0.078647389 |
| 0.131747485 | 0.021263446 | 0.1343909   | 0.106722185 |
| 0.081076962 | 0.142809311 | 0.222710133 | 0.050578174 |
| 0.077543876 | 0.281809659 | 0.219336017 | 0.004059016 |
| 0.287107672 | 0.25756915  | 0.296597812 | 3.33E-05    |
| 0.310027757 | 0.001056676 | 0.127800707 | 0.142760162 |
| 0.117386407 | 0.099841142 | 0.222336046 | 0.168216627 |



|             |             |             |             |
|-------------|-------------|-------------|-------------|
| 0.163863395 | 0.093723051 | 0.129014112 | 0.142994677 |
| 0.080018269 | 0.101595    | 0.280266213 | 0.120369984 |
| 0.155249203 | 0.034200511 | 0.032185537 | 0.029506921 |
| 0.010831299 | 0.280587741 | 0.119166422 | 0.019439003 |
| 0.13566419  | 0.127105817 | 0.235585816 | 0.249189091 |
| 0.305606548 | 0.030523558 | 0.134420712 | 0.242626621 |
| 0.048140284 | 0.049096398 | 0.008203921 | 0.174608233 |
| 0.109871187 | 0.088288341 | 0.162112332 | 0.096311435 |
| 0.198202167 | 0.21284624  | 0.11664937  | 0.273811321 |
| 0.200889501 | 0.143891393 | 0.063891063 | 0.023244105 |
| 0.054234198 | 0.045701623 | 0.27532027  | 0.000117576 |
| 0.192635234 | 0.036536449 | 0.311756695 | 0.244250257 |
| 0.201802085 | 0.248154337 | 0.032484955 | 0.013571093 |
| 0.033220798 | 0.056700049 | 0.057659245 | 0.281869549 |
| 0.180032207 | 0.062585262 | 0.270371484 | 0.054328413 |
| 0.320939529 | 0.263831252 | 0.13498413  | 0.074388408 |
| 0.128502712 | 0.073081396 | 0.239907781 | 0.02732552  |
| 0.213347923 | 0.154950284 | 0.124207361 | 0.160209559 |
| 0.143112677 | 0.324697498 | 0.016965905 | 0.328189848 |
| 0.163273163 | 0.045432321 | 0.279650128 | 0.119849223 |
| 0.067229378 | 0.053906583 | 0.197023703 | 0.094719122 |
| 0.055693077 | 0.196797508 | 0.003570538 | 0.03376896  |
| 0.232336101 | 0.090934729 | 0.195974241 | 0.236783759 |
| 0.205881839 | 0.260328744 | 0.12874267  | 0.089420251 |
| 0.223041485 | 0.234840274 | 0.046992518 | 0.148530726 |
| 0.182644592 | 0.031106217 | 0.160420233 | 0.009345036 |
| 0.239219615 | 0.25273404  | 0.06739756  | 0.012058495 |
| 0.002509541 | 0.183541277 | 0.213770444 | 0.014843928 |
| 0.355060539 | 0.125492775 | 0.147898716 | 0.301728827 |
| 0.070635104 | 0.235828002 | 0.060084413 | 0.306995448 |
| 0.003877393 | 0.142561688 | 0.240775494 | 0.154084608 |
| 0.090217858 | 0.239770476 | 0.287880095 | 0.239102132 |
| 0.007178703 | 0.076590921 | 0.000357757 | 0.197057099 |
| 0.20914403  | 0.235780491 | 0.089813434 | 0.056256055 |
| 0.209203526 | 0.237391478 | 0.054850687 | 0.204953132 |
| 0.003134484 | 0.309915231 | 0.111279059 | 0.229093528 |
| 0.070260858 | 0.15499086  | 0.018457232 | 0.234776718 |
| 0.195926843 | 0.057162833 | 0.131918627 | 0.068560299 |
| 0.260290019 | 0.215278763 | 0.052396954 | 0.10001758  |
| 0.178601203 | 0.016916533 | 0.101059861 | 0.307981152 |
| 0.0973838   | 0.247934699 | 0.358178967 | 0.07601218  |
| 0.236987482 | 0.215051733 | 0.207071893 | 0.291991463 |
| 0.031839519 | 0.14771166  | 0.321033956 | 0.263549586 |
| 0.228071178 | 0.171732831 | 0.176311691 | 0.135370535 |
| 0.21954086  | 0.016536804 | 0.122919891 | 0.1983068   |
| 0.182912296 | 0.199854794 | 0.121539988 | 0.159792212 |
| 0.006796288 | 0.047110942 | 0.103782162 | 0.056396917 |
| 0.171352724 | 0.223084657 | 0.142773646 | 0.246764445 |
| 0.045337024 | 0.00661292  | 0.285703532 | 0.024222967 |
| 0.121891787 | 0.30035635  | 0.12609015  | 0.242527035 |
| 0.076683717 | 0.156613702 | 0.095521736 | 0.000458926 |
| 0.286648374 | 0.060274414 | 0.136986528 | 0.111338127 |
| 0.079099725 | 0.007215268 | 0.251570898 | 0.348546268 |
| 0.160311462 | 0.077704937 | 0.084388043 | 0.245328528 |

|             |             |             |             |
|-------------|-------------|-------------|-------------|
| 0.119749457 | 0.151038816 | 0.131132862 | 0.190520996 |
| 0.226811616 | 0.119342291 | 0.165544693 | 0.201679021 |
| 0.205328115 | 0.091781584 |             |             |
| NUP155      | 0.170214892 | 0.085151153 | 0.136849746 |
| 0.072722588 | 0.047853441 | 0.021907441 | 0.225880996 |
| 0.17088593  | 0.100932947 | 0.00789552  | 0.052155099 |
| 0.213914935 | 0.004176777 | 0.103971002 | 0.232109586 |
| 0.035585212 | 0.24203084  | 0.240965455 | 0.031844518 |
| 0.055997639 | 0.052945518 | 0.011183879 | 0.041545556 |
| 0.048774841 | 0.294302975 | 0.074698178 | 0.019223326 |
| 0.083247018 | 0.002418592 | 0.03581118  | 0.003642419 |
| 0.182646162 | 0.040959429 | 0.010118112 | 0.163726906 |
| 0.03619053  | 0.009045132 | 0.196916974 | 0.05621785  |
| 0.007270893 | 0.21304257  | 0.014309569 | 0.07515795  |
| 0.020466349 | 0.163363697 | 0.002325827 | 0.037940807 |
| 0.073600858 | 0.057043882 | 0.194164977 | 0.048414682 |
| 0.021188084 | 0.112269669 | 0.040674695 | 0.016645773 |
| 0.007282346 | 3.05E-05    | 0.003004521 | 0.114809058 |
| 0.237194781 | 0.204078734 | 0.005082137 | 0.085234207 |
| 0.039620018 | 0.066946817 | 0.182748664 | 0.012704797 |
| 0.107662513 | 0.007615839 | 0.037945618 | 0.043745226 |
| 0.037877174 | 0.183792776 | 0.31889979  | 0.231031114 |
| 0.015982536 | 0.162166716 | 0.047347544 | 0.013270607 |
| 0.078088414 | 0.170168429 | 0.192610649 | 0.127482055 |
| 0.016514288 | 0.028779958 | 0.026747964 | 0.153180538 |
| 0.091090854 | 0.175438546 | 0.068825288 | 0.138824555 |
| 0.187707752 | 0.025505084 | 0.065398329 | 0.26204913  |
| 0.081894362 | 0.010780111 | 0.01632782  | 0.008851161 |
| 0.046473672 | 0.037201025 | 0.153966676 | 0.157925303 |
| 0.038276349 | 0.246937185 | 0.147375238 | 0.024474787 |
| 0.034798937 | 0.215039926 | 0.037051611 | 0.053064681 |
| 0.046956499 | 0.085937944 | 0.067120023 | 0.11679136  |
| 0.026144989 | 0.100887101 | 0.068135355 | 0.110458801 |
| 0.001595002 | 0.10974299  | 0.163489328 | 0.219410721 |
| 0.157163589 | 0.185965815 | 0.035263145 | 0.212567214 |
| 0.069906407 | 0.119015298 | 0.136610862 | 0.106400974 |
| 0.078231649 | 0.123662784 | 0.106106221 | 0.090702238 |
| 0.218325445 | 0.009288689 | 0.025297329 | 0.057800238 |
| 0.08025174  | 0.294134479 | 0.016940391 | 0.155201933 |
| 0.155381529 | 0.066291108 | 0.117085718 | 0.192300705 |
| 0.123019205 | 0.138858247 | 0.065784937 | 0.178474958 |
| 0.144199667 | 0.144540204 | 0.116744363 | 0.036025899 |
| 0.144333078 | 0.054611865 | 0.024272074 | 0.116308808 |
| 0.139483314 | 0.002856498 | 0.064408793 | 0.073461093 |
| 0.105005578 | 0.052671061 | 0.113677663 | 0.087711631 |
| 0.103983032 | 0.306833616 | 0.001462215 | 0.109476993 |
| 0.127030646 | 0.122123533 | 0.127056866 | 0.017981133 |
| 0.043971884 | 0.037366842 | 0.058324773 | 0.009473176 |
| 0.169535102 | 0.080602095 | 0.071625903 | 0.084874309 |
| 0.061569396 | 0.228184085 | 0.01484732  | 0.144984455 |
| 0.218028682 | 0.149112215 | 0.251672935 | 0.162959053 |
| 0.009822977 | 0.211232682 | 0.035673461 | 0.050156846 |
| 0.230886806 | 0.04828926  | 0.006529857 | 0.046175007 |
| 0.306224695 | 0.022817866 | 0.17663864  | 0.176551537 |

|             |             |             |             |
|-------------|-------------|-------------|-------------|
| 0.220918399 | 0.3649246   | 0.083419105 | 0.100860691 |
| 0.093495798 | 0.313518627 | 0.037093221 | 0.09187513  |
| 0.030674738 | 0.220670536 | 0.054027159 | 0.137230265 |
| 0.177550274 | 0.022999872 | 0.251549148 | 0.057248298 |
| 0.023631057 | 0.005971123 | 0.004359083 | 0.019671828 |
| 0.339555065 | 0.063480507 | 0.046883348 | 0.055635876 |
| 0.085915957 | 0.14430804  | 0.018210237 | 0.204127023 |
| 0.245089744 | 0.029649087 | 0.088933133 | 0.030530968 |
| 0.12110451  | 0.072919072 | 0.064970735 | 0.051846555 |
| 0.118187421 | 0.008412674 | 0.005097717 | 0.082354314 |
| 0.009657305 | 0.025085205 | 0.076200789 | 0.058111716 |
| 0.017486806 | 0.258562912 | 0.11312304  | 0.002250525 |
| 0.032035673 | 0.054102661 | 0.146055788 | 0.016423192 |
| 0.157856977 | 0.177997209 | 0.033088894 | 0.030345277 |
| 0.194878021 | 0.117836185 | 0.114127882 | 0.092734451 |
| 0.010534558 | 0.11840666  | 0.063875956 | 0.102579345 |
| 0.092956275 | 0.015266634 | 0.002509069 | 0.066070687 |
| 0.075513319 | 0.015218735 | 0.264756496 | 0.044582099 |
| 0.017817102 | 0.043682876 | 0.064197682 | 0.109935092 |
| 0.177911519 | 0.109153829 | 0.129658992 | 0.090579566 |
| 0.11820214  | 0.13573753  | 0.092787044 | 0.130173976 |
| 0.009490761 | 0.02876365  | 0.019376239 | 0.10376818  |
| 0.233220495 | 0.032697627 | 0.208619462 | 0.003882203 |
| 0.000864574 | 0.232415181 | 0.255292007 | 0.128181197 |
| 0.014507331 | 0.023612824 | 0.057974808 | 0.106442128 |
| 0.233355034 | 0.130131004 | 0.210413318 | 0.031596472 |
| 0.123911422 | 0.027208323 | 0.020509473 | 0.043691107 |
| 0.231235947 | 0.079398716 | 0.097667755 | 0.172612647 |
| 0.2472801   | 0.011085227 | 0.073472659 | 0.009780635 |
| 0.201446957 | 0.052203953 | 0.332199344 | 0.35475189  |
| 0.092369989 | 0.3090583   | 0.195034906 | 0.012230954 |
| 0.106692818 | 0.26824626  | 0.022776068 | 0.093412007 |
| 0.116209461 | 0.120701402 | 0.114463564 | 0.138518705 |
| 0.097204876 | 0.066728341 | 0.072887978 | 0.046785884 |
| 0.186898277 | 0.153219794 | 0.013125265 | 0.070090058 |
| 0.012967736 | 0.101732959 | 0.059047246 | 0.308512027 |
| 0.051866281 | 0.14365608  | 0.205732805 | 0.042103442 |
| 0.101247634 | 0.00261239  | 0.047043799 | 0.109964263 |
| 0.096463024 | 0.185104593 | 0.008681656 | 0.01116763  |
| 0.124838506 | 0.160428055 | 0.008144272 | 0.117340005 |
| 0.073269903 | 0.194725014 | 0.050464971 | 0.070495067 |
| 0.212237106 | 0.008443019 | 0.033375663 | 0.000720374 |
| 0.014084275 | 0.146355689 | 0.016931249 | 0.139248067 |
| 0.134968969 | 0.140870568 | 0.139819099 | 0.123763828 |
| 0.103444449 | 0.094659411 | 0.10467823  | 0.011803693 |
| 0.109421606 | 0.000376708 | 0.097010208 | 0.087796851 |
| 0.009386741 | 0.008975886 | 0.059157219 | 0.071504777 |
| 0.029153596 | 0.246155614 | 0.257080848 | 0.012351997 |
| 0.144442881 | 0.113496335 | 0.202078062 | 0.02573744  |
| 0.037777885 | 0.073815555 | 0.026362104 | 0.121220921 |
| 0.112171494 | 0.158788032 | 0.021358465 | 0.312134206 |
| 0.034101182 | 0.193383946 | 0.308386819 | 0.012896027 |
| 0.079020247 | 0.277938    | 0.170511762 | 0.103121888 |
| 0.144488386 | 0.055855114 | 0.005285386 | 0.01606966  |

|             |             |             |             |
|-------------|-------------|-------------|-------------|
| 0.089568441 | 0.186245332 | 0.007915736 | 0.188016001 |
| 0.094323023 | 0.046116423 | 0.161562854 | 0.181613448 |
| 0.123986182 | 0.129940366 | 0.235986301 | 0.078774419 |
| 0.068536156 | 0.008834071 | 0.031668417 | 0.196011364 |
| 0.020753546 | 0.023615083 | 0.227058368 | 0.062327571 |
| 0.069715413 | 0.150062031 | 0.009627748 | 0.013119283 |
| 0.117062996 | 0.048889162 | 0.033294221 | 0.205528346 |
| 0.044246135 | 0.042463281 | 0.096602096 | 0.148766521 |
| 0.033589918 | 0.173258704 | 0.286034452 | 0.238955558 |
| 0.019091419 | 0.02129621  | 0.24665263  | 0.273943805 |
| 0.084088574 | 0.078326481 | 0.222189949 | 0.104237201 |
| 0.230119134 | 0.050329974 | 0.089244092 | 0.090629051 |
| 0.139598366 | 0.139317269 | 0.218366599 | 0.117162056 |
| 0.188936176 | 0.082389829 | 0.035575124 | 0.094994474 |
| 0.101879183 | 0.241180024 | 0.111133901 | 0.014296854 |
| 0.319514739 | 0.092276682 | 0.185158977 | 0.292741115 |
| 0.021275097 | 0.259163332 | 0.135028675 | 0.179216862 |
| 0.047536914 | 0.010860629 | 1           | 0.201111236 |
| 0.134801093 | 0.006077037 | 0.263369536 | 0.052948396 |
| 0.115001103 | 0.010577006 | 0.04352419  | 0.176423252 |
| 0.272644675 | 0.231890082 | 0.034389533 | 0.082358855 |
| 0.055617661 | 0.017954524 | 0.06644344  | 0.077076807 |
| 0.103711159 | 0.0308989   | 0.116104854 | 0.140619233 |
| 0.331744896 | 0.024584702 | 0.014755298 | 0.052944408 |
| 0.229919956 | 0.02797395  | 0.134175832 | 0.327030027 |
| 0.236429071 | 0.185484554 | 0.097427953 | 0.141182479 |
| 0.026913243 | 0.183029719 | 0.224962236 | 0.07751122  |
| 0.014509112 | 0.151124347 | 0.014116737 | 0.061439164 |
| 0.012110195 | 0.004660323 | 0.10318142  | 0.074304946 |
| 0.14871965  | 0.091144998 | 0.15336043  | 0.065875866 |
| 0.000486025 | 0.035212035 | 0.056444799 | 0.020311486 |
| 0.085880665 | 0.130021672 | 0.064468084 | 0.178811093 |
| 0.218451452 | 0.234232478 | 0.12672664  | 0.016172544 |
| 0.005432689 | 0.050366017 | 0.281754095 | 0.175181246 |
| 0.110554652 | 0.239308881 | 0.0091047   | 0.102988223 |
| 0.016986669 | 0.24763808  | 0.149189934 | 0.009776041 |
| 0.004977396 | 0.109867961 | 0.079362121 | 0.189168282 |
| 0.02257903  | 0.102795999 | 0.116228449 | 0.033081856 |
| 0.045408861 | 0.194608688 | 0.112187343 | 0.088792955 |
| 0.10372019  | 0.106380978 | 0.120099649 | 0.033330997 |
| 0.08467302  | 0.131328519 | 0.065124616 | 0.176714912 |
| 0.09450342  | 0.143756106 | 0.045943021 | 0.046762453 |
| 0.030995859 | 0.147666672 | 0.333421043 | 0.32719904  |
| 0.156070959 | 0.079615845 | 0.277256548 | 0.252728433 |
| 0.188940294 | 0.038241222 | 0.205135862 | 0.097288548 |
| 0.140488954 | 0.232740107 | 0.05186765  | 0.071798115 |
| 0.004908387 | 0.021911296 | 0.168092249 | 0.043932289 |
| 0.157892112 | 0.025091529 | 0.026953634 | 0.075929335 |
| 0.052192798 | 0.204738918 | 0.265695532 | 0.137437869 |
| 0.037057446 | 0.038811482 | 0.007663796 | 0.134603295 |
| 0.145758218 | 0.302951108 | 0.042308339 | 0.085119884 |
| 0.100209422 | 0.045380461 | 0.064047945 | 0.121316746 |
| 0.006722135 | 0.170742288 | 0.008368976 | 0.162461404 |
| 0.005982352 | 0.234690413 | 0.320278807 | 0.050047709 |

|             |             |             |             |
|-------------|-------------|-------------|-------------|
| 0.003075459 | 0.114121331 | 0.061923447 | 0.021293413 |
| 0.052266773 | 0.04759826  | 0.035176739 | 0.110110363 |
| 0.149062044 | 0.184561665 | 0.159246224 | 0.145407139 |
| 0.022532273 | 0.028123863 | 0.037034964 | 0.057669676 |
| 0.094972776 | 0.091887908 | 0.277020014 | 0.088270382 |
| 0.033635437 | 0.299825095 | 0.183018005 | 0.080215799 |
| 0.050688182 | 0.092307647 | 0.003880796 | 0.019618817 |
| 0.090061741 | 0.007909371 | 0.000211848 | 0.009878702 |
| 0.132761068 | 0.026623848 | 0.058284498 | 0.100281073 |
| 0.030473123 | 0.150674718 | 0.004177912 | 0.092126963 |
| 0.109880009 | 0.151308529 | 0.048006091 | 0.256541724 |
| 0.132763814 | 0.169978023 | 0.043575652 | 0.010045461 |
| 0.029081872 | 0.018332305 | 0.009550046 | 0.227231473 |
| 0.233376226 | 0.004481984 | 0.036218618 | 0.254860263 |
| 0.086982918 | 0.00269791  | 0.050675672 | 0.045963832 |
| 0.272028937 | 0.157481938 | 0.124790465 | 0.065545459 |
| 0.147673317 | 0.187720616 | 0.01946968  | 0.026388149 |
| 0.035776623 | 0.018401633 | 0.095398325 | 0.012474337 |
| 0.229953678 | 0.04173911  | 0.037820501 | 0.218373766 |
| 0.143392753 | 0.018491431 | 0.306794974 | 0.007284671 |
| 0.167545541 | 0.132045377 | 0.039432867 | 0.016513728 |
| 0.12384981  | 0.030600061 | 0.208945821 | 0.094934734 |
| 0.003268556 | 0.047689216 | 0.151868202 | 0.032511598 |
| 0.184149695 | 0.024192319 | 0.257015167 | 0.007288139 |
| 0.098751082 | 0.093601827 | 0.194251259 | 0.042605153 |
| 0.041202908 | 0.323746033 | 0.011979552 | 0.123243657 |
| 0.131670408 | 0.016231488 | 0.067492732 | 0.091606533 |
| 0.015580978 | 0.128834409 | 0.025106877 | 0.124703788 |
| 0.134027787 | 0.205394363 | 0.069140762 | 0.106351596 |
| 0.188084396 | 0.024754083 | 0.011494003 | 0.051830545 |
| 0.106267769 | 0.103227554 | 0.021890202 | 0.124340188 |
| 0.009193099 | 0.134745201 | 0.041843127 | 0.061164144 |
| 0.141040862 | 0.129263229 | 0.020706259 | 0.283108725 |
| 0.117667193 | 0.041819154 | 0.036276539 | 0.192534655 |
| 0.078238307 | 0.097380791 | 0.176876501 | 0.000921968 |
| 0.057111342 | 0.05069622  | 0.15888828  | 0.032332747 |
| 0.269612851 | 0.082328412 | 0.053088824 | 0.061660791 |
| 0.088938774 | 0.012246544 | 0.039754613 | 0.036378749 |
| 0.012149988 | 0.211146429 | 0.128949128 | 0.098545399 |
| 0.122851368 | 0.013446749 | 0.005416304 | 0.115911208 |
| 0.007727156 | 0.004992076 | 0.010530249 | 0.043848693 |
| 0.008430372 | 0.011325245 | 0.013187945 | 0.008628929 |
| 0.090036591 | 0.084663803 |             |             |
| NUP37       | 0.180990494 | 0.224368436 | 0.119380208 |
| 0.20469079  | 0.163933634 | 0.122868401 | 0.212509016 |
| 0.226096379 | 0.196592125 | 0.056860707 | 0.172395093 |
| 0.164858722 | 0.03243835  | 0.285845583 | 0.219245831 |
| 0.159417231 | 0.222160208 | 0.251148509 | 0.057956506 |
| 0.142204591 | 0.176592528 | 0.107082623 | 0.119893972 |
| 0.159388762 | 0.294255684 | 0.159436381 | 0.095017536 |
| 0.263820918 | 0.045374668 | 0.166647791 | 0.037822277 |
| 0.356323979 | 0.165070614 | 0.085172415 | 0.115119848 |
| 0.13652698  | 0.014000049 | 0.352919697 | 0.218775545 |
| 0.070740815 | 0.345270458 | 0.069882024 | 0.24541385  |

|             |             |             |             |
|-------------|-------------|-------------|-------------|
| 0.091668102 | 0.156148605 | 0.029069798 | 0.156803675 |
| 0.148817732 | 0.175367611 | 0.128136491 | 0.178845278 |
| 0.113305613 | 0.230884863 | 0.139818771 | 0.008948636 |
| 0.078885127 | 0.014501789 | 0.049679153 | 0.296298883 |
| 0.302956946 | 0.278751764 | 0.053766996 | 0.149600949 |
| 0.1368191   | 0.193033984 | 0.265817926 | 0.089339911 |
| 0.304023683 | 0.067067429 | 0.161302246 | 0.152135417 |
| 0.147659488 | 0.118599694 | 0.311132312 | 0.135940335 |
| 0.115728452 | 0.262838118 | 0.160689165 | 0.102585268 |
| 0.214340985 | 0.361048769 | 0.253432074 | 0.295506122 |
| 0.066481683 | 0.129172876 | 0.142712608 | 0.299752971 |
| 0.213984159 | 0.182039649 | 0.237868425 | 0.345219959 |
| 0.137534137 | 0.097578381 | 0.197052728 | 0.197960322 |
| 0.230784667 | 0.074087911 | 0.083072029 | 0.080614793 |
| 0.178005339 | 0.150335431 | 0.31368229  | 0.295835264 |
| 0.140206617 | 0.156327269 | 0.304410048 | 0.120884186 |
| 0.182344052 | 0.171303396 | 0.165442349 | 0.215640477 |
| 0.182909217 | 0.272109226 | 0.205734559 | 0.262818783 |
| 0.129160352 | 0.29650137  | 0.221232705 | 0.262394371 |
| 0.018014186 | 0.299486525 | 0.226552899 | 0.232060412 |
| 0.133849053 | 0.25172027  | 0.122237069 | 0.330068699 |
| 0.249211597 | 0.226439671 | 0.227890004 | 0.243498288 |
| 0.270000164 | 0.278581223 | 0.290671261 | 0.252754591 |
| 0.191396276 | 0.072902577 | 0.128398395 | 0.163444922 |
| 0.221956559 | 0.215389537 | 0.111628235 | 0.337240234 |
| 0.328088146 | 0.243152016 | 0.168148006 | 0.364640843 |
| 0.190954108 | 0.354701769 | 0.217886616 | 0.268483121 |
| 0.338416563 | 0.320329738 | 0.33134197  | 0.175759697 |
| 0.320542538 | 0.164710853 | 0.045175477 | 0.259613142 |
| 0.35236879  | 0.018003775 | 0.232940481 | 0.259436806 |
| 0.284674457 | 0.222465383 | 0.324397824 | 0.281018053 |
| 0.280114141 | 0.185133283 | 0.008413312 | 0.251598252 |
| 0.31302271  | 0.300947981 | 0.225277672 | 0.106099639 |
| 0.165280927 | 0.141201815 | 0.199277183 | 0.100256806 |
| 0.381407805 | 0.251540594 | 0.243643467 | 0.222262117 |
| 0.118055351 | 0.337376988 | 0.094076902 | 0.300456896 |
| 0.206084618 | 0.186483535 | 0.141561693 | 0.267655201 |
| 0.07463903  | 0.273204304 | 0.136802187 | 0.146984941 |
| 0.298963845 | 0.131111936 | 0.071329902 | 0.18721933  |
| 0.160518004 | 0.121364174 | 0.217339653 | 0.193668891 |
| 0.236454387 | 0.291742958 | 0.231994314 | 0.24953582  |
| 0.226616343 | 0.300432689 | 0.161919305 | 0.278072477 |
| 0.129228403 | 0.248748901 | 0.19122903  | 0.336368761 |
| 0.38532718  | 0.123669203 | 0.302405039 | 0.095944471 |
| 0.145227284 | 0.057831615 | 0.052393677 | 0.104659098 |
| 0.285945323 | 0.207009885 | 0.16698419  | 0.219679105 |
| 0.163796166 | 0.159389184 | 0.130830458 | 0.363199817 |
| 0.215238252 | 0.173409042 | 0.284262138 | 0.115014952 |
| 0.054219106 | 0.194849093 | 0.238046765 | 0.160724971 |
| 0.216781132 | 0.075690066 | 0.069916171 | 0.270740996 |
| 0.080841505 | 0.129990412 | 0.2577994   | 0.213566889 |
| 0.108623703 | 0.250407013 | 0.319223063 | 0.01642125  |
| 0.114441672 | 0.127149598 | 0.303118357 | 0.068800812 |
| 0.257273788 | 0.301263409 | 0.136793118 | 0.159165753 |

|             |             |             |             |
|-------------|-------------|-------------|-------------|
| 0.176260786 | 0.310635802 | 0.260780405 | 0.291783019 |
| 0.09950461  | 0.325666111 | 0.243215056 | 0.29669492  |
| 0.225362412 | 0.087757743 | 0.041211546 | 0.239348515 |
| 0.256894424 | 0.084832306 | 0.16555117  | 0.184788593 |
| 0.092639169 | 0.178774826 | 0.14230845  | 0.321582852 |
| 0.368545211 | 0.259880419 | 0.269066382 | 0.262576498 |
| 0.300697348 | 0.222339381 | 0.246376121 | 0.339073902 |
| 0.066763889 | 0.134996974 | 0.141243323 | 0.293870066 |
| 0.267166589 | 0.155169613 | 0.302234445 | 0.047001234 |
| 0.001495242 | 0.167080423 | 0.172162168 | 0.267769322 |
| 0.103176664 | 0.113226533 | 0.193360446 | 0.303256264 |
| 0.268512773 | 0.294961457 | 0.250927979 | 0.18568574  |
| 0.284217571 | 0.122996391 | 0.110777877 | 0.163137341 |
| 0.291844924 | 0.111228778 | 0.247323691 | 0.365662827 |
| 0.110119668 | 0.100687963 | 0.154261881 | 0.021007454 |
| 0.181758563 | 0.168346971 | 0.220235564 | 0.334939034 |
| 0.290682206 | 0.300734112 | 0.242626003 | 0.075586785 |
| 0.256551623 | 0.227109577 | 0.0335139   | 0.272153999 |
| 0.282125284 | 0.275973967 | 0.276664628 | 0.283393894 |
| 0.254555224 | 0.193637946 | 0.237690003 | 0.127901754 |
| 0.237598496 | 0.152688031 | 0.112609528 | 0.208272265 |
| 0.017717984 | 0.268318386 | 0.156472068 | 0.293815889 |
| 0.196420738 | 0.242051746 | 0.189106736 | 0.14631265  |
| 0.116309799 | 0.050042689 | 0.157163892 | 0.21456108  |
| 0.247605923 | 0.11780509  | 0.083770692 | 0.104425249 |
| 0.278975682 | 0.296470118 | 0.082687079 | 0.313520679 |
| 0.198725195 | 0.163485703 | 0.189719516 | 0.22981262  |
| 0.239874101 | 0.034320481 | 0.128337891 | 0.008902509 |
| 0.061139058 | 0.296253955 | 0.105845212 | 0.173390894 |
| 0.25953621  | 0.077237291 | 0.287448376 | 0.327109146 |
| 0.256662225 | 0.300761284 | 0.302285506 | 0.102513745 |
| 0.305330668 | 0.016902405 | 0.29394752  | 0.236697944 |
| 0.079941283 | 0.009756464 | 0.056627536 | 0.257846339 |
| 0.141570194 | 0.134685858 | 0.272968489 | 0.101383641 |
| 0.292430837 | 0.167048583 | 0.206016774 | 0.143744033 |
| 0.151779113 | 0.200800359 | 0.123537885 | 0.280080675 |
| 0.246686956 | 0.242797905 | 0.101756097 | 0.197904244 |
| 0.140879678 | 0.229734957 | 0.190514404 | 0.043018328 |
| 0.227587308 | 0.201214095 | 0.315899202 | 0.2903542   |
| 0.348539245 | 0.203505291 | 0.058135166 | 0.106551636 |
| 0.248095822 | 0.1440628   | 0.075600105 | 0.152579513 |
| 0.26560722  | 0.187454878 | 0.322377699 | 0.314517594 |
| 0.338398103 | 0.319206997 | 0.1953068   | 0.249060259 |
| 0.08298918  | 0.012694645 | 0.120017823 | 0.26686211  |
| 0.035767623 | 0.130258575 | 0.331215577 | 0.139252975 |
| 0.175173169 | 0.151186645 | 0.092934301 | 0.101337746 |
| 0.251106327 | 0.170751336 | 0.145526607 | 0.24542978  |
| 0.169030656 | 0.152557492 | 0.235933462 | 0.241579415 |
| 0.100479284 | 0.277524047 | 0.295123011 | 0.161500335 |
| 0.101564228 | 0.116880434 | 0.212260544 | 0.259244359 |
| 0.275235165 | 0.273899961 | 0.227201013 | 0.125864897 |
| 0.30941164  | 0.160790207 | 0.291445818 | 0.265087094 |
| 0.331270627 | 0.35695896  | 0.359232918 | 0.247512923 |
| 0.217609452 | 0.206715848 | 0.136767305 | 0.218294085 |

|             |             |             |             |
|-------------|-------------|-------------|-------------|
| 0.296137454 | 0.138532535 | 0.281363236 | 0.093950544 |
| 0.24429676  | 0.244826915 | 0.208258623 | 0.232887961 |
| 0.119046839 | 0.282717636 | 0.264615484 | 0.184129185 |
| 0.197535423 | 0.088088096 | 0.201111236 | 1           |
| 0.275155767 | 0.072412656 | 0.263428525 | 0.143861428 |
| 0.232274533 | 0.04468007  | 0.188784224 | 0.375996093 |
| 0.24186534  | 0.194850598 | 0.136315672 | 0.208778349 |
| 0.211876696 | 0.087826455 | 0.098505539 | 0.221114889 |
| 0.296654477 | 0.15674779  | 0.295542027 | 0.323538297 |
| 0.209953222 | 0.13422609  | 0.091971409 | 0.166351945 |
| 0.24857953  | 0.125931065 | 0.219426519 | 0.197210761 |
| 0.325546547 | 0.353148917 | 0.250408523 | 0.275265288 |
| 0.116035845 | 0.147432065 | 0.123371123 | 0.231443223 |
| 0.112982539 | 0.221403529 | 0.075405959 | 0.211467459 |
| 0.015028489 | 0.051635069 | 0.289911614 | 0.221366961 |
| 0.341827264 | 0.288118899 | 0.345805127 | 0.156149733 |
| 0.001590549 | 0.159837933 | 0.20360373  | 0.1343962   |
| 0.240380096 | 0.260233899 | 0.111118384 | 0.270575062 |
| 0.350874426 | 0.157569514 | 0.280065362 | 0.103426867 |
| 0.063240432 | 0.164013325 | 0.325251964 | 0.199221547 |
| 0.240620453 | 0.147991889 | 0.084092134 | 0.221157305 |
| 0.072174662 | 0.342424816 | 0.328139955 | 0.056541732 |
| 0.070609447 | 0.28344036  | 0.231557929 | 0.153274947 |
| 0.108161218 | 0.263854958 | 0.281542075 | 0.031851836 |
| 0.200556679 | 0.118295139 | 0.249362424 | 0.244044774 |
| 0.255391755 | 0.238688434 | 0.244341648 | 0.170832746 |
| 0.189699944 | 0.251385604 | 0.21954592  | 0.292171915 |
| 0.258157423 | 0.211084561 | 0.15782794  | 0.145914912 |
| 0.179551273 | 0.247086354 | 0.217911433 | 0.215070085 |
| 0.215158372 | 0.24030162  | 0.343149706 | 0.163858577 |
| 0.275304737 | 0.130469046 | 0.37152854  | 0.264530751 |
| 0.322000581 | 0.176332888 | 0.164633319 | 0.233735824 |
| 0.04253577  | 0.105193417 | 0.151999009 | 0.134056272 |
| 0.237996035 | 0.159569575 | 0.100700365 | 0.16568498  |
| 0.169021097 | 0.367866644 | 0.326082418 | 0.312705814 |
| 0.153267162 | 0.117401852 | 0.061238622 | 0.264998884 |
| 0.248286989 | 0.240473103 | 0.162459105 | 0.045930324 |
| 0.239253527 | 0.14795694  | 0.245297636 | 0.296912433 |
| 0.073675105 | 0.334210547 | 0.07267157  | 0.233205632 |
| 0.050529228 | 0.226566515 | 0.278212711 | 0.182291751 |
| 0.052473671 | 0.245623245 | 0.181040156 | 0.103751681 |
| 0.202525783 | 0.171965033 | 0.145217172 | 0.198643566 |
| 0.206923585 | 0.210215646 | 0.314285233 | 0.163748545 |
| 0.117476072 | 0.155287767 | 0.107632292 | 0.208513423 |
| 0.230012335 | 0.279597013 | 0.175690897 | 0.282491465 |
| 0.157414672 | 0.237846207 | 0.380151655 | 0.156009388 |
| 0.146246519 | 0.22108953  | 0.05653018  | 0.100777356 |
| 0.21829037  | 0.08554634  | 0.002036931 | 0.046518839 |
| 0.305696422 | 0.100218477 | 0.182292271 | 0.226824879 |
| 0.147239316 | 0.309639669 | 0.041927665 | 0.173393061 |
| 0.265436877 | 0.315468304 | 0.208788546 | 0.334347763 |
| 0.271538833 | 0.262664556 | 0.145543418 | 0.011764787 |
| 0.145338753 | 0.112708808 | 0.08543364  | 0.22149692  |
| 0.159008276 | 0.065268406 | 0.146678947 | 0.135998246 |



|             |             |             |             |
|-------------|-------------|-------------|-------------|
| 0.282778084 | 0.047138028 | 0.12922113  | 0.180563979 |
| 0.24873168  | 0.324488321 | 0.25647837  | 0.234021022 |
| 0.113921756 | 0.259511574 | 0.101453095 | 0.105067396 |
| 0.1979325   | 0.123661594 | 0.274323866 | 0.107155573 |
| 0.212553931 | 0.195603974 | 0.024480092 | 0.368125487 |
| 0.292972568 | 0.110061931 | 0.314984798 | 0.052919513 |
| 0.307311171 | 0.268796238 | 0.165671166 | 0.090849868 |
| 0.119915168 | 0.151474827 | 0.252505068 | 0.258030024 |
| 0.058848823 | 0.135669179 | 0.217946271 | 0.125095795 |
| 0.321175029 | 0.145829742 | 0.314113383 | 0.083323976 |
| 0.26698402  | 0.215979803 | 0.18983202  | 0.148131196 |
| 0.131705269 | 0.182514999 | 0.081501549 | 0.323421416 |
| 0.272053167 | 0.116040876 | 0.25693035  | 0.264936537 |
| 0.103049354 | 0.259197718 | 0.110478003 | 0.31040823  |
| 0.245343006 | 0.302813617 | 0.229259516 | 0.273817964 |
| 0.334969423 | 0.12537196  | 0.104744258 | 0.203017981 |
| 0.264156041 | 0.212884748 | 0.115406373 | 0.264164867 |
| 0.094266896 | 0.264340596 | 0.105881928 | 0.197398249 |
| 0.199848287 | 0.218653025 | 0.129501675 | 0.250959799 |
| 0.239094869 | 0.15980011  | 0.167901659 | 0.361203784 |
| 0.226846101 | 0.158559577 | 0.361689666 | 0.013141906 |
| 0.140356549 | 0.198458706 | 0.23647705  | 0.137960276 |
| 0.290329416 | 0.185389441 | 0.131635856 | 0.035383396 |
| 0.263643531 | 0.044984815 | 0.145463881 | 0.1984002   |
| 0.097565447 | 0.193754391 | 0.300661551 | 0.307429241 |
| 0.213377272 | 0.080183753 | 0.07277853  | 0.286355903 |
| 0.072699342 | 0.062227785 | 0.090463278 | 0.152315406 |
| 0.082390792 | 0.077407681 | 0.089941658 | 0.090930105 |
| 0.230179408 | 0.181340902 |             |             |
| NUP62       | 0.150238742 | 0.357997443 | 0.106694903 |
| 0.20637629  | 0.261226709 | 0.275829322 | 0.157099305 |
| 0.230948018 | 0.291150086 | 0.191170724 | 0.303522293 |
| 0.077788175 | 0.062452979 | 0.419271188 | 0.143723387 |
| 0.300546113 | 0.117360049 | 0.214960247 | 0.09883331  |
| 0.218505701 | 0.269329194 | 0.236611316 | 0.289470921 |
| 0.256857128 | 0.247814266 | 0.287760473 | 0.253179817 |
| 0.422194636 | 0.150496022 | 0.295130619 | 0.124975808 |
| 0.427347475 | 0.270021536 | 0.239417986 | 0.058375158 |
| 0.298287766 | 0.016515023 | 0.446325043 | 0.29410012  |
| 0.117342405 | 0.370210769 | 0.22057979  | 0.278709322 |
| 0.273639376 | 0.104434752 | 0.112263021 | 0.294252894 |
| 0.273252694 | 0.257992351 | 0.122837269 | 0.29906504  |
| 0.283806189 | 0.302187556 | 0.271374377 | 0.013577455 |
| 0.199185917 | 0.047399587 | 0.145110617 | 0.442329844 |
| 0.263551873 | 0.215854764 | 0.189632705 | 0.237787012 |
| 0.284817331 | 0.298133175 | 0.27047047  | 0.269425817 |
| 0.448318066 | 0.145635005 | 0.287885079 | 0.178812574 |
| 0.313691008 | 0.091105942 | 0.235101369 | 0.13943438  |
| 0.268236242 | 0.25809838  | 0.27407179  | 0.221392828 |
| 0.366884256 | 0.487395705 | 0.272053165 | 0.451246824 |
| 0.107311147 | 0.260600214 | 0.232556646 | 0.302069713 |
| 0.304877486 | 0.169210763 | 0.331112172 | 0.484742117 |
| 0.112750599 | 0.261127872 | 0.322652249 | 0.187769372 |
| 0.353356379 | 0.181450843 | 0.259976108 | 0.138367631 |

|             |             |             |             |
|-------------|-------------|-------------|-------------|
| 0.28010354  | 0.292621468 | 0.440271279 | 0.319896445 |
| 0.24224133  | 0.139905727 | 0.443534053 | 0.242156131 |
| 0.272501915 | 0.153287159 | 0.249612674 | 0.364104881 |
| 0.321950399 | 0.42380036  | 0.349662219 | 0.335088667 |
| 0.297984891 | 0.438792344 | 0.326508319 | 0.366362017 |
| 0.079577215 | 0.45912104  | 0.245953907 | 0.122295546 |
| 0.143030391 | 0.169335103 | 0.211573396 | 0.306835888 |
| 0.384711689 | 0.307600484 | 0.284667625 | 0.281774206 |
| 0.393097612 | 0.425350958 | 0.458088479 | 0.369641469 |
| 0.118771851 | 0.173285786 | 0.297230594 | 0.248451657 |
| 0.329298571 | 0.193247918 | 0.210245964 | 0.474868894 |
| 0.382681908 | 0.356693469 | 0.222703379 | 0.480150591 |
| 0.253889106 | 0.475534635 | 0.371154778 | 0.259189646 |
| 0.476532723 | 0.454405573 | 0.461379954 | 0.285539112 |
| 0.43459126  | 0.303618222 | 0.081375062 | 0.347714054 |
| 0.450801239 | 0.01801701  | 0.388725537 | 0.420716216 |
| 0.441762618 | 0.371367845 | 0.466212462 | 0.431465506 |
| 0.440866512 | 0.155079715 | 0.02652534  | 0.301667473 |
| 0.465435784 | 0.374683818 | 0.200968061 | 0.291993163 |
| 0.287821439 | 0.307555513 | 0.312526495 | 0.258149954 |
| 0.488903329 | 0.379683371 | 0.405170666 | 0.334765001 |
| 0.263147813 | 0.350975475 | 0.249733218 | 0.430861867 |
| 0.121942132 | 0.194816591 | 0.110385584 | 0.289406309 |
| 0.222840382 | 0.254999066 | 0.327529137 | 0.281541513 |
| 0.268034336 | 0.27891816  | 0.203605669 | 0.292289969 |
| 0.109347724 | 0.295973296 | 0.226841356 | 0.257273765 |
| 0.133445583 | 0.20950343  | 0.290755986 | 0.209731793 |
| 0.286121283 | 0.299034454 | 0.299037409 | 0.420865105 |
| 0.27370098  | 0.230240682 | 0.321447476 | 0.442030524 |
| 0.431843873 | 0.277696529 | 0.266654811 | 0.038147228 |
| 0.307380771 | 0.193929368 | 0.136383557 | 0.263161495 |
| 0.239514876 | 0.321598626 | 0.32705431  | 0.299489058 |
| 0.296223439 | 0.195672356 | 0.300428112 | 0.430874061 |
| 0.200700985 | 0.268812104 | 0.404009931 | 0.29662589  |
| 0.017345174 | 0.335475825 | 0.361663229 | 0.189738231 |
| 0.311069928 | 0.121971936 | 0.166280587 | 0.406679736 |
| 0.227045286 | 0.21036725  | 0.40524827  | 0.288853126 |
| 0.260500312 | 0.269434443 | 0.465893808 | 0.057426977 |
| 0.253100088 | 0.097483748 | 0.3038523   | 0.218047376 |
| 0.299996721 | 0.308328032 | 0.248257398 | 0.25272306  |
| 0.182725878 | 0.464677207 | 0.339594772 | 0.44321823  |
| 0.286126451 | 0.472547151 | 0.378735727 | 0.397098401 |
| 0.309028132 | 0.2547809   | 0.096393306 | 0.368637588 |
| 0.388640814 | 0.262064337 | 0.130380113 | 0.327845353 |
| 0.271067616 | 0.308104782 | 0.154892281 | 0.452144388 |
| 0.470962892 | 0.413104111 | 0.232396048 | 0.314423557 |
| 0.360596417 | 0.279263529 | 0.33934849  | 0.476003817 |
| 0.226685141 | 0.299224922 | 0.28865993  | 0.354181664 |
| 0.250179842 | 0.218190593 | 0.324707865 | 0.114329121 |
| 0.004643827 | 0.160136088 | 0.145682586 | 0.235204218 |
| 0.151276481 | 0.266524907 | 0.311222095 | 0.462534657 |
| 0.219919994 | 0.378743671 | 0.262068841 | 0.312267536 |
| 0.410150256 | 0.274153763 | 0.250092327 | 0.287927992 |
| 0.272412558 | 0.049564083 | 0.188674542 | 0.495809175 |

|             |             |             |             |
|-------------|-------------|-------------|-------------|
| 0.093323323 | 0.191609748 | 0.291779107 | 0.007354287 |
| 0.131402741 | 0.312921962 | 0.157156974 | 0.265928707 |
| 0.409712116 | 0.260694004 | 0.273777118 | 0.245650925 |
| 0.305358941 | 0.17686458  | 0.008633577 | 0.418732626 |
| 0.422778654 | 0.403179012 | 0.423477456 | 0.408835249 |
| 0.38427044  | 0.28872964  | 0.337529214 | 0.277470823 |
| 0.21652056  | 0.165052496 | 0.211770716 | 0.317473439 |
| 0.012467881 | 0.314089279 | 0.259457824 | 0.223873038 |
| 0.308527012 | 0.31021489  | 0.110698508 | 0.262873333 |
| 0.071145576 | 0.141544017 | 0.308396743 | 0.264311446 |
| 0.289366555 | 0.055838374 | 0.197745032 | 0.278206822 |
| 0.398390314 | 0.346204805 | 0.232587135 | 0.46671969  |
| 0.312536688 | 0.172822668 | 0.2958772   | 0.300072086 |
| 0.176919917 | 0.121929448 | 0.290099933 | 0.025654011 |
| 0.136975505 | 0.40987059  | 0.273375973 | 0.153842685 |
| 0.31325667  | 0.028483511 | 0.359336487 | 0.475315626 |
| 0.404820853 | 0.454589545 | 0.442934923 | 0.207741655 |
| 0.451252807 | 0.056783976 | 0.455273437 | 0.353591637 |
| 0.26153092  | 0.004211383 | 0.018807841 | 0.407646271 |
| 0.312795396 | 0.101195377 | 0.243559089 | 0.257707048 |
| 0.208296355 | 0.211195156 | 0.142448967 | 0.183234268 |
| 0.289089248 | 0.247924315 | 0.169100873 | 0.43245878  |
| 0.297919449 | 0.270672271 | 0.28559172  | 0.155950815 |
| 0.279966163 | 0.137520739 | 0.154795064 | 0.016604478 |
| 0.29332334  | 0.169055528 | 0.443383692 | 0.441824544 |
| 0.465115679 | 0.302253598 | 0.214127037 | 0.244304408 |
| 0.359457721 | 0.139212858 | 0.227390346 | 0.161432493 |
| 0.424027681 | 0.326967577 | 0.321715188 | 0.328149927 |
| 0.469118683 | 0.444309381 | 0.108173007 | 0.345687833 |
| 0.034910021 | 0.00366937  | 0.296269256 | 0.285944439 |
| 0.056426507 | 0.297443965 | 0.29166388  | 0.23252019  |
| 0.226386624 | 0.093812717 | 0.201880578 | 0.209871855 |
| 0.314632357 | 0.328629052 | 0.244740504 | 0.255614077 |
| 0.248203326 | 0.191332752 | 0.236032683 | 0.240373972 |
| 0.213389925 | 0.323451065 | 0.256621827 | 0.082874203 |
| 0.281577897 | 0.298601006 | 0.141033411 | 0.223920151 |
| 0.385181518 | 0.424633645 | 0.134648541 | 0.046022068 |
| 0.294415796 | 0.301801052 | 0.435212623 | 0.425977939 |
| 0.477366254 | 0.483520298 | 0.409154778 | 0.220615052 |
| 0.149537498 | 0.295467376 | 0.246854928 | 0.157487612 |
| 0.446882761 | 0.13249734  | 0.418122045 | 0.21214607  |
| 0.202798861 | 0.276881673 | 0.103430236 | 0.176735726 |
| 0.258847781 | 0.251061016 | 0.244891586 | 0.206222285 |
| 0.320205426 | 0.190206973 | 0.134801093 | 0.275155767 |
| 1           | 0.15323984  | 0.253502916 | 0.259853228 |
| 0.301182763 | 0.146918866 | 0.314197037 | 0.447721087 |
| 0.201612006 | 0.196844383 | 0.285033229 | 0.291354663 |
| 0.354335815 | 0.249029684 | 0.055237374 | 0.378931165 |
| 0.426670359 | 0.306160645 | 0.438583986 | 0.380916371 |
| 0.16243146  | 0.293222031 | 0.227494647 | 0.313239322 |
| 0.259990274 | 0.276638057 | 0.275439157 | 0.147416327 |
| 0.314172508 | 0.458254771 | 0.378784581 | 0.242160272 |
| 0.271628617 | 0.178379065 | 0.120156089 | 0.357977214 |
| 0.181637574 | 0.190114449 | 0.231088165 | 0.336420722 |

|             |             |             |             |
|-------------|-------------|-------------|-------------|
| 0.005123374 | 0.099604103 | 0.422378377 | 0.260320675 |
| 0.468026539 | 0.424720386 | 0.428753201 | 0.236856475 |
| 0.003517949 | 0.290976133 | 0.325687238 | 0.313788648 |
| 0.386955193 | 0.305172191 | 0.147385217 | 0.172368124 |
| 0.301409884 | 0.135859375 | 0.248713605 | 0.239066653 |
| 0.139658818 | 0.319978893 | 0.259164836 | 0.253635088 |
| 0.251751342 | 0.145536151 | 0.166938899 | 0.267914536 |
| 0.126966499 | 0.285351934 | 0.345142415 | 0.183477341 |
| 0.189698931 | 0.396808458 | 0.35414545  | 0.081908916 |
| 0.242342492 | 0.355996665 | 0.373771619 | 0.015981618 |
| 0.319461269 | 0.039994972 | 0.255524151 | 0.262129414 |
| 0.249329081 | 0.276382498 | 0.277384298 | 0.270272049 |
| 0.320994831 | 0.291653439 | 0.295431285 | 0.282347749 |
| 0.224136699 | 0.261702145 | 0.29739981  | 0.299061535 |
| 0.269325565 | 0.206266767 | 0.157976606 | 0.164905308 |
| 0.12321612  | 0.37776618  | 0.290272592 | 0.124846572 |
| 0.272707719 | 0.299690729 | 0.370753094 | 0.425950599 |
| 0.384818696 | 0.155532706 | 0.295267165 | 0.374733835 |
| 0.167368216 | 0.258444375 | 0.144641736 | 0.291041429 |
| 0.28560699  | 0.224695393 | 0.26619231  | 0.301095043 |
| 0.298023704 | 0.411655789 | 0.277106928 | 0.396873926 |
| 0.302126045 | 0.275915025 | 0.213285233 | 0.173420952 |
| 0.270480249 | 0.199929324 | 0.243681715 | 0.012037868 |
| 0.321670845 | 0.263974825 | 0.3933874   | 0.438694399 |
| 0.192488324 | 0.367112032 | 0.219968396 | 0.199075085 |
| 0.174926954 | 0.236327126 | 0.223664711 | 0.308896017 |
| 0.143773553 | 0.236508489 | 0.284344616 | 0.246932868 |
| 0.316614271 | 0.290145604 | 0.22286486  | 0.286991381 |
| 0.264162605 | 0.235186639 | 0.440085832 | 0.181243707 |
| 0.286836129 | 0.19275289  | 0.25115226  | 0.31190697  |
| 0.275036735 | 0.436083495 | 0.131477197 | 0.449116063 |
| 0.307837921 | 0.182317609 | 0.471847475 | 0.257397395 |
| 0.253819033 | 0.164565983 | 0.132610505 | 0.267529581 |
| 0.272596751 | 0.212579839 | 0.013863425 | 0.097664876 |
| 0.315131579 | 0.233930145 | 0.322241069 | 0.299509385 |
| 0.221006411 | 0.320145431 | 0.095134863 | 0.317016573 |
| 0.421155468 | 0.453303139 | 0.321223373 | 0.283628727 |
| 0.324602252 | 0.191147034 | 0.284868482 | 0.022467353 |
| 0.311707852 | 0.273033228 | 0.260548006 | 0.136756793 |
| 0.075001488 | 0.163782269 | 0.319525629 | 0.127972194 |
| 0.417317898 | 0.136654545 | 0.263763723 | 0.295609311 |
| 0.224635307 | 0.463827322 | 0.203128344 | 0.322454331 |
| 0.114063019 | 0.2777681   | 0.244809954 | 0.267064568 |
| 0.254965315 | 0.241901666 | 0.327287091 | 0.19094864  |
| 0.108758097 | 0.261161371 | 0.015263901 | 0.424358623 |
| 0.434335842 | 0.2590052   | 0.25143952  | 0.184340058 |
| 0.290651727 | 0.331877186 | 0.263896516 | 0.255072156 |
| 0.041043645 | 0.290403116 | 0.253276225 | 0.358642423 |
| 0.186875146 | 0.300172075 | 0.125554475 | 0.254784555 |
| 0.437453068 | 0.304746719 | 0.280925319 | 0.249706918 |
| 0.419434088 | 0.311666057 | 0.187579728 | 0.196905672 |
| 0.270875469 | 0.134912823 | 0.239656017 | 0.472099347 |
| 0.246024123 | 0.191473638 | 0.373431606 | 0.296233671 |
| 0.228972162 | 0.346629946 | 0.264040862 | 0.458876931 |

|             |             |             |             |
|-------------|-------------|-------------|-------------|
| 0.161623379 | 0.295968547 | 0.324929789 | 0.418950125 |
| 0.299963984 | 0.171313747 | 0.20726059  | 0.266900399 |
| 0.40580178  | 0.161439391 | 0.229356249 | 0.329059953 |
| 0.191720408 | 0.294360062 | 0.239221587 | 0.222129853 |
| 0.095789442 | 0.237856086 | 0.264596271 | 0.218292669 |
| 0.323877717 | 0.299022272 | 0.238532396 | 0.395438403 |
| 0.189074579 | 0.075041715 | 0.439664895 | 0.023060385 |
| 0.270355273 | 0.304659589 | 0.270865623 | 0.279711998 |
| 0.231226759 | 0.318627236 | 0.306764715 | 0.01056403  |
| 0.345895964 | 0.045274097 | 0.241427158 | 0.254641694 |
| 0.235594228 | 0.142265882 | 0.40736986  | 0.449985429 |
| 0.284710377 | 0.203617249 | 0.22802475  | 0.409473275 |
| 0.125167862 | 0.194265329 | 0.239646016 | 0.297102572 |
| 0.165166562 | 0.254635875 | 0.264864333 | 0.243425892 |
| 0.304835494 | 0.264220509 |             |             |
| NUTF2       | 0.006013802 | 0.144387761 | 0.003837389 |
| 0.01730186  | 0.28553405  | 0.06934575  | 0.007049085 |
| 0.012937773 | 0.116636373 | 0.052192804 | 0.148074962 |
| 0.001132467 | 0.051825097 | 0.198849763 | 0.006072131 |
| 0.2793408   | 0.004588281 | 0.025312274 | 0.008008906 |
| 0.025248016 | 0.258803752 | 0.082094287 | 0.062824534 |
| 0.22723965  | 0.041586463 | 0.097367273 | 0.20427469  |
| 0.210151674 | 0.037114406 | 0.204596829 | 0.026382815 |
| 0.173133946 | 0.295489596 | 0.178378838 | 0.000674823 |
| 0.130011839 | 0.016428826 | 0.158244632 | 0.135760517 |
| 0.085955842 | 0.114580802 | 0.060978349 | 0.091097951 |
| 0.120067372 | 0.002751645 | 0.012937612 | 0.264707457 |
| 0.113389448 | 0.067586755 | 0.004903824 | 0.191258645 |
| 0.090731607 | 0.088905899 | 0.122964302 | 9.67E-05    |
| 0.200361478 | 0.072297912 | 0.169814206 | 0.177340826 |
| 0.066398974 | 0.034766168 | 0.059513613 | 0.043921803 |
| 0.175470884 | 0.226182385 | 0.109189551 | 0.093384686 |
| 0.201006554 | 0.11085234  | 0.236183919 | 0.018684055 |
| 0.096398781 | 0.002069781 | 0.051661186 | 0.010555906 |
| 0.118844447 | 0.081674348 | 0.159016485 | 0.231569524 |
| 0.144894119 | 0.185721826 | 0.094901843 | 0.166754029 |
| 0.053869345 | 0.305545691 | 0.158303901 | 0.19752171  |
| 0.186622887 | 0.011079231 | 0.217669431 | 0.218970743 |
| 0.003674951 | 0.107806021 | 0.18955822  | 0.018351567 |
| 0.14977581  | 0.100917394 | 0.102857096 | 0.130917625 |
| 0.322396105 | 0.288985725 | 0.159095065 | 0.117916227 |
| 0.155795963 | 0.008940149 | 0.137199543 | 0.324699773 |
| 0.115798893 | 0.012591744 | 0.133408643 | 0.267520826 |
| 0.208821524 | 0.205143267 | 0.175608559 | 0.193631362 |
| 0.269607813 | 0.212058842 | 0.20224672  | 0.153060294 |
| 0.013080694 | 0.199251717 | 0.04971318  | 0.004355914 |
| 0.004712635 | 0.015406658 | 0.084526389 | 0.130442531 |
| 0.230219159 | 0.108720826 | 0.037593436 | 0.154904483 |
| 0.301672813 | 0.136145676 | 0.201068702 | 0.194315186 |
| 0.00403046  | 0.141149555 | 0.283978906 | 0.031390205 |
| 0.181224769 | 0.023970883 | 0.274642419 | 0.166347414 |
| 0.1518166   | 0.273994944 | 0.018527968 | 0.159081105 |
| 0.040493522 | 0.224337401 | 0.168440049 | 0.059411881 |
| 0.193684084 | 0.156075253 | 0.254860772 | 0.310532861 |

|             |             |             |             |
|-------------|-------------|-------------|-------------|
| 0.155417339 | 0.091995344 | 0.006407173 | 0.174050875 |
| 0.21904078  | 0.012473234 | 0.236039701 | 0.259606693 |
| 0.187103694 | 0.276872552 | 0.265268393 | 0.233642962 |
| 0.175219266 | 0.011671889 | 0.015845875 | 0.22097813  |
| 0.18525961  | 0.187134227 | 0.029582086 | 0.206632391 |
| 0.247609863 | 0.07844181  | 0.207099494 | 0.03947423  |
| 0.216046895 | 0.220812759 | 0.216982415 | 0.162853198 |
| 0.090947884 | 0.09579387  | 0.258911475 | 0.130543034 |
| 0.003836574 | 0.012229094 | 0.005009799 | 0.13563137  |
| 0.03721002  | 0.081786876 | 0.068039471 | 0.202089463 |
| 0.081227703 | 0.055627219 | 0.151556886 | 0.30443647  |
| 0.005841861 | 0.149583778 | 0.041504977 | 0.038855996 |
| 0.007750366 | 0.028823783 | 0.019468588 | 0.021063936 |
| 0.132380725 | 0.046221031 | 0.197244806 | 0.24290281  |
| 0.140144751 | 0.045297712 | 0.1663406   | 0.217267201 |
| 0.216945139 | 0.264803839 | 0.071218481 | 0.00271368  |
| 0.068033163 | 0.097976141 | 0.163854091 | 0.198456941 |
| 0.033701976 | 0.050075617 | 0.222985336 | 0.294620154 |
| 0.052903313 | 0.015878738 | 0.147230207 | 0.133349632 |
| 0.027921442 | 0.111538483 | 0.251666125 | 0.142455089 |
| 0.000319643 | 0.129287595 | 0.229548879 | 0.056531432 |
| 0.115250117 | 0.049607045 | 0.078323507 | 0.263490067 |
| 0.074126352 | 0.151646125 | 0.229178512 | 0.287882347 |
| 0.021183781 | 0.039474723 | 0.243769851 | 0.031597542 |
| 0.206547122 | 0.023153228 | 0.186542636 | 0.068520322 |
| 0.099154095 | 0.160662181 | 0.258108605 | 0.16437772  |
| 0.018408007 | 0.194284098 | 0.152601473 | 0.224015321 |
| 0.143234781 | 0.246561786 | 0.255362149 | 0.206310109 |
| 0.14417248  | 0.172809068 | 0.099078315 | 0.239391659 |
| 0.265454588 | 0.04539821  | 0.009123263 | 0.228057834 |
| 0.142424747 | 0.286891907 | 0.047357413 | 0.250898734 |
| 0.180454882 | 0.141799646 | 0.033974742 | 0.28320414  |
| 0.185772576 | 0.059731059 | 0.207146441 | 0.233994018 |
| 0.062192172 | 0.230931125 | 0.20112981  | 0.299488836 |
| 0.057226043 | 0.131455308 | 0.107913194 | 0.119682011 |
| 0.007668931 | 0.007899055 | 0.008921229 | 0.080486152 |
| 0.18463162  | 0.161680101 | 0.251291554 | 0.220056117 |
| 0.027522532 | 0.150112874 | 0.078916762 | 0.125847178 |
| 0.166450964 | 0.153672076 | 0.230089428 | 0.221324182 |
| 0.086966184 | 0.003977811 | 0.0137331   | 0.189092117 |
| 0.002787577 | 0.143869681 | 0.063603935 | 0.000914988 |
| 0.004183923 | 0.139809295 | 0.016324392 | 0.047159932 |
| 0.263726465 | 0.047578466 | 0.063512753 | 0.073453062 |
| 0.181658367 | 0.018081258 | 0.001229191 | 0.231160972 |
| 0.191206278 | 0.184277126 | 0.184473252 | 0.1442942   |
| 0.22211379  | 0.172770698 | 0.282963385 | 0.066811276 |
| 0.013933843 | 0.00849637  | 0.172054911 | 0.16799906  |
| 9.24E-05    | 0.211348856 | 0.157754651 | 0.04108081  |
| 0.239679982 | 0.131482578 | 0.002491774 | 0.21820462  |
| 0.001324178 | 0.162270928 | 0.03641423  | 0.073313939 |
| 0.256423651 | 0.000599677 | 0.031333165 | 0.093240325 |
| 0.124697686 | 0.110093545 | 0.16177272  | 0.209274846 |
| 0.147327237 | 0.020668971 | 0.20685074  | 0.217594178 |
| 0.010587576 | 0.024624736 | 0.066778728 | 0.008118825 |

|             |             |             |             |
|-------------|-------------|-------------|-------------|
| 0.010250997 | 0.150861759 | 0.10944018  | 0.005355276 |
| 0.123608276 | 6.29E-05    | 0.122977846 | 0.20615757  |
| 0.142392248 | 0.263156717 | 0.205593666 | 0.219227004 |
| 0.204269693 | 0.061295155 | 0.221862747 | 0.150698925 |
| 0.101092087 | 0.000106948 | 0.000385581 | 0.265642856 |
| 0.251637978 | 0.005064421 | 0.051267898 | 0.027433089 |
| 0.019621001 | 0.016032748 | 0.006563874 | 0.180581895 |
| 0.149719612 | 0.173544734 | 0.100617968 | 0.149626238 |
| 0.114202875 | 0.10151088  | 0.068279816 | 0.012463389 |
| 0.193535834 | 0.006287122 | 0.014065528 | 0.002270558 |
| 0.240004979 | 0.018003185 | 0.127894264 | 0.193409437 |
| 0.210809853 | 0.290456899 | 0.073049829 | 0.019698034 |
| 0.21527383  | 0.010595545 | 0.046809876 | 0.012608631 |
| 0.170968357 | 0.273928491 | 0.152106365 | 0.113192125 |
| 0.242647116 | 0.188005577 | 0.00347974  | 0.26818231  |
| 0.000739314 | 0.00127812  | 0.085632718 | 0.088463202 |
| 0.01947586  | 0.218480837 | 0.109844492 | 0.053324517 |
| 0.057063599 | 0.001017749 | 0.249594998 | 0.260938832 |
| 0.188222966 | 0.18382789  | 0.277366336 | 0.078708435 |
| 0.174890608 | 0.077992879 | 0.062495967 | 0.028165866 |
| 0.024341053 | 0.107105668 | 0.045013485 | 0.00176299  |
| 0.160738837 | 0.211746829 | 0.007984278 | 0.03715813  |
| 0.232640224 | 0.245543017 | 0.005449283 | 0.002658065 |
| 0.085632013 | 0.123956154 | 0.251753493 | 0.181186222 |
| 0.179136016 | 0.237938039 | 0.127323619 | 0.042899592 |
| 0.00702467  | 0.213363709 | 0.292634763 | 0.047280417 |
| 0.202078779 | 0.007189022 | 0.159384677 | 0.299083147 |
| 0.028582971 | 0.070304658 | 0.002665488 | 0.018350887 |
| 0.242858491 | 0.049887564 | 0.10901632  | 0.029966965 |
| 0.148759612 | 0.109930912 | 0.006077037 | 0.072412656 |
| 0.15323984  | 1           | 0.049954089 | 0.049992917 |
| 0.131509243 | 0.016350163 | 0.280301829 | 0.19530865  |
| 0.024713309 | 0.022912465 | 0.030893642 | 0.17960955  |
| 0.2262877   | 0.13829835  | 0.001085967 | 0.152269435 |
| 0.221523007 | 0.2141093   | 0.167240464 | 0.222453847 |
| 0.01548972  | 0.214125578 | 0.186421135 | 0.241851133 |
| 0.058095957 | 0.071651547 | 0.086581688 | 0.010012481 |
| 0.106790621 | 0.157330894 | 0.184695493 | 0.057935817 |
| 0.137327122 | 0.014913356 | 0.005889528 | 0.178997033 |
| 0.189680618 | 0.005270412 | 0.063541226 | 0.229020618 |
| 0.002768884 | 0.150538019 | 0.257841582 | 0.038818901 |
| 0.207103334 | 0.268932081 | 0.180400664 | 0.032699373 |
| 0.010722384 | 0.309828253 | 0.200540443 | 0.158752948 |
| 0.159154819 | 0.109228069 | 0.008174889 | 0.015968879 |
| 0.1359499   | 0.008843274 | 0.031951647 | 0.018842689 |
| 0.11604827  | 0.125000174 | 0.077313935 | 0.065276898 |
| 0.115254923 | 0.011847424 | 0.084611679 | 0.064659471 |
| 0.068750355 | 0.098743384 | 0.180952588 | 0.028663347 |
| 0.077201612 | 0.21925752  | 0.199946761 | 0.001630062 |
| 0.210287781 | 0.218986456 | 0.192029508 | 0.001264855 |
| 0.261270142 | 0.000230792 | 0.100104766 | 0.116816493 |
| 0.094295063 | 0.085447074 | 0.189071856 | 0.152205198 |
| 0.144340305 | 0.081929331 | 0.091586731 | 0.106714668 |
| 0.059159141 | 0.057249625 | 0.218109783 | 0.114318696 |

|             |             |             |             |
|-------------|-------------|-------------|-------------|
| 0.122121109 | 0.022359553 | 0.01465162  | 0.013594264 |
| 0.003046523 | 0.175781498 | 0.070301333 | 0.008714738 |
| 0.094436864 | 0.101637362 | 0.166904752 | 0.170145253 |
| 0.195888096 | 0.014801737 | 0.109494473 | 0.170587405 |
| 0.030263265 | 0.017563761 | 0.003117245 | 0.132573966 |
| 0.060098451 | 0.084535628 | 0.096666884 | 0.082342052 |
| 0.164329527 | 0.144590309 | 0.063698135 | 0.187989561 |
| 0.150783074 | 0.143137202 | 0.055971785 | 0.017910935 |
| 0.048245566 | 0.029368868 | 0.275650168 | 3.20E-05    |
| 0.141681378 | 0.016550637 | 0.245126929 | 0.167688831 |
| 0.163260615 | 0.158165195 | 0.016508018 | 0.011730251 |
| 0.025945365 | 0.035486574 | 0.033915988 | 0.204458051 |
| 0.163598793 | 0.034236856 | 0.253579996 | 0.027340946 |
| 0.267392446 | 0.229889732 | 0.123521823 | 0.044808364 |
| 0.099348779 | 0.046336968 | 0.16257616  | 0.012791698 |
| 0.193840085 | 0.153334234 | 0.084637616 | 0.178164839 |
| 0.128462953 | 0.233811596 | 0.007050595 | 0.238045791 |
| 0.198655529 | 0.023541168 | 0.185799014 | 0.05900298  |
| 0.032884331 | 0.019733927 | 0.210977795 | 0.065027979 |
| 0.046797217 | 0.152839471 | 0.002355285 | 0.025095997 |
| 0.191244157 | 0.077954104 | 0.16514576  | 0.186342135 |
| 0.20470952  | 0.214765059 | 0.052489008 | 0.064387914 |
| 0.14493089  | 0.14769127  | 0.041870165 | 0.114640925 |
| 0.134263804 | 0.017170806 | 0.092763581 | 0.003540708 |
| 0.23256057  | 0.22433089  | 0.059436231 | 0.00521159  |
| 0.000888378 | 0.241215064 | 0.214745519 | 0.007908934 |
| 0.283435154 | 0.066941089 | 0.115796779 | 0.202189974 |
| 0.040790767 | 0.15134181  | 0.039707394 | 0.232500906 |
| 0.00211072  | 0.098753827 | 0.203397246 | 0.136112038 |
| 0.090446554 | 0.268412423 | 0.251144402 | 0.221145378 |
| 0.004400549 | 0.065786543 | 0.003277902 | 0.129109872 |
| 0.142443068 | 0.287408015 | 0.054451154 | 0.038561092 |
| 0.16009668  | 0.159092333 | 0.034036263 | 0.151710008 |
| 0.001227115 | 0.297547417 | 0.061231934 | 0.142951098 |
| 0.074973039 | 0.15887866  | 0.006810296 | 0.24065302  |
| 0.117113658 | 0.048865112 | 0.083022886 | 0.101435988 |
| 0.170348731 | 0.136924116 | 0.029956534 | 0.050585502 |
| 0.145770637 | 0.008139757 | 0.060871107 | 0.217319848 |
| 0.071756157 | 0.252365401 | 0.299782076 | 0.085262384 |
| 0.213508737 | 0.12180565  | 0.177557085 | 0.200944307 |
| 0.027042126 | 0.098494585 | 0.24487652  | 0.190710025 |
| 0.156520324 | 0.183166745 | 0.168540264 | 0.150082577 |
| 0.142989058 | 0.006445126 | 0.122643829 | 0.146561767 |
| 0.240296945 | 0.135255958 | 0.085136817 | 0.138363705 |
| 0.002631406 | 0.02375625  | 0.051910054 | 0.035228725 |
| 0.144239645 | 0.238256004 | 0.166570774 | 0.162795529 |
| 0.019329814 | 0.004165932 | 0.191963083 | 0.039798271 |
| 0.062852536 | 0.233761395 | 0.070564965 | 0.194086062 |
| 0.044556277 | 0.122892919 | 0.090624241 | 0.000774991 |
| 0.242371915 | 0.035804901 | 0.096744248 | 0.118895532 |
| 0.044191035 | 0.004268668 | 0.158334841 | 0.259275308 |
| 0.090702995 | 0.028679334 | 0.061795971 | 0.162849699 |
| 0.106184623 | 0.126254833 | 0.119631238 | 0.142656615 |
| 0.205705955 | 0.112005246 | 0.124701858 | 0.183629245 |



|             |             |             |             |
|-------------|-------------|-------------|-------------|
| 0.145442701 | 0.043595303 |             |             |
| NXT1        | 0.220032931 | 0.200678254 | 0.147773268 |
| 0.192488427 | 0.127581549 | 0.104861743 | 0.275267147 |
| 0.277713155 | 0.187136519 | 0.050143115 | 0.14491393  |
| 0.208823557 | 0.023015955 | 0.251090045 | 0.269425281 |
| 0.119666681 | 0.269220425 | 0.290311582 | 0.068058641 |
| 0.141079896 | 0.140736314 | 0.079309039 | 0.113022992 |
| 0.132175672 | 0.312806641 | 0.147180172 | 0.076346202 |
| 0.225698004 | 0.032232768 | 0.128739105 | 0.031505811 |
| 0.327974705 | 0.120813933 | 0.065059492 | 0.152831122 |
| 0.115411767 | 0.015008151 | 0.336666813 | 0.188210311 |
| 0.050266204 | 0.326701424 | 0.064441454 | 0.209738348 |
| 0.084172691 | 0.195099886 | 0.023959491 | 0.125139437 |
| 0.139801742 | 0.164894886 | 0.16504509  | 0.146605968 |
| 0.103213318 | 0.210806695 | 0.123168429 | 0.018607434 |
| 0.056550395 | 0.008541101 | 0.033894632 | 0.264013226 |
| 0.290225326 | 0.286924601 | 0.043872104 | 0.152710426 |
| 0.111742502 | 0.160790744 | 0.247602459 | 0.07793703  |
| 0.263823792 | 0.049324647 | 0.131425821 | 0.130380675 |
| 0.127809116 | 0.171660848 | 0.323872439 | 0.172283401 |
| 0.091675995 | 0.248546465 | 0.131294894 | 0.077256299 |
| 0.194264738 | 0.331528516 | 0.247216371 | 0.273303918 |
| 0.054053307 | 0.095887131 | 0.115761719 | 0.258322536 |
| 0.187636792 | 0.228640815 | 0.193320892 | 0.306422548 |
| 0.186270559 | 0.08506017  | 0.169127265 | 0.229799073 |
| 0.201908283 | 0.059313346 | 0.07240595  | 0.055871283 |
| 0.138057431 | 0.117066979 | 0.291410885 | 0.263605318 |
| 0.11546953  | 0.187610729 | 0.286621296 | 0.087414282 |
| 0.143844022 | 0.206352172 | 0.140732818 | 0.174970639 |
| 0.144959197 | 0.232272092 | 0.179180209 | 0.232035948 |
| 0.100319742 | 0.254402253 | 0.184383166 | 0.233033009 |
| 0.016276876 | 0.263824154 | 0.232038843 | 0.264039459 |
| 0.184582747 | 0.271654586 | 0.109230664 | 0.306528729 |
| 0.20463962  | 0.208648944 | 0.249304105 | 0.216251285 |
| 0.218503272 | 0.258975995 | 0.257541963 | 0.22035423  |
| 0.244361593 | 0.055661743 | 0.101369737 | 0.157128057 |
| 0.186648901 | 0.250788023 | 0.082149409 | 0.310471098 |
| 0.294778533 | 0.193567551 | 0.203469741 | 0.344345954 |
| 0.206025995 | 0.309163338 | 0.187895059 | 0.269072687 |
| 0.305746183 | 0.294173334 | 0.282560658 | 0.131494489 |
| 0.291519662 | 0.149095199 | 0.047374536 | 0.23240893  |
| 0.303977079 | 0.012488324 | 0.194655468 | 0.216560985 |
| 0.252858133 | 0.178821526 | 0.277437959 | 0.237504104 |
| 0.250216881 | 0.236379044 | 0.00671689  | 0.207842965 |
| 0.282646603 | 0.263262492 | 0.229870005 | 0.083614845 |
| 0.125394354 | 0.124684005 | 0.164044235 | 0.07777464  |
| 0.340219435 | 0.214180704 | 0.207295132 | 0.197590411 |
| 0.118258012 | 0.330464689 | 0.07022931  | 0.2821303   |
| 0.253750644 | 0.218212368 | 0.176284654 | 0.246573779 |
| 0.066225841 | 0.272733331 | 0.130389724 | 0.12091961  |
| 0.281867544 | 0.127564541 | 0.053960113 | 0.144313999 |
| 0.207703666 | 0.09445814  | 0.236256609 | 0.224631684 |
| 0.279163548 | 0.327622348 | 0.223779997 | 0.228398224 |
| 0.19797867  | 0.336024373 | 0.131071757 | 0.237719271 |

|             |             |             |             |
|-------------|-------------|-------------|-------------|
| 0.109932002 | 0.255267094 | 0.158999071 | 0.296330914 |
| 0.337826046 | 0.095199117 | 0.29717718  | 0.085181848 |
| 0.125465307 | 0.046950789 | 0.037619203 | 0.079840549 |
| 0.322691002 | 0.19475299  | 0.13729434  | 0.16867277  |
| 0.166458217 | 0.184925698 | 0.103954171 | 0.343363201 |
| 0.241605957 | 0.135291828 | 0.236712578 | 0.098563469 |
| 0.076375891 | 0.177019871 | 0.192488387 | 0.145477501 |
| 0.202118801 | 0.050364707 | 0.048579888 | 0.225867872 |
| 0.066614724 | 0.102471448 | 0.215253323 | 0.164569449 |
| 0.091670941 | 0.282505455 | 0.274423848 | 0.015303372 |
| 0.096483908 | 0.121270978 | 0.255505584 | 0.064641482 |
| 0.233891406 | 0.27510313  | 0.103957431 | 0.132033125 |
| 0.197528095 | 0.274551688 | 0.233756962 | 0.246735454 |
| 0.083090474 | 0.282080715 | 0.196476776 | 0.24819182  |
| 0.190065336 | 0.073567047 | 0.025762318 | 0.1977801   |
| 0.212096988 | 0.084086211 | 0.200731287 | 0.150140002 |
| 0.082105304 | 0.142909167 | 0.148440766 | 0.272976855 |
| 0.338561403 | 0.239992172 | 0.262287018 | 0.21234848  |
| 0.258126135 | 0.218382775 | 0.213132693 | 0.294992243 |
| 0.060390819 | 0.108687119 | 0.111493972 | 0.242262731 |
| 0.267934123 | 0.122558581 | 0.297603347 | 0.032044115 |
| 0.000880323 | 0.216912869 | 0.217964594 | 0.247199793 |
| 0.074169917 | 0.091666911 | 0.157826501 | 0.265029838 |
| 0.28963383  | 0.264183201 | 0.252293206 | 0.15127868  |
| 0.262134378 | 0.102781763 | 0.082495922 | 0.12897051  |
| 0.288766056 | 0.113866029 | 0.225797618 | 0.337560634 |
| 0.150922218 | 0.072241455 | 0.152797232 | 0.017705684 |
| 0.236070184 | 0.148905718 | 0.266316095 | 0.361683058 |
| 0.239838599 | 0.328451002 | 0.247732588 | 0.070583219 |
| 0.217635686 | 0.262522354 | 0.028096104 | 0.23510124  |
| 0.253312175 | 0.24992697  | 0.250610261 | 0.265185332 |
| 0.22363675  | 0.163568985 | 0.193941791 | 0.118279323 |
| 0.29384825  | 0.203834551 | 0.082944515 | 0.184907798 |
| 0.01676431  | 0.22500939  | 0.138177015 | 0.304828471 |
| 0.157764054 | 0.225579803 | 0.231875367 | 0.113591035 |
| 0.135129224 | 0.033903765 | 0.151119815 | 0.216836531 |
| 0.203615787 | 0.160391794 | 0.065484538 | 0.085558206 |
| 0.257709537 | 0.275869933 | 0.065363926 | 0.276604092 |
| 0.172236087 | 0.191096291 | 0.157827603 | 0.18364846  |
| 0.291809268 | 0.039748258 | 0.117201649 | 0.006567175 |
| 0.057079619 | 0.275210345 | 0.093431183 | 0.212105441 |
| 0.226398161 | 0.106871048 | 0.265030399 | 0.287151723 |
| 0.234608046 | 0.253331621 | 0.260454205 | 0.073809113 |
| 0.265823787 | 0.010364795 | 0.25250808  | 0.207719642 |
| 0.067204963 | 0.010154852 | 0.056774854 | 0.213399403 |
| 0.109163843 | 0.172756459 | 0.274556179 | 0.085187546 |
| 0.275149468 | 0.185114844 | 0.247936138 | 0.110154593 |
| 0.121695368 | 0.168966197 | 0.0993959   | 0.260520194 |
| 0.231299453 | 0.229755458 | 0.093217579 | 0.238703132 |
| 0.109917654 | 0.262508351 | 0.23131543  | 0.028334377 |
| 0.182490767 | 0.246171004 | 0.305411911 | 0.252256538 |
| 0.308837899 | 0.161757204 | 0.049376956 | 0.088034884 |
| 0.211293354 | 0.167728805 | 0.063416438 | 0.172840563 |
| 0.235607253 | 0.146948622 | 0.285756296 | 0.294466516 |

|             |             |             |             |
|-------------|-------------|-------------|-------------|
| 0.291373256 | 0.285908968 | 0.247758384 | 0.20594767  |
| 0.085892409 | 0.01004471  | 0.108412505 | 0.258762219 |
| 0.036134517 | 0.102534325 | 0.313326332 | 0.145032793 |
| 0.166036019 | 0.185507437 | 0.065662126 | 0.077231265 |
| 0.215657661 | 0.145531384 | 0.112308868 | 0.249463601 |
| 0.145629731 | 0.135987448 | 0.225111199 | 0.263765279 |
| 0.097970281 | 0.270560483 | 0.315327423 | 0.217602161 |
| 0.084429753 | 0.094226958 | 0.255386209 | 0.274617266 |
| 0.227285437 | 0.227247816 | 0.266845782 | 0.126705792 |
| 0.307926304 | 0.148515069 | 0.243189683 | 0.232628768 |
| 0.299098235 | 0.310028002 | 0.344841828 | 0.238188719 |
| 0.252463071 | 0.168950502 | 0.110023899 | 0.2007803   |
| 0.255627626 | 0.176299451 | 0.251186909 | 0.069276453 |
| 0.274801739 | 0.236769161 | 0.235363112 | 0.277615084 |
| 0.086778163 | 0.279188706 | 0.242186793 | 0.199342166 |
| 0.164032508 | 0.069565255 | 0.263369536 | 0.263428525 |
| 0.253502916 | 0.049954089 | 1           | 0.142195174 |
| 0.21547718  | 0.04421614  | 0.150069109 | 0.33512671  |
| 0.256341193 | 0.235910176 | 0.132556731 | 0.181717057 |
| 0.174643054 | 0.070456503 | 0.10048356  | 0.198386637 |
| 0.254227342 | 0.122414021 | 0.263425388 | 0.280935727 |
| 0.251629342 | 0.104706271 | 0.073579822 | 0.13916798  |
| 0.256124582 | 0.109060091 | 0.215449683 | 0.250550383 |
| 0.316422667 | 0.329821407 | 0.226122495 | 0.258248909 |
| 0.092693191 | 0.170574155 | 0.160067501 | 0.197846787 |
| 0.080848221 | 0.243716918 | 0.066025628 | 0.173786696 |
| 0.014496757 | 0.034299236 | 0.24872518  | 0.201058669 |
| 0.30659466  | 0.242125917 | 0.307786558 | 0.159706954 |
| 0.002043227 | 0.124743115 | 0.159110256 | 0.110948147 |
| 0.214765938 | 0.236960026 | 0.117518917 | 0.287586188 |
| 0.320666783 | 0.190986549 | 0.26633507  | 0.087454511 |
| 0.04204193  | 0.140412055 | 0.318155871 | 0.210031376 |
| 0.227533913 | 0.186629411 | 0.06098578  | 0.216057481 |
| 0.059836449 | 0.323681145 | 0.281652588 | 0.053018387 |
| 0.051629296 | 0.246230302 | 0.20174121  | 0.194207516 |
| 0.084835914 | 0.224994574 | 0.247205725 | 0.034494045 |
| 0.155949212 | 0.154439813 | 0.224908279 | 0.213553923 |
| 0.232115225 | 0.222922918 | 0.204737449 | 0.142634874 |
| 0.173036807 | 0.24956314  | 0.194659924 | 0.257687322 |
| 0.232315609 | 0.226185718 | 0.128502064 | 0.133889529 |
| 0.142378154 | 0.256020245 | 0.265105352 | 0.263309923 |
| 0.223853307 | 0.206926377 | 0.341561135 | 0.196937906 |
| 0.249443717 | 0.127740173 | 0.338347653 | 0.236614335 |
| 0.281645528 | 0.209539645 | 0.14712389  | 0.199453142 |
| 0.038484623 | 0.103723749 | 0.207820454 | 0.120598101 |
| 0.238871442 | 0.117343048 | 0.091200377 | 0.152937305 |
| 0.146613111 | 0.341686287 | 0.325754769 | 0.276929988 |
| 0.136359496 | 0.107471729 | 0.054930649 | 0.254725924 |
| 0.255335161 | 0.267457133 | 0.125829881 | 0.059346534 |
| 0.201599961 | 0.148876306 | 0.200405995 | 0.268176823 |
| 0.054342269 | 0.301047896 | 0.0604681   | 0.262291169 |
| 0.044822488 | 0.257158569 | 0.30304727  | 0.152277939 |
| 0.035104427 | 0.24068293  | 0.15340799  | 0.096774259 |
| 0.163267019 | 0.142516409 | 0.122834198 | 0.204936649 |

|             |             |             |             |
|-------------|-------------|-------------|-------------|
| 0.209605314 | 0.218540096 | 0.296537311 | 0.196563602 |
| 0.091657916 | 0.119738167 | 0.096907111 | 0.171200585 |
| 0.214140966 | 0.240050567 | 0.223588311 | 0.241088783 |
| 0.129317792 | 0.266071192 | 0.344062222 | 0.151033406 |
| 0.149453217 | 0.202411847 | 0.037128871 | 0.091070538 |
| 0.213619178 | 0.062526001 | 0.00241818  | 0.045206745 |
| 0.254409366 | 0.093753472 | 0.159523025 | 0.198312877 |
| 0.118437481 | 0.268426919 | 0.028743993 | 0.183614025 |
| 0.244405057 | 0.295433397 | 0.184557769 | 0.326158596 |
| 0.241762408 | 0.277465266 | 0.124678125 | 0.016042961 |
| 0.112644959 | 0.084965946 | 0.07106387  | 0.266667679 |
| 0.211512354 | 0.044545848 | 0.121299209 | 0.176431977 |
| 0.234290487 | 0.03229401  | 0.116418857 | 0.146777603 |
| 0.26825768  | 0.306030856 | 0.247863878 | 0.186477244 |
| 0.16659284  | 0.249858949 | 0.080428928 | 0.089438262 |
| 0.1532886   | 0.092203889 | 0.224679549 | 0.075357355 |
| 0.257070599 | 0.162800403 | 0.035140759 | 0.351045186 |
| 0.278200864 | 0.086035155 | 0.328269155 | 0.047322452 |
| 0.267737911 | 0.242461371 | 0.139247217 | 0.074336057 |
| 0.127447733 | 0.111986993 | 0.250008219 | 0.223426179 |
| 0.043205184 | 0.117129409 | 0.228816047 | 0.102630723 |
| 0.313788421 | 0.123345032 | 0.312847736 | 0.0666229   |
| 0.238347793 | 0.195713522 | 0.209687969 | 0.13327532  |
| 0.11401271  | 0.223922898 | 0.070324769 | 0.283707791 |
| 0.250935965 | 0.084956393 | 0.204368771 | 0.245406664 |
| 0.077882432 | 0.242093861 | 0.08920348  | 0.27657625  |
| 0.238684562 | 0.284167453 | 0.185704793 | 0.247033171 |
| 0.298707319 | 0.097810132 | 0.075762464 | 0.168081038 |
| 0.240122272 | 0.204847787 | 0.09840656  | 0.24145491  |
| 0.06738134  | 0.22696099  | 0.097951691 | 0.16918977  |
| 0.196318163 | 0.23803958  | 0.107082306 | 0.266330944 |
| 0.208350749 | 0.13010435  | 0.137949858 | 0.331994117 |
| 0.198377405 | 0.153011569 | 0.330404027 | 0.009941142 |
| 0.127675616 | 0.152972619 | 0.22278196  | 0.115559087 |
| 0.300613266 | 0.164871767 | 0.128334087 | 0.045486182 |
| 0.215980345 | 0.03991676  | 0.124850444 | 0.153790052 |
| 0.07601378  | 0.24971513  | 0.269243184 | 0.257668676 |
| 0.198448443 | 0.068725562 | 0.056647119 | 0.253880532 |
| 0.049655546 | 0.047049282 | 0.07080752  | 0.13222809  |
| 0.058482548 | 0.066440039 | 0.074263865 | 0.068509036 |
| 0.197254732 | 0.180552257 |             |             |
| OAS1A       | 0.059123206 | 0.379471022 | 0.050619027 |
| 0.053317746 | 0.170526026 | 0.138713678 | 0.055730984 |
| 0.090535847 | 0.318528617 | 0.101161871 | 0.174965128 |
| 0.01944274  | 0.050715006 | 0.37237522  | 0.059437298 |
| 0.197842801 | 0.037076048 | 0.084932794 | 0.06507392  |
| 0.123999751 | 0.141596054 | 0.10802358  | 0.186206679 |
| 0.151515917 | 0.225737401 | 0.219366061 | 0.191464162 |
| 0.410696642 | 0.075045044 | 0.258184686 | 0.057892528 |
| 0.368153165 | 0.173381568 | 0.141771906 | 0.021519737 |
| 0.208125008 | 0.018871004 | 0.40487653  | 0.091692686 |
| 0.055538774 | 0.337186123 | 0.133536276 | 0.095289726 |
| 0.141575556 | 0.031531013 | 0.067705854 | 0.245967003 |
| 0.226706652 | 0.146900564 | 0.073021261 | 0.282569419 |

|             |             |             |             |
|-------------|-------------|-------------|-------------|
| 0.129701699 | 0.267263723 | 0.27035584  | 0.001972199 |
| 0.098149142 | 0.031730074 | 0.06922605  | 0.445979151 |
| 0.184541488 | 0.097129815 | 0.085833448 | 0.175719454 |
| 0.232228179 | 0.270389657 | 0.253460098 | 0.106262688 |
| 0.411675834 | 0.066099497 | 0.292097784 | 0.06784104  |
| 0.141729358 | 0.045332177 | 0.179241522 | 0.125089863 |
| 0.125144511 | 0.14994767  | 0.185767389 | 0.106313542 |
| 0.352324212 | 0.477087972 | 0.219362975 | 0.442639045 |
| 0.056959068 | 0.176473685 | 0.114246629 | 0.248959199 |
| 0.281517557 | 0.081585489 | 0.263015331 | 0.443775788 |
| 0.064069494 | 0.202626496 | 0.257794396 | 0.151308413 |
| 0.376231462 | 0.123475509 | 0.163823158 | 0.067435467 |
| 0.236699829 | 0.156570379 | 0.457668524 | 0.209456581 |
| 0.174419288 | 0.087391961 | 0.449500132 | 0.161643291 |
| 0.099675664 | 0.081659965 | 0.083056894 | 0.348786513 |
| 0.221866671 | 0.401098955 | 0.335276195 | 0.284650575 |
| 0.159547719 | 0.415261548 | 0.251041919 | 0.393378233 |
| 0.062882359 | 0.452267864 | 0.131728975 | 0.044900642 |
| 0.060214855 | 0.085279106 | 0.119638008 | 0.312637733 |
| 0.377152776 | 0.270963107 | 0.100501839 | 0.122926864 |
| 0.359579023 | 0.433542089 | 0.445878987 | 0.313320819 |
| 0.039927166 | 0.102147747 | 0.155018555 | 0.158176679 |
| 0.247239814 | 0.144034696 | 0.098775114 | 0.453219432 |
| 0.326116618 | 0.321146486 | 0.100170784 | 0.479502435 |
| 0.130837683 | 0.442260584 | 0.359845965 | 0.103543889 |
| 0.454942531 | 0.44341954  | 0.426449171 | 0.245475536 |
| 0.437835995 | 0.149939055 | 0.044050011 | 0.321831558 |
| 0.428594794 | 0.006013752 | 0.383374503 | 0.400315023 |
| 0.420351894 | 0.330179546 | 0.438477391 | 0.427021197 |
| 0.43206926  | 0.098353417 | 0.01502114  | 0.192158563 |
| 0.430585327 | 0.319250978 | 0.116829196 | 0.162079547 |
| 0.200359574 | 0.170658318 | 0.342637923 | 0.073798025 |
| 0.463845922 | 0.376490321 | 0.403585196 | 0.288856267 |
| 0.189935609 | 0.328394494 | 0.168751354 | 0.429028924 |
| 0.049635807 | 0.070728917 | 0.075335349 | 0.29339445  |
| 0.11025394  | 0.14234793  | 0.133280368 | 0.212981528 |
| 0.165516424 | 0.182480212 | 0.106433581 | 0.238002759 |
| 0.102408573 | 0.19992746  | 0.130694195 | 0.114298779 |
| 0.036290801 | 0.20615597  | 0.066604495 | 0.083991583 |
| 0.140082525 | 0.292460314 | 0.280522336 | 0.413379527 |
| 0.141027635 | 0.172554958 | 0.270412511 | 0.424045448 |
| 0.375312119 | 0.166293145 | 0.244430945 | 0.006857862 |
| 0.06847887  | 0.100051976 | 0.066383183 | 0.202154783 |
| 0.257096016 | 0.082333221 | 0.195523968 | 0.262210657 |
| 0.144634311 | 0.124222742 | 0.106770219 | 0.421232618 |
| 0.171328192 | 0.102568421 | 0.336116232 | 0.197816792 |
| 0.006520111 | 0.14225508  | 0.323993886 | 0.077770269 |
| 0.232230637 | 0.047952638 | 0.078763076 | 0.352552078 |
| 0.091806203 | 0.096151513 | 0.413587813 | 0.283222669 |
| 0.114341333 | 0.282410802 | 0.444572635 | 0.017280807 |
| 0.188908262 | 0.032351038 | 0.208106897 | 0.150815071 |
| 0.167595028 | 0.252960753 | 0.169507944 | 0.104865209 |
| 0.129652815 | 0.44055019  | 0.364788488 | 0.416600903 |
| 0.094935055 | 0.447228251 | 0.337956405 | 0.354462144 |

|             |             |             |             |
|-------------|-------------|-------------|-------------|
| 0.254594771 | 0.14316494  | 0.047244021 | 0.300144982 |
| 0.349334366 | 0.085421483 | 0.109792186 | 0.320907404 |
| 0.127753268 | 0.243369163 | 0.085795516 | 0.392447624 |
| 0.465275406 | 0.412358523 | 0.087715256 | 0.283451956 |
| 0.288997573 | 0.143078692 | 0.363369396 | 0.464645542 |
| 0.095318885 | 0.138766041 | 0.094512257 | 0.328001241 |
| 0.150128236 | 0.085228649 | 0.356012673 | 0.074441227 |
| 0.005267614 | 0.089046534 | 0.071131211 | 0.096069592 |
| 0.066695385 | 0.238619525 | 0.250254241 | 0.426773673 |
| 0.090548951 | 0.393638353 | 0.254088152 | 0.07631176  |
| 0.345206577 | 0.146258941 | 0.189580618 | 0.237630297 |
| 0.261776722 | 0.015420904 | 0.054783051 | 0.467292152 |
| 0.07163204  | 0.078971967 | 0.185829821 | 0.001970921 |
| 0.038977646 | 0.325023073 | 0.147197757 | 0.247901523 |
| 0.405498761 | 0.243378809 | 0.157206778 | 0.094647908 |
| 0.264300803 | 0.098013035 | 0.004076204 | 0.410391518 |
| 0.451066156 | 0.433020174 | 0.446382117 | 0.450706507 |
| 0.385594363 | 0.338197477 | 0.296994905 | 0.191767273 |
| 0.073610254 | 0.073195889 | 0.057240906 | 0.115784084 |
| 0.004096304 | 0.312235626 | 0.192951509 | 0.150945055 |
| 0.296224352 | 0.239413807 | 0.03821493  | 0.224587172 |
| 0.013584512 | 0.053306882 | 0.119373581 | 0.134833155 |
| 0.288188205 | 0.021070622 | 0.054850446 | 0.081308229 |
| 0.380193131 | 0.314431488 | 0.108361737 | 0.455100954 |
| 0.166638292 | 0.141431835 | 0.122459606 | 0.299573027 |
| 0.057835734 | 0.035787574 | 0.136669382 | 0.009043826 |
| 0.112327438 | 0.453337269 | 0.133840037 | 0.045729833 |
| 0.16122923  | 0.007207713 | 0.310088083 | 0.454647378 |
| 0.410895652 | 0.41757663  | 0.417532291 | 0.087848079 |
| 0.417007328 | 0.041422824 | 0.441025596 | 0.322037764 |
| 0.099353069 | 0.000465721 | 0.008712168 | 0.378831698 |
| 0.164013613 | 0.104029301 | 0.14012576  | 0.104044704 |
| 0.061221336 | 0.086933037 | 0.075419878 | 0.074534716 |
| 0.250800924 | 0.139981508 | 0.089656411 | 0.411266845 |
| 0.118319956 | 0.183542409 | 0.142429685 | 0.12745556  |
| 0.234344481 | 0.042019141 | 0.133353089 | 0.004146706 |
| 0.276709106 | 0.157198992 | 0.449089012 | 0.431616265 |
| 0.429095822 | 0.253021201 | 0.091714408 | 0.124655845 |
| 0.395902905 | 0.119400333 | 0.121387737 | 0.12148414  |
| 0.399798097 | 0.195866127 | 0.253984159 | 0.258154395 |
| 0.408491007 | 0.393477216 | 0.038387183 | 0.281585021 |
| 0.011368615 | 0.004223608 | 0.147915663 | 0.254556588 |
| 0.075187723 | 0.130369604 | 0.224459197 | 0.13642067  |
| 0.144417033 | 0.02573276  | 0.083386247 | 0.07624194  |
| 0.18488883  | 0.153629948 | 0.125730821 | 0.278074646 |
| 0.112863161 | 0.057020111 | 0.119173988 | 0.108669489 |
| 0.128814294 | 0.285104065 | 0.214656591 | 0.029836921 |
| 0.172802695 | 0.169117157 | 0.055334194 | 0.176876873 |
| 0.334584628 | 0.38019949  | 0.036347861 | 0.008516331 |
| 0.253086498 | 0.134381422 | 0.403256167 | 0.418138207 |
| 0.461259352 | 0.438685746 | 0.393929786 | 0.071735287 |
| 0.059414566 | 0.19322531  | 0.150697395 | 0.073014313 |
| 0.430384962 | 0.08529569  | 0.437588109 | 0.130080695 |
| 0.140335096 | 0.09168475  | 0.03365123  | 0.094928895 |

|             |             |             |             |
|-------------|-------------|-------------|-------------|
| 0.196600779 | 0.172495348 | 0.113506448 | 0.12437283  |
| 0.104749447 | 0.09186352  | 0.052948396 | 0.143861428 |
| 0.259853228 | 0.049992917 | 0.142195174 | 1           |
| 0.326010356 | 0.106850305 | 0.262422876 | 0.395358205 |
| 0.139242974 | 0.106025343 | 0.084998778 | 0.329985058 |
| 0.328014172 | 0.195437214 | 0.018196536 | 0.38048514  |
| 0.428066896 | 0.240666515 | 0.437500154 | 0.338640136 |
| 0.117609542 | 0.146493317 | 0.119059457 | 0.162611492 |
| 0.166118195 | 0.159235238 | 0.174336074 | 0.082320149 |
| 0.345792824 | 0.470619912 | 0.335931702 | 0.093965854 |
| 0.230538975 | 0.135373372 | 0.075127588 | 0.397285854 |
| 0.057256504 | 0.049644753 | 0.138751368 | 0.349969573 |
| 0.002732798 | 0.05745841  | 0.428188837 | 0.11923575  |
| 0.477596987 | 0.378543551 | 0.376642218 | 0.164813228 |
| 0.001487029 | 0.242874232 | 0.191775484 | 0.111994972 |
| 0.341492716 | 0.313554242 | 0.153300035 | 0.051249417 |
| 0.276997139 | 0.105890952 | 0.063007924 | 0.125320775 |
| 0.048862509 | 0.2340821   | 0.206549486 | 0.176009919 |
| 0.114978482 | 0.136885483 | 0.095605703 | 0.132068468 |
| 0.085834257 | 0.227793012 | 0.27505721  | 0.115255453 |
| 0.040233606 | 0.374356492 | 0.280814724 | 0.0313632   |
| 0.181522364 | 0.347216792 | 0.414196228 | 0.000639504 |
| 0.256005753 | 0.011015498 | 0.112115903 | 0.101584251 |
| 0.109132386 | 0.108924344 | 0.18740452  | 0.102778745 |
| 0.224644958 | 0.12140715  | 0.105920969 | 0.178182704 |
| 0.084740711 | 0.165455795 | 0.21728766  | 0.154090724 |
| 0.089764229 | 0.074796431 | 0.167428043 | 0.170836284 |
| 0.042747037 | 0.408147939 | 0.26357957  | 0.110113182 |
| 0.197057103 | 0.143858628 | 0.332842743 | 0.41930541  |
| 0.394010689 | 0.160350199 | 0.15349661  | 0.342532108 |
| 0.073076572 | 0.103671127 | 0.0552938   | 0.202801667 |
| 0.164413856 | 0.071538965 | 0.200810328 | 0.170462816 |
| 0.281661861 | 0.375387299 | 0.258702123 | 0.415046988 |
| 0.140082889 | 0.170625018 | 0.089206793 | 0.048644646 |
| 0.086748094 | 0.164540655 | 0.12964496  | 0.002693913 |
| 0.233928615 | 0.103567962 | 0.346420531 | 0.420446513 |
| 0.098437264 | 0.379766423 | 0.089874628 | 0.048054379 |
| 0.082279088 | 0.204568107 | 0.155263377 | 0.317398585 |
| 0.064790559 | 0.115327354 | 0.157353366 | 0.124224058 |
| 0.296991591 | 0.299471311 | 0.120507269 | 0.142091957 |
| 0.19508979  | 0.178269382 | 0.455497909 | 0.092360699 |
| 0.203801164 | 0.069820974 | 0.223380605 | 0.112376336 |
| 0.11215253  | 0.433829339 | 0.079917104 | 0.42745442  |
| 0.112901086 | 0.182762322 | 0.459153839 | 0.219216741 |
| 0.150276821 | 0.093803946 | 0.060752925 | 0.137015483 |
| 0.113805593 | 0.109224537 | 0.004349708 | 0.021940696 |
| 0.241608401 | 0.136223523 | 0.296969762 | 0.307526271 |
| 0.101903016 | 0.293182328 | 0.083812165 | 0.148125269 |
| 0.422670062 | 0.463167985 | 0.071093633 | 0.251153956 |
| 0.268821942 | 0.070580369 | 0.244065755 | 0.021917546 |
| 0.2002579   | 0.203981994 | 0.108191674 | 0.05939451  |
| 0.027692908 | 0.057416313 | 0.201530533 | 0.106461841 |
| 0.387011162 | 0.060703714 | 0.246887633 | 0.298184245 |
| 0.222668716 | 0.456438515 | 0.085090059 | 0.259767793 |

|             |             |             |             |
|-------------|-------------|-------------|-------------|
| 0.053167075 | 0.236870008 | 0.178555397 | 0.177842788 |
| 0.066910971 | 0.09920322  | 0.255354045 | 0.075335778 |
| 0.03362805  | 0.099448262 | 0.001235611 | 0.387269392 |
| 0.425146832 | 0.12883627  | 0.250337632 | 0.108907998 |
| 0.232793585 | 0.38537988  | 0.093193396 | 0.187238225 |
| 0.013007713 | 0.170848964 | 0.187295887 | 0.340303052 |
| 0.04777377  | 0.19281751  | 0.051469349 | 0.153648423 |
| 0.445821038 | 0.075762097 | 0.293355972 | 0.069248975 |
| 0.426009806 | 0.3694618   | 0.190812384 | 0.135574083 |
| 0.255994633 | 0.096935357 | 0.129399907 | 0.457101976 |
| 0.102687662 | 0.071244348 | 0.321834937 | 0.076832133 |
| 0.118673773 | 0.381402218 | 0.223362433 | 0.46679491  |
| 0.052536978 | 0.204028359 | 0.334420219 | 0.386628568 |
| 0.277172514 | 0.077923652 | 0.073634192 | 0.082347723 |
| 0.392142142 | 0.050986294 | 0.1011992   | 0.268730584 |
| 0.061182461 | 0.255757069 | 0.229505233 | 0.091411959 |
| 0.030166757 | 0.124710474 | 0.131644105 | 0.150558684 |
| 0.177202809 | 0.160174054 | 0.096571575 | 0.361478024 |
| 0.065983451 | 0.014989043 | 0.422682248 | 0.004978823 |
| 0.19791226  | 0.227225064 | 0.198582923 | 0.148847194 |
| 0.200167314 | 0.223019359 | 0.155431196 | 0.00127615  |
| 0.323484852 | 0.036251455 | 0.149291175 | 0.074256851 |
| 0.091084513 | 0.043618005 | 0.419945694 | 0.419731187 |
| 0.269435373 | 0.138712093 | 0.091130281 | 0.413077481 |
| 0.050993615 | 0.105153095 | 0.108579793 | 0.252218941 |
| 0.078556238 | 0.127428499 | 0.145556303 | 0.108230302 |
| 0.291426564 | 0.163683601 |             |             |
| OBFC2B      | 0.138254505 | 0.40410192  | 0.120568721 |
| 0.173302418 | 0.252598837 | 0.331503733 | 0.123586389 |
| 0.186433193 | 0.327274372 | 0.249001563 | 0.295429012 |
| 0.049284757 | 0.069191887 | 0.40131315  | 0.117369246 |
| 0.283353131 | 0.078959832 | 0.16922079  | 0.099903885 |
| 0.268915839 | 0.22361693  | 0.243791133 | 0.316093578 |
| 0.242679204 | 0.245778729 | 0.327508752 | 0.282451532 |
| 0.451734196 | 0.175667113 | 0.32300589  | 0.180567315 |
| 0.403944203 | 0.242930558 | 0.267479617 | 0.058346563 |
| 0.32410635  | 0.019088938 | 0.445945245 | 0.234865955 |
| 0.138394299 | 0.35474501  | 0.287066746 | 0.240885087 |
| 0.298537063 | 0.087030116 | 0.164106145 | 0.297531022 |
| 0.326933334 | 0.308793019 | 0.130419386 | 0.34359441  |
| 0.299061981 | 0.315942757 | 0.311385443 | 0.003144878 |
| 0.205929691 | 0.055650835 | 0.1462825   | 0.482492644 |
| 0.239460108 | 0.179344928 | 0.203567965 | 0.283303526 |
| 0.295514346 | 0.303992506 | 0.284607959 | 0.274033    |
| 0.452978704 | 0.126531993 | 0.323552309 | 0.187025627 |
| 0.311874344 | 0.097031633 | 0.219279932 | 0.166812289 |
| 0.296973342 | 0.233841891 | 0.278921767 | 0.237681303 |
| 0.396611888 | 0.50346184  | 0.282803621 | 0.486205093 |
| 0.085978993 | 0.248952767 | 0.246897214 | 0.283732452 |
| 0.305079695 | 0.15892871  | 0.316947761 | 0.486075108 |
| 0.119714769 | 0.298226576 | 0.306646375 | 0.187177707 |
| 0.398456418 | 0.227507715 | 0.295754327 | 0.131697912 |
| 0.287247035 | 0.250878463 | 0.473017959 | 0.274388274 |
| 0.269847995 | 0.142284444 | 0.487589682 | 0.230304209 |



|             |             |             |             |
|-------------|-------------|-------------|-------------|
| 0.24428006  | 0.158621043 | 0.193638859 | 0.370950817 |
| 0.317614484 | 0.437856754 | 0.355478967 | 0.300381699 |
| 0.262342593 | 0.455516664 | 0.328445725 | 0.388527697 |
| 0.13355509  | 0.487663529 | 0.243928893 | 0.087836006 |
| 0.142775312 | 0.150601415 | 0.214311127 | 0.302485885 |
| 0.407055947 | 0.317455929 | 0.232473551 | 0.232857995 |
| 0.381349221 | 0.471060396 | 0.483096281 | 0.337390684 |
| 0.094109032 | 0.196178604 | 0.274974736 | 0.311442747 |
| 0.297570175 | 0.191454748 | 0.191643421 | 0.495693616 |
| 0.362528796 | 0.343356917 | 0.242057589 | 0.508966663 |
| 0.237550062 | 0.477184023 | 0.404005108 | 0.209005801 |
| 0.499448009 | 0.487152602 | 0.460647659 | 0.28778361  |
| 0.467153812 | 0.313209913 | 0.064236684 | 0.337908824 |
| 0.446297574 | 0.013907975 | 0.403942379 | 0.429422094 |
| 0.466860262 | 0.365424191 | 0.466461627 | 0.454211488 |
| 0.468829617 | 0.15023489  | 0.023138439 | 0.249278987 |
| 0.481883376 | 0.361621532 | 0.189185024 | 0.280480739 |
| 0.266800354 | 0.330309455 | 0.339427593 | 0.201040187 |
| 0.482746482 | 0.407072429 | 0.429316633 | 0.312869469 |
| 0.298031687 | 0.336033645 | 0.259508461 | 0.472853972 |
| 0.108827144 | 0.17347027  | 0.115189941 | 0.298730032 |
| 0.2979704   | 0.215664498 | 0.311919325 | 0.280474965 |
| 0.228761253 | 0.323748992 | 0.231643033 | 0.279189384 |
| 0.119507321 | 0.311426072 | 0.246404802 | 0.220324029 |
| 0.089780287 | 0.205275189 | 0.177317132 | 0.194309973 |
| 0.230575191 | 0.311811471 | 0.318048383 | 0.442574517 |
| 0.280469349 | 0.233135614 | 0.322334632 | 0.442576515 |
| 0.3934033   | 0.275847606 | 0.257192147 | 0.026583427 |
| 0.192652733 | 0.221963877 | 0.131473018 | 0.296778911 |
| 0.260137003 | 0.205065288 | 0.285824423 | 0.293001366 |
| 0.277949082 | 0.21787663  | 0.258834936 | 0.43727373  |
| 0.208686006 | 0.24493071  | 0.367837752 | 0.310689835 |
| 0.018223336 | 0.286403052 | 0.356328247 | 0.152267244 |
| 0.289557232 | 0.092102402 | 0.177886983 | 0.397195127 |
| 0.19545269  | 0.181054642 | 0.433752461 | 0.299373214 |
| 0.250670129 | 0.290266699 | 0.471435884 | 0.031911276 |
| 0.278269071 | 0.075451277 | 0.260635817 | 0.284581103 |
| 0.269780602 | 0.27498273  | 0.23765209  | 0.24587317  |
| 0.191743622 | 0.475428919 | 0.363443268 | 0.451621985 |
| 0.255363022 | 0.477789234 | 0.368732561 | 0.381823919 |
| 0.32780943  | 0.258507051 | 0.089497891 | 0.347047608 |
| 0.390439072 | 0.222936191 | 0.145716285 | 0.333003029 |
| 0.276834656 | 0.291903574 | 0.162269868 | 0.436114881 |
| 0.489727257 | 0.456239429 | 0.174094163 | 0.293570035 |
| 0.326724232 | 0.257563757 | 0.369112235 | 0.481515402 |
| 0.245750179 | 0.24847188  | 0.244150724 | 0.337689028 |
| 0.23093556  | 0.17562587  | 0.338772008 | 0.129868368 |
| 0.008415167 | 0.151892836 | 0.131131389 | 0.186282164 |
| 0.136689914 | 0.307155179 | 0.316941817 | 0.464626382 |
| 0.169799314 | 0.40162573  | 0.271173832 | 0.219176662 |
| 0.3916954   | 0.258721132 | 0.276407895 | 0.298886956 |
| 0.283485589 | 0.047088101 | 0.140369083 | 0.505329233 |
| 0.102769432 | 0.172687002 | 0.300361438 | 0.005447643 |
| 0.098265343 | 0.350541687 | 0.161832443 | 0.261821573 |

|             |             |             |             |
|-------------|-------------|-------------|-------------|
| 0.411492257 | 0.267681737 | 0.241557765 | 0.25593717  |
| 0.299647365 | 0.167204392 | 0.009160883 | 0.442157964 |
| 0.462147859 | 0.438971076 | 0.459803958 | 0.46104071  |
| 0.397394879 | 0.331426321 | 0.320814803 | 0.324513583 |
| 0.173774868 | 0.172080077 | 0.14969747  | 0.24759724  |
| 0.00737133  | 0.322413478 | 0.278702035 | 0.200826221 |
| 0.309192626 | 0.288784192 | 0.086330391 | 0.276111789 |
| 0.051839689 | 0.129788805 | 0.273952202 | 0.245138719 |
| 0.288781783 | 0.052443853 | 0.191564345 | 0.219922592 |
| 0.422628241 | 0.331892146 | 0.259014668 | 0.494670911 |
| 0.27967985  | 0.188402892 | 0.266866061 | 0.312375934 |
| 0.136815655 | 0.094066262 | 0.310281341 | 0.032381766 |
| 0.198135827 | 0.450638403 | 0.294023563 | 0.142887732 |
| 0.267149056 | 0.021224646 | 0.354382397 | 0.487032072 |
| 0.452650663 | 0.451533683 | 0.455201548 | 0.193843294 |
| 0.46379402  | 0.068842624 | 0.475339681 | 0.35803681  |
| 0.261695049 | 0.001966378 | 0.013048047 | 0.417735517 |
| 0.280024656 | 0.123850403 | 0.216293939 | 0.289192062 |
| 0.154130767 | 0.207695241 | 0.136640127 | 0.166135944 |
| 0.336274946 | 0.218750156 | 0.152697692 | 0.448201332 |
| 0.248795528 | 0.254591745 | 0.308863126 | 0.160524819 |
| 0.313215956 | 0.107442125 | 0.164886738 | 0.010578116 |
| 0.294811114 | 0.178164656 | 0.482612648 | 0.466648862 |
| 0.460273443 | 0.304743585 | 0.236354956 | 0.258990794 |
| 0.388057312 | 0.159777046 | 0.277032975 | 0.178440305 |
| 0.449072405 | 0.283450551 | 0.289558943 | 0.300156847 |
| 0.444959063 | 0.438018856 | 0.084296911 | 0.314786739 |
| 0.035681429 | 0.004080648 | 0.310191403 | 0.275276356 |
| 0.085630098 | 0.257066861 | 0.269941388 | 0.262735878 |
| 0.255089062 | 0.069257821 | 0.186828407 | 0.175767297 |
| 0.275834285 | 0.278141962 | 0.208813524 | 0.279982064 |
| 0.24755143  | 0.131322081 | 0.240030695 | 0.203751721 |
| 0.221468416 | 0.323591059 | 0.243756649 | 0.065794111 |
| 0.31534927  | 0.286376052 | 0.119379761 | 0.223582522 |
| 0.373699985 | 0.418165875 | 0.090044207 | 0.025121547 |
| 0.274143928 | 0.26172873  | 0.427317203 | 0.458686267 |
| 0.499588282 | 0.473206121 | 0.409784022 | 0.143884217 |
| 0.129947925 | 0.283848083 | 0.231143892 | 0.142493289 |
| 0.458849322 | 0.130782957 | 0.464036641 | 0.214974559 |
| 0.190814331 | 0.253376538 | 0.074083682 | 0.157454736 |
| 0.270123718 | 0.224435595 | 0.202810619 | 0.202348244 |
| 0.250979274 | 0.196114181 | 0.115001103 | 0.232274533 |
| 0.301182763 | 0.131509243 | 0.21547718  | 0.326010356 |
| 1           | 0.212994918 | 0.305626875 | 0.425334287 |
| 0.194358016 | 0.18510301  | 0.264638006 | 0.323032289 |
| 0.360791676 | 0.291351031 | 0.047265061 | 0.418503012 |
| 0.440857129 | 0.312091477 | 0.473751089 | 0.338229292 |
| 0.160427031 | 0.265647761 | 0.23047166  | 0.263415324 |
| 0.230034503 | 0.333319497 | 0.25969674  | 0.130849142 |
| 0.322281536 | 0.48160011  | 0.380613008 | 0.197728238 |
| 0.322976308 | 0.192206747 | 0.121658294 | 0.396363704 |
| 0.139664668 | 0.133072095 | 0.286109531 | 0.346821247 |
| 0.006771229 | 0.103688061 | 0.439064693 | 0.245848049 |
| 0.494035974 | 0.418435983 | 0.419071393 | 0.305215812 |

|             |             |             |             |
|-------------|-------------|-------------|-------------|
| 0.002338215 | 0.297846715 | 0.290260387 | 0.293892793 |
| 0.381876564 | 0.324222111 | 0.212055705 | 0.123538074 |
| 0.284070241 | 0.146403002 | 0.156752628 | 0.293302643 |
| 0.126859962 | 0.319348135 | 0.236219313 | 0.253709427 |
| 0.226876553 | 0.163544802 | 0.19151369  | 0.276813376 |
| 0.140811214 | 0.2547373   | 0.297609582 | 0.255258507 |
| 0.114962081 | 0.379912242 | 0.32498983  | 0.074116222 |
| 0.264431755 | 0.358006065 | 0.407661832 | 0.004036187 |
| 0.304236705 | 0.025493395 | 0.202618731 | 0.21714731  |
| 0.226490569 | 0.21056384  | 0.241903524 | 0.256148616 |
| 0.307446286 | 0.256805435 | 0.260901318 | 0.248103816 |
| 0.192224578 | 0.279690983 | 0.311090825 | 0.330435518 |
| 0.225067712 | 0.186967837 | 0.172353087 | 0.183736533 |
| 0.091339814 | 0.419830612 | 0.274908727 | 0.145256067 |
| 0.248147382 | 0.319864223 | 0.346521222 | 0.463330845 |
| 0.391457262 | 0.180816633 | 0.281343698 | 0.389888484 |
| 0.165268965 | 0.254358135 | 0.123069454 | 0.34673584  |
| 0.253885129 | 0.160955073 | 0.335163943 | 0.284334691 |
| 0.315145551 | 0.40617549  | 0.261898194 | 0.425894562 |
| 0.310257432 | 0.281019726 | 0.25106248  | 0.117682511 |
| 0.21750971  | 0.202655469 | 0.212449942 | 0.009874251 |
| 0.302706241 | 0.281455096 | 0.387534583 | 0.47088948  |
| 0.199937261 | 0.379025855 | 0.244136722 | 0.135436492 |
| 0.234030697 | 0.243129138 | 0.199716601 | 0.333605677 |
| 0.138881511 | 0.243169572 | 0.25518403  | 0.312629152 |
| 0.323006594 | 0.323692379 | 0.233608874 | 0.257650573 |
| 0.27637714  | 0.26180546  | 0.476463353 | 0.201983364 |
| 0.305138447 | 0.166742215 | 0.306930822 | 0.241114276 |
| 0.219484303 | 0.465328942 | 0.131603436 | 0.461548374 |
| 0.243093468 | 0.199712673 | 0.476979407 | 0.315052083 |
| 0.331370046 | 0.167693563 | 0.128782813 | 0.312155203 |
| 0.23972601  | 0.238248497 | 0.011425717 | 0.045124193 |
| 0.281078048 | 0.272085849 | 0.329327537 | 0.313755266 |
| 0.215510613 | 0.291934682 | 0.126643529 | 0.282020779 |
| 0.465058379 | 0.496745541 | 0.207649283 | 0.269228263 |
| 0.29579625  | 0.156128934 | 0.33003966  | 0.02379107  |
| 0.288541843 | 0.285499559 | 0.264013119 | 0.112013563 |
| 0.06073703  | 0.140347684 | 0.306446894 | 0.144100202 |
| 0.407453653 | 0.136184244 | 0.308750341 | 0.338087626 |
| 0.237873683 | 0.496473673 | 0.158537977 | 0.308329551 |
| 0.107868279 | 0.288465913 | 0.285402116 | 0.286894401 |
| 0.184738773 | 0.20941902  | 0.30173174  | 0.171066226 |
| 0.078162514 | 0.234758721 | 0.004583069 | 0.423667941 |
| 0.472741369 | 0.243053301 | 0.247881987 | 0.235307615 |
| 0.272303566 | 0.370649313 | 0.184792967 | 0.306058923 |
| 0.032318616 | 0.260307488 | 0.244452844 | 0.3733454   |
| 0.149361746 | 0.290241767 | 0.115258982 | 0.240778624 |
| 0.480614412 | 0.195191947 | 0.270574593 | 0.214099835 |
| 0.462858487 | 0.367657667 | 0.229861441 | 0.236299566 |
| 0.307187341 | 0.132442745 | 0.302483341 | 0.482916705 |
| 0.199814799 | 0.166094179 | 0.349768073 | 0.207907546 |
| 0.21753688  | 0.380395694 | 0.306600608 | 0.484034682 |
| 0.101708833 | 0.257777746 | 0.333265733 | 0.415462119 |
| 0.279495801 | 0.149150582 | 0.167697063 | 0.192753189 |

|             |             |             |             |
|-------------|-------------|-------------|-------------|
| 0.441717787 | 0.138699788 | 0.209696585 | 0.319394994 |
| 0.151314351 | 0.288196219 | 0.307728889 | 0.184592326 |
| 0.063075165 | 0.218519097 | 0.299391688 | 0.212629504 |
| 0.261703863 | 0.286110764 | 0.215981842 | 0.381562338 |
| 0.151425348 | 0.049092955 | 0.441395548 | 0.012816807 |
| 0.323853512 | 0.304580509 | 0.265708541 | 0.276721248 |
| 0.229127185 | 0.304862324 | 0.293328251 | 0.003653598 |
| 0.335482713 | 0.079662122 | 0.275471739 | 0.18599918  |
| 0.190154916 | 0.106356613 | 0.447197313 | 0.445440575 |
| 0.320733368 | 0.271212074 | 0.225749626 | 0.433796012 |
| 0.116947871 | 0.228940455 | 0.23179201  | 0.332678802 |
| 0.16508453  | 0.277247657 | 0.289498837 | 0.265342436 |
| 0.333119487 | 0.294447402 |             |             |
| 00SP1       | 0.012103977 | 0.326378525 | 0.013332557 |
| 0.003514624 | 0.086453016 | 0.074979307 | 0.011223047 |
| 0.017151083 | 0.309780028 | 0.202283809 | 0.070622756 |
| 0.000792265 | 0.013658562 | 0.239128023 | 0.010398385 |
| 0.145387863 | 0.002369937 | 0.022556272 | 0.022821513 |
| 0.02883154  | 0.070236904 | 0.039069481 | 0.126684084 |
| 0.091802531 | 0.090163669 | 0.167166795 | 0.233488059 |
| 0.316838933 | 0.032884504 | 0.169482903 | 0.03705543  |
| 0.206862389 | 0.096278148 | 0.141867252 | 0.001392244 |
| 0.134804946 | 0.0166217   | 0.262664732 | 0.036979726 |
| 0.008630168 | 0.162120544 | 0.203902519 | 0.026906822 |
| 0.194789235 | 0.004327471 | 0.056792099 | 0.258344955 |
| 0.214418294 | 0.074750341 | 0.025135348 | 0.215380303 |
| 0.131456124 | 0.118148886 | 0.31801604  | 0.00016828  |
| 0.080783989 | 0.025482664 | 0.07710183  | 0.308427868 |
| 0.050495957 | 0.019247239 | 0.087358219 | 0.125369309 |
| 0.262360215 | 0.234828777 | 0.109624394 | 0.154320802 |
| 0.267709081 | 0.031345899 | 0.292693826 | 0.007538816 |
| 0.109260626 | 0.016950787 | 0.054345437 | 0.071741257 |
| 0.106492445 | 0.03786459  | 0.083796711 | 0.093686685 |
| 0.320780831 | 0.311158072 | 0.099281526 | 0.341101723 |
| 0.028373689 | 0.144542553 | 0.051373366 | 0.116933056 |
| 0.244751153 | 0.032323912 | 0.137813004 | 0.291613403 |
| 0.026636927 | 0.287076686 | 0.233197516 | 0.068062408 |
| 0.261962629 | 0.115329684 | 0.200039829 | 0.022020585 |
| 0.164620336 | 0.112934802 | 0.350761676 | 0.079155962 |
| 0.103321198 | 0.031981587 | 0.322988384 | 0.118696165 |
| 0.032747954 | 0.02275776  | 0.02860379  | 0.297107642 |
| 0.153411841 | 0.27353255  | 0.320498116 | 0.202855449 |
| 0.128969248 | 0.274593505 | 0.141384634 | 0.275007659 |
| 0.079495662 | 0.332781238 | 0.037286804 | 0.002671125 |
| 0.020545291 | 0.012107226 | 0.083726592 | 0.138550983 |
| 0.260619717 | 0.134268853 | 0.030854669 | 0.044148009 |
| 0.26096099  | 0.325892075 | 0.355442418 | 0.218112441 |
| 0.005700906 | 0.100735449 | 0.121864811 | 0.057154486 |
| 0.165227699 | 0.050610123 | 0.062224211 | 0.306297464 |
| 0.151299631 | 0.225675359 | 0.037919208 | 0.309431187 |
| 0.081889073 | 0.260041663 | 0.294745448 | 0.024622386 |
| 0.298740097 | 0.28983037  | 0.264120812 | 0.16310641  |
| 0.258329892 | 0.066378491 | 0.02784457  | 0.237795892 |
| 0.233424886 | 0.000433018 | 0.31892601  | 0.319583795 |

|             |             |             |             |
|-------------|-------------|-------------|-------------|
| 0.316375144 | 0.259134782 | 0.305233908 | 0.303579055 |
| 0.324247615 | 0.029484946 | 0.027645002 | 0.090487303 |
| 0.305774841 | 0.159454042 | 0.023487974 | 0.165112789 |
| 0.142269464 | 0.101189705 | 0.288276361 | 0.01531042  |
| 0.27318684  | 0.258708411 | 0.32746506  | 0.220760225 |
| 0.234835236 | 0.146301571 | 0.193299857 | 0.288374255 |
| 0.002936795 | 0.018006251 | 0.021747271 | 0.174512228 |
| 0.083621049 | 0.035905091 | 0.088808787 | 0.196219862 |
| 0.045952002 | 0.138704268 | 0.114568936 | 0.153324824 |
| 0.041214987 | 0.160892481 | 0.043170821 | 0.053515109 |
| 0.002279568 | 0.075472632 | 0.005796942 | 0.00840107  |
| 0.049473609 | 0.157483207 | 0.243350273 | 0.306221418 |
| 0.14224454  | 0.067081689 | 0.198339925 | 0.240963458 |
| 0.184171283 | 0.113134892 | 0.105311712 | 0.000539719 |
| 0.017445636 | 0.182852039 | 0.057216408 | 0.200785411 |
| 0.117254522 | 0.024040672 | 0.150554902 | 0.145806642 |
| 0.064453228 | 0.069616531 | 0.091442527 | 0.21696582  |
| 0.085001963 | 0.035012093 | 0.206901717 | 0.221024295 |
| 6.94E-05    | 0.069663566 | 0.214216925 | 0.013494799 |
| 0.170577752 | 0.006822202 | 0.022957652 | 0.256262787 |
| 0.050496756 | 0.060990358 | 0.307585414 | 0.173545799 |
| 0.025953411 | 0.17315511  | 0.312805049 | 0.015988658 |
| 0.199696133 | 0.000933021 | 0.077723177 | 0.276630613 |
| 0.065679214 | 0.120725001 | 0.102249632 | 0.040079318 |
| 0.044841494 | 0.311322019 | 0.206526223 | 0.28374739  |
| 0.082663744 | 0.313146006 | 0.234135259 | 0.1967858   |
| 0.13349581  | 0.213292393 | 0.022444767 | 0.197663221 |
| 0.255076766 | 0.038957239 | 0.04306725  | 0.317191456 |
| 0.202792005 | 0.189218885 | 0.009150714 | 0.248987163 |
| 0.266937185 | 0.33463642  | 0.015109184 | 0.165482718 |
| 0.132083189 | 0.042961808 | 0.245275198 | 0.314175535 |
| 0.128879257 | 0.116672492 | 0.061004303 | 0.181721022 |
| 0.046916033 | 0.037628433 | 0.194545134 | 0.053865154 |
| 0.001075367 | 0.029737145 | 0.018133091 | 0.020719814 |
| 0.023519586 | 0.288833225 | 0.179867421 | 0.302338934 |
| 0.019280968 | 0.210723478 | 0.152532928 | 0.027185347 |
| 0.238693498 | 0.133368317 | 0.140904821 | 0.158266211 |
| 0.114441433 | 0.000184234 | 0.002738891 | 0.302826221 |
| 0.029053692 | 0.030987294 | 0.128084504 | 3.32E-05    |
| 0.007586226 | 0.356058516 | 0.062801037 | 0.097466877 |
| 0.264792319 | 0.10318774  | 0.069043637 | 0.151684635 |
| 0.112293058 | 0.022479854 | 0.000767244 | 0.335915371 |
| 0.378554434 | 0.369963188 | 0.38373431  | 0.36151937  |
| 0.348771731 | 0.286739959 | 0.215363575 | 0.108455028 |
| 0.011673415 | 0.028413673 | 0.02498771  | 0.053584408 |
| 0.000737425 | 0.147428786 | 0.118698653 | 0.041381261 |
| 0.232151666 | 0.149337927 | 0.003444989 | 0.171494822 |
| 0.000258455 | 0.033342882 | 0.061331918 | 0.060558532 |
| 0.172907884 | 0.001603938 | 0.009886681 | 0.036630528 |
| 0.230275618 | 0.156345386 | 0.10726526  | 0.318584018 |
| 0.062576942 | 0.084235313 | 0.055340091 | 0.158663635 |
| 0.009768216 | 0.032585984 | 0.129178214 | 0.005239992 |
| 0.022169108 | 0.334316187 | 0.123713243 | 0.003728857 |
| 0.060647666 | 0.000300332 | 0.161387563 | 0.302192766 |

|             |             |             |             |
|-------------|-------------|-------------|-------------|
| 0.314486284 | 0.299382558 | 0.260268681 | 0.047542437 |
| 0.275577428 | 0.036567252 | 0.320574087 | 0.230643669 |
| 0.152007514 | 0.001165843 | 7.23E-05    | 0.278531555 |
| 0.115935247 | 0.044160288 | 0.039819587 | 0.025786333 |
| 0.005217258 | 0.038960132 | 0.013584171 | 0.021956946 |
| 0.164539186 | 0.048137831 | 0.027477236 | 0.310969281 |
| 0.047789812 | 0.06695013  | 0.154528531 | 0.048688369 |
| 0.153854657 | 0.003091397 | 0.059228351 | 7.09E-06    |
| 0.165789984 | 0.070201638 | 0.311715104 | 0.312732066 |
| 0.24888573  | 0.151673543 | 0.154107239 | 0.02481408  |
| 0.315830138 | 0.054489664 | 0.060291734 | 0.051963341 |
| 0.296589577 | 0.128343336 | 0.096268046 | 0.109065118 |
| 0.257026461 | 0.240261291 | 0.005036123 | 0.185464512 |
| 8.31E-05    | 0.000213425 | 0.101193401 | 0.124701238 |
| 0.068395041 | 0.113629311 | 0.087690275 | 0.116178416 |
| 0.070959727 | 0.000944098 | 0.076729204 | 0.059992807 |
| 0.083369275 | 0.099164574 | 0.065649205 | 0.172978191 |
| 0.060552996 | 0.010609012 | 0.030095036 | 0.028901355 |
| 0.057461441 | 0.168577378 | 0.086306208 | 0.003600022 |
| 0.174074154 | 0.130187507 | 0.009368503 | 0.054520864 |
| 0.191457348 | 0.26062969  | 0.002793009 | 0.001011244 |
| 0.10270891  | 0.098361995 | 0.268595182 | 0.31949411  |
| 0.310975248 | 0.277532125 | 0.200976421 | 0.011644174 |
| 0.008991346 | 0.103815551 | 0.091780848 | 0.006549129 |
| 0.293603341 | 0.039010963 | 0.301233664 | 0.10986003  |
| 0.045459102 | 0.027344576 | 0.000675804 | 0.023768654 |
| 0.150615569 | 0.049486522 | 0.027997346 | 0.051623028 |
| 0.054321211 | 0.029283253 | 0.010577006 | 0.04468007  |
| 0.146918866 | 0.016350163 | 0.04421614  | 0.106850305 |
| 0.212994918 | 1           | 0.211816267 | 0.213400519 |
| 0.04253098  | 0.048673652 | 0.028884567 | 0.249384617 |
| 0.275185824 | 0.292986602 | 0.000363988 | 0.339069433 |
| 0.283761534 | 0.183712327 | 0.295692481 | 0.188808259 |
| 0.040039128 | 0.081714392 | 0.155796384 | 0.112779323 |
| 0.06352822  | 0.086597143 | 0.081710266 | 0.020091343 |
| 0.176834266 | 0.309864091 | 0.252859375 | 0.019231644 |
| 0.211477322 | 0.072807137 | 0.036277274 | 0.311742275 |
| 0.020418544 | 0.003900845 | 0.199190277 | 0.309680628 |
| 0.00023924  | 0.02896286  | 0.330328093 | 0.024705009 |
| 0.331321737 | 0.258114573 | 0.200189159 | 0.068165416 |
| 0.001035686 | 0.223442485 | 0.091314426 | 0.067035883 |
| 0.256188468 | 0.155278347 | 0.027233896 | 0.004085107 |
| 0.105582709 | 0.038197437 | 0.008910318 | 0.024986696 |
| 0.023758903 | 0.183446512 | 0.068048964 | 0.108073867 |
| 0.038113404 | 0.091670969 | 0.024125831 | 0.0392339   |
| 0.044150387 | 0.073887535 | 0.126097521 | 0.178568804 |
| 0.010343477 | 0.279522331 | 0.216836301 | 0.00298588  |
| 0.14533485  | 0.26557666  | 0.260877893 | 0.000523745 |
| 0.168720492 | 0.000221598 | 0.031866155 | 0.025494441 |
| 0.029662981 | 0.043945076 | 0.075602185 | 0.040095177 |
| 0.175859137 | 0.046998051 | 0.031369284 | 0.052305815 |
| 0.013320527 | 0.063150246 | 0.151487147 | 0.129209751 |
| 0.026699713 | 0.015135151 | 0.066181317 | 0.073488547 |
| 0.001182097 | 0.310077646 | 0.096383594 | 0.037662767 |

|             |             |             |             |
|-------------|-------------|-------------|-------------|
| 0.066560152 | 0.127429949 | 0.142424966 | 0.337385139 |
| 0.201994751 | 0.077617263 | 0.108139311 | 0.241529355 |
| 0.068519966 | 0.022436461 | 0.012607458 | 0.147092985 |
| 0.049648765 | 0.013967031 | 0.197054074 | 0.112697871 |
| 0.296695533 | 0.185866367 | 0.090858238 | 0.248647152 |
| 0.072983168 | 0.219503964 | 0.142542138 | 0.002743772 |
| 0.025604403 | 0.067842427 | 0.061650005 | 0.00120471  |
| 0.111414115 | 0.017587483 | 0.245113408 | 0.291577153 |
| 0.097845595 | 0.181903039 | 0.030745434 | 0.006862401 |
| 0.072794547 | 0.112519904 | 0.046125176 | 0.281129678 |
| 0.050897479 | 0.025598076 | 0.07248447  | 0.056765331 |
| 0.230619229 | 0.316499735 | 0.068383994 | 0.071215253 |
| 0.100573767 | 0.078928556 | 0.347991914 | 0.033339165 |
| 0.224803813 | 0.015238363 | 0.298165939 | 0.048790799 |
| 0.040769013 | 0.335847782 | 0.018129151 | 0.325122632 |
| 0.080337449 | 0.073224417 | 0.260609121 | 0.114645018 |
| 0.042274531 | 0.005196692 | 0.045943219 | 0.157946943 |
| 0.036871367 | 0.087886267 | 0.005421878 | 0.00443333  |
| 0.098226027 | 0.193279413 | 0.322388021 | 0.224688249 |
| 0.053468236 | 0.15427938  | 0.028261625 | 0.096067824 |
| 0.336354103 | 0.328717365 | 0.011016392 | 0.105089471 |
| 0.146397752 | 0.01022818  | 0.16283446  | 0.01757807  |
| 0.179641594 | 0.224418479 | 0.092311039 | 0.007649128 |
| 0.000977357 | 0.04623432  | 0.189248728 | 0.059140991 |
| 0.275206552 | 0.020393553 | 0.320530119 | 0.204908235 |
| 0.104726001 | 0.312524603 | 0.011482371 | 0.132439655 |
| 0.014186715 | 0.108796047 | 0.178139658 | 0.229039966 |
| 0.011985296 | 0.067247952 | 0.124723844 | 0.037689292 |
| 0.002217128 | 0.018047079 | 9.09E-05    | 0.199232228 |
| 0.328715497 | 0.128801904 | 0.103934691 | 0.17410029  |
| 0.083235318 | 0.254141664 | 0.019607481 | 0.205248123 |
| 0.000162151 | 0.105944082 | 0.054087366 | 0.186229124 |
| 0.017708788 | 0.221626681 | 0.001504242 | 0.145138822 |
| 0.297252378 | 0.019006644 | 0.141653707 | 0.038499012 |
| 0.321204602 | 0.295913269 | 0.097316008 | 0.024681629 |
| 0.340885124 | 0.0297494   | 0.153132302 | 0.325631169 |
| 0.023241464 | 0.03368161  | 0.207500842 | 0.020917578 |
| 0.102499187 | 0.232791078 | 0.299080393 | 0.355507808 |
| 0.004200803 | 0.064926446 | 0.230068417 | 0.296748169 |
| 0.104495706 | 0.036764701 | 0.035056964 | 0.034349895 |
| 0.275150062 | 0.002466886 | 0.051644963 | 0.137546131 |
| 0.036737411 | 0.109900142 | 0.326526494 | 0.031999409 |
| 0.000865149 | 0.031660566 | 0.045594529 | 0.04774555  |
| 0.076946871 | 0.098170396 | 0.040515891 | 0.167326733 |
| 0.003525042 | 0.000160315 | 0.227660001 | 0.001286944 |
| 0.097627593 | 0.112147194 | 0.066001599 | 0.098183429 |
| 0.067939957 | 0.16308443  | 0.129302151 | 0.000715802 |
| 0.214146806 | 0.003715058 | 0.102443046 | 0.017563705 |
| 0.030102449 | 0.007574416 | 0.251210048 | 0.279977514 |
| 0.136080825 | 0.045926659 | 0.043104974 | 0.282507141 |
| 0.01097498  | 0.148732158 | 0.118548939 | 0.229441302 |
| 0.048215285 | 0.1936341   | 0.172177503 | 0.089495762 |
| 0.169625546 | 0.07079519  |             |             |
| ORC1L       | 0.064478818 | 0.397648653 | 0.04574676  |

|             |             |             |             |
|-------------|-------------|-------------|-------------|
| 0.152778097 | 0.334370123 | 0.337809799 | 0.057251351 |
| 0.121012188 | 0.303132811 | 0.283861491 | 0.342649696 |
| 0.016978486 | 0.137332126 | 0.452878358 | 0.051311748 |
| 0.395279598 | 0.035464113 | 0.105620576 | 0.082139533 |
| 0.215065251 | 0.319560687 | 0.352533495 | 0.309914936 |
| 0.316332749 | 0.158566192 | 0.291944109 | 0.379675273 |
| 0.490128206 | 0.298136848 | 0.387685066 | 0.210254877 |
| 0.400103167 | 0.354808232 | 0.388851586 | 0.013776835 |
| 0.365359276 | 0.022815604 | 0.411728901 | 0.295459948 |
| 0.218452223 | 0.316522468 | 0.292101939 | 0.249669883 |
| 0.351445273 | 0.032930334 | 0.204818134 | 0.391241533 |
| 0.290813496 | 0.263601806 | 0.052071408 | 0.368090842 |
| 0.356943969 | 0.281059299 | 0.330607551 | 0.003298429 |
| 0.351050251 | 0.153180474 | 0.302885266 | 0.47666859  |
| 0.180743201 | 0.120770601 | 0.327060651 | 0.216087742 |
| 0.363189316 | 0.352406761 | 0.228183098 | 0.364186849 |
| 0.486527862 | 0.252452188 | 0.39067128  | 0.169057413 |
| 0.349118849 | 0.026489961 | 0.13843481  | 0.067465914 |
| 0.380815211 | 0.19500465  | 0.332998864 | 0.357445319 |
| 0.405181628 | 0.487904282 | 0.21311476  | 0.469248035 |
| 0.155074297 | 0.371017207 | 0.314806789 | 0.285570377 |
| 0.329751058 | 0.080309321 | 0.372418906 | 0.508131981 |
| 0.040986898 | 0.334343223 | 0.36248353  | 0.100270776 |
| 0.397610049 | 0.309292717 | 0.34979605  | 0.238740089 |
| 0.373574532 | 0.374602516 | 0.443191439 | 0.26869842  |
| 0.316315263 | 0.059794149 | 0.439434957 | 0.3633467   |
| 0.310797399 | 0.071108955 | 0.289883975 | 0.469587462 |
| 0.387771127 | 0.485390149 | 0.406781297 | 0.341763862 |
| 0.406050148 | 0.488803438 | 0.363948605 | 0.388417893 |
| 0.164358852 | 0.504656931 | 0.172317418 | 0.04126479  |
| 0.060483674 | 0.082276173 | 0.264339302 | 0.266545673 |
| 0.467429337 | 0.29109147  | 0.188806632 | 0.255444156 |
| 0.476422366 | 0.435647054 | 0.506459097 | 0.400365438 |
| 0.035459274 | 0.306313505 | 0.407791169 | 0.23300631  |
| 0.35204807  | 0.098763835 | 0.325148395 | 0.473695078 |
| 0.360698554 | 0.434753058 | 0.143722716 | 0.458727992 |
| 0.189094148 | 0.501267323 | 0.434127294 | 0.169521401 |
| 0.492303789 | 0.457379929 | 0.511263998 | 0.393732549 |
| 0.439509811 | 0.311575558 | 0.075354211 | 0.358687818 |
| 0.474745914 | 0.027089455 | 0.480982992 | 0.509795124 |
| 0.480300273 | 0.473339936 | 0.523762861 | 0.504360642 |
| 0.480594341 | 0.062917018 | 0.047296727 | 0.299975375 |
| 0.485776528 | 0.381085539 | 0.136334319 | 0.413321867 |
| 0.369589172 | 0.337532028 | 0.394225737 | 0.338205488 |
| 0.495274995 | 0.444212954 | 0.48642371  | 0.359424307 |
| 0.27503032  | 0.285732177 | 0.394388457 | 0.423483318 |
| 0.041707605 | 0.102639003 | 0.041556787 | 0.265525641 |
| 0.304854227 | 0.173339941 | 0.342762563 | 0.349686093 |
| 0.183842888 | 0.286896066 | 0.361508048 | 0.380536128 |
| 0.041127977 | 0.392083454 | 0.149224393 | 0.162983265 |
| 0.04454331  | 0.115170448 | 0.205504289 | 0.151939563 |
| 0.266502238 | 0.198356345 | 0.388604513 | 0.489538533 |
| 0.353513219 | 0.152607509 | 0.373709393 | 0.465919625 |
| 0.419710283 | 0.397565377 | 0.193126067 | 0.014531544 |



|             |             |             |             |
|-------------|-------------|-------------|-------------|
| 0.343131239 | 0.332250205 | 0.271662127 | 0.389848384 |
| 0.144972012 | 0.275158811 | 0.389275152 | 0.377969695 |
| 0.249876784 | 0.121130719 | 0.391366959 | 0.390484911 |
| 0.121595694 | 0.32019143  | 0.45507225  | 0.372058003 |
| 0.002522604 | 0.32544071  | 0.433509259 | 0.196902291 |
| 0.28784128  | 0.194948887 | 0.300913513 | 0.473454237 |
| 0.351467632 | 0.279388783 | 0.489137609 | 0.368812026 |
| 0.323999211 | 0.185572418 | 0.521783678 | 0.091770288 |
| 0.350257902 | 0.074847627 | 0.277769741 | 0.29308504  |
| 0.237272614 | 0.270454526 | 0.34405859  | 0.312811263 |
| 0.106137549 | 0.498651864 | 0.356863043 | 0.505410715 |
| 0.409288741 | 0.523332083 | 0.464649893 | 0.431735453 |
| 0.318666186 | 0.377623584 | 0.215114163 | 0.431658007 |
| 0.463188658 | 0.34799468  | 0.057765015 | 0.428264261 |
| 0.36526421  | 0.397878043 | 0.153611323 | 0.498588429 |
| 0.463136843 | 0.43320583  | 0.149874822 | 0.359912235 |
| 0.363622388 | 0.216570315 | 0.390020932 | 0.517836299 |
| 0.325370592 | 0.386791281 | 0.380617916 | 0.403444983 |
| 0.160817514 | 0.268196035 | 0.281573804 | 0.248816382 |
| 0.017507003 | 0.069838817 | 0.057247449 | 0.174179075 |
| 0.237934395 | 0.372229419 | 0.375593736 | 0.510261661 |
| 0.112975918 | 0.387769016 | 0.203890972 | 0.33879118  |
| 0.409260073 | 0.362325208 | 0.379405901 | 0.370912944 |
| 0.206781382 | 0.02097847  | 0.12543243  | 0.491241365 |
| 0.030541334 | 0.304571835 | 0.282551594 | 0.003317624 |
| 0.042524861 | 0.376902024 | 0.07510396  | 0.164762752 |
| 0.481630619 | 0.167667144 | 0.190531405 | 0.322036005 |
| 0.317613061 | 0.082859187 | 0.003856721 | 0.481762259 |
| 0.463680353 | 0.435620731 | 0.461379814 | 0.417968549 |
| 0.436577233 | 0.350399422 | 0.407387609 | 0.296352504 |
| 0.103803364 | 0.07878764  | 0.309719693 | 0.315232029 |
| 0.005308782 | 0.347386032 | 0.303072654 | 0.125320283 |
| 0.395660107 | 0.279420213 | 0.03351402  | 0.350609868 |
| 0.022161089 | 0.290472556 | 0.28818309  | 0.218481802 |
| 0.327681049 | 0.01143008  | 0.257547979 | 0.388785119 |
| 0.394892305 | 0.310395313 | 0.387074312 | 0.509841773 |
| 0.322560154 | 0.103261615 | 0.335910395 | 0.355687446 |
| 0.069764252 | 0.151096047 | 0.319559855 | 0.048673341 |
| 0.182841831 | 0.417447979 | 0.371695846 | 0.068273789 |
| 0.265063668 | 0.004138971 | 0.338101217 | 0.511004388 |
| 0.431020847 | 0.524773981 | 0.487924292 | 0.327958927 |
| 0.491322767 | 0.170767505 | 0.51763252  | 0.379980079 |
| 0.369576408 | 0.001301947 | 0.005498113 | 0.495440357 |
| 0.409948219 | 0.041691425 | 0.1468207   | 0.32618485  |
| 0.11606762  | 0.13347448  | 0.057057183 | 0.244146464 |
| 0.365780176 | 0.26185508  | 0.225400196 | 0.44200162  |
| 0.251750028 | 0.221446973 | 0.347751637 | 0.06995847  |
| 0.375781796 | 0.052644401 | 0.070271798 | 0.011131732 |
| 0.344977275 | 0.089200289 | 0.421152951 | 0.489497929 |
| 0.480367975 | 0.377857498 | 0.335242917 | 0.309882338 |
| 0.422489707 | 0.07525189  | 0.35547624  | 0.089356293 |
| 0.463410771 | 0.3960089   | 0.287763326 | 0.27731163  |
| 0.502302308 | 0.454460005 | 0.029818941 | 0.396842481 |
| 0.012734684 | 0.002518086 | 0.330471049 | 0.230064222 |

|             |             |             |             |
|-------------|-------------|-------------|-------------|
| 0.07924407  | 0.397131297 | 0.224073845 | 0.224693549 |
| 0.219120995 | 0.028438781 | 0.336503923 | 0.326851653 |
| 0.299068126 | 0.371059985 | 0.323290795 | 0.20364114  |
| 0.293699178 | 0.201480846 | 0.195011342 | 0.149615234 |
| 0.251100664 | 0.278988289 | 0.165442113 | 0.018873629 |
| 0.387679726 | 0.410296406 | 0.05156545  | 0.134210483 |
| 0.437400901 | 0.497844283 | 0.046729669 | 0.014276103 |
| 0.226145256 | 0.32587318  | 0.50550534  | 0.477730049 |
| 0.492605413 | 0.512340432 | 0.35858355  | 0.150295232 |
| 0.061261806 | 0.320250081 | 0.334245615 | 0.122386726 |
| 0.496564658 | 0.053967939 | 0.450427658 | 0.352443169 |
| 0.102100733 | 0.221252586 | 0.034863513 | 0.077177411 |
| 0.386792905 | 0.158663956 | 0.191735634 | 0.128764308 |
| 0.338048107 | 0.31217325  | 0.04352419  | 0.188784224 |
| 0.314197037 | 0.280301829 | 0.150069109 | 0.262422876 |
| 0.305626875 | 0.211816267 | 1           | 0.434663546 |
| 0.109714694 | 0.102173289 | 0.261897388 | 0.335230047 |
| 0.435946496 | 0.358996755 | 0.02592116  | 0.427522195 |
| 0.480767441 | 0.403419585 | 0.466615899 | 0.388375405 |
| 0.070639417 | 0.390415622 | 0.351904769 | 0.365660655 |
| 0.172320708 | 0.331023498 | 0.22884908  | 0.054332791 |
| 0.262211982 | 0.441950077 | 0.404928334 | 0.168520732 |
| 0.365717312 | 0.103932253 | 0.046806308 | 0.422727871 |
| 0.270878198 | 0.088425849 | 0.309848865 | 0.422768211 |
| 0.003072643 | 0.210156067 | 0.489441852 | 0.224481169 |
| 0.491330331 | 0.491702951 | 0.422149203 | 0.219453658 |
| 0.005331587 | 0.400672093 | 0.367474041 | 0.401880959 |
| 0.416099324 | 0.291687679 | 0.13221536  | 0.080775415 |
| 0.254598257 | 0.063166542 | 0.156427275 | 0.297898968 |
| 0.25514072  | 0.355951155 | 0.174772282 | 0.191107365 |
| 0.211045128 | 0.072266641 | 0.288362163 | 0.223993021 |
| 0.202267023 | 0.210004553 | 0.328760848 | 0.254654427 |
| 0.294763544 | 0.431886424 | 0.38677681  | 0.02211811  |
| 0.363556955 | 0.397408303 | 0.410030968 | 0.003906988 |
| 0.400618145 | 0.006554794 | 0.210414144 | 0.231895002 |
| 0.206826918 | 0.224679025 | 0.265638665 | 0.329837706 |
| 0.325864219 | 0.222144974 | 0.27607745  | 0.224062182 |
| 0.174220822 | 0.20018335  | 0.375500235 | 0.330650152 |
| 0.306928991 | 0.118611034 | 0.076792225 | 0.080730161 |
| 0.051578156 | 0.44013271  | 0.208578576 | 0.05619105  |
| 0.2120518   | 0.343294643 | 0.3311139   | 0.467732014 |
| 0.400254047 | 0.087142068 | 0.324590484 | 0.426583211 |
| 0.2709968   | 0.290799024 | 0.054960511 | 0.346406055 |
| 0.213721447 | 0.269075063 | 0.341599121 | 0.278782118 |
| 0.354732181 | 0.372700056 | 0.199628652 | 0.41462414  |
| 0.362176752 | 0.336088218 | 0.296513985 | 0.096606707 |
| 0.175537705 | 0.109165503 | 0.308950768 | 0.00174496  |
| 0.318492703 | 0.234645654 | 0.476012272 | 0.458984731 |
| 0.33853669  | 0.355180046 | 0.292336489 | 0.091378674 |
| 0.261638487 | 0.153306392 | 0.121253854 | 0.394010199 |
| 0.294277378 | 0.168040178 | 0.327228833 | 0.272710193 |
| 0.405611931 | 0.37625924  | 0.280072012 | 0.226253935 |
| 0.223441232 | 0.168053482 | 0.440078947 | 0.103313248 |
| 0.394721921 | 0.243358413 | 0.298616313 | 0.323274663 |

|             |             |             |             |
|-------------|-------------|-------------|-------------|
| 0.243574163 | 0.507852854 | 0.049526987 | 0.522592938 |
| 0.367946564 | 0.101020265 | 0.463749592 | 0.253172412 |
| 0.257667348 | 0.124890774 | 0.272238725 | 0.33600636  |
| 0.234249136 | 0.363888501 | 0.026417736 | 0.106466213 |
| 0.303428741 | 0.293504987 | 0.376643439 | 0.32266824  |
| 0.290776726 | 0.318801242 | 0.214641013 | 0.27271803  |
| 0.443566618 | 0.452842947 | 0.285214736 | 0.213969378 |
| 0.302978031 | 0.097058144 | 0.32280328  | 0.020149658 |
| 0.410929444 | 0.402663911 | 0.365719931 | 0.047825841 |
| 0.016311399 | 0.310998951 | 0.39578596  | 0.053742973 |
| 0.495634836 | 0.288909437 | 0.308756254 | 0.375488761 |
| 0.143459448 | 0.456631609 | 0.134816259 | 0.373929014 |
| 0.04473126  | 0.225529499 | 0.371086003 | 0.356130094 |
| 0.270734773 | 0.355773802 | 0.351926478 | 0.30206087  |
| 0.030943113 | 0.287473549 | 0.003342085 | 0.371332184 |
| 0.430755255 | 0.383627614 | 0.167217987 | 0.285301901 |
| 0.258279017 | 0.346219883 | 0.274033836 | 0.379698338 |
| 0.011341358 | 0.390409308 | 0.178299846 | 0.381408947 |
| 0.319749596 | 0.347763944 | 0.057846253 | 0.344945223 |
| 0.404256292 | 0.332712218 | 0.215033757 | 0.378671838 |
| 0.461586224 | 0.342723355 | 0.124306147 | 0.232277421 |
| 0.337846792 | 0.051687359 | 0.331629242 | 0.513658783 |
| 0.180565698 | 0.286833833 | 0.458148146 | 0.22676125  |
| 0.355932591 | 0.345834276 | 0.369049655 | 0.496539781 |
| 0.089283633 | 0.225060893 | 0.397749696 | 0.451076219 |
| 0.266395628 | 0.232502939 | 0.314729217 | 0.273486342 |
| 0.424895249 | 0.095630618 | 0.313834971 | 0.309275712 |
| 0.306033562 | 0.27814292  | 0.280101157 | 0.224306634 |
| 0.038194559 | 0.159415579 | 0.328468503 | 0.123437207 |
| 0.293058562 | 0.373282474 | 0.286591356 | 0.365830253 |
| 0.14506851  | 0.029404761 | 0.4314657   | 0.042605976 |
| 0.278028955 | 0.372889367 | 0.216954109 | 0.368572975 |
| 0.150507507 | 0.324507881 | 0.305669857 | 0.000804345 |
| 0.397864729 | 0.068019657 | 0.291114407 | 0.276072261 |
| 0.330116416 | 0.047818804 | 0.42353462  | 0.516698619 |
| 0.266252956 | 0.309856746 | 0.377623395 | 0.434368975 |
| 0.225922361 | 0.351476824 | 0.364577096 | 0.354345153 |
| 0.292187991 | 0.364059362 | 0.38605299  | 0.392273224 |
| 0.323680704 | 0.23295951  |             |             |
| ORC6L       | 0.213274673 | 0.420247524 | 0.163947248 |
| 0.289443424 | 0.366158062 | 0.434396546 | 0.200957425 |
| 0.291666744 | 0.39443674  | 0.283302597 | 0.441830494 |
| 0.101906201 | 0.090060012 | 0.460872286 | 0.192762971 |
| 0.416990652 | 0.1497305   | 0.279839153 | 0.120322881 |
| 0.327149583 | 0.363065676 | 0.357883985 | 0.428396562 |
| 0.354165721 | 0.312442256 | 0.420471354 | 0.363778847 |
| 0.446260486 | 0.236098247 | 0.440372372 | 0.189520841 |
| 0.441086358 | 0.374520642 | 0.357558313 | 0.086971375 |
| 0.447224972 | 0.019334713 | 0.451104222 | 0.39007018  |
| 0.177102104 | 0.424872605 | 0.332320009 | 0.398410409 |
| 0.377272766 | 0.144438701 | 0.182896946 | 0.407720148 |
| 0.394259412 | 0.386236466 | 0.182462288 | 0.444540963 |
| 0.386258869 | 0.44214037  | 0.388705729 | 0.008661445 |
| 0.290748097 | 0.070176967 | 0.204946812 | 0.468779401 |

|             |             |             |             |
|-------------|-------------|-------------|-------------|
| 0.372237141 | 0.30193117  | 0.251296682 | 0.357618082 |
| 0.401536093 | 0.414980164 | 0.390008534 | 0.364223859 |
| 0.463922687 | 0.19022286  | 0.414488415 | 0.266626398 |
| 0.451162535 | 0.124791038 | 0.32595723  | 0.199756046 |
| 0.400477711 | 0.36866302  | 0.408152384 | 0.318060705 |
| 0.411549209 | 0.504226368 | 0.382505305 | 0.469640446 |
| 0.133567273 | 0.356680791 | 0.33473453  | 0.41991419  |
| 0.421036804 | 0.220366129 | 0.465857943 | 0.494993664 |
| 0.157710591 | 0.373628386 | 0.438232541 | 0.261666662 |
| 0.439126906 | 0.270488632 | 0.37968453  | 0.202389354 |
| 0.395126954 | 0.38771857  | 0.460201216 | 0.438205142 |
| 0.364944897 | 0.200352263 | 0.469283414 | 0.33602758  |
| 0.3942942   | 0.220978324 | 0.312683599 | 0.438184001 |
| 0.455263665 | 0.456360797 | 0.428478274 | 0.438775286 |
| 0.395581802 | 0.458426502 | 0.4619632   | 0.440299526 |
| 0.123751738 | 0.480191826 | 0.355347745 | 0.170070642 |
| 0.193611831 | 0.240803754 | 0.286989284 | 0.417336546 |
| 0.45497796  | 0.436968401 | 0.369052799 | 0.379868551 |
| 0.449764787 | 0.451422807 | 0.475432157 | 0.456241982 |
| 0.158697983 | 0.247199629 | 0.39997945  | 0.395404295 |
| 0.450005915 | 0.267915234 | 0.291637953 | 0.494357453 |
| 0.451405565 | 0.452626439 | 0.313201136 | 0.499953364 |
| 0.341959244 | 0.490794602 | 0.433245985 | 0.352423205 |
| 0.495536365 | 0.47866425  | 0.47371527  | 0.409166149 |
| 0.460746204 | 0.442629602 | 0.103494781 | 0.437398778 |
| 0.466661052 | 0.026137288 | 0.443162091 | 0.449274458 |
| 0.459298765 | 0.446706463 | 0.475929455 | 0.4537509   |
| 0.461004476 | 0.211551835 | 0.031085298 | 0.400237622 |
| 0.479939779 | 0.458840478 | 0.277346885 | 0.401731721 |
| 0.400711963 | 0.457789787 | 0.43128758  | 0.334408488 |
| 0.500286833 | 0.450651108 | 0.444374021 | 0.44679377  |
| 0.36706696  | 0.410002767 | 0.352608691 | 0.457372115 |
| 0.165918167 | 0.26857436  | 0.159709049 | 0.410293634 |
| 0.34476555  | 0.348579724 | 0.44568165  | 0.390174111 |
| 0.368109592 | 0.41357108  | 0.30279843  | 0.405145949 |
| 0.156613119 | 0.433792279 | 0.329205042 | 0.332569135 |
| 0.169805907 | 0.277554749 | 0.346949638 | 0.321772855 |
| 0.385932691 | 0.305835701 | 0.430982489 | 0.449585905 |
| 0.384411441 | 0.330285935 | 0.45572227  | 0.457192989 |
| 0.455516187 | 0.392576744 | 0.377492229 | 0.057136728 |
| 0.348034905 | 0.27336623  | 0.181919994 | 0.388357455 |
| 0.279303933 | 0.383202942 | 0.431431239 | 0.428071817 |
| 0.409448671 | 0.286463116 | 0.396830634 | 0.446217976 |
| 0.286376057 | 0.390807443 | 0.464672066 | 0.412551504 |
| 0.027341777 | 0.447688185 | 0.46263345  | 0.242608546 |
| 0.421205907 | 0.17247586  | 0.253668839 | 0.457230181 |
| 0.292008548 | 0.284529475 | 0.449040472 | 0.420365204 |
| 0.377053794 | 0.297192711 | 0.479142526 | 0.056716944 |
| 0.361117555 | 0.123494058 | 0.416738677 | 0.322963139 |
| 0.413347204 | 0.414178545 | 0.354769462 | 0.3512812   |
| 0.262875905 | 0.481076865 | 0.444924708 | 0.461277389 |
| 0.373098894 | 0.484320534 | 0.457694227 | 0.467575035 |
| 0.454441505 | 0.346458795 | 0.13797586  | 0.461629701 |
| 0.453889675 | 0.312142848 | 0.192532842 | 0.425956541 |

|             |             |             |             |
|-------------|-------------|-------------|-------------|
| 0.36250393  | 0.419599926 | 0.196673267 | 0.463739886 |
| 0.48928792  | 0.435711587 | 0.315762146 | 0.429581743 |
| 0.464145794 | 0.397422692 | 0.440106117 | 0.490752025 |
| 0.305236057 | 0.392859696 | 0.380228867 | 0.439383764 |
| 0.346665697 | 0.292631023 | 0.40142064  | 0.170698738 |
| 0.008812408 | 0.219756989 | 0.198074968 | 0.324121018 |
| 0.211266002 | 0.391009516 | 0.43634811  | 0.471999409 |
| 0.295319878 | 0.448914622 | 0.367102013 | 0.394403609 |
| 0.439337168 | 0.377278954 | 0.374083223 | 0.414101437 |
| 0.38490236  | 0.078489377 | 0.27652268  | 0.508228844 |
| 0.131258051 | 0.269332274 | 0.416085267 | 0.01424319  |
| 0.169593145 | 0.401646737 | 0.21548795  | 0.310483108 |
| 0.453504197 | 0.307505774 | 0.36408507  | 0.325676923 |
| 0.436275353 | 0.252823894 | 0.01769834  | 0.441999542 |
| 0.442356173 | 0.422655416 | 0.440433361 | 0.433598739 |
| 0.428457835 | 0.423339932 | 0.442186737 | 0.424994722 |
| 0.269893004 | 0.223102925 | 0.260057119 | 0.407283291 |
| 0.017180418 | 0.445492659 | 0.374577856 | 0.311643673 |
| 0.432044755 | 0.416999056 | 0.153489834 | 0.381294247 |
| 0.097292388 | 0.192602431 | 0.414274387 | 0.3559953   |
| 0.409585485 | 0.08064974  | 0.283458125 | 0.345244231 |
| 0.426050594 | 0.43557423  | 0.332368772 | 0.487286718 |
| 0.439365216 | 0.247946705 | 0.404781817 | 0.442036252 |
| 0.226735471 | 0.12407935  | 0.420745083 | 0.040224516 |
| 0.231090631 | 0.432251585 | 0.381397929 | 0.200540399 |
| 0.427647488 | 0.039571702 | 0.438381054 | 0.493324719 |
| 0.430621507 | 0.463794365 | 0.462456226 | 0.294578513 |
| 0.468701455 | 0.084187896 | 0.47485351  | 0.445366457 |
| 0.357843483 | 0.005570722 | 0.030385915 | 0.453516086 |
| 0.420341337 | 0.152755221 | 0.337074238 | 0.393248058 |
| 0.288505221 | 0.30511412  | 0.203629081 | 0.253244972 |
| 0.440532672 | 0.347748705 | 0.234959901 | 0.44385012  |
| 0.396210361 | 0.384257885 | 0.411632119 | 0.220364713 |
| 0.417406251 | 0.193395002 | 0.216899547 | 0.028407793 |
| 0.421536248 | 0.23128554  | 0.464644536 | 0.464437224 |
| 0.475206604 | 0.424792448 | 0.300862832 | 0.380091215 |
| 0.433849675 | 0.211357093 | 0.333732672 | 0.24112523  |
| 0.443055042 | 0.435077654 | 0.444561781 | 0.426002286 |
| 0.471671321 | 0.453718217 | 0.146131949 | 0.453692877 |
| 0.061872567 | 0.00727037  | 0.425356144 | 0.395645168 |
| 0.081986987 | 0.398693459 | 0.40422915  | 0.323268942 |
| 0.337480903 | 0.126431396 | 0.276666618 | 0.269085312 |
| 0.422544785 | 0.431354866 | 0.330175112 | 0.36391967  |
| 0.346124335 | 0.217557321 | 0.347462106 | 0.319603228 |
| 0.289002653 | 0.40331663  | 0.317396132 | 0.109523476 |
| 0.410658761 | 0.412360847 | 0.19652602  | 0.319051245 |
| 0.467933961 | 0.462139243 | 0.169070242 | 0.064522073 |
| 0.40057207  | 0.390451296 | 0.460788687 | 0.448329722 |
| 0.498107057 | 0.493085187 | 0.421697242 | 0.271060896 |
| 0.213228447 | 0.414806822 | 0.33680073  | 0.219484987 |
| 0.465752898 | 0.180312948 | 0.448449586 | 0.30086099  |
| 0.275902844 | 0.380018763 | 0.14589318  | 0.240471965 |
| 0.378044001 | 0.351036518 | 0.336861094 | 0.28767784  |
| 0.419732226 | 0.262237169 | 0.176423252 | 0.375996093 |

|             |             |             |             |
|-------------|-------------|-------------|-------------|
| 0.447721087 | 0.19530865  | 0.33512671  | 0.395358205 |
| 0.425334287 | 0.213400519 | 0.434663546 | 1           |
| 0.28971059  | 0.264376527 | 0.386794382 | 0.422621415 |
| 0.445677944 | 0.365817772 | 0.092427764 | 0.418407072 |
| 0.455918829 | 0.4384184   | 0.465081205 | 0.446860201 |
| 0.224308768 | 0.409958785 | 0.313573815 | 0.407134119 |
| 0.351864401 | 0.436039211 | 0.377513096 | 0.200039021 |
| 0.395703597 | 0.47778397  | 0.439249636 | 0.342581998 |
| 0.412269706 | 0.256034749 | 0.164660432 | 0.437345539 |
| 0.231550411 | 0.248703251 | 0.353398694 | 0.431154098 |
| 0.007714636 | 0.146202025 | 0.442349944 | 0.387712422 |
| 0.487010247 | 0.45866327  | 0.456641021 | 0.364252435 |
| 0.002467806 | 0.405969361 | 0.45179287  | 0.431113852 |
| 0.444321487 | 0.442945126 | 0.240279866 | 0.232493439 |
| 0.415465969 | 0.197855409 | 0.310467243 | 0.381071292 |
| 0.191436147 | 0.451295093 | 0.361128795 | 0.351204172 |
| 0.340381925 | 0.204112901 | 0.256037386 | 0.389922315 |
| 0.171533071 | 0.395096838 | 0.453470317 | 0.281905494 |
| 0.219499403 | 0.445207843 | 0.448772709 | 0.120218269 |
| 0.358314581 | 0.440464094 | 0.442855976 | 0.014606815 |
| 0.446474204 | 0.054038813 | 0.347844238 | 0.362977862 |
| 0.35356909  | 0.360173622 | 0.378493855 | 0.373107629 |
| 0.431264623 | 0.385986569 | 0.410518289 | 0.398481383 |
| 0.320524727 | 0.367367986 | 0.419271406 | 0.423767556 |
| 0.372465449 | 0.29940956  | 0.211792175 | 0.20088929  |
| 0.180688146 | 0.440048594 | 0.378077152 | 0.187344377 |
| 0.38498059  | 0.411512504 | 0.438757064 | 0.44747468  |
| 0.450439714 | 0.219184007 | 0.412124828 | 0.44860157  |
| 0.212905451 | 0.355959623 | 0.187734826 | 0.432138709 |
| 0.395364186 | 0.302284131 | 0.403912196 | 0.413436614 |
| 0.421592132 | 0.434583051 | 0.377065961 | 0.445175065 |
| 0.421885476 | 0.374397646 | 0.306843461 | 0.240144828 |
| 0.357038835 | 0.280631105 | 0.33527437  | 0.018561259 |
| 0.457203059 | 0.375234531 | 0.459412261 | 0.461170644 |
| 0.275160103 | 0.441806976 | 0.335029387 | 0.251843865 |
| 0.26263583  | 0.274902474 | 0.304700735 | 0.429759954 |
| 0.203836383 | 0.352076149 | 0.384073998 | 0.390441002 |
| 0.438161451 | 0.414159133 | 0.318873093 | 0.389626873 |
| 0.370723868 | 0.342707649 | 0.456436229 | 0.263546949 |
| 0.407048351 | 0.265531541 | 0.372538999 | 0.411588983 |
| 0.357337073 | 0.454718952 | 0.187914002 | 0.46291801  |
| 0.397887411 | 0.266736076 | 0.489285359 | 0.401741638 |
| 0.38336162  | 0.254035736 | 0.186228098 | 0.393846137 |
| 0.372861763 | 0.322813693 | 0.016138932 | 0.097990254 |
| 0.441261793 | 0.332762438 | 0.415091413 | 0.424821989 |
| 0.309156492 | 0.427659199 | 0.153833033 | 0.412069833 |
| 0.444770282 | 0.478464765 | 0.390752666 | 0.388891261 |
| 0.447889986 | 0.272455161 | 0.433117358 | 0.02469299  |
| 0.42512018  | 0.389923838 | 0.367990783 | 0.18833119  |
| 0.099589764 | 0.213595269 | 0.427990504 | 0.178529323 |
| 0.453154292 | 0.192083049 | 0.38116204  | 0.440036264 |
| 0.319967916 | 0.483578229 | 0.274284429 | 0.456178075 |
| 0.140704784 | 0.392843938 | 0.366208954 | 0.383023995 |
| 0.339476403 | 0.32459887  | 0.451946008 | 0.268416305 |

|             |             |             |             |
|-------------|-------------|-------------|-------------|
| 0.145166084 | 0.370211425 | 0.011077141 | 0.43660365  |
| 0.45277427  | 0.347707794 | 0.343441634 | 0.272653607 |
| 0.41151151  | 0.425884016 | 0.338685571 | 0.385387898 |
| 0.06472652  | 0.396260753 | 0.360425875 | 0.454757566 |
| 0.234508006 | 0.402331695 | 0.18318884  | 0.344567106 |
| 0.461309081 | 0.362499302 | 0.380296479 | 0.311480372 |
| 0.443929105 | 0.416342357 | 0.280340354 | 0.294698859 |
| 0.388581946 | 0.189364676 | 0.37039828  | 0.487403118 |
| 0.343956922 | 0.25967148  | 0.452966546 | 0.373465417 |
| 0.32163081  | 0.427678395 | 0.383020876 | 0.477191306 |
| 0.206859726 | 0.402764887 | 0.443152392 | 0.443307384 |
| 0.420597634 | 0.229627294 | 0.278801209 | 0.345671262 |
| 0.429055917 | 0.246998272 | 0.293426344 | 0.452925344 |
| 0.246581795 | 0.425891685 | 0.354944595 | 0.30038846  |
| 0.14507671  | 0.319529895 | 0.417407048 | 0.307390121 |
| 0.424736798 | 0.418565752 | 0.319627143 | 0.441622634 |
| 0.278476617 | 0.106590385 | 0.449647588 | 0.025313141 |
| 0.421203176 | 0.44162725  | 0.395134974 | 0.387848735 |
| 0.326800107 | 0.436562468 | 0.413230166 | 0.013022472 |
| 0.451993779 | 0.072647354 | 0.365880837 | 0.337515931 |
| 0.306486719 | 0.18316481  | 0.441378198 | 0.461747008 |
| 0.423249067 | 0.321084949 | 0.3225411   | 0.444507272 |
| 0.171226609 | 0.286950119 | 0.334893829 | 0.429117471 |
| 0.23690485  | 0.357656079 | 0.381082001 | 0.357055331 |
| 0.454660806 | 0.394890936 |             |             |
| OSTM1       | 0.279117373 | 0.193979291 | 0.235664516 |
| 0.194712673 | 0.089667329 | 0.110712332 | 0.267651438 |
| 0.250255587 | 0.171680616 | 0.050103388 | 0.128480413 |
| 0.254835254 | 0.01252144  | 0.211436962 | 0.269302899 |
| 0.083329932 | 0.263058907 | 0.271956568 | 0.05103368  |
| 0.128635007 | 0.096641807 | 0.068206398 | 0.123219971 |
| 0.09122429  | 0.345388761 | 0.13684401  | 0.060476869 |
| 0.20373453  | 0.029750479 | 0.106725224 | 0.031424416 |
| 0.287637589 | 0.083574194 | 0.054789704 | 0.226072517 |
| 0.106431987 | 0.005644013 | 0.310975727 | 0.138736955 |
| 0.030415463 | 0.305569838 | 0.070711858 | 0.185906928 |
| 0.075521705 | 0.267048952 | 0.028331834 | 0.089097919 |
| 0.121676947 | 0.143574893 | 0.2397641   | 0.124641442 |
| 0.081910895 | 0.199539827 | 0.117587501 | 0.012979575 |
| 0.041480688 | 0.004557361 | 0.022008189 | 0.250941543 |
| 0.260213338 | 0.266460366 | 0.030931532 | 0.153533812 |
| 0.08508963  | 0.116401095 | 0.20014011  | 0.066843324 |
| 0.237057664 | 0.026991679 | 0.102934126 | 0.135799014 |
| 0.121211435 | 0.211296922 | 0.295345916 | 0.203969812 |
| 0.078010558 | 0.218738353 | 0.110886532 | 0.052267599 |
| 0.187772773 | 0.303644884 | 0.202333918 | 0.262498472 |
| 0.027048761 | 0.065772232 | 0.080943615 | 0.190841828 |
| 0.143510461 | 0.20915181  | 0.153622666 | 0.270334998 |
| 0.216784483 | 0.077043862 | 0.13190696  | 0.248084203 |
| 0.193566537 | 0.042675189 | 0.072384501 | 0.036974127 |
| 0.092364667 | 0.080595612 | 0.275652705 | 0.22029455  |
| 0.092036707 | 0.248922343 | 0.292362644 | 0.059398956 |
| 0.12126385  | 0.264615228 | 0.082047327 | 0.139286756 |
| 0.114882114 | 0.207313465 | 0.15537943  | 0.177435722 |

|             |             |             |             |
|-------------|-------------|-------------|-------------|
| 0.072242284 | 0.228126593 | 0.14942505  | 0.209510056 |
| 0.01563223  | 0.242568928 | 0.244741782 | 0.27890592  |
| 0.231194093 | 0.255701608 | 0.07210534  | 0.257842661 |
| 0.176900067 | 0.173888137 | 0.235553572 | 0.163138581 |
| 0.168082668 | 0.263945541 | 0.235239654 | 0.1775494   |
| 0.283536664 | 0.035410079 | 0.073808548 | 0.168464487 |
| 0.141578403 | 0.253198606 | 0.052258149 | 0.299527832 |
| 0.263581055 | 0.15103263  | 0.222888709 | 0.330916523 |
| 0.18253388  | 0.269812945 | 0.177528137 | 0.25051231  |
| 0.283215958 | 0.290422298 | 0.236610758 | 0.093995437 |
| 0.280610122 | 0.150976868 | 0.036285877 | 0.192968102 |
| 0.260166642 | 0.009158999 | 0.162853383 | 0.17930916  |
| 0.235890816 | 0.141469164 | 0.228974346 | 0.205559982 |
| 0.23601224  | 0.265978549 | 0.003247458 | 0.138229408 |
| 0.264263431 | 0.225357025 | 0.179826003 | 0.067803115 |
| 0.088663658 | 0.128957851 | 0.135759238 | 0.06289652  |
| 0.293729141 | 0.182133169 | 0.179862874 | 0.160890535 |
| 0.11046296  | 0.310973538 | 0.053196412 | 0.29141221  |
| 0.268967143 | 0.260157958 | 0.241389631 | 0.198766793 |
| 0.072810946 | 0.231571206 | 0.122375808 | 0.089148014 |
| 0.239055375 | 0.130964901 | 0.042193131 | 0.098117098 |
| 0.269650088 | 0.084732064 | 0.24464632  | 0.22176956  |
| 0.268284707 | 0.348550138 | 0.187763312 | 0.236062321 |
| 0.152857585 | 0.374585681 | 0.106214245 | 0.200179834 |
| 0.086144714 | 0.272632093 | 0.133696554 | 0.250227058 |
| 0.274485738 | 0.072699485 | 0.265290952 | 0.106304321 |
| 0.076242802 | 0.036367314 | 0.020662837 | 0.066939103 |
| 0.361264272 | 0.141234361 | 0.095155865 | 0.123006786 |
| 0.18075011  | 0.210754182 | 0.075971497 | 0.325980995 |
| 0.267379717 | 0.113264138 | 0.185731018 | 0.084396746 |
| 0.126585875 | 0.152971593 | 0.159586507 | 0.082891989 |
| 0.164142516 | 0.036687254 | 0.038487696 | 0.183232014 |
| 0.043330401 | 0.065233427 | 0.186439336 | 0.120799027 |
| 0.087420211 | 0.318680464 | 0.23377252  | 0.005612166 |
| 0.072087508 | 0.082446165 | 0.187679687 | 0.066636801 |
| 0.21254792  | 0.200650546 | 0.07557663  | 0.092116674 |
| 0.237309106 | 0.250439516 | 0.204889328 | 0.216774192 |
| 0.058655958 | 0.239995468 | 0.158857371 | 0.21144144  |
| 0.163399626 | 0.054670801 | 0.015071574 | 0.159360242 |
| 0.172313532 | 0.054854644 | 0.253825713 | 0.121217578 |
| 0.0645451   | 0.097886277 | 0.083401009 | 0.228615508 |
| 0.3091437   | 0.241796136 | 0.228368397 | 0.150903599 |
| 0.214815157 | 0.225457131 | 0.17563833  | 0.252572345 |
| 0.049524    | 0.076722804 | 0.075152293 | 0.177396482 |
| 0.252338842 | 0.077155746 | 0.264681488 | 0.019906925 |
| 0.00075356  | 0.254246617 | 0.267456105 | 0.198111018 |
| 0.044020852 | 0.076230511 | 0.113841785 | 0.229932705 |
| 0.281737316 | 0.241867562 | 0.214648973 | 0.108620335 |
| 0.231667442 | 0.077763868 | 0.066906995 | 0.093228015 |
| 0.246856473 | 0.133689465 | 0.221814102 | 0.308907144 |
| 0.207001662 | 0.048277262 | 0.147459293 | 0.020867928 |
| 0.26975657  | 0.139941937 | 0.309075894 | 0.378842668 |
| 0.193751369 | 0.350464501 | 0.226504435 | 0.061160241 |
| 0.168315181 | 0.28997815  | 0.042199583 | 0.202004078 |



|             |             |             |             |
|-------------|-------------|-------------|-------------|
| 0.227606117 | 0.22164197  | 0.225986391 | 0.25673338  |
| 0.183251537 | 0.140122617 | 0.143771872 | 0.134387368 |
| 0.262425735 | 0.234646782 | 0.045543615 | 0.132399722 |
| 0.030103679 | 0.179708067 | 0.106710221 | 0.28918074  |
| 0.120318347 | 0.171252943 | 0.287773475 | 0.084048165 |
| 0.190659726 | 0.021086752 | 0.137331839 | 0.165396626 |
| 0.143752076 | 0.225127028 | 0.064491875 | 0.054683905 |
| 0.260777482 | 0.259193949 | 0.048973426 | 0.251340903 |
| 0.146170492 | 0.230854315 | 0.116892186 | 0.145086672 |
| 0.287276382 | 0.021217413 | 0.112196547 | 0.007512048 |
| 0.063569698 | 0.25682623  | 0.072151902 | 0.233661981 |
| 0.19540402  | 0.161875599 | 0.254261841 | 0.25885688  |
| 0.235781863 | 0.210852319 | 0.233517954 | 0.051398874 |
| 0.241302314 | 0.005895569 | 0.224483324 | 0.193320508 |
| 0.059421557 | 0.015212119 | 0.072873332 | 0.175992121 |
| 0.083199076 | 0.244842408 | 0.265335668 | 0.091982661 |
| 0.266981806 | 0.236587385 | 0.272757852 | 0.06705874  |
| 0.107062887 | 0.124389331 | 0.062616678 | 0.248220711 |
| 0.181839201 | 0.195504383 | 0.092448527 | 0.265844751 |
| 0.087826492 | 0.287826325 | 0.24379386  | 0.046116738 |
| 0.13436869  | 0.285121624 | 0.310673241 | 0.233437979 |
| 0.267849518 | 0.114622081 | 0.04465082  | 0.091869581 |
| 0.176092091 | 0.235842503 | 0.054250601 | 0.23086314  |
| 0.224306559 | 0.101089447 | 0.232567126 | 0.271108469 |
| 0.242722588 | 0.254197555 | 0.280586471 | 0.15298409  |
| 0.148068725 | 0.009660686 | 0.11378533  | 0.212108608 |
| 0.023805194 | 0.075102598 | 0.269994071 | 0.117427712 |
| 0.138742152 | 0.255823935 | 0.041022896 | 0.043311002 |
| 0.158376019 | 0.110158586 | 0.074595765 | 0.215852961 |
| 0.098570021 | 0.069260761 | 0.19285441  | 0.221032497 |
| 0.07648857  | 0.255582455 | 0.34097259  | 0.247129348 |
| 0.076484555 | 0.074060227 | 0.297448286 | 0.267037938 |
| 0.187954822 | 0.190810895 | 0.237622949 | 0.135662662 |
| 0.276964464 | 0.105663703 | 0.20026231  | 0.218228142 |
| 0.283399547 | 0.264880263 | 0.321715086 | 0.163655737 |
| 0.296359874 | 0.129541821 | 0.072203001 | 0.136887027 |
| 0.229117519 | 0.220611654 | 0.243726342 | 0.046527153 |
| 0.26533431  | 0.204228427 | 0.253551845 | 0.279352875 |
| 0.066199432 | 0.258052753 | 0.188603604 | 0.220921481 |
| 0.122238949 | 0.043321541 | 0.272644675 | 0.24186534  |
| 0.201612006 | 0.024713309 | 0.256341193 | 0.139242974 |
| 0.194358016 | 0.04253098  | 0.109714694 | 0.28971059  |
| 1           | 0.242749954 | 0.142261585 | 0.143799032 |
| 0.14509495  | 0.064561966 | 0.162341341 | 0.19099895  |
| 0.216780254 | 0.097217365 | 0.254491428 | 0.21361042  |
| 0.261574499 | 0.082297842 | 0.050424984 | 0.09729259  |
| 0.229824883 | 0.116375813 | 0.175077006 | 0.28218824  |
| 0.278781812 | 0.310455696 | 0.19512853  | 0.235283694 |
| 0.084740536 | 0.21317993  | 0.212286763 | 0.176707701 |
| 0.043160441 | 0.273337506 | 0.072741369 | 0.139455337 |
| 0.012034209 | 0.019490214 | 0.202913297 | 0.194114502 |
| 0.272643589 | 0.196457061 | 0.275168071 | 0.152715582 |
| 0.000120246 | 0.086765735 | 0.121041158 | 0.088733511 |
| 0.193656668 | 0.217742852 | 0.118065982 | 0.261990457 |

|             |             |             |             |
|-------------|-------------|-------------|-------------|
| 0.269798832 | 0.250516859 | 0.211504703 | 0.099893273 |
| 0.024204367 | 0.121775706 | 0.265931532 | 0.191657355 |
| 0.164821454 | 0.213619654 | 0.043781961 | 0.203458714 |
| 0.031898217 | 0.270578746 | 0.227771291 | 0.059413648 |
| 0.029243011 | 0.197372397 | 0.163837432 | 0.264833726 |
| 0.066066069 | 0.182957827 | 0.21188022  | 0.029018175 |
| 0.117147162 | 0.18992336  | 0.173806792 | 0.170124315 |
| 0.183730344 | 0.167917375 | 0.145948668 | 0.101128596 |
| 0.132189504 | 0.202717743 | 0.168671729 | 0.215696715 |
| 0.199930243 | 0.201542095 | 0.095382193 | 0.119942804 |
| 0.110622681 | 0.282649323 | 0.318699689 | 0.339658909 |
| 0.265556038 | 0.190236179 | 0.331439139 | 0.260949684 |
| 0.208537969 | 0.102617205 | 0.281621651 | 0.22734612  |
| 0.236737869 | 0.280818324 | 0.120567605 | 0.186322479 |
| 0.027264975 | 0.097924775 | 0.247343039 | 0.11235943  |
| 0.220259653 | 0.081627664 | 0.090879617 | 0.149439069 |
| 0.12294035  | 0.318480173 | 0.318164255 | 0.246149957 |
| 0.106051111 | 0.083674749 | 0.057161499 | 0.228851503 |
| 0.246600352 | 0.267091079 | 0.084727967 | 0.092487135 |
| 0.164639775 | 0.16260721  | 0.166915533 | 0.259766318 |
| 0.038308226 | 0.264138239 | 0.070568862 | 0.275065112 |
| 0.048575015 | 0.301034149 | 0.285454487 | 0.126194367 |
| 0.023244495 | 0.239768639 | 0.106995036 | 0.116359409 |
| 0.123678296 | 0.111858897 | 0.084805624 | 0.186121472 |
| 0.172478401 | 0.224055554 | 0.276528117 | 0.245962636 |
| 0.073516733 | 0.076730812 | 0.09448195  | 0.128334737 |
| 0.151156901 | 0.208858179 | 0.275145132 | 0.207328067 |
| 0.089941728 | 0.297348396 | 0.310855404 | 0.155641032 |
| 0.141618678 | 0.177186346 | 0.021953208 | 0.088745573 |
| 0.174325928 | 0.049872738 | 0.001650718 | 0.020609352 |
| 0.195005598 | 0.077372277 | 0.139478884 | 0.152026975 |
| 0.076623246 | 0.197901722 | 0.020272474 | 0.159584747 |
| 0.2451877   | 0.294156741 | 0.14541567  | 0.262494252 |
| 0.20114009  | 0.285715888 | 0.124394091 | 0.009383784 |
| 0.082607994 | 0.064647019 | 0.062668413 | 0.282871063 |
| 0.237447426 | 0.025113933 | 0.089133758 | 0.208042316 |
| 0.184674054 | 0.021614357 | 0.101020256 | 0.121552378 |
| 0.254597078 | 0.300071271 | 0.192586518 | 0.14391092  |
| 0.163895159 | 0.205521546 | 0.064837037 | 0.076416016 |
| 0.113618289 | 0.059513475 | 0.166152556 | 0.049562083 |
| 0.276458033 | 0.120447206 | 0.020526597 | 0.339559858 |
| 0.278736986 | 0.057284684 | 0.31965314  | 0.045475689 |
| 0.203900747 | 0.211772452 | 0.10134032  | 0.066944767 |
| 0.162234952 | 0.077465149 | 0.23012174  | 0.213159621 |
| 0.029373741 | 0.094277185 | 0.235321682 | 0.068916856 |
| 0.327468325 | 0.08184407  | 0.274495675 | 0.044558096 |
| 0.227570287 | 0.18185779  | 0.24753864  | 0.098384804 |
| 0.095149405 | 0.260557495 | 0.074175367 | 0.250294302 |
| 0.210408336 | 0.051700015 | 0.155921463 | 0.189398506 |
| 0.053891103 | 0.226437135 | 0.071625611 | 0.247755656 |
| 0.173275997 | 0.229202767 | 0.144849257 | 0.212252384 |
| 0.232393452 | 0.055612515 | 0.048960639 | 0.115024247 |
| 0.240704567 | 0.249920036 | 0.056806058 | 0.199565257 |
| 0.038046415 | 0.181683906 | 0.094096138 | 0.113658671 |

|             |             |             |             |
|-------------|-------------|-------------|-------------|
| 0.245448477 | 0.199354889 | 0.108817112 | 0.267508652 |
| 0.163871101 | 0.099311711 | 0.087451568 | 0.287981211 |
| 0.188360529 | 0.1728966   | 0.284569632 | 0.002732535 |
| 0.148915814 | 0.11762539  | 0.211933287 | 0.085290311 |
| 0.322080267 | 0.136504364 | 0.124296388 | 0.074328821 |
| 0.169867126 | 0.025716939 | 0.104437509 | 0.109569219 |
| 0.054591193 | 0.280657257 | 0.257888947 | 0.213985626 |
| 0.179123128 | 0.062203552 | 0.045021033 | 0.238419254 |
| 0.027089686 | 0.03770694  | 0.053439697 | 0.116767152 |
| 0.037045007 | 0.060075884 | 0.064689469 | 0.054979175 |
| 0.178639826 | 0.180446442 |             |             |
| OTUB1       | 0.163139428 | 0.178091359 | 0.128319789 |
| 0.098059106 | 0.074761433 | 0.056312468 | 0.246755874 |
| 0.197947277 | 0.190162345 | 0.041806022 | 0.07840019  |
| 0.163395034 | 0.009846312 | 0.186948959 | 0.238516213 |
| 0.078249346 | 0.202640404 | 0.220587313 | 0.06198786  |
| 0.127217134 | 0.078905422 | 0.036664146 | 0.079892573 |
| 0.077371714 | 0.306569945 | 0.135591558 | 0.053309866 |
| 0.176464318 | 0.01455137  | 0.081144423 | 0.020245683 |
| 0.271724941 | 0.071858032 | 0.034366066 | 0.137149961 |
| 0.074025672 | 0.01993353  | 0.308095672 | 0.104780098 |
| 0.019558561 | 0.275049983 | 0.046849798 | 0.107751177 |
| 0.060969236 | 0.159329122 | 0.01485168  | 0.09553428  |
| 0.136846156 | 0.118495509 | 0.165412789 | 0.107607108 |
| 0.072835339 | 0.151884812 | 0.106752992 | 0.008800574 |
| 0.025602642 | 0.003692188 | 0.016967651 | 0.215094046 |
| 0.216524252 | 0.181708612 | 0.028987329 | 0.136469248 |
| 0.094625639 | 0.130230475 | 0.208801236 | 0.058379006 |
| 0.20189714  | 0.023320541 | 0.096502259 | 0.073407486 |
| 0.087561065 | 0.205936435 | 0.286798502 | 0.239309238 |
| 0.058616949 | 0.147468755 | 0.071207048 | 0.041763986 |
| 0.171747219 | 0.28280665  | 0.221905915 | 0.24194768  |
| 0.044222601 | 0.061770579 | 0.063833229 | 0.196647179 |
| 0.168314744 | 0.252194185 | 0.122285994 | 0.245637236 |
| 0.215805966 | 0.073453521 | 0.139638912 | 0.258128655 |
| 0.161251537 | 0.040240437 | 0.05074054  | 0.021695933 |
| 0.090446559 | 0.07393848  | 0.272126109 | 0.185519633 |
| 0.066147775 | 0.218527723 | 0.261999424 | 0.052491218 |
| 0.062945206 | 0.18077894  | 0.07942871  | 0.125997292 |
| 0.100599889 | 0.17288615  | 0.152932252 | 0.195021971 |
| 0.061987542 | 0.193907737 | 0.123764315 | 0.193928112 |
| 0.01093045  | 0.214883735 | 0.157500437 | 0.176743984 |
| 0.1649571   | 0.185402519 | 0.089738226 | 0.253171684 |
| 0.147235408 | 0.157806103 | 0.155565616 | 0.126312507 |
| 0.158848247 | 0.231974899 | 0.215916274 | 0.167825423 |
| 0.19673571  | 0.036807438 | 0.060601448 | 0.104662615 |
| 0.139721627 | 0.256000832 | 0.03806989  | 0.270659611 |
| 0.216477028 | 0.136971327 | 0.159299481 | 0.308289224 |
| 0.183860977 | 0.234723939 | 0.148510182 | 0.161936297 |
| 0.253492226 | 0.251345031 | 0.208592806 | 0.079059268 |
| 0.23605975  | 0.084318319 | 0.058621487 | 0.202148149 |
| 0.223254155 | 0.00453066  | 0.146897754 | 0.162075804 |
| 0.209155561 | 0.123146125 | 0.213118457 | 0.177023909 |
| 0.206213499 | 0.242193726 | 0.010128126 | 0.143459947 |

|             |             |             |             |
|-------------|-------------|-------------|-------------|
| 0.236638735 | 0.188165685 | 0.160542451 | 0.05302286  |
| 0.085806617 | 0.074484394 | 0.126557998 | 0.032677725 |
| 0.26983219  | 0.157224936 | 0.158201008 | 0.159818368 |
| 0.12735542  | 0.275957644 | 0.045445833 | 0.251222777 |
| 0.185396329 | 0.152469552 | 0.196439896 | 0.223619012 |
| 0.041113597 | 0.185275157 | 0.078852568 | 0.099002445 |
| 0.210279541 | 0.095343077 | 0.027267616 | 0.088900566 |
| 0.269648835 | 0.06196586  | 0.177291757 | 0.19021655  |
| 0.19422207  | 0.338637183 | 0.113003503 | 0.121676237 |
| 0.105399114 | 0.372194278 | 0.091531048 | 0.182415481 |
| 0.078659231 | 0.238875932 | 0.114600247 | 0.22105955  |
| 0.249775208 | 0.053616823 | 0.273200795 | 0.042581925 |
| 0.064562023 | 0.034777382 | 0.018454518 | 0.054516821 |
| 0.35866591  | 0.119875287 | 0.096342389 | 0.102660848 |
| 0.113438941 | 0.185851295 | 0.059872085 | 0.284591347 |
| 0.272887382 | 0.061133745 | 0.162900435 | 0.079319545 |
| 0.073897758 | 0.108987953 | 0.133520668 | 0.09053444  |
| 0.186467504 | 0.022075732 | 0.018236818 | 0.168644916 |
| 0.035403508 | 0.06016542  | 0.160315353 | 0.107777151 |
| 0.050077187 | 0.324574326 | 0.213955381 | 0.008655627 |
| 0.07013331  | 0.04641463  | 0.172388718 | 0.051430009 |
| 0.18387043  | 0.216197347 | 0.060344962 | 0.062056591 |
| 0.185945207 | 0.223085472 | 0.179617203 | 0.184603057 |
| 0.04523625  | 0.222198123 | 0.136223938 | 0.17527579  |
| 0.142559979 | 0.048485821 | 0.011621012 | 0.135250926 |
| 0.156755039 | 0.056980105 | 0.242403385 | 0.113855315 |
| 0.061203772 | 0.094684305 | 0.084834991 | 0.202966641 |
| 0.275673428 | 0.21673859  | 0.15058029  | 0.1477147   |
| 0.174068007 | 0.139013348 | 0.164190193 | 0.233799505 |
| 0.050440497 | 0.064432709 | 0.057613402 | 0.166986524 |
| 0.223693804 | 0.072632708 | 0.271082883 | 0.016545166 |
| 0.000519113 | 0.197075792 | 0.193183863 | 0.133830133 |
| 0.032251142 | 0.068800321 | 0.112333583 | 0.205141258 |
| 0.195225248 | 0.200426808 | 0.261779488 | 0.073256556 |
| 0.218108371 | 0.064120198 | 0.048993135 | 0.083048336 |
| 0.256845725 | 0.066942104 | 0.112515788 | 0.287173742 |
| 0.205357637 | 0.029711051 | 0.11614489  | 0.007844488 |
| 0.210975803 | 0.129158919 | 0.319939992 | 0.359848479 |
| 0.172946957 | 0.329771791 | 0.221670079 | 0.058902955 |
| 0.142325358 | 0.205320877 | 0.013281536 | 0.193910157 |
| 0.225444524 | 0.229069854 | 0.224546009 | 0.250486    |
| 0.19589417  | 0.13627646  | 0.14181807  | 0.083898043 |
| 0.207576795 | 0.189868062 | 0.040529627 | 0.103724617 |
| 0.019478307 | 0.150617618 | 0.088486185 | 0.265499946 |
| 0.110998267 | 0.197562047 | 0.169698581 | 0.080983784 |
| 0.086285975 | 0.013190514 | 0.11233176  | 0.149147913 |
| 0.149524092 | 0.143293944 | 0.029406489 | 0.043212076 |
| 0.211981229 | 0.224444795 | 0.034119777 | 0.221879491 |
| 0.097083053 | 0.239225157 | 0.08192463  | 0.118693971 |
| 0.225991995 | 0.03079989  | 0.089094187 | 0.003734597 |
| 0.031374226 | 0.250703857 | 0.055544207 | 0.164095146 |
| 0.161347615 | 0.083747858 | 0.211404526 | 0.226639152 |
| 0.202884226 | 0.190331525 | 0.194033609 | 0.030221361 |
| 0.206429297 | 0.005927194 | 0.196113834 | 0.172531212 |

|             |             |             |             |
|-------------|-------------|-------------|-------------|
| 0.043368352 | 0.005488209 | 0.040497889 | 0.153789914 |
| 0.066372859 | 0.227390367 | 0.230408218 | 0.04085053  |
| 0.161325053 | 0.16414559  | 0.197979103 | 0.050856036 |
| 0.080451733 | 0.084689801 | 0.04912311  | 0.226967471 |
| 0.145868181 | 0.169546052 | 0.064913947 | 0.277293705 |
| 0.069469714 | 0.186731691 | 0.287470318 | 0.01480172  |
| 0.130971195 | 0.278492595 | 0.28498519  | 0.20334971  |
| 0.236377273 | 0.102400195 | 0.03080394  | 0.048005183 |
| 0.174392226 | 0.199736043 | 0.033038608 | 0.197857901 |
| 0.191279444 | 0.093324302 | 0.194349775 | 0.22764708  |
| 0.219357375 | 0.221643928 | 0.206481474 | 0.146947463 |
| 0.050317081 | 0.006194497 | 0.067801121 | 0.228108674 |
| 0.053006701 | 0.059480787 | 0.254931545 | 0.144701124 |
| 0.13243044  | 0.123566813 | 0.034398721 | 0.038196418 |
| 0.153625836 | 0.086184306 | 0.054506101 | 0.261564388 |
| 0.086346558 | 0.079503174 | 0.133755425 | 0.186642986 |
| 0.087598587 | 0.250771504 | 0.303029497 | 0.211168847 |
| 0.055544562 | 0.053018864 | 0.194640635 | 0.248010977 |
| 0.153814129 | 0.162067933 | 0.237056746 | 0.068705998 |
| 0.256031373 | 0.094396681 | 0.17352305  | 0.1871465   |
| 0.249965679 | 0.241805499 | 0.29313858  | 0.147440945 |
| 0.187722673 | 0.123466491 | 0.060419448 | 0.11560781  |
| 0.196181138 | 0.223595712 | 0.206802363 | 0.034862784 |
| 0.274196076 | 0.149167429 | 0.137034992 | 0.229258493 |
| 0.052133164 | 0.228461133 | 0.135289615 | 0.194655812 |
| 0.089093302 | 0.029779751 | 0.231890082 | 0.194850598 |
| 0.196844383 | 0.022912465 | 0.235910176 | 0.106025343 |
| 0.18510301  | 0.048673652 | 0.102173289 | 0.264376527 |
| 0.242749954 | 1           | 0.080417841 | 0.146148665 |
| 0.129610715 | 0.057864581 | 0.048065172 | 0.170352708 |
| 0.191298316 | 0.078228162 | 0.215648366 | 0.20886914  |
| 0.280419995 | 0.051691166 | 0.048752041 | 0.094213767 |
| 0.224372984 | 0.06083214  | 0.152606696 | 0.236845634 |
| 0.290226951 | 0.297172004 | 0.186686268 | 0.142060017 |
| 0.066754679 | 0.2060585   | 0.214136981 | 0.157445158 |
| 0.038683663 | 0.159832797 | 0.047635578 | 0.135544609 |
| 0.006811442 | 0.014552055 | 0.199754192 | 0.103826908 |
| 0.259080128 | 0.178031549 | 0.235978607 | 0.121490907 |
| 0.00137383  | 0.0868642   | 0.094346354 | 0.054167813 |
| 0.171118837 | 0.183681517 | 0.104601693 | 0.181678266 |
| 0.247997928 | 0.210975277 | 0.168284154 | 0.050011807 |
| 0.026681068 | 0.107256298 | 0.268289352 | 0.215792377 |
| 0.137609463 | 0.266939202 | 0.027034636 | 0.124624638 |
| 0.048457363 | 0.246851209 | 0.203054166 | 0.042668786 |
| 0.020550269 | 0.20006841  | 0.159544366 | 0.15679372  |
| 0.049602601 | 0.19055221  | 0.195360299 | 0.032911231 |
| 0.097869526 | 0.111424137 | 0.122634586 | 0.104266385 |
| 0.12883192  | 0.140695467 | 0.140202527 | 0.071551556 |
| 0.146827905 | 0.165035808 | 0.093992835 | 0.178189816 |
| 0.120674674 | 0.15797775  | 0.086222986 | 0.096522546 |
| 0.060545599 | 0.172521847 | 0.309381802 | 0.320276132 |
| 0.123863767 | 0.163008482 | 0.289362382 | 0.224090757 |
| 0.190479669 | 0.08978162  | 0.255367932 | 0.200553773 |
| 0.207506895 | 0.253921611 | 0.102611529 | 0.150806604 |

|             |             |             |             |
|-------------|-------------|-------------|-------------|
| 0.02538023  | 0.056861797 | 0.182227402 | 0.08626241  |
| 0.14914789  | 0.049829076 | 0.063559601 | 0.132154432 |
| 0.126695087 | 0.282391231 | 0.270886458 | 0.224666534 |
| 0.070361819 | 0.087636389 | 0.037349787 | 0.134700336 |
| 0.16513924  | 0.292592228 | 0.063464011 | 0.044500759 |
| 0.142515391 | 0.085647746 | 0.140422916 | 0.225592673 |
| 0.027817778 | 0.23439956  | 0.037953159 | 0.182373673 |
| 0.03054074  | 0.287801754 | 0.273380268 | 0.115323071 |
| 0.015186966 | 0.146811546 | 0.087932491 | 0.059749287 |
| 0.11412479  | 0.116362573 | 0.079853952 | 0.151677816 |
| 0.176631286 | 0.210477733 | 0.276160606 | 0.1682853   |
| 0.065888118 | 0.051017315 | 0.093145829 | 0.088760175 |
| 0.122964763 | 0.188698238 | 0.196091406 | 0.18412816  |
| 0.073298401 | 0.292427934 | 0.281331084 | 0.109677686 |
| 0.096408711 | 0.100868466 | 0.016660945 | 0.065164383 |
| 0.158585553 | 0.032028817 | 0.001683402 | 0.02045687  |
| 0.170521481 | 0.085838048 | 0.140959113 | 0.168399463 |
| 0.063928519 | 0.205563112 | 0.014283401 | 0.135789809 |
| 0.21705424  | 0.265870451 | 0.090113978 | 0.280187358 |
| 0.191480352 | 0.171429173 | 0.091282733 | 0.017330168 |
| 0.076665205 | 0.057703053 | 0.04518255  | 0.205129158 |
| 0.175805997 | 0.020183105 | 0.088344509 | 0.250376011 |
| 0.172215366 | 0.013054288 | 0.118155814 | 0.097964442 |
| 0.286700641 | 0.270979116 | 0.139877019 | 0.11355562  |
| 0.233258384 | 0.217462666 | 0.050418992 | 0.068329209 |
| 0.065039537 | 0.046161863 | 0.146314395 | 0.031532464 |
| 0.183197058 | 0.080091101 | 0.040408635 | 0.302345864 |
| 0.26118492  | 0.048658752 | 0.31994835  | 0.0368021   |
| 0.187585994 | 0.211691545 | 0.084713247 | 0.04812859  |
| 0.076765814 | 0.064055403 | 0.188285144 | 0.163908025 |
| 0.018083848 | 0.107300311 | 0.130183402 | 0.065837672 |
| 0.296609554 | 0.06397668  | 0.294431392 | 0.034860268 |
| 0.196756405 | 0.174222188 | 0.230703075 | 0.072945518 |
| 0.10589227  | 0.253888568 | 0.044647188 | 0.230071624 |
| 0.136455976 | 0.036074028 | 0.135922933 | 0.138274641 |
| 0.041639838 | 0.202381014 | 0.072856126 | 0.234844142 |
| 0.132514624 | 0.205078009 | 0.132907248 | 0.203027566 |
| 0.212903835 | 0.051961672 | 0.03333251  | 0.089327936 |
| 0.201823723 | 0.111225078 | 0.055620922 | 0.179126811 |
| 0.029503293 | 0.16738373  | 0.100809924 | 0.088791209 |
| 0.123255873 | 0.171211884 | 0.052771813 | 0.251505944 |
| 0.146419502 | 0.078559425 | 0.078441596 | 0.254578842 |
| 0.085880093 | 0.075924372 | 0.260443852 | 0.002977777 |
| 0.090961894 | 0.090444083 | 0.162582068 | 0.06324252  |
| 0.267766945 | 0.140294296 | 0.105249015 | 0.037347056 |
| 0.162273542 | 0.019556003 | 0.08623065  | 0.069375514 |
| 0.041423253 | 0.213215999 | 0.217626085 | 0.189567315 |
| 0.164208859 | 0.044170707 | 0.027244836 | 0.212097105 |
| 0.021317605 | 0.027286934 | 0.044380176 | 0.103405619 |
| 0.026292959 | 0.042824124 | 0.044387332 | 0.032734785 |
| 0.154239335 | 0.124767696 |             |             |
| OXSR1       | 0.068010186 | 0.337813402 | 0.082393169 |
| 0.09379451  | 0.124795681 | 0.143147511 | 0.030113323 |
| 0.04387978  | 0.231780965 | 0.063990726 | 0.19378087  |

|             |             |             |             |
|-------------|-------------|-------------|-------------|
| 0.021193965 | 0.006835498 | 0.376912816 | 0.022305646 |
| 0.182984171 | 0.018819285 | 0.074703357 | 0.012595605 |
| 0.043610269 | 0.110266989 | 0.059281209 | 0.200894037 |
| 0.085306111 | 0.251781813 | 0.21451059  | 0.126003713 |
| 0.407024508 | 0.048343052 | 0.256067525 | 0.054326804 |
| 0.383424759 | 0.139888641 | 0.117272013 | 0.021026167 |
| 0.170309478 | 1.19E-05    | 0.40826354  | 0.090673993 |
| 0.026330793 | 0.325619834 | 0.138392302 | 0.113895791 |
| 0.158879683 | 0.046920751 | 0.041732793 | 0.199518513 |
| 0.171038427 | 0.061531315 | 0.081207059 | 0.26858615  |
| 0.075752205 | 0.271674716 | 0.283049605 | 0.003895631 |
| 0.073857939 | 0.007902172 | 0.032902838 | 0.43313994  |
| 0.180823258 | 0.067164978 | 0.040823931 | 0.07324372  |
| 0.157029539 | 0.179419337 | 0.139415338 | 0.095678216 |
| 0.435085268 | 0.021098916 | 0.246567139 | 0.055701725 |
| 0.140791019 | 0.027347167 | 0.163808601 | 0.079451854 |
| 0.083054509 | 0.107189876 | 0.135036543 | 0.066165641 |
| 0.382068059 | 0.430646577 | 0.149199322 | 0.442081482 |
| 0.006731057 | 0.122903244 | 0.051548603 | 0.188554921 |
| 0.198749616 | 0.024373003 | 0.316516887 | 0.449671896 |
| 0.026958703 | 0.193957786 | 0.246509905 | 0.12968922  |
| 0.34735555  | 0.028249029 | 0.192255763 | 0.026665992 |
| 0.175645967 | 0.142711315 | 0.378289354 | 0.250164212 |
| 0.08256377  | 0.101428488 | 0.443952025 | 0.114778565 |
| 0.111691546 | 0.109809356 | 0.041501775 | 0.313858198 |
| 0.253274709 | 0.411584287 | 0.307537899 | 0.245046149 |
| 0.162003308 | 0.428181532 | 0.311410862 | 0.304147327 |
| 0.022845671 | 0.434647412 | 0.155282029 | 0.021043029 |
| 0.068137096 | 0.028264203 | 0.024193791 | 0.219457731 |
| 0.359705561 | 0.208370454 | 0.128740228 | 0.107770041 |
| 0.318546906 | 0.431536368 | 0.427636824 | 0.313142493 |
| 0.040138279 | 0.025925194 | 0.173525262 | 0.074068749 |
| 0.221878954 | 0.078402593 | 0.071018697 | 0.458747084 |
| 0.375709263 | 0.299909204 | 0.093140532 | 0.44246786  |
| 0.0610352   | 0.437255807 | 0.388490607 | 0.132863128 |
| 0.459917903 | 0.459397619 | 0.41674505  | 0.218360319 |
| 0.422882926 | 0.224196311 | 0.005498166 | 0.275694275 |
| 0.39374692  | 0.003430255 | 0.342794984 | 0.374342564 |
| 0.439621521 | 0.340490259 | 0.395247281 | 0.394156636 |
| 0.431091894 | 0.080688403 | 0.002126183 | 0.15045475  |
| 0.460696198 | 0.373320051 | 0.021835164 | 0.179221807 |
| 0.147903197 | 0.184103098 | 0.250845269 | 0.089019668 |
| 0.414502864 | 0.355116481 | 0.371715385 | 0.275338689 |
| 0.1326443   | 0.312451614 | 0.133044905 | 0.449036565 |
| 0.025673142 | 0.106744548 | 0.100620591 | 0.178154227 |
| 0.082245742 | 0.109203823 | 0.167803369 | 0.122900471 |
| 0.13967571  | 0.126432474 | 0.070243642 | 0.198225165 |
| 0.110829061 | 0.226897554 | 0.113744326 | 0.142350675 |
| 0.027465004 | 0.175822148 | 0.085572347 | 0.053716153 |
| 0.106322411 | 0.291812714 | 0.2546696   | 0.372688177 |
| 0.084122084 | 0.227513754 | 0.27632947  | 0.387192666 |
| 0.351467027 | 0.162010594 | 0.167069375 | 0.023459371 |
| 0.0748861   | 0.04579266  | 0.021527367 | 0.153844203 |
| 0.216635291 | 0.061800595 | 0.196501551 | 0.239266373 |

|             |             |             |             |
|-------------|-------------|-------------|-------------|
| 0.231851398 | 0.064733936 | 0.093838366 | 0.393506475 |
| 0.167626326 | 0.094929964 | 0.358087481 | 0.191262738 |
| 0.006492246 | 0.21113754  | 0.339271908 | 0.020248925 |
| 0.189277148 | 0.022812647 | 0.046645162 | 0.367012409 |
| 0.041282002 | 0.035994509 | 0.36258497  | 0.210774773 |
| 0.066430221 | 0.248945636 | 0.401924026 | 0.005442042 |
| 0.097456387 | 0.025999474 | 0.188419849 | 0.117596539 |
| 0.184759206 | 0.182664032 | 0.109752691 | 0.075356339 |
| 0.187204161 | 0.430109685 | 0.29590086  | 0.41458104  |
| 0.088651813 | 0.414904918 | 0.342648311 | 0.367988567 |
| 0.220572259 | 0.098864627 | 0.01514801  | 0.364162238 |
| 0.355701234 | 0.056356996 | 0.117938278 | 0.274143004 |
| 0.111283808 | 0.218514072 | 0.017772433 | 0.413482126 |
| 0.428026512 | 0.426904651 | 0.048005451 | 0.223028985 |
| 0.352865209 | 0.185438941 | 0.276158802 | 0.399576299 |
| 0.054909747 | 0.129917839 | 0.096546723 | 0.270809128 |
| 0.177392334 | 0.031501106 | 0.244732397 | 0.016601382 |
| 0.00242405  | 0.070243214 | 0.098427578 | 0.06884016  |
| 0.027870125 | 0.195401262 | 0.212640983 | 0.428886953 |
| 0.083485004 | 0.340647205 | 0.145418791 | 0.100527786 |
| 0.39736194  | 0.090242932 | 0.137298304 | 0.17117205  |
| 0.181243848 | 0.018303591 | 0.052353793 | 0.454909414 |
| 0.069229767 | 0.043381851 | 0.117029969 | 0.003554136 |
| 0.039310901 | 0.302155893 | 0.151230059 | 0.244230874 |
| 0.333634829 | 0.264670707 | 0.216367434 | 0.083718185 |
| 0.214832218 | 0.08096635  | 0.002684649 | 0.366395508 |
| 0.35501303  | 0.325535054 | 0.360443784 | 0.356691379 |
| 0.300507572 | 0.218751916 | 0.268925331 | 0.222688948 |
| 0.046191932 | 0.063816469 | 0.038761649 | 0.127932492 |
| 0.001897643 | 0.259612998 | 0.09036956  | 0.152696392 |
| 0.241420743 | 0.171571436 | 0.031182585 | 0.123451912 |
| 0.05560502  | 0.035863832 | 0.062955914 | 0.060930046 |
| 0.176088224 | 0.017088789 | 0.105980824 | 0.064918855 |
| 0.43173855  | 0.324999678 | 0.078952732 | 0.443377984 |
| 0.187693932 | 0.169277995 | 0.135956139 | 0.236179024 |
| 0.043322784 | 0.025133238 | 0.101796241 | 0.024099463 |
| 0.037763904 | 0.338754279 | 0.08178284  | 0.06112877  |
| 0.205735891 | 0.014712393 | 0.37398806  | 0.438075196 |
| 0.422815383 | 0.407524752 | 0.430376669 | 0.07829717  |
| 0.446406585 | 0.007902666 | 0.424934136 | 0.343763292 |
| 0.118130232 | 0.005302757 | 0.002244191 | 0.377941836 |
| 0.195741701 | 0.110721866 | 0.140777994 | 0.10763349  |
| 0.048102836 | 0.097908377 | 0.033123659 | 0.034936611 |
| 0.234092347 | 0.089317081 | 0.02114385  | 0.420602546 |
| 0.113347227 | 0.107776411 | 0.126185529 | 0.105482631 |
| 0.176421955 | 0.033710804 | 0.090689121 | 0.00421043  |
| 0.184705685 | 0.180358446 | 0.438745393 | 0.421199518 |
| 0.425923313 | 0.224715424 | 0.085104419 | 0.062173085 |
| 0.273845483 | 0.158124752 | 0.059555338 | 0.132369717 |
| 0.439511193 | 0.233288952 | 0.282829696 | 0.336949498 |
| 0.416951352 | 0.43389924  | 0.027975677 | 0.294811233 |
| 0.023753496 | 5.56E-05    | 0.240835544 | 0.157110452 |
| 0.002414082 | 0.127494638 | 0.239763589 | 0.041048087 |
| 0.037392639 | 0.039022831 | 0.053077    | 0.053602418 |



|             |             |             |             |
|-------------|-------------|-------------|-------------|
| 0.18202698  | 0.151944553 | 0.097349776 | 0.150633013 |
| 0.061897931 | 0.024793542 | 0.059055032 | 0.043407614 |
| 0.028024363 | 0.30843871  | 0.271768125 | 0.015402966 |
| 0.185067723 | 0.183352735 | 0.059683735 | 0.149508413 |
| 0.368687003 | 0.400204938 | 0.021180859 | 0.015788743 |
| 0.255481099 | 0.086455982 | 0.382520982 | 0.421373313 |
| 0.458760702 | 0.424895836 | 0.367256021 | 0.027094611 |
| 0.045035063 | 0.145226865 | 0.100370116 | 0.018777306 |
| 0.414672428 | 0.101973711 | 0.403572028 | 0.084809352 |
| 0.103602223 | 0.09551544  | 0.0238344   | 0.063123827 |
| 0.15335362  | 0.131306748 | 0.08018965  | 0.208561783 |
| 0.115217852 | 0.038177709 | 0.034389533 | 0.136315672 |
| 0.285033229 | 0.030893642 | 0.132556731 | 0.084998778 |
| 0.264638006 | 0.028884567 | 0.261897388 | 0.386794382 |
| 0.142261585 | 0.080417841 | 1           | 0.20095015  |
| 0.328878308 | 0.152455619 | 0.03222438  | 0.38275579  |
| 0.364821745 | 0.26057644  | 0.437398854 | 0.277895079 |
| 0.096693045 | 0.171418141 | 0.060924916 | 0.150502875 |
| 0.106514624 | 0.159379649 | 0.08766087  | 0.072660245 |
| 0.217610226 | 0.390392233 | 0.364295308 | 0.089790684 |
| 0.173792814 | 0.125382424 | 0.092157755 | 0.302313824 |
| 0.031276766 | 0.060811552 | 0.131365902 | 0.26057915  |
| 0.001467136 | 0.014832469 | 0.337320741 | 0.07145034  |
| 0.397810549 | 0.383744165 | 0.40566495  | 0.052431968 |
| 0.000125352 | 0.207781369 | 0.237408347 | 0.160461706 |
| 0.383796098 | 0.26898677  | 0.019888105 | 0.032464822 |
| 0.229219295 | 0.146730878 | 0.045468262 | 0.078691828 |
| 0.025102181 | 0.242210403 | 0.145805489 | 0.10012931  |
| 0.066646622 | 0.101634645 | 0.033826243 | 0.118354831 |
| 0.011075406 | 0.200586746 | 0.283304255 | 0.056024032 |
| 0.050311319 | 0.30155349  | 0.32861709  | 0.027698601 |
| 0.106808626 | 0.271692376 | 0.303344243 | 0.005441583 |
| 0.28214202  | 0.009542701 | 0.075852191 | 0.102065994 |
| 0.071774471 | 0.067031305 | 0.118650995 | 0.078909788 |
| 0.201114402 | 0.099492651 | 0.134814293 | 0.164228188 |
| 0.055487316 | 0.097354212 | 0.171914919 | 0.14182273  |
| 0.095370334 | 0.077783522 | 0.15700009  | 0.179634487 |
| 0.033819689 | 0.342906335 | 0.254644284 | 0.130024753 |
| 0.121859026 | 0.106124578 | 0.304315523 | 0.428317191 |
| 0.311522808 | 0.184540864 | 0.092299885 | 0.397941082 |
| 0.036058136 | 0.070782203 | 0.043152965 | 0.184312982 |
| 0.132282662 | 0.046246866 | 0.152931519 | 0.264925208 |
| 0.248546469 | 0.375497059 | 0.242719359 | 0.340244986 |
| 0.133937708 | 0.103561225 | 0.115145501 | 0.036072108 |
| 0.140530829 | 0.129030121 | 0.094988293 | 0.007957886 |
| 0.211465208 | 0.111983169 | 0.378095259 | 0.448607512 |
| 0.050926909 | 0.304253678 | 0.092592784 | 0.060842455 |
| 0.07076807  | 0.280777902 | 0.145374799 | 0.273161995 |
| 0.036047285 | 0.072814614 | 0.1332643   | 0.109727431 |
| 0.268015453 | 0.231512079 | 0.037873031 | 0.086694772 |
| 0.096495288 | 0.174306796 | 0.383837222 | 0.08526558  |
| 0.208389748 | 0.040911858 | 0.182267936 | 0.135895776 |
| 0.078290304 | 0.395638416 | 0.068015264 | 0.410823495 |
| 0.114352283 | 0.146049322 | 0.41128961  | 0.114611211 |

|             |             |             |             |
|-------------|-------------|-------------|-------------|
| 0.062914691 | 0.027233298 | 0.029071832 | 0.103378354 |
| 0.043110937 | 0.067608672 | 0.002508034 | 0.014399346 |
| 0.230305347 | 0.053574576 | 0.294338027 | 0.194028516 |
| 0.052436091 | 0.212256163 | 0.014068123 | 0.130847171 |
| 0.431917538 | 0.438309202 | 0.09592871  | 0.19367914  |
| 0.242972139 | 0.057396334 | 0.270088135 | 0.001197586 |
| 0.220944083 | 0.190701821 | 0.066023507 | 0.026400007 |
| 0.015391025 | 0.040430233 | 0.231801835 | 0.072942973 |
| 0.348609963 | 0.031738512 | 0.161943826 | 0.268160208 |
| 0.134555664 | 0.458035494 | 0.028834902 | 0.285983893 |
| 0.016230122 | 0.151561001 | 0.107319476 | 0.111928652 |
| 0.067197721 | 0.081785944 | 0.278404699 | 0.058209726 |
| 0.025752847 | 0.053730155 | 0.002415951 | 0.408546754 |
| 0.436419784 | 0.104227774 | 0.192032546 | 0.042696262 |
| 0.178383435 | 0.252356427 | 0.037871045 | 0.145971395 |
| 0.012313313 | 0.180499982 | 0.111356078 | 0.372872378 |
| 0.06895555  | 0.150228365 | 0.03198065  | 0.085725293 |
| 0.438006681 | 0.063008476 | 0.185319172 | 0.077106949 |
| 0.417545022 | 0.261185692 | 0.197430981 | 0.02988186  |
| 0.184696125 | 0.088143136 | 0.114080013 | 0.414372262 |
| 0.076641127 | 0.056619731 | 0.320694995 | 0.094347986 |
| 0.073238083 | 0.30925129  | 0.175695107 | 0.393991164 |
| 0.019751602 | 0.187099101 | 0.259858747 | 0.371410666 |
| 0.210339166 | 0.026321085 | 0.050867573 | 0.070750491 |
| 0.439089936 | 0.058731676 | 0.03523045  | 0.298092693 |
| 0.048214132 | 0.166989522 | 0.167505368 | 0.048228437 |
| 0.018513289 | 0.034370789 | 0.089999223 | 0.117134229 |
| 0.16803624  | 0.15252386  | 0.045467709 | 0.34418622  |
| 0.050988544 | 0.035947184 | 0.38005392  | 0.003603946 |
| 0.215993142 | 0.239116763 | 0.125596092 | 0.110090676 |
| 0.243829944 | 0.18270847  | 0.216030707 | 0.004980802 |
| 0.267774802 | 0.008172009 | 0.058203115 | 0.060512776 |
| 0.041819838 | 0.038338086 | 0.394661846 | 0.394608992 |
| 0.181365784 | 0.043340749 | 0.059620909 | 0.368116673 |
| 0.021983341 | 0.058730561 | 0.057929644 | 0.269547769 |
| 0.03966247  | 0.142618444 | 0.12134015  | 0.112285016 |
| 0.261614272 | 0.087775505 |             |             |
| P2RY12      | 0.093617082 | 0.393587634 | 0.063885657 |
| 0.118778121 | 0.301556586 | 0.310323267 | 0.095800791 |
| 0.172016192 | 0.329091332 | 0.26200782  | 0.298037612 |
| 0.028380479 | 0.152426894 | 0.417093387 | 0.10019093  |
| 0.327127542 | 0.06270108  | 0.14153821  | 0.129858548 |
| 0.253790527 | 0.281762277 | 0.302236135 | 0.294728396 |
| 0.31499886  | 0.189206501 | 0.286659173 | 0.34946196  |
| 0.451318679 | 0.221898805 | 0.334083796 | 0.147175158 |
| 0.386928102 | 0.303887955 | 0.322549451 | 0.02583354  |
| 0.345726101 | 0.050796632 | 0.412066893 | 0.251658471 |
| 0.16865793  | 0.333435366 | 0.260582354 | 0.225185551 |
| 0.287201966 | 0.046474937 | 0.175058087 | 0.342773288 |
| 0.303017175 | 0.322502017 | 0.080905568 | 0.332233078 |
| 0.342319162 | 0.286800424 | 0.297620107 | 0.004271321 |
| 0.283679723 | 0.118009959 | 0.239553859 | 0.462830877 |
| 0.205439393 | 0.16580153  | 0.268032756 | 0.307672943 |
| 0.352654232 | 0.351476573 | 0.289091045 | 0.298602944 |

|             |             |             |             |
|-------------|-------------|-------------|-------------|
| 0.447557977 | 0.224971308 | 0.347663004 | 0.155662616 |
| 0.315827356 | 0.060130979 | 0.173979551 | 0.117449101 |
| 0.344148226 | 0.230226388 | 0.324616286 | 0.31076872  |
| 0.373619818 | 0.493778441 | 0.257157763 | 0.456669549 |
| 0.192664401 | 0.325554283 | 0.305819351 | 0.294320938 |
| 0.335632567 | 0.146138925 | 0.311809989 | 0.478044427 |
| 0.093506856 | 0.29909565  | 0.324835122 | 0.142803476 |
| 0.387790801 | 0.338724511 | 0.286868554 | 0.207316163 |
| 0.336294141 | 0.305138692 | 0.465600669 | 0.253913544 |
| 0.348142627 | 0.087422054 | 0.445547864 | 0.308935584 |
| 0.260228316 | 0.094216947 | 0.246632272 | 0.415621685 |
| 0.318219451 | 0.442087535 | 0.377876105 | 0.328076568 |
| 0.315274336 | 0.448878488 | 0.304455352 | 0.405364336 |
| 0.159591132 | 0.482221407 | 0.185820508 | 0.073532624 |
| 0.092233069 | 0.148459372 | 0.322877169 | 0.307026813 |
| 0.423800251 | 0.315035789 | 0.197312113 | 0.243965276 |
| 0.427393639 | 0.434904363 | 0.481008743 | 0.363696223 |
| 0.059549636 | 0.309212493 | 0.305954212 | 0.301374184 |
| 0.326891132 | 0.163389723 | 0.26675198  | 0.465613433 |
| 0.340459551 | 0.382903827 | 0.181458528 | 0.475906482 |
| 0.264238068 | 0.474115519 | 0.391213093 | 0.172671416 |
| 0.473415478 | 0.448654673 | 0.471042857 | 0.331978448 |
| 0.440651448 | 0.262507248 | 0.119480012 | 0.354473498 |
| 0.459667502 | 0.020166264 | 0.438707333 | 0.459626039 |
| 0.447319203 | 0.398835424 | 0.492683174 | 0.471021587 |
| 0.457453457 | 0.103756876 | 0.049578725 | 0.288545955 |
| 0.456356749 | 0.342656811 | 0.232319666 | 0.316666263 |
| 0.335695094 | 0.310385322 | 0.384912854 | 0.226344105 |
| 0.492079562 | 0.411327795 | 0.450150545 | 0.333484877 |
| 0.293748052 | 0.311252514 | 0.326470181 | 0.42382356  |
| 0.074557612 | 0.12096915  | 0.064503817 | 0.311048969 |
| 0.26324142  | 0.204989502 | 0.298243523 | 0.354179473 |
| 0.213116068 | 0.318475903 | 0.312495474 | 0.331991751 |
| 0.06878343  | 0.320401125 | 0.185524651 | 0.174723538 |
| 0.063817996 | 0.162090936 | 0.170219148 | 0.169652178 |
| 0.271075389 | 0.244104194 | 0.344921957 | 0.45795633  |
| 0.350702222 | 0.16619995  | 0.331421024 | 0.451775932 |
| 0.408191158 | 0.316022238 | 0.244365588 | 0.012163496 |
| 0.225754148 | 0.299873047 | 0.230744933 | 0.346702388 |
| 0.200161542 | 0.239319923 | 0.324506387 | 0.327855616 |
| 0.226658285 | 0.193524435 | 0.317081301 | 0.411926502 |
| 0.15499688  | 0.274845686 | 0.395171298 | 0.324687052 |
| 0.006282469 | 0.262300842 | 0.375912896 | 0.223264945 |
| 0.297959753 | 0.156276374 | 0.232594374 | 0.412200024 |
| 0.300773618 | 0.288426611 | 0.460125159 | 0.344167586 |
| 0.29928476  | 0.237071787 | 0.494814336 | 0.078354946 |
| 0.357968979 | 0.068776275 | 0.269537697 | 0.283921174 |
| 0.235804112 | 0.292507636 | 0.316777777 | 0.281580148 |
| 0.126051729 | 0.47585144  | 0.367042605 | 0.463142521 |
| 0.300473705 | 0.492840695 | 0.400862441 | 0.392655032 |
| 0.318533402 | 0.334596685 | 0.172732534 | 0.355352235 |
| 0.403963802 | 0.268761291 | 0.087757614 | 0.384455122 |
| 0.310187    | 0.338191899 | 0.198229922 | 0.445188534 |
| 0.470325937 | 0.420191942 | 0.190753508 | 0.3372381   |

|             |             |             |             |
|-------------|-------------|-------------|-------------|
| 0.319707852 | 0.214288566 | 0.391164261 | 0.506575132 |
| 0.27132224  | 0.311030191 | 0.283973063 | 0.377349327 |
| 0.175921539 | 0.259902867 | 0.333890404 | 0.239294217 |
| 0.012240102 | 0.114608591 | 0.080274439 | 0.198098506 |
| 0.208072469 | 0.337386215 | 0.340169921 | 0.471170082 |
| 0.146790649 | 0.398834239 | 0.26576651  | 0.234355012 |
| 0.374487885 | 0.350932518 | 0.337672761 | 0.351120202 |
| 0.256033736 | 0.024447713 | 0.119653914 | 0.484982883 |
| 0.058112216 | 0.247256388 | 0.328274336 | 0.003203114 |
| 0.063796147 | 0.354718778 | 0.108400001 | 0.205754158 |
| 0.458472311 | 0.201172377 | 0.189497056 | 0.262220964 |
| 0.316052897 | 0.123876556 | 0.005910125 | 0.454805567 |
| 0.474299244 | 0.454180662 | 0.469301835 | 0.448519109 |
| 0.429797254 | 0.367621388 | 0.359479509 | 0.278423458 |
| 0.137882349 | 0.117540553 | 0.210973835 | 0.265568918 |
| 0.008379079 | 0.33865122  | 0.347974211 | 0.15575247  |
| 0.35937827  | 0.304494729 | 0.057308491 | 0.357930886 |
| 0.021009221 | 0.189860731 | 0.302980399 | 0.286902603 |
| 0.340216439 | 0.024679261 | 0.155928461 | 0.269837115 |
| 0.381044125 | 0.312696155 | 0.318866374 | 0.4846386   |
| 0.28245856  | 0.126239631 | 0.272526444 | 0.342522042 |
| 0.102619392 | 0.115358952 | 0.328152314 | 0.023742372 |
| 0.224034024 | 0.454337158 | 0.355524434 | 0.076510592 |
| 0.238987635 | 0.00766967  | 0.319215224 | 0.488927441 |
| 0.417890475 | 0.473744085 | 0.451311078 | 0.25508941  |
| 0.450202073 | 0.150587725 | 0.482867873 | 0.348960271 |
| 0.282276906 | 0.000662225 | 0.013844482 | 0.436029346 |
| 0.308875284 | 0.069366336 | 0.173271637 | 0.257250284 |
| 0.127338954 | 0.157469756 | 0.114254655 | 0.21733832  |
| 0.334456264 | 0.268222175 | 0.250378562 | 0.428619218 |
| 0.242271321 | 0.268919803 | 0.326300646 | 0.11208822  |
| 0.351462993 | 0.07241857  | 0.118907069 | 0.009500336 |
| 0.343656288 | 0.119149296 | 0.435994272 | 0.463191815 |
| 0.457403084 | 0.331578493 | 0.261867763 | 0.308334796 |
| 0.433377172 | 0.098514476 | 0.321760861 | 0.120098472 |
| 0.426466138 | 0.307602046 | 0.272147232 | 0.262870005 |
| 0.459103021 | 0.42086497  | 0.057434031 | 0.337824302 |
| 0.015418323 | 0.007210188 | 0.263132234 | 0.284429664 |
| 0.172057965 | 0.312285507 | 0.231224808 | 0.306429991 |
| 0.315544355 | 0.039375823 | 0.272738222 | 0.256500537 |
| 0.275067918 | 0.315485449 | 0.275180431 | 0.271373144 |
| 0.298344102 | 0.17851753  | 0.247365546 | 0.223236926 |
| 0.322559486 | 0.282229277 | 0.186354815 | 0.041620018 |
| 0.316449852 | 0.321324629 | 0.079931675 | 0.176896214 |
| 0.380728478 | 0.436139658 | 0.06970812  | 0.014787733 |
| 0.243780495 | 0.331315888 | 0.460641046 | 0.448253776 |
| 0.479524956 | 0.482456794 | 0.382056529 | 0.181577205 |
| 0.095540932 | 0.309426912 | 0.301243121 | 0.16184618  |
| 0.468378091 | 0.080690686 | 0.448490875 | 0.298626426 |
| 0.150420027 | 0.208456235 | 0.054061292 | 0.125585172 |
| 0.334438455 | 0.204787376 | 0.213121019 | 0.133619401 |
| 0.280041895 | 0.268358655 | 0.082358855 | 0.208778349 |
| 0.291354663 | 0.17960955  | 0.181717057 | 0.329985058 |
| 0.323032289 | 0.249384617 | 0.335230047 | 0.422621415 |

|             |             |             |             |
|-------------|-------------|-------------|-------------|
| 0.143799032 | 0.146148665 | 0.20095015  | 1           |
| 0.380544395 | 0.325436937 | 0.029068432 | 0.402950738 |
| 0.46719739  | 0.330453902 | 0.451464906 | 0.3817555   |
| 0.111998966 | 0.299159226 | 0.335909124 | 0.30849203  |
| 0.225548399 | 0.309935353 | 0.291883589 | 0.090365343 |
| 0.325012237 | 0.471757977 | 0.366432523 | 0.184559542 |
| 0.351488103 | 0.142165333 | 0.071206208 | 0.426760286 |
| 0.196713147 | 0.096459069 | 0.281920502 | 0.405009943 |
| 0.003888337 | 0.189138921 | 0.476701943 | 0.255187142 |
| 0.498783433 | 0.434335069 | 0.399947964 | 0.310850164 |
| 0.005165098 | 0.339055294 | 0.298385826 | 0.293010959 |
| 0.376514542 | 0.307704759 | 0.259377668 | 0.103074944 |
| 0.276811165 | 0.087190565 | 0.157310645 | 0.282056686 |
| 0.174765781 | 0.32330586  | 0.220398045 | 0.249046937 |
| 0.245221823 | 0.116491256 | 0.26705132  | 0.24273547  |
| 0.251071524 | 0.235081775 | 0.308226978 | 0.267744308 |
| 0.160272301 | 0.423952243 | 0.329580173 | 0.040924858 |
| 0.347301489 | 0.389904811 | 0.428316221 | 0.002073647 |
| 0.325953609 | 0.014222244 | 0.233937366 | 0.219346131 |
| 0.234470373 | 0.256558205 | 0.283102658 | 0.281115561 |
| 0.311701837 | 0.24329652  | 0.243653304 | 0.235385755 |
| 0.189274439 | 0.26191877  | 0.345022793 | 0.30840401  |
| 0.246739009 | 0.141977411 | 0.116735426 | 0.119248329 |
| 0.071429364 | 0.434191655 | 0.240526966 | 0.083580543 |
| 0.259484635 | 0.337893384 | 0.340310462 | 0.442341226 |
| 0.411972938 | 0.117829    | 0.342603415 | 0.376347132 |
| 0.227245981 | 0.267087303 | 0.08827107  | 0.322076269 |
| 0.249819763 | 0.214288316 | 0.340407629 | 0.23890754  |
| 0.327089619 | 0.378554672 | 0.233060311 | 0.424653916 |
| 0.317020809 | 0.338709296 | 0.230396545 | 0.10615805  |
| 0.166768528 | 0.155528166 | 0.271761325 | 0.00275559  |
| 0.31232071  | 0.213048645 | 0.405526466 | 0.435799458 |
| 0.301308429 | 0.377493718 | 0.224498684 | 0.095860789 |
| 0.204213446 | 0.172233936 | 0.159046686 | 0.360707297 |
| 0.220785008 | 0.21531649  | 0.289045435 | 0.259417848 |
| 0.353584284 | 0.349805506 | 0.320672779 | 0.283443562 |
| 0.287616953 | 0.197597718 | 0.460155718 | 0.142590187 |
| 0.32332658  | 0.201988923 | 0.299573877 | 0.25987479  |
| 0.253787791 | 0.477068849 | 0.086531844 | 0.479376348 |
| 0.293126247 | 0.14726066  | 0.471306962 | 0.323509247 |
| 0.30104176  | 0.178598953 | 0.211165875 | 0.327704214 |
| 0.273875949 | 0.316862753 | 0.019679429 | 0.080174862 |
| 0.28758621  | 0.343938552 | 0.339968971 | 0.345249085 |
| 0.284063094 | 0.328643578 | 0.235809942 | 0.283875535 |
| 0.431734971 | 0.462092809 | 0.204160082 | 0.247848488 |
| 0.303750775 | 0.130374267 | 0.299150822 | 0.043985073 |
| 0.322817152 | 0.328133899 | 0.307593684 | 0.094012904 |
| 0.036068874 | 0.210713563 | 0.316230813 | 0.097414955 |
| 0.448663687 | 0.210025585 | 0.326622136 | 0.341975791 |
| 0.207314253 | 0.45690658  | 0.184562016 | 0.31807308  |
| 0.088173117 | 0.276619701 | 0.353554524 | 0.350362676 |
| 0.197845639 | 0.279081545 | 0.303198824 | 0.238049427 |
| 0.051957066 | 0.263123819 | 0.002851823 | 0.380267545 |
| 0.427478769 | 0.308098949 | 0.21757729  | 0.285723811 |

|             |             |             |             |
|-------------|-------------|-------------|-------------|
| 0.274946392 | 0.385209994 | 0.277972233 | 0.339913278 |
| 0.017879558 | 0.303773199 | 0.23915425  | 0.356201643 |
| 0.167956518 | 0.327044384 | 0.081571553 | 0.331714537 |
| 0.426051574 | 0.249788362 | 0.273599333 | 0.227797824 |
| 0.443197171 | 0.370580322 | 0.154819117 | 0.300054216 |
| 0.332626262 | 0.086970646 | 0.305196638 | 0.495948021 |
| 0.207329891 | 0.225454358 | 0.391036719 | 0.197647127 |
| 0.315411476 | 0.370917853 | 0.33411977  | 0.496967932 |
| 0.119026358 | 0.244127865 | 0.377043234 | 0.425360028 |
| 0.287226263 | 0.23404953  | 0.243125405 | 0.24199392  |
| 0.401385939 | 0.099853579 | 0.297784135 | 0.290962815 |
| 0.215591402 | 0.310897223 | 0.295109301 | 0.243055425 |
| 0.056127253 | 0.250694693 | 0.311128036 | 0.170749723 |
| 0.280519307 | 0.310087354 | 0.270059602 | 0.370181187 |
| 0.143987652 | 0.027508588 | 0.434989726 | 0.022624905 |
| 0.274940947 | 0.315449538 | 0.270462564 | 0.333985884 |
| 0.171496135 | 0.321532887 | 0.258945152 | 0.001608278 |
| 0.374190988 | 0.076575989 | 0.356736663 | 0.216762019 |
| 0.292769757 | 0.074112721 | 0.422655049 | 0.474498521 |
| 0.31193276  | 0.336143981 | 0.284002733 | 0.434077462 |
| 0.172951394 | 0.306990287 | 0.333091229 | 0.312844838 |
| 0.250439852 | 0.28659204  | 0.335820925 | 0.296822814 |
| 0.318846079 | 0.304891951 |             |             |
| PALM        | 0.089031623 | 0.440313766 | 0.073150778 |
| 0.169165007 | 0.323383207 | 0.413944413 | 0.069339781 |
| 0.140326438 | 0.349474475 | 0.359267686 | 0.374792601 |
| 0.021792892 | 0.106341051 | 0.459605349 | 0.061970924 |
| 0.409969207 | 0.038114279 | 0.120649878 | 0.09289945  |
| 0.260355011 | 0.299301859 | 0.364960457 | 0.391105032 |
| 0.303889301 | 0.187799308 | 0.366570543 | 0.40987526  |
| 0.518997366 | 0.323180721 | 0.442258458 | 0.268038097 |
| 0.416900121 | 0.342477453 | 0.415772676 | 0.021731714 |
| 0.423106802 | 0.016324557 | 0.444448797 | 0.287829023 |
| 0.187362437 | 0.339555615 | 0.384657771 | 0.265124377 |
| 0.417810767 | 0.047454558 | 0.268721187 | 0.422133612 |
| 0.355279858 | 0.30184532  | 0.081408812 | 0.43890392  |
| 0.399832751 | 0.347951981 | 0.40746762  | 0.003025527 |
| 0.338332841 | 0.124617979 | 0.273995767 | 0.519151555 |
| 0.213203654 | 0.133261643 | 0.349349265 | 0.265053814 |
| 0.404537195 | 0.384812579 | 0.260435252 | 0.414347075 |
| 0.512462082 | 0.208675816 | 0.440151343 | 0.18448006  |
| 0.404998719 | 0.042114193 | 0.169097989 | 0.101744681 |
| 0.410945425 | 0.210323384 | 0.351068043 | 0.342850079 |
| 0.448901162 | 0.521439012 | 0.251084164 | 0.517714888 |
| 0.120706602 | 0.362657789 | 0.299925456 | 0.306036009 |
| 0.370092606 | 0.098544282 | 0.418257181 | 0.53251718  |
| 0.05976588  | 0.412400323 | 0.409233317 | 0.139833067 |
| 0.432717055 | 0.314050137 | 0.432251494 | 0.202213544 |
| 0.382659817 | 0.365502757 | 0.484471531 | 0.305809515 |
| 0.327468985 | 0.089882843 | 0.497814495 | 0.342635898 |
| 0.318595137 | 0.101348726 | 0.251682998 | 0.464454674 |
| 0.435315982 | 0.507016518 | 0.424295705 | 0.365018676 |
| 0.404333166 | 0.514701068 | 0.418759924 | 0.414079465 |
| 0.207469419 | 0.540674032 | 0.210108392 | 0.045938238 |

|             |             |             |             |
|-------------|-------------|-------------|-------------|
| 0.089249259 | 0.090705998 | 0.254259318 | 0.290171199 |
| 0.478545061 | 0.342832627 | 0.220329276 | 0.250313406 |
| 0.46025299  | 0.492934107 | 0.541480083 | 0.405433895 |
| 0.047172664 | 0.288721745 | 0.412358432 | 0.296318184 |
| 0.38672713  | 0.124241727 | 0.289476783 | 0.519720987 |
| 0.375945223 | 0.427750118 | 0.190264437 | 0.505528177 |
| 0.216767749 | 0.520073689 | 0.470741246 | 0.187826033 |
| 0.530116303 | 0.507409943 | 0.519211896 | 0.411329057 |
| 0.480538842 | 0.372944455 | 0.079113096 | 0.373077035 |
| 0.484702289 | 0.01942257  | 0.488069308 | 0.516568937 |
| 0.519682659 | 0.464693167 | 0.529493743 | 0.522289461 |
| 0.520994797 | 0.085607427 | 0.044893381 | 0.297077887 |
| 0.525186767 | 0.390974177 | 0.13930803  | 0.443753142 |
| 0.373021958 | 0.415916716 | 0.420368833 | 0.352055537 |
| 0.511242353 | 0.459267702 | 0.505455013 | 0.398179221 |
| 0.338299936 | 0.309055585 | 0.406928509 | 0.481354283 |
| 0.050850568 | 0.136186714 | 0.065411178 | 0.304831709 |
| 0.394530082 | 0.184467708 | 0.407623351 | 0.365134312 |
| 0.203209649 | 0.364213683 | 0.36825897  | 0.38857262  |
| 0.067360241 | 0.455675605 | 0.187053553 | 0.198609926 |
| 0.047427728 | 0.143940078 | 0.208064768 | 0.168891215 |
| 0.2639043   | 0.241639625 | 0.443746889 | 0.502687366 |
| 0.368286709 | 0.201536885 | 0.433801591 | 0.474997126 |
| 0.415212    | 0.405864461 | 0.231408687 | 0.014739882 |
| 0.310727407 | 0.360299026 | 0.229773905 | 0.428001524 |
| 0.178504508 | 0.267586083 | 0.40536787  | 0.396367518 |
| 0.313384725 | 0.165726192 | 0.3988155   | 0.425041229 |
| 0.16684079  | 0.324151658 | 0.442619588 | 0.429731588 |
| 0.00424415  | 0.359054928 | 0.436923001 | 0.166270798 |
| 0.332763581 | 0.156329951 | 0.290866115 | 0.473128839 |
| 0.326568886 | 0.247461886 | 0.504259636 | 0.39211988  |
| 0.364971767 | 0.226873414 | 0.533697493 | 0.069716437 |
| 0.365245221 | 0.061707578 | 0.290268955 | 0.37658963  |
| 0.272547144 | 0.290559717 | 0.33282216  | 0.301800146 |
| 0.151634609 | 0.529465937 | 0.377698231 | 0.524264214 |
| 0.409003351 | 0.538094843 | 0.456743357 | 0.437511701 |
| 0.375111576 | 0.397429158 | 0.172966444 | 0.436603022 |
| 0.464420113 | 0.338621978 | 0.090010116 | 0.439575225 |
| 0.405996246 | 0.414267341 | 0.127187703 | 0.503065106 |
| 0.495592897 | 0.48915693  | 0.151639665 | 0.369103323 |
| 0.378300266 | 0.256819244 | 0.396406413 | 0.532235285 |
| 0.374774641 | 0.379102156 | 0.369432884 | 0.378669835 |
| 0.195382828 | 0.231916572 | 0.300928715 | 0.217021518 |
| 0.016791234 | 0.096248859 | 0.07986977  | 0.17060499  |
| 0.191739803 | 0.435519024 | 0.409053962 | 0.530175262 |
| 0.127989513 | 0.411705565 | 0.244972639 | 0.321069168 |
| 0.431136817 | 0.366059111 | 0.396458111 | 0.395829577 |
| 0.250455043 | 0.022466749 | 0.131122287 | 0.526206932 |
| 0.05220953  | 0.270471926 | 0.331979461 | 0.003538435 |
| 0.056304533 | 0.411555371 | 0.10528107  | 0.191188876 |
| 0.475899761 | 0.198699051 | 0.23208441  | 0.378740478 |
| 0.345568644 | 0.105076656 | 0.003411708 | 0.500386678 |
| 0.495270491 | 0.463631302 | 0.495181286 | 0.465397281 |
| 0.445564626 | 0.399844265 | 0.411638377 | 0.380306309 |

|             |             |             |             |
|-------------|-------------|-------------|-------------|
| 0.12042981  | 0.110800924 | 0.250026671 | 0.309065078 |
| 0.006996056 | 0.373209243 | 0.316638592 | 0.153950863 |
| 0.421938223 | 0.312464154 | 0.044335265 | 0.362909157 |
| 0.029887735 | 0.250410302 | 0.335098541 | 0.22926557  |
| 0.343368229 | 0.017787373 | 0.296817614 | 0.366400637 |
| 0.442025616 | 0.334735508 | 0.393139542 | 0.543172701 |
| 0.34498158  | 0.150389551 | 0.336516845 | 0.392974219 |
| 0.082746381 | 0.14550317  | 0.385236441 | 0.059300899 |
| 0.218577641 | 0.453923171 | 0.40016953  | 0.089807737 |
| 0.293378679 | 0.006431438 | 0.363852908 | 0.53842863  |
| 0.484338806 | 0.531759412 | 0.512320435 | 0.302810496 |
| 0.520576056 | 0.146508513 | 0.543419142 | 0.405419817 |
| 0.425247618 | 0.001424301 | 0.005922406 | 0.499699188 |
| 0.420848291 | 0.070932323 | 0.173591606 | 0.398139982 |
| 0.124813714 | 0.181470898 | 0.072915028 | 0.206687779 |
| 0.432910631 | 0.249358737 | 0.191549712 | 0.48473039  |
| 0.261762068 | 0.23896231  | 0.419626709 | 0.100822512 |
| 0.414420036 | 0.060812751 | 0.100256082 | 0.010223635 |
| 0.365273427 | 0.12654755  | 0.478566405 | 0.522790211 |
| 0.497445057 | 0.399131934 | 0.394617101 | 0.361415473 |
| 0.429301012 | 0.118785664 | 0.400068048 | 0.133119678 |
| 0.505056626 | 0.409028313 | 0.322367607 | 0.308830054 |
| 0.507416734 | 0.478266294 | 0.038507345 | 0.410461865 |
| 0.01703221  | 0.001986414 | 0.411692754 | 0.265288604 |
| 0.078872658 | 0.395264499 | 0.261417794 | 0.256014162 |
| 0.23860499  | 0.039080764 | 0.304107361 | 0.276818866 |
| 0.312622272 | 0.378923686 | 0.295737802 | 0.250381982 |
| 0.282134548 | 0.156235974 | 0.205644603 | 0.161538223 |
| 0.266220995 | 0.30833231  | 0.192773406 | 0.025174408 |
| 0.45097828  | 0.435025871 | 0.066783229 | 0.170505731 |
| 0.438809268 | 0.504329492 | 0.049053796 | 0.013172963 |
| 0.265869104 | 0.32891954  | 0.506217951 | 0.516705573 |
| 0.535123154 | 0.524686999 | 0.387716958 | 0.131244429 |
| 0.077927446 | 0.33384711  | 0.312794668 | 0.105877322 |
| 0.521580639 | 0.082882768 | 0.494016119 | 0.329933624 |
| 0.12828502  | 0.24160273  | 0.038060431 | 0.093717599 |
| 0.402222519 | 0.185203174 | 0.187890699 | 0.175290689 |
| 0.335677047 | 0.279963603 | 0.055617661 | 0.211876696 |
| 0.354335815 | 0.2262877   | 0.174643054 | 0.328014172 |
| 0.360791676 | 0.275185824 | 0.435946496 | 0.445677944 |
| 0.14509495  | 0.129610715 | 0.328878308 | 0.380544395 |
| 1           | 0.422859675 | 0.03336063  | 0.471651556 |
| 0.492730114 | 0.451937567 | 0.511061717 | 0.370981645 |
| 0.096370112 | 0.399650915 | 0.344323704 | 0.360250301 |
| 0.195687271 | 0.407541671 | 0.247189441 | 0.072410558 |
| 0.276563168 | 0.480790841 | 0.425821234 | 0.17847593  |
| 0.432440418 | 0.149125112 | 0.074164205 | 0.443445025 |
| 0.215954065 | 0.10852281  | 0.398541765 | 0.421072914 |
| 0.002425949 | 0.167693349 | 0.492688592 | 0.249736944 |
| 0.519438197 | 0.490614413 | 0.440916269 | 0.273101675 |
| 0.002679249 | 0.423376286 | 0.394393394 | 0.426609966 |
| 0.440989576 | 0.350485511 | 0.162582319 | 0.082436253 |
| 0.278693234 | 0.098112775 | 0.1507715   | 0.378620153 |
| 0.220296708 | 0.421473659 | 0.199932528 | 0.224203759 |



|             |             |             |             |
|-------------|-------------|-------------|-------------|
| 0.208257479 | 0.109211801 | 0.272687771 | 0.259575245 |
| 0.177779998 | 0.240246948 | 0.344000845 | 0.336908578 |
| 0.240916602 | 0.430020067 | 0.412541623 | 0.032188976 |
| 0.372258502 | 0.397062727 | 0.423939339 | 0.003127114 |
| 0.435167108 | 0.007901412 | 0.20470054  | 0.231009076 |
| 0.210533767 | 0.220680072 | 0.264140191 | 0.317063052 |
| 0.371165028 | 0.241359716 | 0.296853808 | 0.244895413 |
| 0.174064368 | 0.235113473 | 0.40038416  | 0.390754331 |
| 0.299110744 | 0.142220963 | 0.105875781 | 0.109693846 |
| 0.058471118 | 0.468832333 | 0.235514485 | 0.088525665 |
| 0.231515592 | 0.383663088 | 0.333757468 | 0.513686764 |
| 0.404793083 | 0.125139593 | 0.343208668 | 0.455605091 |
| 0.288745214 | 0.330403854 | 0.076985184 | 0.411370518 |
| 0.242356022 | 0.239567965 | 0.417632252 | 0.346062293 |
| 0.417181148 | 0.397150625 | 0.23433497  | 0.436313418 |
| 0.383193935 | 0.367891835 | 0.37985058  | 0.093797633 |
| 0.202370483 | 0.144859704 | 0.284162501 | 0.002496926 |
| 0.358668791 | 0.300900079 | 0.478941114 | 0.504768976 |
| 0.326695939 | 0.368213195 | 0.376408705 | 0.107235563 |
| 0.342874703 | 0.190683737 | 0.150652552 | 0.434777929 |
| 0.261839739 | 0.198736023 | 0.316875608 | 0.366884173 |
| 0.434147185 | 0.425599687 | 0.271802967 | 0.258348142 |
| 0.248711748 | 0.219727156 | 0.481307234 | 0.143603077 |
| 0.451548391 | 0.206677756 | 0.381553433 | 0.319121715 |
| 0.233353745 | 0.529109051 | 0.069798647 | 0.539984563 |
| 0.355424961 | 0.141142965 | 0.488480956 | 0.312337022 |
| 0.312341189 | 0.125535505 | 0.228749604 | 0.408788963 |
| 0.239773984 | 0.366897302 | 0.023611413 | 0.079462645 |
| 0.327425926 | 0.331236078 | 0.412347125 | 0.364317714 |
| 0.265730295 | 0.32689025  | 0.195388606 | 0.311280278 |
| 0.498671884 | 0.506438956 | 0.284588042 | 0.246715987 |
| 0.345261135 | 0.1112633   | 0.412637942 | 0.020222203 |
| 0.439960152 | 0.443079672 | 0.41605487  | 0.058078007 |
| 0.021571003 | 0.258717301 | 0.43791477  | 0.082278145 |
| 0.484895513 | 0.256758582 | 0.376398067 | 0.435978141 |
| 0.185037897 | 0.508776889 | 0.126733439 | 0.408351967 |
| 0.060597346 | 0.263547914 | 0.396103006 | 0.397591646 |
| 0.249043084 | 0.321463547 | 0.378640106 | 0.263954303 |
| 0.036517406 | 0.285188316 | 0.002356602 | 0.406322203 |
| 0.486131336 | 0.371221732 | 0.202040309 | 0.347648729 |
| 0.278994451 | 0.363229585 | 0.255846111 | 0.434622682 |
| 0.01254931  | 0.388732292 | 0.203381451 | 0.409359619 |
| 0.301244051 | 0.385819984 | 0.063525898 | 0.334019053 |
| 0.464678075 | 0.311583218 | 0.245931087 | 0.37584053  |
| 0.505940312 | 0.376246632 | 0.182412176 | 0.231942766 |
| 0.401767284 | 0.074989731 | 0.414450442 | 0.536174569 |
| 0.184707976 | 0.242532433 | 0.43453201  | 0.225285319 |
| 0.334833313 | 0.377935514 | 0.428562128 | 0.525949119 |
| 0.077107315 | 0.250344807 | 0.41557341  | 0.467578084 |
| 0.289884728 | 0.191262368 | 0.273161057 | 0.246875889 |
| 0.475489618 | 0.112415171 | 0.286334124 | 0.364897679 |
| 0.254649944 | 0.308638747 | 0.364735849 | 0.200779769 |
| 0.040356798 | 0.174432062 | 0.382019136 | 0.153462553 |
| 0.304649002 | 0.383659861 | 0.263565865 | 0.375299675 |

|             |             |             |             |
|-------------|-------------|-------------|-------------|
| 0.145938718 | 0.030310147 | 0.446408673 | 0.027613858 |
| 0.360699154 | 0.403717808 | 0.247940336 | 0.367044313 |
| 0.191967224 | 0.36970037  | 0.373807235 | 0.001293883 |
| 0.400082846 | 0.0590662   | 0.313508601 | 0.251815088 |
| 0.322769862 | 0.06112794  | 0.461308636 | 0.519496786 |
| 0.324189891 | 0.346209017 | 0.386577512 | 0.466872415 |
| 0.176252346 | 0.375504212 | 0.369458598 | 0.42938507  |
| 0.253529963 | 0.429977719 | 0.435557218 | 0.412212255 |
| 0.387944554 | 0.27895026  |             |             |
| PAQR7       | 0.031264029 | 0.426841723 | 0.026790849 |
| 0.055986216 | 0.174179936 | 0.230345336 | 0.024739518 |
| 0.056774841 | 0.331998334 | 0.323203757 | 0.185101668 |
| 0.004442852 | 0.08883786  | 0.403489194 | 0.022234844 |
| 0.261519457 | 0.009492948 | 0.045286134 | 0.062024974 |
| 0.149770135 | 0.156962077 | 0.222239286 | 0.228422136 |
| 0.175245853 | 0.132044034 | 0.230026582 | 0.300435604 |
| 0.484125527 | 0.262928838 | 0.321964198 | 0.209577032 |
| 0.338945798 | 0.195867608 | 0.292575116 | 0.005136585 |
| 0.250851398 | 0.019082315 | 0.376076233 | 0.13367186  |
| 0.103398627 | 0.26646045  | 0.283833461 | 0.110120391 |
| 0.282869759 | 0.013482807 | 0.277007978 | 0.348992748 |
| 0.235245055 | 0.172801644 | 0.033929925 | 0.342210599 |
| 0.270775889 | 0.220953448 | 0.386951841 | 0.000964925 |
| 0.230867865 | 0.135962    | 0.230124485 | 0.467834487 |
| 0.099041492 | 0.048816928 | 0.31475082  | 0.168054323 |
| 0.31175817  | 0.301559096 | 0.152672051 | 0.30232522  |
| 0.449537041 | 0.150756055 | 0.400503845 | 0.082115206 |
| 0.238661591 | 0.016529831 | 0.083727425 | 0.052159722 |
| 0.277889421 | 0.087841339 | 0.192173665 | 0.22668213  |
| 0.431110864 | 0.459233596 | 0.133173677 | 0.47293569  |
| 0.105894646 | 0.228337156 | 0.17246042  | 0.196660191 |
| 0.304135726 | 0.047905013 | 0.293377123 | 0.463065285 |
| 0.026882364 | 0.31979209  | 0.33090446  | 0.074510798 |
| 0.398622911 | 0.266238631 | 0.298031039 | 0.122182296 |
| 0.27395602  | 0.210425884 | 0.451282695 | 0.167899392 |
| 0.203374959 | 0.036160843 | 0.448041668 | 0.214250799 |
| 0.14839971  | 0.036939495 | 0.132711278 | 0.455621164 |
| 0.283655647 | 0.45844245  | 0.424512428 | 0.294923401 |
| 0.242845125 | 0.454938592 | 0.280596832 | 0.383028796 |
| 0.258583829 | 0.496616569 | 0.084771958 | 0.012368172 |
| 0.035891072 | 0.032933974 | 0.189338321 | 0.214436739 |
| 0.440402089 | 0.213146864 | 0.089161326 | 0.112491931 |
| 0.425394852 | 0.451758578 | 0.507616941 | 0.352786043 |
| 0.013193912 | 0.239492104 | 0.239671696 | 0.160649607 |
| 0.27378447  | 0.05434929  | 0.172635526 | 0.456616438 |
| 0.289328854 | 0.385296251 | 0.08584756  | 0.439055169 |
| 0.122244245 | 0.442120096 | 0.445164466 | 0.069525433 |
| 0.461935275 | 0.442143885 | 0.450544142 | 0.312099434 |
| 0.412529447 | 0.177665724 | 0.079462482 | 0.331163161 |
| 0.409909903 | 0.009013677 | 0.476483936 | 0.490099341 |
| 0.471669513 | 0.43721911  | 0.478525833 | 0.480628082 |
| 0.480295273 | 0.032488382 | 0.055954061 | 0.164764108 |
| 0.465126695 | 0.307539836 | 0.066598443 | 0.288283044 |
| 0.24133564  | 0.22797346  | 0.401104313 | 0.192797914 |

|              |             |             |             |
|--------------|-------------|-------------|-------------|
| 0.438226757  | 0.413773996 | 0.486708521 | 0.329802096 |
| 0.225518645  | 0.236728631 | 0.288596825 | 0.422545071 |
| 0.013735338  | 0.050999749 | 0.025302031 | 0.225265323 |
| 0.268058599  | 0.073324528 | 0.223574916 | 0.24491491  |
| 0.086731751  | 0.22154007  | 0.278423621 | 0.280852049 |
| 0.036756446  | 0.291729714 | 0.079004418 | 0.088699681 |
| 0.0111083305 | 0.093729949 | 0.078690056 | 0.064387308 |
| 0.124328825  | 0.187737267 | 0.378564396 | 0.463242179 |
| 0.251245597  | 0.109942022 | 0.331852956 | 0.404497439 |
| 0.332473068  | 0.23740323  | 0.14729721  | 0.001681951 |
| 0.158684897  | 0.335646061 | 0.182932878 | 0.295609768 |
| 0.133436543  | 0.130857586 | 0.255750671 | 0.298262509 |
| 0.145350247  | 0.089077172 | 0.247961665 | 0.346254635 |
| 0.101821263  | 0.160029878 | 0.379894604 | 0.292271964 |
| 0.000323946  | 0.169991978 | 0.388164937 | 0.0892887   |
| 0.22508481   | 0.094743234 | 0.18273076  | 0.424227175 |
| 0.242596381  | 0.161592402 | 0.477789493 | 0.307750732 |
| 0.231069435  | 0.188401717 | 0.486628366 | 0.069895224 |
| 0.257204106  | 0.016158639 | 0.159712367 | 0.302720384 |
| 0.122249935  | 0.188603935 | 0.199664627 | 0.151455759 |
| 0.070388848  | 0.479611583 | 0.323706669 | 0.473144984 |
| 0.2634329    | 0.485249214 | 0.418239986 | 0.368688617 |
| 0.233495831  | 0.304707415 | 0.140345798 | 0.369402999 |
| 0.419687841  | 0.235606845 | 0.044974852 | 0.443215103 |
| 0.295686054  | 0.318003435 | 0.059643567 | 0.434197573 |
| 0.418368325  | 0.45532431  | 0.059886398 | 0.284147313 |
| 0.278274984  | 0.107692051 | 0.362429468 | 0.481898841 |
| 0.310060782  | 0.23161473  | 0.203941278 | 0.320357977 |
| 0.083016245  | 0.137727856 | 0.25364466  | 0.188662585 |
| 0.014517457  | 0.040423888 | 0.027650028 | 0.066707691 |
| 0.107661819  | 0.364476665 | 0.289075309 | 0.477748571 |
| 0.046137764  | 0.349792693 | 0.166674141 | 0.148902022 |
| 0.370051537  | 0.247967337 | 0.255610566 | 0.264298514 |
| 0.156260205  | 0.004329574 | 0.043745281 | 0.455465375 |
| 0.021680512  | 0.158711656 | 0.200601722 | 0.000736989 |
| 0.018326702  | 0.43364182  | 0.064994124 | 0.134011554 |
| 0.434954667  | 0.140652128 | 0.114059964 | 0.288235336 |
| 0.22076987   | 0.038459904 | 0.00026676  | 0.474045276 |
| 0.479241509  | 0.450782339 | 0.48066487  | 0.442123758 |
| 0.436954563  | 0.36649416  | 0.351112923 | 0.206423759 |
| 0.042533303  | 0.046482417 | 0.141663363 | 0.147677766 |
| 0.003603517  | 0.278530744 | 0.191152396 | 0.06838129  |
| 0.367353186  | 0.201417912 | 0.012193362 | 0.247022637 |
| 0.005774922  | 0.174313273 | 0.198353346 | 0.118436011 |
| 0.265081028  | 0.003938054 | 0.145327216 | 0.223684764 |
| 0.375350574  | 0.266159135 | 0.276433789 | 0.488516725 |
| 0.162746051  | 0.093281458 | 0.161438923 | 0.299049278 |
| 0.026732973  | 0.1165407   | 0.249843983 | 0.046081843 |
| 0.155902751  | 0.426035694 | 0.2732575   | 0.027986915 |
| 0.130678575  | 0.000550784 | 0.289745663 | 0.480226443 |
| 0.446241315  | 0.482919178 | 0.447401469 | 0.17352881  |
| 0.456199687  | 0.177243387 | 0.499878738 | 0.362640412 |
| 0.310281419  | 7.96E-05    | 0.001628521 | 0.459236995 |
| 0.237122062  | 0.039970043 | 0.068709475 | 0.215612647 |

|             |             |             |             |
|-------------|-------------|-------------|-------------|
| 0.039392592 | 0.084461676 | 0.02657389  | 0.102485653 |
| 0.290949938 | 0.121468981 | 0.114908602 | 0.441273115 |
| 0.117470759 | 0.114750876 | 0.284969121 | 0.049381401 |
| 0.265343349 | 0.016948417 | 0.050141945 | 0.002681431 |
| 0.271660835 | 0.079039215 | 0.42350588  | 0.47967382  |
| 0.420815695 | 0.280920757 | 0.325653026 | 0.230288417 |
| 0.422495459 | 0.067494119 | 0.287820567 | 0.064445942 |
| 0.458229005 | 0.257149468 | 0.203471327 | 0.212139236 |
| 0.437673042 | 0.402700748 | 0.010640325 | 0.327244006 |
| 0.003387245 | 0.00084948  | 0.222384184 | 0.167857984 |
| 0.098104657 | 0.244443258 | 0.156779174 | 0.175076862 |
| 0.146793524 | 0.009792867 | 0.20516796  | 0.172045531 |
| 0.157742664 | 0.206896102 | 0.160693211 | 0.181290158 |
| 0.154493003 | 0.077062129 | 0.092805988 | 0.073419218 |
| 0.217006273 | 0.247341981 | 0.134204007 | 0.006675985 |
| 0.291167632 | 0.25985323  | 0.020537264 | 0.080882936 |
| 0.36821269  | 0.452117971 | 0.014876594 | 0.001345148 |
| 0.173506833 | 0.197012937 | 0.457082322 | 0.480013916 |
| 0.473818    | 0.455443975 | 0.312110593 | 0.054543461 |
| 0.025955272 | 0.177455388 | 0.180055165 | 0.040337864 |
| 0.472561242 | 0.036562186 | 0.450311661 | 0.220468204 |
| 0.053813981 | 0.099950496 | 0.008302405 | 0.034473775 |
| 0.267988668 | 0.08224587  | 0.076068789 | 0.081947302 |
| 0.168396919 | 0.171197246 | 0.017954524 | 0.087826455 |
| 0.249029684 | 0.13829835  | 0.070456503 | 0.195437214 |
| 0.291351031 | 0.292986602 | 0.358996755 | 0.365817772 |
| 0.064561966 | 0.057864581 | 0.152455619 | 0.325436937 |
| 0.422859675 | 1           | 0.008937039 | 0.458130674 |
| 0.447829195 | 0.336305363 | 0.456870022 | 0.313547574 |
| 0.04144474  | 0.218620288 | 0.264521004 | 0.202238186 |
| 0.090403243 | 0.227886464 | 0.129086425 | 0.02516931  |
| 0.22934366  | 0.427242902 | 0.377037494 | 0.066922147 |
| 0.297727083 | 0.077645996 | 0.03168482  | 0.435141289 |
| 0.117311086 | 0.0357348   | 0.30105974  | 0.425812222 |
| 5.69E-05    | 0.122419538 | 0.466834652 | 0.113150415 |
| 0.469798805 | 0.435575263 | 0.356889999 | 0.15843295  |
| 0.001994693 | 0.339189045 | 0.213925983 | 0.225544719 |
| 0.399037773 | 0.256297993 | 0.11024239  | 0.024177346 |
| 0.186900233 | 0.048282676 | 0.056877568 | 0.22017915  |
| 0.165468706 | 0.29098407  | 0.105976716 | 0.120919321 |
| 0.093064094 | 0.067696419 | 0.173756592 | 0.112248985 |
| 0.151514395 | 0.1349159   | 0.246729591 | 0.300803641 |
| 0.140570306 | 0.399395524 | 0.344338009 | 0.008377475 |
| 0.250909417 | 0.372741414 | 0.385383971 | 0.000341095 |
| 0.331109119 | 0.000854243 | 0.089744976 | 0.093177719 |
| 0.089503496 | 0.107192166 | 0.133639118 | 0.159194738 |
| 0.239386761 | 0.106432658 | 0.124746237 | 0.11077984  |
| 0.065942141 | 0.111602267 | 0.246266517 | 0.225123934 |
| 0.13679055  | 0.052082868 | 0.068961816 | 0.076594661 |
| 0.015751026 | 0.449697803 | 0.161600404 | 0.043251013 |
| 0.110793649 | 0.238409269 | 0.253107211 | 0.480006832 |
| 0.341164036 | 0.087313198 | 0.209513153 | 0.408525631 |
| 0.282972908 | 0.189331699 | 0.029821506 | 0.237155921 |
| 0.107295175 | 0.116863004 | 0.280442845 | 0.192095104 |

|             |             |             |             |
|-------------|-------------|-------------|-------------|
| 0.37636199  | 0.315910926 | 0.155047669 | 0.379430119 |
| 0.20054786  | 0.261063265 | 0.284830049 | 0.027603242 |
| 0.076522964 | 0.075846996 | 0.149461166 | 0.000836769 |
| 0.213579106 | 0.134231269 | 0.434435229 | 0.445739066 |
| 0.247110331 | 0.301755001 | 0.253019768 | 0.034470689 |
| 0.268812664 | 0.142939642 | 0.069475271 | 0.398066199 |
| 0.198081607 | 0.082330901 | 0.159165315 | 0.205481664 |
| 0.367389389 | 0.392056804 | 0.171746345 | 0.138518107 |
| 0.131836118 | 0.112043095 | 0.442946404 | 0.062162782 |
| 0.322927974 | 0.093919113 | 0.304630706 | 0.14996843  |
| 0.107045897 | 0.496499364 | 0.024634068 | 0.502815468 |
| 0.200102159 | 0.084046705 | 0.414424101 | 0.181194546 |
| 0.168397264 | 0.049025906 | 0.166879095 | 0.285815884 |
| 0.127121632 | 0.259623915 | 0.029094695 | 0.044309588 |
| 0.205316566 | 0.265564735 | 0.404186328 | 0.292471546 |
| 0.149103254 | 0.248294553 | 0.175005845 | 0.169177852 |
| 0.463598367 | 0.45594967  | 0.118385781 | 0.155858912 |
| 0.246201143 | 0.037764116 | 0.277396564 | 0.02106334  |
| 0.308385021 | 0.337118978 | 0.309097142 | 0.018896564 |
| 0.004640531 | 0.176364931 | 0.291384989 | 0.040189145 |
| 0.4456143   | 0.193678011 | 0.307478433 | 0.345764927 |
| 0.113275846 | 0.44798161  | 0.048751253 | 0.286882095 |
| 0.031272559 | 0.149470196 | 0.278087803 | 0.295476994 |
| 0.103468993 | 0.188827447 | 0.258192348 | 0.149750294 |
| 0.008171872 | 0.13685449  | 0.00017772  | 0.323241684 |
| 0.439620085 | 0.240345225 | 0.137755603 | 0.336091838 |
| 0.157801363 | 0.333540369 | 0.155255034 | 0.309745858 |
| 0.001647308 | 0.226933271 | 0.090062222 | 0.344444859 |
| 0.187199378 | 0.255138307 | 0.016276985 | 0.222619357 |
| 0.405875945 | 0.170128741 | 0.181899829 | 0.23377937  |
| 0.466324883 | 0.361798163 | 0.1154421   | 0.129754669 |
| 0.354719203 | 0.030653951 | 0.29897504  | 0.489275397 |
| 0.073382844 | 0.12947781  | 0.385475963 | 0.088211973 |
| 0.229220969 | 0.333753857 | 0.344065365 | 0.493575378 |
| 0.024751363 | 0.12527514  | 0.36332397  | 0.428827572 |
| 0.19122114  | 0.111840825 | 0.162393318 | 0.120130206 |
| 0.421958502 | 0.036757364 | 0.183342345 | 0.244017786 |
| 0.149907771 | 0.186397488 | 0.294984271 | 0.097652664 |
| 0.011350122 | 0.085919886 | 0.212921178 | 0.065652154 |
| 0.147651015 | 0.210079211 | 0.138972877 | 0.294141854 |
| 0.050194908 | 0.004766874 | 0.369747173 | 0.014492774 |
| 0.188619958 | 0.249661388 | 0.118012753 | 0.217848758 |
| 0.115316865 | 0.226785964 | 0.208124432 | 0.000207685 |
| 0.348215881 | 0.028119693 | 0.205511759 | 0.110589565 |
| 0.223693302 | 0.020151202 | 0.399850056 | 0.468092956 |
| 0.201065698 | 0.27217999  | 0.274090199 | 0.425470082 |
| 0.109065919 | 0.31625827  | 0.284576673 | 0.330867276 |
| 0.166852879 | 0.314316347 | 0.312946462 | 0.261282661 |
| 0.28701897  | 0.149812719 |             |             |
| PARP12      | 0.165007471 | 0.042034403 | 0.18326511  |
| 0.061454877 | 0.030849121 | 0.043257584 | 0.045680226 |
| 0.043169878 | 0.025244217 | 0.002507583 | 0.081900492 |
| 0.089014309 | 0.000579112 | 0.059996004 | 0.048075232 |
| 0.020524585 | 0.064206855 | 0.084260953 | 0.000164031 |

|             |             |             |             |
|-------------|-------------|-------------|-------------|
| 0.002010858 | 0.029591881 | 0.015333293 | 0.035730496 |
| 0.017581601 | 0.160753711 | 0.028693772 | 0.008264749 |
| 0.052068645 | 0.004418123 | 0.044054125 | 0.000717516 |
| 0.085290047 | 0.029986989 | 0.011910771 | 0.098498782 |
| 0.029772244 | 0.000621691 | 0.074406461 | 0.035270469 |
| 0.002106023 | 0.110493412 | 0.010580127 | 0.106533571 |
| 0.008088775 | 0.132671757 | 0.002187703 | 0.013540965 |
| 0.018063936 | 0.016823745 | 0.11619592  | 0.03378003  |
| 0.00514522  | 0.101110753 | 0.022179767 | 0.000493361 |
| 0.010610092 | 5.48E-05    | 0.002118422 | 0.070475192 |
| 0.18130829  | 0.129077794 | 0.000590443 | 0.01762432  |
| 0.011415643 | 0.018484466 | 0.061176809 | 0.003982493 |
| 0.070635233 | 0.001736782 | 0.020177197 | 0.005363054 |
| 0.018673288 | 0.032417963 | 0.140632787 | 0.042388646 |
| 0.008533896 | 0.119314003 | 0.052929015 | 0.00684012  |
| 0.039895843 | 0.076919242 | 0.055370755 | 0.060731441 |
| 1.58E-05    | 0.012847359 | 0.012177608 | 0.059156869 |
| 0.021110701 | 0.013647449 | 0.066437293 | 0.071761981 |
| 0.031311896 | 0.011801125 | 0.022260575 | 0.08243361  |
| 0.058060624 | 0.001899052 | 0.014273977 | 0.012100319 |
| 0.023923866 | 0.016432162 | 0.055692724 | 0.115153717 |
| 0.021699246 | 0.111050338 | 0.074389529 | 0.015263007 |
| 0.07285281  | 0.154094107 | 0.006695522 | 0.031428332 |
| 0.035044263 | 0.063109442 | 0.027389421 | 0.034019651 |
| 0.015045436 | 0.068232742 | 0.058048292 | 0.049383027 |
| 0.000150966 | 0.060306064 | 0.150480758 | 0.116870328 |
| 0.069320832 | 0.081152183 | 0.002195972 | 0.085977493 |
| 0.054851956 | 0.056297495 | 0.084055788 | 0.053603162 |
| 0.039520574 | 0.067117801 | 0.052348933 | 0.042163538 |
| 0.122855547 | 0.001380047 | 0.016253381 | 0.037073655 |
| 0.033509622 | 0.07059266  | 0.013812929 | 0.078795823 |
| 0.115331177 | 0.038234012 | 0.051655592 | 0.08457176  |
| 0.019107094 | 0.084276446 | 0.04778609  | 0.152789552 |
| 0.077625013 | 0.085244467 | 0.069889337 | 0.032676806 |
| 0.093311819 | 0.08296597  | 5.24E-05    | 0.03674952  |
| 0.089131931 | 0.002410513 | 0.037197932 | 0.041132267 |
| 0.059156683 | 0.036189996 | 0.055074164 | 0.05578278  |
| 0.060695478 | 0.097532426 | 0.001239445 | 0.043344068 |
| 0.067999991 | 0.092616042 | 0.020717522 | 0.012732003 |
| 0.021846886 | 0.037175282 | 0.029246036 | 0.003191784 |
| 0.082660907 | 0.05152053  | 0.042673838 | 0.033132185 |
| 0.010067421 | 0.120467553 | 0.009027733 | 0.084725538 |
| 0.065126074 | 0.138815384 | 0.17151131  | 0.040993897 |
| 0.010369865 | 0.1139333   | 0.024220274 | 0.012300616 |
| 0.127441893 | 0.018851591 | 0.007435052 | 0.029621252 |
| 0.11483571  | 0.026937421 | 0.090092503 | 0.054225253 |
| 0.088314368 | 0.14786233  | 0.026769366 | 0.128735684 |
| 0.056538569 | 0.112074138 | 0.025902334 | 0.048595616 |
| 0.007705588 | 0.138632213 | 0.037537016 | 0.077984746 |
| 0.094876413 | 0.023045623 | 0.085941521 | 0.033961825 |
| 0.00381466  | 0.001333072 | 0.001361858 | 0.013943712 |
| 0.121822587 | 0.012806352 | 0.019990696 | 0.050478361 |
| 0.084674785 | 0.030351453 | 0.007392338 | 0.111840587 |
| 0.089997849 | 0.05479874  | 0.055814166 | 0.012463354 |

|             |             |             |             |
|-------------|-------------|-------------|-------------|
| 0.033247554 | 0.050475661 | 0.049220909 | 0.003852116 |
| 0.030000681 | 0.001595916 | 0.011535929 | 0.045273723 |
| 0.002245584 | 0.006757173 | 0.049885369 | 0.039451486 |
| 0.004942027 | 0.080310331 | 0.057788993 | 0.000135476 |
| 0.008054274 | 0.007169298 | 0.089150692 | 0.00670135  |
| 0.081361461 | 0.054261034 | 0.023971914 | 0.024035214 |
| 0.164839332 | 0.063699836 | 0.064901126 | 0.062218727 |
| 0.005296325 | 0.0586489   | 0.04677122  | 0.076582278 |
| 0.056674621 | 0.004491645 | 0.001278966 | 0.049629663 |
| 0.043255804 | 0.000533596 | 0.12301696  | 0.022928712 |
| 0.004263797 | 0.022294236 | 0.001699906 | 0.066965407 |
| 0.093456158 | 0.056984116 | 0.084519759 | 0.041085809 |
| 0.101836724 | 0.163084759 | 0.04431268  | 0.062353524 |
| 0.001375514 | 0.011821158 | 0.011322755 | 0.054679448 |
| 0.135331512 | 0.008079994 | 0.06652932  | 0.001508162 |
| 0.000289077 | 0.082703793 | 0.138912485 | 0.0983931   |
| 0.011370816 | 0.014569193 | 0.02539602  | 0.058277239 |
| 0.130663717 | 0.089243779 | 0.039660846 | 0.02634209  |
| 0.056816304 | 0.009792967 | 0.02127181  | 0.02762804  |
| 0.07133407  | 0.027791354 | 0.077387486 | 0.079608236 |
| 0.075254583 | 0.012678075 | 0.023323706 | 0.009421148 |
| 0.070168227 | 0.026131319 | 0.114789037 | 0.157731321 |
| 0.053200298 | 0.137825985 | 0.086392793 | 0.00265857  |
| 0.081424524 | 0.151601918 | 0.03434026  | 0.041535614 |
| 0.042918112 | 0.038640939 | 0.041429648 | 0.051361706 |
| 0.029554281 | 0.028281806 | 0.032903907 | 0.058961139 |
| 0.048993085 | 0.048835748 | 0.004180305 | 0.031334066 |
| 0.001204397 | 0.078689107 | 0.020000165 | 0.171212643 |
| 0.028823857 | 0.032775681 | 0.147046623 | 0.018426962 |
| 0.078934382 | 0.003959493 | 0.009599051 | 0.025061615 |
| 0.035942778 | 0.107678305 | 0.003683013 | 0.002992479 |
| 0.092280365 | 0.095472516 | 0.006547153 | 0.066758781 |
| 0.086684192 | 0.069570288 | 0.038243898 | 0.060119019 |
| 0.070288686 | 1.26E-05    | 0.01047076  | 0.000494813 |
| 0.002149842 | 0.053797259 | 0.006676438 | 0.028800454 |
| 0.092859166 | 0.094857531 | 0.103512837 | 0.071136233 |
| 0.062581271 | 0.052943568 | 0.075659099 | 0.019655689 |
| 0.072023531 | 0.000415386 | 0.057941683 | 0.052022885 |
| 0.005466298 | 0.005780224 | 0.006067343 | 0.046638451 |
| 0.022512074 | 0.119975617 | 0.134665898 | 0.02415555  |
| 0.083582789 | 0.061089871 | 0.091666591 | 0.015678588 |
| 0.044903129 | 0.055005732 | 0.009090755 | 0.057823478 |
| 0.046114163 | 0.064520038 | 0.011599815 | 0.102269774 |
| 0.029936052 | 0.122215563 | 0.06843892  | 0.013794846 |
| 0.038675975 | 0.107819621 | 0.078553995 | 0.061437116 |
| 0.081932468 | 0.037376293 | 0.003903735 | 0.008643308 |
| 0.035016024 | 0.124794602 | 0.004030824 | 0.105422812 |
| 0.061091062 | 0.028845218 | 0.119400128 | 0.130265597 |
| 0.066607116 | 0.076325688 | 0.10533395  | 0.038789203 |
| 0.085400814 | 0.001342592 | 0.037705071 | 0.054774414 |
| 0.000166484 | 0.010836117 | 0.114513904 | 0.0048434   |
| 0.012818208 | 0.057120796 | 0.004706899 | 0.00545394  |
| 0.053714902 | 0.021462706 | 0.02283557  | 0.038995112 |
| 0.015406622 | 0.001389208 | 0.066338428 | 0.03839372  |

|             |             |             |             |
|-------------|-------------|-------------|-------------|
| 0.000525047 | 0.068622093 | 0.162850417 | 0.055440578 |
| 0.014808388 | 0.019593434 | 0.17429619  | 0.135900281 |
| 0.06955158  | 0.055191088 | 0.013757711 | 0.05263438  |
| 0.112369378 | 0.011519039 | 0.056754741 | 0.056828176 |
| 0.076696069 | 0.072135727 | 0.102385341 | 0.020312594 |
| 0.139733759 | 0.036246181 | 0.017791952 | 0.021708404 |
| 0.064423601 | 0.071303881 | 0.070431386 | 0.009704254 |
| 0.094833473 | 0.054293521 | 0.122336743 | 0.097256602 |
| 0.021307845 | 0.130910472 | 0.08381036  | 0.116083309 |
| 0.025409024 | 0.005206594 | 0.06644344  | 0.098505539 |
| 0.055237374 | 0.001085967 | 0.10048356  | 0.018196536 |
| 0.047265061 | 0.000363988 | 0.02592116  | 0.092427764 |
| 0.162341341 | 0.048065172 | 0.03222438  | 0.029068432 |
| 0.03336063  | 0.008937039 | 1           | 0.042192527 |
| 0.058786632 | 0.030347246 | 0.074348684 | 0.059047458 |
| 0.099349454 | 0.033468544 | 0.003569004 | 0.018925914 |
| 0.064906365 | 0.048906547 | 0.031936259 | 0.126926052 |
| 0.072664262 | 0.073787348 | 0.044580954 | 0.158382168 |
| 0.021293719 | 0.061278404 | 0.064227969 | 0.042478622 |
| 0.004438612 | 0.061482261 | 0.010206534 | 0.026786221 |
| 0.002850895 | 0.003453762 | 0.042095241 | 0.091635843 |
| 0.063612403 | 0.052614522 | 0.098481565 | 0.016844795 |
| 0.003017227 | 0.016607247 | 0.061466292 | 0.024512845 |
| 0.04789988  | 0.083271349 | 0.003476257 | 0.093091167 |
| 0.121878539 | 0.154290026 | 0.029944658 | 0.007770243 |
| 9.70E-05    | 0.028718917 | 0.114146775 | 0.029931412 |
| 0.038208799 | 0.040500989 | 0.006349218 | 0.096807142 |
| 0.000161581 | 0.13583276  | 0.091613288 | 0.004026715 |
| 0.002015748 | 0.038930922 | 0.035753542 | 0.161915876 |
| 0.015238291 | 0.035674056 | 0.056333006 | 0.001065458 |
| 0.038507995 | 0.075640155 | 0.06788687  | 0.099713576 |
| 0.066918447 | 0.033072197 | 0.050934163 | 0.024003579 |
| 0.023067198 | 0.041579489 | 0.089239089 | 0.140450637 |
| 0.100929638 | 0.047102337 | 0.024175405 | 0.01563865  |
| 0.051126199 | 0.151641206 | 0.133983677 | 0.145838751 |
| 0.123929994 | 0.049916981 | 0.161914602 | 0.165646299 |
| 0.08590825  | 0.00996505  | 0.107984151 | 0.054892471 |
| 0.083303038 | 0.120877697 | 0.015778389 | 0.059740409 |
| 0.000133667 | 0.002270714 | 0.056304476 | 0.02750591  |
| 0.10134638  | 0.01861209  | 0.017847737 | 0.044149024 |
| 0.019277148 | 0.119470667 | 0.17224458  | 0.07052034  |
| 0.027812169 | 0.006231733 | 0.006699056 | 0.111644043 |
| 0.101229116 | 0.083925815 | 0.028386448 | 0.034767869 |
| 0.063646343 | 0.028855102 | 0.048904737 | 0.073410302 |
| 0.004764597 | 0.098432842 | 0.005259613 | 0.082855127 |
| 0.003676686 | 0.099219482 | 0.143151659 | 0.027890194 |
| 0.004082625 | 0.094469105 | 0.034514546 | 0.028802216 |
| 0.030087276 | 0.017466086 | 0.008098008 | 0.030603919 |
| 0.030247386 | 0.089282919 | 0.055769006 | 0.079747188 |
| 0.013898303 | 0.025295605 | 0.014380776 | 0.040438148 |
| 0.03743086  | 0.049483459 | 0.14721052  | 0.050745878 |
| 0.01429758  | 0.117123864 | 0.093965439 | 0.04105714  |
| 0.017314785 | 0.047923071 | 0.003211564 | 0.008903662 |
| 0.018949009 | 0.00968178  | 9.98E-06    | 0.000349414 |



|             |             |             |             |
|-------------|-------------|-------------|-------------|
| 0.092982591 | 0.003177089 | 0.02193751  | 0.027163723 |
| 0.01353686  | 0.054366273 | 0.001251716 | 0.022902205 |
| 0.059461805 | 0.07390668  | 0.023123022 | 0.081240757 |
| 0.058660766 | 0.171928156 | 0.05002092  | 0.000183421 |
| 0.018197464 | 0.013677144 | 0.003964134 | 0.089945595 |
| 0.033253211 | 0.002970148 | 0.016614182 | 0.043104184 |
| 0.0450016   | 0.001910336 | 0.011841935 | 0.041333975 |
| 0.065319537 | 0.078058971 | 0.052903262 | 0.066141814 |
| 0.003276177 | 0.0582655   | 0.010295878 | 0.00718511  |
| 0.041641424 | 0.011483229 | 0.065534705 | 0.017458487 |
| 0.129064433 | 0.021986142 | 0.000142649 | 0.116130995 |
| 0.063748107 | 0.007220717 | 0.112277797 | 0.002010106 |
| 0.09910371  | 0.048515602 | 0.004892028 | 0.01271861  |
| 0.047990577 | 0.026942649 | 0.103344091 | 0.093581022 |
| 0.002502493 | 0.009759291 | 0.076769236 | 0.007919257 |
| 0.087457428 | 0.004542151 | 0.073970154 | 0.002284973 |
| 0.059717998 | 0.03885988  | 0.088959597 | 0.010445427 |
| 0.011572227 | 0.123593134 | 0.012386424 | 0.060480698 |
| 0.105905565 | 0.016111774 | 0.047873104 | 0.050175854 |
| 0.008838537 | 0.063577321 | 0.01043328  | 0.053044251 |
| 0.042912429 | 0.116678852 | 0.036750084 | 0.04603108  |
| 0.102193963 | 0.007235469 | 0.010711121 | 0.027801287 |
| 0.071879569 | 0.139546467 | 0.002784225 | 0.065785285 |
| 0.005975435 | 0.070925944 | 0.012249372 | 0.029509089 |
| 0.037236171 | 0.023153291 | 0.041239713 | 0.110507081 |
| 0.053309922 | 0.025668266 | 0.010435581 | 0.111242904 |
| 0.111956806 | 0.067442422 | 0.087927575 | 0.000129376 |
| 0.083323478 | 0.062381673 | 0.09821025  | 0.017192992 |
| 0.199001123 | 0.02647096  | 0.02163936  | 0.007698253 |
| 0.04369878  | 0.001592016 | 0.01310942  | 0.033528936 |
| 0.00138869  | 0.072831663 | 0.086094236 | 0.058115904 |
| 0.058771918 | 0.002207122 | 0.00412403  | 0.063186408 |
| 0.000807277 | 0.003396304 | 0.00404342  | 0.027226291 |
| 0.007623409 | 0.007156474 | 0.008646527 | 0.013068042 |
| 0.061930521 | 0.041248416 |             |             |
| PARP6       | 0.127222499 | 0.468116001 | 0.122558474 |
| 0.169293001 | 0.275855413 | 0.45552918  | 0.091722595 |
| 0.166613511 | 0.42186024  | 0.421460108 | 0.365919749 |
| 0.031010469 | 0.070287645 | 0.446789981 | 0.079339886 |
| 0.374258592 | 0.043077932 | 0.140740097 | 0.101125026 |
| 0.284526213 | 0.24574741  | 0.331472352 | 0.470624641 |
| 0.257853834 | 0.251499593 | 0.433540826 | 0.398598207 |
| 0.497016714 | 0.308154213 | 0.448652838 | 0.298930523 |
| 0.39971173  | 0.290159887 | 0.395559334 | 0.038022411 |
| 0.439933791 | 0.010615696 | 0.449453423 | 0.249381881 |
| 0.133367581 | 0.361639064 | 0.470991033 | 0.246973429 |
| 0.460239221 | 0.072990375 | 0.332051194 | 0.41516635  |
| 0.410633251 | 0.315691641 | 0.137595446 | 0.4674339   |
| 0.405399796 | 0.401691072 | 0.487570094 | 0.004107224 |
| 0.283672174 | 0.083249807 | 0.21436819  | 0.517481048 |
| 0.235623855 | 0.138599815 | 0.331130496 | 0.317139909 |
| 0.414664276 | 0.38120522  | 0.278135962 | 0.435331666 |
| 0.489697335 | 0.150774074 | 0.457100205 | 0.190684016 |
| 0.42957594  | 0.076282665 | 0.201608016 | 0.16430733  |

|             |             |             |             |
|-------------|-------------|-------------|-------------|
| 0.402240368 | 0.208140587 | 0.331850165 | 0.286462776 |
| 0.474030348 | 0.516991029 | 0.27813291  | 0.529444521 |
| 0.082576205 | 0.311158878 | 0.254165231 | 0.299244818 |
| 0.387538852 | 0.126925532 | 0.419203358 | 0.508441678 |
| 0.096207814 | 0.480324942 | 0.429803188 | 0.202331561 |
| 0.471530371 | 0.284242234 | 0.488881073 | 0.146295084 |
| 0.34779037  | 0.31620171  | 0.494348505 | 0.319829785 |
| 0.302673412 | 0.142249837 | 0.527261012 | 0.28606685  |
| 0.285836286 | 0.145624915 | 0.199418366 | 0.458084557 |
| 0.434923974 | 0.481064898 | 0.46752803  | 0.380438131 |
| 0.360519136 | 0.488684282 | 0.430739389 | 0.438507046 |
| 0.25863355  | 0.529271614 | 0.241032335 | 0.053010636 |
| 0.144875928 | 0.097850019 | 0.225468168 | 0.319116077 |
| 0.46617332  | 0.378630694 | 0.247187968 | 0.222402897 |
| 0.425140917 | 0.519758743 | 0.531498365 | 0.432374425 |
| 0.067140451 | 0.238086813 | 0.371210809 | 0.350912345 |
| 0.392019292 | 0.160388154 | 0.223660689 | 0.528125472 |
| 0.393646709 | 0.428606754 | 0.254735669 | 0.519372192 |
| 0.24486813  | 0.488199194 | 0.488633019 | 0.193838015 |
| 0.523559504 | 0.519404648 | 0.474443255 | 0.380528941 |
| 0.483051105 | 0.404390634 | 0.082377329 | 0.409879443 |
| 0.447088879 | 0.011983599 | 0.470619913 | 0.470168783 |
| 0.513228388 | 0.458686093 | 0.482838891 | 0.485882962 |
| 0.519883348 | 0.124647008 | 0.035225906 | 0.266915531 |
| 0.521613537 | 0.412208623 | 0.136387186 | 0.427306229 |
| 0.338081003 | 0.463201355 | 0.448386604 | 0.316801212 |
| 0.483139762 | 0.459561925 | 0.478420282 | 0.433136628 |
| 0.393585985 | 0.345217031 | 0.373482328 | 0.509877816 |
| 0.063507208 | 0.18187296  | 0.112242676 | 0.330743043 |
| 0.466930008 | 0.182558373 | 0.453302204 | 0.350622215 |
| 0.208990677 | 0.433172489 | 0.335376721 | 0.354137524 |
| 0.120727512 | 0.47758631  | 0.224317402 | 0.245665583 |
| 0.051278637 | 0.200024756 | 0.200086675 | 0.173199004 |
| 0.236477842 | 0.29240636  | 0.465390297 | 0.464322462 |
| 0.355668908 | 0.259351793 | 0.460135516 | 0.441639213 |
| 0.373613983 | 0.364667839 | 0.269198058 | 0.012638797 |
| 0.262717582 | 0.356080032 | 0.167073545 | 0.423632962 |
| 0.233728283 | 0.248015808 | 0.389547329 | 0.3708119   |
| 0.370647595 | 0.228984518 | 0.360648771 | 0.429480611 |
| 0.235352331 | 0.289164569 | 0.42811624  | 0.467090611 |
| 0.008409645 | 0.362175811 | 0.456297164 | 0.124405979 |
| 0.366470197 | 0.112884777 | 0.243557551 | 0.44785663  |
| 0.285406805 | 0.195212651 | 0.467624224 | 0.36952378  |
| 0.381697286 | 0.285916059 | 0.495326618 | 0.049746537 |
| 0.344418646 | 0.044507221 | 0.272821279 | 0.456250532 |
| 0.287820736 | 0.293713281 | 0.284066059 | 0.254940778 |
| 0.21770693  | 0.515632266 | 0.424868499 | 0.490019224 |
| 0.379218668 | 0.500845156 | 0.452420841 | 0.43271623  |
| 0.395116939 | 0.383694106 | 0.117240879 | 0.451558097 |
| 0.450703925 | 0.334547401 | 0.149336835 | 0.462233181 |
| 0.415409123 | 0.393762832 | 0.101030942 | 0.457009175 |
| 0.487651676 | 0.512518053 | 0.146374369 | 0.348386242 |
| 0.396126234 | 0.28443936  | 0.426715209 | 0.498282374 |
| 0.403625795 | 0.337833551 | 0.313395997 | 0.367746696 |

|             |             |             |             |
|-------------|-------------|-------------|-------------|
| 0.225965755 | 0.17928067  | 0.349027608 | 0.161921921 |
| 0.012264495 | 0.144910777 | 0.119047716 | 0.151691825 |
| 0.131362874 | 0.469181846 | 0.399467185 | 0.502853636 |
| 0.142335215 | 0.425732757 | 0.287923548 | 0.275114422 |
| 0.434380082 | 0.341414424 | 0.366521518 | 0.379018205 |
| 0.288070119 | 0.022260734 | 0.124780022 | 0.521558609 |
| 0.099893208 | 0.207906377 | 0.3799076   | 0.003360984 |
| 0.082378011 | 0.485900099 | 0.164375585 | 0.23722928  |
| 0.429065181 | 0.253000284 | 0.274831779 | 0.421035685 |
| 0.343786161 | 0.134131635 | 0.002742463 | 0.47134023  |
| 0.486749529 | 0.455101731 | 0.49068878  | 0.482574438 |
| 0.434678525 | 0.435030423 | 0.40728369  | 0.456372924 |
| 0.140188684 | 0.163794141 | 0.177554016 | 0.277509979 |
| 0.00876075  | 0.379391349 | 0.299253241 | 0.18462787  |
| 0.422988031 | 0.330545858 | 0.062628454 | 0.339260261 |
| 0.041358512 | 0.187622548 | 0.365474213 | 0.227116322 |
| 0.326656735 | 0.031752848 | 0.286120037 | 0.319762606 |
| 0.458220219 | 0.389829113 | 0.361279274 | 0.527065049 |
| 0.332156382 | 0.229606485 | 0.295821833 | 0.390468688 |
| 0.100346936 | 0.151213595 | 0.429242261 | 0.067269583 |
| 0.266431324 | 0.460869682 | 0.399350471 | 0.118075829 |
| 0.296289343 | 0.011740489 | 0.410511172 | 0.518688681 |
| 0.503690512 | 0.484234246 | 0.486367481 | 0.240742998 |
| 0.499732747 | 0.105447591 | 0.517158441 | 0.457313098 |
| 0.44503639  | 0.001722336 | 0.006314477 | 0.463394578 |
| 0.385268915 | 0.131803397 | 0.197839243 | 0.437364827 |
| 0.118489458 | 0.246786907 | 0.097132134 | 0.146971238 |
| 0.462473521 | 0.212427982 | 0.14427465  | 0.496417795 |
| 0.248809311 | 0.239945308 | 0.476592323 | 0.153316338 |
| 0.409502807 | 0.072917025 | 0.15108046  | 0.006845914 |
| 0.350604047 | 0.195344519 | 0.512924746 | 0.50965554  |
| 0.469741261 | 0.375371595 | 0.426826558 | 0.385509778 |
| 0.432211001 | 0.19623808  | 0.403019345 | 0.205506591 |
| 0.503787834 | 0.38002461  | 0.333504309 | 0.350802483 |
| 0.464200716 | 0.459523158 | 0.053972643 | 0.409722657 |
| 0.022561583 | 0.001194937 | 0.46661856  | 0.296217028 |
| 0.071805862 | 0.355921629 | 0.287536556 | 0.279008059 |
| 0.242334957 | 0.056099469 | 0.232658927 | 0.207795323 |
| 0.298504976 | 0.352115223 | 0.235184011 | 0.299410556 |
| 0.241893178 | 0.109301855 | 0.203482835 | 0.173897108 |
| 0.276743531 | 0.370125795 | 0.255536098 | 0.038532482 |
| 0.468339826 | 0.411494244 | 0.089396493 | 0.214610025 |
| 0.439706882 | 0.463297395 | 0.054892275 | 0.011162751 |
| 0.310326974 | 0.312909756 | 0.456126852 | 0.510704622 |
| 0.53450677  | 0.487545341 | 0.392662486 | 0.109284245 |
| 0.10182569  | 0.310809782 | 0.258439321 | 0.080590956 |
| 0.498130196 | 0.13929829  | 0.497773077 | 0.269421465 |
| 0.163120983 | 0.242189088 | 0.041790933 | 0.116968074 |
| 0.370279449 | 0.210004928 | 0.165817336 | 0.238453412 |
| 0.299544228 | 0.223903706 | 0.077076807 | 0.221114889 |
| 0.378931165 | 0.152269435 | 0.198386637 | 0.38048514  |
| 0.418503012 | 0.339069433 | 0.427522195 | 0.418407072 |
| 0.19099895  | 0.170352708 | 0.38275579  | 0.402950738 |
| 0.471651556 | 0.458130674 | 0.042192527 | 1           |

|             |             |             |             |
|-------------|-------------|-------------|-------------|
| 0.45769526  | 0.456976623 | 0.512644358 | 0.366776967 |
| 0.139415671 | 0.361672643 | 0.303801671 | 0.326961951 |
| 0.216307725 | 0.457533378 | 0.252088457 | 0.102987547 |
| 0.319434079 | 0.487166042 | 0.449013581 | 0.171902161 |
| 0.459966346 | 0.22685433  | 0.129280166 | 0.460939727 |
| 0.144797088 | 0.130118325 | 0.476261795 | 0.442189737 |
| 0.001425731 | 0.112302082 | 0.450217521 | 0.258304385 |
| 0.502662211 | 0.445854748 | 0.419036246 | 0.319460684 |
| 0.001335065 | 0.404028631 | 0.373819522 | 0.403520725 |
| 0.468487092 | 0.401024867 | 0.199888287 | 0.080465051 |
| 0.296455849 | 0.161773832 | 0.13587636  | 0.418529382 |
| 0.165322528 | 0.465307628 | 0.218645037 | 0.256828851 |
| 0.186176462 | 0.178517803 | 0.218989889 | 0.274256515 |
| 0.132639032 | 0.257138052 | 0.351441938 | 0.42653644  |
| 0.180231643 | 0.41762595  | 0.440991938 | 0.050830903 |
| 0.340435777 | 0.41381908  | 0.425494246 | 0.002901394 |
| 0.423322881 | 0.011098155 | 0.181772762 | 0.202631007 |
| 0.191527779 | 0.202669131 | 0.236249479 | 0.273961459 |
| 0.398797618 | 0.240134899 | 0.283034597 | 0.245657826 |
| 0.155342654 | 0.262520543 | 0.386676896 | 0.414355814 |
| 0.257748278 | 0.163234575 | 0.168778347 | 0.170997604 |
| 0.065788319 | 0.471609084 | 0.284093859 | 0.146871126 |
| 0.236091078 | 0.408916939 | 0.342748446 | 0.518443122 |
| 0.396112003 | 0.205576348 | 0.342034353 | 0.479501474 |
| 0.304023567 | 0.364703429 | 0.120592943 | 0.445285844 |
| 0.260475135 | 0.185138604 | 0.472489995 | 0.40743376  |
| 0.463246734 | 0.391255926 | 0.284306671 | 0.420284518 |
| 0.369025499 | 0.374306024 | 0.449007062 | 0.082964822 |
| 0.219067555 | 0.19485283  | 0.225730193 | 0.003797213 |
| 0.368656138 | 0.353653399 | 0.467212101 | 0.508778328 |
| 0.2749428   | 0.38139814  | 0.444250586 | 0.12503985  |
| 0.413705505 | 0.260984106 | 0.187578227 | 0.466949658 |
| 0.200672121 | 0.216342033 | 0.274386854 | 0.457453037 |
| 0.434374758 | 0.44566019  | 0.232808522 | 0.290210794 |
| 0.261879123 | 0.280019002 | 0.491142287 | 0.201634894 |
| 0.461459723 | 0.15142118  | 0.467798135 | 0.277718789 |
| 0.204464021 | 0.498991217 | 0.105126021 | 0.504722079 |
| 0.312903161 | 0.201060941 | 0.474521439 | 0.365317018 |
| 0.358693483 | 0.114850721 | 0.16161206  | 0.464873254 |
| 0.241662896 | 0.326601906 | 0.02659382  | 0.059501391 |
| 0.319237925 | 0.353049938 | 0.468714915 | 0.380136376 |
| 0.211355923 | 0.324227723 | 0.151678858 | 0.353122767 |
| 0.520762748 | 0.528962638 | 0.257774769 | 0.26856675  |
| 0.371475751 | 0.123799365 | 0.484708766 | 0.021662223 |
| 0.427866659 | 0.435643119 | 0.433787376 | 0.074632345 |
| 0.031379583 | 0.186104058 | 0.440739605 | 0.137899332 |
| 0.436211457 | 0.199172619 | 0.432397149 | 0.456880234 |
| 0.239792966 | 0.528595311 | 0.111403281 | 0.400203925 |
| 0.092437471 | 0.288305975 | 0.374346242 | 0.40991848  |
| 0.1995655   | 0.254210008 | 0.366235375 | 0.197587498 |
| 0.044371931 | 0.245132779 | 0.002235521 | 0.415646513 |
| 0.51225629  | 0.317366753 | 0.254367607 | 0.40383294  |
| 0.274278385 | 0.401396799 | 0.226478979 | 0.451829367 |
| 0.013451153 | 0.3404967   | 0.220903941 | 0.451551795 |

|             |             |             |             |
|-------------|-------------|-------------|-------------|
| 0.24969631  | 0.39909401  | 0.065867291 | 0.289477345 |
| 0.505563129 | 0.272702558 | 0.288281668 | 0.330349731 |
| 0.507070321 | 0.440312012 | 0.261943607 | 0.207404323 |
| 0.449681721 | 0.118486568 | 0.480560861 | 0.511974914 |
| 0.170293241 | 0.176373513 | 0.419636449 | 0.202598795 |
| 0.282946942 | 0.42635816  | 0.453382297 | 0.512776276 |
| 0.061859912 | 0.262805545 | 0.422395159 | 0.451276819 |
| 0.294627082 | 0.134651864 | 0.2112254   | 0.200938526 |
| 0.489424916 | 0.125188414 | 0.233672362 | 0.39490659  |
| 0.184043733 | 0.315130901 | 0.448233238 | 0.160611688 |
| 0.042835581 | 0.190420376 | 0.403720864 | 0.1890955   |
| 0.294659252 | 0.349126594 | 0.206918463 | 0.371319702 |
| 0.131882088 | 0.027356507 | 0.424939027 | 0.013315917 |
| 0.431507491 | 0.386071585 | 0.267551687 | 0.334442849 |
| 0.247822289 | 0.395950232 | 0.428565175 | 0.002498866 |
| 0.406481904 | 0.04561057  | 0.30463767  | 0.196216617 |
| 0.274934487 | 0.08709496  | 0.460204317 | 0.470918608 |
| 0.370262188 | 0.368579664 | 0.361253163 | 0.461127294 |
| 0.120701646 | 0.352123443 | 0.338472042 | 0.486229646 |
| 0.190971589 | 0.464068491 | 0.444150353 | 0.37690698  |
| 0.42622299  | 0.321493945 |             |             |
| PARP8       | 0.147161828 | 0.455709926 | 0.113002529 |
| 0.215007597 | 0.389959455 | 0.493894828 | 0.120544948 |
| 0.221768691 | 0.416860775 | 0.358005066 | 0.456732765 |
| 0.044980814 | 0.137660968 | 0.48231651  | 0.117417338 |
| 0.454039219 | 0.07864804  | 0.190475079 | 0.129689182 |
| 0.315480485 | 0.361044204 | 0.429503631 | 0.464359347 |
| 0.371760321 | 0.255617221 | 0.427370007 | 0.449737973 |
| 0.495552107 | 0.330883986 | 0.502741915 | 0.236331741 |
| 0.422958202 | 0.401241152 | 0.44953209  | 0.042170883 |
| 0.50141908  | 0.023435319 | 0.447481093 | 0.347757936 |
| 0.209328832 | 0.396335739 | 0.400049696 | 0.344357157 |
| 0.425036913 | 0.080020146 | 0.264587943 | 0.461139233 |
| 0.414027598 | 0.398210215 | 0.127208317 | 0.493606186 |
| 0.441765379 | 0.444135178 | 0.441787466 | 0.005334087 |
| 0.373516798 | 0.120962443 | 0.28216906  | 0.511857096 |
| 0.304006876 | 0.219777923 | 0.332347663 | 0.365238421 |
| 0.456025393 | 0.450754509 | 0.363791645 | 0.416033962 |
| 0.499519719 | 0.241189655 | 0.484882647 | 0.243948053 |
| 0.463737526 | 0.075158687 | 0.248153145 | 0.15251085  |
| 0.459419157 | 0.310701406 | 0.444990488 | 0.380102532 |
| 0.442012676 | 0.528100543 | 0.33971455  | 0.503717146 |
| 0.14972235  | 0.408887421 | 0.366825443 | 0.391450451 |
| 0.43714839  | 0.15722517  | 0.482398339 | 0.52205576  |
| 0.106362896 | 0.437450274 | 0.45923202  | 0.203529462 |
| 0.478678173 | 0.360413903 | 0.447687792 | 0.249472788 |
| 0.441118402 | 0.407750754 | 0.487801571 | 0.389581484 |
| 0.418902429 | 0.135388147 | 0.49632942  | 0.3889223   |
| 0.395633124 | 0.151825594 | 0.298050922 | 0.4959635   |
| 0.480073718 | 0.492735124 | 0.467763642 | 0.432997314 |
| 0.435548756 | 0.498902313 | 0.475425056 | 0.468745893 |
| 0.203128873 | 0.526712753 | 0.289374863 | 0.097256039 |
| 0.139192802 | 0.172107923 | 0.31606946  | 0.389688457 |
| 0.50130464  | 0.441604214 | 0.301093265 | 0.325379803 |

|             |             |             |             |
|-------------|-------------|-------------|-------------|
| 0.484129261 | 0.486493658 | 0.521912829 | 0.47383949  |
| 0.08724941  | 0.320164634 | 0.438585435 | 0.413778109 |
| 0.458095219 | 0.200663069 | 0.3316788   | 0.516270003 |
| 0.436685289 | 0.488430645 | 0.267962953 | 0.515669251 |
| 0.305198805 | 0.518221811 | 0.476368174 | 0.26386979  |
| 0.523064763 | 0.504221865 | 0.508869435 | 0.467140053 |
| 0.488335571 | 0.437801581 | 0.103510544 | 0.444279486 |
| 0.493181662 | 0.025103288 | 0.496432728 | 0.495760989 |
| 0.498612783 | 0.497275077 | 0.517416778 | 0.506957473 |
| 0.505883399 | 0.141330449 | 0.039890533 | 0.37515544  |
| 0.509619905 | 0.454958576 | 0.237477464 | 0.461747276 |
| 0.435515648 | 0.492035263 | 0.491667776 | 0.370638946 |
| 0.520911433 | 0.491694682 | 0.495650298 | 0.464022382 |
| 0.384634274 | 0.379798802 | 0.432633012 | 0.480747549 |
| 0.098281649 | 0.199745786 | 0.104493577 | 0.397691216 |
| 0.419569164 | 0.273325277 | 0.465718203 | 0.429228966 |
| 0.294428652 | 0.448740264 | 0.404162963 | 0.450873454 |
| 0.104742215 | 0.498168646 | 0.266055682 | 0.260313541 |
| 0.08940128  | 0.214805975 | 0.273059907 | 0.257418487 |
| 0.355495733 | 0.26832496  | 0.499290579 | 0.487550507 |
| 0.427673292 | 0.267153405 | 0.494321633 | 0.481304847 |
| 0.442249919 | 0.447992116 | 0.32659614  | 0.02506288  |
| 0.329423187 | 0.359740216 | 0.246875077 | 0.474279915 |
| 0.230364388 | 0.327995071 | 0.45343712  | 0.465092467 |
| 0.380428133 | 0.245442275 | 0.432439326 | 0.448980461 |
| 0.229597377 | 0.402477331 | 0.48490631  | 0.465429643 |
| 0.010267009 | 0.413098427 | 0.499536478 | 0.222064692 |
| 0.405862878 | 0.195758507 | 0.332261947 | 0.4829708   |
| 0.362375333 | 0.308890477 | 0.499914067 | 0.464578346 |
| 0.43149723  | 0.264546917 | 0.522646721 | 0.070485971 |
| 0.423224475 | 0.09341541  | 0.374944205 | 0.397687006 |
| 0.3512663   | 0.381928862 | 0.399384078 | 0.370695826 |
| 0.210830896 | 0.519372654 | 0.468646884 | 0.507676574 |
| 0.424741524 | 0.523865838 | 0.498191153 | 0.483361172 |
| 0.460064594 | 0.421155723 | 0.188939307 | 0.488113887 |
| 0.485606409 | 0.346482704 | 0.135689562 | 0.48894565  |
| 0.415388006 | 0.465781549 | 0.190331984 | 0.486714147 |
| 0.508585552 | 0.471809843 | 0.245574586 | 0.443812825 |
| 0.454217383 | 0.341695234 | 0.478126725 | 0.53040988  |
| 0.361952192 | 0.41755711  | 0.397200357 | 0.45495758  |
| 0.268200369 | 0.289058766 | 0.388571309 | 0.245738745 |
| 0.016777144 | 0.15672898  | 0.126603175 | 0.257356296 |
| 0.235383602 | 0.475375703 | 0.469204165 | 0.513892956 |
| 0.205810627 | 0.467906218 | 0.333405264 | 0.361575397 |
| 0.440819929 | 0.430066308 | 0.454279465 | 0.471520467 |
| 0.34448292  | 0.039725484 | 0.19530215  | 0.527040976 |
| 0.084934419 | 0.316185026 | 0.428982877 | 0.006575754 |
| 0.094669115 | 0.455934652 | 0.154934596 | 0.249623907 |
| 0.492338997 | 0.253301609 | 0.295085072 | 0.370393625 |
| 0.441091426 | 0.173294483 | 0.008845041 | 0.47932651  |
| 0.487920736 | 0.459271059 | 0.485738633 | 0.46867592  |
| 0.460144818 | 0.477609755 | 0.468719948 | 0.454048852 |
| 0.187687006 | 0.165753978 | 0.265249168 | 0.370434207 |
| 0.010672261 | 0.463878348 | 0.409733501 | 0.228868722 |

|             |             |             |             |
|-------------|-------------|-------------|-------------|
| 0.486510224 | 0.396136793 | 0.086659193 | 0.439438971 |
| 0.046923998 | 0.253507343 | 0.410453294 | 0.328022999 |
| 0.42869417  | 0.0380963   | 0.294277828 | 0.381947851 |
| 0.441384529 | 0.418131294 | 0.421544732 | 0.53016612  |
| 0.42593132  | 0.197642518 | 0.390630695 | 0.481293071 |
| 0.140604252 | 0.140384828 | 0.451767992 | 0.045943755 |
| 0.301440979 | 0.465808309 | 0.460815532 | 0.126575876 |
| 0.366940744 | 0.014663966 | 0.426558633 | 0.532706901 |
| 0.471017338 | 0.508938333 | 0.50217791  | 0.3462818   |
| 0.503809451 | 0.143979384 | 0.525941535 | 0.461024713 |
| 0.420465853 | 0.001921826 | 0.016169056 | 0.49683143  |
| 0.453579655 | 0.108723096 | 0.25228612  | 0.448173904 |
| 0.191257429 | 0.246639663 | 0.139864666 | 0.256229878 |
| 0.504558561 | 0.337521006 | 0.260949868 | 0.474447606 |
| 0.334081866 | 0.340507232 | 0.469654851 | 0.157398143 |
| 0.488355017 | 0.109114938 | 0.156192818 | 0.015856424 |
| 0.447565031 | 0.178875936 | 0.48291499  | 0.508916024 |
| 0.498028438 | 0.462696376 | 0.383936334 | 0.447082973 |
| 0.477247085 | 0.165491988 | 0.441363476 | 0.190095372 |
| 0.483655076 | 0.452139397 | 0.410045101 | 0.384891315 |
| 0.497254215 | 0.471201243 | 0.077683139 | 0.466619847 |
| 0.032274796 | 0.005318031 | 0.446362197 | 0.36526658  |
| 0.105897529 | 0.428060763 | 0.342549007 | 0.32877077  |
| 0.33903685  | 0.07093251  | 0.325685319 | 0.304040081 |
| 0.386200141 | 0.438217076 | 0.351006987 | 0.339789186 |
| 0.351935853 | 0.194024212 | 0.310358148 | 0.259747393 |
| 0.328376285 | 0.375537983 | 0.25753857  | 0.052749905 |
| 0.47640514  | 0.473132823 | 0.118443828 | 0.253161741 |
| 0.490484824 | 0.497894396 | 0.087435804 | 0.026216016 |
| 0.35229491  | 0.405606387 | 0.497214189 | 0.497987672 |
| 0.530021665 | 0.518557869 | 0.412286384 | 0.203702128 |
| 0.137565263 | 0.406865838 | 0.37165897  | 0.17132801  |
| 0.511630031 | 0.122744253 | 0.492529729 | 0.367504104 |
| 0.199646133 | 0.308960738 | 0.079600946 | 0.159935468 |
| 0.455691703 | 0.280365377 | 0.273584188 | 0.2253958   |
| 0.397947768 | 0.326874947 | 0.103711159 | 0.296654477 |
| 0.426670359 | 0.221523007 | 0.254227342 | 0.428066896 |
| 0.440857129 | 0.283761534 | 0.480767441 | 0.455918829 |
| 0.216780254 | 0.191298316 | 0.364821745 | 0.46719739  |
| 0.492730114 | 0.447829195 | 0.058786632 | 0.45769526  |
| 1           | 0.500008832 | 0.504051842 | 0.445404955 |
| 0.153289708 | 0.448979776 | 0.381124582 | 0.412091089 |
| 0.286284789 | 0.489275548 | 0.34877909  | 0.124845451 |
| 0.37308083  | 0.495897139 | 0.453679891 | 0.265044068 |
| 0.493987217 | 0.209275918 | 0.109410751 | 0.489940018 |
| 0.235611629 | 0.162884281 | 0.423942935 | 0.48661971  |
| 0.004466062 | 0.198334822 | 0.482265779 | 0.36435676  |
| 0.521566247 | 0.485082204 | 0.451849139 | 0.381556546 |
| 0.003051486 | 0.462755284 | 0.458246376 | 0.460274383 |
| 0.468723715 | 0.44581408  | 0.260614406 | 0.142103097 |
| 0.373127536 | 0.144929019 | 0.216055542 | 0.43863909  |
| 0.211902774 | 0.485738803 | 0.292517652 | 0.305256639 |
| 0.294965631 | 0.157245951 | 0.326585722 | 0.353182959 |
| 0.209503508 | 0.33344488  | 0.425802179 | 0.365237838 |

|             |             |             |             |
|-------------|-------------|-------------|-------------|
| 0.237725975 | 0.466858721 | 0.459121611 | 0.063758682 |
| 0.436739108 | 0.458840723 | 0.474731616 | 0.004361452 |
| 0.487096626 | 0.021298029 | 0.297273967 | 0.312186373 |
| 0.303270351 | 0.310439228 | 0.352582584 | 0.379019395 |
| 0.434888335 | 0.325005509 | 0.377966235 | 0.338148134 |
| 0.258258261 | 0.335598439 | 0.467026456 | 0.438686932 |
| 0.37029812  | 0.215682018 | 0.158918096 | 0.151454402 |
| 0.111564333 | 0.490184229 | 0.324894762 | 0.134562156 |
| 0.335116361 | 0.445931107 | 0.411344894 | 0.492681385 |
| 0.464408747 | 0.175500965 | 0.427891393 | 0.48148083  |
| 0.286799076 | 0.399972549 | 0.126723939 | 0.472150429 |
| 0.349224714 | 0.295347401 | 0.481476875 | 0.392236441 |
| 0.46467121  | 0.415452235 | 0.326633907 | 0.460562052 |
| 0.451446286 | 0.41338829  | 0.368870348 | 0.153817594 |
| 0.267916863 | 0.212839383 | 0.343758434 | 0.005895556 |
| 0.450325327 | 0.365542033 | 0.499225828 | 0.491643963 |
| 0.361809774 | 0.439519225 | 0.384925093 | 0.157277044 |
| 0.326478861 | 0.22889112  | 0.227413837 | 0.489541364 |
| 0.276308138 | 0.299892676 | 0.38358219  | 0.435257541 |
| 0.487032583 | 0.471605362 | 0.344925274 | 0.359867602 |
| 0.342724327 | 0.294832454 | 0.482551093 | 0.210626285 |
| 0.473990255 | 0.259448438 | 0.428080915 | 0.378084344 |
| 0.314728719 | 0.509017491 | 0.122709463 | 0.516837175 |
| 0.399779998 | 0.209329888 | 0.503780868 | 0.426258032 |
| 0.409601404 | 0.217241399 | 0.244482175 | 0.460694848 |
| 0.330256259 | 0.412196074 | 0.022883259 | 0.093146511 |
| 0.414164634 | 0.386627007 | 0.452663986 | 0.445333574 |
| 0.327505251 | 0.414197899 | 0.238003411 | 0.390438654 |
| 0.483852812 | 0.507838497 | 0.334066878 | 0.334120543 |
| 0.43228831  | 0.188343393 | 0.480190143 | 0.029833134 |
| 0.470864574 | 0.467320557 | 0.438422013 | 0.117024806 |
| 0.048536814 | 0.26118951  | 0.465134192 | 0.127124633 |
| 0.487318808 | 0.266459535 | 0.428240837 | 0.503469231 |
| 0.269616457 | 0.507596174 | 0.213290637 | 0.479766735 |
| 0.093249644 | 0.359465083 | 0.447001304 | 0.444841003 |
| 0.303744608 | 0.35632072  | 0.447419494 | 0.305560221 |
| 0.074145226 | 0.357483304 | 0.003478187 | 0.424539151 |
| 0.475175372 | 0.395592169 | 0.287413754 | 0.36437069  |
| 0.374419724 | 0.445732291 | 0.331359998 | 0.475504931 |
| 0.028686386 | 0.432593715 | 0.309541931 | 0.474773331 |
| 0.272219259 | 0.429289244 | 0.116767294 | 0.385433013 |
| 0.474359005 | 0.352696222 | 0.341613565 | 0.345526021 |
| 0.490890533 | 0.45484363  | 0.241316229 | 0.328119571 |
| 0.446573532 | 0.124015287 | 0.456645207 | 0.527812334 |
| 0.277229179 | 0.282942571 | 0.487298877 | 0.290363753 |
| 0.383115106 | 0.447266799 | 0.45702624  | 0.521120982 |
| 0.13777822  | 0.346897638 | 0.488857212 | 0.466738329 |
| 0.390744475 | 0.242057705 | 0.314190932 | 0.31177615  |
| 0.461323377 | 0.174595831 | 0.33248869  | 0.44071525  |
| 0.274996826 | 0.413532691 | 0.407505543 | 0.280080371 |
| 0.082013615 | 0.279828499 | 0.477747848 | 0.233143415 |
| 0.388500031 | 0.432313093 | 0.31664429  | 0.425247955 |
| 0.221809066 | 0.052686496 | 0.461264949 | 0.026669392 |
| 0.444637193 | 0.472369692 | 0.360780186 | 0.432650314 |



|             |             |             |             |
|-------------|-------------|-------------|-------------|
| 0.265044363 | 0.441694941 | 0.408095032 | 0.003540592 |
| 0.472925761 | 0.078318608 | 0.408498778 | 0.306709673 |
| 0.35985157  | 0.10613308  | 0.466876192 | 0.506444503 |
| 0.426843727 | 0.414269343 | 0.407968386 | 0.467853697 |
| 0.20371495  | 0.389369259 | 0.406119998 | 0.476657272 |
| 0.295005742 | 0.428378936 | 0.466877112 | 0.435556274 |
| 0.469807778 | 0.396103869 |             |             |
| PASK        | 0.059168828 | 0.419833549 | 0.045046477 |
| 0.139422487 | 0.282844156 | 0.356139668 | 0.040214911 |
| 0.096506175 | 0.299424225 | 0.266939593 | 0.331015997 |
| 0.012594124 | 0.119505336 | 0.467177225 | 0.036096833 |
| 0.348353    | 0.023621274 | 0.080843536 | 0.06525826  |
| 0.172235129 | 0.260557114 | 0.355695044 | 0.312620211 |
| 0.252092324 | 0.16086394  | 0.267614779 | 0.342245963 |
| 0.517954227 | 0.333500804 | 0.382057977 | 0.207485552 |
| 0.399360305 | 0.305438003 | 0.376798314 | 0.010696161 |
| 0.354544523 | 0.01031598  | 0.411697503 | 0.236918226 |
| 0.181501074 | 0.320777078 | 0.291600381 | 0.223778037 |
| 0.317617764 | 0.028267845 | 0.236331419 | 0.344689722 |
| 0.251857073 | 0.224258802 | 0.0477885   | 0.37135427  |
| 0.306572004 | 0.283937986 | 0.354805563 | 0.002680605 |
| 0.334482207 | 0.14313114  | 0.273003575 | 0.507889952 |
| 0.160591142 | 0.098350033 | 0.285122814 | 0.185321374 |
| 0.317407352 | 0.304463907 | 0.191045669 | 0.317301458 |
| 0.514178366 | 0.210074338 | 0.398851531 | 0.153414163 |
| 0.317954266 | 0.019056703 | 0.115780709 | 0.054521495 |
| 0.337315631 | 0.166078413 | 0.312869545 | 0.300000358 |
| 0.428871873 | 0.50040015  | 0.176470491 | 0.490497323 |
| 0.097649177 | 0.314973825 | 0.256110115 | 0.244943041 |
| 0.299634757 | 0.054334758 | 0.3872788   | 0.521405047 |
| 0.029899198 | 0.316725361 | 0.342300344 | 0.086666638 |
| 0.429333429 | 0.260743253 | 0.348332007 | 0.219645734 |
| 0.323326891 | 0.313800353 | 0.452119159 | 0.243130277 |
| 0.280036416 | 0.051754166 | 0.466801115 | 0.311016354 |
| 0.296493486 | 0.062682696 | 0.214277497 | 0.482667816 |
| 0.353918067 | 0.516327834 | 0.415113099 | 0.322471479 |
| 0.351012909 | 0.515763088 | 0.357599662 | 0.402445879 |
| 0.175921898 | 0.53104672  | 0.15486945  | 0.031667381 |
| 0.053334601 | 0.062894614 | 0.191668389 | 0.256413814 |
| 0.494783542 | 0.265568317 | 0.166689129 | 0.200810018 |
| 0.475369224 | 0.467140881 | 0.527513783 | 0.401651557 |
| 0.027445382 | 0.243883595 | 0.355723489 | 0.228242818 |
| 0.314321835 | 0.076684914 | 0.274898799 | 0.495158037 |
| 0.37463854  | 0.440419722 | 0.129873263 | 0.473726307 |
| 0.147231156 | 0.519187928 | 0.468492786 | 0.144011403 |
| 0.512213243 | 0.485439287 | 0.524554738 | 0.378923407 |
| 0.467932329 | 0.304312877 | 0.053753344 | 0.350222052 |
| 0.491548386 | 0.023169043 | 0.498785044 | 0.526462463 |
| 0.505380208 | 0.489704986 | 0.530869169 | 0.530454557 |
| 0.509858508 | 0.049485617 | 0.030233308 | 0.243217027 |
| 0.507567633 | 0.393643782 | 0.100808085 | 0.379178846 |
| 0.318235173 | 0.340236843 | 0.405738248 | 0.344594799 |
| 0.503239257 | 0.463748388 | 0.512674061 | 0.355796201 |
| 0.231839171 | 0.29126249  | 0.355975698 | 0.454463738 |

|             |             |             |             |
|-------------|-------------|-------------|-------------|
| 0.03069782  | 0.096393606 | 0.037264293 | 0.23925662  |
| 0.31661598  | 0.139291923 | 0.325942317 | 0.288913414 |
| 0.153730249 | 0.272414251 | 0.346844548 | 0.343458039 |
| 0.038143531 | 0.390255834 | 0.127256989 | 0.135208492 |
| 0.030973148 | 0.111036799 | 0.180195977 | 0.141295798 |
| 0.22403197  | 0.199364261 | 0.400424323 | 0.501217615 |
| 0.291687647 | 0.141374968 | 0.372810262 | 0.477110965 |
| 0.417347141 | 0.362856875 | 0.172527418 | 0.011610301 |
| 0.277431176 | 0.289821067 | 0.226225435 | 0.367302556 |
| 0.14376291  | 0.21932859  | 0.33670741  | 0.3810371   |
| 0.242764307 | 0.10370675  | 0.337051454 | 0.40694539  |
| 0.110040116 | 0.301252778 | 0.462830871 | 0.339767507 |
| 0.001605892 | 0.286691454 | 0.454032542 | 0.133414666 |
| 0.245297808 | 0.180543161 | 0.316615438 | 0.478565554 |
| 0.305493908 | 0.217187719 | 0.515274511 | 0.362676601 |
| 0.319833814 | 0.187247688 | 0.533141978 | 0.067942989 |
| 0.293061973 | 0.05644216  | 0.234867974 | 0.279258122 |
| 0.205113585 | 0.231705497 | 0.301049761 | 0.269668011 |
| 0.102467731 | 0.52177459  | 0.369805266 | 0.532666375 |
| 0.360523573 | 0.532716535 | 0.481574514 | 0.450928401 |
| 0.293743746 | 0.326303217 | 0.190431364 | 0.446561249 |
| 0.470023738 | 0.272015674 | 0.051089181 | 0.440127028 |
| 0.31218578  | 0.362698143 | 0.101232638 | 0.50916435  |
| 0.479387983 | 0.461828679 | 0.12261576  | 0.343029079 |
| 0.375569357 | 0.201551667 | 0.393819231 | 0.528487612 |
| 0.280321315 | 0.326075709 | 0.321129914 | 0.392127804 |
| 0.137795875 | 0.200754324 | 0.275174736 | 0.216770981 |
| 0.025314623 | 0.058086759 | 0.048561785 | 0.139567676 |
| 0.189935723 | 0.35644589  | 0.330905856 | 0.530078107 |
| 0.092272697 | 0.410902783 | 0.167931004 | 0.289594033 |
| 0.416621537 | 0.310266138 | 0.356821068 | 0.33980972  |
| 0.184067724 | 0.015234335 | 0.113456571 | 0.503552484 |
| 0.025606517 | 0.272591111 | 0.250884974 | 0.003336755 |
| 0.032582447 | 0.400240392 | 0.070551158 | 0.161541977 |
| 0.493429769 | 0.167119476 | 0.164044247 | 0.28099383  |
| 0.291782158 | 0.068098127 | 0.003183972 | 0.490258457 |
| 0.471348135 | 0.436533429 | 0.470442601 | 0.431484627 |
| 0.42744138  | 0.355848077 | 0.393751744 | 0.302862609 |
| 0.080227822 | 0.065114289 | 0.235504557 | 0.256083289 |
| 0.00415896  | 0.353312222 | 0.256863099 | 0.106130727 |
| 0.398132168 | 0.231335928 | 0.028145711 | 0.306462256 |
| 0.020495771 | 0.271557612 | 0.254450864 | 0.170244086 |
| 0.301531423 | 0.008582605 | 0.274824805 | 0.335929942 |
| 0.429595465 | 0.323612496 | 0.351637681 | 0.533292222 |
| 0.297121965 | 0.094172987 | 0.282629025 | 0.368405784 |
| 0.05262603  | 0.110141527 | 0.292015097 | 0.050501092 |
| 0.201761494 | 0.427141879 | 0.33683492  | 0.054789044 |
| 0.230623754 | 0.00317347  | 0.356357996 | 0.535055785 |
| 0.464418851 | 0.538017852 | 0.518116448 | 0.304900818 |
| 0.516712673 | 0.152689795 | 0.544558352 | 0.395101375 |
| 0.34781089  | 0.001009212 | 0.004495822 | 0.514131226 |
| 0.364223179 | 0.039850447 | 0.122658361 | 0.358165527 |
| 0.09483064  | 0.12256977  | 0.045344538 | 0.189611883 |
| 0.362992913 | 0.220074922 | 0.180362398 | 0.464342078 |

|             |             |             |             |
|-------------|-------------|-------------|-------------|
| 0.199739221 | 0.182390665 | 0.330423725 | 0.058801081 |
| 0.357272761 | 0.040821742 | 0.055957428 | 0.009510395 |
| 0.310830593 | 0.088229293 | 0.442752841 | 0.516679963 |
| 0.494677678 | 0.347330241 | 0.330506152 | 0.328690273 |
| 0.423923231 | 0.073425226 | 0.35482738  | 0.084042808 |
| 0.496272844 | 0.349903266 | 0.289181014 | 0.284410151 |
| 0.5117322   | 0.473230659 | 0.021887599 | 0.389079297 |
| 0.013335101 | 0.001656915 | 0.328370776 | 0.193452067 |
| 0.047558834 | 0.338509628 | 0.209406455 | 0.170992245 |
| 0.173841035 | 0.026804496 | 0.276309936 | 0.256329042 |
| 0.247902014 | 0.315534744 | 0.272073847 | 0.177914182 |
| 0.229115902 | 0.132579566 | 0.162488071 | 0.116166231 |
| 0.192795911 | 0.279993886 | 0.168145135 | 0.01213138  |
| 0.370821347 | 0.385024505 | 0.042282033 | 0.116675205 |
| 0.457218198 | 0.521429485 | 0.02914953  | 0.010136181 |
| 0.222441092 | 0.266806046 | 0.524967685 | 0.510822168 |
| 0.518309636 | 0.520744923 | 0.366278398 | 0.103357171 |
| 0.051051871 | 0.265121777 | 0.27863916  | 0.081796508 |
| 0.52514386  | 0.045799952 | 0.483000076 | 0.305480716 |
| 0.080711963 | 0.180285709 | 0.027860662 | 0.057814135 |
| 0.364905651 | 0.134834186 | 0.150644284 | 0.117551679 |
| 0.286341061 | 0.272051099 | 0.0308989   | 0.15674779  |
| 0.306160645 | 0.2141093   | 0.122414021 | 0.240666515 |
| 0.312091477 | 0.183712327 | 0.403419585 | 0.4384184   |
| 0.097217365 | 0.078228162 | 0.26057644  | 0.330453902 |
| 0.451937567 | 0.336305363 | 0.030347246 | 0.456976623 |
| 0.500008832 | 1           | 0.499533793 | 0.375130115 |
| 0.056133719 | 0.369431323 | 0.288002953 | 0.300044518 |
| 0.137484494 | 0.342245177 | 0.18397727  | 0.042447368 |
| 0.25163819  | 0.451836041 | 0.410328356 | 0.144019495 |
| 0.355627623 | 0.092664663 | 0.039473899 | 0.444120323 |
| 0.200967116 | 0.080029257 | 0.311015134 | 0.425997903 |
| 0.001508628 | 0.1799828   | 0.487406367 | 0.21532738  |
| 0.499921703 | 0.497901131 | 0.43673457  | 0.196540762 |
| 0.002277055 | 0.359393847 | 0.342060962 | 0.374260054 |
| 0.438154844 | 0.307266853 | 0.113294923 | 0.060483179 |
| 0.245063006 | 0.060094602 | 0.117920538 | 0.313405803 |
| 0.192803322 | 0.339089497 | 0.143596168 | 0.149718798 |
| 0.161533547 | 0.059587882 | 0.271419871 | 0.202166375 |
| 0.135514861 | 0.189026953 | 0.323833622 | 0.253391537 |
| 0.260828057 | 0.42575039  | 0.385214195 | 0.018230444 |
| 0.329695155 | 0.386096221 | 0.419970268 | 0.002344512 |
| 0.406687447 | 0.00454731  | 0.171675361 | 0.198935762 |
| 0.169160425 | 0.17487176  | 0.214465402 | 0.272864015 |
| 0.281146489 | 0.177603376 | 0.254449074 | 0.194390203 |
| 0.144801615 | 0.168269263 | 0.332473245 | 0.287460711 |
| 0.285271405 | 0.102693768 | 0.075302001 | 0.081392598 |
| 0.046506113 | 0.470101146 | 0.210568049 | 0.051898088 |
| 0.177296999 | 0.293414807 | 0.32767989  | 0.497313674 |
| 0.40759124  | 0.09156534  | 0.271927223 | 0.460139713 |
| 0.245699432 | 0.285668903 | 0.046322095 | 0.31885328  |
| 0.191168991 | 0.236913763 | 0.331294085 | 0.260156151 |
| 0.357418179 | 0.380646083 | 0.203401121 | 0.423912481 |
| 0.322969288 | 0.274954705 | 0.298736386 | 0.076943654 |

|             |             |             |             |
|-------------|-------------|-------------|-------------|
| 0.150525836 | 0.08956935  | 0.254378587 | 0.001148857 |
| 0.29200297  | 0.236987324 | 0.500127821 | 0.486165897 |
| 0.30809523  | 0.361968245 | 0.311997977 | 0.075908046 |
| 0.265054169 | 0.157247403 | 0.10246855  | 0.404745776 |
| 0.277710485 | 0.150033556 | 0.270436867 | 0.295255756 |
| 0.405815982 | 0.372587367 | 0.21796144  | 0.191710121 |
| 0.176468591 | 0.14982501  | 0.445940554 | 0.092117323 |
| 0.369785464 | 0.196960533 | 0.282749439 | 0.274323576 |
| 0.18864842  | 0.525915091 | 0.041252587 | 0.544107604 |
| 0.304954637 | 0.093497744 | 0.474500167 | 0.237933108 |
| 0.236821306 | 0.107425939 | 0.235570964 | 0.316139698 |
| 0.179860833 | 0.344919469 | 0.024527116 | 0.082761223 |
| 0.283501099 | 0.239727585 | 0.383301694 | 0.299533123 |
| 0.228408584 | 0.296198465 | 0.201907825 | 0.231380128 |
| 0.474431719 | 0.477209774 | 0.253037355 | 0.193505407 |
| 0.293459668 | 0.08335844  | 0.333039327 | 0.013269078 |
| 0.372572092 | 0.378599115 | 0.350522614 | 0.036653785 |
| 0.01123897  | 0.258126882 | 0.352828982 | 0.042254203 |
| 0.496765902 | 0.272842911 | 0.272630182 | 0.393650771 |
| 0.119996776 | 0.480127095 | 0.100917395 | 0.382681716 |
| 0.028001945 | 0.189393516 | 0.332935366 | 0.311490043 |
| 0.23818497  | 0.292184785 | 0.344708596 | 0.263293282 |
| 0.022595242 | 0.247770364 | 0.000912781 | 0.383343171 |
| 0.449264154 | 0.318969411 | 0.16111701  | 0.272282516 |
| 0.220620558 | 0.344787217 | 0.223490924 | 0.363618153 |
| 0.008517341 | 0.350811179 | 0.151508612 | 0.416569073 |
| 0.300767633 | 0.29186536  | 0.046369107 | 0.276621014 |
| 0.427244427 | 0.283502875 | 0.202255546 | 0.32546216  |
| 0.492419454 | 0.353563898 | 0.12448279  | 0.193978845 |
| 0.303337502 | 0.042498664 | 0.337265337 | 0.527377638 |
| 0.150942458 | 0.237272406 | 0.464640413 | 0.181861748 |
| 0.306326861 | 0.362970266 | 0.336076836 | 0.510228328 |
| 0.062088977 | 0.194886087 | 0.403280264 | 0.457539614 |
| 0.256279926 | 0.171285044 | 0.27600463  | 0.216866891 |
| 0.459153925 | 0.093990052 | 0.243214772 | 0.309222191 |
| 0.252789012 | 0.244471199 | 0.259325058 | 0.174683254 |
| 0.031828587 | 0.125186793 | 0.348131061 | 0.101609469 |
| 0.246905132 | 0.317781027 | 0.216183423 | 0.368306467 |
| 0.136287181 | 0.02493867  | 0.435730649 | 0.032410999 |
| 0.287324481 | 0.352163144 | 0.19278536  | 0.316303053 |
| 0.154090007 | 0.280136906 | 0.278128464 | 0.000698129 |
| 0.392412005 | 0.046670313 | 0.248878018 | 0.231975132 |
| 0.289571084 | 0.036759184 | 0.450399193 | 0.532454887 |
| 0.243484787 | 0.291239439 | 0.373531739 | 0.45688492  |
| 0.184443952 | 0.332015848 | 0.319462301 | 0.341611416 |
| 0.25419772  | 0.345706977 | 0.366159953 | 0.379032678 |
| 0.330478468 | 0.21189037  |             |             |
| PBK         | 0.181682098 | 0.504611569 | 0.166534581 |
| 0.241196457 | 0.333551481 | 0.526391449 | 0.130378755 |
| 0.226039106 | 0.450990334 | 0.386869356 | 0.448059557 |
| 0.05556574  | 0.083673342 | 0.502458002 | 0.119230621 |
| 0.419538156 | 0.077329079 | 0.197044997 | 0.110757128 |
| 0.324299783 | 0.301984992 | 0.386939769 | 0.520446498 |
| 0.308892556 | 0.312307727 | 0.475297572 | 0.414586651 |

|             |             |             |             |
|-------------|-------------|-------------|-------------|
| 0.522612702 | 0.31716582  | 0.506182155 | 0.278512257 |
| 0.454424807 | 0.345995225 | 0.421177275 | 0.062965358 |
| 0.497321616 | 0.01096955  | 0.457109174 | 0.313087485 |
| 0.164813866 | 0.431591284 | 0.46190134  | 0.330794231 |
| 0.456234891 | 0.110704231 | 0.301121862 | 0.4382789   |
| 0.441378668 | 0.374679429 | 0.177565888 | 0.514267085 |
| 0.421988357 | 0.480827846 | 0.497348275 | 0.005544995 |
| 0.315594237 | 0.081483376 | 0.220649991 | 0.518638538 |
| 0.316672229 | 0.206728466 | 0.302678238 | 0.367031129 |
| 0.437218473 | 0.420729597 | 0.349404089 | 0.429079486 |
| 0.516164983 | 0.168254719 | 0.484153883 | 0.252743133 |
| 0.476578049 | 0.101025419 | 0.268889469 | 0.196849545 |
| 0.438510329 | 0.288711319 | 0.405495017 | 0.31816432  |
| 0.502357948 | 0.525191408 | 0.344073193 | 0.520722914 |
| 0.090043092 | 0.348491672 | 0.305973017 | 0.36820127  |
| 0.426110412 | 0.160659107 | 0.48787759  | 0.515111455 |
| 0.126719426 | 0.476353532 | 0.462442144 | 0.248678057 |
| 0.52421504  | 0.295365021 | 0.493566362 | 0.18341803  |
| 0.395872763 | 0.358320424 | 0.491377253 | 0.39890902  |
| 0.360532893 | 0.182783493 | 0.524676687 | 0.325570588 |
| 0.367551655 | 0.197610921 | 0.238408349 | 0.496637941 |
| 0.487844519 | 0.525954196 | 0.496267081 | 0.428360178 |
| 0.3976215   | 0.518904406 | 0.494177364 | 0.491949833 |
| 0.213174395 | 0.525762456 | 0.320475792 | 0.094644939 |
| 0.185804345 | 0.155199806 | 0.249087109 | 0.392086545 |
| 0.520530433 | 0.450295109 | 0.321653817 | 0.290384517 |
| 0.474542818 | 0.512939551 | 0.521277631 | 0.482844052 |
| 0.105484626 | 0.247938446 | 0.408707728 | 0.428637874 |
| 0.444223599 | 0.213919682 | 0.262865598 | 0.531136765 |
| 0.469382041 | 0.480997209 | 0.315336034 | 0.528337467 |
| 0.292996594 | 0.503248241 | 0.527828549 | 0.269559999 |
| 0.528968688 | 0.52468526  | 0.500990498 | 0.431672523 |
| 0.501402059 | 0.482498731 | 0.081056746 | 0.458170634 |
| 0.490509634 | 0.016979011 | 0.51042939  | 0.509034655 |
| 0.512371343 | 0.501701141 | 0.493768952 | 0.51773076  |
| 0.515657938 | 0.170271856 | 0.027786611 | 0.329604822 |
| 0.519798586 | 0.483493583 | 0.193032094 | 0.450925629 |
| 0.387290646 | 0.526160374 | 0.490384388 | 0.359932121 |
| 0.500108224 | 0.513738869 | 0.519681967 | 0.477135007 |
| 0.406696397 | 0.41668055  | 0.391392666 | 0.51193472  |
| 0.107095169 | 0.244658782 | 0.150998057 | 0.390552661 |
| 0.480325028 | 0.255423706 | 0.502855363 | 0.384968356 |
| 0.284816205 | 0.478614908 | 0.355842899 | 0.406212135 |
| 0.152797824 | 0.516259696 | 0.293348056 | 0.296534175 |
| 0.090482387 | 0.256097623 | 0.26959045  | 0.254870348 |
| 0.30850758  | 0.318494929 | 0.501309277 | 0.505669963 |
| 0.388189796 | 0.323216232 | 0.509804633 | 0.490121862 |
| 0.445089296 | 0.412319495 | 0.336323664 | 0.028831024 |
| 0.292577744 | 0.33088262  | 0.176404665 | 0.45142229  |
| 0.284768158 | 0.295868869 | 0.428952946 | 0.433382915 |
| 0.440744371 | 0.274952656 | 0.393879304 | 0.462234644 |
| 0.2834103   | 0.367595314 | 0.486994378 | 0.480511523 |
| 0.016742198 | 0.42952403  | 0.512395416 | 0.157226596 |
| 0.411281836 | 0.145574678 | 0.285780543 | 0.496424467 |

|             |             |             |             |
|-------------|-------------|-------------|-------------|
| 0.298823885 | 0.230845495 | 0.517212518 | 0.429052922 |
| 0.431961901 | 0.328021542 | 0.500950949 | 0.043289395 |
| 0.37152425  | 0.077421096 | 0.348117089 | 0.438528048 |
| 0.36168951  | 0.358713721 | 0.335302579 | 0.316836223 |
| 0.275276038 | 0.515283181 | 0.490760892 | 0.519904915 |
| 0.391749628 | 0.503781411 | 0.504439089 | 0.500937737 |
| 0.468554936 | 0.384554156 | 0.129186997 | 0.505201946 |
| 0.499937059 | 0.328964215 | 0.18863536  | 0.490154812 |
| 0.407470771 | 0.433327743 | 0.13844627  | 0.498214795 |
| 0.505303304 | 0.499163504 | 0.215727759 | 0.40922401  |
| 0.472041639 | 0.370444529 | 0.482765356 | 0.504892749 |
| 0.369439024 | 0.371864154 | 0.35478148  | 0.431612346 |
| 0.296356191 | 0.218376527 | 0.4113765   | 0.174846939 |
| 0.014368162 | 0.190428412 | 0.164617565 | 0.221578553 |
| 0.168186264 | 0.481680525 | 0.44709967  | 0.511586166 |
| 0.207327683 | 0.495810672 | 0.341130101 | 0.332755479 |
| 0.482252354 | 0.375844761 | 0.412272102 | 0.431554658 |
| 0.356454241 | 0.043717478 | 0.190065876 | 0.529248891 |
| 0.12653256  | 0.251293155 | 0.432468637 | 0.006717454 |
| 0.117412979 | 0.503148487 | 0.205456893 | 0.297010461 |
| 0.487204878 | 0.310118291 | 0.335182283 | 0.394396316 |
| 0.421951648 | 0.193312431 | 0.008206144 | 0.499224932 |
| 0.488834672 | 0.476104195 | 0.489096666 | 0.477635061 |
| 0.470420404 | 0.47871272  | 0.456822425 | 0.520661267 |
| 0.196767437 | 0.207885584 | 0.203670576 | 0.337929442 |
| 0.012531594 | 0.455026141 | 0.354408324 | 0.251572993 |
| 0.468620067 | 0.384956741 | 0.103023249 | 0.385250575 |
| 0.069666868 | 0.202825666 | 0.407314629 | 0.286811851 |
| 0.384836996 | 0.054211904 | 0.327281493 | 0.334951172 |
| 0.500621691 | 0.457975555 | 0.382583317 | 0.527926752 |
| 0.413595981 | 0.26472823  | 0.361172122 | 0.460109201 |
| 0.149229491 | 0.130162818 | 0.460885126 | 0.06548918  |
| 0.310336876 | 0.476740898 | 0.4235827   | 0.164886344 |
| 0.372397325 | 0.023454231 | 0.476810555 | 0.523962508 |
| 0.507804773 | 0.505552634 | 0.520661269 | 0.286768149 |
| 0.516150895 | 0.098617192 | 0.519167174 | 0.506050636 |
| 0.436417708 | 0.003432486 | 0.013553684 | 0.511593544 |
| 0.43129665  | 0.164072827 | 0.266903236 | 0.498460198 |
| 0.185534765 | 0.301249084 | 0.147710238 | 0.191513785 |
| 0.521662146 | 0.279654405 | 0.184126852 | 0.496419841 |
| 0.315648003 | 0.313019483 | 0.495151598 | 0.197279694 |
| 0.465210736 | 0.119899354 | 0.191185012 | 0.01484463  |
| 0.411869483 | 0.237462695 | 0.513188049 | 0.517211791 |
| 0.494562322 | 0.433765713 | 0.400565679 | 0.442722316 |
| 0.478292699 | 0.236045873 | 0.420779844 | 0.252836697 |
| 0.519587853 | 0.429129412 | 0.41484164  | 0.425173271 |
| 0.492690504 | 0.499812618 | 0.088412265 | 0.461887493 |
| 0.044577734 | 0.002890611 | 0.513936588 | 0.361215883 |
| 0.069911556 | 0.389405646 | 0.360675704 | 0.305520997 |
| 0.294952375 | 0.092352379 | 0.258035227 | 0.234156433 |
| 0.366215616 | 0.405473613 | 0.285655788 | 0.351036546 |
| 0.292605142 | 0.136492056 | 0.279504122 | 0.235233832 |
| 0.292336317 | 0.424387532 | 0.314634867 | 0.063272796 |
| 0.492310848 | 0.450804073 | 0.138140996 | 0.282968318 |

|             |             |             |             |
|-------------|-------------|-------------|-------------|
| 0.504656363 | 0.516308812 | 0.085835393 | 0.026627808 |
| 0.382200196 | 0.355503411 | 0.505295392 | 0.52277507  |
| 0.53802458  | 0.498527312 | 0.444330541 | 0.158195584 |
| 0.155647795 | 0.372647159 | 0.304232998 | 0.126682467 |
| 0.518401171 | 0.171062802 | 0.515183167 | 0.301257432 |
| 0.21835755  | 0.31360277  | 0.079754175 | 0.169353494 |
| 0.413283031 | 0.284343063 | 0.235684996 | 0.290787494 |
| 0.35904537  | 0.260236648 | 0.116104854 | 0.295542027 |
| 0.438583986 | 0.167240464 | 0.263425388 | 0.437500154 |
| 0.473751089 | 0.295692481 | 0.466615899 | 0.465081205 |
| 0.254491428 | 0.215648366 | 0.437398854 | 0.451464906 |
| 0.511061717 | 0.456870022 | 0.074348684 | 0.512644358 |
| 0.504051842 | 0.499533793 | 1           | 0.430559176 |
| 0.184988708 | 0.418699897 | 0.317417784 | 0.370556762 |
| 0.280529557 | 0.52837541  | 0.315869774 | 0.147825678 |
| 0.384804502 | 0.496297213 | 0.491935073 | 0.249918729 |
| 0.497207848 | 0.269418373 | 0.157262793 | 0.50805124  |
| 0.174758176 | 0.185694068 | 0.474862277 | 0.480353703 |
| 0.003628953 | 0.133011627 | 0.48316252  | 0.348648809 |
| 0.508138338 | 0.498834594 | 0.48324065  | 0.379646729 |
| 0.001165535 | 0.434885702 | 0.445818592 | 0.455783678 |
| 0.511682693 | 0.473001249 | 0.243759732 | 0.132594201 |
| 0.374963632 | 0.204071088 | 0.191679323 | 0.483318151 |
| 0.168997424 | 0.506846698 | 0.289497856 | 0.306815025 |
| 0.249890681 | 0.206279862 | 0.260998956 | 0.360330175 |
| 0.141004106 | 0.335307172 | 0.425722348 | 0.405325889 |
| 0.195343842 | 0.465892143 | 0.482390079 | 0.084026258 |
| 0.382225718 | 0.461712114 | 0.48556298  | 0.004675687 |
| 0.476538225 | 0.024735527 | 0.250318789 | 0.279543683 |
| 0.26408821  | 0.263104477 | 0.302541864 | 0.335927079 |
| 0.438628243 | 0.308455107 | 0.370474034 | 0.327371113 |
| 0.229945367 | 0.334118464 | 0.437535423 | 0.456343308 |
| 0.33111548  | 0.235645415 | 0.212235192 | 0.21084864  |
| 0.116651287 | 0.520116311 | 0.358425425 | 0.189924018 |
| 0.310883097 | 0.438164828 | 0.419145461 | 0.51309588  |
| 0.468474157 | 0.245428058 | 0.392879173 | 0.530106842 |
| 0.265387189 | 0.406688672 | 0.160475782 | 0.494796903 |
| 0.342998223 | 0.238856433 | 0.503723698 | 0.453377347 |
| 0.483379851 | 0.450472223 | 0.360205434 | 0.483573869 |
| 0.431507483 | 0.38732757  | 0.427262751 | 0.138568827 |
| 0.290447193 | 0.247592232 | 0.280173866 | 0.009220801 |
| 0.442596321 | 0.428496532 | 0.517259623 | 0.508559601 |
| 0.295092121 | 0.455237553 | 0.459347462 | 0.179138865 |
| 0.389714327 | 0.301502936 | 0.250838828 | 0.503901922 |
| 0.217311016 | 0.300178443 | 0.335258875 | 0.512713641 |
| 0.479282111 | 0.470280122 | 0.275694681 | 0.352116903 |
| 0.321234183 | 0.343561534 | 0.488150598 | 0.26012287  |
| 0.480808203 | 0.202480497 | 0.474128428 | 0.343124009 |
| 0.266610636 | 0.512285763 | 0.151683498 | 0.515788222 |
| 0.353568667 | 0.255232934 | 0.494328087 | 0.434259283 |
| 0.426753747 | 0.180605    | 0.180288615 | 0.483498342 |
| 0.300514766 | 0.361501019 | 0.020134432 | 0.06580172  |
| 0.396089361 | 0.359071602 | 0.486934977 | 0.429517537 |
| 0.258377869 | 0.389010629 | 0.1703508   | 0.400509177 |

|             |             |             |             |
|-------------|-------------|-------------|-------------|
| 0.50890062  | 0.528535642 | 0.323268101 | 0.33629698  |
| 0.436664379 | 0.190122255 | 0.538193451 | 0.020453122 |
| 0.459262522 | 0.454627951 | 0.436714798 | 0.11956376  |
| 0.055653889 | 0.201988445 | 0.467723871 | 0.167212095 |
| 0.487388742 | 0.216098141 | 0.44468181  | 0.51099889  |
| 0.295277677 | 0.529348832 | 0.171328259 | 0.46998831  |
| 0.109042093 | 0.356607734 | 0.405058985 | 0.424610609 |
| 0.26659911  | 0.294703733 | 0.436097619 | 0.241685354 |
| 0.079835818 | 0.309594902 | 0.003217366 | 0.446925681 |
| 0.504187186 | 0.341184099 | 0.317783222 | 0.371879833 |
| 0.351922665 | 0.458345855 | 0.269472218 | 0.473381612 |
| 0.031354502 | 0.390472105 | 0.298727889 | 0.52002251  |
| 0.257004187 | 0.417025921 | 0.117273842 | 0.319948171 |
| 0.509393428 | 0.306273828 | 0.351766979 | 0.332356913 |
| 0.51726799  | 0.485369162 | 0.310414261 | 0.265227282 |
| 0.45715623  | 0.159858112 | 0.496124138 | 0.513496747 |
| 0.244318987 | 0.218239275 | 0.475788667 | 0.270085857 |
| 0.314977953 | 0.48617776  | 0.461642983 | 0.509389356 |
| 0.103578718 | 0.342743881 | 0.476913841 | 0.49507111  |
| 0.37288983  | 0.168545387 | 0.249627378 | 0.255810237 |
| 0.509634642 | 0.19247942  | 0.260110559 | 0.462025142 |
| 0.21025274  | 0.391419237 | 0.452131583 | 0.215202556 |
| 0.079970709 | 0.251999564 | 0.483065369 | 0.253457229 |
| 0.364453385 | 0.404606928 | 0.254083894 | 0.44604605  |
| 0.205921775 | 0.0561198   | 0.469597272 | 0.014663867 |
| 0.50676658  | 0.457122564 | 0.34934041  | 0.385456728 |
| 0.316401216 | 0.445899883 | 0.458653406 | 0.005532994 |
| 0.462874063 | 0.060843671 | 0.357262158 | 0.257884563 |
| 0.300524766 | 0.126783967 | 0.504964176 | 0.503402391 |
| 0.441745937 | 0.395467341 | 0.374379321 | 0.504042368 |
| 0.143626433 | 0.352189139 | 0.352923636 | 0.515640932 |
| 0.222678479 | 0.453481025 | 0.460171318 | 0.410928237 |
| 0.49252348  | 0.397766746 |             |             |
| PCNA        | 0.152028719 | 0.355016811 | 0.096001255 |
| 0.213250486 | 0.367777772 | 0.339927905 | 0.16411642  |
| 0.261246578 | 0.317594516 | 0.230937599 | 0.381622078 |
| 0.071694479 | 0.133115361 | 0.419305169 | 0.165727474 |
| 0.390264212 | 0.130703315 | 0.237163802 | 0.131778867 |
| 0.277084692 | 0.376780204 | 0.335103526 | 0.331540505 |
| 0.373958977 | 0.222949693 | 0.323586127 | 0.344595378 |
| 0.422953106 | 0.210262945 | 0.372590779 | 0.139698954 |
| 0.413690009 | 0.377934699 | 0.325688067 | 0.051103392 |
| 0.384076734 | 0.037907964 | 0.422015414 | 0.371303062 |
| 0.187743198 | 0.359763894 | 0.249646389 | 0.344747162 |
| 0.306359803 | 0.092427348 | 0.140698289 | 0.374369643 |
| 0.320873836 | 0.34907622  | 0.116229886 | 0.362989517 |
| 0.358197126 | 0.351755288 | 0.299582362 | 0.010605373 |
| 0.296244174 | 0.092529411 | 0.229448209 | 0.436894217 |
| 0.306473157 | 0.270764987 | 0.248275675 | 0.316183468 |
| 0.370396632 | 0.389354715 | 0.352659502 | 0.31756941  |
| 0.443364238 | 0.241023515 | 0.35949991  | 0.213568818 |
| 0.374865807 | 0.086354055 | 0.260123968 | 0.141004927 |
| 0.361937366 | 0.336421839 | 0.382687948 | 0.327310043 |
| 0.347147481 | 0.482675854 | 0.327972785 | 0.432279246 |



|             |             |             |             |
|-------------|-------------|-------------|-------------|
| 0.196349577 | 0.36697593  | 0.345362993 | 0.38541853  |
| 0.380869861 | 0.196179346 | 0.394330149 | 0.477667591 |
| 0.122881008 | 0.301380482 | 0.381221648 | 0.193557151 |
| 0.356337109 | 0.291287933 | 0.298709723 | 0.235162002 |
| 0.380373313 | 0.384692311 | 0.436873335 | 0.367709006 |
| 0.366764289 | 0.1304867   | 0.422018353 | 0.350405503 |
| 0.359262751 | 0.146054181 | 0.341238114 | 0.385058058 |
| 0.385476283 | 0.425767069 | 0.354095418 | 0.388926732 |
| 0.381735193 | 0.438084442 | 0.378409122 | 0.380010917 |
| 0.106928494 | 0.456381769 | 0.271998545 | 0.146242382 |
| 0.133160326 | 0.227331545 | 0.327779304 | 0.358008372 |
| 0.400300301 | 0.377569696 | 0.305091388 | 0.36268442  |
| 0.41888097  | 0.406319311 | 0.452757624 | 0.391232656 |
| 0.11596838  | 0.281390871 | 0.371205095 | 0.3255026   |
| 0.405102502 | 0.224160242 | 0.316163345 | 0.456469729 |
| 0.371350571 | 0.395602504 | 0.233935007 | 0.465000899 |
| 0.322684437 | 0.477616441 | 0.362977923 | 0.291051283 |
| 0.464182377 | 0.435985173 | 0.470408704 | 0.379551062 |
| 0.428290209 | 0.338807352 | 0.12201353  | 0.371347604 |
| 0.465623942 | 0.029505649 | 0.404674657 | 0.433663536 |
| 0.428521573 | 0.384519136 | 0.480415335 | 0.444411603 |
| 0.432009211 | 0.157436018 | 0.042060915 | 0.396345757 |
| 0.446734684 | 0.369569752 | 0.299050309 | 0.359846692 |
| 0.394731825 | 0.362216418 | 0.372644739 | 0.304878268 |
| 0.496343697 | 0.389066878 | 0.414534902 | 0.383758203 |
| 0.306807894 | 0.338350698 | 0.338183037 | 0.406798814 |
| 0.132885566 | 0.192996119 | 0.099250743 | 0.367547431 |
| 0.25733266  | 0.318321491 | 0.36466263  | 0.384842076 |
| 0.325456405 | 0.339506118 | 0.297991607 | 0.390580809 |
| 0.097584389 | 0.357578156 | 0.253616336 | 0.258374087 |
| 0.140549955 | 0.205498954 | 0.31325826  | 0.266724853 |
| 0.386150341 | 0.259175643 | 0.372084796 | 0.432339395 |
| 0.374564763 | 0.234039962 | 0.384400496 | 0.452333883 |
| 0.443423977 | 0.366418924 | 0.321128452 | 0.037774525 |
| 0.348697951 | 0.265453522 | 0.225098458 | 0.351672204 |
| 0.213373405 | 0.376596393 | 0.400146461 | 0.393003279 |
| 0.307577435 | 0.228090175 | 0.386173732 | 0.421608654 |
| 0.203969743 | 0.364316781 | 0.411945842 | 0.349398753 |
| 0.014560047 | 0.373188042 | 0.386513935 | 0.290505463 |
| 0.366192849 | 0.201988927 | 0.249234586 | 0.410573914 |
| 0.320999252 | 0.334258301 | 0.424437841 | 0.392010588 |
| 0.338336263 | 0.238031631 | 0.478202983 | 0.08417738  |
| 0.359930572 | 0.127950088 | 0.384136123 | 0.258151842 |
| 0.341899341 | 0.386881269 | 0.365671198 | 0.35190468  |
| 0.176201035 | 0.460665786 | 0.36725049  | 0.449289209 |
| 0.348921693 | 0.480210529 | 0.394279837 | 0.405675812 |
| 0.381861859 | 0.337804899 | 0.172525694 | 0.383799782 |
| 0.396409392 | 0.304520192 | 0.122057195 | 0.369303042 |
| 0.325939158 | 0.392671923 | 0.236450829 | 0.45405271  |
| 0.467292875 | 0.391653881 | 0.308429561 | 0.405443238 |
| 0.382363141 | 0.312960707 | 0.375027963 | 0.490958247 |
| 0.265667762 | 0.386873888 | 0.370543966 | 0.398488124 |
| 0.26828056  | 0.333210899 | 0.334120699 | 0.209821442 |
| 0.009003304 | 0.165637022 | 0.135853729 | 0.318027609 |

|             |             |             |             |
|-------------|-------------|-------------|-------------|
| 0.253344953 | 0.334357985 | 0.392810471 | 0.459950036 |
| 0.25271578  | 0.388213243 | 0.318871975 | 0.367490206 |
| 0.385827051 | 0.382565141 | 0.353350945 | 0.389133069 |
| 0.325143217 | 0.054090827 | 0.227829681 | 0.482170633 |
| 0.081933155 | 0.294198848 | 0.366147864 | 0.009277204 |
| 0.122123656 | 0.316088587 | 0.144899166 | 0.238188731 |
| 0.441558835 | 0.226667823 | 0.279339834 | 0.27313691  |
| 0.394152076 | 0.194924949 | 0.012969834 | 0.425656995 |
| 0.431572277 | 0.413339934 | 0.427737064 | 0.40700746  |
| 0.398116461 | 0.365249051 | 0.394150802 | 0.316258406 |
| 0.228812835 | 0.161618117 | 0.291214745 | 0.387873835 |
| 0.014497873 | 0.388032359 | 0.376966749 | 0.244149831 |
| 0.392562602 | 0.379523203 | 0.112896358 | 0.379539219 |
| 0.054954063 | 0.208285211 | 0.370353611 | 0.360674189 |
| 0.396371488 | 0.050083192 | 0.210718675 | 0.339081944 |
| 0.376170745 | 0.34414019  | 0.319411085 | 0.463689274 |
| 0.3875175   | 0.162224706 | 0.372673649 | 0.395996113 |
| 0.185130531 | 0.128784275 | 0.355850359 | 0.026651627 |
| 0.196608748 | 0.417320945 | 0.362945141 | 0.134720793 |
| 0.357836787 | 0.022224909 | 0.337635023 | 0.475793756 |
| 0.388056129 | 0.463754308 | 0.443195374 | 0.304030098 |
| 0.443525083 | 0.111068794 | 0.459284718 | 0.34985992  |
| 0.30352398  | 0.003054164 | 0.027001171 | 0.418031604 |
| 0.385269558 | 0.090783985 | 0.270844752 | 0.296110699 |
| 0.245060234 | 0.217457265 | 0.170686081 | 0.284311653 |
| 0.361600331 | 0.359733758 | 0.289347344 | 0.412321903 |
| 0.360258325 | 0.360366354 | 0.339785881 | 0.156839852 |
| 0.376467367 | 0.14527898  | 0.159849002 | 0.023447338 |
| 0.399301165 | 0.155393667 | 0.418001092 | 0.440922589 |
| 0.464582779 | 0.390801295 | 0.254215679 | 0.330445601 |
| 0.390799825 | 0.128767702 | 0.302191299 | 0.158671519 |
| 0.408183616 | 0.39659135  | 0.377804718 | 0.329928311 |
| 0.471097157 | 0.429841105 | 0.111941863 | 0.395400942 |
| 0.034583236 | 0.008595723 | 0.318359471 | 0.356305983 |
| 0.113552448 | 0.382094662 | 0.328551439 | 0.312441472 |
| 0.336258107 | 0.085226212 | 0.304788399 | 0.307205409 |
| 0.382904017 | 0.408923584 | 0.3522523   | 0.312268595 |
| 0.355943587 | 0.263448994 | 0.326124503 | 0.3127594   |
| 0.308679136 | 0.307599248 | 0.225420798 | 0.081605925 |
| 0.339516289 | 0.373874802 | 0.145433982 | 0.249512659 |
| 0.391107327 | 0.430659283 | 0.142945517 | 0.049095793 |
| 0.323291364 | 0.399021014 | 0.451825284 | 0.419582676 |
| 0.466016137 | 0.487483865 | 0.397443271 | 0.302272526 |
| 0.164298308 | 0.388241433 | 0.356564363 | 0.240939038 |
| 0.45126419  | 0.118106255 | 0.417086936 | 0.318433254 |
| 0.221995803 | 0.314008571 | 0.118352161 | 0.198978641 |
| 0.35936048  | 0.3006578   | 0.329808775 | 0.194062432 |
| 0.397964668 | 0.289022804 | 0.140619233 | 0.323538297 |
| 0.380916371 | 0.222453847 | 0.280935727 | 0.338640136 |
| 0.338229292 | 0.188808259 | 0.388375405 | 0.446860201 |
| 0.21361042  | 0.20886914  | 0.277895079 | 0.3817555   |
| 0.370981645 | 0.313547574 | 0.059047458 | 0.366776967 |
| 0.445404955 | 0.375130115 | 0.430559176 | 1           |
| 0.165267582 | 0.375503307 | 0.334725825 | 0.39609994  |

|             |             |             |             |
|-------------|-------------|-------------|-------------|
| 0.317192157 | 0.339611498 | 0.368795348 | 0.149916717 |
| 0.335855886 | 0.456253718 | 0.363277288 | 0.303628801 |
| 0.352154448 | 0.179249744 | 0.104010258 | 0.380372023 |
| 0.269065844 | 0.186930128 | 0.273264262 | 0.380064915 |
| 0.007001993 | 0.187421736 | 0.445960955 | 0.346064664 |
| 0.475972657 | 0.431995762 | 0.419532945 | 0.318350823 |
| 0.00558013  | 0.374193758 | 0.3971793   | 0.370297613 |
| 0.370895854 | 0.357641904 | 0.227468913 | 0.203002977 |
| 0.354196566 | 0.123290878 | 0.295087482 | 0.298974009 |
| 0.202113465 | 0.373231104 | 0.315157548 | 0.308367026 |
| 0.342536881 | 0.142503872 | 0.271922756 | 0.32650028  |
| 0.225830967 | 0.339842789 | 0.390049755 | 0.225577148 |
| 0.233807248 | 0.415049856 | 0.371552572 | 0.079435921 |
| 0.356041694 | 0.379271915 | 0.398841468 | 0.010914575 |
| 0.394138448 | 0.03919408  | 0.351040344 | 0.340007889 |
| 0.338815411 | 0.371400491 | 0.38164311  | 0.361196594 |
| 0.375509061 | 0.350290921 | 0.356843295 | 0.348937233 |
| 0.298702479 | 0.325312398 | 0.387185748 | 0.351672678 |
| 0.352544898 | 0.231154693 | 0.141522989 | 0.132174673 |
| 0.144429558 | 0.391587778 | 0.295171287 | 0.115939574 |
| 0.357267344 | 0.366160188 | 0.37605334  | 0.412786134 |
| 0.409694993 | 0.135577404 | 0.397629792 | 0.365257007 |
| 0.209585421 | 0.302184625 | 0.13930388  | 0.350659704 |
| 0.351527419 | 0.321153877 | 0.331776091 | 0.311213051 |
| 0.353301811 | 0.401122565 | 0.295898932 | 0.409942566 |
| 0.379093885 | 0.356134111 | 0.23225717  | 0.215617633 |
| 0.279810978 | 0.214321677 | 0.353725275 | 0.009561178 |
| 0.398949793 | 0.276644182 | 0.399136081 | 0.420965722 |
| 0.295671742 | 0.382535046 | 0.246545296 | 0.19159255  |
| 0.193448047 | 0.189544378 | 0.241720346 | 0.363150076 |
| 0.226010433 | 0.299020939 | 0.379179445 | 0.280398066 |
| 0.385585085 | 0.360208429 | 0.345071487 | 0.359905693 |
| 0.346040628 | 0.252140669 | 0.43255021  | 0.188339727 |
| 0.348873894 | 0.284260187 | 0.293026579 | 0.386817808 |
| 0.366397258 | 0.444825055 | 0.13475814  | 0.455362307 |
| 0.389491029 | 0.193678465 | 0.474654566 | 0.340836109 |
| 0.318617348 | 0.249971446 | 0.219609358 | 0.330165043 |
| 0.358695046 | 0.316564908 | 0.015869643 | 0.125696006 |
| 0.394007489 | 0.320710583 | 0.336479398 | 0.386901709 |
| 0.336048472 | 0.395318727 | 0.18850247  | 0.360561575 |
| 0.401689692 | 0.436897426 | 0.349678724 | 0.336141446 |
| 0.389140923 | 0.226880425 | 0.329628881 | 0.035142903 |
| 0.380252798 | 0.347760163 | 0.323554478 | 0.160633436 |
| 0.074497755 | 0.242069902 | 0.372021799 | 0.124606002 |
| 0.438918285 | 0.211557128 | 0.323503547 | 0.370394103 |
| 0.259553402 | 0.441352791 | 0.289855491 | 0.397873222 |
| 0.115985116 | 0.343218499 | 0.348010967 | 0.353828221 |
| 0.324269115 | 0.344492716 | 0.398579225 | 0.292012043 |
| 0.113850841 | 0.356704645 | 0.01080865  | 0.401306533 |
| 0.406998265 | 0.349918862 | 0.269458967 | 0.238863648 |
| 0.373287149 | 0.357154209 | 0.373044704 | 0.333767534 |
| 0.046077055 | 0.377581822 | 0.324999979 | 0.355179758 |
| 0.216841749 | 0.366378821 | 0.150394487 | 0.366166018 |
| 0.409733642 | 0.367074532 | 0.325719947 | 0.283917063 |

|             |             |             |             |
|-------------|-------------|-------------|-------------|
| 0.411752251 | 0.335693722 | 0.188503051 | 0.314005133 |
| 0.332957481 | 0.132401645 | 0.295007711 | 0.477568301 |
| 0.327019397 | 0.288484509 | 0.39840872  | 0.341266533 |
| 0.341819033 | 0.35014766  | 0.331582193 | 0.465714246 |
| 0.225983304 | 0.353917112 | 0.392016713 | 0.413426676 |
| 0.38132813  | 0.283626616 | 0.305291951 | 0.361692285 |
| 0.384504102 | 0.179460341 | 0.334705632 | 0.373061434 |
| 0.275645321 | 0.389163533 | 0.28075175  | 0.332992796 |
| 0.120525667 | 0.320831022 | 0.347856564 | 0.245338419 |
| 0.397973768 | 0.385602191 | 0.344082654 | 0.395743108 |
| 0.248326229 | 0.077080162 | 0.442659759 | 0.03597447  |
| 0.312771698 | 0.386908697 | 0.351931527 | 0.381750706 |
| 0.235045592 | 0.385218464 | 0.322921514 | 0.007566959 |
| 0.396159339 | 0.075320867 | 0.364270229 | 0.339636241 |
| 0.33320359  | 0.137447268 | 0.405942061 | 0.465963455 |
| 0.354405661 | 0.296460558 | 0.298401095 | 0.412804411 |
| 0.202187138 | 0.278490868 | 0.341111303 | 0.340156381 |
| 0.268041883 | 0.29598244  | 0.340318701 | 0.32057462  |
| 0.369375399 | 0.346571186 |             |             |
| PDIA3       | 0.25954149  | 0.146206697 | 0.216412645 |
| 0.1356895   | 0.060682253 | 0.062360057 | 0.328863783 |
| 0.262581331 | 0.152711022 | 0.035525008 | 0.076304427 |
| 0.265196854 | 0.008027325 | 0.150928331 | 0.321105153 |
| 0.05246935  | 0.290479481 | 0.28692691  | 0.059237752 |
| 0.130417024 | 0.066295471 | 0.033728447 | 0.081823809 |
| 0.069351382 | 0.324633511 | 0.113692106 | 0.038792361 |
| 0.141062276 | 0.012474541 | 0.06176351  | 0.018873162 |
| 0.233287029 | 0.052110875 | 0.028793452 | 0.243331545 |
| 0.06590807  | 0.012310344 | 0.266486495 | 0.102972791 |
| 0.017742102 | 0.253267523 | 0.046968439 | 0.124744156 |
| 0.054254029 | 0.257623293 | 0.014260607 | 0.062376648 |
| 0.108448029 | 0.123837543 | 0.246687332 | 0.083082123 |
| 0.062514188 | 0.142916782 | 0.083094795 | 0.016250585 |
| 0.020763728 | 0.001804569 | 0.011298808 | 0.183039787 |
| 0.220131075 | 0.239942708 | 0.020353069 | 0.146577323 |
| 0.062963015 | 0.090813729 | 0.183723597 | 0.047328828 |
| 0.166355702 | 0.016956152 | 0.068446884 | 0.090982856 |
| 0.083694963 | 0.290515178 | 0.291875936 | 0.254195483 |
| 0.050511458 | 0.176605216 | 0.068017472 | 0.033432554 |
| 0.140692851 | 0.240455094 | 0.197655393 | 0.204963476 |
| 0.028660508 | 0.042556714 | 0.058682576 | 0.159811862 |
| 0.121415576 | 0.285939542 | 0.097124852 | 0.202721014 |
| 0.287997658 | 0.053427502 | 0.099226687 | 0.267971839 |
| 0.136268781 | 0.031466498 | 0.04351294  | 0.019269738 |
| 0.063171246 | 0.053571692 | 0.227504325 | 0.167162484 |
| 0.063578499 | 0.266846709 | 0.231782555 | 0.036512376 |
| 0.068156774 | 0.258783638 | 0.068254874 | 0.090952652 |
| 0.074047974 | 0.140117728 | 0.114504808 | 0.146905554 |
| 0.044156696 | 0.158931491 | 0.099693804 | 0.159725268 |
| 0.009800419 | 0.176332291 | 0.202878267 | 0.270303809 |
| 0.252889193 | 0.253285929 | 0.072392668 | 0.226302919 |
| 0.115501905 | 0.139206865 | 0.201528788 | 0.132284488 |
| 0.115967443 | 0.202921688 | 0.173879914 | 0.128990722 |
| 0.306581565 | 0.026113943 | 0.044983998 | 0.129409004 |

|             |             |             |             |
|-------------|-------------|-------------|-------------|
| 0.103826131 | 0.28785894  | 0.031207876 | 0.233431004 |
| 0.195223495 | 0.099988375 | 0.218078296 | 0.271526901 |
| 0.194056329 | 0.196093843 | 0.120548448 | 0.208186332 |
| 0.215958793 | 0.221635953 | 0.168361547 | 0.055466552 |
| 0.210367629 | 0.097308475 | 0.045559556 | 0.157749742 |
| 0.186863138 | 0.00473382  | 0.110070544 | 0.121830228 |
| 0.172666122 | 0.089630422 | 0.166273867 | 0.140380493 |
| 0.171471438 | 0.305097297 | 0.004362286 | 0.109327092 |
| 0.198880764 | 0.162629929 | 0.185124368 | 0.038810658 |
| 0.058232356 | 0.079727108 | 0.09424102  | 0.028923298 |
| 0.225502564 | 0.126621297 | 0.122671571 | 0.122027642 |
| 0.105263853 | 0.262479146 | 0.030833362 | 0.22681799  |
| 0.290362921 | 0.230687369 | 0.250556338 | 0.182264609 |
| 0.043029474 | 0.206172268 | 0.083609361 | 0.06995187  |
| 0.206974147 | 0.102082098 | 0.022376605 | 0.062543908 |
| 0.312945729 | 0.046853307 | 0.232160363 | 0.224932888 |
| 0.278430787 | 0.361034923 | 0.135058016 | 0.167146431 |
| 0.111864039 | 0.37798989  | 0.066283174 | 0.143351509 |
| 0.065994448 | 0.24720973  | 0.087157986 | 0.185158825 |
| 0.209673749 | 0.041286345 | 0.250740723 | 0.072415032 |
| 0.052442125 | 0.024575368 | 0.012363623 | 0.039809705 |
| 0.376699618 | 0.115155238 | 0.06591806  | 0.076136112 |
| 0.13168404  | 0.226940584 | 0.048400917 | 0.26111786  |
| 0.27578823  | 0.063843719 | 0.125622407 | 0.05883188  |
| 0.150771427 | 0.109981915 | 0.102829074 | 0.081063461 |
| 0.145289227 | 0.017725878 | 0.016706418 | 0.12773939  |
| 0.026908673 | 0.048872216 | 0.125364456 | 0.079127076 |
| 0.050061522 | 0.323918187 | 0.168967526 | 0.004838976 |
| 0.054566666 | 0.065552412 | 0.144568466 | 0.048435962 |
| 0.174506707 | 0.17820409  | 0.046796319 | 0.062084649 |
| 0.21622603  | 0.182806186 | 0.155249362 | 0.147373624 |
| 0.035620337 | 0.176364898 | 0.102246351 | 0.143638347 |
| 0.11914173  | 0.037176887 | 0.007475247 | 0.103837917 |
| 0.118990323 | 0.045220139 | 0.278693222 | 0.079859796 |
| 0.048236009 | 0.064797713 | 0.09244083  | 0.16085714  |
| 0.241787131 | 0.185816769 | 0.187529886 | 0.109478022 |
| 0.149598051 | 0.168677975 | 0.131741267 | 0.187204777 |
| 0.038432406 | 0.050040761 | 0.04763336  | 0.129006277 |
| 0.229017637 | 0.060007907 | 0.24313462  | 0.011562171 |
| 0.000467711 | 0.281858143 | 0.277967152 | 0.159906361 |
| 0.027739149 | 0.048182045 | 0.081451    | 0.164836558 |
| 0.261917722 | 0.177410665 | 0.223830619 | 0.067793384 |
| 0.180823632 | 0.053215322 | 0.037701011 | 0.060793365 |
| 0.237245493 | 0.113056881 | 0.153109676 | 0.245069546 |
| 0.253183168 | 0.02589932  | 0.121068795 | 0.013387549 |
| 0.30222978  | 0.100747918 | 0.346581733 | 0.373817568 |
| 0.133094214 | 0.345370522 | 0.210464445 | 0.047736779 |
| 0.120659501 | 0.290727159 | 0.026830752 | 0.149655012 |
| 0.180039895 | 0.181525443 | 0.17942627  | 0.211801062 |
| 0.146406743 | 0.103471081 | 0.103204177 | 0.087985257 |
| 0.281887186 | 0.2651287   | 0.029036965 | 0.101851402 |
| 0.021889762 | 0.126599111 | 0.083647895 | 0.27724384  |
| 0.079367777 | 0.157502253 | 0.279848078 | 0.057578907 |
| 0.156292366 | 0.009601926 | 0.110162832 | 0.161081487 |

|             |             |             |             |
|-------------|-------------|-------------|-------------|
| 0.111607676 | 0.253531146 | 0.030368731 | 0.033084999 |
| 0.192640688 | 0.203292827 | 0.028212892 | 0.183712756 |
| 0.094951962 | 0.244307341 | 0.080523785 | 0.093975748 |
| 0.308269134 | 0.022956962 | 0.085162991 | 0.003863963 |
| 0.039581879 | 0.211198273 | 0.049219316 | 0.241164919 |
| 0.149621629 | 0.16984395  | 0.191984515 | 0.187073746 |
| 0.175734807 | 0.146779014 | 0.161268289 | 0.026362632 |
| 0.171301918 | 0.002965591 | 0.156932917 | 0.140727006 |
| 0.035444739 | 0.011388206 | 0.060934973 | 0.117419872 |
| 0.04934163  | 0.273900974 | 0.247879195 | 0.04561404  |
| 0.212415004 | 0.211150883 | 0.291808301 | 0.046640309 |
| 0.064767102 | 0.088533188 | 0.045264961 | 0.191966882 |
| 0.155968369 | 0.169347981 | 0.061684585 | 0.300298088 |
| 0.053446727 | 0.275998474 | 0.296477163 | 0.0190882   |
| 0.097533766 | 0.306996976 | 0.256593573 | 0.166516188 |
| 0.199132427 | 0.076007387 | 0.025514088 | 0.048998216 |
| 0.133017044 | 0.229603564 | 0.030243861 | 0.220329321 |
| 0.159802276 | 0.064907606 | 0.174207182 | 0.214349975 |
| 0.174953884 | 0.187483896 | 0.313592215 | 0.109351775 |
| 0.103733486 | 0.007932149 | 0.07140175  | 0.199137921 |
| 0.039372564 | 0.047387709 | 0.235668829 | 0.133935331 |
| 0.133369206 | 0.214567178 | 0.024721593 | 0.028676846 |
| 0.125216052 | 0.075841551 | 0.046997154 | 0.225561776 |
| 0.08088116  | 0.066039008 | 0.161131169 | 0.225963178 |
| 0.076124543 | 0.224824975 | 0.317526347 | 0.312307383 |
| 0.045642934 | 0.041592093 | 0.297210058 | 0.260511022 |
| 0.123473759 | 0.125519536 | 0.291882612 | 0.111227737 |
| 0.244953523 | 0.086316112 | 0.134784821 | 0.154019328 |
| 0.212969824 | 0.195926224 | 0.269275584 | 0.158473861 |
| 0.283327059 | 0.099532859 | 0.049058724 | 0.130252024 |
| 0.159622207 | 0.252420993 | 0.177578497 | 0.027392195 |
| 0.291011126 | 0.174136818 | 0.226885823 | 0.309748497 |
| 0.036659919 | 0.233269851 | 0.156034702 | 0.208010289 |
| 0.083263446 | 0.026521766 | 0.331744896 | 0.209953222 |
| 0.16243146  | 0.01548972  | 0.251629342 | 0.117609542 |
| 0.160427031 | 0.040039128 | 0.070639417 | 0.224308768 |
| 0.261574499 | 0.280419995 | 0.096693045 | 0.111998966 |
| 0.096370112 | 0.04144474  | 0.099349454 | 0.139415671 |
| 0.153289708 | 0.056133719 | 0.184988708 | 0.165267582 |
| 1           | 0.044274371 | 0.035908436 | 0.07166995  |
| 0.228364745 | 0.068726456 | 0.163161092 | 0.315007935 |
| 0.259464843 | 0.255733181 | 0.150435514 | 0.181838796 |
| 0.051752734 | 0.21856506  | 0.24810558  | 0.124899146 |
| 0.028970098 | 0.232059179 | 0.045965874 | 0.097891962 |
| 0.011885957 | 0.010990553 | 0.152676563 | 0.132028183 |
| 0.213443484 | 0.137795536 | 0.204836913 | 0.140826376 |
| 0.000594025 | 0.057580685 | 0.073415894 | 0.051064017 |
| 0.139111212 | 0.165985206 | 0.123717948 | 0.242551055 |
| 0.225538232 | 0.25268204  | 0.186544088 | 0.055391954 |
| 0.016254621 | 0.08214452  | 0.25354458  | 0.204557238 |
| 0.149784055 | 0.266073695 | 0.024087714 | 0.158871899 |
| 0.034140181 | 0.233902932 | 0.170144541 | 0.04158523  |
| 0.014171449 | 0.151493109 | 0.120959834 | 0.270151349 |
| 0.040463153 | 0.143961775 | 0.161326354 | 0.035615748 |

|             |             |             |             |
|-------------|-------------|-------------|-------------|
| 0.070670197 | 0.203243031 | 0.136773054 | 0.120621568 |
| 0.148453789 | 0.146243277 | 0.117054068 | 0.070475336 |
| 0.111502146 | 0.185286007 | 0.111111583 | 0.167841226 |
| 0.149152325 | 0.192592437 | 0.065043257 | 0.095308642 |
| 0.063272545 | 0.239928847 | 0.35080227  | 0.366116144 |
| 0.205658346 | 0.13218802  | 0.289875637 | 0.269909026 |
| 0.178658978 | 0.085807545 | 0.227333414 | 0.166526248 |
| 0.176660102 | 0.287676366 | 0.094550374 | 0.123835151 |
| 0.018846682 | 0.061412265 | 0.27297768  | 0.079757776 |
| 0.177345979 | 0.046457277 | 0.060159477 | 0.113445964 |
| 0.091098919 | 0.255875374 | 0.27542643  | 0.189502838 |
| 0.072306194 | 0.071685375 | 0.035234093 | 0.181897967 |
| 0.208492117 | 0.294708091 | 0.056021377 | 0.095196774 |
| 0.117870581 | 0.113093666 | 0.106883077 | 0.193919175 |
| 0.021341731 | 0.207944531 | 0.038122349 | 0.251566487 |
| 0.02992916  | 0.299306371 | 0.286099686 | 0.086514451 |
| 0.010902866 | 0.195815431 | 0.077170231 | 0.073090829 |
| 0.082664636 | 0.081311856 | 0.070933599 | 0.168556063 |
| 0.173379744 | 0.210736073 | 0.232983774 | 0.238566635 |
| 0.044636239 | 0.0503612   | 0.071889795 | 0.085650596 |
| 0.128648562 | 0.148907116 | 0.294690332 | 0.143820559 |
| 0.06113211  | 0.309865102 | 0.242749397 | 0.123894429 |
| 0.117673284 | 0.13526532  | 0.011487957 | 0.062089847 |
| 0.16358513  | 0.026472293 | 0.001214371 | 0.016104027 |
| 0.142318796 | 0.071604369 | 0.104232347 | 0.127258926 |
| 0.057159692 | 0.163677822 | 0.011586401 | 0.144961587 |
| 0.186219418 | 0.233128792 | 0.093060699 | 0.252042898 |
| 0.157156677 | 0.247386159 | 0.078715105 | 0.016008451 |
| 0.050558337 | 0.037364201 | 0.037354319 | 0.302730955 |
| 0.283875635 | 0.013518487 | 0.060789306 | 0.26682302  |
| 0.129255185 | 0.009915444 | 0.084934059 | 0.076700619 |
| 0.274825095 | 0.238831969 | 0.170247996 | 0.089365067 |
| 0.256274764 | 0.192945104 | 0.041123576 | 0.055306309 |
| 0.066570607 | 0.036656368 | 0.116228352 | 0.02694727  |
| 0.287316366 | 0.081395098 | 0.037775187 | 0.279470991 |
| 0.227400532 | 0.037196267 | 0.31457795  | 0.031190454 |
| 0.164618829 | 0.17591181  | 0.073353991 | 0.039997324 |
| 0.14155668  | 0.044628636 | 0.205155865 | 0.143903964 |
| 0.013519528 | 0.076568642 | 0.205515691 | 0.051849306 |
| 0.272958123 | 0.053031094 | 0.265724027 | 0.026332986 |
| 0.165401485 | 0.144353246 | 0.244239858 | 0.078929657 |
| 0.073632524 | 0.293121309 | 0.044270811 | 0.185460183 |
| 0.165440418 | 0.031089535 | 0.100081705 | 0.152646644 |
| 0.032876371 | 0.179708856 | 0.049209236 | 0.189546925 |
| 0.161278322 | 0.192707052 | 0.100176182 | 0.161484315 |
| 0.187633173 | 0.043311308 | 0.026902845 | 0.083502242 |
| 0.176738065 | 0.170896117 | 0.045843575 | 0.154690376 |
| 0.021916167 | 0.142274994 | 0.077888167 | 0.089693033 |
| 0.18121677  | 0.203378392 | 0.058762695 | 0.269057305 |
| 0.126776943 | 0.06687594  | 0.069451521 | 0.228160327 |
| 0.11959725  | 0.124149872 | 0.225718152 | 0.001641403 |
| 0.097426664 | 0.070662058 | 0.170847977 | 0.057652323 |
| 0.287522269 | 0.10862219  | 0.097333966 | 0.066239751 |
| 0.122253566 | 0.022955446 | 0.081810736 | 0.067187447 |

|             |             |             |             |
|-------------|-------------|-------------|-------------|
| 0.031887801 | 0.309190045 | 0.191633972 | 0.147602218 |
| 0.147645976 | 0.042460853 | 0.022267274 | 0.176623988 |
| 0.016578844 | 0.020916038 | 0.033306372 | 0.080698405 |
| 0.021071017 | 0.036801627 | 0.038267649 | 0.028094672 |
| 0.128136466 | 0.148161304 |             |             |
| PDK3        | 0.042286133 | 0.334395595 | 0.027342492 |
| 0.133802119 | 0.269079018 | 0.237662038 | 0.031579184 |
| 0.072780645 | 0.234465917 | 0.133698267 | 0.276837519 |
| 0.013309438 | 0.127696995 | 0.423163396 | 0.029996786 |
| 0.323599682 | 0.026082489 | 0.06613176  | 0.039675892 |
| 0.11326748  | 0.244281674 | 0.288923492 | 0.190628362 |
| 0.215933987 | 0.139235132 | 0.197096095 | 0.239711929 |
| 0.442183255 | 0.233144324 | 0.368515995 | 0.114350528 |
| 0.365848033 | 0.307139964 | 0.263071084 | 0.008720237 |
| 0.249178515 | 0.009485885 | 0.35092189  | 0.213949309 |
| 0.190376944 | 0.29250746  | 0.149967971 | 0.20422769  |
| 0.183084304 | 0.022077494 | 0.11892837  | 0.319814625 |
| 0.178145152 | 0.153422623 | 0.027379647 | 0.332515292 |
| 0.191221723 | 0.261578031 | 0.270141743 | 0.00284082  |
| 0.275680755 | 0.125956891 | 0.22158658  | 0.42590361  |
| 0.161697367 | 0.090861203 | 0.17072011  | 0.111560006 |
| 0.250493974 | 0.288440824 | 0.180224428 | 0.18780416  |
| 0.453552882 | 0.202810719 | 0.351237674 | 0.12441321  |
| 0.210278458 | 0.010643341 | 0.117743949 | 0.032909121 |
| 0.232054716 | 0.146229851 | 0.256771256 | 0.241479029 |
| 0.337577255 | 0.4283136   | 0.152568725 | 0.396915969 |
| 0.091957944 | 0.280545374 | 0.221337034 | 0.265764466 |
| 0.27307632  | 0.036191439 | 0.394453286 | 0.460225687 |
| 0.017333042 | 0.208072124 | 0.307540789 | 0.066072994 |
| 0.360005125 | 0.179730839 | 0.206442052 | 0.235135546 |
| 0.33862967  | 0.277691133 | 0.368525703 | 0.255699414 |
| 0.218947898 | 0.034560061 | 0.371898935 | 0.290981306 |
| 0.271183181 | 0.041965696 | 0.205638271 | 0.43836714  |
| 0.324724932 | 0.454137437 | 0.345295838 | 0.305970026 |
| 0.293140841 | 0.454586946 | 0.349037417 | 0.343727286 |
| 0.081169732 | 0.448602174 | 0.117068424 | 0.034318214 |
| 0.031069835 | 0.058961993 | 0.143545412 | 0.250691648 |
| 0.447873631 | 0.237642627 | 0.127143942 | 0.184203665 |
| 0.455227252 | 0.369724019 | 0.439477922 | 0.36914784  |
| 0.02306297  | 0.184814538 | 0.288201153 | 0.147375873 |
| 0.308356086 | 0.056786109 | 0.258415965 | 0.413026339 |
| 0.356373625 | 0.42643616  | 0.081037463 | 0.394270432 |
| 0.098118527 | 0.472323073 | 0.386424069 | 0.12737714  |
| 0.438352906 | 0.403348028 | 0.485091675 | 0.40163668  |
| 0.400737589 | 0.214823139 | 0.03434913  | 0.312961298 |
| 0.461968694 | 0.032147467 | 0.437048722 | 0.467670906 |
| 0.421481753 | 0.455192305 | 0.483284908 | 0.469619997 |
| 0.422227519 | 0.034855359 | 0.0185093   | 0.257674399 |
| 0.427131792 | 0.377918193 | 0.088500549 | 0.276182093 |
| 0.297685375 | 0.217965203 | 0.358575899 | 0.284027792 |
| 0.457341366 | 0.414947179 | 0.439506821 | 0.317095845 |
| 0.139019527 | 0.263841746 | 0.273456559 | 0.365796384 |
| 0.028701541 | 0.068815612 | 0.026215735 | 0.225837595 |
| 0.176227524 | 0.129087804 | 0.207676928 | 0.232176638 |



|             |             |             |             |
|-------------|-------------|-------------|-------------|
| 0.152850485 | 0.157889517 | 0.251848853 | 0.373191474 |
| 0.028209495 | 0.297534841 | 0.090015764 | 0.090791097 |
| 0.034671885 | 0.097012939 | 0.171224335 | 0.133976556 |
| 0.202995044 | 0.155560242 | 0.359762949 | 0.443271645 |
| 0.201939613 | 0.128574047 | 0.337327174 | 0.44067483  |
| 0.415125238 | 0.302587886 | 0.165715721 | 0.019626999 |
| 0.243081464 | 0.170967396 | 0.199765831 | 0.274811442 |
| 0.114613428 | 0.18656471  | 0.298241931 | 0.414087657 |
| 0.162336583 | 0.059381137 | 0.250611092 | 0.357441267 |
| 0.089393811 | 0.271827963 | 0.448480833 | 0.236657644 |
| 0.00169525  | 0.215526389 | 0.426186445 | 0.137587525 |
| 0.213108335 | 0.208552756 | 0.282693224 | 0.441478387 |
| 0.233699986 | 0.198389871 | 0.455002186 | 0.382026615 |
| 0.218985786 | 0.139426506 | 0.476960101 | 0.058731274 |
| 0.205304795 | 0.081067223 | 0.268029041 | 0.141263634 |
| 0.17727438  | 0.244143922 | 0.273764129 | 0.247283036 |
| 0.078853731 | 0.447181422 | 0.330260956 | 0.474868237 |
| 0.258794287 | 0.475409843 | 0.454846057 | 0.4297489   |
| 0.272684665 | 0.210534207 | 0.188355456 | 0.423429887 |
| 0.433460355 | 0.180615116 | 0.037889137 | 0.385115079 |
| 0.189139962 | 0.366518849 | 0.105026182 | 0.473467213 |
| 0.420382835 | 0.363489059 | 0.11926106  | 0.365525077 |
| 0.378127459 | 0.155413119 | 0.356935218 | 0.47214578  |
| 0.15529262  | 0.254492165 | 0.268687188 | 0.407726521 |
| 0.122768958 | 0.195498971 | 0.240812159 | 0.18826833  |
| 0.026887214 | 0.036287928 | 0.033621658 | 0.144052463 |
| 0.213755887 | 0.279410039 | 0.32391415  | 0.463488393 |
| 0.080672507 | 0.36780453  | 0.149663862 | 0.266155106 |
| 0.360239014 | 0.226292514 | 0.291309369 | 0.312174422 |
| 0.17407225  | 0.020560306 | 0.123021601 | 0.432088542 |
| 0.014975292 | 0.266492236 | 0.157178485 | 0.006049951 |
| 0.025023895 | 0.309862002 | 0.056452201 | 0.142126171 |
| 0.466632804 | 0.142018433 | 0.141872708 | 0.155112132 |
| 0.313475593 | 0.052874547 | 0.007131066 | 0.422074522 |
| 0.3890516   | 0.360591531 | 0.38426137  | 0.34291364  |
| 0.367270038 | 0.308756296 | 0.385718653 | 0.195512838 |
| 0.064478225 | 0.038516432 | 0.237441553 | 0.222449259 |
| 0.002830591 | 0.361216535 | 0.195399108 | 0.103971845 |
| 0.379785823 | 0.212881652 | 0.024863839 | 0.266790941 |
| 0.020660591 | 0.247295123 | 0.165327179 | 0.13311295  |
| 0.318516313 | 0.007084725 | 0.217524439 | 0.26086051  |
| 0.357549466 | 0.291529209 | 0.252128073 | 0.457140298 |
| 0.258568509 | 0.070247184 | 0.244371954 | 0.378080433 |
| 0.044411347 | 0.062905093 | 0.177311553 | 0.030479579 |
| 0.130403965 | 0.350528955 | 0.222433276 | 0.04174583  |
| 0.210386342 | 0.003503219 | 0.316817326 | 0.466672911 |
| 0.370417566 | 0.486969557 | 0.461960542 | 0.286736018 |
| 0.451826887 | 0.12088402  | 0.472061361 | 0.337739965 |
| 0.207924605 | 0.00152435  | 0.00619655  | 0.467255856 |
| 0.304626246 | 0.027450004 | 0.10840315  | 0.2403739   |
| 0.099474909 | 0.075013096 | 0.035345366 | 0.20889339  |
| 0.307677018 | 0.211438942 | 0.184185556 | 0.377146376 |
| 0.166973708 | 0.155425757 | 0.190938367 | 0.045644311 |
| 0.302243063 | 0.040365538 | 0.041451094 | 0.016261796 |

|             |             |             |             |
|-------------|-------------|-------------|-------------|
| 0.325070468 | 0.068409819 | 0.351573849 | 0.439328231 |
| 0.450767229 | 0.367238067 | 0.185110593 | 0.227448449 |
| 0.37411638  | 0.053718191 | 0.228675981 | 0.055986806 |
| 0.412208445 | 0.349060588 | 0.308717061 | 0.273953006 |
| 0.474234628 | 0.419743595 | 0.019558834 | 0.385349486 |
| 0.016442569 | 0.002822593 | 0.205319285 | 0.181176194 |
| 0.0291369   | 0.258621551 | 0.21385892  | 0.106495244 |
| 0.12562003  | 0.024044224 | 0.242708561 | 0.238235194 |
| 0.237617409 | 0.24159559  | 0.256842573 | 0.153517141 |
| 0.198128182 | 0.141878367 | 0.140854581 | 0.09309198  |
| 0.120079123 | 0.242095007 | 0.147751481 | 0.010509314 |
| 0.243320425 | 0.294247226 | 0.035615842 | 0.102874836 |
| 0.439889213 | 0.476926928 | 0.029897642 | 0.018759973 |
| 0.212733283 | 0.19876136  | 0.486342664 | 0.424895179 |
| 0.437153273 | 0.474702119 | 0.323555491 | 0.111583703 |
| 0.041913199 | 0.238536491 | 0.248726295 | 0.098641055 |
| 0.458712988 | 0.029613161 | 0.401693319 | 0.256397972 |
| 0.066506226 | 0.147844291 | 0.033920724 | 0.045487919 |
| 0.319569548 | 0.12319809  | 0.15028327  | 0.091175079 |
| 0.241981358 | 0.246407711 | 0.024584702 | 0.13422609  |
| 0.293222031 | 0.214125578 | 0.104706271 | 0.146493317 |
| 0.265647761 | 0.081714392 | 0.390415622 | 0.409958785 |
| 0.082297842 | 0.051691166 | 0.171418141 | 0.299159226 |
| 0.399650915 | 0.218620288 | 0.033468544 | 0.361672643 |
| 0.448979776 | 0.369431323 | 0.418699897 | 0.375503307 |
| 0.044274371 | 1           | 0.20879877  | 0.257108744 |
| 0.11252912  | 0.223075277 | 0.139113176 | 0.031801024 |
| 0.227664316 | 0.379740703 | 0.353664793 | 0.139419558 |
| 0.259120937 | 0.059011092 | 0.023901888 | 0.378414952 |
| 0.220501983 | 0.068523179 | 0.166612927 | 0.379381165 |
| 0.002978346 | 0.189417129 | 0.435028499 | 0.181293105 |
| 0.430593558 | 0.462009706 | 0.402223432 | 0.123030244 |
| 0.002815658 | 0.350084295 | 0.33201345  | 0.285001232 |
| 0.37070707  | 0.276651118 | 0.06944892  | 0.06726702  |
| 0.255266929 | 0.045671681 | 0.120459656 | 0.203944869 |
| 0.168393489 | 0.277651995 | 0.151068495 | 0.105975323 |
| 0.149237865 | 0.040318268 | 0.249021932 | 0.159160463 |
| 0.111143526 | 0.204645324 | 0.337234301 | 0.122108015 |
| 0.256285385 | 0.387438408 | 0.347798418 | 0.015413528 |
| 0.249625727 | 0.351214725 | 0.375906465 | 0.004037144 |
| 0.410670303 | 0.006136697 | 0.16730094  | 0.197581718 |
| 0.158241602 | 0.154529228 | 0.218968985 | 0.239497087 |
| 0.230798908 | 0.141589405 | 0.221338836 | 0.195500604 |
| 0.149515507 | 0.119464103 | 0.282840873 | 0.183748999 |
| 0.273117388 | 0.086435138 | 0.058720588 | 0.060393404 |
| 0.051640578 | 0.396799989 | 0.199759022 | 0.039883583 |
| 0.166016941 | 0.187467375 | 0.327189796 | 0.403450811 |
| 0.389727241 | 0.066039095 | 0.194113038 | 0.396183938 |
| 0.133771483 | 0.180788224 | 0.02952548  | 0.213933799 |
| 0.149409919 | 0.254253325 | 0.19586838  | 0.195513573 |
| 0.296342715 | 0.347913294 | 0.193320104 | 0.379187299 |
| 0.245742483 | 0.173477454 | 0.1577852   | 0.094290803 |
| 0.122086983 | 0.076094106 | 0.243650728 | 0.001935606 |
| 0.280531823 | 0.157088784 | 0.460490451 | 0.40460045  |

|             |             |             |             |
|-------------|-------------|-------------|-------------|
| 0.239926652 | 0.338883606 | 0.178644493 | 0.067168143 |
| 0.135371053 | 0.121214249 | 0.095919778 | 0.352034302 |
| 0.244790848 | 0.119982119 | 0.246997003 | 0.172106413 |
| 0.383160667 | 0.322834759 | 0.179999475 | 0.132272753 |
| 0.130878971 | 0.115973088 | 0.363395248 | 0.056597819 |
| 0.284390249 | 0.223095695 | 0.186170142 | 0.246285668 |
| 0.174554487 | 0.45462366  | 0.028791367 | 0.475697953 |
| 0.248792587 | 0.078542275 | 0.42371663  | 0.150932773 |
| 0.154469117 | 0.115945157 | 0.225934725 | 0.179453184 |
| 0.139368187 | 0.265599012 | 0.013595502 | 0.091435184 |
| 0.317266195 | 0.140943014 | 0.309618166 | 0.279299557 |
| 0.212911962 | 0.309401509 | 0.173449828 | 0.149380287 |
| 0.3752838   | 0.384567602 | 0.233030159 | 0.196680038 |
| 0.28354041  | 0.07790343  | 0.264631781 | 0.007495646 |
| 0.329645281 | 0.311613857 | 0.217536879 | 0.032191294 |
| 0.010657047 | 0.241356835 | 0.291367115 | 0.025575759 |
| 0.465441427 | 0.237997433 | 0.196905412 | 0.363478056 |
| 0.103503463 | 0.391134692 | 0.107750091 | 0.402419694 |
| 0.015324926 | 0.170808616 | 0.232363889 | 0.193789458 |
| 0.255447398 | 0.263279081 | 0.370204181 | 0.265688728 |
| 0.024318166 | 0.227127786 | 0.001726816 | 0.33679381  |
| 0.356113411 | 0.247604518 | 0.145340894 | 0.138608018 |
| 0.24593374  | 0.300802177 | 0.192258802 | 0.231941785 |
| 0.013438671 | 0.340026761 | 0.129174211 | 0.372393213 |
| 0.242383237 | 0.207338615 | 0.051947889 | 0.215500235 |
| 0.338034967 | 0.242083631 | 0.186090986 | 0.23868074  |
| 0.404445586 | 0.288223088 | 0.095857206 | 0.165959658 |
| 0.237938337 | 0.03211583  | 0.189554719 | 0.458160862 |
| 0.14808471  | 0.249855965 | 0.46330018  | 0.173334616 |
| 0.249505021 | 0.306707409 | 0.250657116 | 0.431239895 |
| 0.080412356 | 0.199847912 | 0.383762287 | 0.391564714 |
| 0.278621464 | 0.181671263 | 0.271212211 | 0.215428737 |
| 0.374907145 | 0.09041547  | 0.203092989 | 0.293898419 |
| 0.252105293 | 0.242568002 | 0.169110291 | 0.180524488 |
| 0.038892271 | 0.094415962 | 0.253339118 | 0.084319051 |
| 0.226158369 | 0.252090245 | 0.203088538 | 0.352001924 |
| 0.155569944 | 0.037391182 | 0.399218154 | 0.047855009 |
| 0.195655891 | 0.363324645 | 0.15861209  | 0.24775596  |
| 0.142657122 | 0.218556544 | 0.175856811 | 0.001152938 |
| 0.378657547 | 0.050585884 | 0.180542816 | 0.243266914 |
| 0.222375567 | 0.028697102 | 0.386370306 | 0.491312979 |
| 0.206331568 | 0.186150318 | 0.264370757 | 0.389293485 |
| 0.199446093 | 0.218363732 | 0.225656424 | 0.281807869 |
| 0.241846068 | 0.1985841   | 0.231921853 | 0.281871362 |
| 0.303996643 | 0.142024193 |             |             |
| PDPK1       | 0.014566732 | 0.298108965 | 0.00894681  |
| 0.031935761 | 0.249089284 | 0.109983858 | 0.02081106  |
| 0.042325027 | 0.264517072 | 0.148252232 | 0.164754247 |
| 0.003448857 | 0.161676878 | 0.330623786 | 0.021911953 |
| 0.304340209 | 0.011938232 | 0.038883033 | 0.065860076 |
| 0.11003492  | 0.230221827 | 0.168662309 | 0.133506462 |
| 0.241370034 | 0.087948812 | 0.170152019 | 0.308746741 |
| 0.360076421 | 0.14345998  | 0.274797077 | 0.072762146 |
| 0.278796426 | 0.280572281 | 0.230448373 | 0.002374225 |

|             |             |             |             |
|-------------|-------------|-------------|-------------|
| 0.20873948  | 0.082117857 | 0.287036001 | 0.126889784 |
| 0.125269054 | 0.212137728 | 0.121365978 | 0.083465287 |
| 0.17207736  | 0.006090983 | 0.090148369 | 0.368429739 |
| 0.197794298 | 0.137339237 | 0.016295765 | 0.276753257 |
| 0.189397774 | 0.162664027 | 0.245355536 | 0.000919278 |
| 0.203792694 | 0.170512872 | 0.236878653 | 0.331222461 |
| 0.093601507 | 0.047052422 | 0.219278613 | 0.128737282 |
| 0.326535681 | 0.351703288 | 0.181197286 | 0.171831203 |
| 0.338421712 | 0.219481751 | 0.354353623 | 0.050048874 |
| 0.157142521 | 0.009653636 | 0.079824886 | 0.038525896 |
| 0.197906325 | 0.09630222  | 0.202245446 | 0.226945428 |
| 0.280255069 | 0.356592243 | 0.143120437 | 0.326083118 |
| 0.231981209 | 0.32515871  | 0.188097872 | 0.242233811 |
| 0.327837192 | 0.045313212 | 0.259959628 | 0.363848127 |
| 0.018613663 | 0.217928915 | 0.309106562 | 0.054392492 |
| 0.281778842 | 0.266556587 | 0.174499864 | 0.160739782 |
| 0.346562164 | 0.277144731 | 0.344343693 | 0.155733997 |
| 0.222687118 | 0.022795609 | 0.294322636 | 0.315150337 |
| 0.112142074 | 0.021292962 | 0.170930193 | 0.405712364 |
| 0.253636277 | 0.344688485 | 0.335745824 | 0.305213674 |
| 0.277924054 | 0.343942472 | 0.234016851 | 0.312877963 |
| 0.100561741 | 0.367224945 | 0.061068027 | 0.012906317 |
| 0.014743187 | 0.036222027 | 0.242051328 | 0.216637096 |
| 0.356295151 | 0.192349463 | 0.053979822 | 0.134653154 |
| 0.418538133 | 0.292320463 | 0.376593161 | 0.314023048 |
| 0.008639079 | 0.281683191 | 0.253723166 | 0.090402349 |
| 0.283345233 | 0.057228465 | 0.217028239 | 0.32335617  |
| 0.22689679  | 0.372959212 | 0.041353802 | 0.320253287 |
| 0.104410183 | 0.357033602 | 0.299465969 | 0.059632682 |
| 0.339152041 | 0.300270237 | 0.380168044 | 0.345039069 |
| 0.29340424  | 0.107774744 | 0.09581685  | 0.303626307 |
| 0.351540852 | 0.015940551 | 0.395684705 | 0.411832869 |
| 0.333624665 | 0.380111291 | 0.421744787 | 0.386718091 |
| 0.337431306 | 0.026821998 | 0.078807621 | 0.239530151 |
| 0.331293264 | 0.247525817 | 0.088310778 | 0.254221337 |
| 0.316982635 | 0.133212964 | 0.364705973 | 0.119119379 |
| 0.373189948 | 0.333142785 | 0.379952986 | 0.289978683 |
| 0.190415322 | 0.184802426 | 0.316648547 | 0.270560476 |
| 0.011754465 | 0.022806302 | 0.013803255 | 0.250152476 |
| 0.100637163 | 0.091032139 | 0.112424469 | 0.319858317 |
| 0.103902175 | 0.129980973 | 0.213836117 | 0.341437134 |
| 0.020713339 | 0.222703801 | 0.057456843 | 0.064418779 |
| 0.01222257  | 0.071135977 | 0.057657121 | 0.045644439 |
| 0.150353843 | 0.119757476 | 0.323676593 | 0.384917597 |
| 0.22127522  | 0.07557245  | 0.273238709 | 0.344343097 |
| 0.31775698  | 0.255230774 | 0.149213297 | 0.001974245 |
| 0.143801435 | 0.236298141 | 0.241351336 | 0.289195831 |
| 0.090395978 | 0.119912852 | 0.280359814 | 0.331146856 |
| 0.085341791 | 0.056136385 | 0.197370506 | 0.260851329 |
| 0.07060954  | 0.126782726 | 0.344448552 | 0.24011092  |
| 4.44E-05    | 0.134271453 | 0.326415613 | 0.160733867 |
| 0.22224332  | 0.127752869 | 0.147973254 | 0.36689133  |
| 0.228476378 | 0.224650446 | 0.389676681 | 0.356890535 |
| 0.130797101 | 0.119670138 | 0.411846531 | 0.111266565 |

|             |             |             |             |
|-------------|-------------|-------------|-------------|
| 0.308612351 | 0.024102309 | 0.199971871 | 0.157735398 |
| 0.121342006 | 0.231476143 | 0.282224665 | 0.151163441 |
| 0.039428817 | 0.362887466 | 0.265163126 | 0.372396901 |
| 0.190270174 | 0.405554382 | 0.364921338 | 0.308727953 |
| 0.216313151 | 0.267748734 | 0.199466476 | 0.306492891 |
| 0.360975722 | 0.170438559 | 0.026005525 | 0.38999591  |
| 0.208941593 | 0.351732636 | 0.105817232 | 0.366659665 |
| 0.324042522 | 0.292452051 | 0.061803423 | 0.345931229 |
| 0.235656241 | 0.078059876 | 0.329590316 | 0.412838854 |
| 0.176171082 | 0.25763628  | 0.180069378 | 0.356483546 |
| 0.072587559 | 0.197963381 | 0.223478399 | 0.246079224 |
| 0.010974568 | 0.025398423 | 0.017209721 | 0.07575803  |
| 0.168196963 | 0.29551874  | 0.310916985 | 0.373087669 |
| 0.040781153 | 0.274183402 | 0.176507222 | 0.124466175 |
| 0.278630236 | 0.2485695   | 0.281474789 | 0.299835628 |
| 0.153339505 | 0.004612927 | 0.033544789 | 0.346631851 |
| 0.012367887 | 0.174196032 | 0.158638811 | 0.000736654 |
| 0.011296662 | 0.293609489 | 0.04281519  | 0.098159737 |
| 0.411565969 | 0.094852171 | 0.091749758 | 0.150225028 |
| 0.237094629 | 0.031541349 | 0.00100648  | 0.390053152 |
| 0.384443893 | 0.374927265 | 0.377710896 | 0.325317565 |
| 0.396204965 | 0.339947788 | 0.360590582 | 0.119327343 |
| 0.031697085 | 0.022610153 | 0.187384415 | 0.149556728 |
| 0.002700833 | 0.275310041 | 0.235275998 | 0.063393952 |
| 0.368522584 | 0.226901279 | 0.007653277 | 0.327779625 |
| 0.002382087 | 0.169651604 | 0.132667364 | 0.121015388 |
| 0.349362004 | 0.002182706 | 0.066069551 | 0.183437701 |
| 0.240621824 | 0.202000468 | 0.205249423 | 0.365422652 |
| 0.15674665  | 0.054383849 | 0.156136637 | 0.307059568 |
| 0.021606884 | 0.082814026 | 0.149341099 | 0.01242972  |
| 0.079080579 | 0.335318613 | 0.198295354 | 0.014316885 |
| 0.130117387 | 0.000111966 | 0.204547521 | 0.370674672 |
| 0.286704398 | 0.407073101 | 0.339086328 | 0.171248416 |
| 0.336711794 | 0.216660854 | 0.385268171 | 0.265364231 |
| 0.158898519 | 9.11E-05    | 0.002972341 | 0.382698307 |
| 0.244963842 | 0.019275916 | 0.068630253 | 0.087767332 |
| 0.035239731 | 0.038635661 | 0.020712066 | 0.153744994 |
| 0.228335266 | 0.167422374 | 0.180033936 | 0.3052057   |
| 0.111122196 | 0.144640833 | 0.150652225 | 0.037117716 |
| 0.265839121 | 0.013204347 | 0.042037565 | 0.003366504 |
| 0.331297665 | 0.047104458 | 0.278973781 | 0.353768327 |
| 0.340728334 | 0.312723935 | 0.150550156 | 0.132299957 |
| 0.395856748 | 0.032363988 | 0.173221361 | 0.037031566 |
| 0.310529432 | 0.277675522 | 0.192502536 | 0.16257267  |
| 0.374447142 | 0.304877441 | 0.00873779  | 0.321123963 |
| 0.001430319 | 0.004410158 | 0.118022675 | 0.181970327 |
| 0.18352796  | 0.239100098 | 0.146551458 | 0.159597764 |
| 0.152359274 | 0.004696455 | 0.237227136 | 0.215744407 |
| 0.188521732 | 0.210665231 | 0.229150389 | 0.184159571 |
| 0.176484798 | 0.140188384 | 0.087058191 | 0.071471824 |
| 0.199633716 | 0.185170682 | 0.08901748  | 0.006100762 |
| 0.212763433 | 0.237760738 | 0.01355923  | 0.069371572 |
| 0.309661712 | 0.368767825 | 0.018691114 | 0.002458115 |
| 0.146141735 | 0.187497778 | 0.395259188 | 0.337000578 |

|             |             |             |             |
|-------------|-------------|-------------|-------------|
| 0.340990482 | 0.383809502 | 0.241883705 | 0.084679851 |
| 0.016611169 | 0.232734359 | 0.265067953 | 0.076766615 |
| 0.363218605 | 0.022608963 | 0.316516587 | 0.282888754 |
| 0.054640282 | 0.072238674 | 0.008156466 | 0.033497704 |
| 0.302768994 | 0.087308253 | 0.097041541 | 0.04940536  |
| 0.1470057   | 0.186437009 | 0.014755298 | 0.091971409 |
| 0.227494647 | 0.186421135 | 0.073579822 | 0.119059457 |
| 0.23047166  | 0.155796384 | 0.351904769 | 0.313573815 |
| 0.050424984 | 0.048752041 | 0.060924916 | 0.335909124 |
| 0.344323704 | 0.264521004 | 0.003569004 | 0.303801671 |
| 0.381124582 | 0.288002953 | 0.317417784 | 0.334725825 |
| 0.035908436 | 0.20879877  | 1           | 0.255214871 |
| 0.105927671 | 0.115779685 | 0.14883632  | 0.021673042 |
| 0.221103631 | 0.333099464 | 0.288329266 | 0.058916975 |
| 0.251406561 | 0.04915892  | 0.018859479 | 0.354988373 |
| 0.178651093 | 0.020357587 | 0.140963278 | 0.402306377 |
| 0.001118877 | 0.191138446 | 0.427616367 | 0.079114075 |
| 0.384257982 | 0.375792278 | 0.281934649 | 0.105922055 |
| 0.009657616 | 0.366729672 | 0.212436405 | 0.141682254 |
| 0.286674926 | 0.202695575 | 0.090127158 | 0.026629369 |
| 0.191524071 | 0.024937165 | 0.063089346 | 0.101027308 |
| 0.194303342 | 0.230781438 | 0.122371925 | 0.133219863 |
| 0.109856576 | 0.046854026 | 0.188775753 | 0.075642418 |
| 0.265123611 | 0.140488871 | 0.24360621  | 0.12367525  |
| 0.136105766 | 0.384895678 | 0.287290176 | 0.004537708 |
| 0.285762773 | 0.359969172 | 0.33973955  | 0.00070327  |
| 0.314034966 | 0.001178751 | 0.109107021 | 0.092426635 |
| 0.091877139 | 0.119053541 | 0.209553887 | 0.146062372 |
| 0.229055484 | 0.0945528   | 0.085439157 | 0.124606868 |
| 0.066820354 | 0.093114202 | 0.269911288 | 0.153542612 |
| 0.114851534 | 0.033060694 | 0.042388919 | 0.042091909 |
| 0.011614935 | 0.342201213 | 0.129896845 | 0.023165724 |
| 0.142474955 | 0.159799959 | 0.239403542 | 0.326258126 |
| 0.314994795 | 0.044231077 | 0.188620444 | 0.28263712  |
| 0.170340932 | 0.098162587 | 0.014768159 | 0.17952363  |
| 0.09781942  | 0.131922732 | 0.189772195 | 0.13045461  |
| 0.311104314 | 0.248805418 | 0.123023964 | 0.319473862 |
| 0.149375878 | 0.256590268 | 0.103925955 | 0.030521839 |
| 0.050316549 | 0.065908401 | 0.220735624 | 0.000626891 |
| 0.213972555 | 0.055859037 | 0.353234213 | 0.304233853 |
| 0.238198581 | 0.263906099 | 0.088521099 | 0.021849633 |
| 0.08898079  | 0.080916663 | 0.063480967 | 0.330611416 |
| 0.201783477 | 0.056996571 | 0.211578227 | 0.074735806 |
| 0.349334005 | 0.364513874 | 0.210600021 | 0.107122994 |
| 0.158632789 | 0.083114408 | 0.335766324 | 0.029260385 |
| 0.271085389 | 0.125788073 | 0.206322925 | 0.15206496  |
| 0.125663978 | 0.394561136 | 0.017099721 | 0.399972627 |
| 0.199386235 | 0.062022272 | 0.335943478 | 0.139990493 |
| 0.09632191  | 0.058095964 | 0.212899235 | 0.147179823 |
| 0.120850717 | 0.213725328 | 0.015409563 | 0.066430079 |
| 0.22750282  | 0.211910526 | 0.305826451 | 0.321374488 |
| 0.190937115 | 0.297917014 | 0.217939417 | 0.123966023 |
| 0.300143362 | 0.311201231 | 0.08756689  | 0.168943035 |
| 0.237043442 | 0.028445212 | 0.175432987 | 0.032104555 |

|             |             |             |             |
|-------------|-------------|-------------|-------------|
| 0.296357684 | 0.310783607 | 0.177111157 | 0.017000496 |
| 0.004442758 | 0.206230047 | 0.263605207 | 0.030225653 |
| 0.414324208 | 0.17810716  | 0.266912123 | 0.289941275 |
| 0.104256745 | 0.304712407 | 0.067059666 | 0.273710798 |
| 0.02487542  | 0.16397703  | 0.283822313 | 0.266155896 |
| 0.098276841 | 0.211143095 | 0.265948339 | 0.173396635 |
| 0.007781398 | 0.131499807 | 0.001480315 | 0.236908751 |
| 0.290716555 | 0.270195535 | 0.118144546 | 0.170475291 |
| 0.189856986 | 0.302018184 | 0.175131851 | 0.239990937 |
| 0.00213705  | 0.274632914 | 0.101389379 | 0.242955972 |
| 0.121637186 | 0.268041209 | 0.01519013  | 0.299231788 |
| 0.26217832  | 0.152625133 | 0.181438271 | 0.156837493 |
| 0.321778141 | 0.285127793 | 0.067871555 | 0.149413484 |
| 0.30573464  | 0.023120116 | 0.129654536 | 0.393645513 |
| 0.076137248 | 0.166954071 | 0.376557095 | 0.080435679 |
| 0.250157703 | 0.250787507 | 0.297659338 | 0.393984484 |
| 0.044937069 | 0.133337422 | 0.357279803 | 0.341750389 |
| 0.217066376 | 0.192921223 | 0.183803975 | 0.143235221 |
| 0.27004372  | 0.020386709 | 0.224009547 | 0.206322478 |
| 0.187674507 | 0.213202507 | 0.206789497 | 0.137792543 |
| 0.011537752 | 0.082694022 | 0.116439853 | 0.064120063 |
| 0.179356577 | 0.223484228 | 0.179947531 | 0.253318069 |
| 0.042614984 | 0.004649048 | 0.312345898 | 0.033506973 |
| 0.114169533 | 0.24837384  | 0.124468221 | 0.218468694 |
| 0.079482703 | 0.218775889 | 0.13798402  | 0.000409037 |
| 0.351307074 | 0.043133842 | 0.193722665 | 0.120487828 |
| 0.208123611 | 0.013196697 | 0.288031842 | 0.405805269 |
| 0.179744042 | 0.178759628 | 0.178083536 | 0.324114071 |
| 0.162130058 | 0.226141154 | 0.244445333 | 0.234285576 |
| 0.206917285 | 0.17026251  | 0.204520232 | 0.174565404 |
| 0.241177151 | 0.098113333 |             |             |
| PDSS1       | 0.051524994 | 0.311588749 | 0.029747547 |
| 0.117932037 | 0.2585036   | 0.175762123 | 0.069020264 |
| 0.113561806 | 0.261300407 | 0.143088435 | 0.221669905 |
| 0.024242334 | 0.110420377 | 0.395023034 | 0.065571867 |
| 0.307094566 | 0.052838426 | 0.110315415 | 0.073040074 |
| 0.158034395 | 0.271353194 | 0.212325932 | 0.165757184 |
| 0.262131117 | 0.152229524 | 0.199635051 | 0.231635986 |
| 0.392543122 | 0.138168274 | 0.284237938 | 0.093125648 |
| 0.375158121 | 0.285478532 | 0.219069928 | 0.014764406 |
| 0.21841748  | 0.039230414 | 0.370908731 | 0.256879031 |
| 0.161826022 | 0.296691968 | 0.136578132 | 0.198794123 |
| 0.199534683 | 0.031086706 | 0.078394593 | 0.331370868 |
| 0.201986537 | 0.190272413 | 0.038000415 | 0.289591504 |
| 0.230950839 | 0.221272082 | 0.242735473 | 0.004525325 |
| 0.218825406 | 0.091971316 | 0.198015913 | 0.379981245 |
| 0.168610007 | 0.123307933 | 0.196300699 | 0.150926185 |
| 0.26924424  | 0.320325738 | 0.215315151 | 0.215815376 |
| 0.405228875 | 0.214212848 | 0.322457764 | 0.113819951 |
| 0.225860363 | 0.027919374 | 0.149552907 | 0.056079089 |
| 0.23993635  | 0.169488478 | 0.223388467 | 0.25292286  |
| 0.312157975 | 0.421880843 | 0.191690059 | 0.37757058  |
| 0.179939048 | 0.278271199 | 0.244773471 | 0.304321423 |
| 0.321467949 | 0.089986514 | 0.333568209 | 0.43902842  |

|             |             |             |             |
|-------------|-------------|-------------|-------------|
| 0.042082118 | 0.195979163 | 0.329918468 | 0.090957212 |
| 0.308714694 | 0.206881835 | 0.17566938  | 0.180083404 |
| 0.328553721 | 0.291085179 | 0.377303227 | 0.251345118 |
| 0.222637167 | 0.048431618 | 0.348921064 | 0.271869421 |
| 0.21740023  | 0.054992451 | 0.286929607 | 0.396734908 |
| 0.29405528  | 0.393254672 | 0.339852321 | 0.351606565 |
| 0.282090799 | 0.401929039 | 0.304684847 | 0.331184913 |
| 0.067356044 | 0.410290387 | 0.126719752 | 0.053590524 |
| 0.045857516 | 0.092711264 | 0.234157023 | 0.278628953 |
| 0.382350352 | 0.235462927 | 0.147806323 | 0.235185035 |
| 0.438657071 | 0.338155959 | 0.413409083 | 0.366643587 |
| 0.040112617 | 0.227356644 | 0.276116133 | 0.142319474 |
| 0.322222189 | 0.092793117 | 0.255247787 | 0.39343006  |
| 0.324570558 | 0.395175943 | 0.099225449 | 0.390234727 |
| 0.164376708 | 0.43553625  | 0.330063525 | 0.150360809 |
| 0.411159446 | 0.368262704 | 0.447538596 | 0.336898225 |
| 0.35897018  | 0.183661123 | 0.07923846  | 0.340139293 |
| 0.423478551 | 0.024484274 | 0.397107664 | 0.428330445 |
| 0.385632751 | 0.401143507 | 0.465328709 | 0.415977528 |
| 0.381912936 | 0.058771879 | 0.04270272  | 0.295915811 |
| 0.399309715 | 0.3404665   | 0.148020006 | 0.24931864  |
| 0.297736187 | 0.188460189 | 0.333365402 | 0.207664276 |
| 0.448220013 | 0.367759585 | 0.392483064 | 0.328004188 |
| 0.177824908 | 0.267665561 | 0.246891685 | 0.333032267 |
| 0.048485886 | 0.075819269 | 0.034047804 | 0.274284821 |
| 0.139358265 | 0.165464556 | 0.200998704 | 0.269660622 |
| 0.179008086 | 0.167074557 | 0.208096188 | 0.340692604 |
| 0.043123471 | 0.230673188 | 0.11592385  | 0.130673545 |
| 0.061430563 | 0.124783534 | 0.182414904 | 0.124619005 |
| 0.230400146 | 0.18240004  | 0.309959597 | 0.413362442 |
| 0.251717955 | 0.13683937  | 0.300553755 | 0.413068325 |
| 0.415237997 | 0.257448182 | 0.206083603 | 0.018121136 |
| 0.299356356 | 0.197924675 | 0.205123638 | 0.235474986 |
| 0.141086302 | 0.259725802 | 0.310479709 | 0.356621411 |
| 0.150898615 | 0.09273336  | 0.277508347 | 0.343271687 |
| 0.113513318 | 0.223553734 | 0.414460607 | 0.234053726 |
| 0.003653229 | 0.22976083  | 0.36898175  | 0.226859845 |
| 0.258585002 | 0.158422205 | 0.172536009 | 0.417956852 |
| 0.248903884 | 0.253896174 | 0.399532214 | 0.346215055 |
| 0.183141004 | 0.165537967 | 0.452644913 | 0.095300336 |
| 0.245397837 | 0.08047314  | 0.283844971 | 0.145834397 |
| 0.195469916 | 0.297009747 | 0.253454161 | 0.244180322 |
| 0.077724003 | 0.415959732 | 0.305531279 | 0.420000115 |
| 0.274069432 | 0.455121662 | 0.400939116 | 0.379481482 |
| 0.255319795 | 0.243331458 | 0.160131567 | 0.373629842 |
| 0.402540608 | 0.247147978 | 0.05159496  | 0.357856337 |
| 0.232734849 | 0.355075948 | 0.166504979 | 0.441546338 |
| 0.400926903 | 0.334727584 | 0.151586007 | 0.374073218 |
| 0.336045478 | 0.150634417 | 0.34241751  | 0.455616995 |
| 0.194051517 | 0.292878233 | 0.29179141  | 0.401863388 |
| 0.141603967 | 0.26551304  | 0.270979453 | 0.174539632 |
| 0.006801353 | 0.059658665 | 0.049968607 | 0.176750229 |
| 0.21084846  | 0.244680091 | 0.323664061 | 0.429828096 |
| 0.11355192  | 0.327366948 | 0.206371433 | 0.278511584 |



|             |             |             |             |
|-------------|-------------|-------------|-------------|
| 0.357557963 | 0.259259415 | 0.232125726 | 0.281038409 |
| 0.21095376  | 0.024709517 | 0.117658844 | 0.424991458 |
| 0.026158356 | 0.223076712 | 0.188911899 | 0.004651464 |
| 0.047382564 | 0.284448897 | 0.081087517 | 0.16886832  |
| 0.42972955  | 0.161931408 | 0.165703976 | 0.190548983 |
| 0.289631911 | 0.077171479 | 0.005056511 | 0.410016502 |
| 0.390542673 | 0.376528722 | 0.386615648 | 0.344109636 |
| 0.391478242 | 0.299710426 | 0.387595047 | 0.153411583 |
| 0.103351656 | 0.061068321 | 0.284100814 | 0.271888087 |
| 0.004789398 | 0.323349064 | 0.229311728 | 0.127996492 |
| 0.353299936 | 0.266882042 | 0.03614542  | 0.26397813  |
| 0.021060971 | 0.187138603 | 0.209402327 | 0.197937711 |
| 0.343796007 | 0.013838702 | 0.142139582 | 0.286071737 |
| 0.310158065 | 0.279063052 | 0.231549203 | 0.418658223 |
| 0.229839731 | 0.088343887 | 0.260502562 | 0.323278555 |
| 0.078377637 | 0.115718618 | 0.202834074 | 0.019484828 |
| 0.089534562 | 0.355159028 | 0.235705385 | 0.060045156 |
| 0.218224307 | 0.00573957  | 0.288871433 | 0.428560577 |
| 0.329325297 | 0.452446365 | 0.402488498 | 0.229161507 |
| 0.404169464 | 0.106709813 | 0.425015254 | 0.313773667 |
| 0.205469337 | 0.001382356 | 0.008799576 | 0.416436455 |
| 0.275665766 | 0.037148573 | 0.13429787  | 0.157309728 |
| 0.121400348 | 0.091835274 | 0.058630769 | 0.228875351 |
| 0.236715509 | 0.226911535 | 0.205966778 | 0.359323301 |
| 0.221607768 | 0.19301785  | 0.191760701 | 0.068431265 |
| 0.246998571 | 0.059802119 | 0.07069823  | 0.011952865 |
| 0.327252044 | 0.086914186 | 0.340324823 | 0.396652636 |
| 0.422646321 | 0.335060467 | 0.167569453 | 0.170741566 |
| 0.372860923 | 0.057880464 | 0.186341074 | 0.06350876  |
| 0.363935372 | 0.333004474 | 0.294562848 | 0.262179442 |
| 0.452369491 | 0.389057177 | 0.038681417 | 0.383101039 |
| 0.011024681 | 0.004395979 | 0.17621251  | 0.225336823 |
| 0.082278762 | 0.287697212 | 0.23937707  | 0.182936809 |
| 0.183299103 | 0.027415389 | 0.260460821 | 0.273938591 |
| 0.264516627 | 0.273238002 | 0.264183415 | 0.206278142 |
| 0.251933989 | 0.237639869 | 0.167635125 | 0.149358655 |
| 0.187163503 | 0.258171383 | 0.160668985 | 0.027823494 |
| 0.216706772 | 0.251305361 | 0.053108785 | 0.122808065 |
| 0.379791709 | 0.419254664 | 0.072859744 | 0.023661245 |
| 0.229856126 | 0.262017092 | 0.437748478 | 0.375659441 |
| 0.405158894 | 0.457414816 | 0.326150706 | 0.188619998 |
| 0.059248358 | 0.262120277 | 0.265022341 | 0.152104538 |
| 0.409768943 | 0.046280417 | 0.355249972 | 0.248905476 |
| 0.101552115 | 0.18358767  | 0.043546508 | 0.081760828 |
| 0.256591872 | 0.148381785 | 0.190980855 | 0.098134665 |
| 0.274860071 | 0.223330899 | 0.052944408 | 0.166351945 |
| 0.313239322 | 0.241851133 | 0.13916798  | 0.162611492 |
| 0.263415324 | 0.112779323 | 0.365660655 | 0.407134119 |
| 0.09729259  | 0.094213767 | 0.150502875 | 0.30849203  |
| 0.360250301 | 0.202238186 | 0.018925914 | 0.326961951 |
| 0.412091089 | 0.300044518 | 0.370556762 | 0.39609994  |
| 0.07166995  | 0.257108744 | 0.255214871 | 1           |
| 0.157642325 | 0.172043468 | 0.199222818 | 0.055421261 |
| 0.267269983 | 0.385826457 | 0.347096312 | 0.154806511 |

|                     |             |             |             |
|---------------------|-------------|-------------|-------------|
| 0.214224447         | 0.074981835 | 0.039030693 | 0.343623854 |
| 0.2617990.081095316 | 0.150483372 | 0.367568979 |             |
| 0.004554602         | 0.163946881 | 0.434439733 | 0.162735483 |
| 0.42583841          | 0.432108079 | 0.374964911 | 0.148153218 |
| 0.010598719         | 0.341095365 | 0.279975862 | 0.254256953 |
| 0.341418227         | 0.255144982 | 0.095361306 | 0.099693413 |
| 0.273071206         | 0.052144666 | 0.182856956 | 0.147676511 |
| 0.221631549         | 0.25584773  | 0.192586878 | 0.161569707 |
| 0.208582164         | 0.067851449 | 0.195812875 | 0.161674707 |
| 0.193935023         | 0.227497893 | 0.337466396 | 0.118339119 |
| 0.233371018         | 0.405980482 | 0.348926035 | 0.023494194 |
| 0.234620288         | 0.372988344 | 0.358776527 | 0.009397921 |
| 0.352240979         | 0.011664118 | 0.205301012 | 0.203782563 |
| 0.191219139         | 0.222361362 | 0.25206692  | 0.252793107 |
| 0.264933009         | 0.195715627 | 0.200125276 | 0.202535525 |
| 0.162126693         | 0.156145021 | 0.269908581 | 0.211125146 |
| 0.228944192         | 0.101536015 | 0.077604021 | 0.076454861 |
| 0.051671251         | 0.348310694 | 0.210813996 | 0.047913676 |
| 0.196060341         | 0.230360675 | 0.333906152 | 0.365416334 |
| 0.366501105         | 0.074848202 | 0.242442119 | 0.333410938 |
| 0.15820662          | 0.161163713 | 0.048200146 | 0.200483328 |
| 0.167476713         | 0.235022288 | 0.181348272 | 0.189775396 |
| 0.302040406         | 0.341424406 | 0.198874358 | 0.363260485 |
| 0.240911823         | 0.237864749 | 0.13924215  | 0.112396277 |
| 0.146582467         | 0.110295168 | 0.260249278 | 0.002892577 |
| 0.268361727         | 0.130843937 | 0.39838231  | 0.366899054 |
| 0.219522074         | 0.32796599  | 0.13430931  | 0.090632821 |
| 0.113651692         | 0.135921045 | 0.12378943  | 0.320545655 |
| 0.189308911         | 0.131666576 | 0.263555745 | 0.130033088 |
| 0.355614317         | 0.324833661 | 0.237429017 | 0.180272941 |
| 0.189261566         | 0.129089486 | 0.375569595 | 0.071517779 |
| 0.251876231         | 0.221679426 | 0.18138347  | 0.26907912  |
| 0.233289857         | 0.418959108 | 0.045311324 | 0.433305184 |
| 0.296540992         | 0.101614113 | 0.412346473 | 0.157871051 |
| 0.158130151         | 0.120236414 | 0.200212939 | 0.183495688 |
| 0.207515435         | 0.220527545 | 0.015479978 | 0.122769425 |
| 0.312701452         | 0.202212169 | 0.310504169 | 0.314147146 |
| 0.251146235         | 0.349920507 | 0.136422599 | 0.199081895 |
| 0.342532182         | 0.364311959 | 0.236807785 | 0.24699393  |
| 0.29934883          | 0.095210819 | 0.201216797 | 0.023032725 |
| 0.305900123         | 0.267341999 | 0.213909316 | 0.057145717 |
| 0.023944212         | 0.23550597  | 0.287042964 | 0.048528652 |
| 0.444214128         | 0.173970436 | 0.220873482 | 0.296769513 |
| 0.143596809         | 0.371394916 | 0.151020552 | 0.336956373 |
| 0.050173873         | 0.207176263 | 0.232482183 | 0.22728282  |
| 0.231650577         | 0.278270033 | 0.351051616 | 0.230788236 |
| 0.042044614         | 0.23640496  | 0.011872161 | 0.331452946 |
| 0.346134876         | 0.280653047 | 0.17885802  | 0.144922537 |
| 0.261631037         | 0.311758674 | 0.252993198 | 0.206167169 |
| 0.016079033         | 0.296356897 | 0.150231277 | 0.305819257 |
| 0.194926345         | 0.249594282 | 0.061577567 | 0.272576489 |
| 0.326099135         | 0.286464519 | 0.233402306 | 0.248745938 |
| 0.360088976         | 0.280508596 | 0.104752547 | 0.182883199 |
| 0.253681143         | 0.0504914   | 0.158843696 | 0.437802909 |

|             |             |             |             |
|-------------|-------------|-------------|-------------|
| 0.174396062 | 0.240070721 | 0.417145769 | 0.219429743 |
| 0.256436304 | 0.289356979 | 0.241698675 | 0.421031656 |
| 0.128179087 | 0.216434595 | 0.356808303 | 0.387476485 |
| 0.2936903   | 0.233360457 | 0.249922956 | 0.265869661 |
| 0.327763677 | 0.076052096 | 0.266446538 | 0.286634776 |
| 0.258506004 | 0.251229328 | 0.174254042 | 0.225669745 |
| 0.046098437 | 0.14951814  | 0.179738964 | 0.11344548  |
| 0.250379267 | 0.26951539  | 0.262648031 | 0.345672047 |
| 0.125119531 | 0.036007989 | 0.392912994 | 0.055821706 |
| 0.146062075 | 0.292217402 | 0.166775939 | 0.260616874 |
| 0.147014486 | 0.241991969 | 0.188944473 | 0.002215954 |
| 0.375909431 | 0.059002177 | 0.21197326  | 0.244145788 |
| 0.2299962   | 0.052513913 | 0.344162265 | 0.450985915 |
| 0.206249663 | 0.174191549 | 0.21191854  | 0.362325114 |
| 0.19465185  | 0.196400739 | 0.246753158 | 0.253376308 |
| 0.218762168 | 0.191037669 | 0.215704836 | 0.225954666 |
| 0.277793484 | 0.157387904 |             |             |
| PDZD11      | 0.174863805 | 0.224209441 | 0.106819731 |
| 0.134198673 | 0.14362943  | 0.107226884 | 0.246431797 |
| 0.260960704 | 0.219931659 | 0.063582066 | 0.144622454 |
| 0.152721398 | 0.038271151 | 0.271868941 | 0.262760542 |
| 0.141984094 | 0.229342735 | 0.264142965 | 0.088161272 |
| 0.156417703 | 0.161189244 | 0.093467865 | 0.119633069 |
| 0.162434904 | 0.282761577 | 0.156336206 | 0.098674236 |
| 0.247636797 | 0.03947361  | 0.14386794  | 0.031078043 |
| 0.336594917 | 0.144566315 | 0.079606102 | 0.104357245 |
| 0.131646325 | 0.033042329 | 0.346560953 | 0.186901894 |
| 0.052915931 | 0.332175168 | 0.06993441  | 0.190546266 |
| 0.090856484 | 0.138386299 | 0.029140759 | 0.15540564  |
| 0.157688881 | 0.189654848 | 0.139228809 | 0.162444244 |
| 0.125261627 | 0.212664321 | 0.137515539 | 0.014857205 |
| 0.071127515 | 0.014460518 | 0.049439039 | 0.282583337 |
| 0.268959366 | 0.269897686 | 0.059358938 | 0.197495129 |
| 0.148854818 | 0.201360348 | 0.27879227  | 0.093462432 |
| 0.281218615 | 0.072087922 | 0.15609925  | 0.113823027 |
| 0.144198498 | 0.154512251 | 0.29735022  | 0.172275718 |
| 0.115768518 | 0.243635526 | 0.149459865 | 0.097043108 |
| 0.207826431 | 0.35882234  | 0.256566595 | 0.290052027 |
| 0.098441687 | 0.122358357 | 0.135850181 | 0.284029873 |
| 0.231594829 | 0.251330855 | 0.198434157 | 0.325909679 |
| 0.192652354 | 0.099943876 | 0.196994433 | 0.222970671 |
| 0.219202214 | 0.090566563 | 0.079203225 | 0.069838347 |
| 0.16508806  | 0.13653572  | 0.327848019 | 0.254948512 |
| 0.14798129  | 0.159225415 | 0.302081542 | 0.111355622 |
| 0.142302596 | 0.157458591 | 0.159671951 | 0.204499919 |
| 0.156456334 | 0.251853248 | 0.20928327  | 0.266242547 |
| 0.116015724 | 0.271280539 | 0.183103154 | 0.268424595 |
| 0.021911537 | 0.288636277 | 0.19393789  | 0.229474345 |
| 0.152068123 | 0.274238103 | 0.164880945 | 0.332307123 |
| 0.227253632 | 0.229943547 | 0.214760814 | 0.218420539 |
| 0.252459234 | 0.27465367  | 0.284141641 | 0.244062337 |
| 0.190860565 | 0.085369237 | 0.110161982 | 0.175878568 |
| 0.218608043 | 0.251679039 | 0.100121813 | 0.327157102 |
| 0.288765514 | 0.222000075 | 0.178244882 | 0.363778389 |

|             |             |             |             |
|-------------|-------------|-------------|-------------|
| 0.250814771 | 0.326947158 | 0.202026746 | 0.227335787 |
| 0.320324232 | 0.305100462 | 0.304895995 | 0.153434707 |
| 0.305367655 | 0.131813229 | 0.089675299 | 0.265452177 |
| 0.329010249 | 0.011657774 | 0.224899227 | 0.245404981 |
| 0.268323408 | 0.201146076 | 0.310944932 | 0.264222744 |
| 0.270911629 | 0.205231549 | 0.013951044 | 0.235258139 |
| 0.296158091 | 0.258693271 | 0.282379273 | 0.096730094 |
| 0.159737672 | 0.127889987 | 0.200437102 | 0.079118038 |
| 0.370126663 | 0.232279348 | 0.234602635 | 0.224507939 |
| 0.138103957 | 0.328551902 | 0.088886737 | 0.290209539 |
| 0.205154406 | 0.172271059 | 0.139966512 | 0.292680005 |
| 0.068389993 | 0.259315639 | 0.131621156 | 0.161636914 |
| 0.275583907 | 0.145302945 | 0.070562645 | 0.170836286 |
| 0.176904087 | 0.106311764 | 0.206583281 | 0.19907506  |
| 0.217259138 | 0.306762379 | 0.193973099 | 0.20227226  |
| 0.216124644 | 0.319702192 | 0.155534748 | 0.263939831 |
| 0.145113975 | 0.220258458 | 0.177864452 | 0.317898337 |
| 0.358224074 | 0.105764227 | 0.322910228 | 0.048690275 |
| 0.126626572 | 0.067887599 | 0.055152932 | 0.100989143 |
| 0.307982548 | 0.207994198 | 0.159426558 | 0.191186869 |
| 0.14460312  | 0.20751656  | 0.126145293 | 0.354063209 |
| 0.227203703 | 0.141561916 | 0.255766221 | 0.116449026 |
| 0.047346557 | 0.163719707 | 0.212064454 | 0.17887914  |
| 0.232926185 | 0.065212231 | 0.055823292 | 0.245839193 |
| 0.091726873 | 0.144843432 | 0.245575491 | 0.196363547 |
| 0.111285898 | 0.283270983 | 0.30857534  | 0.026083821 |
| 0.129207968 | 0.093890369 | 0.264186083 | 0.076823912 |
| 0.222315206 | 0.307342484 | 0.128492419 | 0.14043501  |
| 0.160906861 | 0.300751999 | 0.253881613 | 0.270919878 |
| 0.094381976 | 0.312624914 | 0.220872417 | 0.266053621 |
| 0.207625848 | 0.097839043 | 0.039301997 | 0.20680303  |
| 0.232181255 | 0.097278737 | 0.172746765 | 0.18260977  |
| 0.099726919 | 0.169085272 | 0.163180215 | 0.291260684 |
| 0.35495029  | 0.254581656 | 0.265637019 | 0.245923215 |
| 0.253813021 | 0.188574487 | 0.242527533 | 0.333369714 |
| 0.075000989 | 0.131587502 | 0.122111722 | 0.268474431 |
| 0.232642626 | 0.160745374 | 0.326903531 | 0.051665712 |
| 0.000928695 | 0.199826732 | 0.169634145 | 0.243905857 |
| 0.090914579 | 0.11341839  | 0.18129425  | 0.288169884 |
| 0.261971819 | 0.282039144 | 0.293725142 | 0.144919356 |
| 0.269149325 | 0.137720019 | 0.100565401 | 0.155883706 |
| 0.303745045 | 0.071450839 | 0.183270689 | 0.356367286 |
| 0.129811744 | 0.087526437 | 0.183836547 | 0.011877    |
| 0.189899722 | 0.17094726  | 0.23467069  | 0.332306675 |
| 0.277386395 | 0.293048804 | 0.219031094 | 0.082066084 |
| 0.235709057 | 0.227110283 | 0.019139852 | 0.265117974 |
| 0.292879584 | 0.29239218  | 0.288528295 | 0.299275418 |
| 0.26467433  | 0.203824466 | 0.222562353 | 0.115128538 |
| 0.246681554 | 0.171936185 | 0.096378917 | 0.188991767 |
| 0.018310425 | 0.242270217 | 0.174505424 | 0.271867364 |
| 0.192236857 | 0.262173616 | 0.182423455 | 0.151907499 |
| 0.074887622 | 0.040950357 | 0.182331324 | 0.254383059 |
| 0.249349411 | 0.113724545 | 0.054593707 | 0.095600536 |
| 0.258871165 | 0.278670383 | 0.079675465 | 0.297838377 |

|             |             |             |             |
|-------------|-------------|-------------|-------------|
| 0.169579931 | 0.171742863 | 0.155293464 | 0.211250558 |
| 0.243290696 | 0.045518156 | 0.143253547 | 0.005633422 |
| 0.071460658 | 0.315783559 | 0.115715541 | 0.144924885 |
| 0.212145952 | 0.062511607 | 0.255826006 | 0.312783281 |
| 0.247597493 | 0.280906562 | 0.277127908 | 0.084456727 |
| 0.279971659 | 0.020161356 | 0.278647283 | 0.220909285 |
| 0.078013461 | 0.005047952 | 0.055742421 | 0.234872166 |
| 0.118353074 | 0.147170083 | 0.248003881 | 0.079546352 |
| 0.232751989 | 0.167391552 | 0.235954455 | 0.121408488 |
| 0.135000403 | 0.187716434 | 0.132274357 | 0.278039463 |
| 0.224831109 | 0.249962807 | 0.108906186 | 0.220097846 |
| 0.130994454 | 0.202925205 | 0.224776137 | 0.022452867 |
| 0.222355846 | 0.211432375 | 0.318206868 | 0.276764646 |
| 0.32699164  | 0.180272109 | 0.058299592 | 0.107816305 |
| 0.257358703 | 0.143801516 | 0.074219474 | 0.154139137 |
| 0.248225059 | 0.160228412 | 0.279660857 | 0.270878725 |
| 0.314748003 | 0.29321011  | 0.206269727 | 0.224303929 |
| 0.049987402 | 0.013159365 | 0.101346815 | 0.298249778 |
| 0.080772475 | 0.123094249 | 0.296719111 | 0.195635343 |
| 0.219815837 | 0.126336662 | 0.087498333 | 0.096630754 |
| 0.2189829   | 0.160115796 | 0.130419428 | 0.291558942 |
| 0.16772451  | 0.147004351 | 0.231033815 | 0.291389328 |
| 0.153025866 | 0.266382403 | 0.277522478 | 0.181459758 |
| 0.093564286 | 0.103744058 | 0.204937963 | 0.255358684 |
| 0.237226866 | 0.247434265 | 0.238861027 | 0.083641134 |
| 0.298488326 | 0.18550951  | 0.272766313 | 0.252260058 |
| 0.318903898 | 0.336652062 | 0.353742607 | 0.266326347 |
| 0.213359157 | 0.189489714 | 0.130927351 | 0.208684352 |
| 0.281807224 | 0.153204928 | 0.272677581 | 0.089278232 |
| 0.259164364 | 0.202821195 | 0.178108968 | 0.254880791 |
| 0.108370697 | 0.279517132 | 0.240888699 | 0.161800124 |
| 0.174415275 | 0.082219626 | 0.229919956 | 0.24857953  |
| 0.259990274 | 0.058095957 | 0.256124582 | 0.166118195 |
| 0.230034503 | 0.06352822  | 0.172320708 | 0.351864401 |
| 0.229824883 | 0.224372984 | 0.106514624 | 0.225548399 |
| 0.195687271 | 0.090403243 | 0.064906365 | 0.216307725 |
| 0.286284789 | 0.137484494 | 0.280529557 | 0.317192157 |
| 0.228364745 | 0.11252912  | 0.105927671 | 0.157642325 |
| 1           | 0.112263851 | 0.253853838 | 0.213086943 |
| 0.352936522 | 0.363919965 | 0.235826196 | 0.235359054 |
| 0.113979288 | 0.165429435 | 0.136621944 | 0.23401107  |
| 0.094612624 | 0.188268035 | 0.077405105 | 0.215108296 |
| 0.008885195 | 0.049602067 | 0.289348109 | 0.205399484 |
| 0.341303233 | 0.262848548 | 0.311303274 | 0.191632388 |
| 0.002378697 | 0.149776427 | 0.164258213 | 0.108996108 |
| 0.228612968 | 0.248163503 | 0.173121276 | 0.241971282 |
| 0.324533389 | 0.155274964 | 0.255642352 | 0.092454546 |
| 0.057798639 | 0.158417257 | 0.324732223 | 0.236394316 |
| 0.239523231 | 0.188777765 | 0.076089977 | 0.196712638 |
| 0.099103573 | 0.317834027 | 0.292290229 | 0.066796287 |
| 0.056319181 | 0.289551604 | 0.213642691 | 0.143733737 |
| 0.110369181 | 0.265137695 | 0.282248218 | 0.023485902 |
| 0.173614563 | 0.109816058 | 0.240217887 | 0.200024858 |
| 0.231685429 | 0.257031873 | 0.233657311 | 0.146837917 |

|             |             |             |             |
|-------------|-------------|-------------|-------------|
| 0.194705446 | 0.243110937 | 0.173820032 | 0.251737161 |
| 0.214420093 | 0.23198823  | 0.149572626 | 0.141546606 |
| 0.139817292 | 0.214734939 | 0.234279461 | 0.228143356 |
| 0.176728942 | 0.236084017 | 0.325566251 | 0.159741516 |
| 0.272770637 | 0.145935557 | 0.34209112  | 0.254504107 |
| 0.308886136 | 0.181500473 | 0.183454792 | 0.209208693 |
| 0.052383421 | 0.103647888 | 0.178320681 | 0.124730571 |
| 0.23858809  | 0.131182409 | 0.105414518 | 0.146519874 |
| 0.174513196 | 0.344580686 | 0.312221756 | 0.300771769 |
| 0.138128771 | 0.140781925 | 0.057986675 | 0.216278706 |
| 0.20562927  | 0.260696438 | 0.143809003 | 0.029655661 |
| 0.222279425 | 0.119688153 | 0.21892748  | 0.27788637  |
| 0.075281004 | 0.319874306 | 0.063942877 | 0.200940831 |
| 0.046608899 | 0.223780623 | 0.27721546  | 0.176994422 |
| 0.047438756 | 0.226889103 | 0.162825723 | 0.094172644 |
| 0.185914598 | 0.172627891 | 0.163725945 | 0.240933636 |
| 0.239277397 | 0.200652391 | 0.327466975 | 0.169469306 |
| 0.107769775 | 0.122813574 | 0.115963536 | 0.173161979 |
| 0.225586013 | 0.268329985 | 0.186882527 | 0.268637803 |
| 0.147279901 | 0.254096025 | 0.36878696  | 0.177675857 |
| 0.154779948 | 0.201816122 | 0.051451097 | 0.109036321 |
| 0.243926767 | 0.081518222 | 0.003356994 | 0.052617682 |
| 0.267506996 | 0.135402403 | 0.182931662 | 0.243968163 |
| 0.141355974 | 0.306771125 | 0.047779824 | 0.19695256  |
| 0.259933838 | 0.314001854 | 0.160624692 | 0.333656379 |
| 0.26949118  | 0.242232831 | 0.131676358 | 0.028921478 |
| 0.131984272 | 0.10427577  | 0.08950506  | 0.247126429 |
| 0.16175337  | 0.056912576 | 0.133866823 | 0.171914771 |
| 0.26726354  | 0.042264848 | 0.148331239 | 0.163547823 |
| 0.286905838 | 0.318647745 | 0.259596931 | 0.198028644 |
| 0.17541953  | 0.268928753 | 0.104164642 | 0.12056886  |
| 0.144083654 | 0.110029261 | 0.232736084 | 0.088986305 |
| 0.199288338 | 0.166965622 | 0.024683368 | 0.348141781 |
| 0.290435695 | 0.104975301 | 0.32784868  | 0.065231809 |
| 0.278646084 | 0.280329731 | 0.190413841 | 0.090396857 |
| 0.086069796 | 0.126806534 | 0.256568015 | 0.229492943 |
| 0.043355906 | 0.146619879 | 0.17559658  | 0.137190314 |
| 0.323443395 | 0.1413867   | 0.347349525 | 0.068507975 |
| 0.255372436 | 0.225370299 | 0.187795183 | 0.159906814 |
| 0.145209554 | 0.197938476 | 0.081288376 | 0.316260935 |
| 0.247429605 | 0.096461322 | 0.227186193 | 0.220885605 |
| 0.104807546 | 0.264889199 | 0.112016505 | 0.314940806 |
| 0.242344548 | 0.280382769 | 0.218648757 | 0.271020272 |
| 0.318810849 | 0.12755373  | 0.093933664 | 0.187029096 |
| 0.246313256 | 0.153822374 | 0.127236352 | 0.238148211 |
| 0.080196563 | 0.258607449 | 0.118269263 | 0.196489413 |
| 0.170271071 | 0.281694971 | 0.115877758 | 0.254316728 |
| 0.223399637 | 0.141297494 | 0.156943838 | 0.337295512 |
| 0.17088059  | 0.096405348 | 0.346627607 | 0.010548191 |
| 0.123029124 | 0.161980093 | 0.235325261 | 0.136644646 |
| 0.260715638 | 0.190878808 | 0.126368304 | 0.02911084  |
| 0.248416452 | 0.035983149 | 0.17027727  | 0.152030815 |
| 0.104059687 | 0.207237244 | 0.282839544 | 0.288453593 |
| 0.221264442 | 0.094862451 | 0.066875728 | 0.282375329 |

|             |             |             |             |
|-------------|-------------|-------------|-------------|
| 0.061005866 | 0.064201702 | 0.101454279 | 0.142422483 |
| 0.076120825 | 0.075026161 | 0.091242793 | 0.076403225 |
| 0.213753194 | 0.204700881 |             |             |
| PEX3        | 0.058405108 | 0.429127297 | 0.052512312 |
| 0.109505604 | 0.190280974 | 0.243923479 | 0.030548608 |
| 0.067267255 | 0.292956628 | 0.129845897 | 0.255005461 |
| 0.014127851 | 0.051397091 | 0.443088919 | 0.029145498 |
| 0.240705068 | 0.021282231 | 0.055903723 | 0.02861793  |
| 0.105638917 | 0.14928912  | 0.193822195 | 0.24576246  |
| 0.13453701  | 0.208689525 | 0.23885108  | 0.207653184 |
| 0.509526955 | 0.17541444  | 0.372196353 | 0.117230323 |
| 0.396369591 | 0.205287601 | 0.201391362 | 0.017214033 |
| 0.254347997 | 0.002257805 | 0.416327091 | 0.116718267 |
| 0.099517517 | 0.347520128 | 0.177854941 | 0.140592964 |
| 0.170559609 | 0.030219426 | 0.140063737 | 0.267299988 |
| 0.211973084 | 0.137052239 | 0.054132726 | 0.358945476 |
| 0.141912725 | 0.324249388 | 0.335910739 | 0.00113616  |
| 0.156180443 | 0.048870856 | 0.102217059 | 0.53331987  |
| 0.179199172 | 0.073341222 | 0.104301827 | 0.118366353 |
| 0.226235753 | 0.249475786 | 0.193194708 | 0.13915609  |
| 0.509968071 | 0.074896153 | 0.348199265 | 0.120108589 |
| 0.167314087 | 0.019271498 | 0.140692401 | 0.064834251 |
| 0.172182483 | 0.134251719 | 0.229072181 | 0.136639132 |
| 0.42362124  | 0.511083766 | 0.16716776  | 0.501349327 |
| 0.026204622 | 0.188641745 | 0.131989267 | 0.22962988  |
| 0.250884178 | 0.034425841 | 0.362322156 | 0.51158208  |
| 0.026829597 | 0.240725442 | 0.277934558 | 0.102690746 |
| 0.460033206 | 0.118493258 | 0.234193694 | 0.10777472  |
| 0.263519886 | 0.17526827  | 0.459331184 | 0.240535925 |
| 0.16630673  | 0.061711126 | 0.503473006 | 0.187626304 |
| 0.179823199 | 0.069750458 | 0.085321899 | 0.424985595 |
| 0.295569091 | 0.513455321 | 0.371943984 | 0.272991691 |
| 0.19973457  | 0.517389473 | 0.34094245  | 0.40665416  |
| 0.089961994 | 0.531468    | 0.141604486 | 0.031834832 |
| 0.048632336 | 0.05432753  | 0.079747447 | 0.277091833 |
| 0.486528768 | 0.267495978 | 0.108413602 | 0.117858452 |
| 0.415713411 | 0.500493698 | 0.514528778 | 0.354713399 |
| 0.027839383 | 0.097050608 | 0.205963032 | 0.175485052 |
| 0.264417853 | 0.076833496 | 0.120457001 | 0.512789663 |
| 0.396727038 | 0.385868577 | 0.099923723 | 0.50308545  |
| 0.081896311 | 0.521846602 | 0.470739917 | 0.10788945  |
| 0.526915206 | 0.521287317 | 0.509865651 | 0.325013557 |
| 0.513645777 | 0.230445497 | 0.016958342 | 0.318077904 |
| 0.496503842 | 0.012348063 | 0.459520648 | 0.480429751 |
| 0.505444357 | 0.42998813  | 0.495143554 | 0.51795721  |
| 0.516729821 | 0.055927973 | 0.005643664 | 0.179864218 |
| 0.509671664 | 0.401756553 | 0.065712649 | 0.222721785 |
| 0.217101585 | 0.229344574 | 0.379485686 | 0.156370395 |
| 0.500512315 | 0.45980319  | 0.488215065 | 0.312083825 |
| 0.155191122 | 0.326410858 | 0.20839275  | 0.501148383 |
| 0.034144182 | 0.080699702 | 0.05687053  | 0.232273458 |
| 0.202259915 | 0.11508596  | 0.181796171 | 0.186428472 |
| 0.142174231 | 0.171596951 | 0.166562486 | 0.282943513 |
| 0.062959104 | 0.299335753 | 0.109570976 | 0.097144567 |

|             |             |             |             |
|-------------|-------------|-------------|-------------|
| 0.02723437  | 0.150203119 | 0.097704841 | 0.11908053  |
| 0.13661022  | 0.245465989 | 0.354998951 | 0.481421909 |
| 0.135444039 | 0.176377272 | 0.341407596 | 0.480440495 |
| 0.405079359 | 0.230200485 | 0.187941614 | 0.016646555 |
| 0.097256459 | 0.114827411 | 0.079361442 | 0.250520774 |
| 0.19398551  | 0.090524655 | 0.223883899 | 0.340662641 |
| 0.193936252 | 0.074465012 | 0.141956481 | 0.447438675 |
| 0.136975917 | 0.178229884 | 0.415843899 | 0.231132086 |
| 0.0048856   | 0.183650529 | 0.426022162 | 0.054734837 |
| 0.20554049  | 0.081893013 | 0.174476068 | 0.430648291 |
| 0.117030669 | 0.088854759 | 0.502735982 | 0.327812132 |
| 0.186883394 | 0.228791683 | 0.507927047 | 0.012160219 |
| 0.167095877 | 0.044823873 | 0.214580859 | 0.164493144 |
| 0.168715324 | 0.2124464   | 0.189757063 | 0.142619982 |
| 0.134753942 | 0.514108493 | 0.397146057 | 0.518356076 |
| 0.145345388 | 0.508100466 | 0.438859927 | 0.444518796 |
| 0.28438975  | 0.145084204 | 0.068937048 | 0.403614956 |
| 0.430264498 | 0.103924851 | 0.078086886 | 0.376825767 |
| 0.130596768 | 0.286897203 | 0.05728867  | 0.4790196   |
| 0.507877057 | 0.48218838  | 0.081406715 | 0.294592743 |
| 0.375502516 | 0.17711646  | 0.391317763 | 0.51008383  |
| 0.113917241 | 0.156730121 | 0.136139732 | 0.357830613 |
| 0.141545862 | 0.081117128 | 0.299710703 | 0.088065614 |
| 0.019077836 | 0.053759596 | 0.052593628 | 0.088919245 |
| 0.086763273 | 0.292217152 | 0.278369915 | 0.50807674  |
| 0.068416886 | 0.450449751 | 0.171625157 | 0.128284959 |
| 0.395014039 | 0.142753581 | 0.247854303 | 0.270860629 |
| 0.204232636 | 0.02201798  | 0.086880451 | 0.510334642 |
| 0.037080868 | 0.129914983 | 0.161773239 | 0.005015635 |
| 0.026754175 | 0.383007825 | 0.100586514 | 0.206618132 |
| 0.462941625 | 0.214684485 | 0.155690695 | 0.118575622 |
| 0.296056222 | 0.068216391 | 0.00864519  | 0.459941382 |
| 0.46199582  | 0.422721537 | 0.457625195 | 0.450380898 |
| 0.382835705 | 0.342792194 | 0.338395361 | 0.274165157 |
| 0.058090346 | 0.054834425 | 0.079016921 | 0.124758927 |
| 0.002638235 | 0.364884506 | 0.160157245 | 0.124062141 |
| 0.344886541 | 0.196247057 | 0.031228053 | 0.21955303  |
| 0.025408634 | 0.10713547  | 0.125482325 | 0.09669978  |
| 0.266046028 | 0.013925196 | 0.155376033 | 0.123947295 |
| 0.474473932 | 0.343816229 | 0.166206929 | 0.538527821 |
| 0.221314817 | 0.11853867  | 0.153391365 | 0.361088333 |
| 0.040225307 | 0.033056714 | 0.153258217 | 0.036225919 |
| 0.175470547 | 0.443360212 | 0.161261526 | 0.047998416 |
| 0.185554406 | 0.006843769 | 0.383287319 | 0.534111029 |
| 0.495968426 | 0.498849395 | 0.525237962 | 0.146605865 |
| 0.519810808 | 0.049513029 | 0.532151416 | 0.38938093  |
| 0.15186409  | 0.001667192 | 0.005150363 | 0.478229556 |
| 0.225418308 | 0.071643872 | 0.118391596 | 0.247622001 |
| 0.068814777 | 0.087346585 | 0.045045648 | 0.090075327 |
| 0.352668505 | 0.138583007 | 0.085306129 | 0.465525558 |
| 0.11010515  | 0.142262294 | 0.175125244 | 0.078263446 |
| 0.292692091 | 0.039541803 | 0.069988827 | 0.01001269  |
| 0.280798887 | 0.121850025 | 0.482444794 | 0.519780448 |
| 0.495896744 | 0.306423473 | 0.148066354 | 0.203406756 |



|             |             |             |             |
|-------------|-------------|-------------|-------------|
| 0.401668251 | 0.110615283 | 0.18541017  | 0.102878041 |
| 0.502804343 | 0.254506501 | 0.294068538 | 0.306666159 |
| 0.478118315 | 0.471053524 | 0.022275804 | 0.333151783 |
| 0.027565815 | 0.001829532 | 0.230577529 | 0.193528575 |
| 0.017363132 | 0.155706629 | 0.222589949 | 0.086962221 |
| 0.10195792  | 0.030104678 | 0.10723697  | 0.095998434 |
| 0.190586702 | 0.171729508 | 0.142379193 | 0.18727483  |
| 0.114349733 | 0.044993582 | 0.115241297 | 0.074731475 |
| 0.090142846 | 0.290193184 | 0.208519089 | 0.013240773 |
| 0.238474504 | 0.23792011  | 0.041030186 | 0.139722199 |
| 0.441119354 | 0.48726366  | 0.019335255 | 0.01279786  |
| 0.245059399 | 0.120086593 | 0.490906279 | 0.515539429 |
| 0.533993662 | 0.501443455 | 0.399454081 | 0.050811031 |
| 0.049559057 | 0.189990383 | 0.157332387 | 0.052669577 |
| 0.520436432 | 0.053688962 | 0.518331111 | 0.154065098 |
| 0.085892309 | 0.113030585 | 0.032762491 | 0.05220279  |
| 0.259362527 | 0.137053538 | 0.096660974 | 0.131579032 |
| 0.131776867 | 0.129307409 | 0.02797395  | 0.125931065 |
| 0.276638057 | 0.071651547 | 0.109060091 | 0.159235238 |
| 0.333319497 | 0.086597143 | 0.331023498 | 0.436039211 |
| 0.116375813 | 0.06083214  | 0.159379649 | 0.309935353 |
| 0.407541671 | 0.227886464 | 0.048906547 | 0.457533378 |
| 0.489275548 | 0.342245177 | 0.52837541  | 0.339611498 |
| 0.068726456 | 0.223075277 | 0.115779685 | 0.172043468 |
| 0.112263851 | 1           | 0.118470215 | 0.047071015 |
| 0.274871575 | 0.470334597 | 0.387066407 | 0.101391318 |
| 0.284180943 | 0.102522383 | 0.045623538 | 0.444475591 |
| 0.072688269 | 0.05837811  | 0.18270756  | 0.379065147 |
| 0.002709703 | 0.076335974 | 0.45372384  | 0.158924139 |
| 0.501224881 | 0.461469988 | 0.448633109 | 0.138749996 |
| 0.00025749  | 0.285231458 | 0.271532991 | 0.189109093 |
| 0.417070328 | 0.339387987 | 0.091221156 | 0.046071092 |
| 0.265807817 | 0.09157466  | 0.058874396 | 0.223045616 |
| 0.061467825 | 0.285212212 | 0.156620858 | 0.112109051 |
| 0.091513911 | 0.074911    | 0.142262506 | 0.147686641 |
| 0.047532298 | 0.207010551 | 0.309169041 | 0.144551712 |
| 0.082256082 | 0.377053634 | 0.332133083 | 0.024826259 |
| 0.204659081 | 0.35169212  | 0.4320671   | 0.00070538  |
| 0.349626427 | 0.00759066  | 0.097553988 | 0.12095614  |
| 0.106708672 | 0.087787095 | 0.160643289 | 0.145345992 |
| 0.216980511 | 0.102103583 | 0.162198115 | 0.181708283 |
| 0.101646842 | 0.122617603 | 0.248229347 | 0.163509272 |
| 0.158736151 | 0.084972789 | 0.116191533 | 0.126902591 |
| 0.053012267 | 0.480386995 | 0.252017245 | 0.08775554  |
| 0.15665749  | 0.14959557  | 0.340268492 | 0.504391935 |
| 0.423932553 | 0.138545311 | 0.136086356 | 0.463713748 |
| 0.088812648 | 0.165163505 | 0.039637645 | 0.247497129 |
| 0.153256424 | 0.11092909  | 0.239305819 | 0.214766052 |
| 0.306328645 | 0.410503265 | 0.249198727 | 0.442287315 |
| 0.18068691  | 0.139552693 | 0.154583791 | 0.058046185 |
| 0.096456348 | 0.107386774 | 0.141417554 | 0.003670681 |
| 0.261603314 | 0.175253024 | 0.460801885 | 0.508942126 |
| 0.132496739 | 0.395490454 | 0.190824863 | 0.052593401 |
| 0.152901569 | 0.193366965 | 0.11849654  | 0.377535895 |

|             |             |             |             |
|-------------|-------------|-------------|-------------|
| 0.112306873 | 0.12096508  | 0.17189649  | 0.224611152 |
| 0.357985297 | 0.319253595 | 0.105465209 | 0.111154879 |
| 0.130222315 | 0.165334191 | 0.454677287 | 0.080400726 |
| 0.265006452 | 0.101120144 | 0.242533783 | 0.137750495 |
| 0.09694341  | 0.50970489  | 0.049509324 | 0.515216363 |
| 0.126535669 | 0.130592663 | 0.494221421 | 0.195166366 |
| 0.172513335 | 0.092013371 | 0.090860872 | 0.174710185 |
| 0.098640558 | 0.171681731 | 0.006923366 | 0.022779468 |
| 0.270645896 | 0.111437956 | 0.335175778 | 0.269839012 |
| 0.10883111  | 0.271277406 | 0.098896017 | 0.130885235 |
| 0.496806724 | 0.511234608 | 0.119074029 | 0.200815305 |
| 0.27387082  | 0.070752582 | 0.345288887 | 0.00432133  |
| 0.263462238 | 0.270174664 | 0.157487554 | 0.034630356 |
| 0.013899278 | 0.0907399   | 0.247888179 | 0.050531219 |
| 0.448564234 | 0.117684247 | 0.222767823 | 0.391268672 |
| 0.143472047 | 0.509504185 | 0.067335779 | 0.357702821 |
| 0.018308336 | 0.185692176 | 0.195279127 | 0.170277006 |
| 0.123690728 | 0.123204    | 0.315575604 | 0.123292763 |
| 0.023860945 | 0.132530486 | 0.0003813   | 0.419047342 |
| 0.470272015 | 0.142890885 | 0.193958372 | 0.130087074 |
| 0.224009191 | 0.360502556 | 0.09168222  | 0.24039456  |
| 0.015780375 | 0.233450455 | 0.143293549 | 0.454362114 |
| 0.111426586 | 0.176695767 | 0.052896881 | 0.134018599 |
| 0.477596515 | 0.104653845 | 0.218388046 | 0.121135032 |
| 0.511431505 | 0.371822526 | 0.168751297 | 0.122107754 |
| 0.253003977 | 0.057317757 | 0.204744196 | 0.514072085 |
| 0.0974917   | 0.106311535 | 0.408766475 | 0.093767644 |
| 0.13356702  | 0.397341575 | 0.252509574 | 0.499956999 |
| 0.037584687 | 0.193989509 | 0.374064932 | 0.428227797 |
| 0.263286639 | 0.070309175 | 0.115951005 | 0.095724493 |
| 0.491384005 | 0.091311336 | 0.097133517 | 0.303061466 |
| 0.092210626 | 0.237776213 | 0.224099521 | 0.088028464 |
| 0.032717913 | 0.081433283 | 0.241552676 | 0.108220456 |
| 0.175623954 | 0.192249641 | 0.097374771 | 0.390806573 |
| 0.111736723 | 0.027985929 | 0.45121927  | 0.006645447 |
| 0.280720069 | 0.321918414 | 0.173583516 | 0.166361614 |
| 0.203145441 | 0.21476739  | 0.182281579 | 0.001126769 |
| 0.356359037 | 0.038173049 | 0.138076338 | 0.112100978 |
| 0.116019613 | 0.030736985 | 0.496181074 | 0.5000778   |
| 0.25456954  | 0.173121466 | 0.168436039 | 0.466693292 |
| 0.073732304 | 0.148036971 | 0.131931013 | 0.324389528 |
| 0.112471661 | 0.171222979 | 0.180803416 | 0.189847798 |
| 0.340031826 | 0.149264599 |             |             |
| PEX7        | 0.101799944 | 0.260050374 | 0.055538714 |
| 0.090108575 | 0.19887593  | 0.115488254 | 0.145696796 |
| 0.188313946 | 0.251463575 | 0.077799291 | 0.16590243  |
| 0.066147143 | 0.075898499 | 0.315312652 | 0.165366535 |
| 0.194425231 | 0.130027108 | 0.176969493 | 0.100059791 |
| 0.147641592 | 0.197871015 | 0.120577437 | 0.128836922 |
| 0.194188735 | 0.226064943 | 0.170034855 | 0.151583464 |
| 0.297823485 | 0.057191429 | 0.191633074 | 0.036238023 |
| 0.347946389 | 0.201600429 | 0.107550698 | 0.044054316 |
| 0.164031534 | 0.055484537 | 0.354528715 | 0.177273196 |
| 0.075685441 | 0.326885199 | 0.076457438 | 0.16535818  |

|             |             |             |             |
|-------------|-------------|-------------|-------------|
| 0.099155099 | 0.065066859 | 0.037650672 | 0.216009116 |
| 0.18308844  | 0.200537805 | 0.078487155 | 0.205329901 |
| 0.148075954 | 0.225692171 | 0.167567089 | 0.007283173 |
| 0.105091681 | 0.03345229  | 0.083104061 | 0.322738046 |
| 0.239229098 | 0.201614587 | 0.087613575 | 0.19611126  |
| 0.203990237 | 0.267360931 | 0.304341287 | 0.107982064 |
| 0.321968394 | 0.115670999 | 0.215968589 | 0.102720995 |
| 0.145262544 | 0.085298152 | 0.246189582 | 0.130494229 |
| 0.14153133  | 0.21839254  | 0.185179582 | 0.13648072  |
| 0.235827775 | 0.394610541 | 0.259637904 | 0.3198401   |
| 0.144986778 | 0.186242062 | 0.171205135 | 0.318261307 |
| 0.283241697 | 0.182348755 | 0.23496176  | 0.366494289 |
| 0.122646515 | 0.128492556 | 0.237588244 | 0.172096666 |
| 0.258370971 | 0.140292651 | 0.098041848 | 0.103922132 |
| 0.234077722 | 0.1851109   | 0.363226145 | 0.249850335 |
| 0.185810157 | 0.102211068 | 0.321488364 | 0.172636239 |
| 0.147298003 | 0.09523404  | 0.178783369 | 0.270986158 |
| 0.191084025 | 0.299336864 | 0.254488746 | 0.304005789 |
| 0.161770243 | 0.316413721 | 0.212101057 | 0.315735276 |
| 0.0341406   | 0.336216959 | 0.150404045 | 0.136959499 |
| 0.088863031 | 0.209134207 | 0.208887245 | 0.350040546 |
| 0.283448292 | 0.259928981 | 0.159776659 | 0.202439633 |
| 0.322051859 | 0.299044708 | 0.331084141 | 0.28705978  |
| 0.098658535 | 0.135355841 | 0.149226898 | 0.17391361  |
| 0.259996089 | 0.209440083 | 0.134802014 | 0.350599566 |
| 0.3001876   | 0.284480339 | 0.130298622 | 0.38540921  |
| 0.222960366 | 0.371518855 | 0.23981578  | 0.164032251 |
| 0.353457748 | 0.327556619 | 0.359621435 | 0.218121717 |
| 0.334071022 | 0.121624565 | 0.092668718 | 0.304574254 |
| 0.378430739 | 0.0133046   | 0.28763797  | 0.310116159 |
| 0.30552498  | 0.261684621 | 0.374935012 | 0.325516703 |
| 0.310392468 | 0.141580296 | 0.023961032 | 0.277680458 |
| 0.327241626 | 0.280464731 | 0.271023266 | 0.132829782 |
| 0.220034133 | 0.129664454 | 0.267030924 | 0.089875842 |
| 0.415459864 | 0.285718265 | 0.293732734 | 0.262192643 |
| 0.157714673 | 0.318333521 | 0.140339742 | 0.304695982 |
| 0.121675999 | 0.106726942 | 0.08387919  | 0.329215529 |
| 0.076244537 | 0.232008278 | 0.128649355 | 0.222226673 |
| 0.255412822 | 0.148893542 | 0.104975362 | 0.239169071 |
| 0.109242773 | 0.139446273 | 0.154503916 | 0.144200812 |
| 0.121301144 | 0.239365635 | 0.150724325 | 0.156499162 |
| 0.214683075 | 0.262733727 | 0.20999751  | 0.323770208 |
| 0.174334314 | 0.176287571 | 0.21773515  | 0.367943378 |
| 0.392828429 | 0.14926571  | 0.308888017 | 0.023090238 |
| 0.13173217  | 0.097946102 | 0.09579983  | 0.151441214 |
| 0.249304027 | 0.185536412 | 0.201932753 | 0.253306492 |
| 0.125589717 | 0.161567531 | 0.151412112 | 0.365609772 |
| 0.176432909 | 0.152362123 | 0.307642551 | 0.149823226 |
| 0.016241065 | 0.153594032 | 0.26303275  | 0.197285859 |
| 0.2511628   | 0.088127505 | 0.081815959 | 0.296489587 |
| 0.128252106 | 0.187887566 | 0.309632184 | 0.268102756 |
| 0.123669634 | 0.243138698 | 0.36896943  | 0.039806765 |
| 0.180995584 | 0.080132657 | 0.285120647 | 0.088676529 |
| 0.211972474 | 0.336669395 | 0.186328845 | 0.165017935 |

|             |             |             |             |
|-------------|-------------|-------------|-------------|
| 0.118740157 | 0.343879299 | 0.296227913 | 0.323340107 |
| 0.114874862 | 0.369073719 | 0.277526226 | 0.308519205 |
| 0.238532757 | 0.129525159 | 0.069754856 | 0.248670572 |
| 0.285488402 | 0.11000917  | 0.113523175 | 0.245415665 |
| 0.118929076 | 0.230653291 | 0.187758183 | 0.337838595 |
| 0.387162444 | 0.279379934 | 0.218074721 | 0.312875862 |
| 0.274973159 | 0.15837971  | 0.302528325 | 0.393811641 |
| 0.090013571 | 0.159491875 | 0.141674393 | 0.333804858 |
| 0.191959425 | 0.190182658 | 0.343904476 | 0.094083025 |
| 0.002246161 | 0.124393542 | 0.098507622 | 0.210370173 |
| 0.126719379 | 0.160349408 | 0.235832574 | 0.338112824 |
| 0.180677058 | 0.318898881 | 0.299925839 | 0.140557261 |
| 0.289808132 | 0.170618016 | 0.15467833  | 0.217815998 |
| 0.30337866  | 0.037963622 | 0.125299379 | 0.385693078 |
| 0.078357887 | 0.119934732 | 0.181830145 | 0.0061267   |
| 0.096570273 | 0.209728616 | 0.162519046 | 0.267999466 |
| 0.351173317 | 0.237456037 | 0.183646002 | 0.091331902 |
| 0.277789328 | 0.14602695  | 0.011294546 | 0.320677918 |
| 0.347549924 | 0.345553572 | 0.34042483  | 0.335789928 |
| 0.324898047 | 0.265676572 | 0.281724568 | 0.125011493 |
| 0.164197403 | 0.108402863 | 0.120496668 | 0.182864909 |
| 0.010322219 | 0.292192825 | 0.212478544 | 0.213864613 |
| 0.259139747 | 0.289807014 | 0.09532342  | 0.221990916 |
| 0.031012107 | 0.065340407 | 0.175152969 | 0.248162811 |
| 0.32369235  | 0.049635163 | 0.052710351 | 0.116699494 |
| 0.273173385 | 0.28140466  | 0.111755975 | 0.344077713 |
| 0.183446029 | 0.125368779 | 0.159559952 | 0.272136606 |
| 0.148560657 | 0.054139275 | 0.150178365 | 0.005790257 |
| 0.087318922 | 0.359075938 | 0.148449255 | 0.081787004 |
| 0.205673538 | 0.021177062 | 0.258914441 | 0.360332407 |
| 0.275651273 | 0.34101561  | 0.321538068 | 0.114505362 |
| 0.318636945 | 0.045250595 | 0.333217203 | 0.245453546 |
| 0.091326628 | 0.001491611 | 0.032858371 | 0.294391505 |
| 0.15740797  | 0.092508844 | 0.204697343 | 0.083497502 |
| 0.160459854 | 0.113194329 | 0.158219568 | 0.150156286 |
| 0.175714334 | 0.202049721 | 0.175375747 | 0.305267139 |
| 0.196100547 | 0.259629404 | 0.117397187 | 0.156511508 |
| 0.185708063 | 0.111759078 | 0.167926361 | 0.012474472 |
| 0.289482667 | 0.15252114  | 0.33035818  | 0.32231642  |
| 0.36768553  | 0.240645894 | 0.072914833 | 0.122041305 |
| 0.327346066 | 0.09776736  | 0.102581543 | 0.111758545 |
| 0.281466674 | 0.202809956 | 0.288076839 | 0.255833362 |
| 0.363296563 | 0.323941099 | 0.108994222 | 0.271045794 |
| 0.0215977   | 0.012678051 | 0.100263473 | 0.313238761 |
| 0.123614318 | 0.145228851 | 0.275456038 | 0.204710095 |
| 0.235230863 | 0.060102463 | 0.126313178 | 0.133379148 |
| 0.23954376  | 0.17951152  | 0.164348462 | 0.302323236 |
| 0.193068978 | 0.1659666   | 0.215000563 | 0.245021567 |
| 0.183307831 | 0.257412849 | 0.21811022  | 0.089645936 |
| 0.120241743 | 0.141399309 | 0.114321304 | 0.213272639 |
| 0.281159233 | 0.301747746 | 0.138330001 | 0.038701145 |
| 0.27758115  | 0.20654289  | 0.335949112 | 0.294898564 |
| 0.352890165 | 0.384329631 | 0.360402404 | 0.23653023  |
| 0.127819618 | 0.228986091 | 0.181078867 | 0.200049505 |

|             |             |             |             |
|-------------|-------------|-------------|-------------|
| 0.331917214 | 0.098874283 | 0.311757416 | 0.130107965 |
| 0.205621021 | 0.162946159 | 0.099517585 | 0.167677398 |
| 0.164838191 | 0.250981315 | 0.214815957 | 0.119700322 |
| 0.177201541 | 0.121678205 | 0.134175832 | 0.219426519 |
| 0.275439157 | 0.086581688 | 0.215449683 | 0.174336074 |
| 0.25969674  | 0.081710266 | 0.22884908  | 0.377513096 |
| 0.175077006 | 0.152606696 | 0.08766087  | 0.291883589 |
| 0.247189441 | 0.129086425 | 0.031936259 | 0.252088457 |
| 0.34877909  | 0.18397727  | 0.315869774 | 0.368795348 |
| 0.163161092 | 0.139113176 | 0.14883632  | 0.199222818 |
| 0.253853838 | 0.118470215 | 1           | 0.134613902 |
| 0.36838818  | 0.394126487 | 0.264958002 | 0.184505493 |
| 0.15829656  | 0.128971173 | 0.084890044 | 0.294507002 |
| 0.12354909  | 0.109526142 | 0.086625732 | 0.286104066 |
| 0.007116013 | 0.087182895 | 0.359827512 | 0.188873199 |
| 0.392470345 | 0.316988507 | 0.333453437 | 0.195062755 |
| 0.005270756 | 0.212563222 | 0.195264245 | 0.11871559  |
| 0.260604853 | 0.268410104 | 0.187398944 | 0.156042969 |
| 0.327600147 | 0.101336051 | 0.195084379 | 0.098623699 |
| 0.081336052 | 0.189490281 | 0.300522774 | 0.22967644  |
| 0.230341292 | 0.142107191 | 0.114555795 | 0.169493347 |
| 0.154324783 | 0.300861603 | 0.310977345 | 0.079509546 |
| 0.070305085 | 0.349690802 | 0.244392459 | 0.068510934 |
| 0.160812145 | 0.319140235 | 0.341734928 | 0.008376696 |
| 0.225572217 | 0.045667684 | 0.224104294 | 0.180835579 |
| 0.214583803 | 0.242048642 | 0.275862291 | 0.162329244 |
| 0.223623826 | 0.211459079 | 0.158279305 | 0.246530309 |
| 0.183140608 | 0.207695059 | 0.202635824 | 0.144811273 |
| 0.147795053 | 0.143270624 | 0.166613274 | 0.156779917 |
| 0.105436624 | 0.290884959 | 0.290962931 | 0.104597195 |
| 0.282799037 | 0.15740259  | 0.358350706 | 0.291244313 |
| 0.359586096 | 0.129373355 | 0.199627477 | 0.242821135 |
| 0.07483575  | 0.106450722 | 0.101934594 | 0.149853793 |
| 0.216104484 | 0.146599079 | 0.130067571 | 0.143740639 |
| 0.21658347  | 0.346248521 | 0.279439303 | 0.344682157 |
| 0.152097195 | 0.165651756 | 0.063791545 | 0.146603    |
| 0.143674431 | 0.208314508 | 0.176386418 | 0.00908262  |
| 0.251096805 | 0.102534434 | 0.27045948  | 0.304556413 |
| 0.116073532 | 0.351192525 | 0.066391491 | 0.114735156 |
| 0.052172453 | 0.172697805 | 0.218918735 | 0.231877459 |
| 0.078006209 | 0.189271918 | 0.199243158 | 0.092602823 |
| 0.246102387 | 0.232613071 | 0.202557067 | 0.218017247 |
| 0.250748583 | 0.174538855 | 0.360705629 | 0.113458687 |
| 0.14912534  | 0.142039832 | 0.143227235 | 0.170374697 |
| 0.218037077 | 0.32782623  | 0.111450048 | 0.327450388 |
| 0.161580279 | 0.199638876 | 0.402288442 | 0.185525183 |
| 0.157561743 | 0.187807549 | 0.086341821 | 0.124205539 |
| 0.223499568 | 0.116947628 | 0.003993972 | 0.05572431  |
| 0.293867785 | 0.164497505 | 0.221062115 | 0.302633771 |
| 0.176853867 | 0.354421286 | 0.090844392 | 0.177735003 |
| 0.287507089 | 0.33937337  | 0.136878047 | 0.325250966 |
| 0.292770213 | 0.162760101 | 0.154924283 | 0.038034558 |
| 0.175742832 | 0.151948367 | 0.107646557 | 0.155194451 |
| 0.082552791 | 0.087719568 | 0.171603468 | 0.123249801 |

|             |             |             |             |
|-------------|-------------|-------------|-------------|
| 0.335166482 | 0.068888147 | 0.187481216 | 0.216590419 |
| 0.259705168 | 0.339444848 | 0.228933181 | 0.243190293 |
| 0.110747626 | 0.280535118 | 0.145440929 | 0.151546372 |
| 0.139800671 | 0.142455363 | 0.271400133 | 0.120461567 |
| 0.10494581  | 0.170931999 | 0.011313233 | 0.343415315 |
| 0.306685794 | 0.137326068 | 0.28834793  | 0.085287995 |
| 0.299488049 | 0.329582934 | 0.206470613 | 0.125053099 |
| 0.041183405 | 0.17515901  | 0.254668942 | 0.255374963 |
| 0.055049523 | 0.186358898 | 0.116540455 | 0.179908642 |
| 0.328690151 | 0.147638907 | 0.344458537 | 0.082472886 |
| 0.294688643 | 0.269594103 | 0.153140511 | 0.197479648 |
| 0.191536988 | 0.130749861 | 0.095815936 | 0.369156431 |
| 0.211392701 | 0.127395017 | 0.28988558  | 0.180727529 |
| 0.144086641 | 0.296852073 | 0.158144208 | 0.369355126 |
| 0.194639062 | 0.274674966 | 0.287138685 | 0.313891929 |
| 0.344500469 | 0.169100783 | 0.124663423 | 0.191058557 |
| 0.268655893 | 0.096998657 | 0.171307934 | 0.254844322 |
| 0.110214417 | 0.295446199 | 0.145946518 | 0.212591113 |
| 0.097911284 | 0.256485383 | 0.128395629 | 0.210082861 |
| 0.243974107 | 0.167674517 | 0.183912212 | 0.354283039 |
| 0.135919562 | 0.049834444 | 0.381037497 | 0.014663267 |
| 0.13314124  | 0.205890194 | 0.244570394 | 0.165997373 |
| 0.20878814  | 0.220663787 | 0.127410838 | 0.007750065 |
| 0.305304123 | 0.047550939 | 0.204739291 | 0.154852748 |
| 0.135016662 | 0.110799815 | 0.314539697 | 0.351806587 |
| 0.245027924 | 0.126028195 | 0.089359863 | 0.320801578 |
| 0.094784144 | 0.097047604 | 0.136534231 | 0.173717952 |
| 0.115821555 | 0.08851075  | 0.115592095 | 0.100922415 |
| 0.243637016 | 0.198584227 |             |             |
| PFKP        | 0.260650854 | 0.109968197 | 0.200468716 |
| 0.129928699 | 0.049399259 | 0.042407467 | 0.317193114 |
| 0.248801313 | 0.115733902 | 0.018053112 | 0.062018028 |
| 0.31541661  | 0.0058629   | 0.125478656 | 0.319452247 |
| 0.042024436 | 0.324893897 | 0.274801542 | 0.043652593 |
| 0.089547245 | 0.053651456 | 0.023659414 | 0.055370205 |
| 0.052088533 | 0.32162102  | 0.088969507 | 0.023776355 |
| 0.107866358 | 0.006893384 | 0.048031705 | 0.009454183 |
| 0.206466782 | 0.044529791 | 0.016750215 | 0.255788508 |
| 0.045678399 | 0.008036984 | 0.225676757 | 0.086958136 |
| 0.012504648 | 0.236411177 | 0.025788546 | 0.11450811  |
| 0.030648906 | 0.26868299  | 0.007175799 | 0.045485036 |
| 0.081880145 | 0.091118369 | 0.220811618 | 0.062389655 |
| 0.038722125 | 0.132721188 | 0.057423252 | 0.021766692 |
| 0.013141264 | 0.000468058 | 0.006359032 | 0.14515907  |
| 0.241515083 | 0.24259602  | 0.010475938 | 0.105305749 |
| 0.046249646 | 0.072261084 | 0.176222523 | 0.026552144 |
| 0.135371907 | 0.011911471 | 0.048643952 | 0.07824482  |
| 0.056914876 | 0.255757809 | 0.310728331 | 0.226348847 |
| 0.031125841 | 0.165934417 | 0.053452249 | 0.021230536 |
| 0.104139898 | 0.199935207 | 0.186968542 | 0.160094485 |
| 0.020209322 | 0.0315989   | 0.042611859 | 0.151911572 |
| 0.097287678 | 0.237787334 | 0.084496026 | 0.166870534 |
| 0.250024293 | 0.03576418  | 0.077553968 | 0.267895416 |
| 0.106029899 | 0.018186976 | 0.024960376 | 0.015402269 |

|             |             |             |             |
|-------------|-------------|-------------|-------------|
| 0.051118353 | 0.040428404 | 0.181900523 | 0.171100566 |
| 0.046542136 | 0.256863853 | 0.185007968 | 0.027193837 |
| 0.059082544 | 0.234958842 | 0.053521218 | 0.067850959 |
| 0.059425745 | 0.110806508 | 0.085000894 | 0.125437102 |
| 0.031248548 | 0.127538576 | 0.083972083 | 0.130384003 |
| 0.004386283 | 0.138180137 | 0.180421876 | 0.313112081 |
| 0.225420808 | 0.259278646 | 0.048753396 | 0.214916099 |
| 0.090070472 | 0.126909685 | 0.185103537 | 0.114961382 |
| 0.092739029 | 0.159070372 | 0.134062524 | 0.107139566 |
| 0.324323772 | 0.015152626 | 0.030842186 | 0.100618594 |
| 0.08982791  | 0.267216176 | 0.022758594 | 0.19076601  |
| 0.179998951 | 0.080244131 | 0.179074794 | 0.226476146 |
| 0.154007824 | 0.16579473  | 0.08986624  | 0.199901363 |
| 0.17597723  | 0.180679532 | 0.139423509 | 0.044453633 |
| 0.176026675 | 0.07390539  | 0.032790611 | 0.129656911 |
| 0.16257972  | 0.005035826 | 0.082645112 | 0.093024844 |
| 0.13466905  | 0.068150856 | 0.134550683 | 0.110267257 |
| 0.133725878 | 0.287761587 | 0.002007396 | 0.107131642 |
| 0.159032152 | 0.14396834  | 0.168429172 | 0.02455356  |
| 0.048605412 | 0.055997547 | 0.071246642 | 0.021221638 |
| 0.194103799 | 0.099503449 | 0.092570411 | 0.099557146 |
| 0.068003909 | 0.250264197 | 0.019377678 | 0.183596754 |
| 0.304877348 | 0.22081424  | 0.266366962 | 0.162129187 |
| 0.024419185 | 0.197172447 | 0.058644021 | 0.052331153 |
| 0.222078608 | 0.069000358 | 0.013002739 | 0.052490364 |
| 0.318525147 | 0.03329076  | 0.197483484 | 0.187594126 |
| 0.308144222 | 0.370354799 | 0.136519374 | 0.168672008 |
| 0.10081999  | 0.346310259 | 0.049028771 | 0.112139771 |
| 0.0428517   | 0.243976706 | 0.069604728 | 0.158414457 |
| 0.194038603 | 0.028788214 | 0.249494376 | 0.092179497 |
| 0.040458421 | 0.012457757 | 0.007528849 | 0.025879543 |
| 0.358400657 | 0.099951278 | 0.053773237 | 0.065378246 |
| 0.105426323 | 0.180623645 | 0.032705344 | 0.23394854  |
| 0.263162527 | 0.053922483 | 0.106320479 | 0.039356057 |
| 0.174180377 | 0.086343618 | 0.082264866 | 0.067837967 |
| 0.125863874 | 0.015345949 | 0.011340872 | 0.101256657 |
| 0.017457924 | 0.037384941 | 0.096762913 | 0.066262085 |
| 0.035837058 | 0.287359    | 0.136018093 | 0.003171494 |
| 0.034344744 | 0.072104729 | 0.148005173 | 0.026095705 |
| 0.164633039 | 0.172201683 | 0.036218686 | 0.048912135 |
| 0.221053123 | 0.146613472 | 0.131453872 | 0.117589567 |
| 0.02169483  | 0.141958692 | 0.080872507 | 0.12378785  |
| 0.105104264 | 0.021397125 | 0.004792309 | 0.083798397 |
| 0.093105457 | 0.027123641 | 0.281261218 | 0.057989727 |
| 0.027147155 | 0.05124318  | 0.076924799 | 0.13340565  |
| 0.206965464 | 0.142263607 | 0.193170498 | 0.096641838 |
| 0.13791048  | 0.151179458 | 0.106014331 | 0.153450339 |
| 0.01970897  | 0.034424206 | 0.033764754 | 0.112776384 |
| 0.237917301 | 0.047842509 | 0.217139719 | 0.006895614 |
| 0.000621186 | 0.256461735 | 0.264642083 | 0.158371731 |
| 0.022369239 | 0.032727053 | 0.065425972 | 0.131702618 |
| 0.264684059 | 0.153542813 | 0.20297937  | 0.056379145 |
| 0.149260475 | 0.036063746 | 0.025895176 | 0.050215383 |
| 0.227252959 | 0.126326997 | 0.166381138 | 0.20405807  |

|             |             |             |             |
|-------------|-------------|-------------|-------------|
| 0.248009204 | 0.019797257 | 0.088010096 | 0.017436204 |
| 0.30454345  | 0.070932208 | 0.343207558 | 0.372123016 |
| 0.109203014 | 0.331943808 | 0.207149987 | 0.02567409  |
| 0.114551446 | 0.278399761 | 0.03527635  | 0.114603948 |
| 0.138752426 | 0.14050394  | 0.137590905 | 0.165922441 |
| 0.112131924 | 0.079003707 | 0.083137508 | 0.063130611 |
| 0.270008304 | 0.225075037 | 0.021562058 | 0.083587906 |
| 0.023296165 | 0.113416037 | 0.061711412 | 0.30546067  |
| 0.062385337 | 0.141949938 | 0.31369555  | 0.045707361 |
| 0.178134596 | 0.005811667 | 0.081651701 | 0.13498661  |
| 0.09829809  | 0.275455756 | 0.021278395 | 0.021714543 |
| 0.159819401 | 0.1860668   | 0.016339332 | 0.145932013 |
| 0.081644172 | 0.220733949 | 0.06326905  | 0.081958926 |
| 0.308299772 | 0.013440372 | 0.055511144 | 0.002150066 |
| 0.027165364 | 0.169844214 | 0.030848929 | 0.218981803 |
| 0.143722457 | 0.212376021 | 0.169747592 | 0.152277716 |
| 0.135476431 | 0.116712979 | 0.131530495 | 0.019356601 |
| 0.138137478 | 0.00106437  | 0.122911924 | 0.112427599 |
| 0.019748862 | 0.0162339   | 0.081970501 | 0.090705913 |
| 0.036182575 | 0.269526746 | 0.251793241 | 0.030731493 |
| 0.225071252 | 0.177203585 | 0.291099502 | 0.038668237 |
| 0.050354293 | 0.078243546 | 0.038383944 | 0.152078212 |
| 0.13304982  | 0.150817823 | 0.037544342 | 0.309781859 |
| 0.041519728 | 0.293468872 | 0.294970995 | 0.02527714  |
| 0.084726815 | 0.297324425 | 0.208595163 | 0.131099326 |
| 0.16956247  | 0.063515535 | 0.013426355 | 0.035063944 |
| 0.103630155 | 0.221338601 | 0.017565353 | 0.213528769 |
| 0.124052449 | 0.054497612 | 0.174148251 | 0.205520491 |
| 0.14707705  | 0.157578269 | 0.337477779 | 0.090700149 |
| 0.124062984 | 0.010462976 | 0.047333    | 0.190992279 |
| 0.023127286 | 0.031550839 | 0.235044887 | 0.089719865 |
| 0.101632018 | 0.250624844 | 0.016087138 | 0.020004325 |
| 0.119038675 | 0.056498762 | 0.036988267 | 0.200234389 |
| 0.061238659 | 0.055182008 | 0.144550788 | 0.208851612 |
| 0.049721321 | 0.196055531 | 0.315225611 | 0.327344459 |
| 0.026909219 | 0.02804012  | 0.307823039 | 0.273420428 |
| 0.103979591 | 0.099999819 | 0.295828667 | 0.151437252 |
| 0.241095652 | 0.06438979  | 0.109514473 | 0.118439233 |
| 0.173002207 | 0.164301416 | 0.242930969 | 0.155002851 |
| 0.292993106 | 0.084465536 | 0.036301871 | 0.123897489 |
| 0.128196444 | 0.247852319 | 0.140933325 | 0.017715591 |
| 0.297458312 | 0.148642884 | 0.274284722 | 0.294584976 |
| 0.027185943 | 0.250615897 | 0.147847856 | 0.203470928 |
| 0.067477571 | 0.018354978 | 0.327030027 | 0.197210761 |
| 0.147416327 | 0.010012481 | 0.250550383 | 0.082320149 |
| 0.130849142 | 0.020091343 | 0.054332791 | 0.200039021 |
| 0.28218824  | 0.236845634 | 0.072660245 | 0.090365343 |
| 0.072410558 | 0.02516931  | 0.126926052 | 0.102987547 |
| 0.124845451 | 0.042447368 | 0.147825678 | 0.149916717 |
| 0.315007935 | 0.031801024 | 0.021673042 | 0.055421261 |
| 0.213086943 | 0.047071015 | 0.134613902 | 1           |
| 0.239309557 | 0.214135724 | 0.118872043 | 0.18204502  |
| 0.035999963 | 0.199835378 | 0.23296898  | 0.096283534 |
| 0.022005706 | 0.248115986 | 0.025568919 | 0.074244701 |



|             |             |             |             |
|-------------|-------------|-------------|-------------|
| 0.014169543 | 0.007646745 | 0.120141857 | 0.124933853 |
| 0.173938339 | 0.110593368 | 0.180556132 | 0.103960608 |
| 0.000307018 | 0.042504906 | 0.067488448 | 0.034980776 |
| 0.109875832 | 0.149916474 | 0.091976525 | 0.259223    |
| 0.224439228 | 0.259802916 | 0.185663506 | 0.037182446 |
| 0.009447662 | 0.064925717 | 0.268426076 | 0.164781085 |
| 0.13102616  | 0.241917449 | 0.01662376  | 0.138229179 |
| 0.021459567 | 0.2475461   | 0.163093217 | 0.022423872 |
| 0.010140095 | 0.12435883  | 0.096737816 | 0.293401208 |
| 0.026595571 | 0.115843696 | 0.1326676   | 0.042980586 |
| 0.057360252 | 0.265397143 | 0.130111666 | 0.113823495 |
| 0.136594742 | 0.131447574 | 0.113765453 | 0.054896466 |
| 0.092216125 | 0.159104207 | 0.099198665 | 0.179378387 |
| 0.147075013 | 0.159035032 | 0.051485312 | 0.062864083 |
| 0.055305211 | 0.23292272  | 0.347828862 | 0.356216499 |
| 0.24814851  | 0.101746122 | 0.293914341 | 0.276318498 |
| 0.180954932 | 0.055676925 | 0.217506294 | 0.127076572 |
| 0.156626645 | 0.267659064 | 0.068907777 | 0.096613126 |
| 0.010056264 | 0.045024259 | 0.26086842  | 0.05373265  |
| 0.162838824 | 0.042456098 | 0.036164543 | 0.095664593 |
| 0.066215746 | 0.232660204 | 0.282272898 | 0.158958296 |
| 0.052373264 | 0.044350925 | 0.018954321 | 0.203055184 |
| 0.191390958 | 0.294985246 | 0.045188476 | 0.126225244 |
| 0.110699881 | 0.089374826 | 0.083489211 | 0.15457441  |
| 0.013169779 | 0.1883778   | 0.022511233 | 0.25819032  |
| 0.01561691  | 0.270842602 | 0.312061656 | 0.063531132 |
| 0.00662536  | 0.18193103  | 0.062245364 | 0.048710442 |
| 0.063915018 | 0.058185546 | 0.051860086 | 0.139473732 |
| 0.136197603 | 0.198664899 | 0.185991822 | 0.203168115 |
| 0.031021103 | 0.043765855 | 0.049634791 | 0.071963139 |
| 0.113627019 | 0.114586216 | 0.283114861 | 0.111547509 |
| 0.045036692 | 0.308489879 | 0.210581071 | 0.092129115 |
| 0.084549484 | 0.13728208  | 0.007201402 | 0.037363379 |
| 0.134898609 | 0.016231477 | 0.000547009 | 0.014536964 |
| 0.141017376 | 0.042644098 | 0.075330446 | 0.105053246 |
| 0.04348838  | 0.151414159 | 0.00724043  | 0.110202673 |
| 0.143140241 | 0.187040983 | 0.085242161 | 0.248204958 |
| 0.14496373  | 0.26138353  | 0.061155733 | 0.011253099 |
| 0.038028498 | 0.025827407 | 0.021556776 | 0.321122929 |
| 0.317568731 | 0.008423026 | 0.045410117 | 0.245450429 |
| 0.103555443 | 0.005934346 | 0.06009187  | 0.059027098 |
| 0.264393187 | 0.193717312 | 0.173104195 | 0.078735736 |
| 0.202145161 | 0.183362998 | 0.02480661  | 0.033134949 |
| 0.061566784 | 0.026134443 | 0.105963312 | 0.020672905 |
| 0.327466641 | 0.069617806 | 0.040755044 | 0.250802024 |
| 0.178920706 | 0.023577608 | 0.3112741   | 0.016225375 |
| 0.167462815 | 0.145374262 | 0.061996445 | 0.022878722 |
| 0.181521374 | 0.036575054 | 0.198096211 | 0.121687679 |
| 0.008153865 | 0.053232682 | 0.224056322 | 0.035002698 |
| 0.224581537 | 0.042179873 | 0.25456939  | 0.015544008 |
| 0.127727175 | 0.111576632 | 0.220994255 | 0.062744608 |
| 0.051008425 | 0.314748123 | 0.025410006 | 0.149225612 |
| 0.163790244 | 0.024392961 | 0.082252693 | 0.141991909 |
| 0.022074751 | 0.149814444 | 0.032858398 | 0.149826729 |

|             |             |             |             |
|-------------|-------------|-------------|-------------|
| 0.177597728 | 0.204451545 | 0.08059761  | 0.128536843 |
| 0.189233614 | 0.034552685 | 0.020331079 | 0.073315547 |
| 0.139315124 | 0.183737378 | 0.032108401 | 0.13954156  |
| 0.015838904 | 0.138679198 | 0.053109241 | 0.080418787 |
| 0.224364325 | 0.180382558 | 0.043388045 | 0.271556317 |
| 0.11891398  | 0.047584798 | 0.053720189 | 0.21138779  |
| 0.130314847 | 0.156799915 | 0.197794615 | 0.00131114  |
| 0.074903028 | 0.061630169 | 0.159629161 | 0.040491039 |
| 0.294434337 | 0.091131098 | 0.066074661 | 0.097703246 |
| 0.102118067 | 0.01693535  | 0.058695612 | 0.061270832 |
| 0.022630649 | 0.313754621 | 0.158441834 | 0.119743    |
| 0.132183315 | 0.025197478 | 0.013114723 | 0.142903312 |
| 0.012050146 | 0.011229302 | 0.020347754 | 0.059011842 |
| 0.01468139  | 0.020148474 | 0.022200198 | 0.016832162 |
| 0.108298698 | 0.118405498 |             |             |
| PFN1        | 0.219666476 | 0.321423408 | 0.159825312 |
| 0.183957479 | 0.25413505  | 0.266305433 | 0.249709024 |
| 0.314660523 | 0.306848818 | 0.181870345 | 0.276321977 |
| 0.120751925 | 0.075664624 | 0.34081481  | 0.262170128 |
| 0.253825269 | 0.195520449 | 0.293361066 | 0.14222749  |
| 0.288328861 | 0.251087038 | 0.210856689 | 0.276920039 |
| 0.273347427 | 0.27464822  | 0.295222934 | 0.237338952 |
| 0.350685037 | 0.117939412 | 0.263676385 | 0.10023652  |
| 0.375333147 | 0.242989052 | 0.205668103 | 0.110225071 |
| 0.290264827 | 0.041411447 | 0.406356587 | 0.269178908 |
| 0.109312463 | 0.355517553 | 0.203379611 | 0.276891867 |
| 0.225546609 | 0.150139576 | 0.101577392 | 0.260510504 |
| 0.303070931 | 0.348006136 | 0.193658917 | 0.280863892 |
| 0.2718462   | 0.315855282 | 0.243396819 | 0.00975291  |
| 0.167286992 | 0.040675243 | 0.118067793 | 0.389795405 |
| 0.318367622 | 0.309250269 | 0.151980526 | 0.360266603 |
| 0.278810941 | 0.304254644 | 0.368933422 | 0.222037488 |
| 0.369507015 | 0.128718915 | 0.263100842 | 0.197565454 |
| 0.29071461  | 0.184753811 | 0.312650092 | 0.244184019 |
| 0.260149485 | 0.330175629 | 0.284021789 | 0.208245707 |
| 0.302458888 | 0.446438228 | 0.352918084 | 0.395765001 |
| 0.13634388  | 0.234571909 | 0.252565024 | 0.334907357 |
| 0.317145551 | 0.29979131  | 0.281903966 | 0.411328933 |
| 0.237065223 | 0.233339555 | 0.287150654 | 0.269150622 |
| 0.314924344 | 0.21296305  | 0.214846746 | 0.130669822 |
| 0.264609568 | 0.242284935 | 0.419773021 | 0.311436624 |
| 0.288700858 | 0.209227906 | 0.407905319 | 0.214471243 |
| 0.244674885 | 0.217530098 | 0.224639595 | 0.286740425 |
| 0.2725406   | 0.346417664 | 0.286918012 | 0.316797482 |
| 0.232030448 | 0.365046955 | 0.281458344 | 0.344679125 |
| 0.079513103 | 0.394935656 | 0.292151566 | 0.208417219 |
| 0.20965867  | 0.30568406  | 0.2752975   | 0.357735032 |
| 0.317297655 | 0.343855827 | 0.298310175 | 0.296284348 |
| 0.317817457 | 0.383472269 | 0.390007735 | 0.303063409 |
| 0.189709401 | 0.186220959 | 0.228509761 | 0.345829303 |
| 0.305163821 | 0.323388726 | 0.182823747 | 0.422001832 |
| 0.328235679 | 0.287966939 | 0.290026641 | 0.453595168 |
| 0.360675057 | 0.40780167  | 0.300754122 | 0.284374727 |
| 0.416528383 | 0.405332627 | 0.385375694 | 0.248167938 |

|             |             |             |             |
|-------------|-------------|-------------|-------------|
| 0.397677997 | 0.2699099   | 0.11839024  | 0.319322223 |
| 0.396338318 | 0.016424288 | 0.316661985 | 0.338197365 |
| 0.370433505 | 0.278084133 | 0.394297694 | 0.362972731 |
| 0.376229783 | 0.253315161 | 0.026003925 | 0.303467327 |
| 0.393361683 | 0.307234176 | 0.351730027 | 0.223843756 |
| 0.269362714 | 0.287628224 | 0.295553844 | 0.163271496 |
| 0.439170728 | 0.319740561 | 0.334393595 | 0.303567201 |
| 0.288668488 | 0.346168545 | 0.209978894 | 0.392075477 |
| 0.214866407 | 0.233614527 | 0.173624081 | 0.358910933 |
| 0.203044301 | 0.322868242 | 0.277911036 | 0.292455707 |
| 0.328701936 | 0.316635884 | 0.18226759  | 0.260338373 |
| 0.180012177 | 0.243509304 | 0.31072948  | 0.280510627 |
| 0.192038658 | 0.284452169 | 0.234678894 | 0.267393296 |
| 0.304063651 | 0.334893103 | 0.265967754 | 0.356647633 |
| 0.28548971  | 0.269580537 | 0.286003758 | 0.388947297 |
| 0.381183335 | 0.229278733 | 0.353534936 | 0.043150576 |
| 0.189860743 | 0.17596957  | 0.117234835 | 0.240695156 |
| 0.30429651  | 0.267085796 | 0.268510734 | 0.269610193 |
| 0.269673552 | 0.318854528 | 0.242225886 | 0.412287524 |
| 0.268522357 | 0.248048488 | 0.310705661 | 0.256466248 |
| 0.041942217 | 0.279526741 | 0.285873773 | 0.224736199 |
| 0.324005582 | 0.105953468 | 0.136607744 | 0.318089093 |
| 0.183639333 | 0.226376209 | 0.344354781 | 0.283535906 |
| 0.239134431 | 0.310611508 | 0.397810992 | 0.03650185  |
| 0.270240709 | 0.105492776 | 0.313583448 | 0.215791653 |
| 0.317514465 | 0.346114996 | 0.240428843 | 0.244665372 |
| 0.226540996 | 0.396183692 | 0.326835625 | 0.364094906 |
| 0.204158846 | 0.401338086 | 0.292585575 | 0.326244101 |
| 0.326218558 | 0.222706767 | 0.081889085 | 0.27636515  |
| 0.307445591 | 0.193589889 | 0.205088275 | 0.26931874  |
| 0.227948133 | 0.261681322 | 0.226123852 | 0.36355899  |
| 0.435825254 | 0.361486183 | 0.305346765 | 0.303985331 |
| 0.300819726 | 0.29488133  | 0.318191184 | 0.419366203 |
| 0.187080481 | 0.239056935 | 0.220462535 | 0.307168898 |
| 0.295078961 | 0.226664358 | 0.354847846 | 0.119127463 |
| 0.004187086 | 0.254769517 | 0.206018591 | 0.290308937 |
| 0.148498868 | 0.243247551 | 0.289111151 | 0.38003012  |
| 0.292754932 | 0.35526993  | 0.358701517 | 0.218902565 |
| 0.332095828 | 0.266021401 | 0.234318524 | 0.279427224 |
| 0.357302168 | 0.073671131 | 0.20419102  | 0.441987967 |
| 0.165198984 | 0.164063375 | 0.343393034 | 0.009331735 |
| 0.189145308 | 0.261993414 | 0.228036921 | 0.308110057 |
| 0.352373405 | 0.290624526 | 0.283486468 | 0.197936606 |
| 0.319719163 | 0.275985945 | 0.018561271 | 0.357632209 |
| 0.392394366 | 0.382026839 | 0.388083845 | 0.399586178 |
| 0.340819304 | 0.310529885 | 0.291270245 | 0.273519    |
| 0.283876163 | 0.247458839 | 0.148793015 | 0.276639    |
| 0.019588548 | 0.316476329 | 0.316212885 | 0.294422154 |
| 0.282912314 | 0.345504663 | 0.179950001 | 0.280679314 |
| 0.075846964 | 0.095739085 | 0.311831106 | 0.359307139 |
| 0.316974426 | 0.111727438 | 0.125876683 | 0.184500028 |
| 0.346885954 | 0.315515667 | 0.199729709 | 0.401768841 |
| 0.286204216 | 0.221544235 | 0.259917651 | 0.300985353 |
| 0.255375864 | 0.083124416 | 0.299143103 | 0.016644905 |

|             |             |             |             |
|-------------|-------------|-------------|-------------|
| 0.183585196 | 0.405852547 | 0.259853403 | 0.18582992  |
| 0.300528274 | 0.049525614 | 0.308276995 | 0.40852397  |
| 0.355558841 | 0.367901508 | 0.368994268 | 0.169296099 |
| 0.373476547 | 0.054842031 | 0.381191681 | 0.292726024 |
| 0.196207943 | 0.003459372 | 0.043075701 | 0.322925253 |
| 0.239045159 | 0.171574408 | 0.30706331  | 0.209500003 |
| 0.251883295 | 0.26202819  | 0.273401427 | 0.184547345 |
| 0.276401686 | 0.275604079 | 0.202014854 | 0.371631196 |
| 0.310572194 | 0.354647861 | 0.263905051 | 0.24986522  |
| 0.272970253 | 0.201972219 | 0.262039344 | 0.020732833 |
| 0.30974333  | 0.226561476 | 0.41621203  | 0.378042188 |
| 0.400033795 | 0.276083175 | 0.164616144 | 0.244308499 |
| 0.336881336 | 0.191673287 | 0.206455652 | 0.228242763 |
| 0.349514852 | 0.254468565 | 0.316879953 | 0.301163745 |
| 0.382777683 | 0.368247975 | 0.191867444 | 0.288416099 |
| 0.055102677 | 0.012390571 | 0.240493831 | 0.366018539 |
| 0.143647869 | 0.236149805 | 0.321836122 | 0.334552944 |
| 0.35636174  | 0.126892322 | 0.171227648 | 0.169717955 |
| 0.308380315 | 0.282470092 | 0.218041209 | 0.357855128 |
| 0.276293794 | 0.179082302 | 0.333008133 | 0.356670466 |
| 0.281394495 | 0.301463137 | 0.265932871 | 0.162067612 |
| 0.236309373 | 0.232783375 | 0.219499723 | 0.311136512 |
| 0.301962516 | 0.331323807 | 0.202526951 | 0.057645594 |
| 0.324948898 | 0.303949575 | 0.353280554 | 0.358598476 |
| 0.419149803 | 0.411248959 | 0.397343881 | 0.274365521 |
| 0.239335097 | 0.306440396 | 0.233308683 | 0.239504402 |
| 0.37694684  | 0.193345639 | 0.378875813 | 0.189416722 |
| 0.305079688 | 0.292115417 | 0.161041525 | 0.289902669 |
| 0.230126599 | 0.338718725 | 0.299339165 | 0.226920065 |
| 0.2707973   | 0.172159219 | 0.236429071 | 0.325546547 |
| 0.314172508 | 0.106790621 | 0.316422667 | 0.345792824 |
| 0.322281536 | 0.176834266 | 0.262211982 | 0.395703597 |
| 0.278781812 | 0.290226951 | 0.217610226 | 0.325012237 |
| 0.276563168 | 0.22934366  | 0.072664262 | 0.319434079 |
| 0.37308083  | 0.25163819  | 0.384804502 | 0.335855886 |
| 0.259464843 | 0.227664316 | 0.221103631 | 0.267269983 |
| 0.352936522 | 0.274871575 | 0.36838818  | 0.239309557 |
| 1           | 0.444410424 | 0.306680232 | 0.289565519 |
| 0.268145217 | 0.250995472 | 0.178586861 | 0.327564944 |
| 0.143158894 | 0.206526511 | 0.215961527 | 0.293241463 |
| 0.009747965 | 0.099882394 | 0.374001093 | 0.31594107  |
| 0.432928688 | 0.338855606 | 0.369192483 | 0.360293536 |
| 0.002793018 | 0.252208174 | 0.269979484 | 0.232329882 |
| 0.306785829 | 0.330318674 | 0.317168553 | 0.234055704 |
| 0.341830417 | 0.191089087 | 0.26221055  | 0.239409626 |
| 0.106714341 | 0.285664838 | 0.346160041 | 0.350789668 |
| 0.317900018 | 0.232805648 | 0.168996394 | 0.317117356 |
| 0.173123491 | 0.336099204 | 0.319192602 | 0.197129105 |
| 0.096085278 | 0.345710704 | 0.282746418 | 0.147908331 |
| 0.243399565 | 0.320664716 | 0.359749339 | 0.009873138 |
| 0.262238553 | 0.076322926 | 0.301246063 | 0.270690213 |
| 0.311452106 | 0.32364565  | 0.314587715 | 0.25355925  |
| 0.308821383 | 0.338297768 | 0.277703089 | 0.320713407 |
| 0.274071087 | 0.362856235 | 0.284012381 | 0.29613358  |

|             |             |             |             |
|-------------|-------------|-------------|-------------|
| 0.228924299 | 0.273065838 | 0.228323019 | 0.221116766 |
| 0.17916123  | 0.337263869 | 0.321554244 | 0.19508412  |
| 0.354397309 | 0.298575186 | 0.35067074  | 0.362685203 |
| 0.363837899 | 0.207523263 | 0.323126355 | 0.297194106 |
| 0.128766835 | 0.229949106 | 0.213074341 | 0.289335182 |
| 0.343143251 | 0.186634919 | 0.27348169  | 0.260138531 |
| 0.275957349 | 0.384905074 | 0.321585986 | 0.376213885 |
| 0.276949672 | 0.280365303 | 0.167868994 | 0.210442407 |
| 0.272203272 | 0.297134038 | 0.230897581 | 0.021746632 |
| 0.323635297 | 0.247831819 | 0.298606557 | 0.378490799 |
| 0.174052449 | 0.363614543 | 0.175572952 | 0.213467417 |
| 0.146019321 | 0.241523621 | 0.30016652  | 0.280091937 |
| 0.111118352 | 0.331846545 | 0.267723142 | 0.24528083  |
| 0.278573352 | 0.276669057 | 0.278065708 | 0.359879661 |
| 0.366620845 | 0.300241497 | 0.418746026 | 0.26685071  |
| 0.237509586 | 0.181591324 | 0.257039145 | 0.26003482  |
| 0.300038339 | 0.370835711 | 0.227369469 | 0.367691282 |
| 0.245180118 | 0.280150651 | 0.43836952  | 0.352297005 |
| 0.323550916 | 0.264087283 | 0.109888887 | 0.267670527 |
| 0.34288691  | 0.197291746 | 0.008463541 | 0.058934068 |
| 0.313983812 | 0.283356356 | 0.268027475 | 0.33243779  |
| 0.236995006 | 0.336370819 | 0.118983179 | 0.325782264 |
| 0.369361748 | 0.420113953 | 0.22360116  | 0.347719543 |
| 0.330108472 | 0.269521184 | 0.269327653 | 0.043062331 |
| 0.243201599 | 0.224013876 | 0.213459023 | 0.249279891 |
| 0.144497787 | 0.115455083 | 0.253875347 | 0.225793471 |
| 0.340513173 | 0.103604763 | 0.285077222 | 0.279602074 |
| 0.337088083 | 0.419109999 | 0.292322127 | 0.280587823 |
| 0.208351138 | 0.361982316 | 0.246351969 | 0.267137556 |
| 0.200592163 | 0.200144282 | 0.294060136 | 0.162362364 |
| 0.175813012 | 0.257304175 | 0.012583487 | 0.397030736 |
| 0.390861086 | 0.212825635 | 0.328590077 | 0.184250773 |
| 0.333355022 | 0.345345362 | 0.260139724 | 0.238018542 |
| 0.072395323 | 0.229048575 | 0.358311589 | 0.304463007 |
| 0.099713877 | 0.281082644 | 0.196251319 | 0.251271706 |
| 0.419500336 | 0.20905509  | 0.359188258 | 0.151235431 |
| 0.364170878 | 0.314761041 | 0.25102399  | 0.285260756 |
| 0.269454796 | 0.223277336 | 0.229095433 | 0.410287318 |
| 0.302831353 | 0.163032719 | 0.286063412 | 0.270696642 |
| 0.209127129 | 0.338487074 | 0.245519076 | 0.413446661 |
| 0.21985733  | 0.335165695 | 0.301547976 | 0.349955337 |
| 0.343199274 | 0.187793827 | 0.163584484 | 0.246545625 |
| 0.346748027 | 0.191703549 | 0.22063275  | 0.314216469 |
| 0.138222172 | 0.349367492 | 0.259646497 | 0.259160722 |
| 0.151525164 | 0.37321085  | 0.264133372 | 0.318868533 |
| 0.317218392 | 0.265409952 | 0.244757121 | 0.368119599 |
| 0.211805388 | 0.084941425 | 0.405218703 | 0.011535976 |
| 0.282906748 | 0.269604077 | 0.357938621 | 0.26613274  |
| 0.276541952 | 0.32223739  | 0.25853599  | 0.013915178 |
| 0.30952875  | 0.071409156 | 0.320751559 | 0.213235408 |
| 0.196701909 | 0.209429393 | 0.374732379 | 0.371025591 |
| 0.351303018 | 0.239226228 | 0.169791047 | 0.370016295 |
| 0.108492293 | 0.17448189  | 0.216397403 | 0.266926267 |
| 0.152640413 | 0.200634683 | 0.231089158 | 0.193320017 |

|             |             |             |             |
|-------------|-------------|-------------|-------------|
| 0.31576349  | 0.36560117  |             |             |
| PGLYRP1     | 0.226103227 | 0.492089711 | 0.1909027   |
| 0.228183361 | 0.335791063 | 0.462787824 | 0.207228244 |
| 0.302157944 | 0.476009198 | 0.360357094 | 0.417953033 |
| 0.089713311 | 0.086881778 | 0.492284772 | 0.200893634 |
| 0.405643523 | 0.130913572 | 0.27180656  | 0.15177498  |
| 0.368236372 | 0.320085614 | 0.347743473 | 0.488492734 |
| 0.338095221 | 0.35338428  | 0.476977995 | 0.398901971 |
| 0.495099431 | 0.24807182  | 0.45512237  | 0.214549858 |
| 0.469098536 | 0.343471228 | 0.373330157 | 0.0901985   |
| 0.475366243 | 0.024770777 | 0.467982227 | 0.335018456 |
| 0.144024718 | 0.458737482 | 0.406851069 | 0.340046967 |
| 0.424388506 | 0.145573787 | 0.23529743  | 0.432010066 |
| 0.459096272 | 0.42145274  | 0.225560962 | 0.479216032 |
| 0.431725889 | 0.474541634 | 0.460514516 | 0.008856659 |
| 0.280615954 | 0.06940267  | 0.202425647 | 0.497066704 |
| 0.359549564 | 0.274484379 | 0.285667312 | 0.441580603 |
| 0.449393784 | 0.444451067 | 0.412869728 | 0.410594263 |
| 0.496239437 | 0.175021498 | 0.454272794 | 0.245431446 |
| 0.477741504 | 0.163200022 | 0.330909296 | 0.268409577 |
| 0.424119995 | 0.338633869 | 0.398477294 | 0.308818404 |
| 0.478211663 | 0.504785394 | 0.404895258 | 0.487244708 |
| 0.135075123 | 0.347770078 | 0.316574514 | 0.409773766 |
| 0.461801969 | 0.2617375   | 0.456717207 | 0.491117793 |
| 0.206169546 | 0.444502923 | 0.469659582 | 0.316414204 |
| 0.497962797 | 0.308242337 | 0.431856232 | 0.173155937 |
| 0.39005946  | 0.361526    | 0.49072566  | 0.419246972 |
| 0.377436459 | 0.236841082 | 0.491779082 | 0.317827961 |
| 0.344060782 | 0.238669949 | 0.268053421 | 0.470061638 |
| 0.457906476 | 0.49656076  | 0.487048102 | 0.460525874 |
| 0.37958863  | 0.494456812 | 0.460664071 | 0.500416649 |
| 0.174561616 | 0.499037476 | 0.345893441 | 0.148754422 |
| 0.235522775 | 0.231945926 | 0.31507197  | 0.440420181 |
| 0.48809472  | 0.472235236 | 0.358428345 | 0.330034671 |
| 0.466231869 | 0.485362867 | 0.49658153  | 0.482730277 |
| 0.157034718 | 0.263323155 | 0.379899327 | 0.454820784 |
| 0.461685161 | 0.302263066 | 0.257109785 | 0.499999446 |
| 0.465607992 | 0.465870349 | 0.356978431 | 0.510792177 |
| 0.391658622 | 0.49115821  | 0.488244471 | 0.308135146 |
| 0.491153981 | 0.48694127  | 0.487393301 | 0.40167541  |
| 0.492002775 | 0.437988213 | 0.134853159 | 0.479943665 |
| 0.48745603  | 0.016792801 | 0.48641327  | 0.486505147 |
| 0.4922111   | 0.466793714 | 0.489030709 | 0.494824115 |
| 0.49649877  | 0.238946508 | 0.038780549 | 0.368686257 |
| 0.490112531 | 0.467524351 | 0.284503408 | 0.410347027 |
| 0.395425584 | 0.491652111 | 0.479769059 | 0.306489923 |
| 0.489963805 | 0.487129299 | 0.493768284 | 0.484429866 |
| 0.443277445 | 0.446393263 | 0.364506033 | 0.478515879 |
| 0.157734024 | 0.277160505 | 0.191482883 | 0.449646918 |
| 0.402053888 | 0.315137875 | 0.476423828 | 0.416178727 |
| 0.342960928 | 0.492473166 | 0.318043559 | 0.39485712  |
| 0.2033262   | 0.457953151 | 0.341803879 | 0.350769988 |
| 0.138100748 | 0.319773323 | 0.289191467 | 0.2794276   |
| 0.347878727 | 0.364200344 | 0.467439074 | 0.489527927 |

|             |             |             |             |
|-------------|-------------|-------------|-------------|
| 0.413786723 | 0.354066755 | 0.485690839 | 0.486902755 |
| 0.462514404 | 0.376219698 | 0.408520151 | 0.032093158 |
| 0.294984774 | 0.322263697 | 0.173964419 | 0.418021839 |
| 0.341084433 | 0.345497952 | 0.428545517 | 0.41371124  |
| 0.426769307 | 0.362492321 | 0.390769608 | 0.476674091 |
| 0.339703339 | 0.348449431 | 0.472133419 | 0.460088984 |
| 0.026683207 | 0.421911073 | 0.481356054 | 0.210871516 |
| 0.459905267 | 0.141958376 | 0.234173061 | 0.478333952 |
| 0.296517674 | 0.269465717 | 0.492974092 | 0.421109738 |
| 0.405971912 | 0.376725308 | 0.494122971 | 0.055077785 |
| 0.391268976 | 0.083580356 | 0.379986721 | 0.409788313 |
| 0.397986063 | 0.414540792 | 0.336918543 | 0.314200867 |
| 0.299211093 | 0.499977317 | 0.489326898 | 0.497147966 |
| 0.365885696 | 0.492607259 | 0.475738272 | 0.484618166 |
| 0.473974126 | 0.380880294 | 0.123437733 | 0.470620186 |
| 0.476594964 | 0.3280136   | 0.239316284 | 0.469088188 |
| 0.403523402 | 0.421016949 | 0.179146564 | 0.484275574 |
| 0.488122578 | 0.4812633   | 0.279878709 | 0.423515609 |
| 0.457785774 | 0.38139613  | 0.480569796 | 0.496062896 |
| 0.358616979 | 0.376046423 | 0.342761926 | 0.436327454 |
| 0.339377902 | 0.259379523 | 0.457788302 | 0.172376697 |
| 0.008173952 | 0.260393404 | 0.213017545 | 0.272119395 |
| 0.172715015 | 0.445916381 | 0.444128245 | 0.496264103 |
| 0.274023709 | 0.492159928 | 0.421562471 | 0.324642429 |
| 0.479087565 | 0.394597706 | 0.380060116 | 0.42344527  |
| 0.417707012 | 0.053435327 | 0.210741464 | 0.505043625 |
| 0.177437088 | 0.235252431 | 0.479296817 | 0.007709628 |
| 0.174269325 | 0.476455056 | 0.26233186  | 0.349150561 |
| 0.479957777 | 0.351353836 | 0.372049215 | 0.380361193 |
| 0.430302959 | 0.257317716 | 0.009986502 | 0.490293527 |
| 0.494459522 | 0.49071125  | 0.494052943 | 0.489241306 |
| 0.481676324 | 0.483544538 | 0.451904666 | 0.472702264 |
| 0.261654424 | 0.266771712 | 0.207952178 | 0.360597012 |
| 0.020020962 | 0.450225426 | 0.392145029 | 0.309864921 |
| 0.455956727 | 0.443381372 | 0.148746938 | 0.398985767 |
| 0.077162178 | 0.169433621 | 0.457845836 | 0.366121435 |
| 0.415241625 | 0.084174076 | 0.253330242 | 0.318733663 |
| 0.480941534 | 0.470639936 | 0.343160766 | 0.496154275 |
| 0.404563528 | 0.308512875 | 0.355958783 | 0.449430865 |
| 0.21712264  | 0.139528032 | 0.482519629 | 0.040627949 |
| 0.282045718 | 0.494474075 | 0.416831956 | 0.194174783 |
| 0.392783013 | 0.034955562 | 0.469199561 | 0.49986884  |
| 0.485407175 | 0.488585782 | 0.496656448 | 0.258824403 |
| 0.49363862  | 0.091998852 | 0.498736835 | 0.491007978 |
| 0.394047273 | 0.003375901 | 0.025642363 | 0.481623893 |
| 0.399421305 | 0.206728983 | 0.324959001 | 0.403840242 |
| 0.231394604 | 0.347912806 | 0.220586293 | 0.203238975 |
| 0.472174447 | 0.308083919 | 0.213396773 | 0.489993432 |
| 0.359412328 | 0.378136512 | 0.476999457 | 0.265538846 |
| 0.435504907 | 0.166170944 | 0.267871357 | 0.016576725 |
| 0.42823313  | 0.283917522 | 0.489055975 | 0.498949209 |
| 0.489502677 | 0.416896016 | 0.347288185 | 0.415840184 |
| 0.486202653 | 0.268804011 | 0.370377297 | 0.296670558 |
| 0.492018923 | 0.411367199 | 0.427881861 | 0.432985269 |

|             |             |             |             |
|-------------|-------------|-------------|-------------|
| 0.487144717 | 0.488071973 | 0.144351466 | 0.454052667 |
| 0.047163804 | 0.005835563 | 0.450990634 | 0.431331692 |
| 0.121936216 | 0.384164535 | 0.399794658 | 0.39166327  |
| 0.376209007 | 0.117632263 | 0.255420071 | 0.236859475 |
| 0.392334356 | 0.413868683 | 0.289831127 | 0.427952948 |
| 0.324217004 | 0.173424339 | 0.3303495   | 0.326903217 |
| 0.357193779 | 0.446514978 | 0.35135328  | 0.113434954 |
| 0.440296555 | 0.408099569 | 0.191902604 | 0.340958734 |
| 0.476601131 | 0.487686366 | 0.148609021 | 0.037068948 |
| 0.42035373  | 0.400146052 | 0.48770462  | 0.497152137 |
| 0.500260703 | 0.48992432  | 0.466645604 | 0.229252006 |
| 0.212232087 | 0.398541732 | 0.311301406 | 0.176360125 |
| 0.500936605 | 0.226544329 | 0.498793596 | 0.287762067 |
| 0.295954437 | 0.341092359 | 0.114282375 | 0.247378625 |
| 0.38145889  | 0.352241076 | 0.286321834 | 0.314009354 |
| 0.375203733 | 0.2427979   | 0.185484554 | 0.353148917 |
| 0.458254771 | 0.157330894 | 0.329821407 | 0.470619912 |
| 0.48160011  | 0.309864091 | 0.441950077 | 0.47778397  |
| 0.310455696 | 0.297172004 | 0.390392233 | 0.471757977 |
| 0.480790841 | 0.427242902 | 0.073787348 | 0.487166042 |
| 0.495897139 | 0.451836041 | 0.496297213 | 0.456253718 |
| 0.255733181 | 0.379740703 | 0.333099464 | 0.385826457 |
| 0.363919965 | 0.470334597 | 0.394126487 | 0.214135724 |
| 0.444410424 | 1           | 0.480168983 | 0.29154967  |
| 0.463802295 | 0.325102451 | 0.210400589 | 0.497690537 |
| 0.180809961 | 0.225090662 | 0.428669521 | 0.475726907 |
| 0.004584148 | 0.129630494 | 0.48474122  | 0.37201456  |
| 0.494582336 | 0.480059346 | 0.480367218 | 0.435275841 |
| 0.001976262 | 0.416170524 | 0.421100124 | 0.403964802 |
| 0.492237649 | 0.482611606 | 0.318771825 | 0.185585986 |
| 0.414804668 | 0.241394604 | 0.253390325 | 0.421613896 |
| 0.170641242 | 0.492752403 | 0.360724488 | 0.393623013 |
| 0.308299308 | 0.277169305 | 0.241457059 | 0.378139213 |
| 0.184164823 | 0.385318096 | 0.443704382 | 0.378304478 |
| 0.173792117 | 0.483043207 | 0.47235311  | 0.121308956 |
| 0.371092523 | 0.477853699 | 0.490568224 | 0.00796402  |
| 0.442492718 | 0.044053502 | 0.303438577 | 0.300292371 |
| 0.311216543 | 0.3356977   | 0.349939219 | 0.332182783 |
| 0.463749902 | 0.367392047 | 0.362468926 | 0.365525571 |
| 0.264435132 | 0.394471519 | 0.428000442 | 0.457436476 |
| 0.314027838 | 0.279548016 | 0.264877263 | 0.257309372 |
| 0.148433561 | 0.500115361 | 0.401110687 | 0.229912156 |
| 0.37678291  | 0.453185073 | 0.445273401 | 0.491011595 |
| 0.476785088 | 0.282113074 | 0.435667273 | 0.490214054 |
| 0.254104621 | 0.382365405 | 0.21976883  | 0.466900307 |
| 0.391149625 | 0.242827771 | 0.471673452 | 0.44349842  |
| 0.478399261 | 0.465805502 | 0.401448339 | 0.488252712 |
| 0.409655181 | 0.423230254 | 0.361344958 | 0.177071859 |
| 0.322942571 | 0.321499027 | 0.290914347 | 0.013180426 |
| 0.458968582 | 0.388531012 | 0.481660131 | 0.487984954 |
| 0.280486769 | 0.472135586 | 0.37831038  | 0.222738621 |
| 0.315533921 | 0.331595306 | 0.316060874 | 0.475954746 |
| 0.190524222 | 0.345587949 | 0.344859781 | 0.448448116 |
| 0.456029639 | 0.460681724 | 0.320569205 | 0.428621725 |



|             |             |             |             |
|-------------|-------------|-------------|-------------|
| 0.396929521 | 0.381713794 | 0.485083631 | 0.306983919 |
| 0.438274881 | 0.205493253 | 0.461720822 | 0.353259842 |
| 0.317212699 | 0.493403351 | 0.209299798 | 0.494546522 |
| 0.365611414 | 0.318045032 | 0.487975321 | 0.468471138 |
| 0.431876853 | 0.221005291 | 0.166940796 | 0.466489627 |
| 0.373904986 | 0.328240421 | 0.019314104 | 0.077550648 |
| 0.41550848  | 0.40838683  | 0.474869024 | 0.464601871 |
| 0.279911201 | 0.429285742 | 0.164386008 | 0.448898183 |
| 0.484979088 | 0.497917825 | 0.321447137 | 0.3978449   |
| 0.467613957 | 0.244378288 | 0.48685116  | 0.036599703 |
| 0.430495105 | 0.413122715 | 0.409157876 | 0.189571665 |
| 0.09616575  | 0.185163623 | 0.442564715 | 0.238948509 |
| 0.476499092 | 0.181082227 | 0.463460325 | 0.469178244 |
| 0.376208541 | 0.497389653 | 0.235556012 | 0.442726411 |
| 0.18670727  | 0.418045062 | 0.392261399 | 0.437086964 |
| 0.259618472 | 0.289059173 | 0.429570037 | 0.227275421 |
| 0.125047229 | 0.321751218 | 0.007723687 | 0.461858367 |
| 0.473774957 | 0.335415481 | 0.38365529  | 0.354413315 |
| 0.390154258 | 0.482910064 | 0.324881007 | 0.428939341 |
| 0.044957913 | 0.365820953 | 0.364868205 | 0.490351578 |
| 0.204770078 | 0.443207802 | 0.148901649 | 0.346758772 |
| 0.488051665 | 0.322475006 | 0.423733511 | 0.289628852 |
| 0.494221743 | 0.490181475 | 0.343147967 | 0.297972308 |
| 0.460483204 | 0.222237624 | 0.437995045 | 0.49831057  |
| 0.295744508 | 0.212360195 | 0.454327361 | 0.306539829 |
| 0.314256309 | 0.491783111 | 0.437094031 | 0.499426642 |
| 0.158430763 | 0.387211526 | 0.468219231 | 0.491717992 |
| 0.412888399 | 0.19831902  | 0.240549911 | 0.289982436 |
| 0.483779898 | 0.205224428 | 0.284069    | 0.465506435 |
| 0.203263109 | 0.432501795 | 0.449690594 | 0.259050799 |
| 0.116029227 | 0.34625525  | 0.432517852 | 0.324482834 |
| 0.401026944 | 0.395704712 | 0.282635258 | 0.461066035 |
| 0.215891623 | 0.066420372 | 0.479684427 | 0.014994282 |
| 0.466236891 | 0.423100863 | 0.403586728 | 0.382632171 |
| 0.349380794 | 0.473164876 | 0.449887577 | 0.010167906 |
| 0.468086522 | 0.061487488 | 0.401894135 | 0.26440758  |
| 0.307902391 | 0.187715227 | 0.492661813 | 0.489205638 |
| 0.472408407 | 0.379677008 | 0.325588133 | 0.501279321 |
| 0.139722033 | 0.318815357 | 0.357002361 | 0.478710966 |
| 0.214015403 | 0.402286427 | 0.421799021 | 0.350859862 |
| 0.487806514 | 0.446072954 |             |             |
| PHF19       | 0.132032697 | 0.419981092 | 0.115448946 |
| 0.2078676   | 0.293364502 | 0.386273985 | 0.115357345 |
| 0.188804055 | 0.368404891 | 0.323204901 | 0.356023342 |
| 0.044826256 | 0.067615774 | 0.43384552  | 0.098594693 |
| 0.369152455 | 0.066439253 | 0.170542649 | 0.100449566 |
| 0.286542727 | 0.273938503 | 0.296240104 | 0.391127735 |
| 0.277047581 | 0.241012672 | 0.390788371 | 0.351601518 |
| 0.480983192 | 0.235464142 | 0.401407187 | 0.243931608 |
| 0.423940974 | 0.30198958  | 0.341972785 | 0.047376387 |
| 0.390769354 | 0.014505868 | 0.461969049 | 0.293893562 |
| 0.153272529 | 0.352776826 | 0.367954853 | 0.276188987 |
| 0.410915662 | 0.085371128 | 0.211505034 | 0.388095528 |
| 0.376908    | 0.306675367 | 0.127781229 | 0.420220391 |

|             |             |             |             |
|-------------|-------------|-------------|-------------|
| 0.378518873 | 0.36342402  | 0.401463897 | 0.005222313 |
| 0.261012615 | 0.070934744 | 0.195176444 | 0.497658811 |
| 0.252316103 | 0.166749907 | 0.286026463 | 0.280293423 |
| 0.372031776 | 0.365260138 | 0.282858723 | 0.389503667 |
| 0.485379973 | 0.155903286 | 0.40622064  | 0.196172721 |
| 0.394936058 | 0.081689533 | 0.221465459 | 0.156277889 |
| 0.364870858 | 0.232346254 | 0.315337956 | 0.286308408 |
| 0.434693338 | 0.514045158 | 0.291320927 | 0.511357135 |
| 0.096201355 | 0.312089051 | 0.268989678 | 0.318164498 |
| 0.369779588 | 0.146233122 | 0.405855378 | 0.515525601 |
| 0.099933503 | 0.395018259 | 0.40440814  | 0.194718687 |
| 0.40694652  | 0.251102124 | 0.401285955 | 0.14956753  |
| 0.346072306 | 0.332967119 | 0.479250667 | 0.331166262 |
| 0.286124787 | 0.142193403 | 0.500383424 | 0.288653861 |
| 0.294178669 | 0.154607162 | 0.244683884 | 0.413007864 |
| 0.417670436 | 0.469610683 | 0.41126712  | 0.375096823 |
| 0.362015567 | 0.484211459 | 0.417867831 | 0.391128448 |
| 0.162157514 | 0.512677113 | 0.256644794 | 0.07179153  |
| 0.141158698 | 0.11946271  | 0.2318715   | 0.315655449 |
| 0.430558283 | 0.356813085 | 0.26841255  | 0.264919125 |
| 0.411321459 | 0.487469392 | 0.514767066 | 0.406090439 |
| 0.084602355 | 0.227386166 | 0.375644677 | 0.302810519 |
| 0.378518831 | 0.173216364 | 0.23840506  | 0.517215722 |
| 0.377349101 | 0.402912807 | 0.247747127 | 0.512562206 |
| 0.24843216  | 0.497113547 | 0.438199971 | 0.230085199 |
| 0.520343715 | 0.503678438 | 0.486422224 | 0.361888629 |
| 0.470943568 | 0.386829767 | 0.074387245 | 0.385769444 |
| 0.457591805 | 0.01518969  | 0.437673181 | 0.466420104 |
| 0.499721692 | 0.420031273 | 0.491885575 | 0.477209224 |
| 0.497972063 | 0.137251267 | 0.034665767 | 0.295690692 |
| 0.513802599 | 0.398244042 | 0.15708456  | 0.39292769  |
| 0.333359021 | 0.404778543 | 0.393384609 | 0.302479328 |
| 0.494803964 | 0.423676365 | 0.459329956 | 0.402057229 |
| 0.359748467 | 0.328569381 | 0.340543035 | 0.484989515 |
| 0.086247597 | 0.186575113 | 0.11068084  | 0.323684646 |
| 0.369557219 | 0.218106046 | 0.413033107 | 0.338313424 |
| 0.237788149 | 0.371122246 | 0.287942186 | 0.348187736 |
| 0.115484449 | 0.412949404 | 0.239505709 | 0.261273019 |
| 0.081162006 | 0.197628417 | 0.236767354 | 0.190271602 |
| 0.260594289 | 0.29518543  | 0.406236314 | 0.46465354  |
| 0.338744503 | 0.257527841 | 0.416462871 | 0.453240465 |
| 0.403589396 | 0.356571291 | 0.268966096 | 0.025403249 |
| 0.307335742 | 0.296503922 | 0.166588931 | 0.370341039 |
| 0.225517711 | 0.283790362 | 0.387051426 | 0.360870041 |
| 0.350254166 | 0.209672915 | 0.356129352 | 0.432739603 |
| 0.224270269 | 0.292927029 | 0.408560238 | 0.412472937 |
| 0.012306403 | 0.381024939 | 0.417184223 | 0.161131287 |
| 0.354935205 | 0.116428904 | 0.217978316 | 0.43707923  |
| 0.267282019 | 0.208654963 | 0.453546647 | 0.354847495 |
| 0.32211933  | 0.271889855 | 0.496851612 | 0.052274641 |
| 0.323830345 | 0.073777878 | 0.300644943 | 0.356653299 |
| 0.309563243 | 0.310289898 | 0.283378747 | 0.277607764 |
| 0.205098489 | 0.5042279   | 0.38529219  | 0.48337957  |
| 0.368106614 | 0.506472973 | 0.415236542 | 0.406868776 |

|             |             |             |             |
|-------------|-------------|-------------|-------------|
| 0.375242455 | 0.345755531 | 0.113748736 | 0.426598786 |
| 0.425697394 | 0.33780015  | 0.142004504 | 0.405757882 |
| 0.381882743 | 0.380557569 | 0.136796769 | 0.472970212 |
| 0.491181422 | 0.482227374 | 0.172742631 | 0.35229851  |
| 0.388665976 | 0.292267734 | 0.390726824 | 0.499697658 |
| 0.350987359 | 0.34315902  | 0.338939091 | 0.367902027 |
| 0.249251432 | 0.2066603   | 0.328689058 | 0.148123878 |
| 0.008729219 | 0.145773414 | 0.130513702 | 0.188332983 |
| 0.153226588 | 0.390123874 | 0.388654672 | 0.4997184   |
| 0.169339816 | 0.394843917 | 0.2832352   | 0.314968459 |
| 0.43084556  | 0.321981002 | 0.332619096 | 0.355280754 |
| 0.291124144 | 0.038469697 | 0.154091725 | 0.524079593 |
| 0.095728019 | 0.214205855 | 0.340263533 | 0.005011224 |
| 0.099411951 | 0.40273443  | 0.162316021 | 0.236360415 |
| 0.426663381 | 0.245663211 | 0.29019984  | 0.371861658 |
| 0.341170086 | 0.151770649 | 0.00504499  | 0.467882599 |
| 0.47186895  | 0.44492138  | 0.473955654 | 0.459042491 |
| 0.417828524 | 0.380083562 | 0.39609752  | 0.387731103 |
| 0.174228844 | 0.168885944 | 0.216210685 | 0.317038097 |
| 0.008731139 | 0.36568635  | 0.293190004 | 0.204685411 |
| 0.387596308 | 0.333233193 | 0.075232941 | 0.318087425 |
| 0.056652898 | 0.183561967 | 0.340057038 | 0.245966821 |
| 0.326259433 | 0.040265893 | 0.276484084 | 0.328717576 |
| 0.440350301 | 0.363106204 | 0.329078654 | 0.518030495 |
| 0.341643469 | 0.210938486 | 0.330801889 | 0.364376228 |
| 0.129283198 | 0.155023339 | 0.374695012 | 0.053815579 |
| 0.194263977 | 0.443915116 | 0.359000262 | 0.148050171 |
| 0.323449397 | 0.017607256 | 0.379251606 | 0.510848002 |
| 0.472702998 | 0.490056833 | 0.481148305 | 0.243566673 |
| 0.496107119 | 0.085685803 | 0.504976984 | 0.410681326 |
| 0.382419913 | 0.003225656 | 0.008272787 | 0.452538363 |
| 0.386327006 | 0.117693315 | 0.223366239 | 0.368026392 |
| 0.157141298 | 0.232618186 | 0.108758676 | 0.181761511 |
| 0.40144579  | 0.235579878 | 0.158065995 | 0.478163092 |
| 0.290883223 | 0.258117078 | 0.397594274 | 0.153062491 |
| 0.368972627 | 0.098006797 | 0.153995696 | 0.010907773 |
| 0.34263154  | 0.185837593 | 0.491791364 | 0.492795945 |
| 0.480574472 | 0.371759126 | 0.339506419 | 0.311084594 |
| 0.390023993 | 0.16953396  | 0.334713146 | 0.18507537  |
| 0.48371976  | 0.386053324 | 0.342520078 | 0.34704925  |
| 0.479892908 | 0.46695162  | 0.070396488 | 0.404348457 |
| 0.02870015  | 0.001809903 | 0.417194347 | 0.293888305 |
| 0.067368457 | 0.35507519  | 0.304162072 | 0.272424552 |
| 0.238875181 | 0.066735616 | 0.242583223 | 0.232570093 |
| 0.329495531 | 0.36277239  | 0.257171586 | 0.287921903 |
| 0.26844802  | 0.156576477 | 0.222881154 | 0.193241664 |
| 0.249538909 | 0.352466802 | 0.247893623 | 0.053124927 |
| 0.413213972 | 0.386730208 | 0.107407761 | 0.221941581 |
| 0.414186336 | 0.459208368 | 0.08386389  | 0.024060988 |
| 0.310128943 | 0.317577301 | 0.458957467 | 0.486756789 |
| 0.521529975 | 0.50023937  | 0.403089442 | 0.149108743 |
| 0.117410329 | 0.328867751 | 0.274606141 | 0.118476042 |
| 0.485976044 | 0.136148899 | 0.472043505 | 0.265698067 |
| 0.181986049 | 0.284554414 | 0.061291924 | 0.140237961 |

|             |             |             |             |
|-------------|-------------|-------------|-------------|
| 0.337410262 | 0.224373118 | 0.205520212 | 0.236928214 |
| 0.324785595 | 0.229271214 | 0.097427953 | 0.250408523 |
| 0.378784581 | 0.184695493 | 0.226122495 | 0.335931702 |
| 0.380613008 | 0.252859375 | 0.404928334 | 0.439249636 |
| 0.19512853  | 0.186686268 | 0.364295308 | 0.366432523 |
| 0.425821234 | 0.377037494 | 0.044580954 | 0.449013581 |
| 0.453679891 | 0.410328356 | 0.491935073 | 0.363277288 |
| 0.150435514 | 0.353664793 | 0.288329266 | 0.347096312 |
| 0.235826196 | 0.387066407 | 0.264958002 | 0.118872043 |
| 0.306680232 | 0.480168983 | 1           | 0.203652907 |
| 0.386984874 | 0.203716056 | 0.126472489 | 0.401380706 |
| 0.183929995 | 0.149611622 | 0.366721237 | 0.393524476 |
| 0.004201519 | 0.114942758 | 0.454740966 | 0.25296828  |
| 0.500943019 | 0.454598822 | 0.433865863 | 0.287808543 |
| 0.002672517 | 0.384385401 | 0.375642004 | 0.400452861 |
| 0.422185207 | 0.366317219 | 0.168069137 | 0.116023881 |
| 0.306425281 | 0.148730091 | 0.181390047 | 0.348106879 |
| 0.180431041 | 0.410715601 | 0.238990877 | 0.264601828 |
| 0.225273835 | 0.165033259 | 0.209372529 | 0.287647404 |
| 0.144977368 | 0.27575949  | 0.356340885 | 0.30630234  |
| 0.198643348 | 0.400997063 | 0.420668609 | 0.061005668 |
| 0.310653992 | 0.387616816 | 0.39772444  | 0.006670492 |
| 0.401822913 | 0.018723182 | 0.212235854 | 0.240022099 |
| 0.224612986 | 0.231521033 | 0.26401483  | 0.303294178 |
| 0.387334357 | 0.275891902 | 0.306496274 | 0.269476626 |
| 0.190466503 | 0.271792242 | 0.373060009 | 0.39869644  |
| 0.27629248  | 0.185093736 | 0.16015068  | 0.156561454 |
| 0.081949047 | 0.429277009 | 0.279652607 | 0.138349243 |
| 0.252636984 | 0.387514639 | 0.343985624 | 0.492805127 |
| 0.382754636 | 0.179284368 | 0.332114748 | 0.425931946 |
| 0.241007774 | 0.320057284 | 0.123740112 | 0.408253687 |
| 0.268291466 | 0.207523297 | 0.390504455 | 0.381328382 |
| 0.408289874 | 0.407057101 | 0.276693493 | 0.420472354 |
| 0.371309679 | 0.352633627 | 0.355930827 | 0.118242431 |
| 0.25423059  | 0.200788692 | 0.252439505 | 0.007565777 |
| 0.356818844 | 0.334225005 | 0.431428259 | 0.49488459  |
| 0.249110374 | 0.362697139 | 0.346673198 | 0.156133623 |
| 0.318677823 | 0.240624539 | 0.202593444 | 0.413084854 |
| 0.185723429 | 0.228082286 | 0.303763154 | 0.366670982 |
| 0.407781419 | 0.401918761 | 0.243955048 | 0.282296741 |
| 0.27504586  | 0.273239458 | 0.481992562 | 0.196758585 |
| 0.408838287 | 0.187285009 | 0.375791676 | 0.31209818  |
| 0.244272513 | 0.48988476  | 0.113712    | 0.496884043 |
| 0.33353866  | 0.194190628 | 0.481226312 | 0.316949297 |
| 0.330436951 | 0.134322069 | 0.163664767 | 0.38736919  |
| 0.260501986 | 0.290121757 | 0.019147637 | 0.075104979 |
| 0.331686037 | 0.311488654 | 0.410531817 | 0.361411548 |
| 0.236386428 | 0.332651838 | 0.127629416 | 0.345441742 |
| 0.489077158 | 0.505656464 | 0.298248223 | 0.287667241 |
| 0.358371514 | 0.146320908 | 0.403915157 | 0.020674651 |
| 0.401823556 | 0.384469493 | 0.365229337 | 0.090796328 |
| 0.045093048 | 0.198980086 | 0.421573612 | 0.134872015 |
| 0.439832602 | 0.183738628 | 0.372029867 | 0.406913233 |
| 0.23441232  | 0.512475368 | 0.1435296   | 0.386862529 |

|             |             |             |             |
|-------------|-------------|-------------|-------------|
| 0.106494503 | 0.294694319 | 0.337174862 | 0.358660833 |
| 0.238346976 | 0.27523116  | 0.375871568 | 0.211717694 |
| 0.065841136 | 0.272532455 | 0.007006188 | 0.425253387 |
| 0.493653795 | 0.323332492 | 0.250693076 | 0.297706775 |
| 0.293922151 | 0.364811905 | 0.233651453 | 0.379473454 |
| 0.023469111 | 0.344491159 | 0.233870692 | 0.400615439 |
| 0.251581347 | 0.378494798 | 0.092978311 | 0.29389646  |
| 0.48286321  | 0.292271716 | 0.283033663 | 0.342809146 |
| 0.483480837 | 0.381383681 | 0.239598435 | 0.213382683 |
| 0.384543846 | 0.12317389  | 0.37426731  | 0.507219352 |
| 0.201681429 | 0.202495806 | 0.40059497  | 0.254719491 |
| 0.273170081 | 0.37620374  | 0.390577998 | 0.499904576 |
| 0.094154512 | 0.28231321  | 0.390758555 | 0.449220558 |
| 0.305406082 | 0.161946245 | 0.221077242 | 0.23821516  |
| 0.466506925 | 0.139464085 | 0.252376896 | 0.387889122 |
| 0.207706062 | 0.311737506 | 0.365904061 | 0.191603791 |
| 0.056049354 | 0.201333774 | 0.343032411 | 0.203749089 |
| 0.317653515 | 0.362688249 | 0.245946619 | 0.378487159 |
| 0.156446484 | 0.048050097 | 0.441937119 | 0.022720837 |
| 0.368719436 | 0.37461376  | 0.266779647 | 0.333022245 |
| 0.244533154 | 0.378253052 | 0.402945978 | 0.003859207 |
| 0.387016516 | 0.060012385 | 0.283372379 | 0.236310998 |
| 0.26035155  | 0.103804766 | 0.448387568 | 0.475801906 |
| 0.339844069 | 0.297548025 | 0.312223688 | 0.445737965 |
| 0.135810982 | 0.292693915 | 0.303788078 | 0.42397143  |
| 0.193588555 | 0.391479658 | 0.378041085 | 0.345590772 |
| 0.390016325 | 0.293785567 |             |             |
| PHF5A       | 0.144525233 | 0.176043036 | 0.089762298 |
| 0.209483931 | 0.185035985 | 0.095800709 | 0.144787717 |
| 0.166155382 | 0.145010327 | 0.027894193 | 0.201343974 |
| 0.139555901 | 0.034796649 | 0.252384481 | 0.156805015 |
| 0.151793163 | 0.190381006 | 0.192558526 | 0.03072702  |
| 0.091918362 | 0.189653205 | 0.093855333 | 0.099876031 |
| 0.147667168 | 0.259726334 | 0.126496714 | 0.080185211 |
| 0.222017754 | 0.036088984 | 0.164710605 | 0.022957836 |
| 0.312074511 | 0.181677055 | 0.069047659 | 0.097469426 |
| 0.128068394 | 0.00834392  | 0.285361454 | 0.178323446 |
| 0.08053246  | 0.314722217 | 0.041798198 | 0.227465561 |
| 0.058107121 | 0.120682586 | 0.017916322 | 0.128694786 |
| 0.113246029 | 0.122579908 | 0.101549106 | 0.158531246 |
| 0.064814035 | 0.22809669  | 0.102886467 | 0.006563954 |
| 0.065846009 | 0.013043232 | 0.037395965 | 0.250574227 |
| 0.336296992 | 0.252729034 | 0.028421405 | 0.096324014 |
| 0.107692016 | 0.163643682 | 0.261862904 | 0.046846841 |
| 0.264293317 | 0.055857344 | 0.135518836 | 0.132435749 |
| 0.098733423 | 0.06496227  | 0.306702455 | 0.095895009 |
| 0.076781788 | 0.291044198 | 0.181770406 | 0.077920319 |
| 0.162310347 | 0.30409386  | 0.233287117 | 0.233722644 |
| 0.043976618 | 0.126268785 | 0.119878396 | 0.296579064 |
| 0.172136089 | 0.101316604 | 0.238175839 | 0.294869828 |
| 0.077739643 | 0.070053459 | 0.156445621 | 0.157574951 |
| 0.199720083 | 0.049190805 | 0.064006737 | 0.088395569 |
| 0.177281696 | 0.144201576 | 0.246878492 | 0.304328635 |
| 0.127067593 | 0.130899509 | 0.24124703  | 0.128047603 |

|             |             |             |             |
|-------------|-------------|-------------|-------------|
| 0.177951757 | 0.154296028 | 0.126846777 | 0.18738726  |
| 0.167269569 | 0.239436223 | 0.1589298   | 0.220458849 |
| 0.120939399 | 0.259254739 | 0.211635311 | 0.221540149 |
| 0.010025755 | 0.249147434 | 0.232141985 | 0.224035233 |
| 0.083352217 | 0.224454674 | 0.07617809  | 0.318980639 |
| 0.22651142  | 0.213004751 | 0.173624038 | 0.230286688 |
| 0.241863274 | 0.220377335 | 0.23474226  | 0.216435303 |
| 0.14839969  | 0.049660126 | 0.120066507 | 0.123351569 |
| 0.197302901 | 0.192856701 | 0.10241794  | 0.276182782 |
| 0.31471215  | 0.220656821 | 0.113942684 | 0.299726144 |
| 0.115873125 | 0.320044011 | 0.179009012 | 0.269397142 |
| 0.285871671 | 0.267144418 | 0.299860937 | 0.179779779 |
| 0.282463701 | 0.155231549 | 0.02049792  | 0.211587871 |
| 0.331973716 | 0.028234641 | 0.198147958 | 0.221405079 |
| 0.232087467 | 0.196716774 | 0.283136462 | 0.246887462 |
| 0.229877151 | 0.163272247 | 0.003021337 | 0.258602045 |
| 0.256407536 | 0.288477511 | 0.178559042 | 0.090924083 |
| 0.160876419 | 0.111703842 | 0.171469509 | 0.0788586   |
| 0.339990939 | 0.224433294 | 0.205246339 | 0.18246267  |
| 0.080715443 | 0.310833349 | 0.083859849 | 0.243953451 |
| 0.177884626 | 0.144142048 | 0.126534208 | 0.234105581 |
| 0.046521327 | 0.308184669 | 0.087190196 | 0.127122209 |
| 0.330568103 | 0.084508755 | 0.053416467 | 0.189289602 |
| 0.122353302 | 0.109216307 | 0.189644664 | 0.149673559 |
| 0.208680491 | 0.258000465 | 0.192973552 | 0.266256754 |
| 0.229674543 | 0.231085828 | 0.141022723 | 0.240327588 |
| 0.080748666 | 0.227802492 | 0.167474176 | 0.309970817 |
| 0.370634014 | 0.128177183 | 0.27921763  | 0.139659995 |
| 0.098013302 | 0.031059481 | 0.04150761  | 0.093882349 |
| 0.232696383 | 0.143675494 | 0.147879816 | 0.232943723 |
| 0.14793503  | 0.094217151 | 0.083725307 | 0.325466772 |
| 0.172973717 | 0.165357909 | 0.261349311 | 0.088822333 |
| 0.055489924 | 0.173575399 | 0.217284002 | 0.134417696 |
| 0.173816352 | 0.083276158 | 0.071333141 | 0.235302691 |
| 0.055553144 | 0.101167489 | 0.227324242 | 0.218688955 |
| 0.07989019  | 0.184120226 | 0.2767336   | 0.009474903 |
| 0.095667853 | 0.160181672 | 0.331567311 | 0.040777119 |
| 0.252568556 | 0.28657326  | 0.152120807 | 0.143484245 |
| 0.161678901 | 0.260457097 | 0.240131244 | 0.256872675 |
| 0.064125439 | 0.280054491 | 0.221885124 | 0.279535503 |
| 0.218097289 | 0.057354737 | 0.037741279 | 0.21634756  |
| 0.224758458 | 0.047834359 | 0.133442196 | 0.151965398 |
| 0.051541408 | 0.164604944 | 0.127018659 | 0.287977676 |
| 0.325571608 | 0.200932887 | 0.249722356 | 0.256615415 |
| 0.300804803 | 0.240760053 | 0.22220186  | 0.294732662 |
| 0.03260605  | 0.11217908  | 0.103455016 | 0.291648483 |
| 0.267358901 | 0.123188501 | 0.261329496 | 0.03977811  |
| 0.003180606 | 0.12402702  | 0.150328331 | 0.256179694 |
| 0.106415903 | 0.091684086 | 0.177351953 | 0.257160707 |
| 0.237848037 | 0.277653813 | 0.204414976 | 0.148488317 |
| 0.230631979 | 0.090008533 | 0.115881655 | 0.162416691 |
| 0.265178688 | 0.152278291 | 0.282429789 | 0.306053087 |
| 0.080542335 | 0.097143147 | 0.115915838 | 0.034592922 |
| 0.124321545 | 0.126808586 | 0.174563696 | 0.29601555  |

|             |             |             |             |
|-------------|-------------|-------------|-------------|
| 0.268805233 | 0.257072767 | 0.213632468 | 0.036155086 |
| 0.28106169  | 0.217373334 | 0.081886842 | 0.223553219 |
| 0.224543441 | 0.216969761 | 0.216698714 | 0.220972064 |
| 0.201644172 | 0.165486607 | 0.213489105 | 0.118195623 |
| 0.176119951 | 0.093291153 | 0.088950922 | 0.171997314 |
| 0.011938933 | 0.28306179  | 0.144608585 | 0.3014951   |
| 0.177500556 | 0.206714008 | 0.16376602  | 0.142264148 |
| 0.110837745 | 0.044564028 | 0.093288787 | 0.157465575 |
| 0.243494182 | 0.09537223  | 0.071350225 | 0.068587481 |
| 0.237918048 | 0.26811497  | 0.059162823 | 0.266040457 |
| 0.230059029 | 0.118372791 | 0.171157574 | 0.2412582   |
| 0.17795757  | 0.014341429 | 0.073964194 | 0.006590465 |
| 0.053579215 | 0.240121541 | 0.06773245  | 0.123019479 |
| 0.266460609 | 0.074748272 | 0.259374849 | 0.282121601 |
| 0.205601242 | 0.260696522 | 0.271016277 | 0.096879192 |
| 0.264141912 | 0.012635434 | 0.250624495 | 0.196855904 |
| 0.044086084 | 0.013505454 | 0.068425661 | 0.227495179 |
| 0.135036294 | 0.101570134 | 0.280972644 | 0.080985381 |
| 0.271796431 | 0.105524233 | 0.164109515 | 0.141444963 |
| 0.147056409 | 0.223342764 | 0.117326238 | 0.220894077 |
| 0.198277914 | 0.255923026 | 0.0601962   | 0.164473149 |
| 0.142619714 | 0.214014727 | 0.148137773 | 0.073600271 |
| 0.226043513 | 0.156973493 | 0.248787992 | 0.243647374 |
| 0.312840739 | 0.2061188   | 0.032328201 | 0.084118977 |
| 0.211863072 | 0.112632373 | 0.052355381 | 0.125870104 |
| 0.218164859 | 0.177227048 | 0.338198871 | 0.301288317 |
| 0.29910187  | 0.276841923 | 0.152521609 | 0.224612827 |
| 0.127591422 | 0.018691905 | 0.095369589 | 0.241111803 |
| 0.017687244 | 0.099932303 | 0.321667041 | 0.076218125 |
| 0.123133323 | 0.134398521 | 0.070677736 | 0.079913244 |
| 0.251262379 | 0.146016856 | 0.152891667 | 0.198496375 |
| 0.135747416 | 0.114980318 | 0.215685208 | 0.183423941 |
| 0.055962467 | 0.228003834 | 0.261223141 | 0.115057072 |
| 0.084089577 | 0.110820819 | 0.175002152 | 0.256408478 |
| 0.262439082 | 0.243627635 | 0.159491393 | 0.165685068 |
| 0.29279047  | 0.106076512 | 0.263217614 | 0.21926152  |
| 0.276511188 | 0.313691132 | 0.316862188 | 0.203792939 |
| 0.182372015 | 0.209533395 | 0.14504807  | 0.216358299 |
| 0.256861371 | 0.101040055 | 0.239443556 | 0.090091132 |
| 0.223920462 | 0.191018923 | 0.236368914 | 0.199020274 |
| 0.121557526 | 0.296472701 | 0.265994048 | 0.157775709 |
| 0.146991979 | 0.080532086 | 0.141182479 | 0.275265288 |
| 0.242160272 | 0.057935817 | 0.258248909 | 0.093965854 |
| 0.197728238 | 0.019231644 | 0.168520732 | 0.342581998 |
| 0.235283694 | 0.142060017 | 0.089790684 | 0.184559542 |
| 0.17847593  | 0.066922147 | 0.158382168 | 0.171902161 |
| 0.265044068 | 0.144019495 | 0.249918729 | 0.303628801 |
| 0.181838796 | 0.139419558 | 0.058916975 | 0.154806511 |
| 0.235359054 | 0.101391318 | 0.184505493 | 0.18204502  |
| 0.289565519 | 0.29154967  | 0.203652907 | 1           |
| 0.103226056 | 0.11049432  | 0.087306405 | 0.198563599 |
| 0.096818695 | 0.17966477  | 0.045716363 | 0.178493039 |
| 0.023843534 | 0.053245706 | 0.247638436 | 0.212641903 |
| 0.287861974 | 0.256169407 | 0.317243535 | 0.106023913 |

|             |             |             |             |
|-------------|-------------|-------------|-------------|
| 0.000813111 | 0.141227509 | 0.2166031   | 0.101188823 |
| 0.195115581 | 0.245096367 | 0.077011045 | 0.260035068 |
| 0.363818293 | 0.133183081 | 0.219582651 | 0.080672681 |
| 0.040593292 | 0.135841323 | 0.332166526 | 0.162585062 |
| 0.19852666  | 0.096339788 | 0.082946337 | 0.195653625 |
| 0.047631646 | 0.360447608 | 0.325951624 | 0.029432083 |
| 0.056615665 | 0.238899689 | 0.189282187 | 0.133097422 |
| 0.105621172 | 0.222316002 | 0.25463116  | 0.019467826 |
| 0.191157886 | 0.12027648  | 0.23630544  | 0.241965638 |
| 0.230725647 | 0.1835426   | 0.268020339 | 0.14565413  |
| 0.151181784 | 0.185306811 | 0.200187996 | 0.335292005 |
| 0.265110599 | 0.171453646 | 0.1512529   | 0.097237943 |
| 0.172584923 | 0.218124249 | 0.177444657 | 0.168538866 |
| 0.251043444 | 0.206023432 | 0.333856782 | 0.141452198 |
| 0.295398259 | 0.080054045 | 0.366009544 | 0.211157929 |
| 0.315321512 | 0.135487237 | 0.113442673 | 0.201039574 |
| 0.020625784 | 0.075116974 | 0.098978421 | 0.119864779 |
| 0.245803889 | 0.153157292 | 0.082076549 | 0.131963269 |
| 0.128303681 | 0.339500074 | 0.32577699  | 0.282024433 |
| 0.12345972  | 0.078293283 | 0.033017359 | 0.293059586 |
| 0.195373024 | 0.202762601 | 0.175495971 | 0.057704739 |
| 0.240015638 | 0.110708449 | 0.218822736 | 0.245957929 |
| 0.055417778 | 0.323066422 | 0.044031395 | 0.18211723  |
| 0.028201948 | 0.169437445 | 0.271970539 | 0.154565182 |
| 0.045179152 | 0.215244111 | 0.198012712 | 0.070271408 |
| 0.181764961 | 0.137878753 | 0.110695119 | 0.13348208  |
| 0.184916636 | 0.18916001  | 0.246790748 | 0.111732135 |
| 0.095547184 | 0.161560422 | 0.076412056 | 0.185439697 |
| 0.191159473 | 0.236463222 | 0.159683354 | 0.240297123 |
| 0.116897249 | 0.20415743  | 0.338539864 | 0.13708454  |
| 0.108884674 | 0.256404235 | 0.050099951 | 0.056787183 |
| 0.157855994 | 0.067522701 | 0.001180855 | 0.040578558 |
| 0.326991098 | 0.052884369 | 0.133970647 | 0.195548914 |
| 0.126430931 | 0.298387356 | 0.038981674 | 0.117121607 |
| 0.207814104 | 0.253598424 | 0.168683616 | 0.314879899 |
| 0.246833692 | 0.24817481  | 0.129244468 | 0.005516885 |
| 0.125375241 | 0.096518405 | 0.04934416  | 0.181264167 |
| 0.12379803  | 0.052445357 | 0.11945516  | 0.093377926 |
| 0.251422081 | 0.042440605 | 0.092284068 | 0.171117044 |
| 0.207914833 | 0.261999801 | 0.245273649 | 0.243319362 |
| 0.052796193 | 0.244789179 | 0.087342504 | 0.074019533 |
| 0.193420431 | 0.099024849 | 0.277614023 | 0.103812414 |
| 0.189170759 | 0.179409099 | 0.013572725 | 0.323170177 |
| 0.225485692 | 0.087321716 | 0.282689146 | 0.027414746 |
| 0.338798097 | 0.234209684 | 0.119433895 | 0.076244908 |
| 0.165419974 | 0.158789125 | 0.276273743 | 0.241685405 |
| 0.042529836 | 0.100369503 | 0.239817057 | 0.104121314 |
| 0.254468678 | 0.10098981  | 0.278502391 | 0.051811255 |
| 0.220152319 | 0.177500373 | 0.150050883 | 0.136490353 |
| 0.095285732 | 0.159606516 | 0.049552378 | 0.27357255  |
| 0.256181284 | 0.111896503 | 0.244266087 | 0.213158992 |
| 0.081605377 | 0.223876609 | 0.085640217 | 0.254509418 |
| 0.240421092 | 0.322274209 | 0.2104889   | 0.222959356 |
| 0.35654709  | 0.110607012 | 0.093783352 | 0.170185982 |



|             |             |             |             |
|-------------|-------------|-------------|-------------|
| 0.217016035 | 0.244038715 | 0.082193905 | 0.242721603 |
| 0.079173626 | 0.274960689 | 0.073387089 | 0.180115481 |
| 0.232969009 | 0.159332211 | 0.113206585 | 0.242370079 |
| 0.239868012 | 0.152824122 | 0.135700826 | 0.347528537 |
| 0.284234916 | 0.194767854 | 0.33059817  | 0.015344611 |
| 0.139436013 | 0.216799535 | 0.260106171 | 0.116884575 |
| 0.281524275 | 0.153424446 | 0.097049593 | 0.031647305 |
| 0.241623152 | 0.059839052 | 0.105142527 | 0.186894768 |
| 0.067507106 | 0.1375018   | 0.266754735 | 0.274875538 |
| 0.203734857 | 0.055857005 | 0.052393521 | 0.24320432  |
| 0.067928984 | 0.040193649 | 0.057732659 | 0.122623135 |
| 0.07581581  | 0.047301056 | 0.060070965 | 0.069068656 |
| 0.215773729 | 0.135213824 |             |             |
| PIBF1       | 0.048452498 | 0.43619414  | 0.038878157 |
| 0.084377893 | 0.215897551 | 0.290559827 | 0.032847709 |
| 0.078365182 | 0.324300342 | 0.254304069 | 0.24353446  |
| 0.008334859 | 0.119154753 | 0.438214033 | 0.032488596 |
| 0.274104158 | 0.017506811 | 0.061226356 | 0.063570078 |
| 0.160174829 | 0.189006399 | 0.279390257 | 0.256072969 |
| 0.204710149 | 0.160587782 | 0.235396274 | 0.295978881 |
| 0.509402324 | 0.275941984 | 0.363975464 | 0.173629201 |
| 0.373868678 | 0.227916786 | 0.309338379 | 0.009144521 |
| 0.290264133 | 0.015074149 | 0.398386433 | 0.161513165 |
| 0.141258415 | 0.311182846 | 0.26007073  | 0.154611745 |
| 0.250437328 | 0.020784801 | 0.236207167 | 0.33027852  |
| 0.230421828 | 0.207139584 | 0.043934169 | 0.364802596 |
| 0.260623033 | 0.273365161 | 0.359559112 | 0.001426646 |
| 0.265891498 | 0.13052798  | 0.226483468 | 0.508070561 |
| 0.135449138 | 0.076663651 | 0.244875001 | 0.189015406 |
| 0.292429978 | 0.305227802 | 0.188687578 | 0.255303461 |
| 0.489340878 | 0.167310925 | 0.397732021 | 0.11507154  |
| 0.251006055 | 0.020129787 | 0.10868499  | 0.056842499 |
| 0.286404204 | 0.129386265 | 0.253020155 | 0.245399346 |
| 0.424185207 | 0.49845142  | 0.157351502 | 0.490300274 |
| 0.093983737 | 0.247728683 | 0.209913514 | 0.230223143 |
| 0.299721787 | 0.052537166 | 0.338168206 | 0.499001133 |
| 0.033299973 | 0.281286085 | 0.319523041 | 0.086213198 |
| 0.435731993 | 0.263100604 | 0.282797905 | 0.171525101 |
| 0.301283015 | 0.224715935 | 0.469083023 | 0.206064713 |
| 0.252990603 | 0.045063411 | 0.475642565 | 0.241214662 |
| 0.208598928 | 0.051149771 | 0.145083658 | 0.468426478 |
| 0.30066407  | 0.496947591 | 0.411454003 | 0.301503023 |
| 0.253013908 | 0.495314087 | 0.315263398 | 0.416367571 |
| 0.198763363 | 0.526302698 | 0.117642544 | 0.024344002 |
| 0.047161847 | 0.057064312 | 0.183668995 | 0.259079321 |
| 0.481271918 | 0.253010652 | 0.118874046 | 0.142460335 |
| 0.448985418 | 0.476249686 | 0.523000266 | 0.370396249 |
| 0.021399106 | 0.22970279  | 0.251206105 | 0.216575871 |
| 0.289395606 | 0.071295982 | 0.205355675 | 0.488648731 |
| 0.343614549 | 0.410995645 | 0.110052195 | 0.477633834 |
| 0.134981844 | 0.494815431 | 0.460251861 | 0.098492411 |
| 0.499690361 | 0.481830407 | 0.49729015  | 0.349380574 |
| 0.467816829 | 0.221613782 | 0.061016491 | 0.341165842 |
| 0.471961654 | 0.014294136 | 0.490636415 | 0.508270502 |

|             |             |             |             |
|-------------|-------------|-------------|-------------|
| 0.493058375 | 0.45474821  | 0.512805907 | 0.520871104 |
| 0.506043246 | 0.043840585 | 0.03023858  | 0.19113056  |
| 0.491064719 | 0.356389137 | 0.097215552 | 0.283959319 |
| 0.259210755 | 0.267694285 | 0.419025907 | 0.220331911 |
| 0.488566062 | 0.453244882 | 0.506687212 | 0.335153293 |
| 0.20700997  | 0.282960711 | 0.287294707 | 0.457902601 |
| 0.025840181 | 0.072366665 | 0.033599408 | 0.24864966  |
| 0.275236546 | 0.104866171 | 0.245115265 | 0.24666352  |
| 0.117394769 | 0.242410522 | 0.29883732  | 0.314604227 |
| 0.043497444 | 0.304003049 | 0.105680401 | 0.100075121 |
| 0.020198235 | 0.117081778 | 0.105413347 | 0.105550505 |
| 0.165757202 | 0.208647384 | 0.389030987 | 0.493167813 |
| 0.250987205 | 0.132437816 | 0.351944926 | 0.458932669 |
| 0.386109683 | 0.270409432 | 0.176103563 | 0.005081859 |
| 0.156571447 | 0.267683436 | 0.187893784 | 0.308762386 |
| 0.157383047 | 0.141373842 | 0.25726383  | 0.347473427 |
| 0.177335252 | 0.103712869 | 0.247876193 | 0.402884238 |
| 0.114295468 | 0.220184011 | 0.4158248   | 0.273014762 |
| 0.001455973 | 0.194687745 | 0.421509371 | 0.106055791 |
| 0.228159359 | 0.125999228 | 0.242701829 | 0.443683418 |
| 0.242377845 | 0.180836097 | 0.514965262 | 0.352589898 |
| 0.270281812 | 0.204227177 | 0.521319523 | 0.052148842 |
| 0.261258764 | 0.033981646 | 0.199015556 | 0.26373461  |
| 0.149721141 | 0.217583782 | 0.240004219 | 0.200854927 |
| 0.090547256 | 0.510603556 | 0.372506515 | 0.512351182 |
| 0.252218267 | 0.517267614 | 0.448076626 | 0.419443518 |
| 0.273992351 | 0.27359521  | 0.154378779 | 0.396119738 |
| 0.440933485 | 0.198990067 | 0.054104249 | 0.435028032 |
| 0.250252198 | 0.329451891 | 0.087209721 | 0.471237015 |
| 0.473362606 | 0.466876139 | 0.092193137 | 0.319010702 |
| 0.329161408 | 0.147911323 | 0.400684917 | 0.521425581 |
| 0.233442013 | 0.233684478 | 0.217890566 | 0.36683591  |
| 0.105866818 | 0.154230961 | 0.289865705 | 0.205185532 |
| 0.02248598  | 0.053008863 | 0.038060466 | 0.101524895 |
| 0.144254922 | 0.346994341 | 0.307514362 | 0.507219203 |
| 0.068068265 | 0.412718964 | 0.180996729 | 0.171895631 |
| 0.38537926  | 0.259699205 | 0.296299699 | 0.299942216 |
| 0.188378906 | 0.009618197 | 0.071394554 | 0.49194215  |
| 0.02576896  | 0.205451564 | 0.222996636 | 0.001635054 |
| 0.024387675 | 0.414331581 | 0.075418051 | 0.162523886 |
| 0.481464262 | 0.167441111 | 0.129291633 | 0.22391956  |
| 0.276061914 | 0.057033889 | 0.002183217 | 0.48570362  |
| 0.491342791 | 0.458147722 | 0.487937579 | 0.460287962 |
| 0.433275446 | 0.385575848 | 0.367914543 | 0.246217321 |
| 0.060536827 | 0.058386649 | 0.14680543  | 0.17136761  |
| 0.004344734 | 0.34060797  | 0.230097633 | 0.091081162 |
| 0.387087409 | 0.215586684 | 0.022072699 | 0.270291344 |
| 0.010572201 | 0.190201687 | 0.208444832 | 0.148715433 |
| 0.300018819 | 0.00745537  | 0.170096403 | 0.216984859 |
| 0.418521571 | 0.30676689  | 0.288460359 | 0.525062068 |
| 0.211992846 | 0.097446238 | 0.196302317 | 0.358315635 |
| 0.039301566 | 0.077772346 | 0.252746112 | 0.035335592 |
| 0.210338162 | 0.453742852 | 0.28358863  | 0.038441856 |
| 0.159802922 | 0.00198181  | 0.330495462 | 0.522050743 |

|             |             |             |             |
|-------------|-------------|-------------|-------------|
| 0.469757016 | 0.511194052 | 0.496448431 | 0.221056198 |
| 0.494249471 | 0.154434281 | 0.53225825  | 0.379659912 |
| 0.268686173 | 0.000332681 | 0.00408328  | 0.487326199 |
| 0.255565466 | 0.04785445  | 0.0924781   | 0.268884507 |
| 0.063251314 | 0.099930834 | 0.043965262 | 0.138102354 |
| 0.333276586 | 0.168492177 | 0.154382397 | 0.45756426  |
| 0.142509093 | 0.15002023  | 0.282576353 | 0.060566314 |
| 0.304593693 | 0.028558842 | 0.058426963 | 0.006103104 |
| 0.307531855 | 0.091995244 | 0.451463646 | 0.510318893 |
| 0.470248788 | 0.319705039 | 0.272787215 | 0.286076953 |
| 0.44421738  | 0.078569847 | 0.310071832 | 0.076506856 |
| 0.481903952 | 0.271064216 | 0.252975946 | 0.253248141 |
| 0.475021461 | 0.442202396 | 0.017950459 | 0.34559765  |
| 0.008908156 | 0.002240255 | 0.242332389 | 0.195335031 |
| 0.076562571 | 0.244060246 | 0.188823076 | 0.170014015 |
| 0.174754754 | 0.018247691 | 0.213784131 | 0.18395607  |
| 0.182781229 | 0.226489149 | 0.19673034  | 0.197808204 |
| 0.184666241 | 0.084802893 | 0.136973024 | 0.100429101 |
| 0.199345324 | 0.26816698  | 0.160249096 | 0.010574881 |
| 0.293235536 | 0.282821596 | 0.033276336 | 0.106007539 |
| 0.417096266 | 0.486051051 | 0.020013944 | 0.004408368 |
| 0.208566928 | 0.211761002 | 0.498715809 | 0.505893465 |
| 0.511408338 | 0.495949495 | 0.360051424 | 0.073617602 |
| 0.041825975 | 0.206407548 | 0.21361318  | 0.065761975 |
| 0.512765758 | 0.040527491 | 0.493093214 | 0.245022212 |
| 0.068801111 | 0.127361774 | 0.018959416 | 0.04950304  |
| 0.295889173 | 0.110775363 | 0.110932489 | 0.094804105 |
| 0.194213483 | 0.213314707 | 0.026913243 | 0.116035845 |
| 0.271628617 | 0.137327122 | 0.092693191 | 0.230538975 |
| 0.322976308 | 0.211477322 | 0.365717312 | 0.412269706 |
| 0.084740536 | 0.066754679 | 0.173792814 | 0.351488103 |
| 0.432440418 | 0.297727083 | 0.021293719 | 0.459966346 |
| 0.493987217 | 0.355627623 | 0.497207848 | 0.352154448 |
| 0.051752734 | 0.259120937 | 0.251406561 | 0.214224447 |
| 0.113979288 | 0.284180943 | 0.15829656  | 0.035999963 |
| 0.268145217 | 0.463802295 | 0.386984874 | 0.103226056 |
| 1           | 0.08579018  | 0.034814327 | 0.466057742 |
| 0.130585123 | 0.052044643 | 0.278458051 | 0.432743487 |
| 0.001072674 | 0.15446162  | 0.48899038  | 0.172177514 |
| 0.505916183 | 0.464631698 | 0.407928823 | 0.198769474 |
| 0.001471901 | 0.336933394 | 0.253640349 | 0.254726344 |
| 0.412912988 | 0.306006079 | 0.144219048 | 0.040860807 |
| 0.234054167 | 0.060395793 | 0.073606297 | 0.276321815 |
| 0.13594552  | 0.300106829 | 0.136323074 | 0.132602035 |
| 0.126130766 | 0.068768029 | 0.228903297 | 0.159974924 |
| 0.139766706 | 0.173979245 | 0.28971286  | 0.262034592 |
| 0.140711208 | 0.416508597 | 0.345663253 | 0.015256556 |
| 0.285613733 | 0.384547071 | 0.433244597 | 0.00036503  |
| 0.359386618 | 0.003055923 | 0.127371524 | 0.13700293  |
| 0.129829983 | 0.133435806 | 0.16648522  | 0.199501483 |
| 0.239179675 | 0.134169058 | 0.175852124 | 0.148028084 |
| 0.10532699  | 0.147997822 | 0.272221305 | 0.234402133 |
| 0.190062996 | 0.077978072 | 0.084430514 | 0.091258419 |
| 0.032650183 | 0.484656972 | 0.204070671 | 0.055541882 |

|             |             |             |             |
|-------------|-------------|-------------|-------------|
| 0.144350024 | 0.243437891 | 0.306419641 | 0.496016482 |
| 0.405024153 | 0.101006257 | 0.226813199 | 0.437267095 |
| 0.208438532 | 0.224778512 | 0.039731194 | 0.264432249 |
| 0.150122776 | 0.154738912 | 0.300560455 | 0.196603789 |
| 0.35377201  | 0.366173824 | 0.198668428 | 0.427634897 |
| 0.243783569 | 0.237553042 | 0.243124329 | 0.048917588 |
| 0.100104869 | 0.089984147 | 0.186812625 | 0.000428808 |
| 0.253013182 | 0.17490974  | 0.462144243 | 0.477365655 |
| 0.26386584  | 0.360268261 | 0.247600384 | 0.047813761 |
| 0.229552446 | 0.154752391 | 0.091010577 | 0.406645396 |
| 0.216528585 | 0.125454264 | 0.195649275 | 0.24808638  |
| 0.385366129 | 0.377980151 | 0.198970553 | 0.1639751   |
| 0.156842472 | 0.13412309  | 0.461064028 | 0.082738631 |
| 0.305817989 | 0.133641339 | 0.277921643 | 0.180318398 |
| 0.137729554 | 0.522341811 | 0.037294448 | 0.528635279 |
| 0.2087042   | 0.103188743 | 0.46691001  | 0.22755419  |
| 0.21643764  | 0.091945217 | 0.185068288 | 0.280351566 |
| 0.147594967 | 0.292421253 | 0.020250616 | 0.046519882 |
| 0.250980451 | 0.236818704 | 0.375608955 | 0.307834318 |
| 0.182605044 | 0.284014064 | 0.213227899 | 0.180996925 |
| 0.479818397 | 0.487027581 | 0.144807021 | 0.186185837 |
| 0.274200964 | 0.062709201 | 0.309664864 | 0.017104815 |
| 0.301455897 | 0.323783138 | 0.284179038 | 0.032313457 |
| 0.009159947 | 0.179693417 | 0.278798603 | 0.043244039 |
| 0.472040924 | 0.21855483  | 0.279557979 | 0.386699275 |
| 0.132150733 | 0.479747392 | 0.079438297 | 0.337980103 |
| 0.028934744 | 0.180272498 | 0.294513695 | 0.276009145 |
| 0.143747935 | 0.209874442 | 0.299190308 | 0.192226717 |
| 0.016068849 | 0.181389536 | 0.00056808  | 0.368972523 |
| 0.453358293 | 0.23880766  | 0.167380355 | 0.274435801 |
| 0.202367713 | 0.368699    | 0.170415369 | 0.315174018 |
| 0.00536888  | 0.252481494 | 0.129043432 | 0.399243931 |
| 0.174303538 | 0.235884206 | 0.034043316 | 0.228068396 |
| 0.438660094 | 0.177007778 | 0.212172956 | 0.204170882 |
| 0.494883069 | 0.385703922 | 0.133302576 | 0.18581741  |
| 0.317889238 | 0.039525592 | 0.301813028 | 0.520654342 |
| 0.111510618 | 0.165880488 | 0.421817709 | 0.113131845 |
| 0.248880953 | 0.377047865 | 0.313371986 | 0.517681439 |
| 0.042218726 | 0.162799067 | 0.397293317 | 0.442011707 |
| 0.24197363  | 0.136339319 | 0.193345334 | 0.146149713 |
| 0.451854097 | 0.063668582 | 0.193361517 | 0.279126696 |
| 0.165878164 | 0.230086538 | 0.266133286 | 0.134161584 |
| 0.0224679   | 0.116325058 | 0.285838803 | 0.08623495  |
| 0.177139491 | 0.23511244  | 0.163866582 | 0.350032257 |
| 0.091469205 | 0.011958583 | 0.422487773 | 0.015670946 |
| 0.239888566 | 0.300236359 | 0.162936526 | 0.250565929 |
| 0.147059477 | 0.233304575 | 0.205002808 | 0.000255141 |
| 0.377062662 | 0.044254034 | 0.240835722 | 0.14695496  |
| 0.236315003 | 0.028321386 | 0.451800479 | 0.507236027 |
| 0.241806848 | 0.293555074 | 0.282737736 | 0.460902023 |
| 0.130190642 | 0.298332868 | 0.27325633  | 0.330325883 |
| 0.202937879 | 0.276338326 | 0.307878124 | 0.287654372 |
| 0.325740737 | 0.195390419 |             |             |
| PICALM      | 0.191129707 | 0.224565225 | 0.189115064 |

|             |             |             |             |
|-------------|-------------|-------------|-------------|
| 0.08808277  | 0.056101055 | 0.094005153 | 0.185736229 |
| 0.179162533 | 0.207288517 | 0.071680802 | 0.08463064  |
| 0.129147463 | 0.008276534 | 0.206332294 | 0.175361614 |
| 0.069179482 | 0.128972651 | 0.175060783 | 0.052667061 |
| 0.117231816 | 0.05809402  | 0.050465676 | 0.132355603 |
| 0.062551123 | 0.314660989 | 0.149305808 | 0.061540641 |
| 0.214492501 | 0.028439478 | 0.09575712  | 0.035406279 |
| 0.265037469 | 0.055601994 | 0.05095758  | 0.13567113  |
| 0.093062722 | 0.005354199 | 0.319787498 | 0.078187376 |
| 0.014215105 | 0.274058895 | 0.091756762 | 0.091406624 |
| 0.089188094 | 0.17113205  | 0.039132099 | 0.091954923 |
| 0.134363026 | 0.111792817 | 0.218903598 | 0.121840899 |
| 0.086008951 | 0.174463787 | 0.151339965 | 0.014874642 |
| 0.032325954 | 0.003982246 | 0.01952246  | 0.264492568 |
| 0.167493007 | 0.136603098 | 0.037819013 | 0.158015272 |
| 0.095439002 | 0.111282887 | 0.153722032 | 0.082381825 |
| 0.235332593 | 0.019247337 | 0.108979042 | 0.07806385  |
| 0.113387026 | 0.201185623 | 0.211136346 | 0.224236756 |
| 0.073061648 | 0.117287689 | 0.075368129 | 0.039986274 |
| 0.226861626 | 0.311180889 | 0.160553259 | 0.296316876 |
| 0.022826665 | 0.051893687 | 0.052699527 | 0.136810291 |
| 0.147112244 | 0.186310073 | 0.123604033 | 0.26779586  |
| 0.205445638 | 0.101324197 | 0.139320835 | 0.24927273  |
| 0.204363775 | 0.042735188 | 0.084893244 | 0.019838906 |
| 0.074075147 | 0.059609472 | 0.308366596 | 0.155515041 |
| 0.068449959 | 0.219150757 | 0.332429902 | 0.044161747 |
| 0.065781923 | 0.195280142 | 0.049699411 | 0.140834706 |
| 0.102253447 | 0.209447238 | 0.18095467  | 0.167177498 |
| 0.060336365 | 0.225310848 | 0.124737536 | 0.217321565 |
| 0.0244168   | 0.258519584 | 0.154613965 | 0.129291471 |
| 0.216159974 | 0.135809894 | 0.066630292 | 0.206551609 |
| 0.1706691   | 0.154752449 | 0.160485002 | 0.089376524 |
| 0.154014753 | 0.304469494 | 0.259049906 | 0.173298355 |
| 0.173391143 | 0.032787881 | 0.059124456 | 0.140638201 |
| 0.128210575 | 0.199224828 | 0.032577043 | 0.319511377 |
| 0.221236128 | 0.136354785 | 0.192746352 | 0.348040024 |
| 0.166499069 | 0.250295818 | 0.197398908 | 0.133272176 |
| 0.289501272 | 0.308395611 | 0.218887995 | 0.076923522 |
| 0.281013366 | 0.113220301 | 0.046521631 | 0.194126514 |
| 0.230267256 | 0.002594893 | 0.171336094 | 0.182781443 |
| 0.254777153 | 0.137465664 | 0.220349863 | 0.204177066 |
| 0.259737351 | 0.21063331  | 0.0057954   | 0.092530104 |
| 0.280987556 | 0.188650354 | 0.112095725 | 0.065818607 |
| 0.071415517 | 0.116420178 | 0.139687258 | 0.048391976 |
| 0.27527172  | 0.175992455 | 0.191602266 | 0.169069487 |
| 0.13322491  | 0.277229593 | 0.050149162 | 0.322717714 |
| 0.14394772  | 0.186129244 | 0.207317912 | 0.179296032 |
| 0.08158259  | 0.125057024 | 0.122112942 | 0.083082104 |
| 0.137482101 | 0.140965467 | 0.039056073 | 0.078348497 |
| 0.281929356 | 0.082254197 | 0.169194255 | 0.191086296 |
| 0.122263363 | 0.309081994 | 0.105561331 | 0.106777848 |
| 0.088604195 | 0.409096128 | 0.111191359 | 0.199726138 |
| 0.082038791 | 0.23127694  | 0.133827841 | 0.228396219 |
| 0.221751101 | 0.055365816 | 0.219387483 | 0.024846701 |

|             |             |                      |             |
|-------------|-------------|----------------------|-------------|
| 0.055627796 | 0.046338642 | 0.016726076          | 0.06464413  |
| 0.365424664 | 0.099810471 | 0.086252079          | 0.094040978 |
| 0.155329741 | 0.211050239 | 0.066412846          | 0.308877752 |
| 0.271257735 | 0.064829895 | 0.164890147          | 0.095254461 |
| 0.060746268 | 0.112974327 | 0.148765695          | 0.046249829 |
| 0.164137836 | 0.020636933 | 0.025906794          | 0.174411659 |
| 0.04215244  | 0.045379225 | 0.188083003          | 0.096989874 |
| 0.085807223 | 0.376295078 | 0.231863628          | 0.006312445 |
| 0.067479374 | 0.026104901 | 0.116384465          | 0.091827291 |
| 0.141410632 | 0.153917331 | 0.052349361          | 0.052688991 |
| 0.214627301 | 0.262636817 | 0.193532727          | 0.214741365 |
| 0.054585242 | 0.23836985  | 0.149713651          | 0.186668381 |
| 0.135008221 | 0.060493556 | 0.010568708          | 0.146082848 |
| 0.164072417 | 0.064706961 | 0.251776075          | 0.132364034 |
| 0.07533907  | 0.088690176 | 0.045487314          | 0.211140916 |
| 0.297110575 | 0.285396008 | 0.116261673          | 0.117925274 |
| 0.168795859 | 0.14539583  | 0.166120573          | 0.24882967  |
| 0.067473014 | 0.063668565 | 0.053005327          | 0.137973932 |
| 0.170561929 | 0.04678335  | 0.25433005           | 0.016206481 |
| 0.00025364  | 0.222141412 | 0.200861973          | 0.091004874 |
| 0.021817327 | 0.089163605 | 0.099249796          | 0.235161265 |
| 0.160307591 | 0.223945435 | 0.207143898          | 0.063946514 |
| 0.240136826 | 0.07114952  | 0.054983227          | 0.078625795 |
| 0.204147839 | 0.039874627 | 0.084607035          | 0.315300528 |
| 0.21546482  | 0.029399695 | 0.148319605          | 0.004466876 |
| 0.188758524 | 0.176198692 | 0.307125649          | 0.336119362 |
| 0.177122501 | 0.327889057 | 0.190373023          | 0.082555301 |
| 0.122878246 | 0.184375236 | 0.007217358          | 0.211634106 |
| 0.253244818 | 0.246782551 | 0.256511097          | 0.294827994 |
| 0.198260672 | 0.146990615 | 0.129765162          | 0.129871472 |
| 0.168286368 | 0.215269491 | 0.027309707          | 0.084111169 |
| 0.024299944 | 0.138341448 | 0.081419086          | 0.19762115  |
| 0.116571597 | 0.154841515 | 0.161934095          | 0.070578551 |
| 0.09035526  | 0.015546949 | 0.134994665          | 0.118867391 |
| 0.113963375 | 0.134595718 | 0.043508181          | 0.04584506  |
| 0.273462481 | 0.237852346 | 0.045160846          | 0.259316317 |
| 0.091601686 | 0.265977199 | 0.069072485          | 0.116822944 |
| 0.172890702 | 0.032222746 | 0.120207646          | 0.008015089 |
| 0.063657225 | 0.282450518 | 0.070892094          | 0.156788026 |
| 0.122754743 | 0.076120654 | 0.23583457           | 0.261620505 |
| 0.269580947 | 0.206807782 | 0.227018345          | 0.031702664 |
| 0.241975015 | 0.006260794 | 0.231445983          | 0.203459168 |
| 0.069851317 | 0.005706299 | 0.025741 0.170687453 |             |
| 0.066799383 | 0.271631618 | 0.166772277          | 0.079019317 |
| 0.114616036 | 0.212325815 | 0.177859791          | 0.030175303 |
| 0.100380581 | 0.066061017 | 0.035921818          | 0.282017755 |
| 0.111265578 | 0.123986787 | 0.10876445           | 0.247795496 |
| 0.074858644 | 0.1404907   | 0.23793373           | 0.010482602 |
| 0.109295699 | 0.297726998 | 0.353386913          | 0.246413625 |
| 0.251141474 | 0.090446004 | 0.056196444          | 0.085090024 |
| 0.180131203 | 0.257628628 | 0.053982225          | 0.22663782  |
| 0.244704828 | 0.082158858 | 0.164043061          | 0.218866173 |
| 0.226668282 | 0.245932547 | 0.163883598          | 0.133061138 |
| 0.050372912 | 0.002298223 | 0.11148225           | 0.184838596 |

|             |             |             |             |
|-------------|-------------|-------------|-------------|
| 0.03077434  | 0.063661539 | 0.198485161 | 0.124113251 |
| 0.110695992 | 0.134347824 | 0.03008232  | 0.030016603 |
| 0.104179767 | 0.085583114 | 0.044760432 | 0.21489964  |
| 0.062403795 | 0.036232107 | 0.106103514 | 0.150047561 |
| 0.095632114 | 0.249958062 | 0.306949064 | 0.156620253 |
| 0.076055934 | 0.06368626  | 0.17433913  | 0.205313303 |
| 0.162019633 | 0.18369764  | 0.131390246 | 0.03520646  |
| 0.231193936 | 0.089904411 | 0.189852329 | 0.237667205 |
| 0.298156981 | 0.250789512 | 0.303359106 | 0.085824126 |
| 0.177308114 | 0.088719515 | 0.047689167 | 0.0551077   |
| 0.232954343 | 0.22476542  | 0.259777244 | 0.035220695 |
| 0.196866247 | 0.118798475 | 0.097945314 | 0.184848409 |
| 0.055254384 | 0.16967021  | 0.090056674 | 0.204538393 |
| 0.078900615 | 0.02969031  | 0.183029719 | 0.147432065 |
| 0.178379065 | 0.014913356 | 0.170574155 | 0.135373372 |
| 0.192206747 | 0.072807137 | 0.103932253 | 0.256034749 |
| 0.21317993  | 0.2060585   | 0.125382424 | 0.142165333 |
| 0.149125112 | 0.077645996 | 0.061278404 | 0.22685433  |
| 0.209275918 | 0.092664663 | 0.269418373 | 0.179249744 |
| 0.21856506  | 0.059011092 | 0.04915892  | 0.074981835 |
| 0.165429435 | 0.102522383 | 0.128971173 | 0.199835378 |
| 0.250995472 | 0.325102451 | 0.203716056 | 0.11049432  |
| 0.08579018  | 1           | 0.220343506 | 0.187574604 |
| 0.022599734 | 0.157074391 | 0.093537866 | 0.146163222 |
| 0.002187347 | 0.011642313 | 0.203328729 | 0.113215774 |
| 0.277374486 | 0.185260025 | 0.244236625 | 0.137488379 |
| 0.000100938 | 0.082268641 | 0.086400672 | 0.067795708 |
| 0.210813859 | 0.194417185 | 0.11780961  | 0.111174545 |
| 0.191754836 | 0.24549155  | 0.105208063 | 0.09191369  |
| 0.018549639 | 0.128866678 | 0.182944215 | 0.168883514 |
| 0.089353338 | 0.263855166 | 0.028042447 | 0.123525531 |
| 0.027307749 | 0.183401432 | 0.171269962 | 0.087502722 |
| 0.020596796 | 0.195060806 | 0.164792305 | 0.153739237 |
| 0.055770525 | 0.179591356 | 0.202225153 | 0.011664637 |
| 0.101848117 | 0.076177901 | 0.088251888 | 0.077882645 |
| 0.090290281 | 0.104716652 | 0.087202643 | 0.060750937 |
| 0.132453109 | 0.129210761 | 0.092338315 | 0.123608787 |
| 0.085931054 | 0.149947914 | 0.07859749  | 0.112812193 |
| 0.057916991 | 0.157824152 | 0.319578297 | 0.359710128 |
| 0.110970647 | 0.202580948 | 0.263061002 | 0.24653447  |
| 0.131130472 | 0.103325474 | 0.215996553 | 0.257024667 |
| 0.201896143 | 0.313297353 | 0.104994997 | 0.193080352 |
| 0.039683763 | 0.092068198 | 0.214702111 | 0.103148864 |
| 0.143633184 | 0.040678437 | 0.098363274 | 0.152896994 |
| 0.144891809 | 0.28329586  | 0.253336769 | 0.230232629 |
| 0.077912717 | 0.091931406 | 0.074146493 | 0.083794452 |
| 0.14936237  | 0.239393654 | 0.047613209 | 0.029664434 |
| 0.128594631 | 0.128763748 | 0.161124804 | 0.276289034 |
| 0.033521435 | 0.223845275 | 0.083676184 | 0.159495285 |
| 0.063261029 | 0.336082346 | 0.211935496 | 0.134778967 |
| 0.018292179 | 0.138932142 | 0.06575837  | 0.118749301 |
| 0.116409737 | 0.121016524 | 0.060390488 | 0.161420721 |
| 0.133507794 | 0.197503214 | 0.307782826 | 0.20890452  |
| 0.078197503 | 0.032541453 | 0.128391426 | 0.074423606 |

|             |             |             |             |
|-------------|-------------|-------------|-------------|
| 0.086275503 | 0.216861461 | 0.197829586 | 0.214070676 |
| 0.066614988 | 0.277530509 | 0.29459506  | 0.140774451 |
| 0.120742576 | 0.071815477 | 0.015245584 | 0.104518001 |
| 0.128808055 | 0.041822767 | 0.00324146  | 0.013923657 |
| 0.130877753 | 0.093393569 | 0.168540502 | 0.146092694 |
| 0.045609507 | 0.153810661 | 0.016134404 | 0.155144317 |
| 0.286247408 | 0.327787191 | 0.082701658 | 0.199789108 |
| 0.178090726 | 0.142369102 | 0.131966729 | 0.013372885 |
| 0.081242175 | 0.067706885 | 0.071019764 | 0.165402795 |
| 0.128268493 | 0.018223774 | 0.090522595 | 0.225194323 |
| 0.175487669 | 0.017362765 | 0.128922593 | 0.114081471 |
| 0.240986376 | 0.329439919 | 0.09104199  | 0.111734447 |
| 0.180282597 | 0.163327085 | 0.059282831 | 0.085575791 |
| 0.050267505 | 0.040404642 | 0.122637868 | 0.028062802 |
| 0.130553417 | 0.062261239 | 0.011477159 | 0.321301091 |
| 0.322893557 | 0.047155731 | 0.274766752 | 0.066357578 |
| 0.12991712  | 0.207229404 | 0.076095733 | 0.069855166 |
| 0.049156299 | 0.05578664  | 0.147596988 | 0.200367977 |
| 0.023864979 | 0.101144715 | 0.093028407 | 0.05757391  |
| 0.370209739 | 0.061670031 | 0.243306085 | 0.040036292 |
| 0.249292899 | 0.197916463 | 0.258354606 | 0.060889582 |
| 0.120129787 | 0.220250205 | 0.087048014 | 0.257754282 |
| 0.099458004 | 0.027205166 | 0.134103207 | 0.098053754 |
| 0.043602738 | 0.233328525 | 0.084626957 | 0.26604101  |
| 0.06912259  | 0.153295687 | 0.131934245 | 0.226876923 |
| 0.16093812  | 0.030449644 | 0.031209542 | 0.062240625 |
| 0.264575077 | 0.108698077 | 0.04400694  | 0.170482818 |
| 0.023046285 | 0.134969266 | 0.129173883 | 0.057448702 |
| 0.097634539 | 0.148733393 | 0.084827862 | 0.191500605 |
| 0.111497811 | 0.07166561  | 0.050804095 | 0.239883005 |
| 0.070562707 | 0.04834064  | 0.257875838 | 0.000714599 |
| 0.132975552 | 0.086624593 | 0.14183346  | 0.066330143 |
| 0.260163304 | 0.133580155 | 0.13384609  | 0.030602529 |
| 0.149813869 | 0.009558291 | 0.086480762 | 0.050468259 |
| 0.049744976 | 0.194059236 | 0.255500966 | 0.203615537 |
| 0.162329278 | 0.066746157 | 0.042485867 | 0.247885039 |
| 0.014396515 | 0.039797079 | 0.053930638 | 0.130627336 |
| 0.023788695 | 0.071886543 | 0.069612204 | 0.045195031 |
| 0.161726367 | 0.151240084 |             |             |
| PIGF        | 0.20164515  | 0.130465766 | 0.207604649 |
| 0.077142863 | 0.025222247 | 0.041003799 | 0.229493044 |
| 0.162461581 | 0.131061174 | 0.033004631 | 0.040263444 |
| 0.205664435 | 0.0019553   | 0.11365171  | 0.207486556 |
| 0.031008285 | 0.162810656 | 0.182304016 | 0.039736417 |
| 0.084118135 | 0.028506945 | 0.017019312 | 0.068842029 |
| 0.029546435 | 0.29421384  | 0.099083505 | 0.023116003 |
| 0.113793232 | 0.007721014 | 0.040101631 | 0.015046833 |
| 0.182792798 | 0.023831023 | 0.016821648 | 0.188128757 |
| 0.042043017 | 0.004139524 | 0.22952129  | 0.049510865 |
| 0.004897309 | 0.197052707 | 0.044321814 | 0.061238565 |
| 0.047153457 | 0.224926065 | 0.012841365 | 0.042650231 |
| 0.085827498 | 0.065575182 | 0.241487271 | 0.06033281  |
| 0.042156611 | 0.10629573  | 0.081562911 | 0.017149456 |
| 0.009885379 | 0.000234908 | 0.005454292 | 0.152234384 |



|             |             |             |             |
|-------------|-------------|-------------|-------------|
| 0.140024262 | 0.124347281 | 0.014230713 | 0.09495438  |
| 0.045183722 | 0.057794517 | 0.104704212 | 0.039550025 |
| 0.133804888 | 0.006649685 | 0.048145338 | 0.045890354 |
| 0.062128797 | 0.257864175 | 0.204234235 | 0.235214707 |
| 0.029527712 | 0.0834531   | 0.031800355 | 0.014627021 |
| 0.136389273 | 0.193724337 | 0.127203612 | 0.185301108 |
| 0.01140193  | 0.020496239 | 0.022700813 | 0.089217473 |
| 0.086039486 | 0.201449657 | 0.063975996 | 0.160620338 |
| 0.229570117 | 0.050630971 | 0.078297648 | 0.253265695 |
| 0.110505812 | 0.014898413 | 0.037898372 | 0.006384392 |
| 0.032916253 | 0.028015476 | 0.195461291 | 0.112860033 |
| 0.027947386 | 0.251620002 | 0.216899095 | 0.016385645 |
| 0.030981548 | 0.212955144 | 0.029044681 | 0.06429362  |
| 0.05170177  | 0.109454748 | 0.098503381 | 0.105986072 |
| 0.024708915 | 0.124771683 | 0.069294227 | 0.123273228 |
| 0.00792081  | 0.145776453 | 0.127905597 | 0.150849525 |
| 0.231526428 | 0.121639749 | 0.034013769 | 0.142211643 |
| 0.083098921 | 0.09135338  | 0.133698358 | 0.060780905 |
| 0.077190452 | 0.190728857 | 0.147665007 | 0.096590016 |
| 0.226016506 | 0.011599873 | 0.02530256  | 0.079175578 |
| 0.071500257 | 0.190053587 | 0.012422082 | 0.205966825 |
| 0.14336885  | 0.067005863 | 0.167831038 | 0.231907514 |
| 0.124728546 | 0.145301399 | 0.105328716 | 0.118966545 |
| 0.178671017 | 0.195120895 | 0.119844347 | 0.031090691 |
| 0.17016527  | 0.066216871 | 0.034966977 | 0.120745309 |
| 0.129626793 | 0.001054157 | 0.082402788 | 0.090869455 |
| 0.149860326 | 0.063567425 | 0.119692902 | 0.104064882 |
| 0.148235001 | 0.231068286 | 0.004584584 | 0.056202933 |
| 0.172980853 | 0.116494129 | 0.079040621 | 0.025828563 |
| 0.031914895 | 0.060275207 | 0.065457499 | 0.019138573 |
| 0.16530565  | 0.090861109 | 0.09562991  | 0.095094218 |
| 0.087932177 | 0.204141101 | 0.017751745 | 0.211664757 |
| 0.161615941 | 0.187078451 | 0.246572812 | 0.118086061 |
| 0.035532558 | 0.102171526 | 0.065287401 | 0.039212393 |
| 0.115627016 | 0.079693944 | 0.011736573 | 0.033856539 |
| 0.340114346 | 0.034739277 | 0.148442406 | 0.182911633 |
| 0.155665672 | 0.306385042 | 0.08310749  | 0.080820351 |
| 0.050529009 | 0.37991562  | 0.047896398 | 0.104565079 |
| 0.037594321 | 0.21749115  | 0.065698079 | 0.128619519 |
| 0.138603541 | 0.021433483 | 0.175424294 | 0.032636495 |
| 0.032358518 | 0.017232795 | 0.005001764 | 0.024155066 |
| 0.348802677 | 0.072181345 | 0.043757592 | 0.04173202  |
| 0.109829369 | 0.183135723 | 0.029226556 | 0.207208101 |
| 0.262148654 | 0.028749665 | 0.086355902 | 0.046321928 |
| 0.101451405 | 0.072829979 | 0.07297133  | 0.029972865 |
| 0.113751503 | 0.006788072 | 0.007448384 | 0.094103627 |
| 0.014480291 | 0.019934508 | 0.091422045 | 0.04274632  |
| 0.032538868 | 0.330371966 | 0.124959788 | 0.003027893 |
| 0.028761734 | 0.019883272 | 0.07707899  | 0.043685999 |
| 0.111193703 | 0.104589108 | 0.020610537 | 0.024660204 |
| 0.210711756 | 0.151029559 | 0.108040801 | 0.11308726  |
| 0.022705715 | 0.132649233 | 0.07160658  | 0.101671737 |
| 0.078183147 | 0.024170355 | 0.002732237 | 0.076071658 |
| 0.085881958 | 0.031761047 | 0.285890487 | 0.060008273 |

|             |             |             |             |
|-------------|-------------|-------------|-------------|
| 0.037822714 | 0.03969588  | 0.027852597 | 0.118408791 |
| 0.186419277 | 0.178676743 | 0.088545899 | 0.061143297 |
| 0.10185246  | 0.106186067 | 0.086451376 | 0.138069655 |
| 0.034568733 | 0.028966328 | 0.025105706 | 0.073270586 |
| 0.162156921 | 0.024347411 | 0.17682277  | 0.004330065 |
| 0.001779931 | 0.228544601 | 0.236390099 | 0.067737696 |
| 0.008351526 | 0.037011312 | 0.050139035 | 0.130369701 |
| 0.157869683 | 0.127579222 | 0.16063949  | 0.036701672 |
| 0.157089789 | 0.029158956 | 0.018991665 | 0.033973395 |
| 0.159912192 | 0.048758204 | 0.077456185 | 0.202258234 |
| 0.266132128 | 0.010036996 | 0.082222937 | 0.007923767 |
| 0.257080171 | 0.093061822 | 0.340205484 | 0.320503794 |
| 0.087448087 | 0.311520024 | 0.176537069 | 0.04673505  |
| 0.065363384 | 0.189625086 | 0.006840478 | 0.117334284 |
| 0.1455506   | 0.145817871 | 0.149339919 | 0.1841469   |
| 0.111740949 | 0.072096794 | 0.065892297 | 0.07007467  |
| 0.172826499 | 0.218966165 | 0.012336529 | 0.05259187  |
| 0.022068043 | 0.071967368 | 0.038522837 | 0.198362722 |
| 0.050971351 | 0.10512192  | 0.200543539 | 0.029640322 |
| 0.137847712 | 0.00424805  | 0.084229526 | 0.077535471 |
| 0.058984114 | 0.19325032  | 0.022488629 | 0.020199961 |
| 0.174138835 | 0.165933753 | 0.014799638 | 0.147606929 |
| 0.049692706 | 0.27343809  | 0.038000986 | 0.053592376 |
| 0.202881334 | 0.019702143 | 0.066370257 | 0.003455845 |
| 0.022402001 | 0.170922673 | 0.029000545 | 0.184282139 |
| 0.091379298 | 0.136963889 | 0.159723381 | 0.147806602 |
| 0.162359311 | 0.109163998 | 0.124255724 | 0.011014143 |
| 0.138418015 | 0.000781573 | 0.12407913  | 0.121384914 |
| 0.030598753 | 0.010079439 | 0.032500667 | 0.085070401 |
| 0.028528522 | 0.306588021 | 0.157235714 | 0.032689087 |
| 0.112635759 | 0.196932788 | 0.178456273 | 0.014811791 |
| 0.043796501 | 0.034679631 | 0.014912619 | 0.176269322 |
| 0.082975602 | 0.085173098 | 0.05036795  | 0.273347007 |
| 0.029992532 | 0.166523724 | 0.262668891 | 0.007810832 |
| 0.053196129 | 0.315132741 | 0.240466237 | 0.137149931 |
| 0.148249664 | 0.041770908 | 0.021705891 | 0.032655312 |
| 0.092478568 | 0.269992884 | 0.017930721 | 0.228524265 |
| 0.142119812 | 0.040869133 | 0.110045015 | 0.166503063 |
| 0.129724988 | 0.15054824  | 0.218853829 | 0.073589683 |
| 0.061866042 | 0.001905714 | 0.061946032 | 0.129394947 |
| 0.017767426 | 0.028008255 | 0.162028642 | 0.083435273 |
| 0.065276889 | 0.179406826 | 0.010911676 | 0.011735231 |
| 0.070077189 | 0.042645091 | 0.019415871 | 0.163730642 |
| 0.032909042 | 0.025142228 | 0.069052558 | 0.11793068  |
| 0.043310412 | 0.198485585 | 0.295298717 | 0.224465902 |
| 0.0329935   | 0.024938453 | 0.205485032 | 0.190154016 |
| 0.085386046 | 0.093428466 | 0.18611919  | 0.054255076 |
| 0.181483411 | 0.046355568 | 0.095449107 | 0.13152895  |
| 0.181234839 | 0.146130714 | 0.212164845 | 0.067597598 |
| 0.188173688 | 0.049966111 | 0.020447613 | 0.042046518 |
| 0.1255948   | 0.272788634 | 0.14750902  | 0.012024549 |
| 0.203473227 | 0.095866825 | 0.117088906 | 0.194192156 |
| 0.019879828 | 0.144449723 | 0.065508636 | 0.208587186 |
| 0.044384889 | 0.009904068 | 0.224962236 | 0.123371123 |

|             |             |             |             |
|-------------|-------------|-------------|-------------|
| 0.120156089 | 0.005889528 | 0.160067501 | 0.075127588 |
| 0.121658294 | 0.036277274 | 0.046806308 | 0.164660432 |
| 0.212286763 | 0.214136981 | 0.092157755 | 0.071206208 |
| 0.074164205 | 0.03168482  | 0.064227969 | 0.129280166 |
| 0.109410751 | 0.039473899 | 0.157262793 | 0.104010258 |
| 0.24810558  | 0.023901888 | 0.018859479 | 0.039030693 |
| 0.136621944 | 0.045623538 | 0.084890044 | 0.23296898  |
| 0.178586861 | 0.210400589 | 0.126472489 | 0.087306405 |
| 0.034814327 | 0.220343506 | 1           | 0.092837672 |
| 0.010384247 | 0.18678022  | 0.042216357 | 0.068368301 |
| 0.002563123 | 0.003220362 | 0.107361796 | 0.064453853 |
| 0.164362509 | 0.098283245 | 0.154577238 | 0.082339239 |
| 3.92E-05    | 0.035864216 | 0.044215667 | 0.030322267 |
| 0.122373356 | 0.12184105  | 0.062799326 | 0.121412547 |
| 0.137423514 | 0.27449797  | 0.103813504 | 0.03803466  |
| 0.008608773 | 0.068582126 | 0.155791573 | 0.135704692 |
| 0.063272545 | 0.283820272 | 0.008941739 | 0.083257851 |
| 0.01310949  | 0.145588942 | 0.110591947 | 0.038043669 |
| 0.008011966 | 0.109342005 | 0.09933584  | 0.200946008 |
| 0.019618745 | 0.102411776 | 0.109884855 | 0.038963878 |
| 0.046060242 | 0.126197179 | 0.059183447 | 0.051601363 |
| 0.062932596 | 0.071342898 | 0.053015506 | 0.029411541 |
| 0.085094562 | 0.100293063 | 0.055288222 | 0.092169144 |
| 0.060848852 | 0.105972188 | 0.035912518 | 0.066178124 |
| 0.027883764 | 0.145366995 | 0.342096502 | 0.387349833 |
| 0.112416885 | 0.10263164  | 0.218605178 | 0.273090537 |
| 0.093731249 | 0.055427422 | 0.14750821  | 0.14960745  |
| 0.11217694  | 0.320380862 | 0.053999285 | 0.104376505 |
| 0.015393125 | 0.041899255 | 0.241562465 | 0.051710876 |
| 0.098398125 | 0.019397747 | 0.042042082 | 0.113757146 |
| 0.078150556 | 0.197106754 | 0.205542438 | 0.13606492  |
| 0.036368546 | 0.048898624 | 0.035420191 | 0.081947903 |
| 0.140209671 | 0.242088938 | 0.022157852 | 0.061026871 |
| 0.075081294 | 0.086101277 | 0.079586734 | 0.170463671 |
| 0.010356013 | 0.139186308 | 0.038009217 | 0.191328002 |
| 0.028153427 | 0.334887279 | 0.211764106 | 0.062729135 |
| 0.004952293 | 0.101915763 | 0.033560014 | 0.062778498 |
| 0.053840309 | 0.059390486 | 0.029216632 | 0.106709067 |
| 0.092805069 | 0.169705588 | 0.198705999 | 0.18729915  |
| 0.034205461 | 0.01640475  | 0.068732786 | 0.043752291 |
| 0.056562637 | 0.113947635 | 0.219838829 | 0.11116498  |
| 0.034271374 | 0.268022223 | 0.183244182 | 0.075830986 |
| 0.066125022 | 0.047651772 | 0.004376308 | 0.048818731 |
| 0.085596542 | 0.013149496 | 0.000991593 | 0.008492655 |
| 0.081712878 | 0.047629786 | 0.095793746 | 0.082332746 |
| 0.021072941 | 0.094034479 | 0.003957049 | 0.104368189 |
| 0.175943215 | 0.209022491 | 0.057796269 | 0.16223455  |
| 0.111820651 | 0.138317054 | 0.06823457  | 0.00935873  |
| 0.036147794 | 0.026475263 | 0.030189752 | 0.186231263 |
| 0.191796874 | 0.005773483 | 0.046236954 | 0.256336328 |
| 0.088076049 | 0.004381397 | 0.07206528  | 0.050439911 |
| 0.212816815 | 0.215381367 | 0.06666541  | 0.054106772 |
| 0.219648877 | 0.119579792 | 0.021967891 | 0.038114777 |
| 0.028761326 | 0.015955017 | 0.068633318 | 0.010027422 |

|             |             |             |             |
|-------------|-------------|-------------|-------------|
| 0.175601841 | 0.035210321 | 0.034162512 | 0.233250823 |
| 0.216801567 | 0.019499727 | 0.243704143 | 0.026060376 |
| 0.087073973 | 0.122242424 | 0.039211984 | 0.025802171 |
| 0.06638744  | 0.023793893 | 0.106970135 | 0.113333095 |
| 0.008545742 | 0.056496563 | 0.092489303 | 0.025379277 |
| 0.258249409 | 0.033254409 | 0.187103678 | 0.017823407 |
| 0.141933666 | 0.112395409 | 0.244868711 | 0.027460317 |
| 0.061954811 | 0.260018482 | 0.034891137 | 0.144500157 |
| 0.074469468 | 0.010899829 | 0.063876765 | 0.080909255 |
| 0.015367184 | 0.140830634 | 0.037557079 | 0.15182021  |
| 0.065065731 | 0.114629487 | 0.063404836 | 0.131005392 |
| 0.104840798 | 0.014270397 | 0.011478154 | 0.037148095 |
| 0.162704233 | 0.098840998 | 0.019556717 | 0.11241384  |
| 0.009132257 | 0.08007184  | 0.073507962 | 0.033089665 |
| 0.101573842 | 0.103243835 | 0.033822694 | 0.179000147 |
| 0.069781543 | 0.034790831 | 0.027360521 | 0.156577606 |
| 0.048863225 | 0.064990014 | 0.160185197 | 0.000405503 |
| 0.073097926 | 0.039879125 | 0.091496235 | 0.027444062 |
| 0.240373916 | 0.078738795 | 0.091856449 | 0.085434736 |
| 0.079473366 | 0.004955253 | 0.039790833 | 0.028080535 |
| 0.017963976 | 0.24218903  | 0.152082262 | 0.105492078 |
| 0.098126559 | 0.023273084 | 0.013596276 | 0.14456179  |
| 0.005353793 | 0.012460208 | 0.019894654 | 0.068134598 |
| 0.007765268 | 0.030876749 | 0.025769365 | 0.015444462 |
| 0.092182814 | 0.085454849 |             |             |
| PIGP        | 0.115736483 | 0.440688856 | 0.093999796 |
| 0.155506144 | 0.325671443 | 0.445298888 | 0.090593272 |
| 0.174492366 | 0.390261593 | 0.367554635 | 0.382388542 |
| 0.028753523 | 0.129085441 | 0.442436453 | 0.089570625 |
| 0.392451244 | 0.052305688 | 0.144011956 | 0.115926367 |
| 0.285682741 | 0.293600481 | 0.381007148 | 0.424555219 |
| 0.316606918 | 0.217463091 | 0.38574224  | 0.422336357 |
| 0.500501131 | 0.322088178 | 0.449786968 | 0.23168486  |
| 0.40357633  | 0.337591234 | 0.417993146 | 0.030508155 |
| 0.450697244 | 0.023386824 | 0.437992926 | 0.272168063 |
| 0.17567389  | 0.346745519 | 0.392854624 | 0.266755769 |
| 0.391557457 | 0.058299912 | 0.288735481 | 0.41652144  |
| 0.380819062 | 0.355274387 | 0.109279343 | 0.446317669 |
| 0.405109072 | 0.385563807 | 0.417687015 | 0.003508768 |
| 0.336748446 | 0.122195517 | 0.265470165 | 0.516507298 |
| 0.241367861 | 0.164904807 | 0.323642704 | 0.345093725 |
| 0.424478491 | 0.40297768  | 0.311422934 | 0.389225431 |
| 0.493385374 | 0.210271895 | 0.446267779 | 0.199299702 |
| 0.412483025 | 0.062935911 | 0.19729278  | 0.13798857  |
| 0.425742948 | 0.244184255 | 0.385260932 | 0.339070145 |
| 0.430144601 | 0.525611235 | 0.285460836 | 0.509938044 |
| 0.136516709 | 0.357147471 | 0.314414105 | 0.325212085 |
| 0.391379521 | 0.131857003 | 0.408358293 | 0.513251289 |
| 0.092525406 | 0.41880281  | 0.407270958 | 0.175359074 |
| 0.438358034 | 0.354900635 | 0.421852702 | 0.212151895 |
| 0.384330052 | 0.341999071 | 0.496928329 | 0.314474338 |
| 0.377920299 | 0.112702294 | 0.504873836 | 0.338112505 |
| 0.31984675  | 0.121135109 | 0.234407448 | 0.448734229 |
| 0.417286491 | 0.489455374 | 0.429700559 | 0.374467841 |

|             |             |             |             |
|-------------|-------------|-------------|-------------|
| 0.373887676 | 0.494840852 | 0.404751502 | 0.426540438 |
| 0.23374368  | 0.531021144 | 0.231142129 | 0.066849673 |
| 0.116462318 | 0.131834006 | 0.291333806 | 0.333733357 |
| 0.461159631 | 0.384945066 | 0.23532366  | 0.253111349 |
| 0.432285679 | 0.497489691 | 0.528292152 | 0.413536767 |
| 0.062431672 | 0.305383392 | 0.373381458 | 0.377734066 |
| 0.395982651 | 0.166589771 | 0.279972212 | 0.515957227 |
| 0.370812731 | 0.429023614 | 0.2272405   | 0.514837318 |
| 0.267632733 | 0.5057182   | 0.450591435 | 0.196996206 |
| 0.519220574 | 0.505347061 | 0.497219393 | 0.408270335 |
| 0.487116261 | 0.369147767 | 0.10484959  | 0.3933762   |
| 0.479681223 | 0.01855476  | 0.468771067 | 0.489372498 |
| 0.500814911 | 0.441984941 | 0.510592843 | 0.507772887 |
| 0.512306128 | 0.113368868 | 0.041261019 | 0.303370607 |
| 0.507630065 | 0.387091833 | 0.195228615 | 0.413260362 |
| 0.380423483 | 0.435918002 | 0.453746625 | 0.307655746 |
| 0.509074159 | 0.441710004 | 0.490125972 | 0.410497934 |
| 0.35918306  | 0.325362627 | 0.396772156 | 0.486014472 |
| 0.070191924 | 0.157766386 | 0.086422301 | 0.349284992 |
| 0.403347146 | 0.208775595 | 0.406936431 | 0.387963104 |
| 0.228910379 | 0.415307664 | 0.382343812 | 0.388096666 |
| 0.090179852 | 0.450598518 | 0.21744261  | 0.211202345 |
| 0.057282793 | 0.181343618 | 0.19841562  | 0.198252963 |
| 0.283203791 | 0.264083108 | 0.455664565 | 0.48453258  |
| 0.391259532 | 0.22198698  | 0.44049294  | 0.468897523 |
| 0.405648109 | 0.387564252 | 0.277503943 | 0.013304741 |
| 0.252843205 | 0.361239135 | 0.224308597 | 0.440715162 |
| 0.207601168 | 0.255503663 | 0.38845315  | 0.399197924 |
| 0.319552069 | 0.222800435 | 0.374636883 | 0.438523192 |
| 0.199556607 | 0.332018921 | 0.417175253 | 0.427651037 |
| 0.006818797 | 0.335662454 | 0.440648329 | 0.176161781 |
| 0.354686368 | 0.162509214 | 0.294382858 | 0.435451089 |
| 0.327667312 | 0.267111714 | 0.494915004 | 0.408155966 |
| 0.399243833 | 0.25595136  | 0.519973911 | 0.063297225 |
| 0.391277881 | 0.060254772 | 0.299450472 | 0.398765061 |
| 0.281680141 | 0.316658166 | 0.346178435 | 0.302108275 |
| 0.177381615 | 0.519687117 | 0.417728735 | 0.504930376 |
| 0.368638194 | 0.519377121 | 0.440867005 | 0.420317322 |
| 0.400697618 | 0.394628615 | 0.17206414  | 0.422142846 |
| 0.429079047 | 0.307504361 | 0.116872848 | 0.450066816 |
| 0.383544716 | 0.40594682  | 0.148941296 | 0.472346227 |
| 0.500137937 | 0.48335372  | 0.185403263 | 0.377871935 |
| 0.380005721 | 0.275038369 | 0.429902994 | 0.527290251 |
| 0.348821264 | 0.356544192 | 0.327285953 | 0.38845072  |
| 0.211493303 | 0.239228614 | 0.34407955  | 0.236847786 |
| 0.01680994  | 0.131173973 | 0.098020816 | 0.191931529 |
| 0.192341071 | 0.452040008 | 0.408946719 | 0.509546973 |
| 0.153411175 | 0.424617094 | 0.293619984 | 0.277521387 |
| 0.406009224 | 0.388896982 | 0.412550124 | 0.417398797 |
| 0.292438495 | 0.024481714 | 0.138283093 | 0.520628744 |
| 0.073481438 | 0.268056866 | 0.39100813  | 0.003807734 |
| 0.06979637  | 0.431374246 | 0.131966657 | 0.210559978 |
| 0.466970842 | 0.215542836 | 0.238815779 | 0.348711979 |
| 0.373258518 | 0.135114862 | 0.005227012 | 0.483000661 |

|             |             |             |             |
|-------------|-------------|-------------|-------------|
| 0.500296184 | 0.470775291 | 0.498185496 | 0.483625947 |
| 0.434844651 | 0.446155749 | 0.409732307 | 0.409777588 |
| 0.139906247 | 0.138999377 | 0.208993293 | 0.291729737 |
| 0.009317969 | 0.399862184 | 0.363882519 | 0.179272178 |
| 0.437159255 | 0.340018954 | 0.062060758 | 0.398466788 |
| 0.029363004 | 0.220923771 | 0.362874203 | 0.275143681 |
| 0.372370064 | 0.026966067 | 0.242201736 | 0.317978161 |
| 0.439566668 | 0.361220671 | 0.388226578 | 0.530796089 |
| 0.347316529 | 0.175196438 | 0.313598276 | 0.421980478 |
| 0.101473461 | 0.124899137 | 0.417881849 | 0.04495501  |
| 0.302686485 | 0.476906791 | 0.421646126 | 0.092917137 |
| 0.290380017 | 0.008798706 | 0.368894705 | 0.530177165 |
| 0.481673604 | 0.502795657 | 0.496433177 | 0.291581613 |
| 0.498956866 | 0.152481543 | 0.527575691 | 0.413190675 |
| 0.391092006 | 0.001027309 | 0.011327991 | 0.467981515 |
| 0.384597148 | 0.097443691 | 0.196137915 | 0.398134907 |
| 0.133892412 | 0.210706334 | 0.111351544 | 0.201004919 |
| 0.458347217 | 0.271606416 | 0.220702477 | 0.477987428 |
| 0.262326847 | 0.279827122 | 0.443036824 | 0.133083808 |
| 0.44039437  | 0.075275759 | 0.133648485 | 0.010244145 |
| 0.392271954 | 0.153681056 | 0.488913666 | 0.513094124 |
| 0.484832439 | 0.397077509 | 0.373396073 | 0.417517979 |
| 0.438255173 | 0.147704054 | 0.417267908 | 0.166737092 |
| 0.486744812 | 0.37784471  | 0.33380614  | 0.319477984 |
| 0.481833691 | 0.458023592 | 0.055209832 | 0.399030976 |
| 0.021507461 | 0.004444195 | 0.392573732 | 0.314607206 |
| 0.118545968 | 0.369305919 | 0.278169876 | 0.306333158 |
| 0.307664717 | 0.048959965 | 0.284894929 | 0.253984201 |
| 0.310655529 | 0.366136693 | 0.287354274 | 0.303834186 |
| 0.294511444 | 0.142343733 | 0.25185807  | 0.210162485 |
| 0.322814995 | 0.325553508 | 0.216112564 | 0.037528271 |
| 0.43506721  | 0.412461437 | 0.087049364 | 0.207687974 |
| 0.424066146 | 0.472200423 | 0.059294003 | 0.01352694  |
| 0.293930982 | 0.348609918 | 0.485607643 | 0.504955009 |
| 0.530254231 | 0.506885934 | 0.399608558 | 0.149109353 |
| 0.10430008  | 0.34174958  | 0.312855901 | 0.124954726 |
| 0.511530062 | 0.10386965  | 0.501174045 | 0.326557337 |
| 0.160012104 | 0.239811506 | 0.051107343 | 0.123598497 |
| 0.410537039 | 0.22507985  | 0.206572969 | 0.186727309 |
| 0.319211291 | 0.281009584 | 0.07751122  | 0.231443223 |
| 0.357977214 | 0.178997033 | 0.197846787 | 0.397285854 |
| 0.396363704 | 0.311742275 | 0.422727871 | 0.437345539 |
| 0.176707701 | 0.157445158 | 0.302313824 | 0.426760286 |
| 0.443445025 | 0.435141289 | 0.042478622 | 0.460939727 |
| 0.489940018 | 0.444120323 | 0.50805124  | 0.380372023 |
| 0.124899146 | 0.378414952 | 0.354988373 | 0.343623854 |
| 0.23401107  | 0.444475591 | 0.294507002 | 0.096283534 |
| 0.327564944 | 0.497690537 | 0.401380706 | 0.198563599 |
| 0.466057742 | 0.187574604 | 0.092837672 | 1           |
| 0.18403787  | 0.117837971 | 0.4180225   | 0.446966015 |
| 0.002497833 | 0.177516794 | 0.484127112 | 0.300394226 |
| 0.522538084 | 0.45737891  | 0.428278389 | 0.353360862 |
| 0.002163166 | 0.412135834 | 0.379030219 | 0.385520282 |
| 0.419482409 | 0.391379923 | 0.261427069 | 0.096187712 |

|             |             |             |             |
|-------------|-------------|-------------|-------------|
| 0.309203994 | 0.123543968 | 0.153206756 | 0.409238408 |
| 0.185784732 | 0.434476881 | 0.236040694 | 0.264753549 |
| 0.230438536 | 0.142904788 | 0.2906275   | 0.288044612 |
| 0.197321496 | 0.267724966 | 0.353826817 | 0.383429351 |
| 0.186291562 | 0.421190828 | 0.399131939 | 0.046228156 |
| 0.400821402 | 0.411074655 | 0.437381134 | 0.001892621 |
| 0.421040888 | 0.012473993 | 0.229447905 | 0.235967401 |
| 0.235425507 | 0.246941226 | 0.28536075  | 0.309613384 |
| 0.378741183 | 0.256601342 | 0.296455679 | 0.266936617 |
| 0.192915391 | 0.283288031 | 0.410509617 | 0.38960897  |
| 0.291334588 | 0.16562526  | 0.137787909 | 0.133266925 |
| 0.077200714 | 0.47466964  | 0.271408409 | 0.115042235 |
| 0.273229787 | 0.400551825 | 0.343918712 | 0.50183223  |
| 0.413185404 | 0.157534412 | 0.378577874 | 0.432255603 |
| 0.284281267 | 0.354426092 | 0.102680368 | 0.425137618 |
| 0.283231912 | 0.230210496 | 0.45871033  | 0.337688401 |
| 0.428305054 | 0.399764185 | 0.27398402  | 0.44123415  |
| 0.381980558 | 0.381983266 | 0.35528996  | 0.103259831 |
| 0.201900965 | 0.179088536 | 0.279781389 | 0.003031048 |
| 0.382383629 | 0.305959386 | 0.442536689 | 0.492857636 |
| 0.336154105 | 0.383175942 | 0.36613594  | 0.111498913 |
| 0.324579538 | 0.199585445 | 0.180936375 | 0.449981877 |
| 0.251019437 | 0.242669679 | 0.310918313 | 0.402013272 |
| 0.432667825 | 0.43493126  | 0.305652263 | 0.311242982 |
| 0.294057573 | 0.252509292 | 0.489529085 | 0.179976947 |
| 0.433655507 | 0.19795491  | 0.416420022 | 0.296435481 |
| 0.244925618 | 0.513578902 | 0.097547591 | 0.517889951 |
| 0.329848265 | 0.181013431 | 0.494455547 | 0.394036575 |
| 0.368250963 | 0.167852444 | 0.217409763 | 0.439821353 |
| 0.277303319 | 0.382794431 | 0.024192081 | 0.069837135 |
| 0.33900562  | 0.377707123 | 0.416749126 | 0.39846222  |
| 0.273650087 | 0.351007299 | 0.238436401 | 0.335442477 |
| 0.495329577 | 0.515390156 | 0.248280876 | 0.274838361 |
| 0.370486843 | 0.139146883 | 0.438763929 | 0.02981728  |
| 0.414752217 | 0.429859352 | 0.411793269 | 0.087453508 |
| 0.032388975 | 0.223250392 | 0.406814461 | 0.112435204 |
| 0.459597867 | 0.245386812 | 0.410760825 | 0.45395124  |
| 0.234857042 | 0.509920101 | 0.158604685 | 0.406728469 |
| 0.080953115 | 0.30574526  | 0.417877705 | 0.422479205 |
| 0.225659359 | 0.298543681 | 0.371064225 | 0.254344162 |
| 0.048411091 | 0.286715656 | 0.001328102 | 0.410282468 |
| 0.482189716 | 0.344255668 | 0.244670837 | 0.382422549 |
| 0.304751087 | 0.405114867 | 0.279005915 | 0.452074514 |
| 0.016775128 | 0.363540147 | 0.253293562 | 0.420648524 |
| 0.226232144 | 0.387143431 | 0.079668907 | 0.341245818 |
| 0.480200888 | 0.281613665 | 0.295569659 | 0.291196998 |
| 0.499072468 | 0.424112883 | 0.214060654 | 0.287124588 |
| 0.425642427 | 0.101564816 | 0.445164643 | 0.52799686  |
| 0.209750897 | 0.22731715  | 0.422299014 | 0.212107195 |
| 0.343330217 | 0.405006268 | 0.434677007 | 0.527774322 |
| 0.092715508 | 0.276647198 | 0.436227142 | 0.451413432 |
| 0.322490295 | 0.198428662 | 0.261426436 | 0.241743558 |
| 0.465258102 | 0.128162555 | 0.284759661 | 0.371271875 |
| 0.222445514 | 0.352728238 | 0.399478989 | 0.220440451 |

|             |             |             |             |
|-------------|-------------|-------------|-------------|
| 0.056079498 | 0.235503014 | 0.428505262 | 0.189360465 |
| 0.313028876 | 0.366136394 | 0.256483956 | 0.376538889 |
| 0.161516359 | 0.029713187 | 0.446851338 | 0.017896435 |
| 0.399731373 | 0.401506311 | 0.302678209 | 0.376165707 |
| 0.219551283 | 0.389574205 | 0.355917507 | 0.001922883 |
| 0.415554355 | 0.064289876 | 0.378317108 | 0.231248149 |
| 0.323625379 | 0.078911228 | 0.467044637 | 0.499019682 |
| 0.38102605  | 0.413944418 | 0.372067305 | 0.472195254 |
| 0.167370878 | 0.381134182 | 0.381107158 | 0.435024028 |
| 0.257643634 | 0.40384419  | 0.43949235  | 0.388830367 |
| 0.416989261 | 0.353715766 |             |             |
| PIGT        | 0.012248124 | 0.141800372 | 0.006830762 |
| 0.038708365 | 0.312537036 | 0.069365441 | 0.015593485 |
| 0.023586638 | 0.121042893 | 0.038303015 | 0.172103495 |
| 0.00449587  | 0.091593344 | 0.214780549 | 0.015167311 |
| 0.285453474 | 0.013601991 | 0.047586424 | 0.016293043 |
| 0.049880593 | 0.308704716 | 0.086094871 | 0.065870333 |
| 0.266644503 | 0.060443732 | 0.101232978 | 0.180986648 |
| 0.207422855 | 0.045758776 | 0.199911944 | 0.025599948 |
| 0.202770134 | 0.329239936 | 0.15468004  | 0.002346226 |
| 0.134591726 | 0.029876719 | 0.178747368 | 0.168192342 |
| 0.130596969 | 0.14767328  | 0.046295912 | 0.124017241 |
| 0.094942128 | 0.006327372 | 0.014234996 | 0.247603844 |
| 0.111751255 | 0.078504439 | 0.009326339 | 0.182909906 |
| 0.082467957 | 0.107727793 | 0.106571018 | 0.000386288 |
| 0.181948136 | 0.077338251 | 0.138880834 | 0.182889578 |
| 0.103767725 | 0.066267291 | 0.060735594 | 0.058660958 |
| 0.177048099 | 0.239639566 | 0.151978896 | 0.079459583 |
| 0.210908281 | 0.131129795 | 0.212286258 | 0.036726607 |
| 0.105955405 | 0.00497774  | 0.083669668 | 0.017090817 |
| 0.117247043 | 0.126963103 | 0.187882128 | 0.215036798 |
| 0.136869762 | 0.206844822 | 0.127267055 | 0.169656434 |
| 0.106143141 | 0.306141307 | 0.174245467 | 0.251968768 |
| 0.20846843  | 0.020401814 | 0.234693907 | 0.234554234 |
| 0.008352035 | 0.090078278 | 0.196528601 | 0.030028744 |
| 0.152261065 | 0.091916753 | 0.083596071 | 0.143477553 |
| 0.327315223 | 0.299395285 | 0.173733476 | 0.159555148 |
| 0.178942802 | 0.016048679 | 0.145009509 | 0.328759953 |
| 0.141304312 | 0.021087371 | 0.147817527 | 0.258290515 |
| 0.209719566 | 0.209486677 | 0.173597037 | 0.223590678 |
| 0.266001299 | 0.217813403 | 0.206112568 | 0.167492492 |
| 0.012769742 | 0.204792766 | 0.070868866 | 0.012718483 |
| 0.008423198 | 0.033520964 | 0.096350328 | 0.174651879 |
| 0.231012054 | 0.132151339 | 0.056650935 | 0.206612648 |
| 0.311834515 | 0.140043897 | 0.203505095 | 0.211052395 |
| 0.010216209 | 0.128875609 | 0.25998918  | 0.039741144 |
| 0.209502624 | 0.044107477 | 0.279882611 | 0.17983835  |
| 0.180123752 | 0.285186386 | 0.025677406 | 0.177596752 |
| 0.061413744 | 0.245425168 | 0.159816572 | 0.0939491   |
| 0.20525579  | 0.16665042  | 0.271412852 | 0.30759097  |
| 0.170563883 | 0.09886986  | 0.016108542 | 0.194460404 |
| 0.249468956 | 0.026925875 | 0.230786595 | 0.255736527 |
| 0.18732447  | 0.266289838 | 0.281036619 | 0.236667698 |
| 0.178043097 | 0.022845219 | 0.018739582 | 0.282561631 |



|              |             |              |             |
|--------------|-------------|--------------|-------------|
| 0.191924535  | 0.207187283 | 0.051352595  | 0.185453858 |
| 0.27608298   | 0.081722405 | 0.2061162    | 0.066459249 |
| 0.247913145  | 0.219738589 | 0.211632028  | 0.178519027 |
| 0.089918484  | 0.12583704  | 0.224619919  | 0.138516307 |
| 0.011117548  | 0.02086855  | 0.009833741  | 0.175157856 |
| 0.028557413  | 0.130910795 | 0.0711102473 | 0.219417313 |
| 0.130183902  | 0.058923912 | 0.130631661  | 0.317329    |
| 0.0111034604 | 0.138762358 | 0.059132812  | 0.055441687 |
| 0.018192356  | 0.04800744  | 0.051906211  | 0.038573224 |
| 0.187881379  | 0.061659116 | 0.189341138  | 0.244373604 |
| 0.148223768  | 0.063394166 | 0.171389844  | 0.241625414 |
| 0.265775398  | 0.252159756 | 0.109118785  | 0.0094091   |
| 0.111219275  | 0.075740433 | 0.142636033  | 0.179003928 |
| 0.049676891  | 0.074315436 | 0.233470009  | 0.317045243 |
| 0.063909754  | 0.025130844 | 0.146016688  | 0.161029687 |
| 0.041146014  | 0.135112499 | 0.269710894  | 0.130593853 |
| 0.000538431  | 0.147439322 | 0.23575415   | 0.126474483 |
| 0.13928201   | 0.1080959   | 0.085774159  | 0.266114088 |
| 0.088095772  | 0.181378198 | 0.23076541   | 0.311719869 |
| 0.040030928  | 0.051673409 | 0.259740284  | 0.044708002 |
| 0.205629817  | 0.053521398 | 0.249613208  | 0.053727624 |
| 0.134515227  | 0.213834807 | 0.285362498  | 0.183723813 |
| 0.02677977   | 0.206569461 | 0.168691288  | 0.233082287 |
| 0.122782305  | 0.260627892 | 0.260491266  | 0.229729893 |
| 0.17103258   | 0.150196906 | 0.120226942  | 0.239148793 |
| 0.263928548  | 0.066254017 | 0.015439667  | 0.217194057 |
| 0.117664102  | 0.285383754 | 0.10033294   | 0.267577889 |
| 0.203307181  | 0.141037529 | 0.06440273   | 0.32525541  |
| 0.214917525  | 0.083948921 | 0.217299323  | 0.255943287 |
| 0.046507994  | 0.239281248 | 0.195177108  | 0.333173673 |
| 0.083977199  | 0.161645609 | 0.135648333  | 0.108709659 |
| 0.007991105  | 0.015803593 | 0.017439942  | 0.130921083 |
| 0.208856895  | 0.14117777  | 0.258094823  | 0.227332655 |
| 0.054436592  | 0.170553761 | 0.109473276  | 0.145109578 |
| 0.176157004  | 0.167314405 | 0.22331866   | 0.229062968 |
| 0.119241511  | 0.011597397 | 0.039739925  | 0.208093367 |
| 0.005862002  | 0.151437236 | 0.081024881  | 0.002212863 |
| 0.009726737  | 0.127364452 | 0.026901498  | 0.070543309 |
| 0.28412445   | 0.065640566 | 0.085633579  | 0.055905543 |
| 0.223972296  | 0.035532686 | 0.004810738  | 0.23077267  |
| 0.197943859  | 0.193153748 | 0.189209141  | 0.152841902 |
| 0.227538418  | 0.180666724 | 0.294776118  | 0.068291703 |
| 0.024254018  | 0.013575778 | 0.170838029  | 0.204654042 |
| 0.000637502  | 0.242692482 | 0.187146006  | 0.070317242 |
| 0.247887884  | 0.167923688 | 0.007068486  | 0.237148935 |
| 0.004565696  | 0.128824614 | 0.045649553  | 0.105051073 |
| 0.301617296  | 0.002186657 | 0.044356117  | 0.100439825 |
| 0.133111422  | 0.134683511 | 0.137681048  | 0.215525343 |
| 0.182442815  | 0.027783145 | 0.227171863  | 0.246117517 |
| 0.022066121  | 0.026650615 | 0.071401603  | 0.007628063 |
| 0.017767309  | 0.16668007  | 0.100605136  | 0.013459044 |
| 0.161107044  | 0.000842042 | 0.140169096  | 0.221115159 |
| 0.141619525  | 0.269932131 | 0.21677631   | 0.221220771 |
| 0.211701035  | 0.073655004 | 0.22630879   | 0.157534381 |

|             |             |             |             |
|-------------|-------------|-------------|-------------|
| 0.081180681 | 0.000413181 | 0.002862283 | 0.259653022 |
| 0.244957327 | 0.008628756 | 0.082831213 | 0.03376814  |
| 0.041220279 | 0.024131176 | 0.015695159 | 0.207172857 |
| 0.145836918 | 0.230079122 | 0.125859364 | 0.155439028 |
| 0.14883296  | 0.150042792 | 0.065995144 | 0.023016356 |
| 0.195605172 | 0.014834467 | 0.025073633 | 0.008290375 |
| 0.279082895 | 0.02650067  | 0.137849449 | 0.199474726 |
| 0.23443734  | 0.300937024 | 0.052275057 | 0.037804532 |
| 0.228124918 | 0.015458331 | 0.052771962 | 0.019586498 |
| 0.170322328 | 0.281233472 | 0.197607152 | 0.141765694 |
| 0.265483561 | 0.201471582 | 0.009894233 | 0.279148623 |
| 0.003113579 | 0.004522767 | 0.079823516 | 0.125962628 |
| 0.034252902 | 0.22013731  | 0.149975513 | 0.063909542 |
| 0.077831169 | 0.004393042 | 0.236512263 | 0.252542494 |
| 0.228250454 | 0.204481485 | 0.311445833 | 0.105286429 |
| 0.202158279 | 0.148942481 | 0.09174051  | 0.050478842 |
| 0.048042444 | 0.123813373 | 0.064398933 | 0.005415661 |
| 0.136698292 | 0.193482784 | 0.018548814 | 0.060249771 |
| 0.244794265 | 0.24964839  | 0.020716359 | 0.011506921 |
| 0.118682075 | 0.14441086  | 0.264616771 | 0.180188037 |
| 0.191571256 | 0.261920763 | 0.156342351 | 0.076495805 |
| 0.01568562  | 0.253607404 | 0.311524614 | 0.095872881 |
| 0.212387505 | 0.012820668 | 0.166532505 | 0.283929284 |
| 0.050361866 | 0.089122177 | 0.011977592 | 0.03723316  |
| 0.235470294 | 0.085990514 | 0.16533152  | 0.03984944  |
| 0.177019518 | 0.125274235 | 0.014509112 | 0.112982539 |
| 0.181637574 | 0.189680618 | 0.080848221 | 0.057256504 |
| 0.139664668 | 0.020418544 | 0.270878198 | 0.231550411 |
| 0.043160441 | 0.038683663 | 0.031276766 | 0.196713147 |
| 0.215954065 | 0.117311086 | 0.004438612 | 0.144797088 |
| 0.235611629 | 0.200967116 | 0.174758176 | 0.269065844 |
| 0.028970098 | 0.220501983 | 0.178651093 | 0.261799    |
| 0.094612624 | 0.072688269 | 0.12354909  | 0.022005706 |
| 0.143158894 | 0.180809961 | 0.183929995 | 0.096818695 |
| 0.130585123 | 0.022599734 | 0.010384247 | 0.18403787  |
| 1           | 0.016365419 | 0.053557562 | 0.231619168 |
| 0.005782068 | 0.148991552 | 0.268337895 | 0.059311932 |
| 0.224421699 | 0.275906548 | 0.205954248 | 0.040169675 |
| 0.012295639 | 0.286802173 | 0.225019318 | 0.150586904 |
| 0.162188691 | 0.129095054 | 0.019505241 | 0.033167474 |
| 0.18647437  | 0.01467293  | 0.062697833 | 0.032813604 |
| 0.143543734 | 0.130050782 | 0.124132293 | 0.092877256 |
| 0.159947235 | 0.01848354  | 0.118971999 | 0.086187335 |
| 0.113803375 | 0.148161661 | 0.229529462 | 0.022934171 |
| 0.116707505 | 0.24298358  | 0.20256347  | 0.00469787  |
| 0.211983729 | 0.238570007 | 0.210294225 | 0.004037091 |
| 0.262543355 | 0.002376314 | 0.154791681 | 0.162861142 |
| 0.134751832 | 0.131603027 | 0.254413599 | 0.16501137  |
| 0.152712353 | 0.112724441 | 0.116451944 | 0.156487448 |
| 0.091598928 | 0.078806828 | 0.220106406 | 0.112899068 |
| 0.145777958 | 0.039488203 | 0.023913229 | 0.021411064 |
| 0.013205728 | 0.178188894 | 0.102308059 | 0.014532411 |
| 0.145293077 | 0.101304752 | 0.212874816 | 0.167639877 |
| 0.23101001  | 0.020804477 | 0.133431517 | 0.169421239 |

|             |             |             |             |
|-------------|-------------|-------------|-------------|
| 0.034232449 | 0.029364649 | 0.006783821 | 0.125591213 |
| 0.092898866 | 0.121060518 | 0.090181731 | 0.089433034 |
| 0.157502003 | 0.177440554 | 0.094252942 | 0.209892358 |
| 0.154933665 | 0.141632309 | 0.039349773 | 0.043635151 |
| 0.071635137 | 0.048557215 | 0.31806487  | 0.000746077 |
| 0.180731728 | 0.025103474 | 0.243767322 | 0.172099369 |
| 0.148849632 | 0.190806437 | 0.023523347 | 0.022648272 |
| 0.021196608 | 0.044901271 | 0.059374271 | 0.194464594 |
| 0.141178417 | 0.053210596 | 0.288619271 | 0.025893901 |
| 0.258497282 | 0.2128215   | 0.144388263 | 0.067959586 |
| 0.133465452 | 0.061287731 | 0.1740478   | 0.019673022 |
| 0.168105314 | 0.178699525 | 0.076700178 | 0.218781734 |
| 0.178369104 | 0.233527723 | 0.015418924 | 0.239377709 |
| 0.213875738 | 0.038427976 | 0.216400617 | 0.073697626 |
| 0.037352032 | 0.054517299 | 0.190117444 | 0.058713559 |
| 0.067736509 | 0.143072619 | 0.002717341 | 0.051473546 |
| 0.24649213  | 0.078269227 | 0.154002522 | 0.213752192 |
| 0.233777298 | 0.268600539 | 0.082897458 | 0.079422988 |
| 0.144912459 | 0.157252298 | 0.076952619 | 0.160300511 |
| 0.173354137 | 0.035383655 | 0.091701218 | 0.005463266 |
| 0.22214621  | 0.195422501 | 0.0526505   | 0.014031995 |
| 0.004458848 | 0.205467371 | 0.195436461 | 0.013955706 |
| 0.295365905 | 0.093436962 | 0.112483782 | 0.194725805 |
| 0.063111345 | 0.160832446 | 0.071043464 | 0.253794566 |
| 0.006433333 | 0.134836802 | 0.192402966 | 0.133836253 |
| 0.113078334 | 0.273885323 | 0.282960249 | 0.233164366 |
| 0.011794617 | 0.099138615 | 0.007260872 | 0.15667669  |
| 0.146879047 | 0.261166494 | 0.082444456 | 0.030185995 |
| 0.216260889 | 0.17938127  | 0.080986687 | 0.132329531 |
| 0.006084304 | 0.302831051 | 0.098428094 | 0.154758909 |
| 0.084571954 | 0.15872678  | 0.021834791 | 0.252646738 |
| 0.12880082  | 0.090025812 | 0.119814792 | 0.09496341  |
| 0.169583297 | 0.140719641 | 0.037163002 | 0.084233135 |
| 0.134473373 | 0.017042552 | 0.051233685 | 0.232329607 |
| 0.117710799 | 0.268950982 | 0.311082937 | 0.12223401  |
| 0.216390031 | 0.135410467 | 0.153999409 | 0.213308322 |
| 0.057482107 | 0.14482613  | 0.253865885 | 0.19773127  |
| 0.213780569 | 0.216089558 | 0.182811649 | 0.199696617 |
| 0.144627607 | 0.020024323 | 0.125611787 | 0.167807884 |
| 0.226644607 | 0.182399663 | 0.076419352 | 0.190167989 |
| 0.012880021 | 0.040327769 | 0.057282308 | 0.059933353 |
| 0.193446871 | 0.250083042 | 0.191791232 | 0.199660032 |
| 0.050842091 | 0.014465483 | 0.221911215 | 0.052586347 |
| 0.068132849 | 0.250145683 | 0.107877153 | 0.205868749 |
| 0.065461687 | 0.141677964 | 0.089047687 | 0.000122631 |
| 0.265690057 | 0.059634694 | 0.116710961 | 0.15064534  |
| 0.078326597 | 0.010483876 | 0.170430811 | 0.274931545 |
| 0.114943549 | 0.047152931 | 0.066076849 | 0.177139944 |
| 0.162276221 | 0.100898446 | 0.11751063  | 0.128343783 |
| 0.203341153 | 0.085088508 | 0.112073249 | 0.153724297 |
| 0.164994148 | 0.06072493  |             |             |
| PIH1D1      | 0.180251477 | 0.128029856 | 0.15138001  |
| 0.055955509 | 0.069632404 | 0.050855137 | 0.125928999 |
| 0.100019846 | 0.104771925 | 0.012657608 | 0.10838854  |

|             |             |             |             |
|-------------|-------------|-------------|-------------|
| 0.121201674 | 0.001885474 | 0.173802955 | 0.122109428 |
| 0.072475866 | 0.107516783 | 0.201738989 | 0.00761443  |
| 0.017697478 | 0.081697731 | 0.021498092 | 0.080104511 |
| 0.055966958 | 0.309972566 | 0.097646082 | 0.034001563 |
| 0.146062087 | 0.004888806 | 0.082871325 | 0.003965895 |
| 0.244783153 | 0.073887426 | 0.027830637 | 0.065033562 |
| 0.070621745 | 0.000343681 | 0.241725587 | 0.08098832  |
| 0.005056712 | 0.265592788 | 0.029123599 | 0.125589453 |
| 0.038474394 | 0.153731716 | 0.003495898 | 0.064822312 |
| 0.072144207 | 0.045312391 | 0.17978924  | 0.088700861 |
| 0.025887788 | 0.176648526 | 0.076820299 | 0.010360114 |
| 0.02032988  | 0.00049855  | 0.007283029 | 0.179700987 |
| 0.277159136 | 0.199809892 | 0.004599693 | 0.060935969 |
| 0.057662456 | 0.084099979 | 0.154044332 | 0.023344829 |
| 0.188354974 | 0.007250534 | 0.068736224 | 0.024753318 |
| 0.067069454 | 0.096616729 | 0.290299119 | 0.129600155 |
| 0.026736746 | 0.17885072  | 0.080579526 | 0.021193469 |
| 0.130816017 | 0.226121457 | 0.160667684 | 0.185172431 |
| 0.004398963 | 0.048450696 | 0.027439978 | 0.1672497   |
| 0.103809387 | 0.068056913 | 0.146310738 | 0.21060393  |
| 0.093230209 | 0.048189835 | 0.104948161 | 0.219602456 |
| 0.133816323 | 0.008269366 | 0.042549054 | 0.014139734 |
| 0.071496243 | 0.068172288 | 0.189143077 | 0.244523086 |
| 0.046881121 | 0.22004185  | 0.205940835 | 0.044577728 |
| 0.076742504 | 0.202459872 | 0.029012705 | 0.101845671 |
| 0.096246348 | 0.158087838 | 0.109539412 | 0.149790846 |
| 0.057230154 | 0.174574446 | 0.132826281 | 0.150031941 |
| 0.001504339 | 0.175344579 | 0.190049993 | 0.132915542 |
| 0.130301467 | 0.119418239 | 0.015364164 | 0.210360609 |
| 0.13095265  | 0.14037403  | 0.170255056 | 0.123910106 |
| 0.132972542 | 0.183949246 | 0.167543182 | 0.148329694 |
| 0.186952579 | 0.007853512 | 0.0562224   | 0.05837551  |
| 0.127913895 | 0.18629224  | 0.032403617 | 0.224523341 |
| 0.239836466 | 0.123224178 | 0.10457502  | 0.24239535  |
| 0.084517546 | 0.217008979 | 0.125806892 | 0.225018063 |
| 0.212587705 | 0.214787962 | 0.188228848 | 0.078388132 |
| 0.210087146 | 0.109542405 | 0.006516707 | 0.145922657 |
| 0.214010534 | 0.002884274 | 0.1159859   | 0.132755804 |
| 0.172370047 | 0.111165285 | 0.175476902 | 0.151287061 |
| 0.16965285  | 0.210067792 | 0.00051305  | 0.138463733 |
| 0.199020007 | 0.200506372 | 0.055333071 | 0.047588983 |
| 0.07281775  | 0.080212838 | 0.090967824 | 0.019410731 |
| 0.234393254 | 0.132808034 | 0.128098961 | 0.128797987 |
| 0.05775117  | 0.27290913  | 0.033985992 | 0.211020222 |
| 0.072864033 | 0.189841656 | 0.224443468 | 0.146635761 |
| 0.016601566 | 0.208614091 | 0.069747496 | 0.058405474 |
| 0.246322659 | 0.06118566  | 0.016136039 | 0.085160892 |
| 0.235966514 | 0.064503709 | 0.152187942 | 0.178265673 |
| 0.125540073 | 0.308150229 | 0.07046539  | 0.081824763 |
| 0.125539007 | 0.295751499 | 0.078645494 | 0.143906773 |
| 0.035896361 | 0.255232919 | 0.106639182 | 0.19846616  |
| 0.24906351  | 0.053046927 | 0.230455063 | 0.043743435 |
| 0.024842219 | 0.00919936  | 0.005968572 | 0.04127574  |
| 0.28118726  | 0.060709055 | 0.086139672 | 0.108559686 |

|             |             |             |             |
|-------------|-------------|-------------|-------------|
| 0.153843507 | 0.101215379 | 0.037299389 | 0.263977371 |
| 0.217321847 | 0.061936252 | 0.164525339 | 0.056091746 |
| 0.02712143  | 0.12901785  | 0.130467594 | 0.017519965 |
| 0.134839733 | 0.009996443 | 0.009929985 | 0.145830341 |
| 0.010152909 | 0.028236666 | 0.132692364 | 0.095563161 |
| 0.016257542 | 0.230095706 | 0.175104331 | 0.002748617 |
| 0.037286373 | 0.023814228 | 0.194652948 | 0.026273796 |
| 0.20015323  | 0.181919357 | 0.056845938 | 0.044774463 |
| 0.227744443 | 0.189364728 | 0.150372115 | 0.167853201 |
| 0.024870015 | 0.180898584 | 0.12822816  | 0.182252692 |
| 0.132877621 | 0.026636924 | 0.003477438 | 0.138251752 |
| 0.132912691 | 0.009178556 | 0.219800854 | 0.085948128 |
| 0.029669579 | 0.081989045 | 0.012865941 | 0.188422567 |
| 0.237428865 | 0.167349176 | 0.128981484 | 0.129796533 |
| 0.209130683 | 0.197213767 | 0.120576077 | 0.190596043 |
| 0.010939382 | 0.057920846 | 0.041079377 | 0.148086993 |
| 0.249286728 | 0.030068806 | 0.191430376 | 0.004224789 |
| 7.18E-05    | 0.175840269 | 0.240651611 | 0.144892016 |
| 0.018340423 | 0.049274427 | 0.090763963 | 0.177615931 |
| 0.241313963 | 0.185544008 | 0.155436044 | 0.067982055 |
| 0.190290762 | 0.040959732 | 0.043130089 | 0.073585147 |
| 0.19890863  | 0.034772611 | 0.071844069 | 0.235888636 |
| 0.170655718 | 0.01965914  | 0.079251739 | 0.012628249 |
| 0.162800279 | 0.089566738 | 0.25797688  | 0.332845352 |
| 0.149727137 | 0.296830238 | 0.228675105 | 0.019390848 |
| 0.149194574 | 0.223595147 | 0.011361749 | 0.141900546 |
| 0.149932191 | 0.14494504  | 0.150079358 | 0.166760017 |
| 0.124517885 | 0.088317359 | 0.112828362 | 0.088182914 |
| 0.105075798 | 0.105711506 | 0.018031795 | 0.103175662 |
| 0.007349874 | 0.147050873 | 0.059728462 | 0.305709448 |
| 0.090706444 | 0.141371251 | 0.162111822 | 0.057522275 |
| 0.076936593 | 0.007542349 | 0.046903089 | 0.082353607 |
| 0.11302685  | 0.09354538  | 0.017431728 | 0.015562887 |
| 0.203094733 | 0.231665849 | 0.017413232 | 0.183209044 |
| 0.133868028 | 0.182929999 | 0.081450013 | 0.119805924 |
| 0.152006703 | 0.003747477 | 0.048205599 | 0.0013412   |
| 0.008335628 | 0.171424982 | 0.02646124  | 0.052697264 |
| 0.199262656 | 0.056924102 | 0.218564922 | 0.197344636 |
| 0.162867826 | 0.16331011  | 0.183654679 | 0.031017867 |
| 0.186609429 | 0.000557384 | 0.166282498 | 0.147537163 |
| 0.026335251 | 0.009501868 | 0.029130259 | 0.133451607 |
| 0.068814006 | 0.190053743 | 0.258441894 | 0.020438965 |
| 0.107073163 | 0.133291174 | 0.137189886 | 0.028290335 |
| 0.07746594  | 0.095793256 | 0.0202042   | 0.183943019 |
| 0.124631624 | 0.151970743 | 0.040728508 | 0.234236222 |
| 0.062632036 | 0.114897127 | 0.194334875 | 0.013136112 |
| 0.104768877 | 0.239536051 | 0.220661783 | 0.170043177 |
| 0.217622163 | 0.094641019 | 0.015167058 | 0.016870985 |
| 0.117523994 | 0.204466706 | 0.008791257 | 0.189942901 |
| 0.166622901 | 0.100731671 | 0.242935119 | 0.266441881 |
| 0.203766662 | 0.209072946 | 0.175973092 | 0.134074339 |
| 0.042866256 | 0.002858104 | 0.077315791 | 0.171888853 |
| 0.001378848 | 0.050390319 | 0.259044983 | 0.030954634 |
| 0.04186483  | 0.08880958  | 0.018957136 | 0.021948983 |

|             |             |             |             |
|-------------|-------------|-------------|-------------|
| 0.148756898 | 0.08220423  | 0.059040794 | 0.147810306 |
| 0.044359236 | 0.016171857 | 0.089009273 | 0.102894797 |
| 0.00900752  | 0.209776213 | 0.326501691 | 0.109594823 |
| 0.045825317 | 0.05591143  | 0.226275456 | 0.247856397 |
| 0.162272606 | 0.154040527 | 0.068333687 | 0.061900998 |
| 0.260872657 | 0.057023156 | 0.160433695 | 0.156664372 |
| 0.211870524 | 0.212141804 | 0.261188905 | 0.063960047 |
| 0.160545071 | 0.102158015 | 0.052367883 | 0.033031919 |
| 0.174761151 | 0.204212364 | 0.170536694 | 0.027474442 |
| 0.233309886 | 0.099392633 | 0.085177694 | 0.201847805 |
| 0.049053792 | 0.252250716 | 0.143367944 | 0.217612747 |
| 0.085258383 | 0.01002303  | 0.151124347 | 0.221403529 |
| 0.190114449 | 0.005270412 | 0.243716918 | 0.049644753 |
| 0.133072095 | 0.003900845 | 0.088425849 | 0.248703251 |
| 0.273337506 | 0.159832797 | 0.060811552 | 0.096459069 |
| 0.10852281  | 0.0357348   | 0.061482261 | 0.130118325 |
| 0.162884281 | 0.080029257 | 0.185694068 | 0.186930128 |
| 0.232059179 | 0.068523179 | 0.020357587 | 0.081095316 |
| 0.188268035 | 0.05837811  | 0.109526142 | 0.248115986 |
| 0.206526511 | 0.225090662 | 0.149611622 | 0.17966477  |
| 0.052044643 | 0.157074391 | 0.18678022  | 0.117837971 |
| 0.016365419 | 1           | 0.031091185 | 0.096354161 |
| 0.00219977  | 0.005813284 | 0.141998596 | 0.093067612 |
| 0.194241044 | 0.155129435 | 0.234561229 | 0.041765005 |
| 3.96E-05    | 0.064462664 | 0.126379738 | 0.054236695 |
| 0.153610367 | 0.17760332  | 0.013008158 | 0.111812658 |
| 0.241920573 | 0.243031871 | 0.088468766 | 0.015347386 |
| 0.004576181 | 0.099807815 | 0.25462366  | 0.12279395  |
| 0.096712076 | 0.153328128 | 0.008416426 | 0.119737669 |
| 0.003592529 | 0.277411546 | 0.223040397 | 0.012784777 |
| 0.011146338 | 0.152213373 | 0.138123839 | 0.137178029 |
| 0.038066781 | 0.132388599 | 0.148558386 | 0.027534287 |
| 0.105318865 | 0.068140168 | 0.131874661 | 0.129847109 |
| 0.111854057 | 0.109440478 | 0.132864352 | 0.044150904 |
| 0.106228033 | 0.125354676 | 0.112766083 | 0.222235754 |
| 0.099204836 | 0.110407317 | 0.068556902 | 0.058738052 |
| 0.066866072 | 0.161039648 | 0.258343118 | 0.271988076 |
| 0.091591049 | 0.12918444  | 0.309604823 | 0.223638357 |
| 0.18943727  | 0.04337212  | 0.254744554 | 0.159153687 |
| 0.18664685  | 0.217995825 | 0.060198964 | 0.142973012 |
| 0.004325206 | 0.017523392 | 0.1223946   | 0.064618463 |
| 0.184271441 | 0.034301025 | 0.044408888 | 0.136869029 |
| 0.086007614 | 0.268079458 | 0.301544642 | 0.179311867 |
| 0.057777194 | 0.042157025 | 0.020856073 | 0.091027157 |
| 0.194910954 | 0.227155141 | 0.066440864 | 0.031384441 |
| 0.156999475 | 0.037239262 | 0.135047549 | 0.190696779 |
| 0.01466509  | 0.209564285 | 0.011879378 | 0.158996847 |
| 0.007724693 | 0.256282779 | 0.29561252  | 0.084118111 |
| 0.008754845 | 0.116529699 | 0.08652462  | 0.037551172 |
| 0.092405368 | 0.072936988 | 0.027227309 | 0.104586152 |
| 0.105238859 | 0.172900481 | 0.187516658 | 0.119517105 |
| 0.052725737 | 0.033653955 | 0.055006816 | 0.109694891 |
| 0.101148595 | 0.146740462 | 0.209056799 | 0.153688229 |
| 0.063950586 | 0.235486016 | 0.242929385 | 0.08104774  |

|             |             |             |             |
|-------------|-------------|-------------|-------------|
| 0.029518654 | 0.039520453 | 0.00820129  | 0.031120546 |
| 0.0543143   | 0.018569238 | 0.00025859  | 0.010299209 |
| 0.199781119 | 0.021833476 | 0.097594788 | 0.109014927 |
| 0.03523853  | 0.16815268  | 0.002438989 | 0.097852246 |
| 0.169895614 | 0.205961127 | 0.058491488 | 0.232740403 |
| 0.183104999 | 0.184909705 | 0.094146552 | 0.00109847  |
| 0.07058666  | 0.047413373 | 0.017691632 | 0.149922506 |
| 0.068257664 | 0.010576159 | 0.073175389 | 0.145176424 |
| 0.14281779  | 0.003752727 | 0.058321658 | 0.087601868 |
| 0.197067574 | 0.218958493 | 0.083734137 | 0.135901885 |
| 0.024901848 | 0.160834754 | 0.032273587 | 0.038405057 |
| 0.054724397 | 0.035054202 | 0.159260877 | 0.027449135 |
| 0.158856956 | 0.03362479  | 0.010861813 | 0.284653811 |
| 0.194794784 | 0.034513877 | 0.271038632 | 0.009143891 |
| 0.19406566  | 0.140236151 | 0.025013149 | 0.034673222 |
| 0.05577864  | 0.073003324 | 0.18741809  | 0.172970549 |
| 0.007562628 | 0.06273167  | 0.05877027  | 0.040740025 |
| 0.233543697 | 0.026245353 | 0.219845674 | 0.011210454 |
| 0.158526678 | 0.11184195  | 0.182876807 | 0.016570458 |
| 0.058275374 | 0.246159608 | 0.026483839 | 0.184716892 |
| 0.158170257 | 0.03036541  | 0.13239726  | 0.131360419 |
| 0.028603154 | 0.160730124 | 0.04372026  | 0.174542361 |
| 0.07881685  | 0.238569492 | 0.108531943 | 0.158494572 |
| 0.218436706 | 0.02368221  | 0.025054257 | 0.078763807 |
| 0.176620587 | 0.075192663 | 0.014934471 | 0.183211542 |
| 0.020705745 | 0.158071512 | 0.051170674 | 0.066666659 |
| 0.078141743 | 0.066728693 | 0.039463527 | 0.225991909 |
| 0.159559106 | 0.069781329 | 0.034166221 | 0.244835647 |
| 0.057463088 | 0.069850581 | 0.226139134 | 0.001284634 |
| 0.100847701 | 0.107282655 | 0.169520396 | 0.047202091 |
| 0.307782278 | 0.102351821 | 0.091916494 | 0.056530409 |
| 0.134424458 | 0.002737817 | 0.038402385 | 0.058011969 |
| 0.011262704 | 0.155981136 | 0.188697062 | 0.168763862 |
| 0.130793986 | 0.007213796 | 0.009631197 | 0.174306724 |
| 0.005679676 | 0.011669785 | 0.019727579 | 0.081668235 |
| 0.015494829 | 0.02894906  | 0.029899779 | 0.025853432 |
| 0.136559501 | 0.08127765  |             |             |
| PJA1        | 0.029600383 | 0.437482356 | 0.030264435 |
| 0.04385996  | 0.126666048 | 0.18167094  | 0.018399247 |
| 0.040345474 | 0.321149957 | 0.242432686 | 0.159148944 |
| 0.004260969 | 0.03589151  | 0.387039793 | 0.016084499 |
| 0.21463954  | 0.006280587 | 0.032519701 | 0.033048277 |
| 0.098277581 | 0.103507246 | 0.144164487 | 0.226473891 |
| 0.102023307 | 0.153039219 | 0.232956257 | 0.232819268 |
| 0.480416687 | 0.19161621  | 0.301985332 | 0.170939397 |
| 0.331349243 | 0.149170999 | 0.197668348 | 0.005807014 |
| 0.214683176 | 0.004246726 | 0.378409561 | 0.078711451 |
| 0.052377371 | 0.271647354 | 0.234803162 | 0.075347255 |
| 0.217702032 | 0.013949007 | 0.251750725 | 0.289867813 |
| 0.218259387 | 0.109617323 | 0.040122176 | 0.325962003 |
| 0.167977976 | 0.230935386 | 0.403789785 | 0.000791616 |
| 0.133606593 | 0.062301707 | 0.119998251 | 0.479943261 |
| 0.098136882 | 0.033343415 | 0.190745018 | 0.116204776 |
| 0.263882288 | 0.245240457 | 0.13249946  | 0.203859641 |

|             |             |                     |             |
|-------------|-------------|---------------------|-------------|
| 0.449574739 | 0.068794823 | 0.357705789         | 0.061221939 |
| 0.171660585 | 0.015450205 | 0.083970056         | 0.060010498 |
| 0.178930152 | 0.066191527 | 0.148391058         | 0.122896893 |
| 0.451742441 | 0.456841927 | 0.119599052         | 0.487777076 |
| 0.037284298 | 0.167194982 | 0.093181282         | 0.164683762 |
| 0.258435537 | 0.031244405 | 0.273806523         | 0.453495501 |
| 0.022205513 | 0.318114727 | 0.295420504         | 0.085585139 |
| 0.408474747 | 0.141985716 | 0.283848192         | 0.061598436 |
| 0.214823469 | 0.153684805 | 0.452355776         | 0.161427067 |
| 0.122394489 | 0.045972021 | 0.479896771         | 0.153244342 |
| 0.099605069 | 0.039543871 | 0.065985229         | 0.412313956 |
| 0.258889368 | 0.455358896 | 0.406733153         | 0.258339336 |
| 0.185027791 | 0.451781981 | 0.26565258          | 0.373086269 |
| 0.203153857 | 0.497843405 | 0.076191463         | 0.009085395 |
| 0.03529184  | 0.021433916 | 0.091501286         | 0.198885253 |
| 0.422818799 | 0.20158157  | 0.06721675          | 0.070702608 |
| 0.375352033 | 0.484563084 | 0.505242854         | 0.324789901 |
| 0.011855844 | 0.117011723 | 0.183203388         | 0.124783092 |
| 0.24136187  | 0.050592407 | 0.089962784         | 0.47297303  |
| 0.290849307 | 0.343736052 | 0.070893325         | 0.451125773 |
| 0.077988943 | 0.43109452  | 0.459926851         | 0.053508913 |
| 0.467230319 | 0.466256358 | 0.427712425         | 0.260708089 |
| 0.428317156 | 0.155183169 | 0.044161 0.30448795 |             |
| 0.39268244  | 0.004374222 | 0.445729435         | 0.45745615  |
| 0.479614132 | 0.400732937 | 0.444115838         | 0.462045374 |
| 0.491102416 | 0.03410074  | 0.023992986         | 0.127585021 |
| 0.474749142 | 0.30090992  | 0.036732116         | 0.238696373 |
| 0.189029654 | 0.189571592 | 0.364437665         | 0.134175712 |
| 0.420328645 | 0.395722483 | 0.469799077         | 0.304794357 |
| 0.192455401 | 0.243198217 | 0.223641352         | 0.459272157 |
| 0.01057438  | 0.046688503 | 0.035712232         | 0.196629028 |
| 0.221576367 | 0.057614747 | 0.170952223         | 0.188887925 |
| 0.078086244 | 0.166519218 | 0.168875545         | 0.22564379  |
| 0.050861337 | 0.28575211  | 0.064503746         | 0.077998646 |
| 0.00761445  | 0.105700443 | 0.055216094         | 0.048068235 |
| 0.081672606 | 0.217246834 | 0.349614426         | 0.436381568 |
| 0.147470212 | 0.124074621 | 0.314332757         | 0.384614638 |
| 0.307522055 | 0.183271837 | 0.140598698         | 0.001323413 |
| 0.090692621 | 0.204959181 | 0.083705192         | 0.252141565 |
| 0.154787051 | 0.079542317 | 0.212560429         | 0.252921397 |
| 0.143782849 | 0.071487198 | 0.151250714         | 0.356331493 |
| 0.115549705 | 0.104342508 | 0.348607597         | 0.270343648 |
| 0.000682775 | 0.137919364 | 0.368856099         | 0.039028691 |
| 0.203237797 | 0.048031695 | 0.113414719         | 0.393292143 |
| 0.133211797 | 0.078063193 | 0.456308536         | 0.255966571 |
| 0.172982257 | 0.217274313 | 0.459962983         | 0.029484469 |
| 0.17345801  | 0.008358794 | 0.134607489         | 0.241944935 |
| 0.114761792 | 0.158224928 | 0.141149977         | 0.087129642 |
| 0.089047639 | 0.478950334 | 0.313587019         | 0.462541708 |
| 0.1614045   | 0.460165525 | 0.388277561         | 0.356282156 |
| 0.219674854 | 0.189359772 | 0.064218721         | 0.348128111 |
| 0.389434425 | 0.136328742 | 0.059830079         | 0.402735935 |
| 0.188507867 | 0.261857015 | 0.025390026         | 0.411165364 |
| 0.417811712 | 0.486293811 | 0.037881496         | 0.232207651 |



|             |             |             |             |
|-------------|-------------|-------------|-------------|
| 0.268911037 | 0.099663432 | 0.330756846 | 0.456402612 |
| 0.206679306 | 0.15438535  | 0.118581114 | 0.271386445 |
| 0.084408481 | 0.066544473 | 0.243776946 | 0.088446049 |
| 0.009880829 | 0.037464076 | 0.030038327 | 0.040054891 |
| 0.049522818 | 0.339566823 | 0.245068292 | 0.466026238 |
| 0.033751005 | 0.349235817 | 0.151483888 | 0.092298058 |
| 0.367661881 | 0.143917877 | 0.203252932 | 0.219834818 |
| 0.147562758 | 0.003135399 | 0.031924662 | 0.455507367 |
| 0.030804223 | 0.085953037 | 0.151355871 | 0.000876721 |
| 0.016360816 | 0.441378826 | 0.079154237 | 0.148827081 |
| 0.393750442 | 0.159551098 | 0.116677351 | 0.200104852 |
| 0.194091712 | 0.033890476 | 5.71E-05    | 0.44834304  |
| 0.461973008 | 0.428531389 | 0.466715582 | 0.447962346 |
| 0.39529494  | 0.332296574 | 0.302089596 | 0.214894384 |
| 0.0305686   | 0.03985374  | 0.067301322 | 0.089495808 |
| 0.003119761 | 0.251528532 | 0.124347713 | 0.070422724 |
| 0.318378367 | 0.173743839 | 0.011458579 | 0.191735987 |
| 0.006688759 | 0.093814335 | 0.139005758 | 0.069608966 |
| 0.210404637 | 0.004409792 | 0.116948354 | 0.130378783 |
| 0.407812651 | 0.274075923 | 0.166697123 | 0.486333333 |
| 0.137051017 | 0.113972831 | 0.100417289 | 0.265632817 |
| 0.019785839 | 0.065775523 | 0.179566826 | 0.047077357 |
| 0.124133613 | 0.421483911 | 0.169702636 | 0.024339814 |
| 0.121423332 | 0.001022762 | 0.303335772 | 0.475858717 |
| 0.476145829 | 0.453825294 | 0.446314557 | 0.098537929 |
| 0.458409586 | 0.082229208 | 0.490893759 | 0.365709892 |
| 0.222137101 | 0.000240515 | 0.001153879 | 0.430707969 |
| 0.193376136 | 0.058207065 | 0.067701212 | 0.181820913 |
| 0.02753255  | 0.074137749 | 0.020772973 | 0.049218745 |
| 0.284103234 | 0.075612713 | 0.053125523 | 0.456929653 |
| 0.073777724 | 0.089495413 | 0.211424293 | 0.058277566 |
| 0.233117628 | 0.013391424 | 0.055795147 | 0.001658979 |
| 0.222144106 | 0.097448483 | 0.453919972 | 0.483022881 |
| 0.410240702 | 0.233966962 | 0.240464189 | 0.174624409 |
| 0.382391454 | 0.094849965 | 0.191903746 | 0.082406859 |
| 0.476372635 | 0.21691345  | 0.191957586 | 0.218769899 |
| 0.414646908 | 0.401716927 | 0.008999171 | 0.289139064 |
| 0.0039512   | 6.64E-05    | 0.206111692 | 0.150951156 |
| 0.03778326  | 0.155857406 | 0.150806956 | 0.102288826 |
| 0.085210051 | 0.010258623 | 0.104356253 | 0.083052763 |
| 0.131602769 | 0.144882533 | 0.096707658 | 0.166558099 |
| 0.082942433 | 0.031345232 | 0.058235536 | 0.046837525 |
| 0.123504306 | 0.254121539 | 0.154661422 | 0.005616747 |
| 0.250487935 | 0.211156029 | 0.01777641  | 0.084645508 |
| 0.350412372 | 0.43181362  | 0.009664581 | 0.000783748 |
| 0.174248975 | 0.114395713 | 0.428115141 | 0.490612522 |
| 0.485577262 | 0.435312324 | 0.31799164  | 0.027557993 |
| 0.021786112 | 0.142215519 | 0.114963796 | 0.018722893 |
| 0.468006937 | 0.047852159 | 0.465501048 | 0.130952881 |
| 0.053821157 | 0.067910226 | 0.006305876 | 0.027106699 |
| 0.22102978  | 0.079419863 | 0.045263985 | 0.097817613 |
| 0.104154017 | 0.089415188 | 0.014116737 | 0.075405959 |
| 0.231088165 | 0.063541226 | 0.066025628 | 0.138751368 |
| 0.286109531 | 0.199190277 | 0.309848865 | 0.353398694 |

|             |             |             |             |
|-------------|-------------|-------------|-------------|
| 0.072741369 | 0.047635578 | 0.131365902 | 0.281920502 |
| 0.398541765 | 0.30105974  | 0.010206534 | 0.476261795 |
| 0.423942935 | 0.311015134 | 0.474862277 | 0.273264262 |
| 0.045965874 | 0.166612927 | 0.140963278 | 0.150483372 |
| 0.077405105 | 0.18270756  | 0.086625732 | 0.025568919 |
| 0.215961527 | 0.428669521 | 0.366721237 | 0.045716363 |
| 0.278458051 | 0.093537866 | 0.042216357 | 0.4180225   |
| 0.053557562 | 0.031091185 | 1           | 0.379469283 |
| 0.000634072 | 0.053675816 | 0.422542064 | 0.082339629 |
| 0.453346312 | 0.404814297 | 0.35506876  | 0.111242686 |
| 0.000335865 | 0.278642922 | 0.192299115 | 0.153494555 |
| 0.403818423 | 0.257686292 | 0.074073316 | 0.015643577 |
| 0.172376471 | 0.067111848 | 0.034512637 | 0.176809837 |
| 0.082986582 | 0.283892066 | 0.096640934 | 0.099608663 |
| 0.0524185   | 0.080066723 | 0.094913127 | 0.08081997  |
| 0.059565109 | 0.126111884 | 0.227043389 | 0.238399703 |
| 0.077415579 | 0.358079147 | 0.322722173 | 0.008628555 |
| 0.176054446 | 0.334574388 | 0.361341039 | 0.000189825 |
| 0.295840262 | 0.000806257 | 0.053014614 | 0.05851367  |
| 0.054404786 | 0.061972993 | 0.101960541 | 0.092825523 |
| 0.212804874 | 0.068359836 | 0.086813381 | 0.100380299 |
| 0.041142778 | 0.07774387  | 0.204459232 | 0.157060454 |
| 0.087011727 | 0.040900739 | 0.086803682 | 0.101253875 |
| 0.013103163 | 0.444549594 | 0.169419098 | 0.059004421 |
| 0.095608808 | 0.154287152 | 0.237635022 | 0.496578503 |
| 0.317800716 | 0.117361679 | 0.127346072 | 0.420492234 |
| 0.185393461 | 0.137065394 | 0.027971181 | 0.210105348 |
| 0.088653508 | 0.066698246 | 0.241371332 | 0.204336842 |
| 0.351309846 | 0.319564056 | 0.163769876 | 0.364276016 |
| 0.129892481 | 0.174475334 | 0.235399998 | 0.017815762 |
| 0.057745594 | 0.080707678 | 0.091338841 | 0.000322083 |
| 0.197211709 | 0.113332355 | 0.414390945 | 0.464454588 |
| 0.135956038 | 0.290491196 | 0.231276303 | 0.027914404 |
| 0.228431644 | 0.174693948 | 0.07205996  | 0.368856489 |
| 0.105903158 | 0.060485307 | 0.112453585 | 0.185655038 |
| 0.322097957 | 0.344400187 | 0.088420414 | 0.095337089 |
| 0.098392477 | 0.11907751  | 0.441403769 | 0.054077579 |
| 0.295881871 | 0.04858312  | 0.31012505  | 0.094680347 |
| 0.059948219 | 0.476870884 | 0.025146151 | 0.483405342 |
| 0.116897173 | 0.095792852 | 0.408371318 | 0.149419539 |
| 0.121747016 | 0.029734718 | 0.079808506 | 0.207729922 |
| 0.076167258 | 0.155473523 | 0.019675981 | 0.020295754 |
| 0.181754349 | 0.159012411 | 0.392416032 | 0.249290659 |
| 0.075731764 | 0.208437092 | 0.085554484 | 0.121181184 |
| 0.493365348 | 0.478993613 | 0.079111638 | 0.14074861  |
| 0.228798975 | 0.028751887 | 0.301392675 | 0.009387021 |
| 0.269008327 | 0.296463558 | 0.216986901 | 0.014450616 |
| 0.003990873 | 0.086572556 | 0.257037073 | 0.047425959 |
| 0.401147528 | 0.106213175 | 0.279878189 | 0.323776759 |
| 0.114039372 | 0.470599007 | 0.026983993 | 0.260792218 |
| 0.021517565 | 0.133430909 | 0.191686038 | 0.213401538 |
| 0.063336994 | 0.100233874 | 0.227743436 | 0.079303451 |
| 0.006447867 | 0.081420048 | 0.001185922 | 0.3384729   |
| 0.465172398 | 0.142328815 | 0.142486146 | 0.241679117 |

|             |             |             |             |
|-------------|-------------|-------------|-------------|
| 0.136102144 | 0.311082966 | 0.086803488 | 0.254995424 |
| 0.001347301 | 0.183211789 | 0.078908771 | 0.359176632 |
| 0.118944152 | 0.212117351 | 0.011622674 | 0.132525274 |
| 0.442336108 | 0.102218291 | 0.171481925 | 0.144494387 |
| 0.479324725 | 0.351853957 | 0.137575395 | 0.070351991 |
| 0.322478746 | 0.037776129 | 0.23673846  | 0.473853208 |
| 0.046627041 | 0.065269094 | 0.340604189 | 0.055822607 |
| 0.12545897  | 0.33785211  | 0.308729765 | 0.480197644 |
| 0.012618547 | 0.115122397 | 0.321996514 | 0.410910086 |
| 0.168218176 | 0.048614996 | 0.086894251 | 0.065568804 |
| 0.453224951 | 0.031670074 | 0.090776237 | 0.234379799 |
| 0.07436503  | 0.163642364 | 0.293148528 | 0.050109968 |
| 0.00854165  | 0.054025028 | 0.162465914 | 0.066274758 |
| 0.124237166 | 0.152255751 | 0.070193409 | 0.283997768 |
| 0.035172603 | 0.003725668 | 0.355742013 | 0.004776111 |
| 0.201437003 | 0.223173813 | 0.104277719 | 0.131225184 |
| 0.131068407 | 0.202463258 | 0.193210245 | 0.000105224 |
| 0.30778571  | 0.013012646 | 0.121422572 | 0.063075649 |
| 0.127363004 | 0.01752932  | 0.411614183 | 0.438404298 |
| 0.193547389 | 0.180509383 | 0.178889199 | 0.427419161 |
| 0.05011875  | 0.195339643 | 0.166421598 | 0.327925721 |
| 0.083316972 | 0.231172597 | 0.212636674 | 0.169707842 |
| 0.277201894 | 0.107390366 |             |             |
| PJA2        | 0.083686204 | 0.42227644  | 0.061474391 |
| 0.131210472 | 0.338283476 | 0.380741931 | 0.076758166 |
| 0.150674063 | 0.352890676 | 0.357101458 | 0.352070694 |
| 0.020791387 | 0.155730401 | 0.441675959 | 0.075722115 |
| 0.407443421 | 0.043879671 | 0.126694126 | 0.117515677 |
| 0.267491058 | 0.319278008 | 0.373382358 | 0.367400729 |
| 0.341497965 | 0.174444511 | 0.344134582 | 0.436057235 |
| 0.490328371 | 0.315486848 | 0.418609272 | 0.209706105 |
| 0.395628787 | 0.358060668 | 0.419310442 | 0.01861668  |
| 0.42093882  | 0.037122849 | 0.422238338 | 0.282061461 |
| 0.188354758 | 0.327245719 | 0.347054982 | 0.247333666 |
| 0.380053038 | 0.040374655 | 0.255120053 | 0.430099718 |
| 0.35021665  | 0.330241048 | 0.076761643 | 0.41082314  |
| 0.410822278 | 0.327119063 | 0.376474602 | 0.003272132 |
| 0.357681684 | 0.155777143 | 0.31219169  | 0.490172781 |
| 0.206107297 | 0.14439481  | 0.364688128 | 0.310813556 |
| 0.432730898 | 0.408202307 | 0.284520216 | 0.400807261 |
| 0.481205612 | 0.258573709 | 0.431292904 | 0.172036373 |
| 0.394522038 | 0.045967866 | 0.166580866 | 0.10584953  |
| 0.430918889 | 0.221370485 | 0.367857057 | 0.371253027 |
| 0.414302002 | 0.506814943 | 0.258131027 | 0.485615192 |
| 0.194134783 | 0.388299243 | 0.330613966 | 0.316894134 |
| 0.389347438 | 0.121485021 | 0.382713513 | 0.504262222 |
| 0.072101153 | 0.393045011 | 0.402232626 | 0.1399553   |
| 0.4118627   | 0.388297109 | 0.390320842 | 0.233443647 |
| 0.393935575 | 0.373061405 | 0.479293975 | 0.286491606 |
| 0.376616751 | 0.08304489  | 0.468149953 | 0.36937739  |
| 0.30393658  | 0.08855181  | 0.27426202  | 0.45471564  |
| 0.401998353 | 0.478893787 | 0.415038169 | 0.368608907 |
| 0.399474877 | 0.482825519 | 0.374243197 | 0.415428006 |
| 0.219426975 | 0.515271667 | 0.190981234 | 0.053588377 |

|             |             |             |             |
|-------------|-------------|-------------|-------------|
| 0.084298637 | 0.112252458 | 0.335909012 | 0.300117712 |
| 0.458302673 | 0.345898275 | 0.203871543 | 0.257706789 |
| 0.457430776 | 0.462210842 | 0.517316087 | 0.3927665   |
| 0.046346107 | 0.358034273 | 0.391314661 | 0.313173146 |
| 0.390965405 | 0.139868179 | 0.3141176   | 0.489951694 |
| 0.347451164 | 0.416967984 | 0.179782847 | 0.485175389 |
| 0.256503039 | 0.495227604 | 0.434151141 | 0.174400454 |
| 0.498081328 | 0.472456517 | 0.497049269 | 0.4086261   |
| 0.454793097 | 0.320029334 | 0.125646616 | 0.37142987  |
| 0.472190477 | 0.020856012 | 0.477495672 | 0.499540326 |
| 0.483730412 | 0.443011818 | 0.517929203 | 0.502962061 |
| 0.491814627 | 0.087579291 | 0.064134761 | 0.31519396  |
| 0.488619313 | 0.357323828 | 0.187836506 | 0.423513886 |
| 0.399575668 | 0.384505939 | 0.429234019 | 0.309234211 |
| 0.501656347 | 0.435880088 | 0.488443519 | 0.391571998 |
| 0.343307853 | 0.298315946 | 0.419855225 | 0.446055304 |
| 0.052870895 | 0.121152726 | 0.058630712 | 0.329885329 |
| 0.345225757 | 0.192484209 | 0.372160269 | 0.40779809  |
| 0.207120703 | 0.36934298  | 0.395679785 | 0.396354715 |
| 0.062799701 | 0.42270248  | 0.178854966 | 0.186201939 |
| 0.047834828 | 0.142673385 | 0.190475811 | 0.16605625  |
| 0.284263316 | 0.228682174 | 0.435534173 | 0.485205884 |
| 0.411795088 | 0.179542951 | 0.412612217 | 0.461897742 |
| 0.408298509 | 0.393787259 | 0.246340908 | 0.01001857  |
| 0.291737915 | 0.397502043 | 0.27570229  | 0.437915962 |
| 0.175360461 | 0.275240785 | 0.400994995 | 0.392650241 |
| 0.26986982  | 0.184986305 | 0.407049424 | 0.408709986 |
| 0.159944297 | 0.320250685 | 0.423844767 | 0.4160048   |
| 0.003538809 | 0.320437398 | 0.412996157 | 0.208521777 |
| 0.340791656 | 0.186540997 | 0.293822983 | 0.447754246 |
| 0.370859484 | 0.312863302 | 0.492212529 | 0.403347832 |
| 0.374042417 | 0.221842605 | 0.521651272 | 0.094710973 |
| 0.413343814 | 0.057554415 | 0.290923833 | 0.367307894 |
| 0.257383753 | 0.308465199 | 0.36603242  | 0.306614405 |
| 0.131390005 | 0.506964629 | 0.370320428 | 0.49946153  |
| 0.394352991 | 0.52058561  | 0.440001374 | 0.416959064 |
| 0.364933348 | 0.427047847 | 0.21446317  | 0.397648847 |
| 0.439473655 | 0.338259165 | 0.083820611 | 0.437152941 |
| 0.404021494 | 0.415294647 | 0.157433826 | 0.476070173 |
| 0.475954306 | 0.45400075  | 0.172542128 | 0.379379016 |
| 0.345869273 | 0.232805593 | 0.39630152  | 0.5266708   |
| 0.368522438 | 0.392076007 | 0.357436914 | 0.379708122 |
| 0.179559286 | 0.28317985  | 0.310282449 | 0.2804595   |
| 0.015265158 | 0.101113447 | 0.073018135 | 0.185225478 |
| 0.223750256 | 0.43341209  | 0.40488276  | 0.505075007 |
| 0.13314882  | 0.400538581 | 0.269150636 | 0.294276492 |
| 0.399765816 | 0.413103977 | 0.412189717 | 0.411110544 |
| 0.257673739 | 0.018289088 | 0.120779637 | 0.501804987 |
| 0.050088449 | 0.292165998 | 0.359835324 | 0.003001438 |
| 0.054764678 | 0.394529884 | 0.099599987 | 0.183238458 |
| 0.478323979 | 0.1835561   | 0.209044872 | 0.35715072  |
| 0.34798204  | 0.106667159 | 0.003452263 | 0.485786308 |
| 0.493447045 | 0.467803529 | 0.490863727 | 0.459595174 |
| 0.449937073 | 0.416169056 | 0.405181703 | 0.342546633 |

|             |             |             |             |
|-------------|-------------|-------------|-------------|
| 0.119020158 | 0.10611367  | 0.260555114 | 0.3045602   |
| 0.008185167 | 0.367285121 | 0.363974695 | 0.149081475 |
| 0.429976824 | 0.330330438 | 0.044436265 | 0.408824772 |
| 0.019717163 | 0.253222937 | 0.351194619 | 0.270077892 |
| 0.374145888 | 0.016668968 | 0.218576528 | 0.355396528 |
| 0.403965186 | 0.316946792 | 0.401352492 | 0.514365624 |
| 0.326765695 | 0.136765297 | 0.317256652 | 0.397333735 |
| 0.084502504 | 0.149697979 | 0.397561348 | 0.04101247  |
| 0.247167987 | 0.45809998  | 0.425398811 | 0.071450142 |
| 0.270923358 | 0.004893391 | 0.332374176 | 0.516752673 |
| 0.449256357 | 0.510671091 | 0.481906831 | 0.309685203 |
| 0.484450787 | 0.196535593 | 0.519485813 | 0.378672069 |
| 0.394391233 | 0.000765917 | 0.008955931 | 0.474617249 |
| 0.395324334 | 0.06527957  | 0.168900533 | 0.336077937 |
| 0.11920806  | 0.170141407 | 0.085928162 | 0.226440426 |
| 0.411407864 | 0.276130194 | 0.24827042  | 0.457228321 |
| 0.259264581 | 0.265387715 | 0.411363718 | 0.101146295 |
| 0.420362724 | 0.059204569 | 0.105092039 | 0.008835986 |
| 0.389960599 | 0.115410614 | 0.451413447 | 0.49841138  |
| 0.475159018 | 0.391256251 | 0.369726232 | 0.375579228 |
| 0.445474605 | 0.105383823 | 0.398231555 | 0.123586049 |
| 0.465553622 | 0.387127788 | 0.303923674 | 0.276868897 |
| 0.486573869 | 0.44483158  | 0.041808847 | 0.391548968 |
| 0.012405889 | 0.004464675 | 0.346265477 | 0.289574103 |
| 0.148454656 | 0.401963081 | 0.248369974 | 0.309587245 |
| 0.301161227 | 0.032987357 | 0.33574054  | 0.304270239 |
| 0.306017631 | 0.378875904 | 0.315412218 | 0.273663203 |
| 0.311723836 | 0.179689082 | 0.228554479 | 0.194679963 |
| 0.346032044 | 0.285049968 | 0.175590686 | 0.028240463 |
| 0.416622003 | 0.413529392 | 0.06540976  | 0.169342275 |
| 0.408423817 | 0.476428722 | 0.055723567 | 0.011076889 |
| 0.255273012 | 0.368073947 | 0.492574643 | 0.485762187 |
| 0.506308735 | 0.506198383 | 0.375067086 | 0.163174834 |
| 0.079657638 | 0.343719129 | 0.339199264 | 0.129539865 |
| 0.50058826  | 0.077662343 | 0.471649134 | 0.360802987 |
| 0.133445858 | 0.221039165 | 0.038895937 | 0.102692426 |
| 0.415100094 | 0.195006233 | 0.202330474 | 0.148552084 |
| 0.332978337 | 0.303018442 | 0.061439164 | 0.211467459 |
| 0.336420722 | 0.229020618 | 0.173786696 | 0.349969573 |
| 0.346821247 | 0.309680628 | 0.422768211 | 0.431154098 |
| 0.139455337 | 0.135544609 | 0.26057915  | 0.405009943 |
| 0.421072914 | 0.425812222 | 0.026786221 | 0.442189737 |
| 0.48661971  | 0.425997903 | 0.480353703 | 0.380064915 |
| 0.097891962 | 0.379381165 | 0.402306377 | 0.367568979 |
| 0.215108296 | 0.379065147 | 0.286104066 | 0.074244701 |
| 0.293241463 | 0.475726907 | 0.393524476 | 0.178493039 |
| 0.432743487 | 0.146163222 | 0.068368301 | 0.446966015 |
| 0.231619168 | 0.096354161 | 0.379469283 | 1           |
| 0.002056392 | 0.212158885 | 0.495766426 | 0.26083906  |
| 0.511590613 | 0.466981835 | 0.413106957 | 0.306011811 |
| 0.004377949 | 0.423251827 | 0.364970747 | 0.377333948 |
| 0.41150473  | 0.338753489 | 0.222764985 | 0.084924663 |
| 0.27759594  | 0.086779121 | 0.157760956 | 0.344801749 |
| 0.242116731 | 0.403830729 | 0.211510817 | 0.248759381 |

|             |             |             |             |
|-------------|-------------|-------------|-------------|
| 0.23062806  | 0.112146955 | 0.302734224 | 0.246906254 |
| 0.253595439 | 0.239592418 | 0.33151785  | 0.344348968 |
| 0.225988668 | 0.438096275 | 0.380323463 | 0.030515352 |
| 0.411621874 | 0.404889047 | 0.429475611 | 0.00228278  |
| 0.412813054 | 0.008318143 | 0.228170733 | 0.226065647 |
| 0.224850145 | 0.25594366  | 0.290380402 | 0.315375094 |
| 0.368086913 | 0.244367509 | 0.270237132 | 0.243455731 |
| 0.178109379 | 0.248193729 | 0.403483052 | 0.369007281 |
| 0.286679351 | 0.1347833   | 0.10042436  | 0.101950778 |
| 0.058597893 | 0.459690593 | 0.226108956 | 0.079321692 |
| 0.254532924 | 0.389997797 | 0.32620353  | 0.479959851 |
| 0.405380899 | 0.113018836 | 0.384678297 | 0.416320826 |
| 0.317756729 | 0.313121443 | 0.077529516 | 0.385526367 |
| 0.249885656 | 0.252835116 | 0.411225909 | 0.302538669 |
| 0.410664979 | 0.377967116 | 0.226827286 | 0.427810626 |
| 0.365427002 | 0.40322396  | 0.326326839 | 0.093721899 |
| 0.177666668 | 0.147514869 | 0.30472795  | 0.001520191 |
| 0.357393569 | 0.24875323  | 0.449480605 | 0.465887077 |
| 0.370583936 | 0.367195232 | 0.324933081 | 0.094395756 |
| 0.288653318 | 0.168598806 | 0.149591941 | 0.42269741  |
| 0.287226076 | 0.203227004 | 0.322157269 | 0.324370295 |
| 0.421092631 | 0.424981535 | 0.329452388 | 0.290241472 |
| 0.280470888 | 0.205163103 | 0.470783152 | 0.135584118 |
| 0.427488923 | 0.214874297 | 0.375920661 | 0.307596752 |
| 0.253547851 | 0.509917365 | 0.070448563 | 0.51769316  |
| 0.361300863 | 0.140573883 | 0.47734079  | 0.339452286 |
| 0.31188685  | 0.146683557 | 0.260763856 | 0.412566234 |
| 0.276741385 | 0.395949415 | 0.02554371  | 0.090015811 |
| 0.323473226 | 0.392727005 | 0.392999726 | 0.388201794 |
| 0.300420894 | 0.342611721 | 0.263997772 | 0.317377177 |
| 0.464804384 | 0.481362285 | 0.248834385 | 0.251074425 |
| 0.347872776 | 0.114310739 | 0.375094786 | 0.034925998 |
| 0.42279144  | 0.433471099 | 0.41631138  | 0.069495817 |
| 0.023386747 | 0.273177919 | 0.406964178 | 0.085992428 |
| 0.478870692 | 0.272479269 | 0.391236195 | 0.417145037 |
| 0.199179964 | 0.477392134 | 0.15386835  | 0.385562279 |
| 0.071669737 | 0.275845442 | 0.426154839 | 0.434962477 |
| 0.231881958 | 0.338464484 | 0.358721612 | 0.281571234 |
| 0.037245795 | 0.286721751 | 0.002120577 | 0.382170674 |
| 0.452230396 | 0.384556456 | 0.20415176  | 0.375773854 |
| 0.285639104 | 0.376062434 | 0.31306645  | 0.436855585 |
| 0.011691282 | 0.377639704 | 0.221855996 | 0.378781999 |
| 0.250606907 | 0.400134774 | 0.061962553 | 0.382276153 |
| 0.437354885 | 0.315346741 | 0.263060326 | 0.322828645 |
| 0.474325947 | 0.374622562 | 0.163775243 | 0.277356965 |
| 0.413967704 | 0.075300534 | 0.400069644 | 0.522414726 |
| 0.196929037 | 0.257485801 | 0.421707578 | 0.213214076 |
| 0.380751302 | 0.371329524 | 0.427939224 | 0.519597607 |
| 0.095749822 | 0.2503572   | 0.418542833 | 0.450976401 |
| 0.299407274 | 0.238973997 | 0.296668889 | 0.266891014 |
| 0.433399921 | 0.098678772 | 0.330054995 | 0.336596491 |
| 0.267385132 | 0.329985202 | 0.360218833 | 0.236611048 |
| 0.045160227 | 0.217026138 | 0.373274423 | 0.157219902 |
| 0.309748502 | 0.375059473 | 0.286788546 | 0.362517266 |

|             |             |             |             |
|-------------|-------------|-------------|-------------|
| 0.14046756  | 0.023112699 | 0.434122338 | 0.027085426 |
| 0.325410142 | 0.381283569 | 0.267349447 | 0.386276799 |
| 0.174011109 | 0.375682298 | 0.332223941 | 0.001084409 |
| 0.400800638 | 0.061827407 | 0.376474747 | 0.246816948 |
| 0.359148733 | 0.062088179 | 0.437814064 | 0.506019247 |
| 0.331748931 | 0.395580228 | 0.380235126 | 0.454673799 |
| 0.202817447 | 0.402510575 | 0.419149389 | 0.396081138 |
| 0.290783164 | 0.395735594 | 0.435932372 | 0.388911737 |
| 0.373655711 | 0.306438689 |             |             |
| PLA2G7      | 0.010345733 | 0.002039411 | 0.01213784  |
| 0.013086189 | 0.016260059 | 0.002190551 | 0.005662184 |
| 0.005177503 | 0.002036243 | 0.000495119 | 0.008080576 |
| 0.00843387  | 0.001054481 | 0.00351596  | 0.006002823 |
| 0.003291141 | 0.015352155 | 0.011209263 | 2.15E-05    |
| 0.00136247  | 0.009724729 | 0.001015296 | 0.00027624  |
| 0.009305872 | 0.010341312 | 0.00245964  | 0.001010253 |
| 0.003107558 | 0.000369484 | 0.003489632 | 0.001472163 |
| 0.00754747  | 0.007751868 | 0.000877404 | 0.025740329 |
| 0.001856167 | 0.00016007  | 0.006175039 | 0.011092232 |
| 0.018089723 | 0.007481638 | 0.000104784 | 0.017664535 |
| 0.000768221 | 0.011116393 | 0.00204665  | 0.001904405 |
| 0.004224215 | 0.007515557 | 0.003594858 | 0.003787988 |
| 0.001012387 | 0.005114403 | 0.000253123 | 0.000392213 |
| 0.001890202 | 0.000275069 | 0.000434972 | 0.004009004 |
| 0.021399717 | 0.020264104 | 8.67E-05    | 0.001789411 |
| 0.000766382 | 0.003526862 | 0.015261483 | 0.000181708 |
| 0.003826186 | 0.000929114 | 0.002221704 | 0.002588942 |
| 0.00108911  | 0.003872399 | 0.020944122 | 0.004219043 |
| 0.001390576 | 0.025579958 | 0.007217049 | 0.006057053 |
| 0.001440888 | 0.005175567 | 0.015166436 | 0.003330571 |
| 0.000492849 | 0.004231355 | 0.012893225 | 0.015209847 |
| 0.002762777 | 0.002873084 | 0.005894809 | 0.005554747 |
| 0.003408558 | 0.000131008 | 0.001698028 | 0.00370999  |
| 0.003207264 | 0.001135251 | 0.000116928 | 0.0062178   |
| 0.008667435 | 0.004157959 | 0.003225284 | 0.009101158 |
| 0.006699183 | 0.006107408 | 0.003169369 | 0.005387195 |
| 0.009998122 | 0.02119688  | 0.005381548 | 0.00250283  |
| 0.004335665 | 0.003301075 | 0.001053195 | 0.003853283 |
| 0.002496893 | 0.004704231 | 0.007538961 | 0.003030909 |
| 0.000464747 | 0.003262302 | 0.028125639 | 0.012617235 |
| 0.003784905 | 0.020357482 | 0.001871054 | 0.013108198 |
| 0.004155571 | 0.005955199 | 0.007908537 | 0.018623191 |
| 0.004714923 | 0.002514898 | 0.002768442 | 0.0028692   |
| 0.013909198 | 0.00153931  | 0.004168184 | 0.00338959  |
| 0.00244179  | 0.011238946 | 0.007287742 | 0.004095698 |
| 0.009641398 | 0.003793145 | 0.005906841 | 0.005544748 |
| 0.002387144 | 0.006997066 | 0.001978677 | 0.022022316 |
| 0.005620637 | 0.004509756 | 0.006725154 | 0.00503635  |
| 0.005651437 | 0.008401967 | 0.000700691 | 0.003524284 |
| 0.007248235 | 0.000480046 | 0.002373672 | 0.003018277 |
| 0.003429648 | 0.002824119 | 0.005124995 | 0.004017334 |
| 0.002690835 | 0.014098622 | 8.68E-05    | 0.010791923 |
| 0.003965843 | 0.010220724 | 0.008862161 | 0.000797047 |
| 0.003430326 | 0.001461093 | 0.002439165 | 6.42E-05    |

|             |             |             |             |
|-------------|-------------|-------------|-------------|
| 0.006659368 | 0.005609358 | 0.002282248 | 0.001870992 |
| 0.001378331 | 0.008377902 | 0.001294864 | 0.003655248 |
| 0.031247788 | 0.006995198 | 0.010630354 | 0.006627007 |
| 0.000723677 | 0.027199851 | 0.000824492 | 0.002617436 |
| 0.019731151 | 0.000966605 | 0.000834661 | 0.005397058 |
| 0.005757832 | 0.000573768 | 0.026102459 | 0.004789415 |
| 0.024745257 | 0.011080034 | 0.001645914 | 0.016420541 |
| 0.009470859 | 0.005552469 | 0.00093962  | 0.005135136 |
| 0.001856249 | 0.01217574  | 0.001951029 | 0.007742877 |
| 0.009761451 | 0.005164188 | 0.007652741 | 0.018330826 |
| 0.000735709 | 0.000291428 | 0.001138255 | 0.001164591 |
| 0.008526774 | 0.001202018 | 0.002208838 | 0.007462224 |
| 0.003386452 | 0.001744889 | 0.000920304 | 0.007035678 |
| 0.005496421 | 0.007510672 | 0.00470138  | 0.000430386 |
| 0.022015996 | 0.006770978 | 0.003315688 | 0.003757339 |
| 0.002504267 | 0.000213634 | 0.001710823 | 0.00476247  |
| 7.68E-05    | 0.002972683 | 0.003381984 | 0.007714025 |
| 0.000172434 | 0.00321055  | 0.00446497  | 0.000330689 |
| 0.002782179 | 0.028886283 | 0.017500201 | 0.000174899 |
| 0.012151487 | 0.009791795 | 0.006152626 | 0.014320363 |
| 0.009220865 | 0.003028967 | 0.006917656 | 0.003492539 |
| 0.000648692 | 0.004967564 | 0.00327048  | 0.005291269 |
| 0.006559097 | 0.000338164 | 0.000563558 | 0.004167572 |
| 0.005085016 | 0.00016134  | 0.007203198 | 0.001036241 |
| 0.000438032 | 0.003065791 | 0.008999659 | 0.005890794 |
| 0.007759773 | 0.002188196 | 0.009585236 | 0.008452919 |
| 0.00926234  | 0.015784499 | 0.007046402 | 0.004644881 |
| 0.000139626 | 0.00171856  | 0.003542153 | 0.012551136 |
| 0.022158138 | 0.004179099 | 0.008009978 | 0.001168716 |
| 0.000416368 | 0.004416541 | 0.011626514 | 0.02493557  |
| 0.013861647 | 0.000180678 | 0.005019069 | 0.003505722 |
| 0.012589603 | 0.006704043 | 0.005525641 | 0.003656026 |
| 0.003697364 | 0.001160457 | 0.003661505 | 0.004330334 |
| 0.012636804 | 0.022589889 | 0.005874405 | 0.005603794 |
| 0.003655967 | 0.004345933 | 0.00115289  | 0.00027264  |
| 0.004352144 | 0.000487634 | 0.009083913 | 0.013339261 |
| 0.004981769 | 0.013286001 | 0.009102933 | 7.06E-05    |
| 0.012926597 | 0.021446059 | 0.008528757 | 0.003791559 |
| 0.003200039 | 0.003242164 | 0.002682407 | 0.003051979 |
| 0.003219709 | 0.002696239 | 0.005813017 | 0.002555893 |
| 0.011840066 | 0.007541702 | 0.00309598  | 0.007337714 |
| 1.87E-06    | 0.014080377 | 0.006942936 | 0.01963077  |
| 0.002472753 | 0.004561832 | 0.010875452 | 0.00372076  |
| 0.011407765 | 0.001301347 | 0.000320286 | 0.007540163 |
| 0.009245481 | 0.025909302 | 0.000236553 | 0.000503017 |
| 0.003749155 | 0.00498835  | 0.002003899 | 0.004690203 |
| 0.009539991 | 0.003185259 | 0.015858604 | 0.006674272 |
| 0.011428302 | 1.93E-05    | 0.000345332 | 0.000138957 |
| 0.003430492 | 0.000852533 | 0.012819922 | 3.63E-05    |
| 0.02570536  | 0.00639918  | 0.004006266 | 0.013276762 |
| 0.004265103 | 0.00450988  | 0.005569459 | 0.002651055 |
| 0.000268974 | 0.003315242 | 0.002900779 | 0.004641593 |
| 0.000446917 | 0.000128881 | 0.004278753 | 0.000241486 |
| 0.00622175  | 0.01906804  | 0.00066208  | 0.003547988 |
|             |             |             | 0.015104391 |



|             |             |             |             |
|-------------|-------------|-------------|-------------|
| 0.002366083 | 0.013798822 | 0.021938451 | 0.003376335 |
| 0.018456805 | 0.006417054 | 0.00217234  | 0.014553168 |
| 0.013777574 | 6.41E-05    | 0.006992651 | 0.003889036 |
| 0.018327004 | 0.007169418 | 0.000894645 | 0.007594805 |
| 0.006908145 | 0.003697967 | 0.003172916 | 0.006455439 |
| 0.00934274  | 0.000864674 | 0.000220668 | 0.003581517 |
| 0.002915444 | 0.000337223 | 0.003890739 | 0.002600311 |
| 0.003827461 | 0.012448384 | 0.010765332 | 0.005028481 |
| 0.005330767 | 0.012477272 | 0.005511866 | 0.012057421 |
| 0.000428249 | 0.001694699 | 0.006204218 | 0.00012085  |
| 0.001557606 | 0.016705033 | 0.001727637 | 0.004633416 |
| 0.003949171 | 0.002784295 | 0.004521899 | 0.015172242 |
| 0.003584028 | 0.008699689 | 0.005671896 | 0.013947046 |
| 0.003200473 | 0.025822461 | 0.005390871 | 7.05E-05    |
| 0.006150158 | 0.008913897 | 0.010991652 | 0.001067376 |
| 0.001823157 | 0.018800939 | 0.016274613 | 0.006394122 |
| 0.003559404 | 0.003365007 | 0.021252214 | 0.009540658 |
| 0.001984152 | 0.003821672 | 0.002514641 | 0.003983804 |
| 0.005927219 | 0.007740894 | 0.006805351 | 0.015190239 |
| 0.01196337  | 0.009493332 | 0.036936678 | 0.003148963 |
| 0.002667773 | 0.003543516 | 0.004546672 | 0.014970069 |
| 0.021619767 | 0.020122456 | 0.018945271 | 0.00239087  |
| 0.013452997 | 0.030399489 | 0.00812771  | 0.004190645 |
| 0.00530108  | 0.012110195 | 0.015028489 | 0.005123374 |
| 0.002768884 | 0.014496757 | 0.002732798 | 0.006771229 |
| 0.00023924  | 0.003072643 | 0.007714636 | 0.012034209 |
| 0.006811442 | 0.001467136 | 0.003888337 | 0.002425949 |
| 5.69E-05    | 0.002850895 | 0.001425731 | 0.004466062 |
| 0.001508628 | 0.003628953 | 0.007001993 | 0.011885957 |
| 0.002978346 | 0.001118877 | 0.004554602 | 0.008885195 |
| 0.002709703 | 0.007116013 | 0.014169543 | 0.009747965 |
| 0.004584148 | 0.004201519 | 0.023843534 | 0.001072674 |
| 0.002187347 | 0.002563123 | 0.002497833 | 0.005782068 |
| 0.00219977  | 0.000634072 | 0.002056392 | 1           |
| 0.005148397 | 0.005088371 | 0.007234566 | 0.005634456 |
| 0.005730822 | 0.008046361 | 0.003368741 | 2.08E-05    |
| 0.003437703 | 0.006108744 | 0.003171691 | 0.0017267   |
| 0.006251027 | 0.000688345 | 0.018594947 | 0.020243428 |
| 0.005162902 | 0.005006471 | 0.000430912 | 0.000173834 |
| 0.000713891 | 0.017264456 | 0.005604577 | 0.022651376 |
| 0.001957208 | 0.004287785 | 0.027376311 | 0.001529472 |
| 0.01725885  | 0.009346515 | 0.000778648 | 0.000150208 |
| 0.003321752 | 0.003072145 | 0.020482293 | 0.002968453 |
| 0.004525433 | 0.006399885 | 7.62E-05    | 0.003165394 |
| 0.018626999 | 0.013473042 | 0.025864338 | 0.026113897 |
| 0.005718513 | 0.015927409 | 0.016556628 | 0.002818247 |
| 0.013350777 | 0.018638325 | 0.021209109 | 0.03286425  |
| 0.015210181 | 0.00619235  | 0.004220694 | 0.008868734 |
| 0.020747475 | 0.010166273 | 0.008017847 | 0.010005954 |
| 0.002580898 | 0.012799035 | 0.012903361 | 0.013662104 |
| 0.002001683 | 0.014812908 | 0.002504578 | 0.009974105 |
| 0.004986239 | 0.00220565  | 0.002719157 | 0.00055903  |
| 0.000108564 | 0.001901536 | 0.007419025 | 0.009415389 |
| 0.002532395 | 0.001063012 | 0.001846643 | 0.0007973   |

|             |             |             |             |
|-------------|-------------|-------------|-------------|
| 0.009342385 | 0.01165176  | 0.008319487 | 0.009934252 |
| 0.001075124 | 0.000355661 | 0.016287868 | 0.013878573 |
| 0.009207746 | 0.013446279 | 0.031002138 | 0.004556652 |
| 0.004439283 | 0.003018765 | 0.004365883 | 0.000849308 |
| 0.011523752 | 0.000163948 | 0.005905873 | 0.000360269 |
| 0.004420697 | 0.013109733 | 0.00263526  | 0.000700008 |
| 0.02331145  | 0.015766332 | 0.00072706  | 0.004873379 |
| 0.002361386 | 0.006447478 | 0.001710252 | 0.011121353 |
| 0.013894028 | 0.004203074 | 0.011398899 | 0.00075237  |
| 0.023040548 | 0.000100097 | 0.006957284 | 0.013046887 |
| 0.004025889 | 0.017743    | 0.003185143 | 0.002757932 |
| 0.010571332 | 0.007255826 | 0.003730471 | 0.007060492 |
| 0.025645679 | 0.002429055 | 0.000330135 | 0.004084657 |
| 0.001497769 | 0.005276501 | 4.35E-06    | 0.011639711 |
| 0.000490511 | 0.000885374 | 0.004143549 | 0.013788343 |
| 0.010870511 | 0.000823209 | 0.001722661 | 0.002256695 |
| 0.003735691 | 0.001766269 | 0.016253731 | 0.003512133 |
| 0.016595381 | 0.001103319 | 3.27E-05    | 0.001213569 |
| 0.000657423 | 0.000413216 | 0.009711618 | 0.010567536 |
| 0.002028274 | 0.001881282 | 0.003683005 | 0.004769953 |
| 0.000616565 | 0.000778905 | 0.004484107 | 0.006652316 |
| 0.004070714 | 0.018749353 | 0.006332835 | 0.000701343 |
| 0.013178639 | 0.002604057 | 0.000337714 | 0.008151876 |
| 0.005490216 | 0.011388523 | 0.008187633 | 0.026052999 |
| 0.006600697 | 0.000247439 | 0.00756411  | 0.003391804 |
| 0.003042645 | 0.010546046 | 0.001386644 | 0.021986884 |
| 0.007036407 | 0.000310431 | 0.000754626 | 0.018604218 |
| 0.004434097 | 0.018661122 | 0.004627451 | 0.000248579 |
| 0.001147484 | 0.051520814 | 0.003168555 | 0.003949854 |
| 0.000277971 | 0.007735668 | 0.000673611 | 0.003273185 |
| 0.003997117 | 0.008546523 | 0.013951316 | 0.000438389 |
| 0.008686093 | 4.09E-05    | 0.004007705 | 0.018952863 |
| 0.012509536 | 0.005379547 | 0.01011836  | 0.001989306 |
| 0.004349999 | 0.00078832  | 0.003212883 | 0.012702529 |
| 0.015504111 | 0.004770313 | 0.003117064 | 0.015980868 |
| 0.009847508 | 0.002056761 | 0.006469522 | 0.00314153  |
| 0.009682099 | 0.002410454 | 0.007127627 | 0.003250314 |
| 0.009687568 | 0.00046548  | 0.014144705 | 0.001939675 |
| 0.004089697 | 0.001643082 | 0.016990385 | 0.006993409 |
| 0.008189825 | 0.011111112 | 0.012652615 | 0.016060113 |
| 0.021279941 | 0.009783982 | 8.46E-05    | 0.004394622 |
| 0.008661418 | 0.011299837 | 0.005292628 | 0.015827435 |
| 0.002621496 | 0.001178866 | 4.64E-05    | 0.005837231 |
| 0.042453266 | 0.003305942 | 0.008479314 | 6.61E-05    |
| 0.004588448 | 0.006228964 | 0.004320318 | 0.006431298 |
| 0.000180039 | 2.78E-05    | 0.003075632 | 0.001321343 |
| 0.000108818 | 0.000113718 | 0.001805522 | 0.005126118 |
| 1.34E-05    | 0.000109184 | 0.002358112 | 0.005369134 |
| 0.004415819 |             |             |             |
| PLAC8       | 0.005750766 | 0.113906324 | 0.003015187 |
| 0.017499271 | 0.268670155 | 0.07598088  | 0.004823657 |
| 0.011835167 | 0.090927396 | 0.038740382 | 0.143913147 |
| 0.000950946 | 0.253437663 | 0.155532237 | 0.005768801 |
| 0.218755109 | 0.004498339 | 0.017142189 | 0.018202595 |

|             |             |             |             |
|-------------|-------------|-------------|-------------|
| 0.033398348 | 0.227972476 | 0.126219315 | 0.05566412  |
| 0.220620654 | 0.029534026 | 0.062513038 | 0.204075007 |
| 0.163036141 | 0.101683418 | 0.197022711 | 0.023280701 |
| 0.116720897 | 0.28327277  | 0.197045871 | 0.00053985  |
| 0.132672724 | 0.041887337 | 0.103033576 | 0.089595376 |
| 0.165132861 | 0.089345016 | 0.043725222 | 0.072397942 |
| 0.062231428 | 0.001613433 | 0.03125166  | 0.198415261 |
| 0.077166086 | 0.069210851 | 0.004078722 | 0.149564215 |
| 0.071090437 | 0.084181361 | 0.085467028 | 5.34E-05    |
| 0.259168339 | 0.214307118 | 0.212880589 | 0.141933565 |
| 0.055730998 | 0.034593156 | 0.072046877 | 0.055000698 |
| 0.156971581 | 0.193999251 | 0.109146648 | 0.054621068 |
| 0.15250243  | 0.196221803 | 0.195822445 | 0.028397304 |
| 0.069148923 | 0.001536506 | 0.03671697  | 0.008359497 |
| 0.108875475 | 0.082040613 | 0.204684635 | 0.219464268 |
| 0.096303272 | 0.14597996  | 0.071793279 | 0.118820601 |
| 0.125370287 | 0.287820012 | 0.157776893 | 0.155606004 |
| 0.144750074 | 0.00848558  | 0.164971418 | 0.158132678 |
| 0.003906075 | 0.076977336 | 0.127204602 | 0.014217038 |
| 0.129878203 | 0.140013691 | 0.072313893 | 0.217328101 |
| 0.288527279 | 0.20798881  | 0.126248065 | 0.084981264 |
| 0.218607695 | 0.005782333 | 0.103451329 | 0.329528439 |
| 0.122524078 | 0.007826412 | 0.094596753 | 0.223554136 |
| 0.142405487 | 0.165465967 | 0.129907383 | 0.133771606 |
| 0.200332913 | 0.162005193 | 0.133754922 | 0.14031966  |
| 0.033663834 | 0.155820052 | 0.035342034 | 0.005980584 |
| 0.003685268 | 0.020875049 | 0.095815206 | 0.116494996 |
| 0.196941083 | 0.103511362 | 0.026370322 | 0.10997232  |
| 0.238011212 | 0.104353117 | 0.151092069 | 0.143796377 |
| 0.003002851 | 0.162944255 | 0.184144139 | 0.043446774 |
| 0.142951081 | 0.02181042  | 0.284348726 | 0.1214209   |
| 0.113000739 | 0.21786962  | 0.014311474 | 0.121151565 |
| 0.03986897  | 0.174244594 | 0.125810463 | 0.039196443 |
| 0.140621513 | 0.116833036 | 0.196939513 | 0.298930615 |
| 0.129081553 | 0.062865449 | 0.018006699 | 0.126065872 |
| 0.188945034 | 0.034736205 | 0.197584859 | 0.205200366 |
| 0.133342222 | 0.212468783 | 0.209222435 | 0.197489696 |
| 0.1360246   | 0.008679766 | 0.02076061  | 0.178922419 |
| 0.12902262  | 0.130113946 | 0.043045227 | 0.149501946 |
| 0.239156805 | 0.068279503 | 0.200734442 | 0.062475754 |
| 0.175207005 | 0.177220135 | 0.180350273 | 0.120330997 |
| 0.060002404 | 0.077823694 | 0.240620235 | 0.097776273 |
| 0.004942021 | 0.009107613 | 0.003697891 | 0.12007496  |
| 0.030941399 | 0.068020301 | 0.047823771 | 0.189878507 |
| 0.067432203 | 0.053205459 | 0.205827735 | 0.288071178 |
| 0.004071394 | 0.126986572 | 0.029433221 | 0.020100028 |
| 0.005281639 | 0.023475682 | 0.023528464 | 0.028570883 |
| 0.135876215 | 0.032044161 | 0.181266414 | 0.192117588 |
| 0.128068478 | 0.027558252 | 0.137022074 | 0.180218854 |
| 0.171770247 | 0.230589532 | 0.064150133 | 0.002884122 |
| 0.054632756 | 0.088954005 | 0.204941221 | 0.202093397 |
| 0.02662121  | 0.036400965 | 0.154545058 | 0.280641422 |
| 0.034704071 | 0.016427771 | 0.10627331  | 0.111001346 |
| 0.019267261 | 0.127125052 | 0.189513172 | 0.097923673 |

|             |             |             |             |
|-------------|-------------|-------------|-------------|
| 0.000590355 | 0.069943491 | 0.181119865 | 0.101159911 |
| 0.082635223 | 0.15299224  | 0.164385948 | 0.181298247 |
| 0.119970363 | 0.181799097 | 0.205896066 | 0.292493197 |
| 0.055745062 | 0.030378545 | 0.197834157 | 0.059069427 |
| 0.209055011 | 0.040133464 | 0.149793626 | 0.05519353  |
| 0.062504457 | 0.130648228 | 0.302977165 | 0.157699666 |
| 0.013278311 | 0.151592933 | 0.139490907 | 0.180761925 |
| 0.091527904 | 0.189474065 | 0.205195386 | 0.16734491  |
| 0.125083234 | 0.146990859 | 0.231970943 | 0.161498175 |
| 0.186324579 | 0.04650006  | 0.006376505 | 0.195215309 |
| 0.083178084 | 0.233034118 | 0.09094059  | 0.181272565 |
| 0.14480211  | 0.101319565 | 0.040154524 | 0.242892072 |
| 0.134375888 | 0.04670366  | 0.185756709 | 0.195966249 |
| 0.03580884  | 0.166073353 | 0.12438262  | 0.249055068 |
| 0.034815865 | 0.124862666 | 0.09530328  | 0.232688643 |
| 0.037366698 | 0.007257089 | 0.005553787 | 0.078726783 |
| 0.225212745 | 0.152047647 | 0.193838408 | 0.165896028 |
| 0.022564336 | 0.142337924 | 0.067004891 | 0.071347594 |
| 0.104208028 | 0.170000884 | 0.276338945 | 0.240209678 |
| 0.071405298 | 0.004973348 | 0.02155052  | 0.138166972 |
| 0.002044852 | 0.188276746 | 0.068009689 | 0.000885189 |
| 0.00236141  | 0.108254811 | 0.010551935 | 0.033642033 |
| 0.243396752 | 0.031249368 | 0.033155107 | 0.034374124 |
| 0.183568819 | 0.01528509  | 0.005234679 | 0.172773469 |
| 0.156776847 | 0.149896822 | 0.147680344 | 0.119650512 |
| 0.169162115 | 0.1792537   | 0.208833242 | 0.057292425 |
| 0.009639793 | 0.006025187 | 0.127152998 | 0.104204688 |
| 0.000460558 | 0.202507378 | 0.191773133 | 0.029427313 |
| 0.227941245 | 0.101830642 | 0.002595422 | 0.263831156 |
| 0.000822054 | 0.16995899  | 0.030514471 | 0.078169954 |
| 0.253629552 | 0.000438856 | 0.030098501 | 0.0781502   |
| 0.09441032  | 0.084238031 | 0.160895361 | 0.160912686 |
| 0.126357321 | 0.011954224 | 0.137117111 | 0.239239991 |
| 0.007116655 | 0.01649412  | 0.056191158 | 0.004957667 |
| 0.047130066 | 0.133612594 | 0.110482881 | 0.00389567  |
| 0.074907867 | 0.000613064 | 0.085910777 | 0.165871043 |
| 0.107616772 | 0.199877794 | 0.164245546 | 0.25652452  |
| 0.150139094 | 0.203909497 | 0.176892462 | 0.106195392 |
| 0.061798307 | 0.000178286 | 0.001863347 | 0.202858174 |
| 0.172831871 | 0.003934006 | 0.034634595 | 0.039211972 |
| 0.01797666  | 0.011233304 | 0.008757609 | 0.172558181 |
| 0.15173754  | 0.197623017 | 0.170082755 | 0.108289883 |
| 0.070490736 | 0.098072321 | 0.060196844 | 0.009991597 |
| 0.218732329 | 0.005255988 | 0.010776314 | 0.004853034 |
| 0.241144445 | 0.011780205 | 0.095013328 | 0.152970786 |
| 0.162065008 | 0.248681718 | 0.054350392 | 0.063472709 |
| 0.202177671 | 0.007606323 | 0.089241629 | 0.009834732 |
| 0.123385654 | 0.179397436 | 0.116916353 | 0.073415954 |
| 0.178828864 | 0.132880545 | 0.002982615 | 0.175291394 |
| 0.001572328 | 0.008217776 | 0.050254312 | 0.084554619 |
| 0.058872767 | 0.15229654  | 0.07146119  | 0.049348225 |
| 0.073778823 | 0.001561001 | 0.229864913 | 0.220168541 |
| 0.123719906 | 0.133256306 | 0.270453988 | 0.070277785 |
| 0.154375928 | 0.08939307  | 0.07109629  | 0.03190482  |

|             |             |             |             |
|-------------|-------------|-------------|-------------|
| 0.056180739 | 0.065121007 | 0.029074489 | 0.001193062 |
| 0.113726292 | 0.173985659 | 0.006549413 | 0.030535704 |
| 0.178274176 | 0.189313641 | 0.004900138 | 0.002720986 |
| 0.06318772  | 0.112704693 | 0.212703133 | 0.141084803 |
| 0.137138516 | 0.179820759 | 0.100067704 | 0.044214787 |
| 0.006793647 | 0.168149532 | 0.286539389 | 0.069648862 |
| 0.168209683 | 0.004278972 | 0.136763226 | 0.324296479 |
| 0.021309132 | 0.038591726 | 0.00566763  | 0.014953027 |
| 0.281778659 | 0.046567001 | 0.097523371 | 0.015278907 |
| 0.10357572  | 0.174066811 | 0.004660323 | 0.051635069 |
| 0.099604103 | 0.150538019 | 0.034299236 | 0.05745841  |
| 0.103688061 | 0.02896286  | 0.210156067 | 0.146202025 |
| 0.019490214 | 0.014552055 | 0.014832469 | 0.189138921 |
| 0.167693349 | 0.122419538 | 0.003453762 | 0.112302082 |
| 0.198334822 | 0.1799828   | 0.133011627 | 0.187421736 |
| 0.010990553 | 0.189417129 | 0.191138446 | 0.163946881 |
| 0.049602067 | 0.076335974 | 0.087182895 | 0.007646745 |
| 0.099882394 | 0.129630494 | 0.114942758 | 0.053245706 |
| 0.15446162  | 0.011642313 | 0.003220362 | 0.177516794 |
| 0.148991552 | 0.005813284 | 0.053675816 | 0.212158885 |
| 0.005148397 | 1           | 0.213825305 | 0.054540008 |
| 0.168681027 | 0.193893288 | 0.1327502   | 0.041916086 |
| 0.007837001 | 0.237169507 | 0.158184728 | 0.102238636 |
| 0.111203137 | 0.100586467 | 0.033238585 | 0.013764861 |
| 0.113719649 | 0.006415372 | 0.02416404  | 0.043653982 |
| 0.098403361 | 0.098097513 | 0.066049895 | 0.050755273 |
| 0.099210099 | 0.008492355 | 0.198725265 | 0.05799754  |
| 0.140243437 | 0.080462043 | 0.136582497 | 0.031488242 |
| 0.092354257 | 0.179088883 | 0.117620597 | 0.001555187 |
| 0.272114873 | 0.17023624  | 0.181657443 | 0.000990189 |
| 0.206689179 | 0.000511    | 0.104875231 | 0.102970708 |
| 0.089555879 | 0.081238131 | 0.179780254 | 0.123405067 |
| 0.09312024  | 0.056760577 | 0.076598978 | 0.090442433 |
| 0.058952001 | 0.054270171 | 0.196714546 | 0.070381191 |
| 0.11944148  | 0.017593531 | 0.01129536  | 0.01010527  |
| 0.007648288 | 0.165117175 | 0.057105707 | 0.006514491 |
| 0.095184944 | 0.075663695 | 0.131921313 | 0.125503631 |
| 0.187491769 | 0.010651454 | 0.106794024 | 0.125976086 |
| 0.045045063 | 0.035418526 | 0.002679553 | 0.09950122  |
| 0.062788214 | 0.112052103 | 0.100265921 | 0.042551885 |
| 0.119457454 | 0.10938709  | 0.055661608 | 0.159264976 |
| 0.123040716 | 0.11015693  | 0.031807052 | 0.021436541 |
| 0.025333054 | 0.021043116 | 0.260827403 | 0.00073136  |
| 0.127250399 | 0.018270261 | 0.184771885 | 0.120030746 |
| 0.225354775 | 0.142835547 | 0.023007746 | 0.005930177 |
| 0.021612399 | 0.019953388 | 0.026087974 | 0.171762596 |
| 0.220838076 | 0.036661446 | 0.204304013 | 0.02529835  |
| 0.211718149 | 0.178876186 | 0.140960087 | 0.046441529 |
| 0.087831043 | 0.032358538 | 0.123509951 | 0.010617909 |
| 0.139555997 | 0.143820758 | 0.069276606 | 0.119706364 |
| 0.108969759 | 0.186164794 | 0.006542636 | 0.187895447 |
| 0.131013016 | 0.019683851 | 0.15205025  | 0.079609444 |
| 0.03895993  | 0.05803778  | 0.256108428 | 0.058509137 |
| 0.04232072  | 0.20261853  | 0.00347871  | 0.042660331 |

|             |             |             |             |
|-------------|-------------|-------------|-------------|
| 0.157365111 | 0.07793016  | 0.10769274  | 0.16526289  |
| 0.202575267 | 0.182169052 | 0.245039999 | 0.045199236 |
| 0.106948757 | 0.114335078 | 0.035972157 | 0.083837375 |
| 0.10953088  | 0.017281059 | 0.082988446 | 0.008777982 |
| 0.164066632 | 0.19151174  | 0.05071413  | 0.006305955 |
| 0.001350441 | 0.202454107 | 0.125370598 | 0.005776508 |
| 0.22534169  | 0.174932431 | 0.096563328 | 0.190115579 |
| 0.0360299   | 0.111010615 | 0.048671944 | 0.19958293  |
| 0.002446319 | 0.086773119 | 0.224139552 | 0.126509062 |
| 0.077927064 | 0.224826067 | 0.180640712 | 0.254300534 |
| 0.003418814 | 0.085871666 | 0.000494251 | 0.093018688 |
| 0.09723007  | 0.209838159 | 0.045043921 | 0.043164439 |
| 0.142218759 | 0.14815548  | 0.072795323 | 0.151928446 |
| 0.002447721 | 0.247256727 | 0.067324333 | 0.120404641 |
| 0.066783165 | 0.106029305 | 0.012564322 | 0.224731274 |
| 0.088249701 | 0.057605907 | 0.076033911 | 0.057851564 |
| 0.132928653 | 0.1263679   | 0.020031376 | 0.117403619 |
| 0.117491621 | 0.006422724 | 0.062224039 | 0.174135908 |
| 0.073111945 | 0.250376736 | 0.241487175 | 0.047866129 |
| 0.250771947 | 0.110334743 | 0.142821939 | 0.165233957 |
| 0.032962794 | 0.082167673 | 0.222563336 | 0.13942115  |
| 0.147155428 | 0.199787452 | 0.185917245 | 0.121667712 |
| 0.103195195 | 0.011698305 | 0.126735838 | 0.099850701 |
| 0.195209887 | 0.143744775 | 0.067906401 | 0.153665047 |
| 0.006577007 | 0.031021939 | 0.074517982 | 0.02811268  |
| 0.110460132 | 0.166774215 | 0.131011363 | 0.130317366 |
| 0.042090064 | 0.004830213 | 0.152433452 | 0.043597652 |
| 0.060837105 | 0.210275031 | 0.082883082 | 0.187468976 |
| 0.03173624  | 0.094902215 | 0.04387495  | 0.002081384 |
| 0.200426945 | 0.066461472 | 0.134377175 | 0.097706963 |
| 0.106573502 | 0.002952378 | 0.131476927 | 0.211626652 |
| 0.094643171 | 0.083804952 | 0.097660062 | 0.138071424 |
| 0.188053264 | 0.149984305 | 0.134438894 | 0.099192265 |
| 0.269633226 | 0.070686529 | 0.120442348 | 0.164620727 |
| 0.125435018 | 0.057124582 |             |             |
| PLEKHA1     | 0.128715263 | 0.451565098 | 0.09860079  |
| 0.196953395 | 0.402761554 | 0.454008056 | 0.122535976 |
| 0.214277865 | 0.431061055 | 0.386573619 | 0.428480277 |
| 0.039293844 | 0.146639101 | 0.470702629 | 0.117792257 |
| 0.467834534 | 0.075651583 | 0.188049529 | 0.140415149 |
| 0.351022041 | 0.37635125  | 0.406674355 | 0.434966203 |
| 0.401237636 | 0.241764504 | 0.431080183 | 0.473722189 |
| 0.48335187  | 0.312065254 | 0.486570656 | 0.251754501 |
| 0.417395562 | 0.411513311 | 0.452241274 | 0.038474052 |
| 0.48540718  | 0.039569205 | 0.44168739  | 0.360162495 |
| 0.227223764 | 0.382226052 | 0.401683236 | 0.326219275 |
| 0.447677726 | 0.070741556 | 0.255623364 | 0.487372476 |
| 0.438121105 | 0.414193105 | 0.11685396  | 0.492149863 |
| 0.472540718 | 0.409940529 | 0.44090553  | 0.004043042 |
| 0.375279737 | 0.135583366 | 0.304913214 | 0.492913366 |
| 0.284620098 | 0.207351091 | 0.373597645 | 0.378858178 |
| 0.482507306 | 0.475352999 | 0.36930272  | 0.451271243 |
| 0.479977037 | 0.260608741 | 0.496408645 | 0.23139089  |
| 0.466133803 | 0.07835644  | 0.24140622  | 0.158760572 |

|             |             |             |             |
|-------------|-------------|-------------|-------------|
| 0.484838991 | 0.297406821 | 0.427481285 | 0.414433754 |
| 0.437431239 | 0.51502822  | 0.34843697  | 0.492369801 |
| 0.196013079 | 0.433563627 | 0.394605947 | 0.401789905 |
| 0.462161087 | 0.176880229 | 0.464946287 | 0.510141702 |
| 0.111461526 | 0.446870011 | 0.473154005 | 0.197643169 |
| 0.463685431 | 0.405122612 | 0.443187819 | 0.2469803   |
| 0.459586634 | 0.4292295   | 0.482816981 | 0.369508319 |
| 0.427610432 | 0.129210847 | 0.478389368 | 0.409521644 |
| 0.367772385 | 0.142031811 | 0.331237034 | 0.499405503 |
| 0.481902127 | 0.478295481 | 0.473607937 | 0.446542443 |
| 0.453842376 | 0.482175782 | 0.464735979 | 0.461292652 |
| 0.212922629 | 0.512299968 | 0.273044107 | 0.086182862 |
| 0.129170851 | 0.164792865 | 0.374695795 | 0.387320164 |
| 0.491225271 | 0.429126826 | 0.28136027  | 0.336445613 |
| 0.490146998 | 0.467685353 | 0.5125187   | 0.470737904 |
| 0.080162645 | 0.373380134 | 0.455730233 | 0.387165    |
| 0.459817354 | 0.20398553  | 0.348835524 | 0.499620242 |
| 0.415903988 | 0.489815845 | 0.256073131 | 0.500946734 |
| 0.324009289 | 0.500699573 | 0.464727838 | 0.249743331 |
| 0.50823976  | 0.483827514 | 0.496942417 | 0.466116812 |
| 0.464937844 | 0.410929336 | 0.123161398 | 0.453039435 |
| 0.474042836 | 0.024900056 | 0.495925136 | 0.494785661 |
| 0.485375436 | 0.495583518 | 0.511965126 | 0.493222405 |
| 0.489393154 | 0.139118383 | 0.05809688  | 0.386354056 |
| 0.495173738 | 0.439894322 | 0.245912628 | 0.472345414 |
| 0.451901257 | 0.459546043 | 0.495360026 | 0.342846132 |
| 0.507237012 | 0.485105962 | 0.489232897 | 0.466477775 |
| 0.418496321 | 0.362202998 | 0.453806704 | 0.458812573 |
| 0.093270287 | 0.177323334 | 0.095462677 | 0.411729993 |
| 0.407024412 | 0.268396839 | 0.447270528 | 0.463521793 |
| 0.28448742  | 0.440559178 | 0.411259605 | 0.454955874 |
| 0.10051768  | 0.480376473 | 0.262346777 | 0.259848253 |
| 0.084826662 | 0.206072638 | 0.249621581 | 0.230305661 |
| 0.349209678 | 0.258472063 | 0.493969849 | 0.487216018 |
| 0.466619979 | 0.254532423 | 0.484800414 | 0.466700599 |
| 0.433119003 | 0.452989263 | 0.323296447 | 0.021495894 |
| 0.34311244  | 0.406636735 | 0.275425671 | 0.482759754 |
| 0.223500435 | 0.333350593 | 0.466600537 | 0.459736625 |
| 0.350755903 | 0.246342966 | 0.451859394 | 0.42606191  |
| 0.225448921 | 0.380013528 | 0.476321451 | 0.478622785 |
| 0.009427754 | 0.408464223 | 0.489079407 | 0.255958211 |
| 0.416730269 | 0.19208558  | 0.309456783 | 0.484767801 |
| 0.380340426 | 0.339692637 | 0.492307447 | 0.469252573 |
| 0.405954103 | 0.258173909 | 0.514898861 | 0.083612453 |
| 0.462084828 | 0.089622572 | 0.371937798 | 0.414894013 |
| 0.34518655  | 0.389061314 | 0.408881562 | 0.374766567 |
| 0.190685431 | 0.503687487 | 0.456689445 | 0.491074015 |
| 0.442252857 | 0.517592581 | 0.491931985 | 0.466915826 |
| 0.452033303 | 0.457123022 | 0.203394366 | 0.479583132 |
| 0.488459538 | 0.390176999 | 0.12948395  | 0.495462383 |
| 0.45526469  | 0.476502939 | 0.217337451 | 0.476211719 |
| 0.490295412 | 0.457923647 | 0.230306259 | 0.453443483 |
| 0.434281226 | 0.315179238 | 0.480217862 | 0.521075324 |
| 0.406958821 | 0.439615449 | 0.417126804 | 0.459953633 |

|             |             |             |             |
|-------------|-------------|-------------|-------------|
| 0.259194279 | 0.321271516 | 0.388025901 | 0.271126098 |
| 0.014469233 | 0.149874235 | 0.117636739 | 0.250205743 |
| 0.252902682 | 0.480873133 | 0.482045195 | 0.500335365 |
| 0.192950019 | 0.447298574 | 0.348125894 | 0.359390083 |
| 0.434814671 | 0.452151935 | 0.456195904 | 0.470304725 |
| 0.344427366 | 0.037559914 | 0.17230259  | 0.513857403 |
| 0.08219174  | 0.316899044 | 0.430001616 | 0.005010382 |
| 0.090218585 | 0.455893991 | 0.152298583 | 0.240390463 |
| 0.487639963 | 0.244264444 | 0.289565973 | 0.406342001 |
| 0.42912494  | 0.165178682 | 0.007189191 | 0.480772333 |
| 0.488491916 | 0.464039416 | 0.485459095 | 0.463222395 |
| 0.47664091  | 0.485852605 | 0.483300177 | 0.422202964 |
| 0.183242459 | 0.163687125 | 0.295990398 | 0.381000613 |
| 0.010102002 | 0.453044021 | 0.426768525 | 0.218341389 |
| 0.491089951 | 0.410253069 | 0.074379187 | 0.456445866 |
| 0.038297146 | 0.25979329  | 0.410283733 | 0.342034587 |
| 0.444194818 | 0.034296769 | 0.271164703 | 0.395242371 |
| 0.414591993 | 0.398436975 | 0.44133566  | 0.516198389 |
| 0.405811244 | 0.195019847 | 0.400807849 | 0.467707682 |
| 0.135736485 | 0.166572881 | 0.45839075  | 0.048135743 |
| 0.270833146 | 0.45968443  | 0.472891    | 0.124036385 |
| 0.357784861 | 0.011925196 | 0.406032762 | 0.514896159 |
| 0.453241108 | 0.50149876  | 0.4810852   | 0.341849293 |
| 0.486882052 | 0.168920785 | 0.511504817 | 0.453844752 |
| 0.433471154 | 0.00161659  | 0.013356869 | 0.493162105 |
| 0.461349426 | 0.102612542 | 0.244016959 | 0.400027592 |
| 0.178123952 | 0.233468642 | 0.131735092 | 0.276166986 |
| 0.483655686 | 0.336118752 | 0.274267081 | 0.459458623 |
| 0.344340483 | 0.342810167 | 0.468220488 | 0.153111232 |
| 0.480891276 | 0.100840732 | 0.159204625 | 0.013969152 |
| 0.4588479   | 0.171427292 | 0.46625061  | 0.493608306 |
| 0.48174271  | 0.467200654 | 0.392720018 | 0.406033494 |
| 0.485926455 | 0.151898479 | 0.43576575  | 0.177375454 |
| 0.465503596 | 0.456716311 | 0.390628396 | 0.365690959 |
| 0.485283029 | 0.453129781 | 0.072431651 | 0.472762961 |
| 0.024659826 | 0.005575094 | 0.425691509 | 0.367641916 |
| 0.15415418  | 0.451191403 | 0.336445145 | 0.37651771  |
| 0.365084534 | 0.056685778 | 0.36043527  | 0.337074238 |
| 0.393604829 | 0.44851269  | 0.36233968  | 0.353798837 |
| 0.38323662  | 0.225921258 | 0.305664154 | 0.259136089 |
| 0.376778364 | 0.37147069  | 0.242898474 | 0.052818394 |
| 0.480795732 | 0.468132961 | 0.107982943 | 0.242340805 |
| 0.4756673   | 0.487326617 | 0.092689224 | 0.022654524 |
| 0.339803915 | 0.425287204 | 0.487378809 | 0.480978263 |
| 0.511331082 | 0.507841651 | 0.395308954 | 0.213813548 |
| 0.125149176 | 0.425433509 | 0.390478711 | 0.185854686 |
| 0.492751915 | 0.119259571 | 0.472558922 | 0.390769145 |
| 0.199344318 | 0.313051989 | 0.067544547 | 0.159425193 |
| 0.45485292  | 0.26752076  | 0.273440149 | 0.21414342  |
| 0.400394604 | 0.338510944 | 0.10318142  | 0.289911614 |
| 0.422378377 | 0.257841582 | 0.24872518  | 0.428188837 |
| 0.439064693 | 0.330328093 | 0.489441852 | 0.442349944 |
| 0.202913297 | 0.199754192 | 0.337320741 | 0.476701943 |
| 0.492688592 | 0.466834652 | 0.042095241 | 0.450217521 |



|             |             |             |             |
|-------------|-------------|-------------|-------------|
| 0.482265779 | 0.487406367 | 0.48316252  | 0.445960955 |
| 0.152676563 | 0.435028499 | 0.427616367 | 0.434439733 |
| 0.289348109 | 0.45372384  | 0.359827512 | 0.120141857 |
| 0.374001093 | 0.48474122  | 0.454740966 | 0.247638436 |
| 0.48899038  | 0.203328729 | 0.107361796 | 0.484127112 |
| 0.268337895 | 0.141998596 | 0.422542064 | 0.495766426 |
| 0.005088371 | 0.213825305 | 1           | 0.326931095 |
| 0.514848787 | 0.484832683 | 0.436182674 | 0.382262083 |
| 0.00489993  | 0.484736091 | 0.440483115 | 0.452932417 |
| 0.456356266 | 0.423898497 | 0.26749402  | 0.135057377 |
| 0.366171406 | 0.131345484 | 0.215416442 | 0.408612705 |
| 0.257771784 | 0.472215991 | 0.289369855 | 0.32695767  |
| 0.307566934 | 0.16222061  | 0.329168769 | 0.336158834 |
| 0.271341522 | 0.321572894 | 0.416102238 | 0.373787984 |
| 0.239896574 | 0.472847501 | 0.462879261 | 0.055869833 |
| 0.448233264 | 0.473181419 | 0.470632605 | 0.004350808 |
| 0.479277557 | 0.017738758 | 0.291180703 | 0.299435007 |
| 0.300123478 | 0.317316291 | 0.361229126 | 0.392583678 |
| 0.44754604  | 0.33115544  | 0.35270126  | 0.323881723 |
| 0.247123394 | 0.335832689 | 0.47686026  | 0.45989143  |
| 0.347002103 | 0.201020531 | 0.152456012 | 0.143823196 |
| 0.091477009 | 0.47895951  | 0.306595523 | 0.124547672 |
| 0.329942851 | 0.469953199 | 0.400559795 | 0.47886717  |
| 0.453580108 | 0.165179509 | 0.447819471 | 0.464810612 |
| 0.308672664 | 0.370770975 | 0.117217263 | 0.476449259 |
| 0.325828563 | 0.285938514 | 0.478538557 | 0.381534527 |
| 0.476222857 | 0.400269312 | 0.305495605 | 0.455571978 |
| 0.451356264 | 0.457820985 | 0.370545565 | 0.141177825 |
| 0.255522111 | 0.214022229 | 0.357982408 | 0.004960526 |
| 0.435101337 | 0.331969868 | 0.489718642 | 0.474749409 |
| 0.377985305 | 0.42714888  | 0.363606706 | 0.145091234 |
| 0.33292756  | 0.220106918 | 0.216898196 | 0.495322913 |
| 0.284084911 | 0.280316838 | 0.395953213 | 0.393852778 |
| 0.495274625 | 0.493414718 | 0.382337148 | 0.357714987 |
| 0.364349097 | 0.288696594 | 0.479822299 | 0.200802826 |
| 0.483626479 | 0.267149424 | 0.435672153 | 0.378274899 |
| 0.325207261 | 0.502572632 | 0.114580568 | 0.506540563 |
| 0.418115847 | 0.203616704 | 0.487899404 | 0.413482302 |
| 0.40434469  | 0.201452903 | 0.265880738 | 0.46738718  |
| 0.349794951 | 0.419914394 | 0.024131929 | 0.096643933 |
| 0.403720541 | 0.4368857   | 0.461782648 | 0.46363905  |
| 0.356814622 | 0.423877322 | 0.250293033 | 0.394636117 |
| 0.467889334 | 0.491215933 | 0.315493289 | 0.338208719 |
| 0.425168627 | 0.169126541 | 0.448113459 | 0.037001295 |
| 0.479075456 | 0.476431334 | 0.444042314 | 0.108542943 |
| 0.045048353 | 0.288493618 | 0.479064084 | 0.132370423 |
| 0.490795253 | 0.273167442 | 0.455145172 | 0.492180252 |
| 0.271778405 | 0.489960502 | 0.209785097 | 0.461705273 |
| 0.111187203 | 0.364762959 | 0.471507676 | 0.476192826 |
| 0.289720971 | 0.382539419 | 0.443516304 | 0.312423199 |
| 0.067253287 | 0.355238781 | 0.004899294 | 0.405148135 |
| 0.46499969  | 0.430721163 | 0.280738413 | 0.38698027  |
| 0.369655154 | 0.450418945 | 0.339292352 | 0.483395514 |
| 0.024296782 | 0.434577202 | 0.298528771 | 0.447673571 |

|                    |             |             |             |
|--------------------|-------------|-------------|-------------|
| 0.275969752        | 0.46231373  | 0.105952902 | 0.425213752 |
| 0.455359963        | 0.352256515 | 0.342191468 | 0.372354528 |
| 0.475104099        | 0.456272556 | 0.233214908 | 0.337846821 |
| 0.470228687        | 0.119085896 | 0.445988701 | 0.518169708 |
| 0.26360997         | 0.296468477 | 0.484350431 | 0.288249301 |
| 0.404765592        | 0.434106316 | 0.481811303 | 0.514018708 |
| 0.135118956        | 0.332448101 | 0.490605034 | 0.465466419 |
| 0.381640539        | 0.272751748 | 0.319537814 | 0.321723092 |
| 0.440693902        | 0.146662426 | 0.370059277 | 0.428421573 |
| 0.293113452        | 0.406782068 | 0.425017675 | 0.28984863  |
| 0.069221064        | 0.281543278 | 0.430758673 | 0.22912881  |
| 0.386657306        | 0.451829694 | 0.351922789 | 0.412613178 |
| 0.192404477        | 0.043706269 | 0.44886274  | 0.029744083 |
| 0.407765668        | 0.456892387 | 0.344119956 | 0.449036759 |
| 0.246921725        | 0.452471983 | 0.409980598 | 0.00241602  |
| 0.478498096        | 0.093554996 | 0.429140437 | 0.304050066 |
| 0.369311254        | 0.100177668 | 0.44680252  | 0.495397625 |
| 0.41780538         | 0.427331526 | 0.399630269 | 0.456335255 |
| 0.221340694        | 0.411601629 | 0.43358146  | 0.473475137 |
| 0.309962728        | 0.441018445 | 0.475726523 | 0.435554595 |
| 0.460062063        | 0.382888888 |             |             |
| PLEKHA2 0.10582952 | 0.255823923 | 0.072959522 |             |
| 0.103375476        | 0.202397422 | 0.141663505 | 0.064668941 |
| 0.10298736         | 0.195425219 | 0.036133831 | 0.243961609 |
| 0.052931898        | 0.04413145  | 0.333754831 | 0.075506296 |
| 0.186191738        | 0.078295791 | 0.1372818   | 0.027623437 |
| 0.060342832        | 0.189543445 | 0.106697443 | 0.160027552 |
| 0.15667175         | 0.241739863 | 0.156073983 | 0.127193891 |
| 0.315504104        | 0.057200978 | 0.244707441 | 0.02387245  |
| 0.341236658        | 0.210680292 | 0.11609448  | 0.036097052 |
| 0.186845156        | 0.004882846 | 0.324882316 | 0.124264971 |
| 0.058440358        | 0.344015612 | 0.07268334  | 0.179581833 |
| 0.081538614        | 0.053047077 | 0.031407762 | 0.174173217 |
| 0.138203555        | 0.102754773 | 0.084596867 | 0.218510332 |
| 0.066546353        | 0.296174415 | 0.165321102 | 0.005256182 |
| 0.102130477        | 0.019004025 | 0.044269213 | 0.349966268 |
| 0.295538785        | 0.19759233  | 0.032916392 | 0.12743753  |
| 0.155302157        | 0.20422043  | 0.266546068 | 0.055316751 |
| 0.353268967        | 0.054922612 | 0.203295383 | 0.09339865  |
| 0.12141885         | 0.036650842 | 0.242413452 | 0.0830502   |
| 0.087063596        | 0.261115404 | 0.241489622 | 0.089160011 |
| 0.235355195        | 0.38860162  | 0.211960694 | 0.317361707 |
| 0.03180457         | 0.160117253 | 0.094914397 | 0.282176415 |
| 0.207288652        | 0.052538368 | 0.288662115 | 0.370948808 |
| 0.053363899        | 0.116131833 | 0.196965558 | 0.144995073 |
| 0.292564552        | 0.056057472 | 0.107643025 | 0.087886944 |
| 0.216499386        | 0.158128091 | 0.327896139 | 0.293626897 |
| 0.17270187         | 0.096050043 | 0.329839075 | 0.164222643 |
| 0.179128526        | 0.109420758 | 0.07626683  | 0.270067957 |
| 0.202528106        | 0.3383713   | 0.229063793 | 0.244225806 |
| 0.150766795        | 0.347846491 | 0.246676795 | 0.307849257 |
| 0.018596531        | 0.348129651 | 0.194062057 | 0.111644366 |
| 0.068289168        | 0.131424114 | 0.061689463 | 0.331946335 |
| 0.319466444        | 0.268320365 | 0.153333684 | 0.185468469 |

|             |             |             |             |
|-------------|-------------|-------------|-------------|
| 0.307771838 | 0.313733064 | 0.327661865 | 0.275861909 |
| 0.07479365  | 0.048817648 | 0.143344304 | 0.131334735 |
| 0.237274913 | 0.159214246 | 0.120093504 | 0.357530083 |
| 0.355907969 | 0.284647296 | 0.098440079 | 0.378022596 |
| 0.113826456 | 0.400895001 | 0.266385855 | 0.200095614 |
| 0.366411838 | 0.353716475 | 0.3805056   | 0.246099854 |
| 0.376137152 | 0.175569439 | 0.019119051 | 0.254181317 |
| 0.417252251 | 0.016167983 | 0.290206053 | 0.31109755  |
| 0.316852971 | 0.275253345 | 0.365303412 | 0.348051064 |
| 0.328021825 | 0.119597681 | 0.002721936 | 0.247115933 |
| 0.33670483  | 0.326050281 | 0.122064908 | 0.131621954 |
| 0.199453625 | 0.159991396 | 0.255645758 | 0.080962204 |
| 0.418574084 | 0.306047136 | 0.304832715 | 0.238053662 |
| 0.099981407 | 0.343451377 | 0.127067235 | 0.330004348 |
| 0.081558598 | 0.117563604 | 0.096872407 | 0.256334307 |
| 0.05772377  | 0.24388166  | 0.120970483 | 0.160397446 |
| 0.272515228 | 0.126337882 | 0.086648512 | 0.244638495 |
| 0.09450112  | 0.17294557  | 0.151679883 | 0.122091411 |
| 0.081459805 | 0.22725714  | 0.121108855 | 0.162520278 |
| 0.230834004 | 0.236281163 | 0.222609635 | 0.323761954 |
| 0.102751856 | 0.195790084 | 0.235036623 | 0.391966689 |
| 0.406480232 | 0.16707518  | 0.272150659 | 0.042829172 |
| 0.065453818 | 0.037030029 | 0.04344226  | 0.150959577 |
| 0.224698614 | 0.090295361 | 0.178007323 | 0.293912811 |
| 0.167440046 | 0.099190813 | 0.089245096 | 0.3955105   |
| 0.155670568 | 0.161550455 | 0.327899463 | 0.131349022 |
| 0.015296859 | 0.1670472   | 0.29531451  | 0.074620317 |
| 0.192328421 | 0.082068916 | 0.090153098 | 0.293942283 |
| 0.062944354 | 0.089334708 | 0.331420812 | 0.280970019 |
| 0.100501528 | 0.209128299 | 0.367355961 | 0.00921451  |
| 0.128894904 | 0.081615373 | 0.301366039 | 0.071800528 |
| 0.213214537 | 0.283868525 | 0.192890268 | 0.125936354 |
| 0.154051699 | 0.354957778 | 0.319863229 | 0.353742139 |
| 0.064341909 | 0.363506279 | 0.302830402 | 0.354593348 |
| 0.2538686   | 0.087578678 | 0.041764782 | 0.275420228 |
| 0.286312359 | 0.043152333 | 0.106599161 | 0.231190589 |
| 0.070813682 | 0.216294771 | 0.076951536 | 0.35414958  |
| 0.405414375 | 0.285702033 | 0.161760602 | 0.29069226  |
| 0.336180021 | 0.227337862 | 0.294446303 | 0.38791229  |
| 0.034106475 | 0.131954028 | 0.091849811 | 0.328951596 |
| 0.206165292 | 0.081942241 | 0.301668965 | 0.047742283 |
| 0.005787889 | 0.107450198 | 0.107069251 | 0.204421233 |
| 0.081285983 | 0.156446911 | 0.214201824 | 0.348808288 |
| 0.182812118 | 0.369160933 | 0.20953302  | 0.09621909  |
| 0.282105401 | 0.12485814  | 0.178162622 | 0.225411955 |
| 0.260346833 | 0.050311459 | 0.142303181 | 0.381191971 |
| 0.061927895 | 0.092757942 | 0.156667858 | 0.012662981 |
| 0.053204505 | 0.202961931 | 0.137102294 | 0.262892292 |
| 0.361737503 | 0.234322388 | 0.177392593 | 0.038589045 |
| 0.325743794 | 0.158532284 | 0.032059309 | 0.298634314 |
| 0.310753576 | 0.292881964 | 0.302952824 | 0.305749203 |
| 0.264447443 | 0.241495716 | 0.256993826 | 0.174621474 |
| 0.089703479 | 0.067146137 | 0.057013883 | 0.153307862 |
| 0.006012812 | 0.340009239 | 0.178189029 | 0.230525799 |

|             |             |             |             |
|-------------|-------------|-------------|-------------|
| 0.254603027 | 0.21879998  | 0.082165811 | 0.197163406 |
| 0.042147221 | 0.049444467 | 0.081855428 | 0.149299117 |
| 0.280949532 | 0.037260243 | 0.057932429 | 0.059802456 |
| 0.322121363 | 0.310696069 | 0.07856082  | 0.359595839 |
| 0.245878122 | 0.107203868 | 0.156398805 | 0.322921941 |
| 0.082019644 | 0.01314893  | 0.095909398 | 0.00603938  |
| 0.093433198 | 0.329459147 | 0.088003784 | 0.050656383 |
| 0.226725969 | 0.025083488 | 0.302812791 | 0.381297004 |
| 0.297035411 | 0.345324937 | 0.366762053 | 0.12393172  |
| 0.349116444 | 0.018691481 | 0.351069026 | 0.255868444 |
| 0.063820491 | 0.00388622  | 0.033148402 | 0.310056636 |
| 0.164699845 | 0.087951104 | 0.212379884 | 0.094226459 |
| 0.127323801 | 0.091926953 | 0.110053242 | 0.089052661 |
| 0.227382944 | 0.226967162 | 0.097705966 | 0.305745425 |
| 0.156189882 | 0.239572219 | 0.097266668 | 0.132146424 |
| 0.216576882 | 0.090369693 | 0.116776612 | 0.028452553 |
| 0.273369833 | 0.140231144 | 0.330628136 | 0.340840634 |
| 0.390857049 | 0.251705217 | 0.04613479  | 0.111499067 |
| 0.293366638 | 0.109103774 | 0.068849913 | 0.118513926 |
| 0.307409567 | 0.203850611 | 0.342631406 | 0.299788989 |
| 0.370987487 | 0.347255999 | 0.072438512 | 0.258243823 |
| 0.054969759 | 0.0088329   | 0.129206909 | 0.260609899 |
| 0.016178087 | 0.11976259  | 0.277905105 | 0.062677409 |
| 0.099581822 | 0.066336763 | 0.073513818 | 0.07713131  |
| 0.224516016 | 0.163230581 | 0.167587657 | 0.212601282 |
| 0.114668636 | 0.057786623 | 0.167163778 | 0.129952339 |
| 0.059447692 | 0.237708158 | 0.236386176 | 0.043000512 |
| 0.124596604 | 0.159196474 | 0.117363304 | 0.224233848 |
| 0.328695241 | 0.331161006 | 0.055921    | 0.053538724 |
| 0.291029294 | 0.126031567 | 0.359553687 | 0.317591449 |
| 0.36986709  | 0.387495399 | 0.368780926 | 0.111218723 |
| 0.103537406 | 0.203373783 | 0.165416659 | 0.107528731 |
| 0.360247054 | 0.078880733 | 0.343054123 | 0.122670008 |
| 0.170211087 | 0.109032891 | 0.110436224 | 0.140985429 |
| 0.187668143 | 0.266435102 | 0.212671064 | 0.132760641 |
| 0.140387164 | 0.079196335 | 0.074304946 | 0.221366961 |
| 0.260320675 | 0.038818901 | 0.201058669 | 0.11923575  |
| 0.245848049 | 0.024705009 | 0.224481169 | 0.387712422 |
| 0.194114502 | 0.103826908 | 0.07145034  | 0.255187142 |
| 0.249736944 | 0.113150415 | 0.091635843 | 0.258304385 |
| 0.36435676  | 0.21532738  | 0.348648809 | 0.346064664 |
| 0.132028183 | 0.181293105 | 0.079114075 | 0.162735483 |
| 0.205399484 | 0.158924139 | 0.188873199 | 0.124933853 |
| 0.31594107  | 0.37201456  | 0.25296828  | 0.212641903 |
| 0.172177514 | 0.113215774 | 0.064453853 | 0.300394226 |
| 0.059311932 | 0.093067612 | 0.082339629 | 0.26083906  |
| 0.007234566 | 0.054540008 | 0.326931095 | 1           |
| 0.372802256 | 0.323897139 | 0.369575074 | 0.098989519 |
| 0.000344711 | 0.187902238 | 0.247531637 | 0.120450824 |
| 0.271775714 | 0.304619171 | 0.086458536 | 0.11195341  |
| 0.34366374  | 0.117323311 | 0.10407402  | 0.093016108 |
| 0.027310281 | 0.194990992 | 0.282105123 | 0.147489007 |
| 0.16039349  | 0.08802747  | 0.086351968 | 0.185819652 |
| 0.035860696 | 0.324079698 | 0.332179875 | 0.042277602 |

|             |             |             |             |
|-------------|-------------|-------------|-------------|
| 0.048210406 | 0.304286279 | 0.227288735 | 0.059715503 |
| 0.16203393  | 0.27058864  | 0.340964155 | 0.00327147  |
| 0.255018561 | 0.044374145 | 0.211103874 | 0.205225655 |
| 0.183059482 | 0.162212422 | 0.254221067 | 0.112717802 |
| 0.175362606 | 0.152560024 | 0.183481577 | 0.29467996  |
| 0.151629303 | 0.17257412  | 0.194904117 | 0.110072534 |
| 0.150868222 | 0.136447589 | 0.153959686 | 0.149525006 |
| 0.139986557 | 0.31229905  | 0.322702383 | 0.116725671 |
| 0.2792286   | 0.098611107 | 0.376291238 | 0.302294404 |
| 0.389923414 | 0.131684254 | 0.136728145 | 0.283780276 |
| 0.028275222 | 0.082653633 | 0.059739876 | 0.155339922 |
| 0.255987009 | 0.11547804  | 0.13698576  | 0.149459305 |
| 0.184583182 | 0.372780526 | 0.326401699 | 0.3493993   |
| 0.146371828 | 0.100732454 | 0.047889507 | 0.135713257 |
| 0.142140538 | 0.165493073 | 0.178190036 | 0.013613157 |
| 0.275830374 | 0.092372926 | 0.30057371  | 0.326696121 |
| 0.075545898 | 0.377974579 | 0.055536689 | 0.08255313  |
| 0.034605889 | 0.165133492 | 0.220994834 | 0.229245674 |
| 0.054460772 | 0.164179898 | 0.197374091 | 0.084234347 |
| 0.242448026 | 0.193263697 | 0.086204121 | 0.153592359 |
| 0.177780553 | 0.173103251 | 0.320949029 | 0.099038758 |
| 0.143981218 | 0.103618974 | 0.125703373 | 0.168327247 |
| 0.165276066 | 0.329612435 | 0.119275735 | 0.337186649 |
| 0.12101196  | 0.182278912 | 0.414719229 | 0.194412207 |
| 0.099947441 | 0.167213651 | 0.050483742 | 0.083909719 |
| 0.103109842 | 0.092959475 | 0.001908068 | 0.027646386 |
| 0.327095946 | 0.063410575 | 0.191297167 | 0.240172595 |
| 0.110414033 | 0.309869916 | 0.056574238 | 0.133379858 |
| 0.298428364 | 0.344736419 | 0.103625187 | 0.277381805 |
| 0.28341123  | 0.155221244 | 0.206613929 | 0.006393537 |
| 0.170747681 | 0.151431368 | 0.058061539 | 0.097070238 |
| 0.050293968 | 0.047378199 | 0.153631854 | 0.074701543 |
| 0.328619428 | 0.053501784 | 0.134693127 | 0.254515055 |
| 0.202122685 | 0.347102198 | 0.146054397 | 0.303842848 |
| 0.024515838 | 0.238292781 | 0.129547033 | 0.110838613 |
| 0.123146146 | 0.110714591 | 0.296546306 | 0.110533344 |
| 0.078335917 | 0.115707629 | 0.001887494 | 0.364648953 |
| 0.297604037 | 0.104217546 | 0.262614735 | 0.039000022 |
| 0.318074547 | 0.296927412 | 0.098348841 | 0.129671562 |
| 0.062667722 | 0.194165787 | 0.268320669 | 0.326304717 |
| 0.040148668 | 0.125399168 | 0.116471847 | 0.124423509 |
| 0.33432245  | 0.078011686 | 0.287081472 | 0.042778752 |
| 0.315270518 | 0.250601531 | 0.147246675 | 0.114512797 |
| 0.14551005  | 0.119239331 | 0.086398148 | 0.366694476 |
| 0.214828152 | 0.107023081 | 0.310579628 | 0.12616895  |
| 0.114301312 | 0.307154952 | 0.132910646 | 0.350265438 |
| 0.119430671 | 0.303815423 | 0.284421672 | 0.29722307  |
| 0.363309486 | 0.078472318 | 0.086039521 | 0.133387919 |
| 0.301679883 | 0.133889841 | 0.067395509 | 0.268425173 |
| 0.065625334 | 0.306023402 | 0.115659264 | 0.148239882 |
| 0.113549371 | 0.120663703 | 0.131506643 | 0.194744748 |
| 0.236041156 | 0.160776386 | 0.083695302 | 0.383556184 |
| 0.1771393   | 0.07197583  | 0.391399841 | 0.006706524 |
| 0.198019072 | 0.268453564 | 0.277157433 | 0.147679075 |

|             |             |             |             |
|-------------|-------------|-------------|-------------|
| 0.251624955 | 0.185492541 | 0.11554322  | 0.009562693 |
| 0.291034729 | 0.030816445 | 0.123887453 | 0.115349092 |
| 0.071633262 | 0.06418834  | 0.353936246 | 0.366626603 |
| 0.252512216 | 0.075246494 | 0.064899939 | 0.331743831 |
| 0.054700492 | 0.058047509 | 0.069267793 | 0.179662965 |
| 0.081102898 | 0.07682947  | 0.101435068 | 0.099280935 |
| 0.266363575 | 0.170320119 |             |             |
| PLK1        | 0.188253268 | 0.505269857 | 0.154881064 |
| 0.235623611 | 0.385842942 | 0.497476814 | 0.169011479 |
| 0.270398576 | 0.479722898 | 0.392766364 | 0.454151319 |
| 0.065622292 | 0.112337702 | 0.513529933 | 0.162099622 |
| 0.456570533 | 0.106453433 | 0.240681881 | 0.14952891  |
| 0.378733515 | 0.360163705 | 0.396237677 | 0.495244787 |
| 0.37994847  | 0.318171361 | 0.484618755 | 0.453680632 |
| 0.521926612 | 0.294275539 | 0.504137305 | 0.254030646 |
| 0.473754715 | 0.392352334 | 0.432746973 | 0.067497515 |
| 0.511430917 | 0.028443165 | 0.465592702 | 0.366135502 |
| 0.191923321 | 0.449132769 | 0.436101088 | 0.358684723 |
| 0.463626742 | 0.113976204 | 0.261737111 | 0.479915413 |
| 0.476970869 | 0.442481835 | 0.17852381  | 0.520329046 |
| 0.474371343 | 0.476695184 | 0.482481552 | 0.005955069 |
| 0.338800607 | 0.09751453  | 0.253243965 | 0.511800709 |
| 0.345364461 | 0.254521201 | 0.337057673 | 0.426542754 |
| 0.483935283 | 0.480021425 | 0.412390543 | 0.451184216 |
| 0.515858944 | 0.214419685 | 0.503675036 | 0.261980025 |
| 0.498321325 | 0.122497058 | 0.304550163 | 0.221998653 |
| 0.474630754 | 0.338253334 | 0.436545595 | 0.371794617 |
| 0.49123883  | 0.518514589 | 0.399879543 | 0.498338814 |
| 0.15455678  | 0.40281081  | 0.367896969 | 0.427864683 |
| 0.48199502  | 0.223088457 | 0.494056429 | 0.508041907 |
| 0.161218055 | 0.473251185 | 0.495672723 | 0.269110115 |
| 0.517134821 | 0.36103608  | 0.468353691 | 0.21332351  |
| 0.444531627 | 0.409625763 | 0.491725312 | 0.421979356 |
| 0.418647739 | 0.191585122 | 0.496718125 | 0.373787029 |
| 0.381167673 | 0.204477898 | 0.305352381 | 0.513820026 |
| 0.501539192 | 0.522672541 | 0.509099664 | 0.476108463 |
| 0.433697189 | 0.518901373 | 0.498543745 | 0.512007832 |
| 0.203243898 | 0.516759364 | 0.335913358 | 0.121467823 |
| 0.191197441 | 0.206944926 | 0.34415249  | 0.438749282 |
| 0.524270724 | 0.480244499 | 0.342631545 | 0.350450251 |
| 0.505657642 | 0.486853025 | 0.51408393  | 0.505716803 |
| 0.123118252 | 0.317073526 | 0.439195947 | 0.450316625 |
| 0.483655069 | 0.263609706 | 0.309765274 | 0.510560125 |
| 0.475031902 | 0.50607533  | 0.328471679 | 0.516510104 |
| 0.368212409 | 0.510905275 | 0.512731321 | 0.299533463 |
| 0.510759915 | 0.496893342 | 0.515387787 | 0.457370325 |
| 0.499215592 | 0.463118754 | 0.122415215 | 0.493292132 |
| 0.507227799 | 0.021023171 | 0.522330194 | 0.52239515  |
| 0.509289743 | 0.511855609 | 0.516704301 | 0.525560698 |
| 0.511126155 | 0.197762941 | 0.044762085 | 0.393723691 |
| 0.502060361 | 0.489332929 | 0.27246336  | 0.463820386 |
| 0.439116679 | 0.513214702 | 0.51615928  | 0.344904965 |
| 0.502548512 | 0.521743519 | 0.524677401 | 0.50224574  |
| 0.452536469 | 0.432745147 | 0.424505754 | 0.479305815 |

|             |             |             |             |
|-------------|-------------|-------------|-------------|
| 0.133156515 | 0.243202901 | 0.150758483 | 0.451508018 |
| 0.441228772 | 0.30928894  | 0.494396317 | 0.453092877 |
| 0.332946384 | 0.497119869 | 0.377609853 | 0.445423808 |
| 0.157708645 | 0.500998477 | 0.325686027 | 0.3226106   |
| 0.117551772 | 0.277758438 | 0.28690936  | 0.275642111 |
| 0.364707312 | 0.325309778 | 0.50909934  | 0.521748355 |
| 0.4542763   | 0.327302214 | 0.517410753 | 0.508115458 |
| 0.476694344 | 0.436984501 | 0.384633816 | 0.030495197 |
| 0.330226276 | 0.3711659   | 0.221038974 | 0.473054388 |
| 0.299198677 | 0.350203339 | 0.467720345 | 0.461592338 |
| 0.420889525 | 0.316257282 | 0.437560497 | 0.471818405 |
| 0.298533132 | 0.387663278 | 0.505104409 | 0.494446008 |
| 0.018633076 | 0.445376258 | 0.517982998 | 0.232524036 |
| 0.459412161 | 0.167106263 | 0.285252064 | 0.513334976 |
| 0.342019612 | 0.304342892 | 0.52595468  | 0.468547691 |
| 0.428352722 | 0.336010042 | 0.518893559 | 0.063394565 |
| 0.439156717 | 0.094602215 | 0.398266525 | 0.43845227  |
| 0.397487368 | 0.421422062 | 0.385517597 | 0.361935185 |
| 0.263954268 | 0.514220828 | 0.506959472 | 0.523396941 |
| 0.419894436 | 0.516892068 | 0.514743135 | 0.509421789 |
| 0.494136696 | 0.431026771 | 0.158909315 | 0.508874608 |
| 0.515042331 | 0.368853628 | 0.193672577 | 0.508789093 |
| 0.446819657 | 0.469838986 | 0.203209881 | 0.5117489   |
| 0.496704339 | 0.486262623 | 0.266843302 | 0.460586236 |
| 0.479829871 | 0.377022183 | 0.511890856 | 0.515947567 |
| 0.396169415 | 0.420541081 | 0.396366338 | 0.474729931 |
| 0.322031544 | 0.291293196 | 0.449282221 | 0.217918398 |
| 0.011512976 | 0.212677162 | 0.174316547 | 0.275201078 |
| 0.213829595 | 0.489367266 | 0.487914309 | 0.518599994 |
| 0.24581314  | 0.504362148 | 0.40205103  | 0.360404564 |
| 0.489166918 | 0.434643855 | 0.438421881 | 0.470359536 |
| 0.40481404  | 0.050807137 | 0.207237343 | 0.519198128 |
| 0.133233783 | 0.283959676 | 0.475319743 | 0.00705113  |
| 0.135861986 | 0.497430507 | 0.218048063 | 0.314100647 |
| 0.513415438 | 0.319109975 | 0.353985048 | 0.412064075 |
| 0.456931349 | 0.223350032 | 0.009563658 | 0.517337551 |
| 0.509708266 | 0.50390809  | 0.507646502 | 0.490941957 |
| 0.50616198  | 0.512057593 | 0.493539229 | 0.486805915 |
| 0.235935253 | 0.22809838  | 0.2532298   | 0.388358844 |
| 0.014944095 | 0.482621783 | 0.424970832 | 0.281163924 |
| 0.498306359 | 0.445972913 | 0.115808846 | 0.443066926 |
| 0.063086006 | 0.21787824  | 0.451435793 | 0.366884092 |
| 0.448418264 | 0.061173647 | 0.287019878 | 0.3696834   |
| 0.483177111 | 0.465681796 | 0.40874668  | 0.515822164 |
| 0.432989194 | 0.266045422 | 0.401613302 | 0.486573238 |
| 0.185267254 | 0.156481142 | 0.493014587 | 0.048976442 |
| 0.29430832  | 0.497256388 | 0.4649188   | 0.173387556 |
| 0.402433006 | 0.024001804 | 0.472044556 | 0.516618127 |
| 0.493925992 | 0.519849743 | 0.519220273 | 0.311791177 |
| 0.514271522 | 0.12348537  | 0.523184676 | 0.506223979 |
| 0.435519016 | 0.002757689 | 0.019235725 | 0.520882237 |
| 0.454232123 | 0.161929093 | 0.303222279 | 0.440549895 |
| 0.219722535 | 0.308335473 | 0.183141483 | 0.245274755 |
| 0.514352299 | 0.336282744 | 0.245272709 | 0.494335034 |

|             |             |             |             |
|-------------|-------------|-------------|-------------|
| 0.37310453  | 0.378499971 | 0.499405132 | 0.218368206 |
| 0.485424596 | 0.141481812 | 0.222152643 | 0.016679134 |
| 0.464728055 | 0.241540761 | 0.489141891 | 0.517367799 |
| 0.506223298 | 0.468030733 | 0.389625768 | 0.433915533 |
| 0.513414538 | 0.222674855 | 0.426860022 | 0.250979206 |
| 0.507909296 | 0.457385922 | 0.438485164 | 0.430615945 |
| 0.509607507 | 0.503352595 | 0.111079654 | 0.491268604 |
| 0.040212893 | 0.005664251 | 0.476671462 | 0.418771104 |
| 0.129976804 | 0.432143198 | 0.393798002 | 0.393298109 |
| 0.381488365 | 0.092350617 | 0.310543518 | 0.288904855 |
| 0.4170603   | 0.452312372 | 0.336309537 | 0.409579908 |
| 0.365413349 | 0.201014342 | 0.33716732  | 0.302616259 |
| 0.368313674 | 0.438184832 | 0.317795113 | 0.08397069  |
| 0.491015211 | 0.463697677 | 0.157654151 | 0.310606312 |
| 0.511163964 | 0.521290651 | 0.123256913 | 0.032387865 |
| 0.405241987 | 0.425228926 | 0.519345067 | 0.516169875 |
| 0.516545654 | 0.509463992 | 0.459514078 | 0.225752407 |
| 0.178083438 | 0.432248763 | 0.36183944  | 0.187860557 |
| 0.521524745 | 0.179134601 | 0.51090148  | 0.346986493 |
| 0.260362512 | 0.352915801 | 0.096345002 | 0.212566693 |
| 0.437861627 | 0.327272937 | 0.295009647 | 0.284402947 |
| 0.406675806 | 0.298739889 | 0.14871965  | 0.341827264 |
| 0.468026539 | 0.207103334 | 0.30659466  | 0.477596987 |
| 0.494035974 | 0.331321737 | 0.491330331 | 0.487010247 |
| 0.272643589 | 0.259080128 | 0.397810549 | 0.498783433 |
| 0.519438197 | 0.469798805 | 0.063612403 | 0.502662211 |
| 0.521566247 | 0.499921703 | 0.508138338 | 0.475972657 |
| 0.213443484 | 0.430593558 | 0.384257982 | 0.42583841  |
| 0.341303233 | 0.501224881 | 0.392470345 | 0.173938339 |
| 0.432928688 | 0.494582336 | 0.500943019 | 0.287861974 |
| 0.505916183 | 0.277374486 | 0.164362509 | 0.522538084 |
| 0.224421699 | 0.194241044 | 0.453346312 | 0.511590613 |
| 0.005634456 | 0.168681027 | 0.514848787 | 0.372802256 |
| 1           | 0.514753229 | 0.492361662 | 0.432703175 |
| 0.002891513 | 0.471902867 | 0.460264175 | 0.45737455  |
| 0.507537278 | 0.486813863 | 0.301677052 | 0.169852111 |
| 0.416569849 | 0.196858843 | 0.244722975 | 0.450496836 |
| 0.211871164 | 0.512388493 | 0.342917113 | 0.374763496 |
| 0.32244084  | 0.227255437 | 0.293210744 | 0.386626289 |
| 0.220371508 | 0.376237861 | 0.457640769 | 0.398357836 |
| 0.209745862 | 0.503981783 | 0.498084264 | 0.092340765 |
| 0.425074295 | 0.501811939 | 0.51212303  | 0.006098592 |
| 0.489492749 | 0.031214544 | 0.310537616 | 0.319978157 |
| 0.324133106 | 0.336437064 | 0.37089415  | 0.3825671   |
| 0.480963143 | 0.370601478 | 0.387194161 | 0.368250837 |
| 0.273383918 | 0.38854251  | 0.477893089 | 0.489415895 |
| 0.352244456 | 0.258094719 | 0.220347591 | 0.211731965 |
| 0.12763459  | 0.523622776 | 0.378665751 | 0.188291323 |
| 0.371592497 | 0.484532775 | 0.452209246 | 0.505680829 |
| 0.496285356 | 0.237372814 | 0.458033148 | 0.514499906 |
| 0.287240356 | 0.404901014 | 0.17364205  | 0.507977923 |
| 0.38083754  | 0.273748129 | 0.506852722 | 0.442813718 |
| 0.503718531 | 0.464033162 | 0.377888124 | 0.505024893 |
| 0.45918874  | 0.454219573 | 0.39328606  | 0.169356679 |



|             |             |             |             |
|-------------|-------------|-------------|-------------|
| 0.31175251  | 0.281233228 | 0.335437803 | 0.009764468 |
| 0.473299382 | 0.397912862 | 0.519037482 | 0.499064782 |
| 0.335156607 | 0.481237735 | 0.401084787 | 0.195024295 |
| 0.352034718 | 0.294461427 | 0.2817269   | 0.516908605 |
| 0.239092694 | 0.337005406 | 0.388206483 | 0.460900071 |
| 0.505067467 | 0.503437899 | 0.358386424 | 0.408022469 |
| 0.397738806 | 0.360579139 | 0.488051465 | 0.27230143  |
| 0.488213824 | 0.245237945 | 0.476484074 | 0.38490548  |
| 0.334156226 | 0.522548516 | 0.169917813 | 0.523599174 |
| 0.405674528 | 0.275750438 | 0.494653435 | 0.467634683 |
| 0.450382989 | 0.224594503 | 0.214813093 | 0.496438479 |
| 0.374456394 | 0.387578723 | 0.020732125 | 0.08514134  |
| 0.434922604 | 0.432481199 | 0.497081084 | 0.48585557  |
| 0.325705669 | 0.448186753 | 0.206001369 | 0.442717543 |
| 0.490865213 | 0.505771042 | 0.339297768 | 0.38977351  |
| 0.470927624 | 0.219484941 | 0.505604611 | 0.035097248 |
| 0.478032669 | 0.46755781  | 0.445393878 | 0.153284504 |
| 0.072569924 | 0.23669048  | 0.487859117 | 0.191506653 |
| 0.512910083 | 0.230971859 | 0.482075848 | 0.515298795 |
| 0.339680402 | 0.50543432  | 0.231772294 | 0.482881797 |
| 0.15043997  | 0.414180505 | 0.449156865 | 0.472323369 |
| 0.292018783 | 0.344241821 | 0.465333331 | 0.277021302 |
| 0.100486033 | 0.358113567 | 0.006215694 | 0.453479356 |
| 0.480291476 | 0.394000295 | 0.351876714 | 0.384789772 |
| 0.40351554  | 0.495924576 | 0.335089664 | 0.48188958  |
| 0.037160315 | 0.419453682 | 0.351020879 | 0.506535068 |
| 0.251639654 | 0.470672048 | 0.13923151  | 0.392649054 |
| 0.483550373 | 0.34660358  | 0.402834823 | 0.346499188 |
| 0.510969045 | 0.505676803 | 0.310497498 | 0.332055684 |
| 0.48814022  | 0.177089153 | 0.474157464 | 0.516658906 |
| 0.295651585 | 0.260077147 | 0.498254697 | 0.31501756  |
| 0.366270287 | 0.495955946 | 0.483586213 | 0.513819744 |
| 0.151173972 | 0.383163692 | 0.508185176 | 0.510046552 |
| 0.421291726 | 0.234423726 | 0.284780484 | 0.314869158 |
| 0.492357349 | 0.191896009 | 0.330923946 | 0.479683484 |
| 0.250756843 | 0.442917399 | 0.464348183 | 0.281811554 |
| 0.096465049 | 0.324261271 | 0.464557162 | 0.292769099 |
| 0.414424042 | 0.446081704 | 0.325560036 | 0.468247231 |
| 0.220519224 | 0.061494597 | 0.491419068 | 0.021691114 |
| 0.476210526 | 0.470243184 | 0.395607051 | 0.433763552 |
| 0.320876887 | 0.487949006 | 0.459333369 | 0.005685052 |
| 0.500583468 | 0.081695274 | 0.429414703 | 0.298373499 |
| 0.345607911 | 0.147755845 | 0.504222532 | 0.519221424 |
| 0.47317093  | 0.419840754 | 0.378516143 | 0.511309864 |
| 0.180445893 | 0.376688    | 0.401981677 | 0.510951596 |
| 0.26488105  | 0.447389183 | 0.47090394  | 0.415836567 |
| 0.506850863 | 0.438138017 |             |             |
| PLK4        | 0.127541149 | 0.43243041  | 0.100348293 |
| 0.244525505 | 0.397799759 | 0.464885968 | 0.109122261 |
| 0.19833659  | 0.39201631  | 0.348181992 | 0.452219902 |
| 0.040864942 | 0.120156204 | 0.469307197 | 0.098765979 |
| 0.469419092 | 0.070982569 | 0.179329612 | 0.10563056  |
| 0.314682813 | 0.373965987 | 0.40879412  | 0.434457442 |
| 0.372934231 | 0.236823113 | 0.420256043 | 0.437000557 |

|             |             |             |             |
|-------------|-------------|-------------|-------------|
| 0.499885493 | 0.317848328 | 0.494730543 | 0.265501626 |
| 0.429217475 | 0.411062604 | 0.442621575 | 0.038770638 |
| 0.473088258 | 0.020005859 | 0.451062593 | 0.374098151 |
| 0.236793282 | 0.375419069 | 0.38958021  | 0.350973963 |
| 0.443172107 | 0.074504711 | 0.243090236 | 0.465755125 |
| 0.40582399  | 0.364487298 | 0.108792316 | 0.489548259 |
| 0.43250907  | 0.411897761 | 0.430142843 | 0.004465046 |
| 0.369357328 | 0.119212631 | 0.283288517 | 0.506567454 |
| 0.286995394 | 0.197905529 | 0.339728035 | 0.313385715 |
| 0.440758321 | 0.437686431 | 0.333129456 | 0.43492098  |
| 0.503281634 | 0.236122347 | 0.47960423  | 0.244896225 |
| 0.458659287 | 0.062932949 | 0.234024467 | 0.13230849  |
| 0.459983739 | 0.290177271 | 0.419057649 | 0.392089925 |
| 0.431391312 | 0.520640902 | 0.323022881 | 0.502823563 |
| 0.141787445 | 0.414435413 | 0.372085603 | 0.387136553 |
| 0.425576384 | 0.138499012 | 0.488850564 | 0.529486741 |
| 0.085328691 | 0.427990295 | 0.459761052 | 0.179216485 |
| 0.4538377   | 0.333773615 | 0.447227382 | 0.241803547 |
| 0.445903826 | 0.42922842  | 0.475285572 | 0.384127182 |
| 0.384423396 | 0.121972869 | 0.485646086 | 0.397620725 |
| 0.397081758 | 0.142563369 | 0.326683898 | 0.489981045 |
| 0.49686801  | 0.494043327 | 0.456059349 | 0.428676971 |
| 0.461555302 | 0.504953465 | 0.488550338 | 0.435539085 |
| 0.181343325 | 0.525061924 | 0.283518711 | 0.081461359 |
| 0.121467703 | 0.14271894  | 0.298573588 | 0.364140245 |
| 0.488889385 | 0.41132348  | 0.292553093 | 0.339205462 |
| 0.481284312 | 0.475906516 | 0.52272082  | 0.465590433 |
| 0.078027021 | 0.313178525 | 0.472478067 | 0.351983753 |
| 0.448799749 | 0.17500851  | 0.344577389 | 0.51272684  |
| 0.426895836 | 0.486496191 | 0.246007375 | 0.505341096 |
| 0.270956757 | 0.522002124 | 0.464509444 | 0.266340749 |
| 0.525882145 | 0.50014536  | 0.519053703 | 0.468125526 |
| 0.47890919  | 0.446534325 | 0.082357379 | 0.432101115 |
| 0.490597783 | 0.027262204 | 0.483738182 | 0.497564537 |
| 0.503304211 | 0.499735924 | 0.523609284 | 0.507484755 |
| 0.503165038 | 0.125674799 | 0.04052434  | 0.377060366 |
| 0.514664083 | 0.455539486 | 0.198482439 | 0.48095495  |
| 0.433316393 | 0.46500186  | 0.466285914 | 0.386751423 |
| 0.517265525 | 0.481287374 | 0.483359111 | 0.454656094 |
| 0.37388892  | 0.354526815 | 0.436343947 | 0.471847801 |
| 0.08874243  | 0.185724674 | 0.092033195 | 0.371878674 |
| 0.409568392 | 0.262889347 | 0.461638699 | 0.417542153 |
| 0.279976689 | 0.404919793 | 0.388877645 | 0.450251706 |
| 0.090909052 | 0.493272044 | 0.253771472 | 0.258875121 |
| 0.087360872 | 0.190629537 | 0.283381991 | 0.240691577 |
| 0.342961661 | 0.254620598 | 0.484774851 | 0.491614158 |
| 0.419321201 | 0.259071806 | 0.484626248 | 0.481661168 |
| 0.434190522 | 0.463730572 | 0.29580206  | 0.031510192 |
| 0.376651292 | 0.355426548 | 0.248072908 | 0.461716083 |
| 0.204675588 | 0.3376577   | 0.467194269 | 0.464795552 |
| 0.375338799 | 0.204694859 | 0.446547294 | 0.435042699 |
| 0.211001759 | 0.399485829 | 0.483841298 | 0.465962391 |
| 0.009645193 | 0.440790852 | 0.495962087 | 0.224682609 |
| 0.389965106 | 0.192904064 | 0.322205433 | 0.48709903  |

|             |             |             |             |
|-------------|-------------|-------------|-------------|
| 0.355269642 | 0.298149992 | 0.487005647 | 0.456056289 |
| 0.400138046 | 0.236203438 | 0.525778477 | 0.06962721  |
| 0.408391565 | 0.105515604 | 0.374929959 | 0.378949105 |
| 0.3508469   | 0.367761416 | 0.391362164 | 0.379203605 |
| 0.194113866 | 0.517203931 | 0.441564178 | 0.511593795 |
| 0.45122132  | 0.531083466 | 0.495933217 | 0.472988607 |
| 0.444020323 | 0.41900127  | 0.186877312 | 0.498099394 |
| 0.490603289 | 0.382583846 | 0.119932768 | 0.476719525 |
| 0.428872733 | 0.471734785 | 0.191127562 | 0.502169592 |
| 0.50113174  | 0.46860562  | 0.220168452 | 0.440960054 |
| 0.455283782 | 0.334507781 | 0.458047663 | 0.527048454 |
| 0.378823286 | 0.435776529 | 0.434647146 | 0.452854774 |
| 0.265232073 | 0.293623477 | 0.357234499 | 0.230893807 |
| 0.016089368 | 0.133665551 | 0.117073929 | 0.248054655 |
| 0.246109295 | 0.457338897 | 0.472259788 | 0.518899162 |
| 0.189353512 | 0.436401022 | 0.304516334 | 0.403802414 |
| 0.436363092 | 0.411969411 | 0.442308127 | 0.451143389 |
| 0.318673183 | 0.045314397 | 0.194988396 | 0.526036959 |
| 0.071550769 | 0.32001898  | 0.386520271 | 0.006546777 |
| 0.087261314 | 0.437321814 | 0.140721442 | 0.230451034 |
| 0.473481962 | 0.237815831 | 0.297928032 | 0.389057184 |
| 0.425009193 | 0.156346816 | 0.008562778 | 0.485377548 |
| 0.479864509 | 0.450895465 | 0.477757683 | 0.452042521 |
| 0.447514494 | 0.445253391 | 0.477402251 | 0.432181063 |
| 0.179082233 | 0.150088444 | 0.307785042 | 0.39621055  |
| 0.008304332 | 0.449054841 | 0.377861543 | 0.215687987 |
| 0.47492714  | 0.380135234 | 0.073313133 | 0.414336365 |
| 0.051822893 | 0.272600544 | 0.379648578 | 0.298624426 |
| 0.412327694 | 0.032853064 | 0.333937042 | 0.410179995 |
| 0.435778507 | 0.396590839 | 0.428950756 | 0.532130239 |
| 0.429346313 | 0.185203728 | 0.424268675 | 0.458775056 |
| 0.129571428 | 0.154784913 | 0.422564806 | 0.061139514 |
| 0.245767358 | 0.446812788 | 0.437365622 | 0.136411628 |
| 0.377769805 | 0.01384607  | 0.414511912 | 0.530038881 |
| 0.465840332 | 0.520661009 | 0.505173138 | 0.35394572  |
| 0.511869422 | 0.136489406 | 0.527291771 | 0.452492568 |
| 0.434106709 | 0.003004799 | 0.011073001 | 0.49348562  |
| 0.484065198 | 0.092719078 | 0.24274607  | 0.440020434 |
| 0.190381602 | 0.225702096 | 0.112474352 | 0.274240459 |
| 0.483751391 | 0.326163469 | 0.241033666 | 0.470140658 |
| 0.347105066 | 0.316011674 | 0.446349073 | 0.136638991 |
| 0.468497437 | 0.104596562 | 0.136192984 | 0.0172775   |
| 0.433947775 | 0.162544931 | 0.471418948 | 0.507799236 |
| 0.502078229 | 0.46870955  | 0.385087165 | 0.3913681   |
| 0.451591132 | 0.14624579  | 0.416029893 | 0.167453974 |
| 0.486959806 | 0.477191749 | 0.404037816 | 0.380888565 |
| 0.507396748 | 0.477578282 | 0.066353308 | 0.479313024 |
| 0.031635805 | 0.003609703 | 0.459020516 | 0.332376027 |
| 0.083974702 | 0.451021555 | 0.338804147 | 0.301083837 |
| 0.295577433 | 0.062414222 | 0.34457771  | 0.330057533 |
| 0.398705112 | 0.449876604 | 0.361543298 | 0.306735567 |
| 0.35781898  | 0.215428765 | 0.284538001 | 0.22548081  |
| 0.298528236 | 0.36633949  | 0.243047813 | 0.046036322 |
| 0.484842067 | 0.482367038 | 0.10610922  | 0.231245141 |

|             |             |             |             |
|-------------|-------------|-------------|-------------|
| 0.488940445 | 0.492019102 | 0.086152081 | 0.029921344 |
| 0.336931211 | 0.390243636 | 0.497215264 | 0.496442074 |
| 0.525729324 | 0.525332797 | 0.402373693 | 0.197371109 |
| 0.120020038 | 0.412540629 | 0.376563834 | 0.170058229 |
| 0.508409249 | 0.10986796  | 0.481146749 | 0.373711246 |
| 0.1817507   | 0.329335867 | 0.071375316 | 0.143262994 |
| 0.445087319 | 0.253819449 | 0.26942758  | 0.224046874 |
| 0.412501645 | 0.331417072 | 0.091144998 | 0.288118899 |
| 0.424720386 | 0.268932081 | 0.242125917 | 0.378543551 |
| 0.418435983 | 0.258114573 | 0.491702951 | 0.45866327  |
| 0.196457061 | 0.178031549 | 0.383744165 | 0.434335069 |
| 0.490614413 | 0.435575263 | 0.052614522 | 0.445854748 |
| 0.485082204 | 0.497901131 | 0.498834594 | 0.431995762 |
| 0.137795536 | 0.462009706 | 0.375792278 | 0.432108079 |
| 0.262848548 | 0.461469988 | 0.316988507 | 0.110593368 |
| 0.338855606 | 0.480059346 | 0.454598822 | 0.256169407 |
| 0.464631698 | 0.185260025 | 0.098283245 | 0.45737891  |
| 0.275906548 | 0.155129435 | 0.404814297 | 0.466981835 |
| 0.005730822 | 0.193893288 | 0.484832683 | 0.323897139 |
| 0.514753229 | 1           | 0.450365154 | 0.326035889 |
| 0.003808397 | 0.474185849 | 0.468877824 | 0.495251938 |
| 0.45699084  | 0.412247451 | 0.198000636 | 0.137992717 |
| 0.357448258 | 0.128004816 | 0.219772048 | 0.413377096 |
| 0.249377876 | 0.466543452 | 0.271430368 | 0.284465673 |
| 0.288575923 | 0.136955497 | 0.314206369 | 0.340712941 |
| 0.202224714 | 0.317264636 | 0.421395303 | 0.328453534 |
| 0.276136231 | 0.449278661 | 0.468974007 | 0.05491322  |
| 0.416325256 | 0.448471244 | 0.445544759 | 0.006378335 |
| 0.494509261 | 0.018140757 | 0.281216888 | 0.316634161 |
| 0.291152076 | 0.292773655 | 0.34296362  | 0.403365616 |
| 0.429595233 | 0.320885515 | 0.383864604 | 0.327436468 |
| 0.253452272 | 0.306885456 | 0.463648048 | 0.448089356 |
| 0.37756825  | 0.20638968  | 0.139602545 | 0.132904119 |
| 0.098569791 | 0.460374473 | 0.300232422 | 0.118569315 |
| 0.306983513 | 0.440650971 | 0.396492764 | 0.492302208 |
| 0.439419492 | 0.155721481 | 0.405973734 | 0.473189713 |
| 0.275556237 | 0.369317421 | 0.108454428 | 0.470695134 |
| 0.317315329 | 0.302056405 | 0.451122173 | 0.399261929 |
| 0.453730696 | 0.413455634 | 0.298972685 | 0.4399282   |
| 0.462491045 | 0.404961758 | 0.377050649 | 0.153673798 |
| 0.277365145 | 0.194295319 | 0.355664329 | 0.006582086 |
| 0.431070122 | 0.361684369 | 0.498392004 | 0.493845299 |
| 0.347427871 | 0.412621556 | 0.385696862 | 0.159664804 |
| 0.337769451 | 0.217187944 | 0.208586013 | 0.480785275 |
| 0.278694161 | 0.270296938 | 0.400392614 | 0.403417865 |
| 0.490053933 | 0.465380569 | 0.329170176 | 0.3204804   |
| 0.319791445 | 0.279232734 | 0.474294452 | 0.189399077 |
| 0.481704962 | 0.281077892 | 0.401781273 | 0.402023205 |
| 0.31498864  | 0.513242197 | 0.10517344  | 0.52244968  |
| 0.421686059 | 0.185009829 | 0.496654783 | 0.368399881 |
| 0.380455865 | 0.188255651 | 0.255040682 | 0.434000988 |
| 0.315356043 | 0.400630768 | 0.022380013 | 0.098470514 |
| 0.408954128 | 0.357228846 | 0.446537687 | 0.424565485 |
| 0.334505412 | 0.40306633  | 0.205701533 | 0.374910282 |

|             |             |             |             |
|-------------|-------------|-------------|-------------|
| 0.47840983  | 0.496415294 | 0.363748126 | 0.321086561 |
| 0.41359881  | 0.169371825 | 0.4537667   | 0.021888522 |
| 0.486889467 | 0.470248897 | 0.428285583 | 0.094908108 |
| 0.041029222 | 0.293037153 | 0.486808942 | 0.109667793 |
| 0.483086356 | 0.27388235  | 0.40495555  | 0.489315289 |
| 0.238025629 | 0.500899533 | 0.19341754  | 0.480155981 |
| 0.083516453 | 0.33464614  | 0.433661181 | 0.426575201 |
| 0.330553067 | 0.38393233  | 0.460079754 | 0.319406643 |
| 0.06742459  | 0.359825123 | 0.00537323  | 0.420269728 |
| 0.473641233 | 0.418949398 | 0.259322922 | 0.334065974 |
| 0.361972361 | 0.414539289 | 0.308012584 | 0.462871583 |
| 0.028149328 | 0.451937303 | 0.275859119 | 0.454974228 |
| 0.323855436 | 0.427920179 | 0.111597929 | 0.384414312 |
| 0.459995954 | 0.366142412 | 0.308351264 | 0.410355727 |
| 0.487825499 | 0.421845709 | 0.222163078 | 0.293429162 |
| 0.427926179 | 0.107942983 | 0.429528359 | 0.526857199 |
| 0.26090701  | 0.304812984 | 0.489598218 | 0.311682529 |
| 0.378556423 | 0.414024588 | 0.453256134 | 0.513127154 |
| 0.128560623 | 0.331278526 | 0.47346875  | 0.457868153 |
| 0.369931961 | 0.245650133 | 0.325161386 | 0.323139849 |
| 0.461303522 | 0.166904705 | 0.337271775 | 0.436101972 |
| 0.302286185 | 0.382814931 | 0.383761881 | 0.271465779 |
| 0.069907881 | 0.235983956 | 0.436646444 | 0.213445807 |
| 0.386247593 | 0.459550107 | 0.336612458 | 0.409632779 |
| 0.21572789  | 0.058135498 | 0.460173343 | 0.032903397 |
| 0.415019228 | 0.475931368 | 0.321157002 | 0.4349442   |
| 0.249427143 | 0.429812965 | 0.420779617 | 0.002851337 |
| 0.464250655 | 0.08864648  | 0.365187325 | 0.329368088 |
| 0.344801968 | 0.095847496 | 0.459340312 | 0.51274754  |
| 0.389367824 | 0.377766489 | 0.40439317  | 0.457301804 |
| 0.217817294 | 0.377648432 | 0.392634832 | 0.471332444 |
| 0.295020748 | 0.439151374 | 0.458336138 | 0.450589941 |
| 0.451326564 | 0.343766269 |             |             |

|             |             |             |             |
|-------------|-------------|-------------|-------------|
| PLP2        | 0.205833787 | 0.416090045 | 0.168825308 |
| 0.300635706 | 0.34509641  | 0.449386033 | 0.170759624 |
| 0.261545422 | 0.378428669 | 0.278293789 | 0.439437834 |
| 0.089710285 | 0.079310293 | 0.451447914 | 0.159488215 |
| 0.396613859 | 0.126614234 | 0.247448768 | 0.103743214 |
| 0.301371209 | 0.329764347 | 0.352522764 | 0.430269226 |
| 0.319333749 | 0.304607152 | 0.412664437 | 0.347561606 |
| 0.459461859 | 0.242897213 | 0.442572351 | 0.206283536 |
| 0.430714742 | 0.350340877 | 0.353255154 | 0.084654577 |
| 0.435892127 | 0.012190734 | 0.455605085 | 0.36032963  |
| 0.176039329 | 0.410207813 | 0.34292826  | 0.383622096 |
| 0.374598904 | 0.139749353 | 0.193321693 | 0.386267721 |
| 0.38117143  | 0.360621755 | 0.17421678  | 0.443623522 |
| 0.36573478  | 0.441096473 | 0.39131264  | 0.007341961 |
| 0.282662954 | 0.065563311 | 0.191076054 | 0.486991035 |
| 0.353631843 | 0.268884307 | 0.238356213 | 0.323764861 |
| 0.373797275 | 0.385950202 | 0.358221374 | 0.350710391 |
| 0.478276789 | 0.167689652 | 0.408150098 | 0.275075792 |
| 0.431303933 | 0.109705082 | 0.303830561 | 0.18350112  |
| 0.381315214 | 0.33968376  | 0.392004888 | 0.299294142 |
| 0.412086899 | 0.511324631 | 0.355322958 | 0.485089188 |

|             |             |             |             |
|-------------|-------------|-------------|-------------|
| 0.098282498 | 0.332583961 | 0.312065687 | 0.387725871 |
| 0.388982797 | 0.180914165 | 0.462533266 | 0.505956187 |
| 0.13430335  | 0.370630596 | 0.415894057 | 0.242373171 |
| 0.440600296 | 0.245990827 | 0.386145652 | 0.190307585 |
| 0.376351466 | 0.358717042 | 0.46327936  | 0.420031604 |
| 0.338734241 | 0.189593617 | 0.485573372 | 0.314121822 |
| 0.388045544 | 0.218309704 | 0.273880476 | 0.429456348 |
| 0.448166594 | 0.458686437 | 0.415894872 | 0.407558679 |
| 0.376689356 | 0.474598554 | 0.463068639 | 0.42637148  |
| 0.127202868 | 0.494684629 | 0.35035562  | 0.145917692 |
| 0.186576998 | 0.20724387  | 0.240117454 | 0.390970931 |
| 0.452590497 | 0.419855035 | 0.355216504 | 0.345273419 |
| 0.432755261 | 0.46932344  | 0.487709543 | 0.440583968 |
| 0.143477641 | 0.219850075 | 0.38878575  | 0.382409414 |
| 0.420740457 | 0.236686592 | 0.27024917  | 0.507346704 |
| 0.447590247 | 0.438256374 | 0.307061776 | 0.509883168 |
| 0.294554155 | 0.502244833 | 0.437834336 | 0.332969071 |
| 0.510576858 | 0.496970154 | 0.483742522 | 0.398909304 |
| 0.477411004 | 0.456605355 | 0.073022466 | 0.415708539 |
| 0.473425985 | 0.024568655 | 0.435300023 | 0.441658111 |
| 0.476344921 | 0.441429751 | 0.480898534 | 0.464801039 |
| 0.477249488 | 0.193686529 | 0.022591413 | 0.362231635 |
| 0.496027484 | 0.456691915 | 0.231215658 | 0.393032504 |
| 0.370826283 | 0.460380383 | 0.417713112 | 0.338137614 |
| 0.503362969 | 0.449702788 | 0.440080856 | 0.427806403 |
| 0.344464387 | 0.397443833 | 0.339014634 | 0.476923464 |
| 0.152298038 | 0.264107051 | 0.156315269 | 0.375746247 |
| 0.366468477 | 0.315638396 | 0.444008039 | 0.353944065 |
| 0.337331763 | 0.399474936 | 0.295550911 | 0.387385957 |
| 0.14921202  | 0.43574904  | 0.317350039 | 0.311406594 |
| 0.150559653 | 0.26095341  | 0.328775336 | 0.308427698 |
| 0.350410222 | 0.307553949 | 0.423919458 | 0.446293037 |
| 0.351556054 | 0.325678917 | 0.448459396 | 0.461265313 |
| 0.435591071 | 0.385436981 | 0.343954796 | 0.059885097 |
| 0.320202876 | 0.254491349 | 0.164887405 | 0.378539294 |
| 0.267406971 | 0.33646575  | 0.406451066 | 0.415002673 |
| 0.415909689 | 0.2568061   | 0.370030095 | 0.454471415 |
| 0.272189735 | 0.380992098 | 0.4534624   | 0.401163435 |
| 0.026753401 | 0.437081901 | 0.457162984 | 0.198930505 |
| 0.387831057 | 0.156225147 | 0.258368728 | 0.448220997 |
| 0.267489184 | 0.242352116 | 0.443974529 | 0.402418813 |
| 0.366372333 | 0.286499166 | 0.485822913 | 0.042734548 |
| 0.331783918 | 0.121342106 | 0.387611387 | 0.322318702 |
| 0.392365998 | 0.376714048 | 0.329258004 | 0.336767618 |
| 0.266868461 | 0.491946303 | 0.437328819 | 0.474141416 |
| 0.358393343 | 0.491566802 | 0.449308572 | 0.459479934 |
| 0.440924965 | 0.323022976 | 0.123702633 | 0.459511808 |
| 0.446967958 | 0.29174097  | 0.184753046 | 0.413370393 |
| 0.343138405 | 0.40078669  | 0.174667449 | 0.467923852 |
| 0.500212086 | 0.453466498 | 0.277742752 | 0.403605765 |
| 0.45900771  | 0.393407042 | 0.429582034 | 0.494356855 |
| 0.289635764 | 0.36085853  | 0.357743186 | 0.420374324 |
| 0.332315101 | 0.247181721 | 0.380510242 | 0.153804597 |
| 0.010368141 | 0.199951179 | 0.188664565 | 0.288815944 |

|             |             |             |             |
|-------------|-------------|-------------|-------------|
| 0.19133715  | 0.385476144 | 0.418180737 | 0.483751663 |
| 0.264993804 | 0.443962018 | 0.330689442 | 0.373932835 |
| 0.432242394 | 0.34421665  | 0.364907922 | 0.397152518 |
| 0.359268924 | 0.078569422 | 0.259872442 | 0.517790224 |
| 0.123146973 | 0.255271186 | 0.386805289 | 0.012672963 |
| 0.150430684 | 0.399918568 | 0.204676069 | 0.297413291 |
| 0.439177832 | 0.300948504 | 0.350466383 | 0.313896984 |
| 0.41913511  | 0.232992269 | 0.018011755 | 0.44072721  |
| 0.446451503 | 0.419980946 | 0.444939127 | 0.439883216 |
| 0.409655122 | 0.406605849 | 0.424251688 | 0.438578131 |
| 0.247597229 | 0.212903727 | 0.233163326 | 0.375364982 |
| 0.014199155 | 0.435269301 | 0.342411415 | 0.291096979 |
| 0.415577589 | 0.380098214 | 0.140587905 | 0.353090094 |
| 0.10356546  | 0.189350111 | 0.377517977 | 0.311163605 |
| 0.377372704 | 0.075863538 | 0.308281863 | 0.326270745 |
| 0.440820307 | 0.424686689 | 0.327600506 | 0.502997939 |
| 0.426547635 | 0.240296107 | 0.389067538 | 0.428413913 |
| 0.202779293 | 0.112791182 | 0.395160528 | 0.046305685 |
| 0.234252786 | 0.434561174 | 0.364456129 | 0.202590813 |
| 0.408725235 | 0.038754403 | 0.438266718 | 0.50533638  |
| 0.451123669 | 0.4725321   | 0.478757932 | 0.285945159 |
| 0.4855032   | 0.075085329 | 0.488404193 | 0.439979992 |
| 0.352777833 | 0.005813219 | 0.024195672 | 0.449666668 |
| 0.410502995 | 0.14970319  | 0.313454365 | 0.423684343 |
| 0.265006979 | 0.292023559 | 0.179623584 | 0.230531016 |
| 0.446151123 | 0.316683986 | 0.203632084 | 0.456353585 |
| 0.363631248 | 0.344840964 | 0.402699058 | 0.20396959  |
| 0.409940483 | 0.177136333 | 0.196241505 | 0.027158212 |
| 0.393777811 | 0.226143135 | 0.47894886  | 0.478472275 |
| 0.484849894 | 0.413736135 | 0.301821679 | 0.370489013 |
| 0.415255402 | 0.210431763 | 0.339333514 | 0.235421994 |
| 0.462530895 | 0.418757857 | 0.429862514 | 0.421266434 |
| 0.477473133 | 0.464678317 | 0.126655953 | 0.436911808 |
| 0.068126175 | 0.005318824 | 0.441322569 | 0.359613252 |
| 0.059140831 | 0.370959854 | 0.385008323 | 0.279774579 |
| 0.292827425 | 0.12494983  | 0.252077412 | 0.243992334 |
| 0.397000748 | 0.406268786 | 0.304909955 | 0.330878372 |
| 0.313878408 | 0.185316739 | 0.31951123  | 0.274231389 |
| 0.247898444 | 0.393096497 | 0.310103342 | 0.092686757 |
| 0.412027739 | 0.407159404 | 0.181133273 | 0.300950794 |
| 0.465001929 | 0.45755134  | 0.138028978 | 0.058899279 |
| 0.383621991 | 0.350084809 | 0.453142586 | 0.466095755 |
| 0.512630632 | 0.498814031 | 0.423320418 | 0.222221376 |
| 0.195714804 | 0.384875324 | 0.31177949  | 0.187641135 |
| 0.478038263 | 0.169116785 | 0.465238264 | 0.282941763 |
| 0.249529075 | 0.365145942 | 0.132400444 | 0.212257852 |
| 0.367029684 | 0.321118422 | 0.301828623 | 0.28716687  |
| 0.38957735  | 0.253232483 | 0.15336043  | 0.345805127 |
| 0.428753201 | 0.180400664 | 0.307786558 | 0.376642218 |
| 0.419071393 | 0.200189159 | 0.422149203 | 0.456641021 |
| 0.275168071 | 0.235978607 | 0.40566495  | 0.399947964 |
| 0.440916269 | 0.356889999 | 0.098481565 | 0.419036246 |
| 0.451849139 | 0.43673457  | 0.48324065  | 0.419532945 |
| 0.204836913 | 0.402223432 | 0.281934649 | 0.374964911 |

|             |             |             |             |
|-------------|-------------|-------------|-------------|
| 0.311303274 | 0.448633109 | 0.333453437 | 0.180556132 |
| 0.369192483 | 0.480367218 | 0.433865863 | 0.317243535 |
| 0.407928823 | 0.244236625 | 0.154577238 | 0.428278389 |
| 0.205954248 | 0.234561229 | 0.35506876  | 0.413106957 |
| 0.008046361 | 0.1327502   | 0.436182674 | 0.369575074 |
| 0.492361662 | 0.450365154 | 1           | 0.339499642 |
| 0.001745799 | 0.390514087 | 0.443470928 | 0.43356888  |
| 0.441180627 | 0.433541989 | 0.210837805 | 0.205916627 |
| 0.393097642 | 0.196706603 | 0.267620762 | 0.39521229  |
| 0.16650522  | 0.441225922 | 0.326953338 | 0.31080462  |
| 0.303063728 | 0.186830042 | 0.246556763 | 0.382332509 |
| 0.139220861 | 0.368608543 | 0.431979449 | 0.281525179 |
| 0.206561703 | 0.422097726 | 0.437853456 | 0.112706628 |
| 0.339576317 | 0.417263815 | 0.429956155 | 0.011699305 |
| 0.438027256 | 0.047145166 | 0.308083832 | 0.341685646 |
| 0.32190224  | 0.30953952  | 0.339713816 | 0.358225159 |
| 0.40607078  | 0.355064895 | 0.407239663 | 0.373247098 |
| 0.298647908 | 0.343780853 | 0.406054997 | 0.413609738 |
| 0.364015195 | 0.285580469 | 0.204201314 | 0.19651117  |
| 0.169223162 | 0.436491095 | 0.363702025 | 0.186322552 |
| 0.346340936 | 0.390455872 | 0.421520662 | 0.465493546 |
| 0.436751826 | 0.218692119 | 0.372760175 | 0.453387244 |
| 0.199307684 | 0.361779309 | 0.172243741 | 0.434101608 |
| 0.370244395 | 0.274864394 | 0.405223193 | 0.410430375 |
| 0.405563041 | 0.431320559 | 0.362583799 | 0.434955388 |
| 0.417846992 | 0.339356283 | 0.318351972 | 0.215311545 |
| 0.344763029 | 0.257412672 | 0.307255579 | 0.019058268 |
| 0.434350521 | 0.399967564 | 0.456028543 | 0.480348271 |
| 0.258334279 | 0.427686569 | 0.34793576  | 0.235312553 |
| 0.279779704 | 0.273082456 | 0.282640928 | 0.424594922 |
| 0.194709175 | 0.334684701 | 0.360373027 | 0.410889489 |
| 0.428673242 | 0.400015167 | 0.280636554 | 0.347840027 |
| 0.331573752 | 0.336593509 | 0.461742235 | 0.259071841 |
| 0.402832765 | 0.248171571 | 0.367610629 | 0.384370252 |
| 0.317959608 | 0.467175811 | 0.175257781 | 0.4749777   |
| 0.364008239 | 0.252159278 | 0.494456712 | 0.382209849 |
| 0.382363177 | 0.23207508  | 0.172985538 | 0.384720331 |
| 0.326501959 | 0.312272326 | 0.014832041 | 0.079093574 |
| 0.416063053 | 0.297471958 | 0.405238541 | 0.39384382  |
| 0.279481258 | 0.394700676 | 0.141659396 | 0.382570152 |
| 0.463224206 | 0.493514479 | 0.375823955 | 0.358794055 |
| 0.420710935 | 0.248768841 | 0.443586231 | 0.018104039 |
| 0.41114767  | 0.382031113 | 0.352826116 | 0.161318458 |
| 0.087354375 | 0.199692893 | 0.418598343 | 0.16175961  |
| 0.438904369 | 0.189196652 | 0.361425891 | 0.441817977 |
| 0.291144604 | 0.499382206 | 0.236008088 | 0.449766627 |
| 0.115259591 | 0.365117086 | 0.349347762 | 0.354673786 |
| 0.325477942 | 0.300956748 | 0.437545065 | 0.253699836 |
| 0.128553423 | 0.345449738 | 0.008257419 | 0.445576717 |
| 0.468018185 | 0.324417156 | 0.321143132 | 0.262445516 |
| 0.383534201 | 0.407828224 | 0.285446623 | 0.381358887 |
| 0.06097919  | 0.382481415 | 0.329911498 | 0.458258429 |
| 0.239239856 | 0.371323432 | 0.175628574 | 0.307976375 |
| 0.476463792 | 0.325241325 | 0.347726641 | 0.308195848 |



|             |             |             |             |
|-------------|-------------|-------------|-------------|
| 0.462883004 | 0.407969444 | 0.279870686 | 0.272421901 |
| 0.370409654 | 0.174035988 | 0.377045937 | 0.494889326 |
| 0.309741899 | 0.242667655 | 0.44185706  | 0.343384178 |
| 0.294813091 | 0.420480729 | 0.373226297 | 0.482622984 |
| 0.16882963  | 0.378049465 | 0.427725315 | 0.433242142 |
| 0.3925468   | 0.196069831 | 0.257355439 | 0.304854831 |
| 0.451106192 | 0.247460301 | 0.261726017 | 0.444576049 |
| 0.226690399 | 0.394889815 | 0.348618155 | 0.262013465 |
| 0.127021169 | 0.27596482  | 0.423190929 | 0.283834822 |
| 0.392169068 | 0.398947559 | 0.286842418 | 0.430024443 |
| 0.268626231 | 0.106276104 | 0.455403004 | 0.020809353 |
| 0.43586597  | 0.438104935 | 0.366553797 | 0.368645728 |
| 0.322105416 | 0.410402996 | 0.405209759 | 0.010830737 |
| 0.430974641 | 0.073215184 | 0.32978907  | 0.314043105 |
| 0.279470259 | 0.162992554 | 0.4529797   | 0.468808084 |
| 0.406645902 | 0.308365323 | 0.319570301 | 0.441490886 |
| 0.158299655 | 0.277640362 | 0.30477602  | 0.4319119   |
| 0.221036701 | 0.358110012 | 0.373585248 | 0.36070941  |
| 0.445582979 | 0.371754214 |             |             |
| PLXNC1      | 0.066508852 | 0.329635016 | 0.054342051 |
| 0.040050805 | 0.162870151 | 0.119046531 | 0.056760809 |
| 0.082233285 | 0.293705382 | 0.066211619 | 0.15698859  |
| 0.021428104 | 0.0396275   | 0.324920461 | 0.065119786 |
| 0.169066121 | 0.04138318  | 0.103842111 | 0.052036113 |
| 0.092586602 | 0.135529292 | 0.070602692 | 0.158961496 |
| 0.148361995 | 0.22888357  | 0.195113291 | 0.16333787  |
| 0.349814461 | 0.044440881 | 0.217409748 | 0.032793306 |
| 0.336972017 | 0.157194591 | 0.11575129  | 0.02207133  |
| 0.183053115 | 0.022443214 | 0.368256603 | 0.084330416 |
| 0.041466893 | 0.321493276 | 0.105978914 | 0.09493771  |
| 0.112560562 | 0.029188815 | 0.03941442  | 0.208973719 |
| 0.209371474 | 0.131279306 | 0.082347236 | 0.241838244 |
| 0.094904816 | 0.245869235 | 0.218943795 | 0.001994006 |
| 0.08273739  | 0.019770276 | 0.044734015 | 0.389047071 |
| 0.196269828 | 0.119853842 | 0.052544235 | 0.188576411 |
| 0.202657149 | 0.247263982 | 0.27391991  | 0.075871955 |
| 0.355691171 | 0.047695548 | 0.246187343 | 0.052877873 |
| 0.124638415 | 0.05542931  | 0.199633359 | 0.143714732 |
| 0.098837724 | 0.167445305 | 0.177001495 | 0.095172643 |
| 0.292836288 | 0.431991986 | 0.230689987 | 0.383167896 |
| 0.048849234 | 0.156315851 | 0.088509706 | 0.252398235 |
| 0.259096312 | 0.080531816 | 0.224594106 | 0.389615993 |
| 0.083820417 | 0.162729427 | 0.221607287 | 0.164842649 |
| 0.32503936  | 0.089097882 | 0.127304998 | 0.048666686 |
| 0.214972439 | 0.138666901 | 0.414838708 | 0.200470289 |
| 0.17328767  | 0.098070864 | 0.395625323 | 0.143724832 |
| 0.090737336 | 0.090131093 | 0.063043974 | 0.294081383 |
| 0.186091709 | 0.342326403 | 0.282551496 | 0.261989597 |
| 0.132346998 | 0.35700621  | 0.213982116 | 0.35848814  |
| 0.03909092  | 0.39082668  | 0.134784319 | 0.048792814 |
| 0.068313699 | 0.092994917 | 0.09668291  | 0.323914059 |
| 0.323682435 | 0.261835278 | 0.101774045 | 0.128886861 |
| 0.314865096 | 0.376311887 | 0.382807944 | 0.272335765 |
| 0.046314283 | 0.072495574 | 0.128501273 | 0.140217543 |

|             |             |             |             |
|-------------|-------------|-------------|-------------|
| 0.22422198  | 0.177460034 | 0.091151053 | 0.399954323 |
| 0.296442014 | 0.276339973 | 0.101759594 | 0.43625632  |
| 0.146912076 | 0.392705369 | 0.298565445 | 0.111531383 |
| 0.399903126 | 0.388942605 | 0.37558679  | 0.211168308 |
| 0.39325862  | 0.12904754  | 0.042318113 | 0.29321031  |
| 0.389258265 | 0.004701338 | 0.32464942  | 0.339175159 |
| 0.357712861 | 0.274581577 | 0.387888814 | 0.369662722 |
| 0.370330782 | 0.120050561 | 0.009565955 | 0.191721526 |
| 0.371417747 | 0.282852159 | 0.120399856 | 0.128602086 |
| 0.181086346 | 0.145259568 | 0.303514591 | 0.04293023  |
| 0.423643779 | 0.32765258  | 0.34310387  | 0.250786544 |
| 0.171235258 | 0.315271584 | 0.140063423 | 0.376964182 |
| 0.052351565 | 0.074034184 | 0.085551662 | 0.297524534 |
| 0.06771548  | 0.163144686 | 0.111256895 | 0.198099814 |
| 0.185251982 | 0.165000491 | 0.089064941 | 0.211085325 |
| 0.115446549 | 0.160582674 | 0.141800898 | 0.1159985   |
| 0.038101247 | 0.228330476 | 0.04977919  | 0.072673934 |
| 0.145614746 | 0.290010667 | 0.233736503 | 0.360533801 |
| 0.129515628 | 0.169328387 | 0.227444764 | 0.382669391 |
| 0.352539295 | 0.140197699 | 0.264244487 | 0.006752685 |
| 0.043690597 | 0.062976446 | 0.045028284 | 0.170947311 |
| 0.272098776 | 0.061524421 | 0.16841441  | 0.233252907 |
| 0.126319321 | 0.142820945 | 0.084174952 | 0.393039634 |
| 0.176564727 | 0.087514766 | 0.290464695 | 0.163765393 |
| 0.007949425 | 0.124431493 | 0.275220673 | 0.07023267  |
| 0.220250344 | 0.031221724 | 0.050940913 | 0.301586215 |
| 0.060907459 | 0.083904189 | 0.358310713 | 0.256728097 |
| 0.07633452  | 0.280164067 | 0.39144342  | 0.012964766 |
| 0.175290463 | 0.030385161 | 0.209217157 | 0.122289915 |
| 0.165684889 | 0.260757622 | 0.156961817 | 0.093013264 |
| 0.129012426 | 0.383486164 | 0.334634068 | 0.357847389 |
| 0.064478717 | 0.392191962 | 0.287201316 | 0.311939183 |
| 0.236988551 | 0.119650905 | 0.031576703 | 0.250073421 |
| 0.298128173 | 0.054668094 | 0.122446485 | 0.268125024 |
| 0.104483727 | 0.210041042 | 0.083548346 | 0.340337463 |
| 0.424988088 | 0.352228166 | 0.085110195 | 0.261730704 |
| 0.257222832 | 0.139269479 | 0.333561589 | 0.416007118 |
| 0.057380128 | 0.119417247 | 0.075648096 | 0.303490209 |
| 0.157756883 | 0.068067947 | 0.356444172 | 0.05248013  |
| 0.002686262 | 0.10653424  | 0.081472262 | 0.11147462  |
| 0.050343724 | 0.196773616 | 0.224127724 | 0.368376272 |
| 0.108433404 | 0.362797516 | 0.271755027 | 0.052630183 |
| 0.298390498 | 0.133063298 | 0.164799485 | 0.217389474 |
| 0.279701584 | 0.015408097 | 0.04740304  | 0.418342206 |
| 0.083832195 | 0.055645419 | 0.17851101  | 0.002335645 |
| 0.038179075 | 0.270333798 | 0.161433958 | 0.259474981 |
| 0.361236753 | 0.246200714 | 0.152291701 | 0.061297153 |
| 0.253572063 | 0.11806512  | 0.005252301 | 0.356936763 |
| 0.402357281 | 0.39170977  | 0.395681747 | 0.408972513 |
| 0.342485254 | 0.307502859 | 0.26217348  | 0.163026945 |
| 0.067985515 | 0.078993647 | 0.039139065 | 0.111015059 |
| 0.003493932 | 0.293064711 | 0.197536767 | 0.168323554 |
| 0.257008988 | 0.239741957 | 0.039015169 | 0.21073346  |
| 0.012168023 | 0.032708999 | 0.087268128 | 0.155425211 |

|             |             |             |             |
|-------------|-------------|-------------|-------------|
| 0.281455733 | 0.023021371 | 0.03200114  | 0.051910188 |
| 0.330083559 | 0.286958057 | 0.084729024 | 0.396169306 |
| 0.154177385 | 0.138846758 | 0.113730414 | 0.274436966 |
| 0.05767446  | 0.024477325 | 0.124456858 | 0.004830864 |
| 0.091968128 | 0.418520135 | 0.109290009 | 0.03832989  |
| 0.1557392   | 0.008134967 | 0.275058501 | 0.398357993 |
| 0.352030916 | 0.358378589 | 0.361134059 | 0.076795456 |
| 0.358363739 | 0.026551179 | 0.379106891 | 0.273625491 |
| 0.075647551 | 0.00045372  | 0.011021953 | 0.321790846 |
| 0.134232453 | 0.115136452 | 0.156088619 | 0.063870871 |
| 0.055458228 | 0.085401402 | 0.090637162 | 0.05861782  |
| 0.216615709 | 0.147642229 | 0.074413082 | 0.355422892 |
| 0.122151048 | 0.202077202 | 0.118522623 | 0.147880878 |
| 0.207695701 | 0.041493071 | 0.158232273 | 0.003353776 |
| 0.260052342 | 0.163737574 | 0.40053598  | 0.372804182 |
| 0.38262275  | 0.224916297 | 0.059786558 | 0.084369865 |
| 0.36047391  | 0.119738039 | 0.076428951 | 0.123291289 |
| 0.337572072 | 0.165557128 | 0.242133395 | 0.239401982 |
| 0.358401796 | 0.343276318 | 0.046618129 | 0.246301206 |
| 0.011298667 | 0.006441592 | 0.117313027 | 0.270553651 |
| 0.077367912 | 0.109765738 | 0.226159428 | 0.119946506 |
| 0.134170473 | 0.024473043 | 0.069788984 | 0.066551168 |
| 0.179395963 | 0.135735101 | 0.116636799 | 0.296555948 |
| 0.113548684 | 0.047329101 | 0.125121178 | 0.113865643 |
| 0.099053551 | 0.265033293 | 0.213403676 | 0.033671487 |
| 0.139399844 | 0.138784872 | 0.070266131 | 0.192726467 |
| 0.288846215 | 0.320879369 | 0.04020627  | 0.009511333 |
| 0.249387489 | 0.132077071 | 0.350567621 | 0.356687659 |
| 0.404454813 | 0.390433483 | 0.372121857 | 0.069956774 |
| 0.062821967 | 0.185837241 | 0.143010961 | 0.073849038 |
| 0.373740959 | 0.093719169 | 0.384946611 | 0.114832868 |
| 0.16682445  | 0.081552025 | 0.035860594 | 0.121521144 |
| 0.16835773  | 0.195530443 | 0.130228468 | 0.119031732 |
| 0.098111488 | 0.064176778 | 0.065875866 | 0.156149733 |
| 0.236856475 | 0.032699373 | 0.159706954 | 0.164813228 |
| 0.305215812 | 0.068165416 | 0.219453658 | 0.364252435 |
| 0.152715582 | 0.121490907 | 0.052431968 | 0.310850164 |
| 0.273101675 | 0.15843295  | 0.016844795 | 0.319460684 |
| 0.381556546 | 0.196540762 | 0.379646729 | 0.318350823 |
| 0.140826376 | 0.123030244 | 0.105922055 | 0.148153218 |
| 0.191632388 | 0.138749996 | 0.195062755 | 0.103960608 |
| 0.360293536 | 0.435275841 | 0.287808543 | 0.106023913 |
| 0.198769474 | 0.137488379 | 0.082339239 | 0.353360862 |
| 0.040169675 | 0.041765005 | 0.111242686 | 0.306011811 |
| 0.003368741 | 0.041916086 | 0.382262083 | 0.098989519 |
| 0.432703175 | 0.326035889 | 0.339499642 | 1           |
| 0.001400689 | 0.206204706 | 0.167114434 | 0.091452958 |
| 0.287726379 | 0.295115941 | 0.159867079 | 0.051510374 |
| 0.282682863 | 0.111508502 | 0.056671526 | 0.078978496 |
| 0.032538055 | 0.198614552 | 0.233452383 | 0.192811243 |
| 0.13285868  | 0.150837313 | 0.06677704  | 0.135373872 |
| 0.071443982 | 0.23884427  | 0.2592007   | 0.072375163 |
| 0.023828744 | 0.33743235  | 0.23658199  | 0.03203805  |
| 0.16409816  | 0.316239538 | 0.384613249 | 0.000721897 |

|             |             |             |             |
|-------------|-------------|-------------|-------------|
| 0.214398497 | 0.014225781 | 0.128137351 | 0.107139136 |
| 0.123973911 | 0.122842334 | 0.198507206 | 0.084716239 |
| 0.205446537 | 0.131098546 | 0.100739109 | 0.187447624 |
| 0.075490353 | 0.183074445 | 0.1983471   | 0.137413522 |
| 0.073827216 | 0.078070518 | 0.184000593 | 0.182225017 |
| 0.041071032 | 0.356426395 | 0.27085519  | 0.119401805 |
| 0.218937743 | 0.13238674  | 0.323149219 | 0.35646141  |
| 0.370496494 | 0.162914252 | 0.144618058 | 0.284916324 |
| 0.045513764 | 0.06883797  | 0.049689378 | 0.178803307 |
| 0.176095073 | 0.051917161 | 0.173853079 | 0.142892852 |
| 0.237892677 | 0.351108073 | 0.264934125 | 0.379379842 |
| 0.127337578 | 0.154169972 | 0.062500094 | 0.047182571 |
| 0.087863229 | 0.185632114 | 0.124979894 | 0.003202262 |
| 0.220686288 | 0.068265594 | 0.289178614 | 0.363118962 |
| 0.077118864 | 0.364991444 | 0.051903554 | 0.040767777 |
| 0.047223914 | 0.193564204 | 0.175505302 | 0.268967763 |
| 0.040450345 | 0.116316371 | 0.151052006 | 0.081646623 |
| 0.253577118 | 0.256581653 | 0.103181741 | 0.151179413 |
| 0.216780399 | 0.18006562  | 0.414315412 | 0.098877107 |
| 0.162520191 | 0.05472932  | 0.188449401 | 0.104382212 |
| 0.119695395 | 0.375111476 | 0.099537482 | 0.365443713 |
| 0.100393558 | 0.201418771 | 0.42188772  | 0.225549663 |
| 0.116350202 | 0.091172526 | 0.041184187 | 0.115193036 |
| 0.094281066 | 0.086469472 | 0.002753657 | 0.016175763 |
| 0.234561785 | 0.119516074 | 0.247453681 | 0.291032728 |
| 0.098429691 | 0.2930837   | 0.06235213  | 0.142754871 |
| 0.361874946 | 0.410452683 | 0.047607144 | 0.267009612 |
| 0.251277093 | 0.077918211 | 0.204130468 | 0.024368669 |
| 0.162430135 | 0.163162065 | 0.066995953 | 0.064400978 |
| 0.031544455 | 0.037741806 | 0.163946616 | 0.125057625 |
| 0.336088854 | 0.038499968 | 0.217611532 | 0.256528883 |
| 0.247311492 | 0.403086387 | 0.083289716 | 0.227963062 |
| 0.051642193 | 0.251959799 | 0.157395225 | 0.154628987 |
| 0.049449431 | 0.086160709 | 0.231389468 | 0.066351458 |
| 0.036664434 | 0.077535947 | 0.001365049 | 0.357996999 |
| 0.371225421 | 0.110465411 | 0.270676016 | 0.068279747 |
| 0.24235863  | 0.368729196 | 0.072097562 | 0.155458175 |
| 0.014614071 | 0.145866456 | 0.21488226  | 0.296633775 |
| 0.026347937 | 0.168716342 | 0.050516111 | 0.14363488  |
| 0.401657969 | 0.051722423 | 0.313139355 | 0.040086632 |
| 0.36510814  | 0.338761172 | 0.188954702 | 0.117193066 |
| 0.219361867 | 0.116597057 | 0.105679267 | 0.401988246 |
| 0.119173342 | 0.065993805 | 0.276177697 | 0.071123726 |
| 0.106538676 | 0.353182405 | 0.184815048 | 0.41512352  |
| 0.056133892 | 0.212697159 | 0.298993295 | 0.334831201 |
| 0.285239647 | 0.066965075 | 0.052320981 | 0.082703053 |
| 0.33389189  | 0.043346482 | 0.075418883 | 0.24273243  |
| 0.045538291 | 0.259007166 | 0.197114974 | 0.103001443 |
| 0.031121545 | 0.119649682 | 0.090770288 | 0.174926425 |
| 0.172601006 | 0.141371974 | 0.073273055 | 0.342631404 |
| 0.05587421  | 0.015301945 | 0.391300471 | 0.004439124 |
| 0.17546344  | 0.198390724 | 0.213947768 | 0.136480026 |
| 0.202801365 | 0.200857336 | 0.12851633  | 0.001753569 |
| 0.2925919   | 0.033126265 | 0.152267191 | 0.053856082 |

|             |             |             |             |
|-------------|-------------|-------------|-------------|
| 0.060420734 | 0.042677418 | 0.376013376 | 0.364960514 |
| 0.26593278  | 0.101078975 | 0.0559276   | 0.368206493 |
| 0.037653562 | 0.07472898  | 0.080743907 | 0.209668742 |
| 0.06374326  | 0.097530449 | 0.116682464 | 0.087321112 |
| 0.261460334 | 0.169116047 |             |             |
| PMCH        | 0.000325923 | 0.001267672 | 0.000847898 |
| 0.000117079 | 0.010833558 | 0.000235832 | 0.000601258 |
| 0.000905955 | 0.002566549 | 0.000880234 | 0.001393785 |
| 0.000285238 | 0.003981869 | 0.002732076 | 0.000414343 |
| 0.006159106 | 0.000351231 | 0.00118773  | 0.000628051 |
| 0.000298394 | 0.009533992 | 0.000785076 | 0.000410445 |
| 0.010923571 | 0.000212156 | 0.001359903 | 0.006761544 |
| 0.001861398 | 0.000132484 | 0.001640468 | 7.66E-06    |
| 0.002284763 | 0.008080366 | 0.00205895  | 0.000625957 |
| 0.00143688  | 0.004803739 | 0.00223686  | 0.004147368 |
| 0.000631911 | 0.001182038 | 0.000380574 | 0.000934682 |
| 0.002320695 | 0.000425953 | 0.000524286 | 0.007839598 |
| 0.003264819 | 0.002404622 | 0.000369082 | 0.002009742 |
| 0.003955535 | 0.000643438 | 0.001151457 | 1.67E-06    |
| 0.003989063 | 0.00380928  | 0.005405846 | 0.001445161 |
| 0.000877215 | 0.001005488 | 0.003920918 | 0.001441444 |
| 0.00478223  | 0.008098195 | 0.003924243 | 0.001987092 |
| 0.001738031 | 0.010383511 | 0.004674887 | 6.21E-05    |
| 0.000854254 | 0.000202458 | 0.001349367 | 0.000503678 |
| 0.001756216 | 0.002095616 | 0.002533168 | 0.008651076 |
| 0.00125171  | 0.002291252 | 0.003959955 | 0.001608924 |
| 0.0083664   | 0.012911364 | 0.007002441 | 0.005982836 |
| 0.005986996 | 0.001969877 | 0.002289247 | 0.002496145 |
| 0.000317873 | 0.001698117 | 0.003735165 | 0.000319355 |
| 0.001097421 | 0.006328023 | 0.000761164 | 0.004153958 |
| 0.010451437 | 0.010750075 | 0.002057312 | 0.00139847  |
| 0.004620564 | 4.96E-05    | 0.000996418 | 0.011705861 |
| 0.001138389 | 0.000114436 | 0.013583936 | 0.004000902 |
| 0.002025616 | 0.001740892 | 0.00248191  | 0.00529981  |
| 0.00710988  | 0.001811645 | 0.002273808 | 0.00218066  |
| 0.000141542 | 0.001926117 | 0.000524342 | 4.37E-05    |
| 0.000816393 | 0.010475709 | 0.003093649 | 3.94E-05    |
| 0.00288173  | 0.000839536 | 0.005790567 | 0.002048131 |
| 0.000925374 | 0.002107223 | 0.003369411 | 0.005361838 |
| 0.009735024 | 0.007448005 | 0.000405828 | 1.03E-05    |
| 0.001328684 | 0.010097868 | 0.000405828 | 0.00375144  |
| 0.00405093  | 0.000613673 | 0.001386011 | 0.001369949 |
| 0.002500424 | 0.000613673 | 0.001759876 | 0.002492874 |
| 0.001066855 | 0.001091828 | 0.001013311 | 0.001904994 |
| 0.000436551 | 0.003348106 | 0.005622097 | 0.001230051 |
| 7.94E-06    | 0.000220826 | 0.003643097 | 0.002614876 |
| 0.0037161   | 0.003116909 | 0.003529195 | 0.001584525 |
| 0.000508342 | 0.004084678 | 0.002595118 | 0.001455644 |
| 0.002017665 | 0.000401667 | 0.009372108 | 0.001641974 |
| 0.000410115 | 0.003296096 | 0.003039239 | 0.00589361  |
| 0.002919534 | 0.003446622 | 0.000122775 | 0.003072983 |
| 0.001184538 | 0.002639624 | 0.003019756 | 0.003381137 |
| 8.68E-05    | 0.006209675 | 0.000767605 | 0.000309434 |
| 0.001055227 | 0.00047252  | 0.004551368 | 2.40E-06    |
|             | 0.008822277 | 0.002124372 | 0.003065558 |
|             |             |             | 0.001052472 |

|             |             |             |             |
|-------------|-------------|-------------|-------------|
| 0.003191263 | 0.008814629 | 0.000193579 | 0.000967869 |
| 0.001066122 | 0.001240605 | 0.000516006 | 0.000436309 |
| 0.000345364 | 0.000144563 | 0.004185424 | 0.000492572 |
| 0.002875839 | 0.003487008 | 0.004805586 | 0.000294494 |
| 0.001542849 | 0.003409128 | 0.003593579 | 0.004634253 |
| 0.001592909 | 0.000231371 | 0.004838039 | 0.003584842 |
| 0.012297815 | 0.003562063 | 0.000459154 | 0.002078895 |
| 0.006366234 | 0.004839417 | 0.000183362 | 0.000483437 |
| 0.004879738 | 0.00137331  | 0.000297437 | 0.001108303 |
| 0.003885782 | 0.002988636 | 0.000389855 | 0.00193665  |
| 0.002435214 | 0.005657277 | 0.003012959 | 0.000182474 |
| 0.001022532 | 0.003460796 | 0.004684641 | 0.01035977  |
| 0.002473421 | 0.005600356 | 8.41E-05    | 0.000508832 |
| 0.003117562 | 0.001829078 | 0.009668192 | 0.000391901 |
| 0.004428398 | 0.001133377 | 0.001946436 | 0.007306759 |
| 0.007211489 | 0.006903598 | 0.000220319 | 0.001852954 |
| 0.002514979 | 0.002025064 | 0.004327402 | 0.003289923 |
| 0.002941228 | 0.001966426 | 0.001566097 | 0.007845122 |
| 0.003935443 | 0.00274145  | 0.003542054 | 0.001787979 |
| 0.000102475 | 0.003562853 | 0.005434727 | 0.008767174 |
| 0.008703006 | 0.002796828 | 0.002205156 | 0.001006725 |
| 0.001026489 | 0.008038055 | 0.002004185 | 0.000291316 |
| 0.00415576  | 0.003269348 | 0.002275379 | 0.007353871 |
| 0.007238357 | 0.007516692 | 0.000989076 | 0.007952026 |
| 0.002843162 | 0.006234266 | 5.01E-06    | 0.000181896 |
| 0.002868376 | 0.009072597 | 0.002509465 | 4.02E-05    |
| 0.002743124 | 0.000685174 | 0.001572113 | 0.006833003 |
| 0.002902347 | 0.002229855 | 0.004966707 | 0.00340765  |
| 0.005825406 | 0.002976488 | 0.000152276 | 0.003823229 |
| 0.002262073 | 0.000118602 | 0.000152276 | 0.000220845 |
| 1.41E-05    | 4.48E-05    | 0.000118602 | 0.001338975 |
| 0.004092849 | 0.00058251  | 0.000218168 | 0.000598464 |
| 0.003619329 | 0.000362244 | 0.001168159 | 0.002331875 |
| 0.00292501  | 0.003328119 | 0.000188147 | 0.003169227 |
| 0.00501467  | 0.002726335 | 0.002929116 | 0.001817247 |
| 0.001143684 | 0.00040048  | 0.006134163 | 0.000195933 |
| 0.002217338 | 0.003552265 | 0.010268224 | 0.000195933 |
| 0.004529116 | 0.005528853 | 0.007206665 | 0.00701266  |
| 0.000454745 | 0.004304874 | 0.000283954 | 0.000712469 |
| 0.009115668 | 0.000313709 | 0.000826868 | 0.006721091 |
| 0.000644797 | 0.000989216 | 3.98E-05    | 0.006323896 |
| 0.00197828  | 0.000141247 | 0.004173504 | 0.002072619 |
| 0.000824633 | 0.005013443 | 0.005461036 | 0.003155631 |
| 1.07E-05    | 0.002302951 | 0.001230321 | 0.000107754 |
| 0.00198937  | 0.000705544 | 0.000218168 | 0.000598464 |
| 0.00092371  | 0.003339403 | 0.001168159 | 0.002331875 |
| 0.00166749  | 0.003638176 | 0.000188147 | 0.003169227 |
| 0.001205439 | 6.37E-05    | 0.002929116 | 0.001817247 |
| 0.000463947 | 0.001204436 | 0.006134163 | 0.000195933 |
| 0.000251244 | 0.009111853 | 0.010268224 | 0.000195933 |
| 0.007877604 | 0.001560842 | 0.007206665 | 0.00701266  |
| 0.000716023 | 0.000217202 | 0.000283954 | 0.000712469 |
| 0.000606672 | 0.001234473 | 0.000826868 | 0.006721091 |
| 0.00113639  | 0.001587589 | 3.98E-05    | 0.006323896 |
|             |             | 0.004173504 | 0.002072619 |
|             |             | 0.005461036 | 0.003155631 |
|             |             | 0.001230321 | 0.000107754 |
|             |             | 1.07E-05    | 0.002302951 |
|             |             | 0.000705544 | 0.000705544 |
|             |             | 0.003339403 | 0.003339403 |
|             |             | 0.003638176 | 0.003638176 |
|             |             | 6.37E-05    | 4.51E-05    |
|             |             | 0.001204436 | 0.001204436 |
|             |             | 0.009111853 | 0.009111853 |
|             |             | 0.001560842 | 0.001560842 |
|             |             | 0.000217202 | 0.000217202 |
|             |             | 0.001234473 | 0.001234473 |
|             |             | 0.001587589 | 0.001587589 |
|             |             | 0.000857337 | 0.000857337 |
|             |             | 0.00177147  | 0.00177147  |
|             |             | 0.002223773 | 0.002223773 |
|             |             | 0.003310483 | 0.003310483 |
|             |             | 7.61E-05    | 0.000169831 |
|             |             | 0.001121738 | 0.001121738 |
|             |             | 0.004300321 | 0.004300321 |
|             |             | 0.003849404 | 0.003849404 |
|             |             | 0.005610269 | 0.005610269 |
|             |             | 0.002707638 | 0.002707638 |
|             |             | 0.000181312 | 0.000181312 |
|             |             | 0.002044999 | 0.002044999 |
|             |             | 0.004912964 | 0.004912964 |
|             |             | 0.001034002 | 0.001034002 |
|             |             | 0.004672163 | 0.004672163 |
|             |             | 1.77E-05    | 1.77E-05    |
|             |             | 0.006483895 | 0.006483895 |
|             |             | 0.003603897 | 0.003603897 |
|             |             | 2.52E-05    | 2.52E-05    |
|             |             | 0.000206113 | 0.000206113 |
|             |             | 0.007180085 | 0.007180085 |

|             |             |             |             |
|-------------|-------------|-------------|-------------|
| 0.00098833  | 3.91E-06    | 0.004013222 | 0.00048671  |
| 0.001148053 | 0.000187037 | 0.001206963 | 0.006079122 |
| 0.002308399 | 0.001010302 | 0.003238582 | 0.002069032 |
| 5.12E-05    | 0.005926491 | 0.001955672 | 4.16E-06    |
| 0.003175243 | 0.002922695 | 0.005365079 | 0.002038434 |
| 0.005672272 | 0.00301166  | 0.000442977 | 0.009947516 |
| 0.019026808 | 0.006853727 | 0.005855133 | 0.010858408 |
| 0.003432052 | 0.010059605 | 0.015652113 | 0.002537267 |
| 0.002073141 | 0.001278524 | 0.001414424 | 0.00026225  |
| 0.000127998 | 0.00166836  | 0.004213911 | 6.58E-05    |
| 0.000783933 | 0.002343939 | 0.00252548  | 0.000502022 |
| 0.000113323 | 0.001517927 | 0.009494854 | 0.003298263 |
| 0.001457733 | 0.001509488 | 0.002925673 | 0.001749113 |
| 0.004360519 | 0.000101668 | 0.006047319 | 0.015386897 |
| 0.00453096  | 0.001892498 | 6.60E-05    | 0.001175583 |
| 0.010276794 | 0.001302957 | 0.002060545 | 0.000265032 |
| 0.000938169 | 0.004233807 | 0.001098101 | 0.004413775 |
| 0.000117445 | 0.00390538  | 0.007542382 | 0.000486025 |
| 0.001590549 | 0.003517949 | 0.010722384 | 0.002043227 |
| 0.001487029 | 0.002338215 | 0.001035686 | 0.005331587 |
| 0.002467806 | 0.000120246 | 0.00137383  | 0.000125352 |
| 0.005165098 | 0.002679249 | 0.001994693 | 0.003017227 |
| 0.001335065 | 0.003051486 | 0.002277055 | 0.001165535 |
| 0.00558013  | 0.000594025 | 0.002815658 | 0.009657616 |
| 0.010598719 | 0.002378697 | 0.00025749  | 0.005270756 |
| 0.000307018 | 0.002793018 | 0.001976262 | 0.002672517 |
| 0.000813111 | 0.001471901 | 0.000100938 | 3.92E-05    |
| 0.002163166 | 0.012295639 | 3.96E-05    | 0.000335865 |
| 0.004377949 | 2.08E-05    | 0.007837001 | 0.00489993  |
| 0.000344711 | 0.002891513 | 0.003808397 | 0.001745799 |
| 0.001400689 | 1           | 0.008659006 | 0.002144636 |
| 0.002288889 | 0.001687652 | 0.001175099 | 0.000307455 |
| 0.000576215 | 0.002528225 | 0.00033476  | 0.001486479 |
| 0.000157193 | 0.00123558  | 0.001342803 | 0.002308696 |
| 0.003271699 | 0.008561494 | 0.000525529 | 0.002221904 |
| 0.001193567 | 0.010256843 | 0.002118861 | 0.002359967 |
| 0.000374424 | 0.002151274 | 0.004663685 | 0.00302865  |
| 0.0004747   | 0.005681246 | 0.004057877 | 0.003376114 |
| 0.000118887 | 0.003696441 | 0.000195079 | 0.003800769 |
| 0.002657767 | 0.003569004 | 0.004539368 | 0.008565245 |
| 0.005561898 | 0.00538317  | 0.004522659 | 0.001251445 |
| 0.001856715 | 0.001344194 | 0.003690851 | 0.006408821 |
| 0.002379695 | 0.002130751 | 2.37E-05    | 8.67E-05    |
| 0.0004046   | 0.001685429 | 0.000761594 | 0.000301612 |
| 0.002907554 | 0.005276856 | 0.00323563  | 0.00132125  |
| 0.003114534 | 0.000202404 | 0.00354194  | 0.000936927 |
| 0.001959864 | 3.77E-05    | 2.02E-05    | 0.001911445 |
| 0.002176272 | 0.001196322 | 0.000568393 | 0.002812043 |
| 0.001370373 | 0.000619139 | 0.002391559 | 0.005105559 |
| 0.00777333  | 0.000353164 | 9.81E-05    | 0.000874417 |
| 0.000808036 | 0.010268907 | 0.000333292 | 0.001896783 |
| 0.000103534 | 0.002386113 | 0.001161175 | 0.006016059 |
| 0.002346088 | 0.000119143 | 0.00012867  | 1.06E-05    |
| 0.000232923 | 0.000801101 | 0.003151097 | 0.004236452 |

|             |             |             |             |
|-------------|-------------|-------------|-------------|
| 0.000567251 | 0.011495729 | 2.61E-06    | 0.005162186 |
| 0.005121641 | 0.007021128 | 0.00155106  | 0.006385344 |
| 0.000667838 | 0.002456064 | 6.87E-05    | 0.002717973 |
| 0.006469277 | 0.001024493 | 0.003945113 | 0.008593003 |
| 0.00283517  | 4.54E-05    | 0.002796996 | 0.006902335 |
| 0.000272482 | 0.002171366 | 0.000968406 | 0.001677734 |
| 0.000685506 | 0.007692495 | 0.001105877 | 0.002154973 |
| 0.002282412 | 3.84E-06    | 0.000223652 | 0.003244284 |
| 0.005127001 | 0.002393448 | 0.006433151 | 0.010895953 |
| 0.006659798 | 0.002095311 | 0.003032285 | 0.001036151 |
| 0.001263261 | 0.000793842 | 0.00420834  | 0.00209688  |
| 5.80E-05    | 0.000322655 | 0.007525681 | 0.003512099 |
| 0.003084175 | 0.000876625 | 0.000207497 | 6.07E-05    |
| 0.010569192 | 0.004982381 | 0.000490402 | 0.004897132 |
| 0.001222931 | 0.002767494 | 0.002579361 | 0.001411911 |
| 0.00140203  | 0.002720467 | 0.002910615 | 0.000814144 |
| 0.003553106 | 0.004375018 | 0.003544788 | 0.001507931 |
| 0.010099076 | 0.004893847 | 0.006074123 | 6.10E-05    |
| 0.001494061 | 0.002365416 | 0.001226679 | 0.001221436 |
| 0.012201653 | 0.001028084 | 0.001062473 | 0.004100561 |
| 0.003111272 | 0.001283223 | 0.002189356 | 0.000162142 |
| 0.006366791 | 0.002074097 | 0.000685748 | 0.00126008  |
| 0.00607607  | 0.000140407 | 0.014153001 | 0.000915758 |
| 0.001929969 | 0.002371641 | 0.003695647 | 0.001367013 |
| 0.001893462 | 0.000160768 | 0.003619254 | 0.00347849  |
| 9.58E-05    | 0.000416474 | 0.002578269 | 0.001851826 |
| 0.010714792 | 0.004370363 | 0.00308473  | 0.007622749 |
| 0.001738319 | 0.003369199 | 0.002726436 | 0.002381053 |
| 0.00264105  | 0.005054063 | 0.003010033 | 0.004073505 |
| 0.016190037 | 0.005615267 | 0.006192044 | 0.000793888 |
| 0.000823533 | 0.018342409 | 0.002793659 | 0.012534086 |
| 0.002829301 | 0.001466572 | 0.008636093 | 0.000544702 |
| 0.002264696 | 0.000204905 | 0.000940372 | 0.004613647 |
| 0.005296101 | 0.010200276 | 0.002402972 | 0.000168671 |
| 0.000416295 | 0.003277209 | 0.000207846 | 5.47E-06    |
| 0.002731767 | 0.001367535 | 0.006922798 | 0.000181678 |
| 0.002723766 | 0.001357222 | 0.002124751 | 0.003901805 |
| 0.000304803 | 0.003089712 | 0.002782183 | 0.000760433 |
| 6.35E-05    | 0.001247476 | 0.003354219 | 0.001580289 |
| 0.000504544 | 0.000854998 | 0.001401809 | 0.004123008 |
| 0.002777091 | 0.003375335 | 0.001593659 | 0.007723352 |
| 0.001562942 | 0.002100546 | 0.002312587 | 0.001186304 |
| 0.000968079 |             |             |             |
| PMF1        | 0.047355253 | 0.380040667 | 0.033105115 |
| 0.120332176 | 0.326563415 | 0.293074086 | 0.046391883 |
| 0.097615286 | 0.298941957 | 0.277187276 | 0.297386761 |
| 0.011389957 | 0.162689473 | 0.423631587 | 0.042618674 |
| 0.371355546 | 0.02759046  | 0.086177794 | 0.084549375 |
| 0.211479572 | 0.305844109 | 0.326468818 | 0.258546727 |
| 0.317217261 | 0.137255464 | 0.258753317 | 0.37515016  |
| 0.468124962 | 0.278309397 | 0.347353593 | 0.202110345 |
| 0.371045898 | 0.338346599 | 0.372221433 | 0.009695348 |
| 0.329159496 | 0.037257343 | 0.383559082 | 0.268715624 |
| 0.236284397 | 0.287493903 | 0.262939735 | 0.214390911 |



|             |             |             |             |
|-------------|-------------|-------------|-------------|
| 0.323658936 | 0.022898363 | 0.189258981 | 0.372301482 |
| 0.271204823 | 0.256259542 | 0.038848196 | 0.349019873 |
| 0.343083146 | 0.234344206 | 0.316858699 | 0.001679342 |
| 0.347280082 | 0.182998478 | 0.321831272 | 0.448125645 |
| 0.148515142 | 0.10159584  | 0.340377575 | 0.201507581 |
| 0.344750606 | 0.337020929 | 0.209716891 | 0.340027771 |
| 0.454374069 | 0.273491899 | 0.396074372 | 0.145026459 |
| 0.30958904  | 0.021804892 | 0.11522173  | 0.057302419 |
| 0.367167943 | 0.170690108 | 0.304271792 | 0.372784708 |
| 0.380543832 | 0.458520033 | 0.193370195 | 0.439938524 |
| 0.187463532 | 0.368182231 | 0.323893736 | 0.265825431 |
| 0.323812965 | 0.073935399 | 0.348701464 | 0.478362166 |
| 0.034785362 | 0.301607277 | 0.342217093 | 0.079964741 |
| 0.376691555 | 0.341292949 | 0.310047474 | 0.244174403 |
| 0.363153493 | 0.357622745 | 0.421856175 | 0.222458016 |
| 0.312992629 | 0.046048937 | 0.406434562 | 0.360985682 |
| 0.270593378 | 0.055259802 | 0.290956882 | 0.464521643 |
| 0.344536024 | 0.456635685 | 0.392579744 | 0.332645746 |
| 0.378635586 | 0.461224751 | 0.327823237 | 0.372233475 |
| 0.170182179 | 0.477876585 | 0.142065822 | 0.031378794 |
| 0.045472274 | 0.071144396 | 0.287680492 | 0.256555261 |
| 0.450782316 | 0.253532876 | 0.149898318 | 0.234754435 |
| 0.472483775 | 0.403504903 | 0.481103581 | 0.378524359 |
| 0.026084468 | 0.346228051 | 0.38244817  | 0.206120208 |
| 0.311959903 | 0.085030968 | 0.328707509 | 0.438942609 |
| 0.327963839 | 0.428431228 | 0.118546116 | 0.4276963   |
| 0.171582661 | 0.472036576 | 0.408916782 | 0.138539183 |
| 0.461550433 | 0.422243844 | 0.488234691 | 0.374929131 |
| 0.407357498 | 0.260347911 | 0.07694613  | 0.348112292 |
| 0.448252468 | 0.026633817 | 0.468680681 | 0.496000308 |
| 0.451297734 | 0.461489094 | 0.507436904 | 0.485379454 |
| 0.449671879 | 0.050563574 | 0.06123382  | 0.276692266 |
| 0.452904856 | 0.354161239 | 0.131758824 | 0.378005671 |
| 0.349941184 | 0.287380281 | 0.395694726 | 0.28389086  |
| 0.467862085 | 0.43078701  | 0.469265648 | 0.339496313 |
| 0.25919923  | 0.25674351  | 0.386372119 | 0.388164529 |
| 0.033352375 | 0.076626684 | 0.030295112 | 0.256515009 |
| 0.271906015 | 0.151040564 | 0.285937597 | 0.341221691 |
| 0.156806219 | 0.254915861 | 0.359075575 | 0.357292356 |
| 0.032814614 | 0.343773252 | 0.129140207 | 0.132552807 |
| 0.034404109 | 0.100694103 | 0.157737593 | 0.12510174  |
| 0.2382599   | 0.174760026 | 0.370681052 | 0.476280744 |
| 0.346817629 | 0.12288678  | 0.337198861 | 0.442220836 |
| 0.395539096 | 0.374439175 | 0.170464151 | 0.010329531 |
| 0.304919473 | 0.345349023 | 0.301357257 | 0.373127288 |
| 0.129283774 | 0.233990776 | 0.352722819 | 0.373156466 |
| 0.197178098 | 0.104837807 | 0.366150501 | 0.357175915 |
| 0.099531117 | 0.2831562   | 0.431461849 | 0.338309227 |
| 0.001618414 | 0.275486125 | 0.414851654 | 0.209889034 |
| 0.253756208 | 0.187430598 | 0.286973071 | 0.457819332 |
| 0.34108806  | 0.290167984 | 0.474413363 | 0.37201798  |
| 0.272106257 | 0.164830511 | 0.501107548 | 0.100197534 |
| 0.357456401 | 0.067325126 | 0.246440286 | 0.275033237 |
| 0.203273813 | 0.247942551 | 0.335454036 | 0.304490277 |

|             |             |             |             |
|-------------|-------------|-------------|-------------|
| 0.080780648 | 0.467873601 | 0.340582194 | 0.478609863 |
| 0.382326629 | 0.50218191  | 0.447192332 | 0.40425615  |
| 0.283813035 | 0.372647059 | 0.23675836  | 0.408658252 |
| 0.451650135 | 0.325188794 | 0.044838765 | 0.424651529 |
| 0.353703364 | 0.372737887 | 0.16945762  | 0.472455551 |
| 0.433656984 | 0.403463844 | 0.125466933 | 0.362539458 |
| 0.334147243 | 0.174194174 | 0.387499145 | 0.49668876  |
| 0.320275629 | 0.362625156 | 0.361361619 | 0.40371877  |
| 0.132533367 | 0.274715949 | 0.268536327 | 0.282866906 |
| 0.019084081 | 0.054165436 | 0.042862553 | 0.154606367 |
| 0.253096018 | 0.345417555 | 0.352124239 | 0.482086407 |
| 0.090383923 | 0.362993557 | 0.184257777 | 0.293306016 |
| 0.378529274 | 0.347651711 | 0.365507653 | 0.348148559 |
| 0.186545239 | 0.01732481  | 0.098456133 | 0.459136491 |
| 0.023087232 | 0.296949476 | 0.249157052 | 0.00254849  |
| 0.031322055 | 0.363224965 | 0.064598549 | 0.145301166 |
| 0.471764084 | 0.1483575   | 0.154900813 | 0.304295954 |
| 0.282087316 | 0.0672022   | 0.003210052 | 0.470716456 |
| 0.452061702 | 0.428002919 | 0.447856531 | 0.40043936  |
| 0.434989371 | 0.353788197 | 0.406528314 | 0.247669877 |
| 0.08417493  | 0.063248082 | 0.310469704 | 0.284348253 |
| 0.003437419 | 0.338590082 | 0.300130663 | 0.101506843 |
| 0.392420333 | 0.252343123 | 0.023685976 | 0.343050638 |
| 0.014232281 | 0.291829093 | 0.250712958 | 0.205575147 |
| 0.333524956 | 0.008060839 | 0.2165983   | 0.362933166 |
| 0.35739521  | 0.280560308 | 0.382441792 | 0.482877329 |
| 0.277858466 | 0.082586833 | 0.311531565 | 0.347991795 |
| 0.05545344  | 0.147896535 | 0.291258921 | 0.042802219 |
| 0.164773222 | 0.400746391 | 0.358960364 | 0.054036035 |
| 0.224703532 | 0.002403749 | 0.30479966  | 0.480389019 |
| 0.40125557  | 0.504160168 | 0.457241066 | 0.317755627 |
| 0.459650825 | 0.209110977 | 0.492802093 | 0.353612095 |
| 0.336038066 | 0.000666982 | 0.004336419 | 0.481085988 |
| 0.371832056 | 0.032479017 | 0.12199901  | 0.269454722 |
| 0.094141288 | 0.105337736 | 0.046486566 | 0.257486849 |
| 0.32535791  | 0.247403313 | 0.235502256 | 0.409372005 |
| 0.224900676 | 0.202204771 | 0.305766879 | 0.055744474 |
| 0.350289629 | 0.04015955  | 0.058703821 | 0.008424397 |
| 0.329819498 | 0.075967972 | 0.387682478 | 0.461793686 |
| 0.450600912 | 0.35521112  | 0.309959145 | 0.265266235 |
| 0.423782672 | 0.056974498 | 0.341491305 | 0.069294421 |
| 0.431200094 | 0.356402328 | 0.263493151 | 0.247811326 |
| 0.474513849 | 0.421371398 | 0.022529497 | 0.38773642  |
| 0.008428563 | 0.003019603 | 0.275668663 | 0.202303956 |
| 0.114433151 | 0.372589795 | 0.201905357 | 0.229255753 |
| 0.220309081 | 0.018736243 | 0.353393625 | 0.3372908   |
| 0.269061219 | 0.335517947 | 0.315665358 | 0.19103376  |
| 0.30016987  | 0.212086343 | 0.179861572 | 0.130999894 |
| 0.252290352 | 0.258436348 | 0.142066039 | 0.014542842 |
| 0.357304869 | 0.37224846  | 0.039008592 | 0.110554064 |
| 0.413612106 | 0.472969333 | 0.039297476 | 0.010005752 |
| 0.20308621  | 0.30678851  | 0.483695361 | 0.449898084 |
| 0.458538334 | 0.485331994 | 0.329422207 | 0.13735576  |
| 0.046681983 | 0.303271286 | 0.334634244 | 0.127989145 |

|             |             |             |             |
|-------------|-------------|-------------|-------------|
| 0.467316289 | 0.041226412 | 0.423011686 | 0.36192679  |
| 0.085631418 | 0.194767668 | 0.025573581 | 0.06425555  |
| 0.36710617  | 0.131898946 | 0.175101974 | 0.100379518 |
| 0.302447896 | 0.320688442 | 0.035212035 | 0.159837933 |
| 0.290976133 | 0.309828253 | 0.124743115 | 0.242874232 |
| 0.297846715 | 0.223442485 | 0.400672093 | 0.405969361 |
| 0.086765735 | 0.0868642   | 0.207781369 | 0.339055294 |
| 0.423376286 | 0.339189045 | 0.016607247 | 0.404028631 |
| 0.462755284 | 0.359393847 | 0.434885702 | 0.374193758 |
| 0.057580685 | 0.350084295 | 0.366729672 | 0.341095365 |
| 0.149776427 | 0.285231458 | 0.212563222 | 0.042504906 |
| 0.252208174 | 0.416170524 | 0.384385401 | 0.141227509 |
| 0.336933394 | 0.082268641 | 0.035864216 | 0.412135834 |
| 0.286802173 | 0.064462664 | 0.278642922 | 0.423251827 |
| 0.003437703 | 0.237169507 | 0.484736091 | 0.187902238 |
| 0.471902867 | 0.474185849 | 0.390514087 | 0.206204706 |
| 0.008659006 | 1           | 0.318567377 | 0.356684883 |
| 0.385319622 | 0.270377173 | 0.130164951 | 0.066008541 |
| 0.240523231 | 0.047133261 | 0.132290525 | 0.255728591 |
| 0.288097277 | 0.307202803 | 0.150935391 | 0.175381981 |
| 0.203632725 | 0.059942049 | 0.301573415 | 0.193486845 |
| 0.253662942 | 0.181599316 | 0.306460572 | 0.239127384 |
| 0.265518419 | 0.421470558 | 0.366549779 | 0.015719154 |
| 0.358081721 | 0.394786991 | 0.401902494 | 0.0025953   |
| 0.380228125 | 0.004294687 | 0.189612784 | 0.205056468 |
| 0.191348205 | 0.203467619 | 0.249513759 | 0.313632943 |
| 0.292509186 | 0.199173022 | 0.233752315 | 0.191495298 |
| 0.153847562 | 0.180164948 | 0.353140475 | 0.306716312 |
| 0.270174799 | 0.095136166 | 0.066068239 | 0.068271577 |
| 0.036835472 | 0.423099201 | 0.185825515 | 0.042993956 |
| 0.188186619 | 0.322386422 | 0.311280618 | 0.439745368 |
| 0.384273843 | 0.074165403 | 0.303035199 | 0.396224975 |
| 0.267829511 | 0.239843244 | 0.040224397 | 0.316300089 |
| 0.17809521  | 0.244843119 | 0.313533012 | 0.228839409 |
| 0.347220686 | 0.342128074 | 0.176358669 | 0.399863591 |
| 0.332939587 | 0.329882544 | 0.264058289 | 0.07787734  |
| 0.141159915 | 0.091460085 | 0.303630465 | 0.000950084 |
| 0.277341856 | 0.189856001 | 0.453824961 | 0.427015783 |
| 0.346994792 | 0.337219817 | 0.242505412 | 0.067832582 |
| 0.237425946 | 0.132325004 | 0.097499188 | 0.389831625 |
| 0.301511546 | 0.144100279 | 0.310947459 | 0.227368676 |
| 0.404235559 | 0.386372344 | 0.294925597 | 0.195041699 |
| 0.213521162 | 0.141570526 | 0.420175902 | 0.082878104 |
| 0.364197791 | 0.243307272 | 0.269505979 | 0.288282632 |
| 0.226542766 | 0.491701737 | 0.038498867 | 0.500616936 |
| 0.340814145 | 0.085935051 | 0.434133764 | 0.227836647 |
| 0.236815854 | 0.116346822 | 0.295943595 | 0.306825921 |
| 0.213605955 | 0.361578682 | 0.023192013 | 0.095320884 |
| 0.274980634 | 0.300813873 | 0.364827148 | 0.320488754 |
| 0.303874924 | 0.3162893   | 0.245593246 | 0.233549308 |
| 0.412967704 | 0.421558081 | 0.230393862 | 0.202826552 |
| 0.276911236 | 0.076620251 | 0.273454545 | 0.025353451 |
| 0.37066521  | 0.375660688 | 0.336297579 | 0.037859254 |
| 0.012640065 | 0.324998257 | 0.359001306 | 0.0448649   |

|             |             |             |             |
|-------------|-------------|-------------|-------------|
| 0.484426854 | 0.288594691 | 0.29055096  | 0.362171962 |
| 0.123908939 | 0.422464173 | 0.121740542 | 0.349531226 |
| 0.039846634 | 0.204075884 | 0.37219461  | 0.344484189 |
| 0.23573967  | 0.352724472 | 0.337487472 | 0.299886103 |
| 0.023111117 | 0.267710708 | 0.002933597 | 0.337561157 |
| 0.400800296 | 0.384684567 | 0.15286207  | 0.278938131 |
| 0.231157502 | 0.343127636 | 0.249172564 | 0.360142965 |
| 0.008219076 | 0.361867841 | 0.154986237 | 0.349207394 |
| 0.291602926 | 0.327416352 | 0.047450257 | 0.351491245 |
| 0.370033659 | 0.289180978 | 0.203260599 | 0.357905425 |
| 0.435104324 | 0.337339437 | 0.108188473 | 0.239737406 |
| 0.317531836 | 0.040006285 | 0.298360029 | 0.488558893 |
| 0.157606145 | 0.290914567 | 0.446578444 | 0.194398197 |
| 0.355055088 | 0.326147101 | 0.352254471 | 0.476546116 |
| 0.07927173  | 0.189947118 | 0.398301763 | 0.427191687 |
| 0.254129654 | 0.25445503  | 0.305092748 | 0.254217323 |
| 0.391359385 | 0.071461064 | 0.330253298 | 0.284391705 |
| 0.311001957 | 0.248912783 | 0.260136775 | 0.22107758  |
| 0.027506429 | 0.142835851 | 0.283485882 | 0.103593803 |
| 0.255372339 | 0.351409806 | 0.296873852 | 0.33989511  |
| 0.11728383  | 0.020849405 | 0.407585098 | 0.047974042 |
| 0.231914021 | 0.333987896 | 0.188012504 | 0.353355527 |
| 0.129872294 | 0.286800628 | 0.26065329  | 0.000187746 |
| 0.392609884 | 0.084004364 | 0.290817968 | 0.250358893 |
| 0.30668917  | 0.035182744 | 0.39674601  | 0.496254549 |
| 0.235078014 | 0.305767006 | 0.347361434 | 0.409596063 |
| 0.251410149 | 0.358295437 | 0.358723275 | 0.3125497   |
| 0.308210586 | 0.33287266  | 0.361160765 | 0.373950711 |
| 0.303538267 | 0.205338705 |             |             |
| PMM1        | 0.084574619 | 0.350083384 | 0.056654948 |
| 0.210859449 | 0.281163692 | 0.282420117 | 0.067107442 |
| 0.127702014 | 0.25116942  | 0.14787028  | 0.32310048  |
| 0.036413747 | 0.098163032 | 0.439115464 | 0.064363483 |
| 0.299083318 | 0.060735804 | 0.121638916 | 0.052298084 |
| 0.154511436 | 0.280674411 | 0.294517555 | 0.235668714 |
| 0.248774702 | 0.1906536   | 0.212837248 | 0.237598215 |
| 0.450748513 | 0.205359332 | 0.34637088  | 0.125002786 |
| 0.412196995 | 0.296041786 | 0.265414588 | 0.025562471 |
| 0.28227334  | 0.009035301 | 0.399560754 | 0.28063283  |
| 0.187614478 | 0.344199619 | 0.178372177 | 0.284986412 |
| 0.216770121 | 0.052707427 | 0.114075133 | 0.295699915 |
| 0.193060249 | 0.202867393 | 0.055310241 | 0.327841539 |
| 0.225635575 | 0.290861465 | 0.269396604 | 0.00529306  |
| 0.259623998 | 0.084190951 | 0.188299557 | 0.450903025 |
| 0.209626901 | 0.156403685 | 0.168110303 | 0.15216481  |
| 0.235530726 | 0.282390887 | 0.210268262 | 0.215406136 |
| 0.474791483 | 0.179859021 | 0.328193926 | 0.180219588 |
| 0.26277497  | 0.026669029 | 0.165485507 | 0.053739327 |
| 0.258114079 | 0.21825115  | 0.293499532 | 0.24725652  |
| 0.353778853 | 0.466974524 | 0.186318983 | 0.428214026 |
| 0.089466653 | 0.267988477 | 0.246346184 | 0.293465484 |
| 0.279338487 | 0.067573175 | 0.398670046 | 0.492047348 |
| 0.038124795 | 0.202786684 | 0.310229808 | 0.096332969 |
| 0.372430177 | 0.175843641 | 0.22857756  | 0.21613344  |

|             |             |             |             |
|-------------|-------------|-------------|-------------|
| 0.311493772 | 0.289082227 | 0.401132132 | 0.297488925 |
| 0.244700109 | 0.06303498  | 0.410439345 | 0.270818339 |
| 0.327297331 | 0.084004164 | 0.236743267 | 0.417633269 |
| 0.323684714 | 0.46288608  | 0.347259052 | 0.323733744 |
| 0.298196779 | 0.472813514 | 0.360350039 | 0.362867795 |
| 0.072117373 | 0.468163966 | 0.188574782 | 0.073884789 |
| 0.061999381 | 0.108652418 | 0.161485873 | 0.290584481 |
| 0.443981313 | 0.260738767 | 0.201674287 | 0.252431066 |
| 0.446385566 | 0.401696454 | 0.457552265 | 0.380951562 |
| 0.055246986 | 0.176081285 | 0.302561193 | 0.198822982 |
| 0.313601707 | 0.096329452 | 0.261337296 | 0.453328845 |
| 0.401283871 | 0.415949328 | 0.131981179 | 0.441725568 |
| 0.145540689 | 0.502534278 | 0.394007198 | 0.206386638 |
| 0.473902878 | 0.442669889 | 0.502767368 | 0.360957199 |
| 0.437163183 | 0.285720135 | 0.039734318 | 0.33270719  |
| 0.487884051 | 0.032102265 | 0.426607171 | 0.461816252 |
| 0.445436002 | 0.436309589 | 0.495083551 | 0.473961991 |
| 0.44340869  | 0.068757557 | 0.016648397 | 0.270097624 |
| 0.459436396 | 0.410611839 | 0.13412941  | 0.284749859 |
| 0.280658999 | 0.27485542  | 0.345374471 | 0.306686661 |
| 0.492788012 | 0.420967462 | 0.436192797 | 0.328495047 |
| 0.169376312 | 0.316937835 | 0.257262722 | 0.406234964 |
| 0.065538411 | 0.122589105 | 0.048701448 | 0.251195106 |
| 0.206468454 | 0.196524156 | 0.265560968 | 0.234396234 |
| 0.204026591 | 0.204722688 | 0.238608094 | 0.341766547 |
| 0.050219013 | 0.289318234 | 0.150360334 | 0.147619816 |
| 0.07797275  | 0.141888091 | 0.251957583 | 0.206094121 |
| 0.265557293 | 0.207278446 | 0.334806397 | 0.451236946 |
| 0.231922558 | 0.172946031 | 0.338435321 | 0.466282171 |
| 0.453417401 | 0.308010804 | 0.207216196 | 0.044454153 |
| 0.280715033 | 0.16856879  | 0.171386294 | 0.261883957 |
| 0.160109921 | 0.247245951 | 0.28714031  | 0.389629071 |
| 0.231035562 | 0.097898167 | 0.282343273 | 0.408313101 |
| 0.124631237 | 0.321546266 | 0.455230229 | 0.240043854 |
| 0.006912007 | 0.290643813 | 0.421747179 | 0.165300292 |
| 0.235082858 | 0.188037909 | 0.259501589 | 0.447078638 |
| 0.226419483 | 0.210095076 | 0.451312471 | 0.359744143 |
| 0.252031258 | 0.181707875 | 0.49070977  | 0.046877706 |
| 0.223787197 | 0.119302784 | 0.2987174   | 0.164499266 |
| 0.232307101 | 0.274184842 | 0.275256139 | 0.28297676  |
| 0.112593179 | 0.469973762 | 0.351086499 | 0.484126671 |
| 0.273961407 | 0.493047188 | 0.443365381 | 0.447337429 |
| 0.290477343 | 0.221896679 | 0.149350452 | 0.425399573 |
| 0.435364812 | 0.199677486 | 0.062283621 | 0.362752151 |
| 0.21339593  | 0.338205015 | 0.131116743 | 0.491969115 |
| 0.463393507 | 0.391269445 | 0.185819256 | 0.36440882  |
| 0.408357029 | 0.232536948 | 0.3634086   | 0.491028103 |
| 0.169290692 | 0.283003108 | 0.301061765 | 0.4119252   |
| 0.171825094 | 0.217845925 | 0.280229669 | 0.15539447  |
| 0.015270433 | 0.071081978 | 0.070698569 | 0.212384794 |
| 0.210792467 | 0.253139794 | 0.314543399 | 0.480098329 |
| 0.144172397 | 0.395914232 | 0.180613234 | 0.324409246 |
| 0.392905108 | 0.248519943 | 0.280144864 | 0.289332305 |
| 0.214865689 | 0.0455842   | 0.195149084 | 0.474378087 |

|             |             |             |             |
|-------------|-------------|-------------|-------------|
| 0.03024326  | 0.263757796 | 0.206150309 | 0.010857099 |
| 0.056698485 | 0.309405217 | 0.089505968 | 0.197132726 |
| 0.463159485 | 0.193981163 | 0.184161302 | 0.178475973 |
| 0.326627466 | 0.102233264 | 0.014339459 | 0.431093803 |
| 0.406652855 | 0.378973774 | 0.402070126 | 0.371905118 |
| 0.375332725 | 0.304558407 | 0.381032814 | 0.239996244 |
| 0.120781913 | 0.074508178 | 0.24469962  | 0.284159666 |
| 0.006289973 | 0.371853419 | 0.230608678 | 0.149889917 |
| 0.358593931 | 0.236389507 | 0.058029891 | 0.251335036 |
| 0.049399616 | 0.211858073 | 0.21709425  | 0.186026392 |
| 0.315818025 | 0.021901934 | 0.249026003 | 0.274635538 |
| 0.394229584 | 0.333290681 | 0.253493335 | 0.480574248 |
| 0.313456438 | 0.098290817 | 0.303784352 | 0.368037751 |
| 0.092311044 | 0.070439747 | 0.219439005 | 0.032862684 |
| 0.139416176 | 0.378129065 | 0.242999536 | 0.085982885 |
| 0.264746548 | 0.012393199 | 0.358198938 | 0.490340649 |
| 0.396178647 | 0.493963904 | 0.480166447 | 0.284437585 |
| 0.475936732 | 0.083284297 | 0.483027898 | 0.359085131 |
| 0.2290134   | 0.003764689 | 0.013302914 | 0.462362168 |
| 0.316867603 | 0.047225243 | 0.163155699 | 0.282618082 |
| 0.176242747 | 0.124999368 | 0.072651349 | 0.22891503  |
| 0.297119284 | 0.258651183 | 0.191917869 | 0.406392176 |
| 0.240953837 | 0.211124514 | 0.227700975 | 0.073407207 |
| 0.284714432 | 0.086320496 | 0.066553717 | 0.028584541 |
| 0.318908396 | 0.102313351 | 0.395743692 | 0.457778783 |
| 0.482162203 | 0.350754177 | 0.192342193 | 0.251495718 |
| 0.374050957 | 0.079172264 | 0.234845994 | 0.083954563 |
| 0.4329993   | 0.334244411 | 0.3491742   | 0.325005827 |
| 0.496219215 | 0.453340698 | 0.04840901  | 0.387367795 |
| 0.036726175 | 0.004342027 | 0.262169705 | 0.213593895 |
| 0.029989556 | 0.28672351  | 0.265090586 | 0.139173133 |
| 0.164780806 | 0.055798227 | 0.237577538 | 0.238059586 |
| 0.269004752 | 0.29495608  | 0.279746217 | 0.183595609 |
| 0.234886376 | 0.17001185  | 0.201620356 | 0.147875065 |
| 0.139622218 | 0.284691671 | 0.199950551 | 0.029692914 |
| 0.267008838 | 0.307151657 | 0.077117719 | 0.14286132  |
| 0.450028739 | 0.47864866  | 0.06513067  | 0.043036408 |
| 0.26092298  | 0.238916708 | 0.486945028 | 0.439955521 |
| 0.471473165 | 0.502701471 | 0.37526543  | 0.165187517 |
| 0.086617999 | 0.265638974 | 0.265085332 | 0.143433695 |
| 0.473405312 | 0.051567362 | 0.424958882 | 0.251871547 |
| 0.105937583 | 0.225106477 | 0.073464499 | 0.090838877 |
| 0.286488393 | 0.170261911 | 0.218683274 | 0.126160229 |
| 0.302143689 | 0.239184422 | 0.056444799 | 0.20360373  |
| 0.325687238 | 0.200540443 | 0.159110256 | 0.191775484 |
| 0.290260387 | 0.091314426 | 0.367474041 | 0.45179287  |
| 0.121041158 | 0.094346354 | 0.237408347 | 0.298385826 |
| 0.394393394 | 0.213925983 | 0.061466292 | 0.373819522 |
| 0.458246376 | 0.342060962 | 0.445818592 | 0.3971793   |
| 0.073415894 | 0.33201345  | 0.212436405 | 0.279975862 |
| 0.164258213 | 0.271532991 | 0.195264245 | 0.067488448 |
| 0.269979484 | 0.421100124 | 0.375642004 | 0.2166031   |
| 0.253640349 | 0.086400672 | 0.044215667 | 0.379030219 |
| 0.225019318 | 0.126379738 | 0.192299115 | 0.364970747 |

|             |             |             |             |
|-------------|-------------|-------------|-------------|
| 0.006108744 | 0.158184728 | 0.440483115 | 0.247531637 |
| 0.460264175 | 0.468877824 | 0.443470928 | 0.167114434 |
| 0.002144636 | 0.318567377 | 1           | 0.328626073 |
| 0.387769123 | 0.30814197  | 0.093179092 | 0.126861173 |
| 0.302497837 | 0.071957221 | 0.191014641 | 0.245140508 |
| 0.157898621 | 0.279940428 | 0.196312743 | 0.150137107 |
| 0.208598277 | 0.060986974 | 0.232944431 | 0.231957411 |
| 0.110681037 | 0.254538574 | 0.373201372 | 0.138465251 |
| 0.240119537 | 0.398686649 | 0.361977288 | 0.039677734 |
| 0.258432694 | 0.362073563 | 0.389522241 | 0.008794569 |
| 0.389910616 | 0.018889489 | 0.230608257 | 0.270299521 |
| 0.225678487 | 0.214033697 | 0.246351174 | 0.287026509 |
| 0.244046356 | 0.213801504 | 0.300530422 | 0.241489004 |
| 0.221539106 | 0.179230873 | 0.280179858 | 0.237764615 |
| 0.324633626 | 0.152408709 | 0.092036982 | 0.094585215 |
| 0.09997672  | 0.401246891 | 0.255600441 | 0.065718791 |
| 0.209727113 | 0.227695017 | 0.374755549 | 0.424197376 |
| 0.413852354 | 0.096445235 | 0.237804395 | 0.408658693 |
| 0.130477308 | 0.223780119 | 0.060778407 | 0.253532308 |
| 0.221200453 | 0.282448013 | 0.22941045  | 0.223705829 |
| 0.292558889 | 0.399448251 | 0.245841205 | 0.406897107 |
| 0.295017585 | 0.203806179 | 0.179810885 | 0.16057453  |
| 0.200508041 | 0.110959873 | 0.274949754 | 0.007191796 |
| 0.296914765 | 0.225285408 | 0.454240183 | 0.437114054 |
| 0.224541428 | 0.374972262 | 0.208118248 | 0.126839953 |
| 0.154194379 | 0.163141966 | 0.138589685 | 0.34137855  |
| 0.207602454 | 0.189159643 | 0.284897991 | 0.218802926 |
| 0.369925757 | 0.309624779 | 0.206158713 | 0.188107352 |
| 0.180317015 | 0.151609622 | 0.398257664 | 0.101677    |
| 0.264293648 | 0.250638886 | 0.187105338 | 0.31026314  |
| 0.234160419 | 0.462230914 | 0.062230525 | 0.480759909 |
| 0.288117652 | 0.115175158 | 0.466058506 | 0.198710049 |
| 0.203900366 | 0.167115411 | 0.193511766 | 0.214145588 |
| 0.19510603  | 0.257699587 | 0.010186941 | 0.089677695 |
| 0.343153146 | 0.162847383 | 0.312739748 | 0.28578289  |
| 0.236049824 | 0.33214715  | 0.139942636 | 0.206624568 |
| 0.402553289 | 0.422742271 | 0.309704768 | 0.242891261 |
| 0.310446729 | 0.139933025 | 0.268965533 | 0.008261301 |
| 0.304503378 | 0.273096033 | 0.233185641 | 0.069123679 |
| 0.030129119 | 0.217549684 | 0.281368319 | 0.044719257 |
| 0.462833081 | 0.204468071 | 0.197572593 | 0.348955054 |
| 0.138233128 | 0.432397739 | 0.165787143 | 0.397427609 |
| 0.032509212 | 0.204164714 | 0.245923779 | 0.218006064 |
| 0.316014846 | 0.276859898 | 0.383753372 | 0.265626287 |
| 0.058982456 | 0.281619087 | 0.004611654 | 0.392371861 |
| 0.394452168 | 0.261512948 | 0.193328722 | 0.144583302 |
| 0.279226686 | 0.322122924 | 0.22544134  | 0.246539309 |
| 0.03346225  | 0.317211062 | 0.183543029 | 0.395435122 |
| 0.233436557 | 0.223365279 | 0.101953876 | 0.234421253 |
| 0.385679969 | 0.276760689 | 0.228284284 | 0.252603599 |
| 0.425113294 | 0.303192153 | 0.130046712 | 0.195206581 |
| 0.229435232 | 0.057269394 | 0.215795538 | 0.479538651 |
| 0.219931571 | 0.255003179 | 0.450614056 | 0.253312568 |
| 0.25075475  | 0.3338832   | 0.230696832 | 0.451204497 |

|             |             |             |             |
|-------------|-------------|-------------|-------------|
| 0.129854862 | 0.242512433 | 0.374452882 | 0.410858334 |
| 0.314636379 | 0.190619933 | 0.265863981 | 0.263546414 |
| 0.404220146 | 0.15399301  | 0.215231566 | 0.326281984 |
| 0.244554226 | 0.265153145 | 0.172017712 | 0.220974783 |
| 0.078397095 | 0.145082723 | 0.29171987  | 0.128711426 |
| 0.268528242 | 0.297290716 | 0.238392087 | 0.398654496 |
| 0.223105031 | 0.078381144 | 0.438684476 | 0.040569741 |
| 0.238946119 | 0.35090173  | 0.212227018 | 0.278342188 |
| 0.19396654  | 0.23900305  | 0.224449718 | 0.004616016 |
| 0.383482718 | 0.058504739 | 0.211606208 | 0.297484963 |
| 0.23504664  | 0.063422448 | 0.417268283 | 0.495922723 |
| 0.229399747 | 0.193491331 | 0.25660228  | 0.411594139 |
| 0.18213553  | 0.207648281 | 0.229289362 | 0.283072753 |
| 0.224680841 | 0.22130071  | 0.249006827 | 0.288514027 |
| 0.320708568 | 0.196008692 |             |             |
| POLD3       | 0.034839278 | 0.365626118 | 0.027281422 |
| 0.123142742 | 0.249651691 | 0.183667444 | 0.025690744 |
| 0.056160707 | 0.257864015 | 0.112898804 | 0.268735885 |
| 0.010578211 | 0.059437986 | 0.445654614 | 0.02130382  |
| 0.316230445 | 0.018779874 | 0.055689454 | 0.026743644 |
| 0.096654106 | 0.217064509 | 0.18609699  | 0.200984415 |
| 0.179628881 | 0.158847308 | 0.225988373 | 0.229517357 |
| 0.478479853 | 0.155044651 | 0.369046331 | 0.121042738 |
| 0.397079931 | 0.27495709  | 0.218831685 | 0.008942385 |
| 0.238280067 | 0.004654105 | 0.393595773 | 0.161186509 |
| 0.138419599 | 0.311342592 | 0.150738793 | 0.151410643 |
| 0.199480602 | 0.020170387 | 0.091928956 | 0.324610209 |
| 0.204382896 | 0.114985074 | 0.030215554 | 0.357476616 |
| 0.149857629 | 0.270168371 | 0.305988428 | 0.001781194 |
| 0.177141731 | 0.068449123 | 0.136554253 | 0.464125858 |
| 0.164611856 | 0.06572208  | 0.133097573 | 0.087574295 |
| 0.243934016 | 0.282260563 | 0.176078794 | 0.158720888 |
| 0.485007993 | 0.114619411 | 0.367758541 | 0.100064146 |
| 0.179128989 | 0.009961357 | 0.127488805 | 0.039776301 |
| 0.172857909 | 0.131195785 | 0.225485008 | 0.170772447 |
| 0.384898706 | 0.460769563 | 0.162024783 | 0.445936198 |
| 0.047454584 | 0.256218279 | 0.15723906  | 0.263116577 |
| 0.276893507 | 0.028228319 | 0.408995098 | 0.499105073 |
| 0.013867126 | 0.231702814 | 0.322825503 | 0.072667615 |
| 0.387367569 | 0.116823753 | 0.229738205 | 0.130279196 |
| 0.32774081  | 0.263683565 | 0.397209876 | 0.26058653  |
| 0.162618103 | 0.041551022 | 0.414914778 | 0.258672156 |
| 0.187269338 | 0.051088267 | 0.14745366  | 0.451918191 |
| 0.344151921 | 0.483551783 | 0.368333137 | 0.313980696 |
| 0.288868053 | 0.489089224 | 0.382852233 | 0.352677747 |
| 0.062690502 | 0.484779132 | 0.128208587 | 0.022192024 |
| 0.028686364 | 0.038217774 | 0.093766069 | 0.254363812 |
| 0.467037354 | 0.240466996 | 0.104541125 | 0.161936803 |
| 0.462137631 | 0.411730947 | 0.478362809 | 0.38384167  |
| 0.019328533 | 0.120039908 | 0.298402278 | 0.107172975 |
| 0.301798077 | 0.058653437 | 0.180163982 | 0.454592208 |
| 0.383679775 | 0.429989579 | 0.07220085  | 0.432943989 |
| 0.070406044 | 0.502215757 | 0.427865409 | 0.121437824 |
| 0.483995625 | 0.44776709  | 0.513296186 | 0.381784689 |



|             |             |             |             |
|-------------|-------------|-------------|-------------|
| 0.433773153 | 0.229458763 | 0.016620012 | 0.328445892 |
| 0.473058641 | 0.019400889 | 0.455827474 | 0.491654283 |
| 0.467487591 | 0.475789933 | 0.50537817  | 0.492308459 |
| 0.46040223  | 0.040151816 | 0.011557318 | 0.239625473 |
| 0.475272877 | 0.412976205 | 0.054528956 | 0.283150749 |
| 0.269215267 | 0.202847363 | 0.356978015 | 0.201468911 |
| 0.477479391 | 0.446212328 | 0.464385743 | 0.332017218 |
| 0.155878698 | 0.281212279 | 0.260384025 | 0.41049284  |
| 0.023930029 | 0.059113263 | 0.032395557 | 0.224358674 |
| 0.15478263  | 0.124774515 | 0.176194578 | 0.218719234 |
| 0.148436561 | 0.136447989 | 0.167725572 | 0.349414386 |
| 0.035357135 | 0.304840442 | 0.094452259 | 0.102768963 |
| 0.027649515 | 0.106946618 | 0.127020318 | 0.093839884 |
| 0.164111706 | 0.181309574 | 0.361688446 | 0.474589364 |
| 0.149149042 | 0.151231329 | 0.347824029 | 0.462675661 |
| 0.422207146 | 0.294038852 | 0.163462265 | 0.018898787 |
| 0.189068115 | 0.127094397 | 0.12094709  | 0.263908606 |
| 0.131297721 | 0.133657636 | 0.301304601 | 0.395014391 |
| 0.183856851 | 0.0479734   | 0.182249554 | 0.38109163  |
| 0.103297805 | 0.182857695 | 0.46299115  | 0.25671083  |
| 0.002036058 | 0.23308757  | 0.442432161 | 0.089257314 |
| 0.218233768 | 0.105949981 | 0.174881666 | 0.474378447 |
| 0.152143593 | 0.117210742 | 0.470906214 | 0.360177142 |
| 0.149369321 | 0.15977013  | 0.499437225 | 0.032986293 |
| 0.19179144  | 0.061853469 | 0.258456328 | 0.1422789   |
| 0.187454093 | 0.238729745 | 0.232171128 | 0.177145589 |
| 0.094349522 | 0.477661586 | 0.346203206 | 0.49960247  |
| 0.20519588  | 0.504934329 | 0.467407719 | 0.44186267  |
| 0.276956295 | 0.180714522 | 0.100336044 | 0.456529689 |
| 0.466561858 | 0.157229724 | 0.046424299 | 0.391004593 |
| 0.169803694 | 0.363259953 | 0.080215341 | 0.503252858 |
| 0.452755993 | 0.410825079 | 0.075648919 | 0.351994669 |
| 0.400594055 | 0.165973811 | 0.371470078 | 0.489181815 |
| 0.136340514 | 0.232588577 | 0.202091959 | 0.408320127 |
| 0.138939452 | 0.120486358 | 0.253338059 | 0.103335026 |
| 0.01694949  | 0.035068645 | 0.039593354 | 0.096544586 |
| 0.129137456 | 0.285329437 | 0.332642409 | 0.497461807 |
| 0.065552554 | 0.382432499 | 0.152997906 | 0.20192403  |
| 0.402643186 | 0.169146567 | 0.264366581 | 0.290187697 |
| 0.182094414 | 0.020383347 | 0.085801011 | 0.472723382 |
| 0.019021173 | 0.163523196 | 0.141213961 | 0.003308762 |
| 0.021338544 | 0.34151311  | 0.069012364 | 0.160937955 |
| 0.463567714 | 0.168635982 | 0.165043786 | 0.139190367 |
| 0.303192207 | 0.052728755 | 0.004669769 | 0.453799638 |
| 0.415784777 | 0.384086799 | 0.412985124 | 0.372045034 |
| 0.389198316 | 0.306694833 | 0.399978657 | 0.21429692  |
| 0.054889411 | 0.036251901 | 0.165906192 | 0.190176201 |
| 0.001448255 | 0.362071492 | 0.166630109 | 0.111180612 |
| 0.369938648 | 0.214853699 | 0.018841902 | 0.234497981 |
| 0.022858528 | 0.163898753 | 0.120431564 | 0.093176583 |
| 0.296744893 | 0.006673082 | 0.201289963 | 0.198559463 |
| 0.397509153 | 0.30895301  | 0.187822584 | 0.497370935 |
| 0.252590064 | 0.087323698 | 0.218460235 | 0.356864805 |
| 0.035778108 | 0.059665767 | 0.135642573 | 0.036781774 |

|                    |             |             |             |
|--------------------|-------------|-------------|-------------|
| 0.084484471        | 0.370963798 | 0.163140462 | 0.046226987 |
| 0.221603478        | 0.003695692 | 0.352012242 | 0.495246402 |
| 0.4153280513167985 | 0.492894716 | 0.185260082 |             |
| 0.493034582        | 0.063848213 | 0.502228737 | 0.369584376 |
| 0.172024027        | 0.001972678 | 0.002714188 | 0.496878698 |
| 0.312194879        | 0.034853779 | 0.115791335 | 0.197207656 |
| 0.072166137        | 0.062583126 | 0.025254461 | 0.138678207 |
| 0.31285915         | 0.166955169 | 0.101710678 | 0.417138195 |
| 0.143895143        | 0.142749051 | 0.158211186 | 0.051745998 |
| 0.28811885         | 0.032815284 | 0.047275181 | 0.009243793 |
| 0.303430464        | 0.084715741 | 0.395139667 | 0.470969844 |
| 0.480437654        | 0.367303711 | 0.152326796 | 0.145077693 |
| 0.377640729        | 0.064643401 | 0.169466142 | 0.064390883 |
| 0.457545652        | 0.355899896 | 0.315905286 | 0.304485321 |
| 0.498296134        | 0.458683234 | 0.014882785 | 0.405672121 |
| 0.014824774        | 0.0010171   | 0.230973958 | 0.176714556 |
| 0.01572158         | 0.22553514  | 0.231676673 | 0.080252608 |
| 0.083491755        | 0.019433257 | 0.160325287 | 0.162543062 |
| 0.245016077        | 0.230580504 | 0.211458331 | 0.15853394  |
| 0.144299428        | 0.100074083 | 0.099278321 | 0.063774691 |
| 0.082768884        | 0.27578398  | 0.170403904 | 0.008755947 |
| 0.261884298        | 0.292885502 | 0.029420597 | 0.110722666 |
| 0.462910491        | 0.50144026  | 0.02333042  | 0.014517684 |
| 0.229897113        | 0.142154941 | 0.49702086  | 0.463017653 |
| 0.47525891         | 0.500981767 | 0.348785126 | 0.070368891 |
| 0.031923051        | 0.23544108  | 0.222087243 | 0.066724063 |
| 0.481448704        | 0.036430224 | 0.432549181 | 0.210670257 |
| 0.072305736        | 0.129156741 | 0.024099726 | 0.043004225 |
| 0.287925419        | 0.11977391  | 0.117713438 | 0.114150371 |
| 0.176040377        | 0.166112962 | 0.020311486 | 0.1343962   |
| 0.313788648        | 0.158752948 | 0.110948147 | 0.111994972 |
| 0.293892793        | 0.067035883 | 0.401880959 | 0.431113852 |
| 0.088733511        | 0.054167813 | 0.160461706 | 0.293010959 |
| 0.426609966        | 0.225544719 | 0.024512845 | 0.403520725 |
| 0.460274383        | 0.374260054 | 0.455783678 | 0.370297613 |
| 0.051064017        | 0.285001232 | 0.141682254 | 0.254256953 |
| 0.108996108        | 0.189109093 | 0.11871559  | 0.034980776 |
| 0.232329882        | 0.403964802 | 0.400452861 | 0.101188823 |
| 0.254726344        | 0.067795708 | 0.030322267 | 0.385520282 |
| 0.150586904        | 0.054236695 | 0.153494555 | 0.377333948 |
| 0.003171691        | 0.102238636 | 0.452932417 | 0.120450824 |
| 0.45737455         | 0.495251938 | 0.43356888  | 0.091452958 |
| 0.002288889        | 0.356684883 | 0.328626073 | 1           |
| 0.406007437        | 0.285385166 | 0.045407016 | 0.048637984 |
| 0.259963956        | 0.055810324 | 0.083233105 | 0.156130675 |
| 0.120995588        | 0.286575221 | 0.148966093 | 0.10842019  |
| 0.107281431        | 0.047966649 | 0.152836806 | 0.131235517 |
| 0.068786686        | 0.205287095 | 0.340123164 | 0.098423682 |
| 0.179454076        | 0.392211496 | 0.384154513 | 0.013005789 |
| 0.217384518        | 0.362464355 | 0.385460593 | 0.003601893 |
| 0.41116911         | 0.00448038  | 0.116292796 | 0.146899751 |
| 0.110740787        | 0.101093668 | 0.196785693 | 0.183370955 |
| 0.244783619        | 0.116324393 | 0.169937052 | 0.189377955 |
| 0.104525654        | 0.107859528 | 0.282909386 | 0.179577681 |

|             |             |             |             |
|-------------|-------------|-------------|-------------|
| 0.187482645 | 0.069228017 | 0.070819565 | 0.074358955 |
| 0.035143138 | 0.413145568 | 0.211546989 | 0.04975862  |
| 0.151810184 | 0.155670185 | 0.340181847 | 0.447967064 |
| 0.394123614 | 0.082201718 | 0.14313386  | 0.434403534 |
| 0.1010397   | 0.140709489 | 0.024838356 | 0.239821836 |
| 0.139558907 | 0.152029291 | 0.205232914 | 0.225531901 |
| 0.314516961 | 0.37474244  | 0.202250767 | 0.400518563 |
| 0.207835777 | 0.164490485 | 0.144642549 | 0.06416778  |
| 0.110720395 | 0.084725296 | 0.205238771 | 0.002479746 |
| 0.271049842 | 0.142620447 | 0.485747424 | 0.452942835 |
| 0.149993286 | 0.348817932 | 0.149359974 | 0.056507939 |
| 0.130423714 | 0.151054785 | 0.102191677 | 0.372944025 |
| 0.147953805 | 0.089065416 | 0.240070259 | 0.14427728  |
| 0.398024668 | 0.339337486 | 0.118590793 | 0.096468674 |
| 0.130265062 | 0.135322143 | 0.399509797 | 0.050750064 |
| 0.30046761  | 0.151161485 | 0.204290311 | 0.205725532 |
| 0.126695865 | 0.487413997 | 0.030596103 | 0.505680515 |
| 0.197524269 | 0.087644524 | 0.446662627 | 0.138223049 |
| 0.129285817 | 0.071584104 | 0.1366864   | 0.14139053  |
| 0.100523729 | 0.173643238 | 0.011891969 | 0.054218815 |
| 0.30626408  | 0.103418719 | 0.340913625 | 0.277068716 |
| 0.144896395 | 0.302833544 | 0.087589968 | 0.138635912 |
| 0.420968597 | 0.425947868 | 0.178517554 | 0.206123429 |
| 0.281269817 | 0.055336629 | 0.282079023 | 0.004450717 |
| 0.335530383 | 0.310708564 | 0.161535938 | 0.021907451 |
| 0.008662195 | 0.163700502 | 0.319534335 | 0.03106142  |
| 0.479999565 | 0.149226353 | 0.207996262 | 0.374383215 |
| 0.108844985 | 0.437306813 | 0.067552559 | 0.400856015 |
| 0.013730481 | 0.175412613 | 0.210458452 | 0.179311667 |
| 0.176773631 | 0.186714646 | 0.381346923 | 0.16752847  |
| 0.018773782 | 0.157362995 | 0.002257952 | 0.371296836 |
| 0.407194555 | 0.218845762 | 0.154459059 | 0.105418972 |
| 0.238455355 | 0.311416386 | 0.111317646 | 0.232545383 |
| 0.010587428 | 0.325402526 | 0.121973759 | 0.39579327  |
| 0.204412239 | 0.213885062 | 0.041290392 | 0.184729442 |
| 0.380806234 | 0.166603464 | 0.186617505 | 0.214787052 |
| 0.446207775 | 0.306753172 | 0.116971604 | 0.108857442 |
| 0.248867388 | 0.036734329 | 0.150828395 | 0.485386988 |
| 0.100968814 | 0.164053635 | 0.467885262 | 0.134042878 |
| 0.170729603 | 0.325578596 | 0.264357561 | 0.456237152 |
| 0.047265814 | 0.199035672 | 0.38007867  | 0.424065129 |
| 0.26738472  | 0.109703945 | 0.167849579 | 0.142161532 |
| 0.423016627 | 0.069263393 | 0.140690044 | 0.320973891 |
| 0.166717774 | 0.224964421 | 0.189524742 | 0.112623364 |
| 0.022497988 | 0.063773921 | 0.17608565  | 0.090203355 |
| 0.217967787 | 0.255964534 | 0.145198893 | 0.372578571 |
| 0.102965472 | 0.030216003 | 0.427081319 | 0.026582634 |
| 0.209959573 | 0.359260993 | 0.146450748 | 0.20619742  |
| 0.162263052 | 0.224037418 | 0.204551274 | 0.000657241 |
| 0.380034826 | 0.046780404 | 0.117263881 | 0.16482261  |
| 0.138131847 | 0.023789527 | 0.418449687 | 0.506520596 |
| 0.210372185 | 0.129987254 | 0.189276486 | 0.408724806 |
| 0.124500274 | 0.151249934 | 0.148804919 | 0.316835172 |
| 0.147261246 | 0.191100393 | 0.191748035 | 0.213090175 |

|             |             |             |             |
|-------------|-------------|-------------|-------------|
| 0.315296334 | 0.103029529 |             |             |
| POLE        | 0.133821916 | 0.432417078 | 0.115889173 |
| 0.188520531 | 0.281644652 | 0.417534871 | 0.102491254 |
| 0.185706422 | 0.375756093 | 0.339867109 | 0.371094813 |
| 0.040186689 | 0.06943958  | 0.450863632 | 0.089498953 |
| 0.372752963 | 0.056986241 | 0.158762452 | 0.100133639 |
| 0.250300063 | 0.264941083 | 0.324378581 | 0.437958555 |
| 0.263161119 | 0.243027143 | 0.395357408 | 0.363762102 |
| 0.496257915 | 0.272675138 | 0.422779582 | 0.230477273 |
| 0.423292811 | 0.300897301 | 0.36260403  | 0.039269947 |
| 0.414692555 | 0.009929256 | 0.461849082 | 0.272046142 |
| 0.127303388 | 0.358201045 | 0.389943151 | 0.267005798 |
| 0.412068939 | 0.079928763 | 0.252824595 | 0.393096806 |
| 0.365484644 | 0.292055261 | 0.129985094 | 0.42794478  |
| 0.376080058 | 0.391307393 | 0.428391431 | 0.008177391 |
| 0.273969897 | 0.073017169 | 0.202473395 | 0.515056927 |
| 0.249265148 | 0.157626412 | 0.293167928 | 0.287874458 |
| 0.386609982 | 0.365897151 | 0.27460969  | 0.397212455 |
| 0.503081446 | 0.15847005  | 0.417679176 | 0.19202611  |
| 0.412618082 | 0.07257406  | 0.209786694 | 0.146548066 |
| 0.369836022 | 0.22485948  | 0.330702346 | 0.271895702 |
| 0.450071693 | 0.526408572 | 0.273832766 | 0.524094103 |
| 0.087080692 | 0.310224245 | 0.249949374 | 0.306435953 |
| 0.371899735 | 0.12841338  | 0.419935684 | 0.524107999 |
| 0.091960981 | 0.421516797 | 0.416855258 | 0.196297495 |
| 0.42677075  | 0.247804617 | 0.433075443 | 0.152670445 |
| 0.339366097 | 0.328318868 | 0.490825249 | 0.33852008  |
| 0.289343444 | 0.136962962 | 0.519053568 | 0.287102705 |
| 0.303325624 | 0.143873976 | 0.220706938 | 0.429370601 |
| 0.422386303 | 0.489180089 | 0.431745742 | 0.378050614 |
| 0.366916005 | 0.496942505 | 0.421058971 | 0.407311855 |
| 0.184314248 | 0.530606151 | 0.245510156 | 0.067518694 |
| 0.143086197 | 0.111178085 | 0.216869007 | 0.31398782  |
| 0.442800334 | 0.371401896 | 0.271579179 | 0.244179121 |
| 0.413801212 | 0.509225406 | 0.53100762  | 0.425479749 |
| 0.076978904 | 0.216045168 | 0.371449244 | 0.321833141 |
| 0.395119095 | 0.162260671 | 0.230761935 | 0.532381734 |
| 0.389844647 | 0.415363705 | 0.245937217 | 0.5231845   |
| 0.245521743 | 0.506853278 | 0.456740331 | 0.217311264 |
| 0.529625626 | 0.51968553  | 0.493216568 | 0.372449747 |
| 0.487257624 | 0.39515292  | 0.080359461 | 0.393264468 |
| 0.469359609 | 0.013760718 | 0.451512373 | 0.478312873 |
| 0.513323304 | 0.437620114 | 0.499203321 | 0.491961841 |
| 0.518727823 | 0.126897819 | 0.031324106 | 0.288559709 |
| 0.527395231 | 0.403803603 | 0.148479289 | 0.412783274 |
| 0.340134126 | 0.438743207 | 0.410968386 | 0.343588382 |
| 0.504676751 | 0.428643169 | 0.477600312 | 0.422731734 |
| 0.350080744 | 0.339746237 | 0.350879783 | 0.50398334  |
| 0.07331795  | 0.192124861 | 0.108461697 | 0.321369259 |
| 0.391328463 | 0.202837255 | 0.446918838 | 0.337551565 |
| 0.228866471 | 0.393656642 | 0.306696003 | 0.356239574 |
| 0.112091454 | 0.448389173 | 0.219462007 | 0.254384869 |
| 0.067650571 | 0.195466502 | 0.250475054 | 0.186545509 |
| 0.2633097   | 0.294868803 | 0.436614409 | 0.469351666 |

|             |             |             |             |
|-------------|-------------|-------------|-------------|
| 0.337595667 | 0.254088121 | 0.44233521  | 0.461468268 |
| 0.405787672 | 0.358493603 | 0.27050673  | 0.018070981 |
| 0.306422011 | 0.30501162  | 0.164518386 | 0.387882416 |
| 0.221506428 | 0.289982241 | 0.395944193 | 0.370077372 |
| 0.372965805 | 0.212925611 | 0.368054388 | 0.445793    |
| 0.222736856 | 0.303523888 | 0.425637488 | 0.432176387 |
| 0.008877665 | 0.377985914 | 0.438173748 | 0.138481493 |
| 0.361354914 | 0.126986935 | 0.237362729 | 0.438645646 |
| 0.289715322 | 0.205176819 | 0.469369553 | 0.359382923 |
| 0.373371625 | 0.277583299 | 0.508639763 | 0.056752187 |
| 0.319565763 | 0.05877256  | 0.292407848 | 0.37538988  |
| 0.29979527  | 0.306549136 | 0.286367083 | 0.265213098 |
| 0.211201654 | 0.524544199 | 0.399009035 | 0.501478906 |
| 0.376258667 | 0.513928421 | 0.43470724  | 0.422382396 |
| 0.381926224 | 0.356459473 | 0.116716996 | 0.440843428 |
| 0.427376851 | 0.329338363 | 0.138073758 | 0.429047868 |
| 0.380974709 | 0.390252001 | 0.109495477 | 0.479293923 |
| 0.499908788 | 0.500059536 | 0.173434946 | 0.352333857 |
| 0.399764913 | 0.296022564 | 0.396867796 | 0.512527671 |
| 0.350485748 | 0.349484898 | 0.326218435 | 0.364182035 |
| 0.234505672 | 0.194295897 | 0.331180916 | 0.149015611 |
| 0.009658678 | 0.146025001 | 0.124765413 | 0.17607237  |
| 0.141100439 | 0.418629787 | 0.387498317 | 0.516609657 |
| 0.164623629 | 0.408961741 | 0.277839097 | 0.31322627  |
| 0.439028572 | 0.336531818 | 0.345125428 | 0.367751819 |
| 0.283862471 | 0.025874385 | 0.146011715 | 0.533539405 |
| 0.092308965 | 0.217905528 | 0.363285465 | 0.003869085 |
| 0.092307266 | 0.429086284 | 0.155253204 | 0.230621828 |
| 0.437657937 | 0.241448462 | 0.282848907 | 0.374439153 |
| 0.347457571 | 0.14085318  | 0.003576414 | 0.471671312 |
| 0.479871279 | 0.449090573 | 0.484059327 | 0.469841667 |
| 0.417176709 | 0.393118304 | 0.396447804 | 0.417252166 |
| 0.159041854 | 0.158251136 | 0.200432873 | 0.306012084 |
| 0.009936144 | 0.370136401 | 0.290571804 | 0.195178189 |
| 0.407350007 | 0.333367034 | 0.073609324 | 0.325574434 |
| 0.050824414 | 0.189012004 | 0.367239708 | 0.236988415 |
| 0.323642484 | 0.034246491 | 0.283630856 | 0.335362556 |
| 0.46163     | 0.379740569 | 0.333808163 | 0.530406586 |
| 0.348299847 | 0.209541024 | 0.308907393 | 0.380773715 |
| 0.11653886  | 0.149795526 | 0.397785408 | 0.052774251 |
| 0.230249359 | 0.456124166 | 0.375334255 | 0.125242405 |
| 0.314745004 | 0.014682112 | 0.395082134 | 0.530188106 |
| 0.491828232 | 0.499847504 | 0.498381663 | 0.248552175 |
| 0.509192028 | 0.089339403 | 0.522751438 | 0.426915803 |
| 0.409729513 | 0.002522426 | 0.008535458 | 0.460149356 |
| 0.391355871 | 0.116679096 | 0.210427287 | 0.408562436 |
| 0.142717536 | 0.239245002 | 0.10376784  | 0.158868691 |
| 0.425726971 | 0.23003221  | 0.154047163 | 0.499060191 |
| 0.267683221 | 0.24993754  | 0.433267866 | 0.148387078 |
| 0.386053144 | 0.085820792 | 0.143751795 | 0.008804752 |
| 0.344546742 | 0.184182481 | 0.507437747 | 0.511725928 |
| 0.490944555 | 0.370842631 | 0.372676105 | 0.365148634 |
| 0.39774078  | 0.177649067 | 0.360398135 | 0.190589272 |
| 0.50342428  | 0.392247119 | 0.348670094 | 0.352552835 |

|             |             |             |             |
|-------------|-------------|-------------|-------------|
| 0.490947825 | 0.478808293 | 0.063196896 | 0.406038369 |
| 0.024998301 | 0.00140325  | 0.44002251  | 0.298117345 |
| 0.055883174 | 0.36135754  | 0.295412262 | 0.254753132 |
| 0.229344177 | 0.067621252 | 0.233143297 | 0.219819127 |
| 0.314058639 | 0.368828083 | 0.252195652 | 0.282025914 |
| 0.243384147 | 0.132426314 | 0.210369691 | 0.191331342 |
| 0.256475862 | 0.352028946 | 0.250408001 | 0.044197802 |
| 0.426584307 | 0.405832527 | 0.099895955 | 0.216307449 |
| 0.427722659 | 0.474412978 | 0.068508542 | 0.017767886 |
| 0.314501181 | 0.325057305 | 0.475859949 | 0.507639533 |
| 0.539801789 | 0.508721091 | 0.41059927  | 0.139089105 |
| 0.111647021 | 0.31266365  | 0.265776807 | 0.093083048 |
| 0.507915835 | 0.134323854 | 0.491853292 | 0.262870556 |
| 0.168455599 | 0.253316176 | 0.054973777 | 0.126454034 |
| 0.355373951 | 0.22411985  | 0.187999799 | 0.233309465 |
| 0.327034553 | 0.2245386   | 0.085880665 | 0.240380096 |
| 0.386955193 | 0.159154819 | 0.214765938 | 0.341492716 |
| 0.381876564 | 0.256188468 | 0.416099324 | 0.444321487 |
| 0.193656668 | 0.171118837 | 0.383796098 | 0.376514542 |
| 0.440989576 | 0.399037773 | 0.04789988  | 0.468487092 |
| 0.468723715 | 0.438154844 | 0.511682693 | 0.370895854 |
| 0.139111212 | 0.37070707  | 0.286674926 | 0.341418227 |
| 0.228612968 | 0.417070328 | 0.260604853 | 0.109875832 |
| 0.306785829 | 0.492237649 | 0.422185207 | 0.195115581 |
| 0.412912988 | 0.210813859 | 0.122373356 | 0.419482409 |
| 0.162188691 | 0.153610367 | 0.403818423 | 0.41150473  |
| 0.0017267   | 0.111203137 | 0.456356266 | 0.271775714 |
| 0.507537278 | 0.45699084  | 0.441180627 | 0.287726379 |
| 0.001687652 | 0.385319622 | 0.387769123 | 0.406007437 |
| 1           | 0.382584367 | 0.172734134 | 0.10037183  |
| 0.300112726 | 0.153326715 | 0.169825681 | 0.374203209 |
| 0.159714324 | 0.446794851 | 0.229645887 | 0.250656325 |
| 0.202658321 | 0.161155992 | 0.209563089 | 0.277140365 |
| 0.122731887 | 0.271814216 | 0.361345467 | 0.339968208 |
| 0.211409321 | 0.408593226 | 0.428962277 | 0.055325403 |
| 0.321794571 | 0.39059112  | 0.402915215 | 0.005596381 |
| 0.420571234 | 0.015961008 | 0.207546478 | 0.227676893 |
| 0.207333864 | 0.229566279 | 0.25364163  | 0.282625051 |
| 0.390072849 | 0.257220232 | 0.304962404 | 0.263170301 |
| 0.17557599  | 0.260788075 | 0.373997546 | 0.384829975 |
| 0.283358096 | 0.174939898 | 0.156313769 | 0.155526653 |
| 0.0820767   | 0.44922692  | 0.284014671 | 0.135585377 |
| 0.249212048 | 0.382948011 | 0.344821951 | 0.510877824 |
| 0.387440941 | 0.183019833 | 0.338059419 | 0.446224017 |
| 0.273313574 | 0.355699769 | 0.127310757 | 0.403530101 |
| 0.279067716 | 0.213967487 | 0.414084583 | 0.397773312 |
| 0.426161514 | 0.409988183 | 0.284403692 | 0.420740121 |
| 0.365166118 | 0.349044409 | 0.382392405 | 0.106052757 |
| 0.241904461 | 0.191077664 | 0.240747795 | 0.004902329 |
| 0.374162538 | 0.345703756 | 0.445932846 | 0.507227607 |
| 0.261664252 | 0.365548474 | 0.392785776 | 0.14929034  |
| 0.331389079 | 0.242996485 | 0.198030138 | 0.427025963 |
| 0.196986942 | 0.222024868 | 0.289226743 | 0.404389699 |
| 0.41288743  | 0.404986869 | 0.22680392  | 0.298945762 |

|             |             |             |             |
|-------------|-------------|-------------|-------------|
| 0.257639818 | 0.264862287 | 0.487139257 | 0.191810374 |
| 0.427249099 | 0.168531963 | 0.402264553 | 0.307521227 |
| 0.229413442 | 0.499791433 | 0.107225928 | 0.512634159 |
| 0.332790898 | 0.190517102 | 0.491006263 | 0.333629977 |
| 0.325772708 | 0.125295903 | 0.160532478 | 0.411491992 |
| 0.250893981 | 0.303329653 | 0.023680282 | 0.077507445 |
| 0.333644471 | 0.310645639 | 0.428908923 | 0.362955438 |
| 0.215823611 | 0.328362745 | 0.133987879 | 0.358081961 |
| 0.509302509 | 0.522805969 | 0.306683469 | 0.274358156 |
| 0.376607573 | 0.142008122 | 0.442296193 | 0.020452384 |
| 0.420718167 | 0.40544882  | 0.402065909 | 0.086629785 |
| 0.037899993 | 0.192441333 | 0.427860199 | 0.125941625 |
| 0.44534992  | 0.193708298 | 0.379718547 | 0.423535768 |
| 0.23059184  | 0.527778837 | 0.13381038  | 0.403409241 |
| 0.088289527 | 0.28457156  | 0.339456543 | 0.374041316 |
| 0.233851237 | 0.265221947 | 0.375101889 | 0.208269935 |
| 0.056605953 | 0.257047525 | 0.004193725 | 0.432882434 |
| 0.503907782 | 0.313306611 | 0.248257981 | 0.329708963 |
| 0.284776859 | 0.36780443  | 0.254644237 | 0.400069339 |
| 0.018089087 | 0.35048823  | 0.230944368 | 0.425779645 |
| 0.258809225 | 0.380922273 | 0.07782629  | 0.287202233 |
| 0.499361051 | 0.314268625 | 0.283627235 | 0.330208539 |
| 0.49947416  | 0.390375257 | 0.234741795 | 0.199963717 |
| 0.399599731 | 0.117972756 | 0.412011228 | 0.521619394 |
| 0.194238278 | 0.190732977 | 0.412562256 | 0.239479449 |
| 0.279984253 | 0.394124718 | 0.401044233 | 0.515030416 |
| 0.084365788 | 0.282673402 | 0.401141051 | 0.460486621 |
| 0.305734952 | 0.145592314 | 0.22881275  | 0.231177428 |
| 0.48460472  | 0.139626473 | 0.2397897   | 0.394174658 |
| 0.20052884  | 0.317485811 | 0.377671369 | 0.18051169  |
| 0.055173843 | 0.202867439 | 0.382886181 | 0.193354166 |
| 0.32088194  | 0.348030889 | 0.217579989 | 0.379110768 |
| 0.155132934 | 0.038769607 | 0.444079423 | 0.016857664 |
| 0.395294872 | 0.383705904 | 0.273742861 | 0.333074585 |
| 0.244910844 | 0.387574008 | 0.412607649 | 0.004109881 |
| 0.392394322 | 0.038191951 | 0.284707253 | 0.226661252 |
| 0.285765453 | 0.099516827 | 0.459827179 | 0.489428312 |
| 0.349727587 | 0.316786798 | 0.344064721 | 0.463195157 |
| 0.126923976 | 0.30925357  | 0.322813879 | 0.442631308 |
| 0.191081537 | 0.413044503 | 0.406408893 | 0.353827992 |
| 0.401309325 | 0.308714339 |             |             |
| POLH        | 0.174502598 | 0.388226275 | 0.136317441 |
| 0.19647663  | 0.248497831 | 0.337320341 | 0.14110778  |
| 0.219461402 | 0.298626091 | 0.197461873 | 0.317470066 |
| 0.075041128 | 0.068572348 | 0.412572814 | 0.140515194 |
| 0.272227304 | 0.106823436 | 0.194957093 | 0.091621559 |
| 0.22845892  | 0.233258406 | 0.260211119 | 0.322129572 |
| 0.233588964 | 0.265429581 | 0.294983013 | 0.25276986  |
| 0.439666408 | 0.177692542 | 0.318977449 | 0.132201681 |
| 0.413956805 | 0.247757653 | 0.251705238 | 0.069587191 |
| 0.329381051 | 0.011693299 | 0.4395979   | 0.246232342 |
| 0.120662966 | 0.379023535 | 0.246837737 | 0.274944032 |
| 0.252178732 | 0.110360566 | 0.144023685 | 0.270337966 |
| 0.277262182 | 0.287150082 | 0.145185215 | 0.316977457 |

|             |             |             |             |
|-------------|-------------|-------------|-------------|
| 0.26666133  | 0.338544884 | 0.280990415 | 0.006976685 |
| 0.203791108 | 0.048029564 | 0.134018108 | 0.47653862  |
| 0.275494035 | 0.224486395 | 0.162485529 | 0.269786152 |
| 0.272060103 | 0.282558533 | 0.286053527 | 0.234581565 |
| 0.459812288 | 0.122505107 | 0.291509825 | 0.195418574 |
| 0.301063991 | 0.095134594 | 0.236108913 | 0.152720605 |
| 0.268608009 | 0.271915396 | 0.301405082 | 0.210881792 |
| 0.377859081 | 0.503916392 | 0.273398672 | 0.470467445 |
| 0.074927617 | 0.235645308 | 0.227003891 | 0.284722377 |
| 0.282370704 | 0.151610117 | 0.324053923 | 0.484875297 |
| 0.122420289 | 0.264730993 | 0.290629663 | 0.198697899 |
| 0.393309633 | 0.192198653 | 0.270157996 | 0.144471191 |
| 0.268294811 | 0.243134179 | 0.460856545 | 0.305364993 |
| 0.269878797 | 0.151128652 | 0.479404101 | 0.22139053  |
| 0.281294405 | 0.168611934 | 0.185427463 | 0.359718523 |
| 0.306980679 | 0.441026212 | 0.342671548 | 0.297597102 |
| 0.251706493 | 0.45587914  | 0.320843255 | 0.393154822 |
| 0.098804823 | 0.479767108 | 0.261767812 | 0.132257678 |
| 0.154112192 | 0.189836747 | 0.185205059 | 0.315988219 |
| 0.404660827 | 0.326579783 | 0.265250476 | 0.244544112 |
| 0.376976918 | 0.462811155 | 0.470312519 | 0.344400388 |
| 0.121053599 | 0.161819276 | 0.256196481 | 0.327747506 |
| 0.303397909 | 0.20003833  | 0.189888052 | 0.494441125 |
| 0.386217949 | 0.342582849 | 0.240667805 | 0.50588118  |
| 0.240455617 | 0.486498612 | 0.392586674 | 0.243289907 |
| 0.493619376 | 0.485555421 | 0.463471796 | 0.283852757 |
| 0.474049192 | 0.317894821 | 0.065232429 | 0.329065213 |
| 0.466043979 | 0.01734352  | 0.394839445 | 0.419978934 |
| 0.456737039 | 0.358830565 | 0.461594643 | 0.450781766 |
| 0.464109505 | 0.159807623 | 0.016108918 | 0.262079917 |
| 0.474484555 | 0.372973356 | 0.209406615 | 0.263634109 |
| 0.264740689 | 0.342599971 | 0.329853578 | 0.223593393 |
| 0.495194282 | 0.395682339 | 0.42022517  | 0.309036807 |
| 0.25134909  | 0.364940266 | 0.236339587 | 0.469401738 |
| 0.129752983 | 0.206463968 | 0.128213869 | 0.288521226 |
| 0.263192829 | 0.246989266 | 0.316775175 | 0.260615043 |
| 0.26118961  | 0.31844208  | 0.217587282 | 0.277216442 |
| 0.122868953 | 0.307996952 | 0.243923167 | 0.224351195 |
| 0.117924117 | 0.225425258 | 0.227024698 | 0.245237375 |
| 0.265894333 | 0.317455309 | 0.306199417 | 0.42921571  |
| 0.252989378 | 0.238637461 | 0.322550156 | 0.452028598 |
| 0.418667521 | 0.265776864 | 0.27339912  | 0.037715109 |
| 0.198137027 | 0.179134208 | 0.117740463 | 0.274238813 |
| 0.26666135  | 0.231924125 | 0.278341903 | 0.296386556 |
| 0.297048667 | 0.220202827 | 0.252626916 | 0.45888189  |
| 0.210769672 | 0.277670609 | 0.381335055 | 0.279264158 |
| 0.022135575 | 0.292978147 | 0.360345198 | 0.150065251 |
| 0.285516419 | 0.11164733  | 0.190666622 | 0.388265555 |
| 0.191577476 | 0.182172415 | 0.428535111 | 0.29480881  |
| 0.282567273 | 0.291727198 | 0.468433856 | 0.030331684 |
| 0.245680076 | 0.092275874 | 0.283171699 | 0.236798766 |
| 0.28116878  | 0.283965685 | 0.243625425 | 0.24203389  |
| 0.207046964 | 0.476768584 | 0.369226482 | 0.455493255 |
| 0.235662587 | 0.472316961 | 0.372131685 | 0.401302018 |



|             |             |             |             |
|-------------|-------------|-------------|-------------|
| 0.324137212 | 0.228543153 | 0.089403815 | 0.348746657 |
| 0.377448532 | 0.18942737  | 0.150210569 | 0.322956175 |
| 0.232524175 | 0.280756102 | 0.139041062 | 0.440546738 |
| 0.496454365 | 0.440717105 | 0.230638175 | 0.291301667 |
| 0.350465747 | 0.291244795 | 0.356142185 | 0.483895541 |
| 0.193183729 | 0.243046803 | 0.236728514 | 0.340843063 |
| 0.246356209 | 0.177109359 | 0.341731569 | 0.118738764 |
| 0.008451579 | 0.170794158 | 0.14874706  | 0.228484223 |
| 0.137571584 | 0.279813687 | 0.29523212  | 0.463877217 |
| 0.212662674 | 0.417951497 | 0.260849877 | 0.237641179 |
| 0.39064301  | 0.252771852 | 0.267785801 | 0.29754023  |
| 0.282529198 | 0.056453388 | 0.197656389 | 0.504129371 |
| 0.105146573 | 0.184940998 | 0.302268347 | 0.01124342  |
| 0.120110889 | 0.32831977  | 0.164243316 | 0.279604721 |
| 0.417524932 | 0.274328863 | 0.248293325 | 0.207676944 |
| 0.315946426 | 0.190378905 | 0.014483822 | 0.421749454 |
| 0.441106258 | 0.416074696 | 0.438982853 | 0.442723811 |
| 0.373634482 | 0.311592264 | 0.310329348 | 0.327069456 |
| 0.195815034 | 0.173206334 | 0.14334094  | 0.253353458 |
| 0.012668955 | 0.329468672 | 0.269836214 | 0.2263655   |
| 0.300995891 | 0.282638565 | 0.123362571 | 0.268727854 |
| 0.070544522 | 0.125678705 | 0.28366021  | 0.255340265 |
| 0.28378541  | 0.065916422 | 0.187161498 | 0.213150103 |
| 0.432172946 | 0.357777752 | 0.228550876 | 0.486551817 |
| 0.30623541  | 0.180317638 | 0.261540896 | 0.32211281  |
| 0.162708118 | 0.073659641 | 0.294014438 | 0.026171885 |
| 0.209606662 | 0.440989844 | 0.272532579 | 0.139067044 |
| 0.286049227 | 0.032552693 | 0.36903101  | 0.491503176 |
| 0.440549556 | 0.449169928 | 0.462142443 | 0.201836583 |
| 0.464073841 | 0.055659569 | 0.471385741 | 0.358719324 |
| 0.235088355 | 0.00389029  | 0.024332214 | 0.407937028 |
| 0.272599404 | 0.125231158 | 0.238698068 | 0.302617549 |
| 0.199635743 | 0.225030479 | 0.167150057 | 0.163467448 |
| 0.330385356 | 0.24431809  | 0.166789584 | 0.444375689 |
| 0.258932007 | 0.273330395 | 0.294198737 | 0.168734947 |
| 0.306934227 | 0.138297398 | 0.16341508  | 0.019104613 |
| 0.293298058 | 0.17855325  | 0.47619959  | 0.463689143 |
| 0.469574489 | 0.293123778 | 0.207896512 | 0.299362464 |
| 0.374486209 | 0.166725519 | 0.252589792 | 0.188251038 |
| 0.442930335 | 0.279780635 | 0.313513298 | 0.321040715 |
| 0.454042737 | 0.444901254 | 0.110663221 | 0.31200987  |
| 0.052224916 | 0.006207073 | 0.301469512 | 0.286060022 |
| 0.056217392 | 0.246355738 | 0.279773324 | 0.221650499 |
| 0.2468243   | 0.103498376 | 0.170983638 | 0.16334623  |
| 0.278983806 | 0.279558453 | 0.215436525 | 0.265199785 |
| 0.229138695 | 0.123285534 | 0.261903566 | 0.234723699 |
| 0.197500232 | 0.318615127 | 0.263826907 | 0.079618792 |
| 0.282696463 | 0.283405525 | 0.149343582 | 0.241487152 |
| 0.384821443 | 0.422918623 | 0.103506317 | 0.043143089 |
| 0.288408009 | 0.259880851 | 0.436412157 | 0.450817762 |
| 0.50047419  | 0.479105889 | 0.424578642 | 0.172065673 |
| 0.168267525 | 0.275387551 | 0.224519887 | 0.151637246 |
| 0.466062629 | 0.1339943   | 0.461404586 | 0.199948826 |
| 0.202356958 | 0.252864852 | 0.115615444 | 0.176761385 |

|             |             |             |             |
|-------------|-------------|-------------|-------------|
| 0.267339383 | 0.258806323 | 0.232745028 | 0.207131256 |
| 0.264942262 | 0.18456036  | 0.130021672 | 0.260233899 |
| 0.305172191 | 0.109228069 | 0.236960026 | 0.313554242 |
| 0.324222111 | 0.155278347 | 0.291687679 | 0.442945126 |
| 0.217742852 | 0.183681517 | 0.26898677  | 0.307704759 |
| 0.350485511 | 0.256297993 | 0.083271349 | 0.401024867 |
| 0.44581408  | 0.307266853 | 0.473001249 | 0.357641904 |
| 0.165985206 | 0.276651118 | 0.202695575 | 0.255144982 |
| 0.248163503 | 0.339387987 | 0.268410104 | 0.149916474 |
| 0.330318674 | 0.482611606 | 0.366317219 | 0.245096367 |
| 0.306006079 | 0.194417185 | 0.12184105  | 0.391379923 |
| 0.129095054 | 0.17760332  | 0.257686292 | 0.338753489 |
| 0.006251027 | 0.100586467 | 0.423898497 | 0.304619171 |
| 0.486813863 | 0.412247451 | 0.433541989 | 0.295115941 |
| 0.001175099 | 0.270377173 | 0.30814197  | 0.285385166 |
| 0.382584367 | 1           | 0.208445638 | 0.160548315 |
| 0.303592864 | 0.156596137 | 0.191444499 | 0.301538441 |
| 0.099946514 | 0.317683744 | 0.258967379 | 0.240252906 |
| 0.23319516  | 0.152392875 | 0.186785754 | 0.294986932 |
| 0.108023187 | 0.284184817 | 0.324426458 | 0.217447368 |
| 0.123374769 | 0.379720802 | 0.318721458 | 0.098624647 |
| 0.256122592 | 0.346098671 | 0.404062998 | 0.005455363 |
| 0.305343203 | 0.042881526 | 0.241137607 | 0.251457449 |
| 0.253589369 | 0.23951498  | 0.258781754 | 0.249560637 |
| 0.292184773 | 0.26343909  | 0.294246211 | 0.283559352 |
| 0.230135476 | 0.279064718 | 0.29266537  | 0.288021056 |
| 0.258140945 | 0.218361716 | 0.179146738 | 0.189900931 |
| 0.146333764 | 0.415057947 | 0.305289627 | 0.151400891 |
| 0.278543376 | 0.283164215 | 0.368275355 | 0.449242672 |
| 0.406767309 | 0.182091511 | 0.280988561 | 0.389817318 |
| 0.142660531 | 0.27569044  | 0.146767679 | 0.312833552 |
| 0.297172644 | 0.197150558 | 0.302757739 | 0.280710499 |
| 0.291340707 | 0.423701284 | 0.297250293 | 0.423129605 |
| 0.296601916 | 0.245751416 | 0.216302197 | 0.166012234 |
| 0.239636752 | 0.204403821 | 0.219057573 | 0.014392989 |
| 0.320528742 | 0.290954562 | 0.388583599 | 0.46306635  |
| 0.191784097 | 0.395758027 | 0.244240184 | 0.168883175 |
| 0.190903554 | 0.241580555 | 0.224062084 | 0.315867049 |
| 0.136839816 | 0.278418973 | 0.253991634 | 0.316610675 |
| 0.307409721 | 0.287066887 | 0.216800227 | 0.280104796 |
| 0.261306514 | 0.253128143 | 0.457192358 | 0.208208019 |
| 0.277161229 | 0.173281365 | 0.271145606 | 0.257968464 |
| 0.237715659 | 0.449674539 | 0.149825706 | 0.455054429 |
| 0.243625967 | 0.205417434 | 0.490542395 | 0.32039383  |
| 0.302458091 | 0.20751573  | 0.118750437 | 0.2903549   |
| 0.249424697 | 0.227748634 | 0.009791091 | 0.056675732 |
| 0.303898986 | 0.227493866 | 0.308842026 | 0.296694577 |
| 0.203626843 | 0.299033226 | 0.12099633  | 0.283071428 |
| 0.451670142 | 0.488340369 | 0.242532878 | 0.272669596 |
| 0.310509371 | 0.206901544 | 0.330026904 | 0.019392539 |
| 0.277910721 | 0.26624697  | 0.249207913 | 0.148175647 |
| 0.07806039  | 0.126508625 | 0.280979083 | 0.134632533 |
| 0.404857384 | 0.132114345 | 0.268414662 | 0.323980923 |
| 0.239410763 | 0.490867308 | 0.200374133 | 0.319079976 |

|             |             |             |             |
|-------------|-------------|-------------|-------------|
| 0.096333393 | 0.283894205 | 0.256063903 | 0.258660001 |
| 0.216571662 | 0.202481633 | 0.30605047  | 0.177619824 |
| 0.10898375  | 0.256479846 | 0.004484828 | 0.437376315 |
| 0.453922497 | 0.217967071 | 0.264772876 | 0.197915042 |
| 0.292448813 | 0.360501608 | 0.215903816 | 0.276835168 |
| 0.050194985 | 0.259964834 | 0.274901806 | 0.391385518 |
| 0.141550997 | 0.261295588 | 0.145776454 | 0.22126564  |
| 0.475726295 | 0.217617683 | 0.286420666 | 0.184279652 |
| 0.451504467 | 0.34849421  | 0.217928181 | 0.233959357 |
| 0.270453664 | 0.145266845 | 0.282639952 | 0.481226211 |
| 0.24644953  | 0.166147394 | 0.355993513 | 0.23294008  |
| 0.213623124 | 0.382663157 | 0.26438187  | 0.474794271 |
| 0.141475081 | 0.288602457 | 0.33229449  | 0.410029281 |
| 0.302885868 | 0.145036211 | 0.176797574 | 0.212716718 |
| 0.435751623 | 0.187234593 | 0.189993188 | 0.320478716 |
| 0.147751887 | 0.310686674 | 0.259131735 | 0.202130014 |
| 0.109917597 | 0.242572427 | 0.329857598 | 0.225114477 |
| 0.283130198 | 0.270977236 | 0.200991645 | 0.400668517 |
| 0.210185277 | 0.075234578 | 0.448905368 | 0.015064859 |
| 0.33120432  | 0.31079701  | 0.299743065 | 0.262552291 |
| 0.246811871 | 0.301169601 | 0.276834126 | 0.00928391  |
| 0.338068135 | 0.055481268 | 0.267960699 | 0.215193099 |
| 0.206111326 | 0.130873108 | 0.449515984 | 0.449682587 |
| 0.319896321 | 0.243343894 | 0.225142335 | 0.436690596 |
| 0.106268035 | 0.201039299 | 0.219965552 | 0.306254423 |
| 0.159780313 | 0.244696021 | 0.266442603 | 0.246776313 |
| 0.327428181 | 0.31126272  |             |             |
| POLQ        | 0.052491771 | 0.219978259 | 0.038356604 |
| 0.005802484 | 0.11256492  | 0.074919377 | 0.050268772 |
| 0.064715863 | 0.227717892 | 0.046556369 | 0.096227722 |
| 0.010419685 | 0.013689692 | 0.206447547 | 0.069141441 |
| 0.105779128 | 0.028412301 | 0.084589493 | 0.016662969 |
| 0.021746766 | 0.095300941 | 0.040721095 | 0.104817583 |
| 0.121289359 | 0.161856273 | 0.12713415  | 0.119050467 |
| 0.217868363 | 0.013521692 | 0.13308932  | 0.004543144 |
| 0.213832329 | 0.107627552 | 0.076677888 | 0.011464145 |
| 0.124697469 | 0.01305453  | 0.239406993 | 0.051468464 |
| 0.007467161 | 0.225483217 | 0.063135619 | 0.056538535 |
| 0.062171683 | 0.019303598 | 0.0109434   | 0.138107615 |
| 0.148813535 | 0.117865539 | 0.069648217 | 0.147883271 |
| 0.065346303 | 0.166817008 | 0.132927741 | 0.000680245 |
| 0.05713174  | 0.009128345 | 0.034459988 | 0.251084087 |
| 0.14010262  | 0.103467434 | 0.01844871  | 0.23007271  |
| 0.156985731 | 0.186158808 | 0.252549024 | 0.047019932 |
| 0.217499623 | 0.025870614 | 0.157580141 | 0.009507706 |
| 0.082134783 | 0.063308114 | 0.149510115 | 0.149421913 |
| 0.07406777  | 0.134889655 | 0.138080173 | 0.068683743 |
| 0.176461508 | 0.297194394 | 0.180053856 | 0.243646545 |
| 0.018175192 | 0.110251743 | 0.069191766 | 0.186948356 |
| 0.19935345  | 0.085574366 | 0.125564775 | 0.243682693 |
| 0.117530814 | 0.102610206 | 0.143222679 | 0.140036373 |
| 0.214891901 | 0.077047125 | 0.071773637 | 0.034697073 |
| 0.146675836 | 0.086619128 | 0.300661942 | 0.123790285 |
| 0.16399953  | 0.075396892 | 0.261249848 | 0.102326062 |

|             |             |             |             |
|-------------|-------------|-------------|-------------|
| 0.055728434 | 0.060643308 | 0.033079956 | 0.187218225 |
| 0.104786643 | 0.212588297 | 0.184825172 | 0.181523753 |
| 0.079421276 | 0.217625669 | 0.114496486 | 0.264178854 |
| 0.010023543 | 0.252023689 | 0.086058679 | 0.037288373 |
| 0.05617273  | 0.112236794 | 0.08787344  | 0.265577606 |
| 0.20439628  | 0.200255474 | 0.065417341 | 0.088876891 |
| 0.20381996  | 0.245574004 | 0.246246215 | 0.173020648 |
| 0.037874039 | 0.060674041 | 0.069891797 | 0.141670342 |
| 0.153685667 | 0.186242593 | 0.063674498 | 0.258115788 |
| 0.180820751 | 0.17421591  | 0.074956504 | 0.297780265 |
| 0.158737015 | 0.248945918 | 0.178502706 | 0.069671667 |
| 0.252104242 | 0.248046649 | 0.235988103 | 0.133391315 |
| 0.262096999 | 0.067467954 | 0.021724771 | 0.203597636 |
| 0.260571211 | 0.001015867 | 0.210512587 | 0.212796339 |
| 0.21778596  | 0.162289361 | 0.254264008 | 0.237193009 |
| 0.235631583 | 0.107384966 | 0.003094414 | 0.13911516  |
| 0.227803213 | 0.162784682 | 0.133690855 | 0.074080278 |
| 0.134684415 | 0.086866272 | 0.221117754 | 0.00584991  |
| 0.290107742 | 0.203935683 | 0.220122933 | 0.168008454 |
| 0.127969399 | 0.222919268 | 0.09280989  | 0.242560899 |
| 0.028637559 | 0.049219101 | 0.066581341 | 0.258883304 |
| 0.032371498 | 0.125738763 | 0.064799502 | 0.165826276 |
| 0.139913283 | 0.125320565 | 0.066431087 | 0.13891522  |
| 0.097560624 | 0.09259666  | 0.102410415 | 0.07736699  |
| 0.022750548 | 0.191797815 | 0.011533521 | 0.03755535  |
| 0.114385859 | 0.213281997 | 0.151576417 | 0.231982762 |
| 0.107862317 | 0.107493275 | 0.140915299 | 0.254388034 |
| 0.236288909 | 0.082358493 | 0.233464349 | 0.000881086 |
| 0.01015413  | 0.04963895  | 0.031742922 | 0.117240252 |
| 0.225049131 | 0.029660322 | 0.104285461 | 0.150940071 |
| 0.070279123 | 0.158621182 | 0.052564236 | 0.273751237 |
| 0.137332387 | 0.057813933 | 0.17448203  | 0.103401435 |
| 0.002503437 | 0.065397152 | 0.166966467 | 0.026441254 |
| 0.163268611 | 0.007624687 | 0.021728181 | 0.179269438 |
| 0.02939654  | 0.080699353 | 0.238479858 | 0.184128373 |
| 0.017324043 | 0.22480878  | 0.260806499 | 0.003467531 |
| 0.148583608 | 0.004935931 | 0.142371773 | 0.083983642 |
| 0.103540229 | 0.204179095 | 0.121158208 | 0.061266148 |
| 0.08438979  | 0.249498512 | 0.238388881 | 0.22520561  |
| 0.035882265 | 0.254308893 | 0.176647652 | 0.194613965 |
| 0.165013063 | 0.085820186 | 0.016018667 | 0.137098091 |
| 0.177479703 | 0.009735661 | 0.098620754 | 0.177962062 |
| 0.065624807 | 0.133467306 | 0.022145682 | 0.205839145 |
| 0.285792173 | 0.221793516 | 0.078166064 | 0.182749825 |
| 0.148581882 | 0.087576486 | 0.238421755 | 0.287071414 |
| 0.029413429 | 0.076762525 | 0.041138714 | 0.202396151 |
| 0.100690221 | 0.054806174 | 0.292147683 | 0.040308742 |
| 0.000621325 | 0.104486109 | 0.058076821 | 0.088081787 |
| 0.039579333 | 0.133183477 | 0.145724673 | 0.230330937 |
| 0.086916928 | 0.257333687 | 0.254649968 | 0.026299846 |
| 0.176317406 | 0.111315909 | 0.1184836   | 0.156877096 |
| 0.226544523 | 0.002666821 | 0.008424013 | 0.273190167 |
| 0.078408622 | 0.037346549 | 0.167228614 | 0.000344586 |
| 0.029554801 | 0.176073886 | 0.127847012 | 0.192057839 |

|             |             |             |             |
|-------------|-------------|-------------|-------------|
| 0.249459473 | 0.169959104 | 0.091741924 | 0.036026963 |
| 0.184764765 | 0.101402823 | 0.001773164 | 0.231308279 |
| 0.288506498 | 0.288374722 | 0.279408774 | 0.300515656 |
| 0.241132481 | 0.24735576  | 0.169114279 | 0.099170477 |
| 0.043222387 | 0.064071188 | 0.018275626 | 0.068039942 |
| 0.001219411 | 0.204075385 | 0.186461654 | 0.123104707 |
| 0.179675574 | 0.192318045 | 0.031284063 | 0.181546429 |
| 0.001561942 | 0.016894774 | 0.059653614 | 0.158772985 |
| 0.228641846 | 0.017862544 | 0.003484641 | 0.016383114 |
| 0.20275942  | 0.186788512 | 0.056040668 | 0.251575214 |
| 0.094336488 | 0.098355105 | 0.06395503  | 0.199384533 |
| 0.045365848 | 0.004083893 | 0.095357237 | 0.000676824 |
| 0.039623477 | 0.323031495 | 0.078830685 | 0.008825385 |
| 0.090094134 | 0.002793715 | 0.165130271 | 0.260107593 |
| 0.221770289 | 0.222269036 | 0.224582029 | 0.048909235 |
| 0.217201217 | 0.011983176 | 0.241096564 | 0.167729954 |
| 0.042547826 | 3.55E-05    | 0.005874953 | 0.193510977 |
| 0.07318217  | 0.099904429 | 0.110644986 | 0.019093385 |
| 0.024783216 | 0.060292381 | 0.112855439 | 0.040253138 |
| 0.13941765  | 0.118359144 | 0.061617108 | 0.226973681 |
| 0.079401865 | 0.177096263 | 0.082880602 | 0.134310343 |
| 0.148571331 | 0.02275321  | 0.153029692 | 0.00065198  |
| 0.203978911 | 0.118719372 | 0.267792    | 0.239828757 |
| 0.2451818   | 0.141046995 | 0.03532671  | 0.024443796 |
| 0.27744318  | 0.086306009 | 0.028690229 | 0.094599927 |
| 0.202898227 | 0.091635549 | 0.151802122 | 0.140946711 |
| 0.223383665 | 0.205622334 | 0.04435747  | 0.145390809 |
| 0.002156779 | 0.006243448 | 0.058077828 | 0.247791857 |
| 0.05272093  | 0.069162788 | 0.148723831 | 0.130791808 |
| 0.168367405 | 0.004471624 | 0.050258951 | 0.04536209  |
| 0.112435176 | 0.085950206 | 0.079584258 | 0.282896168 |
| 0.090043261 | 0.009509783 | 0.113926915 | 0.125785969 |
| 0.038364067 | 0.165598841 | 0.140513693 | 0.030805712 |
| 0.078324278 | 0.077591839 | 0.056839484 | 0.153239838 |
| 0.168056596 | 0.191673412 | 0.011260158 | 0.001528012 |
| 0.176099335 | 0.107842932 | 0.22460328  | 0.223671861 |
| 0.261237208 | 0.251755585 | 0.260133103 | 0.049769423 |
| 0.054719461 | 0.132785532 | 0.102478156 | 0.039740627 |
| 0.242148881 | 0.073127891 | 0.259748105 | 0.083527054 |
| 0.14402913  | 0.047509265 | 0.013092707 | 0.115534226 |
| 0.116169961 | 0.168547967 | 0.100693691 | 0.068946183 |
| 0.060265104 | 0.029799872 | 0.064468084 | 0.111118384 |
| 0.147385217 | 0.008174889 | 0.117518917 | 0.153300035 |
| 0.212055705 | 0.027233896 | 0.13221536  | 0.240279866 |
| 0.118065982 | 0.104601693 | 0.019888105 | 0.259377668 |
| 0.162582319 | 0.11024239  | 0.003476257 | 0.199888287 |
| 0.260614406 | 0.113294923 | 0.243759732 | 0.227468913 |
| 0.123717948 | 0.06944892  | 0.090127158 | 0.095361306 |
| 0.173121276 | 0.091221156 | 0.187398944 | 0.091976525 |
| 0.317168553 | 0.318771825 | 0.168069137 | 0.077011045 |
| 0.144219048 | 0.11780961  | 0.062799326 | 0.261427069 |
| 0.019505241 | 0.013008158 | 0.074073316 | 0.222764985 |
| 0.000688345 | 0.033238585 | 0.26749402  | 0.086458536 |
| 0.301677052 | 0.198000636 | 0.210837805 | 0.159867079 |

|             |             |             |             |
|-------------|-------------|-------------|-------------|
| 0.000307455 | 0.130164951 | 0.093179092 | 0.045407016 |
| 0.172734134 | 0.208445638 | 1           | 0.029384969 |
| 0.208241115 | 0.081121513 | 0.026377212 | 0.015115378 |
| 0.00624834  | 0.125482303 | 0.196608866 | 0.179852187 |
| 0.107751406 | 0.143252844 | 0.030452388 | 0.093525511 |
| 0.027854335 | 0.174840809 | 0.167699374 | 0.05652418  |
| 0.004444213 | 0.239672753 | 0.13421053  | 0.026945922 |
| 0.133979798 | 0.227277462 | 0.287833273 | 0.000191446 |
| 0.123193163 | 0.005966923 | 0.106484874 | 0.068823008 |
| 0.096012368 | 0.110043649 | 0.159826596 | 0.053244987 |
| 0.134501795 | 0.093320683 | 0.057689788 | 0.131518839 |
| 0.055763662 | 0.160630435 | 0.133913033 | 0.085434192 |
| 0.043352639 | 0.056350166 | 0.1533596   | 0.145793181 |
| 0.013090868 | 0.247912643 | 0.196935139 | 0.091498689 |
| 0.192719778 | 0.094850304 | 0.21993433  | 0.221998711 |
| 0.272232032 | 0.122966824 | 0.123728117 | 0.165864986 |
| 0.008973836 | 0.012536208 | 0.043880853 | 0.110674593 |
| 0.143901919 | 0.023408111 | 0.126780643 | 0.076878534 |
| 0.156918971 | 0.235220358 | 0.199441968 | 0.26511809  |
| 0.077205346 | 0.12214013  | 0.033140797 | 0.020709873 |
| 0.049239616 | 0.159768368 | 0.087742392 | 0.000544067 |
| 0.156980421 | 0.019144578 | 0.168991    | 0.222719399 |
| 0.061215006 | 0.26734654  | 0.010961875 | 0.021017878 |
| 0.015712454 | 0.122892959 | 0.138342085 | 0.176257741 |
| 0.028980807 | 0.096748312 | 0.098473641 | 0.048941664 |
| 0.157013943 | 0.172030838 | 0.10348629  | 0.14852926  |
| 0.203361451 | 0.127754515 | 0.291837614 | 0.079807134 |
| 0.094504246 | 0.031909228 | 0.136025741 | 0.060581015 |
| 0.09197564  | 0.242325646 | 0.09244367  | 0.230750857 |
| 0.061913533 | 0.178014642 | 0.293045512 | 0.23332504  |
| 0.071211809 | 0.041334944 | 0.031078185 | 0.080297281 |
| 0.076749403 | 0.065757799 | 0.000924127 | 0.00328248  |
| 0.156283841 | 0.119181237 | 0.15396096  | 0.235129759 |
| 0.078597543 | 0.225509072 | 0.026675265 | 0.106887995 |
| 0.229811242 | 0.276319761 | 0.01260111  | 0.203022054 |
| 0.182892885 | 0.063580926 | 0.124576887 | 0.01534466  |
| 0.094461338 | 0.100033247 | 0.035961765 | 0.072621105 |
| 0.01136312  | 0.023690827 | 0.089716708 | 0.12647339  |
| 0.218330581 | 0.009768713 | 0.171505835 | 0.162512373 |
| 0.23769575  | 0.260825437 | 0.075210724 | 0.135676255 |
| 0.020173098 | 0.213241294 | 0.122663285 | 0.125275948 |
| 0.020807465 | 0.056145194 | 0.136914013 | 0.045375567 |
| 0.027633086 | 0.030780019 | 7.10E-05    | 0.235792329 |
| 0.237075445 | 0.070376499 | 0.225378641 | 0.049498908 |
| 0.179816042 | 0.296599236 | 0.028746148 | 0.107402093 |
| 0.003259021 | 0.084990394 | 0.201086257 | 0.183204289 |
| 0.00495028  | 0.11861979  | 0.015088184 | 0.117305304 |
| 0.272439941 | 0.014817149 | 0.281832339 | 0.010314448 |
| 0.231004087 | 0.25644701  | 0.129556588 | 0.070478447 |
| 0.160994567 | 0.105652347 | 0.07069597  | 0.270022867 |
| 0.094493319 | 0.04318065  | 0.168112534 | 0.041498633 |
| 0.085014767 | 0.258936614 | 0.125005455 | 0.290632846 |
| 0.037687229 | 0.154232341 | 0.206250133 | 0.214941355 |
| 0.218773165 | 0.059568151 | 0.036196011 | 0.058649854 |

|             |             |             |             |
|-------------|-------------|-------------|-------------|
| 0.201980501 | 0.010284879 | 0.043857603 | 0.144659468 |
| 0.027354162 | 0.218078334 | 0.145649861 | 0.089870391 |
| 0.008339257 | 0.134685667 | 0.065614363 | 0.150203697 |
| 0.119210896 | 0.086239744 | 0.053318359 | 0.231683638 |
| 0.001922268 | 0.002109527 | 0.266369105 | 0.00044872  |
| 0.113219155 | 0.118251303 | 0.196821843 | 0.098192794 |
| 0.135872657 | 0.144832149 | 0.068931094 | 0.000407219 |
| 0.201231397 | 0.00752034  | 0.166982095 | 0.029095874 |
| 0.013520251 | 0.036113733 | 0.249790107 | 0.23508068  |
| 0.23012237  | 0.035986195 | 0.020253253 | 0.254335657 |
| 0.00735892  | 0.055298523 | 0.066317381 | 0.123070691 |
| 0.04984382  | 0.054657866 | 0.078692945 | 0.049079359 |
| 0.178532553 | 0.17530598  |             |             |
| POLR3K      | 0.152758351 | 0.088118145 | 0.106952941 |
| 0.104794019 | 0.112191759 | 0.040141737 | 0.146111802 |
| 0.114364354 | 0.08566222  | 0.007080966 | 0.117497287 |
| 0.13130602  | 0.007533299 | 0.140085386 | 0.150409132 |
| 0.076280472 | 0.167194097 | 0.244000598 | 0.014611856 |
| 0.038328367 | 0.126007253 | 0.021584201 | 0.046388168 |
| 0.095617556 | 0.249958227 | 0.075301841 | 0.031695539 |
| 0.107881846 | 0.004671254 | 0.071264796 | 0.004134782 |
| 0.219935382 | 0.101816712 | 0.02411571  | 0.090287481 |
| 0.062358323 | 0.006355663 | 0.198056597 | 0.127117952 |
| 0.02279833  | 0.236187109 | 0.01479918  | 0.173893242 |
| 0.025264556 | 0.12727903  | 0.002088348 | 0.060790198 |
| 0.070067836 | 0.069292412 | 0.128620443 | 0.074913339 |
| 0.025112907 | 0.143710186 | 0.041801646 | 0.004577373 |
| 0.023039971 | 0.001673996 | 0.00881463  | 0.132512118 |
| 0.317642566 | 0.280245944 | 0.005112646 | 0.069458279 |
| 0.051188398 | 0.093907769 | 0.217894962 | 0.016192328 |
| 0.142463389 | 0.013942339 | 0.057482435 | 0.052962134 |
| 0.055767088 | 0.090219102 | 0.333608702 | 0.117661527 |
| 0.02871619  | 0.261007646 | 0.101265061 | 0.033921977 |
| 0.078055533 | 0.186155912 | 0.211149453 | 0.128459205 |
| 0.018001584 | 0.062833736 | 0.053153565 | 0.232529913 |
| 0.106875271 | 0.090674494 | 0.132200926 | 0.172105135 |
| 0.099423799 | 0.026940775 | 0.086723259 | 0.17365864  |
| 0.099515869 | 0.012324022 | 0.022221862 | 0.025542957 |
| 0.094816507 | 0.083417481 | 0.146872087 | 0.242769081 |
| 0.070505753 | 0.170207017 | 0.137986073 | 0.062575505 |
| 0.096609006 | 0.191396325 | 0.053361085 | 0.084316572 |
| 0.088548329 | 0.118860293 | 0.07648537  | 0.148411922 |
| 0.058871152 | 0.136820115 | 0.121113994 | 0.123153435 |
| 0.000924374 | 0.129024969 | 0.219878404 | 0.166813481 |
| 0.093677729 | 0.189079483 | 0.029270134 | 0.254003787 |
| 0.109627518 | 0.138455253 | 0.162558692 | 0.201990147 |
| 0.128723091 | 0.118314419 | 0.120968025 | 0.124727649 |
| 0.179858743 | 0.013854166 | 0.059913036 | 0.060055877 |
| 0.119947103 | 0.230192151 | 0.054545425 | 0.163820556 |
| 0.21180426  | 0.113971362 | 0.09856403  | 0.190500896 |
| 0.105485791 | 0.188097671 | 0.081182284 | 0.279226767 |
| 0.166246663 | 0.153717991 | 0.167861783 | 0.08361004  |
| 0.164415591 | 0.096213768 | 0.00989408  | 0.134309708 |
| 0.198691441 | 0.011853132 | 0.091514409 | 0.106233739 |

|             |             |             |             |
|-------------|-------------|-------------|-------------|
| 0.121523984 | 0.089638738 | 0.156879277 | 0.12276985  |
| 0.11739724  | 0.219738937 | 0.000655275 | 0.196588957 |
| 0.143176745 | 0.183654002 | 0.10179192  | 0.036216838 |
| 0.08837616  | 0.056366138 | 0.081135557 | 0.017361991 |
| 0.212586568 | 0.113779533 | 0.095107439 | 0.10377719  |
| 0.050099895 | 0.241297178 | 0.032535195 | 0.140579262 |
| 0.134175015 | 0.142539153 | 0.168667676 | 0.177563311 |
| 0.009607742 | 0.311902817 | 0.043831129 | 0.072214098 |
| 0.328256856 | 0.045811875 | 0.015876981 | 0.097403923 |
| 0.166503033 | 0.04224457  | 0.196084913 | 0.157929296 |
| 0.182362645 | 0.284317129 | 0.090158134 | 0.131860328 |
| 0.175160913 | 0.213566794 | 0.05838259  | 0.124333887 |
| 0.045405874 | 0.220484783 | 0.082037664 | 0.184289233 |
| 0.258023113 | 0.060348184 | 0.259221236 | 0.103270244 |
| 0.034662949 | 0.007598608 | 0.01001128  | 0.036519263 |
| 0.234739053 | 0.06505622  | 0.082216337 | 0.123965374 |
| 0.102496793 | 0.094123376 | 0.034981175 | 0.221601166 |
| 0.183132825 | 0.080998926 | 0.144655851 | 0.038783119 |
| 0.069241887 | 0.123126622 | 0.106567322 | 0.065637176 |
| 0.127407937 | 0.023136649 | 0.012753903 | 0.126683138 |
| 0.012316623 | 0.049809834 | 0.108368893 | 0.11547854  |
| 0.017463401 | 0.160821331 | 0.150322318 | 0.00277549  |
| 0.048906874 | 0.078231261 | 0.26718984  | 0.01501427  |
| 0.226583573 | 0.232666257 | 0.081649193 | 0.073209444 |
| 0.158814574 | 0.140747346 | 0.14026541  | 0.130748712 |
| 0.021604422 | 0.154635575 | 0.10826765  | 0.157692207 |
| 0.138417381 | 0.023538846 | 0.007520379 | 0.11169504  |
| 0.116623846 | 0.013345036 | 0.164938822 | 0.06524067  |
| 0.023205472 | 0.081919303 | 0.061720729 | 0.165061012 |
| 0.205484023 | 0.104090463 | 0.186217583 | 0.159531361 |
| 0.19410806  | 0.202408749 | 0.124269638 | 0.166452254 |
| 0.007075498 | 0.061241264 | 0.050649165 | 0.182083958 |
| 0.27522517  | 0.058415556 | 0.197753001 | 0.007814341 |
| 0.000235002 | 0.154774496 | 0.199611302 | 0.242770159 |
| 0.042852144 | 0.033677513 | 0.097872589 | 0.135637047 |
| 0.276579547 | 0.165115199 | 0.18018719  | 0.07472752  |
| 0.14050663  | 0.046808922 | 0.047850325 | 0.082083305 |
| 0.232626215 | 0.114581421 | 0.159417515 | 0.189862759 |
| 0.116463185 | 0.029661005 | 0.075560172 | 0.024448059 |
| 0.13872372  | 0.053755138 | 0.217240815 | 0.302671378 |
| 0.143078744 | 0.250766266 | 0.207324664 | 0.011600913 |
| 0.184694361 | 0.272234888 | 0.054578495 | 0.118096664 |
| 0.121573571 | 0.122390321 | 0.116189474 | 0.126544403 |
| 0.110989615 | 0.083780376 | 0.118651432 | 0.059359408 |
| 0.129642051 | 0.101537719 | 0.030555449 | 0.132188515 |
| 0.009692544 | 0.173762605 | 0.091436342 | 0.339517924 |
| 0.084588354 | 0.158142795 | 0.149343005 | 0.073987774 |
| 0.084855445 | 0.008940627 | 0.037318699 | 0.128970615 |
| 0.156581998 | 0.101759405 | 0.018264411 | 0.017929831 |
| 0.135237451 | 0.187013421 | 0.018653411 | 0.142713926 |
| 0.154446881 | 0.124250457 | 0.119041492 | 0.130576266 |
| 0.182619085 | 0.004563322 | 0.036321802 | 0.001374654 |
| 0.011108202 | 0.140983141 | 0.025115066 | 0.083867643 |
| 0.225821869 | 0.081850338 | 0.1733942   | 0.154333033 |



|             |             |             |             |
|-------------|-------------|-------------|-------------|
| 0.105022364 | 0.13611524  | 0.143363143 | 0.042120769 |
| 0.142135757 | 0.001719483 | 0.1264759   | 0.108756739 |
| 0.01482252  | 0.011840588 | 0.059445145 | 0.111408804 |
| 0.067285586 | 0.126641733 | 0.306715502 | 0.016589822 |
| 0.159927348 | 0.101848585 | 0.16870374  | 0.066477684 |
| 0.064410845 | 0.164040352 | 0.043228704 | 0.120931887 |
| 0.180744304 | 0.225403349 | 0.025502361 | 0.209039767 |
| 0.063008001 | 0.164154399 | 0.190687943 | 0.049709587 |
| 0.135874928 | 0.175556637 | 0.150846899 | 0.125532084 |
| 0.186679819 | 0.111772398 | 0.007812008 | 0.018671531 |
| 0.112416661 | 0.117137515 | 0.00919379  | 0.134575301 |
| 0.109789313 | 0.097857038 | 0.254788489 | 0.235149395 |
| 0.173998176 | 0.163485977 | 0.190924447 | 0.131282463 |
| 0.092419838 | 0.014376832 | 0.045098139 | 0.200132467 |
| 0.00784517  | 0.051608951 | 0.293187669 | 0.044576752 |
| 0.071483231 | 0.104363699 | 0.02903657  | 0.037666109 |
| 0.201088332 | 0.089382937 | 0.090849374 | 0.169309674 |
| 0.086871392 | 0.05975281  | 0.159091307 | 0.143092111 |
| 0.017006111 | 0.174616424 | 0.256420779 | 0.131313885 |
| 0.033493758 | 0.046891076 | 0.244875925 | 0.266506157 |
| 0.143374024 | 0.121484419 | 0.146682933 | 0.146833596 |
| 0.24979046  | 0.068685846 | 0.135305596 | 0.107479453 |
| 0.155817116 | 0.186122236 | 0.2268368   | 0.116715022 |
| 0.180922009 | 0.150551185 | 0.08425494  | 0.119090719 |
| 0.132573777 | 0.133081645 | 0.125705863 | 0.039915647 |
| 0.272475499 | 0.143472267 | 0.173022332 | 0.264013213 |
| 0.049742743 | 0.296846741 | 0.249910934 | 0.155852896 |
| 0.100327358 | 0.019077128 | 0.178811093 | 0.270575062 |
| 0.172368124 | 0.015968879 | 0.287586188 | 0.051249417 |
| 0.123538074 | 0.004085107 | 0.080775415 | 0.232493439 |
| 0.261990457 | 0.181678266 | 0.032464822 | 0.103074944 |
| 0.082436253 | 0.024177346 | 0.093091167 | 0.080465051 |
| 0.142103097 | 0.060483179 | 0.132594201 | 0.203002977 |
| 0.242551055 | 0.06726702  | 0.026629369 | 0.099693413 |
| 0.241971282 | 0.046071092 | 0.156042969 | 0.259223    |
| 0.234055704 | 0.185585986 | 0.116023881 | 0.260035068 |
| 0.040860807 | 0.111174545 | 0.121412547 | 0.096187712 |
| 0.033167474 | 0.111812658 | 0.015643577 | 0.084924663 |
| 0.018594947 | 0.013764861 | 0.135057377 | 0.11195341  |
| 0.169852111 | 0.137992717 | 0.205916627 | 0.051510374 |
| 0.000576215 | 0.066008541 | 0.126861173 | 0.048637984 |
| 0.10037183  | 0.160548315 | 0.029384969 | 1           |
| 0.308177222 | 0.153418207 | 0.132939175 | 0.017918667 |
| 0.011768638 | 0.067538792 | 0.336072998 | 0.158435352 |
| 0.178893341 | 0.113924775 | 0.019105936 | 0.160860366 |
| 0.016712032 | 0.328969106 | 0.238781385 | 0.006663735 |
| 0.014012741 | 0.1399414   | 0.10824642  | 0.138002288 |
| 0.046007224 | 0.132620992 | 0.14634382  | 0.02774992  |
| 0.091793804 | 0.129899306 | 0.210995377 | 0.204227296 |
| 0.193528318 | 0.159302591 | 0.212084578 | 0.074437929 |
| 0.09892874  | 0.173065215 | 0.13649986  | 0.297801665 |
| 0.176802686 | 0.149648433 | 0.080412948 | 0.058257227 |
| 0.085867846 | 0.205219625 | 0.206941032 | 0.19459122  |
| 0.153980504 | 0.098755864 | 0.303295208 | 0.16964423  |

|             |             |             |             |
|-------------|-------------|-------------|-------------|
| 0.262800795 | 0.044841386 | 0.279913767 | 0.105755061 |
| 0.197424989 | 0.139934074 | 0.074455433 | 0.097427452 |
| 0.003696755 | 0.021212229 | 0.088350698 | 0.06338939  |
| 0.20806122  | 0.051186566 | 0.033712554 | 0.085343658 |
| 0.061527723 | 0.247802806 | 0.290369688 | 0.173781595 |
| 0.070268258 | 0.043695648 | 0.009257615 | 0.183100307 |
| 0.202806409 | 0.230022298 | 0.112550206 | 0.074232666 |
| 0.15971956  | 0.037286741 | 0.104741958 | 0.136258155 |
| 0.016814934 | 0.222560386 | 0.007702185 | 0.139193972 |
| 0.004725826 | 0.157708653 | 0.309799908 | 0.069043393 |
| 0.010233874 | 0.155260191 | 0.132719518 | 0.020570838 |
| 0.088755859 | 0.064744989 | 0.05444345  | 0.108724168 |
| 0.161281481 | 0.17970043  | 0.149774609 | 0.119505101 |
| 0.037207424 | 0.070820051 | 0.033001184 | 0.134354312 |
| 0.16635132  | 0.118674349 | 0.216988782 | 0.118637458 |
| 0.074527597 | 0.223201868 | 0.217812225 | 0.087007841 |
| 0.03637087  | 0.122287194 | 0.014004743 | 0.02154746  |
| 0.087082817 | 0.021158305 | 0.000202856 | 0.017097077 |
| 0.241622598 | 0.0240406   | 0.06366187  | 0.121120906 |
| 0.072639457 | 0.219130826 | 0.006943088 | 0.088264884 |
| 0.107275724 | 0.146252215 | 0.070393796 | 0.292935311 |
| 0.172197051 | 0.230690476 | 0.05660391  | 0.002497249 |
| 0.056568999 | 0.035920352 | 0.010667576 | 0.176084098 |
| 0.116523269 | 0.015818983 | 0.05811628  | 0.125470218 |
| 0.132361176 | 0.006843754 | 0.04674923  | 0.076905911 |
| 0.206393766 | 0.154103225 | 0.155787451 | 0.133012797 |
| 0.047495403 | 0.212084484 | 0.037510931 | 0.033610891 |
| 0.076651382 | 0.053386071 | 0.177652975 | 0.045550678 |
| 0.191434311 | 0.072209249 | 0.025405862 | 0.232914154 |
| 0.130814514 | 0.04365494  | 0.278978598 | 0.005325288 |
| 0.276765661 | 0.147545489 | 0.044917041 | 0.027166674 |
| 0.13172117  | 0.079929382 | 0.254068155 | 0.132829183 |
| 0.008217103 | 0.056748636 | 0.148028947 | 0.058637377 |
| 0.159226819 | 0.033697121 | 0.245784004 | 0.011993125 |
| 0.111120901 | 0.097572979 | 0.138500022 | 0.048502461 |
| 0.043277164 | 0.217467375 | 0.015321778 | 0.150161795 |
| 0.242343871 | 0.056692324 | 0.128346692 | 0.16499539  |
| 0.037909448 | 0.132070039 | 0.033876858 | 0.138799539 |
| 0.151680499 | 0.282729527 | 0.108213176 | 0.123581444 |
| 0.282081408 | 0.056821514 | 0.033974424 | 0.122551832 |
| 0.114152733 | 0.135997828 | 0.024916786 | 0.164235371 |
| 0.031710512 | 0.199582165 | 0.033322726 | 0.131111145 |
| 0.172235041 | 0.094643798 | 0.035179693 | 0.272335365 |
| 0.187546427 | 0.092077071 | 0.068354239 | 0.250601416 |
| 0.130844185 | 0.142653651 | 0.217523566 | 0.007952726 |
| 0.076422472 | 0.116243623 | 0.216039017 | 0.063131524 |
| 0.274085903 | 0.09744901  | 0.056646779 | 0.042181123 |
| 0.142305497 | 0.024891374 | 0.056621351 | 0.088408579 |
| 0.016162963 | 0.1426244   | 0.153729259 | 0.145360353 |
| 0.138733079 | 0.011178949 | 0.009194206 | 0.136284491 |
| 0.018810818 | 0.009973548 | 0.018921791 | 0.056025312 |
| 0.02777464  | 0.016440589 | 0.021335896 | 0.024367746 |
| 0.13173148  | 0.092388586 |             |             |
| POMP        | 0.220493465 | 0.295227115 | 0.154328017 |

|             |             |             |             |
|-------------|-------------|-------------|-------------|
| 0.284075849 | 0.282416353 | 0.263363192 | 0.230336218 |
| 0.291294514 | 0.247034189 | 0.133140259 | 0.311760625 |
| 0.144244342 | 0.074539327 | 0.347899357 | 0.235118966 |
| 0.259164359 | 0.221745748 | 0.295608142 | 0.094910081 |
| 0.252419326 | 0.285054287 | 0.225119634 | 0.239663297 |
| 0.279281843 | 0.274477297 | 0.2547934   | 0.205119338 |
| 0.346651394 | 0.116372409 | 0.261811289 | 0.095329506 |
| 0.388665526 | 0.268023358 | 0.197288021 | 0.123643311 |
| 0.27150805  | 0.023654654 | 0.394426757 | 0.326337584 |
| 0.154498108 | 0.36352444  | 0.163327374 | 0.357150327 |
| 0.193711461 | 0.165804349 | 0.079823399 | 0.233921067 |
| 0.24871572  | 0.309180516 | 0.16145861  | 0.262259258 |
| 0.2264632   | 0.300367521 | 0.199140689 | 0.007452252 |
| 0.176162376 | 0.040643144 | 0.115722838 | 0.379243452 |
| 0.345028547 | 0.345305241 | 0.121343245 | 0.26540327  |
| 0.230648514 | 0.267954262 | 0.339185822 | 0.18576624  |
| 0.37574658  | 0.130765941 | 0.234162819 | 0.237945521 |
| 0.268147196 | 0.134333012 | 0.313219404 | 0.17147776  |
| 0.240364536 | 0.370173779 | 0.297236334 | 0.213688808 |
| 0.281103146 | 0.430826266 | 0.328088359 | 0.372322787 |
| 0.1096112   | 0.234039727 | 0.271508306 | 0.339471956 |
| 0.269783306 | 0.222597701 | 0.297590324 | 0.414767095 |
| 0.165719657 | 0.186323931 | 0.254787152 | 0.214229628 |
| 0.306960655 | 0.171529269 | 0.186734267 | 0.160123757 |
| 0.266684222 | 0.254658691 | 0.381319336 | 0.335420713 |
| 0.272832481 | 0.180858013 | 0.377534605 | 0.225164063 |
| 0.306371646 | 0.21877702  | 0.253903742 | 0.290263299 |
| 0.276020559 | 0.351787752 | 0.266906359 | 0.287169527 |
| 0.239121994 | 0.37309993  | 0.293185924 | 0.323356839 |
| 0.053648816 | 0.382805513 | 0.326693607 | 0.242067143 |
| 0.171872543 | 0.309738486 | 0.218290653 | 0.341852157 |
| 0.328838547 | 0.310702669 | 0.315634125 | 0.346697981 |
| 0.333242455 | 0.35456571  | 0.372534382 | 0.299557589 |
| 0.197546474 | 0.161361185 | 0.242789359 | 0.29628476  |
| 0.285485362 | 0.27253816  | 0.210530613 | 0.406215412 |
| 0.361227285 | 0.300771165 | 0.259133285 | 0.429825827 |
| 0.280719262 | 0.423479285 | 0.294074357 | 0.348033805 |
| 0.412754206 | 0.393462204 | 0.403475005 | 0.255956115 |
| 0.392967785 | 0.296060038 | 0.065478755 | 0.299662882 |
| 0.41564117  | 0.029810931 | 0.312382778 | 0.339373362 |
| 0.361464425 | 0.292656621 | 0.399195885 | 0.365090158 |
| 0.360990377 | 0.222457879 | 0.014944634 | 0.322284738 |
| 0.385641778 | 0.344521257 | 0.309828816 | 0.215692868 |
| 0.265610128 | 0.271244717 | 0.266678378 | 0.186400335 |
| 0.443396203 | 0.327653173 | 0.326302071 | 0.268186773 |
| 0.219083731 | 0.351841511 | 0.197086379 | 0.37083032  |
| 0.235403013 | 0.241174108 | 0.153954005 | 0.309842273 |
| 0.179299975 | 0.362939515 | 0.256218609 | 0.254588573 |
| 0.358821627 | 0.252185219 | 0.171466595 | 0.265477839 |
| 0.139792978 | 0.232250388 | 0.314057738 | 0.26120893  |
| 0.243178873 | 0.256340884 | 0.290370267 | 0.347133045 |
| 0.33443767  | 0.29721228  | 0.239742047 | 0.357639462 |
| 0.247968067 | 0.264600091 | 0.265475818 | 0.402515906 |
| 0.415081626 | 0.246565869 | 0.315310054 | 0.100496207 |

|             |             |             |             |
|-------------|-------------|-------------|-------------|
| 0.2172872   | 0.135548414 | 0.11638748  | 0.218744256 |
| 0.272220515 | 0.27887614  | 0.261375707 | 0.284838804 |
| 0.269857915 | 0.23071639  | 0.234219091 | 0.409401492 |
| 0.224189103 | 0.298734253 | 0.336948156 | 0.219164392 |
| 0.054031814 | 0.307895662 | 0.30063543  | 0.240182072 |
| 0.277444343 | 0.135465544 | 0.159774812 | 0.334661707 |
| 0.166497507 | 0.220979927 | 0.34305393  | 0.283829017 |
| 0.217224899 | 0.259280437 | 0.39755163  | 0.027939423 |
| 0.232733036 | 0.173232202 | 0.351549769 | 0.160762979 |
| 0.339926171 | 0.331359098 | 0.25242303  | 0.284756297 |
| 0.21093762  | 0.386641823 | 0.320653573 | 0.370757136 |
| 0.201636913 | 0.402405706 | 0.310789179 | 0.351167007 |
| 0.316455273 | 0.186184918 | 0.089826092 | 0.296219387 |
| 0.323519719 | 0.170749144 | 0.167819974 | 0.250726813 |
| 0.189250786 | 0.254231572 | 0.236829278 | 0.386063936 |
| 0.434587679 | 0.334139669 | 0.343814694 | 0.30430027  |
| 0.333121439 | 0.332024358 | 0.313971005 | 0.414600579 |
| 0.145463462 | 0.239391751 | 0.247479527 | 0.341254331 |
| 0.316211826 | 0.241735378 | 0.331509235 | 0.112909465 |
| 0.006178325 | 0.208423704 | 0.200112437 | 0.355105551 |
| 0.188089295 | 0.205255273 | 0.279258612 | 0.378857118 |
| 0.317644863 | 0.359264476 | 0.289061142 | 0.278519299 |
| 0.331228311 | 0.237513978 | 0.232611371 | 0.268488469 |
| 0.320398294 | 0.136823105 | 0.309999774 | 0.432273774 |
| 0.120541334 | 0.194079268 | 0.278735169 | 0.021336301 |
| 0.18496486  | 0.235122456 | 0.188260106 | 0.306637054 |
| 0.363036118 | 0.286460001 | 0.282808364 | 0.156744931 |
| 0.330668742 | 0.282370914 | 0.046496028 | 0.34815465  |
| 0.359886348 | 0.346336323 | 0.353012527 | 0.355930514 |
| 0.318649821 | 0.261279579 | 0.288904803 | 0.254391058 |
| 0.290586742 | 0.20660909  | 0.185474244 | 0.312148647 |
| 0.017140448 | 0.320951292 | 0.28818809  | 0.306770329 |
| 0.260687635 | 0.303447087 | 0.195773921 | 0.256705304 |
| 0.116515845 | 0.113039834 | 0.257567578 | 0.322380958 |
| 0.302475987 | 0.118051606 | 0.163652948 | 0.191358276 |
| 0.342313377 | 0.322269662 | 0.193247094 | 0.3968879   |
| 0.328888586 | 0.176354835 | 0.312458746 | 0.298830262 |
| 0.26645784  | 0.060549635 | 0.242068853 | 0.019951899 |
| 0.149318909 | 0.366363566 | 0.223392732 | 0.212132355 |
| 0.342318469 | 0.066505951 | 0.325887104 | 0.405416604 |
| 0.334518541 | 0.376388817 | 0.379581453 | 0.203078725 |
| 0.380433841 | 0.046486298 | 0.377852963 | 0.292067466 |
| 0.171486977 | 0.007549005 | 0.053085119 | 0.335768976 |
| 0.255513612 | 0.129111688 | 0.32789872  | 0.221405147 |
| 0.3382596   | 0.23396843  | 0.248766111 | 0.240544598 |
| 0.263115411 | 0.315459214 | 0.21341763  | 0.347742544 |
| 0.345563542 | 0.35376428  | 0.217312542 | 0.204559337 |
| 0.261957989 | 0.256437677 | 0.203187273 | 0.050962572 |
| 0.299700105 | 0.185197618 | 0.382068783 | 0.369633989 |
| 0.412325386 | 0.285586764 | 0.137428415 | 0.22296185  |
| 0.31912979  | 0.154633958 | 0.184591422 | 0.190294318 |
| 0.342008942 | 0.270027799 | 0.340018502 | 0.321436145 |
| 0.398582795 | 0.378409824 | 0.195123872 | 0.290133482 |
| 0.102176179 | 0.01460038  | 0.235649676 | 0.315855583 |

|             |             |             |             |
|-------------|-------------|-------------|-------------|
| 0.072289603 | 0.23763014  | 0.333394837 | 0.24055956  |
| 0.292736975 | 0.154300636 | 0.182196199 | 0.188314564 |
| 0.336942537 | 0.28801841  | 0.25118705  | 0.28188516  |
| 0.292302166 | 0.210415244 | 0.360050891 | 0.321166591 |
| 0.192245145 | 0.297094767 | 0.27328875  | 0.15493357  |
| 0.220820992 | 0.235382871 | 0.237955952 | 0.297582099 |
| 0.33486078  | 0.346982793 | 0.216834203 | 0.116088701 |
| 0.311398347 | 0.27021037  | 0.365081563 | 0.347218734 |
| 0.407089126 | 0.421647671 | 0.393551568 | 0.297027291 |
| 0.252861551 | 0.320280741 | 0.250193467 | 0.296838297 |
| 0.374614255 | 0.150439874 | 0.363702913 | 0.197122727 |
| 0.278687313 | 0.34755524  | 0.223609126 | 0.276813202 |
| 0.227946838 | 0.336556771 | 0.359149269 | 0.218405226 |
| 0.301123726 | 0.189968072 | 0.218451452 | 0.350874426 |
| 0.301409884 | 0.1359499   | 0.320666783 | 0.276997139 |
| 0.284070241 | 0.105582709 | 0.254598257 | 0.415465969 |
| 0.269798832 | 0.247997928 | 0.229219295 | 0.276811165 |
| 0.278693234 | 0.186900233 | 0.121878539 | 0.296455849 |
| 0.373127536 | 0.245063006 | 0.374963632 | 0.354196566 |
| 0.225538232 | 0.255266929 | 0.191524071 | 0.273071206 |
| 0.324533389 | 0.265807817 | 0.327600147 | 0.224439228 |
| 0.341830417 | 0.414804668 | 0.306425281 | 0.363818293 |
| 0.234054167 | 0.191754836 | 0.137423514 | 0.309203994 |
| 0.18647437  | 0.241920573 | 0.172376471 | 0.27759594  |
| 0.020243428 | 0.113719649 | 0.366171406 | 0.34366374  |
| 0.416569849 | 0.357448258 | 0.393097642 | 0.282682863 |
| 0.002528225 | 0.240523231 | 0.302497837 | 0.259963956 |
| 0.300112726 | 0.303592864 | 0.208241115 | 0.308177222 |
| 1           | 0.163088344 | 0.314202811 | 0.231006832 |
| 0.114802751 | 0.253631402 | 0.343145754 | 0.289806908 |
| 0.344751504 | 0.15807166  | 0.188004097 | 0.351556753 |
| 0.139449859 | 0.350212403 | 0.338088032 | 0.137722573 |
| 0.121829631 | 0.336579384 | 0.274288381 | 0.16193529  |
| 0.229486836 | 0.314905095 | 0.352340999 | 0.017053348 |
| 0.26659131  | 0.099903418 | 0.342824414 | 0.351805139 |
| 0.363091787 | 0.324504477 | 0.334141448 | 0.298222492 |
| 0.271271326 | 0.34976706  | 0.343241272 | 0.364967701 |
| 0.360290254 | 0.330479919 | 0.275211847 | 0.269877281 |
| 0.29247825  | 0.321104452 | 0.193376185 | 0.193700088 |
| 0.244346912 | 0.322499418 | 0.328757048 | 0.168292979 |
| 0.355727245 | 0.255918209 | 0.386648992 | 0.344461044 |
| 0.38027369  | 0.170045227 | 0.28828268  | 0.30364811  |
| 0.092635699 | 0.214339679 | 0.177939648 | 0.271286722 |
| 0.347121821 | 0.239289005 | 0.229826575 | 0.243470284 |
| 0.230192216 | 0.402017358 | 0.315488632 | 0.378301378 |
| 0.294088782 | 0.223054832 | 0.141484664 | 0.310677605 |
| 0.320956315 | 0.253101741 | 0.270899518 | 0.040339033 |
| 0.322168379 | 0.260243805 | 0.315957504 | 0.371402107 |
| 0.164343251 | 0.37791151  | 0.159136661 | 0.255867737 |
| 0.12407799  | 0.221751103 | 0.291406884 | 0.250960296 |
| 0.120002519 | 0.35422793  | 0.303171069 | 0.220152923 |
| 0.265577956 | 0.238656311 | 0.260973403 | 0.300836119 |
| 0.322124368 | 0.278206114 | 0.382281427 | 0.238569692 |
| 0.216230498 | 0.251963856 | 0.195643362 | 0.31163816  |

|             |             |             |             |
|-------------|-------------|-------------|-------------|
| 0.332349673 | 0.364872836 | 0.211818119 | 0.365730401 |
| 0.259292006 | 0.234968635 | 0.439213121 | 0.291985863 |
| 0.290315201 | 0.325195746 | 0.124168979 | 0.213866726 |
| 0.325029746 | 0.195586066 | 0.005974558 | 0.067289401 |
| 0.340708742 | 0.202024091 | 0.236121527 | 0.286962786 |
| 0.262327739 | 0.326521782 | 0.107446857 | 0.277559013 |
| 0.342703269 | 0.391048627 | 0.28831638  | 0.333983641 |
| 0.307324878 | 0.317399798 | 0.243078916 | 0.019582511 |
| 0.235566203 | 0.207282767 | 0.181430411 | 0.241814038 |
| 0.149741449 | 0.134031242 | 0.240204208 | 0.158199004 |
| 0.352287026 | 0.113566843 | 0.216282513 | 0.265211694 |
| 0.271154624 | 0.395976108 | 0.331897508 | 0.297626115 |
| 0.137098491 | 0.332222806 | 0.224244146 | 0.214933861 |
| 0.28687967  | 0.227263472 | 0.317089498 | 0.201401435 |
| 0.211062312 | 0.312849896 | 0.015633963 | 0.401472074 |
| 0.361302087 | 0.214229415 | 0.294365445 | 0.129019308 |
| 0.358292805 | 0.32627293  | 0.244140559 | 0.209866561 |
| 0.124490737 | 0.253008475 | 0.350977762 | 0.319789794 |
| 0.119419619 | 0.233988924 | 0.271635761 | 0.232563652 |
| 0.384487051 | 0.220229847 | 0.309077138 | 0.163629238 |
| 0.349783742 | 0.283382166 | 0.208697239 | 0.279747183 |
| 0.21042719  | 0.190829164 | 0.190506498 | 0.401101918 |
| 0.36181798  | 0.208580683 | 0.317191486 | 0.338654429 |
| 0.20613783  | 0.318806124 | 0.205847509 | 0.389314242 |
| 0.272750847 | 0.352742473 | 0.288876045 | 0.338564079 |
| 0.35018921  | 0.209308834 | 0.191314847 | 0.291124718 |
| 0.336928959 | 0.276482391 | 0.210090508 | 0.308022934 |
| 0.168041876 | 0.339686648 | 0.192381702 | 0.29329094  |
| 0.212858694 | 0.310634339 | 0.267620239 | 0.302686074 |
| 0.331447377 | 0.287904367 | 0.276689071 | 0.394843719 |
| 0.315897454 | 0.163329046 | 0.416203777 | 0.020608413 |
| 0.268835472 | 0.295546655 | 0.350677151 | 0.26711748  |
| 0.273044481 | 0.283194448 | 0.231370825 | 0.020364052 |
| 0.312721846 | 0.100746177 | 0.274024232 | 0.291170489 |
| 0.182003787 | 0.20363815  | 0.373126307 | 0.382288032 |
| 0.310279943 | 0.193216129 | 0.166580182 | 0.356379433 |
| 0.134697012 | 0.151258996 | 0.187611347 | 0.236149385 |
| 0.170942496 | 0.172915897 | 0.202377062 | 0.204541974 |
| 0.298512542 | 0.314854398 |             |             |
| PON2        | 0.281425807 | 0.158678842 | 0.299552634 |
| 0.140224302 | 0.042028279 | 0.084940202 | 0.220873798 |
| 0.193694831 | 0.137846391 | 0.043919882 | 0.077956659 |
| 0.23160014  | 0.004027416 | 0.147007015 | 0.203599425 |
| 0.045946834 | 0.178352887 | 0.202881803 | 0.035260164 |
| 0.092328343 | 0.042538227 | 0.03697371  | 0.114005039 |
| 0.041476401 | 0.321263272 | 0.122210689 | 0.036573324 |
| 0.150917738 | 0.019270323 | 0.065084311 | 0.027344017 |
| 0.209195394 | 0.03928781  | 0.03280648  | 0.244039592 |
| 0.07120422  | 0.001164524 | 0.250246623 | 0.068265653 |
| 0.01135947  | 0.229770403 | 0.06995692  | 0.101797777 |
| 0.063031824 | 0.286759239 | 0.027497379 | 0.050740496 |
| 0.100185799 | 0.087311204 | 0.291235926 | 0.083768079 |
| 0.053999117 | 0.149446284 | 0.101879722 | 0.02015092  |
| 0.02051289  | 0.000892898 | 0.009771274 | 0.198007004 |

|             |             |             |             |
|-------------|-------------|-------------|-------------|
| 0.178979065 | 0.163291833 | 0.019102739 | 0.114083811 |
| 0.055084308 | 0.06426125  | 0.119515137 | 0.05007711  |
| 0.174740577 | 0.010195805 | 0.065426764 | 0.087117575 |
| 0.087011274 | 0.238220155 | 0.213390763 | 0.231431063 |
| 0.04654307  | 0.124055822 | 0.059935716 | 0.024118051 |
| 0.163988485 | 0.230956652 | 0.141725862 | 0.220998216 |
| 0.008037267 | 0.032039325 | 0.036593176 | 0.100298387 |
| 0.087929824 | 0.163152181 | 0.093213244 | 0.197715429 |
| 0.212351045 | 0.068635744 | 0.086182872 | 0.246594581 |
| 0.150184646 | 0.021474504 | 0.062999132 | 0.014000466 |
| 0.044799134 | 0.040181428 | 0.220019235 | 0.139043334 |
| 0.046489103 | 0.284322547 | 0.258970339 | 0.027646189 |
| 0.063101724 | 0.276030876 | 0.034817406 | 0.087714272 |
| 0.071224249 | 0.150140242 | 0.115461099 | 0.110117232 |
| 0.039187357 | 0.165632605 | 0.096523761 | 0.151003601 |
| 0.014553417 | 0.185561182 | 0.191008004 | 0.191858893 |
| 0.283310375 | 0.154322746 | 0.033021316 | 0.162454843 |
| 0.118115153 | 0.116922942 | 0.18674838  | 0.081424531 |
| 0.09886076  | 0.233571691 | 0.181699577 | 0.117592409 |
| 0.26305509  | 0.015459978 | 0.041078853 | 0.128552731 |
| 0.083311751 | 0.204317137 | 0.021441316 | 0.245738479 |
| 0.188124105 | 0.08880868  | 0.222036926 | 0.27016126  |
| 0.12484833  | 0.187919812 | 0.141946568 | 0.166907141 |
| 0.220547936 | 0.242865553 | 0.157400011 | 0.048079205 |
| 0.221576509 | 0.118574858 | 0.020902809 | 0.13182272  |
| 0.171331205 | 0.002974267 | 0.109812504 | 0.119769526 |
| 0.187402761 | 0.089044189 | 0.150590156 | 0.141508619 |
| 0.18881957  | 0.256473149 | 0.001303375 | 0.068834346 |
| 0.211940015 | 0.154822314 | 0.091815449 | 0.04297872  |
| 0.04585771  | 0.10243324  | 0.0863871   | 0.039223128 |
| 0.202336219 | 0.124973942 | 0.128152743 | 0.110429005 |
| 0.093123505 | 0.240234335 | 0.029906035 | 0.260135594 |
| 0.209652683 | 0.265945957 | 0.298568901 | 0.121799419 |
| 0.067547083 | 0.1350799   | 0.10284368  | 0.049922414 |
| 0.149289768 | 0.110962235 | 0.023522624 | 0.048374073 |
| 0.316952755 | 0.061936856 | 0.19534486  | 0.203892607 |
| 0.183204146 | 0.310271487 | 0.124044438 | 0.141702143 |
| 0.075776448 | 0.381957394 | 0.068687836 | 0.136148532 |
| 0.048366837 | 0.242138549 | 0.089040628 | 0.168104947 |
| 0.169912294 | 0.039519855 | 0.179106041 | 0.06510217  |
| 0.040520685 | 0.022700941 | 0.00805424  | 0.042078306 |
| 0.352198056 | 0.080853896 | 0.057815277 | 0.062873686 |
| 0.171471563 | 0.194664043 | 0.041541152 | 0.253586254 |
| 0.255209525 | 0.057534051 | 0.114989003 | 0.065566461 |
| 0.134069786 | 0.105758601 | 0.102804762 | 0.031352973 |
| 0.111359387 | 0.013330492 | 0.019732414 | 0.119576571 |
| 0.02242198  | 0.025612741 | 0.126474957 | 0.061258554 |
| 0.061025173 | 0.330568071 | 0.158787156 | 0.002120009 |
| 0.039131452 | 0.038202383 | 0.093840587 | 0.062007767 |
| 0.146248939 | 0.11100379  | 0.035041267 | 0.043868082 |
| 0.268980427 | 0.189119291 | 0.142941174 | 0.151904192 |
| 0.034861872 | 0.16543524  | 0.099803072 | 0.138522653 |
| 0.103341197 | 0.033037787 | 0.005103457 | 0.104414592 |
| 0.111920092 | 0.037065857 | 0.283640798 | 0.078333365 |

|             |             |             |             |
|-------------|-------------|-------------|-------------|
| 0.045143474 | 0.052710427 | 0.036057064 | 0.15208981  |
| 0.231332382 | 0.215514932 | 0.12376944  | 0.076575998 |
| 0.13925851  | 0.170797201 | 0.112920268 | 0.171900446 |
| 0.038733706 | 0.040140234 | 0.037431944 | 0.095159706 |
| 0.201730198 | 0.029253844 | 0.193569297 | 0.00769533  |
| 0.000151124 | 0.259934856 | 0.28572854  | 0.097368639 |
| 0.014940067 | 0.053086731 | 0.063616223 | 0.166683606 |
| 0.197454862 | 0.173163874 | 0.147969477 | 0.056166236 |
| 0.182085011 | 0.041673026 | 0.036952991 | 0.052403748 |
| 0.168786421 | 0.085968782 | 0.127812966 | 0.239271602 |
| 0.276609689 | 0.020303303 | 0.109231625 | 0.013425488 |
| 0.263408154 | 0.116153215 | 0.320397022 | 0.334602128 |
| 0.117620132 | 0.331158803 | 0.194734431 | 0.052335766 |
| 0.092006567 | 0.235813113 | 0.020289072 | 0.142458901 |
| 0.1700586   | 0.163805685 | 0.172887559 | 0.210941629 |
| 0.124571868 | 0.090699505 | 0.082491706 | 0.123635371 |
| 0.205428186 | 0.250005361 | 0.01683164  | 0.070986652 |
| 0.021172923 | 0.103336925 | 0.055677458 | 0.220942435 |
| 0.069559475 | 0.105970372 | 0.263540327 | 0.044424003 |
| 0.21924664  | 0.00942373  | 0.100753387 | 0.091897162 |
| 0.070889853 | 0.238957791 | 0.049357783 | 0.029570049 |
| 0.226150235 | 0.198965893 | 0.027822183 | 0.18913751  |
| 0.086305836 | 0.258638373 | 0.060241865 | 0.08006067  |
| 0.223753692 | 0.016673835 | 0.086163421 | 0.007892466 |
| 0.052830318 | 0.198627243 | 0.045344446 | 0.235997609 |
| 0.127383753 | 0.185787679 | 0.202302097 | 0.189853872 |
| 0.205618399 | 0.140870752 | 0.168855842 | 0.023152167 |
| 0.180577706 | 0.001623196 | 0.162584259 | 0.148679588 |
| 0.045257962 | 0.017342876 | 0.040010322 | 0.116164556 |
| 0.047851709 | 0.306581904 | 0.197496631 | 0.077120216 |
| 0.156733225 | 0.237357088 | 0.216659178 | 0.024044749 |
| 0.073904646 | 0.055793802 | 0.023147667 | 0.209967821 |
| 0.103467086 | 0.110533589 | 0.076150769 | 0.264525153 |
| 0.053985912 | 0.21500838  | 0.241104346 | 0.015755387 |
| 0.068026824 | 0.315420083 | 0.279588327 | 0.176739953 |
| 0.189029433 | 0.060049542 | 0.035503756 | 0.064420284 |
| 0.113318491 | 0.287267256 | 0.036709544 | 0.269290004 |
| 0.183266656 | 0.055856203 | 0.142829378 | 0.204778638 |
| 0.162718788 | 0.190250814 | 0.239554272 | 0.090812778 |
| 0.135008549 | 0.00272505  | 0.104313659 | 0.134551474 |
| 0.009854486 | 0.040266003 | 0.1806155   | 0.076673633 |
| 0.075382508 | 0.266449071 | 0.016815707 | 0.017339057 |
| 0.090891345 | 0.061565144 | 0.031902432 | 0.153480876 |
| 0.045088289 | 0.025180341 | 0.104078799 | 0.137264575 |
| 0.046159985 | 0.212375423 | 0.319840999 | 0.217584995 |
| 0.055303933 | 0.045154074 | 0.258341413 | 0.220009405 |
| 0.120404478 | 0.127726551 | 0.160768639 | 0.080202306 |
| 0.206275957 | 0.058428864 | 0.129462563 | 0.172110872 |
| 0.224851378 | 0.180904249 | 0.24998452  | 0.074340457 |
| 0.245804986 | 0.069245881 | 0.032472145 | 0.054540003 |
| 0.16604694  | 0.276911844 | 0.193607003 | 0.021149832 |
| 0.220206661 | 0.130572307 | 0.176479842 | 0.215018148 |
| 0.036808519 | 0.182006815 | 0.091680933 | 0.245507941 |
| 0.063282339 | 0.019854729 | 0.234232478 | 0.157569514 |



|             |             |             |             |
|-------------|-------------|-------------|-------------|
| 0.135859375 | 0.008843274 | 0.190986549 | 0.105890952 |
| 0.146403002 | 0.038197437 | 0.063166542 | 0.197855409 |
| 0.250516859 | 0.210975277 | 0.146730878 | 0.087190565 |
| 0.098112775 | 0.048282676 | 0.154290026 | 0.161773832 |
| 0.144929019 | 0.060094602 | 0.204071088 | 0.123290878 |
| 0.25268204  | 0.045671681 | 0.024937165 | 0.052144666 |
| 0.155274964 | 0.09157466  | 0.101336051 | 0.259802916 |
| 0.191089087 | 0.241394604 | 0.148730091 | 0.133183081 |
| 0.060395793 | 0.24549155  | 0.27449797  | 0.123543968 |
| 0.01467293  | 0.243031871 | 0.067111848 | 0.086779121 |
| 0.005162902 | 0.006415372 | 0.131345484 | 0.117323311 |
| 0.196858843 | 0.128004816 | 0.196706603 | 0.111508502 |
| 0.00033476  | 0.047133261 | 0.071957221 | 0.055810324 |
| 0.153326715 | 0.156596137 | 0.081121513 | 0.153418207 |
| 0.163088344 | 1           | 0.113793679 | 0.079030231 |
| 0.009445194 | 0.090181144 | 0.162234256 | 0.137510761 |
| 0.080867282 | 0.234277928 | 0.019413126 | 0.135735075 |
| 0.011254383 | 0.166857595 | 0.135383674 | 0.058144128 |
| 0.01329256  | 0.126016427 | 0.11504842  | 0.263717761 |
| 0.034876925 | 0.1158545   | 0.141142958 | 0.023178535 |
| 0.067123248 | 0.15951404  | 0.083453884 | 0.084675545 |
| 0.091106431 | 0.084758433 | 0.071108057 | 0.049335602 |
| 0.093751267 | 0.123235488 | 0.100316418 | 0.129073768 |
| 0.099260065 | 0.140749125 | 0.05644024  | 0.088210618 |
| 0.054824728 | 0.207954488 | 0.342211335 | 0.390469775 |
| 0.190362129 | 0.139373386 | 0.252774556 | 0.293751672 |
| 0.121664299 | 0.072667649 | 0.179184386 | 0.187842836 |
| 0.148949287 | 0.336454942 | 0.069316396 | 0.143719688 |
| 0.019999098 | 0.077104701 | 0.275881281 | 0.08342855  |
| 0.146748169 | 0.033388544 | 0.072233232 | 0.142950695 |
| 0.088747636 | 0.23660116  | 0.243347647 | 0.170072244 |
| 0.06411412  | 0.053529784 | 0.056194617 | 0.120693525 |
| 0.18703033  | 0.228731042 | 0.035374605 | 0.089163655 |
| 0.100166955 | 0.155152022 | 0.110859836 | 0.213638056 |
| 0.018626566 | 0.175900337 | 0.068844935 | 0.231504393 |
| 0.048448768 | 0.340570037 | 0.227990384 | 0.084875525 |
| 0.010304232 | 0.158026538 | 0.052256604 | 0.118285186 |
| 0.073064082 | 0.071254922 | 0.037422241 | 0.129897115 |
| 0.106279265 | 0.205511063 | 0.222773938 | 0.246290042 |
| 0.051689573 | 0.029378012 | 0.087090283 | 0.06492359  |
| 0.073667764 | 0.148061518 | 0.269915993 | 0.145890583 |
| 0.045773272 | 0.270353859 | 0.223790986 | 0.115235599 |
| 0.108983002 | 0.084615718 | 0.008245224 | 0.071623527 |
| 0.098334154 | 0.026078626 | 0.001420434 | 0.008935322 |
| 0.103994835 | 0.050773925 | 0.108282252 | 0.09026083  |
| 0.031434604 | 0.10644315  | 0.008359321 | 0.125099474 |
| 0.215763519 | 0.25108833  | 0.086922782 | 0.166220188 |
| 0.128853928 | 0.196569864 | 0.104673248 | 0.006251485 |
| 0.050666959 | 0.041106436 | 0.045348772 | 0.21602094  |
| 0.209818703 | 0.009945619 | 0.061090401 | 0.240282147 |
| 0.113918469 | 0.010080919 | 0.077727565 | 0.07772301  |
| 0.200616156 | 0.257369648 | 0.091169139 | 0.081821181 |
| 0.156465536 | 0.133995902 | 0.036395738 | 0.049941198 |
| 0.051603085 | 0.025602198 | 0.091787703 | 0.019764211 |

|             |             |             |             |
|-------------|-------------|-------------|-------------|
| 0.213436647 | 0.056053617 | 0.014282803 | 0.274597449 |
| 0.249171647 | 0.028288221 | 0.249601012 | 0.037660575 |
| 0.106621481 | 0.143566142 | 0.047549819 | 0.046005069 |
| 0.110686304 | 0.040550913 | 0.148046724 | 0.160690262 |
| 0.016738731 | 0.064200994 | 0.15166205  | 0.032787446 |
| 0.300870055 | 0.043281243 | 0.188864704 | 0.026716418 |
| 0.183592821 | 0.136738802 | 0.259884677 | 0.045896738 |
| 0.067872959 | 0.276593586 | 0.063290875 | 0.179429177 |
| 0.108630025 | 0.019818102 | 0.089098121 | 0.105351867 |
| 0.024994316 | 0.176668135 | 0.050857824 | 0.183085796 |
| 0.078328457 | 0.14289488  | 0.08490207  | 0.156581157 |
| 0.128514731 | 0.018935631 | 0.020583669 | 0.04994283  |
| 0.208766628 | 0.183477867 | 0.025445376 | 0.138574077 |
| 0.014751875 | 0.100818282 | 0.087086518 | 0.046612828 |
| 0.146190433 | 0.123591316 | 0.074562668 | 0.213589114 |
| 0.095443488 | 0.053519648 | 0.036257769 | 0.19592946  |
| 0.099493375 | 0.114827412 | 0.198039167 | 0.000376185 |
| 0.133624455 | 0.064278238 | 0.134620358 | 0.045157126 |
| 0.280519837 | 0.096373721 | 0.114859401 | 0.084292438 |
| 0.09868334  | 0.010291231 | 0.055614364 | 0.046216492 |
| 0.027034903 | 0.262879781 | 0.199190105 | 0.139369491 |
| 0.127074509 | 0.041440754 | 0.027205045 | 0.180042954 |
| 0.009220637 | 0.022084078 | 0.028828496 | 0.089755681 |
| 0.014711174 | 0.047750652 | 0.044116855 | 0.031937017 |
| 0.120238659 | 0.127817615 |             |             |
| POP4        | 0.100161695 | 0.141173718 | 0.061370956 |
| 0.066292435 | 0.158463624 | 0.052268728 | 0.117570403 |
| 0.099070921 | 0.133316363 | 0.018626663 | 0.145163736 |
| 0.072840807 | 0.011539913 | 0.218188255 | 0.121423566 |
| 0.148321267 | 0.103552233 | 0.215290024 | 0.01966585  |
| 0.037874929 | 0.196129285 | 0.036388212 | 0.07403977  |
| 0.143721541 | 0.224831959 | 0.109811883 | 0.071151714 |
| 0.175591474 | 0.009674915 | 0.115835723 | 0.006527273 |
| 0.291190316 | 0.168266502 | 0.051668189 | 0.03377863  |
| 0.10244482  | 0.008420576 | 0.266541186 | 0.163397698 |
| 0.0209632   | 0.27430397  | 0.029550306 | 0.175608714 |
| 0.055641026 | 0.079030427 | 0.004547156 | 0.131907406 |
| 0.102214609 | 0.080923234 | 0.092688259 | 0.12099118  |
| 0.050891273 | 0.166127539 | 0.082748403 | 0.005676222 |
| 0.047464942 | 0.004411632 | 0.025196424 | 0.191842454 |
| 0.27918691  | 0.229675534 | 0.01498367  | 0.088490738 |
| 0.111814088 | 0.168116314 | 0.230092409 | 0.041493866 |
| 0.218720738 | 0.029607315 | 0.110978913 | 0.041962251 |
| 0.102027307 | 0.065231299 | 0.287959231 | 0.098147811 |
| 0.055537909 | 0.238847285 | 0.132994535 | 0.061738414 |
| 0.133865933 | 0.25946528  | 0.220493783 | 0.192148505 |
| 0.037356037 | 0.123171046 | 0.06975605  | 0.293290178 |
| 0.186520625 | 0.091864657 | 0.197132001 | 0.254434969 |
| 0.079956685 | 0.060028265 | 0.170708576 | 0.1635567   |
| 0.142956687 | 0.025177975 | 0.049035198 | 0.03799096  |
| 0.155740024 | 0.166725581 | 0.217263896 | 0.288511949 |
| 0.098466803 | 0.130644996 | 0.193539455 | 0.117961526 |
| 0.114673911 | 0.128162619 | 0.08883793  | 0.157091445 |
| 0.149705915 | 0.186677539 | 0.146584322 | 0.245719295 |

|             |             |             |             |
|-------------|-------------|-------------|-------------|
| 0.124865963 | 0.20670292  | 0.173648395 | 0.185116788 |
| 0.002781573 | 0.201196013 | 0.175922795 | 0.107232307 |
| 0.069697592 | 0.139249531 | 0.053317877 | 0.280062011 |
| 0.172998221 | 0.173657092 | 0.157764859 | 0.239592114 |
| 0.223399027 | 0.172605403 | 0.196875079 | 0.21033456  |
| 0.117094604 | 0.030602107 | 0.119539564 | 0.062388591 |
| 0.212533896 | 0.195961268 | 0.095920617 | 0.233280345 |
| 0.256906993 | 0.2007151   | 0.081327826 | 0.252558196 |
| 0.13483054  | 0.264247325 | 0.135343109 | 0.245760719 |
| 0.234101319 | 0.21022156  | 0.249380163 | 0.146791452 |
| 0.213013473 | 0.109817886 | 0.025343661 | 0.214211257 |
| 0.272451616 | 0.007493338 | 0.162722969 | 0.186857677 |
| 0.189492156 | 0.166917045 | 0.24876591  | 0.194831004 |
| 0.182995923 | 0.162120104 | 0.004272223 | 0.282007301 |
| 0.2151308   | 0.234138317 | 0.10312038  | 0.08660475  |
| 0.163780622 | 0.086424844 | 0.141602201 | 0.035332634 |
| 0.295567632 | 0.170826011 | 0.163942361 | 0.180933313 |
| 0.086880499 | 0.262911465 | 0.077251959 | 0.189605886 |
| 0.066365553 | 0.110759818 | 0.107141546 | 0.232790507 |
| 0.016235511 | 0.285320207 | 0.07371484  | 0.134456387 |
| 0.312780075 | 0.07017211  | 0.034365819 | 0.170477815 |
| 0.120855384 | 0.084429767 | 0.15525558  | 0.17068803  |
| 0.119232605 | 0.237594447 | 0.103010289 | 0.086241604 |
| 0.222508918 | 0.214341849 | 0.115083835 | 0.194916653 |
| 0.087278017 | 0.198371571 | 0.143129308 | 0.251152344 |
| 0.340190777 | 0.106117312 | 0.2799112   | 0.037746327 |
| 0.073277078 | 0.023282237 | 0.024964657 | 0.075876206 |
| 0.206803266 | 0.107949099 | 0.164178304 | 0.192419776 |
| 0.120022732 | 0.101293076 | 0.084458322 | 0.265096319 |
| 0.168465463 | 0.101337166 | 0.237136941 | 0.084306044 |
| 0.016505275 | 0.173954508 | 0.179648498 | 0.076187649 |
| 0.201944647 | 0.035225303 | 0.018664843 | 0.212037552 |
| 0.029036376 | 0.093199726 | 0.175673014 | 0.178229656 |
| 0.027865756 | 0.170231228 | 0.236547878 | 0.013340077 |
| 0.093173169 | 0.047404292 | 0.317486534 | 0.032188608 |
| 0.25478845  | 0.301685538 | 0.134474962 | 0.09357374  |
| 0.123476441 | 0.220072464 | 0.179265912 | 0.208554254 |
| 0.054247442 | 0.240861814 | 0.187920824 | 0.232416962 |
| 0.180088132 | 0.062694616 | 0.017126671 | 0.187406689 |
| 0.193756136 | 0.027699253 | 0.122988291 | 0.135037292 |
| 0.060363296 | 0.159309347 | 0.049629069 | 0.253210083 |
| 0.263163857 | 0.160358945 | 0.171312544 | 0.245783026 |
| 0.251778923 | 0.181309076 | 0.175454186 | 0.25459714  |
| 0.02069664  | 0.140803043 | 0.099517761 | 0.256257146 |
| 0.243598294 | 0.100761351 | 0.228334609 | 0.017370999 |
| 1.71E-05    | 0.122867322 | 0.145045915 | 0.226982267 |
| 0.060366409 | 0.073084411 | 0.16423971  | 0.218221444 |
| 0.239250163 | 0.204563866 | 0.21774621  | 0.127478443 |
| 0.216158747 | 0.096857759 | 0.083585724 | 0.135033088 |
| 0.246751316 | 0.036227316 | 0.101332886 | 0.264633194 |
| 0.08281585  | 0.049602624 | 0.108398666 | 0.011761778 |
| 0.10925787  | 0.101612598 | 0.1722991   | 0.267855913 |
| 0.225866711 | 0.223076695 | 0.222031603 | 0.032062685 |
| 0.21862418  | 0.189052371 | 0.010734031 | 0.194997446 |

|             |             |             |             |
|-------------|-------------|-------------|-------------|
| 0.191875701 | 0.193047936 | 0.187559823 | 0.184136059 |
| 0.190854809 | 0.134709205 | 0.200656305 | 0.075406248 |
| 0.103131847 | 0.075633289 | 0.065985401 | 0.198244388 |
| 0.008059907 | 0.210398793 | 0.127320417 | 0.280148067 |
| 0.155868941 | 0.228548197 | 0.091666475 | 0.127152346 |
| 0.040408362 | 0.021605733 | 0.070138783 | 0.15059646  |
| 0.228832048 | 0.0469967   | 0.023711544 | 0.042945746 |
| 0.179969343 | 0.232180801 | 0.037855866 | 0.212643992 |
| 0.187675254 | 0.118402321 | 0.15900326  | 0.183438146 |
| 0.141002668 | 0.012947186 | 0.071190675 | 0.001692531 |
| 0.010576114 | 0.200750336 | 0.05093081  | 0.050521812 |
| 0.266025164 | 0.027914096 | 0.212402771 | 0.232454871 |
| 0.155691526 | 0.22576416  | 0.211228433 | 0.07116982  |
| 0.212447228 | 0.005488657 | 0.203473947 | 0.167827858 |
| 0.04157672  | 0.004391719 | 0.030121674 | 0.18639446  |
| 0.129597369 | 0.086801374 | 0.269817804 | 0.02041127  |
| 0.11977638  | 0.100531839 | 0.113675073 | 0.083521866 |
| 0.096830453 | 0.194222562 | 0.059595513 | 0.188257338 |
| 0.215279706 | 0.245868941 | 0.051513096 | 0.164886756 |
| 0.100053056 | 0.095093652 | 0.159629061 | 0.019834873 |
| 0.201251845 | 0.144984908 | 0.202938564 | 0.196971244 |
| 0.261434216 | 0.170393922 | 0.021817751 | 0.027071888 |
| 0.180762085 | 0.096874852 | 0.01559665  | 0.111088161 |
| 0.172824552 | 0.186109269 | 0.297194939 | 0.261672303 |
| 0.271606571 | 0.235410471 | 0.126228701 | 0.221495509 |
| 0.023928095 | 0.007466511 | 0.072353083 | 0.24016556  |
| 0.011899787 | 0.119495224 | 0.307820457 | 0.066902892 |
| 0.087064449 | 0.054833377 | 0.065658767 | 0.077983072 |
| 0.257591243 | 0.159972625 | 0.14940526  | 0.200067901 |
| 0.112474958 | 0.081889922 | 0.135566869 | 0.143558036 |
| 0.028886746 | 0.217077252 | 0.237063775 | 0.082938026 |
| 0.0690942   | 0.095927763 | 0.157957174 | 0.218286871 |
| 0.212599546 | 0.203137578 | 0.117368577 | 0.065095414 |
| 0.261205553 | 0.124921886 | 0.222270098 | 0.171535661 |
| 0.22666337  | 0.278099839 | 0.269265138 | 0.136645422 |
| 0.11884767  | 0.201562535 | 0.136850575 | 0.08915468  |
| 0.208162422 | 0.1161939   | 0.17847174  | 0.079083964 |
| 0.22750158  | 0.139324699 | 0.079734317 | 0.201576127 |
| 0.095223275 | 0.272816028 | 0.244802944 | 0.142798933 |
| 0.170716425 | 0.026282725 | 0.12672664  | 0.280065362 |
| 0.248713605 | 0.031951647 | 0.26633507  | 0.063007924 |
| 0.156752628 | 0.008910318 | 0.156427275 | 0.310467243 |
| 0.211504703 | 0.168284154 | 0.045468262 | 0.157310645 |
| 0.1507715   | 0.056877568 | 0.029944658 | 0.13587636  |
| 0.216055542 | 0.117920538 | 0.191679323 | 0.295087482 |
| 0.186544088 | 0.120459656 | 0.063089346 | 0.182856956 |
| 0.255642352 | 0.058874396 | 0.195084379 | 0.185663506 |
| 0.26221055  | 0.253390325 | 0.181390047 | 0.219582651 |
| 0.073606297 | 0.105208063 | 0.103813504 | 0.153206756 |
| 0.062697833 | 0.088468766 | 0.034512637 | 0.157760956 |
| 0.005006471 | 0.02416404  | 0.215416442 | 0.10407402  |
| 0.244722975 | 0.219772048 | 0.267620762 | 0.056671526 |
| 0.001486479 | 0.132290525 | 0.191014641 | 0.083233105 |
| 0.169825681 | 0.191444499 | 0.026377212 | 0.132939175 |

|             |             |             |             |
|-------------|-------------|-------------|-------------|
| 0.314202811 | 0.113793679 | 1           | 0.019814528 |
| 0.031941956 | 0.127340683 | 0.321966931 | 0.188401003 |
| 0.192024997 | 0.111598713 | 0.024140467 | 0.134994156 |
| 0.027557284 | 0.327999882 | 0.311416611 | 0.014110956 |
| 0.039284282 | 0.234900017 | 0.190199324 | 0.070452213 |
| 0.083180203 | 0.213922762 | 0.199699999 | 0.040068139 |
| 0.169523434 | 0.052766036 | 0.234493156 | 0.202932978 |
| 0.188505001 | 0.21203892  | 0.264292469 | 0.093826384 |
| 0.168181952 | 0.194068761 | 0.140809181 | 0.293994557 |
| 0.143345601 | 0.142281373 | 0.127591527 | 0.090047322 |
| 0.111867831 | 0.145835069 | 0.154765342 | 0.146468647 |
| 0.07583916  | 0.154082696 | 0.288209254 | 0.11217955  |
| 0.278307126 | 0.073383907 | 0.31959025  | 0.16817228  |
| 0.245440293 | 0.111714839 | 0.120413911 | 0.154459949 |
| 0.012760897 | 0.025539948 | 0.069719328 | 0.087470551 |
| 0.20948509  | 0.075583855 | 0.055499775 | 0.133135779 |
| 0.125615484 | 0.287335367 | 0.26835322  | 0.224232425 |
| 0.092510092 | 0.094369636 | 0.021691988 | 0.116828452 |
| 0.196464343 | 0.206989725 | 0.167515121 | 0.017698048 |
| 0.220448312 | 0.032610514 | 0.18203268  | 0.194849882 |
| 0.038949903 | 0.256644153 | 0.014533304 | 0.121681185 |
| 0.00850778  | 0.158991717 | 0.261638447 | 0.120567105 |
| 0.025729963 | 0.125355937 | 0.182811099 | 0.02735203  |
| 0.153511639 | 0.124448616 | 0.078499743 | 0.14285566  |
| 0.185189832 | 0.156541207 | 0.214999244 | 0.085811215 |
| 0.084117325 | 0.0840069   | 0.06368626  | 0.207013719 |
| 0.197527916 | 0.190515477 | 0.137279226 | 0.198473057 |
| 0.152074444 | 0.182549817 | 0.284814637 | 0.098546114 |
| 0.034449857 | 0.074335654 | 0.031772857 | 0.042915916 |
| 0.101867346 | 0.041593338 | 0.000720005 | 0.036331791 |
| 0.306406332 | 0.049902629 | 0.129561573 | 0.188316554 |
| 0.099566508 | 0.295325362 | 0.011131381 | 0.130496787 |
| 0.163904207 | 0.20315707  | 0.095069764 | 0.312938756 |
| 0.249470352 | 0.166096614 | 0.086405466 | 0.004129542 |
| 0.127849208 | 0.084357822 | 0.030196224 | 0.124094487 |
| 0.060230342 | 0.040360404 | 0.121141575 | 0.106354635 |
| 0.221341208 | 0.013484878 | 0.089200645 | 0.119044285 |
| 0.204771434 | 0.213358773 | 0.138050546 | 0.199170272 |
| 0.039934421 | 0.223722705 | 0.070791442 | 0.07808772  |
| 0.101826414 | 0.100885484 | 0.251502204 | 0.073969208 |
| 0.116901237 | 0.074783478 | 0.027191172 | 0.27583945  |
| 0.188304559 | 0.097103954 | 0.26512547  | 0.014054152 |
| 0.296172705 | 0.192005129 | 0.082359358 | 0.055418227 |
| 0.043687363 | 0.148089751 | 0.230298904 | 0.176031605 |
| 0.020501329 | 0.122853942 | 0.068723446 | 0.118099809 |
| 0.204937031 | 0.075792477 | 0.273497602 | 0.028057429 |
| 0.167042062 | 0.137067367 | 0.122853944 | 0.041790794 |
| 0.093070139 | 0.158072589 | 0.029928218 | 0.232468136 |
| 0.229867898 | 0.087859641 | 0.214885035 | 0.201388384 |
| 0.079956335 | 0.171386502 | 0.074064103 | 0.21803731  |
| 0.136877862 | 0.292535659 | 0.176789643 | 0.19967979  |
| 0.315813287 | 0.087427639 | 0.06955944  | 0.185761301 |
| 0.164666927 | 0.070100643 | 0.047161934 | 0.214887809 |
| 0.071325762 | 0.238531805 | 0.060979848 | 0.161851225 |

|             |             |             |             |
|-------------|-------------|-------------|-------------|
| 0.088891114 | 0.099362255 | 0.044269954 | 0.226023165 |
| 0.258015872 | 0.144633617 | 0.096430564 | 0.288580372 |
| 0.080661909 | 0.067386282 | 0.273091053 | 0.014500861 |
| 0.083723668 | 0.163774212 | 0.211842647 | 0.102385423 |
| 0.22940604  | 0.155977772 | 0.103363929 | 0.027018812 |
| 0.22286275  | 0.010736978 | 0.082359427 | 0.11891089  |
| 0.036099736 | 0.10857354  | 0.198292928 | 0.234614003 |
| 0.153931333 | 0.016744828 | 0.019776411 | 0.201268212 |
| 0.031953923 | 0.025733357 | 0.050762909 | 0.098313116 |
| 0.049482789 | 0.041367595 | 0.048559263 | 0.047586423 |
| 0.17199922  | 0.096419903 |             |             |
| PPBP        | 0.041142699 | 0.394443511 | 0.045504453 |
| 0.019669408 | 0.16659634  | 0.20518499  | 0.013906826 |
| 0.03155677  | 0.26105557  | 0.088703958 | 0.231472984 |
| 0.004321737 | 0.009041269 | 0.394707493 | 0.013108852 |
| 0.219549104 | 0.007600105 | 0.042419511 | 0.004257198 |
| 0.016915071 | 0.132299804 | 0.10201624  | 0.222094556 |
| 0.123360713 | 0.182655987 | 0.209415058 | 0.192371274 |
| 0.465845432 | 0.057714352 | 0.35004965  | 0.021395986 |
| 0.350116765 | 0.187536671 | 0.195808196 | 0.006246704 |
| 0.232844056 | 0.000312933 | 0.364561686 | 0.083785328 |
| 0.015314607 | 0.30875363  | 0.172194123 | 0.107448997 |
| 0.155715406 | 0.01704753  | 0.038480158 | 0.2398908   |
| 0.186050334 | 0.086072404 | 0.047204214 | 0.33190846  |
| 0.093861372 | 0.291839387 | 0.311522062 | 0.000142598 |
| 0.138748989 | 0.018491675 | 0.069919019 | 0.484792307 |
| 0.152372925 | 0.056768669 | 0.034091649 | 0.10821566  |
| 0.20976987  | 0.224971231 | 0.167452962 | 0.104060308 |
| 0.459958625 | 0.029835138 | 0.319437482 | 0.015606773 |
| 0.151196961 | 0.01223767  | 0.114757911 | 0.056394405 |
| 0.123288397 | 0.111480207 | 0.207696887 | 0.108393855 |
| 0.387250898 | 0.455369378 | 0.141734372 | 0.455350153 |
| 0.00416019  | 0.173666206 | 0.082186183 | 0.195827806 |
| 0.224383055 | 0.016484436 | 0.328784857 | 0.459556062 |
| 0.018376001 | 0.223998524 | 0.249790337 | 0.087826588 |
| 0.423884284 | 0.064592833 | 0.223955711 | 0.060971431 |
| 0.237019621 | 0.15507999  | 0.413363918 | 0.206976353 |
| 0.155278899 | 0.05205047  | 0.458361413 | 0.17322249  |
| 0.136750123 | 0.059593106 | 0.035705233 | 0.394111067 |
| 0.274216851 | 0.467529647 | 0.343012687 | 0.238220374 |
| 0.184387764 | 0.469534801 | 0.305873255 | 0.368890251 |
| 0.015218723 | 0.483315336 | 0.12153333  | 0.011861406 |
| 0.035012896 | 0.029251268 | 0.038601409 | 0.236092961 |
| 0.445986319 | 0.233659409 | 0.085859232 | 0.097479882 |
| 0.371325524 | 0.458100454 | 0.468102005 | 0.315726874 |
| 0.016291739 | 0.05476661  | 0.183599399 | 0.110580797 |
| 0.232869461 | 0.062464503 | 0.109352871 | 0.462674009 |
| 0.351934411 | 0.349996904 | 0.071407707 | 0.44892019  |
| 0.065277701 | 0.464782558 | 0.436303644 | 0.088585274 |
| 0.472562278 | 0.474762708 | 0.45458143  | 0.297493937 |
| 0.46431191  | 0.207709749 | 0.002630544 | 0.281167913 |
| 0.443165005 | 0.001937085 | 0.422339781 | 0.438403437 |
| 0.46052328  | 0.39235028  | 0.443863213 | 0.471911195 |
| 0.473816848 | 0.044572327 | 0.000933206 | 0.152918853 |

|             |             |             |             |
|-------------|-------------|-------------|-------------|
| 0.459994604 | 0.357227229 | 0.028746053 | 0.208346746 |
| 0.200813285 | 0.20860826  | 0.343469494 | 0.025992127 |
| 0.444010343 | 0.416168163 | 0.444714012 | 0.279893846 |
| 0.141472884 | 0.2889274   | 0.195567446 | 0.456355316 |
| 0.010838733 | 0.060591591 | 0.049356141 | 0.202603335 |
| 0.110332479 | 0.093746983 | 0.154517814 | 0.169859321 |
| 0.117638845 | 0.155061844 | 0.1388996   | 0.254478937 |
| 0.054896847 | 0.28132471  | 0.09205843  | 0.079072185 |
| 0.010593901 | 0.127278738 | 0.021330067 | 0.046042046 |
| 0.116921646 | 0.216152747 | 0.327346177 | 0.435454785 |
| 0.117899923 | 0.152578298 | 0.319588304 | 0.425361046 |
| 0.353674147 | 0.214385851 | 0.160080519 | 0.002305328 |
| 0.025283047 | 0.07532672  | 0.04474902  | 0.233873997 |
| 0.167035599 | 0.035591974 | 0.198511707 | 0.307953242 |
| 0.176464409 | 0.062441388 | 0.101684023 | 0.399730688 |
| 0.120005823 | 0.127552078 | 0.368437622 | 0.208683018 |
| 0.000754241 | 0.159565972 | 0.382338848 | 0.011904638 |
| 0.179611109 | 0.014907801 | 0.073552535 | 0.387313941 |
| 0.044982798 | 0.059657559 | 0.46213095  | 0.302020289 |
| 0.032354013 | 0.202230289 | 0.460666922 | 0.001820018 |
| 0.152805722 | 0.006045372 | 0.184163911 | 0.15930438  |
| 0.143066384 | 0.177123264 | 0.17617732  | 0.096859468 |
| 0.120276364 | 0.466376544 | 0.351964091 | 0.473299442 |
| 0.091132724 | 0.460486067 | 0.397315661 | 0.399705572 |
| 0.261015133 | 0.134137303 | 0.027594626 | 0.36402011  |
| 0.388748492 | 0.014914466 | 0.065746375 | 0.348602279 |
| 0.117978008 | 0.254833742 | 0.007161771 | 0.430707077 |
| 0.451608254 | 0.443008427 | 0.046685243 | 0.262877686 |
| 0.329669105 | 0.155193039 | 0.347634886 | 0.458800186 |
| 0.055366511 | 0.139338982 | 0.097615313 | 0.316064511 |
| 0.117058623 | 0.042564656 | 0.262949829 | 0.046444337 |
| 0.016944928 | 0.044197475 | 0.042213996 | 0.068361718 |
| 0.05268584  | 0.274627117 | 0.245595037 | 0.454416545 |
| 0.053754775 | 0.405766943 | 0.146178015 | 0.074190738 |
| 0.350012684 | 0.133760177 | 0.235728277 | 0.24322713  |
| 0.171055404 | 0.003034397 | 0.013969212 | 0.454953694 |
| 0.031822424 | 0.075162909 | 0.148822404 | 0.000395498 |
| 0.013712383 | 0.355517097 | 0.085568334 | 0.176310988 |
| 0.418348265 | 0.184650328 | 0.131539431 | 0.076961808 |
| 0.26425955  | 0.056693299 | 0.001385291 | 0.415704856 |
| 0.419928143 | 0.381957127 | 0.414897561 | 0.409793927 |
| 0.345718734 | 0.321309218 | 0.302072758 | 0.250985256 |
| 0.025460875 | 0.039889284 | 0.035354419 | 0.103563984 |
| 0.001435431 | 0.325753158 | 0.145112786 | 0.102729112 |
| 0.316427126 | 0.16750284  | 0.014773756 | 0.203516795 |
| 0.003459138 | 0.059494354 | 0.06415172  | 0.07256958  |
| 0.235286325 | 0.00602966  | 0.025585688 | 0.041231785 |
| 0.431234147 | 0.306987864 | 0.126127647 | 0.488483674 |
| 0.196075043 | 0.104109189 | 0.132763121 | 0.330163822 |
| 0.020901343 | 0.00405631  | 0.12053144  | 0.007292203 |
| 0.025639744 | 0.399673678 | 0.111996069 | 0.010764269 |
| 0.15571323  | 0.001737611 | 0.338322449 | 0.48205819  |
| 0.45566976  | 0.452292342 | 0.476413871 | 0.124558466 |
| 0.47207125  | 0.016182988 | 0.483680681 | 0.361002487 |

|             |             |             |             |
|-------------|-------------|-------------|-------------|
| 0.128237213 | 0.000246641 | 0.000828732 | 0.432206351 |
| 0.205972558 | 0.063659422 | 0.094653906 | 0.089729024 |
| 0.025715351 | 0.07113711  | 0.028180144 | 0.050653274 |
| 0.325818567 | 0.119528462 | 0.041719384 | 0.419672945 |
| 0.090947173 | 0.119397826 | 0.162192582 | 0.066345531 |
| 0.268695764 | 0.014666669 | 0.058023324 | 0.00986455  |
| 0.255857598 | 0.104341924 | 0.435171161 | 0.47255     |
| 0.440688909 | 0.275899246 | 0.109462932 | 0.049656701 |
| 0.365637844 | 0.099524586 | 0.067676363 | 0.093667837 |
| 0.45923993  | 0.224146568 | 0.253462976 | 0.266451441 |
| 0.424935768 | 0.41781896  | 0.012116367 | 0.289668758 |
| 0.00420678  | 0.000266992 | 0.21538851  | 0.165473879 |
| 0.002905659 | 0.139455174 | 0.186493086 | 0.054000782 |
| 0.062619646 | 0.00423287  | 0.084485729 | 0.070332781 |
| 0.16004256  | 0.150602546 | 0.128967112 | 0.161566686 |
| 0.083013898 | 0.005703476 | 0.075934388 | 0.042386194 |
| 0.014129196 | 0.253445048 | 0.179720721 | 0.005642957 |
| 0.222330281 | 0.215564952 | 0.031310508 | 0.117915854 |
| 0.397751388 | 0.443256736 | 0.002628037 | 0.001570412 |
| 0.210866674 | 0.096343589 | 0.442289085 | 0.470680029 |
| 0.483995469 | 0.447400995 | 0.35005084  | 0.019092103 |
| 0.029697454 | 0.16880525  | 0.139013906 | 0.015699129 |
| 0.473034952 | 0.044574498 | 0.475330228 | 0.145333971 |
| 0.068791448 | 0.068664016 | 0.007354922 | 0.04111004  |
| 0.24600839  | 0.112815154 | 0.079076111 | 0.112891126 |
| 0.102963685 | 0.050950021 | 0.016172544 | 0.103426867 |
| 0.239066653 | 0.018842689 | 0.087454511 | 0.125320775 |
| 0.293302643 | 0.024986696 | 0.297898968 | 0.381071292 |
| 0.099893273 | 0.050011807 | 0.078691828 | 0.282056686 |
| 0.378620153 | 0.22017915  | 0.007770243 | 0.418529382 |
| 0.43863909  | 0.313405803 | 0.483318151 | 0.298974009 |
| 0.055391954 | 0.203944869 | 0.101027308 | 0.147676511 |
| 0.092454546 | 0.223045616 | 0.098623699 | 0.037182446 |
| 0.239409626 | 0.421613896 | 0.348106879 | 0.080672681 |
| 0.276321815 | 0.09191369  | 0.03803466  | 0.409238408 |
| 0.032813604 | 0.015347386 | 0.176809837 | 0.344801749 |
| 0.000430912 | 0.043653982 | 0.408612705 | 0.093016108 |
| 0.450496836 | 0.413377096 | 0.39521229  | 0.078978496 |
| 0.000157193 | 0.255728591 | 0.245140508 | 0.156130675 |
| 0.374203209 | 0.301538441 | 0.015115378 | 0.017918667 |
| 0.231006832 | 0.079030231 | 0.019814528 | 1           |
| 0.008487354 | 0.257242104 | 0.129598524 | 0.095029717 |
| 0.06842395  | 0.06384747  | 0.053702053 | 0.125816776 |
| 0.009698125 | 0.175530898 | 0.271911855 | 0.092836821 |
| 0.018953463 | 0.338542566 | 0.297911647 | 0.01296243  |
| 0.192731928 | 0.313869274 | 0.385712608 | 2.79E-05    |
| 0.315820616 | 0.001549486 | 0.079775515 | 0.099709243 |
| 0.077305872 | 0.065877285 | 0.137161056 | 0.091408455 |
| 0.184822066 | 0.080173399 | 0.126445593 | 0.152680855 |
| 0.059307529 | 0.103997306 | 0.220512306 | 0.145969904 |
| 0.103678903 | 0.058884382 | 0.100650108 | 0.111786265 |
| 0.010942088 | 0.442958562 | 0.216281829 | 0.076740328 |
| 0.130180313 | 0.118636849 | 0.293605969 | 0.462179411 |
| 0.381759983 | 0.121183547 | 0.120238717 | 0.429028735 |



|             |             |             |             |
|-------------|-------------|-------------|-------------|
| 0.012074796 | 0.025043342 | 0.02117584  | 0.220586606 |
| 0.129026512 | 0.043696306 | 0.22863232  | 0.191638888 |
| 0.278538844 | 0.364829456 | 0.215994308 | 0.401543907 |
| 0.15188704  | 0.125806989 | 0.122772811 | 0.019282662 |
| 0.07764335  | 0.089808594 | 0.125905533 | 0.000470469 |
| 0.231082575 | 0.057372015 | 0.420193378 | 0.463554114 |
| 0.102020246 | 0.345216128 | 0.049814201 | 0.02399131  |
| 0.063169737 | 0.167462768 | 0.097350211 | 0.349491703 |
| 0.075966116 | 0.079037586 | 0.146183739 | 0.130822367 |
| 0.325155224 | 0.292762827 | 0.066017261 | 0.091578229 |
| 0.108635168 | 0.144776318 | 0.40783558  | 0.069106486 |
| 0.247921001 | 0.050846973 | 0.225649606 | 0.118409398 |
| 0.077293701 | 0.464227812 | 0.040818103 | 0.469592646 |
| 0.109197934 | 0.114836998 | 0.439553763 | 0.176502577 |
| 0.074539654 | 0.022933929 | 0.062603198 | 0.13602817  |
| 0.047068577 | 0.135037176 | 0.001264916 | 0.003289089 |
| 0.232867663 | 0.081658647 | 0.303130343 | 0.240940808 |
| 0.080941031 | 0.233382405 | 0.025165749 | 0.109209926 |
| 0.455529838 | 0.462941567 | 0.037708486 | 0.16774567  |
| 0.241629851 | 0.043033999 | 0.325216564 | 0.000507473 |
| 0.241949879 | 0.258051734 | 0.081916474 | 0.017315782 |
| 0.00231695  | 0.058686711 | 0.222693512 | 0.042047632 |
| 0.402932924 | 0.029428227 | 0.209690394 | 0.358203495 |
| 0.12051949  | 0.458412926 | 0.031920162 | 0.318568058 |
| 0.003437944 | 0.160828491 | 0.187710915 | 0.158345387 |
| 0.054263063 | 0.108433553 | 0.273132668 | 0.095431958 |
| 0.010669416 | 0.046239646 | 0.000582611 | 0.367953291 |
| 0.428225569 | 0.12848035  | 0.164385952 | 0.073431608 |
| 0.189907138 | 0.321486558 | 0.023033051 | 0.225280773 |
| 0.002121828 | 0.211700076 | 0.119998554 | 0.415805555 |
| 0.031683077 | 0.157232115 | 0.01155128  | 0.12168998  |
| 0.430869161 | 0.027793071 | 0.18716889  | 0.041937109 |
| 0.470796926 | 0.342572039 | 0.150738354 | 0.041189859 |
| 0.231552228 | 0.046922432 | 0.168622898 | 0.465548804 |
| 0.076000024 | 0.080504101 | 0.368902594 | 0.057943146 |
| 0.122580652 | 0.357531152 | 0.238306558 | 0.451190405 |
| 0.012839636 | 0.161356548 | 0.334352227 | 0.384906747 |
| 0.224676989 | 0.044112753 | 0.07300328  | 0.068956024 |
| 0.451431424 | 0.018570193 | 0.04065469  | 0.26393771  |
| 0.057594995 | 0.208086416 | 0.214351258 | 0.062216406 |
| 0.004861503 | 0.039766657 | 0.146578643 | 0.089435563 |
| 0.150020122 | 0.173524687 | 0.057340564 | 0.343291179 |
| 0.031944151 | 0.003454395 | 0.39582799  | 0.000905658 |
| 0.266252899 | 0.292583574 | 0.150523055 | 0.149612705 |
| 0.175435315 | 0.194203067 | 0.161318082 | 0.000165713 |
| 0.318101699 | 0.005957602 | 0.109703332 | 0.060705489 |
| 0.019890512 | 0.015353549 | 0.446439015 | 0.450554318 |
| 0.2329755   | 0.033682628 | 0.062079845 | 0.425320592 |
| 0.0097515   | 0.113788458 | 0.095041308 | 0.290556344 |
| 0.079271468 | 0.161863722 | 0.177022657 | 0.162695436 |
| 0.316164928 | 0.124045112 |             |             |
| PPIL5       | 0.004738612 | 0.164197773 | 0.003541272 |
| 0.007125601 | 0.201606894 | 0.058216254 | 0.007333816 |
| 0.009919235 | 0.142503901 | 0.0773419   | 0.107178457 |

|             |             |             |             |
|-------------|-------------|-------------|-------------|
| 0.00104253  | 0.01606295  | 0.185461637 | 0.006827152 |
| 0.255136998 | 0.003460691 | 0.023047561 | 0.001564224 |
| 0.010094406 | 0.203177509 | 0.064087616 | 0.063628481 |
| 0.181688796 | 0.041646013 | 0.108979088 | 0.204134179 |
| 0.211394061 | 0.031470291 | 0.173899514 | 0.008408011 |
| 0.170268259 | 0.228866656 | 0.165185755 | 0.000519999 |
| 0.128401378 | 0.004005992 | 0.16701847  | 0.109299864 |
| 0.014753754 | 0.110873352 | 0.069019333 | 0.067184912 |
| 0.131348958 | 0.002408174 | 0.012921472 | 0.277566883 |
| 0.123247537 | 0.065023717 | 0.006144658 | 0.184112773 |
| 0.092043829 | 0.074185472 | 0.140032434 | 0.000237984 |
| 0.15101922  | 0.053860793 | 0.149563468 | 0.177235508 |
| 0.051274214 | 0.026541543 | 0.064095723 | 0.056245305 |
| 0.20752213  | 0.230467729 | 0.095673226 | 0.10941681  |
| 0.197443048 | 0.082118376 | 0.22627354  | 0.002709461 |
| 0.121603357 | 0.003050005 | 0.044637817 | 0.014364346 |
| 0.138248248 | 0.057564028 | 0.120855796 | 0.195205275 |
| 0.15902134  | 0.190698325 | 0.084612435 | 0.175744241 |
| 0.034491438 | 0.251069896 | 0.113356151 | 0.174962208 |
| 0.210360084 | 0.015218365 | 0.175972692 | 0.21387647  |
| 0.005484258 | 0.124526689 | 0.209763829 | 0.021701242 |
| 0.149552142 | 0.103023835 | 0.109205093 | 0.075770369 |
| 0.262502804 | 0.263201462 | 0.18236232  | 0.101191355 |
| 0.130364756 | 0.010808095 | 0.149479453 | 0.255257384 |
| 0.075173709 | 0.011072469 | 0.110290679 | 0.256328121 |
| 0.19423712  | 0.196901395 | 0.19825491  | 0.208820341 |
| 0.229343995 | 0.204427145 | 0.166793722 | 0.159889983 |
| 0.004415718 | 0.20365421  | 0.037103611 | 0.00327604  |
| 0.004342859 | 0.011356383 | 0.093407641 | 0.120655953 |
| 0.219525365 | 0.091255085 | 0.027352151 | 0.123968337 |
| 0.296184246 | 0.147232302 | 0.212601885 | 0.188760782 |
| 0.00326267  | 0.139727858 | 0.238811958 | 0.029712482 |
| 0.190163181 | 0.024212887 | 0.20451479  | 0.17662773  |
| 0.128065633 | 0.264571563 | 0.015525452 | 0.165743705 |
| 0.049562535 | 0.209218858 | 0.170736086 | 0.044363511 |
| 0.19262873  | 0.158736367 | 0.234249214 | 0.250933949 |
| 0.149225537 | 0.071059233 | 0.003757906 | 0.189879965 |
| 0.200601466 | 0.001273014 | 0.234952745 | 0.253530281 |
| 0.190616454 | 0.25516951  | 0.258344899 | 0.222617406 |
| 0.179494674 | 0.011050549 | 0.005542006 | 0.185507762 |
| 0.188387348 | 0.156991616 | 0.024210285 | 0.197553716 |
| 0.235869153 | 0.075101498 | 0.217365464 | 0.012541516 |
| 0.209206343 | 0.197131167 | 0.215783464 | 0.166469489 |
| 0.11569605  | 0.086414086 | 0.244705518 | 0.137212983 |
| 0.002290989 | 0.009633646 | 0.005024817 | 0.142589809 |
| 0.035008257 | 0.059642055 | 0.05848536  | 0.211049289 |
| 0.06479037  | 0.060895275 | 0.127480644 | 0.240549632 |
| 0.007486498 | 0.144214474 | 0.033822338 | 0.039078854 |
| 0.005241725 | 0.02967444  | 0.01214001  | 0.014870127 |
| 0.098603169 | 0.052488327 | 0.190046863 | 0.229385691 |
| 0.157974119 | 0.043763929 | 0.156723691 | 0.191088106 |
| 0.196347194 | 0.206788858 | 0.077016081 | 0.000269348 |
| 0.057640988 | 0.125416742 | 0.122145818 | 0.195527233 |
| 0.037829049 | 0.052401866 | 0.212366746 | 0.235802213 |

|             |             |             |             |
|-------------|-------------|-------------|-------------|
| 0.043445921 | 0.022867687 | 0.145182452 | 0.126166039 |
| 0.033072366 | 0.076681021 | 0.222463474 | 0.155973636 |
| 0.000133405 | 0.109806252 | 0.215683701 | 0.038933355 |
| 0.136150731 | 0.007520585 | 0.047296392 | 0.255708761 |
| 0.062632295 | 0.141307346 | 0.222883212 | 0.24205872  |
| 0.01085816  | 0.047377011 | 0.240957257 | 0.005645715 |
| 0.21025963  | 0.001442167 | 0.148191405 | 0.084796822 |
| 0.089918068 | 0.144262272 | 0.207528671 | 0.100097845 |
| 0.01583962  | 0.201621162 | 0.134429381 | 0.21944326  |
| 0.133423736 | 0.242341155 | 0.242715775 | 0.188895478 |
| 0.134243242 | 0.1868223   | 0.080255261 | 0.210730045 |
| 0.252718638 | 0.015950878 | 0.011276771 | 0.24175763  |
| 0.168693922 | 0.25128704  | 0.007182254 | 0.23823526  |
| 0.170050771 | 0.155487201 | 0.025494699 | 0.241626883 |
| 0.151659553 | 0.044081654 | 0.189518258 | 0.235053621 |
| 0.083450833 | 0.236702482 | 0.174641461 | 0.24744442  |
| 0.047205291 | 0.133768164 | 0.105110183 | 0.099322592 |
| 0.000544311 | 0.008393708 | 0.008110007 | 0.054384019 |
| 0.110579492 | 0.172114641 | 0.227741933 | 0.214280583 |
| 0.023115428 | 0.134011722 | 0.091148593 | 0.103849737 |
| 0.164694049 | 0.15734993  | 0.189088345 | 0.184424976 |
| 0.079783452 | 0.000402474 | 0.00675005  | 0.190685305 |
| 0.00374519  | 0.089968983 | 0.071245503 | 0.001716336 |
| 0.004698219 | 0.158738355 | 0.019116499 | 0.047320731 |
| 0.247431871 | 0.045928049 | 0.059014536 | 0.095793377 |
| 0.135024885 | 0.015520303 | 6.18E-05    | 0.244475055 |
| 0.210193744 | 0.20787475  | 0.204139527 | 0.164281427 |
| 0.241322849 | 0.187827176 | 0.263387481 | 0.060439706 |
| 0.009523855 | 0.007548505 | 0.140411509 | 0.138944482 |
| 5.71E-05    | 0.163577883 | 0.135135716 | 0.03585582  |
| 0.223756083 | 0.13470177  | 0.001940042 | 0.203692519 |
| 0.000506095 | 0.105064881 | 0.0465157   | 0.060923434 |
| 0.22898248  | 0.000481948 | 0.005055946 | 0.0833437   |
| 0.121231106 | 0.107141004 | 0.128715004 | 0.205840079 |
| 0.109788334 | 0.02750699  | 0.153948163 | 0.179746393 |
| 0.008715821 | 0.004409056 | 0.089644243 | 0.001932544 |
| 0.00172295  | 0.165742471 | 0.098973134 | 0.003276855 |
| 0.107008731 | 0.000226855 | 0.114889456 | 0.204943583 |
| 0.148905597 | 0.254680902 | 0.192884624 | 0.140977351 |
| 0.197608792 | 0.054584588 | 0.222143906 | 0.158950869 |
| 0.116185456 | 5.10E-06    | 0.000122296 | 0.248567768 |
| 0.204205229 | 0.006555367 | 0.044430615 | 0.019727374 |
| 0.014627841 | 0.019554511 | 0.005515246 | 0.112463267 |
| 0.129598852 | 0.118201564 | 0.066786952 | 0.158287073 |
| 0.096261829 | 0.091018966 | 0.077540538 | 0.014372638 |
| 0.156528826 | 0.004959088 | 0.017416565 | 0.00029046  |
| 0.216906654 | 0.018628191 | 0.136829948 | 0.200797927 |
| 0.194598147 | 0.220462268 | 0.080253097 | 0.014571128 |
| 0.229458275 | 0.013816922 | 0.035823847 | 0.0152528   |
| 0.17381243  | 0.238400216 | 0.119819031 | 0.098329367 |
| 0.232975253 | 0.174746892 | 0.003274795 | 0.251628022 |
| 7.85E-05    | 0.000638944 | 0.076221404 | 0.087831399 |
| 0.007354537 | 0.230607871 | 0.098051672 | 0.068032339 |
| 0.063574633 | 0.000395901 | 0.219525878 | 0.193008915 |

|             |             |             |             |
|-------------|-------------|-------------|-------------|
| 0.153817396 | 0.158913731 | 0.197411588 | 0.089509584 |
| 0.134800812 | 0.029229179 | 0.042825507 | 0.024699167 |
| 0.013340961 | 0.113246662 | 0.045368015 | 0.001921144 |
| 0.165318021 | 0.170253649 | 0.006575719 | 0.032400095 |
| 0.200282196 | 0.22956269  | 0.004774972 | 0.000713512 |
| 0.075181993 | 0.115270759 | 0.235703762 | 0.185429346 |
| 0.183735986 | 0.234008842 | 0.120478462 | 0.034684094 |
| 0.005808369 | 0.187203184 | 0.213127925 | 0.027249004 |
| 0.200638226 | 0.009581782 | 0.162346426 | 0.238227486 |
| 0.02641952  | 0.053214344 | 0.001396406 | 0.016278745 |
| 0.202852987 | 0.043567902 | 0.074184675 | 0.028747004 |
| 0.135667677 | 0.061006415 | 0.005432689 | 0.063240432 |
| 0.139658818 | 0.11604827  | 0.04204193  | 0.048862509 |
| 0.126859962 | 0.023758903 | 0.25514072  | 0.191436147 |
| 0.024204367 | 0.026681068 | 0.025102181 | 0.174765781 |
| 0.220296708 | 0.165468706 | 9.70E-05    | 0.165322528 |
| 0.211902774 | 0.192803322 | 0.168997424 | 0.202113465 |
| 0.016254621 | 0.168393489 | 0.194303342 | 0.221631549 |
| 0.057798639 | 0.061467825 | 0.081336052 | 0.009447662 |
| 0.106714341 | 0.170641242 | 0.180431041 | 0.040593292 |
| 0.13594552  | 0.018549639 | 0.008608773 | 0.185784732 |
| 0.143543734 | 0.004576181 | 0.082986582 | 0.242116731 |
| 0.000173834 | 0.098403361 | 0.257771784 | 0.027310281 |
| 0.211871164 | 0.249377876 | 0.16650522  | 0.032538055 |
| 0.00123558  | 0.288097277 | 0.157898621 | 0.120995588 |
| 0.159714324 | 0.099946514 | 0.00624834  | 0.011768638 |
| 0.114802751 | 0.009445194 | 0.031941956 | 0.008487354 |
| 1           | 0.133611998 | 0.069823398 | 0.07920388  |
| 0.081369267 | 0.018636576 | 0.055057641 | 0.042313202 |
| 0.04968596  | 0.080826073 | 0.16491979  | 0.037956263 |
| 0.05008785  | 0.228156313 | 0.199487787 | 0.001270657 |
| 0.180850394 | 0.242759092 | 0.183635277 | 0.000392788 |
| 0.22570594  | 0.000105947 | 0.076741628 | 0.073408593 |
| 0.06504978  | 0.080521991 | 0.146819856 | 0.09969044  |
| 0.151922236 | 0.064334654 | 0.055522426 | 0.083793996 |
| 0.035209414 | 0.042713554 | 0.175416685 | 0.112750603 |
| 0.075280343 | 0.017901464 | 0.01585375  | 0.015865681 |
| 0.001466486 | 0.178145763 | 0.064397153 | 0.009102849 |
| 0.082613696 | 0.097109534 | 0.139780291 | 0.179413566 |
| 0.167700657 | 0.018242144 | 0.118007705 | 0.165233439 |
| 0.010973503 | 0.002756501 | 0.003047043 | 0.116410872 |
| 0.045415711 | 0.06317058  | 0.094495762 | 0.088080517 |
| 0.19459558  | 0.140191164 | 0.05690176  | 0.179999975 |
| 0.100063262 | 0.174583904 | 0.061407447 | 0.011993744 |
| 0.038397307 | 0.032442785 | 0.200635764 | 8.00E-05    |
| 0.133909873 | 0.010847512 | 0.231448789 | 0.170543332 |
| 0.135298384 | 0.14356488  | 0.015756293 | 0.010012366 |
| 0.026629824 | 0.040037731 | 0.030137494 | 0.194828618 |
| 0.120822241 | 0.023867216 | 0.176103629 | 0.025093397 |
| 0.235302236 | 0.244465689 | 0.112459887 | 0.048630029 |
| 0.093543961 | 0.04347858  | 0.17725657  | 0.01130559  |
| 0.196079865 | 0.086983749 | 0.107860607 | 0.150670569 |
| 0.091031099 | 0.230624036 | 0.00628289  | 0.233121979 |
| 0.198486211 | 0.025734862 | 0.182513332 | 0.05997518  |

|             |             |             |             |
|-------------|-------------|-------------|-------------|
| 0.02360399  | 0.009936948 | 0.156145486 | 0.074204262 |
| 0.048602901 | 0.135057922 | 0.000620157 | 0.003795765 |
| 0.164936858 | 0.106956454 | 0.19466375  | 0.191601807 |
| 0.147746775 | 0.196549182 | 0.031685586 | 0.065033085 |
| 0.156615219 | 0.157278761 | 0.03246338  | 0.101968414 |
| 0.137910711 | 0.012927248 | 0.088556029 | 0.000656527 |
| 0.230419218 | 0.223188276 | 0.075849883 | 0.004563453 |
| 0.000557958 | 0.182580394 | 0.202217137 | 0.011611757 |
| 0.267742336 | 0.032984856 | 0.149222696 | 0.16997239  |
| 0.045630592 | 0.156343658 | 0.024368415 | 0.18328842  |
| 0.002983746 | 0.087171933 | 0.19957657  | 0.176689011 |
| 0.059957146 | 0.207645637 | 0.200858911 | 0.142398577 |
| 0.003076498 | 0.050146946 | 0.00050808  | 0.127199008 |
| 0.155491083 | 0.266843041 | 0.056777054 | 0.053761454 |
| 0.12509229  | 0.163489324 | 0.038955962 | 0.154462586 |
| 0.000185237 | 0.231745089 | 0.047007173 | 0.131866983 |
| 0.054860366 | 0.19215213  | 0.002736858 | 0.230961233 |
| 0.125926705 | 0.049345349 | 0.087463499 | 0.087976488 |
| 0.171068194 | 0.14587382  | 0.032261398 | 0.030937855 |
| 0.184930842 | 0.008957137 | 0.064671855 | 0.220844912 |
| 0.051581916 | 0.155357195 | 0.26371046  | 0.066024174 |
| 0.190877562 | 0.117467258 | 0.19825878  | 0.214928222 |
| 0.018484692 | 0.0751511   | 0.228278138 | 0.189535601 |
| 0.125812895 | 0.133823931 | 0.127150104 | 0.131635592 |
| 0.144555548 | 0.003510482 | 0.091441575 | 0.121698375 |
| 0.183950366 | 0.120012199 | 0.107591607 | 0.098132571 |
| 0.000714232 | 0.020399511 | 0.041285149 | 0.032389791 |
| 0.122249054 | 0.209680939 | 0.123344801 | 0.138831483 |
| 0.009861881 | 0.000859901 | 0.171190002 | 0.006576677 |
| 0.054362534 | 0.176987157 | 0.059293067 | 0.149603097 |
| 0.0400719   | 0.125814913 | 0.098288291 | 0.000125775 |
| 0.24267698  | 0.003140743 | 0.10181598  | 0.080905166 |
| 0.021266093 | 0.004331196 | 0.154334214 | 0.248824066 |
| 0.082522612 | 0.020590001 | 0.052200813 | 0.177237018 |
| 0.031113772 | 0.126801907 | 0.138096642 | 0.140625311 |
| 0.145602841 | 0.11920266  | 0.122546947 | 0.147334535 |
| 0.144767727 | 0.03862519  |             |             |
| PPM1K       | 0.079390313 | 0.432699929 | 0.062769021 |
| 0.113780529 | 0.209450173 | 0.290255468 | 0.063569074 |
| 0.12046479  | 0.329432912 | 0.242843702 | 0.264138884 |
| 0.023032057 | 0.064394946 | 0.462347857 | 0.05903165  |
| 0.279257952 | 0.035660293 | 0.102512037 | 0.075907806 |
| 0.166704837 | 0.204128641 | 0.254487865 | 0.299624851 |
| 0.201346251 | 0.205057117 | 0.263633083 | 0.274872888 |
| 0.501867665 | 0.214566006 | 0.323585942 | 0.146275393 |
| 0.419891075 | 0.229652752 | 0.275932966 | 0.019054849 |
| 0.302937922 | 0.00978928  | 0.450440029 | 0.197691217 |
| 0.093512082 | 0.353871126 | 0.260855602 | 0.187985287 |
| 0.282161963 | 0.043526448 | 0.184350454 | 0.313071315 |
| 0.244123443 | 0.207940039 | 0.075353752 | 0.337379762 |
| 0.274619014 | 0.289887475 | 0.354775601 | 0.005406114 |
| 0.218255551 | 0.067805906 | 0.17331461  | 0.5114089   |
| 0.164769768 | 0.108645821 | 0.22668352  | 0.20527414  |
| 0.29024237  | 0.292572631 | 0.191163948 | 0.282656644 |

|             |             |             |             |
|-------------|-------------|-------------|-------------|
| 0.508424828 | 0.140200501 | 0.355342559 | 0.125725327 |
| 0.302306728 | 0.039289544 | 0.140020198 | 0.084999152 |
| 0.274352753 | 0.15693188  | 0.247198696 | 0.208748472 |
| 0.441795189 | 0.526869899 | 0.182031969 | 0.514049446 |
| 0.086275541 | 0.239700404 | 0.18582717  | 0.240660899 |
| 0.30982997  | 0.084098    | 0.346923456 | 0.52483633  |
| 0.055429341 | 0.292984618 | 0.345991343 | 0.121904024 |
| 0.421403047 | 0.198323073 | 0.300138888 | 0.128408838 |
| 0.261622931 | 0.25130453  | 0.491599602 | 0.246759861 |
| 0.221918369 | 0.079304462 | 0.505208941 | 0.223590075 |
| 0.220912718 | 0.081559678 | 0.168476446 | 0.439074023 |
| 0.30021018  | 0.496342546 | 0.419526789 | 0.335839967 |
| 0.275162574 | 0.499125762 | 0.322825153 | 0.415978377 |
| 0.134362233 | 0.533316083 | 0.153596503 | 0.044476004 |
| 0.080656509 | 0.07642205  | 0.174544474 | 0.273465303 |
| 0.455634963 | 0.258954337 | 0.176354547 | 0.175215973 |
| 0.439592074 | 0.498248819 | 0.534931832 | 0.400640554 |
| 0.043899128 | 0.178024224 | 0.27133454  | 0.222934162 |
| 0.315185063 | 0.103265259 | 0.184616237 | 0.525607395 |
| 0.376464548 | 0.402956492 | 0.149526518 | 0.512700381 |
| 0.178042442 | 0.511354045 | 0.455368567 | 0.143164479 |
| 0.52227804  | 0.507400338 | 0.501259687 | 0.307107377 |
| 0.479765183 | 0.259671613 | 0.084241387 | 0.365422063 |
| 0.480485043 | 0.012418274 | 0.469011924 | 0.496053366 |
| 0.509222922 | 0.439504377 | 0.516157851 | 0.504452888 |
| 0.517599505 | 0.073604181 | 0.029900242 | 0.215635127 |
| 0.521401054 | 0.376852575 | 0.110482322 | 0.304343713 |
| 0.262369932 | 0.307936739 | 0.38005462  | 0.260180424 |
| 0.513503676 | 0.43187722  | 0.491016494 | 0.365320095 |
| 0.240984595 | 0.325421892 | 0.269668749 | 0.487564451 |
| 0.041426837 | 0.115327088 | 0.058641393 | 0.259095511 |
| 0.259697654 | 0.138808848 | 0.30436127  | 0.257033774 |
| 0.157834152 | 0.271677973 | 0.239998523 | 0.287092878 |
| 0.070185735 | 0.322971603 | 0.135861764 | 0.161298967 |
| 0.04100149  | 0.15508686  | 0.173918503 | 0.127104298 |
| 0.19866512  | 0.26660975  | 0.363420742 | 0.477754807 |
| 0.255862159 | 0.169613553 | 0.355439523 | 0.465850721 |
| 0.418240419 | 0.264828249 | 0.20866183  | 0.009798827 |
| 0.23159991  | 0.238927894 | 0.142379823 | 0.28883471  |
| 0.198068999 | 0.225865781 | 0.293641167 | 0.319970938 |
| 0.241576563 | 0.143177247 | 0.28158817  | 0.438791691 |
| 0.152494156 | 0.225076988 | 0.434867631 | 0.307649212 |
| 0.003757658 | 0.255716645 | 0.41717985  | 0.114539107 |
| 0.266333544 | 0.112919856 | 0.186873699 | 0.451876885 |
| 0.237884216 | 0.174739514 | 0.485390152 | 0.309238982 |
| 0.279897012 | 0.25478516  | 0.523286625 | 0.062226231 |
| 0.244812418 | 0.035869344 | 0.216648555 | 0.258047606 |
| 0.203539002 | 0.243067531 | 0.225005611 | 0.194029372 |
| 0.124034607 | 0.53254173  | 0.363537749 | 0.514404384 |
| 0.285823211 | 0.523429398 | 0.439714201 | 0.430722791 |
| 0.272113386 | 0.273644811 | 0.109197901 | 0.408924663 |
| 0.43495916  | 0.233620606 | 0.079619147 | 0.411478372 |
| 0.278547402 | 0.31784031  | 0.075545029 | 0.490172271 |
| 0.494799549 | 0.487582183 | 0.12780533  | 0.312551096 |

|             |             |             |             |
|-------------|-------------|-------------|-------------|
| 0.356538596 | 0.19299819  | 0.372976245 | 0.528458744 |
| 0.253354981 | 0.272390043 | 0.243488433 | 0.353675503 |
| 0.147318399 | 0.163315706 | 0.306808043 | 0.132044007 |
| 0.007899781 | 0.08829916  | 0.070170732 | 0.127032758 |
| 0.114854353 | 0.305324046 | 0.296234347 | 0.524687676 |
| 0.110081584 | 0.411331856 | 0.204312597 | 0.232350476 |
| 0.434743486 | 0.26698713  | 0.260756623 | 0.275554175 |
| 0.209269101 | 0.01391908  | 0.101533383 | 0.529010122 |
| 0.049161953 | 0.1746472   | 0.263203438 | 0.002724917 |
| 0.054719444 | 0.402968558 | 0.110006806 | 0.208347219 |
| 0.462085402 | 0.210933273 | 0.179970791 | 0.262224807 |
| 0.267469005 | 0.086783501 | 0.002237307 | 0.48191163  |
| 0.486340019 | 0.456581097 | 0.489676268 | 0.467246531 |
| 0.431079853 | 0.345853957 | 0.360036758 | 0.273994391 |
| 0.097637479 | 0.090200738 | 0.164247455 | 0.221987661 |
| 0.008573499 | 0.319393249 | 0.220483791 | 0.123913179 |
| 0.360836109 | 0.242934006 | 0.043764872 | 0.251437194 |
| 0.025367129 | 0.153483979 | 0.281102816 | 0.17314992  |
| 0.279203357 | 0.01701702  | 0.193737383 | 0.262593368 |
| 0.447981441 | 0.348418306 | 0.247747376 | 0.529776197 |
| 0.246692506 | 0.136124398 | 0.218338492 | 0.327047114 |
| 0.072734263 | 0.104283265 | 0.295236145 | 0.029451856 |
| 0.162448619 | 0.45895702  | 0.28052975  | 0.065388392 |
| 0.215430769 | 0.006517968 | 0.370299098 | 0.537670362 |
| 0.479654669 | 0.513951572 | 0.502683148 | 0.195382195 |
| 0.508226194 | 0.084696844 | 0.532482319 | 0.400724604 |
| 0.299795516 | 0.000986831 | 0.007602576 | 0.472931253 |
| 0.284315386 | 0.070329634 | 0.136334883 | 0.278318861 |
| 0.097133242 | 0.15408387  | 0.065107516 | 0.123327903 |
| 0.298312641 | 0.174630145 | 0.129991257 | 0.494791937 |
| 0.185905844 | 0.179295445 | 0.314173398 | 0.089064926 |
| 0.280648036 | 0.051980154 | 0.085693753 | 0.006752018 |
| 0.281661202 | 0.129552528 | 0.488693301 | 0.515994105 |
| 0.49236996  | 0.292235446 | 0.272887315 | 0.285281553 |
| 0.414965385 | 0.110862204 | 0.265420657 | 0.115000747 |
| 0.499263013 | 0.287612652 | 0.285359864 | 0.298996651 |
| 0.504397357 | 0.476366127 | 0.037795134 | 0.360611339 |
| 0.013148547 | 0.001542001 | 0.288628539 | 0.218122992 |
| 0.050590891 | 0.278212144 | 0.226775545 | 0.185200027 |
| 0.174045507 | 0.038763334 | 0.190234104 | 0.175854777 |
| 0.220276834 | 0.272816192 | 0.197278752 | 0.21462284  |
| 0.18156547  | 0.104922607 | 0.147027593 | 0.137305075 |
| 0.196035989 | 0.312703225 | 0.212436801 | 0.024696434 |
| 0.30231471  | 0.298700728 | 0.059619907 | 0.135309391 |
| 0.420612432 | 0.489311947 | 0.045124868 | 0.010422614 |
| 0.250232078 | 0.248908274 | 0.496802292 | 0.509450993 |
| 0.53698237  | 0.519116124 | 0.399948206 | 0.107905956 |
| 0.068278865 | 0.227714488 | 0.205266565 | 0.067252893 |
| 0.519315235 | 0.076574557 | 0.490060061 | 0.207964252 |
| 0.105036807 | 0.16429258  | 0.03393664  | 0.078785177 |
| 0.271387732 | 0.151648239 | 0.134606643 | 0.137265304 |
| 0.249088475 | 0.17072882  | 0.050366017 | 0.164013325 |
| 0.319978893 | 0.125000174 | 0.140412055 | 0.2340821   |
| 0.319348135 | 0.183446512 | 0.355951155 | 0.451295093 |

|             |             |             |             |
|-------------|-------------|-------------|-------------|
| 0.121775706 | 0.107256298 | 0.242210403 | 0.32330586  |
| 0.421473659 | 0.29098407  | 0.028718917 | 0.465307628 |
| 0.485738803 | 0.339089497 | 0.506846698 | 0.373231104 |
| 0.08214452  | 0.277651995 | 0.230781438 | 0.25584773  |
| 0.158417257 | 0.285212212 | 0.189490281 | 0.064925717 |
| 0.285664838 | 0.492752403 | 0.410715601 | 0.135841323 |
| 0.300106829 | 0.128866678 | 0.068582126 | 0.434476881 |
| 0.130050782 | 0.099807815 | 0.283892066 | 0.403830729 |
| 0.000713891 | 0.098097513 | 0.472215991 | 0.194990992 |
| 0.512388493 | 0.466543452 | 0.441225922 | 0.198614552 |
| 0.001342803 | 0.307202803 | 0.279940428 | 0.286575221 |
| 0.446794851 | 0.317683744 | 0.125482303 | 0.067538792 |
| 0.253631402 | 0.090181144 | 0.127340683 | 0.257242104 |
| 0.133611998 | 1           | 0.162910705 | 0.173445855 |
| 0.145491976 | 0.099326891 | 0.167341272 | 0.181277118 |
| 0.105425813 | 0.205232956 | 0.323155805 | 0.239204561 |
| 0.176065093 | 0.432054577 | 0.381740546 | 0.030024928 |
| 0.248222611 | 0.385145549 | 0.411400966 | 0.003933562 |
| 0.35336827  | 0.008765808 | 0.157870298 | 0.162524448 |
| 0.148809697 | 0.178182849 | 0.189226718 | 0.20058112  |
| 0.274765424 | 0.17690788  | 0.207853787 | 0.182976023 |
| 0.123167741 | 0.171661868 | 0.270308851 | 0.261231579 |
| 0.209564023 | 0.11102948  | 0.115371622 | 0.127622233 |
| 0.052217319 | 0.459480285 | 0.244845989 | 0.078285601 |
| 0.179039119 | 0.269336786 | 0.334707511 | 0.506109574 |
| 0.396632796 | 0.135610718 | 0.254446445 | 0.443954038 |
| 0.215320348 | 0.257244657 | 0.075004973 | 0.271455734 |
| 0.193993517 | 0.174012445 | 0.290450488 | 0.263090465 |
| 0.360977989 | 0.404334693 | 0.235744249 | 0.422484903 |
| 0.252856791 | 0.261254874 | 0.258012598 | 0.07418966  |
| 0.155498114 | 0.119666671 | 0.186225088 | 0.001995958 |
| 0.272554757 | 0.212677865 | 0.46080798  | 0.497022617 |
| 0.214909552 | 0.365548765 | 0.267321622 | 0.093431049 |
| 0.214541208 | 0.210450141 | 0.126268435 | 0.371649664 |
| 0.166125989 | 0.147200703 | 0.210306299 | 0.264458922 |
| 0.358881697 | 0.347835583 | 0.179427641 | 0.21713376  |
| 0.179789225 | 0.165135513 | 0.480751231 | 0.113834967 |
| 0.306691543 | 0.126913441 | 0.278734313 | 0.229881623 |
| 0.168801392 | 0.507177125 | 0.061531082 | 0.525291564 |
| 0.258688485 | 0.131677841 | 0.492086547 | 0.23395511  |
| 0.21096947  | 0.089966256 | 0.136309468 | 0.289256715 |
| 0.183536499 | 0.237502293 | 0.02265541  | 0.072402155 |
| 0.270509067 | 0.235486455 | 0.391241726 | 0.301393205 |
| 0.166704794 | 0.294102907 | 0.117588177 | 0.248387403 |
| 0.498596021 | 0.511701262 | 0.221801355 | 0.215697039 |
| 0.31274469  | 0.094179197 | 0.302863359 | 0.017566043 |
| 0.31107237  | 0.301604709 | 0.308172378 | 0.055934745 |
| 0.020950579 | 0.156993052 | 0.30292059  | 0.072182655 |
| 0.463870532 | 0.156413795 | 0.270121181 | 0.343174091 |
| 0.159394951 | 0.513715768 | 0.098605559 | 0.335461273 |
| 0.052736663 | 0.195035711 | 0.257995404 | 0.284450849 |
| 0.174364794 | 0.205159604 | 0.310149245 | 0.165552061 |
| 0.033432427 | 0.193641077 | 0.002248051 | 0.419743621 |
| 0.486580998 | 0.241787073 | 0.203846767 | 0.247662107 |



|             |             |             |             |
|-------------|-------------|-------------|-------------|
| 0.210669579 | 0.35286877  | 0.221533627 | 0.289301568 |
| 0.010102978 | 0.264359782 | 0.157837616 | 0.406350514 |
| 0.191469142 | 0.280984608 | 0.045716198 | 0.227614822 |
| 0.478621693 | 0.259425869 | 0.242075272 | 0.235723424 |
| 0.494096175 | 0.360993901 | 0.159327606 | 0.148434969 |
| 0.302941205 | 0.067887531 | 0.287079922 | 0.531437519 |
| 0.14193232  | 0.149633351 | 0.413801268 | 0.169163396 |
| 0.22701743  | 0.378878656 | 0.287595024 | 0.524863053 |
| 0.06495913  | 0.19314892  | 0.366998723 | 0.465812194 |
| 0.256742969 | 0.12154098  | 0.188324448 | 0.183564222 |
| 0.470958949 | 0.090600827 | 0.18758837  | 0.310786195 |
| 0.165348979 | 0.231700796 | 0.257068062 | 0.142742441 |
| 0.04031439  | 0.145520477 | 0.276621859 | 0.123259505 |
| 0.232101996 | 0.250727558 | 0.16475657  | 0.375589579 |
| 0.10774612  | 0.023116529 | 0.441522519 | 0.016540583 |
| 0.261178748 | 0.279938996 | 0.1936393   | 0.246323138 |
| 0.185128971 | 0.273635767 | 0.27508961  | 0.002679147 |
| 0.372661823 | 0.023847609 | 0.22016831  | 0.173478995 |
| 0.242910959 | 0.060078781 | 0.453450761 | 0.507458328 |
| 0.240380295 | 0.232202522 | 0.271834127 | 0.471997922 |
| 0.105332517 | 0.241521823 | 0.265491073 | 0.327181929 |
| 0.15816748  | 0.291655417 | 0.299055117 | 0.260874158 |
| 0.324321738 | 0.214009882 |             |             |
| PPP1CA      | 0.23537484  | 0.225849492 | 0.151078826 |
| 0.213596159 | 0.191057549 | 0.151129604 | 0.296698193 |
| 0.313743604 | 0.209481867 | 0.074911728 | 0.201900553 |
| 0.203673346 | 0.046722671 | 0.275148801 | 0.312687771 |
| 0.161546936 | 0.293551805 | 0.32858151  | 0.090227285 |
| 0.198548252 | 0.208281102 | 0.128280244 | 0.151922611 |
| 0.203958602 | 0.292699309 | 0.174153916 | 0.120409084 |
| 0.25490528  | 0.053774843 | 0.155010487 | 0.043920391 |
| 0.341566287 | 0.177030245 | 0.104377853 | 0.15033201  |
| 0.170992975 | 0.029091325 | 0.346709606 | 0.250039087 |
| 0.083051371 | 0.339683367 | 0.089088453 | 0.276024109 |
| 0.111980863 | 0.190011629 | 0.037811005 | 0.150943653 |
| 0.17348061  | 0.241194319 | 0.17567624  | 0.171009889 |
| 0.147307886 | 0.224792703 | 0.137084276 | 0.012323152 |
| 0.094251848 | 0.018373689 | 0.06070897  | 0.291567258 |
| 0.308893779 | 0.36014842  | 0.067173731 | 0.227196755 |
| 0.151748157 | 0.193692489 | 0.292802355 | 0.109531288 |
| 0.289637701 | 0.084469219 | 0.157306043 | 0.168564147 |
| 0.179442421 | 0.179297365 | 0.309623648 | 0.186208294 |
| 0.145507115 | 0.33213747  | 0.200876677 | 0.126833502 |
| 0.209028559 | 0.360887891 | 0.285992682 | 0.292862078 |
| 0.098921729 | 0.148081799 | 0.182622717 | 0.289563223 |
| 0.217883184 | 0.275357296 | 0.213027119 | 0.331981173 |
| 0.216019117 | 0.10872793  | 0.188906367 | 0.222009332 |
| 0.229244181 | 0.10707068  | 0.10111285  | 0.097263773 |
| 0.170321856 | 0.169541565 | 0.321744381 | 0.269391194 |
| 0.189504433 | 0.196890223 | 0.30522224  | 0.138846619 |
| 0.204682742 | 0.216293833 | 0.197247483 | 0.207406404 |
| 0.16924656  | 0.261025196 | 0.203069844 | 0.255928857 |
| 0.145008891 | 0.282403393 | 0.198307472 | 0.266943104 |
| 0.026071673 | 0.2937165   | 0.274678463 | 0.307711032 |

|             |             |             |             |
|-------------|-------------|-------------|-------------|
| 0.185999369 | 0.352968645 | 0.179683406 | 0.337601075 |
| 0.23858003  | 0.234634758 | 0.27889648  | 0.28899236  |
| 0.256341841 | 0.278534236 | 0.285922121 | 0.241255301 |
| 0.250064793 | 0.100760289 | 0.142875996 | 0.228893708 |
| 0.212155771 | 0.302047607 | 0.131925951 | 0.331438889 |
| 0.306248777 | 0.22722679  | 0.228628318 | 0.366280129 |
| 0.278516605 | 0.339742878 | 0.209310485 | 0.316113104 |
| 0.329291531 | 0.314033592 | 0.315680424 | 0.162171584 |
| 0.316867536 | 0.18739976  | 0.077506183 | 0.25694862  |
| 0.340687244 | 0.020362929 | 0.227543206 | 0.249562151 |
| 0.27484294  | 0.206871894 | 0.314663206 | 0.272516849 |
| 0.275151656 | 0.254907763 | 0.011980332 | 0.258208865 |
| 0.302082728 | 0.277399203 | 0.331784163 | 0.121177122 |
| 0.178262221 | 0.170375003 | 0.20054767  | 0.102950529 |
| 0.375005016 | 0.242744283 | 0.238524693 | 0.216810458 |
| 0.159343457 | 0.335827486 | 0.110346931 | 0.297626986 |
| 0.276093314 | 0.231257442 | 0.167873033 | 0.281163242 |
| 0.092437316 | 0.345023477 | 0.165199677 | 0.180294548 |
| 0.335476    | 0.177619085 | 0.090536345 | 0.174844446 |
| 0.173616017 | 0.12951121  | 0.280827821 | 0.244763257 |
| 0.294494948 | 0.307434461 | 0.249763239 | 0.301796538 |
| 0.277864509 | 0.313873846 | 0.156485461 | 0.270812032 |
| 0.170255233 | 0.23625368  | 0.180427986 | 0.327977204 |
| 0.367987042 | 0.141393593 | 0.315241743 | 0.091538104 |
| 0.151737075 | 0.076978484 | 0.06655532  | 0.124106036 |
| 0.306318497 | 0.242563556 | 0.172840299 | 0.203113674 |
| 0.192267389 | 0.237051323 | 0.150949535 | 0.362131204 |
| 0.224981726 | 0.19845274  | 0.262449702 | 0.132849595 |
| 0.073229379 | 0.216768974 | 0.221060902 | 0.218512051 |
| 0.221069306 | 0.086932033 | 0.080284367 | 0.252711046 |
| 0.103155242 | 0.170122677 | 0.252722117 | 0.205270384 |
| 0.13694113  | 0.270868988 | 0.311681046 | 0.022847699 |
| 0.154652503 | 0.14344517  | 0.282503773 | 0.092551586 |
| 0.28166673  | 0.300555222 | 0.166314325 | 0.192046491 |
| 0.185673948 | 0.303746811 | 0.262702193 | 0.279434138 |
| 0.116399857 | 0.316409834 | 0.227692916 | 0.277329487 |
| 0.222186552 | 0.112736408 | 0.050018008 | 0.216292893 |
| 0.240113211 | 0.107711391 | 0.177964429 | 0.180230273 |
| 0.115853011 | 0.168524516 | 0.206331673 | 0.301153639 |
| 0.365030226 | 0.257363458 | 0.346258234 | 0.249677106 |
| 0.272575761 | 0.264381344 | 0.248219158 | 0.335087317 |
| 0.085681579 | 0.158016342 | 0.157004689 | 0.280133984 |
| 0.285943332 | 0.193957317 | 0.320256928 | 0.063953418 |
| 0.00196366  | 0.238904803 | 0.220606804 | 0.331916625 |
| 0.12480793  | 0.116598785 | 0.184846414 | 0.292285997 |
| 0.33998341  | 0.294806643 | 0.273728275 | 0.192691114 |
| 0.269751831 | 0.160866363 | 0.132991244 | 0.172612128 |
| 0.302110278 | 0.129572235 | 0.281819989 | 0.359985066 |
| 0.145647653 | 0.117389709 | 0.216432306 | 0.022343677 |
| 0.236096484 | 0.169040483 | 0.232845716 | 0.34005505  |
| 0.283311143 | 0.302518818 | 0.243155609 | 0.093849261 |
| 0.249573331 | 0.302208077 | 0.040994378 | 0.267043091 |
| 0.288728416 | 0.284995006 | 0.282868455 | 0.29491786  |
| 0.256721835 | 0.202142001 | 0.224560038 | 0.15665585  |

|             |             |             |             |
|-------------|-------------|-------------|-------------|
| 0.311875796 | 0.213528864 | 0.121632632 | 0.240339047 |
| 0.021089896 | 0.260222981 | 0.215439042 | 0.303726217 |
| 0.190784014 | 0.252196655 | 0.24484438  | 0.172688148 |
| 0.118974585 | 0.055124036 | 0.205584778 | 0.302102521 |
| 0.248982397 | 0.15704998  | 0.082319266 | 0.115978845 |
| 0.27000884  | 0.286870561 | 0.102621729 | 0.305733351 |
| 0.23182295  | 0.169497533 | 0.213589377 | 0.223073319 |
| 0.311039762 | 0.043342623 | 0.169269251 | 0.008478381 |
| 0.092514748 | 0.31028281  | 0.139212446 | 0.202601361 |
| 0.27166732  | 0.093432692 | 0.271048742 | 0.318957377 |
| 0.253756468 | 0.2862001   | 0.28927722  | 0.116761132 |
| 0.290646861 | 0.02303737  | 0.285130546 | 0.226414951 |
| 0.09437282  | 0.008441884 | 0.077413385 | 0.243766949 |
| 0.151870578 | 0.147038054 | 0.317171808 | 0.115466402 |
| 0.332568317 | 0.212930721 | 0.297160982 | 0.170930088 |
| 0.153331561 | 0.250012172 | 0.166518767 | 0.277102089 |
| 0.292873828 | 0.317654743 | 0.132779402 | 0.225546303 |
| 0.157638074 | 0.288489215 | 0.22899993  | 0.042491255 |
| 0.224889678 | 0.210565717 | 0.319204561 | 0.282547111 |
| 0.335821039 | 0.190152219 | 0.071329671 | 0.138781084 |
| 0.254844375 | 0.147343536 | 0.096989427 | 0.179564096 |
| 0.255522881 | 0.171437024 | 0.297620584 | 0.289721793 |
| 0.320024319 | 0.302375796 | 0.26301182  | 0.228717654 |
| 0.093960742 | 0.019003138 | 0.136429778 | 0.283278678 |
| 0.075083871 | 0.150627216 | 0.312337257 | 0.213220335 |
| 0.260730278 | 0.177284491 | 0.109777721 | 0.119843921 |
| 0.260820294 | 0.199504733 | 0.170430879 | 0.272785979 |
| 0.218718569 | 0.180240719 | 0.314879287 | 0.344449061 |
| 0.157481572 | 0.269718555 | 0.28819083  | 0.224233156 |
| 0.121393004 | 0.134495544 | 0.275395784 | 0.285060751 |
| 0.252851947 | 0.25634016  | 0.291295988 | 0.135768895 |
| 0.305211658 | 0.211235449 | 0.278579645 | 0.258599107 |
| 0.324659702 | 0.3425289   | 0.358361476 | 0.317348654 |
| 0.285204124 | 0.236674708 | 0.168388311 | 0.286762386 |
| 0.287815581 | 0.168818742 | 0.28100429  | 0.114932864 |
| 0.300763231 | 0.283821965 | 0.264297455 | 0.319526898 |
| 0.131086201 | 0.32871587  | 0.32650438  | 0.188146576 |
| 0.222110123 | 0.110100068 | 0.281754095 | 0.325251964 |
| 0.259164836 | 0.077313935 | 0.318155871 | 0.206549486 |
| 0.236219313 | 0.068048964 | 0.174772282 | 0.361128795 |
| 0.265931532 | 0.268289352 | 0.145805489 | 0.220398045 |
| 0.199932528 | 0.105976716 | 0.114146775 | 0.218645037 |
| 0.292517652 | 0.143596168 | 0.289497856 | 0.315157548 |
| 0.25354458  | 0.151068495 | 0.122371925 | 0.192586878 |
| 0.324732223 | 0.156620858 | 0.300522774 | 0.268426076 |
| 0.346160041 | 0.360724488 | 0.238990877 | 0.332166526 |
| 0.136323074 | 0.182944215 | 0.155791573 | 0.236040694 |
| 0.124132293 | 0.25462366  | 0.096640934 | 0.211510817 |
| 0.017264456 | 0.066049895 | 0.289369855 | 0.282105123 |
| 0.342917113 | 0.271430368 | 0.326953338 | 0.233452383 |
| 0.002308696 | 0.150935391 | 0.196312743 | 0.148966093 |
| 0.229645887 | 0.258967379 | 0.196608866 | 0.336072998 |
| 0.343145754 | 0.162234256 | 0.321966931 | 0.129598524 |
| 0.069823398 | 0.162910705 | 1           | 0.275456851 |

|             |             |             |             |
|-------------|-------------|-------------|-------------|
| 0.309763321 | 0.170804483 | 0.107219867 | 0.277011933 |
| 0.109039677 | 0.332710657 | 0.303905584 | 0.079535281 |
| 0.069500801 | 0.28121685  | 0.213754457 | 0.201168029 |
| 0.14000074  | 0.261536776 | 0.287776669 | 0.02794093  |
| 0.180078782 | 0.152463268 | 0.312122404 | 0.284407309 |
| 0.318596359 | 0.307469335 | 0.279154912 | 0.201248505 |
| 0.198849543 | 0.311462006 | 0.249092557 | 0.312056252 |
| 0.311958787 | 0.291617604 | 0.175622779 | 0.17983043  |
| 0.197850915 | 0.303591391 | 0.234977269 | 0.229961348 |
| 0.264699067 | 0.241435069 | 0.339768446 | 0.169381163 |
| 0.326180776 | 0.175568676 | 0.358422703 | 0.259006225 |
| 0.321206165 | 0.185817041 | 0.218520544 | 0.219372151 |
| 0.05487451  | 0.134000485 | 0.211785706 | 0.166846544 |
| 0.307195161 | 0.175010924 | 0.134727071 | 0.167704964 |
| 0.167795007 | 0.358453822 | 0.326443384 | 0.312010575 |
| 0.186706641 | 0.15816612  | 0.07370547  | 0.315016409 |
| 0.282132002 | 0.261302813 | 0.191331496 | 0.052488803 |
| 0.238391353 | 0.170429329 | 0.227534918 | 0.287628139 |
| 0.093433636 | 0.334237017 | 0.084003906 | 0.268537778 |
| 0.061452827 | 0.225393021 | 0.29685492  | 0.179350461 |
| 0.061442727 | 0.315377272 | 0.216047468 | 0.129478012 |
| 0.191383305 | 0.170577571 | 0.200365007 | 0.276252632 |
| 0.288900708 | 0.233391203 | 0.321948529 | 0.221406375 |
| 0.121455922 | 0.17759609  | 0.121358593 | 0.229204136 |
| 0.288831985 | 0.273623814 | 0.242466415 | 0.273220396 |
| 0.180652586 | 0.253993237 | 0.376073731 | 0.223607482 |
| 0.204223665 | 0.295837404 | 0.066960481 | 0.131926732 |
| 0.295577902 | 0.106748773 | 0.003420335 | 0.057729038 |
| 0.282512282 | 0.147923309 | 0.177141518 | 0.235123026 |
| 0.187145752 | 0.305886417 | 0.06066402  | 0.228383133 |
| 0.263357187 | 0.317517851 | 0.213880225 | 0.335576579 |
| 0.264453304 | 0.333952831 | 0.144420333 | 0.02467009  |
| 0.139744769 | 0.114454829 | 0.105429841 | 0.30979589  |
| 0.212513668 | 0.072479335 | 0.14511914  | 0.183308988 |
| 0.270891817 | 0.054955237 | 0.145222421 | 0.173991334 |
| 0.274065386 | 0.322763457 | 0.339296587 | 0.211753897 |
| 0.182013319 | 0.285841284 | 0.132388162 | 0.139555612 |
| 0.204693808 | 0.142246393 | 0.246884489 | 0.122084592 |
| 0.270940041 | 0.232198158 | 0.027055665 | 0.359080001 |
| 0.291604817 | 0.130546776 | 0.328768749 | 0.074392424 |
| 0.297029661 | 0.281824165 | 0.210055975 | 0.115822745 |
| 0.144685597 | 0.153499417 | 0.329455693 | 0.245173197 |
| 0.057784115 | 0.162984246 | 0.270096505 | 0.161896712 |
| 0.325738053 | 0.162554363 | 0.334739112 | 0.087288029 |
| 0.26302083  | 0.226720834 | 0.194416573 | 0.213033954 |
| 0.136131195 | 0.223160442 | 0.104541874 | 0.318449084 |
| 0.336672102 | 0.132630603 | 0.236790744 | 0.294384701 |
| 0.129103888 | 0.266843039 | 0.119324176 | 0.312562675 |
| 0.312443797 | 0.306288537 | 0.223100984 | 0.268603618 |
| 0.329715253 | 0.160678519 | 0.119891916 | 0.236721104 |
| 0.255798371 | 0.24492463  | 0.149545643 | 0.247882818 |
| 0.103261233 | 0.273089136 | 0.122187046 | 0.251757703 |
| 0.246495347 | 0.3233619   | 0.161261018 | 0.305016033 |
| 0.267714629 | 0.186612747 | 0.205393548 | 0.35126969  |

|             |             |             |             |
|-------------|-------------|-------------|-------------|
| 0.264926299 | 0.161648822 | 0.356905896 | 0.013818572 |
| 0.17032857  | 0.182629095 | 0.305848353 | 0.172621479 |
| 0.281006969 | 0.207922018 | 0.155460059 | 0.037338461 |
| 0.253535902 | 0.063228557 | 0.206532403 | 0.213794945 |
| 0.119220484 | 0.256287404 | 0.296867931 | 0.294536943 |
| 0.236291909 | 0.1162011   | 0.08685689  | 0.285801655 |
| 0.082027428 | 0.079400272 | 0.116717488 | 0.146120105 |
| 0.101134583 | 0.093312387 | 0.11309627  | 0.104882032 |
| 0.224729082 | 0.257224264 |             |             |
| PPP1R11     | 0.120410561 | 0.266645756 | 0.084237262 |
| 0.092899588 | 0.137258713 | 0.107057018 | 0.197396248 |
| 0.193310706 | 0.272225582 | 0.095785114 | 0.124448348 |
| 0.088652087 | 0.03623289  | 0.281526159 | 0.203552878 |
| 0.154138997 | 0.146139549 | 0.202354666 | 0.096147677 |
| 0.191339681 | 0.145142808 | 0.090836504 | 0.122931556 |
| 0.161986601 | 0.259201052 | 0.183771199 | 0.12110069  |
| 0.28078432  | 0.044132395 | 0.152339791 | 0.044195217 |
| 0.340026028 | 0.139272825 | 0.092715532 | 0.072239023 |
| 0.135735754 | 0.052140293 | 0.374504779 | 0.16288226  |
| 0.052128159 | 0.318332481 | 0.091050999 | 0.146019607 |
| 0.11840712  | 0.09366533  | 0.038446112 | 0.18845712  |
| 0.196157164 | 0.198818033 | 0.118150891 | 0.186183484 |
| 0.151388686 | 0.193572222 | 0.173406258 | 0.004837397 |
| 0.07479519  | 0.019304082 | 0.060588577 | 0.31141641  |
| 0.20925479  | 0.188681979 | 0.084435047 | 0.216625765 |
| 0.183135676 | 0.230929899 | 0.264642736 | 0.123972244 |
| 0.298891917 | 0.072751366 | 0.186897408 | 0.094413558 |
| 0.159240553 | 0.147705765 | 0.249343382 | 0.189277884 |
| 0.137902268 | 0.182893897 | 0.132362989 | 0.11173067  |
| 0.248686066 | 0.385586819 | 0.250657777 | 0.331825667 |
| 0.122109509 | 0.133550823 | 0.13873964  | 0.269180267 |
| 0.268688193 | 0.257975603 | 0.192202848 | 0.348576895 |
| 0.184540975 | 0.129858104 | 0.227013869 | 0.208808736 |
| 0.244503728 | 0.119649358 | 0.096177719 | 0.05993376  |
| 0.176934109 | 0.141486812 | 0.374529647 | 0.215186111 |
| 0.147342961 | 0.144686275 | 0.339472624 | 0.117812507 |
| 0.11094013  | 0.129088156 | 0.150316607 | 0.234174911 |
| 0.168792214 | 0.272127191 | 0.248762246 | 0.285347834 |
| 0.124993624 | 0.292563435 | 0.185943645 | 0.291434781 |
| 0.032208759 | 0.322490681 | 0.155452979 | 0.13471216  |
| 0.123498211 | 0.191513555 | 0.199013921 | 0.314774232 |
| 0.249085093 | 0.215511487 | 0.16153406  | 0.18420944  |
| 0.27690644  | 0.311972641 | 0.325480167 | 0.25637625  |
| 0.128675073 | 0.114624956 | 0.118160043 | 0.162223209 |
| 0.223487528 | 0.224845332 | 0.097570602 | 0.35799592  |
| 0.270428944 | 0.240597755 | 0.15742333  | 0.392723749 |
| 0.251581793 | 0.337718268 | 0.233064013 | 0.165913269 |
| 0.347892492 | 0.331471079 | 0.319087312 | 0.159969781 |
| 0.318598388 | 0.121377622 | 0.113296888 | 0.292673953 |
| 0.327367221 | 0.009131019 | 0.257248181 | 0.277591835 |
| 0.302953687 | 0.223475388 | 0.337536802 | 0.289406343 |
| 0.30294897  | 0.171393374 | 0.029477689 | 0.212976835 |
| 0.327752722 | 0.251976186 | 0.228609142 | 0.11035876  |
| 0.167306248 | 0.128689055 | 0.230584343 | 0.069832164 |

|             |             |             |             |
|-------------|-------------|-------------|-------------|
| 0.379749534 | 0.253205366 | 0.266622407 | 0.242726668 |
| 0.183462274 | 0.303205661 | 0.108271054 | 0.319411219 |
| 0.135620611 | 0.123723562 | 0.114988189 | 0.304954501 |
| 0.081876701 | 0.195937991 | 0.129901953 | 0.187915706 |
| 0.216061814 | 0.157761787 | 0.080819382 | 0.171899151 |
| 0.16709795  | 0.118372539 | 0.181810209 | 0.182185784 |
| 0.137312709 | 0.273980864 | 0.127396899 | 0.135594813 |
| 0.169855716 | 0.327594086 | 0.175008812 | 0.294563309 |
| 0.170833764 | 0.203102958 | 0.190316452 | 0.321449992 |
| 0.339784065 | 0.109652222 | 0.297698737 | 0.025476211 |
| 0.116179081 | 0.101365937 | 0.06453216  | 0.119807076 |
| 0.303909347 | 0.177382864 | 0.169788454 | 0.188306916 |
| 0.127495761 | 0.209855033 | 0.134389992 | 0.347906862 |
| 0.227690394 | 0.114449149 | 0.258833498 | 0.143045829 |
| 0.030073597 | 0.149763588 | 0.225670649 | 0.169193134 |
| 0.250855347 | 0.054830359 | 0.051375232 | 0.271998651 |
| 0.096991961 | 0.144653449 | 0.273265517 | 0.202976032 |
| 0.104473926 | 0.301315357 | 0.335946817 | 0.029443336 |
| 0.155944606 | 0.051114752 | 0.225765167 | 0.105420451 |
| 0.199270931 | 0.284321449 | 0.125495692 | 0.122819382 |
| 0.137564636 | 0.329415993 | 0.259027339 | 0.293074113 |
| 0.107813928 | 0.341154617 | 0.23710595  | 0.264639972 |
| 0.208505872 | 0.123924914 | 0.044134353 | 0.217477506 |
| 0.258257188 | 0.115913554 | 0.162624788 | 0.216640939 |
| 0.134083771 | 0.182050487 | 0.138768487 | 0.30682277  |
| 0.365608363 | 0.296558653 | 0.179129064 | 0.245952848 |
| 0.234870637 | 0.146972383 | 0.263689203 | 0.35852298  |
| 0.113437176 | 0.139211308 | 0.122776084 | 0.268894544 |
| 0.195716593 | 0.155541784 | 0.330423073 | 0.06267743  |
| 0.000712423 | 0.163711083 | 0.129490551 | 0.171405379 |
| 0.08145647  | 0.140898084 | 0.199094775 | 0.31283152  |
| 0.183575195 | 0.281823782 | 0.309021486 | 0.123015246 |
| 0.28892106  | 0.149557561 | 0.109794866 | 0.160351279 |
| 0.28655833  | 0.045022566 | 0.112053825 | 0.381912175 |
| 0.122596356 | 0.077257398 | 0.190595455 | 0.00569346  |
| 0.141992227 | 0.21192691  | 0.226851325 | 0.305315726 |
| 0.292904616 | 0.279078586 | 0.202013074 | 0.116716922 |
| 0.211009155 | 0.174414397 | 0.009230522 | 0.308265158 |
| 0.342897659 | 0.344974387 | 0.338807494 | 0.348267734 |
| 0.314244524 | 0.23898537  | 0.242792022 | 0.116152551 |
| 0.181188341 | 0.155008744 | 0.096337192 | 0.166171379 |
| 0.015200492 | 0.231545031 | 0.175765414 | 0.218181035 |
| 0.208615321 | 0.267732863 | 0.110179616 | 0.165219342 |
| 0.043070474 | 0.042711769 | 0.186076829 | 0.226121832 |
| 0.25410583  | 0.075453201 | 0.053059539 | 0.100855256 |
| 0.271883366 | 0.269006678 | 0.092536106 | 0.327894976 |
| 0.139921168 | 0.187550568 | 0.141668116 | 0.206169034 |
| 0.178512916 | 0.057182656 | 0.167186326 | 0.0070309   |
| 0.065109124 | 0.355020705 | 0.128930336 | 0.115882892 |
| 0.183363982 | 0.032274401 | 0.254939395 | 0.335569002 |
| 0.282356131 | 0.306580872 | 0.292173631 | 0.077248933 |
| 0.30194105  | 0.030375988 | 0.308700921 | 0.246301555 |
| 0.098666909 | 0.001997881 | 0.030915859 | 0.260421457 |
| 0.123741565 | 0.142808143 | 0.202438665 | 0.077390779 |

|             |             |             |             |
|-------------|-------------|-------------|-------------|
| 0.154410218 | 0.15541036  | 0.171205658 | 0.107161501 |
| 0.143526358 | 0.14945649  | 0.11365017  | 0.310778552 |
| 0.195057802 | 0.214225654 | 0.129387316 | 0.202459015 |
| 0.137327176 | 0.134763641 | 0.221458188 | 0.011978314 |
| 0.22699181  | 0.202526787 | 0.352286754 | 0.307216035 |
| 0.333583435 | 0.183278106 | 0.076005494 | 0.103012858 |
| 0.295711694 | 0.140874533 | 0.084596339 | 0.14753501  |
| 0.278334519 | 0.163279029 | 0.238517377 | 0.247369622 |
| 0.326990479 | 0.303857577 | 0.13935593  | 0.236141471 |
| 0.026226634 | 0.009855121 | 0.106584075 | 0.280725535 |
| 0.137190362 | 0.134887582 | 0.266482969 | 0.243805452 |
| 0.230623888 | 0.069372108 | 0.099199442 | 0.099612846 |
| 0.201824313 | 0.156289075 | 0.11803383  | 0.313472505 |
| 0.168147244 | 0.1350889   | 0.184103873 | 0.229817382 |
| 0.185843725 | 0.281137804 | 0.252851433 | 0.134418987 |
| 0.111276091 | 0.10711583  | 0.139928572 | 0.215260582 |
| 0.240650821 | 0.265556574 | 0.188714369 | 0.039730214 |
| 0.266959784 | 0.181598599 | 0.287074809 | 0.284864235 |
| 0.346579219 | 0.353936184 | 0.346834469 | 0.197144773 |
| 0.145028556 | 0.191641241 | 0.126719757 | 0.161312312 |
| 0.30320326  | 0.146496528 | 0.300578578 | 0.097531387 |
| 0.224944396 | 0.1748541   | 0.094891309 | 0.201682803 |
| 0.116398205 | 0.222445214 | 0.18069747  | 0.149969339 |
| 0.156768069 | 0.078647389 | 0.175181246 | 0.199221547 |
| 0.253635088 | 0.065276898 | 0.210031376 | 0.176009919 |
| 0.253709427 | 0.108073867 | 0.191107365 | 0.351204172 |
| 0.191657355 | 0.215792377 | 0.10012931  | 0.249046937 |
| 0.224203759 | 0.120919321 | 0.029931412 | 0.256828851 |
| 0.305256639 | 0.149718798 | 0.306815025 | 0.308367026 |
| 0.204557238 | 0.105975323 | 0.133219863 | 0.161569707 |
| 0.236394316 | 0.112109051 | 0.22967644  | 0.164781085 |
| 0.350789668 | 0.393623013 | 0.264601828 | 0.162585062 |
| 0.132602035 | 0.168883514 | 0.135704692 | 0.264753549 |
| 0.092877256 | 0.12279395  | 0.099608663 | 0.248759381 |
| 0.005604577 | 0.050755273 | 0.32695767  | 0.147489007 |
| 0.374763496 | 0.284465673 | 0.31080462  | 0.192811243 |
| 0.003271699 | 0.175381981 | 0.150137107 | 0.10842019  |
| 0.250656325 | 0.240252906 | 0.179852187 | 0.158435352 |
| 0.289806908 | 0.137510761 | 0.188401003 | 0.095029717 |
| 0.07920388  | 0.173445855 | 0.275456851 | 1           |
| 0.199838708 | 0.212294997 | 0.076646207 | 0.157154838 |
| 0.136018199 | 0.261676611 | 0.268660639 | 0.091224334 |
| 0.051886495 | 0.315765061 | 0.236775548 | 0.092552405 |
| 0.118432221 | 0.300901304 | 0.301449206 | 0.017676313 |
| 0.178036224 | 0.05399494  | 0.178709158 | 0.145436711 |
| 0.179887763 | 0.21115887  | 0.203856998 | 0.132764733 |
| 0.212371985 | 0.210501589 | 0.131533736 | 0.199996612 |
| 0.150567584 | 0.203542247 | 0.157718991 | 0.163756579 |
| 0.107105576 | 0.15762407  | 0.220715279 | 0.222216607 |
| 0.09342162  | 0.265253275 | 0.283727844 | 0.144337148 |
| 0.228809027 | 0.166704429 | 0.314386821 | 0.293241073 |
| 0.30330368  | 0.186373976 | 0.191310428 | 0.229762095 |
| 0.069003725 | 0.097458955 | 0.134224407 | 0.138528733 |
| 0.180128801 | 0.099641521 | 0.123491125 | 0.155736289 |

|             |             |             |             |
|-------------|-------------|-------------|-------------|
| 0.21431879  | 0.338469978 | 0.266299889 | 0.320226072 |
| 0.131239825 | 0.178227701 | 0.075278713 | 0.12936263  |
| 0.161258948 | 0.2470637   | 0.129030304 | 0.015143202 |
| 0.207346768 | 0.103651134 | 0.237846404 | 0.308601673 |
| 0.085304254 | 0.310784839 | 0.073505137 | 0.138612239 |
| 0.062345785 | 0.233651872 | 0.224787161 | 0.20585155  |
| 0.051406343 | 0.17195237  | 0.146671422 | 0.096734066 |
| 0.206514145 | 0.215232041 | 0.174682006 | 0.215992394 |
| 0.236650924 | 0.196512002 | 0.372931463 | 0.14890511  |
| 0.131095678 | 0.098272971 | 0.152366173 | 0.149098812 |
| 0.185435868 | 0.303737578 | 0.142074616 | 0.299252998 |
| 0.147385765 | 0.238796081 | 0.377010655 | 0.175192669 |
| 0.150173293 | 0.133778962 | 0.057224126 | 0.130348303 |
| 0.229615752 | 0.09112481  | 0.004873293 | 0.040660023 |
| 0.234683444 | 0.184186813 | 0.226513821 | 0.269972262 |
| 0.1397606   | 0.298190882 | 0.053814615 | 0.192087038 |
| 0.300001694 | 0.350838889 | 0.121989623 | 0.307948609 |
| 0.259935596 | 0.156029871 | 0.141397285 | 0.034575806 |
| 0.148650762 | 0.125833355 | 0.10787163  | 0.166220264 |
| 0.105432445 | 0.063131665 | 0.154672404 | 0.184700735 |
| 0.289869831 | 0.043601995 | 0.19741911  | 0.176376155 |
| 0.282171671 | 0.350263804 | 0.178246626 | 0.187665748 |
| 0.204738245 | 0.26007192  | 0.125713513 | 0.152537366 |
| 0.105154599 | 0.111178873 | 0.219161827 | 0.080323806 |
| 0.120315515 | 0.139592676 | 0.023606525 | 0.347367537 |
| 0.334839945 | 0.121477211 | 0.306631992 | 0.092941027 |
| 0.239638381 | 0.309097892 | 0.167125021 | 0.108940916 |
| 0.044485253 | 0.126756552 | 0.205989495 | 0.232146114 |
| 0.045892123 | 0.182625279 | 0.106172821 | 0.154198491 |
| 0.3550568   | 0.125969482 | 0.334046648 | 0.080509365 |
| 0.289190302 | 0.263206032 | 0.195679014 | 0.14443426  |
| 0.191101987 | 0.168320479 | 0.096705484 | 0.347062642 |
| 0.174626501 | 0.086162563 | 0.237031832 | 0.170031287 |
| 0.112494222 | 0.276633566 | 0.146986845 | 0.354477697 |
| 0.151958671 | 0.225404083 | 0.234870202 | 0.299932355 |
| 0.273500177 | 0.121581439 | 0.08564666  | 0.155625704 |
| 0.274003746 | 0.095662289 | 0.13291664  | 0.230138142 |
| 0.07827526  | 0.235006016 | 0.161012193 | 0.157624804 |
| 0.093640021 | 0.230312732 | 0.104489352 | 0.21926887  |
| 0.194411823 | 0.144976372 | 0.155096634 | 0.317564798 |
| 0.099712523 | 0.048933333 | 0.34790983  | 0.008189894 |
| 0.121223253 | 0.155662876 | 0.195734921 | 0.137170809 |
| 0.225352851 | 0.20417216  | 0.140798257 | 0.012165722 |
| 0.266349466 | 0.037184207 | 0.182114217 | 0.118515029 |
| 0.10542666  | 0.150108899 | 0.300498734 | 0.307240393 |
| 0.220409076 | 0.110727875 | 0.07455046  | 0.309671694 |
| 0.059709153 | 0.083233974 | 0.121786704 | 0.167802786 |
| 0.07722657  | 0.095936954 | 0.108439319 | 0.084646715 |
| 0.225388242 | 0.185891798 |             |             |
| PPP1R8      | 0.080161852 | 0.193968117 | 0.04352957  |
| 0.118429752 | 0.248833083 | 0.084814367 | 0.118771495 |
| 0.145012737 | 0.185141776 | 0.040964891 | 0.181700741 |
| 0.062334746 | 0.076282116 | 0.265674702 | 0.128296015 |
| 0.198119025 | 0.127651921 | 0.161443619 | 0.060094782 |



|             |             |             |             |
|-------------|-------------|-------------|-------------|
| 0.124001042 | 0.240449671 | 0.099301206 | 0.093122189 |
| 0.221560637 | 0.195701848 | 0.140541316 | 0.12787638  |
| 0.242100284 | 0.039349943 | 0.176905241 | 0.028314465 |
| 0.309402339 | 0.231672739 | 0.091965134 | 0.043228429 |
| 0.140938108 | 0.049305291 | 0.294054195 | 0.187898127 |
| 0.121963922 | 0.285329542 | 0.048774928 | 0.17838593  |
| 0.077751385 | 0.056693885 | 0.019252341 | 0.18770892  |
| 0.153671988 | 0.161828872 | 0.060627441 | 0.18384443  |
| 0.099253278 | 0.195287796 | 0.117918806 | 0.003462647 |
| 0.091455356 | 0.031456437 | 0.068418241 | 0.258269645 |
| 0.260114716 | 0.200206824 | 0.055950211 | 0.125431443 |
| 0.156783968 | 0.236692062 | 0.299439652 | 0.066058453 |
| 0.267553397 | 0.108611064 | 0.183331203 | 0.10368776  |
| 0.107892123 | 0.055171798 | 0.257316799 | 0.095471085 |
| 0.103672825 | 0.258427213 | 0.192471238 | 0.130934861 |
| 0.173977756 | 0.319644247 | 0.262934543 | 0.24654056  |
| 0.117976795 | 0.196782971 | 0.180928589 | 0.340772471 |
| 0.235588985 | 0.124690065 | 0.234956578 | 0.31039837  |
| 0.073751918 | 0.088304055 | 0.193467288 | 0.130349149 |
| 0.206554338 | 0.102310854 | 0.072285365 | 0.116922185 |
| 0.253785742 | 0.199918578 | 0.273955146 | 0.256501363 |
| 0.174985966 | 0.087307521 | 0.240213814 | 0.193801805 |
| 0.148996559 | 0.099323001 | 0.193445999 | 0.23189422  |
| 0.182818149 | 0.247679883 | 0.189820863 | 0.266096123 |
| 0.163554917 | 0.267983834 | 0.214987249 | 0.246916259 |
| 0.017274982 | 0.26708785  | 0.174006527 | 0.128924454 |
| 0.058402237 | 0.186271657 | 0.156040614 | 0.334766522 |
| 0.246170358 | 0.226815683 | 0.134341185 | 0.249900117 |
| 0.294791213 | 0.220873915 | 0.258128308 | 0.241186982 |
| 0.086162021 | 0.111467339 | 0.160745074 | 0.118971306 |
| 0.22589642  | 0.188362551 | 0.152094645 | 0.275934376 |
| 0.282134583 | 0.260589232 | 0.097470051 | 0.306332915 |
| 0.14333412  | 0.327971463 | 0.187186088 | 0.200869365 |
| 0.293623025 | 0.259952238 | 0.323245913 | 0.223349536 |
| 0.274330828 | 0.126833195 | 0.040165667 | 0.252312233 |
| 0.338272577 | 0.024293915 | 0.234706127 | 0.260387925 |
| 0.243403775 | 0.231442252 | 0.325726787 | 0.27408621  |
| 0.239382996 | 0.131661049 | 0.013222967 | 0.30799675  |
| 0.263162441 | 0.2749089   | 0.221218872 | 0.115948835 |
| 0.213257115 | 0.104093957 | 0.217419403 | 0.070415435 |
| 0.357782856 | 0.254001944 | 0.23519196  | 0.208589223 |
| 0.117953323 | 0.276187787 | 0.128565859 | 0.232636722 |
| 0.121802886 | 0.084921079 | 0.07179207  | 0.288908953 |
| 0.048740878 | 0.280807497 | 0.086021981 | 0.197060872 |
| 0.288611472 | 0.097477741 | 0.078924625 | 0.246083514 |
| 0.082346556 | 0.114971745 | 0.168629576 | 0.133355677 |
| 0.134989143 | 0.20527069  | 0.136385636 | 0.166409009 |
| 0.237436128 | 0.198700562 | 0.169500805 | 0.279981844 |
| 0.125976541 | 0.169241404 | 0.178934385 | 0.329281441 |
| 0.375178711 | 0.162872351 | 0.270504663 | 0.045979712 |
| 0.120798688 | 0.058493657 | 0.090101493 | 0.13023445  |
| 0.198517075 | 0.148781486 | 0.187934662 | 0.266670117 |
| 0.111397096 | 0.097945703 | 0.112736077 | 0.305600978 |
| 0.140994536 | 0.14698697  | 0.281847811 | 0.115977945 |

|             |             |             |             |
|-------------|-------------|-------------|-------------|
| 0.019290168 | 0.163199928 | 0.233689662 | 0.221307771 |
| 0.202818508 | 0.087237583 | 0.078261804 | 0.267659527 |
| 0.090758804 | 0.163801769 | 0.257419895 | 0.272970261 |
| 0.075132839 | 0.168855875 | 0.310358396 | 0.027915945 |
| 0.165583837 | 0.136935872 | 0.331112534 | 0.056082573 |
| 0.229901987 | 0.33155835  | 0.204019822 | 0.182839784 |
| 0.103859095 | 0.272747926 | 0.257255642 | 0.270491372 |
| 0.090036272 | 0.313553098 | 0.245723828 | 0.27703648  |
| 0.226615189 | 0.097554464 | 0.06851604  | 0.229798512 |
| 0.260106112 | 0.078732652 | 0.091345526 | 0.193140168 |
| 0.083074911 | 0.219981779 | 0.237047439 | 0.30368508  |
| 0.330455218 | 0.206212485 | 0.198680706 | 0.319522002 |
| 0.275380246 | 0.172503104 | 0.271428742 | 0.328470225 |
| 0.053693913 | 0.153829287 | 0.135805795 | 0.350642536 |
| 0.21418648  | 0.183589911 | 0.288305011 | 0.083083038 |
| 0.003631546 | 0.094750553 | 0.095437741 | 0.226539753 |
| 0.160732104 | 0.120737883 | 0.23444886  | 0.278242874 |
| 0.176170221 | 0.274367582 | 0.247006175 | 0.142960041 |
| 0.238682123 | 0.132583268 | 0.153523738 | 0.209229081 |
| 0.284089654 | 0.069099859 | 0.151408227 | 0.316902654 |
| 0.05649812  | 0.123721834 | 0.133398076 | 0.010294881 |
| 0.076747622 | 0.148376768 | 0.134208553 | 0.238776372 |
| 0.311095903 | 0.211353247 | 0.180353681 | 0.053312585 |
| 0.28958834  | 0.156384819 | 0.027968646 | 0.265239297 |
| 0.268773587 | 0.267364133 | 0.258721215 | 0.249214155 |
| 0.263176217 | 0.212432724 | 0.269747576 | 0.101911206 |
| 0.149535701 | 0.078236039 | 0.136514564 | 0.196698203 |
| 0.004870305 | 0.301897191 | 0.211291723 | 0.227032785 |
| 0.222670078 | 0.255720757 | 0.081125619 | 0.205818444 |
| 0.037731596 | 0.067429365 | 0.104818339 | 0.200405958 |
| 0.324610096 | 0.045268516 | 0.051287229 | 0.096829921 |
| 0.215929892 | 0.239594854 | 0.091180423 | 0.283336284 |
| 0.207199306 | 0.093313116 | 0.195574567 | 0.263191883 |
| 0.134014374 | 0.033121208 | 0.090141508 | 0.005181128 |
| 0.052039898 | 0.27272036  | 0.102917725 | 0.086979221 |
| 0.234546408 | 0.023398883 | 0.22751531  | 0.294094605 |
| 0.207954249 | 0.292613435 | 0.273494301 | 0.119978388 |
| 0.267916185 | 0.034371282 | 0.271590898 | 0.198031677 |
| 0.055359661 | 0.002330126 | 0.030320738 | 0.260403733 |
| 0.162952031 | 0.065962648 | 0.227879543 | 0.062129188 |
| 0.178860721 | 0.074487561 | 0.121970692 | 0.20278825  |
| 0.154614211 | 0.251003373 | 0.175347131 | 0.22878232  |
| 0.209729267 | 0.2731142   | 0.069883157 | 0.128313611 |
| 0.175531622 | 0.119971164 | 0.13597834  | 0.021704496 |
| 0.282979491 | 0.122251486 | 0.247238458 | 0.255832106 |
| 0.321403451 | 0.259032112 | 0.042008803 | 0.074481044 |
| 0.269477397 | 0.069713948 | 0.07279179  | 0.08476474  |
| 0.220887054 | 0.208982753 | 0.302014102 | 0.250830488 |
| 0.31801121  | 0.277625495 | 0.092840537 | 0.264168608 |
| 0.032728641 | 0.016116164 | 0.085450413 | 0.267435335 |
| 0.073628121 | 0.135134236 | 0.289589827 | 0.134123392 |
| 0.175438763 | 0.05388365  | 0.121411878 | 0.138713436 |
| 0.276444399 | 0.178313362 | 0.205527885 | 0.245575822 |
| 0.203301535 | 0.203816576 | 0.21223361  | 0.188552703 |

|             |             |             |             |
|-------------|-------------|-------------|-------------|
| 0.102578029 | 0.223302285 | 0.192799603 | 0.075611622 |
| 0.103592185 | 0.134624183 | 0.10480905  | 0.207609353 |
| 0.266952924 | 0.261066211 | 0.134494139 | 0.064232106 |
| 0.258251937 | 0.153415985 | 0.289540263 | 0.230458725 |
| 0.279837791 | 0.333443117 | 0.305431998 | 0.226514424 |
| 0.109138846 | 0.26028365  | 0.219231702 | 0.265142826 |
| 0.268286701 | 0.073812522 | 0.244331078 | 0.148079833 |
| 0.201087265 | 0.176849888 | 0.114964903 | 0.168044753 |
| 0.157897427 | 0.248036141 | 0.262942432 | 0.110797411 |
| 0.159049248 | 0.131747485 | 0.110554652 | 0.240620453 |
| 0.251751342 | 0.115254923 | 0.227533913 | 0.114978482 |
| 0.226876553 | 0.038113404 | 0.211045128 | 0.340381925 |
| 0.164821454 | 0.137609463 | 0.066646622 | 0.245221823 |
| 0.208257479 | 0.093064094 | 0.038208799 | 0.186176462 |
| 0.294965631 | 0.161533547 | 0.249890681 | 0.342536881 |
| 0.149784055 | 0.149237865 | 0.109856576 | 0.208582164 |
| 0.239523231 | 0.091513911 | 0.230341292 | 0.13102616  |
| 0.317900018 | 0.308299308 | 0.225273835 | 0.19852666  |
| 0.126130766 | 0.089353338 | 0.063272545 | 0.230438536 |
| 0.159947235 | 0.096712076 | 0.0524185   | 0.23062806  |
| 0.022651376 | 0.099210099 | 0.307566934 | 0.16039349  |
| 0.32244084  | 0.288575923 | 0.303063728 | 0.13285868  |
| 0.008561494 | 0.203632725 | 0.208598277 | 0.107281431 |
| 0.202658321 | 0.23319516  | 0.107751406 | 0.178893341 |
| 0.344751504 | 0.080867282 | 0.192024997 | 0.06842395  |
| 0.081369267 | 0.145491976 | 0.309763321 | 0.199838708 |
| 1           | 0.094251236 | 0.122201252 | 0.16962252  |
| 0.138678123 | 0.316758924 | 0.311284919 | 0.038446757 |
| 0.068670065 | 0.289887327 | 0.211350426 | 0.062083537 |
| 0.153228327 | 0.274706289 | 0.294813449 | 0.011351011 |
| 0.213179009 | 0.048792971 | 0.235309998 | 0.215413412 |
| 0.229998064 | 0.203200704 | 0.317987249 | 0.17780506  |
| 0.189437741 | 0.203275457 | 0.16275146  | 0.285852319 |
| 0.21413491  | 0.193094669 | 0.202722466 | 0.125181042 |
| 0.155845422 | 0.139245417 | 0.134459176 | 0.120002565 |
| 0.109194978 | 0.22771374  | 0.272186674 | 0.088903351 |
| 0.292913918 | 0.114179696 | 0.359374231 | 0.222558341 |
| 0.333901849 | 0.0958595   | 0.148336407 | 0.198253485 |
| 0.038574917 | 0.070926058 | 0.065414616 | 0.14242084  |
| 0.21261031  | 0.151590269 | 0.101545619 | 0.117714064 |
| 0.161355386 | 0.311060996 | 0.257772533 | 0.305044024 |
| 0.149771248 | 0.13060787  | 0.036933156 | 0.181481142 |
| 0.147261321 | 0.182377928 | 0.230293936 | 0.015127376 |
| 0.237147354 | 0.08386227  | 0.235936564 | 0.245188163 |
| 0.091284553 | 0.324822762 | 0.03793668  | 0.108648733 |
| 0.031794565 | 0.133963685 | 0.213818109 | 0.192585589 |
| 0.070457101 | 0.174116935 | 0.252491321 | 0.058516299 |
| 0.228881069 | 0.194252594 | 0.183362564 | 0.143707586 |
| 0.246933202 | 0.165294125 | 0.278790979 | 0.08400662  |
| 0.123229112 | 0.196338545 | 0.094383303 | 0.19167798  |
| 0.224810234 | 0.271685794 | 0.106904089 | 0.269406846 |
| 0.150466203 | 0.165511054 | 0.341889938 | 0.148842367 |
| 0.127205944 | 0.217709447 | 0.091304723 | 0.071108319 |
| 0.179825562 | 0.093549166 | 0.002096088 | 0.055460206 |

|             |             |             |             |
|-------------|-------------|-------------|-------------|
| 0.317230974 | 0.09676944  | 0.16294559  | 0.262720469 |
| 0.195837106 | 0.354348616 | 0.075300136 | 0.133989916 |
| 0.21286784  | 0.258237715 | 0.133370972 | 0.330968021 |
| 0.250088286 | 0.156015682 | 0.119751141 | 0.01951367  |
| 0.153910997 | 0.12739113  | 0.062878456 | 0.12466731  |
| 0.076576053 | 0.093046364 | 0.15321249  | 0.089722717 |
| 0.298189231 | 0.063128638 | 0.132124045 | 0.196344409 |
| 0.212477967 | 0.263161252 | 0.23311549  | 0.246885868 |
| 0.066514097 | 0.275319752 | 0.135779685 | 0.112401953 |
| 0.16546257  | 0.146804879 | 0.294307344 | 0.134832203 |
| 0.107709195 | 0.186801721 | 0.017169471 | 0.294191052 |
| 0.231900357 | 0.143887515 | 0.255310075 | 0.04210862  |
| 0.341185213 | 0.280434797 | 0.142863091 | 0.102242685 |
| 0.061434661 | 0.195163555 | 0.259498159 | 0.217942301 |
| 0.050975786 | 0.147729393 | 0.149368571 | 0.179190112 |
| 0.245830462 | 0.114457689 | 0.292619019 | 0.073731195 |
| 0.231227364 | 0.212235109 | 0.126007063 | 0.196383071 |
| 0.136025797 | 0.112226681 | 0.055314916 | 0.299788406 |
| 0.221074398 | 0.15720011  | 0.278375867 | 0.192735832 |
| 0.12602743  | 0.236356239 | 0.123814248 | 0.28898319  |
| 0.216484375 | 0.289590983 | 0.260047314 | 0.25108502  |
| 0.357586013 | 0.191016749 | 0.12258752  | 0.192158712 |
| 0.209691041 | 0.108510379 | 0.157210213 | 0.243884158 |
| 0.122712937 | 0.286776316 | 0.098800083 | 0.224411054 |
| 0.097926495 | 0.182661301 | 0.095078984 | 0.208401495 |
| 0.250026313 | 0.191508136 | 0.20869679  | 0.335229925 |
| 0.165433945 | 0.078466421 | 0.344794474 | 0.028240165 |
| 0.113949879 | 0.224004277 | 0.238369187 | 0.163881063 |
| 0.200664291 | 0.180631287 | 0.102116679 | 0.006587739 |
| 0.283174329 | 0.102271805 | 0.149683808 | 0.18099288  |
| 0.091953256 | 0.086335287 | 0.263371456 | 0.304364475 |
| 0.213927298 | 0.080674245 | 0.065127751 | 0.252303265 |
| 0.121068021 | 0.065538463 | 0.089762277 | 0.139003425 |
| 0.122176888 | 0.061039118 | 0.081068454 | 0.087236673 |
| 0.217557929 | 0.136312038 |             |             |
| PPP2R1A     | 0.192202461 | 0.182898957 | 0.188886944 |
| 0.064620582 | 0.045280544 | 0.066920447 | 0.250093261 |
| 0.19852793  | 0.192761211 | 0.071388574 | 0.059913306 |
| 0.14689407  | 0.006642978 | 0.153657836 | 0.237790934 |
| 0.05370168  | 0.151408227 | 0.20283887  | 0.075560938 |
| 0.143539166 | 0.04843632  | 0.032723779 | 0.109153584 |
| 0.057825394 | 0.285612452 | 0.142124118 | 0.052709056 |
| 0.160029475 | 0.017018629 | 0.06034269  | 0.027592029 |
| 0.219257101 | 0.042609351 | 0.036235378 | 0.151050456 |
| 0.074961592 | 0.015563495 | 0.279251332 | 0.06796892  |
| 0.009511589 | 0.228068045 | 0.080175106 | 0.071464464 |
| 0.084211477 | 0.178294775 | 0.027867214 | 0.072111606 |
| 0.141116992 | 0.117825516 | 0.248397296 | 0.088692595 |
| 0.085618303 | 0.126133631 | 0.118468687 | 0.015947707 |
| 0.021617687 | 0.002535338 | 0.014357432 | 0.203263112 |
| 0.143961915 | 0.140615412 | 0.036070437 | 0.179094126 |
| 0.086387592 | 0.094643132 | 0.145655942 | 0.077588586 |
| 0.175666442 | 0.016188419 | 0.079926676 | 0.056827934 |
| 0.102234829 | 0.296920911 | 0.198822623 | 0.302678979 |

|             |             |             |             |
|-------------|-------------|-------------|-------------|
| 0.061327107 | 0.107706746 | 0.056282027 | 0.032711134 |
| 0.182384907 | 0.254801632 | 0.1697924   | 0.242539648 |
| 0.032753651 | 0.042844774 | 0.044796846 | 0.116098018 |
| 0.132928222 | 0.291181758 | 0.081758771 | 0.209798254 |
| 0.300567216 | 0.089860936 | 0.114368346 | 0.268069856 |
| 0.152251713 | 0.042205841 | 0.068288432 | 0.012911007 |
| 0.053833721 | 0.050704467 | 0.266527425 | 0.118320629 |
| 0.058667876 | 0.26137897  | 0.274431749 | 0.034140116 |
| 0.043707643 | 0.208917951 | 0.049161827 | 0.10120196  |
| 0.073105597 | 0.150733814 | 0.145657351 | 0.14638184  |
| 0.046567206 | 0.166581237 | 0.08664437  | 0.176278905 |
| 0.021476583 | 0.199863356 | 0.141196505 | 0.137856188 |
| 0.247574746 | 0.151475369 | 0.084128462 | 0.180315154 |
| 0.120078873 | 0.124936433 | 0.149065164 | 0.083684317 |
| 0.115344126 | 0.246067524 | 0.204563082 | 0.132383929 |
| 0.201965009 | 0.032874487 | 0.045416381 | 0.130135172 |
| 0.101231103 | 0.250419151 | 0.024595359 | 0.260024587 |
| 0.164763848 | 0.09852429  | 0.203427566 | 0.293121005 |
| 0.20819798  | 0.189439247 | 0.145055811 | 0.123088965 |
| 0.229522304 | 0.244410292 | 0.162959607 | 0.04931962  |
| 0.217098023 | 0.085453656 | 0.082105369 | 0.166953973 |
| 0.171801027 | 0.001452844 | 0.125867209 | 0.135000352 |
| 0.198237756 | 0.095186786 | 0.170190146 | 0.149681658 |
| 0.2001253   | 0.258463997 | 0.013028032 | 0.081265348 |
| 0.222157967 | 0.138349993 | 0.134919973 | 0.049817602 |
| 0.058550386 | 0.092459235 | 0.106147893 | 0.029243408 |
| 0.218513326 | 0.129194763 | 0.141784787 | 0.133893629 |
| 0.159060092 | 0.230107936 | 0.03930335  | 0.260559151 |
| 0.159183825 | 0.17916818  | 0.229654957 | 0.167215652 |
| 0.06224613  | 0.125346533 | 0.100641421 | 0.082342669 |
| 0.136132068 | 0.136759259 | 0.027826172 | 0.053204534 |
| 0.30263917  | 0.060220819 | 0.178717516 | 0.215185466 |
| 0.133634942 | 0.304126203 | 0.082635335 | 0.085482622 |
| 0.075914869 | 0.398944143 | 0.076690629 | 0.151775887 |
| 0.079676034 | 0.20275119  | 0.093990176 | 0.172477864 |
| 0.173221925 | 0.039694455 | 0.206595187 | 0.017244293 |
| 0.046522836 | 0.045198066 | 0.013618828 | 0.051107041 |
| 0.364273657 | 0.098628241 | 0.072041747 | 0.061516753 |
| 0.13062763  | 0.266567387 | 0.05573566  | 0.249976739 |
| 0.267587366 | 0.04374954  | 0.117345142 | 0.085901328 |
| 0.070459504 | 0.094618708 | 0.103114646 | 0.055636644 |
| 0.154143707 | 0.012079606 | 0.014870303 | 0.13075878  |
| 0.033721696 | 0.043689652 | 0.13659524  | 0.06760537  |
| 0.061526298 | 0.369124558 | 0.177532414 | 0.008279929 |
| 0.066061617 | 0.019741308 | 0.090319633 | 0.08803246  |
| 0.136747149 | 0.136511673 | 0.040765056 | 0.04136756  |
| 0.197753699 | 0.203806786 | 0.148370482 | 0.156729698 |
| 0.043884711 | 0.185044131 | 0.104007162 | 0.133251779 |
| 0.105160415 | 0.055694659 | 0.00747895  | 0.101277063 |
| 0.121526352 | 0.062954994 | 0.263494065 | 0.097761735 |
| 0.07690963  | 0.063274676 | 0.051415305 | 0.156726999 |
| 0.23743401  | 0.232144597 | 0.107568229 | 0.0892375   |
| 0.118844807 | 0.120736742 | 0.129067065 | 0.194829323 |
| 0.073103266 | 0.054125184 | 0.042636476 | 0.103660127 |

|             |             |             |             |
|-------------|-------------|-------------|-------------|
| 0.170794713 | 0.046491509 | 0.230610407 | 0.013071489 |
| 0.001251711 | 0.26373875  | 0.223914266 | 0.083508787 |
| 0.016315106 | 0.066375972 | 0.076414653 | 0.178660879 |
| 0.166522765 | 0.168376988 | 0.215042198 | 0.047338337 |
| 0.194577034 | 0.062573566 | 0.039864484 | 0.059799126 |
| 0.193067064 | 0.03441501  | 0.066604479 | 0.258215103 |
| 0.280932063 | 0.019671829 | 0.145113442 | 0.004029765 |
| 0.233653824 | 0.139174343 | 0.321107355 | 0.317842657 |
| 0.129964107 | 0.308133992 | 0.183302309 | 0.087622431 |
| 0.087231178 | 0.203204805 | 0.004337947 | 0.169227525 |
| 0.212815918 | 0.214553012 | 0.216749048 | 0.255291775 |
| 0.169991741 | 0.11769686  | 0.098362444 | 0.102697567 |
| 0.189279502 | 0.255880213 | 0.021834919 | 0.075497331 |
| 0.022576766 | 0.098426199 | 0.078376295 | 0.190442847 |
| 0.082575647 | 0.147593512 | 0.170213512 | 0.061292666 |
| 0.078682957 | 0.009409164 | 0.139928985 | 0.133782587 |
| 0.092434241 | 0.157760771 | 0.027008732 | 0.037014873 |
| 0.209221814 | 0.190802138 | 0.033252258 | 0.199619747 |
| 0.069317685 | 0.269378262 | 0.055646521 | 0.07954422  |
| 0.203831813 | 0.041038659 | 0.121015908 | 0.004582415 |
| 0.046625378 | 0.241469427 | 0.062086068 | 0.166839824 |
| 0.109790609 | 0.079256706 | 0.18050743  | 0.199438452 |
| 0.211868285 | 0.154152158 | 0.165356626 | 0.020589336 |
| 0.181123187 | 0.005204382 | 0.173652236 | 0.157381567 |
| 0.058069427 | 0.003960119 | 0.027486064 | 0.122754142 |
| 0.049154113 | 0.279632914 | 0.175709573 | 0.049480001 |
| 0.105152794 | 0.221723664 | 0.208157965 | 0.024840653 |
| 0.068730266 | 0.055194721 | 0.031459014 | 0.229262163 |
| 0.110768838 | 0.126583263 | 0.094342067 | 0.275925371 |
| 0.056481431 | 0.144309686 | 0.292799034 | 0.004696512 |
| 0.082693077 | 0.297822638 | 0.298918475 | 0.187559265 |
| 0.192126092 | 0.062184135 | 0.04502037  | 0.060314728 |
| 0.146171731 | 0.242404389 | 0.039329592 | 0.241668063 |
| 0.186040238 | 0.058721744 | 0.121555476 | 0.171694157 |
| 0.172097152 | 0.188269286 | 0.202031181 | 0.100843777 |
| 0.036511868 | 0.002978358 | 0.086808502 | 0.1710661   |
| 0.066004994 | 0.052549532 | 0.16962091  | 0.172797085 |
| 0.130970523 | 0.123222497 | 0.024400093 | 0.024630436 |
| 0.094518025 | 0.071612088 | 0.034551615 | 0.224013124 |
| 0.06114864  | 0.040051401 | 0.099554089 | 0.17209877  |
| 0.110435745 | 0.224902676 | 0.276626493 | 0.213794215 |
| 0.06062895  | 0.046172559 | 0.189550655 | 0.201781274 |
| 0.112448199 | 0.13009657  | 0.18550548  | 0.029707118 |
| 0.196180334 | 0.08929683  | 0.136797708 | 0.180042763 |
| 0.235153124 | 0.194637728 | 0.253011852 | 0.094493012 |
| 0.18453163  | 0.082530577 | 0.039723303 | 0.059888898 |
| 0.173404834 | 0.281981758 | 0.199415228 | 0.02687081  |
| 0.238458815 | 0.113197128 | 0.092554984 | 0.224200417 |
| 0.039944028 | 0.172190762 | 0.085125196 | 0.199983222 |
| 0.066658496 | 0.021263446 | 0.239308881 | 0.147991889 |
| 0.145536151 | 0.011847424 | 0.186629411 | 0.136885483 |
| 0.163544802 | 0.091670969 | 0.072266641 | 0.204112901 |
| 0.213619654 | 0.266939202 | 0.101634645 | 0.116491256 |
| 0.109211801 | 0.067696419 | 0.040500989 | 0.178517803 |

|             |             |             |             |
|-------------|-------------|-------------|-------------|
| 0.157245951 | 0.059587882 | 0.206279862 | 0.142503872 |
| 0.266073695 | 0.040318268 | 0.046854026 | 0.067851449 |
| 0.188777765 | 0.074911    | 0.142107191 | 0.241917449 |
| 0.232805648 | 0.277169305 | 0.165033259 | 0.096339788 |
| 0.068768029 | 0.263855166 | 0.283820272 | 0.142904788 |
| 0.01848354  | 0.153328128 | 0.080066723 | 0.112146955 |
| 0.001957208 | 0.008492355 | 0.16222061  | 0.08802747  |
| 0.227255437 | 0.136955497 | 0.186830042 | 0.150837313 |
| 0.000525529 | 0.059942049 | 0.060986974 | 0.047966649 |
| 0.161155992 | 0.152392875 | 0.143252844 | 0.113924775 |
| 0.15807166  | 0.234277928 | 0.111598713 | 0.06384747  |
| 0.018636576 | 0.099326891 | 0.170804483 | 0.212294997 |
| 0.094251236 | 1           | 0.019609362 | 0.106665027 |
| 0.039445404 | 0.154391435 | 0.131132879 | 0.081267086 |
| 0.013159136 | 0.160061338 | 0.130178229 | 0.167640064 |
| 0.043740572 | 0.151006126 | 0.160037838 | 0.018290906 |
| 0.066579199 | 0.083880232 | 0.081849559 | 0.062811202 |
| 0.085247042 | 0.109218695 | 0.082959019 | 0.047819974 |
| 0.125859489 | 0.136390734 | 0.067928189 | 0.109085875 |
| 0.071077278 | 0.158539341 | 0.065366531 | 0.111028373 |
| 0.038805547 | 0.147530457 | 0.326571029 | 0.36266867  |
| 0.091170694 | 0.151239682 | 0.225360184 | 0.237465516 |
| 0.131627086 | 0.104568953 | 0.173822618 | 0.201057559 |
| 0.153207461 | 0.304667949 | 0.100721699 | 0.137416873 |
| 0.038274073 | 0.067685062 | 0.25074104  | 0.088641822 |
| 0.130228048 | 0.028791181 | 0.082493513 | 0.138486384 |
| 0.119364532 | 0.229629502 | 0.212807758 | 0.183450061 |
| 0.060973859 | 0.10281909  | 0.061581761 | 0.074066505 |
| 0.141461856 | 0.258051781 | 0.038310434 | 0.029130307 |
| 0.100234054 | 0.100338393 | 0.112015235 | 0.216524416 |
| 0.025404889 | 0.177810671 | 0.060513059 | 0.161976552 |
| 0.050718765 | 0.322665702 | 0.210152526 | 0.098991679 |
| 0.011815201 | 0.128083393 | 0.054936854 | 0.093452235 |
| 0.083242918 | 0.097926085 | 0.063839444 | 0.169875933 |
| 0.156759607 | 0.195879572 | 0.26852221  | 0.218608827 |
| 0.061363126 | 0.024388218 | 0.115944566 | 0.06038398  |
| 0.083705904 | 0.164997132 | 0.227087077 | 0.159609041 |
| 0.058010032 | 0.274414598 | 0.2354388   | 0.133688972 |
| 0.11095546  | 0.062016296 | 0.01073123  | 0.094699349 |
| 0.137350669 | 0.029519294 | 0.002703842 | 0.013360914 |
| 0.097803515 | 0.111943014 | 0.139509761 | 0.128485754 |
| 0.040998254 | 0.12999738  | 0.012509597 | 0.161334119 |
| 0.229957253 | 0.26951576  | 0.06150015  | 0.188495372 |
| 0.142867457 | 0.137243394 | 0.093319517 | 0.026877597 |
| 0.059081852 | 0.04921819  | 0.060089073 | 0.196554359 |
| 0.166056087 | 0.012834346 | 0.073387289 | 0.313538993 |
| 0.130149162 | 0.01046014  | 0.124823046 | 0.076802537 |
| 0.251431561 | 0.27097569  | 0.089655633 | 0.072453755 |
| 0.310248145 | 0.160236423 | 0.049726466 | 0.082913293 |
| 0.034442029 | 0.030581891 | 0.087038268 | 0.018846206 |
| 0.14623059  | 0.051703692 | 0.026114654 | 0.265992497 |
| 0.273596395 | 0.040406186 | 0.26554657  | 0.063031087 |
| 0.104322542 | 0.177831625 | 0.071043264 | 0.055031032 |
| 0.044268656 | 0.040532745 | 0.147807318 | 0.141672961 |

|             |             |             |             |
|-------------|-------------|-------------|-------------|
| 0.014516265 | 0.107178797 | 0.083462421 | 0.055960454 |
| 0.314565099 | 0.052608348 | 0.233672595 | 0.031185716 |
| 0.192029061 | 0.165872874 | 0.248255771 | 0.056581603 |
| 0.104407565 | 0.264542418 | 0.068408565 | 0.201466949 |
| 0.091191408 | 0.019513967 | 0.091954072 | 0.090546981 |
| 0.034553597 | 0.189150043 | 0.071685475 | 0.215923548 |
| 0.074190706 | 0.128947731 | 0.098085056 | 0.180670198 |
| 0.128615089 | 0.029362088 | 0.021778561 | 0.054927803 |
| 0.204175107 | 0.082291726 | 0.043723901 | 0.133516548 |
| 0.017257323 | 0.110248708 | 0.125649705 | 0.054278311 |
| 0.08062543  | 0.169407832 | 0.057391387 | 0.213881465 |
| 0.100239184 | 0.058962872 | 0.048826888 | 0.18800009  |
| 0.04843306  | 0.037299462 | 0.205487265 | 0.00067145  |
| 0.104670773 | 0.055270044 | 0.131683112 | 0.053528293 |
| 0.222539318 | 0.125941626 | 0.130727105 | 0.033837046 |
| 0.115430157 | 0.008749301 | 0.085890324 | 0.036604493 |
| 0.039040467 | 0.229742871 | 0.196667545 | 0.149594258 |
| 0.139385619 | 0.056521822 | 0.02876806  | 0.195665424 |
| 0.010977793 | 0.031148581 | 0.046655307 | 0.097274321 |
| 0.017336582 | 0.059792368 | 0.054591209 | 0.030480324 |
| 0.121640312 | 0.141583119 |             |             |
| PPP2R4      | 0.014642552 | 0.214352804 | 0.010036231 |
| 0.022734639 | 0.307081371 | 0.141956879 | 0.008560914 |
| 0.02045497  | 0.157963651 | 0.057541405 | 0.223319553 |
| 0.001692903 | 0.11948659  | 0.26584953  | 0.009488    |
| 0.276324986 | 0.006132876 | 0.029371597 | 0.014047562 |
| 0.03402984  | 0.24738206  | 0.148835408 | 0.111322479 |
| 0.240529107 | 0.070073357 | 0.121296148 | 0.242959105 |
| 0.29191247  | 0.08201409  | 0.302387316 | 0.026901499 |
| 0.212329118 | 0.318783385 | 0.244880918 | 0.00150949  |
| 0.20225728  | 0.010918702 | 0.198402355 | 0.112347152 |
| 0.106547736 | 0.172342752 | 0.082357834 | 0.110867417 |
| 0.101663421 | 0.004626976 | 0.032358609 | 0.254864943 |
| 0.127995043 | 0.095791198 | 0.01155769  | 0.249193472 |
| 0.091092749 | 0.166661692 | 0.161349634 | 5.92E-05    |
| 0.271554824 | 0.09677313  | 0.183718059 | 0.273079842 |
| 0.103780818 | 0.055548409 | 0.048494287 | 0.083808198 |
| 0.203265255 | 0.250809456 | 0.164325408 | 0.077056583 |
| 0.279590127 | 0.116663476 | 0.283343532 | 0.028023006 |
| 0.109892711 | 0.003834014 | 0.071127746 | 0.019349437 |
| 0.137768511 | 0.123236827 | 0.26622393  | 0.227134445 |
| 0.191502204 | 0.26934945  | 0.118547544 | 0.234915368 |
| 0.051462526 | 0.309409012 | 0.17783752  | 0.215208682 |
| 0.203421654 | 0.012622758 | 0.267816436 | 0.284648188 |
| 0.007621298 | 0.129532941 | 0.190346371 | 0.031833953 |
| 0.247887114 | 0.134415604 | 0.128612457 | 0.200111567 |
| 0.348301525 | 0.236674001 | 0.233182221 | 0.147153159 |
| 0.254510811 | 0.015179727 | 0.216028308 | 0.343551172 |
| 0.166563367 | 0.020564536 | 0.085730053 | 0.334223946 |
| 0.217953216 | 0.295689682 | 0.217428274 | 0.198116684 |
| 0.238744871 | 0.293440236 | 0.228507341 | 0.240876945 |
| 0.028316312 | 0.28760582  | 0.072413181 | 0.00958608  |
| 0.009880422 | 0.03181676  | 0.084813618 | 0.190915704 |
| 0.327481158 | 0.171753204 | 0.050779042 | 0.139215223 |



|             |             |             |             |
|-------------|-------------|-------------|-------------|
| 0.344911889 | 0.216854544 | 0.275603327 | 0.230002351 |
| 0.006896747 | 0.146157586 | 0.229056641 | 0.078540298 |
| 0.204106842 | 0.039411119 | 0.27372081  | 0.240137833 |
| 0.213325926 | 0.322177285 | 0.033220468 | 0.238516577 |
| 0.055112542 | 0.308890103 | 0.240094053 | 0.069175277 |
| 0.269056167 | 0.238328496 | 0.330253786 | 0.380248638 |
| 0.254374333 | 0.124321106 | 0.00901774  | 0.203459783 |
| 0.320019119 | 0.019646029 | 0.314544174 | 0.329984494 |
| 0.254469359 | 0.325672322 | 0.33803923  | 0.333681648 |
| 0.258632776 | 0.019079125 | 0.008031149 | 0.216664882 |
| 0.249711697 | 0.237332765 | 0.048534464 | 0.199360011 |
| 0.278526474 | 0.128173423 | 0.296337761 | 0.057260606 |
| 0.302271625 | 0.301687858 | 0.305114876 | 0.192460507 |
| 0.095094693 | 0.15498123  | 0.272856853 | 0.209576455 |
| 0.006863977 | 0.023121827 | 0.011174196 | 0.179338289 |
| 0.057675734 | 0.101569853 | 0.087630778 | 0.221872841 |
| 0.107567946 | 0.094769719 | 0.224665985 | 0.352079978 |
| 0.011987021 | 0.206362429 | 0.058596084 | 0.039757306 |
| 0.008499432 | 0.052912044 | 0.023642036 | 0.040260879 |
| 0.165959811 | 0.076553522 | 0.272606512 | 0.316801035 |
| 0.149147377 | 0.064572828 | 0.219476837 | 0.306556407 |
| 0.278693318 | 0.287480803 | 0.1090253   | 0.003850352 |
| 0.040617686 | 0.095063599 | 0.162557163 | 0.262610524 |
| 0.063596195 | 0.037836763 | 0.204562325 | 0.370984561 |
| 0.077360668 | 0.031066985 | 0.124409354 | 0.219095511 |
| 0.043803819 | 0.163183007 | 0.296172024 | 0.15312687  |
| 0.000253895 | 0.115136475 | 0.294722635 | 0.060051558 |
| 0.127840932 | 0.099510182 | 0.138716727 | 0.292953999 |
| 0.082006627 | 0.163056652 | 0.338370094 | 0.377867518 |
| 0.049433726 | 0.070900677 | 0.327130234 | 0.021058677 |
| 0.234343175 | 0.029698972 | 0.207916493 | 0.09137494  |
| 0.108184139 | 0.182170525 | 0.327490517 | 0.188062623 |
| 0.036502617 | 0.277245701 | 0.24391415  | 0.314918024 |
| 0.110747508 | 0.318778551 | 0.319340911 | 0.283163901 |
| 0.207519278 | 0.165608998 | 0.116773442 | 0.268187584 |
| 0.299931886 | 0.035247917 | 0.01745413  | 0.286421635 |
| 0.109346638 | 0.297026219 | 0.061678149 | 0.304796988 |
| 0.272132007 | 0.209190047 | 0.054910534 | 0.31817871  |
| 0.235095227 | 0.092014959 | 0.291211483 | 0.325723814 |
| 0.045109828 | 0.189329178 | 0.144463482 | 0.348115423 |
| 0.06901378  | 0.114502487 | 0.169041468 | 0.166873052 |
| 0.036817833 | 0.01626619  | 0.014194182 | 0.102289032 |
| 0.202076486 | 0.222882337 | 0.268553788 | 0.292008225 |
| 0.03953956  | 0.260264597 | 0.107055561 | 0.091055581 |
| 0.195755705 | 0.187596527 | 0.33477886  | 0.303531781 |
| 0.123931587 | 0.006364739 | 0.023802508 | 0.260511142 |
| 0.006439119 | 0.178758728 | 0.106607257 | 0.001059371 |
| 0.005175419 | 0.196699803 | 0.026478141 | 0.075772945 |
| 0.368218024 | 0.074426898 | 0.066562711 | 0.051688952 |
| 0.267343303 | 0.032098246 | 0.006039735 | 0.28908018  |
| 0.269661888 | 0.252675325 | 0.258018629 | 0.225187375 |
| 0.262457614 | 0.267689312 | 0.292814961 | 0.12204739  |
| 0.01693375  | 0.014229188 | 0.099774347 | 0.133414641 |
| 0.000309889 | 0.310072035 | 0.228177248 | 0.059095646 |

|             |             |             |             |
|-------------|-------------|-------------|-------------|
| 0.309127799 | 0.148367608 | 0.006157579 | 0.302890376 |
| 0.001957307 | 0.155262527 | 0.045665338 | 0.09672293  |
| 0.316070635 | 0.001656869 | 0.039764756 | 0.059413281 |
| 0.202475007 | 0.167100831 | 0.18558229  | 0.295022089 |
| 0.19069681  | 0.030461407 | 0.17840152  | 0.341295681 |
| 0.013274652 | 0.0101502   | 0.087928376 | 0.005415741 |
| 0.047752422 | 0.240729394 | 0.136970639 | 0.006089222 |
| 0.123568248 | 0.000321612 | 0.176399532 | 0.299322458 |
| 0.221300453 | 0.32732863  | 0.300253884 | 0.271316159 |
| 0.278972718 | 0.091688556 | 0.31240539  | 0.198310468 |
| 0.091651225 | 5.59E-05    | 0.002080256 | 0.330225292 |
| 0.225908674 | 0.012313851 | 0.064653003 | 0.051384648 |
| 0.023368782 | 0.025927907 | 0.01724738  | 0.171566424 |
| 0.248020182 | 0.225600491 | 0.140606427 | 0.214056961 |
| 0.097242289 | 0.137689888 | 0.098605773 | 0.023520874 |
| 0.300597482 | 0.009120084 | 0.02327214  | 0.004940778 |
| 0.308914184 | 0.031116972 | 0.200209302 | 0.27946264  |
| 0.288961548 | 0.333306272 | 0.078966497 | 0.062122882 |
| 0.305614582 | 0.022582948 | 0.077832446 | 0.026461387 |
| 0.243295822 | 0.242050803 | 0.197894234 | 0.148824749 |
| 0.300702702 | 0.24882589  | 0.006176827 | 0.261230653 |
| 0.003476051 | 0.003017961 | 0.104311085 | 0.130048738 |
| 0.026870125 | 0.179180522 | 0.127546625 | 0.061639562 |
| 0.089242094 | 0.002857037 | 0.213683957 | 0.196786636 |
| 0.17330685  | 0.170493412 | 0.282981222 | 0.115323168 |
| 0.174412651 | 0.051133998 | 0.100615584 | 0.04423655  |
| 0.039428809 | 0.132511289 | 0.069679063 | 0.002504172 |
| 0.178404711 | 0.229847981 | 0.014933515 | 0.064022977 |
| 0.298511964 | 0.316788116 | 0.004559628 | 0.003161173 |
| 0.122559719 | 0.129468853 | 0.340045883 | 0.266851246 |
| 0.264459823 | 0.305674054 | 0.195785922 | 0.039086285 |
| 0.014454959 | 0.220152221 | 0.301362771 | 0.050767548 |
| 0.298457436 | 0.011332192 | 0.263766321 | 0.324379716 |
| 0.040732948 | 0.062005566 | 0.007423983 | 0.027024347 |
| 0.338255012 | 0.081373999 | 0.124733591 | 0.038398796 |
| 0.128735611 | 0.1343909   | 0.0091047   | 0.084092134 |
| 0.166938899 | 0.084611679 | 0.06098578  | 0.095605703 |
| 0.19151369  | 0.024125831 | 0.288362163 | 0.256037386 |
| 0.043781961 | 0.027034636 | 0.033826243 | 0.26705132  |
| 0.272687771 | 0.173756592 | 0.006349218 | 0.218989889 |
| 0.326585722 | 0.271419871 | 0.260998956 | 0.271922756 |
| 0.024087714 | 0.249021932 | 0.188775753 | 0.195812875 |
| 0.076089977 | 0.142262506 | 0.114555795 | 0.01662376  |
| 0.168996394 | 0.241457059 | 0.209372529 | 0.082946337 |
| 0.228903297 | 0.028042447 | 0.008941739 | 0.2906275   |
| 0.118971999 | 0.008416426 | 0.094913127 | 0.302734224 |
| 0.004287785 | 0.198725265 | 0.329168769 | 0.086351968 |
| 0.293210744 | 0.314206369 | 0.246556763 | 0.06677704  |
| 0.002221904 | 0.301573415 | 0.232944431 | 0.152836806 |
| 0.209563089 | 0.186785754 | 0.030452388 | 0.019105936 |
| 0.188004097 | 0.019413126 | 0.024140467 | 0.053702053 |
| 0.055057641 | 0.167341272 | 0.107219867 | 0.076646207 |
| 0.122201252 | 0.019609362 | 1           | 0.10184969  |
| 0.069897433 | 0.136326651 | 0.217246343 | 0.051004797 |

|             |             |             |             |
|-------------|-------------|-------------|-------------|
| 0.056630276 | 0.272174317 | 0.198306859 | 0.00437329  |
| 0.305531305 | 0.256588853 | 0.298814748 | 0.000244057 |
| 0.296232592 | 0.000974201 | 0.126990528 | 0.13951923  |
| 0.118192884 | 0.094614784 | 0.21575891  | 0.14632023  |
| 0.141946769 | 0.082995096 | 0.120047504 | 0.14162233  |
| 0.082136566 | 0.08888248  | 0.256034357 | 0.112151483 |
| 0.150999145 | 0.035666966 | 0.030233791 | 0.0287526   |
| 0.010463568 | 0.288290931 | 0.117014622 | 0.019394622 |
| 0.137511744 | 0.109391489 | 0.225894277 | 0.24396641  |
| 0.305706783 | 0.031193108 | 0.135181081 | 0.240326327 |
| 0.030406696 | 0.036472009 | 0.006528743 | 0.164379642 |
| 0.103466272 | 0.090306049 | 0.164543769 | 0.087981037 |
| 0.189744759 | 0.210891424 | 0.115144017 | 0.278915383 |
| 0.173360797 | 0.134416018 | 0.059742975 | 0.022913864 |
| 0.048711088 | 0.043126462 | 0.275360973 | 0.00019137  |
| 0.200303538 | 0.027410505 | 0.30648419  | 0.240187189 |
| 0.217085815 | 0.248673211 | 0.029378386 | 0.012187392 |
| 0.028602989 | 0.052483986 | 0.052803947 | 0.267896665 |
| 0.200638382 | 0.064444213 | 0.243756203 | 0.058110664 |
| 0.301271248 | 0.257610909 | 0.143888304 | 0.070048666 |
| 0.122385501 | 0.069875348 | 0.229456479 | 0.025272636 |
| 0.206252767 | 0.149479748 | 0.121612797 | 0.153882305 |
| 0.129880286 | 0.316369477 | 0.01605498  | 0.318806599 |
| 0.150873566 | 0.044673208 | 0.274569618 | 0.132748581 |
| 0.059402022 | 0.052523866 | 0.218165041 | 0.090328794 |
| 0.053255447 | 0.226603942 | 0.002474448 | 0.022309977 |
| 0.231057093 | 0.091983419 | 0.183438186 | 0.233964293 |
| 0.211684523 | 0.24922578  | 0.136300469 | 0.072762584 |
| 0.219281191 | 0.231421991 | 0.035420189 | 0.136599583 |
| 0.175938955 | 0.0323615   | 0.169819969 | 0.004190187 |
| 0.223907391 | 0.254608753 | 0.068065291 | 0.011780494 |
| 0.002002492 | 0.175320331 | 0.185937679 | 0.013445005 |
| 0.339686795 | 0.10276535  | 0.146603388 | 0.300028478 |
| 0.06813657  | 0.227135031 | 0.057206756 | 0.2986431   |
| 0.002531795 | 0.138767252 | 0.265418426 | 0.159281708 |
| 0.084445599 | 0.229887163 | 0.264604591 | 0.245871147 |
| 0.006887076 | 0.072446524 | 0.000264419 | 0.191686889 |
| 0.201115162 | 0.223515433 | 0.089512775 | 0.056336256 |
| 0.206045982 | 0.242850934 | 0.04724514  | 0.212652591 |
| 0.003675487 | 0.300724443 | 0.107876136 | 0.23497902  |
| 0.050368708 | 0.142429781 | 0.015506698 | 0.230077583 |
| 0.191308481 | 0.042095767 | 0.127971232 | 0.048038615 |
| 0.257228449 | 0.220386942 | 0.051592788 | 0.087605622 |
| 0.173216718 | 0.015735398 | 0.103477559 | 0.300919654 |
| 0.100423074 | 0.241377093 | 0.350151998 | 0.067320102 |
| 0.245580846 | 0.208998648 | 0.20210309  | 0.288099067 |
| 0.029541581 | 0.134130587 | 0.321128191 | 0.241212897 |
| 0.219080761 | 0.174637806 | 0.179389234 | 0.131238974 |
| 0.216903945 | 0.017101071 | 0.102431872 | 0.180230085 |
| 0.172987949 | 0.207617734 | 0.119238914 | 0.157548492 |
| 0.007565435 | 0.041773949 | 0.121748499 | 0.053833755 |
| 0.153690835 | 0.215559879 | 0.140632513 | 0.23157929  |
| 0.041892957 | 0.006238247 | 0.269859569 | 0.017629788 |
| 0.131594213 | 0.307203028 | 0.132584112 | 0.221695156 |

|             |             |             |             |
|-------------|-------------|-------------|-------------|
| 0.074840977 | 0.142842114 | 0.083792218 | 0.000332816 |
| 0.290740494 | 0.053561513 | 0.158463938 | 0.11111266  |
| 0.066489368 | 0.006254302 | 0.255120622 | 0.342956403 |
| 0.165573761 | 0.069654526 | 0.078123487 | 0.253207327 |
| 0.102618588 | 0.164858773 | 0.139605437 | 0.175746234 |
| 0.246712154 | 0.109125359 | 0.165907686 | 0.211384562 |
| 0.219069253 | 0.095583141 |             |             |
| PPP2R5C     | 0.11936354  | 0.270124839 | 0.088056331 |
| 0.189496959 | 0.19646707  | 0.140610403 | 0.099677112 |
| 0.142597646 | 0.212531639 | 0.053085415 | 0.2207267   |
| 0.07239071  | 0.039749714 | 0.328204633 | 0.09981225  |
| 0.178583077 | 0.109937677 | 0.141781624 | 0.038246752 |
| 0.114711212 | 0.169683429 | 0.112239787 | 0.146230143 |
| 0.149319594 | 0.270705112 | 0.177672053 | 0.12020286  |
| 0.328040248 | 0.059263587 | 0.231645918 | 0.050315339 |
| 0.365318472 | 0.18648429  | 0.10333898  | 0.074073195 |
| 0.166555416 | 0.007454317 | 0.360943185 | 0.155635955 |
| 0.102856624 | 0.346822587 | 0.081933338 | 0.191254599 |
| 0.097464256 | 0.089016933 | 0.038113129 | 0.175158882 |
| 0.168873076 | 0.143191017 | 0.092069628 | 0.234427826 |
| 0.095036845 | 0.275912073 | 0.177332927 | 0.004375989 |
| 0.086660524 | 0.019284012 | 0.049957407 | 0.365012931 |
| 0.291749472 | 0.176891335 | 0.047792898 | 0.114323583 |
| 0.145140582 | 0.20098965  | 0.263164531 | 0.07441345  |
| 0.357898234 | 0.057278592 | 0.211765749 | 0.139019069 |
| 0.117049568 | 0.056584634 | 0.268298765 | 0.107656532 |
| 0.104190181 | 0.236941827 | 0.194118428 | 0.099788769 |
| 0.257749228 | 0.400090363 | 0.241993216 | 0.346557916 |
| 0.033578952 | 0.148724617 | 0.136217157 | 0.285724355 |
| 0.207916556 | 0.083857937 | 0.286089524 | 0.391463532 |
| 0.066686418 | 0.12197158  | 0.198432546 | 0.15342057  |
| 0.299977617 | 0.072571198 | 0.111416121 | 0.087307976 |
| 0.218081345 | 0.151713675 | 0.339957302 | 0.281799554 |
| 0.144513157 | 0.116217801 | 0.35263678  | 0.147621891 |
| 0.170402872 | 0.144750198 | 0.113181712 | 0.269586878 |
| 0.21360937  | 0.339153072 | 0.233769531 | 0.24455456  |
| 0.146207133 | 0.360743524 | 0.271046423 | 0.297338114 |
| 0.025715978 | 0.359245447 | 0.224899443 | 0.126001824 |
| 0.085081791 | 0.157338699 | 0.081537077 | 0.328397293 |
| 0.319370021 | 0.255059667 | 0.162579035 | 0.190293801 |
| 0.304578515 | 0.331859299 | 0.342044155 | 0.270999149 |
| 0.100484036 | 0.065629842 | 0.151682705 | 0.149280939 |
| 0.215167082 | 0.167588691 | 0.105538617 | 0.37757017  |
| 0.366626813 | 0.277392909 | 0.134919829 | 0.402265139 |
| 0.108883821 | 0.409353974 | 0.280841847 | 0.211349202 |
| 0.394134563 | 0.377274351 | 0.389969677 | 0.226474156 |
| 0.386894595 | 0.193991332 | 0.015065331 | 0.263061973 |
| 0.404557312 | 0.018161577 | 0.290103559 | 0.315306241 |
| 0.340115414 | 0.276460148 | 0.370509198 | 0.349701004 |
| 0.33977146  | 0.141733729 | 0.003254792 | 0.227902735 |
| 0.361805868 | 0.352689491 | 0.141379845 | 0.127715668 |
| 0.174831607 | 0.148734668 | 0.244605864 | 0.092326671 |
| 0.416977509 | 0.325140751 | 0.305965726 | 0.233055232 |
| 0.117687142 | 0.346900061 | 0.119156452 | 0.35392562  |

|             |             |             |             |
|-------------|-------------|-------------|-------------|
| 0.138707911 | 0.130244973 | 0.117854303 | 0.253201104 |
| 0.092004697 | 0.241545269 | 0.12109836  | 0.150836621 |
| 0.263395817 | 0.121577126 | 0.081759934 | 0.223412373 |
| 0.120344126 | 0.160509458 | 0.191820034 | 0.142625947 |
| 0.128287912 | 0.245988802 | 0.146569216 | 0.20470749  |
| 0.186867852 | 0.273960468 | 0.207676168 | 0.340576668 |
| 0.100052273 | 0.234256379 | 0.226152823 | 0.395654711 |
| 0.396695335 | 0.164199384 | 0.256120606 | 0.081716763 |
| 0.091270022 | 0.051342496 | 0.051539483 | 0.141145152 |
| 0.257574416 | 0.11056685  | 0.173053366 | 0.269303549 |
| 0.175532359 | 0.094303964 | 0.096531277 | 0.398841699 |
| 0.180163232 | 0.160663871 | 0.31965939  | 0.135846737 |
| 0.037917477 | 0.184472422 | 0.287746495 | 0.101893318 |
| 0.189369005 | 0.065668851 | 0.092087512 | 0.311057744 |
| 0.069782066 | 0.089423902 | 0.326844404 | 0.260409075 |
| 0.102021032 | 0.231808964 | 0.369488862 | 0.007802302 |
| 0.124594311 | 0.151635914 | 0.289938532 | 0.079041682 |
| 0.23148413  | 0.27132503  | 0.159874947 | 0.155212203 |
| 0.178241305 | 0.357041729 | 0.322312637 | 0.351163599 |
| 0.086378741 | 0.37604595  | 0.294284523 | 0.341955129 |
| 0.252643038 | 0.083434288 | 0.039333698 | 0.287432367 |
| 0.306591484 | 0.072119693 | 0.131650802 | 0.222028121 |
| 0.077683404 | 0.207691721 | 0.142994424 | 0.365366221 |
| 0.42259933  | 0.3104719   | 0.169252249 | 0.278225551 |
| 0.340168477 | 0.230813692 | 0.305677233 | 0.382963229 |
| 0.055196095 | 0.119621233 | 0.113013393 | 0.334016354 |
| 0.243704411 | 0.097993265 | 0.314928679 | 0.050654367 |
| 0.006620418 | 0.107770182 | 0.126147225 | 0.18506214  |
| 0.099030249 | 0.150419989 | 0.221026616 | 0.355081928 |
| 0.165652266 | 0.359883868 | 0.213629077 | 0.130439043 |
| 0.305913447 | 0.104199818 | 0.156339579 | 0.2011947   |
| 0.277049258 | 0.10724122  | 0.178911672 | 0.404383225 |
| 0.079007753 | 0.101199378 | 0.13698698  | 0.014007701 |
| 0.082277108 | 0.212131066 | 0.175487156 | 0.299250997 |
| 0.342459277 | 0.286801632 | 0.211246278 | 0.060840585 |
| 0.302228247 | 0.17181418  | 0.048637203 | 0.317633336 |
| 0.324446221 | 0.307173426 | 0.316668308 | 0.32228038  |
| 0.279152139 | 0.233883645 | 0.267275015 | 0.176771925 |
| 0.149792177 | 0.102078411 | 0.079418021 | 0.155135754 |
| 0.005482255 | 0.334094325 | 0.160447713 | 0.248266918 |
| 0.234558516 | 0.214210288 | 0.104242361 | 0.168961252 |
| 0.077649398 | 0.057962865 | 0.098838907 | 0.144292896 |
| 0.261022593 | 0.066803936 | 0.093353624 | 0.080774064 |
| 0.336911558 | 0.309519206 | 0.094229445 | 0.37924033  |
| 0.228217675 | 0.136659903 | 0.17471512  | 0.284537162 |
| 0.12742336  | 0.022895261 | 0.096124126 | 0.012922541 |
| 0.089749481 | 0.333179084 | 0.100302021 | 0.12534609  |
| 0.240693648 | 0.044171138 | 0.321275258 | 0.381663427 |
| 0.319513171 | 0.352129453 | 0.370111306 | 0.10703045  |
| 0.366232122 | 0.018708679 | 0.35542959  | 0.26978536  |
| 0.070410718 | 0.007038892 | 0.024452725 | 0.321700764 |
| 0.166374523 | 0.113114006 | 0.230209124 | 0.125513096 |
| 0.178351934 | 0.102992026 | 0.125521356 | 0.1276242   |
| 0.216899541 | 0.190128716 | 0.102278195 | 0.319057669 |

|             |             |             |             |
|-------------|-------------|-------------|-------------|
| 0.172371032 | 0.219689413 | 0.09216711  | 0.149893935 |
| 0.196382198 | 0.138245853 | 0.14027649  | 0.032825773 |
| 0.25157354  | 0.177798545 | 0.35810625  | 0.346489433 |
| 0.39946326  | 0.256399872 | 0.058655225 | 0.105285942 |
| 0.288154735 | 0.125538531 | 0.092860869 | 0.132564442 |
| 0.32442416  | 0.201634396 | 0.334757663 | 0.325288487 |
| 0.371770134 | 0.364588013 | 0.093646916 | 0.269825584 |
| 0.086134657 | 0.007560192 | 0.143607744 | 0.240027225 |
| 0.02086659  | 0.111481061 | 0.30565046  | 0.09128392  |
| 0.121928266 | 0.09044106  | 0.078691628 | 0.085492002 |
| 0.242157251 | 0.154701405 | 0.146031808 | 0.221691973 |
| 0.138772958 | 0.090981199 | 0.193289428 | 0.143246937 |
| 0.0712359   | 0.27628191  | 0.267716093 | 0.070629721 |
| 0.132572043 | 0.149654433 | 0.124172047 | 0.241185986 |
| 0.332647331 | 0.330250133 | 0.087180813 | 0.076508248 |
| 0.301821733 | 0.111854502 | 0.34529504  | 0.327913988 |
| 0.382898939 | 0.39349394  | 0.381637511 | 0.127962812 |
| 0.133404961 | 0.21140066  | 0.154369422 | 0.161904689 |
| 0.353322459 | 0.095387302 | 0.34973855  | 0.110450659 |
| 0.191839707 | 0.181081355 | 0.13760824  | 0.151905157 |
| 0.160089029 | 0.242047074 | 0.201222716 | 0.170309644 |
| 0.131375032 | 0.106722185 | 0.102988223 | 0.221157305 |
| 0.267914536 | 0.064659471 | 0.216057481 | 0.132068468 |
| 0.276813376 | 0.0392339   | 0.223993021 | 0.389922315 |
| 0.203458714 | 0.124624638 | 0.118354831 | 0.24273547  |
| 0.259575245 | 0.112248985 | 0.096807142 | 0.274256515 |
| 0.353182959 | 0.202166375 | 0.360330175 | 0.32650028  |
| 0.158871899 | 0.159160463 | 0.075642418 | 0.161674707 |
| 0.196712638 | 0.147686641 | 0.169493347 | 0.138229179 |
| 0.317117356 | 0.378139213 | 0.287647404 | 0.195653625 |
| 0.159974924 | 0.123525531 | 0.083257851 | 0.288044612 |
| 0.086187335 | 0.119737669 | 0.08081997  | 0.246906254 |
| 0.027376311 | 0.05799754  | 0.336158834 | 0.185819652 |
| 0.386626289 | 0.340712941 | 0.382332509 | 0.135373872 |
| 0.001193567 | 0.193486845 | 0.231957411 | 0.131235517 |
| 0.277140365 | 0.294986932 | 0.093525511 | 0.160860366 |
| 0.351556753 | 0.135735075 | 0.134994156 | 0.125816776 |
| 0.042313202 | 0.181277118 | 0.277011933 | 0.157154838 |
| 0.16962252  | 0.106665027 | 0.10184969  | 1           |
| 0.05244146  | 0.317269667 | 0.322145953 | 0.059139857 |
| 0.053514796 | 0.295429855 | 0.246994392 | 0.09163378  |
| 0.136641288 | 0.276732215 | 0.34018926  | 0.0055895   |
| 0.240614003 | 0.057821784 | 0.171849542 | 0.195138235 |
| 0.188117822 | 0.136843324 | 0.230532223 | 0.159158022 |
| 0.184398983 | 0.165848101 | 0.195972263 | 0.280078061 |
| 0.205228216 | 0.186567584 | 0.19774487  | 0.133230725 |
| 0.160074357 | 0.174326993 | 0.190807831 | 0.187175863 |
| 0.152596339 | 0.306414338 | 0.327929651 | 0.14814615  |
| 0.244429891 | 0.113915715 | 0.384904532 | 0.322358774 |
| 0.378694301 | 0.162682526 | 0.12125915  | 0.294351405 |
| 0.034492422 | 0.107013046 | 0.083465426 | 0.180836092 |
| 0.218000629 | 0.115719928 | 0.138294399 | 0.165216449 |
| 0.187546461 | 0.389634967 | 0.319764903 | 0.366379744 |
| 0.159834003 | 0.102344768 | 0.063867001 | 0.173671976 |

|             |             |             |             |
|-------------|-------------|-------------|-------------|
| 0.165140473 | 0.18953832  | 0.160785828 | 0.032172733 |
| 0.243306521 | 0.157030309 | 0.30100566  | 0.355241508 |
| 0.073540791 | 0.376282201 | 0.074950892 | 0.126059694 |
| 0.060674723 | 0.207433223 | 0.229526985 | 0.239180792 |
| 0.057227984 | 0.196155998 | 0.200009336 | 0.117478886 |
| 0.251444038 | 0.206051526 | 0.113370465 | 0.125851331 |
| 0.187117127 | 0.214387921 | 0.348341335 | 0.12360511  |
| 0.147241074 | 0.142925019 | 0.130188706 | 0.158499261 |
| 0.158093292 | 0.344701892 | 0.132931673 | 0.342617912 |
| 0.112899754 | 0.205868474 | 0.41764171  | 0.169587477 |
| 0.1651254   | 0.202805151 | 0.058922988 | 0.093321037 |
| 0.136995582 | 0.093120349 | 0.001896175 | 0.027679451 |
| 0.303019244 | 0.074730707 | 0.202426292 | 0.235744386 |
| 0.126602033 | 0.300175698 | 0.053703938 | 0.130368917 |
| 0.320016603 | 0.366128683 | 0.139079267 | 0.300650153 |
| 0.25709826  | 0.170532189 | 0.199499982 | 0.006457073 |
| 0.164270673 | 0.144343486 | 0.07347682  | 0.116968081 |
| 0.077158618 | 0.061581846 | 0.167271999 | 0.095970857 |
| 0.328482762 | 0.05998909  | 0.142064097 | 0.254527825 |
| 0.20837482  | 0.373895785 | 0.169058393 | 0.283399763 |
| 0.048848776 | 0.251814817 | 0.123444942 | 0.102026232 |
| 0.153982755 | 0.105379676 | 0.301774397 | 0.104806372 |
| 0.113607598 | 0.159109169 | 0.005359347 | 0.386178928 |
| 0.333992043 | 0.106078953 | 0.274546506 | 0.051298119 |
| 0.308647166 | 0.305417977 | 0.089952866 | 0.124970053 |
| 0.092395981 | 0.180091208 | 0.243729566 | 0.322787615 |
| 0.05810097  | 0.128128825 | 0.190084169 | 0.114986802 |
| 0.361866657 | 0.086336981 | 0.277853915 | 0.073840081 |
| 0.335446697 | 0.265935536 | 0.192968911 | 0.155008047 |
| 0.147880167 | 0.134016569 | 0.089955387 | 0.370305853 |
| 0.18465944  | 0.109518079 | 0.302501239 | 0.161702796 |
| 0.092367192 | 0.312209142 | 0.139945295 | 0.353806132 |
| 0.131522045 | 0.28872677  | 0.274186152 | 0.310023577 |
| 0.336609337 | 0.095172745 | 0.090031137 | 0.128611686 |
| 0.325974152 | 0.171107014 | 0.093244289 | 0.287298434 |
| 0.077202887 | 0.265829414 | 0.129743671 | 0.140529638 |
| 0.112580754 | 0.139401243 | 0.144964839 | 0.211669528 |
| 0.217242883 | 0.172728773 | 0.129582765 | 0.396709359 |
| 0.205629917 | 0.11338989  | 0.408335459 | 0.011002419 |
| 0.197321473 | 0.255725698 | 0.235035515 | 0.142455585 |
| 0.28188512  | 0.183193258 | 0.131307537 | 0.009296072 |
| 0.284668473 | 0.089577781 | 0.11827361  | 0.146691092 |
| 0.072968088 | 0.092122231 | 0.368223198 | 0.359723703 |
| 0.244684879 | 0.09346385  | 0.076492543 | 0.32852986  |
| 0.06800917  | 0.066188118 | 0.072719445 | 0.194907972 |
| 0.084370583 | 0.081722471 | 0.095040492 | 0.102932208 |
| 0.269176817 | 0.153335535 |             |             |
| PPP5C       | 0.007691308 | 0.146883237 | 0.003808691 |
| 0.003776388 | 0.226085243 | 0.043177687 | 0.017743157 |
| 0.022858981 | 0.170061164 | 0.06706039  | 0.084513844 |
| 0.001549042 | 0.052696874 | 0.160632454 | 0.021151289 |
| 0.208989419 | 0.00908011  | 0.036426077 | 0.021681533 |
| 0.029077464 | 0.21100052  | 0.056455227 | 0.048270514 |
| 0.260213236 | 0.045688255 | 0.090492711 | 0.232251445 |

|             |             |             |             |
|-------------|-------------|-------------|-------------|
| 0.171014538 | 0.019992678 | 0.135130555 | 0.007504716 |
| 0.148677484 | 0.223081627 | 0.135105977 | 0.001103264 |
| 0.114692229 | 0.121476927 | 0.152541362 | 0.094164736 |
| 0.03298726  | 0.113338998 | 0.050110099 | 0.053528954 |
| 0.089418111 | 0.002705594 | 0.007996992 | 0.2571456   |
| 0.140534548 | 0.113278381 | 0.009091816 | 0.147911203 |
| 0.116975016 | 0.070969934 | 0.10436532  | 0.000102883 |
| 0.141374017 | 0.064583003 | 0.147253168 | 0.152860181 |
| 0.061350412 | 0.047853843 | 0.066500395 | 0.119318804 |
| 0.235913397 | 0.289942523 | 0.17310186  | 0.084770825 |
| 0.154172819 | 0.113234294 | 0.210242618 | 0.007602615 |
| 0.08524801  | 0.012233499 | 0.062931031 | 0.038137615 |
| 0.116401947 | 0.085863637 | 0.137097577 | 0.210438662 |
| 0.120059588 | 0.186799667 | 0.130075645 | 0.151934195 |
| 0.119145419 | 0.285615519 | 0.151992877 | 0.206487194 |
| 0.251417743 | 0.047246213 | 0.126695963 | 0.182881264 |
| 0.024856493 | 0.102795739 | 0.181554748 | 0.036450594 |
| 0.129538507 | 0.191682374 | 0.067756567 | 0.094109159 |
| 0.282821826 | 0.216226421 | 0.19014608  | 0.083433132 |
| 0.208638162 | 0.015203404 | 0.131063309 | 0.267769276 |
| 0.060013663 | 0.01363197  | 0.106193652 | 0.227011191 |
| 0.133542171 | 0.155364004 | 0.173682848 | 0.207697682 |
| 0.181744743 | 0.161883655 | 0.115473418 | 0.17840554  |
| 0.01222239  | 0.17581215  | 0.037151155 | 0.008081318 |
| 0.008521018 | 0.03795953  | 0.208261302 | 0.164774629 |
| 0.178125608 | 0.117261167 | 0.029496394 | 0.126668708 |
| 0.260545594 | 0.12631622  | 0.183289439 | 0.165532266 |
| 0.007060618 | 0.227744049 | 0.163182621 | 0.0468328   |
| 0.173429652 | 0.064092544 | 0.202176554 | 0.150299521 |
| 0.107826504 | 0.220274038 | 0.022134909 | 0.163052754 |
| 0.109269834 | 0.182580205 | 0.12540414  | 0.041195354 |
| 0.163466342 | 0.132799538 | 0.201884192 | 0.219714927 |
| 0.135625049 | 0.043111234 | 0.034413027 | 0.188577004 |
| 0.188204163 | 0.004651409 | 0.208040909 | 0.219322581 |
| 0.152651582 | 0.196138262 | 0.240893107 | 0.19820808  |
| 0.150740595 | 0.026327416 | 0.045502673 | 0.210631744 |
| 0.151305908 | 0.121348896 | 0.082858587 | 0.133013052 |
| 0.240805949 | 0.055911983 | 0.225150697 | 0.010355279 |
| 0.207168479 | 0.17551505  | 0.188663868 | 0.154984759 |
| 0.148443957 | 0.09717882  | 0.222480893 | 0.114268649 |
| 0.00680564  | 0.009936359 | 0.007911149 | 0.211670968 |
| 0.022646434 | 0.088664524 | 0.045147145 | 0.290282265 |
| 0.086752846 | 0.075171603 | 0.134468374 | 0.240229331 |
| 0.014500052 | 0.091756235 | 0.047296756 | 0.039158962 |
| 0.008979849 | 0.049469422 | 0.008035671 | 0.01554887  |
| 0.126332601 | 0.063814274 | 0.163218087 | 0.21428983  |
| 0.192783447 | 0.038113206 | 0.130639838 | 0.187623977 |
| 0.190388321 | 0.162599166 | 0.114940891 | 0.000485426 |
| 0.031231259 | 0.139213738 | 0.168213954 | 0.179353196 |
| 0.058092617 | 0.041596899 | 0.173574698 | 0.209496845 |
| 0.029586869 | 0.050658943 | 0.118251711 | 0.130395745 |
| 0.042273635 | 0.065963635 | 0.180482664 | 0.124938168 |
| 5.95E-05    | 0.067927861 | 0.160760037 | 0.078369476 |
| 0.150281813 | 0.021990749 | 0.039477722 | 0.19828551  |



|             |             |             |             |
|-------------|-------------|-------------|-------------|
| 0.076328959 | 0.215799154 | 0.203521302 | 0.259754897 |
| 0.013536566 | 0.064729629 | 0.223623212 | 0.035573038 |
| 0.305809247 | 0.007670572 | 0.156195247 | 0.084571511 |
| 0.080795733 | 0.193137882 | 0.239821288 | 0.115028915 |
| 0.016096001 | 0.172788589 | 0.147476728 | 0.178569619 |
| 0.088222643 | 0.219866258 | 0.184373968 | 0.151954455 |
| 0.132830378 | 0.205038342 | 0.084775835 | 0.144348239 |
| 0.197400181 | 0.025879893 | 0.016902587 | 0.21796419  |
| 0.146182156 | 0.229060073 | 0.048476682 | 0.18795747  |
| 0.168882611 | 0.1258786   | 0.04295326  | 0.264357331 |
| 0.113727341 | 0.038317858 | 0.21062616  | 0.23107074  |
| 0.066145983 | 0.181335047 | 0.116480635 | 0.258983342 |
| 0.04876871  | 0.156128842 | 0.154724311 | 0.155078455 |
| 0.001500922 | 0.019731983 | 0.011437612 | 0.078531868 |
| 0.141490904 | 0.158055283 | 0.221437879 | 0.181300358 |
| 0.033553943 | 0.140537002 | 0.160171214 | 0.052595347 |
| 0.130558056 | 0.19840336  | 0.192309363 | 0.212810345 |
| 0.124656027 | 0.001751494 | 0.004977474 | 0.175292184 |
| 0.010315613 | 0.095481532 | 0.10478841  | 0.000181993 |
| 0.007075089 | 0.135067836 | 0.029926597 | 0.060182482 |
| 0.2460375   | 0.053477086 | 0.050156952 | 0.066104639 |
| 0.157021321 | 0.028768836 | 0.000590554 | 0.219006756 |
| 0.224642024 | 0.234028549 | 0.2145173   | 0.179980904 |
| 0.260643683 | 0.229823023 | 0.23578317  | 0.042941875 |
| 0.01827016  | 0.016342173 | 0.099369306 | 0.112451258 |
| 0.000473192 | 0.176161374 | 0.241906011 | 0.046398309 |
| 0.222424058 | 0.18204676  | 0.004078994 | 0.282520053 |
| 0.000126702 | 0.07378467  | 0.051858442 | 0.139746181 |
| 0.311330608 | 0.001678584 | 0.004569678 | 0.051092099 |
| 0.094335617 | 0.096098454 | 0.12228496  | 0.177825262 |
| 0.087500844 | 0.027983196 | 0.119632078 | 0.191190047 |
| 0.016929359 | 0.017575044 | 0.090253045 | 0.000905758 |
| 0.008654179 | 0.194618376 | 0.123888366 | 0.003323319 |
| 0.078829584 | 0.000185177 | 0.087051892 | 0.17983152  |
| 0.120931747 | 0.214030168 | 0.156000166 | 0.124053555 |
| 0.153957967 | 0.075410142 | 0.187481701 | 0.12160922  |
| 0.069846678 | 0.000419888 | 0.001238992 | 0.198224804 |
| 0.140137193 | 0.01162113  | 0.053307082 | 0.010542428 |
| 0.015179739 | 0.018873901 | 0.02094706  | 0.136969634 |
| 0.108775016 | 0.161729839 | 0.135592755 | 0.136214919 |
| 0.09601126  | 0.139632545 | 0.071496218 | 0.03014356  |
| 0.166039252 | 0.006581561 | 0.042653693 | 0.000624888 |
| 0.259617075 | 0.026278641 | 0.127350517 | 0.166158113 |
| 0.17278261  | 0.214292253 | 0.053951476 | 0.01424756  |
| 0.265647301 | 0.012995796 | 0.040847072 | 0.018100879 |
| 0.130386084 | 0.161795029 | 0.107771182 | 0.076239843 |
| 0.194803203 | 0.142204454 | 0.008749425 | 0.191596798 |
| 5.91E-05    | 0.006882146 | 0.039439573 | 0.146328872 |
| 0.150649341 | 0.160530208 | 0.095293102 | 0.159553509 |
| 0.15240846  | 0.000523358 | 0.211158791 | 0.199766332 |
| 0.144733814 | 0.142749674 | 0.206396352 | 0.168639275 |
| 0.194835557 | 0.053338611 | 0.078366056 | 0.061921143 |
| 0.05383769  | 0.098604004 | 0.042576967 | 0.006522579 |
| 0.104967958 | 0.128062508 | 0.011695384 | 0.049259832 |

|             |             |             |             |
|-------------|-------------|-------------|-------------|
| 0.153922033 | 0.178028494 | 0.00712778  | 0.000749665 |
| 0.082608625 | 0.163564823 | 0.205542513 | 0.150077353 |
| 0.15841988  | 0.205128192 | 0.127782266 | 0.059711446 |
| 0.011035733 | 0.207858738 | 0.257550268 | 0.064006346 |
| 0.172211237 | 0.014987588 | 0.146170519 | 0.25226952  |
| 0.054016479 | 0.047226741 | 0.002770655 | 0.039458071 |
| 0.19504256  | 0.067876075 | 0.107011654 | 0.021336768 |
| 0.101853709 | 0.081076962 | 0.016986669 | 0.072174662 |
| 0.126966499 | 0.068750355 | 0.059836449 | 0.085834257 |
| 0.140811214 | 0.044150387 | 0.202267023 | 0.171533071 |
| 0.031898217 | 0.048457363 | 0.011075406 | 0.251071524 |
| 0.177779998 | 0.151514395 | 0.000161581 | 0.132639032 |
| 0.209503508 | 0.135514861 | 0.141004106 | 0.225830967 |
| 0.034140181 | 0.111143526 | 0.265123611 | 0.193935023 |
| 0.099103573 | 0.047532298 | 0.154324783 | 0.021459567 |
| 0.173123491 | 0.184164823 | 0.144977368 | 0.047631646 |
| 0.139766706 | 0.027307749 | 0.01310949  | 0.197321496 |
| 0.113803375 | 0.003592529 | 0.059565109 | 0.253595439 |
| 0.001529472 | 0.140243437 | 0.271341522 | 0.035860696 |
| 0.220371508 | 0.202224714 | 0.139220861 | 0.071443982 |
| 0.010256843 | 0.253662942 | 0.110681037 | 0.068786686 |
| 0.122731887 | 0.108023187 | 0.027854335 | 0.016712032 |
| 0.139449859 | 0.011254383 | 0.027557284 | 0.009698125 |
| 0.04968596  | 0.105425813 | 0.109039677 | 0.136018199 |
| 0.138678123 | 0.039445404 | 0.069897433 | 0.05244146  |
| 1           | 0.100586741 | 0.144609655 | 0.044287796 |
| 0.020675174 | 0.245010497 | 0.145919707 | 0.002900953 |
| 0.226545059 | 0.243405116 | 0.211079896 | 0.000101629 |
| 0.162421522 | 0.000581852 | 0.107663726 | 0.076985795 |
| 0.097606648 | 0.119680657 | 0.212631973 | 0.099065698 |
| 0.148550366 | 0.08996621  | 0.048658497 | 0.090983252 |
| 0.048308851 | 0.086104764 | 0.191803993 | 0.105182698 |
| 0.059079613 | 0.020154397 | 0.028271414 | 0.024333864 |
| 0.002151885 | 0.171655254 | 0.074720292 | 0.013141869 |
| 0.129555257 | 0.116813678 | 0.153030129 | 0.144795184 |
| 0.194227203 | 0.020989384 | 0.153656144 | 0.114844255 |
| 0.026819358 | 0.009703908 | 0.006919366 | 0.105076018 |
| 0.065608966 | 0.048822829 | 0.100289653 | 0.050101295 |
| 0.171598895 | 0.128843656 | 0.068164569 | 0.189733709 |
| 0.098343103 | 0.229252459 | 0.032333846 | 0.013081215 |
| 0.029785136 | 0.055734391 | 0.21518357  | 0.000234303 |
| 0.126818025 | 0.008075573 | 0.166301595 | 0.134766688 |
| 0.172102918 | 0.160100481 | 0.006887831 | 0.007905438 |
| 0.014149353 | 0.035506614 | 0.046232959 | 0.181453964 |
| 0.108719056 | 0.039523369 | 0.186284779 | 0.017115272 |
| 0.214115531 | 0.24600776  | 0.212074738 | 0.080359924 |
| 0.178944398 | 0.051231467 | 0.187539201 | 0.018580658 |
| 0.142479253 | 0.088218549 | 0.105074157 | 0.105784995 |
| 0.133743062 | 0.207367423 | 0.015377066 | 0.20032121  |
| 0.144441619 | 0.044589292 | 0.180397247 | 0.098435207 |
| 0.035214527 | 0.023549065 | 0.152797906 | 0.075919175 |
| 0.072500374 | 0.129504362 | 0.00119213  | 0.014597077 |
| 0.150447652 | 0.192266838 | 0.155994611 | 0.258184689 |
| 0.210538542 | 0.2434803   | 0.062162102 | 0.077025066 |

|             |             |             |             |
|-------------|-------------|-------------|-------------|
| 0.128836638 | 0.145631809 | 0.016282519 | 0.142865994 |
| 0.136587339 | 0.0190099   | 0.063391774 | 0.022538837 |
| 0.155827679 | 0.171575719 | 0.052826565 | 0.014990731 |
| 0.002066342 | 0.134580094 | 0.144583937 | 0.03173023  |
| 0.241943342 | 0.030508808 | 0.187837071 | 0.152126115 |
| 0.090102726 | 0.139141411 | 0.057776874 | 0.1428158   |
| 0.010453774 | 0.147634357 | 0.233274579 | 0.199097843 |
| 0.036689479 | 0.183811282 | 0.162555941 | 0.135030268 |
| 0.006509057 | 0.050669268 | 0.001642363 | 0.114810824 |
| 0.133527895 | 0.232378966 | 0.086651619 | 0.064540412 |
| 0.157314906 | 0.21364489  | 0.044004642 | 0.137138813 |
| 0.000779835 | 0.177450773 | 0.091060226 | 0.100246983 |
| 0.01789166  | 0.198997308 | 0.005252299 | 0.311072255 |
| 0.118066181 | 0.031007172 | 0.144745707 | 0.037928216 |
| 0.146318313 | 0.175132685 | 0.036825226 | 0.07839497  |
| 0.197961001 | 0.01938405  | 0.053448725 | 0.206622995 |
| 0.072520687 | 0.151896633 | 0.214571671 | 0.052478062 |
| 0.214629279 | 0.131178652 | 0.185950365 | 0.214292755 |
| 0.035574671 | 0.091893449 | 0.231928131 | 0.175507469 |
| 0.162646621 | 0.215281707 | 0.105401821 | 0.120193691 |
| 0.108988988 | 0.002597006 | 0.144857123 | 0.11066524  |
| 0.134354901 | 0.164223921 | 0.122768641 | 0.156428562 |
| 0.002216214 | 0.061708351 | 0.035504216 | 0.056044246 |
| 0.124650916 | 0.163692391 | 0.1629033   | 0.142453599 |
| 0.010156318 | 0.000954741 | 0.177559077 | 0.010800949 |
| 0.042947221 | 0.139988135 | 0.095495697 | 0.167937518 |
| 0.039989885 | 0.139855993 | 0.061436737 | 0.001122323 |
| 0.232006036 | 0.021680826 | 0.18708206  | 0.065088726 |
| 0.036655655 | 0.007839715 | 0.138029299 | 0.215446618 |
| 0.119142358 | 0.029345913 | 0.038323128 | 0.161189196 |
| 0.04310459  | 0.133922862 | 0.152085041 | 0.106044883 |
| 0.166285381 | 0.079321545 | 0.112785416 | 0.098206829 |
| 0.130845479 | 0.070715386 |             |             |
| PRDX1       | 0.242554692 | 0.256449167 | 0.158811752 |
| 0.267113113 | 0.227689954 | 0.203081217 | 0.260059131 |
| 0.312688912 | 0.217489284 | 0.09295875  | 0.260994683 |
| 0.188495625 | 0.054364025 | 0.319443215 | 0.265825174 |
| 0.203440544 | 0.262506407 | 0.316082399 | 0.085810232 |
| 0.202529304 | 0.242567553 | 0.172097867 | 0.196099805 |
| 0.226878583 | 0.291705499 | 0.204597207 | 0.1499533   |
| 0.300656884 | 0.080897986 | 0.200367694 | 0.062282844 |
| 0.372785923 | 0.217515722 | 0.140643166 | 0.138056465 |
| 0.215240703 | 0.017942617 | 0.37254758  | 0.286845964 |
| 0.105814865 | 0.360174412 | 0.11807072  | 0.324809004 |
| 0.144444888 | 0.190490075 | 0.053799507 | 0.178755238 |
| 0.193951857 | 0.249937969 | 0.170252443 | 0.203499627 |
| 0.174166135 | 0.261809951 | 0.165380502 | 0.015564877 |
| 0.127938933 | 0.024720586 | 0.079354793 | 0.336607361 |
| 0.337212908 | 0.359804612 | 0.085447517 | 0.222817684 |
| 0.178195517 | 0.213039279 | 0.300544933 | 0.13874291  |
| 0.339394931 | 0.100999553 | 0.187617613 | 0.198334511 |
| 0.21451702  | 0.147416246 | 0.310825172 | 0.165491924 |
| 0.176220852 | 0.355035243 | 0.24504241  | 0.153947039 |
| 0.245967618 | 0.396511787 | 0.294668563 | 0.3328878   |

|             |             |             |             |
|-------------|-------------|-------------|-------------|
| 0.087167167 | 0.180832099 | 0.208564091 | 0.296547739 |
| 0.226431652 | 0.226394203 | 0.259475333 | 0.378089741 |
| 0.175583111 | 0.140018415 | 0.21219914  | 0.216928398 |
| 0.267666082 | 0.119112822 | 0.138917037 | 0.124451841 |
| 0.206064885 | 0.206651949 | 0.345964159 | 0.311866722 |
| 0.214946215 | 0.188638773 | 0.342076953 | 0.172367792 |
| 0.264463567 | 0.219961166 | 0.219256639 | 0.247392363 |
| 0.217591564 | 0.310978741 | 0.234065662 | 0.27122348  |
| 0.18760157  | 0.332131768 | 0.239643132 | 0.293770483 |
| 0.034765232 | 0.339308789 | 0.306532607 | 0.288849595 |
| 0.184812971 | 0.327666016 | 0.172627047 | 0.336863012 |
| 0.283926424 | 0.271523752 | 0.31699214  | 0.314057318 |
| 0.293565181 | 0.317362122 | 0.328864213 | 0.276181198 |
| 0.234622948 | 0.111571462 | 0.18708056  | 0.253042267 |
| 0.241959424 | 0.275380578 | 0.162823353 | 0.371826917 |
| 0.348386306 | 0.265125967 | 0.244502432 | 0.398738657 |
| 0.261324891 | 0.387996186 | 0.253134684 | 0.346526945 |
| 0.3740928   | 0.357553802 | 0.364398879 | 0.197615716 |
| 0.359290342 | 0.245808131 | 0.060404199 | 0.275626734 |
| 0.385288046 | 0.024423202 | 0.268903379 | 0.29462976  |
| 0.320480926 | 0.252228202 | 0.356922439 | 0.319648296 |
| 0.320511772 | 0.235644738 | 0.011098385 | 0.287063734 |
| 0.347649967 | 0.322503212 | 0.302365218 | 0.163251792 |
| 0.212401264 | 0.220479863 | 0.227820287 | 0.156207    |
| 0.413591929 | 0.285634459 | 0.282319696 | 0.244626862 |
| 0.172723452 | 0.356177684 | 0.142893399 | 0.33718854  |
| 0.258884415 | 0.256431478 | 0.165167816 | 0.274567821 |
| 0.127833443 | 0.357838661 | 0.216921685 | 0.201227626 |
| 0.352137215 | 0.208020289 | 0.120792798 | 0.21199113  |
| 0.151440386 | 0.177628118 | 0.289899936 | 0.257133163 |
| 0.278691091 | 0.284045032 | 0.307773478 | 0.335087631 |
| 0.310573168 | 0.307655816 | 0.190755857 | 0.31243542  |
| 0.190047056 | 0.247989053 | 0.216142784 | 0.371165611 |
| 0.401266743 | 0.187208627 | 0.298040053 | 0.10328909  |
| 0.196498443 | 0.093394002 | 0.082169795 | 0.16028972  |
| 0.286820671 | 0.271352538 | 0.214019372 | 0.239857051 |
| 0.243870456 | 0.218570196 | 0.188937586 | 0.394362559 |
| 0.212718137 | 0.252565497 | 0.309321585 | 0.16824557  |
| 0.061043334 | 0.269872935 | 0.265600168 | 0.211103503 |
| 0.241112551 | 0.111862307 | 0.117551973 | 0.295149513 |
| 0.12995381  | 0.181704841 | 0.296312928 | 0.233970755 |
| 0.179138621 | 0.263056064 | 0.354673653 | 0.024616092 |
| 0.174068574 | 0.172898406 | 0.318359435 | 0.116046445 |
| 0.3123422   | 0.301256509 | 0.200488035 | 0.232941247 |
| 0.20667358  | 0.348131551 | 0.2937819   | 0.328965249 |
| 0.153856669 | 0.360477921 | 0.272978732 | 0.323956433 |
| 0.261488351 | 0.138515013 | 0.063131305 | 0.264440953 |
| 0.282395495 | 0.134102402 | 0.17073548  | 0.213174803 |
| 0.141705455 | 0.201067395 | 0.202216057 | 0.349257178 |
| 0.404067007 | 0.296242721 | 0.356775526 | 0.274016978 |
| 0.318679997 | 0.311369813 | 0.275337402 | 0.37491497  |
| 0.105440904 | 0.193630006 | 0.199991662 | 0.310980508 |
| 0.306481793 | 0.203631829 | 0.322112284 | 0.076252341 |
| 0.003649009 | 0.224607612 | 0.219786366 | 0.351201827 |

|             |             |             |             |
|-------------|-------------|-------------|-------------|
| 0.147636169 | 0.151081308 | 0.220372602 | 0.340348798 |
| 0.342118513 | 0.331086144 | 0.260034424 | 0.247103276 |
| 0.308414934 | 0.186940094 | 0.171923983 | 0.212026663 |
| 0.292942991 | 0.13321967  | 0.317146813 | 0.399480059 |
| 0.131345824 | 0.152709852 | 0.236177285 | 0.024301546 |
| 0.218337098 | 0.199299412 | 0.208744768 | 0.328311329 |
| 0.32331115  | 0.299824908 | 0.268725612 | 0.117331117 |
| 0.283355458 | 0.292550633 | 0.04179007  | 0.302941791 |
| 0.316844164 | 0.306436796 | 0.31189257  | 0.317996455 |
| 0.280030618 | 0.220639469 | 0.25486711  | 0.204863932 |
| 0.310822089 | 0.207825478 | 0.147983666 | 0.279562286 |
| 0.019154707 | 0.292654815 | 0.233267632 | 0.310847894 |
| 0.222257416 | 0.267934023 | 0.236606533 | 0.199801752 |
| 0.135485479 | 0.080384563 | 0.22676663  | 0.298601675 |
| 0.259591557 | 0.139695733 | 0.125982514 | 0.152927198 |
| 0.314664715 | 0.316460269 | 0.136313286 | 0.352685155 |
| 0.28861248  | 0.164615218 | 0.259436726 | 0.256295562 |
| 0.294066075 | 0.051174096 | 0.193871556 | 0.013611207 |
| 0.116052338 | 0.331612894 | 0.171657272 | 0.214120265 |
| 0.313866523 | 0.088324929 | 0.308422037 | 0.365961056 |
| 0.295125365 | 0.334298133 | 0.340832347 | 0.157235151 |
| 0.340916974 | 0.028085371 | 0.333240908 | 0.261958628 |
| 0.127628801 | 0.01063761  | 0.065404058 | 0.290878352 |
| 0.20175614  | 0.131008355 | 0.326251804 | 0.170420944 |
| 0.351405625 | 0.224453613 | 0.271472172 | 0.195251733 |
| 0.201260052 | 0.280634148 | 0.180174301 | 0.316482948 |
| 0.317231434 | 0.326867051 | 0.166862427 | 0.210116031 |
| 0.201584349 | 0.279590487 | 0.205499169 | 0.047269025 |
| 0.243702126 | 0.200106943 | 0.35247215  | 0.327460231 |
| 0.382258718 | 0.225950539 | 0.098960588 | 0.179594402 |
| 0.277798143 | 0.149847927 | 0.132264356 | 0.184143646 |
| 0.302795498 | 0.220612059 | 0.329843335 | 0.320959881 |
| 0.366860732 | 0.349804548 | 0.233802701 | 0.263511013 |
| 0.102695139 | 0.014362731 | 0.188242309 | 0.290265682 |
| 0.05048675  | 0.187351748 | 0.319150762 | 0.197899776 |
| 0.246098057 | 0.187789364 | 0.134419194 | 0.145652742 |
| 0.296356297 | 0.241732194 | 0.207174509 | 0.25104263  |
| 0.236169887 | 0.186272371 | 0.327876518 | 0.327185954 |
| 0.155677378 | 0.285884418 | 0.291919729 | 0.18593031  |
| 0.162264031 | 0.183279481 | 0.265683219 | 0.293364098 |
| 0.302169964 | 0.307649675 | 0.24553388  | 0.138847239 |
| 0.317207783 | 0.233306173 | 0.326831397 | 0.304312395 |
| 0.369532074 | 0.386265681 | 0.383633648 | 0.306078965 |
| 0.278466282 | 0.265556625 | 0.199840195 | 0.275818632 |
| 0.335360261 | 0.160175906 | 0.322177302 | 0.144135823 |
| 0.284924312 | 0.313187153 | 0.26390958  | 0.293008208 |
| 0.171707178 | 0.335963518 | 0.343764055 | 0.210335231 |
| 0.262872225 | 0.142809311 | 0.24763808  | 0.342424816 |
| 0.285351934 | 0.098743384 | 0.323681145 | 0.227793012 |
| 0.2547373   | 0.073887535 | 0.210004553 | 0.395096838 |
| 0.270578746 | 0.246851209 | 0.200586746 | 0.235081775 |
| 0.240246948 | 0.1349159   | 0.13583276  | 0.257138052 |
| 0.33344488  | 0.189026953 | 0.335307172 | 0.339842789 |
| 0.233902932 | 0.204645324 | 0.140488871 | 0.227497893 |

|             |             |             |             |
|-------------|-------------|-------------|-------------|
| 0.317834027 | 0.207010551 | 0.300861603 | 0.2475461   |
| 0.336099204 | 0.385318096 | 0.27575949  | 0.360447608 |
| 0.173979245 | 0.183401432 | 0.145588942 | 0.267724966 |
| 0.148161661 | 0.277411546 | 0.126111884 | 0.239592418 |
| 0.01725885  | 0.080462043 | 0.321572894 | 0.324079698 |
| 0.376237861 | 0.317264636 | 0.368608543 | 0.23884427  |
| 0.002118861 | 0.181599316 | 0.254538574 | 0.205287095 |
| 0.271814216 | 0.284184817 | 0.174840809 | 0.328969106 |
| 0.350212403 | 0.166857595 | 0.327999882 | 0.175530898 |
| 0.080826073 | 0.205232956 | 0.332710657 | 0.261676611 |
| 0.316758924 | 0.154391435 | 0.136326651 | 0.317269667 |
| 0.100586741 | 1           | 0.331426489 | 0.098840117 |
| 0.101767331 | 0.30730957  | 0.249042412 | 0.189711751 |
| 0.17210578  | 0.28089689  | 0.315480201 | 0.024289383 |
| 0.22217299  | 0.134755666 | 0.330092378 | 0.327398027 |
| 0.337677849 | 0.312736162 | 0.300783556 | 0.242160515 |
| 0.228872244 | 0.326188455 | 0.310652256 | 0.344382626 |
| 0.340801479 | 0.302009221 | 0.214612571 | 0.211151393 |
| 0.255386053 | 0.318787085 | 0.214195209 | 0.211728731 |
| 0.282743246 | 0.279508566 | 0.344123764 | 0.168464666 |
| 0.337162942 | 0.202937305 | 0.381310013 | 0.302198486 |
| 0.352963569 | 0.177474064 | 0.240262611 | 0.266618413 |
| 0.069949268 | 0.175136382 | 0.205648431 | 0.206702212 |
| 0.337491442 | 0.217282849 | 0.169488526 | 0.209212189 |
| 0.191548873 | 0.386916092 | 0.333148385 | 0.342311812 |
| 0.235845736 | 0.174357061 | 0.10314456  | 0.330108733 |
| 0.31561881  | 0.249720834 | 0.225131325 | 0.048173906 |
| 0.279544706 | 0.227391081 | 0.27684245  | 0.332012656 |
| 0.11913458  | 0.358112091 | 0.120744576 | 0.285359814 |
| 0.086339559 | 0.229203268 | 0.298995921 | 0.212334093 |
| 0.085187468 | 0.337460965 | 0.25514453  | 0.1742628   |
| 0.226447097 | 0.194005899 | 0.205511533 | 0.284334165 |
| 0.284152514 | 0.247776241 | 0.3467508   | 0.22632762  |
| 0.16149969  | 0.211450517 | 0.147041856 | 0.275648835 |
| 0.309668613 | 0.31712825  | 0.228356633 | 0.321027329 |
| 0.216704716 | 0.231761007 | 0.411522855 | 0.243869883 |
| 0.234792055 | 0.309002027 | 0.086735007 | 0.163572853 |
| 0.293157012 | 0.139202264 | 0.004134754 | 0.069195023 |
| 0.306271416 | 0.152642652 | 0.204717119 | 0.244009274 |
| 0.208183618 | 0.313389347 | 0.072286313 | 0.251913377 |
| 0.303691237 | 0.353929487 | 0.277166782 | 0.325368509 |
| 0.283084751 | 0.341554827 | 0.19183831  | 0.018539652 |
| 0.183526147 | 0.1530033   | 0.137612805 | 0.280265012 |
| 0.185185347 | 0.096315767 | 0.188294156 | 0.159409847 |
| 0.312617139 | 0.079082477 | 0.164637092 | 0.211556646 |
| 0.257931633 | 0.362500897 | 0.33683781  | 0.25537747  |
| 0.141468905 | 0.294761672 | 0.160821962 | 0.162273377 |
| 0.258863616 | 0.177418297 | 0.283624308 | 0.157067531 |
| 0.2534157   | 0.269220845 | 0.021329704 | 0.3889912   |
| 0.326007214 | 0.161003071 | 0.309343299 | 0.091377947 |
| 0.323515985 | 0.293704595 | 0.225378225 | 0.151352902 |
| 0.142618993 | 0.201028002 | 0.338717867 | 0.290731243 |
| 0.090139601 | 0.186618464 | 0.281931833 | 0.181721942 |
| 0.356669287 | 0.200900361 | 0.317030638 | 0.123237147 |

|             |             |             |             |
|-------------|-------------|-------------|-------------|
| 0.306872986 | 0.245728892 | 0.193008625 | 0.226479536 |
| 0.15921957  | 0.206644792 | 0.139713819 | 0.360188087 |
| 0.357181404 | 0.165473929 | 0.281020368 | 0.330858875 |
| 0.156727901 | 0.294053455 | 0.149709722 | 0.347852488 |
| 0.300756666 | 0.337934134 | 0.254502117 | 0.306145067 |
| 0.340873068 | 0.171168082 | 0.154095296 | 0.264537514 |
| 0.300603904 | 0.278354857 | 0.168907524 | 0.280135245 |
| 0.131727311 | 0.300552966 | 0.143660677 | 0.265318216 |
| 0.241653608 | 0.30631241  | 0.214043723 | 0.297601721 |
| 0.304709491 | 0.228143423 | 0.226126476 | 0.381720426 |
| 0.314525651 | 0.17900581  | 0.391348553 | 0.017492687 |
| 0.217905951 | 0.237284938 | 0.325722929 | 0.209263811 |
| 0.286679159 | 0.239122003 | 0.194483563 | 0.034818792 |
| 0.280319872 | 0.066680847 | 0.217097956 | 0.260599139 |
| 0.147398998 | 0.237663873 | 0.336516352 | 0.342031864 |
| 0.262714628 | 0.139305563 | 0.121953274 | 0.320251794 |
| 0.099801595 | 0.104157873 | 0.14047771  | 0.181037455 |
| 0.125272468 | 0.126966609 | 0.149708306 | 0.146747812 |
| 0.251277106 | 0.277479622 |             |             |
| PRDX2       | 0.170829985 | 0.339917432 | 0.117037097 |
| 0.268262232 | 0.315492529 | 0.311249357 | 0.170074802 |
| 0.243235207 | 0.267862191 | 0.17741401  | 0.360801962 |
| 0.0994546   | 0.083753659 | 0.407568614 | 0.168864936 |
| 0.333182912 | 0.150716136 | 0.243686622 | 0.088785305 |
| 0.239385462 | 0.329725463 | 0.288111489 | 0.29230971  |
| 0.305476783 | 0.245901187 | 0.288664033 | 0.263366064 |
| 0.409939216 | 0.171338288 | 0.327082081 | 0.123603231 |
| 0.422030342 | 0.323937316 | 0.264402518 | 0.072759455 |
| 0.330297623 | 0.017485833 | 0.423700739 | 0.357259136 |
| 0.164926428 | 0.37306818  | 0.208855028 | 0.364933449 |
| 0.255225565 | 0.121596589 | 0.111611002 | 0.301426976 |
| 0.269381953 | 0.294578038 | 0.127626085 | 0.317706231 |
| 0.278739155 | 0.326343684 | 0.253255387 | 0.008602747 |
| 0.236069518 | 0.058967284 | 0.166845592 | 0.429047737 |
| 0.31407525  | 0.28143525  | 0.17610879  | 0.252374211 |
| 0.29052216  | 0.314130468 | 0.310287141 | 0.253589975 |
| 0.439931135 | 0.171972805 | 0.293786759 | 0.22547854  |
| 0.335940279 | 0.087300182 | 0.265899414 | 0.130770403 |
| 0.298963556 | 0.330255722 | 0.334567584 | 0.258577778 |
| 0.335631459 | 0.472204732 | 0.298769801 | 0.422140977 |
| 0.125329954 | 0.292008145 | 0.284093214 | 0.349192878 |
| 0.312279305 | 0.170467267 | 0.363898945 | 0.471998166 |
| 0.113815862 | 0.243887819 | 0.322424682 | 0.186311563 |
| 0.347103    | 0.200244777 | 0.253263876 | 0.191189395 |
| 0.315538189 | 0.326421589 | 0.418033366 | 0.362615464 |
| 0.293127427 | 0.144170554 | 0.417552846 | 0.281720473 |
| 0.350618035 | 0.169411748 | 0.288628747 | 0.358048911 |
| 0.347781663 | 0.416575179 | 0.325750323 | 0.335263135 |
| 0.319506784 | 0.433425076 | 0.351638882 | 0.359469559 |
| 0.071275228 | 0.442345218 | 0.290015101 | 0.169199544 |
| 0.135882641 | 0.224023664 | 0.230820207 | 0.325220599 |
| 0.389025575 | 0.327407093 | 0.306261033 | 0.348873104 |
| 0.398401732 | 0.399384224 | 0.435141941 | 0.356210452 |
| 0.138345328 | 0.194771801 | 0.319532774 | 0.284978781 |

|             |             |             |             |
|-------------|-------------|-------------|-------------|
| 0.349859022 | 0.209938335 | 0.261247442 | 0.454661689 |
| 0.389954941 | 0.364045521 | 0.225128673 | 0.460112361 |
| 0.264854591 | 0.475933247 | 0.353992159 | 0.319183349 |
| 0.461507808 | 0.437357165 | 0.462515551 | 0.322646258 |
| 0.428341502 | 0.337143838 | 0.080583562 | 0.336086443 |
| 0.46180058  | 0.030106528 | 0.377911721 | 0.409966089 |
| 0.420655091 | 0.366314535 | 0.461525737 | 0.427099208 |
| 0.419667339 | 0.162738696 | 0.02299351  | 0.35192549  |
| 0.443043124 | 0.381887195 | 0.247854517 | 0.301230452 |
| 0.327581674 | 0.329486435 | 0.312044132 | 0.279683846 |
| 0.487331574 | 0.376292808 | 0.390837516 | 0.326211109 |
| 0.247245551 | 0.349471095 | 0.266444418 | 0.409156509 |
| 0.151356685 | 0.211894026 | 0.114303863 | 0.312377175 |
| 0.224323794 | 0.31756005  | 0.321291877 | 0.300108694 |
| 0.326219382 | 0.280918844 | 0.227524151 | 0.327056606 |
| 0.105134754 | 0.311882493 | 0.258880349 | 0.254302898 |
| 0.172262817 | 0.208955367 | 0.32776069  | 0.298917251 |
| 0.351457113 | 0.274049406 | 0.30857045  | 0.413061686 |
| 0.293808701 | 0.246773237 | 0.333739354 | 0.442658416 |
| 0.44855102  | 0.314679404 | 0.295685619 | 0.070429157 |
| 0.308924018 | 0.188199154 | 0.156003017 | 0.281995212 |
| 0.228691216 | 0.34303598  | 0.338620874 | 0.344979686 |
| 0.304595575 | 0.201043762 | 0.31816408  | 0.426471049 |
| 0.201537625 | 0.345027705 | 0.404034493 | 0.28639734  |
| 0.024692299 | 0.362755232 | 0.365160574 | 0.236163806 |
| 0.315117513 | 0.171959461 | 0.211283166 | 0.401694919 |
| 0.232979302 | 0.256194747 | 0.403336492 | 0.332865171 |
| 0.282897811 | 0.241361784 | 0.459519767 | 0.050580324 |
| 0.27279129  | 0.138805142 | 0.366118608 | 0.201725224 |
| 0.342623568 | 0.339980383 | 0.30116932  | 0.308811714 |
| 0.187951573 | 0.449085174 | 0.339987938 | 0.439170012 |
| 0.286360422 | 0.463720769 | 0.381514159 | 0.407130861 |
| 0.348161445 | 0.251615284 | 0.125857859 | 0.364288344 |
| 0.386109123 | 0.230434257 | 0.131604256 | 0.315815189 |
| 0.254787309 | 0.324993691 | 0.182896663 | 0.451720035 |
| 0.464511573 | 0.383853563 | 0.30336297  | 0.348605691 |
| 0.37425686  | 0.325954473 | 0.341265105 | 0.470960958 |
| 0.202219031 | 0.322634246 | 0.323474008 | 0.375399718 |
| 0.283788774 | 0.275491155 | 0.318992377 | 0.142867227 |
| 0.007266901 | 0.163140835 | 0.15473459  | 0.317741091 |
| 0.208177231 | 0.267544193 | 0.334615142 | 0.445532532 |
| 0.267704123 | 0.384014043 | 0.272496653 | 0.360385449 |
| 0.383409558 | 0.297022844 | 0.289002052 | 0.321302705 |
| 0.29532733  | 0.083994359 | 0.281037949 | 0.476913485 |
| 0.08614518  | 0.244927747 | 0.301429658 | 0.017297898 |
| 0.142273793 | 0.285953922 | 0.150564673 | 0.264745873 |
| 0.419034815 | 0.251534041 | 0.282968868 | 0.216406916 |
| 0.353393516 | 0.212025451 | 0.02344192  | 0.405229471 |
| 0.403376799 | 0.383893316 | 0.399081446 | 0.386375076 |
| 0.365932518 | 0.299270401 | 0.340934664 | 0.292413583 |
| 0.232571288 | 0.159395283 | 0.249887134 | 0.359045549 |
| 0.015952145 | 0.347659898 | 0.299965342 | 0.259708685 |
| 0.323833609 | 0.323671004 | 0.137999616 | 0.29889732  |
| 0.090497615 | 0.165595654 | 0.312942545 | 0.2982362   |



|             |             |             |             |
|-------------|-------------|-------------|-------------|
| 0.329883116 | 0.06814734  | 0.22723886  | 0.280564362 |
| 0.383111685 | 0.344939324 | 0.249739545 | 0.453272968 |
| 0.371403661 | 0.163160111 | 0.352744075 | 0.344431386 |
| 0.202346675 | 0.085770869 | 0.296513231 | 0.027762592 |
| 0.155435435 | 0.393223422 | 0.27695827  | 0.163090064 |
| 0.363406202 | 0.037418947 | 0.355088409 | 0.465141491 |
| 0.381530994 | 0.447447827 | 0.439577944 | 0.259998344 |
| 0.441720545 | 0.067218958 | 0.444141953 | 0.342409966 |
| 0.249757598 | 0.006134255 | 0.0346817   | 0.403242324 |
| 0.33718167  | 0.097314621 | 0.285019734 | 0.28296811  |
| 0.291698563 | 0.222726886 | 0.171246828 | 0.249593521 |
| 0.316771297 | 0.321361026 | 0.22222043  | 0.400838682 |
| 0.348540984 | 0.328394803 | 0.280209336 | 0.159647322 |
| 0.313121182 | 0.183885843 | 0.154993188 | 0.040152086 |
| 0.336302696 | 0.157049813 | 0.413455498 | 0.429976292 |
| 0.460984446 | 0.337038835 | 0.200201757 | 0.281718072 |
| 0.358574747 | 0.137785548 | 0.2348441   | 0.165092189 |
| 0.403287306 | 0.351807596 | 0.364305405 | 0.334449406 |
| 0.464339131 | 0.430970504 | 0.131850982 | 0.349955903 |
| 0.063236992 | 0.008913839 | 0.300206568 | 0.307288948 |
| 0.059146551 | 0.322217428 | 0.326738269 | 0.23333999  |
| 0.267064805 | 0.115677489 | 0.239872086 | 0.24106114  |
| 0.35859849  | 0.354249698 | 0.29990762  | 0.263538151 |
| 0.298420932 | 0.219517891 | 0.304429149 | 0.274601833 |
| 0.208859704 | 0.310380665 | 0.252024933 | 0.096439596 |
| 0.291214066 | 0.316944049 | 0.172414018 | 0.249324133 |
| 0.394288488 | 0.420499396 | 0.163692487 | 0.08158554  |
| 0.308136073 | 0.314802721 | 0.434777742 | 0.408131286 |
| 0.460427763 | 0.480795663 | 0.401824839 | 0.275131558 |
| 0.185858968 | 0.345433621 | 0.291038538 | 0.227753213 |
| 0.438613426 | 0.123332246 | 0.407905702 | 0.249840772 |
| 0.220326665 | 0.327724827 | 0.151667274 | 0.204188285 |
| 0.293885396 | 0.295090889 | 0.323907423 | 0.208244156 |
| 0.368361845 | 0.222710133 | 0.149189934 | 0.328139955 |
| 0.345142415 | 0.180952588 | 0.281652588 | 0.27505721  |
| 0.297609582 | 0.126097521 | 0.328760848 | 0.453470317 |
| 0.227771291 | 0.203054166 | 0.283304255 | 0.308226978 |
| 0.344000845 | 0.246729591 | 0.091613288 | 0.351441938 |
| 0.425802179 | 0.323833622 | 0.425722348 | 0.390049755 |
| 0.170144541 | 0.337234301 | 0.24360621  | 0.337466396 |
| 0.292290229 | 0.309169041 | 0.310977345 | 0.163093217 |
| 0.319192602 | 0.443704382 | 0.356340885 | 0.325951624 |
| 0.28971286  | 0.171269962 | 0.110591947 | 0.353826817 |
| 0.229529462 | 0.223040397 | 0.227043389 | 0.33151785  |
| 0.009346515 | 0.136582497 | 0.416102238 | 0.332179875 |
| 0.457640769 | 0.421395303 | 0.431979449 | 0.2592007   |
| 0.002359967 | 0.306460572 | 0.373201372 | 0.340123164 |
| 0.361345467 | 0.324426458 | 0.167699374 | 0.238781385 |
| 0.338088032 | 0.135383674 | 0.311416611 | 0.271911855 |
| 0.16491979  | 0.323155805 | 0.303905584 | 0.268660639 |
| 0.311284919 | 0.131132879 | 0.217246343 | 0.322145953 |
| 0.144609655 | 0.331426489 | 1           | 0.171071564 |
| 0.203809231 | 0.387834707 | 0.334809384 | 0.103687384 |
| 0.278803976 | 0.355883244 | 0.377623354 | 0.018637615 |

|             |             |             |             |
|-------------|-------------|-------------|-------------|
| 0.345693822 | 0.057273434 | 0.331498889 | 0.346472549 |
| 0.327627472 | 0.328619093 | 0.337870351 | 0.324518073 |
| 0.318745628 | 0.331045759 | 0.36009732  | 0.350229877 |
| 0.313924827 | 0.287528865 | 0.323370186 | 0.307983046 |
| 0.340633283 | 0.263417731 | 0.148438082 | 0.152276589 |
| 0.181068381 | 0.370815864 | 0.303331528 | 0.128680358 |
| 0.330425879 | 0.294651151 | 0.388747097 | 0.401874604 |
| 0.400846945 | 0.142630924 | 0.323064009 | 0.364745246 |
| 0.141242828 | 0.259016744 | 0.141120606 | 0.307287489 |
| 0.331229158 | 0.29795142  | 0.272647575 | 0.296762826 |
| 0.29180213  | 0.417934863 | 0.290327247 | 0.40198777  |
| 0.332384835 | 0.271633342 | 0.196492247 | 0.259351916 |
| 0.308904912 | 0.20995588  | 0.308344256 | 0.019853912 |
| 0.364523648 | 0.27536927  | 0.390296377 | 0.421450866 |
| 0.218580733 | 0.383015588 | 0.223845879 | 0.229372939 |
| 0.164624206 | 0.210405511 | 0.246846143 | 0.302468846 |
| 0.172171938 | 0.29800165  | 0.334855367 | 0.258115334 |
| 0.326307132 | 0.292910754 | 0.269986214 | 0.304563631 |
| 0.293393579 | 0.250096941 | 0.414193722 | 0.191855138 |
| 0.290537604 | 0.264326222 | 0.238766112 | 0.372545815 |
| 0.32896981  | 0.424402437 | 0.147878842 | 0.435717566 |
| 0.338458949 | 0.192318273 | 0.471436601 | 0.287056817 |
| 0.272937409 | 0.247650874 | 0.166371399 | 0.264252348 |
| 0.312817864 | 0.251697893 | 0.010361458 | 0.098706687 |
| 0.372490399 | 0.230443032 | 0.293418596 | 0.317028064 |
| 0.276715913 | 0.346583489 | 0.125431845 | 0.306543398 |
| 0.392966742 | 0.429278669 | 0.362222596 | 0.313278498 |
| 0.347164854 | 0.253752618 | 0.296264667 | 0.017184433 |
| 0.322821058 | 0.284067832 | 0.260125637 | 0.169201838 |
| 0.090449545 | 0.190229355 | 0.31636546  | 0.118261555 |
| 0.416273693 | 0.161733314 | 0.255321328 | 0.318074008 |
| 0.233873071 | 0.436995768 | 0.273679699 | 0.362116053 |
| 0.099390803 | 0.308068267 | 0.273478124 | 0.272980405 |
| 0.337811009 | 0.28639414  | 0.367757291 | 0.249257336 |
| 0.142710794 | 0.337797657 | 0.012535824 | 0.417459844 |
| 0.402358481 | 0.28111119  | 0.258422788 | 0.171502586 |
| 0.351120584 | 0.334304205 | 0.304090583 | 0.268426545 |
| 0.072889941 | 0.32958139  | 0.302381013 | 0.363423963 |
| 0.191971086 | 0.293462129 | 0.181603509 | 0.281304982 |
| 0.409565019 | 0.319876303 | 0.289036219 | 0.243670517 |
| 0.400883934 | 0.303323332 | 0.187143161 | 0.248549212 |
| 0.262147011 | 0.141181106 | 0.242718664 | 0.459671011 |
| 0.329979125 | 0.247124823 | 0.384047497 | 0.354360403 |
| 0.265308521 | 0.337260779 | 0.263817467 | 0.441719545 |
| 0.227717585 | 0.340319804 | 0.333751143 | 0.393616653 |
| 0.349749028 | 0.222754967 | 0.255140548 | 0.332142448 |
| 0.385871259 | 0.232058321 | 0.246912108 | 0.343726657 |
| 0.22961363  | 0.345527198 | 0.225482128 | 0.290836676 |
| 0.158382941 | 0.264502116 | 0.314396807 | 0.24715389  |
| 0.363221638 | 0.343291256 | 0.292250937 | 0.405414787 |
| 0.282993285 | 0.124720168 | 0.439078321 | 0.031309778 |
| 0.295784324 | 0.353677799 | 0.324709149 | 0.313165331 |
| 0.24735581  | 0.325819498 | 0.291475326 | 0.015659504 |
| 0.358473594 | 0.066092522 | 0.285346074 | 0.334712279 |

|             |             |             |             |
|-------------|-------------|-------------|-------------|
| 0.255521062 | 0.155152748 | 0.405687864 | 0.449683649 |
| 0.310772829 | 0.221883849 | 0.241501112 | 0.402974616 |
| 0.16298221  | 0.206357058 | 0.257350314 | 0.293576862 |
| 0.209991766 | 0.241652162 | 0.269790994 | 0.273268318 |
| 0.334826967 | 0.29519347  |             |             |
| PREB        | 0.020106415 | 0.394689127 | 0.023644717 |
| 0.015972385 | 0.101547901 | 0.126678115 | 0.00978836  |
| 0.022431355 | 0.31128888  | 0.181695542 | 0.117498882 |
| 0.001747273 | 0.02809982  | 0.320883298 | 0.009026531 |
| 0.167361027 | 0.003138228 | 0.025137506 | 0.030253691 |
| 0.053937065 | 0.07795265  | 0.070534651 | 0.194278956 |
| 0.087130402 | 0.126457879 | 0.196504067 | 0.228677522 |
| 0.41174743  | 0.10630365  | 0.246575526 | 0.098182606 |
| 0.266027932 | 0.1161088   | 0.17601076  | 0.002939936 |
| 0.180550673 | 0.005710355 | 0.317393441 | 0.043701306 |
| 0.024854745 | 0.220442439 | 0.23870667  | 0.042850561 |
| 0.19713177  | 0.006817203 | 0.180282044 | 0.256003494 |
| 0.207024976 | 0.072776522 | 0.035738596 | 0.27402524  |
| 0.115465909 | 0.189883051 | 0.377645463 | 0.000756992 |
| 0.101835568 | 0.042550057 | 0.07412765  | 0.414588937 |
| 0.075453013 | 0.024690797 | 0.126232414 | 0.11738138  |
| 0.248655303 | 0.222742652 | 0.118860409 | 0.143071198 |
| 0.368862213 | 0.040920331 | 0.329628796 | 0.028739768 |
| 0.131580369 | 0.01276137  | 0.067911274 | 0.062755234 |
| 0.115730824 | 0.051693117 | 0.120968536 | 0.089904374 |
| 0.397218258 | 0.393385888 | 0.103888543 | 0.427139985 |
| 0.026232375 | 0.144731345 | 0.053082498 | 0.131389445 |
| 0.231507807 | 0.01977574  | 0.204894468 | 0.376689888 |
| 0.01994285  | 0.311982947 | 0.249278676 | 0.078339367 |
| 0.356692072 | 0.099206595 | 0.254931426 | 0.031714665 |
| 0.181850863 | 0.11910378  | 0.407237045 | 0.117796058 |
| 0.113901763 | 0.038862751 | 0.422066744 | 0.129273061 |
| 0.056529307 | 0.032095035 | 0.031080243 | 0.357181352 |
| 0.19940645  | 0.379585476 | 0.36331129  | 0.213250119 |
| 0.147112505 | 0.373406744 | 0.200972847 | 0.334205029 |
| 0.195505786 | 0.429770631 | 0.057610261 | 0.004499491 |
| 0.027949338 | 0.013175321 | 0.060230482 | 0.168008209 |
| 0.352853729 | 0.176742712 | 0.046531517 | 0.051209595 |
| 0.308406369 | 0.428994527 | 0.440298641 | 0.271062799 |
| 0.007052573 | 0.076204866 | 0.142340905 | 0.08004848  |
| 0.194676979 | 0.048465911 | 0.069063365 | 0.400626871 |
| 0.226374651 | 0.277771769 | 0.051636252 | 0.392417797 |
| 0.0675663   | 0.351681154 | 0.395831783 | 0.037083373 |
| 0.392282423 | 0.395400779 | 0.349101787 | 0.211747285 |
| 0.364106999 | 0.112981668 | 0.031305906 | 0.263085891 |
| 0.321301948 | 0.001553686 | 0.390900101 | 0.391978599 |
| 0.40865917  | 0.331066669 | 0.374187821 | 0.395978944 |
| 0.427153493 | 0.03146463  | 0.018811644 | 0.099160429 |
| 0.399314802 | 0.231368127 | 0.023180107 | 0.196937716 |
| 0.157002538 | 0.152918089 | 0.333665074 | 0.0589422   |
| 0.351466341 | 0.337725139 | 0.413667612 | 0.260882111 |
| 0.190538566 | 0.203545327 | 0.202574748 | 0.395913029 |
| 0.005736334 | 0.031074574 | 0.03172621  | 0.176909767 |
| 0.131933581 | 0.044546571 | 0.126641508 | 0.174956367 |

|             |             |             |             |
|-------------|-------------|-------------|-------------|
| 0.060091727 | 0.159131494 | 0.134833309 | 0.186881656 |
| 0.047966587 | 0.231819128 | 0.053722409 | 0.061736839 |
| 0.003295815 | 0.093956246 | 0.022378424 | 0.020972852 |
| 0.0629397   | 0.193792786 | 0.309308361 | 0.376112455 |
| 0.126956127 | 0.096062874 | 0.262538755 | 0.321951544 |
| 0.243380798 | 0.14647482  | 0.121434273 | 0.000278389 |
| 0.038352655 | 0.144501354 | 0.052012528 | 0.23249815  |
| 0.142070453 | 0.035036868 | 0.170230535 | 0.198568479 |
| 0.108571978 | 0.067353603 | 0.0948661   | 0.301567527 |
| 0.10068939  | 0.057455675 | 0.276242936 | 0.243390807 |
| 0.000210046 | 0.097523793 | 0.293944799 | 0.020231033 |
| 0.17431497  | 0.022318797 | 0.056982511 | 0.317112918 |
| 0.07997865  | 0.049915562 | 0.397181782 | 0.212459806 |
| 0.091913135 | 0.205939031 | 0.391409288 | 0.019971157 |
| 0.170125487 | 0.003559544 | 0.099912278 | 0.271130473 |
| 0.085009374 | 0.131809257 | 0.117899173 | 0.05167924  |
| 0.074018101 | 0.40622443  | 0.274582834 | 0.38263761  |
| 0.090554973 | 0.38854926  | 0.313337918 | 0.280913929 |
| 0.176832947 | 0.187775733 | 0.035259176 | 0.27134121  |
| 0.316761241 | 0.079137035 | 0.053400208 | 0.36167736  |
| 0.171030465 | 0.218629023 | 0.016643426 | 0.32834333  |
| 0.355109623 | 0.428553989 | 0.020261676 | 0.189451827 |
| 0.200567861 | 0.07297071  | 0.29580246  | 0.390320154 |
| 0.124233579 | 0.121491237 | 0.067813814 | 0.219935651 |
| 0.063698184 | 0.032792451 | 0.224337168 | 0.057699924 |
| 0.005200799 | 0.035503928 | 0.02471377  | 0.026799009 |
| 0.025155012 | 0.328992792 | 0.201677449 | 0.392636426 |
| 0.025741998 | 0.298956525 | 0.142060338 | 0.038547463 |
| 0.303174724 | 0.132552743 | 0.177652449 | 0.191884364 |
| 0.12993786  | 0.000909459 | 0.011970097 | 0.386113238 |
| 0.031093555 | 0.042257071 | 0.143399127 | 9.35E-05    |
| 0.00833116  | 0.418171029 | 0.07130453  | 0.125999234 |
| 0.333774575 | 0.135174478 | 0.088709628 | 0.130611183 |
| 0.157354479 | 0.028364348 | 0.001038546 | 0.390391149 |
| 0.424603075 | 0.397076994 | 0.430289684 | 0.417078755 |
| 0.358913146 | 0.314533425 | 0.247601805 | 0.177551063 |
| 0.015579879 | 0.030942256 | 0.029097555 | 0.063673501 |
| 0.00191363  | 0.205056595 | 0.117807698 | 0.055175109 |
| 0.279049479 | 0.150085082 | 0.005684764 | 0.177734965 |
| 0.002116454 | 0.046943008 | 0.073066822 | 0.056118103 |
| 0.182276336 | 0.002361837 | 0.043541923 | 0.062468984 |
| 0.340561203 | 0.220950757 | 0.12210056  | 0.415573084 |
| 0.09891358  | 0.098403134 | 0.071264243 | 0.218996443 |
| 0.010602242 | 0.04822467  | 0.135463272 | 0.019761811 |
| 0.089589058 | 0.390128975 | 0.128436949 | 0.011038992 |
| 0.085192115 | 0.000181637 | 0.239864456 | 0.401894785 |
| 0.420061578 | 0.377619634 | 0.366157496 | 0.066403819 |
| 0.376200486 | 0.061952429 | 0.417645533 | 0.300293965 |
| 0.166836493 | 0.000433183 | 0.000461741 | 0.358496225 |
| 0.147424499 | 0.056818717 | 0.051571484 | 0.085017394 |
| 0.010868808 | 0.052569191 | 0.015447891 | 0.02281502  |
| 0.242251205 | 0.060198257 | 0.03083622  | 0.398320235 |
| 0.053683209 | 0.074938707 | 0.182529867 | 0.053996774 |
| 0.203282923 | 0.005815188 | 0.054462855 | 0.000475959 |

|             |             |             |             |
|-------------|-------------|-------------|-------------|
| 0.189104143 | 0.088610615 | 0.402221395 | 0.4119953   |
| 0.336645542 | 0.190883145 | 0.17204038  | 0.09245956  |
| 0.348873145 | 0.081784277 | 0.123889674 | 0.072666796 |
| 0.402322148 | 0.16149189  | 0.143657207 | 0.16432523  |
| 0.334818217 | 0.328182175 | 0.005422025 | 0.225099845 |
| 0.001431394 | 0.000261431 | 0.157531968 | 0.136680764 |
| 0.043997702 | 0.121018839 | 0.11505759  | 0.075252765 |
| 0.057352666 | 0.004678637 | 0.068972481 | 0.054968084 |
| 0.099520791 | 0.114065042 | 0.075429067 | 0.16104199  |
| 0.056261588 | 0.01583763  | 0.0378264   | 0.02980541  |
| 0.090470792 | 0.207679427 | 0.123851526 | 0.003120433 |
| 0.213509644 | 0.171135221 | 0.013025239 | 0.072122747 |
| 0.272437158 | 0.35084484  | 0.004232744 | 0.000748887 |
| 0.14072384  | 0.094323679 | 0.355389925 | 0.424109108 |
| 0.412859991 | 0.356511358 | 0.269817331 | 0.013340712 |
| 0.012796931 | 0.111838865 | 0.096695745 | 0.009369006 |
| 0.395515637 | 0.043070151 | 0.40790593  | 0.114923237 |
| 0.047438072 | 0.034811952 | 0.002698065 | 0.024079004 |
| 0.190878883 | 0.06526758  | 0.033827626 | 0.074900888 |
| 0.066407743 | 0.050578174 | 0.009776041 | 0.056541732 |
| 0.183477341 | 0.028663347 | 0.053018387 | 0.115255453 |
| 0.255258507 | 0.178568804 | 0.254654427 | 0.281905494 |
| 0.059413648 | 0.042668786 | 0.056024032 | 0.267744308 |
| 0.336908578 | 0.300803641 | 0.004026715 | 0.42653644  |
| 0.365237838 | 0.253391537 | 0.405325889 | 0.225577148 |
| 0.04158523  | 0.122108015 | 0.12367525  | 0.118339119 |
| 0.066796287 | 0.144551712 | 0.079509546 | 0.022423872 |
| 0.197129105 | 0.378304478 | 0.30630234  | 0.029432083 |
| 0.262034592 | 0.087502722 | 0.038043669 | 0.383429351 |
| 0.022934171 | 0.012784777 | 0.238399703 | 0.344348968 |
| 0.000778648 | 0.031488242 | 0.373787984 | 0.042277602 |
| 0.398357836 | 0.328453534 | 0.281525179 | 0.072375163 |
| 0.000374424 | 0.239127384 | 0.138465251 | 0.098423682 |
| 0.339968208 | 0.217447368 | 0.05652418  | 0.006663735 |
| 0.137722573 | 0.058144128 | 0.014110956 | 0.092836821 |
| 0.037956263 | 0.239204561 | 0.079535281 | 0.091224334 |
| 0.038446757 | 0.081267086 | 0.051004797 | 0.059139857 |
| 0.044287796 | 0.098840117 | 0.171071564 | 1           |
| 0.031389417 | 0.311482675 | 0.258797714 | 0.004408041 |
| 0.163227033 | 0.286420632 | 0.321952783 | 0.001121186 |
| 0.230732335 | 9.95E-05    | 0.039247992 | 0.038028104 |
| 0.036192272 | 0.044321068 | 0.082167171 | 0.050760035 |
| 0.183602046 | 0.05059526  | 0.052631033 | 0.074694137 |
| 0.019393657 | 0.072244317 | 0.178565028 | 0.133850812 |
| 0.044276391 | 0.023341945 | 0.08161558  | 0.094246878 |
| 0.005684312 | 0.401162879 | 0.137975815 | 0.05308631  |
| 0.078946383 | 0.126636647 | 0.189843905 | 0.434756522 |
| 0.26870617  | 0.106061591 | 0.107535522 | 0.34469604  |
| 0.136051598 | 0.078044546 | 0.016268133 | 0.182145414 |
| 0.072797848 | 0.0276164   | 0.239970842 | 0.15489601  |
| 0.316928654 | 0.257011732 | 0.134335822 | 0.312234072 |
| 0.098526628 | 0.171058972 | 0.172820626 | 0.006752543 |
| 0.037403518 | 0.07140349  | 0.06949607  | 0.001211593 |
| 0.153239339 | 0.054350218 | 0.33289994  | 0.391403707 |

|             |             |             |             |
|-------------|-------------|-------------|-------------|
| 0.099147725 | 0.24412628  | 0.113494481 | 0.011381141 |
| 0.139849435 | 0.147098918 | 0.059633086 | 0.334802061 |
| 0.059550382 | 0.037025054 | 0.086151787 | 0.097614567 |
| 0.27345451  | 0.318421889 | 0.054981749 | 0.079588198 |
| 0.090840835 | 0.101542964 | 0.400771461 | 0.044876689 |
| 0.258174209 | 0.020823992 | 0.316850767 | 0.063661218 |
| 0.043181313 | 0.416353885 | 0.023239095 | 0.413533745 |
| 0.085147035 | 0.087860204 | 0.343031037 | 0.143694677 |
| 0.071491699 | 0.015681836 | 0.045948733 | 0.170985324 |
| 0.040156974 | 0.107116376 | 0.013419266 | 0.009786511 |
| 0.134915945 | 0.136780754 | 0.351309553 | 0.224951385 |
| 0.050323818 | 0.171708553 | 0.062091077 | 0.106304232 |
| 0.436421878 | 0.423667443 | 0.030530556 | 0.116524971 |
| 0.185850576 | 0.016059039 | 0.254354788 | 0.013016452 |
| 0.216261767 | 0.260434407 | 0.120242724 | 0.008634122 |
| 0.002165933 | 0.046083538 | 0.212038201 | 0.04919193  |
| 0.335043822 | 0.061003276 | 0.287016205 | 0.279820225 |
| 0.107398348 | 0.408515843 | 0.013749172 | 0.198093355 |
| 0.015253543 | 0.117764033 | 0.180527272 | 0.207189328 |
| 0.024054262 | 0.071925426 | 0.169725497 | 0.048505129 |
| 0.00293135  | 0.036780921 | 0.00240357  | 0.275759786 |
| 0.408272085 | 0.119243491 | 0.1237803   | 0.17970807  |
| 0.106481331 | 0.284960214 | 0.044383068 | 0.240854032 |
| 0.000134442 | 0.137890458 | 0.068877301 | 0.288820261 |
| 0.050300994 | 0.192519509 | 0.00541355  | 0.120577416 |
| 0.391270692 | 0.044842927 | 0.154693701 | 0.065554121 |
| 0.420925267 | 0.336301856 | 0.123158809 | 0.04373591  |
| 0.321191906 | 0.034406652 | 0.197548995 | 0.406894995 |
| 0.031575029 | 0.040074576 | 0.270609524 | 0.026975641 |
| 0.105560674 | 0.305440769 | 0.299818822 | 0.426514385 |
| 0.005634292 | 0.090490057 | 0.27612935  | 0.3584505   |
| 0.136546834 | 0.028501431 | 0.044157367 | 0.03825792  |
| 0.383716186 | 0.012498083 | 0.052354802 | 0.185234238 |
| 0.038383239 | 0.136670223 | 0.313348934 | 0.033160073 |
| 0.003583126 | 0.033401271 | 0.082128068 | 0.056379286 |
| 0.096014512 | 0.115237452 | 0.035191547 | 0.231666189 |
| 0.014091172 | 0.000825618 | 0.297824971 | 0.002162485 |
| 0.166781299 | 0.168075084 | 0.088966863 | 0.114285448 |
| 0.103843268 | 0.176787026 | 0.153004719 | 0.000303363 |
| 0.251866496 | 0.007854549 | 0.096483171 | 0.025082628 |
| 0.071071234 | 0.008922034 | 0.348701614 | 0.363336638 |
| 0.17342419  | 0.12050691  | 0.093602357 | 0.367704995 |
| 0.025191002 | 0.147386791 | 0.111673698 | 0.288642879 |
| 0.052576032 | 0.213754349 | 0.196290048 | 0.120258803 |
| 0.227873791 | 0.090206179 |             |             |
| PREP        | 0.008772542 | 0.155999052 | 0.005122224 |
| 0.015493811 | 0.197461797 | 0.081291416 | 0.007026964 |
| 0.016132082 | 0.111375795 | 0.048162783 | 0.169448306 |
| 0.001749397 | 0.028157017 | 0.248451234 | 0.005560932 |
| 0.258230372 | 0.004208209 | 0.026742176 | 0.005442597 |
| 0.01027592  | 0.208088006 | 0.091968654 | 0.095837011 |
| 0.147056908 | 0.050442511 | 0.096121237 | 0.170237424 |
| 0.230885438 | 0.053052861 | 0.217765071 | 0.017605187 |
| 0.195028143 | 0.249900678 | 0.174969153 | 0.00035462  |

|             |             |             |             |
|-------------|-------------|-------------|-------------|
| 0.140856647 | 0.002760094 | 0.174275644 | 0.113781094 |
| 0.032398294 | 0.136107343 | 0.067571629 | 0.087990881 |
| 0.120434333 | 0.003960735 | 0.016672488 | 0.240836885 |
| 0.086959839 | 0.040577566 | 0.007076452 | 0.179245242 |
| 0.076952292 | 0.119540458 | 0.147260916 | 0.002240497 |
| 0.183586356 | 0.049442327 | 0.142015458 | 0.199407248 |
| 0.071506019 | 0.031629438 | 0.049997711 | 0.036612432 |
| 0.169010318 | 0.187750783 | 0.079461708 | 0.095689061 |
| 0.24182009  | 0.088751946 | 0.219627317 | 0.012632182 |
| 0.111481028 | 0.00136615  | 0.048007393 | 0.009003473 |
| 0.095394719 | 0.068081802 | 0.154439615 | 0.137744396 |
| 0.172898175 | 0.207976375 | 0.068099028 | 0.190317393 |
| 0.024632093 | 0.235737397 | 0.084637872 | 0.155865111 |
| 0.172724783 | 0.007951302 | 0.256087274 | 0.243692173 |
| 0.002872438 | 0.128028535 | 0.219278528 | 0.024289422 |
| 0.16394597  | 0.056700905 | 0.132243245 | 0.106752231 |
| 0.239867202 | 0.259774096 | 0.17188384  | 0.153540027 |
| 0.110644071 | 0.010562748 | 0.163335338 | 0.255116939 |
| 0.128469206 | 0.012239553 | 0.091850901 | 0.276634741 |
| 0.216313378 | 0.243675089 | 0.203042484 | 0.204307159 |
| 0.272314121 | 0.235621192 | 0.212658759 | 0.164747907 |
| 0.011654725 | 0.225219712 | 0.045885693 | 0.004946475 |
| 0.007005051 | 0.011211237 | 0.046646214 | 0.114377109 |
| 0.242445154 | 0.116153825 | 0.053979957 | 0.115940432 |
| 0.292543478 | 0.164695581 | 0.227959738 | 0.23952614  |
| 0.004500816 | 0.075099624 | 0.258041018 | 0.030032545 |
| 0.220059523 | 0.019544723 | 0.204951798 | 0.197203889 |
| 0.181471811 | 0.275697038 | 0.020168605 | 0.177419759 |
| 0.0391013   | 0.245564295 | 0.198657139 | 0.06284023  |
| 0.213445711 | 0.183402293 | 0.267319343 | 0.293214162 |
| 0.178517586 | 0.107020145 | 0.008772633 | 0.179945571 |
| 0.241495038 | 0.008948567 | 0.25490109  | 0.276390613 |
| 0.213242209 | 0.301072069 | 0.274411385 | 0.249673912 |
| 0.210174376 | 0.0106382   | 0.006657114 | 0.195267592 |
| 0.216528006 | 0.203176053 | 0.018646171 | 0.236509033 |
| 0.229796279 | 0.102174374 | 0.196420686 | 0.070512815 |
| 0.2375703   | 0.216527101 | 0.242011079 | 0.204833472 |
| 0.075781069 | 0.117909155 | 0.231068651 | 0.15840855  |
| 0.002470929 | 0.020013106 | 0.006658908 | 0.114199287 |
| 0.040188668 | 0.066280715 | 0.102323254 | 0.163852656 |
| 0.078306406 | 0.059735789 | 0.139636075 | 0.284306346 |
| 0.007202666 | 0.198580193 | 0.029084176 | 0.050397859 |
| 0.006784493 | 0.032245253 | 0.037053809 | 0.021221    |
| 0.133587704 | 0.057194565 | 0.232307864 | 0.238757588 |
| 0.109552914 | 0.051297378 | 0.208384344 | 0.229911927 |
| 0.236106183 | 0.237613043 | 0.075013245 | 0.001801837 |
| 0.096845563 | 0.080847215 | 0.114167762 | 0.185005176 |
| 0.035888031 | 0.083640554 | 0.257409819 | 0.287221063 |
| 0.085861112 | 0.016480935 | 0.152000023 | 0.159463906 |
| 0.033490521 | 0.119562498 | 0.294576848 | 0.165908913 |
| 0.001106166 | 0.149786664 | 0.257436615 | 0.027076647 |
| 0.134508593 | 0.050881224 | 0.084648847 | 0.273495547 |
| 0.087931747 | 0.111361837 | 0.241686771 | 0.241010902 |
| 0.030823733 | 0.050593815 | 0.262020253 | 0.040667075 |

|             |             |             |             |
|-------------|-------------|-------------|-------------|
| 0.139450316 | 0.012958553 | 0.171008799 | 0.067921323 |
| 0.098224132 | 0.150582701 | 0.212253607 | 0.114954126 |
| 0.026547334 | 0.233600056 | 0.152760717 | 0.259365469 |
| 0.166932906 | 0.260071071 | 0.288851842 | 0.240720032 |
| 0.136438214 | 0.158598604 | 0.078572178 | 0.277975788 |
| 0.259359972 | 0.042128355 | 0.010009943 | 0.249072062 |
| 0.12989323  | 0.293724438 | 0.01458588  | 0.277791596 |
| 0.195650344 | 0.168352144 | 0.039508689 | 0.245841928 |
| 0.221518744 | 0.073122605 | 0.180216426 | 0.252289925 |
| 0.057990142 | 0.246634235 | 0.175409642 | 0.251070053 |
| 0.054097204 | 0.094727488 | 0.102960498 | 0.075676012 |
| 0.006992558 | 0.010689993 | 0.011363987 | 0.066506344 |
| 0.111298156 | 0.176077384 | 0.217141513 | 0.257435531 |
| 0.033304966 | 0.166651586 | 0.068618205 | 0.165496356 |
| 0.206156088 | 0.152318751 | 0.197227886 | 0.205394567 |
| 0.073917534 | 0.001170534 | 0.015113743 | 0.214286253 |
| 0.003374116 | 0.129652738 | 0.075579703 | 0.000611545 |
| 0.006329959 | 0.163157732 | 0.017574245 | 0.051580434 |
| 0.267063768 | 0.050902044 | 0.077146177 | 0.075654558 |
| 0.176294631 | 0.015840882 | 0.000310323 | 0.229366037 |
| 0.190150467 | 0.177181532 | 0.190373065 | 0.150206397 |
| 0.207486926 | 0.154392431 | 0.256787628 | 0.084439069 |
| 0.013505071 | 0.008483505 | 0.143024443 | 0.165556837 |
| 0.000550676 | 0.189528645 | 0.109235777 | 0.042440085 |
| 0.251734255 | 0.129422206 | 0.003674647 | 0.175290624 |
| 0.001867278 | 0.158625309 | 0.054087638 | 0.05466843  |
| 0.19872445  | 0.000164147 | 0.041755725 | 0.114324761 |
| 0.161763804 | 0.141600952 | 0.132475273 | 0.228380908 |
| 0.16879286  | 0.026028935 | 0.156361757 | 0.217456854 |
| 0.010746242 | 0.020630566 | 0.074224846 | 0.006935297 |
| 0.011000699 | 0.157364964 | 0.102265382 | 0.003689163 |
| 0.131476466 | 7.10E-05    | 0.155412038 | 0.240630598 |
| 0.167826001 | 0.284108589 | 0.239666457 | 0.199591218 |
| 0.234384823 | 0.036412451 | 0.25001536  | 0.178551554 |
| 0.132159783 | 0.000273036 | 0.000413951 | 0.275136997 |
| 0.263373327 | 0.005989479 | 0.04860126  | 0.042083535 |
| 0.018933211 | 0.02277407  | 0.005732384 | 0.095369389 |
| 0.158216846 | 0.137534456 | 0.068776874 | 0.190020371 |
| 0.091545836 | 0.079781575 | 0.092738256 | 0.013924471 |
| 0.178146205 | 0.005796224 | 0.012526974 | 0.002128157 |
| 0.199221855 | 0.022582397 | 0.152347075 | 0.221398476 |
| 0.2369301   | 0.246861922 | 0.098174794 | 0.028125434 |
| 0.195220361 | 0.015709035 | 0.046033981 | 0.017203146 |
| 0.208664868 | 0.305393877 | 0.178616515 | 0.13930704  |
| 0.279717814 | 0.223694337 | 0.003482313 | 0.269134173 |
| 0.000669406 | 0.000321391 | 0.115183075 | 0.089854567 |
| 0.003690506 | 0.224146579 | 0.109083523 | 0.032565374 |
| 0.033290554 | 0.002011251 | 0.17118366  | 0.188001358 |
| 0.160271791 | 0.191054972 | 0.224139352 | 0.065431792 |
| 0.094825551 | 0.038213739 | 0.040600864 | 0.027711271 |
| 0.01661142  | 0.116093832 | 0.059399653 | 0.001171392 |
| 0.161679243 | 0.242751177 | 0.008766083 | 0.037061855 |
| 0.257372249 | 0.2843883   | 0.003819474 | 0.002275003 |
| 0.10248139  | 0.124419895 | 0.287671994 | 0.213220842 |



|             |             |             |             |
|-------------|-------------|-------------|-------------|
| 0.211361376 | 0.261362478 | 0.146024869 | 0.038419473 |
| 0.00767795  | 0.153263903 | 0.209404738 | 0.017222125 |
| 0.241427121 | 0.010389759 | 0.181051273 | 0.214625217 |
| 0.024724007 | 0.049336453 | 0.002736181 | 0.014462996 |
| 0.235615454 | 0.053782313 | 0.076996173 | 0.038338944 |
| 0.165471276 | 0.077543876 | 0.004977396 | 0.070609447 |
| 0.189698931 | 0.077201612 | 0.051629296 | 0.040233606 |
| 0.114962081 | 0.010343477 | 0.294763544 | 0.219499403 |
| 0.029243011 | 0.020550269 | 0.050311319 | 0.160272301 |
| 0.240916602 | 0.140570306 | 0.002015748 | 0.180231643 |
| 0.237725975 | 0.260828057 | 0.195343842 | 0.233807248 |
| 0.014171449 | 0.256285385 | 0.136105766 | 0.233371018 |
| 0.056319181 | 0.082256082 | 0.070305085 | 0.010140095 |
| 0.096085278 | 0.173792117 | 0.198643348 | 0.056615665 |
| 0.140711208 | 0.020596796 | 0.008011966 | 0.186291562 |
| 0.116707505 | 0.011146338 | 0.077415579 | 0.225988668 |
| 0.000150208 | 0.092354257 | 0.239896574 | 0.048210406 |
| 0.209745862 | 0.276136231 | 0.206561703 | 0.023828744 |
| 0.002151274 | 0.265518419 | 0.240119537 | 0.179454076 |
| 0.211409321 | 0.123374769 | 0.004444213 | 0.014012741 |
| 0.121829631 | 0.01329256  | 0.039284282 | 0.018953463 |
| 0.05008785  | 0.176065093 | 0.069500801 | 0.051886495 |
| 0.068670065 | 0.013159136 | 0.056630276 | 0.053514796 |
| 0.020675174 | 0.101767331 | 0.203809231 | 0.031389417 |
| 1           | 0.23299746  | 0.233410348 | 0.001577601 |
| 0.170745266 | 0.199002445 | 0.178400358 | 0.002337337 |
| 0.302401828 | 0.000188465 | 0.09387357  | 0.102550359 |
| 0.063249464 | 0.086938313 | 0.144998067 | 0.104356165 |
| 0.153375149 | 0.063754778 | 0.097163304 | 0.103600721 |
| 0.044056779 | 0.042446384 | 0.18383959  | 0.08732807  |
| 0.137467156 | 0.021816566 | 0.015789706 | 0.016064697 |
| 0.003969811 | 0.19160592  | 0.082318633 | 0.009713393 |
| 0.084066541 | 0.090909513 | 0.166053493 | 0.197572243 |
| 0.191876839 | 0.018160018 | 0.101777902 | 0.209811541 |
| 0.032969777 | 0.025293243 | 0.005982426 | 0.106744818 |
| 0.07346314  | 0.10143854  | 0.096291368 | 0.119869159 |
| 0.187156928 | 0.163370477 | 0.078280727 | 0.175683575 |
| 0.126640292 | 0.118134433 | 0.073412763 | 0.018809844 |
| 0.056966495 | 0.027371326 | 0.197944661 | 0.000271126 |
| 0.167116935 | 0.020827493 | 0.28542076  | 0.191716431 |
| 0.138433482 | 0.153700586 | 0.023363737 | 0.020122939 |
| 0.028098859 | 0.047235155 | 0.039609086 | 0.19922482  |
| 0.15498351  | 0.027822793 | 0.18834657  | 0.036561198 |
| 0.24545374  | 0.196192266 | 0.067374117 | 0.057784188 |
| 0.063235777 | 0.042571754 | 0.16861409  | 0.013192305 |
| 0.20178946  | 0.096629373 | 0.093887015 | 0.188731216 |
| 0.100874586 | 0.239562074 | 0.006892957 | 0.266030227 |
| 0.213920117 | 0.024057305 | 0.204089204 | 0.054837965 |
| 0.023750701 | 0.011790761 | 0.14762095  | 0.067550516 |
| 0.039399401 | 0.128916071 | 0.007674213 | 0.057755113 |
| 0.199599369 | 0.055535023 | 0.1881903   | 0.158089355 |
| 0.111064117 | 0.186229478 | 0.027871595 | 0.084573866 |
| 0.173645115 | 0.170287258 | 0.07721528  | 0.097224644 |
| 0.172046281 | 0.019692246 | 0.125283824 | 0.001930548 |

|             |             |             |             |
|-------------|-------------|-------------|-------------|
| 0.279146879 | 0.240251892 | 0.080880625 | 0.005428602 |
| 0.00041744  | 0.187880831 | 0.229636881 | 0.007155705 |
| 0.285907118 | 0.057290708 | 0.10621057  | 0.198078129 |
| 0.038067191 | 0.178695323 | 0.029632562 | 0.267691895 |
| 0.001384933 | 0.07664837  | 0.146290637 | 0.125371072 |
| 0.103771987 | 0.202262525 | 0.246833162 | 0.174986718 |
| 0.004023014 | 0.053022546 | 0.0018391   | 0.153515818 |
| 0.163066891 | 0.218223789 | 0.055092482 | 0.041878486 |
| 0.132248951 | 0.133005412 | 0.046912389 | 0.140630476 |
| 0.000612573 | 0.302122053 | 0.053773812 | 0.178391765 |
| 0.104729699 | 0.154652873 | 0.003544635 | 0.173997038 |
| 0.140827284 | 0.090628629 | 0.082227571 | 0.101544397 |
| 0.191143354 | 0.123827662 | 0.029578542 | 0.025705372 |
| 0.142858532 | 0.009158092 | 0.070088941 | 0.240698663 |
| 0.066087627 | 0.177336594 | 0.313322532 | 0.09146876  |
| 0.182527389 | 0.132564227 | 0.158469495 | 0.217927368 |
| 0.024491145 | 0.107455267 | 0.221172009 | 0.221454884 |
| 0.150282481 | 0.100062879 | 0.174334129 | 0.148106688 |
| 0.173630094 | 0.00765991  | 0.078583406 | 0.164769819 |
| 0.201566484 | 0.125073526 | 0.079635301 | 0.098684708 |
| 0.003451676 | 0.021735358 | 0.0679723   | 0.031031178 |
| 0.164114684 | 0.183989649 | 0.087909399 | 0.173154183 |
| 0.023312626 | 0.004020809 | 0.196871831 | 0.031390916 |
| 0.077465383 | 0.233156175 | 0.070053165 | 0.158422444 |
| 0.053091494 | 0.132001534 | 0.11637069  | 0.000119773 |
| 0.227259241 | 0.004704564 | 0.065765157 | 0.11460039  |
| 0.04783861  | 0.00673095  | 0.170084209 | 0.284289736 |
| 0.086450454 | 0.020487681 | 0.085914681 | 0.188465281 |
| 0.050123298 | 0.107587561 | 0.121998499 | 0.161262371 |
| 0.143097139 | 0.130276922 | 0.135394861 | 0.167024527 |
| 0.149565271 | 0.042350905 |             |             |
| PRIM1       | 0.127645984 | 0.400829798 | 0.09094883  |
| 0.171322446 | 0.35192574  | 0.379224657 | 0.132822813 |
| 0.220204311 | 0.381604103 | 0.3243866   | 0.376952248 |
| 0.04640049  | 0.126029488 | 0.434914188 | 0.130883858 |
| 0.419155046 | 0.085285689 | 0.194829574 | 0.145535328 |
| 0.301159663 | 0.349987259 | 0.3535075   | 0.38510865  |
| 0.364244033 | 0.225962109 | 0.377137602 | 0.409267274 |
| 0.462731726 | 0.25453836  | 0.413478391 | 0.184257895 |
| 0.415328374 | 0.370104129 | 0.380331709 | 0.037566678 |
| 0.427563324 | 0.039727995 | 0.441473674 | 0.335523229 |
| 0.167707858 | 0.352492424 | 0.328776502 | 0.299148698 |
| 0.384210982 | 0.073082902 | 0.200984067 | 0.433309114 |
| 0.376475862 | 0.362770706 | 0.11547115  | 0.417884899 |
| 0.4220727   | 0.368292218 | 0.378463982 | 0.006928575 |
| 0.318447944 | 0.107472301 | 0.262754311 | 0.47329465  |
| 0.26954715  | 0.209498223 | 0.326021517 | 0.349998587 |
| 0.437909184 | 0.432417424 | 0.34023129  | 0.398575062 |
| 0.469593206 | 0.242684053 | 0.423666483 | 0.192760116 |
| 0.427265244 | 0.081720637 | 0.232031203 | 0.151761048 |
| 0.414882136 | 0.280752356 | 0.377351798 | 0.348013759 |
| 0.395968338 | 0.508758575 | 0.320598711 | 0.477014351 |
| 0.202639433 | 0.386879134 | 0.334928418 | 0.371350137 |
| 0.427458031 | 0.186783214 | 0.413335586 | 0.501173696 |

|             |             |             |             |
|-------------|-------------|-------------|-------------|
| 0.116917468 | 0.385541539 | 0.436479245 | 0.196513861 |
| 0.397333307 | 0.343928703 | 0.376197781 | 0.213012393 |
| 0.399477857 | 0.396887521 | 0.477152188 | 0.351056296 |
| 0.374473938 | 0.127776064 | 0.465474642 | 0.360223753 |
| 0.326694627 | 0.13297708  | 0.313180277 | 0.435506919 |
| 0.422797967 | 0.45496003  | 0.422559413 | 0.419943172 |
| 0.409140531 | 0.46487002  | 0.404571419 | 0.412277447 |
| 0.162441593 | 0.496402314 | 0.245445977 | 0.095681794 |
| 0.12724359  | 0.168523519 | 0.352697006 | 0.355219713 |
| 0.425852987 | 0.389017605 | 0.273949558 | 0.315766001 |
| 0.435997671 | 0.452532911 | 0.498182532 | 0.431366313 |
| 0.085921591 | 0.322756201 | 0.398984961 | 0.340531147 |
| 0.434150016 | 0.202871139 | 0.30666033  | 0.491222376 |
| 0.374008803 | 0.436518138 | 0.233786228 | 0.49364708  |
| 0.326887021 | 0.490212097 | 0.40557949  | 0.240262443 |
| 0.49342217  | 0.469211349 | 0.48370054  | 0.404719687 |
| 0.449965966 | 0.352070812 | 0.148324753 | 0.414637523 |
| 0.467873863 | 0.021020875 | 0.441134477 | 0.468295619 |
| 0.468698606 | 0.433052865 | 0.503150752 | 0.47468795  |
| 0.473696345 | 0.138758374 | 0.059973445 | 0.369616393 |
| 0.482817232 | 0.388119545 | 0.247973128 | 0.416421139 |
| 0.414083593 | 0.406811173 | 0.430737386 | 0.321265122 |
| 0.505575123 | 0.416200187 | 0.454623455 | 0.429583961 |
| 0.376047768 | 0.334959587 | 0.392577209 | 0.444608075 |
| 0.092394138 | 0.172137399 | 0.092778931 | 0.383035974 |
| 0.323378367 | 0.259790831 | 0.404819452 | 0.424109446 |
| 0.277710582 | 0.394011398 | 0.343450406 | 0.406109711 |
| 0.099462262 | 0.416676168 | 0.235295381 | 0.254729831 |
| 0.091183421 | 0.198966097 | 0.259782407 | 0.211833751 |
| 0.339080507 | 0.266796902 | 0.432630848 | 0.460381142 |
| 0.420742442 | 0.234392425 | 0.43243137  | 0.456763765 |
| 0.425209763 | 0.388655645 | 0.313867089 | 0.019723829 |
| 0.342935683 | 0.352887607 | 0.241695581 | 0.412078669 |
| 0.210561615 | 0.355764497 | 0.432980764 | 0.404945774 |
| 0.320857465 | 0.243354148 | 0.421649119 | 0.425769617 |
| 0.214270085 | 0.337459145 | 0.429721951 | 0.423385026 |
| 0.009054634 | 0.373296349 | 0.429520765 | 0.250292885 |
| 0.400098502 | 0.181027303 | 0.25415561  | 0.432252618 |
| 0.355021105 | 0.326206452 | 0.456984408 | 0.410503419 |
| 0.368886797 | 0.252800567 | 0.504644468 | 0.095520619 |
| 0.407567039 | 0.076597314 | 0.34943053  | 0.346247462 |
| 0.325560101 | 0.372564451 | 0.365437482 | 0.325646487 |
| 0.176026008 | 0.495775641 | 0.397986571 | 0.477840713 |
| 0.39731596  | 0.506401922 | 0.433026358 | 0.416935551 |
| 0.403279842 | 0.409022732 | 0.178515418 | 0.423062183 |
| 0.425544655 | 0.350897759 | 0.123969073 | 0.437010487 |
| 0.406906452 | 0.427378581 | 0.186600009 | 0.468210123 |
| 0.480682216 | 0.441269861 | 0.238491491 | 0.413240155 |
| 0.390119698 | 0.287518275 | 0.414510337 | 0.514657085 |
| 0.357203533 | 0.414229303 | 0.377997486 | 0.408510577 |
| 0.242462744 | 0.311389458 | 0.353183211 | 0.229182181 |
| 0.009311282 | 0.152765579 | 0.117968558 | 0.244626652 |
| 0.218996206 | 0.412332163 | 0.427073969 | 0.490279856 |
| 0.200634294 | 0.395244076 | 0.331980926 | 0.34309105  |

|             |             |             |             |
|-------------|-------------|-------------|-------------|
| 0.4078569   | 0.420146483 | 0.385318447 | 0.414973015 |
| 0.32047048  | 0.03158566  | 0.167129131 | 0.507665032 |
| 0.083054267 | 0.27646623  | 0.40321102  | 0.004999332 |
| 0.099886669 | 0.393408932 | 0.146583644 | 0.226240794 |
| 0.454757349 | 0.22456074  | 0.275146537 | 0.360647595 |
| 0.384212893 | 0.161860272 | 0.005790322 | 0.464223697 |
| 0.475087875 | 0.454320652 | 0.473919537 | 0.451367237 |
| 0.43388293  | 0.423533379 | 0.428061808 | 0.357373775 |
| 0.183999793 | 0.155458071 | 0.276902856 | 0.362727726 |
| 0.013582266 | 0.394602474 | 0.384630715 | 0.212747408 |
| 0.436199378 | 0.393005121 | 0.08078864  | 0.407145102 |
| 0.037865034 | 0.21751809  | 0.412346066 | 0.331349195 |
| 0.403558436 | 0.035481354 | 0.228845135 | 0.368322066 |
| 0.402387978 | 0.366082814 | 0.363859181 | 0.497681421 |
| 0.367763    | 0.182882228 | 0.352298656 | 0.412325841 |
| 0.143954399 | 0.156855701 | 0.424436744 | 0.032644535 |
| 0.218559995 | 0.451649677 | 0.417216302 | 0.113633123 |
| 0.334741664 | 0.012953721 | 0.362279243 | 0.504689574 |
| 0.432931991 | 0.489896775 | 0.465942452 | 0.295313573 |
| 0.471025005 | 0.139849874 | 0.495689581 | 0.401367529 |
| 0.38491879  | 0.001522987 | 0.016962712 | 0.445235765 |
| 0.409192029 | 0.096808354 | 0.235804867 | 0.330631853 |
| 0.180127688 | 0.226636179 | 0.13489225  | 0.240611174 |
| 0.406340008 | 0.311363283 | 0.254511319 | 0.453212512 |
| 0.324631819 | 0.327083736 | 0.41655432  | 0.152424665 |
| 0.409588451 | 0.102268662 | 0.1578001   | 0.013368434 |
| 0.41142817  | 0.162114764 | 0.456233474 | 0.47807778  |
| 0.474555126 | 0.406264278 | 0.336364022 | 0.368483947 |
| 0.427688816 | 0.14284463  | 0.360590141 | 0.168453993 |
| 0.448954995 | 0.416825191 | 0.362336042 | 0.334160991 |
| 0.484183534 | 0.446426508 | 0.080795416 | 0.424857867 |
| 0.021263622 | 0.005449144 | 0.365770045 | 0.353320124 |
| 0.144179684 | 0.416332976 | 0.31375822  | 0.35299189  |
| 0.339133495 | 0.061296645 | 0.319848592 | 0.302751533 |
| 0.362886218 | 0.41872947  | 0.330986667 | 0.331547122 |
| 0.338572667 | 0.222317931 | 0.276726687 | 0.266808018 |
| 0.354858466 | 0.338080407 | 0.228759998 | 0.059355545 |
| 0.407689871 | 0.410875796 | 0.111406639 | 0.229169156 |
| 0.418115956 | 0.453957871 | 0.105334142 | 0.023987942 |
| 0.318415433 | 0.411443063 | 0.470619461 | 0.462549557 |
| 0.500299683 | 0.503029707 | 0.397177096 | 0.231243609 |
| 0.127094978 | 0.3840696   | 0.348427877 | 0.171197201 |
| 0.481576609 | 0.121689498 | 0.45321627  | 0.335508504 |
| 0.197217442 | 0.27974274  | 0.070793621 | 0.16203289  |
| 0.393093466 | 0.263390468 | 0.261354911 | 0.197631679 |
| 0.385155196 | 0.281809659 | 0.109867961 | 0.28344036  |
| 0.396808458 | 0.21925752  | 0.246230302 | 0.374356492 |
| 0.379912242 | 0.279522331 | 0.431886424 | 0.445207843 |
| 0.197372397 | 0.20006841  | 0.30155349  | 0.423952243 |
| 0.430020067 | 0.399395524 | 0.038930922 | 0.41762595  |
| 0.466858721 | 0.42575039  | 0.465892143 | 0.415049856 |
| 0.151493109 | 0.387438408 | 0.384895678 | 0.405980482 |
| 0.289551604 | 0.377053634 | 0.349690802 | 0.12435883  |
| 0.345710704 | 0.483043207 | 0.400997063 | 0.238899689 |

|             |             |             |             |
|-------------|-------------|-------------|-------------|
| 0.416508597 | 0.195060806 | 0.109342005 | 0.421190828 |
| 0.24298358  | 0.152213373 | 0.358079147 | 0.438096275 |
| 0.003321752 | 0.179088883 | 0.472847501 | 0.304286279 |
| 0.503981783 | 0.449278661 | 0.422097726 | 0.33743235  |
| 0.004663685 | 0.421470558 | 0.398686649 | 0.392211496 |
| 0.408593226 | 0.379720802 | 0.239672753 | 0.1399414   |
| 0.336579384 | 0.126016427 | 0.234900017 | 0.338542566 |
| 0.228156313 | 0.432054577 | 0.28121685  | 0.315765061 |
| 0.289887327 | 0.160061338 | 0.272174317 | 0.295429855 |
| 0.245010497 | 0.30730957  | 0.387834707 | 0.311482675 |
| 0.23299746  | 1           | 0.419085619 | 0.057474952 |
| 0.386361698 | 0.42406261  | 0.413642603 | 0.006815384 |
| 0.426136023 | 0.021036282 | 0.28909989  | 0.278138675 |
| 0.279395966 | 0.327338732 | 0.342616617 | 0.335247724 |
| 0.415347671 | 0.316206763 | 0.316604054 | 0.304969101 |
| 0.229122835 | 0.306318765 | 0.413496502 | 0.397933091 |
| 0.313966848 | 0.19078627  | 0.143850589 | 0.135201356 |
| 0.093855097 | 0.428470068 | 0.287717797 | 0.115815622 |
| 0.319023274 | 0.414938101 | 0.3667995   | 0.460191087 |
| 0.402678458 | 0.15132426  | 0.420041646 | 0.40306014  |
| 0.281057503 | 0.330019851 | 0.124622964 | 0.394301111 |
| 0.314702742 | 0.277418134 | 0.400909674 | 0.350789345 |
| 0.42654234  | 0.39804576  | 0.28643392  | 0.422527142 |
| 0.383409768 | 0.422025075 | 0.308989701 | 0.143919625 |
| 0.246147062 | 0.208201451 | 0.324192681 | 0.004764812 |
| 0.406402081 | 0.284017617 | 0.42951453  | 0.456967744 |
| 0.329628017 | 0.379753315 | 0.307877494 | 0.153385445 |
| 0.259260228 | 0.204051914 | 0.215101946 | 0.422888328 |
| 0.243420148 | 0.256281169 | 0.354021073 | 0.327504053 |
| 0.428389961 | 0.42775024  | 0.344366589 | 0.358544823 |
| 0.338546212 | 0.258358377 | 0.470466533 | 0.183729036 |
| 0.418629551 | 0.232035495 | 0.376292964 | 0.360544497 |
| 0.314468882 | 0.481635853 | 0.11363138  | 0.491197266 |
| 0.399557396 | 0.193078553 | 0.483579227 | 0.365478339 |
| 0.333545137 | 0.183557273 | 0.226170564 | 0.404221735 |
| 0.336868581 | 0.352271183 | 0.022706521 | 0.110458983 |
| 0.37620485  | 0.39654309  | 0.410843537 | 0.422171408 |
| 0.314059352 | 0.393239316 | 0.204060497 | 0.380453431 |
| 0.450840868 | 0.477599087 | 0.315951263 | 0.319646232 |
| 0.404706379 | 0.17077116  | 0.385101239 | 0.039923403 |
| 0.431397527 | 0.413140893 | 0.404301009 | 0.118757573 |
| 0.049887144 | 0.250282386 | 0.426627128 | 0.131427087 |
| 0.455548448 | 0.22487089  | 0.403221996 | 0.415178204 |
| 0.261121318 | 0.478265232 | 0.211267566 | 0.410393926 |
| 0.118809766 | 0.337318017 | 0.399904587 | 0.429690662 |
| 0.27063151  | 0.340293295 | 0.39787854  | 0.270623014 |
| 0.073419157 | 0.321664584 | 0.006936212 | 0.405763357 |
| 0.451811279 | 0.382593684 | 0.267065261 | 0.331611022 |
| 0.340628232 | 0.395113015 | 0.36376005  | 0.402334279 |
| 0.024032945 | 0.388443238 | 0.284263823 | 0.390668011 |
| 0.239132251 | 0.430407874 | 0.097278798 | 0.391446472 |
| 0.44606382  | 0.369068487 | 0.327051654 | 0.323977935 |
| 0.453413666 | 0.392666577 | 0.207740911 | 0.287466661 |
| 0.415999994 | 0.120526528 | 0.368699905 | 0.508473029 |

|             |             |             |             |
|-------------|-------------|-------------|-------------|
| 0.259336678 | 0.25839139  | 0.42932449  | 0.286610072 |
| 0.362043163 | 0.382482945 | 0.410718314 | 0.50469643  |
| 0.148987272 | 0.317625035 | 0.430201737 | 0.443223891 |
| 0.356427913 | 0.252405053 | 0.294256577 | 0.319580095 |
| 0.422493432 | 0.137426737 | 0.338795118 | 0.388984396 |
| 0.266687497 | 0.377154679 | 0.363507779 | 0.278605717 |
| 0.077673525 | 0.284172158 | 0.367866963 | 0.221025967 |
| 0.375189917 | 0.395623248 | 0.317640618 | 0.37997469  |
| 0.178860302 | 0.043530845 | 0.441917507 | 0.029497808 |
| 0.345390373 | 0.396182699 | 0.324449803 | 0.393509755 |
| 0.228270677 | 0.418894989 | 0.374980107 | 0.004271468 |
| 0.428185113 | 0.059899611 | 0.385952623 | 0.28710026  |
| 0.359059971 | 0.11038964  | 0.427755259 | 0.486049053 |
| 0.372978795 | 0.350594086 | 0.346100974 | 0.444448436 |
| 0.187704678 | 0.345929867 | 0.399875477 | 0.405009029 |
| 0.264710419 | 0.376362536 | 0.411240609 | 0.359392429 |
| 0.40487028  | 0.348614794 |             |             |
| PRIM2       | 0.105491916 | 0.410041116 | 0.08559193  |
| 0.186080976 | 0.282010476 | 0.3348055   | 0.099239477 |
| 0.164612456 | 0.319619103 | 0.28818956  | 0.329951538 |
| 0.038435321 | 0.067526247 | 0.445980871 | 0.084918174 |
| 0.362312307 | 0.05909219  | 0.152540399 | 0.091535735 |
| 0.243320517 | 0.27833224  | 0.284497824 | 0.34295063  |
| 0.271230051 | 0.212432902 | 0.340848799 | 0.330417542 |
| 0.481697155 | 0.221541133 | 0.365508084 | 0.206932466 |
| 0.429767407 | 0.300192201 | 0.322681686 | 0.033871105 |
| 0.35589763  | 0.014879171 | 0.458615868 | 0.29336841  |
| 0.141766443 | 0.350604203 | 0.31363806  | 0.26155101  |
| 0.376223925 | 0.068354039 | 0.180936446 | 0.371424335 |
| 0.325701923 | 0.26743586  | 0.098274797 | 0.374832067 |
| 0.353033397 | 0.316951358 | 0.352593105 | 0.005538373 |
| 0.25597638  | 0.07416545  | 0.202423036 | 0.48773963  |
| 0.22239091  | 0.149960325 | 0.281405003 | 0.240600614 |
| 0.352455988 | 0.344871462 | 0.249056473 | 0.371542258 |
| 0.490195756 | 0.167267428 | 0.369959985 | 0.173057697 |
| 0.374170156 | 0.060842526 | 0.190345573 | 0.119240415 |
| 0.342764783 | 0.21046428  | 0.293028286 | 0.277191474 |
| 0.428447689 | 0.510179007 | 0.253869453 | 0.500674254 |
| 0.110710002 | 0.30911214  | 0.253922434 | 0.297805139 |
| 0.346733208 | 0.126039353 | 0.379275758 | 0.520113461 |
| 0.077376648 | 0.35341611  | 0.385330117 | 0.160028747 |
| 0.396044765 | 0.234056794 | 0.360818806 | 0.150895908 |
| 0.328478981 | 0.338705217 | 0.47140997  | 0.30961407  |
| 0.263616629 | 0.112491535 | 0.48272437  | 0.287322673 |
| 0.281006758 | 0.121897897 | 0.255203206 | 0.422641778 |
| 0.39267804  | 0.473134331 | 0.403527984 | 0.355500061 |
| 0.363712025 | 0.485714013 | 0.382537672 | 0.388854784 |
| 0.133793728 | 0.510264348 | 0.218576308 | 0.062707419 |
| 0.108982654 | 0.102706225 | 0.227630696 | 0.278759836 |
| 0.435745104 | 0.314651715 | 0.242273313 | 0.258702586 |
| 0.434172587 | 0.471051667 | 0.514680551 | 0.392414843 |
| 0.068831546 | 0.224084075 | 0.370417638 | 0.250782819 |
| 0.364874779 | 0.143653379 | 0.242758872 | 0.510075597 |
| 0.377640607 | 0.395596231 | 0.200158287 | 0.499532896 |

|             |             |             |             |
|-------------|-------------|-------------|-------------|
| 0.227076765 | 0.501548751 | 0.43432347  | 0.211527015 |
| 0.514342197 | 0.490780427 | 0.495510626 | 0.344885277 |
| 0.458244173 | 0.343121262 | 0.081048264 | 0.365151118 |
| 0.464153571 | 0.016473221 | 0.447265832 | 0.479444252 |
| 0.496346561 | 0.42917607  | 0.505119903 | 0.481292516 |
| 0.492769711 | 0.109234203 | 0.039895475 | 0.293207025 |
| 0.511311383 | 0.386602828 | 0.141619803 | 0.383764591 |
| 0.329511181 | 0.362469048 | 0.354627377 | 0.312458503 |
| 0.500627927 | 0.423248656 | 0.463627549 | 0.374698358 |
| 0.319831875 | 0.321849465 | 0.331283509 | 0.466582714 |
| 0.068141514 | 0.155565701 | 0.082999083 | 0.291915189 |
| 0.311411899 | 0.199636116 | 0.37771344  | 0.324827835 |
| 0.218024613 | 0.319769481 | 0.272312217 | 0.336533615 |
| 0.086584864 | 0.382529146 | 0.197655794 | 0.233483765 |
| 0.072953352 | 0.161424684 | 0.242035399 | 0.168332416 |
| 0.256739945 | 0.272011778 | 0.374845732 | 0.468638047 |
| 0.325587243 | 0.21747532  | 0.385068051 | 0.456393129 |
| 0.419010974 | 0.343125165 | 0.238788897 | 0.022941852 |
| 0.33876003  | 0.285950827 | 0.174724427 | 0.343647682 |
| 0.20257183  | 0.303738354 | 0.382224163 | 0.343267949 |
| 0.310835689 | 0.173876905 | 0.362210225 | 0.423362213 |
| 0.185597496 | 0.281342539 | 0.429888044 | 0.382508123 |
| 0.00814398  | 0.362513052 | 0.40369148  | 0.16754847  |
| 0.332326426 | 0.129129979 | 0.208317977 | 0.455048333 |
| 0.275334833 | 0.218422663 | 0.457276699 | 0.332484555 |
| 0.30130717  | 0.249509021 | 0.506739121 | 0.065836477 |
| 0.306255523 | 0.065768199 | 0.287749655 | 0.307094667 |
| 0.285566716 | 0.291580266 | 0.2784003   | 0.263662234 |
| 0.163989357 | 0.507654489 | 0.349768053 | 0.491507835 |
| 0.370872273 | 0.514881772 | 0.425784522 | 0.418667763 |
| 0.338435794 | 0.33672928  | 0.124449449 | 0.41180702  |
| 0.439426741 | 0.333545413 | 0.10828502  | 0.386417634 |
| 0.366984117 | 0.368126597 | 0.121213713 | 0.488838342 |
| 0.48308787  | 0.468044338 | 0.165029573 | 0.336964407 |
| 0.362028107 | 0.258465465 | 0.363737602 | 0.507849922 |
| 0.333211027 | 0.354565668 | 0.344365274 | 0.362130769 |
| 0.21663516  | 0.220665714 | 0.304379978 | 0.148700955 |
| 0.007317918 | 0.117063918 | 0.105023763 | 0.179529227 |
| 0.157328383 | 0.354706527 | 0.365271803 | 0.507410705 |
| 0.153892637 | 0.387161943 | 0.248951936 | 0.332202714 |
| 0.438255129 | 0.318446345 | 0.311057038 | 0.332259677 |
| 0.251321604 | 0.030727655 | 0.145788424 | 0.520991439 |
| 0.069895165 | 0.21610517  | 0.307410643 | 0.004569067 |
| 0.085026709 | 0.376232243 | 0.127701425 | 0.220525052 |
| 0.44062376  | 0.226066768 | 0.259732239 | 0.351022354 |
| 0.312083613 | 0.12533138  | 0.004058481 | 0.473160533 |
| 0.467369326 | 0.441665575 | 0.46969582  | 0.443994973 |
| 0.426828927 | 0.337779622 | 0.372671071 | 0.3290984   |
| 0.150699188 | 0.131843959 | 0.244200626 | 0.318674349 |
| 0.009053054 | 0.328389306 | 0.271183176 | 0.176874988 |
| 0.3639666   | 0.311356544 | 0.061526118 | 0.301459993 |
| 0.046981412 | 0.191433511 | 0.3281164   | 0.226442593 |
| 0.30737171  | 0.029059435 | 0.264114302 | 0.345688341 |
| 0.427525325 | 0.340245713 | 0.30980341  | 0.514560991 |

|             |             |             |             |
|-------------|-------------|-------------|-------------|
| 0.322073855 | 0.171020699 | 0.319357594 | 0.33481114  |
| 0.113182312 | 0.155260402 | 0.345773405 | 0.046430672 |
| 0.155500516 | 0.433108333 | 0.333877077 | 0.119619601 |
| 0.304934032 | 0.012819627 | 0.367151931 | 0.513587768 |
| 0.456840241 | 0.504466673 | 0.483117569 | 0.243335316 |
| 0.497224809 | 0.089908721 | 0.508728365 | 0.39347184  |
| 0.369374219 | 0.002735103 | 0.008046801 | 0.463917102 |
| 0.380854776 | 0.085069358 | 0.19710946  | 0.32415928  |
| 0.148983581 | 0.199004622 | 0.086740752 | 0.182671822 |
| 0.354436638 | 0.227984228 | 0.158716559 | 0.473410888 |
| 0.277769353 | 0.237060132 | 0.362383197 | 0.121832302 |
| 0.334893557 | 0.084522807 | 0.121958134 | 0.011557682 |
| 0.321654724 | 0.146187356 | 0.471814844 | 0.492039966 |
| 0.484797639 | 0.348594173 | 0.317909603 | 0.285797679 |
| 0.394290569 | 0.131845417 | 0.300704857 | 0.147141001 |
| 0.47959503  | 0.382993834 | 0.316172026 | 0.31086553  |
| 0.497398117 | 0.470721896 | 0.058108883 | 0.382708952 |
| 0.02151896  | 0.001753473 | 0.372583756 | 0.26398337  |
| 0.062462623 | 0.363679229 | 0.274160805 | 0.244441131 |
| 0.214871326 | 0.055135129 | 0.253059913 | 0.245291871 |
| 0.314254111 | 0.361319488 | 0.2622106   | 0.247901782 |
| 0.256056476 | 0.172729382 | 0.196046381 | 0.175701203 |
| 0.233837382 | 0.325270113 | 0.222513542 | 0.042704604 |
| 0.380016851 | 0.37227293  | 0.088592335 | 0.184653728 |
| 0.416414358 | 0.474306159 | 0.080088314 | 0.023014407 |
| 0.273230742 | 0.312841602 | 0.474650701 | 0.482634555 |
| 0.516131288 | 0.511840859 | 0.394588036 | 0.15551734  |
| 0.096576328 | 0.312738456 | 0.271274264 | 0.110435824 |
| 0.490123845 | 0.108197983 | 0.459656929 | 0.263446986 |
| 0.152650492 | 0.25816408  | 0.052350067 | 0.117899323 |
| 0.321533565 | 0.198990571 | 0.195351622 | 0.197651981 |
| 0.333256853 | 0.219336017 | 0.079362121 | 0.231557929 |
| 0.35414545  | 0.199946761 | 0.20174121  | 0.280814724 |
| 0.32498983  | 0.216836301 | 0.38677681  | 0.448772709 |
| 0.163837432 | 0.159544366 | 0.32861709  | 0.329580173 |
| 0.412541623 | 0.344338009 | 0.035753542 | 0.440991938 |
| 0.459121611 | 0.385214195 | 0.482390079 | 0.371552572 |
| 0.120959834 | 0.347798418 | 0.287290176 | 0.348926035 |
| 0.213642691 | 0.332133083 | 0.244392459 | 0.096737816 |
| 0.282746418 | 0.47235311  | 0.420668609 | 0.189282187 |
| 0.345663253 | 0.164792305 | 0.09933584  | 0.399131939 |
| 0.20256347  | 0.138123839 | 0.322722173 | 0.380323463 |
| 0.003072145 | 0.117620597 | 0.462879261 | 0.227288735 |
| 0.498084264 | 0.468974007 | 0.437853456 | 0.23658199  |
| 0.00302865  | 0.366549779 | 0.361977288 | 0.384154513 |
| 0.428962277 | 0.318721458 | 0.13421053  | 0.10824642  |
| 0.274288381 | 0.11504842  | 0.190199324 | 0.297911647 |
| 0.199487787 | 0.381740546 | 0.213754457 | 0.236775548 |
| 0.211350426 | 0.130178229 | 0.198306859 | 0.246994392 |
| 0.145919707 | 0.249042412 | 0.334809384 | 0.258797714 |
| 0.233410348 | 0.419085619 | 1           | 0.046151083 |
| 0.292831945 | 0.383841137 | 0.392921808 | 0.009074798 |
| 0.38390674  | 0.015209497 | 0.208330176 | 0.22962556  |
| 0.208114769 | 0.232647854 | 0.254925271 | 0.287793908 |



|             |             |             |             |
|-------------|-------------|-------------|-------------|
| 0.360694487 | 0.256047248 | 0.283654586 | 0.248451532 |
| 0.176895672 | 0.230099076 | 0.346060826 | 0.358573721 |
| 0.271924651 | 0.160055903 | 0.123230767 | 0.133806952 |
| 0.070878571 | 0.424037954 | 0.246791581 | 0.103381582 |
| 0.232004488 | 0.351305561 | 0.342353273 | 0.485059962 |
| 0.383728302 | 0.137141531 | 0.317367569 | 0.427220405 |
| 0.237105965 | 0.290551112 | 0.100022672 | 0.354703625 |
| 0.242067431 | 0.221857569 | 0.338134583 | 0.348109373 |
| 0.375052178 | 0.403857994 | 0.237345974 | 0.414912333 |
| 0.338746013 | 0.336364976 | 0.317091653 | 0.114227685 |
| 0.234280819 | 0.166451706 | 0.254245323 | 0.005476553 |
| 0.334912053 | 0.281386263 | 0.447835622 | 0.4852556   |
| 0.246512909 | 0.357445986 | 0.310505705 | 0.145213402 |
| 0.271075126 | 0.221879579 | 0.174180875 | 0.369915273 |
| 0.19222997  | 0.193507305 | 0.294517105 | 0.302808077 |
| 0.376952674 | 0.366948417 | 0.233979649 | 0.260261575 |
| 0.244524939 | 0.226140142 | 0.470695712 | 0.154964459 |
| 0.383244073 | 0.186978507 | 0.3272043   | 0.319362315 |
| 0.239707461 | 0.491578977 | 0.087752637 | 0.505107571 |
| 0.347523796 | 0.155404558 | 0.479394427 | 0.267125732 |
| 0.267955465 | 0.116267114 | 0.171975235 | 0.342938133 |
| 0.247262574 | 0.276571687 | 0.020503665 | 0.09158639  |
| 0.314820173 | 0.2870205   | 0.381112687 | 0.331016113 |
| 0.231505495 | 0.311912941 | 0.120093676 | 0.319661061 |
| 0.475008117 | 0.489372387 | 0.313123903 | 0.257269799 |
| 0.335926185 | 0.128654509 | 0.349980538 | 0.018803627 |
| 0.393937422 | 0.366303811 | 0.352588248 | 0.076037163 |
| 0.035483844 | 0.215354659 | 0.40284462  | 0.103634035 |
| 0.4581289   | 0.184690374 | 0.331800555 | 0.361966553 |
| 0.196052543 | 0.497837815 | 0.135942879 | 0.364023662 |
| 0.087859021 | 0.259305217 | 0.313851486 | 0.339959062 |
| 0.247018354 | 0.283346447 | 0.355200412 | 0.21582317  |
| 0.055805855 | 0.263283812 | 0.008590781 | 0.417446521 |
| 0.478261852 | 0.326412417 | 0.212477334 | 0.266772197 |
| 0.270056925 | 0.34227335  | 0.253883194 | 0.342428549 |
| 0.019163493 | 0.342942019 | 0.203918331 | 0.384954355 |
| 0.267101262 | 0.364050218 | 0.075557753 | 0.294442127 |
| 0.46007041  | 0.324186667 | 0.248029008 | 0.351519894 |
| 0.47257827  | 0.342735607 | 0.188028154 | 0.186200007 |
| 0.349533014 | 0.096534303 | 0.324022162 | 0.512072998 |
| 0.19139208  | 0.208062144 | 0.409317172 | 0.257151219 |
| 0.275069815 | 0.358481914 | 0.356512468 | 0.499965111 |
| 0.095815117 | 0.257981728 | 0.35720115  | 0.456362091 |
| 0.279830245 | 0.169046388 | 0.234969036 | 0.252840392 |
| 0.453666757 | 0.122679541 | 0.252845134 | 0.351018759 |
| 0.226477817 | 0.2853157   | 0.31260478  | 0.191954238 |
| 0.053152979 | 0.179326835 | 0.303626871 | 0.17251086  |
| 0.309991418 | 0.349298528 | 0.245492664 | 0.37858427  |
| 0.144578411 | 0.04448562  | 0.440056347 | 0.028156825 |
| 0.309659497 | 0.349747211 | 0.237234119 | 0.318221566 |
| 0.204198556 | 0.351292262 | 0.370496723 | 0.003946728 |
| 0.368453588 | 0.04553172  | 0.25971651  | 0.247108155 |
| 0.273769761 | 0.089174945 | 0.435272839 | 0.490536711 |
| 0.292741505 | 0.258193856 | 0.306251367 | 0.443455623 |

|             |             |             |             |
|-------------|-------------|-------------|-------------|
| 0.143493158 | 0.277572007 | 0.306212349 | 0.377072934 |
| 0.195372972 | 0.362679778 | 0.352676679 | 0.326917717 |
| 0.347618193 | 0.250939357 |             |             |
| PRKAR1A     | 0.204678143 | 0.056012603 | 0.206539394 |
| 0.082660877 | 0.025710875 | 0.019549155 | 0.135727762 |
| 0.097752285 | 0.054026165 | 0.00322346  | 0.042328993 |
| 0.216499906 | 0.001028884 | 0.064823131 | 0.141297285 |
| 0.017399005 | 0.17600392  | 0.180026389 | 0.009104705 |
| 0.026735022 | 0.02763252  | 0.006201533 | 0.030580305 |
| 0.021787865 | 0.276199941 | 0.047508504 | 0.007628056 |
| 0.053732989 | 0.001199197 | 0.023955871 | 0.002173521 |
| 0.125073345 | 0.021674322 | 0.005239821 | 0.21002605  |
| 0.022971354 | 0.000826943 | 0.131943021 | 0.035842435 |
| 0.004516003 | 0.160551195 | 0.00940612  | 0.070441529 |
| 0.010232717 | 0.188028868 | 0.001290921 | 0.015901655 |
| 0.038581705 | 0.029631488 | 0.216963111 | 0.030162416 |
| 0.007936794 | 0.09338737  | 0.024925701 | 0.007321613 |
| 0.003646823 | 0.001535296 | 0.000727737 | 0.080633404 |
| 0.213345537 | 0.175303699 | 0.001121902 | 0.044065079 |
| 0.016096597 | 0.02915292  | 0.111471061 | 0.005284384 |
| 0.073788815 | 0.001834908 | 0.018738377 | 0.038236373 |
| 0.022331741 | 0.143568961 | 0.25912594  | 0.16710224  |
| 0.007591045 | 0.130289179 | 0.032030937 | 0.005568025 |
| 0.051950649 | 0.111656221 | 0.120626973 | 0.086481946 |
| 0.002506883 | 0.011793907 | 0.011943436 | 0.088947885 |
| 0.040906854 | 0.07408451  | 0.048000998 | 0.090848537 |
| 0.132186803 | 0.01338078  | 0.032145757 | 0.210554144 |
| 0.058766504 | 0.002773533 | 0.009880207 | 0.004459621 |
| 0.02220353  | 0.016405233 | 0.095940099 | 0.124269949 |
| 0.019981654 | 0.246904572 | 0.107965744 | 0.010720928 |
| 0.03095409  | 0.245281498 | 0.012209642 | 0.028223521 |
| 0.029446782 | 0.057787782 | 0.036424375 | 0.059668085 |
| 0.011679261 | 0.069488989 | 0.048299108 | 0.067832249 |
| 0.000301231 | 0.071581451 | 0.164305368 | 0.191564333 |
| 0.146256871 | 0.132643791 | 0.008017159 | 0.138385485 |
| 0.045613467 | 0.074567454 | 0.110928093 | 0.066188223 |
| 0.042111098 | 0.090322114 | 0.06668967  | 0.051659088 |
| 0.226323277 | 0.002089581 | 0.012316052 | 0.041136077 |
| 0.042380647 | 0.202065716 | 0.008139693 | 0.109982286 |
| 0.121593242 | 0.036985046 | 0.096535198 | 0.133578225 |
| 0.060376985 | 0.094586096 | 0.045382189 | 0.162864322 |
| 0.100116989 | 0.108163121 | 0.074409078 | 0.019936945 |
| 0.107818714 | 0.052210385 | 0.005233146 | 0.063088894 |
| 0.094186852 | 0.00488023  | 0.03645755  | 0.041915352 |
| 0.071534669 | 0.029471703 | 0.066060665 | 0.054992326 |
| 0.070460287 | 0.256691959 | 0.000466289 | 0.05814706  |
| 0.087273732 | 0.091802653 | 0.055002627 | 0.008483243 |
| 0.020613978 | 0.029428601 | 0.030964787 | 0.004941294 |
| 0.108922748 | 0.050881325 | 0.042642152 | 0.045883745 |
| 0.028042725 | 0.177170203 | 0.006104347 | 0.11248408  |
| 0.181460173 | 0.165401358 | 0.302645156 | 0.086412804 |
| 0.00625372  | 0.158125545 | 0.022816822 | 0.019491148 |
| 0.176752414 | 0.029589328 | 0.002977325 | 0.023179023 |
| 0.305854827 | 0.014500821 | 0.152144079 | 0.124216275 |

|             |             |             |             |
|-------------|-------------|-------------|-------------|
| 0.174610597 | 0.3149142   | 0.055749265 | 0.100209626 |
| 0.05839795  | 0.257781172 | 0.019785756 | 0.054719897 |
| 0.01199009  | 0.211939129 | 0.033329252 | 0.088962809 |
| 0.116750332 | 0.012850589 | 0.170420451 | 0.120491513 |
| 0.008256112 | 0.001516427 | 0.000911901 | 0.009416593 |
| 0.286078543 | 0.027131701 | 0.021740994 | 0.033487011 |
| 0.07938019  | 0.094648657 | 0.00744115  | 0.152685002 |
| 0.205939845 | 0.024212341 | 0.05357867  | 0.01436141  |
| 0.20213579  | 0.051767832 | 0.040646524 | 0.016614821 |
| 0.062569341 | 0.005000828 | 0.003050737 | 0.048807235 |
| 0.002484988 | 0.0087223   | 0.046658086 | 0.032335962 |
| 0.008946617 | 0.199215774 | 0.067719479 | 0.000519194 |
| 0.011719389 | 0.045052088 | 0.09901824  | 0.008565825 |
| 0.118668085 | 0.096757844 | 0.017097909 | 0.01753472  |
| 0.220711138 | 0.076779222 | 0.076184366 | 0.060469896 |
| 0.003984524 | 0.07162697  | 0.038160358 | 0.070570135 |
| 0.063155068 | 0.005110807 | 0.000593335 | 0.04194043  |
| 0.044712136 | 0.004046783 | 0.272708584 | 0.022284151 |
| 0.006492604 | 0.020192173 | 0.021332691 | 0.07106178  |
| 0.124407216 | 0.077637138 | 0.093628555 | 0.047777717 |
| 0.089389316 | 0.136088573 | 0.053559666 | 0.078287105 |
| 0.002689414 | 0.011956582 | 0.009411513 | 0.05961473  |
| 0.205237094 | 0.010944148 | 0.130954971 | 0.000956045 |
| 0.000252051 | 0.195456539 | 0.264333644 | 0.099579916 |
| 0.006331525 | 0.0116955   | 0.028870592 | 0.066271949 |
| 0.200430911 | 0.094566171 | 0.113819363 | 0.017760932 |
| 0.080644087 | 0.010809957 | 0.011101304 | 0.022761277 |
| 0.149257953 | 0.146758346 | 0.109807201 | 0.115606894 |
| 0.235115614 | 0.004990872 | 0.040328034 | 0.022212171 |
| 0.162434347 | 0.030846485 | 0.298513138 | 0.308531097 |
| 0.053657714 | 0.271491856 | 0.15321931  | 0.004490546 |
| 0.071938681 | 0.255663289 | 0.069785828 | 0.054188267 |
| 0.066859058 | 0.06678989  | 0.065589899 | 0.08756671  |
| 0.048694746 | 0.03576154  | 0.037326894 | 0.043116    |
| 0.11433217  | 0.127570206 | 0.004167208 | 0.037886483 |
| 0.0132992   | 0.069143869 | 0.027487996 | 0.276816029 |
| 0.026007692 | 0.071068976 | 0.205432058 | 0.019014721 |
| 0.165077692 | 0.000818131 | 0.01960712  | 0.0538932   |
| 0.047774499 | 0.213171076 | 0.008338278 | 0.003600825 |
| 0.101665876 | 0.124921582 | 0.003574204 | 0.078018951 |
| 0.056713638 | 0.17243342  | 0.032010238 | 0.045043411 |
| 0.15382532  | 0.001550885 | 0.016808495 | 0.000825476 |
| 0.009009051 | 0.089252501 | 0.00689556  | 0.116161535 |
| 0.104451141 | 0.218831688 | 0.114982248 | 0.081666029 |
| 0.075777291 | 0.056763112 | 0.072891557 | 0.00704973  |
| 0.076341442 | 0.001573089 | 0.061880714 | 0.061716169 |
| 0.004382162 | 0.024680655 | 0.062963543 | 0.043057012 |
| 0.015547252 | 0.273279633 | 0.214937176 | 0.010710638 |
| 0.122016219 | 0.109210576 | 0.179479579 | 0.011814814 |
| 0.026689639 | 0.046710561 | 0.010055222 | 0.080948335 |
| 0.070543548 | 0.101071807 | 0.011860464 | 0.267333332 |
| 0.019422296 | 0.183329912 | 0.231304424 | 0.031256769 |
| 0.042318225 | 0.251631184 | 0.124526083 | 0.068866391 |
| 0.096209677 | 0.030967651 | 0.002375401 | 0.009954954 |

|             |             |             |             |
|-------------|-------------|-------------|-------------|
| 0.047253277 | 0.215031291 | 0.003348894 | 0.197952528 |
| 0.066608956 | 0.024345063 | 0.12192494  | 0.152203469 |
| 0.077179822 | 0.090005868 | 0.221644946 | 0.043444551 |
| 0.173830792 | 0.008837422 | 0.026486232 | 0.112616355 |
| 0.003124074 | 0.010177713 | 0.171984732 | 0.019940163 |
| 0.029125408 | 0.191920462 | 0.003516328 | 0.004580781 |
| 0.071521187 | 0.024351513 | 0.016976977 | 0.111921149 |
| 0.020812261 | 0.012044206 | 0.072710209 | 0.081156398 |
| 0.007977097 | 0.124629044 | 0.268602198 | 0.181384457 |
| 0.01064465  | 0.011254828 | 0.26814717  | 0.236314019 |
| 0.057930669 | 0.049551134 | 0.125892348 | 0.148847455 |
| 0.172908287 | 0.019490071 | 0.053735286 | 0.061152615 |
| 0.097333326 | 0.088428859 | 0.15718528  | 0.049901523 |
| 0.196264698 | 0.046212909 | 0.016087726 | 0.049109693 |
| 0.066851707 | 0.210930666 | 0.079289334 | 0.005969017 |
| 0.238464745 | 0.069099332 | 0.208086859 | 0.23045488  |
| 0.011078704 | 0.203818499 | 0.096201797 | 0.182299003 |
| 0.026297392 | 0.004059016 | 0.189168282 | 0.153274947 |
| 0.081908916 | 0.001630062 | 0.194207516 | 0.0313632   |
| 0.074116222 | 0.00298588  | 0.02211811  | 0.120218269 |
| 0.264833726 | 0.15679372  | 0.027698601 | 0.040924858 |
| 0.032188976 | 0.008377475 | 0.161915876 | 0.050830903 |
| 0.063758682 | 0.018230444 | 0.084026258 | 0.079435921 |
| 0.270151349 | 0.015413528 | 0.004537708 | 0.023494194 |
| 0.143733737 | 0.024826259 | 0.068510934 | 0.293401208 |
| 0.147908331 | 0.121308956 | 0.061005668 | 0.133097422 |
| 0.015256556 | 0.153739237 | 0.200946008 | 0.046228156 |
| 0.00469787  | 0.137178029 | 0.008628555 | 0.030515352 |
| 0.020482293 | 0.001555187 | 0.055869833 | 0.059715503 |
| 0.092340765 | 0.05491322  | 0.112706628 | 0.03203805  |
| 0.0004747   | 0.015719154 | 0.039677734 | 0.013005789 |
| 0.055325403 | 0.098624647 | 0.026945922 | 0.138002288 |
| 0.16193529  | 0.263717761 | 0.070452213 | 0.01296243  |
| 0.001270657 | 0.030024928 | 0.201168029 | 0.092552405 |
| 0.062083537 | 0.167640064 | 0.00437329  | 0.09163378  |
| 0.002900953 | 0.189711751 | 0.103687384 | 0.004408041 |
| 0.001577601 | 0.057474952 | 0.046151083 | 1           |
| 0.010511544 | 0.054708694 | 0.070722611 | 0.02056835  |
| 0.026324897 | 0.225963048 | 0.074761978 | 0.073085717 |
| 0.075119944 | 0.056729546 | 0.067419364 | 0.01882082  |
| 0.042176686 | 0.07984831  | 0.058160876 | 0.14509509  |
| 0.076096293 | 0.090705777 | 0.022996943 | 0.025590388 |
| 0.023747793 | 0.159770252 | 0.317141528 | 0.330411501 |
| 0.192572961 | 0.051076848 | 0.236250401 | 0.296206473 |
| 0.127542276 | 0.01683191  | 0.14433922  | 0.066349077 |
| 0.092847271 | 0.242012304 | 0.024949747 | 0.052298118 |
| 0.000976499 | 0.01322977  | 0.124685968 | 0.028519804 |
| 0.120187502 | 0.013697809 | 0.015632159 | 0.058184508 |
| 0.026490808 | 0.15707235  | 0.232396356 | 0.092291553 |
| 0.022086394 | 0.013528678 | 0.004788851 | 0.118940686 |
| 0.129424986 | 0.227319218 | 0.02287785  | 0.184525127 |
| 0.06638515  | 0.039718967 | 0.040088877 | 0.089199826 |
| 0.002602248 | 0.121842094 | 0.005844173 | 0.132323615 |
| 0.003433834 | 0.210839944 | 0.265141715 | 0.027387843 |

|             |             |             |             |
|-------------|-------------|-------------|-------------|
| 0.000992492 | 0.105030159 | 0.033534186 | 0.017557466 |
| 0.028104712 | 0.022430208 | 0.012477535 | 0.061462578 |
| 0.075017173 | 0.157470884 | 0.098639646 | 0.142361896 |
| 0.011200567 | 0.015275097 | 0.020908615 | 0.03609236  |
| 0.052863287 | 0.055573937 | 0.28492947  | 0.053305548 |
| 0.0154849   | 0.262240539 | 0.125750982 | 0.053583195 |
| 0.027647579 | 0.073511181 | 0.00118686  | 0.010478152 |
| 0.040075326 | 0.004016352 | 0.000162536 | 0.003089971 |
| 0.092114148 | 0.00855543  | 0.031284871 | 0.047890826 |
| 0.01433988  | 0.082018428 | 0.001343899 | 0.048001445 |
| 0.078158608 | 0.107563835 | 0.029930172 | 0.163330339 |
| 0.082295817 | 0.175940153 | 0.035078534 | 0.00154163  |
| 0.01423211  | 0.008812906 | 0.003515681 | 0.175090315 |
| 0.201175057 | 0.001271954 | 0.017616828 | 0.183936604 |
| 0.048256913 | 0.00089609  | 0.02330695  | 0.029080033 |
| 0.180518066 | 0.112753759 | 0.071574885 | 0.04381068  |
| 0.062758295 | 0.11563384  | 0.00869892  | 0.010285807 |
| 0.02363017  | 0.008331838 | 0.060776322 | 0.007110162 |
| 0.208485511 | 0.024375345 | 0.016130951 | 0.168536578 |
| 0.101141848 | 0.007024437 | 0.233824092 | 0.00243244  |
| 0.116609062 | 0.078696864 | 0.014265572 | 0.008400453 |
| 0.198230947 | 0.016337162 | 0.153043258 | 0.077589055 |
| 0.001150638 | 0.018969806 | 0.160043909 | 0.011263431 |
| 0.139396104 | 0.008817486 | 0.162053277 | 0.002479201 |
| 0.068662428 | 0.0578102   | 0.183492339 | 0.019518637 |
| 0.018310579 | 0.30066101  | 0.007673913 | 0.07627221  |
| 0.106026033 | 0.008569148 | 0.0396649   | 0.062417232 |
| 0.006313034 | 0.086839649 | 0.011273638 | 0.074443128 |
| 0.077207448 | 0.151123744 | 0.037770933 | 0.062802932 |
| 0.126453379 | 0.008720265 | 0.004842111 | 0.028423869 |
| 0.081573717 | 0.140375175 | 0.005489062 | 0.084127163 |
| 0.003439715 | 0.087910583 | 0.022192619 | 0.0327198   |
| 0.16809988  | 0.056924221 | 0.01525694  | 0.223680486 |
| 0.070123886 | 0.023371541 | 0.013882074 | 0.138764855 |
| 0.084585803 | 0.152500553 | 0.117707618 | 0.000139149 |
| 0.056726884 | 0.035953021 | 0.119797699 | 0.015154722 |
| 0.27111221  | 0.044266399 | 0.033390607 | 0.089053569 |
| 0.050935936 | 0.010436781 | 0.018661121 | 0.021766698 |
| 0.003842293 | 0.158212924 | 0.097068667 | 0.059521624 |
| 0.082296813 | 0.005047811 | 0.002234104 | 0.078175499 |
| 0.002542401 | 0.001896306 | 0.00352921  | 0.02727341  |
| 0.003698519 | 0.00566444  | 0.006123699 | 0.004929496 |
| 0.064916667 | 0.057622447 |             |             |
| PRMT2       | 0.031485099 | 0.330673879 | 0.019266391 |
| 0.069012895 | 0.275540169 | 0.212012248 | 0.027856719 |
| 0.066781294 | 0.257434919 | 0.167720293 | 0.224174716 |
| 0.006874053 | 0.23747633  | 0.375781694 | 0.030473584 |
| 0.305799535 | 0.019962001 | 0.053881295 | 0.064104875 |
| 0.133662279 | 0.235248638 | 0.288688335 | 0.169243263 |
| 0.251398393 | 0.113670672 | 0.182228913 | 0.292991949 |
| 0.411986915 | 0.24542035  | 0.342599868 | 0.104400803 |
| 0.312539663 | 0.302446331 | 0.287037216 | 0.00537589  |
| 0.24581385  | 0.04010748  | 0.312649369 | 0.174844521 |
| 0.209963546 | 0.254071922 | 0.154176585 | 0.149306209 |

|             |             |             |             |
|-------------|-------------|-------------|-------------|
| 0.172674632 | 0.012548601 | 0.141060442 | 0.337132004 |
| 0.192686626 | 0.192104053 | 0.022797846 | 0.315306788 |
| 0.22204175  | 0.222633007 | 0.260354557 | 0.001168291 |
| 0.309992954 | 0.21276607  | 0.292250356 | 0.395257894 |
| 0.12763801  | 0.078081445 | 0.22161675  | 0.154315423 |
| 0.290672274 | 0.323594818 | 0.200136867 | 0.193435152 |
| 0.397692114 | 0.265847357 | 0.368446256 | 0.102189324 |
| 0.191659074 | 0.012269548 | 0.097999973 | 0.038008474 |
| 0.264310931 | 0.132410321 | 0.259766294 | 0.294784155 |
| 0.308258665 | 0.402961087 | 0.153405914 | 0.366752901 |
| 0.177083503 | 0.31258222  | 0.263471433 | 0.255978942 |
| 0.293512688 | 0.046273296 | 0.315648753 | 0.411695998 |
| 0.023305572 | 0.214014608 | 0.288193552 | 0.06122086  |
| 0.343136109 | 0.30697139  | 0.190096814 | 0.269437507 |
| 0.358941325 | 0.259082393 | 0.368914056 | 0.191140228 |
| 0.283698509 | 0.027501268 | 0.343753525 | 0.319228311 |
| 0.214773891 | 0.030706938 | 0.196610506 | 0.431702543 |
| 0.278176127 | 0.409075318 | 0.338286157 | 0.288529923 |
| 0.270648241 | 0.406934365 | 0.27953084  | 0.350982038 |
| 0.132304456 | 0.419512833 | 0.089073367 | 0.026612133 |
| 0.026375651 | 0.064095283 | 0.23386425  | 0.249222676 |
| 0.420137843 | 0.233364119 | 0.091537142 | 0.160162685 |
| 0.437810621 | 0.342963873 | 0.41434513  | 0.331161632 |
| 0.016242696 | 0.299707167 | 0.255055152 | 0.167392387 |
| 0.283887083 | 0.061862906 | 0.277226199 | 0.371571306 |
| 0.288022767 | 0.398989708 | 0.071554428 | 0.368258898 |
| 0.120506458 | 0.421495225 | 0.350449241 | 0.086813356 |
| 0.394346265 | 0.360503645 | 0.439484334 | 0.3914129   |
| 0.365186777 | 0.158031828 | 0.064639941 | 0.303210615 |
| 0.421039095 | 0.027716051 | 0.430017249 | 0.446608401 |
| 0.380780781 | 0.416542969 | 0.458369491 | 0.446919917 |
| 0.389977737 | 0.032011941 | 0.041554264 | 0.241335299 |
| 0.378220312 | 0.305767695 | 0.123188198 | 0.254758288 |
| 0.312796421 | 0.188630071 | 0.391581253 | 0.19405898  |
| 0.424331488 | 0.391239027 | 0.425174091 | 0.294527914 |
| 0.157769503 | 0.22941161  | 0.304772554 | 0.327713756 |
| 0.024061613 | 0.046430603 | 0.019985731 | 0.248532702 |
| 0.169957396 | 0.110607917 | 0.171479249 | 0.280069256 |
| 0.126464706 | 0.172559387 | 0.312698303 | 0.369549962 |
| 0.0246923   | 0.261932866 | 0.080159625 | 0.06965693  |
| 0.021967634 | 0.087881421 | 0.097726289 | 0.10020321  |
| 0.187728405 | 0.139015081 | 0.355347693 | 0.428813242 |
| 0.249298832 | 0.096740104 | 0.306853229 | 0.40754423  |
| 0.363779983 | 0.284905472 | 0.16303453  | 0.006254828 |
| 0.164662348 | 0.24060003  | 0.282208568 | 0.305078054 |
| 0.109219894 | 0.139807739 | 0.266277809 | 0.385639094 |
| 0.113968    | 0.071041377 | 0.243597166 | 0.32088969  |
| 0.079130761 | 0.232990518 | 0.387370565 | 0.229843751 |
| 0.000797233 | 0.156643229 | 0.378806183 | 0.169459432 |
| 0.205536094 | 0.201970233 | 0.283240673 | 0.393520438 |
| 0.276641835 | 0.259867019 | 0.447735637 | 0.398536306 |
| 0.221166634 | 0.134871393 | 0.454517161 | 0.081444136 |
| 0.27161341  | 0.056850817 | 0.22822831  | 0.168751736 |
| 0.138297479 | 0.237131203 | 0.302922909 | 0.239609585 |

|             |             |             |             |
|-------------|-------------|-------------|-------------|
| 0.058192635 | 0.409976495 | 0.325049304 | 0.43115272  |
| 0.230858225 | 0.446401689 | 0.411356163 | 0.372523632 |
| 0.253811558 | 0.255269471 | 0.255896906 | 0.349255413 |
| 0.394207506 | 0.178478471 | 0.032795653 | 0.395630323 |
| 0.20235198  | 0.354021552 | 0.145342917 | 0.41249203  |
| 0.386885105 | 0.334498125 | 0.104947056 | 0.360503389 |
| 0.295070071 | 0.112554675 | 0.371844483 | 0.455957426 |
| 0.172068825 | 0.239378014 | 0.231737967 | 0.39185525  |
| 0.0920473   | 0.224182896 | 0.250522948 | 0.311682729 |
| 0.028108644 | 0.034631587 | 0.023890064 | 0.124280483 |
| 0.246664381 | 0.30468539  | 0.315983362 | 0.420641718 |
| 0.062103057 | 0.34674527  | 0.168734405 | 0.175483334 |
| 0.304574201 | 0.269825725 | 0.324455138 | 0.333352645 |
| 0.173774185 | 0.011013198 | 0.070813916 | 0.392039646 |
| 0.01421517  | 0.280374071 | 0.175698748 | 0.001968213 |
| 0.016882341 | 0.311539205 | 0.049301996 | 0.121357581 |
| 0.461095284 | 0.118794437 | 0.103615683 | 0.155429917 |
| 0.293988435 | 0.044760056 | 0.004242666 | 0.411523158 |
| 0.404732265 | 0.382713358 | 0.395370559 | 0.353969107 |
| 0.38491206  | 0.356288646 | 0.369806126 | 0.167227207 |
| 0.051539156 | 0.035946504 | 0.211017489 | 0.177564797 |
| 0.003064993 | 0.342896024 | 0.25037407  | 0.08076426  |
| 0.391336022 | 0.214936457 | 0.01704452  | 0.330085112 |
| 0.006643501 | 0.249318976 | 0.162047075 | 0.160308251 |
| 0.354746463 | 0.004868278 | 0.118315178 | 0.218469642 |
| 0.304779792 | 0.245528892 | 0.289176182 | 0.422964611 |
| 0.202008911 | 0.059237629 | 0.202954199 | 0.373727159 |
| 0.03404038  | 0.069524636 | 0.18899436  | 0.021210492 |
| 0.174164982 | 0.366957553 | 0.26217772  | 0.025631396 |
| 0.153383677 | 0.00118839  | 0.255228411 | 0.428656895 |
| 0.340851189 | 0.448878554 | 0.409199817 | 0.278426245 |
| 0.397069594 | 0.236508922 | 0.439539428 | 0.298046204 |
| 0.193457557 | 0.000230655 | 0.005568901 | 0.430173603 |
| 0.258511566 | 0.025306052 | 0.084488145 | 0.181398001 |
| 0.064792888 | 0.060743371 | 0.038281066 | 0.219504747 |
| 0.295816254 | 0.213120972 | 0.250569983 | 0.342315328 |
| 0.140484104 | 0.159589293 | 0.194967015 | 0.042587962 |
| 0.320544097 | 0.025720809 | 0.043434607 | 0.007874591 |
| 0.35161198  | 0.057702903 | 0.325442167 | 0.408625495 |
| 0.400536281 | 0.351127816 | 0.189878172 | 0.232199935 |
| 0.412014926 | 0.043183293 | 0.267052907 | 0.047400173 |
| 0.363670109 | 0.285494407 | 0.241256741 | 0.205075145 |
| 0.417034547 | 0.358371767 | 0.01525048  | 0.335105862 |
| 0.006380813 | 0.005513902 | 0.154895331 | 0.192082686 |
| 0.116978919 | 0.242396436 | 0.171659296 | 0.159089252 |
| 0.188354863 | 0.012012471 | 0.28301634  | 0.259145234 |
| 0.201672389 | 0.218594547 | 0.25500356  | 0.179134523 |
| 0.227545196 | 0.14371234  | 0.149147644 | 0.102715331 |
| 0.201545121 | 0.204750202 | 0.112844698 | 0.008903611 |
| 0.226855588 | 0.264611773 | 0.025445108 | 0.090179329 |
| 0.372618927 | 0.422409886 | 0.02216644  | 0.006567508 |
| 0.176851899 | 0.219238422 | 0.449899073 | 0.391685069 |
| 0.397263928 | 0.429675287 | 0.291047857 | 0.107660327 |
| 0.033212644 | 0.235123046 | 0.269440947 | 0.112423688 |

|             |             |             |             |
|-------------|-------------|-------------|-------------|
| 0.423095251 | 0.024480359 | 0.381841359 | 0.304172603 |
| 0.061743518 | 0.113653856 | 0.020996333 | 0.043073641 |
| 0.341778127 | 0.109533411 | 0.135333201 | 0.063432249 |
| 0.196884847 | 0.287107672 | 0.02257903  | 0.108161218 |
| 0.242342492 | 0.210287781 | 0.084835914 | 0.181522364 |
| 0.264431755 | 0.14533485  | 0.363556955 | 0.358314581 |
| 0.066066069 | 0.049602601 | 0.106808626 | 0.347301489 |
| 0.372258502 | 0.250909417 | 0.015238291 | 0.340435777 |
| 0.436739108 | 0.329695155 | 0.382225718 | 0.356041694 |
| 0.040463153 | 0.249625727 | 0.285762773 | 0.234620288 |
| 0.110369181 | 0.204659081 | 0.160812145 | 0.026595571 |
| 0.243399565 | 0.371092523 | 0.310653992 | 0.105621172 |
| 0.285613733 | 0.055770525 | 0.019618745 | 0.400821402 |
| 0.211983729 | 0.038066781 | 0.176054446 | 0.411621874 |
| 0.002968453 | 0.272114873 | 0.448233264 | 0.16203393  |
| 0.425074295 | 0.416325256 | 0.339576317 | 0.16409816  |
| 0.005681246 | 0.358081721 | 0.258432694 | 0.217384518 |
| 0.321794571 | 0.256122592 | 0.133979798 | 0.046007224 |
| 0.229486836 | 0.034876925 | 0.083180203 | 0.192731928 |
| 0.180850394 | 0.248222611 | 0.14000074  | 0.118432221 |
| 0.153228327 | 0.043740572 | 0.305531305 | 0.136641288 |
| 0.226545059 | 0.17210578  | 0.278803976 | 0.163227033 |
| 0.170745266 | 0.386361698 | 0.292831945 | 0.010511544 |
| 1           | 0.359218181 | 0.390955765 | 0.000303769 |
| 0.355804496 | 0.003270143 | 0.153824014 | 0.153324713 |
| 0.149848669 | 0.15397458  | 0.221611669 | 0.226184126 |
| 0.218094539 | 0.12808572  | 0.162856628 | 0.159256448 |
| 0.123545394 | 0.128664523 | 0.292951972 | 0.180287542 |
| 0.209850146 | 0.063095577 | 0.053922218 | 0.053650256 |
| 0.032064011 | 0.399636989 | 0.167119306 | 0.032971968 |
| 0.164189311 | 0.200462791 | 0.285949038 | 0.37286857  |
| 0.379134698 | 0.057347815 | 0.221536485 | 0.340574341 |
| 0.174751807 | 0.164196531 | 0.024647944 | 0.209591593 |
| 0.13190309  | 0.207907153 | 0.21752977  | 0.144559297 |
| 0.296788551 | 0.299156851 | 0.163075908 | 0.370105702 |
| 0.226332298 | 0.213157774 | 0.143189099 | 0.058971285 |
| 0.078247333 | 0.072082203 | 0.244808282 | 0.000215517 |
| 0.246827047 | 0.113491407 | 0.402839197 | 0.359286792 |
| 0.316220441 | 0.32369343  | 0.148359894 | 0.03670504  |
| 0.131189918 | 0.095655788 | 0.07836238  | 0.360718759 |
| 0.286975296 | 0.111998038 | 0.230148746 | 0.149828752 |
| 0.375889049 | 0.350148266 | 0.252680907 | 0.140255823 |
| 0.154300295 | 0.101968022 | 0.361401218 | 0.051261774 |
| 0.27503375  | 0.202847332 | 0.20543457  | 0.187354859 |
| 0.165941784 | 0.440530697 | 0.025321144 | 0.446168358 |
| 0.216897916 | 0.075304373 | 0.39311966  | 0.181212968 |
| 0.170696839 | 0.120350061 | 0.280730838 | 0.204480695 |
| 0.15264298  | 0.318895368 | 0.013261572 | 0.068989897 |
| 0.266495219 | 0.213911418 | 0.2979385   | 0.311296603 |
| 0.251323717 | 0.308497857 | 0.32375114  | 0.140181198 |
| 0.346614389 | 0.36171181  | 0.132424811 | 0.182588148 |
| 0.254359287 | 0.057859082 | 0.23159088  | 0.022560555 |
| 0.294219438 | 0.314976899 | 0.220524564 | 0.030550362 |
| 0.008532193 | 0.253527597 | 0.25579623  | 0.028627318 |



|             |             |             |             |
|-------------|-------------|-------------|-------------|
| 0.446228365 | 0.277787926 | 0.235412482 | 0.355121141 |
| 0.11185645  | 0.355654113 | 0.110137182 | 0.336765383 |
| 0.02066328  | 0.17750721  | 0.292277012 | 0.239777252 |
| 0.170235617 | 0.26683217  | 0.307934999 | 0.270704606 |
| 0.015867997 | 0.203181891 | 0.0002132   | 0.286334595 |
| 0.326261731 | 0.262042481 | 0.137264479 | 0.196420213 |
| 0.226077538 | 0.331058931 | 0.202469298 | 0.260804463 |
| 0.006723176 | 0.297960071 | 0.129648435 | 0.317085345 |
| 0.165197118 | 0.219522997 | 0.037581427 | 0.266536368 |
| 0.311083176 | 0.180315589 | 0.194285277 | 0.182468111 |
| 0.378115874 | 0.315499645 | 0.08534469  | 0.23672384  |
| 0.273839744 | 0.028303095 | 0.206546385 | 0.436686831 |
| 0.12566989  | 0.247259076 | 0.418084174 | 0.116900338 |
| 0.301053964 | 0.30324585  | 0.28235327  | 0.427751947 |
| 0.06875645  | 0.166197423 | 0.394963392 | 0.365594773 |
| 0.258923815 | 0.231923321 | 0.261503394 | 0.18565716  |
| 0.327841539 | 0.051436822 | 0.25509475  | 0.241587238 |
| 0.237416314 | 0.248115797 | 0.197064224 | 0.193106247 |
| 0.024925147 | 0.118806356 | 0.235544575 | 0.076822069 |
| 0.191331407 | 0.232331067 | 0.221042268 | 0.309073396 |
| 0.102963298 | 0.013610043 | 0.367510633 | 0.033451064 |
| 0.167604295 | 0.312597776 | 0.15798241  | 0.26623219  |
| 0.109132222 | 0.217418072 | 0.139429665 | 0.000184057 |
| 0.370931073 | 0.07238934  | 0.256825651 | 0.185747638 |
| 0.25945287  | 0.020735315 | 0.357566958 | 0.456099918 |
| 0.215388663 | 0.269463811 | 0.259662798 | 0.370220538 |
| 0.223374039 | 0.289328893 | 0.281653641 | 0.260081849 |
| 0.295734919 | 0.193321842 | 0.25332382  | 0.270806326 |
| 0.282335471 | 0.163464884 |             |             |
| PRPF39      | 0.113890846 | 0.401963714 | 0.086332917 |
| 0.168324517 | 0.333149285 | 0.349991494 | 0.123965942 |
| 0.189774211 | 0.358936432 | 0.309828882 | 0.344425286 |
| 0.042601863 | 0.11080873  | 0.42141584  | 0.121521994 |
| 0.390711037 | 0.07856861  | 0.179280354 | 0.117956261 |
| 0.310104229 | 0.327266201 | 0.320217694 | 0.344792357 |
| 0.344828563 | 0.210036893 | 0.359027252 | 0.379547473 |
| 0.460548479 | 0.230580537 | 0.382974375 | 0.189057446 |
| 0.411377979 | 0.344416328 | 0.353991535 | 0.038413442 |
| 0.391578444 | 0.040184554 | 0.4402765   | 0.318877491 |
| 0.178253264 | 0.346422309 | 0.308876231 | 0.282879825 |
| 0.360542626 | 0.068098443 | 0.184982508 | 0.403313941 |
| 0.363451105 | 0.350089624 | 0.107362743 | 0.394894033 |
| 0.385997391 | 0.328770727 | 0.34945644  | 0.003164082 |
| 0.292014131 | 0.10132427  | 0.243274335 | 0.469888819 |
| 0.247027207 | 0.192039978 | 0.299031886 | 0.327371386 |
| 0.404258649 | 0.40022637  | 0.319497372 | 0.371782027 |
| 0.461743895 | 0.214180187 | 0.393814166 | 0.190636222 |
| 0.399998923 | 0.079046176 | 0.217463224 | 0.146477781 |
| 0.404575985 | 0.260450673 | 0.345941183 | 0.339758666 |
| 0.393468215 | 0.503041255 | 0.304310407 | 0.474012002 |
| 0.190181295 | 0.358040924 | 0.327367742 | 0.351053897 |
| 0.396430129 | 0.178220785 | 0.376623731 | 0.495826357 |
| 0.110662035 | 0.353854106 | 0.398354533 | 0.17870362  |
| 0.387480683 | 0.329387044 | 0.34596697  | 0.194895747 |

|             |             |             |             |
|-------------|-------------|-------------|-------------|
| 0.37605356  | 0.366939466 | 0.475183939 | 0.316687284 |
| 0.350438484 | 0.121437546 | 0.46188906  | 0.336008295 |
| 0.29977932  | 0.12789388  | 0.295901448 | 0.412095622 |
| 0.396311586 | 0.44848243  | 0.387557074 | 0.385507225 |
| 0.374371986 | 0.461672442 | 0.375921024 | 0.397878546 |
| 0.147691552 | 0.491242406 | 0.233361363 | 0.085836268 |
| 0.113613517 | 0.154482891 | 0.336303147 | 0.332440884 |
| 0.425393328 | 0.350259025 | 0.2393024   | 0.303350471 |
| 0.433831598 | 0.447931792 | 0.493467208 | 0.387570288 |
| 0.079225459 | 0.312828375 | 0.372574514 | 0.314095908 |
| 0.391405162 | 0.190140169 | 0.289380742 | 0.486761399 |
| 0.354095226 | 0.403735446 | 0.21339568  | 0.489607163 |
| 0.296755426 | 0.485041038 | 0.40302886  | 0.224273148 |
| 0.491527828 | 0.466011624 | 0.480312478 | 0.373480738 |
| 0.445328886 | 0.328976739 | 0.128957154 | 0.382532932 |
| 0.460109994 | 0.021280735 | 0.436046821 | 0.462612207 |
| 0.465320168 | 0.404409341 | 0.498093161 | 0.469305579 |
| 0.466778365 | 0.130531105 | 0.056973022 | 0.339764303 |
| 0.478222445 | 0.359594153 | 0.225640579 | 0.381805189 |
| 0.382306134 | 0.36761043  | 0.400470105 | 0.2697258   |
| 0.497449647 | 0.410573197 | 0.447696164 | 0.386249341 |
| 0.356705554 | 0.315703145 | 0.364472199 | 0.441212016 |
| 0.087860435 | 0.152863102 | 0.086926301 | 0.357716741 |
| 0.304464254 | 0.242155331 | 0.356922062 | 0.394832342 |
| 0.255104761 | 0.357077763 | 0.315542559 | 0.369285483 |
| 0.093809249 | 0.379726211 | 0.228718202 | 0.233557864 |
| 0.085994561 | 0.184194446 | 0.218036848 | 0.200560359 |
| 0.304148503 | 0.264886692 | 0.391565551 | 0.459774236 |
| 0.398105933 | 0.221669219 | 0.391004316 | 0.449379812 |
| 0.41712908  | 0.361831362 | 0.288369699 | 0.022294895 |
| 0.297529833 | 0.332264907 | 0.220358159 | 0.382529512 |
| 0.212021756 | 0.306589151 | 0.390850113 | 0.373800037 |
| 0.285378287 | 0.224783785 | 0.382749108 | 0.415700601 |
| 0.201248023 | 0.310497197 | 0.404204978 | 0.387563198 |
| 0.010175843 | 0.346024138 | 0.39632674  | 0.239415662 |
| 0.363636792 | 0.161301079 | 0.229786369 | 0.431679219 |
| 0.304558554 | 0.301485929 | 0.453346363 | 0.384072021 |
| 0.321821614 | 0.248906152 | 0.499184085 | 0.074097497 |
| 0.38578879  | 0.072981004 | 0.324279046 | 0.323514586 |
| 0.304493103 | 0.339867284 | 0.338740087 | 0.303932148 |
| 0.160263669 | 0.48728306  | 0.366790371 | 0.471366571 |
| 0.359163691 | 0.502510847 | 0.408009821 | 0.40221504  |
| 0.377050082 | 0.374257755 | 0.166546679 | 0.387471544 |
| 0.420490282 | 0.315415539 | 0.119083168 | 0.400331218 |
| 0.378738991 | 0.388441315 | 0.178738028 | 0.463940828 |
| 0.474897343 | 0.438960131 | 0.209693763 | 0.381312644 |
| 0.356485987 | 0.264210992 | 0.387808626 | 0.507754299 |
| 0.337377596 | 0.378082669 | 0.352908406 | 0.381082788 |
| 0.229766114 | 0.296994863 | 0.32564469  | 0.216500602 |
| 0.008678055 | 0.137683665 | 0.109128161 | 0.226708733 |
| 0.211425626 | 0.378232479 | 0.398871245 | 0.480713975 |
| 0.180711727 | 0.38808484  | 0.310458938 | 0.31218479  |
| 0.398253246 | 0.379053959 | 0.360115273 | 0.378145464 |
| 0.298166554 | 0.036682821 | 0.157789509 | 0.501744475 |

|             |             |             |             |
|-------------|-------------|-------------|-------------|
| 0.077578376 | 0.253571761 | 0.361426044 | 0.005706545 |
| 0.091650008 | 0.362844674 | 0.139681472 | 0.222816705 |
| 0.448334815 | 0.219879479 | 0.254510212 | 0.335729003 |
| 0.351259012 | 0.153338712 | 0.006943845 | 0.465484301 |
| 0.474787886 | 0.455128315 | 0.47115887  | 0.450746795 |
| 0.434061008 | 0.396467966 | 0.40140258  | 0.330206196 |
| 0.165453584 | 0.144095467 | 0.261591411 | 0.334750354 |
| 0.010986511 | 0.367111152 | 0.356784676 | 0.19843933  |
| 0.397663063 | 0.358909725 | 0.071936056 | 0.377121144 |
| 0.036945306 | 0.198669362 | 0.359495344 | 0.301868563 |
| 0.376253732 | 0.034948544 | 0.214937445 | 0.32567642  |
| 0.394953864 | 0.331629411 | 0.340401227 | 0.49463766  |
| 0.335939018 | 0.174180518 | 0.339540426 | 0.378130411 |
| 0.131204893 | 0.134148758 | 0.390729025 | 0.037172067 |
| 0.195312221 | 0.448335175 | 0.373163922 | 0.112395931 |
| 0.313157077 | 0.012610774 | 0.338602366 | 0.496352729 |
| 0.430169332 | 0.484365859 | 0.459531688 | 0.270719072 |
| 0.467566234 | 0.1324678   | 0.48980935  | 0.372492104 |
| 0.34931661  | 0.001731296 | 0.015030608 | 0.442979134 |
| 0.376042533 | 0.092588514 | 0.222282858 | 0.300171802 |
| 0.170906655 | 0.208219134 | 0.12263988  | 0.236878687 |
| 0.377174117 | 0.287029191 | 0.231100756 | 0.442721465 |
| 0.309269447 | 0.305496429 | 0.376000769 | 0.1420378   |
| 0.378219809 | 0.099487807 | 0.150094217 | 0.014260879 |
| 0.384636539 | 0.149685894 | 0.451534132 | 0.474379681 |
| 0.466933801 | 0.376864945 | 0.30257715  | 0.321082555 |
| 0.420767993 | 0.133682931 | 0.321556028 | 0.156398197 |
| 0.443564895 | 0.379991865 | 0.327895569 | 0.306977493 |
| 0.474621978 | 0.43707455  | 0.074744328 | 0.394370058 |
| 0.022544243 | 0.006378522 | 0.33724312  | 0.319998027 |
| 0.147727967 | 0.386750873 | 0.294548947 | 0.33784041  |
| 0.325800867 | 0.052534613 | 0.305880294 | 0.282662278 |
| 0.340616095 | 0.378963409 | 0.304479823 | 0.310620762 |
| 0.330276023 | 0.206604092 | 0.262283173 | 0.23659086  |
| 0.325451022 | 0.315548136 | 0.211203799 | 0.057541404 |
| 0.382863057 | 0.370042407 | 0.103361973 | 0.212513258 |
| 0.391439424 | 0.445951858 | 0.104665992 | 0.025149113 |
| 0.289398045 | 0.363302084 | 0.460119036 | 0.457258538 |
| 0.493975024 | 0.497929699 | 0.389155257 | 0.208193125 |
| 0.117047062 | 0.368304153 | 0.323306161 | 0.17353127  |
| 0.472315485 | 0.112330935 | 0.449960108 | 0.316682225 |
| 0.184867303 | 0.276109455 | 0.064962172 | 0.153050443 |
| 0.360380346 | 0.239527179 | 0.247447641 | 0.186034714 |
| 0.351187953 | 0.25756915  | 0.102795999 | 0.263854958 |
| 0.355996665 | 0.218986456 | 0.224994574 | 0.347216792 |
| 0.358006065 | 0.26557666  | 0.397408303 | 0.440464094 |
| 0.182957827 | 0.19055221  | 0.271692376 | 0.389904811 |
| 0.397062727 | 0.372741414 | 0.035674056 | 0.41381908  |
| 0.458840723 | 0.386096221 | 0.461712114 | 0.379271915 |
| 0.143961775 | 0.351214725 | 0.359969172 | 0.372988344 |
| 0.265137695 | 0.35169212  | 0.319140235 | 0.115843696 |
| 0.320664716 | 0.477853699 | 0.387616816 | 0.222316002 |
| 0.384547071 | 0.179591356 | 0.102411776 | 0.411074655 |
| 0.238570007 | 0.132388599 | 0.334574388 | 0.404889047 |

|             |             |             |             |
|-------------|-------------|-------------|-------------|
| 0.004525433 | 0.17023624  | 0.473181419 | 0.27058864  |
| 0.501811939 | 0.448471244 | 0.417263815 | 0.316239538 |
| 0.004057877 | 0.394786991 | 0.362073563 | 0.362464355 |
| 0.39059112  | 0.346098671 | 0.227277462 | 0.132620992 |
| 0.314905095 | 0.1158545   | 0.213922762 | 0.313869274 |
| 0.242759092 | 0.385145549 | 0.261536776 | 0.300901304 |
| 0.274706289 | 0.151006126 | 0.256588853 | 0.276732215 |
| 0.243405116 | 0.28089689  | 0.355883244 | 0.286420632 |
| 0.199002445 | 0.42406261  | 0.383841137 | 0.054708694 |
| 0.359218181 | 1           | 0.412754538 | 0.006452812 |
| 0.387516322 | 0.019444729 | 0.26202491  | 0.258886102 |
| 0.265083684 | 0.292797365 | 0.317192495 | 0.32318719  |
| 0.378346526 | 0.294865275 | 0.288896194 | 0.283311826 |
| 0.21763735  | 0.282875342 | 0.383447809 | 0.384015803 |
| 0.283311282 | 0.181897865 | 0.135522484 | 0.133171949 |
| 0.083962195 | 0.4237814   | 0.263216977 | 0.110440078 |
| 0.293459843 | 0.384663698 | 0.345426413 | 0.456783987 |
| 0.397782552 | 0.143717123 | 0.385532035 | 0.39186366  |
| 0.241997858 | 0.28026214  | 0.107207685 | 0.379189767 |
| 0.276595898 | 0.24899888  | 0.371378726 | 0.320651433 |
| 0.391994086 | 0.396079171 | 0.260134045 | 0.424551826 |
| 0.356670707 | 0.393137899 | 0.28502301  | 0.135814868 |
| 0.228523937 | 0.19754311  | 0.306543268 | 0.005554359 |
| 0.368320584 | 0.256061579 | 0.417743638 | 0.456046049 |
| 0.299341573 | 0.372404231 | 0.2856198   | 0.138214388 |
| 0.249463593 | 0.198899515 | 0.195622573 | 0.393637981 |
| 0.221103088 | 0.239279614 | 0.332657718 | 0.30130767  |
| 0.398945852 | 0.402303569 | 0.333252565 | 0.314358894 |
| 0.322880688 | 0.24668146  | 0.469452171 | 0.171972546 |
| 0.38721568  | 0.225645419 | 0.349539358 | 0.333080019 |
| 0.2881761   | 0.480244042 | 0.106073285 | 0.484252256 |
| 0.365196932 | 0.181997537 | 0.478501834 | 0.338182483 |
| 0.314708337 | 0.17185977  | 0.214370433 | 0.372541352 |
| 0.318115217 | 0.33157002  | 0.018021137 | 0.085199552 |
| 0.346531137 | 0.374661344 | 0.37898417  | 0.39245177  |
| 0.304912732 | 0.365887854 | 0.190559662 | 0.336565476 |
| 0.447025698 | 0.473974234 | 0.2729116   | 0.298746252 |
| 0.363199373 | 0.155703307 | 0.350252431 | 0.032191735 |
| 0.393042694 | 0.380107417 | 0.362332486 | 0.106169436 |
| 0.046829121 | 0.236180925 | 0.390254132 | 0.126002822 |
| 0.452231628 | 0.203862651 | 0.377707051 | 0.384676119 |
| 0.243462661 | 0.472791206 | 0.192126023 | 0.373287414 |
| 0.11482639  | 0.315714275 | 0.381806713 | 0.401057238 |
| 0.250062394 | 0.321520405 | 0.369317433 | 0.254979192 |
| 0.068553037 | 0.303304517 | 0.006686416 | 0.401167455 |
| 0.45117499  | 0.360736807 | 0.24854074  | 0.303136447 |
| 0.318750276 | 0.373802895 | 0.310961632 | 0.37905262  |
| 0.025291158 | 0.355396509 | 0.259111288 | 0.363420893 |
| 0.215815303 | 0.396519391 | 0.094847988 | 0.365258405 |
| 0.441913656 | 0.31080658  | 0.300372996 | 0.302434481 |
| 0.450377545 | 0.369007644 | 0.198227914 | 0.270725134 |
| 0.386619989 | 0.112841444 | 0.341744219 | 0.502630687 |
| 0.237816267 | 0.245163847 | 0.395337886 | 0.264272117 |
| 0.33545971  | 0.361408635 | 0.387426866 | 0.499265644 |

|             |             |             |             |
|-------------|-------------|-------------|-------------|
| 0.134379745 | 0.286028748 | 0.399599351 | 0.43307289  |
| 0.325144548 | 0.24105029  | 0.265796798 | 0.292811173 |
| 0.419378075 | 0.129289084 | 0.309549614 | 0.35255793  |
| 0.247118958 | 0.346987694 | 0.342258741 | 0.257559097 |
| 0.070693511 | 0.24975545  | 0.332782815 | 0.208733663 |
| 0.335418391 | 0.381492864 | 0.309301681 | 0.374582916 |
| 0.16371043  | 0.043775668 | 0.437409953 | 0.026150019 |
| 0.31907775  | 0.367459543 | 0.294564229 | 0.36441941  |
| 0.212487393 | 0.381898235 | 0.343348863 | 0.003399292 |
| 0.401092247 | 0.072005681 | 0.365303852 | 0.266060369 |
| 0.306100902 | 0.099634743 | 0.42807597  | 0.47878392  |
| 0.344538044 | 0.332498845 | 0.307787947 | 0.439970211 |
| 0.183073175 | 0.321341628 | 0.364111326 | 0.375066062 |
| 0.249496    | 0.347085982 | 0.374410029 | 0.33839316  |
| 0.378932712 | 0.315572096 |             |             |
| PRR11       | 0.146938596 | 0.411223451 | 0.113086834 |
| 0.196675968 | 0.355840412 | 0.432319494 | 0.128900607 |
| 0.221954787 | 0.382144981 | 0.308613277 | 0.400024812 |
| 0.048011478 | 0.132526388 | 0.428674221 | 0.129233025 |
| 0.390444766 | 0.087780256 | 0.192277678 | 0.129161463 |
| 0.315246652 | 0.323315935 | 0.366385102 | 0.401054976 |
| 0.347016617 | 0.24273378  | 0.384993813 | 0.393682956 |
| 0.471727469 | 0.267774175 | 0.434102239 | 0.202796466 |
| 0.410258776 | 0.354168862 | 0.382532986 | 0.048761998 |
| 0.439219992 | 0.029879595 | 0.438945396 | 0.312157551 |
| 0.197847374 | 0.36024131  | 0.343395699 | 0.312110778 |
| 0.361217359 | 0.081559376 | 0.218979219 | 0.399297694 |
| 0.384369231 | 0.389481457 | 0.127945511 | 0.43414543  |
| 0.388638259 | 0.396824122 | 0.379357175 | 0.004248829 |
| 0.318599767 | 0.103277984 | 0.23757674  | 0.494476503 |
| 0.289768695 | 0.223067633 | 0.277363476 | 0.361807462 |
| 0.400767402 | 0.405043857 | 0.359392171 | 0.351556442 |
| 0.474068769 | 0.21170989  | 0.423360798 | 0.226357921 |
| 0.399152897 | 0.086569667 | 0.24612149  | 0.162346598 |
| 0.408539751 | 0.303848384 | 0.400638444 | 0.342458125 |
| 0.397407465 | 0.516030004 | 0.334482829 | 0.486107847 |
| 0.14548076  | 0.359528292 | 0.349160251 | 0.365782217 |
| 0.394364689 | 0.171998896 | 0.41353188  | 0.501911694 |
| 0.120611094 | 0.372965276 | 0.393925441 | 0.199451235 |
| 0.426258373 | 0.33751107  | 0.374071534 | 0.22244868  |
| 0.395218887 | 0.351595751 | 0.479991721 | 0.344855686 |
| 0.394257518 | 0.135803188 | 0.482903237 | 0.34258475  |
| 0.345749984 | 0.153082357 | 0.273418412 | 0.429287064 |
| 0.410649542 | 0.46475651  | 0.40661353  | 0.384036299 |
| 0.367817234 | 0.476335182 | 0.411401766 | 0.421134971 |
| 0.178560375 | 0.505575385 | 0.278158625 | 0.105804418 |
| 0.140301733 | 0.189211748 | 0.309185474 | 0.371761711 |
| 0.43912761  | 0.407417005 | 0.276423233 | 0.305448691 |
| 0.423452291 | 0.469843581 | 0.499217168 | 0.410117747 |
| 0.093304688 | 0.296260551 | 0.371332077 | 0.399866806 |
| 0.39680111  | 0.213356751 | 0.292199572 | 0.498832501 |
| 0.387449202 | 0.424318144 | 0.26363648  | 0.50809217  |
| 0.299334731 | 0.499624633 | 0.41680271  | 0.248935275 |
| 0.506614556 | 0.488266338 | 0.48910359  | 0.403604726 |

|             |             |             |             |
|-------------|-------------|-------------|-------------|
| 0.476943107 | 0.382002241 | 0.095386266 | 0.398595723 |
| 0.478461779 | 0.022107602 | 0.438953895 | 0.462511936 |
| 0.47544955  | 0.425426143 | 0.497429083 | 0.484903998 |
| 0.483278072 | 0.150526427 | 0.034912681 | 0.340901802 |
| 0.487255935 | 0.402099118 | 0.257012093 | 0.382394501 |
| 0.383090069 | 0.421947043 | 0.438100249 | 0.288433082 |
| 0.507975549 | 0.435777961 | 0.458863181 | 0.402829212 |
| 0.351866308 | 0.349035589 | 0.368286489 | 0.466465196 |
| 0.112604918 | 0.189557643 | 0.107341441 | 0.379172557 |
| 0.361764454 | 0.270064726 | 0.394622866 | 0.388902752 |
| 0.283869672 | 0.408635249 | 0.348934665 | 0.39351209  |
| 0.108476189 | 0.415827641 | 0.26861739  | 0.241516521 |
| 0.096071839 | 0.214138743 | 0.232982528 | 0.250741797 |
| 0.325075416 | 0.277257624 | 0.428290737 | 0.466922469 |
| 0.387924468 | 0.250770989 | 0.42179354  | 0.469585733 |
| 0.420118294 | 0.385283384 | 0.314467928 | 0.025982051 |
| 0.264535063 | 0.309569167 | 0.214888662 | 0.412808764 |
| 0.22911414  | 0.27738965  | 0.385787643 | 0.406105266 |
| 0.328676845 | 0.246823506 | 0.363284858 | 0.443894703 |
| 0.220532335 | 0.353001786 | 0.417366768 | 0.398446439 |
| 0.013572977 | 0.356341485 | 0.43109549  | 0.218139959 |
| 0.362272881 | 0.169098365 | 0.280900039 | 0.420475499 |
| 0.304504782 | 0.284643226 | 0.468425072 | 0.415438464 |
| 0.363262839 | 0.262037655 | 0.502422683 | 0.054669535 |
| 0.387431319 | 0.097151855 | 0.34262174  | 0.348768301 |
| 0.322596306 | 0.356240929 | 0.356335686 | 0.341622129 |
| 0.199137722 | 0.495832377 | 0.428279053 | 0.481349388 |
| 0.348239081 | 0.504335835 | 0.429243053 | 0.42235479  |
| 0.416923329 | 0.361396246 | 0.160645053 | 0.416248711 |
| 0.423856141 | 0.295651907 | 0.137975811 | 0.420681626 |
| 0.354176139 | 0.40054332  | 0.213303822 | 0.461961873 |
| 0.500587248 | 0.453068102 | 0.239553732 | 0.397916007 |
| 0.396941039 | 0.312173666 | 0.436262614 | 0.513420586 |
| 0.30694951  | 0.352418717 | 0.338471638 | 0.410261542 |
| 0.256838533 | 0.267273476 | 0.370537647 | 0.222616653 |
| 0.015063324 | 0.160992947 | 0.128495964 | 0.252882132 |
| 0.219606277 | 0.408572904 | 0.414628758 | 0.488117295 |
| 0.203402345 | 0.422658932 | 0.326427295 | 0.298852807 |
| 0.39566368  | 0.377876369 | 0.399521049 | 0.416860929 |
| 0.336437389 | 0.045576728 | 0.181909448 | 0.512420836 |
| 0.090676021 | 0.274252771 | 0.393528419 | 0.006685851 |
| 0.096472549 | 0.396715732 | 0.157003201 | 0.242348897 |
| 0.455758861 | 0.244291327 | 0.268845243 | 0.311684534 |
| 0.402693258 | 0.18162763  | 0.01154488  | 0.461697526 |
| 0.478644989 | 0.453506019 | 0.474408986 | 0.464219542 |
| 0.418308667 | 0.434181008 | 0.413212757 | 0.400229734 |
| 0.190020963 | 0.170303299 | 0.223249945 | 0.328111377 |
| 0.009249997 | 0.422757085 | 0.390046893 | 0.225157078 |
| 0.42433062  | 0.365407624 | 0.09113753  | 0.399235697 |
| 0.044974813 | 0.206755525 | 0.355426422 | 0.324998265 |
| 0.396193868 | 0.044782978 | 0.234724425 | 0.306259873 |
| 0.423451824 | 0.373458792 | 0.367443417 | 0.510770279 |
| 0.376140295 | 0.18757001  | 0.349151333 | 0.42901321  |
| 0.145266147 | 0.116335903 | 0.397045674 | 0.038303801 |

|             |             |             |             |
|-------------|-------------|-------------|-------------|
| 0.292235508 | 0.46380236  | 0.406191491 | 0.129215133 |
| 0.328329105 | 0.016964649 | 0.376454971 | 0.510846931 |
| 0.45335252  | 0.483194702 | 0.479135047 | 0.297066778 |
| 0.480020044 | 0.125816869 | 0.501414696 | 0.401338648 |
| 0.341091265 | 0.00181716  | 0.018045443 | 0.447188278 |
| 0.380923401 | 0.112472001 | 0.246153092 | 0.372185671 |
| 0.185164385 | 0.228599617 | 0.155928825 | 0.243265026 |
| 0.442159397 | 0.317526129 | 0.24929031  | 0.453249835 |
| 0.310388541 | 0.333857343 | 0.399238316 | 0.161314622 |
| 0.43451171  | 0.115108338 | 0.164995243 | 0.015273737 |
| 0.408486556 | 0.175361609 | 0.473477844 | 0.486824048 |
| 0.48190993  | 0.410037379 | 0.311895912 | 0.38116629  |
| 0.432361061 | 0.157329254 | 0.381130951 | 0.1835181   |
| 0.458021413 | 0.380739491 | 0.367191071 | 0.343802551 |
| 0.472777752 | 0.449647199 | 0.085959589 | 0.405901239 |
| 0.034896723 | 0.006903609 | 0.375378854 | 0.349428089 |
| 0.124046098 | 0.36072161  | 0.318365506 | 0.329029651 |
| 0.34516087  | 0.069821363 | 0.284065243 | 0.266097949 |
| 0.351160121 | 0.376861346 | 0.310944074 | 0.334666756 |
| 0.337357577 | 0.18199342  | 0.315900666 | 0.263366194 |
| 0.315794997 | 0.340864046 | 0.240492913 | 0.061884346 |
| 0.405860845 | 0.39454074  | 0.124520406 | 0.253213483 |
| 0.42486757  | 0.450234364 | 0.094032327 | 0.028061095 |
| 0.327085738 | 0.364227812 | 0.466878529 | 0.473865998 |
| 0.510511358 | 0.498339453 | 0.411810408 | 0.200981639 |
| 0.143881127 | 0.374653539 | 0.335539993 | 0.189214876 |
| 0.487068382 | 0.122257626 | 0.478022398 | 0.324222428 |
| 0.206224857 | 0.292412888 | 0.086131055 | 0.171705471 |
| 0.39320526  | 0.274659723 | 0.269178766 | 0.208427583 |
| 0.339813768 | 0.296597812 | 0.116228449 | 0.281542075 |
| 0.373771619 | 0.192029508 | 0.247205725 | 0.414196228 |
| 0.407661832 | 0.260877893 | 0.410030968 | 0.442855976 |
| 0.21188022  | 0.195360299 | 0.303344243 | 0.428316221 |
| 0.423939339 | 0.385383971 | 0.056333006 | 0.425494246 |
| 0.474731616 | 0.419970268 | 0.48556298  | 0.398841468 |
| 0.161326354 | 0.375906465 | 0.33973955  | 0.358776527 |
| 0.282248218 | 0.4320671   | 0.341734928 | 0.1326676   |
| 0.359749339 | 0.490568224 | 0.39772444  | 0.25463116  |
| 0.433244597 | 0.202225153 | 0.109884855 | 0.437381134 |
| 0.210294225 | 0.148558386 | 0.361341039 | 0.429475611 |
| 0.006399885 | 0.181657443 | 0.470632605 | 0.340964155 |
| 0.51212303  | 0.445544759 | 0.429956155 | 0.384613249 |
| 0.003376114 | 0.401902494 | 0.389522241 | 0.385460593 |
| 0.402915215 | 0.404062998 | 0.287833273 | 0.14634382  |
| 0.352340999 | 0.141142958 | 0.199699999 | 0.385712608 |
| 0.183635277 | 0.411400966 | 0.287776669 | 0.301449206 |
| 0.294813449 | 0.160037838 | 0.298814748 | 0.34018926  |
| 0.211079896 | 0.315480201 | 0.377623354 | 0.321952783 |
| 0.178400358 | 0.413642603 | 0.392921808 | 0.070722611 |
| 0.390955765 | 0.412754538 | 1           | 0.003487159 |
| 0.412263956 | 0.025282215 | 0.282465138 | 0.290210956 |
| 0.29753345  | 0.291318363 | 0.332848323 | 0.346783558 |
| 0.384687677 | 0.309800992 | 0.338556999 | 0.317129114 |
| 0.253582153 | 0.338189696 | 0.416572335 | 0.394850256 |

|             |             |             |             |
|-------------|-------------|-------------|-------------|
| 0.320228659 | 0.213890209 | 0.162879769 | 0.152304929 |
| 0.114012722 | 0.446994681 | 0.305761457 | 0.136879154 |
| 0.32488118  | 0.404218628 | 0.378155811 | 0.470421988 |
| 0.42408772  | 0.171302165 | 0.391445006 | 0.414775518 |
| 0.231799271 | 0.334360757 | 0.127624032 | 0.425588977 |
| 0.328726894 | 0.252028652 | 0.429337659 | 0.333683753 |
| 0.401648552 | 0.41025176  | 0.307831965 | 0.442649963 |
| 0.405482301 | 0.370529674 | 0.303647304 | 0.151712796 |
| 0.245031274 | 0.215967677 | 0.311029672 | 0.007275109 |
| 0.399644498 | 0.324692193 | 0.427374994 | 0.472480163 |
| 0.312353542 | 0.40679178  | 0.313206676 | 0.146934456 |
| 0.275643618 | 0.212504535 | 0.223724589 | 0.43165546  |
| 0.230336746 | 0.299711327 | 0.348913261 | 0.381069184 |
| 0.425152938 | 0.416784487 | 0.333535651 | 0.338319329 |
| 0.344360021 | 0.284638142 | 0.477413736 | 0.211441661 |
| 0.400391566 | 0.24186307  | 0.376135797 | 0.325681917 |
| 0.298065943 | 0.489661705 | 0.13276095  | 0.49051144  |
| 0.337911381 | 0.211408022 | 0.495461674 | 0.410922679 |
| 0.404059641 | 0.232964841 | 0.212640229 | 0.404711875 |
| 0.318419948 | 0.361253996 | 0.016685587 | 0.074474766 |
| 0.371349719 | 0.361434811 | 0.389415468 | 0.410877906 |
| 0.310843632 | 0.382114373 | 0.224726737 | 0.350362134 |
| 0.464687114 | 0.495848833 | 0.2732241   | 0.322050076 |
| 0.383872497 | 0.189912133 | 0.41499246  | 0.032537106 |
| 0.391675599 | 0.392396558 | 0.362622999 | 0.128914933 |
| 0.057216592 | 0.219513302 | 0.392564505 | 0.135930548 |
| 0.44624789  | 0.222924524 | 0.385933263 | 0.443686695 |
| 0.271206964 | 0.493402485 | 0.219349379 | 0.41321802  |
| 0.103661245 | 0.349947142 | 0.401034144 | 0.392088659 |
| 0.259874384 | 0.311703339 | 0.393448662 | 0.267765645 |
| 0.081546458 | 0.323209383 | 0.00356203  | 0.418552918 |
| 0.461387583 | 0.341025872 | 0.28010332  | 0.315325097 |
| 0.353032168 | 0.417391323 | 0.287273645 | 0.415577031 |
| 0.0338247   | 0.36624208  | 0.310186072 | 0.416182895 |
| 0.207736601 | 0.374933748 | 0.130328224 | 0.347281355 |
| 0.467181531 | 0.280263828 | 0.330032265 | 0.276727177 |
| 0.472193232 | 0.418240846 | 0.233830895 | 0.335129077 |
| 0.393356781 | 0.130590507 | 0.394333751 | 0.508211545 |
| 0.267458433 | 0.252765276 | 0.42039237  | 0.26091424  |
| 0.334741858 | 0.409775592 | 0.399142372 | 0.506139538 |
| 0.141390426 | 0.325207075 | 0.436014194 | 0.433246041 |
| 0.36572062  | 0.23206687  | 0.267522071 | 0.278164794 |
| 0.441241773 | 0.164891819 | 0.303618936 | 0.390435021 |
| 0.231400992 | 0.38671755  | 0.367540859 | 0.269559354 |
| 0.083411754 | 0.287422892 | 0.419548936 | 0.236361661 |
| 0.348358839 | 0.38350549  | 0.299108619 | 0.394343017 |
| 0.210728704 | 0.052345829 | 0.456877083 | 0.021433787 |
| 0.397382327 | 0.411245991 | 0.348157689 | 0.389303923 |
| 0.251155888 | 0.393322674 | 0.347116905 | 0.003466062 |
| 0.419425085 | 0.094012118 | 0.392952022 | 0.266477053 |
| 0.294241695 | 0.108636609 | 0.457480017 | 0.483079116 |
| 0.403062325 | 0.390599738 | 0.328297233 | 0.452774137 |
| 0.183922317 | 0.334525724 | 0.346961174 | 0.410671895 |
| 0.26308287  | 0.3542785   | 0.39871122  | 0.368781932 |



|             |             |             |             |
|-------------|-------------|-------------|-------------|
| 0.421497551 | 0.386444186 |             |             |
| PRRG4       | 0.015490064 | 0.002838101 | 0.011472513 |
| 0.005390628 | 0.003988713 | 0.000635947 | 0.039251033 |
| 0.009545644 | 0.003497691 | 0.00010046  | 0.004665909 |
| 0.051193154 | 0.001345766 | 0.00665721  | 0.035056689 |
| 0.004476656 | 0.03225489  | 0.042293519 | 1.84E-05    |
| 0.000361199 | 0.008451138 | 0.00042788  | 0.001577866 |
| 0.003554766 | 0.023258001 | 0.00473494  | 0.000424316 |
| 0.00369555  | 0.000422068 | 0.001599505 | 3.67E-05    |
| 0.015656174 | 0.004712937 | 0.000261836 | 0.011842811 |
| 0.001629112 | 4.96E-05    | 0.014203363 | 0.012727823 |
| 0.000221572 | 0.014903246 | 0.000118463 | 0.013198547 |
| 0.001634752 | 0.031245007 | 0.0019775   | 0.002769877 |
| 0.002865846 | 0.001826531 | 0.020046518 | 0.002181638 |
| 0.000830076 | 0.005206785 | 0.001500057 | 9.12E-05    |
| 0.003158866 | 0.000266279 | 0.00438335  | 3.07E-05    |
| 0.023549428 | 2.46E-05    | 0.001687873 | 0.001864112 |
| 0.003788538 | 0.00824178  | 0.001037361 | 0.00644625  |
| 0.00036625  | 0.001275869 | 0.000168098 | 0.004972771 |
| 0.02045925  | 0.034016158 | 0.011861547 | 0.000860414 |
| 0.013122259 | 0.002118189 | 0.000695806 | 0.003721124 |
| 0.00819052  | 0.012609279 | 0.005643953 | 0.000580352 |
| 0.002267033 | 0.001245698 | 0.015413493 | 0.006227331 |
| 0.018775596 | 0.007524458 | 0.008453853 | 0.013276879 |
| 0.000840151 | 0.006764843 | 0.021618433 | 0.002467653 |
| 0.000871533 | 0.000663677 | 8.33E-05    | 0.002972361 |
| 0.007333909 | 0.006228883 | 0.024001395 | 0.000619465 |
| 0.03527612  | 0.00591877  | 0.002068367 | 0.0042152   |
| 0.022336594 | 0.006090708 | 0.002573876 | 0.005031073 |
| 0.004171945 | 0.00338444  | 0.012916873 | 0.003918333 |
| 0.005296195 | 0.006924078 | 0.003602646 | 0.001839309 |
| 0.004710721 | 0.014631737 | 0.023702932 | 0.011365225 |
| 0.010949979 | 0.001007    | 0.012350735 | 0.003190315 |
| 0.004194657 | 0.017208463 | 0.020050248 | 0.00593525  |
| 0.004591569 | 0.004844724 | 0.007572455 | 0.037986494 |
| 9.84E-05    | 0.004123008 | 0.000838954 | 0.009246961 |
| 0.021081471 | 0.002280268 | 0.008250764 | 0.012157338 |
| 0.005469668 | 0.006201733 | 0.008716685 | 0.008053582 |
| 0.008219769 | 0.002744455 | 0.033293066 | 0.00747195  |
| 0.006586963 | 0.006978957 | 0.0026225   | 0.005631189 |
| 0.005565843 | 0.000163839 | 0.008354675 | 0.007713013 |
| 2.03E-05    | 0.002651279 | 0.003743405 | 0.005211705 |
| 0.003631969 | 0.006581205 | 0.003660718 | 0.004251414 |
| 0.028016112 | 6.38E-06    | 0.016064253 | 0.007208057 |
| 0.010182184 | 0.00413671  | 0.001965197 | 0.004181944 |
| 0.00223132  | 0.001729077 | 0.000623316 | 0.009606625 |
| 0.003285052 | 0.002740655 | 0.006324081 | 0.003134333 |
| 0.013601552 | 0.000892896 | 0.006124404 | 0.00933764  |
| 0.018819222 | 0.022856803 | 0.00895624  | 2.11E-05    |
| 0.023790758 | 0.002689851 | 0.002612717 | 0.028374842 |
| 0.001064181 | 0.000512422 | 0.003714484 | 0.029259868 |
| 0.001477051 | 0.012498225 | 0.031806802 | 0.039678203 |
| 0.02669269  | 0.010685247 | 0.005853107 | 0.010820388 |
| 0.020053012 | 0.001513819 | 0.003992335 | 0.001730143 |

|                               |                      |                      |             |
|-------------------------------|----------------------|----------------------|-------------|
| 0.025092404                   | 0.003255972          | 0.006746198          | 0.015583537 |
| 0.00216156                    | 0.020788118          | 0.004353682          | 0.006677606 |
| 7.23E-05 0.000164935          | 0.000525462          | 0.018835632          |             |
| 0.016192648                   | 0.006912561          | 0.004678695          | 0.009791174 |
| 0.007970039                   | 0.003039154          | 0.009928579          | 0.02153297  |
| 0.003055152                   | 0.00819786           | 0.001968236          | 0.003826608 |
| 0.014345787                   | 0.004664736          | 0.002971926          | 0.0124059   |
| 0.000154841                   | 0.000348134          | 0.006879085          | 0.000391666 |
| 0.002488804                   | 0.002725843          | 0.003046954          | 6.74E-05    |
| 0.012270271                   | 0.005765539          | 7.66E-05 0.001049044 |             |
| 0.000458059                   | 0.019681548          | 0.000127841          | 0.026845641 |
| 0.016751681                   | 0.002382026          | 0.002601776          | 0.014647628 |
| 0.006143082                   | 0.003465535          | 0.00501696           | 0.001897914 |
| 0.006332513                   | 0.004557997          | 0.007280237          | 0.005724902 |
| 0.000759035                   | 6.86E-05 0.00657742  | 0.005350833          |             |
| 0.000334276                   | 0.023740429          | 0.002037584          | 0.001620296 |
| 0.003939094                   | 0.000392876          | 0.008846872          | 0.008128765 |
| 0.004458139                   | 0.013850446          | 0.00774634           | 0.012542476 |
| 0.013670534                   | 0.003027117          | 0.006374396          | 0.000624046 |
| 0.006417066                   | 0.005021433          | 0.007506336          | 0.029053093 |
| 0.005872977                   | 0.007388537          | 0.001615866          | 0.001661939 |
| 0.01877952                    | 0.036895802          | 0.016210047          | 0.001241552 |
| 0.000471284                   | 0.004601833          | 0.005930498          | 0.039643054 |
| 0.004504975                   | 0.012796581          | 0.013938682          | 0.01030404  |
| 0.001733608                   | 0.000466046          | 0.001922815          | 0.012900335 |
| 0.001573408                   | 0.007025483          | 0.009583452          | 0.02213587  |
| 0.00070308                    | 0.002687239          | 0.000722209          | 0.056562238 |
| 0.001530744                   | 0.030894011          | 0.028201497          | 0.004520698 |
| 0.022144363                   | 0.031623365          | 0.00130901           | 0.005785788 |
| 0.027499836                   | 0.000205282          | 0.004651854          | 0.003865183 |
| 0.004219692                   | 0.003942186          | 0.004163505          | 0.004482839 |
| 0.001511987                   | 0.005861517          | 0.001624134          | 0.014064385 |
| 0.008571974                   | 0.004931013          | 0.017260775          | 8.33E-05    |
| 0.004838202                   | 0.00176976           | 0.038995376          | 0.002481489 |
| 0.012544969                   | 0.025446248          | 0.001399838          | 0.019369731 |
| 3.34E-05 0.004006554          | 0.005472489          | 0.005482437          |             |
| 0.018877697                   | 0.000304941          | 0.002073583          | 0.005966193 |
| 0.011966578                   | 1.02E-05 0.00520773  | 0.008806189          |             |
| 0.020900739                   | 0.008753408          | 0.003157546          | 0.033437029 |
| 6.36E-05 0.002176359          | 3.83E-07 0.000438248 | 0.004338256          |             |
| 0.000407446                   | 0.008032116          | 0.027123537          | 0.0228446   |
| 0.011042217                   | 0.006141605          | 0.003700314          | 0.005764411 |
| 0.005439674                   | 0.001286639          | 0.006160593          | 0.002519499 |
| 0.004533861                   | 0.005611652          | 0.001015686          | 0.000565967 |
| 0.000463862                   | 0.004133385          | 0.004646632          | 0.013923637 |
| 0.038518383                   | 0.0003145            | 0.020737991          | 0.014592605 |
| 0.011434893                   | 0.003118117          | 0.001057952          | 0.006342489 |
| 0.000798749                   | 0.005988042          | 0.019372086          | 0.013607442 |
| 0.000851233                   | 0.028191446          | 0.000808282          | 0.027588142 |
| 0.02485275                    | 0.000135886          | 0.004145954          | 0.020145105 |
| 0.006868979                   | 0.00463049           | 0.008544395          | 0.003907897 |
| 4.26E-05 7.55E-05 0.002844103 |                      | 0.01618379           | 0.000222517 |
| 0.014807362                   | 0.004723927          | 0.009195929          | 0.018398803 |
| 0.021007814                   | 0.009896446          | 0.008796893          | 0.044385664 |

|             |             |             |             |
|-------------|-------------|-------------|-------------|
| 0.009382744 | 0.001480291 | 3.02E-05    | 0.003026178 |
| 0.010622434 | 0.000217875 | 0.00506792  | 0.029362591 |
| 0.002114378 | 0.002184938 | 0.008531408 | 0.001440789 |
| 0.002380264 | 0.017485616 | 0.007378956 | 0.004997181 |
| 0.008835789 | 0.003588593 | 0.003625103 | 0.004967952 |
| 0.010443052 | 6.20E-05    | 0.015611646 | 0.031250367 |
| 0.041560712 | 0.001210379 | 0.0020139   | 0.036968282 |
| 0.019329345 | 0.006613118 | 0.005226111 | 0.06713719  |
| 0.018951303 | 0.019704715 | 0.004039206 | 0.005157662 |
| 0.003755207 | 0.006672439 | 0.009369584 | 0.011701632 |
| 0.017638895 | 0.017679069 | 0.008714864 | 0.003194571 |
| 0.005129894 | 0.004768845 | 0.036640759 | 0.003575076 |
| 0.000800528 | 0.030985142 | 0.014121478 | 0.012558227 |
| 0.032065673 | 0.000873064 | 0.024222587 | 0.017051202 |
| 0.023503071 | 0.013857208 | 3.33E-05    | 0.033081856 |
| 0.031851836 | 0.015981618 | 0.001264855 | 0.034494045 |
| 0.000639504 | 0.004036187 | 0.000523745 | 0.003906988 |
| 0.014606815 | 0.029018175 | 0.032911231 | 0.005441583 |
| 0.002073647 | 0.003127114 | 0.000341095 | 0.001065458 |
| 0.002901394 | 0.004361452 | 0.002344512 | 0.004675687 |
| 0.010914575 | 0.035615748 | 0.004037144 | 0.00070327  |
| 0.009397921 | 0.023485902 | 0.00070538  | 0.008376696 |
| 0.042980586 | 0.009873138 | 0.00796402  | 0.006670492 |
| 0.019467826 | 0.00036503  | 0.011664637 | 0.038963878 |
| 0.001892621 | 0.004037091 | 0.027534287 | 0.000189825 |
| 0.00228278  | 7.62E-05    | 0.000990189 | 0.004350808 |
| 0.00327147  | 0.006098592 | 0.006378335 | 0.011699305 |
| 0.000721897 | 0.000118887 | 0.0025953   | 0.008794569 |
| 0.003601893 | 0.005596381 | 0.005455363 | 0.000191446 |
| 0.02774992  | 0.017053348 | 0.023178535 | 0.040068139 |
| 2.79E-05    | 0.000392788 | 0.003933562 | 0.02794093  |
| 0.017676313 | 0.011351011 | 0.018290906 | 0.000244057 |
| 0.0055895   | 0.000101629 | 0.024289383 | 0.018637615 |
| 0.001121186 | 0.002337337 | 0.006815384 | 0.009074798 |
| 0.02056835  | 0.000303769 | 0.006452812 | 0.003487159 |
| 1           | 0.004791999 | 0.024330654 | 0.015481814 |
| 0.013132526 | 0.010151632 | 0.017144603 | 0.011636147 |
| 0.003105317 | 0.007720391 | 0.015977728 | 0.007726669 |
| 0.020483506 | 0.009090225 | 0.004953558 | 0.002252051 |
| 0.00313503  | 0.005285215 | 0.018273325 | 0.019608494 |
| 0.020947204 | 0.007722502 | 0.002099456 | 0.021981093 |
| 0.016970417 | 0.015996881 | 0.001802589 | 0.015984773 |
| 0.004033063 | 0.005710269 | 0.014927507 | 0.003354738 |
| 0.004004608 | 1.60E-05    | 5.60E-05    | 0.016053774 |
| 0.010903918 | 0.004432585 | 0.000240015 | 0.012249455 |
| 0.003064983 | 0.014543801 | 0.018593101 | 0.005572792 |
| 0.00232759  | 0.002335569 | 0.000345727 | 0.017967225 |
| 0.035268271 | 0.028349314 | 0.005958823 | 0.008091714 |
| 0.01006262  | 0.00144737  | 0.004685443 | 0.005971433 |
| 0.000188236 | 0.007699089 | 0.000155155 | 0.048452819 |
| 0.000118176 | 0.023402223 | 0.035661585 | 0.001504485 |
| 0.000247749 | 0.005368158 | 0.007226969 | 0.000404667 |
| 0.002839865 | 0.001929467 | 0.001465746 | 0.00726117  |
| 0.008414555 | 0.011887493 | 0.006154351 | 0.006859202 |

|                     |                      |                      |             |
|---------------------|----------------------|----------------------|-------------|
| 0.001401063         | 0.003764395          | 0.000828133          | 0.018492301 |
| 0.012157511         | 0.003702384          | 0.022082313          | 0.004246581 |
| 0.010204561         | 0.017555015          | 0.009383919          | 0.001174092 |
| 0.000467395         | 0.001556707          | 8.32E-05 0.000367892 |             |
| 0.007124601         | 9.17E-05 3.10E-07    | 0.000280786          | 0.017185079 |
| 0.000639729         | 0.003686166          | 0.004439561          | 0.002505629 |
| 0.012473724         | 0.005527984          | 0.008043272          | 0.004270441 |
| 0.005787782         | 0.013313454          | 0.023163344          | 0.013152321 |
| 0.021631796         | 0.001399146          | 8.56E-06 0.003896418 |             |
| 0.001077842         | 0.000573168          | 0.022326287          | 0.01471326  |
| 0.001002582         | 0.004198615          | 0.019798835          | 0.005255853 |
| 0.000514671         | 0.001514706          | 0.001375392          | 0.015512968 |
| 0.006987657         | 0.008527656          | 0.006415515          | 0.00468895  |
| 0.010526637         | 0.000397504          | 0.001155373          | 0.008963881 |
| 0.003088642         | 0.011478162          | 0.001587482          | 0.039189806 |
| 0.003105946         | 0.039210005          | 0.015398991          | 0.006668917 |
| 0.002715192         | 0.022743098          | 0.000849584          | 0.01414447  |
| 0.003841244         | 0.003308665          | 0.000155547          | 0.004703381 |
| 0.005013326         | 0.010574031          | 0.004782848          | 0.000764964 |
| 0.00459047          | 0.004943198          | 0.002598667          | 0.007429404 |
| 0.005650691         | 0.014794217          | 0.001440317          | 0.003492324 |
| 0.001995983         | 0.009674087          | 2.44E-05 0.001453157 |             |
| 0.035010451         | 0.000109771          | 0.005835363          | 0.016919319 |
| 0.002797606         | 0.006031667          | 0.033252949          | 0.001167532 |
| 0.003486462         | 0.000714513          | 0.004988919          | 0.020065797 |
| 0.019990269         | 0.003009284          | 0.005710671          | 0.01357518  |
| 0.002678418         | 0.002341 0.015966871 | 0.004820374          |             |
| 0.006289022         | 0.000954057          | 0.011004562          | 0.003412005 |
| 0.007433037         | 0.000715366          | 0.00725984           | 0.004072555 |
| 0.0039429           | 0.000387203          | 0.02615121           | 0.017768832 |
| 0.00536262          | 0.004169534          | 0.012044199          | 0.004252964 |
| 0.010074053         | 0.009190081          | 0.000143577          | 0.001766836 |
| 0.004470596         | 0.008231284          | 0.001879652          | 0.024142982 |
| 0.005190778         | 0.007601236          | 0.008935723          | 0.006553565 |
| 5.64E-05 0.00075392 | 0.008968797          | 0.000257813          |             |
| 0.044167685         | 0.004913229          | 0.005841666          | 0.003600906 |
| 0.000316148         | 0.000220816          | 0.005117733          | 0.000262293 |
| 0.000517382         | 0.000755593          | 0.002103263          | 0.000392115 |
| 0.000616058         | 0.000278049          | 0.000494413          | 0.004917767 |
| 0.001711412         |                      |                      |             |
| PSAT1 0.073691263   | 0.39234909           | 0.051454356          |             |
| 0.179705671         | 0.335566036          | 0.360769831          | 0.057352843 |
| 0.125669932         | 0.284955171          | 0.248943511          | 0.371961756 |
| 0.021184206         | 0.136352524          | 0.460716714          | 0.05305403  |
| 0.389606876         | 0.040246499          | 0.110635168          | 0.073204314 |
| 0.194561712         | 0.323355959          | 0.375064272          | 0.318681199 |
| 0.304362202         | 0.168081924          | 0.281587391          | 0.354291532 |
| 0.492800688         | 0.310167177          | 0.397943459          | 0.190722997 |
| 0.408528706         | 0.360269673          | 0.381311386          | 0.015735058 |
| 0.373697642         | 0.01452754           | 0.410702068          | 0.299559176 |
| 0.216094558         | 0.329190313          | 0.274217792          | 0.277985845 |
| 0.321156984         | 0.038687581          | 0.196831735          | 0.365412168 |
| 0.266348282         | 0.251140581          | 0.055014155          | 0.363758938 |
| 0.325670273         | 0.298893128          | 0.320710603          | 0.004491894 |

|             |             |             |             |
|-------------|-------------|-------------|-------------|
| 0.355216654 | 0.140263794 | 0.284341284 | 0.483868699 |
| 0.197526259 | 0.134479164 | 0.28390567  | 0.2016249   |
| 0.336813769 | 0.331674577 | 0.225899221 | 0.328026348 |
| 0.499864423 | 0.24458633  | 0.378974386 | 0.182407196 |
| 0.34289374  | 0.024874108 | 0.144837058 | 0.062023889 |
| 0.361073335 | 0.21185092  | 0.351905978 | 0.335388195 |
| 0.399899563 | 0.490045902 | 0.209551537 | 0.466515124 |
| 0.125522183 | 0.356979435 | 0.301923488 | 0.284901462 |
| 0.307720564 | 0.07215403  | 0.393376604 | 0.514499198 |
| 0.038329635 | 0.310387653 | 0.344014933 | 0.100662696 |
| 0.404135314 | 0.272940137 | 0.339793685 | 0.255790286 |
| 0.363197061 | 0.367056034 | 0.4360444   | 0.287497447 |
| 0.313511131 | 0.061449616 | 0.442307279 | 0.354663487 |
| 0.350655505 | 0.076193846 | 0.27806895  | 0.465260382 |
| 0.386774513 | 0.496119858 | 0.396420539 | 0.334964927 |
| 0.39495206  | 0.50026589  | 0.371926291 | 0.39069672  |
| 0.143820986 | 0.508083238 | 0.186333772 | 0.049927952 |
| 0.063039056 | 0.089997876 | 0.226540337 | 0.272412856 |
| 0.47632097  | 0.296833459 | 0.204472443 | 0.261114904 |
| 0.475356573 | 0.438230973 | 0.503192078 | 0.4015359   |
| 0.040279361 | 0.265863521 | 0.39704262  | 0.244049234 |
| 0.348639189 | 0.097573832 | 0.323922944 | 0.478805921 |
| 0.38297366  | 0.440078374 | 0.146823765 | 0.461956295 |
| 0.176027968 | 0.514950784 | 0.437423752 | 0.187657123 |
| 0.498316114 | 0.466306578 | 0.521869492 | 0.397267491 |
| 0.453119611 | 0.332646905 | 0.061402789 | 0.352816203 |
| 0.492935144 | 0.028113334 | 0.476819393 | 0.507954063 |
| 0.482600579 | 0.476389115 | 0.524826029 | 0.511085807 |
| 0.483957373 | 0.063894998 | 0.033503173 | 0.301490704 |
| 0.48967901  | 0.400139021 | 0.136719092 | 0.401086874 |
| 0.362517657 | 0.353223216 | 0.389066268 | 0.378007028 |
| 0.504128095 | 0.449853901 | 0.485885874 | 0.35426477  |
| 0.243419347 | 0.299844107 | 0.373056242 | 0.431223292 |
| 0.046908612 | 0.116597433 | 0.044693271 | 0.255783537 |
| 0.299807398 | 0.184938186 | 0.3485512   | 0.322233822 |
| 0.197323753 | 0.282758323 | 0.352102128 | 0.381815546 |
| 0.041353775 | 0.398008966 | 0.152626171 | 0.162042749 |
| 0.051222607 | 0.120167214 | 0.238767651 | 0.17947128  |
| 0.282392803 | 0.200406897 | 0.383254701 | 0.487345544 |
| 0.323142776 | 0.159415692 | 0.372732783 | 0.477261013 |
| 0.4361383   | 0.398704424 | 0.194532274 | 0.020637228 |
| 0.340970078 | 0.28471281  | 0.249756068 | 0.37794765  |
| 0.147505333 | 0.276784497 | 0.376992605 | 0.390959155 |
| 0.267366005 | 0.116915497 | 0.381821957 | 0.405730234 |
| 0.119473635 | 0.354228326 | 0.467557371 | 0.349164749 |
| 0.002981839 | 0.335863885 | 0.44609949  | 0.179807717 |
| 0.274703085 | 0.214053553 | 0.331169384 | 0.473484382 |
| 0.331773265 | 0.265292519 | 0.492993084 | 0.370783043 |
| 0.338877264 | 0.18385109  | 0.52333429  | 0.076897347 |
| 0.318650887 | 0.090297511 | 0.289678188 | 0.264176955 |
| 0.246922841 | 0.268419407 | 0.345471321 | 0.323559414 |
| 0.114852693 | 0.503581722 | 0.364747976 | 0.515815901 |
| 0.384101405 | 0.524745132 | 0.47338628  | 0.452763772 |
| 0.325709532 | 0.340933721 | 0.207613025 | 0.443155326 |

|             |             |             |             |
|-------------|-------------|-------------|-------------|
| 0.464326625 | 0.298416845 | 0.058695411 | 0.418365073 |
| 0.324219577 | 0.38662683  | 0.140284326 | 0.507637592 |
| 0.473517969 | 0.432458172 | 0.16690276  | 0.363570152 |
| 0.388066796 | 0.238025913 | 0.387511975 | 0.520479389 |
| 0.277028838 | 0.373130082 | 0.377670545 | 0.409323778 |
| 0.169873959 | 0.256653747 | 0.281459336 | 0.231215682 |
| 0.020772203 | 0.071417413 | 0.062403373 | 0.19219852  |
| 0.240280358 | 0.353789574 | 0.364440177 | 0.514984678 |
| 0.125779131 | 0.402457769 | 0.193023741 | 0.356701171 |
| 0.41167935  | 0.342077537 | 0.378989386 | 0.36999748  |
| 0.207407089 | 0.024701943 | 0.153375479 | 0.494832993 |
| 0.030251205 | 0.319837074 | 0.270849255 | 0.005305977 |
| 0.045637605 | 0.365360819 | 0.07575613  | 0.171929256 |
| 0.489023459 | 0.174065148 | 0.194250924 | 0.282070643 |
| 0.329186195 | 0.088937956 | 0.005626879 | 0.473238759 |
| 0.451968229 | 0.421195422 | 0.449500588 | 0.409898226 |
| 0.418470435 | 0.341124838 | 0.402103353 | 0.310074298 |
| 0.108852631 | 0.077424259 | 0.294702344 | 0.319444397 |
| 0.005479614 | 0.362387392 | 0.292553916 | 0.134211467 |
| 0.393942608 | 0.268673242 | 0.040763454 | 0.337947481 |
| 0.029887484 | 0.290979403 | 0.281307435 | 0.211721825 |
| 0.319167654 | 0.013229087 | 0.286440677 | 0.372304087 |
| 0.410408746 | 0.326164399 | 0.366875642 | 0.514410345 |
| 0.348553943 | 0.09980562  | 0.342314218 | 0.371438128 |
| 0.074822947 | 0.120478057 | 0.305531465 | 0.048452375 |
| 0.196576633 | 0.411441457 | 0.352791144 | 0.07285762  |
| 0.280017547 | 0.005670117 | 0.35273224  | 0.519521128 |
| 0.434393571 | 0.528650317 | 0.50317234  | 0.346689161 |
| 0.501747374 | 0.148545274 | 0.52296772  | 0.382269665 |
| 0.346930055 | 0.001977184 | 0.00718106  | 0.498969495 |
| 0.407853306 | 0.042019251 | 0.155567612 | 0.356261992 |
| 0.136494486 | 0.137600199 | 0.061915831 | 0.245927123 |
| 0.374643897 | 0.276734191 | 0.224673297 | 0.442502194 |
| 0.254397213 | 0.226655216 | 0.329288858 | 0.070102531 |
| 0.38006427  | 0.060167479 | 0.067709344 | 0.014860477 |
| 0.340099772 | 0.091172845 | 0.423120086 | 0.495171483 |
| 0.493870113 | 0.377876608 | 0.310738121 | 0.332387791 |
| 0.412773947 | 0.078159412 | 0.346998003 | 0.092049001 |
| 0.469808382 | 0.396419058 | 0.311649671 | 0.296278706 |
| 0.512474693 | 0.466814043 | 0.033757786 | 0.399497275 |
| 0.018575078 | 0.002726416 | 0.341335299 | 0.226975973 |
| 0.053082254 | 0.382079238 | 0.23066858  | 0.193102375 |
| 0.203010407 | 0.037522901 | 0.319065972 | 0.308427067 |
| 0.301131327 | 0.366182251 | 0.330074014 | 0.191949145 |
| 0.278070342 | 0.184968949 | 0.203253938 | 0.151299201 |
| 0.213627047 | 0.282224953 | 0.175698412 | 0.019909098 |
| 0.377942309 | 0.412513812 | 0.058856933 | 0.140973186 |
| 0.455837788 | 0.508793327 | 0.048020937 | 0.020118221 |
| 0.237141496 | 0.310812303 | 0.516224667 | 0.481886265 |
| 0.500144837 | 0.519907304 | 0.370503474 | 0.154462763 |
| 0.06961386  | 0.313298241 | 0.328793601 | 0.123750282 |
| 0.506514126 | 0.05391009  | 0.457452468 | 0.340483439 |
| 0.103169456 | 0.226299324 | 0.044587047 | 0.079659407 |
| 0.388788996 | 0.169016532 | 0.204989441 | 0.134455104 |

|             |             |             |             |
|-------------|-------------|-------------|-------------|
| 0.345528811 | 0.310027757 | 0.045408861 | 0.200556679 |
| 0.319461269 | 0.261270142 | 0.155949212 | 0.256005753 |
| 0.304236705 | 0.168720492 | 0.400618145 | 0.446474204 |
| 0.117147162 | 0.097869526 | 0.28214202  | 0.325953609 |
| 0.435167108 | 0.331109119 | 0.038507995 | 0.423322881 |
| 0.487096626 | 0.406687447 | 0.476538225 | 0.394138448 |
| 0.070670197 | 0.410670303 | 0.314034966 | 0.352240979 |
| 0.173614563 | 0.349626427 | 0.225572217 | 0.057360252 |
| 0.262238553 | 0.442492718 | 0.401822913 | 0.191157886 |
| 0.359386618 | 0.101848117 | 0.046060242 | 0.421040888 |
| 0.262543355 | 0.105318865 | 0.295840262 | 0.412813054 |
| 0.003165394 | 0.206689179 | 0.479277557 | 0.255018561 |
| 0.489492749 | 0.494509261 | 0.438027256 | 0.214398497 |
| 0.003696441 | 0.380228125 | 0.389910616 | 0.41116911  |
| 0.420571234 | 0.305343203 | 0.123193163 | 0.091793804 |
| 0.26659131  | 0.067123248 | 0.169523434 | 0.315820616 |
| 0.22570594  | 0.35336827  | 0.180078782 | 0.178036224 |
| 0.213179009 | 0.066579199 | 0.296232592 | 0.240614003 |
| 0.162421522 | 0.22217299  | 0.345693822 | 0.230732335 |
| 0.302401828 | 0.426136023 | 0.38390674  | 0.026324897 |
| 0.355804496 | 0.387516322 | 0.412263956 | 0.004791999 |
| 1           | 0.008864381 | 0.226215241 | 0.257644831 |
| 0.219547971 | 0.227735356 | 0.269766733 | 0.330167047 |
| 0.311477332 | 0.224250602 | 0.30801065  | 0.241784671 |
| 0.194473456 | 0.200881631 | 0.366234385 | 0.313457868 |
| 0.344264332 | 0.132327365 | 0.07908884  | 0.08287232  |
| 0.067722569 | 0.442892858 | 0.223305829 | 0.058794067 |
| 0.220328031 | 0.315279525 | 0.346591822 | 0.467936497 |
| 0.412481549 | 0.089175537 | 0.308974455 | 0.437976025 |
| 0.235692721 | 0.289231363 | 0.058324183 | 0.335980208 |
| 0.231538607 | 0.301529694 | 0.328770864 | 0.281680788 |
| 0.339137491 | 0.386100693 | 0.215136498 | 0.419104525 |
| 0.363208891 | 0.298109966 | 0.279903455 | 0.116107374 |
| 0.190242324 | 0.108600627 | 0.314838771 | 0.002506619 |
| 0.330633325 | 0.25717722  | 0.486227722 | 0.464877769 |
| 0.325719779 | 0.367429987 | 0.302033432 | 0.104356211 |
| 0.243041694 | 0.156286812 | 0.127750924 | 0.386777004 |
| 0.293742118 | 0.184625233 | 0.329114069 | 0.290788379 |
| 0.401806057 | 0.357548188 | 0.258747563 | 0.225021189 |
| 0.212339678 | 0.168360879 | 0.431812337 | 0.105922548 |
| 0.380824383 | 0.257329987 | 0.275847207 | 0.338877234 |
| 0.245947814 | 0.505776472 | 0.053421009 | 0.524118322 |
| 0.358469295 | 0.101914018 | 0.473804511 | 0.253983134 |
| 0.256171676 | 0.143383665 | 0.263719777 | 0.319221987 |
| 0.221752886 | 0.360854525 | 0.018937419 | 0.105651326 |
| 0.318761161 | 0.25139262  | 0.362070674 | 0.307480916 |
| 0.279485478 | 0.319847088 | 0.209372339 | 0.262291599 |
| 0.443953329 | 0.454289967 | 0.315982347 | 0.215741518 |
| 0.305748109 | 0.113623094 | 0.335086893 | 0.01512763  |
| 0.4006522   | 0.388660188 | 0.352495976 | 0.053789656 |
| 0.01881631  | 0.295750968 | 0.379249643 | 0.04953455  |
| 0.495254879 | 0.29005623  | 0.277968596 | 0.377945028 |
| 0.139898222 | 0.460416631 | 0.145361566 | 0.390940238 |
| 0.036351639 | 0.221869285 | 0.349668919 | 0.325521379 |

|             |             |             |             |
|-------------|-------------|-------------|-------------|
| 0.308573695 | 0.34814535  | 0.366781491 | 0.314557833 |
| 0.037225509 | 0.301207566 | 0.002814286 | 0.384678123 |
| 0.427515824 | 0.357739716 | 0.17164949  | 0.250814463 |
| 0.26799506  | 0.340490695 | 0.273704233 | 0.365230016 |
| 0.015512867 | 0.396812594 | 0.188180774 | 0.403057693 |
| 0.31989962  | 0.316659321 | 0.069901777 | 0.318012765 |
| 0.408041745 | 0.337625164 | 0.21580903  | 0.354674394 |
| 0.464345981 | 0.334924989 | 0.124920744 | 0.228751602 |
| 0.307709721 | 0.053400674 | 0.324954414 | 0.514020915 |
| 0.201117656 | 0.293493464 | 0.467109091 | 0.243251069 |
| 0.341954642 | 0.352643376 | 0.340757063 | 0.492424285 |
| 0.100790278 | 0.239326192 | 0.401574164 | 0.445816698 |
| 0.281616055 | 0.222228523 | 0.326022508 | 0.281628109 |
| 0.433580898 | 0.11902859  | 0.289853589 | 0.317514821 |
| 0.303429096 | 0.284910202 | 0.254420916 | 0.230511175 |
| 0.048797842 | 0.158479628 | 0.362031967 | 0.126673083 |
| 0.301408384 | 0.367750838 | 0.274114691 | 0.380752827 |
| 0.182370651 | 0.041942129 | 0.440173911 | 0.044564504 |
| 0.29582328  | 0.390615061 | 0.228394556 | 0.359325404 |
| 0.163235369 | 0.312128113 | 0.299168407 | 0.001569893 |
| 0.397229654 | 0.058938027 | 0.277853836 | 0.299684403 |
| 0.321252557 | 0.051467745 | 0.434520535 | 0.525268167 |
| 0.266211148 | 0.294327657 | 0.370080864 | 0.439169373 |
| 0.223641178 | 0.328111164 | 0.338927773 | 0.342077031 |
| 0.288977598 | 0.339696379 | 0.370717173 | 0.393691743 |
| 0.325747649 | 0.236430098 |             |             |
| PSEN1       | 0.171930716 | 0.013349686 | 0.138468692 |
| 0.030241661 | 0.012999326 | 0.005928913 | 0.130946194 |
| 0.075350897 | 0.015139628 | 0.000192706 | 0.021267149 |
| 0.186710588 | 0.000127515 | 0.023207175 | 0.144821742 |
| 0.006108038 | 0.183505912 | 0.16871129  | 0.002384706 |
| 0.004857946 | 0.016678397 | 0.001828709 | 0.0086767   |
| 0.01146877  | 0.15452285  | 0.014479565 | 0.001411174 |
| 0.014003488 | 0.000388489 | 0.006690792 | 0.000676642 |
| 0.05528664  | 0.01056488  | 0.000761553 | 0.138907392 |
| 0.007458894 | 0.000423282 | 0.05091711  | 0.024538086 |
| 0.000958762 | 0.078548732 | 0.000845542 | 0.05037534  |
| 0.001615715 | 0.179040742 | 0.001484479 | 0.004111503 |
| 0.011471686 | 0.013790917 | 0.146626799 | 0.007730658 |
| 0.00207443  | 0.042903086 | 0.003900345 | 0.00560166  |
| 0.000840262 | 0.002736251 | 0.000620179 | 0.023465979 |
| 0.158193491 | 0.170960195 | 0.000340121 | 0.018593313 |
| 0.004098327 | 0.010405625 | 0.066189277 | 0.000772766 |
| 0.023897975 | 0.000524568 | 0.003935547 | 0.011234563 |
| 0.007629628 | 0.114368604 | 0.192497795 | 0.088925795 |
| 0.002045747 | 0.103673564 | 0.015954409 | 0.001775222 |
| 0.011446553 | 0.039806001 | 0.069846067 | 0.02402738  |
| 0.000872697 | 0.004292724 | 0.005724529 | 0.05244524  |
| 0.015242624 | 0.055437349 | 0.019360836 | 0.031400189 |
| 0.100415048 | 0.001738454 | 0.01024844  | 0.128437937 |
| 0.015958748 | 0.000449841 | 0.001028926 | 0.002198195 |
| 0.008414949 | 0.00736708  | 0.030052361 | 0.078599293 |
| 0.008827987 | 0.164787423 | 0.031569951 | 0.004165752 |
| 0.018592458 | 0.173250355 | 0.006772441 | 0.00702414  |



|             |             |             |             |
|-------------|-------------|-------------|-------------|
| 0.009708789 | 0.01693092  | 0.008742402 | 0.026233826 |
| 0.003950479 | 0.021495786 | 0.017940592 | 0.022106465 |
| 0.002732079 | 0.020306594 | 0.109195961 | 0.195379671 |
| 0.100366593 | 0.141364599 | 0.003156026 | 0.077534182 |
| 0.013147185 | 0.035267792 | 0.082362117 | 0.049470214 |
| 0.014293096 | 0.024327117 | 0.018014795 | 0.019264168 |
| 0.238075288 | 0.000388442 | 0.004053891 | 0.019076161 |
| 0.01857446  | 0.153882932 | 0.003898095 | 0.035808179 |
| 0.056426158 | 0.012392999 | 0.055850203 | 0.047170183 |
| 0.036977823 | 0.035137839 | 0.010196683 | 0.136910742 |
| 0.032843683 | 0.034101962 | 0.026511428 | 0.006682206 |
| 0.037368745 | 0.022297151 | 0.001453464 | 0.024068202 |
| 0.038600162 | 0.002070652 | 0.009169534 | 0.011258366 |
| 0.019649706 | 0.00785275  | 0.022412908 | 0.015967172 |
| 0.019204633 | 0.204420748 | 0.000929956 | 0.037888145 |
| 0.026489769 | 0.038875961 | 0.043295359 | 0.001682892 |
| 0.008783167 | 0.009418254 | 0.008350857 | 0.000867015 |
| 0.043893939 | 0.015068574 | 0.010633759 | 0.016146785 |
| 0.007500794 | 0.091299884 | 0.00106539  | 0.034006737 |
| 0.123745132 | 0.124821852 | 0.217653458 | 0.043308955 |
| 0.000675505 | 0.135462984 | 0.007546366 | 0.007206889 |
| 0.144464957 | 0.008788419 | 0.000327339 | 0.00922777  |
| 0.193836327 | 0.002974894 | 0.098026476 | 0.079310004 |
| 0.191759752 | 0.204729596 | 0.025049888 | 0.06243663  |
| 0.043614155 | 0.11968035  | 0.004548008 | 0.016124191 |
| 0.004197654 | 0.119432366 | 0.009931204 | 0.034970445 |
| 0.059032672 | 0.004264411 | 0.109643136 | 0.082374908 |
| 0.002430094 | 0.000520434 | 6.26E-05    | 0.00187069  |
| 0.151304732 | 0.015732715 | 0.008429814 | 0.013996387 |
| 0.037591459 | 0.051889561 | 0.00261863  | 0.065987216 |
| 0.11076257  | 0.014152678 | 0.02050847  | 0.002908059 |
| 0.122067504 | 0.026262738 | 0.012798231 | 0.00666643  |
| 0.028420474 | 0.001750303 | 0.000601681 | 0.015560565 |
| 0.000445609 | 0.005280872 | 0.012781556 | 0.01258718  |
| 0.001403634 | 0.084523842 | 0.022163201 | 0.000741195 |
| 0.003585985 | 0.028827299 | 0.066483173 | 0.000730176 |
| 0.075140333 | 0.060667451 | 0.007915914 | 0.009506234 |
| 0.127087418 | 0.023745278 | 0.028569286 | 0.018391635 |
| 0.000925172 | 0.023452789 | 0.011889109 | 0.027615109 |
| 0.027339133 | 0.000845473 | 0.000173074 | 0.013677585 |
| 0.013614797 | 0.000554101 | 0.165626097 | 0.00486602  |
| 0.001125214 | 0.006842035 | 0.008711179 | 0.025649755 |
| 0.047871812 | 0.0192805   | 0.096778329 | 0.022364826 |
| 0.042401247 | 0.088807701 | 0.018374945 | 0.027174937 |
| 4.18E-06    | 0.004859172 | 0.004072077 | 0.026734396 |
| 0.141765267 | 0.007538597 | 0.060988538 | 0.000103457 |
| 0.000833419 | 0.147661505 | 0.216567617 | 0.094643798 |
| 0.004046599 | 0.00166001  | 0.010389396 | 0.020516484 |
| 0.196319269 | 0.036753707 | 0.060899741 | 0.011372089 |
| 0.028248214 | 0.004001697 | 0.003136429 | 0.008371931 |
| 0.08675943  | 0.075169022 | 0.051712326 | 0.041323393 |
| 0.155217368 | 0.002343531 | 0.016840259 | 0.01253199  |
| 0.16048593  | 0.005460882 | 0.1823423   | 0.183761014 |
| 0.018944921 | 0.145263739 | 0.091585479 | 0.000496858 |

|             |             |             |             |
|-------------|-------------|-------------|-------------|
| 0.038495646 | 0.219398685 | 0.039142136 | 0.015275265 |
| 0.018750615 | 0.019525809 | 0.01794108  | 0.025077265 |
| 0.014334475 | 0.009981677 | 0.013511861 | 0.013284411 |
| 0.090014459 | 0.080249241 | 0.00198716  | 0.024782969 |
| 0.005818802 | 0.031514771 | 0.013100307 | 0.217336956 |
| 0.00810987  | 0.037529535 | 0.215758647 | 0.007195772 |
| 0.086666767 | 0.000426814 | 0.007874045 | 0.037258413 |
| 0.023096923 | 0.212956521 | 0.001422477 | 0.000745913 |
| 0.032972984 | 0.057001014 | 0.000592573 | 0.023464294 |
| 0.033310157 | 0.078602258 | 0.017357325 | 0.01877765  |
| 0.157539801 | 0.000234704 | 0.004843407 | 0.000355503 |
| 0.001445135 | 0.028593041 | 0.001820585 | 0.041713246 |
| 0.066892234 | 0.159058494 | 0.047524866 | 0.026630856 |
| 0.019320054 | 0.017713553 | 0.023613318 | 0.003028834 |
| 0.023801177 | 0.002944011 | 0.017685661 | 0.018541026 |
| 0.000270329 | 0.019852585 | 0.048184079 | 0.012270917 |
| 0.00539275  | 0.153091712 | 0.167775503 | 0.001683734 |
| 0.087048142 | 0.062137968 | 0.172721875 | 0.007861949 |
| 0.007299002 | 0.033674653 | 0.005967852 | 0.023408274 |
| 0.048999161 | 0.072487684 | 0.002218211 | 0.180983688 |
| 0.005936502 | 0.154248152 | 0.15188705  | 0.017527504 |
| 0.019073035 | 0.138565114 | 0.039046156 | 0.019776855 |
| 0.037016276 | 0.012114395 | 0.000672316 | 0.001560278 |
| 0.014466449 | 0.10666449  | 0.000224588 | 0.107330897 |
| 0.017643804 | 0.009886448 | 0.073102368 | 0.079751728 |
| 0.029047131 | 0.03246784  | 0.258031353 | 0.0169998   |
| 0.08551763  | 0.008718077 | 0.006971395 | 0.067130265 |
| 0.000454455 | 0.003660925 | 0.107723205 | 0.008412068 |
| 0.016248845 | 0.101528562 | 0.001192398 | 0.002141159 |
| 0.043241428 | 0.011455276 | 0.009399748 | 0.055239946 |
| 0.011651229 | 0.005476048 | 0.055569658 | 0.07100231  |
| 0.001270158 | 0.052716381 | 0.154056669 | 0.198384173 |
| 0.001867586 | 0.003044437 | 0.267586702 | 0.164467688 |
| 0.021068153 | 0.015078223 | 0.076117464 | 0.132739838 |
| 0.101714069 | 0.010150193 | 0.017853438 | 0.015793188 |
| 0.0308481   | 0.03293233  | 0.071365289 | 0.046553037 |
| 0.189842222 | 0.024306571 | 0.007885771 | 0.031257488 |
| 0.020537692 | 0.135190048 | 0.022912353 | 0.001912359 |
| 0.184137343 | 0.046107262 | 0.126852219 | 0.211655171 |
| 0.003113786 | 0.162186509 | 0.084569273 | 0.0983888   |
| 0.015710211 | 0.001056676 | 0.194608688 | 0.118295139 |
| 0.039994972 | 0.000230792 | 0.154439813 | 0.011015498 |
| 0.025493395 | 0.000221598 | 0.006554794 | 0.054038813 |
| 0.18992336  | 0.111424137 | 0.009542701 | 0.014222244 |
| 0.007901412 | 0.000854243 | 0.075640155 | 0.011098155 |
| 0.021298029 | 0.00454731  | 0.024735527 | 0.03919408  |
| 0.203243031 | 0.006136697 | 0.001178751 | 0.011664118 |
| 0.109816058 | 0.00759066  | 0.045667684 | 0.265397143 |
| 0.076322926 | 0.044053502 | 0.018723182 | 0.12027648  |
| 0.003055923 | 0.076177901 | 0.126197179 | 0.012473993 |
| 0.002376314 | 0.068140168 | 0.000806257 | 0.008318143 |
| 0.018626999 | 0.000511    | 0.017738758 | 0.044374145 |
| 0.031214544 | 0.018140757 | 0.047145166 | 0.014225781 |
| 0.000195079 | 0.004294687 | 0.018889489 | 0.00448038  |

|             |             |             |             |
|-------------|-------------|-------------|-------------|
| 0.015961008 | 0.042881526 | 0.005966923 | 0.129899306 |
| 0.099903418 | 0.15951404  | 0.052766036 | 0.001549486 |
| 0.000105947 | 0.008765808 | 0.152463268 | 0.05399494  |
| 0.048792971 | 0.083880232 | 0.000974201 | 0.057821784 |
| 0.000581852 | 0.134755666 | 0.057273434 | 9.95E-05    |
| 0.000188465 | 0.021036282 | 0.015209497 | 0.225963048 |
| 0.003270143 | 0.019444729 | 0.025282215 | 0.024330654 |
| 0.008864381 | 1           | 0.066857754 | 0.058188519 |
| 0.059429592 | 0.047936597 | 0.046782272 | 0.010224608 |
| 0.016947078 | 0.055894553 | 0.03744262  | 0.10810907  |
| 0.067866299 | 0.055903091 | 0.008401477 | 0.008147498 |
| 0.015159521 | 0.133997409 | 0.186492817 | 0.179745139 |
| 0.103729539 | 0.013424975 | 0.145724977 | 0.180230786 |
| 0.095060873 | 0.005629351 | 0.078756441 | 0.01661899  |
| 0.040516945 | 0.113392773 | 0.011690713 | 0.014063598 |
| 0.000314144 | 0.002362021 | 0.102173828 | 0.008269349 |
| 0.089313282 | 0.00722921  | 0.002993291 | 0.021344152 |
| 0.006063737 | 0.073053417 | 0.14521754  | 0.03416195  |
| 0.009275408 | 0.003975725 | 0.000132475 | 0.092101092 |
| 0.097638706 | 0.148553181 | 0.013466651 | 0.14555804  |
| 0.034879721 | 0.009642346 | 0.011533885 | 0.026269517 |
| 0.000467238 | 0.057039545 | 0.000336705 | 0.11438784  |
| 0.000246462 | 0.093199091 | 0.206853867 | 0.006419718 |
| 0.000247903 | 0.076735241 | 0.01886492  | 0.004389672 |
| 0.008240629 | 0.005136931 | 0.006518329 | 0.038923366 |
| 0.044506423 | 0.082903267 | 0.03123714  | 0.086000226 |
| 0.001899635 | 0.0101704   | 0.003431748 | 0.022924622 |
| 0.041311604 | 0.015331094 | 0.244633349 | 0.014855148 |
| 0.007842578 | 0.158359516 | 0.051107809 | 0.022952389 |
| 0.008755501 | 0.032112023 | 9.49E-05    | 0.002008798 |
| 0.025193803 | 0.000947075 | 0.000750447 | 0.001418847 |
| 0.056084494 | 0.002171538 | 0.006778986 | 0.018914163 |
| 0.007960212 | 0.045038864 | 1.70E-05    | 0.024450658 |
| 0.019731036 | 0.032417577 | 0.013000886 | 0.10446421  |
| 0.042158416 | 0.178593522 | 0.008642901 | 0.000333404 |
| 0.003768105 | 0.001354768 | 0.00039038  | 0.197466727 |
| 0.126554222 | 0.000101757 | 0.004727534 | 0.108691645 |
| 0.01605801  | 0.000157147 | 0.005011579 | 0.007943571 |
| 0.106323528 | 0.03535821  | 0.072155958 | 0.018745422 |
| 0.020389375 | 0.066868443 | 0.002047826 | 0.002284859 |
| 0.015014559 | 0.003765191 | 0.029596464 | 0.003624482 |
| 0.257551049 | 0.009998608 | 0.025006584 | 0.07404677  |
| 0.028646158 | 0.002233877 | 0.141691267 | 0.000375255 |
| 0.076680763 | 0.028962214 | 0.004928994 | 0.00124613  |
| 0.128716381 | 0.006483905 | 0.115811757 | 0.02736908  |
| 0.000469406 | 0.005791009 | 0.083023472 | 0.004581964 |
| 0.045192729 | 0.002681167 | 0.094154006 | 0.000120406 |
| 0.01788886  | 0.016146034 | 0.079673921 | 0.006297301 |
| 0.003513878 | 0.233323609 | 0.000952738 | 0.024327872 |
| 0.09687894  | 0.004889512 | 0.0142582   | 0.052672283 |
| 0.002283412 | 0.030622363 | 0.001709775 | 0.022571593 |
| 0.082555142 | 0.109489163 | 0.012682465 | 0.01965372  |
| 0.081593055 | 0.006143202 | 0.002571661 | 0.022890414 |
| 0.022359081 | 0.060512738 | 0.001950334 | 0.038051551 |

|             |             |             |             |
|-------------|-------------|-------------|-------------|
| 0.001679358 | 0.051036261 | 0.003643968 | 0.027493266 |
| 0.103575173 | 0.042260379 | 0.006147404 | 0.166563414 |
| 0.046749366 | 0.010076233 | 0.008200146 | 0.069019136 |
| 0.04163664  | 0.107040291 | 0.050127151 | 1.89E-05    |
| 0.02007443  | 0.014970363 | 0.082212822 | 0.006343955 |
| 0.165506169 | 0.017702593 | 0.010252736 | 0.076293937 |
| 0.019722552 | 0.002962213 | 0.008121404 | 0.015196322 |
| 0.000624231 | 0.160811587 | 0.032681824 | 0.020016861 |
| 0.037011031 | 0.000482822 | 7.78E-05    | 0.025104878 |
| 0.000649927 | 0.000309789 | 0.000764763 | 0.006030997 |
| 0.001550301 | 0.000320906 | 0.000838433 | 0.000913392 |
| 0.024931739 | 0.03012725  |             |             |
| PSMA4       | 0.098268343 | 0.187622429 | 0.047473979 |
| 0.132372496 | 0.234535436 | 0.098533482 | 0.124048314 |
| 0.160299562 | 0.166104399 | 0.03949373  | 0.201361125 |
| 0.083773921 | 0.0828352   | 0.274692155 | 0.142934242 |
| 0.198019297 | 0.148362666 | 0.165274912 | 0.053699879 |
| 0.101437867 | 0.246049495 | 0.125960042 | 0.102332856 |
| 0.204494967 | 0.196306884 | 0.128351368 | 0.12007126  |
| 0.238556036 | 0.050949374 | 0.184217926 | 0.023924563 |
| 0.307492035 | 0.238670571 | 0.094786359 | 0.045686333 |
| 0.150601564 | 0.029868193 | 0.280479227 | 0.200692853 |
| 0.103233181 | 0.294360354 | 0.045455187 | 0.210394909 |
| 0.069295438 | 0.068202176 | 0.022522478 | 0.177818939 |
| 0.126488593 | 0.151258286 | 0.065032354 | 0.174414833 |
| 0.095846696 | 0.213146327 | 0.113996298 | 0.00693325  |
| 0.104785053 | 0.032767317 | 0.075448457 | 0.254710935 |
| 0.277743737 | 0.226650296 | 0.052668065 | 0.117709904 |
| 0.153459438 | 0.221597092 | 0.279187616 | 0.065989316 |
| 0.274384932 | 0.120781448 | 0.171022589 | 0.110917828 |
| 0.114064284 | 0.049373907 | 0.249430556 | 0.077795456 |
| 0.107218674 | 0.27252521  | 0.212547376 | 0.123097813 |
| 0.168396264 | 0.315228881 | 0.230239412 | 0.237163577 |
| 0.115581242 | 0.188090236 | 0.166397911 | 0.326292199 |
| 0.221841986 | 0.112295936 | 0.248068299 | 0.306108016 |
| 0.070874719 | 0.084849659 | 0.194028461 | 0.13048272  |
| 0.204210999 | 0.094162627 | 0.072619428 | 0.140124656 |
| 0.234380954 | 0.19962286  | 0.264310056 | 0.284095304 |
| 0.17293935  | 0.086128946 | 0.235671348 | 0.189963976 |
| 0.187426444 | 0.094156074 | 0.188240179 | 0.228532409 |
| 0.183560012 | 0.253299352 | 0.187477258 | 0.263080983 |
| 0.164432973 | 0.268049313 | 0.211665333 | 0.247079953 |
| 0.016358619 | 0.264112246 | 0.170693923 | 0.172542465 |
| 0.061567605 | 0.213608021 | 0.141886396 | 0.324639023 |
| 0.247550227 | 0.227275582 | 0.154114747 | 0.243365642 |
| 0.291678437 | 0.218212859 | 0.253380857 | 0.248769234 |
| 0.099345274 | 0.100306518 | 0.153496041 | 0.1321292   |
| 0.242684046 | 0.173726438 | 0.152641442 | 0.27460111  |
| 0.291874394 | 0.262987381 | 0.095666647 | 0.297083838 |
| 0.149583714 | 0.329179379 | 0.186054052 | 0.213327161 |
| 0.285838663 | 0.257570766 | 0.32034588  | 0.228417182 |
| 0.274706379 | 0.130128288 | 0.051855311 | 0.243108742 |
| 0.348623502 | 0.028923978 | 0.232732588 | 0.256915193 |
| 0.238460497 | 0.23182317  | 0.320277034 | 0.272716285 |

|             |             |             |             |
|-------------|-------------|-------------|-------------|
| 0.239319203 | 0.120742861 | 0.010695279 | 0.313669876 |
| 0.258999676 | 0.273766026 | 0.232362175 | 0.119130824 |
| 0.222023595 | 0.114326673 | 0.21287788  | 0.098497052 |
| 0.360039169 | 0.241764611 | 0.233548914 | 0.213771347 |
| 0.09891048  | 0.284154943 | 0.125538365 | 0.230460737 |
| 0.123450745 | 0.102344844 | 0.072861922 | 0.270651089 |
| 0.049712281 | 0.284395785 | 0.096602777 | 0.185661203 |
| 0.303037955 | 0.095668052 | 0.086707506 | 0.249665813 |
| 0.077521794 | 0.125272332 | 0.147952934 | 0.128519903 |
| 0.151906411 | 0.202386743 | 0.187552876 | 0.210544019 |
| 0.265389979 | 0.189062843 | 0.175142856 | 0.26714351  |
| 0.124189861 | 0.165977913 | 0.189528736 | 0.326290644 |
| 0.387392596 | 0.161461186 | 0.277796598 | 0.056969854 |
| 0.139654689 | 0.056867484 | 0.090696755 | 0.128469874 |
| 0.184997673 | 0.188266046 | 0.192388297 | 0.277936581 |
| 0.1220594   | 0.097430035 | 0.126600134 | 0.31127975  |
| 0.136457203 | 0.184737278 | 0.29291767  | 0.11206735  |
| 0.019411179 | 0.165870932 | 0.240976522 | 0.211969541 |
| 0.204396757 | 0.12797448  | 0.098828215 | 0.261879242 |
| 0.105819546 | 0.180813532 | 0.256966467 | 0.271552906 |
| 0.101865146 | 0.160959524 | 0.308638629 | 0.033821191 |
| 0.147143267 | 0.133063731 | 0.343500463 | 0.050266585 |
| 0.22967078  | 0.327680761 | 0.212889782 | 0.183294531 |
| 0.106716876 | 0.277317988 | 0.249719122 | 0.27716344  |
| 0.096804811 | 0.307268763 | 0.253942542 | 0.292274839 |
| 0.226643363 | 0.092357608 | 0.081444015 | 0.232799397 |
| 0.249618199 | 0.074294059 | 0.086895877 | 0.194307083 |
| 0.074262935 | 0.219226951 | 0.177690711 | 0.306350322 |
| 0.324208641 | 0.200677951 | 0.257494975 | 0.314996851 |
| 0.289311299 | 0.187867126 | 0.251905209 | 0.328742501 |
| 0.04998158  | 0.162253229 | 0.142785639 | 0.335792658 |
| 0.206817968 | 0.200467927 | 0.269007823 | 0.086642854 |
| 0.003929025 | 0.097419116 | 0.096341751 | 0.263561414 |
| 0.16611879  | 0.119361365 | 0.219702077 | 0.278973541 |
| 0.198117286 | 0.279394905 | 0.225757795 | 0.173539178 |
| 0.23611704  | 0.138842093 | 0.155292081 | 0.212467268 |
| 0.261792164 | 0.070348771 | 0.209816647 | 0.310472315 |
| 0.051654753 | 0.146985825 | 0.139052968 | 0.018098287 |
| 0.089303455 | 0.143712197 | 0.122490273 | 0.231332131 |
| 0.315126045 | 0.195573909 | 0.176077777 | 0.051132856 |
| 0.299674529 | 0.157110741 | 0.033082047 | 0.252261608 |
| 0.253474024 | 0.248960027 | 0.244859969 | 0.235630259 |
| 0.243628942 | 0.203735008 | 0.256573343 | 0.106186983 |
| 0.151230685 | 0.072419295 | 0.145027166 | 0.197296613 |
| 0.008694444 | 0.298560524 | 0.198261417 | 0.232258727 |
| 0.227772988 | 0.246447455 | 0.107228079 | 0.204906164 |
| 0.047744261 | 0.07623089  | 0.127078906 | 0.205239058 |
| 0.313021773 | 0.049498997 | 0.062035441 | 0.109387078 |
| 0.221076854 | 0.253016828 | 0.08977512  | 0.276909514 |
| 0.228392463 | 0.087064011 | 0.182889828 | 0.278141081 |
| 0.144744215 | 0.027897773 | 0.099183966 | 0.004736228 |
| 0.062607125 | 0.261882337 | 0.105018567 | 0.075057582 |
| 0.242920755 | 0.029534808 | 0.234037565 | 0.298408736 |
| 0.203427208 | 0.291526999 | 0.27883516  | 0.139349543 |

|             |             |             |             |
|-------------|-------------|-------------|-------------|
| 0.268205914 | 0.035320764 | 0.272046445 | 0.200388963 |
| 0.061022855 | 0.003816212 | 0.052191992 | 0.255003021 |
| 0.164742605 | 0.061569664 | 0.228033385 | 0.076484473 |
| 0.218029423 | 0.086724864 | 0.137369282 | 0.195207373 |
| 0.158689108 | 0.265211871 | 0.195985052 | 0.228390753 |
| 0.199855536 | 0.273991568 | 0.075934584 | 0.123410898 |
| 0.175793894 | 0.141587611 | 0.119820415 | 0.036873538 |
| 0.281336915 | 0.112406251 | 0.239842308 | 0.257215033 |
| 0.321937236 | 0.246654246 | 0.045625136 | 0.105727139 |
| 0.257408809 | 0.072786504 | 0.074909389 | 0.08755782  |
| 0.221180508 | 0.215717618 | 0.322002265 | 0.257959746 |
| 0.324455446 | 0.278533854 | 0.109644878 | 0.258307654 |
| 0.045944016 | 0.020251114 | 0.087655191 | 0.267616225 |
| 0.049965558 | 0.140376559 | 0.284819201 | 0.115212123 |
| 0.172229372 | 0.076340437 | 0.123689883 | 0.138839024 |
| 0.264423652 | 0.183080186 | 0.210680754 | 0.219004947 |
| 0.186437289 | 0.182607285 | 0.223158503 | 0.212769944 |
| 0.099716458 | 0.211162907 | 0.19643018  | 0.079568637 |
| 0.099824968 | 0.140665744 | 0.120308869 | 0.203941624 |
| 0.273687193 | 0.267842072 | 0.142035891 | 0.089407099 |
| 0.261837796 | 0.16359978  | 0.299123835 | 0.230099214 |
| 0.280362137 | 0.33515364  | 0.302830195 | 0.262997488 |
| 0.13160009  | 0.242511486 | 0.207839182 | 0.24622425  |
| 0.276414863 | 0.071077927 | 0.243634009 | 0.141315354 |
| 0.186540011 | 0.169557202 | 0.153240064 | 0.160982467 |
| 0.166278344 | 0.26649274  | 0.266691668 | 0.107630009 |
| 0.186938936 | 0.127800707 | 0.112187343 | 0.249362424 |
| 0.255524151 | 0.100104766 | 0.224908279 | 0.112115903 |
| 0.202618731 | 0.031866155 | 0.210414144 | 0.347844238 |
| 0.173806792 | 0.122634586 | 0.075852191 | 0.233937366 |
| 0.20470054  | 0.089744976 | 0.06788687  | 0.181772762 |
| 0.297273967 | 0.171675361 | 0.250318789 | 0.351040344 |
| 0.136773054 | 0.16730094  | 0.109107021 | 0.205301012 |
| 0.240217887 | 0.097553988 | 0.224104294 | 0.130111666 |
| 0.301246063 | 0.303438577 | 0.212235854 | 0.23630544  |
| 0.127371524 | 0.088251888 | 0.059183447 | 0.229447905 |
| 0.154791681 | 0.131874661 | 0.053014614 | 0.228170733 |
| 0.013473042 | 0.104875231 | 0.291180703 | 0.211103874 |
| 0.310537616 | 0.281216888 | 0.308083832 | 0.128137351 |
| 0.003800769 | 0.189612784 | 0.230608257 | 0.116292796 |
| 0.207546478 | 0.241137607 | 0.106484874 | 0.210995377 |
| 0.342824414 | 0.083453884 | 0.234493156 | 0.079775515 |
| 0.076741628 | 0.157870298 | 0.312122404 | 0.178709158 |
| 0.235309998 | 0.081849559 | 0.126990528 | 0.171849542 |
| 0.107663726 | 0.330092378 | 0.331498889 | 0.039247992 |
| 0.09387357  | 0.28909989  | 0.208330176 | 0.074761978 |
| 0.153824014 | 0.26202491  | 0.282465138 | 0.015481814 |
| 0.226215241 | 0.066857754 | 1           | 0.237378791 |
| 0.246140714 | 0.239264382 | 0.318780086 | 0.174123658 |
| 0.180893412 | 0.194575125 | 0.187642602 | 0.306492859 |
| 0.244002469 | 0.171212769 | 0.190016124 | 0.106748358 |
| 0.194067415 | 0.160197651 | 0.123103962 | 0.112088049 |
| 0.160964007 | 0.227524062 | 0.282975404 | 0.084731149 |
| 0.30775075  | 0.107017488 | 0.357257519 | 0.218129048 |

|             |             |             |             |
|-------------|-------------|-------------|-------------|
| 0.33352373  | 0.090536381 | 0.154396541 | 0.20291228  |
| 0.041032515 | 0.086061597 | 0.07687446  | 0.125525186 |
| 0.237729682 | 0.206714819 | 0.0962058   | 0.122609049 |
| 0.158776645 | 0.315115478 | 0.274478998 | 0.291448145 |
| 0.14048359  | 0.117271461 | 0.038431901 | 0.236660216 |
| 0.154204675 | 0.168040075 | 0.229717865 | 0.017560683 |
| 0.260899922 | 0.088309205 | 0.242326659 | 0.240381429 |
| 0.100699815 | 0.322260685 | 0.046251261 | 0.133283752 |
| 0.030715201 | 0.126241    | 0.219487537 | 0.1819942   |
| 0.083027072 | 0.191687755 | 0.237525692 | 0.066298182 |
| 0.218170518 | 0.176466296 | 0.174645337 | 0.16419553  |
| 0.213519372 | 0.149619465 | 0.260556966 | 0.083767683 |
| 0.120226541 | 0.201963202 | 0.089860782 | 0.207705322 |
| 0.23275763  | 0.261656358 | 0.106330559 | 0.268125408 |
| 0.159090952 | 0.157793597 | 0.343402641 | 0.149667003 |
| 0.113641202 | 0.246671085 | 0.095654219 | 0.074357177 |
| 0.191653068 | 0.104134562 | 0.002666296 | 0.077299581 |
| 0.341355451 | 0.089403968 | 0.157808488 | 0.245613941 |
| 0.185038564 | 0.346588976 | 0.081295139 | 0.134205279 |
| 0.208562206 | 0.251773172 | 0.174773827 | 0.308738911 |
| 0.271721801 | 0.197932194 | 0.127764917 | 0.015881522 |
| 0.161581636 | 0.129525359 | 0.073896614 | 0.151558464 |
| 0.082966055 | 0.095654103 | 0.146292436 | 0.07445143  |
| 0.294155338 | 0.072699504 | 0.119414641 | 0.192095243 |
| 0.197941288 | 0.256739241 | 0.271424527 | 0.265339128 |
| 0.05414206  | 0.251784754 | 0.125820714 | 0.109509298 |
| 0.209335566 | 0.149365211 | 0.295789461 | 0.152601059 |
| 0.128488044 | 0.208890442 | 0.013205382 | 0.295077887 |
| 0.220672684 | 0.132245739 | 0.249684112 | 0.043540128 |
| 0.343001894 | 0.258756453 | 0.19908612  | 0.098578127 |
| 0.077956198 | 0.203558588 | 0.265883354 | 0.23086943  |
| 0.058338159 | 0.139109475 | 0.158826446 | 0.166912454 |
| 0.239361398 | 0.156339192 | 0.28778118  | 0.071753692 |
| 0.225319823 | 0.195145787 | 0.111176028 | 0.184443225 |
| 0.127139892 | 0.110538973 | 0.060276727 | 0.298498975 |
| 0.260769493 | 0.164792958 | 0.284852141 | 0.217157899 |
| 0.132736705 | 0.229795227 | 0.113161121 | 0.28324212  |
| 0.269324536 | 0.30510134  | 0.254436297 | 0.246447704 |
| 0.370593612 | 0.188645627 | 0.151222034 | 0.22768211  |
| 0.208007024 | 0.150582943 | 0.14653824  | 0.240085299 |
| 0.134863782 | 0.301646443 | 0.086665523 | 0.247301143 |
| 0.159515761 | 0.199407452 | 0.12247548  | 0.199996277 |
| 0.267117969 | 0.179429229 | 0.190511432 | 0.334533286 |
| 0.22539698  | 0.104483042 | 0.334355896 | 0.032713412 |
| 0.120360728 | 0.233645539 | 0.258187106 | 0.155933569 |
| 0.204609136 | 0.179790527 | 0.100091173 | 0.014712571 |
| 0.282228882 | 0.060102401 | 0.155696358 | 0.217261094 |
| 0.118286472 | 0.102262234 | 0.260047872 | 0.309064193 |
| 0.20915111  | 0.082107102 | 0.078816792 | 0.25721319  |
| 0.120398004 | 0.068134078 | 0.103229295 | 0.133763812 |
| 0.130274311 | 0.058981469 | 0.081051812 | 0.092303915 |
| 0.219874545 | 0.150220494 |             |             |
| PSMB2       | 0.094779754 | 0.201469181 | 0.054454672 |
| 0.203925852 | 0.25417708  | 0.120712886 | 0.094832203 |

|             |             |             |             |
|-------------|-------------|-------------|-------------|
| 0.131365672 | 0.158023275 | 0.039226719 | 0.24282348  |
| 0.073588062 | 0.06878432  | 0.294086632 | 0.099776611 |
| 0.212300235 | 0.121414557 | 0.144014853 | 0.033550902 |
| 0.100452806 | 0.246146668 | 0.137225777 | 0.112251235 |
| 0.194918894 | 0.20258428  | 0.139521384 | 0.1195145   |
| 0.26900331  | 0.061787498 | 0.22118176  | 0.036916182 |
| 0.326415554 | 0.251366576 | 0.107442538 | 0.051252774 |
| 0.159614162 | 0.012770859 | 0.292969953 | 0.212860823 |
| 0.147206576 | 0.300389018 | 0.05475331  | 0.241137019 |
| 0.08021565  | 0.071390152 | 0.02635916  | 0.179297363 |
| 0.130538523 | 0.136697288 | 0.059477044 | 0.204660142 |
| 0.089627793 | 0.233534984 | 0.128639756 | 0.004470693 |
| 0.113951312 | 0.03279284  | 0.073011532 | 0.284003861 |
| 0.290274022 | 0.201819212 | 0.049462379 | 0.090069832 |
| 0.139354906 | 0.206319439 | 0.253460698 | 0.067048914 |
| 0.305947805 | 0.102077048 | 0.18866057  | 0.140225189 |
| 0.115337406 | 0.035376585 | 0.245630485 | 0.062726244 |
| 0.1075978   | 0.270169243 | 0.222693573 | 0.128484055 |
| 0.189854796 | 0.326030346 | 0.222297383 | 0.260043196 |
| 0.065153443 | 0.189046382 | 0.172449497 | 0.319622126 |
| 0.200990905 | 0.073593225 | 0.295459051 | 0.334405566 |
| 0.045544242 | 0.091489008 | 0.191643415 | 0.110077532 |
| 0.230751819 | 0.078831296 | 0.08734589  | 0.147042768 |
| 0.250813688 | 0.203269764 | 0.262186906 | 0.302546204 |
| 0.162342205 | 0.081350909 | 0.254502554 | 0.197552552 |
| 0.220597689 | 0.106239027 | 0.177901524 | 0.2499874   |
| 0.215920718 | 0.286958726 | 0.193323696 | 0.248315365 |
| 0.178344282 | 0.305265932 | 0.262321895 | 0.244911907 |
| 0.016826227 | 0.288422855 | 0.203089905 | 0.142097081 |
| 0.054294982 | 0.169870547 | 0.099955286 | 0.309351345 |
| 0.282433187 | 0.224346562 | 0.157713586 | 0.249825034 |
| 0.307426562 | 0.238440639 | 0.273416639 | 0.255771607 |
| 0.08835703  | 0.085272507 | 0.179795713 | 0.121278011 |
| 0.230399446 | 0.139531117 | 0.161694405 | 0.295599597 |
| 0.331459373 | 0.282500269 | 0.096831302 | 0.309941227 |
| 0.103944045 | 0.361930109 | 0.217755901 | 0.236605947 |
| 0.31720624  | 0.287202487 | 0.354868638 | 0.257163593 |
| 0.303313699 | 0.176030376 | 0.018505522 | 0.237277264 |
| 0.372275192 | 0.037026491 | 0.252450194 | 0.280950835 |
| 0.268573979 | 0.263741498 | 0.338469552 | 0.301311931 |
| 0.263979543 | 0.106130562 | 0.00540435  | 0.296557088 |
| 0.288372921 | 0.325086083 | 0.162487819 | 0.134027007 |
| 0.213847045 | 0.129803367 | 0.21647673  | 0.119418778 |
| 0.37096515  | 0.278094292 | 0.255652998 | 0.211971079 |
| 0.09176839  | 0.289382426 | 0.132582059 | 0.25611596  |
| 0.119583062 | 0.107569206 | 0.073345245 | 0.237979665 |
| 0.064537554 | 0.278185841 | 0.105237233 | 0.163749374 |
| 0.294361492 | 0.091599931 | 0.090716607 | 0.263842744 |
| 0.069448086 | 0.148126337 | 0.161501345 | 0.125760408 |
| 0.144097804 | 0.184952022 | 0.193890525 | 0.234843156 |
| 0.247627205 | 0.183168475 | 0.189238603 | 0.29428368  |
| 0.107753062 | 0.186961381 | 0.206746258 | 0.351795519 |
| 0.398795506 | 0.192164536 | 0.239015273 | 0.099934417 |
| 0.141649122 | 0.050353462 | 0.083307969 | 0.137828047 |



|              |             |             |             |
|--------------|-------------|-------------|-------------|
| 0.172881593  | 0.157325732 | 0.195523067 | 0.309115228 |
| 0.147246885  | 0.069594905 | 0.12005897  | 0.324055361 |
| 0.128732402  | 0.208708881 | 0.32000241  | 0.118164387 |
| 0.02386631   | 0.197246745 | 0.272684284 | 0.169082244 |
| 0.180800591  | 0.124433776 | 0.122976996 | 0.293223853 |
| 0.090873297  | 0.140578934 | 0.281175188 | 0.287432812 |
| 0.098891844  | 0.146946868 | 0.326546675 | 0.017903004 |
| 0.133548067  | 0.187715959 | 0.353454444 | 0.053507695 |
| 0.244079007  | 0.295709827 | 0.212225925 | 0.203185426 |
| 0.121071391  | 0.295873193 | 0.266608938 | 0.306960994 |
| 0.102261001  | 0.329804862 | 0.283615079 | 0.323599898 |
| 0.241867287  | 0.08624     | 0.075125396 | 0.275842963 |
| 0.284717093  | 0.073787323 | 0.082254671 | 0.201411802 |
| 0.073945693  | 0.229617471 | 0.168505842 | 0.34107731  |
| 0.346856678  | 0.223162739 | 0.217239589 | 0.316985387 |
| 0.337403452  | 0.221393051 | 0.266677394 | 0.338008458 |
| 0.048660034  | 0.156804907 | 0.155413701 | 0.358588701 |
| 0.227362478  | 0.163814727 | 0.252826516 | 0.076536586 |
| 0.007696152  | 0.078319242 | 0.095952211 | 0.249382116 |
| 0.172037555  | 0.12708063  | 0.232817316 | 0.303637518 |
| 0.179773359  | 0.29990562  | 0.184599863 | 0.194351303 |
| 0.257600176  | 0.120761913 | 0.171655495 | 0.217088379 |
| 0.24375739   | 0.109228977 | 0.243458525 | 0.329697246 |
| 0.042791057  | 0.156876246 | 0.117775001 | 0.02473479  |
| 0.074680883  | 0.155853996 | 0.11524531  | 0.229643157 |
| 0.328131086  | 0.20638881  | 0.190335217 | 0.051592189 |
| 0.317928996  | 0.152036706 | 0.057073212 | 0.270042693 |
| 0.256442953  | 0.245034949 | 0.247511556 | 0.236580438 |
| 0.241667927  | 0.199320907 | 0.274439401 | 0.131774712 |
| 0.140523563  | 0.067093461 | 0.147106529 | 0.204782229 |
| 0.005598995  | 0.331109312 | 0.176751475 | 0.232764136 |
| 0.233037541  | 0.214739238 | 0.094740068 | 0.188691609 |
| 0.0711159287 | 0.09123486  | 0.099422902 | 0.159728033 |
| 0.293342968  | 0.047529598 | 0.102209261 | 0.111258742 |
| 0.253785383  | 0.266194542 | 0.100790697 | 0.307878969 |
| 0.263637848  | 0.086570304 | 0.219795865 | 0.2951498   |
| 0.126318153  | 0.023030796 | 0.086401067 | 0.009959981 |
| 0.063173344  | 0.255644108 | 0.098882204 | 0.096669026 |
| 0.271170377  | 0.033699184 | 0.26824271  | 0.320984226 |
| 0.230570701  | 0.319078596 | 0.315942452 | 0.158926668 |
| 0.30610925   | 0.029481897 | 0.298760119 | 0.223175597 |
| 0.065246072  | 0.007607958 | 0.035526508 | 0.291247971 |
| 0.193423666  | 0.057850267 | 0.229869282 | 0.107745766 |
| 0.227946466  | 0.081735541 | 0.107471404 | 0.20932766  |
| 0.188699886  | 0.260545272 | 0.162221769 | 0.243612294 |
| 0.206421458  | 0.245924621 | 0.074832182 | 0.105604379 |
| 0.193888025  | 0.144612515 | 0.097344899 | 0.053718144 |
| 0.275468519  | 0.111162522 | 0.255258128 | 0.281599322 |
| 0.350477956  | 0.279761512 | 0.049864212 | 0.101876955 |
| 0.253010583  | 0.07402918  | 0.083833645 | 0.085696433 |
| 0.253193106  | 0.240380642 | 0.351262437 | 0.29587711  |
| 0.347340571  | 0.311331376 | 0.087825536 | 0.2826021   |
| 0.079045171  | 0.01394189  | 0.117058415 | 0.224305842 |
| 0.021771502  | 0.141295134 | 0.300740868 | 0.082342292 |

|             |             |             |             |
|-------------|-------------|-------------|-------------|
| 0.127448948 | 0.079983704 | 0.121373175 | 0.137170646 |
| 0.281524991 | 0.185043581 | 0.218378257 | 0.181401788 |
| 0.180445361 | 0.16215776  | 0.213578708 | 0.154985074 |
| 0.06553614  | 0.225629411 | 0.207523982 | 0.061061458 |
| 0.119832562 | 0.162978819 | 0.113031889 | 0.200635568 |
| 0.319736584 | 0.302477993 | 0.108693399 | 0.109791639 |
| 0.266731781 | 0.131707647 | 0.32215586  | 0.257645775 |
| 0.304041186 | 0.356574538 | 0.310977061 | 0.197700897 |
| 0.120712153 | 0.248994638 | 0.211646127 | 0.23106355  |
| 0.299259105 | 0.061254471 | 0.267521187 | 0.14919743  |
| 0.165198162 | 0.196495349 | 0.154365486 | 0.138363002 |
| 0.180422654 | 0.240735574 | 0.264077246 | 0.126682704 |
| 0.182074701 | 0.142760162 | 0.088792955 | 0.244044774 |
| 0.262129414 | 0.116816493 | 0.213553923 | 0.101584251 |
| 0.21714731  | 0.025494441 | 0.231895002 | 0.362977862 |
| 0.170124315 | 0.104266385 | 0.102065994 | 0.219346131 |
| 0.231009076 | 0.093177719 | 0.099713576 | 0.202631007 |
| 0.312186373 | 0.198935762 | 0.279543683 | 0.340007889 |
| 0.120621568 | 0.197581718 | 0.092426635 | 0.203782563 |
| 0.200024858 | 0.12095614  | 0.180835579 | 0.113823495 |
| 0.270690213 | 0.300292371 | 0.240022099 | 0.241965638 |
| 0.13700293  | 0.077882645 | 0.051601363 | 0.235967401 |
| 0.162861142 | 0.129847109 | 0.05851367  | 0.226065647 |
| 0.025864338 | 0.102970708 | 0.299435007 | 0.205225655 |
| 0.319978157 | 0.316634161 | 0.341685646 | 0.107139136 |
| 0.002657767 | 0.205056468 | 0.270299521 | 0.146899751 |
| 0.227676893 | 0.251457449 | 0.068823008 | 0.204227296 |
| 0.351805139 | 0.084675545 | 0.202932978 | 0.099709243 |
| 0.073408593 | 0.162524448 | 0.284407309 | 0.145436711 |
| 0.215413412 | 0.062811202 | 0.13951923  | 0.195138235 |
| 0.076985795 | 0.327398027 | 0.346472549 | 0.038028104 |
| 0.102550359 | 0.278138675 | 0.22962556  | 0.073085717 |
| 0.153324713 | 0.258886102 | 0.290210956 | 0.013132526 |
| 0.257644831 | 0.058188519 | 0.237378791 | 1           |
| 0.239126358 | 0.185867856 | 0.296306792 | 0.199582982 |
| 0.174433102 | 0.183233776 | 0.225022908 | 0.318972613 |
| 0.261724142 | 0.162194723 | 0.204503017 | 0.118367875 |
| 0.223892829 | 0.172678446 | 0.117030216 | 0.108674518 |
| 0.167833515 | 0.244284852 | 0.285477582 | 0.088799031 |
| 0.273459651 | 0.103309511 | 0.373273441 | 0.244186338 |
| 0.348254117 | 0.092417461 | 0.130046016 | 0.240737605 |
| 0.033428218 | 0.092250007 | 0.060800683 | 0.150735976 |
| 0.223537    | 0.203426998 | 0.105713147 | 0.140691602 |
| 0.159545617 | 0.33742044  | 0.275820048 | 0.310997394 |
| 0.165082625 | 0.100482831 | 0.046977857 | 0.245794987 |
| 0.173257985 | 0.148714245 | 0.238888129 | 0.026989049 |
| 0.259846996 | 0.121011787 | 0.279029688 | 0.274188947 |
| 0.095012434 | 0.334518272 | 0.057635412 | 0.136739932 |
| 0.040890321 | 0.135109838 | 0.205186894 | 0.202142723 |
| 0.087822323 | 0.192079473 | 0.257902444 | 0.081963356 |
| 0.243886704 | 0.18390307  | 0.14631596  | 0.122892552 |
| 0.184021133 | 0.162246134 | 0.264691989 | 0.084395232 |
| 0.136415342 | 0.230877666 | 0.091121756 | 0.223153868 |
| 0.212392242 | 0.287829405 | 0.098307452 | 0.294080961 |

|             |             |             |             |
|-------------|-------------|-------------|-------------|
| 0.155880475 | 0.144971344 | 0.356452856 | 0.136205365 |
| 0.124354961 | 0.246632046 | 0.099636262 | 0.072968648 |
| 0.155980097 | 0.109550411 | 0.001974293 | 0.060175013 |
| 0.354098226 | 0.066887666 | 0.164992162 | 0.225462066 |
| 0.181217979 | 0.327720536 | 0.071657627 | 0.118446571 |
| 0.231307837 | 0.269169514 | 0.197133105 | 0.294427631 |
| 0.255951725 | 0.1877359   | 0.152854548 | 0.005805778 |
| 0.175701719 | 0.143319032 | 0.070961749 | 0.114039127 |
| 0.067782967 | 0.103938106 | 0.164846486 | 0.057337737 |
| 0.313972621 | 0.084306124 | 0.110408887 | 0.22576487  |
| 0.163670265 | 0.278707994 | 0.226659802 | 0.306331122 |
| 0.033715106 | 0.234943853 | 0.128502041 | 0.096950845 |
| 0.245621969 | 0.15624635  | 0.334998365 | 0.168174219 |
| 0.117246967 | 0.221661643 | 0.010481001 | 0.315214936 |
| 0.241213471 | 0.137442543 | 0.228155095 | 0.038653781 |
| 0.347633434 | 0.253448081 | 0.136834083 | 0.109652224 |
| 0.09807958  | 0.231125822 | 0.241430851 | 0.269697986 |
| 0.07922202  | 0.126087746 | 0.18909127  | 0.147730429 |
| 0.254378278 | 0.134488245 | 0.245765727 | 0.089982142 |
| 0.254438954 | 0.200115281 | 0.120804279 | 0.17250012  |
| 0.12077448  | 0.095568125 | 0.066837314 | 0.313428968 |
| 0.243782139 | 0.181843877 | 0.316791487 | 0.22328476  |
| 0.124123926 | 0.238311725 | 0.119899113 | 0.288817389 |
| 0.213193507 | 0.303162664 | 0.26593039  | 0.259305821 |
| 0.361456486 | 0.164388734 | 0.150809337 | 0.207130639 |
| 0.241990943 | 0.188291411 | 0.128724867 | 0.2662081   |
| 0.139817785 | 0.281402217 | 0.087563519 | 0.215375843 |
| 0.147126794 | 0.139002415 | 0.139453125 | 0.185740584 |
| 0.257513603 | 0.204439993 | 0.188843083 | 0.358469767 |
| 0.268348604 | 0.146293292 | 0.355192776 | 0.037280676 |
| 0.149458035 | 0.28131137  | 0.237038705 | 0.163284629 |
| 0.225292337 | 0.170407904 | 0.111859384 | 0.011737709 |
| 0.289080243 | 0.094148054 | 0.125967208 | 0.237297056 |
| 0.098054181 | 0.083308641 | 0.290402736 | 0.332572754 |
| 0.204773558 | 0.077856829 | 0.086436817 | 0.268218305 |
| 0.127971813 | 0.068345368 | 0.086669529 | 0.155313488 |
| 0.132632644 | 0.068435822 | 0.087006693 | 0.114502053 |
| 0.239916064 | 0.130256697 |             |             |
| PSMB3       | 0.092619399 | 0.199750396 | 0.055619467 |
| 0.142152496 | 0.243621493 | 0.095303294 | 0.110411244 |
| 0.136511661 | 0.172718125 | 0.036471041 | 0.204121391 |
| 0.072854564 | 0.064121076 | 0.271721348 | 0.12174993  |
| 0.191795826 | 0.128567915 | 0.162621801 | 0.043036354 |
| 0.109477556 | 0.234312577 | 0.106133686 | 0.100973067 |
| 0.202620342 | 0.213095539 | 0.138535572 | 0.118492861 |
| 0.249835015 | 0.043564954 | 0.190689833 | 0.027941821 |
| 0.315779389 | 0.228799832 | 0.094141417 | 0.051544522 |
| 0.150944961 | 0.02518712  | 0.294236448 | 0.182174973 |
| 0.118520126 | 0.301169107 | 0.050562418 | 0.199002771 |
| 0.073147622 | 0.066436755 | 0.020670255 | 0.173563628 |
| 0.141434434 | 0.15106115  | 0.068144902 | 0.188491261 |
| 0.085682772 | 0.217531747 | 0.119176774 | 0.002559996 |
| 0.090579883 | 0.02737893  | 0.060314583 | 0.270499614 |
| 0.292377525 | 0.222860028 | 0.044459321 | 0.115381584 |

|             |             |             |             |
|-------------|-------------|-------------|-------------|
| 0.14304702  | 0.21730776  | 0.293634523 | 0.056830116 |
| 0.281042128 | 0.089267555 | 0.177193148 | 0.117954485 |
| 0.108501801 | 0.048333419 | 0.269596302 | 0.086689205 |
| 0.095617317 | 0.284729522 | 0.209125173 | 0.116232849 |
| 0.177817069 | 0.325061926 | 0.254027416 | 0.251634973 |
| 0.080514407 | 0.181437819 | 0.16286279  | 0.334327175 |
| 0.2131834   | 0.099445859 | 0.250924675 | 0.316609657 |
| 0.06405975  | 0.085999185 | 0.183135778 | 0.131269369 |
| 0.219501038 | 0.08452756  | 0.074908494 | 0.117108952 |
| 0.241117456 | 0.185996149 | 0.272196199 | 0.280273857 |
| 0.173286372 | 0.094494859 | 0.249766173 | 0.182176354 |
| 0.167153847 | 0.113120293 | 0.161091764 | 0.230026067 |
| 0.188107401 | 0.260548977 | 0.184902015 | 0.251439196 |
| 0.153542095 | 0.281689778 | 0.227019336 | 0.251520056 |
| 0.015375145 | 0.274349978 | 0.19808354  | 0.147713667 |
| 0.057037405 | 0.192067825 | 0.11756863  | 0.337660084 |
| 0.258496959 | 0.228790992 | 0.142344416 | 0.249608478 |
| 0.292056567 | 0.231244673 | 0.261682515 | 0.238607444 |
| 0.093239829 | 0.0884875   | 0.154140563 | 0.125810211 |
| 0.221822728 | 0.180050353 | 0.146773968 | 0.286108008 |
| 0.304477313 | 0.261112499 | 0.094599986 | 0.313010174 |
| 0.125055765 | 0.342892643 | 0.197014211 | 0.225646219 |
| 0.303550623 | 0.27394756  | 0.332142223 | 0.227708389 |
| 0.291441599 | 0.14475026  | 0.028136866 | 0.239635247 |
| 0.355110281 | 0.028503577 | 0.236227923 | 0.261853113 |
| 0.252115259 | 0.233073673 | 0.32529823  | 0.282937895 |
| 0.248388084 | 0.131623636 | 0.007459436 | 0.298668056 |
| 0.271223267 | 0.292941664 | 0.197179227 | 0.112847338 |
| 0.203832551 | 0.117673141 | 0.216178155 | 0.073549591 |
| 0.365389306 | 0.259710403 | 0.239654124 | 0.201868762 |
| 0.103506208 | 0.292131667 | 0.121473401 | 0.246486234 |
| 0.126456229 | 0.094684629 | 0.081589715 | 0.270078848 |
| 0.051010921 | 0.296315354 | 0.088335913 | 0.175506221 |
| 0.307329587 | 0.098932163 | 0.074907645 | 0.241059415 |
| 0.0855025   | 0.123837619 | 0.177794696 | 0.130091259 |
| 0.141644809 | 0.21486753  | 0.141762932 | 0.203336398 |
| 0.245602609 | 0.202335452 | 0.170482995 | 0.281925943 |
| 0.111730838 | 0.185897572 | 0.185705602 | 0.338094256 |
| 0.387108013 | 0.163880402 | 0.271926617 | 0.068280378 |
| 0.104148115 | 0.047663116 | 0.07351964  | 0.127856074 |
| 0.203348983 | 0.135376069 | 0.176311845 | 0.275695551 |
| 0.124131065 | 0.093496385 | 0.100890515 | 0.322046447 |
| 0.145090918 | 0.161067029 | 0.288374346 | 0.108637177 |
| 0.024422632 | 0.169533519 | 0.243179391 | 0.182258688 |
| 0.191465544 | 0.089813894 | 0.085617511 | 0.269118934 |
| 0.07581998  | 0.139451188 | 0.265222241 | 0.274700453 |
| 0.078916803 | 0.167570815 | 0.312312551 | 0.017334563 |
| 0.146304142 | 0.145295004 | 0.346186276 | 0.053683761 |
| 0.24153382  | 0.317512244 | 0.202807578 | 0.172596357 |
| 0.118994765 | 0.280580591 | 0.266304411 | 0.282354335 |
| 0.080023317 | 0.31499918  | 0.252398409 | 0.294242591 |
| 0.234775894 | 0.085239483 | 0.062669222 | 0.236844375 |
| 0.261037736 | 0.05976832  | 0.098751003 | 0.189616094 |
| 0.07228915  | 0.209486978 | 0.184262938 | 0.31284619  |

|             |             |             |             |
|-------------|-------------|-------------|-------------|
| 0.342752397 | 0.213664875 | 0.210875894 | 0.310655427 |
| 0.297574343 | 0.201023856 | 0.268579847 | 0.331329719 |
| 0.043711408 | 0.142147486 | 0.123947017 | 0.348873813 |
| 0.232126501 | 0.158566442 | 0.280777256 | 0.071966494 |
| 0.004480178 | 0.095736405 | 0.104286875 | 0.246059674 |
| 0.147691073 | 0.119043746 | 0.224468425 | 0.283668474 |
| 0.192914975 | 0.293285416 | 0.225634172 | 0.141427332 |
| 0.240131992 | 0.1213595   | 0.156677593 | 0.209960988 |
| 0.277960804 | 0.091873235 | 0.195397468 | 0.322544755 |
| 0.056389122 | 0.121735815 | 0.128246971 | 0.019389781 |
| 0.078303535 | 0.148511433 | 0.13631666  | 0.2520483   |
| 0.315814962 | 0.220995852 | 0.186062051 | 0.044514108 |
| 0.303836484 | 0.171624795 | 0.044602511 | 0.263149517 |
| 0.263572224 | 0.2578339   | 0.253048305 | 0.248381172 |
| 0.247859682 | 0.208585949 | 0.258709673 | 0.116704729 |
| 0.1422914   | 0.073943371 | 0.116800786 | 0.187947727 |
| 0.005816815 | 0.316739858 | 0.197550843 | 0.247847184 |
| 0.218030554 | 0.23440435  | 0.095426502 | 0.196350748 |
| 0.051959353 | 0.063670271 | 0.095215875 | 0.178585051 |
| 0.310255135 | 0.052408511 | 0.058766856 | 0.086287657 |
| 0.23455428  | 0.257809664 | 0.082040812 | 0.291876811 |
| 0.22714348  | 0.095546803 | 0.196914755 | 0.278396157 |
| 0.133373631 | 0.021301454 | 0.083321329 | 0.005611235 |
| 0.055973255 | 0.270376189 | 0.090859124 | 0.087083838 |
| 0.252467369 | 0.031337449 | 0.24756661  | 0.304456082 |
| 0.218401996 | 0.296572851 | 0.289284589 | 0.121232639 |
| 0.281210687 | 0.027574999 | 0.280153368 | 0.207728372 |
| 0.051021159 | 0.004027831 | 0.039073944 | 0.265299416 |
| 0.160902609 | 0.071321447 | 0.245028609 | 0.073459966 |
| 0.20469502  | 0.079851155 | 0.125517888 | 0.18747917  |
| 0.168854986 | 0.259467988 | 0.159872832 | 0.23357198  |
| 0.209830544 | 0.275434213 | 0.070142863 | 0.130541555 |
| 0.180490783 | 0.137279022 | 0.129355857 | 0.035213561 |
| 0.278139254 | 0.124809154 | 0.254766753 | 0.266047341 |
| 0.330905865 | 0.255802545 | 0.039409567 | 0.083718473 |
| 0.262384281 | 0.079906565 | 0.069586843 | 0.094476011 |
| 0.2320079   | 0.205157583 | 0.324525287 | 0.272282365 |
| 0.323876667 | 0.28886829  | 0.098025953 | 0.259324392 |
| 0.055660012 | 0.018715435 | 0.09384454  | 0.256058226 |
| 0.044007045 | 0.126501779 | 0.302874896 | 0.102789954 |
| 0.154871862 | 0.068584335 | 0.104601516 | 0.116074693 |
| 0.275387106 | 0.171678846 | 0.19960934  | 0.224762212 |
| 0.179043582 | 0.159426073 | 0.216703892 | 0.174324312 |
| 0.07632465  | 0.225891158 | 0.209968809 | 0.073353409 |
| 0.104055553 | 0.136964113 | 0.12059111  | 0.220779872 |
| 0.284145244 | 0.271490123 | 0.123081179 | 0.085462678 |
| 0.26713528  | 0.134956106 | 0.297479733 | 0.240409994 |
| 0.291183106 | 0.340395964 | 0.313914237 | 0.20258454  |
| 0.123132105 | 0.25318418  | 0.205075687 | 0.248326193 |
| 0.280274287 | 0.073454155 | 0.257863283 | 0.138411503 |
| 0.199699708 | 0.177573364 | 0.144293783 | 0.169765714 |
| 0.160809588 | 0.26438303  | 0.276045167 | 0.121936046 |
| 0.159336207 | 0.117386407 | 0.10372019  | 0.255391755 |
| 0.249329081 | 0.094295063 | 0.232115225 | 0.109132386 |

|             |             |             |             |
|-------------|-------------|-------------|-------------|
| 0.226490569 | 0.029662981 | 0.206826918 | 0.35356909  |
| 0.183730344 | 0.12883192  | 0.071774471 | 0.234470373 |
| 0.210533767 | 0.089503496 | 0.066918447 | 0.191527779 |
| 0.303270351 | 0.169160425 | 0.26408821  | 0.338815411 |
| 0.148453789 | 0.158241602 | 0.091877139 | 0.191219139 |
| 0.231685429 | 0.106708672 | 0.214583803 | 0.136594742 |
| 0.311452106 | 0.311216543 | 0.224612986 | 0.230725647 |
| 0.129829983 | 0.090290281 | 0.062932596 | 0.235425507 |
| 0.134751832 | 0.111854057 | 0.054404786 | 0.224850145 |
| 0.026113897 | 0.089555879 | 0.300123478 | 0.183059482 |
| 0.324133106 | 0.291152076 | 0.32190224  | 0.123973911 |
| 0.003569004 | 0.191348205 | 0.225678487 | 0.110740787 |
| 0.207333864 | 0.253589369 | 0.096012368 | 0.193528318 |
| 0.363091787 | 0.091106431 | 0.188505001 | 0.077305872 |
| 0.06504978  | 0.148809697 | 0.318596359 | 0.179887763 |
| 0.229998064 | 0.085247042 | 0.118192884 | 0.188117822 |
| 0.097606648 | 0.337677849 | 0.327627472 | 0.036192272 |
| 0.063249464 | 0.279395966 | 0.208114769 | 0.075119944 |
| 0.149848669 | 0.265083684 | 0.29753345  | 0.010151632 |
| 0.219547971 | 0.059429592 | 0.246140714 | 0.239126358 |
| 1           | 0.192782425 | 0.313109571 | 0.169285239 |
| 0.176804359 | 0.199069434 | 0.178198661 | 0.317379576 |
| 0.235219852 | 0.186489196 | 0.19524563  | 0.118747254 |
| 0.16845524  | 0.156992847 | 0.139663649 | 0.127583453 |
| 0.145285638 | 0.236630307 | 0.295630645 | 0.101133161 |
| 0.304517853 | 0.100905778 | 0.373868481 | 0.230297143 |
| 0.346138827 | 0.104129604 | 0.139496323 | 0.212122974 |
| 0.030527347 | 0.074848199 | 0.064189001 | 0.14517833  |
| 0.22911228  | 0.157995703 | 0.101922543 | 0.122867178 |
| 0.155267423 | 0.329795049 | 0.283818067 | 0.313733201 |
| 0.148930751 | 0.110869414 | 0.036311593 | 0.211239478 |
| 0.161219169 | 0.178764279 | 0.226582922 | 0.023191012 |
| 0.248476926 | 0.092780148 | 0.244950335 | 0.258023998 |
| 0.082816742 | 0.342510291 | 0.041911289 | 0.117134925 |
| 0.031865437 | 0.13905923  | 0.224725323 | 0.189927982 |
| 0.066236147 | 0.191290703 | 0.244938043 | 0.066908429 |
| 0.226877981 | 0.183458266 | 0.157179495 | 0.136552884 |
| 0.224212001 | 0.172586477 | 0.273758936 | 0.090042363 |
| 0.120581086 | 0.191554877 | 0.09227757  | 0.19665572  |
| 0.217158618 | 0.27410169  | 0.116493829 | 0.273884303 |
| 0.142187666 | 0.17155763  | 0.354233351 | 0.155149657 |
| 0.119833834 | 0.24464324  | 0.080344367 | 0.067708064 |
| 0.164164683 | 0.090457063 | 0.001453744 | 0.046952608 |
| 0.337229275 | 0.07612805  | 0.15769867  | 0.244047749 |
| 0.173636347 | 0.343471652 | 0.06924857  | 0.123732855 |
| 0.221214715 | 0.266850428 | 0.137582605 | 0.324167223 |
| 0.251799312 | 0.178864835 | 0.134232584 | 0.010857652 |
| 0.150255351 | 0.125966238 | 0.058222807 | 0.129943928 |
| 0.081255528 | 0.079233797 | 0.145058668 | 0.081123733 |
| 0.296210863 | 0.059321508 | 0.120149751 | 0.205273638 |
| 0.204772332 | 0.27207584  | 0.234260896 | 0.263250045 |
| 0.049140373 | 0.267424956 | 0.129189644 | 0.1018156   |
| 0.177877619 | 0.137101443 | 0.302665572 | 0.131147534 |
| 0.120207485 | 0.194638078 | 0.010799808 | 0.309579254 |

|             |             |             |             |
|-------------|-------------|-------------|-------------|
| 0.236052086 | 0.12934949  | 0.262761138 | 0.037023967 |
| 0.358958386 | 0.277783953 | 0.129180415 | 0.102185561 |
| 0.085972555 | 0.194860551 | 0.27166137  | 0.242494488 |
| 0.048665662 | 0.130298492 | 0.177257398 | 0.15544908  |
| 0.255120585 | 0.104453136 | 0.286641645 | 0.064137444 |
| 0.241392493 | 0.212555269 | 0.133845912 | 0.184126708 |
| 0.125390912 | 0.116701399 | 0.056878701 | 0.303928159 |
| 0.245777599 | 0.146216999 | 0.284338783 | 0.189894803 |
| 0.118931305 | 0.241498626 | 0.115928665 | 0.288346037 |
| 0.216259466 | 0.30522801  | 0.260329016 | 0.248658146 |
| 0.371427931 | 0.161672741 | 0.114556631 | 0.180045912 |
| 0.223391473 | 0.147686202 | 0.124795985 | 0.250392837 |
| 0.109193431 | 0.299616297 | 0.09258487  | 0.208726563 |
| 0.130364337 | 0.162383545 | 0.109393496 | 0.213733828 |
| 0.247978068 | 0.186913007 | 0.18038587  | 0.349417157 |
| 0.207572502 | 0.109545908 | 0.35190083  | 0.027091585 |
| 0.133179017 | 0.241905963 | 0.257206226 | 0.153397836 |
| 0.226067053 | 0.173561323 | 0.100704176 | 0.009321372 |
| 0.285282318 | 0.097202077 | 0.136337355 | 0.187937965 |
| 0.084200191 | 0.086726197 | 0.281766157 | 0.310216775 |
| 0.218051134 | 0.073534621 | 0.065445379 | 0.262446412 |
| 0.107230047 | 0.059346841 | 0.078149423 | 0.141984407 |
| 0.112448289 | 0.059970547 | 0.078428456 | 0.087607529 |
| 0.229913058 | 0.138377567 |             |             |
| PSMB7       | 0.080092413 | 0.209376697 | 0.039737334 |
| 0.084575568 | 0.212651945 | 0.079304758 | 0.123721652 |
| 0.153045022 | 0.200522725 | 0.047109795 | 0.172201567 |
| 0.068378564 | 0.066018348 | 0.292150261 | 0.140449122 |
| 0.205665129 | 0.125368028 | 0.166435192 | 0.065063031 |
| 0.101049453 | 0.236540114 | 0.101880529 | 0.108851689 |
| 0.205606786 | 0.199023162 | 0.142273584 | 0.135093851 |
| 0.253274527 | 0.042418028 | 0.175071101 | 0.021741413 |
| 0.324767115 | 0.226791699 | 0.094908132 | 0.033946052 |
| 0.15135097  | 0.039713402 | 0.310047931 | 0.171575062 |
| 0.065635969 | 0.304447943 | 0.051433446 | 0.156471104 |
| 0.082523719 | 0.054740824 | 0.021863911 | 0.205507595 |
| 0.145417856 | 0.139876821 | 0.067770548 | 0.177372948 |
| 0.105449589 | 0.203565106 | 0.132107115 | 0.00907289  |
| 0.087743324 | 0.027902941 | 0.071859494 | 0.267350234 |
| 0.247535871 | 0.193754593 | 0.062953803 | 0.140489059 |
| 0.18840159  | 0.252567631 | 0.281395799 | 0.077361063 |
| 0.286817285 | 0.11172786  | 0.185187479 | 0.080336849 |
| 0.128527249 | 0.055287197 | 0.240520307 | 0.097102059 |
| 0.106088304 | 0.236365413 | 0.1902312   | 0.110249347 |
| 0.190919235 | 0.341737555 | 0.23519744  | 0.262146124 |
| 0.139765143 | 0.195047585 | 0.138864715 | 0.326996564 |
| 0.26531673  | 0.132270069 | 0.236539685 | 0.325549831 |
| 0.081319867 | 0.103178483 | 0.23148577  | 0.150677269 |
| 0.210168038 | 0.097609978 | 0.080839837 | 0.101321716 |
| 0.231619419 | 0.209892911 | 0.302023428 | 0.271658729 |
| 0.166856896 | 0.091442618 | 0.258706286 | 0.186436694 |
| 0.136918517 | 0.085692689 | 0.173839446 | 0.24525682  |
| 0.187656983 | 0.262597552 | 0.220528087 | 0.303121919 |
| 0.174706386 | 0.276321581 | 0.202980193 | 0.270670559 |

|             |             |             |             |
|-------------|-------------|-------------|-------------|
| 0.017106095 | 0.284437069 | 0.145358262 | 0.13424391  |
| 0.060470503 | 0.17737571  | 0.161921774 | 0.327654924 |
| 0.250400849 | 0.232985087 | 0.136495373 | 0.226885366 |
| 0.309497809 | 0.239376869 | 0.280475075 | 0.274841773 |
| 0.084957622 | 0.104327173 | 0.156020456 | 0.114822129 |
| 0.272019201 | 0.189247488 | 0.138966216 | 0.298529675 |
| 0.283265243 | 0.275165124 | 0.086321058 | 0.32243778  |
| 0.169992577 | 0.336346213 | 0.198193835 | 0.183455182 |
| 0.301894462 | 0.272475514 | 0.328123499 | 0.219272325 |
| 0.280916543 | 0.114061005 | 0.089117368 | 0.276807492 |
| 0.350467532 | 0.017752353 | 0.252079512 | 0.276436652 |
| 0.257437324 | 0.243041401 | 0.341765599 | 0.283532465 |
| 0.259432003 | 0.126975819 | 0.020121937 | 0.316627434 |
| 0.279922707 | 0.263124813 | 0.218237295 | 0.131503482 |
| 0.235193576 | 0.11366151  | 0.230219923 | 0.085409275 |
| 0.379257266 | 0.244653666 | 0.25132393  | 0.247629003 |
| 0.12838703  | 0.289467655 | 0.135937736 | 0.246469148 |
| 0.096938811 | 0.084593687 | 0.071539814 | 0.300993682 |
| 0.04511177  | 0.25627563  | 0.098924109 | 0.216949212 |
| 0.279245522 | 0.107855803 | 0.078127231 | 0.246745689 |
| 0.087643546 | 0.128848035 | 0.135143078 | 0.142814381 |
| 0.119734906 | 0.211361196 | 0.160002148 | 0.141951773 |
| 0.251362974 | 0.213683902 | 0.188418333 | 0.281814566 |
| 0.138324598 | 0.16098808  | 0.203588008 | 0.331227302 |
| 0.390755506 | 0.15174577  | 0.297375512 | 0.028439662 |
| 0.142445954 | 0.068874229 | 0.085087358 | 0.135003769 |
| 0.20049334  | 0.198840839 | 0.215336621 | 0.262053826 |
| 0.11909663  | 0.11626302  | 0.132597494 | 0.320399042 |
| 0.15287532  | 0.139640937 | 0.303017447 | 0.132976595 |
| 0.012821648 | 0.163727316 | 0.246144429 | 0.198868987 |
| 0.246108604 | 0.099131302 | 0.068986139 | 0.277550821 |
| 0.112603286 | 0.177592764 | 0.26813822  | 0.264503486 |
| 0.099037879 | 0.190638092 | 0.331016939 | 0.050009727 |
| 0.167066503 | 0.079005925 | 0.32077171  | 0.061593558 |
| 0.221425505 | 0.34688109  | 0.203734982 | 0.141768013 |
| 0.101163396 | 0.301535154 | 0.25124823  | 0.289891364 |
| 0.099165589 | 0.329393003 | 0.262760085 | 0.292942361 |
| 0.223381995 | 0.114886031 | 0.070697861 | 0.237161991 |
| 0.260754763 | 0.086965478 | 0.093163069 | 0.220513172 |
| 0.09545725  | 0.233726379 | 0.145209161 | 0.317750739 |
| 0.334525307 | 0.223187167 | 0.212561712 | 0.320814878 |
| 0.274448635 | 0.16219425  | 0.258538785 | 0.353838522 |
| 0.062684424 | 0.183305857 | 0.131083932 | 0.329219013 |
| 0.191686665 | 0.191116306 | 0.29084612  | 0.078313584 |
| 0.001630789 | 0.107946619 | 0.093739174 | 0.209286841 |
| 0.125924419 | 0.134687482 | 0.229340721 | 0.300011258 |
| 0.185327087 | 0.276924691 | 0.265486007 | 0.150739357 |
| 0.260711175 | 0.159982266 | 0.147211043 | 0.211665099 |
| 0.271302654 | 0.037590447 | 0.137043472 | 0.335221141 |
| 0.061136101 | 0.115129468 | 0.16292688  | 0.008631183 |
| 0.08570962  | 0.166350461 | 0.13503932  | 0.236699964 |
| 0.325493947 | 0.199713753 | 0.182166703 | 0.063009973 |
| 0.277732198 | 0.143755489 | 0.012154952 | 0.277104942 |
| 0.287120193 | 0.286553875 | 0.280457393 | 0.267557213 |



|             |             |             |             |
|-------------|-------------|-------------|-------------|
| 0.282664025 | 0.224026337 | 0.272327699 | 0.101356368 |
| 0.135413662 | 0.071488421 | 0.133284621 | 0.197023646 |
| 0.010705254 | 0.275939339 | 0.20254321  | 0.217615516 |
| 0.244988504 | 0.284039183 | 0.085368999 | 0.215891203 |
| 0.030701796 | 0.060728479 | 0.147131213 | 0.201022779 |
| 0.322923048 | 0.038952538 | 0.046047569 | 0.111488878 |
| 0.227805821 | 0.260021368 | 0.08153911  | 0.292525669 |
| 0.20099503  | 0.102015479 | 0.163835509 | 0.264682909 |
| 0.128953105 | 0.040105509 | 0.110872275 | 0.003830509 |
| 0.049449997 | 0.294194535 | 0.106361499 | 0.061017172 |
| 0.22738978  | 0.019947995 | 0.234162045 | 0.316782969 |
| 0.219036383 | 0.310225641 | 0.284357472 | 0.106557566 |
| 0.279178868 | 0.035786343 | 0.289439064 | 0.217431809 |
| 0.06826818  | 0.00211912  | 0.038389408 | 0.263807839 |
| 0.166634556 | 0.067986509 | 0.213268963 | 0.05953753  |
| 0.162960677 | 0.084582802 | 0.120433646 | 0.146644826 |
| 0.150734502 | 0.23296487  | 0.16598973  | 0.256552832 |
| 0.194809851 | 0.266966708 | 0.087298147 | 0.136162646 |
| 0.168309017 | 0.105539008 | 0.139775294 | 0.018336927 |
| 0.286552164 | 0.122562076 | 0.264988141 | 0.275564237 |
| 0.331973305 | 0.235856604 | 0.04995948  | 0.096099875 |
| 0.283523424 | 0.077974289 | 0.067495265 | 0.092450772 |
| 0.236714934 | 0.222413365 | 0.300862417 | 0.248190364 |
| 0.343219572 | 0.289969617 | 0.096022647 | 0.270578527 |
| 0.020376704 | 0.013922734 | 0.087773327 | 0.296462229 |
| 0.072674981 | 0.157285152 | 0.27734845  | 0.137985232 |
| 0.173101453 | 0.055350707 | 0.116049335 | 0.127322006 |
| 0.256992944 | 0.195591091 | 0.194861505 | 0.256326922 |
| 0.163416357 | 0.169830843 | 0.174510894 | 0.20676648  |
| 0.128879212 | 0.226894561 | 0.198424643 | 0.07535872  |
| 0.105267575 | 0.141765185 | 0.10098183  | 0.19561464  |
| 0.267942844 | 0.278206496 | 0.13836066  | 0.05255253  |
| 0.26460227  | 0.17945231  | 0.312133256 | 0.246622876 |
| 0.300922717 | 0.354808728 | 0.315251291 | 0.245477223 |
| 0.106620886 | 0.239783281 | 0.197882362 | 0.186314212 |
| 0.292715223 | 0.084787002 | 0.25566048  | 0.136705487 |
| 0.193883466 | 0.137977949 | 0.102204179 | 0.161804635 |
| 0.162252669 | 0.257787123 | 0.231760239 | 0.107614039 |
| 0.176381859 | 0.099841142 | 0.106380978 | 0.238688434 |
| 0.276382498 | 0.085447074 | 0.222922918 | 0.108924344 |
| 0.21056384  | 0.043945076 | 0.224679025 | 0.360173622 |
| 0.167917375 | 0.140695467 | 0.067031305 | 0.256558205 |
| 0.220680072 | 0.107192166 | 0.033072197 | 0.202669131 |
| 0.310439228 | 0.17487176  | 0.263104477 | 0.371400491 |
| 0.146243277 | 0.154529228 | 0.119053541 | 0.222361362 |
| 0.257031873 | 0.087787095 | 0.242048642 | 0.131447574 |
| 0.32364565  | 0.3356977   | 0.231521033 | 0.1835426   |
| 0.133435806 | 0.104716652 | 0.071342898 | 0.246941226 |
| 0.131603027 | 0.109440478 | 0.061972993 | 0.25594366  |
| 0.005718513 | 0.081238131 | 0.317316291 | 0.162212422 |
| 0.336437064 | 0.292773655 | 0.30953952  | 0.122842334 |
| 0.004539368 | 0.203467619 | 0.214033697 | 0.101093668 |
| 0.229566279 | 0.23951498  | 0.110043649 | 0.159302591 |
| 0.324504477 | 0.084758433 | 0.21203892  | 0.065877285 |

|             |             |             |             |
|-------------|-------------|-------------|-------------|
| 0.080521991 | 0.178182849 | 0.307469335 | 0.21115887  |
| 0.203200704 | 0.109218695 | 0.094614784 | 0.136843324 |
| 0.119680657 | 0.312736162 | 0.328619093 | 0.044321068 |
| 0.086938313 | 0.327338732 | 0.232647854 | 0.056729546 |
| 0.15397458  | 0.292797365 | 0.291318363 | 0.017144603 |
| 0.227735356 | 0.047936597 | 0.239264382 | 0.185867856 |
| 0.192782425 | 1           | 0.307497688 | 0.139467817 |
| 0.211087295 | 0.187140041 | 0.139512795 | 0.271386098 |
| 0.173662455 | 0.169215581 | 0.190610541 | 0.116370911 |
| 0.143606196 | 0.122020115 | 0.131020832 | 0.121051715 |
| 0.105937391 | 0.240648279 | 0.274594832 | 0.083204986 |
| 0.298251633 | 0.112466655 | 0.347111178 | 0.238363174 |
| 0.328726174 | 0.097394756 | 0.170646383 | 0.209945088 |
| 0.054251982 | 0.079330879 | 0.077846561 | 0.124489866 |
| 0.224039711 | 0.166670378 | 0.101589957 | 0.135622023 |
| 0.191500859 | 0.318051929 | 0.263831962 | 0.297641235 |
| 0.124348353 | 0.152180032 | 0.040332771 | 0.164511057 |
| 0.137521998 | 0.184498505 | 0.208938887 | 0.009493418 |
| 0.261211931 | 0.069682338 | 0.250821122 | 0.254322608 |
| 0.094949882 | 0.315811267 | 0.045259394 | 0.112842075 |
| 0.030432921 | 0.140170976 | 0.217487399 | 0.195336671 |
| 0.070464779 | 0.148173034 | 0.219489888 | 0.057016818 |
| 0.226972645 | 0.200624349 | 0.1659676   | 0.181832484 |
| 0.22963828  | 0.147883383 | 0.294882647 | 0.076768974 |
| 0.133534445 | 0.142877143 | 0.109886348 | 0.198082575 |
| 0.212969828 | 0.279367558 | 0.100847134 | 0.287858735 |
| 0.173547571 | 0.167341324 | 0.35855863  | 0.152147626 |
| 0.095625607 | 0.16324922  | 0.080149386 | 0.079739815 |
| 0.190432859 | 0.090813249 | 0.003799295 | 0.08193297  |
| 0.322650564 | 0.110394354 | 0.189982126 | 0.276818356 |
| 0.15665005  | 0.360337062 | 0.067352539 | 0.161053245 |
| 0.230134486 | 0.275079822 | 0.149889114 | 0.316218338 |
| 0.296368664 | 0.150250651 | 0.127467354 | 0.024447225 |
| 0.179698208 | 0.141941044 | 0.082730309 | 0.132605922 |
| 0.069709294 | 0.084758145 | 0.164085303 | 0.095012986 |
| 0.312519599 | 0.058668946 | 0.15160025  | 0.186217583 |
| 0.223711962 | 0.279015257 | 0.220667719 | 0.249264364 |
| 0.073974599 | 0.258371984 | 0.131798091 | 0.137478736 |
| 0.153841684 | 0.137894457 | 0.283324546 | 0.117489895 |
| 0.100092634 | 0.162812162 | 0.016152316 | 0.304883983 |
| 0.247064229 | 0.142665344 | 0.261242502 | 0.052603908 |
| 0.315439967 | 0.275799659 | 0.216915903 | 0.104303425 |
| 0.044119835 | 0.195456735 | 0.250121298 | 0.225113062 |
| 0.051858173 | 0.177299653 | 0.10073115  | 0.188670406 |
| 0.262360546 | 0.168435053 | 0.31648643  | 0.071486938 |
| 0.239823516 | 0.211929437 | 0.115722236 | 0.146489686 |
| 0.159560037 | 0.117360966 | 0.059019432 | 0.324847019 |
| 0.212382951 | 0.126384417 | 0.287390509 | 0.185190669 |
| 0.136957439 | 0.241395773 | 0.13195254  | 0.315254833 |
| 0.219410333 | 0.287851911 | 0.262482306 | 0.275962032 |
| 0.353693813 | 0.164347898 | 0.128155876 | 0.202553934 |
| 0.219409611 | 0.094090199 | 0.145569701 | 0.241983884 |
| 0.116025134 | 0.296767544 | 0.106954125 | 0.207141012 |
| 0.110880195 | 0.200236475 | 0.095170205 | 0.199096008 |

|             |             |             |             |
|-------------|-------------|-------------|-------------|
| 0.272030224 | 0.175519297 | 0.166752304 | 0.32901616  |
| 0.139832426 | 0.058793858 | 0.340878625 | 0.022215695 |
| 0.109137071 | 0.208992708 | 0.243257387 | 0.154563828 |
| 0.191584328 | 0.208268846 | 0.11721566  | 0.012070804 |
| 0.296763459 | 0.032610532 | 0.151985444 | 0.169101764 |
| 0.128629136 | 0.097451574 | 0.26311093  | 0.323860062 |
| 0.212303951 | 0.078815053 | 0.073584279 | 0.277087503 |
| 0.091865462 | 0.068601866 | 0.114734861 | 0.145374662 |
| 0.105242147 | 0.069451905 | 0.090494988 | 0.077637591 |
| 0.220503086 | 0.138199367 |             |             |
| PSMB9       | 0.102632263 | 0.240220432 | 0.052451144 |
| 0.156382045 | 0.280586184 | 0.161526267 | 0.135797189 |
| 0.190914006 | 0.211680253 | 0.087176952 | 0.23112825  |
| 0.067739743 | 0.138172281 | 0.320808183 | 0.149802847 |
| 0.242634167 | 0.139225992 | 0.188854946 | 0.086567989 |
| 0.179798205 | 0.299188371 | 0.201948526 | 0.137814201 |
| 0.294367794 | 0.185319998 | 0.159104842 | 0.18056386  |
| 0.300158603 | 0.095869074 | 0.226217312 | 0.05429876  |
| 0.339115689 | 0.269986413 | 0.166146834 | 0.04201521  |
| 0.198723259 | 0.057323051 | 0.322611211 | 0.286460566 |
| 0.180260259 | 0.305361437 | 0.089667125 | 0.266256824 |
| 0.125679158 | 0.065409456 | 0.046919292 | 0.236067753 |
| 0.164914518 | 0.238821226 | 0.06297209  | 0.223556954 |
| 0.182472926 | 0.221459074 | 0.157259295 | 0.005662498 |
| 0.186287145 | 0.070346083 | 0.147263214 | 0.310006809 |
| 0.240803541 | 0.248633489 | 0.116867159 | 0.185949845 |
| 0.20174047  | 0.274188204 | 0.283208064 | 0.135770971 |
| 0.325323558 | 0.201135194 | 0.231091695 | 0.148121332 |
| 0.186942507 | 0.058565428 | 0.219595061 | 0.07821595  |
| 0.198036438 | 0.284532021 | 0.255519766 | 0.229900542 |
| 0.220236982 | 0.367357945 | 0.237706842 | 0.295059765 |
| 0.196184137 | 0.243594239 | 0.280000698 | 0.339152962 |
| 0.270503644 | 0.149484957 | 0.27964297  | 0.362727106 |
| 0.086277348 | 0.120926055 | 0.240398071 | 0.119846998 |
| 0.252105951 | 0.189725209 | 0.114146258 | 0.212272006 |
| 0.28747356  | 0.251060316 | 0.319507449 | 0.269583587 |
| 0.261573337 | 0.075319004 | 0.285093395 | 0.242921873 |
| 0.254755633 | 0.092726159 | 0.290373158 | 0.294784359 |
| 0.2240756   | 0.308147162 | 0.243403422 | 0.301290949 |
| 0.219950835 | 0.323873451 | 0.247630165 | 0.29347708  |
| 0.037756447 | 0.325432552 | 0.183263657 | 0.15375722  |
| 0.073347761 | 0.229301916 | 0.251176918 | 0.330253885 |
| 0.304587893 | 0.244934754 | 0.193129006 | 0.302464207 |
| 0.354423739 | 0.268564083 | 0.317497686 | 0.291219409 |
| 0.096662862 | 0.202440109 | 0.21154502  | 0.19096969  |
| 0.27157784  | 0.166255722 | 0.2497323   | 0.325085931 |
| 0.309892771 | 0.318016243 | 0.130468013 | 0.345258199 |
| 0.21444389  | 0.379551472 | 0.239573373 | 0.226732283 |
| 0.341289621 | 0.30635942  | 0.377993791 | 0.276569945 |
| 0.317530176 | 0.172536015 | 0.07770925  | 0.286444153 |
| 0.38930094  | 0.038075142 | 0.298026796 | 0.325187928 |
| 0.296985128 | 0.293583708 | 0.384724063 | 0.335179387 |
| 0.296267091 | 0.110883473 | 0.027247191 | 0.319654499 |
| 0.314603373 | 0.304473317 | 0.29098682  | 0.172408948 |

|             |             |             |             |
|-------------|-------------|-------------|-------------|
| 0.258819325 | 0.168108989 | 0.269475908 | 0.152509953 |
| 0.406956302 | 0.299558928 | 0.296740612 | 0.255596302 |
| 0.145033569 | 0.288556193 | 0.182014735 | 0.274986395 |
| 0.128083167 | 0.116152159 | 0.057343272 | 0.295752596 |
| 0.097865971 | 0.275407797 | 0.162060341 | 0.235042693 |
| 0.261155245 | 0.159290804 | 0.164955586 | 0.293191734 |
| 0.066360954 | 0.159207156 | 0.17669627  | 0.147894975 |
| 0.146411957 | 0.180469978 | 0.215415088 | 0.228655523 |
| 0.309519439 | 0.194991658 | 0.224434312 | 0.333430901 |
| 0.222179865 | 0.157925012 | 0.230737052 | 0.373455407 |
| 0.408706146 | 0.216427836 | 0.262719055 | 0.048338465 |
| 0.214947498 | 0.125327766 | 0.172901923 | 0.177992796 |
| 0.180075393 | 0.25122073  | 0.229841354 | 0.316247317 |
| 0.144565759 | 0.13347403  | 0.21932099  | 0.335907423 |
| 0.132553527 | 0.256832768 | 0.338881461 | 0.152516693 |
| 0.015116497 | 0.210623706 | 0.290470635 | 0.310541133 |
| 0.227962928 | 0.174733767 | 0.160398309 | 0.321660629 |
| 0.187277439 | 0.282364855 | 0.319713216 | 0.320164798 |
| 0.163331956 | 0.171286159 | 0.372019808 | 0.058963752 |
| 0.223197785 | 0.15667239  | 0.332347203 | 0.097323391 |
| 0.225820522 | 0.332410307 | 0.263326453 | 0.280129422 |
| 0.096638871 | 0.33314372  | 0.288380413 | 0.334738743 |
| 0.177906782 | 0.372276667 | 0.308516658 | 0.330095188 |
| 0.25024547  | 0.170965492 | 0.143622037 | 0.281136347 |
| 0.311496154 | 0.145939898 | 0.076038654 | 0.255316726 |
| 0.150460842 | 0.27002364  | 0.270947384 | 0.359996265 |
| 0.368485069 | 0.253734991 | 0.282322277 | 0.355860711 |
| 0.308156235 | 0.19634656  | 0.304889743 | 0.388866064 |
| 0.109804785 | 0.231105503 | 0.239832481 | 0.381848671 |
| 0.187315234 | 0.297511718 | 0.292515114 | 0.165233673 |
| 0.007181073 | 0.104356825 | 0.088694139 | 0.309000093 |
| 0.25821447  | 0.164838184 | 0.268294177 | 0.338406098 |
| 0.208830499 | 0.312308299 | 0.238976962 | 0.245454579 |
| 0.279619788 | 0.229334144 | 0.208347703 | 0.250770941 |
| 0.263245231 | 0.067850022 | 0.209244672 | 0.362595757 |
| 0.043909355 | 0.230330891 | 0.194848712 | 0.012681654 |
| 0.089905247 | 0.194659515 | 0.111478801 | 0.216484906 |
| 0.372379327 | 0.192094211 | 0.17229152  | 0.107660248 |
| 0.312060797 | 0.153524285 | 0.025588049 | 0.31848968  |
| 0.319042196 | 0.312216043 | 0.309422762 | 0.290759513 |
| 0.310693579 | 0.257045289 | 0.313827647 | 0.137023153 |
| 0.178805426 | 0.095371506 | 0.235194356 | 0.2759832   |
| 0.008722224 | 0.327721508 | 0.271245827 | 0.194870731 |
| 0.280935049 | 0.267080338 | 0.095817886 | 0.24660486  |
| 0.041741542 | 0.138563801 | 0.19337583  | 0.287723035 |
| 0.352227347 | 0.043625683 | 0.098631962 | 0.188071325 |
| 0.257626501 | 0.267889346 | 0.17547276  | 0.338260164 |
| 0.25067905  | 0.089386214 | 0.267367188 | 0.310809687 |
| 0.155731201 | 0.057318909 | 0.171248756 | 0.010165454 |
| 0.097430525 | 0.314527085 | 0.192378533 | 0.093076899 |
| 0.236666684 | 0.021166489 | 0.256013938 | 0.354130844 |
| 0.254739392 | 0.3567488   | 0.330723263 | 0.222334053 |
| 0.323263854 | 0.078319968 | 0.334702409 | 0.244190344 |
| 0.121692748 | 0.002671931 | 0.036767458 | 0.318836192 |

|             |             |             |             |
|-------------|-------------|-------------|-------------|
| 0.213398341 | 0.054863727 | 0.201346508 | 0.126544992 |
| 0.232619504 | 0.113051691 | 0.146159965 | 0.295368735 |
| 0.194325117 | 0.314840974 | 0.285293883 | 0.278896826 |
| 0.272692588 | 0.284703331 | 0.140896752 | 0.106628233 |
| 0.215333012 | 0.136189756 | 0.109509114 | 0.030937699 |
| 0.321039381 | 0.106727033 | 0.28616751  | 0.314863246 |
| 0.369046117 | 0.293387712 | 0.095527014 | 0.162875529 |
| 0.31961709  | 0.067444825 | 0.145488935 | 0.080063244 |
| 0.274736849 | 0.251807446 | 0.31486798  | 0.260464514 |
| 0.375741684 | 0.3232892   | 0.102306323 | 0.305293293 |
| 0.034697192 | 0.018331712 | 0.131038183 | 0.268724299 |
| 0.106088131 | 0.220716264 | 0.274993718 | 0.201122549 |
| 0.261304449 | 0.064400128 | 0.225328108 | 0.240661521 |
| 0.274161203 | 0.248597765 | 0.279791144 | 0.237660848 |
| 0.299487908 | 0.272762902 | 0.286000255 | 0.258712438 |
| 0.183884021 | 0.233679556 | 0.183949534 | 0.076033301 |
| 0.152421439 | 0.19303067  | 0.119578932 | 0.181247451 |
| 0.317495743 | 0.325468409 | 0.145679317 | 0.068754682 |
| 0.25674939  | 0.257370982 | 0.355883974 | 0.287343918 |
| 0.334067596 | 0.389205572 | 0.324877269 | 0.310048876 |
| 0.133770659 | 0.275475325 | 0.273616609 | 0.312170665 |
| 0.331421772 | 0.06217224  | 0.295190737 | 0.222250147 |
| 0.163026665 | 0.233878344 | 0.131808282 | 0.166076289 |
| 0.206879798 | 0.226900718 | 0.316160396 | 0.103965137 |
| 0.269686411 | 0.222336046 | 0.120099649 | 0.244341648 |
| 0.277384298 | 0.189071856 | 0.204737449 | 0.18740452  |
| 0.241903524 | 0.075602185 | 0.265638665 | 0.378493855 |
| 0.145948668 | 0.140202527 | 0.118650995 | 0.283102658 |
| 0.264140191 | 0.133639118 | 0.050934163 | 0.236249479 |
| 0.352582584 | 0.214465402 | 0.302541864 | 0.38164311  |
| 0.117054068 | 0.218968985 | 0.209553887 | 0.25206692  |
| 0.233657311 | 0.160643289 | 0.275862291 | 0.113765453 |
| 0.314587715 | 0.349939219 | 0.26401483  | 0.268020339 |
| 0.16648522  | 0.087202643 | 0.053015506 | 0.28536075  |
| 0.254413599 | 0.132864352 | 0.101960541 | 0.290380402 |
| 0.015927409 | 0.179780254 | 0.361229126 | 0.254221067 |
| 0.37089415  | 0.34296362  | 0.339713816 | 0.198507206 |
| 0.008565245 | 0.249513759 | 0.246351174 | 0.196785693 |
| 0.25364163  | 0.258781754 | 0.159826596 | 0.212084578 |
| 0.334141448 | 0.071108057 | 0.264292469 | 0.137161056 |
| 0.146819856 | 0.189226718 | 0.279154912 | 0.203856998 |
| 0.317987249 | 0.082959019 | 0.21575891  | 0.230532223 |
| 0.212631973 | 0.300783556 | 0.337870351 | 0.082167171 |
| 0.144998067 | 0.342616617 | 0.254925271 | 0.067419364 |
| 0.221611669 | 0.317192495 | 0.332848323 | 0.011636147 |
| 0.269766733 | 0.046782272 | 0.318780086 | 0.296306792 |
| 0.313109571 | 0.307497688 | 1           | 0.272781728 |
| 0.213522807 | 0.267155255 | 0.249968521 | 0.27307065  |
| 0.288211345 | 0.228642576 | 0.231110026 | 0.183943505 |
| 0.261284774 | 0.179649106 | 0.112389294 | 0.103435564 |
| 0.140748179 | 0.282931394 | 0.262369168 | 0.073187769 |
| 0.280159361 | 0.192844986 | 0.364808414 | 0.275833114 |
| 0.368186912 | 0.088056135 | 0.24696461  | 0.250574377 |
| 0.0857974   | 0.137504912 | 0.084332878 | 0.176319132 |

|             |             |             |             |
|-------------|-------------|-------------|-------------|
| 0.246588154 | 0.270956418 | 0.148266753 | 0.140748419 |
| 0.208800643 | 0.334477578 | 0.252132282 | 0.339322507 |
| 0.231866253 | 0.191277007 | 0.080100988 | 0.23259904  |
| 0.190945664 | 0.155749938 | 0.296540776 | 0.011841993 |
| 0.267798554 | 0.133729558 | 0.298260548 | 0.292647834 |
| 0.187409338 | 0.344534721 | 0.08738902  | 0.140422546 |
| 0.066707435 | 0.131460617 | 0.18520026  | 0.240279318 |
| 0.151198875 | 0.235914038 | 0.288574742 | 0.11287217  |
| 0.277949114 | 0.239073728 | 0.286598609 | 0.225097933 |
| 0.255105916 | 0.150719998 | 0.317254104 | 0.108914063 |
| 0.165068772 | 0.286156272 | 0.124085988 | 0.277315032 |
| 0.317081077 | 0.329438937 | 0.098313148 | 0.334106397 |
| 0.248258729 | 0.145397366 | 0.384408187 | 0.195438164 |
| 0.184662149 | 0.276348454 | 0.175381454 | 0.142147647 |
| 0.26825536  | 0.189611065 | 0.005219441 | 0.101878208 |
| 0.336427404 | 0.173916019 | 0.209660972 | 0.29266725  |
| 0.299775648 | 0.368893507 | 0.150253453 | 0.192651299 |
| 0.261978721 | 0.303504278 | 0.224752042 | 0.304397576 |
| 0.284821107 | 0.200976247 | 0.155990743 | 0.027696106 |
| 0.205043998 | 0.176475702 | 0.138826941 | 0.148150412 |
| 0.075344669 | 0.177095546 | 0.191168481 | 0.071224742 |
| 0.359332044 | 0.134528789 | 0.163408799 | 0.240384008 |
| 0.19363658  | 0.307212586 | 0.310233497 | 0.293252324 |
| 0.075909556 | 0.257870254 | 0.202211325 | 0.177693589 |
| 0.265141185 | 0.25403968  | 0.322979265 | 0.240439895 |
| 0.11682505  | 0.289238965 | 0.01383972  | 0.317086724 |
| 0.272920785 | 0.220231019 | 0.235617625 | 0.093350571 |
| 0.331031801 | 0.30484479  | 0.267486334 | 0.156401781 |
| 0.062260845 | 0.237673006 | 0.252326088 | 0.262733194 |
| 0.107696004 | 0.186309645 | 0.163769976 | 0.252517534 |
| 0.281051363 | 0.222675242 | 0.286518073 | 0.141550851 |
| 0.28251709  | 0.244552786 | 0.116802391 | 0.281367925 |
| 0.175450559 | 0.088783952 | 0.117432602 | 0.36037572  |
| 0.302306893 | 0.257822953 | 0.337966234 | 0.274216002 |
| 0.229756264 | 0.266926153 | 0.161999326 | 0.346046541 |
| 0.277030785 | 0.278266449 | 0.308823266 | 0.302274575 |
| 0.358292276 | 0.292878803 | 0.231269758 | 0.30541704  |
| 0.255499114 | 0.146074571 | 0.25734652  | 0.263581406 |
| 0.219127267 | 0.30244461  | 0.123089551 | 0.328443959 |
| 0.128883145 | 0.255080525 | 0.184127479 | 0.176382802 |
| 0.269444407 | 0.246817038 | 0.308653709 | 0.35233922  |
| 0.235381584 | 0.088643356 | 0.37390038  | 0.042894937 |
| 0.14382569  | 0.26232978  | 0.252865934 | 0.246365573 |
| 0.185866367 | 0.210720256 | 0.138979896 | 0.007277831 |
| 0.330217429 | 0.103621961 | 0.253461989 | 0.292008188 |
| 0.198774217 | 0.102858892 | 0.304247913 | 0.368978121 |
| 0.226561276 | 0.155018576 | 0.144840179 | 0.3041696   |
| 0.193574987 | 0.141411255 | 0.18995772  | 0.175757786 |
| 0.219594806 | 0.116591269 | 0.156405444 | 0.171848628 |
| 0.251052788 | 0.215189764 |             |             |
| PSMC1       | 0.038824986 | 0.265024631 | 0.027415279 |
| 0.107694445 | 0.311883424 | 0.130371323 | 0.035580219 |
| 0.063154738 | 0.209557909 | 0.056595421 | 0.246337002 |
| 0.015671197 | 0.083267613 | 0.34876636  | 0.034577496 |

|             |             |             |             |
|-------------|-------------|-------------|-------------|
| 0.282184814 | 0.036323344 | 0.083685771 | 0.027532933 |
| 0.088644178 | 0.269566108 | 0.129210934 | 0.134737088 |
| 0.23776003  | 0.148375471 | 0.171911398 | 0.199384426 |
| 0.353153208 | 0.078938025 | 0.293841048 | 0.057878005 |
| 0.337996547 | 0.306586859 | 0.17404559  | 0.013740914 |
| 0.193995247 | 0.017090113 | 0.31987176  | 0.172921668 |
| 0.180691288 | 0.275409819 | 0.09222959  | 0.167559725 |
| 0.133107735 | 0.02108373  | 0.037816746 | 0.27249615  |
| 0.182475189 | 0.114963159 | 0.030829941 | 0.278546641 |
| 0.10489551  | 0.222805829 | 0.193447698 | 0.0011195   |
| 0.165976894 | 0.060156485 | 0.104855559 | 0.347830461 |
| 0.195517188 | 0.110099109 | 0.078716361 | 0.096422237 |
| 0.204943408 | 0.272195358 | 0.229449751 | 0.093624961 |
| 0.362885531 | 0.115068564 | 0.293618431 | 0.106885296 |
| 0.137823201 | 0.014525342 | 0.162826833 | 0.046575181 |
| 0.131980763 | 0.190458477 | 0.241090909 | 0.185488858 |
| 0.256666727 | 0.372223763 | 0.199115217 | 0.324453823 |
| 0.070576358 | 0.272233148 | 0.174400969 | 0.314362902 |
| 0.253576112 | 0.038526132 | 0.332232768 | 0.394658968 |
| 0.021682823 | 0.14897906  | 0.251458455 | 0.074713812 |
| 0.289593207 | 0.10866356  | 0.137066553 | 0.140384863 |
| 0.346070334 | 0.260369418 | 0.313318017 | 0.246861457 |
| 0.199607441 | 0.044405072 | 0.300193539 | 0.28567567  |
| 0.17951729  | 0.06054812  | 0.157369246 | 0.353395741 |
| 0.278462069 | 0.359991415 | 0.266001594 | 0.281072889 |
| 0.255540944 | 0.373478015 | 0.309624905 | 0.289066466 |
| 0.031619752 | 0.361291068 | 0.147055196 | 0.03882004  |
| 0.029003004 | 0.06716437  | 0.107395527 | 0.283329966 |
| 0.365845449 | 0.233064229 | 0.107894617 | 0.223931132 |
| 0.394993852 | 0.290448923 | 0.351933105 | 0.307345316 |
| 0.026955456 | 0.118276522 | 0.263421551 | 0.085908857 |
| 0.259354431 | 0.090756162 | 0.220380017 | 0.34031811  |
| 0.326228061 | 0.356795667 | 0.066521845 | 0.345193406 |
| 0.087263375 | 0.411021505 | 0.293377524 | 0.151896371 |
| 0.374224764 | 0.332499198 | 0.425230939 | 0.348101798 |
| 0.34089834  | 0.183378338 | 0.015683938 | 0.281105409 |
| 0.406633318 | 0.026132418 | 0.349379552 | 0.378090856 |
| 0.339040591 | 0.363609496 | 0.417601602 | 0.385332594 |
| 0.333001166 | 0.059879274 | 0.009650075 | 0.291594798 |
| 0.349402117 | 0.346749959 | 0.09060833  | 0.20774889  |
| 0.272532417 | 0.145655147 | 0.29961646  | 0.103983687 |
| 0.407787605 | 0.361072175 | 0.345570688 | 0.262613146 |
| 0.129027313 | 0.255332258 | 0.222406245 | 0.295368549 |
| 0.043114296 | 0.055694791 | 0.036570279 | 0.245804329 |
| 0.07931397  | 0.190061133 | 0.123566943 | 0.225558712 |
| 0.199066723 | 0.109723264 | 0.137978484 | 0.341922729 |
| 0.037817046 | 0.204021014 | 0.122013428 | 0.098752819 |
| 0.046617277 | 0.120771787 | 0.098699272 | 0.104225494 |
| 0.211318157 | 0.154474556 | 0.269178412 | 0.386671463 |
| 0.154796069 | 0.139987695 | 0.26466816  | 0.401660705 |
| 0.394923636 | 0.271515421 | 0.186650103 | 0.028018905 |
| 0.125040523 | 0.07780524  | 0.115441212 | 0.216710499 |
| 0.130371929 | 0.102511462 | 0.25274185  | 0.376025681 |
| 0.134641044 | 0.053295152 | 0.13648265  | 0.320865081 |

|             |             |             |             |
|-------------|-------------|-------------|-------------|
| 0.098458307 | 0.167610996 | 0.379375975 | 0.179418043 |
| 0.004955421 | 0.203859581 | 0.342737756 | 0.128964321 |
| 0.193679776 | 0.100473161 | 0.129871049 | 0.375612737 |
| 0.112061141 | 0.129857716 | 0.37015511  | 0.363051511 |
| 0.093700532 | 0.133434048 | 0.405231138 | 0.024214254 |
| 0.204370607 | 0.115291617 | 0.308298095 | 0.094465428 |
| 0.197512759 | 0.278158062 | 0.266053956 | 0.189047493 |
| 0.082730566 | 0.356763033 | 0.307621061 | 0.378204058 |
| 0.122201193 | 0.408195361 | 0.366351472 | 0.360897712 |
| 0.254102024 | 0.149723441 | 0.094534183 | 0.346347877 |
| 0.374435676 | 0.105580365 | 0.048756418 | 0.293931296 |
| 0.12539944  | 0.318001655 | 0.157820607 | 0.404796574 |
| 0.379009441 | 0.282988665 | 0.096528419 | 0.366074078 |
| 0.341460021 | 0.167026335 | 0.342054051 | 0.403937677 |
| 0.069214451 | 0.207973511 | 0.168226806 | 0.416527472 |
| 0.161064206 | 0.137796751 | 0.254565572 | 0.10604477  |
| 0.010424323 | 0.044423407 | 0.048287145 | 0.1602383   |
| 0.166462247 | 0.203891696 | 0.302811568 | 0.377305378 |
| 0.095416135 | 0.325604799 | 0.174113672 | 0.147358383 |
| 0.301081295 | 0.167190351 | 0.25197497  | 0.281073211 |
| 0.211553506 | 0.038380766 | 0.092497345 | 0.375116648 |
| 0.021909092 | 0.157788797 | 0.129323789 | 0.004719289 |
| 0.023620007 | 0.229338929 | 0.074628605 | 0.16576653  |
| 0.401488054 | 0.16086169  | 0.154928497 | 0.069301113 |
| 0.324295309 | 0.080468828 | 0.015590256 | 0.356854646 |
| 0.33281648  | 0.315471894 | 0.322156525 | 0.291166138 |
| 0.325115177 | 0.268207649 | 0.363347264 | 0.153443976 |
| 0.065971494 | 0.040043976 | 0.153132939 | 0.206216124 |
| 0.001631224 | 0.36422037  | 0.208484002 | 0.14070472  |
| 0.320288328 | 0.221391237 | 0.025057181 | 0.253478012 |
| 0.019654248 | 0.12148634  | 0.077972026 | 0.134171967 |
| 0.339789227 | 0.011602072 | 0.086305301 | 0.124814874 |
| 0.284113019 | 0.25150818  | 0.150890791 | 0.382411959 |
| 0.247881905 | 0.070683651 | 0.247251313 | 0.33839506  |
| 0.047490955 | 0.0398108   | 0.098013867 | 0.015400123 |
| 0.062556301 | 0.305386404 | 0.123261045 | 0.047317445 |
| 0.227784889 | 0.005884219 | 0.274141328 | 0.38204481  |
| 0.291278395 | 0.405287025 | 0.375656673 | 0.193425987 |
| 0.371050649 | 0.055934174 | 0.377745979 | 0.271468116 |
| 0.097610343 | 0.002085836 | 0.00610348  | 0.387586681 |
| 0.265849405 | 0.034766588 | 0.1482805   | 0.099824662 |
| 0.089364645 | 0.053412975 | 0.04080392  | 0.18146339  |
| 0.249502199 | 0.240568272 | 0.137685927 | 0.29600763  |
| 0.184167632 | 0.198102634 | 0.10698257  | 0.061909457 |
| 0.26286603  | 0.04681736  | 0.06226426  | 0.015256022 |
| 0.328311655 | 0.07948961  | 0.293493159 | 0.351685858 |
| 0.394674713 | 0.361636167 | 0.069635614 | 0.086547695 |
| 0.330783423 | 0.050214553 | 0.106817153 | 0.057167928 |
| 0.318275466 | 0.299715392 | 0.306582751 | 0.261217438 |
| 0.401304395 | 0.354557996 | 0.024122974 | 0.346888027 |
| 0.018909521 | 0.004374679 | 0.147345033 | 0.202704355 |
| 0.029693019 | 0.195518154 | 0.247927779 | 0.077518473 |
| 0.098340826 | 0.020189073 | 0.160042499 | 0.178084082 |
| 0.279628538 | 0.221212658 | 0.257334715 | 0.176872679 |



|             |             |             |             |
|-------------|-------------|-------------|-------------|
| 0.187213301 | 0.139034805 | 0.136934521 | 0.080469004 |
| 0.075551682 | 0.225772436 | 0.151309826 | 0.016767553 |
| 0.183548268 | 0.231606587 | 0.046947137 | 0.134216503 |
| 0.373397331 | 0.380147735 | 0.038694305 | 0.026136731 |
| 0.222778748 | 0.152505077 | 0.397318074 | 0.330457988 |
| 0.356991815 | 0.41238579  | 0.304759991 | 0.105540565 |
| 0.04168328  | 0.272546004 | 0.274158239 | 0.137469401 |
| 0.364120438 | 0.035619136 | 0.325562935 | 0.234695466 |
| 0.104077492 | 0.131571452 | 0.041324539 | 0.076544666 |
| 0.259919523 | 0.156795671 | 0.195347239 | 0.096582567 |
| 0.177089509 | 0.168216627 | 0.033330997 | 0.170832746 |
| 0.270272049 | 0.152205198 | 0.142634874 | 0.102778745 |
| 0.256148616 | 0.040095177 | 0.329837706 | 0.373107629 |
| 0.101128596 | 0.071551556 | 0.078909788 | 0.281115561 |
| 0.317063052 | 0.159194738 | 0.024003579 | 0.273961459 |
| 0.379019395 | 0.272864015 | 0.335927079 | 0.361196594 |
| 0.070475336 | 0.239497087 | 0.146062372 | 0.252793107 |
| 0.146837917 | 0.145345992 | 0.162329244 | 0.054896466 |
| 0.25355925  | 0.332182783 | 0.303294178 | 0.14565413  |
| 0.199501483 | 0.060750937 | 0.029411541 | 0.309613384 |
| 0.16501137  | 0.044150904 | 0.092825523 | 0.315375094 |
| 0.016556628 | 0.123405067 | 0.392583678 | 0.112717802 |
| 0.3825671   | 0.403365616 | 0.358225159 | 0.084716239 |
| 0.005561898 | 0.313632943 | 0.287026509 | 0.183370955 |
| 0.282625051 | 0.249560637 | 0.053244987 | 0.074437929 |
| 0.298222492 | 0.049335602 | 0.093826384 | 0.091408455 |
| 0.09969044  | 0.20058112  | 0.201248505 | 0.132764733 |
| 0.17780506  | 0.047819974 | 0.14632023  | 0.159158022 |
| 0.099065698 | 0.242160515 | 0.324518073 | 0.050760035 |
| 0.104356165 | 0.335247724 | 0.287793908 | 0.01882082  |
| 0.226184126 | 0.32318719  | 0.346783558 | 0.003105317 |
| 0.330167047 | 0.010224608 | 0.174123658 | 0.199582982 |
| 0.169285239 | 0.139467817 | 0.272781728 | 1           |
| 0.210962863 | 0.154202659 | 0.176891881 | 0.236319685 |
| 0.136298246 | 0.144454249 | 0.28220653  | 0.159428342 |
| 0.166589322 | 0.080747651 | 0.075741621 | 0.071338893 |
| 0.047129865 | 0.317169811 | 0.213614357 | 0.051970256 |
| 0.206548841 | 0.138779253 | 0.342464692 | 0.316197698 |
| 0.374515817 | 0.068084858 | 0.151538922 | 0.304183901 |
| 0.052861397 | 0.087693684 | 0.023097836 | 0.210889555 |
| 0.16389447  | 0.1409131   | 0.158238701 | 0.152712188 |
| 0.226984818 | 0.325624863 | 0.203583704 | 0.353133932 |
| 0.212892273 | 0.150186436 | 0.06657486  | 0.090083138 |
| 0.118705472 | 0.102503499 | 0.27018468  | 0.004809795 |
| 0.247917879 | 0.088975835 | 0.360285639 | 0.331379944 |
| 0.126081998 | 0.336166683 | 0.063452446 | 0.050893805 |
| 0.059031685 | 0.11410807  | 0.125647567 | 0.297796655 |
| 0.113108014 | 0.104445773 | 0.295312168 | 0.074716911 |
| 0.34406721  | 0.277892871 | 0.139002923 | 0.104212947 |
| 0.179246118 | 0.138099361 | 0.321097009 | 0.057968091 |
| 0.21286729  | 0.187300015 | 0.139892619 | 0.212529269 |
| 0.183534047 | 0.381970669 | 0.047322168 | 0.383623685 |
| 0.186287841 | 0.099557729 | 0.382617853 | 0.140624975 |
| 0.112801393 | 0.11755446  | 0.128538618 | 0.098114561 |

|                     |             |             |             |
|---------------------|-------------|-------------|-------------|
| 0.110127931         | 0.14195287  | 0.003585381 | 0.042651376 |
| 0.320031638         | 0.086189719 | 0.235896856 | 0.27204793  |
| 0.191458352         | 0.338952758 | 0.095546531 | 0.125296875 |
| 0.292131394         | 0.318491353 | 0.119859575 | 0.248021804 |
| 0.251822725         | 0.071070032 | 0.187208956 | 0.006571117 |
| 0.251381623         | 0.228118385 | 0.082402258 | 0.035646369 |
| 0.017414637         | 0.138570109 | 0.239178916 | 0.038126417 |
| 0.406543483         | 0.120493285 | 0.165142759 | 0.308071634 |
| 0.128152697         | 0.324794435 | 0.111438618 | 0.347369114 |
| 0.018178076         | 0.212664782 | 0.203387405 | 0.149309599 |
| 0.162623322         | 0.21493018  | 0.367164949 | 0.187999139 |
| 0.03224404          | 0.157436075 | 0.003934237 | 0.305365335 |
| 0.293935984         | 0.214446478 | 0.170046973 | 0.055749168 |
| 0.299206068         | 0.297110558 | 0.098457025 | 0.180651752 |
| 0.022436036         | 0.297083862 | 0.173903462 | 0.298784881 |
| 0.100780298         | 0.177249891 | 0.072195305 | 0.209567753 |
| 0.283481292         | 0.106748225 | 0.209754261 | 0.118906198 |
| 0.325072881         | 0.258108471 | 0.102724066 | 0.147941184 |
| 0.187739227         | 0.048635728 | 0.09614217  | 0.384806737 |
| 0.153986412         | 0.203745538 | 0.398020059 | 0.133070614 |
| 0.184487667         | 0.270508782 | 0.201650846 | 0.35918348  |
| 0.085656457         | 0.233681675 | 0.341603258 | 0.328344894 |
| 0.313947373         | 0.149302306 | 0.144237828 | 0.164188061 |
| 0.294223818         | 0.066897669 | 0.143852644 | 0.273772209 |
| 0.148222466         | 0.258240874 | 0.136135852 | 0.169323878 |
| 0.036406021         | 0.081280641 | 0.115101413 | 0.122440272 |
| 0.234932073         | 0.261094106 | 0.168941834 | 0.352490976 |
| 0.117114423         | 0.041806638 | 0.383337947 | 0.02837611  |
| 0.158980411         | 0.32635091  | 0.181607698 | 0.226531035 |
| 0.15805849          | 0.20258774  | 0.137377041 | 0.000839934 |
| 0.346988708         | 0.110182223 | 0.13145217  | 0.161300707 |
| 0.103225673         | 0.027218592 | 0.333162472 | 0.408659444 |
| 0.207295679         | 0.098700754 | 0.105926686 | 0.314211212 |
| 0.145457765         | 0.099774875 | 0.103691489 | 0.224656283 |
| 0.152566313         | 0.118527143 | 0.140246156 | 0.168595576 |
| 0.266776891         | 0.113747821 |             |             |
| PSMC3IP 0.087363858 | 0.380623953 | 0.062633385 |             |
| 0.116889548         | 0.212405624 | 0.215517068 | 0.104008053 |
| 0.154967855         | 0.321519741 | 0.201199787 | 0.222016212 |
| 0.037294991         | 0.062491044 | 0.416001069 | 0.096169455 |
| 0.254176994         | 0.064367696 | 0.142604866 | 0.098633581 |
| 0.192588406         | 0.214187292 | 0.18943796  | 0.233104134 |
| 0.21781253          | 0.213623545 | 0.241055397 | 0.243448739 |
| 0.434526143         | 0.134266131 | 0.267081143 | 0.114877775 |
| 0.412784053         | 0.219479233 | 0.21552806  | 0.029348789 |
| 0.252179372         | 0.027973912 | 0.443137053 | 0.219501278 |
| 0.096893441         | 0.34275175  | 0.203763515 | 0.186303356 |
| 0.254176904         | 0.055284988 | 0.109300877 | 0.301502571 |
| 0.24547097          | 0.223000441 | 0.081355772 | 0.296291964 |
| 0.271248529         | 0.252019987 | 0.297442259 | 0.006292269 |
| 0.176533685         | 0.053787296 | 0.146106284 | 0.445900121 |
| 0.176227857         | 0.137693397 | 0.208151031 | 0.20975242  |
| 0.266874821         | 0.297864634 | 0.217215349 | 0.256564079 |
| 0.446427473         | 0.141186345 | 0.318784437 | 0.121555494 |

|             |             |             |             |
|-------------|-------------|-------------|-------------|
| 0.263048171 | 0.064889945 | 0.173568556 | 0.109968368 |
| 0.24382253  | 0.175238052 | 0.214340495 | 0.205270552 |
| 0.385184211 | 0.489060343 | 0.211725266 | 0.462325046 |
| 0.121767382 | 0.231599626 | 0.195745011 | 0.26951051  |
| 0.319974909 | 0.140935292 | 0.307168275 | 0.483925449 |
| 0.086228182 | 0.242857801 | 0.330935346 | 0.141724975 |
| 0.358729691 | 0.194448616 | 0.230316577 | 0.111800207 |
| 0.259959351 | 0.25112512  | 0.45954607  | 0.245017995 |
| 0.209478899 | 0.093451922 | 0.448020125 | 0.212040075 |
| 0.190742194 | 0.095117102 | 0.213378291 | 0.387071703 |
| 0.272528059 | 0.425779839 | 0.378802147 | 0.347428244 |
| 0.253004335 | 0.439561292 | 0.293887759 | 0.379418948 |
| 0.096058969 | 0.469250601 | 0.16106288  | 0.065607832 |
| 0.093435917 | 0.109010421 | 0.216642446 | 0.291770965 |
| 0.392192436 | 0.253923675 | 0.185267213 | 0.20704516  |
| 0.410520625 | 0.432212429 | 0.475450376 | 0.373282751 |
| 0.065596541 | 0.185782993 | 0.252627788 | 0.197368477 |
| 0.303187874 | 0.14115954  | 0.180993509 | 0.474837814 |
| 0.348511742 | 0.366678089 | 0.158231942 | 0.479200983 |
| 0.215051591 | 0.466254136 | 0.38148906  | 0.162816478 |
| 0.47536026  | 0.44892644  | 0.459440093 | 0.273195572 |
| 0.424371792 | 0.218718042 | 0.094682237 | 0.362951078 |
| 0.43933458  | 0.010901494 | 0.412138321 | 0.440414383 |
| 0.449799627 | 0.384562239 | 0.477574618 | 0.441890851 |
| 0.449841786 | 0.102834146 | 0.041048489 | 0.235560362 |
| 0.467005094 | 0.350467942 | 0.156712768 | 0.25441874  |
| 0.246485292 | 0.243880817 | 0.341644577 | 0.189520343 |
| 0.483218919 | 0.386368204 | 0.425280657 | 0.343355657 |
| 0.249568775 | 0.319609328 | 0.233355183 | 0.426651022 |
| 0.067736814 | 0.117538726 | 0.0677888   | 0.284707511 |
| 0.193598485 | 0.172219277 | 0.256294913 | 0.259500368 |
| 0.18219809  | 0.243257273 | 0.191103232 | 0.271307638 |
| 0.08763075  | 0.246981441 | 0.158798336 | 0.185642857 |
| 0.07050716  | 0.18092966  | 0.177149344 | 0.129143265 |
| 0.207679499 | 0.279944325 | 0.306845146 | 0.43497144  |
| 0.256221087 | 0.176732392 | 0.307597147 | 0.433380253 |
| 0.410156646 | 0.232259118 | 0.233983382 | 0.01440752  |
| 0.247474716 | 0.213622451 | 0.138535099 | 0.241841973 |
| 0.21924817  | 0.246026538 | 0.277033017 | 0.290576352 |
| 0.20595185  | 0.160912839 | 0.264971339 | 0.408738526 |
| 0.168325979 | 0.194618687 | 0.397519901 | 0.267886273 |
| 0.007427087 | 0.248004379 | 0.362368732 | 0.160060038 |
| 0.278415964 | 0.091725462 | 0.134531239 | 0.415346704 |
| 0.214474061 | 0.19109092  | 0.420139642 | 0.288675042 |
| 0.208842093 | 0.261210628 | 0.475786142 | 0.066280489 |
| 0.243892291 | 0.053946079 | 0.235620699 | 0.215136148 |
| 0.21549164  | 0.277383446 | 0.209897509 | 0.196460968 |
| 0.11862434  | 0.470274613 | 0.337011864 | 0.446295109 |
| 0.257801636 | 0.482525728 | 0.385455333 | 0.384186902 |
| 0.253982989 | 0.254427608 | 0.093528578 | 0.363778279 |
| 0.398931793 | 0.24959351  | 0.094671881 | 0.359965462 |
| 0.268443524 | 0.300600145 | 0.12393141  | 0.448236351 |
| 0.460613171 | 0.42529276  | 0.14946643  | 0.315631298 |
| 0.328851295 | 0.182293594 | 0.352491588 | 0.48565966  |

|             |             |             |             |
|-------------|-------------|-------------|-------------|
| 0.237644764 | 0.262022219 | 0.245141484 | 0.35285365  |
| 0.167781582 | 0.19136549  | 0.322784005 | 0.119395811 |
| 0.003502068 | 0.108983441 | 0.08830265  | 0.155533138 |
| 0.122589133 | 0.254284833 | 0.287579634 | 0.468758558 |
| 0.137448861 | 0.366266101 | 0.242076138 | 0.227487606 |
| 0.407671183 | 0.24896362  | 0.216967317 | 0.245935935 |
| 0.241190455 | 0.022888663 | 0.10886738  | 0.493885498 |
| 0.063701376 | 0.15603348  | 0.243446038 | 0.003760785 |
| 0.079373314 | 0.343194507 | 0.136296264 | 0.232532816 |
| 0.419386841 | 0.229579988 | 0.193486802 | 0.24689392  |
| 0.258669253 | 0.110995307 | 0.002995689 | 0.44398933  |
| 0.452108223 | 0.435581821 | 0.454000701 | 0.431609175 |
| 0.419256984 | 0.3157969   | 0.350289133 | 0.215360134 |
| 0.137426864 | 0.113993546 | 0.180720383 | 0.241903819 |
| 0.007989084 | 0.300377904 | 0.225260827 | 0.148355795 |
| 0.325946588 | 0.268746509 | 0.057425954 | 0.235243865 |
| 0.030570398 | 0.125070972 | 0.26136966  | 0.21231947  |
| 0.291830066 | 0.02829577  | 0.137839643 | 0.251454505 |
| 0.384215562 | 0.324707958 | 0.214047511 | 0.472781163 |
| 0.225254824 | 0.146458352 | 0.225782859 | 0.291150703 |
| 0.108262774 | 0.143278894 | 0.260881431 | 0.020799293 |
| 0.116608411 | 0.428213097 | 0.256950631 | 0.089715415 |
| 0.222259375 | 0.011150931 | 0.333859022 | 0.476335729 |
| 0.412349088 | 0.465452308 | 0.436775905 | 0.167091554 |
| 0.448337714 | 0.070835851 | 0.465832993 | 0.355791092 |
| 0.241192067 | 0.001588216 | 0.009088791 | 0.419676255 |
| 0.2548551   | 0.080863166 | 0.162653255 | 0.190249835 |
| 0.120628797 | 0.151306355 | 0.090665837 | 0.143666897 |
| 0.241218463 | 0.185929829 | 0.142835066 | 0.440266966 |
| 0.221989846 | 0.20559422  | 0.250615303 | 0.111094462 |
| 0.2361731   | 0.074173759 | 0.115492445 | 0.006864368 |
| 0.280013112 | 0.146933879 | 0.445264981 | 0.450494961 |
| 0.454417029 | 0.279066534 | 0.205583612 | 0.197141536 |
| 0.388073674 | 0.107204859 | 0.205239803 | 0.113133621 |
| 0.42802996  | 0.271518655 | 0.281564325 | 0.288326564 |
| 0.465252936 | 0.433181011 | 0.061467279 | 0.351122325 |
| 0.013681207 | 0.002611585 | 0.229980327 | 0.244115099 |
| 0.085016926 | 0.260061312 | 0.249247015 | 0.229762811 |
| 0.201237477 | 0.044338455 | 0.187814517 | 0.189632482 |
| 0.239248119 | 0.264946673 | 0.197564518 | 0.250117258 |
| 0.208714815 | 0.159295316 | 0.16916853  | 0.175886372 |
| 0.212374001 | 0.314504709 | 0.219914811 | 0.04833505  |
| 0.248662796 | 0.251388202 | 0.079687693 | 0.153348515 |
| 0.372894412 | 0.426814369 | 0.087002208 | 0.018801221 |
| 0.260404245 | 0.263776508 | 0.440330785 | 0.436010744 |
| 0.477556848 | 0.482122898 | 0.388078003 | 0.157471793 |
| 0.08804394  | 0.238102035 | 0.210759321 | 0.110429008 |
| 0.451109696 | 0.0927026   | 0.422254453 | 0.193248528 |
| 0.141188431 | 0.193381402 | 0.049032034 | 0.11661776  |
| 0.224489606 | 0.171064772 | 0.167807375 | 0.140572444 |
| 0.247605956 | 0.163863395 | 0.08467302  | 0.189699944 |
| 0.320994831 | 0.144340305 | 0.173036807 | 0.224644958 |
| 0.307446286 | 0.175859137 | 0.325864219 | 0.431264623 |
| 0.132189504 | 0.146827905 | 0.201114402 | 0.311701837 |

|             |             |             |             |
|-------------|-------------|-------------|-------------|
| 0.371165028 | 0.239386761 | 0.023067198 | 0.398797618 |
| 0.434888335 | 0.281146489 | 0.438628243 | 0.375509061 |
| 0.111502146 | 0.230798908 | 0.229055484 | 0.264933009 |
| 0.194705446 | 0.216980511 | 0.223623826 | 0.092216125 |
| 0.308821383 | 0.463749902 | 0.387334357 | 0.151181784 |
| 0.239179675 | 0.132453109 | 0.085094562 | 0.378741183 |
| 0.152712353 | 0.106228033 | 0.212804874 | 0.368086913 |
| 0.002818247 | 0.09312024  | 0.44754604  | 0.175362606 |
| 0.480963143 | 0.429595233 | 0.40607078  | 0.205446537 |
| 0.00538317  | 0.292509186 | 0.244046356 | 0.244783619 |
| 0.390072849 | 0.292184773 | 0.134501795 | 0.09892874  |
| 0.271271326 | 0.093751267 | 0.168181952 | 0.184822066 |
| 0.151922236 | 0.274765424 | 0.198849543 | 0.212371985 |
| 0.189437741 | 0.125859489 | 0.141946769 | 0.184398983 |
| 0.148550366 | 0.228872244 | 0.318745628 | 0.183602046 |
| 0.153375149 | 0.415347671 | 0.360694487 | 0.042176686 |
| 0.218094539 | 0.378346526 | 0.384687677 | 0.007720391 |
| 0.311477332 | 0.016947078 | 0.180893412 | 0.174433102 |
| 0.176804359 | 0.211087295 | 0.213522807 | 0.210962863 |
| 1           | 0.214309931 | 0.19695676  | 0.194355289 |
| 0.141279683 | 0.198595071 | 0.253064922 | 0.255966615 |
| 0.188867719 | 0.125019758 | 0.136246293 | 0.142270726 |
| 0.059117333 | 0.392951045 | 0.252242136 | 0.087751522 |
| 0.200620506 | 0.269980204 | 0.340548123 | 0.439136641 |
| 0.372895683 | 0.137239778 | 0.25610546  | 0.37216139  |
| 0.192263083 | 0.201456737 | 0.091634879 | 0.24449011  |
| 0.197208106 | 0.165736029 | 0.234042497 | 0.233421261 |
| 0.330395363 | 0.385690028 | 0.238533542 | 0.396896129 |
| 0.238689347 | 0.271911463 | 0.194721982 | 0.095896424 |
| 0.17215496  | 0.152694868 | 0.194506217 | 0.004198485 |
| 0.252685262 | 0.180557415 | 0.397573006 | 0.438429474 |
| 0.183379851 | 0.353465363 | 0.183609998 | 0.113278022 |
| 0.161564892 | 0.214574927 | 0.15144727  | 0.331279092 |
| 0.131955595 | 0.158980906 | 0.222583035 | 0.195131265 |
| 0.33283679  | 0.328460064 | 0.202887848 | 0.226815379 |
| 0.219662921 | 0.171057336 | 0.459300697 | 0.123097794 |
| 0.255799415 | 0.14127317  | 0.232068955 | 0.230232639 |
| 0.203437478 | 0.453710007 | 0.080963382 | 0.46300712  |
| 0.260031856 | 0.152844478 | 0.46187653  | 0.212564436 |
| 0.20369257  | 0.10585788  | 0.123800105 | 0.249975666 |
| 0.216754204 | 0.192546006 | 0.013695953 | 0.081024853 |
| 0.272461311 | 0.245203022 | 0.354781121 | 0.31046322  |
| 0.185686647 | 0.316759187 | 0.0984394   | 0.257199291 |
| 0.432130586 | 0.457998622 | 0.211191796 | 0.257672169 |
| 0.303799241 | 0.112564837 | 0.237249146 | 0.029307919 |
| 0.269462787 | 0.246576835 | 0.246588084 | 0.082784505 |
| 0.040287399 | 0.150386615 | 0.27597589  | 0.099218417 |
| 0.430752106 | 0.123149655 | 0.256711483 | 0.294586924 |
| 0.192023078 | 0.464365732 | 0.13332468  | 0.297095727 |
| 0.100312702 | 0.218120006 | 0.228688214 | 0.259218344 |
| 0.171389792 | 0.205623378 | 0.304835571 | 0.153577088 |
| 0.056040427 | 0.20028191  | 0.010062304 | 0.397416054 |
| 0.44293878  | 0.239929491 | 0.228843949 | 0.196491912 |
| 0.231455133 | 0.346772417 | 0.222628549 | 0.234515772 |

|             |             |             |             |
|-------------|-------------|-------------|-------------|
| 0.01648327  | 0.235033261 | 0.179140099 | 0.342412128 |
| 0.154977706 | 0.280890353 | 0.065825942 | 0.238696617 |
| 0.434196866 | 0.248281335 | 0.272301903 | 0.223054916 |
| 0.428362688 | 0.333505034 | 0.166632036 | 0.162754009 |
| 0.282549552 | 0.088306598 | 0.216343179 | 0.48177492  |
| 0.162779292 | 0.152747582 | 0.374763616 | 0.198004809 |
| 0.209480993 | 0.348290302 | 0.250336436 | 0.478665711 |
| 0.101845061 | 0.210331837 | 0.341505799 | 0.431419791 |
| 0.273692365 | 0.149209429 | 0.171111758 | 0.203605762 |
| 0.403184428 | 0.085246517 | 0.216780736 | 0.300969015 |
| 0.167506698 | 0.236737601 | 0.226463776 | 0.170474735 |
| 0.047800586 | 0.182490332 | 0.203016816 | 0.150098114 |
| 0.241894098 | 0.246214121 | 0.196682661 | 0.367507733 |
| 0.105617227 | 0.03225106  | 0.425654768 | 0.026283663 |
| 0.203400351 | 0.246595426 | 0.195409167 | 0.236771847 |
| 0.19080684  | 0.266422389 | 0.254863742 | 0.003729433 |
| 0.355457328 | 0.036134599 | 0.218020016 | 0.17719923  |
| 0.206415729 | 0.083748116 | 0.402007888 | 0.456136267 |
| 0.228425645 | 0.194548519 | 0.201631407 | 0.416987027 |
| 0.113037971 | 0.194883133 | 0.232466277 | 0.28409542  |
| 0.146963922 | 0.236932621 | 0.240096686 | 0.20909472  |
| 0.291258611 | 0.20441823  |             |             |
| PSMC4       | 0.105123773 | 0.242559429 | 0.065272452 |
| 0.132773757 | 0.197946569 | 0.096735834 | 0.141023854 |
| 0.162905867 | 0.221838673 | 0.05391254  | 0.175685504 |
| 0.081088624 | 0.038060262 | 0.307280938 | 0.14156166  |
| 0.18817012  | 0.134839092 | 0.175210587 | 0.058279078 |
| 0.124447884 | 0.195312038 | 0.090077751 | 0.118403245 |
| 0.17309064  | 0.258409665 | 0.172047961 | 0.122535914 |
| 0.289300967 | 0.040011562 | 0.185439698 | 0.037096541 |
| 0.364515226 | 0.19172952  | 0.088004119 | 0.060240463 |
| 0.145984307 | 0.022472456 | 0.365949555 | 0.177372554 |
| 0.076886367 | 0.337284876 | 0.066411365 | 0.175236663 |
| 0.098572855 | 0.082347883 | 0.025005295 | 0.192966784 |
| 0.175978946 | 0.154825334 | 0.087501658 | 0.203404433 |
| 0.110026089 | 0.225716766 | 0.156977034 | 0.005291893 |
| 0.075614504 | 0.018606006 | 0.052985734 | 0.314428993 |
| 0.273863743 | 0.187223239 | 0.059834832 | 0.126690869 |
| 0.163647188 | 0.232618937 | 0.283092608 | 0.083495807 |
| 0.320313463 | 0.071733881 | 0.196432453 | 0.115372728 |
| 0.124338059 | 0.07748043  | 0.286241181 | 0.127951879 |
| 0.103836903 | 0.232430873 | 0.167008266 | 0.105551103 |
| 0.231561307 | 0.38019251  | 0.268791738 | 0.315045601 |
| 0.074205745 | 0.165299778 | 0.138864017 | 0.323812005 |
| 0.247611635 | 0.140638305 | 0.253536483 | 0.368354081 |
| 0.093229762 | 0.114405918 | 0.224105479 | 0.173807959 |
| 0.245522154 | 0.080790212 | 0.093294612 | 0.075320043 |
| 0.220809949 | 0.179345715 | 0.333401977 | 0.282215307 |
| 0.138451326 | 0.125010474 | 0.31263442  | 0.153033687 |
| 0.137807432 | 0.132723663 | 0.154111903 | 0.251190359 |
| 0.202641113 | 0.291768187 | 0.229540295 | 0.289362894 |
| 0.156636847 | 0.316559913 | 0.240395204 | 0.282217861 |
| 0.01883773  | 0.322399807 | 0.192447077 | 0.130063346 |
| 0.085877142 | 0.171394736 | 0.12480654  | 0.339922386 |

|             |             |             |             |
|-------------|-------------|-------------|-------------|
| 0.273666531 | 0.239454704 | 0.160963199 | 0.220979204 |
| 0.307362882 | 0.2889398   | 0.315983476 | 0.276269267 |
| 0.110348282 | 0.082743461 | 0.157418066 | 0.123911715 |
| 0.240393769 | 0.204287078 | 0.110127521 | 0.347830444 |
| 0.328888292 | 0.273423911 | 0.121977543 | 0.377421269 |
| 0.153264733 | 0.375430194 | 0.236145388 | 0.208523526 |
| 0.356963819 | 0.329117868 | 0.359847827 | 0.206998572 |
| 0.329753235 | 0.148583787 | 0.038753011 | 0.284118902 |
| 0.369360501 | 0.015364205 | 0.264095071 | 0.294190814 |
| 0.305413286 | 0.255298127 | 0.360224827 | 0.310469428 |
| 0.298344667 | 0.163134596 | 0.011259716 | 0.276343353 |
| 0.331300041 | 0.312262521 | 0.182834751 | 0.12660984  |
| 0.191204959 | 0.125295308 | 0.228636473 | 0.080403503 |
| 0.402411169 | 0.282911259 | 0.272837409 | 0.243922137 |
| 0.141409636 | 0.326801832 | 0.121172186 | 0.304734861 |
| 0.133627715 | 0.112792907 | 0.106147548 | 0.29047109  |
| 0.064673143 | 0.259820813 | 0.110900191 | 0.180387001 |
| 0.28184827  | 0.113762524 | 0.069884015 | 0.222165622 |
| 0.127083154 | 0.133407232 | 0.18394712  | 0.170644256 |
| 0.146799203 | 0.256489159 | 0.155363425 | 0.156579548 |
| 0.20706509  | 0.276570471 | 0.185570271 | 0.314597385 |
| 0.119883899 | 0.220541554 | 0.208908188 | 0.361620632 |
| 0.398913951 | 0.148671518 | 0.290219109 | 0.049121994 |
| 0.127208753 | 0.06066684  | 0.061453814 | 0.127179952 |
| 0.259008241 | 0.160202295 | 0.19359771  | 0.247548565 |
| 0.148167614 | 0.115888341 | 0.118118565 | 0.362826194 |
| 0.192624146 | 0.133875977 | 0.31084141  | 0.135838964 |
| 0.025563279 | 0.186661153 | 0.259851483 | 0.15564435  |
| 0.232142751 | 0.059765378 | 0.062634497 | 0.302871316 |
| 0.08031473  | 0.121882877 | 0.286863332 | 0.24703138  |
| 0.085234345 | 0.235839154 | 0.350039471 | 0.020209017 |
| 0.143750586 | 0.102986864 | 0.311231002 | 0.071617406 |
| 0.250914246 | 0.323517325 | 0.161552916 | 0.145944853 |
| 0.147378242 | 0.329570313 | 0.280123465 | 0.313807168 |
| 0.095688208 | 0.356826505 | 0.268313755 | 0.309216909 |
| 0.236755614 | 0.097047064 | 0.043483765 | 0.263496396 |
| 0.289809925 | 0.086137722 | 0.133575567 | 0.21491853  |
| 0.094242433 | 0.214880984 | 0.156938709 | 0.345917275 |
| 0.384917175 | 0.273153509 | 0.182583914 | 0.299437248 |
| 0.306226459 | 0.192944033 | 0.281394397 | 0.367827662 |
| 0.06692698  | 0.14652782  | 0.127580568 | 0.334054804 |
| 0.246535882 | 0.138441957 | 0.316961353 | 0.052825867 |
| 0.001610855 | 0.120074934 | 0.128264066 | 0.193538438 |
| 0.101463019 | 0.135443657 | 0.230583216 | 0.329974133 |
| 0.184208791 | 0.306978193 | 0.264780779 | 0.146533269 |
| 0.301621397 | 0.119791523 | 0.134011926 | 0.192462427 |
| 0.300699151 | 0.065746848 | 0.144550612 | 0.384099408 |
| 0.087761732 | 0.09275774  | 0.144184287 | 0.00874288  |
| 0.104943407 | 0.1890242   | 0.188884146 | 0.300982245 |
| 0.322743818 | 0.276500425 | 0.230057553 | 0.071920441 |
| 0.272377561 | 0.171936577 | 0.016567672 | 0.305676064 |
| 0.313724918 | 0.308640798 | 0.307342494 | 0.304441822 |
| 0.29458836  | 0.221374188 | 0.275908251 | 0.127482522 |
| 0.173274405 | 0.108922681 | 0.109515304 | 0.184262204 |

|             |             |             |             |
|-------------|-------------|-------------|-------------|
| 0.00798697  | 0.291723708 | 0.172698586 | 0.256502157 |
| 0.226849785 | 0.266618778 | 0.100519187 | 0.176133695 |
| 0.05719643  | 0.052163262 | 0.125535383 | 0.182828451 |
| 0.286935537 | 0.062045248 | 0.063870749 | 0.100241867 |
| 0.279952678 | 0.288319453 | 0.083863704 | 0.338102141 |
| 0.199141094 | 0.143504516 | 0.176616783 | 0.250778216 |
| 0.158997882 | 0.040913942 | 0.107505519 | 0.006890389 |
| 0.048129247 | 0.318353554 | 0.102374377 | 0.119789343 |
| 0.252583971 | 0.034010855 | 0.284349821 | 0.347368571 |
| 0.269719228 | 0.332230327 | 0.320003204 | 0.093927704 |
| 0.323663907 | 0.021413287 | 0.319371847 | 0.247572361 |
| 0.072447548 | 0.003371752 | 0.025635907 | 0.290980209 |
| 0.165865952 | 0.105381022 | 0.248231247 | 0.07901862  |
| 0.184783496 | 0.106053908 | 0.131387187 | 0.137499064 |
| 0.167177782 | 0.193120692 | 0.11593333  | 0.29534846  |
| 0.205860286 | 0.246009348 | 0.086969094 | 0.169776057 |
| 0.164318086 | 0.133377666 | 0.173458699 | 0.01913001  |
| 0.25706584  | 0.178131044 | 0.323003638 | 0.309233441 |
| 0.367607511 | 0.2411472   | 0.054416328 | 0.079884128 |
| 0.282544194 | 0.112115545 | 0.074397199 | 0.123323916 |
| 0.281415213 | 0.213811873 | 0.318878378 | 0.302182324 |
| 0.362636631 | 0.336207275 | 0.111566339 | 0.279744027 |
| 0.036543815 | 0.008000461 | 0.114465918 | 0.275846243 |
| 0.046749694 | 0.131883465 | 0.322541915 | 0.131480325 |
| 0.152041623 | 0.074647312 | 0.094471504 | 0.105237984 |
| 0.271352207 | 0.18047096  | 0.157940231 | 0.26294167  |
| 0.161204393 | 0.157033945 | 0.182453679 | 0.18256373  |
| 0.097364694 | 0.280174658 | 0.25752749  | 0.094307593 |
| 0.117341016 | 0.138630226 | 0.123808357 | 0.233203518 |
| 0.296269323 | 0.299525056 | 0.147654065 | 0.061702985 |
| 0.297463573 | 0.145423596 | 0.319483136 | 0.285127465 |
| 0.345769408 | 0.380939676 | 0.36059187  | 0.192374385 |
| 0.127569203 | 0.234271129 | 0.167803279 | 0.186254974 |
| 0.315847544 | 0.113662878 | 0.295990455 | 0.112067918 |
| 0.22795364  | 0.189739031 | 0.11455197  | 0.181653159 |
| 0.14216861  | 0.25727012  | 0.218306689 | 0.159572628 |
| 0.161894299 | 0.093723051 | 0.131328519 | 0.251385604 |
| 0.291653439 | 0.081929331 | 0.24956314  | 0.12140715  |
| 0.256805435 | 0.046998051 | 0.222144974 | 0.385986569 |
| 0.202717743 | 0.165035808 | 0.099492651 | 0.24329652  |
| 0.241359716 | 0.106432658 | 0.041579489 | 0.240134899 |
| 0.325005509 | 0.177603376 | 0.308455107 | 0.350290921 |
| 0.185286007 | 0.141589405 | 0.0945528   | 0.195715627 |
| 0.243110937 | 0.102103583 | 0.211459079 | 0.159104207 |
| 0.338297768 | 0.367392047 | 0.275891902 | 0.185306811 |
| 0.134169058 | 0.129210761 | 0.100293063 | 0.256601342 |
| 0.112724441 | 0.125354676 | 0.068359836 | 0.244367509 |
| 0.013350777 | 0.056760577 | 0.33115544  | 0.152560024 |
| 0.370601478 | 0.320885515 | 0.355064895 | 0.131098546 |
| 0.004522659 | 0.199173022 | 0.213801504 | 0.116324393 |
| 0.257220232 | 0.26343909  | 0.093320683 | 0.173065215 |
| 0.34976706  | 0.123235488 | 0.194068761 | 0.080173399 |
| 0.064334654 | 0.17690788  | 0.311462006 | 0.210501589 |
| 0.203275457 | 0.136390734 | 0.082995096 | 0.165848101 |



|             |             |             |             |
|-------------|-------------|-------------|-------------|
| 0.08996621  | 0.326188455 | 0.331045759 | 0.05059526  |
| 0.063754778 | 0.316206763 | 0.256047248 | 0.07984831  |
| 0.12808572  | 0.294865275 | 0.309800992 | 0.015977728 |
| 0.224250602 | 0.055894553 | 0.194575125 | 0.183233776 |
| 0.199069434 | 0.187140041 | 0.267155255 | 0.154202659 |
| 0.214309931 | 1           | 0.164685742 | 0.276723056 |
| 0.185545121 | 0.188614147 | 0.191793892 | 0.141540084 |
| 0.140822952 | 0.155182439 | 0.186135988 | 0.178801053 |
| 0.111528172 | 0.262575094 | 0.315698231 | 0.130593509 |
| 0.271532135 | 0.122192732 | 0.38062618  | 0.283650764 |
| 0.343836535 | 0.14765548  | 0.140369269 | 0.247284149 |
| 0.045193376 | 0.088062134 | 0.092122891 | 0.156169541 |
| 0.212775694 | 0.123537239 | 0.112758438 | 0.163295197 |
| 0.193030765 | 0.363185184 | 0.295705638 | 0.335107447 |
| 0.139469714 | 0.133695709 | 0.053933004 | 0.163063123 |
| 0.173095726 | 0.220776506 | 0.175499629 | 0.019808952 |
| 0.24321291  | 0.110973862 | 0.269629785 | 0.31075463  |
| 0.074681806 | 0.343907179 | 0.055426273 | 0.139399809 |
| 0.045588671 | 0.203669508 | 0.247156511 | 0.212638326 |
| 0.053096645 | 0.174293189 | 0.211230282 | 0.078752364 |
| 0.239379108 | 0.209318715 | 0.141240344 | 0.151065063 |
| 0.228001098 | 0.2024313   | 0.338862168 | 0.11127431  |
| 0.140381501 | 0.138754412 | 0.122360013 | 0.181334707 |
| 0.191599074 | 0.312608514 | 0.129497129 | 0.313238348 |
| 0.143199877 | 0.209874187 | 0.392064739 | 0.148007164 |
| 0.127136074 | 0.159413482 | 0.061071677 | 0.087945534 |
| 0.17415457  | 0.079870966 | 0.002241319 | 0.041416679 |
| 0.309057777 | 0.098142941 | 0.206659647 | 0.260510783 |
| 0.143493329 | 0.339881235 | 0.045370967 | 0.156193658 |
| 0.279194294 | 0.328064777 | 0.151029936 | 0.343745542 |
| 0.275529903 | 0.159493929 | 0.149822128 | 0.015155122 |
| 0.168282595 | 0.135847698 | 0.074740555 | 0.133813351 |
| 0.093448638 | 0.07000771  | 0.175280798 | 0.124644017 |
| 0.318921856 | 0.04862481  | 0.153565192 | 0.206422946 |
| 0.242204904 | 0.336647366 | 0.192107598 | 0.252008412 |
| 0.088622448 | 0.277223071 | 0.11962079  | 0.116422666 |
| 0.149090942 | 0.117328516 | 0.297219725 | 0.099155609 |
| 0.121831988 | 0.15941458  | 0.019480292 | 0.361683325 |
| 0.306572579 | 0.125964972 | 0.296690079 | 0.050483236 |
| 0.315841706 | 0.296260557 | 0.130384027 | 0.106044989 |
| 0.059385719 | 0.177930648 | 0.245182681 | 0.260318167 |
| 0.055826873 | 0.163254062 | 0.139922322 | 0.147401362 |
| 0.323506185 | 0.120411827 | 0.314991071 | 0.082933672 |
| 0.287118353 | 0.241079331 | 0.1757144   | 0.141989106 |
| 0.157490417 | 0.147394204 | 0.069805409 | 0.349940815 |
| 0.193184407 | 0.111430249 | 0.288845843 | 0.197796137 |
| 0.100273508 | 0.272685808 | 0.136647154 | 0.337981841 |
| 0.172714761 | 0.294204943 | 0.261720799 | 0.301681025 |
| 0.341407496 | 0.125263722 | 0.093887072 | 0.163617965 |
| 0.273475702 | 0.117637546 | 0.123463747 | 0.27981045  |
| 0.093172965 | 0.271763403 | 0.124534139 | 0.168102353 |
| 0.095909424 | 0.173911856 | 0.098264347 | 0.231756754 |
| 0.247406992 | 0.176877555 | 0.162056416 | 0.368884119 |
| 0.141355938 | 0.084038208 | 0.382875277 | 0.014076752 |

|             |             |             |             |
|-------------|-------------|-------------|-------------|
| 0.137132471 | 0.216734182 | 0.227649659 | 0.141237197 |
| 0.252681974 | 0.203231794 | 0.138152335 | 0.010248551 |
| 0.292567335 | 0.054745615 | 0.128766502 | 0.156849035 |
| 0.089783204 | 0.11415588  | 0.311739505 | 0.335844719 |
| 0.223306504 | 0.073733214 | 0.067905785 | 0.29897413  |
| 0.077469216 | 0.062730158 | 0.08505101  | 0.173041282 |
| 0.083927346 | 0.077073755 | 0.086380571 | 0.085310563 |
| 0.239339283 | 0.139519841 |             |             |
| PSMD1       | 0.088554876 | 0.268922398 | 0.064587282 |
| 0.199017028 | 0.237722363 | 0.147261291 | 0.067084433 |
| 0.111355583 | 0.194774057 | 0.051332212 | 0.270362852 |
| 0.051844418 | 0.049346872 | 0.363906443 | 0.06570814  |
| 0.226962643 | 0.079043843 | 0.120932847 | 0.028686799 |
| 0.087720018 | 0.215475918 | 0.140431628 | 0.157878417 |
| 0.169512579 | 0.229293706 | 0.174197852 | 0.140210437 |
| 0.353588675 | 0.078566708 | 0.27867471  | 0.052589395 |
| 0.377342299 | 0.242000764 | 0.131686221 | 0.04229281  |
| 0.189269321 | 0.004449293 | 0.354001082 | 0.17294771  |
| 0.119527752 | 0.34010441  | 0.085577056 | 0.20624676  |
| 0.110217083 | 0.06391672  | 0.040199228 | 0.206189682 |
| 0.156422196 | 0.11946377  | 0.063146938 | 0.257788338 |
| 0.09610718  | 0.287721754 | 0.188407652 | 0.005490721 |
| 0.115815727 | 0.028647763 | 0.06799194  | 0.373996696 |
| 0.280425229 | 0.160034229 | 0.055968533 | 0.091682895 |
| 0.159932577 | 0.217708999 | 0.234965043 | 0.081166626 |
| 0.390849673 | 0.07738074  | 0.239146368 | 0.144796253 |
| 0.132585071 | 0.028405135 | 0.230229531 | 0.064828557 |
| 0.110653247 | 0.23379643  | 0.229307811 | 0.114285388 |
| 0.26756297  | 0.399679201 | 0.212691306 | 0.346931937 |
| 0.03493914  | 0.188400784 | 0.141007346 | 0.298170067 |
| 0.215418843 | 0.052243137 | 0.350208801 | 0.415228496 |
| 0.035075882 | 0.132332483 | 0.226040721 | 0.116196676 |
| 0.306422793 | 0.071039926 | 0.129923316 | 0.118764612 |
| 0.257710789 | 0.198689386 | 0.326128192 | 0.314930628 |
| 0.155011719 | 0.082454021 | 0.341305572 | 0.193038614 |
| 0.208114913 | 0.110831381 | 0.13025713  | 0.310265965 |
| 0.258599347 | 0.373562584 | 0.251175747 | 0.264284298 |
| 0.19592466  | 0.391563354 | 0.318490308 | 0.298470776 |
| 0.02417309  | 0.375623342 | 0.210242802 | 0.09476638  |
| 0.056358908 | 0.116103178 | 0.073766015 | 0.307191312 |
| 0.355821975 | 0.255057085 | 0.160404698 | 0.211476884 |
| 0.35009914  | 0.326488429 | 0.357323596 | 0.306834028 |
| 0.06887647  | 0.069801908 | 0.202044352 | 0.122655006 |
| 0.248866206 | 0.121289189 | 0.145256952 | 0.380071788 |
| 0.394525457 | 0.326206897 | 0.100629268 | 0.387474736 |
| 0.087459637 | 0.438783749 | 0.303484097 | 0.215740532 |
| 0.403994485 | 0.378535673 | 0.428176776 | 0.287929313 |
| 0.388244116 | 0.222907453 | 0.011060566 | 0.271692693 |
| 0.434974298 | 0.024597257 | 0.32154633  | 0.353514555 |
| 0.357733437 | 0.330909493 | 0.402536348 | 0.38104706  |
| 0.353969082 | 0.098663724 | 0.003672012 | 0.26387636  |
| 0.377778723 | 0.388435429 | 0.108730045 | 0.1685976   |
| 0.21417068  | 0.16926398  | 0.261760875 | 0.141144073 |
| 0.433046682 | 0.351041171 | 0.333589392 | 0.257487734 |

|             |             |             |             |
|-------------|-------------|-------------|-------------|
| 0.108720128 | 0.332124781 | 0.152990157 | 0.346036177 |
| 0.092365114 | 0.108945921 | 0.080670938 | 0.23566732  |
| 0.092834997 | 0.232220163 | 0.139127396 | 0.163593013 |
| 0.25646446  | 0.11605402  | 0.097500343 | 0.28058262  |
| 0.075482591 | 0.199418173 | 0.158172601 | 0.131636753 |
| 0.099679318 | 0.188677262 | 0.181992486 | 0.191099093 |
| 0.217676398 | 0.219656915 | 0.243440462 | 0.365458078 |
| 0.10815387  | 0.209716625 | 0.263415003 | 0.418805324 |
| 0.428172546 | 0.214749924 | 0.227045037 | 0.077787347 |
| 0.131012826 | 0.055157771 | 0.068376887 | 0.167232906 |
| 0.191586869 | 0.129305501 | 0.21510058  | 0.333627027 |
| 0.193189865 | 0.067963807 | 0.119899795 | 0.389571703 |
| 0.141413062 | 0.19576211  | 0.379553573 | 0.153712865 |
| 0.017487898 | 0.22271009  | 0.337627317 | 0.100212788 |
| 0.192643098 | 0.098438029 | 0.129390431 | 0.354686034 |
| 0.088451747 | 0.10057355  | 0.355292231 | 0.303560274 |
| 0.116333451 | 0.18140425  | 0.39740351  | 0.011578426 |
| 0.134404184 | 0.157264882 | 0.324188269 | 0.078822627 |
| 0.239543155 | 0.277177307 | 0.201004018 | 0.173976015 |
| 0.150874569 | 0.377382502 | 0.322696127 | 0.388258296 |
| 0.108840493 | 0.402659021 | 0.346983568 | 0.388147906 |
| 0.265931351 | 0.10022527  | 0.058222942 | 0.345973815 |
| 0.347682342 | 0.081134237 | 0.088734283 | 0.254245127 |
| 0.090305005 | 0.256847095 | 0.115958766 | 0.410596172 |
| 0.421772717 | 0.309605471 | 0.15816773  | 0.320364064 |
| 0.39215607  | 0.240285036 | 0.312368175 | 0.403814074 |
| 0.057718652 | 0.159341114 | 0.142799941 | 0.373741264 |
| 0.225240029 | 0.110753143 | 0.27883578  | 0.061779555 |
| 0.00840422  | 0.076517606 | 0.096872453 | 0.187934917 |
| 0.124274747 | 0.169967684 | 0.252753818 | 0.386997603 |
| 0.151867702 | 0.364250339 | 0.179499936 | 0.176346603 |
| 0.328313529 | 0.12305943  | 0.192833769 | 0.235731578 |
| 0.242564414 | 0.079847916 | 0.182810946 | 0.408622144 |
| 0.045610387 | 0.137578812 | 0.130359079 | 0.013932232 |
| 0.058051145 | 0.220070931 | 0.122507146 | 0.245264003 |
| 0.379719548 | 0.235510625 | 0.207032876 | 0.064192791 |
| 0.330839209 | 0.132755475 | 0.034861748 | 0.334799258 |
| 0.320062623 | 0.298456818 | 0.31326872  | 0.301447995 |
| 0.2872951   | 0.234606791 | 0.307188718 | 0.186558704 |
| 0.117124081 | 0.066462591 | 0.113134898 | 0.190409421 |
| 0.004359395 | 0.360800258 | 0.162922512 | 0.216076236 |
| 0.273982775 | 0.213348111 | 0.074844955 | 0.189684629 |
| 0.070866417 | 0.089816153 | 0.097620534 | 0.124322043 |
| 0.280511199 | 0.037427164 | 0.127604949 | 0.111234565 |
| 0.344657195 | 0.315303344 | 0.10951732  | 0.396424687 |
| 0.275322775 | 0.104153868 | 0.214183162 | 0.324582038 |
| 0.09581994  | 0.026451276 | 0.092250064 | 0.016317683 |
| 0.078014609 | 0.313970744 | 0.105766457 | 0.095227342 |
| 0.270039757 | 0.027366849 | 0.335760646 | 0.40477437  |
| 0.320586008 | 0.393890374 | 0.402977147 | 0.148085793 |
| 0.395439112 | 0.02496583  | 0.383584761 | 0.288037094 |
| 0.082951704 | 0.007476745 | 0.017992284 | 0.36522532  |
| 0.223518591 | 0.068906377 | 0.208334645 | 0.14788868  |
| 0.169297365 | 0.083686171 | 0.081650105 | 0.147674919 |

|             |             |             |             |
|-------------|-------------|-------------|-------------|
| 0.245429806 | 0.219659493 | 0.112726254 | 0.325819192 |
| 0.184799625 | 0.21021698  | 0.100338049 | 0.103556555 |
| 0.226877135 | 0.105240452 | 0.092314587 | 0.035334794 |
| 0.277699511 | 0.131415882 | 0.339340487 | 0.366561988 |
| 0.4252951   | 0.305409741 | 0.067384897 | 0.114870153 |
| 0.293463814 | 0.093226183 | 0.102205547 | 0.099832646 |
| 0.345008402 | 0.265959773 | 0.371414236 | 0.340748501 |
| 0.414844643 | 0.393409461 | 0.061454273 | 0.317813389 |
| 0.067535465 | 0.005662502 | 0.170544302 | 0.219746507 |
| 0.011414435 | 0.148571312 | 0.30223357  | 0.068586695 |
| 0.095978329 | 0.073324869 | 0.100895255 | 0.111213068 |
| 0.270621334 | 0.19484865  | 0.195948667 | 0.180959546 |
| 0.137656234 | 0.104951454 | 0.165317777 | 0.11455047  |
| 0.059908504 | 0.265077159 | 0.235372814 | 0.040987658 |
| 0.158165076 | 0.199444244 | 0.094954617 | 0.19871485  |
| 0.387133855 | 0.38140994  | 0.065666386 | 0.070259114 |
| 0.289282777 | 0.12365954  | 0.392448401 | 0.346530361 |
| 0.392922203 | 0.424596782 | 0.367156465 | 0.125734073 |
| 0.097103525 | 0.230948092 | 0.192572044 | 0.139785037 |
| 0.381945258 | 0.066102743 | 0.352245223 | 0.146065896 |
| 0.147583509 | 0.170787481 | 0.108441025 | 0.113862604 |
| 0.204890287 | 0.218711645 | 0.208740846 | 0.153248097 |
| 0.166561391 | 0.129014112 | 0.065124616 | 0.21954592  |
| 0.295431285 | 0.091586731 | 0.194659924 | 0.105920969 |
| 0.260901318 | 0.031369284 | 0.27607745  | 0.410518289 |
| 0.168671729 | 0.093992835 | 0.134814293 | 0.243653304 |
| 0.296853808 | 0.124746237 | 0.089239089 | 0.283034597 |
| 0.377966235 | 0.254449074 | 0.370474034 | 0.356843295 |
| 0.111111583 | 0.221338836 | 0.085439157 | 0.200125276 |
| 0.173820032 | 0.162198115 | 0.158279305 | 0.099198665 |
| 0.277703089 | 0.362468926 | 0.306496274 | 0.200187996 |
| 0.175852124 | 0.092338315 | 0.055288222 | 0.296455679 |
| 0.116451944 | 0.112766083 | 0.086813381 | 0.270237132 |
| 0.018638325 | 0.076598978 | 0.35270126  | 0.183481577 |
| 0.387194161 | 0.383864604 | 0.407239663 | 0.100739109 |
| 0.001251445 | 0.233752315 | 0.300530422 | 0.169937052 |
| 0.304962404 | 0.294246211 | 0.057689788 | 0.13649986  |
| 0.343241272 | 0.100316418 | 0.140809181 | 0.126445593 |
| 0.055522426 | 0.207853787 | 0.249092557 | 0.131533736 |
| 0.16275146  | 0.067928189 | 0.120047504 | 0.195972263 |
| 0.048658497 | 0.310652256 | 0.36009732  | 0.052631033 |
| 0.097163304 | 0.316604054 | 0.283654586 | 0.058160876 |
| 0.162856628 | 0.288896194 | 0.338556999 | 0.007726669 |
| 0.30801065  | 0.03744262  | 0.187642602 | 0.225022908 |
| 0.178198661 | 0.139512795 | 0.249968521 | 0.176891881 |
| 0.19695676  | 0.164685742 | 1           | 0.291838461 |
| 0.198271122 | 0.158691457 | 0.226552729 | 0.138748003 |
| 0.205514818 | 0.144833152 | 0.12961414  | 0.126728787 |
| 0.131571159 | 0.317659839 | 0.30066857  | 0.101706904 |
| 0.235762167 | 0.111204486 | 0.39239765  | 0.333318351 |
| 0.389325062 | 0.115362491 | 0.128231565 | 0.32762003  |
| 0.040948448 | 0.114424654 | 0.057156859 | 0.18843035  |
| 0.218075786 | 0.161619699 | 0.141595561 | 0.184666054 |
| 0.203117359 | 0.386875281 | 0.292762816 | 0.364035658 |

|             |             |             |             |
|-------------|-------------|-------------|-------------|
| 0.184349825 | 0.107606966 | 0.068877762 | 0.166652726 |
| 0.172121651 | 0.143436002 | 0.206145381 | 0.020005289 |
| 0.271511455 | 0.15755655  | 0.354257508 | 0.364268116 |
| 0.090832068 | 0.369929265 | 0.085186937 | 0.115597055 |
| 0.06225093  | 0.172666223 | 0.194039246 | 0.26072007  |
| 0.083393675 | 0.164874371 | 0.240280573 | 0.114076048 |
| 0.292076872 | 0.222980335 | 0.108294173 | 0.117706092 |
| 0.162405217 | 0.179587831 | 0.331239755 | 0.090987219 |
| 0.179395881 | 0.172944158 | 0.128563596 | 0.208607644 |
| 0.170809512 | 0.366866151 | 0.091156948 | 0.376156028 |
| 0.150113167 | 0.151063996 | 0.42107793  | 0.149428668 |
| 0.133129449 | 0.172635098 | 0.082457389 | 0.090832474 |
| 0.121549636 | 0.110835064 | 0.002149296 | 0.039781621 |
| 0.345288068 | 0.064623299 | 0.219565928 | 0.236743382 |
| 0.13509951  | 0.314938357 | 0.060700035 | 0.131856385 |
| 0.320146886 | 0.354816324 | 0.185995874 | 0.277582168 |
| 0.276578652 | 0.142688972 | 0.217570956 | 0.0036708   |
| 0.213178979 | 0.181792018 | 0.083932421 | 0.080018941 |
| 0.047306708 | 0.090586839 | 0.205680669 | 0.057108611 |
| 0.370981353 | 0.086889959 | 0.136783455 | 0.286632195 |
| 0.160330504 | 0.367472066 | 0.152250363 | 0.351583328 |
| 0.0256928   | 0.224723263 | 0.139970828 | 0.111247384 |
| 0.208762779 | 0.144099826 | 0.360099181 | 0.142006423 |
| 0.082064102 | 0.1749805   | 0.005181356 | 0.377689838 |
| 0.324072318 | 0.138476929 | 0.227164735 | 0.049186852 |
| 0.318423611 | 0.285137921 | 0.104583192 | 0.142581455 |
| 0.067084123 | 0.246058299 | 0.217334715 | 0.349004238 |
| 0.094084873 | 0.141174935 | 0.147682358 | 0.135378267 |
| 0.337178813 | 0.119652345 | 0.241541033 | 0.101665065 |
| 0.343870527 | 0.249012232 | 0.148594829 | 0.134913994 |
| 0.152961144 | 0.09078288  | 0.091072609 | 0.389215347 |
| 0.191120058 | 0.144165826 | 0.366014798 | 0.178471312 |
| 0.120597665 | 0.298522868 | 0.154457523 | 0.359732185 |
| 0.12475201  | 0.29380142  | 0.304749081 | 0.32915572  |
| 0.346027417 | 0.107286812 | 0.127155983 | 0.152364248 |
| 0.334602479 | 0.161971686 | 0.104219604 | 0.310682457 |
| 0.112725397 | 0.271364932 | 0.120561681 | 0.147438124 |
| 0.096001711 | 0.10801679  | 0.158566004 | 0.170446325 |
| 0.248808658 | 0.208979335 | 0.13889557  | 0.402858614 |
| 0.21711513  | 0.11273743  | 0.412605619 | 0.01812218  |
| 0.20221107  | 0.316774634 | 0.222306935 | 0.169398292 |
| 0.249177798 | 0.193978153 | 0.147427441 | 0.007755783 |
| 0.315551081 | 0.064420589 | 0.1067227   | 0.188405765 |
| 0.094312243 | 0.065592749 | 0.368748795 | 0.402136597 |
| 0.225373157 | 0.085743159 | 0.099663871 | 0.33450028  |
| 0.095935405 | 0.076129806 | 0.083995328 | 0.214121135 |
| 0.108594341 | 0.098785361 | 0.113452307 | 0.13029434  |
| 0.279620654 | 0.129594568 |             |             |
| PSMD13      | 0.183490128 | 0.246092356 | 0.116913241 |
| 0.261783262 | 0.220238228 | 0.180986707 | 0.187413796 |
| 0.232207026 | 0.200183715 | 0.072680904 | 0.244175338 |
| 0.143628937 | 0.058413065 | 0.319522807 | 0.196139036 |
| 0.189174814 | 0.208610555 | 0.246840878 | 0.059390246 |
| 0.162783716 | 0.23333786  | 0.168590204 | 0.155603602 |

|             |             |             |             |
|-------------|-------------|-------------|-------------|
| 0.209565844 | 0.265761269 | 0.165670065 | 0.130070484 |
| 0.300682106 | 0.078828052 | 0.211604645 | 0.054734406 |
| 0.367220926 | 0.209313302 | 0.130400652 | 0.104695088 |
| 0.187851679 | 0.014472499 | 0.353094911 | 0.272582905 |
| 0.12502371  | 0.349461832 | 0.093153903 | 0.315723917 |
| 0.116066501 | 0.143468683 | 0.045356933 | 0.180095419 |
| 0.15343376  | 0.213951189 | 0.116574714 | 0.211649148 |
| 0.142253828 | 0.257618849 | 0.157227416 | 0.007536832 |
| 0.128421808 | 0.028238662 | 0.080039859 | 0.329769346 |
| 0.306469424 | 0.311151406 | 0.071880611 | 0.167618565 |
| 0.151870032 | 0.211311342 | 0.271194073 | 0.111514225 |
| 0.339985503 | 0.10139254  | 0.193511859 | 0.196310406 |
| 0.180849779 | 0.09117386  | 0.284801068 | 0.105496884 |
| 0.157806026 | 0.31933904  | 0.230513456 | 0.150394968 |
| 0.232708752 | 0.383138911 | 0.245469536 | 0.315731853 |
| 0.07868235  | 0.167601199 | 0.201543721 | 0.313462343 |
| 0.221868255 | 0.154983529 | 0.28033154  | 0.374302137 |
| 0.112825519 | 0.11058827  | 0.210423132 | 0.162496342 |
| 0.265338673 | 0.106348723 | 0.113395113 | 0.137582072 |
| 0.216263425 | 0.191011694 | 0.325205665 | 0.308856846 |
| 0.197518728 | 0.130883445 | 0.32017271  | 0.166200678 |
| 0.264971935 | 0.167143143 | 0.207282952 | 0.255979273 |
| 0.211883612 | 0.314291865 | 0.225686661 | 0.269552428 |
| 0.170463022 | 0.335587274 | 0.255753085 | 0.285771989 |
| 0.028186285 | 0.332364133 | 0.261671574 | 0.240102763 |
| 0.121854818 | 0.273991828 | 0.144382686 | 0.338099453 |
| 0.295896222 | 0.24477941  | 0.25368073  | 0.29245723  |
| 0.309039972 | 0.298490575 | 0.319465578 | 0.276351365 |
| 0.173330819 | 0.103815677 | 0.173391751 | 0.20801357  |
| 0.239980432 | 0.201363627 | 0.167487419 | 0.356152606 |
| 0.354217484 | 0.280659964 | 0.180223094 | 0.377610422 |
| 0.194685953 | 0.392908724 | 0.250164552 | 0.305971291 |
| 0.365890709 | 0.343899749 | 0.373603305 | 0.223510245 |
| 0.351640127 | 0.21777758  | 0.041053785 | 0.268907077 |
| 0.395065994 | 0.030851437 | 0.272457154 | 0.299591682 |
| 0.312735643 | 0.264336579 | 0.361723591 | 0.324961258 |
| 0.310748879 | 0.166466972 | 0.008277631 | 0.269649816 |
| 0.337209927 | 0.33427941  | 0.250497335 | 0.143650887 |
| 0.193837979 | 0.186675245 | 0.233224898 | 0.145348504 |
| 0.411607649 | 0.292062382 | 0.282611767 | 0.238275654 |
| 0.128527792 | 0.340459634 | 0.130184436 | 0.318327934 |
| 0.204087724 | 0.195805166 | 0.113788215 | 0.267986791 |
| 0.107261259 | 0.313427726 | 0.172783269 | 0.170308914 |
| 0.303273153 | 0.160265861 | 0.114277602 | 0.228971845 |
| 0.118177618 | 0.154299944 | 0.236436925 | 0.191253867 |
| 0.232026769 | 0.251745603 | 0.267844317 | 0.3255434   |
| 0.284535303 | 0.262595093 | 0.196364127 | 0.316236982 |
| 0.163074439 | 0.229886278 | 0.220732432 | 0.375543384 |
| 0.414009813 | 0.178194119 | 0.285993966 | 0.116947593 |
| 0.176557679 | 0.078189739 | 0.082923498 | 0.141928333 |
| 0.247144256 | 0.230048963 | 0.187931453 | 0.271543435 |
| 0.194891428 | 0.152651728 | 0.167497269 | 0.380181485 |
| 0.183753793 | 0.252669856 | 0.322754732 | 0.135357373 |
| 0.048423488 | 0.235435485 | 0.278552407 | 0.197140131 |

|             |             |             |             |
|-------------|-------------|-------------|-------------|
| 0.212456353 | 0.122992199 | 0.126324039 | 0.304806375 |
| 0.115542542 | 0.17129529  | 0.302544421 | 0.260107574 |
| 0.152901969 | 0.219672388 | 0.356422758 | 0.020048611 |
| 0.15106709  | 0.179437925 | 0.326912223 | 0.089025375 |
| 0.267205185 | 0.305207121 | 0.193245909 | 0.227431763 |
| 0.160581072 | 0.340980664 | 0.293344445 | 0.333657845 |
| 0.137277538 | 0.360782938 | 0.287121339 | 0.336607466 |
| 0.249048904 | 0.116656696 | 0.070099386 | 0.276709076 |
| 0.292912236 | 0.107714304 | 0.129947224 | 0.21639677  |
| 0.114893986 | 0.212753303 | 0.18296918  | 0.359345653 |
| 0.396014402 | 0.278379468 | 0.317197354 | 0.296017076 |
| 0.33661425  | 0.269131515 | 0.28116622  | 0.37417936  |
| 0.082395694 | 0.174611174 | 0.18975666  | 0.336440843 |
| 0.252117927 | 0.197544529 | 0.30253529  | 0.07891148  |
| 0.004636256 | 0.153590929 | 0.158532723 | 0.329080665 |
| 0.160589159 | 0.137926998 | 0.221711365 | 0.337720868 |
| 0.281064895 | 0.332041484 | 0.230257863 | 0.238227141 |
| 0.297277034 | 0.162992163 | 0.162060847 | 0.200407008 |
| 0.28077164  | 0.139527151 | 0.323203987 | 0.385659464 |
| 0.07979173  | 0.160704661 | 0.183067074 | 0.033167648 |
| 0.155592328 | 0.189615426 | 0.174170604 | 0.299128181 |
| 0.336778774 | 0.269677125 | 0.222775711 | 0.090541161 |
| 0.299221904 | 0.230968267 | 0.055918503 | 0.301759459 |
| 0.304256999 | 0.292543895 | 0.296854639 | 0.297004997 |
| 0.273161717 | 0.221461467 | 0.268864074 | 0.169280825 |
| 0.237526856 | 0.14198622  | 0.152974194 | 0.252458958 |
| 0.014772818 | 0.316215781 | 0.204735133 | 0.269363364 |
| 0.232892773 | 0.237587926 | 0.181694408 | 0.178610292 |
| 0.117378478 | 0.086596077 | 0.175985659 | 0.244843101 |
| 0.278562659 | 0.102540557 | 0.123518381 | 0.141131757 |
| 0.303342268 | 0.308513051 | 0.126678009 | 0.34862223  |
| 0.266518079 | 0.13398733  | 0.249551747 | 0.2797619   |
| 0.226847593 | 0.037166569 | 0.153526005 | 0.013490325 |
| 0.099580428 | 0.312917354 | 0.145302498 | 0.16557401  |
| 0.278635443 | 0.067839302 | 0.30612418  | 0.362622341 |
| 0.281488197 | 0.340370788 | 0.344446706 | 0.164389977 |
| 0.340968446 | 0.029595484 | 0.333005731 | 0.258357126 |
| 0.105378782 | 0.010726242 | 0.059752933 | 0.301433988 |
| 0.18475057  | 0.102425998 | 0.269280051 | 0.154884075 |
| 0.326199096 | 0.167884823 | 0.204885695 | 0.207329406 |
| 0.19083428  | 0.270997659 | 0.178490237 | 0.297822917 |
| 0.282406732 | 0.282799576 | 0.132320963 | 0.157113059 |
| 0.180648645 | 0.23965658  | 0.147172515 | 0.06197357  |
| 0.262690204 | 0.16525486  | 0.325395446 | 0.323770346 |
| 0.382352142 | 0.246556262 | 0.081295109 | 0.157623469 |
| 0.278450995 | 0.119459846 | 0.116105486 | 0.129937012 |
| 0.29536531  | 0.216565866 | 0.347954625 | 0.322783436 |
| 0.371782656 | 0.346858554 | 0.174113032 | 0.277782946 |
| 0.110786768 | 0.01696251  | 0.15661126  | 0.260470103 |
| 0.036898481 | 0.170133946 | 0.325089201 | 0.14729155  |
| 0.20502815  | 0.148926857 | 0.133894711 | 0.144845322 |
| 0.265075483 | 0.213811031 | 0.204683054 | 0.228344288 |
| 0.221181087 | 0.178707997 | 0.298605928 | 0.258701549 |
| 0.114924575 | 0.270902653 | 0.26769235  | 0.131148748 |

|             |             |             |             |
|-------------|-------------|-------------|-------------|
| 0.140367415 | 0.165751026 | 0.207523386 | 0.241666472 |
| 0.319880253 | 0.317064578 | 0.194705731 | 0.142916317 |
| 0.305035072 | 0.194047892 | 0.336560346 | 0.298530446 |
| 0.358178406 | 0.389319155 | 0.366630917 | 0.270873402 |
| 0.221350969 | 0.240265168 | 0.192077723 | 0.270278969 |
| 0.334835271 | 0.102599823 | 0.314679901 | 0.142320643 |
| 0.212924682 | 0.282080953 | 0.235054516 | 0.22353368  |
| 0.16035965  | 0.273742782 | 0.321675064 | 0.163655203 |
| 0.243576008 | 0.142994677 | 0.176714912 | 0.292171915 |
| 0.282347749 | 0.106714668 | 0.257687322 | 0.178182704 |
| 0.248103816 | 0.052305815 | 0.224062182 | 0.398481383 |
| 0.215696715 | 0.178189816 | 0.164228188 | 0.235385755 |
| 0.244895413 | 0.11077984  | 0.140450637 | 0.245657826 |
| 0.338148134 | 0.194390203 | 0.327371113 | 0.348937233 |
| 0.167841226 | 0.195500604 | 0.124606868 | 0.202535525 |
| 0.251737161 | 0.181708283 | 0.246530309 | 0.179378387 |
| 0.320713407 | 0.365525571 | 0.269476626 | 0.335292005 |
| 0.148028084 | 0.123608787 | 0.092169144 | 0.266936617 |
| 0.156487448 | 0.222235754 | 0.100380299 | 0.243455731 |
| 0.021209109 | 0.090442433 | 0.323881723 | 0.29467996  |
| 0.368250837 | 0.327436468 | 0.373247098 | 0.187447624 |
| 0.001856715 | 0.191495298 | 0.241489004 | 0.189377955 |
| 0.263170301 | 0.283559352 | 0.131518839 | 0.297801665 |
| 0.364967701 | 0.129073768 | 0.293994557 | 0.152680855 |
| 0.083793996 | 0.182976023 | 0.312056252 | 0.199996612 |
| 0.285852319 | 0.109085875 | 0.14162233  | 0.280078061 |
| 0.090983252 | 0.344382626 | 0.350229877 | 0.074694137 |
| 0.103600721 | 0.304969101 | 0.248451532 | 0.14509509  |
| 0.159256448 | 0.283311826 | 0.317129114 | 0.020483506 |
| 0.241784671 | 0.10810907  | 0.306492859 | 0.318972613 |
| 0.317379576 | 0.271386098 | 0.27307065  | 0.236319685 |
| 0.194355289 | 0.276723056 | 0.291838461 | 1           |
| 0.332824163 | 0.240566957 | 0.190648226 | 0.174683995 |
| 0.258169532 | 0.275802651 | 0.177328412 | 0.172850058 |
| 0.255488241 | 0.277989097 | 0.334757658 | 0.13463952  |
| 0.28984863  | 0.162938402 | 0.390545135 | 0.291488055 |
| 0.362803992 | 0.146855962 | 0.202603529 | 0.268186383 |
| 0.05528099  | 0.146575077 | 0.135503688 | 0.176628555 |
| 0.282580903 | 0.224561614 | 0.138899292 | 0.166556629 |
| 0.185791529 | 0.383249121 | 0.323257908 | 0.343549264 |
| 0.213432046 | 0.13914657  | 0.082140126 | 0.32210069  |
| 0.268054042 | 0.200531853 | 0.224223083 | 0.045027261 |
| 0.263067794 | 0.188376059 | 0.287904043 | 0.323041516 |
| 0.113719816 | 0.364144728 | 0.100582464 | 0.229488011 |
| 0.070451687 | 0.194598235 | 0.24885089  | 0.215189457 |
| 0.089095779 | 0.294564666 | 0.240657092 | 0.142997468 |
| 0.239746028 | 0.196258175 | 0.188742962 | 0.218477229 |
| 0.229958063 | 0.198977141 | 0.325028765 | 0.16742097  |
| 0.139769135 | 0.227920289 | 0.117697244 | 0.261255656 |
| 0.278582952 | 0.317486067 | 0.166425069 | 0.322024937 |
| 0.198696185 | 0.203624302 | 0.406191125 | 0.196961406 |
| 0.191739974 | 0.305522686 | 0.093512433 | 0.130573616 |
| 0.247819387 | 0.135294535 | 0.003059894 | 0.062249389 |
| 0.33625703  | 0.11784613  | 0.196278053 | 0.24229451  |



|             |             |             |             |
|-------------|-------------|-------------|-------------|
| 0.203774883 | 0.327810464 | 0.075004256 | 0.191025828 |
| 0.286677926 | 0.333698414 | 0.254164088 | 0.32151073  |
| 0.282143231 | 0.295824945 | 0.173555336 | 0.010952542 |
| 0.17118068  | 0.140280942 | 0.114511408 | 0.214216608 |
| 0.136108594 | 0.101236449 | 0.165692724 | 0.099809381 |
| 0.32322567  | 0.083498213 | 0.13646221  | 0.224349757 |
| 0.218689329 | 0.341785343 | 0.30692913  | 0.281817615 |
| 0.085784686 | 0.25717478  | 0.145506329 | 0.133098957 |
| 0.272044541 | 0.175584948 | 0.310568407 | 0.168323217 |
| 0.203708876 | 0.268498167 | 0.015456531 | 0.373914374 |
| 0.303187036 | 0.150164849 | 0.287774594 | 0.070878275 |
| 0.332221218 | 0.289386209 | 0.198412632 | 0.131181149 |
| 0.13812372  | 0.190800873 | 0.281833799 | 0.296419748 |
| 0.088659018 | 0.149303285 | 0.260969438 | 0.162548672 |
| 0.32781075  | 0.178910321 | 0.298416523 | 0.112770136 |
| 0.298491705 | 0.237647822 | 0.169234901 | 0.211314574 |
| 0.14409237  | 0.142262024 | 0.11546362  | 0.355432869 |
| 0.33210034  | 0.176401943 | 0.303639707 | 0.300704807 |
| 0.149707547 | 0.281088581 | 0.12943273  | 0.337233901 |
| 0.279120601 | 0.310636367 | 0.267574029 | 0.296915635 |
| 0.359651553 | 0.171827665 | 0.158059616 | 0.254035065 |
| 0.289528333 | 0.271313996 | 0.152230503 | 0.280752551 |
| 0.138676869 | 0.287561273 | 0.112919515 | 0.255745469 |
| 0.231401584 | 0.237039327 | 0.1976636   | 0.231736876 |
| 0.263452097 | 0.212359061 | 0.216901051 | 0.385409207 |
| 0.322066698 | 0.18816361  | 0.389331303 | 0.023828054 |
| 0.182645595 | 0.247330771 | 0.276877799 | 0.191174545 |
| 0.274300588 | 0.192622831 | 0.151219699 | 0.026478232 |
| 0.295652572 | 0.077045595 | 0.188708196 | 0.267340769 |
| 0.131751309 | 0.170169881 | 0.333753783 | 0.350698121 |
| 0.229796258 | 0.118558944 | 0.113550281 | 0.314079791 |
| 0.113739714 | 0.093891418 | 0.12374213  | 0.175211951 |
| 0.132712593 | 0.104378342 | 0.126546464 | 0.141240735 |
| 0.258848553 | 0.22231933  |             |             |
| PSMD8       | 0.103063995 | 0.160559898 | 0.071778328 |
| 0.152882111 | 0.22264981  | 0.091184649 | 0.082451316 |
| 0.10336465  | 0.133353974 | 0.019382562 | 0.211896323 |
| 0.07294394  | 0.040346995 | 0.237678825 | 0.090340899 |
| 0.162838735 | 0.118205684 | 0.165900317 | 0.022278509 |
| 0.069270126 | 0.214669765 | 0.076132637 | 0.087806605 |
| 0.174769001 | 0.216935856 | 0.115532415 | 0.087894505 |
| 0.211269462 | 0.028736101 | 0.172220024 | 0.018076839 |
| 0.286687012 | 0.209051392 | 0.077404883 | 0.058311064 |
| 0.1273453   | 0.009830198 | 0.256056963 | 0.165071572 |
| 0.093452176 | 0.283168854 | 0.038603133 | 0.219286738 |
| 0.055545127 | 0.066868496 | 0.012290102 | 0.132932999 |
| 0.111709657 | 0.102164498 | 0.07407294  | 0.159784669 |
| 0.050596583 | 0.211909615 | 0.092533104 | 0.002448387 |
| 0.078457572 | 0.015802016 | 0.034999451 | 0.233561347 |
| 0.31540368  | 0.23862905  | 0.021887429 | 0.091732936 |
| 0.106691819 | 0.170156506 | 0.26716171  | 0.03744148  |
| 0.245891715 | 0.05245172  | 0.140505714 | 0.107940175 |
| 0.091476106 | 0.040802266 | 0.276693528 | 0.076172108 |
| 0.067877339 | 0.297270695 | 0.199722118 | 0.092059109 |

|             |             |             |             |
|-------------|-------------|-------------|-------------|
| 0.144373096 | 0.280131431 | 0.230617219 | 0.211257566 |
| 0.039766777 | 0.148498236 | 0.113272482 | 0.30548929  |
| 0.16797968  | 0.060919049 | 0.2385678   | 0.276653854 |
| 0.05269047  | 0.063970354 | 0.146934088 | 0.121820249 |
| 0.189808448 | 0.044533267 | 0.059163679 | 0.086763679 |
| 0.204895454 | 0.156497837 | 0.222926657 | 0.282497276 |
| 0.148356519 | 0.098592349 | 0.212961789 | 0.155732693 |
| 0.174004105 | 0.132272449 | 0.104220627 | 0.189063979 |
| 0.168891352 | 0.227435888 | 0.146090758 | 0.207873865 |
| 0.13182853  | 0.24687666  | 0.212585048 | 0.207059734 |
| 0.00756735  | 0.232107468 | 0.225102652 | 0.136063272 |
| 0.057806292 | 0.154296683 | 0.063076147 | 0.310090788 |
| 0.225008769 | 0.205562672 | 0.152648903 | 0.245445523 |
| 0.244475998 | 0.195267999 | 0.217001328 | 0.204805482 |
| 0.092954897 | 0.047355346 | 0.133164478 | 0.090802294 |
| 0.186540303 | 0.168795697 | 0.129676976 | 0.247486323 |
| 0.296651122 | 0.222724248 | 0.089819015 | 0.270877698 |
| 0.10132955  | 0.306045885 | 0.16644015  | 0.255561937 |
| 0.265294391 | 0.241719246 | 0.293001339 | 0.200053729 |
| 0.262039974 | 0.153706751 | 0.011357498 | 0.199021801 |
| 0.321059397 | 0.029805186 | 0.194106443 | 0.21690549  |
| 0.214092336 | 0.197375139 | 0.276020642 | 0.241009066 |
| 0.210658582 | 0.134752747 | 0.002351246 | 0.270961776 |
| 0.23401935  | 0.280108415 | 0.131207175 | 0.092962646 |
| 0.173934607 | 0.10428073  | 0.17251813  | 0.056306741 |
| 0.321427264 | 0.224638539 | 0.197243091 | 0.169338529 |
| 0.075535453 | 0.279453192 | 0.09444517  | 0.215793586 |
| 0.118779054 | 0.109726165 | 0.096050929 | 0.22838065  |
| 0.032869483 | 0.306357552 | 0.078260346 | 0.135449562 |
| 0.316764854 | 0.077277167 | 0.057591877 | 0.209604558 |
| 0.088498108 | 0.105688555 | 0.185370491 | 0.124236688 |
| 0.133841414 | 0.213757973 | 0.122657077 | 0.192698348 |
| 0.23904731  | 0.185522331 | 0.139573303 | 0.237867352 |
| 0.087438979 | 0.197881709 | 0.160869138 | 0.303098031 |
| 0.357129718 | 0.147572844 | 0.250876428 | 0.108225745 |
| 0.068876779 | 0.023751692 | 0.042079038 | 0.101007198 |
| 0.191807998 | 0.092014752 | 0.147362793 | 0.253706282 |
| 0.12914328  | 0.076713557 | 0.072485167 | 0.296063294 |
| 0.1406883   | 0.15183794  | 0.255846896 | 0.083829804 |
| 0.035906869 | 0.167024187 | 0.213204433 | 0.114140978 |
| 0.156236483 | 0.075025409 | 0.065161824 | 0.23070835  |
| 0.044295383 | 0.092272115 | 0.223960785 | 0.242070323 |
| 0.054625674 | 0.147186592 | 0.266973268 | 0.006885064 |
| 0.109225477 | 0.150321754 | 0.340647682 | 0.038296878 |
| 0.239959717 | 0.281175777 | 0.178352496 | 0.144393696 |
| 0.133005918 | 0.239285906 | 0.236294057 | 0.244579362 |
| 0.050555862 | 0.269170543 | 0.219304127 | 0.26885625  |
| 0.217173491 | 0.060358471 | 0.038591841 | 0.21195402  |
| 0.22398395  | 0.03561261  | 0.100709206 | 0.148923883 |
| 0.050930184 | 0.17348724  | 0.128554778 | 0.278189992 |
| 0.305883843 | 0.177762763 | 0.177671306 | 0.27333417  |
| 0.29145983  | 0.228932724 | 0.229022312 | 0.281621095 |
| 0.02211858  | 0.116084911 | 0.096968045 | 0.31156862  |
| 0.245637143 | 0.100707046 | 0.245225764 | 0.041406214 |

|             |             |             |             |
|-------------|-------------|-------------|-------------|
| 0.004541634 | 0.095565494 | 0.117893512 | 0.262680155 |
| 0.107185362 | 0.090814549 | 0.186728439 | 0.241396347 |
| 0.208343529 | 0.267195378 | 0.187297559 | 0.108419194 |
| 0.208083303 | 0.096225799 | 0.135287781 | 0.176428441 |
| 0.250618848 | 0.122898015 | 0.1928753   | 0.280554111 |
| 0.056009972 | 0.088055062 | 0.107954783 | 0.020480644 |
| 0.064871784 | 0.115537398 | 0.137719223 | 0.251612334 |
| 0.270716929 | 0.219597486 | 0.186362803 | 0.024747455 |
| 0.295657093 | 0.193270256 | 0.082693901 | 0.215415988 |
| 0.211678299 | 0.204460509 | 0.201529999 | 0.200960509 |
| 0.19541024  | 0.166925842 | 0.22119256  | 0.110609292 |
| 0.112721011 | 0.069849857 | 0.078016302 | 0.175894142 |
| 0.006573355 | 0.300321257 | 0.163682583 | 0.267144258 |
| 0.182799399 | 0.195595262 | 0.091210094 | 0.159457516 |
| 0.064281031 | 0.043259366 | 0.057060641 | 0.152632831 |
| 0.263738395 | 0.054143222 | 0.051476366 | 0.051093658 |
| 0.212452692 | 0.238929062 | 0.061277743 | 0.251396886 |
| 0.235895107 | 0.090722604 | 0.192760989 | 0.254296145 |
| 0.108922937 | 0.010037122 | 0.061604929 | 0.005147423 |
| 0.040308511 | 0.22172714  | 0.060136183 | 0.080900578 |
| 0.256314507 | 0.040728175 | 0.236465091 | 0.263839701 |
| 0.185570039 | 0.252837072 | 0.257283065 | 0.116147111 |
| 0.247893094 | 0.014199559 | 0.237406747 | 0.180411679 |
| 0.038181006 | 0.00753514  | 0.041028956 | 0.226385668 |
| 0.145104767 | 0.074234761 | 0.255610484 | 0.057755088 |
| 0.185191216 | 0.080823281 | 0.115295504 | 0.135770016 |
| 0.151115682 | 0.253399431 | 0.106353246 | 0.195169695 |
| 0.200980844 | 0.258067897 | 0.055101206 | 0.129389901 |
| 0.156241158 | 0.136377287 | 0.118868986 | 0.061814565 |
| 0.243744529 | 0.123633238 | 0.218067819 | 0.226776175 |
| 0.29657659  | 0.230046759 | 0.024239096 | 0.057713808 |
| 0.211170723 | 0.082333345 | 0.042405147 | 0.098583908 |
| 0.198631153 | 0.181877191 | 0.326430603 | 0.27505716  |
| 0.28385843  | 0.257450586 | 0.092219888 | 0.223792517 |
| 0.091788341 | 0.016031508 | 0.087622455 | 0.224967693 |
| 0.01685912  | 0.104204019 | 0.302592853 | 0.056851135 |
| 0.096022796 | 0.074098684 | 0.077907712 | 0.089463916 |
| 0.260598533 | 0.151210828 | 0.182681451 | 0.183500374 |
| 0.146833477 | 0.10236458  | 0.196400826 | 0.128362933 |
| 0.040989546 | 0.201890123 | 0.215548614 | 0.063968195 |
| 0.084749179 | 0.116826732 | 0.146208982 | 0.229444611 |
| 0.259905511 | 0.235871152 | 0.094662525 | 0.111179342 |
| 0.263675372 | 0.106962401 | 0.25642983  | 0.202756726 |
| 0.251994566 | 0.297899575 | 0.288200264 | 0.145970352 |
| 0.119238754 | 0.22846615  | 0.176637276 | 0.190135734 |
| 0.240666744 | 0.071123855 | 0.222655037 | 0.115308073 |
| 0.194922684 | 0.155031158 | 0.152080837 | 0.175275955 |
| 0.13715423  | 0.270116253 | 0.28448321  | 0.129164088 |
| 0.145853269 | 0.080018269 | 0.09450342  | 0.258157423 |
| 0.224136699 | 0.059159141 | 0.232315609 | 0.084740711 |
| 0.192224578 | 0.013320527 | 0.174220822 | 0.320524727 |
| 0.199930243 | 0.120674674 | 0.055487316 | 0.189274439 |
| 0.174064368 | 0.065942141 | 0.100929638 | 0.155342654 |
| 0.258258261 | 0.144801615 | 0.229945367 | 0.298702479 |

|             |             |             |             |
|-------------|-------------|-------------|-------------|
| 0.149152325 | 0.149515507 | 0.066820354 | 0.162126693 |
| 0.214420093 | 0.101646842 | 0.183140608 | 0.147075013 |
| 0.274071087 | 0.264435132 | 0.190466503 | 0.265110599 |
| 0.10532699  | 0.085931054 | 0.060848852 | 0.192915391 |
| 0.091598928 | 0.099204836 | 0.041142778 | 0.178109379 |
| 0.03286425  | 0.058952001 | 0.247123394 | 0.151629303 |
| 0.273383918 | 0.253452272 | 0.298647908 | 0.075490353 |
| 0.001344194 | 0.153847562 | 0.221539106 | 0.104525654 |
| 0.17557599  | 0.230135476 | 0.055763662 | 0.176802686 |
| 0.360290254 | 0.099260065 | 0.143345601 | 0.059307529 |
| 0.035209414 | 0.123167741 | 0.311958787 | 0.150567584 |
| 0.21413491  | 0.071077278 | 0.082136566 | 0.205228216 |
| 0.048308851 | 0.340801479 | 0.313924827 | 0.019393657 |
| 0.044056779 | 0.229122835 | 0.176895672 | 0.076096293 |
| 0.123545394 | 0.21763735  | 0.253582153 | 0.009090225 |
| 0.194473456 | 0.067866299 | 0.244002469 | 0.261724142 |
| 0.235219852 | 0.173662455 | 0.288211345 | 0.136298246 |
| 0.141279683 | 0.185545121 | 0.198271122 | 0.332824163 |
| 1           | 0.173463515 | 0.16731849  | 0.098683497 |
| 0.153554752 | 0.173167747 | 0.140858176 | 0.129885915 |
| 0.16019328  | 0.197858158 | 0.29840842  | 0.112606287 |
| 0.289863934 | 0.078677728 | 0.356243104 | 0.192637465 |
| 0.316711583 | 0.104251952 | 0.115798809 | 0.187849367 |
| 0.013930389 | 0.053011335 | 0.050868137 | 0.126089251 |
| 0.232341761 | 0.119472089 | 0.083064604 | 0.112087086 |
| 0.118408279 | 0.312958266 | 0.290221091 | 0.277061185 |
| 0.139603111 | 0.078427453 | 0.025438698 | 0.204988708 |
| 0.178523329 | 0.17034038  | 0.209846284 | 0.038322171 |
| 0.230923669 | 0.077096605 | 0.212739782 | 0.225159073 |
| 0.05625708  | 0.31570471  | 0.027512231 | 0.105762327 |
| 0.019448704 | 0.132328039 | 0.233567391 | 0.156413092 |
| 0.042852773 | 0.176723938 | 0.227983003 | 0.04562861  |
| 0.191036721 | 0.140667329 | 0.096822158 | 0.118655568 |
| 0.189306043 | 0.175401777 | 0.225498009 | 0.098873818 |
| 0.095602617 | 0.149888678 | 0.069155701 | 0.191169003 |
| 0.205110566 | 0.22995209  | 0.132307948 | 0.230319539 |
| 0.120401136 | 0.171956762 | 0.317065798 | 0.134712618 |
| 0.084720245 | 0.213078773 | 0.051864412 | 0.048345606 |
| 0.113271782 | 0.068638085 | 0.000719368 | 0.029575651 |
| 0.326282276 | 0.04520272  | 0.121480866 | 0.196137642 |
| 0.142036827 | 0.303259638 | 0.041555506 | 0.103785263 |
| 0.185011614 | 0.227792593 | 0.113275471 | 0.300774194 |
| 0.227046698 | 0.181347253 | 0.118813054 | 0.003707422 |
| 0.124948859 | 0.099853325 | 0.032503959 | 0.106656518 |
| 0.070388168 | 0.05145882  | 0.118541746 | 0.070944455 |
| 0.251887085 | 0.041450793 | 0.087574705 | 0.179012365 |
| 0.180393109 | 0.233962183 | 0.184621012 | 0.250049626 |
| 0.029749352 | 0.2434935   | 0.101604299 | 0.073590751 |
| 0.151251181 | 0.122104406 | 0.286023056 | 0.118127886 |
| 0.11328924  | 0.142405685 | 0.008282059 | 0.288936839 |
| 0.199292461 | 0.101894185 | 0.248023594 | 0.01862663  |
| 0.349982798 | 0.23216169  | 0.081528454 | 0.08039366  |
| 0.116985984 | 0.176202905 | 0.270365894 | 0.226979874 |
| 0.033634462 | 0.096287556 | 0.183290668 | 0.119452323 |

|             |             |             |             |
|-------------|-------------|-------------|-------------|
| 0.221502366 | 0.066557185 | 0.253306691 | 0.039884102 |
| 0.204875926 | 0.172452263 | 0.127230926 | 0.126477405 |
| 0.090272609 | 0.122517354 | 0.043958379 | 0.258026617 |
| 0.259473724 | 0.133199855 | 0.25182454  | 0.168757751 |
| 0.096596458 | 0.208783442 | 0.087110935 | 0.237469761 |
| 0.17020281  | 0.30938038  | 0.216990877 | 0.208181085 |
| 0.357053003 | 0.107293375 | 0.081146098 | 0.161588954 |
| 0.195491723 | 0.164943167 | 0.071637473 | 0.230519877 |
| 0.075316378 | 0.277044462 | 0.067900764 | 0.184196464 |
| 0.148655844 | 0.108424687 | 0.08338585  | 0.218489932 |
| 0.235150614 | 0.16973619  | 0.120316626 | 0.335200974 |
| 0.214555371 | 0.135721606 | 0.318679039 | 0.014796771 |
| 0.133305122 | 0.234325922 | 0.25531219  | 0.1355914   |
| 0.245534138 | 0.146182133 | 0.083559493 | 0.012574649 |
| 0.243848249 | 0.085992513 | 0.103367913 | 0.149593695 |
| 0.051545825 | 0.07403063  | 0.251638419 | 0.267858487 |
| 0.199498783 | 0.044253769 | 0.040354562 | 0.22375185  |
| 0.071409613 | 0.036949669 | 0.04781329  | 0.116704948 |
| 0.082549208 | 0.045189451 | 0.061754487 | 0.076869282 |
| 0.211380386 | 0.128929673 |             |             |
| PTPN22      | 0.124497411 | 0.265461401 | 0.082586108 |
| 0.116409048 | 0.17116823  | 0.118025934 | 0.140930086 |
| 0.188166013 | 0.244575845 | 0.063489815 | 0.16498074  |
| 0.073268036 | 0.046009874 | 0.306347718 | 0.146782875 |
| 0.156905575 | 0.129718683 | 0.167695725 | 0.074620061 |
| 0.136851991 | 0.150429799 | 0.093387896 | 0.133817176 |
| 0.149824922 | 0.271226876 | 0.176693296 | 0.121687505 |
| 0.300723141 | 0.046130614 | 0.186545022 | 0.041487687 |
| 0.349675791 | 0.159009697 | 0.086116717 | 0.069490402 |
| 0.147879508 | 0.02553136  | 0.365854077 | 0.142148268 |
| 0.073244655 | 0.337900719 | 0.077219593 | 0.151387733 |
| 0.093819125 | 0.085239129 | 0.03542113  | 0.174744854 |
| 0.186420454 | 0.174835146 | 0.101025666 | 0.205818059 |
| 0.115914808 | 0.245435844 | 0.170719636 | 0.00859491  |
| 0.076177585 | 0.018419968 | 0.049294991 | 0.341163407 |
| 0.259571656 | 0.184793702 | 0.05871909  | 0.162101863 |
| 0.1587738   | 0.217261483 | 0.291311715 | 0.084041966 |
| 0.323624378 | 0.064622049 | 0.200828758 | 0.113052288 |
| 0.115085924 | 0.096226504 | 0.272887125 | 0.155752708 |
| 0.107883295 | 0.214080874 | 0.164143234 | 0.099903254 |
| 0.246889784 | 0.398878059 | 0.264863368 | 0.338510276 |
| 0.061958185 | 0.141517544 | 0.138435717 | 0.283872023 |
| 0.234198396 | 0.15273636  | 0.229303467 | 0.368896267 |
| 0.119971787 | 0.122718069 | 0.201061471 | 0.18978376  |
| 0.274440659 | 0.093954721 | 0.097394748 | 0.072127383 |
| 0.200739321 | 0.13882287  | 0.359755074 | 0.242924976 |
| 0.143712695 | 0.128279512 | 0.347518432 | 0.131536009 |
| 0.129479773 | 0.133950332 | 0.123176891 | 0.248015191 |
| 0.177985084 | 0.30226049  | 0.234938398 | 0.257595329 |
| 0.128597631 | 0.32274135  | 0.21907829  | 0.304050454 |
| 0.031372952 | 0.340962424 | 0.185215344 | 0.132628025 |
| 0.112646776 | 0.192511284 | 0.129062643 | 0.342687673 |
| 0.279343655 | 0.261614477 | 0.166871852 | 0.170903673 |
| 0.283280898 | 0.322644419 | 0.330580524 | 0.26188436  |

|             |             |             |             |
|-------------|-------------|-------------|-------------|
| 0.114656596 | 0.082658316 | 0.127229564 | 0.169348523 |
| 0.212794732 | 0.218460567 | 0.092788539 | 0.364799012 |
| 0.320165174 | 0.250575044 | 0.157660336 | 0.405980318 |
| 0.170399115 | 0.37423908  | 0.251248977 | 0.171793712 |
| 0.371074655 | 0.354624462 | 0.354741237 | 0.188979969 |
| 0.361237044 | 0.141854112 | 0.040020377 | 0.277217988 |
| 0.371341603 | 0.010635522 | 0.271432771 | 0.292744796 |
| 0.317074815 | 0.243058906 | 0.353979829 | 0.321112946 |
| 0.320988887 | 0.172359952 | 0.008115396 | 0.222759334 |
| 0.340645187 | 0.298389442 | 0.211267757 | 0.110932396 |
| 0.166089087 | 0.125773099 | 0.241298246 | 0.071056654 |
| 0.40533067  | 0.294600352 | 0.28664808  | 0.236236521 |
| 0.143620902 | 0.342955735 | 0.109471998 | 0.337545113 |
| 0.153821034 | 0.12818765  | 0.12229697  | 0.293476094 |
| 0.083357095 | 0.228448691 | 0.121948882 | 0.168816672 |
| 0.24963266  | 0.135621839 | 0.079119817 | 0.200001275 |
| 0.147673088 | 0.130631798 | 0.184831269 | 0.153969855 |
| 0.130669978 | 0.277712327 | 0.130707421 | 0.159084757 |
| 0.174463332 | 0.309502181 | 0.190606714 | 0.320352255 |
| 0.122600501 | 0.214089959 | 0.203551097 | 0.371337968 |
| 0.371322091 | 0.131210046 | 0.289513267 | 0.035045954 |
| 0.089397873 | 0.063868811 | 0.056348432 | 0.129463718 |
| 0.298181553 | 0.124325484 | 0.163977178 | 0.223913225 |
| 0.146004823 | 0.143593842 | 0.102698896 | 0.38904246  |
| 0.202563372 | 0.128023133 | 0.285135796 | 0.134968348 |
| 0.030967433 | 0.151097464 | 0.24924643  | 0.128242904 |
| 0.213524946 | 0.051247301 | 0.067242957 | 0.280430018 |
| 0.080730986 | 0.109271075 | 0.301203294 | 0.23281028  |
| 0.100404883 | 0.278914613 | 0.352974491 | 0.015042621 |
| 0.138672672 | 0.107858807 | 0.256217214 | 0.084252003 |
| 0.209660477 | 0.294310447 | 0.141989755 | 0.143289    |
| 0.16518504  | 0.34012327  | 0.310711479 | 0.316545015 |
| 0.085262663 | 0.358064792 | 0.257021204 | 0.299257497 |
| 0.231121268 | 0.09026169  | 0.036352993 | 0.242620115 |
| 0.274528203 | 0.087298547 | 0.149371122 | 0.213866426 |
| 0.088253707 | 0.193017716 | 0.189264277 | 0.326602153 |
| 0.407361733 | 0.30023388  | 0.178153349 | 0.265294259 |
| 0.281002581 | 0.182464203 | 0.299929086 | 0.374035764 |
| 0.067326148 | 0.113046887 | 0.103819527 | 0.306538557 |
| 0.221317955 | 0.111741311 | 0.353976107 | 0.054785407 |
| 0.002909299 | 0.136675897 | 0.12912494  | 0.177927776 |
| 0.088355182 | 0.144552561 | 0.208718237 | 0.333740456 |
| 0.168128055 | 0.335859996 | 0.275076149 | 0.106633039 |
| 0.293619184 | 0.113800315 | 0.132699832 | 0.187394307 |
| 0.310883774 | 0.059255501 | 0.120086323 | 0.396265174 |
| 0.106849984 | 0.085976759 | 0.158188229 | 0.005708498 |
| 0.100989076 | 0.209950766 | 0.205572365 | 0.314254023 |
| 0.321084316 | 0.295795534 | 0.202097076 | 0.072444299 |
| 0.269038957 | 0.171843688 | 0.018778311 | 0.308308986 |
| 0.338371342 | 0.330318816 | 0.332068632 | 0.342747151 |
| 0.295892144 | 0.241624739 | 0.251083872 | 0.145578523 |
| 0.181447334 | 0.135835407 | 0.073496622 | 0.143347201 |
| 0.006894783 | 0.293449245 | 0.175641196 | 0.238793584 |
| 0.22336223  | 0.249324985 | 0.109084884 | 0.172844982 |

|             |             |             |             |
|-------------|-------------|-------------|-------------|
| 0.048277884 | 0.046183174 | 0.126233689 | 0.197964133 |
| 0.268275068 | 0.071392795 | 0.054935959 | 0.079713282 |
| 0.304802298 | 0.290282265 | 0.092018015 | 0.354915134 |
| 0.17707945  | 0.153527399 | 0.138951341 | 0.249776748 |
| 0.153258508 | 0.03874568  | 0.115983164 | 0.007171048 |
| 0.094764945 | 0.357531633 | 0.116748273 | 0.119939671 |
| 0.200682919 | 0.035635798 | 0.282901918 | 0.359248186 |
| 0.301416223 | 0.324561888 | 0.329136395 | 0.086342011 |
| 0.328777523 | 0.021871256 | 0.329698486 | 0.246519422 |
| 0.071599492 | 0.002657423 | 0.02363358  | 0.286267254 |
| 0.136368938 | 0.134302514 | 0.219552628 | 0.091572926 |
| 0.150575343 | 0.11460008  | 0.164891552 | 0.114065532 |
| 0.18068195  | 0.168648713 | 0.114876803 | 0.315086601 |
| 0.167562373 | 0.229729257 | 0.100106052 | 0.184662234 |
| 0.173427594 | 0.125179779 | 0.190173452 | 0.012651888 |
| 0.243980597 | 0.202978596 | 0.36191744  | 0.32387081  |
| 0.372078245 | 0.223407325 | 0.059979729 | 0.0978692   |
| 0.297387746 | 0.12999835  | 0.092732901 | 0.139795761 |
| 0.295870426 | 0.171238282 | 0.288732604 | 0.281368884 |
| 0.344986546 | 0.334656743 | 0.114771663 | 0.244511275 |
| 0.039825938 | 0.007521041 | 0.112011168 | 0.285225888 |
| 0.063817767 | 0.101938842 | 0.2855444   | 0.152776145 |
| 0.174938815 | 0.077934199 | 0.07827886  | 0.0871339   |
| 0.220863653 | 0.14575585  | 0.124681591 | 0.286476138 |
| 0.151460029 | 0.110640889 | 0.201324924 | 0.201458867 |
| 0.122935454 | 0.274759947 | 0.260109372 | 0.097026709 |
| 0.113386511 | 0.124372657 | 0.130836703 | 0.247285989 |
| 0.278828133 | 0.290497324 | 0.114926843 | 0.043743759 |
| 0.297858119 | 0.145530425 | 0.315283488 | 0.30409053  |
| 0.364766461 | 0.370515416 | 0.383419361 | 0.163206632 |
| 0.141312425 | 0.197838202 | 0.142808309 | 0.171124592 |
| 0.327400873 | 0.120922257 | 0.329525613 | 0.09751081  |
| 0.226111213 | 0.166667449 | 0.114203701 | 0.177609357 |
| 0.136404521 | 0.250234283 | 0.182530762 | 0.155114726 |
| 0.128311288 | 0.101595    | 0.143756106 | 0.211084561 |
| 0.261702145 | 0.057249625 | 0.226185718 | 0.165455795 |
| 0.279690983 | 0.063150246 | 0.20018335  | 0.367367986 |
| 0.201542095 | 0.15797775  | 0.097354212 | 0.26191877  |
| 0.235113473 | 0.111602267 | 0.047102337 | 0.262520543 |
| 0.335598439 | 0.168269263 | 0.334118464 | 0.325312398 |
| 0.192592437 | 0.119464103 | 0.093114202 | 0.156145021 |
| 0.23198823  | 0.122617603 | 0.207695059 | 0.159035032 |
| 0.362856235 | 0.394471519 | 0.271792242 | 0.171453646 |
| 0.147997822 | 0.149947914 | 0.105972188 | 0.283288031 |
| 0.078806828 | 0.110407317 | 0.07774387  | 0.248193729 |
| 0.015210181 | 0.054270171 | 0.335832689 | 0.17257412  |
| 0.38854251  | 0.306885456 | 0.343780853 | 0.183074445 |
| 0.003690851 | 0.180164948 | 0.179230873 | 0.107859528 |
| 0.260788075 | 0.279064718 | 0.160630435 | 0.149648433 |
| 0.330479919 | 0.140749125 | 0.142281373 | 0.103997306 |
| 0.042713554 | 0.171661868 | 0.291617604 | 0.203542247 |
| 0.193094669 | 0.158539341 | 0.08888248  | 0.186567584 |
| 0.086104764 | 0.302009221 | 0.287528865 | 0.072244317 |
| 0.042446384 | 0.306318765 | 0.230099076 | 0.090705777 |

|             |             |             |             |
|-------------|-------------|-------------|-------------|
| 0.128664523 | 0.282875342 | 0.338189696 | 0.004953558 |
| 0.200881631 | 0.055903091 | 0.171212769 | 0.162194723 |
| 0.186489196 | 0.169215581 | 0.228642576 | 0.144454249 |
| 0.198595071 | 0.188614147 | 0.158691457 | 0.240566957 |
| 0.173463515 | 1           | 0.185931859 | 0.13317152  |
| 0.12481603  | 0.156936337 | 0.222076072 | 0.213881384 |
| 0.117141309 | 0.291362017 | 0.318539121 | 0.152528649 |
| 0.252593377 | 0.137200496 | 0.362750108 | 0.304825981 |
| 0.358270607 | 0.177208938 | 0.14425366  | 0.253522693 |
| 0.047793357 | 0.104811005 | 0.114393309 | 0.162223616 |
| 0.213415251 | 0.095512265 | 0.133344647 | 0.147907997 |
| 0.191719561 | 0.363588252 | 0.308256753 | 0.351484742 |
| 0.148108688 | 0.124884369 | 0.061886995 | 0.135510051 |
| 0.148463421 | 0.22792253  | 0.136768122 | 0.017798165 |
| 0.223329559 | 0.13163433  | 0.259059282 | 0.327504134 |
| 0.076264982 | 0.359710425 | 0.063286604 | 0.118892358 |
| 0.056369945 | 0.218030228 | 0.242341641 | 0.225989417 |
| 0.04977676  | 0.195961556 | 0.17586604  | 0.104759959 |
| 0.228168402 | 0.207466168 | 0.140860433 | 0.171823574 |
| 0.228780685 | 0.212838553 | 0.368982056 | 0.142032948 |
| 0.132812572 | 0.116024727 | 0.139237658 | 0.128723548 |
| 0.17261467  | 0.325814194 | 0.14503159  | 0.319066208 |
| 0.108769604 | 0.236083493 | 0.405360705 | 0.183935364 |
| 0.183557784 | 0.182761089 | 0.053365904 | 0.106910196 |
| 0.171249963 | 0.086140832 | 0.002755177 | 0.030376105 |
| 0.263540722 | 0.113835188 | 0.204620864 | 0.26107436  |
| 0.131034419 | 0.308387227 | 0.058529399 | 0.152213864 |
| 0.308552207 | 0.363264119 | 0.112198828 | 0.322001843 |
| 0.25827398  | 0.162507775 | 0.168327516 | 0.023780686 |
| 0.144922158 | 0.12753723  | 0.077900054 | 0.150499037 |
| 0.096482894 | 0.055523124 | 0.154041946 | 0.144016322 |
| 0.307337987 | 0.050606901 | 0.165282091 | 0.219962201 |
| 0.265222963 | 0.36652078  | 0.188220669 | 0.229483188 |
| 0.101242638 | 0.277958514 | 0.11834489  | 0.113817944 |
| 0.111969867 | 0.098663308 | 0.255604482 | 0.086346694 |
| 0.117351955 | 0.138210452 | 0.008630422 | 0.370160072 |
| 0.332317662 | 0.099310892 | 0.305295894 | 0.065376388 |
| 0.283888372 | 0.323585411 | 0.112953788 | 0.114082842 |
| 0.057085004 | 0.144992203 | 0.256265585 | 0.273238033 |
| 0.043325125 | 0.145474733 | 0.152830317 | 0.125802065 |
| 0.365842042 | 0.089342079 | 0.327664451 | 0.065444689 |
| 0.313864362 | 0.276293139 | 0.201575788 | 0.177196616 |
| 0.164093207 | 0.160177396 | 0.090089342 | 0.359319205 |
| 0.177796661 | 0.093395098 | 0.261381614 | 0.151189808 |
| 0.093285855 | 0.316428252 | 0.139934151 | 0.358076024 |
| 0.143955167 | 0.274291239 | 0.259885813 | 0.307100136 |
| 0.324467951 | 0.106495431 | 0.079738891 | 0.127523288 |
| 0.296593861 | 0.112169012 | 0.11687746  | 0.264291183 |
| 0.069225195 | 0.263714716 | 0.14574734  | 0.151931293 |
| 0.086986086 | 0.211626408 | 0.121363196 | 0.230734997 |
| 0.209450024 | 0.146009686 | 0.136242185 | 0.371242008 |
| 0.138560038 | 0.06232225  | 0.394036873 | 0.007272012 |
| 0.159615401 | 0.197533805 | 0.234554386 | 0.133942322 |
| 0.257070056 | 0.194706166 | 0.125180093 | 0.007089441 |



|             |             |             |             |
|-------------|-------------|-------------|-------------|
| 0.268490484 | 0.069991601 | 0.149002042 | 0.116167207 |
| 0.080947473 | 0.115646083 | 0.339108651 | 0.33130173  |
| 0.252493854 | 0.108297021 | 0.068214812 | 0.316899573 |
| 0.062262584 | 0.069330137 | 0.083570986 | 0.178639792 |
| 0.078255241 | 0.075913322 | 0.093207651 | 0.085829372 |
| 0.241955024 | 0.185426936 |             |             |
| PTPN7       | 0.057391171 | 0.368996918 | 0.038084258 |
| 0.124112051 | 0.284210904 | 0.252976782 | 0.053695974 |
| 0.110110597 | 0.292036939 | 0.187884818 | 0.265462886 |
| 0.016650193 | 0.145688145 | 0.423918582 | 0.052984986 |
| 0.296706152 | 0.039482281 | 0.094246667 | 0.077017607 |
| 0.173663371 | 0.258257132 | 0.269242371 | 0.215077061 |
| 0.268726858 | 0.161108264 | 0.218121121 | 0.283338092 |
| 0.456693705 | 0.204637467 | 0.339588426 | 0.139618257 |
| 0.381953164 | 0.281216423 | 0.282671129 | 0.014820257 |
| 0.270351778 | 0.03083002  | 0.388814635 | 0.233053758 |
| 0.214637141 | 0.311169564 | 0.197014326 | 0.204624598 |
| 0.231996001 | 0.028882638 | 0.133738469 | 0.331764573 |
| 0.226472402 | 0.234509482 | 0.042154755 | 0.338329442 |
| 0.265365552 | 0.258889568 | 0.28933131  | 0.002415239 |
| 0.274404159 | 0.125228429 | 0.229283476 | 0.451446963 |
| 0.165896284 | 0.1167457   | 0.224770487 | 0.181295656 |
| 0.273398946 | 0.320844771 | 0.223032554 | 0.236306031 |
| 0.452331443 | 0.215753795 | 0.372411781 | 0.151479079 |
| 0.241727247 | 0.026000619 | 0.139547095 | 0.058156598 |
| 0.282406705 | 0.178470127 | 0.274164688 | 0.291769975 |
| 0.359912109 | 0.467552009 | 0.190671298 | 0.434070161 |
| 0.137728946 | 0.290669015 | 0.28010363  | 0.286557841 |
| 0.308931954 | 0.075117387 | 0.351153323 | 0.479276794 |
| 0.040692968 | 0.227204106 | 0.316251653 | 0.087731589 |
| 0.377883977 | 0.261769485 | 0.227821173 | 0.216012432 |
| 0.344625179 | 0.277031236 | 0.420846912 | 0.235768988 |
| 0.275840746 | 0.048159738 | 0.409419955 | 0.289026278 |
| 0.250016245 | 0.061441563 | 0.234882025 | 0.440364027 |
| 0.305532635 | 0.451881416 | 0.365429647 | 0.322568835 |
| 0.28945005  | 0.458903774 | 0.327759398 | 0.377526748 |
| 0.120595156 | 0.471883174 | 0.144943561 | 0.04486437  |
| 0.051643282 | 0.09250218  | 0.227877249 | 0.288385934 |
| 0.444627944 | 0.261826232 | 0.150768622 | 0.215503066 |
| 0.454345737 | 0.402847839 | 0.467392332 | 0.371459135 |
| 0.034692392 | 0.255350437 | 0.293268405 | 0.199919735 |
| 0.300572559 | 0.093532805 | 0.268341721 | 0.44095973  |
| 0.351886177 | 0.411275886 | 0.120986258 | 0.440680097 |
| 0.157343922 | 0.481292048 | 0.394091727 | 0.14188417  |
| 0.46486044  | 0.429000853 | 0.491101971 | 0.366277578 |
| 0.425228387 | 0.228949796 | 0.053598463 | 0.343253008 |
| 0.465764087 | 0.024038257 | 0.448398426 | 0.475443814 |
| 0.441869248 | 0.437794941 | 0.502067189 | 0.481586389 |
| 0.444171018 | 0.059007946 | 0.030871336 | 0.254609696 |
| 0.448389226 | 0.368285092 | 0.148914106 | 0.278638227 |
| 0.285675159 | 0.239962011 | 0.384530666 | 0.221995451 |
| 0.481434554 | 0.432499123 | 0.454063222 | 0.328780238 |
| 0.19803995  | 0.28670308  | 0.287116423 | 0.395195447 |
| 0.049578005 | 0.082439128 | 0.035423076 | 0.272007011 |

|             |             |             |             |
|-------------|-------------|-------------|-------------|
| 0.217228992 | 0.158609174 | 0.234973098 | 0.268329755 |
| 0.16109512  | 0.213782758 | 0.279642807 | 0.351280652 |
| 0.042990033 | 0.265709236 | 0.133495285 | 0.120734636 |
| 0.046679258 | 0.126298535 | 0.151659171 | 0.139105529 |
| 0.224856495 | 0.194912296 | 0.35083145  | 0.470788554 |
| 0.271198776 | 0.139900732 | 0.328768375 | 0.459565207 |
| 0.416696379 | 0.300755189 | 0.196181615 | 0.015170149 |
| 0.222970913 | 0.228828336 | 0.225955537 | 0.288392652 |
| 0.153595918 | 0.190892113 | 0.281626503 | 0.377425416 |
| 0.176353152 | 0.101673597 | 0.273994328 | 0.385077236 |
| 0.113433559 | 0.260250321 | 0.427474355 | 0.252357934 |
| 0.003492819 | 0.23085957  | 0.403873454 | 0.18411555  |
| 0.23615295  | 0.15267956  | 0.243541366 | 0.439915892 |
| 0.261169473 | 0.236494565 | 0.468288242 | 0.375170882 |
| 0.231123058 | 0.182466365 | 0.497469752 | 0.063828011 |
| 0.279091369 | 0.090553798 | 0.258316095 | 0.202509715 |
| 0.185464505 | 0.269851428 | 0.279870992 | 0.278234193 |
| 0.088582686 | 0.462815672 | 0.360657937 | 0.471516188 |
| 0.275053155 | 0.496847454 | 0.432096775 | 0.411190904 |
| 0.277973665 | 0.266778275 | 0.17311484  | 0.395979331 |
| 0.435282818 | 0.237380763 | 0.053232763 | 0.391698848 |
| 0.244804845 | 0.353446542 | 0.191177    | 0.467506327 |
| 0.454696074 | 0.394388633 | 0.13894945  | 0.367239363 |
| 0.35002079  | 0.17145324  | 0.39865295  | 0.497540925 |
| 0.204909147 | 0.270294226 | 0.275459719 | 0.415241544 |
| 0.133745396 | 0.222995885 | 0.296795812 | 0.217080725 |
| 0.015368279 | 0.06107084  | 0.04902051  | 0.163698634 |
| 0.22244775  | 0.290699    | 0.33068864  | 0.475101517 |
| 0.101079681 | 0.38863422  | 0.198685056 | 0.235413233 |
| 0.373399759 | 0.274987752 | 0.297822071 | 0.311188798 |
| 0.216895381 | 0.024290559 | 0.106306514 | 0.466175125 |
| 0.026223475 | 0.257051537 | 0.214916208 | 0.003093763 |
| 0.035982202 | 0.338639042 | 0.07985664  | 0.172931857 |
| 0.472176271 | 0.173266556 | 0.150296953 | 0.201960099 |
| 0.311551363 | 0.078213245 | 0.006436647 | 0.453797546 |
| 0.444017788 | 0.4198303   | 0.437453904 | 0.401816013 |
| 0.416076817 | 0.349172203 | 0.394248294 | 0.213618457 |
| 0.09754333  | 0.068950355 | 0.230778003 | 0.240221736 |
| 0.003606038 | 0.366135353 | 0.265954311 | 0.116703539 |
| 0.381420115 | 0.244926441 | 0.033488542 | 0.283258206 |
| 0.018319516 | 0.218626001 | 0.20425368  | 0.200204878 |
| 0.34422389  | 0.013101333 | 0.16622359  | 0.262031729 |
| 0.367328845 | 0.295668092 | 0.29944153  | 0.482444531 |
| 0.24984758  | 0.089132846 | 0.267870662 | 0.363457017 |
| 0.0666161   | 0.102908966 | 0.225921116 | 0.027810212 |
| 0.16182109  | 0.408032972 | 0.286307302 | 0.06058277  |
| 0.201995556 | 0.004619285 | 0.318156664 | 0.481790943 |
| 0.398689155 | 0.491308316 | 0.459750523 | 0.265981845 |
| 0.457313748 | 0.137929636 | 0.483767138 | 0.343756259 |
| 0.230988138 | 0.000871932 | 0.006524457 | 0.466531963 |
| 0.290418184 | 0.042451876 | 0.125104132 | 0.229154858 |
| 0.105312658 | 0.0976884   | 0.061980708 | 0.230106677 |
| 0.300046385 | 0.236033883 | 0.217541307 | 0.403533086 |
| 0.204757453 | 0.195597614 | 0.235244526 | 0.065935435 |

|             |             |             |             |
|-------------|-------------|-------------|-------------|
| 0.296397446 | 0.050991545 | 0.066602155 | 0.010140296 |
| 0.337242562 | 0.092243849 | 0.395633339 | 0.455949254 |
| 0.461849594 | 0.360272191 | 0.211166361 | 0.224692447 |
| 0.417355666 | 0.06495169  | 0.275847484 | 0.068915068 |
| 0.421925728 | 0.307308911 | 0.291224512 | 0.268915121 |
| 0.471904858 | 0.426926719 | 0.031473458 | 0.373476716 |
| 0.013814788 | 0.003878867 | 0.220448696 | 0.21983442  |
| 0.085392931 | 0.274063145 | 0.226792016 | 0.188658388 |
| 0.20179002  | 0.026522625 | 0.26218014  | 0.262890595 |
| 0.239990766 | 0.272499332 | 0.265622494 | 0.209211357 |
| 0.260339762 | 0.179928943 | 0.191027068 | 0.141393339 |
| 0.199438992 | 0.266583848 | 0.163041344 | 0.020770911 |
| 0.268668525 | 0.291987823 | 0.049896618 | 0.124299481 |
| 0.415887739 | 0.460634665 | 0.04465144  | 0.014856714 |
| 0.229308408 | 0.256060402 | 0.479149784 | 0.441442191 |
| 0.461169385 | 0.487001725 | 0.356886144 | 0.141072625 |
| 0.05917428  | 0.257283771 | 0.281663139 | 0.143002581 |
| 0.465137085 | 0.04183513  | 0.429106674 | 0.284941837 |
| 0.092906137 | 0.184672511 | 0.038802155 | 0.076201085 |
| 0.294625135 | 0.138949582 | 0.180100957 | 0.098220837 |
| 0.250544941 | 0.280266213 | 0.045943021 | 0.15782794  |
| 0.29739981  | 0.218109783 | 0.128502064 | 0.21728766  |
| 0.311090825 | 0.151487147 | 0.375500235 | 0.419271406 |
| 0.095382193 | 0.086222986 | 0.171914919 | 0.345022793 |
| 0.40038416  | 0.246266517 | 0.024175405 | 0.386676896 |
| 0.467026456 | 0.332473245 | 0.437535423 | 0.387185748 |
| 0.065043257 | 0.282840873 | 0.269911288 | 0.269908581 |
| 0.149572626 | 0.248229347 | 0.202635824 | 0.051485312 |
| 0.284012381 | 0.428000442 | 0.373060009 | 0.1512529   |
| 0.272221305 | 0.07859749  | 0.035912518 | 0.410509617 |
| 0.220106406 | 0.068556902 | 0.204459232 | 0.403483052 |
| 0.00619235  | 0.196714546 | 0.47686026  | 0.194904117 |
| 0.477893089 | 0.463648048 | 0.406054997 | 0.1983471   |
| 0.006408821 | 0.353140475 | 0.280179858 | 0.282909386 |
| 0.373997546 | 0.29266537  | 0.133913033 | 0.080412948 |
| 0.275211847 | 0.05644024  | 0.127591527 | 0.220512306 |
| 0.175416685 | 0.270308851 | 0.175622779 | 0.157718991 |
| 0.202722466 | 0.065366531 | 0.256034357 | 0.19774487  |
| 0.191803993 | 0.214612571 | 0.323370186 | 0.178565028 |
| 0.18383959  | 0.413496502 | 0.346060826 | 0.022996943 |
| 0.292951972 | 0.383447809 | 0.416572335 | 0.002252051 |
| 0.366234385 | 0.008401477 | 0.190016124 | 0.204503017 |
| 0.19524563  | 0.190610541 | 0.231111026 | 0.28220653  |
| 0.253064922 | 0.191793892 | 0.226552729 | 0.190648226 |
| 0.16731849  | 0.185931859 | 1           | 0.24747311  |
| 0.24870823  | 0.105061969 | 0.084568319 | 0.08499297  |
| 0.051121432 | 0.422160803 | 0.219090564 | 0.05435048  |
| 0.185867739 | 0.259767494 | 0.343232927 | 0.429231647 |
| 0.41234544  | 0.087131564 | 0.249164759 | 0.387895114 |
| 0.177397197 | 0.214981351 | 0.046619007 | 0.265335097 |
| 0.18270485  | 0.210406123 | 0.257557372 | 0.186914965 |
| 0.315819354 | 0.364798552 | 0.209536242 | 0.413924413 |
| 0.293326529 | 0.244398019 | 0.184435077 | 0.092206605 |
| 0.136989788 | 0.103683167 | 0.260294361 | 0.002229051 |

|             |             |             |             |
|-------------|-------------|-------------|-------------|
| 0.265916163 | 0.178616572 | 0.435944987 | 0.426335996 |
| 0.266622368 | 0.366848077 | 0.178721808 | 0.071440763 |
| 0.170355196 | 0.143206973 | 0.113646501 | 0.375596007 |
| 0.225371183 | 0.157900667 | 0.272149457 | 0.196158643 |
| 0.390562269 | 0.35682135  | 0.253647696 | 0.180963889 |
| 0.199820411 | 0.142620187 | 0.423168213 | 0.089693247 |
| 0.277403188 | 0.226543654 | 0.219225204 | 0.241524325 |
| 0.21217801  | 0.482842621 | 0.048702956 | 0.487708677 |
| 0.260194636 | 0.107309615 | 0.452739447 | 0.212105818 |
| 0.231578237 | 0.142692641 | 0.22376132  | 0.239538267 |
| 0.19413896  | 0.284725068 | 0.013670074 | 0.071735837 |
| 0.295409763 | 0.225006905 | 0.331791833 | 0.318676122 |
| 0.260713511 | 0.334915773 | 0.204791868 | 0.200414446 |
| 0.406209684 | 0.427048025 | 0.195438664 | 0.231700254 |
| 0.285866423 | 0.092064195 | 0.253153755 | 0.022216664 |
| 0.299304595 | 0.292871684 | 0.23842702  | 0.051677901 |
| 0.019945465 | 0.235970886 | 0.285510772 | 0.046392698 |
| 0.471971611 | 0.232330425 | 0.2428185   | 0.363981952 |
| 0.142935918 | 0.428090584 | 0.141126817 | 0.35822181  |
| 0.039414337 | 0.211995351 | 0.290179265 | 0.253308191 |
| 0.216551736 | 0.277108784 | 0.347667763 | 0.25473015  |
| 0.033864415 | 0.243088458 | 0.002487904 | 0.35827829  |
| 0.397594535 | 0.284045378 | 0.180736486 | 0.195197871 |
| 0.255278756 | 0.35713794  | 0.204432075 | 0.275985125 |
| 0.014090342 | 0.289180532 | 0.166020547 | 0.361148426 |
| 0.196155077 | 0.242333844 | 0.067748311 | 0.272368354 |
| 0.382205047 | 0.218731004 | 0.230910891 | 0.24033398  |
| 0.431886854 | 0.34290693  | 0.123611078 | 0.243474629 |
| 0.275652215 | 0.046378792 | 0.233216754 | 0.485195377 |
| 0.166399976 | 0.248623002 | 0.436511362 | 0.178570274 |
| 0.277537016 | 0.345172049 | 0.275906492 | 0.471727848 |
| 0.09352684  | 0.206037929 | 0.39483445  | 0.41928424  |
| 0.290992156 | 0.21697243  | 0.245232819 | 0.21795418  |
| 0.390126737 | 0.082705149 | 0.266234669 | 0.297385339 |
| 0.237031547 | 0.256356899 | 0.212876926 | 0.212245107 |
| 0.037446274 | 0.155426181 | 0.254803607 | 0.110990191 |
| 0.227580957 | 0.282705201 | 0.249954341 | 0.37213644  |
| 0.134653386 | 0.029898926 | 0.430810806 | 0.034508647 |
| 0.209582668 | 0.320804146 | 0.18913439  | 0.299751625 |
| 0.155791964 | 0.239625424 | 0.199275064 | 0.000670627 |
| 0.386974284 | 0.092414795 | 0.251570322 | 0.220204185 |
| 0.240380193 | 0.042187821 | 0.410640718 | 0.489814806 |
| 0.23814216  | 0.252926332 | 0.25742339  | 0.410579962 |
| 0.204003017 | 0.257817351 | 0.261052685 | 0.295990759 |
| 0.253625002 | 0.234027578 | 0.270194978 | 0.288411255 |
| 0.310435476 | 0.199842364 |             |             |
| PUS10       | 0.051760619 | 0.39772406  | 0.044404631 |
| 0.093602886 | 0.195217016 | 0.162419721 | 0.053923185 |
| 0.08093211  | 0.326712696 | 0.153122144 | 0.190199624 |
| 0.018446191 | 0.041368461 | 0.404898421 | 0.048862231 |
| 0.253207682 | 0.033165381 | 0.078957826 | 0.049585046 |
| 0.152531546 | 0.168898457 | 0.135284809 | 0.183461631 |
| 0.163169192 | 0.208125896 | 0.249882028 | 0.213015479 |
| 0.459918144 | 0.100912271 | 0.290143432 | 0.12243514  |

|             |             |             |             |
|-------------|-------------|-------------|-------------|
| 0.40475706  | 0.203913114 | 0.164654629 | 0.021128292 |
| 0.205899831 | 0.015283791 | 0.440766664 | 0.148727063 |
| 0.098098677 | 0.332716461 | 0.158150328 | 0.131682628 |
| 0.198206601 | 0.033822743 | 0.08746824  | 0.302687609 |
| 0.25458986  | 0.161396679 | 0.054415147 | 0.329488889 |
| 0.182077162 | 0.246512169 | 0.31347158  | 0.000930945 |
| 0.127634268 | 0.043332601 | 0.103707813 | 0.467004362 |
| 0.166266409 | 0.080422302 | 0.147084705 | 0.135070709 |
| 0.253970299 | 0.293410862 | 0.213657879 | 0.181340419 |
| 0.45243745  | 0.085856551 | 0.340050659 | 0.103101291 |
| 0.17984271  | 0.037639963 | 0.162730289 | 0.095164383 |
| 0.182802349 | 0.127389683 | 0.173526984 | 0.159723253 |
| 0.400291347 | 0.488392732 | 0.205691269 | 0.476985588 |
| 0.067525615 | 0.209369951 | 0.152878437 | 0.267761193 |
| 0.307009548 | 0.077117681 | 0.315801858 | 0.492207518 |
| 0.047277184 | 0.237580801 | 0.315870495 | 0.120447022 |
| 0.381345504 | 0.141561718 | 0.202355239 | 0.080024008 |
| 0.276862864 | 0.207470016 | 0.459131117 | 0.22834491  |
| 0.149066039 | 0.075575121 | 0.458577716 | 0.191710718 |
| 0.13442335  | 0.076583808 | 0.13286718  | 0.402553757 |
| 0.290830106 | 0.43887993  | 0.374311782 | 0.323116603 |
| 0.217039384 | 0.458959568 | 0.315499222 | 0.375826324 |
| 0.072032387 | 0.484166239 | 0.131722084 | 0.03269335  |
| 0.054552594 | 0.061629578 | 0.137429338 | 0.286120129 |
| 0.417351821 | 0.241882024 | 0.111340406 | 0.146451165 |
| 0.418547013 | 0.444995393 | 0.486879676 | 0.35391515  |
| 0.036482664 | 0.136248885 | 0.224730976 | 0.134397768 |
| 0.276004739 | 0.104444998 | 0.127864574 | 0.480155314 |
| 0.352716605 | 0.37666724  | 0.103553881 | 0.482598951 |
| 0.120398415 | 0.476724536 | 0.407323007 | 0.111594646 |
| 0.492275145 | 0.465585201 | 0.473914617 | 0.286223139 |
| 0.4384976   | 0.182154324 | 0.038012268 | 0.35219178  |
| 0.439527556 | 0.009715545 | 0.422427867 | 0.454067124 |
| 0.468958869 | 0.400864509 | 0.485305372 | 0.460409502 |
| 0.460182377 | 0.076339416 | 0.023830436 | 0.214203243 |
| 0.480806597 | 0.365653542 | 0.087613486 | 0.221723337 |
| 0.227408168 | 0.177150958 | 0.350072013 | 0.122782658 |
| 0.476347252 | 0.416095167 | 0.437213519 | 0.321518509 |
| 0.212985391 | 0.302602836 | 0.211338193 | 0.441581966 |
| 0.043562934 | 0.071538405 | 0.058723773 | 0.27171036  |
| 0.158801755 | 0.129458588 | 0.167387916 | 0.22501316  |
| 0.153348345 | 0.158266633 | 0.138158701 | 0.270608043 |
| 0.079745354 | 0.236285514 | 0.123177071 | 0.125661168 |
| 0.040540828 | 0.164695563 | 0.095864203 | 0.087281615 |
| 0.136992499 | 0.264800997 | 0.307530186 | 0.460220832 |
| 0.173776193 | 0.180808413 | 0.306559013 | 0.437740433 |
| 0.396093711 | 0.211366651 | 0.207801002 | 0.014580052 |
| 0.136895899 | 0.150799403 | 0.095201464 | 0.223462827 |
| 0.210070726 | 0.125366722 | 0.248008154 | 0.300205288 |
| 0.161438796 | 0.094404681 | 0.171537158 | 0.400724823 |
| 0.157857256 | 0.136602799 | 0.392291171 | 0.241268278 |
| 0.006195424 | 0.192628129 | 0.376454817 | 0.10003327  |
| 0.247759328 | 0.05825885  | 0.100811709 | 0.433054277 |
| 0.123663487 | 0.117243791 | 0.440103854 | 0.3046016   |

|             |             |             |             |
|-------------|-------------|-------------|-------------|
| 0.131313066 | 0.243019714 | 0.484024449 | 0.026090823 |
| 0.199747712 | 0.041268044 | 0.228223236 | 0.166230988 |
| 0.190309038 | 0.249790629 | 0.177354395 | 0.144663983 |
| 0.116441345 | 0.471997596 | 0.344421805 | 0.458400813 |
| 0.167723988 | 0.492869976 | 0.393673001 | 0.387653152 |
| 0.268068388 | 0.171439659 | 0.065358681 | 0.376333676 |
| 0.426168415 | 0.151740614 | 0.089940913 | 0.361757304 |
| 0.183001656 | 0.292981868 | 0.090634561 | 0.457498703 |
| 0.466764269 | 0.4425329   | 0.081008812 | 0.314718944 |
| 0.331869069 | 0.145988856 | 0.372231198 | 0.485030709 |
| 0.166916969 | 0.184363095 | 0.165973271 | 0.364346261 |
| 0.1573587   | 0.118438376 | 0.310598292 | 0.086905087 |
| 0.004315689 | 0.061942789 | 0.06099089  | 0.095475145 |
| 0.093232121 | 0.263981035 | 0.299545168 | 0.47202118  |
| 0.076648733 | 0.373068871 | 0.221452152 | 0.144097544 |
| 0.399983183 | 0.15547576  | 0.202932268 | 0.243147149 |
| 0.231363124 | 0.023056972 | 0.067235206 | 0.49501682  |
| 0.050567972 | 0.109384197 | 0.160481458 | 0.002298458 |
| 0.040913913 | 0.355668263 | 0.128190973 | 0.221958959 |
| 0.423514022 | 0.2293575   | 0.183096064 | 0.169117709 |
| 0.257689004 | 0.076553874 | 0.003466316 | 0.461932488 |
| 0.463074334 | 0.442111669 | 0.459686007 | 0.440154748 |
| 0.424607283 | 0.327673288 | 0.364131027 | 0.192656987 |
| 0.079971266 | 0.0729149   | 0.120295383 | 0.153752321 |
| 0.003624857 | 0.316945834 | 0.169356824 | 0.136877577 |
| 0.323523146 | 0.24460859  | 0.030698708 | 0.216752149 |
| 0.02240693  | 0.092282106 | 0.148075993 | 0.12643851  |
| 0.288007324 | 0.017811512 | 0.117103282 | 0.150054118 |
| 0.393645873 | 0.30993617  | 0.162449668 | 0.493191702 |
| 0.184579786 | 0.141082478 | 0.16952592  | 0.296683839 |
| 0.060637375 | 0.071130433 | 0.169693899 | 0.025903183 |
| 0.077641422 | 0.427885148 | 0.166264925 | 0.070652269 |
| 0.197364171 | 0.00688298  | 0.338362855 | 0.481497942 |
| 0.433526186 | 0.475393961 | 0.451458293 | 0.120880284 |
| 0.467187849 | 0.053540677 | 0.479577498 | 0.364886328 |
| 0.16768088  | 0.001105884 | 0.004252716 | 0.442826556 |
| 0.22938532  | 0.077996713 | 0.135955675 | 0.146875035 |
| 0.078656799 | 0.093811477 | 0.050498932 | 0.111976082 |
| 0.263535387 | 0.131410359 | 0.089237201 | 0.43538191  |
| 0.146561736 | 0.157703962 | 0.168406004 | 0.098580446 |
| 0.235122803 | 0.045743564 | 0.102668677 | 0.006137292 |
| 0.281431304 | 0.138175931 | 0.449068855 | 0.464922369 |
| 0.456994801 | 0.29710804  | 0.14564186  | 0.123970551 |
| 0.397487941 | 0.102948397 | 0.152929427 | 0.100610233 |
| 0.444922493 | 0.267540189 | 0.271066253 | 0.288928347 |
| 0.460733287 | 0.436527758 | 0.031886332 | 0.352700632 |
| 0.012671435 | 0.001693972 | 0.191166808 | 0.215101567 |
| 0.056527516 | 0.180102191 | 0.245572674 | 0.147036342 |
| 0.131628704 | 0.024398227 | 0.136909327 | 0.12834966  |
| 0.224137152 | 0.194381257 | 0.148436886 | 0.233374533 |
| 0.153015623 | 0.098937566 | 0.114574596 | 0.09337355  |
| 0.129688539 | 0.314676522 | 0.20930942  | 0.025796564 |
| 0.224271866 | 0.211588146 | 0.046983436 | 0.143106548 |
| 0.389790602 | 0.43755439  | 0.04631815  | 0.012248536 |

|             |             |             |             |
|-------------|-------------|-------------|-------------|
| 0.244125876 | 0.152423066 | 0.440512871 | 0.453617366 |
| 0.485697023 | 0.484653956 | 0.378510588 | 0.082197605 |
| 0.050869591 | 0.222951062 | 0.171201936 | 0.080437677 |
| 0.455099563 | 0.073641708 | 0.440873928 | 0.155198214 |
| 0.11553404  | 0.144717464 | 0.027524578 | 0.072778956 |
| 0.214273587 | 0.140469165 | 0.109504944 | 0.137324003 |
| 0.157210214 | 0.120369984 | 0.046762453 | 0.145914912 |
| 0.299061535 | 0.114318696 | 0.133889529 | 0.154090724 |
| 0.330435518 | 0.129209751 | 0.330650152 | 0.423767556 |
| 0.119942804 | 0.096522546 | 0.14182273  | 0.30840401  |
| 0.390754331 | 0.225123934 | 0.01563865  | 0.414355814 |
| 0.438686932 | 0.287460711 | 0.456343308 | 0.351672678 |
| 0.095308642 | 0.183748999 | 0.153542612 | 0.211125146 |
| 0.141546606 | 0.163509272 | 0.144811273 | 0.062864083 |
| 0.29613358  | 0.457436476 | 0.39869644  | 0.097237943 |
| 0.234402133 | 0.112812193 | 0.066178124 | 0.38960897  |
| 0.112899068 | 0.058738052 | 0.157060454 | 0.369007281 |
| 0.004220694 | 0.070381191 | 0.45989143  | 0.110072534 |
| 0.489415895 | 0.448089356 | 0.413609738 | 0.137413522 |
| 0.002379695 | 0.306716312 | 0.237764615 | 0.179577681 |
| 0.384829975 | 0.288021056 | 0.085434192 | 0.058257227 |
| 0.269877281 | 0.088210618 | 0.090047322 | 0.145969904 |
| 0.112750603 | 0.261231579 | 0.17983043  | 0.163756579 |
| 0.125181042 | 0.111028373 | 0.112151483 | 0.133230725 |
| 0.105182698 | 0.211151393 | 0.307983046 | 0.133850812 |
| 0.08732807  | 0.397933091 | 0.358573721 | 0.025590388 |
| 0.180287542 | 0.384015803 | 0.394850256 | 0.00313503  |
| 0.313457868 | 0.008147498 | 0.106748358 | 0.118367875 |
| 0.118747254 | 0.116370911 | 0.183943505 | 0.159428342 |
| 0.255966615 | 0.141540084 | 0.138748003 | 0.174683995 |
| 0.098683497 | 0.13317152  | 0.24747311  | 1           |
| 0.128235616 | 0.08510689  | 0.130091361 | 0.137875878 |
| 0.034005461 | 0.408389103 | 0.239416416 | 0.088535472 |
| 0.164818495 | 0.180649105 | 0.33653131  | 0.458742881 |
| 0.378928923 | 0.138407876 | 0.158719836 | 0.393740208 |
| 0.108281945 | 0.126560356 | 0.0465519   | 0.235508292 |
| 0.134520181 | 0.100066848 | 0.203313972 | 0.216995536 |
| 0.321332112 | 0.385824844 | 0.222875293 | 0.416449027 |
| 0.176137445 | 0.192802051 | 0.148326156 | 0.057516068 |
| 0.11417704  | 0.141165121 | 0.153005614 | 0.003811529 |
| 0.24082273  | 0.135281896 | 0.411529368 | 0.461598439 |
| 0.126616102 | 0.355515203 | 0.135197779 | 0.064784961 |
| 0.139632283 | 0.209956725 | 0.132456891 | 0.353257955 |
| 0.094007074 | 0.10884752  | 0.188909623 | 0.144438795 |
| 0.35258171  | 0.347282592 | 0.142717814 | 0.124937989 |
| 0.172173952 | 0.176092748 | 0.464335587 | 0.085120629 |
| 0.262509371 | 0.107829262 | 0.238377675 | 0.153073532 |
| 0.126098699 | 0.47791726  | 0.054830783 | 0.475770927 |
| 0.160235199 | 0.145774233 | 0.459736712 | 0.158724619 |
| 0.15479531  | 0.071109646 | 0.094364284 | 0.170543025 |
| 0.131589443 | 0.14323297  | 0.00667139  | 0.0291518   |
| 0.261668302 | 0.161416067 | 0.356329903 | 0.302392794 |
| 0.138389279 | 0.305660556 | 0.073344354 | 0.151664913 |
| 0.448107669 | 0.46944683  | 0.125214838 | 0.244703233 |

|             |             |             |             |
|-------------|-------------|-------------|-------------|
| 0.274924274 | 0.064996616 | 0.248662587 | 0.012228403 |
| 0.266234534 | 0.253392061 | 0.156923497 | 0.041632468 |
| 0.022087074 | 0.110563695 | 0.276079507 | 0.081842803 |
| 0.438018428 | 0.091747042 | 0.259597237 | 0.319403595 |
| 0.173292225 | 0.471664958 | 0.077634206 | 0.301936958 |
| 0.053385605 | 0.216366525 | 0.193944725 | 0.193421284 |
| 0.115529523 | 0.146314033 | 0.311717459 | 0.113532241 |
| 0.030965277 | 0.135724142 | 0.004224897 | 0.395757177 |
| 0.458886037 | 0.178590799 | 0.21424026  | 0.134804354 |
| 0.227501902 | 0.35880279  | 0.109188946 | 0.206796174 |
| 0.012448839 | 0.223911413 | 0.139588298 | 0.355283064 |
| 0.113578852 | 0.233402136 | 0.048071365 | 0.174404066 |
| 0.439642644 | 0.1257754   | 0.24478866  | 0.164300588 |
| 0.452266085 | 0.353808254 | 0.176271966 | 0.119485291 |
| 0.281186997 | 0.07180238  | 0.160006706 | 0.487148118 |
| 0.099616124 | 0.113409988 | 0.383846673 | 0.124268948 |
| 0.139326357 | 0.348947714 | 0.267386898 | 0.480908003 |
| 0.051335379 | 0.191614632 | 0.351247728 | 0.42489564  |
| 0.25612166  | 0.101819439 | 0.109807447 | 0.121569644 |
| 0.425307024 | 0.059171183 | 0.139290914 | 0.299347727 |
| 0.111739777 | 0.225073191 | 0.241837498 | 0.106503729 |
| 0.024723552 | 0.098686946 | 0.142588847 | 0.12956931  |
| 0.192405789 | 0.211930993 | 0.146411099 | 0.366421195 |
| 0.069939657 | 0.023828852 | 0.429304796 | 0.011109037 |
| 0.189862825 | 0.265032156 | 0.153977798 | 0.168771544 |
| 0.189795937 | 0.237552643 | 0.202472287 | 0.000888116 |
| 0.361484165 | 0.049100338 | 0.14837935  | 0.119981002 |
| 0.123338075 | 0.04361982  | 0.423346571 | 0.460589932 |
| 0.231524572 | 0.140938296 | 0.135914539 | 0.418978693 |
| 0.085686938 | 0.144897654 | 0.147760745 | 0.300711149 |
| 0.108177171 | 0.172107576 | 0.170732283 | 0.164619057 |
| 0.305241924 | 0.131996503 |             |             |
| PYGB        | 0.048586931 | 0.243340714 | 0.03260492  |
| 0.127938677 | 0.28399792  | 0.149107955 | 0.03398215  |
| 0.065649201 | 0.172171668 | 0.045710394 | 0.286552657 |
| 0.022374364 | 0.083864392 | 0.349425641 | 0.035261904 |
| 0.268056819 | 0.040699512 | 0.083962736 | 0.02296956  |
| 0.061429076 | 0.262211482 | 0.1616583   | 0.146887884 |
| 0.200223447 | 0.15302417  | 0.151255567 | 0.170722513 |
| 0.337001419 | 0.098777734 | 0.303488312 | 0.043724306 |
| 0.327422057 | 0.303279398 | 0.170208552 | 0.014416999 |
| 0.203735148 | 0.006078143 | 0.295987887 | 0.163096867 |
| 0.137383326 | 0.280674597 | 0.080425535 | 0.194558158 |
| 0.109329757 | 0.027166028 | 0.040064358 | 0.233651311 |
| 0.137423449 | 0.095379989 | 0.033823278 | 0.256234476 |
| 0.087016406 | 0.252266477 | 0.177325696 | 0.003353812 |
| 0.172960435 | 0.054753894 | 0.099464905 | 0.336716136 |
| 0.218117135 | 0.124778921 | 0.062465173 | 0.080401272 |
| 0.176869575 | 0.233636522 | 0.203464421 | 0.075870611 |
| 0.36641027  | 0.116164224 | 0.256161539 | 0.11472699  |
| 0.135254803 | 0.011427787 | 0.160487856 | 0.035189205 |
| 0.111614414 | 0.205456296 | 0.265524588 | 0.147761186 |
| 0.238938001 | 0.353819831 | 0.169591097 | 0.301821136 |
| 0.049906809 | 0.242278386 | 0.14315665  | 0.2855142   |



|             |             |             |             |
|-------------|-------------|-------------|-------------|
| 0.215787393 | 0.029286238 | 0.356757298 | 0.378752936 |
| 0.017376065 | 0.130837847 | 0.230310872 | 0.073380864 |
| 0.28120971  | 0.082004373 | 0.132058435 | 0.166608434 |
| 0.300976964 | 0.244552694 | 0.286183087 | 0.281983447 |
| 0.184685981 | 0.044591297 | 0.28777739  | 0.26085848  |
| 0.225345957 | 0.061047594 | 0.135860296 | 0.329454416 |
| 0.266190235 | 0.359011873 | 0.244058769 | 0.258035669 |
| 0.239102902 | 0.367263189 | 0.307308178 | 0.277330949 |
| 0.025647357 | 0.347009107 | 0.15232613  | 0.053339168 |
| 0.029600422 | 0.073079357 | 0.076060897 | 0.265061401 |
| 0.357089735 | 0.229754043 | 0.122764234 | 0.209028631 |
| 0.370371451 | 0.280210689 | 0.33072472  | 0.302845811 |
| 0.030791224 | 0.086501824 | 0.239544776 | 0.092324027 |
| 0.260819614 | 0.079393627 | 0.209069772 | 0.329648785 |
| 0.344583376 | 0.348079666 | 0.062855116 | 0.326917758 |
| 0.074512062 | 0.406678077 | 0.283674632 | 0.169650727 |
| 0.356672489 | 0.324548776 | 0.411066761 | 0.347394553 |
| 0.338390033 | 0.198507428 | 0.012577181 | 0.255501111 |
| 0.413075209 | 0.031331253 | 0.326997427 | 0.357231895 |
| 0.323410579 | 0.351569136 | 0.394014716 | 0.373316305 |
| 0.321969803 | 0.054537343 | 0.005500597 | 0.282776799 |
| 0.33576903  | 0.350074264 | 0.083906282 | 0.198583248 |
| 0.259235687 | 0.164788956 | 0.274560175 | 0.153916399 |
| 0.398147232 | 0.337623444 | 0.329911255 | 0.250207169 |
| 0.097263899 | 0.264719241 | 0.198662642 | 0.289342118 |
| 0.042487132 | 0.069799115 | 0.03919415  | 0.213822014 |
| 0.076035255 | 0.192397982 | 0.129962422 | 0.185348237 |
| 0.212531541 | 0.1048862   | 0.131686416 | 0.336816943 |
| 0.035903475 | 0.218186451 | 0.108027968 | 0.094366675 |
| 0.05205848  | 0.119656164 | 0.148122918 | 0.138416751 |
| 0.234279147 | 0.146158533 | 0.265632282 | 0.35297807  |
| 0.123843744 | 0.143142887 | 0.266300053 | 0.390734417 |
| 0.401623298 | 0.261934587 | 0.183683096 | 0.039538694 |
| 0.138275921 | 0.060536007 | 0.101385405 | 0.200454334 |
| 0.121678601 | 0.117573145 | 0.24018259  | 0.384058874 |
| 0.15609064  | 0.048382884 | 0.132523659 | 0.326530344 |
| 0.091789305 | 0.203365725 | 0.386572559 | 0.159520737 |
| 0.004714586 | 0.207003135 | 0.3469013   | 0.102061876 |
| 0.178688775 | 0.145542084 | 0.169737563 | 0.352254105 |
| 0.110075031 | 0.120598361 | 0.355218056 | 0.344541024 |
| 0.112067584 | 0.123562513 | 0.384227779 | 0.021779981 |
| 0.160201489 | 0.116434401 | 0.316025957 | 0.076459281 |
| 0.201786163 | 0.260836852 | 0.262649924 | 0.179454125 |
| 0.09271513  | 0.350284274 | 0.292970998 | 0.377284896 |
| 0.116278938 | 0.382825715 | 0.363873622 | 0.377901052 |
| 0.251727679 | 0.123847009 | 0.099601024 | 0.347309674 |
| 0.345725098 | 0.077094795 | 0.046708098 | 0.274071765 |
| 0.099932303 | 0.297687813 | 0.099576528 | 0.396301262 |
| 0.367456782 | 0.267349071 | 0.121845298 | 0.345411688 |
| 0.36702016  | 0.192477537 | 0.302953184 | 0.386387155 |
| 0.053658457 | 0.199799972 | 0.157770825 | 0.385720552 |
| 0.160003977 | 0.126696194 | 0.227952287 | 0.09429221  |
| 0.014139182 | 0.044689197 | 0.052628021 | 0.176395055 |
| 0.159855217 | 0.186700269 | 0.270773133 | 0.367215018 |

|             |             |             |             |
|-------------|-------------|-------------|-------------|
| 0.112471975 | 0.329063731 | 0.146325536 | 0.1742379   |
| 0.291546318 | 0.153053389 | 0.24413192  | 0.273789057 |
| 0.191843989 | 0.037605311 | 0.134629774 | 0.357368038 |
| 0.020014711 | 0.175794512 | 0.121765423 | 0.010301195 |
| 0.027128249 | 0.208250178 | 0.067581825 | 0.162799859 |
| 0.392356936 | 0.153482227 | 0.153041507 | 0.056458085 |
| 0.330161215 | 0.08273208  | 0.020554591 | 0.321395749 |
| 0.294878575 | 0.274227227 | 0.287418495 | 0.261691385 |
| 0.277792739 | 0.236713904 | 0.321641385 | 0.164353868 |
| 0.06424972  | 0.034118642 | 0.142460576 | 0.201340245 |
| 0.002351148 | 0.35648432  | 0.18122315  | 0.148364956 |
| 0.303807043 | 0.198274669 | 0.035494125 | 0.229221464 |
| 0.03073835  | 0.130627963 | 0.082436799 | 0.11596407  |
| 0.303871642 | 0.012887157 | 0.113420554 | 0.128122687 |
| 0.293225103 | 0.267514871 | 0.127300172 | 0.363213524 |
| 0.28138129  | 0.064152188 | 0.226868134 | 0.350979111 |
| 0.050743045 | 0.02593999  | 0.092105229 | 0.012696566 |
| 0.072767595 | 0.277825745 | 0.110014309 | 0.042169821 |
| 0.240506682 | 0.008456882 | 0.284908098 | 0.377261072 |
| 0.279097015 | 0.388244688 | 0.37894139  | 0.215762549 |
| 0.363748362 | 0.046592346 | 0.367195084 | 0.261905989 |
| 0.09174176  | 0.00291172  | 0.011493013 | 0.368231178 |
| 0.258256793 | 0.032533335 | 0.151584987 | 0.127930356 |
| 0.11277101  | 0.058036244 | 0.043084136 | 0.164388723 |
| 0.253931615 | 0.251952336 | 0.136815619 | 0.286889968 |
| 0.16737005  | 0.19252246  | 0.101106457 | 0.05890498  |
| 0.257620616 | 0.054935948 | 0.052460869 | 0.025770493 |
| 0.30180898  | 0.075233133 | 0.27839542  | 0.341747648 |
| 0.389937654 | 0.336421325 | 0.06584981  | 0.114840951 |
| 0.293123724 | 0.053940582 | 0.104972668 | 0.060237645 |
| 0.312837123 | 0.301560909 | 0.338137871 | 0.278793195 |
| 0.399458671 | 0.354971709 | 0.028317354 | 0.32682449  |
| 0.032156309 | 0.005185788 | 0.154826183 | 0.189606348 |
| 0.012659724 | 0.184586889 | 0.243829608 | 0.054319239 |
| 0.080607537 | 0.03422289  | 0.138049894 | 0.150924756 |
| 0.260081345 | 0.216247888 | 0.259570785 | 0.145643056 |
| 0.146024376 | 0.112135639 | 0.131023428 | 0.081295216 |
| 0.054833533 | 0.212534568 | 0.159781954 | 0.016393272 |
| 0.170654238 | 0.237306107 | 0.054776255 | 0.135088274 |
| 0.382491782 | 0.381633794 | 0.037414351 | 0.03872555  |
| 0.227048254 | 0.139147325 | 0.398204071 | 0.321250097 |
| 0.349316907 | 0.399986225 | 0.302291687 | 0.109179523 |
| 0.050283287 | 0.237705958 | 0.248282044 | 0.113690077 |
| 0.364519173 | 0.034898362 | 0.316764257 | 0.208926188 |
| 0.09487132  | 0.117275967 | 0.058513387 | 0.071316831 |
| 0.262992862 | 0.170117035 | 0.196533441 | 0.098219654 |
| 0.189775158 | 0.155249203 | 0.030995859 | 0.179551273 |
| 0.269325565 | 0.122121109 | 0.142378154 | 0.089764229 |
| 0.225067712 | 0.026699713 | 0.306928991 | 0.372465449 |
| 0.110622681 | 0.060545599 | 0.095370334 | 0.246739009 |
| 0.299110744 | 0.13679055  | 0.051126199 | 0.257748278 |
| 0.37029812  | 0.285271405 | 0.33111548  | 0.352544898 |
| 0.063272545 | 0.273117388 | 0.114851534 | 0.228944192 |
| 0.139817292 | 0.158736151 | 0.147795053 | 0.055305211 |

|             |             |             |             |
|-------------|-------------|-------------|-------------|
| 0.228924299 | 0.314027838 | 0.27629248  | 0.172584923 |
| 0.190062996 | 0.057916991 | 0.027883764 | 0.291334588 |
| 0.145777958 | 0.066866072 | 0.087011727 | 0.286679351 |
| 0.008868734 | 0.11944148  | 0.347002103 | 0.150868222 |
| 0.352244456 | 0.37756825  | 0.364015195 | 0.073827216 |
| 0.002130751 | 0.270174799 | 0.324633626 | 0.187482645 |
| 0.283358096 | 0.258140945 | 0.043352639 | 0.085867846 |
| 0.29247825  | 0.054824728 | 0.111867831 | 0.103678903 |
| 0.075280343 | 0.209564023 | 0.197850915 | 0.107105576 |
| 0.155845422 | 0.038805547 | 0.150999145 | 0.160074357 |
| 0.059079613 | 0.255386053 | 0.340633283 | 0.044276391 |
| 0.137467156 | 0.313966848 | 0.271924651 | 0.023747793 |
| 0.209850146 | 0.283311282 | 0.320228659 | 0.005285215 |
| 0.344264332 | 0.015159521 | 0.194067415 | 0.223892829 |
| 0.16845524  | 0.143606196 | 0.261284774 | 0.166589322 |
| 0.188867719 | 0.140822952 | 0.205514818 | 0.258169532 |
| 0.153554752 | 0.12481603  | 0.24870823  | 0.128235616 |
| 1           | 0.090755428 | 0.07055036  | 0.067964769 |
| 0.077484131 | 0.305365125 | 0.228105719 | 0.052279965 |
| 0.212171263 | 0.109839018 | 0.343397063 | 0.300378574 |
| 0.365691586 | 0.066009924 | 0.136916681 | 0.307054579 |
| 0.046848198 | 0.097360712 | 0.026810399 | 0.176904662 |
| 0.188954307 | 0.192367085 | 0.141712632 | 0.158422743 |
| 0.203719262 | 0.325606965 | 0.222152585 | 0.328517097 |
| 0.19126635  | 0.116543673 | 0.061548256 | 0.118189639 |
| 0.130082646 | 0.09208879  | 0.261086729 | 0.00615006  |
| 0.271147223 | 0.10322539  | 0.361305001 | 0.318505668 |
| 0.119911837 | 0.32853343  | 0.072072854 | 0.066224201 |
| 0.050465126 | 0.111341217 | 0.131814387 | 0.263367583 |
| 0.123479878 | 0.112355844 | 0.269381317 | 0.086000319 |
| 0.308957838 | 0.232301972 | 0.10997987  | 0.105412932 |
| 0.142169243 | 0.124738572 | 0.285510441 | 0.054619279 |
| 0.197184084 | 0.189044627 | 0.120862369 | 0.232210637 |
| 0.173099037 | 0.352112062 | 0.048872794 | 0.366925515 |
| 0.182703647 | 0.093514194 | 0.373715291 | 0.135321946 |
| 0.095133139 | 0.135751866 | 0.122626093 | 0.087204999 |
| 0.096938333 | 0.138320103 | 0.003068904 | 0.053989461 |
| 0.343892479 | 0.062250224 | 0.21242808  | 0.234717173 |
| 0.156617045 | 0.310119747 | 0.09230541  | 0.116941    |
| 0.278468405 | 0.302248793 | 0.165567807 | 0.224729344 |
| 0.261841661 | 0.090276473 | 0.20404003  | 0.003669153 |
| 0.245224082 | 0.216105648 | 0.084653508 | 0.042824831 |
| 0.019416307 | 0.127251057 | 0.217083222 | 0.029638608 |
| 0.379315937 | 0.123378132 | 0.132005931 | 0.297149038 |
| 0.113928143 | 0.31088513  | 0.120495598 | 0.377349591 |
| 0.011435411 | 0.186736075 | 0.171464339 | 0.12627047  |
| 0.214037315 | 0.19461343  | 0.365495576 | 0.195990068 |
| 0.03939399  | 0.164698086 | 0.002794436 | 0.308073351 |
| 0.270836387 | 0.180038629 | 0.164160291 | 0.047183658 |
| 0.295789685 | 0.258274987 | 0.116138817 | 0.162098221 |
| 0.030888735 | 0.306252006 | 0.17745045  | 0.319332554 |
| 0.112195931 | 0.14877187  | 0.080587987 | 0.172066722 |
| 0.271587546 | 0.133404621 | 0.195235691 | 0.105458542 |
| 0.309126609 | 0.224473489 | 0.093508605 | 0.125083849 |

|             |             |             |             |
|-------------|-------------|-------------|-------------|
| 0.15650908  | 0.048281943 | 0.092263901 | 0.365093516 |
| 0.178415535 | 0.198500936 | 0.394836667 | 0.145086024 |
| 0.17139059  | 0.258879647 | 0.166097482 | 0.334741094 |
| 0.102011288 | 0.251705842 | 0.321146121 | 0.306104469 |
| 0.321374528 | 0.129474142 | 0.167499409 | 0.174882989 |
| 0.289665288 | 0.103622495 | 0.116671718 | 0.275261271 |
| 0.152386556 | 0.262199411 | 0.109154614 | 0.16670964  |
| 0.060868728 | 0.078023828 | 0.14925033  | 0.116001624 |
| 0.246842062 | 0.22936959  | 0.137817915 | 0.349393875 |
| 0.174173715 | 0.065727422 | 0.364910424 | 0.032539358 |
| 0.175550274 | 0.346728637 | 0.195907043 | 0.200004709 |
| 0.169787602 | 0.184215213 | 0.131509282 | 0.002932772 |
| 0.323876082 | 0.051979034 | 0.113420585 | 0.191843461 |
| 0.111208425 | 0.031715486 | 0.324737851 | 0.401817005 |
| 0.195524327 | 0.084718471 | 0.117006739 | 0.307994429 |
| 0.142862953 | 0.08844527  | 0.096994273 | 0.205478555 |
| 0.147064044 | 0.105713205 | 0.130912187 | 0.165534497 |
| 0.261430206 | 0.112675668 |             |             |
| RAB1        | 0.160254595 | 0.166935064 | 0.147133933 |
| 0.178504792 | 0.112033279 | 0.073490631 | 0.141051342 |
| 0.137954525 | 0.14211791  | 0.02061132  | 0.145811349 |
| 0.153670378 | 0.010451064 | 0.209294719 | 0.144121942 |
| 0.097215684 | 0.176393432 | 0.198264797 | 0.021811377 |
| 0.072777321 | 0.11163519  | 0.046638408 | 0.090678086 |
| 0.090009463 | 0.321740738 | 0.124275204 | 0.052538176 |
| 0.193755097 | 0.017965493 | 0.120224578 | 0.017900462 |
| 0.288950607 | 0.106696243 | 0.04385029  | 0.142158363 |
| 0.094003413 | 0.00323846  | 0.285805589 | 0.108663759 |
| 0.035532424 | 0.302980426 | 0.040123382 | 0.164520404 |
| 0.049996563 | 0.151673851 | 0.012687644 | 0.089582913 |
| 0.108556906 | 0.084155786 | 0.157353523 | 0.12872106  |
| 0.040678633 | 0.205984823 | 0.096334399 | 0.004724796 |
| 0.032742068 | 0.003727716 | 0.01458017  | 0.233732603 |
| 0.315663739 | 0.221321588 | 0.014959693 | 0.089784396 |
| 0.078472782 | 0.118099416 | 0.223632495 | 0.031575749 |
| 0.230730388 | 0.019364422 | 0.102088736 | 0.106099765 |
| 0.080583458 | 0.088707363 | 0.325601217 | 0.14593594  |
| 0.045663131 | 0.231394399 | 0.118036336 | 0.039903246 |
| 0.158308434 | 0.282957649 | 0.219682701 | 0.229997658 |
| 0.016446054 | 0.072610416 | 0.062260048 | 0.229795111 |
| 0.137010676 | 0.095922041 | 0.180077162 | 0.263607723 |
| 0.095023646 | 0.061359051 | 0.124021233 | 0.20215444  |
| 0.18327348  | 0.02409506  | 0.053778751 | 0.033372657 |
| 0.113494886 | 0.08738696  | 0.238624067 | 0.257376501 |
| 0.080020267 | 0.19390464  | 0.250093376 | 0.070446157 |
| 0.104455097 | 0.219022243 | 0.062205207 | 0.140576511 |
| 0.128555407 | 0.203781137 | 0.136611597 | 0.176255667 |
| 0.075306555 | 0.226236193 | 0.171700036 | 0.191946984 |
| 0.006654945 | 0.22479557  | 0.244281733 | 0.189366191 |
| 0.111512423 | 0.169376412 | 0.040176994 | 0.279939932 |
| 0.183032562 | 0.178810995 | 0.164934158 | 0.168713833 |
| 0.178729769 | 0.224429004 | 0.212816742 | 0.175430416 |
| 0.159871563 | 0.022004031 | 0.077910441 | 0.091118286 |
| 0.144985002 | 0.214670756 | 0.051825251 | 0.27016336  |

|             |             |             |             |
|-------------|-------------|-------------|-------------|
| 0.284504208 | 0.162557645 | 0.121416309 | 0.298701848 |
| 0.100638557 | 0.275708724 | 0.162660378 | 0.249079508 |
| 0.269079531 | 0.265258096 | 0.246982299 | 0.113879289 |
| 0.268417476 | 0.142109493 | 0.011693102 | 0.18424838  |
| 0.274358085 | 0.013181013 | 0.157957343 | 0.176301796 |
| 0.21623309  | 0.14722156  | 0.230334893 | 0.203689231 |
| 0.21315364  | 0.215680157 | 0.000920979 | 0.174302583 |
| 0.243117928 | 0.251335044 | 0.111143071 | 0.061593792 |
| 0.101639697 | 0.093833383 | 0.132563966 | 0.040774472 |
| 0.293523511 | 0.186829338 | 0.169999801 | 0.151234893 |
| 0.077467412 | 0.307213256 | 0.051226763 | 0.254630885 |
| 0.180953299 | 0.161034852 | 0.206450068 | 0.200788705 |
| 0.036417836 | 0.256700742 | 0.073221252 | 0.085731037 |
| 0.284952293 | 0.076604326 | 0.027403551 | 0.118327543 |
| 0.20945025  | 0.08136443  | 0.210719589 | 0.166557478 |
| 0.192310666 | 0.320155059 | 0.128904605 | 0.19689479  |
| 0.151598423 | 0.302448694 | 0.104418484 | 0.199293108 |
| 0.057029002 | 0.277748812 | 0.132496052 | 0.260915402 |
| 0.302482609 | 0.080896971 | 0.266574091 | 0.139370324 |
| 0.050004226 | 0.017316198 | 0.014647005 | 0.063576615 |
| 0.306856484 | 0.084427677 | 0.101589113 | 0.153809522 |
| 0.150486195 | 0.108553507 | 0.043973852 | 0.314042107 |
| 0.22892844  | 0.090086837 | 0.199161216 | 0.070987131 |
| 0.099123993 | 0.145762334 | 0.168428586 | 0.062332956 |
| 0.15025641  | 0.033592425 | 0.030715644 | 0.189463649 |
| 0.024735869 | 0.044101293 | 0.184448638 | 0.145611742 |
| 0.046759145 | 0.242264303 | 0.230848912 | 0.002373355 |
| 0.062199261 | 0.09542314  | 0.246381798 | 0.03786892  |
| 0.231284998 | 0.22311959  | 0.086346517 | 0.073650035 |
| 0.22111648  | 0.232472702 | 0.208593322 | 0.214389647 |
| 0.033823809 | 0.236945134 | 0.168155208 | 0.226050542 |
| 0.181492752 | 0.037176233 | 0.011950683 | 0.171015864 |
| 0.18047783  | 0.028987767 | 0.209265518 | 0.11455133  |
| 0.038470805 | 0.108151216 | 0.06872485  | 0.238751431 |
| 0.302338582 | 0.204066173 | 0.161866624 | 0.178266971 |
| 0.248838707 | 0.230530685 | 0.182496931 | 0.246928733 |
| 0.021581444 | 0.068677314 | 0.053222759 | 0.211749118 |
| 0.282627267 | 0.056828751 | 0.252282553 | 0.0142413   |
| 0.001230545 | 0.160130048 | 0.208513524 | 0.183487099 |
| 0.04210028  | 0.069623812 | 0.125990409 | 0.219981203 |
| 0.228435645 | 0.244849721 | 0.197484217 | 0.082163486 |
| 0.215197188 | 0.056531807 | 0.071401618 | 0.105374145 |
| 0.253334487 | 0.158272827 | 0.200699798 | 0.289136586 |
| 0.142137604 | 0.039645816 | 0.100454169 | 0.024463687 |
| 0.137823759 | 0.116363282 | 0.262132682 | 0.359486761 |
| 0.20404193  | 0.325447456 | 0.23230634  | 0.026164635 |
| 0.208821909 | 0.252423817 | 0.080109343 | 0.192077614 |
| 0.20320617  | 0.19658624  | 0.19774356  | 0.218047407 |
| 0.169538389 | 0.134037616 | 0.158461214 | 0.114406657 |
| 0.155815624 | 0.115537256 | 0.037492055 | 0.119608052 |
| 0.015350751 | 0.217168669 | 0.096203422 | 0.325722173 |
| 0.125903682 | 0.169862329 | 0.17000176  | 0.090085299 |
| 0.136589065 | 0.016668876 | 0.063157068 | 0.109827736 |
| 0.166955513 | 0.132336874 | 0.049545371 | 0.032941973 |

|             |             |             |             |
|-------------|-------------|-------------|-------------|
| 0.238772192 | 0.25352754  | 0.030929467 | 0.239957428 |
| 0.168267984 | 0.179142395 | 0.119470105 | 0.169793116 |
| 0.168616393 | 0.008807076 | 0.056270437 | 0.006160347 |
| 0.035945225 | 0.226166188 | 0.038153315 | 0.147424203 |
| 0.227638308 | 0.108451661 | 0.255098877 | 0.248051608 |
| 0.205676558 | 0.211777258 | 0.233657971 | 0.047103775 |
| 0.235901588 | 0.003999923 | 0.214843579 | 0.181355114 |
| 0.030977223 | 0.015678302 | 0.055974548 | 0.181253401 |
| 0.089881318 | 0.185608648 | 0.283756177 | 0.056268313 |
| 0.206644694 | 0.127133309 | 0.154671071 | 0.063480637 |
| 0.114835347 | 0.13819163  | 0.048422918 | 0.213329805 |
| 0.158412599 | 0.202677318 | 0.050385008 | 0.227359951 |
| 0.096493789 | 0.208496246 | 0.203059473 | 0.066526719 |
| 0.157567934 | 0.232485255 | 0.263636896 | 0.218353566 |
| 0.272038808 | 0.141062975 | 0.020569339 | 0.049580437 |
| 0.170552549 | 0.182546261 | 0.029789032 | 0.18671233  |
| 0.20406426  | 0.119486704 | 0.279168819 | 0.294615967 |
| 0.246950592 | 0.249506629 | 0.159730018 | 0.16901461  |
| 0.154925945 | 0.010770325 | 0.089019425 | 0.210924422 |
| 0.009858799 | 0.062861764 | 0.308560147 | 0.054779291 |
| 0.07834392  | 0.155243315 | 0.030593075 | 0.033990048 |
| 0.19479675  | 0.099934008 | 0.083487885 | 0.194344284 |
| 0.076345908 | 0.054604099 | 0.143657565 | 0.126841676 |
| 0.034595782 | 0.238722362 | 0.321064862 | 0.136187654 |
| 0.06493426  | 0.07132962  | 0.214979935 | 0.284132822 |
| 0.207431626 | 0.194631226 | 0.144294507 | 0.144049091 |
| 0.289057973 | 0.069316023 | 0.204898297 | 0.199227174 |
| 0.260522391 | 0.266627565 | 0.311262477 | 0.115368522 |
| 0.180812316 | 0.151044535 | 0.08098708  | 0.122920847 |
| 0.219360007 | 0.158800287 | 0.224668699 | 0.047397628 |
| 0.252170544 | 0.148431131 | 0.201840766 | 0.222896086 |
| 0.073605209 | 0.279147616 | 0.193626886 | 0.209021002 |
| 0.095090982 | 0.034200511 | 0.147666672 | 0.247086354 |
| 0.206266767 | 0.022359553 | 0.256020245 | 0.074796431 |
| 0.186967837 | 0.015135151 | 0.118611034 | 0.29940956  |
| 0.282649323 | 0.172521847 | 0.077783522 | 0.141977411 |
| 0.142220963 | 0.052082868 | 0.151641206 | 0.163234575 |
| 0.215682018 | 0.102693768 | 0.235645415 | 0.231154693 |
| 0.239928847 | 0.086435138 | 0.033060694 | 0.101536015 |
| 0.214734939 | 0.084972789 | 0.143270624 | 0.23292272  |
| 0.273065838 | 0.279548016 | 0.185093736 | 0.218124249 |
| 0.077978072 | 0.157824152 | 0.145366995 | 0.16562526  |
| 0.039488203 | 0.161039648 | 0.040900739 | 0.1347833   |
| 0.020747475 | 0.017593531 | 0.201020531 | 0.136447589 |
| 0.258094719 | 0.20638968  | 0.285580469 | 0.078070518 |
| 2.37E-05    | 0.095136166 | 0.152408709 | 0.069228017 |
| 0.174939898 | 0.218361716 | 0.056350166 | 0.205219625 |
| 0.321104452 | 0.207954488 | 0.145835069 | 0.058884382 |
| 0.017901464 | 0.11102948  | 0.303591391 | 0.15762407  |
| 0.139245417 | 0.147530457 | 0.035666966 | 0.174326993 |
| 0.020154397 | 0.318787085 | 0.263417731 | 0.023341945 |
| 0.021816566 | 0.19078627  | 0.160055903 | 0.159770252 |
| 0.063095577 | 0.181897865 | 0.213890209 | 0.018273325 |
| 0.132327365 | 0.133997409 | 0.160197651 | 0.172678446 |

|             |             |             |             |
|-------------|-------------|-------------|-------------|
| 0.156992847 | 0.122020115 | 0.179649106 | 0.080747651 |
| 0.125019758 | 0.155182439 | 0.144833152 | 0.275802651 |
| 0.173167747 | 0.156936337 | 0.105061969 | 0.08510689  |
| 0.090755428 | 1           | 0.26698513  | 0.271376179 |
| 0.209933305 | 0.178019127 | 0.345439801 | 0.228767792 |
| 0.234046131 | 0.061243733 | 0.317219681 | 0.201148191 |
| 0.257931803 | 0.219150159 | 0.082954151 | 0.179943756 |
| 0.011165609 | 0.051732085 | 0.111369194 | 0.102679933 |
| 0.20479871  | 0.067152935 | 0.069057634 | 0.134086792 |
| 0.106880916 | 0.326571865 | 0.332888416 | 0.251028362 |
| 0.088086607 | 0.058028767 | 0.025524399 | 0.203723858 |
| 0.197722295 | 0.247029845 | 0.099079481 | 0.089564868 |
| 0.184625236 | 0.09765113  | 0.172215874 | 0.239500505 |
| 0.023835819 | 0.283535349 | 0.033476121 | 0.170705419 |
| 0.022783434 | 0.240526422 | 0.297712035 | 0.124171703 |
| 0.016971136 | 0.16327395  | 0.126338116 | 0.057486288 |
| 0.133250426 | 0.107137763 | 0.056403758 | 0.112795513 |
| 0.155257027 | 0.227257905 | 0.242034468 | 0.150147262 |
| 0.070958201 | 0.07552424  | 0.073497207 | 0.123975679 |
| 0.129503653 | 0.201839096 | 0.216792246 | 0.199976613 |
| 0.072951784 | 0.269109244 | 0.307616474 | 0.119582177 |
| 0.084416521 | 0.158214594 | 0.018039507 | 0.042992627 |
| 0.107100512 | 0.032997796 | 0.000618912 | 0.014229761 |
| 0.24408653  | 0.034568301 | 0.118339182 | 0.151943679 |
| 0.0626528   | 0.225487301 | 0.014485464 | 0.103493527 |
| 0.208808722 | 0.256667452 | 0.104488967 | 0.287945774 |
| 0.205013113 | 0.199744311 | 0.116347673 | 0.002803323 |
| 0.086688745 | 0.065727508 | 0.029713115 | 0.164005583 |
| 0.136276465 | 0.020018073 | 0.090159731 | 0.145469711 |
| 0.192996316 | 0.016606381 | 0.082518296 | 0.130960105 |
| 0.227768748 | 0.264194906 | 0.146227469 | 0.17351322  |
| 0.064485955 | 0.221607627 | 0.05665775  | 0.053961031 |
| 0.102310077 | 0.054101053 | 0.205448668 | 0.044833503 |
| 0.183460565 | 0.096345045 | 0.01267628  | 0.32794722  |
| 0.236782646 | 0.050972838 | 0.307120299 | 0.018495992 |
| 0.261581369 | 0.206958374 | 0.058723742 | 0.055272156 |
| 0.164879831 | 0.095606816 | 0.239125254 | 0.217213348 |
| 0.020475319 | 0.077373653 | 0.206340151 | 0.061034946 |
| 0.277053799 | 0.048691182 | 0.264689938 | 0.028054614 |
| 0.207039778 | 0.164876422 | 0.210284475 | 0.072852781 |
| 0.079355516 | 0.225834468 | 0.038314375 | 0.237807809 |
| 0.189429703 | 0.049580582 | 0.176138884 | 0.138704594 |
| 0.043507661 | 0.21044206  | 0.066344762 | 0.225980281 |
| 0.135700902 | 0.274747856 | 0.154367401 | 0.196311252 |
| 0.27968617  | 0.045529688 | 0.038292447 | 0.092427797 |
| 0.21636987  | 0.2120009   | 0.036702845 | 0.210792802 |
| 0.030696792 | 0.209786154 | 0.072827173 | 0.094003714 |
| 0.201036317 | 0.109254399 | 0.069661427 | 0.267681055 |
| 0.179953597 | 0.105700842 | 0.068373487 | 0.313456206 |
| 0.183256948 | 0.174387726 | 0.293992753 | 0.003534542 |
| 0.136120163 | 0.151609946 | 0.217532651 | 0.075391965 |
| 0.334361863 | 0.127962192 | 0.092037453 | 0.042678897 |
| 0.183100441 | 0.035809096 | 0.06404822  | 0.0951245   |
| 0.030520061 | 0.147769173 | 0.251027624 | 0.219197731 |

|             |             |             |             |
|-------------|-------------|-------------|-------------|
| 0.183170529 | 0.033869567 | 0.025917884 | 0.220870013 |
| 0.024927882 | 0.020686765 | 0.028715996 | 0.107612838 |
| 0.029850445 | 0.037208899 | 0.042500162 | 0.041248398 |
| 0.189178005 | 0.114644799 |             |             |
| RAB19       | 0.333218884 | 0.170920721 | 0.33498403  |
| 0.158547364 | 0.065680484 | 0.10585256  | 0.314711812 |
| 0.277374124 | 0.162342904 | 0.063413853 | 0.100067479 |
| 0.260902353 | 0.008318784 | 0.155332239 | 0.298434264 |
| 0.065305135 | 0.247884853 | 0.283319682 | 0.06480708  |
| 0.15757172  | 0.064866307 | 0.048058295 | 0.140223941 |
| 0.069962095 | 0.322652154 | 0.166377925 | 0.056044652 |
| 0.159919125 | 0.023620917 | 0.082860786 | 0.03723607  |
| 0.224233366 | 0.058152447 | 0.045370846 | 0.298085366 |
| 0.097413045 | 0.006753274 | 0.269366192 | 0.099253501 |
| 0.019412755 | 0.242247049 | 0.091997153 | 0.132186754 |
| 0.087229235 | 0.322020192 | 0.033043618 | 0.072336612 |
| 0.153437415 | 0.145562638 | 0.3513577   | 0.10470391  |
| 0.085127106 | 0.178011511 | 0.112609295 | 0.018955597 |
| 0.029178396 | 0.002360285 | 0.014947279 | 0.208467016 |
| 0.236757645 | 0.229298733 | 0.029866182 | 0.185933403 |
| 0.083581713 | 0.096122469 | 0.189452488 | 0.072205967 |
| 0.181136463 | 0.016914303 | 0.081431914 | 0.114216778 |
| 0.115130574 | 0.344761375 | 0.287703234 | 0.339810226 |
| 0.069521131 | 0.179059671 | 0.084849717 | 0.039803035 |
| 0.16992454  | 0.250154871 | 0.219307679 | 0.23377108  |
| 0.019420425 | 0.050054127 | 0.062371642 | 0.142627378 |
| 0.121318988 | 0.277169556 | 0.105224372 | 0.211603826 |
| 0.329285924 | 0.093137419 | 0.108167549 | 0.328662252 |
| 0.158976732 | 0.040043507 | 0.079949387 | 0.020941039 |
| 0.068375218 | 0.059401338 | 0.243026227 | 0.173759586 |
| 0.076018925 | 0.353912771 | 0.269248427 | 0.042619361 |
| 0.080791774 | 0.342082798 | 0.058656185 | 0.097130014 |
| 0.095504643 | 0.156513439 | 0.126530858 | 0.133437279 |
| 0.055475223 | 0.174444929 | 0.115914012 | 0.168262498 |
| 0.021598378 | 0.197250307 | 0.248889474 | 0.247370935 |
| 0.35116391  | 0.236223423 | 0.068082653 | 0.194813482 |
| 0.126436964 | 0.167665115 | 0.236258319 | 0.122759465 |
| 0.111311581 | 0.241239482 | 0.194317391 | 0.126697068 |
| 0.328905754 | 0.029320201 | 0.057756271 | 0.184359092 |
| 0.110941261 | 0.312035349 | 0.033084872 | 0.256766276 |
| 0.192372574 | 0.097721536 | 0.297267893 | 0.290107244 |
| 0.205114884 | 0.200544638 | 0.145876374 | 0.215076234 |
| 0.233943496 | 0.25132835  | 0.170814614 | 0.062686966 |
| 0.232235341 | 0.143811879 | 0.040410912 | 0.150232783 |
| 0.184960497 | 0.00356769  | 0.120695794 | 0.130774872 |
| 0.196423103 | 0.095451623 | 0.166716554 | 0.152900089 |
| 0.197736012 | 0.355698708 | 0.003493593 | 0.104536528 |
| 0.220853478 | 0.161228424 | 0.165544411 | 0.057642133 |
| 0.068414943 | 0.127189319 | 0.100615643 | 0.043081865 |
| 0.221390411 | 0.137019315 | 0.13814209  | 0.128187833 |
| 0.145113001 | 0.253419265 | 0.0437554   | 0.265525408 |
| 0.296074586 | 0.305199134 | 0.357538589 | 0.172112288 |
| 0.08608912  | 0.198025309 | 0.129080162 | 0.081794607 |
| 0.209319962 | 0.15841151  | 0.03441827  | 0.067172294 |



|             |             |             |             |
|-------------|-------------|-------------|-------------|
| 0.359928668 | 0.077758682 | 0.277595669 | 0.267919062 |
| 0.243081329 | 0.332347073 | 0.141264359 | 0.180355211 |
| 0.109884621 | 0.396211093 | 0.08344641  | 0.15139763  |
| 0.07907311  | 0.286241357 | 0.10736473  | 0.184522109 |
| 0.185747332 | 0.055546462 | 0.238114716 | 0.067013149 |
| 0.053285089 | 0.036342834 | 0.013739728 | 0.060780518 |
| 0.376218737 | 0.109168143 | 0.081151848 | 0.076781813 |
| 0.197992601 | 0.286893711 | 0.059634699 | 0.267553167 |
| 0.313607121 | 0.075762205 | 0.122165819 | 0.09045816  |
| 0.169399849 | 0.136140827 | 0.107998624 | 0.058954774 |
| 0.160564932 | 0.01792706  | 0.025492074 | 0.129290177 |
| 0.033451691 | 0.044534736 | 0.137788734 | 0.080047139 |
| 0.077778279 | 0.348800559 | 0.174199719 | 0.00355444  |
| 0.066300685 | 0.059249904 | 0.133735802 | 0.088734334 |
| 0.196975738 | 0.157056522 | 0.053394461 | 0.067212489 |
| 0.314721122 | 0.199070659 | 0.160342652 | 0.159791495 |
| 0.047764714 | 0.181970503 | 0.106313882 | 0.145154162 |
| 0.143434962 | 0.051197087 | 0.008080266 | 0.107994274 |
| 0.122510034 | 0.057341449 | 0.358382986 | 0.086875752 |
| 0.067839632 | 0.070938735 | 0.077791446 | 0.161847253 |
| 0.249788525 | 0.223086297 | 0.17264387  | 0.097372785 |
| 0.141916406 | 0.211250897 | 0.131964441 | 0.189839593 |
| 0.057982196 | 0.057672405 | 0.054120961 | 0.111591153 |
| 0.266766463 | 0.049986012 | 0.228088281 | 0.013741604 |
| 0.000155115 | 0.347442307 | 0.34822154  | 0.142946138 |
| 0.025017075 | 0.073770102 | 0.090958187 | 0.176940694 |
| 0.260559708 | 0.185729297 | 0.223398312 | 0.070246638 |
| 0.189714483 | 0.064119528 | 0.053686428 | 0.076935015 |
| 0.234209605 | 0.108412948 | 0.148652238 | 0.256251859 |
| 0.356620769 | 0.029500411 | 0.159271887 | 0.012507675 |
| 0.323249652 | 0.124037251 | 0.351403339 | 0.350799191 |
| 0.131670615 | 0.342907636 | 0.250059486 | 0.074495862 |
| 0.124590912 | 0.320189384 | 0.023226234 | 0.158555624 |
| 0.193096298 | 0.189376234 | 0.194643535 | 0.23454132  |
| 0.146324779 | 0.114003755 | 0.097109743 | 0.15276464  |
| 0.288864883 | 0.34733847  | 0.025385189 | 0.101273076 |
| 0.025184715 | 0.122998528 | 0.093692748 | 0.292319325 |
| 0.084806829 | 0.161199321 | 0.308671543 | 0.070598182 |
| 0.201238143 | 0.01298681  | 0.138506223 | 0.156675836 |
| 0.100043778 | 0.295543153 | 0.04922677  | 0.040194058 |
| 0.225108585 | 0.204383321 | 0.041783137 | 0.202315485 |
| 0.113145585 | 0.308347598 | 0.086672742 | 0.098303422 |
| 0.303447898 | 0.027579876 | 0.120835492 | 0.008499087 |
| 0.073310968 | 0.22407053  | 0.069174597 | 0.2974474   |
| 0.167029283 | 0.195477685 | 0.201596674 | 0.201018882 |
| 0.212362901 | 0.152957768 | 0.175871607 | 0.032134463 |
| 0.188293715 | 0.003743248 | 0.173006053 | 0.154811739 |
| 0.058636539 | 0.014707068 | 0.046746872 | 0.125521672 |
| 0.064777356 | 0.354243566 | 0.26642616  | 0.08502965  |
| 0.200117964 | 0.29206384  | 0.314046757 | 0.040299574 |
| 0.09840734  | 0.085880871 | 0.040876837 | 0.218107017 |
| 0.153998625 | 0.171523985 | 0.101036487 | 0.354392722 |
| 0.077703356 | 0.270359583 | 0.347579542 | 0.016377079 |
| 0.097125971 | 0.338235969 | 0.29319614  | 0.186576411 |

|             |             |             |             |
|-------------|-------------|-------------|-------------|
| 0.202413461 | 0.082013377 | 0.046336888 | 0.079388072 |
| 0.13362153  | 0.323283898 | 0.051665164 | 0.330139125 |
| 0.187109646 | 0.074998109 | 0.162458057 | 0.204777615 |
| 0.1736731   | 0.197644963 | 0.312203205 | 0.104019435 |
| 0.132006354 | 0.004731239 | 0.123130442 | 0.201614166 |
| 0.03352295  | 0.057005417 | 0.218253378 | 0.144824375 |
| 0.136988705 | 0.267227215 | 0.02689333  | 0.028326596 |
| 0.132504928 | 0.087392271 | 0.048148417 | 0.224141566 |
| 0.077944039 | 0.046199156 | 0.163439349 | 0.21466117  |
| 0.087179256 | 0.224244537 | 0.31279802  | 0.301986314 |
| 0.074185256 | 0.060342881 | 0.323973366 | 0.301053076 |
| 0.125661241 | 0.134065501 | 0.228977735 | 0.088282905 |
| 0.233983692 | 0.092885977 | 0.139128206 | 0.179141686 |
| 0.23563349  | 0.195621634 | 0.268031128 | 0.120029272 |
| 0.317667486 | 0.106539629 | 0.051971298 | 0.099189589 |
| 0.174817221 | 0.344987555 | 0.204209234 | 0.033172643 |
| 0.317816662 | 0.184212796 | 0.212343364 | 0.314687951 |
| 0.052126731 | 0.252061127 | 0.139538119 | 0.293058779 |
| 0.086326946 | 0.032185537 | 0.333421043 | 0.217911433 |
| 0.157976606 | 0.01465162  | 0.265105352 | 0.167428043 |
| 0.172353087 | 0.066181317 | 0.076792225 | 0.211792175 |
| 0.318699689 | 0.309381802 | 0.15700009  | 0.116735426 |
| 0.105875781 | 0.068961816 | 0.133983677 | 0.168778347 |
| 0.158918096 | 0.075302001 | 0.212235192 | 0.141522989 |
| 0.35080227  | 0.058720588 | 0.042388919 | 0.077604021 |
| 0.234279461 | 0.116191533 | 0.166613274 | 0.347828862 |
| 0.228323019 | 0.264877263 | 0.16015068  | 0.177444657 |
| 0.084430514 | 0.319578297 | 0.342096502 | 0.137787909 |
| 0.023913229 | 0.258343118 | 0.086803682 | 0.10042436  |
| 0.010166273 | 0.01129536  | 0.152456012 | 0.153959686 |
| 0.220347591 | 0.139602545 | 0.204201314 | 0.184000593 |
| 8.67E-05    | 0.066068239 | 0.092036982 | 0.070819565 |
| 0.156313769 | 0.179146738 | 0.1533596   | 0.206941032 |
| 0.193376185 | 0.342211335 | 0.154765342 | 0.100650108 |
| 0.01585375  | 0.115371622 | 0.234977269 | 0.220715279 |
| 0.134459176 | 0.326571029 | 0.030233791 | 0.190807831 |
| 0.028271414 | 0.214195209 | 0.148438082 | 0.08161558  |
| 0.015789706 | 0.143850589 | 0.123230767 | 0.317141528 |
| 0.053922218 | 0.135522484 | 0.162879769 | 0.019608494 |
| 0.07908884  | 0.186492817 | 0.123103962 | 0.117030216 |
| 0.139663649 | 0.131020832 | 0.112389294 | 0.075741621 |
| 0.136246293 | 0.186135988 | 0.12961414  | 0.177328412 |
| 0.140858176 | 0.222076072 | 0.084568319 | 0.130091361 |
| 0.07055036  | 0.26698513  | 1           | 0.392019684 |
| 0.214422239 | 0.150950448 | 0.262543409 | 0.356290081 |
| 0.18203932  | 0.112468002 | 0.197539183 | 0.196124753 |
| 0.167950579 | 0.33048389  | 0.108797038 | 0.144795285 |
| 0.029021857 | 0.09624841  | 0.342275401 | 0.119799946 |
| 0.199794267 | 0.04462393  | 0.101416052 | 0.171900182 |
| 0.107583434 | 0.2490955   | 0.258397403 | 0.191213101 |
| 0.092828342 | 0.088331557 | 0.069411081 | 0.153804508 |
| 0.231387642 | 0.323522921 | 0.054838442 | 0.097441994 |
| 0.134293896 | 0.183523445 | 0.115473347 | 0.22127962  |
| 0.028576925 | 0.19681958  | 0.077497761 | 0.26572014  |

|             |             |             |             |
|-------------|-------------|-------------|-------------|
| 0.062342715 | 0.329842693 | 0.303501288 | 0.099812389 |
| 0.014726533 | 0.224164981 | 0.079899664 | 0.140716536 |
| 0.088390891 | 0.091280108 | 0.068992712 | 0.191517012 |
| 0.180907021 | 0.278216885 | 0.248820877 | 0.330069269 |
| 0.070449366 | 0.045136446 | 0.119879654 | 0.086838383 |
| 0.115934438 | 0.162666724 | 0.356276914 | 0.156846653 |
| 0.065127171 | 0.335435815 | 0.243115845 | 0.172514835 |
| 0.168470172 | 0.129861754 | 0.013080641 | 0.102814856 |
| 0.158085139 | 0.038198752 | 0.001708846 | 0.012789939 |
| 0.130815675 | 0.089855336 | 0.117003002 | 0.126471266 |
| 0.054338599 | 0.134531743 | 0.015421148 | 0.177846018 |
| 0.223174777 | 0.264993876 | 0.098822844 | 0.21830899  |
| 0.155960579 | 0.251004851 | 0.128606912 | 0.015117297 |
| 0.067860948 | 0.05647487  | 0.059895101 | 0.297734238 |
| 0.27730388  | 0.01507792  | 0.083797334 | 0.345852313 |
| 0.127901506 | 0.014410623 | 0.118312785 | 0.095540676 |
| 0.288882067 | 0.269380326 | 0.143350075 | 0.095140039 |
| 0.267656782 | 0.205622764 | 0.056974674 | 0.076544572 |
| 0.064750997 | 0.039328419 | 0.110529364 | 0.029036987 |
| 0.271179826 | 0.082006186 | 0.020111818 | 0.283581229 |
| 0.261657815 | 0.043748945 | 0.284753068 | 0.055260722 |
| 0.154025997 | 0.171733306 | 0.06996069  | 0.06577652  |
| 0.130249494 | 0.055242136 | 0.220638371 | 0.161182612 |
| 0.019867363 | 0.097590954 | 0.206960142 | 0.055350054 |
| 0.312561096 | 0.055261528 | 0.232671704 | 0.035810879 |
| 0.193605663 | 0.15824081  | 0.305795071 | 0.085369344 |
| 0.098359457 | 0.362518365 | 0.083878739 | 0.195328709 |
| 0.153316271 | 0.030361299 | 0.09666579  | 0.140320169 |
| 0.038703371 | 0.194732044 | 0.075032278 | 0.202038185 |
| 0.117419519 | 0.196986442 | 0.100188399 | 0.170441396 |
| 0.161608984 | 0.035129998 | 0.02891688  | 0.073076603 |
| 0.211118615 | 0.195219081 | 0.045725843 | 0.162989272 |
| 0.021704306 | 0.149062894 | 0.126858153 | 0.076267753 |
| 0.167625162 | 0.203703068 | 0.093273526 | 0.301476775 |
| 0.134567576 | 0.078827044 | 0.062690507 | 0.212863611 |
| 0.1207562   | 0.118307639 | 0.218931297 | 0.000845089 |
| 0.164817474 | 0.085654456 | 0.19310773  | 0.069528297 |
| 0.293547317 | 0.140772552 | 0.146625684 | 0.064175097 |
| 0.112461346 | 0.023405127 | 0.095028938 | 0.062422221 |
| 0.038579814 | 0.326315083 | 0.211158503 | 0.151138241 |
| 0.183970159 | 0.066564953 | 0.035128486 | 0.191618138 |
| 0.015364838 | 0.033202139 | 0.043323258 | 0.11327504  |
| 0.023276978 | 0.063728216 | 0.061696094 | 0.043268334 |
| 0.144828788 | 0.191521339 |             |             |
| RAB27A      | 0.353031925 | 0.171519298 | 0.381550158 |
| 0.161958134 | 0.061684945 | 0.115951872 | 0.310721262 |
| 0.267245924 | 0.177395716 | 0.073177295 | 0.101739461 |
| 0.26617713  | 0.006779062 | 0.149018291 | 0.28867091  |
| 0.066667384 | 0.231101991 | 0.277214022 | 0.061074945 |
| 0.159756944 | 0.060574602 | 0.049879875 | 0.157604125 |
| 0.064874587 | 0.33532977  | 0.183489977 | 0.058225394 |
| 0.157835298 | 0.02631068  | 0.088393433 | 0.043382602 |
| 0.214279411 | 0.055982721 | 0.048612533 | 0.317892521 |
| 0.103097595 | 0.004734052 | 0.263021481 | 0.095260071 |

|             |             |             |             |
|-------------|-------------|-------------|-------------|
| 0.017542688 | 0.23132792  | 0.10745501  | 0.129938746 |
| 0.097880186 | 0.349956593 | 0.040095368 | 0.07566707  |
| 0.163936723 | 0.143586861 | 0.394905797 | 0.113105072 |
| 0.088613801 | 0.190040847 | 0.129307965 | 0.016727454 |
| 0.029579749 | 0.002122414 | 0.015216029 | 0.206170561 |
| 0.236862421 | 0.216161374 | 0.031784687 | 0.190068407 |
| 0.087942934 | 0.097489415 | 0.183974441 | 0.079920897 |
| 0.177451732 | 0.015415776 | 0.086822311 | 0.117833268 |
| 0.126294551 | 0.36315843  | 0.290878589 | 0.368271948 |
| 0.072982529 | 0.168206802 | 0.083422307 | 0.038803141 |
| 0.173104455 | 0.242831364 | 0.217511673 | 0.23376374  |
| 0.01643325  | 0.048894985 | 0.057822596 | 0.138692388 |
| 0.125365817 | 0.271209048 | 0.11031983  | 0.205018147 |
| 0.338523814 | 0.105694143 | 0.116268749 | 0.355982631 |
| 0.157233423 | 0.038988035 | 0.091672277 | 0.019189025 |
| 0.067359539 | 0.058544097 | 0.238812846 | 0.178289328 |
| 0.07263013  | 0.39271957  | 0.271507833 | 0.041326155 |
| 0.079149048 | 0.371986785 | 0.052459621 | 0.094553666 |
| 0.102131243 | 0.153313191 | 0.130198075 | 0.138078479 |
| 0.056508647 | 0.170347099 | 0.123003709 | 0.161648398 |
| 0.024507597 | 0.194326795 | 0.255779621 | 0.233119634 |
| 0.381771823 | 0.215950386 | 0.062168356 | 0.19544524  |
| 0.122378699 | 0.16973083  | 0.239017373 | 0.114739032 |
| 0.104298209 | 0.244386716 | 0.192333587 | 0.131617927 |
| 0.334063162 | 0.028112912 | 0.059333679 | 0.189720131 |
| 0.114937329 | 0.309897073 | 0.031283981 | 0.255293434 |
| 0.18421456  | 0.099328303 | 0.313962107 | 0.284565597 |
| 0.202658053 | 0.19206318  | 0.147062876 | 0.212135833 |
| 0.229417289 | 0.250645657 | 0.162142431 | 0.064004325 |
| 0.227358498 | 0.155499604 | 0.039747001 | 0.155226434 |
| 0.174150282 | 0.003249338 | 0.116822446 | 0.126255653 |
| 0.195629063 | 0.094103383 | 0.158458231 | 0.147711946 |
| 0.196923134 | 0.367422332 | 0.003434856 | 0.098809396 |
| 0.219420401 | 0.159279044 | 0.144303506 | 0.062078079 |
| 0.068177127 | 0.140775095 | 0.106612305 | 0.046133262 |
| 0.209790037 | 0.131049926 | 0.134961451 | 0.136965138 |
| 0.157149728 | 0.240261112 | 0.045781071 | 0.268357532 |
| 0.282268227 | 0.325709847 | 0.39802466  | 0.172325424 |
| 0.09941084  | 0.185183826 | 0.14012067  | 0.081278915 |
| 0.201829394 | 0.170560649 | 0.035657935 | 0.066688441 |
| 0.404492924 | 0.086217187 | 0.283504116 | 0.283974323 |
| 0.230103991 | 0.353918328 | 0.138357619 | 0.175917505 |
| 0.102360687 | 0.39609253  | 0.089769456 | 0.145076201 |
| 0.079904802 | 0.313656812 | 0.116340114 | 0.173128242 |
| 0.17080842  | 0.056709996 | 0.242381524 | 0.066567134 |
| 0.052627277 | 0.039196986 | 0.013022748 | 0.064138565 |
| 0.368306796 | 0.107361667 | 0.083530832 | 0.077600464 |
| 0.219125695 | 0.304195717 | 0.060856139 | 0.257557958 |
| 0.347312671 | 0.074397985 | 0.115534519 | 0.09908349  |
| 0.175990301 | 0.141827665 | 0.111247439 | 0.050480621 |
| 0.168975317 | 0.01697813  | 0.025876121 | 0.124307581 |
| 0.033205076 | 0.040459724 | 0.133173275 | 0.080164937 |
| 0.08307067  | 0.350547915 | 0.167040337 | 0.003243181 |
| 0.065770433 | 0.047167895 | 0.129139152 | 0.101127794 |

|             |             |             |             |
|-------------|-------------|-------------|-------------|
| 0.201441493 | 0.151959591 | 0.051464484 | 0.061978203 |
| 0.35198672  | 0.195899459 | 0.162039244 | 0.155677846 |
| 0.050472232 | 0.174480532 | 0.103773057 | 0.13790096  |
| 0.149202868 | 0.053415407 | 0.00778258  | 0.112769913 |
| 0.117241883 | 0.058920798 | 0.401144679 | 0.092488683 |
| 0.073316851 | 0.072418928 | 0.061255264 | 0.15527865  |
| 0.239828114 | 0.226881324 | 0.159402347 | 0.096114545 |
| 0.147735341 | 0.218674764 | 0.131471862 | 0.181169347 |
| 0.064693119 | 0.058484889 | 0.053573319 | 0.106193947 |
| 0.274352472 | 0.045229816 | 0.220370595 | 0.013042027 |
| 7.15E-05    | 0.365215785 | 0.372147675 | 0.128609342 |
| 0.02184076  | 0.080985099 | 0.092959374 | 0.172059988 |
| 0.253780467 | 0.177105576 | 0.226505971 | 0.070065338 |
| 0.186327242 | 0.064481594 | 0.054831893 | 0.077348921 |
| 0.235080138 | 0.105780271 | 0.145563856 | 0.249692384 |
| 0.397050274 | 0.027875624 | 0.166908577 | 0.012601225 |
| 0.339340894 | 0.133043792 | 0.387425067 | 0.337665139 |
| 0.123059945 | 0.334643799 | 0.267191448 | 0.084329913 |
| 0.122645273 | 0.323475289 | 0.022012204 | 0.1540617   |
| 0.187694998 | 0.182995533 | 0.190097022 | 0.231529623 |
| 0.139491775 | 0.120728583 | 0.100023531 | 0.171016791 |
| 0.279302455 | 0.369350678 | 0.023999398 | 0.097099876 |
| 0.029417048 | 0.123839991 | 0.088786742 | 0.298358331 |
| 0.088113135 | 0.161489188 | 0.314823253 | 0.069605695 |
| 0.223193403 | 0.013074432 | 0.147348073 | 0.143640528 |
| 0.096956284 | 0.308268024 | 0.056585813 | 0.041412333 |
| 0.226344702 | 0.210265337 | 0.042938348 | 0.197979453 |
| 0.11239864  | 0.355300825 | 0.084097279 | 0.099845721 |
| 0.299849912 | 0.027990987 | 0.13166331  | 0.010368699 |
| 0.075644617 | 0.217122426 | 0.070306207 | 0.311956815 |
| 0.169647158 | 0.205702287 | 0.20391976  | 0.195915827 |
| 0.214901722 | 0.146906604 | 0.171160705 | 0.031260042 |
| 0.18490167  | 0.00359884  | 0.169239977 | 0.162368528 |
| 0.066704647 | 0.015727325 | 0.04488905  | 0.120826895 |
| 0.066999082 | 0.405112725 | 0.267967162 | 0.096620305 |
| 0.19354357  | 0.329040239 | 0.305368208 | 0.035155832 |
| 0.105903529 | 0.077669133 | 0.035204718 | 0.218281586 |
| 0.14838478  | 0.162417733 | 0.1138484   | 0.381761309 |
| 0.079214206 | 0.269795648 | 0.367953557 | 0.017380224 |
| 0.095901447 | 0.377089438 | 0.293948531 | 0.184232658 |
| 0.192836426 | 0.081997599 | 0.053031225 | 0.08684647  |
| 0.125912832 | 0.379416587 | 0.054772456 | 0.376597911 |
| 0.188055375 | 0.077155349 | 0.16427116  | 0.219037575 |
| 0.165710034 | 0.192122382 | 0.310623017 | 0.10783117  |
| 0.143479628 | 0.003813163 | 0.140227858 | 0.200294961 |
| 0.028634281 | 0.058818633 | 0.224183942 | 0.141498133 |
| 0.129395254 | 0.287468998 | 0.026090171 | 0.026328436 |
| 0.129568836 | 0.087804867 | 0.044951285 | 0.228324699 |
| 0.071488466 | 0.03927443  | 0.150798403 | 0.198894562 |
| 0.084297827 | 0.234393064 | 0.326596605 | 0.30023403  |
| 0.081790843 | 0.063168319 | 0.329881071 | 0.308328647 |
| 0.122786455 | 0.12969823  | 0.219560326 | 0.082946262 |
| 0.242843137 | 0.089076087 | 0.132483526 | 0.178759544 |
| 0.232953043 | 0.187114917 | 0.255727635 | 0.103943946 |

|             |             |             |             |
|-------------|-------------|-------------|-------------|
| 0.321587975 | 0.104064143 | 0.048505419 | 0.082210651 |
| 0.170739639 | 0.386728065 | 0.202353416 | 0.032398299 |
| 0.319744289 | 0.182558802 | 0.20041548  | 0.308445473 |
| 0.053524646 | 0.249027787 | 0.125781725 | 0.328382709 |
| 0.085634593 | 0.029506921 | 0.32719904  | 0.215070085 |
| 0.164905308 | 0.013594264 | 0.263309923 | 0.170836284 |
| 0.183736533 | 0.073488547 | 0.080730161 | 0.20088929  |
| 0.339658909 | 0.320276132 | 0.179634487 | 0.119248329 |
| 0.109693846 | 0.076594661 | 0.145838751 | 0.170997604 |
| 0.151454402 | 0.081392598 | 0.21084864  | 0.132174673 |
| 0.366116144 | 0.060393404 | 0.042091909 | 0.076454861 |
| 0.228143356 | 0.126902591 | 0.156779917 | 0.356216499 |
| 0.221116766 | 0.257309372 | 0.156561454 | 0.168538866 |
| 0.091258419 | 0.359710128 | 0.387349833 | 0.133266925 |
| 0.021411064 | 0.271988076 | 0.101253875 | 0.101950778 |
| 0.008017847 | 0.01010527  | 0.143823196 | 0.149525006 |
| 0.211731965 | 0.132904119 | 0.19651117  | 0.182225017 |
| 0.000147929 | 0.068271577 | 0.094585215 | 0.074358955 |
| 0.155526653 | 0.189900931 | 0.145793181 | 0.19459122  |
| 0.193700088 | 0.390469775 | 0.146468647 | 0.111786265 |
| 0.015865681 | 0.127622233 | 0.229961348 | 0.222216607 |
| 0.120002565 | 0.36266867  | 0.0287526   | 0.187175863 |
| 0.024333864 | 0.211728731 | 0.152276589 | 0.094246878 |
| 0.016064697 | 0.135201356 | 0.133806952 | 0.330411501 |
| 0.053650256 | 0.133171949 | 0.152304929 | 0.020947204 |
| 0.08287232  | 0.179745139 | 0.112088049 | 0.108674518 |
| 0.127583453 | 0.121051715 | 0.103435564 | 0.071338893 |
| 0.142270726 | 0.178801053 | 0.126728787 | 0.172850058 |
| 0.129885915 | 0.213881384 | 0.08499297  | 0.137875878 |
| 0.067964769 | 0.271376179 | 0.392019684 | 1           |
| 0.208705377 | 0.147787786 | 0.272589475 | 0.400755882 |
| 0.173606814 | 0.115403974 | 0.183313479 | 0.197257355 |
| 0.154467467 | 0.382380344 | 0.108504691 | 0.144968002 |
| 0.031436695 | 0.104770002 | 0.362670153 | 0.127448472 |
| 0.194923791 | 0.041503719 | 0.110829366 | 0.195412413 |
| 0.118470845 | 0.239155456 | 0.2707116   | 0.181372614 |
| 0.09165815  | 0.09089699  | 0.082223402 | 0.142296626 |
| 0.238576552 | 0.338645223 | 0.050580571 | 0.100809386 |
| 0.137790257 | 0.199063967 | 0.112144955 | 0.221315813 |
| 0.028627427 | 0.182439246 | 0.093209582 | 0.275393309 |
| 0.073818616 | 0.339376649 | 0.310333762 | 0.106882221 |
| 0.014833485 | 0.217761156 | 0.074722266 | 0.160891707 |
| 0.09225384  | 0.097234237 | 0.063483003 | 0.190754642 |
| 0.172230769 | 0.299681038 | 0.243193117 | 0.355849761 |
| 0.076931791 | 0.039741474 | 0.136933844 | 0.085117639 |
| 0.104838391 | 0.157787632 | 0.36983753  | 0.152541478 |
| 0.065245559 | 0.361104758 | 0.23223204  | 0.177185134 |
| 0.168118412 | 0.113616139 | 0.012555917 | 0.112804016 |
| 0.152319514 | 0.039241407 | 0.002033067 | 0.011334817 |
| 0.129828135 | 0.092084363 | 0.129713018 | 0.127619205 |
| 0.049113698 | 0.132058825 | 0.014216351 | 0.18382119  |
| 0.226427262 | 0.264680031 | 0.100115881 | 0.216161455 |
| 0.162238179 | 0.24348214  | 0.145195056 | 0.012994691 |
| 0.072721942 | 0.061136747 | 0.066751698 | 0.285942605 |

|             |             |             |             |
|-------------|-------------|-------------|-------------|
| 0.269606946 | 0.01470324  | 0.089697631 | 0.375307899 |
| 0.120109127 | 0.014458065 | 0.129208723 | 0.101044622 |
| 0.298126152 | 0.268454697 | 0.124778084 | 0.098107142 |
| 0.274086312 | 0.204228837 | 0.05856187  | 0.081295761 |
| 0.06162411  | 0.037647831 | 0.111253787 | 0.027295137 |
| 0.2616276   | 0.077806756 | 0.018667242 | 0.27626558  |
| 0.264132619 | 0.043837178 | 0.29853048  | 0.062275343 |
| 0.148181814 | 0.167144212 | 0.067267156 | 0.070803877 |
| 0.124071987 | 0.055717375 | 0.210320066 | 0.163445891 |
| 0.021367128 | 0.102989013 | 0.191238986 | 0.053215923 |
| 0.314446797 | 0.055649895 | 0.236508322 | 0.038062652 |
| 0.192906052 | 0.16414789  | 0.34352852  | 0.075207835 |
| 0.107614577 | 0.386166069 | 0.094805127 | 0.189248197 |
| 0.141479123 | 0.027629509 | 0.094268037 | 0.13397238  |
| 0.038059286 | 0.188933443 | 0.0814643   | 0.196343903 |
| 0.099773255 | 0.192482861 | 0.103044175 | 0.165493567 |
| 0.156876613 | 0.030053191 | 0.027686322 | 0.067705622 |
| 0.2136574   | 0.203758909 | 0.041247841 | 0.170491214 |
| 0.020608932 | 0.146372036 | 0.142740572 | 0.066639603 |
| 0.168174813 | 0.187699084 | 0.098757682 | 0.305881968 |
| 0.131146835 | 0.078858594 | 0.056579792 | 0.197871141 |
| 0.112027763 | 0.117233046 | 0.205189737 | 0.000566537 |
| 0.18308843  | 0.087688689 | 0.189322799 | 0.06772189  |
| 0.317585781 | 0.1469262   | 0.164316125 | 0.07289263  |
| 0.115477587 | 0.019375347 | 0.091969846 | 0.058565541 |
| 0.03919302  | 0.337249685 | 0.206503331 | 0.143946146 |
| 0.189859355 | 0.067703901 | 0.038105974 | 0.188549052 |
| 0.013741585 | 0.035249231 | 0.045032918 | 0.126289783 |
| 0.021972719 | 0.072051129 | 0.066469575 | 0.045732869 |
| 0.155556142 | 0.191524587 |             |             |
| RAB35       | 0.212541303 | 0.069142626 | 0.163783612 |
| 0.057760733 | 0.07010565  | 0.04452221  | 0.114117052 |
| 0.102775998 | 0.056716254 | 0.004287538 | 0.112806221 |
| 0.134814413 | 0.002478903 | 0.112052317 | 0.126733588 |
| 0.045533134 | 0.142825547 | 0.196307691 | 0.003643604 |
| 0.010769355 | 0.076157324 | 0.02087724  | 0.049894759 |
| 0.052512405 | 0.253366358 | 0.054382161 | 0.018608326 |
| 0.08468602  | 0.003135971 | 0.060907762 | 0.001387798 |
| 0.166605945 | 0.066603948 | 0.017008262 | 0.093932219 |
| 0.050288236 | 0.000275449 | 0.148213725 | 0.073673054 |
| 0.006610563 | 0.207611991 | 0.012094293 | 0.149682721 |
| 0.014551288 | 0.157999471 | 0.001273541 | 0.033116475 |
| 0.041426911 | 0.042538953 | 0.15559871  | 0.053875797 |
| 0.012955316 | 0.154289763 | 0.032831516 | 0.004815944 |
| 0.016361934 | 0.000399735 | 0.00426424  | 0.11276692  |
| 0.312045395 | 0.261524083 | 0.001541997 | 0.05175302  |
| 0.03000718  | 0.052599153 | 0.160971623 | 0.008776701 |
| 0.116826631 | 0.005633476 | 0.037555943 | 0.027209688 |
| 0.036466604 | 0.077042805 | 0.284699258 | 0.093464404 |
| 0.017144625 | 0.238557688 | 0.092844307 | 0.016400886 |
| 0.062705194 | 0.147998433 | 0.143391929 | 0.102988207 |
| 0.002326928 | 0.034162507 | 0.030635542 | 0.150321688 |
| 0.061291905 | 0.051941851 | 0.106911536 | 0.132314978 |
| 0.081817729 | 0.019501254 | 0.052147606 | 0.164897844 |

|             |             |             |             |
|-------------|-------------|-------------|-------------|
| 0.088159155 | 0.005882169 | 0.017925425 | 0.021003816 |
| 0.054750218 | 0.04275562  | 0.112351007 | 0.208547672 |
| 0.051471329 | 0.171222967 | 0.119848902 | 0.035745923 |
| 0.097899147 | 0.19749675  | 0.022920454 | 0.058263664 |
| 0.05948076  | 0.099833299 | 0.054104197 | 0.090743821 |
| 0.033621917 | 0.111283456 | 0.090879517 | 0.099348892 |
| 0.00035269  | 0.104134416 | 0.216355967 | 0.205311288 |
| 0.108360804 | 0.184279458 | 0.011653245 | 0.198017426 |
| 0.086910639 | 0.122730469 | 0.153456568 | 0.126453379 |
| 0.083794075 | 0.104155594 | 0.093255544 | 0.089341025 |
| 0.20700639  | 0.005188954 | 0.032681288 | 0.065000165 |
| 0.080560711 | 0.184843528 | 0.02979125  | 0.134970932 |
| 0.189686423 | 0.077536585 | 0.090856378 | 0.156419722 |
| 0.06692516  | 0.151641161 | 0.068220752 | 0.24681272  |
| 0.134061007 | 0.134593528 | 0.12916126  | 0.058697699 |
| 0.14907666  | 0.093951109 | 0.001902114 | 0.087736193 |
| 0.164586835 | 0.007397785 | 0.06740933  | 0.076483329 |
| 0.097151269 | 0.063670849 | 0.111472771 | 0.09639311  |
| 0.098294936 | 0.1999881   | 0.000152028 | 0.122104997 |
| 0.114670053 | 0.151042008 | 0.074287087 | 0.022993994 |
| 0.05362475  | 0.052943755 | 0.058011    | 0.008132378 |
| 0.166986705 | 0.087737713 | 0.07369885  | 0.074604546 |
| 0.026667656 | 0.225566918 | 0.018097645 | 0.127425356 |
| 0.110674562 | 0.186708666 | 0.212568869 | 0.118487874 |
| 0.008988974 | 0.249441698 | 0.040806759 | 0.038572123 |
| 0.267877444 | 0.039105495 | 0.011238371 | 0.064694748 |
| 0.177207041 | 0.035634592 | 0.159703392 | 0.118472963 |
| 0.163013777 | 0.274623978 | 0.048681476 | 0.14193253  |
| 0.139047364 | 0.196036414 | 0.045050483 | 0.090692188 |
| 0.022917191 | 0.208095726 | 0.06482145  | 0.150044075 |
| 0.197825196 | 0.038799117 | 0.206988806 | 0.082136389 |
| 0.010931439 | 0.003423311 | 0.004100203 | 0.024305031 |
| 0.221388202 | 0.03732176  | 0.048069154 | 0.091206567 |
| 0.110666104 | 0.076310116 | 0.019664768 | 0.200767935 |
| 0.159283113 | 0.077924173 | 0.10848733  | 0.024846549 |
| 0.045234144 | 0.089845196 | 0.084097821 | 0.014071552 |
| 0.079666989 | 0.011711724 | 0.011844988 | 0.085198922 |
| 0.005879439 | 0.02533028  | 0.085217058 | 0.081233044 |
| 0.010305024 | 0.147173972 | 0.112032395 | 0.000270876 |
| 0.024507843 | 0.044215998 | 0.192620457 | 0.010670943 |
| 0.164671425 | 0.155866696 | 0.054160479 | 0.048938975 |
| 0.197038244 | 0.113052007 | 0.122354436 | 0.10516378  |
| 0.010944157 | 0.11391956  | 0.081275739 | 0.132884218 |
| 0.107728992 | 0.011892291 | 0.002947388 | 0.082906591 |
| 0.079886655 | 0.003036354 | 0.176971433 | 0.044732091 |
| 0.010828697 | 0.050283503 | 0.015184045 | 0.121755008 |
| 0.171391776 | 0.088097938 | 0.18005721  | 0.103063228 |
| 0.166441555 | 0.219775683 | 0.089971585 | 0.125969493 |
| 0.003295584 | 0.031557304 | 0.025533262 | 0.120959485 |
| 0.234565686 | 0.026801484 | 0.155489391 | 0.00381927  |
| 0.000407502 | 0.162434553 | 0.219090283 | 0.203533072 |
| 0.025975377 | 0.02424585  | 0.058195825 | 0.105975441 |
| 0.268396021 | 0.15098996  | 0.120413567 | 0.047535348 |
| 0.10594615  | 0.027120131 | 0.035537106 | 0.057773679 |



|             |             |             |             |
|-------------|-------------|-------------|-------------|
| 0.17592698  | 0.079194566 | 0.088685365 | 0.149365304 |
| 0.125862327 | 0.022336742 | 0.059610031 | 0.016454025 |
| 0.132900048 | 0.041888517 | 0.197716244 | 0.280130609 |
| 0.107158689 | 0.231898424 | 0.161340889 | 0.005817448 |
| 0.156688094 | 0.265215995 | 0.055973457 | 0.080416231 |
| 0.087994404 | 0.084702967 | 0.08449626  | 0.098422911 |
| 0.069682313 | 0.059116455 | 0.073186874 | 0.067619489 |
| 0.105039142 | 0.090055584 | 0.01146734  | 0.078539459 |
| 0.006506322 | 0.142477923 | 0.057782345 | 0.310794911 |
| 0.060299234 | 0.099705193 | 0.209741041 | 0.047532269 |
| 0.067273313 | 0.005649374 | 0.025225925 | 0.085530542 |
| 0.098764853 | 0.129879426 | 0.009017674 | 0.006800314 |
| 0.130373118 | 0.169643086 | 0.011270569 | 0.11389737  |
| 0.136689493 | 0.108823358 | 0.072226362 | 0.109817651 |
| 0.150707705 | 0.000811045 | 0.024051589 | 0.000789702 |
| 0.009715051 | 0.111211578 | 0.015811199 | 0.040184244 |
| 0.168300973 | 0.086308309 | 0.155371008 | 0.126274493 |
| 0.092230871 | 0.0995384   | 0.122221752 | 0.031491512 |
| 0.116598731 | 0.000209317 | 0.100057943 | 0.085904479 |
| 0.009099751 | 0.015020256 | 0.044190695 | 0.080729333 |
| 0.04247574  | 0.152242951 | 0.257034593 | 0.016842418 |
| 0.133867568 | 0.097741154 | 0.187427255 | 0.036266859 |
| 0.059230837 | 0.124220355 | 0.028216263 | 0.100209489 |
| 0.110343033 | 0.167106636 | 0.01949721  | 0.193722996 |
| 0.052108064 | 0.163216887 | 0.154524536 | 0.037101188 |
| 0.092786223 | 0.170393461 | 0.131768823 | 0.102798034 |
| 0.152515548 | 0.074668425 | 0.005369218 | 0.01153889  |
| 0.077713415 | 0.143736686 | 0.005494775 | 0.148295742 |
| 0.092623514 | 0.060081445 | 0.218732076 | 0.207029071 |
| 0.13053243  | 0.132992751 | 0.201123333 | 0.082910265 |
| 0.088479649 | 0.00757826  | 0.04263154  | 0.152833729 |
| 0.000839891 | 0.026885511 | 0.223755099 | 0.020499308 |
| 0.043770318 | 0.078090138 | 0.012574066 | 0.016165765 |
| 0.125102118 | 0.055142273 | 0.05539102  | 0.114162655 |
| 0.044318043 | 0.009818081 | 0.134009064 | 0.115547103 |
| 0.004975735 | 0.1286826   | 0.250168798 | 0.119393952 |
| 0.022061966 | 0.033294826 | 0.269658129 | 0.257550816 |
| 0.113818431 | 0.094465603 | 0.045265816 | 0.09587713  |
| 0.222488406 | 0.039898147 | 0.105000011 | 0.089149501 |
| 0.13048983  | 0.139992312 | 0.198319899 | 0.072419629 |
| 0.213058029 | 0.088525011 | 0.046716065 | 0.056797898 |
| 0.11002195  | 0.129558104 | 0.110657512 | 0.021418727 |
| 0.21973283  | 0.09648434  | 0.14681902  | 0.222920686 |
| 0.036571196 | 0.279152151 | 0.188476249 | 0.155727678 |
| 0.060415848 | 0.010831299 | 0.156070959 | 0.215158372 |
| 0.12321612  | 0.003046523 | 0.223853307 | 0.042747037 |
| 0.091339814 | 0.001182097 | 0.051578156 | 0.180688146 |
| 0.265556038 | 0.123863767 | 0.033819689 | 0.071429364 |
| 0.058471118 | 0.015751026 | 0.123929994 | 0.065788319 |
| 0.111564333 | 0.046506113 | 0.116651287 | 0.144429558 |
| 0.205658346 | 0.051640578 | 0.011614935 | 0.051671251 |
| 0.176728942 | 0.053012267 | 0.105436624 | 0.24814851  |
| 0.17916123  | 0.148433561 | 0.081949047 | 0.251043444 |
| 0.032650183 | 0.110970647 | 0.112416885 | 0.077200714 |

|             |             |             |             |
|-------------|-------------|-------------|-------------|
| 0.013205728 | 0.091591049 | 0.013103163 | 0.058597893 |
| 0.010005954 | 0.007648288 | 0.091477009 | 0.139986557 |
| 0.12763459  | 0.098569791 | 0.169223162 | 0.041071032 |
| 0.0004046   | 0.036835472 | 0.09997672  | 0.035143138 |
| 0.0820767   | 0.146333764 | 0.013090868 | 0.153980504 |
| 0.244346912 | 0.190362129 | 0.07583916  | 0.010942088 |
| 0.001466486 | 0.052217319 | 0.264699067 | 0.09342162  |
| 0.109194978 | 0.091170694 | 0.010463568 | 0.152596339 |
| 0.002151885 | 0.282743246 | 0.181068381 | 0.005684312 |
| 0.003969811 | 0.093855097 | 0.070878571 | 0.192572961 |
| 0.032064011 | 0.083962195 | 0.114012722 | 0.007722502 |
| 0.067722569 | 0.103729539 | 0.160964007 | 0.167833515 |
| 0.145285638 | 0.105937391 | 0.140748179 | 0.047129865 |
| 0.059117333 | 0.111528172 | 0.131571159 | 0.255488241 |
| 0.16019328  | 0.117141309 | 0.051121432 | 0.034005461 |
| 0.077484131 | 0.209933305 | 0.214422239 | 0.208705377 |
| 1           | 0.082869982 | 0.283634314 | 0.203155265 |
| 0.212346399 | 0.025578718 | 0.222531323 | 0.086552501 |
| 0.163842426 | 0.153919434 | 0.046987953 | 0.084366199 |
| 0.000989139 | 0.010205592 | 0.105023188 | 0.045312671 |
| 0.207570819 | 0.036957285 | 0.02723748  | 0.069276121 |
| 0.039670039 | 0.208669882 | 0.293869627 | 0.135391958 |
| 0.05075402  | 0.020495094 | 0.007323359 | 0.148183346 |
| 0.16640326  | 0.189024179 | 0.068252816 | 0.054290844 |
| 0.129464366 | 0.032411278 | 0.080126979 | 0.113683299 |
| 0.010232463 | 0.187852194 | 0.004306544 | 0.135482321 |
| 0.003221672 | 0.148896173 | 0.282683867 | 0.050388419 |
| 0.006637066 | 0.164243198 | 0.082459702 | 0.026444102 |
| 0.059066024 | 0.038041051 | 0.026377169 | 0.089514417 |
| 0.097655084 | 0.148522378 | 0.111799011 | 0.119604494 |
| 0.024380018 | 0.04710365  | 0.024707825 | 0.085924425 |
| 0.106594962 | 0.088834124 | 0.239138594 | 0.090384356 |
| 0.037432507 | 0.211960424 | 0.180166575 | 0.082782356 |
| 0.031321327 | 0.076612525 | 0.006765539 | 0.016177376 |
| 0.054533581 | 0.014951014 | 1.32E-05    | 0.004389224 |
| 0.184652044 | 0.011450539 | 0.042369316 | 0.077209978 |
| 0.038069371 | 0.142473764 | 0.002523423 | 0.062873804 |
| 0.091784792 | 0.124736969 | 0.039568531 | 0.204271346 |
| 0.134867497 | 0.262437808 | 0.059358758 | 0.000501926 |
| 0.035264093 | 0.0232829   | 0.0068451   | 0.193762373 |
| 0.064147665 | 0.006722977 | 0.034270375 | 0.09941256  |
| 0.093198288 | 0.002505387 | 0.027823766 | 0.06329794  |
| 0.167572709 | 0.131078256 | 0.132342819 | 0.108840961 |
| 0.012125592 | 0.148037798 | 0.021633892 | 0.018997035 |
| 0.059836635 | 0.028051005 | 0.127765421 | 0.031365112 |
| 0.214167451 | 0.036663632 | 0.004286192 | 0.204457335 |
| 0.105988075 | 0.019093049 | 0.234252562 | 0.003612975 |
| 0.211422376 | 0.108231565 | 0.016452353 | 0.020018811 |
| 0.1155016   | 0.05137282  | 0.23332325  | 0.128155817 |
| 0.003088243 | 0.028619577 | 0.098295448 | 0.027171408 |
| 0.142811338 | 0.01231937  | 0.190042723 | 0.004231193 |
| 0.093469799 | 0.073215113 | 0.129745889 | 0.026173872 |
| 0.026154504 | 0.224993549 | 0.014598016 | 0.116050371 |
| 0.209937678 | 0.033803466 | 0.090127866 | 0.111589275 |

|             |             |             |             |
|-------------|-------------|-------------|-------------|
| 0.021862926 | 0.116820177 | 0.02049113  | 0.105439045 |
| 0.113455832 | 0.246435168 | 0.07745839  | 0.091337489 |
| 0.227061297 | 0.02626722  | 0.022209764 | 0.07143615  |
| 0.10253097  | 0.101581602 | 0.010969977 | 0.12857771  |
| 0.014378448 | 0.165489776 | 0.022884882 | 0.082224402 |
| 0.115019954 | 0.076946634 | 0.045465568 | 0.229191695 |
| 0.134222493 | 0.053057205 | 0.031984122 | 0.208921404 |
| 0.116882869 | 0.092660537 | 0.174980485 | 0.00054289  |
| 0.0895533   | 0.095329174 | 0.205449205 | 0.039614092 |
| 0.284512158 | 0.067294837 | 0.04006967  | 0.031384971 |
| 0.094658682 | 0.008134905 | 0.037262231 | 0.061828189 |
| 0.005217715 | 0.142643104 | 0.136078349 | 0.110539706 |
| 0.120969979 | 0.004665782 | 0.005237005 | 0.110541846 |
| 0.004466862 | 0.005970678 | 0.010074633 | 0.041983143 |
| 0.015962757 | 0.010990264 | 0.015423487 | 0.016879247 |
| 0.104439789 | 0.093063728 |             |             |
| RAB6B       | 0.127283855 | 0.45095421  | 0.108681594 |
| 0.176439433 | 0.327848544 | 0.483045407 | 0.091858676 |
| 0.179403901 | 0.406502909 | 0.381336784 | 0.406866573 |
| 0.031216492 | 0.115661833 | 0.449303219 | 0.087904453 |
| 0.401877388 | 0.052577999 | 0.148400381 | 0.111997484 |
| 0.289488555 | 0.291507992 | 0.392834055 | 0.458631993 |
| 0.309456029 | 0.237020153 | 0.411145001 | 0.425875969 |
| 0.508459372 | 0.337391917 | 0.476551862 | 0.257939854 |
| 0.408747173 | 0.339886959 | 0.430797395 | 0.034922518 |
| 0.470548955 | 0.016790209 | 0.445004013 | 0.278495682 |
| 0.175553651 | 0.362917871 | 0.425254023 | 0.281927584 |
| 0.416481566 | 0.066441185 | 0.31047407  | 0.424820845 |
| 0.397407485 | 0.35697446  | 0.12084045  | 0.47308596  |
| 0.411244452 | 0.415489887 | 0.448776988 | 0.003654011 |
| 0.339286207 | 0.11323708  | 0.2567342   | 0.527532103 |
| 0.255982001 | 0.167512389 | 0.322461444 | 0.343778848 |
| 0.427619222 | 0.406143822 | 0.314939274 | 0.4042049   |
| 0.502788431 | 0.19714856  | 0.465336429 | 0.215187039 |
| 0.429998533 | 0.066015776 | 0.208423435 | 0.145351743 |
| 0.43227856  | 0.249803366 | 0.394117429 | 0.334878338 |
| 0.441731112 | 0.530549298 | 0.294594128 | 0.521295674 |
| 0.11304084  | 0.35524266  | 0.311265588 | 0.331049824 |
| 0.397014369 | 0.127771255 | 0.435900344 | 0.520651657 |
| 0.092828291 | 0.443231127 | 0.422218048 | 0.186441265 |
| 0.469860815 | 0.33739968  | 0.454379827 | 0.206494449 |
| 0.38983959  | 0.345307537 | 0.498873669 | 0.334132686 |
| 0.372585741 | 0.123558247 | 0.518297042 | 0.336196652 |
| 0.336702499 | 0.135190669 | 0.229739855 | 0.468966076 |
| 0.441280394 | 0.498047145 | 0.451762624 | 0.384863102 |
| 0.383336104 | 0.504274106 | 0.435117691 | 0.446313637 |
| 0.243528239 | 0.539268743 | 0.251373711 | 0.067717347 |
| 0.128352211 | 0.128985487 | 0.268430904 | 0.344348488 |
| 0.478180693 | 0.402415073 | 0.253631063 | 0.256234706 |
| 0.442733275 | 0.51106734  | 0.535238962 | 0.434860962 |
| 0.066962854 | 0.286015015 | 0.388124243 | 0.39230723  |
| 0.407074071 | 0.168964671 | 0.275457063 | 0.526889671 |
| 0.399089318 | 0.447356683 | 0.247391746 | 0.523494987 |
| 0.262342993 | 0.512179797 | 0.470400109 | 0.209997091 |

|             |             |             |             |
|-------------|-------------|-------------|-------------|
| 0.529876886 | 0.519234997 | 0.501270905 | 0.421607994 |
| 0.498094539 | 0.406860533 | 0.088505865 | 0.410052863 |
| 0.482336335 | 0.017823701 | 0.475152465 | 0.490792675 |
| 0.512144606 | 0.466219943 | 0.510098033 | 0.512015655 |
| 0.522784983 | 0.120077493 | 0.034403399 | 0.304275386 |
| 0.51946997  | 0.41658072  | 0.183048257 | 0.431078499 |
| 0.381347488 | 0.469331708 | 0.469414518 | 0.331917282 |
| 0.510595565 | 0.467421403 | 0.494054449 | 0.42948755  |
| 0.368935067 | 0.347554576 | 0.401751371 | 0.501741179 |
| 0.073655773 | 0.175625589 | 0.09746728  | 0.35406662  |
| 0.443398476 | 0.213145597 | 0.437909776 | 0.382883373 |
| 0.236315606 | 0.435120778 | 0.385481541 | 0.396768418 |
| 0.099943577 | 0.480575731 | 0.232191353 | 0.225862138 |
| 0.059821937 | 0.193574011 | 0.213171266 | 0.210446128 |
| 0.284138122 | 0.272797075 | 0.477599902 | 0.486452583 |
| 0.387803351 | 0.244078622 | 0.465227045 | 0.472262768 |
| 0.404839003 | 0.40224768  | 0.284919694 | 0.015692947 |
| 0.261814684 | 0.35625874  | 0.211112223 | 0.453289479 |
| 0.218048253 | 0.25776723  | 0.400094799 | 0.413255229 |
| 0.353657768 | 0.227111201 | 0.379655347 | 0.446313313 |
| 0.214604958 | 0.3452294   | 0.44000451  | 0.4481286   |
| 0.008007384 | 0.360260123 | 0.46688651  | 0.160651623 |
| 0.364004723 | 0.159809191 | 0.304893238 | 0.448224772 |
| 0.321595572 | 0.249220018 | 0.496779561 | 0.416661769 |
| 0.412516685 | 0.262459957 | 0.520838324 | 0.054156049 |
| 0.384181389 | 0.063073487 | 0.307647761 | 0.420111292 |
| 0.298166831 | 0.320992309 | 0.343335115 | 0.307951896 |
| 0.199653301 | 0.526390045 | 0.441548742 | 0.510925939 |
| 0.380594064 | 0.521679285 | 0.464626979 | 0.446210757 |
| 0.420258216 | 0.394186779 | 0.160092436 | 0.451502595 |
| 0.453537991 | 0.314869707 | 0.128717346 | 0.467455183 |
| 0.392376415 | 0.417045483 | 0.141318833 | 0.477253527 |
| 0.507518283 | 0.497012519 | 0.18537498  | 0.385401702 |
| 0.407695388 | 0.298694279 | 0.448692963 | 0.526558212 |
| 0.357697876 | 0.359382546 | 0.335646389 | 0.401093858 |
| 0.227503444 | 0.224870124 | 0.35869094  | 0.219483173 |
| 0.018180408 | 0.138444197 | 0.108598689 | 0.192456132 |
| 0.183741806 | 0.470746548 | 0.421286907 | 0.515873024 |
| 0.159041022 | 0.441962976 | 0.297094613 | 0.291636359 |
| 0.414933353 | 0.383801857 | 0.420708442 | 0.425431464 |
| 0.303202131 | 0.027231054 | 0.147966769 | 0.528545876 |
| 0.080999753 | 0.265522895 | 0.399153739 | 0.004195479 |
| 0.07481258  | 0.459141991 | 0.143965754 | 0.22702867  |
| 0.462836051 | 0.235412651 | 0.258436751 | 0.365374611 |
| 0.387319867 | 0.14267822  | 0.005662387 | 0.484302133 |
| 0.499349264 | 0.467372757 | 0.49835154  | 0.486516931 |
| 0.433729063 | 0.458362103 | 0.424198848 | 0.450118608 |
| 0.146746993 | 0.150238185 | 0.204725589 | 0.299574711 |
| 0.009146729 | 0.418241159 | 0.357844711 | 0.190712447 |
| 0.450448178 | 0.344858125 | 0.066908784 | 0.39450868  |
| 0.036217431 | 0.222955799 | 0.368612736 | 0.267879136 |
| 0.37246454  | 0.030211279 | 0.276055749 | 0.325747167 |
| 0.456141268 | 0.387078699 | 0.397321012 | 0.53960103  |
| 0.367003069 | 0.192601999 | 0.326187395 | 0.436784209 |

|             |             |             |             |
|-------------|-------------|-------------|-------------|
| 0.105956667 | 0.125603031 | 0.428002345 | 0.053301134 |
| 0.317126274 | 0.476314575 | 0.428344803 | 0.10580173  |
| 0.308384796 | 0.010629205 | 0.400678543 | 0.53690654  |
| 0.49629773  | 0.505587596 | 0.505851236 | 0.29600801  |
| 0.509627565 | 0.138296097 | 0.53399807  | 0.44195805  |
| 0.412433213 | 0.00133457  | 0.010637285 | 0.472216695 |
| 0.402662074 | 0.109170745 | 0.207039828 | 0.443902618 |
| 0.139999833 | 0.229002886 | 0.112967462 | 0.195351929 |
| 0.487761336 | 0.269813151 | 0.205200257 | 0.488288557 |
| 0.26926332  | 0.28084448  | 0.463478836 | 0.141891782 |
| 0.455593282 | 0.080637594 | 0.139914655 | 0.011031558 |
| 0.396401063 | 0.169911258 | 0.501874501 | 0.521025724 |
| 0.491261596 | 0.411910506 | 0.3941458   | 0.432950143 |
| 0.451246663 | 0.166074321 | 0.435195378 | 0.184235506 |
| 0.500328661 | 0.394664196 | 0.354521561 | 0.346855855 |
| 0.485271698 | 0.468457568 | 0.057352019 | 0.417881271 |
| 0.026286388 | 0.003401691 | 0.43491643  | 0.319341499 |
| 0.094550536 | 0.374764732 | 0.29487834  | 0.295303407 |
| 0.293436543 | 0.056420474 | 0.276271023 | 0.246883631 |
| 0.321864616 | 0.375940259 | 0.285990968 | 0.308251831 |
| 0.288844799 | 0.134728993 | 0.254063915 | 0.205605272 |
| 0.304450187 | 0.349971446 | 0.237091554 | 0.038621423 |
| 0.462474729 | 0.431761376 | 0.093589459 | 0.221070513 |
| 0.45186385  | 0.477828491 | 0.058471055 | 0.014845497 |
| 0.313154012 | 0.345070296 | 0.486783332 | 0.515458921 |
| 0.540641731 | 0.509747681 | 0.406222544 | 0.140860478 |
| 0.110760576 | 0.346154327 | 0.309837055 | 0.117653655 |
| 0.517568727 | 0.114035018 | 0.510801187 | 0.322441918 |
| 0.166083282 | 0.25440886  | 0.053980883 | 0.126286847 |
| 0.419195825 | 0.232706835 | 0.20668174  | 0.209091809 |
| 0.326532502 | 0.280587741 | 0.079615845 | 0.24030162  |
| 0.37776618  | 0.175781498 | 0.206926377 | 0.408147939 |
| 0.419830612 | 0.310077646 | 0.44013271  | 0.440048594 |
| 0.190236179 | 0.163008482 | 0.342906335 | 0.434191655 |
| 0.468832333 | 0.449697803 | 0.049916981 | 0.471609084 |
| 0.490184229 | 0.470101146 | 0.520116311 | 0.391587778 |
| 0.13218802  | 0.396799989 | 0.342201213 | 0.348310694 |
| 0.236084017 | 0.480386995 | 0.290884959 | 0.101746122 |
| 0.337263869 | 0.500115361 | 0.429277009 | 0.206023432 |
| 0.484656972 | 0.202580948 | 0.10263164  | 0.47466964  |
| 0.178188894 | 0.12918444  | 0.444549594 | 0.459690593 |
| 0.002580898 | 0.165117175 | 0.47895951  | 0.31229905  |
| 0.523622776 | 0.460374473 | 0.436491095 | 0.356426395 |
| 0.001685429 | 0.423099201 | 0.401246891 | 0.413145568 |
| 0.44922692  | 0.415057947 | 0.247912643 | 0.098755864 |
| 0.322499418 | 0.139373386 | 0.154082696 | 0.442958562 |
| 0.178145763 | 0.459480285 | 0.241435069 | 0.265253275 |
| 0.22771374  | 0.151239682 | 0.288290931 | 0.306414338 |
| 0.171655254 | 0.279508566 | 0.370815864 | 0.401162879 |
| 0.19160592  | 0.428470068 | 0.424037954 | 0.051076848 |
| 0.399636989 | 0.4237814   | 0.446994681 | 0.002099456 |
| 0.442892858 | 0.013424975 | 0.227524062 | 0.244284852 |
| 0.236630307 | 0.240648279 | 0.282931394 | 0.317169811 |
| 0.392951045 | 0.262575094 | 0.317659839 | 0.277989097 |

|             |             |             |             |
|-------------|-------------|-------------|-------------|
| 0.197858158 | 0.291362017 | 0.422160803 | 0.408389103 |
| 0.305365125 | 0.178019127 | 0.150950448 | 0.147787786 |
| 0.082869982 | 1           | 0.290183018 | 0.129253831 |
| 0.275119815 | 0.411469323 | 0.362198785 | 0.51375567  |
| 0.425153512 | 0.176008631 | 0.377894647 | 0.467303216 |
| 0.28355361  | 0.378390932 | 0.110568765 | 0.451240606 |
| 0.294469581 | 0.230267557 | 0.482736869 | 0.369249363 |
| 0.446634444 | 0.406558591 | 0.292807944 | 0.443068183 |
| 0.401082908 | 0.378994644 | 0.388880627 | 0.106305621 |
| 0.219457962 | 0.187975349 | 0.277026456 | 0.003825951 |
| 0.397818215 | 0.345709954 | 0.470047006 | 0.506556569 |
| 0.328581485 | 0.403102182 | 0.403615174 | 0.121972712 |
| 0.358270138 | 0.222094766 | 0.191488299 | 0.47271467  |
| 0.247630324 | 0.253145945 | 0.315844988 | 0.445352757 |
| 0.451031172 | 0.449066367 | 0.289499784 | 0.313439838 |
| 0.292316896 | 0.272975759 | 0.493129264 | 0.196150715 |
| 0.455924211 | 0.197749033 | 0.438843089 | 0.305849525 |
| 0.243142687 | 0.517520934 | 0.105032424 | 0.522267809 |
| 0.333501453 | 0.193340551 | 0.498412632 | 0.404688237 |
| 0.388881944 | 0.16712768  | 0.209362376 | 0.45864708  |
| 0.273448377 | 0.385680106 | 0.023486953 | 0.066282116 |
| 0.35180051  | 0.367209809 | 0.440000448 | 0.403657498 |
| 0.265322276 | 0.356097984 | 0.221471341 | 0.347619039 |
| 0.509068568 | 0.526751434 | 0.267219668 | 0.283687701 |
| 0.385312657 | 0.145692549 | 0.477677234 | 0.024907396 |
| 0.432316516 | 0.446029008 | 0.425910109 | 0.088063317 |
| 0.033969829 | 0.219747782 | 0.428802103 | 0.118578067 |
| 0.456878744 | 0.245095156 | 0.420761134 | 0.480517888 |
| 0.24182684  | 0.522837482 | 0.153091369 | 0.429750947 |
| 0.079747505 | 0.313044457 | 0.419011126 | 0.422716163 |
| 0.236083503 | 0.297532101 | 0.389647686 | 0.252494245 |
| 0.050867075 | 0.290761038 | 0.001247241 | 0.420635673 |
| 0.495051727 | 0.344255886 | 0.256747219 | 0.38800139  |
| 0.312586795 | 0.419411419 | 0.267289005 | 0.469385497 |
| 0.018295321 | 0.375291667 | 0.258233023 | 0.454666496 |
| 0.243428161 | 0.392472924 | 0.08512125  | 0.330601443 |
| 0.494147316 | 0.284592816 | 0.302683424 | 0.30845343  |
| 0.510527667 | 0.44472927  | 0.235973145 | 0.278321741 |
| 0.437250295 | 0.109094752 | 0.473821    | 0.530569744 |
| 0.211764354 | 0.224978881 | 0.442087115 | 0.220590982 |
| 0.335294895 | 0.430183274 | 0.449287769 | 0.528810997 |
| 0.087633537 | 0.289255587 | 0.451240983 | 0.455078756 |
| 0.33191526  | 0.183717761 | 0.259575981 | 0.239210772 |
| 0.481691028 | 0.142602355 | 0.273623191 | 0.39672291  |
| 0.219234567 | 0.3587909   | 0.419057204 | 0.211926134 |
| 0.057836052 | 0.229002754 | 0.456668821 | 0.197738594 |
| 0.322198022 | 0.377384998 | 0.250059516 | 0.3851745   |
| 0.171511757 | 0.033837781 | 0.450381862 | 0.016770395 |
| 0.438497639 | 0.423716662 | 0.310103286 | 0.381437812 |
| 0.240841355 | 0.402117465 | 0.384164796 | 0.002274228 |
| 0.428833232 | 0.063640829 | 0.367109692 | 0.235754167 |
| 0.31467118  | 0.083689217 | 0.476800239 | 0.500462317 |
| 0.396461534 | 0.416360827 | 0.383975159 | 0.476564647 |
| 0.16162315  | 0.382525645 | 0.372819111 | 0.466111544 |

|             |             |             |             |
|-------------|-------------|-------------|-------------|
| 0.249827021 | 0.428259086 | 0.455373333 | 0.408180272 |
| 0.441114149 | 0.363118023 |             |             |
| RAB7L1      | 0.304384151 | 0.280164395 | 0.24144823  |
| 0.274157575 | 0.198668282 | 0.246270687 | 0.282034691 |
| 0.327671575 | 0.238485578 | 0.122053919 | 0.266589206 |
| 0.212716859 | 0.037208697 | 0.311188247 | 0.281322188 |
| 0.197582098 | 0.255658649 | 0.327906452 | 0.089085353 |
| 0.216698224 | 0.201199519 | 0.171480437 | 0.252816823 |
| 0.193482281 | 0.322824217 | 0.256119066 | 0.158083814 |
| 0.310936546 | 0.090863037 | 0.222991181 | 0.080293568 |
| 0.364465774 | 0.190647889 | 0.150350945 | 0.186577412 |
| 0.239133374 | 0.010713916 | 0.38645097  | 0.250699918 |
| 0.0804594   | 0.358383426 | 0.163428418 | 0.305801737 |
| 0.175993508 | 0.248693685 | 0.076807523 | 0.187481077 |
| 0.234159414 | 0.261851632 | 0.250631895 | 0.232371637 |
| 0.188823077 | 0.311430411 | 0.200366337 | 0.015730097 |
| 0.118900092 | 0.018519262 | 0.069352817 | 0.357838735 |
| 0.355373937 | 0.343558342 | 0.089981514 | 0.258657553 |
| 0.193125975 | 0.219055126 | 0.308049461 | 0.159458311 |
| 0.344764209 | 0.075944886 | 0.197911772 | 0.215773868 |
| 0.245479523 | 0.200590641 | 0.342820224 | 0.233649366 |
| 0.185752312 | 0.332771617 | 0.238152612 | 0.136324483 |
| 0.273214546 | 0.407151624 | 0.312995344 | 0.362194242 |
| 0.058607612 | 0.163082323 | 0.179001082 | 0.287202594 |
| 0.235779643 | 0.246513727 | 0.262148359 | 0.379116513 |
| 0.22387395  | 0.179369518 | 0.229096855 | 0.285308378 |
| 0.284471983 | 0.113525351 | 0.17684288  | 0.095416109 |
| 0.196569517 | 0.186415152 | 0.367120564 | 0.326811428 |
| 0.202901321 | 0.26324141  | 0.384097627 | 0.150984421 |
| 0.245512058 | 0.290628391 | 0.169957793 | 0.234853937 |
| 0.235745165 | 0.315495463 | 0.239009301 | 0.25917108  |
| 0.178550526 | 0.336182153 | 0.262172283 | 0.296448706 |
| 0.04727321  | 0.353873838 | 0.341513019 | 0.28395489  |
| 0.259081408 | 0.311722947 | 0.149859393 | 0.3170957   |
| 0.279447215 | 0.29919072  | 0.342945525 | 0.274594766 |
| 0.265633039 | 0.357788613 | 0.344326265 | 0.261693062 |
| 0.271705002 | 0.096213349 | 0.182085568 | 0.297941622 |
| 0.252861414 | 0.30914346  | 0.131843197 | 0.39801224  |
| 0.338473652 | 0.240402639 | 0.31039027  | 0.424210944 |
| 0.275693442 | 0.380031536 | 0.272534066 | 0.344529259 |
| 0.388954211 | 0.387826815 | 0.348722293 | 0.196636897 |
| 0.378615294 | 0.285564073 | 0.059735734 | 0.265743552 |
| 0.366690806 | 0.015966584 | 0.264379848 | 0.287052931 |
| 0.339507574 | 0.237971439 | 0.341754979 | 0.317706026 |
| 0.342016678 | 0.289350005 | 0.008417177 | 0.255237817 |
| 0.367636727 | 0.307751073 | 0.268768388 | 0.174013583 |
| 0.200674171 | 0.266716226 | 0.224878551 | 0.158273025 |
| 0.400698246 | 0.281597995 | 0.286080323 | 0.252368164 |
| 0.209670476 | 0.356468403 | 0.144745149 | 0.37990266  |
| 0.276430287 | 0.316852418 | 0.242251443 | 0.284240229 |
| 0.173667796 | 0.332800237 | 0.255324953 | 0.196981101 |
| 0.344534685 | 0.255879879 | 0.122506411 | 0.203359572 |
| 0.223888102 | 0.207330976 | 0.330265855 | 0.30146284  |
| 0.271579164 | 0.311185415 | 0.29134113  | 0.329799149 |

|             |             |             |             |
|-------------|-------------|-------------|-------------|
| 0.273103946 | 0.361518481 | 0.210349608 | 0.30627937  |
| 0.190639314 | 0.314562694 | 0.243390405 | 0.354918791 |
| 0.362035413 | 0.182794495 | 0.327278455 | 0.09797787  |
| 0.169174761 | 0.100938906 | 0.063968726 | 0.174127528 |
| 0.329887102 | 0.246668043 | 0.214991466 | 0.224838168 |
| 0.301868992 | 0.278417933 | 0.181531884 | 0.404920375 |
| 0.286260973 | 0.23477387  | 0.282921369 | 0.197806075 |
| 0.083407307 | 0.281491484 | 0.252711282 | 0.152565066 |
| 0.268165361 | 0.083852585 | 0.111091255 | 0.280978049 |
| 0.119424324 | 0.143607629 | 0.29434168  | 0.220661958 |
| 0.199150089 | 0.316655477 | 0.346560102 | 0.017216465 |
| 0.170888002 | 0.128557546 | 0.29670444  | 0.155185496 |
| 0.328261261 | 0.294738335 | 0.177082239 | 0.202146808 |
| 0.288976357 | 0.359156734 | 0.287849497 | 0.328073095 |
| 0.155212595 | 0.352590331 | 0.256569465 | 0.307094551 |
| 0.287719912 | 0.143278949 | 0.04648422  | 0.250342578 |
| 0.268624774 | 0.135553193 | 0.250779121 | 0.205960968 |
| 0.157016594 | 0.201838902 | 0.153989264 | 0.334374433 |
| 0.409645363 | 0.334080226 | 0.32071263  | 0.243861575 |
| 0.295890581 | 0.34171149  | 0.262783833 | 0.365577753 |
| 0.123326512 | 0.180596785 | 0.17797076  | 0.263041066 |
| 0.339364693 | 0.157130191 | 0.317357255 | 0.061130745 |
| 0.003234343 | 0.285353914 | 0.281742151 | 0.297975224 |
| 0.104122207 | 0.179678472 | 0.226803013 | 0.341728145 |
| 0.346168079 | 0.331856696 | 0.290314724 | 0.219513369 |
| 0.315634276 | 0.181677433 | 0.172557967 | 0.214010445 |
| 0.323109393 | 0.129576187 | 0.293252825 | 0.411625931 |
| 0.201874757 | 0.124579881 | 0.270366776 | 0.021994109 |
| 0.261357514 | 0.219558051 | 0.263036143 | 0.350915307 |
| 0.299105111 | 0.332511179 | 0.313452953 | 0.143000205 |
| 0.283609336 | 0.329584923 | 0.037329174 | 0.303698589 |
| 0.326999583 | 0.313590203 | 0.324987036 | 0.345509    |
| 0.272455306 | 0.231433262 | 0.232259466 | 0.264951382 |
| 0.325140486 | 0.273003188 | 0.110183023 | 0.250840151 |
| 0.024282223 | 0.276194143 | 0.22140367  | 0.344705989 |
| 0.217802204 | 0.279253236 | 0.275318639 | 0.193564196 |
| 0.174619906 | 0.067833817 | 0.254264494 | 0.276445023 |
| 0.238546769 | 0.183600054 | 0.145156417 | 0.143869776 |
| 0.34674469  | 0.318712577 | 0.137866091 | 0.363725101 |
| 0.282641592 | 0.245033443 | 0.235636381 | 0.250915255 |
| 0.314379667 | 0.052462926 | 0.229765851 | 0.017419179 |
| 0.145754477 | 0.347172795 | 0.181514912 | 0.261074181 |
| 0.318061522 | 0.115127167 | 0.320832322 | 0.371820127 |
| 0.330721385 | 0.322813168 | 0.343359802 | 0.134692357 |
| 0.348686149 | 0.022299041 | 0.33858992  | 0.271831903 |
| 0.151041845 | 0.011650533 | 0.061263239 | 0.281669664 |
| 0.199259715 | 0.212858526 | 0.347282141 | 0.213334245 |
| 0.32846294  | 0.298314737 | 0.299877059 | 0.142190591 |
| 0.23527499  | 0.235600126 | 0.134807567 | 0.343129    |
| 0.295326583 | 0.311660081 | 0.207446582 | 0.279625559 |
| 0.212247764 | 0.295280164 | 0.266974317 | 0.040145862 |
| 0.238344367 | 0.262658174 | 0.395340951 | 0.340794608 |
| 0.373710844 | 0.224122225 | 0.121409298 | 0.207125099 |
| 0.266809871 | 0.239930077 | 0.149632549 | 0.270433704 |



|             |             |             |             |
|-------------|-------------|-------------|-------------|
| 0.326035363 | 0.217587958 | 0.320845663 | 0.321714648 |
| 0.350417863 | 0.353049341 | 0.262170473 | 0.245018606 |
| 0.129726998 | 0.010035775 | 0.237371003 | 0.308935078 |
| 0.043945665 | 0.179018373 | 0.332553699 | 0.207619249 |
| 0.239241004 | 0.239330675 | 0.109592746 | 0.112916005 |
| 0.28301773  | 0.232721531 | 0.169688504 | 0.284937302 |
| 0.200520943 | 0.130877472 | 0.305320694 | 0.314521933 |
| 0.155851474 | 0.300189442 | 0.321615968 | 0.21292216  |
| 0.18950019  | 0.189558786 | 0.305218715 | 0.338572969 |
| 0.284151718 | 0.298281839 | 0.238408936 | 0.120410776 |
| 0.330530451 | 0.220482161 | 0.311066357 | 0.32437445  |
| 0.390135283 | 0.374146797 | 0.389851849 | 0.241821019 |
| 0.315142643 | 0.249497468 | 0.169459536 | 0.206063823 |
| 0.340081508 | 0.233464789 | 0.345633503 | 0.126002224 |
| 0.320717274 | 0.310980739 | 0.256015853 | 0.31559815  |
| 0.172024089 | 0.352601542 | 0.29205637  | 0.281632486 |
| 0.241891914 | 0.119166422 | 0.277256548 | 0.343149706 |
| 0.290272592 | 0.070301333 | 0.341561135 | 0.26357957  |
| 0.274908727 | 0.096383594 | 0.208578576 | 0.378077152 |
| 0.331439139 | 0.289362382 | 0.254644284 | 0.240526966 |
| 0.235514485 | 0.161600404 | 0.161914602 | 0.284093859 |
| 0.324894762 | 0.210568049 | 0.358425425 | 0.295171287 |
| 0.289875637 | 0.199759022 | 0.129896845 | 0.210813996 |
| 0.325566251 | 0.252017245 | 0.290962931 | 0.293914341 |
| 0.321554244 | 0.401110687 | 0.279652607 | 0.333856782 |
| 0.204070671 | 0.263061002 | 0.218605178 | 0.271408409 |
| 0.102308059 | 0.309604823 | 0.169419098 | 0.226108956 |
| 0.012799035 | 0.057105707 | 0.306595523 | 0.322702383 |
| 0.378665751 | 0.300232422 | 0.363702025 | 0.27085519  |
| 0.000761594 | 0.185825515 | 0.255600441 | 0.211546989 |
| 0.284014671 | 0.305289627 | 0.196935139 | 0.303295208 |
| 0.328757048 | 0.252774556 | 0.288209254 | 0.216281829 |
| 0.064397153 | 0.244845989 | 0.339768446 | 0.283727844 |
| 0.272186674 | 0.225360184 | 0.117014622 | 0.327929651 |
| 0.074720292 | 0.344123764 | 0.303331528 | 0.137975815 |
| 0.082318633 | 0.287717797 | 0.246791581 | 0.236250401 |
| 0.167119306 | 0.263216977 | 0.305761457 | 0.021981093 |
| 0.223305829 | 0.145724977 | 0.282975404 | 0.285477582 |
| 0.295630645 | 0.274594832 | 0.262369168 | 0.213614357 |
| 0.252242136 | 0.315698231 | 0.30066857  | 0.334757658 |
| 0.29840842  | 0.318539121 | 0.219090564 | 0.239416416 |
| 0.228105719 | 0.345439801 | 0.262543409 | 0.272589475 |
| 0.283634314 | 0.290183018 | 1           | 0.252403804 |
| 0.324468102 | 0.221754897 | 0.346053707 | 0.329157658 |
| 0.327511327 | 0.243866609 | 0.238464257 | 0.279983097 |
| 0.078439101 | 0.209664602 | 0.265417489 | 0.240121977 |
| 0.345331362 | 0.170550806 | 0.2103974   | 0.263172841 |
| 0.214202207 | 0.386728327 | 0.34312809  | 0.336491266 |
| 0.235859942 | 0.183313467 | 0.13920468  | 0.284665572 |
| 0.336616023 | 0.304146626 | 0.182227391 | 0.058947467 |
| 0.293236445 | 0.282807873 | 0.26799056  | 0.35817197  |
| 0.1093343   | 0.340577031 | 0.162441185 | 0.309829271 |
| 0.119090471 | 0.284117012 | 0.33979609  | 0.219079126 |
| 0.072774285 | 0.346363015 | 0.222376594 | 0.239165103 |

|             |             |             |             |
|-------------|-------------|-------------|-------------|
| 0.220343285 | 0.20263348  | 0.176797747 | 0.301779202 |
| 0.283358146 | 0.312955465 | 0.36778599  | 0.300599215 |
| 0.183686233 | 0.158627189 | 0.197295207 | 0.246484097 |
| 0.260888914 | 0.319300368 | 0.286549409 | 0.320710569 |
| 0.197298456 | 0.29835325  | 0.408553812 | 0.28329047  |
| 0.270524684 | 0.2663005   | 0.066697772 | 0.200733583 |
| 0.278356459 | 0.136696166 | 0.00495129  | 0.04682978  |
| 0.296400207 | 0.166545736 | 0.21524528  | 0.248202505 |
| 0.166200858 | 0.277572356 | 0.061035008 | 0.279716375 |
| 0.341067921 | 0.389832421 | 0.259018078 | 0.323073592 |
| 0.294290548 | 0.344548763 | 0.247959524 | 0.017127408 |
| 0.194340914 | 0.167420664 | 0.159409237 | 0.296586065 |
| 0.20786168  | 0.075315635 | 0.205590773 | 0.225441221 |
| 0.288241291 | 0.069599934 | 0.20132775  | 0.230699464 |
| 0.306044434 | 0.396235473 | 0.277644284 | 0.254266261 |
| 0.173185519 | 0.313514924 | 0.164498384 | 0.177886039 |
| 0.21713858  | 0.146026497 | 0.26773503  | 0.12450914  |
| 0.262648163 | 0.234145465 | 0.016564209 | 0.404719605 |
| 0.365426537 | 0.146773752 | 0.326997866 | 0.116155463 |
| 0.309859853 | 0.286794941 | 0.196427179 | 0.173201076 |
| 0.138174999 | 0.188535117 | 0.340974223 | 0.300359145 |
| 0.086447539 | 0.201864507 | 0.269893066 | 0.161427205 |
| 0.405612065 | 0.18024329  | 0.31547883  | 0.120857801 |
| 0.330391896 | 0.258181118 | 0.270192739 | 0.198687293 |
| 0.191237998 | 0.270587616 | 0.18038336  | 0.361218932 |
| 0.315770481 | 0.125188315 | 0.250216544 | 0.295137906 |
| 0.13897488  | 0.306196624 | 0.17372787  | 0.355777008 |
| 0.230327139 | 0.34071875  | 0.23753049  | 0.308190988 |
| 0.315397884 | 0.120826552 | 0.124809104 | 0.215117336 |
| 0.333474539 | 0.300907982 | 0.138312309 | 0.298136588 |
| 0.101129401 | 0.300326464 | 0.192027495 | 0.208810961 |
| 0.237569987 | 0.300087227 | 0.242530889 | 0.336673857 |
| 0.291241946 | 0.216592095 | 0.178523942 | 0.362154498 |
| 0.277548506 | 0.173756601 | 0.377581118 | 0.009083675 |
| 0.28116621  | 0.24130302  | 0.334545557 | 0.198548791 |
| 0.327351007 | 0.261089281 | 0.238009393 | 0.044842021 |
| 0.251921197 | 0.050727064 | 0.213123105 | 0.20884552  |
| 0.135266336 | 0.279642972 | 0.352347315 | 0.326292349 |
| 0.300702199 | 0.155915103 | 0.129082821 | 0.333561006 |
| 0.072428007 | 0.10970384  | 0.138385105 | 0.224971807 |
| 0.100681182 | 0.153601809 | 0.167991526 | 0.151703652 |
| 0.279252381 | 0.306905519 |             |             |
| RAB8B       | 0.291324442 | 0.148189334 | 0.318367854 |
| 0.153330223 | 0.04269645  | 0.080206267 | 0.230561486 |
| 0.195019895 | 0.131973745 | 0.039781054 | 0.073661111 |
| 0.237060393 | 0.004148657 | 0.132400395 | 0.215715025 |
| 0.041561611 | 0.195933602 | 0.209839814 | 0.034926311 |
| 0.104760602 | 0.041481422 | 0.032895411 | 0.100258824 |
| 0.042201499 | 0.322441659 | 0.116943033 | 0.033468503 |
| 0.138573915 | 0.016137596 | 0.059278429 | 0.028025983 |
| 0.199090304 | 0.037197195 | 0.029317623 | 0.293357023 |
| 0.065763918 | 0.001979237 | 0.239228406 | 0.06999369  |
| 0.014055914 | 0.221253183 | 0.064340311 | 0.106598633 |
| 0.057143766 | 0.301284176 | 0.023361811 | 0.045621701 |

|             |             |             |             |
|-------------|-------------|-------------|-------------|
| 0.101780299 | 0.09722951  | 0.295782753 | 0.078422864 |
| 0.051276867 | 0.139636677 | 0.090200815 | 0.009959088 |
| 0.018377585 | 0.000728716 | 0.00848336  | 0.185196446 |
| 0.185669678 | 0.175074162 | 0.016443635 | 0.117788101 |
| 0.049970527 | 0.060819847 | 0.128426201 | 0.044451874 |
| 0.159416645 | 0.008928012 | 0.059772552 | 0.102968419 |
| 0.078641535 | 0.25920388  | 0.223264083 | 0.248638987 |
| 0.044097925 | 0.13324001  | 0.057881095 | 0.024260207 |
| 0.148770943 | 0.217927718 | 0.152922171 | 0.20615655  |
| 0.00818767  | 0.029927491 | 0.039759139 | 0.102016426 |
| 0.082535408 | 0.17666771  | 0.084347755 | 0.184592392 |
| 0.233563127 | 0.060706157 | 0.076417242 | 0.247682681 |
| 0.141252169 | 0.021787834 | 0.054454944 | 0.013593144 |
| 0.043035014 | 0.036549775 | 0.20804798  | 0.131204249 |
| 0.047398567 | 0.292504225 | 0.242733081 | 0.02579829  |
| 0.061312309 | 0.301066628 | 0.034777081 | 0.078744834 |
| 0.06626722  | 0.136454678 | 0.1031202   | 0.101981677 |
| 0.034442725 | 0.153930506 | 0.090397574 | 0.141740638 |
| 0.013116985 | 0.171109527 | 0.207605032 | 0.204414155 |
| 0.281667248 | 0.174026899 | 0.03458254  | 0.164854366 |
| 0.109193379 | 0.11367953  | 0.1803713   | 0.085968876 |
| 0.090877482 | 0.21693212  | 0.166814236 | 0.105382706 |
| 0.278362028 | 0.01552669  | 0.037495451 | 0.132177756 |
| 0.073925557 | 0.221541507 | 0.020538325 | 0.229480878 |
| 0.178857571 | 0.080651309 | 0.227502143 | 0.258099242 |
| 0.127160141 | 0.176754665 | 0.128810355 | 0.173565597 |
| 0.20807456  | 0.228386082 | 0.147159851 | 0.043672577 |
| 0.210096927 | 0.115743414 | 0.01848852  | 0.123505626 |
| 0.161062383 | 0.003697534 | 0.099475677 | 0.108659982 |
| 0.173475924 | 0.079072121 | 0.139577227 | 0.13062499  |
| 0.173152864 | 0.276797537 | 0.00107141  | 0.067804347 |
| 0.196182688 | 0.147657679 | 0.101326768 | 0.036749965 |
| 0.042265353 | 0.09376782  | 0.080300993 | 0.029771564 |
| 0.190721677 | 0.117828644 | 0.115991777 | 0.098575598 |
| 0.091530271 | 0.233117998 | 0.026643864 | 0.244120331 |
| 0.2475819   | 0.259708462 | 0.313177264 | 0.122127222 |
| 0.0637051   | 0.145114519 | 0.08929642  | 0.047608508 |
| 0.154968437 | 0.106356884 | 0.021137828 | 0.043943432 |
| 0.324275294 | 0.053408274 | 0.22023157  | 0.198107625 |
| 0.203631745 | 0.318783945 | 0.107586519 | 0.1568991   |
| 0.074053316 | 0.376059072 | 0.059659557 | 0.127970068 |
| 0.046865109 | 0.244819965 | 0.07925672  | 0.159376436 |
| 0.161365928 | 0.036726625 | 0.179637803 | 0.087661321 |
| 0.03311563  | 0.020190232 | 0.007292946 | 0.038170017 |
| 0.360509886 | 0.069984263 | 0.050702263 | 0.057967676 |
| 0.157340519 | 0.199450093 | 0.036115259 | 0.242445736 |
| 0.257514155 | 0.055726745 | 0.103466361 | 0.057266302 |
| 0.187289215 | 0.100432811 | 0.092438915 | 0.033564085 |
| 0.104848321 | 0.012049561 | 0.017786656 | 0.109792323 |
| 0.018228345 | 0.024681342 | 0.116487267 | 0.058328251 |
| 0.05148219  | 0.322971479 | 0.146902586 | 0.000920592 |
| 0.038318596 | 0.048712236 | 0.094994072 | 0.057500986 |
| 0.148931817 | 0.108888286 | 0.033473813 | 0.044608826 |
| 0.270600065 | 0.17242897  | 0.138926253 | 0.138087814 |

|             |             |             |             |
|-------------|-------------|-------------|-------------|
| 0.02937462  | 0.15397952  | 0.089213175 | 0.1273278   |
| 0.101397267 | 0.029069941 | 0.004540333 | 0.093532538 |
| 0.103826088 | 0.032105597 | 0.297207814 | 0.069013521 |
| 0.040279823 | 0.04650789  | 0.045041272 | 0.140601115 |
| 0.222066069 | 0.19911269  | 0.126286121 | 0.073095856 |
| 0.130022168 | 0.173353126 | 0.11012276  | 0.159814341 |
| 0.033952454 | 0.03489128  | 0.034429296 | 0.092708452 |
| 0.213714022 | 0.029153225 | 0.194543154 | 0.007443986 |
| 0.000212414 | 0.264745515 | 0.29428442  | 0.104261171 |
| 0.015746928 | 0.047024727 | 0.05921063  | 0.151469223 |
| 0.201364874 | 0.165640168 | 0.150575988 | 0.050085518 |
| 0.166436384 | 0.037478229 | 0.034667318 | 0.049113779 |
| 0.174375688 | 0.126446519 | 0.13623888  | 0.225386852 |
| 0.286146032 | 0.018825607 | 0.103376661 | 0.016098499 |
| 0.262251786 | 0.104001754 | 0.33179634  | 0.342009864 |
| 0.109034093 | 0.337098581 | 0.193247825 | 0.045700684 |
| 0.089690281 | 0.259022599 | 0.035498759 | 0.133130738 |
| 0.160911614 | 0.156020129 | 0.161969757 | 0.201365503 |
| 0.11713661  | 0.086673206 | 0.076970041 | 0.117909133 |
| 0.216005622 | 0.270434659 | 0.01543829  | 0.067144268 |
| 0.022095644 | 0.1018173   | 0.056853471 | 0.232649186 |
| 0.062409153 | 0.102591752 | 0.27366752  | 0.042719693 |
| 0.227647831 | 0.008067231 | 0.088126068 | 0.095968513 |
| 0.069764945 | 0.28026021  | 0.042660375 | 0.024477856 |
| 0.209752545 | 0.187104497 | 0.02580282  | 0.176855947 |
| 0.082093375 | 0.254932691 | 0.061490176 | 0.075111182 |
| 0.2378572   | 0.013974276 | 0.07747842  | 0.007938999 |
| 0.050192187 | 0.189518377 | 0.041146069 | 0.262728376 |
| 0.127358017 | 0.213119214 | 0.191205682 | 0.174834718 |
| 0.191106992 | 0.129101032 | 0.155287885 | 0.021253121 |
| 0.167172114 | 0.001358381 | 0.148759289 | 0.137503224 |
| 0.037417721 | 0.019137233 | 0.041860244 | 0.10646355  |
| 0.042858153 | 0.319464266 | 0.208103443 | 0.068845889 |
| 0.170826725 | 0.23631375  | 0.241146084 | 0.026808488 |
| 0.069731908 | 0.057483683 | 0.023935047 | 0.190847883 |
| 0.108992505 | 0.116895342 | 0.06658052  | 0.276030553 |
| 0.050797438 | 0.240703542 | 0.258300798 | 0.02147459  |
| 0.066216511 | 0.316393155 | 0.26433679  | 0.16292098  |
| 0.176679288 | 0.057006339 | 0.02936702  | 0.054735696 |
| 0.107549568 | 0.281167076 | 0.033298834 | 0.274249434 |
| 0.166734306 | 0.049454798 | 0.136157347 | 0.196442142 |
| 0.148768426 | 0.176186012 | 0.256094295 | 0.083221322 |
| 0.173289776 | 0.004129361 | 0.093999495 | 0.133247336 |
| 0.013340559 | 0.035267638 | 0.182978614 | 0.08117306  |
| 0.082900286 | 0.265512296 | 0.015636087 | 0.016185761 |
| 0.092777193 | 0.056694082 | 0.030457377 | 0.157486516 |
| 0.04870765  | 0.027270948 | 0.118137544 | 0.139669267 |
| 0.044773425 | 0.204782873 | 0.31370393  | 0.242641455 |
| 0.049804699 | 0.039321104 | 0.276621351 | 0.23294088  |
| 0.111083839 | 0.11502001  | 0.16950509  | 0.096236392 |
| 0.200553838 | 0.053474772 | 0.116885976 | 0.15704203  |
| 0.208971457 | 0.168634294 | 0.241266792 | 0.075632579 |
| 0.269985517 | 0.071065959 | 0.031734003 | 0.068642566 |
| 0.151065113 | 0.273043917 | 0.181522066 | 0.019925752 |

|             |             |             |             |
|-------------|-------------|-------------|-------------|
| 0.236079693 | 0.145086641 | 0.196996974 | 0.237281005 |
| 0.033218627 | 0.187599966 | 0.100297204 | 0.245553482 |
| 0.058326092 | 0.019439003 | 0.252728433 | 0.163858577 |
| 0.124846572 | 0.008714738 | 0.196937906 | 0.110113182 |
| 0.145256067 | 0.037662767 | 0.05619105  | 0.187344377 |
| 0.260949684 | 0.224090757 | 0.130024753 | 0.083580543 |
| 0.088525665 | 0.043251013 | 0.165646299 | 0.146871126 |
| 0.134562156 | 0.051898088 | 0.189924018 | 0.115939574 |
| 0.269909026 | 0.039883583 | 0.023165724 | 0.047913676 |
| 0.159741516 | 0.08775554  | 0.104597195 | 0.276318498 |
| 0.19508412  | 0.229912156 | 0.138349243 | 0.141452198 |
| 0.055541882 | 0.24653447  | 0.273090537 | 0.115042235 |
| 0.014532411 | 0.223638357 | 0.059004421 | 0.079321692 |
| 0.012903361 | 0.006514491 | 0.124547672 | 0.116725671 |
| 0.188291323 | 0.118569315 | 0.186322552 | 0.119401805 |
| 0.000301612 | 0.042993956 | 0.065718791 | 0.04975862  |
| 0.135585377 | 0.151400891 | 0.091498689 | 0.16964423  |
| 0.168292979 | 0.293751672 | 0.11217955  | 0.076740328 |
| 0.009102849 | 0.078285601 | 0.169381163 | 0.144337148 |
| 0.088903351 | 0.237465516 | 0.019394622 | 0.14814615  |
| 0.013141869 | 0.168464666 | 0.128680358 | 0.05308631  |
| 0.009713393 | 0.115815622 | 0.103381582 | 0.296206473 |
| 0.032971968 | 0.110440078 | 0.136879154 | 0.016970417 |
| 0.058794067 | 0.180230786 | 0.084731149 | 0.088799031 |
| 0.101133161 | 0.083204986 | 0.073187769 | 0.051970256 |
| 0.087751522 | 0.130593509 | 0.101706904 | 0.13463952  |
| 0.112606287 | 0.152528649 | 0.05435048  | 0.088535472 |
| 0.052279965 | 0.228767792 | 0.356290081 | 0.400755882 |
| 0.203155265 | 0.129253831 | 0.252403804 | 1           |
| 0.126445547 | 0.069192912 | 0.177202031 | 0.172884583 |
| 0.144782866 | 0.337651321 | 0.067220661 | 0.130254608 |
| 0.015570247 | 0.069512457 | 0.266294944 | 0.084611827 |
| 0.144542036 | 0.030339536 | 0.067868618 | 0.129150225 |
| 0.078788576 | 0.229238045 | 0.24153568  | 0.167237486 |
| 0.063088803 | 0.050465006 | 0.048247047 | 0.130217561 |
| 0.189745559 | 0.240820448 | 0.035514608 | 0.127020265 |
| 0.093268249 | 0.154966343 | 0.098766772 | 0.200397355 |
| 0.016651761 | 0.174937471 | 0.05821096  | 0.224116993 |
| 0.045017134 | 0.327104158 | 0.23355241  | 0.078629976 |
| 0.008815384 | 0.176936116 | 0.052512293 | 0.110446748 |
| 0.068168816 | 0.066570333 | 0.040108638 | 0.122930902 |
| 0.114828121 | 0.219488414 | 0.213119058 | 0.27032801  |
| 0.045615143 | 0.031934354 | 0.080154223 | 0.060883268 |
| 0.075605306 | 0.137946785 | 0.294928743 | 0.1326217   |
| 0.040896213 | 0.284948945 | 0.214252142 | 0.117620373 |
| 0.117154246 | 0.100622891 | 0.007584183 | 0.066692154 |
| 0.103197701 | 0.024113124 | 0.000857575 | 0.006604009 |
| 0.100027177 | 0.049695004 | 0.096263531 | 0.086953559 |
| 0.033623521 | 0.104739177 | 0.008586196 | 0.115797721 |
| 0.199137013 | 0.236953341 | 0.074634769 | 0.171059566 |
| 0.118258314 | 0.207089266 | 0.094620719 | 0.006001821 |
| 0.043506017 | 0.035840405 | 0.036973229 | 0.229238469 |
| 0.236411305 | 0.008775025 | 0.054266485 | 0.254727955 |
| 0.105063296 | 0.008771052 | 0.074034187 | 0.072697    |

|             |             |             |             |
|-------------|-------------|-------------|-------------|
| 0.207128698 | 0.241556616 | 0.100003949 | 0.074001    |
| 0.173470508 | 0.142000277 | 0.035099231 | 0.045343228 |
| 0.049728809 | 0.02428909  | 0.087047783 | 0.018966674 |
| 0.234823979 | 0.058138749 | 0.013534157 | 0.262969344 |
| 0.234352272 | 0.026142431 | 0.255355224 | 0.032859044 |
| 0.110164198 | 0.144172316 | 0.040837135 | 0.042235059 |
| 0.144373988 | 0.036079183 | 0.157336806 | 0.149298391 |
| 0.013326127 | 0.058712979 | 0.190314694 | 0.031153313 |
| 0.285545875 | 0.033718125 | 0.190540464 | 0.022821484 |
| 0.171288977 | 0.134495315 | 0.269583766 | 0.054056213 |
| 0.061473701 | 0.289708313 | 0.05757628  | 0.166501516 |
| 0.113686916 | 0.019625822 | 0.081119583 | 0.103539621 |
| 0.022768612 | 0.169009849 | 0.046849535 | 0.170094039 |
| 0.081910062 | 0.143563325 | 0.079905986 | 0.143608256 |
| 0.128230527 | 0.020110705 | 0.017795023 | 0.047686537 |
| 0.193270338 | 0.197105199 | 0.024581729 | 0.130354415 |
| 0.013185182 | 0.101951171 | 0.083140241 | 0.048299282 |
| 0.159829113 | 0.127487852 | 0.068914818 | 0.229665026 |
| 0.090799537 | 0.052623677 | 0.039034108 | 0.191866426 |
| 0.106045187 | 0.135444331 | 0.191687158 | 0.000296942 |
| 0.130301935 | 0.060969342 | 0.138878232 | 0.043284822 |
| 0.28472143  | 0.092105425 | 0.102812769 | 0.067648723 |
| 0.093546176 | 0.019536739 | 0.057398047 | 0.04575054  |
| 0.022370117 | 0.261088718 | 0.191528809 | 0.127363854 |
| 0.128058547 | 0.039860486 | 0.02260908  | 0.167051599 |
| 0.009466188 | 0.019784236 | 0.024657838 | 0.081553069 |
| 0.014220634 | 0.041341655 | 0.038437012 | 0.029140015 |
| 0.115703416 | 0.131501354 |             |             |
| RAC2        | 0.166410999 | 0.243538056 | 0.095140657 |
| 0.166607955 | 0.208232583 | 0.153631884 | 0.202941334 |
| 0.245919768 | 0.218288755 | 0.074811874 | 0.205351382 |
| 0.12744076  | 0.072645668 | 0.306693479 | 0.226700337 |
| 0.182985022 | 0.206925161 | 0.247500097 | 0.085087026 |
| 0.171561188 | 0.225562646 | 0.15364163  | 0.143670491 |
| 0.220674495 | 0.253947352 | 0.162142164 | 0.135156611 |
| 0.284710431 | 0.067708477 | 0.190969761 | 0.041841296 |
| 0.35061945  | 0.197847637 | 0.121083665 | 0.084088547 |
| 0.178905632 | 0.033029566 | 0.345857771 | 0.238654887 |
| 0.098875795 | 0.342438298 | 0.084261289 | 0.257518567 |
| 0.105900646 | 0.117178844 | 0.041115701 | 0.185272141 |
| 0.160022688 | 0.231222982 | 0.113101478 | 0.197214194 |
| 0.148813734 | 0.241611391 | 0.150652066 | 0.008321395 |
| 0.119497035 | 0.030504271 | 0.082308184 | 0.314719421 |
| 0.286447246 | 0.30559957  | 0.07664919  | 0.208958459 |
| 0.169170901 | 0.23134507  | 0.299687841 | 0.108516288 |
| 0.318361054 | 0.114168074 | 0.190007352 | 0.151476333 |
| 0.17265575  | 0.108036304 | 0.279865521 | 0.123308951 |
| 0.155872235 | 0.306182862 | 0.219881612 | 0.148747335 |
| 0.220938979 | 0.38166325  | 0.25820129  | 0.304984864 |
| 0.121730925 | 0.169213906 | 0.201051833 | 0.318957262 |
| 0.245351809 | 0.200653109 | 0.246123601 | 0.356883778 |
| 0.145015053 | 0.109759856 | 0.21308613  | 0.177944485 |
| 0.253152318 | 0.129884246 | 0.100468195 | 0.130589432 |
| 0.215259648 | 0.18260252  | 0.337443024 | 0.28192389  |

|             |             |             |             |
|-------------|-------------|-------------|-------------|
| 0.213504562 | 0.125978156 | 0.311580936 | 0.162819353 |
| 0.216829153 | 0.142569109 | 0.205462309 | 0.248706232 |
| 0.189115873 | 0.293648987 | 0.227290402 | 0.281102976 |
| 0.157279657 | 0.312322934 | 0.220529405 | 0.296998971 |
| 0.029519145 | 0.321447056 | 0.218986137 | 0.236831062 |
| 0.121477929 | 0.299262162 | 0.192834121 | 0.354758541 |
| 0.277087438 | 0.252686668 | 0.225593307 | 0.271409387 |
| 0.30349741  | 0.288860326 | 0.311530748 | 0.270603499 |
| 0.164053707 | 0.124711206 | 0.151501369 | 0.219910985 |
| 0.245814683 | 0.228075531 | 0.158839449 | 0.343560388 |
| 0.32093264  | 0.271162211 | 0.171014635 | 0.374746722 |
| 0.241846629 | 0.372361365 | 0.231017033 | 0.258230871 |
| 0.347501932 | 0.325414087 | 0.353832009 | 0.210209357 |
| 0.335527558 | 0.168707751 | 0.077954903 | 0.277705979 |
| 0.381029215 | 0.024091657 | 0.266031235 | 0.289696638 |
| 0.294871704 | 0.246631061 | 0.355697373 | 0.312087721 |
| 0.297609215 | 0.171974967 | 0.014910917 | 0.276495882 |
| 0.318374201 | 0.296344509 | 0.315314472 | 0.129866008 |
| 0.201197006 | 0.166506667 | 0.240745947 | 0.114199026 |
| 0.408058443 | 0.275025631 | 0.274335839 | 0.240727491 |
| 0.140296691 | 0.334332099 | 0.126819507 | 0.30238542  |
| 0.19140861  | 0.168460117 | 0.105051625 | 0.302264797 |
| 0.089650826 | 0.300145662 | 0.155079023 | 0.189433714 |
| 0.292861728 | 0.168134303 | 0.111732221 | 0.224414619 |
| 0.122619594 | 0.136262073 | 0.216562764 | 0.181235191 |
| 0.206129279 | 0.262135539 | 0.221593426 | 0.268965494 |
| 0.282878604 | 0.268048661 | 0.191591359 | 0.306186007 |
| 0.178367028 | 0.205112865 | 0.209060904 | 0.363350765 |
| 0.402464047 | 0.155872194 | 0.313400229 | 0.063035328 |
| 0.153962429 | 0.087468327 | 0.09109334  | 0.137725663 |
| 0.259888058 | 0.228513156 | 0.18469029  | 0.254122871 |
| 0.16068185  | 0.186171072 | 0.164453811 | 0.372659185 |
| 0.18729968  | 0.214293713 | 0.302726709 | 0.130803189 |
| 0.035695403 | 0.19439001  | 0.258750146 | 0.228237658 |
| 0.230084994 | 0.116025046 | 0.104903799 | 0.285439272 |
| 0.124550004 | 0.20064745  | 0.293991155 | 0.258416167 |
| 0.148175732 | 0.235791915 | 0.350282233 | 0.030225559 |
| 0.169462484 | 0.131721368 | 0.312001907 | 0.089319625 |
| 0.239790851 | 0.327106821 | 0.192954242 | 0.207140139 |
| 0.141968505 | 0.331435285 | 0.290628076 | 0.316221978 |
| 0.125411449 | 0.351425369 | 0.268803231 | 0.313760001 |
| 0.24186056  | 0.124756822 | 0.074413407 | 0.246306813 |
| 0.273393229 | 0.104753204 | 0.130522934 | 0.217932932 |
| 0.116834245 | 0.209509939 | 0.203850531 | 0.334821752 |
| 0.385379616 | 0.266793431 | 0.320395391 | 0.299295657 |
| 0.297113161 | 0.223612005 | 0.282884657 | 0.375019672 |
| 0.085092441 | 0.17094831  | 0.167800079 | 0.328115875 |
| 0.227358224 | 0.216320991 | 0.326157815 | 0.091513027 |
| 0.0033848   | 0.166425072 | 0.144023349 | 0.312356054 |
| 0.155771599 | 0.138769813 | 0.219827355 | 0.324022751 |
| 0.272080283 | 0.323370512 | 0.272135969 | 0.191958155 |
| 0.280245303 | 0.178531817 | 0.154058527 | 0.203700408 |
| 0.30013548  | 0.08912276  | 0.24304434  | 0.375701466 |
| 0.085537681 | 0.147197788 | 0.204110154 | 0.018592852 |

|             |             |             |             |
|-------------|-------------|-------------|-------------|
| 0.150711167 | 0.187404025 | 0.177098806 | 0.294982615 |
| 0.33545643  | 0.258301203 | 0.202100097 | 0.088735987 |
| 0.28975941  | 0.220663014 | 0.033029735 | 0.29719805  |
| 0.315331241 | 0.309495339 | 0.307385646 | 0.309236607 |
| 0.286411307 | 0.237587295 | 0.261999908 | 0.144421636 |
| 0.228666432 | 0.142164597 | 0.139197064 | 0.230928766 |
| 0.015175869 | 0.301183941 | 0.229367214 | 0.256524046 |
| 0.234886828 | 0.264531933 | 0.168710768 | 0.195896961 |
| 0.071325915 | 0.073810118 | 0.194403362 | 0.286012762 |
| 0.301402617 | 0.090608986 | 0.079062502 | 0.127843857 |
| 0.278963661 | 0.295272646 | 0.118154303 | 0.332559732 |
| 0.227496522 | 0.13215295  | 0.210246512 | 0.274116257 |
| 0.22067344  | 0.04059094  | 0.164693252 | 0.007714621 |
| 0.102587972 | 0.331546688 | 0.151966731 | 0.127140222 |
| 0.238013048 | 0.049605733 | 0.27560468  | 0.350696294 |
| 0.266392517 | 0.325433735 | 0.321229968 | 0.14374253  |
| 0.315999191 | 0.036788034 | 0.319772663 | 0.242241971 |
| 0.09688139  | 0.004711163 | 0.065012222 | 0.281740122 |
| 0.159417722 | 0.103913323 | 0.248767579 | 0.1163532   |
| 0.274478152 | 0.157879431 | 0.225233939 | 0.193856057 |
| 0.174920593 | 0.266231285 | 0.202959504 | 0.29048234  |
| 0.259989739 | 0.295909771 | 0.130615112 | 0.170208413 |
| 0.176741702 | 0.202169394 | 0.169254086 | 0.035700815 |
| 0.274112419 | 0.163548687 | 0.319673102 | 0.310823597 |
| 0.36488492  | 0.232199323 | 0.075479031 | 0.154771972 |
| 0.295588211 | 0.113308518 | 0.110171274 | 0.127002141 |
| 0.274648412 | 0.197228596 | 0.318285386 | 0.285257424 |
| 0.355615823 | 0.322918069 | 0.175698609 | 0.261500586 |
| 0.060981385 | 0.020597346 | 0.12452015  | 0.296675967 |
| 0.081966232 | 0.162682775 | 0.303804186 | 0.194680524 |
| 0.257441712 | 0.116306907 | 0.13484545  | 0.142904073 |
| 0.249014887 | 0.203291398 | 0.195189559 | 0.271617375 |
| 0.227571409 | 0.184645828 | 0.296636805 | 0.30351013  |
| 0.161671977 | 0.259028287 | 0.248322377 | 0.137505225 |
| 0.124149619 | 0.146486498 | 0.189948378 | 0.240640233 |
| 0.288389558 | 0.294990539 | 0.201492803 | 0.096114158 |
| 0.296597479 | 0.217584518 | 0.324139991 | 0.283589858 |
| 0.344871456 | 0.376095904 | 0.362753492 | 0.299752026 |
| 0.207202799 | 0.23314851  | 0.190981244 | 0.275901691 |
| 0.322552028 | 0.106569954 | 0.304338981 | 0.14041641  |
| 0.222163526 | 0.234482537 | 0.199623397 | 0.233625729 |
| 0.153039138 | 0.281305555 | 0.307052186 | 0.140262427 |
| 0.22439157  | 0.13566419  | 0.188940294 | 0.275304737 |
| 0.272707719 | 0.094436864 | 0.249443717 | 0.197057103 |
| 0.248147382 | 0.066560152 | 0.2120518   | 0.38498059  |
| 0.208537969 | 0.190479669 | 0.121859026 | 0.259484635 |
| 0.231515592 | 0.110793649 | 0.08590825  | 0.236091078 |
| 0.335116361 | 0.177296999 | 0.310883097 | 0.357267344 |
| 0.178658978 | 0.166016941 | 0.142474955 | 0.196060341 |
| 0.272770637 | 0.15665749  | 0.282799037 | 0.180954932 |
| 0.354397309 | 0.37678291  | 0.252636984 | 0.295398259 |
| 0.144350024 | 0.131130472 | 0.093731249 | 0.273229787 |
| 0.145293077 | 0.18943727  | 0.095608808 | 0.254532924 |
| 0.013662104 | 0.095184944 | 0.329942851 | 0.2792286   |



|             |             |             |             |
|-------------|-------------|-------------|-------------|
| 0.371592497 | 0.306983513 | 0.346340936 | 0.218937743 |
| 0.002907554 | 0.188186619 | 0.209727113 | 0.151810184 |
| 0.249212048 | 0.278543376 | 0.192719778 | 0.262800795 |
| 0.355727245 | 0.121664299 | 0.278307126 | 0.130180313 |
| 0.082613696 | 0.179039119 | 0.326180776 | 0.228809027 |
| 0.292913918 | 0.131627086 | 0.137511744 | 0.244429891 |
| 0.129555257 | 0.337162942 | 0.330425879 | 0.078946383 |
| 0.084066541 | 0.319023274 | 0.232004488 | 0.127542276 |
| 0.164189311 | 0.293459843 | 0.32488118  | 0.015996881 |
| 0.220328031 | 0.095060873 | 0.30775075  | 0.273459651 |
| 0.304517853 | 0.298251633 | 0.280159361 | 0.206548841 |
| 0.200620506 | 0.271532135 | 0.235762167 | 0.28984863  |
| 0.289863934 | 0.252593377 | 0.185867739 | 0.164818495 |
| 0.212171263 | 0.234046131 | 0.18203932  | 0.173606814 |
| 0.212346399 | 0.275119815 | 0.324468102 | 0.126445547 |
| 1           | 0.167810999 | 0.377754768 | 0.27746583  |
| 0.360934796 | 0.143238214 | 0.221840468 | 0.241712852 |
| 0.062164264 | 0.131060991 | 0.141834715 | 0.158744845 |
| 0.279115303 | 0.203269916 | 0.135119504 | 0.146926098 |
| 0.190125162 | 0.364073644 | 0.314857406 | 0.339441171 |
| 0.187670686 | 0.158540199 | 0.070714308 | 0.266867741 |
| 0.21932838  | 0.216420326 | 0.213623145 | 0.026320094 |
| 0.260131187 | 0.144532038 | 0.264111892 | 0.301165076 |
| 0.119833403 | 0.360736786 | 0.082345892 | 0.190620394 |
| 0.058306932 | 0.183221417 | 0.249877451 | 0.209890885 |
| 0.084687478 | 0.278795229 | 0.223448543 | 0.121467689 |
| 0.229106214 | 0.201269875 | 0.218451455 | 0.251985387 |
| 0.259914847 | 0.188333549 | 0.333158282 | 0.156874508 |
| 0.132386295 | 0.196990471 | 0.122688254 | 0.228837413 |
| 0.280358527 | 0.307677834 | 0.163312007 | 0.309814698 |
| 0.188964137 | 0.213713276 | 0.400670234 | 0.215440872 |
| 0.187118177 | 0.29303346  | 0.091991925 | 0.131722186 |
| 0.270242806 | 0.130662015 | 0.003621551 | 0.065875446 |
| 0.318783264 | 0.149980082 | 0.195212685 | 0.269348409 |
| 0.208853937 | 0.343766575 | 0.089867455 | 0.200774805 |
| 0.275042985 | 0.327665941 | 0.198731665 | 0.332359552 |
| 0.288756057 | 0.270625243 | 0.157244075 | 0.025027381 |
| 0.160837642 | 0.134707214 | 0.112999372 | 0.232505991 |
| 0.137021397 | 0.09305343  | 0.154426517 | 0.117942861 |
| 0.315810484 | 0.073855285 | 0.153280402 | 0.209158013 |
| 0.253250801 | 0.330496906 | 0.323275921 | 0.25281905  |
| 0.114299444 | 0.276826181 | 0.149774016 | 0.147463981 |
| 0.210838792 | 0.164375227 | 0.281722164 | 0.150777125 |
| 0.186288671 | 0.238337582 | 0.014990109 | 0.356771919 |
| 0.29310843  | 0.146489782 | 0.303927877 | 0.079125059 |
| 0.326790618 | 0.3086957   | 0.231441349 | 0.125883679 |
| 0.10067774  | 0.172134016 | 0.292708274 | 0.267879098 |
| 0.065349946 | 0.159170273 | 0.2122028   | 0.180789453 |
| 0.321804697 | 0.173303449 | 0.335390378 | 0.090952031 |
| 0.283940246 | 0.247376309 | 0.162332858 | 0.23281124  |
| 0.15718563  | 0.150370777 | 0.107736487 | 0.351390442 |
| 0.316291653 | 0.158937997 | 0.283741619 | 0.260348945 |
| 0.15610475  | 0.284609058 | 0.132190458 | 0.343195013 |
| 0.290598235 | 0.303022001 | 0.268937659 | 0.29210787  |

|             |             |             |             |
|-------------|-------------|-------------|-------------|
| 0.363190301 | 0.190192583 | 0.148343858 | 0.24574842  |
| 0.266873299 | 0.196534361 | 0.170387792 | 0.261401479 |
| 0.126952359 | 0.303670074 | 0.121109716 | 0.268363918 |
| 0.197037961 | 0.294393329 | 0.173838068 | 0.232338663 |
| 0.254026808 | 0.190230894 | 0.21746213  | 0.367590583 |
| 0.250900166 | 0.118091274 | 0.380348731 | 0.017797251 |
| 0.155622776 | 0.218077299 | 0.284082415 | 0.186260726 |
| 0.247923214 | 0.201906185 | 0.135269094 | 0.020060812 |
| 0.294873839 | 0.06477624  | 0.22285592  | 0.225384486 |
| 0.142310912 | 0.168982955 | 0.317316294 | 0.338791809 |
| 0.242735146 | 0.129719377 | 0.102455827 | 0.311130682 |
| 0.107029735 | 0.096167503 | 0.136694015 | 0.162493425 |
| 0.131240932 | 0.09486621  | 0.123230915 | 0.11960831  |
| 0.247340232 | 0.242908271 |             |             |
| RAD18       | 0.039482979 | 0.389141128 | 0.029647728 |
| 0.060647121 | 0.202356459 | 0.136548898 | 0.047106108 |
| 0.079456137 | 0.335815008 | 0.136122045 | 0.185399677 |
| 0.012327942 | 0.055894219 | 0.414823777 | 0.042816368 |
| 0.257384635 | 0.02655849  | 0.072230227 | 0.060085501 |
| 0.128431665 | 0.174441789 | 0.12413999  | 0.186023937 |
| 0.176296981 | 0.180083043 | 0.239665885 | 0.235136445 |
| 0.447235777 | 0.095070288 | 0.284844495 | 0.085523602 |
| 0.388317456 | 0.211416254 | 0.173766919 | 0.011686421 |
| 0.21156779  | 0.025085862 | 0.421143478 | 0.123866801 |
| 0.082224402 | 0.316909915 | 0.152218965 | 0.10000068  |
| 0.198275427 | 0.021083299 | 0.080438526 | 0.323575887 |
| 0.252177014 | 0.141849619 | 0.046217741 | 0.317603381 |
| 0.172592989 | 0.241499114 | 0.311058423 | 0.002759787 |
| 0.12373916  | 0.048059802 | 0.107411453 | 0.451389202 |
| 0.152888388 | 0.07125631  | 0.145478141 | 0.141517106 |
| 0.277701322 | 0.312558254 | 0.216755667 | 0.16179488  |
| 0.440135586 | 0.10134785  | 0.353245683 | 0.068696792 |
| 0.167125473 | 0.029260729 | 0.146935931 | 0.089014925 |
| 0.160942674 | 0.122906673 | 0.18168385  | 0.146976556 |
| 0.387735885 | 0.483413304 | 0.19807908  | 0.462536945 |
| 0.085612028 | 0.227473184 | 0.140206786 | 0.261641954 |
| 0.32663726  | 0.071546939 | 0.304625703 | 0.476848832 |
| 0.041177138 | 0.248531988 | 0.328530056 | 0.114367289 |
| 0.372151161 | 0.149178137 | 0.201059534 | 0.081338067 |
| 0.290480445 | 0.218815493 | 0.4562697   | 0.214783549 |
| 0.164982089 | 0.061838416 | 0.439213217 | 0.211744496 |
| 0.111773029 | 0.057866605 | 0.132268661 | 0.414096159 |
| 0.273681119 | 0.433576815 | 0.38537921  | 0.335021058 |
| 0.228595688 | 0.440492548 | 0.295289194 | 0.380683323 |
| 0.081470577 | 0.474833391 | 0.111112937 | 0.027351483 |
| 0.044768561 | 0.055615954 | 0.149115843 | 0.284498661 |
| 0.409651357 | 0.251893374 | 0.095684707 | 0.138713622 |
| 0.423099734 | 0.428221131 | 0.481496989 | 0.365457992 |
| 0.026656939 | 0.142183839 | 0.224636204 | 0.120662066 |
| 0.291995824 | 0.104070512 | 0.133402722 | 0.460937007 |
| 0.329044373 | 0.373805143 | 0.088745212 | 0.466479156 |
| 0.119030524 | 0.461596352 | 0.391944932 | 0.097400891 |
| 0.471800005 | 0.440540413 | 0.464036974 | 0.295958829 |
| 0.422090863 | 0.160292999 | 0.052906526 | 0.355788465 |

|             |             |             |             |
|-------------|-------------|-------------|-------------|
| 0.434925456 | 0.008781266 | 0.435082279 | 0.458218603 |
| 0.449233904 | 0.402349049 | 0.486649282 | 0.456757774 |
| 0.45249253  | 0.068123444 | 0.028038238 | 0.221411796 |
| 0.460003002 | 0.341995133 | 0.090729846 | 0.225280353 |
| 0.242710806 | 0.168432881 | 0.365369609 | 0.106474963 |
| 0.475131357 | 0.407145555 | 0.445111278 | 0.338287748 |
| 0.219638936 | 0.293223366 | 0.227783067 | 0.416216409 |
| 0.032352949 | 0.055573304 | 0.04640355  | 0.281810033 |
| 0.129653983 | 0.12479886  | 0.1535245   | 0.255375727 |
| 0.146443364 | 0.16175528  | 0.138992034 | 0.289030247 |
| 0.065353801 | 0.236779655 | 0.106023102 | 0.120108314 |
| 0.029104721 | 0.150508869 | 0.081205388 | 0.067143478 |
| 0.142378992 | 0.243277986 | 0.32764601  | 0.45543826  |
| 0.170266673 | 0.150101299 | 0.307429113 | 0.437436527 |
| 0.391534122 | 0.214381046 | 0.208140525 | 0.005387264 |
| 0.133921842 | 0.152748431 | 0.106811254 | 0.240526938 |
| 0.190744207 | 0.123501738 | 0.270917647 | 0.306646917 |
| 0.147269211 | 0.089298438 | 0.155284393 | 0.38968214  |
| 0.14258883  | 0.115959953 | 0.39239913  | 0.261441496 |
| 0.002789406 | 0.175206013 | 0.36826184  | 0.109315841 |
| 0.26059999  | 0.057655045 | 0.095386281 | 0.421701054 |
| 0.14670746  | 0.124280638 | 0.442107303 | 0.312023372 |
| 0.126273723 | 0.23281614  | 0.484239181 | 0.048345247 |
| 0.22421724  | 0.034677338 | 0.219652612 | 0.172587912 |
| 0.168727635 | 0.263703903 | 0.193772242 | 0.132830864 |
| 0.097722038 | 0.467489687 | 0.347508438 | 0.45126285  |
| 0.168084979 | 0.488770059 | 0.396294695 | 0.374935059 |
| 0.253287726 | 0.198788771 | 0.070116965 | 0.364551991 |
| 0.410898974 | 0.177994069 | 0.073393982 | 0.381286334 |
| 0.188358367 | 0.321726769 | 0.102968642 | 0.443955419 |
| 0.454905013 | 0.423361485 | 0.074592374 | 0.321373504 |
| 0.314251351 | 0.129706873 | 0.378398043 | 0.490018592 |
| 0.161668872 | 0.200776579 | 0.148145951 | 0.366583814 |
| 0.13410785  | 0.11766388  | 0.31686338  | 0.096580792 |
| 0.004620199 | 0.061399926 | 0.049972076 | 0.084500776 |
| 0.090223183 | 0.283707561 | 0.308323474 | 0.471013073 |
| 0.070535683 | 0.370470138 | 0.22984643  | 0.122649325 |
| 0.389546778 | 0.179135683 | 0.214400634 | 0.26413697  |
| 0.226287972 | 0.011526784 | 0.050159761 | 0.483121266 |
| 0.042995062 | 0.106526    | 0.178964114 | 0.001182735 |
| 0.031283021 | 0.362575128 | 0.108976529 | 0.19760426  |
| 0.433118937 | 0.20025585  | 0.162651899 | 0.156038649 |
| 0.265300835 | 0.067132245 | 0.001745945 | 0.458323427 |
| 0.467055501 | 0.448960208 | 0.466490643 | 0.437201366 |
| 0.435769003 | 0.341776238 | 0.365777515 | 0.179892987 |
| 0.068572337 | 0.058170969 | 0.113370961 | 0.155079094 |
| 0.002488472 | 0.315822888 | 0.190982083 | 0.120610286 |
| 0.344875721 | 0.25964097  | 0.022712762 | 0.242245379 |
| 0.010487253 | 0.09131969  | 0.14180822  | 0.127809363 |
| 0.308186896 | 0.010698158 | 0.082319612 | 0.153081601 |
| 0.371523929 | 0.298348894 | 0.156237604 | 0.479374131 |
| 0.181360139 | 0.1226718   | 0.157523173 | 0.306205417 |
| 0.047433866 | 0.091855556 | 0.155675811 | 0.014150309 |
| 0.088370176 | 0.435735704 | 0.17282019  | 0.042816774 |

|             |             |             |             |
|-------------|-------------|-------------|-------------|
| 0.175442808 | 0.003472758 | 0.314755014 | 0.475265966 |
| 0.414865538 | 0.470673001 | 0.439560298 | 0.113002403 |
| 0.446782754 | 0.06140728  | 0.474023886 | 0.348347463 |
| 0.149941322 | 0.000411302 | 0.003384063 | 0.43761598  |
| 0.227113819 | 0.062529877 | 0.120696012 | 0.11853219  |
| 0.053190574 | 0.071699516 | 0.044050397 | 0.100478738 |
| 0.258822702 | 0.140285534 | 0.099641312 | 0.432286549 |
| 0.132249962 | 0.159865505 | 0.166122858 | 0.088621507 |
| 0.248275073 | 0.031896951 | 0.094222155 | 0.002888401 |
| 0.293585074 | 0.12168469  | 0.432535065 | 0.451734452 |
| 0.4487106   | 0.301919919 | 0.13794675  | 0.120702317 |
| 0.413206348 | 0.08405865  | 0.148755357 | 0.085251181 |
| 0.427782735 | 0.270840382 | 0.260117658 | 0.260921755 |
| 0.455101101 | 0.420226092 | 0.02431222  | 0.352121887 |
| 0.005689499 | 0.001577752 | 0.170513818 | 0.229800232 |
| 0.072635592 | 0.187612538 | 0.221708382 | 0.149381942 |
| 0.12916401  | 0.016054813 | 0.128219086 | 0.130847922 |
| 0.213956597 | 0.196684551 | 0.158257438 | 0.244467376 |
| 0.143414906 | 0.096631417 | 0.102737747 | 0.095515327 |
| 0.147781627 | 0.291441046 | 0.183457798 | 0.018950253 |
| 0.218140133 | 0.221337664 | 0.035545443 | 0.133215083 |
| 0.37369561  | 0.430863231 | 0.034832067 | 0.006312464 |
| 0.237265148 | 0.164478778 | 0.446998228 | 0.443442985 |
| 0.469574521 | 0.474246591 | 0.366856026 | 0.080419104 |
| 0.038747058 | 0.22014883  | 0.190435392 | 0.070554813 |
| 0.452888872 | 0.063174413 | 0.429786211 | 0.170895432 |
| 0.108496262 | 0.106604138 | 0.020979635 | 0.067451645 |
| 0.230226837 | 0.136217133 | 0.105667526 | 0.112530208 |
| 0.137036112 | 0.127105817 | 0.038241222 | 0.130469046 |
| 0.299690729 | 0.101637362 | 0.127740173 | 0.143858628 |
| 0.319864223 | 0.127429949 | 0.343294643 | 0.411512504 |
| 0.102617205 | 0.08978162  | 0.106124578 | 0.337893384 |
| 0.383663088 | 0.238409269 | 0.00996505  | 0.408916939 |
| 0.445931107 | 0.293414807 | 0.438164828 | 0.366160188 |
| 0.085807545 | 0.187467375 | 0.159799959 | 0.230360675 |
| 0.145935557 | 0.14959557  | 0.15740259  | 0.055676925 |
| 0.298575186 | 0.453185073 | 0.387514639 | 0.080054045 |
| 0.243437891 | 0.103325474 | 0.055427422 | 0.400551825 |
| 0.101304752 | 0.04337212  | 0.154287152 | 0.389997797 |
| 0.002001683 | 0.075663695 | 0.469953199 | 0.098611107 |
| 0.484532775 | 0.440650971 | 0.390455872 | 0.13238674  |
| 0.005276856 | 0.322386422 | 0.227695017 | 0.155670185 |
| 0.382948011 | 0.283164215 | 0.094850304 | 0.044841386 |
| 0.255918209 | 0.072667649 | 0.073383907 | 0.118636849 |
| 0.097109534 | 0.269336786 | 0.175568676 | 0.166704429 |
| 0.114179696 | 0.104568953 | 0.109391489 | 0.113915715 |
| 0.116813678 | 0.202937305 | 0.294651151 | 0.126636647 |
| 0.090909513 | 0.414938101 | 0.351305561 | 0.01683191  |
| 0.200462791 | 0.384663698 | 0.404218628 | 0.001802589 |
| 0.315279525 | 0.005629351 | 0.107017488 | 0.103309511 |
| 0.100905778 | 0.112466655 | 0.192844986 | 0.138779253 |
| 0.269980204 | 0.122192732 | 0.111204486 | 0.162938402 |
| 0.078677728 | 0.137200496 | 0.259767494 | 0.180649105 |
| 0.109839018 | 0.061243733 | 0.112468002 | 0.115403974 |

|             |             |             |             |
|-------------|-------------|-------------|-------------|
| 0.025578718 | 0.411469323 | 0.221754897 | 0.069192912 |
| 0.167810999 | 1           | 0.323952098 | 0.442797281 |
| 0.381994073 | 0.115270025 | 0.163621087 | 0.372818828 |
| 0.127492599 | 0.12492048  | 0.041067044 | 0.223601596 |
| 0.13852031  | 0.091360941 | 0.211973142 | 0.197220442 |
| 0.340415527 | 0.365391589 | 0.211789932 | 0.404445264 |
| 0.169241386 | 0.217063619 | 0.125625909 | 0.044426813 |
| 0.088197451 | 0.128352852 | 0.157125688 | 0.001283183 |
| 0.241601577 | 0.102723173 | 0.405353752 | 0.434797623 |
| 0.130931257 | 0.350561248 | 0.107486078 | 0.046966264 |
| 0.1111486   | 0.181707052 | 0.124678674 | 0.360610519 |
| 0.095936808 | 0.087252152 | 0.194602655 | 0.11848171  |
| 0.354588287 | 0.357310686 | 0.140729265 | 0.129100187 |
| 0.181401596 | 0.153891733 | 0.46004423  | 0.065636398 |
| 0.26032569  | 0.095013246 | 0.244080461 | 0.145022637 |
| 0.123411783 | 0.472848246 | 0.047684865 | 0.476181239 |
| 0.16542203  | 0.129184907 | 0.450190273 | 0.169385893 |
| 0.142393907 | 0.065167901 | 0.09330037  | 0.155401171 |
| 0.124634657 | 0.135743896 | 0.015715852 | 0.049533344 |
| 0.255021021 | 0.165576924 | 0.358046603 | 0.324266564 |
| 0.130797619 | 0.314176382 | 0.083526156 | 0.167779252 |
| 0.431612852 | 0.453397553 | 0.103894502 | 0.23826152  |
| 0.281562737 | 0.052628805 | 0.240365241 | 0.023767166 |
| 0.275322061 | 0.263813699 | 0.152379114 | 0.036551864 |
| 0.015539527 | 0.106559138 | 0.279181797 | 0.074870476 |
| 0.444485765 | 0.09395531  | 0.275680765 | 0.321089526 |
| 0.172948688 | 0.455373728 | 0.073019286 | 0.299474929 |
| 0.0495138   | 0.214309344 | 0.206236964 | 0.212030076 |
| 0.092334673 | 0.13884045  | 0.300361234 | 0.104564514 |
| 0.022122377 | 0.119835932 | 0.003443962 | 0.37096389  |
| 0.435456416 | 0.190870886 | 0.201677564 | 0.139389127 |
| 0.222860456 | 0.362328337 | 0.117723912 | 0.215906822 |
| 0.00667898  | 0.230954578 | 0.143086428 | 0.33714022  |
| 0.097507654 | 0.251964068 | 0.033753965 | 0.199919766 |
| 0.419223584 | 0.131105125 | 0.251344087 | 0.141871271 |
| 0.437652067 | 0.354141642 | 0.147817134 | 0.121693789 |
| 0.303139945 | 0.063149365 | 0.141525169 | 0.485109081 |
| 0.088314342 | 0.105738778 | 0.383954727 | 0.099233243 |
| 0.152344939 | 0.352335929 | 0.276318793 | 0.485834175 |
| 0.048902599 | 0.188751817 | 0.358025067 | 0.432504749 |
| 0.260906676 | 0.104245747 | 0.110549451 | 0.113095725 |
| 0.399809343 | 0.040090361 | 0.151337471 | 0.289254059 |
| 0.10926415  | 0.229894197 | 0.245548284 | 0.10503474  |
| 0.018074473 | 0.103682284 | 0.127426537 | 0.117674749 |
| 0.197261164 | 0.204386879 | 0.130540994 | 0.355073572 |
| 0.056607705 | 0.011596354 | 0.424406108 | 0.015098483 |
| 0.175183731 | 0.256720441 | 0.157258598 | 0.183513411 |
| 0.162364365 | 0.243362455 | 0.193000538 | 0.00055328  |
| 0.360510123 | 0.04102572  | 0.144361896 | 0.098634802 |
| 0.1255149   | 0.034700449 | 0.404697886 | 0.462152869 |
| 0.236420301 | 0.148251302 | 0.137547492 | 0.415502505 |
| 0.080851555 | 0.140315853 | 0.152779544 | 0.298453458 |
| 0.10842309  | 0.173913809 | 0.177079508 | 0.142872445 |
| 0.293745988 | 0.124242245 |             |             |

| RAD21       | 0.224126053 | 0.333035068 | 0.159734626 |
|-------------|-------------|-------------|-------------|
| 0.297705642 | 0.329803123 | 0.340087554 | 0.219714102 |
| 0.305459535 | 0.299094485 | 0.185059577 | 0.378548751 |
| 0.125920683 | 0.086910496 | 0.387517388 | 0.217165333 |
| 0.328062745 | 0.192935005 | 0.295905496 | 0.113231037 |
| 0.280313362 | 0.326204431 | 0.285353106 | 0.31788931  |
| 0.318301273 | 0.278225561 | 0.322491674 | 0.270471085 |
| 0.39317474  | 0.162976515 | 0.339804381 | 0.131394592 |
| 0.411586647 | 0.320453364 | 0.262266928 | 0.105680587 |
| 0.346451941 | 0.021306816 | 0.423235391 | 0.360263132 |
| 0.170391851 | 0.37452221  | 0.227069853 | 0.385895988 |
| 0.265597275 | 0.158534941 | 0.115303986 | 0.304337281 |
| 0.308685179 | 0.34688039  | 0.167913278 | 0.339325499 |
| 0.293155173 | 0.369756298 | 0.272659401 | 0.009836014 |
| 0.227884612 | 0.052912426 | 0.15132616  | 0.423826378 |
| 0.369139365 | 0.337392972 | 0.171602226 | 0.300901007 |
| 0.296282406 | 0.331278549 | 0.369801334 | 0.252124929 |
| 0.420557598 | 0.161921902 | 0.30986597  | 0.257000314 |
| 0.337344125 | 0.129962808 | 0.327935019 | 0.181344374 |
| 0.300378449 | 0.384357697 | 0.352706953 | 0.260595964 |
| 0.325793735 | 0.467869429 | 0.36138819  | 0.418137343 |
| 0.116232148 | 0.291233054 | 0.308231572 | 0.38139818  |
| 0.33150589  | 0.220786091 | 0.376974267 | 0.456843588 |
| 0.159752847 | 0.257442147 | 0.32801481  | 0.234489265 |
| 0.343785334 | 0.21135634  | 0.261587208 | 0.186633492 |
| 0.327746704 | 0.315136184 | 0.416331934 | 0.389266765 |
| 0.317383857 | 0.187744647 | 0.419896349 | 0.276984419 |
| 0.356929963 | 0.223751453 | 0.288515256 | 0.330852684 |
| 0.351263298 | 0.397128462 | 0.31324056  | 0.351251555 |
| 0.307878854 | 0.416835471 | 0.371844673 | 0.353821162 |
| 0.079363428 | 0.43032561  | 0.350640755 | 0.214554247 |
| 0.186577695 | 0.288076551 | 0.245566135 | 0.376153026 |
| 0.36811441  | 0.375155025 | 0.356455576 | 0.370583559 |
| 0.36681883  | 0.399094261 | 0.420600777 | 0.356168936 |
| 0.185000549 | 0.195867424 | 0.31346358  | 0.344851236 |
| 0.354890224 | 0.274819087 | 0.250570333 | 0.447967653 |
| 0.383345423 | 0.353379236 | 0.293334523 | 0.465512216 |
| 0.30534531  | 0.461683523 | 0.339709054 | 0.362288571 |
| 0.455085579 | 0.435258467 | 0.442879579 | 0.325959502 |
| 0.429344226 | 0.366933529 | 0.071669704 | 0.346165977 |
| 0.446865387 | 0.028442491 | 0.35533195  | 0.385223054 |
| 0.40859551  | 0.338226495 | 0.439557162 | 0.409706929 |
| 0.408447769 | 0.222231605 | 0.019696891 | 0.365110568 |
| 0.431848105 | 0.379333338 | 0.306853047 | 0.291147994 |
| 0.323328366 | 0.352510223 | 0.328807951 | 0.257357154 |
| 0.475920437 | 0.366326399 | 0.373076768 | 0.343016627 |
| 0.275543741 | 0.361285915 | 0.260697108 | 0.41193397  |
| 0.21285384  | 0.263615894 | 0.157042781 | 0.355597894 |
| 0.246239769 | 0.370529555 | 0.341352953 | 0.309772783 |
| 0.375197157 | 0.321357637 | 0.226705712 | 0.332949377 |
| 0.145648587 | 0.314278958 | 0.330321413 | 0.296227994 |
| 0.216890895 | 0.262607823 | 0.33491213  | 0.343836824 |
| 0.36965062  | 0.301197497 | 0.319784609 | 0.398118707 |
| 0.300926304 | 0.296469942 | 0.344958414 | 0.435362718 |

|             |             |             |             |
|-------------|-------------|-------------|-------------|
| 0.43168861  | 0.313866034 | 0.344324988 | 0.080178298 |
| 0.281796069 | 0.183924918 | 0.147339423 | 0.288699401 |
| 0.262950513 | 0.326804956 | 0.334649193 | 0.352059581 |
| 0.337405767 | 0.25098881  | 0.303391727 | 0.433750485 |
| 0.24754773  | 0.347809838 | 0.373715623 | 0.295905865 |
| 0.038863589 | 0.374654444 | 0.356486061 | 0.245633643 |
| 0.335244337 | 0.154388522 | 0.206969475 | 0.373114943 |
| 0.220249254 | 0.249728527 | 0.385160413 | 0.346511659 |
| 0.280755153 | 0.266366886 | 0.438591222 | 0.038488531 |
| 0.286235131 | 0.168539101 | 0.390273233 | 0.22127694  |
| 0.380536416 | 0.376055151 | 0.300771276 | 0.332038658 |
| 0.239036768 | 0.431923135 | 0.365245968 | 0.415783789 |
| 0.273014492 | 0.444129304 | 0.350066898 | 0.383788135 |
| 0.379849838 | 0.248852299 | 0.109870743 | 0.357807947 |
| 0.361302383 | 0.228154712 | 0.176549258 | 0.311664636 |
| 0.256045303 | 0.327694319 | 0.241038295 | 0.424451192 |
| 0.467533587 | 0.379916162 | 0.343112795 | 0.365295215 |
| 0.388485931 | 0.371690859 | 0.356329542 | 0.453379065 |
| 0.202660872 | 0.302885983 | 0.308995365 | 0.373910763 |
| 0.338933978 | 0.263214008 | 0.346012976 | 0.137327093 |
| 0.007939765 | 0.215221138 | 0.204672626 | 0.35524498  |
| 0.206976996 | 0.278493433 | 0.350321614 | 0.426556517 |
| 0.318103373 | 0.385842326 | 0.323158052 | 0.336208298 |
| 0.369995352 | 0.294061027 | 0.295050399 | 0.335989957 |
| 0.357869881 | 0.109108935 | 0.29787602  | 0.47160796  |
| 0.124672386 | 0.233424206 | 0.334579384 | 0.016617072 |
| 0.179129265 | 0.286222473 | 0.199245412 | 0.292970022 |
| 0.396902765 | 0.281478694 | 0.323414162 | 0.218864931 |
| 0.387246604 | 0.27466853  | 0.029996553 | 0.388398991 |
| 0.397754325 | 0.379598421 | 0.393283285 | 0.390718145 |
| 0.35162576  | 0.326566261 | 0.351117309 | 0.328615294 |
| 0.297475938 | 0.219213037 | 0.219903147 | 0.363624761 |
| 0.014927019 | 0.383910799 | 0.332368437 | 0.316296792 |
| 0.333774663 | 0.35581731  | 0.181519122 | 0.310880857 |
| 0.112327666 | 0.150421978 | 0.319068225 | 0.347211963 |
| 0.353640125 | 0.101290323 | 0.218235586 | 0.258534308 |
| 0.382095923 | 0.357550547 | 0.254365816 | 0.442428926 |
| 0.38785051  | 0.201684169 | 0.362781686 | 0.365771635 |
| 0.258023274 | 0.087667696 | 0.309465327 | 0.026600559 |
| 0.187297447 | 0.39738467  | 0.294736064 | 0.218483198 |
| 0.387916634 | 0.054306006 | 0.353733534 | 0.449914048 |
| 0.379545102 | 0.420859197 | 0.423364665 | 0.251465349 |
| 0.424936044 | 0.060072954 | 0.425630512 | 0.335764769 |
| 0.241513824 | 0.006348328 | 0.040765115 | 0.379454066 |
| 0.329831323 | 0.136860952 | 0.340676155 | 0.298455012 |
| 0.325031643 | 0.261089362 | 0.234907166 | 0.258366285 |
| 0.340466725 | 0.342853387 | 0.231244032 | 0.393525921 |
| 0.375916545 | 0.376080862 | 0.290221814 | 0.211367981 |
| 0.333709211 | 0.229780445 | 0.208926839 | 0.036246939 |
| 0.354754603 | 0.207506817 | 0.421421539 | 0.41451257  |
| 0.449493539 | 0.354672917 | 0.198575487 | 0.2846141   |
| 0.346961955 | 0.174901173 | 0.253233393 | 0.209559351 |
| 0.390341932 | 0.345330012 | 0.39805143  | 0.366697024 |
| 0.438519298 | 0.419373579 | 0.175426742 | 0.36107862  |

|             |             |             |             |
|-------------|-------------|-------------|-------------|
| 0.08122956  | 0.010150188 | 0.31669322  | 0.355373189 |
| 0.071776373 | 0.302493495 | 0.371480735 | 0.272949784 |
| 0.310883123 | 0.148114655 | 0.223178132 | 0.22852163  |
| 0.384409094 | 0.355626776 | 0.295697258 | 0.318045199 |
| 0.324260222 | 0.226865603 | 0.367914251 | 0.330064143 |
| 0.227705566 | 0.328816564 | 0.279809947 | 0.133767401 |
| 0.298114863 | 0.314585361 | 0.224384424 | 0.315671243 |
| 0.372703635 | 0.392248512 | 0.194597918 | 0.090854496 |
| 0.358371243 | 0.327718409 | 0.407620222 | 0.395368689 |
| 0.451696273 | 0.459067143 | 0.413185117 | 0.29494621  |
| 0.239308455 | 0.365700708 | 0.297689582 | 0.274392215 |
| 0.419756423 | 0.162691817 | 0.40461809  | 0.244737582 |
| 0.28406439  | 0.372423516 | 0.194395052 | 0.266156568 |
| 0.293697053 | 0.352203623 | 0.363508232 | 0.250750589 |
| 0.357995771 | 0.235585816 | 0.205135862 | 0.37152854  |
| 0.370753094 | 0.166904752 | 0.338347653 | 0.332842743 |
| 0.346521222 | 0.142424966 | 0.3311139   | 0.438757064 |
| 0.281621651 | 0.255367932 | 0.304315523 | 0.340310462 |
| 0.333757468 | 0.253107211 | 0.107984151 | 0.342748446 |
| 0.411344894 | 0.32767989  | 0.419145461 | 0.37605334  |
| 0.227333414 | 0.327189796 | 0.239403542 | 0.333906152 |
| 0.34209112  | 0.340268492 | 0.358350706 | 0.217506294 |
| 0.35067074  | 0.445273401 | 0.343985624 | 0.366009544 |
| 0.306419641 | 0.215996553 | 0.14750821  | 0.343918712 |
| 0.212874816 | 0.254744554 | 0.237635022 | 0.32620353  |
| 0.014812908 | 0.131921313 | 0.400559795 | 0.376291238 |
| 0.452209246 | 0.396492764 | 0.421520662 | 0.323149219 |
| 0.00323563  | 0.311280618 | 0.374755549 | 0.340181847 |
| 0.344821951 | 0.368275355 | 0.21993433  | 0.279913767 |
| 0.386648992 | 0.179184386 | 0.31959025  | 0.293605969 |
| 0.139780291 | 0.334707511 | 0.358422703 | 0.314386821 |
| 0.359374231 | 0.173822618 | 0.225894277 | 0.384904532 |
| 0.153030129 | 0.381310013 | 0.388747097 | 0.189843905 |
| 0.166053493 | 0.3667995   | 0.342353273 | 0.14433922  |
| 0.285949038 | 0.345426413 | 0.378155811 | 0.015984773 |
| 0.346591822 | 0.078756441 | 0.357257519 | 0.373273441 |
| 0.373868481 | 0.347111178 | 0.364808414 | 0.342464692 |
| 0.340548123 | 0.38062618  | 0.39239765  | 0.390545135 |
| 0.356243104 | 0.362750108 | 0.343232927 | 0.33653131  |
| 0.343397063 | 0.317219681 | 0.197539183 | 0.183313479 |
| 0.222531323 | 0.362198785 | 0.346053707 | 0.177202031 |
| 0.377754768 | 0.323952098 | 1           | 0.392325081 |
| 0.398373895 | 0.185430867 | 0.339594886 | 0.346727322 |
| 0.137458621 | 0.278386707 | 0.187065551 | 0.342150782 |
| 0.383829386 | 0.274766121 | 0.30192881  | 0.313558682 |
| 0.303787883 | 0.417116595 | 0.345497332 | 0.402309061 |
| 0.363302734 | 0.281193504 | 0.203928957 | 0.284331335 |
| 0.348933197 | 0.266616005 | 0.308075656 | 0.028448807 |
| 0.385100096 | 0.328282981 | 0.359844372 | 0.414624791 |
| 0.212275575 | 0.388990405 | 0.222203036 | 0.262460643 |
| 0.175658256 | 0.230485427 | 0.305165844 | 0.324458731 |
| 0.157098191 | 0.368416741 | 0.351818526 | 0.293626035 |
| 0.340987262 | 0.309961957 | 0.287460113 | 0.342078652 |
| 0.350422171 | 0.309702557 | 0.417390911 | 0.253140306 |



|             |             |             |             |
|-------------|-------------|-------------|-------------|
| 0.294007794 | 0.2726417   | 0.261242686 | 0.363308368 |
| 0.357947012 | 0.409403799 | 0.205505542 | 0.413828014 |
| 0.318764155 | 0.248861225 | 0.467370897 | 0.341046272 |
| 0.344968909 | 0.308992876 | 0.153505917 | 0.284084707 |
| 0.343452542 | 0.248717808 | 0.00878494  | 0.082035587 |
| 0.392055559 | 0.249567959 | 0.297790769 | 0.347132456 |
| 0.291709948 | 0.374970655 | 0.129119284 | 0.338782962 |
| 0.389386669 | 0.432484144 | 0.347561018 | 0.366948816 |
| 0.369361384 | 0.306509672 | 0.323296549 | 0.022798333 |
| 0.312589915 | 0.280133388 | 0.250717486 | 0.223689395 |
| 0.132547653 | 0.170569704 | 0.32082582  | 0.165112205 |
| 0.389249763 | 0.148776251 | 0.277557148 | 0.343834001 |
| 0.294298537 | 0.439158034 | 0.320034331 | 0.373407384 |
| 0.134223854 | 0.366945262 | 0.282218452 | 0.276697397 |
| 0.322523244 | 0.274090823 | 0.384139573 | 0.237658197 |
| 0.186720134 | 0.344962598 | 0.014244571 | 0.42352303  |
| 0.403029662 | 0.271883753 | 0.31601088  | 0.179086736 |
| 0.392531386 | 0.348969572 | 0.281262403 | 0.280153515 |
| 0.09583563  | 0.320787973 | 0.368746415 | 0.356945751 |
| 0.170196988 | 0.299791448 | 0.244801056 | 0.281008106 |
| 0.421087951 | 0.282081874 | 0.341327895 | 0.227135732 |
| 0.395461272 | 0.324280094 | 0.240689098 | 0.301117183 |
| 0.277443666 | 0.191095208 | 0.26046167  | 0.443156608 |
| 0.36716148  | 0.241728645 | 0.358391757 | 0.368887027 |
| 0.25425229  | 0.346314521 | 0.274602323 | 0.43106555  |
| 0.253128173 | 0.389871379 | 0.352787652 | 0.379376927 |
| 0.392426687 | 0.225976021 | 0.234292863 | 0.321462243 |
| 0.381351698 | 0.26758564  | 0.25595951  | 0.380982391 |
| 0.207575195 | 0.383617202 | 0.253943904 | 0.308445206 |
| 0.175743327 | 0.325631633 | 0.336374858 | 0.310362902 |
| 0.382841061 | 0.346593831 | 0.305829135 | 0.407581574 |
| 0.312552525 | 0.140926114 | 0.441015233 | 0.023353055 |
| 0.337170598 | 0.366434716 | 0.37965811  | 0.326309699 |
| 0.301870021 | 0.347757024 | 0.306155841 | 0.015973783 |
| 0.360910839 | 0.093801019 | 0.312128055 | 0.322590936 |
| 0.232085633 | 0.196924018 | 0.406467699 | 0.424095981 |
| 0.363591885 | 0.244391637 | 0.229464789 | 0.391691258 |
| 0.158726609 | 0.204615377 | 0.241631919 | 0.315190749 |
| 0.204698785 | 0.243657771 | 0.274899684 | 0.271950696 |
| 0.364451716 | 0.357498095 |             |             |
| RAD51       | 0.154744299 | 0.506914043 | 0.146854549 |
| 0.209011188 | 0.314587819 | 0.502459126 | 0.112937728 |
| 0.198785241 | 0.456637751 | 0.42835477  | 0.41626719  |
| 0.042359907 | 0.077244312 | 0.4926495   | 0.099568589 |
| 0.414002291 | 0.058901693 | 0.171888641 | 0.110373607 |
| 0.317360312 | 0.283045339 | 0.366589033 | 0.510565976 |
| 0.293371092 | 0.290428371 | 0.474226124 | 0.42508991  |
| 0.520534672 | 0.320737704 | 0.49380304  | 0.309349666 |
| 0.440407507 | 0.328829531 | 0.424415548 | 0.050551855 |
| 0.4830791   | 0.011589119 | 0.455299582 | 0.292644814 |
| 0.154489036 | 0.409259352 | 0.490819917 | 0.29464153  |
| 0.486519558 | 0.092886869 | 0.328010504 | 0.448196864 |
| 0.447832965 | 0.357266007 | 0.161202076 | 0.511419473 |
| 0.437313662 | 0.451702096 | 0.516292564 | 0.004641878 |

|             |             |             |             |
|-------------|-------------|-------------|-------------|
| 0.309592497 | 0.085698867 | 0.2275838   | 0.517544187 |
| 0.280013776 | 0.171872703 | 0.337897663 | 0.351719422 |
| 0.44584908  | 0.419216905 | 0.321142572 | 0.459902297 |
| 0.507083327 | 0.165182431 | 0.492467978 | 0.228166901 |
| 0.473682914 | 0.091421256 | 0.2403771   | 0.187743072 |
| 0.439042533 | 0.249663457 | 0.375285473 | 0.31612023  |
| 0.510753274 | 0.520772375 | 0.321211787 | 0.526778551 |
| 0.091244343 | 0.344154283 | 0.28913585  | 0.345125692 |
| 0.42574173  | 0.149375305 | 0.469928431 | 0.51300064  |
| 0.114334618 | 0.502695552 | 0.468769512 | 0.232573074 |
| 0.515428587 | 0.302093595 | 0.514301081 | 0.166632804 |
| 0.387048259 | 0.353218444 | 0.493506028 | 0.369784237 |
| 0.33902966  | 0.16758599  | 0.526242687 | 0.317718802 |
| 0.331975316 | 0.176161538 | 0.228663068 | 0.497859219 |
| 0.483114856 | 0.51807589  | 0.504104887 | 0.422591174 |
| 0.397703048 | 0.510160414 | 0.48163858  | 0.481663362 |
| 0.246222835 | 0.527781622 | 0.286479821 | 0.070630897 |
| 0.169254629 | 0.123861724 | 0.248396548 | 0.364935401 |
| 0.511953871 | 0.425532557 | 0.291164589 | 0.264233294 |
| 0.468708203 | 0.516501722 | 0.527812456 | 0.477227655 |
| 0.086053209 | 0.255166722 | 0.410473127 | 0.393905963 |
| 0.434804393 | 0.19074614  | 0.252149802 | 0.530301157 |
| 0.445854451 | 0.473449552 | 0.29263191  | 0.523802402 |
| 0.278366396 | 0.494947648 | 0.529723046 | 0.235582681 |
| 0.526834385 | 0.521951665 | 0.488802661 | 0.420935168 |
| 0.487873354 | 0.458511347 | 0.085446148 | 0.453471094 |
| 0.470936933 | 0.014317981 | 0.510771319 | 0.508292997 |
| 0.511677818 | 0.501045766 | 0.486286441 | 0.510493045 |
| 0.517097564 | 0.150677207 | 0.03416439  | 0.308394069 |
| 0.522413306 | 0.464202993 | 0.164555661 | 0.461381286 |
| 0.3770421   | 0.510864228 | 0.487407147 | 0.351452585 |
| 0.490447194 | 0.505813238 | 0.51912207  | 0.475050332 |
| 0.423149316 | 0.391951643 | 0.401071349 | 0.510724071 |
| 0.084086658 | 0.215871185 | 0.134597956 | 0.373089552 |
| 0.49613964  | 0.221421583 | 0.496448142 | 0.383820288 |
| 0.250771324 | 0.471107534 | 0.358008304 | 0.394256831 |
| 0.141458165 | 0.515833642 | 0.265700519 | 0.282432775 |
| 0.070038251 | 0.233677801 | 0.240017008 | 0.212208717 |
| 0.277516282 | 0.30654408  | 0.502060636 | 0.501125559 |
| 0.390471537 | 0.301060972 | 0.505136175 | 0.473107369 |
| 0.422970864 | 0.404870513 | 0.310634874 | 0.019762776 |
| 0.293858299 | 0.36372353  | 0.179802941 | 0.455276981 |
| 0.267236472 | 0.283765704 | 0.428504335 | 0.41543479  |
| 0.419515313 | 0.259329003 | 0.396494322 | 0.441718892 |
| 0.269257233 | 0.334667528 | 0.475701692 | 0.497028282 |
| 0.012274518 | 0.413411273 | 0.502739647 | 0.145212598 |
| 0.406584274 | 0.130040247 | 0.269029367 | 0.493602895 |
| 0.304407905 | 0.220123727 | 0.510844763 | 0.412557549 |
| 0.416187022 | 0.318705289 | 0.497486479 | 0.049030575 |
| 0.374108485 | 0.059672668 | 0.319121856 | 0.471289875 |
| 0.336091183 | 0.336642818 | 0.318840204 | 0.293622633 |
| 0.25293682  | 0.515580264 | 0.471749352 | 0.511559288 |
| 0.406355044 | 0.503296501 | 0.497215988 | 0.482935901 |
| 0.446081153 | 0.404656671 | 0.127260022 | 0.499223447 |

|             |             |             |             |
|-------------|-------------|-------------|-------------|
| 0.496581666 | 0.353840248 | 0.174263773 | 0.497090588 |
| 0.437562139 | 0.431382515 | 0.121816913 | 0.488568855 |
| 0.495002184 | 0.507298105 | 0.179857562 | 0.392956193 |
| 0.448547181 | 0.33376062  | 0.471640941 | 0.501111005 |
| 0.411733191 | 0.372404203 | 0.350874434 | 0.414228995 |
| 0.268464258 | 0.206260764 | 0.392469374 | 0.173890997 |
| 0.012780568 | 0.170686358 | 0.144691593 | 0.186551123 |
| 0.153055901 | 0.496055768 | 0.441362414 | 0.506355722 |
| 0.175496258 | 0.474184305 | 0.325783769 | 0.317199218 |
| 0.479268127 | 0.373561682 | 0.402056718 | 0.418771659 |
| 0.331676085 | 0.031905473 | 0.156106092 | 0.526081825 |
| 0.116900176 | 0.235502667 | 0.419081077 | 0.004608023 |
| 0.101903423 | 0.51692823  | 0.191798275 | 0.275126168 |
| 0.474331877 | 0.29113195  | 0.317852468 | 0.435997579 |
| 0.391979537 | 0.164872053 | 0.004599749 | 0.49992606  |
| 0.488198294 | 0.475965696 | 0.490187245 | 0.479904993 |
| 0.473722356 | 0.474148494 | 0.451591322 | 0.502957373 |
| 0.171666288 | 0.192107269 | 0.202131009 | 0.319922574 |
| 0.011025563 | 0.428755651 | 0.336020044 | 0.222129036 |
| 0.463391563 | 0.371879106 | 0.081110377 | 0.374448704 |
| 0.055576798 | 0.203533996 | 0.402474652 | 0.262547416 |
| 0.367561137 | 0.042617424 | 0.32082106  | 0.346035848 |
| 0.488954875 | 0.437524901 | 0.38923243  | 0.5280359   |
| 0.381827623 | 0.258599387 | 0.341944306 | 0.436528021 |
| 0.126544226 | 0.153392841 | 0.463572519 | 0.071259769 |
| 0.286176352 | 0.469217782 | 0.428269126 | 0.146787912 |
| 0.345964752 | 0.016948002 | 0.45985314  | 0.520750217 |
| 0.506083053 | 0.500377219 | 0.508538913 | 0.270992119 |
| 0.508094455 | 0.106843333 | 0.515968675 | 0.502426826 |
| 0.466495983 | 0.002517982 | 0.008996506 | 0.508037776 |
| 0.428205189 | 0.152821375 | 0.237225012 | 0.480614244 |
| 0.15230808  | 0.283590006 | 0.120851106 | 0.173696024 |
| 0.507885783 | 0.249404136 | 0.166232971 | 0.495092751 |
| 0.293051183 | 0.281525145 | 0.50690201  | 0.180226072 |
| 0.449902487 | 0.095546633 | 0.176919806 | 0.010234516 |
| 0.393879733 | 0.224485973 | 0.513299457 | 0.511658963 |
| 0.479568484 | 0.420180368 | 0.435683344 | 0.419390485 |
| 0.472700759 | 0.22336471  | 0.427673696 | 0.23627557  |
| 0.5175962   | 0.423293509 | 0.384392718 | 0.401226865 |
| 0.482081141 | 0.489154434 | 0.070506115 | 0.45513857  |
| 0.031828325 | 0.001801102 | 0.512254491 | 0.337881724 |
| 0.074968905 | 0.391582721 | 0.334943449 | 0.305991438 |
| 0.275112258 | 0.073367281 | 0.257464365 | 0.232073679 |
| 0.345458471 | 0.396265093 | 0.268984109 | 0.336641789 |
| 0.276462454 | 0.129993784 | 0.242598438 | 0.206025654 |
| 0.29589888  | 0.414708864 | 0.294399323 | 0.050989444 |
| 0.503999942 | 0.449401656 | 0.113518214 | 0.253074862 |
| 0.489873391 | 0.50944612  | 0.071769537 | 0.017549981 |
| 0.356017389 | 0.34758148  | 0.495363894 | 0.520549807 |
| 0.53627959  | 0.493564024 | 0.424280734 | 0.135471477 |
| 0.128151261 | 0.354586318 | 0.291449783 | 0.103101552 |
| 0.509679769 | 0.161357102 | 0.50605914  | 0.296955697 |
| 0.19509631  | 0.288202966 | 0.057356548 | 0.144782242 |
| 0.405113746 | 0.250047665 | 0.2025202   | 0.275064344 |

|             |             |             |             |
|-------------|-------------|-------------|-------------|
| 0.343256371 | 0.249189091 | 0.097288548 | 0.264530751 |
| 0.425950599 | 0.170145253 | 0.236614335 | 0.41930541  |
| 0.463330845 | 0.337385139 | 0.467732014 | 0.44747468  |
| 0.22734612  | 0.200553773 | 0.428317191 | 0.442341226 |
| 0.513686764 | 0.480006832 | 0.054892471 | 0.518443122 |
| 0.492681385 | 0.497313674 | 0.51309588  | 0.412786134 |
| 0.166526248 | 0.403450811 | 0.326258126 | 0.365416334 |
| 0.254504107 | 0.504391935 | 0.291244313 | 0.127076572 |
| 0.362685203 | 0.491011595 | 0.492805127 | 0.211157929 |
| 0.496016482 | 0.257024667 | 0.14960745  | 0.50183223  |
| 0.167639877 | 0.159153687 | 0.496578503 | 0.479959851 |
| 0.002504578 | 0.125503631 | 0.47886717  | 0.302294404 |
| 0.505680829 | 0.492302208 | 0.465493546 | 0.35646141  |
| 0.00132125  | 0.439745368 | 0.424197376 | 0.447967064 |
| 0.510877824 | 0.449242672 | 0.221998711 | 0.105755061 |
| 0.344461044 | 0.187842836 | 0.16817228  | 0.462179411 |
| 0.179413566 | 0.506109574 | 0.259006225 | 0.293241073 |
| 0.222558341 | 0.201057559 | 0.24396641  | 0.322358774 |
| 0.144795184 | 0.302198486 | 0.401874604 | 0.434756522 |
| 0.197572243 | 0.460191087 | 0.485059962 | 0.066349077 |
| 0.37286857  | 0.456783987 | 0.470421988 | 0.004033063 |
| 0.467936497 | 0.01661899  | 0.218129048 | 0.244186338 |
| 0.230297143 | 0.238363174 | 0.275833114 | 0.316197698 |
| 0.439136641 | 0.283650764 | 0.333318351 | 0.291488055 |
| 0.192637465 | 0.304825981 | 0.429231647 | 0.458742881 |
| 0.300378574 | 0.201148191 | 0.196124753 | 0.197257355 |
| 0.086552501 | 0.51375567  | 0.329157658 | 0.172884583 |
| 0.27746583  | 0.442797281 | 0.392325081 | 1           |
| 0.444783487 | 0.233331103 | 0.381034239 | 0.525360766 |
| 0.300489994 | 0.399972995 | 0.142678909 | 0.490450164 |
| 0.305055544 | 0.215675479 | 0.506926465 | 0.451574386 |
| 0.496198781 | 0.429629242 | 0.328738115 | 0.467891309 |
| 0.414363748 | 0.401883043 | 0.46276157  | 0.108665103 |
| 0.262896498 | 0.228081472 | 0.260715913 | 0.006185836 |
| 0.41702503  | 0.402761304 | 0.51238699  | 0.509722139 |
| 0.295607495 | 0.430006664 | 0.470214625 | 0.155068129 |
| 0.425804023 | 0.293518091 | 0.223438269 | 0.506269045 |
| 0.216358614 | 0.259029581 | 0.315096287 | 0.497032739 |
| 0.477108566 | 0.480561212 | 0.263357429 | 0.32889425  |
| 0.300534655 | 0.322954318 | 0.491143649 | 0.237331423 |
| 0.494867047 | 0.180431443 | 0.493703226 | 0.322127437 |
| 0.241097718 | 0.509570869 | 0.129301699 | 0.512932072 |
| 0.349826654 | 0.234571516 | 0.482779255 | 0.406758119 |
| 0.402002744 | 0.142926021 | 0.177983505 | 0.495699389 |
| 0.279525421 | 0.355525909 | 0.023956374 | 0.064589424 |
| 0.367657856 | 0.374271599 | 0.50251611  | 0.42005742  |
| 0.242227371 | 0.368944678 | 0.163300842 | 0.392296991 |
| 0.515826586 | 0.528780306 | 0.301654794 | 0.31196333  |
| 0.417953812 | 0.154892163 | 0.527575481 | 0.021708988 |
| 0.46543437  | 0.46604168  | 0.455520116 | 0.09513587  |
| 0.042591473 | 0.204868641 | 0.47913906  | 0.158912011 |
| 0.480629211 | 0.215957462 | 0.461006651 | 0.500959393 |
| 0.274848736 | 0.529326128 | 0.139631397 | 0.449382113 |
| 0.1071013   | 0.332207216 | 0.405872375 | 0.437146827 |

|                     |             |             |             |
|---------------------|-------------|-------------|-------------|
| 0.239074663         | 0.286734616 | 0.416001564 | 0.225952271 |
| 0.060484317         | 0.28505623  | 0.003059622 | 0.428644514 |
| 0.510598904         | 0.347346532 | 0.293975202 | 0.406161449 |
| 0.32001282          | 0.444757442 | 0.255823963 | 0.48108725  |
| 0.020371482         | 0.380117687 | 0.261656956 | 0.501394466 |
| 0.269123203         | 0.430926593 | 0.088363378 | 0.318823631 |
| 0.507257028         | 0.302804935 | 0.329138586 | 0.355081457 |
| 0.514203888         | 0.480956513 | 0.297445244 | 0.238797848 |
| 0.476273706         | 0.141957761 | 0.507017105 | 0.51306549  |
| 0.207593482         | 0.203477141 | 0.465725389 | 0.243727918 |
| 0.310239169         | 0.470906019 | 0.481064108 | 0.511283905 |
| 0.080872173         | 0.308717277 | 0.465946808 | 0.493966778 |
| 0.341056419         | 0.156091009 | 0.237459757 | 0.235619256 |
| 0.504977252         | 0.156676642 | 0.257866183 | 0.444481316 |
| 0.206510214         | 0.360709544 | 0.473188831 | 0.190745355 |
| 0.058534323         | 0.223186023 | 0.448713744 | 0.22600635  |
| 0.340344659         | 0.393639513 | 0.239782332 | 0.421697528 |
| 0.164640806         | 0.040276761 | 0.451031666 | 0.015089138 |
| 0.48102176          | 0.434699721 | 0.311624588 | 0.374028851 |
| 0.289330091         | 0.439487745 | 0.467432157 | 0.003778888 |
| 0.451923024         | 0.054596086 | 0.339755374 | 0.233315353 |
| 0.300634404         | 0.108265404 | 0.490132711 | 0.493620315 |
| 0.416042972         | 0.391486762 | 0.382004792 | 0.494840944 |
| 0.137426237         | 0.368308622 | 0.361245197 | 0.524512196 |
| 0.213348367         | 0.484307873 | 0.471350791 | 0.410542364 |
| 0.475473679         | 0.364285931 |             |             |
| RAD51AP1 0.17560871 | 0.383195806 | 0.126170881 |             |
| 0.246217731         | 0.375804117 | 0.424852138 | 0.152979003 |
| 0.258325169         | 0.350346732 | 0.254349681 | 0.427139972 |
| 0.06943777          | 0.134115383 | 0.425682863 | 0.155208854 |
| 0.390084872         | 0.122226809 | 0.227160041 | 0.120496769 |
| 0.302551164         | 0.352358123 | 0.373850984 | 0.384410551 |
| 0.361689536         | 0.254668913 | 0.363892085 | 0.360288729 |
| 0.451114005         | 0.249005869 | 0.426004819 | 0.175849126 |
| 0.415126758         | 0.372948905 | 0.359296377 | 0.063711851 |
| 0.425637554         | 0.02560668  | 0.431128488 | 0.3499108   |
| 0.21461256          | 0.370445789 | 0.299358446 | 0.36359524  |
| 0.325140801         | 0.103069959 | 0.181556472 | 0.375002177 |
| 0.354954463         | 0.383492357 | 0.135949937 | 0.413976939 |
| 0.3592362           | 0.407819892 | 0.341730531 | 0.006715185 |
| 0.313890996         | 0.093309471 | 0.222207664 | 0.475690736 |
| 0.331976051         | 0.274546631 | 0.237335894 | 0.34472516  |
| 0.371379432         | 0.389923319 | 0.376807205 | 0.316541746 |
| 0.464519708         | 0.212704543 | 0.393918179 | 0.253429061 |
| 0.387810283         | 0.091482678 | 0.276056271 | 0.158559908 |
| 0.384298622         | 0.354675832 | 0.420330871 | 0.333581708 |
| 0.370251349         | 0.504179435 | 0.347574206 | 0.462097102 |
| 0.140476467         | 0.357920166 | 0.361475043 | 0.387314369 |
| 0.378553987         | 0.17825464  | 0.425840521 | 0.493385417 |
| 0.126035434         | 0.331426271 | 0.379039151 | 0.206367307 |
| 0.40504606          | 0.301048801 | 0.339392792 | 0.243931519 |
| 0.393859979         | 0.357640224 | 0.456327328 | 0.378517666 |
| 0.395471115         | 0.145864262 | 0.45968326  | 0.345873297 |
| 0.390161175         | 0.172734896 | 0.292520457 | 0.409586983 |

|             |             |             |             |
|-------------|-------------|-------------|-------------|
| 0.408287021 | 0.452276839 | 0.378911426 | 0.38100089  |
| 0.368865815 | 0.464750745 | 0.416246604 | 0.404483284 |
| 0.13340378  | 0.484999688 | 0.31312307  | 0.146885568 |
| 0.151807082 | 0.234901494 | 0.29278511  | 0.386191863 |
| 0.42662261  | 0.41431144  | 0.316732882 | 0.34635156  |
| 0.413779763 | 0.444930934 | 0.47508096  | 0.404786346 |
| 0.120313972 | 0.270140175 | 0.369742324 | 0.397808199 |
| 0.398218395 | 0.232224472 | 0.305741174 | 0.48315908  |
| 0.401594343 | 0.416880011 | 0.274205709 | 0.493945057 |
| 0.304134145 | 0.498084712 | 0.394505019 | 0.299648524 |
| 0.493267308 | 0.473458079 | 0.485756734 | 0.403238656 |
| 0.468578417 | 0.397100717 | 0.08440294  | 0.385792074 |
| 0.482676214 | 0.030041933 | 0.41828954  | 0.444721134 |
| 0.455494568 | 0.411581734 | 0.487500532 | 0.46970512  |
| 0.46203685  | 0.169039749 | 0.026678633 | 0.37073827  |
| 0.471278598 | 0.410913181 | 0.289116194 | 0.366505878 |
| 0.385650328 | 0.414172253 | 0.411226366 | 0.305395392 |
| 0.507359838 | 0.421397534 | 0.436381445 | 0.393387261 |
| 0.317385909 | 0.361609904 | 0.345438334 | 0.448085451 |
| 0.147880345 | 0.218714217 | 0.119137444 | 0.378760416 |
| 0.32612898  | 0.319746152 | 0.392556515 | 0.374028429 |
| 0.329551953 | 0.381703212 | 0.326061811 | 0.398443454 |
| 0.112950029 | 0.398569274 | 0.291101105 | 0.256889141 |
| 0.135275826 | 0.228367493 | 0.286611892 | 0.306309984 |
| 0.371179676 | 0.275756556 | 0.405891539 | 0.451926015 |
| 0.367139131 | 0.266120509 | 0.413383036 | 0.470834687 |
| 0.43746357  | 0.386381773 | 0.331177089 | 0.045593419 |
| 0.282297891 | 0.261592898 | 0.20743562  | 0.383184445 |
| 0.231992611 | 0.307316894 | 0.384357542 | 0.4167327   |
| 0.345677118 | 0.242558486 | 0.357960506 | 0.447785622 |
| 0.225071925 | 0.392110435 | 0.420030681 | 0.36703686  |
| 0.01983496  | 0.378008049 | 0.423418699 | 0.244845391 |
| 0.35723603  | 0.191784385 | 0.289305225 | 0.412568825 |
| 0.293665231 | 0.294010926 | 0.450721871 | 0.418149957 |
| 0.365765304 | 0.254519871 | 0.490777798 | 0.05085598  |
| 0.362501653 | 0.139742901 | 0.382259474 | 0.296647616 |
| 0.350697521 | 0.377225197 | 0.367323506 | 0.370113106 |
| 0.213496506 | 0.480531502 | 0.421509004 | 0.470201425 |
| 0.334596433 | 0.492403111 | 0.42014254  | 0.425039585 |
| 0.422678291 | 0.326785642 | 0.1604618   | 0.413140999 |
| 0.411673238 | 0.27641591  | 0.143170927 | 0.393315348 |
| 0.316565953 | 0.394485112 | 0.242278316 | 0.460335827 |
| 0.496672494 | 0.425718577 | 0.298214924 | 0.408570784 |
| 0.41530283  | 0.352587232 | 0.421946153 | 0.502661496 |
| 0.261267712 | 0.351450911 | 0.346693044 | 0.418884728 |
| 0.288223534 | 0.284246878 | 0.368148824 | 0.209803514 |
| 0.015882569 | 0.176588707 | 0.148840184 | 0.311807935 |
| 0.246145345 | 0.370543558 | 0.408440284 | 0.475099973 |
| 0.249219045 | 0.422380748 | 0.325079801 | 0.334067138 |
| 0.388711092 | 0.367455686 | 0.390065508 | 0.4133002   |
| 0.348617122 | 0.069025514 | 0.238478482 | 0.502001646 |
| 0.093979279 | 0.296151084 | 0.385624726 | 0.009971756 |
| 0.117084362 | 0.359608381 | 0.163032481 | 0.254983892 |
| 0.450037774 | 0.252147425 | 0.288193903 | 0.269752351 |

|             |             |             |             |
|-------------|-------------|-------------|-------------|
| 0.42759028  | 0.214160482 | 0.020990813 | 0.439079225 |
| 0.450978516 | 0.426523066 | 0.445496859 | 0.435964303 |
| 0.395902021 | 0.407133538 | 0.407702111 | 0.389324041 |
| 0.228753739 | 0.181924696 | 0.240529048 | 0.35862879  |
| 0.011537147 | 0.43561786  | 0.391665904 | 0.259009796 |
| 0.412441955 | 0.37051035  | 0.121685858 | 0.390307637 |
| 0.064396885 | 0.208617419 | 0.351176724 | 0.349263986 |
| 0.402051126 | 0.059064302 | 0.246298316 | 0.302037244 |
| 0.414050065 | 0.378634333 | 0.345936434 | 0.493870886 |
| 0.411474853 | 0.183445283 | 0.37761465  | 0.436419927 |
| 0.180080219 | 0.099916897 | 0.369804715 | 0.034544877 |
| 0.272521225 | 0.441815158 | 0.37795656  | 0.15300458  |
| 0.362367013 | 0.026431724 | 0.379125376 | 0.499054403 |
| 0.428445899 | 0.47191141  | 0.471767824 | 0.315518167 |
| 0.469593793 | 0.106711848 | 0.483491254 | 0.387545706 |
| 0.309755649 | 0.003215533 | 0.026951931 | 0.433914371 |
| 0.386346938 | 0.113226623 | 0.281737234 | 0.374029824 |
| 0.243748137 | 0.237066447 | 0.186085897 | 0.276681563 |
| 0.428653461 | 0.359083033 | 0.273671496 | 0.433271627 |
| 0.344559266 | 0.36394753  | 0.370370406 | 0.172161301 |
| 0.425361863 | 0.153745599 | 0.170863404 | 0.026515454 |
| 0.413175538 | 0.179439796 | 0.452904844 | 0.468147558 |
| 0.481554499 | 0.415899538 | 0.273292516 | 0.378481257 |
| 0.409795831 | 0.157146014 | 0.352655814 | 0.187539198 |
| 0.438683437 | 0.388907662 | 0.399352331 | 0.362884029 |
| 0.471844231 | 0.446564584 | 0.111634168 | 0.40458879  |
| 0.053217949 | 0.008771047 | 0.366663262 | 0.362263899 |
| 0.098468488 | 0.356269439 | 0.344554819 | 0.30371024  |
| 0.34415753  | 0.095527241 | 0.282488372 | 0.274350313 |
| 0.378329057 | 0.390137405 | 0.335676088 | 0.328086183 |
| 0.353766114 | 0.20639971  | 0.35762849  | 0.299473674 |
| 0.291187987 | 0.336382796 | 0.252872553 | 0.079306688 |
| 0.376752671 | 0.389562083 | 0.1571684   | 0.277845185 |
| 0.427413634 | 0.442767235 | 0.118905391 | 0.049226604 |
| 0.347840159 | 0.366806784 | 0.460737272 | 0.451714783 |
| 0.495214308 | 0.494850064 | 0.416518595 | 0.247689152 |
| 0.178735261 | 0.390845744 | 0.348514743 | 0.236101526 |
| 0.474143682 | 0.126626034 | 0.458738044 | 0.320154231 |
| 0.229783722 | 0.328187763 | 0.12850852  | 0.202248766 |
| 0.384879423 | 0.312799828 | 0.323768892 | 0.219301939 |
| 0.367182215 | 0.305606548 | 0.140488954 | 0.322000581 |
| 0.384818696 | 0.195888096 | 0.281645528 | 0.394010689 |
| 0.391457262 | 0.201994751 | 0.400254047 | 0.450439714 |
| 0.236737869 | 0.207506895 | 0.311522808 | 0.411972938 |
| 0.404793083 | 0.341164036 | 0.083303038 | 0.396112003 |
| 0.464408747 | 0.40759124  | 0.468474157 | 0.409694993 |
| 0.176660102 | 0.389727241 | 0.314994795 | 0.366501105 |
| 0.308886136 | 0.423932553 | 0.359586096 | 0.156626645 |
| 0.363837899 | 0.476785088 | 0.382754636 | 0.315321512 |
| 0.405024153 | 0.201896143 | 0.11217694  | 0.413185404 |
| 0.23101001  | 0.18664685  | 0.317800716 | 0.405380899 |
| 0.009974105 | 0.187491769 | 0.453580108 | 0.389923414 |
| 0.496285356 | 0.439419492 | 0.436751826 | 0.370496494 |
| 0.003114534 | 0.384273843 | 0.413852354 | 0.394123614 |

|             |             |             |             |
|-------------|-------------|-------------|-------------|
| 0.387440941 | 0.406767309 | 0.272232032 | 0.197424989 |
| 0.38027369  | 0.148949287 | 0.245440293 | 0.381759983 |
| 0.167700657 | 0.396632796 | 0.321206165 | 0.30330368  |
| 0.333901849 | 0.153207461 | 0.305706783 | 0.378694301 |
| 0.194227203 | 0.352963569 | 0.400846945 | 0.26870617  |
| 0.191876839 | 0.402678458 | 0.383728302 | 0.092847271 |
| 0.379134698 | 0.397782552 | 0.42408772  | 0.005710269 |
| 0.412481549 | 0.040516945 | 0.33352373  | 0.348254117 |
| 0.346138827 | 0.328726174 | 0.368186912 | 0.374515817 |
| 0.372895683 | 0.343836535 | 0.389325062 | 0.362803992 |
| 0.316711583 | 0.358270607 | 0.41234544  | 0.378928923 |
| 0.365691586 | 0.257931803 | 0.167950579 | 0.154467467 |
| 0.163842426 | 0.425153512 | 0.327511327 | 0.144782866 |
| 0.360934796 | 0.381994073 | 0.398373895 | 0.444783487 |
| 1           | 0.168713621 | 0.38807028  | 0.4001207   |
| 0.192058163 | 0.338243248 | 0.145034245 | 0.408114373 |
| 0.370797137 | 0.292133021 | 0.395204464 | 0.329915832 |
| 0.3703367   | 0.419332809 | 0.331301263 | 0.436336811 |
| 0.417567838 | 0.33868031  | 0.266531473 | 0.212211216 |
| 0.28569397  | 0.227874415 | 0.339833236 | 0.012544327 |
| 0.41712851  | 0.341078553 | 0.416408062 | 0.455484288 |
| 0.298362216 | 0.411739658 | 0.28962321  | 0.185138877 |
| 0.23775807  | 0.209601062 | 0.253839272 | 0.4059713   |
| 0.226727499 | 0.34276697  | 0.376831545 | 0.362130108 |
| 0.412988212 | 0.384763428 | 0.336967792 | 0.352443538 |
| 0.352469208 | 0.293577485 | 0.453991341 | 0.226301856 |
| 0.372587144 | 0.283774833 | 0.332744617 | 0.362157735 |
| 0.341330993 | 0.46896103  | 0.154308683 | 0.473160001 |
| 0.34755677  | 0.220894031 | 0.494518664 | 0.401868424 |
| 0.398703676 | 0.288681174 | 0.21293611  | 0.364354537 |
| 0.340307486 | 0.345886649 | 0.014608451 | 0.084788892 |
| 0.401843037 | 0.31691832  | 0.357980969 | 0.399058242 |
| 0.330462846 | 0.396998516 | 0.210562437 | 0.352542247 |
| 0.437715187 | 0.473979498 | 0.319097536 | 0.344075165 |
| 0.394291813 | 0.240754691 | 0.397085668 | 0.027669215 |
| 0.380239798 | 0.366711336 | 0.327997808 | 0.162326207 |
| 0.076640178 | 0.221020239 | 0.377149953 | 0.134655918 |
| 0.438568638 | 0.221509222 | 0.344825122 | 0.428710921 |
| 0.276977998 | 0.474886377 | 0.278223412 | 0.428016363 |
| 0.102799854 | 0.365724243 | 0.375150987 | 0.355190937 |
| 0.312630984 | 0.324278789 | 0.413362645 | 0.291557808 |
| 0.114924967 | 0.358567913 | 0.005171367 | 0.423088835 |
| 0.437411346 | 0.330865087 | 0.293405072 | 0.260744995 |
| 0.388641888 | 0.401819537 | 0.305143946 | 0.378995107 |
| 0.056461108 | 0.37855352  | 0.3482619   | 0.412631139 |
| 0.208718321 | 0.349340457 | 0.179754375 | 0.339330046 |
| 0.448405784 | 0.298076007 | 0.339526145 | 0.267330234 |
| 0.449481367 | 0.390275816 | 0.229340568 | 0.354600142 |
| 0.350675114 | 0.144927365 | 0.353826323 | 0.493804639 |
| 0.325652983 | 0.279936366 | 0.42054496  | 0.311315231 |
| 0.330422483 | 0.396118525 | 0.358671046 | 0.484121769 |
| 0.192483787 | 0.365722996 | 0.424087152 | 0.41901086  |
| 0.396957611 | 0.252618782 | 0.285153557 | 0.315651375 |
| 0.423194669 | 0.214986945 | 0.302981524 | 0.401178274 |



|             |             |             |             |
|-------------|-------------|-------------|-------------|
| 0.243817418 | 0.408911094 | 0.321315504 | 0.309894245 |
| 0.122680929 | 0.315796386 | 0.425874538 | 0.263347018 |
| 0.380319839 | 0.391241197 | 0.322983837 | 0.409966048 |
| 0.280109207 | 0.084394395 | 0.461056134 | 0.023659169 |
| 0.394853561 | 0.426451528 | 0.381681232 | 0.392878222 |
| 0.271618903 | 0.388500722 | 0.332980265 | 0.006038143 |
| 0.41544948  | 0.104290294 | 0.383356997 | 0.317049132 |
| 0.298973733 | 0.134049533 | 0.44688933  | 0.475392682 |
| 0.40637732  | 0.350990184 | 0.314623788 | 0.436981481 |
| 0.191794904 | 0.297644431 | 0.323548591 | 0.384100106 |
| 0.269969902 | 0.317717098 | 0.367924809 | 0.356964984 |
| 0.417185371 | 0.396712531 |             |             |
| RAD51C      | 0.278772344 | 0.202058551 | 0.323245563 |
| 0.143248204 | 0.060005563 | 0.128639531 | 0.224537853 |
| 0.199346699 | 0.176523431 | 0.084808094 | 0.103539302 |
| 0.182851007 | 0.006405647 | 0.171321505 | 0.202812109 |
| 0.071184248 | 0.151019113 | 0.209046148 | 0.04758992  |
| 0.143944129 | 0.056559237 | 0.056411974 | 0.167577242 |
| 0.060094155 | 0.312365837 | 0.186662887 | 0.064555446 |
| 0.189486611 | 0.03396917  | 0.097918863 | 0.053851472 |
| 0.230265711 | 0.056111927 | 0.057553596 | 0.234038959 |
| 0.109459953 | 0.002590794 | 0.28530734  | 0.084848009 |
| 0.018551389 | 0.241644689 | 0.122712655 | 0.116505877 |
| 0.108125016 | 0.267994434 | 0.052125296 | 0.081150832 |
| 0.16172144  | 0.130579067 | 0.327772408 | 0.122395795 |
| 0.089888151 | 0.184385563 | 0.142733384 | 0.009320845 |
| 0.034069388 | 0.003175527 | 0.018090816 | 0.240456589 |
| 0.197338938 | 0.162298559 | 0.036878513 | 0.17074805  |
| 0.091960641 | 0.096577057 | 0.15722866  | 0.087548993 |
| 0.207072553 | 0.015745016 | 0.095220198 | 0.109435108 |
| 0.132592219 | 0.2717322   | 0.235826778 | 0.302134206 |
| 0.0801992   | 0.137307514 | 0.083401076 | 0.041748155 |
| 0.206523525 | 0.270902588 | 0.185166628 | 0.26914213  |
| 0.013008566 | 0.050659386 | 0.055890975 | 0.123738078 |
| 0.12185448  | 0.199302224 | 0.114282121 | 0.232714488 |
| 0.25045069  | 0.117478475 | 0.119271157 | 0.29500428  |
| 0.186614056 | 0.041027615 | 0.106471602 | 0.019673164 |
| 0.069305733 | 0.059463034 | 0.267264553 | 0.16153457  |
| 0.070708476 | 0.324038939 | 0.309118953 | 0.043473652 |
| 0.077812863 | 0.305809195 | 0.046439214 | 0.113799517 |
| 0.108225285 | 0.18296516  | 0.14772978  | 0.132051146 |
| 0.060453539 | 0.199828751 | 0.127444404 | 0.182097317 |
| 0.030845893 | 0.227677838 | 0.220040458 | 0.159101561 |
| 0.311463569 | 0.15243209  | 0.054368995 | 0.174251852 |
| 0.148109422 | 0.157776517 | 0.199148806 | 0.097842829 |
| 0.122746425 | 0.282806292 | 0.225696539 | 0.137352742 |
| 0.241528628 | 0.029593057 | 0.064471029 | 0.178649241 |
| 0.113686918 | 0.238160523 | 0.032365726 | 0.289016662 |
| 0.198886599 | 0.109324399 | 0.270595594 | 0.313763568 |
| 0.164544061 | 0.218001973 | 0.179562886 | 0.173785481 |
| 0.261347564 | 0.285746455 | 0.186517199 | 0.069510138 |
| 0.257310537 | 0.158827645 | 0.031768921 | 0.156944143 |
| 0.195194124 | 0.003141543 | 0.141285831 | 0.151707572 |
| 0.229209648 | 0.112749057 | 0.182685865 | 0.175363567 |

|             |             |             |             |
|-------------|-------------|-------------|-------------|
| 0.23095568  | 0.283062971 | 0.00315254  | 0.087572971 |
| 0.253154657 | 0.170493221 | 0.104853386 | 0.070688408 |
| 0.069162739 | 0.149141198 | 0.113067029 | 0.05156507  |
| 0.231740839 | 0.15473867  | 0.163064568 | 0.137368886 |
| 0.153076332 | 0.245486403 | 0.052314836 | 0.306025996 |
| 0.196780914 | 0.271321115 | 0.322642563 | 0.154599405 |
| 0.115648983 | 0.145078281 | 0.144146782 | 0.080003639 |
| 0.162783766 | 0.168324295 | 0.041694566 | 0.068921868 |
| 0.330513613 | 0.099007065 | 0.237996796 | 0.242881368 |
| 0.157062428 | 0.293298347 | 0.11488622  | 0.146756167 |
| 0.088026727 | 0.397431833 | 0.099065919 | 0.170093694 |
| 0.080092055 | 0.278863794 | 0.122439495 | 0.193556905 |
| 0.182328122 | 0.062074652 | 0.205194807 | 0.051241973 |
| 0.051326213 | 0.04531571  | 0.014278015 | 0.072471738 |
| 0.358523615 | 0.093025544 | 0.085859696 | 0.081047621 |
| 0.210919026 | 0.255102291 | 0.063835948 | 0.276422909 |
| 0.300612473 | 0.07365147  | 0.13286037  | 0.108434937 |
| 0.119312522 | 0.136494613 | 0.12526086  | 0.039786926 |
| 0.157342288 | 0.017010787 | 0.030530665 | 0.146864516 |
| 0.035467913 | 0.037076255 | 0.159942479 | 0.082453087 |
| 0.088265202 | 0.355997194 | 0.193102801 | 0.00320685  |
| 0.067236198 | 0.032381741 | 0.11374958  | 0.112476156 |
| 0.177837088 | 0.131783331 | 0.052069998 | 0.059259497 |
| 0.307815332 | 0.22741692  | 0.167167263 | 0.184677026 |
| 0.057100892 | 0.200486478 | 0.123024493 | 0.158125213 |
| 0.146359121 | 0.058446467 | 0.008969368 | 0.12420901  |
| 0.139293687 | 0.060097446 | 0.335916586 | 0.103795767 |
| 0.079651331 | 0.076526465 | 0.044557805 | 0.179302749 |
| 0.264463188 | 0.265029519 | 0.12050234  | 0.093061313 |
| 0.147703645 | 0.194869888 | 0.140002151 | 0.206348094 |
| 0.072980427 | 0.060973803 | 0.055207541 | 0.110049635 |
| 0.23011998  | 0.040331075 | 0.214449414 | 0.014477368 |
| 0.000593792 | 0.287198353 | 0.294630694 | 0.099473137 |
| 0.020680163 | 0.092048632 | 0.096082066 | 0.200902327 |
| 0.192792942 | 0.198062813 | 0.194122901 | 0.06878345  |
| 0.209599572 | 0.065653351 | 0.060979845 | 0.080129404 |
| 0.201169258 | 0.080392252 | 0.118347226 | 0.278207963 |
| 0.316594723 | 0.029027006 | 0.157968282 | 0.01071286  |
| 0.25361155  | 0.154004673 | 0.321776552 | 0.325232999 |
| 0.142830154 | 0.329836707 | 0.234125005 | 0.092642694 |
| 0.115589983 | 0.250193527 | 0.017427241 | 0.18072906  |
| 0.214820333 | 0.206830765 | 0.217938142 | 0.260813671 |
| 0.159076356 | 0.124492023 | 0.102498862 | 0.17990601  |
| 0.207476702 | 0.295488357 | 0.024167042 | 0.088603248 |
| 0.021278106 | 0.121620949 | 0.082569651 | 0.2401548   |
| 0.092830957 | 0.144932968 | 0.228510644 | 0.070291048 |
| 0.178974521 | 0.015799775 | 0.139988256 | 0.115282834 |
| 0.091718005 | 0.219484199 | 0.067684753 | 0.045461387 |
| 0.259353953 | 0.211649577 | 0.049205734 | 0.229996538 |
| 0.10778889  | 0.318477273 | 0.081120712 | 0.1018113   |
| 0.217962636 | 0.026996914 | 0.136141507 | 0.013588883 |
| 0.080117494 | 0.241915931 | 0.074483416 | 0.251434438 |
| 0.152887659 | 0.140785027 | 0.221137279 | 0.226454373 |
| 0.252261071 | 0.172313976 | 0.200624502 | 0.033932566 |

|             |             |             |             |
|-------------|-------------|-------------|-------------|
| 0.215818819 | 0.004736524 | 0.200457504 | 0.179223759 |
| 0.077693627 | 0.011100965 | 0.029863408 | 0.145789619 |
| 0.071989813 | 0.340638713 | 0.218266193 | 0.112581264 |
| 0.14758192  | 0.288423117 | 0.220006049 | 0.031763642 |
| 0.11605816  | 0.067554794 | 0.030315137 | 0.250916868 |
| 0.125678497 | 0.134968574 | 0.124517837 | 0.30780345  |
| 0.085147848 | 0.200502951 | 0.292195889 | 0.013194343 |
| 0.093208899 | 0.322086287 | 0.327836763 | 0.216646533 |
| 0.216481267 | 0.084145791 | 0.063919841 | 0.094489629 |
| 0.145045064 | 0.339752035 | 0.063164816 | 0.328029116 |
| 0.223369209 | 0.080852356 | 0.150782609 | 0.206033123 |
| 0.18886636  | 0.217955267 | 0.216600811 | 0.110063795 |
| 0.115107358 | 0.002437169 | 0.152356127 | 0.171344497 |
| 0.021235834 | 0.063198788 | 0.196823408 | 0.122473771 |
| 0.109822018 | 0.21396653  | 0.028103729 | 0.026712451 |
| 0.116810358 | 0.086457459 | 0.043638575 | 0.197532182 |
| 0.065312104 | 0.030703976 | 0.123551267 | 0.150681389 |
| 0.0764394   | 0.234061925 | 0.307377243 | 0.203364676 |
| 0.093919383 | 0.070186794 | 0.246477293 | 0.253090997 |
| 0.140239454 | 0.15514793  | 0.153388467 | 0.055445017 |
| 0.214594959 | 0.082086052 | 0.155893345 | 0.213331316 |
| 0.266602067 | 0.211679659 | 0.269897907 | 0.07465915  |
| 0.238770686 | 0.097657522 | 0.0475478   | 0.059317357 |
| 0.200345072 | 0.319480456 | 0.235914254 | 0.035338885 |
| 0.24864042  | 0.157948156 | 0.139137906 | 0.227732228 |
| 0.059506529 | 0.201011533 | 0.099330703 | 0.292113292 |
| 0.082250662 | 0.030523558 | 0.232740107 | 0.176332888 |
| 0.155532706 | 0.014801737 | 0.209539645 | 0.160350199 |
| 0.180816633 | 0.077617263 | 0.087142068 | 0.219184007 |
| 0.280818324 | 0.253921611 | 0.184540864 | 0.117829    |
| 0.125139593 | 0.087313198 | 0.120877697 | 0.205576348 |
| 0.175500965 | 0.09156534  | 0.245428058 | 0.135577404 |
| 0.287676366 | 0.066039095 | 0.044231077 | 0.074848202 |
| 0.181500473 | 0.138545311 | 0.129373355 | 0.267659064 |
| 0.207523263 | 0.282113074 | 0.179284368 | 0.135487237 |
| 0.101006257 | 0.313297353 | 0.320380862 | 0.157534412 |
| 0.020804477 | 0.217995825 | 0.117361679 | 0.113018836 |
| 0.004986239 | 0.010651454 | 0.165179509 | 0.131684254 |
| 0.237372814 | 0.155721481 | 0.218692119 | 0.162914252 |
| 0.000202404 | 0.074165403 | 0.096445235 | 0.082201718 |
| 0.183019833 | 0.182091511 | 0.122966824 | 0.139934074 |
| 0.170045227 | 0.336454942 | 0.111714839 | 0.121183547 |
| 0.018242144 | 0.135610718 | 0.185817041 | 0.186373976 |
| 0.0958595   | 0.304667949 | 0.031193108 | 0.162682526 |
| 0.020989384 | 0.177474064 | 0.142630924 | 0.106061591 |
| 0.018160018 | 0.15132426  | 0.137141531 | 0.242012304 |
| 0.057347815 | 0.143717123 | 0.171302165 | 0.014927507 |
| 0.089175537 | 0.113392773 | 0.090536381 | 0.092417461 |
| 0.104129604 | 0.097394756 | 0.088056135 | 0.068084858 |
| 0.137239778 | 0.14765548  | 0.115362491 | 0.146855962 |
| 0.104251952 | 0.177208938 | 0.087131564 | 0.138407876 |
| 0.066009924 | 0.219150159 | 0.33048389  | 0.382380344 |
| 0.153919434 | 0.176008631 | 0.243866609 | 0.337651321 |
| 0.143238214 | 0.115270025 | 0.185430867 | 0.233331103 |

|             |             |             |             |
|-------------|-------------|-------------|-------------|
| 0.168713621 | 1           | 0.102051684 | 0.175098712 |
| 0.036428016 | 0.106863525 | 0.280742531 | 0.133259342 |
| 0.163750219 | 0.038990784 | 0.121652799 | 0.196012212 |
| 0.125633886 | 0.255942505 | 0.235969154 | 0.201667965 |
| 0.092459405 | 0.090170984 | 0.097380424 | 0.105183046 |
| 0.202133756 | 0.276353592 | 0.047799177 | 0.067182826 |
| 0.133122025 | 0.192152103 | 0.136622974 | 0.256370289 |
| 0.032034877 | 0.194948532 | 0.110754771 | 0.215427158 |
| 0.088433336 | 0.350096842 | 0.248743727 | 0.114586217 |
| 0.017611928 | 0.179020604 | 0.0701262   | 0.175280107 |
| 0.097556184 | 0.103609974 | 0.057533575 | 0.163046908 |
| 0.14458079  | 0.265735801 | 0.26994418  | 0.296209342 |
| 0.087202123 | 0.03620637  | 0.147917971 | 0.080649205 |
| 0.08556991  | 0.186509528 | 0.28296022  | 0.181383644 |
| 0.065415294 | 0.300480097 | 0.254463767 | 0.167132096 |
| 0.15897124  | 0.087499323 | 0.014270225 | 0.120161434 |
| 0.127314669 | 0.045074384 | 0.00267127  | 0.009371569 |
| 0.120200037 | 0.090662213 | 0.140793729 | 0.122251937 |
| 0.045751287 | 0.120447161 | 0.015291631 | 0.167257652 |
| 0.264920259 | 0.300339174 | 0.092323666 | 0.182126539 |
| 0.152678367 | 0.185042588 | 0.158050878 | 0.009157046 |
| 0.080321495 | 0.070384699 | 0.076584911 | 0.199777626 |
| 0.180830284 | 0.016762865 | 0.096252128 | 0.302065818 |
| 0.140113835 | 0.017118121 | 0.132444376 | 0.109372949 |
| 0.247968287 | 0.302995004 | 0.090210103 | 0.101770052 |
| 0.198881005 | 0.175805227 | 0.064393042 | 0.086637972 |
| 0.057436786 | 0.038653065 | 0.109093632 | 0.028349486 |
| 0.178495998 | 0.071339042 | 0.01092584  | 0.296784287 |
| 0.299922343 | 0.04718706  | 0.253795447 | 0.071610606 |
| 0.129074774 | 0.175028451 | 0.059917559 | 0.081493891 |
| 0.086353818 | 0.059757022 | 0.169323049 | 0.184797212 |
| 0.026124582 | 0.103785248 | 0.138599117 | 0.052561746 |
| 0.348928068 | 0.055009351 | 0.201888318 | 0.04384184  |
| 0.227118664 | 0.174317522 | 0.307811153 | 0.064716924 |
| 0.114531905 | 0.302851417 | 0.109060318 | 0.217478678 |
| 0.112239488 | 0.027468902 | 0.107419478 | 0.111930018 |
| 0.040566081 | 0.206493851 | 0.090635393 | 0.225281467 |
| 0.067444354 | 0.162593062 | 0.106282825 | 0.189114964 |
| 0.137194832 | 0.026171467 | 0.029133527 | 0.059432129 |
| 0.250338005 | 0.173928458 | 0.03890096  | 0.163438895 |
| 0.021888064 | 0.131689463 | 0.150118043 | 0.054871041 |
| 0.119028287 | 0.14373988  | 0.107034742 | 0.246085536 |
| 0.11604329  | 0.080217814 | 0.050667937 | 0.208630848 |
| 0.091820831 | 0.086436534 | 0.222711905 | 0.000480683 |
| 0.188709565 | 0.092224699 | 0.161854999 | 0.068388833 |
| 0.277341756 | 0.139997941 | 0.166710654 | 0.047271471 |
| 0.11939236  | 0.016958273 | 0.086474931 | 0.053220789 |
| 0.040336736 | 0.251664153 | 0.235699833 | 0.168320547 |
| 0.17774056  | 0.073485348 | 0.046033478 | 0.217075101 |
| 0.014305309 | 0.041716651 | 0.049428301 | 0.137329569 |
| 0.023569945 | 0.083868927 | 0.075660836 | 0.054268266 |
| 0.156939748 | 0.170929171 |             |             |
| RAD51L1     | 0.04991101  | 0.33868202  | 0.029964114 |
| 0.064202944 | 0.223940739 | 0.133148873 | 0.063685706 |

|             |             |             |             |
|-------------|-------------|-------------|-------------|
| 0.09974449  | 0.296748169 | 0.112918164 | 0.193715277 |
| 0.022138784 | 0.082049923 | 0.389082283 | 0.068053842 |
| 0.265956148 | 0.047897661 | 0.092310338 | 0.072771141 |
| 0.130949914 | 0.219304667 | 0.1517329   | 0.167004363 |
| 0.213723517 | 0.180266715 | 0.203177074 | 0.226047147 |
| 0.395394568 | 0.095174264 | 0.269185324 | 0.055788918 |
| 0.376163945 | 0.249769522 | 0.169116067 | 0.015286701 |
| 0.216221724 | 0.038130974 | 0.38749436  | 0.157172928 |
| 0.083228857 | 0.320999602 | 0.111123752 | 0.129745827 |
| 0.150491825 | 0.028463372 | 0.063635541 | 0.309009593 |
| 0.212048318 | 0.163916793 | 0.049890238 | 0.277776304 |
| 0.170100687 | 0.237868539 | 0.247436207 | 0.002666315 |
| 0.14314867  | 0.05933279  | 0.128466328 | 0.400808279 |
| 0.179988673 | 0.104886188 | 0.127283309 | 0.163712306 |
| 0.283596148 | 0.327609648 | 0.253764278 | 0.149386608 |
| 0.404620952 | 0.13400648  | 0.309604999 | 0.078074631 |
| 0.169258709 | 0.034719631 | 0.167277636 | 0.085495371 |
| 0.177090813 | 0.161344621 | 0.211411983 | 0.164815606 |
| 0.319898756 | 0.452738769 | 0.212770232 | 0.398070623 |
| 0.147541689 | 0.24880795  | 0.168682966 | 0.299996735 |
| 0.33693353  | 0.093847717 | 0.294552859 | 0.440620474 |
| 0.054721564 | 0.197931879 | 0.315224108 | 0.122109204 |
| 0.332521655 | 0.171698701 | 0.158663059 | 0.116113849 |
| 0.295345239 | 0.239291556 | 0.42449017  | 0.237892742 |
| 0.199975447 | 0.064231931 | 0.385510423 | 0.236621547 |
| 0.139262125 | 0.059130598 | 0.163744274 | 0.381056371 |
| 0.260400554 | 0.392848244 | 0.34917562  | 0.346143717 |
| 0.232937031 | 0.402037727 | 0.265661607 | 0.369396118 |
| 0.055145538 | 0.42705313  | 0.117362275 | 0.053221754 |
| 0.044769052 | 0.093369228 | 0.198833074 | 0.310008605 |
| 0.379055006 | 0.256336854 | 0.10760275  | 0.172808913 |
| 0.41693979  | 0.371252352 | 0.428819984 | 0.357527728 |
| 0.037821433 | 0.170386898 | 0.213239957 | 0.13725243  |
| 0.31131254  | 0.125965306 | 0.156527226 | 0.417778469 |
| 0.318516156 | 0.3738389   | 0.08582154  | 0.428777064 |
| 0.158203145 | 0.437441686 | 0.33212672  | 0.117055581 |
| 0.423281862 | 0.391814874 | 0.436744767 | 0.300844925 |
| 0.38514595  | 0.143719389 | 0.087420804 | 0.352134139 |
| 0.432826326 | 0.01306982  | 0.39792811  | 0.419837853 |
| 0.393206506 | 0.367528655 | 0.462453231 | 0.420423732 |
| 0.399910877 | 0.0765118   | 0.03387755  | 0.273424019 |
| 0.406072171 | 0.318173267 | 0.143654191 | 0.209947183 |
| 0.285080745 | 0.162005505 | 0.354112426 | 0.118261708 |
| 0.467409408 | 0.360485413 | 0.397736277 | 0.329224228 |
| 0.192284204 | 0.298412394 | 0.222227055 | 0.363012944 |
| 0.044111505 | 0.062695671 | 0.04798312  | 0.315994776 |
| 0.101627197 | 0.161327298 | 0.139529089 | 0.279247578 |
| 0.185346983 | 0.157023228 | 0.147768901 | 0.305643806 |
| 0.065135942 | 0.214436996 | 0.108957319 | 0.117432688 |
| 0.047421158 | 0.163362437 | 0.110119427 | 0.098001442 |
| 0.191424438 | 0.225416166 | 0.303842265 | 0.411235508 |
| 0.196778721 | 0.148091181 | 0.294823364 | 0.419927782 |
| 0.412056013 | 0.213668283 | 0.250452332 | 0.009575545 |
| 0.146696857 | 0.148474403 | 0.127702615 | 0.229743827 |

|             |             |             |             |
|-------------|-------------|-------------|-------------|
| 0.187925222 | 0.162706962 | 0.268513474 | 0.321584925 |
| 0.135068789 | 0.10293592  | 0.179192727 | 0.378287979 |
| 0.143225368 | 0.148373586 | 0.383217189 | 0.219835259 |
| 0.004228607 | 0.173262385 | 0.348438922 | 0.150573369 |
| 0.272529653 | 0.116877297 | 0.109334606 | 0.387724353 |
| 0.165563566 | 0.187469236 | 0.409441084 | 0.335147951 |
| 0.144975886 | 0.215646999 | 0.459977604 | 0.05003441  |
| 0.237166117 | 0.039520729 | 0.264196933 | 0.13244692  |
| 0.188618026 | 0.303761465 | 0.236542409 | 0.148830381 |
| 0.091427283 | 0.431361768 | 0.330392882 | 0.419771163 |
| 0.155701741 | 0.457578509 | 0.376681129 | 0.370914291 |
| 0.261906996 | 0.189856029 | 0.103135239 | 0.330992431 |
| 0.374666297 | 0.143158435 | 0.072454042 | 0.357267447 |
| 0.160538691 | 0.31265903  | 0.108374504 | 0.422082254 |
| 0.426718717 | 0.357936563 | 0.127722089 | 0.35720768  |
| 0.307662998 | 0.13884791  | 0.356261366 | 0.47492291  |
| 0.130592981 | 0.222030089 | 0.164190312 | 0.378125184 |
| 0.142619256 | 0.181108622 | 0.319442101 | 0.129254561 |
| 0.004264761 | 0.070010937 | 0.055366556 | 0.129257852 |
| 0.127170334 | 0.247683025 | 0.293627858 | 0.427403792 |
| 0.09969381  | 0.354888883 | 0.255326054 | 0.146346824 |
| 0.348524395 | 0.209208653 | 0.223206478 | 0.273127301 |
| 0.241407835 | 0.016156471 | 0.079326478 | 0.444260868 |
| 0.042304972 | 0.135396742 | 0.197649809 | 0.003000418 |
| 0.042796897 | 0.299618854 | 0.108379863 | 0.203170726 |
| 0.436620753 | 0.187818294 | 0.160892326 | 0.126821907 |
| 0.288524035 | 0.084641169 | 0.00425662  | 0.415405474 |
| 0.42826165  | 0.416637983 | 0.421981496 | 0.395103349 |
| 0.407068691 | 0.339336689 | 0.356135783 | 0.158243603 |
| 0.079515959 | 0.058750861 | 0.142418889 | 0.171179794 |
| 0.007785943 | 0.319725614 | 0.223348393 | 0.14359537  |
| 0.349540816 | 0.280226093 | 0.036427092 | 0.280664236 |
| 0.01309373  | 0.09797568  | 0.166560957 | 0.166093053 |
| 0.352852479 | 0.015385304 | 0.07072414  | 0.149070355 |
| 0.327593237 | 0.298117801 | 0.151012089 | 0.429112732 |
| 0.197407348 | 0.109686254 | 0.162767497 | 0.326024218 |
| 0.067011088 | 0.059497392 | 0.16282397  | 0.010165503 |
| 0.088757687 | 0.41023197  | 0.171151449 | 0.040336993 |
| 0.193184406 | 0.00549281  | 0.291853215 | 0.44381816  |
| 0.352144292 | 0.441560565 | 0.403179079 | 0.135932669 |
| 0.402063904 | 0.079398187 | 0.432322365 | 0.319354892 |
| 0.134451253 | 0.000626394 | 0.012667594 | 0.394821347 |
| 0.223240241 | 0.058508628 | 0.141466252 | 0.1051562   |
| 0.086229666 | 0.085302155 | 0.067023196 | 0.132510288 |
| 0.236767247 | 0.187110131 | 0.154167486 | 0.378779103 |
| 0.153268498 | 0.210615291 | 0.149701163 | 0.096662445 |
| 0.244121578 | 0.049971505 | 0.102005185 | 0.009797095 |
| 0.33733347  | 0.109660205 | 0.379572488 | 0.412798105 |
| 0.424889561 | 0.297594859 | 0.113882067 | 0.14867251  |
| 0.406219254 | 0.079283427 | 0.134466425 | 0.088684676 |
| 0.36892646  | 0.269189476 | 0.277928654 | 0.252754188 |
| 0.439712916 | 0.384094902 | 0.039539962 | 0.337000345 |
| 0.00917227  | 0.005981114 | 0.140295738 | 0.267750026 |
| 0.103323894 | 0.203386185 | 0.237627095 | 0.169985458 |

|             |             |             |             |
|-------------|-------------|-------------|-------------|
| 0.180315974 | 0.024401604 | 0.160364043 | 0.154152065 |
| 0.23481638  | 0.216462744 | 0.195210237 | 0.260195988 |
| 0.170280795 | 0.13028448  | 0.139832077 | 0.13583312  |
| 0.181103939 | 0.265165985 | 0.180633644 | 0.030248053 |
| 0.185812439 | 0.206139702 | 0.04922669  | 0.149367323 |
| 0.35158252  | 0.400928398 | 0.057791293 | 0.014210802 |
| 0.244648653 | 0.190684171 | 0.429438212 | 0.387265868 |
| 0.427710586 | 0.457374535 | 0.358063234 | 0.13707903  |
| 0.05854722  | 0.246725878 | 0.213899305 | 0.107187127 |
| 0.421605876 | 0.062766908 | 0.386390396 | 0.188847667 |
| 0.124613709 | 0.116827262 | 0.037509243 | 0.088127227 |
| 0.241434716 | 0.175102498 | 0.145314992 | 0.101645675 |
| 0.168256197 | 0.134420712 | 0.05186765  | 0.164633319 |
| 0.295267165 | 0.109494473 | 0.14712389  | 0.15349661  |
| 0.281343698 | 0.108139311 | 0.324590484 | 0.412124828 |
| 0.120567605 | 0.102611529 | 0.092299885 | 0.342603415 |
| 0.343208668 | 0.209513153 | 0.015778389 | 0.342034353 |
| 0.427891393 | 0.271927223 | 0.392879173 | 0.397629792 |
| 0.094550374 | 0.194113038 | 0.188620444 | 0.242442119 |
| 0.183454792 | 0.136086356 | 0.199627477 | 0.068907777 |
| 0.323126355 | 0.435667273 | 0.332114748 | 0.113442673 |
| 0.226813199 | 0.104994997 | 0.053999285 | 0.378577874 |
| 0.133431517 | 0.060198964 | 0.127346072 | 0.384678297 |
| 0.00220565  | 0.106794024 | 0.447819471 | 0.136728145 |
| 0.458033148 | 0.405973734 | 0.372760175 | 0.144618058 |
| 0.00354194  | 0.303035199 | 0.237804395 | 0.14313386  |
| 0.338059419 | 0.280988561 | 0.123728117 | 0.074455433 |
| 0.28828268  | 0.069316396 | 0.120413911 | 0.120238717 |
| 0.118007705 | 0.254446445 | 0.218520544 | 0.191310428 |
| 0.148336407 | 0.100721699 | 0.135181081 | 0.12125915  |
| 0.153656144 | 0.240262611 | 0.323064009 | 0.107535522 |
| 0.101777902 | 0.420041646 | 0.317367569 | 0.024949747 |
| 0.221536485 | 0.385532035 | 0.391445006 | 0.003354738 |
| 0.308974455 | 0.011690713 | 0.154396541 | 0.130046016 |
| 0.139496323 | 0.170646383 | 0.24696461  | 0.151538922 |
| 0.25610546  | 0.140369269 | 0.128231565 | 0.202603529 |
| 0.115798809 | 0.14425366  | 0.249164759 | 0.158719836 |
| 0.136916681 | 0.082954151 | 0.108797038 | 0.108504691 |
| 0.046987953 | 0.377894647 | 0.238464257 | 0.067220661 |
| 0.221840468 | 0.163621087 | 0.339594886 | 0.381034239 |
| 0.38807028  | 0.102051684 | 1           | 0.328043436 |
| 0.106008173 | 0.120039208 | 0.049201713 | 0.188289277 |
| 0.168721898 | 0.141158335 | 0.180448517 | 0.177367285 |
| 0.305954212 | 0.359849826 | 0.229957497 | 0.391100612 |
| 0.151376507 | 0.216825755 | 0.094237842 | 0.076388503 |
| 0.096720797 | 0.140580842 | 0.196603017 | 0.002367035 |
| 0.269444517 | 0.091747781 | 0.371602201 | 0.379085745 |
| 0.155428648 | 0.357837959 | 0.097040169 | 0.063131169 |
| 0.077908968 | 0.155350733 | 0.14433568  | 0.320234349 |
| 0.117323615 | 0.113828101 | 0.210569428 | 0.102894008 |
| 0.331146454 | 0.323551456 | 0.184346972 | 0.162964898 |
| 0.205045447 | 0.147081102 | 0.413974291 | 0.069043811 |
| 0.230080662 | 0.120938066 | 0.204751484 | 0.171826222 |
| 0.159665932 | 0.424976007 | 0.057120723 | 0.43147849  |

|             |             |             |             |
|-------------|-------------|-------------|-------------|
| 0.185418057 | 0.139689393 | 0.443350368 | 0.184173325 |
| 0.128333918 | 0.1031697   | 0.119868009 | 0.15040549  |
| 0.174637419 | 0.159614396 | 0.008367877 | 0.059995061 |
| 0.294224901 | 0.181183416 | 0.309488806 | 0.339920562 |
| 0.166287466 | 0.351641557 | 0.116553424 | 0.166133045 |
| 0.367686837 | 0.402761252 | 0.128275942 | 0.261371861 |
| 0.314059205 | 0.081270562 | 0.209852155 | 0.021683419 |
| 0.265326279 | 0.245790913 | 0.151777432 | 0.061651352 |
| 0.024654935 | 0.123343094 | 0.244207498 | 0.074865375 |
| 0.430952706 | 0.102652338 | 0.251879991 | 0.289665322 |
| 0.191742626 | 0.39938023  | 0.122678279 | 0.299319265 |
| 0.057149014 | 0.23420014  | 0.211886679 | 0.219459852 |
| 0.122447959 | 0.167191797 | 0.304772618 | 0.135754726 |
| 0.036724872 | 0.149990834 | 0.004519376 | 0.3541558   |
| 0.370993252 | 0.19430069  | 0.220285959 | 0.124142016 |
| 0.261849801 | 0.358289881 | 0.198150979 | 0.193947968 |
| 0.013456051 | 0.238232024 | 0.179745388 | 0.313110549 |
| 0.08642917  | 0.246521117 | 0.048764433 | 0.229368105 |
| 0.368900061 | 0.160554598 | 0.286663891 | 0.117738042 |
| 0.37875097  | 0.321858614 | 0.128979101 | 0.150977162 |
| 0.273019711 | 0.072109907 | 0.126922179 | 0.456453121 |
| 0.130253835 | 0.132594957 | 0.381447283 | 0.128678882 |
| 0.180272065 | 0.325863267 | 0.240938293 | 0.452934593 |
| 0.093032738 | 0.221710062 | 0.357714813 | 0.393145863 |
| 0.305926511 | 0.153313265 | 0.147955346 | 0.166106396 |
| 0.340805799 | 0.057544235 | 0.168012047 | 0.270964642 |
| 0.13163435  | 0.280953526 | 0.199216412 | 0.155643145 |
| 0.047831482 | 0.145243218 | 0.140771914 | 0.136791775 |
| 0.236856021 | 0.212784944 | 0.165442416 | 0.355830146 |
| 0.086180098 | 0.020730143 | 0.407163486 | 0.017082134 |
| 0.157634835 | 0.258916535 | 0.200471038 | 0.193144826 |
| 0.165285693 | 0.256720827 | 0.164011218 | 0.002357803 |
| 0.372836657 | 0.034314839 | 0.193540421 | 0.140235378 |
| 0.166773629 | 0.048525565 | 0.369463857 | 0.446666988 |
| 0.242215643 | 0.151422332 | 0.133187437 | 0.393643931 |
| 0.103401813 | 0.14480453  | 0.184594626 | 0.243902234 |
| 0.138335459 | 0.13683986  | 0.163078379 | 0.13869574  |
| 0.293144675 | 0.154359735 |             |             |
| RAD54L      | 0.12722347  | 0.443636991 | 0.117013641 |
| 0.217603135 | 0.298388195 | 0.467328646 | 0.084039963 |
| 0.162097475 | 0.366613228 | 0.343308235 | 0.402969957 |
| 0.034720845 | 0.074546405 | 0.455636978 | 0.073477619 |
| 0.384820058 | 0.048730185 | 0.141253558 | 0.079613783 |
| 0.255525555 | 0.270463633 | 0.359934643 | 0.446598103 |
| 0.266833248 | 0.236573808 | 0.398273777 | 0.371486502 |
| 0.516793519 | 0.315700046 | 0.459863289 | 0.277034851 |
| 0.423693381 | 0.315686606 | 0.394782901 | 0.03866859  |
| 0.434675085 | 0.006809845 | 0.456936931 | 0.278974642 |
| 0.1615287   | 0.357185778 | 0.411539408 | 0.288644999 |
| 0.414312884 | 0.075503574 | 0.284336991 | 0.392869168 |
| 0.364602418 | 0.297624666 | 0.119476307 | 0.455009795 |
| 0.367306921 | 0.402226268 | 0.4358467   | 0.004002029 |
| 0.302469347 | 0.084815176 | 0.216424832 | 0.533877415 |
| 0.24971353  | 0.15099834  | 0.284904752 | 0.274061486 |



|             |             |             |             |
|-------------|-------------|-------------|-------------|
| 0.37854504  | 0.359925949 | 0.270159962 | 0.391945412 |
| 0.518610423 | 0.15664591  | 0.432571525 | 0.219600652 |
| 0.416653359 | 0.058246312 | 0.200588539 | 0.128531302 |
| 0.39187679  | 0.227504148 | 0.354355576 | 0.292665536 |
| 0.457797826 | 0.529642069 | 0.266355793 | 0.531714594 |
| 0.072796815 | 0.31730185  | 0.268019741 | 0.306078025 |
| 0.357758725 | 0.102522215 | 0.441250407 | 0.534150155 |
| 0.074685116 | 0.421358999 | 0.405642705 | 0.175002085 |
| 0.447133846 | 0.253663643 | 0.452698055 | 0.173364156 |
| 0.354688815 | 0.329268077 | 0.488320736 | 0.338618588 |
| 0.304294186 | 0.124788222 | 0.526414459 | 0.300946678 |
| 0.336423671 | 0.141595872 | 0.212625515 | 0.443350594 |
| 0.444537337 | 0.509941034 | 0.429296967 | 0.363265973 |
| 0.373904608 | 0.518628806 | 0.445016065 | 0.408945158 |
| 0.19439213  | 0.544615227 | 0.256337624 | 0.060614769 |
| 0.126271928 | 0.102606871 | 0.199756373 | 0.311404261 |
| 0.469819306 | 0.368996678 | 0.260012569 | 0.246412092 |
| 0.425072099 | 0.519143147 | 0.540473333 | 0.420546669 |
| 0.067640858 | 0.219426634 | 0.387350766 | 0.333227499 |
| 0.385264193 | 0.144092606 | 0.247169148 | 0.539274037 |
| 0.400332537 | 0.427959272 | 0.236653906 | 0.525407686 |
| 0.215722035 | 0.522538355 | 0.478557889 | 0.218873096 |
| 0.543141825 | 0.534110165 | 0.510463291 | 0.396839152 |
| 0.504143124 | 0.431760942 | 0.057121842 | 0.385061394 |
| 0.483798635 | 0.017061309 | 0.466019596 | 0.49282572  |
| 0.527894495 | 0.454254184 | 0.509129037 | 0.512296156 |
| 0.531906408 | 0.112193242 | 0.02346579  | 0.282199594 |
| 0.537949563 | 0.420673245 | 0.132891505 | 0.42604505  |
| 0.345564258 | 0.459852966 | 0.422732342 | 0.359877739 |
| 0.509415221 | 0.450659926 | 0.49271315  | 0.411614874 |
| 0.332391138 | 0.334546553 | 0.365402972 | 0.515977016 |
| 0.068938322 | 0.185452314 | 0.10092084  | 0.309757123 |
| 0.43751404  | 0.198357736 | 0.444248201 | 0.329003433 |
| 0.223235791 | 0.388432356 | 0.332886285 | 0.367833283 |
| 0.099051209 | 0.475660289 | 0.221856516 | 0.231476411 |
| 0.061793856 | 0.181975149 | 0.237642887 | 0.20509569  |
| 0.260239832 | 0.278766416 | 0.448826523 | 0.486130201 |
| 0.334823343 | 0.253418604 | 0.452903663 | 0.473218192 |
| 0.409069271 | 0.387504082 | 0.255476851 | 0.024627311 |
| 0.283322401 | 0.301229805 | 0.168943604 | 0.408709127 |
| 0.209662902 | 0.257379136 | 0.388284487 | 0.392329741 |
| 0.378320802 | 0.190079911 | 0.362758578 | 0.448881778 |
| 0.20862189  | 0.33518124  | 0.432673508 | 0.427959484 |
| 0.00933768  | 0.385452748 | 0.457041348 | 0.128344342 |
| 0.338417111 | 0.140512178 | 0.280483863 | 0.452504867 |
| 0.277858302 | 0.198665889 | 0.490947002 | 0.379513467 |
| 0.384543536 | 0.259538437 | 0.520020115 | 0.040824477 |
| 0.319790977 | 0.06682903  | 0.295924158 | 0.380167487 |
| 0.298979667 | 0.291693076 | 0.301059877 | 0.28408019  |
| 0.208740687 | 0.533185217 | 0.409992464 | 0.520248346 |
| 0.374571465 | 0.525214845 | 0.451601533 | 0.437181292 |
| 0.397349205 | 0.34752996  | 0.127812575 | 0.457313083 |
| 0.443830843 | 0.305441671 | 0.12741115  | 0.435206275 |
| 0.367543192 | 0.393359575 | 0.106805853 | 0.49419435  |

|             |             |             |             |
|-------------|-------------|-------------|-------------|
| 0.509394875 | 0.510082165 | 0.164475657 | 0.356511051 |
| 0.414456735 | 0.308823637 | 0.409801744 | 0.519942481 |
| 0.335591539 | 0.342955261 | 0.335131919 | 0.375601277 |
| 0.232672354 | 0.189500542 | 0.322281003 | 0.161788009 |
| 0.016479898 | 0.126808949 | 0.113733816 | 0.176178173 |
| 0.155915462 | 0.430552716 | 0.395113656 | 0.525861119 |
| 0.152227484 | 0.424088456 | 0.256581468 | 0.318252003 |
| 0.436583401 | 0.330078612 | 0.376364419 | 0.380649996 |
| 0.273399543 | 0.033018541 | 0.159157514 | 0.537009968 |
| 0.078041929 | 0.239405321 | 0.347370039 | 0.005299329 |
| 0.077585208 | 0.434710454 | 0.141604696 | 0.221007921 |
| 0.451775972 | 0.234009936 | 0.271603163 | 0.357588846 |
| 0.360435202 | 0.134302073 | 0.006018816 | 0.482515697 |
| 0.483509226 | 0.448263732 | 0.484640188 | 0.471141664 |
| 0.415173749 | 0.402832043 | 0.405020266 | 0.449395455 |
| 0.14267922  | 0.143460527 | 0.201955489 | 0.300261026 |
| 0.008583078 | 0.39113111  | 0.292011265 | 0.187814385 |
| 0.415559757 | 0.312103914 | 0.066680674 | 0.332559213 |
| 0.054785106 | 0.211444495 | 0.336107225 | 0.21897668  |
| 0.325077112 | 0.031493096 | 0.337854749 | 0.325124095 |
| 0.476808144 | 0.379209106 | 0.359689796 | 0.547737136 |
| 0.367385851 | 0.195295776 | 0.329557665 | 0.401267308 |
| 0.102382268 | 0.119132393 | 0.385925001 | 0.075447555 |
| 0.254400813 | 0.455409401 | 0.371863033 | 0.123914243 |
| 0.319598863 | 0.014160716 | 0.404541762 | 0.542509962 |
| 0.508042122 | 0.514036751 | 0.519300856 | 0.276287311 |
| 0.528719816 | 0.097039702 | 0.539498384 | 0.437037437 |
| 0.411757858 | 0.00308181  | 0.007887617 | 0.481373238 |
| 0.407828268 | 0.107363927 | 0.203695388 | 0.468898221 |
| 0.145749472 | 0.228781079 | 0.09283912  | 0.173409036 |
| 0.46328671  | 0.237582735 | 0.155848866 | 0.498681099 |
| 0.264729162 | 0.244309435 | 0.432950042 | 0.132360508 |
| 0.412580313 | 0.084072651 | 0.125501483 | 0.01336168  |
| 0.353599085 | 0.169560577 | 0.509027696 | 0.528171697 |
| 0.501468518 | 0.390188304 | 0.37999356  | 0.387028477 |
| 0.403424615 | 0.170101567 | 0.385131947 | 0.181932419 |
| 0.51984015  | 0.398442212 | 0.353570365 | 0.357749241 |
| 0.49786759  | 0.488059489 | 0.053831665 | 0.41152496  |
| 0.034054701 | 0.001634239 | 0.468997648 | 0.279452321 |
| 0.045575622 | 0.362103953 | 0.293465112 | 0.230140244 |
| 0.221222473 | 0.064718567 | 0.244532263 | 0.222845923 |
| 0.315529779 | 0.364752986 | 0.262189188 | 0.262910763 |
| 0.249417886 | 0.120199222 | 0.216728862 | 0.168431331 |
| 0.230159091 | 0.347096257 | 0.242580337 | 0.036027524 |
| 0.45355014  | 0.423324048 | 0.09309062  | 0.208413173 |
| 0.448806094 | 0.492756309 | 0.056332938 | 0.020228457 |
| 0.30601784  | 0.30075679  | 0.489732996 | 0.524803558 |
| 0.550727797 | 0.51802728  | 0.408816158 | 0.121197481 |
| 0.105735446 | 0.320299571 | 0.27387499  | 0.094785178 |
| 0.522427432 | 0.114882804 | 0.510776632 | 0.281601179 |
| 0.152216368 | 0.26335055  | 0.054161588 | 0.113151983 |
| 0.380338309 | 0.213430397 | 0.18920575  | 0.228711163 |
| 0.324142823 | 0.242626621 | 0.071798115 | 0.233735824 |
| 0.374733835 | 0.170587405 | 0.199453142 | 0.342532108 |

|             |             |             |             |
|-------------|-------------|-------------|-------------|
| 0.389888484 | 0.241529355 | 0.426583211 | 0.44860157  |
| 0.186322479 | 0.150806604 | 0.397941082 | 0.376347132 |
| 0.455605091 | 0.408525631 | 0.059740409 | 0.479501474 |
| 0.48148083  | 0.460139713 | 0.530106842 | 0.365257007 |
| 0.123835151 | 0.396183938 | 0.28263712  | 0.333410938 |
| 0.209208693 | 0.463713748 | 0.242821135 | 0.096613126 |
| 0.297194106 | 0.490214054 | 0.425931946 | 0.201039574 |
| 0.437267095 | 0.193080352 | 0.104376505 | 0.432255603 |
| 0.169421239 | 0.142973012 | 0.420492234 | 0.416320826 |
| 0.002719157 | 0.125976086 | 0.464810612 | 0.283780276 |
| 0.514499906 | 0.473189713 | 0.453387244 | 0.284916324 |
| 0.000936927 | 0.396224975 | 0.408658693 | 0.434403534 |
| 0.446224017 | 0.389817318 | 0.165864986 | 0.097427452 |
| 0.30364811  | 0.143719688 | 0.154459949 | 0.429028735 |
| 0.165233439 | 0.443954038 | 0.219372151 | 0.229762095 |
| 0.198253485 | 0.137416873 | 0.240326327 | 0.294351405 |
| 0.114844255 | 0.266618413 | 0.364745246 | 0.34469604  |
| 0.209811541 | 0.40306014  | 0.427220405 | 0.052298118 |
| 0.340574341 | 0.39186366  | 0.414775518 | 0.004004608 |
| 0.437976025 | 0.014063598 | 0.20291228  | 0.240737605 |
| 0.212122974 | 0.209945088 | 0.250574377 | 0.304183901 |
| 0.37216139  | 0.247284149 | 0.32762003  | 0.268186383 |
| 0.187849367 | 0.253522693 | 0.387895114 | 0.393740208 |
| 0.307054579 | 0.179943756 | 0.144795285 | 0.144968002 |
| 0.084366199 | 0.467303216 | 0.279983097 | 0.130254608 |
| 0.241712852 | 0.372818828 | 0.346727322 | 0.525360766 |
| 0.4001207   | 0.175098712 | 0.328043436 | 1           |
| 0.244835029 | 0.361851054 | 0.106514385 | 0.431513878 |
| 0.271607759 | 0.222266577 | 0.435219567 | 0.394284196 |
| 0.419839815 | 0.417039186 | 0.280678741 | 0.43542897  |
| 0.386609634 | 0.328603518 | 0.399972777 | 0.109312077 |
| 0.239791112 | 0.174743837 | 0.252968386 | 0.005963639 |
| 0.377022669 | 0.37188494  | 0.465852105 | 0.524725781 |
| 0.274212279 | 0.374521261 | 0.431731601 | 0.138614109 |
| 0.36808992  | 0.230380197 | 0.183817093 | 0.443354782 |
| 0.217108777 | 0.229464543 | 0.298570633 | 0.442404559 |
| 0.429407758 | 0.411611179 | 0.228587487 | 0.271317446 |
| 0.245249857 | 0.265599999 | 0.485353077 | 0.188351037 |
| 0.442634346 | 0.186663608 | 0.401749563 | 0.312392108 |
| 0.220779124 | 0.517400858 | 0.098427538 | 0.527412422 |
| 0.324831868 | 0.179851892 | 0.498075624 | 0.339415785 |
| 0.343154898 | 0.135104291 | 0.17810111  | 0.415696393 |
| 0.23746506  | 0.336216417 | 0.020206504 | 0.062169517 |
| 0.340107756 | 0.291150483 | 0.424272049 | 0.355464402 |
| 0.225932496 | 0.324273883 | 0.151969671 | 0.326886296 |
| 0.520244047 | 0.530212464 | 0.30320697  | 0.263358362 |
| 0.365665246 | 0.139036078 | 0.469768217 | 0.012648516 |
| 0.427406781 | 0.42313262  | 0.399112218 | 0.074304688 |
| 0.031698126 | 0.205644542 | 0.429195251 | 0.106202593 |
| 0.456934497 | 0.219521492 | 0.370316972 | 0.453758907 |
| 0.211104692 | 0.533446773 | 0.127294249 | 0.424813917 |
| 0.066360427 | 0.27760067  | 0.360628762 | 0.366923324 |
| 0.253219439 | 0.278589242 | 0.388368558 | 0.231830268 |
| 0.051119782 | 0.273613667 | 0.002141548 | 0.434971423 |

|             |             |             |             |
|-------------|-------------|-------------|-------------|
| 0.508372386 | 0.318653562 | 0.236153365 | 0.324378539 |
| 0.289555885 | 0.372508323 | 0.22871265  | 0.426761732 |
| 0.02091519  | 0.367869678 | 0.224416794 | 0.449134446 |
| 0.279529559 | 0.359940994 | 0.084158311 | 0.280863317 |
| 0.501320058 | 0.285906324 | 0.266943168 | 0.338942966 |
| 0.517987796 | 0.399744225 | 0.231927997 | 0.211796492 |
| 0.391226092 | 0.104000903 | 0.44049014  | 0.530239295 |
| 0.194411338 | 0.208030812 | 0.428751955 | 0.233101328 |
| 0.288372676 | 0.398244002 | 0.41131683  | 0.519060077 |
| 0.075316977 | 0.276735885 | 0.414479725 | 0.459895219 |
| 0.304911616 | 0.146393028 | 0.239539049 | 0.22602218  |
| 0.502939138 | 0.156790873 | 0.229218137 | 0.394931827 |
| 0.20769518  | 0.318746818 | 0.376377111 | 0.178685974 |
| 0.056086369 | 0.179124356 | 0.427094522 | 0.183202731 |
| 0.310180913 | 0.367868562 | 0.222632668 | 0.386157635 |
| 0.174797682 | 0.045962804 | 0.450927867 | 0.016283156 |
| 0.431542667 | 0.416224975 | 0.27226196  | 0.344860578 |
| 0.24484348  | 0.376089688 | 0.401582772 | 0.003249944 |
| 0.401164596 | 0.051212702 | 0.288713351 | 0.239850878 |
| 0.277453894 | 0.084006562 | 0.480644191 | 0.503627893 |
| 0.353609142 | 0.336382901 | 0.363658148 | 0.473249259 |
| 0.139101606 | 0.328108145 | 0.319143794 | 0.45645016  |
| 0.209944589 | 0.423158221 | 0.419423117 | 0.396137147 |
| 0.419550016 | 0.30669819  |             |             |
| RASA1       | 0.007821157 | 0.269707874 | 0.005964577 |
| 0.003106335 | 0.112317918 | 0.077878622 | 0.006494282 |
| 0.015713867 | 0.226518366 | 0.167377509 | 0.092288746 |
| 0.000398238 | 0.014702495 | 0.268235513 | 0.005360173 |
| 0.188123557 | 0.001461076 | 0.0188569   | 0.006306513 |
| 0.005818863 | 0.098375828 | 0.05570772  | 0.141263044 |
| 0.098952203 | 0.059884342 | 0.135896249 | 0.265488758 |
| 0.303705705 | 0.054547281 | 0.198546365 | 0.009907929 |
| 0.19662129  | 0.134916066 | 0.179388759 | 9.36E-05    |
| 0.151592332 | 0.002513843 | 0.223069118 | 0.04664385  |
| 0.003820998 | 0.142787216 | 0.17186947  | 0.032351829 |
| 0.192954503 | 0.002118353 | 0.053253635 | 0.295450634 |
| 0.153953725 | 0.053145888 | 0.011698179 | 0.206450925 |
| 0.129236648 | 0.120451409 | 0.294883735 | 0.000629246 |
| 0.127372108 | 0.04461925  | 0.123741394 | 0.275355813 |
| 0.045926839 | 0.016304222 | 0.123158279 | 0.075298297 |
| 0.264232703 | 0.230179372 | 0.081751932 | 0.154145309 |
| 0.275859049 | 0.062323194 | 0.30778638  | 0.002746389 |
| 0.114654559 | 0.004249667 | 0.039381263 | 0.024852542 |
| 0.107158981 | 0.036785933 | 0.105153309 | 0.10991874  |
| 0.287765444 | 0.276453359 | 0.070377378 | 0.289850913 |
| 0.015879078 | 0.18989211  | 0.053039351 | 0.115667873 |
| 0.222591121 | 0.014127961 | 0.174587244 | 0.281307313 |
| 0.008262927 | 0.285940447 | 0.25469149  | 0.040948065 |
| 0.228580159 | 0.106149159 | 0.220732198 | 0.038779489 |
| 0.194002304 | 0.163622698 | 0.281372701 | 0.094100101 |
| 0.103898485 | 0.014649539 | 0.261122827 | 0.167917529 |
| 0.049127364 | 0.011371553 | 0.043474759 | 0.323467093 |
| 0.175856727 | 0.284691985 | 0.311746016 | 0.210833188 |
| 0.186725544 | 0.271395525 | 0.161559709 | 0.246098479 |

|             |             |             |             |
|-------------|-------------|-------------|-------------|
| 0.029716172 | 0.308274115 | 0.029941355 | 0.001893245 |
| 0.012336107 | 0.007582467 | 0.068433627 | 0.116166104 |
| 0.267555111 | 0.135608556 | 0.034102797 | 0.05152464  |
| 0.289805124 | 0.269894609 | 0.327065706 | 0.249852837 |
| 0.002908059 | 0.099883152 | 0.174402292 | 0.043842166 |
| 0.204345502 | 0.026749756 | 0.09896238  | 0.268470225 |
| 0.15623381  | 0.254988378 | 0.025833748 | 0.254251545 |
| 0.057866205 | 0.259688997 | 0.280915383 | 0.025934499 |
| 0.268845795 | 0.249049857 | 0.2751488   | 0.219712893 |
| 0.228994065 | 0.072584647 | 0.008395186 | 0.22190974  |
| 0.24105892  | 0.000436041 | 0.33013102  | 0.334053958 |
| 0.290375108 | 0.30661449  | 0.308889314 | 0.304179679 |
| 0.300971125 | 0.014105243 | 0.008230901 | 0.114569186 |
| 0.282166829 | 0.167182804 | 0.0182791   | 0.227894291 |
| 0.17649174  | 0.11096643  | 0.284777491 | 0.014906539 |
| 0.264945575 | 0.253237956 | 0.332526801 | 0.241824266 |
| 0.15826212  | 0.12766218  | 0.253493801 | 0.237308379 |
| 0.001384409 | 0.015135279 | 0.009305942 | 0.138969958 |
| 0.072491819 | 0.03423441  | 0.113893996 | 0.196847799 |
| 0.044397464 | 0.116859527 | 0.157396889 | 0.212672851 |
| 0.01496536  | 0.20739789  | 0.02642801  | 0.047029623 |
| 0.00169435  | 0.043788264 | 0.010922958 | 0.008251311 |
| 0.067183404 | 0.097094695 | 0.291454554 | 0.295231322 |
| 0.134828202 | 0.047366386 | 0.226580805 | 0.243834926 |
| 0.197078605 | 0.154238748 | 0.081777219 | 0.00069286  |
| 0.040129605 | 0.188290575 | 0.095191718 | 0.234507582 |
| 0.062288863 | 0.041271173 | 0.207198937 | 0.191501823 |
| 0.070286622 | 0.036685724 | 0.136663611 | 0.190688668 |
| 0.04928092  | 0.051227983 | 0.256845455 | 0.245503497 |
| 0.000574412 | 0.088175533 | 0.248727587 | 0.013694058 |
| 0.163133841 | 0.004171227 | 0.04154315  | 0.273338937 |
| 0.096381692 | 0.077579099 | 0.305252846 | 0.195479071 |
| 0.023547589 | 0.105640801 | 0.308905151 | 0.019510839 |
| 0.191640484 | 0.000616933 | 0.090412452 | 0.216869233 |
| 0.062754373 | 0.128715415 | 0.135822352 | 0.055131344 |
| 0.029958184 | 0.30075947  | 0.190714407 | 0.293227673 |
| 0.136896536 | 0.304741508 | 0.277204427 | 0.220223697 |
| 0.122690617 | 0.261260228 | 0.040046194 | 0.238531046 |
| 0.26578463  | 0.023332754 | 0.018310509 | 0.347364182 |
| 0.215657172 | 0.260152765 | 0.003573608 | 0.265081188 |
| 0.237846452 | 0.27914157  | 0.017283176 | 0.188260877 |
| 0.156589808 | 0.043772077 | 0.225495955 | 0.305582901 |
| 0.125073661 | 0.173695073 | 0.09389788  | 0.198395184 |
| 0.037770477 | 0.047790728 | 0.147571985 | 0.071218089 |
| 0.000645946 | 0.017439006 | 0.010389509 | 0.023524347 |
| 0.035663946 | 0.310929507 | 0.200979007 | 0.314382224 |
| 0.017941224 | 0.195290664 | 0.103800473 | 0.052716767 |
| 0.241462933 | 0.162072409 | 0.172741262 | 0.199053903 |
| 0.086881981 | 0.000436133 | 0.002548062 | 0.272351846 |
| 0.009336053 | 0.057668858 | 0.110120901 | 3.52E-06    |
| 0.00448923  | 0.32202546  | 0.028511852 | 0.062192445 |
| 0.281398161 | 0.064516965 | 0.06164504  | 0.15158562  |
| 0.126219127 | 0.012367074 | 0.002447003 | 0.307925277 |
| 0.31185143  | 0.297278413 | 0.321617615 | 0.272568867 |

|             |             |             |             |
|-------------|-------------|-------------|-------------|
| 0.307809966 | 0.238292166 | 0.237372252 | 0.104085618 |
| 0.010003035 | 0.013507935 | 0.047993901 | 0.078625428 |
| 0.000197249 | 0.153378344 | 0.112841478 | 0.03036179  |
| 0.274420212 | 0.143100875 | 0.002051245 | 0.186058287 |
| 0.000109464 | 0.075008075 | 0.068779187 | 0.056044406 |
| 0.178644996 | 0.000137867 | 0.005134355 | 0.082381206 |
| 0.210258132 | 0.147758424 | 0.136083423 | 0.294789466 |
| 0.083905286 | 0.044937988 | 0.071572013 | 0.181450406 |
| 0.006684217 | 0.054150846 | 0.12366911  | 0.001706313 |
| 0.008714709 | 0.264972846 | 0.162713701 | 0.002059206 |
| 0.070238923 | 0.000791453 | 0.155965026 | 0.295116381 |
| 0.266529145 | 0.314635067 | 0.264510862 | 0.083739423 |
| 0.270500675 | 0.052750987 | 0.316138461 | 0.215418604 |
| 0.190540942 | 7.39E-05    | 0.00048384  | 0.298135391 |
| 0.167353211 | 0.015521137 | 0.032376304 | 0.03341319  |
| 0.005181311 | 0.026095266 | 0.00644296  | 0.029800533 |
| 0.176407349 | 0.063035938 | 0.038545908 | 0.287407827 |
| 0.051971799 | 0.059293939 | 0.156312922 | 0.022345206 |
| 0.179760274 | 0.001985867 | 0.024340152 | 0.000457643 |
| 0.172829364 | 0.038184956 | 0.248464804 | 0.296447302 |
| 0.251283457 | 0.183138061 | 0.193449854 | 0.025564427 |
| 0.278695908 | 0.028334996 | 0.070118602 | 0.026864105 |
| 0.281878138 | 0.190384577 | 0.112710902 | 0.108160561 |
| 0.279368126 | 0.245283521 | 0.002302388 | 0.22376244  |
| 0.000140184 | 0.000289691 | 0.11279146  | 0.108458998 |
| 0.007825381 | 0.160348411 | 0.080176528 | 0.069389737 |
| 0.045425467 | 0.000412292 | 0.106026646 | 0.1021587   |
| 0.096058768 | 0.134717805 | 0.10092218  | 0.110744631 |
| 0.061270162 | 0.009890789 | 0.02558593  | 0.027039482 |
| 0.02169713  | 0.136709739 | 0.063072034 | 0.000985306 |
| 0.19059662  | 0.20320998  | 0.005255382 | 0.036501904 |
| 0.218566164 | 0.291748371 | 0.001297096 | 0.000290596 |
| 0.093218732 | 0.133918674 | 0.304136809 | 0.301523236 |
| 0.282254017 | 0.280044581 | 0.174574075 | 0.016229072 |
| 0.005390337 | 0.102925561 | 0.129526085 | 0.005419637 |
| 0.298436362 | 0.01883801  | 0.26123006  | 0.151502087 |
| 0.026894557 | 0.025766433 | 0.000542068 | 0.013048835 |
| 0.204087375 | 0.042159981 | 0.030375817 | 0.037778681 |
| 0.084976748 | 0.048140284 | 0.004908387 | 0.04253577  |
| 0.167368216 | 0.030263265 | 0.038484623 | 0.073076572 |
| 0.165268965 | 0.068519966 | 0.2709968   | 0.212905451 |
| 0.027264975 | 0.02538023  | 0.036058136 | 0.227245981 |
| 0.288745214 | 0.282972908 | 0.000133667 | 0.304023567 |
| 0.286799076 | 0.245699432 | 0.265387189 | 0.209585421 |
| 0.018846682 | 0.133771483 | 0.170340932 | 0.15820662  |
| 0.052383421 | 0.088812648 | 0.07483575  | 0.010056264 |
| 0.128766835 | 0.254104621 | 0.241007774 | 0.020625784 |
| 0.208438532 | 0.039683763 | 0.015393125 | 0.284281267 |
| 0.034232449 | 0.004325206 | 0.185393461 | 0.317756729 |
| 0.00055903  | 0.045045063 | 0.308672664 | 0.028275222 |
| 0.287240356 | 0.275556237 | 0.199307684 | 0.045513764 |
| 0.001959864 | 0.267829511 | 0.130477308 | 0.1010397   |
| 0.273313574 | 0.142660531 | 0.008973836 | 0.003696755 |
| 0.092635699 | 0.019999098 | 0.012760897 | 0.012074796 |

|             |             |             |             |
|-------------|-------------|-------------|-------------|
| 0.010973503 | 0.215320348 | 0.05487451  | 0.069003725 |
| 0.038574917 | 0.038274073 | 0.030406696 | 0.034492422 |
| 0.026819358 | 0.069949268 | 0.141242828 | 0.136051598 |
| 0.032969777 | 0.281057503 | 0.237105965 | 0.000976499 |
| 0.174751807 | 0.241997858 | 0.231799271 | 1.60E-05    |
| 0.235692721 | 0.000314144 | 0.041032515 | 0.033428218 |
| 0.030527347 | 0.054251982 | 0.0857974   | 0.052861397 |
| 0.192263083 | 0.045193376 | 0.040948448 | 0.05528099  |
| 0.013930389 | 0.047793357 | 0.177397197 | 0.108281945 |
| 0.046848198 | 0.011165609 | 0.029021857 | 0.031436695 |
| 0.000989139 | 0.28355361  | 0.078439101 | 0.015570247 |
| 0.062164264 | 0.127492599 | 0.137458621 | 0.300489994 |
| 0.192058163 | 0.036428016 | 0.106008173 | 0.244835029 |
| 1           | 0.010452694 | 0.008422435 | 0.130412114 |
| 0.054365361 | 0.029078443 | 0.169431301 | 0.118504451 |
| 0.296582547 | 0.163941188 | 0.075023805 | 0.207250803 |
| 0.091440125 | 0.201895381 | 0.147684476 | 0.003413104 |
| 0.02641317  | 0.036621135 | 0.086603415 | 0.001138258 |
| 0.126902722 | 0.017172193 | 0.282626215 | 0.255772084 |
| 0.141852695 | 0.162928068 | 0.03414603  | 0.006848838 |
| 0.062204026 | 0.071930631 | 0.034559958 | 0.275501554 |
| 0.094002559 | 0.020033627 | 0.098240873 | 0.055165255 |
| 0.256755091 | 0.29393064  | 0.060764013 | 0.069585327 |
| 0.073501664 | 0.049338321 | 0.275886125 | 0.01719764  |
| 0.25910626  | 0.024735019 | 0.239852093 | 0.07447401  |
| 0.049811575 | 0.316895991 | 0.00794107  | 0.331633996 |
| 0.124682568 | 0.036541887 | 0.237449439 | 0.085510437 |
| 0.031925571 | 0.004369854 | 0.073926508 | 0.152984763 |
| 0.032872202 | 0.110173395 | 0.003812954 | 0.006175308 |
| 0.118543084 | 0.141997163 | 0.315259218 | 0.200665555 |
| 0.059604862 | 0.158177954 | 0.028969535 | 0.108723688 |
| 0.284466373 | 0.267212048 | 0.021158741 | 0.086753663 |
| 0.158589779 | 0.008979525 | 0.164251666 | 0.010988548 |
| 0.247629899 | 0.280828796 | 0.125260198 | 0.00440397  |
| 0.000247176 | 0.086756451 | 0.232441549 | 0.02028554  |
| 0.299306229 | 0.034117888 | 0.236302783 | 0.219628873 |
| 0.06183758  | 0.264973613 | 0.012214088 | 0.17939394  |
| 0.003543437 | 0.080140974 | 0.174641972 | 0.220636348 |
| 0.023868951 | 0.099098418 | 0.158136695 | 0.064663891 |
| 0.00126193  | 0.023914904 | 4.65E-05    | 0.172013303 |
| 0.261183376 | 0.172413302 | 0.068281692 | 0.165293813 |
| 0.084695365 | 0.194144254 | 0.032065461 | 0.216728701 |
| 0.000471958 | 0.165713794 | 0.045016913 | 0.187214653 |
| 0.043974484 | 0.221625694 | 0.000914345 | 0.167268737 |
| 0.229513603 | 0.046091407 | 0.106190063 | 0.066823242 |
| 0.280795442 | 0.217204167 | 0.050105838 | 0.021547658 |
| 0.304217412 | 0.013262147 | 0.153937616 | 0.309065046 |
| 0.026333901 | 0.05836782  | 0.253771381 | 0.030209271 |
| 0.146907832 | 0.197828071 | 0.281179128 | 0.3195566   |
| 0.006123099 | 0.070460528 | 0.2463901   | 0.293508286 |
| 0.11013278  | 0.046628406 | 0.069266806 | 0.053822817 |
| 0.242173248 | 0.002147099 | 0.078022776 | 0.145986398 |
| 0.078903202 | 0.106946888 | 0.220109082 | 0.042794795 |
| 0.00025182  | 0.02794515  | 0.056207574 | 0.029975941 |

|             |             |             |             |
|-------------|-------------|-------------|-------------|
| 0.099008864 | 0.114159871 | 0.04369996  | 0.159833527 |
| 0.004769156 | 7.18E-06    | 0.212479848 | 0.002457297 |
| 0.085932217 | 0.1430403   | 0.058176181 | 0.123262153 |
| 0.049317374 | 0.158943916 | 0.138223189 | 0.000148864 |
| 0.221215829 | 0.000645027 | 0.082552205 | 0.029501268 |
| 0.028859326 | 0.004964727 | 0.217737617 | 0.300790448 |
| 0.105343628 | 0.031690471 | 0.078227823 | 0.253767254 |
| 0.00855042  | 0.172483875 | 0.150759151 | 0.234843504 |
| 0.074817821 | 0.225466617 | 0.195808196 | 0.123017731 |
| 0.150349043 | 0.054251844 |             |             |
| RASGEF1B    | 0.045782964 | 0.334937127 | 0.038002819 |
| 0.015347809 | 0.15133097  | 0.149300633 | 0.020410749 |
| 0.046431737 | 0.243727065 | 0.073147302 | 0.190751715 |
| 0.006003027 | 0.007863776 | 0.38458158  | 0.017747359 |
| 0.192766028 | 0.011385665 | 0.054259444 | 0.002964918 |
| 0.007945718 | 0.124337721 | 0.077809589 | 0.194543395 |
| 0.111326607 | 0.167541136 | 0.176905928 | 0.175906424 |
| 0.398883078 | 0.040972199 | 0.279105372 | 0.008097827 |
| 0.327626164 | 0.165273023 | 0.160362721 | 0.005788399 |
| 0.19502732  | 0.000291362 | 0.342216107 | 0.083135085 |
| 0.00637062  | 0.285655897 | 0.142598843 | 0.090960802 |
| 0.148397726 | 0.018628961 | 0.026364746 | 0.231766571 |
| 0.169924805 | 0.079600095 | 0.045590896 | 0.264895882 |
| 0.102447679 | 0.264421845 | 0.272634562 | 0.000650481 |
| 0.11660195  | 0.014349736 | 0.06314732  | 0.413852977 |
| 0.146175459 | 0.060945574 | 0.035725785 | 0.097078726 |
| 0.196750804 | 0.218737348 | 0.156220945 | 0.097346617 |
| 0.40703269  | 0.032399485 | 0.287357351 | 0.005880969 |
| 0.133867475 | 0.014269537 | 0.117030985 | 0.055921815 |
| 0.097557291 | 0.105166704 | 0.175533721 | 0.092655135 |
| 0.33795552  | 0.418228371 | 0.134378006 | 0.403568624 |
| 0.005432915 | 0.164395759 | 0.068510429 | 0.185996024 |
| 0.219566923 | 0.021283572 | 0.290835554 | 0.41493346  |
| 0.021919909 | 0.21011482  | 0.257154566 | 0.095521597 |
| 0.344589321 | 0.055369055 | 0.185016467 | 0.049653237 |
| 0.214607298 | 0.15256064  | 0.370916942 | 0.205530468 |
| 0.128656805 | 0.051345679 | 0.39596578  | 0.158249274 |
| 0.111761    | 0.056271452 | 0.039536007 | 0.350198526 |
| 0.238101369 | 0.407012041 | 0.31206402  | 0.241963653 |
| 0.180257515 | 0.401300514 | 0.268116141 | 0.329466397 |
| 0.00691332  | 0.419990048 | 0.105368214 | 0.014985174 |
| 0.043785917 | 0.032976377 | 0.039663097 | 0.218620888 |
| 0.372171871 | 0.22400487  | 0.100368384 | 0.095345155 |
| 0.336419724 | 0.395543018 | 0.416563537 | 0.324585553 |
| 0.020593559 | 0.048116992 | 0.178013804 | 0.088377621 |
| 0.237846046 | 0.069204767 | 0.101184676 | 0.410141849 |
| 0.320975903 | 0.305355652 | 0.074137895 | 0.403936391 |
| 0.076605824 | 0.414192176 | 0.366355421 | 0.088146785 |
| 0.41331388  | 0.405697443 | 0.402568063 | 0.262601899 |
| 0.397788491 | 0.168881576 | 0.001630622 | 0.268297214 |
| 0.395071218 | 0.001141871 | 0.376776924 | 0.393191941 |
| 0.402816295 | 0.35128405  | 0.405006613 | 0.411318607 |
| 0.41783712  | 0.052427212 | 0.000409896 | 0.160736578 |
| 0.410362108 | 0.312934032 | 0.033236376 | 0.192172531 |



|             |             |             |             |
|-------------|-------------|-------------|-------------|
| 0.185438868 | 0.180393808 | 0.299971795 | 0.019071853 |
| 0.410938267 | 0.355642415 | 0.396681327 | 0.289711997 |
| 0.13593018  | 0.279870029 | 0.182202726 | 0.389606566 |
| 0.012514357 | 0.06209608  | 0.049972197 | 0.19148426  |
| 0.086771285 | 0.097037803 | 0.153748693 | 0.166600931 |
| 0.121503381 | 0.139236183 | 0.119170487 | 0.242772177 |
| 0.055598846 | 0.236558259 | 0.083064442 | 0.092266623 |
| 0.014831524 | 0.12982554  | 0.026901462 | 0.036895237 |
| 0.121872937 | 0.207620425 | 0.295874297 | 0.386338586 |
| 0.113144366 | 0.135249269 | 0.303296639 | 0.389494409 |
| 0.33700485  | 0.188174636 | 0.162548932 | 0.000525182 |
| 0.034727248 | 0.069239755 | 0.047197711 | 0.198293374 |
| 0.155751851 | 0.048940454 | 0.21061665  | 0.273416676 |
| 0.168173293 | 0.062866661 | 0.102154058 | 0.366321469 |
| 0.12093679  | 0.106218713 | 0.356334816 | 0.201428084 |
| 0.000461314 | 0.152796952 | 0.328250196 | 0.014105607 |
| 0.195325716 | 0.004075136 | 0.055648026 | 0.350088192 |
| 0.056251609 | 0.060178983 | 0.396162025 | 0.254141774 |
| 0.029788158 | 0.201603188 | 0.414987538 | 0.002089295 |
| 0.141858516 | 0.002488176 | 0.179603317 | 0.139034764 |
| 0.136549438 | 0.192528909 | 0.156178921 | 0.086691788 |
| 0.114268059 | 0.419312809 | 0.310808761 | 0.41085975  |
| 0.107302463 | 0.410277009 | 0.350445829 | 0.347911102 |
| 0.210918803 | 0.138490568 | 0.024480429 | 0.330920555 |
| 0.335075897 | 0.015700699 | 0.061795783 | 0.31918986  |
| 0.121071959 | 0.259300473 | 0.005792256 | 0.390457874 |
| 0.407078704 | 0.377616366 | 0.054802832 | 0.246727298 |
| 0.300902299 | 0.140635897 | 0.309253261 | 0.416856771 |
| 0.052911995 | 0.14532236  | 0.093012807 | 0.288828941 |
| 0.113671822 | 0.042552142 | 0.250702336 | 0.038007309 |
| 0.000663051 | 0.054152269 | 0.04708815  | 0.067968891 |
| 0.043951389 | 0.24541604  | 0.226980492 | 0.420458359 |
| 0.062727897 | 0.359541743 | 0.147947171 | 0.078933642 |
| 0.342935001 | 0.140350529 | 0.190379707 | 0.23296337  |
| 0.167031893 | 0.000745567 | 0.012694019 | 0.418750989 |
| 0.034581706 | 0.068809673 | 0.152876375 | 6.48E-05    |
| 0.01868387  | 0.313288394 | 0.086729208 | 0.169838985 |
| 0.372141166 | 0.171337414 | 0.139062034 | 0.077354034 |
| 0.243040828 | 0.056134026 | 0.000197576 | 0.369023536 |
| 0.371973856 | 0.342613451 | 0.373468668 | 0.359236841 |
| 0.320224676 | 0.2716325   | 0.276710069 | 0.196569871 |
| 0.036713814 | 0.048061905 | 0.040693248 | 0.109106744 |
| 0.000465796 | 0.280652548 | 0.13449506  | 0.104224053 |
| 0.296860825 | 0.178732676 | 0.01833538  | 0.185068836 |
| 0.003309448 | 0.057603643 | 0.072228396 | 0.082944256 |
| 0.221260604 | 0.006873881 | 0.006732136 | 0.057461512 |
| 0.373372233 | 0.281551788 | 0.114159775 | 0.425484031 |
| 0.172696162 | 0.099377709 | 0.118808415 | 0.283557158 |
| 0.029981449 | 0.004155628 | 0.110701029 | 0.001079263 |
| 0.007909547 | 0.357599496 | 0.119733914 | 0.010632212 |
| 0.150056778 | 0.002027795 | 0.31176348  | 0.431437042 |
| 0.385334612 | 0.40579078  | 0.409640467 | 0.106049295 |
| 0.407838806 | 0.012277801 | 0.422716771 | 0.31454001  |
| 0.120877245 | 6.37E-05    | 0.000276732 | 0.379952155 |

|             |             |             |             |
|-------------|-------------|-------------|-------------|
| 0.196949958 | 0.058476722 | 0.096959254 | 0.071790604 |
| 0.023973947 | 0.068292585 | 0.031841922 | 0.043384547 |
| 0.26290506  | 0.113170393 | 0.043314403 | 0.390740859 |
| 0.09502049  | 0.114113271 | 0.160875904 | 0.071882062 |
| 0.220426963 | 0.015900061 | 0.062626744 | 0.000410248 |
| 0.226382602 | 0.111424131 | 0.386987674 | 0.40732231  |
| 0.39665775  | 0.249638732 | 0.102877218 | 0.038445585 |
| 0.317800783 | 0.086848102 | 0.06322263  | 0.085612049 |
| 0.397572255 | 0.222914758 | 0.244097888 | 0.247352002 |
| 0.396560626 | 0.388952986 | 0.016283096 | 0.27215564  |
| 0.000988051 | 5.98E-05    | 0.17459531  | 0.177034838 |
| 0.001117792 | 0.135893179 | 0.182988278 | 0.053697632 |
| 0.057164943 | 0.005739582 | 0.07232805  | 0.076764453 |
| 0.163386968 | 0.162318359 | 0.120893584 | 0.158940656 |
| 0.076664991 | 0.008909419 | 0.070665975 | 0.054625877 |
| 0.012357275 | 0.232942748 | 0.172536361 | 0.007807243 |
| 0.181312964 | 0.21226129  | 0.034750949 | 0.113973494 |
| 0.349339192 | 0.395141038 | 0.003883328 | 0.001099895 |
| 0.209630824 | 0.116878911 | 0.404589109 | 0.408616476 |
| 0.426153008 | 0.408046123 | 0.326111025 | 0.026770488 |
| 0.03290931  | 0.150014252 | 0.13635122  | 0.014992566 |
| 0.420416193 | 0.049802221 | 0.400455906 | 0.126540517 |
| 0.078060467 | 0.065198541 | 0.008436256 | 0.048540477 |
| 0.210557141 | 0.118377155 | 0.077399794 | 0.105038586 |
| 0.111991881 | 0.049096398 | 0.021911296 | 0.105193417 |
| 0.258444375 | 0.017563761 | 0.103723749 | 0.103671127 |
| 0.254358135 | 0.022436461 | 0.290799024 | 0.355959623 |
| 0.097924775 | 0.056861797 | 0.070782203 | 0.267087303 |
| 0.330403854 | 0.189331699 | 0.002270714 | 0.364703429 |
| 0.399972549 | 0.285668903 | 0.406688672 | 0.302184625 |
| 0.061412265 | 0.180788224 | 0.098162587 | 0.161163713 |
| 0.103647888 | 0.165163505 | 0.106450722 | 0.045024259 |
| 0.229949106 | 0.382365405 | 0.320057284 | 0.075116974 |
| 0.224778512 | 0.092068198 | 0.041899255 | 0.354426092 |
| 0.029364649 | 0.017523392 | 0.137065394 | 0.313121443 |
| 0.000108564 | 0.035418526 | 0.370770975 | 0.082653633 |
| 0.404901014 | 0.369317421 | 0.361779309 | 0.06883797  |
| 3.77E-05    | 0.239843244 | 0.223780119 | 0.140709489 |
| 0.355699769 | 0.27569044  | 0.012536208 | 0.021212229 |
| 0.214339679 | 0.077104701 | 0.025539948 | 0.025043342 |
| 0.002756501 | 0.257244657 | 0.134000485 | 0.097458955 |
| 0.070926058 | 0.067685062 | 0.036472009 | 0.107013046 |
| 0.009703908 | 0.175136382 | 0.259016744 | 0.078044546 |
| 0.025293243 | 0.330019851 | 0.290551112 | 0.01322977  |
| 0.164196531 | 0.28026214  | 0.334360757 | 5.60E-05    |
| 0.289231363 | 0.002362021 | 0.086061597 | 0.092250007 |
| 0.074848199 | 0.079330879 | 0.137504912 | 0.087693684 |
| 0.201456737 | 0.088062134 | 0.114424654 | 0.146575077 |
| 0.053011335 | 0.104811005 | 0.214981351 | 0.126560356 |
| 0.097360712 | 0.051732085 | 0.09624841  | 0.104770002 |
| 0.010205592 | 0.378390932 | 0.209664602 | 0.069512457 |
| 0.131060991 | 0.12492048  | 0.278386707 | 0.399972995 |
| 0.338243248 | 0.106863525 | 0.120039208 | 0.361851054 |
| 0.010452694 | 1           | 0.029630777 | 0.188120095 |

|             |             |             |             |
|-------------|-------------|-------------|-------------|
| 0.138520581 | 0.040961092 | 0.192753717 | 0.179978044 |
| 0.268416227 | 0.326703638 | 0.207546064 | 0.338919818 |
| 0.144939691 | 0.129862012 | 0.102007551 | 0.019277626 |
| 0.080713347 | 0.088540505 | 0.112717819 | 0.000213247 |
| 0.212476785 | 0.049616002 | 0.367244159 | 0.396642145 |
| 0.094035841 | 0.306666493 | 0.033580036 | 0.028204682 |
| 0.047507226 | 0.158500648 | 0.110036486 | 0.301899166 |
| 0.064698128 | 0.069127667 | 0.141662316 | 0.097485796 |
| 0.296849325 | 0.261397412 | 0.060977838 | 0.103154521 |
| 0.106299151 | 0.132761147 | 0.369859296 | 0.06802911  |
| 0.21324833  | 0.044858424 | 0.206584207 | 0.115184442 |
| 0.08578215  | 0.404619427 | 0.044031032 | 0.420813475 |
| 0.121681653 | 0.108744943 | 0.396487482 | 0.146998362 |
| 0.06237773  | 0.018884068 | 0.050378539 | 0.125088733 |
| 0.053030662 | 0.102112969 | 0.001770683 | 0.002988394 |
| 0.218422449 | 0.078979875 | 0.285680948 | 0.221200776 |
| 0.07065177  | 0.230293068 | 0.017539602 | 0.135085458 |
| 0.392393413 | 0.406429953 | 0.04275976  | 0.170343428 |
| 0.24423798  | 0.044666243 | 0.256747259 | 0.000609852 |
| 0.234312503 | 0.227034707 | 0.075203006 | 0.02256819  |
| 0.003356361 | 0.056185881 | 0.221434112 | 0.045780728 |
| 0.365924709 | 0.026636886 | 0.194023418 | 0.299363211 |
| 0.121419446 | 0.409317599 | 0.037629127 | 0.290501421 |
| 0.005614    | 0.156861301 | 0.151476691 | 0.143967522 |
| 0.051899026 | 0.098591209 | 0.254122087 | 0.080933418 |
| 0.013908144 | 0.045247972 | 5.05E-05    | 0.332752106 |
| 0.37459408  | 0.126973434 | 0.162819158 | 0.067101629 |
| 0.180065495 | 0.278498127 | 0.029081394 | 0.178650355 |
| 0.000771849 | 0.197585765 | 0.120555529 | 0.346702567 |
| 0.032170844 | 0.165558245 | 0.00984251  | 0.121181457 |
| 0.379709101 | 0.039186873 | 0.191622232 | 0.043420978 |
| 0.401469975 | 0.292392396 | 0.127516065 | 0.037592747 |
| 0.21912247  | 0.050900912 | 0.135364736 | 0.421097642 |
| 0.076038316 | 0.072585134 | 0.339713255 | 0.06328758  |
| 0.118004109 | 0.313256001 | 0.203288696 | 0.406147331 |
| 0.017805589 | 0.170883187 | 0.289034049 | 0.378007278 |
| 0.222569287 | 0.041957513 | 0.068462894 | 0.073636751 |
| 0.378152946 | 0.01516637  | 0.046468555 | 0.25699271  |
| 0.061899909 | 0.192579103 | 0.182827072 | 0.064973276 |
| 0.002658018 | 0.050467718 | 0.109198564 | 0.091400191 |
| 0.163728655 | 0.146600684 | 0.051061451 | 0.322410294 |
| 0.025006455 | 0.002148603 | 0.364746772 | 0.000947575 |
| 0.201135844 | 0.243173631 | 0.143626725 | 0.14406519  |
| 0.160647346 | 0.198138542 | 0.154244587 | 0.000137131 |
| 0.288832814 | 0.001536482 | 0.090763872 | 0.057502143 |
| 0.025348217 | 0.021511578 | 0.3731236   | 0.401756083 |
| 0.201822364 | 0.025028209 | 0.071538246 | 0.370499279 |
| 0.006399082 | 0.091513259 | 0.091924348 | 0.275591782 |
| 0.070111981 | 0.148939989 | 0.148757466 | 0.129383973 |
| 0.26061347  | 0.110768864 |             |             |
| RASGRP2     | 0.168344557 | 0.121297442 | 0.151673633 |
| 0.047309832 | 0.036120263 | 0.031375221 | 0.136251354 |
| 0.126360921 | 0.120421314 | 0.012666528 | 0.054878262 |
| 0.137303751 | 0.002617418 | 0.134773088 | 0.132738427 |

|             |             |             |             |
|-------------|-------------|-------------|-------------|
| 0.03779062  | 0.124088482 | 0.18178265  | 0.024479109 |
| 0.034949272 | 0.039529512 | 0.01185245  | 0.070798611 |
| 0.035166481 | 0.310180402 | 0.089297491 | 0.024652589 |
| 0.115406745 | 0.004537405 | 0.048699173 | 0.004995142 |
| 0.198680549 | 0.036084222 | 0.015185854 | 0.099790902 |
| 0.046164837 | 0.002115102 | 0.22507666  | 0.039331674 |
| 0.003186426 | 0.228134948 | 0.027907338 | 0.055290624 |
| 0.031329553 | 0.129246682 | 0.005798723 | 0.045419787 |
| 0.07695524  | 0.039390422 | 0.212965459 | 0.061414053 |
| 0.022676211 | 0.140038006 | 0.071875195 | 0.045063339 |
| 0.009148682 | 5.92E-05    | 0.003284023 | 0.155417639 |
| 0.200030173 | 0.141200738 | 0.006340066 | 0.080090564 |
| 0.049086923 | 0.065790313 | 0.139105346 | 0.019531076 |
| 0.143556766 | 0.005498487 | 0.05140539  | 0.027753002 |
| 0.045000125 | 0.149553135 | 0.253483104 | 0.215880582 |
| 0.017714777 | 0.115768318 | 0.046305298 | 0.011081317 |
| 0.122518505 | 0.205327847 | 0.146802122 | 0.175972906 |
| 0.007547461 | 0.027416378 | 0.015934985 | 0.115720398 |
| 0.092143409 | 0.100173235 | 0.081081261 | 0.170146244 |
| 0.150472337 | 0.046232235 | 0.0811949   | 0.274410553 |
| 0.113714735 | 0.008295742 | 0.032229032 | 0.005988521 |
| 0.042340998 | 0.034125919 | 0.191738024 | 0.152215165 |
| 0.032989152 | 0.241560832 | 0.20561301  | 0.023036936 |
| 0.032028273 | 0.192034793 | 0.019325528 | 0.071475657 |
| 0.055951671 | 0.119866464 | 0.097653432 | 0.118200123 |
| 0.030457921 | 0.131891329 | 0.07770277  | 0.136915139 |
| 0.003623415 | 0.149205846 | 0.135951007 | 0.127270349 |
| 0.17521598  | 0.105289657 | 0.019836546 | 0.180593237 |
| 0.091286951 | 0.128291264 | 0.134615827 | 0.068378425 |
| 0.087365051 | 0.180804278 | 0.14646163  | 0.113001342 |
| 0.169351398 | 0.006191948 | 0.027558384 | 0.05507241  |
| 0.089354929 | 0.224513407 | 0.013424197 | 0.203382424 |
| 0.173135251 | 0.076592183 | 0.11850723  | 0.234526455 |
| 0.102511651 | 0.163112755 | 0.102375664 | 0.134833684 |
| 0.181256023 | 0.193838383 | 0.136679064 | 0.041108023 |
| 0.183962788 | 0.06321215  | 0.018852618 | 0.126864496 |
| 0.1580372   | 0.001145584 | 0.089569811 | 0.09789384  |
| 0.145935345 | 0.071397839 | 0.132879542 | 0.114527714 |
| 0.150260358 | 0.251886228 | 0.000965434 | 0.083375321 |
| 0.170459652 | 0.134582906 | 0.066976292 | 0.027192247 |
| 0.043431758 | 0.05332873  | 0.072909106 | 0.014572693 |
| 0.191041289 | 0.09969533  | 0.102072744 | 0.109750018 |
| 0.067662375 | 0.248966035 | 0.019482098 | 0.202868657 |
| 0.117137081 | 0.161150614 | 0.26492722  | 0.140441379 |
| 0.015269925 | 0.144198961 | 0.055832794 | 0.047996982 |
| 0.171092262 | 0.064177255 | 0.009449059 | 0.048280115 |
| 0.324104129 | 0.03871395  | 0.133617234 | 0.169796276 |
| 0.112567961 | 0.345300642 | 0.073611877 | 0.061082776 |
| 0.074122707 | 0.363468073 | 0.056572846 | 0.112498217 |
| 0.029147335 | 0.21955778  | 0.076834475 | 0.15583965  |
| 0.175666966 | 0.025590522 | 0.218872523 | 0.02181263  |
| 0.021160544 | 0.007473278 | 0.003390396 | 0.027125666 |
| 0.348314194 | 0.049282592 | 0.054346905 | 0.057687506 |
| 0.116073519 | 0.136779335 | 0.021058142 | 0.238074669 |

|             |             |             |             |
|-------------|-------------|-------------|-------------|
| 0.253995842 | 0.02748316  | 0.106643547 | 0.046331974 |
| 0.054841966 | 0.074362324 | 0.083767479 | 0.021975837 |
| 0.122838246 | 0.006790368 | 0.005708082 | 0.098601263 |
| 0.011337246 | 0.017340937 | 0.1012493   | 0.057289751 |
| 0.025279698 | 0.316071089 | 0.13848786  | 0.002728943 |
| 0.029552726 | 0.024694046 | 0.111446813 | 0.029203158 |
| 0.128745036 | 0.14607979  | 0.029741265 | 0.022333026 |
| 0.230537602 | 0.158453037 | 0.1308616   | 0.123713019 |
| 0.013247921 | 0.143828882 | 0.083172816 | 0.123087947 |
| 0.091848347 | 0.020593797 | 0.001947356 | 0.085465922 |
| 0.090278939 | 0.017881809 | 0.272775398 | 0.064829755 |
| 0.023595827 | 0.051119035 | 0.026163297 | 0.130413877 |
| 0.206129214 | 0.163277716 | 0.086607225 | 0.081778729 |
| 0.128852661 | 0.129807315 | 0.099472257 | 0.155278897 |
| 0.012018822 | 0.030775131 | 0.017993013 | 0.09387953  |
| 0.191223914 | 0.016719986 | 0.207070595 | 0.002928449 |
| 0.000370792 | 0.227029221 | 0.239454481 | 0.082818241 |
| 0.007264598 | 0.038997569 | 0.05787837  | 0.141429883 |
| 0.180964332 | 0.154077885 | 0.179559674 | 0.02526342  |
| 0.160063309 | 0.03002685  | 0.024198877 | 0.047190819 |
| 0.193997686 | 0.029345927 | 0.05840017  | 0.20991436  |
| 0.260217325 | 0.008551671 | 0.084204686 | 0.004991407 |
| 0.148313823 | 0.086667138 | 0.325853752 | 0.343271119 |
| 0.106351354 | 0.314884722 | 0.188715374 | 0.017793714 |
| 0.100426508 | 0.201524109 | 0.005957665 | 0.115805699 |
| 0.145010945 | 0.143906033 | 0.147526652 | 0.177108737 |
| 0.112517452 | 0.078535644 | 0.07610134  | 0.070448566 |
| 0.121151239 | 0.144513699 | 0.007745496 | 0.055791095 |
| 0.011556441 | 0.097690637 | 0.047347074 | 0.249902983 |
| 0.065309904 | 0.128993745 | 0.144692907 | 0.04115112  |
| 0.078631284 | 0.002857883 | 0.04652183  | 0.080812896 |
| 0.080610102 | 0.111914166 | 0.010229737 | 0.011565739 |
| 0.178017915 | 0.18900761  | 0.010547284 | 0.152840538 |
| 0.070306152 | 0.228098341 | 0.037411698 | 0.07578692  |
| 0.13368243  | 0.010552966 | 0.041993969 | 0.001218249 |
| 0.019313527 | 0.178145621 | 0.021301533 | 0.090817948 |
| 0.112569507 | 0.087359273 | 0.16973223  | 0.160679763 |
| 0.1539725   | 0.119505063 | 0.137643807 | 0.011596316 |
| 0.14462398  | 0.000439046 | 0.13104368  | 0.119145739 |
| 0.017714178 | 0.007833336 | 0.028070333 | 0.091838714 |
| 0.03452101  | 0.282778066 | 0.196210817 | 0.018663077 |
| 0.078401317 | 0.125579575 | 0.150909114 | 0.011028556 |
| 0.052110468 | 0.052157878 | 0.015017286 | 0.174672833 |
| 0.078576914 | 0.1135155   | 0.036352253 | 0.289343537 |
| 0.040979402 | 0.107602533 | 0.266225687 | 0.005528562 |
| 0.072407186 | 0.309096065 | 0.231456842 | 0.141007996 |
| 0.170880301 | 0.055254006 | 0.011118542 | 0.022989507 |
| 0.101547954 | 0.242125661 | 0.010638979 | 0.217694456 |
| 0.139254182 | 0.050883202 | 0.154067192 | 0.190213374 |
| 0.147489159 | 0.163188584 | 0.161829561 | 0.083589543 |
| 0.038751582 | 0.002044074 | 0.051464792 | 0.176627874 |
| 0.007753064 | 0.02591627  | 0.190671175 | 0.042313858 |
| 0.042427449 | 0.124887051 | 0.008140881 | 0.010392429 |
| 0.089722653 | 0.048452406 | 0.026386646 | 0.179384145 |

|             |             |             |             |
|-------------|-------------|-------------|-------------|
| 0.027166535 | 0.016969875 | 0.063698356 | 0.104946468 |
| 0.028655642 | 0.188208079 | 0.307578484 | 0.131788883 |
| 0.028510708 | 0.029944154 | 0.192339911 | 0.238286601 |
| 0.100147621 | 0.104599245 | 0.104897066 | 0.044962765 |
| 0.228704557 | 0.048079269 | 0.113686869 | 0.131896524 |
| 0.185524822 | 0.161973209 | 0.24249231  | 0.059500834 |
| 0.142641533 | 0.061370554 | 0.027804905 | 0.033960765 |
| 0.13847832  | 0.261404779 | 0.152252836 | 0.013496211 |
| 0.247247078 | 0.060003576 | 0.1042839   | 0.206679422 |
| 0.026985852 | 0.211446838 | 0.082707839 | 0.20162211  |
| 0.040446667 | 0.008203921 | 0.168092249 | 0.151999009 |
| 0.144641736 | 0.003117245 | 0.207820454 | 0.0552938   |
| 0.123069454 | 0.012607458 | 0.054960511 | 0.187734826 |
| 0.247343039 | 0.182227402 | 0.043152965 | 0.08827107  |
| 0.076985184 | 0.029821506 | 0.056304476 | 0.120592943 |
| 0.126723939 | 0.046322095 | 0.160475782 | 0.13930388  |
| 0.27297768  | 0.02952548  | 0.014768159 | 0.048200146 |
| 0.178320681 | 0.039637645 | 0.101934594 | 0.26086842  |
| 0.213074341 | 0.21976883  | 0.123740112 | 0.098978421 |
| 0.039731194 | 0.214702111 | 0.241562465 | 0.102680368 |
| 0.006783821 | 0.1223946   | 0.027971181 | 0.077529516 |
| 0.001901536 | 0.002679553 | 0.117217263 | 0.059739876 |
| 0.17364205  | 0.108454428 | 0.172243741 | 0.049689378 |
| 2.02E-05    | 0.040224397 | 0.060778407 | 0.024838356 |
| 0.127310757 | 0.146767679 | 0.043880853 | 0.088350698 |
| 0.177939648 | 0.275881281 | 0.069719328 | 0.02117584  |
| 0.003047043 | 0.075004973 | 0.211785706 | 0.134224407 |
| 0.065414616 | 0.25074104  | 0.006528743 | 0.083465426 |
| 0.006919366 | 0.205648431 | 0.141120606 | 0.016268133 |
| 0.005982426 | 0.124622964 | 0.100022672 | 0.124685968 |
| 0.024647944 | 0.107207685 | 0.127624032 | 0.016053774 |
| 0.058324183 | 0.102173828 | 0.07687446  | 0.060800683 |
| 0.064189001 | 0.077846561 | 0.084332878 | 0.023097836 |
| 0.091634879 | 0.092122891 | 0.057156859 | 0.135503688 |
| 0.050868137 | 0.114393309 | 0.046619007 | 0.0465519   |
| 0.026810399 | 0.111369194 | 0.342275401 | 0.362670153 |
| 0.105023188 | 0.110568765 | 0.265417489 | 0.266294944 |
| 0.141834715 | 0.041067044 | 0.187065551 | 0.142678909 |
| 0.145034245 | 0.280742531 | 0.049201713 | 0.106514385 |
| 0.008422435 | 0.029630777 | 1           | 0.049254341 |
| 0.144655368 | 0.017344002 | 0.039795062 | 0.105343189 |
| 0.075083729 | 0.218456277 | 0.263012514 | 0.148055869 |
| 0.035977375 | 0.040285253 | 0.016847633 | 0.068856073 |
| 0.120575543 | 0.259468395 | 0.029553253 | 0.03492749  |
| 0.100833621 | 0.048567218 | 0.087821399 | 0.164582994 |
| 0.008220134 | 0.169688909 | 0.016439503 | 0.117250269 |
| 0.010455808 | 0.292346983 | 0.27524287  | 0.068168761 |
| 0.003420457 | 0.085960138 | 0.046353864 | 0.030866161 |
| 0.062105453 | 0.058216221 | 0.019854713 | 0.109446996 |
| 0.104518028 | 0.171012287 | 0.194329356 | 0.140037065 |
| 0.034484431 | 0.013181024 | 0.060620345 | 0.046309488 |
| 0.064862598 | 0.119163238 | 0.231786058 | 0.119580334 |
| 0.031341293 | 0.283277037 | 0.207032452 | 0.083604743 |
| 0.040086279 | 0.045639026 | 0.003004184 | 0.030471701 |

|             |             |             |             |
|-------------|-------------|-------------|-------------|
| 0.054440955 | 0.009766456 | 0.000649452 | 0.009836715 |
| 0.114224411 | 0.026462889 | 0.086588336 | 0.096919533 |
| 0.018631579 | 0.124479099 | 0.003273411 | 0.101774656 |
| 0.164188737 | 0.203492167 | 0.041069866 | 0.200692786 |
| 0.14299236  | 0.126795195 | 0.073140321 | 0.008236724 |
| 0.041065147 | 0.028741777 | 0.014431695 | 0.143367833 |
| 0.125799053 | 0.003752852 | 0.047869334 | 0.235349015 |
| 0.102497136 | 0.003250269 | 0.064694451 | 0.060084616 |
| 0.24021488  | 0.211618265 | 0.064198639 | 0.074181658 |
| 0.0919559   | 0.147014874 | 0.02120946  | 0.033116761 |
| 0.02240539  | 0.015554931 | 0.090248356 | 0.010083036 |
| 0.128077373 | 0.024107418 | 0.013864532 | 0.247968502 |
| 0.197031793 | 0.017676397 | 0.273883542 | 0.011640089 |
| 0.125809766 | 0.133278583 | 0.032131815 | 0.024969416 |
| 0.05315738  | 0.032684015 | 0.163062248 | 0.127153849 |
| 0.004709026 | 0.053668013 | 0.074440282 | 0.027493572 |
| 0.247556574 | 0.023922111 | 0.229647481 | 0.008105139 |
| 0.14037069  | 0.112292481 | 0.216146945 | 0.023248264 |
| 0.057429686 | 0.293633169 | 0.022795917 | 0.1556452   |
| 0.089159424 | 0.011170217 | 0.077757707 | 0.064630612 |
| 0.015946844 | 0.159407845 | 0.035844084 | 0.158561136 |
| 0.063242735 | 0.174905436 | 0.076552131 | 0.139686061 |
| 0.157668049 | 0.012086814 | 0.00975806  | 0.036211519 |
| 0.155934566 | 0.069250803 | 0.014077284 | 0.133777966 |
| 0.006777646 | 0.11669036  | 0.061634152 | 0.03739371  |
| 0.083723138 | 0.085836261 | 0.023737683 | 0.219513282 |
| 0.104150243 | 0.036316976 | 0.017590824 | 0.194555263 |
| 0.048630079 | 0.048382354 | 0.188538139 | 0.00028998  |
| 0.078595175 | 0.053528735 | 0.134314931 | 0.030704962 |
| 0.26827136  | 0.091830649 | 0.074867727 | 0.052605387 |
| 0.090996196 | 0.002825454 | 0.032964656 | 0.021344726 |
| 0.013681999 | 0.149472725 | 0.16012242  | 0.121515461 |
| 0.123561973 | 0.01449708  | 0.00802131  | 0.150148001 |
| 0.003708016 | 0.007446128 | 0.013085684 | 0.066246138 |
| 0.006530636 | 0.021305311 | 0.02166191  | 0.011655881 |
| 0.100186108 | 0.083554465 |             |             |
| RBBP6       | 0.06340771  | 0.423049211 | 0.055724219 |
| 0.127714857 | 0.206414994 | 0.246205413 | 0.049480477 |
| 0.091145689 | 0.322536719 | 0.187849762 | 0.220211085 |
| 0.017304663 | 0.061603259 | 0.429298638 | 0.044327713 |
| 0.254164581 | 0.031277179 | 0.08137215  | 0.049612014 |
| 0.174534517 | 0.170217167 | 0.196937274 | 0.213406535 |
| 0.179529524 | 0.20186752  | 0.251384684 | 0.223139879 |
| 0.495485756 | 0.162006965 | 0.334024575 | 0.178356333 |
| 0.404995538 | 0.210680006 | 0.224203395 | 0.022878907 |
| 0.23292033  | 0.010270053 | 0.435908664 | 0.1733244   |
| 0.152016944 | 0.336082851 | 0.218070762 | 0.168091089 |
| 0.227356873 | 0.036348457 | 0.139231028 | 0.300439956 |
| 0.252153002 | 0.200505087 | 0.054496522 | 0.357770977 |
| 0.217662295 | 0.276420578 | 0.334547429 | 0.000933539 |
| 0.182705253 | 0.0633306   | 0.136439804 | 0.507051776 |
| 0.168502545 | 0.092305638 | 0.169183482 | 0.159273926 |
| 0.246830806 | 0.283120647 | 0.208683687 | 0.21054281  |
| 0.483804752 | 0.105655825 | 0.365461882 | 0.145133697 |

|             |             |             |             |
|-------------|-------------|-------------|-------------|
| 0.214878428 | 0.032682894 | 0.150436306 | 0.078780879 |
| 0.232341633 | 0.141362463 | 0.206482962 | 0.205038412 |
| 0.421174476 | 0.506805341 | 0.193328973 | 0.500218372 |
| 0.058415801 | 0.210752369 | 0.196918519 | 0.256095839 |
| 0.286624024 | 0.065135212 | 0.341034292 | 0.511333121 |
| 0.043042005 | 0.249834661 | 0.303881528 | 0.10625621  |
| 0.426162701 | 0.178440326 | 0.227106053 | 0.118171088 |
| 0.289465284 | 0.19855171  | 0.465771234 | 0.22881122  |
| 0.196066593 | 0.064530461 | 0.483774183 | 0.201281851 |
| 0.189961122 | 0.07721904  | 0.146244597 | 0.428537506 |
| 0.302606325 | 0.481275145 | 0.38107561  | 0.302413753 |
| 0.217720058 | 0.495643271 | 0.339030756 | 0.394243718 |
| 0.113231774 | 0.515478986 | 0.148204737 | 0.035656703 |
| 0.061437013 | 0.069634426 | 0.142859475 | 0.285191642 |
| 0.461070371 | 0.256923503 | 0.134711256 | 0.159786497 |
| 0.429988514 | 0.475707015 | 0.511208782 | 0.36020416  |
| 0.036811236 | 0.160877317 | 0.230170838 | 0.188144539 |
| 0.269946266 | 0.088977326 | 0.165862003 | 0.49979571  |
| 0.373833818 | 0.388243365 | 0.129540378 | 0.498597571 |
| 0.124218067 | 0.506178004 | 0.446891379 | 0.125109329 |
| 0.519316229 | 0.496547792 | 0.503074792 | 0.315655362 |
| 0.47783834  | 0.229494385 | 0.029671491 | 0.341775474 |
| 0.470165536 | 0.01441105  | 0.454918048 | 0.481365357 |
| 0.497243182 | 0.427826181 | 0.5029128   | 0.499701174 |
| 0.495061939 | 0.064321735 | 0.016197172 | 0.200948698 |
| 0.503168131 | 0.390504583 | 0.095547684 | 0.229082806 |
| 0.227051998 | 0.23003502  | 0.376536808 | 0.163108711 |
| 0.493801447 | 0.454467931 | 0.474393464 | 0.321885321 |
| 0.193468336 | 0.31105197  | 0.222353329 | 0.472052301 |
| 0.048206633 | 0.088525969 | 0.054021627 | 0.256464192 |
| 0.238366369 | 0.125399134 | 0.21815492  | 0.215457932 |
| 0.145435048 | 0.205087154 | 0.199625733 | 0.286896308 |
| 0.066782689 | 0.265804833 | 0.139616965 | 0.119598571 |
| 0.040483067 | 0.152502961 | 0.112529972 | 0.120535856 |
| 0.153282822 | 0.250532907 | 0.336988742 | 0.489907636 |
| 0.20394988  | 0.175466357 | 0.327705459 | 0.468981599 |
| 0.402505283 | 0.232656023 | 0.193640882 | 0.018129413 |
| 0.149194322 | 0.177664521 | 0.120014577 | 0.246910868 |
| 0.198195859 | 0.129973313 | 0.243122643 | 0.327549889 |
| 0.17946317  | 0.10085635  | 0.198877298 | 0.421618057 |
| 0.144537059 | 0.191640881 | 0.410157813 | 0.245759065 |
| 0.006696197 | 0.205925942 | 0.404667433 | 0.102660775 |
| 0.227367788 | 0.079691364 | 0.164824612 | 0.446290187 |
| 0.157045434 | 0.1321643   | 0.481713049 | 0.326487785 |
| 0.185846902 | 0.231908516 | 0.506525653 | 0.023742783 |
| 0.206022346 | 0.062489781 | 0.223811751 | 0.208151643 |
| 0.179338884 | 0.234873292 | 0.188896028 | 0.19267067  |
| 0.119878302 | 0.496362468 | 0.37990388  | 0.492549395 |
| 0.208775739 | 0.512974684 | 0.423015132 | 0.414430061 |
| 0.276946233 | 0.200363955 | 0.087035022 | 0.399068048 |
| 0.444279955 | 0.179493626 | 0.080058035 | 0.379644285 |
| 0.207874189 | 0.303468578 | 0.115392761 | 0.477669517 |
| 0.494679268 | 0.468428759 | 0.095740628 | 0.314072462 |
| 0.354209499 | 0.164764613 | 0.401049232 | 0.505480037 |



|             |             |             |             |
|-------------|-------------|-------------|-------------|
| 0.186234177 | 0.190112862 | 0.19884491  | 0.377423804 |
| 0.150244527 | 0.128147707 | 0.312008444 | 0.117893445 |
| 0.011671842 | 0.064390406 | 0.057363596 | 0.11406876  |
| 0.122269224 | 0.288529518 | 0.303285541 | 0.498757592 |
| 0.084006514 | 0.413430923 | 0.197652151 | 0.171273389 |
| 0.404345689 | 0.189271449 | 0.232882735 | 0.265869349 |
| 0.221233127 | 0.030824025 | 0.088806302 | 0.510818308 |
| 0.040641872 | 0.153910296 | 0.183852989 | 0.003245303 |
| 0.038118208 | 0.380464156 | 0.111188616 | 0.210696819 |
| 0.451085194 | 0.221071518 | 0.169178082 | 0.18957241  |
| 0.281442084 | 0.078705887 | 0.006373113 | 0.478250006 |
| 0.477030004 | 0.446692821 | 0.472082276 | 0.4547584   |
| 0.420547408 | 0.346602861 | 0.367846031 | 0.228646812 |
| 0.087012472 | 0.081016027 | 0.134002725 | 0.175731706 |
| 0.002945638 | 0.350374864 | 0.189739295 | 0.127046861 |
| 0.343614928 | 0.222589841 | 0.033753521 | 0.226504395 |
| 0.02639292  | 0.132823866 | 0.164514224 | 0.143177534 |
| 0.288064326 | 0.018403039 | 0.164351639 | 0.181712661 |
| 0.430840204 | 0.321254895 | 0.226152521 | 0.527535573 |
| 0.201867703 | 0.126861076 | 0.210107388 | 0.330184465 |
| 0.060309716 | 0.073363766 | 0.200498829 | 0.043486113 |
| 0.140056014 | 0.443278816 | 0.218103021 | 0.076343834 |
| 0.191871018 | 0.00738967  | 0.360826578 | 0.512018813 |
| 0.471000725 | 0.498901913 | 0.491590795 | 0.170898972 |
| 0.500592177 | 0.069930756 | 0.51379599  | 0.382075936 |
| 0.204902709 | 0.001469162 | 0.004226938 | 0.476337339 |
| 0.237466226 | 0.070926806 | 0.125714003 | 0.232938321 |
| 0.08662995  | 0.107487232 | 0.056359257 | 0.139393486 |
| 0.310762069 | 0.154831741 | 0.11465097  | 0.454339016 |
| 0.165270375 | 0.150896897 | 0.218551196 | 0.084307442 |
| 0.270119789 | 0.05087018  | 0.083591461 | 0.008024743 |
| 0.290103899 | 0.127595566 | 0.469668603 | 0.497478487 |
| 0.482061606 | 0.318760834 | 0.191556194 | 0.183226658 |
| 0.412719192 | 0.099056524 | 0.224327232 | 0.096101312 |
| 0.478934494 | 0.268276479 | 0.280151586 | 0.29558731  |
| 0.474659478 | 0.459587139 | 0.0304312   | 0.354664564 |
| 0.020067807 | 0.002000026 | 0.230455708 | 0.204183595 |
| 0.046527784 | 0.201253894 | 0.236004356 | 0.151196072 |
| 0.150513131 | 0.028869409 | 0.162327694 | 0.154555475 |
| 0.216507865 | 0.205003018 | 0.166728315 | 0.213899777 |
| 0.183228435 | 0.097724584 | 0.149327563 | 0.102500644 |
| 0.141137853 | 0.305896927 | 0.20247111  | 0.021853817 |
| 0.246853375 | 0.231971175 | 0.051125717 | 0.139496593 |
| 0.421544847 | 0.469072151 | 0.036754254 | 0.013832246 |
| 0.242709622 | 0.174819198 | 0.471480044 | 0.491299581 |
| 0.513272835 | 0.500383917 | 0.388935443 | 0.080630834 |
| 0.058744084 | 0.216390899 | 0.18298263  | 0.091183523 |
| 0.490243982 | 0.058798828 | 0.483592305 | 0.185744448 |
| 0.099484363 | 0.171795395 | 0.033985178 | 0.07046306  |
| 0.241719657 | 0.133605665 | 0.128342343 | 0.132168962 |
| 0.181129824 | 0.174608233 | 0.043932289 | 0.134056272 |
| 0.291041429 | 0.132573966 | 0.120598101 | 0.202801667 |
| 0.34673584  | 0.147092985 | 0.346406055 | 0.432138709 |
| 0.11235943  | 0.08626241  | 0.184312982 | 0.322076269 |

|             |             |             |             |
|-------------|-------------|-------------|-------------|
| 0.411370518 | 0.237155921 | 0.02750591  | 0.445285844 |
| 0.472150429 | 0.31885328  | 0.494796903 | 0.350659704 |
| 0.079757776 | 0.213933799 | 0.17952363  | 0.200483328 |
| 0.124730571 | 0.247497129 | 0.149853793 | 0.05373265  |
| 0.289335182 | 0.466900307 | 0.408253687 | 0.119864779 |
| 0.264432249 | 0.103148864 | 0.051710876 | 0.425137618 |
| 0.125591213 | 0.064618463 | 0.210105348 | 0.385526367 |
| 0.007419025 | 0.09950122  | 0.476449259 | 0.155339922 |
| 0.507977923 | 0.470695134 | 0.434101608 | 0.178803307 |
| 0.001911445 | 0.316300089 | 0.253532308 | 0.239821836 |
| 0.403530101 | 0.312833552 | 0.110674593 | 0.06338939  |
| 0.271286722 | 0.08342855  | 0.087470551 | 0.220586606 |
| 0.116410872 | 0.271455734 | 0.166846544 | 0.138528733 |
| 0.14242084  | 0.088641822 | 0.164379642 | 0.180836092 |
| 0.105076018 | 0.206702212 | 0.307287489 | 0.182145414 |
| 0.106744818 | 0.394301111 | 0.354703625 | 0.028519804 |
| 0.209591593 | 0.379189767 | 0.425588977 | 0.001690687 |
| 0.335980208 | 0.008269349 | 0.125525186 | 0.150735976 |
| 0.14517833  | 0.124489866 | 0.176319132 | 0.210889555 |
| 0.24449011  | 0.156169541 | 0.18843035  | 0.176628555 |
| 0.126089251 | 0.162223616 | 0.265335097 | 0.235508292 |
| 0.176904662 | 0.102679933 | 0.119799946 | 0.127448472 |
| 0.045312671 | 0.451240606 | 0.240121977 | 0.084611827 |
| 0.158744845 | 0.223601596 | 0.342150782 | 0.490450164 |
| 0.408114373 | 0.133259342 | 0.188289277 | 0.431513878 |
| 0.130412114 | 0.188120095 | 0.049254341 | 1           |
| 0.148493124 | 0.125510565 | 0.243358837 | 0.213331966 |
| 0.323552758 | 0.398577115 | 0.229002937 | 0.440839395 |
| 0.242361942 | 0.193448762 | 0.198022527 | 0.068007844 |
| 0.129910519 | 0.121067677 | 0.168045918 | 0.004508343 |
| 0.245396305 | 0.194186661 | 0.442754417 | 0.493145417 |
| 0.169218707 | 0.38093686  | 0.192507927 | 0.067664993 |
| 0.200873147 | 0.197135447 | 0.121535829 | 0.383772047 |
| 0.132392184 | 0.142103142 | 0.195503871 | 0.22062311  |
| 0.375403175 | 0.35375838  | 0.166709533 | 0.142507282 |
| 0.162189961 | 0.174931513 | 0.472119755 | 0.103906999 |
| 0.273290875 | 0.141951676 | 0.249386009 | 0.176163088 |
| 0.143983286 | 0.510428847 | 0.054775464 | 0.507106308 |
| 0.182837374 | 0.134822695 | 0.480688952 | 0.193416519 |
| 0.221898664 | 0.100560317 | 0.124411558 | 0.224629368 |
| 0.14778686  | 0.203091556 | 0.0091445   | 0.03279681  |
| 0.264827146 | 0.178860924 | 0.355618096 | 0.294955349 |
| 0.168635405 | 0.296197234 | 0.111774721 | 0.17196061  |
| 0.478245696 | 0.495922846 | 0.147093325 | 0.226838847 |
| 0.269920657 | 0.078678788 | 0.28877954  | 0.010243067 |
| 0.271332626 | 0.270682122 | 0.196027953 | 0.043247237 |
| 0.020611202 | 0.137808276 | 0.275140219 | 0.063314145 |
| 0.457638908 | 0.13841946  | 0.252649542 | 0.367370578 |
| 0.156401157 | 0.49647694  | 0.09011461  | 0.331206801 |
| 0.040736971 | 0.206832234 | 0.225048473 | 0.204724901 |
| 0.147487821 | 0.179858803 | 0.322543446 | 0.154523056 |
| 0.031470969 | 0.175505034 | 0.001796338 | 0.40511396  |
| 0.473225246 | 0.20055813  | 0.201140438 | 0.173726098 |
| 0.230343278 | 0.373440535 | 0.118746005 | 0.242546245 |

|             |             |             |             |
|-------------|-------------|-------------|-------------|
| 0.015508154 | 0.235333513 | 0.140186886 | 0.399516408 |
| 0.148152892 | 0.211614346 | 0.063890339 | 0.179962141 |
| 0.459854606 | 0.139674353 | 0.230647141 | 0.194414469 |
| 0.49211183  | 0.378560674 | 0.17374795  | 0.167092768 |
| 0.279074991 | 0.060543584 | 0.232021955 | 0.509558245 |
| 0.119579447 | 0.148304493 | 0.406951084 | 0.134780586 |
| 0.178442405 | 0.377253378 | 0.276040795 | 0.499343754 |
| 0.052903724 | 0.191183802 | 0.373378678 | 0.439098469 |
| 0.261240985 | 0.115802276 | 0.142128986 | 0.135544526 |
| 0.461434414 | 0.082578306 | 0.161406371 | 0.306429302 |
| 0.136204174 | 0.230623128 | 0.245826735 | 0.125245116 |
| 0.029109575 | 0.111414573 | 0.222334291 | 0.117406134 |
| 0.183589698 | 0.224929044 | 0.164723738 | 0.384051707 |
| 0.102278805 | 0.029290797 | 0.450743355 | 0.013149614 |
| 0.227624419 | 0.297084133 | 0.159749154 | 0.216041496 |
| 0.19122716  | 0.231091193 | 0.197941225 | 0.000631858 |
| 0.368944783 | 0.085489636 | 0.183974988 | 0.145707915 |
| 0.148485817 | 0.041891736 | 0.465109631 | 0.487550863 |
| 0.245351072 | 0.204796776 | 0.194713917 | 0.444110964 |
| 0.111729508 | 0.193339557 | 0.178002192 | 0.32784368  |
| 0.148118804 | 0.221785488 | 0.225133366 | 0.232856475 |
| 0.326022891 | 0.174575706 |             |             |
| RBMS1       | 0.168570994 | 0.257396668 | 0.100742286 |
| 0.161698927 | 0.175618968 | 0.150728525 | 0.161284    |
| 0.226884246 | 0.215484621 | 0.06239566  | 0.200993432 |
| 0.117126804 | 0.050269482 | 0.332681214 | 0.174543377 |
| 0.171007322 | 0.170823743 | 0.205552814 | 0.065950699 |
| 0.117248576 | 0.17132251  | 0.134089101 | 0.150938624 |
| 0.155892548 | 0.279162391 | 0.166009689 | 0.116285683 |
| 0.306173896 | 0.064981694 | 0.205355583 | 0.038304647 |
| 0.364915848 | 0.179967355 | 0.102498574 | 0.078533003 |
| 0.163499162 | 0.012334955 | 0.360196423 | 0.180660484 |
| 0.069970901 | 0.362325438 | 0.081080335 | 0.214435566 |
| 0.093206418 | 0.116571437 | 0.042027031 | 0.172787553 |
| 0.153355147 | 0.16993784  | 0.109091705 | 0.203675273 |
| 0.119023271 | 0.279878431 | 0.167267133 | 0.018985698 |
| 0.097650396 | 0.019811891 | 0.059006097 | 0.344520861 |
| 0.298634719 | 0.247855188 | 0.059459504 | 0.161411349 |
| 0.156260069 | 0.208654039 | 0.275097456 | 0.09081305  |
| 0.346781219 | 0.079504971 | 0.193217139 | 0.13855534  |
| 0.143506272 | 0.087174649 | 0.2791111   | 0.119485667 |
| 0.120140911 | 0.249303961 | 0.192285374 | 0.104345235 |
| 0.244128002 | 0.402219478 | 0.238374145 | 0.331710322 |
| 0.060917745 | 0.144516237 | 0.14224085  | 0.288881877 |
| 0.224439721 | 0.139478389 | 0.265839132 | 0.379297825 |
| 0.11225979  | 0.118787207 | 0.210310969 | 0.1880797   |
| 0.276301228 | 0.08654884  | 0.101441826 | 0.100444971 |
| 0.196940363 | 0.15228384  | 0.347393281 | 0.296454259 |
| 0.161400325 | 0.127686296 | 0.343834279 | 0.138455934 |
| 0.194685887 | 0.132867172 | 0.140396651 | 0.25490445  |
| 0.192791507 | 0.321887236 | 0.236381791 | 0.266419389 |
| 0.141873528 | 0.336955836 | 0.236004782 | 0.306829377 |
| 0.027993029 | 0.34631603  | 0.197702206 | 0.204109821 |
| 0.126891629 | 0.237995792 | 0.118689108 | 0.341980919 |

|             |             |             |             |
|-------------|-------------|-------------|-------------|
| 0.29262041  | 0.269598336 | 0.22128136  | 0.202280227 |
| 0.295939398 | 0.32168601  | 0.332303501 | 0.284403445 |
| 0.149233728 | 0.076797128 | 0.134767052 | 0.194099405 |
| 0.241078444 | 0.199527915 | 0.115214584 | 0.371643714 |
| 0.354495119 | 0.268970206 | 0.166092511 | 0.400062287 |
| 0.181741954 | 0.39432916  | 0.257547877 | 0.222664535 |
| 0.373603025 | 0.359870527 | 0.370444642 | 0.208111073 |
| 0.370690747 | 0.165920719 | 0.045256661 | 0.274278959 |
| 0.400511235 | 0.016541309 | 0.277548989 | 0.301194164 |
| 0.320747859 | 0.258933933 | 0.362850809 | 0.331140707 |
| 0.328139469 | 0.160224208 | 0.00633881  | 0.247701977 |
| 0.347121483 | 0.320440774 | 0.230725786 | 0.122488505 |
| 0.182512763 | 0.158040962 | 0.238939869 | 0.120513862 |
| 0.423279981 | 0.292537906 | 0.293189909 | 0.251776537 |
| 0.118245657 | 0.365853484 | 0.111841557 | 0.339499295 |
| 0.170132244 | 0.17616903  | 0.124617124 | 0.276846295 |
| 0.090642422 | 0.251069399 | 0.156865606 | 0.161341927 |
| 0.283305272 | 0.149254742 | 0.092916825 | 0.218375065 |
| 0.135322076 | 0.150711611 | 0.181082779 | 0.16092163  |
| 0.172826425 | 0.275224214 | 0.225036237 | 0.234173    |
| 0.227893089 | 0.292809987 | 0.204376095 | 0.317070417 |
| 0.130173572 | 0.221880541 | 0.225720566 | 0.384877076 |
| 0.408021453 | 0.141653764 | 0.301493713 | 0.055333412 |
| 0.129511903 | 0.063909529 | 0.061652305 | 0.13087863  |
| 0.273947963 | 0.184718072 | 0.181215408 | 0.252597633 |
| 0.17369574  | 0.149101597 | 0.131331741 | 0.407314976 |
| 0.19512181  | 0.188689609 | 0.319005934 | 0.134831806 |
| 0.032093184 | 0.174033937 | 0.273735359 | 0.137867753 |
| 0.21961977  | 0.090388195 | 0.097348701 | 0.291445225 |
| 0.102767459 | 0.132228696 | 0.309254512 | 0.244738016 |
| 0.146755827 | 0.258618484 | 0.363218345 | 0.020178252 |
| 0.123548788 | 0.121931818 | 0.293043405 | 0.080274803 |
| 0.228749832 | 0.306236876 | 0.158190141 | 0.165768497 |
| 0.176154328 | 0.356176963 | 0.309076057 | 0.338398903 |
| 0.105269365 | 0.364204395 | 0.281366316 | 0.33521928  |
| 0.241968102 | 0.09720935  | 0.04819479  | 0.266360569 |
| 0.279420883 | 0.09076406  | 0.140250919 | 0.221239935 |
| 0.092225902 | 0.206043485 | 0.145260016 | 0.349508825 |
| 0.412034324 | 0.295781943 | 0.265624804 | 0.279848718 |
| 0.323122719 | 0.217755056 | 0.284666519 | 0.385612375 |
| 0.06686333  | 0.131940538 | 0.129722365 | 0.313739929 |
| 0.231442366 | 0.137484969 | 0.329986786 | 0.059011753 |
| 0.003356532 | 0.154126499 | 0.138353582 | 0.243616005 |
| 0.1064695   | 0.144641598 | 0.208506922 | 0.349057492 |
| 0.233504417 | 0.351133977 | 0.247980294 | 0.16194197  |
| 0.305432231 | 0.137342266 | 0.140121655 | 0.198682533 |
| 0.29189115  | 0.070908949 | 0.206382997 | 0.4001133   |
| 0.094179134 | 0.11841605  | 0.173776263 | 0.01327342  |
| 0.132448013 | 0.204124097 | 0.186407129 | 0.311269657 |
| 0.33860635  | 0.28086581  | 0.213608859 | 0.07466088  |
| 0.295741014 | 0.187886286 | 0.02655152  | 0.30122447  |
| 0.320112373 | 0.307317008 | 0.315503231 | 0.321026672 |
| 0.278246087 | 0.22957435  | 0.253600488 | 0.157015454 |
| 0.206536996 | 0.132383643 | 0.094604814 | 0.184097513 |

|             |             |             |             |
|-------------|-------------|-------------|-------------|
| 0.011995549 | 0.306620882 | 0.170579498 | 0.260293914 |
| 0.23709818  | 0.247617065 | 0.163508934 | 0.174665173 |
| 0.078636619 | 0.061102997 | 0.162704378 | 0.216348078 |
| 0.268761133 | 0.084299841 | 0.082019242 | 0.10579835  |
| 0.322115505 | 0.3205942   | 0.098953082 | 0.357702408 |
| 0.216865248 | 0.141650153 | 0.166481398 | 0.277562113 |
| 0.186965991 | 0.036702046 | 0.134427153 | 0.007987491 |
| 0.110010541 | 0.341245385 | 0.128059725 | 0.120375067 |
| 0.232781708 | 0.052664353 | 0.307638234 | 0.376933545 |
| 0.299119173 | 0.339007287 | 0.351102524 | 0.118368511 |
| 0.34387243  | 0.021992852 | 0.341736331 | 0.258283586 |
| 0.087076335 | 0.005866205 | 0.048033839 | 0.295386    |
| 0.153336411 | 0.119165961 | 0.23706747  | 0.128340383 |
| 0.222156827 | 0.142977686 | 0.19386244  | 0.129588441 |
| 0.192159673 | 0.205081052 | 0.14123608  | 0.321593371 |
| 0.199093552 | 0.240711158 | 0.119243943 | 0.175219833 |
| 0.180651757 | 0.171305279 | 0.162868154 | 0.027147131 |
| 0.252286391 | 0.187498425 | 0.353598394 | 0.334575876 |
| 0.390969556 | 0.229459584 | 0.070409694 | 0.147638129 |
| 0.285870297 | 0.133089349 | 0.102370225 | 0.142137314 |
| 0.306416649 | 0.197080379 | 0.337379201 | 0.313484904 |
| 0.372412453 | 0.354138691 | 0.150165852 | 0.258860379 |
| 0.06329174  | 0.01019542  | 0.127068413 | 0.287637571 |
| 0.034359286 | 0.125764657 | 0.302406293 | 0.129977089 |
| 0.173442262 | 0.131229862 | 0.090623217 | 0.10050073  |
| 0.232616581 | 0.167252944 | 0.147272655 | 0.249145722 |
| 0.155190195 | 0.1171897   | 0.232441873 | 0.243815893 |
| 0.117891857 | 0.269462941 | 0.276203655 | 0.110490908 |
| 0.115103018 | 0.141430866 | 0.171583149 | 0.250758875 |
| 0.307616987 | 0.315634188 | 0.139404078 | 0.080580937 |
| 0.318729285 | 0.171842895 | 0.341851781 | 0.311819715 |
| 0.375161982 | 0.389677312 | 0.391847044 | 0.217618164 |
| 0.187528959 | 0.198308431 | 0.146049345 | 0.17962887  |
| 0.3487122   | 0.116434135 | 0.33316978  | 0.103252207 |
| 0.215006742 | 0.187085581 | 0.181549186 | 0.188965155 |
| 0.150968967 | 0.282277481 | 0.232012447 | 0.160585436 |
| 0.178397119 | 0.109871187 | 0.157892112 | 0.237996035 |
| 0.28560699  | 0.060098451 | 0.238871442 | 0.164413856 |
| 0.253885129 | 0.049648765 | 0.213721447 | 0.395364186 |
| 0.220259653 | 0.14914789  | 0.132282662 | 0.249819763 |
| 0.242356022 | 0.107295175 | 0.10134638  | 0.260475135 |
| 0.349224714 | 0.191168991 | 0.342998223 | 0.351527419 |
| 0.177345979 | 0.149409919 | 0.09781942  | 0.167476713 |
| 0.23858809  | 0.153256424 | 0.216104484 | 0.162838824 |
| 0.343143251 | 0.391149625 | 0.268291466 | 0.245803889 |
| 0.150122776 | 0.143633184 | 0.098398125 | 0.283231912 |
| 0.092898866 | 0.184271441 | 0.088653508 | 0.249885656 |
| 0.009415389 | 0.062788214 | 0.325828563 | 0.255987009 |
| 0.38083754  | 0.317315329 | 0.370244395 | 0.176095073 |
| 0.001346166 | 0.17809521  | 0.221200453 | 0.139558907 |
| 0.279067716 | 0.297172644 | 0.143901919 | 0.20806122  |
| 0.347121821 | 0.146748169 | 0.20948509  | 0.129026512 |
| 0.045415711 | 0.193993517 | 0.307195161 | 0.180128801 |
| 0.21261031  | 0.130228048 | 0.103466272 | 0.218000629 |

|             |             |             |             |
|-------------|-------------|-------------|-------------|
| 0.065608966 | 0.337491442 | 0.331229158 | 0.072797848 |
| 0.07346314  | 0.314702742 | 0.242067431 | 0.120187502 |
| 0.13190309  | 0.276595898 | 0.328726894 | 0.010903918 |
| 0.231538607 | 0.089313282 | 0.237729682 | 0.223537    |
| 0.22911228  | 0.224039711 | 0.246588154 | 0.16389447  |
| 0.197208106 | 0.212775694 | 0.218075786 | 0.282580903 |
| 0.232341761 | 0.213415251 | 0.18270485  | 0.134520181 |
| 0.188954307 | 0.20479871  | 0.199794267 | 0.194923791 |
| 0.207570819 | 0.294469581 | 0.345331362 | 0.144542036 |
| 0.279115303 | 0.13852031  | 0.383829386 | 0.305055544 |
| 0.370797137 | 0.163750219 | 0.168721898 | 0.271607759 |
| 0.054365361 | 0.138520581 | 0.144655368 | 0.148493124 |
| 1           | 0.16076544  | 0.125595993 | 0.164918133 |
| 0.191661304 | 0.383750133 | 0.341377099 | 0.344368157 |
| 0.165976049 | 0.116085646 | 0.069991414 | 0.216758972 |
| 0.195437932 | 0.210895491 | 0.155381312 | 0.024190501 |
| 0.262222489 | 0.159850401 | 0.282852104 | 0.330589048 |
| 0.091077058 | 0.368224487 | 0.084970343 | 0.176992163 |
| 0.057797635 | 0.209556218 | 0.260882784 | 0.219024161 |
| 0.066142946 | 0.238465629 | 0.183469229 | 0.128472088 |
| 0.229776447 | 0.192520649 | 0.141714093 | 0.213091367 |
| 0.198315417 | 0.196516292 | 0.345903617 | 0.149021512 |
| 0.136666518 | 0.144824625 | 0.129597392 | 0.182191784 |
| 0.211813956 | 0.323059679 | 0.149593878 | 0.329626708 |
| 0.144057205 | 0.221123435 | 0.419571893 | 0.183868457 |
| 0.171314416 | 0.232128199 | 0.063169326 | 0.11651564  |
| 0.197633608 | 0.103917882 | 0.003478096 | 0.05098168  |
| 0.310221329 | 0.10446983  | 0.202659876 | 0.247799446 |
| 0.140187901 | 0.316694276 | 0.062166043 | 0.177822975 |
| 0.306153039 | 0.357602862 | 0.186749472 | 0.31418509  |
| 0.294044027 | 0.237476371 | 0.185489125 | 0.017839895 |
| 0.163462578 | 0.135885086 | 0.098392057 | 0.198597742 |
| 0.117308542 | 0.066721571 | 0.158932481 | 0.113732819 |
| 0.318698562 | 0.064082489 | 0.144984182 | 0.224292017 |
| 0.243201301 | 0.364351541 | 0.248646605 | 0.269539152 |
| 0.080114674 | 0.259227667 | 0.112956093 | 0.112595584 |
| 0.179292484 | 0.120413496 | 0.283593517 | 0.115666492 |
| 0.162244459 | 0.180044609 | 0.00904752  | 0.386378403 |
| 0.319996798 | 0.106611585 | 0.301819091 | 0.067236202 |
| 0.306782885 | 0.297994452 | 0.173727912 | 0.111801509 |
| 0.087120918 | 0.168830239 | 0.270609067 | 0.302421425 |
| 0.061600066 | 0.139984063 | 0.185860682 | 0.125393663 |
| 0.357914422 | 0.144405934 | 0.32255019  | 0.077314345 |
| 0.312250769 | 0.250504365 | 0.176911348 | 0.172318752 |
| 0.15176547  | 0.158282832 | 0.103179467 | 0.367891053 |
| 0.250809514 | 0.117115396 | 0.287839551 | 0.20977915  |
| 0.115064212 | 0.309592757 | 0.12923034  | 0.35611685  |
| 0.213168784 | 0.312091524 | 0.264497862 | 0.311310836 |
| 0.356513802 | 0.118447586 | 0.1160636   | 0.180228664 |
| 0.302528215 | 0.188015384 | 0.120545794 | 0.280866037 |
| 0.091337412 | 0.289023061 | 0.123472631 | 0.191434263 |
| 0.168907106 | 0.23999784  | 0.171173308 | 0.227281066 |
| 0.24449317  | 0.150080075 | 0.143535274 | 0.389245931 |
| 0.230958607 | 0.107590577 | 0.398269611 | 0.010246011 |

|             |             |             |             |
|-------------|-------------|-------------|-------------|
| 0.173134478 | 0.226164139 | 0.26284963  | 0.151316528 |
| 0.275350482 | 0.19938398  | 0.130768848 | 0.021427114 |
| 0.280666499 | 0.039848742 | 0.158801405 | 0.174691781 |
| 0.114807746 | 0.153370374 | 0.343053301 | 0.352636176 |
| 0.247984071 | 0.108939592 | 0.092230249 | 0.32802193  |
| 0.07231943  | 0.076103172 | 0.101914778 | 0.178217422 |
| 0.093974992 | 0.086557592 | 0.108645169 | 0.103873684 |
| 0.252783323 | 0.212294798 |             |             |
| REEP4       | 0.033159554 | 0.18046089  | 0.017660168 |
| 0.048419414 | 0.2736359   | 0.104582071 | 0.025547402 |
| 0.041420377 | 0.132763111 | 0.034774184 | 0.233649564 |
| 0.011607835 | 0.067480878 | 0.277373644 | 0.028439974 |
| 0.264210837 | 0.023578722 | 0.074340499 | 0.013623674 |
| 0.032083136 | 0.290926933 | 0.107646591 | 0.107993934 |
| 0.215624081 | 0.105917985 | 0.112489129 | 0.160672954 |
| 0.251644793 | 0.052178647 | 0.241006597 | 0.015725034 |
| 0.258586086 | 0.315783162 | 0.153058773 | 0.004793343 |
| 0.177058808 | 0.007629277 | 0.223436019 | 0.159940545 |
| 0.07137859  | 0.218906719 | 0.053946218 | 0.166737552 |
| 0.083841815 | 0.015790315 | 0.017297158 | 0.220796179 |
| 0.102308124 | 0.077103263 | 0.023062792 | 0.196274231 |
| 0.073606286 | 0.183086299 | 0.12788072  | 0.003668783 |
| 0.174887124 | 0.042322662 | 0.104659817 | 0.24186311  |
| 0.172700017 | 0.114761    | 0.03748571  | 0.071936437 |
| 0.174245438 | 0.223582315 | 0.175714594 | 0.067033884 |
| 0.279589756 | 0.093403615 | 0.20696216  | 0.043064982 |
| 0.122443778 | 0.008303087 | 0.124423061 | 0.024354629 |
| 0.104445255 | 0.182727891 | 0.244276053 | 0.149800025 |
| 0.171627653 | 0.26968686  | 0.137602474 | 0.216608787 |
| 0.056850982 | 0.253872661 | 0.124836201 | 0.263196135 |
| 0.203688318 | 0.023488285 | 0.289256967 | 0.289902502 |
| 0.014679775 | 0.100579383 | 0.208122541 | 0.056817818 |
| 0.201332186 | 0.066152043 | 0.098865822 | 0.144805521 |
| 0.279657725 | 0.262718972 | 0.221193282 | 0.239496509 |
| 0.18361162  | 0.031362617 | 0.202760976 | 0.27564296  |
| 0.199273029 | 0.037315055 | 0.107796234 | 0.274532042 |
| 0.221288747 | 0.271383996 | 0.200778959 | 0.242932268 |
| 0.235282481 | 0.275932629 | 0.233153648 | 0.223287378 |
| 0.011327848 | 0.25978375  | 0.104439663 | 0.033228491 |
| 0.018629522 | 0.060900321 | 0.066930781 | 0.220810359 |
| 0.276886017 | 0.1831565   | 0.093288873 | 0.203926951 |
| 0.32711715  | 0.196476353 | 0.250591841 | 0.254036006 |
| 0.024035766 | 0.079226802 | 0.217429978 | 0.067503004 |
| 0.253755318 | 0.065987097 | 0.233144342 | 0.243225207 |
| 0.255769956 | 0.306499634 | 0.039578022 | 0.239287884 |
| 0.076681078 | 0.313711507 | 0.203074473 | 0.138614595 |
| 0.261232765 | 0.229887557 | 0.324133497 | 0.315625509 |
| 0.241498286 | 0.13387227  | 0.020303974 | 0.216281132 |
| 0.330584489 | 0.022326772 | 0.263494777 | 0.287823777 |
| 0.236146941 | 0.288377012 | 0.321291992 | 0.288296732 |
| 0.235794769 | 0.039123328 | 0.007818263 | 0.29476596  |
| 0.245439185 | 0.261062341 | 0.064957991 | 0.179725133 |
| 0.272212869 | 0.126025711 | 0.231154704 | 0.084785396 |
| 0.319194966 | 0.251173465 | 0.255130309 | 0.213180614 |

|             |             |             |             |
|-------------|-------------|-------------|-------------|
| 0.081290707 | 0.198366569 | 0.192313688 | 0.199326418 |
| 0.017522108 | 0.047559763 | 0.023606889 | 0.193006545 |
| 0.034488611 | 0.173800785 | 0.099587721 | 0.194105283 |
| 0.188382991 | 0.083550712 | 0.125403247 | 0.319755719 |
| 0.023044538 | 0.17721526  | 0.073821443 | 0.074791194 |
| 0.030148814 | 0.087220052 | 0.082625944 | 0.065828022 |
| 0.243649644 | 0.100852619 | 0.221927474 | 0.273066564 |
| 0.12505256  | 0.097059963 | 0.21740027  | 0.30245525  |
| 0.340821728 | 0.233695791 | 0.162233925 | 0.014449896 |
| 0.093290221 | 0.055524023 | 0.095464486 | 0.178119635 |
| 0.083387778 | 0.088698782 | 0.232982799 | 0.345581288 |
| 0.10699918  | 0.041918274 | 0.141947793 | 0.241391862 |
| 0.065906546 | 0.184074557 | 0.324327413 | 0.132870917 |
| 0.001275474 | 0.169867463 | 0.282273334 | 0.080133547 |
| 0.167297138 | 0.113982061 | 0.092295597 | 0.28602719  |
| 0.075146283 | 0.15783547  | 0.277869713 | 0.31763081  |
| 0.062244975 | 0.085279328 | 0.307994693 | 0.030923718 |
| 0.162592374 | 0.053570398 | 0.29554675  | 0.056071232 |
| 0.168175914 | 0.247178505 | 0.281614644 | 0.163092024 |
| 0.055258584 | 0.270268642 | 0.219046313 | 0.295395536 |
| 0.105336962 | 0.304659639 | 0.303454372 | 0.305752627 |
| 0.205819607 | 0.126317125 | 0.083716052 | 0.273980425 |
| 0.276914508 | 0.041255408 | 0.030600996 | 0.237333881 |
| 0.09292856  | 0.278121552 | 0.051969636 | 0.317024499 |
| 0.271560805 | 0.188282409 | 0.114631707 | 0.326816649 |
| 0.286687901 | 0.139494415 | 0.23490659  | 0.31423159  |
| 0.03421507  | 0.222614203 | 0.164289243 | 0.337128952 |
| 0.118531856 | 0.135222395 | 0.176463258 | 0.080039015 |
| 0.006664045 | 0.034228085 | 0.035728944 | 0.176650412 |
| 0.160215107 | 0.153622316 | 0.240284715 | 0.28378913  |
| 0.101446521 | 0.243432836 | 0.129735765 | 0.158353947 |
| 0.220778828 | 0.165983955 | 0.223627031 | 0.251345932 |
| 0.153029532 | 0.013343642 | 0.070496968 | 0.26836855  |
| 0.012945204 | 0.155397745 | 0.107832999 | 0.007044504 |
| 0.020558608 | 0.154133278 | 0.044940512 | 0.115567942 |
| 0.333200287 | 0.101218144 | 0.115142205 | 0.045326921 |
| 0.279411344 | 0.06256725  | 0.006804276 | 0.253551222 |
| 0.230304575 | 0.218746245 | 0.223510503 | 0.195011285 |
| 0.233091669 | 0.199259439 | 0.281369793 | 0.108240782 |
| 0.035916175 | 0.021574595 | 0.117230847 | 0.201255943 |
| 0.002193585 | 0.285119493 | 0.178850489 | 0.115871099 |
| 0.271091551 | 0.186245456 | 0.022062556 | 0.233598678 |
| 0.009930831 | 0.103541127 | 0.064635395 | 0.117437698 |
| 0.297301524 | 0.005789929 | 0.045860239 | 0.080412742 |
| 0.201294952 | 0.207731826 | 0.110070781 | 0.268560708 |
| 0.242729669 | 0.042965566 | 0.200399055 | 0.305517237 |
| 0.03729819  | 0.014579773 | 0.08616019  | 0.004366585 |
| 0.030519375 | 0.213967648 | 0.099157656 | 0.013919517 |
| 0.20403176  | 0.002884825 | 0.20200613  | 0.289364796 |
| 0.192422576 | 0.313450838 | 0.285166778 | 0.219319003 |
| 0.270645102 | 0.038848985 | 0.282315616 | 0.200755355 |
| 0.079908799 | 0.001330153 | 0.008464823 | 0.288561698 |
| 0.231594616 | 0.018971933 | 0.122303096 | 0.048793715 |
| 0.060047682 | 0.044118654 | 0.035113307 | 0.149552979 |



|             |             |             |             |
|-------------|-------------|-------------|-------------|
| 0.189039855 | 0.260501102 | 0.121334937 | 0.211143668 |
| 0.154649391 | 0.184928165 | 0.082643867 | 0.04286475  |
| 0.21916754  | 0.026775061 | 0.03942058  | 0.014133517 |
| 0.288421715 | 0.04655296  | 0.194984759 | 0.258242039 |
| 0.300857625 | 0.287581064 | 0.053500102 | 0.064094493 |
| 0.24877742  | 0.033864876 | 0.048414253 | 0.039833986 |
| 0.225038666 | 0.281299536 | 0.27674766  | 0.203913303 |
| 0.326295598 | 0.264091315 | 0.023545544 | 0.285904095 |
| 0.009105716 | 0.005407788 | 0.105388041 | 0.170354848 |
| 0.012390704 | 0.19786668  | 0.193000259 | 0.051088409 |
| 0.077322109 | 0.013285255 | 0.16576059  | 0.175273002 |
| 0.230969466 | 0.207718043 | 0.284710777 | 0.124177832 |
| 0.146704655 | 0.079524995 | 0.112048054 | 0.07763462  |
| 0.03702612  | 0.157422594 | 0.111014057 | 0.010385007 |
| 0.134836394 | 0.209521703 | 0.041114191 | 0.099534833 |
| 0.301035926 | 0.303962171 | 0.023787227 | 0.020387666 |
| 0.174285858 | 0.148490279 | 0.327277115 | 0.234660852 |
| 0.258583611 | 0.321948316 | 0.223960867 | 0.088529441 |
| 0.037103862 | 0.226732031 | 0.259791588 | 0.068536994 |
| 0.282717374 | 0.024863155 | 0.227823756 | 0.221354678 |
| 0.075313022 | 0.088299197 | 0.028168649 | 0.059116293 |
| 0.248939002 | 0.145971675 | 0.192456126 | 0.063569929 |
| 0.195845342 | 0.088288341 | 0.025091529 | 0.159569575 |
| 0.224695393 | 0.084535628 | 0.117343048 | 0.071538965 |
| 0.160955073 | 0.013967031 | 0.269075063 | 0.302284131 |
| 0.081627664 | 0.049829076 | 0.046246866 | 0.214288316 |
| 0.239567965 | 0.116863004 | 0.01861209  | 0.185138604 |
| 0.295347401 | 0.236913763 | 0.238856433 | 0.321153877 |
| 0.046457277 | 0.254253325 | 0.131922732 | 0.235022288 |
| 0.131182409 | 0.11092909  | 0.146599079 | 0.042456098 |
| 0.186634919 | 0.242827771 | 0.207523297 | 0.153157292 |
| 0.154738912 | 0.040678437 | 0.019397747 | 0.230210496 |
| 0.121060518 | 0.034301025 | 0.066698246 | 0.252835116 |
| 0.002532395 | 0.112052103 | 0.285938514 | 0.11547804  |
| 0.273748129 | 0.302056405 | 0.274864394 | 0.051917161 |
| 0.002176272 | 0.244843119 | 0.282448013 | 0.152029291 |
| 0.213967487 | 0.197150558 | 0.023408111 | 0.051186566 |
| 0.239289005 | 0.033388544 | 0.075583855 | 0.043696306 |
| 0.06317058  | 0.174012445 | 0.175010924 | 0.099641521 |
| 0.151590269 | 0.028791181 | 0.090306049 | 0.115719928 |
| 0.048822829 | 0.217282849 | 0.29795142  | 0.0276164   |
| 0.10143854  | 0.277418134 | 0.221857569 | 0.013697809 |
| 0.207907153 | 0.24899888  | 0.252028652 | 0.004432585 |
| 0.301529694 | 0.00722921  | 0.206714819 | 0.203426998 |
| 0.157995703 | 0.166670378 | 0.270956418 | 0.1409131   |
| 0.165736029 | 0.123537239 | 0.161619699 | 0.224561614 |
| 0.119472089 | 0.095512265 | 0.210406123 | 0.100066848 |
| 0.192367085 | 0.067152935 | 0.04462393  | 0.041503719 |
| 0.036957285 | 0.230267557 | 0.170550806 | 0.030339536 |
| 0.203269916 | 0.091360941 | 0.274766121 | 0.215675479 |
| 0.292133021 | 0.038990784 | 0.141158335 | 0.222266577 |
| 0.029078443 | 0.040961092 | 0.017344002 | 0.125510565 |
| 0.16076544  | 1           | 0.10283779  | 0.120049648 |
| 0.173857904 | 0.246490491 | 0.166693718 | 0.252108515 |

|             |             |             |             |
|-------------|-------------|-------------|-------------|
| 0.148439505 | 0.119346751 | 0.042952425 | 0.066640703 |
| 0.100085374 | 0.071618252 | 0.284675097 | 0.001735881 |
| 0.245054856 | 0.035196351 | 0.288985149 | 0.225679119 |
| 0.133003034 | 0.255623487 | 0.031851883 | 0.041169108 |
| 0.018808071 | 0.071281478 | 0.102873493 | 0.205410395 |
| 0.122306171 | 0.087300373 | 0.256286597 | 0.046221071 |
| 0.257738108 | 0.196949096 | 0.11142449  | 0.103812737 |
| 0.129613464 | 0.081542074 | 0.213493481 | 0.033523847 |
| 0.165416976 | 0.150135268 | 0.090009103 | 0.237167399 |
| 0.180476146 | 0.268725545 | 0.033314724 | 0.286326439 |
| 0.202765807 | 0.065885493 | 0.290126995 | 0.108939367 |
| 0.039913966 | 0.069929805 | 0.131486259 | 0.070449445 |
| 0.073161311 | 0.135238166 | 0.002091863 | 0.060629177 |
| 0.316309999 | 0.06402029  | 0.170861696 | 0.217631562 |
| 0.168159549 | 0.289988493 | 0.064365566 | 0.101517545 |
| 0.195627374 | 0.214737091 | 0.09419341  | 0.190032251 |
| 0.236523323 | 0.076403113 | 0.142791412 | 0.0033843   |
| 0.226792218 | 0.194159949 | 0.060226875 | 0.03402836  |
| 0.008999603 | 0.13239089  | 0.182809056 | 0.021197339 |
| 0.321257926 | 0.074258424 | 0.111619302 | 0.225445546 |
| 0.092875683 | 0.220484206 | 0.098790042 | 0.316045275 |
| 0.006101861 | 0.153619259 | 0.162463976 | 0.12767234  |
| 0.141885171 | 0.212322381 | 0.312928263 | 0.211829363 |
| 0.026411072 | 0.096201971 | 0.002468547 | 0.225202299 |
| 0.190440309 | 0.189207598 | 0.127935014 | 0.031240068 |
| 0.263303842 | 0.205770295 | 0.099959655 | 0.134436351 |
| 0.013069703 | 0.295552871 | 0.151181114 | 0.230605791 |
| 0.060914607 | 0.145705599 | 0.032450581 | 0.197176425 |
| 0.187364704 | 0.102021342 | 0.168578985 | 0.05645049  |
| 0.219564363 | 0.166613586 | 0.05738539  | 0.067924397 |
| 0.135428954 | 0.035121817 | 0.067734701 | 0.287452589 |
| 0.175376816 | 0.214701108 | 0.33963344  | 0.141696159 |
| 0.195970277 | 0.188786513 | 0.139646799 | 0.263241199 |
| 0.080557687 | 0.211793572 | 0.278673239 | 0.237678741 |
| 0.283918409 | 0.154383722 | 0.180097768 | 0.208322063 |
| 0.199356684 | 0.04275099  | 0.086300137 | 0.211025645 |
| 0.17398258  | 0.242844096 | 0.080421324 | 0.19118152  |
| 0.034528877 | 0.059887532 | 0.099193853 | 0.089528096 |
| 0.237083438 | 0.212730538 | 0.129552896 | 0.265140045 |
| 0.087338736 | 0.027129957 | 0.278137382 | 0.033188556 |
| 0.113480183 | 0.288387161 | 0.170097002 | 0.183280174 |
| 0.114311271 | 0.163388571 | 0.10472443  | 0.002001099 |
| 0.288982454 | 0.019384365 | 0.11836494  | 0.163908369 |
| 0.080998497 | 0.022723538 | 0.232497099 | 0.329347404 |
| 0.151811117 | 0.043541739 | 0.065048553 | 0.238770296 |
| 0.094458585 | 0.086013664 | 0.111246525 | 0.147639208 |
| 0.162515649 | 0.0845024   | 0.114534171 | 0.139633921 |
| 0.204491114 | 0.091458128 |             |             |
| REV1        | 0.046389603 | 0.443616817 | 0.040695995 |
| 0.072058595 | 0.179570422 | 0.24274706  | 0.031068766 |
| 0.070866714 | 0.340168631 | 0.225559952 | 0.201960204 |
| 0.007781723 | 0.077319625 | 0.42922609  | 0.029467062 |
| 0.244378398 | 0.015702598 | 0.054396581 | 0.057130357 |
| 0.139766963 | 0.139661096 | 0.205272752 | 0.225751034 |

|             |             |             |             |
|-------------|-------------|-------------|-------------|
| 0.155098549 | 0.174042859 | 0.244338841 | 0.251045566 |
| 0.507868666 | 0.202112742 | 0.340252863 | 0.166339223 |
| 0.372352666 | 0.194019332 | 0.239299529 | 0.01059205  |
| 0.239187533 | 0.010912682 | 0.410074211 | 0.124050694 |
| 0.104083564 | 0.312620031 | 0.237538271 | 0.120736622 |
| 0.220395124 | 0.020915189 | 0.206787194 | 0.307697717 |
| 0.243101609 | 0.175480317 | 0.044623799 | 0.356669434 |
| 0.215724802 | 0.272535902 | 0.370986382 | 0.001415026 |
| 0.190793519 | 0.082783772 | 0.155741631 | 0.516197346 |
| 0.134088032 | 0.063156759 | 0.195969724 | 0.166259368 |
| 0.273123148 | 0.286003639 | 0.187018384 | 0.215435585 |
| 0.482271955 | 0.11259055  | 0.386425937 | 0.099637117 |
| 0.204869751 | 0.0229125   | 0.114032343 | 0.069831316 |
| 0.227738131 | 0.104936415 | 0.196299375 | 0.184331489 |
| 0.437106584 | 0.504533883 | 0.161226039 | 0.506468112 |
| 0.061083256 | 0.20799801  | 0.163726981 | 0.216937517 |
| 0.289087161 | 0.049414158 | 0.317503125 | 0.497279948 |
| 0.034295593 | 0.286040329 | 0.306297798 | 0.09509265  |
| 0.441150589 | 0.201328581 | 0.250379174 | 0.113852671 |
| 0.274579717 | 0.182468864 | 0.479439512 | 0.195509855 |
| 0.193212984 | 0.050401049 | 0.495749786 | 0.197514579 |
| 0.156224339 | 0.051377914 | 0.108572751 | 0.44718341  |
| 0.282330761 | 0.489380715 | 0.406075662 | 0.287467854 |
| 0.21074581  | 0.489247545 | 0.304938515 | 0.410251719 |
| 0.187190717 | 0.528928654 | 0.105506738 | 0.020726608 |
| 0.049653015 | 0.04867001  | 0.141134219 | 0.257578639 |
| 0.466326945 | 0.250207678 | 0.104426726 | 0.111668896 |
| 0.421570135 | 0.494862036 | 0.526599516 | 0.35904392  |
| 0.02084236  | 0.16919848  | 0.209990445 | 0.185543858 |
| 0.266972965 | 0.072280893 | 0.144828464 | 0.498071232 |
| 0.34067277  | 0.383797689 | 0.108555986 | 0.492869573 |
| 0.115008435 | 0.486975387 | 0.464385589 | 0.082625879 |
| 0.507069236 | 0.494784639 | 0.484500489 | 0.31269628  |
| 0.476136252 | 0.18995377  | 0.041353688 | 0.337689188 |
| 0.457157046 | 0.009066358 | 0.476644244 | 0.493054841 |
| 0.498822981 | 0.432854876 | 0.499261495 | 0.510185825 |
| 0.512059939 | 0.046931694 | 0.01996833  | 0.170485578 |
| 0.498980347 | 0.350849126 | 0.078987436 | 0.238764224 |
| 0.227347795 | 0.22189296  | 0.402274173 | 0.163033591 |
| 0.481273638 | 0.449444567 | 0.499674703 | 0.327404356 |
| 0.197579048 | 0.289061869 | 0.241113908 | 0.477471652 |
| 0.025871222 | 0.067523836 | 0.041440112 | 0.245183909 |
| 0.250297196 | 0.089179837 | 0.208682405 | 0.2224304   |
| 0.112836023 | 0.20887789  | 0.225686803 | 0.281579477 |
| 0.054673697 | 0.284379861 | 0.099127707 | 0.091821606 |
| 0.018122222 | 0.129517117 | 0.083124313 | 0.08529616  |
| 0.125415834 | 0.232181954 | 0.370016434 | 0.48680535  |
| 0.200783091 | 0.142792298 | 0.33547119  | 0.453097456 |
| 0.37036409  | 0.223058255 | 0.176203713 | 0.00413639  |
| 0.118304907 | 0.214371947 | 0.12900124  | 0.274451836 |
| 0.178335123 | 0.107137735 | 0.237114089 | 0.313733637 |
| 0.157619246 | 0.095597056 | 0.186763517 | 0.410019696 |
| 0.127035851 | 0.163980957 | 0.39396587  | 0.267202934 |
| 0.002056059 | 0.160412825 | 0.401361444 | 0.076462305 |

|             |             |             |             |
|-------------|-------------|-------------|-------------|
| 0.221652839 | 0.081146474 | 0.17205813  | 0.429041293 |
| 0.179409301 | 0.125832398 | 0.502242968 | 0.319156193 |
| 0.205717023 | 0.22962548  | 0.510691047 | 0.032599379 |
| 0.208099318 | 0.027626858 | 0.181773759 | 0.240615439 |
| 0.143195687 | 0.207299228 | 0.186307776 | 0.156667116 |
| 0.102489607 | 0.508419962 | 0.373500621 | 0.499321746 |
| 0.199485754 | 0.508332153 | 0.423876215 | 0.400311276 |
| 0.264292246 | 0.216408039 | 0.095535193 | 0.380819653 |
| 0.427100911 | 0.172805824 | 0.064770133 | 0.413743459 |
| 0.208988415 | 0.302739792 | 0.078821385 | 0.456821174 |
| 0.479683613 | 0.484778422 | 0.07199344  | 0.292539728 |
| 0.31700044  | 0.127930561 | 0.398205842 | 0.51027244  |
| 0.201200487 | 0.175698769 | 0.163074081 | 0.344214264 |
| 0.109497082 | 0.107315076 | 0.299772447 | 0.137519975 |
| 0.015494877 | 0.052287286 | 0.038272833 | 0.077809305 |
| 0.098541967 | 0.336276991 | 0.290059638 | 0.502106447 |
| 0.057805426 | 0.412445486 | 0.185756795 | 0.129150094 |
| 0.38930286  | 0.198592387 | 0.246570457 | 0.272034399 |
| 0.19374028  | 0.008957831 | 0.053888992 | 0.499545802 |
| 0.0334861   | 0.141301375 | 0.191246385 | 0.000937423 |
| 0.023441337 | 0.424536649 | 0.089817127 | 0.177153492 |
| 0.456764659 | 0.186613357 | 0.134363055 | 0.196647718 |
| 0.260126382 | 0.053595907 | 0.001795707 | 0.482109018 |
| 0.496663651 | 0.463132582 | 0.494904443 | 0.476366896 |
| 0.428644128 | 0.375340065 | 0.348782066 | 0.228194119 |
| 0.056333676 | 0.060591209 | 0.102585881 | 0.13466891  |
| 0.002742129 | 0.326425314 | 0.182273401 | 0.094582883 |
| 0.361035638 | 0.210068391 | 0.020809323 | 0.240516504 |
| 0.010392453 | 0.131802142 | 0.168331202 | 0.121680338 |
| 0.275037788 | 0.008598406 | 0.13801055  | 0.164147378 |
| 0.430315898 | 0.305101802 | 0.23071633  | 0.528053952 |
| 0.175751255 | 0.112680552 | 0.154860449 | 0.329980171 |
| 0.036328719 | 0.070202059 | 0.209020084 | 0.032927831 |
| 0.183770828 | 0.464031925 | 0.230959162 | 0.040226062 |
| 0.14937885  | 0.002352032 | 0.336348795 | 0.518390681 |
| 0.487442007 | 0.494929401 | 0.489742742 | 0.156748173 |
| 0.491637592 | 0.100855297 | 0.525786707 | 0.376686714 |
| 0.22134686  | 0.000223571 | 0.002987684 | 0.473493832 |
| 0.21989781  | 0.060944513 | 0.091621254 | 0.225322371 |
| 0.049597339 | 0.091170718 | 0.041526727 | 0.098752947 |
| 0.320851264 | 0.125407874 | 0.105900645 | 0.468821144 |
| 0.114970626 | 0.127837578 | 0.240177856 | 0.070272735 |
| 0.281807137 | 0.026147826 | 0.068301498 | 0.003704083 |
| 0.280704617 | 0.10948376  | 0.47454176  | 0.508467763 |
| 0.46560514  | 0.297927113 | 0.229126295 | 0.215504222 |
| 0.432200839 | 0.091258195 | 0.258915142 | 0.087260853 |
| 0.488219024 | 0.246795335 | 0.242634666 | 0.25561718  |
| 0.460398372 | 0.442286023 | 0.017156453 | 0.326799633 |
| 0.008609365 | 0.00121899  | 0.209409326 | 0.193655945 |
| 0.060140198 | 0.185183812 | 0.189468962 | 0.147296597 |
| 0.141340023 | 0.01738201  | 0.149760571 | 0.132303797 |
| 0.172431422 | 0.178346171 | 0.141868329 | 0.205317767 |
| 0.144820085 | 0.063243423 | 0.114064405 | 0.084727717 |
| 0.165210101 | 0.278403986 | 0.173092772 | 0.011001078 |

|             |             |             |             |
|-------------|-------------|-------------|-------------|
| 0.251572601 | 0.232877909 | 0.031654223 | 0.113606243 |
| 0.398577605 | 0.467624496 | 0.017458832 | 0.00320207  |
| 0.214101666 | 0.167528844 | 0.476843335 | 0.510115927 |
| 0.516969659 | 0.484495287 | 0.37005758  | 0.054910501 |
| 0.038362989 | 0.185681982 | 0.162084134 | 0.050965195 |
| 0.503581775 | 0.04888605  | 0.501232781 | 0.178836856 |
| 0.074853612 | 0.109541544 | 0.016354036 | 0.046266096 |
| 0.259503056 | 0.110601864 | 0.086233111 | 0.104429716 |
| 0.147500419 | 0.162112332 | 0.026953634 | 0.100700365 |
| 0.26619231  | 0.096666884 | 0.091200377 | 0.200810328 |
| 0.335163943 | 0.197054074 | 0.341599121 | 0.403912196 |
| 0.090879617 | 0.063559601 | 0.152931519 | 0.340407629 |
| 0.417632252 | 0.280442845 | 0.017847737 | 0.472489995 |
| 0.481476875 | 0.331294085 | 0.503723698 | 0.331776091 |
| 0.060159477 | 0.19586838  | 0.189772195 | 0.181348272 |
| 0.105414518 | 0.239305819 | 0.130067571 | 0.036164543 |
| 0.27348169  | 0.471673452 | 0.390504455 | 0.082076549 |
| 0.300560455 | 0.098363274 | 0.042042082 | 0.45871033  |
| 0.090181731 | 0.044408888 | 0.241371332 | 0.411225909 |
| 0.001063012 | 0.100265921 | 0.478538557 | 0.13698576  |
| 0.506852722 | 0.451122173 | 0.405223193 | 0.173853079 |
| 0.001196322 | 0.313533012 | 0.22941045  | 0.205232914 |
| 0.414084583 | 0.302757739 | 0.126780643 | 0.033712554 |
| 0.229826575 | 0.072233232 | 0.055499775 | 0.22863232  |
| 0.094495762 | 0.290450488 | 0.134727071 | 0.123491125 |
| 0.101545619 | 0.082493513 | 0.164543769 | 0.138294399 |
| 0.100289653 | 0.169488526 | 0.272647575 | 0.239970842 |
| 0.096291368 | 0.400909674 | 0.338134583 | 0.015632159 |
| 0.21752977  | 0.371378726 | 0.429337659 | 0.000240015 |
| 0.328770864 | 0.002993291 | 0.0962058   | 0.105713147 |
| 0.101922543 | 0.101589957 | 0.148266753 | 0.158238701 |
| 0.234042497 | 0.112758438 | 0.141595561 | 0.138899292 |
| 0.083064604 | 0.133344647 | 0.257557372 | 0.203313972 |
| 0.141712632 | 0.069057634 | 0.101416052 | 0.110829366 |
| 0.02723748  | 0.482736869 | 0.2103974   | 0.067868618 |
| 0.135119504 | 0.211973142 | 0.30192881  | 0.506926465 |
| 0.395204464 | 0.121652799 | 0.180448517 | 0.435219567 |
| 0.169431301 | 0.192753717 | 0.039795062 | 0.243358837 |
| 0.125595993 | 0.10283779  | 1           | 0.198380236 |
| 0.346614059 | 0.3691774   | 0.204209537 | 0.426977542 |
| 0.203858575 | 0.194360892 | 0.217780887 | 0.037046084 |
| 0.086732223 | 0.099137171 | 0.134738907 | 0.000620602 |
| 0.236488114 | 0.159169423 | 0.442823761 | 0.488092778 |
| 0.18879526  | 0.357415693 | 0.203927701 | 0.04175673  |
| 0.21439919  | 0.176680605 | 0.096552211 | 0.400759234 |
| 0.146663863 | 0.107010593 | 0.158580519 | 0.218237459 |
| 0.365266943 | 0.367230833 | 0.150107691 | 0.137602518 |
| 0.138272645 | 0.14783135  | 0.476994668 | 0.082494425 |
| 0.290881546 | 0.097097029 | 0.29042168  | 0.135909508 |
| 0.107341278 | 0.519532341 | 0.038150567 | 0.519481683 |
| 0.156961236 | 0.116270639 | 0.465912668 | 0.195662501 |
| 0.201514907 | 0.073029962 | 0.124617694 | 0.23789227  |
| 0.120943134 | 0.216946589 | 0.018163925 | 0.030552128 |
| 0.229915396 | 0.198598844 | 0.375606309 | 0.295563775 |

|             |             |             |             |
|-------------|-------------|-------------|-------------|
| 0.136177082 | 0.267421699 | 0.14431534  | 0.157609113 |
| 0.497731638 | 0.506154959 | 0.111529365 | 0.186944091 |
| 0.26250943  | 0.052932637 | 0.308621161 | 0.015124499 |
| 0.276234578 | 0.296804154 | 0.224599095 | 0.029393024 |
| 0.009454848 | 0.125626898 | 0.268259966 | 0.053792664 |
| 0.450659956 | 0.153517633 | 0.283213536 | 0.373976438 |
| 0.141605701 | 0.497633667 | 0.061474193 | 0.312653603 |
| 0.030166828 | 0.182848261 | 0.231059484 | 0.221911386 |
| 0.103787547 | 0.152493353 | 0.279283303 | 0.132952185 |
| 0.014670829 | 0.134525206 | 0.000454257 | 0.379750663 |
| 0.475564027 | 0.18113379  | 0.176540501 | 0.236938903 |
| 0.189860019 | 0.370278924 | 0.119199748 | 0.262331611 |
| 0.004766792 | 0.221548813 | 0.119553795 | 0.39478424  |
| 0.13117764  | 0.217460393 | 0.030993075 | 0.171733778 |
| 0.464562299 | 0.127863407 | 0.214587705 | 0.162994441 |
| 0.505330683 | 0.395387959 | 0.152127838 | 0.147864478 |
| 0.315222464 | 0.046769935 | 0.258496869 | 0.515602513 |
| 0.085847264 | 0.117349442 | 0.392733595 | 0.088833055 |
| 0.178997246 | 0.386300698 | 0.306281418 | 0.51811586  |
| 0.030222353 | 0.158689161 | 0.372928797 | 0.442938728 |
| 0.229549479 | 0.094190741 | 0.133797498 | 0.10567255  |
| 0.465824011 | 0.053761822 | 0.145757231 | 0.277197187 |
| 0.114251481 | 0.214317589 | 0.283443976 | 0.098126483 |
| 0.017059515 | 0.099695096 | 0.226922236 | 0.092043671 |
| 0.160225885 | 0.1852764   | 0.123137984 | 0.350410053 |
| 0.069492967 | 0.00935455  | 0.424517362 | 0.008456279 |
| 0.227905943 | 0.275350563 | 0.146703841 | 0.199596286 |
| 0.158015334 | 0.225405664 | 0.183323719 | 0.000209119 |
| 0.353663465 | 0.041691167 | 0.187153391 | 0.10406729  |
| 0.163573883 | 0.027403546 | 0.458135851 | 0.488315403 |
| 0.24501462  | 0.245294159 | 0.212859791 | 0.459176393 |
| 0.090927505 | 0.229710049 | 0.201662064 | 0.335152966 |
| 0.141366653 | 0.233684494 | 0.250340686 | 0.223855328 |
| 0.319667965 | 0.169858666 |             |             |
| RFC3        | 0.108491574 | 0.374686364 | 0.104354226 |
| 0.155576976 | 0.142799065 | 0.213014392 | 0.089785848 |
| 0.124826891 | 0.284512754 | 0.164514552 | 0.202177411 |
| 0.051654948 | 0.021249532 | 0.394837085 | 0.073645073 |
| 0.198012583 | 0.054875042 | 0.124038183 | 0.047665802 |
| 0.144942573 | 0.144385527 | 0.152108249 | 0.237663378 |
| 0.132610735 | 0.258667126 | 0.23484853  | 0.166512912 |
| 0.425801276 | 0.116463555 | 0.249641421 | 0.121159747 |
| 0.408133455 | 0.155094622 | 0.16729314  | 0.047637039 |
| 0.210343374 | 0.003177648 | 0.44695182  | 0.170558839 |
| 0.05885307  | 0.347553717 | 0.200073362 | 0.171727117 |
| 0.225176446 | 0.087326981 | 0.107968864 | 0.233813087 |
| 0.201270572 | 0.150375938 | 0.111315485 | 0.276760006 |
| 0.188313981 | 0.261616649 | 0.302800621 | 0.006319058 |
| 0.121071654 | 0.023652799 | 0.084453987 | 0.450798872 |
| 0.175814279 | 0.108884363 | 0.131254839 | 0.148950699 |
| 0.199175631 | 0.219041924 | 0.165218069 | 0.212728712 |
| 0.447515814 | 0.066519174 | 0.267562633 | 0.120037504 |
| 0.235378037 | 0.06726589  | 0.172184975 | 0.109858459 |
| 0.184874852 | 0.136489042 | 0.163362559 | 0.126442212 |

|             |             |             |             |
|-------------|-------------|-------------|-------------|
| 0.404619999 | 0.472396614 | 0.170598854 | 0.473693554 |
| 0.038444483 | 0.15005587  | 0.12073855  | 0.212847592 |
| 0.249965181 | 0.093591657 | 0.299725763 | 0.473660533 |
| 0.072415072 | 0.217410631 | 0.28844616  | 0.15574357  |
| 0.36001609  | 0.099182576 | 0.225121037 | 0.065350682 |
| 0.190560788 | 0.177217905 | 0.437884793 | 0.245358807 |
| 0.132117873 | 0.12083223  | 0.476305793 | 0.137358688 |
| 0.168217568 | 0.124326865 | 0.125878713 | 0.338297031 |
| 0.258699151 | 0.421437312 | 0.350636255 | 0.291109268 |
| 0.192823022 | 0.437468562 | 0.292832148 | 0.343273269 |
| 0.066227759 | 0.462062841 | 0.170713895 | 0.058302745 |
| 0.114824614 | 0.073013967 | 0.100828749 | 0.248112863 |
| 0.370904952 | 0.221625469 | 0.186050313 | 0.153622503 |
| 0.349716228 | 0.459206654 | 0.464270763 | 0.340238626 |
| 0.07651112  | 0.089860331 | 0.198955596 | 0.163889501 |
| 0.255623359 | 0.112440065 | 0.111679668 | 0.491474996 |
| 0.362303522 | 0.321542471 | 0.162483154 | 0.481658449 |
| 0.14326763  | 0.451494756 | 0.395716832 | 0.160638853 |
| 0.480708675 | 0.476633594 | 0.43131842  | 0.222380173 |
| 0.434812089 | 0.239224976 | 0.04131233  | 0.319900393 |
| 0.410637951 | 0.007348229 | 0.371711105 | 0.400559949 |
| 0.459054983 | 0.350766801 | 0.429225546 | 0.412899752 |
| 0.455276194 | 0.104222242 | 0.014397733 | 0.170566769 |
| 0.481422068 | 0.356755537 | 0.079127403 | 0.213674036 |
| 0.17400533  | 0.239472837 | 0.284482664 | 0.190711194 |
| 0.449185034 | 0.361009233 | 0.395946021 | 0.310950345 |
| 0.195221143 | 0.325307597 | 0.164933919 | 0.46686395  |
| 0.063534999 | 0.150272428 | 0.099717051 | 0.221768695 |
| 0.197889457 | 0.133410741 | 0.251951795 | 0.167610134 |
| 0.150561828 | 0.206437162 | 0.12995237  | 0.208329391 |
| 0.125578422 | 0.231821822 | 0.150609641 | 0.190387131 |
| 0.068293731 | 0.19783912  | 0.184473957 | 0.1235929   |
| 0.148766883 | 0.326857587 | 0.271238262 | 0.396705888 |
| 0.169148262 | 0.220780168 | 0.291321997 | 0.401561999 |
| 0.372455131 | 0.181155607 | 0.203815763 | 0.026686995 |
| 0.194957639 | 0.135304659 | 0.066199749 | 0.182140803 |
| 0.246929267 | 0.189892307 | 0.218563035 | 0.242774516 |
| 0.242214681 | 0.135631159 | 0.195598807 | 0.412674369 |
| 0.195839586 | 0.163135969 | 0.366449477 | 0.225620621 |
| 0.01384153  | 0.244063822 | 0.344717493 | 0.074139094 |
| 0.23645423  | 0.062218006 | 0.103094387 | 0.386788402 |
| 0.129387024 | 0.098056492 | 0.385792895 | 0.227177121 |
| 0.183803079 | 0.292732732 | 0.43729949  | 0.024363692 |
| 0.148711494 | 0.039960685 | 0.196777403 | 0.183083468 |
| 0.200189368 | 0.212971661 | 0.138015664 | 0.134568534 |
| 0.166238871 | 0.462829676 | 0.309181481 | 0.432727966 |
| 0.194244523 | 0.44810476  | 0.356120629 | 0.372559117 |
| 0.233636103 | 0.168251726 | 0.047319542 | 0.356291974 |
| 0.370369937 | 0.175285499 | 0.130144054 | 0.309463447 |
| 0.198494021 | 0.237200828 | 0.051150875 | 0.429724852 |
| 0.449539839 | 0.453617911 | 0.110255574 | 0.246417724 |
| 0.332944296 | 0.195198154 | 0.299817336 | 0.44111696  |
| 0.18069665  | 0.188812127 | 0.182105594 | 0.287037764 |
| 0.172394979 | 0.103966534 | 0.28295961  | 0.054973498 |

|             |             |             |             |
|-------------|-------------|-------------|-------------|
| 0.002873563 | 0.112024048 | 0.114359289 | 0.111582348 |
| 0.065811672 | 0.217680078 | 0.231732885 | 0.45105624  |
| 0.124238704 | 0.351530616 | 0.191909887 | 0.201738319 |
| 0.414763917 | 0.162307935 | 0.159305357 | 0.185064828 |
| 0.205909698 | 0.029694267 | 0.113832256 | 0.488922646 |
| 0.084705327 | 0.101457779 | 0.192100278 | 0.005316902 |
| 0.094841966 | 0.333657165 | 0.17159853  | 0.261603102 |
| 0.361534228 | 0.270649682 | 0.216789886 | 0.206862807 |
| 0.218756681 | 0.110201536 | 0.00392096  | 0.40586054  |
| 0.408910867 | 0.384182169 | 0.41438685  | 0.411011035 |
| 0.354619761 | 0.259163077 | 0.294346586 | 0.232948393 |
| 0.120832848 | 0.121350033 | 0.1134093   | 0.187941641 |
| 0.009987482 | 0.261242787 | 0.137764816 | 0.156717193 |
| 0.268036008 | 0.210812768 | 0.070257467 | 0.152593838 |
| 0.071300406 | 0.084389584 | 0.207685871 | 0.127152831 |
| 0.207841642 | 0.04104352  | 0.180768954 | 0.178508024 |
| 0.427236659 | 0.337171709 | 0.150732895 | 0.464957906 |
| 0.20082675  | 0.193798796 | 0.181403902 | 0.245812306 |
| 0.100380296 | 0.080499025 | 0.211705965 | 0.037736261 |
| 0.09438575  | 0.392682928 | 0.172557445 | 0.122632923 |
| 0.210126052 | 0.024086696 | 0.366907851 | 0.464454447 |
| 0.438773982 | 0.432357936 | 0.436042074 | 0.1183678   |
| 0.455679868 | 0.029003844 | 0.449088334 | 0.366488876 |
| 0.215477083 | 0.005443261 | 0.008111332 | 0.389617421 |
| 0.213267961 | 0.121907555 | 0.154317106 | 0.217916016 |
| 0.117096002 | 0.178056287 | 0.075006679 | 0.081976085 |
| 0.228729766 | 0.121554786 | 0.067696917 | 0.451560275 |
| 0.175119475 | 0.145561754 | 0.221542531 | 0.126409768 |
| 0.183438164 | 0.083086629 | 0.117145683 | 0.009523347 |
| 0.212587016 | 0.189205852 | 0.472467294 | 0.447207111 |
| 0.439928276 | 0.227169774 | 0.178823929 | 0.1740631   |
| 0.320858288 | 0.16486085  | 0.154905717 | 0.146504949 |
| 0.449812008 | 0.236901277 | 0.272253509 | 0.319107578 |
| 0.439500447 | 0.438273059 | 0.062750856 | 0.30999701  |
| 0.029837277 | 0.000794735 | 0.262929755 | 0.193362705 |
| 0.019506765 | 0.195674523 | 0.246550652 | 0.131976348 |
| 0.114245225 | 0.071778244 | 0.111833933 | 0.107812324 |
| 0.191301678 | 0.205544587 | 0.129274694 | 0.197592797 |
| 0.124958088 | 0.078457268 | 0.117500823 | 0.113642818 |
| 0.116684768 | 0.329697084 | 0.27296545  | 0.048977479 |
| 0.220945266 | 0.205777901 | 0.090201074 | 0.156922758 |
| 0.361465782 | 0.409336867 | 0.071832224 | 0.025975984 |
| 0.263924076 | 0.167048663 | 0.402384712 | 0.440188755 |
| 0.48590906  | 0.455319833 | 0.387650072 | 0.090408795 |
| 0.092763516 | 0.174370218 | 0.129603619 | 0.056004395 |
| 0.43768234  | 0.119880624 | 0.425633435 | 0.119741647 |
| 0.124719258 | 0.176924577 | 0.050978893 | 0.098732052 |
| 0.166540292 | 0.14704126  | 0.117640282 | 0.191666329 |
| 0.194139321 | 0.096311435 | 0.075929335 | 0.16568498  |
| 0.301095043 | 0.082342052 | 0.152937305 | 0.170462816 |
| 0.284334691 | 0.112697871 | 0.278782118 | 0.413436614 |
| 0.149439069 | 0.132154432 | 0.264925208 | 0.23890754  |
| 0.346062293 | 0.192095104 | 0.044149024 | 0.40743376  |
| 0.392236441 | 0.260156151 | 0.453377347 | 0.311213051 |



|             |             |             |             |
|-------------|-------------|-------------|-------------|
| 0.113445964 | 0.195513573 | 0.13045461  | 0.189775396 |
| 0.146519874 | 0.214766052 | 0.143740639 | 0.095664593 |
| 0.260138531 | 0.44349842  | 0.381328382 | 0.131963269 |
| 0.196603789 | 0.152896994 | 0.113757146 | 0.337688401 |
| 0.089433034 | 0.136869029 | 0.204336842 | 0.302538669 |
| 0.001846643 | 0.042551885 | 0.381534527 | 0.149459305 |
| 0.442813718 | 0.399261929 | 0.410430375 | 0.142892852 |
| 0.000568393 | 0.228839409 | 0.223705829 | 0.225531901 |
| 0.397773312 | 0.280710499 | 0.076878534 | 0.085343658 |
| 0.243470284 | 0.142950695 | 0.133135779 | 0.191638888 |
| 0.088080517 | 0.263090465 | 0.167704964 | 0.155736289 |
| 0.117714064 | 0.138486384 | 0.087981037 | 0.165216449 |
| 0.050101295 | 0.209212189 | 0.296762826 | 0.15489601  |
| 0.119869159 | 0.350789345 | 0.348109373 | 0.058184508 |
| 0.144559297 | 0.320651433 | 0.333683753 | 0.012249455 |
| 0.281680788 | 0.021344152 | 0.122609049 | 0.140691602 |
| 0.122867178 | 0.135622023 | 0.140748419 | 0.152712188 |
| 0.233421261 | 0.163295197 | 0.184666054 | 0.166556629 |
| 0.112087086 | 0.147907997 | 0.186914965 | 0.216995536 |
| 0.158422743 | 0.134086792 | 0.171900182 | 0.195412413 |
| 0.069276121 | 0.369249363 | 0.263172841 | 0.129150225 |
| 0.146926098 | 0.197220442 | 0.313558682 | 0.451574386 |
| 0.329915832 | 0.196012212 | 0.177367285 | 0.394284196 |
| 0.118504451 | 0.179978044 | 0.105343189 | 0.213331966 |
| 0.164918133 | 0.120049648 | 0.198380236 | 1           |
| 0.292688514 | 0.393910414 | 0.249472843 | 0.36721995  |
| 0.190021559 | 0.178634292 | 0.203592277 | 0.085967295 |
| 0.188051957 | 0.154737339 | 0.126455972 | 0.010092796 |
| 0.226861338 | 0.215616948 | 0.383524894 | 0.462662856 |
| 0.110328301 | 0.323232656 | 0.222460537 | 0.140643392 |
| 0.171948471 | 0.287930539 | 0.155077253 | 0.293771573 |
| 0.083398542 | 0.135154944 | 0.156975653 | 0.217980748 |
| 0.283477674 | 0.267740863 | 0.10759993  | 0.169784694 |
| 0.143904972 | 0.181613673 | 0.4365449   | 0.137347295 |
| 0.220578598 | 0.091407601 | 0.215681108 | 0.189414368 |
| 0.134052969 | 0.423083858 | 0.089807903 | 0.436017047 |
| 0.189391628 | 0.169407604 | 0.443775352 | 0.167759441 |
| 0.16437541  | 0.06841607  | 0.068759323 | 0.205804672 |
| 0.147929836 | 0.134607695 | 0.009059944 | 0.045200626 |
| 0.238647619 | 0.146851714 | 0.33477765  | 0.23704392  |
| 0.106133731 | 0.245847675 | 0.044120169 | 0.211016299 |
| 0.457543334 | 0.473031845 | 0.214846691 | 0.21859623  |
| 0.275072991 | 0.106124708 | 0.258680484 | 0.00717238  |
| 0.237487522 | 0.206354606 | 0.201338683 | 0.068865811 |
| 0.040770763 | 0.09195873  | 0.242995164 | 0.10176353  |
| 0.377282242 | 0.080651606 | 0.209265117 | 0.266235703 |
| 0.170689973 | 0.485003439 | 0.08070694  | 0.274621232 |
| 0.074034815 | 0.176112812 | 0.155610082 | 0.183547852 |
| 0.148758184 | 0.13636561  | 0.274202569 | 0.100888339 |
| 0.05832941  | 0.14376579  | 0.007946462 | 0.423164126 |
| 0.470481936 | 0.157835188 | 0.222697028 | 0.143318675 |
| 0.188684709 | 0.293434092 | 0.138203693 | 0.187407999 |
| 0.022124265 | 0.183416281 | 0.135971391 | 0.363348588 |
| 0.143817822 | 0.206516099 | 0.062987258 | 0.139486642 |

|             |             |             |             |
|-------------|-------------|-------------|-------------|
| 0.46997864  | 0.184980371 | 0.228953047 | 0.187899628 |
| 0.434990846 | 0.298016726 | 0.205063561 | 0.086908758 |
| 0.230751338 | 0.101708396 | 0.197849609 | 0.453722428 |
| 0.122030993 | 0.095252819 | 0.33136211  | 0.172248913 |
| 0.129465822 | 0.331787704 | 0.20375713  | 0.443055312 |
| 0.059764526 | 0.188984414 | 0.282538521 | 0.405450952 |
| 0.225226889 | 0.069824375 | 0.113279827 | 0.13834701  |
| 0.4421439   | 0.111666055 | 0.111597531 | 0.293750343 |
| 0.102380394 | 0.189494215 | 0.20239131  | 0.096285448 |
| 0.052011149 | 0.110553338 | 0.187843313 | 0.137149743 |
| 0.192087812 | 0.192821107 | 0.116613496 | 0.352281559 |
| 0.101567713 | 0.048033604 | 0.398917502 | 0.009515798 |
| 0.219348122 | 0.225224821 | 0.155004855 | 0.164168989 |
| 0.233061342 | 0.21742024  | 0.260365816 | 0.010483728 |
| 0.301382719 | 0.017125229 | 0.132975465 | 0.138535228 |
| 0.135742572 | 0.094962768 | 0.407131978 | 0.418757483 |
| 0.202293539 | 0.133650386 | 0.157971916 | 0.405881871 |
| 0.058422732 | 0.131697191 | 0.1502497   | 0.278416593 |
| 0.083012093 | 0.211431544 | 0.192624629 | 0.17094946  |
| 0.279981782 | 0.16070932  |             |             |
| RFC4        | 0.072842875 | 0.435560825 | 0.060078932 |
| 0.105409443 | 0.238735916 | 0.306743576 | 0.069265027 |
| 0.123845707 | 0.348342565 | 0.342223454 | 0.269870121 |
| 0.018586027 | 0.078247279 | 0.435672744 | 0.061753818 |
| 0.32583851  | 0.031926256 | 0.106199619 | 0.097518952 |
| 0.22885623  | 0.229510553 | 0.267526275 | 0.326664226 |
| 0.242655516 | 0.183645102 | 0.315359346 | 0.349926815 |
| 0.488764866 | 0.242758908 | 0.335591571 | 0.200444386 |
| 0.398634484 | 0.258707956 | 0.328014548 | 0.0177962   |
| 0.341437591 | 0.022797112 | 0.439852467 | 0.219040929 |
| 0.113228421 | 0.324044884 | 0.330593571 | 0.185485786 |
| 0.366995194 | 0.039100421 | 0.23112253  | 0.365423937 |
| 0.314402202 | 0.252538888 | 0.07828516  | 0.349057506 |
| 0.356447058 | 0.273633262 | 0.365052079 | 0.003433011 |
| 0.251137088 | 0.094189149 | 0.222030672 | 0.490775183 |
| 0.164021346 | 0.10445828  | 0.322450845 | 0.252422359 |
| 0.367685384 | 0.334523356 | 0.21698399  | 0.375766087 |
| 0.480120553 | 0.169964143 | 0.366752891 | 0.124941416 |
| 0.347573564 | 0.047427767 | 0.139954288 | 0.106604827 |
| 0.341921882 | 0.157542722 | 0.262768172 | 0.265945749 |
| 0.443296426 | 0.50807165  | 0.211109128 | 0.506928786 |
| 0.131872523 | 0.289691741 | 0.224402028 | 0.246941523 |
| 0.334813648 | 0.110034814 | 0.316720042 | 0.504249828 |
| 0.067386675 | 0.371157608 | 0.36218803  | 0.135509983 |
| 0.406029816 | 0.279197153 | 0.362077915 | 0.136449777 |
| 0.299028206 | 0.295964977 | 0.4906836   | 0.239457658 |
| 0.259838683 | 0.085381264 | 0.489839921 | 0.266105483 |
| 0.216947821 | 0.082927488 | 0.206230121 | 0.43715427  |
| 0.341837149 | 0.471809487 | 0.428328359 | 0.335095926 |
| 0.322947838 | 0.476481642 | 0.31840734  | 0.404985439 |
| 0.197098195 | 0.517393228 | 0.156117748 | 0.037023634 |
| 0.083129015 | 0.074190792 | 0.248796813 | 0.256998172 |
| 0.43784717  | 0.280013553 | 0.173130951 | 0.191504956 |
| 0.432957259 | 0.483054793 | 0.527698451 | 0.383014088 |

|             |             |             |             |
|-------------|-------------|-------------|-------------|
| 0.040649204 | 0.255354258 | 0.319734261 | 0.240927204 |
| 0.33247428  | 0.116673733 | 0.215482303 | 0.505696234 |
| 0.336396742 | 0.389727461 | 0.161035883 | 0.494843975 |
| 0.216204671 | 0.48137604  | 0.443646337 | 0.139333624 |
| 0.503195525 | 0.483653399 | 0.478096065 | 0.313868828 |
| 0.4498154   | 0.27088575  | 0.119214396 | 0.364350968 |
| 0.44646476  | 0.011707014 | 0.466664653 | 0.488848196 |
| 0.496185024 | 0.427331856 | 0.501976408 | 0.486076336 |
| 0.501586661 | 0.079321325 | 0.059384613 | 0.239515245 |
| 0.503086918 | 0.346217877 | 0.122342529 | 0.360827685 |
| 0.306374597 | 0.329480659 | 0.383495063 | 0.253928088 |
| 0.487093887 | 0.418333117 | 0.482099793 | 0.357076128 |
| 0.326020652 | 0.293902374 | 0.334459728 | 0.464868491 |
| 0.038515857 | 0.108427332 | 0.05932229  | 0.269011887 |
| 0.308494125 | 0.142355176 | 0.332847604 | 0.326697887 |
| 0.159737392 | 0.320934456 | 0.290716505 | 0.302251103 |
| 0.067806595 | 0.362768204 | 0.148407328 | 0.17955322  |
| 0.035872722 | 0.140554538 | 0.155368923 | 0.117077104 |
| 0.203606968 | 0.25514936  | 0.366966316 | 0.470994125 |
| 0.328590886 | 0.165498526 | 0.355015818 | 0.438844273 |
| 0.384859069 | 0.303116158 | 0.205754677 | 0.006497412 |
| 0.259299086 | 0.34642574  | 0.185558303 | 0.350953287 |
| 0.187565614 | 0.24210917  | 0.343202565 | 0.300973451 |
| 0.2449414   | 0.167752328 | 0.333702492 | 0.403748959 |
| 0.156210955 | 0.226000984 | 0.40610903  | 0.380028461 |
| 0.003281655 | 0.277422083 | 0.39416596  | 0.143992396 |
| 0.307628814 | 0.112688765 | 0.193488475 | 0.441762161 |
| 0.287588387 | 0.214237595 | 0.471609452 | 0.304505365 |
| 0.298494502 | 0.247230318 | 0.507783922 | 0.082721779 |
| 0.320175511 | 0.031568696 | 0.222754141 | 0.345937959 |
| 0.2164195   | 0.246599456 | 0.25785246  | 0.211557108 |
| 0.124020769 | 0.511089669 | 0.346088646 | 0.489680724 |
| 0.346146384 | 0.511299727 | 0.421139935 | 0.396802392 |
| 0.295828592 | 0.362593861 | 0.133945749 | 0.385666018 |
| 0.427883799 | 0.319055849 | 0.08596771  | 0.41769191  |
| 0.377144321 | 0.339774937 | 0.092658028 | 0.466492251 |
| 0.467569638 | 0.480724176 | 0.119706089 | 0.300373402 |
| 0.317697662 | 0.189954911 | 0.368295757 | 0.511432886 |
| 0.367742599 | 0.323317013 | 0.287510016 | 0.339761276 |
| 0.154079457 | 0.198624377 | 0.299245715 | 0.174854844 |
| 0.007875248 | 0.093689042 | 0.069609684 | 0.125432651 |
| 0.131436192 | 0.373857139 | 0.331789755 | 0.50422423  |
| 0.104512361 | 0.379661008 | 0.230171128 | 0.241579748 |
| 0.418011194 | 0.322951788 | 0.302700171 | 0.314827125 |
| 0.212373383 | 0.012301924 | 0.089869307 | 0.509357328 |
| 0.055337244 | 0.190212083 | 0.303906259 | 0.002165414 |
| 0.05484757  | 0.414016708 | 0.104732269 | 0.19051302  |
| 0.44332831  | 0.194961499 | 0.194943661 | 0.364527255 |
| 0.264295509 | 0.087419134 | 0.001287567 | 0.485440007 |
| 0.494434727 | 0.469557678 | 0.497909186 | 0.47025967  |
| 0.44839634  | 0.353825644 | 0.358935309 | 0.296409234 |
| 0.099258759 | 0.101462713 | 0.195834037 | 0.244459319 |
| 0.007930418 | 0.294913756 | 0.262328572 | 0.126072213 |
| 0.3544939   | 0.279074549 | 0.036360272 | 0.302503362 |

|             |             |             |             |
|-------------|-------------|-------------|-------------|
| 0.018807211 | 0.176936962 | 0.317104257 | 0.200305586 |
| 0.283001941 | 0.015314507 | 0.1937653   | 0.309158528 |
| 0.414970863 | 0.317980136 | 0.306700918 | 0.512939254 |
| 0.253602781 | 0.145875176 | 0.243177838 | 0.304361842 |
| 0.071132801 | 0.158928406 | 0.354669505 | 0.038528381 |
| 0.174243396 | 0.456448152 | 0.343565595 | 0.066861523 |
| 0.225652244 | 0.004667801 | 0.336890791 | 0.511482495 |
| 0.466281236 | 0.499557758 | 0.472091521 | 0.209955873 |
| 0.484550906 | 0.126872993 | 0.514494285 | 0.389495355 |
| 0.372542826 | 0.000774803 | 0.005195108 | 0.460373457 |
| 0.323214513 | 0.069879007 | 0.140589722 | 0.280813251 |
| 0.087441889 | 0.164481334 | 0.064338477 | 0.14076291  |
| 0.332083908 | 0.184487933 | 0.149225442 | 0.479926261 |
| 0.207610264 | 0.196586253 | 0.374452812 | 0.09750068  |
| 0.319533229 | 0.046957845 | 0.101034997 | 0.005166418 |
| 0.295973313 | 0.120213116 | 0.474599683 | 0.498303262 |
| 0.463161846 | 0.302963017 | 0.347802097 | 0.295692486 |
| 0.421614983 | 0.110858288 | 0.311981657 | 0.122668612 |
| 0.479942411 | 0.322783966 | 0.247502021 | 0.263967496 |
| 0.477229454 | 0.446310101 | 0.035049576 | 0.351171489 |
| 0.008988903 | 0.001705    | 0.317491502 | 0.235808616 |
| 0.103736964 | 0.332069334 | 0.210373303 | 0.261287437 |
| 0.218449386 | 0.02895468  | 0.240041127 | 0.217773375 |
| 0.244628799 | 0.306557308 | 0.219497966 | 0.234593913 |
| 0.221990419 | 0.127255816 | 0.155720732 | 0.145873493 |
| 0.274612994 | 0.301614555 | 0.189065632 | 0.025246054 |
| 0.363133179 | 0.337824286 | 0.054794413 | 0.14240597  |
| 0.38949268  | 0.464813806 | 0.047692387 | 0.007178291 |
| 0.224863076 | 0.294048761 | 0.471442017 | 0.492639104 |
| 0.513607784 | 0.496117593 | 0.370978132 | 0.111937993 |
| 0.06409151  | 0.265810479 | 0.239993178 | 0.074308672 |
| 0.493686007 | 0.08507957  | 0.469726822 | 0.253645819 |
| 0.11505978  | 0.179276725 | 0.025935264 | 0.083251077 |
| 0.31175225  | 0.153248841 | 0.138320822 | 0.147049245 |
| 0.26678811  | 0.198202167 | 0.052192798 | 0.169021097 |
| 0.298023704 | 0.164329527 | 0.146613111 | 0.281661861 |
| 0.315145551 | 0.296695533 | 0.354732181 | 0.421592132 |
| 0.12294035  | 0.126695087 | 0.248546469 | 0.327089619 |
| 0.417181148 | 0.37636199  | 0.019277148 | 0.463246734 |
| 0.46467121  | 0.357418179 | 0.483379851 | 0.353301811 |
| 0.091098919 | 0.296342715 | 0.311104314 | 0.302040406 |
| 0.174513196 | 0.306328645 | 0.21658347  | 0.066215746 |
| 0.275957349 | 0.478399261 | 0.408289874 | 0.128303681 |
| 0.35377201  | 0.144891809 | 0.078150556 | 0.428305054 |
| 0.157502003 | 0.086007614 | 0.351309846 | 0.410664979 |
| 0.0007973   | 0.119457454 | 0.476222857 | 0.184583182 |
| 0.503718531 | 0.453730696 | 0.405563041 | 0.237892677 |
| 0.002812043 | 0.347220686 | 0.292558889 | 0.314516961 |
| 0.426161514 | 0.291340707 | 0.156918971 | 0.061527723 |
| 0.230192216 | 0.088747636 | 0.125615484 | 0.278538844 |
| 0.19459558  | 0.360977989 | 0.167795007 | 0.21431879  |
| 0.161355386 | 0.119364532 | 0.189744759 | 0.187546461 |
| 0.171598895 | 0.191548873 | 0.29180213  | 0.316928654 |
| 0.187156928 | 0.42654234  | 0.375052178 | 0.026490808 |

|             |             |             |             |
|-------------|-------------|-------------|-------------|
| 0.296788551 | 0.391994086 | 0.401648552 | 0.003064983 |
| 0.339137491 | 0.006063737 | 0.158776645 | 0.159545617 |
| 0.155267423 | 0.191500859 | 0.208800643 | 0.226984818 |
| 0.330395363 | 0.193030765 | 0.203117359 | 0.185791529 |
| 0.118408279 | 0.191719561 | 0.315819354 | 0.321332112 |
| 0.203719262 | 0.106880916 | 0.107583434 | 0.118470845 |
| 0.039670039 | 0.446634444 | 0.214202207 | 0.078788576 |
| 0.190125162 | 0.340415527 | 0.303787883 | 0.496198781 |
| 0.3703367   | 0.125633886 | 0.305954212 | 0.419839815 |
| 0.296582547 | 0.268416227 | 0.075083729 | 0.323552758 |
| 0.191661304 | 0.173857904 | 0.346614059 | 0.292688514 |
| 1           | 0.37398328  | 0.204681172 | 0.408956973 |
| 0.283654009 | 0.353194223 | 0.324459541 | 0.06423515  |
| 0.153926902 | 0.134209194 | 0.209184207 | 0.00123787  |
| 0.289237936 | 0.213783116 | 0.439525511 | 0.478836809 |
| 0.263381349 | 0.341465019 | 0.30451262  | 0.085759505 |
| 0.280326176 | 0.198280717 | 0.128920696 | 0.377238253 |
| 0.195167229 | 0.147214882 | 0.23607919  | 0.283426886 |
| 0.358498233 | 0.37071539  | 0.229007981 | 0.239131401 |
| 0.218186432 | 0.182856662 | 0.483195212 | 0.1212933   |
| 0.371517479 | 0.134740712 | 0.350653205 | 0.241602268 |
| 0.184349683 | 0.500799014 | 0.061438116 | 0.511560926 |
| 0.299634916 | 0.128277266 | 0.465404506 | 0.265421138 |
| 0.242356654 | 0.084832593 | 0.167722004 | 0.361694568 |
| 0.21574868  | 0.28245134  | 0.029270336 | 0.079171204 |
| 0.254496498 | 0.334588176 | 0.405225667 | 0.318628871 |
| 0.201321589 | 0.283067729 | 0.149293652 | 0.285542614 |
| 0.48813818  | 0.496453707 | 0.211604973 | 0.207240876 |
| 0.295256184 | 0.084779702 | 0.328421031 | 0.028160022 |
| 0.36404201  | 0.364970456 | 0.376003223 | 0.052019731 |
| 0.018636955 | 0.193989288 | 0.363459648 | 0.089623478 |
| 0.455514342 | 0.182869116 | 0.355614013 | 0.337753775 |
| 0.173713837 | 0.495900917 | 0.096236919 | 0.307930085 |
| 0.078916333 | 0.221081916 | 0.324994812 | 0.369737221 |
| 0.166283972 | 0.243624592 | 0.288286406 | 0.182148663 |
| 0.028305341 | 0.210062859 | 0.003342542 | 0.387339981 |
| 0.481544826 | 0.30534946  | 0.18855398  | 0.34220575  |
| 0.215596531 | 0.354775052 | 0.24210258  | 0.356925487 |
| 0.007118774 | 0.292995626 | 0.163564847 | 0.369926728 |
| 0.217116015 | 0.361650299 | 0.039506539 | 0.29088776  |
| 0.460371187 | 0.275819567 | 0.23202786  | 0.296336272 |
| 0.481129709 | 0.367030109 | 0.15874431  | 0.172839041 |
| 0.374661336 | 0.07211636  | 0.344777991 | 0.516878173 |
| 0.137241653 | 0.166626335 | 0.392613051 | 0.169888687 |
| 0.275529646 | 0.362782197 | 0.372224155 | 0.518183587 |
| 0.059960534 | 0.196539023 | 0.360800417 | 0.458197555 |
| 0.230409233 | 0.149436293 | 0.205842728 | 0.197000141 |
| 0.449722398 | 0.074777076 | 0.240662572 | 0.290349324 |
| 0.191655275 | 0.250388475 | 0.336987239 | 0.154310782 |
| 0.030985427 | 0.158441806 | 0.281257507 | 0.130960152 |
| 0.24699034  | 0.295505827 | 0.200569215 | 0.343780971 |
| 0.091015293 | 0.01580359  | 0.417137097 | 0.021488347 |
| 0.274677634 | 0.294977556 | 0.20000041  | 0.287268992 |
| 0.159902931 | 0.323485976 | 0.325436742 | 0.00139675  |

|             |             |             |             |
|-------------|-------------|-------------|-------------|
| 0.364997038 | 0.033463839 | 0.270503274 | 0.17498866  |
| 0.276431372 | 0.0577578   | 0.430139837 | 0.485849108 |
| 0.268374267 | 0.295318823 | 0.310855122 | 0.454139535 |
| 0.123821102 | 0.314619292 | 0.335316848 | 0.358029396 |
| 0.185557382 | 0.370224004 | 0.364290979 | 0.3017463   |
| 0.314147967 | 0.233751713 |             |             |
| RFC5        | 0.250492367 | 0.394455056 | 0.207958071 |
| 0.306958573 | 0.310942208 | 0.406377832 | 0.222614478 |
| 0.30282729  | 0.370560145 | 0.246371127 | 0.402268596 |
| 0.12849249  | 0.066091731 | 0.420835377 | 0.21168481  |
| 0.34972357  | 0.171540139 | 0.293246528 | 0.107262568 |
| 0.313849742 | 0.302699662 | 0.30348424  | 0.402957779 |
| 0.297824436 | 0.337257785 | 0.398666823 | 0.302028287 |
| 0.416308514 | 0.195830649 | 0.391619125 | 0.173234103 |
| 0.418266209 | 0.312479733 | 0.299490571 | 0.122621724 |
| 0.397370373 | 0.013811977 | 0.442603128 | 0.345195319 |
| 0.148261378 | 0.414472237 | 0.30680306  | 0.376305716 |
| 0.332437785 | 0.183045745 | 0.163344764 | 0.343124459 |
| 0.368527111 | 0.357369336 | 0.221337573 | 0.402554062 |
| 0.330457453 | 0.427772931 | 0.356921966 | 0.009148902 |
| 0.233792211 | 0.048374424 | 0.153567305 | 0.452334984 |
| 0.377996366 | 0.308327276 | 0.195654189 | 0.341873638 |
| 0.342117361 | 0.357521176 | 0.372795169 | 0.310632046 |
| 0.438926348 | 0.13982937  | 0.361819347 | 0.263078738 |
| 0.402373013 | 0.153970129 | 0.342080925 | 0.22974928  |
| 0.342907602 | 0.356882841 | 0.360122826 | 0.257329726 |
| 0.386002897 | 0.486685518 | 0.373534999 | 0.455896519 |
| 0.09452505  | 0.28990217  | 0.28507837  | 0.382193001 |
| 0.371678741 | 0.227757536 | 0.418945146 | 0.470563465 |
| 0.182860761 | 0.333241362 | 0.38380842  | 0.285691043 |
| 0.414163745 | 0.217614072 | 0.33874049  | 0.160784333 |
| 0.335430186 | 0.317840876 | 0.445088414 | 0.414573484 |
| 0.315260366 | 0.23679657  | 0.465039549 | 0.272298188 |
| 0.353089217 | 0.261664156 | 0.254322173 | 0.384567686 |
| 0.403633282 | 0.419911862 | 0.386291815 | 0.390743965 |
| 0.326499068 | 0.433696185 | 0.421433353 | 0.408109416 |
| 0.105887692 | 0.45633445  | 0.372797241 | 0.192858515 |
| 0.228864774 | 0.252743388 | 0.233690161 | 0.399862154 |
| 0.413032733 | 0.410604893 | 0.37231206  | 0.343017959 |
| 0.39400703  | 0.444163625 | 0.449732931 | 0.409518904 |
| 0.19151139  | 0.191142777 | 0.333690715 | 0.386167076 |
| 0.39349813  | 0.286321589 | 0.232408355 | 0.482188127 |
| 0.431441011 | 0.396591072 | 0.33816993  | 0.492811709 |
| 0.322604919 | 0.465547631 | 0.402271751 | 0.356531477 |
| 0.478998839 | 0.470891434 | 0.4422425   | 0.347607858 |
| 0.452042267 | 0.42539156  | 0.081250652 | 0.3998003   |
| 0.44074279  | 0.021749976 | 0.396120884 | 0.401310258 |
| 0.43890335  | 0.391957663 | 0.439586601 | 0.419983598 |
| 0.441374298 | 0.243998129 | 0.019721623 | 0.347295985 |
| 0.461842697 | 0.431333442 | 0.260867783 | 0.336425882 |
| 0.336075044 | 0.422211736 | 0.382964682 | 0.280962481 |
| 0.475217105 | 0.412908072 | 0.402266612 | 0.401552242 |
| 0.336280391 | 0.406200432 | 0.287181799 | 0.456033424 |
| 0.19849435  | 0.299758929 | 0.201030509 | 0.381300494 |

|             |             |             |             |
|-------------|-------------|-------------|-------------|
| 0.322512609 | 0.341453952 | 0.407577951 | 0.329390869 |
| 0.361713986 | 0.386552879 | 0.247441418 | 0.3422114   |
| 0.194174422 | 0.381460077 | 0.349677169 | 0.338551435 |
| 0.193409569 | 0.305361556 | 0.325030014 | 0.33216616  |
| 0.341309212 | 0.334613027 | 0.37692178  | 0.408902339 |
| 0.325546991 | 0.352812271 | 0.408053591 | 0.428790343 |
| 0.420578607 | 0.332136359 | 0.371995378 | 0.072353205 |
| 0.278026806 | 0.218210515 | 0.133251746 | 0.330154579 |
| 0.306837224 | 0.32710084  | 0.365920709 | 0.371086876 |
| 0.405784371 | 0.297645378 | 0.322442928 | 0.443448606 |
| 0.31114089  | 0.345991264 | 0.41350644  | 0.360985278 |
| 0.044526712 | 0.410930662 | 0.413554206 | 0.198668641 |
| 0.383556643 | 0.136874227 | 0.209885754 | 0.409663278 |
| 0.227734519 | 0.224174283 | 0.407149852 | 0.364504516 |
| 0.332775538 | 0.315903906 | 0.446048569 | 0.035552378 |
| 0.300899301 | 0.123198133 | 0.379888977 | 0.291943832 |
| 0.398467179 | 0.377200817 | 0.293913468 | 0.303592656 |
| 0.297861576 | 0.456129745 | 0.418611408 | 0.430497525 |
| 0.302923579 | 0.452494192 | 0.405915657 | 0.427923416 |
| 0.422378106 | 0.280733071 | 0.098850135 | 0.413520202 |
| 0.407106619 | 0.259570757 | 0.230530853 | 0.37044636  |
| 0.302364236 | 0.354179417 | 0.176815205 | 0.426940186 |
| 0.476651003 | 0.425901453 | 0.305439639 | 0.373963586 |
| 0.43128245  | 0.401178723 | 0.4027321   | 0.458741778 |
| 0.254600423 | 0.318869888 | 0.312322506 | 0.390261347 |
| 0.360313666 | 0.233706986 | 0.391128858 | 0.127572881 |
| 0.007810564 | 0.24994047  | 0.234584989 | 0.307077938 |
| 0.167733995 | 0.339873446 | 0.378805981 | 0.441532887 |
| 0.306767637 | 0.426345804 | 0.35451523  | 0.334889681 |
| 0.410578216 | 0.312297355 | 0.31665287  | 0.355575056 |
| 0.379111631 | 0.099474725 | 0.28379712  | 0.491923922 |
| 0.166026466 | 0.216323399 | 0.386221225 | 0.01651975  |
| 0.198630667 | 0.368902472 | 0.250629444 | 0.334179524 |
| 0.405118363 | 0.332576565 | 0.368055621 | 0.27918818  |
| 0.399707612 | 0.28454163  | 0.024890004 | 0.403219176 |
| 0.418460342 | 0.396592737 | 0.416732162 | 0.422375353 |
| 0.385363786 | 0.382375453 | 0.387347935 | 0.41208226  |
| 0.288034942 | 0.256251509 | 0.197816415 | 0.354287119 |
| 0.019371816 | 0.409247788 | 0.326451682 | 0.332283974 |
| 0.374556367 | 0.379010357 | 0.186825895 | 0.322355933 |
| 0.126444633 | 0.146627774 | 0.368131065 | 0.324750844 |
| 0.357011528 | 0.111780195 | 0.260940101 | 0.270826908 |
| 0.416196848 | 0.420504214 | 0.275815764 | 0.464538043 |
| 0.401096797 | 0.275994754 | 0.35624758  | 0.394023127 |
| 0.249968351 | 0.096691773 | 0.373988334 | 0.038697023 |
| 0.222698701 | 0.417867993 | 0.321449528 | 0.236459973 |
| 0.403437643 | 0.059742825 | 0.424974297 | 0.467744548 |
| 0.421412668 | 0.427059583 | 0.438211691 | 0.239648091 |
| 0.446095073 | 0.057961548 | 0.444969234 | 0.415894528 |
| 0.302518304 | 0.007823046 | 0.035074737 | 0.406945292 |
| 0.355698127 | 0.192150792 | 0.348373043 | 0.367843702 |
| 0.296577731 | 0.326440456 | 0.231378453 | 0.208898665 |
| 0.400789349 | 0.304679282 | 0.18973923  | 0.428381645 |
| 0.365216351 | 0.360698846 | 0.368405686 | 0.253241896 |

|             |             |             |             |
|-------------|-------------|-------------|-------------|
| 0.365132458 | 0.225995244 | 0.245473902 | 0.03359987  |
| 0.369440841 | 0.264650044 | 0.464456451 | 0.440681254 |
| 0.45231885  | 0.370182508 | 0.254149107 | 0.340779726 |
| 0.390832107 | 0.24775058  | 0.286073059 | 0.276213131 |
| 0.42464142  | 0.369530639 | 0.418771274 | 0.418346238 |
| 0.438283886 | 0.430567081 | 0.175358583 | 0.399235794 |
| 0.088903166 | 0.00700531  | 0.399188592 | 0.375871722 |
| 0.064847814 | 0.325417728 | 0.397186287 | 0.291342181 |
| 0.30618841  | 0.159867955 | 0.2133819   | 0.207201517 |
| 0.382554302 | 0.36709161  | 0.269956739 | 0.353725021 |
| 0.29651924  | 0.17197684  | 0.336736292 | 0.309012186 |
| 0.246654648 | 0.395712135 | 0.340203705 | 0.13652857  |
| 0.359598807 | 0.347531783 | 0.232170348 | 0.341179798 |
| 0.424674728 | 0.415974362 | 0.179865347 | 0.078275226 |
| 0.398523581 | 0.329043498 | 0.413328352 | 0.426467838 |
| 0.481307481 | 0.4629015   | 0.417130242 | 0.240766323 |
| 0.246822963 | 0.366831164 | 0.276403805 | 0.204315934 |
| 0.437981153 | 0.212060516 | 0.434737654 | 0.240048477 |
| 0.29666402  | 0.371411253 | 0.172018468 | 0.264086487 |
| 0.316728055 | 0.35543848  | 0.314981005 | 0.31396317  |
| 0.356169763 | 0.21284624  | 0.204738918 | 0.367866644 |
| 0.411655789 | 0.144590309 | 0.341686287 | 0.375387299 |
| 0.40617549  | 0.185866367 | 0.372700056 | 0.434583051 |
| 0.318480173 | 0.282391231 | 0.375497059 | 0.378554672 |
| 0.397150625 | 0.315910926 | 0.119470667 | 0.391255926 |
| 0.415452235 | 0.380646083 | 0.450472223 | 0.401122565 |
| 0.255875374 | 0.347913294 | 0.248805418 | 0.341424406 |
| 0.344580686 | 0.410503265 | 0.346248521 | 0.232660204 |
| 0.384905074 | 0.465805502 | 0.407057101 | 0.339500074 |
| 0.366173824 | 0.28329586  | 0.197106754 | 0.399764185 |
| 0.177440554 | 0.268079458 | 0.319564056 | 0.377967116 |
| 0.009342385 | 0.10938709  | 0.400269312 | 0.372780526 |
| 0.464033162 | 0.413455634 | 0.431320559 | 0.351108073 |
| 0.001370373 | 0.342128074 | 0.399448251 | 0.37474244  |
| 0.409988183 | 0.423701284 | 0.235220358 | 0.247802806 |
| 0.402017358 | 0.23660116  | 0.287335367 | 0.364829456 |
| 0.140191164 | 0.404334693 | 0.358453822 | 0.338469978 |
| 0.311060996 | 0.229629502 | 0.210891424 | 0.389634967 |
| 0.128843656 | 0.386916092 | 0.417934863 | 0.257011732 |
| 0.163370477 | 0.39804576  | 0.403857994 | 0.15707235  |
| 0.299156851 | 0.396079171 | 0.41025176  | 0.014543801 |
| 0.386100693 | 0.073053417 | 0.315115478 | 0.33742044  |
| 0.329795049 | 0.318051929 | 0.334477578 | 0.325624863 |
| 0.385690028 | 0.363185184 | 0.386875281 | 0.383249121 |
| 0.312958266 | 0.363588252 | 0.364798552 | 0.385824844 |
| 0.325606965 | 0.326571865 | 0.2490955   | 0.239155456 |
| 0.208669882 | 0.406558591 | 0.386728327 | 0.229238045 |
| 0.364073644 | 0.365391589 | 0.417116595 | 0.429629242 |
| 0.419332809 | 0.255942505 | 0.359849826 | 0.417039186 |
| 0.163941188 | 0.326703638 | 0.218456277 | 0.398577115 |
| 0.383750133 | 0.246490491 | 0.3691774   | 0.393910414 |
| 0.37398328  | 1           | 0.386645966 | 0.419181832 |
| 0.376372119 | 0.316270942 | 0.275878036 | 0.247708188 |
| 0.362467735 | 0.303131495 | 0.277987595 | 0.029721017 |



|             |             |             |             |
|-------------|-------------|-------------|-------------|
| 0.416003791 | 0.379360706 | 0.411017248 | 0.448951101 |
| 0.216029072 | 0.420938364 | 0.308090206 | 0.273033945 |
| 0.24167648  | 0.29949365  | 0.324932881 | 0.384951538 |
| 0.155080108 | 0.358442403 | 0.330632528 | 0.380536526 |
| 0.383225429 | 0.362155305 | 0.267500859 | 0.365315779 |
| 0.34754498  | 0.362567989 | 0.443740971 | 0.299817484 |
| 0.349703898 | 0.224399706 | 0.343124965 | 0.354613013 |
| 0.317564342 | 0.424697398 | 0.226472132 | 0.429046665 |
| 0.326052744 | 0.297514795 | 0.47328197  | 0.385920374 |
| 0.376700731 | 0.253608494 | 0.139574832 | 0.351958271 |
| 0.342789311 | 0.266701518 | 0.012580191 | 0.07231977  |
| 0.401066814 | 0.284408003 | 0.372944212 | 0.37915209  |
| 0.256788978 | 0.384693048 | 0.119192424 | 0.380426627 |
| 0.434160091 | 0.47141696  | 0.347851076 | 0.37743335  |
| 0.411378807 | 0.292710721 | 0.408449775 | 0.019825538 |
| 0.359097983 | 0.328116131 | 0.308954922 | 0.212542931 |
| 0.123688556 | 0.159542069 | 0.368961546 | 0.207822597 |
| 0.402329677 | 0.149811662 | 0.343420688 | 0.395957567 |
| 0.329977824 | 0.476383334 | 0.260119498 | 0.405151919 |
| 0.156012064 | 0.37975198  | 0.308504155 | 0.323750808 |
| 0.295459793 | 0.260431401 | 0.40387544  | 0.215628382 |
| 0.172789351 | 0.325450438 | 0.01090022  | 0.438038431 |
| 0.447472577 | 0.278003512 | 0.355427995 | 0.233106508 |
| 0.383961155 | 0.399452346 | 0.274473032 | 0.333576435 |
| 0.085149943 | 0.330421615 | 0.35760046  | 0.431463826 |
| 0.185484667 | 0.343899799 | 0.211127639 | 0.277967004 |
| 0.466345897 | 0.287902088 | 0.371998389 | 0.25071358  |
| 0.427461043 | 0.39262152  | 0.309192243 | 0.264182164 |
| 0.341472225 | 0.225012286 | 0.334529863 | 0.458714301 |
| 0.32675339  | 0.208131149 | 0.396691675 | 0.342772598 |
| 0.25602604  | 0.410521593 | 0.331653188 | 0.450737358 |
| 0.193663725 | 0.388922275 | 0.391065671 | 0.407073896 |
| 0.393121412 | 0.180543487 | 0.219424939 | 0.290386279 |
| 0.420738171 | 0.275238138 | 0.231183316 | 0.423898782 |
| 0.186623531 | 0.392062119 | 0.330264881 | 0.257167663 |
| 0.167163701 | 0.306378098 | 0.384388618 | 0.327478855 |
| 0.381920349 | 0.361768628 | 0.266649186 | 0.423231924 |
| 0.281160818 | 0.125859545 | 0.433866344 | 0.01690264  |
| 0.416164302 | 0.391900655 | 0.383010615 | 0.330705183 |
| 0.352126702 | 0.394294676 | 0.380851042 | 0.019128474 |
| 0.401264744 | 0.070256383 | 0.319913974 | 0.287890134 |
| 0.241448066 | 0.212718906 | 0.427052337 | 0.425106422 |
| 0.408256494 | 0.283322543 | 0.262565448 | 0.416887545 |
| 0.128290645 | 0.232198651 | 0.267538804 | 0.391059182 |
| 0.185329837 | 0.307526969 | 0.324858037 | 0.300389034 |
| 0.426264694 | 0.38388993  |             |             |
| RFWD3       | 0.301273017 | 0.279768446 | 0.234142891 |
| 0.262734755 | 0.190125478 | 0.242343058 | 0.269450155 |
| 0.3241871   | 0.230184743 | 0.114879833 | 0.261086194 |
| 0.207861236 | 0.037677082 | 0.313319069 | 0.270337093 |
| 0.18802984  | 0.247845308 | 0.314311195 | 0.084258217 |
| 0.204429501 | 0.192114893 | 0.169554225 | 0.249326712 |
| 0.184622791 | 0.322173218 | 0.243047467 | 0.151324456 |
| 0.310537071 | 0.090724566 | 0.216873308 | 0.074863579 |

|             |             |             |             |
|-------------|-------------|-------------|-------------|
| 0.362045475 | 0.183554914 | 0.145449794 | 0.17882372  |
| 0.232714771 | 0.009426088 | 0.382195656 | 0.235352453 |
| 0.076416559 | 0.359971592 | 0.156572019 | 0.292421346 |
| 0.164982851 | 0.239142918 | 0.076124958 | 0.177765862 |
| 0.220010697 | 0.246941056 | 0.242867377 | 0.222137451 |
| 0.177813309 | 0.306583272 | 0.192114716 | 0.019115736 |
| 0.115800521 | 0.017920314 | 0.066231543 | 0.358879839 |
| 0.345873265 | 0.335086173 | 0.083788712 | 0.25136465  |
| 0.184711708 | 0.207585548 | 0.296415099 | 0.150147262 |
| 0.345348176 | 0.072671345 | 0.189389261 | 0.203084894 |
| 0.231854338 | 0.189338904 | 0.32752602  | 0.221260155 |
| 0.176986065 | 0.325132143 | 0.235374524 | 0.128746852 |
| 0.272328325 | 0.407459278 | 0.296115968 | 0.361220929 |
| 0.053968474 | 0.15536317  | 0.17095166  | 0.272173355 |
| 0.223528051 | 0.230085435 | 0.252820689 | 0.377765588 |
| 0.213882067 | 0.17229424  | 0.217256445 | 0.274941357 |
| 0.286980587 | 0.108666724 | 0.170564404 | 0.094933133 |
| 0.187181818 | 0.175374397 | 0.366208971 | 0.314713181 |
| 0.198703583 | 0.250091471 | 0.384331148 | 0.144969281 |
| 0.241551048 | 0.274795573 | 0.158568813 | 0.234727801 |
| 0.224021168 | 0.317669743 | 0.238636693 | 0.245878784 |
| 0.170102105 | 0.336414257 | 0.25007998  | 0.298596856 |
| 0.04619547  | 0.354335201 | 0.327946959 | 0.28504636  |
| 0.25270705  | 0.308176832 | 0.140897048 | 0.30622541  |
| 0.280415225 | 0.293538888 | 0.333998728 | 0.258745551 |
| 0.263583982 | 0.358661903 | 0.343850265 | 0.261262371 |
| 0.264541046 | 0.090396723 | 0.171278615 | 0.295781472 |
| 0.242599046 | 0.296955137 | 0.125897499 | 0.397340547 |
| 0.339645671 | 0.238807501 | 0.299909413 | 0.423611548 |
| 0.264108398 | 0.380445799 | 0.273033811 | 0.330265641 |
| 0.38811265  | 0.388400597 | 0.348821351 | 0.18975391  |
| 0.381517942 | 0.274824248 | 0.056759843 | 0.262262304 |
| 0.36931507  | 0.016109107 | 0.265416421 | 0.286687201 |
| 0.338482886 | 0.23736379  | 0.340365057 | 0.318532046 |
| 0.34341557  | 0.276544281 | 0.007432616 | 0.242973592 |
| 0.366132458 | 0.307251714 | 0.262654054 | 0.166110092 |
| 0.192264431 | 0.25859423  | 0.22046307  | 0.154271105 |
| 0.401775259 | 0.281492418 | 0.287212303 | 0.243264036 |
| 0.195964103 | 0.360482686 | 0.137754251 | 0.380507149 |
| 0.268524542 | 0.312341328 | 0.234141574 | 0.271660179 |
| 0.167260688 | 0.321160584 | 0.249860727 | 0.188282139 |
| 0.331485722 | 0.249500702 | 0.119609498 | 0.195811248 |
| 0.213444317 | 0.201468469 | 0.311798821 | 0.285498614 |
| 0.259694757 | 0.305171588 | 0.285449795 | 0.325769446 |
| 0.266202635 | 0.359585687 | 0.20437591  | 0.305530683 |
| 0.180028183 | 0.298453349 | 0.235610978 | 0.357344719 |
| 0.362033788 | 0.174885555 | 0.314971737 | 0.092789953 |
| 0.158272684 | 0.09508846  | 0.06074799  | 0.167814029 |
| 0.328532472 | 0.234398338 | 0.204997845 | 0.217271714 |
| 0.293471236 | 0.266597406 | 0.17164802  | 0.408355983 |
| 0.27251211  | 0.230529904 | 0.283013279 | 0.18912643  |
| 0.079920208 | 0.266895674 | 0.253288167 | 0.143595582 |
| 0.254513354 | 0.084772687 | 0.111003704 | 0.277759365 |
| 0.116489842 | 0.1373429   | 0.29587857  | 0.213201985 |

|             |             |             |             |
|-------------|-------------|-------------|-------------|
| 0.202302833 | 0.316287256 | 0.346518873 | 0.016336206 |
| 0.162109106 | 0.128291198 | 0.283669797 | 0.148428165 |
| 0.308328686 | 0.282381862 | 0.171841247 | 0.193999831 |
| 0.279988582 | 0.359880857 | 0.291979009 | 0.329245544 |
| 0.146607104 | 0.351965434 | 0.257326642 | 0.309001667 |
| 0.275608878 | 0.136227916 | 0.044929924 | 0.249089493 |
| 0.265948135 | 0.129321529 | 0.239163315 | 0.206158548 |
| 0.146194719 | 0.193614754 | 0.147215106 | 0.332725706 |
| 0.410860461 | 0.333716264 | 0.318515956 | 0.233024567 |
| 0.294403802 | 0.333555081 | 0.262700649 | 0.366329978 |
| 0.11500809  | 0.170600961 | 0.167073333 | 0.261490245 |
| 0.322021931 | 0.147380482 | 0.31878321  | 0.059312777 |
| 0.003676508 | 0.279479823 | 0.270846227 | 0.291250623 |
| 0.100717743 | 0.173611635 | 0.215085335 | 0.342121901 |
| 0.336761677 | 0.336581419 | 0.276494179 | 0.20685526  |
| 0.313141403 | 0.174974366 | 0.168058876 | 0.207410067 |
| 0.308578202 | 0.124808725 | 0.289076676 | 0.410599904 |
| 0.193421505 | 0.122305495 | 0.264657213 | 0.022490459 |
| 0.249995001 | 0.219893291 | 0.2490053   | 0.349059951 |
| 0.300446991 | 0.329387545 | 0.295729804 | 0.132803068 |
| 0.277845867 | 0.317868669 | 0.038527665 | 0.300821601 |
| 0.326047578 | 0.311696068 | 0.324085572 | 0.344957039 |
| 0.269472677 | 0.22326401  | 0.222284557 | 0.260062836 |
| 0.312776609 | 0.261065232 | 0.10100613  | 0.236961188 |
| 0.023326378 | 0.268246112 | 0.21371698  | 0.330586801 |
| 0.210988035 | 0.265803269 | 0.273863481 | 0.187457359 |
| 0.166890455 | 0.065435207 | 0.243182867 | 0.268281894 |
| 0.228929817 | 0.177032264 | 0.13658871  | 0.134560815 |
| 0.349172292 | 0.321122217 | 0.132400835 | 0.363684746 |
| 0.275867284 | 0.231196833 | 0.221255551 | 0.245560144 |
| 0.298183976 | 0.048439765 | 0.219012542 | 0.016810956 |
| 0.154414925 | 0.348607859 | 0.17505052  | 0.241306477 |
| 0.300338855 | 0.113414407 | 0.320610424 | 0.373164645 |
| 0.331426063 | 0.322114305 | 0.345441604 | 0.13109406  |
| 0.348864525 | 0.021233133 | 0.339205036 | 0.271384058 |
| 0.142977562 | 0.012292321 | 0.062448484 | 0.28061993  |
| 0.189632679 | 0.204035438 | 0.330590187 | 0.210918953 |
| 0.312723138 | 0.284392759 | 0.297141029 | 0.134262409 |
| 0.229610671 | 0.230002679 | 0.133225992 | 0.343730189 |
| 0.276683859 | 0.299908178 | 0.201392714 | 0.266982383 |
| 0.208141359 | 0.285040348 | 0.252619297 | 0.039738073 |
| 0.230253283 | 0.250324806 | 0.395935638 | 0.341450933 |
| 0.37512219  | 0.214737736 | 0.116542631 | 0.210852539 |
| 0.266908295 | 0.230181388 | 0.145827693 | 0.259454801 |
| 0.326241947 | 0.20630522  | 0.310130134 | 0.31413969  |
| 0.349541146 | 0.352416642 | 0.25411298  | 0.232461937 |
| 0.128467681 | 0.010121931 | 0.2280868   | 0.299610506 |
| 0.040083574 | 0.168680411 | 0.314799746 | 0.194624423 |
| 0.229597211 | 0.234577695 | 0.102725437 | 0.106299171 |
| 0.266261062 | 0.220681376 | 0.162537682 | 0.272011083 |
| 0.18925953  | 0.117601864 | 0.298381215 | 0.309539069 |
| 0.153593483 | 0.294383639 | 0.319967316 | 0.202955982 |
| 0.179702037 | 0.182804894 | 0.296030935 | 0.328375922 |
| 0.284216541 | 0.298730053 | 0.219059085 | 0.119114428 |

|             |             |             |             |
|-------------|-------------|-------------|-------------|
| 0.320378362 | 0.21162522  | 0.312669402 | 0.325065416 |
| 0.390741803 | 0.373083349 | 0.391559709 | 0.232160201 |
| 0.309736545 | 0.235705031 | 0.161715531 | 0.196278654 |
| 0.342308576 | 0.221352334 | 0.348104768 | 0.120363363 |
| 0.305814015 | 0.289009223 | 0.259705014 | 0.302466855 |
| 0.167479007 | 0.343474649 | 0.281278154 | 0.267620051 |
| 0.226874444 | 0.11664937  | 0.265695532 | 0.326082418 |
| 0.277106928 | 0.063698135 | 0.325754769 | 0.258702123 |
| 0.261898194 | 0.090858238 | 0.199628652 | 0.377065961 |
| 0.318164255 | 0.270886458 | 0.242719359 | 0.233060311 |
| 0.23433497  | 0.155047669 | 0.17224458  | 0.284306671 |
| 0.326633907 | 0.203401121 | 0.360205434 | 0.295898932 |
| 0.27542643  | 0.193320104 | 0.123023964 | 0.198874358 |
| 0.312221756 | 0.249198727 | 0.279439303 | 0.282272898 |
| 0.321585986 | 0.401448339 | 0.276693493 | 0.32577699  |
| 0.198668428 | 0.253336769 | 0.205542438 | 0.27398402  |
| 0.094252942 | 0.301544642 | 0.163769876 | 0.226827286 |
| 0.01165176  | 0.055661608 | 0.305495605 | 0.326401699 |
| 0.377888124 | 0.298972685 | 0.362583799 | 0.264934125 |
| 0.000619139 | 0.176358669 | 0.245841205 | 0.202250767 |
| 0.284403692 | 0.297250293 | 0.199441968 | 0.290369688 |
| 0.315488632 | 0.243347647 | 0.26835322  | 0.215994308 |
| 0.05690176  | 0.235744249 | 0.326443384 | 0.266299889 |
| 0.257772533 | 0.212807758 | 0.115144017 | 0.319764903 |
| 0.068164569 | 0.333148385 | 0.290327247 | 0.134335822 |
| 0.078280727 | 0.28643392  | 0.237345974 | 0.232396356 |
| 0.163075908 | 0.260134045 | 0.307831965 | 0.018593101 |
| 0.215136498 | 0.14521754  | 0.274478998 | 0.275820048 |
| 0.283818067 | 0.263831962 | 0.252132282 | 0.203583704 |
| 0.238533542 | 0.295705638 | 0.292762816 | 0.323257908 |
| 0.290221091 | 0.308256753 | 0.209536242 | 0.222875293 |
| 0.222152585 | 0.332888416 | 0.258397403 | 0.2707116   |
| 0.293869627 | 0.292807944 | 0.34312809  | 0.24153568  |
| 0.314857406 | 0.211789932 | 0.345497332 | 0.328738115 |
| 0.331301263 | 0.235969154 | 0.229957497 | 0.280678741 |
| 0.075023805 | 0.207546064 | 0.263012514 | 0.229002937 |
| 0.341377099 | 0.166693718 | 0.204209537 | 0.249472843 |
| 0.204681172 | 0.386645966 | 1           | 0.336469585 |
| 0.22774158  | 0.172231419 | 0.132890596 | 0.279283388 |
| 0.316458683 | 0.288904312 | 0.173941279 | 0.056321914 |
| 0.283544238 | 0.275139558 | 0.268094937 | 0.357225393 |
| 0.106108697 | 0.343208351 | 0.159493044 | 0.29597794  |
| 0.11382706  | 0.279614756 | 0.327663605 | 0.211393682 |
| 0.070875596 | 0.339474105 | 0.212318474 | 0.236332284 |
| 0.21112055  | 0.192193924 | 0.167206525 | 0.296421379 |
| 0.268847305 | 0.295739952 | 0.365847983 | 0.288489409 |
| 0.174852646 | 0.151668937 | 0.189162293 | 0.231986381 |
| 0.2509993   | 0.318815341 | 0.277946468 | 0.32107988  |
| 0.184831278 | 0.285827046 | 0.410300183 | 0.28052368  |
| 0.26486295  | 0.267505147 | 0.063531418 | 0.19399175  |
| 0.267170794 | 0.133008266 | 0.005109086 | 0.047092128 |
| 0.284811028 | 0.157298274 | 0.211650303 | 0.238239182 |
| 0.157919917 | 0.264973307 | 0.061193238 | 0.269793369 |
| 0.341247997 | 0.390252489 | 0.24630143  | 0.306848074 |

|             |             |             |             |
|-------------|-------------|-------------|-------------|
| 0.284414783 | 0.340704113 | 0.242950873 | 0.01697009  |
| 0.185430278 | 0.160611102 | 0.15284278  | 0.293486251 |
| 0.199689475 | 0.070528609 | 0.194029895 | 0.212169471 |
| 0.288268956 | 0.068249172 | 0.191201538 | 0.224075068 |
| 0.294240619 | 0.39644819  | 0.274616483 | 0.246194137 |
| 0.160105963 | 0.298409318 | 0.157349567 | 0.169627739 |
| 0.206791744 | 0.138615465 | 0.255984817 | 0.120565856 |
| 0.256017581 | 0.223252394 | 0.013993281 | 0.404286315 |
| 0.363152254 | 0.136907029 | 0.312624918 | 0.112471009 |
| 0.298433212 | 0.286865313 | 0.190462501 | 0.167890244 |
| 0.14010515  | 0.180320466 | 0.334989048 | 0.303811    |
| 0.081499126 | 0.189292309 | 0.266558597 | 0.152458224 |
| 0.406152499 | 0.171343856 | 0.304117971 | 0.111552933 |
| 0.331195341 | 0.257950016 | 0.255363572 | 0.195827575 |
| 0.182063413 | 0.260809784 | 0.176719394 | 0.361837805 |
| 0.307593993 | 0.119732401 | 0.249507829 | 0.276928316 |
| 0.134266414 | 0.310008677 | 0.165312338 | 0.356008898 |
| 0.225676046 | 0.331026619 | 0.231016792 | 0.30792546  |
| 0.306314895 | 0.114363412 | 0.120926459 | 0.203659441 |
| 0.334036512 | 0.297922535 | 0.131044925 | 0.285639983 |
| 0.094415066 | 0.293054381 | 0.182758359 | 0.200904498 |
| 0.239101483 | 0.296872204 | 0.244034509 | 0.321129112 |
| 0.279722718 | 0.204519644 | 0.16641558  | 0.363454062 |
| 0.282917438 | 0.165481544 | 0.378943457 | 0.007890208 |
| 0.27610386  | 0.233505842 | 0.32942259  | 0.190832025 |
| 0.314574703 | 0.250930921 | 0.224871127 | 0.043571145 |
| 0.250019638 | 0.047372562 | 0.206589732 | 0.199097263 |
| 0.131658735 | 0.27015173  | 0.354345457 | 0.327056227 |
| 0.29395831  | 0.155601426 | 0.125803124 | 0.334602345 |
| 0.06702417  | 0.105392741 | 0.132808819 | 0.21536165  |
| 0.096807279 | 0.146512574 | 0.163062814 | 0.145334465 |
| 0.268547572 | 0.306252077 |             |             |
| RILPL2      | 0.174110353 | 0.420144779 | 0.142358598 |
| 0.237839118 | 0.35328667  | 0.4426374   | 0.151531595 |
| 0.239689755 | 0.393723474 | 0.304419427 | 0.413137179 |
| 0.065054284 | 0.105324503 | 0.433779227 | 0.147205215 |
| 0.393999611 | 0.106207503 | 0.218329247 | 0.121777296 |
| 0.339734202 | 0.326095997 | 0.356239366 | 0.411877855 |
| 0.342569732 | 0.277352478 | 0.408147623 | 0.376755995 |
| 0.464080981 | 0.250367465 | 0.438903411 | 0.215899475 |
| 0.417319556 | 0.351723295 | 0.37003934  | 0.068808292 |
| 0.440603161 | 0.023191365 | 0.447787458 | 0.335654734 |
| 0.193517018 | 0.387809717 | 0.351505241 | 0.343108501 |
| 0.373757818 | 0.108282931 | 0.207301886 | 0.397343427 |
| 0.399177971 | 0.395062436 | 0.15408483  | 0.446950124 |
| 0.386503173 | 0.416428736 | 0.390635832 | 0.003919446 |
| 0.298600422 | 0.084936533 | 0.214313513 | 0.490511642 |
| 0.320498432 | 0.246262728 | 0.259835082 | 0.361571676 |
| 0.394953095 | 0.404909273 | 0.372175793 | 0.357332628 |
| 0.470626723 | 0.186264559 | 0.421775    | 0.247279865 |
| 0.416649435 | 0.10559664  | 0.278493617 | 0.186195173 |
| 0.404560846 | 0.323492686 | 0.39525409  | 0.330041342 |
| 0.403820968 | 0.51346093  | 0.358543236 | 0.487062964 |
| 0.12796178  | 0.349167699 | 0.343624205 | 0.382310158 |

|             |             |             |             |
|-------------|-------------|-------------|-------------|
| 0.401036893 | 0.18844901  | 0.432504753 | 0.501031952 |
| 0.137162161 | 0.376299314 | 0.405960344 | 0.22581938  |
| 0.44173788  | 0.305654722 | 0.381207231 | 0.204112061 |
| 0.391185636 | 0.352823929 | 0.475970295 | 0.374259967 |
| 0.377021526 | 0.166583394 | 0.486310452 | 0.329607286 |
| 0.356946715 | 0.189371136 | 0.273732087 | 0.43313107  |
| 0.430163637 | 0.45669863  | 0.416703495 | 0.398652367 |
| 0.368636539 | 0.472598945 | 0.43594822  | 0.43149273  |
| 0.154534191 | 0.499128102 | 0.31671444  | 0.123370871 |
| 0.163282529 | 0.20268741  | 0.290085639 | 0.389318939 |
| 0.450032835 | 0.415927516 | 0.306545175 | 0.325933568 |
| 0.431453367 | 0.470841387 | 0.49304438  | 0.423424121 |
| 0.117158325 | 0.270596806 | 0.377243031 | 0.40142604  |
| 0.40550107  | 0.23453277  | 0.28069863  | 0.50248466  |
| 0.415169846 | 0.43360509  | 0.290828504 | 0.511093364 |
| 0.307819757 | 0.496962204 | 0.429496432 | 0.284962066 |
| 0.508107751 | 0.492468975 | 0.48218092  | 0.400256634 |
| 0.476014338 | 0.414876032 | 0.086431594 | 0.413316136 |
| 0.471084509 | 0.023365523 | 0.438669395 | 0.449060835 |
| 0.475050004 | 0.433251729 | 0.486598911 | 0.47245157  |
| 0.478540895 | 0.177179801 | 0.030990996 | 0.350449408 |
| 0.489475771 | 0.429112142 | 0.251618039 | 0.383946162 |
| 0.378766865 | 0.439798066 | 0.435901141 | 0.29425665  |
| 0.502741792 | 0.448489262 | 0.444131097 | 0.414875169 |
| 0.365666701 | 0.375448139 | 0.355424215 | 0.472267652 |
| 0.134953563 | 0.220480637 | 0.133803565 | 0.389712202 |
| 0.370623482 | 0.29409781  | 0.410367267 | 0.380976346 |
| 0.309745902 | 0.414918274 | 0.322785776 | 0.388400896 |
| 0.134110381 | 0.421934361 | 0.304384139 | 0.274128165 |
| 0.12050491  | 0.24341399  | 0.256586082 | 0.277161081 |
| 0.332384503 | 0.296314768 | 0.425740684 | 0.456442165 |
| 0.380829622 | 0.290900274 | 0.433972949 | 0.461764149 |
| 0.418815623 | 0.384979506 | 0.335437795 | 0.040155995 |
| 0.274283302 | 0.290509988 | 0.190293075 | 0.3999309   |
| 0.257407471 | 0.292155968 | 0.391110119 | 0.408526221 |
| 0.362584083 | 0.263893688 | 0.362077827 | 0.447081044 |
| 0.253343593 | 0.358780122 | 0.431261758 | 0.401127273 |
| 0.021363649 | 0.388454277 | 0.44319414  | 0.215698615 |
| 0.378597798 | 0.160565278 | 0.262543596 | 0.436041486 |
| 0.277518211 | 0.267456904 | 0.452707669 | 0.414201074 |
| 0.355398292 | 0.276910716 | 0.491803307 | 0.044262631 |
| 0.372293523 | 0.105576982 | 0.363670487 | 0.347392105 |
| 0.358039564 | 0.368169797 | 0.344984845 | 0.33938077  |
| 0.232598168 | 0.490559635 | 0.43987256  | 0.473231185 |
| 0.345506328 | 0.49649371  | 0.43845692  | 0.439502196 |
| 0.435933955 | 0.345605161 | 0.142017581 | 0.434570819 |
| 0.439674124 | 0.289675486 | 0.167022091 | 0.420594773 |
| 0.354679019 | 0.397926437 | 0.201905412 | 0.459667193 |
| 0.49994959  | 0.454811771 | 0.253924012 | 0.40417725  |
| 0.422229602 | 0.347143442 | 0.442419775 | 0.502083663 |
| 0.306283852 | 0.351848922 | 0.345329888 | 0.4199782   |
| 0.295530086 | 0.26073453  | 0.386542303 | 0.192538061 |
| 0.013568586 | 0.182879175 | 0.157785429 | 0.269743904 |
| 0.208385698 | 0.401111744 | 0.420612417 | 0.480510134 |

|             |             |             |             |
|-------------|-------------|-------------|-------------|
| 0.229804276 | 0.437924139 | 0.341568687 | 0.319450177 |
| 0.408123289 | 0.36327716  | 0.38578157  | 0.40795762  |
| 0.357091276 | 0.064201699 | 0.211849018 | 0.514028221 |
| 0.112075521 | 0.25883852  | 0.397808385 | 0.008953126 |
| 0.121336297 | 0.405090694 | 0.187604671 | 0.275558594 |
| 0.441657693 | 0.278817094 | 0.307291117 | 0.317984774 |
| 0.411442304 | 0.212387502 | 0.015438498 | 0.453085426 |
| 0.467635441 | 0.442790339 | 0.463730299 | 0.458654603 |
| 0.420992956 | 0.434167194 | 0.422281799 | 0.421258215 |
| 0.216516403 | 0.199227447 | 0.223506415 | 0.344031549 |
| 0.012274511 | 0.433112649 | 0.377838525 | 0.259489355 |
| 0.42103698  | 0.377103473 | 0.112256346 | 0.38386024  |
| 0.065905044 | 0.19190437  | 0.363650106 | 0.32515952  |
| 0.39474216  | 0.061421979 | 0.26109919  | 0.302066708 |
| 0.428502507 | 0.400175273 | 0.350104505 | 0.506090382 |
| 0.393529941 | 0.220579963 | 0.368429182 | 0.430329232 |
| 0.173363017 | 0.108467424 | 0.40193634  | 0.042670744 |
| 0.259761776 | 0.454108783 | 0.386227115 | 0.166042888 |
| 0.362838481 | 0.026139579 | 0.406936965 | 0.504457238 |
| 0.453129219 | 0.474036126 | 0.474163463 | 0.286185705 |
| 0.479215482 | 0.102378552 | 0.49223805  | 0.425565868 |
| 0.345115432 | 0.003021081 | 0.021298876 | 0.443938924 |
| 0.390274643 | 0.137358435 | 0.280495273 | 0.388159715 |
| 0.22066838  | 0.264474297 | 0.173045066 | 0.242480489 |
| 0.446616493 | 0.316935955 | 0.229103742 | 0.452161274 |
| 0.337655257 | 0.346944234 | 0.403878016 | 0.189143896 |
| 0.425295063 | 0.144693751 | 0.190646588 | 0.022171475 |
| 0.408697614 | 0.205215683 | 0.47843728  | 0.480818856 |
| 0.47858322  | 0.413774321 | 0.306015287 | 0.371855525 |
| 0.435210783 | 0.187459703 | 0.362131535 | 0.215690518 |
| 0.457294869 | 0.391965855 | 0.392338863 | 0.379041281 |
| 0.468250141 | 0.451195757 | 0.106176624 | 0.420495066 |
| 0.04991021  | 0.006764319 | 0.403984504 | 0.360260923 |
| 0.104309834 | 0.362750982 | 0.352481048 | 0.326156754 |
| 0.339149105 | 0.090282308 | 0.272507854 | 0.253603379 |
| 0.374058004 | 0.386616945 | 0.306301604 | 0.348327658 |
| 0.337665702 | 0.184102573 | 0.326881407 | 0.269683874 |
| 0.294360033 | 0.372747397 | 0.276178873 | 0.079517632 |
| 0.412995245 | 0.393417592 | 0.152239036 | 0.282903771 |
| 0.44368713  | 0.443122883 | 0.115240796 | 0.04019961  |
| 0.35538755  | 0.354609106 | 0.453103281 | 0.467905119 |
| 0.509988206 | 0.49452289  | 0.416068107 | 0.207227494 |
| 0.170457425 | 0.389076627 | 0.325247719 | 0.198095718 |
| 0.477963554 | 0.148409613 | 0.472409923 | 0.306721278 |
| 0.234067568 | 0.331412969 | 0.105503938 | 0.197159386 |
| 0.379753977 | 0.298326215 | 0.286960854 | 0.246949223 |
| 0.354110961 | 0.273811321 | 0.137437869 | 0.312705814 |
| 0.396873926 | 0.187989561 | 0.276929988 | 0.415046988 |
| 0.425894562 | 0.248647152 | 0.41462414  | 0.445175065 |
| 0.246149957 | 0.224666534 | 0.340244986 | 0.424653916 |
| 0.436313418 | 0.379430119 | 0.07052034  | 0.420284518 |
| 0.460562052 | 0.423912481 | 0.483573869 | 0.409942566 |
| 0.189502838 | 0.379187299 | 0.319473862 | 0.363260485 |
| 0.300771769 | 0.442287315 | 0.344682157 | 0.158958296 |

|             |             |             |             |
|-------------|-------------|-------------|-------------|
| 0.376213885 | 0.488252712 | 0.420472354 | 0.282024433 |
| 0.427634897 | 0.230232629 | 0.13606492  | 0.44123415  |
| 0.209892358 | 0.179311867 | 0.364276016 | 0.427810626 |
| 0.008319487 | 0.159264976 | 0.455571978 | 0.3493993   |
| 0.505024893 | 0.4399282   | 0.434955388 | 0.379379842 |
| 0.002391559 | 0.399863591 | 0.406897107 | 0.400518563 |
| 0.420740121 | 0.423129605 | 0.26511809  | 0.173781595 |
| 0.378301378 | 0.170072244 | 0.224232425 | 0.401543907 |
| 0.179999975 | 0.422484903 | 0.312010575 | 0.320226072 |
| 0.305044024 | 0.183450061 | 0.278915383 | 0.366379744 |
| 0.189733709 | 0.342311812 | 0.40198777  | 0.312234072 |
| 0.175683575 | 0.422527142 | 0.414912333 | 0.092291553 |
| 0.370105702 | 0.424551826 | 0.442649963 | 0.005572792 |
| 0.419104525 | 0.03416195  | 0.291448145 | 0.310997394 |
| 0.313733201 | 0.297641235 | 0.339322507 | 0.353133932 |
| 0.396896129 | 0.335107447 | 0.364035658 | 0.343549264 |
| 0.277061185 | 0.351484742 | 0.413924413 | 0.416449027 |
| 0.328517097 | 0.251028362 | 0.191213101 | 0.181372614 |
| 0.135391958 | 0.443068183 | 0.336491266 | 0.167237486 |
| 0.339441171 | 0.404445264 | 0.402309061 | 0.467891309 |
| 0.436336811 | 0.201667965 | 0.391100612 | 0.43542897  |
| 0.207250803 | 0.338919818 | 0.148055869 | 0.440839395 |
| 0.344368157 | 0.252108515 | 0.426977542 | 0.36721995  |
| 0.408956973 | 0.419181832 | 0.336469585 | 1           |
| 0.410954267 | 0.366160133 | 0.312941822 | 0.177090571 |
| 0.287087726 | 0.245286257 | 0.310351582 | 0.01273052  |
| 0.41438344  | 0.357959125 | 0.440982425 | 0.47634245  |
| 0.286319799 | 0.42434142  | 0.327189404 | 0.181198536 |
| 0.284675028 | 0.246179386 | 0.253483061 | 0.435390205 |
| 0.209413236 | 0.323196834 | 0.354368554 | 0.396310717 |
| 0.431178298 | 0.419543416 | 0.321514009 | 0.34397223  |
| 0.352987737 | 0.320637989 | 0.474489126 | 0.243998748 |
| 0.403874504 | 0.243727321 | 0.38167923  | 0.345619879 |
| 0.308706737 | 0.478495568 | 0.158127963 | 0.479274406 |
| 0.344232665 | 0.241319892 | 0.493945537 | 0.410275819 |
| 0.407037885 | 0.238325869 | 0.194395736 | 0.402540918 |
| 0.330276043 | 0.340865313 | 0.014381869 | 0.070051595 |
| 0.390184044 | 0.347180011 | 0.401928071 | 0.413893268 |
| 0.305624577 | 0.392825644 | 0.187280695 | 0.363075822 |
| 0.464895298 | 0.497043363 | 0.301874213 | 0.346891891 |
| 0.400526525 | 0.215411804 | 0.430050907 | 0.025406922 |
| 0.396624729 | 0.388254541 | 0.354793114 | 0.145607734 |
| 0.072708598 | 0.207375111 | 0.404088067 | 0.15915897  |
| 0.43667754  | 0.200724095 | 0.389358473 | 0.446801577 |
| 0.292657908 | 0.49675983  | 0.227916835 | 0.424329845 |
| 0.120232445 | 0.369518625 | 0.387496938 | 0.382932622 |
| 0.276309326 | 0.307610796 | 0.41148258  | 0.257789137 |
| 0.102768163 | 0.334453884 | 0.005352685 | 0.429830208 |
| 0.46765865  | 0.335636106 | 0.308540694 | 0.29584527  |
| 0.371529004 | 0.427906641 | 0.278074277 | 0.405110692 |
| 0.047267593 | 0.368055869 | 0.324737317 | 0.437801521 |
| 0.211486292 | 0.379566694 | 0.155640429 | 0.334488804 |
| 0.47435396  | 0.282017284 | 0.347774727 | 0.285879434 |
| 0.468505933 | 0.428814122 | 0.268266091 | 0.31797242  |



|             |             |             |             |
|-------------|-------------|-------------|-------------|
| 0.392069148 | 0.156357962 | 0.390105487 | 0.500143953 |
| 0.285702777 | 0.245874406 | 0.430165396 | 0.291108038 |
| 0.315264828 | 0.42297774  | 0.396141324 | 0.49529452  |
| 0.150704839 | 0.347849549 | 0.437642954 | 0.42700207  |
| 0.380113706 | 0.220600547 | 0.254567152 | 0.285556888 |
| 0.445090651 | 0.197713871 | 0.284329947 | 0.41593047  |
| 0.222680604 | 0.396192438 | 0.374165427 | 0.266209013 |
| 0.102449017 | 0.28518146  | 0.416585438 | 0.266198492 |
| 0.364236994 | 0.396272662 | 0.304209504 | 0.411401536 |
| 0.230773304 | 0.072676918 | 0.454811483 | 0.019848854 |
| 0.420007215 | 0.422086281 | 0.361752703 | 0.380619999 |
| 0.288069311 | 0.407033581 | 0.37428207  | 0.005709719 |
| 0.430806962 | 0.096017405 | 0.378061715 | 0.283071812 |
| 0.28108606  | 0.13265614  | 0.456284162 | 0.471101492 |
| 0.416059353 | 0.358033667 | 0.315215518 | 0.447153349 |
| 0.169103967 | 0.311938676 | 0.327820401 | 0.424080551 |
| 0.242792803 | 0.357644282 | 0.389244521 | 0.364805125 |
| 0.442090301 | 0.39030737  |             |             |
| RIPK3       | 0.048572041 | 0.346127126 | 0.032924912 |
| 0.125109242 | 0.272878167 | 0.178461221 | 0.041191684 |
| 0.084152147 | 0.264386744 | 0.101627414 | 0.25706602  |
| 0.016067272 | 0.087968617 | 0.419948851 | 0.037783294 |
| 0.285090801 | 0.034456153 | 0.073974863 | 0.041936057 |
| 0.116418219 | 0.22342628  | 0.177051485 | 0.183121952 |
| 0.202995447 | 0.17472057  | 0.214913838 | 0.221996476 |
| 0.442491822 | 0.125685397 | 0.338246565 | 0.096885047 |
| 0.386955302 | 0.273315295 | 0.19348826  | 0.015504247 |
| 0.225022949 | 0.012713832 | 0.386194163 | 0.17004903  |
| 0.173363299 | 0.318766472 | 0.131465212 | 0.16139586  |
| 0.168701473 | 0.026699377 | 0.075765136 | 0.298820915 |
| 0.215223145 | 0.149991788 | 0.037377174 | 0.332081107 |
| 0.156292665 | 0.272869725 | 0.267731765 | 0.002389233 |
| 0.17294145  | 0.066667065 | 0.127646276 | 0.444319904 |
| 0.191746863 | 0.091632487 | 0.12044458  | 0.108981184 |
| 0.232034947 | 0.287314418 | 0.224219682 | 0.139266187 |
| 0.447520384 | 0.126946804 | 0.347460244 | 0.120490249 |
| 0.156503835 | 0.018664839 | 0.158942765 | 0.056521796 |
| 0.171519986 | 0.166097267 | 0.237740665 | 0.185510261 |
| 0.345408265 | 0.456409543 | 0.19873239  | 0.422518335 |
| 0.063069777 | 0.255864613 | 0.195018986 | 0.290866034 |
| 0.277123823 | 0.046711159 | 0.36897117  | 0.474672471 |
| 0.02601935  | 0.203011785 | 0.289977089 | 0.088486421 |
| 0.372015539 | 0.140901013 | 0.18727086  | 0.148031105 |
| 0.336462109 | 0.242379379 | 0.394416314 | 0.254868522 |
| 0.189646277 | 0.050250343 | 0.398347733 | 0.258769157 |
| 0.191038215 | 0.063475093 | 0.163515539 | 0.41594993  |
| 0.30357657  | 0.446537171 | 0.335221232 | 0.303378987 |
| 0.255455583 | 0.456095014 | 0.348325365 | 0.354748811 |
| 0.063694497 | 0.457162641 | 0.146695945 | 0.039130987 |
| 0.040618371 | 0.070898834 | 0.122666867 | 0.293968314 |
| 0.43593632  | 0.266056309 | 0.119758523 | 0.180191629 |
| 0.433933596 | 0.390259963 | 0.446892817 | 0.35820507  |
| 0.030975617 | 0.138678998 | 0.263158046 | 0.134172025 |
| 0.28171609  | 0.088772669 | 0.182192589 | 0.431894574 |

|             |             |             |             |
|-------------|-------------|-------------|-------------|
| 0.375022621 | 0.394881614 | 0.093718512 | 0.433114043 |
| 0.093184548 | 0.484529382 | 0.384101228 | 0.134513612 |
| 0.463874736 | 0.427315487 | 0.492263342 | 0.359355937 |
| 0.428405346 | 0.20980551  | 0.019568622 | 0.322309281 |
| 0.467176522 | 0.021294978 | 0.424476332 | 0.454580173 |
| 0.432293661 | 0.425137374 | 0.485496297 | 0.467831671 |
| 0.430717955 | 0.06058927  | 0.011114318 | 0.255587772 |
| 0.442225589 | 0.394395247 | 0.09771153  | 0.234114445 |
| 0.261558771 | 0.182809528 | 0.351765858 | 0.154181361 |
| 0.475369276 | 0.432606503 | 0.433275276 | 0.311297879 |
| 0.156709015 | 0.300195104 | 0.235155512 | 0.391807541 |
| 0.047093158 | 0.069666577 | 0.042657931 | 0.25606363  |
| 0.143935208 | 0.160266898 | 0.162703537 | 0.227363502 |
| 0.178666301 | 0.141552692 | 0.168104791 | 0.342783833 |
| 0.046697952 | 0.253926613 | 0.120762572 | 0.107741117 |
| 0.044353377 | 0.135269234 | 0.122437865 | 0.117307548 |
| 0.183151056 | 0.198256585 | 0.328514112 | 0.459226042 |
| 0.157158111 | 0.157763193 | 0.315472585 | 0.466001866 |
| 0.423996968 | 0.271655719 | 0.192671639 | 0.021906741 |
| 0.155616918 | 0.118300343 | 0.130424026 | 0.246448425 |
| 0.159268621 | 0.125803528 | 0.269406877 | 0.380304684 |
| 0.167926867 | 0.061780681 | 0.167342033 | 0.391358589 |
| 0.116091871 | 0.189858532 | 0.42738497  | 0.225931923 |
| 0.004558044 | 0.209224559 | 0.399974347 | 0.121491358 |
| 0.215848045 | 0.101795471 | 0.168789604 | 0.431658499 |
| 0.151818905 | 0.137433393 | 0.448879321 | 0.364775984 |
| 0.145287062 | 0.177865233 | 0.479271088 | 0.030217162 |
| 0.205064455 | 0.104534086 | 0.276088368 | 0.132124147 |
| 0.192697278 | 0.269397786 | 0.2398004   | 0.208691538 |
| 0.103988622 | 0.4468061   | 0.365649469 | 0.460878899 |
| 0.176672928 | 0.483126472 | 0.422616294 | 0.414486102 |
| 0.277823266 | 0.16665721  | 0.097849057 | 0.40269864  |
| 0.429321787 | 0.153478406 | 0.058094272 | 0.354581517 |
| 0.147120355 | 0.339068271 | 0.161829546 | 0.46592005  |
| 0.45861225  | 0.380962698 | 0.104227552 | 0.359316616 |
| 0.377513601 | 0.173732715 | 0.390201676 | 0.477700204 |
| 0.116347862 | 0.202444772 | 0.186807064 | 0.420474381 |
| 0.1575338   | 0.135937281 | 0.29352763  | 0.118511052 |
| 0.014403042 | 0.049716558 | 0.050856077 | 0.128995609 |
| 0.158778134 | 0.258749894 | 0.322321073 | 0.464866021 |
| 0.083983215 | 0.393347934 | 0.185120223 | 0.174496465 |
| 0.371553262 | 0.168587842 | 0.259637199 | 0.29574803  |
| 0.222764588 | 0.031862894 | 0.094729206 | 0.4608343   |
| 0.027798597 | 0.1749613   | 0.151857623 | 0.003368334 |
| 0.029064582 | 0.311159644 | 0.08635716  | 0.187334797 |
| 0.453791083 | 0.190979311 | 0.166124196 | 0.117781659 |
| 0.328710151 | 0.074656724 | 0.009726898 | 0.430015142 |
| 0.412893448 | 0.386433021 | 0.406199195 | 0.37532561  |
| 0.382103848 | 0.314266424 | 0.383602878 | 0.201219931 |
| 0.081675935 | 0.053488632 | 0.153546813 | 0.184885673 |
| 0.001680782 | 0.383898253 | 0.200090499 | 0.135392469 |
| 0.355604397 | 0.231685547 | 0.029959302 | 0.250999446 |
| 0.022700674 | 0.145105452 | 0.119645267 | 0.132464096 |
| 0.32689643  | 0.013065733 | 0.135110288 | 0.168291591 |

|             |             |             |             |
|-------------|-------------|-------------|-------------|
| 0.373687437 | 0.302432706 | 0.191407259 | 0.47465196  |
| 0.245882574 | 0.090984588 | 0.217627651 | 0.361157122 |
| 0.054264624 | 0.060661526 | 0.132451553 | 0.022642035 |
| 0.109346249 | 0.383063924 | 0.174645821 | 0.059570116 |
| 0.216730597 | 0.006188208 | 0.333661555 | 0.470772448 |
| 0.389985585 | 0.477176626 | 0.461322542 | 0.18545893  |
| 0.456986998 | 0.064127465 | 0.468582791 | 0.335435589 |
| 0.137807528 | 0.001718458 | 0.004940647 | 0.458369381 |
| 0.271667512 | 0.04568396  | 0.138131339 | 0.171431099 |
| 0.08890566  | 0.067439012 | 0.047901819 | 0.172919579 |
| 0.298997232 | 0.198063853 | 0.139532185 | 0.390363042 |
| 0.157074502 | 0.177135387 | 0.142425974 | 0.069499719 |
| 0.290465774 | 0.047785568 | 0.067686613 | 0.010054923 |
| 0.32148433  | 0.101149837 | 0.388277818 | 0.440556529 |
| 0.467273402 | 0.367990502 | 0.123909543 | 0.138999439 |
| 0.383350114 | 0.06814068  | 0.174431483 | 0.072152877 |
| 0.415283    | 0.308880563 | 0.318972542 | 0.295614716 |
| 0.466205911 | 0.432458438 | 0.02637745  | 0.373170916 |
| 0.018579997 | 0.002461871 | 0.190234307 | 0.211866182 |
| 0.030890952 | 0.192253334 | 0.247500498 | 0.105772545 |
| 0.118548643 | 0.025695126 | 0.158913904 | 0.171757665 |
| 0.255974535 | 0.217597434 | 0.216321716 | 0.194903527 |
| 0.180341259 | 0.125975319 | 0.145577072 | 0.097014882 |
| 0.105416588 | 0.270476346 | 0.178938172 | 0.017352433 |
| 0.222359227 | 0.256492738 | 0.043364903 | 0.141121829 |
| 0.426968157 | 0.453947362 | 0.034433683 | 0.018989477 |
| 0.248363629 | 0.157320978 | 0.466363272 | 0.428070657 |
| 0.451815205 | 0.478765209 | 0.36507541  | 0.098670069 |
| 0.049379829 | 0.24849295  | 0.239902955 | 0.117493972 |
| 0.451529876 | 0.043847235 | 0.418949279 | 0.21106991  |
| 0.101209136 | 0.14981     | 0.040606233 | 0.067028918 |
| 0.271961685 | 0.150745091 | 0.150709604 | 0.113911901 |
| 0.169279431 | 0.200889501 | 0.037057446 | 0.153267162 |
| 0.302126045 | 0.150783074 | 0.136359496 | 0.140082889 |
| 0.310257432 | 0.072983168 | 0.362176752 | 0.421885476 |
| 0.106051111 | 0.070361819 | 0.133937708 | 0.317020809 |
| 0.383193935 | 0.20054786  | 0.027812169 | 0.369025499 |
| 0.451446286 | 0.322969288 | 0.431507483 | 0.379093885 |
| 0.072306194 | 0.245742483 | 0.149375878 | 0.240911823 |
| 0.138128771 | 0.18068691  | 0.152097195 | 0.052373264 |
| 0.276949672 | 0.409655181 | 0.371309679 | 0.12345972  |
| 0.243783569 | 0.077912717 | 0.036368546 | 0.381980558 |
| 0.154933665 | 0.057777194 | 0.129892481 | 0.365427002 |
| 0.009934252 | 0.123040716 | 0.451356264 | 0.146371828 |
| 0.45918874  | 0.462491045 | 0.417846992 | 0.127337578 |
| 0.005105559 | 0.332939587 | 0.295017585 | 0.207835777 |
| 0.365166118 | 0.296601916 | 0.077205346 | 0.070268258 |
| 0.294088782 | 0.06411412  | 0.092510092 | 0.15188704  |
| 0.100063262 | 0.252856791 | 0.186706641 | 0.131239825 |
| 0.149771248 | 0.060973859 | 0.173360797 | 0.159834003 |
| 0.098343103 | 0.235845736 | 0.332384835 | 0.098526628 |
| 0.126640292 | 0.383409768 | 0.338746013 | 0.022086394 |
| 0.226332298 | 0.356670707 | 0.405482301 | 0.00232759  |
| 0.363208891 | 0.009275408 | 0.14048359  | 0.165082625 |

|             |             |             |             |
|-------------|-------------|-------------|-------------|
| 0.148930751 | 0.124348353 | 0.231866253 | 0.212892273 |
| 0.238689347 | 0.139469714 | 0.184349825 | 0.213432046 |
| 0.139603111 | 0.148108688 | 0.293326529 | 0.176137445 |
| 0.19126635  | 0.088086607 | 0.092828342 | 0.09165815  |
| 0.05075402  | 0.401082908 | 0.235859942 | 0.06308803  |
| 0.187670686 | 0.169241386 | 0.363302734 | 0.414363748 |
| 0.417567838 | 0.092459405 | 0.151376507 | 0.386609634 |
| 0.091440125 | 0.144939691 | 0.035977375 | 0.242361942 |
| 0.165976049 | 0.148439505 | 0.203858575 | 0.190021559 |
| 0.283654009 | 0.376372119 | 0.22774158  | 0.410954267 |
| 1           | 0.163377977 | 0.116061665 | 0.083332248 |
| 0.112635661 | 0.108156956 | 0.218101679 | 0.003884728 |
| 0.265053677 | 0.147373099 | 0.430044986 | 0.423807568 |
| 0.154190076 | 0.375761823 | 0.116108177 | 0.061602926 |
| 0.109956193 | 0.151920374 | 0.128040231 | 0.358092849 |
| 0.136908405 | 0.124154595 | 0.258825153 | 0.139505595 |
| 0.379938007 | 0.323595092 | 0.153451758 | 0.114003775 |
| 0.170015098 | 0.155124257 | 0.403000538 | 0.068535699 |
| 0.255947057 | 0.182325632 | 0.191401247 | 0.187622169 |
| 0.154900508 | 0.4657313   | 0.047958549 | 0.470612367 |
| 0.17359969  | 0.112271748 | 0.450479441 | 0.164326715 |
| 0.173652918 | 0.120011827 | 0.137844259 | 0.142618613 |
| 0.127038935 | 0.173824812 | 0.007950653 | 0.048493159 |
| 0.308689287 | 0.117971651 | 0.301712244 | 0.294458306 |
| 0.179196883 | 0.329370863 | 0.112408157 | 0.144182485 |
| 0.392739236 | 0.415718239 | 0.151215961 | 0.243485503 |
| 0.276877368 | 0.077474035 | 0.253367596 | 0.01034928  |
| 0.280537539 | 0.26481751  | 0.136742411 | 0.040493595 |
| 0.018521461 | 0.151080584 | 0.27548664  | 0.045063325 |
| 0.457412436 | 0.14658962  | 0.205663368 | 0.363515428 |
| 0.140925336 | 0.422988345 | 0.10866185  | 0.372851395 |
| 0.023756726 | 0.215032069 | 0.210929826 | 0.169355117 |
| 0.171658185 | 0.18464227  | 0.368823281 | 0.177537719 |
| 0.032373995 | 0.174870371 | 0.002650095 | 0.369808363 |
| 0.387027065 | 0.201600405 | 0.185316374 | 0.101651678 |
| 0.274668786 | 0.340945965 | 0.11479846  | 0.216280617 |
| 0.018505643 | 0.291509719 | 0.165722547 | 0.370453845 |
| 0.139662715 | 0.198677274 | 0.072500945 | 0.192028524 |
| 0.376921078 | 0.138845902 | 0.224036602 | 0.16468671  |
| 0.422486164 | 0.321139485 | 0.131135137 | 0.170980484 |
| 0.234755118 | 0.052230815 | 0.144282776 | 0.466615767 |
| 0.127600807 | 0.181432533 | 0.431610083 | 0.140140896 |
| 0.168943147 | 0.341243332 | 0.243091721 | 0.444964817 |
| 0.073804732 | 0.228371877 | 0.377717761 | 0.404059044 |
| 0.305582115 | 0.141586991 | 0.162280774 | 0.149170008 |
| 0.390003071 | 0.077812104 | 0.168646866 | 0.314734491 |
| 0.157819482 | 0.254790275 | 0.185402836 | 0.148311207 |
| 0.032062637 | 0.102293591 | 0.177873784 | 0.119289555 |
| 0.224228696 | 0.244416716 | 0.17393767  | 0.391394816 |
| 0.124876166 | 0.035668975 | 0.442202713 | 0.023099484 |
| 0.204525955 | 0.338927183 | 0.179921987 | 0.218541147 |
| 0.178219478 | 0.224064751 | 0.172541254 | 0.000678137 |
| 0.369722627 | 0.095505392 | 0.146198243 | 0.166359497 |
| 0.133693687 | 0.033931655 | 0.413637346 | 0.477118009 |

|             |             |             |             |
|-------------|-------------|-------------|-------------|
| 0.238510109 | 0.152274665 | 0.161151456 | 0.391901651 |
| 0.139710059 | 0.144121243 | 0.141682752 | 0.287442999 |
| 0.1632138   | 0.154372214 | 0.170749606 | 0.193559813 |
| 0.307069464 | 0.135023789 |             |             |
| RNF103      | 0.034288523 | 0.365898852 | 0.02312709  |
| 0.047733356 | 0.192183539 | 0.139123246 | 0.052282131 |
| 0.081139121 | 0.33446869  | 0.202610308 | 0.153363815 |
| 0.010832982 | 0.083299996 | 0.375444133 | 0.051305425 |
| 0.266197587 | 0.026332347 | 0.072078024 | 0.093708973 |
| 0.162741695 | 0.182366805 | 0.150780018 | 0.162020445 |
| 0.195083165 | 0.146346137 | 0.217841325 | 0.262374393 |
| 0.408790894 | 0.119059026 | 0.255778518 | 0.093613829 |
| 0.351208022 | 0.215594544 | 0.190313494 | 0.008641692 |
| 0.20416578  | 0.0730546   | 0.384620367 | 0.14889451  |
| 0.084017645 | 0.278740023 | 0.158304123 | 0.104644825 |
| 0.204689761 | 0.017899168 | 0.100987563 | 0.352130023 |
| 0.242647301 | 0.177268407 | 0.036467746 | 0.289697267 |
| 0.242367516 | 0.196975751 | 0.296584259 | 0.00203865  |
| 0.161830392 | 0.084856033 | 0.171364636 | 0.398933399 |
| 0.121632471 | 0.071093513 | 0.236191559 | 0.175415579 |
| 0.32135638  | 0.343978339 | 0.203525984 | 0.231334065 |
| 0.395802325 | 0.156782784 | 0.346331453 | 0.065926677 |
| 0.197707901 | 0.033869895 | 0.120352439 | 0.081959108 |
| 0.218635388 | 0.103393933 | 0.167244721 | 0.201208441 |
| 0.357103311 | 0.440866516 | 0.180871275 | 0.417638107 |
| 0.194658951 | 0.249992417 | 0.17273874  | 0.252836185 |
| 0.356462627 | 0.102404575 | 0.265876313 | 0.433722081 |
| 0.052428333 | 0.251201982 | 0.344067784 | 0.102889961 |
| 0.327118448 | 0.240067564 | 0.191009987 | 0.102587814 |
| 0.288055793 | 0.236017433 | 0.437213079 | 0.186594824 |
| 0.185950368 | 0.050608585 | 0.391473119 | 0.224597227 |
| 0.117773832 | 0.041272399 | 0.175661647 | 0.402906989 |
| 0.259118174 | 0.386981996 | 0.387359626 | 0.347642081 |
| 0.236546828 | 0.394686778 | 0.25226018  | 0.3646765   |
| 0.107525143 | 0.43405622  | 0.082113966 | 0.025988102 |
| 0.040477838 | 0.059266162 | 0.256353221 | 0.25700585  |
| 0.3724482   | 0.221727081 | 0.091922107 | 0.136904276 |
| 0.419116309 | 0.381893227 | 0.449532942 | 0.350727498 |
| 0.024043962 | 0.240230852 | 0.221362803 | 0.130492846 |
| 0.300559314 | 0.094601079 | 0.162707457 | 0.416056697 |
| 0.27526033  | 0.369051506 | 0.0821282   | 0.41880332  |
| 0.169076107 | 0.411782167 | 0.351132775 | 0.07893607  |
| 0.418510129 | 0.385037461 | 0.41932326  | 0.284924476 |
| 0.361926222 | 0.123496062 | 0.130948896 | 0.355658247 |
| 0.390454401 | 0.008998396 | 0.416121234 | 0.437284519 |
| 0.407246351 | 0.380663907 | 0.460611023 | 0.419233684 |
| 0.408913964 | 0.054705419 | 0.084746317 | 0.225607153 |
| 0.413411747 | 0.286915895 | 0.116403858 | 0.232886141 |
| 0.266091686 | 0.157632951 | 0.365366395 | 0.126145061 |
| 0.436004972 | 0.360430889 | 0.415120602 | 0.332427105 |
| 0.242317014 | 0.249207931 | 0.251407178 | 0.360856991 |
| 0.026347845 | 0.048802609 | 0.03284474  | 0.287190188 |
| 0.137463391 | 0.105648446 | 0.163846417 | 0.293039937 |
| 0.125814478 | 0.177320095 | 0.183759078 | 0.28504177  |

|             |             |             |             |
|-------------|-------------|-------------|-------------|
| 0.053014783 | 0.220687198 | 0.085314855 | 0.104317305 |
| 0.025941864 | 0.125480046 | 0.085175037 | 0.062815473 |
| 0.140867531 | 0.209558595 | 0.316755312 | 0.42063944  |
| 0.24392282  | 0.119418702 | 0.292271451 | 0.386377648 |
| 0.357670226 | 0.204163036 | 0.199395772 | 0.003344893 |
| 0.173009179 | 0.254554393 | 0.168591802 | 0.247309548 |
| 0.160806853 | 0.16733712  | 0.275180157 | 0.285819272 |
| 0.115672482 | 0.108695926 | 0.224643106 | 0.336267047 |
| 0.125037813 | 0.128300864 | 0.363873737 | 0.260566106 |
| 0.001679578 | 0.154111572 | 0.339528753 | 0.15499155  |
| 0.274990639 | 0.083609563 | 0.107259205 | 0.39764865  |
| 0.209639872 | 0.199611955 | 0.410765201 | 0.305989175 |
| 0.154401518 | 0.206511012 | 0.455782491 | 0.090980829 |
| 0.261245133 | 0.023186319 | 0.202260743 | 0.190404285 |
| 0.150737187 | 0.257013116 | 0.205421129 | 0.14377586  |
| 0.069893029 | 0.431607581 | 0.301562822 | 0.413538538 |
| 0.213710874 | 0.45733653  | 0.370955531 | 0.338343718 |
| 0.232449159 | 0.255306009 | 0.117462558 | 0.327720513 |
| 0.384480831 | 0.215696719 | 0.058818187 | 0.392382464 |
| 0.251542323 | 0.319748804 | 0.099427919 | 0.407824907 |
| 0.397746652 | 0.381911366 | 0.08412352  | 0.322285732 |
| 0.264767508 | 0.098155839 | 0.346182452 | 0.463623153 |
| 0.241626751 | 0.226801513 | 0.192186913 | 0.343254221 |
| 0.106008896 | 0.184195341 | 0.288064123 | 0.159272398 |
| 0.003688244 | 0.053861208 | 0.036551378 | 0.090848969 |
| 0.115675742 | 0.288349264 | 0.300340168 | 0.431053481 |
| 0.066254092 | 0.317117057 | 0.23587659  | 0.144515226 |
| 0.354373851 | 0.233231589 | 0.212373853 | 0.258871297 |
| 0.202890527 | 0.007402298 | 0.047187758 | 0.43580522  |
| 0.035052842 | 0.132440987 | 0.186724763 | 0.00109153  |
| 0.032747158 | 0.347480005 | 0.09053536  | 0.163231878 |
| 0.414620732 | 0.159602131 | 0.137899625 | 0.223195046 |
| 0.230337583 | 0.05250787  | 0.000883432 | 0.440651249 |
| 0.453686047 | 0.44519698  | 0.452950884 | 0.413699775 |
| 0.445165792 | 0.34735917  | 0.358028351 | 0.144551873 |
| 0.064170613 | 0.056679469 | 0.161303829 | 0.163526883 |
| 0.005546208 | 0.271416752 | 0.200135659 | 0.097340964 |
| 0.345837    | 0.265823175 | 0.019636937 | 0.266528538 |
| 0.006827859 | 0.11658308  | 0.200009691 | 0.160855098 |
| 0.318004055 | 0.008307095 | 0.079634635 | 0.200817898 |
| 0.312996875 | 0.262415348 | 0.193492572 | 0.430528377 |
| 0.152802935 | 0.106717101 | 0.15323848  | 0.281986429 |
| 0.048372418 | 0.125595348 | 0.214485979 | 0.014485213 |
| 0.084145622 | 0.412321279 | 0.223579493 | 0.034379429 |
| 0.153145255 | 0.001970726 | 0.263272082 | 0.432683332 |
| 0.364814925 | 0.444042393 | 0.386946497 | 0.13532633  |
| 0.397033006 | 0.124371686 | 0.436561879 | 0.322523729 |
| 0.205379931 | 0.000160512 | 0.004541649 | 0.402653669 |
| 0.219472133 | 0.048423976 | 0.099027286 | 0.112688415 |
| 0.054947048 | 0.081346263 | 0.044516214 | 0.121369357 |
| 0.225060826 | 0.134256197 | 0.139050639 | 0.393410621 |
| 0.140204578 | 0.154978893 | 0.199583666 | 0.075853004 |
| 0.229577645 | 0.027914373 | 0.086676282 | 0.003109016 |
| 0.299323244 | 0.095293406 | 0.382354798 | 0.41512867  |

|             |             |             |             |
|-------------|-------------|-------------|-------------|
| 0.397819741 | 0.277201397 | 0.184314612 | 0.147987841 |
| 0.414761135 | 0.06733109  | 0.175285944 | 0.070664871 |
| 0.380245902 | 0.262662486 | 0.219084792 | 0.212989587 |
| 0.423210736 | 0.369946823 | 0.024076759 | 0.335375074 |
| 0.003103501 | 0.003264551 | 0.142511886 | 0.223987319 |
| 0.187674258 | 0.221548272 | 0.190379096 | 0.229263537 |
| 0.186411784 | 0.012325875 | 0.196617001 | 0.181472041 |
| 0.197413779 | 0.201821653 | 0.163364377 | 0.246362956 |
| 0.179735351 | 0.135458175 | 0.107690234 | 0.112918687 |
| 0.242091664 | 0.259548529 | 0.147780363 | 0.020015977 |
| 0.210620487 | 0.210762257 | 0.031081338 | 0.106146226 |
| 0.329631653 | 0.396801665 | 0.043655745 | 0.004579751 |
| 0.19804631  | 0.219451039 | 0.416922711 | 0.399795249 |
| 0.422924923 | 0.440631563 | 0.317800285 | 0.106136963 |
| 0.036646693 | 0.218568912 | 0.194350999 | 0.077607937 |
| 0.414450295 | 0.054966738 | 0.380318796 | 0.188017001 |
| 0.092700302 | 0.107759638 | 0.01569294  | 0.059570956 |
| 0.23277133  | 0.117482616 | 0.10294276  | 0.086694579 |
| 0.173792602 | 0.143891393 | 0.038811482 | 0.117401852 |
| 0.275915025 | 0.143137202 | 0.107471729 | 0.170625018 |
| 0.281019726 | 0.219503964 | 0.336088218 | 0.374397646 |
| 0.083674749 | 0.087636389 | 0.103561225 | 0.338709296 |
| 0.367891835 | 0.261063265 | 0.006231733 | 0.374306024 |
| 0.41338829  | 0.274954705 | 0.38732757  | 0.356134111 |
| 0.071685375 | 0.173477454 | 0.256590268 | 0.237864749 |
| 0.140781925 | 0.139552693 | 0.165651756 | 0.044350925 |
| 0.280365303 | 0.423230254 | 0.352633627 | 0.078293283 |
| 0.237553042 | 0.091931406 | 0.048898624 | 0.381983266 |
| 0.141632309 | 0.042157025 | 0.174475334 | 0.40322396  |
| 0.001075124 | 0.11015693  | 0.457820985 | 0.100732454 |
| 0.454219573 | 0.404961758 | 0.339356283 | 0.154169972 |
| 0.00777333  | 0.329882544 | 0.203806179 | 0.164490485 |
| 0.349044409 | 0.245751416 | 0.12214013  | 0.043695648 |
| 0.223054832 | 0.053529784 | 0.094369636 | 0.125806989 |
| 0.174583904 | 0.261254874 | 0.15816612  | 0.178227701 |
| 0.13060787  | 0.10281909  | 0.134416018 | 0.102344768 |
| 0.229252459 | 0.174357061 | 0.271633342 | 0.171058972 |
| 0.118134433 | 0.422025075 | 0.336364976 | 0.013528678 |
| 0.213157774 | 0.393137899 | 0.370529674 | 0.002335569 |
| 0.298109966 | 0.003975725 | 0.117271461 | 0.100482831 |
| 0.110869414 | 0.152180032 | 0.191277007 | 0.150186436 |
| 0.271911463 | 0.133695709 | 0.107606966 | 0.13914657  |
| 0.078427453 | 0.124884369 | 0.244398019 | 0.192802051 |
| 0.116543673 | 0.058028767 | 0.088331557 | 0.09089699  |
| 0.020495094 | 0.378994644 | 0.183313467 | 0.050465006 |
| 0.158540199 | 0.217063619 | 0.281193504 | 0.401883043 |
| 0.33868031  | 0.090170984 | 0.216825755 | 0.328603518 |
| 0.201895381 | 0.129862012 | 0.040285253 | 0.193448762 |
| 0.116085646 | 0.119346751 | 0.194360892 | 0.178634292 |
| 0.353194223 | 0.316270942 | 0.172231419 | 0.366160133 |
| 0.163377977 | 1           | 0.150842429 | 0.042225855 |
| 0.082467474 | 0.115254674 | 0.160691727 | 0.000445207 |
| 0.226873959 | 0.09070723  | 0.372945035 | 0.382542193 |
| 0.193535585 | 0.305934071 | 0.126220971 | 0.045748852 |

|             |             |             |             |
|-------------|-------------|-------------|-------------|
| 0.126305294 | 0.149195351 | 0.101378971 | 0.340957162 |
| 0.137260761 | 0.086063304 | 0.178324712 | 0.116005432 |
| 0.340476583 | 0.372560251 | 0.205129126 | 0.158985624 |
| 0.180610779 | 0.123983851 | 0.430564974 | 0.061393305 |
| 0.266356828 | 0.102491772 | 0.248490093 | 0.154233747 |
| 0.14214163  | 0.438439381 | 0.034836865 | 0.443027573 |
| 0.20647802  | 0.109944479 | 0.405992685 | 0.155504625 |
| 0.133930645 | 0.061641927 | 0.138689502 | 0.203685573 |
| 0.1636633   | 0.181476301 | 0.015761155 | 0.063837283 |
| 0.234317137 | 0.269055948 | 0.364969189 | 0.338043037 |
| 0.169870301 | 0.308908411 | 0.129918051 | 0.174059162 |
| 0.38728631  | 0.405193224 | 0.115502488 | 0.21603635  |
| 0.274665926 | 0.049652408 | 0.203767557 | 0.041732776 |
| 0.283012973 | 0.277131526 | 0.216429064 | 0.037765028 |
| 0.013803503 | 0.152390827 | 0.275828929 | 0.071107834 |
| 0.427422202 | 0.120231332 | 0.306135424 | 0.282917361 |
| 0.162490259 | 0.401523056 | 0.081267222 | 0.263359361 |
| 0.075382006 | 0.197113738 | 0.225753356 | 0.256953138 |
| 0.100363534 | 0.18134287  | 0.268132151 | 0.130832768 |
| 0.019009073 | 0.138796546 | 0.005996026 | 0.318480152 |
| 0.39212564  | 0.224063729 | 0.17868179  | 0.210243463 |
| 0.197787019 | 0.344124349 | 0.192179596 | 0.216066234 |
| 0.004367095 | 0.223086814 | 0.121608954 | 0.284715631 |
| 0.116642948 | 0.292197965 | 0.024717706 | 0.240676557 |
| 0.365890366 | 0.182467555 | 0.241680635 | 0.17895557  |
| 0.389257663 | 0.332745438 | 0.119439613 | 0.138328246 |
| 0.335730684 | 0.051049274 | 0.169094842 | 0.45512862  |
| 0.093638256 | 0.12805172  | 0.363592178 | 0.1109956   |
| 0.205262097 | 0.308358994 | 0.295101916 | 0.462955934 |
| 0.056655146 | 0.158969935 | 0.349443843 | 0.405484041 |
| 0.233323542 | 0.153356584 | 0.147484706 | 0.150955847 |
| 0.345034693 | 0.032984253 | 0.213499943 | 0.248289753 |
| 0.149697552 | 0.220311038 | 0.252924143 | 0.13265287  |
| 0.019080168 | 0.125382471 | 0.132928466 | 0.098805045 |
| 0.18931929  | 0.199637601 | 0.173336895 | 0.302306787 |
| 0.048885572 | 0.008195283 | 0.370145512 | 0.02175474  |
| 0.136463191 | 0.223821771 | 0.139490531 | 0.193021781 |
| 0.124473071 | 0.250467732 | 0.184386396 | 0.000553769 |
| 0.358579466 | 0.031039109 | 0.207750736 | 0.118137657 |
| 0.199086649 | 0.035037074 | 0.348754711 | 0.433417981 |
| 0.208188343 | 0.184263025 | 0.170831113 | 0.385778203 |
| 0.108923    | 0.208810131 | 0.244019869 | 0.269700191 |
| 0.146455761 | 0.19767512  | 0.210487688 | 0.168368781 |
| 0.26697453  | 0.139677477 |             |             |
| RNF167      | 0.018703532 | 0.392063523 | 0.023872208 |
| 0.036559602 | 0.109489251 | 0.139275155 | 0.010310964 |
| 0.024581094 | 0.276460788 | 0.192008265 | 0.142022707 |
| 0.00235689  | 0.018739623 | 0.351848501 | 0.007618746 |
| 0.195997648 | 0.003115597 | 0.02420992  | 0.020750153 |
| 0.062498718 | 0.087018414 | 0.094258845 | 0.201856718 |
| 0.082063229 | 0.128267473 | 0.211893096 | 0.208339732 |
| 0.444076316 | 0.14824344  | 0.277260931 | 0.205767449 |
| 0.297179266 | 0.128372326 | 0.183841645 | 0.003530651 |
| 0.182413926 | 0.001547827 | 0.340472577 | 0.056378635 |



|             |             |             |             |
|-------------|-------------|-------------|-------------|
| 0.039644581 | 0.229108938 | 0.252334325 | 0.055491601 |
| 0.241634179 | 0.009328919 | 0.20831123  | 0.268408405 |
| 0.19870738  | 0.065728987 | 0.030528361 | 0.304182063 |
| 0.121784683 | 0.198975422 | 0.403656713 | 0.000668595 |
| 0.104902164 | 0.046812031 | 0.08560722  | 0.432755618 |
| 0.080528659 | 0.022411916 | 0.158562607 | 0.077689668 |
| 0.224372675 | 0.208474488 | 0.100114543 | 0.165608496 |
| 0.410771917 | 0.043765123 | 0.339907091 | 0.042195853 |
| 0.144369075 | 0.00835737  | 0.06815095  | 0.045231252 |
| 0.11762951  | 0.05073315  | 0.118355336 | 0.089978502 |
| 0.436838007 | 0.397928561 | 0.097808602 | 0.450274496 |
| 0.01745545  | 0.147291098 | 0.05986061  | 0.135512304 |
| 0.218892759 | 0.016515536 | 0.259395714 | 0.413862759 |
| 0.011187617 | 0.320328403 | 0.272780384 | 0.066528893 |
| 0.364813873 | 0.085357837 | 0.30054819  | 0.037888903 |
| 0.190931568 | 0.141404528 | 0.387115704 | 0.142141158 |
| 0.091215493 | 0.0366895   | 0.42960035  | 0.134105423 |
| 0.070838906 | 0.034105649 | 0.046658151 | 0.382154218 |
| 0.248823919 | 0.417156513 | 0.374979229 | 0.224976156 |
| 0.180244901 | 0.414961537 | 0.260849592 | 0.312826984 |
| 0.173181438 | 0.450612781 | 0.066828796 | 0.004280266 |
| 0.024498291 | 0.01018085  | 0.050570421 | 0.156888224 |
| 0.382622234 | 0.168089341 | 0.054782277 | 0.059650578 |
| 0.335113578 | 0.437926898 | 0.461616284 | 0.29760668  |
| 0.006889498 | 0.072351675 | 0.187759468 | 0.070615787 |
| 0.207244308 | 0.035661897 | 0.074985735 | 0.423790497 |
| 0.263125949 | 0.309323028 | 0.04973363  | 0.394670823 |
| 0.048994389 | 0.385315869 | 0.439606685 | 0.046800502 |
| 0.425008846 | 0.42113793  | 0.386551702 | 0.236652175 |
| 0.376457726 | 0.152496837 | 0.017055308 | 0.267177142 |
| 0.339750114 | 0.002947459 | 0.407898659 | 0.422856608 |
| 0.448611896 | 0.382907103 | 0.396442711 | 0.417069842 |
| 0.449858554 | 0.025939919 | 0.015227077 | 0.106466406 |
| 0.440905626 | 0.281692433 | 0.017432773 | 0.240563453 |
| 0.15782113  | 0.170155632 | 0.311877107 | 0.113370136 |
| 0.363298016 | 0.365870617 | 0.430963125 | 0.276026758 |
| 0.174049406 | 0.206844074 | 0.210608858 | 0.414312083 |
| 0.005945554 | 0.034953038 | 0.029145712 | 0.153674908 |
| 0.188033365 | 0.045549523 | 0.151091116 | 0.154169956 |
| 0.062210317 | 0.137517259 | 0.123872768 | 0.20168596  |
| 0.040323767 | 0.274646713 | 0.054097017 | 0.07096401  |
| 0.004551657 | 0.082008791 | 0.041521207 | 0.028862077 |
| 0.064664971 | 0.183966533 | 0.321849536 | 0.397740213 |
| 0.111031935 | 0.109882118 | 0.289480196 | 0.339981986 |
| 0.264968381 | 0.176120356 | 0.105755926 | 0.001115342 |
| 0.079565173 | 0.151401709 | 0.057915382 | 0.227982101 |
| 0.122744424 | 0.054773781 | 0.200857308 | 0.223765697 |
| 0.139272581 | 0.046064388 | 0.108183643 | 0.305020014 |
| 0.094394504 | 0.068775715 | 0.322398061 | 0.264718248 |
| 2.56E-05    | 0.13673481  | 0.337866503 | 0.022373714 |
| 0.171461473 | 0.028661605 | 0.080432895 | 0.370143086 |
| 0.093192098 | 0.043563803 | 0.406081055 | 0.216223394 |
| 0.108424535 | 0.178972029 | 0.408232039 | 0.021250404 |
| 0.142068342 | 0.006664944 | 0.113630877 | 0.243023898 |

|             |             |             |             |
|-------------|-------------|-------------|-------------|
| 0.100763267 | 0.129143993 | 0.114407831 | 0.060355827 |
| 0.079527973 | 0.428336495 | 0.269717692 | 0.417927218 |
| 0.133359143 | 0.414230994 | 0.356090287 | 0.316957171 |
| 0.185126005 | 0.176234636 | 0.040619352 | 0.341666578 |
| 0.366985092 | 0.121152143 | 0.047119348 | 0.367504035 |
| 0.186618692 | 0.243940067 | 0.016318848 | 0.378420056 |
| 0.366080814 | 0.451809662 | 0.021004388 | 0.199458294 |
| 0.248976315 | 0.088046268 | 0.287331296 | 0.39571328  |
| 0.176455243 | 0.141200258 | 0.09155321  | 0.238250756 |
| 0.074131148 | 0.038183704 | 0.198549862 | 0.052202491 |
| 0.009994698 | 0.027433869 | 0.025369608 | 0.027433736 |
| 0.030826849 | 0.318121373 | 0.221780643 | 0.42796219  |
| 0.025377    | 0.297433952 | 0.115045651 | 0.072898828 |
| 0.350896507 | 0.116290278 | 0.175332645 | 0.187140425 |
| 0.118120353 | 0.002191707 | 0.020744081 | 0.40775242  |
| 0.023767814 | 0.057066462 | 0.117495477 | 0.000411203 |
| 0.010044733 | 0.418785781 | 0.064691724 | 0.122741801 |
| 0.339460401 | 0.138402742 | 0.109241777 | 0.176251374 |
| 0.163178878 | 0.025277172 | 0.000680847 | 0.408012283 |
| 0.402414378 | 0.369021998 | 0.410943271 | 0.384264298 |
| 0.350682739 | 0.273624794 | 0.275519921 | 0.197834742 |
| 0.020305396 | 0.027098233 | 0.052856195 | 0.082634353 |
| 0.00116121  | 0.215430302 | 0.094397407 | 0.057044891 |
| 0.280072091 | 0.142470939 | 0.00626312  | 0.150844263 |
| 0.006183281 | 0.079538709 | 0.086177286 | 0.044081456 |
| 0.168447091 | 0.002400342 | 0.121137132 | 0.109657932 |
| 0.373861999 | 0.238515441 | 0.126598315 | 0.443142604 |
| 0.122201523 | 0.09922416  | 0.09584813  | 0.221415918 |
| 0.012055104 | 0.068816046 | 0.124136787 | 0.069251427 |
| 0.071428723 | 0.352396611 | 0.118188177 | 0.019697153 |
| 0.110318585 | 0.000565546 | 0.278023187 | 0.423451659 |
| 0.441030283 | 0.41666196  | 0.405096141 | 0.077865294 |
| 0.423652276 | 0.055187695 | 0.445210639 | 0.336451667 |
| 0.205269901 | 0.000229742 | 0.000699119 | 0.40460826  |
| 0.195143633 | 0.045787152 | 0.05553231  | 0.144891582 |
| 0.01707316  | 0.052884227 | 0.010127811 | 0.032237902 |
| 0.25525725  | 0.058957885 | 0.028820171 | 0.419348339 |
| 0.063535955 | 0.066535957 | 0.178025802 | 0.043872902 |
| 0.200698228 | 0.007963511 | 0.041400322 | 0.000869408 |
| 0.18016449  | 0.084716954 | 0.4053754   | 0.434098972 |
| 0.367563155 | 0.215495826 | 0.210736006 | 0.103351241 |
| 0.31924663  | 0.078345895 | 0.145737169 | 0.066357299 |
| 0.448359206 | 0.212655224 | 0.170096663 | 0.200890001 |
| 0.375587618 | 0.373278328 | 0.004590757 | 0.271660639 |
| 0.002786901 | 0.002377734 | 0.219094062 | 0.115523868 |
| 0.015164661 | 0.144185007 | 0.130880721 | 0.059076016 |
| 0.043160394 | 0.006940142 | 0.072649894 | 0.061871445 |
| 0.118994964 | 0.133085713 | 0.083880996 | 0.126861049 |
| 0.055113824 | 0.02318989  | 0.033567576 | 0.024974805 |
| 0.069156086 | 0.231219195 | 0.134795974 | 0.002754205 |
| 0.254615372 | 0.2087438   | 0.012194839 | 0.067411593 |
| 0.325433998 | 0.401862127 | 0.005094183 | 0.000228949 |
| 0.149428246 | 0.086211375 | 0.383606557 | 0.451856916 |
| 0.435041059 | 0.387145146 | 0.273407376 | 0.015211284 |

|             |             |             |             |
|-------------|-------------|-------------|-------------|
| 0.012228573 | 0.119953301 | 0.099340331 | 0.009973924 |
| 0.417185281 | 0.0394702   | 0.410166324 | 0.114655008 |
| 0.041322168 | 0.049151216 | 0.003447316 | 0.019344992 |
| 0.193994067 | 0.059699296 | 0.035219608 | 0.09341438  |
| 0.083164817 | 0.063891063 | 0.007663796 | 0.061238622 |
| 0.213285233 | 0.055971785 | 0.054930649 | 0.089206793 |
| 0.25106248  | 0.142542138 | 0.296513985 | 0.306843461 |
| 0.057161499 | 0.037349787 | 0.115145501 | 0.230396545 |
| 0.37985058  | 0.284830049 | 0.006699056 | 0.449007062 |
| 0.368870348 | 0.298736386 | 0.427262751 | 0.23225717  |
| 0.035234093 | 0.1577852   | 0.103925955 | 0.13924215  |
| 0.057986675 | 0.154583791 | 0.063791545 | 0.018954321 |
| 0.167868994 | 0.361344958 | 0.355930827 | 0.033017359 |
| 0.243124329 | 0.074146493 | 0.035420191 | 0.35528996  |
| 0.039349773 | 0.020856073 | 0.235399998 | 0.326326839 |
| 0.000355661 | 0.031807052 | 0.370545565 | 0.047889507 |
| 0.39328606  | 0.377050649 | 0.318351972 | 0.062500094 |
| 0.000353164 | 0.264058289 | 0.179810885 | 0.144642549 |
| 0.382392405 | 0.216302197 | 0.033140797 | 0.009257615 |
| 0.141484664 | 0.056194617 | 0.021691988 | 0.122772811 |
| 0.061407447 | 0.258012598 | 0.07370547  | 0.075278713 |
| 0.036933156 | 0.061581761 | 0.059742975 | 0.063867001 |
| 0.032333846 | 0.10314456  | 0.196492247 | 0.172820626 |
| 0.073412763 | 0.308989701 | 0.317091653 | 0.004788851 |
| 0.143189099 | 0.28502301  | 0.303647304 | 0.000345727 |
| 0.279903455 | 0.000132475 | 0.038431901 | 0.046977857 |
| 0.036311593 | 0.040332771 | 0.080100988 | 0.06657486  |
| 0.194721982 | 0.053933004 | 0.068877762 | 0.082140126 |
| 0.025438698 | 0.061886995 | 0.184435077 | 0.148326156 |
| 0.061548256 | 0.025524399 | 0.069411081 | 0.082223402 |
| 0.007323359 | 0.388880627 | 0.13920468  | 0.048247047 |
| 0.070714308 | 0.125625909 | 0.203928957 | 0.46276157  |
| 0.266531473 | 0.097380424 | 0.094237842 | 0.399972777 |
| 0.147684476 | 0.102007551 | 0.016847633 | 0.198022527 |
| 0.069991414 | 0.042952425 | 0.217780887 | 0.203592277 |
| 0.324459541 | 0.275878036 | 0.132890596 | 0.312941822 |
| 0.116061665 | 0.150842429 | 1           | 0.010756717 |
| 0.051334979 | 0.062167493 | 0.076624724 | 0.000595753 |
| 0.162754524 | 0.091200861 | 0.391509187 | 0.429662729 |
| 0.089836683 | 0.241149201 | 0.186113816 | 0.019819884 |
| 0.226758861 | 0.161214912 | 0.057525866 | 0.342830457 |
| 0.076739684 | 0.035694753 | 0.100915498 | 0.133519522 |
| 0.301430095 | 0.31751987  | 0.049958479 | 0.064681922 |
| 0.074536178 | 0.10241032  | 0.387632653 | 0.040111222 |
| 0.296801267 | 0.033400463 | 0.284593704 | 0.086253237 |
| 0.045296869 | 0.43503412  | 0.018471083 | 0.444030575 |
| 0.105054492 | 0.073309949 | 0.349663156 | 0.109657969 |
| 0.080600197 | 0.015476918 | 0.055474065 | 0.152765082 |
| 0.04422915  | 0.102751692 | 0.01707546  | 0.015722444 |
| 0.153446225 | 0.096988562 | 0.37641272  | 0.203534991 |
| 0.048746614 | 0.170342021 | 0.045955354 | 0.105898628 |
| 0.455698443 | 0.425120408 | 0.063967347 | 0.115806864 |
| 0.191076862 | 0.016428409 | 0.278374925 | 0.004811534 |
| 0.263134165 | 0.288266287 | 0.159546024 | 0.00688103  |

|             |             |             |             |
|-------------|-------------|-------------|-------------|
| 0.001943391 | 0.069807231 | 0.267295036 | 0.035530086 |
| 0.361258731 | 0.081906457 | 0.244027514 | 0.297212266 |
| 0.084428962 | 0.425867491 | 0.014302805 | 0.238739038 |
| 0.012603841 | 0.105749521 | 0.162391046 | 0.178127009 |
| 0.046626086 | 0.084329615 | 0.209791454 | 0.055062554 |
| 0.003515714 | 0.054000625 | 0.000535782 | 0.296482197 |
| 0.429224396 | 0.13608502  | 0.11048049  | 0.172908553 |
| 0.110436965 | 0.253313531 | 0.048294441 | 0.234082146 |
| 0.000494459 | 0.17423069  | 0.058276255 | 0.322296808 |
| 0.13607105  | 0.192341346 | 0.007149007 | 0.109097555 |
| 0.390841691 | 0.074433923 | 0.130516663 | 0.152621331 |
| 0.441692685 | 0.29994743  | 0.120323946 | 0.039780175 |
| 0.289769712 | 0.028123177 | 0.186635602 | 0.41878065  |
| 0.032193741 | 0.048132054 | 0.313349168 | 0.040012644 |
| 0.098072247 | 0.288677505 | 0.293911997 | 0.418290915 |
| 0.006424654 | 0.096036446 | 0.27775226  | 0.379514464 |
| 0.136021195 | 0.028225241 | 0.059028074 | 0.044423598 |
| 0.424700909 | 0.020518219 | 0.061353453 | 0.218513714 |
| 0.056411536 | 0.12544777  | 0.271340552 | 0.030511184 |
| 0.003855967 | 0.02831467  | 0.10387637  | 0.050630273 |
| 0.107271673 | 0.140509701 | 0.046418354 | 0.247267299 |
| 0.02224471  | 0.002900529 | 0.311165444 | 0.005443453 |
| 0.178898628 | 0.20370945  | 0.077231421 | 0.115839203 |
| 0.112384118 | 0.175225936 | 0.198868544 | 0.000353146 |
| 0.263336591 | 0.010216694 | 0.068763808 | 0.044429798 |
| 0.082438669 | 0.010270444 | 0.361001333 | 0.392066044 |
| 0.15326099  | 0.109861742 | 0.139222405 | 0.367652257 |
| 0.03442256  | 0.141312749 | 0.10683726  | 0.323859318 |
| 0.053790055 | 0.255220104 | 0.195979035 | 0.150181396 |
| 0.238033862 | 0.069820578 |             |             |
| RPA1        | 0.137489823 | 0.088897872 | 0.091576575 |
| 0.105294372 | 0.137985281 | 0.051297849 | 0.111870594 |
| 0.098687007 | 0.076127244 | 0.007377051 | 0.152899255 |
| 0.093432519 | 0.009503906 | 0.152349046 | 0.11911075  |
| 0.095092286 | 0.133130877 | 0.209933501 | 0.008080519 |
| 0.028635605 | 0.155490627 | 0.031986786 | 0.05211143  |
| 0.10918211  | 0.217278885 | 0.072807949 | 0.037393074 |
| 0.117192257 | 0.006691895 | 0.092138081 | 0.004161789 |
| 0.219080397 | 0.132208251 | 0.033131788 | 0.059643455 |
| 0.074538606 | 0.003186191 | 0.18471587  | 0.143553894 |
| 0.028138624 | 0.232434738 | 0.015982619 | 0.208309281 |
| 0.026659556 | 0.106473293 | 0.002397571 | 0.068558045 |
| 0.0626778   | 0.064893883 | 0.100850055 | 0.085691275 |
| 0.025279692 | 0.155784305 | 0.044084686 | 0.003941632 |
| 0.035120529 | 0.002582139 | 0.013345996 | 0.137689813 |
| 0.323795905 | 0.279677257 | 0.004931129 | 0.059362758 |
| 0.054988884 | 0.097036933 | 0.206096068 | 0.017531948 |
| 0.154788266 | 0.016638213 | 0.065596665 | 0.048661733 |
| 0.060826137 | 0.056032721 | 0.29589666  | 0.077108835 |
| 0.034151973 | 0.281932751 | 0.130355084 | 0.042731545 |
| 0.079426781 | 0.18412607  | 0.187173223 | 0.12639493  |
| 0.014756538 | 0.077673622 | 0.062125392 | 0.239310517 |
| 0.104357073 | 0.061569026 | 0.160900736 | 0.178318323 |
| 0.06544512  | 0.028845926 | 0.090943578 | 0.134647542 |

|             |             |             |             |
|-------------|-------------|-------------|-------------|
| 0.10626462  | 0.013794322 | 0.026782391 | 0.040757396 |
| 0.112698578 | 0.100916262 | 0.139062141 | 0.26207851  |
| 0.082984233 | 0.130568328 | 0.13283439  | 0.082443742 |
| 0.134960758 | 0.157653336 | 0.059573284 | 0.098141005 |
| 0.10480569  | 0.133450185 | 0.080204403 | 0.149087513 |
| 0.074626805 | 0.149319058 | 0.13989183  | 0.125715233 |
| 0.00091022  | 0.135022967 | 0.219465117 | 0.160590506 |
| 0.070538508 | 0.178284057 | 0.027420146 | 0.2475472   |
| 0.126598068 | 0.142479948 | 0.157801551 | 0.218344161 |
| 0.145618595 | 0.116258933 | 0.124851799 | 0.132352095 |
| 0.149108559 | 0.016043761 | 0.074514526 | 0.062039108 |
| 0.131965924 | 0.180775226 | 0.075170357 | 0.16233588  |
| 0.225754584 | 0.131907705 | 0.081749313 | 0.181216264 |
| 0.087057192 | 0.201205658 | 0.089149314 | 0.290026786 |
| 0.169045954 | 0.154568254 | 0.184433584 | 0.109064763 |
| 0.169469959 | 0.113189915 | 0.006326683 | 0.130664646 |
| 0.217099697 | 0.017133024 | 0.102859645 | 0.118550213 |
| 0.125855933 | 0.106779711 | 0.1679866   | 0.13579293  |
| 0.12246466  | 0.164617712 | 0.000402371 | 0.215919991 |
| 0.145701272 | 0.20123853  | 0.094672466 | 0.046672136 |
| 0.10627981  | 0.064660989 | 0.089220842 | 0.021860862 |
| 0.219372552 | 0.12534865  | 0.104926602 | 0.107754445 |
| 0.04243826  | 0.231709844 | 0.041844883 | 0.13756013  |
| 0.093722126 | 0.134987192 | 0.130239218 | 0.164710123 |
| 0.011282606 | 0.316061918 | 0.049561645 | 0.076714353 |
| 0.32966848  | 0.044281092 | 0.022617299 | 0.12100819  |
| 0.115382504 | 0.055058797 | 0.172674243 | 0.133041068 |
| 0.160522372 | 0.231224439 | 0.085712378 | 0.143056665 |
| 0.203899656 | 0.170079226 | 0.070105181 | 0.134015812 |
| 0.047107896 | 0.197739719 | 0.094494521 | 0.19631188  |
| 0.273956528 | 0.079664773 | 0.23460383  | 0.112440536 |
| 0.034279365 | 0.008674339 | 0.014143157 | 0.045439806 |
| 0.184007266 | 0.065449168 | 0.0947868   | 0.1571401   |
| 0.108302814 | 0.071570306 | 0.042482247 | 0.218359064 |
| 0.144438287 | 0.112201548 | 0.165463619 | 0.042647033 |
| 0.043788608 | 0.136325685 | 0.126172523 | 0.056946753 |
| 0.119222358 | 0.031039639 | 0.019245621 | 0.140075584 |
| 0.013251886 | 0.058943273 | 0.121694668 | 0.140525173 |
| 0.019502634 | 0.124134702 | 0.160905586 | 0.003033328 |
| 0.052474534 | 0.084978758 | 0.295621991 | 0.015101907 |
| 0.222817945 | 0.229873278 | 0.105793267 | 0.091676479 |
| 0.138226853 | 0.147548779 | 0.146464098 | 0.146149708 |
| 0.027060971 | 0.16423909  | 0.12903004  | 0.180385833 |
| 0.149858611 | 0.02693848  | 0.010208075 | 0.130315587 |
| 0.130527034 | 0.011587669 | 0.123596667 | 0.074698143 |
| 0.024329154 | 0.098256617 | 0.048559813 | 0.181078032 |
| 0.205907622 | 0.103037364 | 0.200423269 | 0.178688354 |
| 0.220795287 | 0.220731321 | 0.129783723 | 0.175249649 |
| 0.007433997 | 0.074109856 | 0.063442356 | 0.203287095 |
| 0.25650928  | 0.067329592 | 0.178343398 | 0.011334724 |
| 0.000828601 | 0.120323943 | 0.160316469 | 0.27314531  |
| 0.060862939 | 0.039481252 | 0.109803529 | 0.145280709 |
| 0.262767836 | 0.174868081 | 0.150263581 | 0.094647196 |
| 0.140128676 | 0.05365006  | 0.064345004 | 0.098925636 |

|             |             |             |             |
|-------------|-------------|-------------|-------------|
| 0.207317423 | 0.109846299 | 0.163725977 | 0.187340396 |
| 0.076531125 | 0.045962517 | 0.072167875 | 0.031466465 |
| 0.108745664 | 0.056155643 | 0.158638954 | 0.255048699 |
| 0.160836619 | 0.208640719 | 0.186028306 | 0.011669562 |
| 0.213066443 | 0.237551642 | 0.067324294 | 0.122438963 |
| 0.119421199 | 0.11739938  | 0.113528194 | 0.118440884 |
| 0.110361655 | 0.087508256 | 0.132681424 | 0.067165146 |
| 0.1090649   | 0.073133945 | 0.039717283 | 0.148226916 |
| 0.007460324 | 0.198749601 | 0.097386763 | 0.308574973 |
| 0.099256243 | 0.148758375 | 0.134431686 | 0.085757705 |
| 0.071542788 | 0.015622092 | 0.036676519 | 0.123290838 |
| 0.169879253 | 0.077581779 | 0.022575887 | 0.018748305 |
| 0.138936037 | 0.189228478 | 0.024613325 | 0.149523254 |
| 0.192173826 | 0.093010065 | 0.141396133 | 0.158621087 |
| 0.147738589 | 0.003201425 | 0.036991971 | 0.001934922 |
| 0.011712074 | 0.134355871 | 0.028101567 | 0.056118777 |
| 0.240126468 | 0.056726978 | 0.17697184  | 0.163386412 |
| 0.106098462 | 0.150149662 | 0.158819828 | 0.064587207 |
| 0.153559447 | 0.002253372 | 0.137149697 | 0.114605059 |
| 0.017825424 | 0.015689708 | 0.050140629 | 0.126523218 |
| 0.085330503 | 0.088392523 | 0.284389301 | 0.019579079 |
| 0.152819196 | 0.086187636 | 0.142616623 | 0.084931241 |
| 0.079477302 | 0.199088413 | 0.05454014  | 0.119972331 |
| 0.183174334 | 0.225681254 | 0.028008383 | 0.155272681 |
| 0.079688306 | 0.147929236 | 0.134050949 | 0.060342233 |
| 0.153670225 | 0.129742402 | 0.141243889 | 0.133501281 |
| 0.19781292  | 0.13357938  | 0.009656258 | 0.020844222 |
| 0.117157528 | 0.092275017 | 0.009592145 | 0.106266678 |
| 0.116274967 | 0.11921692  | 0.279122726 | 0.238969534 |
| 0.187850874 | 0.170319027 | 0.154296477 | 0.147101392 |
| 0.093546966 | 0.014184739 | 0.053079675 | 0.184271026 |
| 0.003997758 | 0.063245507 | 0.28182453  | 0.03505081  |
| 0.065885892 | 0.077882715 | 0.038970131 | 0.049216002 |
| 0.210385485 | 0.101019651 | 0.118468434 | 0.139788143 |
| 0.094666523 | 0.048325581 | 0.1674358   | 0.131827155 |
| 0.012733742 | 0.159335371 | 0.22452102  | 0.094568485 |
| 0.040430978 | 0.062078826 | 0.213488007 | 0.236484134 |
| 0.167287863 | 0.139556465 | 0.093593896 | 0.140850545 |
| 0.238608698 | 0.071591097 | 0.154122073 | 0.114413146 |
| 0.158941495 | 0.197080303 | 0.216804592 | 0.117464655 |
| 0.162981409 | 0.163226344 | 0.103861559 | 0.103111735 |
| 0.144781748 | 0.093249214 | 0.130616641 | 0.05413203  |
| 0.219099101 | 0.142894067 | 0.150571438 | 0.214939414 |
| 0.067642599 | 0.282918109 | 0.274040331 | 0.136398561 |
| 0.116809084 | 0.023244105 | 0.134603295 | 0.264998884 |
| 0.173420952 | 0.017910935 | 0.254725924 | 0.048644646 |
| 0.117682511 | 0.002743772 | 0.096606707 | 0.240144828 |
| 0.228851503 | 0.134700336 | 0.036072108 | 0.10615805  |
| 0.093797633 | 0.027603242 | 0.111644043 | 0.082964822 |
| 0.153817594 | 0.076943654 | 0.138568827 | 0.215617633 |
| 0.181897967 | 0.094290803 | 0.030521839 | 0.112396277 |
| 0.216278706 | 0.058046185 | 0.146603    | 0.203055184 |
| 0.210442407 | 0.177071859 | 0.118242431 | 0.293059586 |
| 0.048917588 | 0.083794452 | 0.081947903 | 0.103259831 |

|             |             |             |             |
|-------------|-------------|-------------|-------------|
| 0.043635151 | 0.091027157 | 0.017815762 | 0.093721899 |
| 0.016287868 | 0.021436541 | 0.141177825 | 0.135713257 |
| 0.169356679 | 0.153673798 | 0.215311545 | 0.047182571 |
| 9.81E-05    | 0.07787734  | 0.16057453  | 0.06416778  |
| 0.106052757 | 0.166012234 | 0.020709873 | 0.183100307 |
| 0.310677605 | 0.120693525 | 0.116828452 | 0.019282662 |
| 0.011993744 | 0.07418966  | 0.315016409 | 0.12936263  |
| 0.181481142 | 0.074066505 | 0.022913864 | 0.173671976 |
| 0.013081215 | 0.330108733 | 0.259351916 | 0.006752543 |
| 0.018809844 | 0.143919625 | 0.114227685 | 0.118940686 |
| 0.058971285 | 0.135814868 | 0.151712796 | 0.017967225 |
| 0.116107374 | 0.092101092 | 0.236660216 | 0.245794987 |
| 0.211239478 | 0.164511057 | 0.23259904  | 0.090083138 |
| 0.095896424 | 0.163063123 | 0.166652726 | 0.32210069  |
| 0.204988708 | 0.135510051 | 0.092206605 | 0.057516068 |
| 0.118189639 | 0.203723858 | 0.153804508 | 0.142296626 |
| 0.148183346 | 0.106305621 | 0.284665572 | 0.130217561 |
| 0.266867741 | 0.044426813 | 0.284331335 | 0.108665103 |
| 0.212211216 | 0.105183046 | 0.076388503 | 0.109312077 |
| 0.003413104 | 0.019277626 | 0.068856073 | 0.068007844 |
| 0.216758972 | 0.066640703 | 0.037046084 | 0.085967295 |
| 0.06423515  | 0.247708188 | 0.279283388 | 0.177090571 |
| 0.083332248 | 0.042225855 | 0.010756717 | 1           |
| 0.197064921 | 0.181354427 | 0.143264163 | 0.05565144  |
| 0.178551137 | 0.032902436 | 0.123518265 | 0.139066376 |
| 0.023478171 | 0.228509212 | 0.008391769 | 0.129501742 |
| 0.004566456 | 0.124935581 | 0.269196714 | 0.07730779  |
| 0.017184942 | 0.161206729 | 0.157197137 | 0.024038497 |
| 0.102834091 | 0.068978438 | 0.058222159 | 0.10223846  |
| 0.143687074 | 0.153029605 | 0.139723082 | 0.096084899 |
| 0.044776489 | 0.095280691 | 0.032143507 | 0.161660966 |
| 0.17869468  | 0.127021156 | 0.172788754 | 0.130177836 |
| 0.087478702 | 0.1762911   | 0.22067976  | 0.086971694 |
| 0.035321565 | 0.118137978 | 0.021797743 | 0.022629348 |
| 0.082578459 | 0.029944914 | 0.00020669  | 0.019578742 |
| 0.274152782 | 0.021386956 | 0.065200474 | 0.121380737 |
| 0.085935771 | 0.226917958 | 0.008430572 | 0.081010843 |
| 0.10674507  | 0.141059255 | 0.069738729 | 0.268540186 |
| 0.177633857 | 0.237476228 | 0.065964051 | 0.001312882 |
| 0.069996638 | 0.045938851 | 0.013027739 | 0.151452947 |
| 0.072051855 | 0.023758631 | 0.065435963 | 0.079679963 |
| 0.148302818 | 0.010033606 | 0.043417764 | 0.0921211   |
| 0.166149348 | 0.149476548 | 0.167310859 | 0.166146277 |
| 0.021956895 | 0.19296207  | 0.044971975 | 0.035876338 |
| 0.104947647 | 0.070224911 | 0.206343512 | 0.06879189  |
| 0.169553122 | 0.072628468 | 0.012607881 | 0.224715562 |
| 0.123716478 | 0.052946455 | 0.23852833  | 0.005699737 |
| 0.297327726 | 0.142825014 | 0.042086607 | 0.033689518 |
| 0.12396386  | 0.106689014 | 0.249808501 | 0.14937773  |
| 0.010733129 | 0.055917922 | 0.128249101 | 0.065960565 |
| 0.147294681 | 0.034594188 | 0.217694903 | 0.012776937 |
| 0.115240524 | 0.094170806 | 0.10935904  | 0.044226376 |
| 0.043270765 | 0.164761571 | 0.018308936 | 0.156850545 |
| 0.271487849 | 0.080564871 | 0.152670352 | 0.177271228 |

|             |             |             |             |
|-------------|-------------|-------------|-------------|
| 0.050136891 | 0.130782362 | 0.037747117 | 0.140418021 |
| 0.157498821 | 0.288560997 | 0.122920919 | 0.125627177 |
| 0.298366613 | 0.068286401 | 0.050682973 | 0.144885699 |
| 0.1176704   | 0.135557911 | 0.027867936 | 0.169352106 |
| 0.045148585 | 0.214054528 | 0.03065411  | 0.152212839 |
| 0.156823322 | 0.085166097 | 0.048724307 | 0.23222156  |
| 0.200207367 | 0.109206941 | 0.076645131 | 0.255325137 |
| 0.146901366 | 0.137884681 | 0.220599206 | 0.009616223 |
| 0.086568003 | 0.149536556 | 0.222806815 | 0.075135395 |
| 0.251385909 | 0.096982179 | 0.057068714 | 0.030769817 |
| 0.156501489 | 0.024321766 | 0.059649383 | 0.116082669 |
| 0.017481865 | 0.11377536  | 0.159541274 | 0.162191375 |
| 0.137954369 | 0.010926577 | 0.011099657 | 0.140580634 |
| 0.021875068 | 0.013153532 | 0.023433742 | 0.060551608 |
| 0.040019529 | 0.019570508 | 0.026494496 | 0.034779526 |
| 0.140916261 | 0.091247318 |             |             |
| RPA3        | 0.148906999 | 0.212150375 | 0.116053286 |
| 0.217251939 | 0.134922326 | 0.093321284 | 0.152362105 |
| 0.157296374 | 0.174112954 | 0.038586516 | 0.166823476 |
| 0.14134547  | 0.012954318 | 0.27406211  | 0.138927165 |
| 0.140343047 | 0.160049276 | 0.184303238 | 0.030680669 |
| 0.092966364 | 0.138122647 | 0.069582011 | 0.114856394 |
| 0.105561679 | 0.311992564 | 0.158142015 | 0.075970027 |
| 0.255620119 | 0.031423132 | 0.157028328 | 0.03430145  |
| 0.350937806 | 0.135878929 | 0.062717811 | 0.110594996 |
| 0.117163937 | 0.003557292 | 0.350471985 | 0.157487022 |
| 0.04835631  | 0.33183294  | 0.058256968 | 0.185785013 |
| 0.082490897 | 0.148752303 | 0.021106075 | 0.134595979 |
| 0.136156819 | 0.103988158 | 0.127481317 | 0.171083323 |
| 0.072817897 | 0.225509561 | 0.139627914 | 0.008752508 |
| 0.049262267 | 0.006959345 | 0.028186214 | 0.289076121 |
| 0.293157813 | 0.183532985 | 0.033829785 | 0.083653265 |
| 0.108872782 | 0.155104623 | 0.212111594 | 0.064092364 |
| 0.298528355 | 0.034187478 | 0.14571493  | 0.121552153 |
| 0.107823069 | 0.087132035 | 0.304696251 | 0.128216994 |
| 0.073190615 | 0.205724802 | 0.126110757 | 0.061394606 |
| 0.218225528 | 0.340183981 | 0.224011045 | 0.294198708 |
| 0.025017349 | 0.10216358  | 0.085141773 | 0.255440575 |
| 0.177202172 | 0.108420032 | 0.239400896 | 0.336532434 |
| 0.086365802 | 0.093166427 | 0.18087167  | 0.190562016 |
| 0.222156503 | 0.036491544 | 0.083340966 | 0.044998304 |
| 0.149159996 | 0.129296096 | 0.286927099 | 0.293885335 |
| 0.083043982 | 0.172117076 | 0.30281951  | 0.096002365 |
| 0.131292704 | 0.189495465 | 0.104600396 | 0.196907537 |
| 0.180396869 | 0.264958327 | 0.190465841 | 0.231923244 |
| 0.117215131 | 0.290560669 | 0.231606708 | 0.229204778 |
| 0.011581133 | 0.287775089 | 0.228219026 | 0.157741207 |
| 0.113319493 | 0.147662976 | 0.056782764 | 0.282654306 |
| 0.235434429 | 0.197143631 | 0.186367038 | 0.185922432 |
| 0.241229603 | 0.277293002 | 0.279161676 | 0.238189896 |
| 0.15437885  | 0.03622967  | 0.123052047 | 0.099538444 |
| 0.19308766  | 0.182101196 | 0.06878555  | 0.333269751 |
| 0.334368717 | 0.220529433 | 0.136742021 | 0.351490402 |
| 0.107236102 | 0.340874314 | 0.219575061 | 0.243732372 |



|             |             |             |             |
|-------------|-------------|-------------|-------------|
| 0.335073613 | 0.322143149 | 0.314818496 | 0.154913864 |
| 0.312655066 | 0.171264395 | 0.016078489 | 0.233968586 |
| 0.325614145 | 0.012570173 | 0.214241334 | 0.242031283 |
| 0.284233436 | 0.212099409 | 0.298298215 | 0.262936988 |
| 0.274163453 | 0.183574687 | 0.003160987 | 0.20801455  |
| 0.315180575 | 0.310631056 | 0.110130438 | 0.10001609  |
| 0.132098391 | 0.119267311 | 0.168570345 | 0.084722117 |
| 0.351715291 | 0.240701631 | 0.228206742 | 0.205828926 |
| 0.1034546   | 0.327164018 | 0.079037432 | 0.306033014 |
| 0.157353006 | 0.16481256  | 0.166199981 | 0.214628033 |
| 0.060794585 | 0.238164486 | 0.108405169 | 0.110716037 |
| 0.27043798  | 0.090180281 | 0.04385102  | 0.159564188 |
| 0.178517184 | 0.118515429 | 0.1927194   | 0.193365688 |
| 0.189591663 | 0.285092288 | 0.197514044 | 0.182567338 |
| 0.161027864 | 0.311753496 | 0.146956993 | 0.259708826 |
| 0.075594869 | 0.281526415 | 0.180929526 | 0.31461902  |
| 0.355220684 | 0.113929195 | 0.255805395 | 0.11404823  |
| 0.11691814  | 0.034258579 | 0.027728541 | 0.088892234 |
| 0.283588484 | 0.145279909 | 0.153003926 | 0.195428373 |
| 0.184129083 | 0.097250117 | 0.085026693 | 0.34880081  |
| 0.222224447 | 0.119075413 | 0.27125696  | 0.108514607 |
| 0.056205924 | 0.197579403 | 0.227137916 | 0.084868015 |
| 0.189051447 | 0.044141836 | 0.046986371 | 0.262242806 |
| 0.047671818 | 0.064309748 | 0.236200248 | 0.1775781   |
| 0.070258683 | 0.248317268 | 0.294529237 | 0.007872379 |
| 0.080662349 | 0.101567366 | 0.270702542 | 0.054122264 |
| 0.256866827 | 0.250777727 | 0.104483153 | 0.105250029 |
| 0.210036016 | 0.297329216 | 0.237257922 | 0.278741393 |
| 0.073243786 | 0.304943068 | 0.2291225   | 0.282536391 |
| 0.204790702 | 0.059275865 | 0.020903391 | 0.244063324 |
| 0.247484055 | 0.063608662 | 0.180639029 | 0.163667913 |
| 0.065302546 | 0.158332928 | 0.079659742 | 0.313159757 |
| 0.352540289 | 0.262286284 | 0.166500953 | 0.221987804 |
| 0.307613151 | 0.228472309 | 0.217655036 | 0.306718196 |
| 0.046997355 | 0.106715417 | 0.100293842 | 0.259281045 |
| 0.283940113 | 0.083149127 | 0.263137786 | 0.022029316 |
| 0.001138242 | 0.1352018   | 0.184923909 | 0.170948825 |
| 0.057505664 | 0.100447986 | 0.171803496 | 0.292239535 |
| 0.201519031 | 0.273980114 | 0.201688926 | 0.149909259 |
| 0.291437782 | 0.074748303 | 0.091294287 | 0.133679098 |
| 0.254551633 | 0.114270833 | 0.198529649 | 0.355772044 |
| 0.119314749 | 0.06081639  | 0.109521314 | 0.019140147 |
| 0.150902542 | 0.160884308 | 0.238025569 | 0.342936741 |
| 0.254868755 | 0.325061239 | 0.270105986 | 0.057018068 |
| 0.225261588 | 0.199794205 | 0.031878081 | 0.253666932 |
| 0.252858757 | 0.242945989 | 0.250380472 | 0.258668424 |
| 0.223682784 | 0.159138406 | 0.214871609 | 0.134256917 |
| 0.184850251 | 0.124322186 | 0.075692873 | 0.159104936 |
| 0.011227342 | 0.241462416 | 0.102656753 | 0.295722882 |
| 0.168415153 | 0.201633652 | 0.149378618 | 0.10750519  |
| 0.150782159 | 0.034007766 | 0.099314361 | 0.118510499 |
| 0.192131788 | 0.103888024 | 0.091447547 | 0.075938338 |
| 0.290312205 | 0.291279795 | 0.055109637 | 0.304201398 |
| 0.192097934 | 0.185670802 | 0.152071594 | 0.196277853 |

|             |             |             |             |
|-------------|-------------|-------------|-------------|
| 0.18415826  | 0.025341105 | 0.081887435 | 0.010944522 |
| 0.036697758 | 0.261874966 | 0.065911714 | 0.182682428 |
| 0.265696711 | 0.083179441 | 0.304551997 | 0.311502512 |
| 0.259038865 | 0.283909972 | 0.295724275 | 0.067134066 |
| 0.304333293 | 0.007293081 | 0.279905005 | 0.23570098  |
| 0.06030327  | 0.014603388 | 0.032936816 | 0.247480246 |
| 0.138094067 | 0.151638595 | 0.27079474  | 0.089480475 |
| 0.220996022 | 0.134306625 | 0.132044903 | 0.086856307 |
| 0.142267722 | 0.138535499 | 0.059344228 | 0.277477389 |
| 0.182758217 | 0.191830041 | 0.07156221  | 0.196135513 |
| 0.119498298 | 0.190874974 | 0.177989976 | 0.035537129 |
| 0.18172217  | 0.227237022 | 0.31468825  | 0.278267131 |
| 0.335617655 | 0.184042791 | 0.043196711 | 0.067109019 |
| 0.207548727 | 0.167610095 | 0.05151056  | 0.165812451 |
| 0.269863711 | 0.181701149 | 0.316621525 | 0.339943212 |
| 0.323002794 | 0.321549918 | 0.1448585   | 0.236995057 |
| 0.097718737 | 0.005099532 | 0.128791275 | 0.213965055 |
| 0.009883062 | 0.098158797 | 0.33182264  | 0.073102666 |
| 0.086910229 | 0.146569096 | 0.054149249 | 0.061455524 |
| 0.235733288 | 0.141272391 | 0.107003151 | 0.196412124 |
| 0.100793817 | 0.095068489 | 0.145966648 | 0.138060174 |
| 0.047542907 | 0.286378094 | 0.326770064 | 0.121124287 |
| 0.097930478 | 0.110298509 | 0.169981349 | 0.251790579 |
| 0.271296413 | 0.264965167 | 0.162686024 | 0.11914497  |
| 0.30701483  | 0.093927729 | 0.269226564 | 0.259954513 |
| 0.323358712 | 0.336750265 | 0.3455405   | 0.141099367 |
| 0.162704995 | 0.17671669  | 0.10414003  | 0.124504385 |
| 0.280049535 | 0.153430029 | 0.269604731 | 0.065515264 |
| 0.228027514 | 0.199277264 | 0.16244362  | 0.183354173 |
| 0.099232938 | 0.248868576 | 0.181303287 | 0.227909123 |
| 0.137135351 | 0.054234198 | 0.145758218 | 0.248286989 |
| 0.270480249 | 0.048245566 | 0.255335161 | 0.086748094 |
| 0.21750971  | 0.025604403 | 0.175537705 | 0.357038835 |
| 0.246600352 | 0.16513924  | 0.140530829 | 0.166768528 |
| 0.202370483 | 0.076522964 | 0.101229116 | 0.219067555 |
| 0.267916863 | 0.150525836 | 0.290447193 | 0.279810978 |
| 0.208492117 | 0.122086983 | 0.050316549 | 0.146582467 |
| 0.20562927  | 0.096456348 | 0.143674431 | 0.191390958 |
| 0.272203272 | 0.322942571 | 0.25423059  | 0.195373024 |
| 0.100104869 | 0.14936237  | 0.140209671 | 0.201900965 |
| 0.071635137 | 0.194910954 | 0.057745594 | 0.177666668 |
| 0.013878573 | 0.025333054 | 0.255522111 | 0.142140538 |
| 0.31175251  | 0.277365145 | 0.344763029 | 0.087863229 |
| 0.000874417 | 0.141159915 | 0.200508041 | 0.110720395 |
| 0.241904461 | 0.239636752 | 0.049239616 | 0.202806409 |
| 0.320956315 | 0.18703033  | 0.196464343 | 0.07764335  |
| 0.038397307 | 0.155498114 | 0.282132002 | 0.161258948 |
| 0.147261321 | 0.141461856 | 0.048711088 | 0.165140473 |
| 0.029785136 | 0.31561881  | 0.308904912 | 0.037403518 |
| 0.056966495 | 0.246147062 | 0.234280819 | 0.129424986 |
| 0.078247333 | 0.228523937 | 0.245031274 | 0.035268271 |
| 0.190242324 | 0.097638706 | 0.154204675 | 0.173257985 |
| 0.161219169 | 0.137521998 | 0.190945664 | 0.118705472 |
| 0.17215496  | 0.173095726 | 0.172121651 | 0.268054042 |

|             |             |             |             |
|-------------|-------------|-------------|-------------|
| 0.178523329 | 0.148463421 | 0.136989788 | 0.11417704  |
| 0.130082646 | 0.197722295 | 0.231387642 | 0.238576552 |
| 0.16640326  | 0.219457962 | 0.336616023 | 0.189745559 |
| 0.21932838  | 0.088197451 | 0.348933197 | 0.262896498 |
| 0.28569397  | 0.202133756 | 0.096720797 | 0.239791112 |
| 0.02641317  | 0.080713347 | 0.120575543 | 0.129910519 |
| 0.195437932 | 0.100085374 | 0.086732223 | 0.188051957 |
| 0.153926902 | 0.362467735 | 0.316458683 | 0.287087726 |
| 0.112635661 | 0.082467474 | 0.051334979 | 0.197064921 |
| 1           | 0.227357781 | 0.119285731 | 0.057910699 |
| 0.212571232 | 0.140463698 | 0.239977009 | 0.301860948 |
| 0.04132218  | 0.301510085 | 0.060305298 | 0.211166134 |
| 0.042981405 | 0.267495471 | 0.273976252 | 0.167116446 |
| 0.031477542 | 0.165088972 | 0.15626996  | 0.08398243  |
| 0.184876655 | 0.150543019 | 0.074743658 | 0.117912619 |
| 0.15569785  | 0.221397195 | 0.2929987   | 0.132778076 |
| 0.110783222 | 0.101811452 | 0.09859531  | 0.16360264  |
| 0.145136545 | 0.26274378  | 0.16315872  | 0.267698297 |
| 0.110569694 | 0.231149041 | 0.354447924 | 0.110872263 |
| 0.101151226 | 0.130321869 | 0.032013532 | 0.066721432 |
| 0.131214746 | 0.052025464 | 0.001563277 | 0.030319683 |
| 0.275825543 | 0.053224833 | 0.174036451 | 0.18162009  |
| 0.084478166 | 0.257203354 | 0.018088577 | 0.131341518 |
| 0.266387083 | 0.308495104 | 0.185007441 | 0.300624147 |
| 0.242512816 | 0.188882469 | 0.147270001 | 0.003766877 |
| 0.137046744 | 0.101751404 | 0.057885468 | 0.144236334 |
| 0.121241997 | 0.041784606 | 0.145625395 | 0.130049388 |
| 0.256589341 | 0.029938028 | 0.108330703 | 0.168203466 |
| 0.21145552  | 0.324162235 | 0.146632457 | 0.224281112 |
| 0.074730789 | 0.221423729 | 0.073622035 | 0.074692715 |
| 0.151480484 | 0.078727207 | 0.263179485 | 0.066347082 |
| 0.165915223 | 0.129819724 | 0.024002097 | 0.372192475 |
| 0.297282017 | 0.08054417  | 0.289995242 | 0.032585023 |
| 0.265632237 | 0.227059363 | 0.0873757   | 0.076388738 |
| 0.106034388 | 0.139235904 | 0.206617712 | 0.259425659 |
| 0.052682621 | 0.115062634 | 0.172029925 | 0.083025027 |
| 0.32227997  | 0.101454843 | 0.260562638 | 0.070555396 |
| 0.262958478 | 0.190632595 | 0.208168057 | 0.077775957 |
| 0.111889492 | 0.185489076 | 0.057452643 | 0.300496075 |
| 0.174370056 | 0.073139562 | 0.239260102 | 0.205274762 |
| 0.058986794 | 0.237890185 | 0.096924346 | 0.282413818 |
| 0.142579941 | 0.279759428 | 0.195845133 | 0.261761153 |
| 0.28658976  | 0.064021586 | 0.065025531 | 0.129227815 |
| 0.274390573 | 0.190599144 | 0.063814531 | 0.266827062 |
| 0.060720143 | 0.211338857 | 0.09544159  | 0.109914831 |
| 0.14268084  | 0.116841731 | 0.089781151 | 0.23551461  |
| 0.214233612 | 0.140285557 | 0.101963297 | 0.347264366 |
| 0.169948785 | 0.164414817 | 0.341316928 | 0.008914756 |
| 0.145676025 | 0.189099318 | 0.193046359 | 0.095935637 |
| 0.318171286 | 0.161832692 | 0.140986443 | 0.038909542 |
| 0.230219163 | 0.031340807 | 0.074369078 | 0.139722597 |
| 0.05547568  | 0.155382307 | 0.291395973 | 0.284660532 |
| 0.183618609 | 0.045686318 | 0.051000862 | 0.266382671 |
| 0.042167802 | 0.037758283 | 0.051413393 | 0.153321741 |

|             |             |             |             |
|-------------|-------------|-------------|-------------|
| 0.046450618 | 0.062680439 | 0.062685346 | 0.06633235  |
| 0.21637467  | 0.109377076 |             |             |
| RPIA        | 0.24570931  | 0.201089836 | 0.204036025 |
| 0.1467538   | 0.093466003 | 0.099139883 | 0.307584293 |
| 0.269255352 | 0.199297311 | 0.064578266 | 0.113175641 |
| 0.215497488 | 0.014742968 | 0.205308779 | 0.304715483 |
| 0.089385713 | 0.254117741 | 0.289217804 | 0.07461981  |
| 0.171599696 | 0.100736078 | 0.060839784 | 0.124256138 |
| 0.105938241 | 0.326807539 | 0.157556238 | 0.07155829  |
| 0.200978829 | 0.026888436 | 0.09618202  | 0.034055702 |
| 0.285307244 | 0.085402831 | 0.056025152 | 0.195670268 |
| 0.107563817 | 0.016385817 | 0.323257036 | 0.137509602 |
| 0.029411685 | 0.294415331 | 0.078808899 | 0.156729032 |
| 0.090366761 | 0.226149308 | 0.028122518 | 0.09837956  |
| 0.154033448 | 0.167332645 | 0.240120891 | 0.123009595 |
| 0.102124285 | 0.175343483 | 0.122916914 | 0.012890214 |
| 0.040942238 | 0.005523495 | 0.024857105 | 0.246017618 |
| 0.232887833 | 0.250838295 | 0.041367775 | 0.196336018 |
| 0.104044931 | 0.130399487 | 0.213403775 | 0.083643386 |
| 0.227228585 | 0.031769494 | 0.107585848 | 0.112291538 |
| 0.130410758 | 0.267103214 | 0.283655943 | 0.263749931 |
| 0.089093844 | 0.206826067 | 0.104781707 | 0.060287282 |
| 0.194063924 | 0.307974825 | 0.23271548  | 0.269181005 |
| 0.046333164 | 0.074346891 | 0.090195218 | 0.194152041 |
| 0.16584447  | 0.299872614 | 0.136008201 | 0.268436068 |
| 0.280899746 | 0.090389799 | 0.141650356 | 0.264964965 |
| 0.187560224 | 0.057851341 | 0.077198021 | 0.033389006 |
| 0.094755373 | 0.088919486 | 0.294310504 | 0.192742537 |
| 0.100264785 | 0.261342624 | 0.295402158 | 0.064627819 |
| 0.099840967 | 0.250930779 | 0.098386818 | 0.140232108 |
| 0.109572156 | 0.198056752 | 0.166225622 | 0.192606556 |
| 0.07775792  | 0.219324039 | 0.136353225 | 0.21511536  |
| 0.019245661 | 0.242332651 | 0.224521    | 0.242193301 |
| 0.24477846  | 0.256128039 | 0.110967645 | 0.261798486 |
| 0.168623427 | 0.173362183 | 0.223009153 | 0.16800778  |
| 0.169666792 | 0.264709274 | 0.240056792 | 0.176798267 |
| 0.269891128 | 0.049291204 | 0.077892973 | 0.172818847 |
| 0.143613467 | 0.300210602 | 0.054200571 | 0.299378131 |
| 0.238609639 | 0.148399308 | 0.235613594 | 0.337186763 |
| 0.237935855 | 0.259376019 | 0.172996459 | 0.225638034 |
| 0.281287016 | 0.284538714 | 0.23046282  | 0.087752061 |
| 0.269738039 | 0.134477266 | 0.064541996 | 0.207819698 |
| 0.247015335 | 0.00603085  | 0.164309844 | 0.179746293 |
| 0.234731599 | 0.137737216 | 0.23092615  | 0.200637024 |
| 0.234210471 | 0.294294172 | 0.008776221 | 0.146735481 |
| 0.262887388 | 0.20698997  | 0.216292901 | 0.072294979 |
| 0.096752458 | 0.122165328 | 0.140837325 | 0.05257282  |
| 0.291342488 | 0.178692332 | 0.179582285 | 0.167180418 |
| 0.151584924 | 0.295968522 | 0.059332207 | 0.286584584 |
| 0.258610437 | 0.232955261 | 0.233765965 | 0.222302211 |
| 0.072635989 | 0.229931513 | 0.125963164 | 0.112288059 |
| 0.233581022 | 0.149321144 | 0.044496613 | 0.094857098 |
| 0.274438355 | 0.083214433 | 0.251616088 | 0.247911191 |
| 0.243854271 | 0.345781817 | 0.158583916 | 0.18425538  |

|             |             |             |             |
|-------------|-------------|-------------|-------------|
| 0.14939536  | 0.390603002 | 0.104631534 | 0.20223981  |
| 0.10780723  | 0.250284297 | 0.127525756 | 0.243304568 |
| 0.262213402 | 0.072324343 | 0.271532699 | 0.060662328 |
| 0.081022361 | 0.049235685 | 0.025199372 | 0.073106907 |
| 0.374647872 | 0.151291833 | 0.10540496  | 0.112433382 |
| 0.166795727 | 0.25958312  | 0.085428911 | 0.313655193 |
| 0.273841193 | 0.09617675  | 0.176386676 | 0.098768332 |
| 0.102443392 | 0.150691901 | 0.15127554  | 0.105892304 |
| 0.181195276 | 0.030347646 | 0.032187778 | 0.181847639 |
| 0.050285767 | 0.078769289 | 0.182992451 | 0.117361941 |
| 0.08470551  | 0.342395456 | 0.234608052 | 0.009413275 |
| 0.092031067 | 0.068114065 | 0.171485527 | 0.081942697 |
| 0.211342101 | 0.210686795 | 0.078120449 | 0.092016723 |
| 0.217166885 | 0.248400661 | 0.201876651 | 0.208685356 |
| 0.064524954 | 0.242647051 | 0.152355456 | 0.196410504 |
| 0.155858726 | 0.0691161   | 0.016200507 | 0.149539744 |
| 0.171776493 | 0.07307026  | 0.252374075 | 0.125574508 |
| 0.08419731  | 0.099465075 | 0.108963426 | 0.220104284 |
| 0.303627208 | 0.246526629 | 0.207729884 | 0.151056883 |
| 0.190520198 | 0.197790284 | 0.180104866 | 0.254947718 |
| 0.069093333 | 0.08585064  | 0.079857949 | 0.174565863 |
| 0.248796723 | 0.090794012 | 0.28356016  | 0.024010013 |
| 0.000194511 | 0.279150914 | 0.262079452 | 0.184130696 |
| 0.044895649 | 0.079820282 | 0.117889208 | 0.227904952 |
| 0.267933225 | 0.227824258 | 0.252617309 | 0.099496136 |
| 0.232922213 | 0.090217782 | 0.068273349 | 0.095928157 |
| 0.260393166 | 0.093152531 | 0.159238134 | 0.311595457 |
| 0.237101045 | 0.045707063 | 0.169386948 | 0.011534617 |
| 0.273279473 | 0.147728753 | 0.319107827 | 0.370760582 |
| 0.190183395 | 0.346306157 | 0.229334716 | 0.081366797 |
| 0.153960158 | 0.285231864 | 0.020518513 | 0.210224584 |
| 0.245254928 | 0.244582842 | 0.244354361 | 0.275249991 |
| 0.204397227 | 0.149274746 | 0.148742398 | 0.127750084 |
| 0.275584411 | 0.263329408 | 0.049489923 | 0.139863479 |
| 0.023072391 | 0.166582586 | 0.124355399 | 0.270908839 |
| 0.12119104  | 0.192331246 | 0.244778483 | 0.095367343 |
| 0.129189868 | 0.020465381 | 0.158381078 | 0.201120648 |
| 0.151351789 | 0.200815053 | 0.049859303 | 0.058910967 |
| 0.244846094 | 0.243912128 | 0.053612499 | 0.24926404  |
| 0.132694151 | 0.242423075 | 0.115998829 | 0.133511555 |
| 0.288732292 | 0.035240965 | 0.133184275 | 0.006808763 |
| 0.060674128 | 0.274137606 | 0.084136694 | 0.229856215 |
| 0.186754842 | 0.119143288 | 0.232587163 | 0.253311726 |
| 0.234243617 | 0.209045971 | 0.221330709 | 0.047113799 |
| 0.232860242 | 0.008195606 | 0.221171078 | 0.18989036  |
| 0.066376453 | 0.008615773 | 0.051971128 | 0.171973968 |
| 0.084233286 | 0.244271544 | 0.264187132 | 0.074987867 |
| 0.222146385 | 0.233980859 | 0.280002735 | 0.068373207 |
| 0.099763151 | 0.121071576 | 0.06756345  | 0.252413011 |
| 0.192611473 | 0.209535221 | 0.102119822 | 0.279443121 |
| 0.090430537 | 0.247374755 | 0.287684337 | 0.019168399 |
| 0.136317993 | 0.288560209 | 0.317881876 | 0.230289368 |
| 0.260600848 | 0.110277076 | 0.0495608   | 0.082603296 |
| 0.188711301 | 0.219798535 | 0.055935686 | 0.232090543 |

|             |             |             |             |
|-------------|-------------|-------------|-------------|
| 0.218874925 | 0.098084706 | 0.20551374  | 0.243356655 |
| 0.236975211 | 0.244260086 | 0.273477801 | 0.153464233 |
| 0.080510759 | 0.00757751  | 0.109677586 | 0.228163359 |
| 0.057805402 | 0.083261602 | 0.254816296 | 0.182548262 |
| 0.178200037 | 0.181012175 | 0.047455623 | 0.050439809 |
| 0.164865443 | 0.116908154 | 0.075513033 | 0.256179635 |
| 0.115599445 | 0.085556356 | 0.190447332 | 0.252362937 |
| 0.118430805 | 0.260948142 | 0.318065238 | 0.264155643 |
| 0.081297446 | 0.074245433 | 0.2714737   | 0.266029117 |
| 0.17223521  | 0.181753507 | 0.268681212 | 0.088276189 |
| 0.266350161 | 0.128807458 | 0.193386687 | 0.214670009 |
| 0.280019056 | 0.261690578 | 0.317335514 | 0.182544444 |
| 0.266968843 | 0.141382786 | 0.078833565 | 0.146833786 |
| 0.222198937 | 0.249383964 | 0.238389905 | 0.051194841 |
| 0.297458207 | 0.20251303  | 0.193131492 | 0.303732922 |
| 0.067167065 | 0.258403855 | 0.184089373 | 0.21948752  |
| 0.122278055 | 0.045701623 | 0.302951108 | 0.240473103 |
| 0.199929324 | 0.029368868 | 0.267457133 | 0.164540655 |
| 0.202655469 | 0.067842427 | 0.109165503 | 0.280631105 |
| 0.267091079 | 0.292592228 | 0.129030121 | 0.155528166 |
| 0.144859704 | 0.075846996 | 0.083925815 | 0.19485283  |
| 0.212839383 | 0.08956935  | 0.247592232 | 0.214321677 |
| 0.294708091 | 0.076094106 | 0.065908401 | 0.110295168 |
| 0.260696438 | 0.107386774 | 0.208314508 | 0.294985246 |
| 0.297134038 | 0.321499027 | 0.200788692 | 0.202762601 |
| 0.089984147 | 0.239393654 | 0.242088938 | 0.179088536 |
| 0.048557215 | 0.227155141 | 0.080707678 | 0.147514869 |
| 0.009207746 | 0.021043116 | 0.214022229 | 0.165493073 |
| 0.281233228 | 0.194295319 | 0.257412672 | 0.185632114 |
| 0.000808036 | 0.091460085 | 0.110959873 | 0.084725296 |
| 0.191077664 | 0.204403821 | 0.159768368 | 0.230022298 |
| 0.253101741 | 0.228731042 | 0.206989725 | 0.089808594 |
| 0.032442785 | 0.119666671 | 0.261302813 | 0.2470637   |
| 0.182377928 | 0.258051781 | 0.043126462 | 0.18953832  |
| 0.055734391 | 0.249720834 | 0.20995588  | 0.07140349  |
| 0.027371326 | 0.208201451 | 0.166451706 | 0.227319218 |
| 0.072082203 | 0.19754311  | 0.215967677 | 0.028349314 |
| 0.108600627 | 0.148553181 | 0.168040075 | 0.148714245 |
| 0.178764279 | 0.184498505 | 0.155749938 | 0.102503499 |
| 0.152694868 | 0.220776506 | 0.143436002 | 0.200531853 |
| 0.17034038  | 0.22792253  | 0.103683167 | 0.141165121 |
| 0.09208879  | 0.247029845 | 0.323522921 | 0.338645223 |
| 0.189024179 | 0.187975349 | 0.304146626 | 0.240820448 |
| 0.216420326 | 0.128352852 | 0.266616005 | 0.228081472 |
| 0.227874415 | 0.276353592 | 0.140580842 | 0.174743837 |
| 0.036621135 | 0.088540505 | 0.259468395 | 0.121067677 |
| 0.210895491 | 0.071618252 | 0.099137171 | 0.154737339 |
| 0.134209194 | 0.303131495 | 0.288904312 | 0.245286257 |
| 0.108156956 | 0.115254674 | 0.062167493 | 0.181354427 |
| 0.227357781 | 1           | 0.086423854 | 0.05926471  |
| 0.154845328 | 0.142403122 | 0.158518318 | 0.254707425 |
| 0.042331848 | 0.254430036 | 0.067502167 | 0.24399906  |
| 0.052638987 | 0.304477505 | 0.276841609 | 0.130244093 |
| 0.023488213 | 0.22269645  | 0.112072114 | 0.109000139 |

|             |             |             |             |
|-------------|-------------|-------------|-------------|
| 0.124364794 | 0.123642385 | 0.106569236 | 0.214338579 |
| 0.217658136 | 0.233690066 | 0.297819733 | 0.247682916 |
| 0.080599248 | 0.071515484 | 0.110236088 | 0.122781159 |
| 0.161706904 | 0.211233604 | 0.274160092 | 0.20624519  |
| 0.097343193 | 0.299794358 | 0.306078775 | 0.169858588 |
| 0.156029668 | 0.150937576 | 0.023941551 | 0.103013552 |
| 0.203143121 | 0.051272254 | 0.002122802 | 0.022753142 |
| 0.17617993  | 0.114778661 | 0.151477358 | 0.171670337 |
| 0.086680469 | 0.20519665  | 0.023106975 | 0.189186724 |
| 0.247635473 | 0.297935661 | 0.122489608 | 0.272926043 |
| 0.197559171 | 0.245952034 | 0.112877228 | 0.020758268 |
| 0.084828154 | 0.068528686 | 0.070122845 | 0.280785917 |
| 0.230595355 | 0.02777479  | 0.097982015 | 0.268612479 |
| 0.186345937 | 0.021281811 | 0.12442186  | 0.114936988 |
| 0.284027553 | 0.302527764 | 0.188936995 | 0.126791987 |
| 0.254346576 | 0.222329401 | 0.074335246 | 0.096372726 |
| 0.09267315  | 0.063781836 | 0.154415653 | 0.047010115 |
| 0.245472293 | 0.112106756 | 0.028975961 | 0.327742239 |
| 0.289186712 | 0.066924004 | 0.32303519  | 0.058000719 |
| 0.19020704  | 0.226429103 | 0.110590671 | 0.07374956  |
| 0.11112582  | 0.076544308 | 0.236063471 | 0.191137986 |
| 0.02756521  | 0.121336648 | 0.190755876 | 0.086940633 |
| 0.3320252   | 0.084375505 | 0.293738918 | 0.049319705 |
| 0.225524619 | 0.192991813 | 0.248851501 | 0.10817257  |
| 0.111160341 | 0.280050912 | 0.078083072 | 0.252852894 |
| 0.191431304 | 0.05109713  | 0.147191101 | 0.181629582 |
| 0.060083257 | 0.229115136 | 0.084820161 | 0.2577746   |
| 0.167802143 | 0.213408726 | 0.14650098  | 0.218502702 |
| 0.21897371  | 0.066126627 | 0.047994311 | 0.115979891 |
| 0.233205477 | 0.169679907 | 0.074518978 | 0.190678147 |
| 0.039679814 | 0.17528938  | 0.116627592 | 0.119153984 |
| 0.165347789 | 0.237393503 | 0.093633671 | 0.284132468 |
| 0.168086236 | 0.105555674 | 0.101488026 | 0.2724353   |
| 0.133560498 | 0.105850322 | 0.281305095 | 0.00273111  |
| 0.136309196 | 0.101935625 | 0.208766014 | 0.093125684 |
| 0.285823769 | 0.156965367 | 0.140624729 | 0.045290962 |
| 0.170499886 | 0.027068819 | 0.124930518 | 0.094864472 |
| 0.058689173 | 0.282505786 | 0.248186358 | 0.209329611 |
| 0.183265568 | 0.074202193 | 0.044028809 | 0.236299144 |
| 0.029014922 | 0.043225325 | 0.063590791 | 0.11682436  |
| 0.03847949  | 0.067756943 | 0.071600296 | 0.053797741 |
| 0.168930842 | 0.192288693 |             |             |
| RPS27L      | 0.04270329  | 0.22403222  | 0.021784447 |
| 0.119580817 | 0.32008206  | 0.147829669 | 0.051102054 |
| 0.08822232  | 0.18045743  | 0.081423987 | 0.229181303 |
| 0.022120704 | 0.193273892 | 0.307741595 | 0.055410809 |
| 0.295944137 | 0.053991356 | 0.089334763 | 0.050426677 |
| 0.132673094 | 0.305126243 | 0.23034113  | 0.113434539 |
| 0.278026361 | 0.116912464 | 0.143586545 | 0.205108891 |
| 0.301625539 | 0.131156421 | 0.267114168 | 0.062574223 |
| 0.292662493 | 0.335669338 | 0.192150228 | 0.013429252 |
| 0.190797981 | 0.045094094 | 0.268028759 | 0.248357033 |
| 0.25625984  | 0.240561302 | 0.079570298 | 0.213374914 |
| 0.115698926 | 0.024654771 | 0.051540009 | 0.271258453 |

|             |             |             |             |
|-------------|-------------|-------------|-------------|
| 0.149233995 | 0.174981994 | 0.023683971 | 0.243116439 |
| 0.160633004 | 0.189527302 | 0.158669124 | 0.00171509  |
| 0.241379549 | 0.133339326 | 0.210294277 | 0.289337291 |
| 0.173002724 | 0.133715509 | 0.131818955 | 0.112956295 |
| 0.213494926 | 0.281356079 | 0.220179943 | 0.12882428  |
| 0.313787204 | 0.254822702 | 0.263714738 | 0.120256539 |
| 0.156520512 | 0.01654157  | 0.138293083 | 0.035626142 |
| 0.19882678  | 0.186922206 | 0.249053415 | 0.269219247 |
| 0.208861434 | 0.320417037 | 0.17828832  | 0.265616309 |
| 0.189480357 | 0.301335922 | 0.288111985 | 0.307331083 |
| 0.254133269 | 0.060378366 | 0.301870304 | 0.338934047 |
| 0.027013623 | 0.126062722 | 0.239993917 | 0.06254586  |
| 0.242387416 | 0.20301714  | 0.115630662 | 0.281381097 |
| 0.346756374 | 0.284697861 | 0.272937587 | 0.229360113 |
| 0.243169393 | 0.034402907 | 0.244392976 | 0.315826186 |
| 0.247432549 | 0.042572694 | 0.280536499 | 0.32782363  |
| 0.251096691 | 0.309133102 | 0.239641302 | 0.276729045 |
| 0.260684949 | 0.319270896 | 0.263389473 | 0.263701449 |
| 0.041803474 | 0.309357964 | 0.114742089 | 0.062342756 |
| 0.027408597 | 0.108288359 | 0.211834203 | 0.261048082 |
| 0.323053077 | 0.207201669 | 0.11412876  | 0.238544395 |
| 0.380564259 | 0.23633776  | 0.301812671 | 0.281607735 |
| 0.034436724 | 0.232913706 | 0.251133789 | 0.12605673  |
| 0.264614258 | 0.080721678 | 0.299031585 | 0.285308093 |
| 0.275169375 | 0.347590895 | 0.067973181 | 0.288443119 |
| 0.117967612 | 0.358535172 | 0.241685459 | 0.141989573 |
| 0.311672644 | 0.271520327 | 0.37460428  | 0.348754133 |
| 0.281728252 | 0.145218371 | 0.045228345 | 0.259407544 |
| 0.366918978 | 0.050997188 | 0.314226655 | 0.341687425 |
| 0.282336262 | 0.331545212 | 0.380079915 | 0.340075282 |
| 0.278427834 | 0.046525208 | 0.028765132 | 0.312927672 |
| 0.290319588 | 0.291288863 | 0.16311493  | 0.200065024 |
| 0.29988332  | 0.139153424 | 0.282515291 | 0.17198896  |
| 0.365666594 | 0.307307239 | 0.30365346  | 0.240401408 |
| 0.116732374 | 0.21689049  | 0.231692569 | 0.236731273 |
| 0.05140905  | 0.05704765  | 0.024974076 | 0.240539844 |
| 0.093028397 | 0.182562522 | 0.129804491 | 0.244610779 |
| 0.191490553 | 0.113745888 | 0.201839162 | 0.352080039 |
| 0.027119643 | 0.187016656 | 0.099927738 | 0.081418863 |
| 0.063916716 | 0.098498161 | 0.152502673 | 0.151194837 |
| 0.242330685 | 0.120260288 | 0.251345822 | 0.336611927 |
| 0.200635002 | 0.108268683 | 0.239101237 | 0.350380435 |
| 0.368735927 | 0.26490137  | 0.178725499 | 0.030804731 |
| 0.213369518 | 0.135208012 | 0.237727828 | 0.214015828 |
| 0.102286367 | 0.186072159 | 0.252647991 | 0.372370256 |
| 0.106016508 | 0.060751818 | 0.218571654 | 0.272414505 |
| 0.07781075  | 0.25297643  | 0.349574492 | 0.161125511 |
| 0.003895134 | 0.175879671 | 0.31205927  | 0.262707127 |
| 0.189130186 | 0.226510984 | 0.223304333 | 0.336349321 |
| 0.205634648 | 0.27754431  | 0.330439267 | 0.368630182 |
| 0.146554979 | 0.104492972 | 0.363398417 | 0.067308071 |
| 0.221828198 | 0.135573592 | 0.307624742 | 0.08399775  |
| 0.180585929 | 0.276608219 | 0.304685809 | 0.284461708 |
| 0.058453483 | 0.311571707 | 0.262258581 | 0.335696639 |



|             |             |             |             |
|-------------|-------------|-------------|-------------|
| 0.1921401   | 0.361931011 | 0.33656112  | 0.326640878 |
| 0.237763686 | 0.172717102 | 0.222324734 | 0.303482072 |
| 0.332014066 | 0.139633714 | 0.035701472 | 0.280103175 |
| 0.142380748 | 0.314994903 | 0.220817896 | 0.359473694 |
| 0.320580741 | 0.229106756 | 0.167770149 | 0.374482031 |
| 0.297764689 | 0.137028255 | 0.300096129 | 0.367589987 |
| 0.105241533 | 0.2313491   | 0.257445472 | 0.398825444 |
| 0.130375379 | 0.285242766 | 0.220403101 | 0.229010361 |
| 0.017038036 | 0.039209847 | 0.036100608 | 0.212897215 |
| 0.319747985 | 0.188353525 | 0.293873683 | 0.32780333  |
| 0.104957045 | 0.279621454 | 0.165214271 | 0.239798501 |
| 0.252951684 | 0.21504732  | 0.25872347  | 0.285401058 |
| 0.187441017 | 0.039497894 | 0.141305044 | 0.317717174 |
| 0.015623862 | 0.287045183 | 0.131765404 | 0.008313942 |
| 0.032408418 | 0.192379114 | 0.054988549 | 0.13222125  |
| 0.382866455 | 0.121314587 | 0.125180934 | 0.098209697 |
| 0.304157559 | 0.069469379 | 0.018067318 | 0.315297541 |
| 0.293129923 | 0.281880482 | 0.282415386 | 0.248461085 |
| 0.299020243 | 0.255469627 | 0.339512738 | 0.119377119 |
| 0.084233005 | 0.039289143 | 0.286815331 | 0.234970661 |
| 0.003444316 | 0.329621452 | 0.228587036 | 0.120596269 |
| 0.310469367 | 0.219240572 | 0.03451988  | 0.279719597 |
| 0.019503981 | 0.216198433 | 0.133683653 | 0.18466215  |
| 0.357349291 | 0.012471832 | 0.113007517 | 0.208102465 |
| 0.227548375 | 0.220482426 | 0.207206779 | 0.322292977 |
| 0.233893078 | 0.052392475 | 0.256056464 | 0.332552989 |
| 0.066175615 | 0.050048114 | 0.132958594 | 0.013879555 |
| 0.082623805 | 0.26760597  | 0.181838721 | 0.045920355 |
| 0.206322861 | 0.005648531 | 0.222847238 | 0.333161769 |
| 0.233336987 | 0.36368511  | 0.323299551 | 0.281061144 |
| 0.312908465 | 0.132251445 | 0.330461762 | 0.232082537 |
| 0.122093483 | 0.00142312  | 0.014086824 | 0.341733636 |
| 0.252581625 | 0.023265476 | 0.129645544 | 0.125214072 |
| 0.139997053 | 0.059305686 | 0.056297629 | 0.32764356  |
| 0.215718808 | 0.27386954  | 0.285710326 | 0.247353904 |
| 0.199051805 | 0.205134669 | 0.118145982 | 0.049954014 |
| 0.253072294 | 0.061227829 | 0.050759222 | 0.025630868 |
| 0.337241037 | 0.056237731 | 0.235976951 | 0.302143044 |
| 0.342321011 | 0.341053024 | 0.099492311 | 0.147559557 |
| 0.313603982 | 0.036692889 | 0.157851929 | 0.043981396 |
| 0.262945995 | 0.294634576 | 0.278571585 | 0.216113053 |
| 0.363352659 | 0.299288656 | 0.034594078 | 0.32357358  |
| 0.018211831 | 0.012131208 | 0.114911677 | 0.195090916 |
| 0.076499998 | 0.226593473 | 0.2138819   | 0.131662969 |
| 0.177799293 | 0.025015224 | 0.280062471 | 0.289575813 |
| 0.260864645 | 0.223255666 | 0.300099425 | 0.16453431  |
| 0.275708878 | 0.254411701 | 0.194470893 | 0.133797026 |
| 0.135345766 | 0.187372068 | 0.118897874 | 0.022413473 |
| 0.163608494 | 0.221883244 | 0.048229929 | 0.110909795 |
| 0.33142692  | 0.340380827 | 0.06141083  | 0.03622093  |
| 0.18924436  | 0.206587077 | 0.364890439 | 0.277799615 |
| 0.301850687 | 0.368356989 | 0.256984167 | 0.199405317 |
| 0.056240689 | 0.276755056 | 0.30226462  | 0.231241275 |
| 0.320600577 | 0.027425203 | 0.272216793 | 0.270660856 |

|             |             |             |             |
|-------------|-------------|-------------|-------------|
| 0.088669787 | 0.168174726 | 0.058279315 | 0.070830185 |
| 0.272640856 | 0.147518973 | 0.225699552 | 0.069243395 |
| 0.238760248 | 0.27532027  | 0.042308339 | 0.162459105 |
| 0.243681715 | 0.275650168 | 0.125829881 | 0.12964496  |
| 0.212449942 | 0.061650005 | 0.308950768 | 0.33527437  |
| 0.084727967 | 0.063464011 | 0.094988293 | 0.271761325 |
| 0.284162501 | 0.149461166 | 0.028386448 | 0.225730193 |
| 0.343758434 | 0.254378587 | 0.280173866 | 0.353725275 |
| 0.056021377 | 0.243650728 | 0.220735624 | 0.260249278 |
| 0.143809003 | 0.141417554 | 0.176386418 | 0.045188476 |
| 0.230897581 | 0.290914347 | 0.252439505 | 0.175495971 |
| 0.186812625 | 0.047613209 | 0.022157852 | 0.279781389 |
| 0.31806487  | 0.066440864 | 0.091338841 | 0.30472795  |
| 0.013446279 | 0.260827403 | 0.357982408 | 0.178190036 |
| 0.335437803 | 0.355664329 | 0.307255579 | 0.124979894 |
| 0.010268907 | 0.303630465 | 0.274949754 | 0.205238771 |
| 0.240747795 | 0.219057573 | 0.087742392 | 0.112550206 |
| 0.270899518 | 0.035374605 | 0.167515121 | 0.125905533 |
| 0.200635764 | 0.186225088 | 0.191331496 | 0.129030304 |
| 0.230293936 | 0.038310434 | 0.275360973 | 0.160785828 |
| 0.21518357  | 0.225131325 | 0.308344256 | 0.06949607  |
| 0.197944661 | 0.324192681 | 0.254245323 | 0.02287785  |
| 0.244808282 | 0.306543268 | 0.311029672 | 0.005958823 |
| 0.314838771 | 0.013466651 | 0.229717865 | 0.238888129 |
| 0.226582922 | 0.208938887 | 0.296540776 | 0.27018468  |
| 0.194506217 | 0.175499629 | 0.206145381 | 0.224223083 |
| 0.209846284 | 0.136768122 | 0.260294361 | 0.153005614 |
| 0.261086729 | 0.099079481 | 0.054838442 | 0.050580571 |
| 0.068252816 | 0.277026456 | 0.182227391 | 0.035514608 |
| 0.213623145 | 0.157125688 | 0.308075656 | 0.260715913 |
| 0.339833236 | 0.047799177 | 0.196603017 | 0.252968386 |
| 0.086603415 | 0.112717819 | 0.029553253 | 0.168045918 |
| 0.155381312 | 0.284675097 | 0.134738907 | 0.126455972 |
| 0.209184207 | 0.277987595 | 0.173941279 | 0.310351582 |
| 0.218101679 | 0.160691727 | 0.076624724 | 0.143264163 |
| 0.119285731 | 0.086423854 | 1           | 0.003848227 |
| 0.249174059 | 0.099619618 | 0.322538758 | 0.269736979 |
| 0.229509899 | 0.296475784 | 0.083514503 | 0.07116036  |
| 0.066411821 | 0.083775864 | 0.107597447 | 0.258744262 |
| 0.223826903 | 0.142349973 | 0.293611223 | 0.091173311 |
| 0.313069431 | 0.259375911 | 0.258705308 | 0.132406948 |
| 0.174607487 | 0.104211028 | 0.270583818 | 0.051728572 |
| 0.197582422 | 0.316100028 | 0.118146279 | 0.250968307 |
| 0.242224554 | 0.330089203 | 0.036566105 | 0.337372488 |
| 0.238387181 | 0.079214034 | 0.334330968 | 0.132137655 |
| 0.134795465 | 0.190192324 | 0.260005608 | 0.120269583 |
| 0.178230128 | 0.229765558 | 0.00535019  | 0.099227557 |
| 0.318091734 | 0.138890995 | 0.207853723 | 0.273008127 |
| 0.306752238 | 0.336585915 | 0.205027714 | 0.124556009 |
| 0.236998546 | 0.261225897 | 0.192340887 | 0.225747759 |
| 0.245157809 | 0.102180249 | 0.155737813 | 0.014525027 |
| 0.244872896 | 0.224051961 | 0.135782062 | 0.055347439 |
| 0.023320142 | 0.257121666 | 0.216019238 | 0.029663928 |
| 0.375903724 | 0.202955965 | 0.153661958 | 0.268394336 |

|             |             |             |             |
|-------------|-------------|-------------|-------------|
| 0.114311763 | 0.264276613 | 0.193945508 | 0.323949262 |
| 0.024479271 | 0.195845039 | 0.213939147 | 0.159811172 |
| 0.265559358 | 0.294397441 | 0.337876739 | 0.303821458 |
| 0.044900488 | 0.262955908 | 0.006158472 | 0.254887539 |
| 0.235952998 | 0.245458563 | 0.148558167 | 0.086448969 |
| 0.289243514 | 0.267658545 | 0.214854467 | 0.167812769 |
| 0.028088631 | 0.307921147 | 0.164213823 | 0.250541332 |
| 0.151150827 | 0.179726581 | 0.088353454 | 0.248060117 |
| 0.226426616 | 0.205218031 | 0.19690053  | 0.171319179 |
| 0.267304969 | 0.221503137 | 0.074160471 | 0.241812213 |
| 0.17671028  | 0.038436793 | 0.108882719 | 0.339734166 |
| 0.202932572 | 0.31771484  | 0.377330104 | 0.202871398 |
| 0.257648323 | 0.227426145 | 0.18579631  | 0.318657431 |
| 0.166072951 | 0.215066922 | 0.328474308 | 0.282874097 |
| 0.303075457 | 0.309315458 | 0.282357357 | 0.270581368 |
| 0.235403288 | 0.088777069 | 0.262175041 | 0.236572482 |
| 0.285855674 | 0.262813407 | 0.114646654 | 0.278778218 |
| 0.061067203 | 0.132862195 | 0.171272451 | 0.104154344 |
| 0.236977704 | 0.253013928 | 0.302644556 | 0.300835403 |
| 0.1778212   | 0.052960198 | 0.32890915  | 0.068188174 |
| 0.124703981 | 0.306479421 | 0.178302976 | 0.243975216 |
| 0.122692549 | 0.190278904 | 0.116544418 | 0.001601253 |
| 0.336528748 | 0.118681224 | 0.209746072 | 0.288511379 |
| 0.20423859  | 0.037265941 | 0.276045413 | 0.374255934 |
| 0.185644404 | 0.149490263 | 0.173087948 | 0.277635697 |
| 0.274716897 | 0.169394368 | 0.198474182 | 0.181591884 |
| 0.286827793 | 0.115696207 | 0.158533487 | 0.209183458 |
| 0.239328716 | 0.136352119 |             |             |
| RPS6KA1     | 0.092282878 | 0.004571665 | 0.122257958 |
| 0.033737982 | 0.004093343 | 0.002992728 | 0.051501312 |
| 0.021352272 | 0.004058715 | 0.00129572  | 0.008939532 |
| 0.12076454  | 0.000773265 | 0.006542354 | 0.048460842 |
| 0.001577244 | 0.087282234 | 0.062945781 | 0.000102528 |
| 0.001193962 | 0.004350667 | 0.000440176 | 0.00226852  |
| 0.002696333 | 0.075377048 | 0.005937334 | 0.000605746 |
| 0.004967518 | 0.000941881 | 0.002364778 | 5.01E-06    |
| 0.020377481 | 0.002702561 | 0.000435744 | 0.185659801 |
| 0.001878075 | 0.000329525 | 0.019240734 | 0.010964823 |
| 0.000652401 | 0.027693401 | 3.78E-06    | 0.030630061 |
| 0.000495601 | 0.137198095 | 0.002072738 | 0.00059795  |
| 0.004329604 | 0.004576167 | 0.075952662 | 0.003187677 |
| 0.000281461 | 0.014297311 | 0.000991966 | 0.000112988 |
| 0.0004632   | 0.007520709 | 0.0029952   | 0.008680288 |
| 0.069091355 | 0.064742587 | 0.001535807 | 0.003523488 |
| 0.000302258 | 0.002092194 | 0.019764397 | 0.000124243 |
| 0.008294664 | 0.000855285 | 0.000745813 | 0.003779024 |
| 0.002357838 | 0.05155553  | 0.086550615 | 0.037079763 |
| 0.00048317  | 0.039011403 | 0.004138999 | 0.000316412 |
| 0.004353524 | 0.012731654 | 0.025915993 | 0.009040116 |
| 0.000330671 | 0.000588846 | 0.002132313 | 0.016728686 |
| 0.00328932  | 0.01489519  | 0.007652205 | 0.011126919 |
| 0.034119479 | 0.000172548 | 0.002477159 | 0.044762006 |
| 0.006104589 | 0.000881817 | 0.000111408 | 0.000329639 |
| 0.002302208 | 0.001733454 | 0.008894611 | 0.028891215 |

|             |             |             |             |
|-------------|-------------|-------------|-------------|
| 0.001699433 | 0.093063288 | 0.011872103 | 0.000633338 |
| 0.008363886 | 0.140109256 | 0.001771755 | 0.001684034 |
| 0.00428007  | 0.005755091 | 0.002051617 | 0.006524905 |
| 0.000828421 | 0.00825507  | 0.009456705 | 0.005530005 |
| 0.002263889 | 0.006719101 | 0.075314317 | 0.085330795 |
| 0.04248507  | 0.048902768 | 0.000249233 | 0.024313543 |
| 0.004704992 | 0.008515028 | 0.030751722 | 0.019393048 |
| 0.004048929 | 0.009039778 | 0.005823473 | 0.005020996 |
| 0.135161064 | 0.000895955 | 0.001482634 | 0.005298255 |
| 0.003931057 | 0.051755287 | 0.000846814 | 0.013181113 |
| 0.023226964 | 0.003598753 | 0.024844334 | 0.016585045 |
| 0.007146002 | 0.012598336 | 0.004006638 | 0.075081809 |
| 0.012868746 | 0.013761414 | 0.009129267 | 0.001751434 |
| 0.013926379 | 0.017036677 | 0.000210379 | 0.006516206 |
| 0.012071998 | 0.003946288 | 0.002380438 | 0.003234909 |
| 0.007692051 | 0.002288412 | 0.006629143 | 0.00501169  |
| 0.006487063 | 0.096001546 | 0.001849921 | 0.009624616 |
| 0.010229789 | 0.018173829 | 0.008125827 | 1.96E-05    |
| 0.001739722 | 0.003444928 | 0.001765655 | 5.48E-05    |
| 0.013224996 | 0.005604241 | 0.002914735 | 0.003763695 |
| 0.002083962 | 0.031477286 | 0.000694239 | 0.013990042 |
| 0.084684849 | 0.062410465 | 0.141548346 | 0.010624627 |
| 0.000342984 | 0.05233414  | 0.001988972 | 0.001078938 |
| 0.052652008 | 0.001993835 | 0.001045095 | 0.001969826 |
| 0.104847933 | 0.000727187 | 0.063139403 | 0.030703356 |
| 0.122187855 | 0.086061994 | 0.007112276 | 0.040103807 |
| 0.010286093 | 0.04984449  | 0.000656349 | 0.005404465 |
| 0.00072983  | 0.072493565 | 0.00273957  | 0.011190758 |
| 0.018354308 | 0.001476154 | 0.031375547 | 0.100779352 |
| 0.000598766 | 0.002980106 | 0.001874364 | 0.000102165 |
| 0.065299679 | 0.003404122 | 0.001855523 | 0.004279377 |
| 0.017604982 | 0.013156405 | 0.000342494 | 0.022254139 |
| 0.051869627 | 0.005489081 | 0.006079759 | 0.000348584 |
| 0.11901714  | 0.012916569 | 0.00419436  | 0.00130657  |
| 0.006748306 | 0.000139387 | 1.24E-05    | 0.005780176 |
| 0.000725827 | 0.000520465 | 0.003722685 | 0.003429094 |
| 8.34E-05    | 0.029835708 | 0.006532013 | 0.003980696 |
| 0.000313339 | 0.009295962 | 0.023553418 | 0.000601061 |
| 0.033726099 | 0.014647731 | 0.001603101 | 0.003369184 |
| 0.075529036 | 0.007343536 | 0.009134388 | 0.00596803  |
| 9.75E-05    | 0.007411155 | 0.003583098 | 0.009089481 |
| 0.009835714 | 0.001033793 | 0.001461985 | 0.005404094 |
| 0.005250018 | 5.51E-06    | 0.097213198 | 0.00067261  |
| 0.000189182 | 0.001320696 | 0.000998741 | 0.009451652 |
| 0.016935251 | 0.007504938 | 0.027574537 | 0.005914574 |
| 0.017754167 | 0.049250978 | 0.005731242 | 0.007535066 |
| 0.000691074 | 0.000848159 | 0.001365503 | 0.008716154 |
| 0.081201898 | 0.0015094   | 0.017494488 | 0.001984799 |
| 0.000124582 | 0.052133322 | 0.122300172 | 0.033612358 |
| 0.001108458 | 0.000446152 | 0.002995804 | 0.006295624 |
| 0.07197086  | 0.012171015 | 0.015069302 | 0.004981981 |
| 0.010151086 | 0.000290233 | 0.000544565 | 0.001599874 |
| 0.027458105 | 0.096687181 | 0.026965787 | 0.014390793 |
| 0.075969171 | 0.000389095 | 0.003206152 | 0.009931954 |

|             |             |              |             |
|-------------|-------------|--------------|-------------|
| 0.076926206 | 0.001251137 | 0.097385687  | 0.085723021 |
| 0.004926655 | 0.075097152 | 0.044514129  | 0.000290101 |
| 0.011913892 | 0.119715628 | 0.067194166  | 0.005047397 |
| 0.005268039 | 0.005276492 | 0.004876251  | 0.0076138   |
| 0.003685562 | 0.002271017 | 0.00415378   | 0.006799284 |
| 0.038261444 | 0.040922566 | 0.000565481  | 0.007685132 |
| 0.00082624  | 0.01149552  | 0.002449158  | 0.1055483   |
| 0.001485948 | 0.008162028 | 0.113574906  | 0.001033058 |
| 0.08825626  | 0.001230747 | 0.00126947   | 0.007216133 |
| 0.005241397 | 0.206532964 | 0.001246247  | 4.46E-06    |
| 0.01388823  | 0.019989523 | 0.000320417  | 0.008509039 |
| 0.012794833 | 0.043327873 | 0.009330737  | 0.005052503 |
| 0.072570903 | 0.00021554  | 0.000854102  | 0.000184211 |
| 5.36E-05    | 0.007667152 | 9.05E-05     | 0.041030437 |
| 0.227797533 | 0.022399765 | 0.008425523  | 0.032251802 |
| 0.005595461 | 0.008478715 | 0.000734027  | 0.007726886 |
| 0.010427582 | 0.005659223 | 0.007529627  | 0.009370699 |
| 0.017401995 | 0.00700783  | 0.004319874  | 0.000702968 |
| 0.093540936 | 0.080564426 | 0.001329814  | 0.001881189 |
| 0.028936285 | 0.0668286   | 0.003222026  | 0.052872459 |
| 0.008903959 | 0.000794702 | 0.007457259  | 0.002624582 |
| 0.020575494 | 0.000253945 | 0.0079105408 | 0.019943644 |
| 0.120411715 | 0.061936746 | 0.014651449  | 0.001335424 |
| 0.06926085  | 0.014442714 | 0.006674136  | 0.004757618 |
| 0.004043389 | 0.002054914 | 0.000189875  | 0.012309064 |
| 0.061530232 | 0.000254913 | 0.056338351  | 0.003421871 |
| 0.00308972  | 0.026611114 | 0.038462526  | 0.006867886 |
| 0.012079979 | 0.127817417 | 0.005664327  | 0.009021069 |
| 0.002188092 | 0.004652293 | 0.014926696  | 0.080738036 |
| 0.000745266 | 0.0489424   | 0.001441718  | 0.000314497 |
| 0.039991488 | 0.000177062 | 0.000172293  | 0.003235581 |
| 0.002953858 | 0.002247168 | 0.013820194  | 0.01710138  |
| 0.00089606  | 0.022306131 | 0.014854283  | 0.00381994  |
| 0.022754244 | 0.076776718 | 0.112279348  | 1.85E-05    |
| 0.000564267 | 0.154741185 | 0.072185301  | 0.000555617 |
| 0.004974636 | 0.025042797 | 0.09408888   | 0.008396663 |
| 0.001288108 | 0.004818826 | 0.005476115  | 0.036334862 |
| 0.010719684 | 0.023917981 | 0.01021398   | 0.010810102 |
| 0.008910369 | 0.001712356 | 0.014321187  | 0.101269192 |
| 0.058190664 | 0.008089451 | 7.94E-05     | 0.006144922 |
| 0.03365875  | 0.092951721 | 0.074594367  | 0.000311401 |
| 0.053448645 | 0.031894824 | 0.091345855  | 0.004558562 |
| 0.000117576 | 0.085119884 | 0.065866981  | 0.012037868 |
| 3.20E-05    | 0.059346534 | 0.045930324  |             |
|             | 0.002693913 | 0.009874251  |             |
| 0.00120471  | 0.00174496  | 0.018561259  | 0.092487135 |
| 0.044500759 | 0.007957886 | 0.00275559   | 0.002496926 |
| 0.000836769 | 0.034767869 | 0.003797213  | 0.005895556 |
| 0.001148857 | 0.009220801 | 0.009561178  | 0.000836769 |
| 0.001935606 | 0.000626891 | 0.002892577  | 0.095196774 |
| 0.003670681 | 0.00908262  | 0.126225244  | 0.029655661 |
| 0.013180426 | 0.007565777 | 0.057704739  | 0.021746632 |
| 0.029664434 | 0.061026871 | 0.003031048  | 0.000428808 |
| 0.031384441 | 0.000322083 | 0.001520191  | 0.000746077 |
| 0.00073136  | 0.004960526 | 0.013613157  | 0.031002138 |
|             |             |              | 0.009764468 |

|             |             |             |             |
|-------------|-------------|-------------|-------------|
| 0.006582086 | 0.019058268 | 0.003202262 | 0.000333292 |
| 0.000950084 | 0.007191796 | 0.002479746 | 0.004902329 |
| 0.014392989 | 0.000544067 | 0.074232666 | 0.040339033 |
| 0.089163655 | 0.017698048 | 0.000470469 | 8.00E-05    |
| 0.001995958 | 0.052488803 | 0.015143202 | 0.015127376 |
| 0.029130307 | 0.00019137  | 0.032172733 | 0.000234303 |
| 0.048173906 | 0.019853912 | 0.001211593 | 0.000271126 |
| 0.004764812 | 0.005476553 | 0.184525127 | 0.000215517 |
| 0.005554359 | 0.007275109 | 0.008091714 | 0.002506619 |
| 0.14555804  | 0.017560683 | 0.026989049 | 0.023191012 |
| 0.009493418 | 0.011841993 | 0.004809795 | 0.004198485 |
| 0.019808952 | 0.020005289 | 0.045027261 | 0.038322171 |
| 0.017798165 | 0.002229051 | 0.003811529 | 0.00615006  |
| 0.089564868 | 0.097441994 | 0.100809386 | 0.054290844 |
| 0.003825951 | 0.058947467 | 0.127020265 | 0.026320094 |
| 0.001283183 | 0.028448807 | 0.006185836 | 0.012544327 |
| 0.067182826 | 0.002367035 | 0.005963639 | 0.001138258 |
| 0.000213247 | 0.03492749  | 0.004508343 | 0.024190501 |
| 0.001735881 | 0.000620602 | 0.010092796 | 0.00123787  |
| 0.029721017 | 0.056321914 | 0.01273052  | 0.003884728 |
| 0.000445207 | 0.000595753 | 0.05565144  | 0.057910699 |
| 0.05926471  | 0.003848227 | 1           | 0.009423482 |
| 0.007583119 | 0.003935637 | 0.011441609 | 0.001160017 |
| 0.020051881 | 7.77E-05    | 0.06112369  | 0.000225671 |
| 0.048921361 | 0.082275455 | 0.001748153 | 0.001726975 |
| 0.036237118 | 0.006274361 | 0.002322823 | 0.002573228 |
| 0.001208514 | 0.001300887 | 0.006649036 | 0.011641232 |
| 0.048846789 | 0.009892035 | 0.050539455 | 0.000170051 |
| 0.004956893 | 0.000553141 | 0.00829999  | 0.01142872  |
| 0.005016362 | 0.134601413 | 0.004459649 | 0.001992894 |
| 0.073118772 | 0.016899491 | 0.005533486 | 0.003669288 |
| 0.014428963 | 0.001070209 | 0.000229356 | 0.007375885 |
| 0.000183536 | 0.00145628  | 8.49E-05    | 0.018559233 |
| 0.001758359 | 0.004016962 | 0.002381915 | 3.96E-05    |
| 0.000900884 | 0.005052424 | 0.007444438 | 0.011908473 |
| 0.005414904 | 0.035639543 | 0.01041152  | 0.011783092 |
| 0.003234716 | 0.000561168 | 0.000719335 | 0.082391009 |
| 0.000486498 | 0.070534849 | 0.068396318 | 0.000386064 |
| 0.001438361 | 0.043298075 | 0.00456582  | 0.000818037 |
| 0.000884473 | 0.002683706 | 0.00456582  | 0.000586457 |
| 0.021347037 | 0.006335449 | 0.031981966 | 0.013186    |
| 0.000138053 | 0.000119054 | 0.005286604 | 0.021975077 |
| 0.011240036 | 0.000987289 | 0.008163145 | 0.00097718  |
| 0.007378687 | 0.029373962 | 0.16432385  | 0.004245241 |
| 0.052954254 | 0.002701895 | 0.011595658 | 0.000299599 |
| 0.000520287 | 0.000183741 | 0.027552356 | 0.008798876 |
| 0.035229746 | 0.011479573 | 0.079635475 | 0.001824835 |
| 0.074427154 | 0.000494533 | 0.000441311 | 0.001048569 |
| 0.02515723  | 2.25E-05    | 0.017247664 | 0.000375526 |
| 0.049403343 | 0.006826659 | 0.005155978 |             |
| 8.55E-05    | 0.001764481 | 0.00024139  | 0.109761388 |
| 0.004586265 | 0.007303024 | 0.033320521 | 0.001529644 |
| 0.000130284 | 0.021787399 | 0.000137148 | 0.008939569 |
| 0.003201998 | 0.006181709 | 0.023637578 | 0.03598056  |
|             | 0.005738097 | 0.023853559 | 0.001136489 |

|                      |             |                      |             |
|----------------------|-------------|----------------------|-------------|
| 0.00030444           | 0.006085083 | 0.009880071          | 0.050169447 |
| 8.55E-05 0.014020455 | 0.000149447 | 0.013367809          |             |
| 0.000744828          | 0.006210922 | 0.01890105           | 0.007401156 |
| 0.002040968          | 0.072650351 | 0.012246144          | 0.004383823 |
| 0.002775517          | 0.025617244 | 0.026358087          | 0.069695879 |
| 0.017269379          | 0.000119091 | 0.010837948          | 0.006395374 |
| 0.0240753            | 0.001500357 | 0.093323244          | 0.004377263 |
| 0.004183459          | 0.016040608 | 0.006011793          | 0.006036513 |
| 0.001364367          | 0.006696593 | 0.000120028          | 0.067894225 |
| 0.013378241          | 0.005835045 | 0.011163708          | 6.34E-05    |
| 0.000504645          | 0.007842288 | 1.47E-05 0.002122024 |             |
| 0.000789976          | 0.002283227 | 2.81E-05 0.000617946 |             |
| 0.000447081          | 0.000180548 | 0.010181166          | 0.007335976 |
| RPS6KA5 0.120417161  | 0.356211412 | 0.079384838          |             |
| 0.174511589          | 0.255980516 | 0.26683376           | 0.114629942 |
| 0.178491234          | 0.280286366 | 0.153606342          | 0.294536055 |
| 0.061155762          | 0.086839685 | 0.422117531          | 0.119934889 |
| 0.276025496          | 0.098182859 | 0.169868448          | 0.077310934 |
| 0.18423896           | 0.264218508 | 0.260799799          | 0.247405808 |
| 0.25178061           | 0.229716642 | 0.232456356          | 0.230578321 |
| 0.429008565          | 0.16132651  | 0.296801565          | 0.096495101 |
| 0.416288347          | 0.26729562  | 0.233460645          | 0.042146609 |
| 0.282334989          | 0.015952717 | 0.419854935          | 0.261611387 |
| 0.128337576          | 0.371422893 | 0.173797413          | 0.271001319 |
| 0.204156596          | 0.075745776 | 0.105080483          | 0.271776437 |
| 0.214305123          | 0.239062528 | 0.090672596          | 0.298975101 |
| 0.228278334          | 0.29261269  | 0.258200784          | 0.006499402 |
| 0.211090952          | 0.058906229 | 0.15326254           | 0.44676751  |
| 0.233296955          | 0.207403576 | 0.153253178          | 0.217636682 |
| 0.249158561          | 0.283717257 | 0.247896493          | 0.206000617 |
| 0.454559341          | 0.159344144 | 0.296151904          | 0.161893996 |
| 0.276802249          | 0.058682879 | 0.201658024          | 0.094822229 |
| 0.253342953          | 0.253265469 | 0.286164901          | 0.217179082 |
| 0.346195441          | 0.485949418 | 0.226889114          | 0.432922801 |
| 0.114046917          | 0.246448683 | 0.234292748          | 0.300828957 |
| 0.296096816          | 0.123562491 | 0.344622477          | 0.480235922 |
| 0.08189939           | 0.204713535 | 0.301553899          | 0.137483012 |
| 0.366734875          | 0.18413952  | 0.213226389          | 0.173453798 |
| 0.27345047           | 0.264644421 | 0.434627177          | 0.29235779  |
| 0.257808245          | 0.098952379 | 0.430049789          | 0.239231541 |
| 0.281361515          | 0.112568557 | 0.222508651          | 0.380939323 |
| 0.27870135           | 0.435699108 | 0.342446765          | 0.332636391 |
| 0.260907696          | 0.446810905 | 0.310617254          | 0.380771878 |
| 0.068979262          | 0.462204482 | 0.207582667          | 0.120017766 |
| 0.096393658          | 0.169230641 | 0.199326415          | 0.327980898 |
| 0.409904555          | 0.273225065 | 0.224181387          | 0.25821822  |
| 0.416409542          | 0.414524875 | 0.453253454          | 0.366613718 |
| 0.089878062          | 0.17512944  | 0.254323183          | 0.246566639 |
| 0.310575054          | 0.15493266  | 0.218865873          | 0.464422664 |
| 0.386792114          | 0.382483284 | 0.168809676          | 0.469038078 |
| 0.212325962          | 0.487256215 | 0.369773943          | 0.224366938 |
| 0.470290285          | 0.447266204 | 0.475133362          | 0.30251166  |
| 0.442247908          | 0.259132409 | 0.07901377           | 0.344763217 |
| 0.477931535          | 0.02355024  | 0.400897644          | 0.431345332 |

|             |             |             |             |
|-------------|-------------|-------------|-------------|
| 0.431923146 | 0.38470189  | 0.480079252 | 0.449847758 |
| 0.436682508 | 0.111543509 | 0.021346606 | 0.276319403 |
| 0.451881127 | 0.378152495 | 0.202810251 | 0.250482556 |
| 0.275540289 | 0.274097208 | 0.338026754 | 0.234534682 |
| 0.501148167 | 0.391392429 | 0.415334967 | 0.325668892 |
| 0.198740521 | 0.346253801 | 0.229652706 | 0.419315647 |
| 0.098624606 | 0.152090348 | 0.076450358 | 0.290992356 |
| 0.186642846 | 0.232646295 | 0.259777282 | 0.253831164 |
| 0.242852585 | 0.236943728 | 0.206926945 | 0.295993908 |
| 0.082453081 | 0.264844174 | 0.184951297 | 0.181321515 |
| 0.10765085  | 0.19442249  | 0.239207162 | 0.223206403 |
| 0.281465602 | 0.261118463 | 0.305711136 | 0.428962135 |
| 0.246541236 | 0.193747851 | 0.310813788 | 0.455586323 |
| 0.452413068 | 0.259081909 | 0.259698879 | 0.038131233 |
| 0.233610762 | 0.1678857   | 0.142141855 | 0.246175908 |
| 0.217636597 | 0.264514901 | 0.275302726 | 0.337024795 |
| 0.232842831 | 0.160962885 | 0.262324275 | 0.433844898 |
| 0.163067747 | 0.280902065 | 0.414557836 | 0.24008427  |
| 0.012849604 | 0.268236523 | 0.382778546 | 0.187952355 |
| 0.2591593   | 0.160828751 | 0.192950424 | 0.410449711 |
| 0.208823139 | 0.223714612 | 0.429749444 | 0.327060274 |
| 0.247570363 | 0.236855766 | 0.479218488 | 0.04982662  |
| 0.235854304 | 0.09005768  | 0.290014507 | 0.171846155 |
| 0.253126927 | 0.29771612  | 0.257935308 | 0.250880232 |
| 0.135641991 | 0.468363277 | 0.353985517 | 0.460134499 |
| 0.236376759 | 0.478801109 | 0.400260636 | 0.41947352  |
| 0.289574575 | 0.217110752 | 0.119594553 | 0.37044801  |
| 0.395645308 | 0.179845204 | 0.093654647 | 0.340711218 |
| 0.209909862 | 0.297898067 | 0.140913188 | 0.459608784 |
| 0.474395253 | 0.396141196 | 0.234780457 | 0.344528448 |
| 0.371851645 | 0.24220093  | 0.358001119 | 0.492751143 |
| 0.169430179 | 0.26571318  | 0.253460999 | 0.383533504 |
| 0.198586932 | 0.227537837 | 0.323261983 | 0.137696699 |
| 0.00854786  | 0.118574168 | 0.103132188 | 0.238506333 |
| 0.175598714 | 0.234957674 | 0.291372419 | 0.462286411 |
| 0.193223744 | 0.40145598  | 0.232742117 | 0.270649612 |
| 0.383089975 | 0.258304525 | 0.252659283 | 0.274175184 |
| 0.254566744 | 0.047704655 | 0.195542227 | 0.484653981 |
| 0.058590159 | 0.209792373 | 0.256385275 | 0.010496301 |
| 0.092388678 | 0.304889911 | 0.129270935 | 0.245521422 |
| 0.445263874 | 0.232739582 | 0.200754448 | 0.175042665 |
| 0.312530142 | 0.148897801 | 0.015330166 | 0.421102357 |
| 0.423736931 | 0.402585239 | 0.419209088 | 0.404450609 |
| 0.381440391 | 0.314833479 | 0.349288922 | 0.238843182 |
| 0.157700564 | 0.109412183 | 0.194346018 | 0.273412222 |
| 0.010779236 | 0.350719697 | 0.258363785 | 0.184043307 |
| 0.331964668 | 0.265322861 | 0.09405337  | 0.260581878 |
| 0.051243473 | 0.14442407  | 0.263843575 | 0.23992807  |
| 0.318850207 | 0.040687368 | 0.177709136 | 0.226794411 |
| 0.391784958 | 0.346733909 | 0.214143083 | 0.468286745 |
| 0.29336475  | 0.128582989 | 0.26518751  | 0.344383643 |
| 0.134855363 | 0.063692215 | 0.25541742  | 0.019406759 |
| 0.152066798 | 0.414741486 | 0.241410024 | 0.098545601 |
| 0.26613523  | 0.020262539 | 0.352679937 | 0.484695539 |



|             |             |             |             |
|-------------|-------------|-------------|-------------|
| 0.395435697 | 0.463033926 | 0.456872809 | 0.223359468 |
| 0.452420738 | 0.068955417 | 0.4658293   | 0.347981591 |
| 0.209337844 | 0.002656117 | 0.028084301 | 0.420019952 |
| 0.268541768 | 0.075709741 | 0.202670221 | 0.236084362 |
| 0.198735547 | 0.164654422 | 0.126538669 | 0.197818993 |
| 0.267521418 | 0.260981894 | 0.195556334 | 0.414185196 |
| 0.250079606 | 0.258955144 | 0.23963533  | 0.113977578 |
| 0.270930737 | 0.118558529 | 0.11007237  | 0.024170337 |
| 0.3105678   | 0.136809148 | 0.421548776 | 0.448543904 |
| 0.471488139 | 0.302679864 | 0.17370981  | 0.261268276 |
| 0.384683291 | 0.107680416 | 0.210628895 | 0.121281929 |
| 0.417228605 | 0.281235523 | 0.336718016 | 0.321213235 |
| 0.475990384 | 0.436337493 | 0.087186519 | 0.350823733 |
| 0.038238126 | 0.007433903 | 0.235933444 | 0.258479317 |
| 0.058290344 | 0.264934404 | 0.27931885  | 0.194486214 |
| 0.227442974 | 0.074826184 | 0.204094349 | 0.197750657 |
| 0.268174373 | 0.281730693 | 0.247386874 | 0.237037929 |
| 0.239459958 | 0.160744827 | 0.238276876 | 0.217395386 |
| 0.186465591 | 0.302020428 | 0.233732872 | 0.059940465 |
| 0.242933341 | 0.26333083  | 0.116182016 | 0.183794812 |
| 0.403221107 | 0.437556783 | 0.104383751 | 0.046126652 |
| 0.286717651 | 0.263267876 | 0.457358606 | 0.427714478 |
| 0.474804107 | 0.491789933 | 0.404138645 | 0.208039355 |
| 0.127712178 | 0.272450292 | 0.242368356 | 0.166631768 |
| 0.460756858 | 0.085424373 | 0.428650984 | 0.21643814  |
| 0.156208154 | 0.225218299 | 0.101929625 | 0.141770746 |
| 0.25659217  | 0.224437414 | 0.241302524 | 0.144463133 |
| 0.288485075 | 0.192635234 | 0.100209422 | 0.239253527 |
| 0.321670845 | 0.141681378 | 0.201599961 | 0.233928615 |
| 0.302706241 | 0.111414115 | 0.318492703 | 0.457203059 |
| 0.164639775 | 0.142515391 | 0.211465208 | 0.31232071  |
| 0.358668791 | 0.213579106 | 0.063646343 | 0.368656138 |
| 0.450325327 | 0.29200297  | 0.442596321 | 0.398949793 |
| 0.117870581 | 0.280531823 | 0.213972555 | 0.268361727 |
| 0.222279425 | 0.261603314 | 0.251096805 | 0.110699881 |
| 0.323635297 | 0.458968582 | 0.356818844 | 0.240015638 |
| 0.253013182 | 0.128594631 | 0.075081294 | 0.382383629 |
| 0.180731728 | 0.156999475 | 0.197211709 | 0.357393569 |
| 0.004556652 | 0.127250399 | 0.435101337 | 0.275830374 |
| 0.473299382 | 0.431070122 | 0.434350521 | 0.220686288 |
| 0.001896783 | 0.277341856 | 0.296914765 | 0.271049842 |
| 0.374162538 | 0.320528742 | 0.156980421 | 0.15971956  |
| 0.322168379 | 0.100166955 | 0.220448312 | 0.231082575 |
| 0.133909873 | 0.272554757 | 0.238391353 | 0.207346768 |
| 0.237147354 | 0.100234054 | 0.200303538 | 0.243306521 |
| 0.126818025 | 0.279544706 | 0.364523648 | 0.153239339 |
| 0.167116935 | 0.406402081 | 0.334912053 | 0.06638515  |
| 0.246827047 | 0.368320584 | 0.399644498 | 0.01006262  |
| 0.330633325 | 0.034879721 | 0.260899922 | 0.259846996 |
| 0.248476926 | 0.261211931 | 0.267798554 | 0.247917879 |
| 0.252685262 | 0.24321291  | 0.271511455 | 0.263067794 |
| 0.230923669 | 0.223329559 | 0.265916163 | 0.24082273  |
| 0.271147223 | 0.184625236 | 0.134293896 | 0.137790257 |
| 0.129464366 | 0.397818215 | 0.293236445 | 0.093268249 |

|             |             |             |             |
|-------------|-------------|-------------|-------------|
| 0.260131187 | 0.241601577 | 0.385100096 | 0.41702503  |
| 0.41712851  | 0.133122025 | 0.269444517 | 0.377022669 |
| 0.126902722 | 0.212476785 | 0.100833621 | 0.245396305 |
| 0.262222489 | 0.245054856 | 0.236488114 | 0.226861338 |
| 0.289237936 | 0.416003791 | 0.283544238 | 0.41438344  |
| 0.265053677 | 0.226873959 | 0.162754524 | 0.178551137 |
| 0.212571232 | 0.154845328 | 0.249174059 | 0.009423482 |
| 1           | 0.207629399 | 0.407145241 | 0.429773552 |
| 0.199900857 | 0.391406502 | 0.185858364 | 0.151865116 |
| 0.133381175 | 0.195585776 | 0.178708294 | 0.316069601 |
| 0.158657676 | 0.227155698 | 0.26301947  | 0.216801893 |
| 0.327001752 | 0.294553288 | 0.22797851  | 0.252122671 |
| 0.232175168 | 0.184230538 | 0.425217045 | 0.137195235 |
| 0.243355425 | 0.205903772 | 0.202620987 | 0.286702573 |
| 0.252670545 | 0.443561132 | 0.102196395 | 0.456528165 |
| 0.270009723 | 0.160511444 | 0.481933786 | 0.248406546 |
| 0.22417866  | 0.198538968 | 0.149514358 | 0.222671864 |
| 0.242332946 | 0.226504046 | 0.0106817   | 0.082116166 |
| 0.330941324 | 0.202087257 | 0.305449402 | 0.305707828 |
| 0.22754082  | 0.344340976 | 0.128482866 | 0.242181962 |
| 0.407361512 | 0.44296841  | 0.26731033  | 0.27648699  |
| 0.327019497 | 0.184043945 | 0.252703781 | 0.017227745 |
| 0.265961887 | 0.242593481 | 0.229161535 | 0.123027023 |
| 0.057658504 | 0.159977184 | 0.253345332 | 0.083615719 |
| 0.432823297 | 0.143639598 | 0.214977814 | 0.310564    |
| 0.192888607 | 0.446421542 | 0.20950169  | 0.343770492 |
| 0.065601832 | 0.240970339 | 0.239319406 | 0.237852228 |
| 0.253005692 | 0.232680581 | 0.339173808 | 0.209346542 |
| 0.091171467 | 0.260365385 | 0.005843761 | 0.415992862 |
| 0.408166727 | 0.231389192 | 0.247692445 | 0.157422367 |
| 0.286044985 | 0.349877131 | 0.264122392 | 0.23423749  |
| 0.044943666 | 0.271562611 | 0.236806537 | 0.375756052 |
| 0.151757143 | 0.240738811 | 0.120358401 | 0.239250702 |
| 0.417447588 | 0.262152281 | 0.285421502 | 0.186503659 |
| 0.417029965 | 0.320400044 | 0.157900499 | 0.212351335 |
| 0.235611593 | 0.097828162 | 0.210681983 | 0.478117114 |
| 0.2518015   | 0.202436648 | 0.398460811 | 0.252814399 |
| 0.232289516 | 0.353043909 | 0.223769763 | 0.464555795 |
| 0.167865073 | 0.259418413 | 0.354337368 | 0.404216765 |
| 0.330013877 | 0.187205195 | 0.221548072 | 0.261499784 |
| 0.396165244 | 0.16442145  | 0.20776758  | 0.314544857 |
| 0.189665705 | 0.286074541 | 0.189963509 | 0.236166708 |
| 0.110448172 | 0.216466094 | 0.27747475  | 0.179565602 |
| 0.282962473 | 0.269558854 | 0.22917006  | 0.40349319  |
| 0.2132845   | 0.072655527 | 0.445189991 | 0.022138941 |
| 0.24284659  | 0.295496919 | 0.263180417 | 0.260263122 |
| 0.221444693 | 0.260047452 | 0.22504827  | 0.008939201 |
| 0.371076311 | 0.047623709 | 0.251976492 | 0.253740061 |
| 0.223004239 | 0.104455023 | 0.41884985  | 0.470852674 |
| 0.257629325 | 0.205525718 | 0.213662265 | 0.423562217 |
| 0.139148878 | 0.18779713  | 0.231118408 | 0.260045857 |
| 0.186481016 | 0.200705855 | 0.236376642 | 0.231951953 |
| 0.318515694 | 0.250531793 |             |             |
| RQCD1       | 0.088154865 | 0.320983263 | 0.100513764 |

|             |             |             |             |
|-------------|-------------|-------------|-------------|
| 0.066537539 | 0.137608227 | 0.156474936 | 0.033969419 |
| 0.056366731 | 0.222250067 | 0.052637301 | 0.206257472 |
| 0.017734572 | 0.007182663 | 0.357708986 | 0.027875299 |
| 0.162484292 | 0.02263061  | 0.084165451 | 0.010622066 |
| 0.030559386 | 0.108811051 | 0.058080895 | 0.190574112 |
| 0.09159363  | 0.268042578 | 0.197240138 | 0.119740161 |
| 0.386819786 | 0.029171473 | 0.256436257 | 0.031093346 |
| 0.365940472 | 0.139265691 | 0.110885226 | 0.022707266 |
| 0.169358518 | 0.000215643 | 0.385429218 | 0.08802636  |
| 0.022947416 | 0.330543814 | 0.125418306 | 0.125010421 |
| 0.129093111 | 0.054349697 | 0.02450979  | 0.174579503 |
| 0.170236815 | 0.075088674 | 0.087295859 | 0.259634202 |
| 0.071159031 | 0.296698328 | 0.247789222 | 0.002378396 |
| 0.074443033 | 0.005404234 | 0.02943874  | 0.428460409 |
| 0.215624424 | 0.089637463 | 0.020696632 | 0.083946949 |
| 0.139873823 | 0.172546897 | 0.171984884 | 0.074907881 |
| 0.411447642 | 0.015839786 | 0.234984395 | 0.048477838 |
| 0.118585899 | 0.032901179 | 0.1913682   | 0.090247235 |
| 0.07740332  | 0.139306405 | 0.153200151 | 0.067759223 |
| 0.341604887 | 0.423296926 | 0.174087413 | 0.418656525 |
| 0.003872014 | 0.119040013 | 0.061504485 | 0.198856344 |
| 0.182636713 | 0.027461614 | 0.30255798  | 0.429804189 |
| 0.034113827 | 0.165999416 | 0.20761975  | 0.136021145 |
| 0.352112766 | 0.03110226  | 0.162245156 | 0.032523778 |
| 0.1790728   | 0.123563088 | 0.364742363 | 0.246498166 |
| 0.098601996 | 0.104009454 | 0.428150469 | 0.113116592 |
| 0.123993394 | 0.131855709 | 0.035018712 | 0.292837225 |
| 0.227750228 | 0.394500341 | 0.271996875 | 0.218430428 |
| 0.139508525 | 0.414079912 | 0.298191449 | 0.306549006 |
| 0.015017063 | 0.416870392 | 0.189186388 | 0.028005292 |
| 0.078750903 | 0.046739966 | 0.024153996 | 0.246162204 |
| 0.352031102 | 0.233712398 | 0.141441195 | 0.113135952 |
| 0.296450663 | 0.414620063 | 0.399935974 | 0.286921712 |
| 0.050428106 | 0.026245474 | 0.151783255 | 0.09456882  |
| 0.1967888   | 0.100070946 | 0.071044878 | 0.435250163 |
| 0.383340651 | 0.277893353 | 0.112956469 | 0.439812508 |
| 0.065138508 | 0.432318991 | 0.362545069 | 0.146672123 |
| 0.446544276 | 0.448282454 | 0.407752712 | 0.21465281  |
| 0.433857596 | 0.228978093 | 0.002241889 | 0.256926382 |
| 0.4000992   | 0.002775922 | 0.323888229 | 0.350954312 |
| 0.413522363 | 0.311384108 | 0.379071582 | 0.38763076  |
| 0.410991426 | 0.100883671 | 0.000698714 | 0.150527252 |
| 0.431506108 | 0.372975881 | 0.032861355 | 0.148122859 |
| 0.13898547  | 0.180129129 | 0.248841023 | 0.046839452 |
| 0.41226115  | 0.358983154 | 0.354631321 | 0.247965525 |
| 0.119760043 | 0.336182105 | 0.119421712 | 0.436878914 |
| 0.031010562 | 0.119774124 | 0.118185852 | 0.18946     |
| 0.08239847  | 0.135801729 | 0.152662275 | 0.117200961 |
| 0.163007018 | 0.131886034 | 0.071369472 | 0.196628597 |
| 0.119788136 | 0.20145553  | 0.145266465 | 0.129937074 |
| 0.034244004 | 0.202533502 | 0.050345426 | 0.05969829  |
| 0.116898528 | 0.293903645 | 0.237138802 | 0.366315669 |
| 0.079864553 | 0.234235894 | 0.256750597 | 0.39984669  |
| 0.351723532 | 0.157241659 | 0.18180907  | 0.019285429 |

|             |             |             |             |
|-------------|-------------|-------------|-------------|
| 0.033471978 | 0.037535117 | 0.021249203 | 0.147351028 |
| 0.241319614 | 0.040334994 | 0.166188274 | 0.239408213 |
| 0.223199756 | 0.070698291 | 0.077591092 | 0.411420215 |
| 0.169527483 | 0.105101821 | 0.334717896 | 0.161071578 |
| 0.00762835  | 0.18828758  | 0.316907797 | 0.013898528 |
| 0.168730547 | 0.015000697 | 0.040341878 | 0.334152315 |
| 0.026684969 | 0.035906994 | 0.357697892 | 0.218765815 |
| 0.041567625 | 0.25308913  | 0.387088868 | 0.001681306 |
| 0.097530873 | 0.036920363 | 0.199001094 | 0.10807084  |
| 0.185782636 | 0.191052744 | 0.114214527 | 0.088777007 |
| 0.210953165 | 0.404494129 | 0.325323621 | 0.393546941 |
| 0.06960008  | 0.397762957 | 0.316644708 | 0.357703831 |
| 0.227896196 | 0.084405309 | 0.009780513 | 0.331114148 |
| 0.331018415 | 0.028807872 | 0.126936146 | 0.24722141  |
| 0.087625291 | 0.199194169 | 0.02274781  | 0.387643437 |
| 0.441961739 | 0.397978601 | 0.061807201 | 0.224136078 |
| 0.347952073 | 0.209408311 | 0.294478111 | 0.389523014 |
| 0.037247237 | 0.104703015 | 0.082165646 | 0.280325619 |
| 0.19601999  | 0.029500805 | 0.274716922 | 0.016672612 |
| 0.002659429 | 0.082305585 | 0.111151655 | 0.088357488 |
| 0.03362144  | 0.179411622 | 0.20147105  | 0.404055511 |
| 0.098191861 | 0.368672178 | 0.155402711 | 0.080957172 |
| 0.359442222 | 0.084386142 | 0.14356319  | 0.17766734  |
| 0.210609092 | 0.02020145  | 0.038248152 | 0.440448426 |
| 0.076885216 | 0.046682991 | 0.119621716 | 0.002128846 |
| 0.039077143 | 0.274489974 | 0.162572653 | 0.268071215 |
| 0.332855943 | 0.287519259 | 0.204293973 | 0.060460133 |
| 0.243603421 | 0.106472354 | 0.004851383 | 0.344656804 |
| 0.346483096 | 0.316918224 | 0.346897554 | 0.353838716 |
| 0.282348271 | 0.224014811 | 0.251591278 | 0.233495912 |
| 0.058395962 | 0.080277968 | 0.027520776 | 0.115220506 |
| 0.001221879 | 0.290853322 | 0.1054536   | 0.176181426 |
| 0.232153942 | 0.166876723 | 0.04180211  | 0.129594153 |
| 0.035341016 | 0.032605666 | 0.053822899 | 0.074732426 |
| 0.186974882 | 0.025434417 | 0.053440636 | 0.034938679 |
| 0.423983519 | 0.32186629  | 0.079420402 | 0.432380935 |
| 0.194121216 | 0.154586323 | 0.135919503 | 0.25204388  |
| 0.053477906 | 0.010952161 | 0.088771379 | 0.011508032 |
| 0.035160935 | 0.343650038 | 0.081706653 | 0.046827342 |
| 0.198967794 | 0.012756951 | 0.365799273 | 0.423587411 |
| 0.408044981 | 0.383039543 | 0.419682281 | 0.081575577 |
| 0.425572999 | 0.004980967 | 0.405358329 | 0.314432966 |
| 0.08851921  | 0.002954865 | 0.002102874 | 0.358424866 |
| 0.172258413 | 0.125308836 | 0.157584863 | 0.074336296 |
| 0.045661715 | 0.095340035 | 0.052855382 | 0.041890311 |
| 0.246433438 | 0.10802025  | 0.026182681 | 0.390097527 |
| 0.115399452 | 0.128135083 | 0.111380347 | 0.119303405 |
| 0.189430982 | 0.037244409 | 0.104366299 | 0.004228031 |
| 0.193997372 | 0.193924186 | 0.428909956 | 0.401868163 |
| 0.42120112  | 0.231894565 | 0.067088488 | 0.040812365 |
| 0.274028662 | 0.154985901 | 0.043217362 | 0.140532544 |
| 0.409071088 | 0.199457326 | 0.294022847 | 0.33379867  |
| 0.390303075 | 0.417210377 | 0.036642188 | 0.264964928 |
| 0.023479882 | 0.000336276 | 0.212867776 | 0.17435795  |

|             |             |             |             |
|-------------|-------------|-------------|-------------|
| 0.002107941 | 0.102185669 | 0.248316522 | 0.043284545 |
| 0.04601512  | 0.031817489 | 0.047676306 | 0.049613811 |
| 0.183815257 | 0.138053607 | 0.099133431 | 0.166108744 |
| 0.069650058 | 0.015923628 | 0.085921494 | 0.054819482 |
| 0.018694558 | 0.290579533 | 0.273473234 | 0.020239679 |
| 0.162887013 | 0.16657026  | 0.077237059 | 0.184313956 |
| 0.3570659   | 0.373926739 | 0.013329856 | 0.012501029 |
| 0.269929446 | 0.083132735 | 0.366421984 | 0.39992787  |
| 0.441818124 | 0.405593867 | 0.384477277 | 0.026600282 |
| 0.062902865 | 0.147768975 | 0.105892674 | 0.021291125 |
| 0.398440388 | 0.097097473 | 0.40548413  | 0.084982871 |
| 0.125211503 | 0.104247353 | 0.024433583 | 0.083391816 |
| 0.152310447 | 0.157595586 | 0.101015697 | 0.19968336  |
| 0.100425984 | 0.036536449 | 0.045380461 | 0.14795694  |
| 0.263974825 | 0.016550637 | 0.148876306 | 0.103567962 |
| 0.281455096 | 0.017587483 | 0.234645654 | 0.375234531 |
| 0.16260721  | 0.085647746 | 0.111983169 | 0.213048645 |
| 0.300900079 | 0.134231269 | 0.028855102 | 0.353653399 |
| 0.365542033 | 0.236987324 | 0.428496532 | 0.276644182 |
| 0.113093666 | 0.157088784 | 0.055859037 | 0.130843937 |
| 0.119688153 | 0.175253024 | 0.102534434 | 0.089374826 |
| 0.247831819 | 0.388531012 | 0.334225005 | 0.110708449 |
| 0.17490974  | 0.128763748 | 0.086101277 | 0.305959386 |
| 0.025103474 | 0.037239262 | 0.113332355 | 0.24875323  |
| 0.004439283 | 0.018270261 | 0.331969868 | 0.092372926 |
| 0.397912862 | 0.361684369 | 0.399967564 | 0.068265594 |
| 0.000103534 | 0.189856001 | 0.225285408 | 0.142620447 |
| 0.345703756 | 0.290954562 | 0.019144578 | 0.037286741 |
| 0.260243805 | 0.155152022 | 0.032610514 | 0.057372015 |
| 0.010847512 | 0.212677865 | 0.170429329 | 0.103651134 |
| 0.08386227  | 0.100338393 | 0.027410505 | 0.157030309 |
| 0.008075573 | 0.227391081 | 0.27536927  | 0.054350218 |
| 0.020827493 | 0.284017617 | 0.281386263 | 0.039718967 |
| 0.113491407 | 0.256061579 | 0.324692193 | 0.00144737  |
| 0.25717722  | 0.009642346 | 0.088309205 | 0.121011787 |
| 0.092780148 | 0.069682338 | 0.133729558 | 0.088975835 |
| 0.180557415 | 0.110973862 | 0.15755655  | 0.188376059 |
| 0.077096605 | 0.13163433  | 0.178616572 | 0.135281896 |
| 0.10322539  | 0.09765113  | 0.183523445 | 0.199063967 |
| 0.032411278 | 0.345709954 | 0.282807873 | 0.154966343 |
| 0.144532038 | 0.102723173 | 0.328282981 | 0.402761304 |
| 0.341078553 | 0.192152103 | 0.091747781 | 0.37188494  |
| 0.017172193 | 0.049616002 | 0.048567218 | 0.194186661 |
| 0.159850401 | 0.035196351 | 0.159169423 | 0.215616948 |
| 0.213783116 | 0.379360706 | 0.275139558 | 0.357959125 |
| 0.147373099 | 0.09070723  | 0.091200861 | 0.032902436 |
| 0.140463698 | 0.142403122 | 0.099619618 | 0.007583119 |
| 0.207629399 | 1           | 0.345744666 | 0.429623455 |
| 0.050541387 | 0.336198805 | 0.047775616 | 0.057781414 |
| 0.044694093 | 0.260302125 | 0.167209036 | 0.267498019 |
| 0.034004528 | 0.105188573 | 0.14142419  | 0.116388138 |
| 0.259489268 | 0.215805634 | 0.042919534 | 0.091011866 |
| 0.11425259  | 0.198323293 | 0.376522774 | 0.111086698 |
| 0.179700778 | 0.048962984 | 0.166300416 | 0.120428981 |

|             |             |             |             |
|-------------|-------------|-------------|-------------|
| 0.087741182 | 0.384524325 | 0.093675601 | 0.388408569 |
| 0.092335825 | 0.172330331 | 0.417509886 | 0.139911203 |
| 0.075798605 | 0.032652312 | 0.028709259 | 0.099320498 |
| 0.046250996 | 0.069270485 | 0.000830931 | 0.006029375 |
| 0.232656121 | 0.051028777 | 0.249285628 | 0.195241043 |
| 0.059798045 | 0.218700728 | 0.012574537 | 0.122113427 |
| 0.40755323  | 0.430440952 | 0.051043422 | 0.213463058 |
| 0.230494439 | 0.075909225 | 0.266181379 | 0.001024617 |
| 0.181931653 | 0.165752642 | 0.051063897 | 0.038471091 |
| 0.015149383 | 0.034395288 | 0.194725262 | 0.079623694 |
| 0.332063014 | 0.020797618 | 0.149577152 | 0.28045999  |
| 0.153895669 | 0.444605764 | 0.043005162 | 0.281085196 |
| 0.011240929 | 0.177676236 | 0.108284797 | 0.098354994 |
| 0.06099641  | 0.077047655 | 0.272473682 | 0.061811344 |
| 0.036120226 | 0.04145495  | 0.000921861 | 0.406864831 |
| 0.409887111 | 0.090356557 | 0.214313288 | 0.037617707 |
| 0.205468256 | 0.273993143 | 0.020965051 | 0.141221023 |
| 0.014741693 | 0.164538358 | 0.149973429 | 0.375033379 |
| 0.030882788 | 0.124923302 | 0.039587199 | 0.080552558 |
| 0.432185298 | 0.02885643  | 0.205429039 | 0.03759619  |
| 0.408849186 | 0.27636969  | 0.216875162 | 0.032060016 |
| 0.163677263 | 0.102263989 | 0.1122621   | 0.398726311 |
| 0.09475608  | 0.060665772 | 0.302911351 | 0.087955728 |
| 0.069738595 | 0.331245244 | 0.158671207 | 0.380344099 |
| 0.022033678 | 0.214065233 | 0.262051444 | 0.348905511 |
| 0.240333516 | 0.029864787 | 0.046683848 | 0.065091299 |
| 0.419157574 | 0.046739185 | 0.031605972 | 0.296479373 |
| 0.04116516  | 0.189172749 | 0.158430294 | 0.057354372 |
| 0.016737415 | 0.046806611 | 0.102843064 | 0.141896015 |
| 0.16587545  | 0.143940649 | 0.048790898 | 0.369226229 |
| 0.045856908 | 0.028169989 | 0.39767605  | 0.001512192 |
| 0.241238457 | 0.244877201 | 0.156859074 | 0.115808679 |
| 0.270192358 | 0.173954191 | 0.170964465 | 0.002524801 |
| 0.25694139  | 0.013527533 | 0.066991169 | 0.059997193 |
| 0.023686969 | 0.040894509 | 0.407399719 | 0.377700096 |
| 0.208885873 | 0.031837628 | 0.03590322  | 0.355981723 |
| 0.015121006 | 0.055094789 | 0.049209082 | 0.248415999 |
| 0.043183306 | 0.115182632 | 0.110419158 | 0.107096416 |
| 0.264142762 | 0.113156676 |             |             |
| RRM1        | 0.106363142 | 0.433612824 | 0.085634735 |
| 0.216002268 | 0.362717075 | 0.470551389 | 0.079001313 |
| 0.160641041 | 0.36348585  | 0.349263082 | 0.439134914 |
| 0.028839488 | 0.114663381 | 0.470522296 | 0.070830504 |
| 0.450460556 | 0.048227543 | 0.140926136 | 0.089946075 |
| 0.267023042 | 0.338947072 | 0.419368555 | 0.434386113 |
| 0.331198805 | 0.209101007 | 0.393861143 | 0.426096556 |
| 0.521282315 | 0.357080209 | 0.492292237 | 0.268387158 |
| 0.426786156 | 0.386195434 | 0.450729085 | 0.026672229 |
| 0.466873239 | 0.0128715   | 0.447053096 | 0.330407872 |
| 0.211512258 | 0.350467242 | 0.393377665 | 0.318288904 |
| 0.430618968 | 0.058353192 | 0.274586553 | 0.445570392 |
| 0.368150253 | 0.31985651  | 0.091662928 | 0.474938538 |
| 0.406603069 | 0.395471589 | 0.427477706 | 0.004048554 |
| 0.374949166 | 0.12635922  | 0.28863515  | 0.52382166  |

|             |             |             |             |
|-------------|-------------|-------------|-------------|
| 0.250339308 | 0.159857799 | 0.337820045 | 0.277420749 |
| 0.421470651 | 0.405934556 | 0.286198092 | 0.422648058 |
| 0.523053263 | 0.22626771  | 0.466461705 | 0.218535751 |
| 0.442498841 | 0.04398557  | 0.193734769 | 0.104588938 |
| 0.440814535 | 0.247829624 | 0.402011262 | 0.36512344  |
| 0.443408281 | 0.525935851 | 0.274105384 | 0.515403066 |
| 0.117151225 | 0.39060131  | 0.329611885 | 0.340900762 |
| 0.391195835 | 0.101200627 | 0.474457498 | 0.53947378  |
| 0.061953585 | 0.425473452 | 0.437846199 | 0.15198393  |
| 0.441169298 | 0.312487951 | 0.457953393 | 0.236084987 |
| 0.416675722 | 0.403229267 | 0.479380078 | 0.354522606 |
| 0.357342334 | 0.099820827 | 0.498164764 | 0.377160103 |
| 0.382948587 | 0.116413521 | 0.282085448 | 0.478169855 |
| 0.479413721 | 0.517061937 | 0.442003052 | 0.395073735 |
| 0.444525445 | 0.523422637 | 0.468548126 | 0.414794432 |
| 0.196822578 | 0.543349848 | 0.246203058 | 0.059809832 |
| 0.100060629 | 0.107555495 | 0.254648045 | 0.322478631 |
| 0.487041504 | 0.379955978 | 0.258577795 | 0.289554668 |
| 0.464858762 | 0.492539751 | 0.540131327 | 0.44499415  |
| 0.057157571 | 0.288130942 | 0.453176803 | 0.328523602 |
| 0.425914595 | 0.136304807 | 0.324459349 | 0.523985195 |
| 0.402029225 | 0.469155025 | 0.213245744 | 0.50813196  |
| 0.228347034 | 0.532460093 | 0.472013182 | 0.227153897 |
| 0.53607912  | 0.51332985  | 0.530247781 | 0.4572659   |
| 0.490348945 | 0.430473482 | 0.073857832 | 0.402222371 |
| 0.500010835 | 0.024529177 | 0.487951288 | 0.517550884 |
| 0.520834961 | 0.489860863 | 0.534152599 | 0.527379503 |
| 0.523236709 | 0.095700201 | 0.035954729 | 0.33501284  |
| 0.529055642 | 0.430651744 | 0.154551626 | 0.479921443 |
| 0.410236391 | 0.463516867 | 0.450360327 | 0.411626422 |
| 0.521322847 | 0.463697835 | 0.506112278 | 0.432525698 |
| 0.33975919  | 0.324645413 | 0.431150583 | 0.485430242 |
| 0.061916827 | 0.162939243 | 0.074666386 | 0.328944312 |
| 0.418099051 | 0.216661297 | 0.451669602 | 0.384078767 |
| 0.237879865 | 0.386136202 | 0.395726539 | 0.431238977 |
| 0.072886774 | 0.503585754 | 0.210565249 | 0.222264303 |
| 0.061110864 | 0.160136494 | 0.260021492 | 0.211901151 |
| 0.306771913 | 0.24203178  | 0.482370006 | 0.503061318 |
| 0.386752494 | 0.22901002  | 0.474610003 | 0.487075904 |
| 0.43179497  | 0.451797347 | 0.257238582 | 0.022940651 |
| 0.355472447 | 0.351436777 | 0.239286882 | 0.458741295 |
| 0.179905908 | 0.306846458 | 0.445531927 | 0.447386134 |
| 0.359800286 | 0.174334931 | 0.430540446 | 0.436488744 |
| 0.182026015 | 0.385064318 | 0.465228636 | 0.45549815  |
| 0.005638589 | 0.409990999 | 0.484409799 | 0.180337437 |
| 0.357012825 | 0.194021342 | 0.340261299 | 0.478159408 |
| 0.351700779 | 0.268045922 | 0.507883933 | 0.432674277 |
| 0.408280284 | 0.224583039 | 0.538491666 | 0.06849777  |
| 0.377662163 | 0.080836869 | 0.333967344 | 0.375004272 |
| 0.311024653 | 0.323048167 | 0.370859597 | 0.345378503 |
| 0.173450618 | 0.534869873 | 0.415305504 | 0.533494659 |
| 0.444359235 | 0.541984181 | 0.484345263 | 0.455912371 |
| 0.41654431  | 0.406746436 | 0.188575819 | 0.484549929 |
| 0.470165878 | 0.354826176 | 0.098657526 | 0.468626728 |

|             |             |             |             |
|-------------|-------------|-------------|-------------|
| 0.411038762 | 0.45330809  | 0.140291464 | 0.514729346 |
| 0.504572267 | 0.485836201 | 0.184643652 | 0.407599609 |
| 0.432309507 | 0.30429381  | 0.429543241 | 0.537285672 |
| 0.368410722 | 0.41654582  | 0.410456621 | 0.419048059 |
| 0.225238774 | 0.257557208 | 0.319551981 | 0.225796233 |
| 0.020200338 | 0.107647861 | 0.093459828 | 0.2062829   |
| 0.219984758 | 0.458072012 | 0.444066819 | 0.536255113 |
| 0.15439715  | 0.423095111 | 0.260659498 | 0.381582358 |
| 0.435892178 | 0.392526398 | 0.435685301 | 0.433765692 |
| 0.274874046 | 0.030785355 | 0.171305373 | 0.531428398 |
| 0.055495836 | 0.310656322 | 0.358657884 | 0.00558613  |
| 0.06628878  | 0.430628391 | 0.11485497  | 0.198435462 |
| 0.484062066 | 0.206841288 | 0.262021309 | 0.37859101  |
| 0.393587741 | 0.123178223 | 0.005908559 | 0.49659185  |
| 0.486612291 | 0.453329573 | 0.48593217  | 0.45712649  |
| 0.435041604 | 0.423844773 | 0.448288066 | 0.426897439 |
| 0.139501309 | 0.119791256 | 0.28186362  | 0.355458098 |
| 0.007256716 | 0.419801396 | 0.341011715 | 0.179339855 |
| 0.459472685 | 0.33815806  | 0.056100786 | 0.390391031 |
| 0.041774748 | 0.281143189 | 0.359848281 | 0.249593273 |
| 0.374685595 | 0.021939404 | 0.353090057 | 0.402881178 |
| 0.452482402 | 0.373745747 | 0.420790796 | 0.547319069 |
| 0.405629893 | 0.161873453 | 0.38412702  | 0.440880657 |
| 0.097539811 | 0.139649485 | 0.406509873 | 0.065491837 |
| 0.251505044 | 0.449578043 | 0.423034093 | 0.105088877 |
| 0.340257956 | 0.009125976 | 0.393680654 | 0.546688054 |
| 0.484550087 | 0.53718378  | 0.524854772 | 0.349731814 |
| 0.529379051 | 0.142080401 | 0.548283726 | 0.436136173 |
| 0.443675234 | 0.002304462 | 0.008291128 | 0.505455075 |
| 0.468479375 | 0.076421713 | 0.202104814 | 0.461015692 |
| 0.155447401 | 0.20279008  | 0.08462397  | 0.236269153 |
| 0.479424902 | 0.290260488 | 0.213741343 | 0.485187205 |
| 0.296631263 | 0.270457768 | 0.443731649 | 0.110300553 |
| 0.457053181 | 0.078129102 | 0.106475677 | 0.014565028 |
| 0.401505826 | 0.138220158 | 0.478495199 | 0.527180459 |
| 0.510304363 | 0.442536493 | 0.404167074 | 0.410331061 |
| 0.426906776 | 0.13140574  | 0.422964663 | 0.147603562 |
| 0.509339489 | 0.458557277 | 0.372972672 | 0.352580306 |
| 0.519031592 | 0.489070509 | 0.046825187 | 0.452963113 |
| 0.025643885 | 0.002458479 | 0.458139149 | 0.290985649 |
| 0.063367957 | 0.433490618 | 0.297659721 | 0.254049088 |
| 0.250627487 | 0.051334834 | 0.325684275 | 0.302962121 |
| 0.353372691 | 0.420226951 | 0.335702771 | 0.263951708 |
| 0.30805317  | 0.172278127 | 0.238642758 | 0.182870643 |
| 0.263970984 | 0.336289741 | 0.216454318 | 0.029629183 |
| 0.483970077 | 0.480507458 | 0.081609548 | 0.194739546 |
| 0.472629524 | 0.514506331 | 0.058800791 | 0.02074989  |
| 0.301458852 | 0.355673094 | 0.516696198 | 0.519234189 |
| 0.5405684   | 0.534009241 | 0.397907497 | 0.154766343 |
| 0.094139631 | 0.368742279 | 0.345876624 | 0.123494026 |
| 0.529500309 | 0.089816702 | 0.49839058  | 0.358297034 |
| 0.143147977 | 0.27796693  | 0.052453068 | 0.107211045 |
| 0.44303212  | 0.215103036 | 0.222356325 | 0.19846594  |
| 0.383323123 | 0.311756695 | 0.064047945 | 0.245297636 |



|             |             |                      |             |
|-------------|-------------|----------------------|-------------|
| 0.3933874   | 0.245126929 | 0.200405995          | 0.346420531 |
| 0.387534583 | 0.245113408 | 0.476012272          | 0.459412261 |
| 0.166915533 | 0.140422916 | 0.378095259          | 0.405526466 |
| 0.478941114 | 0.434435229 | 0.048904737          | 0.467212101 |
| 0.499225828 | 0.500127821 | 0.517259623          | 0.399136081 |
| 0.106883077 | 0.460490451 | 0.353234213          | 0.39838231  |
| 0.21892748  | 0.460801885 | 0.27045948           | 0.083489211 |
| 0.298606557 | 0.481660131 | 0.431428259          | 0.218822736 |
| 0.462144243 | 0.161124804 | 0.079586734          | 0.442536689 |
| 0.243767322 | 0.135047549 | 0.414390945          | 0.449480605 |
| 0.003018765 | 0.184771885 | 0.489718642          | 0.30057371  |
| 0.519037482 | 0.498392004 | 0.456028543          | 0.289178614 |
| 0.002386113 | 0.453824961 | 0.454240183          | 0.485747424 |
| 0.445932846 | 0.388583599 | 0.168991 0.104741958 |             |
| 0.315957504 | 0.110859836 | 0.18203268           | 0.420193378 |
| 0.231448789 | 0.46080798  | 0.227534918          | 0.237846404 |
| 0.235936564 | 0.112015235 | 0.30648419           | 0.30100566  |
| 0.166301595 | 0.27684245  | 0.390296377          | 0.33289994  |
| 0.28542076  | 0.42951453  | 0.447835622          | 0.040088877 |
| 0.402839197 | 0.417743638 | 0.427374994          | 0.004685443 |
| 0.486227722 | 0.011533885 | 0.242326659          | 0.279029688 |
| 0.244950335 | 0.250821122 | 0.298260548          | 0.360285639 |
| 0.397573006 | 0.269629785 | 0.354257508          | 0.287904043 |
| 0.212739782 | 0.259059282 | 0.435944987          | 0.411529368 |
| 0.361305001 | 0.172215874 | 0.115473347          | 0.112144955 |
| 0.080126979 | 0.470047006 | 0.26799056           | 0.098766772 |
| 0.264111892 | 0.405353752 | 0.359844372          | 0.51238699  |
| 0.416408062 | 0.136622974 | 0.371602201          | 0.465852105 |
| 0.282626215 | 0.367244159 | 0.087821399          | 0.442754417 |
| 0.282852104 | 0.288985149 | 0.442823761          | 0.383524894 |
| 0.439525511 | 0.411017248 | 0.268094937          | 0.440982425 |
| 0.430044986 | 0.372945035 | 0.391509187          | 0.123518265 |
| 0.239977009 | 0.158518318 | 0.322538758          | 0.003935637 |
| 0.407145241 | 0.345744666 | 1                    | 0.508871545 |
| 0.346354314 | 0.381008802 | 0.412083332          | 0.132661279 |
| 0.347746972 | 0.19501674  | 0.173565256          | 0.464974541 |
| 0.288865875 | 0.231251175 | 0.35911213           | 0.409628824 |
| 0.469056377 | 0.444169062 | 0.286310034          | 0.285466764 |
| 0.267160459 | 0.243255973 | 0.47506755           | 0.159684125 |
| 0.47944295  | 0.246454783 | 0.3926574            | 0.371316444 |
| 0.266846805 | 0.528960062 | 0.080897544          | 0.542934256 |
| 0.396151361 | 0.154854549 | 0.498913325          | 0.341070645 |
| 0.342423339 | 0.154773059 | 0.24979912           | 0.424504718 |
| 0.266239207 | 0.402197601 | 0.024873307          | 0.093973097 |
| 0.376616193 | 0.325733167 | 0.433371902          | 0.388460986 |
| 0.292207547 | 0.361060508 | 0.205328284          | 0.339360473 |
| 0.496751177 | 0.506847296 | 0.345964605          | 0.273980559 |
| 0.385740152 | 0.13898518  | 0.457340961          | 0.016930308 |
| 0.480673146 | 0.473175024 | 0.440931524          | 0.070024493 |
| 0.026505398 | 0.283983642 | 0.470297347          | 0.084618841 |
| 0.49039706  | 0.283389136 | 0.381696719          | 0.478591781 |
| 0.199522938 | 0.510958118 | 0.151923129          | 0.465912951 |
| 0.058159215 | 0.288129777 | 0.417268828          | 0.409878575 |
| 0.308582654 | 0.357770931 | 0.429201755          | 0.304525464 |

|             |             |             |             |
|-------------|-------------|-------------|-------------|
| 0.047086045 | 0.327657797 | 0.002753143 | 0.418808717 |
| 0.482337622 | 0.395443311 | 0.223186049 | 0.340237354 |
| 0.318690093 | 0.380830493 | 0.28821727  | 0.461521133 |
| 0.018846372 | 0.438986612 | 0.233395492 | 0.444325074 |
| 0.339332256 | 0.399870248 | 0.082434604 | 0.351865037 |
| 0.46599631  | 0.357164989 | 0.26832685  | 0.402742846 |
| 0.506284023 | 0.397477152 | 0.19613794  | 0.252769308 |
| 0.411620265 | 0.084254464 | 0.438340203 | 0.539148193 |
| 0.22228396  | 0.280088713 | 0.472496199 | 0.269030362 |
| 0.364107749 | 0.390978536 | 0.441794838 | 0.524206373 |
| 0.096831231 | 0.291259782 | 0.451863743 | 0.467562081 |
| 0.330550635 | 0.209807489 | 0.317868016 | 0.288688383 |
| 0.480342225 | 0.148385963 | 0.300903667 | 0.406677416 |
| 0.287907029 | 0.346415106 | 0.367355603 | 0.231783431 |
| 0.055728374 | 0.192948185 | 0.445147081 | 0.173771538 |
| 0.348825373 | 0.42584233  | 0.287702718 | 0.390593209 |
| 0.1931034   | 0.044927579 | 0.457254794 | 0.031353833 |
| 0.407951951 | 0.461120667 | 0.284538452 | 0.405417483 |
| 0.220556285 | 0.397474297 | 0.402838355 | 0.002208443 |
| 0.436935893 | 0.063649373 | 0.332313701 | 0.300906307 |
| 0.342183881 | 0.072978915 | 0.469829861 | 0.529423187 |
| 0.356347717 | 0.368115148 | 0.424486804 | 0.471416698 |
| 0.200451826 | 0.384849006 | 0.387597084 | 0.460502995 |
| 0.282322643 | 0.444684162 | 0.461015883 | 0.455147236 |
| 0.429272882 | 0.309967827 |             |             |
| RRM2        | 0.184911559 | 0.500271955 | 0.175576912 |
| 0.252987994 | 0.322270384 | 0.506063576 | 0.137213284 |
| 0.224210462 | 0.449406358 | 0.383999658 | 0.432532045 |
| 0.060179297 | 0.070559594 | 0.494019388 | 0.121421674 |
| 0.409786144 | 0.079673455 | 0.201695126 | 0.105650418 |
| 0.330494655 | 0.292431727 | 0.3608487   | 0.50488251  |
| 0.297221742 | 0.319378559 | 0.478261382 | 0.398444013 |
| 0.515777322 | 0.293603538 | 0.489589693 | 0.291117919 |
| 0.45519754  | 0.332113042 | 0.402501757 | 0.07057331  |
| 0.477960499 | 0.010154349 | 0.458505068 | 0.315109006 |
| 0.161918133 | 0.42909103  | 0.461334771 | 0.328265765 |
| 0.464304857 | 0.119864041 | 0.2850532   | 0.43097077  |
| 0.44562057  | 0.366964232 | 0.185267914 | 0.507508113 |
| 0.417877282 | 0.467520267 | 0.49469     | 0.005009637 |
| 0.295447481 | 0.072666836 | 0.206296164 | 0.509452287 |
| 0.314532609 | 0.203195366 | 0.296963177 | 0.352389981 |
| 0.424566147 | 0.411144935 | 0.340352    | 0.430428427 |
| 0.509535778 | 0.154574111 | 0.474091879 | 0.253057538 |
| 0.472285915 | 0.108856081 | 0.273816375 | 0.20636949  |
| 0.425638218 | 0.280100786 | 0.382025109 | 0.307766682 |
| 0.502647692 | 0.51723395  | 0.344691142 | 0.517356609 |
| 0.084028705 | 0.335420318 | 0.294582685 | 0.363585499 |
| 0.420282717 | 0.165772557 | 0.479945186 | 0.50902166  |
| 0.131029304 | 0.472068564 | 0.460373538 | 0.254667508 |
| 0.514283084 | 0.277116173 | 0.487427582 | 0.166294694 |
| 0.384717089 | 0.351554433 | 0.484552089 | 0.396473157 |
| 0.337104034 | 0.194731173 | 0.51997165  | 0.311101377 |
| 0.352056853 | 0.210339316 | 0.236199294 | 0.485600735 |
| 0.485591961 | 0.516567077 | 0.49015637  | 0.425783992 |

|             |             |             |             |
|-------------|-------------|-------------|-------------|
| 0.389571839 | 0.512466364 | 0.493445677 | 0.47999828  |
| 0.20080097  | 0.51614007  | 0.325352163 | 0.093314942 |
| 0.192987952 | 0.149092757 | 0.238144888 | 0.38495882  |
| 0.509380143 | 0.435805267 | 0.322818255 | 0.28957068  |
| 0.465699425 | 0.507100254 | 0.513683529 | 0.476187519 |
| 0.111535069 | 0.235342984 | 0.405935191 | 0.405616071 |
| 0.434957976 | 0.215529986 | 0.251265366 | 0.526524475 |
| 0.465846956 | 0.470631092 | 0.319300764 | 0.523135046 |
| 0.287675272 | 0.49417977  | 0.522596836 | 0.274085822 |
| 0.523753884 | 0.519316419 | 0.493573506 | 0.416092045 |
| 0.494234665 | 0.482611424 | 0.076558343 | 0.454288477 |
| 0.47951439  | 0.016466149 | 0.499597112 | 0.500161261 |
| 0.510058579 | 0.492409594 | 0.486027316 | 0.50707693  |
| 0.509730806 | 0.178047078 | 0.027361291 | 0.322480873 |
| 0.515972787 | 0.481666793 | 0.180423196 | 0.442226488 |
| 0.372497562 | 0.513348151 | 0.474707861 | 0.345702473 |
| 0.489700519 | 0.505529245 | 0.509094712 | 0.470745211 |
| 0.412489252 | 0.413051114 | 0.378305824 | 0.50771931  |
| 0.110642343 | 0.248696505 | 0.160441639 | 0.382424198 |
| 0.47594059  | 0.25318492  | 0.495356455 | 0.373030906 |
| 0.28236199  | 0.464452859 | 0.333201728 | 0.390974243 |
| 0.163589762 | 0.501920364 | 0.300901017 | 0.308849781 |
| 0.095915896 | 0.261256724 | 0.267294504 | 0.248021695 |
| 0.295569276 | 0.32688873  | 0.484435092 | 0.498742296 |
| 0.377416939 | 0.334047937 | 0.499799198 | 0.480660477 |
| 0.438224194 | 0.401191313 | 0.332075365 | 0.033077129 |
| 0.296200529 | 0.321412623 | 0.164738481 | 0.43322085  |
| 0.291006743 | 0.295612534 | 0.423210684 | 0.4187663   |
| 0.44270215  | 0.273527177 | 0.384134602 | 0.456203682 |
| 0.293769155 | 0.350197472 | 0.478763339 | 0.475181579 |
| 0.019673826 | 0.435183206 | 0.501480631 | 0.15398245  |
| 0.4103989   | 0.130260547 | 0.262372381 | 0.493679496 |
| 0.280791673 | 0.216442866 | 0.50439547  | 0.412778072 |
| 0.403959411 | 0.333394657 | 0.49236368  | 0.040982052 |
| 0.358169135 | 0.07698051  | 0.343353503 | 0.433992116 |
| 0.366247963 | 0.352234491 | 0.317227342 | 0.305304277 |
| 0.283110872 | 0.505805548 | 0.478420572 | 0.510497515 |
| 0.389223146 | 0.494778552 | 0.493489262 | 0.490504785 |
| 0.458811528 | 0.373505005 | 0.117732995 | 0.501166645 |
| 0.495869393 | 0.333118178 | 0.199919402 | 0.477624116 |
| 0.409478674 | 0.422604792 | 0.133596356 | 0.493818628 |
| 0.49694466  | 0.496506343 | 0.205999396 | 0.398352694 |
| 0.467394042 | 0.369485095 | 0.471864835 | 0.492627741 |
| 0.374239711 | 0.364297352 | 0.352284435 | 0.422872897 |
| 0.305566807 | 0.209897396 | 0.405407204 | 0.158215813 |
| 0.012089176 | 0.194203804 | 0.174220074 | 0.214767515 |
| 0.15745587  | 0.46662556  | 0.440149344 | 0.504859088 |
| 0.207110155 | 0.483451946 | 0.338562837 | 0.334096129 |
| 0.484290741 | 0.358553828 | 0.39098585  | 0.413181234 |
| 0.35387662  | 0.049362135 | 0.190644273 | 0.524218526 |
| 0.13583526  | 0.234759555 | 0.417511424 | 0.007252105 |
| 0.126390951 | 0.496956684 | 0.21765019  | 0.304136724 |
| 0.472699994 | 0.319641995 | 0.347985674 | 0.403014591 |
| 0.407181429 | 0.19762557  | 0.008233843 | 0.494950594 |

|             |             |             |             |
|-------------|-------------|-------------|-------------|
| 0.482288608 | 0.47039839  | 0.483107712 | 0.472799374 |
| 0.465662285 | 0.463697224 | 0.450883873 | 0.510558984 |
| 0.202985153 | 0.218356617 | 0.203454772 | 0.337032833 |
| 0.01263309  | 0.441775202 | 0.336253577 | 0.256937915 |
| 0.452332565 | 0.380218223 | 0.105471983 | 0.365057084 |
| 0.079452176 | 0.192245806 | 0.398524164 | 0.276347353 |
| 0.371248846 | 0.059813458 | 0.333285047 | 0.333623976 |
| 0.49705347  | 0.453890562 | 0.368284857 | 0.519671828 |
| 0.402875073 | 0.280082714 | 0.361628465 | 0.440427797 |
| 0.155951981 | 0.136208461 | 0.450839519 | 0.069158207 |
| 0.275067992 | 0.468261789 | 0.405974767 | 0.182746331 |
| 0.376761513 | 0.026902305 | 0.477254527 | 0.512936836 |
| 0.504557585 | 0.498312755 | 0.511987331 | 0.270490031 |
| 0.511723811 | 0.087828022 | 0.510676294 | 0.504888473 |
| 0.433709318 | 0.004158879 | 0.01256768  | 0.504115881 |
| 0.426099113 | 0.174222492 | 0.272658079 | 0.48454762  |
| 0.188924115 | 0.308938035 | 0.145195038 | 0.185395342 |
| 0.504118202 | 0.265176959 | 0.168179568 | 0.493567347 |
| 0.320224501 | 0.303498927 | 0.484787987 | 0.205394825 |
| 0.442761264 | 0.126434889 | 0.199737227 | 0.015052857 |
| 0.396608964 | 0.249076871 | 0.509890281 | 0.509808062 |
| 0.487631295 | 0.423075819 | 0.393005847 | 0.408598435 |
| 0.465510562 | 0.246207021 | 0.399698806 | 0.260954865 |
| 0.516071428 | 0.424754846 | 0.40938411  | 0.428705877 |
| 0.486498225 | 0.496795192 | 0.092530423 | 0.458839484 |
| 0.047793694 | 0.002497745 | 0.516378201 | 0.352114689 |
| 0.064967458 | 0.38263774  | 0.365612158 | 0.301176204 |
| 0.281134351 | 0.096560678 | 0.248163221 | 0.227178693 |
| 0.367185803 | 0.399186212 | 0.273369859 | 0.347819659 |
| 0.286334806 | 0.138044524 | 0.268913265 | 0.226367227 |
| 0.275517718 | 0.432011055 | 0.323668578 | 0.068587713 |
| 0.486616879 | 0.438648566 | 0.143343651 | 0.284462691 |
| 0.497469667 | 0.507670274 | 0.093070736 | 0.029342558 |
| 0.381639754 | 0.342791163 | 0.493204285 | 0.516204882 |
| 0.530232765 | 0.490346799 | 0.440258996 | 0.153478805 |
| 0.158110584 | 0.368189984 | 0.292047297 | 0.124041876 |
| 0.508183967 | 0.182841945 | 0.506470261 | 0.286416481 |
| 0.224258249 | 0.325495027 | 0.080461927 | 0.173510736 |
| 0.392088287 | 0.279724346 | 0.230778553 | 0.306406037 |
| 0.355436132 | 0.244250257 | 0.121316746 | 0.296912433 |
| 0.438694399 | 0.167688831 | 0.268176823 | 0.420446513 |
| 0.47088948  | 0.291577153 | 0.458984731 | 0.461170644 |
| 0.259766318 | 0.225592673 | 0.448607512 | 0.435799458 |
| 0.504768976 | 0.445739066 | 0.073410302 | 0.508778328 |
| 0.491643963 | 0.486165897 | 0.508559601 | 0.420965722 |
| 0.193919175 | 0.40460045  | 0.304233853 | 0.366899054 |
| 0.27788637  | 0.508942126 | 0.304556413 | 0.15457441  |
| 0.378490799 | 0.487984954 | 0.49488459  | 0.245957929 |
| 0.477365655 | 0.276289034 | 0.170463671 | 0.492857636 |
| 0.172099369 | 0.190696779 | 0.464454588 | 0.465887077 |
| 0.004365883 | 0.120030746 | 0.474749409 | 0.326696121 |
| 0.499064782 | 0.493845299 | 0.480348271 | 0.363118962 |
| 0.001161175 | 0.427015783 | 0.437114054 | 0.452942835 |
| 0.507227607 | 0.46306635  | 0.222719399 | 0.136258155 |

|             |             |             |             |
|-------------|-------------|-------------|-------------|
| 0.371402107 | 0.213638056 | 0.194849882 | 0.463554114 |
| 0.170543332 | 0.497022617 | 0.287628139 | 0.308601673 |
| 0.245188163 | 0.216524416 | 0.240187189 | 0.355241508 |
| 0.134766688 | 0.332012656 | 0.421450866 | 0.391403707 |
| 0.191716431 | 0.456967744 | 0.4852556   | 0.089199826 |
| 0.359286792 | 0.456046049 | 0.472480163 | 0.005971433 |
| 0.464877769 | 0.026269517 | 0.240381429 | 0.274188947 |
| 0.258023998 | 0.254322608 | 0.292647834 | 0.331379944 |
| 0.438429474 | 0.31075463  | 0.364268116 | 0.323041516 |
| 0.225159073 | 0.327504134 | 0.426335996 | 0.461598439 |
| 0.318505668 | 0.239500505 | 0.22127962  | 0.221315813 |
| 0.113683299 | 0.506556569 | 0.35817197  | 0.200397355 |
| 0.301165076 | 0.434797623 | 0.414624791 | 0.509722139 |
| 0.455484288 | 0.256370289 | 0.379085745 | 0.524725781 |
| 0.255772084 | 0.396642145 | 0.164582994 | 0.493145417 |
| 0.330589048 | 0.225679119 | 0.488092778 | 0.462662856 |
| 0.478836809 | 0.448951101 | 0.357225393 | 0.47634245  |
| 0.423807568 | 0.382542193 | 0.429662729 | 0.139066376 |
| 0.301860948 | 0.254707425 | 0.269736979 | 0.011441609 |
| 0.429773552 | 0.429623455 | 0.508871545 | 1           |
| 0.274869593 | 0.445799014 | 0.451119966 | 0.188830364 |
| 0.395008647 | 0.315544366 | 0.254672894 | 0.493348513 |
| 0.200849486 | 0.29213075  | 0.328293972 | 0.499040262 |
| 0.471120963 | 0.464131825 | 0.264134054 | 0.338658346 |
| 0.315831324 | 0.352211741 | 0.483597865 | 0.267009747 |
| 0.472795211 | 0.196220448 | 0.4684957   | 0.340593489 |
| 0.260876675 | 0.50474051  | 0.156793476 | 0.507451746 |
| 0.350514283 | 0.261074289 | 0.484848251 | 0.412490699 |
| 0.414360208 | 0.167617774 | 0.16821546  | 0.471112376 |
| 0.295837381 | 0.338791957 | 0.019629569 | 0.06389209  |
| 0.388231649 | 0.348859355 | 0.486148039 | 0.418390663 |
| 0.248846904 | 0.381453688 | 0.147857829 | 0.398253686 |
| 0.503997154 | 0.522574854 | 0.325517536 | 0.337264575 |
| 0.427815416 | 0.187830546 | 0.52427965  | 0.018724186 |
| 0.451807751 | 0.4419916   | 0.42255933  | 0.118161088 |
| 0.059314779 | 0.195113067 | 0.468093837 | 0.177427247 |
| 0.477900384 | 0.200284275 | 0.440098685 | 0.495825128 |
| 0.29536829  | 0.525148837 | 0.163050869 | 0.457586856 |
| 0.118947607 | 0.353112466 | 0.388596934 | 0.411157155 |
| 0.262484932 | 0.285575927 | 0.431180479 | 0.22828342  |
| 0.083787889 | 0.304023301 | 0.00448087  | 0.446848475 |
| 0.504232924 | 0.33598655  | 0.319955522 | 0.356460473 |
| 0.34507361  | 0.449040042 | 0.253529579 | 0.455547952 |
| 0.033221888 | 0.379923701 | 0.288332402 | 0.51066879  |
| 0.258107459 | 0.415491272 | 0.118636472 | 0.308610029 |
| 0.506445098 | 0.30071181  | 0.346885819 | 0.34180621  |
| 0.512055541 | 0.477342134 | 0.321997259 | 0.247303393 |
| 0.450135961 | 0.167391113 | 0.478384699 | 0.503303525 |
| 0.236736613 | 0.208977216 | 0.466056036 | 0.27474802  |
| 0.297670459 | 0.475406539 | 0.453421353 | 0.498551025 |
| 0.100113997 | 0.337030337 | 0.462134016 | 0.491002519 |
| 0.36249285  | 0.159377952 | 0.234597075 | 0.249581955 |
| 0.50776746  | 0.193453801 | 0.250138865 | 0.460859058 |
| 0.204148335 | 0.376415077 | 0.44957899  | 0.204569096 |

|             |             |             |             |
|-------------|-------------|-------------|-------------|
| 0.078659027 | 0.238635616 | 0.45207671  | 0.257412598 |
| 0.357632519 | 0.401070554 | 0.250122996 | 0.44105914  |
| 0.196510659 | 0.061396652 | 0.463693539 | 0.015301967 |
| 0.494935021 | 0.444265367 | 0.334839557 | 0.371141083 |
| 0.322897588 | 0.440180418 | 0.468261679 | 0.006167934 |
| 0.45464855  | 0.063227104 | 0.335928467 | 0.253427502 |
| 0.283830555 | 0.133457482 | 0.498172295 | 0.492711506 |
| 0.428695478 | 0.366567596 | 0.358813269 | 0.495593014 |
| 0.136020243 | 0.333469613 | 0.335288452 | 0.513756588 |
| 0.207837204 | 0.451452382 | 0.442031607 | 0.398498103 |
| 0.484566439 | 0.3769024   |             |             |
| RRM2B       | 0.011058191 | 0.263998061 | 0.007365703 |
| 0.027811776 | 0.259358485 | 0.126328994 | 0.009356867 |
| 0.026302717 | 0.204062554 | 0.107561363 | 0.186734936 |
| 0.001702449 | 0.214367554 | 0.307678695 | 0.010049519 |
| 0.295403652 | 0.005954336 | 0.025711676 | 0.04085857  |
| 0.06452638  | 0.22375631  | 0.190557303 | 0.133635869 |
| 0.220400487 | 0.069465421 | 0.138901055 | 0.305699767 |
| 0.33808529  | 0.190597188 | 0.305549652 | 0.062896092 |
| 0.235312787 | 0.294859643 | 0.268582252 | 0.001072531 |
| 0.216807179 | 0.034248993 | 0.231908294 | 0.098324128 |
| 0.139116333 | 0.181944663 | 0.116332847 | 0.080948584 |
| 0.144635509 | 0.003583851 | 0.098718447 | 0.326722763 |
| 0.152169672 | 0.09763511  | 0.011066332 | 0.267379213 |
| 0.137002411 | 0.164031136 | 0.222850623 | 0.000772587 |
| 0.265900611 | 0.22723635  | 0.250255288 | 0.307475623 |
| 0.083055575 | 0.038435903 | 0.176202469 | 0.095469287 |
| 0.278274793 | 0.298340191 | 0.146446955 | 0.120134912 |
| 0.317985456 | 0.222284514 | 0.341434643 | 0.044624481 |
| 0.134460436 | 0.003504507 | 0.059517852 | 0.020855991 |
| 0.156183813 | 0.089151083 | 0.232307471 | 0.221177572 |
| 0.247071014 | 0.309165593 | 0.107741417 | 0.283564554 |
| 0.14278457  | 0.327934022 | 0.157769585 | 0.202403894 |
| 0.254803413 | 0.018105284 | 0.266326887 | 0.324559315 |
| 0.007865759 | 0.19584581  | 0.255818247 | 0.036539004 |
| 0.269477603 | 0.22056577  | 0.175361344 | 0.201485853 |
| 0.342505759 | 0.256883502 | 0.28494306  | 0.142426706 |
| 0.233612942 | 0.014545927 | 0.256470201 | 0.337794926 |
| 0.127483267 | 0.015642289 | 0.121002635 | 0.392252267 |
| 0.241134033 | 0.33354681  | 0.290319433 | 0.242384569 |
| 0.271662667 | 0.32571665  | 0.228941658 | 0.282388105 |
| 0.099653282 | 0.3354952   | 0.05399328  | 0.008107569 |
| 0.009812588 | 0.023407297 | 0.150605611 | 0.180168316 |
| 0.352702328 | 0.178353167 | 0.046734109 | 0.113559372 |
| 0.386841235 | 0.260456366 | 0.335127105 | 0.279440167 |
| 0.004660656 | 0.225808089 | 0.249422059 | 0.076477109 |
| 0.248272359 | 0.035640553 | 0.246518282 | 0.281929268 |
| 0.214087886 | 0.354068186 | 0.029835613 | 0.273117944 |
| 0.068288285 | 0.331866701 | 0.285799609 | 0.051159246 |
| 0.302378214 | 0.270136183 | 0.356342449 | 0.37994291  |
| 0.273251077 | 0.11127267  | 0.046266114 | 0.245683571 |
| 0.333842649 | 0.021752158 | 0.374955066 | 0.387701596 |
| 0.301990918 | 0.374541161 | 0.38218635  | 0.372883623 |
| 0.309540305 | 0.016248256 | 0.043017097 | 0.208992338 |

|             |             |             |             |
|-------------|-------------|-------------|-------------|
| 0.294471316 | 0.234602822 | 0.057169671 | 0.254927794 |
| 0.30200338  | 0.139018348 | 0.345469407 | 0.131432339 |
| 0.332359609 | 0.321828872 | 0.362131585 | 0.248092266 |
| 0.133141036 | 0.160201966 | 0.33126538  | 0.241451378 |
| 0.006788714 | 0.019257618 | 0.009456583 | 0.192117688 |
| 0.092822334 | 0.075237835 | 0.108914301 | 0.267779521 |
| 0.08630354  | 0.116165231 | 0.246965928 | 0.357992032 |
| 0.0121056   | 0.241136975 | 0.044298128 | 0.044682751 |
| 0.006729086 | 0.050761568 | 0.046842471 | 0.040703458 |
| 0.145821414 | 0.087722337 | 0.328405111 | 0.356741336 |
| 0.182585009 | 0.06013921  | 0.265968002 | 0.32182257  |
| 0.285268436 | 0.280541214 | 0.112039893 | 0.001654386 |
| 0.106443227 | 0.179336193 | 0.2454368   | 0.303473152 |
| 0.064478404 | 0.078660992 | 0.249140805 | 0.353015323 |
| 0.081456301 | 0.036495944 | 0.161197278 | 0.232917199 |
| 0.048591939 | 0.131664264 | 0.330432763 | 0.210166038 |
| 0.000668163 | 0.119895426 | 0.322447764 | 0.106094588 |
| 0.167538987 | 0.148504273 | 0.206087846 | 0.333671066 |
| 0.209761161 | 0.177766334 | 0.379217225 | 0.365457529 |
| 0.131264175 | 0.08670554  | 0.374573183 | 0.095418248 |
| 0.272551603 | 0.026274893 | 0.181225662 | 0.139555428 |
| 0.099416936 | 0.187060962 | 0.307466114 | 0.141140044 |
| 0.033742249 | 0.328104901 | 0.250574876 | 0.355364519 |
| 0.155558352 | 0.364552175 | 0.357457587 | 0.300786668 |
| 0.200105792 | 0.242555197 | 0.234848382 | 0.297229087 |
| 0.333712098 | 0.113102895 | 0.016906428 | 0.367897214 |
| 0.167316478 | 0.340831097 | 0.078392202 | 0.337288245 |
| 0.291091611 | 0.257706436 | 0.046663509 | 0.319527154 |
| 0.229778423 | 0.075415004 | 0.304507335 | 0.371638091 |
| 0.114732957 | 0.231739586 | 0.151165708 | 0.335107316 |
| 0.057774676 | 0.144199844 | 0.179895487 | 0.264777657 |
| 0.027951929 | 0.016398501 | 0.011738564 | 0.069541443 |
| 0.172087618 | 0.2939935   | 0.284726692 | 0.343742041 |
| 0.031295867 | 0.264859555 | 0.121211569 | 0.101471537 |
| 0.2393198   | 0.231015755 | 0.327355746 | 0.31690801  |
| 0.119407139 | 0.003084815 | 0.029398905 | 0.299462822 |
| 0.006580553 | 0.197804944 | 0.129409424 | 0.000676214 |
| 0.005401224 | 0.264787286 | 0.026652923 | 0.073405229 |
| 0.39619219  | 0.072291139 | 0.070057876 | 0.09697104  |
| 0.238092683 | 0.022293781 | 0.001085021 | 0.342255893 |
| 0.327618477 | 0.309955209 | 0.320720683 | 0.27281548  |
| 0.327454809 | 0.307175752 | 0.323578982 | 0.124170903 |
| 0.019204849 | 0.01356927  | 0.152274663 | 0.128176125 |
| 0.002698691 | 0.277038753 | 0.218354182 | 0.048093464 |
| 0.360229828 | 0.172514756 | 0.004845286 | 0.322842605 |
| 0.001758376 | 0.209010173 | 0.089717379 | 0.093556385 |
| 0.314674883 | 0.000907898 | 0.068036372 | 0.154094672 |
| 0.225890679 | 0.180224019 | 0.200934108 | 0.334942267 |
| 0.16344672  | 0.036083085 | 0.14939626  | 0.32544551  |
| 0.011730185 | 0.051547703 | 0.118843677 | 0.011629776 |
| 0.089480209 | 0.283955883 | 0.169902924 | 0.008473585 |
| 0.113572945 | 0.000347625 | 0.186703768 | 0.341584307 |
| 0.261588071 | 0.377652881 | 0.326429313 | 0.22538484  |
| 0.313968876 | 0.245616726 | 0.360556199 | 0.236306852 |

|             |             |             |             |
|-------------|-------------|-------------|-------------|
| 0.142698426 | 0.000126024 | 0.001882121 | 0.367935313 |
| 0.246162329 | 0.012291833 | 0.052468082 | 0.097661545 |
| 0.025707898 | 0.028399313 | 0.012088375 | 0.139607817 |
| 0.251825821 | 0.174793981 | 0.172097847 | 0.267494443 |
| 0.089028971 | 0.118464541 | 0.139182055 | 0.023096572 |
| 0.295816354 | 0.007840747 | 0.023643551 | 0.003468934 |
| 0.309739149 | 0.032843246 | 0.238405904 | 0.326671066 |
| 0.312582779 | 0.317883357 | 0.132576464 | 0.13922049  |
| 0.350468025 | 0.024341578 | 0.18161027  | 0.027188893 |
| 0.287902993 | 0.265386091 | 0.181732235 | 0.14514988  |
| 0.340636961 | 0.279679565 | 0.004219615 | 0.288323456 |
| 0.001435813 | 0.002887211 | 0.118236545 | 0.141307596 |
| 0.085293601 | 0.216574424 | 0.118687597 | 0.086041675 |
| 0.098401634 | 0.003497802 | 0.220881902 | 0.198450097 |
| 0.161340719 | 0.191743176 | 0.247017585 | 0.128782623 |
| 0.142642201 | 0.093934037 | 0.06848062  | 0.04484932  |
| 0.12325845  | 0.147190844 | 0.070119365 | 0.002169912 |
| 0.210249756 | 0.262659378 | 0.009499208 | 0.053545053 |
| 0.308511319 | 0.358276245 | 0.007463459 | 0.001672483 |
| 0.120903506 | 0.159314566 | 0.383168799 | 0.315039707 |
| 0.30676032  | 0.344233291 | 0.208100778 | 0.053810636 |
| 0.010558777 | 0.200277915 | 0.274837693 | 0.054114758 |
| 0.344211321 | 0.013188245 | 0.295576529 | 0.318086506 |
| 0.035630967 | 0.050164117 | 0.006081116 | 0.020895712 |
| 0.351685618 | 0.069981925 | 0.086353085 | 0.038828256 |
| 0.134739688 | 0.201802085 | 0.006722135 | 0.073675105 |
| 0.192488324 | 0.163260615 | 0.054342269 | 0.098437264 |
| 0.199937261 | 0.097845595 | 0.33853669  | 0.275160103 |
| 0.038308226 | 0.027817778 | 0.050926909 | 0.301308429 |
| 0.326695939 | 0.247110331 | 0.004764597 | 0.2749428   |
| 0.361809774 | 0.30809523  | 0.295092121 | 0.295671742 |
| 0.021341731 | 0.239926652 | 0.238198581 | 0.219522074 |
| 0.075281004 | 0.132496739 | 0.116073532 | 0.013169779 |
| 0.174052449 | 0.280486769 | 0.249110374 | 0.055417778 |
| 0.26386584  | 0.033521435 | 0.010356013 | 0.336154105 |
| 0.148849632 | 0.01466509  | 0.135956038 | 0.370583936 |
| 0.000849308 | 0.225354775 | 0.377985305 | 0.075545898 |
| 0.335156607 | 0.347427871 | 0.258334279 | 0.077118864 |
| 0.006016059 | 0.346994792 | 0.224541428 | 0.149993286 |
| 0.261664252 | 0.191784097 | 0.061215006 | 0.016814934 |
| 0.164343251 | 0.018626566 | 0.038949903 | 0.102020246 |
| 0.135298384 | 0.214909552 | 0.093433636 | 0.085304254 |
| 0.091284553 | 0.025404889 | 0.217085815 | 0.073540791 |
| 0.172102918 | 0.11913458  | 0.218580733 | 0.099147725 |
| 0.138433482 | 0.329628017 | 0.246512909 | 0.002602248 |
| 0.316220441 | 0.299341573 | 0.312353542 | 0.000188236 |
| 0.325719779 | 0.000467238 | 0.100699815 | 0.095012434 |
| 0.082816742 | 0.094949882 | 0.187409338 | 0.126081998 |
| 0.183379851 | 0.074681806 | 0.090832068 | 0.113719816 |
| 0.05625708  | 0.076264982 | 0.266622368 | 0.126616102 |
| 0.119911837 | 0.023835819 | 0.028576925 | 0.028627427 |
| 0.010232463 | 0.328581485 | 0.1093343   | 0.016651761 |
| 0.119833403 | 0.130931257 | 0.212275575 | 0.295607495 |
| 0.298362216 | 0.032034877 | 0.155428648 | 0.274212279 |



|             |             |             |             |
|-------------|-------------|-------------|-------------|
| 0.141852695 | 0.094035841 | 0.008220134 | 0.169218707 |
| 0.091077058 | 0.133003034 | 0.18879526  | 0.110328301 |
| 0.263381349 | 0.216029072 | 0.106108697 | 0.286319799 |
| 0.154190076 | 0.193535585 | 0.089836683 | 0.023478171 |
| 0.04132218  | 0.042331848 | 0.229509899 | 0.001160017 |
| 0.199900857 | 0.050541387 | 0.346354314 | 0.274869593 |
| 1           | 0.240669371 | 0.083250046 | 0.013818735 |
| 0.076508378 | 0.059929011 | 0.046813748 | 0.314326767 |
| 0.241371836 | 0.045802147 | 0.206303934 | 0.071285491 |
| 0.3379915   | 0.320229401 | 0.155749619 | 0.082746645 |
| 0.115794857 | 0.064424564 | 0.276719979 | 0.022243812 |
| 0.264312202 | 0.122810305 | 0.176147576 | 0.142340644 |
| 0.107671011 | 0.364237852 | 0.011337178 | 0.374590685 |
| 0.174920642 | 0.042988008 | 0.297515923 | 0.129526898 |
| 0.078198564 | 0.054069429 | 0.232421211 | 0.126390296 |
| 0.074715513 | 0.223921106 | 0.013271966 | 0.056465461 |
| 0.213250441 | 0.134290551 | 0.258067459 | 0.264503442 |
| 0.167150843 | 0.251842807 | 0.267543172 | 0.09557509  |
| 0.267543988 | 0.271539837 | 0.071675095 | 0.128478489 |
| 0.201485217 | 0.020851293 | 0.185078156 | 0.018662523 |
| 0.283937769 | 0.321485818 | 0.144630105 | 0.009466428 |
| 0.001984632 | 0.203433223 | 0.236447398 | 0.01511749  |
| 0.383953722 | 0.226358974 | 0.207762519 | 0.307808029 |
| 0.070995955 | 0.266353781 | 0.050657893 | 0.290841874 |
| 0.007644128 | 0.128262402 | 0.28575141  | 0.224194976 |
| 0.095576138 | 0.217347296 | 0.255498789 | 0.199580553 |
| 0.004363673 | 0.114972847 | 0.000188405 | 0.203382562 |
| 0.245153652 | 0.254000021 | 0.087734677 | 0.134388172 |
| 0.171929185 | 0.257487726 | 0.128151409 | 0.250889763 |
| 0.001459259 | 0.296166757 | 0.08671465  | 0.243341319 |
| 0.127021246 | 0.204701154 | 0.011834284 | 0.263256812 |
| 0.223624831 | 0.119194678 | 0.136278291 | 0.125980324 |
| 0.297922921 | 0.249926539 | 0.051848786 | 0.135329687 |
| 0.251623535 | 0.013966612 | 0.13292094  | 0.352704996 |
| 0.071261297 | 0.183372502 | 0.372136286 | 0.057156155 |
| 0.268024582 | 0.227927678 | 0.269497323 | 0.344975541 |
| 0.03130876  | 0.11752484  | 0.34626622  | 0.298741796 |
| 0.1968882   | 0.159291074 | 0.186185336 | 0.118397482 |
| 0.24935772  | 0.018931587 | 0.178279906 | 0.18692498  |
| 0.179217384 | 0.195025996 | 0.167802197 | 0.121911065 |
| 0.008327842 | 0.053393009 | 0.127014587 | 0.045430066 |
| 0.155158824 | 0.20651688  | 0.13428476  | 0.227594014 |
| 0.045609668 | 0.004116704 | 0.278391321 | 0.033548025 |
| 0.121765675 | 0.273620906 | 0.112534243 | 0.21814305  |
| 0.066340175 | 0.179731523 | 0.113051343 | 0.001079311 |
| 0.317081537 | 0.037123387 | 0.161157593 | 0.109710529 |
| 0.198080652 | 0.006646958 | 0.268823472 | 0.38265476  |
| 0.159302347 | 0.159732816 | 0.192380507 | 0.291379962 |
| 0.167447615 | 0.216170811 | 0.200298116 | 0.218948969 |
| 0.220746457 | 0.163853675 | 0.211265842 | 0.207541701 |
| 0.221520721 | 0.088361945 |             |             |
| RSAD2       | 0.204692447 | 0.371730403 | 0.154947496 |
| 0.257311134 | 0.330838516 | 0.392506538 | 0.183109177 |
| 0.273736303 | 0.337334917 | 0.228620223 | 0.390252546 |

|             |             |             |             |
|-------------|-------------|-------------|-------------|
| 0.093398191 | 0.097986537 | 0.40357494  | 0.1841729   |
| 0.340758042 | 0.147281416 | 0.253794924 | 0.113842899 |
| 0.297630336 | 0.311254055 | 0.317198356 | 0.36338751  |
| 0.317025871 | 0.276479738 | 0.352452171 | 0.310530636 |
| 0.427586303 | 0.203600452 | 0.380784678 | 0.157421115 |
| 0.411638458 | 0.323029143 | 0.305381878 | 0.088154499 |
| 0.389794945 | 0.021102565 | 0.432978541 | 0.327830515 |
| 0.17595554  | 0.373310447 | 0.277043274 | 0.355192    |
| 0.296791118 | 0.132028295 | 0.156932994 | 0.332308951 |
| 0.341171831 | 0.370346375 | 0.165338416 | 0.37929885  |
| 0.32171238  | 0.393980501 | 0.318279147 | 0.006307471 |
| 0.255844634 | 0.065243013 | 0.172580489 | 0.46079997  |
| 0.344443119 | 0.295269781 | 0.196128661 | 0.337079571 |
| 0.331096535 | 0.352663788 | 0.371559809 | 0.280836148 |
| 0.445610331 | 0.165972818 | 0.351287714 | 0.254494213 |
| 0.360343762 | 0.118104951 | 0.300280703 | 0.184477356 |
| 0.340365954 | 0.357060147 | 0.376839819 | 0.281359745 |
| 0.358586815 | 0.493840207 | 0.353520866 | 0.452275748 |
| 0.113415972 | 0.303765109 | 0.315796618 | 0.371076569 |
| 0.350686544 | 0.201613462 | 0.389212371 | 0.476515702 |
| 0.152567241 | 0.302418224 | 0.347358959 | 0.231381907 |
| 0.383600587 | 0.25158087  | 0.306202916 | 0.194666146 |
| 0.345091129 | 0.312729665 | 0.449280459 | 0.370998036 |
| 0.349405558 | 0.176317513 | 0.457186005 | 0.290384885 |
| 0.35363579  | 0.204530967 | 0.262399082 | 0.366681124 |
| 0.371121159 | 0.428336825 | 0.351056822 | 0.35859215  |
| 0.316072081 | 0.444905844 | 0.386280988 | 0.383190825 |
| 0.113081492 | 0.465497157 | 0.330733883 | 0.174840117 |
| 0.177314285 | 0.256302778 | 0.25771047  | 0.381657544 |
| 0.39925644  | 0.395873324 | 0.322795843 | 0.334426234 |
| 0.381603356 | 0.438810419 | 0.455622732 | 0.375314749 |
| 0.150533404 | 0.220390956 | 0.32228229  | 0.391655259 |
| 0.366399543 | 0.257982929 | 0.254537671 | 0.476634381 |
| 0.388029863 | 0.377416843 | 0.292561211 | 0.492391262 |
| 0.30442874  | 0.480071476 | 0.375234156 | 0.314773927 |
| 0.482024788 | 0.466885974 | 0.461461561 | 0.351122756 |
| 0.459713629 | 0.380248178 | 0.077740901 | 0.366357082 |
| 0.463158411 | 0.024763272 | 0.388066284 | 0.413374711 |
| 0.440043171 | 0.369201667 | 0.460104321 | 0.441976932 |
| 0.445185548 | 0.200292859 | 0.021056336 | 0.343756783 |
| 0.458479915 | 0.391896574 | 0.289618765 | 0.316643047 |
| 0.33751495  | 0.390160911 | 0.375577085 | 0.25721442  |
| 0.491679861 | 0.392259145 | 0.408774324 | 0.36493884  |
| 0.303362076 | 0.362454527 | 0.291831082 | 0.446503257 |
| 0.175681938 | 0.242475753 | 0.14808954  | 0.367324208 |
| 0.299453608 | 0.329189189 | 0.362704673 | 0.332173156 |
| 0.338388409 | 0.368000336 | 0.268654382 | 0.347745006 |
| 0.140660136 | 0.355912511 | 0.314637428 | 0.273470057 |
| 0.162709291 | 0.255366317 | 0.280053473 | 0.321613601 |
| 0.34511034  | 0.303338726 | 0.361788648 | 0.425561049 |
| 0.327206392 | 0.287277993 | 0.376659677 | 0.451624775 |
| 0.424510261 | 0.333599791 | 0.3404335   | 0.056111467 |
| 0.249462559 | 0.219686987 | 0.158292182 | 0.333998925 |
| 0.261728017 | 0.288481474 | 0.342133385 | 0.369505833 |

|             |             |             |             |
|-------------|-------------|-------------|-------------|
| 0.339647026 | 0.262751625 | 0.311714402 | 0.447495148 |
| 0.248354571 | 0.351144132 | 0.385281826 | 0.330827883 |
| 0.030636946 | 0.360669945 | 0.387153955 | 0.217599416 |
| 0.343970097 | 0.1547147   | 0.235231024 | 0.386814867 |
| 0.238223374 | 0.249861733 | 0.421129909 | 0.37101219  |
| 0.320606477 | 0.276906031 | 0.464140019 | 0.036583078 |
| 0.316651896 | 0.1349015   | 0.365565918 | 0.271600531 |
| 0.354734944 | 0.363803885 | 0.315602368 | 0.32496293  |
| 0.236115968 | 0.461586291 | 0.401314123 | 0.444208828 |
| 0.287073423 | 0.468004693 | 0.381436794 | 0.39707095  |
| 0.398116929 | 0.279939791 | 0.120540218 | 0.378058408 |
| 0.378395533 | 0.238854453 | 0.173880434 | 0.352307075 |
| 0.281175777 | 0.346267087 | 0.21837819  | 0.437271348 |
| 0.488633283 | 0.418004692 | 0.303202732 | 0.37035072  |
| 0.393410047 | 0.356344665 | 0.392801818 | 0.47909511  |
| 0.230836111 | 0.306432074 | 0.303849185 | 0.384332275 |
| 0.309658952 | 0.25025122  | 0.365777676 | 0.160915856 |
| 0.010602801 | 0.204000733 | 0.180012889 | 0.311710855 |
| 0.200381985 | 0.327983457 | 0.367497236 | 0.451876328 |
| 0.273207049 | 0.409901716 | 0.329511947 | 0.303108751 |
| 0.378997799 | 0.317520513 | 0.333922079 | 0.365487371 |
| 0.355773777 | 0.08545893  | 0.257663544 | 0.493075821 |
| 0.119632862 | 0.241389232 | 0.364567775 | 0.014857585 |
| 0.146617976 | 0.33453253  | 0.192487435 | 0.279179567 |
| 0.419266574 | 0.274466661 | 0.30155673  | 0.244740276 |
| 0.396553517 | 0.245582782 | 0.02527443  | 0.417396202 |
| 0.434035608 | 0.411971901 | 0.429226987 | 0.429404662 |
| 0.374523758 | 0.374354605 | 0.369282902 | 0.375266658 |
| 0.250724868 | 0.208001739 | 0.19959253  | 0.332680041 |
| 0.013310264 | 0.404176994 | 0.352157354 | 0.285257389 |
| 0.366614133 | 0.354568348 | 0.150489266 | 0.341801795 |
| 0.085066446 | 0.161497616 | 0.329332483 | 0.336023359 |
| 0.366157443 | 0.083010416 | 0.219760388 | 0.259297342 |
| 0.409741303 | 0.373239059 | 0.28944076  | 0.474894226 |
| 0.382480654 | 0.207056848 | 0.345618284 | 0.394719526 |
| 0.210067512 | 0.089191749 | 0.3446261   | 0.032450485 |
| 0.250054006 | 0.43257536  | 0.331654195 | 0.180457531 |
| 0.35994428  | 0.039985261 | 0.372030543 | 0.478949268 |
| 0.419214255 | 0.443649468 | 0.45028256  | 0.260248455 |
| 0.451192234 | 0.076132874 | 0.459008877 | 0.368445413 |
| 0.270855354 | 0.004727634 | 0.032636797 | 0.404219166 |
| 0.337594108 | 0.140780686 | 0.305653412 | 0.339803154 |
| 0.264375112 | 0.260066773 | 0.214623256 | 0.238146868 |
| 0.390356182 | 0.328505105 | 0.230976389 | 0.423015714 |
| 0.34133998  | 0.361840686 | 0.334880192 | 0.201226764 |
| 0.375799147 | 0.18677427  | 0.200348645 | 0.028275015 |
| 0.374495195 | 0.205074347 | 0.454751925 | 0.449460383 |
| 0.46481782  | 0.369587689 | 0.235285021 | 0.336347754 |
| 0.378745497 | 0.18322365  | 0.298343865 | 0.21447498  |
| 0.423069296 | 0.34573955  | 0.385655874 | 0.361826521 |
| 0.449320474 | 0.433269075 | 0.141632058 | 0.372047952 |
| 0.069879798 | 0.00981581  | 0.344463767 | 0.358092407 |
| 0.085589134 | 0.310764675 | 0.351757128 | 0.291176587 |
| 0.32955547  | 0.119692283 | 0.230037905 | 0.224501023 |

|             |             |             |             |
|-------------|-------------|-------------|-------------|
| 0.362455197 | 0.350385986 | 0.287066616 | 0.331865559 |
| 0.318054189 | 0.184810279 | 0.356196418 | 0.305784508 |
| 0.255876922 | 0.338848133 | 0.274267079 | 0.105437364 |
| 0.336883132 | 0.338279572 | 0.189278018 | 0.301936482 |
| 0.394907232 | 0.413815506 | 0.146718727 | 0.063205847 |
| 0.351653098 | 0.329657101 | 0.430019832 | 0.432596739 |
| 0.482958315 | 0.474914037 | 0.419892813 | 0.244050732 |
| 0.211141129 | 0.361542459 | 0.299005003 | 0.233854086 |
| 0.451238022 | 0.153373063 | 0.444953339 | 0.263673051 |
| 0.257772986 | 0.336154183 | 0.154137015 | 0.232506584 |
| 0.32851301  | 0.328280848 | 0.320837302 | 0.242019864 |
| 0.335424931 | 0.248154337 | 0.170742288 | 0.334210547 |
| 0.367112032 | 0.158165195 | 0.301047896 | 0.379766423 |
| 0.379025855 | 0.181903039 | 0.355180046 | 0.441806976 |
| 0.264138239 | 0.23439956  | 0.304253678 | 0.377493718 |
| 0.368213195 | 0.301755001 | 0.098432842 | 0.38139814  |
| 0.439519225 | 0.361968245 | 0.455237553 | 0.382535046 |
| 0.207944531 | 0.338883606 | 0.263906099 | 0.32796599  |
| 0.319874306 | 0.395490454 | 0.351192525 | 0.1883778   |
| 0.363614543 | 0.472135586 | 0.362697139 | 0.323066422 |
| 0.360268261 | 0.223845275 | 0.139186308 | 0.383175942 |
| 0.190806437 | 0.209564285 | 0.290491196 | 0.367195232 |
| 0.011523752 | 0.142835547 | 0.42714888  | 0.377974579 |
| 0.481237735 | 0.412621556 | 0.427686569 | 0.364991444 |
| 0.002346088 | 0.337219817 | 0.374972262 | 0.348817932 |
| 0.365548474 | 0.395758027 | 0.26734654  | 0.222560386 |
| 0.37791151  | 0.175900337 | 0.256644153 | 0.345216128 |
| 0.14356488  | 0.365548765 | 0.334237017 | 0.310784839 |
| 0.324822762 | 0.177810671 | 0.248673211 | 0.376282201 |
| 0.160100481 | 0.358112091 | 0.383015588 | 0.24412628  |
| 0.153700586 | 0.379753315 | 0.357445986 | 0.121842094 |
| 0.32369343  | 0.372404231 | 0.40679178  | 0.007699089 |
| 0.367429987 | 0.057039545 | 0.322260685 | 0.334518272 |
| 0.342510291 | 0.315811267 | 0.344534721 | 0.336166683 |
| 0.353465363 | 0.343907179 | 0.369929265 | 0.364144728 |
| 0.31570471  | 0.359710425 | 0.366848077 | 0.355515203 |
| 0.32853343  | 0.283535349 | 0.19681958  | 0.182439246 |
| 0.187852194 | 0.403102182 | 0.340577031 | 0.174937471 |
| 0.360736786 | 0.350561248 | 0.388990405 | 0.430006664 |
| 0.411739658 | 0.194948532 | 0.357837959 | 0.374521261 |
| 0.162928068 | 0.306666493 | 0.169688909 | 0.38093686  |
| 0.368224487 | 0.255623487 | 0.357415693 | 0.323232656 |
| 0.341465019 | 0.420938364 | 0.343208351 | 0.42434142  |
| 0.375761823 | 0.305934071 | 0.241149201 | 0.228509212 |
| 0.301510085 | 0.254430036 | 0.296475784 | 0.020051881 |
| 0.391406502 | 0.336198805 | 0.381008802 | 0.445799014 |
| 0.240669371 | 1           | 0.26669518  | 0.20994983  |
| 0.216078402 | 0.229927002 | 0.277893674 | 0.368204299 |
| 0.175238021 | 0.355342951 | 0.33850611  | 0.349702074 |
| 0.370994409 | 0.348167723 | 0.296806257 | 0.344489092 |
| 0.348395364 | 0.310944055 | 0.447925984 | 0.250772655 |
| 0.328990847 | 0.248705498 | 0.311375362 | 0.332164238 |
| 0.321526723 | 0.443098967 | 0.186461693 | 0.444538952 |
| 0.309353703 | 0.247871237 | 0.485997433 | 0.389276004 |

|             |             |             |             |
|-------------|-------------|-------------|-------------|
| 0.382396755 | 0.290984827 | 0.163529683 | 0.336850297 |
| 0.333799798 | 0.288698222 | 0.010541735 | 0.070064321 |
| 0.381841299 | 0.286840276 | 0.333137124 | 0.37090688  |
| 0.286146621 | 0.374262083 | 0.162110583 | 0.341259813 |
| 0.428797185 | 0.469274343 | 0.297911768 | 0.349235771 |
| 0.37592207  | 0.26731655  | 0.37278399  | 0.024447928 |
| 0.334084025 | 0.317253392 | 0.288012243 | 0.191655385 |
| 0.102291508 | 0.173062818 | 0.337927204 | 0.16192222  |
| 0.407848593 | 0.168811582 | 0.320097453 | 0.388229117 |
| 0.296163887 | 0.47083244  | 0.278082543 | 0.387377114 |
| 0.123198269 | 0.363169212 | 0.323367802 | 0.316088664 |
| 0.285284175 | 0.272911531 | 0.382435472 | 0.239275484 |
| 0.143727466 | 0.331776402 | 0.007018443 | 0.42905269  |
| 0.434736499 | 0.281923264 | 0.312386956 | 0.227407756 |
| 0.377993472 | 0.385811459 | 0.273178275 | 0.333449645 |
| 0.072576437 | 0.325739014 | 0.354703509 | 0.392820443 |
| 0.171382891 | 0.319026474 | 0.204946876 | 0.291486452 |
| 0.453631308 | 0.261434386 | 0.345311795 | 0.227987105 |
| 0.433914649 | 0.372006632 | 0.252656072 | 0.318056975 |
| 0.320950605 | 0.175874843 | 0.321636156 | 0.472116223 |
| 0.326372463 | 0.231774166 | 0.37898773  | 0.307544757 |
| 0.275813127 | 0.382480781 | 0.318506174 | 0.465124211 |
| 0.200407651 | 0.365226529 | 0.386572638 | 0.400434522 |
| 0.384467783 | 0.212626627 | 0.234074151 | 0.287806233 |
| 0.414504199 | 0.237685423 | 0.255560103 | 0.383896587 |
| 0.199182112 | 0.391171603 | 0.301696278 | 0.282394023 |
| 0.145521931 | 0.315303057 | 0.387520506 | 0.287815963 |
| 0.360118705 | 0.351858237 | 0.28423259  | 0.405412862 |
| 0.279145296 | 0.102995764 | 0.451021779 | 0.019659418 |
| 0.381339425 | 0.383363742 | 0.378696784 | 0.342186455 |
| 0.293504672 | 0.365194992 | 0.319881619 | 0.010013682 |
| 0.383748694 | 0.094246105 | 0.346956954 | 0.285245267 |
| 0.243523366 | 0.162253169 | 0.438573218 | 0.446513247 |
| 0.39115021  | 0.306808193 | 0.261882878 | 0.423818031 |
| 0.156497963 | 0.245606934 | 0.271390143 | 0.356365516 |
| 0.217119564 | 0.281272382 | 0.317273339 | 0.303677014 |
| 0.395308894 | 0.386275656 |             |             |
| RUNDC3B     | 0.025823818 | 0.395118479 | 0.033629633 |
| 0.016020601 | 0.11352177  | 0.166631623 | 0.008824836 |
| 0.019548692 | 0.251101358 | 0.126977052 | 0.172471996 |
| 0.002178388 | 0.005735576 | 0.371118238 | 0.006956385 |
| 0.198443638 | 0.002641067 | 0.028274965 | 0.004314294 |
| 0.018034491 | 0.095354828 | 0.074657075 | 0.236748809 |
| 0.081596265 | 0.15157941  | 0.206617577 | 0.184919739 |
| 0.452993662 | 0.065562869 | 0.307533727 | 0.044138896 |
| 0.318553513 | 0.140569592 | 0.183627418 | 0.002678593 |
| 0.204072711 | 8.00E-05    | 0.347865496 | 0.061668356 |
| 0.012385063 | 0.259936953 | 0.219265372 | 0.070558861 |
| 0.194016523 | 0.011272457 | 0.062174806 | 0.243812071 |
| 0.171746349 | 0.056857004 | 0.039867651 | 0.30394866  |
| 0.090414306 | 0.236944283 | 0.373787614 | 0.000344016 |
| 0.110439062 | 0.015532512 | 0.064017406 | 0.454072124 |
| 0.099694624 | 0.02861488  | 0.046573643 | 0.078463071 |
| 0.210271083 | 0.193461309 | 0.105284616 | 0.134023562 |

|             |             |             |             |
|-------------|-------------|-------------|-------------|
| 0.442114576 | 0.021216249 | 0.310951452 | 0.017139556 |
| 0.154074858 | 0.00827001  | 0.077477596 | 0.043635015 |
| 0.115105397 | 0.062270018 | 0.142830184 | 0.083056068 |
| 0.430708907 | 0.415013725 | 0.097891159 | 0.452663474 |
| 0.00419256  | 0.140432094 | 0.049930991 | 0.143972035 |
| 0.20514939  | 0.011438451 | 0.288391878 | 0.430899472 |
| 0.011726825 | 0.282229241 | 0.261541098 | 0.075366551 |
| 0.387251036 | 0.049004952 | 0.287056111 | 0.032502504 |
| 0.184576055 | 0.139298674 | 0.392021042 | 0.169528425 |
| 0.097818386 | 0.043353281 | 0.450400428 | 0.134045947 |
| 0.093820863 | 0.040757867 | 0.027593981 | 0.374581926 |
| 0.262688264 | 0.447345984 | 0.365977717 | 0.224206896 |
| 0.176302808 | 0.442791937 | 0.275265652 | 0.328939704 |
| 0.0367771   | 0.464476422 | 0.080891581 | 0.004286614 |
| 0.028030367 | 0.011016084 | 0.027741727 | 0.170441509 |
| 0.406193188 | 0.184240046 | 0.063921171 | 0.066473575 |
| 0.339324502 | 0.45713047  | 0.464802952 | 0.30356156  |
| 0.008779104 | 0.041664522 | 0.177746733 | 0.075338374 |
| 0.22012154  | 0.038220312 | 0.077827417 | 0.448720004 |
| 0.299378384 | 0.319244393 | 0.05204085  | 0.411749549 |
| 0.049076129 | 0.414117412 | 0.452121689 | 0.058236782 |
| 0.443882118 | 0.451942138 | 0.408693764 | 0.248844822 |
| 0.412379878 | 0.180202068 | 0.005259303 | 0.263145834 |
| 0.3756031   | 0.001217551 | 0.4081255   | 0.420657657 |
| 0.459309247 | 0.383986303 | 0.401660377 | 0.430930685 |
| 0.468358806 | 0.028637288 | 0.002544888 | 0.113971191 |
| 0.455091733 | 0.30936236  | 0.01282931  | 0.234257326 |
| 0.166014876 | 0.196237631 | 0.312557463 | 0.042289488 |
| 0.387254609 | 0.369552981 | 0.431909822 | 0.279148292 |
| 0.142065437 | 0.234219434 | 0.192159978 | 0.444415723 |
| 0.00373052  | 0.046347578 | 0.037557141 | 0.15536786  |
| 0.12105412  | 0.053565459 | 0.163535419 | 0.144003066 |
| 0.073440369 | 0.142185699 | 0.121316638 | 0.206872889 |
| 0.046110082 | 0.300880156 | 0.057962275 | 0.07430478  |
| 0.004138892 | 0.09420042  | 0.018271426 | 0.024166298 |
| 0.076815123 | 0.198653026 | 0.325170597 | 0.396363299 |
| 0.103078012 | 0.127800537 | 0.310913635 | 0.361282998 |
| 0.291186659 | 0.179268653 | 0.11912913  | 0.000958688 |
| 0.029396174 | 0.092906088 | 0.033852707 | 0.220090124 |
| 0.134208959 | 0.034869618 | 0.195866686 | 0.244675211 |
| 0.167239484 | 0.04958608  | 0.107346834 | 0.338130972 |
| 0.10469955  | 0.087399599 | 0.342502354 | 0.236551066 |
| 0.000211532 | 0.152930306 | 0.364877327 | 0.006469635 |
| 0.171402778 | 0.012374222 | 0.052181648 | 0.37141229  |
| 0.043842135 | 0.040318038 | 0.420002002 | 0.23040285  |
| 0.049322294 | 0.188636894 | 0.420790538 | 0.004238715 |
| 0.124538794 | 0.002909963 | 0.129661199 | 0.193785065 |
| 0.111796875 | 0.134759554 | 0.124709407 | 0.06012396  |
| 0.09847978  | 0.450005676 | 0.288487659 | 0.445929447 |
| 0.102056366 | 0.424738789 | 0.379701222 | 0.359678755 |
| 0.202877018 | 0.147510199 | 0.019568053 | 0.355247108 |
| 0.368647531 | 0.0281966   | 0.055644887 | 0.357304506 |
| 0.143626711 | 0.236276995 | 0.00394969  | 0.399489368 |
| 0.388742093 | 0.461526849 | 0.024171614 | 0.205752606 |

|             |             |             |             |
|-------------|-------------|-------------|-------------|
| 0.284240278 | 0.112533558 | 0.284869227 | 0.412009741 |
| 0.07964344  | 0.139942274 | 0.090455146 | 0.244871371 |
| 0.085491963 | 0.029672682 | 0.204529204 | 0.030447681 |
| 0.004291492 | 0.032502716 | 0.031320375 | 0.034834416 |
| 0.027081244 | 0.294061045 | 0.211607524 | 0.440384319 |
| 0.032702887 | 0.328531342 | 0.114384181 | 0.069634704 |
| 0.355570046 | 0.114261691 | 0.185297951 | 0.193208797 |
| 0.12312367  | 0.001136393 | 0.010255766 | 0.422789017 |
| 0.026110697 | 0.051185395 | 0.122417919 | 0.00061293  |
| 0.010515845 | 0.394940218 | 0.070820203 | 0.139176553 |
| 0.356634534 | 0.151283895 | 0.119237909 | 0.11306675  |
| 0.185017937 | 0.030849667 | 0.000101068 | 0.396839841 |
| 0.392190177 | 0.354330947 | 0.397403693 | 0.381596351 |
| 0.327293439 | 0.270822601 | 0.272853025 | 0.238555281 |
| 0.015201522 | 0.027746152 | 0.030805216 | 0.086793474 |
| 0.001163657 | 0.236533494 | 0.092775178 | 0.068591438 |
| 0.287456151 | 0.140565635 | 0.007312952 | 0.153007782 |
| 0.003573043 | 0.054112859 | 0.063742201 | 0.044723739 |
| 0.171524808 | 0.002482353 | 0.041537013 | 0.047708181 |
| 0.415991732 | 0.272760404 | 0.112419833 | 0.457799344 |
| 0.148207647 | 0.106627917 | 0.101091183 | 0.249857512 |
| 0.011724577 | 0.011860004 | 0.123756225 | 0.038762628 |
| 0.030981698 | 0.356491209 | 0.102379548 | 0.007321204 |
| 0.127853024 | 0.000679259 | 0.310674922 | 0.449165151 |
| 0.457151747 | 0.429050048 | 0.439134692 | 0.087297588 |
| 0.452441147 | 0.014546871 | 0.461711686 | 0.360964216 |
| 0.178546758 | 0.000849746 | 0.000206231 | 0.407466358 |
| 0.198167784 | 0.054563338 | 0.064701209 | 0.084449333 |
| 0.013426296 | 0.06444227  | 0.012234652 | 0.026326644 |
| 0.28387277  | 0.069006318 | 0.020699259 | 0.428683529 |
| 0.068780554 | 0.074918755 | 0.174894572 | 0.048910517 |
| 0.214768152 | 0.006824333 | 0.042779445 | 0.001029784 |
| 0.19268336  | 0.090607292 | 0.423475928 | 0.460250207 |
| 0.394360514 | 0.216902071 | 0.159851409 | 0.046019633 |
| 0.316290293 | 0.099307439 | 0.058432391 | 0.08086607  |
| 0.467757332 | 0.21600754  | 0.196998322 | 0.228996123 |
| 0.396382964 | 0.39404971  | 0.005760647 | 0.273828449 |
| 0.002031614 | 8.46E-05    | 0.244239028 | 0.123750765 |
| 0.0023879   | 0.143615011 | 0.14566393  | 0.041461476 |
| 0.03704637  | 0.003656141 | 0.068248572 | 0.055981928 |
| 0.124605346 | 0.135756793 | 0.089237655 | 0.123378381 |
| 0.052033299 | 0.005718887 | 0.037764219 | 0.024773759 |
| 0.018902496 | 0.236404824 | 0.157534373 | 0.002533286 |
| 0.23762617  | 0.213008043 | 0.016410936 | 0.078397139 |
| 0.354252815 | 0.424168619 | 0.001920535 | 0.000622343 |
| 0.167946345 | 0.081991915 | 0.40673979  | 0.466487789 |
| 0.462037508 | 0.410181885 | 0.297339456 | 0.010807097 |
| 0.015556066 | 0.122887284 | 0.097118666 | 0.005132112 |
| 0.447230838 | 0.043419336 | 0.43739624  | 0.110648653 |
| 0.044605579 | 0.048898572 | 0.002222432 | 0.022325135 |
| 0.206246183 | 0.072471541 | 0.042008832 | 0.109762059 |
| 0.090368609 | 0.032484955 | 0.008368976 | 0.07267157  |
| 0.219968396 | 0.016508018 | 0.0604681   | 0.089874628 |
| 0.244136722 | 0.030745434 | 0.292336489 | 0.335029387 |

|             |             |             |             |
|-------------|-------------|-------------|-------------|
| 0.070568862 | 0.037953159 | 0.092592784 | 0.224498684 |
| 0.376408705 | 0.253019768 | 0.005259613 | 0.444250586 |
| 0.384925093 | 0.311997977 | 0.459347462 | 0.246545296 |
| 0.038122349 | 0.178644493 | 0.088521099 | 0.13430931  |
| 0.063942877 | 0.190824863 | 0.066391491 | 0.022511233 |
| 0.175572952 | 0.37831038  | 0.346673198 | 0.044031395 |
| 0.247600384 | 0.083676184 | 0.038009217 | 0.36613594  |
| 0.023523347 | 0.011879378 | 0.231276303 | 0.324933081 |
| 0.000163948 | 0.023007746 | 0.363606706 | 0.055536689 |
| 0.401084787 | 0.385696862 | 0.34793576  | 0.051903554 |
| 0.000119143 | 0.242505412 | 0.208118248 | 0.149359974 |
| 0.392785776 | 0.244240184 | 0.010961875 | 0.007702185 |
| 0.159136661 | 0.068844935 | 0.014533304 | 0.049814201 |
| 0.015756293 | 0.267321622 | 0.084003906 | 0.073505137 |
| 0.03793668  | 0.060513059 | 0.029378386 | 0.074950892 |
| 0.006887831 | 0.120744576 | 0.223845879 | 0.113494481 |
| 0.023363737 | 0.307877494 | 0.310505705 | 0.005844173 |
| 0.148359894 | 0.2856198   | 0.313206676 | 0.000155155 |
| 0.302033432 | 0.000336705 | 0.046251261 | 0.057635412 |
| 0.041911289 | 0.045259394 | 0.08738902  | 0.063452446 |
| 0.183609998 | 0.055426273 | 0.085186937 | 0.100582464 |
| 0.027512231 | 0.063286604 | 0.178721808 | 0.135197779 |
| 0.072072854 | 0.033476121 | 0.077497761 | 0.093209582 |
| 0.004306544 | 0.403615174 | 0.162441185 | 0.05821096  |
| 0.082345892 | 0.107486078 | 0.222203036 | 0.470214625 |
| 0.28962321  | 0.110754771 | 0.097040169 | 0.431731601 |
| 0.03414603  | 0.033580036 | 0.016439503 | 0.192507927 |
| 0.084970343 | 0.031851883 | 0.203927701 | 0.222460537 |
| 0.30451262  | 0.308090206 | 0.159493044 | 0.327189404 |
| 0.116108177 | 0.126220971 | 0.186113816 | 0.008391769 |
| 0.060305298 | 0.067502167 | 0.083514503 | 7.77E-05    |
| 0.185858364 | 0.047775616 | 0.412083332 | 0.451119966 |
| 0.083250046 | 0.26669518  | 1           | 0.018329916 |
| 0.092921308 | 0.172234027 | 0.066714493 | 0.332360006 |
| 0.063296892 | 0.04280019  | 0.104004076 | 0.132158611 |
| 0.297527455 | 0.283511996 | 0.04030834  | 0.07213241  |
| 0.071955554 | 0.108739042 | 0.382002803 | 0.045741784 |
| 0.275930458 | 0.027686892 | 0.256374724 | 0.097366191 |
| 0.047948984 | 0.434856041 | 0.022688113 | 0.451155572 |
| 0.105054991 | 0.083700936 | 0.380879878 | 0.123466656 |
| 0.048707361 | 0.007602884 | 0.044216672 | 0.14953242  |
| 0.033263428 | 0.10659007  | 0.003483367 | 0.004915282 |
| 0.178358377 | 0.075943227 | 0.349234283 | 0.198320468 |
| 0.047550143 | 0.178087155 | 0.014730728 | 0.105043444 |
| 0.466956007 | 0.441639218 | 0.034430236 | 0.120937442 |
| 0.212934463 | 0.022101224 | 0.319237761 | 0.000435168 |
| 0.262812084 | 0.276623364 | 0.104653053 | 0.007627887 |
| 0.000833135 | 0.052339322 | 0.241578426 | 0.034360199 |
| 0.37025764  | 0.026570142 | 0.210168952 | 0.309059447 |
| 0.089191614 | 0.442769332 | 0.013159521 | 0.269046866 |
| 0.003173939 | 0.107131957 | 0.15204358  | 0.164279937 |
| 0.038678158 | 0.085185813 | 0.22915183  | 0.062779763 |
| 0.004064268 | 0.030252819 | 0.000574815 | 0.326737579 |
| 0.432650557 | 0.119249533 | 0.121743328 | 0.096708568 |



|             |             |             |             |
|-------------|-------------|-------------|-------------|
| 0.12515791  | 0.255604677 | 0.019972167 | 0.227067799 |
| 0.000568431 | 0.181585273 | 0.068323363 | 0.374792639 |
| 0.045221428 | 0.167452698 | 0.003404917 | 0.098814883 |
| 0.413022387 | 0.030976627 | 0.140304801 | 0.0570332   |
| 0.452637812 | 0.291701279 | 0.127965181 | 0.018367383 |
| 0.252398534 | 0.033346027 | 0.194026607 | 0.434531193 |
| 0.040962617 | 0.050739203 | 0.328340325 | 0.043739706 |
| 0.100428563 | 0.305509095 | 0.255001787 | 0.423123668 |
| 0.005211925 | 0.111625333 | 0.28782459  | 0.375934272 |
| 0.154409234 | 0.023680107 | 0.05592007  | 0.049856602 |
| 0.451766037 | 0.010430817 | 0.031319211 | 0.227872283 |
| 0.047996985 | 0.14476009  | 0.225787117 | 0.033485105 |
| 0.002656052 | 0.022615555 | 0.111505431 | 0.057079802 |
| 0.118651481 | 0.144674303 | 0.035610962 | 0.271840499 |
| 0.014464448 | 0.001943396 | 0.328457885 | 0.001282358 |
| 0.218750962 | 0.230446925 | 0.09250631  | 0.114221059 |
| 0.135654182 | 0.180213674 | 0.196087666 | 0.0001628   |
| 0.275761525 | 0.00220555  | 0.0713884   | 0.040460027 |
| 0.028030346 | 0.01052468  | 0.393893575 | 0.412834516 |
| 0.165161832 | 0.034546205 | 0.066911541 | 0.393388387 |
| 0.010203084 | 0.114659283 | 0.094208964 | 0.309319161 |
| 0.050625586 | 0.219905022 | 0.184368776 | 0.14843097  |
| 0.259928573 | 0.079339909 |             |             |
| SAE1        | 0.167236685 | 0.12361393  | 0.144005744 |
| 0.108360386 | 0.074689942 | 0.045193294 | 0.13532691  |
| 0.104685268 | 0.107871232 | 0.0122449   | 0.105457793 |
| 0.156546804 | 0.003049999 | 0.171549721 | 0.124707645 |
| 0.074580425 | 0.140219289 | 0.217961489 | 0.013988638 |
| 0.0358862   | 0.087745963 | 0.019951796 | 0.07164418  |
| 0.061800924 | 0.311721007 | 0.100708492 | 0.03333552  |
| 0.14260078  | 0.006874617 | 0.078811017 | 0.007392798 |
| 0.255631348 | 0.076984277 | 0.026152973 | 0.096607478 |
| 0.065080725 | 0.001276162 | 0.25250451  | 0.094676411 |
| 0.010815797 | 0.264770024 | 0.027446702 | 0.13125885  |
| 0.040896517 | 0.154159356 | 0.004777102 | 0.067456852 |
| 0.079707232 | 0.048148245 | 0.173698255 | 0.088237554 |
| 0.027384157 | 0.163991603 | 0.073397079 | 0.013840089 |
| 0.019224345 | 0.000900809 | 0.007263569 | 0.174270638 |
| 0.279079206 | 0.198855418 | 0.007656482 | 0.061094112 |
| 0.057826809 | 0.087630627 | 0.162648045 | 0.02537282  |
| 0.183715802 | 0.009591558 | 0.068803794 | 0.046290093 |
| 0.066733542 | 0.103909125 | 0.30958771  | 0.14244643  |
| 0.027808742 | 0.179665065 | 0.075213269 | 0.023205755 |
| 0.128339372 | 0.22550424  | 0.178567595 | 0.184147391 |
| 0.009068313 | 0.050635951 | 0.030819032 | 0.182823407 |
| 0.110427833 | 0.078866706 | 0.14613461  | 0.213408739 |
| 0.099141793 | 0.046569645 | 0.108959675 | 0.219813839 |
| 0.127900865 | 0.008498593 | 0.039763691 | 0.013252201 |
| 0.075874779 | 0.073978512 | 0.187957294 | 0.24555911  |
| 0.04551148  | 0.221377687 | 0.200617443 | 0.046905852 |
| 0.074421046 | 0.214447107 | 0.039394268 | 0.100460164 |
| 0.101029196 | 0.153074371 | 0.108967802 | 0.158405073 |
| 0.061388852 | 0.172125826 | 0.137799115 | 0.142998849 |
| 0.00216356  | 0.17102341  | 0.202890871 | 0.139052949 |

|             |             |             |             |
|-------------|-------------|-------------|-------------|
| 0.128809956 | 0.11831618  | 0.018941445 | 0.217407511 |
| 0.127574962 | 0.138358026 | 0.175435138 | 0.142075439 |
| 0.134814882 | 0.176596862 | 0.165066524 | 0.150576336 |
| 0.183596988 | 0.008682092 | 0.061638981 | 0.051735998 |
| 0.127527141 | 0.200640955 | 0.034513303 | 0.222162914 |
| 0.240544826 | 0.123260219 | 0.110598534 | 0.242163217 |
| 0.090382323 | 0.215843338 | 0.121011596 | 0.239162364 |
| 0.21343235  | 0.210913693 | 0.189467956 | 0.07731814  |
| 0.203923306 | 0.112204929 | 0.009790403 | 0.153143936 |
| 0.210228465 | 0.004774654 | 0.113720253 | 0.130912273 |
| 0.170360227 | 0.110295528 | 0.176415228 | 0.146748628 |
| 0.164725665 | 0.22545265  | 0.000978119 | 0.149211254 |
| 0.198536415 | 0.206255112 | 0.05832145  | 0.04800154  |
| 0.075090458 | 0.072097333 | 0.088054872 | 0.031371839 |
| 0.234234053 | 0.132214104 | 0.123272389 | 0.13156428  |
| 0.063460138 | 0.271412264 | 0.033946092 | 0.204611834 |
| 0.115154955 | 0.179243414 | 0.225160627 | 0.156006708 |
| 0.015691735 | 0.223013163 | 0.067386002 | 0.061954006 |
| 0.256677642 | 0.056955096 | 0.015085173 | 0.085859078 |
| 0.240461986 | 0.059365109 | 0.170069511 | 0.195605939 |
| 0.150444985 | 0.313163018 | 0.120919798 | 0.099117343 |
| 0.125217893 | 0.301349747 | 0.074393212 | 0.14448991  |
| 0.03942912  | 0.267695171 | 0.103902976 | 0.199000461 |
| 0.253368049 | 0.055181242 | 0.235878074 | 0.078650036 |
| 0.048754905 | 0.00939572  | 0.0063149   | 0.039808947 |
| 0.286654413 | 0.075901819 | 0.091064411 | 0.108494967 |
| 0.150491465 | 0.099330996 | 0.038290163 | 0.25849539  |
| 0.229269015 | 0.060408376 | 0.164859925 | 0.056585243 |
| 0.056628752 | 0.142284404 | 0.127391743 | 0.03545024  |
| 0.140772948 | 0.016548871 | 0.011477148 | 0.150063942 |
| 0.013807742 | 0.029365134 | 0.127714844 | 0.095767139 |
| 0.024074004 | 0.231601856 | 0.174891186 | 0.003612213 |
| 0.039176237 | 0.048090554 | 0.206478439 | 0.025367083 |
| 0.215499147 | 0.194058748 | 0.056702757 | 0.047817685 |
| 0.222480824 | 0.184344354 | 0.148282589 | 0.162628602 |
| 0.026077514 | 0.182913991 | 0.12685621  | 0.178418764 |
| 0.133391981 | 0.027304076 | 0.004925569 | 0.140530644 |
| 0.137041901 | 0.02015114  | 0.221360432 | 0.083165595 |
| 0.031857887 | 0.08412646  | 0.029404987 | 0.192019406 |
| 0.23666599  | 0.162809765 | 0.125351695 | 0.135821374 |
| 0.211634359 | 0.198880582 | 0.122742327 | 0.188557398 |
| 0.012626578 | 0.061462354 | 0.046196582 | 0.15560975  |
| 0.26983466  | 0.033687909 | 0.198879478 | 0.004686396 |
| 4.14E-05    | 0.175689608 | 0.24499747  | 0.150330067 |
| 0.020066324 | 0.046083436 | 0.094075278 | 0.174872927 |
| 0.239998019 | 0.177575216 | 0.167711391 | 0.07488082  |
| 0.19550764  | 0.041243669 | 0.041318427 | 0.07072357  |
| 0.21043712  | 0.069682449 | 0.122139351 | 0.238233843 |
| 0.171684081 | 0.019317387 | 0.077696975 | 0.016733437 |
| 0.163625846 | 0.08571511  | 0.277179275 | 0.345359208 |
| 0.14639873  | 0.311190375 | 0.250877834 | 0.021117405 |
| 0.150520948 | 0.234588559 | 0.019985619 | 0.143793272 |
| 0.149668655 | 0.146405117 | 0.149146572 | 0.164068184 |
| 0.129033627 | 0.086421575 | 0.120680626 | 0.082380697 |

|             |             |             |             |
|-------------|-------------|-------------|-------------|
| 0.11890073  | 0.116726798 | 0.024442178 | 0.116314235 |
| 0.012179068 | 0.148227818 | 0.060671008 | 0.31949001  |
| 0.089958323 | 0.150475492 | 0.147738131 | 0.056933343 |
| 0.125427513 | 0.007584233 | 0.044073112 | 0.08702395  |
| 0.11746386  | 0.098353597 | 0.030060806 | 0.022963267 |
| 0.19447091  | 0.225517428 | 0.018003513 | 0.181752273 |
| 0.135628703 | 0.193459301 | 0.093726655 | 0.114219451 |
| 0.163476426 | 0.008417588 | 0.044967857 | 0.002954046 |
| 0.01138553  | 0.16837851  | 0.025719098 | 0.109370838 |
| 0.214678055 | 0.096511696 | 0.218829774 | 0.192407665 |
| 0.157400225 | 0.163778634 | 0.178292987 | 0.030315118 |
| 0.184940315 | 0.001013756 | 0.161597394 | 0.147719194 |
| 0.025877005 | 0.017149583 | 0.038016545 | 0.133292086 |
| 0.073698    | 0.190992292 | 0.274111034 | 0.026840373 |
| 0.13850692  | 0.132713416 | 0.134456266 | 0.03238734  |
| 0.07224744  | 0.097576332 | 0.021136962 | 0.179054668 |
| 0.144038453 | 0.15882336  | 0.037964736 | 0.24039175  |
| 0.059074134 | 0.144184401 | 0.209176544 | 0.025459889 |
| 0.108376416 | 0.249180035 | 0.217614097 | 0.165380453 |
| 0.218218546 | 0.098947179 | 0.014119565 | 0.023026308 |
| 0.11670001  | 0.194131066 | 0.011987237 | 0.187258284 |
| 0.161436503 | 0.106376512 | 0.246527283 | 0.273455908 |
| 0.204688196 | 0.208846163 | 0.174977211 | 0.141968796 |
| 0.071231398 | 0.004025082 | 0.076466651 | 0.177493556 |
| 0.003147992 | 0.053693341 | 0.281320253 | 0.035585706 |
| 0.043511465 | 0.140341422 | 0.020743864 | 0.025507027 |
| 0.168277117 | 0.087600438 | 0.062153099 | 0.157941074 |
| 0.050865609 | 0.037475875 | 0.093715514 | 0.103766699 |
| 0.016724881 | 0.220273427 | 0.33094397  | 0.119274045 |
| 0.045516078 | 0.054427703 | 0.227640683 | 0.25729033  |
| 0.160908502 | 0.150819863 | 0.134190379 | 0.109683005 |
| 0.269841015 | 0.059411386 | 0.155965269 | 0.150391793 |
| 0.207252927 | 0.214149348 | 0.262763372 | 0.080934857 |
| 0.159971708 | 0.113108035 | 0.055845811 | 0.05801969  |
| 0.167474257 | 0.205853134 | 0.163128207 | 0.028679498 |
| 0.251912516 | 0.118526558 | 0.135895241 | 0.219436068 |
| 0.046468498 | 0.252466052 | 0.154383477 | 0.229058094 |
| 0.089630916 | 0.013571093 | 0.162461404 | 0.233205632 |
| 0.199075085 | 0.011730251 | 0.262291169 | 0.048054379 |
| 0.135436492 | 0.006862401 | 0.091378674 | 0.251843865 |
| 0.275065112 | 0.182373673 | 0.060842455 | 0.095860789 |
| 0.107235563 | 0.034470689 | 0.082855127 | 0.12503985  |
| 0.157277044 | 0.075908046 | 0.179138865 | 0.19159255  |
| 0.251566487 | 0.067168143 | 0.021849633 | 0.090632821 |
| 0.200940831 | 0.052593401 | 0.114735156 | 0.25819032  |
| 0.213467417 | 0.222738621 | 0.156133623 | 0.18211723  |
| 0.047813761 | 0.159495285 | 0.191328002 | 0.111498913 |
| 0.022648272 | 0.158996847 | 0.027914404 | 0.094395756 |
| 0.005905873 | 0.005930177 | 0.145091234 | 0.08255313  |
| 0.195024295 | 0.159664804 | 0.235312553 | 0.040767777 |
| 0.00012867  | 0.067832582 | 0.126839953 | 0.056507939 |
| 0.14929034  | 0.168883175 | 0.021017878 | 0.139193972 |
| 0.255867737 | 0.231504393 | 0.121681185 | 0.02399131  |
| 0.010012366 | 0.093431049 | 0.268537778 | 0.138612239 |

|             |             |             |             |
|-------------|-------------|-------------|-------------|
| 0.108648733 | 0.161976552 | 0.012187392 | 0.126059694 |
| 0.007905438 | 0.285359814 | 0.229372939 | 0.011381141 |
| 0.020122939 | 0.153385445 | 0.145213402 | 0.132323615 |
| 0.03670504  | 0.138214388 | 0.146934456 | 0.048452819 |
| 0.104356211 | 0.11438784  | 0.133283752 | 0.136739932 |
| 0.117134925 | 0.112842075 | 0.140422546 | 0.050893805 |
| 0.113278022 | 0.139399809 | 0.115597055 | 0.229488011 |
| 0.105762327 | 0.118892358 | 0.071440763 | 0.064784961 |
| 0.066224201 | 0.170705419 | 0.26572014  | 0.275393309 |
| 0.135482321 | 0.121972712 | 0.309829271 | 0.224116993 |
| 0.190620394 | 0.046966264 | 0.262460643 | 0.155068129 |
| 0.185138877 | 0.215427158 | 0.063131169 | 0.138614109 |
| 0.006848838 | 0.028204682 | 0.117250269 | 0.067664993 |
| 0.176992163 | 0.041169108 | 0.04175673  | 0.140643392 |
| 0.085759505 | 0.273033945 | 0.29597794  | 0.181198536 |
| 0.061602926 | 0.045748852 | 0.019819884 | 0.129501742 |
| 0.211166134 | 0.24399906  | 0.07116036  | 0.06112369  |
| 0.151865116 | 0.057781414 | 0.132661279 | 0.188830364 |
| 0.013818735 | 0.20994983  | 0.018329916 | 1           |
| 0.010624816 | 0.262200945 | 0.304940761 | 0.084464617 |
| 0.00835234  | 0.114314493 | 0.095682304 | 0.032165194 |
| 0.095055026 | 0.074844343 | 0.029863066 | 0.102492109 |
| 0.117623156 | 0.189476055 | 0.19081948  | 0.128408795 |
| 0.052050374 | 0.037610888 | 0.05260761  | 0.117120219 |
| 0.111565522 | 0.146072223 | 0.213928058 | 0.150772789 |
| 0.069385799 | 0.245938038 | 0.243035232 | 0.075500201 |
| 0.035310195 | 0.065563903 | 0.008703335 | 0.029822797 |
| 0.061713781 | 0.017850487 | 0.000437982 | 0.017222765 |
| 0.20359472  | 0.023139406 | 0.097708525 | 0.112964772 |
| 0.039474534 | 0.178679745 | 0.003759752 | 0.103228768 |
| 0.164348236 | 0.201689405 | 0.09412706  | 0.254931931 |
| 0.18323482  | 0.177628019 | 0.084098591 | 0.00177248  |
| 0.071987065 | 0.046020853 | 0.016687654 | 0.143206664 |
| 0.115228711 | 0.012069354 | 0.077736624 | 0.157539983 |
| 0.145458987 | 0.006448886 | 0.059746345 | 0.084432416 |
| 0.204800055 | 0.215945032 | 0.085689661 | 0.133825515 |
| 0.054743516 | 0.173001339 | 0.032336957 | 0.038187713 |
| 0.063371783 | 0.03954149  | 0.168475817 | 0.02835216  |
| 0.158665179 | 0.050341932 | 0.026804168 | 0.285890091 |
| 0.195655439 | 0.038123603 | 0.277331302 | 0.008299843 |
| 0.202891744 | 0.1423475   | 0.0408643   | 0.032950808 |
| 0.091371173 | 0.074588098 | 0.188268439 | 0.164442807 |
| 0.013899317 | 0.06714202  | 0.106335426 | 0.04407393  |
| 0.229112121 | 0.044196311 | 0.226573431 | 0.018922357 |
| 0.153848828 | 0.110549425 | 0.189035575 | 0.025770684 |
| 0.058166225 | 0.250740029 | 0.023519394 | 0.183099197 |
| 0.157234887 | 0.033234987 | 0.133770044 | 0.144572249 |
| 0.028732151 | 0.156240713 | 0.044166452 | 0.171665537 |
| 0.094229004 | 0.245358965 | 0.107099888 | 0.160751515 |
| 0.223184922 | 0.026752837 | 0.0252759   | 0.085481492 |
| 0.171205441 | 0.120052369 | 0.019049912 | 0.187341456 |
| 0.022589574 | 0.155481225 | 0.050858029 | 0.070256468 |
| 0.127981025 | 0.067131681 | 0.033647522 | 0.242697886 |
| 0.168805469 | 0.078787807 | 0.040550031 | 0.252976289 |

|             |             |             |             |
|-------------|-------------|-------------|-------------|
| 0.0934087   | 0.120262307 | 0.231169161 | 0.003134789 |
| 0.093214165 | 0.106642325 | 0.164064446 | 0.050674267 |
| 0.312257606 | 0.107836036 | 0.09601135  | 0.082207329 |
| 0.137037857 | 0.007140759 | 0.037866305 | 0.061895549 |
| 0.017822722 | 0.157373212 | 0.184165119 | 0.166855044 |
| 0.129181325 | 0.011811013 | 0.012523214 | 0.168128417 |
| 0.010786247 | 0.011078223 | 0.019070978 | 0.08093018  |
| 0.015731334 | 0.028347929 | 0.02839902  | 0.02541458  |
| 0.137137512 | 0.077712971 |             |             |
| SAMD9L      | 0.016228312 | 0.362990905 | 0.023075173 |
| 0.018526603 | 0.099726207 | 0.135142933 | 0.00602881  |
| 0.013905645 | 0.250020658 | 0.168394721 | 0.126824913 |
| 0.000874476 | 0.008916016 | 0.303116158 | 0.004303339 |
| 0.166911588 | 0.00138059  | 0.019200602 | 0.00762207  |
| 0.030631272 | 0.072784414 | 0.054904087 | 0.178267722 |
| 0.0712281   | 0.112139515 | 0.191031867 | 0.189401493 |
| 0.408058233 | 0.073798881 | 0.260608034 | 0.164650341 |
| 0.255718617 | 0.111073407 | 0.173797107 | 0.001916851 |
| 0.159988325 | 0.000497253 | 0.296530771 | 0.048294881 |
| 0.02626134  | 0.196084271 | 0.270797322 | 0.048967172 |
| 0.228916888 | 0.006708814 | 0.117679585 | 0.233260918 |
| 0.190548772 | 0.055724635 | 0.025954901 | 0.287518546 |
| 0.096675895 | 0.174672965 | 0.381318858 | 1.01E-06    |
| 0.09700599  | 0.023807043 | 0.063578972 | 0.397638584 |
| 0.069294815 | 0.01831513  | 0.071398901 | 0.067756405 |
| 0.190822824 | 0.177431504 | 0.088108962 | 0.145803751 |
| 0.363234378 | 0.018595374 | 0.319352577 | 0.024009566 |
| 0.121187765 | 0.006853614 | 0.058278887 | 0.040231798 |
| 0.106179954 | 0.043844136 | 0.105687036 | 0.08626073  |
| 0.400952385 | 0.350412817 | 0.086126025 | 0.409123267 |
| 0.006138821 | 0.127500691 | 0.049127835 | 0.116777616 |
| 0.182622619 | 0.009588727 | 0.22638408  | 0.366468446 |
| 0.009124312 | 0.300017313 | 0.226580376 | 0.054027842 |
| 0.341537604 | 0.056545219 | 0.287508252 | 0.02499917  |
| 0.173092144 | 0.116120234 | 0.34167347  | 0.116752995 |
| 0.082889653 | 0.030767882 | 0.389154129 | 0.118625974 |
| 0.063659235 | 0.031704736 | 0.024036531 | 0.342957109 |
| 0.224891577 | 0.376903993 | 0.327467581 | 0.182986208 |
| 0.153809758 | 0.376942339 | 0.23703415  | 0.27478863  |
| 0.101454372 | 0.405699199 | 0.062424555 | 0.002016173 |
| 0.020915203 | 0.007218097 | 0.027930554 | 0.13666585  |
| 0.352944121 | 0.14696338  | 0.044990085 | 0.051209726 |
| 0.291587796 | 0.399639319 | 0.413930505 | 0.250110554 |
| 0.005272794 | 0.047708984 | 0.168366393 | 0.057839012 |
| 0.166412042 | 0.029987818 | 0.066691721 | 0.375952325 |
| 0.231730002 | 0.267503439 | 0.04476333  | 0.351028735 |
| 0.038398186 | 0.341722165 | 0.412250608 | 0.03976475  |
| 0.383727727 | 0.382941588 | 0.344960414 | 0.212367931 |
| 0.343218075 | 0.145175354 | 0.004888725 | 0.226959881 |
| 0.297842712 | 0.001473269 | 0.368023939 | 0.377445981 |
| 0.408460814 | 0.342055567 | 0.347724243 | 0.378269029 |
| 0.407903636 | 0.022339228 | 0.005085742 | 0.086649537 |
| 0.395337559 | 0.2525764   | 0.009695953 | 0.212612379 |
| 0.132996691 | 0.149907268 | 0.283408577 | 0.045839432 |

|             |             |             |             |
|-------------|-------------|-------------|-------------|
| 0.314647358 | 0.341283756 | 0.389790497 | 0.231104497 |
| 0.154429037 | 0.177422041 | 0.190540271 | 0.378287286 |
| 0.002904293 | 0.029597249 | 0.026401023 | 0.130490046 |
| 0.150503485 | 0.038573024 | 0.129010037 | 0.130294073 |
| 0.051432383 | 0.120761767 | 0.118455929 | 0.174426743 |
| 0.034635205 | 0.246799033 | 0.051385769 | 0.056866826 |
| 0.002419039 | 0.070037999 | 0.015690132 | 0.015152542 |
| 0.052334274 | 0.158688787 | 0.284730304 | 0.364959732 |
| 0.097780615 | 0.097289269 | 0.254762619 | 0.302487209 |
| 0.223936062 | 0.162757744 | 0.086706313 | 0.000750952 |
| 0.029488739 | 0.113977388 | 0.035895745 | 0.210599634 |
| 0.107840385 | 0.02242481  | 0.163519086 | 0.197891181 |
| 0.120523168 | 0.037263877 | 0.087599494 | 0.266437572 |
| 0.081171429 | 0.060531719 | 0.275968399 | 0.23121866  |
| 0.000142733 | 0.117780822 | 0.29927116  | 0.00873961  |
| 0.136965524 | 0.011957559 | 0.04186005  | 0.328045067 |
| 0.038247629 | 0.031645747 | 0.371285325 | 0.194128368 |
| 0.04761636  | 0.154533176 | 0.361210066 | 0.006339546 |
| 0.126389078 | 0.003970456 | 0.095774517 | 0.24815908  |
| 0.084453763 | 0.105534141 | 0.099348761 | 0.053415192 |
| 0.072051192 | 0.375591349 | 0.247510504 | 0.371074424 |
| 0.099502316 | 0.367546308 | 0.314432114 | 0.277128925 |
| 0.163579241 | 0.151827456 | 0.017626266 | 0.302332029 |
| 0.332485405 | 0.054015506 | 0.041674874 | 0.323637805 |
| 0.161927683 | 0.207816768 | 0.008906512 | 0.332629914 |
| 0.326965075 | 0.414977684 | 0.014278581 | 0.170031038 |
| 0.216904801 | 0.078948742 | 0.267459423 | 0.345579445 |
| 0.101971032 | 0.112502496 | 0.077285479 | 0.210641798 |
| 0.065318067 | 0.02259441  | 0.17533289  | 0.030517339 |
| 0.010089644 | 0.022482749 | 0.021447947 | 0.022926586 |
| 0.023378127 | 0.294824762 | 0.193174531 | 0.376898398 |
| 0.019921381 | 0.26893768  | 0.096151606 | 0.049288009 |
| 0.302412531 | 0.096033398 | 0.164975723 | 0.16490693  |
| 0.102390107 | 0.001618778 | 0.008965774 | 0.359059425 |
| 0.020005225 | 0.039712716 | 0.097481859 | 0.000272441 |
| 0.006176159 | 0.390226121 | 0.056562865 | 0.106727672 |
| 0.29752066  | 0.123492103 | 0.091616208 | 0.138090742 |
| 0.144729452 | 0.022032777 | 0.000202742 | 0.368166267 |
| 0.363240063 | 0.330052071 | 0.36792528  | 0.348233816 |
| 0.309565134 | 0.250233533 | 0.244287398 | 0.191739363 |
| 0.011778611 | 0.024745804 | 0.027287483 | 0.066833158 |
| 0.000408603 | 0.197399586 | 0.082479938 | 0.048254128 |
| 0.246211467 | 0.115168915 | 0.003795669 | 0.132133389 |
| 0.002961472 | 0.053527123 | 0.045593574 | 0.03641903  |
| 0.145039864 | 0.001581748 | 0.062593986 | 0.044045856 |
| 0.339124782 | 0.201872867 | 0.125957566 | 0.404149146 |
| 0.105560529 | 0.085916596 | 0.087454324 | 0.196253981 |
| 0.007974598 | 0.030001297 | 0.10184854  | 0.079496432 |
| 0.038713942 | 0.314057853 | 0.101267915 | 0.009730746 |
| 0.093311855 | 0.000276809 | 0.246664622 | 0.374173805 |
| 0.411798726 | 0.368942817 | 0.363254483 | 0.07041043  |
| 0.383329055 | 0.026151546 | 0.398807305 | 0.300750659 |
| 0.181802289 | 0.000243649 | 0.001033425 | 0.367956178 |
| 0.172140629 | 0.042419457 | 0.04685043  | 0.074204204 |

|             |             |             |             |
|-------------|-------------|-------------|-------------|
| 0.007910744 | 0.043523086 | 0.008204857 | 0.023716562 |
| 0.247773501 | 0.050707749 | 0.016310882 | 0.367848623 |
| 0.054445744 | 0.055721878 | 0.156674557 | 0.036620006 |
| 0.185871608 | 0.004158927 | 0.034978546 | 0.000741966 |
| 0.158575103 | 0.074193746 | 0.365451064 | 0.392411535 |
| 0.323047154 | 0.195655749 | 0.183643852 | 0.04380887  |
| 0.285716247 | 0.068719403 | 0.072185575 | 0.057568532 |
| 0.40739545  | 0.177469319 | 0.143636472 | 0.173710709 |
| 0.321976485 | 0.328392618 | 0.003231102 | 0.232808701 |
| 0.001814983 | 0.002068091 | 0.207306443 | 0.095617962 |
| 0.006624647 | 0.118416865 | 0.11264381  | 0.043560182 |
| 0.032043026 | 0.002920536 | 0.063081463 | 0.05353502  |
| 0.10250409  | 0.110155449 | 0.071013297 | 0.108386286 |
| 0.049742091 | 0.009230854 | 0.030296187 | 0.017337341 |
| 0.029778852 | 0.19980003  | 0.115094973 | 0.001545644 |
| 0.241799496 | 0.184238115 | 0.010272012 | 0.058863956 |
| 0.290154078 | 0.355162402 | 0.001771725 | 3.38E-06    |
| 0.126493658 | 0.06787463  | 0.334799981 | 0.412232564 |
| 0.387950622 | 0.337841232 | 0.23792411  | 0.00685724  |
| 0.009571311 | 0.10466813  | 0.086573008 | 0.004820849 |
| 0.369215489 | 0.031271673 | 0.378224133 | 0.104929023 |
| 0.034727472 | 0.042606362 | 0.001494224 | 0.016333143 |
| 0.174969389 | 0.04924199  | 0.030232111 | 0.082892305 |
| 0.066223659 | 0.033220798 | 0.005982352 | 0.050529228 |
| 0.174926954 | 0.025945365 | 0.044822488 | 0.082279088 |
| 0.234030697 | 0.072794547 | 0.261638487 | 0.26263583  |
| 0.048575015 | 0.03054074  | 0.07076807  | 0.204213446 |
| 0.342874703 | 0.268812664 | 0.003676686 | 0.413705505 |
| 0.326478861 | 0.265054169 | 0.389714327 | 0.193448047 |
| 0.02992916  | 0.135371053 | 0.08898079  | 0.113651692 |
| 0.046608899 | 0.152901569 | 0.052172453 | 0.01561691  |
| 0.146019321 | 0.315533921 | 0.318677823 | 0.028201948 |
| 0.229552446 | 0.063261029 | 0.028153427 | 0.324579538 |
| 0.021196608 | 0.007724693 | 0.228431644 | 0.288653318 |
| 0.000360269 | 0.021612399 | 0.33292756  | 0.034605889 |
| 0.352034718 | 0.337769451 | 0.279779704 | 0.047223914 |
| 1.06E-05    | 0.237425946 | 0.154194379 | 0.130423714 |
| 0.331389079 | 0.190903554 | 0.015712454 | 0.004725826 |
| 0.12407799  | 0.048448768 | 0.00850778  | 0.063169737 |
| 0.026629824 | 0.214541208 | 0.061452827 | 0.062345785 |
| 0.031794565 | 0.050718765 | 0.028602989 | 0.060674723 |
| 0.014149353 | 0.086339559 | 0.164624206 | 0.139849435 |
| 0.028098859 | 0.259260228 | 0.271075126 | 0.003433834 |
| 0.131189918 | 0.249463593 | 0.275643618 | 0.000118176 |
| 0.243041694 | 0.000246462 | 0.030715201 | 0.040890321 |
| 0.031865437 | 0.030432921 | 0.066707435 | 0.059031685 |
| 0.161564892 | 0.045588671 | 0.06225093  | 0.070451687 |
| 0.019448704 | 0.056369945 | 0.170355196 | 0.139632283 |
| 0.050465126 | 0.022783434 | 0.062342715 | 0.073818616 |
| 0.003221672 | 0.358270138 | 0.119090471 | 0.045017134 |
| 0.058306932 | 0.1111486   | 0.175658256 | 0.425804023 |
| 0.23775807  | 0.088433336 | 0.077908968 | 0.36808992  |
| 0.062204026 | 0.047507226 | 0.010455808 | 0.200873147 |
| 0.057797635 | 0.018808071 | 0.21439919  | 0.171948471 |

|             |             |             |             |
|-------------|-------------|-------------|-------------|
| 0.280326176 | 0.24167648  | 0.11382706  | 0.284675028 |
| 0.109956193 | 0.126305294 | 0.226758861 | 0.004566456 |
| 0.042981405 | 0.052638987 | 0.066411821 | 0.000225671 |
| 0.133381175 | 0.044694093 | 0.347746972 | 0.395008647 |
| 0.076508378 | 0.216078402 | 0.092921308 | 0.010624816 |
| 1           | 0.139068    | 0.047309956 | 0.056321637 |
| 0.031474728 | 0.089125763 | 0.106614197 | 0.277449732 |
| 0.290874118 | 0.037782796 | 0.050160826 | 0.064879035 |
| 0.095722249 | 0.348324517 | 0.038340337 | 0.270976594 |
| 0.023221497 | 0.269785376 | 0.069542127 | 0.036885443 |
| 0.399781952 | 0.016376888 | 0.397464669 | 0.082629929 |
| 0.065124568 | 0.307663073 | 0.099886439 | 0.050635553 |
| 0.007322619 | 0.043104807 | 0.144823244 | 0.025898595 |
| 0.0962287   | 0.00638615  | 0.004717527 | 0.128362514 |
| 0.082972352 | 0.331822604 | 0.173436704 | 0.043907794 |
| 0.144424827 | 0.023100478 | 0.084795332 | 0.418298781 |
| 0.385646127 | 0.024426349 | 0.098256844 | 0.154468719 |
| 0.013012424 | 0.258111616 | 0.001442416 | 0.22426668  |
| 0.260238541 | 0.090178443 | 0.004377632 | 0.000754788 |
| 0.05335883  | 0.233084071 | 0.029955998 | 0.318998248 |
| 0.041671116 | 0.220599193 | 0.283935664 | 0.071053297 |
| 0.382911607 | 0.008751135 | 0.208756813 | 0.005010628 |
| 0.092372686 | 0.152891567 | 0.152754655 | 0.025668318 |
| 0.074284388 | 0.183452773 | 0.050694069 | 0.002157045 |
| 0.023732945 | 0.001055342 | 0.257700495 | 0.391171396 |
| 0.117874976 | 0.093699256 | 0.114777014 | 0.096065691 |
| 0.231931825 | 0.016958515 | 0.22808175  | 0.000275546 |
| 0.149061265 | 0.050215307 | 0.293723171 | 0.064773649 |
| 0.157550264 | 0.003796616 | 0.090714764 | 0.352529101 |
| 0.025881023 | 0.108876539 | 0.07052603  | 0.410977328 |
| 0.284328802 | 0.11315585  | 0.019821112 | 0.258149798 |
| 0.023531422 | 0.190913776 | 0.370745486 | 0.026402135 |
| 0.043824881 | 0.274588409 | 0.030092878 | 0.084554391 |
| 0.261084693 | 0.279206164 | 0.369486021 | 0.002708028 |
| 0.080257295 | 0.247975011 | 0.332961474 | 0.115613767 |
| 0.020655687 | 0.041353832 | 0.034328248 | 0.392566788 |
| 0.009534049 | 0.031270303 | 0.187043765 | 0.041820943 |
| 0.106884536 | 0.263701489 | 0.025137612 | 0.001494046 |
| 0.016982858 | 0.077738407 | 0.043873375 | 0.085847314 |
| 0.126993774 | 0.033099316 | 0.218835431 | 0.010186487 |
| 0.001463352 | 0.276295299 | 0.001924033 | 0.174444012 |
| 0.184831515 | 0.065706596 | 0.105544781 | 0.099876306 |
| 0.148966504 | 0.167105264 | 0.000663295 | 0.229698874 |
| 0.011637417 | 0.060780952 | 0.027810446 | 0.032647924 |
| 0.006233412 | 0.334372415 | 0.343208258 | 0.137293643 |
| 0.055800915 | 0.06175366  | 0.324521738 | 0.016418785 |
| 0.125587327 | 0.080190392 | 0.307133539 | 0.046340816 |
| 0.243533296 | 0.177446126 | 0.148152766 | 0.214137357 |
| 0.06182044  |             |             |             |
| SAP30       | 0.276352991 | 0.248595564 | 0.303215265 |
| 0.192750229 | 0.10151613  | 0.1836889   | 0.241418204 |
| 0.23600907  | 0.239172541 | 0.133815382 | 0.161499782 |
| 0.175052057 | 0.010795817 | 0.2302578   | 0.20476544  |
| 0.128849309 | 0.15321903  | 0.243807239 | 0.0658038   |



|             |             |             |             |
|-------------|-------------|-------------|-------------|
| 0.187993939 | 0.09918879  | 0.094211523 | 0.236329571 |
| 0.099380743 | 0.329405651 | 0.260195502 | 0.112012045 |
| 0.248952926 | 0.060287939 | 0.158084106 | 0.088220371 |
| 0.287541311 | 0.100021436 | 0.10121991  | 0.196413188 |
| 0.168845027 | 0.003746026 | 0.344024737 | 0.140054481 |
| 0.032799838 | 0.277912499 | 0.182078576 | 0.166313578 |
| 0.183941741 | 0.263107571 | 0.0764923   | 0.142606099 |
| 0.226740101 | 0.169858632 | 0.31752087  | 0.189648191 |
| 0.150859006 | 0.245984159 | 0.214381969 | 0.014378103 |
| 0.06404593  | 0.007775039 | 0.037566115 | 0.296823698 |
| 0.240757338 | 0.184607428 | 0.074578731 | 0.203181064 |
| 0.150503018 | 0.155116935 | 0.197820313 | 0.156143464 |
| 0.270265102 | 0.032441121 | 0.15741727  | 0.134551169 |
| 0.203353982 | 0.257833691 | 0.274070984 | 0.307292743 |
| 0.131083423 | 0.172923937 | 0.126543417 | 0.075850833 |
| 0.264276301 | 0.33008882  | 0.236164276 | 0.331195498 |
| 0.023672377 | 0.093587838 | 0.089797706 | 0.179618268 |
| 0.187335134 | 0.224221238 | 0.187239634 | 0.300551094 |
| 0.238122188 | 0.18584429  | 0.195314568 | 0.321189341 |
| 0.22982277  | 0.06709211  | 0.174616998 | 0.034753919 |
| 0.118964283 | 0.112921771 | 0.319139603 | 0.230615752 |
| 0.104840155 | 0.330311996 | 0.361619664 | 0.081032333 |
| 0.124115115 | 0.313670982 | 0.087564176 | 0.168450951 |
| 0.180842561 | 0.242028188 | 0.211021972 | 0.205124201 |
| 0.117240604 | 0.261021641 | 0.204352663 | 0.224471277 |
| 0.047515484 | 0.290228285 | 0.263061626 | 0.153459415 |
| 0.320458889 | 0.154693051 | 0.085277794 | 0.224951431 |
| 0.199532098 | 0.218475487 | 0.263130564 | 0.147660395 |
| 0.17618609  | 0.335124238 | 0.290497913 | 0.209084008 |
| 0.237903319 | 0.053407481 | 0.123811644 | 0.208510899 |
| 0.18290469  | 0.25456488  | 0.061667464 | 0.350267509 |
| 0.249434723 | 0.171705097 | 0.30991894  | 0.368386789 |
| 0.206792237 | 0.280395098 | 0.234437191 | 0.223610947 |
| 0.325059259 | 0.34220284  | 0.249476019 | 0.121688407 |
| 0.306414073 | 0.231802454 | 0.043481114 | 0.224016014 |
| 0.250329407 | 0.004315466 | 0.196065785 | 0.212087262 |
| 0.293052595 | 0.172438173 | 0.245910132 | 0.233260616 |
| 0.291675733 | 0.289544602 | 0.008065197 | 0.140618172 |
| 0.319598586 | 0.233196327 | 0.121829001 | 0.132667727 |
| 0.119066187 | 0.217911024 | 0.171983411 | 0.105002653 |
| 0.29216278  | 0.206449273 | 0.220007979 | 0.214077939 |
| 0.221168804 | 0.277505742 | 0.097535818 | 0.356011618 |
| 0.188779298 | 0.303678752 | 0.309486185 | 0.208766033 |
| 0.170434034 | 0.184632118 | 0.228384109 | 0.131105313 |
| 0.206532375 | 0.228492983 | 0.074538822 | 0.12128598  |
| 0.322817844 | 0.165512694 | 0.270911251 | 0.313488604 |
| 0.168295015 | 0.312011645 | 0.182982552 | 0.167063899 |
| 0.132704711 | 0.400054697 | 0.163264069 | 0.227411564 |
| 0.130096598 | 0.327010887 | 0.194451761 | 0.24923867  |
| 0.235137711 | 0.113152703 | 0.248574018 | 0.051250527 |
| 0.116035088 | 0.083375225 | 0.030353391 | 0.123331113 |
| 0.33954365  | 0.161211266 | 0.154992302 | 0.135863184 |
| 0.289709251 | 0.274307864 | 0.122280196 | 0.319677974 |
| 0.332939883 | 0.1171761   | 0.192425066 | 0.180943997 |

|             |             |             |             |
|-------------|-------------|-------------|-------------|
| 0.081606821 | 0.221125437 | 0.190196583 | 0.063608847 |
| 0.228542264 | 0.030482746 | 0.054480912 | 0.207219819 |
| 0.071175075 | 0.063918734 | 0.212779323 | 0.133513689 |
| 0.136681527 | 0.355053618 | 0.255347611 | 0.009667766 |
| 0.11060837  | 0.046446905 | 0.16890184  | 0.16793473  |
| 0.243171255 | 0.190245095 | 0.089342928 | 0.099374559 |
| 0.333882362 | 0.290602219 | 0.221681631 | 0.245895715 |
| 0.114756411 | 0.26578576  | 0.18089335  | 0.211355772 |
| 0.208010505 | 0.1084662   | 0.018825846 | 0.197797172 |
| 0.196596544 | 0.121340913 | 0.332973078 | 0.165891322 |
| 0.14504127  | 0.137205192 | 0.062194811 | 0.243825444 |
| 0.319030621 | 0.32179959  | 0.147679621 | 0.150966329 |
| 0.220351836 | 0.24934828  | 0.193372708 | 0.26733826  |
| 0.133352186 | 0.11714633  | 0.110129391 | 0.164106927 |
| 0.280744639 | 0.069630057 | 0.25224652  | 0.026790315 |
| 0.001003991 | 0.29362695  | 0.307901701 | 0.131489849 |
| 0.0371722   | 0.149868969 | 0.159331808 | 0.267285881 |
| 0.223014164 | 0.237173226 | 0.242374676 | 0.132554006 |
| 0.274107109 | 0.112001904 | 0.103005799 | 0.130976923 |
| 0.250318333 | 0.071994415 | 0.143624693 | 0.342767489 |
| 0.302743551 | 0.054460064 | 0.211912481 | 0.009561484 |
| 0.268093985 | 0.213358927 | 0.334983025 | 0.322417973 |
| 0.194106169 | 0.333299932 | 0.307196148 | 0.165269257 |
| 0.170079492 | 0.25752196  | 0.009931576 | 0.239676935 |
| 0.268399235 | 0.257334977 | 0.273515863 | 0.305931281 |
| 0.212444772 | 0.179331441 | 0.169190972 | 0.243622422 |
| 0.246259253 | 0.312428541 | 0.054454584 | 0.152918746 |
| 0.020113667 | 0.178211795 | 0.121378197 | 0.273690363 |
| 0.153100606 | 0.209086722 | 0.214247646 | 0.11244671  |
| 0.18680445  | 0.035063975 | 0.206555304 | 0.154287936 |
| 0.140878214 | 0.182070553 | 0.120284883 | 0.097886128 |
| 0.308834792 | 0.269282567 | 0.090200306 | 0.293142275 |
| 0.168982421 | 0.35436576  | 0.13839147  | 0.155725119 |
| 0.239256414 | 0.060104725 | 0.200055933 | 0.022694747 |
| 0.09464667  | 0.285454258 | 0.126634983 | 0.290497264 |
| 0.222878239 | 0.115207375 | 0.273885744 | 0.289182057 |
| 0.305345373 | 0.237587544 | 0.26076027  | 0.064183077 |
| 0.279666184 | 0.010494595 | 0.263527527 | 0.2430394   |
| 0.143071076 | 0.012155571 | 0.023294217 | 0.204525135 |
| 0.135908316 | 0.321344824 | 0.260290393 | 0.171016326 |
| 0.176522081 | 0.325318517 | 0.2077983   | 0.054679451 |
| 0.174714144 | 0.102027503 | 0.047745473 | 0.312027783 |
| 0.186160783 | 0.175872496 | 0.189941207 | 0.313266458 |
| 0.1362364   | 0.202176861 | 0.301268401 | 0.011632543 |
| 0.144395906 | 0.346367448 | 0.378238854 | 0.276228692 |
| 0.278565079 | 0.141820797 | 0.115842165 | 0.13520766  |
| 0.187811023 | 0.346822646 | 0.10578178  | 0.338313986 |
| 0.285240264 | 0.149368378 | 0.218340734 | 0.277719113 |
| 0.255341252 | 0.28134179  | 0.206333365 | 0.184120322 |
| 0.087154428 | 0.001501942 | 0.237107835 | 0.221170593 |
| 0.025052029 | 0.120333176 | 0.25860119  | 0.165867402 |
| 0.136518158 | 0.207204312 | 0.056968546 | 0.056151733 |
| 0.18106943  | 0.151517284 | 0.080231775 | 0.243204947 |
| 0.103368326 | 0.058430294 | 0.150514661 | 0.180375491 |

|             |             |                      |             |
|-------------|-------------|----------------------|-------------|
| 0.11146074  | 0.294777726 | 0.333999072          | 0.188982691 |
| 0.159695721 | 0.130280023 | 0.244300168          | 0.283541342 |
| 0.200136623 | 0.216789996 | 0.173660216          | 0.055800389 |
| 0.276882964 | 0.136776761 | 0.215186112          | 0.272529738 |
| 0.328732631 | 0.27694833  | 0.31177195           | 0.10530972  |
| 0.233673886 | 0.151501866 | 0.085070266          | 0.074290483 |
| 0.260221169 | 0.337047555 | 0.285043539          | 0.066596783 |
| 0.27435114  | 0.217734842 | 0.131956652          | 0.239157493 |
| 0.104198471 | 0.235340418 | 0.134501564          | 0.346908859 |
| 0.14295992  | 0.056700049 | 0.234690413          | 0.226566515 |
| 0.236327126 | 0.035486574 | 0.257158569          | 0.204568107 |
| 0.243129138 | 0.112519904 | 0.153306392          | 0.274902474 |
| 0.301034149 | 0.287801754 | 0.280777902          | 0.172233936 |
| 0.190683737 | 0.142939642 | 0.099219482          | 0.260984106 |
| 0.22889112  | 0.157247403 | 0.301502936          | 0.189544378 |
| 0.299306371 | 0.121214249 | 0.080916663          | 0.135921045 |
| 0.223780623 | 0.193366965 | 0.172697805          | 0.270842602 |
| 0.241523621 | 0.331595306 | 0.240624539          | 0.169437445 |
| 0.154752391 | 0.336082346 | 0.334887279          | 0.199585445 |
| 0.044901271 | 0.256282779 | 0.174693948          | 0.168598806 |
| 0.004420697 | 0.019953388 | 0.220106918          | 0.165133492 |
| 0.294461427 | 0.217187944 | 0.273082456          | 0.193564204 |
| 0.000232923 | 0.132325004 | 0.163141966          | 0.151054785 |
| 0.242996485 | 0.241580555 | 0.122892959          | 0.157708653 |
| 0.221751103 | 0.340570037 | 0.158991717          | 0.167462768 |
| 0.040037731 | 0.210450141 | 0.225393021          | 0.233651872 |
| 0.133963685 | 0.322665702 | 0.052483986          | 0.207433223 |
| 0.035506614 | 0.229203268 | 0.210405511          | 0.147098918 |
| 0.047235155 | 0.204051914 | 0.221879579          | 0.210839944 |
| 0.095655788 | 0.198899515 | 0.212504535          | 0.023402223 |
| 0.156286812 | 0.093199091 | 0.126241 0.135109838 |             |
| 0.13905923  | 0.140170976 | 0.131460617          | 0.11410807  |
| 0.214574927 | 0.203669508 | 0.172666223          | 0.194598235 |
| 0.132328039 | 0.218030228 | 0.143206973          | 0.209956725 |
| 0.111341217 | 0.240526422 | 0.329842693          | 0.339376649 |
| 0.148896173 | 0.222094766 | 0.284117012          | 0.327104158 |
| 0.183221417 | 0.181707052 | 0.230485427          | 0.293518091 |
| 0.209601062 | 0.350096842 | 0.155350733          | 0.230380197 |
| 0.071930631 | 0.158500648 | 0.292346983          | 0.197135447 |
| 0.209556218 | 0.071281478 | 0.176680605          | 0.287930539 |
| 0.198280717 | 0.29949365  | 0.279614756          | 0.246179386 |
| 0.151920374 | 0.149195351 | 0.161214912          | 0.124935581 |
| 0.267495471 | 0.304477505 | 0.083775864          | 0.048921361 |
| 0.195585776 | 0.260302125 | 0.19501674           | 0.315544366 |
| 0.059929011 | 0.229927002 | 0.172234027          | 0.262200945 |
| 0.139068 1  | 0.281965841 | 0.180051064          | 0.036583308 |
| 0.20384385  | 0.119311001 | 0.231172598          | 0.162558482 |
| 0.167234474 | 0.087496777 | 0.213066314          | 0.188238455 |
| 0.306287638 | 0.323560623 | 0.306555725          | 0.152964969 |
| 0.061963781 | 0.208987925 | 0.140508507          | 0.130776975 |
| 0.246429571 | 0.26996374  | 0.245241586          | 0.123655733 |
| 0.312506655 | 0.30837047  | 0.202741012          | 0.201871071 |
| 0.095875841 | 0.029962756 | 0.181137545          | 0.17088012  |
| 0.078542305 | 0.005055591 | 0.023015985          | 0.180092237 |

|             |             |             |             |
|-------------|-------------|-------------|-------------|
| 0.136125949 | 0.215005867 | 0.181704885 | 0.076122736 |
| 0.177527414 | 0.02418749  | 0.242513692 | 0.32147335  |
| 0.353060164 | 0.167098695 | 0.23727861  | 0.221086086 |
| 0.199257849 | 0.22497861  | 0.011546872 | 0.147575974 |
| 0.126921422 | 0.135267692 | 0.193494679 | 0.164117042 |
| 0.038604482 | 0.173212209 | 0.306481004 | 0.197659216 |
| 0.03542775  | 0.1933212   | 0.170645434 | 0.2796795   |
| 0.361258824 | 0.110277879 | 0.167060206 | 0.218068282 |
| 0.222626511 | 0.106588609 | 0.140765082 | 0.101130139 |
| 0.076135587 | 0.177523735 | 0.05367458  | 0.174240944 |
| 0.113119428 | 0.018527243 | 0.342374154 | 0.35732836  |
| 0.092635962 | 0.289389768 | 0.111788956 | 0.178242095 |
| 0.216264877 | 0.099404067 | 0.133393521 | 0.069208855 |
| 0.112516633 | 0.2009601   | 0.237050651 | 0.06283719  |
| 0.173429582 | 0.138860998 | 0.093788829 | 0.393144363 |
| 0.112351215 | 0.247478994 | 0.099727238 | 0.283168162 |
| 0.222128421 | 0.33813226  | 0.085353725 | 0.17772395  |
| 0.300260146 | 0.162251867 | 0.279932173 | 0.145352547 |
| 0.052782513 | 0.165518162 | 0.175279987 | 0.074511076 |
| 0.246513521 | 0.149667794 | 0.284299037 | 0.085081197 |
| 0.21725591  | 0.167104269 | 0.250125353 | 0.189324619 |
| 0.045586188 | 0.058047341 | 0.101839018 | 0.305618607 |
| 0.182373816 | 0.073520584 | 0.241907063 | 0.048121155 |
| 0.17944526  | 0.209271646 | 0.083063648 | 0.108479318 |
| 0.170609206 | 0.152487707 | 0.271295492 | 0.180051344 |
| 0.138746523 | 0.08703723  | 0.252018128 | 0.114355889 |
| 0.091209884 | 0.274849942 | 0.002518508 | 0.242664941 |
| 0.151147931 | 0.197927223 | 0.116471431 | 0.315143359 |
| 0.210366109 | 0.262678207 | 0.0432039   | 0.180161559 |
| 0.019993693 | 0.119984994 | 0.094003065 | 0.076792501 |
| 0.262594665 | 0.281345525 | 0.229850459 | 0.226361652 |
| 0.106947091 | 0.086849981 | 0.266420701 | 0.028346118 |
| 0.075795704 | 0.08994607  | 0.21127405  | 0.043758545 |
| 0.148590826 | 0.130839484 | 0.099899217 | 0.220120396 |
| 0.206323251 |             |             |             |
| SAR1B       | 0.288291122 | 0.190072128 | 0.21099702  |
| 0.203333377 | 0.112066473 | 0.112432712 | 0.323255879 |
| 0.315740025 | 0.176458583 | 0.051503869 | 0.144501559 |
| 0.273657962 | 0.018230497 | 0.225067121 | 0.321171675 |
| 0.098691829 | 0.315565187 | 0.32625785  | 0.068507448 |
| 0.144452487 | 0.122972413 | 0.075786774 | 0.127975372 |
| 0.116982902 | 0.333436089 | 0.144554335 | 0.070524429 |
| 0.205000433 | 0.030965989 | 0.110070758 | 0.030583206 |
| 0.301355066 | 0.103014893 | 0.06049984  | 0.213559928 |
| 0.116464108 | 0.010752874 | 0.318139701 | 0.169790508 |
| 0.037958902 | 0.31496792  | 0.069973187 | 0.207547862 |
| 0.082405084 | 0.261289185 | 0.026617604 | 0.099719272 |
| 0.134289676 | 0.164945832 | 0.230881655 | 0.127359578 |
| 0.096929667 | 0.203978159 | 0.114830266 | 0.025751811 |
| 0.048960533 | 0.005945847 | 0.027079253 | 0.249117221 |
| 0.280401982 | 0.314723543 | 0.037536378 | 0.172464623 |
| 0.097575281 | 0.131875746 | 0.224117807 | 0.074698593 |
| 0.241171863 | 0.038317359 | 0.109945626 | 0.136147342 |
| 0.130272609 | 0.227446774 | 0.316309936 | 0.213204252 |

|              |             |             |             |
|--------------|-------------|-------------|-------------|
| 0.086922346  | 0.258682824 | 0.128888784 | 0.064110112 |
| 0.183894456  | 0.311505103 | 0.234667932 | 0.260423272 |
| 0.041895181  | 0.082276241 | 0.101037327 | 0.21744796  |
| 0.160529992  | 0.25699908  | 0.164389263 | 0.278966902 |
| 0.239682573  | 0.081932092 | 0.14385942  | 0.250283551 |
| 0.190527     | 0.052460577 | 0.074929869 | 0.04687859  |
| 0.106733768  | 0.100947352 | 0.278298413 | 0.237973519 |
| 0.110266068  | 0.247904726 | 0.283238923 | 0.074593063 |
| 0.138495305  | 0.261539291 | 0.11456376  | 0.148226725 |
| 0.120616404  | 0.211031206 | 0.161009125 | 0.198796705 |
| 0.088311692  | 0.230909867 | 0.157104569 | 0.216455142 |
| 0.016671046  | 0.244555611 | 0.260221152 | 0.322424683 |
| 0.246262938  | 0.307966062 | 0.097371601 | 0.281876465 |
| 0.180784671  | 0.192108381 | 0.276078979 | 0.201522626 |
| 0.182305584  | 0.254830522 | 0.237754249 | 0.192575857 |
| 0.311169225  | 0.04546632  | 0.088104906 | 0.180253992 |
| 0.158652874  | 0.29398164  | 0.066923531 | 0.297401644 |
| 0.2728482    | 0.162025894 | 0.244138017 | 0.332304933 |
| 0.22232102   | 0.279685285 | 0.174189238 | 0.286555289 |
| 0.285547514  | 0.284604833 | 0.24926348  | 0.104169475 |
| 0.279822448  | 0.157206866 | 0.048774629 | 0.20692074  |
| 0.274013129  | 0.010631466 | 0.170315294 | 0.188065521 |
| 0.234881504  | 0.150386714 | 0.243164859 | 0.211879843 |
| 0.235416454  | 0.293137212 | 0.004821348 | 0.172688969 |
| 0.264510566  | 0.235213466 | 0.237323303 | 0.077245665 |
| 0.106982626  | 0.133204527 | 0.142935912 | 0.072768944 |
| 0.310049235  | 0.189165915 | 0.185302168 | 0.175088509 |
| 0.123070205  | 0.323185631 | 0.062214108 | 0.280141872 |
| 0.306102241  | 0.274796831 | 0.232491438 | 0.221580665 |
| 0.0711159418 | 0.281535962 | 0.137657147 | 0.110000657 |
| 0.282790885  | 0.140694878 | 0.04880704  | 0.113442412 |
| 0.24975877   | 0.09035694  | 0.264818009 | 0.253151475 |
| 0.316656666  | 0.350876235 | 0.231387877 | 0.252636283 |
| 0.191422638  | 0.362768682 | 0.112786101 | 0.209301575 |
| 0.102726455  | 0.262696656 | 0.139769466 | 0.266371905 |
| 0.298969822  | 0.084863232 | 0.286488327 | 0.096853108 |
| 0.103867083  | 0.042226338 | 0.028317019 | 0.075408711 |
| 0.351557693  | 0.184225188 | 0.116246255 | 0.136657357 |
| 0.18999907   | 0.226659021 | 0.09230038  | 0.332802504 |
| 0.259694986  | 0.129737446 | 0.201882847 | 0.095177586 |
| 0.113621361  | 0.1741974   | 0.166781972 | 0.121274818 |
| 0.180855092  | 0.044498344 | 0.043648557 | 0.193187377 |
| 0.057892423  | 0.087760974 | 0.191857965 | 0.134085292 |
| 0.097598945  | 0.308430487 | 0.244924812 | 0.010910867 |
| 0.087871618  | 0.111132152 | 0.213961527 | 0.068932482 |
| 0.237804219  | 0.236683242 | 0.092764185 | 0.116644534 |
| 0.227319398  | 0.254530469 | 0.215343244 | 0.222058494 |
| 0.071944674  | 0.251452926 | 0.168213297 | 0.221038955 |
| 0.170213549  | 0.066236639 | 0.019403391 | 0.16855874  |
| 0.181078138  | 0.074234427 | 0.234502104 | 0.12832539  |
| 0.075445266  | 0.113099451 | 0.127932108 | 0.23943236  |
| 0.317724398  | 0.233592915 | 0.279857587 | 0.17258469  |
| 0.228225454  | 0.24305021  | 0.187484007 | 0.265585687 |
| 0.056578121  | 0.095209359 | 0.093450852 | 0.19933997  |

|             |             |             |             |
|-------------|-------------|-------------|-------------|
| 0.277251325 | 0.102973197 | 0.283859744 | 0.025492265 |
| 0.000750414 | 0.279690289 | 0.279862933 | 0.246032368 |
| 0.058982624 | 0.079177365 | 0.12781585  | 0.238994129 |
| 0.328640298 | 0.24843749  | 0.237719377 | 0.133253726 |
| 0.240263863 | 0.095545469 | 0.076536756 | 0.108309595 |
| 0.270633726 | 0.130463223 | 0.241938734 | 0.316263569 |
| 0.206168877 | 0.061065544 | 0.167580087 | 0.01988825  |
| 0.297244062 | 0.138842734 | 0.297518127 | 0.377542178 |
| 0.207671481 | 0.344367279 | 0.242712886 | 0.068195464 |
| 0.188763994 | 0.315944658 | 0.035391738 | 0.208612808 |
| 0.233579998 | 0.229572763 | 0.231925792 | 0.255964798 |
| 0.195956672 | 0.146123009 | 0.159373945 | 0.134108132 |
| 0.325982504 | 0.253288606 | 0.061868058 | 0.168667108 |
| 0.023428657 | 0.195187698 | 0.132018151 | 0.304678967 |
| 0.132490428 | 0.197906545 | 0.306496125 | 0.101045071 |
| 0.176992987 | 0.026370307 | 0.158937956 | 0.216859451 |
| 0.166860322 | 0.222948479 | 0.063781191 | 0.070299084 |
| 0.252945595 | 0.264559346 | 0.057846668 | 0.254644127 |
| 0.170343882 | 0.213650882 | 0.140470492 | 0.157678576 |
| 0.335644834 | 0.032784035 | 0.122813208 | 0.006598399 |
| 0.068195627 | 0.262671894 | 0.087645112 | 0.247239207 |
| 0.221743876 | 0.155037664 | 0.252994421 | 0.264641846 |
| 0.227771012 | 0.221388489 | 0.237969247 | 0.062754263 |
| 0.243636208 | 0.007572921 | 0.228959754 | 0.192334659 |
| 0.064681053 | 0.01369334  | 0.074674988 | 0.183969508 |
| 0.098110363 | 0.215505033 | 0.299845623 | 0.091285243 |
| 0.294605286 | 0.231055223 | 0.308934119 | 0.088420109 |
| 0.10846576  | 0.157303125 | 0.086271479 | 0.249012081 |
| 0.220999795 | 0.234739667 | 0.098853805 | 0.2647603   |
| 0.100374136 | 0.312581767 | 0.255387398 | 0.03320796  |
| 0.151468868 | 0.275391357 | 0.303882737 | 0.233769611 |
| 0.280959883 | 0.129440455 | 0.04821271  | 0.096613207 |
| 0.186838147 | 0.203510231 | 0.061006556 | 0.217464872 |
| 0.221299758 | 0.115126449 | 0.254764829 | 0.277888147 |
| 0.257393509 | 0.261767786 | 0.313503338 | 0.169476193 |
| 0.120216951 | 0.010447274 | 0.115626426 | 0.240676702 |
| 0.033218284 | 0.090311374 | 0.287778812 | 0.146057678 |
| 0.168423602 | 0.25145297  | 0.051960335 | 0.059688337 |
| 0.190654999 | 0.133989236 | 0.09559072  | 0.236994473 |
| 0.127332284 | 0.10354057  | 0.230902525 | 0.285349834 |
| 0.099456109 | 0.258577412 | 0.332198639 | 0.276835132 |
| 0.081899243 | 0.086472322 | 0.319988476 | 0.284959484 |
| 0.196986214 | 0.19870216  | 0.291532148 | 0.145046728 |
| 0.296880557 | 0.139233998 | 0.21261405  | 0.216902678 |
| 0.283264886 | 0.277568226 | 0.332786134 | 0.226771827 |
| 0.315782134 | 0.155033955 | 0.093691659 | 0.18213695  |
| 0.234107016 | 0.224122467 | 0.240181752 | 0.057726907 |
| 0.304938044 | 0.233779477 | 0.285919223 | 0.323822944 |
| 0.076544982 | 0.296837153 | 0.234827188 | 0.219563538 |
| 0.148934447 | 0.057659245 | 0.320278807 | 0.278212711 |
| 0.223664711 | 0.033915988 | 0.30304727  | 0.155263377 |
| 0.199716601 | 0.046125176 | 0.121253854 | 0.304700735 |
| 0.285454487 | 0.273380268 | 0.145374799 | 0.159046686 |
| 0.150652552 | 0.069475271 | 0.143151659 | 0.187578227 |

|             |             |             |             |
|-------------|-------------|-------------|-------------|
| 0.227413837 | 0.10246855  | 0.250838828 | 0.241720346 |
| 0.286099686 | 0.095919778 | 0.063480967 | 0.12378943  |
| 0.27721546  | 0.11849654  | 0.218918735 | 0.312061656 |
| 0.30016652  | 0.316060874 | 0.202593444 | 0.271970539 |
| 0.091010577 | 0.211935496 | 0.211764106 | 0.180936375 |
| 0.059374271 | 0.29561252  | 0.07205996  | 0.149591941 |
| 0.013109733 | 0.026087974 | 0.216898196 | 0.220994834 |
| 0.2817269   | 0.208586013 | 0.282640928 | 0.175505302 |
| 0.000801101 | 0.097499188 | 0.138589685 | 0.102191677 |
| 0.198030138 | 0.224062084 | 0.138342085 | 0.309799908 |
| 0.291406884 | 0.227990384 | 0.261638447 | 0.097350211 |
| 0.030137494 | 0.126268435 | 0.29685492  | 0.224787161 |
| 0.213818109 | 0.210152526 | 0.052803947 | 0.229526985 |
| 0.046232959 | 0.298995921 | 0.246846143 | 0.059633086 |
| 0.039609086 | 0.215101946 | 0.174180875 | 0.265141715 |
| 0.07836238  | 0.195622573 | 0.223724589 | 0.035661585 |
| 0.127750924 | 0.206853867 | 0.219487537 | 0.205186894 |
| 0.224725323 | 0.217487399 | 0.18520026  | 0.125647567 |
| 0.15144727  | 0.247156511 | 0.194039246 | 0.24885089  |
| 0.233567391 | 0.242341641 | 0.113646501 | 0.132456891 |
| 0.131814387 | 0.297712035 | 0.303501288 | 0.310333762 |
| 0.282683867 | 0.191488299 | 0.33979609  | 0.23355241  |
| 0.249877451 | 0.124678674 | 0.305165844 | 0.223438269 |
| 0.253839272 | 0.248743727 | 0.14433568  | 0.183817093 |
| 0.034559958 | 0.110036486 | 0.27524287  | 0.121535829 |
| 0.260882784 | 0.102873493 | 0.096552211 | 0.155077253 |
| 0.128920696 | 0.324932881 | 0.327663605 | 0.253483061 |
| 0.128040231 | 0.101378971 | 0.057525866 | 0.269196714 |
| 0.273976252 | 0.276841609 | 0.107597447 | 0.082275455 |
| 0.178708294 | 0.167209036 | 0.173565256 | 0.254672894 |
| 0.046813748 | 0.277893674 | 0.066714493 | 0.304940761 |
| 0.047309956 | 0.281965841 | 1           | 0.132477895 |
| 0.028482358 | 0.266098903 | 0.136178308 | 0.112586987 |
| 0.134419236 | 0.119458194 | 0.109110316 | 0.225129178 |
| 0.212599847 | 0.231453957 | 0.281539785 | 0.247984623 |
| 0.080788122 | 0.099276718 | 0.0953008   | 0.155219944 |
| 0.199570373 | 0.214910627 | 0.290197232 | 0.214826898 |
| 0.11255723  | 0.289760814 | 0.321334065 | 0.170236756 |
| 0.161213578 | 0.211023522 | 0.028163663 | 0.095007534 |
| 0.215078628 | 0.056655579 | 0.002340294 | 0.035675189 |
| 0.216976628 | 0.092165139 | 0.142676013 | 0.171104864 |
| 0.099893825 | 0.22737533  | 0.02487184  | 0.193757676 |
| 0.237554311 | 0.288610827 | 0.17520898  | 0.295328386 |
| 0.219150934 | 0.322830305 | 0.119622521 | 0.016005946 |
| 0.091792502 | 0.071207099 | 0.069286497 | 0.329276164 |
| 0.267665955 | 0.032996153 | 0.10176521  | 0.218845469 |
| 0.19970164  | 0.026513784 | 0.105185817 | 0.126937875 |
| 0.271291199 | 0.29712991  | 0.25013199  | 0.156697901 |
| 0.195331102 | 0.229192289 | 0.074162397 | 0.087075565 |
| 0.136544821 | 0.075592637 | 0.185395521 | 0.062159403 |
| 0.31324248  | 0.146548094 | 0.031304851 | 0.341672877 |
| 0.27174407  | 0.071300084 | 0.330463555 | 0.049036915 |
| 0.230739385 | 0.222282136 | 0.131522717 | 0.072897155 |
| 0.162664315 | 0.093466492 | 0.273360734 | 0.210616118 |

|             |             |              |             |
|-------------|-------------|--------------|-------------|
| 0.03502621  | 0.111388555 | 0.26005357   | 0.088884944 |
| 0.317046266 | 0.108386213 | 0.299690843  | 0.054246875 |
| 0.224677429 | 0.183328445 | 0.228105224  | 0.125614029 |
| 0.100015005 | 0.274083451 | 0.075286474  | 0.258693565 |
| 0.254884541 | 0.067893127 | 0.169129333  | 0.233874594 |
| 0.067315779 | 0.232494498 | 0.077848523  | 0.255160181 |
| 0.234995726 | 0.258833322 | 0.157091765  | 0.223256165 |
| 0.263825633 | 0.07807891  | 0.063230769  | 0.148876872 |
| 0.232397862 | 0.245986563 | 0.080690154  | 0.215585436 |
| 0.050924716 | 0.20174081  | 0.095688366  | 0.152137567 |
| 0.245435689 | 0.258465317 | 0.114749473  | 0.2979028   |
| 0.201279609 | 0.117030338 | 0.114739131  | 0.305891051 |
| 0.212414709 | 0.172889244 | 0.302318737  | 0.004972455 |
| 0.14725563  | 0.126469171 | 0.243497049  | 0.105384263 |
| 0.313418556 | 0.15697811  | 0.134477799  | 0.069351798 |
| 0.183089066 | 0.031999393 | 0.123414176  | 0.134267919 |
| 0.068337267 | 0.315084272 | 0.255802411  | 0.226034148 |
| 0.189160037 | 0.070697112 | 0.051530729  | 0.239061088 |
| 0.036397918 | 0.042586731 | 0.064138575  | 0.118256476 |
| 0.04725671  | 0.064808132 | 0.072309158  | 0.061328924 |
| 0.18049869  | 0.20400077  |              |             |
| SASS6       | 0.077645159 | 0.437135563  | 0.063534813 |
| 0.14171863  | 0.30216474  | 0.37893923   | 0.060092821 |
| 0.128810213 | 0.335187089 | 0.341343834  | 0.335381548 |
| 0.016490435 | 0.120594114 | 0.449134729  | 0.054733361 |
| 0.365105146 | 0.033083022 | 0.105374492  | 0.090881158 |
| 0.242848573 | 0.268375857 | 0.335134385  | 0.35495706  |
| 0.286227296 | 0.17934104  | 0.330723892  | 0.39043995  |
| 0.512548501 | 0.304658828 | 0.40445898   | 0.252985807 |
| 0.401025396 | 0.313049619 | 0.390198633  | 0.01856663  |
| 0.383983731 | 0.020316826 | 0.431241764  | 0.249320703 |
| 0.188334958 | 0.327251097 | 0.359554519  | 0.226432315 |
| 0.376121202 | 0.038415935 | 0.266428383  | 0.385796596 |
| 0.334252121 | 0.288424719 | 0.0711075781 | 0.399257481 |
| 0.369550293 | 0.313141025 | 0.372181997  | 0.002599924 |
| 0.321433241 | 0.130858109 | 0.263680606  | 0.514363512 |
| 0.187573581 | 0.117185985 | 0.327412105  | 0.259466133 |
| 0.374954069 | 0.353911014 | 0.245709054  | 0.377973911 |
| 0.497806947 | 0.201499893 | 0.411288008  | 0.172921158 |
| 0.352772224 | 0.038509596 | 0.149735471  | 0.095525187 |
| 0.388626867 | 0.19028128  | 0.327387973  | 0.328477669 |
| 0.440055363 | 0.51451889  | 0.231067661  | 0.509691712 |
| 0.119011973 | 0.336512546 | 0.293195672  | 0.276681182 |
| 0.338055795 | 0.091221235 | 0.36660403   | 0.519707685 |
| 0.056429154 | 0.381285782 | 0.361975823  | 0.123806763 |
| 0.433653914 | 0.321407807 | 0.390938339  | 0.196656278 |
| 0.356899936 | 0.323340577 | 0.481401298  | 0.260796353 |
| 0.319671032 | 0.076250578 | 0.490533436  | 0.322651065 |
| 0.28245077  | 0.08739971  | 0.227973458  | 0.461795777 |
| 0.383791823 | 0.499155322 | 0.419111082  | 0.322809886 |
| 0.363204328 | 0.504159761 | 0.368002264  | 0.412093236 |
| 0.230106212 | 0.533950102 | 0.186588611  | 0.039911445 |
| 0.080604944 | 0.08580048  | 0.252655812  | 0.270601451 |
| 0.474834715 | 0.319071487 | 0.191172496  | 0.222011837 |



|             |             |             |             |
|-------------|-------------|-------------|-------------|
| 0.451149315 | 0.48620359  | 0.533884756 | 0.384608144 |
| 0.039482551 | 0.288328058 | 0.368312496 | 0.282650021 |
| 0.340114125 | 0.116264202 | 0.269261813 | 0.506666393 |
| 0.361241671 | 0.410654514 | 0.176937419 | 0.498513115 |
| 0.201092149 | 0.50779619  | 0.46365497  | 0.159055776 |
| 0.520013444 | 0.497474167 | 0.509849928 | 0.37650377  |
| 0.475816233 | 0.32796087  | 0.0696851   | 0.358718295 |
| 0.476198316 | 0.016805347 | 0.487477261 | 0.509879285 |
| 0.508249506 | 0.455799024 | 0.521013129 | 0.517930815 |
| 0.514239174 | 0.077565693 | 0.040157143 | 0.264338038 |
| 0.511459649 | 0.376397687 | 0.138386993 | 0.397590844 |
| 0.341926929 | 0.365268176 | 0.404602984 | 0.295359619 |
| 0.502025436 | 0.458287952 | 0.503432385 | 0.358190765 |
| 0.311084803 | 0.30128787  | 0.378704389 | 0.472259078 |
| 0.047507341 | 0.117237896 | 0.057430274 | 0.284096902 |
| 0.372705206 | 0.164415979 | 0.360977725 | 0.342566129 |
| 0.178225139 | 0.337896898 | 0.361108331 | 0.356498354 |
| 0.059110467 | 0.406386376 | 0.170647731 | 0.170324295 |
| 0.039376936 | 0.132899673 | 0.17083137  | 0.150380898 |
| 0.235447683 | 0.234310182 | 0.408800785 | 0.50025825  |
| 0.350944881 | 0.174505942 | 0.38819504  | 0.472115404 |
| 0.401177108 | 0.371381725 | 0.209067477 | 0.010600005 |
| 0.255822174 | 0.346765719 | 0.225268397 | 0.404643126 |
| 0.176704555 | 0.219222388 | 0.358716629 | 0.360108198 |
| 0.269295395 | 0.152106618 | 0.351927914 | 0.417074502 |
| 0.147551814 | 0.292750975 | 0.42716876  | 0.392419031 |
| 0.003717949 | 0.307372975 | 0.422522511 | 0.152094932 |
| 0.293353311 | 0.148366875 | 0.277688745 | 0.458000248 |
| 0.312384361 | 0.233717381 | 0.504481888 | 0.363315305 |
| 0.337306525 | 0.224649713 | 0.527736759 | 0.061176703 |
| 0.351061736 | 0.060679745 | 0.254480711 | 0.362382681 |
| 0.233432617 | 0.262990187 | 0.310848897 | 0.283022644 |
| 0.132932334 | 0.51793194  | 0.37882149  | 0.512734259 |
| 0.361610872 | 0.530231036 | 0.447716546 | 0.424177233 |
| 0.337535861 | 0.372811244 | 0.165700861 | 0.410916127 |
| 0.454225115 | 0.325341625 | 0.078992398 | 0.424544777 |
| 0.366883316 | 0.376538162 | 0.143263024 | 0.486726458 |
| 0.489706022 | 0.480919581 | 0.135167464 | 0.335057034 |
| 0.345508739 | 0.224881035 | 0.403602178 | 0.526244618 |
| 0.341792772 | 0.33374736  | 0.322188355 | 0.374764084 |
| 0.168882119 | 0.212089228 | 0.306589647 | 0.223336246 |
| 0.01852877  | 0.087685861 | 0.068521652 | 0.152236358 |
| 0.187230086 | 0.408651054 | 0.36940055  | 0.519232585 |
| 0.10995178  | 0.410992061 | 0.228006405 | 0.265747696 |
| 0.413957201 | 0.343184143 | 0.377294318 | 0.367380109 |
| 0.230611248 | 0.018982345 | 0.106346273 | 0.515120785 |
| 0.046369358 | 0.25528287  | 0.310696624 | 0.00224318  |
| 0.045435976 | 0.413741978 | 0.093535192 | 0.184864371 |
| 0.473674321 | 0.192601377 | 0.197624591 | 0.34061161  |
| 0.31910939  | 0.093920569 | 0.003278633 | 0.495173939 |
| 0.497956237 | 0.466483248 | 0.496282601 | 0.467289824 |
| 0.445281632 | 0.377542957 | 0.381049055 | 0.347472071 |
| 0.106942315 | 0.101705607 | 0.218214512 | 0.268483653 |
| 0.005107847 | 0.345054331 | 0.305594629 | 0.133630288 |

|             |             |             |             |
|-------------|-------------|-------------|-------------|
| 0.39170834  | 0.282145333 | 0.037328038 | 0.346804521 |
| 0.021509593 | 0.234989196 | 0.288663581 | 0.217011721 |
| 0.320199475 | 0.015216635 | 0.239522218 | 0.314346389 |
| 0.430528778 | 0.32019808  | 0.385042615 | 0.536766384 |
| 0.304885947 | 0.131150781 | 0.298387661 | 0.361814827 |
| 0.070217195 | 0.139435557 | 0.343344556 | 0.058450122 |
| 0.244522349 | 0.4585602   | 0.382103119 | 0.076797841 |
| 0.248857885 | 0.004895842 | 0.349230363 | 0.529047076 |
| 0.479643194 | 0.520855026 | 0.501683928 | 0.279453501 |
| 0.507587202 | 0.155768034 | 0.535183079 | 0.391760863 |
| 0.375619772 | 0.001006724 | 0.004745723 | 0.492272454 |
| 0.373370006 | 0.064032604 | 0.150072289 | 0.354144603 |
| 0.100604852 | 0.15476241  | 0.069467948 | 0.193323191 |
| 0.401895422 | 0.231566827 | 0.189393744 | 0.473759859 |
| 0.228053837 | 0.219976908 | 0.381702508 | 0.089494115 |
| 0.392254077 | 0.051223413 | 0.091159311 | 0.007760328 |
| 0.341287061 | 0.112650168 | 0.472634337 | 0.515307005 |
| 0.487891681 | 0.367254807 | 0.361804433 | 0.32972357  |
| 0.436343733 | 0.102621742 | 0.389137812 | 0.116983948 |
| 0.492679089 | 0.355898428 | 0.281953191 | 0.275645918 |
| 0.490654394 | 0.462798931 | 0.032582533 | 0.364027629 |
| 0.014228215 | 0.001925971 | 0.358548825 | 0.246284717 |
| 0.09108014  | 0.348869471 | 0.22841938  | 0.248746152 |
| 0.2333895   | 0.030957449 | 0.280599688 | 0.259228368 |
| 0.276235613 | 0.335131655 | 0.269446449 | 0.2353724   |
| 0.266405658 | 0.140988918 | 0.198141566 | 0.150821926 |
| 0.274489406 | 0.293305478 | 0.181383695 | 0.021694591 |
| 0.408055163 | 0.389497041 | 0.057160137 | 0.155325818 |
| 0.422907072 | 0.490084487 | 0.039375379 | 0.009423914 |
| 0.237328954 | 0.30371258  | 0.497020858 | 0.509124508 |
| 0.524138737 | 0.51100821  | 0.382098101 | 0.117477996 |
| 0.068795017 | 0.30131004  | 0.292739215 | 0.102472276 |
| 0.512195024 | 0.070748562 | 0.492515826 | 0.315442509 |
| 0.115238152 | 0.211181895 | 0.032317126 | 0.084908533 |
| 0.376063385 | 0.16620524  | 0.168687476 | 0.149360724 |
| 0.284554725 | 0.281869549 | 0.050047709 | 0.182291751 |
| 0.308896017 | 0.204458051 | 0.152277939 | 0.317398585 |
| 0.333605677 | 0.281129678 | 0.394010199 | 0.429759954 |
| 0.126194367 | 0.115323071 | 0.273161995 | 0.360707297 |
| 0.434777929 | 0.398066199 | 0.027890194 | 0.466949658 |
| 0.489541364 | 0.404745776 | 0.503901922 | 0.363150076 |
| 0.086514451 | 0.352034302 | 0.330611416 | 0.320545655 |
| 0.176994422 | 0.377535895 | 0.231877459 | 0.063531132 |
| 0.280091937 | 0.475954746 | 0.413084854 | 0.154565182 |
| 0.406645396 | 0.134778967 | 0.062729135 | 0.449981877 |
| 0.194464594 | 0.084118111 | 0.368856489 | 0.42269741  |
| 0.00263526  | 0.171762596 | 0.495322913 | 0.229245674 |
| 0.516908605 | 0.480785275 | 0.424594922 | 0.268967763 |
| 0.003151097 | 0.389831625 | 0.34137855  | 0.372944025 |
| 0.427025963 | 0.315867049 | 0.176257741 | 0.069043393 |
| 0.250960296 | 0.084875525 | 0.120567105 | 0.349491703 |
| 0.194828618 | 0.371649664 | 0.179350461 | 0.20585155  |
| 0.192585589 | 0.098991679 | 0.267896665 | 0.239180792 |
| 0.181453964 | 0.212334093 | 0.302468846 | 0.334802061 |

|             |             |             |             |
|-------------|-------------|-------------|-------------|
| 0.19922482  | 0.422888328 | 0.369915273 | 0.027387843 |
| 0.360718759 | 0.393637981 | 0.43165546  | 0.001504485 |
| 0.386777004 | 0.006419718 | 0.1819942   | 0.202142723 |
| 0.189927982 | 0.195336671 | 0.240279318 | 0.297796655 |
| 0.331279092 | 0.212638326 | 0.26072007  | 0.215189457 |
| 0.156413092 | 0.225989417 | 0.375596007 | 0.353257955 |
| 0.263367583 | 0.124171703 | 0.099812389 | 0.106882221 |
| 0.050388419 | 0.47271467  | 0.219079126 | 0.078629976 |
| 0.209890885 | 0.360610519 | 0.324458731 | 0.506269045 |
| 0.4059713   | 0.114586217 | 0.320234349 | 0.443354782 |
| 0.275501554 | 0.301899166 | 0.068168761 | 0.383772047 |
| 0.219024161 | 0.205410395 | 0.400759234 | 0.293771573 |
| 0.377238253 | 0.384951538 | 0.211393682 | 0.435390205 |
| 0.358092849 | 0.340957162 | 0.342830457 | 0.07730779  |
| 0.167116446 | 0.130244093 | 0.258744262 | 0.001748153 |
| 0.316069601 | 0.267498019 | 0.464974541 | 0.493348513 |
| 0.314326767 | 0.368204299 | 0.332360006 | 0.084464617 |
| 0.32389455  | 0.180051064 | 0.132477895 | 1           |
| 0.250301131 | 0.182984572 | 0.289933851 | 0.334455912 |
| 0.397737021 | 0.393751529 | 0.262418351 | 0.237393417 |
| 0.236719462 | 0.199438711 | 0.480765419 | 0.132714129 |
| 0.408606091 | 0.191749222 | 0.358386033 | 0.268362486 |
| 0.210312746 | 0.528030618 | 0.063635171 | 0.532588629 |
| 0.305675149 | 0.128710332 | 0.481856373 | 0.302440983 |
| 0.314203822 | 0.123023931 | 0.221751187 | 0.386241735 |
| 0.223755602 | 0.35617462  | 0.022254758 | 0.06553101  |
| 0.286532249 | 0.32312923  | 0.387713395 | 0.338637095 |
| 0.252570589 | 0.297011342 | 0.214387098 | 0.280701268 |
| 0.491681048 | 0.50163549  | 0.227271603 | 0.221838275 |
| 0.306116138 | 0.096727477 | 0.372316698 | 0.022413537 |
| 0.389744675 | 0.404119028 | 0.373018508 | 0.052675894 |
| 0.018388918 | 0.241461686 | 0.387827378 | 0.075402743 |
| 0.480641156 | 0.257174459 | 0.353596998 | 0.406177452 |
| 0.171456097 | 0.500037548 | 0.11807048  | 0.363081746 |
| 0.056095439 | 0.24338441  | 0.379714406 | 0.371956684 |
| 0.209953749 | 0.296396611 | 0.335118317 | 0.247203241 |
| 0.030143317 | 0.249880649 | 0.001391854 | 0.393003299 |
| 0.477120533 | 0.336854599 | 0.181913403 | 0.343611984 |
| 0.251358439 | 0.371608047 | 0.22519784  | 0.415947733 |
| 0.010235091 | 0.344683678 | 0.190551419 | 0.399062422 |
| 0.255082113 | 0.346432153 | 0.058849621 | 0.312207356 |
| 0.458546828 | 0.253770001 | 0.225719059 | 0.321798616 |
| 0.501813101 | 0.382571199 | 0.163385656 | 0.239127276 |
| 0.374971034 | 0.066658114 | 0.395449805 | 0.529569477 |
| 0.161339552 | 0.226495308 | 0.423603056 | 0.185148044 |
| 0.317099249 | 0.382537273 | 0.403390945 | 0.523505759 |
| 0.066417528 | 0.223549506 | 0.390878715 | 0.460806582 |
| 0.263490644 | 0.183055418 | 0.250475118 | 0.213562536 |
| 0.464888689 | 0.093710213 | 0.273192677 | 0.32052161  |
| 0.226340079 | 0.283094742 | 0.346407999 | 0.186134625 |
| 0.032886657 | 0.170127206 | 0.355636763 | 0.138557143 |
| 0.268575212 | 0.345950066 | 0.241750676 | 0.369786982 |
| 0.128797169 | 0.021926022 | 0.442991435 | 0.021188769 |
| 0.329401686 | 0.362424447 | 0.229393542 | 0.35194715  |

|             |             |             |             |
|-------------|-------------|-------------|-------------|
| 0.168157422 | 0.335564712 | 0.320037817 | 0.000597339 |
| 0.378377649 | 0.069219236 | 0.305560487 | 0.212602973 |
| 0.287963422 | 0.051292906 | 0.458153094 | 0.511103202 |
| 0.304273642 | 0.367539853 | 0.349545557 | 0.459863694 |
| 0.171773289 | 0.364372271 | 0.343423913 | 0.391055659 |
| 0.246713141 | 0.389379573 | 0.40903656  | 0.379391098 |
| 0.351002893 | 0.270965611 |             |             |
| SCOC        | 0.006399364 | 0.186905178 | 0.004266803 |
| 0.022928217 | 0.242673289 | 0.112257143 | 0.003891345 |
| 0.013030244 | 0.133242184 | 0.072380327 | 0.175369184 |
| 0.000639822 | 0.196447864 | 0.237699044 | 0.003930187 |
| 0.267338724 | 0.002711886 | 0.015638728 | 0.019182845 |
| 0.035759582 | 0.208490226 | 0.170523088 | 0.101686697 |
| 0.189389849 | 0.043035373 | 0.098076216 | 0.257208694 |
| 0.26012147  | 0.192950108 | 0.275529019 | 0.054197701 |
| 0.171103247 | 0.283914541 | 0.264958325 | 0.000185665 |
| 0.179228591 | 0.016780354 | 0.159825744 | 0.087862504 |
| 0.142777104 | 0.126019838 | 0.088897842 | 0.073318432 |
| 0.114130829 | 0.001748082 | 0.081183085 | 0.266289489 |
| 0.103296688 | 0.062542095 | 0.005695737 | 0.216278237 |
| 0.093423502 | 0.123450124 | 0.166401795 | 0.000445776 |
| 0.290040612 | 0.246852837 | 0.237072626 | 0.226408022 |
| 0.059523606 | 0.025800049 | 0.126641026 | 0.057480957 |
| 0.210825099 | 0.225517478 | 0.09893166  | 0.09630649  |
| 0.244183648 | 0.19438026  | 0.279455893 | 0.033494404 |
| 0.104584862 | 0.001121422 | 0.037754632 | 0.009521242 |
| 0.133228312 | 0.068054111 | 0.211369918 | 0.210776138 |
| 0.179340494 | 0.218564669 | 0.071023572 | 0.200688702 |
| 0.093959144 | 0.299411511 | 0.128262672 | 0.154807448 |
| 0.182519504 | 0.007083733 | 0.233578879 | 0.242359937 |
| 0.00295251  | 0.147434104 | 0.194590733 | 0.019460101 |
| 0.202833672 | 0.152719297 | 0.147232645 | 0.201488561 |
| 0.302778663 | 0.235067287 | 0.192963599 | 0.111620729 |
| 0.197891923 | 0.007612708 | 0.17698482  | 0.330767719 |
| 0.130749466 | 0.009227513 | 0.093719318 | 0.322780951 |
| 0.207002661 | 0.262500674 | 0.215655839 | 0.177664556 |
| 0.256724407 | 0.252251289 | 0.194069025 | 0.199523013 |
| 0.071317451 | 0.248943327 | 0.039494185 | 0.003914941 |
| 0.005005632 | 0.011850501 | 0.090113628 | 0.124554572 |
| 0.287090161 | 0.129002507 | 0.033909315 | 0.096015373 |
| 0.314066694 | 0.182052506 | 0.246189768 | 0.216396996 |
| 0.00226476  | 0.165837968 | 0.238491129 | 0.048200129 |
| 0.193462029 | 0.01855492  | 0.258491973 | 0.199922116 |
| 0.163900612 | 0.294883372 | 0.018473356 | 0.187225297 |
| 0.039735559 | 0.252683763 | 0.220584634 | 0.039864369 |
| 0.220944096 | 0.193598164 | 0.279093843 | 0.358039377 |
| 0.198336307 | 0.095752155 | 0.021380609 | 0.177429901 |
| 0.257459372 | 0.026358473 | 0.296981095 | 0.307197083 |
| 0.223546523 | 0.318274207 | 0.293263123 | 0.291182469 |
| 0.228160026 | 0.008072875 | 0.025123817 | 0.17259073  |
| 0.215696823 | 0.186593595 | 0.030005228 | 0.235784214 |
| 0.264997711 | 0.110843024 | 0.26840093  | 0.127065334 |
| 0.244175645 | 0.253333115 | 0.281085104 | 0.186045088 |
| 0.085223807 | 0.109123897 | 0.308763686 | 0.168862966 |

|             |                      |             |             |
|-------------|----------------------|-------------|-------------|
| 0.003078348 | 0.012759804          | 0.004844134 | 0.130043471 |
| 0.06654101  | 0.055076031          | 0.085599886 | 0.205561461 |
| 0.062306418 | 0.078085283          | 0.248312861 | 0.326213734 |
| 0.005573812 | 0.216147774          | 0.028686008 | 0.029027477 |
| 0.003559156 | 0.028315148          | 0.036224597 | 0.029181552 |
| 0.123879905 | 0.051165163          | 0.27586179  | 0.273898098 |
| 0.143152217 | 0.040159965          | 0.214224431 | 0.245555878 |
| 0.218289824 | 0.277355726          | 0.070890809 | 0.001646947 |
| 0.089102048 | 0.126997212          | 0.218137721 | 0.268758251 |
| 0.035785936 | 0.053554866          | 0.211577585 | 0.324980783 |
| 0.062331486 | 0.018540382          | 0.141212147 | 0.162536451 |
| 0.027970794 | 0.133333511          | 0.271629556 | 0.165477075 |
| 0.002078915 | 0.101559336          | 0.268837331 | 0.072079112 |
| 0.113921149 | 0.165752542          | 0.215159954 | 0.267276096 |
| 0.165927163 | 0.148066133          | 0.298574858 | 0.318859717 |
| 0.096069622 | 0.049115141          | 0.2855621   | 0.07271794  |
| 0.214995711 | 0.025266245          | 0.148695569 | 0.100471149 |
| 0.074252477 | 0.13545455           | 0.29112523  | 0.137355386 |
| 0.021239378 | 0.242946828          | 0.185122627 | 0.278546149 |
| 0.135490548 | 0.276510674          | 0.300695842 | 0.241540337 |
| 0.155069532 | 0.199218645          | 0.240251982 | 0.251615585 |
| 0.269845583 | 0.081617404          | 0.008576669 | 0.295314194 |
| 0.130169472 | 0.297174791          | 0.054485939 | 0.267221281 |
| 0.208764398 | 0.181947148          | 0.031490575 | 0.264936189 |
| 0.189243678 | 0.059002591          | 0.231677352 | 0.277043567 |
| 0.0751512   | 0.208724758          | 0.146363077 | 0.275903559 |
| 0.039731983 | 0.108941218          | 0.116853355 | 0.233974749 |
| 0.047971172 | 0.008146272          | 0.006554661 | 0.057575798 |
| 0.162756234 | 0.240293838          | 0.233184698 | 0.261296457 |
| 0.020523713 | 0.195879068          | 0.07306132  | 0.090986302 |
| 0.175797618 | 0.19220654           | 0.313411406 | 0.271474741 |
| 0.076604119 | 0.002151616          | 0.023005222 | 0.213393396 |
| 0.002569265 | 0.186221402          | 0.087462013 | 0.000611459 |
| 0.00240551  | 0.194467949          | 0.014013928 | 0.044296521 |
| 0.31638248  | 0.044318838          | 0.048615472 | 0.06781496  |
| 0.197517117 | 0.012982859          | 0.001173038 | 0.256141257 |
| 0.230008118 | 0.213789278          | 0.224001647 | 0.182583896 |
| 0.235793705 | 0.227372768          | 0.265676389 | 0.097289248 |
| 0.009871699 | 0.007034594          | 0.142076996 | 0.112881708 |
| 0.001075288 | 0.227880115          | 0.170132109 | 0.030923059 |
| 0.300551872 | 0.118482478          | 0.002167163 | 0.269385995 |
| 0.001182617 | 0.229143796          | 0.051428715 | 0.062633091 |
| 0.249014523 | 4.83E-05 0.070083159 | 0.126833408 |             |
| 0.16443418  | 0.128697981          | 0.197284608 | 0.250121286 |
| 0.148483199 | 0.020680093          | 0.13978468  | 0.277592272 |
| 0.00574457  | 0.031246903          | 0.082953912 | 0.014261766 |
| 0.066296595 | 0.192000391          | 0.137548273 | 0.004754117 |
| 0.09157765  | 0.001098578          | 0.138696916 | 0.255870087 |
| 0.188229986 | 0.29704953           | 0.254108141 | 0.257138443 |
| 0.240277527 | 0.23450495           | 0.275921888 | 0.176709068 |
| 0.125110706 | 8.81E-05 0.001009379 | 0.299635816 |             |
| 0.235020126 | 0.005745162          | 0.035044246 | 0.081660108 |
| 0.0170103   | 0.017562112          | 0.00577659  | 0.123037869 |
| 0.21477447  | 0.159038988          | 0.136662833 | 0.189248427 |

|             |             |             |             |
|-------------|-------------|-------------|-------------|
| 0.06949074  | 0.085189282 | 0.105141799 | 0.01150134  |
| 0.260675844 | 0.004259229 | 0.011211613 | 0.004110398 |
| 0.253616637 | 0.018039377 | 0.160878276 | 0.244883738 |
| 0.236836383 | 0.283004645 | 0.114460613 | 0.105412213 |
| 0.258812192 | 0.013746076 | 0.141082669 | 0.015393666 |
| 0.215936958 | 0.24305655  | 0.145578372 | 0.108774391 |
| 0.264142797 | 0.210608275 | 0.00180152  | 0.238063993 |
| 0.001131558 | 0.00201154  | 0.099350877 | 0.091910531 |
| 0.037579435 | 0.198064743 | 0.085454857 | 0.045907904 |
| 0.056686378 | 0.001910631 | 0.224934011 | 0.203190872 |
| 0.131468298 | 0.163855861 | 0.247361661 | 0.076355694 |
| 0.120141526 | 0.072034136 | 0.052096186 | 0.02510955  |
| 0.068095545 | 0.100564087 | 0.044913135 | 0.000568298 |
| 0.184563828 | 0.247420693 | 0.005385307 | 0.033166388 |
| 0.255882958 | 0.291070119 | 0.003557371 | 0.001399109 |
| 0.083711835 | 0.121760895 | 0.307027298 | 0.236141973 |
| 0.222094619 | 0.260582425 | 0.14354677  | 0.034633531 |
| 0.005646427 | 0.163239823 | 0.258244495 | 0.037326187 |
| 0.262316466 | 0.00648868  | 0.215671624 | 0.321612555 |
| 0.019701443 | 0.037886978 | 0.003459777 | 0.01118981  |
| 0.337468241 | 0.045787457 | 0.070733536 | 0.025747256 |
| 0.119504407 | 0.180032207 | 0.003075459 | 0.052473671 |
| 0.143773553 | 0.163598793 | 0.035104427 | 0.064790559 |
| 0.138881511 | 0.050897479 | 0.294277378 | 0.203836383 |
| 0.023244495 | 0.015186966 | 0.036047285 | 0.220785008 |
| 0.261839739 | 0.198081607 | 0.004082625 | 0.200672121 |
| 0.276308138 | 0.277710485 | 0.217311016 | 0.226010433 |
| 0.010902866 | 0.244790848 | 0.201783477 | 0.189308911 |
| 0.047438756 | 0.112306873 | 0.078006209 | 0.00662536  |
| 0.111118352 | 0.190524222 | 0.185723429 | 0.045179152 |
| 0.216528585 | 0.018292179 | 0.004952293 | 0.251019437 |
| 0.141178417 | 0.008754845 | 0.105903158 | 0.287226076 |
| 0.000700008 | 0.220838076 | 0.284084911 | 0.054460772 |
| 0.239092694 | 0.278694161 | 0.194709175 | 0.040450345 |
| 0.004236452 | 0.301511546 | 0.207602454 | 0.147953805 |
| 0.196986942 | 0.136839816 | 0.028980807 | 0.010233874 |
| 0.120002519 | 0.010304232 | 0.025729963 | 0.075966116 |
| 0.120822241 | 0.166125989 | 0.061442727 | 0.051406343 |
| 0.070457101 | 0.011815201 | 0.200638382 | 0.057227984 |
| 0.108719056 | 0.085187468 | 0.172171938 | 0.059550382 |
| 0.15498351  | 0.243420148 | 0.19222997  | 0.000992492 |
| 0.286975296 | 0.221103088 | 0.230336746 | 0.000247749 |
| 0.293742118 | 0.000247903 | 0.083027072 | 0.087822323 |
| 0.066236147 | 0.070464779 | 0.151198875 | 0.113108014 |
| 0.131955595 | 0.053096645 | 0.083393675 | 0.089095779 |
| 0.042852773 | 0.04977676  | 0.225371183 | 0.094007074 |
| 0.123479878 | 0.016971136 | 0.014726533 | 0.014833485 |
| 0.006637066 | 0.247630324 | 0.072774285 | 0.008815384 |
| 0.084687478 | 0.095936808 | 0.157098191 | 0.216358614 |
| 0.226727499 | 0.017611928 | 0.117323615 | 0.217108777 |
| 0.094002559 | 0.064698128 | 0.003420457 | 0.132392184 |
| 0.066142946 | 0.122306171 | 0.146663863 | 0.083398542 |
| 0.195167229 | 0.155080108 | 0.070875596 | 0.209413236 |
| 0.136908405 | 0.137260761 | 0.076739684 | 0.017184942 |

|             |             |             |             |
|-------------|-------------|-------------|-------------|
| 0.031477542 | 0.023488213 | 0.223826903 | 0.001726975 |
| 0.158657676 | 0.034004528 | 0.288865875 | 0.200849486 |
| 0.241371836 | 0.175238021 | 0.063296892 | 0.00835234  |
| 0.056321637 | 0.036583308 | 0.028482358 | 0.250301131 |
| 1           | 0.031934413 | 0.188454765 | 0.046949429 |
| 0.281460458 | 0.246315838 | 0.108685199 | 0.053619362 |
| 0.075660755 | 0.041362843 | 0.187423527 | 0.012926588 |
| 0.227233301 | 0.114770919 | 0.122404076 | 0.132758119 |
| 0.08776711  | 0.278076399 | 0.005662586 | 0.290217128 |
| 0.157295781 | 0.023601451 | 0.214554134 | 0.088134151 |
| 0.047971559 | 0.038460205 | 0.239381386 | 0.092743488 |
| 0.044353654 | 0.228473642 | 0.011732388 | 0.048857989 |
| 0.175895236 | 0.088583904 | 0.189739632 | 0.190194046 |
| 0.153812104 | 0.190072389 | 0.233158823 | 0.064659334 |
| 0.189824135 | 0.187776335 | 0.059977339 | 0.08647791  |
| 0.149128031 | 0.014180698 | 0.147149393 | 0.007607285 |
| 0.253873339 | 0.291529378 | 0.103784358 | 0.003953384 |
| 0.000474025 | 0.212954159 | 0.198926878 | 0.006502176 |
| 0.307782949 | 0.235177008 | 0.140410906 | 0.260366184 |
| 0.039384599 | 0.185486858 | 0.032457378 | 0.260993986 |
| 0.002484549 | 0.084839812 | 0.2486897   | 0.169379865 |
| 0.08974715  | 0.222461828 | 0.219496981 | 0.227537048 |
| 0.001994708 | 0.088473433 | 0.000829581 | 0.142093041 |
| 0.168719613 | 0.235907177 | 0.052364169 | 0.08527698  |
| 0.133445027 | 0.178122519 | 0.088223352 | 0.216887662 |
| 0.000814515 | 0.294022112 | 0.058272316 | 0.190424231 |
| 0.144285311 | 0.148956643 | 0.007469489 | 0.219607055 |
| 0.149306073 | 0.093181833 | 0.084460773 | 0.113730137 |
| 0.218985158 | 0.172751378 | 0.030467647 | 0.093148007 |
| 0.179981644 | 0.006773562 | 0.107783852 | 0.260904867 |
| 0.057232535 | 0.206996102 | 0.321625096 | 0.04872497  |
| 0.255493496 | 0.159295241 | 0.214205752 | 0.247649695 |
| 0.020675663 | 0.087474842 | 0.277920709 | 0.219707259 |
| 0.149643145 | 0.135984572 | 0.183949495 | 0.110086167 |
| 0.182789985 | 0.013974235 | 0.128504395 | 0.14135897  |
| 0.187884778 | 0.1460372   | 0.112167244 | 0.108073536 |
| 0.005262655 | 0.026901836 | 0.100188266 | 0.027084745 |
| 0.124917632 | 0.186570584 | 0.101056266 | 0.168784289 |
| 0.039947728 | 0.003624964 | 0.203713158 | 0.040492788 |
| 0.095294777 | 0.25568802  | 0.079935487 | 0.196962319 |
| 0.043778723 | 0.129794981 | 0.084498551 | 0.001747347 |
| 0.249262901 | 0.030990587 | 0.12081254  | 0.097001071 |
| 0.149218204 | 0.002924072 | 0.196726707 | 0.303675688 |
| 0.110397655 | 0.112260342 | 0.170614112 | 0.211587327 |
| 0.16842178  | 0.198170098 | 0.165692946 | 0.169927732 |
| 0.23354706  | 0.139273768 | 0.184224289 | 0.219579062 |
| 0.170550928 | 0.060010781 |             |             |
| SDCBP       | 0.131943893 | 0.22270089  | 0.105816175 |
| 0.130169686 | 0.166952441 | 0.104294728 | 0.10710923  |
| 0.133763602 | 0.185156503 | 0.030956239 | 0.184844815 |
| 0.088180885 | 0.027403942 | 0.270969785 | 0.118282254 |
| 0.138820825 | 0.124340241 | 0.171632773 | 0.033460733 |
| 0.084082124 | 0.152431771 | 0.072640968 | 0.120960904 |
| 0.133649439 | 0.290564667 | 0.147959044 | 0.091913027 |

|             |             |             |             |
|-------------|-------------|-------------|-------------|
| 0.259891059 | 0.032487235 | 0.177024465 | 0.023862116 |
| 0.324153823 | 0.155524334 | 0.073968352 | 0.079621106 |
| 0.140144561 | 0.007496561 | 0.32088273  | 0.117542817 |
| 0.055830626 | 0.334709078 | 0.058690568 | 0.169498303 |
| 0.067678057 | 0.091477124 | 0.02108343  | 0.134507316 |
| 0.14143724  | 0.116082607 | 0.115932355 | 0.17969392  |
| 0.060776628 | 0.253346755 | 0.132674325 | 0.003572884 |
| 0.059769882 | 0.010096791 | 0.027854344 | 0.302709847 |
| 0.316111886 | 0.22123027  | 0.026263081 | 0.124508046 |
| 0.119204021 | 0.173762109 | 0.281618288 | 0.042824505 |
| 0.293576257 | 0.036834443 | 0.157678377 | 0.111638146 |
| 0.097769682 | 0.067669598 | 0.302211096 | 0.129457577 |
| 0.06568852  | 0.266260802 | 0.177299221 | 0.068598088 |
| 0.201823209 | 0.351266809 | 0.249761    | 0.285778606 |
| 0.028135224 | 0.118430419 | 0.093001555 | 0.278324527 |
| 0.18270186  | 0.08888587  | 0.227244358 | 0.32692076  |
| 0.08417024  | 0.089637378 | 0.159842906 | 0.182490116 |
| 0.246118753 | 0.048402845 | 0.077999843 | 0.058698806 |
| 0.173633302 | 0.12082327  | 0.301114447 | 0.271056967 |
| 0.135374081 | 0.142906861 | 0.30203021  | 0.114556651 |
| 0.132339163 | 0.165350726 | 0.078052095 | 0.205811353 |
| 0.16295636  | 0.27069598  | 0.184947252 | 0.21754232  |
| 0.107043578 | 0.293085421 | 0.210632187 | 0.266116043 |
| 0.013643055 | 0.294749249 | 0.228194669 | 0.150023548 |
| 0.092313428 | 0.174782132 | 0.064231776 | 0.336026073 |
| 0.252982401 | 0.240973595 | 0.157826598 | 0.186729405 |
| 0.247794229 | 0.279056556 | 0.277911109 | 0.224189192 |
| 0.112203047 | 0.041863284 | 0.108650584 | 0.128599613 |
| 0.188373425 | 0.211295691 | 0.083151285 | 0.323273404 |
| 0.325120408 | 0.223689835 | 0.118063696 | 0.358746822 |
| 0.120016815 | 0.349095417 | 0.216397348 | 0.221315213 |
| 0.330678815 | 0.319808129 | 0.322902875 | 0.1750178   |
| 0.335166269 | 0.154960047 | 0.016646325 | 0.228993117 |
| 0.354448529 | 0.013615512 | 0.226388435 | 0.247608895 |
| 0.274757073 | 0.208129807 | 0.307543355 | 0.28317934  |
| 0.276254622 | 0.179686543 | 0.002355045 | 0.220133533 |
| 0.297367358 | 0.294773285 | 0.148938564 | 0.090011604 |
| 0.146937106 | 0.126027875 | 0.202017654 | 0.052120982 |
| 0.370020343 | 0.258821142 | 0.241439565 | 0.19375693  |
| 0.100322118 | 0.340282353 | 0.086027855 | 0.302428172 |
| 0.144595236 | 0.133599549 | 0.146639728 | 0.253899932 |
| 0.051661253 | 0.269681583 | 0.094367522 | 0.130330196 |
| 0.291220666 | 0.112040683 | 0.052224782 | 0.1798957   |
| 0.151637204 | 0.117762983 | 0.202555666 | 0.14412793  |
| 0.132326134 | 0.290294439 | 0.114335911 | 0.18291695  |
| 0.1942938   | 0.284215246 | 0.158173927 | 0.274982043 |
| 0.083740276 | 0.237158505 | 0.179830393 | 0.340869925 |
| 0.363874773 | 0.119744138 | 0.286837697 | 0.072035722 |
| 0.055042776 | 0.029341797 | 0.029808856 | 0.10518763  |
| 0.288652588 | 0.085093573 | 0.134540511 | 0.218300437 |
| 0.151317333 | 0.117553892 | 0.064439371 | 0.370716381 |
| 0.19636685  | 0.116006387 | 0.261314998 | 0.099688621 |
| 0.043612337 | 0.152375118 | 0.228413259 | 0.082942899 |
| 0.177517569 | 0.046200446 | 0.054206549 | 0.244834575 |



|             |             |             |             |
|-------------|-------------|-------------|-------------|
| 0.041853524 | 0.06904684  | 0.263149241 | 0.218286409 |
| 0.069625206 | 0.240975701 | 0.306386839 | 0.004722592 |
| 0.104590945 | 0.112177778 | 0.283965672 | 0.058552849 |
| 0.228961845 | 0.273832281 | 0.137381927 | 0.104962899 |
| 0.187694274 | 0.297236749 | 0.28475163  | 0.284515365 |
| 0.04728822  | 0.310165226 | 0.229594838 | 0.289415929 |
| 0.226283065 | 0.062159362 | 0.024089174 | 0.218991971 |
| 0.239141451 | 0.037406826 | 0.161676974 | 0.171432289 |
| 0.056363086 | 0.159602922 | 0.106247385 | 0.298157644 |
| 0.374646446 | 0.253632946 | 0.167564502 | 0.244572728 |
| 0.289671278 | 0.225803608 | 0.258583155 | 0.328104294 |
| 0.030449031 | 0.094181408 | 0.071098655 | 0.287009247 |
| 0.255301289 | 0.075702576 | 0.310506515 | 0.031690087 |
| 0.002764588 | 0.138366953 | 0.153756259 | 0.202938141 |
| 0.066970057 | 0.111670279 | 0.178069569 | 0.28918673  |
| 0.205943216 | 0.321503663 | 0.23111213  | 0.083764387 |
| 0.252538962 | 0.087954788 | 0.121036944 | 0.168929873 |
| 0.293443762 | 0.09460267  | 0.156251564 | 0.349239617 |
| 0.104324004 | 0.064707119 | 0.132211349 | 0.014442102 |
| 0.088296125 | 0.163197822 | 0.204323765 | 0.327391237 |
| 0.289266906 | 0.297270814 | 0.204524194 | 0.03382573  |
| 0.275206276 | 0.211576706 | 0.047524151 | 0.256686104 |
| 0.275642423 | 0.265352151 | 0.267392738 | 0.283442575 |
| 0.232532225 | 0.200107343 | 0.213526743 | 0.145209517 |
| 0.136054808 | 0.101114082 | 0.047310033 | 0.135624763 |
| 0.007617716 | 0.292657907 | 0.153386393 | 0.284158841 |
| 0.187925487 | 0.209472268 | 0.121526707 | 0.148598599 |
| 0.071029519 | 0.029772428 | 0.076199429 | 0.150900603 |
| 0.242162488 | 0.07977171  | 0.046678683 | 0.046042071 |
| 0.284567688 | 0.28731447  | 0.053702583 | 0.310864461 |
| 0.198493205 | 0.141589336 | 0.142611156 | 0.247246334 |
| 0.129988978 | 0.012528361 | 0.078067093 | 0.005511857 |
| 0.064857402 | 0.299605    | 0.065303768 | 0.100654652 |
| 0.227548691 | 0.053357617 | 0.279451099 | 0.32044204  |
| 0.260258096 | 0.283167108 | 0.302914144 | 0.076769897 |
| 0.297310439 | 0.01042606  | 0.288057397 | 0.219986142 |
| 0.043966442 | 0.005975364 | 0.037498397 | 0.249239438 |
| 0.121246021 | 0.140204271 | 0.257848651 | 0.073212248 |
| 0.170208766 | 0.106091807 | 0.142958806 | 0.089747181 |
| 0.171338161 | 0.190435067 | 0.082600446 | 0.265712908 |
| 0.169062584 | 0.24334897  | 0.071558943 | 0.187632302 |
| 0.158170573 | 0.138350441 | 0.176648225 | 0.029809088 |
| 0.225138645 | 0.193851064 | 0.313063637 | 0.285215278 |
| 0.340718308 | 0.202714929 | 0.031349331 | 0.074620572 |
| 0.247315127 | 0.141424318 | 0.053463223 | 0.151106721 |
| 0.25854513  | 0.154151859 | 0.311915479 | 0.296664757 |
| 0.31158862  | 0.30516758  | 0.111642102 | 0.216189203 |
| 0.080823103 | 0.011373809 | 0.104976759 | 0.257732624 |
| 0.022633731 | 0.085707261 | 0.30407175  | 0.07513367  |
| 0.111967651 | 0.096603752 | 0.050834089 | 0.054833051 |
| 0.221996794 | 0.131094992 | 0.123720858 | 0.236531745 |
| 0.109861123 | 0.067943737 | 0.173693317 | 0.144378777 |
| 0.055968334 | 0.249564525 | 0.277225481 | 0.086074013 |
| 0.093246074 | 0.109274467 | 0.160165171 | 0.271157589 |

|             |             |             |             |
|-------------|-------------|-------------|-------------|
| 0.268564997 | 0.261154827 | 0.096628651 | 0.077844922 |
| 0.297925517 | 0.101722341 | 0.282161827 | 0.263186185 |
| 0.324297884 | 0.335077629 | 0.359070478 | 0.124438373 |
| 0.142067427 | 0.190477546 | 0.128621497 | 0.14832318  |
| 0.292365287 | 0.11707078  | 0.294148626 | 0.082985515 |
| 0.231940819 | 0.136908211 | 0.151213507 | 0.196407531 |
| 0.123087985 | 0.285799953 | 0.220572119 | 0.167284804 |
| 0.114334171 | 0.062585262 | 0.114121331 | 0.245623245 |
| 0.236508489 | 0.034236856 | 0.24068293  | 0.115327354 |
| 0.243169572 | 0.025598076 | 0.168040178 | 0.352076149 |
| 0.239768639 | 0.146811546 | 0.072814614 | 0.21531649  |
| 0.198736023 | 0.082330901 | 0.094469105 | 0.216342033 |
| 0.299892676 | 0.150033556 | 0.300178443 | 0.299020939 |
| 0.195815431 | 0.119982119 | 0.056996571 | 0.131666576 |
| 0.226889103 | 0.12096508  | 0.189271918 | 0.18193103  |
| 0.331846545 | 0.345587949 | 0.228082286 | 0.215244111 |
| 0.125454264 | 0.138932142 | 0.101915763 | 0.242669679 |
| 0.053210596 | 0.116529699 | 0.060485307 | 0.203227004 |
| 0.02331145  | 0.036661446 | 0.280316838 | 0.164179898 |
| 0.337005406 | 0.270296938 | 0.334684701 | 0.116316371 |
| 0.000567251 | 0.144100279 | 0.189159643 | 0.089065416 |
| 0.222024868 | 0.278418973 | 0.096748312 | 0.155260191 |
| 0.35422793  | 0.158026538 | 0.125355937 | 0.079037586 |
| 0.023867216 | 0.147200703 | 0.315377272 | 0.17195237  |
| 0.174116935 | 0.128083393 | 0.064444213 | 0.196155998 |
| 0.039523369 | 0.337460965 | 0.29800165  | 0.037025054 |
| 0.027822793 | 0.256281169 | 0.193507305 | 0.105030159 |
| 0.111998038 | 0.239279614 | 0.299711327 | 0.005368158 |
| 0.184625233 | 0.076735241 | 0.191687755 | 0.192079473 |
| 0.191290703 | 0.148173034 | 0.235914038 | 0.104445773 |
| 0.158980906 | 0.174293189 | 0.164874371 | 0.294564666 |
| 0.176723938 | 0.195961556 | 0.157900667 | 0.10884752  |
| 0.112355844 | 0.16327395  | 0.224164981 | 0.217761156 |
| 0.164243198 | 0.253145945 | 0.346363015 | 0.176936116 |
| 0.278795229 | 0.087252152 | 0.368416741 | 0.259029581 |
| 0.34276697  | 0.179020604 | 0.113828101 | 0.229464543 |
| 0.020033627 | 0.069127667 | 0.085960138 | 0.142103142 |
| 0.238465629 | 0.087300373 | 0.107010593 | 0.135154944 |
| 0.147214882 | 0.358442403 | 0.339474105 | 0.323196834 |
| 0.124154595 | 0.086063304 | 0.035694753 | 0.161206729 |
| 0.165088972 | 0.22269645  | 0.142349973 | 0.036237118 |
| 0.227155698 | 0.105188573 | 0.231251175 | 0.29213075  |
| 0.045802147 | 0.355342951 | 0.04280019  | 0.114314493 |
| 0.031474728 | 0.20384385  | 0.266098903 | 0.182984572 |
| 0.031934413 | 1           | 0.171813145 | 0.077389129 |
| 0.194710696 | 0.160130377 | 0.087244659 | 0.138169293 |
| 0.198711754 | 0.21405444  | 0.303861307 | 0.133265128 |
| 0.10577665  | 0.099527405 | 0.103631761 | 0.140372971 |
| 0.15893875  | 0.276349267 | 0.173224805 | 0.272827055 |
| 0.092528071 | 0.241727921 | 0.377192029 | 0.174286632 |
| 0.116219683 | 0.193243941 | 0.033302816 | 0.066975718 |
| 0.117452462 | 0.05765806  | 0.000784023 | 0.01803241  |
| 0.287617711 | 0.055462527 | 0.157509195 | 0.214482203 |
| 0.09651494  | 0.287372149 | 0.036773515 | 0.122858116 |

|             |             |             |             |
|-------------|-------------|-------------|-------------|
| 0.262082339 | 0.315698381 | 0.09404532  | 0.312801931 |
| 0.24211826  | 0.171411367 | 0.158465985 | 0.007352279 |
| 0.119880213 | 0.102975497 | 0.043107914 | 0.139216783 |
| 0.09857974  | 0.032579672 | 0.121306799 | 0.121852271 |
| 0.26623776  | 0.031134246 | 0.117602042 | 0.197589985 |
| 0.243442162 | 0.319707037 | 0.16884561  | 0.230027204 |
| 0.050542954 | 0.261618217 | 0.096327666 | 0.083818576 |
| 0.107901435 | 0.080375391 | 0.25453353  | 0.07154885  |
| 0.129082836 | 0.117065761 | 0.005226125 | 0.35673767  |
| 0.280003596 | 0.078579485 | 0.308924334 | 0.031047026 |
| 0.313395564 | 0.282820472 | 0.07635835  | 0.092274714 |
| 0.102020496 | 0.136083663 | 0.281540657 | 0.270430016 |
| 0.02731906  | 0.105520763 | 0.18198114  | 0.097474732 |
| 0.321501051 | 0.058104624 | 0.304582266 | 0.036126691 |
| 0.271906752 | 0.230856921 | 0.197298418 | 0.124481482 |
| 0.11776157  | 0.17476152  | 0.062394222 | 0.311668954 |
| 0.210000824 | 0.076532401 | 0.240251114 | 0.127970094 |
| 0.074568471 | 0.278513282 | 0.102991274 | 0.301159958 |
| 0.138876997 | 0.300755046 | 0.230678022 | 0.254061878 |
| 0.341171391 | 0.071373415 | 0.05666986  | 0.108764735 |
| 0.26461808  | 0.154047021 | 0.062658536 | 0.249980257 |
| 0.045940139 | 0.275852929 | 0.103674832 | 0.129457419 |
| 0.129005029 | 0.139875962 | 0.100008983 | 0.248015973 |
| 0.208044479 | 0.135949604 | 0.092028001 | 0.364068191 |
| 0.174404956 | 0.106135505 | 0.364185955 | 0.00488756  |
| 0.168334451 | 0.20506282  | 0.262837868 | 0.113604095 |
| 0.296136403 | 0.163753235 | 0.103224067 | 0.013422284 |
| 0.245646351 | 0.055089607 | 0.104669353 | 0.107154053 |
| 0.04939585  | 0.099232943 | 0.317717704 | 0.295232861 |
| 0.236556326 | 0.060272666 | 0.042630864 | 0.282335119 |
| 0.043168709 | 0.03781687  | 0.045934561 | 0.146631452 |
| 0.053017875 | 0.055872002 | 0.069075636 | 0.066202183 |
| 0.231415283 | 0.156512551 |             |             |
| SDHB        | 0.061779429 | 0.265771729 | 0.034563047 |
| 0.1574661   | 0.30357454  | 0.17556804  | 0.071808348 |
| 0.120561503 | 0.216221607 | 0.097350174 | 0.238659961 |
| 0.030734387 | 0.145261614 | 0.355139063 | 0.071572566 |
| 0.289484038 | 0.069801693 | 0.117824504 | 0.05898275  |
| 0.155589778 | 0.285431965 | 0.219361012 | 0.138863258 |
| 0.2758238   | 0.153836334 | 0.175146497 | 0.200966583 |
| 0.349918539 | 0.125145411 | 0.281165784 | 0.081008529 |
| 0.346095665 | 0.307779172 | 0.196035362 | 0.021849911 |
| 0.197361054 | 0.035328599 | 0.328967494 | 0.267607394 |
| 0.243737117 | 0.286561798 | 0.105060335 | 0.23569564  |
| 0.148184454 | 0.037239819 | 0.059209512 | 0.279665549 |
| 0.179668187 | 0.197764446 | 0.036172001 | 0.271117019 |
| 0.183736858 | 0.224622738 | 0.192720588 | 0.002999254 |
| 0.221537737 | 0.095498397 | 0.177130386 | 0.345625761 |
| 0.201130734 | 0.15599611  | 0.139577864 | 0.132911855 |
| 0.217427524 | 0.28705003  | 0.240383597 | 0.153221177 |
| 0.365053354 | 0.212571756 | 0.286914304 | 0.146987648 |
| 0.180266369 | 0.027238061 | 0.171348105 | 0.051514317 |
| 0.210079546 | 0.211969554 | 0.243833024 | 0.260335605 |
| 0.257469124 | 0.380497294 | 0.207681073 | 0.326319754 |

|             |             |             |             |
|-------------|-------------|-------------|-------------|
| 0.14798947  | 0.277171151 | 0.289597673 | 0.323528603 |
| 0.272372494 | 0.080233844 | 0.329742017 | 0.397802961 |
| 0.039428502 | 0.149422776 | 0.264837204 | 0.083711257 |
| 0.285381571 | 0.188945325 | 0.135536208 | 0.233263377 |
| 0.34021852  | 0.271356669 | 0.324398583 | 0.257329085 |
| 0.238659824 | 0.048399067 | 0.303457713 | 0.283181291 |
| 0.257204553 | 0.063155262 | 0.286196898 | 0.35338323  |
| 0.271316834 | 0.357001723 | 0.274550475 | 0.302489008 |
| 0.257219408 | 0.369986624 | 0.300055564 | 0.299050424 |
| 0.048998385 | 0.36387882  | 0.150400181 | 0.075767298 |
| 0.045477781 | 0.126789924 | 0.204887167 | 0.294745358 |
| 0.358189429 | 0.238927019 | 0.153447569 | 0.261410736 |
| 0.401883813 | 0.292353606 | 0.355935176 | 0.317992229 |
| 0.05012715  | 0.208678453 | 0.255669903 | 0.150890654 |
| 0.278488259 | 0.101364306 | 0.274260428 | 0.345710165 |
| 0.325645371 | 0.364392465 | 0.101811143 | 0.352270504 |
| 0.139467969 | 0.413032837 | 0.28796491  | 0.175922668 |
| 0.374509165 | 0.332383002 | 0.424303283 | 0.340596908 |
| 0.339193134 | 0.186740713 | 0.039065807 | 0.294261414 |
| 0.411127826 | 0.041115359 | 0.349271284 | 0.380312733 |
| 0.338386584 | 0.361330903 | 0.424443567 | 0.383510666 |
| 0.333233748 | 0.065173914 | 0.023095203 | 0.309300214 |
| 0.3511156   | 0.340855391 | 0.176211315 | 0.206823527 |
| 0.281324479 | 0.168409591 | 0.30090684  | 0.182018627 |
| 0.418866767 | 0.352281544 | 0.34596091  | 0.274590774 |
| 0.136510111 | 0.265325521 | 0.219738663 | 0.295772313 |
| 0.073618446 | 0.083089529 | 0.037704495 | 0.263477461 |
| 0.121121617 | 0.200084644 | 0.169331389 | 0.239344317 |
| 0.211043683 | 0.141621317 | 0.194819247 | 0.343490294 |
| 0.041445841 | 0.202146283 | 0.13565447  | 0.114735258 |
| 0.084284551 | 0.130030737 | 0.18280382  | 0.171539686 |
| 0.252332964 | 0.163632858 | 0.270869974 | 0.382593431 |
| 0.210977668 | 0.141458486 | 0.264980688 | 0.402520088 |
| 0.408659038 | 0.258634382 | 0.204265571 | 0.037212998 |
| 0.236356104 | 0.138297109 | 0.200636352 | 0.213021031 |
| 0.138606378 | 0.205525093 | 0.265026871 | 0.369934775 |
| 0.139001731 | 0.079390705 | 0.228070951 | 0.329026765 |
| 0.103984927 | 0.25726774  | 0.384967632 | 0.184253953 |
| 0.006903504 | 0.213952096 | 0.342703424 | 0.248605432 |
| 0.21215364  | 0.178468939 | 0.2028102   | 0.376038836 |
| 0.201383561 | 0.245535827 | 0.367174234 | 0.360594362 |
| 0.159763499 | 0.142305385 | 0.409555094 | 0.056534556 |
| 0.217826208 | 0.158384643 | 0.316990756 | 0.107076272 |
| 0.205018867 | 0.299052925 | 0.268811679 | 0.29663071  |
| 0.082729836 | 0.363956213 | 0.305293638 | 0.380307925 |
| 0.213697809 | 0.412089066 | 0.365400176 | 0.363124527 |
| 0.257969906 | 0.183773394 | 0.164176505 | 0.342946182 |
| 0.370383402 | 0.176197203 | 0.051737867 | 0.299854497 |
| 0.165566916 | 0.323322367 | 0.252187532 | 0.405894345 |
| 0.382388734 | 0.283989941 | 0.182580176 | 0.377418287 |
| 0.339813063 | 0.168376296 | 0.335892998 | 0.413633952 |
| 0.126018505 | 0.238056652 | 0.267467508 | 0.417069117 |
| 0.162125258 | 0.257782496 | 0.264443771 | 0.180345736 |
| 0.013026801 | 0.058441097 | 0.054613332 | 0.227487972 |

|             |             |             |             |
|-------------|-------------|-------------|-------------|
| 0.278036936 | 0.203275445 | 0.308540551 | 0.381818329 |
| 0.130283923 | 0.324865797 | 0.191839757 | 0.259325514 |
| 0.307905311 | 0.216135173 | 0.24172127  | 0.281655804 |
| 0.222914534 | 0.051303324 | 0.154924317 | 0.381980874 |
| 0.024980051 | 0.257765613 | 0.157508522 | 0.00752807  |
| 0.047235455 | 0.229787155 | 0.079175766 | 0.173401642 |
| 0.407718642 | 0.164950415 | 0.15991654  | 0.123496419 |
| 0.321663777 | 0.093843986 | 0.018313312 | 0.359137062 |
| 0.339589969 | 0.324979259 | 0.330484416 | 0.298050615 |
| 0.335276685 | 0.271625478 | 0.362421664 | 0.145992125 |
| 0.119577409 | 0.062612106 | 0.266931941 | 0.263236287 |
| 0.00328705  | 0.355030811 | 0.235547273 | 0.148171665 |
| 0.321765226 | 0.242914039 | 0.047734239 | 0.259826149 |
| 0.030131968 | 0.192912743 | 0.154173408 | 0.207602498 |
| 0.352746403 | 0.020110349 | 0.135493385 | 0.222438801 |
| 0.282757855 | 0.262249545 | 0.218814783 | 0.380163286 |
| 0.245589499 | 0.074239708 | 0.283377903 | 0.337737935 |
| 0.090388936 | 0.069368198 | 0.154196693 | 0.018066666 |
| 0.096384111 | 0.315274521 | 0.202032798 | 0.0748556   |
| 0.23038951  | 0.00961467  | 0.273204821 | 0.386884435 |
| 0.288241376 | 0.40756466  | 0.37467678  | 0.260048002 |
| 0.368284369 | 0.094250828 | 0.37981189  | 0.27237303  |
| 0.143786278 | 0.002246416 | 0.013244781 | 0.382331301 |
| 0.259780819 | 0.036096771 | 0.15554679  | 0.155318113 |
| 0.158545894 | 0.080277773 | 0.075011566 | 0.305337206 |
| 0.235902453 | 0.272868336 | 0.248070711 | 0.303627244 |
| 0.231593633 | 0.2123633   | 0.14418565  | 0.068774395 |
| 0.256194068 | 0.081086915 | 0.069743362 | 0.021573675 |
| 0.332951837 | 0.083358795 | 0.297737316 | 0.352144446 |
| 0.398876193 | 0.351633662 | 0.117935249 | 0.152036372 |
| 0.338378367 | 0.052298669 | 0.17449616  | 0.060167429 |
| 0.317534024 | 0.305656829 | 0.313383821 | 0.263644483 |
| 0.411092617 | 0.357175891 | 0.047770492 | 0.352601592 |
| 0.023775551 | 0.008010311 | 0.152136575 | 0.220382969 |
| 0.063042565 | 0.235200895 | 0.252647854 | 0.150427655 |
| 0.184510612 | 0.035709657 | 0.250498305 | 0.273036695 |
| 0.281009097 | 0.245969828 | 0.28596804  | 0.193099124 |
| 0.284023939 | 0.255162495 | 0.218974595 | 0.15900021  |
| 0.145335537 | 0.232960857 | 0.157512011 | 0.033150858 |
| 0.18017514  | 0.227883394 | 0.066942826 | 0.14064202  |
| 0.368963846 | 0.380984461 | 0.077465634 | 0.041778351 |
| 0.233010443 | 0.224971261 | 0.40176492  | 0.329701232 |
| 0.361013678 | 0.418972533 | 0.314010107 | 0.207730449 |
| 0.075091879 | 0.278030597 | 0.282521523 | 0.237253616 |
| 0.367827316 | 0.040800252 | 0.323664995 | 0.252409084 |
| 0.113706107 | 0.211302638 | 0.07281149  | 0.095439054 |
| 0.254600728 | 0.169774182 | 0.243557772 | 0.096473947 |
| 0.254001967 | 0.270371484 | 0.061923447 | 0.181040156 |
| 0.284344616 | 0.253579996 | 0.15340799  | 0.157353366 |
| 0.25518403  | 0.07248447  | 0.327228833 | 0.384073998 |
| 0.106995036 | 0.087932491 | 0.1332643   | 0.289045435 |
| 0.316875608 | 0.159165315 | 0.034514546 | 0.274386854 |
| 0.38358219  | 0.270436867 | 0.335258875 | 0.379179445 |
| 0.077170231 | 0.246997003 | 0.211578227 | 0.263555745 |

|             |             |             |             |
|-------------|-------------|-------------|-------------|
| 0.162825723 | 0.17189649  | 0.199243158 | 0.062245364 |
| 0.267723142 | 0.344859781 | 0.303763154 | 0.198012712 |
| 0.195649275 | 0.06575837  | 0.033560014 | 0.310918313 |
| 0.288619271 | 0.08652462  | 0.112453585 | 0.322157269 |
| 0.015766332 | 0.204304013 | 0.395953213 | 0.197374091 |
| 0.388206483 | 0.400392614 | 0.360373027 | 0.151052006 |
| 0.011495729 | 0.310947459 | 0.284897991 | 0.240070259 |
| 0.289226743 | 0.253991634 | 0.098473641 | 0.132719518 |
| 0.303171069 | 0.052256604 | 0.182811099 | 0.146183739 |
| 0.176103629 | 0.210306299 | 0.216047468 | 0.146671422 |
| 0.252491321 | 0.054936854 | 0.243756203 | 0.200009336 |
| 0.186284779 | 0.25514453  | 0.334855367 | 0.086151787 |
| 0.18834657  | 0.354021073 | 0.294517105 | 0.033534186 |
| 0.230148746 | 0.332657718 | 0.348913261 | 0.007226969 |
| 0.329114069 | 0.01886492  | 0.237525692 | 0.257902444 |
| 0.244938043 | 0.219489888 | 0.288574742 | 0.295312168 |
| 0.222583035 | 0.211230282 | 0.240280573 | 0.240657092 |
| 0.227983003 | 0.17586604  | 0.272149457 | 0.188909623 |
| 0.269381317 | 0.126338116 | 0.079899664 | 0.074722266 |
| 0.082459702 | 0.315844988 | 0.222376594 | 0.052512293 |
| 0.223448543 | 0.194602655 | 0.351818526 | 0.315096287 |
| 0.376831545 | 0.0701262   | 0.210569428 | 0.298570633 |
| 0.098240873 | 0.141662316 | 0.046353864 | 0.195503871 |
| 0.183469229 | 0.256286597 | 0.158580519 | 0.156975653 |
| 0.23607919  | 0.330632528 | 0.212318474 | 0.354368554 |
| 0.258825153 | 0.178324712 | 0.100915498 | 0.157197137 |
| 0.15626996  | 0.112072114 | 0.293611223 | 0.006274361 |
| 0.26301947  | 0.14142419  | 0.35911213  | 0.328293972 |
| 0.206303934 | 0.33850611  | 0.104004076 | 0.095682304 |
| 0.089125763 | 0.119311001 | 0.136178308 | 0.289933851 |
| 0.188454765 | 0.171813145 | 1           | 0.121532527 |
| 0.335665668 | 0.27981404  | 0.247903605 | 0.157744212 |
| 0.193839412 | 0.135722443 | 0.32767435  | 0.076656013 |
| 0.212344274 | 0.305576559 | 0.140671621 | 0.265702081 |
| 0.260616227 | 0.378597769 | 0.054573087 | 0.384934441 |
| 0.248213401 | 0.104892158 | 0.389651547 | 0.156480626 |
| 0.179344181 | 0.198319197 | 0.214543881 | 0.145051332 |
| 0.20035554  | 0.215688186 | 0.006919159 | 0.092225613 |
| 0.33043648  | 0.150404515 | 0.242632718 | 0.289766163 |
| 0.295134364 | 0.353563046 | 0.158040474 | 0.16207479  |
| 0.292821104 | 0.321578208 | 0.219353483 | 0.261919257 |
| 0.270548494 | 0.124322813 | 0.184270845 | 0.017015529 |
| 0.255122442 | 0.226899211 | 0.14994521  | 0.071637922 |
| 0.034255823 | 0.229833654 | 0.24125598  | 0.043672271 |
| 0.409085183 | 0.18104306  | 0.171956477 | 0.294444696 |
| 0.142083749 | 0.328294039 | 0.205358992 | 0.342536437 |
| 0.037178174 | 0.222712062 | 0.214799907 | 0.171495774 |
| 0.269771743 | 0.282679559 | 0.363362875 | 0.273145959 |
| 0.06017955  | 0.266207006 | 0.00920273  | 0.313730993 |
| 0.295965542 | 0.247557082 | 0.182694825 | 0.09842841  |
| 0.304996562 | 0.301647249 | 0.200075756 | 0.178690403 |
| 0.03485747  | 0.296794654 | 0.183574157 | 0.293340709 |
| 0.163074242 | 0.192038497 | 0.112808282 | 0.243266414 |
| 0.287797453 | 0.211937158 | 0.228335504 | 0.19755217  |

|             |             |             |             |
|-------------|-------------|-------------|-------------|
| 0.321641506 | 0.256900274 | 0.102704112 | 0.245608179 |
| 0.195264316 | 0.054322595 | 0.132246118 | 0.390677172 |
| 0.217617862 | 0.293337454 | 0.396884987 | 0.23277182  |
| 0.238925547 | 0.27350028  | 0.199803955 | 0.368476373 |
| 0.169339442 | 0.244023265 | 0.344361109 | 0.333924682 |
| 0.32540039  | 0.272495191 | 0.253341381 | 0.265853603 |
| 0.291216589 | 0.10760465  | 0.261628548 | 0.280456694 |
| 0.257847969 | 0.271159793 | 0.137320997 | 0.26902782  |
| 0.064734941 | 0.158147386 | 0.188526361 | 0.129334686 |
| 0.250607657 | 0.263800929 | 0.29922841  | 0.353016523 |
| 0.190855155 | 0.062467948 | 0.386775305 | 0.051052388 |
| 0.150219768 | 0.31497027  | 0.191746663 | 0.260539202 |
| 0.159583621 | 0.211512845 | 0.143957874 | 0.001982752 |
| 0.353340792 | 0.129670542 | 0.207337291 | 0.281122413 |
| 0.189023546 | 0.054269879 | 0.328742589 | 0.413905992 |
| 0.212598414 | 0.161128173 | 0.177856533 | 0.320617592 |
| 0.238624571 | 0.164808725 | 0.189302354 | 0.217649545 |
| 0.248718517 | 0.141495564 | 0.176491376 | 0.219272175 |
| 0.266465538 | 0.164238386 |             |             |
| SEC14L1     | 0.053156474 | 0.421732582 | 0.065203498 |
| 0.058845848 | 0.131502866 | 0.198096861 | 0.018790571 |
| 0.039183761 | 0.280614554 | 0.0911931   | 0.204643679 |
| 0.009522548 | 0.016347759 | 0.40134446  | 0.016593118 |
| 0.184778776 | 0.010332807 | 0.048675498 | 0.017059422 |
| 0.057680568 | 0.099730252 | 0.091773497 | 0.248491684 |
| 0.089733518 | 0.223171671 | 0.23021466  | 0.167301812 |
| 0.475226278 | 0.094412663 | 0.316313813 | 0.075713504 |
| 0.36619141  | 0.1423032   | 0.159016525 | 0.013097091 |
| 0.220253707 | 0.000284288 | 0.402973705 | 0.067311733 |
| 0.037227524 | 0.325968386 | 0.189377496 | 0.092860472 |
| 0.163262501 | 0.02395583  | 0.096691641 | 0.21982322  |
| 0.196226611 | 0.07979766  | 0.069002494 | 0.319481703 |
| 0.087087911 | 0.306656577 | 0.342596956 | 0.001203782 |
| 0.098576445 | 0.017062559 | 0.04405282  | 0.51282968  |
| 0.155128002 | 0.054507631 | 0.056900251 | 0.10346711  |
| 0.18915833  | 0.201168054 | 0.155243935 | 0.097698608 |
| 0.477445688 | 0.028531736 | 0.301791289 | 0.062353632 |
| 0.145808845 | 0.019930541 | 0.128686201 | 0.076890036 |
| 0.103931664 | 0.101042495 | 0.172327876 | 0.080136489 |
| 0.430321697 | 0.481003407 | 0.143646767 | 0.496785479 |
| 0.007893037 | 0.134127716 | 0.05938227  | 0.177741429 |
| 0.210955243 | 0.020630997 | 0.308205877 | 0.47408197  |
| 0.025044718 | 0.239572668 | 0.24367037  | 0.115988233 |
| 0.437877442 | 0.053745773 | 0.232935502 | 0.039625415 |
| 0.196144202 | 0.128667973 | 0.442676216 | 0.208023931 |
| 0.118687404 | 0.075208873 | 0.512560225 | 0.127637722 |
| 0.112062544 | 0.07744826  | 0.035832185 | 0.365917764 |
| 0.250387968 | 0.474442745 | 0.348498563 | 0.233727717 |
| 0.151107202 | 0.480179057 | 0.299126249 | 0.377660638 |
| 0.062255149 | 0.503356659 | 0.127624123 | 0.015663949 |
| 0.053678423 | 0.026908487 | 0.034117362 | 0.235345901 |
| 0.431102979 | 0.238004709 | 0.092459735 | 0.082600011 |
| 0.346953296 | 0.510132357 | 0.489155729 | 0.314176093 |
| 0.022204433 | 0.040206477 | 0.159648746 | 0.115780908 |

|             |             |             |             |
|-------------|-------------|-------------|-------------|
| 0.222165314 | 0.071373968 | 0.075843173 | 0.502385446 |
| 0.363725956 | 0.322156317 | 0.086767823 | 0.491618581 |
| 0.063659988 | 0.473480502 | 0.457758161 | 0.088130935 |
| 0.502552339 | 0.515180759 | 0.451893255 | 0.250873016 |
| 0.493883612 | 0.211381909 | 0.008807528 | 0.284165348 |
| 0.438517281 | 0.003749831 | 0.40969986  | 0.427385571 |
| 0.489045469 | 0.371787976 | 0.435225637 | 0.467609603 |
| 0.501159172 | 0.059626505 | 0.00249711  | 0.130264784 |
| 0.493630876 | 0.362012347 | 0.029179733 | 0.185205537 |
| 0.15896064  | 0.218010621 | 0.328888732 | 0.083856842 |
| 0.450383128 | 0.413612431 | 0.448581121 | 0.279841425 |
| 0.146453763 | 0.312380836 | 0.16064723  | 0.512385071 |
| 0.018891138 | 0.077208113 | 0.073890422 | 0.194397247 |
| 0.132867489 | 0.086942146 | 0.165223668 | 0.142359025 |
| 0.113160087 | 0.168542208 | 0.105581066 | 0.214369896 |
| 0.085622047 | 0.269752643 | 0.100184652 | 0.097231398 |
| 0.013422885 | 0.158590089 | 0.052031612 | 0.058456414 |
| 0.096648778 | 0.277414218 | 0.311092954 | 0.430111918 |
| 0.097265702 | 0.180810687 | 0.30426259  | 0.426732092 |
| 0.346257508 | 0.173919691 | 0.166458447 | 0.006782768 |
| 0.048576452 | 0.062616286 | 0.030416112 | 0.205210501 |
| 0.214804154 | 0.045654042 | 0.181373483 | 0.261609437 |
| 0.195924642 | 0.075618889 | 0.089061275 | 0.428732338 |
| 0.148363442 | 0.100711142 | 0.358141975 | 0.211017702 |
| 0.003430649 | 0.158588347 | 0.372822358 | 0.019842352 |
| 0.183818567 | 0.027844481 | 0.079387697 | 0.3775334   |
| 0.05469694  | 0.039748079 | 0.448650812 | 0.249948974 |
| 0.104723965 | 0.260089478 | 0.452017345 | 0.005106408 |
| 0.125133841 | 0.017324477 | 0.161995555 | 0.167932609 |
| 0.144588435 | 0.170112711 | 0.129855603 | 0.076362161 |
| 0.156627387 | 0.4836614   | 0.359967666 | 0.471332783 |
| 0.083364459 | 0.456588266 | 0.378098719 | 0.393330994 |
| 0.241517891 | 0.117864782 | 0.023765805 | 0.356802316 |
| 0.376434253 | 0.055488838 | 0.098785267 | 0.330206812 |
| 0.114893622 | 0.228401201 | 0.02097169  | 0.423902645 |
| 0.475984303 | 0.493361084 | 0.039953699 | 0.226246794 |
| 0.329085886 | 0.157292341 | 0.337510039 | 0.455706731 |
| 0.068144738 | 0.117973353 | 0.081330798 | 0.283445914 |
| 0.1306859   | 0.031099823 | 0.277197313 | 0.032608966 |
| 0.00813299  | 0.059853341 | 0.060702001 | 0.055612697 |
| 0.029819446 | 0.262696933 | 0.225128062 | 0.470556993 |
| 0.057370489 | 0.412938123 | 0.15331929  | 0.064682004 |
| 0.380488153 | 0.106041211 | 0.186411644 | 0.213111882 |
| 0.183451944 | 0.00949212  | 0.041226445 | 0.48535459  |
| 0.0536798   | 0.05268232  | 0.141746682 | 0.003036457 |
| 0.02002139  | 0.37966938  | 0.119140511 | 0.214550878 |
| 0.391656907 | 0.230604767 | 0.151537159 | 0.08172801  |
| 0.233657935 | 0.062412873 | 0.002236454 | 0.417870772 |
| 0.430772155 | 0.391934677 | 0.432897634 | 0.44091987  |
| 0.340793575 | 0.295598071 | 0.275794569 | 0.275478567 |
| 0.033886724 | 0.051798664 | 0.030383242 | 0.093220381 |
| 0.001612263 | 0.297211041 | 0.11678285  | 0.114043725 |
| 0.282909429 | 0.165267149 | 0.020484859 | 0.161859835 |
| 0.019740586 | 0.044726575 | 0.07300664  | 0.065256462 |



|             |             |             |             |
|-------------|-------------|-------------|-------------|
| 0.199662903 | 0.010748469 | 0.09025384  | 0.062828135 |
| 0.48066258  | 0.330151932 | 0.100841246 | 0.505515248 |
| 0.174999591 | 0.142001579 | 0.11263231  | 0.289229301 |
| 0.024711923 | 0.021186071 | 0.123303619 | 0.025525899 |
| 0.10383388  | 0.420354313 | 0.105613914 | 0.033035113 |
| 0.155194872 | 0.005775202 | 0.369224826 | 0.495562027 |
| 0.501875345 | 0.444158056 | 0.485021526 | 0.08777396  |
| 0.487902893 | 0.017819112 | 0.491926133 | 0.369262625 |
| 0.123377082 | 0.0013591   | 0.001781987 | 0.422688503 |
| 0.177266854 | 0.100283053 | 0.104340121 | 0.15339748  |
| 0.032650866 | 0.084308114 | 0.031206572 | 0.032647475 |
| 0.312872077 | 0.091804814 | 0.031103388 | 0.465002067 |
| 0.084990558 | 0.108129408 | 0.157712019 | 0.088668733 |
| 0.236886445 | 0.020926196 | 0.078226857 | 0.002718994 |
| 0.213039797 | 0.148563827 | 0.496070184 | 0.490591291 |
| 0.451844558 | 0.238327757 | 0.10610187  | 0.112807631 |
| 0.346690108 | 0.144548794 | 0.101196377 | 0.122004112 |
| 0.493468184 | 0.202925442 | 0.249565607 | 0.287954141 |
| 0.426258571 | 0.444076938 | 0.015964285 | 0.280329146 |
| 0.015198166 | 0.000435669 | 0.231776125 | 0.166016765 |
| 0.006483987 | 0.11796153  | 0.195024107 | 0.050215622 |
| 0.051612711 | 0.022433128 | 0.055749003 | 0.049086839 |
| 0.14860754  | 0.13338798  | 0.093040803 | 0.170613904 |
| 0.064179557 | 0.016224415 | 0.065016383 | 0.041972036 |
| 0.04467121  | 0.287106556 | 0.223396332 | 0.008705958 |
| 0.212282588 | 0.196117955 | 0.037641687 | 0.13299614  |
| 0.386072716 | 0.435467565 | 0.009771313 | 0.004980699 |
| 0.227004877 | 0.087518961 | 0.430691652 | 0.496948322 |
| 0.515397744 | 0.449496521 | 0.381808815 | 0.020037551 |
| 0.033781008 | 0.14083593  | 0.106105577 | 0.018091513 |
| 0.482313237 | 0.071259983 | 0.499176943 | 0.102482446 |
| 0.08170972  | 0.067893584 | 0.015657881 | 0.046439452 |
| 0.197628309 | 0.116630269 | 0.064991929 | 0.1485841   |
| 0.091627863 | 0.054328413 | 0.021293413 | 0.103751681 |
| 0.246932868 | 0.027340946 | 0.096774259 | 0.124224058 |
| 0.312629152 | 0.056765331 | 0.272710193 | 0.390441002 |
| 0.116359409 | 0.059749287 | 0.109727431 | 0.259417848 |
| 0.366884173 | 0.205481664 | 0.028802216 | 0.457453037 |
| 0.435257541 | 0.295255756 | 0.512713641 | 0.280398066 |
| 0.073090829 | 0.172106413 | 0.074735806 | 0.130033088 |
| 0.094172644 | 0.224611152 | 0.092602823 | 0.048710442 |
| 0.24528083  | 0.448448116 | 0.366670982 | 0.070271408 |
| 0.24808638  | 0.118749301 | 0.062778498 | 0.402013272 |
| 0.025893901 | 0.037551172 | 0.185655038 | 0.324370295 |
| 0.00072706  | 0.02529835  | 0.393852778 | 0.084234347 |
| 0.460900071 | 0.403417865 | 0.410889489 | 0.081646623 |
| 2.61E-06    | 0.227368676 | 0.218802926 | 0.14427728  |
| 0.404389699 | 0.316610675 | 0.048941664 | 0.020570838 |
| 0.220152923 | 0.118285186 | 0.02735203  | 0.130822367 |
| 0.025093397 | 0.264458922 | 0.129478012 | 0.096734066 |
| 0.058516299 | 0.093452235 | 0.058110664 | 0.117478886 |
| 0.017115272 | 0.1742628   | 0.258115334 | 0.097614567 |
| 0.036561198 | 0.327504053 | 0.302808077 | 0.017557466 |
| 0.149828752 | 0.30130767  | 0.381069184 | 0.000404667 |

|             |             |             |             |
|-------------|-------------|-------------|-------------|
| 0.290788379 | 0.004389672 | 0.066298182 | 0.081963356 |
| 0.066908429 | 0.057016818 | 0.11287217  | 0.074716911 |
| 0.195131265 | 0.078752364 | 0.114076048 | 0.142997468 |
| 0.04562861  | 0.104759959 | 0.196158643 | 0.144438795 |
| 0.086000319 | 0.057486288 | 0.140716536 | 0.160891707 |
| 0.026444102 | 0.445352757 | 0.239165103 | 0.110446748 |
| 0.121467689 | 0.11848171  | 0.293626035 | 0.497032739 |
| 0.362130108 | 0.175280107 | 0.102894008 | 0.442404559 |
| 0.055165255 | 0.097485796 | 0.030866161 | 0.22062311  |
| 0.128472088 | 0.046221071 | 0.218237459 | 0.217980748 |
| 0.283426886 | 0.380536526 | 0.236332284 | 0.396310717 |
| 0.139505595 | 0.116005432 | 0.133519522 | 0.024038497 |
| 0.08398243  | 0.109000139 | 0.091173311 | 0.002322823 |
| 0.216801893 | 0.116388138 | 0.409628824 | 0.499040262 |
| 0.071285491 | 0.349702074 | 0.132158611 | 0.032165194 |
| 0.106614197 | 0.231172598 | 0.112586987 | 0.334455912 |
| 0.046949429 | 0.077389129 | 0.121532527 | 1           |
| 0.29988608  | 0.276854106 | 0.047087931 | 0.091571592 |
| 0.103520619 | 0.162380124 | 0.440300637 | 0.079416396 |
| 0.233698518 | 0.038127692 | 0.242889937 | 0.100940214 |
| 0.063389365 | 0.464173663 | 0.05310621  | 0.46937076  |
| 0.094358025 | 0.138896107 | 0.453475778 | 0.173207    |
| 0.098458815 | 0.038007869 | 0.03507751  | 0.14161029  |
| 0.046790709 | 0.097187865 | 0.003739998 | 0.009808392 |
| 0.214267182 | 0.073262793 | 0.32195868  | 0.224052586 |
| 0.055803283 | 0.213226876 | 0.037470666 | 0.120484548 |
| 0.504862293 | 0.509823485 | 0.061353638 | 0.171363881 |
| 0.237181196 | 0.043963097 | 0.344461042 | 0.002669886 |
| 0.219256092 | 0.22671573  | 0.091538977 | 0.020084726 |
| 0.009034888 | 0.037471956 | 0.216390314 | 0.062811928 |
| 0.382109615 | 0.049238271 | 0.205496008 | 0.340659471 |
| 0.139310076 | 0.511050761 | 0.026985113 | 0.293341233 |
| 0.013397905 | 0.155614426 | 0.147715004 | 0.141913484 |
| 0.053499228 | 0.076452987 | 0.254981493 | 0.062137725 |
| 0.013284308 | 0.060453467 | 0.000453418 | 0.406917147 |
| 0.479327397 | 0.10337219  | 0.186965406 | 0.080487842 |
| 0.173052289 | 0.319297622 | 0.041590288 | 0.206817278 |
| 0.006590928 | 0.173577956 | 0.116038739 | 0.429546769 |
| 0.057246818 | 0.151981678 | 0.024794086 | 0.09363365  |
| 0.49566863  | 0.052441506 | 0.196237665 | 0.064256932 |
| 0.497888404 | 0.347766231 | 0.194974467 | 0.052587934 |
| 0.232160669 | 0.066383131 | 0.175986338 | 0.470422874 |
| 0.065215933 | 0.053305174 | 0.335780042 | 0.053964994 |
| 0.089519743 | 0.381460785 | 0.222044267 | 0.464609227 |
| 0.014003208 | 0.160509038 | 0.3136323   | 0.398627284 |
| 0.210353457 | 0.026442124 | 0.050106902 | 0.052974493 |
| 0.49577676  | 0.048470357 | 0.04256424  | 0.275615057 |
| 0.041014032 | 0.188736662 | 0.224685536 | 0.045454127 |
| 0.013869701 | 0.041476374 | 0.133592654 | 0.098607899 |
| 0.137794467 | 0.144618131 | 0.040188732 | 0.346918625 |
| 0.048884993 | 0.012974063 | 0.406009666 | 0.00228625  |
| 0.276027567 | 0.256047338 | 0.140243782 | 0.121161096 |
| 0.206969153 | 0.18698464  | 0.183697069 | 0.001091666 |
| 0.294453188 | 0.013567498 | 0.085277908 | 0.046755054 |

|             |             |             |             |
|-------------|-------------|-------------|-------------|
| 0.053886618 | 0.020795734 | 0.472009803 | 0.438612149 |
| 0.223471145 | 0.089935445 | 0.087052968 | 0.43840557  |
| 0.026121879 | 0.087198481 | 0.07265112  | 0.309561678 |
| 0.050277327 | 0.163793266 | 0.154679647 | 0.13442408  |
| 0.298314099 | 0.116966441 |             |             |
| SEC61A1     | 0.075533616 | 0.409456519 | 0.055633185 |
| 0.164004303 | 0.346694511 | 0.3622125   | 0.064513761 |
| 0.133377561 | 0.31208714  | 0.294434129 | 0.354487137 |
| 0.019660341 | 0.141862182 | 0.449063679 | 0.059359001 |
| 0.393265355 | 0.041054593 | 0.115158583 | 0.089587806 |
| 0.243231195 | 0.319421742 | 0.354816516 | 0.323463771 |
| 0.326323012 | 0.171143132 | 0.309802846 | 0.388520877 |
| 0.496128869 | 0.293663522 | 0.403377395 | 0.22617821  |
| 0.404616851 | 0.35613237  | 0.392006976 | 0.018446683 |
| 0.381393801 | 0.025276291 | 0.420598347 | 0.297604696 |
| 0.236804644 | 0.326239165 | 0.311570787 | 0.262240457 |
| 0.356553589 | 0.038773606 | 0.211157763 | 0.392614009 |
| 0.315035988 | 0.295801797 | 0.060909379 | 0.388670563 |
| 0.369948318 | 0.301671942 | 0.333484034 | 0.002544284 |
| 0.349710666 | 0.147985592 | 0.290200849 | 0.490361806 |
| 0.198620893 | 0.135324953 | 0.321451331 | 0.239048801 |
| 0.367742832 | 0.363566624 | 0.253199052 | 0.361062146 |
| 0.489601637 | 0.241026475 | 0.399662249 | 0.187992479 |
| 0.351026573 | 0.033611349 | 0.15509474  | 0.081008802 |
| 0.389878777 | 0.214737134 | 0.34886214  | 0.367595885 |
| 0.410235043 | 0.498856264 | 0.237061808 | 0.480852105 |
| 0.147683484 | 0.372837445 | 0.333643259 | 0.301056524 |
| 0.337845224 | 0.091376839 | 0.380602986 | 0.513954428 |
| 0.050514161 | 0.343380224 | 0.361724418 | 0.112859905 |
| 0.410792102 | 0.326967144 | 0.357031105 | 0.240060946 |
| 0.385179068 | 0.36492167  | 0.45558015  | 0.277596168 |
| 0.338425983 | 0.069395021 | 0.454816769 | 0.362045095 |
| 0.319797404 | 0.084364987 | 0.281441235 | 0.464200145 |
| 0.395149838 | 0.488127322 | 0.402817681 | 0.33366195  |
| 0.394127455 | 0.496122436 | 0.377647602 | 0.399783606 |
| 0.173805651 | 0.51300447  | 0.193372061 | 0.047923658 |
| 0.070516539 | 0.097613843 | 0.272855952 | 0.27929395  |
| 0.471714988 | 0.313560122 | 0.199772714 | 0.264008915 |
| 0.469845495 | 0.449740235 | 0.511967818 | 0.39087392  |
| 0.042336722 | 0.313505196 | 0.402073816 | 0.265582259 |
| 0.351431458 | 0.114790923 | 0.321968497 | 0.484152204 |
| 0.36797053  | 0.427565172 | 0.16301856  | 0.475290192 |
| 0.201450859 | 0.509165623 | 0.439777997 | 0.181009553 |
| 0.504145261 | 0.471785276 | 0.515831457 | 0.399899096 |
| 0.455838683 | 0.329759746 | 0.068852684 | 0.358013328 |
| 0.481902186 | 0.026184745 | 0.479644723 | 0.507955186 |
| 0.488524427 | 0.464051321 | 0.525087222 | 0.510949776 |
| 0.488584489 | 0.074900446 | 0.044674587 | 0.303559415 |
| 0.492993122 | 0.387057865 | 0.154870053 | 0.404362441 |
| 0.368400949 | 0.354831103 | 0.398684998 | 0.316287827 |
| 0.502511966 | 0.454423141 | 0.488760176 | 0.351006031 |
| 0.291235586 | 0.297790138 | 0.392309699 | 0.43923316  |
| 0.052856437 | 0.113969349 | 0.050129666 | 0.284102956 |
| 0.32963078  | 0.189485423 | 0.349165107 | 0.355437453 |

|             |             |             |             |
|-------------|-------------|-------------|-------------|
| 0.198368501 | 0.312192003 | 0.365668929 | 0.384565402 |
| 0.049551041 | 0.39558796  | 0.173141727 | 0.170371775 |
| 0.050939464 | 0.127083182 | 0.197669355 | 0.168667314 |
| 0.272902072 | 0.213227496 | 0.395365334 | 0.497320195 |
| 0.35923862  | 0.168318896 | 0.382577322 | 0.474804719 |
| 0.421360826 | 0.400861069 | 0.208979654 | 0.017119144 |
| 0.305477407 | 0.329207093 | 0.263542716 | 0.398904826 |
| 0.160946476 | 0.25340242  | 0.378364938 | 0.385112542 |
| 0.261275407 | 0.137601437 | 0.380577423 | 0.405359909 |
| 0.135042523 | 0.328567692 | 0.445993967 | 0.372195276 |
| 0.003871148 | 0.328959768 | 0.429083548 | 0.198752871 |
| 0.293396816 | 0.179651033 | 0.303389828 | 0.468520492 |
| 0.330120433 | 0.275480977 | 0.495144959 | 0.383605493 |
| 0.326887621 | 0.19907647  | 0.524368014 | 0.073508079 |
| 0.362832029 | 0.086603737 | 0.288691847 | 0.311611301 |
| 0.250552155 | 0.281738655 | 0.348777262 | 0.326920693 |
| 0.120845665 | 0.501945128 | 0.372049664 | 0.506845164 |
| 0.384991213 | 0.527416819 | 0.456142105 | 0.432652894 |
| 0.339292487 | 0.372973517 | 0.202751687 | 0.423318625 |
| 0.462457168 | 0.325508998 | 0.068761145 | 0.419650577 |
| 0.361418108 | 0.395234623 | 0.174907237 | 0.496237075 |
| 0.479193106 | 0.445100419 | 0.158854805 | 0.360698128 |
| 0.363234607 | 0.233514164 | 0.402315504 | 0.522532788 |
| 0.318623803 | 0.367271964 | 0.370695919 | 0.405958654 |
| 0.177835454 | 0.260322194 | 0.298315646 | 0.250755436 |
| 0.018482925 | 0.080283709 | 0.066237816 | 0.186688211 |
| 0.241154452 | 0.381739877 | 0.385280944 | 0.51117738  |
| 0.122881812 | 0.402749199 | 0.222023574 | 0.316707885 |
| 0.408193258 | 0.358006391 | 0.391811015 | 0.383906605 |
| 0.230175144 | 0.026890728 | 0.132001117 | 0.501164098 |
| 0.037775498 | 0.302981844 | 0.294764622 | 0.003710545 |
| 0.047162007 | 0.380062747 | 0.084081409 | 0.17876166  |
| 0.483215529 | 0.182757195 | 0.201037006 | 0.316512447 |
| 0.33549187  | 0.096848719 | 0.005179938 | 0.486376241 |
| 0.475730834 | 0.447066015 | 0.471827497 | 0.435270028 |
| 0.439557407 | 0.35996073  | 0.401101279 | 0.32065047  |
| 0.116827424 | 0.093650094 | 0.282184272 | 0.309332689 |
| 0.005505899 | 0.357350621 | 0.323402994 | 0.139709643 |
| 0.393063638 | 0.289118517 | 0.03971748  | 0.362754835 |
| 0.025252085 | 0.273505425 | 0.286688613 | 0.236164862 |
| 0.342256421 | 0.015425693 | 0.250930855 | 0.356898736 |
| 0.406799724 | 0.317308561 | 0.392999558 | 0.520456508 |
| 0.330657902 | 0.11435286  | 0.344551824 | 0.372387744 |
| 0.079076457 | 0.139779345 | 0.327850395 | 0.050397205 |
| 0.202972485 | 0.432924259 | 0.380655527 | 0.080363596 |
| 0.27426916  | 0.00553935  | 0.344340938 | 0.516719521 |
| 0.444892137 | 0.523735374 | 0.493844553 | 0.325595368 |
| 0.497733442 | 0.165474254 | 0.522214839 | 0.382375981 |
| 0.358239868 | 0.001393633 | 0.006226733 | 0.495011072 |
| 0.403411856 | 0.05133075  | 0.161538243 | 0.340609641 |
| 0.126746708 | 0.14503047  | 0.0700949   | 0.253411943 |
| 0.38904137  | 0.273450636 | 0.232385427 | 0.447468834 |
| 0.263030722 | 0.239544703 | 0.353120075 | 0.081639912 |
| 0.395164282 | 0.060201052 | 0.083272581 | 0.012061969 |

|             |             |             |             |
|-------------|-------------|-------------|-------------|
| 0.35937166  | 0.099069889 | 0.437947453 | 0.496751637 |
| 0.486769221 | 0.390791654 | 0.329093974 | 0.315929084 |
| 0.430326042 | 0.086033736 | 0.372483081 | 0.101961799 |
| 0.469458315 | 0.386432908 | 0.297959072 | 0.282522515 |
| 0.498799166 | 0.459169095 | 0.035797131 | 0.386803838 |
| 0.016232907 | 0.00316032  | 0.342400178 | 0.246698748 |
| 0.090833368 | 0.379400815 | 0.239327225 | 0.242995193 |
| 0.242517446 | 0.032870886 | 0.329029796 | 0.314269251 |
| 0.309152391 | 0.367104288 | 0.321616447 | 0.225145034 |
| 0.309332411 | 0.195305956 | 0.219581988 | 0.162381528 |
| 0.259216798 | 0.287223197 | 0.174735303 | 0.023450536 |
| 0.395871107 | 0.408163163 | 0.060483474 | 0.152733442 |
| 0.437513011 | 0.494069929 | 0.050179032 | 0.016027908 |
| 0.235307905 | 0.324100095 | 0.502465175 | 0.485053479 |
| 0.5030373   | 0.514727371 | 0.372539989 | 0.151131127 |
| 0.072330422 | 0.333302274 | 0.338917461 | 0.14040246  |
| 0.500489593 | 0.061533023 | 0.465353912 | 0.353429974 |
| 0.117270079 | 0.239639848 | 0.041361596 | 0.090240723 |
| 0.392204939 | 0.17410182  | 0.206605674 | 0.141366695 |
| 0.328482703 | 0.320939529 | 0.052266773 | 0.202525783 |
| 0.316614271 | 0.267392446 | 0.163267019 | 0.296991591 |
| 0.323006594 | 0.230619229 | 0.405611931 | 0.438161451 |
| 0.123678296 | 0.11412479  | 0.268015453 | 0.353584284 |
| 0.434147185 | 0.367389389 | 0.030087276 | 0.434374758 |
| 0.487032583 | 0.405815982 | 0.479282111 | 0.385585085 |
| 0.082664636 | 0.383160667 | 0.349334005 | 0.355614317 |
| 0.185914598 | 0.357985297 | 0.246102387 | 0.063915018 |
| 0.278573352 | 0.456029639 | 0.407781419 | 0.181764961 |
| 0.385366129 | 0.116409737 | 0.053840309 | 0.432667825 |
| 0.258497282 | 0.092405368 | 0.322097957 | 0.421092631 |
| 0.004873379 | 0.211718149 | 0.495274625 | 0.242448026 |
| 0.505067467 | 0.490053933 | 0.428673242 | 0.253577118 |
| 0.005162186 | 0.404235559 | 0.369925757 | 0.398024668 |
| 0.41288743  | 0.307409721 | 0.157013943 | 0.088755859 |
| 0.265577956 | 0.073064082 | 0.153511639 | 0.325155224 |
| 0.235302236 | 0.358881697 | 0.191383305 | 0.206514145 |
| 0.228881069 | 0.083242918 | 0.301271248 | 0.251444038 |
| 0.214115531 | 0.226447097 | 0.326307132 | 0.27345451  |
| 0.24545374  | 0.428389961 | 0.376952674 | 0.028104712 |
| 0.375889049 | 0.398945852 | 0.425152938 | 0.002839865 |
| 0.401806057 | 0.008240629 | 0.218170518 | 0.243886704 |
| 0.226877981 | 0.226972645 | 0.277949114 | 0.34406721  |
| 0.33283679  | 0.239379108 | 0.292076872 | 0.239746028 |
| 0.191036721 | 0.228168402 | 0.390562269 | 0.35258171  |
| 0.308957838 | 0.133250426 | 0.088390891 | 0.09225384  |
| 0.059066024 | 0.451031172 | 0.220343285 | 0.068168816 |
| 0.229106214 | 0.354588287 | 0.340987262 | 0.477108566 |
| 0.412988212 | 0.097556184 | 0.331146454 | 0.429407758 |
| 0.256755091 | 0.296849325 | 0.062105453 | 0.375403175 |
| 0.229776447 | 0.257738108 | 0.365266943 | 0.283477674 |
| 0.358498233 | 0.383225429 | 0.21112055  | 0.431178298 |
| 0.379938007 | 0.340476583 | 0.301430095 | 0.102834091 |
| 0.184876655 | 0.124364794 | 0.313069431 | 0.002573228 |
| 0.327001752 | 0.259489268 | 0.469056377 | 0.471120963 |

|             |             |             |             |
|-------------|-------------|-------------|-------------|
| 0.3379915   | 0.370994409 | 0.297527455 | 0.095055026 |
| 0.277449732 | 0.162558482 | 0.134419236 | 0.397737021 |
| 0.281460458 | 0.194710696 | 0.335665668 | 0.29988608  |
| 1           | 0.384241513 | 0.296625111 | 0.235462002 |
| 0.246172686 | 0.189572954 | 0.455199265 | 0.121754234 |
| 0.399147937 | 0.250079766 | 0.31471974  | 0.315966582 |
| 0.251306913 | 0.515578979 | 0.060539398 | 0.523810105 |
| 0.348413764 | 0.117525803 | 0.475808441 | 0.282898695 |
| 0.295282971 | 0.146186186 | 0.264064586 | 0.355743632 |
| 0.242865465 | 0.369584485 | 0.019028479 | 0.085441751 |
| 0.312858218 | 0.306439571 | 0.371417164 | 0.339058339 |
| 0.30298826  | 0.320316055 | 0.22801146  | 0.277495821 |
| 0.455576768 | 0.468940791 | 0.266855969 | 0.232297331 |
| 0.309151825 | 0.108762549 | 0.342629424 | 0.021663061 |
| 0.400258137 | 0.401803513 | 0.354748099 | 0.056688669 |
| 0.021276712 | 0.290674712 | 0.393773821 | 0.064455621 |
| 0.492069963 | 0.280731181 | 0.324741953 | 0.397705266 |
| 0.162260365 | 0.471136992 | 0.148167662 | 0.381224692 |
| 0.051814409 | 0.248819839 | 0.386334232 | 0.360254378 |
| 0.264171226 | 0.348801149 | 0.361287651 | 0.300321284 |
| 0.037149865 | 0.298319748 | 0.002871592 | 0.383068504 |
| 0.444357387 | 0.376093388 | 0.180010294 | 0.292123955 |
| 0.277247219 | 0.364252208 | 0.254434093 | 0.394908607 |
| 0.014594865 | 0.383344302 | 0.200152893 | 0.389959616 |
| 0.287269678 | 0.347054856 | 0.072283076 | 0.34444198  |
| 0.422372594 | 0.294032156 | 0.226149963 | 0.354053141 |
| 0.474950964 | 0.36135873  | 0.144948418 | 0.265225178 |
| 0.348297105 | 0.061199054 | 0.352601218 | 0.519067489 |
| 0.193384199 | 0.285020888 | 0.448439769 | 0.226063923 |
| 0.35038956  | 0.362410796 | 0.381160377 | 0.504543281 |
| 0.093827222 | 0.239721884 | 0.402093062 | 0.451325596 |
| 0.28131607  | 0.235566632 | 0.296145828 | 0.262710534 |
| 0.436675636 | 0.105038743 | 0.315797324 | 0.324802804 |
| 0.285595682 | 0.297440726 | 0.301919216 | 0.231040131 |
| 0.041589761 | 0.176271317 | 0.347756191 | 0.140272214 |
| 0.295235654 | 0.379757788 | 0.29689013  | 0.37668249  |
| 0.155802481 | 0.033391936 | 0.444008387 | 0.036324989 |
| 0.305182699 | 0.384922868 | 0.237376339 | 0.375943194 |
| 0.162149387 | 0.33516653  | 0.309718186 | 0.000755408 |
| 0.396702896 | 0.088410817 | 0.313800138 | 0.272078346 |
| 0.317045945 | 0.052769174 | 0.440924836 | 0.515150863 |
| 0.292035813 | 0.330604356 | 0.361107547 | 0.442128298 |
| 0.22114818  | 0.35615619  | 0.352807458 | 0.368984487 |
| 0.29202172  | 0.365138222 | 0.390332821 | 0.396547518 |
| 0.342991093 | 0.259306163 |             |             |
| SEMA7A      | 0.062800178 | 0.424142153 | 0.049809353 |
| 0.112867248 | 0.293424928 | 0.323246632 | 0.060611371 |
| 0.115108555 | 0.341188596 | 0.352258074 | 0.291718627 |
| 0.014431482 | 0.122677524 | 0.426425856 | 0.056109483 |
| 0.360703277 | 0.030746098 | 0.099534253 | 0.105291958 |
| 0.25662643  | 0.269656783 | 0.304895979 | 0.306706582 |
| 0.2957061   | 0.163658863 | 0.312623695 | 0.394498303 |
| 0.489175352 | 0.268261071 | 0.362476528 | 0.233795399 |
| 0.385856525 | 0.303715215 | 0.371026654 | 0.015068514 |

|             |             |             |             |
|-------------|-------------|-------------|-------------|
| 0.357709957 | 0.038603345 | 0.419081273 | 0.245768522 |
| 0.178294065 | 0.308254789 | 0.331754519 | 0.204352361 |
| 0.372783352 | 0.03157097  | 0.233161544 | 0.392051939 |
| 0.329471181 | 0.29181068  | 0.061138022 | 0.372019581 |
| 0.384040666 | 0.268104848 | 0.351148768 | 0.001559149 |
| 0.306528402 | 0.141878217 | 0.278728198 | 0.482792817 |
| 0.16459468  | 0.108693077 | 0.361931577 | 0.258092742 |
| 0.383771654 | 0.363731482 | 0.236863508 | 0.383085307 |
| 0.470045939 | 0.219464669 | 0.393231451 | 0.144162261 |
| 0.344753865 | 0.038987536 | 0.137162608 | 0.093068736 |
| 0.382878394 | 0.173663682 | 0.296629186 | 0.340577707 |
| 0.421521614 | 0.493613712 | 0.22458472  | 0.486797696 |
| 0.171298396 | 0.34356818  | 0.293160092 | 0.270580018 |
| 0.345522633 | 0.103831914 | 0.330334029 | 0.497367541 |
| 0.057966787 | 0.363983496 | 0.359080595 | 0.114301    |
| 0.40464988  | 0.353472836 | 0.35900728  | 0.186386733 |
| 0.351255039 | 0.33095213  | 0.472127987 | 0.235747296 |
| 0.312564019 | 0.069653756 | 0.461818866 | 0.321528634 |
| 0.244345051 | 0.075429444 | 0.245529622 | 0.45497445  |
| 0.359642143 | 0.467852727 | 0.41600838  | 0.331427607 |
| 0.355133079 | 0.475924816 | 0.334395691 | 0.400700058 |
| 0.214658421 | 0.508898937 | 0.160224832 | 0.034973241 |
| 0.067399937 | 0.080013918 | 0.299740777 | 0.264059503 |
| 0.451088241 | 0.286089468 | 0.164557802 | 0.218142729 |
| 0.453252616 | 0.456723643 | 0.515390721 | 0.375586924 |
| 0.034665899 | 0.333619673 | 0.359293893 | 0.250806168 |
| 0.331677701 | 0.11234106  | 0.272322247 | 0.481440606 |
| 0.331402869 | 0.408113225 | 0.152529106 | 0.4749463   |
| 0.210992746 | 0.481810379 | 0.435547651 | 0.141806798 |
| 0.492943293 | 0.464058847 | 0.486983867 | 0.354733597 |
| 0.439446815 | 0.27894325  | 0.100721593 | 0.361330601 |
| 0.450321893 | 0.016877025 | 0.474206249 | 0.498411197 |
| 0.484106091 | 0.442537479 | 0.510913882 | 0.495247244 |
| 0.48509113  | 0.071109593 | 0.068753851 | 0.263982084 |
| 0.486034244 | 0.350076405 | 0.14144561  | 0.380925806 |
| 0.340154083 | 0.327113039 | 0.401461768 | 0.257748268 |
| 0.482772365 | 0.435513461 | 0.484405028 | 0.34409455  |
| 0.327859276 | 0.278084929 | 0.38067219  | 0.438408502 |
| 0.039984514 | 0.094832024 | 0.047291029 | 0.280818855 |
| 0.324737989 | 0.153961436 | 0.318026962 | 0.358819398 |
| 0.165635444 | 0.317116399 | 0.344257341 | 0.341309055 |
| 0.052799791 | 0.36808816  | 0.15573297  | 0.16010827  |
| 0.035819557 | 0.124499091 | 0.145594648 | 0.126164308 |
| 0.223497851 | 0.220779427 | 0.379189594 | 0.485282482 |
| 0.36579424  | 0.153923999 | 0.356326991 | 0.445534347 |
| 0.387474585 | 0.350352509 | 0.199418704 | 0.008079314 |
| 0.260863079 | 0.383026261 | 0.24855497  | 0.389188954 |
| 0.166391446 | 0.225045391 | 0.353064745 | 0.335064111 |
| 0.226745385 | 0.151391827 | 0.357310346 | 0.387332765 |
| 0.136010214 | 0.25659176  | 0.410850833 | 0.379813029 |
| 0.00284301  | 0.280441724 | 0.402508347 | 0.182194231 |
| 0.295050374 | 0.13893494  | 0.240565438 | 0.450902691 |
| 0.313050887 | 0.259794615 | 0.483458003 | 0.346465573 |
| 0.289290119 | 0.212557338 | 0.511319699 | 0.08363604  |

|             |             |             |             |
|-------------|-------------|-------------|-------------|
| 0.373473976 | 0.046089332 | 0.241990081 | 0.351945285 |
| 0.220646688 | 0.257218347 | 0.306589647 | 0.265780796 |
| 0.108586157 | 0.495240078 | 0.353507136 | 0.487982714 |
| 0.364772025 | 0.514270421 | 0.430001129 | 0.398310856 |
| 0.313189259 | 0.392488633 | 0.181695204 | 0.391271055 |
| 0.444046114 | 0.323322153 | 0.070537847 | 0.425067896 |
| 0.39302448  | 0.365857463 | 0.139744874 | 0.468828369 |
| 0.461617589 | 0.455353913 | 0.123802461 | 0.328584671 |
| 0.319276664 | 0.18906282  | 0.391606477 | 0.511732367 |
| 0.373936948 | 0.343679529 | 0.325181258 | 0.372257117 |
| 0.152347024 | 0.238714968 | 0.296326848 | 0.242791774 |
| 0.0132309   | 0.077850377 | 0.058708253 | 0.142649602 |
| 0.188826278 | 0.389518628 | 0.363766879 | 0.496666831 |
| 0.099843921 | 0.380245077 | 0.22872109  | 0.252706254 |
| 0.397809487 | 0.35068333  | 0.355026416 | 0.351378937 |
| 0.217708959 | 0.016095904 | 0.091798508 | 0.492932397 |
| 0.041885241 | 0.239054174 | 0.296410631 | 0.002235872 |
| 0.042893278 | 0.401262121 | 0.087639124 | 0.17264592  |
| 0.462021031 | 0.17779595  | 0.181294104 | 0.358872475 |
| 0.287239427 | 0.084270169 | 0.002306338 | 0.491262118 |
| 0.492850407 | 0.468669952 | 0.490994078 | 0.456410149 |
| 0.4559574   | 0.371038703 | 0.381986229 | 0.292313929 |
| 0.096323442 | 0.090991665 | 0.238172941 | 0.262327076 |
| 0.005198604 | 0.319975812 | 0.308642102 | 0.120650042 |
| 0.371820019 | 0.282297305 | 0.030585848 | 0.347301254 |
| 0.015918444 | 0.224856941 | 0.292192864 | 0.21960796  |
| 0.319360409 | 0.012712345 | 0.205639316 | 0.325281823 |
| 0.39205133  | 0.299631777 | 0.365988524 | 0.509601836 |
| 0.269582689 | 0.121173743 | 0.284153395 | 0.331394243 |
| 0.066551933 | 0.154486895 | 0.347046541 | 0.043638315 |
| 0.1853325   | 0.446640319 | 0.376919554 | 0.065602947 |
| 0.230804352 | 0.003498142 | 0.321405245 | 0.502369262 |
| 0.447598367 | 0.505261256 | 0.469095101 | 0.261203732 |
| 0.477848438 | 0.180954063 | 0.51192304  | 0.375230187 |
| 0.369899827 | 0.000527806 | 0.004943917 | 0.475371016 |
| 0.352570185 | 0.054895306 | 0.138893925 | 0.286669999 |
| 0.092504686 | 0.141268999 | 0.061733821 | 0.199927906 |
| 0.354785837 | 0.220893482 | 0.196678033 | 0.450907647 |
| 0.224094118 | 0.214477433 | 0.361283738 | 0.083099405 |
| 0.358930931 | 0.044923336 | 0.089030137 | 0.006492951 |
| 0.330352102 | 0.100664057 | 0.444133736 | 0.489319991 |
| 0.460060004 | 0.345046022 | 0.349394413 | 0.289073782 |
| 0.438672977 | 0.088020402 | 0.357904367 | 0.102400177 |
| 0.462913211 | 0.34216399  | 0.25206671  | 0.253691181 |
| 0.473913327 | 0.436063218 | 0.030219849 | 0.363267076 |
| 0.0092684   | 0.002927771 | 0.310724238 | 0.235275029 |
| 0.147538329 | 0.356072863 | 0.211318243 | 0.283014086 |
| 0.251308967 | 0.023453709 | 0.304270166 | 0.273916069 |
| 0.266511526 | 0.327278666 | 0.267778103 | 0.235132225 |
| 0.278975929 | 0.165810404 | 0.182738377 | 0.146427356 |
| 0.29349678  | 0.285758247 | 0.166004127 | 0.02143642  |
| 0.386954081 | 0.363566197 | 0.049413018 | 0.137260211 |
| 0.39959083  | 0.468148625 | 0.044504397 | 0.00778487  |
| 0.213382039 | 0.310696718 | 0.476996386 | 0.481465055 |



|             |             |             |             |
|-------------|-------------|-------------|-------------|
| 0.495484899 | 0.493803195 | 0.356795493 | 0.122567443 |
| 0.058649417 | 0.302458423 | 0.295691733 | 0.107650784 |
| 0.485462115 | 0.065551498 | 0.46051572  | 0.319436598 |
| 0.109651799 | 0.197959946 | 0.025973232 | 0.080643521 |
| 0.355109027 | 0.150796168 | 0.162000407 | 0.129292872 |
| 0.282585649 | 0.263831252 | 0.04759826  | 0.171965033 |
| 0.290145604 | 0.229889732 | 0.142516409 | 0.299471311 |
| 0.323692379 | 0.316499735 | 0.37625924  | 0.414159133 |
| 0.111858897 | 0.116362573 | 0.231512079 | 0.349805506 |
| 0.425599687 | 0.392056804 | 0.017466086 | 0.44566019  |
| 0.471605362 | 0.372587367 | 0.470280122 | 0.360208429 |
| 0.081311856 | 0.322834759 | 0.364513874 | 0.324833661 |
| 0.172627891 | 0.319253595 | 0.232613071 | 0.058185546 |
| 0.276669057 | 0.460681724 | 0.401918761 | 0.137878753 |
| 0.377980151 | 0.121016524 | 0.059390486 | 0.43493126  |
| 0.2128215   | 0.072936988 | 0.344400187 | 0.424981535 |
| 0.002361386 | 0.178876186 | 0.493414718 | 0.193263697 |
| 0.503437899 | 0.465380569 | 0.400015167 | 0.256581653 |
| 0.005121641 | 0.386372344 | 0.309624779 | 0.339337486 |
| 0.404986869 | 0.287066887 | 0.172030838 | 0.064744989 |
| 0.238656311 | 0.071254922 | 0.124448616 | 0.292762827 |
| 0.244465689 | 0.347835583 | 0.170577571 | 0.215232041 |
| 0.194252594 | 0.097926085 | 0.257610909 | 0.206051526 |
| 0.24600776  | 0.194005899 | 0.292910754 | 0.318421889 |
| 0.196192266 | 0.42775024  | 0.366948417 | 0.022430208 |
| 0.350148266 | 0.402303569 | 0.416784487 | 0.001929467 |
| 0.357548188 | 0.005136931 | 0.176466296 | 0.18390307  |
| 0.183458266 | 0.200624349 | 0.239073728 | 0.277892871 |
| 0.328460064 | 0.209318715 | 0.222980335 | 0.196258175 |
| 0.140667329 | 0.207466168 | 0.35682135  | 0.347282592 |
| 0.232301972 | 0.107137763 | 0.091280108 | 0.097234237 |
| 0.038041051 | 0.449066367 | 0.20263348  | 0.066570333 |
| 0.201269875 | 0.357310686 | 0.309961957 | 0.480561212 |
| 0.384763428 | 0.103609974 | 0.323551456 | 0.411611179 |
| 0.29393064  | 0.261397412 | 0.058216221 | 0.35375838  |
| 0.192520649 | 0.196949096 | 0.367230833 | 0.267740863 |
| 0.37071539  | 0.362155305 | 0.192193924 | 0.419543416 |
| 0.323595092 | 0.372560251 | 0.31751987  | 0.068978438 |
| 0.150543019 | 0.123642385 | 0.259375911 | 0.001208514 |
| 0.294553288 | 0.215805634 | 0.444169062 | 0.464131825 |
| 0.320229401 | 0.348167723 | 0.283511996 | 0.074844343 |
| 0.290874118 | 0.167234474 | 0.119458194 | 0.393751529 |
| 0.246315838 | 0.160130377 | 0.27981404  | 0.276854106 |
| 0.384241513 | 1           | 0.288207243 | 0.227011489 |
| 0.241119962 | 0.17950886  | 0.469467446 | 0.113435626 |
| 0.392520053 | 0.184021693 | 0.342984175 | 0.261564329 |
| 0.209614986 | 0.509348255 | 0.054775671 | 0.512664395 |
| 0.317125878 | 0.116245658 | 0.457523235 | 0.276066664 |
| 0.271928862 | 0.108663857 | 0.23157266  | 0.367277241 |
| 0.226243815 | 0.340668462 | 0.022847267 | 0.072095832 |
| 0.268112316 | 0.362039361 | 0.391257354 | 0.338050509 |
| 0.265212986 | 0.300041975 | 0.216440754 | 0.267875969 |
| 0.463778433 | 0.473953916 | 0.206912332 | 0.213497632 |
| 0.287273555 | 0.083312781 | 0.321988794 | 0.031732591 |

|             |             |             |             |
|-------------|-------------|-------------|-------------|
| 0.37549568  | 0.390595392 | 0.369501472 | 0.047938097 |
| 0.017229241 | 0.251614259 | 0.376860245 | 0.075123999 |
| 0.471150689 | 0.233041512 | 0.36101833  | 0.366077241 |
| 0.16468673  | 0.470995114 | 0.112519322 | 0.326978305 |
| 0.066827013 | 0.235295158 | 0.383269416 | 0.388396289 |
| 0.189611703 | 0.298864162 | 0.30993915  | 0.236478597 |
| 0.026625172 | 0.244868281 | 0.002659684 | 0.36721542  |
| 0.455204212 | 0.357861613 | 0.177097299 | 0.347985481 |
| 0.236512078 | 0.368308133 | 0.238389969 | 0.391473448 |
| 0.00798298  | 0.329417097 | 0.172622145 | 0.362521315 |
| 0.23959501  | 0.367397921 | 0.047035731 | 0.340003684 |
| 0.428383175 | 0.260525997 | 0.224533341 | 0.325758738 |
| 0.472758701 | 0.375046953 | 0.146535705 | 0.231373821 |
| 0.379917482 | 0.059973648 | 0.353505792 | 0.511226202 |
| 0.151223406 | 0.222623932 | 0.413244715 | 0.178578728 |
| 0.323904698 | 0.357038426 | 0.398949883 | 0.510547858 |
| 0.06747702  | 0.200790884 | 0.38597055  | 0.446975997 |
| 0.24365952  | 0.205893669 | 0.244274421 | 0.219207293 |
| 0.430385216 | 0.073930841 | 0.297239146 | 0.292877806 |
| 0.239115211 | 0.266830497 | 0.339429251 | 0.190456686 |
| 0.028261668 | 0.163433157 | 0.297012509 | 0.128175916 |
| 0.254497625 | 0.337204168 | 0.260536806 | 0.344894137 |
| 0.101951283 | 0.017428877 | 0.419625298 | 0.028362746 |
| 0.274825602 | 0.326901248 | 0.208339525 | 0.334849028 |
| 0.146972329 | 0.323480889 | 0.303962646 | 0.000487013 |
| 0.381361237 | 0.067346399 | 0.314578148 | 0.205111913 |
| 0.293448676 | 0.04648078  | 0.426394698 | 0.492755329 |
| 0.277095134 | 0.335178984 | 0.330641954 | 0.441217804 |
| 0.181369618 | 0.367953748 | 0.362919713 | 0.360442619 |
| 0.249719835 | 0.375440999 | 0.388265197 | 0.353613925 |
| 0.323079961 | 0.242296962 |             |             |
| SEPW1       | 0.027680261 | 0.245175478 | 0.016483846 |
| 0.039252522 | 0.281922961 | 0.095243834 | 0.037182937 |
| 0.05593994  | 0.230854065 | 0.064105239 | 0.172708142 |
| 0.010533752 | 0.11603297  | 0.287730374 | 0.043717403 |
| 0.264374435 | 0.031143166 | 0.076300314 | 0.05042473  |
| 0.103394019 | 0.261616122 | 0.109823224 | 0.105338863 |
| 0.274721447 | 0.117899817 | 0.1523372   | 0.228756336 |
| 0.295986794 | 0.062719451 | 0.23118258  | 0.03372216  |
| 0.278558901 | 0.28393022  | 0.16668617  | 0.007628283 |
| 0.182681047 | 0.084166849 | 0.275139897 | 0.140342725 |
| 0.120087742 | 0.236022324 | 0.076463406 | 0.11543445  |
| 0.112571106 | 0.011750005 | 0.032192864 | 0.283415526 |
| 0.181710423 | 0.138688311 | 0.027777227 | 0.235630978 |
| 0.116152887 | 0.168623167 | 0.165673601 | 0.000658843 |
| 0.15971151  | 0.079080053 | 0.121599841 | 0.288930688 |
| 0.149191433 | 0.103239701 | 0.091801923 | 0.148894357 |
| 0.251878594 | 0.319719311 | 0.257215263 | 0.091230037 |
| 0.292177    | 0.142334116 | 0.27030785  | 0.053098692 |
| 0.134169446 | 0.020598369 | 0.137053277 | 0.061609878 |
| 0.138902132 | 0.167029414 | 0.220181441 | 0.198616555 |
| 0.211662122 | 0.333491838 | 0.199744826 | 0.275052171 |
| 0.181215207 | 0.291459867 | 0.166401283 | 0.303326137 |
| 0.296450138 | 0.061142973 | 0.239515227 | 0.326680619 |

|             |             |             |             |
|-------------|-------------|-------------|-------------|
| 0.037738577 | 0.137662421 | 0.245986311 | 0.07777711  |
| 0.243068365 | 0.167486245 | 0.108946654 | 0.127965351 |
| 0.334135202 | 0.250120791 | 0.309742465 | 0.184781204 |
| 0.244267611 | 0.039952649 | 0.256593561 | 0.287935837 |
| 0.120565247 | 0.041066932 | 0.143586867 | 0.321788561 |
| 0.217005988 | 0.288742158 | 0.2528596   | 0.286777728 |
| 0.222655918 | 0.298622314 | 0.215871853 | 0.287796788 |
| 0.033102401 | 0.31032597  | 0.09552456  | 0.032835368 |
| 0.023766642 | 0.072581201 | 0.187091147 | 0.280585187 |
| 0.30504813  | 0.207521938 | 0.073625697 | 0.191854015 |
| 0.368320942 | 0.246396734 | 0.309278079 | 0.266938972 |
| 0.021569704 | 0.179839861 | 0.206933795 | 0.089158131 |
| 0.256559827 | 0.10990159  | 0.217012511 | 0.288160435 |
| 0.236721359 | 0.32312602  | 0.05172528  | 0.304252293 |
| 0.133043332 | 0.33672187  | 0.232378712 | 0.102138528 |
| 0.306177836 | 0.268893953 | 0.349213827 | 0.302340931 |
| 0.277410849 | 0.106913105 | 0.064177369 | 0.276019971 |
| 0.344836621 | 0.019960956 | 0.314354945 | 0.334223148 |
| 0.277083416 | 0.300242023 | 0.377583278 | 0.331785275 |
| 0.278120214 | 0.057653147 | 0.036159692 | 0.2862406   |
| 0.283388751 | 0.246851407 | 0.128783134 | 0.175266987 |
| 0.291590087 | 0.115093091 | 0.306154526 | 0.06092927  |
| 0.363264998 | 0.294669109 | 0.303336636 | 0.239721521 |
| 0.158542608 | 0.21115834  | 0.230458172 | 0.239679284 |
| 0.030511033 | 0.034758544 | 0.026943118 | 0.287048325 |
| 0.051880938 | 0.165956745 | 0.08910745  | 0.291092969 |
| 0.174228895 | 0.11479975  | 0.143976671 | 0.312155935 |
| 0.036667905 | 0.160624332 | 0.097606265 | 0.079713104 |
| 0.03107673  | 0.114230325 | 0.053357918 | 0.06559894  |
| 0.200693017 | 0.139623511 | 0.241169602 | 0.336992346 |
| 0.193414888 | 0.099243725 | 0.221262304 | 0.333535502 |
| 0.34051906  | 0.219791491 | 0.204191868 | 0.007988135 |
| 0.084953783 | 0.105575243 | 0.142222582 | 0.21680885  |
| 0.126361704 | 0.09230423  | 0.230559214 | 0.318189524 |
| 0.08281135  | 0.079668427 | 0.134082727 | 0.270843515 |
| 0.092266504 | 0.122542953 | 0.304599598 | 0.166515293 |
| 0.002323261 | 0.13285926  | 0.276252447 | 0.184329132 |
| 0.212832679 | 0.089533372 | 0.092086231 | 0.314128217 |
| 0.12005181  | 0.192106081 | 0.330007932 | 0.351002467 |
| 0.077571205 | 0.132005642 | 0.363369942 | 0.051036535 |
| 0.275300423 | 0.045232452 | 0.264255238 | 0.09780407  |
| 0.157633208 | 0.283557302 | 0.283561676 | 0.15503287  |
| 0.053358752 | 0.31021891  | 0.263138394 | 0.317595912 |
| 0.103078614 | 0.35850516  | 0.303149344 | 0.287212953 |
| 0.230170518 | 0.181434961 | 0.119817455 | 0.254748444 |
| 0.309202723 | 0.082088798 | 0.044134586 | 0.289168783 |
| 0.137573565 | 0.291475731 | 0.146697118 | 0.32840578  |
| 0.320222962 | 0.237097485 | 0.088112574 | 0.354814858 |
| 0.238852525 | 0.105498136 | 0.316127349 | 0.375401177 |
| 0.075055758 | 0.209380802 | 0.139852233 | 0.374213075 |
| 0.114623275 | 0.171600191 | 0.256406767 | 0.152114441 |
| 0.006260513 | 0.046336783 | 0.034474556 | 0.141233058 |
| 0.153974649 | 0.202030412 | 0.288847959 | 0.315292356 |
| 0.081883179 | 0.276480295 | 0.219661686 | 0.090886971 |

|             |             |             |             |
|-------------|-------------|-------------|-------------|
| 0.238446451 | 0.210646359 | 0.243100675 | 0.279879723 |
| 0.210910911 | 0.015968461 | 0.051480371 | 0.320597094 |
| 0.023927867 | 0.129716559 | 0.154756833 | 0.002381513 |
| 0.019376543 | 0.208967946 | 0.068346084 | 0.14046751  |
| 0.376013853 | 0.126666991 | 0.111014504 | 0.066271821 |
| 0.273150965 | 0.070319081 | 0.006380141 | 0.329575195 |
| 0.333043402 | 0.330535895 | 0.319791614 | 0.290948574 |
| 0.33805861  | 0.302887939 | 0.324919375 | 0.104256548 |
| 0.048569255 | 0.035126067 | 0.131462411 | 0.166933102 |
| 0.002731443 | 0.303065259 | 0.269266607 | 0.112906509 |
| 0.30478667  | 0.247304228 | 0.017918627 | 0.311094919 |
| 0.005688387 | 0.090989303 | 0.089280668 | 0.173268474 |
| 0.381706417 | 0.007739759 | 0.038184466 | 0.09786871  |
| 0.213320396 | 0.205519665 | 0.134612889 | 0.318549542 |
| 0.175752293 | 0.062514247 | 0.179961485 | 0.308180572 |
| 0.038930247 | 0.032851844 | 0.118836512 | 0.005340756 |
| 0.052633527 | 0.311560733 | 0.132762117 | 0.021998206 |
| 0.162360957 | 0.002309387 | 0.198648494 | 0.326345357 |
| 0.236545404 | 0.345817063 | 0.299071686 | 0.159918711 |
| 0.292359468 | 0.097233454 | 0.323625294 | 0.224279594 |
| 0.087320914 | 0.000171419 | 0.009026096 | 0.319177719 |
| 0.199915411 | 0.031944514 | 0.119620323 | 0.052107406 |
| 0.059683117 | 0.046573629 | 0.046227751 | 0.160565624 |
| 0.197088297 | 0.231239721 | 0.170775161 | 0.251980986 |
| 0.152513787 | 0.214851363 | 0.106895808 | 0.066343642 |
| 0.238563064 | 0.029564216 | 0.075695179 | 0.007056531 |
| 0.342480442 | 0.065159119 | 0.250258827 | 0.298875101 |
| 0.320625993 | 0.301814329 | 0.063627679 | 0.081811411 |
| 0.357602175 | 0.040648434 | 0.091635419 | 0.0496361   |
| 0.252103622 | 0.236742632 | 0.226957937 | 0.18138151  |
| 0.336775754 | 0.274667216 | 0.023478181 | 0.288120834 |
| 0.005507145 | 0.014262762 | 0.090162993 | 0.228104646 |
| 0.155590623 | 0.189775495 | 0.194576195 | 0.133042655 |
| 0.157900582 | 0.010060034 | 0.185425456 | 0.179114999 |
| 0.226517136 | 0.194920295 | 0.24407144  | 0.227550288 |
| 0.20792828  | 0.137904585 | 0.131033449 | 0.098861471 |
| 0.129534427 | 0.189052558 | 0.113472246 | 0.017090427 |
| 0.151758661 | 0.182290886 | 0.03648164  | 0.113471628 |
| 0.28423837  | 0.307546344 | 0.038926553 | 0.01047859  |
| 0.178708389 | 0.180503587 | 0.341695974 | 0.275082242 |
| 0.300660373 | 0.35459265  | 0.257097791 | 0.112519684 |
| 0.033052671 | 0.272294224 | 0.278550563 | 0.13788508  |
| 0.311059987 | 0.034724288 | 0.278692959 | 0.248785342 |
| 0.104489562 | 0.088755603 | 0.024895431 | 0.078624844 |
| 0.248801544 | 0.146572607 | 0.17509171  | 0.060380356 |
| 0.153259654 | 0.13498413  | 0.035176739 | 0.145217172 |
| 0.22286486  | 0.123521823 | 0.122834198 | 0.120507269 |
| 0.233608874 | 0.068383994 | 0.280072012 | 0.318873093 |
| 0.084805624 | 0.079853952 | 0.037873031 | 0.320672779 |
| 0.271802967 | 0.171746345 | 0.008098008 | 0.232808522 |
| 0.344925274 | 0.21796144  | 0.275694681 | 0.345071487 |
| 0.070933599 | 0.179999475 | 0.210600021 | 0.237429017 |
| 0.163725945 | 0.105465209 | 0.202557067 | 0.051860086 |
| 0.278065708 | 0.320569205 | 0.243955048 | 0.110695119 |

|             |             |             |             |
|-------------|-------------|-------------|-------------|
| 0.198970553 | 0.060390488 | 0.029216632 | 0.305652263 |
| 0.144388263 | 0.027227309 | 0.088420414 | 0.329452388 |
| 0.006447478 | 0.140960087 | 0.382337148 | 0.086204121 |
| 0.358386424 | 0.329170176 | 0.280636554 | 0.103181741 |
| 0.007021128 | 0.294925597 | 0.206158713 | 0.118590793 |
| 0.22680392  | 0.216800227 | 0.10348629  | 0.05444345  |
| 0.260973403 | 0.037422241 | 0.078499743 | 0.066017261 |
| 0.112459887 | 0.179427641 | 0.200365007 | 0.174682006 |
| 0.183362564 | 0.063839444 | 0.143888304 | 0.113370465 |
| 0.212074738 | 0.205511533 | 0.269986214 | 0.054981749 |
| 0.067374117 | 0.344366589 | 0.233979649 | 0.012477535 |
| 0.252680907 | 0.333252565 | 0.333535651 | 0.001465746 |
| 0.258747563 | 0.006518329 | 0.174645337 | 0.14631596  |
| 0.157179495 | 0.1659676   | 0.286598609 | 0.139002923 |
| 0.202887848 | 0.141240344 | 0.108294173 | 0.188742962 |
| 0.096822158 | 0.140860433 | 0.253647696 | 0.142717814 |
| 0.10997987  | 0.056403758 | 0.068992712 | 0.063483003 |
| 0.026377169 | 0.289499784 | 0.176797747 | 0.040108638 |
| 0.218451455 | 0.140729265 | 0.287460113 | 0.263357429 |
| 0.336967792 | 0.057533575 | 0.184346972 | 0.228587487 |
| 0.060764013 | 0.060977838 | 0.019854713 | 0.166709533 |
| 0.141714093 | 0.11142449  | 0.150107691 | 0.10759993  |
| 0.229007981 | 0.267500859 | 0.167206525 | 0.321514009 |
| 0.153451758 | 0.205129126 | 0.049958479 | 0.058222159 |
| 0.074743658 | 0.106569236 | 0.258705308 | 0.001300887 |
| 0.22797851  | 0.042919534 | 0.286310034 | 0.264134054 |
| 0.155749619 | 0.296806257 | 0.04030834  | 0.029863066 |
| 0.037782796 | 0.087496777 | 0.109110316 | 0.262418351 |
| 0.108685199 | 0.087244659 | 0.247903605 | 0.047087931 |
| 0.296625111 | 0.288207243 | 1           | 0.126650149 |
| 0.221396878 | 0.111364974 | 0.305015741 | 0.046694957 |
| 0.18664041  | 0.133791825 | 0.144263841 | 0.169344665 |
| 0.181347375 | 0.33333553  | 0.041715442 | 0.329981899 |
| 0.178170455 | 0.09819739  | 0.33456156  | 0.162301674 |
| 0.085853141 | 0.101152239 | 0.132498988 | 0.098503151 |
| 0.119969815 | 0.148272934 | 0.004369544 | 0.046370557 |
| 0.270459433 | 0.149909344 | 0.220367018 | 0.316563091 |
| 0.214817016 | 0.346433964 | 0.140929338 | 0.120650977 |
| 0.244557104 | 0.276435429 | 0.067060639 | 0.237354278 |
| 0.237729583 | 0.055454851 | 0.140711195 | 0.024314254 |
| 0.215346686 | 0.213022762 | 0.080976254 | 0.036951846 |
| 0.014884058 | 0.119663051 | 0.194728388 | 0.051546754 |
| 0.360633437 | 0.094374347 | 0.206312287 | 0.249044616 |
| 0.152003567 | 0.27080223  | 0.108668248 | 0.259416774 |
| 0.031795667 | 0.227336405 | 0.240583111 | 0.198145856 |
| 0.092855076 | 0.198375748 | 0.276241389 | 0.16241165  |
| 0.022728006 | 0.130877698 | 0.00273493  | 0.246186775 |
| 0.248919618 | 0.222462253 | 0.172270914 | 0.071180325 |
| 0.26839009  | 0.314601088 | 0.128172285 | 0.173257165 |
| 0.010643892 | 0.243957117 | 0.171947252 | 0.222844776 |
| 0.052674    | 0.208608479 | 0.039013784 | 0.27680272  |
| 0.241486008 | 0.093178167 | 0.2374022   | 0.074104917 |
| 0.269543006 | 0.264051591 | 0.084789894 | 0.16614204  |
| 0.219198879 | 0.047695244 | 0.083459138 | 0.345694146 |

|             |             |             |             |
|-------------|-------------|-------------|-------------|
| 0.139551612 | 0.173215322 | 0.332171308 | 0.097002736 |
| 0.215975187 | 0.241958787 | 0.208721854 | 0.342854553 |
| 0.084102341 | 0.188670367 | 0.325605602 | 0.285654883 |
| 0.285809011 | 0.186102368 | 0.125098839 | 0.161506995 |
| 0.226748999 | 0.032452193 | 0.162046978 | 0.209810909 |
| 0.132722052 | 0.266151511 | 0.150881505 | 0.19069966  |
| 0.026320949 | 0.102949098 | 0.082225738 | 0.116325468 |
| 0.205215032 | 0.220144835 | 0.171205069 | 0.281797178 |
| 0.062722983 | 0.015054998 | 0.322526275 | 0.025433098 |
| 0.110876034 | 0.243748035 | 0.182328669 | 0.20835577  |
| 0.112192356 | 0.199963939 | 0.105394187 | 0.000517376 |
| 0.336488354 | 0.074211172 | 0.198856228 | 0.114910606 |
| 0.12032004  | 0.022761068 | 0.273625495 | 0.354289511 |
| 0.208568455 | 0.107472427 | 0.087607665 | 0.28920795  |
| 0.123969424 | 0.120181502 | 0.143050517 | 0.177267435 |
| 0.1637987   | 0.100508225 | 0.137549718 | 0.131754    |
| 0.23621492  | 0.123400525 |             |             |
| SEPX1       | 0.097246019 | 0.290311088 | 0.057765762 |
| 0.066819613 | 0.15274426  | 0.102147485 | 0.122529262 |
| 0.164313413 | 0.270028191 | 0.07211754  | 0.158084454 |
| 0.061757558 | 0.040759042 | 0.341694145 | 0.135065587 |
| 0.178320114 | 0.10022733  | 0.14915197  | 0.074798623 |
| 0.106667426 | 0.158944428 | 0.095437293 | 0.157733029 |
| 0.150556766 | 0.253855059 | 0.182814105 | 0.140734006 |
| 0.320952254 | 0.050731883 | 0.191451956 | 0.030018305 |
| 0.364776537 | 0.168010059 | 0.097601969 | 0.038551266 |
| 0.165353574 | 0.022024816 | 0.382438978 | 0.121518258 |
| 0.035643638 | 0.351433356 | 0.081908923 | 0.11715753  |
| 0.10450965  | 0.06215117  | 0.04004925  | 0.207941957 |
| 0.178960201 | 0.137432681 | 0.099721545 | 0.205875931 |
| 0.11813848  | 0.247701144 | 0.196772982 | 0.016464728 |
| 0.074600093 | 0.018453523 | 0.056864328 | 0.353827025 |
| 0.228938643 | 0.150914132 | 0.068854994 | 0.173969464 |
| 0.207202491 | 0.246964633 | 0.267973122 | 0.097290837 |
| 0.350622697 | 0.072785462 | 0.213591017 | 0.070421518 |
| 0.138112703 | 0.077224508 | 0.234158728 | 0.144420467 |
| 0.11046424  | 0.184957877 | 0.166778045 | 0.085570639 |
| 0.274315457 | 0.426641782 | 0.228686139 | 0.360182777 |
| 0.087077878 | 0.154931911 | 0.103448729 | 0.274593191 |
| 0.279685855 | 0.143656379 | 0.235627689 | 0.389153292 |
| 0.108542049 | 0.149579286 | 0.253228443 | 0.201645625 |
| 0.281672379 | 0.092663484 | 0.114373297 | 0.062572289 |
| 0.195632326 | 0.160743193 | 0.399702153 | 0.25139253  |
| 0.14441055  | 0.120067509 | 0.371229385 | 0.14073659  |
| 0.10888597  | 0.099164676 | 0.111506727 | 0.276317198 |
| 0.189802069 | 0.325987102 | 0.283712301 | 0.30600098  |
| 0.15098844  | 0.336153945 | 0.209229978 | 0.336404788 |
| 0.030885353 | 0.367976678 | 0.140224731 | 0.111185284 |
| 0.092405844 | 0.151382244 | 0.139125746 | 0.329681391 |
| 0.292268926 | 0.262874723 | 0.140496092 | 0.155221371 |
| 0.313012028 | 0.347989693 | 0.36548791  | 0.305603572 |
| 0.087579278 | 0.08363907  | 0.132825621 | 0.145422711 |
| 0.269032876 | 0.202443018 | 0.088426747 | 0.393688592 |
| 0.312927959 | 0.278873515 | 0.116400382 | 0.422214856 |

|             |             |             |             |
|-------------|-------------|-------------|-------------|
| 0.186317083 | 0.385318773 | 0.270141792 | 0.14494805  |
| 0.381405281 | 0.368294294 | 0.365596223 | 0.197858825 |
| 0.365283925 | 0.124384172 | 0.094636744 | 0.31204823  |
| 0.386873322 | 0.006931229 | 0.303126798 | 0.322424331 |
| 0.337449557 | 0.267494862 | 0.381604918 | 0.33909168  |
| 0.350174658 | 0.145363351 | 0.016183252 | 0.237538564 |
| 0.363110041 | 0.282961842 | 0.185397193 | 0.136320341 |
| 0.200084074 | 0.137982938 | 0.266853837 | 0.083914834 |
| 0.431967569 | 0.287868874 | 0.315357727 | 0.28829373  |
| 0.162076927 | 0.343476032 | 0.12845917  | 0.352575995 |
| 0.090118824 | 0.104088403 | 0.102715261 | 0.310718765 |
| 0.070682372 | 0.195662074 | 0.126665614 | 0.203730934 |
| 0.22870613  | 0.146064446 | 0.079435958 | 0.213309907 |
| 0.136211766 | 0.154216286 | 0.134104488 | 0.157153371 |
| 0.089010768 | 0.260050002 | 0.134198513 | 0.113806118 |
| 0.1867581   | 0.311018158 | 0.223626984 | 0.32909988  |
| 0.132425966 | 0.189298675 | 0.236843873 | 0.373779905 |
| 0.387963507 | 0.130878594 | 0.310129898 | 0.013709706 |
| 0.106438235 | 0.0794934   | 0.058113751 | 0.145306499 |
| 0.277888907 | 0.162427984 | 0.202468693 | 0.231188737 |
| 0.148493091 | 0.151051711 | 0.121040924 | 0.39733738  |
| 0.204061055 | 0.112632892 | 0.313980685 | 0.165043379 |
| 0.013148428 | 0.151605296 | 0.271911759 | 0.116397775 |
| 0.265882895 | 0.063513974 | 0.058362501 | 0.300936363 |
| 0.105626705 | 0.124987465 | 0.322699251 | 0.238228636 |
| 0.126270179 | 0.295427858 | 0.385233659 | 0.036047419 |
| 0.154316999 | 0.042538825 | 0.24706714  | 0.095952575 |
| 0.195751883 | 0.30963076  | 0.154470845 | 0.103624249 |
| 0.141901583 | 0.381534035 | 0.300492674 | 0.347109071 |
| 0.095191626 | 0.383989529 | 0.286894338 | 0.320195091 |
| 0.230777982 | 0.118842701 | 0.042585871 | 0.257128909 |
| 0.284956496 | 0.09698167  | 0.134780696 | 0.259186512 |
| 0.105167095 | 0.220543927 | 0.09514988  | 0.348516078 |
| 0.407141791 | 0.325267479 | 0.167173761 | 0.278552389 |
| 0.278075997 | 0.159626156 | 0.29008838  | 0.411283651 |
| 0.080665697 | 0.150819606 | 0.100699334 | 0.29608141  |
| 0.181467203 | 0.121780051 | 0.347131485 | 0.056257554 |
| 0.001293332 | 0.138916031 | 0.109623244 | 0.141733404 |
| 0.068722594 | 0.171864883 | 0.216627453 | 0.365534559 |
| 0.158159835 | 0.334648397 | 0.29383087  | 0.108295473 |
| 0.320467545 | 0.148035611 | 0.13721109  | 0.198861504 |
| 0.283767956 | 0.021703912 | 0.091922147 | 0.417911824 |
| 0.099180356 | 0.079119112 | 0.197452117 | 0.003847061 |
| 0.09195155  | 0.242384266 | 0.185085813 | 0.287042451 |
| 0.347698224 | 0.25707864  | 0.193044876 | 0.084708983 |
| 0.257478874 | 0.140418439 | 0.005467669 | 0.33174882  |
| 0.368561726 | 0.361866991 | 0.366857016 | 0.369143582 |
| 0.330092241 | 0.265432025 | 0.266514358 | 0.141802427 |
| 0.130822232 | 0.098051014 | 0.075776289 | 0.146474589 |
| 0.012741004 | 0.26889591  | 0.176769073 | 0.208910168 |
| 0.259137438 | 0.283344152 | 0.088461821 | 0.195766084 |
| 0.028149453 | 0.04339782  | 0.169023375 | 0.181281986 |
| 0.28023238  | 0.043208295 | 0.046685129 | 0.092437277 |
| 0.315786194 | 0.309479224 | 0.082049207 | 0.369040888 |

|             |             |             |             |
|-------------|-------------|-------------|-------------|
| 0.17271232  | 0.156556437 | 0.11787581  | 0.258941536 |
| 0.117956954 | 0.046656563 | 0.138437053 | 0.005071725 |
| 0.082314741 | 0.388056526 | 0.117754846 | 0.063729793 |
| 0.189783299 | 0.020027427 | 0.284605153 | 0.391102285 |
| 0.31650859  | 0.35349968  | 0.34580291  | 0.076363389 |
| 0.345018611 | 0.027020986 | 0.358694781 | 0.273828644 |
| 0.087466051 | 0.001611302 | 0.026658291 | 0.299551577 |
| 0.148312249 | 0.118468111 | 0.190135589 | 0.079648426 |
| 0.112951229 | 0.11219473  | 0.130105424 | 0.078273053 |
| 0.178987863 | 0.15879407  | 0.107183239 | 0.354042184 |
| 0.146817143 | 0.222373635 | 0.118964078 | 0.175664177 |
| 0.173985868 | 0.08689913  | 0.177238363 | 0.008186654 |
| 0.25919794  | 0.181233831 | 0.381161293 | 0.353380509 |
| 0.385284515 | 0.21161208  | 0.070999432 | 0.123139316 |
| 0.325924572 | 0.131209174 | 0.082710458 | 0.138164454 |
| 0.319546153 | 0.194079024 | 0.280945594 | 0.268110278 |
| 0.379288498 | 0.347851752 | 0.093220547 | 0.261762912 |
| 0.01656898  | 0.005756421 | 0.115061366 | 0.311044539 |
| 0.067551327 | 0.132550986 | 0.261853484 | 0.152714368 |
| 0.164385899 | 0.058557837 | 0.080288959 | 0.083384542 |
| 0.204792233 | 0.167623985 | 0.128130333 | 0.295782188 |
| 0.117794358 | 0.089279202 | 0.143450594 | 0.195041062 |
| 0.156918977 | 0.274272975 | 0.248622272 | 0.074999789 |
| 0.122574405 | 0.138661735 | 0.097612505 | 0.213207355 |
| 0.284155088 | 0.318004737 | 0.100977461 | 0.025837362 |
| 0.292245109 | 0.163490359 | 0.349523514 | 0.329548474 |
| 0.392378167 | 0.399683259 | 0.384302965 | 0.164348029 |
| 0.108580247 | 0.190871327 | 0.138991129 | 0.102409315 |
| 0.362728396 | 0.124320236 | 0.345368871 | 0.101323017 |
| 0.19828717  | 0.111192534 | 0.077017791 | 0.152659178 |
| 0.15176934  | 0.243998727 | 0.152406515 | 0.138310647 |
| 0.134523916 | 0.074388408 | 0.110110363 | 0.198643566 |
| 0.286991381 | 0.044808364 | 0.204936649 | 0.142091957 |
| 0.257650573 | 0.071215253 | 0.226253935 | 0.389626873 |
| 0.186121472 | 0.151677816 | 0.086694772 | 0.283443562 |
| 0.258348142 | 0.138518107 | 0.030603919 | 0.290210794 |
| 0.359867602 | 0.191710121 | 0.352116903 | 0.359905693 |
| 0.168556063 | 0.132272753 | 0.107122994 | 0.180272941 |
| 0.240933636 | 0.111154879 | 0.218017247 | 0.139473732 |
| 0.359879661 | 0.428621725 | 0.282296741 | 0.13348208  |
| 0.1639751   | 0.161420721 | 0.106709067 | 0.311242982 |
| 0.067959586 | 0.104586152 | 0.095337089 | 0.290241472 |
| 0.001710252 | 0.046441529 | 0.357714987 | 0.153592359 |
| 0.408022469 | 0.3204804   | 0.347840027 | 0.151179413 |
| 0.00155106  | 0.195041699 | 0.188107352 | 0.096468674 |
| 0.298945762 | 0.280104796 | 0.14852926  | 0.108724168 |
| 0.300836119 | 0.129897115 | 0.14285566  | 0.091578229 |
| 0.048630029 | 0.21713376  | 0.276252632 | 0.215992394 |
| 0.143707586 | 0.169875933 | 0.070048666 | 0.125851331 |
| 0.080359924 | 0.284334165 | 0.304563631 | 0.079588198 |
| 0.057784188 | 0.358544823 | 0.260261575 | 0.061462578 |
| 0.140255823 | 0.314358894 | 0.338319329 | 0.00726117  |
| 0.225021189 | 0.038923366 | 0.16419553  | 0.122892552 |
| 0.136552884 | 0.181832484 | 0.225097933 | 0.104212947 |



|             |             |             |             |
|-------------|-------------|-------------|-------------|
| 0.226815379 | 0.151065063 | 0.117706092 | 0.218477229 |
| 0.118655568 | 0.171823574 | 0.180963889 | 0.124937989 |
| 0.105412932 | 0.112795513 | 0.191517012 | 0.190754642 |
| 0.089514417 | 0.313439838 | 0.301779202 | 0.122930902 |
| 0.251985387 | 0.129100187 | 0.342078652 | 0.32889425  |
| 0.352443538 | 0.163046908 | 0.162964898 | 0.271317446 |
| 0.069585327 | 0.103154521 | 0.109446996 | 0.142507282 |
| 0.213091367 | 0.103812737 | 0.137602518 | 0.169784694 |
| 0.239131401 | 0.365315779 | 0.296421379 | 0.34397223  |
| 0.114003775 | 0.158985624 | 0.064681922 | 0.10223846  |
| 0.117912619 | 0.214338579 | 0.132406948 | 0.006649036 |
| 0.252122671 | 0.091011866 | 0.285466764 | 0.338658346 |
| 0.082746645 | 0.344489092 | 0.07213241  | 0.102492109 |
| 0.050160826 | 0.213066314 | 0.225129178 | 0.237393417 |
| 0.053619362 | 0.138169293 | 0.157744212 | 0.091571592 |
| 0.235462002 | 0.227011489 | 0.126650149 | 1           |
| 0.212441952 | 0.176399895 | 0.390083711 | 0.101732923 |
| 0.153663298 | 0.077830754 | 0.166921653 | 0.138638523 |
| 0.148898795 | 0.342247096 | 0.116694705 | 0.349595719 |
| 0.131960871 | 0.216160681 | 0.422887704 | 0.186467358 |
| 0.120477592 | 0.115061429 | 0.050861098 | 0.11253302  |
| 0.170095868 | 0.085300828 | 0.006102293 | 0.050713318 |
| 0.27043491  | 0.130627351 | 0.247540879 | 0.288278501 |
| 0.103539657 | 0.320409733 | 0.05391071  | 0.182465974 |
| 0.333726736 | 0.383897887 | 0.116185994 | 0.297241047 |
| 0.310847039 | 0.129140956 | 0.180615789 | 0.028983113 |
| 0.18234253  | 0.154439681 | 0.103330728 | 0.129652493 |
| 0.064734083 | 0.054504798 | 0.174116333 | 0.137898175 |
| 0.334748782 | 0.048154535 | 0.198784471 | 0.213643812 |
| 0.26580913  | 0.384423577 | 0.153654445 | 0.237283466 |
| 0.094900586 | 0.253380589 | 0.126492007 | 0.153162584 |
| 0.095100982 | 0.093435248 | 0.249792014 | 0.074894068 |
| 0.08273792  | 0.111923687 | 0.0070683   | 0.374496198 |
| 0.35142271  | 0.110965516 | 0.294759611 | 0.082017186 |
| 0.256952819 | 0.320609724 | 0.177506275 | 0.124788908 |
| 0.028555758 | 0.157101997 | 0.231708037 | 0.280572066 |
| 0.044305708 | 0.188194638 | 0.074958358 | 0.149812686 |
| 0.381876331 | 0.134180614 | 0.345107106 | 0.064060983 |
| 0.326473499 | 0.277242206 | 0.169788327 | 0.117705408 |
| 0.204387421 | 0.147635018 | 0.090653615 | 0.395500514 |
| 0.147791233 | 0.074037789 | 0.281697031 | 0.130397571 |
| 0.107364763 | 0.318884921 | 0.159959681 | 0.397965166 |
| 0.128535147 | 0.259332376 | 0.272557895 | 0.341423972 |
| 0.314704256 | 0.093528924 | 0.087328923 | 0.13301281  |
| 0.308718077 | 0.078780528 | 0.109718461 | 0.258399418 |
| 0.068456391 | 0.273312437 | 0.162135653 | 0.132917676 |
| 0.08196847  | 0.203565316 | 0.11289928  | 0.201723808 |
| 0.230396554 | 0.142849882 | 0.106843455 | 0.354822616 |
| 0.097999739 | 0.032674653 | 0.385751316 | 0.006325654 |
| 0.148103888 | 0.18993349  | 0.231533344 | 0.133754548 |
| 0.224369254 | 0.228621161 | 0.146262541 | 0.010357597 |
| 0.293087979 | 0.015673682 | 0.147474492 | 0.102055005 |
| 0.116627485 | 0.10596752  | 0.336150454 | 0.363063473 |
| 0.247689039 | 0.103436028 | 0.077682917 | 0.352979347 |

|             |             |             |             |
|-------------|-------------|-------------|-------------|
| 0.047834638 | 0.074996017 | 0.112896921 | 0.190025522 |
| 0.069280319 | 0.090442644 | 0.108028205 | 0.075935129 |
| 0.24929133  | 0.167503551 |             |             |
| SERF2       | 0.105065294 | 0.271260057 | 0.065130846 |
| 0.104073549 | 0.19307945  | 0.126079145 | 0.161259035 |
| 0.188644631 | 0.268033265 | 0.092652194 | 0.15551445  |
| 0.065813923 | 0.06887806  | 0.305582897 | 0.172644203 |
| 0.188112594 | 0.132053887 | 0.185687003 | 0.099511061 |
| 0.195084383 | 0.183532722 | 0.118934303 | 0.124266852 |
| 0.206753367 | 0.231402064 | 0.184632025 | 0.149152346 |
| 0.303896248 | 0.057692648 | 0.187667968 | 0.050103764 |
| 0.347216459 | 0.186129541 | 0.114987519 | 0.054623946 |
| 0.155824224 | 0.066165038 | 0.365928913 | 0.188047859 |
| 0.095575076 | 0.320921271 | 0.091122987 | 0.171029881 |
| 0.117783294 | 0.070555173 | 0.042002396 | 0.214787922 |
| 0.203622153 | 0.227943624 | 0.085654188 | 0.214531483 |
| 0.162128395 | 0.213385001 | 0.17529961  | 0.00406169  |
| 0.105502811 | 0.033829544 | 0.083416998 | 0.330150767 |
| 0.226537281 | 0.201056341 | 0.095683752 | 0.214913629 |
| 0.198645416 | 0.262637331 | 0.301571711 | 0.121656821 |
| 0.319127225 | 0.107570737 | 0.219983298 | 0.112408769 |
| 0.156529494 | 0.105304176 | 0.247422365 | 0.14908193  |
| 0.157571214 | 0.215069933 | 0.169980322 | 0.153093595 |
| 0.246772135 | 0.397975192 | 0.269874461 | 0.333151564 |
| 0.145804088 | 0.176650665 | 0.19423722  | 0.310952293 |
| 0.282298475 | 0.211198386 | 0.225909823 | 0.368431227 |
| 0.141045951 | 0.132619281 | 0.232515764 | 0.171521778 |
| 0.265805592 | 0.155494278 | 0.100577084 | 0.098822962 |
| 0.232401929 | 0.173602088 | 0.372299498 | 0.23042103  |
| 0.192686722 | 0.109494851 | 0.333023031 | 0.162898128 |
| 0.144493219 | 0.107913695 | 0.189658528 | 0.269764383 |
| 0.190444402 | 0.29837759  | 0.255140977 | 0.295750511 |
| 0.152935472 | 0.318528205 | 0.214814252 | 0.311027667 |
| 0.039318285 | 0.341030395 | 0.162118808 | 0.129316335 |
| 0.098724439 | 0.207808984 | 0.227498946 | 0.346469704 |
| 0.284796585 | 0.246613596 | 0.162370724 | 0.214881053 |
| 0.317331628 | 0.309128834 | 0.337658797 | 0.273834701 |
| 0.105452521 | 0.151158721 | 0.147092409 | 0.184077807 |
| 0.240261273 | 0.211687059 | 0.138238826 | 0.357335152 |
| 0.293154997 | 0.277195511 | 0.150442164 | 0.394458666 |
| 0.233373398 | 0.369604184 | 0.246994278 | 0.173073557 |
| 0.362965112 | 0.336501638 | 0.358287984 | 0.208045413 |
| 0.337910281 | 0.133701238 | 0.087462282 | 0.302792998 |
| 0.367001558 | 0.015100066 | 0.287495481 | 0.309943891 |
| 0.313706008 | 0.258397464 | 0.373187226 | 0.325188757 |
| 0.31449415  | 0.147743835 | 0.026762303 | 0.254959724 |
| 0.334791134 | 0.281585243 | 0.267558508 | 0.127798041 |
| 0.202886063 | 0.136012971 | 0.26485399  | 0.081502484 |
| 0.40830291  | 0.29244199  | 0.294670366 | 0.251542648 |
| 0.173208946 | 0.308749964 | 0.136096738 | 0.315499682 |
| 0.135199509 | 0.11151499  | 0.088170313 | 0.326180367 |
| 0.090254412 | 0.2200625   | 0.134262551 | 0.216897298 |
| 0.238455699 | 0.160550073 | 0.108815136 | 0.222607587 |
| 0.119474424 | 0.135054999 | 0.184056511 | 0.155378673 |

|             |             |             |             |
|-------------|-------------|-------------|-------------|
| 0.128275549 | 0.242502726 | 0.132802625 | 0.158109719 |
| 0.203647038 | 0.276747856 | 0.202555894 | 0.330511641 |
| 0.187820614 | 0.185495043 | 0.208064302 | 0.36308624  |
| 0.37558318  | 0.145006692 | 0.294602619 | 0.027233996 |
| 0.126811507 | 0.109783425 | 0.096686342 | 0.148529228 |
| 0.264512249 | 0.172096921 | 0.190972953 | 0.240178344 |
| 0.122967033 | 0.176423774 | 0.150317634 | 0.360215568 |
| 0.186435005 | 0.148267364 | 0.293164481 | 0.152208488 |
| 0.022022667 | 0.156788429 | 0.257786756 | 0.215189785 |
| 0.242718858 | 0.075600898 | 0.079735096 | 0.299544426 |
| 0.119782491 | 0.18294588  | 0.309668149 | 0.259223172 |
| 0.115601535 | 0.25377523  | 0.366773248 | 0.034104115 |
| 0.18510354  | 0.086163759 | 0.26702194  | 0.104797644 |
| 0.208615756 | 0.317071157 | 0.170442933 | 0.176806317 |
| 0.121438425 | 0.342856315 | 0.296201615 | 0.320597613 |
| 0.122621893 | 0.37041873  | 0.270977635 | 0.296404537 |
| 0.23637359  | 0.137790385 | 0.066822374 | 0.245438632 |
| 0.291046276 | 0.12253505  | 0.124083783 | 0.240733461 |
| 0.135230897 | 0.220449465 | 0.221067392 | 0.335077854 |
| 0.390056394 | 0.292173966 | 0.19925733  | 0.297935663 |
| 0.265574021 | 0.154931457 | 0.308650513 | 0.388890126 |
| 0.10836746  | 0.154860313 | 0.148985073 | 0.329155447 |
| 0.196520453 | 0.190327997 | 0.345861313 | 0.095942387 |
| 0.002729132 | 0.133017999 | 0.104177649 | 0.207635341 |
| 0.13162083  | 0.160291076 | 0.237943928 | 0.33617193  |
| 0.178226273 | 0.314821278 | 0.30281805  | 0.139066435 |
| 0.29037232  | 0.169939864 | 0.14897132  | 0.204966508 |
| 0.303967598 | 0.050955621 | 0.12271797  | 0.391047887 |
| 0.086067051 | 0.115323195 | 0.189021757 | 0.005971663 |
| 0.103645719 | 0.217468312 | 0.177797192 | 0.276475689 |
| 0.340235877 | 0.253440584 | 0.186801861 | 0.107047164 |
| 0.26227653  | 0.160926969 | 0.014066719 | 0.330146725 |
| 0.358041228 | 0.356957862 | 0.349867535 | 0.349202736 |
| 0.332903292 | 0.268254893 | 0.281566563 | 0.126489387 |
| 0.177044156 | 0.129002267 | 0.123756122 | 0.189518201 |
| 0.008230222 | 0.287972155 | 0.218305478 | 0.211026526 |
| 0.245709366 | 0.280204989 | 0.09336564  | 0.208825697 |
| 0.034728056 | 0.06554871  | 0.171492333 | 0.255689938 |
| 0.311191422 | 0.057568467 | 0.059709012 | 0.11632062  |
| 0.276372333 | 0.272711061 | 0.123109846 | 0.351024582 |
| 0.170117584 | 0.140364208 | 0.176811213 | 0.257004023 |
| 0.157850761 | 0.056044636 | 0.162046979 | 0.007953121 |
| 0.089196427 | 0.3658091   | 0.155382655 | 0.104706718 |
| 0.198542055 | 0.023464308 | 0.260152279 | 0.357850564 |
| 0.286832337 | 0.338185232 | 0.320692999 | 0.113831402 |
| 0.322372207 | 0.045798055 | 0.33430071  | 0.249342483 |
| 0.098787797 | 0.001508541 | 0.027397982 | 0.297008782 |
| 0.150615982 | 0.103174757 | 0.203483609 | 0.090123982 |
| 0.16080489  | 0.122638817 | 0.163130131 | 0.165221405 |
| 0.174493435 | 0.198503332 | 0.166763949 | 0.308798272 |
| 0.211270807 | 0.244500857 | 0.127685322 | 0.163220751 |
| 0.180127953 | 0.122116293 | 0.180474224 | 0.012247768 |
| 0.276573744 | 0.164197736 | 0.342213018 | 0.32447496  |
| 0.363824855 | 0.236982411 | 0.07984893  | 0.114912829 |

|             |             |             |             |
|-------------|-------------|-------------|-------------|
| 0.330206203 | 0.103981463 | 0.11039276  | 0.115946443 |
| 0.28772756  | 0.192109407 | 0.270351781 | 0.2543093   |
| 0.354094706 | 0.32215986  | 0.1133559   | 0.268151975 |
| 0.02531128  | 0.013033059 | 0.108837122 | 0.294423708 |
| 0.152114555 | 0.149792776 | 0.27535218  | 0.23982125  |
| 0.256174069 | 0.056468834 | 0.132834561 | 0.138188546 |
| 0.234587919 | 0.175177635 | 0.160031219 | 0.310576694 |
| 0.219956423 | 0.175661529 | 0.228952674 | 0.240374621 |
| 0.19388756  | 0.269328533 | 0.222712484 | 0.101160636 |
| 0.124058797 | 0.13279712  | 0.121708048 | 0.21385324  |
| 0.27673353  | 0.296394544 | 0.15256223  | 0.039406367 |
| 0.271728102 | 0.203681532 | 0.324609765 | 0.300289296 |
| 0.356286067 | 0.380025287 | 0.357362033 | 0.221230741 |
| 0.130912199 | 0.230904378 | 0.173162719 | 0.223842324 |
| 0.326974918 | 0.104557232 | 0.318029567 | 0.135727127 |
| 0.210133985 | 0.190853057 | 0.09821994  | 0.183991585 |
| 0.153758782 | 0.231753161 | 0.22078773  | 0.127915875 |
| 0.174651836 | 0.128502712 | 0.149062044 | 0.206923585 |
| 0.264162605 | 0.099348779 | 0.209605314 | 0.19508979  |
| 0.27637714  | 0.100573767 | 0.223441232 | 0.370723868 |
| 0.172478401 | 0.176631286 | 0.096495288 | 0.287616953 |
| 0.248711748 | 0.131836118 | 0.030247386 | 0.261879123 |
| 0.342724327 | 0.176468591 | 0.321234183 | 0.346040628 |
| 0.173379744 | 0.130878971 | 0.158632789 | 0.189261566 |
| 0.239277397 | 0.130222315 | 0.250748583 | 0.136197603 |
| 0.366620845 | 0.396929521 | 0.27504586  | 0.184916636 |
| 0.156842472 | 0.133507794 | 0.092805069 | 0.294057573 |
| 0.133465452 | 0.105238859 | 0.098392477 | 0.280470888 |
| 0.011121353 | 0.087831043 | 0.364349097 | 0.177780553 |
| 0.397738806 | 0.319791445 | 0.331573752 | 0.216780399 |
| 0.006385344 | 0.213521162 | 0.180317015 | 0.130265062 |
| 0.257639818 | 0.261306514 | 0.203361451 | 0.161281481 |
| 0.322124368 | 0.106279265 | 0.185189832 | 0.108635168 |
| 0.093543961 | 0.179789225 | 0.288900708 | 0.236650924 |
| 0.246933202 | 0.156759607 | 0.122385501 | 0.187117127 |
| 0.178944398 | 0.284152514 | 0.293393579 | 0.090840835 |
| 0.063235777 | 0.338546212 | 0.244524939 | 0.075017173 |
| 0.154300295 | 0.322880688 | 0.344360021 | 0.008414555 |
| 0.212339678 | 0.044506423 | 0.213519372 | 0.184021133 |
| 0.224212001 | 0.22963828  | 0.255105916 | 0.179246118 |
| 0.219662921 | 0.228001098 | 0.162405217 | 0.229958063 |
| 0.189306043 | 0.228780685 | 0.199820411 | 0.172173952 |
| 0.142169243 | 0.155257027 | 0.180907021 | 0.172230769 |
| 0.097655084 | 0.292316896 | 0.283358146 | 0.114828121 |
| 0.259914847 | 0.181401596 | 0.350422171 | 0.300534655 |
| 0.352469208 | 0.14458079  | 0.205045447 | 0.245249857 |
| 0.073501664 | 0.106299151 | 0.104518028 | 0.162189961 |
| 0.198315417 | 0.129613464 | 0.138272645 | 0.143904972 |
| 0.218186432 | 0.34754498  | 0.268847305 | 0.352987737 |
| 0.170015098 | 0.180610779 | 0.074536178 | 0.143687074 |
| 0.15569785  | 0.217658136 | 0.174607487 | 0.011641232 |
| 0.232175168 | 0.11425259  | 0.267160459 | 0.315831324 |
| 0.115794857 | 0.348395364 | 0.071955554 | 0.117623156 |
| 0.064879035 | 0.188238455 | 0.212599847 | 0.236719462 |

|             |             |             |             |
|-------------|-------------|-------------|-------------|
| 0.075660755 | 0.198711754 | 0.193839412 | 0.103520619 |
| 0.246172686 | 0.241119962 | 0.221396878 | 0.212441952 |
| 1           | 0.18914327  | 0.37461228  | 0.131529    |
| 0.149066078 |             |             |             |
| 0.15201554  | 0.150106688 | 0.171111963 | 0.223498575 |
| 0.334513908 | 0.121265182 | 0.327638346 | 0.162656152 |
| 0.207868914 | 0.398857052 | 0.193262174 | 0.186619904 |
| 0.190270015 | 0.088681221 | 0.13501106  | 0.235878991 |
| 0.121782842 | 0.00460958  | 0.047324079 | 0.272738734 |
| 0.186772786 | 0.225681491 | 0.301049075 | 0.195949251 |
| 0.341481793 | 0.089633371 | 0.184468326 | 0.298717087 |
| 0.350560731 | 0.128558176 | 0.325689834 | 0.269854506 |
| 0.160187003 | 0.154093065 | 0.038432856 | 0.167039589 |
| 0.147936276 | 0.110556334 | 0.152611343 | 0.089189599 |
| 0.091032129 | 0.171347484 | 0.138681801 | 0.330402312 |
| 0.067418577 | 0.19691603  | 0.217473247 | 0.26406809  |
| 0.349763794 | 0.219439385 | 0.228830342 | 0.138659159 |
| 0.283959948 | 0.155518377 | 0.15855031  | 0.134002054 |
| 0.147982652 | 0.262491982 | 0.120438654 | 0.108414488 |
| 0.177412623 | 0.014168308 | 0.346629196 | 0.323690444 |
| 0.148877978 | 0.290476134 | 0.09472832  | 0.287210864 |
| 0.339992449 | 0.17417415  | 0.128407556 | 0.045817094 |
| 0.164166189 | 0.237159858 | 0.252602879 | 0.057031753 |
| 0.185357429 | 0.129183237 | 0.185376151 | 0.341499589 |
| 0.130163644 | 0.334631452 | 0.093041949 | 0.304526114 |
| 0.283012247 | 0.171058488 | 0.214694327 | 0.196396346 |
| 0.135061282 | 0.105853757 | 0.368791061 | 0.20572014  |
| 0.132262886 | 0.280006149 | 0.184627876 | 0.144274346 |
| 0.298154257 | 0.164569761 | 0.371988199 | 0.178542308 |
| 0.253592766 | 0.281015583 | 0.313218214 | 0.320566214 |
| 0.175463755 | 0.117084624 | 0.18384837  | 0.278575738 |
| 0.099057927 | 0.17899394  | 0.251943876 | 0.109920808 |
| 0.274049856 | 0.159344158 | 0.209192207 | 0.08498901  |
| 0.249741471 | 0.129118499 | 0.212598819 | 0.21919232  |
| 0.173378945 | 0.206687575 | 0.348687981 | 0.130021476 |
| 0.051200907 | 0.382367881 | 0.013497413 | 0.134630343 |
| 0.198952745 | 0.223992723 | 0.175040068 | 0.212634492 |
| 0.211795153 | 0.129741343 | 0.005725323 | 0.300653186 |
| 0.077393558 | 0.215895129 | 0.151399618 | 0.120122617 |
| 0.115788844 | 0.322566253 | 0.344209336 | 0.245174372 |
| 0.139409564 | 0.090952923 | 0.321122782 | 0.098447345 |
| 0.103777483 | 0.136658601 | 0.180258186 | 0.118501304 |
| 0.099705504 | 0.123875193 | 0.111031896 | 0.245810611 |
| 0.206073674 |             |             |             |
| SERHL       | 0.194625772 | 0.276315097 | 0.183603024 |
| 0.190072225 | 0.121348226 | 0.159851385 | 0.182798038 |
| 0.197317433 | 0.238252964 | 0.092745357 | 0.158877309 |
| 0.122601368 | 0.019334687 | 0.279706746 | 0.170448878 |
| 0.122012763 | 0.151711412 | 0.204224851 | 0.05715345  |
| 0.169742998 | 0.114221891 | 0.097412132 | 0.163211852 |
| 0.11833028  | 0.31933992  | 0.187030283 | 0.10338308  |
| 0.297231601 | 0.054242889 | 0.162539848 | 0.072322349 |
| 0.340346402 | 0.110764571 | 0.09613154  | 0.147756456 |
| 0.1470003   | 0.007681658 | 0.379626604 | 0.154110296 |
| 0.05850282  | 0.328118454 | 0.123729799 | 0.181922843 |

|             |             |             |             |
|-------------|-------------|-------------|-------------|
| 0.130564268 | 0.17082379  | 0.054096613 | 0.140910699 |
| 0.179550036 | 0.181219437 | 0.180429435 | 0.192897956 |
| 0.12878426  | 0.227359415 | 0.186096878 | 0.004900878 |
| 0.069974334 | 0.011355818 | 0.041668448 | 0.344996552 |
| 0.227070055 | 0.193948955 | 0.061705477 | 0.175222929 |
| 0.126467447 | 0.162742861 | 0.211704487 | 0.113763459 |
| 0.31826985  | 0.040204239 | 0.17121451  | 0.157161936 |
| 0.159711901 | 0.156341022 | 0.255509824 | 0.190045568 |
| 0.124785711 | 0.192676765 | 0.136295704 | 0.090048639 |
| 0.272760512 | 0.386461776 | 0.216683497 | 0.35938987  |
| 0.033063066 | 0.099546161 | 0.117889236 | 0.212802836 |
| 0.190581616 | 0.173594271 | 0.203700886 | 0.357656219 |
| 0.162619931 | 0.127213532 | 0.183005613 | 0.209047699 |
| 0.274404926 | 0.076141064 | 0.122041864 | 0.049911434 |
| 0.139368198 | 0.111499147 | 0.357270391 | 0.218487613 |
| 0.122025541 | 0.194664653 | 0.381113483 | 0.090869457 |
| 0.136519162 | 0.221100273 | 0.101440919 | 0.215373261 |
| 0.166174031 | 0.292207215 | 0.225818984 | 0.217937694 |
| 0.110148888 | 0.315746586 | 0.207505121 | 0.271704621 |
| 0.036449061 | 0.337245012 | 0.235278048 | 0.149893294 |
| 0.1859975   | 0.176902333 | 0.096951402 | 0.276382493 |
| 0.258996986 | 0.203044584 | 0.211251235 | 0.167646035 |
| 0.238519518 | 0.353650085 | 0.331109555 | 0.233770702 |
| 0.17226453  | 0.064283962 | 0.117764296 | 0.187125578 |
| 0.173875261 | 0.209647993 | 0.076489012 | 0.384623692 |
| 0.307363806 | 0.213494844 | 0.225963859 | 0.413018368 |
| 0.175514306 | 0.350143186 | 0.264585308 | 0.212111578 |
| 0.376157913 | 0.378390954 | 0.320250407 | 0.1419882   |
| 0.36015768  | 0.193880181 | 0.031538403 | 0.249033804 |
| 0.32644134  | 0.009141916 | 0.245314734 | 0.265816608 |
| 0.329838281 | 0.216187313 | 0.314542354 | 0.294552481 |
| 0.3278188   | 0.207929487 | 0.005473972 | 0.14982093  |
| 0.356361042 | 0.28450011  | 0.150431285 | 0.111187807 |
| 0.11977101  | 0.168687748 | 0.202029558 | 0.085249884 |
| 0.364984507 | 0.267396204 | 0.267242416 | 0.212066285 |
| 0.159025171 | 0.325373219 | 0.092816934 | 0.37639324  |
| 0.187799056 | 0.202257182 | 0.181888253 | 0.226931721 |
| 0.130173531 | 0.198038726 | 0.162314966 | 0.125467752 |
| 0.20497052  | 0.169237279 | 0.07636556  | 0.139285361 |
| 0.213160405 | 0.131381576 | 0.243378445 | 0.209005571 |
| 0.168775386 | 0.296825135 | 0.151547076 | 0.191494803 |
| 0.146748152 | 0.373796688 | 0.163847391 | 0.290792583 |
| 0.126488707 | 0.26304591  | 0.186994296 | 0.324130233 |
| 0.31540032  | 0.115382996 | 0.246263974 | 0.071291591 |
| 0.0953836   | 0.070475067 | 0.038076002 | 0.112757247 |
| 0.341261048 | 0.133054427 | 0.132496779 | 0.169706552 |
| 0.198415012 | 0.189969234 | 0.107831075 | 0.375200618 |
| 0.249915912 | 0.131256354 | 0.247280054 | 0.134586063 |
| 0.07484571  | 0.182184092 | 0.226397183 | 0.088388529 |
| 0.189307215 | 0.040692328 | 0.062182913 | 0.262249201 |
| 0.067434256 | 0.078561095 | 0.272723001 | 0.169317694 |
| 0.111993689 | 0.329047369 | 0.320719801 | 0.007497515 |
| 0.113005512 | 0.07748008  | 0.19274224  | 0.11741047  |
| 0.213400837 | 0.211427679 | 0.101788623 | 0.122788119 |

|             |             |             |             |
|-------------|-------------|-------------|-------------|
| 0.213904104 | 0.33542389  | 0.267382984 | 0.300832085 |
| 0.098398909 | 0.329324412 | 0.229053428 | 0.270313827 |
| 0.201781252 | 0.093030385 | 0.025126391 | 0.22779771  |
| 0.252986144 | 0.095319744 | 0.208846775 | 0.187500127 |
| 0.110276876 | 0.145953346 | 0.107230563 | 0.307125754 |
| 0.38692563  | 0.334142433 | 0.165365667 | 0.192728253 |
| 0.258309567 | 0.217150697 | 0.249669153 | 0.334782883 |
| 0.091676016 | 0.106925761 | 0.10832697  | 0.233655294 |
| 0.231592149 | 0.087684086 | 0.301793851 | 0.036396014 |
| 0.002085275 | 0.191902842 | 0.196894006 | 0.161660402 |
| 0.059315537 | 0.128222019 | 0.165178626 | 0.316938597 |
| 0.19866862  | 0.303871797 | 0.225228072 | 0.125583345 |
| 0.300420556 | 0.108722781 | 0.107494209 | 0.132324938 |
| 0.25473233  | 0.104775788 | 0.158238858 | 0.393940837 |
| 0.158003509 | 0.067736952 | 0.173052878 | 0.009855538 |
| 0.168477375 | 0.216756415 | 0.26800322  | 0.347995562 |
| 0.265009937 | 0.344201224 | 0.223657778 | 0.106386614 |
| 0.198421996 | 0.220948906 | 0.028119851 | 0.292810769 |
| 0.318167694 | 0.305974184 | 0.315896677 | 0.342582727 |
| 0.262008747 | 0.202888771 | 0.206420898 | 0.181421141 |
| 0.211663419 | 0.211776238 | 0.065058595 | 0.149564077 |
| 0.013820359 | 0.230517499 | 0.136667896 | 0.235394975 |
| 0.175566791 | 0.192639374 | 0.160895547 | 0.118068563 |
| 0.120567513 | 0.039956251 | 0.15095734  | 0.164516436 |
| 0.181162039 | 0.134228527 | 0.097321279 | 0.085063136 |
| 0.333233383 | 0.28716073  | 0.092849023 | 0.348673166 |
| 0.165357503 | 0.226281199 | 0.151526903 | 0.189875101 |
| 0.201595979 | 0.037667402 | 0.148667652 | 0.01613596  |
| 0.088888606 | 0.334267796 | 0.114818474 | 0.216386027 |
| 0.1999502   | 0.078895577 | 0.304836141 | 0.345097611 |
| 0.32877298  | 0.296993445 | 0.317108757 | 0.075717982 |
| 0.329808145 | 0.013980897 | 0.316468662 | 0.260024937 |
| 0.101244385 | 0.006969376 | 0.02720474  | 0.262591274 |
| 0.125333646 | 0.20540332  | 0.225300917 | 0.138313022 |
| 0.189352912 | 0.207091155 | 0.185557346 | 0.085148717 |
| 0.161417669 | 0.128901568 | 0.070214326 | 0.329886547 |
| 0.187280281 | 0.186519934 | 0.138676619 | 0.213827041 |
| 0.132629108 | 0.19143514  | 0.205162084 | 0.024182828 |
| 0.173653267 | 0.262594    | 0.393936408 | 0.322434569 |
| 0.343166154 | 0.166631963 | 0.082541194 | 0.113896195 |
| 0.249007279 | 0.206416005 | 0.098829059 | 0.201231288 |
| 0.314392406 | 0.140834979 | 0.246007882 | 0.293030293 |
| 0.315890823 | 0.329599685 | 0.160607316 | 0.209998486 |
| 0.096097832 | 0.004465866 | 0.164396926 | 0.214240881 |
| 0.033960899 | 0.109405952 | 0.27191055  | 0.148693862 |
| 0.152827623 | 0.14147698  | 0.066576132 | 0.067748582 |
| 0.180557357 | 0.141488518 | 0.095429912 | 0.234845865 |
| 0.129894323 | 0.080678262 | 0.187809878 | 0.177644779 |
| 0.10185473  | 0.298280043 | 0.316073131 | 0.144126084 |
| 0.130367187 | 0.115887498 | 0.195797171 | 0.234192586 |
| 0.25504567  | 0.270193999 | 0.150707425 | 0.068454706 |
| 0.27829166  | 0.128652837 | 0.276075238 | 0.310625453 |
| 0.371811447 | 0.34351567  | 0.365548456 | 0.126167736 |
| 0.196604566 | 0.160473174 | 0.100839419 | 0.125506886 |

|             |             |             |             |
|-------------|-------------|-------------|-------------|
| 0.311449307 | 0.175100772 | 0.332223981 | 0.077575561 |
| 0.218845983 | 0.219416434 | 0.140701952 | 0.208840043 |
| 0.103753817 | 0.212531267 | 0.167232116 | 0.211538663 |
| 0.139132842 | 0.073081396 | 0.184561665 | 0.210215646 |
| 0.235186639 | 0.046336968 | 0.218540096 | 0.178269382 |
| 0.26180546  | 0.078928556 | 0.168053482 | 0.342707649 |
| 0.224055554 | 0.210477733 | 0.174306796 | 0.197597718 |
| 0.219727156 | 0.112043095 | 0.089282919 | 0.280019002 |
| 0.294832454 | 0.14982501  | 0.343561534 | 0.252140669 |
| 0.210736073 | 0.115973088 | 0.083114408 | 0.129089486 |
| 0.200652391 | 0.165334191 | 0.174538855 | 0.198664899 |
| 0.300241497 | 0.381713794 | 0.273239458 | 0.18916001  |
| 0.13412309  | 0.197503214 | 0.169705588 | 0.252509292 |
| 0.061287731 | 0.172900481 | 0.11907751  | 0.205163103 |
| 0.013894028 | 0.032358538 | 0.288696594 | 0.173103251 |
| 0.360579139 | 0.279232734 | 0.336593509 | 0.18006562  |
| 0.000667838 | 0.141570526 | 0.151609622 | 0.135322143 |
| 0.264862287 | 0.253128143 | 0.127754515 | 0.17970043  |
| 0.278206114 | 0.205511063 | 0.156541207 | 0.144776318 |
| 0.04347858  | 0.165135513 | 0.233391203 | 0.196512002 |
| 0.165294125 | 0.195879572 | 0.069875348 | 0.214387921 |
| 0.051231467 | 0.247776241 | 0.250096941 | 0.101542964 |
| 0.042571754 | 0.258358377 | 0.226140142 | 0.157470884 |
| 0.101968022 | 0.24668146  | 0.284638142 | 0.011887493 |
| 0.168360879 | 0.082903267 | 0.149619465 | 0.162246134 |
| 0.172586477 | 0.147883383 | 0.150719998 | 0.138099361 |
| 0.171057336 | 0.2024313   | 0.179587831 | 0.198977141 |
| 0.175401777 | 0.212838553 | 0.142620187 | 0.176092748 |
| 0.124738572 | 0.227257905 | 0.278216885 | 0.299681038 |
| 0.148522378 | 0.272975759 | 0.312955465 | 0.219488414 |
| 0.188333549 | 0.153891733 | 0.309702557 | 0.322954318 |
| 0.293577485 | 0.265735801 | 0.147081102 | 0.265599999 |
| 0.049338321 | 0.132761147 | 0.171012287 | 0.174931513 |
| 0.196516292 | 0.081542074 | 0.14783135  | 0.181613673 |
| 0.182856662 | 0.362567989 | 0.295739952 | 0.320637989 |
| 0.155124257 | 0.123983851 | 0.10241032  | 0.153029605 |
| 0.221397195 | 0.233690066 | 0.104211028 | 0.048846789 |
| 0.184230538 | 0.198323293 | 0.243255973 | 0.352211741 |
| 0.064424564 | 0.310944055 | 0.108739042 | 0.189476055 |
| 0.095722249 | 0.306287638 | 0.231453957 | 0.199438711 |
| 0.041362843 | 0.21405444  | 0.135722443 | 0.162380124 |
| 0.189572954 | 0.17950886  | 0.111364974 | 0.176399895 |
| 0.18914327  | 1           | 0.364694698 | 0.22972364  |
| 0.122894978 | 0.092314681 | 0.146507232 | 0.141487822 |
| 0.150081131 | 0.30516891  | 0.200195013 | 0.298715905 |
| 0.115956816 | 0.263625357 | 0.378621111 | 0.182524608 |
| 0.196496992 | 0.14716006  | 0.03968939  | 0.136987714 |
| 0.175657655 | 0.084670088 | 0.003354054 | 0.020103153 |
| 0.208473577 | 0.117050754 | 0.208297337 | 0.19762624  |
| 0.103189352 | 0.227692748 | 0.035229885 | 0.179439073 |
| 0.33875418  | 0.38493482  | 0.142667856 | 0.263573639 |
| 0.221706286 | 0.193688337 | 0.175578335 | 0.010034596 |
| 0.126509642 | 0.109397934 | 0.099273747 | 0.168924458 |
| 0.131907839 | 0.046098622 | 0.139280938 | 0.180456125 |



|             |             |             |             |
|-------------|-------------|-------------|-------------|
| 0.261449644 | 0.041559586 | 0.152801113 | 0.187754512 |
| 0.238045098 | 0.38913358  | 0.147298423 | 0.189784804 |
| 0.141499409 | 0.220039309 | 0.109424031 | 0.116954884 |
| 0.117522487 | 0.088080338 | 0.20858358  | 0.070018129 |
| 0.156232089 | 0.135053762 | 0.011714675 | 0.385883613 |
| 0.371250431 | 0.094094178 | 0.296987513 | 0.081401948 |
| 0.209470548 | 0.275860676 | 0.095714456 | 0.116790578 |
| 0.088332096 | 0.112079997 | 0.204378723 | 0.275997829 |
| 0.05363715  | 0.135103244 | 0.176052184 | 0.099453338 |
| 0.406290569 | 0.091808076 | 0.270824413 | 0.082332546 |
| 0.323063777 | 0.257138155 | 0.259981523 | 0.12489302  |
| 0.149208366 | 0.192126497 | 0.123550911 | 0.337785441 |
| 0.169727666 | 0.072230743 | 0.220285133 | 0.172431979 |
| 0.081136666 | 0.289356935 | 0.124131322 | 0.336339876 |
| 0.110277661 | 0.214775284 | 0.20515195  | 0.291085108 |
| 0.237786877 | 0.068585248 | 0.066231754 | 0.115794609 |
| 0.328645721 | 0.181914728 | 0.083423963 | 0.240935404 |
| 0.056874273 | 0.191278319 | 0.14931057  | 0.112283414 |
| 0.12206799  | 0.172810445 | 0.142323049 | 0.229954519 |
| 0.169689374 | 0.141308081 | 0.11312427  | 0.332197661 |
| 0.145282499 | 0.105570179 | 0.351853394 | 0.004051643 |
| 0.191501937 | 0.161124675 | 0.197965722 | 0.125371223 |
| 0.296661757 | 0.170210102 | 0.165081827 | 0.019255214 |
| 0.225879491 | 0.051995805 | 0.131984961 | 0.113397027 |
| 0.072549143 | 0.177877323 | 0.338544374 | 0.294153212 |
| 0.21031477  | 0.104349855 | 0.077702558 | 0.312366358 |
| 0.043161724 | 0.071796973 | 0.082760448 | 0.182222452 |
| 0.058877997 | 0.107080626 | 0.109248489 | 0.09873263  |
| 0.231006588 | 0.192786349 |             |             |
| SERPINB6B   | 0.193970532 | 0.492693384 | 0.172109998 |
| 0.207302167 | 0.320550089 | 0.446038892 | 0.179349745 |
| 0.266923584 | 0.480215572 | 0.392132417 | 0.390580001 |
| 0.068468137 | 0.081578323 | 0.479288868 | 0.166966609 |
| 0.396355848 | 0.102705123 | 0.237397207 | 0.147909568 |
| 0.368405164 | 0.297232116 | 0.325509133 | 0.475400052 |
| 0.321034849 | 0.329712444 | 0.477412005 | 0.405872491 |
| 0.49280248  | 0.247676398 | 0.445949583 | 0.244724402 |
| 0.453373558 | 0.325352762 | 0.373874458 | 0.076582189 |
| 0.457807731 | 0.026250081 | 0.459279357 | 0.312112163 |
| 0.145299957 | 0.432422304 | 0.432506831 | 0.303552287 |
| 0.451173702 | 0.123769479 | 0.251509716 | 0.436685713 |
| 0.471687192 | 0.405217627 | 0.203920705 | 0.479769257 |
| 0.443338582 | 0.445638868 | 0.474990369 | 0.006986826 |
| 0.274712832 | 0.072502574 | 0.204552621 | 0.490536083 |
| 0.319377252 | 0.228347647 | 0.311914756 | 0.418704238 |
| 0.448875987 | 0.437495317 | 0.381685269 | 0.433735258 |
| 0.485644312 | 0.168418123 | 0.463133922 | 0.229318325 |
| 0.463582377 | 0.149736874 | 0.298782424 | 0.259146626 |
| 0.423514388 | 0.294547157 | 0.368411359 | 0.309770957 |
| 0.484718986 | 0.50257407  | 0.382822073 | 0.49239688  |
| 0.128568831 | 0.341137341 | 0.305458321 | 0.383942748 |
| 0.454531047 | 0.242359132 | 0.439525359 | 0.482325261 |
| 0.186198661 | 0.463933817 | 0.466379679 | 0.293159513 |
| 0.491423046 | 0.314379178 | 0.44644962  | 0.158135683 |

|             |             |             |             |
|-------------|-------------|-------------|-------------|
| 0.383827795 | 0.351610266 | 0.483549091 | 0.384084635 |
| 0.355248706 | 0.216650246 | 0.496344123 | 0.309763636 |
| 0.312443505 | 0.217779013 | 0.257098466 | 0.469094948 |
| 0.452429725 | 0.488399378 | 0.48938315  | 0.446564829 |
| 0.3758898   | 0.486603469 | 0.452190002 | 0.486379409 |
| 0.202697112 | 0.493539457 | 0.316609696 | 0.112117243 |
| 0.217488131 | 0.188400895 | 0.309017196 | 0.410728373 |
| 0.480610782 | 0.448363856 | 0.32525944  | 0.301228715 |
| 0.457226508 | 0.481407621 | 0.494210065 | 0.470988477 |
| 0.130039907 | 0.268892574 | 0.381564385 | 0.420208036 |
| 0.441147027 | 0.272047313 | 0.246611168 | 0.501133326 |
| 0.443244857 | 0.454961056 | 0.339255832 | 0.510016088 |
| 0.36309105  | 0.476621626 | 0.489879482 | 0.270960943 |
| 0.493887626 | 0.48695479  | 0.47618798  | 0.391409613 |
| 0.478624548 | 0.423174946 | 0.123530829 | 0.471246041 |
| 0.467035443 | 0.013965732 | 0.484761701 | 0.483612914 |
| 0.490160519 | 0.464527044 | 0.479616899 | 0.487555742 |
| 0.492394628 | 0.215295751 | 0.042832149 | 0.34038675  |
| 0.48545226  | 0.45225559  | 0.244487553 | 0.414296376 |
| 0.378861004 | 0.472015728 | 0.475028004 | 0.292152312 |
| 0.474078908 | 0.483727497 | 0.491551779 | 0.475059631 |
| 0.458049195 | 0.419270299 | 0.369537073 | 0.477142344 |
| 0.132125638 | 0.24650205  | 0.173633699 | 0.427509254 |
| 0.421493786 | 0.27553729  | 0.467442674 | 0.408656766 |
| 0.301547417 | 0.481656027 | 0.319615775 | 0.381937074 |
| 0.189388649 | 0.452749744 | 0.31869092  | 0.332356578 |
| 0.110548562 | 0.292500541 | 0.252829789 | 0.235760971 |
| 0.307909446 | 0.350644809 | 0.464368839 | 0.486328373 |
| 0.411050569 | 0.332247894 | 0.475842385 | 0.471439547 |
| 0.436645496 | 0.371452174 | 0.372435099 | 0.024212373 |
| 0.287701794 | 0.34537774  | 0.175222928 | 0.420554703 |
| 0.322237566 | 0.315002764 | 0.420838302 | 0.396146727 |
| 0.405875698 | 0.335474982 | 0.384039195 | 0.454997264 |
| 0.321003109 | 0.318059492 | 0.45769672  | 0.471014973 |
| 0.021644355 | 0.406449051 | 0.470649979 | 0.191802506 |
| 0.443490395 | 0.123056938 | 0.223265118 | 0.473910954 |
| 0.293745698 | 0.249564934 | 0.486269443 | 0.405139958 |
| 0.382424194 | 0.364727544 | 0.484654846 | 0.054921592 |
| 0.391196002 | 0.072867361 | 0.346298286 | 0.438719566 |
| 0.368393751 | 0.385644223 | 0.317731929 | 0.298346425 |
| 0.278631544 | 0.490259753 | 0.474526527 | 0.486807616 |
| 0.372543144 | 0.48500462  | 0.466703797 | 0.465577202 |
| 0.451354482 | 0.392887903 | 0.117840357 | 0.464510408 |
| 0.474349168 | 0.353402246 | 0.222671796 | 0.46958402  |
| 0.425853244 | 0.415645611 | 0.171713324 | 0.473093804 |
| 0.476948184 | 0.482213535 | 0.229296331 | 0.404340945 |
| 0.435528024 | 0.346561442 | 0.473642062 | 0.483141775 |
| 0.391653592 | 0.366503296 | 0.337542    | 0.420234683 |
| 0.311403224 | 0.238431246 | 0.439251397 | 0.170051555 |
| 0.007856484 | 0.233114069 | 0.189957725 | 0.230127322 |
| 0.159966903 | 0.45480567  | 0.437543739 | 0.489050853 |
| 0.230345319 | 0.471756016 | 0.40007454  | 0.304160473 |
| 0.473630178 | 0.38183385  | 0.371910548 | 0.408998713 |
| 0.392053894 | 0.043397046 | 0.172012863 | 0.504880596 |

|             |             |             |             |
|-------------|-------------|-------------|-------------|
| 0.165235745 | 0.221299655 | 0.454377556 | 0.005266642 |
| 0.149178775 | 0.4866557   | 0.247112306 | 0.325250068 |
| 0.464921912 | 0.334401899 | 0.352539392 | 0.413237724 |
| 0.401783025 | 0.222996893 | 0.006582295 | 0.48979797  |
| 0.492424928 | 0.488691062 | 0.493152114 | 0.485370666 |
| 0.4824066   | 0.476835358 | 0.446662885 | 0.461768621 |
| 0.23345234  | 0.252244667 | 0.202202952 | 0.339410248 |
| 0.015217296 | 0.428692392 | 0.371174958 | 0.274860457 |
| 0.447378768 | 0.422274571 | 0.117810112 | 0.383906499 |
| 0.06404994  | 0.170150788 | 0.431476771 | 0.333755341 |
| 0.394438391 | 0.069383987 | 0.250050661 | 0.320414915 |
| 0.470099218 | 0.446101526 | 0.353713631 | 0.49075806  |
| 0.374580606 | 0.300247345 | 0.342256711 | 0.425485006 |
| 0.185157133 | 0.16295465  | 0.4715001   | 0.046658258 |
| 0.268850472 | 0.485003312 | 0.419351282 | 0.183621093 |
| 0.363660348 | 0.026913081 | 0.452024525 | 0.488231259 |
| 0.484699987 | 0.481823523 | 0.484986456 | 0.245705843 |
| 0.486082871 | 0.097189154 | 0.492022344 | 0.484255879 |
| 0.410022127 | 0.002737047 | 0.016035217 | 0.478732101 |
| 0.395151127 | 0.195359758 | 0.289971812 | 0.393191953 |
| 0.189850457 | 0.320468089 | 0.18407872  | 0.188435449 |
| 0.463509415 | 0.275057972 | 0.191039745 | 0.485428808 |
| 0.33418701  | 0.339159868 | 0.476913953 | 0.242234418 |
| 0.424363424 | 0.135175523 | 0.249325407 | 0.011400163 |
| 0.408047645 | 0.271367268 | 0.493086385 | 0.492005674 |
| 0.475047073 | 0.40754916  | 0.368780227 | 0.381341177 |
| 0.478505898 | 0.252765649 | 0.378391387 | 0.275421341 |
| 0.489129228 | 0.401399469 | 0.395897333 | 0.409224627 |
| 0.473259818 | 0.477050982 | 0.116256564 | 0.445982412 |
| 0.036480851 | 0.003801681 | 0.451907549 | 0.399677571 |
| 0.126363123 | 0.377286759 | 0.371890808 | 0.389490217 |
| 0.347457556 | 0.093882235 | 0.252046396 | 0.234259132 |
| 0.370784015 | 0.397799375 | 0.271584487 | 0.409664575 |
| 0.309950174 | 0.163988421 | 0.292692593 | 0.28320554  |
| 0.35368248  | 0.436433884 | 0.328649793 | 0.09356353  |
| 0.450648221 | 0.404350476 | 0.159946555 | 0.30917321  |
| 0.462651233 | 0.478812325 | 0.123703677 | 0.02608327  |
| 0.392089423 | 0.3828911   | 0.475122302 | 0.493807028 |
| 0.50092591  | 0.476524013 | 0.446411139 | 0.19313255  |
| 0.176846301 | 0.37889526  | 0.299019979 | 0.150900797 |
| 0.489607355 | 0.212154073 | 0.490288005 | 0.284165161 |
| 0.267049466 | 0.320965249 | 0.085205075 | 0.214830609 |
| 0.372228727 | 0.308231334 | 0.248329842 | 0.300273578 |
| 0.349513066 | 0.239907781 | 0.159246224 | 0.314285233 |
| 0.440085832 | 0.16257616  | 0.296537311 | 0.455497909 |
| 0.476463353 | 0.347991914 | 0.440078947 | 0.456436229 |
| 0.276528117 | 0.276160606 | 0.383837222 | 0.460155718 |
| 0.481307234 | 0.442946404 | 0.055769006 | 0.491142287 |
| 0.482551093 | 0.445940554 | 0.488150598 | 0.43255021  |
| 0.232983774 | 0.363395248 | 0.335766324 | 0.375569595 |
| 0.327466975 | 0.454677287 | 0.360705629 | 0.185991822 |
| 0.418746026 | 0.485083631 | 0.481992562 | 0.246790748 |
| 0.461064028 | 0.307782826 | 0.198705999 | 0.489529085 |
| 0.1740478   | 0.187516658 | 0.441403769 | 0.470783152 |

|             |             |             |             |
|-------------|-------------|-------------|-------------|
| 0.004203074 | 0.123509951 | 0.479822299 | 0.320949029 |
| 0.488051465 | 0.474294452 | 0.461742235 | 0.414315412 |
| 0.002456064 | 0.420175902 | 0.398257664 | 0.399509797 |
| 0.487139257 | 0.457192358 | 0.291837614 | 0.149774609 |
| 0.382281427 | 0.222773938 | 0.214999244 | 0.40783558  |
| 0.17725657  | 0.480751231 | 0.321948529 | 0.372931463 |
| 0.278790979 | 0.26852221  | 0.229456479 | 0.348341335 |
| 0.187539201 | 0.3467508   | 0.414193722 | 0.400771461 |
| 0.16861409  | 0.470466533 | 0.470695712 | 0.098639646 |
| 0.361401218 | 0.469452171 | 0.477413736 | 0.006154351 |
| 0.431812337 | 0.03123714  | 0.260556966 | 0.264691989 |
| 0.273758936 | 0.294882647 | 0.317254104 | 0.321097009 |
| 0.459300697 | 0.338862168 | 0.331239755 | 0.325028765 |
| 0.225498009 | 0.368982056 | 0.423168213 | 0.464335587 |
| 0.285510441 | 0.242034468 | 0.248820877 | 0.243193117 |
| 0.111799011 | 0.493129264 | 0.36778599  | 0.213119058 |
| 0.333158282 | 0.46004423  | 0.417390911 | 0.491143649 |
| 0.453991341 | 0.26994418  | 0.413974291 | 0.485353077 |
| 0.275886125 | 0.369859296 | 0.194329356 | 0.472119755 |
| 0.345903617 | 0.213493481 | 0.476994668 | 0.4365449   |
| 0.483195212 | 0.443740971 | 0.365847983 | 0.474489126 |
| 0.403000538 | 0.430564974 | 0.387632653 | 0.139723082 |
| 0.2929987   | 0.297819733 | 0.270583818 | 0.009892035 |
| 0.425217045 | 0.376522774 | 0.47506755  | 0.483597865 |
| 0.276719979 | 0.447925984 | 0.382002803 | 0.19081948  |
| 0.348324517 | 0.323560623 | 0.281539785 | 0.480765419 |
| 0.187423527 | 0.303861307 | 0.32767435  | 0.440300637 |
| 0.455199265 | 0.469467446 | 0.305015741 | 0.390083711 |
| 0.37461228  | 0.364694698 | 1           | 0.286413319 |
| 0.447765142 | 0.188409572 | 0.475221584 | 0.326008539 |
| 0.285910295 | 0.491521049 | 0.182686524 | 0.490035893 |
| 0.351502586 | 0.294409313 | 0.469548904 | 0.439388514 |
| 0.425621015 | 0.181471128 | 0.164709067 | 0.475282579 |
| 0.342354979 | 0.322876009 | 0.020520232 | 0.070522829 |
| 0.382117113 | 0.417454366 | 0.483696745 | 0.451480321 |
| 0.26503478  | 0.404493599 | 0.15881769  | 0.432750894 |
| 0.484552332 | 0.501568798 | 0.292490954 | 0.370576079 |
| 0.438453537 | 0.199784947 | 0.477066712 | 0.036996972 |
| 0.428846772 | 0.418198755 | 0.413073944 | 0.15198005  |
| 0.076613147 | 0.187261111 | 0.4504193   | 0.228255098 |
| 0.468534937 | 0.182992931 | 0.474719828 | 0.464821562 |
| 0.349806506 | 0.501245178 | 0.193311945 | 0.422670825 |
| 0.182852582 | 0.391255465 | 0.392569463 | 0.439313018 |
| 0.232628274 | 0.280987987 | 0.411032796 | 0.214126277 |
| 0.097773845 | 0.2954728   | 0.007337339 | 0.442529589 |
| 0.483573515 | 0.338254434 | 0.353600093 | 0.377142292 |
| 0.355585387 | 0.470388719 | 0.287703279 | 0.437042325 |
| 0.031945874 | 0.35383746  | 0.322212983 | 0.473244564 |
| 0.212111069 | 0.447458528 | 0.12151837  | 0.339812342 |
| 0.48997105  | 0.300338411 | 0.393189205 | 0.308525736 |
| 0.492290892 | 0.487867265 | 0.334568867 | 0.276769847 |
| 0.472599671 | 0.198719687 | 0.447363193 | 0.48898799  |
| 0.249557196 | 0.200878321 | 0.442290307 | 0.274080153 |
| 0.304305988 | 0.479142556 | 0.453957037 | 0.492102942 |

|             |             |             |             |
|-------------|-------------|-------------|-------------|
| 0.123425659 | 0.34880531  | 0.457495289 | 0.487928448 |
| 0.377080655 | 0.183199096 | 0.225432955 | 0.260208154 |
| 0.480310648 | 0.168035465 | 0.281544477 | 0.44828606  |
| 0.197196504 | 0.394933324 | 0.469740151 | 0.228533447 |
| 0.082350145 | 0.30515695  | 0.403346854 | 0.291940164 |
| 0.36919467  | 0.387529494 | 0.268966838 | 0.43806695  |
| 0.176143148 | 0.050130201 | 0.462869085 | 0.015195112 |
| 0.448288931 | 0.404652952 | 0.35774265  | 0.374354601 |
| 0.322108283 | 0.460223867 | 0.454007558 | 0.006275763 |
| 0.452845014 | 0.064593315 | 0.37829665  | 0.236153168 |
| 0.291935945 | 0.158786011 | 0.480618514 | 0.477470154 |
| 0.446436419 | 0.382171084 | 0.324024804 | 0.488363472 |
| 0.135903985 | 0.329849697 | 0.352191296 | 0.486998474 |
| 0.205716514 | 0.424291481 | 0.427996802 | 0.353547652 |
| 0.46992248  | 0.409346587 |             |             |
| SERTAD1     | 0.157056786 | 0.202728962 | 0.153801789 |
| 0.105815424 | 0.069075733 | 0.070368919 | 0.133412782 |
| 0.141399261 | 0.18093687  | 0.035128274 | 0.095759762 |
| 0.111038552 | 0.007444271 | 0.202614452 | 0.128507295 |
| 0.071161323 | 0.124356066 | 0.145204996 | 0.032954884 |
| 0.081603987 | 0.061140049 | 0.037172411 | 0.103174295 |
| 0.058651904 | 0.33147308  | 0.137377343 | 0.052298095 |
| 0.207161454 | 0.018624038 | 0.104554862 | 0.02588663  |
| 0.269382977 | 0.064698639 | 0.038798169 | 0.137046981 |
| 0.083032984 | 0.003687404 | 0.304817643 | 0.068402473 |
| 0.020202268 | 0.28290291  | 0.058278876 | 0.089988355 |
| 0.06014429  | 0.145519827 | 0.02122831  | 0.084059629 |
| 0.129596922 | 0.088615258 | 0.177282036 | 0.126013236 |
| 0.052623799 | 0.19184241  | 0.127157385 | 0.007100389 |
| 0.023982566 | 0.002913059 | 0.012584975 | 0.258443941 |
| 0.220014832 | 0.130539433 | 0.019936996 | 0.102567846 |
| 0.080575333 | 0.107869166 | 0.183807733 | 0.043080738 |
| 0.230631869 | 0.013462303 | 0.106776163 | 0.088074565 |
| 0.072033044 | 0.127841123 | 0.258379226 | 0.206179113 |
| 0.046675325 | 0.137351436 | 0.079556763 | 0.030854258 |
| 0.197858599 | 0.300381355 | 0.188895219 | 0.273582454 |
| 0.01235186  | 0.053092377 | 0.047157265 | 0.16231667  |
| 0.13291958  | 0.115043353 | 0.138697473 | 0.265220993 |
| 0.129920251 | 0.081934811 | 0.121937252 | 0.233997326 |
| 0.201827476 | 0.027808957 | 0.064383802 | 0.018796339 |
| 0.085804991 | 0.057634296 | 0.278253737 | 0.180334598 |
| 0.060285411 | 0.207157859 | 0.304877798 | 0.047098084 |
| 0.061394982 | 0.205807185 | 0.0394209   | 0.137110017 |
| 0.107213659 | 0.206279752 | 0.15552551  | 0.155992547 |
| 0.056358957 | 0.226401487 | 0.141540234 | 0.206336208 |
| 0.013645235 | 0.245482916 | 0.179568403 | 0.122084422 |
| 0.146805583 | 0.128350892 | 0.040625163 | 0.233312447 |
| 0.175044545 | 0.168209382 | 0.130563628 | 0.092962455 |
| 0.154408378 | 0.277248469 | 0.238707108 | 0.166148987 |
| 0.143610529 | 0.021384944 | 0.058091681 | 0.103479749 |
| 0.12040275  | 0.202195545 | 0.028564056 | 0.299867391 |
| 0.247467565 | 0.137420827 | 0.14620916  | 0.334565739 |
| 0.101470134 | 0.259010016 | 0.185522851 | 0.146127421 |
| 0.284956356 | 0.297670542 | 0.227447648 | 0.085925152 |

|             |             |             |             |
|-------------|-------------|-------------|-------------|
| 0.285196666 | 0.113239664 | 0.016256188 | 0.182898723 |
| 0.244028839 | 0.003846431 | 0.1632024   | 0.176592187 |
| 0.241196255 | 0.136574691 | 0.219553684 | 0.204914142 |
| 0.243083529 | 0.215358353 | 0.001431078 | 0.108442061 |
| 0.266791926 | 0.213446323 | 0.093144102 | 0.055145293 |
| 0.073398748 | 0.089849164 | 0.1348598   | 0.033053505 |
| 0.278266881 | 0.186094018 | 0.182146045 | 0.152923795 |
| 0.100317624 | 0.295705192 | 0.045088382 | 0.303654109 |
| 0.156056179 | 0.144388066 | 0.230721355 | 0.18254209  |
| 0.055095138 | 0.154727493 | 0.075831894 | 0.075607385 |
| 0.181409947 | 0.092024688 | 0.026719125 | 0.087462139 |
| 0.271663191 | 0.077293611 | 0.176864409 | 0.156010267 |
| 0.128616191 | 0.329154896 | 0.086278783 | 0.116169302 |
| 0.087499158 | 0.380828557 | 0.104556948 | 0.20189371  |
| 0.051403707 | 0.256588739 | 0.129293859 | 0.243306627 |
| 0.241845467 | 0.058742418 | 0.230196997 | 0.049396947 |
| 0.035694216 | 0.023468426 | 0.01179012  | 0.060327881 |
| 0.363573572 | 0.062352763 | 0.082348598 | 0.108943476 |
| 0.142336265 | 0.128953307 | 0.039987249 | 0.318054063 |
| 0.261824413 | 0.05832806  | 0.169662155 | 0.079022768 |
| 0.080979043 | 0.106177209 | 0.149857273 | 0.038190229 |
| 0.146109369 | 0.015985982 | 0.02251109  | 0.17424396  |
| 0.024540557 | 0.030966179 | 0.186994693 | 0.110004469 |
| 0.051546857 | 0.334651165 | 0.227936539 | 0.002084568 |
| 0.056690711 | 0.05138742  | 0.149496617 | 0.05739181  |
| 0.163592774 | 0.169737539 | 0.055018179 | 0.051109942 |
| 0.241294176 | 0.246238793 | 0.207900598 | 0.21043582  |
| 0.03338764  | 0.234931283 | 0.149540199 | 0.195189549 |
| 0.15020605  | 0.038113529 | 0.007392168 | 0.151050872 |
| 0.167040646 | 0.036928034 | 0.249936059 | 0.118686329 |
| 0.042642129 | 0.089388078 | 0.05752835  | 0.215571338 |
| 0.307016684 | 0.25540523  | 0.103899987 | 0.131482471 |
| 0.193054654 | 0.16384268  | 0.178885221 | 0.243131362 |
| 0.031945935 | 0.048853894 | 0.038779809 | 0.160914855 |
| 0.216163081 | 0.034238265 | 0.265107548 | 0.011665834 |
| 0.000837524 | 0.171623318 | 0.19327478  | 0.090804861 |
| 0.02201993  | 0.079207712 | 0.104515924 | 0.226122788 |
| 0.146451681 | 0.240326701 | 0.200034488 | 0.049861031 |
| 0.226897366 | 0.04758899  | 0.056847585 | 0.086190841 |
| 0.230996815 | 0.07273918  | 0.093399386 | 0.306189106 |
| 0.197315294 | 0.025306404 | 0.105710603 | 0.005948381 |
| 0.131109496 | 0.150520536 | 0.309156215 | 0.361026926 |
| 0.182220535 | 0.350443438 | 0.205103087 | 0.039892429 |
| 0.152420478 | 0.192390159 | 0.021907189 | 0.201952338 |
| 0.233762748 | 0.225835785 | 0.232414335 | 0.268537773 |
| 0.182333632 | 0.14199722  | 0.134433169 | 0.12221807  |
| 0.149606503 | 0.158895795 | 0.020968022 | 0.071511692 |
| 0.013234131 | 0.169706974 | 0.076455942 | 0.245464247 |
| 0.114772451 | 0.150999144 | 0.141244969 | 0.073411455 |
| 0.097132217 | 0.012097849 | 0.072412275 | 0.089689398 |
| 0.126553539 | 0.129118915 | 0.035993202 | 0.028647817 |
| 0.267145793 | 0.239506532 | 0.032568674 | 0.25554963  |
| 0.104082583 | 0.234335126 | 0.069836297 | 0.132330325 |
| 0.147665507 | 0.015105052 | 0.064144976 | 0.006329413 |

|             |             |             |             |
|-------------|-------------|-------------|-------------|
| 0.047890573 | 0.262593512 | 0.04523517  | 0.149708082 |
| 0.147035819 | 0.085424684 | 0.245726401 | 0.254243859 |
| 0.251373573 | 0.203913661 | 0.229305851 | 0.027201837 |
| 0.239926543 | 0.003685939 | 0.223015741 | 0.190682479 |
| 0.036552319 | 0.007174832 | 0.023054521 | 0.173325127 |
| 0.067063322 | 0.26502042  | 0.200869362 | 0.060266948 |
| 0.118782345 | 0.134287238 | 0.150343709 | 0.032977805 |
| 0.109791417 | 0.07385164  | 0.031137125 | 0.25271257  |
| 0.100712765 | 0.135928257 | 0.060667706 | 0.251967023 |
| 0.08309847  | 0.14050227  | 0.236548908 | 0.017556666 |
| 0.120513026 | 0.298335457 | 0.325665071 | 0.234198848 |
| 0.258136539 | 0.107880639 | 0.029605883 | 0.051792417 |
| 0.173660965 | 0.23684485  | 0.037996479 | 0.221346405 |
| 0.229354492 | 0.086082861 | 0.19856474  | 0.246772162 |
| 0.225744309 | 0.248037527 | 0.135604869 | 0.13713771  |
| 0.08416721  | 0.003150826 | 0.091242712 | 0.191508401 |
| 0.016537595 | 0.045535445 | 0.235958031 | 0.072164086 |
| 0.078039059 | 0.131815071 | 0.02129897  | 0.022802932 |
| 0.129880455 | 0.073685452 | 0.045761444 | 0.208987899 |
| 0.053618218 | 0.033061075 | 0.105466386 | 0.11213091  |
| 0.048594288 | 0.24632824  | 0.319506541 | 0.12581898  |
| 0.064538809 | 0.059274643 | 0.155593901 | 0.245892279 |
| 0.175927535 | 0.182860572 | 0.100157464 | 0.052890109 |
| 0.253501583 | 0.057230013 | 0.189843454 | 0.223737273 |
| 0.284294331 | 0.250624621 | 0.313496775 | 0.070696057 |
| 0.158087922 | 0.101666178 | 0.051079734 | 0.067420738 |
| 0.224714514 | 0.199107512 | 0.252362104 | 0.032334912 |
| 0.22440922  | 0.112661614 | 0.114608342 | 0.178522594 |
| 0.058424487 | 0.205092573 | 0.099834363 | 0.214388426 |
| 0.057621751 | 0.02732552  | 0.145407139 | 0.163748545 |
| 0.181243707 | 0.012791698 | 0.196563602 | 0.092360699 |
| 0.201983364 | 0.033339165 | 0.103313248 | 0.263546949 |
| 0.245962636 | 0.1682853   | 0.08526558  | 0.142590187 |
| 0.143603077 | 0.062162782 | 0.079747188 | 0.201634894 |
| 0.210626285 | 0.092117323 | 0.26012287  | 0.188339727 |
| 0.238566635 | 0.056597819 | 0.029260385 | 0.071517779 |
| 0.169469306 | 0.080400726 | 0.113458687 | 0.203168115 |
| 0.26685071  | 0.306983919 | 0.196758585 | 0.111732135 |
| 0.082738631 | 0.20890452  | 0.18729915  | 0.179976947 |
| 0.019673022 | 0.119517105 | 0.054077579 | 0.135584118 |
| 0.011398899 | 0.010617909 | 0.200802826 | 0.099038758 |
| 0.27230143  | 0.189399077 | 0.259071841 | 0.098877107 |
| 6.87E-05    | 0.082878104 | 0.101677    | 0.050750064 |
| 0.208208019 | 0.079807134 | 0.119505101 | 0.191810374 |
| 0.246290042 | 0.085811215 | 0.069106486 | 0.238569692 |
| 0.113834967 | 0.221406375 | 0.14890511  | 0.01130559  |
| 0.218608827 | 0.025272636 | 0.12360511  | 0.08400662  |
| 0.22632762  | 0.191855138 | 0.044876689 | 0.018580658 |
| 0.183729036 | 0.154964459 | 0.142361896 | 0.013192305 |
| 0.171972546 | 0.211441661 | 0.006859202 | 0.051261774 |
| 0.086000226 | 0.083767683 | 0.084395232 | 0.105922548 |
| 0.076768974 | 0.108914063 | 0.057968091 | 0.090042363 |
| 0.11127431  | 0.090987219 | 0.16742097  | 0.123097794 |
| 0.142032948 | 0.089693247 | 0.085120629 | 0.098873818 |
|             |             |             | 0.054619279 |

|             |             |             |             |
|-------------|-------------|-------------|-------------|
| 0.150147262 | 0.330069269 | 0.355849761 | 0.119604494 |
| 0.196150715 | 0.300599215 | 0.27032801  | 0.156874508 |
| 0.065636398 | 0.253140306 | 0.237331423 | 0.226301856 |
| 0.296209342 | 0.069043811 | 0.188351037 | 0.01719764  |
| 0.06802911  | 0.140037065 | 0.103906999 | 0.149021512 |
| 0.033523847 | 0.082494425 | 0.137347295 | 0.1212933   |
| 0.299817484 | 0.288489409 | 0.243998748 | 0.068535699 |
| 0.061393305 | 0.040111222 | 0.096084899 | 0.132778076 |
| 0.247682916 | 0.051728572 | 0.050539455 | 0.137195235 |
| 0.111086698 | 0.159684125 | 0.267009747 | 0.022243812 |
| 0.250772655 | 0.045741784 | 0.128408795 | 0.038340337 |
| 0.306555725 | 0.247984623 | 0.132714129 | 0.012926588 |
| 0.133265128 | 0.076656013 | 0.079416396 | 0.121754234 |
| 0.113435626 | 0.046694957 | 0.101732923 | 0.131529    |
| 0.22972364  | 0.286413319 | 1           | 0.071848364 |
| 0.037319405 | 0.104020699 | 0.066461572 | 0.075391202 |
| 0.213066973 | 0.200770466 | 0.206355395 | 0.047059009 |
| 0.295591409 | 0.299524936 | 0.121581414 | 0.103485816 |
| 0.089937605 | 0.011925799 | 0.059513508 | 0.091916521 |
| 0.02985419  | 0.001116991 | 0.008469253 | 0.156553428 |
| 0.048959195 | 0.140480481 | 0.141909138 | 0.040488186 |
| 0.170896116 | 0.012894996 | 0.105423553 | 0.258852317 |
| 0.306138803 | 0.065695562 | 0.23205026  | 0.174070262 |
| 0.134854677 | 0.128265983 | 0.006254087 | 0.075070013 |
| 0.062712074 | 0.03654291  | 0.136969108 | 0.117709176 |
| 0.013515869 | 0.085632453 | 0.201831843 | 0.175803427 |
| 0.013732625 | 0.106740485 | 0.125070931 | 0.239701355 |
| 0.309864707 | 0.090884173 | 0.128095325 | 0.10493905  |
| 0.191963789 | 0.050609703 | 0.056829734 | 0.050566481 |
| 0.03161861  | 0.144829797 | 0.025284832 | 0.130142183 |
| 0.058907378 | 0.00747942  | 0.325568917 | 0.293569511 |
| 0.037488326 | 0.293408564 | 0.031809854 | 0.169997552 |
| 0.213014433 | 0.043478349 | 0.057770497 | 0.074436192 |
| 0.06303042  | 0.176638244 | 0.209568531 | 0.016484015 |
| 0.079409404 | 0.129953077 | 0.046116258 | 0.343223821 |
| 0.035696643 | 0.250111628 | 0.025992233 | 0.239355586 |
| 0.195157029 | 0.266774261 | 0.062918332 | 0.097684372 |
| 0.231781477 | 0.051781747 | 0.246801179 | 0.096588525 |
| 0.026022072 | 0.142494983 | 0.085163524 | 0.030639265 |
| 0.234672579 | 0.075426145 | 0.247431876 | 0.068032181 |
| 0.193307071 | 0.137215265 | 0.213028425 | 0.198135306 |
| 0.026421757 | 0.023362421 | 0.049743241 | 0.251396899 |
| 0.119575561 | 0.031575892 | 0.186072913 | 0.018003683 |
| 0.154850422 | 0.107580029 | 0.05255015  | 0.100421404 |
| 0.110198404 | 0.064859764 | 0.226262959 | 0.121959901 |
| 0.071409852 | 0.044879437 | 0.2736598   | 0.086764165 |
| 0.076826491 | 0.27656734  | 0.001040272 | 0.138086188 |
| 0.105814045 | 0.159414111 | 0.057550052 | 0.302792218 |
| 0.125508554 | 0.100082345 | 0.023736778 | 0.153572257 |
| 0.023848743 | 0.059941541 | 0.048161282 | 0.028578869 |
| 0.139636912 | 0.262189165 | 0.203242756 | 0.177030689 |
| 0.043562484 | 0.026669773 | 0.234152748 | 0.013608956 |
| 0.024260719 | 0.029462934 | 0.123328415 | 0.020046626 |
| 0.044077546 | 0.044378274 | 0.033743868 | 0.17117961  |



|             |             |             |             |
|-------------|-------------|-------------|-------------|
| 0.110590157 |             |             |             |
| SFI1        | 0.039668976 | 0.423201068 | 0.032479823 |
| 0.092172169 | 0.223125818 | 0.27235971  | 0.030000081 |
| 0.070100988 | 0.315049184 | 0.292239748 | 0.242877201 |
| 0.007099578 | 0.092207289 | 0.439850508 | 0.026130584 |
| 0.296953266 | 0.014315336 | 0.059177244 | 0.060753717 |
| 0.159050181 | 0.205527223 | 0.265626776 | 0.25551575  |
| 0.210364484 | 0.145953708 | 0.239857603 | 0.3147475   |
| 0.509166197 | 0.275114005 | 0.35473854  | 0.222685082 |
| 0.378037011 | 0.242842241 | 0.32171806  | 0.006947576 |
| 0.286178524 | 0.013338816 | 0.403085608 | 0.183823197 |
| 0.138689879 | 0.294054844 | 0.282542548 | 0.15749646  |
| 0.309139661 | 0.01886837  | 0.234537492 | 0.359572151 |
| 0.233779638 | 0.188484085 | 0.036957173 | 0.365761455 |
| 0.287218209 | 0.247894107 | 0.37721133  | 0.001462275 |
| 0.268306229 | 0.132890808 | 0.243876073 | 0.490614173 |
| 0.121323589 | 0.065718277 | 0.311126493 | 0.162322221 |
| 0.300474494 | 0.310074637 | 0.164026624 | 0.320994398 |
| 0.488768084 | 0.173297357 | 0.4092683   | 0.111415284 |
| 0.273753654 | 0.016788487 | 0.099185358 | 0.049404912 |
| 0.302248612 | 0.11666963  | 0.232755817 | 0.262172502 |
| 0.43897383  | 0.481785712 | 0.147658821 | 0.487916065 |
| 0.097929528 | 0.270152267 | 0.209971654 | 0.227165646 |
| 0.308782757 | 0.049249546 | 0.350085345 | 0.503444917 |
| 0.025717802 | 0.302637212 | 0.347862053 | 0.075819675 |
| 0.41244617  | 0.250129507 | 0.320671935 | 0.153740538 |
| 0.304653526 | 0.265160792 | 0.451802577 | 0.206325734 |
| 0.224488007 | 0.041307386 | 0.458371386 | 0.257289625 |
| 0.206260305 | 0.047013335 | 0.177477352 | 0.478898253 |
| 0.323365372 | 0.491718296 | 0.42737981  | 0.318354456 |
| 0.30053846  | 0.493873559 | 0.332471129 | 0.39007875  |
| 0.195449792 | 0.519641118 | 0.113454819 | 0.017703336 |
| 0.041235759 | 0.041168583 | 0.185275272 | 0.234417991 |
| 0.472049767 | 0.232480256 | 0.12131204  | 0.15425773  |
| 0.462499731 | 0.459620186 | 0.524335993 | 0.385407441 |
| 0.018066622 | 0.236675723 | 0.304745496 | 0.17510023  |
| 0.298711241 | 0.060978986 | 0.216973095 | 0.480439198 |
| 0.337345311 | 0.426012746 | 0.101663201 | 0.458852332 |
| 0.126748887 | 0.487703629 | 0.463870841 | 0.100528222 |
| 0.495101992 | 0.467693943 | 0.498010595 | 0.351545316 |
| 0.439733325 | 0.233868734 | 0.055543038 | 0.349800886 |
| 0.452650005 | 0.012804154 | 0.492674385 | 0.518806523 |
| 0.498079573 | 0.478734032 | 0.514563471 | 0.510913905 |
| 0.498410256 | 0.038367059 | 0.045091802 | 0.197051739 |
| 0.496426574 | 0.360518038 | 0.075789304 | 0.337682363 |
| 0.265740002 | 0.270322105 | 0.40225177  | 0.265855457 |
| 0.47420056  | 0.447961428 | 0.503783143 | 0.349254224 |
| 0.227369746 | 0.262644212 | 0.319067843 | 0.43980781  |
| 0.019704398 | 0.067734758 | 0.028151066 | 0.233479935 |
| 0.284639968 | 0.099502974 | 0.269421862 | 0.258153464 |
| 0.111016797 | 0.233977064 | 0.295273372 | 0.319456173 |
| 0.036503253 | 0.325149508 | 0.098773965 | 0.110189627 |
| 0.018559863 | 0.099786562 | 0.122824722 | 0.089457546 |
| 0.164063737 | 0.192556459 | 0.392174176 | 0.491629484 |

|             |             |             |             |
|-------------|-------------|-------------|-------------|
| 0.266800556 | 0.127841275 | 0.356975731 | 0.445262927 |
| 0.379954156 | 0.295904946 | 0.156949626 | 0.005261493 |
| 0.227715067 | 0.30912299  | 0.199923343 | 0.320846131 |
| 0.135949821 | 0.171342569 | 0.286389112 | 0.343806253 |
| 0.187205916 | 0.08851165  | 0.298923116 | 0.374940303 |
| 0.104342879 | 0.213868138 | 0.433120664 | 0.31105529  |
| 0.00073976  | 0.230053577 | 0.431436087 | 0.107593279 |
| 0.233326752 | 0.122581404 | 0.226285883 | 0.468223486 |
| 0.261646211 | 0.181179639 | 0.498392728 | 0.338818424 |
| 0.250841924 | 0.183892486 | 0.51701644  | 0.065405142 |
| 0.268489348 | 0.032101112 | 0.197013138 | 0.283070099 |
| 0.160118426 | 0.21331081  | 0.237828841 | 0.204693007 |
| 0.080384962 | 0.504771293 | 0.345307121 | 0.50891762  |
| 0.313286482 | 0.519277403 | 0.458882158 | 0.416255935 |
| 0.260881448 | 0.31352656  | 0.153756156 | 0.425155346 |
| 0.463012456 | 0.261104103 | 0.045725515 | 0.447054108 |
| 0.312924849 | 0.350290937 | 0.078620867 | 0.484122541 |
| 0.451072827 | 0.463298189 | 0.08020476  | 0.323254035 |
| 0.3343213   | 0.144634091 | 0.380682447 | 0.508757084 |
| 0.305011368 | 0.279989911 | 0.269576267 | 0.365559711 |
| 0.104209188 | 0.164907631 | 0.262598913 | 0.18784463  |
| 0.016612001 | 0.04462716  | 0.035747371 | 0.094237361 |
| 0.142240735 | 0.349694175 | 0.319432925 | 0.512638507 |
| 0.063088468 | 0.375133428 | 0.166652157 | 0.218988183 |
| 0.406340166 | 0.266431173 | 0.291602014 | 0.283789094 |
| 0.171353262 | 0.008201671 | 0.067097213 | 0.485861965 |
| 0.021785096 | 0.201850018 | 0.209577178 | 0.001396881 |
| 0.023512619 | 0.4186292   | 0.067277371 | 0.147049727 |
| 0.46720107  | 0.155371867 | 0.136492345 | 0.297845346 |
| 0.25443864  | 0.048517825 | 0.001008267 | 0.491817602 |
| 0.477386578 | 0.445788895 | 0.47807893  | 0.434258441 |
| 0.441479949 | 0.356090369 | 0.388382585 | 0.241131634 |
| 0.05788525  | 0.052850682 | 0.19571659  | 0.202817468 |
| 0.003213058 | 0.316317409 | 0.211608384 | 0.082439686 |
| 0.386664326 | 0.215673246 | 0.016862438 | 0.257593187 |
| 0.011577877 | 0.218556783 | 0.216558259 | 0.135831407 |
| 0.285319506 | 0.005354367 | 0.214116196 | 0.282028295 |
| 0.403756585 | 0.295335941 | 0.309535731 | 0.518109409 |
| 0.218355524 | 0.093605662 | 0.223598263 | 0.329836166 |
| 0.036687708 | 0.123381947 | 0.261140239 | 0.054995701 |
| 0.148690676 | 0.422146075 | 0.294062939 | 0.042123248 |
| 0.176013084 | 0.00147219  | 0.326271513 | 0.511538141 |
| 0.45800249  | 0.523089708 | 0.48802138  | 0.226963967 |
| 0.495766345 | 0.156352359 | 0.528447674 | 0.385065005 |
| 0.336582473 | 0.0005128   | 0.002006465 | 0.499447233 |
| 0.304575809 | 0.038196812 | 0.090527298 | 0.26806542  |
| 0.061689914 | 0.09742892  | 0.031002867 | 0.143352754 |
| 0.311263303 | 0.158884656 | 0.133672794 | 0.456758503 |
| 0.157431932 | 0.140128761 | 0.292395839 | 0.050365011 |
| 0.289750532 | 0.025072112 | 0.049473696 | 0.004611108 |
| 0.292970776 | 0.083233174 | 0.433996801 | 0.502997052 |
| 0.465427688 | 0.324750937 | 0.326807798 | 0.243621412 |
| 0.422473822 | 0.068156038 | 0.30740588  | 0.067184083 |
| 0.48463952  | 0.308734012 | 0.249538101 | 0.253806048 |

|             |             |             |             |
|-------------|-------------|-------------|-------------|
| 0.486204869 | 0.447839336 | 0.014114961 | 0.375348649 |
| 0.006087959 | 0.000721578 | 0.275695012 | 0.176290299 |
| 0.063285523 | 0.295061949 | 0.187420151 | 0.167023561 |
| 0.147656637 | 0.015220435 | 0.244088758 | 0.216751588 |
| 0.196954942 | 0.261770448 | 0.211641687 | 0.177388983 |
| 0.188742318 | 0.109909722 | 0.115916477 | 0.085913813 |
| 0.193218156 | 0.271485702 | 0.151419888 | 0.008450051 |
| 0.33244532  | 0.317327008 | 0.027827517 | 0.09180544  |
| 0.422494623 | 0.497605626 | 0.021133137 | 0.004281753 |
| 0.199012022 | 0.225596992 | 0.496774077 | 0.499591877 |
| 0.500309447 | 0.497431313 | 0.340937459 | 0.075006853 |
| 0.033533072 | 0.217803094 | 0.224368767 | 0.05750044  |
| 0.500949897 | 0.038881289 | 0.464259376 | 0.257494505 |
| 0.062690655 | 0.139336764 | 0.013896455 | 0.042622258 |
| 0.297841449 | 0.098277382 | 0.10659282  | 0.095991674 |
| 0.225268068 | 0.213347923 | 0.022532273 | 0.117476072 |
| 0.286836129 | 0.193840085 | 0.091657916 | 0.203801164 |
| 0.305138447 | 0.224803813 | 0.394721921 | 0.407048351 |
| 0.073516733 | 0.065888118 | 0.208389748 | 0.32332658  |
| 0.451548391 | 0.322927974 | 0.013898303 | 0.461459723 |
| 0.473990255 | 0.369785464 | 0.480808203 | 0.348873894 |
| 0.044636239 | 0.284390249 | 0.271085389 | 0.251876231 |
| 0.107769775 | 0.265006452 | 0.14912534  | 0.031021103 |
| 0.237509586 | 0.438274881 | 0.408838287 | 0.095547184 |
| 0.305817989 | 0.078197503 | 0.034205461 | 0.433655507 |
| 0.168105314 | 0.052725737 | 0.295881871 | 0.427488923 |
| 0.00075237  | 0.139555997 | 0.483626479 | 0.143981218 |
| 0.488213824 | 0.481704962 | 0.402832765 | 0.162520191 |
| 0.002717973 | 0.364197791 | 0.264293648 | 0.30046761  |
| 0.427249099 | 0.277161229 | 0.094504246 | 0.037207424 |
| 0.216230498 | 0.051689573 | 0.084117325 | 0.247921001 |
| 0.196079865 | 0.306691543 | 0.121455922 | 0.131095678 |
| 0.123229112 | 0.061363126 | 0.206252767 | 0.147241074 |
| 0.142479253 | 0.16149969  | 0.290537604 | 0.258174209 |
| 0.20178946  | 0.418629551 | 0.383244073 | 0.011200567 |
| 0.27503375  | 0.38721568  | 0.400391566 | 0.001401063 |
| 0.380824383 | 0.001899635 | 0.120226541 | 0.136415342 |
| 0.120581086 | 0.133534445 | 0.165068772 | 0.21286729  |
| 0.255799415 | 0.140381501 | 0.179395881 | 0.139769135 |
| 0.095602617 | 0.132812572 | 0.277403188 | 0.262509371 |
| 0.197184084 | 0.070958201 | 0.070449366 | 0.076931791 |
| 0.024380018 | 0.455924211 | 0.183686233 | 0.045615143 |
| 0.132386295 | 0.26032569  | 0.294007794 | 0.494867047 |
| 0.372587144 | 0.087202123 | 0.230080662 | 0.442634346 |
| 0.25910626  | 0.21324833  | 0.034484431 | 0.273290875 |
| 0.136666518 | 0.165416976 | 0.290881546 | 0.220578598 |
| 0.371517479 | 0.349703898 | 0.174852646 | 0.403874504 |
| 0.255947057 | 0.266356828 | 0.296801267 | 0.044776489 |
| 0.110783222 | 0.080599248 | 0.197582422 | 0.000170051 |
| 0.243355425 | 0.179700778 | 0.47944295  | 0.472795211 |
| 0.264312202 | 0.328990847 | 0.275930458 | 0.052050374 |
| 0.270976594 | 0.152964969 | 0.080788122 | 0.408606091 |
| 0.227233301 | 0.10577665  | 0.212344274 | 0.233698518 |
| 0.399147937 | 0.392520053 | 0.18664041  | 0.153663298 |

|             |             |             |             |
|-------------|-------------|-------------|-------------|
| 0.149066078 | 0.122894978 | 0.447765142 | 0.071848364 |
| 1           | 0.139849496 | 0.27602917  | 0.210983593 |
| 0.142656026 | 0.519660772 | 0.029554629 | 0.531911429 |
| 0.252827172 | 0.086566438 | 0.445652512 | 0.189904097 |
| 0.191469889 | 0.065695125 | 0.197532665 | 0.290199134 |
| 0.144622983 | 0.286200033 | 0.021224925 | 0.056239675 |
| 0.246985236 | 0.242449284 | 0.405648978 | 0.298986367 |
| 0.185112429 | 0.276605358 | 0.167200812 | 0.194190858 |
| 0.472192417 | 0.467049072 | 0.181924876 | 0.1780326   |
| 0.271319688 | 0.052413346 | 0.293540892 | 0.015279147 |
| 0.339214217 | 0.347233557 | 0.322544961 | 0.02363777  |
| 0.00688941  | 0.224170616 | 0.324386485 | 0.038447214 |
| 0.4826708   | 0.222773723 | 0.278700064 | 0.372245766 |
| 0.113953237 | 0.467400883 | 0.066414808 | 0.340050582 |
| 0.028417184 | 0.162558549 | 0.295495561 | 0.295632319 |
| 0.162359628 | 0.242833777 | 0.313433454 | 0.197730411 |
| 0.013037598 | 0.180503637 | 0.000849706 | 0.356731244 |
| 0.451151835 | 0.285794391 | 0.14691869  | 0.284599259 |
| 0.187373361 | 0.336344196 | 0.175789099 | 0.326416222 |
| 0.00368868  | 0.280387603 | 0.110505532 | 0.379537657 |
| 0.262634385 | 0.274736725 | 0.026588802 | 0.247422121 |
| 0.416004377 | 0.22122878  | 0.188643842 | 0.30923263  |
| 0.483067404 | 0.353452608 | 0.120465167 | 0.147271877 |
| 0.328095992 | 0.032918027 | 0.30259882  | 0.513239654 |
| 0.101688365 | 0.179390748 | 0.436395901 | 0.133809867 |
| 0.255912085 | 0.345398489 | 0.330651771 | 0.504042276 |
| 0.037996949 | 0.152957835 | 0.389026824 | 0.450910454 |
| 0.222136168 | 0.138438316 | 0.209737941 | 0.163558407 |
| 0.446014955 | 0.055036783 | 0.215083453 | 0.285405553 |
| 0.202512975 | 0.205347063 | 0.263232351 | 0.127734653 |
| 0.01628867  | 0.095759074 | 0.251449392 | 0.077899108 |
| 0.191522176 | 0.266284568 | 0.181348813 | 0.333722257 |
| 0.078263475 | 0.011664268 | 0.40683293  | 0.023638749 |
| 0.22166323  | 0.297724878 | 0.141298471 | 0.261356699 |
| 0.133832545 | 0.241760612 | 0.248531142 | 6.63E-05    |
| 0.376130547 | 0.036518112 | 0.210896546 | 0.165226088 |
| 0.243969204 | 0.025882999 | 0.424403905 | 0.508516695 |
| 0.209053377 | 0.258624367 | 0.303725527 | 0.438655921 |
| 0.146261957 | 0.315626924 | 0.289830853 | 0.343110629 |
| 0.199317121 | 0.334409835 | 0.333522566 | 0.316565184 |
| 0.308822743 | 0.16473489  |             |             |
| SFRS4       | 0.030698625 | 0.15010136  | 0.018552482 |
| 0.084881545 | 0.329450523 | 0.095023946 | 0.025526295 |
| 0.040659101 | 0.118895449 | 0.027249217 | 0.224696115 |
| 0.013237197 | 0.104311551 | 0.232233449 | 0.026553046 |
| 0.24544598  | 0.031999074 | 0.073132097 | 0.016549469 |
| 0.056462301 | 0.295518367 | 0.105618044 | 0.078715948 |
| 0.247238198 | 0.096568446 | 0.105035696 | 0.14794087  |
| 0.219138087 | 0.052692123 | 0.220475816 | 0.026429265 |
| 0.22865816  | 0.316693933 | 0.138520661 | 0.009585496 |
| 0.144618892 | 0.01777416  | 0.197596841 | 0.172858678 |
| 0.184621758 | 0.189496791 | 0.045057182 | 0.175383343 |
| 0.074983994 | 0.015571878 | 0.01628055  | 0.196655323 |
| 0.110889863 | 0.092389695 | 0.019270278 | 0.189224601 |

|             |             |             |             |
|-------------|-------------|-------------|-------------|
| 0.067086586 | 0.15566217  | 0.101067105 | 0.000590106 |
| 0.168805552 | 0.061119814 | 0.097737562 | 0.211062155 |
| 0.172779619 | 0.118009107 | 0.042727369 | 0.064336088 |
| 0.139048254 | 0.207945132 | 0.19499327  | 0.05408059  |
| 0.233272461 | 0.120827053 | 0.195762056 | 0.074936832 |
| 0.095101568 | 0.009197007 | 0.133489771 | 0.025636732 |
| 0.10000769  | 0.199110568 | 0.233019322 | 0.183786902 |
| 0.139009288 | 0.233716057 | 0.159431591 | 0.184971404 |
| 0.070843492 | 0.258954592 | 0.177299186 | 0.278924202 |
| 0.178691541 | 0.0238766   | 0.261392943 | 0.25440306  |
| 0.014058399 | 0.07756006  | 0.165099506 | 0.04566789  |
| 0.177835416 | 0.076297425 | 0.076276532 | 0.163601413 |
| 0.311762354 | 0.244395801 | 0.184888427 | 0.205392494 |
| 0.192927793 | 0.029154096 | 0.168033643 | 0.290135679 |
| 0.192850261 | 0.044066206 | 0.143663757 | 0.243297004 |
| 0.201941489 | 0.231006415 | 0.156940961 | 0.203773999 |
| 0.216661671 | 0.241381618 | 0.229046005 | 0.184772962 |
| 0.013064267 | 0.221005285 | 0.122778536 | 0.037141517 |
| 0.01715793  | 0.067558332 | 0.079700048 | 0.225032701 |
| 0.249636408 | 0.168182168 | 0.085820788 | 0.232618208 |
| 0.295636276 | 0.160840268 | 0.210076735 | 0.207583844 |
| 0.024015653 | 0.093532485 | 0.220386611 | 0.0625892   |
| 0.19586215  | 0.069923198 | 0.25596416  | 0.202676072 |
| 0.233191204 | 0.270597491 | 0.043563741 | 0.20833816  |
| 0.063775631 | 0.281094924 | 0.170851972 | 0.147045313 |
| 0.232478288 | 0.196967747 | 0.296925688 | 0.305000555 |
| 0.213596196 | 0.135100297 | 0.00912702  | 0.186969493 |
| 0.29320423  | 0.041373947 | 0.226594133 | 0.250669294 |
| 0.201211886 | 0.254716018 | 0.287991465 | 0.255186817 |
| 0.195197537 | 0.043197461 | 0.006633227 | 0.286916729 |
| 0.209285449 | 0.251430042 | 0.077762567 | 0.148491995 |
| 0.242716423 | 0.097739695 | 0.203758374 | 0.07503318  |
| 0.280056009 | 0.243521173 | 0.217507535 | 0.168594084 |
| 0.074120153 | 0.173838984 | 0.177910994 | 0.167294983 |
| 0.033723559 | 0.042138518 | 0.023240715 | 0.185828344 |
| 0.035012928 | 0.194522341 | 0.076951058 | 0.18056654  |
| 0.191983405 | 0.065411747 | 0.118505505 | 0.308734083 |
| 0.021300583 | 0.137613162 | 0.097863168 | 0.067513445 |
| 0.041186688 | 0.082220349 | 0.079463878 | 0.094336379 |
| 0.22503244  | 0.086472339 | 0.18163263  | 0.256325606 |
| 0.118241792 | 0.096336121 | 0.173958933 | 0.282297787 |
| 0.307270321 | 0.241096122 | 0.142664546 | 0.033376024 |
| 0.095165857 | 0.046052192 | 0.108499422 | 0.160719983 |
| 0.079251927 | 0.075764217 | 0.196128798 | 0.336601609 |
| 0.087841603 | 0.033584082 | 0.111593366 | 0.209659329 |
| 0.058926494 | 0.176312001 | 0.279027358 | 0.108873244 |
| 0.004025075 | 0.157547046 | 0.244124227 | 0.13412707  |
| 0.130418341 | 0.122817347 | 0.120280884 | 0.259393289 |
| 0.079595246 | 0.149120229 | 0.245600889 | 0.319638334 |
| 0.054083016 | 0.069869483 | 0.270086859 | 0.022409133 |
| 0.168522193 | 0.127657269 | 0.298730321 | 0.046464349 |
| 0.166081844 | 0.236741524 | 0.277456133 | 0.212414152 |
| 0.051746959 | 0.221329982 | 0.209991628 | 0.249527977 |
| 0.092101726 | 0.270191086 | 0.261108917 | 0.260512012 |

|             |             |             |             |
|-------------|-------------|-------------|-------------|
| 0.196946527 | 0.105272906 | 0.106121507 | 0.243290514 |
| 0.259808124 | 0.053788598 | 0.029458721 | 0.191877619 |
| 0.078984454 | 0.254970717 | 0.151315597 | 0.280813301 |
| 0.248010822 | 0.154340289 | 0.10298613  | 0.321183721 |
| 0.263110295 | 0.13844959  | 0.241467103 | 0.271348142 |
| 0.031948845 | 0.180510682 | 0.158902689 | 0.354610602 |
| 0.130419346 | 0.132760404 | 0.170096177 | 0.10129268  |
| 0.014783194 | 0.029451242 | 0.035304268 | 0.191901455 |
| 0.21155886  | 0.126268389 | 0.243712546 | 0.240519835 |
| 0.092389125 | 0.222157571 | 0.121984094 | 0.136406441 |
| 0.184302012 | 0.137712473 | 0.22353828  | 0.238211484 |
| 0.1599934   | 0.040778509 | 0.091097689 | 0.233917809 |
| 0.011906629 | 0.158539868 | 0.085311033 | 0.007003115 |
| 0.017367022 | 0.123405805 | 0.044993448 | 0.111718342 |
| 0.297810664 | 0.102546154 | 0.108448686 | 0.03559067  |
| 0.284412164 | 0.070769477 | 0.03080817  | 0.22728606  |
| 0.201541334 | 0.192609586 | 0.191107294 | 0.166996533 |
| 0.208921441 | 0.180245519 | 0.27565801  | 0.093784537 |
| 0.044643851 | 0.0244034   | 0.145776888 | 0.199111744 |
| 0.00091783  | 0.303579183 | 0.194583372 | 0.118469736 |
| 0.235406851 | 0.16720837  | 0.019690983 | 0.222206622 |
| 0.015521803 | 0.112453399 | 0.042848254 | 0.123743125 |
| 0.303967602 | 0.008206668 | 0.058269498 | 0.08711607  |
| 0.167399302 | 0.16906405  | 0.122470051 | 0.238369283 |
| 0.230742363 | 0.03734299  | 0.241412385 | 0.28570347  |
| 0.039048116 | 0.017444063 | 0.062742578 | 0.007140103 |
| 0.03567725  | 0.184692897 | 0.091273881 | 0.029129036 |
| 0.197496024 | 0.004857617 | 0.178032736 | 0.244453512 |
| 0.162336333 | 0.272476958 | 0.247508388 | 0.229013318 |
| 0.235170838 | 0.050676742 | 0.240248723 | 0.165100492 |
| 0.057388009 | 0.001792241 | 0.008495159 | 0.264560259 |
| 0.217632243 | 0.018004707 | 0.129764893 | 0.056773951 |
| 0.082561635 | 0.034195656 | 0.036453667 | 0.217379592 |
| 0.175094584 | 0.282126032 | 0.147942702 | 0.168293532 |
| 0.168735212 | 0.190008427 | 0.060629291 | 0.040429229 |
| 0.214704768 | 0.039488193 | 0.03998204  | 0.021081207 |
| 0.282622168 | 0.044631206 | 0.163347089 | 0.216037875 |
| 0.268152864 | 0.312538248 | 0.038997093 | 0.054156485 |
| 0.226401053 | 0.026942715 | 0.063646655 | 0.033425497 |
| 0.186707451 | 0.250680772 | 0.258257815 | 0.189246999 |
| 0.278082328 | 0.229311953 | 0.022802707 | 0.264911608 |
| 0.020170864 | 0.008734562 | 0.088766694 | 0.152074036 |
| 0.02105977  | 0.165051003 | 0.197294997 | 0.053326681 |
| 0.082940539 | 0.015260677 | 0.174343487 | 0.199002789 |
| 0.249730509 | 0.185834434 | 0.2980079   | 0.120487138 |
| 0.201726192 | 0.14129903  | 0.144628471 | 0.072363338 |
| 0.041871002 | 0.143453492 | 0.099026347 | 0.011990754 |
| 0.121388014 | 0.182610352 | 0.043128526 | 0.103690369 |
| 0.274346678 | 0.258707369 | 0.032660821 | 0.033066909 |
| 0.161736689 | 0.128043876 | 0.27826477  | 0.196574091 |
| 0.216464318 | 0.280567896 | 0.200484592 | 0.102561264 |
| 0.037084723 | 0.254064449 | 0.296701483 | 0.15668986  |
| 0.233113123 | 0.02031771  | 0.196199263 | 0.24341035  |
| 0.081703268 | 0.117566975 | 0.042717262 | 0.066178779 |

|             |             |             |             |
|-------------|-------------|-------------|-------------|
| 0.227060243 | 0.137076488 | 0.226792784 | 0.060516019 |
| 0.168807796 | 0.154950284 | 0.028123863 | 0.155287767 |
| 0.19275289  | 0.153334234 | 0.119738167 | 0.069820974 |
| 0.166742215 | 0.015238363 | 0.243358413 | 0.265531541 |
| 0.076730812 | 0.051017315 | 0.040911858 | 0.201988923 |
| 0.206677756 | 0.093919113 | 0.025295605 | 0.15142118  |
| 0.259448438 | 0.196960533 | 0.202480497 | 0.284260187 |
| 0.0503612   | 0.223095695 | 0.125788073 | 0.221679426 |
| 0.122813574 | 0.101120144 | 0.142039832 | 0.043765855 |
| 0.181591324 | 0.205493253 | 0.187285009 | 0.161560422 |
| 0.133641339 | 0.032541453 | 0.01640475  | 0.19795491  |
| 0.178699525 | 0.033653955 | 0.04858312  | 0.214874297 |
| 0.023040548 | 0.143820758 | 0.267149424 | 0.103618974 |
| 0.245237945 | 0.281077892 | 0.248171571 | 0.05472932  |
| 0.006469277 | 0.243307272 | 0.250638886 | 0.151161485 |
| 0.168531963 | 0.173281365 | 0.031909228 | 0.070820051 |
| 0.251963856 | 0.029378012 | 0.0840069   | 0.050846973 |
| 0.086983749 | 0.126913441 | 0.17759609  | 0.098272971 |
| 0.196338545 | 0.024388218 | 0.149479748 | 0.142925019 |
| 0.088218549 | 0.211450517 | 0.264326222 | 0.020823992 |
| 0.096629373 | 0.232035495 | 0.186978507 | 0.015275097 |
| 0.202847332 | 0.225645419 | 0.24186307  | 0.003764395 |
| 0.257329987 | 0.0101704   | 0.201963202 | 0.230877666 |
| 0.191554877 | 0.142877143 | 0.286156272 | 0.187300015 |
| 0.14127317  | 0.138754412 | 0.172944158 | 0.227920289 |
| 0.149888678 | 0.116024727 | 0.226543654 | 0.107829262 |
| 0.189044627 | 0.07552424  | 0.045136446 | 0.039741474 |
| 0.04710365  | 0.197749033 | 0.158627189 | 0.031934354 |
| 0.196990471 | 0.095013246 | 0.2726417   | 0.180431443 |
| 0.283774833 | 0.03620637  | 0.120938066 | 0.186663608 |
| 0.024735019 | 0.044858424 | 0.013181024 | 0.141951676 |
| 0.144824625 | 0.150135268 | 0.097097029 | 0.091407601 |
| 0.134740712 | 0.224399706 | 0.151668937 | 0.243727321 |
| 0.182325632 | 0.102491772 | 0.033400463 | 0.095280691 |
| 0.101811452 | 0.071515484 | 0.316100028 | 0.004956893 |
| 0.205903772 | 0.048962984 | 0.246454783 | 0.196220448 |
| 0.122810305 | 0.248705498 | 0.027686892 | 0.037610888 |
| 0.023221497 | 0.061963781 | 0.099276718 | 0.191749222 |
| 0.114770919 | 0.099527405 | 0.305576559 | 0.038127692 |
| 0.250079766 | 0.184021693 | 0.133791825 | 0.077830754 |
| 0.15201554  | 0.092314681 | 0.188409572 | 0.037319405 |
| 0.139849496 | 1           | 0.070988938 | 0.217158492 |
| 0.199601487 | 0.243313155 | 0.036784679 | 0.246071678 |
| 0.170151838 | 0.064580306 | 0.256196959 | 0.100489047 |
| 0.066458249 | 0.132141495 | 0.148990957 | 0.055089861 |
| 0.077654222 | 0.131340641 | 0.001589997 | 0.047322168 |
| 0.292506121 | 0.05641989  | 0.133555189 | 0.203620427 |
| 0.227134838 | 0.287910028 | 0.092461696 | 0.081755464 |
| 0.160778798 | 0.182415944 | 0.095491717 | 0.20207398  |
| 0.185097931 | 0.075680575 | 0.113308969 | 0.004020491 |
| 0.181364899 | 0.160552933 | 0.042482379 | 0.031556771 |
| 0.013978942 | 0.146994759 | 0.162198838 | 0.021213823 |
| 0.290485426 | 0.099652888 | 0.093675647 | 0.219881658 |
| 0.087792628 | 0.187382677 | 0.111638319 | 0.289402948 |

|             |             |             |             |
|-------------|-------------|-------------|-------------|
| 0.008294927 | 0.170963235 | 0.167618955 | 0.099910508 |
| 0.159594501 | 0.229476392 | 0.311481617 | 0.235113943 |
| 0.028939494 | 0.139477946 | 0.004129324 | 0.198713053 |
| 0.162096776 | 0.194998946 | 0.121952682 | 0.023711134 |
| 0.284376894 | 0.203567147 | 0.079455598 | 0.122419167 |
| 0.027912859 | 0.282656324 | 0.158719702 | 0.196967754 |
| 0.070976165 | 0.117740157 | 0.071182226 | 0.196014389 |
| 0.15772466  | 0.081772117 | 0.152371666 | 0.074018378 |
| 0.190633459 | 0.157199362 | 0.058433986 | 0.132435052 |
| 0.108696017 | 0.033760024 | 0.053908053 | 0.245518725 |
| 0.178847346 | 0.267374843 | 0.310365141 | 0.139317855 |
| 0.181629527 | 0.168630547 | 0.125420498 | 0.222733834 |
| 0.099410806 | 0.206335934 | 0.25867446  | 0.201277604 |
| 0.280393472 | 0.19275199  | 0.164233604 | 0.190979954 |
| 0.168596834 | 0.060386079 | 0.120521943 | 0.198004342 |
| 0.179698259 | 0.226278663 | 0.069465981 | 0.215265106 |
| 0.038877685 | 0.056834885 | 0.083594158 | 0.097804739 |
| 0.20947238  | 0.231738519 | 0.174563391 | 0.257929118 |
| 0.12522667  | 0.046202808 | 0.267886392 | 0.043508111 |
| 0.103523631 | 0.288429282 | 0.162443002 | 0.20232023  |
| 0.112514734 | 0.135595511 | 0.080519132 | 0.000969598 |
| 0.264482528 | 0.120924639 | 0.115887451 | 0.16364824  |
| 0.073409933 | 0.019420777 | 0.211656674 | 0.285145976 |
| 0.149926245 | 0.056708117 | 0.069060163 | 0.19643325  |
| 0.17308467  | 0.076467489 | 0.083461757 | 0.130828414 |
| 0.189665278 | 0.066850841 | 0.094594237 | 0.144487127 |
| 0.18858142  | 0.086441995 |             |             |
| SFT2D2      | 0.057943895 | 0.438130304 | 0.056623175 |
| 0.064896517 | 0.146439734 | 0.238617813 | 0.045727365 |
| 0.083370693 | 0.352334151 | 0.314523594 | 0.179810859 |
| 0.011471772 | 0.04791688  | 0.391973599 | 0.040885522 |
| 0.208286157 | 0.017982634 | 0.067990617 | 0.069954257 |
| 0.165494832 | 0.129809937 | 0.180550389 | 0.262597688 |
| 0.147037758 | 0.183185645 | 0.245912768 | 0.257063191 |
| 0.469207298 | 0.190214115 | 0.273833628 | 0.191234262 |
| 0.354836017 | 0.155920411 | 0.238394274 | 0.015414995 |
| 0.244507948 | 0.012506943 | 0.413252854 | 0.123648187 |
| 0.067834103 | 0.297016987 | 0.303755915 | 0.112445191 |
| 0.283774002 | 0.030311279 | 0.250175547 | 0.28494162  |
| 0.249724945 | 0.18570508  | 0.070515521 | 0.310550903 |
| 0.258569239 | 0.236761807 | 0.380375125 | 0.00186011  |
| 0.164957317 | 0.063953749 | 0.14415     | 0.481766061 |
| 0.113853266 | 0.063997415 | 0.246730295 | 0.20386942  |
| 0.266145286 | 0.259910142 | 0.159395357 | 0.28441956  |
| 0.445076608 | 0.095283186 | 0.342868268 | 0.094614043 |
| 0.247014012 | 0.042265935 | 0.108198797 | 0.096791711 |
| 0.246667339 | 0.099527058 | 0.176100001 | 0.171772701 |
| 0.445028148 | 0.482652541 | 0.148911949 | 0.501483822 |
| 0.069023179 | 0.182600744 | 0.142103057 | 0.184062601 |
| 0.281529809 | 0.077485974 | 0.262401426 | 0.465133344 |
| 0.057170918 | 0.308655384 | 0.3034635   | 0.114292065 |
| 0.402393247 | 0.205825719 | 0.294977952 | 0.078794507 |
| 0.213647523 | 0.175308388 | 0.481778858 | 0.171858899 |
| 0.177308583 | 0.07191279  | 0.497061729 | 0.164240204 |



|             |             |             |             |
|-------------|-------------|-------------|-------------|
| 0.134529867 | 0.06778782  | 0.106641541 | 0.394838636 |
| 0.247591722 | 0.44241998  | 0.40418562  | 0.27933618  |
| 0.203044824 | 0.445060964 | 0.258637686 | 0.385628159 |
| 0.225992804 | 0.498496162 | 0.111621588 | 0.021891714 |
| 0.073361045 | 0.047683322 | 0.160405304 | 0.227373958 |
| 0.405429183 | 0.217879595 | 0.116128257 | 0.11019583  |
| 0.371538255 | 0.493312051 | 0.508532058 | 0.335235834 |
| 0.028712908 | 0.170632764 | 0.204125982 | 0.193531894 |
| 0.247648065 | 0.087159583 | 0.123565187 | 0.489532373 |
| 0.301265873 | 0.333882613 | 0.129957238 | 0.483024561 |
| 0.151077565 | 0.438195552 | 0.43866119  | 0.08556388  |
| 0.479499117 | 0.476600647 | 0.428829005 | 0.242095914 |
| 0.438426768 | 0.196174273 | 0.075756322 | 0.32738319  |
| 0.39956675  | 0.005573773 | 0.433075471 | 0.447073107 |
| 0.479668936 | 0.378945797 | 0.45126852  | 0.454182    |
| 0.490444609 | 0.063039534 | 0.036401402 | 0.14149833  |
| 0.482730178 | 0.30420492  | 0.077305936 | 0.250682142 |
| 0.195468715 | 0.247842986 | 0.359121383 | 0.16045393  |
| 0.44109293  | 0.39067978  | 0.457792349 | 0.317728294 |
| 0.254546826 | 0.272581974 | 0.232303721 | 0.471662424 |
| 0.026753567 | 0.082039467 | 0.054223823 | 0.22878825  |
| 0.281283908 | 0.086195943 | 0.244247427 | 0.219188225 |
| 0.100408057 | 0.255389396 | 0.211014059 | 0.219605917 |
| 0.07587293  | 0.267207047 | 0.110745471 | 0.126063655 |
| 0.019582734 | 0.140089824 | 0.087867863 | 0.07586136  |
| 0.120367537 | 0.265531795 | 0.326413622 | 0.437650538 |
| 0.22845038  | 0.144968815 | 0.305305244 | 0.397599624 |
| 0.325693239 | 0.19802629  | 0.171823813 | 0.002728831 |
| 0.134723932 | 0.270860322 | 0.111929783 | 0.257249955 |
| 0.198637931 | 0.130987692 | 0.218988353 | 0.242118165 |
| 0.182428965 | 0.138159926 | 0.21158462  | 0.383204928 |
| 0.147780271 | 0.142374281 | 0.346203822 | 0.284537291 |
| 0.002970212 | 0.179041983 | 0.350511145 | 0.071512099 |
| 0.229141843 | 0.060766045 | 0.129142438 | 0.389365291 |
| 0.183675307 | 0.121627108 | 0.444249824 | 0.249663478 |
| 0.221841904 | 0.266965132 | 0.465764549 | 0.040519324 |
| 0.223104435 | 0.015022278 | 0.146471141 | 0.31697255  |
| 0.14238897  | 0.184266873 | 0.159717296 | 0.128352473 |
| 0.10619811  | 0.483036417 | 0.326518739 | 0.45175264  |
| 0.221159708 | 0.46699423  | 0.369990183 | 0.350118604 |
| 0.224673598 | 0.257200838 | 0.076435073 | 0.33497496  |
| 0.381142158 | 0.211531391 | 0.082750909 | 0.384169047 |
| 0.27251549  | 0.256433144 | 0.054072627 | 0.412045198 |
| 0.441352289 | 0.489184301 | 0.069954862 | 0.241384897 |
| 0.269828229 | 0.132702481 | 0.343257529 | 0.468303757 |
| 0.283389777 | 0.195052551 | 0.165719461 | 0.280212403 |
| 0.106625465 | 0.105536948 | 0.283749156 | 0.113318052 |
| 0.006337677 | 0.076511062 | 0.054799283 | 0.06953283  |
| 0.070368196 | 0.310851983 | 0.246684054 | 0.467223998 |
| 0.065606508 | 0.360367985 | 0.190761732 | 0.131490173 |
| 0.383720202 | 0.214260443 | 0.2114611   | 0.215728312 |
| 0.179356967 | 0.006736381 | 0.04943795  | 0.480511672 |
| 0.05328846  | 0.11185755  | 0.229891002 | 0.000829347 |
| 0.038125573 | 0.426061604 | 0.111769853 | 0.186121609 |

|             |             |             |             |
|-------------|-------------|-------------|-------------|
| 0.392817058 | 0.195789434 | 0.137939536 | 0.28229608  |
| 0.202119747 | 0.063492547 | 0.000439226 | 0.454048203 |
| 0.48159527  | 0.454431845 | 0.486229317 | 0.475782339 |
| 0.414680024 | 0.338601918 | 0.304413214 | 0.240899818 |
| 0.064894134 | 0.085428826 | 0.097597032 | 0.139554224 |
| 0.005908333 | 0.256263749 | 0.1771642   | 0.090158066 |
| 0.311222939 | 0.201601904 | 0.02615957  | 0.205907378 |
| 0.012659534 | 0.107321891 | 0.219069363 | 0.128616625 |
| 0.225582855 | 0.012967837 | 0.130746387 | 0.181376573 |
| 0.410942725 | 0.289932642 | 0.221080262 | 0.489973934 |
| 0.160578244 | 0.143611351 | 0.14602389  | 0.259639869 |
| 0.045969433 | 0.111755008 | 0.265269584 | 0.038476761 |
| 0.160169879 | 0.451184444 | 0.247234594 | 0.049735169 |
| 0.142510169 | 0.003458544 | 0.315289407 | 0.480547523 |
| 0.475704268 | 0.449656912 | 0.439073669 | 0.125622012 |
| 0.454214443 | 0.091283752 | 0.484474668 | 0.365452489 |
| 0.282116991 | 0.00025886  | 0.002931276 | 0.417570447 |
| 0.207532462 | 0.082405635 | 0.094034753 | 0.221346447 |
| 0.048949282 | 0.129668654 | 0.048349789 | 0.074013957 |
| 0.262803096 | 0.107798801 | 0.083927093 | 0.469367599 |
| 0.124456612 | 0.126600893 | 0.29713403  | 0.084624744 |
| 0.229506124 | 0.029532764 | 0.084811428 | 0.002280764 |
| 0.229555622 | 0.130237818 | 0.481404614 | 0.478946789 |
| 0.420753558 | 0.231370539 | 0.287281107 | 0.220365296 |
| 0.392801343 | 0.114868985 | 0.25143927  | 0.108647692 |
| 0.467840383 | 0.209868885 | 0.20303541  | 0.233787771 |
| 0.420656063 | 0.410924004 | 0.023847039 | 0.28948386  |
| 0.006929207 | 0.000675373 | 0.243030662 | 0.182597243 |
| 0.081742042 | 0.206226049 | 0.173741433 | 0.190857046 |
| 0.153265898 | 0.021217756 | 0.140784662 | 0.120519118 |
| 0.152101488 | 0.193812771 | 0.124667561 | 0.208434563 |
| 0.134124586 | 0.060330068 | 0.102325853 | 0.094124322 |
| 0.208553357 | 0.281106434 | 0.18339759  | 0.017802168 |
| 0.27268935  | 0.226913975 | 0.038970015 | 0.107722738 |
| 0.34014819  | 0.417219131 | 0.025860348 | 0.002399715 |
| 0.200407311 | 0.186315931 | 0.420518443 | 0.482084307 |
| 0.495351284 | 0.44581569  | 0.35006951  | 0.056120969 |
| 0.046080406 | 0.167864998 | 0.143272226 | 0.038082217 |
| 0.462939357 | 0.073886797 | 0.467291644 | 0.160041646 |
| 0.083253669 | 0.114070284 | 0.014535546 | 0.057989934 |
| 0.213026175 | 0.10518668  | 0.078055954 | 0.11567228  |
| 0.156500329 | 0.124207361 | 0.037034964 | 0.107632292 |
| 0.25115226  | 0.084637616 | 0.096907111 | 0.223380605 |
| 0.306930822 | 0.298165939 | 0.298616313 | 0.372538999 |
| 0.09448195  | 0.093145829 | 0.182267936 | 0.299573877 |
| 0.381553433 | 0.304630706 | 0.014380776 | 0.467798135 |
| 0.428080915 | 0.282749439 | 0.474128428 | 0.293026579 |
| 0.071889795 | 0.186170142 | 0.206322925 | 0.18138347  |
| 0.115963536 | 0.242533783 | 0.143227235 | 0.049634791 |
| 0.257039145 | 0.461720822 | 0.375791676 | 0.076412056 |
| 0.277921643 | 0.128391426 | 0.068732786 | 0.416420022 |
| 0.076700178 | 0.055006816 | 0.31012505  | 0.375920661 |
| 0.000100097 | 0.069276606 | 0.435672153 | 0.125703373 |
| 0.476484074 | 0.401781273 | 0.367610629 | 0.188449401 |

|             |             |             |             |
|-------------|-------------|-------------|-------------|
| 0.001024493 | 0.269505979 | 0.187105338 | 0.204290311 |
| 0.402264553 | 0.271145606 | 0.136025741 | 0.033001184 |
| 0.195643362 | 0.087090283 | 0.06368626  | 0.225649606 |
| 0.107860607 | 0.278734313 | 0.121358593 | 0.152366173 |
| 0.094383303 | 0.115944566 | 0.121612797 | 0.130188706 |
| 0.105074157 | 0.147041856 | 0.238766112 | 0.316850767 |
| 0.093887015 | 0.376292964 | 0.3272043   | 0.020908615 |
| 0.20543457  | 0.349539358 | 0.376135797 | 0.000828133 |
| 0.275847207 | 0.003431748 | 0.089860782 | 0.091121756 |
| 0.09227757  | 0.109886348 | 0.124085988 | 0.139892619 |
| 0.232068955 | 0.122360013 | 0.128563596 | 0.117697244 |
| 0.069155701 | 0.139237658 | 0.219225204 | 0.238377675 |
| 0.120862369 | 0.073497207 | 0.119879654 | 0.136933844 |
| 0.024707825 | 0.438843089 | 0.197295207 | 0.080154223 |
| 0.122688254 | 0.244080461 | 0.261242686 | 0.493703226 |
| 0.332744617 | 0.147917971 | 0.204751484 | 0.401749563 |
| 0.239852093 | 0.206584207 | 0.060620345 | 0.249386009 |
| 0.129597392 | 0.090009103 | 0.29042168  | 0.215681108 |
| 0.350653205 | 0.343124965 | 0.189162293 | 0.38167923  |
| 0.191401247 | 0.248490093 | 0.284593704 | 0.032143507 |
| 0.09859531  | 0.110236088 | 0.118146279 | 0.000553141 |
| 0.202620987 | 0.166300416 | 0.3926574   | 0.4684957   |
| 0.176147576 | 0.311375362 | 0.256374724 | 0.05260761  |
| 0.269785376 | 0.208987925 | 0.0953008   | 0.358386033 |
| 0.122404076 | 0.103631761 | 0.140671621 | 0.242889937 |
| 0.31471974  | 0.342984175 | 0.144263841 | 0.166921653 |
| 0.150106688 | 0.146507232 | 0.475221584 | 0.104020699 |
| 0.27602917  | 0.070988938 | 1           | 0.136931782 |
| 0.103580605 | 0.475058017 | 0.050408987 | 0.476266042 |
| 0.173141977 | 0.127776551 | 0.431690843 | 0.211329164 |
| 0.195366417 | 0.052117395 | 0.098821724 | 0.295785901 |
| 0.138736807 | 0.196645902 | 0.023028022 | 0.031340674 |
| 0.18922913  | 0.25800847  | 0.389187739 | 0.270155975 |
| 0.117153693 | 0.230709013 | 0.106514925 | 0.201216457 |
| 0.496580582 | 0.499909056 | 0.11664935  | 0.171384835 |
| 0.246523    | 0.053833368 | 0.27792269  | 0.021434043 |
| 0.250114447 | 0.263366925 | 0.275727973 | 0.035239264 |
| 0.012720251 | 0.110142123 | 0.251377179 | 0.080544605 |
| 0.399780818 | 0.1217835   | 0.295985439 | 0.306503372 |
| 0.150428112 | 0.491218845 | 0.053472947 | 0.249822804 |
| 0.060404823 | 0.161970483 | 0.23407099  | 0.273731666 |
| 0.088677472 | 0.140681737 | 0.229290948 | 0.104190302 |
| 0.016817592 | 0.121316841 | 0.000661595 | 0.366073964 |
| 0.485747478 | 0.189264514 | 0.178401277 | 0.313861199 |
| 0.15144313  | 0.337940976 | 0.136745023 | 0.279892936 |
| 0.003647123 | 0.180424104 | 0.112349622 | 0.34996282  |
| 0.132832466 | 0.251578532 | 0.024256173 | 0.181152757 |
| 0.472301632 | 0.147992603 | 0.210254805 | 0.185196696 |
| 0.47782939  | 0.370210383 | 0.166098513 | 0.116861211 |
| 0.32514481  | 0.060075677 | 0.30197401  | 0.483725759 |
| 0.079124822 | 0.090580076 | 0.331046552 | 0.092045712 |
| 0.173048855 | 0.356161199 | 0.292339807 | 0.495258764 |
| 0.026987435 | 0.133469816 | 0.317739744 | 0.426416142 |
| 0.188085234 | 0.078016244 | 0.114636713 | 0.10306563  |

|             |             |             |             |
|-------------|-------------|-------------|-------------|
| 0.449652659 | 0.050105907 | 0.142224887 | 0.247858549 |
| 0.100362375 | 0.178952467 | 0.299225935 | 0.08378956  |
| 0.01756316  | 0.108875678 | 0.210354429 | 0.096446948 |
| 0.15216959  | 0.186536465 | 0.11208571  | 0.307694338 |
| 0.052258238 | 0.007261149 | 0.380223548 | 0.006253405 |
| 0.224200401 | 0.209582212 | 0.139671845 | 0.190059132 |
| 0.154118096 | 0.229773234 | 0.235897134 | 0.000654645 |
| 0.313158743 | 0.022844793 | 0.190764325 | 0.091448922 |
| 0.175545759 | 0.041004487 | 0.418554177 | 0.434466284 |
| 0.213234799 | 0.243402204 | 0.216285351 | 0.434822809 |
| 0.068787596 | 0.241302947 | 0.225801691 | 0.318881297 |
| 0.111468782 | 0.293710983 | 0.277200334 | 0.209892098 |
| 0.282093661 | 0.180030107 |             |             |
| SFXN1       | 0.061591672 | 0.266760502 | 0.036022969 |
| 0.155387212 | 0.262782238 | 0.143217155 | 0.070491998 |
| 0.103257874 | 0.208484968 | 0.076971344 | 0.243164365 |
| 0.041731071 | 0.071583298 | 0.366913048 | 0.069896879 |
| 0.289596254 | 0.071269849 | 0.114347476 | 0.039770288 |
| 0.114604807 | 0.272060366 | 0.175141923 | 0.142950596 |
| 0.213695771 | 0.176803627 | 0.179273708 | 0.175203715 |
| 0.352039683 | 0.095714491 | 0.271176259 | 0.060450141 |
| 0.37355896  | 0.290413257 | 0.152068937 | 0.023592713 |
| 0.195660967 | 0.013743194 | 0.349644327 | 0.238539026 |
| 0.135597094 | 0.311487931 | 0.083746118 | 0.221964006 |
| 0.130545257 | 0.045153713 | 0.045141721 | 0.26918562  |
| 0.163945692 | 0.142324776 | 0.04228914  | 0.262550696 |
| 0.140598735 | 0.233771962 | 0.194160465 | 0.004516899 |
| 0.158167184 | 0.052482689 | 0.12384163  | 0.347905161 |
| 0.221501511 | 0.14361566  | 0.102517443 | 0.100601228 |
| 0.211225269 | 0.271908148 | 0.222081713 | 0.129270395 |
| 0.38302438  | 0.144623651 | 0.262494992 | 0.120811067 |
| 0.171927945 | 0.024900827 | 0.187983279 | 0.051663935 |
| 0.164256    | 0.198453454 | 0.221050061 | 0.17551722  |
| 0.266151113 | 0.389088428 | 0.199633763 | 0.333680345 |
| 0.10283195  | 0.246326458 | 0.188823659 | 0.322989713 |
| 0.271402902 | 0.068059251 | 0.348157846 | 0.411839722 |
| 0.034148847 | 0.146363295 | 0.283625658 | 0.095881758 |
| 0.280089332 | 0.114846329 | 0.136871223 | 0.155011657 |
| 0.299438212 | 0.275347509 | 0.329755354 | 0.301047052 |
| 0.166497184 | 0.061592932 | 0.314858947 | 0.246693744 |
| 0.221243403 | 0.071068864 | 0.22469363  | 0.342789597 |
| 0.28439366  | 0.362939283 | 0.280711749 | 0.322833347 |
| 0.255054081 | 0.378143221 | 0.310303488 | 0.296803088 |
| 0.028724416 | 0.368985424 | 0.151819202 | 0.077622891 |
| 0.04199088  | 0.104378093 | 0.138596553 | 0.290403712 |
| 0.353695972 | 0.227713393 | 0.146320202 | 0.233938285 |
| 0.402357399 | 0.301630478 | 0.362576761 | 0.334981312 |
| 0.053625    | 0.131026843 | 0.250172665 | 0.115237018 |
| 0.303423381 | 0.101714834 | 0.199714198 | 0.365068216 |
| 0.349191689 | 0.371489579 | 0.084158953 | 0.361975853 |
| 0.117473882 | 0.423876087 | 0.292696825 | 0.1819026   |
| 0.384185486 | 0.345576672 | 0.426898489 | 0.318841075 |
| 0.34350929  | 0.182081081 | 0.040121168 | 0.304089793 |
| 0.418667254 | 0.031150217 | 0.340614942 | 0.377331406 |

|             |             |             |             |
|-------------|-------------|-------------|-------------|
| 0.348587992 | 0.360995833 | 0.426216515 | 0.378368744 |
| 0.340047157 | 0.070754941 | 0.017222278 | 0.316668375 |
| 0.367461166 | 0.356045744 | 0.126958657 | 0.211187074 |
| 0.276042146 | 0.158167004 | 0.281765857 | 0.182949614 |
| 0.429196853 | 0.336894293 | 0.340016504 | 0.287606736 |
| 0.131902987 | 0.28157134  | 0.199988489 | 0.309303737 |
| 0.062345318 | 0.084580545 | 0.046423709 | 0.255224314 |
| 0.093564574 | 0.206494448 | 0.149987209 | 0.219396016 |
| 0.231597023 | 0.113712468 | 0.133150266 | 0.321086807 |
| 0.05053479  | 0.210277758 | 0.119191935 | 0.127018387 |
| 0.088043571 | 0.143918873 | 0.207163002 | 0.158427876 |
| 0.232260528 | 0.181037006 | 0.263459971 | 0.370141816 |
| 0.162647197 | 0.166491984 | 0.274867076 | 0.396215705 |
| 0.431950191 | 0.240243698 | 0.219946852 | 0.046391914 |
| 0.238579173 | 0.102097417 | 0.126365168 | 0.192471143 |
| 0.147786241 | 0.22299     | 0.277895205 | 0.357479839 |
| 0.157470835 | 0.070142368 | 0.200434582 | 0.342405933 |
| 0.119630925 | 0.216389024 | 0.402047893 | 0.184072048 |
| 0.007511375 | 0.229750209 | 0.351990278 | 0.179522045 |
| 0.232893851 | 0.149750845 | 0.143123059 | 0.387751148 |
| 0.14985671  | 0.184900992 | 0.356891028 | 0.331844518 |
| 0.135053646 | 0.152178109 | 0.411917819 | 0.046094109 |
| 0.178533937 | 0.102992649 | 0.33559018  | 0.083852199 |
| 0.235916445 | 0.302057653 | 0.242020801 | 0.209126022 |
| 0.095780042 | 0.379506459 | 0.286224424 | 0.391218393 |
| 0.180811101 | 0.415085543 | 0.372167582 | 0.381585582 |
| 0.263633771 | 0.142915456 | 0.11372301  | 0.359274125 |
| 0.371725829 | 0.132155995 | 0.061664571 | 0.29513235  |
| 0.136305867 | 0.311384807 | 0.12422728  | 0.42510407  |
| 0.385245914 | 0.293745817 | 0.168259958 | 0.367101808 |
| 0.366067162 | 0.182122811 | 0.305892779 | 0.416800421 |
| 0.10333223  | 0.236823419 | 0.22747741  | 0.396607239 |
| 0.183176983 | 0.210761466 | 0.252489594 | 0.107073905 |
| 0.005874013 | 0.055848597 | 0.06461995  | 0.196102672 |
| 0.180160122 | 0.190178115 | 0.295963467 | 0.390904176 |
| 0.131322092 | 0.319236956 | 0.189368458 | 0.26366715  |
| 0.331684648 | 0.171254328 | 0.209163506 | 0.256052145 |
| 0.218743898 | 0.046329921 | 0.168742394 | 0.395887821 |
| 0.02940528  | 0.184038402 | 0.138806127 | 0.011543931 |
| 0.056467498 | 0.226628317 | 0.091534273 | 0.19312948  |
| 0.398942661 | 0.179879794 | 0.190309289 | 0.106301773 |
| 0.305631382 | 0.094932474 | 0.0142879   | 0.357474079 |
| 0.330743301 | 0.316010391 | 0.32444643  | 0.294396827 |
| 0.326323178 | 0.251009312 | 0.354219219 | 0.147283335 |
| 0.105253005 | 0.053020553 | 0.225961017 | 0.237367403 |
| 0.00566626  | 0.331597183 | 0.183050781 | 0.172125808 |
| 0.307523024 | 0.248727379 | 0.052931223 | 0.228101527 |
| 0.042183024 | 0.135792596 | 0.15149065  | 0.155099526 |
| 0.32371862  | 0.021596285 | 0.14057434  | 0.197766223 |
| 0.298793866 | 0.288471078 | 0.147716912 | 0.382156016 |
| 0.259193093 | 0.088877217 | 0.232199188 | 0.321506481 |
| 0.091069415 | 0.0488986   | 0.137861355 | 0.015187243 |
| 0.059352352 | 0.307668353 | 0.145040864 | 0.071615785 |
| 0.268664058 | 0.012707723 | 0.298533756 | 0.397697963 |

|             |             |             |             |
|-------------|-------------|-------------|-------------|
| 0.293015472 | 0.413860008 | 0.383793764 | 0.192728786 |
| 0.381241843 | 0.054037304 | 0.384888008 | 0.290822451 |
| 0.129469503 | 0.003351146 | 0.017208699 | 0.378527213 |
| 0.263809065 | 0.041792141 | 0.177898942 | 0.133966032 |
| 0.17085123  | 0.085121143 | 0.06369128  | 0.207529942 |
| 0.221968895 | 0.226452371 | 0.162271605 | 0.317784226 |
| 0.20636394  | 0.211170249 | 0.123140316 | 0.079004759 |
| 0.225372208 | 0.086162193 | 0.074906531 | 0.029008042 |
| 0.310368005 | 0.09320384  | 0.307064078 | 0.360821278 |
| 0.408325206 | 0.321902231 | 0.097248311 | 0.131580922 |
| 0.318915976 | 0.065909402 | 0.118567196 | 0.072665387 |
| 0.330850895 | 0.32657582  | 0.341823475 | 0.299317072 |
| 0.433561981 | 0.375408068 | 0.051688516 | 0.365018057 |
| 0.027921208 | 0.006274554 | 0.15466038  | 0.219215485 |
| 0.030425711 | 0.217855425 | 0.280857184 | 0.107653676 |
| 0.13214442  | 0.045282967 | 0.186186818 | 0.194613647 |
| 0.290556806 | 0.239509815 | 0.243204177 | 0.183552847 |
| 0.196891569 | 0.1920807   | 0.16136195  | 0.131054425 |
| 0.098688902 | 0.255887357 | 0.187598143 | 0.03538253  |
| 0.17701282  | 0.223318959 | 0.070003293 | 0.148273051 |
| 0.381339669 | 0.392759721 | 0.088994451 | 0.05365066  |
| 0.251264771 | 0.180446355 | 0.406756876 | 0.335777522 |
| 0.375371178 | 0.436029813 | 0.325226257 | 0.185079248 |
| 0.074121278 | 0.268825638 | 0.236419238 | 0.159340068 |
| 0.377325359 | 0.052093436 | 0.323586398 | 0.190073329 |
| 0.12103816  | 0.184580718 | 0.073185545 | 0.089966121 |
| 0.230802119 | 0.185554474 | 0.202396718 | 0.117277337 |
| 0.243956949 | 0.160209559 | 0.057669676 | 0.208513423 |
| 0.31190697  | 0.178164839 | 0.171200585 | 0.112376336 |
| 0.241114276 | 0.048790799 | 0.323274663 | 0.411588983 |
| 0.128334737 | 0.088760175 | 0.135895776 | 0.25987479  |
| 0.319121715 | 0.14996843  | 0.040438148 | 0.277718789 |
| 0.378084344 | 0.274323576 | 0.343124009 | 0.386817808 |
| 0.085650596 | 0.246285668 | 0.15206496  | 0.26907912  |
| 0.173161979 | 0.137750495 | 0.170374697 | 0.071963139 |
| 0.26003482  | 0.353259842 | 0.31209818  | 0.185439697 |
| 0.180318398 | 0.074423606 | 0.043752291 | 0.296435481 |
| 0.218781734 | 0.109694891 | 0.094680347 | 0.307596752 |
| 0.006957284 | 0.119706364 | 0.378274899 | 0.168327247 |
| 0.38490548  | 0.402023205 | 0.384370252 | 0.104382212 |
| 0.003945113 | 0.288282632 | 0.31026314  | 0.205725532 |
| 0.307521227 | 0.257968464 | 0.060581015 | 0.134354312 |
| 0.31163816  | 0.06492359  | 0.207013719 | 0.118409398 |
| 0.150670569 | 0.229881623 | 0.229204136 | 0.149098812 |
| 0.19167798  | 0.06038398  | 0.153882305 | 0.158499261 |
| 0.105784995 | 0.275648835 | 0.372545815 | 0.063661218 |
| 0.188731216 | 0.360544497 | 0.319362315 | 0.03609236  |
| 0.187354859 | 0.333080019 | 0.325681917 | 0.018492301 |
| 0.338877234 | 0.022924622 | 0.207705322 | 0.223153868 |
| 0.19665572  | 0.198082575 | 0.277315032 | 0.212529269 |
| 0.230232639 | 0.181334707 | 0.208607644 | 0.261255656 |
| 0.191169003 | 0.128723548 | 0.241524325 | 0.153073532 |
| 0.232210637 | 0.123975679 | 0.086838383 | 0.085117639 |
| 0.085924425 | 0.305849525 | 0.246484097 | 0.060883268 |

|             |             |             |             |
|-------------|-------------|-------------|-------------|
| 0.228837413 | 0.145022637 | 0.363308368 | 0.322127437 |
| 0.362157735 | 0.080649205 | 0.171826222 | 0.312392108 |
| 0.07447401  | 0.115184442 | 0.046309488 | 0.176163088 |
| 0.182191784 | 0.237167399 | 0.135909508 | 0.189414368 |
| 0.241602268 | 0.354613013 | 0.231986381 | 0.345619879 |
| 0.187622169 | 0.154233747 | 0.086253237 | 0.161660966 |
| 0.16360264  | 0.122781159 | 0.250968307 | 0.00829999  |
| 0.286702573 | 0.120428981 | 0.371316444 | 0.340593489 |
| 0.142340644 | 0.332164238 | 0.097366191 | 0.117120219 |
| 0.069542127 | 0.140508507 | 0.155219944 | 0.268362486 |
| 0.132758119 | 0.140372971 | 0.265702081 | 0.100940214 |
| 0.315966582 | 0.261564329 | 0.169344665 | 0.138638523 |
| 0.171111963 | 0.141487822 | 0.326008539 | 0.066461572 |
| 0.210983593 | 0.217158492 | 0.136931782 | 1           |
| 0.210597961 | 0.3698717   | 0.055968341 | 0.386222805 |
| 0.230322992 | 0.113729996 | 0.399469184 | 0.129531913 |
| 0.115933253 | 0.141171213 | 0.142956202 | 0.113668403 |
| 0.166275804 | 0.153591969 | 0.005723262 | 0.090139189 |
| 0.358028945 | 0.109177848 | 0.252902004 | 0.273015201 |
| 0.199712966 | 0.349999024 | 0.084607225 | 0.14338206  |
| 0.301312882 | 0.328470858 | 0.249897337 | 0.267949811 |
| 0.299079602 | 0.122397358 | 0.189392712 | 0.00762467  |
| 0.269809593 | 0.221285146 | 0.13419668  | 0.068306651 |
| 0.034682949 | 0.166679457 | 0.247246677 | 0.04653482  |
| 0.402954931 | 0.117533581 | 0.163155895 | 0.269839653 |
| 0.143355621 | 0.338752272 | 0.163153507 | 0.3515735   |
| 0.031844668 | 0.213447076 | 0.170830617 | 0.153477615 |
| 0.258662676 | 0.215003036 | 0.373115629 | 0.197337186 |
| 0.064235104 | 0.221238951 | 0.012166137 | 0.339703595 |
| 0.307515584 | 0.201467681 | 0.196933216 | 0.072631494 |
| 0.303457268 | 0.279363288 | 0.197824764 | 0.154922363 |
| 0.036815285 | 0.29542124  | 0.177324757 | 0.307000116 |
| 0.146628628 | 0.197329898 | 0.091377063 | 0.199817236 |
| 0.299015367 | 0.229720345 | 0.232415647 | 0.169896352 |
| 0.321302111 | 0.23812806  | 0.109311339 | 0.141569365 |
| 0.187686389 | 0.063966717 | 0.102092463 | 0.395932403 |
| 0.195843043 | 0.206808465 | 0.400651679 | 0.235787583 |
| 0.177019139 | 0.263315986 | 0.184314998 | 0.36889015  |
| 0.15512261  | 0.259075624 | 0.325150664 | 0.338667071 |
| 0.326164376 | 0.184207485 | 0.203990454 | 0.24551258  |
| 0.303269449 | 0.117207156 | 0.173383123 | 0.294474862 |
| 0.204059265 | 0.267943182 | 0.127799245 | 0.205461969 |
| 0.079535597 | 0.119556733 | 0.152370187 | 0.138908774 |
| 0.273544866 | 0.247425483 | 0.215946076 | 0.359815325 |
| 0.173040523 | 0.078175827 | 0.383172674 | 0.044081772 |
| 0.151384351 | 0.310158206 | 0.191841588 | 0.190047643 |
| 0.183383492 | 0.216283667 | 0.163694205 | 0.006812408 |
| 0.356211554 | 0.050440315 | 0.148680421 | 0.257324232 |
| 0.159438453 | 0.061375103 | 0.328633493 | 0.419273421 |
| 0.200355023 | 0.102801254 | 0.142382289 | 0.331802625 |
| 0.157604672 | 0.11629523  | 0.153213123 | 0.214993081 |
| 0.164225759 | 0.117598661 | 0.137562099 | 0.166245232 |
| 0.273114037 | 0.12411542  |             |             |

SGK3

0.075466627

0.206219839

0.037501251

|             |             |             |             |
|-------------|-------------|-------------|-------------|
| 0.116772477 | 0.254455268 | 0.092319953 | 0.108442409 |
| 0.144471484 | 0.188086883 | 0.046657035 | 0.195315343 |
| 0.057447645 | 0.083021238 | 0.296152089 | 0.113022207 |
| 0.224535034 | 0.115184705 | 0.149422359 | 0.057474484 |
| 0.118500929 | 0.259212748 | 0.116965271 | 0.105538729 |
| 0.227957255 | 0.184993386 | 0.144887498 | 0.141537176 |
| 0.262740696 | 0.049598457 | 0.195936407 | 0.030878453 |
| 0.324288297 | 0.254857788 | 0.105831058 | 0.034302911 |
| 0.153177946 | 0.038942467 | 0.304295896 | 0.201568952 |
| 0.116858803 | 0.292744915 | 0.054134421 | 0.181600606 |
| 0.089184447 | 0.051588034 | 0.023038463 | 0.212336198 |
| 0.150479852 | 0.147755648 | 0.054020161 | 0.195433186 |
| 0.110438319 | 0.205115205 | 0.133333824 | 0.006602473 |
| 0.107775915 | 0.03780385  | 0.083465494 | 0.27311692  |
| 0.24909942  | 0.182777696 | 0.067089808 | 0.117640535 |
| 0.176568909 | 0.250907104 | 0.276047696 | 0.081423844 |
| 0.291982496 | 0.126001487 | 0.201010461 | 0.095434848 |
| 0.119675412 | 0.044766306 | 0.233677113 | 0.080228836 |
| 0.114688613 | 0.242767434 | 0.202606521 | 0.140726258 |
| 0.192825705 | 0.335124279 | 0.239387496 | 0.263430484 |
| 0.126955324 | 0.217582307 | 0.182374816 | 0.33480147  |
| 0.251556502 | 0.108959772 | 0.262463046 | 0.332258099 |
| 0.06150117  | 0.102855218 | 0.222758219 | 0.12257296  |
| 0.218666816 | 0.106662301 | 0.085528347 | 0.131709994 |
| 0.266555197 | 0.22503339  | 0.28504916  | 0.270735701 |
| 0.175403175 | 0.077364764 | 0.252283297 | 0.21531577  |
| 0.164118591 | 0.085134941 | 0.208301161 | 0.26002444  |
| 0.205173707 | 0.273191335 | 0.21487008  | 0.288763444 |
| 0.194051204 | 0.288906616 | 0.232867206 | 0.259105759 |
| 0.018759763 | 0.287742343 | 0.160284208 | 0.119027548 |
| 0.054552499 | 0.164718343 | 0.158291745 | 0.319662218 |
| 0.266817084 | 0.2309161   | 0.141368764 | 0.24606975  |
| 0.321791144 | 0.235086677 | 0.281160083 | 0.272155048 |
| 0.077554128 | 0.119423221 | 0.183203242 | 0.112290873 |
| 0.254905317 | 0.162969741 | 0.166205904 | 0.293111821 |
| 0.295702833 | 0.287460267 | 0.091209127 | 0.314627688 |
| 0.142860494 | 0.347898693 | 0.207203203 | 0.19396518  |
| 0.309506808 | 0.274215516 | 0.345753895 | 0.248664086 |
| 0.284885598 | 0.133660101 | 0.047051205 | 0.265426925 |
| 0.357015735 | 0.028788653 | 0.261763367 | 0.288806432 |
| 0.263952054 | 0.262367304 | 0.349584212 | 0.295508025 |
| 0.261200034 | 0.11237739  | 0.01614641  | 0.322243927 |
| 0.283839174 | 0.289312419 | 0.19799854  | 0.140736204 |
| 0.237646455 | 0.114571247 | 0.231318037 | 0.096198736 |
| 0.376740141 | 0.267379329 | 0.259257397 | 0.238993627 |
| 0.121859762 | 0.280771366 | 0.147940772 | 0.244008688 |
| 0.101159155 | 0.085008723 | 0.06239806  | 0.281253698 |
| 0.053691002 | 0.262778791 | 0.102683203 | 0.213145421 |
| 0.274106687 | 0.101041444 | 0.091818204 | 0.271547426 |
| 0.070964997 | 0.136361119 | 0.144833544 | 0.134857857 |
| 0.122703781 | 0.185642858 | 0.162777125 | 0.156197027 |
| 0.248857827 | 0.190663514 | 0.194902439 | 0.298601093 |
| 0.134732196 | 0.160701153 | 0.206674493 | 0.346081844 |
| 0.392491551 | 0.181799938 | 0.25898838  | 0.040031349 |



|              |             |             |             |
|--------------|-------------|-------------|-------------|
| 0.158613052  | 0.069715841 | 0.105340456 | 0.144504343 |
| 0.177679607  | 0.181590896 | 0.220630005 | 0.291381946 |
| 0.123787347  | 0.08732655  | 0.13635959  | 0.313141936 |
| 0.134139349  | 0.162124426 | 0.316238256 | 0.134867422 |
| 0.013582634  | 0.179554107 | 0.260000966 | 0.226446768 |
| 0.218386129  | 0.112305159 | 0.091673564 | 0.294213186 |
| 0.115697768  | 0.180230586 | 0.278357175 | 0.290195825 |
| 0.094692206  | 0.163299388 | 0.335165435 | 0.041707778 |
| 0.172407725  | 0.125388642 | 0.336471134 | 0.061535916 |
| 0.225459888  | 0.334002198 | 0.222376981 | 0.186314698 |
| 0.098725468  | 0.297820182 | 0.262667332 | 0.297616468 |
| 0.113330661  | 0.337614083 | 0.276746603 | 0.301417284 |
| 0.229587042  | 0.114209954 | 0.083945223 | 0.259704444 |
| 0.282313618  | 0.101138456 | 0.078651986 | 0.221382641 |
| 0.096152164  | 0.251351023 | 0.20404267  | 0.331838212 |
| 0.339285107  | 0.221845225 | 0.202146851 | 0.338643076 |
| 0.296542089  | 0.173726471 | 0.274355481 | 0.351306075 |
| 0.065552875  | 0.182827804 | 0.158271064 | 0.362520257 |
| 0.199263664  | 0.197387834 | 0.277611011 | 0.093101872 |
| 0.004025611  | 0.086850529 | 0.085349721 | 0.222175583 |
| 0.171753626  | 0.137656143 | 0.249740773 | 0.305704137 |
| 0.166681085  | 0.282600079 | 0.232374081 | 0.173204315 |
| 0.262500663  | 0.150941711 | 0.167937658 | 0.224462748 |
| 0.259806825  | 0.055499805 | 0.152280916 | 0.33380981  |
| 0.047837649  | 0.143397421 | 0.142816279 | 0.009127034 |
| 0.072568494  | 0.165463364 | 0.11796226  | 0.220305054 |
| 0.33403568   | 0.194524065 | 0.182416126 | 0.06505353  |
| 0.299395928  | 0.135817141 | 0.019565932 | 0.283163728 |
| 0.281289131  | 0.276867633 | 0.273089683 | 0.255120635 |
| 0.279968308  | 0.22067266  | 0.291847389 | 0.108978182 |
| 0.141171164  | 0.071152885 | 0.163399103 | 0.211887268 |
| 0.005724606  | 0.30605161  | 0.207054799 | 0.209128212 |
| 0.250679788  | 0.262007031 | 0.074276719 | 0.218514548 |
| 0.03476832   | 0.084329189 | 0.121234706 | 0.19654428  |
| 0.331234254  | 0.03569886  | 0.06176178  | 0.122984581 |
| 0.230900245  | 0.253096389 | 0.103625479 | 0.30188602  |
| 0.222466857  | 0.089635572 | 0.20055867  | 0.280593488 |
| 0.122750228  | 0.041775572 | 0.100228566 | 0.005978536 |
| 0.052021266  | 0.279442877 | 0.114780496 | 0.075371533 |
| 0.23876386   | 0.019368864 | 0.240709569 | 0.317711341 |
| 0.221866377  | 0.321847169 | 0.296680632 | 0.138359956 |
| 0.290641748  | 0.040486711 | 0.29588565  | 0.21958995  |
| 0.0711103815 | 0.002545781 | 0.027280223 | 0.284798523 |
| 0.191184203  | 0.055463759 | 0.209847755 | 0.073329822 |
| 0.170928315  | 0.075449673 | 0.105646943 | 0.203846929 |
| 0.165633791  | 0.252018026 | 0.186139306 | 0.250543545 |
| 0.206335605  | 0.256646148 | 0.082957205 | 0.112803579 |
| 0.188001371  | 0.108341656 | 0.115310413 | 0.023302153 |
| 0.296572815  | 0.111557389 | 0.257357288 | 0.276735182 |
| 0.34172529   | 0.274940575 | 0.053759969 | 0.090355283 |
| 0.280934788  | 0.064952271 | 0.082092021 | 0.078838427 |
| 0.242512607  | 0.242514872 | 0.313992031 | 0.257871053 |
| 0.347900858  | 0.298941994 | 0.081044752 | 0.289257539 |
| 0.026202259  | 0.011902916 | 0.098095582 | 0.262997348 |

|             |             |             |             |
|-------------|-------------|-------------|-------------|
| 0.059413121 | 0.160263313 | 0.281241368 | 0.127556541 |
| 0.162986847 | 0.0505746   | 0.139651874 | 0.159806494 |
| 0.279706197 | 0.201678055 | 0.224376619 | 0.227848867 |
| 0.201995692 | 0.210684496 | 0.194824103 | 0.183522206 |
| 0.113397363 | 0.2236395   | 0.18693166  | 0.063246848 |
| 0.116120461 | 0.158786673 | 0.091887764 | 0.188742543 |
| 0.291387698 | 0.29250745  | 0.1193519   | 0.060660514 |
| 0.260632727 | 0.16833587  | 0.320126007 | 0.250979652 |
| 0.299071212 | 0.357613096 | 0.30794538  | 0.231585896 |
| 0.09910179  | 0.263537537 | 0.230687955 | 0.231114403 |
| 0.293791324 | 0.067230751 | 0.257541199 | 0.162362558 |
| 0.177187392 | 0.168541326 | 0.105945106 | 0.144958787 |
| 0.178742127 | 0.234143053 | 0.248364985 | 0.108483518 |
| 0.18027892  | 0.143112677 | 0.094972776 | 0.230012335 |
| 0.275036735 | 0.128462953 | 0.214140966 | 0.11215253  |
| 0.219484303 | 0.040769013 | 0.243574163 | 0.357337073 |
| 0.151156901 | 0.122964763 | 0.078290304 | 0.253787791 |
| 0.233353745 | 0.107045897 | 0.03743086  | 0.204464021 |
| 0.314728719 | 0.18864842  | 0.266610636 | 0.366397258 |
| 0.128648562 | 0.174554487 | 0.125663978 | 0.233289857 |
| 0.225586013 | 0.09694341  | 0.218037077 | 0.113627019 |
| 0.300038339 | 0.317212699 | 0.244272513 | 0.191159473 |
| 0.137729554 | 0.086275503 | 0.056562637 | 0.244925618 |
| 0.178369104 | 0.101148595 | 0.059948219 | 0.253547851 |
| 0.013046887 | 0.108969759 | 0.325207261 | 0.165276066 |
| 0.334156226 | 0.31498864  | 0.317959608 | 0.119695395 |
| 0.008593003 | 0.226542766 | 0.234160419 | 0.126695865 |
| 0.229413442 | 0.237715659 | 0.09197564  | 0.16635132  |
| 0.332349673 | 0.073667764 | 0.197527916 | 0.077293701 |
| 0.091031099 | 0.168801392 | 0.288831985 | 0.185435868 |
| 0.224810234 | 0.083705904 | 0.129880286 | 0.158093292 |
| 0.133743062 | 0.309668613 | 0.32896981  | 0.043181313 |
| 0.100874586 | 0.314468882 | 0.239707461 | 0.052863287 |
| 0.165941784 | 0.2881761   | 0.298065943 | 0.012157511 |
| 0.245947814 | 0.041311604 | 0.23275763  | 0.212392242 |
| 0.217158618 | 0.212969828 | 0.317081077 | 0.183534047 |
| 0.203437478 | 0.191599074 | 0.170809512 | 0.278582952 |
| 0.205110566 | 0.17261467  | 0.21217801  | 0.126098699 |
| 0.173099037 | 0.129503653 | 0.115934438 | 0.104838391 |
| 0.106594962 | 0.243142687 | 0.260888914 | 0.075605306 |
| 0.280358527 | 0.123411783 | 0.357947012 | 0.241097718 |
| 0.341330993 | 0.08556991  | 0.159665932 | 0.220779124 |
| 0.049811575 | 0.08578215  | 0.064862598 | 0.143983286 |
| 0.211813956 | 0.180476146 | 0.107341278 | 0.134052969 |
| 0.184349683 | 0.317564342 | 0.2509993   | 0.308706737 |
| 0.154900508 | 0.14214163  | 0.045296869 | 0.17869468  |
| 0.145136545 | 0.161706904 | 0.242224554 | 0.01142872  |
| 0.252670545 | 0.087741182 | 0.266846805 | 0.260876675 |
| 0.107671011 | 0.321526723 | 0.047948984 | 0.111565522 |
| 0.036885443 | 0.130776975 | 0.199570373 | 0.210312746 |
| 0.08776711  | 0.15893875  | 0.260616227 | 0.063389365 |
| 0.251306913 | 0.209614986 | 0.181347375 | 0.148898795 |
| 0.223498575 | 0.150081131 | 0.285910295 | 0.075391202 |
| 0.142656026 | 0.199601487 | 0.103580605 | 0.210597961 |

|             |             |             |             |
|-------------|-------------|-------------|-------------|
| 1           | 0.291148575 | 0.089542838 | 0.296938297 |
| 0.174839675 | 0.146162228 | 0.354684519 | 0.14202061  |
| 0.116285072 | 0.189323627 | 0.106140945 | 0.080044323 |
| 0.184403539 | 0.106677821 | 0.003784606 | 0.084939712 |
| 0.329337119 | 0.101658283 | 0.184404922 | 0.270965456 |
| 0.199961596 | 0.358307021 | 0.079540269 | 0.145937092 |
| 0.22890872  | 0.269904596 | 0.165310721 | 0.312176314 |
| 0.272775569 | 0.146886676 | 0.132592385 | 0.018799573 |
| 0.186344964 | 0.151061396 | 0.078765572 | 0.110979212 |
| 0.061873211 | 0.112678591 | 0.178174341 | 0.075090875 |
| 0.327588065 | 0.077654218 | 0.141105891 | 0.209808594 |
| 0.192764117 | 0.276963509 | 0.225773538 | 0.273051207 |
| 0.058889964 | 0.255023938 | 0.144196512 | 0.126020092 |
| 0.183695346 | 0.165496944 | 0.313798432 | 0.152739898 |
| 0.095275394 | 0.192663181 | 0.01958047  | 0.300462994 |
| 0.244285978 | 0.161575767 | 0.234751052 | 0.049651845 |
| 0.331318537 | 0.274488721 | 0.172936257 | 0.113089224 |
| 0.051509436 | 0.224114225 | 0.239078964 | 0.234231751 |
| 0.06969674  | 0.165975441 | 0.125149718 | 0.193872801 |
| 0.252892    | 0.152801191 | 0.279956634 | 0.093229133 |
| 0.247387133 | 0.211848181 | 0.111815781 | 0.180197458 |
| 0.150378235 | 0.097436759 | 0.063220654 | 0.323944885 |
| 0.212536275 | 0.172461299 | 0.310527676 | 0.204293746 |
| 0.143982136 | 0.239528162 | 0.137336295 | 0.307509279 |
| 0.213955178 | 0.28717334  | 0.274982454 | 0.276966356 |
| 0.354753215 | 0.198258417 | 0.148161896 | 0.212888479 |
| 0.225539749 | 0.104512742 | 0.170605018 | 0.257091899 |
| 0.144487952 | 0.287844794 | 0.103287173 | 0.226105768 |
| 0.096556924 | 0.174583071 | 0.105287556 | 0.184345601 |
| 0.267647684 | 0.204540854 | 0.213324835 | 0.339484119 |
| 0.16792378  | 0.070637014 | 0.353049143 | 0.032140108 |
| 0.117258753 | 0.242396841 | 0.229572858 | 0.174215287 |
| 0.188957439 | 0.198575703 | 0.117365239 | 0.00672313  |
| 0.302153422 | 0.075163746 | 0.149565986 | 0.204116785 |
| 0.119993092 | 0.08225234  | 0.27112583  | 0.333049066 |
| 0.210300364 | 0.084830497 | 0.083830347 | 0.268346614 |
| 0.124554759 | 0.076778787 | 0.109861116 | 0.154632815 |
| 0.134494085 | 0.073812473 | 0.09531847  | 0.100546535 |
| 0.226949087 | 0.135189212 |             |             |
| SG0L1       | 0.135392458 | 0.49215223  | 0.114282907 |
| 0.215996627 | 0.384764301 | 0.511700408 | 0.107584608 |
| 0.20149315  | 0.449304351 | 0.420985712 | 0.454380915 |
| 0.036319916 | 0.122181802 | 0.501511299 | 0.099111356 |
| 0.469631957 | 0.062532569 | 0.173620689 | 0.122326374 |
| 0.336514883 | 0.348403124 | 0.422203659 | 0.488708279 |
| 0.364214946 | 0.260218094 | 0.463104324 | 0.477290198 |
| 0.52168461  | 0.351666452 | 0.526627615 | 0.303028416 |
| 0.439408057 | 0.396833038 | 0.475396868 | 0.03964205  |
| 0.510978872 | 0.021302166 | 0.452237618 | 0.341930859 |
| 0.215553585 | 0.402043765 | 0.463502006 | 0.328273503 |
| 0.486108945 | 0.074984387 | 0.310769194 | 0.49096841  |
| 0.453349251 | 0.396354321 | 0.126725274 | 0.530606021 |
| 0.472234709 | 0.446862319 | 0.494174997 | 0.003955739 |
| 0.377394454 | 0.124746385 | 0.290995123 | 0.520532097 |

|             |             |             |             |
|-------------|-------------|-------------|-------------|
| 0.287184342 | 0.188509854 | 0.376964205 | 0.363643777 |
| 0.480790244 | 0.463906564 | 0.350918369 | 0.473865376 |
| 0.505849776 | 0.227967228 | 0.524046287 | 0.245315583 |
| 0.486225834 | 0.073411289 | 0.238017519 | 0.158783896 |
| 0.489777732 | 0.281344687 | 0.429744613 | 0.393369074 |
| 0.486406874 | 0.528029294 | 0.337700714 | 0.519359344 |
| 0.137335533 | 0.414813992 | 0.364992175 | 0.385781075 |
| 0.454222404 | 0.148898569 | 0.497184909 | 0.526675372 |
| 0.100096312 | 0.491300829 | 0.485900118 | 0.202510439 |
| 0.509329805 | 0.372322179 | 0.503250222 | 0.228840433 |
| 0.452254842 | 0.414403292 | 0.49338748  | 0.381679089 |
| 0.40562223  | 0.136068255 | 0.508594962 | 0.391586746 |
| 0.380034777 | 0.151974297 | 0.291455017 | 0.526985406 |
| 0.511003669 | 0.52142952  | 0.504464537 | 0.444674736 |
| 0.455502293 | 0.512385196 | 0.50152376  | 0.48536454  |
| 0.245856434 | 0.535905744 | 0.285987303 | 0.07422412  |
| 0.138421854 | 0.140259064 | 0.31260431  | 0.383908397 |
| 0.529352149 | 0.442246559 | 0.290622938 | 0.311557474 |
| 0.503991412 | 0.499962433 | 0.534321641 | 0.492131725 |
| 0.076224143 | 0.330146359 | 0.465760301 | 0.401939774 |
| 0.462961765 | 0.188012637 | 0.325271495 | 0.523857702 |
| 0.4476111   | 0.508265623 | 0.272027054 | 0.519016943 |
| 0.292767142 | 0.515089084 | 0.518124483 | 0.247813664 |
| 0.531110179 | 0.51357974  | 0.508235899 | 0.478202217 |
| 0.4893508   | 0.460531067 | 0.094152317 | 0.46497855  |
| 0.486397796 | 0.021196626 | 0.528098261 | 0.526312269 |
| 0.512705732 | 0.52873632  | 0.516883597 | 0.523441605 |
| 0.5172509   | 0.134982515 | 0.043628199 | 0.360268719 |
| 0.521499371 | 0.473498998 | 0.201487708 | 0.499193951 |
| 0.437595399 | 0.507409621 | 0.515245191 | 0.379203974 |
| 0.512001497 | 0.522044839 | 0.527629443 | 0.485331534 |
| 0.422401201 | 0.382089662 | 0.459060407 | 0.492024108 |
| 0.085165907 | 0.192819754 | 0.10473871  | 0.397765744 |
| 0.479457784 | 0.248372735 | 0.491430449 | 0.438190328 |
| 0.271396625 | 0.464710621 | 0.420492516 | 0.454589172 |
| 0.107787793 | 0.530337455 | 0.264780339 | 0.264964571 |
| 0.073886641 | 0.210820931 | 0.254100979 | 0.230629801 |
| 0.326296919 | 0.268579894 | 0.527339681 | 0.517447489 |
| 0.444948607 | 0.275162659 | 0.518992054 | 0.488478939 |
| 0.443828827 | 0.465688001 | 0.314607897 | 0.021537648 |
| 0.334764345 | 0.403603919 | 0.246098419 | 0.502188346 |
| 0.23541453  | 0.31201065  | 0.469544978 | 0.469311579 |
| 0.395053511 | 0.239897419 | 0.44769454  | 0.439471722 |
| 0.236433055 | 0.387594239 | 0.500739937 | 0.508729307 |
| 0.009356507 | 0.42997852  | 0.524154534 | 0.199856692 |
| 0.414210742 | 0.17581769  | 0.32698254  | 0.512960752 |
| 0.364840363 | 0.28888449  | 0.527059086 | 0.469882408 |
| 0.434339936 | 0.277632275 | 0.523935894 | 0.065965465 |
| 0.43690707  | 0.08213508  | 0.359649038 | 0.457574765 |
| 0.348058877 | 0.370217755 | 0.388868409 | 0.362342757 |
| 0.215822999 | 0.523628354 | 0.483234709 | 0.519268151 |
| 0.452159363 | 0.527746314 | 0.522866226 | 0.498215988 |
| 0.469462895 | 0.452114139 | 0.180127175 | 0.517534685 |
| 0.518584248 | 0.388762676 | 0.13906096  | 0.520773358 |

|             |             |             |             |
|-------------|-------------|-------------|-------------|
| 0.462881907 | 0.481744779 | 0.176478403 | 0.502736897 |
| 0.504757962 | 0.490820158 | 0.206446262 | 0.444842129 |
| 0.463852747 | 0.335664766 | 0.498848694 | 0.526671527 |
| 0.421659557 | 0.427001056 | 0.410478174 | 0.461068408 |
| 0.26455571  | 0.270871583 | 0.39465907  | 0.240864412 |
| 0.017119143 | 0.148934275 | 0.122465104 | 0.224158109 |
| 0.219955668 | 0.515696029 | 0.487071439 | 0.518639044 |
| 0.181041347 | 0.478878115 | 0.332578384 | 0.36047086  |
| 0.469160897 | 0.431491361 | 0.465211094 | 0.473053441 |
| 0.340181518 | 0.035270242 | 0.16991965  | 0.530266883 |
| 0.086742137 | 0.303861023 | 0.429984552 | 0.004724222 |
| 0.086565606 | 0.502295782 | 0.15960475  | 0.251309212 |
| 0.505507439 | 0.262046167 | 0.302785357 | 0.431996654 |
| 0.433398867 | 0.159417826 | 0.006253243 | 0.509233143 |
| 0.496487326 | 0.478944386 | 0.495471884 | 0.47707158  |
| 0.490000525 | 0.499187067 | 0.492454374 | 0.48241108  |
| 0.173540478 | 0.16781579  | 0.265822991 | 0.366800958 |
| 0.00912652  | 0.467057123 | 0.397512686 | 0.216874736 |
| 0.50450277  | 0.396013276 | 0.072273352 | 0.43759791  |
| 0.044409359 | 0.260878682 | 0.408497794 | 0.303754835 |
| 0.423205822 | 0.033695633 | 0.325271088 | 0.394718807 |
| 0.463494656 | 0.426361472 | 0.453462971 | 0.539182513 |
| 0.419324488 | 0.213070319 | 0.397676504 | 0.480338909 |
| 0.124311514 | 0.162190805 | 0.4701804   | 0.064991717 |
| 0.299413121 | 0.466489544 | 0.476518556 | 0.131888584 |
| 0.364209594 | 0.012413768 | 0.445190904 | 0.53396943  |
| 0.48759883  | 0.516253166 | 0.511603905 | 0.338826171 |
| 0.511838679 | 0.150919467 | 0.532375907 | 0.492936157 |
| 0.473118853 | 0.001943975 | 0.010100865 | 0.528231873 |
| 0.477791304 | 0.114420244 | 0.239251494 | 0.475146656 |
| 0.167033074 | 0.249070492 | 0.119423    | 0.241127719 |
| 0.529419432 | 0.308843778 | 0.230386477 | 0.484359463 |
| 0.327026835 | 0.317177104 | 0.504069586 | 0.154410109 |
| 0.499987649 | 0.094390576 | 0.154920031 | 0.012823868 |
| 0.447602313 | 0.186448656 | 0.493480645 | 0.517076748 |
| 0.494935464 | 0.475529739 | 0.438384063 | 0.435603931 |
| 0.497858433 | 0.174126377 | 0.46955596  | 0.19487033  |
| 0.50187259  | 0.468053008 | 0.404072913 | 0.39381749  |
| 0.494939109 | 0.486053959 | 0.064665712 | 0.487570261 |
| 0.028394739 | 0.00321618  | 0.4916458   | 0.354145385 |
| 0.104582236 | 0.445152765 | 0.34135876  | 0.336178351 |
| 0.320051679 | 0.061068351 | 0.331654763 | 0.305173244 |
| 0.384782061 | 0.443908962 | 0.338627367 | 0.341404156 |
| 0.345045313 | 0.181176384 | 0.282913344 | 0.228041941 |
| 0.336936124 | 0.396583241 | 0.263020175 | 0.0451938   |
| 0.52483887  | 0.494011545 | 0.104873967 | 0.244550073 |
| 0.510214551 | 0.524195273 | 0.074714842 | 0.019841813 |
| 0.351991476 | 0.397932591 | 0.516180221 | 0.511091768 |
| 0.536213147 | 0.516368122 | 0.41567963  | 0.172164238 |
| 0.120999758 | 0.407071696 | 0.364428597 | 0.145582893 |
| 0.512771768 | 0.126072426 | 0.498869934 | 0.373062034 |
| 0.189116851 | 0.310856439 | 0.060873691 | 0.144344719 |
| 0.465059164 | 0.258064703 | 0.244846675 | 0.238441203 |
| 0.390073359 | 0.324697498 | 0.091887908 | 0.279597013 |

|             |             |             |             |
|-------------|-------------|-------------|-------------|
| 0.436083495 | 0.233811596 | 0.240050567 | 0.433829339 |
| 0.465328942 | 0.335847782 | 0.507852854 | 0.454718952 |
| 0.208858179 | 0.188698238 | 0.395638416 | 0.477068849 |
| 0.529109051 | 0.496499364 | 0.049483459 | 0.498991217 |
| 0.509017491 | 0.525915091 | 0.512285763 | 0.444825055 |
| 0.148907116 | 0.45462366  | 0.394561136 | 0.418959108 |
| 0.268329985 | 0.50970489  | 0.32782623  | 0.114586216 |
| 0.370835711 | 0.493403351 | 0.48988476  | 0.236463222 |
| 0.522341811 | 0.216861461 | 0.113947635 | 0.513578902 |
| 0.233527723 | 0.146740462 | 0.476870884 | 0.509917365 |
| 0.004025889 | 0.186164794 | 0.502572632 | 0.329612435 |
| 0.522548516 | 0.513242197 | 0.467175811 | 0.375111476 |
| 0.00283517  | 0.491701737 | 0.462230914 | 0.487413997 |
| 0.499791433 | 0.449674539 | 0.242325646 | 0.118674349 |
| 0.364872836 | 0.148061518 | 0.190515477 | 0.464227812 |
| 0.230624036 | 0.507177125 | 0.273623814 | 0.303737578 |
| 0.271685794 | 0.164997132 | 0.316369477 | 0.344701892 |
| 0.207367423 | 0.31712825  | 0.424402437 | 0.416353885 |
| 0.239562074 | 0.481635853 | 0.491578977 | 0.055573937 |
| 0.440530697 | 0.480244042 | 0.489661705 | 0.003702384 |
| 0.505776472 | 0.015331094 | 0.261656358 | 0.287829405 |
| 0.27410169  | 0.279367558 | 0.329438937 | 0.381970669 |
| 0.453710007 | 0.312608514 | 0.366866151 | 0.317486067 |
| 0.22995209  | 0.325814194 | 0.482842621 | 0.47791726  |
| 0.352112062 | 0.201839096 | 0.162666724 | 0.157787632 |
| 0.088834124 | 0.517520934 | 0.319300368 | 0.137946785 |
| 0.307677834 | 0.472848246 | 0.409403799 | 0.509570869 |
| 0.46896103  | 0.186509528 | 0.424976007 | 0.517400858 |
| 0.316895991 | 0.404619427 | 0.119163238 | 0.510428847 |
| 0.323059679 | 0.268725545 | 0.519532341 | 0.423083858 |
| 0.500799014 | 0.424697398 | 0.318815341 | 0.478495568 |
| 0.4657313   | 0.438439381 | 0.43503412  | 0.127021156 |
| 0.26274378  | 0.211233604 | 0.330089203 | 0.005016362 |
| 0.443561132 | 0.384524325 | 0.528960062 | 0.50474051  |
| 0.364237852 | 0.443098967 | 0.434856041 | 0.146072223 |
| 0.399781952 | 0.246429571 | 0.214910627 | 0.528030618 |
| 0.278076399 | 0.276349267 | 0.378597769 | 0.464173663 |
| 0.515578979 | 0.509348255 | 0.33333553  | 0.342247096 |
| 0.334513908 | 0.30516891  | 0.491521049 | 0.213066973 |
| 0.519660772 | 0.243313155 | 0.475058017 | 0.3698717   |
| 0.291148575 | 1           | 0.113908614 | 0.524284348 |
| 0.402005313 | 0.20946163  | 0.496332957 | 0.420518078 |
| 0.424071975 | 0.179380121 | 0.244870716 | 0.499174958 |
| 0.315002091 | 0.423333894 | 0.024807217 | 0.081715302 |
| 0.403010562 | 0.409727189 | 0.495998315 | 0.454564713 |
| 0.316488937 | 0.409301946 | 0.227214234 | 0.396066978 |
| 0.501127536 | 0.5176943   | 0.325466717 | 0.327609458 |
| 0.431754271 | 0.161162062 | 0.510082277 | 0.026866376 |
| 0.500706867 | 0.50347188  | 0.47163255  | 0.095060404 |
| 0.0391364   | 0.271483618 | 0.504934537 | 0.130690811 |
| 0.510074247 | 0.276565827 | 0.466429814 | 0.530219055 |
| 0.264727589 | 0.517483023 | 0.175443322 | 0.486804769 |
| 0.094851968 | 0.353065397 | 0.467830143 | 0.472107281 |
| 0.286998752 | 0.360353643 | 0.455090904 | 0.296085426 |

|             |             |             |             |
|-------------|-------------|-------------|-------------|
| 0.059710262 | 0.339143642 | 0.003173155 | 0.42018719  |
| 0.493210885 | 0.414239998 | 0.282255035 | 0.411000897 |
| 0.357409331 | 0.460108486 | 0.30113178  | 0.515569785 |
| 0.021780937 | 0.439979857 | 0.283468645 | 0.495349113 |
| 0.303058442 | 0.456537935 | 0.099003332 | 0.387848274 |
| 0.483598043 | 0.340352358 | 0.333584076 | 0.393502439 |
| 0.504391158 | 0.482659361 | 0.257595937 | 0.304217589 |
| 0.486466533 | 0.119378569 | 0.5025584   | 0.530576498 |
| 0.241811438 | 0.273298563 | 0.504162369 | 0.27456979  |
| 0.381407195 | 0.465429387 | 0.506459812 | 0.525072619 |
| 0.105491238 | 0.328827323 | 0.504383286 | 0.495236172 |
| 0.373595886 | 0.222794709 | 0.302803105 | 0.289777249 |
| 0.480580616 | 0.15618858  | 0.329494611 | 0.452901276 |
| 0.271092436 | 0.395934088 | 0.458024011 | 0.249046936 |
| 0.061504355 | 0.248872983 | 0.473537751 | 0.222657424 |
| 0.375986979 | 0.450152022 | 0.310018796 | 0.431469456 |
| 0.191278841 | 0.043062594 | 0.460387115 | 0.023897416 |
| 0.464489758 | 0.480240746 | 0.33485931  | 0.440741565 |
| 0.266210459 | 0.456715524 | 0.446916383 | 0.002347728 |
| 0.485699689 | 0.0812443   | 0.397042246 | 0.287184775 |
| 0.352754994 | 0.095406719 | 0.483277176 | 0.513300362 |
| 0.428544545 | 0.437535458 | 0.424089222 | 0.489743973 |
| 0.197071733 | 0.421304329 | 0.417292833 | 0.521260905 |
| 0.286127775 | 0.487291687 | 0.504800476 | 0.465109134 |
| 0.486894578 | 0.381662015 |             |             |
| SH2D2A      | 0.251020571 | 0.111318794 | 0.211352052 |
| 0.125535077 | 0.044766111 | 0.044934752 | 0.251524353 |
| 0.211514925 | 0.111319426 | 0.016708874 | 0.062025632 |
| 0.267295275 | 0.005474194 | 0.120314364 | 0.257145667 |
| 0.036692037 | 0.268184721 | 0.225200499 | 0.036401955 |
| 0.077339113 | 0.044457801 | 0.02240877  | 0.057891566 |
| 0.042102555 | 0.32024108  | 0.086041789 | 0.022343521 |
| 0.108462636 | 0.007112701 | 0.049215543 | 0.009939433 |
| 0.193927636 | 0.039221746 | 0.015695949 | 0.260101181 |
| 0.045281338 | 0.005308009 | 0.214513065 | 0.068640036 |
| 0.012152798 | 0.226342197 | 0.026208705 | 0.101154575 |
| 0.026911714 | 0.25366787  | 0.00823458  | 0.040107993 |
| 0.078325607 | 0.082117219 | 0.21254017  | 0.062521397 |
| 0.032546183 | 0.137234407 | 0.058588497 | 0.016624619 |
| 0.011920637 | 0.000210727 | 0.00518982  | 0.148920631 |
| 0.231829592 | 0.20859807  | 0.008396365 | 0.095405692 |
| 0.041174414 | 0.063819638 | 0.165487359 | 0.022165892 |
| 0.133716821 | 0.00902001  | 0.047669853 | 0.079881037 |
| 0.048330833 | 0.224443369 | 0.289942029 | 0.218960716 |
| 0.027416511 | 0.147742827 | 0.052492744 | 0.017889736 |
| 0.104650526 | 0.195363283 | 0.172852249 | 0.160492813 |
| 0.012485043 | 0.027349791 | 0.037361157 | 0.134342986 |
| 0.084909261 | 0.183826334 | 0.080540295 | 0.161888469 |
| 0.217319003 | 0.035317504 | 0.067792076 | 0.25318143  |
| 0.111498722 | 0.016074849 | 0.02550815  | 0.013844266 |
| 0.046750414 | 0.03318657  | 0.177571478 | 0.156340013 |
| 0.042630872 | 0.247503335 | 0.189308649 | 0.023980252 |
| 0.054382721 | 0.231476292 | 0.038910805 | 0.065253232 |
| 0.055241144 | 0.111340307 | 0.080987273 | 0.107895522 |

|             |             |             |             |
|-------------|-------------|-------------|-------------|
| 0.026754935 | 0.127571026 | 0.080873123 | 0.128075234 |
| 0.005155556 | 0.138399616 | 0.174687015 | 0.273055713 |
| 0.212707887 | 0.228432012 | 0.036679004 | 0.202017342 |
| 0.09065618  | 0.124355294 | 0.16278135  | 0.092034412 |
| 0.085288157 | 0.164037451 | 0.132385342 | 0.098974686 |
| 0.28431047  | 0.012147865 | 0.026984928 | 0.101822924 |
| 0.078159885 | 0.244831878 | 0.018345545 | 0.18919958  |
| 0.176468669 | 0.074558342 | 0.172544957 | 0.224997893 |
| 0.123259981 | 0.161893617 | 0.092505887 | 0.172389318 |
| 0.175029515 | 0.184167855 | 0.134960144 | 0.042067479 |
| 0.180988955 | 0.072044658 | 0.021057065 | 0.11930999  |
| 0.15866299  | 0.004464241 | 0.081033691 | 0.089983323 |
| 0.134663061 | 0.065211506 | 0.12793146  | 0.110137164 |
| 0.13539243  | 0.272508086 | 0.000787406 | 0.089745938 |
| 0.157443753 | 0.140574926 | 0.141134225 | 0.022240318 |
| 0.042436924 | 0.053650686 | 0.070214169 | 0.018305743 |
| 0.186007969 | 0.100409965 | 0.092426502 | 0.090972159 |
| 0.060785748 | 0.244918295 | 0.017657977 | 0.189834718 |
| 0.283921541 | 0.208713675 | 0.279264607 | 0.147360107 |
| 0.026686608 | 0.177224675 | 0.052995534 | 0.044879093 |
| 0.201039358 | 0.065427714 | 0.012337147 | 0.047973901 |
| 0.319268869 | 0.033195285 | 0.183969577 | 0.156882124 |
| 0.257491982 | 0.359959457 | 0.111451441 | 0.164428501 |
| 0.082813483 | 0.341989125 | 0.048282912 | 0.109819534 |
| 0.035241444 | 0.241228629 | 0.066895693 | 0.155397397 |
| 0.179686519 | 0.027162419 | 0.228321898 | 0.092400312 |
| 0.027683985 | 0.010331923 | 0.005820024 | 0.02554777  |
| 0.358499105 | 0.070881026 | 0.045669134 | 0.061490188 |
| 0.104574156 | 0.158536007 | 0.025307501 | 0.233386293 |
| 0.25284411  | 0.049460415 | 0.09874375  | 0.036724221 |
| 0.191218191 | 0.07420018  | 0.079591153 | 0.047259751 |
| 0.108469538 | 0.013325705 | 0.011556277 | 0.094759956 |
| 0.013803286 | 0.028030513 | 0.097256614 | 0.062611218 |
| 0.033410529 | 0.286700629 | 0.131337528 | 0.001263495 |
| 0.030186983 | 0.069515314 | 0.130750218 | 0.025524831 |
| 0.148899737 | 0.14950144  | 0.032639106 | 0.043320177 |
| 0.23450933  | 0.143915921 | 0.133940295 | 0.115855841 |
| 0.017218628 | 0.136691208 | 0.077451738 | 0.119948071 |
| 0.102006001 | 0.017426096 | 0.003653341 | 0.079710911 |
| 0.088715623 | 0.020858359 | 0.283260351 | 0.055142545 |
| 0.02170516  | 0.045652349 | 0.066687521 | 0.126776118 |
| 0.206097256 | 0.145475374 | 0.163574151 | 0.086415044 |
| 0.131954529 | 0.148867822 | 0.105655834 | 0.147579612 |
| 0.015811104 | 0.026282079 | 0.026187589 | 0.104253412 |
| 0.223970496 | 0.034655709 | 0.211023551 | 0.005921747 |
| 0.000141743 | 0.229593761 | 0.24868243  | 0.13337066  |
| 0.018408196 | 0.032735812 | 0.059035742 | 0.128098059 |
| 0.223570952 | 0.157143655 | 0.18177338  | 0.042913237 |
| 0.141593447 | 0.02941058  | 0.025785984 | 0.047565148 |
| 0.2137547   | 0.131852693 | 0.150687097 | 0.198882637 |
| 0.246824105 | 0.016889456 | 0.077914437 | 0.01649129  |
| 0.249930767 | 0.072170257 | 0.336085825 | 0.363448946 |
| 0.105212481 | 0.331171368 | 0.188698253 | 0.021118312 |
| 0.110776067 | 0.252117792 | 0.044276561 | 0.110687549 |



|             |             |             |             |
|-------------|-------------|-------------|-------------|
| 0.135973836 | 0.135557331 | 0.134602152 | 0.16632669  |
| 0.104185616 | 0.078213001 | 0.075424796 | 0.069898974 |
| 0.228168109 | 0.208243875 | 0.014547511 | 0.064577115 |
| 0.019102999 | 0.112485619 | 0.053924282 | 0.28655936  |
| 0.058912526 | 0.122198214 | 0.287992664 | 0.042222967 |
| 0.176399512 | 0.004922727 | 0.065442441 | 0.109654435 |
| 0.088218452 | 0.271396294 | 0.020416296 | 0.016069208 |
| 0.166138926 | 0.180688647 | 0.015218176 | 0.146238514 |
| 0.077366917 | 0.215424772 | 0.052661196 | 0.080354055 |
| 0.256641699 | 0.009141598 | 0.047392519 | 0.002463418 |
| 0.035045583 | 0.16847911  | 0.027563791 | 0.204067216 |
| 0.128506753 | 0.213389202 | 0.169180624 | 0.150475825 |
| 0.141407523 | 0.111884348 | 0.131809837 | 0.01700809  |
| 0.137364657 | 0.000685889 | 0.122003788 | 0.109624423 |
| 0.016975808 | 0.016061829 | 0.069566708 | 0.088656769 |
| 0.032132738 | 0.288264989 | 0.23035317  | 0.033093192 |
| 0.19157793  | 0.161511088 | 0.267913629 | 0.031360828 |
| 0.053686916 | 0.066771783 | 0.031524039 | 0.150657298 |
| 0.10611635  | 0.136460233 | 0.034271605 | 0.296032087 |
| 0.042231804 | 0.261989255 | 0.276114258 | 0.025774433 |
| 0.078166578 | 0.299214406 | 0.212185665 | 0.131357089 |
| 0.165324247 | 0.060054022 | 0.012350358 | 0.034752699 |
| 0.099945402 | 0.233078239 | 0.017891116 | 0.220366631 |
| 0.125698674 | 0.046968673 | 0.163157609 | 0.198071212 |
| 0.138399536 | 0.154092578 | 0.289690391 | 0.08117954  |
| 0.150477926 | 0.009344648 | 0.045981857 | 0.173573848 |
| 0.01855486  | 0.024324931 | 0.216285027 | 0.071505933 |
| 0.08597205  | 0.246146528 | 0.012236766 | 0.014821059 |
| 0.103907285 | 0.045475184 | 0.029795603 | 0.18358007  |
| 0.049694022 | 0.037000348 | 0.132739865 | 0.170524898 |
| 0.040167706 | 0.186632756 | 0.30946932  | 0.275604226 |
| 0.026604359 | 0.026083797 | 0.278937171 | 0.267732125 |
| 0.100627675 | 0.096929044 | 0.21426647  | 0.132963904 |
| 0.228445531 | 0.050442409 | 0.105539503 | 0.120373277 |
| 0.172877713 | 0.156201111 | 0.239423178 | 0.113878071 |
| 0.272517184 | 0.074041981 | 0.031535693 | 0.102221968 |
| 0.127201248 | 0.233577042 | 0.146215956 | 0.014958656 |
| 0.270981829 | 0.127268385 | 0.253330146 | 0.251872452 |
| 0.026296346 | 0.232949183 | 0.122988033 | 0.201441455 |
| 0.051774688 | 0.016965905 | 0.277020014 | 0.175690897 |
| 0.131477197 | 0.007050595 | 0.223588311 | 0.079917104 |
| 0.131603436 | 0.018129151 | 0.049526987 | 0.187914002 |
| 0.275145132 | 0.196091406 | 0.068015264 | 0.086531844 |
| 0.069798647 | 0.024634068 | 0.14721052  | 0.105126021 |
| 0.122709463 | 0.041252587 | 0.151683498 | 0.13475814  |
| 0.294690332 | 0.028791367 | 0.017099721 | 0.045311324 |
| 0.186882527 | 0.049509324 | 0.111450048 | 0.283114861 |
| 0.227369469 | 0.209299798 | 0.113712    | 0.159683354 |
| 0.037294448 | 0.197829586 | 0.219838829 | 0.097547591 |
| 0.015418924 | 0.209056799 | 0.025146151 | 0.070448563 |
| 0.017743    | 0.006542636 | 0.114580568 | 0.119275735 |
| 0.169917813 | 0.10517344  | 0.175257781 | 0.099537482 |
| 4.54E-05    | 0.038498867 | 0.062230525 | 0.030596103 |
| 0.107225928 | 0.149825706 | 0.09244367  | 0.216988782 |

|             |             |             |             |
|-------------|-------------|-------------|-------------|
| 0.211818119 | 0.269915993 | 0.137279226 | 0.040818103 |
| 0.00628289  | 0.061531082 | 0.242466415 | 0.142074616 |
| 0.106904089 | 0.227087077 | 0.01605498  | 0.132931673 |
| 0.015377066 | 0.228356633 | 0.147878842 | 0.023239095 |
| 0.006892957 | 0.11363138  | 0.087752637 | 0.28492947  |
| 0.025321144 | 0.106073285 | 0.13276095  | 0.022082313 |
| 0.053421009 | 0.244633349 | 0.106330559 | 0.098307452 |
| 0.116493829 | 0.100847134 | 0.098313148 | 0.047322168 |
| 0.080963382 | 0.129497129 | 0.091156948 | 0.166425069 |
| 0.132307948 | 0.14503159  | 0.048702956 | 0.054830783 |
| 0.048872794 | 0.216792246 | 0.356276914 | 0.36983753  |
| 0.239138594 | 0.105032424 | 0.286549409 | 0.294928743 |
| 0.163312007 | 0.047684865 | 0.205505542 | 0.129301699 |
| 0.154308683 | 0.28296022  | 0.057120723 | 0.098427538 |
| 0.00794107  | 0.044031032 | 0.231786058 | 0.054775464 |
| 0.149593878 | 0.033314724 | 0.038150567 | 0.089807903 |
| 0.061438116 | 0.226472132 | 0.277946468 | 0.158127963 |
| 0.047958549 | 0.034836865 | 0.018471083 | 0.172788754 |
| 0.16315872  | 0.274160092 | 0.036566105 | 0.134601413 |
| 0.102196395 | 0.093675601 | 0.080897544 | 0.156793476 |
| 0.011337178 | 0.186461693 | 0.022688113 | 0.213928058 |
| 0.016376888 | 0.26996374  | 0.290197232 | 0.063635171 |
| 0.005662586 | 0.173224805 | 0.054573087 | 0.05310621  |
| 0.060539398 | 0.054775671 | 0.041715442 | 0.116694705 |
| 0.121265182 | 0.200195013 | 0.182686524 | 0.200770466 |
| 0.029554629 | 0.036784679 | 0.050408987 | 0.055968341 |
| 0.089542838 | 0.113908614 | 1           | 0.1093356   |
| 0.03339179  | 0.307386293 | 0.205824841 | 0.090771413 |
| 0.088573034 | 0.134955995 | 0.005825971 | 0.035309748 |
| 0.107576442 | 0.015250546 | 0.000393338 | 0.0089417   |
| 0.127254976 | 0.035001834 | 0.070924823 | 0.095242944 |
| 0.035373721 | 0.133645319 | 0.007428158 | 0.090531699 |
| 0.147085443 | 0.190448488 | 0.066530458 | 0.222818608 |
| 0.131316859 | 0.235223554 | 0.066254268 | 0.008623969 |
| 0.033764173 | 0.024419276 | 0.018686503 | 0.279535677 |
| 0.280456169 | 0.006334085 | 0.040607953 | 0.230938127 |
| 0.097389312 | 0.005450853 | 0.056526281 | 0.061388973 |
| 0.246228365 | 0.195507129 | 0.144058997 | 0.075055447 |
| 0.157382994 | 0.170189635 | 0.022674139 | 0.027936646 |
| 0.050554505 | 0.020606859 | 0.096441326 | 0.017367169 |
| 0.284730107 | 0.058087224 | 0.021873173 | 0.246376342 |
| 0.179898643 | 0.018314928 | 0.294576814 | 0.015296298 |
| 0.153533751 | 0.142958602 | 0.045534276 | 0.023360505 |
| 0.180617928 | 0.032302751 | 0.189156092 | 0.126033372 |
| 0.006501814 | 0.044586136 | 0.22258621  | 0.026954817 |
| 0.230145486 | 0.029237197 | 0.234230073 | 0.011902386 |
| 0.131619144 | 0.114434059 | 0.23147417  | 0.060425983 |
| 0.047717408 | 0.302633116 | 0.026317513 | 0.144982204 |
| 0.138634948 | 0.019812032 | 0.07675655  | 0.109469454 |
| 0.017925293 | 0.154197283 | 0.031690521 | 0.146408558 |
| 0.135498593 | 0.189357067 | 0.077309608 | 0.123157481 |
| 0.175608621 | 0.025982091 | 0.016199204 | 0.05507043  |
| 0.144399894 | 0.18367723  | 0.024417802 | 0.131345903 |
| 0.011554973 | 0.129450105 | 0.053875084 | 0.064075081 |

|             |             |             |             |
|-------------|-------------|-------------|-------------|
| 0.205572457 | 0.152694222 | 0.045718617 | 0.255089545 |
| 0.103161301 | 0.041612262 | 0.041476495 | 0.206013046 |
| 0.126184505 | 0.149745163 | 0.192580529 | 0.000684561 |
| 0.084578569 | 0.060119291 | 0.154346305 | 0.035407149 |
| 0.297095541 | 0.082054005 | 0.059910794 | 0.079410349 |
| 0.093493184 | 0.020439203 | 0.051884806 | 0.048366227 |
| 0.017172541 | 0.261634553 | 0.163375622 | 0.115335572 |
| 0.132412799 | 0.026196085 | 0.011709493 | 0.142160992 |
| 0.009636621 | 0.010324752 | 0.016263148 | 0.059127837 |
| 0.012475913 | 0.018186058 | 0.020492485 | 0.015771908 |
| 0.107695912 | 0.114220708 |             |             |
| SHCBP1      | 0.134877598 | 0.494901843 | 0.110751493 |
| 0.2184515   | 0.388831476 | 0.519113213 | 0.105866057 |
| 0.203394771 | 0.446650032 | 0.419398391 | 0.467547375 |
| 0.03637003  | 0.12270692  | 0.514588374 | 0.09681436  |
| 0.484204957 | 0.061355558 | 0.173638061 | 0.121686178 |
| 0.324745169 | 0.358647869 | 0.438115266 | 0.502058032 |
| 0.366794578 | 0.258902041 | 0.463958703 | 0.483351963 |
| 0.528435141 | 0.367706698 | 0.537594758 | 0.294260169 |
| 0.446241687 | 0.407941389 | 0.486275115 | 0.036504444 |
| 0.522598846 | 0.019172907 | 0.453987124 | 0.3503224   |
| 0.209433275 | 0.407562915 | 0.463560606 | 0.335453235 |
| 0.492749032 | 0.073753409 | 0.314450739 | 0.501359676 |
| 0.445820696 | 0.386054228 | 0.124139135 | 0.53510113  |
| 0.477115304 | 0.455848122 | 0.50060194  | 0.00518117  |
| 0.388979419 | 0.126962108 | 0.30052472  | 0.522964419 |
| 0.28977687  | 0.188901521 | 0.384879828 | 0.356581202 |
| 0.489779092 | 0.469378651 | 0.346050429 | 0.483291147 |
| 0.516078036 | 0.237115271 | 0.529669693 | 0.240094375 |
| 0.499032492 | 0.068319818 | 0.23568744  | 0.150568339 |
| 0.49195134  | 0.282472045 | 0.438821785 | 0.393684557 |
| 0.492596519 | 0.531229129 | 0.331979952 | 0.521566238 |
| 0.138598526 | 0.424169167 | 0.360806664 | 0.387926482 |
| 0.459852628 | 0.143050354 | 0.513365619 | 0.532357577 |
| 0.094431577 | 0.499568191 | 0.500370057 | 0.201141233 |
| 0.512544386 | 0.366899934 | 0.515923089 | 0.235797854 |
| 0.457159041 | 0.429145758 | 0.49378262  | 0.394390309 |
| 0.40564007  | 0.133099562 | 0.50959534  | 0.400708179 |
| 0.393590427 | 0.147196992 | 0.298384735 | 0.537734624 |
| 0.523527727 | 0.531447307 | 0.514275013 | 0.45532584  |
| 0.473026199 | 0.520042348 | 0.512413943 | 0.490695175 |
| 0.240899928 | 0.540472822 | 0.283679113 | 0.074166697 |
| 0.136144066 | 0.136831309 | 0.308732953 | 0.383075254 |
| 0.537132661 | 0.446926396 | 0.298442705 | 0.31491466  |
| 0.514316887 | 0.501853298 | 0.53924389  | 0.506360957 |
| 0.074912525 | 0.327494806 | 0.479287389 | 0.398373649 |
| 0.480062741 | 0.182131112 | 0.333847351 | 0.527813533 |
| 0.456151609 | 0.520182499 | 0.267525384 | 0.519536599 |
| 0.292754894 | 0.521092403 | 0.525533874 | 0.251781714 |
| 0.534077299 | 0.51605203  | 0.514435847 | 0.490781127 |
| 0.491372355 | 0.468383863 | 0.099889237 | 0.470487097 |
| 0.494828237 | 0.022283674 | 0.537450356 | 0.536278191 |
| 0.517159871 | 0.542135654 | 0.523121185 | 0.53105004  |
| 0.522355479 | 0.130028306 | 0.044887731 | 0.369584572 |

|             |             |             |             |
|-------------|-------------|-------------|-------------|
| 0.526482157 | 0.481690066 | 0.196792194 | 0.51796099  |
| 0.449413221 | 0.521263504 | 0.519717033 | 0.410621918 |
| 0.517666522 | 0.526560793 | 0.53632365  | 0.49917283  |
| 0.419555559 | 0.386531675 | 0.470117931 | 0.493392774 |
| 0.080581426 | 0.195447038 | 0.101341958 | 0.396414886 |
| 0.477349255 | 0.24908654  | 0.510734563 | 0.444051646 |
| 0.27411666  | 0.467653521 | 0.428730483 | 0.467207643 |
| 0.103661118 | 0.549465769 | 0.256280928 | 0.268668277 |
| 0.072821131 | 0.207434399 | 0.272479911 | 0.231418654 |
| 0.336912345 | 0.265326407 | 0.54149631  | 0.522725352 |
| 0.446578314 | 0.273992242 | 0.534551263 | 0.494972528 |
| 0.453161606 | 0.476911209 | 0.315233577 | 0.020820259 |
| 0.361420665 | 0.408009146 | 0.252628553 | 0.510006969 |
| 0.229923609 | 0.334896356 | 0.488775449 | 0.481619378 |
| 0.407632968 | 0.235460374 | 0.466532107 | 0.442321966 |
| 0.233871273 | 0.399957113 | 0.516233856 | 0.521191562 |
| 0.008053681 | 0.443569673 | 0.537059035 | 0.202102437 |
| 0.423787593 | 0.185887509 | 0.338813381 | 0.523265412 |
| 0.384292148 | 0.29568992  | 0.534130586 | 0.476860631 |
| 0.456762097 | 0.274950635 | 0.529933468 | 0.075316913 |
| 0.436989167 | 0.080863066 | 0.367406692 | 0.455102874 |
| 0.352262091 | 0.375733474 | 0.398211786 | 0.365798227 |
| 0.214842265 | 0.530949896 | 0.485219611 | 0.529831688 |
| 0.473866822 | 0.533285337 | 0.536543237 | 0.510277809 |
| 0.473600851 | 0.46318005  | 0.187790449 | 0.532308093 |
| 0.526631479 | 0.401015811 | 0.134372599 | 0.532934775 |
| 0.471956244 | 0.49723652  | 0.166083071 | 0.513374563 |
| 0.506634614 | 0.492890351 | 0.211824891 | 0.453259215 |
| 0.476420002 | 0.34131936  | 0.498554549 | 0.532545783 |
| 0.428850815 | 0.446492932 | 0.425836335 | 0.466953116 |
| 0.263827858 | 0.276987468 | 0.392026947 | 0.242632447 |
| 0.017394911 | 0.146801512 | 0.120420302 | 0.227241738 |
| 0.222137475 | 0.524863379 | 0.495354539 | 0.526857735 |
| 0.183461204 | 0.483440442 | 0.328808673 | 0.382706208 |
| 0.479160978 | 0.443813806 | 0.472400284 | 0.482973598 |
| 0.336323371 | 0.03246005  | 0.175873321 | 0.534118855 |
| 0.082807076 | 0.315121166 | 0.435991703 | 0.004807332 |
| 0.086581255 | 0.507862017 | 0.154521384 | 0.248428611 |
| 0.514338053 | 0.258209631 | 0.306909121 | 0.440075263 |
| 0.440305973 | 0.155310957 | 0.005594435 | 0.513950263 |
| 0.496186082 | 0.479696753 | 0.496208375 | 0.474814436 |
| 0.493647992 | 0.499635421 | 0.500437683 | 0.48748369  |
| 0.172814622 | 0.162152466 | 0.278565844 | 0.379794455 |
| 0.009804567 | 0.470955794 | 0.396690602 | 0.216087431 |
| 0.516213869 | 0.401617029 | 0.071981262 | 0.442585964 |
| 0.044577236 | 0.273410364 | 0.426289068 | 0.303717479 |
| 0.426853266 | 0.031170262 | 0.340387953 | 0.419769914 |
| 0.46987469  | 0.435026742 | 0.457491274 | 0.542693481 |
| 0.432927792 | 0.210125988 | 0.403730213 | 0.489922372 |
| 0.123087093 | 0.167791961 | 0.480270277 | 0.063130115 |
| 0.29673212  | 0.465377345 | 0.485065162 | 0.126653474 |
| 0.372792569 | 0.011779581 | 0.45249339  | 0.540657713 |
| 0.489012609 | 0.526346771 | 0.520840364 | 0.351361208 |
| 0.51799968  | 0.151961761 | 0.53885104  | 0.501819723 |

|             |             |             |             |
|-------------|-------------|-------------|-------------|
| 0.491864491 | 0.002028416 | 0.0102023   | 0.537271302 |
| 0.495180009 | 0.109068416 | 0.238874966 | 0.490368527 |
| 0.169371933 | 0.250602279 | 0.115187708 | 0.241468695 |
| 0.535871666 | 0.314091968 | 0.233951369 | 0.490391007 |
| 0.330685505 | 0.316652739 | 0.518462152 | 0.150344509 |
| 0.507081963 | 0.092632623 | 0.148666315 | 0.012912896 |
| 0.452477389 | 0.182660969 | 0.493726781 | 0.522076885 |
| 0.500997606 | 0.483029602 | 0.453735386 | 0.456796847 |
| 0.50014589  | 0.171915575 | 0.475515726 | 0.192007215 |
| 0.509889967 | 0.487558545 | 0.41468264  | 0.40098467  |
| 0.506689467 | 0.495191731 | 0.063014952 | 0.499820741 |
| 0.026810013 | 0.002946677 | 0.504594356 | 0.35579383  |
| 0.094889331 | 0.46308873  | 0.343583672 | 0.327634638 |
| 0.312288774 | 0.06189088  | 0.33946121  | 0.314115174 |
| 0.390475026 | 0.459533684 | 0.349233554 | 0.33586427  |
| 0.342750834 | 0.183866811 | 0.27774704  | 0.22932625  |
| 0.336046806 | 0.398622686 | 0.263750825 | 0.042675576 |
| 0.533554771 | 0.513914424 | 0.103020106 | 0.241194452 |
| 0.522483198 | 0.537326536 | 0.073330443 | 0.019865154 |
| 0.356192991 | 0.409928578 | 0.528697729 | 0.518250469 |
| 0.540981167 | 0.523433912 | 0.418575673 | 0.176530104 |
| 0.119043225 | 0.410109788 | 0.371048367 | 0.139446793 |
| 0.521943875 | 0.123871652 | 0.500558207 | 0.379196642 |
| 0.184939339 | 0.308636251 | 0.060774759 | 0.140006234 |
| 0.477593155 | 0.259150741 | 0.245973873 | 0.238635267 |
| 0.407696546 | 0.328189848 | 0.088270382 | 0.282491465 |
| 0.449116063 | 0.238045791 | 0.241088783 | 0.42745442  |
| 0.461548374 | 0.325122632 | 0.522592938 | 0.46291801  |
| 0.207328067 | 0.18412816  | 0.410823495 | 0.479376348 |
| 0.539984563 | 0.502815468 | 0.050745878 | 0.504722079 |
| 0.516837175 | 0.544107604 | 0.515788222 | 0.455362307 |
| 0.143820559 | 0.475697953 | 0.399972627 | 0.433305184 |
| 0.268637803 | 0.515216363 | 0.327450388 | 0.111547509 |
| 0.367691282 | 0.494546522 | 0.496884043 | 0.240297123 |
| 0.528635279 | 0.214070676 | 0.11116498  | 0.517889951 |
| 0.239377709 | 0.153688229 | 0.483405342 | 0.51769316  |
| 0.003185143 | 0.187895447 | 0.506540563 | 0.337186649 |
| 0.523599174 | 0.52244968  | 0.4749777   | 0.365443713 |
| 0.002796996 | 0.500616936 | 0.480759909 | 0.505680515 |
| 0.512634159 | 0.455054429 | 0.230750857 | 0.118637458 |
| 0.365730401 | 0.145890583 | 0.198473057 | 0.469592646 |
| 0.233121979 | 0.525291564 | 0.273220396 | 0.299252998 |
| 0.269406846 | 0.159609041 | 0.318806599 | 0.342617912 |
| 0.20032121  | 0.321027329 | 0.435717566 | 0.413533745 |
| 0.266030227 | 0.491197266 | 0.505107571 | 0.053305548 |
| 0.446168358 | 0.484252256 | 0.49051144  | 0.004246581 |
| 0.524118322 | 0.014855148 | 0.268125408 | 0.294080961 |
| 0.273884303 | 0.287858735 | 0.334106397 | 0.383623685 |
| 0.46300712  | 0.313238348 | 0.376156028 | 0.322024937 |
| 0.230319539 | 0.319066208 | 0.487708677 | 0.475770927 |
| 0.366925515 | 0.199976613 | 0.156846653 | 0.152541478 |
| 0.090384356 | 0.522267809 | 0.320710569 | 0.1326217   |
| 0.309814698 | 0.476181239 | 0.413828014 | 0.512932072 |
| 0.473160001 | 0.181383644 | 0.43147849  | 0.527412422 |

|             |             |             |             |
|-------------|-------------|-------------|-------------|
| 0.331633996 | 0.420813475 | 0.119580334 | 0.507106308 |
| 0.329626708 | 0.286326439 | 0.519481683 | 0.436017047 |
| 0.511560926 | 0.429046665 | 0.32107988  | 0.479274406 |
| 0.470612367 | 0.443027573 | 0.444030575 | 0.130177836 |
| 0.267698297 | 0.20624519  | 0.337372488 | 0.004459649 |
| 0.456528165 | 0.388408569 | 0.542934256 | 0.507451746 |
| 0.374590685 | 0.444538952 | 0.451155572 | 0.150772789 |
| 0.397464669 | 0.245241586 | 0.214826898 | 0.532588629 |
| 0.290217128 | 0.272827055 | 0.384934441 | 0.46937076  |
| 0.523810105 | 0.512664395 | 0.329981899 | 0.349595719 |
| 0.327638346 | 0.298715905 | 0.490035893 | 0.206355395 |
| 0.531911429 | 0.246071678 | 0.476266042 | 0.386222805 |
| 0.296938297 | 0.524284348 | 0.1093356   | 1           |
| 0.421302933 | 0.203614489 | 0.499528123 | 0.416608605 |
| 0.411687321 | 0.175320105 | 0.25048145  | 0.502910157 |
| 0.315945615 | 0.42956681  | 0.028331335 | 0.094082507 |
| 0.413811167 | 0.405665043 | 0.505151514 | 0.457433799 |
| 0.316144688 | 0.414069783 | 0.225245423 | 0.406483301 |
| 0.503451793 | 0.518237666 | 0.349934051 | 0.326813884 |
| 0.444329706 | 0.162313817 | 0.520481025 | 0.026575344 |
| 0.521124796 | 0.518528174 | 0.492132291 | 0.093390968 |
| 0.036963811 | 0.281046128 | 0.51989171  | 0.124128348 |
| 0.51974154  | 0.286034561 | 0.46579508  | 0.535985916 |
| 0.259795807 | 0.51960597  | 0.176056682 | 0.502593409 |
| 0.089710702 | 0.349072536 | 0.468767744 | 0.478935942 |
| 0.301388234 | 0.369907803 | 0.466332023 | 0.304776831 |
| 0.058611012 | 0.347019091 | 0.003276552 | 0.422570567 |
| 0.493519198 | 0.424162383 | 0.279577402 | 0.414343916 |
| 0.360265612 | 0.456504732 | 0.320945899 | 0.519938192 |
| 0.02067366  | 0.457727736 | 0.281812226 | 0.504235909 |
| 0.324235625 | 0.466299323 | 0.094624414 | 0.394443167 |
| 0.482997865 | 0.37264002  | 0.332867207 | 0.410884986 |
| 0.506525605 | 0.478764741 | 0.250485457 | 0.295703568 |
| 0.490664784 | 0.115740824 | 0.506876655 | 0.536156011 |
| 0.246426155 | 0.279837509 | 0.517724816 | 0.285122704 |
| 0.392508848 | 0.466730661 | 0.509514869 | 0.528494062 |
| 0.108294146 | 0.334290171 | 0.510910578 | 0.50403767  |
| 0.378469355 | 0.2242412   | 0.318473545 | 0.302438283 |
| 0.485758734 | 0.158585418 | 0.335102908 | 0.46250514  |
| 0.284105398 | 0.400370743 | 0.453242365 | 0.252794631 |
| 0.062837578 | 0.247646129 | 0.485294577 | 0.218141025 |
| 0.388331683 | 0.456745022 | 0.310376894 | 0.435596707 |
| 0.196942016 | 0.043211502 | 0.464185464 | 0.026441881 |
| 0.467431843 | 0.492137305 | 0.336489777 | 0.445846738 |
| 0.265338054 | 0.465268415 | 0.460254406 | 0.002598646 |
| 0.493752461 | 0.070356426 | 0.393816724 | 0.300649628 |
| 0.376086586 | 0.09546217  | 0.485619626 | 0.523826538 |
| 0.427510145 | 0.431973855 | 0.447724639 | 0.495963492 |
| 0.198066772 | 0.427275958 | 0.432528448 | 0.528541401 |
| 0.29098993  | 0.500153184 | 0.517137924 | 0.475139601 |
| 0.491294656 | 0.379337844 |             |             |
| SIVA1       | 0.034953639 | 0.298486741 | 0.01985476  |
| 0.086934295 | 0.254759378 | 0.131393573 | 0.04674398  |
| 0.076001305 | 0.243688506 | 0.107959656 | 0.212680335 |

|             |             |             |             |
|-------------|-------------|-------------|-------------|
| 0.017763237 | 0.082982897 | 0.385033541 | 0.044932695 |
| 0.316412201 | 0.036129504 | 0.07789428  | 0.050476888 |
| 0.110852639 | 0.262840144 | 0.171494411 | 0.15072968  |
| 0.220611488 | 0.139081745 | 0.188720724 | 0.226819019 |
| 0.379601514 | 0.112946809 | 0.281099367 | 0.068051428 |
| 0.362087509 | 0.292270712 | 0.184052483 | 0.00927787  |
| 0.21025562  | 0.025743703 | 0.352625966 | 0.202440887 |
| 0.118371637 | 0.282910379 | 0.103324028 | 0.155926153 |
| 0.166302811 | 0.021752432 | 0.059643087 | 0.334023622 |
| 0.185408367 | 0.136457804 | 0.02964975  | 0.28067996  |
| 0.173833148 | 0.210131406 | 0.233931226 | 0.00349645  |
| 0.175261415 | 0.077158359 | 0.164771663 | 0.361409065 |
| 0.158917174 | 0.089869805 | 0.153523467 | 0.105414603 |
| 0.269408944 | 0.316734535 | 0.197460476 | 0.165295852 |
| 0.395376475 | 0.174325055 | 0.312518254 | 0.083134998 |
| 0.179522544 | 0.016780839 | 0.136128931 | 0.045674047 |
| 0.184310673 | 0.143918517 | 0.208171761 | 0.194963422 |
| 0.299322902 | 0.401710115 | 0.174671656 | 0.358041176 |
| 0.146967607 | 0.282520381 | 0.179651284 | 0.295524619 |
| 0.315083168 | 0.059746236 | 0.333718902 | 0.423224179 |
| 0.026236753 | 0.189881075 | 0.333301124 | 0.081443738 |
| 0.293203658 | 0.154515941 | 0.165680854 | 0.144786006 |
| 0.323427599 | 0.304341918 | 0.358203169 | 0.252075171 |
| 0.175197564 | 0.043278003 | 0.329113714 | 0.276858008 |
| 0.170952988 | 0.044033186 | 0.223899364 | 0.391091035 |
| 0.296321204 | 0.381754428 | 0.332075347 | 0.350837973 |
| 0.290124347 | 0.389468359 | 0.299611937 | 0.317827126 |
| 0.047133046 | 0.393956762 | 0.105237365 | 0.038039912 |
| 0.02885075  | 0.063144602 | 0.173695497 | 0.259912897 |
| 0.373327803 | 0.21803521  | 0.106227604 | 0.194857911 |
| 0.43867229  | 0.320223184 | 0.398404648 | 0.36306167  |
| 0.026917691 | 0.175247881 | 0.277988438 | 0.10031524  |
| 0.329835158 | 0.079004509 | 0.204924986 | 0.376773227 |
| 0.312140583 | 0.397545765 | 0.065088631 | 0.367185275 |
| 0.118443761 | 0.42140221  | 0.318523068 | 0.122905119 |
| 0.39181141  | 0.349223397 | 0.433636539 | 0.341105976 |
| 0.338367849 | 0.155841946 | 0.070751669 | 0.329869856 |
| 0.410530609 | 0.022230703 | 0.387554939 | 0.420172122 |
| 0.371234748 | 0.398700575 | 0.453600941 | 0.403155365 |
| 0.365876539 | 0.047933992 | 0.036440946 | 0.299339346 |
| 0.383637256 | 0.328388951 | 0.101510155 | 0.252168012 |
| 0.305840988 | 0.158673691 | 0.324527488 | 0.174715219 |
| 0.43185151  | 0.350358781 | 0.38062557  | 0.322094379 |
| 0.165913431 | 0.250114063 | 0.253810706 | 0.314119738 |
| 0.030037102 | 0.052684103 | 0.028695027 | 0.257995494 |
| 0.100992279 | 0.149098366 | 0.149369055 | 0.267032127 |
| 0.171804607 | 0.123770156 | 0.161111758 | 0.342757213 |
| 0.03617321  | 0.23456441  | 0.086854593 | 0.109803854 |
| 0.043267749 | 0.110489    | 0.146338954 | 0.093252363 |
| 0.199237124 | 0.164126278 | 0.306380376 | 0.397088756 |
| 0.19185767  | 0.127320132 | 0.299081939 | 0.393345972 |
| 0.407001954 | 0.257080184 | 0.19464397  | 0.014371667 |
| 0.253604154 | 0.154680031 | 0.164612568 | 0.234662213 |
| 0.123504122 | 0.218323178 | 0.317887491 | 0.359073585 |

|             |             |             |             |
|-------------|-------------|-------------|-------------|
| 0.135437667 | 0.064529422 | 0.225156418 | 0.323023156 |
| 0.103440564 | 0.175513933 | 0.413460608 | 0.229605273 |
| 0.002101683 | 0.208431812 | 0.366321515 | 0.174465658 |
| 0.257278495 | 0.138538626 | 0.137975682 | 0.414053995 |
| 0.196193712 | 0.204024504 | 0.387303715 | 0.342865988 |
| 0.141226571 | 0.147766803 | 0.439037474 | 0.085510584 |
| 0.224252311 | 0.053399175 | 0.283850235 | 0.114000458 |
| 0.193026119 | 0.286479295 | 0.256338409 | 0.180585602 |
| 0.069153873 | 0.403739636 | 0.284445154 | 0.411453243 |
| 0.221532973 | 0.44000537  | 0.399245005 | 0.373866001 |
| 0.247620759 | 0.200851832 | 0.1406545   | 0.371244103 |
| 0.394487372 | 0.177949058 | 0.044656447 | 0.356661919 |
| 0.180412456 | 0.357470469 | 0.102872771 | 0.435377227 |
| 0.378248698 | 0.317810326 | 0.114749819 | 0.371760471 |
| 0.330282029 | 0.133489247 | 0.321825669 | 0.44156619  |
| 0.149001782 | 0.279637172 | 0.235472201 | 0.392367739 |
| 0.13203169  | 0.217936074 | 0.245662331 | 0.139699156 |
| 0.005245709 | 0.041793652 | 0.039706288 | 0.132776149 |
| 0.163915269 | 0.240403094 | 0.31999784  | 0.417052519 |
| 0.084642934 | 0.309209529 | 0.189179178 | 0.233927587 |
| 0.346546201 | 0.207482425 | 0.231978229 | 0.279339852 |
| 0.191238053 | 0.017182836 | 0.096274965 | 0.405101815 |
| 0.021000635 | 0.177515677 | 0.153630365 | 0.005066622 |
| 0.033877615 | 0.272260024 | 0.070030308 | 0.152462242 |
| 0.421897478 | 0.144117326 | 0.158322987 | 0.145903344 |
| 0.277379722 | 0.059298765 | 0.003553996 | 0.39768458  |
| 0.370885929 | 0.357396159 | 0.367400001 | 0.322759611 |
| 0.377299397 | 0.287813809 | 0.381007975 | 0.141639613 |
| 0.068845278 | 0.038728943 | 0.242315156 | 0.217153153 |
| 0.00461003  | 0.308021038 | 0.194397682 | 0.118698137 |
| 0.349032262 | 0.256897652 | 0.02485338  | 0.262447717 |
| 0.015828614 | 0.154890541 | 0.166913745 | 0.140220899 |
| 0.336450586 | 0.008649556 | 0.116619716 | 0.242086912 |
| 0.294843301 | 0.269946939 | 0.1730614   | 0.400148384 |
| 0.222007256 | 0.080367313 | 0.207209124 | 0.31824208  |
| 0.054922453 | 0.082112272 | 0.157537418 | 0.014457514 |
| 0.059852328 | 0.332767435 | 0.176008164 | 0.03914894  |
| 0.219741609 | 0.003710963 | 0.278526272 | 0.414351199 |
| 0.311236181 | 0.443806375 | 0.389449459 | 0.184183152 |
| 0.390764983 | 0.089001943 | 0.412654617 | 0.307416766 |
| 0.163716441 | 0.001035131 | 0.007521526 | 0.407574102 |
| 0.282323343 | 0.03069777  | 0.126440259 | 0.119803467 |
| 0.095280996 | 0.068431332 | 0.037682719 | 0.176067421 |
| 0.228853985 | 0.194727162 | 0.158659738 | 0.343849987 |
| 0.168953632 | 0.179297049 | 0.145951911 | 0.05939616  |
| 0.239280397 | 0.042700066 | 0.059962712 | 0.011576227 |
| 0.321463377 | 0.074789549 | 0.317708592 | 0.383532885 |
| 0.405141374 | 0.327059738 | 0.130550721 | 0.136284105 |
| 0.358721646 | 0.052688738 | 0.137683764 | 0.057750997 |
| 0.350947498 | 0.345357328 | 0.288056688 | 0.252683437 |
| 0.44564694  | 0.375868129 | 0.026295174 | 0.382993105 |
| 0.008024354 | 0.003910821 | 0.153750434 | 0.209681615 |
| 0.056223512 | 0.255773733 | 0.229520088 | 0.128277445 |
| 0.132395717 | 0.019882687 | 0.212807114 | 0.217558495 |



|             |             |             |             |
|-------------|-------------|-------------|-------------|
| 0.261262566 | 0.250274329 | 0.241228213 | 0.186439088 |
| 0.186280425 | 0.186722304 | 0.117852403 | 0.104567685 |
| 0.131324004 | 0.245458384 | 0.149219907 | 0.017952045 |
| 0.205933668 | 0.250589162 | 0.036396382 | 0.108956188 |
| 0.375453255 | 0.41492737  | 0.054974552 | 0.01905384  |
| 0.213554702 | 0.199105071 | 0.431407839 | 0.361795146 |
| 0.388339664 | 0.446443948 | 0.303904858 | 0.144101335 |
| 0.040816598 | 0.259503098 | 0.249412253 | 0.10618023  |
| 0.398845237 | 0.04057395  | 0.337016087 | 0.221695293 |
| 0.089076533 | 0.13406941  | 0.030625808 | 0.059880938 |
| 0.260983626 | 0.138445463 | 0.14699115  | 0.090585217 |
| 0.226468036 | 0.163273163 | 0.033635437 | 0.157414672 |
| 0.307837921 | 0.198655529 | 0.129317792 | 0.112901086 |
| 0.243093468 | 0.080337449 | 0.367946564 | 0.397887411 |
| 0.089941728 | 0.073298401 | 0.114352283 | 0.293126247 |
| 0.355424961 | 0.200102159 | 0.01429758  | 0.312903161 |
| 0.399779998 | 0.304954637 | 0.353568667 | 0.389491029 |
| 0.06113211  | 0.248792587 | 0.199386235 | 0.296540992 |
| 0.147279901 | 0.126535669 | 0.161580279 | 0.045036692 |
| 0.245180118 | 0.365611414 | 0.33353866  | 0.116897249 |
| 0.2087042   | 0.066614988 | 0.034271374 | 0.329848265 |
| 0.213875738 | 0.063950586 | 0.116897173 | 0.361300863 |
| 0.002757932 | 0.131013016 | 0.418115847 | 0.12101196  |
| 0.405674528 | 0.421686059 | 0.364008239 | 0.100393558 |
| 0.006902335 | 0.340814145 | 0.288117652 | 0.197524269 |
| 0.332790898 | 0.243625967 | 0.061913533 | 0.074527597 |
| 0.259292006 | 0.045773272 | 0.152074444 | 0.109197934 |
| 0.198486211 | 0.258688485 | 0.180652586 | 0.147385765 |
| 0.150466203 | 0.058010032 | 0.150873566 | 0.112899754 |
| 0.144441619 | 0.216704716 | 0.338458949 | 0.085147035 |
| 0.213920117 | 0.399557396 | 0.347523796 | 0.0154849   |
| 0.216897916 | 0.365196932 | 0.337911381 | 0.010204561 |
| 0.358469295 | 0.007842578 | 0.159090952 | 0.155880475 |
| 0.142187666 | 0.173547571 | 0.248258729 | 0.186287841 |
| 0.260031856 | 0.143199877 | 0.150113167 | 0.198696185 |
| 0.120401136 | 0.108769604 | 0.260194636 | 0.160235199 |
| 0.182703647 | 0.072951784 | 0.065127171 | 0.065245559 |
| 0.037432507 | 0.333501453 | 0.197298456 | 0.040896213 |
| 0.188964137 | 0.16542203  | 0.318764155 | 0.349826654 |
| 0.34755677  | 0.065415294 | 0.185418057 | 0.324831868 |
| 0.124682568 | 0.121681653 | 0.031341293 | 0.182837374 |
| 0.144057205 | 0.202765807 | 0.156961236 | 0.189391628 |
| 0.299634916 | 0.326052744 | 0.184831278 | 0.344232665 |
| 0.17359969  | 0.20647802  | 0.105054492 | 0.087478702 |
| 0.110569694 | 0.097343193 | 0.238387181 | 0.001992894 |
| 0.270009723 | 0.092335825 | 0.396151361 | 0.350514283 |
| 0.174920642 | 0.309353703 | 0.105054991 | 0.069385799 |
| 0.082629929 | 0.123655733 | 0.11255723  | 0.305675149 |
| 0.157295781 | 0.092528071 | 0.248213401 | 0.094358025 |
| 0.348413764 | 0.317125878 | 0.178170455 | 0.131960871 |
| 0.162656152 | 0.115956816 | 0.351502586 | 0.047059009 |
| 0.252827172 | 0.170151838 | 0.173141977 | 0.230322992 |
| 0.174839675 | 0.402005313 | 0.03339179  | 0.421302933 |
| 1           | 0.088863499 | 0.393435299 | 0.128493889 |

|             |             |             |             |
|-------------|-------------|-------------|-------------|
| 0.102642945 | 0.08460372  | 0.164265763 | 0.136086172 |
| 0.154240918 | 0.172969598 | 0.012370939 | 0.11281271  |
| 0.315757999 | 0.149172904 | 0.306048262 | 0.301335571 |
| 0.189670382 | 0.340790001 | 0.104863501 | 0.153317851 |
| 0.325146847 | 0.34300454  | 0.199933503 | 0.229768741 |
| 0.297558777 | 0.069098634 | 0.194497998 | 0.014043947 |
| 0.317160445 | 0.273531144 | 0.172616163 | 0.038436405 |
| 0.015477876 | 0.194748736 | 0.287723853 | 0.039836225 |
| 0.435492305 | 0.135943513 | 0.211629329 | 0.284748351 |
| 0.127313492 | 0.350015272 | 0.109275726 | 0.337966485 |
| 0.031719808 | 0.190185565 | 0.207044913 | 0.203977892 |
| 0.192480737 | 0.221374083 | 0.348097412 | 0.184735306 |
| 0.029024548 | 0.188219372 | 0.00896895  | 0.313812768 |
| 0.325973755 | 0.246091234 | 0.164123597 | 0.108281456 |
| 0.252716565 | 0.291017485 | 0.21791739  | 0.188368013 |
| 0.011307536 | 0.308209377 | 0.136162697 | 0.296014716 |
| 0.165774884 | 0.251779993 | 0.040768879 | 0.243906609 |
| 0.303338092 | 0.254439303 | 0.216360669 | 0.200943925 |
| 0.342152773 | 0.261519253 | 0.092670595 | 0.126165058 |
| 0.247869243 | 0.042813797 | 0.117368864 | 0.422813658 |
| 0.133329842 | 0.189285325 | 0.419741645 | 0.173835417 |
| 0.205395183 | 0.266989949 | 0.235409394 | 0.403662903 |
| 0.098730529 | 0.205638726 | 0.348895432 | 0.373038868 |
| 0.281715113 | 0.181988827 | 0.207759904 | 0.219196068 |
| 0.311812168 | 0.058501752 | 0.19956177  | 0.275628008 |
| 0.219478509 | 0.24418067  | 0.161973448 | 0.173262166 |
| 0.037729016 | 0.101412927 | 0.136087416 | 0.101291692 |
| 0.250719429 | 0.250499604 | 0.199461549 | 0.325956636 |
| 0.094810454 | 0.029382893 | 0.36963145  | 0.055756887 |
| 0.137106578 | 0.292132707 | 0.157030986 | 0.203878769 |
| 0.135167235 | 0.235956885 | 0.179137439 | 0.002391143 |
| 0.37556386  | 0.035829855 | 0.158064245 | 0.203186502 |
| 0.191852641 | 0.036395829 | 0.325473727 | 0.442606197 |
| 0.18927747  | 0.122196393 | 0.174063514 | 0.350889586 |
| 0.159988533 | 0.15337215  | 0.200672798 | 0.244803221 |
| 0.174684305 | 0.151682687 | 0.163839357 | 0.176856967 |
| 0.270128663 | 0.109196459 |             |             |
| SLA         | 0.287045656 | 0.206103519 | 0.261454612 |
| 0.158562101 | 0.08983667  | 0.120866126 | 0.291320536 |
| 0.272443664 | 0.193186207 | 0.072057294 | 0.12278638  |
| 0.222201188 | 0.014191775 | 0.199690875 | 0.291094077 |
| 0.087561377 | 0.245055362 | 0.280249578 | 0.071570077 |
| 0.169442271 | 0.091724498 | 0.067315174 | 0.147088494 |
| 0.097708771 | 0.331943805 | 0.170459068 | 0.074363465 |
| 0.202718155 | 0.032308411 | 0.102341152 | 0.040659073 |
| 0.271433315 | 0.082142517 | 0.061823158 | 0.234845331 |
| 0.118928929 | 0.011107391 | 0.312193241 | 0.127838491 |
| 0.028878332 | 0.286546995 | 0.095787534 | 0.159738863 |
| 0.096347387 | 0.262364396 | 0.037675365 | 0.092532053 |
| 0.162924313 | 0.173732892 | 0.285202506 | 0.121456866 |
| 0.104308472 | 0.187752661 | 0.127130528 | 0.012262131 |
| 0.043079849 | 0.005329517 | 0.024337863 | 0.252656365 |
| 0.246399816 | 0.24963235  | 0.040323658 | 0.209291686 |
| 0.105732951 | 0.121292883 | 0.216925452 | 0.08624273  |

|             |             |             |             |
|-------------|-------------|-------------|-------------|
| 0.226803119 | 0.02769044  | 0.1041626   | 0.131978926 |
| 0.13657566  | 0.279929737 | 0.28137116  | 0.288775461 |
| 0.092425177 | 0.208027074 | 0.111831099 | 0.058157282 |
| 0.198334322 | 0.304141846 | 0.233580078 | 0.273293197 |
| 0.034392237 | 0.071138116 | 0.086698721 | 0.172373099 |
| 0.146422246 | 0.274783916 | 0.129687919 | 0.2626175   |
| 0.293252893 | 0.102056244 | 0.128919783 | 0.290583393 |
| 0.195602393 | 0.057719514 | 0.089263885 | 0.03325081  |
| 0.091212824 | 0.081907594 | 0.291368689 | 0.191856261 |
| 0.103798361 | 0.2923335   | 0.306362485 | 0.062147017 |
| 0.105246164 | 0.289849486 | 0.080859851 | 0.135170157 |
| 0.115974752 | 0.199941071 | 0.161567891 | 0.169256077 |
| 0.075707547 | 0.219880461 | 0.132240898 | 0.212943195 |
| 0.024284324 | 0.243999163 | 0.246451471 | 0.24584555  |
| 0.28021104  | 0.257844569 | 0.096398745 | 0.241330824 |
| 0.168782343 | 0.185489349 | 0.23413747  | 0.154037799 |
| 0.156703991 | 0.276862894 | 0.240003411 | 0.167068766 |
| 0.282646121 | 0.045302478 | 0.076744592 | 0.200781849 |
| 0.135427018 | 0.304173913 | 0.050430711 | 0.30202002  |
| 0.234605351 | 0.138173016 | 0.265436916 | 0.338115404 |
| 0.230464481 | 0.253978517 | 0.179314535 | 0.226566387 |
| 0.281137078 | 0.292815044 | 0.222483806 | 0.083730123 |
| 0.277262909 | 0.153370522 | 0.054317501 | 0.192539674 |
| 0.240456098 | 0.005849246 | 0.161755271 | 0.174855071 |
| 0.237560902 | 0.132312293 | 0.220338132 | 0.199976995 |
| 0.239896475 | 0.31204898  | 0.0055103   | 0.135677344 |
| 0.263936049 | 0.200667832 | 0.203098448 | 0.075218105 |
| 0.094760572 | 0.14186791  | 0.137399273 | 0.05621322  |
| 0.280759068 | 0.177207272 | 0.179681534 | 0.157345076 |
| 0.154437863 | 0.292535568 | 0.060881817 | 0.300032588 |
| 0.273663921 | 0.26346662  | 0.281511777 | 0.198962929 |
| 0.092079823 | 0.222382618 | 0.138595329 | 0.108049097 |
| 0.231501979 | 0.16867373  | 0.048659246 | 0.089832544 |
| 0.284994749 | 0.094140143 | 0.270367139 | 0.249499186 |
| 0.237352835 | 0.341252082 | 0.155025894 | 0.202695653 |
| 0.143178246 | 0.396726053 | 0.103009969 | 0.197592693 |
| 0.105849076 | 0.261362077 | 0.126466398 | 0.236529078 |
| 0.243113227 | 0.075030264 | 0.253836349 | 0.06734606  |
| 0.069084879 | 0.049508669 | 0.022828132 | 0.079085293 |
| 0.37914175  | 0.133771588 | 0.10273819  | 0.10409181  |
| 0.191333836 | 0.277912769 | 0.081341051 | 0.315011907 |
| 0.281182511 | 0.101644145 | 0.165888071 | 0.1045768   |
| 0.127879361 | 0.152294173 | 0.146445423 | 0.084393383 |
| 0.179243916 | 0.030280194 | 0.036525886 | 0.172140477 |
| 0.04859097  | 0.069056046 | 0.18319869  | 0.108261913 |
| 0.09731463  | 0.352563948 | 0.22787267  | 0.006141891 |
| 0.089823487 | 0.0664331   | 0.163804841 | 0.095470517 |
| 0.213323461 | 0.18476012  | 0.077000149 | 0.089047792 |
| 0.26306038  | 0.247688436 | 0.201357656 | 0.207286553 |
| 0.063252532 | 0.234674236 | 0.146612849 | 0.190897518 |
| 0.166302823 | 0.068403119 | 0.014890478 | 0.143440391 |
| 0.163455694 | 0.069099368 | 0.290358613 | 0.121152219 |
| 0.082574359 | 0.091937843 | 0.095959833 | 0.211506538 |
| 0.302085503 | 0.255720834 | 0.205626644 | 0.133179869 |

|              |             |             |             |
|--------------|-------------|-------------|-------------|
| 0.1819548    | 0.218579251 | 0.174744183 | 0.246744958 |
| 0.06789434   | 0.079906877 | 0.073783201 | 0.157794606 |
| 0.259675652  | 0.076569021 | 0.27232963  | 0.023308795 |
| 0.000619692  | 0.304096156 | 0.288629016 | 0.174769849 |
| 0.040145254  | 0.089419862 | 0.113289744 | 0.224005525 |
| 0.267151116  | 0.231796638 | 0.238360657 | 0.091748374 |
| 0.225988469  | 0.089418641 | 0.073593862 | 0.100369285 |
| 0.244579803  | 0.104088288 | 0.166516911 | 0.30718747  |
| 0.272214464  | 0.044927594 | 0.182463899 | 0.011950502 |
| 0.276686446  | 0.151851593 | 0.320162567 | 0.366270826 |
| 0.182139891  | 0.347103636 | 0.239046105 | 0.082469868 |
| 0.151134835  | 0.303340413 | 0.026727784 | 0.204090279 |
| 0.24125069   | 0.236946347 | 0.24059135  | 0.277960792 |
| 0.19124125   | 0.146489979 | 0.134450578 | 0.156446013 |
| 0.273840153  | 0.295219561 | 0.040614146 | 0.126329377 |
| 0.029143018  | 0.159654579 | 0.123556033 | 0.283658365 |
| 0.114626311  | 0.185068096 | 0.270037301 | 0.096813746 |
| 0.152367153  | 0.020358921 | 0.160010854 | 0.189006504 |
| 0.132610798  | 0.233233108 | 0.056108417 | 0.054875153 |
| 0.257425055  | 0.241092912 | 0.057057243 | 0.250349871 |
| 0.137092938  | 0.257535348 | 0.110689658 | 0.128459107 |
| 0.287719192  | 0.030213395 | 0.139387895 | 0.008582426 |
| 0.08179557   | 0.272775306 | 0.087583351 | 0.246026557 |
| 0.186418754  | 0.141918468 | 0.235463946 | 0.252572045 |
| 0.246083178  | 0.201946419 | 0.22215199  | 0.047348845 |
| 0.233403588  | 0.007729833 | 0.220759514 | 0.190283812 |
| 0.0711154446 | 0.010551258 | 0.053767018 | 0.167636805 |
| 0.084959023  | 0.273104657 | 0.267273714 | 0.094803715 |
| 0.221511625  | 0.269057851 | 0.30042532  | 0.059927415 |
| 0.116377199  | 0.116133571 | 0.062569848 | 0.255296003 |
| 0.180299775  | 0.204433023 | 0.115916834 | 0.307367836 |
| 0.098740798  | 0.258589423 | 0.305646791 | 0.025835348 |
| 0.126146204  | 0.297576891 | 0.327795908 | 0.232779772 |
| 0.253661255  | 0.104535696 | 0.055819957 | 0.099847884 |
| 0.180606753  | 0.258862549 | 0.064985687 | 0.280310928 |
| 0.224507658  | 0.096168183 | 0.190637863 | 0.23598858  |
| 0.225642735  | 0.241201242 | 0.279288857 | 0.137596937 |
| 0.113499165  | 0.007624145 | 0.127314755 | 0.224424317 |
| 0.049498099  | 0.078866611 | 0.233768246 | 0.1693102   |
| 0.173945135  | 0.220417011 | 0.042616209 | 0.043721451 |
| 0.158475091  | 0.113384836 | 0.070045256 | 0.236119263 |
| 0.104986101  | 0.065751087 | 0.194580967 | 0.240771641 |
| 0.11337914   | 0.251487004 | 0.319609109 | 0.263791743 |
| 0.0893049    | 0.078176156 | 0.292030109 | 0.287124313 |
| 0.167115351  | 0.177942559 | 0.230089251 | 0.08866041  |
| 0.252408571  | 0.120088603 | 0.187464624 | 0.219983036 |
| 0.283300878  | 0.251407004 | 0.312642128 | 0.154320039 |
| 0.296755512  | 0.135654032 | 0.073653547 | 0.128451896 |
| 0.222814407  | 0.274961459 | 0.247697282 | 0.049744847 |
| 0.301624831  | 0.199602891 | 0.204007042 | 0.305035589 |
| 0.071603714  | 0.266203537 | 0.171991401 | 0.248234468 |
| 0.114026156  | 0.045432321 | 0.299825095 | 0.237846207 |
| 0.182317609  | 0.023541168 | 0.266071192 | 0.182762322 |
| 0.199712673  | 0.073224417 | 0.101020265 | 0.266736076 |

|             |             |             |             |
|-------------|-------------|-------------|-------------|
| 0.297348396 | 0.292427934 | 0.146049322 | 0.14726066  |
| 0.141142965 | 0.084046705 | 0.117123864 | 0.201060941 |
| 0.209329888 | 0.093497744 | 0.255232934 | 0.193678465 |
| 0.309865102 | 0.078542275 | 0.062022272 | 0.101614113 |
| 0.254096025 | 0.130592663 | 0.199638876 | 0.308489879 |
| 0.280150651 | 0.318045032 | 0.194190628 | 0.20415743  |
| 0.103188743 | 0.277530509 | 0.268022223 | 0.181013431 |
| 0.038427976 | 0.235486016 | 0.095792852 | 0.140573883 |
| 0.010571332 | 0.019683851 | 0.203616704 | 0.182278912 |
| 0.275750438 | 0.185009829 | 0.252159278 | 0.201418771 |
| 0.000272482 | 0.085935051 | 0.115175158 | 0.087644524 |
| 0.190517102 | 0.205417434 | 0.178014642 | 0.223201868 |
| 0.234968635 | 0.270353859 | 0.182549817 | 0.114836998 |
| 0.025734862 | 0.131677841 | 0.253993237 | 0.238796081 |
| 0.165511054 | 0.274414598 | 0.044673208 | 0.205868474 |
| 0.044589292 | 0.231761007 | 0.192318273 | 0.087860204 |
| 0.024057305 | 0.193078553 | 0.155404558 | 0.262240539 |
| 0.075304373 | 0.181997537 | 0.211408022 | 0.017555015 |
| 0.101914018 | 0.158359516 | 0.157793597 | 0.144971344 |
| 0.17155763  | 0.167341324 | 0.145397366 | 0.099557729 |
| 0.152844478 | 0.209874187 | 0.151063996 | 0.203624302 |
| 0.171956762 | 0.236083493 | 0.107309615 | 0.145774233 |
| 0.093514194 | 0.269109244 | 0.335435815 | 0.361104758 |
| 0.211960424 | 0.193340551 | 0.29835325  | 0.284948945 |
| 0.213713276 | 0.129184907 | 0.248861225 | 0.234571516 |
| 0.220894031 | 0.300480097 | 0.139689393 | 0.179851892 |
| 0.036541887 | 0.108744943 | 0.283277037 | 0.134822695 |
| 0.221123435 | 0.065885493 | 0.116270639 | 0.169407604 |
| 0.128277266 | 0.297514795 | 0.285827046 | 0.241319892 |
| 0.112271748 | 0.109944479 | 0.073309949 | 0.1762911   |
| 0.231149041 | 0.299794358 | 0.079214034 | 0.073118772 |
| 0.160511444 | 0.172330331 | 0.154854549 | 0.261074289 |
| 0.042988008 | 0.247871237 | 0.083700936 | 0.245938038 |
| 0.065124568 | 0.312506655 | 0.289760814 | 0.128710332 |
| 0.023601451 | 0.241727921 | 0.104892158 | 0.138896107 |
| 0.117525803 | 0.116245658 | 0.09819739  | 0.216160681 |
| 0.207868914 | 0.263625357 | 0.294409313 | 0.295591409 |
| 0.086566438 | 0.064580306 | 0.127776551 | 0.113729996 |
| 0.146162228 | 0.20946163  | 0.307386293 | 0.203614489 |
| 0.088863499 | 1           | 0.300527159 | 0.193215352 |
| 0.17721561  | 0.158521576 | 0.022180994 | 0.116973931 |
| 0.193587454 | 0.055212079 | 0.002211803 | 0.017621381 |
| 0.158741023 | 0.112099617 | 0.146640727 | 0.153691031 |
| 0.078302535 | 0.179112575 | 0.024901345 | 0.189888563 |
| 0.257772237 | 0.306703406 | 0.117343137 | 0.241003113 |
| 0.182930517 | 0.256980381 | 0.136605542 | 0.017782087 |
| 0.087217986 | 0.073565615 | 0.074823666 | 0.28613653  |
| 0.234222722 | 0.024755706 | 0.100108243 | 0.28858752  |
| 0.175426032 | 0.022495165 | 0.133305302 | 0.116025696 |
| 0.282470682 | 0.308953361 | 0.17807309  | 0.120132052 |
| 0.24152837  | 0.226690797 | 0.077819277 | 0.098166142 |
| 0.087786367 | 0.0587077   | 0.138872752 | 0.044913618 |
| 0.248602448 | 0.108821542 | 0.017783516 | 0.324992102 |
| 0.295352289 | 0.062257386 | 0.308916984 | 0.065825186 |

|             |             |             |             |
|-------------|-------------|-------------|-------------|
| 0.182980518 | 0.219098745 | 0.101240607 | 0.082415897 |
| 0.121956567 | 0.075563449 | 0.243448121 | 0.198628408 |
| 0.027365626 | 0.117649091 | 0.206407541 | 0.079094982 |
| 0.345014639 | 0.07485976  | 0.27134477  | 0.046449278 |
| 0.233181143 | 0.196041522 | 0.262868322 | 0.112104459 |
| 0.113987129 | 0.306188957 | 0.095213858 | 0.248519138 |
| 0.185593279 | 0.046226551 | 0.138074824 | 0.163789727 |
| 0.058188388 | 0.232685019 | 0.091213881 | 0.253800797 |
| 0.14458463  | 0.217084038 | 0.138050611 | 0.213083148 |
| 0.198501528 | 0.055130029 | 0.044605833 | 0.101988394 |
| 0.243848373 | 0.198051372 | 0.064440412 | 0.179697551 |
| 0.034251215 | 0.18045969  | 0.132538324 | 0.106319628 |
| 0.188593204 | 0.233122436 | 0.113083941 | 0.296526855 |
| 0.162642099 | 0.102820198 | 0.08793096  | 0.263401335 |
| 0.142986935 | 0.116093774 | 0.271510138 | 0.001779586 |
| 0.169502486 | 0.108139008 | 0.221573915 | 0.093228322 |
| 0.290377173 | 0.1625184   | 0.147764246 | 0.04905128  |
| 0.157554345 | 0.028418212 | 0.127252354 | 0.087696524 |
| 0.057945563 | 0.287950947 | 0.254875752 | 0.201979899 |
| 0.202120736 | 0.083835613 | 0.048229501 | 0.238158132 |
| 0.025163946 | 0.046496566 | 0.062773563 | 0.124102121 |
| 0.036953674 | 0.074724893 | 0.07822827  | 0.058267396 |
| 0.168044573 | 0.214396432 |             |             |
| SLAMF1      | 0.231210157 | 0.476777953 | 0.185701523 |
| 0.282541538 | 0.378009792 | 0.488846854 | 0.20278813  |
| 0.310173248 | 0.44780764  | 0.328847432 | 0.466909974 |
| 0.096515784 | 0.099407228 | 0.503078379 | 0.196103017 |
| 0.433262629 | 0.144599633 | 0.282874678 | 0.136865916 |
| 0.358446435 | 0.361272384 | 0.384034315 | 0.486524576 |
| 0.366437296 | 0.345010817 | 0.465589726 | 0.402499631 |
| 0.497258213 | 0.265799049 | 0.483634161 | 0.216414434 |
| 0.475952677 | 0.384475367 | 0.392727559 | 0.091993271 |
| 0.491485209 | 0.020781343 | 0.460554043 | 0.380888606 |
| 0.180548925 | 0.462492503 | 0.38822134  | 0.3952287   |
| 0.414987387 | 0.149679531 | 0.223211009 | 0.437874102 |
| 0.442635258 | 0.425243798 | 0.206283833 | 0.490269342 |
| 0.424131863 | 0.49093533  | 0.443265992 | 0.00893483  |
| 0.311371423 | 0.076998857 | 0.217199408 | 0.495271893 |
| 0.38883949  | 0.303257625 | 0.275271094 | 0.412651607 |
| 0.44049837  | 0.447109158 | 0.423201136 | 0.39998391  |
| 0.503547691 | 0.193103821 | 0.460421476 | 0.283321678 |
| 0.479194604 | 0.140055804 | 0.342039109 | 0.232178143 |
| 0.436499417 | 0.378787738 | 0.438247604 | 0.335541049 |
| 0.464527338 | 0.511219451 | 0.411168938 | 0.482278219 |
| 0.131902763 | 0.373395895 | 0.352144381 | 0.435665913 |
| 0.45466774  | 0.235265891 | 0.492703336 | 0.496123391 |
| 0.178520969 | 0.425510119 | 0.468167066 | 0.292038212 |
| 0.498117909 | 0.305261065 | 0.427857883 | 0.208399426 |
| 0.418666186 | 0.391434715 | 0.473156261 | 0.451199874 |
| 0.400205543 | 0.218678708 | 0.486373923 | 0.350165522 |
| 0.404235844 | 0.238279413 | 0.301865189 | 0.48032344  |
| 0.48336601  | 0.505875795 | 0.476803968 | 0.463393964 |
| 0.409598466 | 0.503722652 | 0.491531271 | 0.493757968 |
| 0.157646024 | 0.496763068 | 0.37551707  | 0.167225121 |

|             |             |             |             |
|-------------|-------------|-------------|-------------|
| 0.219537842 | 0.249964552 | 0.307495228 | 0.451084539 |
| 0.502519415 | 0.485007239 | 0.384699993 | 0.373432743 |
| 0.482054676 | 0.47044252  | 0.490447049 | 0.492316562 |
| 0.161403671 | 0.266788709 | 0.41343571  | 0.455747922 |
| 0.473265665 | 0.291502984 | 0.29421437  | 0.502979099 |
| 0.48730197  | 0.48473137  | 0.352417965 | 0.511412198 |
| 0.370825793 | 0.503638748 | 0.487227979 | 0.348477005 |
| 0.502121956 | 0.490642801 | 0.503251492 | 0.435618779 |
| 0.493432645 | 0.475628928 | 0.106851517 | 0.476463986 |
| 0.504059716 | 0.023141986 | 0.491574839 | 0.493917776 |
| 0.489456028 | 0.484430585 | 0.497260167 | 0.503198328 |
| 0.49179061  | 0.22957535  | 0.031512377 | 0.402734397 |
| 0.487332444 | 0.493170344 | 0.294663055 | 0.42873457  |
| 0.419976912 | 0.504647983 | 0.482049867 | 0.344027876 |
| 0.499373952 | 0.499658247 | 0.495899482 | 0.48594246  |
| 0.409901361 | 0.451065899 | 0.379451582 | 0.473115791 |
| 0.172342144 | 0.287968073 | 0.180038612 | 0.44718837  |
| 0.402364624 | 0.350671501 | 0.488132933 | 0.418873307 |
| 0.373534701 | 0.475365379 | 0.336816941 | 0.427608594 |
| 0.179116638 | 0.47508415  | 0.35367864  | 0.347369451 |
| 0.15963055  | 0.30696417  | 0.336516947 | 0.328205436 |
| 0.389372041 | 0.338281638 | 0.477230316 | 0.496747474 |
| 0.416298942 | 0.356056399 | 0.498272592 | 0.502197387 |
| 0.48373447  | 0.414197923 | 0.406329455 | 0.048331074 |
| 0.329169409 | 0.305072947 | 0.189175802 | 0.430149161 |
| 0.317743531 | 0.366992501 | 0.447938778 | 0.451624603 |
| 0.443309293 | 0.325065504 | 0.410597456 | 0.477790151 |
| 0.317879183 | 0.40430331  | 0.495810889 | 0.453726621 |
| 0.02842472  | 0.45885883  | 0.50166225  | 0.230153793 |
| 0.449217601 | 0.173004762 | 0.273890827 | 0.491830057 |
| 0.310064859 | 0.288388097 | 0.500182681 | 0.450643426 |
| 0.421754604 | 0.343189826 | 0.500016084 | 0.051607751 |
| 0.393314621 | 0.11902007  | 0.420742138 | 0.380462137 |
| 0.422988139 | 0.432325062 | 0.370940406 | 0.361374788 |
| 0.294988011 | 0.498186102 | 0.499560026 | 0.506154315 |
| 0.38433898  | 0.498463355 | 0.495469667 | 0.506274841 |
| 0.491485847 | 0.377133053 | 0.139929473 | 0.494497692 |
| 0.491694217 | 0.332173041 | 0.21738338  | 0.470127221 |
| 0.390776857 | 0.44371716  | 0.205920725 | 0.500247741 |
| 0.495770203 | 0.465818389 | 0.31608615  | 0.451245172 |
| 0.491390277 | 0.41852829  | 0.489933436 | 0.499755621 |
| 0.334341844 | 0.39834023  | 0.380260497 | 0.465489026 |
| 0.359113313 | 0.284626149 | 0.450511214 | 0.18532132  |
| 0.010592967 | 0.244331296 | 0.211227415 | 0.318117717 |
| 0.209730175 | 0.441307068 | 0.462354286 | 0.500983548 |
| 0.296505803 | 0.5016009   | 0.403472979 | 0.376168085 |
| 0.479314368 | 0.403665542 | 0.408833827 | 0.447312042 |
| 0.419390155 | 0.071963862 | 0.260289272 | 0.513084621 |
| 0.152027882 | 0.276397784 | 0.46567054  | 0.011206164 |
| 0.170399591 | 0.458918622 | 0.240975716 | 0.340998736 |
| 0.495295011 | 0.341318539 | 0.37996941  | 0.35740399  |
| 0.467030332 | 0.265783943 | 0.016263424 | 0.488408572 |
| 0.481458268 | 0.47502638  | 0.47904673  | 0.468267305 |
| 0.473128089 | 0.477518431 | 0.471454115 | 0.484666909 |

|             |             |             |             |
|-------------|-------------|-------------|-------------|
| 0.276699206 | 0.251410203 | 0.241843863 | 0.40076039  |
| 0.018148686 | 0.482453507 | 0.406507734 | 0.323594999 |
| 0.471914221 | 0.4426343   | 0.157426208 | 0.414513849 |
| 0.091824826 | 0.197870567 | 0.439750554 | 0.3765234   |
| 0.435469019 | 0.084908883 | 0.28793899  | 0.342870365 |
| 0.479444252 | 0.475943998 | 0.365905172 | 0.497947114 |
| 0.454307501 | 0.278829474 | 0.405729808 | 0.479156838 |
| 0.226601455 | 0.131712835 | 0.46067224  | 0.046076788 |
| 0.290249496 | 0.478443762 | 0.422286943 | 0.20647967  |
| 0.430506224 | 0.039079818 | 0.479099922 | 0.503042837 |
| 0.47501375  | 0.49932999  | 0.507808614 | 0.302435129 |
| 0.500917715 | 0.094146564 | 0.502139939 | 0.491030467 |
| 0.389166095 | 0.004975293 | 0.028330294 | 0.496002441 |
| 0.436406703 | 0.180874734 | 0.344189967 | 0.43785371  |
| 0.272534653 | 0.333438992 | 0.222125744 | 0.245572089 |
| 0.493751692 | 0.353344194 | 0.241653281 | 0.478136926 |
| 0.394344266 | 0.401470295 | 0.461819007 | 0.244274268 |
| 0.461814758 | 0.187835155 | 0.241988101 | 0.024821044 |
| 0.452265395 | 0.262345293 | 0.482165922 | 0.498674603 |
| 0.501333486 | 0.451697298 | 0.338292318 | 0.427339279 |
| 0.483329608 | 0.243214219 | 0.381153214 | 0.274672524 |
| 0.489608269 | 0.445158097 | 0.463676439 | 0.452485746 |
| 0.500020288 | 0.496863163 | 0.146998973 | 0.476748947 |
| 0.061585195 | 0.006800506 | 0.467291364 | 0.430719567 |
| 0.096452115 | 0.406999195 | 0.420404431 | 0.359252107 |
| 0.369868198 | 0.128945794 | 0.280290924 | 0.26762729  |
| 0.428949909 | 0.443797214 | 0.331440858 | 0.406000621 |
| 0.354055247 | 0.200090817 | 0.366941173 | 0.334968762 |
| 0.331331616 | 0.439046963 | 0.345570917 | 0.110747842 |
| 0.450276953 | 0.438380282 | 0.201473196 | 0.346960559 |
| 0.502904916 | 0.503309023 | 0.154399465 | 0.053543147 |
| 0.431259852 | 0.409954394 | 0.502550593 | 0.494148241 |
| 0.507354325 | 0.499159906 | 0.467467048 | 0.25735103  |
| 0.22393816  | 0.427387631 | 0.345945876 | 0.211344055 |
| 0.505332374 | 0.200503091 | 0.494614579 | 0.316320039 |
| 0.292717927 | 0.380544047 | 0.139682327 | 0.25068651  |
| 0.409442927 | 0.369112732 | 0.331314253 | 0.311282238 |
| 0.412449926 | 0.279650128 | 0.183018005 | 0.380151655 |
| 0.471847475 | 0.185799014 | 0.344062222 | 0.459153839 |
| 0.476979407 | 0.260609121 | 0.463749592 | 0.489285359 |
| 0.310855404 | 0.281331084 | 0.41128961  | 0.471306962 |
| 0.488480956 | 0.414424101 | 0.093965439 | 0.474521439 |
| 0.503780868 | 0.474500167 | 0.494328087 | 0.474654566 |
| 0.242749397 | 0.42371663  | 0.335943478 | 0.412346473 |
| 0.36878696  | 0.494221421 | 0.402288442 | 0.210581071 |
| 0.43836952  | 0.487975321 | 0.481226312 | 0.338539864 |
| 0.46691001  | 0.29459506  | 0.183244182 | 0.494455547 |
| 0.216400617 | 0.242929385 | 0.408371318 | 0.47734079  |
| 0.007255826 | 0.15205025  | 0.487899404 | 0.414719229 |
| 0.494653435 | 0.496654783 | 0.494456712 | 0.42188772  |
| 0.002171366 | 0.434133764 | 0.466058506 | 0.446662627 |
| 0.491006263 | 0.490542395 | 0.293045512 | 0.217812225 |
| 0.439213121 | 0.223790986 | 0.284814637 | 0.439553763 |
| 0.182513332 | 0.492086547 | 0.376073731 | 0.377010655 |



|             |             |             |             |
|-------------|-------------|-------------|-------------|
| 0.341889938 | 0.2354388   | 0.274569618 | 0.41764171  |
| 0.180397247 | 0.411522855 | 0.471436601 | 0.343031037 |
| 0.204089204 | 0.483579227 | 0.479394427 | 0.125750982 |
| 0.39311966  | 0.478501834 | 0.495461674 | 0.009383919 |
| 0.473804511 | 0.051107809 | 0.343402641 | 0.356452856 |
| 0.354233351 | 0.35855863  | 0.384408187 | 0.382617853 |
| 0.46187653  | 0.392064739 | 0.42107793  | 0.406191125 |
| 0.317065798 | 0.405360705 | 0.452739447 | 0.459736712 |
| 0.373715291 | 0.307616474 | 0.243115845 | 0.23223204  |
| 0.180166575 | 0.498412632 | 0.408553812 | 0.214252142 |
| 0.400670234 | 0.450190273 | 0.467370897 | 0.482779255 |
| 0.494518664 | 0.254463767 | 0.443350368 | 0.498075624 |
| 0.237449439 | 0.396487482 | 0.207032452 | 0.480688952 |
| 0.419571893 | 0.290126995 | 0.465912668 | 0.443775352 |
| 0.465404506 | 0.47328197  | 0.410300183 | 0.493945537 |
| 0.450479441 | 0.405992685 | 0.349663156 | 0.22067976  |
| 0.354447924 | 0.306078775 | 0.334330968 | 0.016899491 |
| 0.481933786 | 0.417509886 | 0.498913325 | 0.484848251 |
| 0.297515923 | 0.485997433 | 0.380879878 | 0.243035232 |
| 0.307663073 | 0.30837047  | 0.321334065 | 0.481856373 |
| 0.214554134 | 0.377192029 | 0.389651547 | 0.453475778 |
| 0.475808441 | 0.457523235 | 0.33456156  | 0.422887704 |
| 0.398857052 | 0.378621111 | 0.469548904 | 0.299524936 |
| 0.445652512 | 0.256196959 | 0.431690843 | 0.399469184 |
| 0.354684519 | 0.496332957 | 0.205824841 | 0.499528123 |
| 0.393435299 | 0.300527159 | 1           | 0.463591056 |
| 0.444292383 | 0.263581841 | 0.191195191 | 0.452947527 |
| 0.387707212 | 0.353982416 | 0.016919664 | 0.08650968  |
| 0.452795061 | 0.375647947 | 0.46003744  | 0.463907791 |
| 0.313897554 | 0.448860053 | 0.177295745 | 0.443655707 |
| 0.470921975 | 0.494949263 | 0.371723965 | 0.40917462  |
| 0.477719765 | 0.274250255 | 0.491808196 | 0.028624768 |
| 0.449231422 | 0.424867927 | 0.401963502 | 0.195289615 |
| 0.099571959 | 0.212882505 | 0.455420256 | 0.204431304 |
| 0.491946117 | 0.207570035 | 0.433078394 | 0.490386907 |
| 0.356230398 | 0.497129317 | 0.272126913 | 0.481918436 |
| 0.154988897 | 0.423642631 | 0.40312917  | 0.422912245 |
| 0.32079633  | 0.327966169 | 0.469160548 | 0.270687902 |
| 0.139954186 | 0.367432464 | 0.008042774 | 0.462312109 |
| 0.466869607 | 0.357025512 | 0.37455097  | 0.322292053 |
| 0.425806737 | 0.4782578   | 0.338098505 | 0.435707012 |
| 0.059596314 | 0.405713537 | 0.386497347 | 0.504600461 |
| 0.234211842 | 0.430498595 | 0.184384998 | 0.359042481 |
| 0.479673227 | 0.345799072 | 0.416041423 | 0.313723034 |
| 0.489584227 | 0.476529709 | 0.321372995 | 0.32522077  |
| 0.437365418 | 0.207966173 | 0.432911578 | 0.498801709 |
| 0.339070774 | 0.255856599 | 0.482057276 | 0.352148771 |
| 0.337842541 | 0.486870376 | 0.429686626 | 0.49189101  |
| 0.189342104 | 0.419441671 | 0.484669465 | 0.490061391 |
| 0.443072283 | 0.225610805 | 0.278047343 | 0.329808244 |
| 0.478772048 | 0.24530649  | 0.302562747 | 0.484160346 |
| 0.236536431 | 0.455644315 | 0.414549433 | 0.295738322 |
| 0.138423113 | 0.348105948 | 0.467844882 | 0.32725667  |
| 0.433773115 | 0.432374207 | 0.316687706 | 0.479421829 |

|             |             |             |             |
|-------------|-------------|-------------|-------------|
| 0.274941102 | 0.092514465 | 0.490776675 | 0.019668382 |
| 0.480125047 | 0.467083    | 0.425710482 | 0.414355436 |
| 0.354830673 | 0.474857971 | 0.444395727 | 0.010874875 |
| 0.483498285 | 0.077296528 | 0.405016029 | 0.319475572 |
| 0.320262742 | 0.186308444 | 0.495634762 | 0.502646985 |
| 0.474667707 | 0.379982787 | 0.34520799  | 0.496100644 |
| 0.168166729 | 0.322324208 | 0.358421788 | 0.478823834 |
| 0.24486802  | 0.397589532 | 0.426170617 | 0.383629937 |
| 0.498898547 | 0.450830694 |             |             |
| SLC12A2     | 0.094835942 | 0.366254657 | 0.069787059 |
| 0.082508318 | 0.170389094 | 0.191642247 | 0.0832819   |
| 0.133195179 | 0.303319649 | 0.120707801 | 0.188033632 |
| 0.035655293 | 0.069256919 | 0.371221515 | 0.094413637 |
| 0.191885923 | 0.063410947 | 0.110969361 | 0.072980699 |
| 0.149097594 | 0.144386401 | 0.159474987 | 0.191219125 |
| 0.154268101 | 0.237110415 | 0.210859459 | 0.177660851 |
| 0.401355116 | 0.106950274 | 0.2604243   | 0.066857845 |
| 0.366268456 | 0.175828338 | 0.151227943 | 0.035657351 |
| 0.209345999 | 0.019283944 | 0.394904453 | 0.127861621 |
| 0.074419569 | 0.348046622 | 0.13610758  | 0.141567536 |
| 0.130396997 | 0.051449776 | 0.091335484 | 0.228448629 |
| 0.208518914 | 0.197954772 | 0.082083951 | 0.272710759 |
| 0.157443572 | 0.28197174  | 0.253254603 | 0.003135754 |
| 0.127251812 | 0.039887377 | 0.09035723  | 0.440753039 |
| 0.203628075 | 0.137207446 | 0.097284377 | 0.210863866 |
| 0.219721837 | 0.255815592 | 0.261814678 | 0.128291503 |
| 0.409378707 | 0.087196214 | 0.274019364 | 0.10613662  |
| 0.166069131 | 0.062333239 | 0.190842827 | 0.122192872 |
| 0.16893795  | 0.167902634 | 0.200973399 | 0.135100423 |
| 0.334331133 | 0.473899339 | 0.215717034 | 0.427134491 |
| 0.07138837  | 0.167715792 | 0.152569379 | 0.253866426 |
| 0.268753706 | 0.109025206 | 0.2651898   | 0.435383793 |
| 0.09154192  | 0.185751632 | 0.246597818 | 0.157103548 |
| 0.372845228 | 0.154299822 | 0.153849546 | 0.100114179 |
| 0.228351378 | 0.150905441 | 0.447469699 | 0.223363115 |
| 0.19654748  | 0.093291928 | 0.442424584 | 0.158616233 |
| 0.151943018 | 0.087903396 | 0.10751484  | 0.335647501 |
| 0.217065053 | 0.399270125 | 0.318361249 | 0.276450018 |
| 0.152923728 | 0.409250674 | 0.245986661 | 0.388146891 |
| 0.074174749 | 0.443080597 | 0.141191645 | 0.082492538 |
| 0.085917987 | 0.139655541 | 0.151341187 | 0.325151693 |
| 0.375242065 | 0.274374587 | 0.134676964 | 0.137572441 |
| 0.350999407 | 0.425832193 | 0.432369066 | 0.308819133 |
| 0.064041433 | 0.12514078  | 0.146510535 | 0.23191381  |
| 0.248521057 | 0.152351977 | 0.116301572 | 0.448129989 |
| 0.334598234 | 0.315111623 | 0.139154948 | 0.473455537 |
| 0.169852998 | 0.440976721 | 0.34995625  | 0.122326044 |
| 0.446445849 | 0.439711444 | 0.421427977 | 0.24420984  |
| 0.441482892 | 0.156298658 | 0.061806223 | 0.313201342 |
| 0.435615874 | 0.00980493  | 0.370896703 | 0.385948506 |
| 0.406917517 | 0.319835553 | 0.429753912 | 0.419792771 |
| 0.42365296  | 0.104636845 | 0.013069971 | 0.19702594  |
| 0.420576678 | 0.318765507 | 0.176162369 | 0.154684952 |
| 0.202062009 | 0.183289885 | 0.334821168 | 0.103680385 |

|             |             |             |             |
|-------------|-------------|-------------|-------------|
| 0.464867168 | 0.365362061 | 0.39195245  | 0.282650315 |
| 0.168343538 | 0.337972171 | 0.159327681 | 0.426135893 |
| 0.078600324 | 0.104222513 | 0.083741359 | 0.293620504 |
| 0.143655127 | 0.155897191 | 0.16158053  | 0.203219552 |
| 0.183084776 | 0.197103197 | 0.14278394  | 0.235331424 |
| 0.106802477 | 0.199438282 | 0.140539153 | 0.115138877 |
| 0.060726136 | 0.219452768 | 0.103486861 | 0.14309269  |
| 0.159640901 | 0.292564631 | 0.274329043 | 0.399447721 |
| 0.167576692 | 0.18032048  | 0.267909878 | 0.423026141 |
| 0.384141133 | 0.163149424 | 0.261384254 | 0.013952928 |
| 0.087372945 | 0.118663587 | 0.082977905 | 0.195064546 |
| 0.263337218 | 0.117074597 | 0.189085505 | 0.26855835  |
| 0.150243182 | 0.154455034 | 0.138191802 | 0.429547437 |
| 0.177443866 | 0.157181025 | 0.333736323 | 0.18544421  |
| 0.012061663 | 0.141948409 | 0.322999644 | 0.104374315 |
| 0.228424181 | 0.078148227 | 0.116705006 | 0.341454655 |
| 0.121458735 | 0.133186232 | 0.408635215 | 0.284346903 |
| 0.170597907 | 0.28349748  | 0.439022332 | 0.019858025 |
| 0.176683597 | 0.047056262 | 0.220000572 | 0.142918182 |
| 0.173457394 | 0.257974965 | 0.173523981 | 0.143871796 |
| 0.138621045 | 0.436994065 | 0.362932439 | 0.414263381 |
| 0.121052201 | 0.436475921 | 0.336343081 | 0.360008338 |
| 0.260459038 | 0.140176845 | 0.06544975  | 0.293114094 |
| 0.33634914  | 0.10224886  | 0.115936901 | 0.307425776 |
| 0.129366412 | 0.234740366 | 0.109368134 | 0.388509211 |
| 0.463835054 | 0.39855813  | 0.146131533 | 0.28119621  |
| 0.296302586 | 0.157749209 | 0.356433449 | 0.460890531 |
| 0.108920166 | 0.134948227 | 0.121304431 | 0.323954761 |
| 0.157274472 | 0.12016986  | 0.354023331 | 0.098708973 |
| 0.00691893  | 0.10559705  | 0.078142662 | 0.137917053 |
| 0.094008905 | 0.226760353 | 0.240355029 | 0.418145063 |
| 0.120716399 | 0.403158289 | 0.253521417 | 0.10792468  |
| 0.333854327 | 0.165288793 | 0.190461186 | 0.237021762 |
| 0.264408584 | 0.026654682 | 0.096560086 | 0.460097264 |
| 0.073326191 | 0.114064276 | 0.200168237 | 0.004626398 |
| 0.060655069 | 0.308031283 | 0.151516627 | 0.258063452 |
| 0.404512749 | 0.245995878 | 0.15895468  | 0.110018758 |
| 0.277390518 | 0.113312079 | 0.010612472 | 0.393718118 |
| 0.433460822 | 0.414242849 | 0.426969912 | 0.437195191 |
| 0.363316728 | 0.331518986 | 0.287760154 | 0.196027421 |
| 0.105778994 | 0.098724301 | 0.075293046 | 0.131902544 |
| 0.007290142 | 0.320580813 | 0.193708459 | 0.165754936 |
| 0.29299217  | 0.237622522 | 0.067866036 | 0.224307431 |
| 0.024087325 | 0.071425351 | 0.165748845 | 0.179894803 |
| 0.288490803 | 0.035574445 | 0.077541599 | 0.103551098 |
| 0.38188824  | 0.319805978 | 0.139789829 | 0.445815071 |
| 0.178335892 | 0.141747884 | 0.135311453 | 0.311001477 |
| 0.08822416  | 0.037136935 | 0.177954469 | 0.012079051 |
| 0.184424205 | 0.446130397 | 0.170398054 | 0.062139576 |
| 0.168888517 | 0.013724128 | 0.316671776 | 0.45315995  |
| 0.40136115  | 0.406552546 | 0.417098697 | 0.117811205 |
| 0.411392087 | 0.051099077 | 0.433284683 | 0.316037285 |
| 0.121529293 | 0.001029987 | 0.019866848 | 0.367831062 |
| 0.158673313 | 0.109448799 | 0.152226229 | 0.151405374 |

|             |             |             |             |
|-------------|-------------|-------------|-------------|
| 0.100611626 | 0.120367286 | 0.120511299 | 0.102028498 |
| 0.254683803 | 0.156407003 | 0.129248965 | 0.400578063 |
| 0.137807624 | 0.196353903 | 0.168920061 | 0.135543117 |
| 0.234207587 | 0.072680295 | 0.135288897 | 0.009485897 |
| 0.279760441 | 0.158893154 | 0.440048115 | 0.426939586 |
| 0.427495601 | 0.247511626 | 0.113138219 | 0.192422827 |
| 0.386637522 | 0.128406709 | 0.154977558 | 0.130210409 |
| 0.391314535 | 0.191552605 | 0.267596304 | 0.267044918 |
| 0.405099825 | 0.388153107 | 0.064253656 | 0.272698107 |
| 0.025267985 | 0.0084382   | 0.144475872 | 0.26480159  |
| 0.08711791  | 0.134963135 | 0.23428447  | 0.170172523 |
| 0.203056879 | 0.04708653  | 0.107216024 | 0.097908189 |
| 0.18556062  | 0.151588541 | 0.127749077 | 0.273461451 |
| 0.149492191 | 0.071607119 | 0.179413993 | 0.165828585 |
| 0.167207725 | 0.278741253 | 0.225502729 | 0.047533543 |
| 0.163556002 | 0.163648034 | 0.08212292  | 0.188488234 |
| 0.334113611 | 0.374276443 | 0.057577783 | 0.018088229 |
| 0.263293305 | 0.163532467 | 0.401438551 | 0.410383547 |
| 0.456780096 | 0.436007204 | 0.398681936 | 0.111677644 |
| 0.09781598  | 0.191969489 | 0.147383155 | 0.107301474 |
| 0.4292328   | 0.087465643 | 0.436883311 | 0.128604711 |
| 0.147065155 | 0.127000339 | 0.06341145  | 0.110467895 |
| 0.197005721 | 0.194749978 | 0.140082691 | 0.126499531 |
| 0.136738581 | 0.119849223 | 0.080215799 | 0.156009388 |
| 0.257397395 | 0.05900298  | 0.151033406 | 0.219216741 |
| 0.315052083 | 0.114645018 | 0.253172412 | 0.401741638 |
| 0.155641032 | 0.109677686 | 0.114611211 | 0.323509247 |
| 0.312337022 | 0.181194546 | 0.04105714  | 0.365317018 |
| 0.426258032 | 0.237933108 | 0.434259283 | 0.340836109 |
| 0.123894429 | 0.150932773 | 0.139990493 | 0.157871051 |
| 0.177675857 | 0.195166366 | 0.185525183 | 0.092129115 |
| 0.352297005 | 0.468471138 | 0.316949297 | 0.13708454  |
| 0.22755419  | 0.140774451 | 0.075830986 | 0.394036575 |
| 0.073697626 | 0.08104774  | 0.149419539 | 0.339452286 |
| 0.003730471 | 0.079609444 | 0.413482302 | 0.194412207 |
| 0.467634683 | 0.368399881 | 0.382209849 | 0.225549663 |
| 0.000968406 | 0.227836647 | 0.198710049 | 0.138223049 |
| 0.333629977 | 0.32039383  | 0.23332504  | 0.087007841 |
| 0.291985863 | 0.115235599 | 0.098546114 | 0.176502577 |
| 0.05997518  | 0.23395511  | 0.223607482 | 0.175192669 |
| 0.148842367 | 0.133688972 | 0.132748581 | 0.169587477 |
| 0.098435207 | 0.243869883 | 0.287056817 | 0.143694677 |
| 0.054837965 | 0.365478339 | 0.267125732 | 0.053583195 |
| 0.181212968 | 0.338182483 | 0.410922679 | 0.001174092 |
| 0.253983134 | 0.022952389 | 0.149667003 | 0.136205365 |
| 0.155149657 | 0.152147626 | 0.195438164 | 0.140624975 |
| 0.212564436 | 0.148007164 | 0.149428668 | 0.196961406 |
| 0.134712618 | 0.183935364 | 0.212105818 | 0.158724619 |
| 0.135321946 | 0.119582177 | 0.172514835 | 0.177185134 |
| 0.082782356 | 0.404688237 | 0.28329047  | 0.117620373 |
| 0.215440872 | 0.169385893 | 0.341046272 | 0.406758119 |
| 0.401868424 | 0.167132096 | 0.184173325 | 0.339415785 |
| 0.085510437 | 0.146998362 | 0.083604743 | 0.193416519 |
| 0.183868457 | 0.108939367 | 0.195662501 | 0.167759441 |

|                      |             |             |             |
|----------------------|-------------|-------------|-------------|
| 0.265421138          | 0.385920374 | 0.28052368  | 0.410275819 |
| 0.164326715          | 0.155504625 | 0.109657969 | 0.086971694 |
| 0.110872263          | 0.169858588 | 0.132137655 | 0.005533486 |
| 0.248406546          | 0.139911203 | 0.341070645 | 0.412490699 |
| 0.129526898          | 0.389276004 | 0.123466656 | 0.075500201 |
| 0.099886439          | 0.202741012 | 0.170236756 | 0.302440983 |
| 0.088134151          | 0.174286632 | 0.156480626 | 0.173207    |
| 0.282898695          | 0.276066664 | 0.162301674 | 0.186467358 |
| 0.193262174          | 0.182524608 | 0.439388514 | 0.121581414 |
| 0.189904097          | 0.100489047 | 0.211329164 | 0.129531913 |
| 0.14202061           | 0.420518078 | 0.090771413 | 0.416608605 |
| 0.128493889          | 0.193215352 | 0.463591056 | 1           |
| 0.201831551          | 0.154901342 | 0.08063903  | 0.174537805 |
| 0.165472892          | 0.151078563 | 0.006420574 | 0.029253408 |
| 0.256485331          | 0.168343889 | 0.277827557 | 0.296592713 |
| 0.136046191          | 0.298268608 | 0.116006603 | 0.160936756 |
| 0.411017887          | 0.456177251 | 0.103277211 | 0.254501639 |
| 0.279469804          | 0.12005896  | 0.246940682 | 0.024443203 |
| 0.193731462          | 0.193624502 | 0.141503286 | 0.099983832 |
| 0.044904778          | 0.073775234 | 0.185795854 | 0.104420815 |
| 0.377265484          | 0.083929269 | 0.227314102 | 0.293175483 |
| 0.227873488          | 0.447066367 | 0.1369878   | 0.267970055 |
| 0.065881144          | 0.24067282  | 0.171244808 | 0.167935084 |
| 0.103623476          | 0.117983383 | 0.257150862 | 0.107666091 |
| 0.057967534          | 0.142599621 | 0.001209003 | 0.393714604 |
| 0.410117025          | 0.124701794 | 0.263187082 | 0.134244131 |
| 0.246246525          | 0.379020161 | 0.141108611 | 0.179378016 |
| 0.026394696          | 0.170118628 | 0.206259313 | 0.349949571 |
| 0.060642983          | 0.176502331 | 0.084138765 | 0.145851124 |
| 0.441379409          | 0.105909517 | 0.303235246 | 0.08197827  |
| 0.414322352          | 0.356885566 | 0.186819073 | 0.187234447 |
| 0.236182262          | 0.106003003 | 0.167741132 | 0.450424329 |
| 0.147051774          | 0.098526151 | 0.31948406  | 0.111565167 |
| 0.140180069          | 0.378662823 | 0.204736963 | 0.457063264 |
| 0.088638327          | 0.220430761 | 0.326397951 | 0.372845786 |
| 0.294241198          | 0.104811265 | 0.106058697 | 0.120865725 |
| 0.385487269          | 0.093938285 | 0.124056004 | 0.264096524 |
| 0.081289386          | 0.27156035  | 0.208427038 | 0.135507418 |
| 0.065104523          | 0.186976669 | 0.201029141 | 0.163767998 |
| 0.185063875          | 0.15595991  | 0.124192858 | 0.370831202 |
| 0.117079491          | 0.029665072 | 0.421809497 | 0.005926603 |
| 0.208667457          | 0.233597517 | 0.221877969 | 0.162282315 |
| 0.215323304          | 0.216783524 | 0.144385982 | 0.003577787 |
| 0.321695984          | 0.043330432 | 0.208372629 | 0.10882473  |
| 0.124295643          | 0.070684381 | 0.4212647   | 0.415950881 |
| 0.27868831           | 0.192741431 | 0.124039784 | 0.415115126 |
| 0.069649354          | 0.132153252 | 0.144141082 | 0.240942325 |
| 0.109037656          | 0.128340879 | 0.158598993 | 0.135945699 |
| 0.29738582           | 0.223226925 |             |             |
| SLC25A11 0.063653079 | 0.347381887 | 0.059636225 |             |
| 0.051690097          | 0.189305013 | 0.150451702 | 0.037711928 |
| 0.06280315           | 0.285519993 | 0.067881855 | 0.199375108 |
| 0.012122838          | 0.029316206 | 0.363653783 | 0.036911311 |
| 0.188782771          | 0.024045537 | 0.087303724 | 0.026710655 |

|             |             |             |             |
|-------------|-------------|-------------|-------------|
| 0.063509789 | 0.140076772 | 0.06629769  | 0.178843567 |
| 0.146478616 | 0.22746938  | 0.213919962 | 0.169807984 |
| 0.401648137 | 0.042501002 | 0.268358766 | 0.040812724 |
| 0.360255936 | 0.175546825 | 0.136483033 | 0.017112063 |
| 0.189958598 | 0.006577519 | 0.386907033 | 0.093677825 |
| 0.052916782 | 0.326422037 | 0.128039489 | 0.111173119 |
| 0.134380971 | 0.029017374 | 0.037100272 | 0.218872374 |
| 0.22251463  | 0.118021905 | 0.06924571  | 0.286065108 |
| 0.093218212 | 0.27653334  | 0.250559278 | 0.001542305 |
| 0.098448046 | 0.016186428 | 0.047100117 | 0.439035848 |
| 0.202514995 | 0.101391181 | 0.040321751 | 0.143042311 |
| 0.189303322 | 0.234786179 | 0.248581238 | 0.083828834 |
| 0.401409397 | 0.034218015 | 0.285531805 | 0.055667054 |
| 0.126505092 | 0.037053704 | 0.191782344 | 0.110973871 |
| 0.106195224 | 0.16309485  | 0.190408573 | 0.106718257 |
| 0.330971259 | 0.454115738 | 0.221757313 | 0.423019372 |
| 0.018871084 | 0.166266719 | 0.102432981 | 0.2496977   |
| 0.241061097 | 0.045241657 | 0.278088052 | 0.434365862 |
| 0.048946358 | 0.180527146 | 0.226580291 | 0.132010634 |
| 0.370997185 | 0.066267555 | 0.155213544 | 0.049851668 |
| 0.24421626  | 0.148596619 | 0.412044531 | 0.214323717 |
| 0.162978621 | 0.08256783  | 0.42625364  | 0.162002395 |
| 0.11487475  | 0.096049805 | 0.051216578 | 0.333519109 |
| 0.223258297 | 0.39726443  | 0.297287234 | 0.250783588 |
| 0.157467123 | 0.411154088 | 0.273044183 | 0.35285125  |
| 0.037056816 | 0.433892538 | 0.16199673  | 0.027903823 |
| 0.064930324 | 0.069157908 | 0.056160616 | 0.310574328 |
| 0.376513151 | 0.272430227 | 0.114717508 | 0.134558939 |
| 0.339925199 | 0.410306623 | 0.419275627 | 0.295557068 |
| 0.038261833 | 0.056508679 | 0.163212619 | 0.126245131 |
| 0.218406461 | 0.135859238 | 0.102788617 | 0.430620531 |
| 0.345326412 | 0.305132086 | 0.115173058 | 0.458008949 |
| 0.101501648 | 0.439024488 | 0.353243805 | 0.123067745 |
| 0.448988582 | 0.435016542 | 0.427743252 | 0.249887035 |
| 0.439677009 | 0.179914864 | 0.010415667 | 0.296096805 |
| 0.423863452 | 0.004782819 | 0.362767274 | 0.381104808 |
| 0.405474576 | 0.326727201 | 0.421497793 | 0.417190544 |
| 0.414187196 | 0.102007422 | 0.002899331 | 0.185857065 |
| 0.418853871 | 0.343846791 | 0.068527491 | 0.154685034 |
| 0.182802534 | 0.161047507 | 0.314784058 | 0.043750862 |
| 0.445282576 | 0.389479333 | 0.3855153   | 0.263762271 |
| 0.157269398 | 0.325415441 | 0.156012673 | 0.417661269 |
| 0.039930485 | 0.081195359 | 0.08186089  | 0.265216    |
| 0.079370806 | 0.156571716 | 0.132919414 | 0.17962826  |
| 0.176057644 | 0.153856247 | 0.103163479 | 0.23948404  |
| 0.095995738 | 0.19305845  | 0.153607449 | 0.113748666 |
| 0.028439613 | 0.20005695  | 0.043565151 | 0.060062864 |
| 0.139393109 | 0.272997864 | 0.265912793 | 0.40796666  |
| 0.122085282 | 0.185973943 | 0.255533025 | 0.430593085 |
| 0.370295223 | 0.17871294  | 0.22075594  | 0.010282974 |
| 0.038295607 | 0.059515278 | 0.040423535 | 0.191178729 |
| 0.246078935 | 0.040522279 | 0.183899314 | 0.273791868 |
| 0.157571554 | 0.096499949 | 0.086603476 | 0.414208158 |
| 0.159145794 | 0.106671814 | 0.332196922 | 0.183806186 |

|             |             |             |             |
|-------------|-------------|-------------|-------------|
| 0.006729905 | 0.153931822 | 0.32178568  | 0.040263003 |
| 0.194623422 | 0.026426453 | 0.052633373 | 0.34591335  |
| 0.047063318 | 0.067080223 | 0.401039632 | 0.280469476 |
| 0.060030024 | 0.255157714 | 0.426921056 | 0.005871307 |
| 0.163169614 | 0.04478554  | 0.216187654 | 0.133175629 |
| 0.17325129  | 0.241637637 | 0.160954526 | 0.11996118  |
| 0.145861447 | 0.415612574 | 0.370454691 | 0.403012078 |
| 0.07706232  | 0.430925519 | 0.332880803 | 0.352085469 |
| 0.255130542 | 0.118244375 | 0.022581732 | 0.308939057 |
| 0.349290831 | 0.052324989 | 0.10530171  | 0.286580866 |
| 0.107530465 | 0.237109874 | 0.085408464 | 0.387932449 |
| 0.462692856 | 0.389752125 | 0.071681294 | 0.275008801 |
| 0.310689418 | 0.168292263 | 0.370649227 | 0.436914736 |
| 0.047183607 | 0.122616249 | 0.088641155 | 0.33655404  |
| 0.168971288 | 0.051172954 | 0.343193938 | 0.037357448 |
| 0.005144283 | 0.083933615 | 0.078854155 | 0.106334583 |
| 0.05938977  | 0.217729141 | 0.247248305 | 0.412900186 |
| 0.093526953 | 0.39728203  | 0.220126018 | 0.065902791 |
| 0.334162958 | 0.123322213 | 0.190499183 | 0.229471991 |
| 0.261672413 | 0.019303514 | 0.038239151 | 0.451194243 |
| 0.064944491 | 0.062663688 | 0.158759107 | 0.001395357 |
| 0.028795989 | 0.298594011 | 0.14445687  | 0.249309934 |
| 0.386945729 | 0.256080833 | 0.163776473 | 0.066369424 |
| 0.285343493 | 0.10772059  | 0.007441713 | 0.387036483 |
| 0.411449323 | 0.388490506 | 0.404626891 | 0.409192243 |
| 0.346821507 | 0.302986075 | 0.296277836 | 0.203893698 |
| 0.057210707 | 0.076076187 | 0.035089228 | 0.123786554 |
| 0.001102259 | 0.340403814 | 0.179497507 | 0.161075517 |
| 0.280841434 | 0.215121162 | 0.029798831 | 0.199234362 |
| 0.013320403 | 0.040429332 | 0.061710559 | 0.124560202 |
| 0.269932644 | 0.017268283 | 0.041200535 | 0.04432846  |
| 0.380286286 | 0.298462146 | 0.111577198 | 0.448503282 |
| 0.187250894 | 0.130519071 | 0.146184336 | 0.299595721 |
| 0.048684923 | 0.01978856  | 0.109815981 | 0.008325194 |
| 0.084453004 | 0.413092452 | 0.114378781 | 0.040362459 |
| 0.172978546 | 0.006711086 | 0.319748526 | 0.437732451 |
| 0.400654885 | 0.401794794 | 0.417186388 | 0.098436872 |
| 0.414154539 | 0.017756074 | 0.423504411 | 0.30252799  |
| 0.08705523  | 0.000703419 | 0.003767007 | 0.379282617 |
| 0.171386309 | 0.100993296 | 0.1506191   | 0.071060973 |
| 0.040229224 | 0.077297851 | 0.067494473 | 0.067412886 |
| 0.263453151 | 0.149269973 | 0.052421126 | 0.384112684 |
| 0.124125842 | 0.176494228 | 0.123722674 | 0.117835334 |
| 0.239713449 | 0.030438886 | 0.119081888 | 0.003594522 |
| 0.262226991 | 0.161200793 | 0.427022719 | 0.412765767 |
| 0.430069991 | 0.275441044 | 0.070643444 | 0.061299968 |
| 0.359452784 | 0.112078928 | 0.072382198 | 0.113780197 |
| 0.389620944 | 0.198010053 | 0.274010976 | 0.27853168  |
| 0.394846205 | 0.393127831 | 0.033229938 | 0.280116908 |
| 0.014430542 | 0.001587522 | 0.158331292 | 0.231831843 |
| 0.020935732 | 0.117315596 | 0.238830225 | 0.086400643 |
| 0.093807552 | 0.019096103 | 0.072667222 | 0.076599566 |
| 0.197734569 | 0.147907976 | 0.129472346 | 0.242183107 |
| 0.117078127 | 0.035257636 | 0.125284973 | 0.08397851  |

|             |             |             |             |
|-------------|-------------|-------------|-------------|
| 0.054792534 | 0.278926763 | 0.219012969 | 0.01966837  |
| 0.171882394 | 0.170108845 | 0.06345709  | 0.18865399  |
| 0.344373311 | 0.371495868 | 0.019711933 | 0.00857584  |
| 0.263060379 | 0.118953728 | 0.389725571 | 0.404085036 |
| 0.441908579 | 0.423192254 | 0.39265451  | 0.039673823 |
| 0.054642462 | 0.191837039 | 0.156744665 | 0.052804415 |
| 0.410767888 | 0.076144903 | 0.425999749 | 0.129889763 |
| 0.140437639 | 0.099064662 | 0.026262675 | 0.097314382 |
| 0.190850126 | 0.17374755  | 0.127265726 | 0.134800047 |
| 0.102162863 | 0.067229378 | 0.050688182 | 0.146246519 |
| 0.253819033 | 0.032884331 | 0.149453217 | 0.150276821 |
| 0.331370046 | 0.042274531 | 0.257667348 | 0.38336162  |
| 0.141618678 | 0.096408711 | 0.062914691 | 0.30104176  |
| 0.312341189 | 0.168397264 | 0.017314785 | 0.358693483 |
| 0.409601404 | 0.236821306 | 0.426753747 | 0.318617348 |
| 0.117673284 | 0.154469117 | 0.09632191  | 0.158130151 |
| 0.154779948 | 0.172513335 | 0.157561743 | 0.084549484 |
| 0.323550916 | 0.431876853 | 0.330436951 | 0.108884674 |
| 0.21643764  | 0.120742576 | 0.066125022 | 0.368250963 |
| 0.037352032 | 0.029518654 | 0.121747016 | 0.31188685  |
| 0.007060492 | 0.03895993  | 0.40434469  | 0.099947441 |
| 0.450382989 | 0.380455865 | 0.382363177 | 0.116350202 |
| 0.001677734 | 0.236815854 | 0.203900366 | 0.129285817 |
| 0.325772708 | 0.302458091 | 0.071211809 | 0.03637087  |
| 0.290315201 | 0.108983002 | 0.034449857 | 0.074539654 |
| 0.02360399  | 0.21096947  | 0.204223665 | 0.150173293 |
| 0.127205944 | 0.11095546  | 0.059402022 | 0.1651254   |
| 0.035214527 | 0.234792055 | 0.272937409 | 0.071491699 |
| 0.023750701 | 0.333545137 | 0.267955465 | 0.027647579 |
| 0.170696839 | 0.314708337 | 0.404059641 | 0.000467395 |
| 0.256171676 | 0.008755501 | 0.113641202 | 0.124354961 |
| 0.119833834 | 0.095625607 | 0.184662149 | 0.112801393 |
| 0.20369257  | 0.127136074 | 0.133129449 | 0.191739974 |
| 0.084720245 | 0.183557784 | 0.231578237 | 0.15479531  |
| 0.095133139 | 0.084416521 | 0.168470172 | 0.168118412 |
| 0.031321327 | 0.388881944 | 0.270524684 | 0.117154246 |
| 0.187118177 | 0.142393907 | 0.344968909 | 0.402002744 |
| 0.398703676 | 0.15897124  | 0.128333918 | 0.343154898 |
| 0.031925571 | 0.06237773  | 0.040086279 | 0.221898664 |
| 0.171314416 | 0.039913966 | 0.201514907 | 0.16437541  |
| 0.242356654 | 0.376700731 | 0.26486295  | 0.407037885 |
| 0.173652918 | 0.133930645 | 0.080600197 | 0.035321565 |
| 0.101151226 | 0.156029668 | 0.134795465 | 0.003669288 |
| 0.22417866  | 0.075798605 | 0.342423339 | 0.414360208 |
| 0.078198564 | 0.382396755 | 0.048707361 | 0.035310195 |
| 0.050635553 | 0.201871071 | 0.161213578 | 0.314203822 |
| 0.047971559 | 0.116219683 | 0.179344181 | 0.098458815 |
| 0.295282971 | 0.271928862 | 0.085853141 | 0.120477592 |
| 0.186619904 | 0.196496992 | 0.425621015 | 0.103485816 |
| 0.191469889 | 0.066458249 | 0.195366417 | 0.115933253 |
| 0.116285072 | 0.424071975 | 0.088573034 | 0.411687321 |
| 0.102642945 | 0.17721561  | 0.444292383 | 0.201831551 |
| 1           | 0.06854969  | 0.048333863 | 0.117157444 |
| 0.06780969  | 0.09858195  | 0.002502717 | 0.010194194 |



|                      |             |             |             |
|----------------------|-------------|-------------|-------------|
| 0.24449673           | 0.093340241 | 0.26279943  | 0.271541381 |
| 0.103323761          | 0.282831019 | 0.042692187 | 0.13602119  |
| 0.401825621          | 0.441499853 | 0.044625743 | 0.253284896 |
| 0.244988005          | 0.071554496 | 0.243026733 | 0.00714171  |
| 0.187506543          | 0.186888131 | 0.057248976 | 0.044948858 |
| 0.017916914          | 0.048949998 | 0.196410131 | 0.090796923 |
| 0.373500624          | 0.040884012 | 0.203001338 | 0.313827777 |
| 0.197765074          | 0.440071933 | 0.063272783 | 0.277750064 |
| 0.022255923          | 0.236555372 | 0.163674272 | 0.139698041 |
| 0.051080484          | 0.101596389 | 0.27554231  | 0.082688084 |
| 0.028891988          | 0.060334483 | 0.000679314 | 0.385785334 |
| 0.405489896          | 0.120590542 | 0.236741332 | 0.055936773 |
| 0.244491729          | 0.361370807 | 0.039132779 | 0.18001603  |
| 0.013656695          | 0.178641541 | 0.195573689 | 0.347740113 |
| 0.031311925          | 0.156537134 | 0.048937668 | 0.131030848 |
| 0.427035391          | 0.037076135 | 0.262397517 | 0.042706808 |
| 0.415726435          | 0.346441138 | 0.193507827 | 0.086509019 |
| 0.212548462          | 0.094247712 | 0.122496827 | 0.431145333 |
| 0.109143582          | 0.085632912 | 0.320843116 | 0.076673925 |
| 0.105937691          | 0.374555969 | 0.203164806 | 0.430735937 |
| 0.030803758          | 0.220035279 | 0.318129668 | 0.366081346 |
| 0.284083833          | 0.060960304 | 0.060451214 | 0.07929008  |
| 0.388989045          | 0.040171032 | 0.055700288 | 0.278601515 |
| 0.053629216          | 0.239317134 | 0.201625046 | 0.093745918 |
| 0.01825821           | 0.080121628 | 0.105784545 | 0.158141105 |
| 0.175960381          | 0.16809014  | 0.076579993 | 0.382149132 |
| 0.053244426          | 0.015925254 | 0.431177896 | 0.003002368 |
| 0.217669366          | 0.249979489 | 0.195721805 | 0.162463283 |
| 0.21950035           | 0.196865379 | 0.143482066 | 0.000651132 |
| 0.300909277          | 0.051568521 | 0.121656632 | 0.057370411 |
| 0.040251989          | 0.033152519 | 0.420852395 | 0.405379726 |
| 0.267092315          | 0.082371194 | 0.049741795 | 0.38343396  |
| 0.035591106          | 0.080166384 | 0.072643228 | 0.251953824 |
| 0.072285165          | 0.116402762 | 0.133401948 | 0.118245745 |
| 0.286689777          | 0.156855888 |             |             |
| SLC25A20 0.101556497 | 0.124752211 | 0.064798729 |             |
| 0.05062926           | 0.206499415 | 0.083202085 | 0.06919922  |
| 0.084888646          | 0.108903748 | 0.013558527 | 0.185791261 |
| 0.04017361           | 0.027146042 | 0.182888714 | 0.084690216 |
| 0.122231751          | 0.079338458 | 0.147179398 | 0.012257341 |
| 0.026320767          | 0.183012925 | 0.05732703  | 0.07052683  |
| 0.162662195          | 0.179970069 | 0.086101699 | 0.074670998 |
| 0.159735724          | 0.011742946 | 0.139945629 | 0.00477559  |
| 0.21691767           | 0.178948207 | 0.064193044 | 0.032914011 |
| 0.112311007          | 0.007742091 | 0.191619032 | 0.12547632  |
| 0.042711279          | 0.23287558  | 0.026887226 | 0.189418867 |
| 0.034160783          | 0.054845127 | 0.004575261 | 0.098049363 |
| 0.08890181           | 0.107668174 | 0.067931675 | 0.123653704 |
| 0.039527387          | 0.189379138 | 0.064091361 | 0.000761667 |
| 0.072370183          | 0.00848547  | 0.030692044 | 0.185386707 |
| 0.292776479          | 0.249251297 | 0.007906814 | 0.101909296 |
| 0.084407101          | 0.142746425 | 0.273930367 | 0.022559717 |
| 0.186328758          | 0.034812184 | 0.109430066 | 0.040243606 |
| 0.064109774          | 0.040301347 | 0.248394244 | 0.072173508 |

|             |             |             |             |
|-------------|-------------|-------------|-------------|
| 0.053609996 | 0.30795818  | 0.201040614 | 0.08110069  |
| 0.100842805 | 0.225496415 | 0.213543517 | 0.158138941 |
| 0.018538802 | 0.125963683 | 0.113224919 | 0.264638059 |
| 0.133633001 | 0.053258561 | 0.179211155 | 0.208972762 |
| 0.057475988 | 0.043924047 | 0.100596907 | 0.107939963 |
| 0.156997033 | 0.040715302 | 0.039480472 | 0.08379728  |
| 0.177134471 | 0.117483137 | 0.180111923 | 0.224469161 |
| 0.164339772 | 0.081733418 | 0.16552865  | 0.136055445 |
| 0.157239779 | 0.110977444 | 0.065279873 | 0.144721542 |
| 0.114859188 | 0.174757273 | 0.105974525 | 0.156782883 |
| 0.092714002 | 0.188704914 | 0.15345172  | 0.179216952 |
| 0.003553754 | 0.179840097 | 0.198914705 | 0.112537202 |
| 0.053069132 | 0.185961001 | 0.05073394  | 0.293086333 |
| 0.178365479 | 0.192867981 | 0.125938094 | 0.207152591 |
| 0.189426407 | 0.150750486 | 0.163181198 | 0.151998966 |
| 0.087444906 | 0.04036117  | 0.091059938 | 0.109692993 |
| 0.143707658 | 0.171787806 | 0.116924279 | 0.188020988 |
| 0.233653429 | 0.17099223  | 0.084460715 | 0.218454193 |
| 0.097886668 | 0.242515441 | 0.121007318 | 0.215493129 |
| 0.203662409 | 0.186303275 | 0.229674896 | 0.166319831 |
| 0.216844518 | 0.114342674 | 0.005668456 | 0.154593252 |
| 0.26963437  | 0.01187685  | 0.150382386 | 0.164790675 |
| 0.157087954 | 0.144292203 | 0.217069477 | 0.192832044 |
| 0.160249169 | 0.125661884 | 0.000746298 | 0.230739656 |
| 0.171222189 | 0.214669954 | 0.134307162 | 0.061065501 |
| 0.144263466 | 0.083336088 | 0.149161406 | 0.016361391 |
| 0.263983011 | 0.180618999 | 0.154274396 | 0.124100615 |
| 0.057037283 | 0.240921929 | 0.073392512 | 0.166808237 |
| 0.072607338 | 0.09698503  | 0.08507691  | 0.211172746 |
| 0.020323423 | 0.295026138 | 0.055239955 | 0.116874431 |
| 0.295978487 | 0.071942488 | 0.054159934 | 0.178411101 |
| 0.076308231 | 0.076644283 | 0.171750119 | 0.089857746 |
| 0.092234136 | 0.197464977 | 0.039451683 | 0.139316127 |
| 0.224710333 | 0.151481824 | 0.110114386 | 0.186704045 |
| 0.072445456 | 0.15253687  | 0.117741767 | 0.25347125  |
| 0.294937015 | 0.116455943 | 0.234935845 | 0.038216167 |
| 0.018798432 | 0.017775496 | 0.034966001 | 0.085345054 |
| 0.175779037 | 0.045349466 | 0.104348679 | 0.214105598 |
| 0.091829953 | 0.080085022 | 0.050561335 | 0.252656722 |
| 0.112117379 | 0.138340508 | 0.191424107 | 0.058298229 |
| 0.015296156 | 0.109867589 | 0.161284194 | 0.049142813 |
| 0.119860246 | 0.033076487 | 0.04173813  | 0.164950864 |
| 0.023059279 | 0.091802401 | 0.182544464 | 0.21508239  |
| 0.020720707 | 0.125104619 | 0.209628743 | 0.00263837  |
| 0.100711573 | 0.074729751 | 0.292109871 | 0.028942735 |
| 0.188775058 | 0.249933745 | 0.168454939 | 0.142346443 |
| 0.110826743 | 0.183249933 | 0.214192086 | 0.188099041 |
| 0.033303996 | 0.208006308 | 0.16519129  | 0.211589113 |
| 0.185534291 | 0.045896889 | 0.022100462 | 0.148060558 |
| 0.163343716 | 0.009593714 | 0.087436482 | 0.112927998 |
| 0.033253146 | 0.134257771 | 0.071270145 | 0.205656321 |
| 0.255240937 | 0.131211708 | 0.186088563 | 0.230822832 |
| 0.224225062 | 0.194437509 | 0.202879245 | 0.228879741 |
| 0.010566249 | 0.081993679 | 0.068229308 | 0.265774447 |

|             |             |             |             |
|-------------|-------------|-------------|-------------|
| 0.200995065 | 0.081788686 | 0.230243708 | 0.035594985 |
| 0.004067176 | 0.093129964 | 0.101042298 | 0.267600002 |
| 0.108877838 | 0.071338048 | 0.149236439 | 0.182627703 |
| 0.196794536 | 0.239316435 | 0.174489421 | 0.070704904 |
| 0.145706477 | 0.083796868 | 0.124436684 | 0.162406201 |
| 0.238578246 | 0.05242414  | 0.07836924  | 0.217634135 |
| 0.051737291 | 0.075742759 | 0.100259669 | 0.009749582 |
| 0.053035721 | 0.085401833 | 0.114211836 | 0.216580085 |
| 0.229590786 | 0.182586209 | 0.130699293 | 0.014409725 |
| 0.276331385 | 0.188473006 | 0.056378433 | 0.164268374 |
| 0.172507765 | 0.168226435 | 0.162075096 | 0.167730201 |
| 0.152513228 | 0.150796883 | 0.166459848 | 0.09081158  |
| 0.081992078 | 0.061665431 | 0.040483615 | 0.13214972  |
| 0.001729044 | 0.276107789 | 0.176450703 | 0.236447473 |
| 0.148542787 | 0.16481282  | 0.083663434 | 0.155062623 |
| 0.020496873 | 0.030412689 | 0.038248842 | 0.160620424 |
| 0.247213908 | 0.044588614 | 0.013327815 | 0.019615792 |
| 0.163861085 | 0.193773806 | 0.051219613 | 0.194802403 |
| 0.200262948 | 0.065433974 | 0.14888094  | 0.235113788 |
| 0.096883631 | 0.002543637 | 0.049667764 | 0.001009159 |
| 0.027683591 | 0.193195097 | 0.054966136 | 0.025795761 |
| 0.192874199 | 0.018567408 | 0.178290807 | 0.207480997 |
| 0.141524028 | 0.190156633 | 0.201222957 | 0.107162842 |
| 0.184780027 | 0.006956461 | 0.183654974 | 0.128031473 |
| 0.022641701 | 0.001948823 | 0.023816306 | 0.17103219  |
| 0.098277969 | 0.066871423 | 0.223645406 | 0.024747304 |
| 0.107262883 | 0.063375195 | 0.137101554 | 0.130280529 |
| 0.129575091 | 0.263503287 | 0.100059459 | 0.145741687 |
| 0.157997882 | 0.261243005 | 0.040269459 | 0.117999147 |
| 0.146430384 | 0.08904296  | 0.11086623  | 0.020130105 |
| 0.220183248 | 0.102141859 | 0.171543577 | 0.174225865 |
| 0.236077665 | 0.192628346 | 0.015819751 | 0.025588024 |
| 0.184338138 | 0.066445192 | 0.021860356 | 0.083724927 |
| 0.144991209 | 0.125348613 | 0.271596063 | 0.208695692 |
| 0.214530083 | 0.193406074 | 0.092261171 | 0.162639989 |
| 0.041770086 | 0.014038329 | 0.055518198 | 0.215273283 |
| 0.013277153 | 0.070918068 | 0.241955632 | 0.05748249  |
| 0.111692132 | 0.029882438 | 0.063797406 | 0.073826509 |
| 0.205826202 | 0.11055727  | 0.1634951   | 0.178026073 |
| 0.141475893 | 0.037488348 | 0.225917435 | 0.138957183 |
| 0.018253352 | 0.150989462 | 0.170513455 | 0.050613432 |
| 0.059298332 | 0.086189213 | 0.139966707 | 0.220187214 |
| 0.197794047 | 0.175468285 | 0.033444057 | 0.041940996 |
| 0.222019717 | 0.094899074 | 0.202713665 | 0.154035842 |
| 0.194776888 | 0.229316276 | 0.244931202 | 0.100803962 |
| 0.120502648 | 0.192837942 | 0.165443244 | 0.125810757 |
| 0.189329705 | 0.056925895 | 0.182657675 | 0.104150116 |
| 0.181386741 | 0.120294101 | 0.072826988 | 0.170348522 |
| 0.120685912 | 0.2641262   | 0.281988142 | 0.090691864 |
| 0.107346571 | 0.053906583 | 0.092307647 | 0.22108953  |
| 0.164565983 | 0.019733927 | 0.202411847 | 0.093803946 |
| 0.167693563 | 0.005196692 | 0.124890774 | 0.254035736 |
| 0.177186346 | 0.100868466 | 0.027233298 | 0.178598953 |
| 0.125535505 | 0.049025906 | 0.047923071 | 0.114850721 |

|             |             |             |             |
|-------------|-------------|-------------|-------------|
| 0.217241399 | 0.107425939 | 0.180605    | 0.249971446 |
| 0.13526532  | 0.115945157 | 0.058095964 | 0.120236414 |
| 0.201816122 | 0.092013371 | 0.187807549 | 0.13728208  |
| 0.264087283 | 0.221005291 | 0.134322069 | 0.256404235 |
| 0.091945217 | 0.071815477 | 0.047651772 | 0.167852444 |
| 0.054517299 | 0.039520453 | 0.029734718 | 0.146683557 |
| 0.025645679 | 0.05803778  | 0.201452903 | 0.167213651 |
| 0.224594503 | 0.188255651 | 0.23207508  | 0.091172526 |
| 0.000685506 | 0.116346822 | 0.167115411 | 0.071584104 |
| 0.125295903 | 0.20751573  | 0.041334944 | 0.122287194 |
| 0.325195746 | 0.084615718 | 0.074335654 | 0.022933929 |
| 0.009936948 | 0.089966256 | 0.295837404 | 0.133778962 |
| 0.217709447 | 0.062016296 | 0.052523866 | 0.202805151 |
| 0.023549065 | 0.309002027 | 0.247650874 | 0.015681836 |
| 0.011790761 | 0.183557273 | 0.116267114 | 0.073511181 |
| 0.120350061 | 0.17185977  | 0.232964841 | 0.001556707 |
| 0.143383665 | 0.032112023 | 0.246671085 | 0.246632046 |
| 0.24464324  | 0.16324922  | 0.276348454 | 0.11755446  |
| 0.10585788  | 0.159413482 | 0.172635098 | 0.305522686 |
| 0.213078773 | 0.182761089 | 0.142692641 | 0.071109646 |
| 0.135751866 | 0.158214594 | 0.129861754 | 0.113616139 |
| 0.076612525 | 0.16712768  | 0.2663005   | 0.100622891 |
| 0.29303346  | 0.065167901 | 0.308992876 | 0.142926021 |
| 0.288681174 | 0.087499323 | 0.1031697   | 0.135104291 |
| 0.004369854 | 0.018884068 | 0.045639026 | 0.100560317 |
| 0.232128199 | 0.069929805 | 0.073029962 | 0.06841607  |
| 0.084832593 | 0.253608494 | 0.267505147 | 0.238325869 |
| 0.120011827 | 0.061641927 | 0.015476918 | 0.118137978 |
| 0.130321869 | 0.150937576 | 0.190192324 | 0.014428963 |
| 0.198538968 | 0.032652312 | 0.154773059 | 0.167617774 |
| 0.054069429 | 0.290984827 | 0.007602884 | 0.065563903 |
| 0.007322619 | 0.095875841 | 0.211023522 | 0.123023931 |
| 0.038460205 | 0.193243941 | 0.198319197 | 0.038007869 |
| 0.146186186 | 0.108663857 | 0.101152239 | 0.115061429 |
| 0.190270015 | 0.14716006  | 0.181471128 | 0.089937605 |
| 0.065695125 | 0.132141495 | 0.052117395 | 0.141171213 |
| 0.189323627 | 0.179380121 | 0.134955995 | 0.175320105 |
| 0.08460372  | 0.158521576 | 0.263581841 | 0.154901342 |
| 0.06854969  | 1           | 0.048858544 | 0.03884032  |
| 0.085269769 | 0.064477121 | 0.000168621 | 0.011263599 |
| 0.277798648 | 0.042348926 | 0.082329898 | 0.174634994 |
| 0.140908587 | 0.265147689 | 0.026257289 | 0.081770996 |
| 0.138809287 | 0.180497337 | 0.039437574 | 0.265430604 |
| 0.183759061 | 0.188748849 | 0.09558418  | 0.003283581 |
| 0.082637127 | 0.072036397 | 0.018663835 | 0.119217103 |
| 0.033269136 | 0.039593773 | 0.076665702 | 0.06513887  |
| 0.195449159 | 0.015984091 | 0.069764674 | 0.152277547 |
| 0.176587431 | 0.181320905 | 0.180467997 | 0.199668334 |
| 0.011099189 | 0.231891587 | 0.092055097 | 0.059029885 |
| 0.091879429 | 0.097250115 | 0.220942311 | 0.108733294 |
| 0.100807218 | 0.077322787 | 0.001747295 | 0.230399096 |
| 0.14682823  | 0.076094366 | 0.228342019 | 0.013039285 |
| 0.329467827 | 0.216341963 | 0.031906556 | 0.066775372 |
| 0.055680653 | 0.135319327 | 0.292780818 | 0.182037566 |

|             |             |             |             |
|-------------|-------------|-------------|-------------|
| 0.008367376 | 0.068582194 | 0.093007181 | 0.104252727 |
| 0.176440606 | 0.020975442 | 0.241057252 | 0.01209463  |
| 0.158760152 | 0.154141416 | 0.106968775 | 0.092791931 |
| 0.069248064 | 0.114363056 | 0.035954921 | 0.201872086 |
| 0.26470635  | 0.123738649 | 0.192413764 | 0.126308174 |
| 0.086499535 | 0.188674358 | 0.064891856 | 0.191665594 |
| 0.127432152 | 0.282423855 | 0.18669407  | 0.155533344 |
| 0.339602288 | 0.112133442 | 0.071731332 | 0.136192412 |
| 0.145080252 | 0.069133307 | 0.048807568 | 0.178692283 |
| 0.060683918 | 0.271604879 | 0.05372739  | 0.195339748 |
| 0.065128345 | 0.111575142 | 0.081429794 | 0.202832536 |
| 0.192840142 | 0.127397461 | 0.104154829 | 0.284223328 |
| 0.110028375 | 0.051370723 | 0.268784074 | 0.006789523 |
| 0.117933993 | 0.194357977 | 0.271240509 | 0.119505287 |
| 0.207132602 | 0.112318487 | 0.050712481 | 0.004472598 |
| 0.195425082 | 0.060981868 | 0.11526411  | 0.108750165 |
| 0.018039021 | 0.060990703 | 0.209772802 | 0.210866521 |
| 0.196074246 | 0.021980005 | 0.01798862  | 0.181566532 |
| 0.031252091 | 0.03212953  | 0.039353477 | 0.082261589 |
| 0.084242304 | 0.028310109 | 0.048176284 | 0.060263271 |
| 0.174516825 | 0.146007348 |             |             |
| SLC31A1     | 0.005579855 | 0.155904675 | 0.003452161 |
| 0.024342752 | 0.272445653 | 0.091083055 | 0.00482843  |
| 0.013522268 | 0.120400576 | 0.059009836 | 0.161713717 |
| 0.000881556 | 0.221042659 | 0.204348256 | 0.005137069 |
| 0.267975533 | 0.00398502  | 0.017430649 | 0.020598472 |
| 0.044758055 | 0.237608962 | 0.157972116 | 0.076157157 |
| 0.223058187 | 0.037519432 | 0.088107115 | 0.241329909 |
| 0.221726631 | 0.146792008 | 0.240136647 | 0.04725722  |
| 0.155649378 | 0.302124319 | 0.234973253 | 0.000418882 |
| 0.156739825 | 0.031832428 | 0.142394308 | 0.101888806 |
| 0.180154392 | 0.112397548 | 0.067104147 | 0.077664865 |
| 0.098890404 | 0.001743115 | 0.053607438 | 0.255529993 |
| 0.100674311 | 0.069280913 | 0.00475055  | 0.195086991 |
| 0.089514571 | 0.101800012 | 0.130163006 | 0.000116202 |
| 0.273497963 | 0.250280368 | 0.234799878 | 0.190211544 |
| 0.058816364 | 0.029792236 | 0.117868788 | 0.057293126 |
| 0.197277532 | 0.229211819 | 0.10887044  | 0.085453289 |
| 0.206599575 | 0.218777432 | 0.251804673 | 0.035508846 |
| 0.095778471 | 0.001376426 | 0.039555545 | 0.00937855  |
| 0.131668152 | 0.075542402 | 0.203367801 | 0.233942562 |
| 0.144342394 | 0.190888644 | 0.078384541 | 0.167775269 |
| 0.132023397 | 0.316086197 | 0.154422847 | 0.17117772  |
| 0.181883821 | 0.009201574 | 0.210855003 | 0.213333305 |
| 0.00334856  | 0.115612903 | 0.177555013 | 0.017071485 |
| 0.169735903 | 0.166480109 | 0.11161768  | 0.219519227 |
| 0.319526105 | 0.250069446 | 0.167843888 | 0.104114932 |
| 0.207108454 | 0.006993486 | 0.144852587 | 0.350088643 |
| 0.125908197 | 0.008941985 | 0.121831191 | 0.288344809 |
| 0.192134519 | 0.22062092  | 0.183224401 | 0.173132666 |
| 0.25343432  | 0.216901823 | 0.177869882 | 0.173604577 |
| 0.051537259 | 0.211146074 | 0.039431988 | 0.004882784 |
| 0.004182048 | 0.014854409 | 0.113645634 | 0.126542175 |
| 0.251553958 | 0.117273414 | 0.031428135 | 0.116213218 |

|             |             |             |             |
|-------------|-------------|-------------|-------------|
| 0.298174826 | 0.146806019 | 0.208809763 | 0.192084757 |
| 0.002548595 | 0.193560486 | 0.238861241 | 0.042786358 |
| 0.179894878 | 0.020637996 | 0.285969423 | 0.168351459 |
| 0.144819097 | 0.276702467 | 0.016771861 | 0.161358098 |
| 0.042262283 | 0.224194115 | 0.179130923 | 0.042641235 |
| 0.190901673 | 0.161139203 | 0.252051722 | 0.341797517 |
| 0.16732843  | 0.083530786 | 0.022273375 | 0.166661264 |
| 0.230977193 | 0.031871405 | 0.257873614 | 0.270708806 |
| 0.187757317 | 0.282207742 | 0.268023741 | 0.253688761 |
| 0.187854947 | 0.008533287 | 0.02978027  | 0.192772864 |
| 0.182264672 | 0.169125596 | 0.039353383 | 0.208217068 |
| 0.270400905 | 0.08932059  | 0.242443924 | 0.102407182 |
| 0.220058621 | 0.226403243 | 0.23848292  | 0.163313847 |
| 0.082288943 | 0.095654435 | 0.291796964 | 0.137112531 |
| 0.004245608 | 0.010706935 | 0.00416722  | 0.135318769 |
| 0.052935003 | 0.064531766 | 0.067946465 | 0.214311202 |
| 0.068192828 | 0.065480117 | 0.223825563 | 0.322599076 |
| 0.004902397 | 0.17322988  | 0.031241319 | 0.027438701 |
| 0.005144247 | 0.026228574 | 0.034306843 | 0.030752567 |
| 0.133328668 | 0.043160141 | 0.233197801 | 0.246914917 |
| 0.150093177 | 0.036566007 | 0.181423136 | 0.221912261 |
| 0.207289108 | 0.271540458 | 0.070521302 | 0.002675334 |
| 0.092760346 | 0.118777664 | 0.241063974 | 0.242929289 |
| 0.031920917 | 0.055721649 | 0.202228134 | 0.316026468 |
| 0.049765258 | 0.017637017 | 0.136959254 | 0.139928681 |
| 0.024939996 | 0.129336145 | 0.244597193 | 0.141498231 |
| 0.001249843 | 0.096839802 | 0.236715771 | 0.105778376 |
| 0.107571263 | 0.173241353 | 0.19482027  | 0.245016993 |
| 0.157500676 | 0.172546152 | 0.260166192 | 0.319745354 |
| 0.074860841 | 0.040500892 | 0.255468253 | 0.073244879 |
| 0.228446488 | 0.034474314 | 0.161335426 | 0.079952067 |
| 0.07675981  | 0.143396424 | 0.304591966 | 0.155622873 |
| 0.017101172 | 0.205643357 | 0.165192275 | 0.239109712 |
| 0.125403662 | 0.248214521 | 0.266221322 | 0.212842996 |
| 0.14953233  | 0.185979527 | 0.260897314 | 0.222443925 |
| 0.248950052 | 0.080051326 | 0.007576556 | 0.256443472 |
| 0.122077029 | 0.283894621 | 0.084007939 | 0.240853468 |
| 0.183842658 | 0.147022343 | 0.034556028 | 0.27565592  |
| 0.170972136 | 0.054033933 | 0.219450181 | 0.248116873 |
| 0.068711686 | 0.210304212 | 0.155521266 | 0.28332617  |
| 0.04055158  | 0.139645704 | 0.11029688  | 0.255047022 |
| 0.039528072 | 0.007423833 | 0.006203124 | 0.069357409 |
| 0.205601217 | 0.199567513 | 0.234552937 | 0.223818781 |
| 0.021928493 | 0.169940089 | 0.075656421 | 0.092844987 |
| 0.150569937 | 0.189240386 | 0.297884896 | 0.259304147 |
| 0.078325854 | 0.004043786 | 0.024475646 | 0.185896034 |
| 0.002284641 | 0.196187983 | 0.079268574 | 0.000797022 |
| 0.002561083 | 0.155684388 | 0.012990424 | 0.040690932 |
| 0.291484549 | 0.039895218 | 0.04572154  | 0.058643743 |
| 0.194414062 | 0.014328304 | 0.002431496 | 0.230737744 |
| 0.204197759 | 0.193629484 | 0.195826627 | 0.157333028 |
| 0.220495581 | 0.210804112 | 0.262560315 | 0.075923387 |
| 0.011288889 | 0.006681156 | 0.176237692 | 0.124489008 |
| 0.000611058 | 0.22229745  | 0.185915797 | 0.031780748 |

|             |             |             |             |
|-------------|-------------|-------------|-------------|
| 0.274934445 | 0.121061462 | 0.002291346 | 0.273510279 |
| 0.001214063 | 0.224529122 | 0.0470638   | 0.07205373  |
| 0.266958226 | 0.000201502 | 0.059619492 | 0.124016976 |
| 0.131414571 | 0.109792679 | 0.187796336 | 0.215531977 |
| 0.142821127 | 0.017520137 | 0.157551737 | 0.260204721 |
| 0.006730568 | 0.029590094 | 0.073732701 | 0.012108433 |
| 0.051339    | 0.168348023 | 0.126467579 | 0.005591516 |
| 0.092809477 | 0.000854532 | 0.11733712  | 0.219161317 |
| 0.152066585 | 0.264325834 | 0.216559628 | 0.258827569 |
| 0.204995389 | 0.242362901 | 0.236067442 | 0.149798724 |
| 0.100598107 | 0.000135423 | 0.001322993 | 0.267124467 |
| 0.225944045 | 0.004725958 | 0.037392184 | 0.061666714 |
| 0.020884664 | 0.015065601 | 0.006446688 | 0.166841081 |
| 0.182482645 | 0.180241873 | 0.164324786 | 0.154071095 |
| 0.079734697 | 0.096223795 | 0.083325639 | 0.010955178 |
| 0.239908733 | 0.005405113 | 0.01148741  | 0.005022246 |
| 0.261282035 | 0.015328019 | 0.132058926 | 0.206807259 |
| 0.209702516 | 0.285236179 | 0.084978212 | 0.082094656 |
| 0.242361397 | 0.010575766 | 0.122523612 | 0.012690531 |
| 0.176209814 | 0.235569744 | 0.138300586 | 0.097489098 |
| 0.236285959 | 0.180977565 | 0.00226814  | 0.229593089 |
| 0.001286035 | 0.00389312  | 0.078521094 | 0.091444822 |
| 0.057370469 | 0.198507987 | 0.086404336 | 0.053072187 |
| 0.067057892 | 0.001770216 | 0.251563005 | 0.233776415 |
| 0.144008649 | 0.16490504  | 0.275465599 | 0.078053043 |
| 0.151473344 | 0.106906    | 0.061194246 | 0.027916808 |
| 0.071549775 | 0.090936867 | 0.038732708 | 0.001011188 |
| 0.161287212 | 0.218227952 | 0.005867659 | 0.032525034 |
| 0.22873593  | 0.252170228 | 0.005585171 | 0.002313002 |
| 0.077334972 | 0.124550806 | 0.269820645 | 0.194757762 |
| 0.18680397  | 0.234522958 | 0.126711906 | 0.046862667 |
| 0.005844689 | 0.185875366 | 0.289532666 | 0.062318537 |
| 0.221228655 | 0.005656622 | 0.179675941 | 0.340355995 |
| 0.02148651  | 0.044144155 | 0.0043901   | 0.01335078  |
| 0.312028833 | 0.046715951 | 0.088415176 | 0.022016204 |
| 0.12467326  | 0.197023703 | 0.003880796 | 0.05653018  |
| 0.132610505 | 0.210977795 | 0.037128871 | 0.060752925 |
| 0.128782813 | 0.045943219 | 0.272238725 | 0.186228098 |
| 0.021953208 | 0.016660945 | 0.029071832 | 0.211165875 |
| 0.228749604 | 0.166879095 | 0.003211564 | 0.16161206  |
| 0.244482175 | 0.235570964 | 0.180288615 | 0.219609358 |
| 0.011487957 | 0.225934725 | 0.212899235 | 0.200212939 |
| 0.051451097 | 0.090860872 | 0.086341821 | 0.007201402 |
| 0.109888887 | 0.166940796 | 0.163664767 | 0.050099951 |
| 0.185068288 | 0.015245584 | 0.004376308 | 0.217409763 |
| 0.190117444 | 0.00820129  | 0.079808506 | 0.260763856 |
| 0.002429055 | 0.256108428 | 0.265880738 | 0.050483742 |
| 0.214813093 | 0.255040682 | 0.172985538 | 0.041184187 |
| 0.007692495 | 0.295943595 | 0.193511766 | 0.1366864   |
| 0.160532478 | 0.118750437 | 0.031078185 | 0.014004743 |
| 0.124168979 | 0.008245224 | 0.031772857 | 0.062603198 |
| 0.156145486 | 0.136309468 | 0.066960481 | 0.057224126 |
| 0.091304723 | 0.01073123  | 0.218165041 | 0.058922988 |
| 0.152797906 | 0.086735007 | 0.166371399 | 0.045948733 |

|             |             |             |             |
|-------------|-------------|-------------|-------------|
| 0.14762095  | 0.226170564 | 0.171975235 | 0.00118686  |
| 0.280730838 | 0.214370433 | 0.212640229 | 8.32E-05    |
| 0.263719777 | 9.49E-05    | 0.095654219 | 0.099636262 |
| 0.080344367 | 0.080149386 | 0.175381454 | 0.128538618 |
| 0.123800105 | 0.061071677 | 0.082457389 | 0.093512433 |
| 0.051864412 | 0.053365904 | 0.22376132  | 0.094364284 |
| 0.122626093 | 0.018039507 | 0.013080641 | 0.012555917 |
| 0.006765539 | 0.209362376 | 0.066697772 | 0.007584183 |
| 0.091991925 | 0.09330037  | 0.153505917 | 0.177983505 |
| 0.21293611  | 0.014270225 | 0.119868009 | 0.17810111  |
| 0.073926508 | 0.050378539 | 0.003004184 | 0.124411558 |
| 0.063169326 | 0.131486259 | 0.124617694 | 0.068759323 |
| 0.167722004 | 0.139574832 | 0.063531418 | 0.194395736 |
| 0.137844259 | 0.138689502 | 0.055474065 | 0.021797743 |
| 0.032013532 | 0.023941551 | 0.260005608 | 0.001070209 |
| 0.149514358 | 0.028709259 | 0.24979912  | 0.16821546  |
| 0.232421211 | 0.163529683 | 0.044216672 | 0.008703335 |
| 0.043104807 | 0.029962756 | 0.028163663 | 0.221751187 |
| 0.239381386 | 0.033302816 | 0.214543881 | 0.03507751  |
| 0.264064586 | 0.23157266  | 0.132498988 | 0.050861098 |
| 0.088681221 | 0.03968939  | 0.164709067 | 0.011925799 |
| 0.197532665 | 0.148990957 | 0.098821724 | 0.142956202 |
| 0.106140945 | 0.244870716 | 0.005825971 | 0.25048145  |
| 0.164265763 | 0.022180994 | 0.191195191 | 0.08063903  |
| 0.048333863 | 0.048858544 | 1           | 0.076607322 |
| 0.052092502 | 0.217370544 | 0.007135157 | 0.049149311 |
| 0.177204078 | 0.090682147 | 0.160299129 | 0.191454841 |
| 0.192698335 | 0.201385743 | 0.243398156 | 0.058449823 |
| 0.153217747 | 0.156314577 | 0.058628984 | 0.093130571 |
| 0.13697845  | 0.014982065 | 0.112561886 | 0.008350674 |
| 0.227153605 | 0.253569763 | 0.086459638 | 0.004697583 |
| 0.000926563 | 0.231059164 | 0.181976563 | 0.006478711 |
| 0.284834638 | 0.219395142 | 0.127857078 | 0.229701762 |
| 0.039003735 | 0.153901727 | 0.04268762  | 0.238955441 |
| 0.003123774 | 0.091908262 | 0.248889908 | 0.158913685 |
| 0.098959256 | 0.248284578 | 0.21775478  | 0.246712346 |
| 0.002762596 | 0.101468509 | 5.69E-05    | 0.123703491 |
| 0.140496504 | 0.253336973 | 0.050643666 | 0.068653399 |
| 0.144763608 | 0.170804951 | 0.091306254 | 0.18862376  |
| 0.00154814  | 0.29129317  | 0.061853289 | 0.156957574 |
| 0.127011374 | 0.144403059 | 0.010348828 | 0.243949283 |
| 0.122222616 | 0.089338624 | 0.083354852 | 0.112337589 |
| 0.181873516 | 0.154954109 | 0.026415137 | 0.11293443  |
| 0.158884158 | 0.006599821 | 0.082127098 | 0.228341089 |
| 0.065589109 | 0.242274158 | 0.300666362 | 0.055848061 |
| 0.260759935 | 0.136445479 | 0.192250809 | 0.216147582 |
| 0.02935504  | 0.088031598 | 0.262030462 | 0.190019707 |
| 0.153150593 | 0.177815313 | 0.191328459 | 0.12842936  |
| 0.14773349  | 0.01345763  | 0.152792058 | 0.129331659 |
| 0.21150782  | 0.147541435 | 0.09532097  | 0.134533512 |
| 0.005970964 | 0.030209244 | 0.083681234 | 0.029025904 |
| 0.12803364  | 0.201076372 | 0.137174788 | 0.157117723 |
| 0.042182033 | 0.004776139 | 0.187387411 | 0.053129982 |
| 0.075997829 | 0.242771382 | 0.080098812 | 0.205008189 |



|             |             |             |             |
|-------------|-------------|-------------|-------------|
| 0.038993042 | 0.121232938 | 0.071174494 | 0.001917469 |
| 0.241873174 | 0.056412852 | 0.129445777 | 0.113588486 |
| 0.137981861 | 0.003138239 | 0.168504248 | 0.271226137 |
| 0.104181214 | 0.104311891 | 0.142014032 | 0.180617027 |
| 0.214834771 | 0.177621688 | 0.156514343 | 0.141056857 |
| 0.255255439 | 0.11034687  | 0.156507479 | 0.201643038 |
| 0.156235129 | 0.056684128 |             |             |
| SLC35A5     | 0.031193469 | 0.4391003   | 0.03024211  |
| 0.041183829 | 0.161856488 | 0.152429392 | 0.024350153 |
| 0.050699915 | 0.340897434 | 0.168499374 | 0.175837751 |
| 0.00606251  | 0.044013807 | 0.417608257 | 0.022742655 |
| 0.235847532 | 0.01121073  | 0.046916176 | 0.045956952 |
| 0.093930978 | 0.134850253 | 0.122931944 | 0.221201439 |
| 0.134855419 | 0.172508671 | 0.235168023 | 0.251721735 |
| 0.48599656  | 0.127079198 | 0.310866697 | 0.099505981 |
| 0.370680481 | 0.1824483   | 0.196319333 | 0.006868342 |
| 0.232462892 | 0.009891947 | 0.41278135  | 0.083880498 |
| 0.053305276 | 0.304417751 | 0.203130918 | 0.077461167 |
| 0.209303555 | 0.014997607 | 0.134567385 | 0.317594137 |
| 0.23973365  | 0.115875362 | 0.045154001 | 0.330423059 |
| 0.161486535 | 0.252431452 | 0.373440954 | 0.001177906 |
| 0.128174464 | 0.052354787 | 0.104891582 | 0.491824759 |
| 0.125201231 | 0.047727959 | 0.152920359 | 0.135362775 |
| 0.287480681 | 0.290453165 | 0.175174114 | 0.164374487 |
| 0.46809712  | 0.075472396 | 0.374145578 | 0.061386671 |
| 0.169400714 | 0.018378023 | 0.111113676 | 0.074165274 |
| 0.154462091 | 0.091983522 | 0.17558179  | 0.122564745 |
| 0.439209463 | 0.492774933 | 0.156292112 | 0.497906786 |
| 0.050759264 | 0.202493805 | 0.098943201 | 0.210078763 |
| 0.298288333 | 0.041370192 | 0.294855312 | 0.486157658 |
| 0.027721938 | 0.298759671 | 0.319125    | 0.105093568 |
| 0.413752372 | 0.138921425 | 0.248710181 | 0.064762133 |
| 0.25494394  | 0.18392745  | 0.480481056 | 0.190115683 |
| 0.154127213 | 0.053261465 | 0.48642611  | 0.185139114 |
| 0.095315179 | 0.047692467 | 0.077361909 | 0.429896868 |
| 0.273826528 | 0.467178627 | 0.418079973 | 0.300360117 |
| 0.207509783 | 0.471237217 | 0.283317482 | 0.407147579 |
| 0.128838629 | 0.512059772 | 0.092355885 | 0.01404735  |
| 0.036344634 | 0.031460677 | 0.106300856 | 0.243564872 |
| 0.437318723 | 0.242478289 | 0.076521235 | 0.096247805 |
| 0.412026852 | 0.483920149 | 0.51810012  | 0.360635977 |
| 0.015137279 | 0.11757458  | 0.204223368 | 0.118114039 |
| 0.274343845 | 0.074113671 | 0.108692887 | 0.490826537 |
| 0.321079319 | 0.371345274 | 0.069550117 | 0.483954688 |
| 0.095339431 | 0.466851565 | 0.446625845 | 0.069615814 |
| 0.49054856  | 0.477503863 | 0.464240352 | 0.290216822 |
| 0.449607802 | 0.160505143 | 0.043051175 | 0.342823541 |
| 0.435682724 | 0.004097992 | 0.464671097 | 0.479402091 |
| 0.488931077 | 0.415591063 | 0.482660307 | 0.485779911 |
| 0.500140197 | 0.048422812 | 0.023724639 | 0.170146996 |
| 0.488168097 | 0.328604172 | 0.053802178 | 0.239147264 |
| 0.223596818 | 0.194722971 | 0.394291577 | 0.107724585 |
| 0.468204796 | 0.419013325 | 0.483104648 | 0.335906037 |
| 0.210896228 | 0.282378116 | 0.237170871 | 0.462020544 |

|             |             |             |             |
|-------------|-------------|-------------|-------------|
| 0.01574355  | 0.04713543  | 0.042298595 | 0.24484321  |
| 0.158763872 | 0.084040478 | 0.16121341  | 0.227593332 |
| 0.106756049 | 0.185739967 | 0.145203438 | 0.266735508 |
| 0.059517378 | 0.272314787 | 0.08212815  | 0.094162977 |
| 0.012215699 | 0.131197952 | 0.059138967 | 0.050585386 |
| 0.110999702 | 0.24089157  | 0.358507541 | 0.465626477 |
| 0.161141961 | 0.137234476 | 0.332391065 | 0.430595294 |
| 0.358125399 | 0.204439019 | 0.178713466 | 0.001910913 |
| 0.092097843 | 0.161911887 | 0.085520101 | 0.263581637 |
| 0.179593697 | 0.083988056 | 0.23956859  | 0.286394983 |
| 0.149676    | 0.083339968 | 0.142050122 | 0.394254258 |
| 0.13180114  | 0.100976061 | 0.384926025 | 0.268098797 |
| 0.001169476 | 0.156468758 | 0.383360799 | 0.050351211 |
| 0.237878588 | 0.048208644 | 0.098098491 | 0.416059275 |
| 0.127899808 | 0.088849681 | 0.47523571  | 0.295030838 |
| 0.145103708 | 0.239348326 | 0.493720884 | 0.028788836 |
| 0.206728932 | 0.014036934 | 0.172731068 | 0.222519883 |
| 0.139270817 | 0.208973829 | 0.174368394 | 0.091386569 |
| 0.097354941 | 0.496237919 | 0.35331843  | 0.478378846 |
| 0.138691774 | 0.495347109 | 0.407381437 | 0.38545184  |
| 0.242192407 | 0.206015062 | 0.061119523 | 0.365144912 |
| 0.411134016 | 0.128638627 | 0.068404582 | 0.415300696 |
| 0.187907068 | 0.295831868 | 0.040415155 | 0.442096768 |
| 0.458666188 | 0.478960962 | 0.048150015 | 0.28209699  |
| 0.297477711 | 0.115763149 | 0.371663585 | 0.497003851 |
| 0.15396086  | 0.178000941 | 0.115459631 | 0.322653275 |
| 0.105564914 | 0.076483873 | 0.29523862  | 0.087840289 |
| 0.004817005 | 0.049859497 | 0.038934943 | 0.05489631  |
| 0.056947039 | 0.330002638 | 0.2734269   | 0.490487772 |
| 0.049073477 | 0.381394673 | 0.193844936 | 0.088802591 |
| 0.392997459 | 0.169910132 | 0.222920409 | 0.257005737 |
| 0.189956154 | 0.00416379  | 0.034256066 | 0.489943045 |
| 0.037526949 | 0.087645272 | 0.174008184 | 0.000796159 |
| 0.019014301 | 0.423434277 | 0.094629065 | 0.177197294 |
| 0.436412176 | 0.182687035 | 0.137207347 | 0.154387565 |
| 0.235014734 | 0.047106301 | 0.000311579 | 0.472515261 |
| 0.491807982 | 0.463229275 | 0.494130436 | 0.470965497 |
| 0.433119966 | 0.360720076 | 0.338404282 | 0.213461612 |
| 0.038624378 | 0.042905963 | 0.071057939 | 0.11225933  |
| 0.0034205   | 0.290805255 | 0.161345276 | 0.092239377 |
| 0.353454385 | 0.214838822 | 0.014282019 | 0.232278756 |
| 0.006534379 | 0.081638186 | 0.126913999 | 0.088953473 |
| 0.26417671  | 0.005933365 | 0.076750681 | 0.122465165 |
| 0.413005666 | 0.302750542 | 0.146910493 | 0.507421872 |
| 0.159338518 | 0.119535467 | 0.121705379 | 0.300744612 |
| 0.026310304 | 0.075381242 | 0.156209475 | 0.022713891 |
| 0.105979155 | 0.455521505 | 0.161258135 | 0.025471233 |
| 0.145714365 | 0.001580952 | 0.320610994 | 0.500749905 |
| 0.471684606 | 0.485380532 | 0.463482872 | 0.100171707 |
| 0.473707904 | 0.069112243 | 0.507634465 | 0.374521976 |
| 0.167392492 | 0.000290142 | 0.001690466 | 0.45078858  |
| 0.21352447  | 0.064597258 | 0.088861801 | 0.133528773 |
| 0.032498717 | 0.071612493 | 0.028111156 | 0.057267856 |
| 0.292075845 | 0.105876807 | 0.067312991 | 0.468109026 |

|             |             |             |             |
|-------------|-------------|-------------|-------------|
| 0.097631334 | 0.124206673 | 0.187891421 | 0.073105216 |
| 0.25642959  | 0.016821791 | 0.074442292 | 0.001753742 |
| 0.269991008 | 0.112141004 | 0.470881398 | 0.496117867 |
| 0.448010465 | 0.271432817 | 0.163912729 | 0.139833324 |
| 0.419469611 | 0.09478882  | 0.158832292 | 0.089505058 |
| 0.473121904 | 0.241280744 | 0.227198227 | 0.241289298 |
| 0.451537235 | 0.430375416 | 0.012846005 | 0.321945526 |
| 0.003859564 | 0.000666756 | 0.194060019 | 0.197236676 |
| 0.049718447 | 0.172537289 | 0.182899183 | 0.109779803 |
| 0.09626567  | 0.011576178 | 0.101851224 | 0.089705829 |
| 0.168127669 | 0.174754121 | 0.125549727 | 0.210531274 |
| 0.090649791 | 0.045729693 | 0.068758777 | 0.059263684 |
| 0.125740963 | 0.276632709 | 0.172265413 | 0.00876414  |
| 0.23977586  | 0.226825704 | 0.023553697 | 0.109423576 |
| 0.37405099  | 0.451299379 | 0.014451298 | 0.002014602 |
| 0.206583873 | 0.135944628 | 0.460510021 | 0.491265008 |
| 0.504452139 | 0.474184119 | 0.359802552 | 0.040751917 |
| 0.026785434 | 0.174360388 | 0.149840511 | 0.029141906 |
| 0.487669672 | 0.055908333 | 0.475161259 | 0.15522834  |
| 0.076365214 | 0.070670801 | 0.009595607 | 0.042848128 |
| 0.242130255 | 0.107209936 | 0.067850881 | 0.106008486 |
| 0.112653027 | 0.094719122 | 0.019618817 | 0.100777356 |
| 0.267529581 | 0.065027979 | 0.091070538 | 0.137015483 |
| 0.312155203 | 0.157946943 | 0.33600636  | 0.393846137 |
| 0.088745573 | 0.065164383 | 0.103378354 | 0.327704214 |
| 0.408788963 | 0.285815884 | 0.008903662 | 0.464873254 |
| 0.460694848 | 0.316139698 | 0.483498342 | 0.330165043 |
| 0.062089847 | 0.179453184 | 0.147179823 | 0.183495688 |
| 0.109036321 | 0.174710185 | 0.124205539 | 0.037363379 |
| 0.267670527 | 0.466489627 | 0.38736919  | 0.056787183 |
| 0.280351566 | 0.104518001 | 0.048818731 | 0.439821353 |
| 0.058713559 | 0.031120546 | 0.207729922 | 0.412566234 |
| 0.000330135 | 0.058509137 | 0.46738718  | 0.083909719 |
| 0.496438479 | 0.434000988 | 0.384720331 | 0.115193036 |
| 0.001105877 | 0.306825921 | 0.214145588 | 0.14139053  |
| 0.411491992 | 0.2903549   | 0.080297281 | 0.02154746  |
| 0.213866726 | 0.071623527 | 0.042915916 | 0.13602817  |
| 0.074204262 | 0.289256715 | 0.131926732 | 0.130348303 |
| 0.071108319 | 0.094699349 | 0.090328794 | 0.093321037 |
| 0.075919175 | 0.163572853 | 0.264252348 | 0.170985324 |
| 0.067550516 | 0.404221735 | 0.342938133 | 0.010478152 |
| 0.204480695 | 0.372541352 | 0.404711875 | 0.000367892 |
| 0.319221987 | 0.002008798 | 0.074357177 | 0.072968648 |
| 0.067708064 | 0.079739815 | 0.142147647 | 0.098114561 |
| 0.249975666 | 0.087945534 | 0.090832474 | 0.130573616 |
| 0.048345606 | 0.106910196 | 0.239538267 | 0.170543025 |
| 0.087204999 | 0.042992627 | 0.102814856 | 0.112804016 |
| 0.016177376 | 0.45864708  | 0.200733583 | 0.066692154 |
| 0.131722186 | 0.155401171 | 0.284084707 | 0.495699389 |
| 0.364354537 | 0.120161434 | 0.15040549  | 0.415696393 |
| 0.152984763 | 0.125088733 | 0.030471701 | 0.224629368 |
| 0.11651564  | 0.070449445 | 0.23789227  | 0.205804672 |
| 0.361694568 | 0.351958271 | 0.19399175  | 0.402540918 |
| 0.142618613 | 0.203685573 | 0.152765082 | 0.022629348 |

|             |             |             |             |
|-------------|-------------|-------------|-------------|
| 0.066721432 | 0.103013552 | 0.120269583 | 0.000229356 |
| 0.222671864 | 0.099320498 | 0.424504718 | 0.471112376 |
| 0.126390296 | 0.336850297 | 0.14953242  | 0.029822797 |
| 0.144823244 | 0.181137545 | 0.095007534 | 0.386241735 |
| 0.092743488 | 0.066975718 | 0.145051332 | 0.14161029  |
| 0.355743632 | 0.367277241 | 0.098503151 | 0.11253302  |
| 0.13501106  | 0.136987714 | 0.475282579 | 0.059513508 |
| 0.290199134 | 0.055089861 | 0.295785901 | 0.113668403 |
| 0.080044323 | 0.499174958 | 0.035309748 | 0.502910157 |
| 0.136086172 | 0.116973931 | 0.452947527 | 0.174537805 |
| 0.117157444 | 0.03884032  | 0.076607322 | 1           |
| 0.086642565 | 0.136744121 | 0.008969304 | 0.023821021 |
| 0.219121908 | 0.150546859 | 0.393062707 | 0.295288289 |
| 0.083737517 | 0.260330056 | 0.086659812 | 0.147146979 |
| 0.488279543 | 0.493592289 | 0.076308918 | 0.183775131 |
| 0.265089405 | 0.034027835 | 0.28813996  | 0.013738124 |
| 0.279516748 | 0.294497162 | 0.166361043 | 0.02091496  |
| 0.006854746 | 0.082245436 | 0.271438124 | 0.060641342 |
| 0.441639031 | 0.093967004 | 0.294486392 | 0.342684984 |
| 0.146753761 | 0.487989014 | 0.039164635 | 0.287469071 |
| 0.028891047 | 0.170811955 | 0.20943359  | 0.227488336 |
| 0.065108071 | 0.114609675 | 0.264780837 | 0.080853803 |
| 0.01008435  | 0.086333369 | 0.00032293  | 0.366699337 |
| 0.471049612 | 0.165823437 | 0.174546703 | 0.17514653  |
| 0.176628899 | 0.355615719 | 0.0948239   | 0.251595536 |
| 0.00230939  | 0.205040303 | 0.111130327 | 0.368931958 |
| 0.089078437 | 0.238738352 | 0.016665369 | 0.166556806 |
| 0.455927371 | 0.098643962 | 0.219052182 | 0.117183004 |
| 0.484891358 | 0.377896934 | 0.149969907 | 0.084744762 |
| 0.332830878 | 0.049440894 | 0.184984308 | 0.505098021 |
| 0.061233352 | 0.07003602  | 0.374233863 | 0.060550591 |
| 0.142847553 | 0.370184298 | 0.307196445 | 0.509924431 |
| 0.021196853 | 0.151165424 | 0.363106429 | 0.44381617  |
| 0.217569377 | 0.060665787 | 0.085784975 | 0.072696285 |
| 0.447226362 | 0.030118706 | 0.103208434 | 0.264835239 |
| 0.076268243 | 0.206417375 | 0.284266897 | 0.061953469 |
| 0.011473446 | 0.069383366 | 0.13722937  | 0.08796741  |
| 0.160412596 | 0.175926461 | 0.078990777 | 0.329475147 |
| 0.038067496 | 0.005303359 | 0.403071277 | 0.00723541  |
| 0.200948307 | 0.245061674 | 0.135215371 | 0.160152698 |
| 0.149187334 | 0.23947669  | 0.197397205 | 0.000300045 |
| 0.346258949 | 0.01615547  | 0.125043631 | 0.067206288 |
| 0.122562373 | 0.020584448 | 0.431831563 | 0.472142963 |
| 0.22111413  | 0.153872636 | 0.139710842 | 0.445182358 |
| 0.05586939  | 0.157164178 | 0.146748359 | 0.32709292  |
| 0.085261854 | 0.2092743   | 0.202344626 | 0.14798841  |
| 0.295883973 | 0.117897548 |             |             |
| SLC35B1     | 0.071782828 | 0.249210601 | 0.04778454  |
| 0.052771726 | 0.196062035 | 0.084104806 | 0.084420387 |
| 0.088545278 | 0.242560722 | 0.046306024 | 0.161788999 |
| 0.036275279 | 0.029993767 | 0.306839475 | 0.087628052 |
| 0.196816563 | 0.069045772 | 0.157344404 | 0.036392426 |
| 0.077758844 | 0.202751459 | 0.057764527 | 0.119786845 |
| 0.191808007 | 0.219852824 | 0.167874943 | 0.142816633 |

|             |             |             |             |
|-------------|-------------|-------------|-------------|
| 0.28690599  | 0.026711398 | 0.184731499 | 0.019198017 |
| 0.344284365 | 0.202662827 | 0.10111218  | 0.025465347 |
| 0.153306777 | 0.023372734 | 0.349268061 | 0.14173986  |
| 0.042204668 | 0.317517953 | 0.067205661 | 0.133480699 |
| 0.099420121 | 0.040929242 | 0.017329442 | 0.216760277 |
| 0.179244623 | 0.119134217 | 0.077802056 | 0.198561209 |
| 0.088463181 | 0.206803626 | 0.160933254 | 0.002619971 |
| 0.080653188 | 0.015852323 | 0.048947028 | 0.306132886 |
| 0.232757962 | 0.166542687 | 0.040043859 | 0.159316732 |
| 0.200161488 | 0.257592694 | 0.285595455 | 0.077545406 |
| 0.309694294 | 0.051582027 | 0.206733326 | 0.053870263 |
| 0.132970499 | 0.058521449 | 0.242633806 | 0.126419327 |
| 0.100776257 | 0.209795777 | 0.175109774 | 0.106014897 |
| 0.228961974 | 0.380021986 | 0.247663749 | 0.308627069 |
| 0.073530791 | 0.181872962 | 0.105673127 | 0.31613868  |
| 0.280783241 | 0.096417107 | 0.231769858 | 0.355365653 |
| 0.084565764 | 0.124874738 | 0.24276559  | 0.163687572 |
| 0.245891797 | 0.064356595 | 0.094872498 | 0.05059906  |
| 0.228935741 | 0.188131166 | 0.347616517 | 0.248184046 |
| 0.161511654 | 0.105063992 | 0.305912816 | 0.173502283 |
| 0.108365258 | 0.098048943 | 0.092941665 | 0.263678263 |
| 0.198132033 | 0.290021873 | 0.248258596 | 0.304570083 |
| 0.168058789 | 0.305069191 | 0.211997613 | 0.291812235 |
| 0.013738724 | 0.320953182 | 0.152317062 | 0.068413922 |
| 0.063088593 | 0.115747283 | 0.100533979 | 0.333958306 |
| 0.275735173 | 0.233272222 | 0.126332203 | 0.207200191 |
| 0.31828756  | 0.284111573 | 0.320475471 | 0.282998778 |
| 0.066941554 | 0.068252891 | 0.155406153 | 0.092762015 |
| 0.257560026 | 0.198932375 | 0.121077614 | 0.339329058 |
| 0.289914581 | 0.278253944 | 0.089109229 | 0.366287508 |
| 0.172744702 | 0.358495544 | 0.231989947 | 0.168203492 |
| 0.341687376 | 0.314251378 | 0.348242018 | 0.213416318 |
| 0.315065131 | 0.122965398 | 0.046068978 | 0.294987655 |
| 0.360568981 | 0.01019814  | 0.280161258 | 0.300587475 |
| 0.295726701 | 0.256110915 | 0.362357488 | 0.309062411 |
| 0.29790406  | 0.138782875 | 0.011440584 | 0.278696159 |
| 0.317790771 | 0.27490663  | 0.115629331 | 0.135469201 |
| 0.221916689 | 0.117529521 | 0.252378661 | 0.042245202 |
| 0.399270974 | 0.269622086 | 0.280169749 | 0.262073555 |
| 0.156162788 | 0.301030714 | 0.139131361 | 0.290283958 |
| 0.058961806 | 0.079861399 | 0.084122463 | 0.313987206 |
| 0.035608703 | 0.230434473 | 0.101964622 | 0.222132921 |
| 0.249628324 | 0.119024086 | 0.074281201 | 0.2289992   |
| 0.108176111 | 0.136815413 | 0.150079349 | 0.150924552 |
| 0.067410408 | 0.229727605 | 0.074333956 | 0.079266807 |
| 0.206310533 | 0.252207434 | 0.200209584 | 0.312497202 |
| 0.149341128 | 0.180596656 | 0.215449717 | 0.350397638 |
| 0.382213237 | 0.150556487 | 0.297493774 | 0.016865091 |
| 0.070450905 | 0.057121796 | 0.045973893 | 0.144046223 |
| 0.234994878 | 0.097613093 | 0.207455547 | 0.250871307 |
| 0.123245789 | 0.125438064 | 0.105012318 | 0.342421125 |
| 0.184177417 | 0.104499045 | 0.30159641  | 0.148571998 |
| 0.011084074 | 0.162532808 | 0.256507425 | 0.104804974 |
| 0.251697176 | 0.049435041 | 0.037442374 | 0.297123934 |

|             |             |             |             |
|-------------|-------------|-------------|-------------|
| 0.061253802 | 0.120584489 | 0.295590407 | 0.261245365 |
| 0.058937408 | 0.230148366 | 0.358006755 | 0.018415633 |
| 0.175170778 | 0.038962443 | 0.288864191 | 0.080014465 |
| 0.214165787 | 0.325428909 | 0.184301913 | 0.106229607 |
| 0.113667932 | 0.332182986 | 0.275291088 | 0.313181472 |
| 0.076603386 | 0.358281137 | 0.275102599 | 0.297201495 |
| 0.227132845 | 0.119958543 | 0.036065578 | 0.24661764  |
| 0.282206883 | 0.061684514 | 0.113376991 | 0.239308111 |
| 0.105532625 | 0.228936251 | 0.084285446 | 0.336695915 |
| 0.366145812 | 0.267650124 | 0.131710797 | 0.305712502 |
| 0.271673043 | 0.160774383 | 0.285689135 | 0.378563593 |
| 0.046126233 | 0.167374333 | 0.10477277  | 0.326165211 |
| 0.196160236 | 0.106556114 | 0.316779078 | 0.044570513 |
| 0.000933333 | 0.11397513  | 0.098260816 | 0.172917836 |
| 0.074978846 | 0.152601117 | 0.230933089 | 0.325355054 |
| 0.161044572 | 0.297812804 | 0.28598611  | 0.09406206  |
| 0.284076146 | 0.154814928 | 0.149440415 | 0.203402746 |
| 0.276412765 | 0.027230057 | 0.071936153 | 0.372771593 |
| 0.074721005 | 0.063894719 | 0.175515724 | 0.004214817 |
| 0.061234266 | 0.200687684 | 0.16528476  | 0.261787361 |
| 0.334965095 | 0.229004675 | 0.192863487 | 0.058124802 |
| 0.268185093 | 0.14793058  | 0.008578263 | 0.312869041 |
| 0.331028775 | 0.329151209 | 0.322657314 | 0.315448946 |
| 0.315472524 | 0.252920698 | 0.283670448 | 0.118577847 |
| 0.079533587 | 0.078279664 | 0.069758366 | 0.173462654 |
| 0.006711279 | 0.279935277 | 0.194954667 | 0.216052893 |
| 0.252625987 | 0.279231874 | 0.049589235 | 0.212868246 |
| 0.018297112 | 0.033458869 | 0.082900746 | 0.181609542 |
| 0.313312117 | 0.026321199 | 0.027775432 | 0.059815462 |
| 0.25959197  | 0.269621752 | 0.077901483 | 0.330300147 |
| 0.18314782  | 0.134080441 | 0.156387824 | 0.259333003 |
| 0.090206964 | 0.025623696 | 0.11030217  | 0.003861327 |
| 0.034813486 | 0.336640193 | 0.091981402 | 0.043039553 |
| 0.214157987 | 0.0123877   | 0.257888169 | 0.345976043 |
| 0.261947646 | 0.332371038 | 0.308914031 | 0.08892564  |
| 0.310398033 | 0.021308152 | 0.319793033 | 0.248586092 |
| 0.071417206 | 0.001310806 | 0.017401299 | 0.286569527 |
| 0.164153776 | 0.090092706 | 0.208404979 | 0.040044062 |
| 0.08322009  | 0.092471475 | 0.096830369 | 0.087221263 |
| 0.16541834  | 0.194805818 | 0.081992412 | 0.291927653 |
| 0.185152244 | 0.24817678  | 0.100233727 | 0.153713599 |
| 0.171692314 | 0.065495595 | 0.162374367 | 0.012372706 |
| 0.286113293 | 0.147009025 | 0.313121329 | 0.310368279 |
| 0.351824646 | 0.233522993 | 0.046610011 | 0.057026402 |
| 0.312644589 | 0.097315534 | 0.044347276 | 0.1117282   |
| 0.2715473   | 0.208350349 | 0.279720215 | 0.254279447 |
| 0.354063103 | 0.311039474 | 0.07096458  | 0.271622774 |
| 0.014825865 | 0.007292682 | 0.099386121 | 0.293638773 |
| 0.052074691 | 0.150107592 | 0.281372964 | 0.119092485 |
| 0.13553049  | 0.029030837 | 0.09423125  | 0.100903932 |
| 0.247071277 | 0.182553261 | 0.162737428 | 0.282357181 |
| 0.146309498 | 0.087177789 | 0.144155039 | 0.143246584 |
| 0.08762044  | 0.250975829 | 0.217480853 | 0.048822939 |
| 0.117586556 | 0.137314833 | 0.097380169 | 0.204401922 |

|             |             |             |             |
|-------------|-------------|-------------|-------------|
| 0.275038501 | 0.294247351 | 0.079962606 | 0.027166824 |
| 0.271243097 | 0.160365807 | 0.322529209 | 0.282000547 |
| 0.3379871   | 0.375792872 | 0.336877517 | 0.117983638 |
| 0.081821989 | 0.237841341 | 0.175266113 | 0.10089279  |
| 0.31738845  | 0.097161183 | 0.295310591 | 0.129153368 |
| 0.201146603 | 0.116799023 | 0.053579331 | 0.163545167 |
| 0.15814224  | 0.240200018 | 0.198652971 | 0.124848456 |
| 0.149423414 | 0.055693077 | 0.090061741 | 0.21829037  |
| 0.272596751 | 0.046797217 | 0.213619178 | 0.113805593 |
| 0.23972601  | 0.036871367 | 0.234249136 | 0.372861763 |
| 0.174325928 | 0.158585553 | 0.043110937 | 0.273875949 |
| 0.239773984 | 0.127121632 | 0.018949009 | 0.241662896 |
| 0.330256259 | 0.179860833 | 0.300514766 | 0.358695046 |
| 0.16358513  | 0.139368187 | 0.120850717 | 0.207515435 |
| 0.243926767 | 0.098640558 | 0.223499568 | 0.134898609 |
| 0.34288691  | 0.373904986 | 0.260501986 | 0.157855994 |
| 0.147594967 | 0.128808055 | 0.085596542 | 0.277303319 |
| 0.067736509 | 0.0543143   | 0.076167258 | 0.276741385 |
| 0.004084657 | 0.04232072  | 0.349794951 | 0.103109842 |
| 0.374456394 | 0.315356043 | 0.326501959 | 0.094281066 |
| 0.002154973 | 0.213605955 | 0.19510603  | 0.100523729 |
| 0.250893981 | 0.249424697 | 0.076749403 | 0.087082817 |
| 0.325029746 | 0.098334154 | 0.101867346 | 0.047068577 |
| 0.048602901 | 0.183536499 | 0.295577902 | 0.229615752 |
| 0.179825562 | 0.137350669 | 0.053255447 | 0.136995582 |
| 0.072500374 | 0.293157012 | 0.312817864 | 0.040156974 |
| 0.039399401 | 0.336868581 | 0.247262574 | 0.040075326 |
| 0.15264298  | 0.318115217 | 0.318419948 | 0.007124601 |
| 0.221752886 | 0.025193803 | 0.191653068 | 0.155980097 |
| 0.164164683 | 0.190432859 | 0.26825536  | 0.110127931 |
| 0.216754204 | 0.17415457  | 0.121549636 | 0.247819387 |
| 0.113271782 | 0.171249963 | 0.19413896  | 0.131589443 |
| 0.096938333 | 0.107100512 | 0.158085139 | 0.152319514 |
| 0.054533581 | 0.273448377 | 0.278356459 | 0.103197701 |
| 0.270242806 | 0.124634657 | 0.343452542 | 0.279525421 |
| 0.340307486 | 0.127314669 | 0.174637419 | 0.23746506  |
| 0.032872202 | 0.053030662 | 0.054440955 | 0.14778686  |
| 0.197633608 | 0.073161311 | 0.120943134 | 0.147929836 |
| 0.21574868  | 0.342789311 | 0.267170794 | 0.330276043 |
| 0.127038935 | 0.1636633   | 0.04422915  | 0.082578459 |
| 0.131214746 | 0.203143121 | 0.178230128 | 0.007375885 |
| 0.242332946 | 0.046250996 | 0.266239207 | 0.295837381 |
| 0.074715513 | 0.333799798 | 0.033263428 | 0.061713781 |
| 0.025898595 | 0.17088012  | 0.215078628 | 0.223755602 |
| 0.044353654 | 0.117452462 | 0.20035554  | 0.046790709 |
| 0.242865465 | 0.226243815 | 0.119969815 | 0.170095868 |
| 0.235878991 | 0.175657655 | 0.342354979 | 0.091916521 |
| 0.144622983 | 0.077654222 | 0.138736807 | 0.166275804 |
| 0.184403539 | 0.315002091 | 0.107576442 | 0.315945615 |
| 0.154240918 | 0.193587454 | 0.387707212 | 0.165472892 |
| 0.06780969  | 0.085269769 | 0.052092502 | 0.086642565 |
| 1           | 0.080376458 | 0.003136841 | 0.031169676 |
| 0.292212641 | 0.109847405 | 0.217133904 | 0.288634922 |
| 0.131338868 | 0.348593731 | 0.038199311 | 0.162731164 |

|             |             |             |             |
|-------------|-------------|-------------|-------------|
| 0.27450159  | 0.323295793 | 0.072541755 | 0.315844891 |
| 0.288837832 | 0.108797401 | 0.143370512 | 0.012288275 |
| 0.181658579 | 0.150721068 | 0.051332673 | 0.084428865 |
| 0.039183635 | 0.056512749 | 0.172230785 | 0.11952048  |
| 0.33053709  | 0.03349291  | 0.183083711 | 0.203176266 |
| 0.243857539 | 0.323194798 | 0.116322645 | 0.237573725 |
| 0.059450749 | 0.266246273 | 0.142428514 | 0.149916154 |
| 0.073491495 | 0.126822698 | 0.27208679  | 0.089679102 |
| 0.058601694 | 0.087474012 | 0.008648239 | 0.33218499  |
| 0.296437034 | 0.138622932 | 0.276746647 | 0.03953879  |
| 0.295042212 | 0.311714868 | 0.102601669 | 0.119680378 |
| 0.025751705 | 0.17674972  | 0.232757169 | 0.245535518 |
| 0.029657295 | 0.187261431 | 0.058598061 | 0.17847153  |
| 0.310908736 | 0.075544046 | 0.325986474 | 0.044509879 |
| 0.280647414 | 0.251591743 | 0.143753872 | 0.086309423 |
| 0.186169161 | 0.12930663  | 0.06824588  | 0.358395659 |
| 0.172512332 | 0.097746277 | 0.289805614 | 0.129337717 |
| 0.127624676 | 0.268125576 | 0.154262562 | 0.351882611 |
| 0.097272446 | 0.263622978 | 0.269414446 | 0.306194839 |
| 0.328429749 | 0.103508953 | 0.076310202 | 0.150100351 |
| 0.257824647 | 0.054483555 | 0.077737416 | 0.24307503  |
| 0.072275431 | 0.282518602 | 0.136982117 | 0.152580884 |
| 0.059271026 | 0.117604767 | 0.066736278 | 0.207140507 |
| 0.241769442 | 0.178264901 | 0.109381143 | 0.342288259 |
| 0.069972941 | 0.030151082 | 0.365091957 | 0.007394341 |
| 0.124547002 | 0.203567956 | 0.229567583 | 0.152821056 |
| 0.207240991 | 0.221372581 | 0.127657555 | 0.004831255 |
| 0.307248092 | 0.027038004 | 0.141773378 | 0.089457098 |
| 0.065883571 | 0.066744053 | 0.300322468 | 0.340253636 |
| 0.22917874  | 0.057256531 | 0.045049511 | 0.308808069 |
| 0.046328728 | 0.060373561 | 0.089608776 | 0.171589894 |
| 0.075577677 | 0.081078946 | 0.098214142 | 0.079514258 |
| 0.243296381 | 0.144302258 |             |             |
| SLC3A2      | 0.014870975 | 0.312023979 | 0.011732558 |
| 0.043238094 | 0.26953754  | 0.163946245 | 0.010317231 |
| 0.028614114 | 0.228548358 | 0.113083171 | 0.227231465 |
| 0.002373228 | 0.166968754 | 0.351235294 | 0.010780776 |
| 0.308206387 | 0.006981717 | 0.029400258 | 0.029766726 |
| 0.074652618 | 0.223371487 | 0.213445007 | 0.162004828 |
| 0.215607112 | 0.090589938 | 0.167430865 | 0.299137318 |
| 0.400981705 | 0.209276224 | 0.360014152 | 0.085106392 |
| 0.278970525 | 0.304144433 | 0.287863108 | 0.002060527 |
| 0.245541997 | 0.016737185 | 0.275509535 | 0.107807137 |
| 0.156809114 | 0.21799172  | 0.136446043 | 0.100556997 |
| 0.15795448  | 0.005494174 | 0.11545151  | 0.330275796 |
| 0.173018104 | 0.108060045 | 0.015416349 | 0.31611576  |
| 0.134111233 | 0.202794617 | 0.257282591 | 0.000282559 |
| 0.266180436 | 0.186123292 | 0.226245616 | 0.374061968 |
| 0.103123978 | 0.044259955 | 0.14909703  | 0.102749084 |
| 0.276418353 | 0.298230704 | 0.162491844 | 0.125728093 |
| 0.379210189 | 0.180429239 | 0.370961448 | 0.063294054 |
| 0.152605773 | 0.004155486 | 0.07326877  | 0.02518738  |
| 0.177431117 | 0.102894953 | 0.257472083 | 0.218813181 |
| 0.293669193 | 0.363721776 | 0.123133729 | 0.33973158  |



|             |             |             |             |
|-------------|-------------|-------------|-------------|
| 0.098713579 | 0.313032195 | 0.16816773  | 0.222321177 |
| 0.262287381 | 0.017861517 | 0.312318649 | 0.382783493 |
| 0.008561271 | 0.211140902 | 0.26850836  | 0.043170256 |
| 0.33210453  | 0.200522711 | 0.200471727 | 0.197514377 |
| 0.35597947  | 0.255319743 | 0.330515899 | 0.168001402 |
| 0.239272272 | 0.019278242 | 0.315254656 | 0.332331307 |
| 0.15135254  | 0.022378439 | 0.116586735 | 0.430591628 |
| 0.278932486 | 0.397907326 | 0.32154694  | 0.255173292 |
| 0.276900932 | 0.391899139 | 0.274995946 | 0.318151458 |
| 0.10170173  | 0.397405771 | 0.073046799 | 0.010015765 |
| 0.012419826 | 0.026234373 | 0.130356263 | 0.208082772 |
| 0.418867212 | 0.201841598 | 0.055817722 | 0.125274748 |
| 0.423565021 | 0.318550214 | 0.391222611 | 0.308465609 |
| 0.006002444 | 0.198483527 | 0.265001111 | 0.094123214 |
| 0.259784229 | 0.040282074 | 0.238584308 | 0.340882181 |
| 0.262333758 | 0.392828297 | 0.038599902 | 0.328511688 |
| 0.066431617 | 0.393166272 | 0.345795106 | 0.064361912 |
| 0.366194061 | 0.334302467 | 0.416003682 | 0.408567666 |
| 0.33750123  | 0.148679168 | 0.031145681 | 0.274320731 |
| 0.391783936 | 0.020337552 | 0.422042431 | 0.435543902 |
| 0.361238842 | 0.419480841 | 0.431669033 | 0.432933001 |
| 0.369477957 | 0.019961238 | 0.022809423 | 0.212134597 |
| 0.353596125 | 0.287561805 | 0.054875139 | 0.268848772 |
| 0.308599024 | 0.167005522 | 0.38180928  | 0.143666882 |
| 0.384261368 | 0.378974337 | 0.414198759 | 0.269332365 |
| 0.13800699  | 0.193102644 | 0.327310767 | 0.302355987 |
| 0.009017015 | 0.026018021 | 0.01368337  | 0.208697602 |
| 0.121114559 | 0.08536401  | 0.12275568  | 0.258101732 |
| 0.099758024 | 0.129050952 | 0.247316186 | 0.369237779 |
| 0.016254139 | 0.277858168 | 0.057795004 | 0.052084667 |
| 0.008580875 | 0.063507699 | 0.054365467 | 0.057488878 |
| 0.149826462 | 0.10980228  | 0.360180721 | 0.408501606 |
| 0.185081676 | 0.080986426 | 0.297882183 | 0.375886488 |
| 0.326406806 | 0.306882231 | 0.127599201 | 0.003575828 |
| 0.102273079 | 0.16468536  | 0.201346843 | 0.324504714 |
| 0.082508517 | 0.07627046  | 0.255326496 | 0.39022313  |
| 0.103735152 | 0.040398007 | 0.155799573 | 0.282265996 |
| 0.061048144 | 0.15509347  | 0.3693257   | 0.225361548 |
| 8.18E-05    | 0.142779595 | 0.374902183 | 0.089376853 |
| 0.174919041 | 0.163953639 | 0.228122548 | 0.38094517  |
| 0.182787795 | 0.158077029 | 0.438407262 | 0.394956878 |
| 0.140950841 | 0.10597396  | 0.428967058 | 0.046756681 |
| 0.260364241 | 0.030253773 | 0.20079261  | 0.150538024 |
| 0.119159031 | 0.195560578 | 0.307533584 | 0.152623939 |
| 0.046843144 | 0.38455408  | 0.296785459 | 0.41698451  |
| 0.155879489 | 0.419570906 | 0.409506597 | 0.355041171 |
| 0.237562549 | 0.223048929 | 0.202225791 | 0.345687456 |
| 0.385275953 | 0.11126638  | 0.023080647 | 0.392817717 |
| 0.161537281 | 0.348506482 | 0.073696872 | 0.393984529 |
| 0.349341852 | 0.313650552 | 0.051377273 | 0.337230087 |
| 0.277536268 | 0.098765522 | 0.349747494 | 0.422899274 |
| 0.1117244   | 0.227559083 | 0.154948901 | 0.368492525 |
| 0.073511555 | 0.135710646 | 0.207511962 | 0.230618629 |
| 0.034314911 | 0.019518129 | 0.015790407 | 0.076471282 |

|             |             |             |             |
|-------------|-------------|-------------|-------------|
| 0.167507314 | 0.313511939 | 0.302409406 | 0.396570871 |
| 0.036661749 | 0.318564657 | 0.130715798 | 0.113526205 |
| 0.278539508 | 0.220589155 | 0.350375073 | 0.326876562 |
| 0.137215997 | 0.005546424 | 0.041070118 | 0.355105534 |
| 0.008468049 | 0.195970083 | 0.138804445 | 0.001277969 |
| 0.006635332 | 0.302970788 | 0.035076643 | 0.093923468 |
| 0.44277023  | 0.094357433 | 0.085547386 | 0.100110901 |
| 0.271249992 | 0.029019501 | 0.002530909 | 0.39204737  |
| 0.372217963 | 0.347374784 | 0.362712149 | 0.318897423 |
| 0.354082604 | 0.339480626 | 0.355190823 | 0.16455021  |
| 0.022138369 | 0.016671254 | 0.143397264 | 0.135989266 |
| 0.001197581 | 0.324275315 | 0.216669708 | 0.060671108 |
| 0.385084066 | 0.17758255  | 0.0065347   | 0.321479746 |
| 0.003426087 | 0.202364708 | 0.089458762 | 0.08921332  |
| 0.323475907 | 0.001603736 | 0.097517312 | 0.144221478 |
| 0.284782893 | 0.217546761 | 0.209883969 | 0.400037651 |
| 0.194550802 | 0.047192669 | 0.169806496 | 0.364935787 |
| 0.013816631 | 0.037412035 | 0.124167835 | 0.021067847 |
| 0.119645103 | 0.327273659 | 0.164949022 | 0.012377495 |
| 0.136447954 | 0.000237314 | 0.235118056 | 0.402500347 |
| 0.323193248 | 0.431171982 | 0.392543754 | 0.231030786 |
| 0.378734592 | 0.196496983 | 0.422245382 | 0.282596535 |
| 0.147617127 | 0.000111462 | 0.002347714 | 0.425340638 |
| 0.266730277 | 0.017522156 | 0.064635068 | 0.132083541 |
| 0.032736973 | 0.036469153 | 0.014581046 | 0.140669387 |
| 0.303748323 | 0.181074863 | 0.152078259 | 0.314196086 |
| 0.09849146  | 0.130237377 | 0.148703506 | 0.028514415 |
| 0.326024324 | 0.011393381 | 0.028081058 | 0.006232749 |
| 0.332111948 | 0.042707113 | 0.29165845  | 0.389627388 |
| 0.370027941 | 0.348154017 | 0.136331232 | 0.158635371 |
| 0.386146199 | 0.03446348  | 0.188828153 | 0.037191887 |
| 0.349010672 | 0.284085344 | 0.215477437 | 0.182858659 |
| 0.390138504 | 0.332742343 | 0.005266477 | 0.320052709 |
| 0.004048072 | 0.002638224 | 0.150900331 | 0.151698477 |
| 0.05702818  | 0.220228498 | 0.144388565 | 0.081685786 |
| 0.099348735 | 0.005402045 | 0.204034467 | 0.178067226 |
| 0.179686515 | 0.197197288 | 0.242691016 | 0.139501788 |
| 0.142576606 | 0.079723577 | 0.079859796 | 0.04521794  |
| 0.108461094 | 0.179599537 | 0.091891737 | 0.002717296 |
| 0.243145183 | 0.275062826 | 0.012794723 | 0.068060007 |
| 0.363024605 | 0.413486026 | 0.008346853 | 0.003045275 |
| 0.146095291 | 0.146279307 | 0.433247613 | 0.376585136 |
| 0.368570474 | 0.39881324  | 0.251631627 | 0.05020392  |
| 0.014200664 | 0.216353517 | 0.264724191 | 0.055854581 |
| 0.402605725 | 0.016343572 | 0.360941583 | 0.309042207 |
| 0.041515611 | 0.063567565 | 0.008531529 | 0.024403954 |
| 0.367424021 | 0.082150191 | 0.09405852  | 0.05267518  |
| 0.13931334  | 0.196797508 | 0.007909371 | 0.08554634  |
| 0.212579839 | 0.152839471 | 0.062526001 | 0.109224537 |
| 0.238248497 | 0.087886267 | 0.363888501 | 0.322813693 |
| 0.049872738 | 0.032028817 | 0.067608672 | 0.316862753 |
| 0.366897302 | 0.259623915 | 0.00968178  | 0.326601906 |
| 0.412196074 | 0.344919469 | 0.361501019 | 0.316564908 |
| 0.026472293 | 0.265599012 | 0.213725328 | 0.220527545 |

|             |             |             |             |
|-------------|-------------|-------------|-------------|
| 0.081518222 | 0.171681731 | 0.116947628 | 0.016231477 |
| 0.197291746 | 0.328240421 | 0.290121757 | 0.067522701 |
| 0.292421253 | 0.041822767 | 0.013149496 | 0.382794431 |
| 0.143072619 | 0.018569238 | 0.155473523 | 0.395949415 |
| 0.001497769 | 0.20261853  | 0.419914394 | 0.092959475 |
| 0.387578723 | 0.400630768 | 0.312272326 | 0.086469472 |
| 0.002282412 | 0.361578682 | 0.257699587 | 0.173643238 |
| 0.303329653 | 0.227748634 | 0.065757799 | 0.021158305 |
| 0.195586066 | 0.026078626 | 0.041593338 | 0.135037176 |
| 0.135057922 | 0.237502293 | 0.106748773 | 0.09112481  |
| 0.093549166 | 0.029519294 | 0.226603942 | 0.093120349 |
| 0.129504362 | 0.139202264 | 0.251697893 | 0.107116376 |
| 0.128916071 | 0.352271183 | 0.276571687 | 0.004016352 |
| 0.318895368 | 0.33157002  | 0.361253996 | 9.17E-05    |
| 0.360854525 | 0.000947075 | 0.104134562 | 0.109550411 |
| 0.090457063 | 0.090813249 | 0.189611065 | 0.14195287  |
| 0.192546006 | 0.079870966 | 0.110835064 | 0.135294535 |
| 0.068638085 | 0.086140832 | 0.284725068 | 0.14323297  |
| 0.138320103 | 0.032997796 | 0.038198752 | 0.039241407 |
| 0.014951014 | 0.385680106 | 0.136696166 | 0.024113124 |
| 0.130662015 | 0.135743896 | 0.248717808 | 0.355525909 |
| 0.345886649 | 0.045074384 | 0.159614396 | 0.336216417 |
| 0.110173395 | 0.102112969 | 0.009766456 | 0.203091556 |
| 0.103917882 | 0.135238166 | 0.216946589 | 0.134607695 |
| 0.28245134  | 0.266701518 | 0.133008266 | 0.340865313 |
| 0.173824812 | 0.181476301 | 0.102751692 | 0.029944914 |
| 0.052025464 | 0.051272254 | 0.229765558 | 0.000183536 |
| 0.226504046 | 0.069270485 | 0.402197601 | 0.338791957 |
| 0.223921106 | 0.288698222 | 0.10659007  | 0.017850487 |
| 0.0962287   | 0.078542305 | 0.056655579 | 0.35617462  |
| 0.228473642 | 0.05765806  | 0.215688186 | 0.097187865 |
| 0.369584485 | 0.340668462 | 0.148272934 | 0.085300828 |
| 0.121782842 | 0.084670088 | 0.322876009 | 0.02985419  |
| 0.286200033 | 0.131340641 | 0.196645902 | 0.153591969 |
| 0.106677821 | 0.423333894 | 0.015250546 | 0.42956681  |
| 0.172969598 | 0.055212079 | 0.353982416 | 0.151078563 |
| 0.09858195  | 0.064477121 | 0.217370544 | 0.136744121 |
| 0.080376458 | 1           | 0.009744582 | 0.039894242 |
| 0.242257693 | 0.123739904 | 0.283845503 | 0.276218578 |
| 0.162694515 | 0.268749614 | 0.241637928 | 0.099442925 |
| 0.325632037 | 0.330290718 | 0.082570496 | 0.144956849 |
| 0.224050344 | 0.027306707 | 0.232377177 | 0.008124088 |
| 0.301512996 | 0.337631225 | 0.150524623 | 0.011060684 |
| 0.002547261 | 0.192230769 | 0.252645769 | 0.017834072 |
| 0.427623271 | 0.221709104 | 0.217114275 | 0.35976985  |
| 0.081058849 | 0.323553436 | 0.051706569 | 0.334324632 |
| 0.007340688 | 0.143346228 | 0.294508484 | 0.221819651 |
| 0.111501051 | 0.216820556 | 0.290910457 | 0.200303708 |
| 0.00572216  | 0.125370542 | 0.000567005 | 0.252247269 |
| 0.298400533 | 0.24356061  | 0.105222341 | 0.130875673 |
| 0.193914292 | 0.295133742 | 0.116397509 | 0.277448069 |
| 0.002776771 | 0.310362758 | 0.098953549 | 0.306348021 |
| 0.134165824 | 0.200459357 | 0.017219847 | 0.239617275 |
| 0.277388926 | 0.109403693 | 0.151483066 | 0.130275497 |

|             |             |             |             |
|-------------|-------------|-------------|-------------|
| 0.360156649 | 0.290951256 | 0.06974303  | 0.136534647 |
| 0.26019377  | 0.017884065 | 0.154090721 | 0.406373076 |
| 0.078944796 | 0.180767569 | 0.415213658 | 0.064189705 |
| 0.252456833 | 0.272412948 | 0.286422735 | 0.394862322 |
| 0.029904468 | 0.135967627 | 0.379955345 | 0.337365186 |
| 0.220885354 | 0.141452234 | 0.185144534 | 0.118146998 |
| 0.311804006 | 0.03009171  | 0.149764155 | 0.216217304 |
| 0.166855882 | 0.214848309 | 0.18556688  | 0.11618899  |
| 0.01187193  | 0.05289131  | 0.162090791 | 0.055607024 |
| 0.166643359 | 0.231202662 | 0.132438726 | 0.274345161 |
| 0.061837101 | 0.007356859 | 0.328720647 | 0.025180928 |
| 0.164720786 | 0.320452899 | 0.129901975 | 0.229874741 |
| 0.089490522 | 0.192121905 | 0.12900437  | 0.000466439 |
| 0.34974896  | 0.046531366 | 0.162159079 | 0.118063191 |
| 0.164596508 | 0.008038104 | 0.334095494 | 0.438191887 |
| 0.186914174 | 0.181646458 | 0.19211585  | 0.346441689 |
| 0.16413491  | 0.212612561 | 0.187827285 | 0.255079612 |
| 0.213504275 | 0.172976813 | 0.22042345  | 0.232231964 |
| 0.270353665 | 0.102017415 |             |             |
| SLC43A3     | 0.000421014 | 0.021881335 | 0.000312833 |
| 0.000186891 | 0.007064057 | 0.006421832 | 0.000479097 |
| 0.001256734 | 0.02026348  | 0.015385418 | 0.007112753 |
| 0.000151982 | 0.000847214 | 0.024739609 | 0.000297086 |
| 0.016558386 | 5.68E-05    | 0.001115931 | 4.59E-05    |
| 0.006700204 | 0.006350988 | 0.012543894 | 0.006903555 |
| 0.003498784 | 0.012301693 | 0.020410523 | 0.024785579 |
| 0.009881703 | 0.016052619 | 0.0014036   | 0.014012487 |
| 0.009542499 | 0.020172873 | 0.000203838 | 0.010785149 |
| 3.37E-05    | 0.016089874 | 0.003573914 | 0.000276054 |
| 0.01075046  | 0.015359197 | 0.001786319 | 0.018756864 |
| 2.83E-05    | 0.009759323 | 0.025106682 | 0.011732569 |
| 0.002798357 | 0.000824757 | 0.016853465 | 0.008667172 |
| 0.00869924  | 0.02690495  | 2.28E-05    | 0.012203427 |
| 0.005454166 | 0.015028676 | 0.021140633 | 0.002505709 |
| 0.000811185 | 0.009646892 | 0.006485614 | 0.02280034  |
| 0.016354904 | 0.005085481 | 0.014006963 | 0.02122583  |
| 0.004984621 | 0.025327366 | 3.33E-05    | 0.011040921 |
| 0.00019916  | 0.00212116  | 0.001906158 | 0.008712968 |
| 0.001852266 | 0.007689146 | 0.007489549 | 0.023904097 |
| 0.022111279 | 0.00387392  | 0.023524127 | 0.00115145  |
| 0.013706549 | 0.003447493 | 0.006937478 | 0.018740214 |
| 0.000828915 | 0.014228656 | 0.020725701 | 0.000488398 |
| 0.027972871 | 0.0254633   | 0.002515786 | 0.018179814 |
| 0.007175409 | 0.023542645 | 0.00324461  | 0.014388675 |
| 0.012894324 | 0.022022846 | 0.006320077 | 0.006776981 |
| 0.00096545  | 0.020148075 | 0.014066166 | 0.003052243 |
| 0.000554438 | 0.0034443   | 0.030114712 | 0.014167914 |
| 0.024355387 | 0.027125922 | 0.017023833 | 0.018642802 |
| 0.019342926 | 0.012443023 | 0.017803301 | 0.002845964 |
| 0.02443467  | 0.001484688 | 9.65E-07    | 0.000901672 |
| 0.000370267 | 0.004488057 | 0.007829935 | 0.021809589 |
| 0.008371451 | 0.002374478 | 0.00313701  | 0.023030085 |
| 0.021679204 | 0.027395701 | 0.021609762 | 8.23E-06    |
| 0.007279259 | 0.014875242 | 0.002581179 | 0.018342409 |

|             |             |             |             |
|-------------|-------------|-------------|-------------|
| 0.001644558 | 0.008375749 | 0.020767219 | 0.010441334 |
| 0.01930569  | 0.00220889  | 0.018259303 | 0.004672227 |
| 0.018726474 | 0.024064594 | 0.001534275 | 0.019890098 |
| 0.018732225 | 0.020080834 | 0.018173593 | 0.017019448 |
| 0.004913369 | 0.000474005 | 0.016162919 | 0.017255223 |
| 0.000119434 | 0.029582362 | 0.028178605 | 0.022128918 |
| 0.026975298 | 0.024762863 | 0.023593012 | 0.024896203 |
| 0.000747017 | 0.000109508 | 0.007537234 | 0.022025684 |
| 0.011418916 | 0.000926011 | 0.02338964  | 0.014547704 |
| 0.00764405  | 0.020876759 | 0.001673902 | 0.02005121  |
| 0.01843072  | 0.028774238 | 0.02294879  | 0.013214819 |
| 0.008597913 | 0.0241793   | 0.018150025 | 0.00015268  |
| 0.000888598 | 0.000537265 | 0.009384429 | 0.00633938  |
| 0.001862247 | 0.010313375 | 0.017473371 | 0.002607594 |
| 0.006505475 | 0.016243915 | 0.015895639 | 0.000950399 |
| 0.022785215 | 0.001369746 | 0.003979021 | 0.000130515 |
| 0.002662128 | 0.000693127 | 0.000394454 | 0.004446634 |
| 0.006544047 | 0.027867581 | 0.023210111 | 0.010168509 |
| 0.002845055 | 0.021036203 | 0.017578482 | 0.014109604 |
| 0.012919594 | 0.005598803 | 0.000204599 | 0.004179184 |
| 0.020864411 | 0.0090145   | 0.019845952 | 0.00381439  |
| 0.004330194 | 0.023181933 | 0.016313164 | 0.005611487 |
| 0.002373996 | 0.00852199  | 0.013585799 | 0.004112593 |
| 0.003365707 | 0.020330831 | 0.029330494 | 0.000483469 |
| 0.005920489 | 0.019569192 | 0.001658047 | 0.014257865 |
| 0.000315577 | 0.004177893 | 0.023123946 | 0.012420513 |
| 0.005875371 | 0.025562017 | 0.01433716  | 0.003276341 |
| 0.007965084 | 0.025515832 | 0.002766686 | 0.014302077 |
| 0.000196421 | 0.005796948 | 0.018616683 | 0.003513257 |
| 0.008708763 | 0.010506143 | 0.003576737 | 0.001828254 |
| 0.025981761 | 0.012639071 | 0.024827742 | 0.022849608 |
| 0.023772828 | 0.024626621 | 0.015196353 | 0.008354937 |
| 0.023312709 | 0.005657183 | 0.019754041 | 0.020036498 |
| 0.005275544 | 0.001048684 | 0.032350453 | 0.019603376 |
| 0.026239542 | 0.000301199 | 0.021130363 | 0.016832549 |
| 0.022320175 | 0.001258963 | 0.012628345 | 0.011212193 |
| 0.002735638 | 0.016179255 | 0.024580667 | 0.016451154 |
| 0.016663147 | 0.007018343 | 0.013730938 | 0.001959048 |
| 0.003683195 | 0.009707344 | 0.006332542 | 4.97E-05    |
| 0.001283503 | 0.000468552 | 0.001257669 | 0.002497323 |
| 0.032195441 | 0.01802633  | 0.025829874 | 0.000935023 |
| 0.015352593 | 0.007012025 | 0.005496907 | 0.018647162 |
| 0.016847515 | 0.014462536 | 0.015826537 | 0.004562905 |
| 0.000198946 | 0.000158737 | 0.020970312 | 0.00057409  |
| 0.005010636 | 0.013588709 | 7.92E-06    | 0.000286385 |
| 0.030498484 | 0.001824487 | 0.003596867 | 0.02138606  |
| 0.003760629 | 0.004209624 | 0.015161382 | 0.009696969 |
| 0.000723592 | 4.35E-05    | 0.024508641 | 0.024306692 |
| 0.022776489 | 0.025368209 | 0.021102245 | 0.024193423 |
| 0.019753721 | 0.019002421 | 0.006797705 | 0.000656111 |
| 0.0009164   | 0.005881334 | 0.00674047  | 5.83E-05    |
| 0.011002181 | 0.008022965 | 0.001680018 | 0.023449018 |
| 0.011325158 | 2.27E-06    | 0.014154369 | 6.55E-05    |
| 0.006950388 | 0.003999655 | 0.012555224 | 0.000466998 |

|                      |                      |                      |                   |
|----------------------|----------------------|----------------------|-------------------|
| 0.000550944          | 0.010043249          | 0.015686599          | 0.0100712         |
| 0.01297657           | 0.02260986           | 0.006335086          | 0.00390003        |
| 0.004852034          | 0.014768767          | 0.000308964          | 0.000471898       |
| 0.011377974          | 4.01E-05 0.000569248 | 0.021204827          |                   |
| 0.012196717          | 3.57E-05 0.004138729 | 0.001150753          |                   |
| 0.011975748          | 0.023833895          | 0.020792987          | 0.024014405       |
| 0.021172745          | 0.007401301          | 0.020821683          | 0.006192611       |
| 0.025620042          | 0.018489725          | 0.022953213          | 1.83E-05 2.79E-06 |
| 0.024155385          | 0.014605846          | 0.000920464          | 0.001809453       |
| 0.004292332          | 0.000183641          | 0.001756601          | 0.000306561       |
| 0.001814086          | 0.013475835          | 0.003766558          | 0.00279929        |
| 0.024426437          | 0.002871366          | 0.003217468          | 0.027192062       |
| 0.001605718          | 0.013551851          | 7.86E-05 0.001399239 | 6.57E-06          |
| 0.012031502          | 0.00254306           | 0.018358551          | 0.022618029       |
| 0.018191263          | 0.013493682          | 0.027103557          | 0.004336934       |
| 0.022307878          | 0.001959081          | 0.006608928          | 0.001850368       |
| 0.02344474           | 0.017989843          | 0.007515126          | 0.007448432       |
| 0.021526587          | 0.017485232          | 1.28E-05 0.017699912 | 4.89E-05          |
| 8.17E-06 0.008442669 | 0.007625187          | 0.000289026          |                   |
| 0.015292075          | 0.004986938          | 0.005271324          | 0.003150833       |
| 1.92E-05 0.008324704 | 0.009236567          | 0.005956458          |                   |
| 0.009880834          | 0.006936242          | 0.007661001          | 0.004847643       |
| 0.00064954           | 0.001507609          | 0.002161307          | 0.002360173       |
| 0.009550245          | 0.004106087          | 0.000104902          | 0.017009046       |
| 0.018848607          | 0.000230359          | 0.00204515           | 0.016980455       |
| 0.024023403          | 5.79E-05 0.000503632 | 0.006992076          |                   |
| 0.010609489          | 0.025016417          | 0.025515553          | 0.021648035       |
| 0.021127509          | 0.011329994          | 0.001001478          | 0.000197938       |
| 0.007679976          | 0.00924448           | 0.00013839           | 0.024794302       |
| 0.001167229          | 0.021156345          | 0.012164912          | 0.001546801       |
| 0.001470798          | 0.000150514          | 0.000671994          | 0.017875101       |
| 0.00253682           | 0.001540056          | 0.002220895          | 0.006678561       |
| 0.003570538          | 0.000211848          | 0.002036931          | 0.013863425       |
| 0.002355285          | 0.00241818           | 0.004349708          | 0.011425717       |
| 0.005421878          | 0.026417736          | 0.016138932          | 0.001650718       |
| 0.001683402          | 0.002508034          | 0.019679429          | 0.023611413       |
| 0.029094695          | 9.98E-06 0.02659382  | 0.022883259          |                   |
| 0.024527116          | 0.020134432          | 0.015869643          | 0.001214371       |
| 0.013595502          | 0.015409563          | 0.015479978          | 0.003356994       |
| 0.006923366          | 0.003993972          | 0.000547009          | 0.008463541       |
| 0.019314104          | 0.019147637          | 0.001180855          | 0.020250616       |
| 0.00324146           | 0.000991593          | 0.024192081          | 0.002717341       |
| 0.00025859           | 0.019675981          | 0.02554371           | 0.005276501       |
| 0.00347871           | 0.024131929          | 0.001908068          | 0.020732125       |
| 0.022380013          | 0.014832041          | 0.002753657          | 3.84E-06          |
| 0.023192013          | 0.010186941          | 0.011891969          | 0.023680282       |
| 0.009791091          | 0.000924127          | 0.000202856          | 0.005974558       |
| 0.001420434          | 0.000720005          | 0.001264916          | 0.000620157       |
| 0.02265541           | 0.003420335          | 0.004873293          | 0.002096088       |
| 0.002703842          | 0.002474448          | 0.001896175          | 0.00119213        |
| 0.004134754          | 0.010361458          | 0.013419266          | 0.007674213       |
| 0.022706521          | 0.020503665          | 0.000162536          | 0.013261572       |
| 0.018021137          | 0.016685587          | 3.10E-07 0.018937419 |                   |
| 0.000750447          | 0.002666296          | 0.001974293          | 0.001453744       |

|             |             |             |             |
|-------------|-------------|-------------|-------------|
| 0.003799295 | 0.005219441 | 0.003585381 | 0.013695953 |
| 0.002241319 | 0.002149296 | 0.003059894 | 0.000719368 |
| 0.002755177 | 0.013670074 | 0.00667139  | 0.003068904 |
| 0.000618912 | 0.001708846 | 0.002033067 | 1.32E-05    |
| 0.023486953 | 0.00495129  | 0.000857575 | 0.003621551 |
| 0.015715852 | 0.00878494  | 0.023956374 | 0.014608451 |
| 0.00267127  | 0.008367877 | 0.020206504 | 0.003812954 |
| 0.001770683 | 0.000649452 | 0.0091445   | 0.003478096 |
| 0.002091863 | 0.018163925 | 0.009059944 | 0.029270336 |
| 0.012580191 | 0.005109086 | 0.014381869 | 0.007950653 |
| 0.015761155 | 0.01707546  | 0.00020669  | 0.001563277 |
| 0.002122802 | 0.00535019  | 0.00145628  | 0.0106817   |
| 0.000830931 | 0.024873307 | 0.019629569 | 0.013271966 |
| 0.010541735 | 0.003483367 | 0.000437982 | 0.00638615  |
| 0.005055591 | 0.002340294 | 0.022254758 | 0.011732388 |
| 0.000784023 | 0.006919159 | 0.003739998 | 0.019028479 |
| 0.022847267 | 0.004369544 | 0.006102293 | 0.00460958  |
| 0.003354054 | 0.020520232 | 0.001116991 | 0.021224925 |
| 0.001589997 | 0.023028022 | 0.005723262 | 0.003784606 |
| 0.024807217 | 0.000393338 | 0.028331335 | 0.012370939 |
| 0.002211803 | 0.016919664 | 0.006420574 | 0.002502717 |
| 0.000168621 | 0.007135157 | 0.008969304 | 0.003136841 |
| 0.009744582 | 1           | 0.000603584 | 0.008008417 |
| 0.011324249 | 0.02635704  | 0.015050921 | 0.004231723 |
| 0.01148583  | 0.001826691 | 0.009606533 | 0.023036153 |
| 0.020735156 | 0.002025206 | 0.005370466 | 0.013194977 |
| 0.00046135  | 0.01390668  | 0.000134736 | 0.025943159 |
| 0.028396016 | 0.013756499 | 0.00017817  | 0.000321    |
| 0.009658993 | 0.020608592 | 0.001302225 | 0.023300081 |
| 0.004119544 | 0.021587308 | 0.016330184 | 0.003891889 |
| 0.020204168 | 0.000712895 | 0.014871203 | 0.000312552 |
| 0.005593377 | 0.014625058 | 0.018780729 | 0.00164287  |
| 0.007355044 | 0.010751801 | 0.005030817 | 0.000265584 |
| 0.001913017 | 2.23E-05    | 0.01214742  | 0.020447727 |
| 0.014703412 | 0.004479728 | 0.01982563  | 0.005151887 |
| 0.013370822 | 0.003023174 | 0.018622037 | 0.000242167 |
| 0.016603326 | 0.002566445 | 0.014286269 | 0.007555653 |
| 0.018313828 | 0.000492469 | 0.013034793 | 0.017281238 |
| 0.005882499 | 0.007181614 | 0.007943433 | 0.022213553 |
| 0.016282331 | 0.002588594 | 0.001257691 | 0.026608929 |
| 0.000803651 | 0.012182298 | 0.02532834  | 0.001487059 |
| 0.004494467 | 0.021351328 | 0.002031245 | 0.014235444 |
| 0.013782238 | 0.024085912 | 0.02586146  | 0.000291148 |
| 0.004213754 | 0.015301945 | 0.024800139 | 0.006957369 |
| 0.002917321 | 0.007422245 | 0.004600511 | 0.019004269 |
| 0.000151089 | 0.004834337 | 0.010445865 | 0.007907171 |
| 0.006820733 | 0.019336466 | 0.002909531 | 2.24E-05    |
| 0.00200368  | 0.004774637 | 0.001875904 | 0.006929468 |
| 0.008286672 | 0.002699728 | 0.011080499 | 0.000246541 |
| 0.000209161 | 0.015423329 | 9.26E-05    | 0.006354957 |
| 0.010960496 | 0.00409696  | 0.009998542 | 0.002912917 |
| 0.011343304 | 0.010230615 | 7.84E-06    | 0.017342111 |
| 0.000223916 | 0.005677527 | 0.002202301 | 0.003933161 |
| 0.000390249 | 0.015590354 | 0.023489071 | 0.009718148 |

|             |             |             |             |
|-------------|-------------|-------------|-------------|
| 0.003513721 | 0.019126198 | 0.021591858 | 0.000444901 |
| 0.016004033 | 0.017810803 | 0.021758035 | 0.006512068 |
| 0.023168429 | 0.01995642  | 0.01187046  | 0.01270772  |
| 0.004223546 |             |             |             |
| SLFN3       | 0.008919527 | 0.055431439 | 0.003091542 |
| 0.004487202 | 0.0887637   | 0.02199619  | 0.014590577 |
| 0.023338113 | 0.049285136 | 0.012891194 | 0.060705959 |
| 0.003901476 | 0.013594708 | 0.102687804 | 0.012520381 |
| 0.0988612   | 0.009188936 | 0.030634244 | 0.000765587 |
| 0.003117696 | 0.111459914 | 0.029903193 | 0.033637064 |
| 0.083564961 | 0.02760812  | 0.035567965 | 0.062550122 |
| 0.073737629 | 0.011201406 | 0.06309805  | 0.000839341 |
| 0.088286628 | 0.108436432 | 0.049002579 | 0.000845663 |
| 0.055476783 | 0.00084849  | 0.075438204 | 0.0624264   |
| 0.003772942 | 0.067694813 | 0.016428585 | 0.040101951 |
| 0.037000284 | 0.004001236 | 0.00292924  | 0.096020341 |
| 0.035313871 | 0.022099966 | 0.006765492 | 0.055632423 |
| 0.035087155 | 0.048808699 | 0.043564774 | 0.001744176 |
| 0.059039179 | 0.01309791  | 0.046549946 | 0.06717259  |
| 0.046236688 | 0.034994458 | 0.016921381 | 0.024773328 |
| 0.076127444 | 0.090690115 | 0.052617321 | 0.029616473 |
| 0.086439074 | 0.053391925 | 0.07211396  | 0.000350567 |
| 0.043215333 | 0.003357653 | 0.0362684   | 0.009845347 |
| 0.030668273 | 0.048777322 | 0.066716059 | 0.050697397 |
| 0.05660141  | 0.0866323   | 0.043348348 | 0.068849456 |
| 0.017866088 | 0.101576407 | 0.038591255 | 0.083932016 |
| 0.089282954 | 0.013314642 | 0.090767129 | 0.091622142 |
| 0.006530541 | 0.04167913  | 0.099549618 | 0.023290574 |
| 0.053220991 | 0.027792393 | 0.034361263 | 0.048636748 |
| 0.09793928  | 0.119815903 | 0.072715843 | 0.081011051 |
| 0.056891989 | 0.009808307 | 0.059381401 | 0.106785142 |
| 0.048251338 | 0.008171138 | 0.061575917 | 0.096776422 |
| 0.069606648 | 0.082213637 | 0.07937283  | 0.112321732 |
| 0.103155151 | 0.078555778 | 0.069892109 | 0.071207568 |
| 0.001116863 | 0.078568299 | 0.022315657 | 0.010439391 |
| 0.007770541 | 0.018415924 | 0.036194877 | 0.06526095  |
| 0.077917144 | 0.058275707 | 0.035785131 | 0.067136419 |
| 0.114120439 | 0.057422162 | 0.08188104  | 0.104181485 |
| 0.008151834 | 0.036325888 | 0.083115368 | 0.014969367 |
| 0.1202243   | 0.02388819  | 0.091170353 | 0.075080283 |
| 0.070217295 | 0.100181162 | 0.013067507 | 0.072328686 |
| 0.040952452 | 0.092520821 | 0.058737827 | 0.040370943 |
| 0.077133167 | 0.064106942 | 0.098351296 | 0.102406984 |
| 0.064655937 | 0.02992251  | 0.004959336 | 0.080594923 |
| 0.09817004  | 0.000431536 | 0.091222026 | 0.097494643 |
| 0.071383506 | 0.097846868 | 0.107615402 | 0.085798957 |
| 0.073415515 | 0.013090657 | 0.001703451 | 0.118978112 |
| 0.07581942  | 0.074372004 | 0.02575197  | 0.070421998 |
| 0.104374283 | 0.033861856 | 0.073670786 | 0.011385086 |
| 0.103898069 | 0.071263503 | 0.083972006 | 0.094563212 |
| 0.03768601  | 0.062073553 | 0.075586408 | 0.054990806 |
| 0.004081038 | 0.013745002 | 0.006271534 | 0.067588048 |
| 0.008080115 | 0.056769476 | 0.040622674 | 0.091564306 |
| 0.060150733 | 0.027667224 | 0.044934578 | 0.117638261 |



|             |             |             |             |
|-------------|-------------|-------------|-------------|
| 0.007681481 | 0.058916496 | 0.017272847 | 0.037445862 |
| 0.010216247 | 0.026473847 | 0.023365565 | 0.012492179 |
| 0.087732497 | 0.034215008 | 0.081425893 | 0.084450567 |
| 0.049003983 | 0.023524606 | 0.076061414 | 0.091947256 |
| 0.113958818 | 0.076230064 | 0.055920344 | 0.000229098 |
| 0.06364097  | 0.028813288 | 0.052814588 | 0.061373956 |
| 0.023615332 | 0.085149915 | 0.126919909 | 0.108798799 |
| 0.032863073 | 0.01576081  | 0.062379979 | 0.071151778 |
| 0.022874539 | 0.04438953  | 0.114982876 | 0.063518263 |
| 8.14E-05    | 0.05839985  | 0.084114276 | 0.038854243 |
| 0.086587792 | 0.005022781 | 0.022730986 | 0.096891975 |
| 0.053070869 | 0.078423833 | 0.082568341 | 0.095943031 |
| 0.009314884 | 0.030587301 | 0.09990213  | 0.034568022 |
| 0.066824799 | 0.001725429 | 0.096964445 | 0.020611731 |
| 0.049848952 | 0.102051296 | 0.10090846  | 0.052377215 |
| 0.013533729 | 0.088514844 | 0.061519861 | 0.090945761 |
| 0.068567576 | 0.099577321 | 0.101134156 | 0.088899714 |
| 0.053210662 | 0.068168133 | 0.031700051 | 0.091718489 |
| 0.085941342 | 0.010691895 | 0.008143352 | 0.091084898 |
| 0.049860552 | 0.127350787 | 0.005961315 | 0.102648626 |
| 0.079385851 | 0.056764402 | 0.041670707 | 0.113167741 |
| 0.084996103 | 0.032890032 | 0.069003021 | 0.103962159 |
| 0.02075735  | 0.117913549 | 0.075890536 | 0.109931875 |
| 0.032080479 | 0.064475723 | 0.058244449 | 0.034276328 |
| 0.000102666 | 0.014826725 | 0.010565608 | 0.059067774 |
| 0.056408936 | 0.05745095  | 0.090346082 | 0.095474664 |
| 0.033866068 | 0.066474859 | 0.050211048 | 0.077435031 |
| 0.082766111 | 0.081351747 | 0.065112644 | 0.090253724 |
| 0.046498582 | 0.000284684 | 0.008959053 | 0.087160176 |
| 0.005413818 | 0.054298943 | 0.046504266 | 0.000115949 |
| 0.010646951 | 0.053937709 | 0.014186072 | 0.032658363 |
| 0.105707218 | 0.02754597  | 0.042402946 | 0.025677236 |
| 0.08436088  | 0.016398253 | 2.57E-05    | 0.084048658 |
| 0.075693539 | 0.074924481 | 0.07675296  | 0.061180748 |
| 0.087734328 | 0.063045842 | 0.09804673  | 0.023821501 |
| 0.016676466 | 0.008934137 | 0.063377528 | 0.091907853 |
| 8.80E-05    | 0.076629933 | 0.066447427 | 0.033249585 |
| 0.098203105 | 0.084112398 | 0.006111609 | 0.085429715 |
| 0.00072777  | 0.042430176 | 0.042449281 | 0.05597427  |
| 0.107213006 | 0.001242244 | 0.001445445 | 0.055225401 |
| 0.055023363 | 0.067277912 | 0.038980361 | 0.079325951 |
| 0.074886781 | 0.015635209 | 0.06145583  | 0.089211288 |
| 0.014479712 | 0.001272505 | 0.037027507 | 2.46E-05    |
| 0.000863283 | 0.068990486 | 0.047882382 | 0.002120979 |
| 0.062491372 | 0.000450979 | 0.057238164 | 0.089357817 |
| 0.054082991 | 0.103158357 | 0.082776807 | 0.071522005 |
| 0.079243439 | 0.011546584 | 0.087233285 | 0.064595342 |
| 0.037379714 | 2.51E-05    | 0.000121111 | 0.090665908 |
| 0.085679041 | 0.004936083 | 0.035776463 | 0.008964397 |
| 0.014328036 | 0.01398215  | 0.010480554 | 0.052445529 |
| 0.045570583 | 0.087826826 | 0.058828332 | 0.074284673 |
| 0.055309583 | 0.057778366 | 0.037444436 | 0.015091382 |
| 0.063352607 | 0.006799476 | 0.014439445 | 0.000117459 |
| 0.093607847 | 0.016000384 | 0.05940898  | 0.075250909 |

|             |             |             |             |
|-------------|-------------|-------------|-------------|
| 0.092814038 | 0.091986091 | 0.026104484 | 0.012729012 |
| 0.081985561 | 0.008531067 | 0.01362477  | 0.010513158 |
| 0.067931789 | 0.120487177 | 0.085925708 | 0.058281676 |
| 0.111678984 | 0.082629809 | 0.007950102 | 0.109098554 |
| 0.000119919 | 9.56E-05    | 0.028457752 | 0.065917187 |
| 0.001473093 | 0.089144718 | 0.056421381 | 0.027163837 |
| 0.028340673 | 0.001270696 | 0.066417198 | 0.089415249 |
| 0.079444901 | 0.082152972 | 0.109037766 | 0.047959728 |
| 0.058555761 | 0.018537619 | 0.030228278 | 0.037994186 |
| 0.006937511 | 0.052464919 | 0.032873189 | 0.003797109 |
| 0.042406864 | 0.083603784 | 0.011045275 | 0.027730542 |
| 0.088845309 | 0.097679624 | 0.0049379   | 0.001624454 |
| 0.058852985 | 0.086580763 | 0.109395586 | 0.07042197  |
| 0.077564611 | 0.103666742 | 0.066473222 | 0.045962248 |
| 0.009629462 | 0.0778788   | 0.105831688 | 0.02002788  |
| 0.088667998 | 0.010664649 | 0.062271062 | 0.080538793 |
| 0.027000508 | 0.023710452 | 0.005034934 | 0.019595433 |
| 0.082429517 | 0.043226666 | 0.060531671 | 0.018134677 |
| 0.080918051 | 0.03376896  | 0.009878702 | 0.046518839 |
| 0.097664876 | 0.025095997 | 0.045206745 | 0.021940696 |
| 0.045124193 | 0.00443333  | 0.106466213 | 0.097990254 |
| 0.020609352 | 0.02045687  | 0.014399346 | 0.080174862 |
| 0.079462645 | 0.044309588 | 0.000349414 | 0.059501391 |
| 0.093146511 | 0.082761223 | 0.06580172  | 0.125696006 |
| 0.016104027 | 0.091435184 | 0.066430079 | 0.122769425 |
| 0.052617682 | 0.022779468 | 0.05572431  | 0.014536964 |
| 0.058934068 | 0.077550648 | 0.075104979 | 0.040578558 |
| 0.046519882 | 0.013923657 | 0.008492655 | 0.069837135 |
| 0.051473546 | 0.010299209 | 0.020295754 | 0.090015811 |
| 4.35E-06    | 0.042660331 | 0.096643933 | 0.027646386 |
| 0.08514134  | 0.098470514 | 0.079093574 | 0.016175763 |
| 0.000223652 | 0.095320884 | 0.089677695 | 0.054218815 |
| 0.077507445 | 0.056675732 | 0.00328248  | 0.017097077 |
| 0.067289401 | 0.008935322 | 0.036331791 | 0.003289089 |
| 0.003795765 | 0.072402155 | 0.057729038 | 0.040660023 |
| 0.055460206 | 0.013360914 | 0.022309977 | 0.027679451 |
| 0.014597077 | 0.069195023 | 0.098706687 | 0.009786511 |
| 0.057755113 | 0.110458983 | 0.09158639  | 0.003089971 |
| 0.068989897 | 0.085199552 | 0.074474766 | 0.000280786 |
| 0.105651326 | 0.001418847 | 0.077299581 | 0.060175013 |
| 0.046952608 | 0.08193297  | 0.101878208 | 0.042651376 |
| 0.081024853 | 0.041416679 | 0.039781621 | 0.062249389 |
| 0.029575651 | 0.030376105 | 0.071735837 | 0.0291518   |
| 0.053989461 | 0.014229761 | 0.012789939 | 0.011334817 |
| 0.004389224 | 0.066282116 | 0.04682978  | 0.006604009 |
| 0.065875446 | 0.049533344 | 0.082035587 | 0.064589424 |
| 0.084788892 | 0.009371569 | 0.059995061 | 0.062169517 |
| 0.006175308 | 0.002988394 | 0.009836715 | 0.03279681  |
| 0.05098168  | 0.060629177 | 0.030552128 | 0.045200626 |
| 0.079171204 | 0.07231977  | 0.047092128 | 0.070051595 |
| 0.048493159 | 0.063837283 | 0.015722444 | 0.019578742 |
| 0.030319683 | 0.022753142 | 0.099227557 | 8.49E-05    |
| 0.082116166 | 0.006029375 | 0.093973097 | 0.06389209  |
| 0.056465461 | 0.070064321 | 0.004915282 | 0.017222765 |

|             |             |             |             |
|-------------|-------------|-------------|-------------|
| 0.004717527 | 0.023015985 | 0.035675189 | 0.06553101  |
| 0.048857989 | 0.01803241  | 0.092225613 | 0.009808392 |
| 0.085441751 | 0.072095832 | 0.046370557 | 0.050713318 |
| 0.047324079 | 0.020103153 | 0.070522829 | 0.008469253 |
| 0.056239675 | 0.047322168 | 0.031340674 | 0.090139189 |
| 0.084939712 | 0.081715302 | 0.0089417   | 0.094082507 |
| 0.11281271  | 0.017621381 | 0.08650968  | 0.029253408 |
| 0.010194194 | 0.011263599 | 0.049149311 | 0.023821021 |
| 0.031169676 | 0.039894242 | 0.000603584 | 1           |
| 0.102448708 | 0.031960313 | 0.067640045 | 0.08517461  |
| 0.064051197 | 0.105121923 | 0.011684266 | 0.05713674  |
| 0.058532408 | 0.062852487 | 0.04296566  | 0.066464806 |
| 0.093750673 | 0.02022718  | 0.036917003 | 0.002760929 |
| 0.099479753 | 0.073326857 | 0.031961611 | 0.011555247 |
| 0.001422891 | 0.057384966 | 0.079833997 | 0.008915738 |
| 0.109376959 | 0.014684113 | 0.046702994 | 0.061581044 |
| 0.032343012 | 0.067695099 | 0.036604789 | 0.097045919 |
| 0.003015134 | 0.049321011 | 0.052783217 | 0.05393064  |
| 0.042827787 | 0.080759301 | 0.098557687 | 0.06687176  |
| 0.007960353 | 0.033965526 | 0.000537794 | 0.064929116 |
| 0.058938619 | 0.084845692 | 0.038972115 | 0.015879309 |
| 0.079761936 | 0.060495549 | 0.044899583 | 0.040332349 |
| 0.000443127 | 0.113159866 | 0.044202399 | 0.059067611 |
| 0.02249108  | 0.076685118 | 0.003611706 | 0.095269861 |
| 0.054730845 | 0.08230157  | 0.061296107 | 0.026589962 |
| 0.06291868  | 0.048607321 | 0.013791362 | 0.019243772 |
| 0.058238955 | 0.011640481 | 0.018077806 | 0.092975872 |
| 0.055384055 | 0.075926482 | 0.113228517 | 0.057995456 |
| 0.084243708 | 0.055538884 | 0.049781526 | 0.087168988 |
| 0.04182835  | 0.067474456 | 0.085899618 | 0.089963064 |
| 0.091403311 | 0.072461296 | 0.079331737 | 0.099259573 |
| 0.05497134  | 0.003824407 | 0.051290255 | 0.07216624  |
| 0.084695412 | 0.073094307 | 0.028122817 | 0.080186862 |
| 0.001753799 | 0.026991332 | 0.021895932 | 0.024995451 |
| 0.097385081 | 0.069169509 | 0.051469001 | 0.077054199 |
| 0.014577445 | 0.001197495 | 0.085052034 | 0.007910456 |
| 0.022838911 | 0.077300897 | 0.047367902 | 0.064707648 |
| 0.027112196 | 0.064464062 | 0.047609241 | 5.51E-05    |
| 0.095805204 | 0.000256252 | 0.03908406  | 0.058674335 |
| 0.018514261 | 0.010449214 | 0.059795202 | 0.106420802 |
| 0.043968451 | 0.006455901 | 0.03024869  | 0.074235283 |
| 0.007419733 | 0.031425726 | 0.059144475 | 0.049972443 |
| 0.057735768 | 0.034841649 | 0.042357283 | 0.039915253 |
| 0.056385994 | 0.025786499 |             |             |
| SLM02       | 0.14767643  | 0.31163966  | 0.092391915 |
| 0.252826982 | 0.315722609 | 0.274845418 | 0.151000721 |
| 0.218569935 | 0.24498157  | 0.140568336 | 0.338877311 |
| 0.090172707 | 0.101759212 | 0.390537299 | 0.155924782 |
| 0.306588468 | 0.14589353  | 0.222805416 | 0.078821507 |
| 0.21083774  | 0.330821415 | 0.27908622  | 0.241072686 |
| 0.302762033 | 0.226141861 | 0.23762168  | 0.23577287  |
| 0.385314981 | 0.157733645 | 0.29110929  | 0.099481442 |
| 0.402864544 | 0.318856098 | 0.240316017 | 0.060932199 |
| 0.295536263 | 0.020402402 | 0.392608387 | 0.345322583 |

|             |             |             |             |
|-------------|-------------|-------------|-------------|
| 0.182631058 | 0.357168723 | 0.164111378 | 0.357343344 |
| 0.206023788 | 0.101496338 | 0.090457646 | 0.264532511 |
| 0.223641784 | 0.272956591 | 0.099603576 | 0.275875259 |
| 0.238661401 | 0.282486675 | 0.21842303  | 0.006927672 |
| 0.233201116 | 0.06493827  | 0.165475722 | 0.400592832 |
| 0.290470276 | 0.28007379  | 0.151389266 | 0.218672757 |
| 0.250908181 | 0.280422903 | 0.288127206 | 0.205834559 |
| 0.416849274 | 0.185613969 | 0.269074764 | 0.211238188 |
| 0.286529505 | 0.068362189 | 0.238023164 | 0.10029156  |
| 0.26810223  | 0.32861978  | 0.325573639 | 0.254042219 |
| 0.301569424 | 0.444178999 | 0.269147037 | 0.38487383  |
| 0.133104849 | 0.279756851 | 0.287590122 | 0.32676849  |
| 0.275667993 | 0.147113959 | 0.338810355 | 0.446585446 |
| 0.092796594 | 0.194844371 | 0.277233179 | 0.149474422 |
| 0.326582572 | 0.19188     | 0.205583951 | 0.215111522 |
| 0.298072467 | 0.30901076  | 0.386184486 | 0.326996888 |
| 0.288531594 | 0.113700716 | 0.378254653 | 0.277252421 |
| 0.348676614 | 0.140174837 | 0.294726464 | 0.347749391 |
| 0.302626487 | 0.395858196 | 0.301640562 | 0.320392678 |
| 0.291618889 | 0.412107328 | 0.307452483 | 0.342874571 |
| 0.059428149 | 0.413740512 | 0.261554082 | 0.171178423 |
| 0.106724156 | 0.227393359 | 0.222062853 | 0.330385583 |
| 0.377482079 | 0.28978081  | 0.270655685 | 0.344120768 |
| 0.39615781  | 0.361370066 | 0.40365959  | 0.341979398 |
| 0.122653001 | 0.191759795 | 0.291182006 | 0.258439135 |
| 0.309258869 | 0.185420303 | 0.270550143 | 0.419102722 |
| 0.378712926 | 0.36227047  | 0.188111677 | 0.426597011 |
| 0.23248115  | 0.459543001 | 0.326290181 | 0.301646554 |
| 0.431967795 | 0.402831499 | 0.45025308  | 0.301029918 |
| 0.403329656 | 0.293248862 | 0.069831929 | 0.321377303 |
| 0.454820698 | 0.035695372 | 0.361771807 | 0.393391086 |
| 0.388620452 | 0.35650593  | 0.447311888 | 0.410648257 |
| 0.387626237 | 0.137127383 | 0.020608801 | 0.339985903 |
| 0.409121388 | 0.373212887 | 0.254194179 | 0.261409189 |
| 0.307151673 | 0.282037832 | 0.305734496 | 0.252471053 |
| 0.471638653 | 0.363635566 | 0.370751089 | 0.29817428  |
| 0.199697524 | 0.334675554 | 0.24200383  | 0.371329682 |
| 0.142457871 | 0.181100127 | 0.089084642 | 0.283003686 |
| 0.182383768 | 0.311985209 | 0.266927974 | 0.272910063 |
| 0.311640933 | 0.236033679 | 0.21479226  | 0.308194075 |
| 0.079806664 | 0.267608081 | 0.230788847 | 0.210893272 |
| 0.166714989 | 0.195717726 | 0.305948855 | 0.303232208 |
| 0.349453492 | 0.241098434 | 0.272560961 | 0.396633831 |
| 0.264363112 | 0.204676979 | 0.285064257 | 0.432884971 |
| 0.449750207 | 0.294364741 | 0.262161983 | 0.072931118 |
| 0.285948315 | 0.16147817  | 0.162530978 | 0.252748693 |
| 0.206837545 | 0.314849319 | 0.300823453 | 0.33711922  |
| 0.251647764 | 0.166442015 | 0.288132997 | 0.405067347 |
| 0.159535424 | 0.342288108 | 0.397965888 | 0.238014527 |
| 0.02105357  | 0.318902718 | 0.357185449 | 0.252356504 |
| 0.267526408 | 0.190772915 | 0.21722572  | 0.387434303 |
| 0.21863866  | 0.264370189 | 0.388868451 | 0.323056147 |
| 0.247558424 | 0.209700883 | 0.441118486 | 0.04973471  |
| 0.251930563 | 0.157895528 | 0.350970178 | 0.159611474 |

|             |             |             |             |
|-------------|-------------|-------------|-------------|
| 0.308866814 | 0.314209307 | 0.299785664 | 0.315019279 |
| 0.1503234   | 0.420778486 | 0.332098945 | 0.419893752 |
| 0.254527101 | 0.443796638 | 0.373980673 | 0.399752457 |
| 0.309768998 | 0.220510795 | 0.138469994 | 0.352679118 |
| 0.373938535 | 0.193716538 | 0.101865044 | 0.302857838 |
| 0.212921993 | 0.294069875 | 0.20095277  | 0.436605111 |
| 0.442932406 | 0.345297997 | 0.308083871 | 0.348477777 |
| 0.372264462 | 0.293320137 | 0.336580462 | 0.453804202 |
| 0.163236299 | 0.297093402 | 0.307127414 | 0.389352684 |
| 0.251933376 | 0.286577332 | 0.307776362 | 0.152549073 |
| 0.008723871 | 0.134628411 | 0.128512784 | 0.331784204 |
| 0.235151476 | 0.22634502  | 0.301687059 | 0.421586627 |
| 0.253380165 | 0.372836049 | 0.235887127 | 0.342382659 |
| 0.354825777 | 0.272897661 | 0.27312744  | 0.299284543 |
| 0.262594874 | 0.087355439 | 0.29105221  | 0.4462737   |
| 0.063378987 | 0.257393256 | 0.257576398 | 0.022181178 |
| 0.120221212 | 0.258862362 | 0.128936976 | 0.247510468 |
| 0.417516693 | 0.230335746 | 0.237198818 | 0.171110632 |
| 0.330928867 | 0.192118553 | 0.029406569 | 0.383836197 |
| 0.377459678 | 0.359929695 | 0.370985892 | 0.354978863 |
| 0.347509555 | 0.281894293 | 0.339932358 | 0.244348277 |
| 0.209672724 | 0.126983709 | 0.253706038 | 0.341278169 |
| 0.011771201 | 0.350660458 | 0.289689495 | 0.232833112 |
| 0.308456261 | 0.285879374 | 0.125864355 | 0.282573619 |
| 0.078876284 | 0.168897731 | 0.265258035 | 0.28670776  |
| 0.321186261 | 0.058272556 | 0.198762183 | 0.257922533 |
| 0.35210879  | 0.328890322 | 0.230154481 | 0.426304973 |
| 0.351035512 | 0.122076312 | 0.339149972 | 0.333584711 |
| 0.183517709 | 0.069589567 | 0.249847205 | 0.022427286 |
| 0.144850393 | 0.368120557 | 0.249359905 | 0.136300183 |
| 0.332212077 | 0.032508297 | 0.333925511 | 0.440671392 |
| 0.346608071 | 0.430448336 | 0.41999644  | 0.268067416 |
| 0.41619952  | 0.070615355 | 0.420785065 | 0.317349474 |
| 0.203574115 | 0.005641118 | 0.038022358 | 0.390170258 |
| 0.303997097 | 0.071117175 | 0.260455497 | 0.243600188 |
| 0.289714487 | 0.179441127 | 0.159515593 | 0.276550619 |
| 0.278058474 | 0.335125607 | 0.246176296 | 0.365141254 |
| 0.328612364 | 0.318086976 | 0.22784314  | 0.128625963 |
| 0.288775834 | 0.175011986 | 0.125393367 | 0.042972296 |
| 0.31403898  | 0.131235417 | 0.373655738 | 0.403058117 |
| 0.444244752 | 0.312527147 | 0.162748934 | 0.253254153 |
| 0.349813477 | 0.102767453 | 0.209312958 | 0.128051685 |
| 0.37114183  | 0.318472833 | 0.350548791 | 0.322664999 |
| 0.448899016 | 0.407595461 | 0.120228278 | 0.34546573  |
| 0.063169686 | 0.012207394 | 0.245277619 | 0.274020645 |
| 0.057937425 | 0.293630623 | 0.298501937 | 0.204986501 |
| 0.255869671 | 0.101662136 | 0.24024411  | 0.245717113 |
| 0.334500445 | 0.322105356 | 0.306595894 | 0.226751969 |
| 0.300296578 | 0.231780391 | 0.308294604 | 0.263109058 |
| 0.182434724 | 0.287828211 | 0.231431012 | 0.084351679 |
| 0.248347017 | 0.285165681 | 0.155930559 | 0.219892259 |
| 0.388122632 | 0.405330819 | 0.15464741  | 0.08850681  |
| 0.287384488 | 0.290961505 | 0.424496997 | 0.378744092 |
| 0.428102902 | 0.462969588 | 0.382202459 | 0.28592031  |

|             |             |             |             |
|-------------|-------------|-------------|-------------|
| 0.170208678 | 0.326483482 | 0.293426    | 0.257905406 |
| 0.416550562 | 0.092790115 | 0.380793742 | 0.248726393 |
| 0.193785882 | 0.304154874 | 0.157483246 | 0.185800574 |
| 0.275640956 | 0.273094452 | 0.334748017 | 0.165994851 |
| 0.347436232 | 0.232336101 | 0.132761068 | 0.305696422 |
| 0.315131579 | 0.191244157 | 0.254409366 | 0.241608401 |
| 0.281078048 | 0.098226027 | 0.303428741 | 0.441261793 |
| 0.195005598 | 0.170521481 | 0.230305347 | 0.28758621  |
| 0.327425926 | 0.205316566 | 0.092982591 | 0.319237925 |
| 0.414164634 | 0.283501099 | 0.396089361 | 0.394007489 |
| 0.142318796 | 0.317266195 | 0.22750282  | 0.312701452 |
| 0.267506996 | 0.270645896 | 0.293867785 | 0.141017376 |
| 0.313983812 | 0.41550848  | 0.331686037 | 0.326991098 |
| 0.250980451 | 0.130877753 | 0.081712878 | 0.33900562  |
| 0.24649213  | 0.199781119 | 0.181754349 | 0.323473226 |
| 0.011639711 | 0.157365111 | 0.403720541 | 0.327095946 |
| 0.434922604 | 0.408954128 | 0.416063053 | 0.234561785 |
| 0.003244284 | 0.274980634 | 0.343153146 | 0.30626408  |
| 0.333644471 | 0.303898986 | 0.156283841 | 0.241622598 |
| 0.340708742 | 0.103994835 | 0.306406332 | 0.232867663 |
| 0.164936858 | 0.270509067 | 0.282512282 | 0.234683444 |
| 0.317230974 | 0.097803515 | 0.231057093 | 0.303019244 |
| 0.150447652 | 0.306271416 | 0.372490399 | 0.134915945 |
| 0.199599369 | 0.37620485  | 0.314820173 | 0.092114148 |
| 0.266495219 | 0.346531137 | 0.371349719 | 0.017185079 |
| 0.318761161 | 0.056084494 | 0.341355451 | 0.354098226 |
| 0.337229275 | 0.322650564 | 0.336427404 | 0.320031638 |
| 0.272461311 | 0.309057777 | 0.345288068 | 0.33625703  |
| 0.326282276 | 0.263540722 | 0.295409763 | 0.261668302 |
| 0.343892479 | 0.24408653  | 0.130815675 | 0.129828135 |
| 0.184652044 | 0.35180051  | 0.296400207 | 0.100027177 |
| 0.318783264 | 0.255021021 | 0.392055559 | 0.367657856 |
| 0.401843037 | 0.120200037 | 0.294224901 | 0.340107756 |
| 0.118543084 | 0.218422449 | 0.114224411 | 0.264827146 |
| 0.310221329 | 0.316309999 | 0.229915396 | 0.238647619 |
| 0.254496498 | 0.401066814 | 0.284811028 | 0.390184044 |
| 0.308689287 | 0.234317137 | 0.153446225 | 0.274152782 |
| 0.275825543 | 0.17617993  | 0.318091734 | 0.018559233 |
| 0.330941324 | 0.232656121 | 0.376616193 | 0.388231649 |
| 0.213250441 | 0.381841299 | 0.178358377 | 0.20359472  |
| 0.128362514 | 0.180092237 | 0.216976628 | 0.286532249 |
| 0.175895236 | 0.287617711 | 0.33043648  | 0.214267182 |
| 0.312858218 | 0.268112316 | 0.270459433 | 0.27043491  |
| 0.272738734 | 0.208473577 | 0.382117113 | 0.156553428 |
| 0.246985236 | 0.292506121 | 0.18922913  | 0.358028945 |
| 0.329337119 | 0.403010562 | 0.127254976 | 0.413811167 |
| 0.315757999 | 0.158741023 | 0.452795061 | 0.256485331 |
| 0.24449673  | 0.277798648 | 0.177204078 | 0.219121908 |
| 0.292212641 | 0.242257693 | 0.008008417 | 0.102448708 |
| 1           | 0.198374633 | 0.267422432 | 0.288853733 |
| 0.288392916 | 0.352790961 | 0.137766963 | 0.259026053 |
| 0.35499986  | 0.392342213 | 0.335152964 | 0.294025401 |
| 0.313215482 | 0.249689542 | 0.246613468 | 0.016133722 |
| 0.28086633  | 0.247405675 | 0.220255909 | 0.161455815 |

|             |             |             |             |
|-------------|-------------|-------------|-------------|
| 0.084054425 | 0.193697406 | 0.269283653 | 0.090077452 |
| 0.408909093 | 0.16218432  | 0.208491822 | 0.288827717 |
| 0.199451087 | 0.399570012 | 0.29175024  | 0.340519276 |
| 0.076150635 | 0.277973429 | 0.252129376 | 0.235477115 |
| 0.347020536 | 0.284958389 | 0.352700778 | 0.264285709 |
| 0.137383442 | 0.342344017 | 0.011428395 | 0.39244697  |
| 0.36137583  | 0.264125346 | 0.247647554 | 0.139255118 |
| 0.337300904 | 0.326386546 | 0.294336009 | 0.234526659 |
| 0.077636735 | 0.311775452 | 0.288775529 | 0.347067318 |
| 0.1736247   | 0.24902337  | 0.188573118 | 0.268652224 |
| 0.369156871 | 0.296985413 | 0.280808979 | 0.213171331 |
| 0.370534106 | 0.285879797 | 0.149401189 | 0.260629909 |
| 0.216517095 | 0.1155405   | 0.201394284 | 0.435380462 |
| 0.339038414 | 0.266410463 | 0.385650294 | 0.341665366 |
| 0.259641015 | 0.31969486  | 0.222427815 | 0.41577828  |
| 0.252961132 | 0.316773816 | 0.336404566 | 0.367893621 |
| 0.348574911 | 0.246155902 | 0.264830055 | 0.337306352 |
| 0.351839807 | 0.226681961 | 0.246556312 | 0.30862679  |
| 0.240005432 | 0.324481851 | 0.178514876 | 0.312143976 |
| 0.162515031 | 0.250912579 | 0.29122087  | 0.218973841 |
| 0.337619927 | 0.319936792 | 0.298778674 | 0.39918547  |
| 0.303029992 | 0.129828058 | 0.427280628 | 0.040739149 |
| 0.250690722 | 0.328849721 | 0.306710761 | 0.296316793 |
| 0.226941006 | 0.278230061 | 0.234650533 | 0.013367848 |
| 0.35861746  | 0.078279616 | 0.272253827 | 0.344400398 |
| 0.234366801 | 0.132606507 | 0.384436049 | 0.438103641 |
| 0.272829567 | 0.201705134 | 0.218399049 | 0.379501949 |
| 0.185699493 | 0.186693771 | 0.234131758 | 0.241602002 |
| 0.224266855 | 0.196696845 | 0.232536972 | 0.252577752 |
| 0.299216965 | 0.26720185  |             |             |
| SLPI        | 0.022366782 | 0.353963991 | 0.01798536  |
| 0.022098803 | 0.170505233 | 0.098004364 | 0.034273052 |
| 0.051555112 | 0.343963597 | 0.151636838 | 0.128180715 |
| 0.005808135 | 0.067599947 | 0.333180225 | 0.03673445  |
| 0.232389854 | 0.016166524 | 0.054904889 | 0.076173074 |
| 0.115618703 | 0.156070427 | 0.095598345 | 0.149034944 |
| 0.182199536 | 0.134358605 | 0.204331954 | 0.264806243 |
| 0.377215882 | 0.078567868 | 0.228702776 | 0.059319728 |
| 0.308622248 | 0.187964133 | 0.170089861 | 0.005447043 |
| 0.190323191 | 0.080608118 | 0.350575642 | 0.083263105 |
| 0.049947026 | 0.252033086 | 0.14223955  | 0.062528502 |
| 0.179815329 | 0.010102017 | 0.078630134 | 0.329398695 |
| 0.242236593 | 0.128976181 | 0.036240974 | 0.265920586 |
| 0.162574135 | 0.176657089 | 0.283025494 | 0.001003363 |
| 0.118735068 | 0.065317442 | 0.117654354 | 0.372333844 |
| 0.104831044 | 0.053970803 | 0.164280522 | 0.177683782 |
| 0.322228723 | 0.335947667 | 0.206458712 | 0.148992064 |
| 0.352913704 | 0.105518433 | 0.328976294 | 0.038697344 |
| 0.157044912 | 0.027041121 | 0.108788252 | 0.092646525 |
| 0.147604295 | 0.092661702 | 0.155074746 | 0.144909881 |
| 0.330245664 | 0.412990636 | 0.174609119 | 0.389590406 |
| 0.158738496 | 0.232004216 | 0.114331478 | 0.229382989 |
| 0.347620708 | 0.078362966 | 0.218918419 | 0.389701271 |
| 0.045548821 | 0.243973976 | 0.310102749 | 0.101242318 |

|             |             |             |             |
|-------------|-------------|-------------|-------------|
| 0.310525185 | 0.192360673 | 0.175137354 | 0.065837635 |
| 0.265039023 | 0.200930315 | 0.427175457 | 0.151589466 |
| 0.179297658 | 0.048281019 | 0.370960368 | 0.205628304 |
| 0.068978393 | 0.036955648 | 0.100963404 | 0.371786354 |
| 0.218877129 | 0.349174139 | 0.364461481 | 0.314792162 |
| 0.200461167 | 0.354549157 | 0.208071499 | 0.353890922 |
| 0.094509578 | 0.404020144 | 0.069742168 | 0.016278981 |
| 0.029650813 | 0.042726058 | 0.200423836 | 0.24714413  |
| 0.34057589  | 0.207971125 | 0.060137283 | 0.108618073 |
| 0.379527436 | 0.362053143 | 0.419429949 | 0.310370973 |
| 0.014602328 | 0.183913637 | 0.182657841 | 0.095319779 |
| 0.266789927 | 0.100149722 | 0.124063585 | 0.383235662 |
| 0.235214821 | 0.330546625 | 0.056727385 | 0.394981465 |
| 0.142627901 | 0.368571787 | 0.321641291 | 0.059177428 |
| 0.381657676 | 0.354709279 | 0.374116489 | 0.252614563 |
| 0.335833194 | 0.099926037 | 0.111877723 | 0.33327169  |
| 0.35276432  | 0.004822562 | 0.388000524 | 0.400699148 |
| 0.371336391 | 0.336508119 | 0.422225098 | 0.387350283 |
| 0.378947631 | 0.054423399 | 0.068246776 | 0.195887659 |
| 0.374181787 | 0.242158832 | 0.089727604 | 0.202352103 |
| 0.246448921 | 0.133775559 | 0.360123893 | 0.065402219 |
| 0.39977772  | 0.329756067 | 0.387830592 | 0.300449325 |
| 0.248168851 | 0.226162491 | 0.238223516 | 0.336728611 |
| 0.016984649 | 0.031573382 | 0.031363385 | 0.289157048 |
| 0.090409915 | 0.091870259 | 0.113468602 | 0.294010824 |
| 0.109532108 | 0.159220557 | 0.135878418 | 0.253489634 |
| 0.054179859 | 0.193920427 | 0.076875427 | 0.088794744 |
| 0.013964566 | 0.122942179 | 0.040983208 | 0.036731925 |
| 0.119406225 | 0.201723159 | 0.294604431 | 0.38907632  |
| 0.204076359 | 0.104412334 | 0.259160937 | 0.350661112 |
| 0.31443685  | 0.175559631 | 0.19506356  | 0.001076732 |
| 0.083573101 | 0.189375465 | 0.116478559 | 0.240535748 |
| 0.162863674 | 0.089820505 | 0.235195046 | 0.249815043 |
| 0.093885464 | 0.103347452 | 0.135680016 | 0.310514773 |
| 0.120462001 | 0.07357622  | 0.311405281 | 0.242109284 |
| 0.001094506 | 0.118792056 | 0.298887658 | 0.102842533 |
| 0.255902367 | 0.051732581 | 0.066258967 | 0.349368809 |
| 0.137072778 | 0.138188868 | 0.386617717 | 0.284405549 |
| 0.098345636 | 0.20827012  | 0.421207359 | 0.060286906 |
| 0.273549837 | 0.010719661 | 0.170160202 | 0.192409633 |
| 0.126683447 | 0.235243479 | 0.191983676 | 0.08544308  |
| 0.062217529 | 0.397219664 | 0.285144586 | 0.374048756 |
| 0.123037403 | 0.418433524 | 0.327583204 | 0.295467451 |
| 0.214269247 | 0.235669145 | 0.080623712 | 0.27477481  |
| 0.340703106 | 0.128609736 | 0.058634429 | 0.371982797 |
| 0.207242515 | 0.28259031  | 0.068853496 | 0.356378976 |
| 0.367623071 | 0.358697515 | 0.051572407 | 0.291044113 |
| 0.21809215  | 0.080422582 | 0.333928779 | 0.432923063 |
| 0.163130572 | 0.195364302 | 0.10684346  | 0.307259181 |
| 0.088994692 | 0.119598645 | 0.285861745 | 0.122736212 |
| 0.002757736 | 0.051371943 | 0.032329914 | 0.062531292 |
| 0.072014916 | 0.285203875 | 0.272026874 | 0.389045361 |
| 0.050996462 | 0.297169057 | 0.245032189 | 0.070032284 |
| 0.309034722 | 0.206189732 | 0.203320907 | 0.24309742  |



|             |             |             |             |
|-------------|-------------|-------------|-------------|
| 0.197018761 | 0.003577524 | 0.023167091 | 0.399543624 |
| 0.037405502 | 0.079408955 | 0.186727809 | 0.000428307 |
| 0.019472832 | 0.338487966 | 0.089241524 | 0.152847988 |
| 0.385936473 | 0.147990845 | 0.113539545 | 0.143696655 |
| 0.206590002 | 0.049582897 | 0.000478719 | 0.413456317 |
| 0.446425352 | 0.442565861 | 0.443591622 | 0.413206995 |
| 0.430936766 | 0.357290932 | 0.320553068 | 0.130137053 |
| 0.037746372 | 0.040324456 | 0.086502705 | 0.116328292 |
| 0.003662189 | 0.246621491 | 0.208629818 | 0.085672878 |
| 0.322874684 | 0.2522941   | 0.011997386 | 0.270476285 |
| 0.002816913 | 0.067592737 | 0.129213785 | 0.126822967 |
| 0.307649385 | 0.005431495 | 0.038809018 | 0.10849197  |
| 0.282304722 | 0.232591977 | 0.128222495 | 0.396367137 |
| 0.123915808 | 0.101821311 | 0.11104615  | 0.260433243 |
| 0.029168908 | 0.074973011 | 0.162496012 | 0.008077013 |
| 0.068632046 | 0.412617121 | 0.151306366 | 0.018690842 |
| 0.121011497 | 0.000917322 | 0.228382728 | 0.397271142 |
| 0.342502379 | 0.398729199 | 0.347062095 | 0.090270468 |
| 0.35417277  | 0.103598865 | 0.401739718 | 0.288969608 |
| 0.140425804 | 0.000345583 | 0.003896192 | 0.360979278 |
| 0.178377086 | 0.051053387 | 0.085624782 | 0.064605667 |
| 0.028871115 | 0.058201562 | 0.033459434 | 0.072069135 |
| 0.208097422 | 0.118829363 | 0.09700135  | 0.363323022 |
| 0.101863061 | 0.149370029 | 0.161512405 | 0.077531855 |
| 0.217769864 | 0.015738829 | 0.092394222 | 0.001388013 |
| 0.285338975 | 0.091055408 | 0.362118853 | 0.384350804 |
| 0.355766087 | 0.244012991 | 0.121319927 | 0.099627951 |
| 0.414088018 | 0.064998558 | 0.121022841 | 0.069170365 |
| 0.344525664 | 0.212352216 | 0.181659618 | 0.17739746  |
| 0.372702989 | 0.324647611 | 0.015664158 | 0.285812783 |
| 0.001549441 | 0.003820119 | 0.11669232  | 0.221690878 |
| 0.212682681 | 0.181881103 | 0.163220317 | 0.181090863 |
| 0.148826123 | 0.00653855  | 0.129840277 | 0.1129858   |
| 0.164367273 | 0.171060733 | 0.140538605 | 0.261295228 |
| 0.124630228 | 0.077944974 | 0.072293436 | 0.078171441 |
| 0.199234153 | 0.232765765 | 0.130703073 | 0.013815348 |
| 0.190328506 | 0.178002641 | 0.022864694 | 0.100121404 |
| 0.281848495 | 0.349289086 | 0.026465634 | 0.001572601 |
| 0.175586431 | 0.16956794  | 0.375116405 | 0.370402112 |
| 0.389809048 | 0.395799029 | 0.293567629 | 0.064484479 |
| 0.023144517 | 0.197881217 | 0.176376765 | 0.050471474 |
| 0.379801556 | 0.053258098 | 0.361625307 | 0.177171302 |
| 0.089757903 | 0.059334092 | 0.008500879 | 0.05625636  |
| 0.217277645 | 0.109309148 | 0.080215455 | 0.072408586 |
| 0.112281823 | 0.090934729 | 0.026623848 | 0.100218477 |
| 0.233930145 | 0.077954104 | 0.093753472 | 0.136223523 |
| 0.272085849 | 0.193279413 | 0.293504987 | 0.332762438 |
| 0.077372277 | 0.085838048 | 0.053574576 | 0.343938552 |
| 0.331236078 | 0.265564735 | 0.003177089 | 0.353049938 |
| 0.386627007 | 0.239727585 | 0.359071602 | 0.320710583 |
| 0.071604369 | 0.140943014 | 0.211910526 | 0.202212169 |
| 0.135402403 | 0.111437956 | 0.164497505 | 0.042644098 |
| 0.283356356 | 0.40838683  | 0.311488654 | 0.052884369 |
| 0.236818704 | 0.093393569 | 0.047629786 | 0.377707123 |

|             |             |             |             |
|-------------|-------------|-------------|-------------|
| 0.078269227 | 0.021833476 | 0.159012411 | 0.392727005 |
| 0.000490511 | 0.07793016  | 0.4368857   | 0.063410575 |
| 0.432481199 | 0.357228846 | 0.297471958 | 0.119516074 |
| 0.005127001 | 0.300813873 | 0.162847383 | 0.103418719 |
| 0.310645639 | 0.227493866 | 0.119181237 | 0.0240406   |
| 0.202024091 | 0.050773925 | 0.049902629 | 0.081658647 |
| 0.106956454 | 0.235486455 | 0.147923309 | 0.184186813 |
| 0.09676944  | 0.111943014 | 0.091983419 | 0.074730707 |
| 0.192266838 | 0.152642652 | 0.230443032 | 0.136780754 |
| 0.055535023 | 0.39654309  | 0.2870205   | 0.00855543  |
| 0.213911418 | 0.374661344 | 0.361434811 | 0.000639729 |
| 0.25139262  | 0.002171538 | 0.089403968 | 0.066887666 |
| 0.07612805  | 0.110394354 | 0.173916019 | 0.086189719 |
| 0.245203022 | 0.098142941 | 0.064623299 | 0.11784613  |
| 0.04520272  | 0.113835188 | 0.225006905 | 0.161416067 |
| 0.062250224 | 0.034568301 | 0.089855336 | 0.092084363 |
| 0.011450539 | 0.367209809 | 0.166545736 | 0.049695004 |
| 0.149980082 | 0.165576924 | 0.249567959 | 0.374271599 |
| 0.31691832  | 0.090662213 | 0.181183416 | 0.291150483 |
| 0.141997163 | 0.078979875 | 0.026462889 | 0.178860924 |
| 0.10446983  | 0.06402029  | 0.198598844 | 0.146851714 |
| 0.334588176 | 0.284408003 | 0.157298274 | 0.347180011 |
| 0.117971651 | 0.269055948 | 0.096988562 | 0.021386956 |
| 0.053224833 | 0.114778661 | 0.138890995 | 3.96E-05    |
| 0.202087257 | 0.051028777 | 0.325733167 | 0.348859355 |
| 0.134290551 | 0.286840276 | 0.075943227 | 0.023139406 |
| 0.082972352 | 0.136125949 | 0.092165139 | 0.32312923  |
| 0.088583904 | 0.055462527 | 0.150404515 | 0.073262793 |
| 0.306439571 | 0.362039361 | 0.149909344 | 0.130627351 |
| 0.186772786 | 0.117050754 | 0.417454366 | 0.048959195 |
| 0.242449284 | 0.05641989  | 0.25800847  | 0.109177848 |
| 0.101658283 | 0.409727189 | 0.035001834 | 0.405665043 |
| 0.149172904 | 0.112099617 | 0.375647947 | 0.168343889 |
| 0.093340241 | 0.042348926 | 0.090682147 | 0.150546859 |
| 0.109847405 | 0.123739904 | 0.011324249 | 0.031960313 |
| 0.198374633 | 1           | 0.340912507 | 0.335424766 |
| 0.115506607 | 0.285707029 | 0.10995296  | 0.146040148 |
| 0.364595799 | 0.385881272 | 0.054000798 | 0.199045057 |
| 0.247122867 | 0.029489387 | 0.186018415 | 0.043674694 |
| 0.24263662  | 0.255250273 | 0.14052287  | 0.026513311 |
| 0.009007952 | 0.089369881 | 0.235222442 | 0.079158169 |
| 0.387131473 | 0.076053591 | 0.323141311 | 0.260870916 |
| 0.169913461 | 0.373489506 | 0.051796345 | 0.220667122 |
| 0.057907335 | 0.194376864 | 0.23146521  | 0.266378947 |
| 0.048700539 | 0.12825337  | 0.220994457 | 0.08035873  |
| 0.010816571 | 0.079464534 | 0.002766181 | 0.28752053  |
| 0.367660047 | 0.193393005 | 0.174836042 | 0.166437028 |
| 0.175860048 | 0.348115694 | 0.122754856 | 0.214444    |
| 0.002189665 | 0.184343398 | 0.11850907  | 0.252920736 |
| 0.056300566 | 0.279230763 | 0.014142988 | 0.23757839  |
| 0.348478889 | 0.095548346 | 0.241528529 | 0.092144685 |
| 0.36420544  | 0.339305237 | 0.115917392 | 0.103548837 |
| 0.343375831 | 0.051297326 | 0.128487331 | 0.423445512 |
| 0.066244962 | 0.078277101 | 0.31598104  | 0.056251678 |

|             |             |             |             |
|-------------|-------------|-------------|-------------|
| 0.169449695 | 0.298466278 | 0.294030375 | 0.443908711 |
| 0.032469829 | 0.137196707 | 0.327729622 | 0.370648603 |
| 0.210780175 | 0.102288093 | 0.086338554 | 0.09107693  |
| 0.314596104 | 0.017513914 | 0.140279915 | 0.211347109 |
| 0.083005154 | 0.209797531 | 0.270409349 | 0.089479858 |
| 0.011136765 | 0.092646198 | 0.084717352 | 0.095426507 |
| 0.159907844 | 0.170302353 | 0.107549246 | 0.270103809 |
| 0.02586932  | 0.003074602 | 0.338224539 | 0.00881131  |
| 0.124944745 | 0.189358618 | 0.135963969 | 0.164728976 |
| 0.110149313 | 0.232341518 | 0.154240652 | 0.000131668 |
| 0.329147998 | 0.021774241 | 0.169248839 | 0.060602726 |
| 0.127609595 | 0.021612025 | 0.32531376  | 0.39221103  |
| 0.208746205 | 0.144580408 | 0.104644917 | 0.365448026 |
| 0.067105077 | 0.15048428  | 0.169208173 | 0.245383288 |
| 0.096384852 | 0.163982655 | 0.17927317  | 0.115740519 |
| 0.247971217 | 0.117265338 |             |             |
| SMARCA2     | 0.083973557 | 0.436311908 | 0.074911335 |
| 0.121134396 | 0.242338572 | 0.334013569 | 0.075011813 |
| 0.131250541 | 0.352545127 | 0.382851247 | 0.286863309 |
| 0.021446277 | 0.066963819 | 0.428056543 | 0.064881198 |
| 0.339568209 | 0.033542095 | 0.11473246  | 0.097240102 |
| 0.239954783 | 0.229659104 | 0.2717179   | 0.362228961 |
| 0.240108283 | 0.192346365 | 0.351684372 | 0.362811105 |
| 0.488304792 | 0.252640667 | 0.360212494 | 0.241144396 |
| 0.397262094 | 0.261857124 | 0.340766713 | 0.022449559 |
| 0.358890953 | 0.017571774 | 0.444387088 | 0.226189633 |
| 0.112329504 | 0.323061349 | 0.378888564 | 0.19735492  |
| 0.410655608 | 0.047913404 | 0.260340315 | 0.383516187 |
| 0.345933078 | 0.262192141 | 0.093198187 | 0.380259056 |
| 0.375774478 | 0.300420189 | 0.400320607 | 0.00346523  |
| 0.250868704 | 0.086730141 | 0.215182532 | 0.493291621 |
| 0.178080298 | 0.107955286 | 0.343965766 | 0.262022781 |
| 0.382597425 | 0.347024298 | 0.226418824 | 0.413114755 |
| 0.478689507 | 0.157310979 | 0.391310655 | 0.142439856 |
| 0.374867478 | 0.056472407 | 0.154930385 | 0.123576936 |
| 0.357676693 | 0.163397937 | 0.268241324 | 0.26721619  |
| 0.452715109 | 0.504952891 | 0.227063075 | 0.513387447 |
| 0.112111929 | 0.292696908 | 0.224214325 | 0.258877214 |
| 0.35159393  | 0.116495975 | 0.342679365 | 0.503247393 |
| 0.074814736 | 0.411769467 | 0.387801335 | 0.154152396 |
| 0.405306717 | 0.271810638 | 0.405457479 | 0.127908285 |
| 0.307990199 | 0.303087639 | 0.488518755 | 0.259543931 |
| 0.256843292 | 0.101708022 | 0.498926515 | 0.265435448 |
| 0.227097931 | 0.099421075 | 0.202923592 | 0.423873057 |
| 0.370953194 | 0.468266391 | 0.422646896 | 0.341066607 |
| 0.336644252 | 0.475640768 | 0.349787873 | 0.396222484 |
| 0.21631907  | 0.517008737 | 0.175374872 | 0.038032665 |
| 0.099473953 | 0.074427244 | 0.237001182 | 0.256419786 |
| 0.430098553 | 0.300490348 | 0.1916483   | 0.198083057 |
| 0.416602748 | 0.491728771 | 0.526963927 | 0.374171306 |
| 0.046810054 | 0.24488601  | 0.339840023 | 0.255723292 |
| 0.348397635 | 0.126116287 | 0.210458615 | 0.510259695 |
| 0.337832017 | 0.376880754 | 0.182950175 | 0.498401097 |
| 0.221198857 | 0.476913629 | 0.448773465 | 0.151723731 |

|             |             |             |             |
|-------------|-------------|-------------|-------------|
| 0.506194763 | 0.491064733 | 0.471113379 | 0.326384787 |
| 0.45188181  | 0.304935594 | 0.105177111 | 0.357263518 |
| 0.436531383 | 0.010275271 | 0.455171169 | 0.479088485 |
| 0.501030896 | 0.418572607 | 0.49071269  | 0.478870044 |
| 0.503551626 | 0.091353684 | 0.056130768 | 0.244438238 |
| 0.508957852 | 0.346240643 | 0.118028322 | 0.387605544 |
| 0.310719357 | 0.361539559 | 0.375644514 | 0.275212243 |
| 0.477858141 | 0.414775968 | 0.474999056 | 0.373321492 |
| 0.354287022 | 0.293914017 | 0.346007193 | 0.47578316  |
| 0.043132157 | 0.125773302 | 0.072988984 | 0.282649583 |
| 0.354149632 | 0.148170192 | 0.369078562 | 0.329311805 |
| 0.168608416 | 0.346889778 | 0.293579337 | 0.311734336 |
| 0.083235009 | 0.392778711 | 0.16611449  | 0.202583543 |
| 0.039073034 | 0.147029829 | 0.169412504 | 0.123647678 |
| 0.206261913 | 0.267406229 | 0.391466396 | 0.464222774 |
| 0.335923712 | 0.192043715 | 0.38365303  | 0.431177952 |
| 0.373693018 | 0.316586813 | 0.219131622 | 0.007933476 |
| 0.270708862 | 0.358434073 | 0.174605735 | 0.366448694 |
| 0.195770002 | 0.24636216  | 0.358537658 | 0.313398201 |
| 0.279967889 | 0.182521387 | 0.349749272 | 0.403606776 |
| 0.178786351 | 0.234350314 | 0.396800787 | 0.411188631 |
| 0.004341659 | 0.306697229 | 0.387738623 | 0.130923152 |
| 0.326713859 | 0.103989865 | 0.194868575 | 0.435392623 |
| 0.281036764 | 0.200171032 | 0.461715439 | 0.314605117 |
| 0.311430762 | 0.257472715 | 0.498123291 | 0.07096175  |
| 0.322608402 | 0.032792576 | 0.232469727 | 0.386417539 |
| 0.236946566 | 0.256603647 | 0.254679298 | 0.216240201 |
| 0.147917991 | 0.508033629 | 0.339950704 | 0.483531858 |
| 0.360585084 | 0.503559545 | 0.40997783  | 0.390632649 |
| 0.318791335 | 0.373798353 | 0.121135293 | 0.383099842 |
| 0.422883011 | 0.333716628 | 0.103593931 | 0.403544125 |
| 0.40513189  | 0.353291305 | 0.088844141 | 0.460227326 |
| 0.465904287 | 0.491240065 | 0.119579785 | 0.306500924 |
| 0.316529904 | 0.210755309 | 0.358217189 | 0.499492188 |
| 0.400121161 | 0.330450768 | 0.297655309 | 0.323757595 |
| 0.17319949  | 0.187142466 | 0.29376856  | 0.159874388 |
| 0.007387226 | 0.105905164 | 0.083316103 | 0.12563865  |
| 0.123467587 | 0.400619347 | 0.349635976 | 0.500613709 |
| 0.111906239 | 0.373968992 | 0.244989527 | 0.254537421 |
| 0.42217363  | 0.321562968 | 0.310130114 | 0.323453255 |
| 0.230310648 | 0.013781627 | 0.093367193 | 0.509850973 |
| 0.068341138 | 0.186103671 | 0.317182075 | 0.002137192 |
| 0.063127556 | 0.416137201 | 0.119588558 | 0.197069378 |
| 0.426177154 | 0.205363632 | 0.221478192 | 0.407307502 |
| 0.2763865   | 0.096741719 | 0.001201688 | 0.478902828 |
| 0.487891333 | 0.461609097 | 0.492707814 | 0.469606078 |
| 0.437177211 | 0.361830695 | 0.356681505 | 0.333532028 |
| 0.109165678 | 0.118319164 | 0.192961098 | 0.255146105 |
| 0.008162893 | 0.30123417  | 0.260938242 | 0.139798016 |
| 0.365447436 | 0.2937963   | 0.041310071 | 0.302438957 |
| 0.025020846 | 0.176779833 | 0.332264678 | 0.199931999 |
| 0.287733995 | 0.019039387 | 0.223725015 | 0.318673516 |
| 0.423925047 | 0.317172822 | 0.319164735 | 0.512843591 |
| 0.268111423 | 0.17279541  | 0.257574819 | 0.317070874 |

|             |             |             |             |
|-------------|-------------|-------------|-------------|
| 0.078511192 | 0.175486813 | 0.377069536 | 0.050806783 |
| 0.179824429 | 0.450208376 | 0.354539991 | 0.083603716 |
| 0.246035616 | 0.006205019 | 0.341969984 | 0.507512819 |
| 0.475599704 | 0.491344096 | 0.469493846 | 0.209964968 |
| 0.485915448 | 0.116775485 | 0.509998814 | 0.389776769 |
| 0.411107236 | 0.001056573 | 0.004629792 | 0.453509567 |
| 0.345149744 | 0.086726352 | 0.154395427 | 0.315563548 |
| 0.093966597 | 0.187367802 | 0.068597372 | 0.136105565 |
| 0.359631749 | 0.182302936 | 0.135320808 | 0.484425009 |
| 0.219673254 | 0.201375774 | 0.402429906 | 0.112356564 |
| 0.333708642 | 0.051810988 | 0.115539847 | 0.004900612 |
| 0.303407401 | 0.139671027 | 0.484308054 | 0.497788083 |
| 0.459333435 | 0.319054432 | 0.382982201 | 0.300151354 |
| 0.404636854 | 0.134320889 | 0.33108446  | 0.144348855 |
| 0.486097037 | 0.342637872 | 0.267165282 | 0.272423386 |
| 0.46991568  | 0.448494811 | 0.038968455 | 0.356788504 |
| 0.011082305 | 0.000993146 | 0.365034455 | 0.247709195 |
| 0.090664237 | 0.343980794 | 0.231516981 | 0.265038013 |
| 0.213862224 | 0.034820465 | 0.236143164 | 0.212790811 |
| 0.259862513 | 0.323232905 | 0.218172189 | 0.249803829 |
| 0.220314507 | 0.123609767 | 0.157943714 | 0.146688075 |
| 0.271349346 | 0.307531286 | 0.198030197 | 0.028677864 |
| 0.398253913 | 0.358025987 | 0.062043912 | 0.157973729 |
| 0.384040144 | 0.458265406 | 0.051197167 | 0.007787644 |
| 0.242328598 | 0.296717584 | 0.45922948  | 0.494674226 |
| 0.516031571 | 0.489098582 | 0.372457621 | 0.10838293  |
| 0.070849509 | 0.274313711 | 0.238367214 | 0.070581947 |
| 0.487977981 | 0.103364413 | 0.470222923 | 0.251588041 |
| 0.126986957 | 0.197318895 | 0.027245945 | 0.090505232 |
| 0.319250906 | 0.16382997  | 0.140069527 | 0.175281139 |
| 0.27860342  | 0.195974241 | 0.058284498 | 0.182292271 |
| 0.322241069 | 0.16514576  | 0.159523025 | 0.296969762 |
| 0.329327537 | 0.322388021 | 0.376643439 | 0.415091413 |
| 0.139478884 | 0.140959113 | 0.294338027 | 0.339968971 |
| 0.412347125 | 0.404186328 | 0.02193751  | 0.468714915 |
| 0.452663986 | 0.383301694 | 0.486934977 | 0.336479398 |
| 0.104232347 | 0.309618166 | 0.305826451 | 0.310504169 |
| 0.182931662 | 0.335175778 | 0.221062115 | 0.075330446 |
| 0.268027475 | 0.474869024 | 0.410531817 | 0.133970647 |
| 0.375608955 | 0.168540502 | 0.095793746 | 0.416749126 |
| 0.154002522 | 0.097594788 | 0.392416032 | 0.392999726 |
| 0.000885374 | 0.10769274  | 0.461782648 | 0.191297167 |
| 0.497081084 | 0.446537687 | 0.405238541 | 0.247453681 |
| 0.002393448 | 0.364827148 | 0.312739748 | 0.340913625 |
| 0.428908923 | 0.308842026 | 0.15396096  | 0.06366187  |
| 0.236121527 | 0.108282252 | 0.129561573 | 0.303130343 |
| 0.19466375  | 0.391241726 | 0.177141518 | 0.226513821 |
| 0.16294559  | 0.139509761 | 0.183438186 | 0.202426292 |
| 0.155994611 | 0.204717119 | 0.293418596 | 0.351309553 |
| 0.1881903   | 0.410843537 | 0.381112687 | 0.031284871 |
| 0.2979385   | 0.37898417  | 0.389415468 | 0.003686166 |
| 0.362070674 | 0.006778986 | 0.157808488 | 0.164992162 |
| 0.15769867  | 0.189982126 | 0.209660972 | 0.235896856 |
| 0.354781121 | 0.206659647 | 0.219565928 | 0.196278053 |

|             |             |             |             |
|-------------|-------------|-------------|-------------|
| 0.121480866 | 0.204620864 | 0.331791833 | 0.356329903 |
| 0.21242808  | 0.118339182 | 0.117003002 | 0.129713018 |
| 0.042369316 | 0.440000448 | 0.21524528  | 0.096263531 |
| 0.195212685 | 0.358046603 | 0.297790769 | 0.50251611  |
| 0.357980969 | 0.140793729 | 0.309488806 | 0.424272049 |
| 0.315259218 | 0.285680948 | 0.086588336 | 0.355618096 |
| 0.202659876 | 0.170861696 | 0.375606309 | 0.33477765  |
| 0.405225667 | 0.372944212 | 0.211650303 | 0.401928071 |
| 0.301712244 | 0.364969189 | 0.37641272  | 0.065200474 |
| 0.174036451 | 0.151477358 | 0.207853723 | 0.001758359 |
| 0.305449402 | 0.249285628 | 0.433371902 | 0.486148039 |
| 0.258067459 | 0.333137124 | 0.349234283 | 0.097708525 |
| 0.331822604 | 0.215005867 | 0.142676013 | 0.387713395 |
| 0.189739632 | 0.157509195 | 0.242632718 | 0.32195868  |
| 0.371417164 | 0.391257354 | 0.220367018 | 0.247540879 |
| 0.225681491 | 0.208297337 | 0.483696745 | 0.140480481 |
| 0.405648978 | 0.133555189 | 0.389187739 | 0.252902004 |
| 0.184404922 | 0.495998315 | 0.070924823 | 0.505151514 |
| 0.306048262 | 0.146640727 | 0.46003744  | 0.277827557 |
| 0.26279943  | 0.082329898 | 0.160299129 | 0.393062707 |
| 0.217133904 | 0.283845503 | 0.02635704  | 0.067640045 |
| 0.267422432 | 0.340912507 | 1           | 0.331699933 |
| 0.195833637 | 0.28190995  | 0.135687205 | 0.306997149 |
| 0.497487443 | 0.502776053 | 0.228187877 | 0.222351013 |
| 0.31434363  | 0.089886068 | 0.365275388 | 0.025678905 |
| 0.387647186 | 0.387239726 | 0.39770236  | 0.05478574  |
| 0.021452326 | 0.192748109 | 0.396334621 | 0.105374029 |
| 0.441595226 | 0.181855569 | 0.381247657 | 0.363877061 |
| 0.189517685 | 0.503418098 | 0.093474777 | 0.328731331 |
| 0.086606228 | 0.235082831 | 0.331654282 | 0.383382678 |
| 0.173864272 | 0.244552547 | 0.308973992 | 0.179304899 |
| 0.031243986 | 0.210482134 | 0.003871319 | 0.392618957 |
| 0.493174986 | 0.311871031 | 0.196382527 | 0.364560414 |
| 0.22464274  | 0.34385033  | 0.231027427 | 0.380463308 |
| 0.007816049 | 0.304073508 | 0.170781356 | 0.370387024 |
| 0.23927679  | 0.381719164 | 0.042800043 | 0.28724352  |
| 0.471626139 | 0.277419738 | 0.235198782 | 0.32777054  |
| 0.484979953 | 0.361430685 | 0.187380556 | 0.167009599 |
| 0.401452779 | 0.084242675 | 0.381183962 | 0.510060061 |
| 0.139039667 | 0.163799825 | 0.378757882 | 0.18102957  |
| 0.269220904 | 0.360422766 | 0.401480714 | 0.511063616 |
| 0.056547596 | 0.210087674 | 0.355192903 | 0.454114174 |
| 0.240209294 | 0.137766191 | 0.200568736 | 0.194485034 |
| 0.460213702 | 0.083069347 | 0.235808202 | 0.319329762 |
| 0.188143002 | 0.258841296 | 0.374509561 | 0.147887559 |
| 0.030899282 | 0.159424879 | 0.296965831 | 0.144687528 |
| 0.258755583 | 0.31020257  | 0.199002707 | 0.339921896 |
| 0.093750002 | 0.018251197 | 0.41180632  | 0.018027187 |
| 0.30730487  | 0.313414207 | 0.207951599 | 0.295298767 |
| 0.178414028 | 0.345585522 | 0.368561109 | 0.001606637 |
| 0.349425777 | 0.033023709 | 0.266490918 | 0.177569445 |
| 0.272579814 | 0.06580855  | 0.430670861 | 0.474514198 |
| 0.2864713   | 0.30101169  | 0.318396952 | 0.448534037 |
| 0.120627725 | 0.324029891 | 0.332119154 | 0.397551184 |

|             |             |             |             |
|-------------|-------------|-------------|-------------|
| 0.17764224  | 0.411634011 | 0.387385492 | 0.320200054 |
| 0.338920216 | 0.244660411 |             |             |
| SMYD3       | 0.097385575 | 0.373660651 | 0.065136106 |
| 0.123474409 | 0.29137021  | 0.268609537 | 0.118236709 |
| 0.182769049 | 0.32353103  | 0.235265409 | 0.276707095 |
| 0.037737336 | 0.124970791 | 0.403386086 | 0.121657567 |
| 0.319243532 | 0.078824167 | 0.163486431 | 0.128613111 |
| 0.268409383 | 0.288792763 | 0.264164094 | 0.266068894 |
| 0.316864766 | 0.198784461 | 0.279089171 | 0.317431128 |
| 0.427636136 | 0.176217137 | 0.298642227 | 0.127442537 |
| 0.393436124 | 0.29595174  | 0.281185825 | 0.031110892 |
| 0.316092022 | 0.059011856 | 0.417977462 | 0.266094873 |
| 0.150393947 | 0.337564878 | 0.225437635 | 0.22954845  |
| 0.270842022 | 0.054237122 | 0.133737402 | 0.328806101 |
| 0.292678899 | 0.309250774 | 0.086290075 | 0.306156843 |
| 0.321844114 | 0.264622779 | 0.277585478 | 0.00429668  |
| 0.245475104 | 0.093387032 | 0.20960743  | 0.43882472  |
| 0.211187075 | 0.181283655 | 0.245765491 | 0.29920192  |
| 0.337810706 | 0.342822228 | 0.291335099 | 0.287236546 |
| 0.430809695 | 0.209500003 | 0.325087438 | 0.144136502 |
| 0.309176779 | 0.0742171   | 0.188513008 | 0.128460912 |
| 0.323701747 | 0.237469259 | 0.296390421 | 0.291660812 |
| 0.357732458 | 0.48299186  | 0.268529664 | 0.440473531 |
| 0.210118683 | 0.311610643 | 0.296266692 | 0.30311233  |
| 0.335806279 | 0.177432491 | 0.301036673 | 0.46842817  |
| 0.108376451 | 0.270614887 | 0.318059287 | 0.152188345 |
| 0.362671036 | 0.304880694 | 0.256190026 | 0.181972862 |
| 0.318868645 | 0.3080828   | 0.457129869 | 0.256844556 |
| 0.319538255 | 0.09770881  | 0.428747882 | 0.291717761 |
| 0.244791185 | 0.10130158  | 0.270434671 | 0.394393294 |
| 0.303510201 | 0.418280031 | 0.367400731 | 0.343016265 |
| 0.30518282  | 0.430134867 | 0.289035485 | 0.390369694 |
| 0.117922561 | 0.461502292 | 0.189426287 | 0.086260604 |
| 0.096817028 | 0.160455017 | 0.333625263 | 0.316104509 |
| 0.39902029  | 0.299676147 | 0.202565633 | 0.263802504 |
| 0.420829189 | 0.41370391  | 0.462480979 | 0.358460688 |
| 0.072064566 | 0.291483604 | 0.294274494 | 0.273506924 |
| 0.322734731 | 0.180665926 | 0.25342956  | 0.454164232 |
| 0.336010212 | 0.376483002 | 0.180155551 | 0.466950265 |
| 0.280520057 | 0.461787297 | 0.366204261 | 0.187311268 |
| 0.460407872 | 0.431922447 | 0.458484078 | 0.304719609 |
| 0.42039783  | 0.245225406 | 0.131677914 | 0.359649669 |
| 0.446808871 | 0.019413316 | 0.415146335 | 0.439665047 |
| 0.429458381 | 0.380790942 | 0.480951996 | 0.445586437 |
| 0.434210213 | 0.117561639 | 0.057886811 | 0.300688166 |
| 0.442688813 | 0.338126626 | 0.244417053 | 0.295631028 |
| 0.325615513 | 0.282799005 | 0.363039783 | 0.207828372 |
| 0.485299773 | 0.389616614 | 0.423434742 | 0.330742407 |
| 0.292957727 | 0.312929782 | 0.29687174  | 0.406020621 |
| 0.08509555  | 0.125472119 | 0.069521251 | 0.315663405 |
| 0.219582944 | 0.221844245 | 0.279393953 | 0.347754467 |
| 0.227011111 | 0.296754359 | 0.26372809  | 0.311953869 |
| 0.076429261 | 0.288049069 | 0.19304603  | 0.191294005 |
| 0.080025644 | 0.175494275 | 0.181831892 | 0.170237019 |

|             |             |             |             |
|-------------|-------------|-------------|-------------|
| 0.276073004 | 0.25496192  | 0.312092676 | 0.438524064 |
| 0.341088959 | 0.17207486  | 0.305882865 | 0.43845817  |
| 0.413229729 | 0.29085117  | 0.253520656 | 0.015696053 |
| 0.243436265 | 0.275295284 | 0.207378543 | 0.309881863 |
| 0.211760266 | 0.263611523 | 0.319705669 | 0.311635307 |
| 0.216805769 | 0.201840477 | 0.314483251 | 0.403773629 |
| 0.161632967 | 0.255359549 | 0.387456915 | 0.304785498 |
| 0.008242086 | 0.266666502 | 0.362177355 | 0.246671023 |
| 0.303060594 | 0.148090799 | 0.189583436 | 0.404970237 |
| 0.27208426  | 0.291100554 | 0.431688556 | 0.326299202 |
| 0.260812418 | 0.242367379 | 0.479177949 | 0.078623116 |
| 0.34091067  | 0.070261936 | 0.277581188 | 0.24953309  |
| 0.248622093 | 0.302546667 | 0.2983712   | 0.269731072 |
| 0.124528671 | 0.459127908 | 0.350557687 | 0.443023074 |
| 0.284541938 | 0.480836071 | 0.385222922 | 0.382440242 |
| 0.306966792 | 0.314065598 | 0.152799165 | 0.345315737 |
| 0.394897824 | 0.259936535 | 0.09512313  | 0.364946497 |
| 0.302447158 | 0.320645677 | 0.198903434 | 0.436923248 |
| 0.457887289 | 0.401756618 | 0.202003108 | 0.341613032 |
| 0.317166921 | 0.211489251 | 0.373437431 | 0.493130744 |
| 0.264617658 | 0.312875115 | 0.287784214 | 0.376106255 |
| 0.188096896 | 0.277218977 | 0.336306263 | 0.205973485 |
| 0.008168227 | 0.124057762 | 0.09112344  | 0.21362027  |
| 0.201597764 | 0.299000806 | 0.328588209 | 0.454263044 |
| 0.164628498 | 0.377352076 | 0.278076822 | 0.245375079 |
| 0.37215257  | 0.331685595 | 0.298855193 | 0.320437911 |
| 0.262142156 | 0.029305952 | 0.128270834 | 0.477013484 |
| 0.065937356 | 0.222333015 | 0.313277695 | 0.004115611 |
| 0.079382146 | 0.330905438 | 0.122029972 | 0.220343993 |
| 0.441314228 | 0.212663424 | 0.201008114 | 0.255750359 |
| 0.299730824 | 0.137094978 | 0.006160174 | 0.441276519 |
| 0.459155208 | 0.444582121 | 0.454480021 | 0.433158874 |
| 0.425515955 | 0.348161051 | 0.358536377 | 0.248857557 |
| 0.152753699 | 0.124405506 | 0.221688775 | 0.283100365 |
| 0.00908695  | 0.325962499 | 0.331611662 | 0.16958772  |
| 0.342318524 | 0.314175596 | 0.065636425 | 0.333371629 |
| 0.025554359 | 0.163743486 | 0.303229382 | 0.296173088 |
| 0.334994079 | 0.030403657 | 0.14490601  | 0.260607808 |
| 0.362422264 | 0.312474709 | 0.278397254 | 0.464185601 |
| 0.274491597 | 0.132642951 | 0.275748738 | 0.321977413 |
| 0.120733814 | 0.113250011 | 0.317674499 | 0.021345346 |
| 0.172028029 | 0.440293081 | 0.320706658 | 0.088307431 |
| 0.249744626 | 0.010321197 | 0.312444501 | 0.470372857 |
| 0.39416577  | 0.459586106 | 0.431082604 | 0.230419135 |
| 0.433355894 | 0.124143534 | 0.460943964 | 0.339653659 |
| 0.261691489 | 0.000993833 | 0.016183947 | 0.416360529 |
| 0.295842754 | 0.072810361 | 0.189721385 | 0.216600613 |
| 0.146171402 | 0.163082319 | 0.12366278  | 0.221795036 |
| 0.293655978 | 0.266180385 | 0.237371358 | 0.413964292 |
| 0.261690699 | 0.281145681 | 0.293797084 | 0.122504927 |
| 0.314302349 | 0.086009946 | 0.133626304 | 0.010530325 |
| 0.331295973 | 0.127386244 | 0.42298405  | 0.442585444 |
| 0.448194095 | 0.311835005 | 0.228356487 | 0.26275617  |
| 0.418769527 | 0.099595995 | 0.264784709 | 0.122456879 |



|             |             |             |             |
|-------------|-------------|-------------|-------------|
| 0.405798582 | 0.30262439  | 0.277903804 | 0.268209556 |
| 0.453618632 | 0.410370496 | 0.071142364 | 0.342167922 |
| 0.015893341 | 0.007582126 | 0.243453976 | 0.28840509  |
| 0.179712454 | 0.312290546 | 0.241358737 | 0.321091657 |
| 0.316461445 | 0.043133624 | 0.266744443 | 0.25280965  |
| 0.284641888 | 0.313954239 | 0.271170904 | 0.278353339 |
| 0.303601843 | 0.202519935 | 0.246469113 | 0.237583459 |
| 0.318748328 | 0.290856267 | 0.19708921  | 0.055481493 |
| 0.289435047 | 0.293110173 | 0.091712811 | 0.185244995 |
| 0.367564059 | 0.418394111 | 0.09692657  | 0.020716951 |
| 0.253829785 | 0.330803355 | 0.441688306 | 0.423115185 |
| 0.462862657 | 0.47567031  | 0.381583202 | 0.210741626 |
| 0.105068607 | 0.315267041 | 0.290820519 | 0.181487346 |
| 0.446169055 | 0.091808225 | 0.422001458 | 0.274867291 |
| 0.167981833 | 0.222482563 | 0.062388297 | 0.144517585 |
| 0.298104467 | 0.21553651  | 0.230373695 | 0.139616129 |
| 0.288198065 | 0.236783759 | 0.100281073 | 0.226824879 |
| 0.299509385 | 0.186342135 | 0.198312877 | 0.307526271 |
| 0.313755266 | 0.224688249 | 0.32266824  | 0.424821989 |
| 0.152026975 | 0.168399463 | 0.194028516 | 0.345249085 |
| 0.364317714 | 0.292471546 | 0.027163723 | 0.380136376 |
| 0.445333574 | 0.299533123 | 0.429517537 | 0.386901709 |
| 0.127258926 | 0.279299557 | 0.321374488 | 0.314147146 |
| 0.243968163 | 0.269839012 | 0.302633771 | 0.105053246 |
| 0.33243779  | 0.464601871 | 0.361411548 | 0.195548914 |
| 0.307834318 | 0.146092694 | 0.082332746 | 0.39846222  |
| 0.213752192 | 0.109014927 | 0.249290659 | 0.388201794 |
| 0.004143549 | 0.16526289  | 0.46363905  | 0.240172595 |
| 0.48585557  | 0.424565485 | 0.39384382  | 0.291032728 |
| 0.006433151 | 0.320488754 | 0.28578289  | 0.277068716 |
| 0.362955438 | 0.296694577 | 0.235129759 | 0.121120906 |
| 0.286962786 | 0.09026083  | 0.188316554 | 0.240940808 |
| 0.191601807 | 0.301393205 | 0.235123026 | 0.269972262 |
| 0.262720469 | 0.128485754 | 0.233964293 | 0.235744386 |
| 0.258184689 | 0.244009274 | 0.317028064 | 0.224951385 |
| 0.158089355 | 0.422171408 | 0.331016113 | 0.047890826 |
| 0.311296603 | 0.39245177  | 0.410877906 | 0.004439561 |
| 0.307480916 | 0.018914163 | 0.245613941 | 0.225462066 |
| 0.244047749 | 0.276818356 | 0.29266725  | 0.27204793  |
| 0.31046322  | 0.260510783 | 0.236743382 | 0.24229451  |
| 0.196137642 | 0.26107436  | 0.318676122 | 0.302392794 |
| 0.234717173 | 0.151943679 | 0.126471266 | 0.127619205 |
| 0.077209978 | 0.403657498 | 0.248202505 | 0.086953559 |
| 0.269348409 | 0.324266564 | 0.347132456 | 0.42005742  |
| 0.399058242 | 0.122251937 | 0.339920562 | 0.355464402 |
| 0.200665555 | 0.221200776 | 0.096919533 | 0.294955349 |
| 0.247799446 | 0.217631562 | 0.295563775 | 0.23704392  |
| 0.318628871 | 0.37915209  | 0.238239182 | 0.413893268 |
| 0.294458306 | 0.338043037 | 0.203534991 | 0.121380737 |
| 0.18162009  | 0.171670337 | 0.273008127 | 0.004016962 |
| 0.305707828 | 0.195241043 | 0.388460986 | 0.418390663 |
| 0.264503442 | 0.37090688  | 0.198320468 | 0.112964772 |
| 0.173436704 | 0.181704885 | 0.171104864 | 0.338637095 |
| 0.190194046 | 0.214482203 | 0.289766163 | 0.224052586 |

|             |             |             |             |
|-------------|-------------|-------------|-------------|
| 0.339058339 | 0.338050509 | 0.316563091 | 0.288278501 |
| 0.301049075 | 0.19762624  | 0.451480321 | 0.141909138 |
| 0.298986367 | 0.203620427 | 0.270155975 | 0.273015201 |
| 0.270965456 | 0.454564713 | 0.095242944 | 0.457433799 |
| 0.301335571 | 0.153691031 | 0.463907791 | 0.296592713 |
| 0.271541381 | 0.174634994 | 0.191454841 | 0.295288289 |
| 0.288634922 | 0.276218578 | 0.015050921 | 0.08517461  |
| 0.288853733 | 0.335424766 | 0.331699933 | 1           |
| 0.285131529 | 0.34091404  | 0.188515071 | 0.286432761 |
| 0.410546584 | 0.444343572 | 0.21510494  | 0.26514892  |
| 0.303910092 | 0.141422155 | 0.265510611 | 0.044034431 |
| 0.306766436 | 0.298042691 | 0.283851897 | 0.107899243 |
| 0.046558131 | 0.200018651 | 0.304278002 | 0.111112708 |
| 0.438309972 | 0.170825106 | 0.308796943 | 0.306702918 |
| 0.218445309 | 0.442141597 | 0.197521934 | 0.299436569 |
| 0.110591914 | 0.280435464 | 0.321222581 | 0.334524198 |
| 0.201526479 | 0.276124055 | 0.304264591 | 0.221895822 |
| 0.064810051 | 0.25841857  | 0.00649116  | 0.381750431 |
| 0.416097736 | 0.30149214  | 0.231480582 | 0.245866735 |
| 0.278262997 | 0.376681648 | 0.286866452 | 0.300359162 |
| 0.022735551 | 0.289728215 | 0.242698276 | 0.3358003   |
| 0.156741046 | 0.328205091 | 0.089099942 | 0.329833642 |
| 0.413365074 | 0.259094941 | 0.287788711 | 0.225062537 |
| 0.417931164 | 0.349925016 | 0.154262844 | 0.271104234 |
| 0.311986218 | 0.098689163 | 0.259970477 | 0.480402925 |
| 0.219369653 | 0.219122817 | 0.379489742 | 0.223145423 |
| 0.293502017 | 0.3544798   | 0.306729643 | 0.481072562 |
| 0.141003245 | 0.24977631  | 0.364135494 | 0.413394494 |
| 0.294654247 | 0.242219181 | 0.232303555 | 0.260700463 |
| 0.38144604  | 0.101421511 | 0.295936151 | 0.287400091 |
| 0.212761683 | 0.305727882 | 0.270028424 | 0.251786845 |
| 0.063326481 | 0.256276924 | 0.266086732 | 0.183930271 |
| 0.289595696 | 0.308863544 | 0.286438396 | 0.368205992 |
| 0.143683202 | 0.033397679 | 0.429512921 | 0.02367811  |
| 0.243021631 | 0.293282876 | 0.266117391 | 0.312910933 |
| 0.178907084 | 0.316571634 | 0.259075551 | 0.002631117 |
| 0.371517004 | 0.069666736 | 0.33779261  | 0.225923758 |
| 0.267325865 | 0.089018813 | 0.40282949  | 0.459681664 |
| 0.294872176 | 0.28766612  | 0.241741341 | 0.417257171 |
| 0.164630208 | 0.265884236 | 0.311426875 | 0.28399148  |
| 0.225216378 | 0.259597001 | 0.301377058 | 0.262574575 |
| 0.302452001 | 0.287164852 |             |             |

|             |             |             |             |
|-------------|-------------|-------------|-------------|
| SNRPA       | 0.025970509 | 0.214739089 | 0.015471368 |
| 0.068014802 | 0.328308569 | 0.100835308 | 0.036334867 |
| 0.059461801 | 0.187786889 | 0.059310392 | 0.201938088 |
| 0.01229521  | 0.156727915 | 0.280844342 | 0.039436627 |
| 0.284948832 | 0.035531557 | 0.070124795 | 0.043489635 |
| 0.115199003 | 0.298260434 | 0.150380532 | 0.098518422 |
| 0.289449792 | 0.1055811   | 0.14108733  | 0.212841179 |
| 0.28227128  | 0.081637524 | 0.244853298 | 0.044410646 |
| 0.268100591 | 0.324381241 | 0.171736627 | 0.008957123 |
| 0.176970941 | 0.058636091 | 0.25250087  | 0.16592397  |
| 0.204126709 | 0.220468249 | 0.067390393 | 0.139499959 |
| 0.106676661 | 0.014037043 | 0.033761749 | 0.270854703 |

|             |             |             |             |
|-------------|-------------|-------------|-------------|
| 0.159617442 | 0.139276956 | 0.021245856 | 0.23466828  |
| 0.117229096 | 0.166974468 | 0.148340922 | 0.000538454 |
| 0.180580413 | 0.105099273 | 0.15294306  | 0.270580685 |
| 0.155202785 | 0.103327869 | 0.097514323 | 0.10834634  |
| 0.216551822 | 0.292514364 | 0.235289468 | 0.08788569  |
| 0.283244307 | 0.187879761 | 0.260993607 | 0.074850327 |
| 0.123842693 | 0.013533959 | 0.131876611 | 0.040913488 |
| 0.142056502 | 0.179218977 | 0.235364592 | 0.216557994 |
| 0.193213562 | 0.304199947 | 0.188249481 | 0.250212932 |
| 0.171644855 | 0.30929587  | 0.231058279 | 0.306288179 |
| 0.261014902 | 0.049843393 | 0.266367984 | 0.313942555 |
| 0.022093964 | 0.120167084 | 0.226722595 | 0.058929653 |
| 0.229629356 | 0.172761501 | 0.104307435 | 0.197297493 |
| 0.357556747 | 0.272685753 | 0.265629096 | 0.195349545 |
| 0.23646446  | 0.032048132 | 0.22801073  | 0.320668078 |
| 0.151211446 | 0.039309105 | 0.203647659 | 0.314769321 |
| 0.228309479 | 0.282342593 | 0.226468028 | 0.265993806 |
| 0.245681986 | 0.292784121 | 0.238587922 | 0.25366302  |
| 0.031803574 | 0.289840404 | 0.10525905  | 0.038695537 |
| 0.019015378 | 0.078063704 | 0.183636061 | 0.261859466 |
| 0.302696831 | 0.196853266 | 0.077595262 | 0.217535392 |
| 0.36569691  | 0.21977882  | 0.284388522 | 0.257926013 |
| 0.021668157 | 0.198891848 | 0.237199112 | 0.088686816 |
| 0.243017496 | 0.086052291 | 0.255401455 | 0.263420217 |
| 0.243521152 | 0.327810731 | 0.04792671  | 0.273427669 |
| 0.098452114 | 0.331801645 | 0.221634986 | 0.116842998 |
| 0.290964022 | 0.250023621 | 0.349493465 | 0.332038773 |
| 0.261191179 | 0.122924049 | 0.038246385 | 0.250507088 |
| 0.339160217 | 0.038982978 | 0.299592225 | 0.324113272 |
| 0.261198374 | 0.307599192 | 0.363231995 | 0.32051586  |
| 0.257243832 | 0.047025834 | 0.027580623 | 0.302917911 |
| 0.267171893 | 0.262870621 | 0.128747288 | 0.182071884 |
| 0.292537922 | 0.113672457 | 0.279596644 | 0.091321505 |
| 0.344190754 | 0.294118079 | 0.287098194 | 0.223055132 |
| 0.12678546  | 0.198254501 | 0.231185938 | 0.217699728 |
| 0.036416185 | 0.035475296 | 0.022436626 | 0.250839321 |
| 0.06097186  | 0.176314412 | 0.089827413 | 0.261806015 |
| 0.178306825 | 0.096963364 | 0.146651272 | 0.338520593 |
| 0.026381541 | 0.164286442 | 0.097231761 | 0.074244712 |
| 0.040877501 | 0.094458803 | 0.078138477 | 0.092283291 |
| 0.215697693 | 0.113677336 | 0.234683847 | 0.325623595 |
| 0.171985757 | 0.097292367 | 0.214880811 | 0.330692408 |
| 0.340583976 | 0.252524965 | 0.173536977 | 0.016946553 |
| 0.12603978  | 0.10457984  | 0.184279893 | 0.211156805 |
| 0.101346725 | 0.111684779 | 0.235861854 | 0.350757643 |
| 0.086740369 | 0.053239965 | 0.140938454 | 0.251519555 |
| 0.074570989 | 0.15466496  | 0.315172927 | 0.154727352 |
| 0.002920718 | 0.15047464  | 0.283781598 | 0.225091719 |
| 0.181774193 | 0.145067002 | 0.142240743 | 0.315342981 |
| 0.141639121 | 0.210107762 | 0.315009405 | 0.366622568 |
| 0.086989189 | 0.101279862 | 0.344725121 | 0.052083927 |
| 0.248817394 | 0.089418544 | 0.288201389 | 0.079604351 |
| 0.164945497 | 0.272150648 | 0.304972847 | 0.205131368 |
| 0.050442827 | 0.288063466 | 0.253827899 | 0.308725609 |

|             |             |             |             |
|-------------|-------------|-------------|-------------|
| 0.127935744 | 0.342885265 | 0.308119343 | 0.291250816 |
| 0.227829216 | 0.162330247 | 0.163700206 | 0.271223311 |
| 0.313763863 | 0.098840258 | 0.03412142  | 0.268391256 |
| 0.123488687 | 0.303052887 | 0.206636272 | 0.329883902 |
| 0.3028728   | 0.212841818 | 0.10670693  | 0.368920175 |
| 0.260676992 | 0.117294937 | 0.303176242 | 0.350336686 |
| 0.077745841 | 0.216132415 | 0.169130946 | 0.39508298  |
| 0.119296348 | 0.210959965 | 0.222565794 | 0.184162014 |
| 0.014829647 | 0.034786522 | 0.031827985 | 0.160255875 |
| 0.241704503 | 0.183672806 | 0.295820695 | 0.302760893 |
| 0.080590625 | 0.263758761 | 0.175330084 | 0.139514605 |
| 0.228530468 | 0.191218755 | 0.257556353 | 0.280743265 |
| 0.189337746 | 0.029001796 | 0.077993189 | 0.297818325 |
| 0.015924755 | 0.190436608 | 0.127014248 | 0.003902472 |
| 0.019848299 | 0.183556879 | 0.053912118 | 0.124272914 |
| 0.367144033 | 0.114818382 | 0.110769926 | 0.067778663 |
| 0.290555155 | 0.065838137 | 0.014422832 | 0.306390085 |
| 0.29125278  | 0.284205834 | 0.278455188 | 0.245768304 |
| 0.301413457 | 0.26361252  | 0.330672284 | 0.104909068 |
| 0.057109787 | 0.028846419 | 0.197685494 | 0.19178676  |
| 0.001725013 | 0.320947186 | 0.251410559 | 0.110414154 |
| 0.296782955 | 0.220150558 | 0.020259321 | 0.292812672 |
| 0.009546431 | 0.143411231 | 0.08683487  | 0.153705678 |
| 0.372522093 | 0.008346023 | 0.062574596 | 0.131175985 |
| 0.202773672 | 0.196228507 | 0.149593863 | 0.302457913 |
| 0.204577203 | 0.049778458 | 0.220774158 | 0.317151888 |
| 0.043719095 | 0.035339657 | 0.097625296 | 0.00829108  |
| 0.056909378 | 0.266004307 | 0.130890422 | 0.030521192 |
| 0.179912166 | 0.003190635 | 0.197769924 | 0.308611021 |
| 0.21635443  | 0.338670476 | 0.295399    | 0.203728139 |
| 0.285560987 | 0.109609674 | 0.3081928   | 0.21182489  |
| 0.082380742 | 0.000490237 | 0.009132569 | 0.321438985 |
| 0.229387326 | 0.022687786 | 0.120506103 | 0.072425571 |
| 0.08321443  | 0.039912437 | 0.040154942 | 0.253403072 |
| 0.199860008 | 0.261490362 | 0.218873442 | 0.227820976 |
| 0.163966044 | 0.206849569 | 0.092071346 | 0.049834839 |
| 0.247885769 | 0.038760184 | 0.054062741 | 0.013822964 |
| 0.339412919 | 0.053457176 | 0.220933371 | 0.279385965 |
| 0.315818333 | 0.335209886 | 0.065207435 | 0.090785574 |
| 0.319514977 | 0.032302445 | 0.112276198 | 0.04023965  |
| 0.239211052 | 0.2657118   | 0.245841418 | 0.188917878 |
| 0.332225638 | 0.270586561 | 0.022369946 | 0.30203473  |
| 0.010005191 | 0.011809956 | 0.096405346 | 0.19431847  |
| 0.097486695 | 0.198202482 | 0.197864804 | 0.115367108 |
| 0.149670836 | 0.012799877 | 0.206461965 | 0.21115645  |
| 0.2493367   | 0.207075301 | 0.291140421 | 0.178879637 |
| 0.226650707 | 0.199553313 | 0.145028498 | 0.09632343  |
| 0.113274893 | 0.17507633  | 0.104906532 | 0.015964906 |
| 0.153647552 | 0.199647276 | 0.034822873 | 0.106409239 |
| 0.299723092 | 0.309691015 | 0.041791965 | 0.019229202 |
| 0.174115644 | 0.166269281 | 0.33649258  | 0.257245764 |
| 0.27851911  | 0.341906848 | 0.239472895 | 0.136434976 |
| 0.035139965 | 0.287875195 | 0.314591207 | 0.193737431 |
| 0.294441018 | 0.025567404 | 0.256062171 | 0.275580085 |

|             |             |             |             |
|-------------|-------------|-------------|-------------|
| 0.089810021 | 0.114902111 | 0.035549328 | 0.067656736 |
| 0.261631494 | 0.137213929 | 0.198542611 | 0.059407811 |
| 0.167383715 | 0.205881839 | 0.030473123 | 0.147239316 |
| 0.221006411 | 0.20470952  | 0.118437481 | 0.101903016 |
| 0.215510613 | 0.053468236 | 0.290776726 | 0.309156492 |
| 0.076623246 | 0.063928519 | 0.052436091 | 0.284063094 |
| 0.265730295 | 0.149103254 | 0.01353686  | 0.211355923 |
| 0.327505251 | 0.228408584 | 0.258377869 | 0.336048472 |
| 0.057159692 | 0.212911962 | 0.190937115 | 0.251146235 |
| 0.141355974 | 0.10883111  | 0.176853867 | 0.04348838  |
| 0.236995006 | 0.279911201 | 0.236386428 | 0.126430931 |
| 0.182605044 | 0.045609507 | 0.021072941 | 0.273650087 |
| 0.233777298 | 0.03523853  | 0.075731764 | 0.300420894 |
| 0.013788343 | 0.202575267 | 0.356814622 | 0.110414033 |
| 0.325705669 | 0.334505412 | 0.279481258 | 0.098429691 |
| 0.010895953 | 0.303874924 | 0.236049824 | 0.144896395 |
| 0.215823611 | 0.203626843 | 0.078597543 | 0.072639457 |
| 0.262327739 | 0.031434604 | 0.099566508 | 0.080941031 |
| 0.147746775 | 0.166704794 | 0.187145752 | 0.1397606   |
| 0.195837106 | 0.040998254 | 0.211684523 | 0.126602033 |
| 0.210538542 | 0.208183618 | 0.276715913 | 0.050323818 |
| 0.111064117 | 0.314059352 | 0.231505495 | 0.01433988  |
| 0.251323717 | 0.304912732 | 0.310843632 | 0.002505629 |
| 0.279485478 | 0.007960212 | 0.185038564 | 0.181217979 |
| 0.173636347 | 0.15665005  | 0.299775648 | 0.191458352 |
| 0.185686647 | 0.143493329 | 0.13509951  | 0.203774883 |
| 0.142036827 | 0.131034419 | 0.260713511 | 0.138389279 |
| 0.156617045 | 0.0626528   | 0.054338599 | 0.049113698 |
| 0.038069371 | 0.265322276 | 0.166200858 | 0.033623521 |
| 0.208853937 | 0.130797619 | 0.291709948 | 0.242227371 |
| 0.330462846 | 0.045751287 | 0.166287466 | 0.225932496 |
| 0.059604862 | 0.07065177  | 0.018631579 | 0.168635405 |
| 0.140187901 | 0.168159549 | 0.136177082 | 0.106133731 |
| 0.201321589 | 0.256788978 | 0.157919917 | 0.305624577 |
| 0.179196883 | 0.169870301 | 0.048746614 | 0.085935771 |
| 0.084478166 | 0.086680469 | 0.306752238 | 0.002381915 |
| 0.22754082  | 0.059798045 | 0.292207547 | 0.248846904 |
| 0.167150843 | 0.286146621 | 0.047550143 | 0.039474534 |
| 0.043907794 | 0.076122736 | 0.099893825 | 0.252570589 |
| 0.153812104 | 0.09651494  | 0.295134364 | 0.055803283 |
| 0.30298826  | 0.265212986 | 0.214817016 | 0.103539657 |
| 0.195949251 | 0.103189352 | 0.26503478  | 0.040488186 |
| 0.185112429 | 0.227134838 | 0.117153693 | 0.199712966 |
| 0.199961596 | 0.316488937 | 0.035373721 | 0.316144688 |
| 0.189670382 | 0.078302535 | 0.313897554 | 0.136046191 |
| 0.103323761 | 0.140908587 | 0.192698335 | 0.083737517 |
| 0.131338868 | 0.162694515 | 0.004231723 | 0.064051197 |
| 0.288392916 | 0.115506607 | 0.195833637 | 0.285131529 |
| 1           | 0.336129689 | 0.166341972 | 0.106574891 |
| 0.220196134 | 0.24670241  | 0.103261822 | 0.225733178 |
| 0.222744511 | 0.062539731 | 0.137150545 | 0.015677962 |
| 0.220966902 | 0.211283872 | 0.086883659 | 0.036931436 |
| 0.016058351 | 0.181251019 | 0.201012071 | 0.033301728 |
| 0.358293774 | 0.134522969 | 0.163078032 | 0.256244833 |

|             |             |             |             |
|-------------|-------------|-------------|-------------|
| 0.119095801 | 0.246219058 | 0.137683509 | 0.287946086 |
| 0.021577865 | 0.207478638 | 0.230564149 | 0.164810486 |
| 0.15210482  | 0.237739659 | 0.309143932 | 0.207253306 |
| 0.027955364 | 0.178138012 | 0.004482013 | 0.233378278 |
| 0.22191769  | 0.237870587 | 0.146047164 | 0.06432825  |
| 0.282421398 | 0.278515234 | 0.136424559 | 0.166340747 |
| 0.017927934 | 0.285407342 | 0.162676495 | 0.221778263 |
| 0.087247001 | 0.181183857 | 0.060670028 | 0.265653086 |
| 0.211993247 | 0.118004419 | 0.197627885 | 0.109523206 |
| 0.251053102 | 0.227244269 | 0.072070655 | 0.20351668  |
| 0.18065559  | 0.037213217 | 0.075542329 | 0.32123922  |
| 0.15206567  | 0.231504023 | 0.350840585 | 0.125208882 |
| 0.21987157  | 0.218499733 | 0.188552222 | 0.307177035 |
| 0.110033959 | 0.196282078 | 0.320016619 | 0.265959041 |
| 0.288953239 | 0.247614842 | 0.184351228 | 0.181979207 |
| 0.214091061 | 0.049156794 | 0.204069908 | 0.217179432 |
| 0.193926855 | 0.256237101 | 0.11995097  | 0.208479356 |
| 0.03361505  | 0.09906745  | 0.105251931 | 0.103489688 |
| 0.214912466 | 0.24854076  | 0.240203844 | 0.280886863 |
| 0.103432762 | 0.027102483 | 0.315108721 | 0.041692611 |
| 0.110946514 | 0.281463387 | 0.172872349 | 0.224140407 |
| 0.109319225 | 0.181726704 | 0.101926344 | 0.000468552 |
| 0.327005913 | 0.132772116 | 0.168379938 | 0.181674838 |
| 0.133639239 | 0.023183822 | 0.259580474 | 0.348743144 |
| 0.18938181  | 0.11364797  | 0.111762735 | 0.260911377 |
| 0.202944045 | 0.12395193  | 0.141328951 | 0.169955679 |
| 0.213056502 | 0.095504394 | 0.132216956 | 0.153478456 |
| 0.228697272 | 0.108918562 |             |             |
| SNRPD1      | 0.138764629 | 0.321548799 | 0.08509045  |
| 0.197723942 | 0.342624877 | 0.269791845 | 0.172610666 |
| 0.244405623 | 0.277114489 | 0.181567071 | 0.322036304 |
| 0.075412717 | 0.128139954 | 0.382534529 | 0.180109774 |
| 0.334450721 | 0.145319711 | 0.236902406 | 0.118265506 |
| 0.267613538 | 0.352810823 | 0.277048581 | 0.253923159 |
| 0.357511837 | 0.214862565 | 0.270815357 | 0.287351241 |
| 0.383328077 | 0.157411619 | 0.301044828 | 0.110764713 |
| 0.393251073 | 0.338783684 | 0.263990595 | 0.055121122 |
| 0.313608713 | 0.052124367 | 0.398279111 | 0.350091593 |
| 0.193444683 | 0.345875168 | 0.189053245 | 0.321434756 |
| 0.241912807 | 0.088163343 | 0.1008518   | 0.313436221 |
| 0.278531239 | 0.333273874 | 0.10419596  | 0.298606512 |
| 0.299012405 | 0.285848884 | 0.229993537 | 0.006570101 |
| 0.248761771 | 0.081854592 | 0.19660792  | 0.397001326 |
| 0.282649266 | 0.275132286 | 0.201029928 | 0.289835281 |
| 0.309996457 | 0.339951354 | 0.337379891 | 0.251899466 |
| 0.402039345 | 0.22130577  | 0.292875056 | 0.201148869 |
| 0.314310182 | 0.09015827  | 0.249650035 | 0.134649451 |
| 0.31393733  | 0.328309968 | 0.334793064 | 0.301536382 |
| 0.305930587 | 0.450392749 | 0.311754279 | 0.391014275 |
| 0.210081058 | 0.324459956 | 0.335866049 | 0.362054353 |
| 0.331191376 | 0.207830031 | 0.32325477  | 0.441607965 |
| 0.12749531  | 0.230960975 | 0.313437834 | 0.172472545 |
| 0.322709573 | 0.266577725 | 0.22484283  | 0.217442274 |
| 0.338338564 | 0.339042376 | 0.407350185 | 0.318502922 |

|             |             |             |             |
|-------------|-------------|-------------|-------------|
| 0.33633809  | 0.121389871 | 0.381313871 | 0.312283393 |
| 0.313407274 | 0.138118592 | 0.332679265 | 0.353067679 |
| 0.318302569 | 0.383859106 | 0.315629256 | 0.335199369 |
| 0.320165155 | 0.399337076 | 0.312183836 | 0.353633048 |
| 0.078959492 | 0.414492532 | 0.250949112 | 0.155667022 |
| 0.11825613  | 0.244026823 | 0.325123674 | 0.336257381 |
| 0.367671992 | 0.32129946  | 0.265435459 | 0.357768273 |
| 0.398403512 | 0.363386781 | 0.410289346 | 0.341229655 |
| 0.118352832 | 0.266257652 | 0.313529463 | 0.284997351 |
| 0.341274943 | 0.225910409 | 0.292442815 | 0.417101722 |
| 0.349065212 | 0.357022018 | 0.205957124 | 0.432882753 |
| 0.305044367 | 0.445474408 | 0.320863015 | 0.277740535 |
| 0.427547886 | 0.396137335 | 0.439868301 | 0.319325339 |
| 0.393828915 | 0.27749631  | 0.114678519 | 0.337084461 |
| 0.438646095 | 0.031743297 | 0.367634253 | 0.396147257 |
| 0.386063855 | 0.350079914 | 0.451109369 | 0.407204825 |
| 0.386724929 | 0.1567768   | 0.039306667 | 0.369742699 |
| 0.405245762 | 0.344823237 | 0.318689078 | 0.28662355  |
| 0.346046492 | 0.285029556 | 0.320078764 | 0.226417694 |
| 0.469227264 | 0.36038248  | 0.37384022  | 0.311379061 |
| 0.262309363 | 0.322795191 | 0.281247075 | 0.366669126 |
| 0.144992749 | 0.167052464 | 0.090466133 | 0.336417799 |
| 0.196119058 | 0.317366002 | 0.281315531 | 0.34235664  |
| 0.314237442 | 0.27424729  | 0.245003416 | 0.33439816  |
| 0.089281149 | 0.276503058 | 0.245934892 | 0.229887714 |
| 0.154078814 | 0.196290915 | 0.265349126 | 0.258782245 |
| 0.360412518 | 0.24858371  | 0.294618572 | 0.402498978 |
| 0.333577204 | 0.206343205 | 0.305439249 | 0.425731581 |
| 0.431637536 | 0.309396482 | 0.296784734 | 0.044209978 |
| 0.289454468 | 0.219078402 | 0.204277991 | 0.287897386 |
| 0.215364243 | 0.330248239 | 0.333732254 | 0.336701025 |
| 0.242982995 | 0.211879197 | 0.323029769 | 0.395260728 |
| 0.18079797  | 0.319472019 | 0.381262907 | 0.277837052 |
| 0.018109941 | 0.315721844 | 0.341980903 | 0.316637861 |
| 0.314682863 | 0.178514895 | 0.204252451 | 0.382571718 |
| 0.263198619 | 0.32319768  | 0.389423294 | 0.34242518  |
| 0.260688486 | 0.225764036 | 0.445010132 | 0.071656372 |
| 0.32416597  | 0.13565432  | 0.357434316 | 0.199936512 |
| 0.312451924 | 0.356610808 | 0.328583864 | 0.329792275 |
| 0.148143734 | 0.418975298 | 0.332289591 | 0.409222699 |
| 0.283381541 | 0.446739494 | 0.361920425 | 0.376125934 |
| 0.331489223 | 0.278411122 | 0.157883713 | 0.332595559 |
| 0.370081597 | 0.246866272 | 0.112193417 | 0.314934653 |
| 0.26684285  | 0.328354019 | 0.268529937 | 0.422210226 |
| 0.438469904 | 0.348741748 | 0.302494689 | 0.359198383 |
| 0.335132643 | 0.273591809 | 0.349211155 | 0.45961173  |
| 0.213251185 | 0.330795726 | 0.322268    | 0.385595238 |
| 0.251020763 | 0.333688052 | 0.328116214 | 0.194540931 |
| 0.00728394  | 0.154655625 | 0.127526981 | 0.321946618 |
| 0.255141396 | 0.263509879 | 0.340520196 | 0.418297364 |
| 0.247512267 | 0.363174997 | 0.297384017 | 0.318185821 |
| 0.350481634 | 0.329656012 | 0.299610965 | 0.332114362 |
| 0.301887381 | 0.066013818 | 0.221576888 | 0.447493857 |
| 0.075924287 | 0.26306659  | 0.311091318 | 0.010475972 |

|             |             |             |             |
|-------------|-------------|-------------|-------------|
| 0.120488628 | 0.271753696 | 0.133836131 | 0.241858076 |
| 0.416792644 | 0.225617419 | 0.244864402 | 0.214103358 |
| 0.346511954 | 0.196185371 | 0.018042413 | 0.395864678 |
| 0.402495083 | 0.390070542 | 0.395476959 | 0.377942213 |
| 0.37733448  | 0.308621787 | 0.346795624 | 0.246764391 |
| 0.224238795 | 0.149276967 | 0.273878119 | 0.354774161 |
| 0.012034443 | 0.338405776 | 0.352437869 | 0.233147716 |
| 0.324044027 | 0.341838271 | 0.112316197 | 0.336288714 |
| 0.05268056  | 0.174381123 | 0.309465156 | 0.353942405 |
| 0.362535112 | 0.054659067 | 0.16453328  | 0.277388938 |
| 0.335361306 | 0.310769811 | 0.267142297 | 0.424509184 |
| 0.335037497 | 0.138991606 | 0.344258848 | 0.337354966 |
| 0.188989051 | 0.101638408 | 0.296703344 | 0.020696312 |
| 0.156713122 | 0.392022287 | 0.299756005 | 0.13256668  |
| 0.322536598 | 0.023859589 | 0.311001194 | 0.435530699 |
| 0.345614682 | 0.426837597 | 0.403609437 | 0.265517435 |
| 0.403452064 | 0.099345631 | 0.417575762 | 0.311594412 |
| 0.23097826  | 0.002807097 | 0.031286053 | 0.384142696 |
| 0.318509239 | 0.080901619 | 0.26227626  | 0.222950033 |
| 0.250355025 | 0.185915989 | 0.175634544 | 0.295371051 |
| 0.291564704 | 0.346509746 | 0.286716862 | 0.368399838 |
| 0.345453579 | 0.350679017 | 0.264325533 | 0.14839775  |
| 0.314744856 | 0.154644285 | 0.156134503 | 0.025501546 |
| 0.355863731 | 0.135430898 | 0.379546081 | 0.400177142 |
| 0.432646285 | 0.337720176 | 0.188207233 | 0.255926842 |
| 0.374367079 | 0.107387317 | 0.23813014  | 0.136098189 |
| 0.363138547 | 0.331850006 | 0.327922602 | 0.290953392 |
| 0.43776448  | 0.392946364 | 0.119836635 | 0.338015933 |
| 0.037045432 | 0.012742757 | 0.243462115 | 0.324552365 |
| 0.135335138 | 0.325734463 | 0.300348863 | 0.302396405 |
| 0.338303363 | 0.078221647 | 0.280091203 | 0.285018413 |
| 0.352699954 | 0.351498481 | 0.323682116 | 0.289161816 |
| 0.356099513 | 0.276719808 | 0.327818379 | 0.310998839 |
| 0.278919578 | 0.28528386  | 0.214774933 | 0.092444137 |
| 0.270961834 | 0.298984218 | 0.147016896 | 0.232189523 |
| 0.362361617 | 0.390801295 | 0.166141695 | 0.057502742 |
| 0.281722358 | 0.353602736 | 0.415414262 | 0.375803766 |
| 0.424250843 | 0.456991446 | 0.377833845 | 0.318086031 |
| 0.162611768 | 0.363669479 | 0.330162328 | 0.286149945 |
| 0.409275835 | 0.106135872 | 0.379042468 | 0.285358265 |
| 0.220274129 | 0.30538422  | 0.126610157 | 0.207633355 |
| 0.298570938 | 0.28584672  | 0.337966717 | 0.165163551 |
| 0.355438374 | 0.260328744 | 0.150674718 | 0.309639669 |
| 0.320145431 | 0.214765059 | 0.268426919 | 0.293182328 |
| 0.291934682 | 0.15427938  | 0.318801242 | 0.427659199 |
| 0.197901722 | 0.205563112 | 0.212256163 | 0.328643578 |
| 0.32689025  | 0.248294553 | 0.054366273 | 0.324227723 |
| 0.414197899 | 0.296198465 | 0.389010629 | 0.395318727 |
| 0.163677822 | 0.309401509 | 0.297917014 | 0.349920507 |
| 0.306771125 | 0.271277406 | 0.354421286 | 0.151414159 |
| 0.336370819 | 0.429285742 | 0.332651838 | 0.298387356 |
| 0.284014064 | 0.153810661 | 0.094034479 | 0.351007299 |
| 0.268600539 | 0.16815268  | 0.208437092 | 0.342611721 |
| 0.010870511 | 0.182169052 | 0.423877322 | 0.309869916 |



|             |             |             |             |
|-------------|-------------|-------------|-------------|
| 0.448186753 | 0.40306633  | 0.394700676 | 0.2930837   |
| 0.006659798 | 0.3162893   | 0.33214715  | 0.302833544 |
| 0.328362745 | 0.299033226 | 0.225509072 | 0.219130826 |
| 0.326521782 | 0.10644315  | 0.295325362 | 0.233382405 |
| 0.196549182 | 0.294102907 | 0.305886417 | 0.298190882 |
| 0.354348616 | 0.12999738  | 0.24922578  | 0.300175698 |
| 0.2434803   | 0.313389347 | 0.346583489 | 0.171708553 |
| 0.186229478 | 0.393239316 | 0.311912941 | 0.082018428 |
| 0.308497857 | 0.365887854 | 0.382114373 | 0.012473724 |
| 0.319847088 | 0.045038864 | 0.346588976 | 0.327720536 |
| 0.343471652 | 0.360337062 | 0.368893507 | 0.338952758 |
| 0.316759187 | 0.339881235 | 0.314938357 | 0.327810464 |
| 0.303259638 | 0.308387227 | 0.334915773 | 0.305660556 |
| 0.310119747 | 0.225487301 | 0.134531743 | 0.132058825 |
| 0.142473764 | 0.356097984 | 0.277572356 | 0.104739177 |
| 0.343766575 | 0.314176382 | 0.374970655 | 0.368944678 |
| 0.396998516 | 0.120447161 | 0.351641557 | 0.324273883 |
| 0.158177954 | 0.230293068 | 0.124479099 | 0.296197234 |
| 0.316694276 | 0.289988493 | 0.267421699 | 0.245847675 |
| 0.283067729 | 0.384693048 | 0.264973307 | 0.392825644 |
| 0.329370863 | 0.308908411 | 0.170342021 | 0.226917958 |
| 0.257203354 | 0.20519665  | 0.336585915 | 0.011908473 |
| 0.344340976 | 0.218700728 | 0.361060508 | 0.381453688 |
| 0.251842807 | 0.374262083 | 0.178087155 | 0.178679745 |
| 0.144424827 | 0.177527414 | 0.22737533  | 0.297011342 |
| 0.190072389 | 0.287372149 | 0.353563046 | 0.213226876 |
| 0.320316055 | 0.300041975 | 0.346433964 | 0.320409733 |
| 0.341481793 | 0.227692748 | 0.404493599 | 0.170896116 |
| 0.276605358 | 0.287910028 | 0.230709013 | 0.349999024 |
| 0.358307021 | 0.409301946 | 0.133645319 | 0.414069783 |
| 0.340790001 | 0.179112575 | 0.448860053 | 0.298268608 |
| 0.282831019 | 0.265147689 | 0.201385743 | 0.260330056 |
| 0.348593731 | 0.268749614 | 0.01148583  | 0.105121923 |
| 0.352790961 | 0.285707029 | 0.28190995  | 0.34091404  |
| 0.336129689 | 1           | 0.173082965 | 0.30544547  |
| 0.357614943 | 0.398156483 | 0.291639347 | 0.31724026  |
| 0.330260314 | 0.225522636 | 0.253078405 | 0.035576128 |
| 0.305326067 | 0.276383048 | 0.249814965 | 0.16817977  |
| 0.08386841  | 0.216651222 | 0.299855544 | 0.120533672 |
| 0.411771485 | 0.175210871 | 0.268688738 | 0.301490176 |
| 0.24330695  | 0.400820809 | 0.306400526 | 0.33092739  |
| 0.12017616  | 0.324466486 | 0.303116191 | 0.297298205 |
| 0.298053351 | 0.312147401 | 0.345777017 | 0.268881223 |
| 0.123933207 | 0.3369887   | 0.012929407 | 0.378863661 |
| 0.369087052 | 0.308484303 | 0.251903498 | 0.18498974  |
| 0.352002338 | 0.349392175 | 0.331700008 | 0.269451513 |
| 0.055312757 | 0.321191108 | 0.312561552 | 0.321118921 |
| 0.166467211 | 0.30931526  | 0.163294272 | 0.335909022 |
| 0.373449991 | 0.303128523 | 0.299644453 | 0.22906609  |
| 0.370238564 | 0.306279831 | 0.162712432 | 0.314520852 |
| 0.271097833 | 0.128000602 | 0.225316651 | 0.441153761 |
| 0.325602443 | 0.275998664 | 0.371309294 | 0.325338392 |
| 0.301734317 | 0.325243637 | 0.269897689 | 0.431039004 |
| 0.24902121  | 0.323008423 | 0.340670181 | 0.376606644 |

|             |             |             |             |
|-------------|-------------|-------------|-------------|
| 0.348415532 | 0.29480218  | 0.270097151 | 0.345624281 |
| 0.342254423 | 0.170618464 | 0.313393344 | 0.31244394  |
| 0.252211816 | 0.353508335 | 0.226326194 | 0.339936006 |
| 0.125125439 | 0.315033485 | 0.279222964 | 0.241084371 |
| 0.354679543 | 0.344361861 | 0.346926739 | 0.383874204 |
| 0.237651065 | 0.083680527 | 0.423957498 | 0.034583325 |
| 0.249466537 | 0.327293836 | 0.325835936 | 0.337658229 |
| 0.207477869 | 0.323938938 | 0.254706286 | 0.007314025 |
| 0.361445074 | 0.096733966 | 0.341190042 | 0.31761444  |
| 0.27243218  | 0.136067512 | 0.375862351 | 0.431517884 |
| 0.310472204 | 0.251117819 | 0.231772178 | 0.379958864 |
| 0.201846327 | 0.226575776 | 0.286921156 | 0.268407288 |
| 0.250126568 | 0.225290852 | 0.268177155 | 0.262849839 |
| 0.311061021 | 0.307311948 |             |             |
| SNX16       | 0.006215206 | 0.154894908 | 0.003780385 |
| 0.004369252 | 0.229938377 | 0.096939294 | 0.00385943  |
| 0.011504133 | 0.122563097 | 0.064269696 | 0.137304134 |
| 0.000253838 | 0.132336785 | 0.174881551 | 0.005303167 |
| 0.205891241 | 0.002340013 | 0.01356444  | 0.011516899 |
| 0.014059492 | 0.178693873 | 0.129919002 | 0.077128521 |
| 0.197962809 | 0.033895781 | 0.073503506 | 0.259842986 |
| 0.201568367 | 0.074105736 | 0.227785151 | 0.011657307 |
| 0.122269862 | 0.249406931 | 0.238924669 | 0.000236357 |
| 0.16241291  | 0.018162004 | 0.116429228 | 0.061967785 |
| 0.051653317 | 0.098426734 | 0.068643138 | 0.054012965 |
| 0.072791816 | 0.001228975 | 0.026662779 | 0.217677504 |
| 0.092612552 | 0.079669276 | 0.005548119 | 0.17483753  |
| 0.08532191  | 0.100882708 | 0.121458153 | 1.17E-05    |
| 0.282852333 | 0.14768718  | 0.238806327 | 0.181237164 |
| 0.050341796 | 0.028086785 | 0.058135065 | 0.081872726 |
| 0.196256428 | 0.214555794 | 0.116101305 | 0.065884965 |
| 0.179227333 | 0.145806037 | 0.240134833 | 0.010105157 |
| 0.074950955 | 0.002169913 | 0.033357489 | 0.012319421 |
| 0.126081428 | 0.069742066 | 0.216246156 | 0.214796703 |
| 0.126427036 | 0.176771137 | 0.070803315 | 0.151353267 |
| 0.048458845 | 0.281771004 | 0.140680599 | 0.138229688 |
| 0.160426268 | 0.00913853  | 0.158924862 | 0.180168572 |
| 0.006022403 | 0.111019076 | 0.136292838 | 0.017985231 |
| 0.17125906  | 0.189217404 | 0.099522032 | 0.199236908 |
| 0.281339664 | 0.176476117 | 0.164815059 | 0.074501528 |
| 0.25548614  | 0.006434226 | 0.138232299 | 0.312324542 |
| 0.103721493 | 0.007626919 | 0.057607572 | 0.261756931 |
| 0.140491535 | 0.199180112 | 0.165176358 | 0.134365838 |
| 0.182717058 | 0.191091089 | 0.128236087 | 0.183228885 |
| 0.032224562 | 0.195695581 | 0.03135232  | 0.003955775 |
| 0.004833708 | 0.019887632 | 0.09972553  | 0.123273139 |
| 0.233255361 | 0.12174343  | 0.022916189 | 0.077284151 |
| 0.252279705 | 0.14169623  | 0.189515973 | 0.155769691 |
| 0.002342807 | 0.19034524  | 0.160889923 | 0.0644953   |
| 0.146050362 | 0.024347415 | 0.241087078 | 0.149817844 |
| 0.116929613 | 0.231475322 | 0.016962827 | 0.15148335  |
| 0.046330425 | 0.195016434 | 0.161961425 | 0.027513758 |
| 0.167289937 | 0.146968319 | 0.216355211 | 0.305363502 |
| 0.161982903 | 0.061362806 | 0.010281748 | 0.142151187 |

|             |             |             |             |
|-------------|-------------|-------------|-------------|
| 0.211934824 | 0.007501948 | 0.242037527 | 0.241272465 |
| 0.16408385  | 0.235011215 | 0.23549295  | 0.239303381 |
| 0.174817769 | 0.009169137 | 0.010759065 | 0.14478903  |
| 0.154868495 | 0.130235325 | 0.043222676 | 0.160204311 |
| 0.239724845 | 0.083683268 | 0.258691022 | 0.025120618 |
| 0.198598124 | 0.207709072 | 0.22741789  | 0.134984387 |
| 0.075346225 | 0.08837128  | 0.272096961 | 0.12859136  |
| 0.002690422 | 0.009220287 | 0.004558949 | 0.134081755 |
| 0.044662881 | 0.051898014 | 0.054390947 | 0.208228457 |
| 0.055218402 | 0.078296505 | 0.261930006 | 0.284667494 |
| 0.005627049 | 0.152691277 | 0.027786993 | 0.01795461  |
| 0.002550163 | 0.02786297  | 0.007253687 | 0.019413583 |
| 0.112232153 | 0.041422406 | 0.226956179 | 0.22419757  |
| 0.144484647 | 0.027829792 | 0.158182641 | 0.201967881 |
| 0.170901918 | 0.221885494 | 0.070306311 | 0.000261984 |
| 0.019342212 | 0.125758514 | 0.212466359 | 0.254752135 |
| 0.035490624 | 0.02178535  | 0.144729863 | 0.272465155 |
| 0.036076817 | 0.02460492  | 0.104100774 | 0.133673485 |
| 0.022628657 | 0.113564361 | 0.193141026 | 0.119364934 |
| 0.000406163 | 0.05681452  | 0.199903198 | 0.031572763 |
| 0.088597431 | 0.05460823  | 0.131728845 | 0.190349589 |
| 0.097944412 | 0.170477289 | 0.25591071  | 0.305252495 |
| 0.030185341 | 0.043242779 | 0.230658525 | 0.024507899 |
| 0.243489618 | 0.008256983 | 0.119854178 | 0.092023805 |
| 0.052527126 | 0.120736026 | 0.296857357 | 0.129480486 |
| 0.015803612 | 0.185318954 | 0.17053946  | 0.213327613 |
| 0.084728244 | 0.217868084 | 0.225517393 | 0.182299789 |
| 0.135381808 | 0.180732913 | 0.150635813 | 0.164690545 |
| 0.199617693 | 0.018631899 | 0.008249382 | 0.243771745 |
| 0.095665752 | 0.233210905 | 0.028617545 | 0.191826589 |
| 0.171748382 | 0.135927013 | 0.032349501 | 0.231369064 |
| 0.127801986 | 0.042119006 | 0.219680053 | 0.231225372 |
| 0.041813275 | 0.149076044 | 0.09767665  | 0.238631718 |
| 0.029192497 | 0.099620167 | 0.117297968 | 0.246288725 |
| 0.018897916 | 0.009139986 | 0.005351273 | 0.05604184  |
| 0.173870865 | 0.211540289 | 0.191803157 | 0.194930056 |
| 0.017942333 | 0.174521341 | 0.078277416 | 0.045829757 |
| 0.115373706 | 0.191536954 | 0.316861597 | 0.265722951 |
| 0.077577588 | 0.0008053   | 0.005529379 | 0.162770765 |
| 0.003269352 | 0.167661495 | 0.08796133  | 0.000100219 |
| 0.00177951  | 0.154664983 | 0.012559632 | 0.037627909 |
| 0.278772719 | 0.035598569 | 0.029092914 | 0.042653686 |
| 0.181207365 | 0.014198009 | 0.000967438 | 0.206103412 |
| 0.204340297 | 0.194057609 | 0.194181711 | 0.164775325 |
| 0.202482858 | 0.238645785 | 0.208397222 | 0.075460611 |
| 0.007381823 | 0.00708501  | 0.072200939 | 0.073929005 |
| 0.000247255 | 0.209212567 | 0.21384985  | 0.025878765 |
| 0.263064029 | 0.103332245 | 0.002254228 | 0.305227125 |
| 1.13E-05    | 0.155444464 | 0.035456845 | 0.076783781 |
| 0.257442468 | 0.000306595 | 0.010372171 | 0.045235257 |
| 0.119638647 | 0.095555591 | 0.184041362 | 0.195825902 |
| 0.109224029 | 0.014666194 | 0.10003943  | 0.262575077 |
| 0.005337504 | 0.007193837 | 0.072713516 | 0.002352969 |
| 0.042391208 | 0.179979068 | 0.139196927 | 0.001318409 |

|             |             |             |             |
|-------------|-------------|-------------|-------------|
| 0.058401548 | 0.000784668 | 0.09430656  | 0.200115099 |
| 0.144918688 | 0.225962624 | 0.193148689 | 0.228486318 |
| 0.175325196 | 0.134959485 | 0.216042622 | 0.124338944 |
| 0.076323277 | 0.000275389 | 0.000718753 | 0.228791097 |
| 0.153760007 | 0.006336708 | 0.028425979 | 0.030909199 |
| 0.008769337 | 0.012857684 | 0.010672158 | 0.118638803 |
| 0.189587421 | 0.164955193 | 0.148822716 | 0.138547211 |
| 0.051698804 | 0.092797955 | 0.081810072 | 0.01222226  |
| 0.260219743 | 0.00278705  | 0.013497518 | 0.001009261 |
| 0.252307251 | 0.014849748 | 0.126292756 | 0.191572225 |
| 0.181639918 | 0.239256414 | 0.078549704 | 0.036797704 |
| 0.253877691 | 0.010723467 | 0.081642977 | 0.013196084 |
| 0.154463838 | 0.154035424 | 0.105016937 | 0.070675844 |
| 0.192379207 | 0.1491517   | 0.00238762  | 0.165795878 |
| 0.000346197 | 0.002382637 | 0.056358342 | 0.094758769 |
| 0.040510005 | 0.138580537 | 0.062633284 | 0.061701224 |
| 0.088934852 | 0.000461355 | 0.20868306  | 0.175149486 |
| 0.097325623 | 0.117609985 | 0.221008691 | 0.087254911 |
| 0.126576293 | 0.021547758 | 0.064984256 | 0.031217192 |
| 0.033612838 | 0.070949994 | 0.0314638   | 0.000904079 |
| 0.13448081  | 0.179012866 | 0.005452666 | 0.032422106 |
| 0.184764396 | 0.212410776 | 0.001081993 | 0.000222253 |
| 0.063962316 | 0.114335297 | 0.242348475 | 0.180875083 |
| 0.170342847 | 0.198669443 | 0.11741282  | 0.025147679 |
| 0.006328089 | 0.144573702 | 0.251997238 | 0.028886507 |
| 0.206156376 | 0.005230911 | 0.180877346 | 0.323891874 |
| 0.020587757 | 0.026776975 | 0.001759331 | 0.013434956 |
| 0.320107555 | 0.044974874 | 0.068775735 | 0.015386866 |
| 0.079611557 | 0.12874267  | 0.004177912 | 0.041927665 |
| 0.095134863 | 0.052489008 | 0.028743993 | 0.083812165 |
| 0.126643529 | 0.028261625 | 0.214641013 | 0.153833033 |
| 0.020272474 | 0.014283401 | 0.014068123 | 0.235809942 |
| 0.195388606 | 0.175005845 | 0.001251716 | 0.151678858 |
| 0.238003411 | 0.201907825 | 0.1703508   | 0.18850247  |
| 0.011586401 | 0.173449828 | 0.217939417 | 0.136422599 |
| 0.047779824 | 0.098896017 | 0.090844392 | 0.00724043  |
| 0.118983179 | 0.164386008 | 0.127629416 | 0.038981674 |
| 0.213227899 | 0.016134404 | 0.003957049 | 0.238436401 |
| 0.082897458 | 0.002438989 | 0.085554484 | 0.263997772 |
| 0.000823209 | 0.245039999 | 0.250293033 | 0.056574238 |
| 0.206001369 | 0.205701533 | 0.141659396 | 0.06235213  |
| 0.002095311 | 0.245593246 | 0.139942636 | 0.087589968 |
| 0.133987879 | 0.12099633  | 0.026675265 | 0.006943088 |
| 0.107446857 | 0.008359321 | 0.011131381 | 0.025165749 |
| 0.031685586 | 0.117588177 | 0.06066402  | 0.053814615 |
| 0.075300136 | 0.012509597 | 0.136300469 | 0.053703938 |
| 0.062162102 | 0.072286313 | 0.125431845 | 0.062091077 |
| 0.027871595 | 0.204060497 | 0.120093676 | 0.001343899 |
| 0.32375114  | 0.190559662 | 0.224726737 | 0.005527984 |
| 0.209372339 | 1.70E-05    | 0.081295139 | 0.071657627 |
| 0.06924857  | 0.067352539 | 0.150253453 | 0.095546531 |
| 0.0984394   | 0.045370967 | 0.060700035 | 0.075004256 |
| 0.041555506 | 0.058529399 | 0.204791868 | 0.073344354 |
| 0.09230541  | 0.014485464 | 0.015421148 | 0.014216351 |

|             |             |              |             |
|-------------|-------------|--------------|-------------|
| 0.002523423 | 0.221471341 | 0.061035008  | 0.008586196 |
| 0.089867455 | 0.083526156 | 0.129119284  | 0.163300842 |
| 0.210562437 | 0.015291631 | 0.116553424  | 0.151969671 |
| 0.028969535 | 0.017539602 | 0.003273411  | 0.111774721 |
| 0.062166043 | 0.064365566 | 0.14431534   | 0.044120169 |
| 0.149293652 | 0.119192424 | 0.061193238  | 0.187280695 |
| 0.112408157 | 0.129918051 | 0.045955354  | 0.008430572 |
| 0.018088577 | 0.023106975 | 0.205027714  | 0.000900884 |
| 0.128482866 | 0.012574537 | 0.205328284  | 0.147857829 |
| 0.267543172 | 0.162110583 | 0.014730728  | 0.003759752 |
| 0.023100478 | 0.02418749  | 0.02487184   | 0.214387098 |
| 0.233158823 | 0.036773515 | 0.158040474  | 0.037470666 |
| 0.22801146  | 0.216440754 | 0.140929338  | 0.05391071  |
| 0.089633371 | 0.035229885 | 0.15881769   | 0.012894996 |
| 0.167200812 | 0.092461696 | 0.106514925  | 0.084607225 |
| 0.079540269 | 0.227214234 | 0.007428158  | 0.225245423 |
| 0.104863501 | 0.024901345 | 0.177295745  | 0.116006603 |
| 0.042692187 | 0.026257289 | 0.243398156  | 0.086659812 |
| 0.038199311 | 0.241637928 | 0.001826691  | 0.011684266 |
| 0.137766963 | 0.10995296  | 0.135687205  | 0.188515071 |
| 0.166341972 | 0.173082965 | 1            | 0.048052838 |
| 0.143935264 | 0.150783191 | 0.014705977  | 0.077316949 |
| 0.11477869  | 0.014014661 | 0.113298182  | 0.006630766 |
| 0.168576477 | 0.228831947 | 0.065585739  | 0.00629055  |
| 0.000446124 | 0.167041533 | 0.126399979  | 0.008215655 |
| 0.24611095  | 0.078749623 | 0.135466061  | 0.228765981 |
| 0.044767545 | 0.1417501   | 0.035991468  | 0.193019267 |
| 0.001226015 | 0.089297006 | 0.270620816  | 0.165952044 |
| 0.044365358 | 0.184438593 | 0.15698815   | 0.209355554 |
| 0.002061917 | 0.046950111 | 0.001896924  | 0.105705253 |
| 0.125392961 | 0.191009233 | 0.051024053  | 0.077488274 |
| 0.124064206 | 0.185534684 | 0.034481817  | 0.205980786 |
| 0.00040268  | 0.215597515 | 0.06887356   | 0.144329315 |
| 0.027707186 | 0.117645999 | 0.003736423  | 0.223850834 |
| 0.118282683 | 0.024537094 | 0.087846772  | 0.030396602 |
| 0.172854454 | 0.173632597 | 0.026463246  | 0.083072189 |
| 0.162174423 | 0.007492635 | 0.098451842  | 0.209345605 |
| 0.055444171 | 0.183573575 | 0.243565214  | 0.028761632 |
| 0.259175092 | 0.147454939 | 0.188908462  | 0.209465945 |
| 0.015743878 | 0.072612253 | 0.255825535  | 0.164712486 |
| 0.139699694 | 0.157150978 | 0.156800206  | 0.084903056 |
| 0.132270965 | 0.003780469 | 0.1011111024 | 0.098860172 |
| 0.142070208 | 0.15066607  | 0.106326872  | 0.117820981 |
| 0.001891044 | 0.035408163 | 0.094602903  | 0.027544414 |
| 0.093310052 | 0.142714439 | 0.096391828  | 0.136424029 |
| 0.016701572 | 0.000697609 | 0.168163989  | 0.008713777 |
| 0.079864128 | 0.200924921 | 0.089184467  | 0.185318969 |
| 0.033396136 | 0.104749643 | 0.046463168  | 0.001822014 |
| 0.210263971 | 0.018562768 | 0.169770638  | 0.062851978 |
| 0.048960342 | 0.002423523 | 0.164012699  | 0.239955886 |
| 0.116664279 | 0.057136714 | 0.074731149  | 0.1753484   |
| 0.059467936 | 0.208135663 | 0.162161596  | 0.121629646 |
| 0.253255839 | 0.091761172 | 0.160986522  | 0.173083336 |
| 0.14338401  | 0.076237972 |              |             |

| SNX3        | 0.087609144 | 0.336727099 | 0.058788852 |
|-------------|-------------|-------------|-------------|
| 0.081545576 | 0.153320342 | 0.126160979 | 0.108034008 |
| 0.151382307 | 0.299740472 | 0.10603309  | 0.163459592 |
| 0.046107879 | 0.033502659 | 0.386304899 | 0.101296623 |
| 0.199568879 | 0.073742057 | 0.131715899 | 0.07004218  |
| 0.119408249 | 0.150634769 | 0.106041801 | 0.178603207 |
| 0.138922527 | 0.247649894 | 0.21454961  | 0.16059902  |
| 0.378019164 | 0.06700905  | 0.219425751 | 0.053899603 |
| 0.397836171 | 0.167871873 | 0.113906732 | 0.033199604 |
| 0.174093839 | 0.01584935  | 0.430109852 | 0.137338573 |
| 0.044700104 | 0.35333781  | 0.113691616 | 0.121413668 |
| 0.147784973 | 0.057477614 | 0.057175466 | 0.245593838 |
| 0.209355338 | 0.140165426 | 0.085748296 | 0.243587878 |
| 0.154644791 | 0.251873506 | 0.253797564 | 0.015266434 |
| 0.090165374 | 0.021779694 | 0.069398949 | 0.404032383 |
| 0.199392428 | 0.11877864  | 0.103311499 | 0.152744275 |
| 0.22358649  | 0.257887455 | 0.227338185 | 0.143795326 |
| 0.401721052 | 0.075708695 | 0.258783007 | 0.081617657 |
| 0.159432199 | 0.069328724 | 0.207174389 | 0.131422438 |
| 0.134763733 | 0.146789305 | 0.153762099 | 0.104549359 |
| 0.342545968 | 0.464802018 | 0.213523617 | 0.424740571 |
| 0.071599964 | 0.16449809  | 0.111774863 | 0.259451099 |
| 0.292662608 | 0.126822115 | 0.269287698 | 0.442972545 |
| 0.088242338 | 0.195472024 | 0.294887389 | 0.181616036 |
| 0.319161358 | 0.100754563 | 0.152484517 | 0.060332093 |
| 0.211400494 | 0.175891576 | 0.433994282 | 0.249273638 |
| 0.125289345 | 0.109664196 | 0.422748208 | 0.147535624 |
| 0.117686114 | 0.093545032 | 0.12734754  | 0.32335178  |
| 0.227246584 | 0.377706794 | 0.333741929 | 0.32568371  |
| 0.178019693 | 0.388379984 | 0.252484607 | 0.351744295 |
| 0.047159872 | 0.422071637 | 0.134840544 | 0.074148566 |
| 0.095971888 | 0.105882803 | 0.13338503  | 0.301131308 |
| 0.334420162 | 0.257312455 | 0.152517688 | 0.143452326 |
| 0.34961548  | 0.40207655  | 0.42622831  | 0.34483944  |
| 0.073480535 | 0.092910342 | 0.167222381 | 0.137090299 |
| 0.280867926 | 0.158837404 | 0.095989165 | 0.445558839 |
| 0.338239142 | 0.310602435 | 0.129167281 | 0.461653346 |
| 0.170515312 | 0.426760858 | 0.330636437 | 0.131320615 |
| 0.437046783 | 0.419664405 | 0.411012191 | 0.220420518 |
| 0.400026305 | 0.147727316 | 0.069196629 | 0.336563167 |
| 0.406842671 | 0.00657218  | 0.353082431 | 0.377171489 |
| 0.401894001 | 0.321483141 | 0.424790644 | 0.38524401  |
| 0.407922678 | 0.122638593 | 0.019011192 | 0.221972253 |
| 0.427344235 | 0.32110116  | 0.135057154 | 0.171626633 |
| 0.199305543 | 0.154013363 | 0.290232214 | 0.111664421 |
| 0.457226109 | 0.333969374 | 0.368584492 | 0.324801785 |
| 0.188258264 | 0.340731196 | 0.152337537 | 0.403467843 |
| 0.073343924 | 0.10679149  | 0.092009688 | 0.285357399 |
| 0.10584408  | 0.159841606 | 0.170781068 | 0.204809537 |
| 0.189988221 | 0.156928835 | 0.098852561 | 0.228090091 |
| 0.124616754 | 0.187440689 | 0.125907953 | 0.167394675 |
| 0.073955119 | 0.228523619 | 0.144783947 | 0.096932747 |
| 0.157054375 | 0.320182454 | 0.259927044 | 0.379633147 |
| 0.150733593 | 0.195513909 | 0.27299528  | 0.404229386 |

|             |             |             |             |
|-------------|-------------|-------------|-------------|
| 0.394086118 | 0.15263203  | 0.263285336 | 0.011888248 |
| 0.152255825 | 0.107973645 | 0.068008353 | 0.166368287 |
| 0.261424104 | 0.178655108 | 0.233800875 | 0.246058222 |
| 0.170219273 | 0.132913392 | 0.152587251 | 0.409560793 |
| 0.200808032 | 0.11946052  | 0.356857986 | 0.207130374 |
| 0.009795681 | 0.178957508 | 0.313003522 | 0.106014491 |
| 0.274078371 | 0.054551955 | 0.069188792 | 0.356663842 |
| 0.127196923 | 0.115504723 | 0.363285381 | 0.243322828 |
| 0.140307228 | 0.300484403 | 0.427671586 | 0.040846095 |
| 0.157945074 | 0.042238178 | 0.229998017 | 0.124243762 |
| 0.193576095 | 0.286918199 | 0.146460584 | 0.115421726 |
| 0.144014085 | 0.430522938 | 0.317105958 | 0.394647349 |
| 0.141232512 | 0.432370704 | 0.330709187 | 0.348579803 |
| 0.231437782 | 0.140827949 | 0.044156849 | 0.313225343 |
| 0.338042909 | 0.154925743 | 0.125451701 | 0.301990103 |
| 0.146452979 | 0.254131901 | 0.090884567 | 0.398760654 |
| 0.438746004 | 0.388181309 | 0.130362639 | 0.281526972 |
| 0.307400151 | 0.156108045 | 0.312978756 | 0.443891864 |
| 0.126209991 | 0.167316076 | 0.132585314 | 0.310363136 |
| 0.176726903 | 0.114492398 | 0.334656133 | 0.057095505 |
| 0.001488309 | 0.113651077 | 0.097972236 | 0.119302441 |
| 0.067368332 | 0.207006702 | 0.242970418 | 0.423567342 |
| 0.125311352 | 0.347776286 | 0.26327749  | 0.139242519 |
| 0.382233868 | 0.150221305 | 0.146454773 | 0.206427708 |
| 0.259045963 | 0.01887115  | 0.080540424 | 0.46722034  |
| 0.087968406 | 0.08642329  | 0.183443134 | 0.002460914 |
| 0.083952839 | 0.297817791 | 0.176909419 | 0.272900419 |
| 0.3690271   | 0.262351222 | 0.210963532 | 0.135535137 |
| 0.247824253 | 0.109605066 | 0.002753174 | 0.384419525 |
| 0.40840751  | 0.395575307 | 0.411498226 | 0.402789908 |
| 0.370799719 | 0.274423751 | 0.301744536 | 0.164370595 |
| 0.130819883 | 0.105973707 | 0.096438217 | 0.158003847 |
| 0.008283538 | 0.273182191 | 0.154637747 | 0.180467843 |
| 0.283028408 | 0.274244533 | 0.066837087 | 0.185931238 |
| 0.030108518 | 0.06028404  | 0.180952784 | 0.163794541 |
| 0.264132232 | 0.034507007 | 0.071690857 | 0.137349814 |
| 0.363107949 | 0.322503417 | 0.111957377 | 0.424783461 |
| 0.174137954 | 0.171225454 | 0.132062928 | 0.258237541 |
| 0.105812342 | 0.093550697 | 0.161580613 | 0.009957969 |
| 0.078691485 | 0.407432072 | 0.148102309 | 0.078892443 |
| 0.19578416  | 0.015576844 | 0.322052216 | 0.436405964 |
| 0.37469971  | 0.407068473 | 0.392840616 | 0.088999962 |
| 0.402205875 | 0.029570429 | 0.41173005  | 0.32047549  |
| 0.13172874  | 0.001763992 | 0.01062041  | 0.355345478 |
| 0.181987942 | 0.111562479 | 0.168756483 | 0.111585092 |
| 0.096276501 | 0.119086441 | 0.095461394 | 0.079603799 |
| 0.202989179 | 0.131097933 | 0.090364495 | 0.413236943 |
| 0.151430751 | 0.179151208 | 0.154348591 | 0.150597298 |
| 0.185308915 | 0.072960266 | 0.152328612 | 0.004750351 |
| 0.249673793 | 0.186088063 | 0.431204727 | 0.403811226 |
| 0.424325416 | 0.234639849 | 0.109675803 | 0.124244559 |
| 0.341967341 | 0.131370701 | 0.110929445 | 0.130066196 |
| 0.383228357 | 0.230250652 | 0.281303245 | 0.290044118 |
| 0.424208781 | 0.401285239 | 0.070046788 | 0.303895195 |

|             |             |             |             |
|-------------|-------------|-------------|-------------|
| 0.012826697 | 0.001958677 | 0.151948862 | 0.270919532 |
| 0.048601344 | 0.151417686 | 0.260382112 | 0.153845418 |
| 0.138861554 | 0.048918855 | 0.094162117 | 0.102166359 |
| 0.212394842 | 0.183273013 | 0.124227156 | 0.267288912 |
| 0.124955682 | 0.099903073 | 0.124796766 | 0.160266692 |
| 0.152502551 | 0.306045004 | 0.252055562 | 0.057680044 |
| 0.156591165 | 0.170183302 | 0.08132262  | 0.185567523 |
| 0.325798098 | 0.371115956 | 0.085230339 | 0.01844307  |
| 0.287932437 | 0.176865104 | 0.389939239 | 0.38759546  |
| 0.442876895 | 0.441316706 | 0.395599999 | 0.13463945  |
| 0.087831091 | 0.188883879 | 0.139267002 | 0.081106972 |
| 0.407040114 | 0.119041395 | 0.385539934 | 0.107415675 |
| 0.167941991 | 0.131291643 | 0.054569593 | 0.116915262 |
| 0.163899351 | 0.194813548 | 0.12345257  | 0.156437883 |
| 0.155460034 | 0.089420251 | 0.092126963 | 0.173393061 |
| 0.317016573 | 0.064387914 | 0.183614025 | 0.148125269 |
| 0.282020779 | 0.096067824 | 0.27271803  | 0.412069833 |
| 0.159584747 | 0.135789809 | 0.130847171 | 0.283875535 |
| 0.311280278 | 0.169177852 | 0.022902205 | 0.353122767 |
| 0.390438654 | 0.231380128 | 0.400509177 | 0.360561575 |
| 0.144961587 | 0.149380287 | 0.123966023 | 0.199081895 |
| 0.19695256  | 0.130885235 | 0.177735003 | 0.110202673 |
| 0.325782264 | 0.448898183 | 0.345441742 | 0.117121607 |
| 0.180996925 | 0.155144317 | 0.104368189 | 0.335442477 |
| 0.079422988 | 0.097852246 | 0.121181184 | 0.317377177 |
| 0.001722661 | 0.045199236 | 0.394636117 | 0.133379858 |
| 0.442717543 | 0.374910282 | 0.382570152 | 0.142754871 |
| 0.003032285 | 0.233549308 | 0.206624568 | 0.138635912 |
| 0.358081961 | 0.283071428 | 0.106887995 | 0.088264884 |
| 0.277559013 | 0.125099474 | 0.130496787 | 0.109209926 |
| 0.065033085 | 0.248387403 | 0.228383133 | 0.192087038 |
| 0.133989916 | 0.161334119 | 0.072762584 | 0.130368917 |
| 0.077025066 | 0.251913377 | 0.306543398 | 0.106304232 |
| 0.084573866 | 0.380453431 | 0.319661061 | 0.048001445 |
| 0.140181198 | 0.336565476 | 0.350362134 | 0.008043272 |
| 0.262291599 | 0.024450658 | 0.134205279 | 0.118446571 |
| 0.123732855 | 0.161053245 | 0.192651299 | 0.125296875 |
| 0.257199291 | 0.156193658 | 0.131856385 | 0.191025828 |
| 0.103785263 | 0.152213864 | 0.200414446 | 0.151664913 |
| 0.116941    | 0.103493527 | 0.177846018 | 0.18382119  |
| 0.062873804 | 0.347619039 | 0.279716375 | 0.115797721 |
| 0.200774805 | 0.167779252 | 0.338782962 | 0.392296991 |
| 0.352542247 | 0.167257652 | 0.166133045 | 0.326886296 |
| 0.108723688 | 0.135085458 | 0.101774656 | 0.17196061  |
| 0.177822975 | 0.101517545 | 0.157609113 | 0.211016299 |
| 0.285542614 | 0.380426627 | 0.269793369 | 0.363075822 |
| 0.144182485 | 0.174059162 | 0.105898628 | 0.081010843 |
| 0.131341518 | 0.189186724 | 0.124556009 | 0.005052424 |
| 0.242181962 | 0.122113427 | 0.339360473 | 0.398253686 |
| 0.09557509  | 0.341259813 | 0.105043444 | 0.103228768 |
| 0.084795332 | 0.242513692 | 0.193757676 | 0.280701268 |
| 0.064659334 | 0.122858116 | 0.16207479  | 0.120484548 |
| 0.277495821 | 0.267875969 | 0.120650977 | 0.182465974 |
| 0.184468326 | 0.179439073 | 0.432750894 | 0.105423553 |



|             |             |             |             |
|-------------|-------------|-------------|-------------|
| 0.194190858 | 0.081755464 | 0.201216457 | 0.14338206  |
| 0.145937092 | 0.396066978 | 0.090531699 | 0.406483301 |
| 0.153317851 | 0.189888563 | 0.443655707 | 0.160936756 |
| 0.13602119  | 0.081770996 | 0.058449823 | 0.147146979 |
| 0.162731164 | 0.099442925 | 0.009606533 | 0.05713674  |
| 0.259026053 | 0.146040148 | 0.306997149 | 0.286432761 |
| 0.106574891 | 0.30544547  | 0.048052838 | 1           |
| 0.395192721 | 0.432671102 | 0.143441821 | 0.276131641 |
| 0.30578679  | 0.10272513  | 0.20969163  | 0.024733856 |
| 0.22277598  | 0.189064814 | 0.136571329 | 0.091721239 |
| 0.048551356 | 0.072809439 | 0.2256889   | 0.124190374 |
| 0.377038234 | 0.061689635 | 0.223447269 | 0.246302467 |
| 0.229085353 | 0.440173515 | 0.116600701 | 0.261354664 |
| 0.093846596 | 0.228386992 | 0.134734978 | 0.164295963 |
| 0.105588798 | 0.111887932 | 0.274004936 | 0.082653821 |
| 0.062919003 | 0.117736363 | 0.010085312 | 0.399174464 |
| 0.414497242 | 0.130806987 | 0.262478859 | 0.109308887 |
| 0.230661873 | 0.322342146 | 0.156924424 | 0.147795074 |
| 0.018300249 | 0.178263321 | 0.180582591 | 0.312663662 |
| 0.077008852 | 0.215579429 | 0.060455769 | 0.149099781 |
| 0.426243564 | 0.160453066 | 0.302020477 | 0.112060343 |
| 0.383053967 | 0.298601872 | 0.180094376 | 0.104073475 |
| 0.239197568 | 0.121802098 | 0.123266477 | 0.440346527 |
| 0.124071915 | 0.083153738 | 0.319554576 | 0.142066905 |
| 0.116091303 | 0.334681206 | 0.195803091 | 0.438026648 |
| 0.092783135 | 0.233074849 | 0.291939213 | 0.397285175 |
| 0.281108832 | 0.086357245 | 0.096026117 | 0.131982298 |
| 0.367715212 | 0.06980144  | 0.126421989 | 0.288667512 |
| 0.085624384 | 0.237214402 | 0.193786108 | 0.115673976 |
| 0.048962018 | 0.164788372 | 0.1242177   | 0.169600158 |
| 0.22021847  | 0.159595076 | 0.114089404 | 0.364325534 |
| 0.081513434 | 0.027442974 | 0.409919276 | 0.008970481 |
| 0.161073574 | 0.208201054 | 0.184311672 | 0.140694719 |
| 0.218366962 | 0.242261521 | 0.189781093 | 0.005587739 |
| 0.311541992 | 0.018091592 | 0.135014461 | 0.108509169 |
| 0.126306814 | 0.093205309 | 0.370416426 | 0.403957119 |
| 0.231060499 | 0.113765201 | 0.108449268 | 0.382191494 |
| 0.055115974 | 0.096820214 | 0.12919631  | 0.243523882 |
| 0.075330726 | 0.128712753 | 0.134651532 | 0.105809239 |
| 0.262523808 | 0.154203534 |             |             |
| SPAG5       | 0.172793969 | 0.50983269  | 0.170021371 |
| 0.205762675 | 0.289847596 | 0.491665197 | 0.125419048 |
| 0.209470654 | 0.462493255 | 0.419827327 | 0.397857341 |
| 0.049653347 | 0.065700186 | 0.485275111 | 0.110151503 |
| 0.386840306 | 0.064045013 | 0.181173743 | 0.110874944 |
| 0.317829113 | 0.26016736  | 0.340453207 | 0.515275317 |
| 0.271600396 | 0.312317963 | 0.478458905 | 0.39959179  |
| 0.513835004 | 0.296283677 | 0.47219056  | 0.295438188 |
| 0.44120252  | 0.302404944 | 0.395069628 | 0.061106339 |
| 0.46735762  | 0.010177817 | 0.450337845 | 0.274182815 |
| 0.13365229  | 0.416583796 | 0.489042475 | 0.28242812  |
| 0.473627786 | 0.107575031 | 0.321264507 | 0.425154925 |
| 0.447351167 | 0.349736157 | 0.187432291 | 0.496658373 |
| 0.41929263  | 0.455011627 | 0.515684851 | 0.005501903 |

|             |             |             |             |
|-------------|-------------|-------------|-------------|
| 0.279302412 | 0.071077896 | 0.200195568 | 0.508721717 |
| 0.284748988 | 0.175006881 | 0.312276594 | 0.359827412 |
| 0.429308412 | 0.401906533 | 0.320217836 | 0.442382501 |
| 0.502516184 | 0.144333617 | 0.472290317 | 0.221575175 |
| 0.463040507 | 0.110119077 | 0.251481366 | 0.214362507 |
| 0.414862228 | 0.245977746 | 0.355593211 | 0.286163834 |
| 0.514585483 | 0.509895724 | 0.324260277 | 0.518419504 |
| 0.080056827 | 0.315835978 | 0.265575448 | 0.3341214   |
| 0.415952308 | 0.162355432 | 0.451934723 | 0.496034154 |
| 0.132842457 | 0.496822122 | 0.456412037 | 0.257568226 |
| 0.514715882 | 0.278661433 | 0.503335792 | 0.146249942 |
| 0.360741661 | 0.326140619 | 0.486997432 | 0.365959466 |
| 0.319209526 | 0.192082847 | 0.524249621 | 0.288835087 |
| 0.311312791 | 0.195728579 | 0.20808814  | 0.478980126 |
| 0.462625363 | 0.510703956 | 0.498436781 | 0.413958993 |
| 0.368133806 | 0.503915828 | 0.46595149  | 0.481008367 |
| 0.238104967 | 0.511977747 | 0.29305418  | 0.076572474 |
| 0.194567588 | 0.128790635 | 0.23260917  | 0.365629629 |
| 0.498626109 | 0.423925429 | 0.297222103 | 0.250606167 |
| 0.450118513 | 0.512780425 | 0.512192323 | 0.467027501 |
| 0.098562819 | 0.229836515 | 0.379773544 | 0.400431034 |
| 0.421460709 | 0.205788243 | 0.224969743 | 0.522657857 |
| 0.444332192 | 0.453939483 | 0.312259872 | 0.519014927 |
| 0.28461575  | 0.479840483 | 0.526254775 | 0.236072164 |
| 0.514109097 | 0.514974372 | 0.478564441 | 0.392997751 |
| 0.490084019 | 0.451046183 | 0.086096802 | 0.448951055 |
| 0.463772788 | 0.012272319 | 0.497495035 | 0.494469413 |
| 0.510283302 | 0.480778269 | 0.475601469 | 0.500303854 |
| 0.51345451  | 0.169415291 | 0.030807486 | 0.291850448 |
| 0.510121271 | 0.457196152 | 0.16375758  | 0.433447174 |
| 0.352493009 | 0.504927091 | 0.473322913 | 0.326866918 |
| 0.474271503 | 0.494626216 | 0.509557515 | 0.467890859 |
| 0.425132725 | 0.401831771 | 0.37062183  | 0.508956464 |
| 0.092339558 | 0.233942975 | 0.157901948 | 0.371488532 |
| 0.488264203 | 0.219675285 | 0.491970861 | 0.364872137 |
| 0.250692364 | 0.476366647 | 0.32858824  | 0.368029515 |
| 0.167760785 | 0.496752667 | 0.275904573 | 0.29692439  |
| 0.074563899 | 0.255491552 | 0.234606032 | 0.210857096 |
| 0.263860823 | 0.333139811 | 0.483941585 | 0.490474154 |
| 0.369844356 | 0.318598947 | 0.491908392 | 0.466406152 |
| 0.415664623 | 0.374222698 | 0.31930395  | 0.01978079  |
| 0.270686734 | 0.340456509 | 0.156050881 | 0.429716603 |
| 0.293176914 | 0.272935521 | 0.406728621 | 0.390850986 |
| 0.427780212 | 0.281553971 | 0.369483241 | 0.449174479 |
| 0.293661652 | 0.312733476 | 0.459960621 | 0.483825102 |
| 0.015532166 | 0.401474995 | 0.486847494 | 0.132676191 |
| 0.406013373 | 0.114323537 | 0.242354987 | 0.479027385 |
| 0.278638775 | 0.19988151  | 0.499459521 | 0.38935223  |
| 0.404779399 | 0.346979942 | 0.484813378 | 0.043070383 |
| 0.35161999  | 0.054821333 | 0.306620776 | 0.46836412  |
| 0.334535571 | 0.329899963 | 0.293269254 | 0.270294963 |
| 0.277294498 | 0.501786423 | 0.468981643 | 0.502916193 |
| 0.377237276 | 0.485026083 | 0.479611658 | 0.472702318 |
| 0.437495522 | 0.379822363 | 0.108432482 | 0.482500687 |

|             |             |             |             |
|-------------|-------------|-------------|-------------|
| 0.480989668 | 0.334247205 | 0.201247656 | 0.480046311 |
| 0.41800843  | 0.406403362 | 0.11234014  | 0.477695494 |
| 0.484077321 | 0.507380669 | 0.178231938 | 0.373205306 |
| 0.438897519 | 0.3364148   | 0.461071196 | 0.481473016 |
| 0.396778021 | 0.345844878 | 0.321812607 | 0.395835393 |
| 0.277121004 | 0.186841338 | 0.400307506 | 0.151746893 |
| 0.011023249 | 0.192827447 | 0.163901226 | 0.179908774 |
| 0.13321532  | 0.4790034   | 0.420530471 | 0.500224797 |
| 0.182362001 | 0.473539296 | 0.334465792 | 0.29394866  |
| 0.479654051 | 0.350983074 | 0.37390291  | 0.396041624 |
| 0.33843798  | 0.032810901 | 0.153456976 | 0.515279166 |
| 0.141732458 | 0.209968151 | 0.421294012 | 0.004703738 |
| 0.116749924 | 0.516084387 | 0.217324923 | 0.295403881 |
| 0.459563483 | 0.312960089 | 0.328393423 | 0.424965276 |
| 0.378635399 | 0.178184666 | 0.004556467 | 0.491968988 |
| 0.487417109 | 0.475639837 | 0.490520495 | 0.482819783 |
| 0.465808475 | 0.464582661 | 0.431739678 | 0.506627876 |
| 0.180881165 | 0.214669061 | 0.17645047  | 0.302043651 |
| 0.012422991 | 0.414808799 | 0.319660088 | 0.233657786 |
| 0.44294816  | 0.368274169 | 0.092573261 | 0.352312816 |
| 0.06282444  | 0.176895083 | 0.401641952 | 0.258108778 |
| 0.35021796  | 0.052104373 | 0.302650271 | 0.316792131 |
| 0.497210063 | 0.443730735 | 0.357936564 | 0.511196405 |
| 0.365834391 | 0.287718694 | 0.318611222 | 0.418676293 |
| 0.136526695 | 0.145992842 | 0.459943394 | 0.06774131  |
| 0.286102577 | 0.474582514 | 0.406572911 | 0.159857583 |
| 0.338988152 | 0.021326051 | 0.464285888 | 0.503847803 |
| 0.512702427 | 0.48835841  | 0.502729109 | 0.243042731 |
| 0.504064258 | 0.090477889 | 0.507401128 | 0.501169534 |
| 0.446627078 | 0.002839039 | 0.009824015 | 0.492606813 |
| 0.399130163 | 0.1815826   | 0.244977954 | 0.468442704 |
| 0.152015308 | 0.305801315 | 0.133530347 | 0.153702925 |
| 0.492410998 | 0.232847441 | 0.14978032  | 0.501154146 |
| 0.283506292 | 0.277084947 | 0.50096789  | 0.203836027 |
| 0.427687065 | 0.102956346 | 0.199507486 | 0.009536374 |
| 0.375249825 | 0.252022617 | 0.514273683 | 0.509050471 |
| 0.475346311 | 0.395711612 | 0.417389747 | 0.410105885 |
| 0.463032908 | 0.254814832 | 0.403556893 | 0.264693449 |
| 0.518091086 | 0.397767026 | 0.377823076 | 0.405096062 |
| 0.473089012 | 0.486800621 | 0.080846039 | 0.43703369  |
| 0.035121884 | 0.001668092 | 0.507484732 | 0.341424841 |
| 0.071162852 | 0.363733292 | 0.337285188 | 0.305241418 |
| 0.270188463 | 0.083750843 | 0.228445734 | 0.205030087 |
| 0.331523    | 0.374020185 | 0.243762431 | 0.346615554 |
| 0.256765254 | 0.115163142 | 0.237489756 | 0.210107399 |
| 0.289127533 | 0.424583554 | 0.315330749 | 0.060293456 |
| 0.48218617  | 0.421172105 | 0.126122039 | 0.267991978 |
| 0.475289891 | 0.495998666 | 0.076978755 | 0.017952143 |
| 0.364454654 | 0.331501322 | 0.482029913 | 0.51900691  |
| 0.525069407 | 0.473920693 | 0.432356909 | 0.129561595 |
| 0.140668894 | 0.336964534 | 0.265858433 | 0.096320368 |
| 0.504530579 | 0.187871247 | 0.508525677 | 0.267086999 |
| 0.209754104 | 0.282706117 | 0.061422406 | 0.156531233 |
| 0.376637571 | 0.257334835 | 0.194130377 | 0.296534146 |

|             |             |             |             |
|-------------|-------------|-------------|-------------|
| 0.322193932 | 0.223041485 | 0.109880009 | 0.265436877 |
| 0.421155468 | 0.14493089  | 0.244405057 | 0.422670062 |
| 0.465058379 | 0.336354103 | 0.443566618 | 0.444770282 |
| 0.2451877   | 0.21705424  | 0.431917538 | 0.431734971 |
| 0.498671884 | 0.463598367 | 0.059461805 | 0.520762748 |
| 0.483852812 | 0.474431719 | 0.50890062  | 0.401689692 |
| 0.186219418 | 0.3752838   | 0.300143362 | 0.342532182 |
| 0.259933838 | 0.496806724 | 0.287507089 | 0.143140241 |
| 0.369361748 | 0.484979088 | 0.489077158 | 0.207814104 |
| 0.479818397 | 0.286247408 | 0.175943215 | 0.495329577 |
| 0.144912459 | 0.169895614 | 0.493365348 | 0.464804384 |
| 0.002256695 | 0.106948757 | 0.467889334 | 0.298428364 |
| 0.490865213 | 0.47840983  | 0.463224206 | 0.361874946 |
| 0.001036151 | 0.412967704 | 0.402553289 | 0.420968597 |
| 0.509302509 | 0.451670142 | 0.229811242 | 0.107275724 |
| 0.342703269 | 0.215763519 | 0.163904207 | 0.455529838 |
| 0.156615219 | 0.498596021 | 0.263357187 | 0.300001694 |
| 0.21286784  | 0.229957253 | 0.219281191 | 0.320016603 |
| 0.128836638 | 0.303691237 | 0.392966742 | 0.436421878 |
| 0.173645115 | 0.450840868 | 0.475008117 | 0.078158608 |
| 0.346614389 | 0.447025698 | 0.464687114 | 0.004270441 |
| 0.443953329 | 0.019731036 | 0.208562206 | 0.231307837 |
| 0.221214715 | 0.230134486 | 0.261978721 | 0.292131394 |
| 0.432130586 | 0.279194294 | 0.320146886 | 0.286677926 |
| 0.185011614 | 0.308552207 | 0.406209684 | 0.448107669 |
| 0.278468405 | 0.208808722 | 0.223174777 | 0.226427262 |
| 0.091784792 | 0.509068568 | 0.341067921 | 0.199137013 |
| 0.275042985 | 0.431612852 | 0.389386669 | 0.515826586 |
| 0.437715187 | 0.264920259 | 0.367686837 | 0.520244047 |
| 0.284466373 | 0.392393413 | 0.164188737 | 0.478245696 |
| 0.306153039 | 0.195627374 | 0.497731638 | 0.457543334 |
| 0.48813818  | 0.434160091 | 0.341247997 | 0.464895298 |
| 0.392739236 | 0.38728631  | 0.455698443 | 0.10674507  |
| 0.266387083 | 0.247635473 | 0.236998546 | 0.007444438 |
| 0.407361512 | 0.40755323  | 0.496751177 | 0.503997154 |
| 0.267543988 | 0.428797185 | 0.466956007 | 0.164348236 |
| 0.418298781 | 0.32147335  | 0.237554311 | 0.491681048 |
| 0.189824135 | 0.262082339 | 0.292821104 | 0.504862293 |
| 0.455576768 | 0.463778433 | 0.244557104 | 0.333726736 |
| 0.298717087 | 0.33875418  | 0.484552332 | 0.258852317 |
| 0.472192417 | 0.160778798 | 0.496580582 | 0.301312882 |
| 0.22890872  | 0.501127536 | 0.147085443 | 0.503451793 |
| 0.325146847 | 0.257772237 | 0.470921975 | 0.411017887 |
| 0.401825621 | 0.138809287 | 0.153217747 | 0.488279543 |
| 0.27450159  | 0.325632037 | 0.023036153 | 0.058532408 |
| 0.35499986  | 0.364595799 | 0.497487443 | 0.410546584 |
| 0.220196134 | 0.357614943 | 0.143935264 | 0.395192721 |
| 1           | 0.524511476 | 0.286526738 | 0.314357641 |
| 0.414244664 | 0.161051162 | 0.527459465 | 0.02195932  |
| 0.440146814 | 0.439330973 | 0.436987364 | 0.105222623 |
| 0.04988039  | 0.176944918 | 0.457907712 | 0.184383806 |
| 0.464720675 | 0.189215924 | 0.458178897 | 0.483242543 |
| 0.292684505 | 0.524822791 | 0.135674615 | 0.428970862 |
| 0.122419236 | 0.333673028 | 0.379612354 | 0.420414753 |

|             |             |             |             |
|-------------|-------------|-------------|-------------|
| 0.218623177 | 0.257534219 | 0.397701006 | 0.200057528 |
| 0.067114169 | 0.265656347 | 0.003331162 | 0.438026622 |
| 0.508028845 | 0.316906558 | 0.309900855 | 0.397111129 |
| 0.311379524 | 0.443502265 | 0.241394911 | 0.459104007 |
| 0.022167744 | 0.350827363 | 0.264768061 | 0.49963052  |
| 0.240567806 | 0.417549116 | 0.091040213 | 0.294471334 |
| 0.511036181 | 0.282581811 | 0.33812026  | 0.323935259 |
| 0.515147767 | 0.48193622  | 0.323762299 | 0.224891593 |
| 0.467842389 | 0.163470796 | 0.498255262 | 0.49525672  |
| 0.201792431 | 0.179292816 | 0.444143779 | 0.233959585 |
| 0.282584735 | 0.476330662 | 0.462663529 | 0.496292282 |
| 0.078168404 | 0.307448836 | 0.448437805 | 0.490108465 |
| 0.334482911 | 0.138063865 | 0.211900031 | 0.21758897  |
| 0.510923259 | 0.160657049 | 0.234639281 | 0.44022138  |
| 0.180461385 | 0.353398887 | 0.477354925 | 0.17628741  |
| 0.061710104 | 0.227182676 | 0.435344057 | 0.239090339 |
| 0.328936542 | 0.368297945 | 0.218417781 | 0.420584    |
| 0.158794693 | 0.040678724 | 0.449294912 | 0.011778141 |
| 0.485791551 | 0.411548006 | 0.312219124 | 0.348486769 |
| 0.306846083 | 0.433058787 | 0.468598967 | 0.004974249 |
| 0.436557714 | 0.048806863 | 0.325763646 | 0.212685643 |
| 0.277109887 | 0.122808475 | 0.492287441 | 0.481382381 |
| 0.418935224 | 0.376304129 | 0.353656143 | 0.495628992 |
| 0.117321418 | 0.340010725 | 0.335872376 | 0.516436807 |
| 0.18790503  | 0.46640217  | 0.448859832 | 0.378161002 |
| 0.469758177 | 0.369029126 |             |             |
| SPC25       | 0.214534098 | 0.524549596 | 0.202194792 |
| 0.233211445 | 0.315143214 | 0.503564116 | 0.168021293 |
| 0.261100877 | 0.488169956 | 0.399731374 | 0.422656827 |
| 0.071874776 | 0.072374903 | 0.507162469 | 0.153386793 |
| 0.399980812 | 0.09603396  | 0.230167862 | 0.12880188  |
| 0.352427475 | 0.286774536 | 0.350484956 | 0.527343503 |
| 0.301455533 | 0.35585497  | 0.500763755 | 0.403694862 |
| 0.526856521 | 0.277044018 | 0.480885487 | 0.267782997 |
| 0.473678836 | 0.323195378 | 0.391722034 | 0.084201444 |
| 0.48465385  | 0.01388186  | 0.480287892 | 0.30589745  |
| 0.141534049 | 0.4572003   | 0.470518538 | 0.319621579 |
| 0.46415336  | 0.137996146 | 0.287654768 | 0.433882887 |
| 0.472412722 | 0.394287989 | 0.224205172 | 0.507395248 |
| 0.431466559 | 0.489200404 | 0.510481298 | 0.006992406 |
| 0.281410162 | 0.06740395  | 0.196970803 | 0.528553821 |
| 0.334859785 | 0.225534305 | 0.29679147  | 0.408858758 |
| 0.443143843 | 0.427139325 | 0.373836251 | 0.434294401 |
| 0.521153317 | 0.152504844 | 0.477197386 | 0.250025812 |
| 0.481696586 | 0.144783579 | 0.303494782 | 0.257471488 |
| 0.42660584  | 0.29677444  | 0.384500135 | 0.297901159 |
| 0.521304717 | 0.507318681 | 0.375647777 | 0.519520199 |
| 0.094314964 | 0.330884458 | 0.292850159 | 0.376841912 |
| 0.444647737 | 0.209927736 | 0.470324752 | 0.509437161 |
| 0.174413176 | 0.487577323 | 0.472343747 | 0.302712665 |
| 0.532632259 | 0.290314568 | 0.485609228 | 0.15763228  |
| 0.380231849 | 0.342360813 | 0.50502757  | 0.40507228  |
| 0.350051112 | 0.231112323 | 0.514089739 | 0.302498886 |
| 0.336372639 | 0.236830713 | 0.231926449 | 0.488137492 |

|             |             |             |             |
|-------------|-------------|-------------|-------------|
| 0.474540205 | 0.525798452 | 0.50878811  | 0.444065128 |
| 0.376556405 | 0.521753177 | 0.482895702 | 0.508855118 |
| 0.210961081 | 0.526605911 | 0.339541054 | 0.111759801 |
| 0.233577752 | 0.178151961 | 0.262870911 | 0.415073152 |
| 0.513240973 | 0.464256223 | 0.342425093 | 0.290745341 |
| 0.468906436 | 0.522138825 | 0.524068291 | 0.489083233 |
| 0.133955625 | 0.240174586 | 0.386184385 | 0.446532627 |
| 0.447182754 | 0.260384703 | 0.238259929 | 0.513766565 |
| 0.477040341 | 0.471112643 | 0.358714331 | 0.517933645 |
| 0.336383221 | 0.506076079 | 0.532387562 | 0.281259343 |
| 0.515821585 | 0.518092758 | 0.501580858 | 0.405116832 |
| 0.517255189 | 0.471490781 | 0.098227286 | 0.477848342 |
| 0.493560737 | 0.014299991 | 0.508785189 | 0.50717431  |
| 0.525583208 | 0.488482798 | 0.498301548 | 0.517506296 |
| 0.529358536 | 0.215919866 | 0.030692839 | 0.328722279 |
| 0.51975315  | 0.48389466  | 0.215590299 | 0.429314462 |
| 0.373917265 | 0.520920441 | 0.490426393 | 0.32228505  |
| 0.493887019 | 0.512246417 | 0.521334715 | 0.489786633 |
| 0.446375446 | 0.444980645 | 0.37041069  | 0.514029417 |
| 0.130554803 | 0.274462148 | 0.192649004 | 0.417832083 |
| 0.471805484 | 0.269927512 | 0.504630643 | 0.389657271 |
| 0.301543285 | 0.503468093 | 0.326855259 | 0.386103756 |
| 0.202807347 | 0.493496466 | 0.327159651 | 0.338584827 |
| 0.107580728 | 0.304746507 | 0.267123769 | 0.2544117   |
| 0.304331256 | 0.372505385 | 0.489521091 | 0.509163159 |
| 0.392662807 | 0.360174197 | 0.505272205 | 0.496083095 |
| 0.452067847 | 0.382789256 | 0.372488632 | 0.028318466 |
| 0.280388632 | 0.32942001  | 0.159428068 | 0.432429817 |
| 0.339160674 | 0.303512095 | 0.421881637 | 0.410780823 |
| 0.453919901 | 0.332157751 | 0.379471759 | 0.486011391 |
| 0.337232342 | 0.337798051 | 0.480225758 | 0.484768198 |
| 0.023891473 | 0.426439412 | 0.501136776 | 0.160709912 |
| 0.440383098 | 0.124774055 | 0.243395473 | 0.494755009 |
| 0.282992376 | 0.224068697 | 0.515335195 | 0.412401809 |
| 0.414866155 | 0.386083434 | 0.507054469 | 0.042890297 |
| 0.371413623 | 0.071189754 | 0.347477488 | 0.456466423 |
| 0.378240561 | 0.375385094 | 0.314137325 | 0.296093848 |
| 0.314805285 | 0.522089532 | 0.501149234 | 0.519963655 |
| 0.374666713 | 0.506902356 | 0.492694128 | 0.49646493  |
| 0.471363462 | 0.380172011 | 0.110848311 | 0.494195879 |
| 0.495611668 | 0.334057719 | 0.239818305 | 0.486280959 |
| 0.414913077 | 0.419460611 | 0.143757739 | 0.498774286 |
| 0.502055688 | 0.521247832 | 0.226328503 | 0.403238718 |
| 0.466981948 | 0.378908118 | 0.488692523 | 0.504083266 |
| 0.381167341 | 0.358583758 | 0.332710612 | 0.425529974 |
| 0.324193168 | 0.212515511 | 0.446273486 | 0.156744826 |
| 0.009952574 | 0.238799832 | 0.203183787 | 0.223856646 |
| 0.149066444 | 0.475507177 | 0.440934943 | 0.518478776 |
| 0.231608935 | 0.505967515 | 0.385652325 | 0.311823433 |
| 0.500589902 | 0.370581383 | 0.38413817  | 0.416611869 |
| 0.390800735 | 0.046860775 | 0.186345083 | 0.510950606 |
| 0.174351929 | 0.221457035 | 0.461201779 | 0.006248642 |
| 0.151592312 | 0.517955429 | 0.258774201 | 0.342525205 |
| 0.483267189 | 0.356274063 | 0.36834382  | 0.410337175 |

|             |             |             |             |
|-------------|-------------|-------------|-------------|
| 0.415820747 | 0.227839958 | 0.00774911  | 0.50937464  |
| 0.510246956 | 0.500808908 | 0.511822828 | 0.508878931 |
| 0.487210791 | 0.487967727 | 0.451930948 | 0.521701626 |
| 0.228726771 | 0.259259492 | 0.186391761 | 0.332546012 |
| 0.016005826 | 0.447948952 | 0.356252052 | 0.283694954 |
| 0.459032493 | 0.410495782 | 0.126615272 | 0.376680379 |
| 0.078989709 | 0.172640973 | 0.431898925 | 0.308695053 |
| 0.385037433 | 0.074535541 | 0.291445942 | 0.316958175 |
| 0.518115964 | 0.478157122 | 0.357425931 | 0.522919635 |
| 0.396111817 | 0.321728113 | 0.344011504 | 0.445572672 |
| 0.181185278 | 0.142055557 | 0.47999501  | 0.057073861 |
| 0.300088915 | 0.505184898 | 0.417790667 | 0.194536726 |
| 0.377213865 | 0.0314891   | 0.492989086 | 0.520268585 |
| 0.527262426 | 0.505542254 | 0.522303027 | 0.25230611  |
| 0.522152495 | 0.086410741 | 0.523987982 | 0.518270514 |
| 0.428005348 | 0.003530087 | 0.016197987 | 0.50527525  |
| 0.407209173 | 0.215084943 | 0.295408383 | 0.463731061 |
| 0.193933172 | 0.346602008 | 0.181346639 | 0.175179005 |
| 0.504176197 | 0.268759322 | 0.174186676 | 0.519641973 |
| 0.325172353 | 0.32887398  | 0.504758952 | 0.249383241 |
| 0.443858458 | 0.140236206 | 0.246044821 | 0.013191751 |
| 0.406691591 | 0.29103034  | 0.507618725 | 0.526679467 |
| 0.502770276 | 0.4162756   | 0.389951808 | 0.422956188 |
| 0.488031876 | 0.286728445 | 0.399461891 | 0.304105303 |
| 0.530557146 | 0.411056904 | 0.416747947 | 0.441162455 |
| 0.496715113 | 0.510113345 | 0.114938448 | 0.456485222 |
| 0.047261286 | 0.003079167 | 0.506200985 | 0.393066007 |
| 0.086420812 | 0.373749134 | 0.383200926 | 0.346223288 |
| 0.319383389 | 0.109319896 | 0.236545715 | 0.216078112 |
| 0.368846061 | 0.398125166 | 0.264224651 | 0.397019335 |
| 0.289147192 | 0.137099149 | 0.28866104  | 0.265044686 |
| 0.317723799 | 0.45749629  | 0.356146747 | 0.088610303 |
| 0.476400576 | 0.423617598 | 0.16704582  | 0.320443392 |
| 0.494393845 | 0.51000445  | 0.109579191 | 0.027804521 |
| 0.410305788 | 0.362611563 | 0.500831621 | 0.532423459 |
| 0.520912759 | 0.499512425 | 0.471683247 | 0.168975807 |
| 0.184605617 | 0.371453514 | 0.287044634 | 0.130967512 |
| 0.52350683  | 0.223262778 | 0.529630468 | 0.276282633 |
| 0.261883847 | 0.324599805 | 0.089741402 | 0.206593268 |
| 0.384608414 | 0.312343791 | 0.238698146 | 0.330079164 |
| 0.349178374 | 0.234840274 | 0.151308529 | 0.315468304 |
| 0.453303139 | 0.14769127  | 0.295433397 | 0.463167985 |
| 0.496745541 | 0.328717365 | 0.452842947 | 0.478464765 |
| 0.294156741 | 0.265870451 | 0.438309202 | 0.462092809 |
| 0.506438956 | 0.45594967  | 0.07390668  | 0.528962638 |
| 0.507838497 | 0.477209774 | 0.528535642 | 0.436897426 |
| 0.233128792 | 0.384567602 | 0.311201231 | 0.364311959 |
| 0.314001854 | 0.511234608 | 0.33937337  | 0.187040983 |
| 0.420113953 | 0.497917825 | 0.505656464 | 0.253598424 |
| 0.487027581 | 0.327787191 | 0.209022491 | 0.515390156 |
| 0.157252298 | 0.205961127 | 0.478993613 | 0.481362285 |
| 0.003735691 | 0.114335078 | 0.491215933 | 0.344736419 |
| 0.505771042 | 0.496415294 | 0.493514479 | 0.410452683 |
| 0.001263261 | 0.421558081 | 0.422742271 | 0.425947868 |

|             |             |             |             |
|-------------|-------------|-------------|-------------|
| 0.522805969 | 0.488340369 | 0.276319761 | 0.146252215 |
| 0.391048627 | 0.25108833  | 0.20315707  | 0.462941567 |
| 0.157278761 | 0.511701262 | 0.317517851 | 0.350838889 |
| 0.258237715 | 0.26951576  | 0.231421991 | 0.366128683 |
| 0.145631809 | 0.353929487 | 0.429278669 | 0.423667443 |
| 0.170287258 | 0.477599087 | 0.489372387 | 0.107563835 |
| 0.36171181  | 0.473974234 | 0.495848833 | 0.005787782 |
| 0.454289967 | 0.032417577 | 0.251773172 | 0.269169514 |
| 0.266850428 | 0.275079822 | 0.303504278 | 0.318491353 |
| 0.457998622 | 0.328064777 | 0.354816324 | 0.333698414 |
| 0.227792593 | 0.363264119 | 0.427048025 | 0.46944683  |
| 0.302248793 | 0.256667452 | 0.264993876 | 0.264680031 |
| 0.124736969 | 0.526751434 | 0.389832421 | 0.236953341 |
| 0.327665941 | 0.453397553 | 0.432484144 | 0.528780306 |
| 0.473979498 | 0.300339174 | 0.402761252 | 0.530212464 |
| 0.267212048 | 0.406429953 | 0.203492167 | 0.495922846 |
| 0.357602862 | 0.214737091 | 0.506154959 | 0.473031845 |
| 0.496453707 | 0.47141696  | 0.390252489 | 0.497043363 |
| 0.415718239 | 0.405193224 | 0.425120408 | 0.141059255 |
| 0.308495104 | 0.297935661 | 0.261225897 | 0.011783092 |
| 0.44296841  | 0.430440952 | 0.506847296 | 0.522574854 |
| 0.271539837 | 0.469274343 | 0.441639218 | 0.201689405 |
| 0.385646127 | 0.353060164 | 0.288610827 | 0.50163549  |
| 0.187776335 | 0.315698381 | 0.321578208 | 0.509823485 |
| 0.468940791 | 0.473953916 | 0.276435429 | 0.383897887 |
| 0.350560731 | 0.38493482  | 0.501568798 | 0.306138803 |
| 0.467049072 | 0.182415944 | 0.499909056 | 0.328470858 |
| 0.269904596 | 0.5176943   | 0.190448488 | 0.518237666 |
| 0.34300454  | 0.306703406 | 0.494949263 | 0.456177251 |
| 0.441499853 | 0.180497337 | 0.156314577 | 0.493592289 |
| 0.323295793 | 0.330290718 | 0.020735156 | 0.062852487 |
| 0.392342213 | 0.385881272 | 0.502776053 | 0.444343572 |
| 0.24670241  | 0.398156483 | 0.150783191 | 0.432671102 |
| 0.524511476 | 1           | 0.309226345 | 0.364967614 |
| 0.451292343 | 0.207459103 | 0.534881597 | 0.02651534  |
| 0.442628351 | 0.434039867 | 0.426951378 | 0.147769968 |
| 0.075166504 | 0.177644423 | 0.461557588 | 0.225303109 |
| 0.484218251 | 0.185040875 | 0.473166766 | 0.495865145 |
| 0.346637165 | 0.515695123 | 0.180096091 | 0.44933384  |
| 0.156350042 | 0.385934345 | 0.390653719 | 0.431367158 |
| 0.241149357 | 0.271259793 | 0.424950905 | 0.212440263 |
| 0.097916378 | 0.294748067 | 0.005115245 | 0.473963424 |
| 0.507035598 | 0.324912584 | 0.362154888 | 0.381811029 |
| 0.35717092  | 0.480416979 | 0.270647305 | 0.456973393 |
| 0.035096052 | 0.362361446 | 0.321189814 | 0.520942685 |
| 0.225001704 | 0.433730162 | 0.126092673 | 0.314921566 |
| 0.506848584 | 0.295954104 | 0.390667512 | 0.310172159 |
| 0.530775596 | 0.508109854 | 0.361348596 | 0.262868404 |
| 0.475100706 | 0.205637876 | 0.489108802 | 0.514244835 |
| 0.247672438 | 0.19394057  | 0.461258661 | 0.271749305 |
| 0.294969922 | 0.507856062 | 0.461110989 | 0.514763543 |
| 0.110061652 | 0.356853118 | 0.470149387 | 0.510196645 |
| 0.381156966 | 0.159728203 | 0.222566801 | 0.24736726  |
| 0.525927932 | 0.195395682 | 0.253369363 | 0.47177223  |



|             |             |             |             |
|-------------|-------------|-------------|-------------|
| 0.187467184 | 0.399464516 | 0.483531061 | 0.210719561 |
| 0.088373182 | 0.283954431 | 0.453466874 | 0.293356208 |
| 0.368513685 | 0.388312354 | 0.246259764 | 0.460176602 |
| 0.192588656 | 0.056612624 | 0.48457014  | 0.01187029  |
| 0.508287618 | 0.43080646  | 0.366223828 | 0.370513204 |
| 0.351383229 | 0.463894381 | 0.477597487 | 0.007573172 |
| 0.462822051 | 0.05847646  | 0.362793963 | 0.237269794 |
| 0.286285088 | 0.161378519 | 0.518726392 | 0.501668584 |
| 0.46382726  | 0.387307044 | 0.344262526 | 0.519811828 |
| 0.125937556 | 0.331043059 | 0.341487296 | 0.520689738 |
| 0.198429166 | 0.446452152 | 0.44455752  | 0.374014253 |
| 0.498701129 | 0.421756838 |             |             |
| SPNB2       | 0.065371276 | 0.234945055 | 0.046203184 |
| 0.069514395 | 0.199715935 | 0.11195098  | 0.046426413 |
| 0.064323763 | 0.172966511 | 0.038772225 | 0.236622433 |
| 0.027668873 | 0.012716713 | 0.354422693 | 0.040421026 |
| 0.23914106  | 0.038984478 | 0.118527335 | 0.011892911 |
| 0.027304408 | 0.219401374 | 0.07315917  | 0.143483556 |
| 0.151604594 | 0.19683712  | 0.15956357  | 0.127702135 |
| 0.318621516 | 0.027442691 | 0.238374866 | 0.017833039 |
| 0.367819833 | 0.233342146 | 0.118516891 | 0.013123245 |
| 0.167685802 | 0.001476455 | 0.338171916 | 0.170273972 |
| 0.028292134 | 0.308818391 | 0.073716019 | 0.184081107 |
| 0.11757953  | 0.04619433  | 0.013099145 | 0.215134185 |
| 0.131821988 | 0.06947961  | 0.054067456 | 0.223341285 |
| 0.076230815 | 0.2423203   | 0.178413251 | 0.007347933 |
| 0.101980483 | 0.009123899 | 0.051707046 | 0.32250713  |
| 0.234780949 | 0.130014264 | 0.02541149  | 0.070190169 |
| 0.163501543 | 0.211650262 | 0.178318533 | 0.082527285 |
| 0.366844263 | 0.039434382 | 0.215390557 | 0.039545665 |
| 0.144745624 | 0.020717419 | 0.196163078 | 0.049706959 |
| 0.087312319 | 0.180070067 | 0.181672217 | 0.093288819 |
| 0.252865053 | 0.360135154 | 0.172867937 | 0.31481982  |
| 0.018498492 | 0.183111872 | 0.082012766 | 0.27075956  |
| 0.221557473 | 0.033469092 | 0.345054731 | 0.389541867 |
| 0.025262496 | 0.130107624 | 0.257327682 | 0.10617529  |
| 0.253371603 | 0.033834472 | 0.127042009 | 0.0601988   |
| 0.227874939 | 0.231597596 | 0.293088818 | 0.325443541 |
| 0.114051597 | 0.074821261 | 0.301214545 | 0.182715144 |
| 0.170779961 | 0.087229669 | 0.088522207 | 0.293405991 |
| 0.260640648 | 0.339758956 | 0.252252237 | 0.28913842  |
| 0.223634303 | 0.353061484 | 0.30276522  | 0.258259131 |
| 0.007110879 | 0.33913727  | 0.163306556 | 0.043483883 |
| 0.046663241 | 0.059472904 | 0.041050931 | 0.250057499 |
| 0.312050601 | 0.210297218 | 0.163449323 | 0.204986814 |
| 0.340970472 | 0.287483067 | 0.332007429 | 0.324271871 |
| 0.052131361 | 0.039446871 | 0.21883534  | 0.064289242 |
| 0.276680702 | 0.094041205 | 0.136991253 | 0.350136398 |
| 0.359475555 | 0.322324233 | 0.075112275 | 0.341419156 |
| 0.084463164 | 0.396281037 | 0.273816419 | 0.205332346 |
| 0.36249898  | 0.333445363 | 0.389450598 | 0.26448177  |
| 0.325859921 | 0.195269145 | 0.009793064 | 0.272549481 |
| 0.386759984 | 0.008383302 | 0.297550536 | 0.333671139 |
| 0.329004719 | 0.324102675 | 0.377418137 | 0.337237496 |

|             |             |             |             |
|-------------|-------------|-------------|-------------|
| 0.320887805 | 0.078621473 | 0.002857833 | 0.274062985 |
| 0.353633889 | 0.354943735 | 0.047303572 | 0.187514252 |
| 0.220049395 | 0.154087613 | 0.226065439 | 0.085049576 |
| 0.39611629  | 0.298673647 | 0.303083809 | 0.274900687 |
| 0.106322254 | 0.292971675 | 0.151716639 | 0.301985908 |
| 0.025966169 | 0.100253098 | 0.064422902 | 0.207723328 |
| 0.045204943 | 0.195877102 | 0.144051825 | 0.160849951 |
| 0.230259661 | 0.09698902  | 0.077568017 | 0.268900008 |
| 0.064576136 | 0.195814964 | 0.114728366 | 0.148592764 |
| 0.055403373 | 0.154742992 | 0.110112831 | 0.069822804 |
| 0.208805221 | 0.195244637 | 0.232422366 | 0.322137643 |
| 0.106513003 | 0.189233193 | 0.259514183 | 0.366262086 |
| 0.408910099 | 0.202785281 | 0.203679442 | 0.023360018 |
| 0.098365373 | 0.0435263   | 0.042282643 | 0.149915492 |
| 0.15185432  | 0.111925492 | 0.257266912 | 0.306604233 |
| 0.195849289 | 0.056675021 | 0.129910744 | 0.337910545 |
| 0.128962163 | 0.147535069 | 0.384188296 | 0.163648772 |
| 0.003844302 | 0.248484449 | 0.320741614 | 0.041078532 |
| 0.21351935  | 0.046686884 | 0.047533926 | 0.350962659 |
| 0.047866095 | 0.086183818 | 0.309294668 | 0.260102446 |
| 0.043456827 | 0.158297449 | 0.367882651 | 0.014699205 |
| 0.1191368   | 0.038069429 | 0.309103698 | 0.068834903 |
| 0.240513251 | 0.267825623 | 0.180907252 | 0.123431749 |
| 0.125071246 | 0.355257923 | 0.255916558 | 0.360185827 |
| 0.111007704 | 0.373851097 | 0.336574265 | 0.362110399 |
| 0.230915992 | 0.108549193 | 0.02510212  | 0.351072616 |
| 0.329313942 | 0.043471479 | 0.071251377 | 0.249996965 |
| 0.105426676 | 0.268099303 | 0.026779179 | 0.399758532 |
| 0.362627298 | 0.279147615 | 0.111488139 | 0.307277807 |
| 0.376167732 | 0.205400297 | 0.253084871 | 0.370486303 |
| 0.040707397 | 0.205757859 | 0.152820425 | 0.333893008 |
| 0.19841307  | 0.084787871 | 0.225871617 | 0.02723527  |
| 0.001567255 | 0.064959548 | 0.088984323 | 0.159471592 |
| 0.072928117 | 0.156366281 | 0.242158501 | 0.366739215 |
| 0.145233085 | 0.294846035 | 0.15770876  | 0.189217607 |
| 0.337442623 | 0.129635554 | 0.157052873 | 0.204663352 |
| 0.195889878 | 0.017653874 | 0.068047671 | 0.377049641 |
| 0.038210854 | 0.082146303 | 0.121431664 | 0.005469135 |
| 0.051460291 | 0.202201498 | 0.105577235 | 0.207999604 |
| 0.342311269 | 0.196968261 | 0.221330553 | 0.063614336 |
| 0.273860681 | 0.102421332 | 0.005045685 | 0.310171733 |
| 0.281743991 | 0.26493993  | 0.281090315 | 0.257408016 |
| 0.271499962 | 0.194969935 | 0.299148804 | 0.148121008 |
| 0.065048396 | 0.048858457 | 0.090005337 | 0.22548224  |
| 0.002886925 | 0.28699718  | 0.128655476 | 0.190383078 |
| 0.260228268 | 0.216511636 | 0.043158878 | 0.163600683 |
| 0.029269048 | 0.058061931 | 0.076299844 | 0.101797903 |
| 0.24664629  | 0.01603927  | 0.060811691 | 0.071205266 |
| 0.304349681 | 0.296930762 | 0.084620135 | 0.351977636 |
| 0.259885801 | 0.10108294  | 0.203740874 | 0.271839232 |
| 0.070695922 | 0.01742352  | 0.093624854 | 0.006027378 |
| 0.017139044 | 0.266541972 | 0.085861708 | 0.033012623 |
| 0.280197798 | 0.009222331 | 0.311984158 | 0.370798587 |
| 0.278623204 | 0.375803219 | 0.362500627 | 0.13359187  |

|             |             |             |             |
|-------------|-------------|-------------|-------------|
| 0.362056226 | 0.008861885 | 0.350808551 | 0.277032455 |
| 0.099527354 | 0.003108621 | 0.006828371 | 0.338334501 |
| 0.245930677 | 0.050977735 | 0.186667871 | 0.05116447  |
| 0.079332007 | 0.084746927 | 0.046909898 | 0.086190152 |
| 0.193720787 | 0.183404259 | 0.053718801 | 0.309772756 |
| 0.183428186 | 0.176484723 | 0.100288805 | 0.087825101 |
| 0.179834439 | 0.048281203 | 0.075350084 | 0.012078429 |
| 0.243156867 | 0.113591607 | 0.298114056 | 0.331237059 |
| 0.389024483 | 0.271746743 | 0.06157321  | 0.041175961 |
| 0.253203944 | 0.081461042 | 0.033605578 | 0.08659624  |
| 0.318925921 | 0.311811025 | 0.356339702 | 0.328109913 |
| 0.411016491 | 0.372644153 | 0.045252681 | 0.332055942 |
| 0.015140994 | 0.001236515 | 0.168215868 | 0.194023576 |
| 0.003168085 | 0.185534476 | 0.284203029 | 0.047240628 |
| 0.055077185 | 0.030160991 | 0.097616615 | 0.111134132 |
| 0.268929926 | 0.220150117 | 0.195459573 | 0.149762631 |
| 0.107101779 | 0.053530698 | 0.097589762 | 0.078481431 |
| 0.022282981 | 0.255825967 | 0.220688499 | 0.023786581 |
| 0.153263663 | 0.20353829  | 0.080039187 | 0.156896718 |
| 0.360455564 | 0.366840161 | 0.03305118  | 0.027347082 |
| 0.267753169 | 0.134551344 | 0.370245538 | 0.312113609 |
| 0.356413624 | 0.40253834  | 0.322041723 | 0.07706414  |
| 0.06066014  | 0.213725941 | 0.175637942 | 0.038477838 |
| 0.349733158 | 0.067962787 | 0.296220232 | 0.130915631 |
| 0.122664565 | 0.125618605 | 0.03221052  | 0.090762612 |
| 0.182538343 | 0.186009268 | 0.173674941 | 0.147828579 |
| 0.202263374 | 0.046992518 | 0.048006091 | 0.208788546 |
| 0.321223373 | 0.041870165 | 0.184557769 | 0.071093633 |
| 0.207649283 | 0.011016392 | 0.285214736 | 0.390752666 |
| 0.14541567  | 0.090113978 | 0.09592871  | 0.204160082 |
| 0.284588042 | 0.118385781 | 0.023123022 | 0.257774769 |
| 0.334066878 | 0.253037355 | 0.323268101 | 0.349678724 |
| 0.093060699 | 0.233030159 | 0.08756689  | 0.236807785 |
| 0.160624692 | 0.119074029 | 0.136878047 | 0.085242161 |
| 0.22360116  | 0.321447137 | 0.298248223 | 0.168683616 |
| 0.144807021 | 0.082701658 | 0.057796269 | 0.248280876 |
| 0.076952619 | 0.058491488 | 0.079111638 | 0.248834385 |
| 0.001766269 | 0.035972157 | 0.315493289 | 0.103625187 |
| 0.339297768 | 0.363748126 | 0.375823955 | 0.047607144 |
| 0.000793842 | 0.230393862 | 0.309704768 | 0.178517554 |
| 0.306683469 | 0.242532878 | 0.01260111  | 0.070393796 |
| 0.28831638  | 0.086922782 | 0.095069764 | 0.037708486 |
| 0.03246338  | 0.221801355 | 0.213880225 | 0.121989623 |
| 0.133370972 | 0.06150015  | 0.035420189 | 0.139079267 |
| 0.016282519 | 0.277166782 | 0.362222596 | 0.030530556 |
| 0.07721528  | 0.315951263 | 0.313123903 | 0.029930172 |
| 0.132424811 | 0.2729116   | 0.2732241   | 0.013313454 |
| 0.315982347 | 0.013000886 | 0.174773827 | 0.197133105 |
| 0.137582605 | 0.149889114 | 0.224752042 | 0.119859575 |
| 0.211191796 | 0.151029936 | 0.185995874 | 0.254164088 |
| 0.113275471 | 0.112198828 | 0.195438664 | 0.125214838 |
| 0.165567807 | 0.104488967 | 0.098822844 | 0.100115881 |
| 0.039568531 | 0.267219668 | 0.259018078 | 0.074634769 |
| 0.198731665 | 0.103894502 | 0.347561018 | 0.301654794 |

|             |             |             |             |
|-------------|-------------|-------------|-------------|
| 0.319097536 | 0.092323666 | 0.128275942 | 0.30320697  |
| 0.021158741 | 0.04275976  | 0.041069866 | 0.147093325 |
| 0.186749472 | 0.09419341  | 0.111529365 | 0.214846691 |
| 0.211604973 | 0.347851076 | 0.24630143  | 0.301874213 |
| 0.151215961 | 0.115502488 | 0.063967347 | 0.069738729 |
| 0.185007441 | 0.122489608 | 0.192340887 | 0.005414904 |
| 0.26731033  | 0.051043422 | 0.345964605 | 0.325517536 |
| 0.071675095 | 0.297911768 | 0.034430236 | 0.09412706  |
| 0.024426349 | 0.167098695 | 0.17520898  | 0.227271603 |
| 0.059977339 | 0.09404532  | 0.219353483 | 0.061353638 |
| 0.266855969 | 0.206912332 | 0.067060639 | 0.116185994 |
| 0.128558176 | 0.142667856 | 0.292490954 | 0.065695562 |
| 0.181924876 | 0.095491717 | 0.11664935  | 0.249897337 |
| 0.165310721 | 0.325466717 | 0.066530458 | 0.349934051 |
| 0.199933503 | 0.117343137 | 0.371723965 | 0.103277211 |
| 0.044625743 | 0.039437574 | 0.058628984 | 0.076308918 |
| 0.072541755 | 0.082570496 | 0.002025206 | 0.04296566  |
| 0.335152964 | 0.054000798 | 0.228187877 | 0.21510494  |
| 0.103261822 | 0.291639347 | 0.014705977 | 0.143441821 |
| 0.286526738 | 0.309226345 | 1           | 0.246504684 |
| 0.291029018 | 0.09948166  | 0.185383178 | 0.001335566 |
| 0.247583371 | 0.185017588 | 0.061240614 | 0.047400036 |
| 0.015097782 | 0.078839086 | 0.231569739 | 0.04738816  |
| 0.351341314 | 0.030445471 | 0.128355005 | 0.232527949 |
| 0.129521596 | 0.327681946 | 0.077475358 | 0.334642197 |
| 0.010702832 | 0.181412572 | 0.116798225 | 0.113421445 |
| 0.134040439 | 0.15028214  | 0.34889566  | 0.116611734 |
| 0.047914653 | 0.070564767 | 0.008354994 | 0.344003471 |
| 0.294348825 | 0.152076306 | 0.190291287 | 0.028922605 |
| 0.265416793 | 0.224169227 | 0.060715088 | 0.11940861  |
| 0.015973891 | 0.261283265 | 0.160651574 | 0.301592656 |
| 0.055294193 | 0.164078785 | 0.033752356 | 0.139283515 |
| 0.29238359  | 0.087716526 | 0.207681919 | 0.060184157 |
| 0.297736655 | 0.195960661 | 0.114443744 | 0.03136762  |
| 0.14996268  | 0.076375828 | 0.071644639 | 0.357766539 |
| 0.164028704 | 0.124676264 | 0.359549487 | 0.189225015 |
| 0.117726592 | 0.241437578 | 0.143492529 | 0.326061587 |
| 0.065572355 | 0.266764879 | 0.265225779 | 0.31970436  |
| 0.297831902 | 0.076559993 | 0.110852434 | 0.178632504 |
| 0.297121961 | 0.051369684 | 0.055082615 | 0.29899016  |
| 0.109971174 | 0.225479467 | 0.103877391 | 0.125357501 |
| 0.034914172 | 0.056229997 | 0.085639681 | 0.137205005 |
| 0.27409057  | 0.20410666  | 0.094087641 | 0.350417921 |
| 0.065993264 | 0.039621088 | 0.356657537 | 0.014870726 |
| 0.151074179 | 0.280494812 | 0.172875512 | 0.150721512 |
| 0.210119115 | 0.195496393 | 0.173138062 | 0.009271698 |
| 0.297112832 | 0.007928739 | 0.077433231 | 0.141322802 |
| 0.045434512 | 0.052563716 | 0.302599131 | 0.379034556 |
| 0.172465432 | 0.024091721 | 0.045438771 | 0.301362961 |
| 0.035229722 | 0.057718174 | 0.078624452 | 0.19851459  |
| 0.076462498 | 0.103795276 | 0.108771625 | 0.116598836 |
| 0.245099766 | 0.092326884 |             |             |
| SSNA1       | 0.214002527 | 0.270268824 | 0.145293135 |
| 0.225824899 | 0.234679426 | 0.195222834 | 0.274537173 |

|             |             |             |             |
|-------------|-------------|-------------|-------------|
| 0.309605046 | 0.246231884 | 0.116611885 | 0.241017288 |
| 0.156121974 | 0.056827594 | 0.315806781 | 0.274086527 |
| 0.21599748  | 0.241417929 | 0.316526352 | 0.109046242 |
| 0.247232146 | 0.244724106 | 0.161251608 | 0.198165941 |
| 0.24687868  | 0.281571247 | 0.231196436 | 0.171770143 |
| 0.307002902 | 0.077989795 | 0.20149105  | 0.073520064 |
| 0.372878885 | 0.218909964 | 0.148550561 | 0.125494334 |
| 0.218840883 | 0.03476499  | 0.387925674 | 0.286906853 |
| 0.110822314 | 0.349657084 | 0.134648292 | 0.291047546 |
| 0.17119075  | 0.167025839 | 0.057347256 | 0.204176391 |
| 0.234662606 | 0.28292831  | 0.169048608 | 0.215213745 |
| 0.206867259 | 0.251402886 | 0.176998696 | 0.010945827 |
| 0.129074632 | 0.028182444 | 0.08822553  | 0.340519568 |
| 0.31311163  | 0.328365896 | 0.108698878 | 0.258793613 |
| 0.205852109 | 0.242733142 | 0.320683921 | 0.165790896 |
| 0.336091729 | 0.109892907 | 0.199650592 | 0.186532798 |
| 0.231479302 | 0.173511541 | 0.31259938  | 0.201482487 |
| 0.197433705 | 0.329579315 | 0.232809036 | 0.174049466 |
| 0.258805269 | 0.405185383 | 0.323229564 | 0.347075284 |
| 0.117088628 | 0.197250011 | 0.226887571 | 0.312450881 |
| 0.253931568 | 0.282978482 | 0.242909441 | 0.382599414 |
| 0.206406329 | 0.160982715 | 0.229895788 | 0.2316174   |
| 0.268878286 | 0.147385441 | 0.150989354 | 0.114284967 |
| 0.223596895 | 0.221434728 | 0.366662662 | 0.295919474 |
| 0.224546519 | 0.195904181 | 0.352545697 | 0.182857584 |
| 0.230111673 | 0.216757436 | 0.241526033 | 0.254675105 |
| 0.227318236 | 0.307900619 | 0.248335481 | 0.28493257  |
| 0.199628703 | 0.330824526 | 0.242018402 | 0.300276005 |
| 0.042870732 | 0.346446885 | 0.29053459  | 0.239389749 |
| 0.188957383 | 0.307019138 | 0.221960286 | 0.336035756 |
| 0.282505241 | 0.278239032 | 0.297667072 | 0.316661504 |
| 0.300208622 | 0.326263404 | 0.341052227 | 0.277879343 |
| 0.215595217 | 0.140829811 | 0.200850242 | 0.253286613 |
| 0.25441774  | 0.300414873 | 0.167594096 | 0.378878143 |
| 0.328436837 | 0.266590762 | 0.254734372 | 0.409895517 |
| 0.301659124 | 0.383142309 | 0.257338953 | 0.317260605 |
| 0.380067375 | 0.360463343 | 0.362932849 | 0.2018315   |
| 0.355489327 | 0.235454664 | 0.082824705 | 0.292060168 |
| 0.373729261 | 0.019858881 | 0.276191316 | 0.301993081 |
| 0.328214199 | 0.254409475 | 0.364818306 | 0.321785561 |
| 0.325969281 | 0.249175823 | 0.019430436 | 0.294179282 |
| 0.354973931 | 0.30936598  | 0.319882506 | 0.175414936 |
| 0.22435873  | 0.217921347 | 0.237386787 | 0.139364795 |
| 0.412943056 | 0.289546003 | 0.288816293 | 0.251091884 |
| 0.218678829 | 0.340928101 | 0.159183148 | 0.341910471 |
| 0.24416381  | 0.229270786 | 0.161096707 | 0.298138078 |
| 0.137325352 | 0.343377472 | 0.220295776 | 0.232386113 |
| 0.336879541 | 0.226056066 | 0.128519232 | 0.218625505 |
| 0.158392555 | 0.180642555 | 0.301113385 | 0.274704022 |
| 0.252365115 | 0.279584307 | 0.260792731 | 0.276871301 |
| 0.293696416 | 0.319756774 | 0.195333693 | 0.322069918 |
| 0.222510917 | 0.249718318 | 0.219915106 | 0.366360981 |
| 0.387638492 | 0.192558563 | 0.309429191 | 0.073094963 |
| 0.202636696 | 0.118969102 | 0.094715828 | 0.174826887 |

|             |             |             |             |
|-------------|-------------|-------------|-------------|
| 0.296086606 | 0.273383644 | 0.230132552 | 0.228428936 |
| 0.232319381 | 0.249430713 | 0.204096914 | 0.385134766 |
| 0.230244537 | 0.224848667 | 0.301694933 | 0.191563692 |
| 0.053538085 | 0.269574321 | 0.260864601 | 0.239664111 |
| 0.269176958 | 0.094517703 | 0.105594345 | 0.301739581 |
| 0.14169835  | 0.198241136 | 0.299492387 | 0.231515783 |
| 0.169919145 | 0.279710133 | 0.361065684 | 0.032031943 |
| 0.206791139 | 0.144822419 | 0.310653198 | 0.139600708 |
| 0.313706456 | 0.318018149 | 0.203181488 | 0.23410317  |
| 0.198932607 | 0.35223823  | 0.291478811 | 0.326993626 |
| 0.170592626 | 0.368393408 | 0.270013082 | 0.310143156 |
| 0.269491312 | 0.164545664 | 0.065855973 | 0.25991586  |
| 0.289342695 | 0.163633012 | 0.180886561 | 0.222776787 |
| 0.174878829 | 0.215591224 | 0.237866854 | 0.347237441 |
| 0.403810895 | 0.308516717 | 0.313323728 | 0.273716175 |
| 0.29610776  | 0.282557499 | 0.285302283 | 0.380819237 |
| 0.136802293 | 0.209059035 | 0.210717418 | 0.31005099  |
| 0.303064843 | 0.220491122 | 0.334393549 | 0.086269625 |
| 0.002810425 | 0.230543184 | 0.212584987 | 0.31786275  |
| 0.147649844 | 0.16805187  | 0.241602596 | 0.344056041 |
| 0.313904725 | 0.320985615 | 0.299824078 | 0.234678682 |
| 0.31473105  | 0.20549152  | 0.177661614 | 0.220525068 |
| 0.315360026 | 0.108490286 | 0.246356291 | 0.407735733 |
| 0.14473053  | 0.145075861 | 0.255728503 | 0.014694645 |
| 0.212205488 | 0.213128317 | 0.216950605 | 0.323509511 |
| 0.322363254 | 0.300772953 | 0.276999436 | 0.147751155 |
| 0.276862022 | 0.282600949 | 0.026243991 | 0.319762386 |
| 0.3390322   | 0.332508454 | 0.334311733 | 0.339890422 |
| 0.30570877  | 0.234015033 | 0.264533532 | 0.202501497 |
| 0.312233569 | 0.226745843 | 0.159430516 | 0.286051306 |
| 0.016210071 | 0.27996914  | 0.255336301 | 0.300611453 |
| 0.224721701 | 0.298646562 | 0.197601745 | 0.216216694 |
| 0.104307609 | 0.080928607 | 0.246551914 | 0.323931316 |
| 0.267974301 | 0.126945421 | 0.115491821 | 0.165749454 |
| 0.308120012 | 0.302765594 | 0.15095266  | 0.358844831 |
| 0.267523702 | 0.184940149 | 0.263875668 | 0.242426333 |
| 0.288829461 | 0.071730214 | 0.219894334 | 0.01377263  |
| 0.109544695 | 0.34965635  | 0.192650637 | 0.219287278 |
| 0.305646694 | 0.067799549 | 0.296989839 | 0.366495665 |
| 0.302638056 | 0.338254797 | 0.334726304 | 0.149435101 |
| 0.340191714 | 0.03507295  | 0.337141545 | 0.264696926 |
| 0.143770707 | 0.0062371   | 0.047036366 | 0.294768281 |
| 0.20846053  | 0.14014631  | 0.320391902 | 0.156281369 |
| 0.302819131 | 0.225623532 | 0.260212126 | 0.199214688 |
| 0.203816471 | 0.266570078 | 0.18043338  | 0.325633465 |
| 0.327303687 | 0.331793733 | 0.183346163 | 0.224934416 |
| 0.206990652 | 0.24589526  | 0.234792855 | 0.028662819 |
| 0.256123923 | 0.205382305 | 0.3643607   | 0.33150908  |
| 0.377789886 | 0.235468321 | 0.111742744 | 0.16525249  |
| 0.29416011  | 0.153672394 | 0.141677429 | 0.187927336 |
| 0.306269759 | 0.228018263 | 0.300745148 | 0.301566439 |
| 0.364868708 | 0.3466267   | 0.217526978 | 0.267426439 |
| 0.068995709 | 0.011967055 | 0.190401504 | 0.309904234 |
| 0.09091783  | 0.203222237 | 0.31149105  | 0.262155523 |

|             |             |             |             |
|-------------|-------------|-------------|-------------|
| 0.283807617 | 0.144125564 | 0.149911611 | 0.161148842 |
| 0.305944363 | 0.252586535 | 0.206922592 | 0.290410899 |
| 0.263005035 | 0.214829597 | 0.317609774 | 0.334380436 |
| 0.196895145 | 0.29612653  | 0.279779265 | 0.187848194 |
| 0.177813742 | 0.187651865 | 0.240860187 | 0.291567365 |
| 0.291001334 | 0.304022549 | 0.259940095 | 0.098067489 |
| 0.303631232 | 0.258245744 | 0.323128277 | 0.309473963 |
| 0.373314836 | 0.387719554 | 0.379878755 | 0.305887659 |
| 0.24806881  | 0.283519673 | 0.211588341 | 0.280747617 |
| 0.33372315  | 0.174941378 | 0.324839914 | 0.156130213 |
| 0.301778251 | 0.319576838 | 0.202991779 | 0.300631806 |
| 0.17576989  | 0.323450778 | 0.326394961 | 0.212941668 |
| 0.26400916  | 0.148530726 | 0.256541724 | 0.334347763 |
| 0.283628727 | 0.114640925 | 0.326158596 | 0.251153956 |
| 0.269228263 | 0.105089471 | 0.213969378 | 0.388891261 |
| 0.262494252 | 0.280187358 | 0.19367914  | 0.247848488 |
| 0.246715987 | 0.155858912 | 0.081240757 | 0.26856675  |
| 0.334120543 | 0.193505407 | 0.33629698  | 0.336141446 |
| 0.252042898 | 0.196680038 | 0.168943035 | 0.24699393  |
| 0.333656379 | 0.200815305 | 0.325250966 | 0.248204958 |
| 0.347719543 | 0.3978449   | 0.287667241 | 0.314879899 |
| 0.186185837 | 0.199789108 | 0.16223455  | 0.274838361 |
| 0.160300511 | 0.232740403 | 0.14074861  | 0.251074425 |
| 0.016253731 | 0.083837375 | 0.338208719 | 0.277381805 |
| 0.38977351  | 0.321086561 | 0.358794055 | 0.267009612 |
| 0.00420834  | 0.202826552 | 0.242891261 | 0.206123429 |
| 0.274358156 | 0.272669596 | 0.203022054 | 0.292935311 |
| 0.333983641 | 0.166220188 | 0.312938756 | 0.16774567  |
| 0.101968414 | 0.215697039 | 0.335576579 | 0.307948609 |
| 0.330968021 | 0.188495372 | 0.136599583 | 0.300650153 |
| 0.142865994 | 0.325368509 | 0.313278498 | 0.116524971 |
| 0.097224644 | 0.319646232 | 0.257269799 | 0.163330339 |
| 0.182588148 | 0.298746252 | 0.322050076 | 0.023163344 |
| 0.215741518 | 0.10446421  | 0.308738911 | 0.294427631 |
| 0.324167223 | 0.316218338 | 0.304397576 | 0.248021804 |
| 0.257672169 | 0.343745542 | 0.277582168 | 0.32151073  |
| 0.300774194 | 0.322001843 | 0.231700254 | 0.244703233 |
| 0.224729344 | 0.287945774 | 0.21830899  | 0.216161455 |
| 0.204271346 | 0.283687701 | 0.323073592 | 0.171059566 |
| 0.332359552 | 0.23826152  | 0.366948816 | 0.31196333  |
| 0.344075165 | 0.182126539 | 0.261371861 | 0.263358362 |
| 0.086753663 | 0.170343428 | 0.200692786 | 0.226838847 |
| 0.31418509  | 0.190032251 | 0.186944091 | 0.21859623  |
| 0.207240876 | 0.37743335  | 0.306848074 | 0.346891891 |
| 0.243485503 | 0.21603635  | 0.115806864 | 0.268540186 |
| 0.300624147 | 0.272926043 | 0.225747759 | 0.035639543 |
| 0.27648699  | 0.213463058 | 0.273980559 | 0.337264575 |
| 0.128478489 | 0.349235771 | 0.120937442 | 0.254931931 |
| 0.098256844 | 0.23727861  | 0.295328386 | 0.221838275 |
| 0.08647791  | 0.312801931 | 0.261919257 | 0.171363881 |
| 0.232297331 | 0.213497632 | 0.237354278 | 0.297241047 |
| 0.325689834 | 0.263573639 | 0.370576079 | 0.23205026  |
| 0.1780326   | 0.20207398  | 0.171384835 | 0.267949811 |
| 0.312176314 | 0.327609458 | 0.222818608 | 0.326813884 |

|             |             |             |             |
|-------------|-------------|-------------|-------------|
| 0.229768741 | 0.241003113 | 0.40917462  | 0.254501639 |
| 0.253284896 | 0.265430604 | 0.093130571 | 0.183775131 |
| 0.315844891 | 0.144956849 | 0.005370466 | 0.066464806 |
| 0.294025401 | 0.199045057 | 0.222351013 | 0.26514892  |
| 0.225733178 | 0.31724026  | 0.077316949 | 0.276131641 |
| 0.314357641 | 0.364967614 | 0.246504684 | 1           |
| 0.277612623 | 0.291632439 | 0.192712638 | 0.029038157 |
| 0.195564936 | 0.165932637 | 0.151968576 | 0.258571833 |
| 0.173618323 | 0.105516654 | 0.208467492 | 0.193677043 |
| 0.317626234 | 0.079624224 | 0.200282874 | 0.211003567 |
| 0.286201757 | 0.371629015 | 0.310624664 | 0.238973164 |
| 0.193861518 | 0.319575533 | 0.181638504 | 0.191238489 |
| 0.225650583 | 0.186388033 | 0.271476226 | 0.151319531 |
| 0.220547288 | 0.257963422 | 0.027222619 | 0.383315601 |
| 0.343326032 | 0.183656483 | 0.310224245 | 0.111360986 |
| 0.318840827 | 0.309749685 | 0.225665697 | 0.166439222 |
| 0.103117034 | 0.202776065 | 0.330194922 | 0.27551037  |
| 0.090926436 | 0.222770047 | 0.236724162 | 0.210481147 |
| 0.367194944 | 0.200359407 | 0.324541404 | 0.139264855 |
| 0.31372948  | 0.26260074  | 0.205408061 | 0.237808565 |
| 0.189816662 | 0.212629104 | 0.149543634 | 0.367708893 |
| 0.320944649 | 0.164478178 | 0.275892177 | 0.31690288  |
| 0.167627418 | 0.29731146  | 0.175109562 | 0.362258449 |
| 0.269356068 | 0.324068839 | 0.257909568 | 0.316732073 |
| 0.319558196 | 0.186597101 | 0.149414213 | 0.259621109 |
| 0.30287551  | 0.212367492 | 0.197662854 | 0.274212818 |
| 0.137261439 | 0.299419782 | 0.174640847 | 0.263496179 |
| 0.174053418 | 0.322643559 | 0.193873363 | 0.307067399 |
| 0.302716627 | 0.242160688 | 0.249914421 | 0.368726979 |
| 0.236757775 | 0.12980084  | 0.389907678 | 0.017698659 |
| 0.211057647 | 0.230707255 | 0.312144517 | 0.223440524 |
| 0.265603791 | 0.26044253  | 0.2141372   | 0.021578087 |
| 0.284451705 | 0.078170091 | 0.240674387 | 0.235691517 |
| 0.152040623 | 0.228593516 | 0.334655086 | 0.341253401 |
| 0.274922113 | 0.155692163 | 0.124861965 | 0.324121269 |
| 0.106581502 | 0.118488419 | 0.158597459 | 0.198181979 |
| 0.130108674 | 0.14386919  | 0.163686729 | 0.152075725 |
| 0.249599538 | 0.280309339 |             |             |
| SSR2        | 0.148554659 | 0.357688899 | 0.100896731 |
| 0.175354733 | 0.255696468 | 0.272684002 | 0.153991533 |
| 0.227899801 | 0.2937113   | 0.184966448 | 0.297429959 |
| 0.078098561 | 0.074654773 | 0.414917678 | 0.155269705 |
| 0.29222334  | 0.121085374 | 0.211497421 | 0.101538757 |
| 0.212234726 | 0.271461481 | 0.249609489 | 0.286362765 |
| 0.263636863 | 0.244973676 | 0.271849139 | 0.252472072 |
| 0.416531155 | 0.155319172 | 0.287768266 | 0.103964197 |
| 0.418799926 | 0.271964414 | 0.239708652 | 0.054491875 |
| 0.302788576 | 0.019875571 | 0.434498333 | 0.278602852 |
| 0.106197129 | 0.373279475 | 0.204192548 | 0.270995012 |
| 0.242751946 | 0.098112507 | 0.114793206 | 0.284389496 |
| 0.256392694 | 0.262998102 | 0.124065031 | 0.284503475 |
| 0.269498248 | 0.297873494 | 0.262870407 | 0.012257662 |
| 0.203032803 | 0.051459506 | 0.151416983 | 0.438998702 |
| 0.260110435 | 0.227036582 | 0.176658244 | 0.265815294 |



|             |             |             |             |
|-------------|-------------|-------------|-------------|
| 0.290819225 | 0.297610249 | 0.280321648 | 0.252043219 |
| 0.442991317 | 0.155058393 | 0.282717419 | 0.168358608 |
| 0.313099504 | 0.089270681 | 0.227107225 | 0.136590339 |
| 0.274933764 | 0.266318659 | 0.287618014 | 0.217686918 |
| 0.354190228 | 0.488589593 | 0.264797357 | 0.44060837  |
| 0.130623755 | 0.25838524  | 0.232840427 | 0.299819034 |
| 0.304713246 | 0.174445486 | 0.316054423 | 0.475595386 |
| 0.120579495 | 0.246583552 | 0.309994407 | 0.187038122 |
| 0.355078567 | 0.195283706 | 0.243159815 | 0.149983908 |
| 0.272176747 | 0.283316005 | 0.446958891 | 0.308526293 |
| 0.263426502 | 0.13376633  | 0.440436188 | 0.243120749 |
| 0.271272048 | 0.139959512 | 0.238013569 | 0.361916704 |
| 0.302635952 | 0.420433944 | 0.349115246 | 0.336642264 |
| 0.283823371 | 0.432119507 | 0.2983209   | 0.377487082 |
| 0.078507722 | 0.45641257  | 0.230538065 | 0.136856915 |
| 0.13376251  | 0.18983949  | 0.232796804 | 0.31948639  |
| 0.384765946 | 0.30669247  | 0.264748162 | 0.274941345 |
| 0.393752326 | 0.421955213 | 0.453463166 | 0.366339356 |
| 0.115236143 | 0.183000259 | 0.271982803 | 0.267985624 |
| 0.328501692 | 0.199305225 | 0.210670184 | 0.470243756 |
| 0.373174993 | 0.358239001 | 0.208274982 | 0.478171237 |
| 0.273907175 | 0.470702719 | 0.362302339 | 0.244853358 |
| 0.467017337 | 0.448235664 | 0.45527222  | 0.279248871 |
| 0.434334606 | 0.277050927 | 0.109747708 | 0.350268299 |
| 0.456365951 | 0.017969562 | 0.388566404 | 0.416070246 |
| 0.430407877 | 0.362984033 | 0.464643728 | 0.430220728 |
| 0.436484948 | 0.149306011 | 0.028448152 | 0.301800086 |
| 0.45312667  | 0.358925349 | 0.230702658 | 0.277183377 |
| 0.297364107 | 0.300625998 | 0.323606009 | 0.243941962 |
| 0.492962961 | 0.370747443 | 0.403191807 | 0.334314541 |
| 0.25014313  | 0.35255431  | 0.244642624 | 0.425321881 |
| 0.117426577 | 0.184237102 | 0.105069956 | 0.298634179 |
| 0.205629016 | 0.25433034  | 0.304529279 | 0.289607722 |
| 0.268753461 | 0.281925603 | 0.208805098 | 0.287277619 |
| 0.104660095 | 0.286472316 | 0.21294441  | 0.233976121 |
| 0.126431654 | 0.213853746 | 0.273540344 | 0.220563551 |
| 0.298080171 | 0.294150458 | 0.293932596 | 0.413880892 |
| 0.284156311 | 0.21455015  | 0.311360874 | 0.440286529 |
| 0.435077477 | 0.26469051  | 0.278796109 | 0.032981887 |
| 0.269228078 | 0.194938211 | 0.138756174 | 0.262994148 |
| 0.242015308 | 0.315440123 | 0.31216015  | 0.298157987 |
| 0.271654878 | 0.211732288 | 0.294183117 | 0.434192408 |
| 0.194652937 | 0.273907485 | 0.396444486 | 0.280965067 |
| 0.016466636 | 0.30351098  | 0.359283598 | 0.194576482 |
| 0.308176622 | 0.14859233  | 0.170033093 | 0.394426739 |
| 0.232853441 | 0.235129977 | 0.409050085 | 0.292198593 |
| 0.278431505 | 0.271278993 | 0.467610025 | 0.058611082 |
| 0.259453174 | 0.082327982 | 0.299215686 | 0.208077922 |
| 0.285095075 | 0.308529484 | 0.259851314 | 0.241820151 |
| 0.169337558 | 0.464799413 | 0.342970493 | 0.442430676 |
| 0.260465079 | 0.46922063  | 0.377606587 | 0.398005777 |
| 0.307846656 | 0.251034786 | 0.107693098 | 0.351790212 |
| 0.377131202 | 0.229484615 | 0.125332358 | 0.331812927 |
| 0.250694912 | 0.295819109 | 0.14376232  | 0.443491403 |

|             |             |             |             |
|-------------|-------------|-------------|-------------|
| 0.468518987 | 0.404693875 | 0.256205873 | 0.320779407 |
| 0.349210981 | 0.266343148 | 0.34167594  | 0.482659598 |
| 0.207087884 | 0.29500115  | 0.267707075 | 0.353036909 |
| 0.230928857 | 0.23777394  | 0.333537464 | 0.129018755 |
| 0.005005592 | 0.162916176 | 0.135795637 | 0.245168372 |
| 0.157198506 | 0.261997738 | 0.297212317 | 0.454996332 |
| 0.225304614 | 0.384983782 | 0.269979709 | 0.286330459 |
| 0.391915755 | 0.290342255 | 0.254291475 | 0.288502507 |
| 0.269711952 | 0.043742902 | 0.19088523  | 0.488855505 |
| 0.089220066 | 0.196303582 | 0.310331324 | 0.008181548 |
| 0.126482624 | 0.309531707 | 0.153167212 | 0.263760117 |
| 0.419713447 | 0.249983241 | 0.247267338 | 0.220159646 |
| 0.30539529  | 0.177768878 | 0.010504141 | 0.414175428 |
| 0.427220172 | 0.408836305 | 0.425796324 | 0.414593806 |
| 0.384360423 | 0.304615867 | 0.333031115 | 0.26702926  |
| 0.195759494 | 0.150223759 | 0.198527407 | 0.298826915 |
| 0.017495757 | 0.317664897 | 0.275138674 | 0.218000652 |
| 0.317187974 | 0.309715323 | 0.115148073 | 0.278940421 |
| 0.057839937 | 0.134154749 | 0.320313402 | 0.276960191 |
| 0.297206975 | 0.053814111 | 0.169360426 | 0.248909638 |
| 0.390813514 | 0.347045114 | 0.223151333 | 0.4600051   |
| 0.304457206 | 0.161478495 | 0.27141698  | 0.30940161  |
| 0.168667678 | 0.094253284 | 0.297384257 | 0.02146582  |
| 0.157809796 | 0.421808985 | 0.268277808 | 0.121933065 |
| 0.293245433 | 0.025985151 | 0.348769952 | 0.475895869 |
| 0.397746679 | 0.449026987 | 0.438800037 | 0.206474816 |
| 0.441641451 | 0.066021988 | 0.453187841 | 0.348196239 |
| 0.244362706 | 0.003354777 | 0.028450286 | 0.398236724 |
| 0.290149017 | 0.097724429 | 0.234288803 | 0.240198347 |
| 0.206954898 | 0.211150438 | 0.156201803 | 0.179206844 |
| 0.283256333 | 0.26034011  | 0.190398435 | 0.424993744 |
| 0.280484505 | 0.286655344 | 0.282411166 | 0.154421463 |
| 0.280652621 | 0.135648842 | 0.152954642 | 0.020769677 |
| 0.302698477 | 0.159822188 | 0.438100602 | 0.441781219 |
| 0.460429911 | 0.287998977 | 0.200531663 | 0.275506654 |
| 0.373583601 | 0.135679615 | 0.218874964 | 0.160793125 |
| 0.413616066 | 0.305146711 | 0.31656498  | 0.314164572 |
| 0.463990832 | 0.430547188 | 0.111811891 | 0.334282107 |
| 0.034558905 | 0.006050955 | 0.266619554 | 0.297885111 |
| 0.072949037 | 0.29194711  | 0.276648273 | 0.243541243 |
| 0.256825304 | 0.090525359 | 0.203787087 | 0.201876958 |
| 0.295791227 | 0.316047491 | 0.245481099 | 0.262196845 |
| 0.244566683 | 0.173861674 | 0.247865075 | 0.260490549 |
| 0.241035004 | 0.310513993 | 0.249211426 | 0.083667735 |
| 0.26431625  | 0.280305622 | 0.140580491 | 0.221544526 |
| 0.375133537 | 0.417814334 | 0.132998539 | 0.044568292 |
| 0.292231093 | 0.306801332 | 0.43656948  | 0.420875409 |
| 0.474430062 | 0.481309063 | 0.409744305 | 0.236774797 |
| 0.155096762 | 0.290888364 | 0.243965928 | 0.160738606 |
| 0.44886474  | 0.124859628 | 0.421156171 | 0.213907736 |
| 0.197496927 | 0.246105298 | 0.106949473 | 0.177996606 |
| 0.262288658 | 0.260927499 | 0.24858002  | 0.183094562 |
| 0.310224352 | 0.182644592 | 0.132763814 | 0.271538833 |
| 0.324602252 | 0.134263804 | 0.241762408 | 0.268821942 |

|             |             |             |             |
|-------------|-------------|-------------|-------------|
| 0.29579625  | 0.146397752 | 0.302978031 | 0.447889986 |
| 0.20114009  | 0.191480352 | 0.242972139 | 0.303750775 |
| 0.345261135 | 0.246201143 | 0.058660766 | 0.371475751 |
| 0.43228831  | 0.293459668 | 0.436664379 | 0.389140923 |
| 0.157156677 | 0.28354041  | 0.237043442 | 0.29934883  |
| 0.26949118  | 0.27387082  | 0.292770213 | 0.14496373  |
| 0.330108472 | 0.467613957 | 0.358371514 | 0.246833692 |
| 0.274200964 | 0.178090726 | 0.111820651 | 0.370486843 |
| 0.173354137 | 0.183104999 | 0.228798975 | 0.347872776 |
| 0.003512133 | 0.10953088  | 0.425168627 | 0.28341123  |
| 0.470927624 | 0.41359881  | 0.420710935 | 0.251277093 |
| 0.00209688  | 0.276911236 | 0.310446729 | 0.281269817 |
| 0.376607573 | 0.310509371 | 0.182892885 | 0.172197051 |
| 0.307324878 | 0.128853928 | 0.249470352 | 0.241629851 |
| 0.137910711 | 0.31274469  | 0.264453304 | 0.259935596 |
| 0.250088286 | 0.142867457 | 0.175938955 | 0.25709826  |
| 0.136587339 | 0.283084751 | 0.347164854 | 0.185850576 |
| 0.172046281 | 0.404706379 | 0.335926185 | 0.082295817 |
| 0.254359287 | 0.363199373 | 0.383872497 | 0.013152321 |
| 0.305748109 | 0.042158416 | 0.271721801 | 0.255951725 |
| 0.251799312 | 0.296368664 | 0.284821107 | 0.251822725 |
| 0.303799241 | 0.275529903 | 0.276578652 | 0.282143231 |
| 0.227046698 | 0.25827398  | 0.285866423 | 0.274924274 |
| 0.261841661 | 0.205013113 | 0.155960579 | 0.162238179 |
| 0.134867497 | 0.385312657 | 0.294290548 | 0.118258314 |
| 0.288756057 | 0.281562737 | 0.369361384 | 0.417953812 |
| 0.394291813 | 0.152678367 | 0.314059205 | 0.365665246 |
| 0.158589779 | 0.24423798  | 0.14299236  | 0.269920657 |
| 0.294044027 | 0.236523323 | 0.26250943  | 0.275072991 |
| 0.295256184 | 0.411378807 | 0.284414783 | 0.400526525 |
| 0.276877368 | 0.274665926 | 0.191076862 | 0.177633857 |
| 0.242512816 | 0.197559171 | 0.245157809 | 0.01041152  |
| 0.327019497 | 0.230494439 | 0.385740152 | 0.427815416 |
| 0.201485217 | 0.37592207  | 0.212934463 | 0.18323482  |
| 0.154468719 | 0.221086086 | 0.219150934 | 0.306116138 |
| 0.149128031 | 0.24211826  | 0.270548494 | 0.237181196 |
| 0.309151825 | 0.287273555 | 0.237729583 | 0.310847039 |
| 0.269854506 | 0.221706286 | 0.438453537 | 0.174070262 |
| 0.271319688 | 0.185097931 | 0.246523    | 0.299079602 |
| 0.272775569 | 0.431754271 | 0.131316859 | 0.444329706 |
| 0.297558777 | 0.182930517 | 0.477719765 | 0.279469804 |
| 0.244988005 | 0.183759061 | 0.13697845  | 0.265089405 |
| 0.288837832 | 0.224050344 | 0.013194977 | 0.093750673 |
| 0.313215482 | 0.247122867 | 0.31434363  | 0.303910092 |
| 0.222744511 | 0.330260314 | 0.11477869  | 0.30578679  |
| 0.414244664 | 0.451292343 | 0.291029018 | 0.277612623 |
| 1           | 0.200811481 | 0.277047071 | 0.024082432 |
| 0.297794997 | 0.265044761 | 0.261978293 | 0.151309164 |
| 0.073219054 | 0.156314896 | 0.290191838 | 0.124435475 |
| 0.416539839 | 0.137026662 | 0.262640042 | 0.285003671 |
| 0.230609937 | 0.455435586 | 0.22101857  | 0.310177908 |
| 0.109468866 | 0.277126669 | 0.250351761 | 0.277838619 |
| 0.242589063 | 0.237474376 | 0.312786985 | 0.193174102 |
| 0.107534793 | 0.255814529 | 0.00976517  | 0.419684997 |

|             |             |             |             |
|-------------|-------------|-------------|-------------|
| 0.422619008 | 0.246232336 | 0.259294875 | 0.189627426 |
| 0.290150061 | 0.343800331 | 0.306793867 | 0.253306143 |
| 0.042668459 | 0.277305781 | 0.266113852 | 0.357816397 |
| 0.156874002 | 0.291535062 | 0.121169246 | 0.261311407 |
| 0.433817992 | 0.297317016 | 0.298621817 | 0.205638858 |
| 0.412630952 | 0.317410193 | 0.174193332 | 0.207779267 |
| 0.267711999 | 0.133851036 | 0.237142212 | 0.473865568 |
| 0.25794419  | 0.18652021  | 0.369800988 | 0.27365522  |
| 0.2410063   | 0.352039745 | 0.25566686  | 0.464592029 |
| 0.175900596 | 0.292114525 | 0.331369162 | 0.410607241 |
| 0.311358126 | 0.181579442 | 0.215108045 | 0.273575276 |
| 0.395097994 | 0.16246549  | 0.222224085 | 0.306028513 |
| 0.1825881   | 0.309745281 | 0.231802213 | 0.235982243 |
| 0.119223684 | 0.263105312 | 0.277370468 | 0.217214691 |
| 0.320546505 | 0.285063255 | 0.231276554 | 0.393329171 |
| 0.197048175 | 0.067507353 | 0.43627601  | 0.018481636 |
| 0.264106886 | 0.293575187 | 0.290714629 | 0.276826953 |
| 0.226281178 | 0.314971316 | 0.275551751 | 0.012525492 |
| 0.352221332 | 0.037127486 | 0.271976139 | 0.247184391 |
| 0.250091479 | 0.140682865 | 0.407341098 | 0.451761658 |
| 0.29151536  | 0.222053536 | 0.220595948 | 0.418459593 |
| 0.123370513 | 0.198090292 | 0.256810302 | 0.275576697 |
| 0.171451834 | 0.233297801 | 0.262249522 | 0.229582373 |
| 0.302987273 | 0.287212637 |             |             |
| SSR3        | 0.181864333 | 0.130138261 | 0.135233403 |
| 0.146700116 | 0.109028306 | 0.060682067 | 0.163809459 |
| 0.160812114 | 0.114480841 | 0.013079475 | 0.137731533 |
| 0.191123322 | 0.012289419 | 0.182599352 | 0.179433166 |
| 0.083714765 | 0.213484769 | 0.229424733 | 0.023598205 |
| 0.057149376 | 0.115664643 | 0.041527254 | 0.076930045 |
| 0.089285786 | 0.29914614  | 0.097200669 | 0.042643933 |
| 0.15169394  | 0.013386856 | 0.098115872 | 0.009040058 |
| 0.255330193 | 0.103424054 | 0.033982579 | 0.132215052 |
| 0.084794885 | 0.004381441 | 0.240811609 | 0.104867179 |
| 0.027544285 | 0.284121692 | 0.026624092 | 0.164591671 |
| 0.034202444 | 0.151401453 | 0.008202164 | 0.072905211 |
| 0.084018817 | 0.076747929 | 0.159413539 | 0.09935809  |
| 0.032058421 | 0.195562387 | 0.068846969 | 0.011014914 |
| 0.028642436 | 0.002820993 | 0.011478932 | 0.188085988 |
| 0.337279149 | 0.273073579 | 0.010493993 | 0.088566079 |
| 0.066216021 | 0.105639131 | 0.230469491 | 0.021447155 |
| 0.192008831 | 0.020465662 | 0.078877228 | 0.084353448 |
| 0.066854012 | 0.093962142 | 0.337139932 | 0.13467842  |
| 0.034748791 | 0.264698884 | 0.122042624 | 0.033384924 |
| 0.117921427 | 0.242847849 | 0.212383091 | 0.180571081 |
| 0.019048548 | 0.065922009 | 0.054843704 | 0.227366748 |
| 0.121194474 | 0.103100551 | 0.156744855 | 0.219430019 |
| 0.106778592 | 0.044275828 | 0.103404193 | 0.208506786 |
| 0.14595114  | 0.020036251 | 0.037764387 | 0.035189116 |
| 0.100435675 | 0.080619156 | 0.199465287 | 0.259976573 |
| 0.081769037 | 0.190204779 | 0.199671435 | 0.06468062  |
| 0.105927109 | 0.200633674 | 0.061695007 | 0.112789677 |
| 0.101870994 | 0.166181994 | 0.108283127 | 0.162516029 |
| 0.0633215   | 0.183826726 | 0.140011043 | 0.170322868 |

|             |             |             |             |
|-------------|-------------|-------------|-------------|
| 0.004463023 | 0.181275235 | 0.228143022 | 0.25349444  |
| 0.117256078 | 0.212491239 | 0.039075729 | 0.280836176 |
| 0.148163692 | 0.177461036 | 0.173398195 | 0.17318426  |
| 0.153060169 | 0.17682208  | 0.169246504 | 0.153427864 |
| 0.184427625 | 0.017891153 | 0.062274273 | 0.091111503 |
| 0.138695837 | 0.237616459 | 0.05052534  | 0.221719089 |
| 0.255040341 | 0.137915842 | 0.114734246 | 0.252422074 |
| 0.110762411 | 0.237608142 | 0.122300764 | 0.261107017 |
| 0.219481191 | 0.213914147 | 0.210482215 | 0.09963114  |
| 0.226697191 | 0.114462609 | 0.016211612 | 0.159585987 |
| 0.249179378 | 0.012748284 | 0.127163215 | 0.142467099 |
| 0.169142008 | 0.117720727 | 0.196037235 | 0.167756319 |
| 0.170025339 | 0.227935468 | 0.000874412 | 0.184818283 |
| 0.19369808  | 0.215833927 | 0.142126156 | 0.047096277 |
| 0.09524926  | 0.08060797  | 0.111773356 | 0.034505211 |
| 0.264074382 | 0.151081418 | 0.136710617 | 0.131311761 |
| 0.060302069 | 0.295564163 | 0.040526939 | 0.202968864 |
| 0.193960433 | 0.171811282 | 0.201763878 | 0.195765034 |
| 0.023120159 | 0.291326625 | 0.062794866 | 0.079114725 |
| 0.318354423 | 0.068775009 | 0.022560728 | 0.110185834 |
| 0.19871085  | 0.063807704 | 0.194415726 | 0.160859762 |
| 0.216551191 | 0.325858185 | 0.141472057 | 0.208117954 |
| 0.1763668   | 0.270225768 | 0.085589775 | 0.162038324 |
| 0.048988213 | 0.243307486 | 0.110345591 | 0.231782644 |
| 0.29004085  | 0.067028118 | 0.283141909 | 0.115328882 |
| 0.045866809 | 0.011962369 | 0.01283882  | 0.051015687 |
| 0.287185672 | 0.091139132 | 0.090227446 | 0.140858701 |
| 0.131581994 | 0.114947475 | 0.039091245 | 0.286507762 |
| 0.207825462 | 0.089194239 | 0.175513622 | 0.054487621 |
| 0.085591327 | 0.125942349 | 0.140091658 | 0.071904181 |
| 0.141962381 | 0.035855629 | 0.027154225 | 0.152884784 |
| 0.022875945 | 0.047880133 | 0.151116438 | 0.132743511 |
| 0.04340747  | 0.215241877 | 0.194267315 | 0.003494445 |
| 0.054593931 | 0.101063828 | 0.255689736 | 0.026130196 |
| 0.219954984 | 0.237084635 | 0.086552351 | 0.071025534 |
| 0.202075597 | 0.192930501 | 0.186278779 | 0.177305242 |
| 0.026002873 | 0.19775404  | 0.140151102 | 0.200106297 |
| 0.161884053 | 0.03006916  | 0.011128369 | 0.138395436 |
| 0.143545643 | 0.021611911 | 0.198126121 | 0.09193723  |
| 0.028517273 | 0.095189157 | 0.072219094 | 0.200098081 |
| 0.263795024 | 0.155992726 | 0.201913807 | 0.168758558 |
| 0.224787624 | 0.22380596  | 0.155972266 | 0.214781145 |
| 0.014106419 | 0.062394359 | 0.046853354 | 0.194837091 |
| 0.273439693 | 0.060539927 | 0.239612806 | 0.012666019 |
| 0.000816045 | 0.181203319 | 0.217178515 | 0.222195142 |
| 0.042494176 | 0.053229738 | 0.10901523  | 0.182787876 |
| 0.276196558 | 0.220503533 | 0.197243418 | 0.074479701 |
| 0.177519682 | 0.053618124 | 0.061366217 | 0.099942105 |
| 0.25492603  | 0.131949536 | 0.224780853 | 0.244139024 |
| 0.141887317 | 0.03892231  | 0.097153091 | 0.035099602 |
| 0.154439731 | 0.086557889 | 0.241372593 | 0.343265776 |
| 0.181220236 | 0.291778777 | 0.210785693 | 0.017054326 |
| 0.208432967 | 0.271352013 | 0.064612658 | 0.153157957 |
| 0.166017836 | 0.162641118 | 0.161249165 | 0.178619229 |

|             |             |             |             |
|-------------|-------------|-------------|-------------|
| 0.139420853 | 0.112953809 | 0.133275273 | 0.091530143 |
| 0.167604494 | 0.109656321 | 0.032901777 | 0.119213763 |
| 0.013757615 | 0.201702593 | 0.099200807 | 0.34190684  |
| 0.109371281 | 0.169393009 | 0.208199738 | 0.086503312 |
| 0.129122719 | 0.013328286 | 0.06124113  | 0.129870868 |
| 0.165846577 | 0.139682411 | 0.031988488 | 0.027955379 |
| 0.194727718 | 0.235239239 | 0.023588567 | 0.193809077 |
| 0.166902864 | 0.148156197 | 0.106437047 | 0.161625128 |
| 0.185651232 | 0.007288825 | 0.049399789 | 0.002676649 |
| 0.035871251 | 0.194476982 | 0.033675033 | 0.116534123 |
| 0.217881806 | 0.119985633 | 0.215938454 | 0.208729992 |
| 0.158170559 | 0.17509835  | 0.194547683 | 0.045180586 |
| 0.190594266 | 0.00298288  | 0.174985435 | 0.143940309 |
| 0.021789104 | 0.016346793 | 0.083978633 | 0.145143753 |
| 0.073349207 | 0.166624373 | 0.297986467 | 0.041151759 |
| 0.219084176 | 0.117529861 | 0.184846235 | 0.062770002 |
| 0.094032772 | 0.159536988 | 0.058514087 | 0.173512738 |
| 0.157950076 | 0.225526033 | 0.039398776 | 0.23183499  |
| 0.085766345 | 0.221151979 | 0.204944191 | 0.052015371 |
| 0.150163026 | 0.211211325 | 0.214712713 | 0.176403871 |
| 0.23714858  | 0.123536487 | 0.013672369 | 0.047408848 |
| 0.146324474 | 0.160038744 | 0.022432539 | 0.16829146  |
| 0.158944874 | 0.103810151 | 0.27743331  | 0.26486754  |
| 0.214493723 | 0.21020117  | 0.193821278 | 0.145628146 |
| 0.135687165 | 0.016524377 | 0.06456394  | 0.225828213 |
| 0.010297787 | 0.053669165 | 0.293083643 | 0.050260119 |
| 0.081934826 | 0.176311113 | 0.026543451 | 0.031953872 |
| 0.18557723  | 0.092172101 | 0.085454066 | 0.191364569 |
| 0.075087993 | 0.056034145 | 0.156907795 | 0.157908797 |
| 0.032785538 | 0.202714275 | 0.297945362 | 0.154896501 |
| 0.046605409 | 0.060068353 | 0.245042627 | 0.292900368 |
| 0.176348408 | 0.160431267 | 0.166543418 | 0.165633378 |
| 0.283150357 | 0.074034342 | 0.177512515 | 0.157020253 |
| 0.214596955 | 0.229946753 | 0.284704869 | 0.146444404 |
| 0.201363172 | 0.141197407 | 0.080796    | 0.138836853 |
| 0.184540994 | 0.1559893   | 0.182529157 | 0.041645753 |
| 0.27178324  | 0.127259598 | 0.257184252 | 0.252076669 |
| 0.064504964 | 0.317171182 | 0.222703327 | 0.179176309 |
| 0.094653118 | 0.031106217 | 0.169978023 | 0.262664556 |
| 0.191147034 | 0.017170806 | 0.277465266 | 0.070580369 |
| 0.156128934 | 0.01022818  | 0.097058144 | 0.272455161 |
| 0.285715888 | 0.171429173 | 0.057396334 | 0.130374267 |
| 0.1112633   | 0.037764116 | 0.171928156 | 0.123799365 |
| 0.188343393 | 0.08335844  | 0.190122255 | 0.226880425 |
| 0.247386159 | 0.07790343  | 0.028445212 | 0.095210819 |
| 0.242232831 | 0.070752582 | 0.162760101 | 0.26138353  |
| 0.269521184 | 0.244378288 | 0.146320908 | 0.24817481  |
| 0.062709201 | 0.142369102 | 0.138317054 | 0.139146883 |
| 0.035383655 | 0.184909705 | 0.028751887 | 0.114310739 |
| 0.016595381 | 0.017281059 | 0.169126541 | 0.155221244 |
| 0.219484941 | 0.169371825 | 0.248768841 | 0.077918211 |
| 5.80E-05    | 0.076620251 | 0.139933025 | 0.055336629 |
| 0.142008122 | 0.206901544 | 0.063580926 | 0.230690476 |
| 0.317399798 | 0.196569864 | 0.166096614 | 0.043033999 |

|             |             |             |             |
|-------------|-------------|-------------|-------------|
| 0.012927248 | 0.094179197 | 0.333952831 | 0.156029871 |
| 0.156015682 | 0.137243394 | 0.0323615   | 0.170532189 |
| 0.0190099   | 0.341554827 | 0.253752618 | 0.016059039 |
| 0.019692246 | 0.17077116  | 0.128654509 | 0.175940153 |
| 0.057859082 | 0.155703307 | 0.189912133 | 0.021631796 |
| 0.113623094 | 0.178593522 | 0.197932194 | 0.1877359   |
| 0.178864835 | 0.150250651 | 0.200976247 | 0.071070032 |
| 0.112564837 | 0.159493929 | 0.142688972 | 0.295824945 |
| 0.181347253 | 0.162507775 | 0.092064195 | 0.064996616 |
| 0.090276473 | 0.199744311 | 0.251004851 | 0.24348214  |
| 0.262437808 | 0.145692549 | 0.344548763 | 0.207089266 |
| 0.270625243 | 0.052628805 | 0.306509672 | 0.154892163 |
| 0.240754691 | 0.185042588 | 0.081270562 | 0.139036078 |
| 0.008979525 | 0.044666243 | 0.126795195 | 0.078678788 |
| 0.237476371 | 0.076403113 | 0.052932637 | 0.106124708 |
| 0.084779702 | 0.292710721 | 0.340704113 | 0.215411804 |
| 0.077474035 | 0.049652408 | 0.016428409 | 0.237476228 |
| 0.188882469 | 0.245952034 | 0.102180249 | 0.082391009 |
| 0.184043945 | 0.075909225 | 0.13898518  | 0.187830546 |
| 0.020851293 | 0.26731655  | 0.022101224 | 0.177628019 |
| 0.013012424 | 0.199257849 | 0.322830305 | 0.096727477 |
| 0.014180698 | 0.171411367 | 0.124322813 | 0.043963097 |
| 0.108762549 | 0.083312781 | 0.055454851 | 0.129140956 |
| 0.160187003 | 0.193688337 | 0.199784947 | 0.134854677 |
| 0.052413346 | 0.075680575 | 0.053833368 | 0.122397358 |
| 0.146886676 | 0.161162062 | 0.235223554 | 0.162313817 |
| 0.069098634 | 0.256980381 | 0.274250255 | 0.12005896  |
| 0.071554496 | 0.188748849 | 0.014982065 | 0.034027835 |
| 0.108797401 | 0.027306707 | 0.00046135  | 0.02022718  |
| 0.249689542 | 0.029489387 | 0.089886068 | 0.141422155 |
| 0.062539731 | 0.225522636 | 0.014014661 | 0.10272513  |
| 0.161051162 | 0.207459103 | 0.09948166  | 0.291632439 |
| 0.200811481 | 1           | 0.092814783 | 0.004856108 |
| 0.06955577  | 0.050093485 | 0.022550391 | 0.212277222 |
| 0.170792242 | 0.015736038 | 0.069647443 | 0.139866191 |
| 0.163959296 | 0.01316553  | 0.064032463 | 0.107030577 |
| 0.235488663 | 0.215179895 | 0.184467192 | 0.157897747 |
| 0.062242697 | 0.218885875 | 0.045832861 | 0.044442232 |
| 0.100971751 | 0.048660919 | 0.188164642 | 0.044047918 |
| 0.222366443 | 0.098369101 | 0.014932525 | 0.288801323 |
| 0.183405818 | 0.042338948 | 0.30925351  | 0.013176355 |
| 0.276070872 | 0.183616866 | 0.070753604 | 0.04191535  |
| 0.177825546 | 0.085406313 | 0.275641958 | 0.183231374 |
| 0.014162819 | 0.064899198 | 0.215392569 | 0.057777194 |
| 0.226421401 | 0.051003649 | 0.276223292 | 0.018678387 |
| 0.161742644 | 0.134595202 | 0.173179738 | 0.076858893 |
| 0.061742113 | 0.241352785 | 0.028472941 | 0.199371417 |
| 0.230824504 | 0.049375352 | 0.15106789  | 0.140259898 |
| 0.041370626 | 0.185613998 | 0.04834541  | 0.189406437 |
| 0.191398411 | 0.297216513 | 0.136682744 | 0.162590357 |
| 0.300006575 | 0.049193412 | 0.037934623 | 0.103678223 |
| 0.167095869 | 0.214534532 | 0.036033884 | 0.190227243 |
| 0.028533921 | 0.224045946 | 0.052376728 | 0.115088991 |
| 0.243045848 | 0.13413559  | 0.063764034 | 0.275821174 |

|             |             |             |             |
|-------------|-------------|-------------|-------------|
| 0.188552459 | 0.089272645 | 0.063255589 | 0.289781604 |
| 0.205701741 | 0.179574857 | 0.263813704 | 0.005014036 |
| 0.11249682  | 0.134337381 | 0.243832616 | 0.06835724  |
| 0.312644514 | 0.114894131 | 0.071886897 | 0.060180594 |
| 0.162460327 | 0.025994912 | 0.065285092 | 0.095182988 |
| 0.029234541 | 0.167074165 | 0.209156414 | 0.187388202 |
| 0.173408198 | 0.027797276 | 0.020261146 | 0.186483912 |
| 0.023814602 | 0.014868804 | 0.024129201 | 0.080424548 |
| 0.027788859 | 0.02574052  | 0.032622497 | 0.031131032 |
| 0.160066572 | 0.120451886 |             |             |
| STARD4      | 0.090327206 | 0.447271852 | 0.085360994 |
| 0.137585374 | 0.188984529 | 0.35000792  | 0.049556056 |
| 0.105323148 | 0.311831196 | 0.232806481 | 0.278802238 |
| 0.020955841 | 0.053788163 | 0.447540897 | 0.044555661 |
| 0.244833359 | 0.027616146 | 0.085647194 | 0.05326857  |
| 0.16005136  | 0.164543887 | 0.259663015 | 0.326173159 |
| 0.163503447 | 0.218939004 | 0.26549243  | 0.2471238   |
| 0.514873851 | 0.245811471 | 0.342216191 | 0.183586468 |
| 0.404732901 | 0.200417142 | 0.272715598 | 0.02436344  |
| 0.30654495  | 0.002955034 | 0.438388449 | 0.163695113 |
| 0.100639365 | 0.350298346 | 0.291765633 | 0.18581232  |
| 0.265644774 | 0.049071722 | 0.230988912 | 0.267955209 |
| 0.235549879 | 0.195469759 | 0.084647129 | 0.348533413 |
| 0.2341684   | 0.313865454 | 0.365726561 | 0.003194099 |
| 0.208144443 | 0.058066434 | 0.141317235 | 0.540179098 |
| 0.166371465 | 0.09724731  | 0.179807295 | 0.187501368 |
| 0.246376143 | 0.246317715 | 0.17669992  | 0.244886722 |
| 0.516716075 | 0.099458098 | 0.343624661 | 0.144060677 |
| 0.271396419 | 0.036673305 | 0.13421604  | 0.084628358 |
| 0.254581271 | 0.149456585 | 0.247685038 | 0.182827477 |
| 0.456604209 | 0.522971311 | 0.16966     | 0.528814964 |
| 0.037027633 | 0.19970261  | 0.167351307 | 0.209352049 |
| 0.25817292  | 0.059639573 | 0.344495791 | 0.520673845 |
| 0.048085379 | 0.287780675 | 0.294279635 | 0.118144671 |
| 0.456780325 | 0.167393798 | 0.316663242 | 0.119996764 |
| 0.235318413 | 0.200897527 | 0.482932479 | 0.23150611  |
| 0.208021286 | 0.082720866 | 0.533588251 | 0.190955237 |
| 0.230362169 | 0.093190311 | 0.11949141  | 0.42070178  |
| 0.287614976 | 0.511937635 | 0.396913866 | 0.281497112 |
| 0.23221373  | 0.516063192 | 0.327566239 | 0.411398948 |
| 0.155176727 | 0.544323029 | 0.169546277 | 0.03916426  |
| 0.08806217  | 0.067077855 | 0.117626628 | 0.259333989 |
| 0.469472739 | 0.257007769 | 0.170157498 | 0.145500716 |
| 0.404520072 | 0.529569623 | 0.534997471 | 0.364775708 |
| 0.042722015 | 0.135239387 | 0.239788729 | 0.251454641 |
| 0.267210539 | 0.092175743 | 0.15464793  | 0.536357508 |
| 0.38690419  | 0.375855152 | 0.162889957 | 0.522407584 |
| 0.135603606 | 0.51460747  | 0.483564043 | 0.136786629 |
| 0.537040329 | 0.538030155 | 0.498237558 | 0.291864495 |
| 0.513054458 | 0.295528098 | 0.03527016  | 0.330210194 |
| 0.480053676 | 0.010627768 | 0.460104262 | 0.48213808  |
| 0.523836143 | 0.424442871 | 0.493050702 | 0.511320826 |
| 0.535414913 | 0.071526929 | 0.011796036 | 0.171987607 |
| 0.530768545 | 0.388442595 | 0.085182381 | 0.275683923 |



|             |             |             |             |
|-------------|-------------|-------------|-------------|
| 0.220097171 | 0.328779172 | 0.369362826 | 0.247409844 |
| 0.498844288 | 0.446789228 | 0.492992579 | 0.327202092 |
| 0.210636035 | 0.329374572 | 0.23789791  | 0.52577791  |
| 0.042779165 | 0.129680301 | 0.069902828 | 0.227305977 |
| 0.318368287 | 0.123776888 | 0.303848514 | 0.207355298 |
| 0.142094782 | 0.276813417 | 0.233207336 | 0.257293748 |
| 0.07644472  | 0.332834991 | 0.143552948 | 0.143461003 |
| 0.034382374 | 0.156945075 | 0.148932032 | 0.142361911 |
| 0.165673735 | 0.276521435 | 0.353454043 | 0.474893316 |
| 0.208240377 | 0.18045263  | 0.343416112 | 0.466230984 |
| 0.391857456 | 0.252792939 | 0.186313349 | 0.013134161 |
| 0.161224425 | 0.193860281 | 0.105572779 | 0.279731204 |
| 0.209332147 | 0.150899095 | 0.243835651 | 0.303500588 |
| 0.260578788 | 0.130413428 | 0.225510376 | 0.452040794 |
| 0.151026331 | 0.228139034 | 0.40893294  | 0.282751764 |
| 0.005470546 | 0.240748195 | 0.414447638 | 0.070317895 |
| 0.219604058 | 0.095284452 | 0.21057175  | 0.430240434 |
| 0.180787616 | 0.120497982 | 0.492313044 | 0.291632872 |
| 0.282495012 | 0.261235673 | 0.507836502 | 0.023364619 |
| 0.203946079 | 0.040351062 | 0.190073639 | 0.264399941 |
| 0.187993805 | 0.202226758 | 0.197071798 | 0.183020469 |
| 0.148123617 | 0.530146712 | 0.380017654 | 0.517765715 |
| 0.233943236 | 0.510688187 | 0.427871057 | 0.431497867 |
| 0.26962201  | 0.222104642 | 0.083229139 | 0.400835312 |
| 0.424364301 | 0.178605345 | 0.088102235 | 0.383593634 |
| 0.227714543 | 0.276776608 | 0.061235783 | 0.475907158 |
| 0.507187113 | 0.515221181 | 0.106274015 | 0.273202122 |
| 0.358219446 | 0.208519588 | 0.371839465 | 0.510420628 |
| 0.209473853 | 0.209637285 | 0.203061157 | 0.328396433 |
| 0.147738197 | 0.10892026  | 0.299704183 | 0.10849238  |
| 0.017523693 | 0.085815521 | 0.074267659 | 0.110155214 |
| 0.095356736 | 0.298271076 | 0.266345329 | 0.518116489 |
| 0.096566638 | 0.433559602 | 0.175556044 | 0.189736384 |
| 0.419912596 | 0.21244986  | 0.2587848   | 0.257918997 |
| 0.198173488 | 0.018357723 | 0.104172912 | 0.526799049 |
| 0.053389192 | 0.158418482 | 0.235822195 | 0.003893959 |
| 0.047301878 | 0.410183069 | 0.113715121 | 0.214460743 |
| 0.444632784 | 0.225944004 | 0.17012284  | 0.222963377 |
| 0.261437509 | 0.08689667  | 0.003987535 | 0.467996727 |
| 0.476190649 | 0.437678828 | 0.47815412  | 0.472451716 |
| 0.394484536 | 0.334913451 | 0.326174122 | 0.329082941 |
| 0.087625227 | 0.093879857 | 0.108840865 | 0.178983941 |
| 0.005362417 | 0.324800373 | 0.192714982 | 0.120679878 |
| 0.332603839 | 0.198929954 | 0.045200988 | 0.220526391 |
| 0.034739138 | 0.138383237 | 0.22136461  | 0.138529546 |
| 0.240835282 | 0.020030031 | 0.230590659 | 0.198298524 |
| 0.489496576 | 0.351950234 | 0.237495547 | 0.544182878 |
| 0.244913222 | 0.140096635 | 0.200687859 | 0.323693823 |
| 0.061325179 | 0.065574033 | 0.260355294 | 0.050265812 |
| 0.225596661 | 0.456220585 | 0.251731899 | 0.073579139 |
| 0.199996495 | 0.009036859 | 0.38662262  | 0.540391219 |
| 0.51825081  | 0.499386854 | 0.520913848 | 0.185335121 |
| 0.523998278 | 0.064957888 | 0.53762587  | 0.402875247 |
| 0.269667789 | 0.001782496 | 0.005374941 | 0.470371681 |

|             |             |             |             |
|-------------|-------------|-------------|-------------|
| 0.256326857 | 0.084604739 | 0.128448075 | 0.355007912 |
| 0.087893249 | 0.154439256 | 0.06333854  | 0.10261049  |
| 0.33070934  | 0.15346062  | 0.100354443 | 0.498880789 |
| 0.156780468 | 0.156829466 | 0.29825356  | 0.087916973 |
| 0.28876053  | 0.050521061 | 0.080976259 | 0.00799671  |
| 0.253681986 | 0.139538045 | 0.514028577 | 0.528461276 |
| 0.493205531 | 0.276923409 | 0.26209867  | 0.30278066  |
| 0.394659799 | 0.129504477 | 0.277569161 | 0.127819817 |
| 0.522765216 | 0.250153618 | 0.27582859  | 0.304583217 |
| 0.481045802 | 0.479760889 | 0.033326205 | 0.327504441 |
| 0.024787001 | 0.001077566 | 0.322794767 | 0.190103633 |
| 0.025714103 | 0.221692005 | 0.213567888 | 0.142299538 |
| 0.143354439 | 0.045635927 | 0.147350305 | 0.129635307 |
| 0.192532489 | 0.224906131 | 0.163410601 | 0.191349613 |
| 0.150788229 | 0.059538515 | 0.143231073 | 0.10841271  |
| 0.145849909 | 0.308237927 | 0.222476284 | 0.02056677  |
| 0.304630611 | 0.282075354 | 0.060134796 | 0.139708661 |
| 0.423726562 | 0.484527808 | 0.028316356 | 0.010673035 |
| 0.244402036 | 0.188788483 | 0.483181848 | 0.529752902 |
| 0.550993133 | 0.501828804 | 0.405352942 | 0.067124624 |
| 0.070271167 | 0.198067224 | 0.171796213 | 0.053268207 |
| 0.524641665 | 0.075746606 | 0.522566717 | 0.180406755 |
| 0.09595945  | 0.157458628 | 0.035154815 | 0.069596634 |
| 0.260639216 | 0.140488282 | 0.115536971 | 0.150843485 |
| 0.196993214 | 0.160420233 | 0.043575652 | 0.145543418 |
| 0.284868482 | 0.092763581 | 0.124678125 | 0.244065755 |
| 0.33003966  | 0.16283446  | 0.32280328  | 0.433117358 |
| 0.124394091 | 0.091282733 | 0.270088135 | 0.299150822 |
| 0.412637942 | 0.277396564 | 0.05002092  | 0.484708766 |
| 0.480190143 | 0.333039327 | 0.538193451 | 0.329628881 |
| 0.078715105 | 0.264631781 | 0.175432987 | 0.201216797 |
| 0.131676358 | 0.345288887 | 0.154924283 | 0.061155733 |
| 0.269327653 | 0.48685116  | 0.403915157 | 0.129244468 |
| 0.309664864 | 0.131966729 | 0.06823457  | 0.438763929 |
| 0.091701218 | 0.094146552 | 0.301392675 | 0.375094786 |
| 0.001103319 | 0.082988446 | 0.448113459 | 0.206613929 |
| 0.505604611 | 0.4537667   | 0.443586231 | 0.204130468 |
| 0.000322655 | 0.273454545 | 0.268965533 | 0.282079023 |
| 0.442296193 | 0.330026904 | 0.124576887 | 0.05660391  |
| 0.243078916 | 0.104673248 | 0.086405466 | 0.325216564 |
| 0.088556029 | 0.302863359 | 0.144420333 | 0.141397285 |
| 0.119751141 | 0.093319517 | 0.169819969 | 0.199499982 |
| 0.063391774 | 0.19183831  | 0.296264667 | 0.254354788 |
| 0.125283824 | 0.385101239 | 0.349980538 | 0.035078534 |
| 0.23159088  | 0.350252431 | 0.41499246  | 0.001399146 |
| 0.335086893 | 0.008642901 | 0.127764917 | 0.152854548 |
| 0.134232584 | 0.127467354 | 0.155990743 | 0.187208956 |
| 0.237249146 | 0.149822128 | 0.217570956 | 0.173555336 |
| 0.118813054 | 0.168327516 | 0.253153755 | 0.248662587 |
| 0.20404003  | 0.116347673 | 0.128606912 | 0.145195056 |
| 0.059358758 | 0.477677234 | 0.247959524 | 0.094620719 |
| 0.157244075 | 0.240365241 | 0.323296549 | 0.527575481 |
| 0.397085668 | 0.158050878 | 0.209852155 | 0.469768217 |
| 0.164251666 | 0.256747259 | 0.073140321 | 0.28877954  |

|             |             |             |             |
|-------------|-------------|-------------|-------------|
| 0.185489125 | 0.142791412 | 0.308621161 | 0.258680484 |
| 0.328421031 | 0.408449775 | 0.242950873 | 0.430050907 |
| 0.253367596 | 0.203767557 | 0.278374925 | 0.065964051 |
| 0.147270001 | 0.112877228 | 0.155737813 | 0.003234716 |
| 0.252703781 | 0.266181379 | 0.457340961 | 0.52427965  |
| 0.185078156 | 0.37278399  | 0.319237761 | 0.084098591 |
| 0.258111616 | 0.22497861  | 0.119622521 | 0.372316698 |
| 0.147149393 | 0.158465985 | 0.184270845 | 0.344461042 |
| 0.342629424 | 0.321988794 | 0.140711195 | 0.180615789 |
| 0.154093065 | 0.175578335 | 0.477066712 | 0.128265983 |
| 0.293540892 | 0.113308969 | 0.27792269  | 0.189392712 |
| 0.132592385 | 0.510082277 | 0.066254268 | 0.520481025 |
| 0.194497998 | 0.136605542 | 0.491808196 | 0.246940682 |
| 0.243026733 | 0.09558418  | 0.112561886 | 0.28813996  |
| 0.143370512 | 0.232377177 | 0.01390668  | 0.036917003 |
| 0.246613468 | 0.186018415 | 0.365275388 | 0.265510611 |
| 0.137150545 | 0.253078405 | 0.113298182 | 0.20969163  |
| 0.527459465 | 0.534881597 | 0.185383178 | 0.192712638 |
| 0.277047071 | 0.092814783 | 1           | 0.008489654 |
| 0.274919888 | 0.282921015 | 0.27332314  | 0.048921664 |
| 0.019273162 | 0.121218921 | 0.271873938 | 0.068633191 |
| 0.438380882 | 0.149457464 | 0.244658486 | 0.364181605 |
| 0.147893721 | 0.535609268 | 0.078631996 | 0.329117403 |
| 0.036990821 | 0.179278434 | 0.239765142 | 0.239440496 |
| 0.156281505 | 0.167594024 | 0.291172789 | 0.148276207 |
| 0.030761244 | 0.174550991 | 0.000171563 | 0.429485433 |
| 0.504724022 | 0.192692079 | 0.196159879 | 0.230846573 |
| 0.194715877 | 0.348749556 | 0.142833266 | 0.296672994 |
| 0.012646761 | 0.235887033 | 0.150962918 | 0.443240834 |
| 0.172443198 | 0.223461007 | 0.054125333 | 0.171346885 |
| 0.508976216 | 0.174343344 | 0.218251965 | 0.198272081 |
| 0.523849018 | 0.371709243 | 0.182339962 | 0.144589101 |
| 0.271468814 | 0.068742316 | 0.323467771 | 0.52118376  |
| 0.124785134 | 0.127272165 | 0.389161803 | 0.135555531 |
| 0.185482648 | 0.399155177 | 0.272397044 | 0.513834525 |
| 0.043213522 | 0.180430333 | 0.353952844 | 0.446192263 |
| 0.237274941 | 0.084870465 | 0.153217229 | 0.133108852 |
| 0.511074945 | 0.109441753 | 0.138220461 | 0.30261844  |
| 0.123099196 | 0.213935761 | 0.257687657 | 0.109312718 |
| 0.036268367 | 0.118198829 | 0.328394441 | 0.117321134 |
| 0.194004132 | 0.227712134 | 0.128324728 | 0.375755721 |
| 0.122038684 | 0.026700738 | 0.440875753 | 0.008598524 |
| 0.320391476 | 0.284219081 | 0.186676731 | 0.22066912  |
| 0.201996438 | 0.241627684 | 0.259554382 | 0.002199276 |
| 0.341572069 | 0.030032391 | 0.194011592 | 0.14460182  |
| 0.179051224 | 0.051821893 | 0.488236602 | 0.493635902 |
| 0.245083867 | 0.245248589 | 0.252470325 | 0.476122647 |
| 0.083471384 | 0.22491249  | 0.207601255 | 0.332679786 |
| 0.1362552   | 0.282549666 | 0.287304698 | 0.268162559 |
| 0.3289463   | 0.218429029 |             |             |
| STAT3       | 0.00409723  | 0.023610938 | 0.001378544 |
| 0.00017075  | 0.017768305 | 0.003665053 | 0.009382678 |
| 0.012930203 | 0.037371939 | 0.01310952  | 0.006054086 |
| 0.000836803 | 0.007361509 | 0.024801712 | 0.012522745 |

|             |             |             |             |
|-------------|-------------|-------------|-------------|
| 0.017352365 | 0.003559526 | 0.01236963  | 0.016781894 |
| 0.002214461 | 0.016914489 | 0.003472144 | 0.009621161 |
| 0.025495385 | 0.012908634 | 0.014421252 | 0.031356336 |
| 0.021303721 | 0.001468685 | 0.010345039 | 9.73E-06    |
| 0.022942047 | 0.016219232 | 0.009891366 | 0.000355826 |
| 0.013116466 | 0.006233498 | 0.027532189 | 0.00621395  |
| 0.000298039 | 0.021981597 | 0.008226717 | 0.002887678 |
| 0.012335188 | 0.000992711 | 0.001539334 | 0.031639324 |
| 0.024351589 | 0.016671274 | 0.005800058 | 0.014363527 |
| 0.019762218 | 0.01295159  | 0.017760145 | 0.001331908 |
| 0.009909791 | 0.00442973  | 0.011418576 | 0.022244995 |
| 0.011234913 | 0.011211209 | 0.01515109  | 0.037738795 |
| 0.036513392 | 0.041503677 | 0.033867703 | 0.011392871 |
| 0.020471051 | 0.018734518 | 0.02617914  | 1.59E-05    |
| 0.009865561 | 0.012398866 | 0.015367694 | 0.024221118 |
| 0.009003205 | 0.012841392 | 0.012978218 | 0.014080236 |
| 0.019442951 | 0.032475677 | 0.024730355 | 0.025522258 |
| 0.015839391 | 0.028480079 | 0.010230269 | 0.025551667 |
| 0.04206918  | 0.023411159 | 0.010892222 | 0.025501884 |
| 0.023393278 | 0.019936443 | 0.026999496 | 0.019966414 |
| 0.017158967 | 0.026966149 | 0.009003475 | 0.005853864 |
| 0.025982027 | 0.020381742 | 0.037042887 | 0.011609452 |
| 0.023347988 | 0.007473701 | 0.024234569 | 0.021604219 |
| 0.003095324 | 0.003652158 | 0.011243897 | 0.026039708 |
| 0.009864806 | 0.019213046 | 0.028032381 | 0.034060041 |
| 0.015827981 | 0.019077988 | 0.009548532 | 0.032957111 |
| 0.00221122  | 0.025690247 | 0.004591726 | 0.003713806 |
| 0.008781693 | 0.015349332 | 0.038264567 | 0.031230442 |
| 0.017848182 | 0.026801846 | 0.007507794 | 0.011052042 |
| 0.028084875 | 0.022673449 | 0.027682669 | 0.025166131 |
| 0.003954278 | 0.025418768 | 0.011774965 | 0.012829579 |
| 0.027148084 | 0.02944374  | 0.012822164 | 0.024810791 |
| 0.014326364 | 0.021758386 | 0.007710769 | 0.030717107 |
| 0.037409751 | 0.0235647   | 0.015745482 | 0.005136226 |
| 0.023597768 | 0.020681574 | 0.024215691 | 0.017402683 |
| 0.021397207 | 0.002864145 | 0.00533501  | 0.031249272 |
| 0.025223472 | 1.00E-06    | 0.026388413 | 0.026932821 |
| 0.021200585 | 0.020334478 | 0.03194079  | 0.024827763 |
| 0.023200106 | 0.013935685 | 0.002343267 | 0.025503523 |
| 0.022291432 | 0.01290118  | 0.029299424 | 0.012306688 |
| 0.02287222  | 0.006715215 | 0.030185989 | 0.000577254 |
| 0.032542678 | 0.020869549 | 0.026329089 | 0.026791901 |
| 0.032229973 | 0.022069705 | 0.021184675 | 0.019878199 |
| 0.002743378 | 0.00354896  | 0.004730639 | 0.041693939 |
| 0.002431799 | 0.014844127 | 0.009031778 | 0.041818718 |
| 0.015660713 | 0.018516074 | 0.013026598 | 0.025384054 |
| 0.010926895 | 0.008682036 | 0.00821791  | 0.011661494 |
| 0.00210556  | 0.020756294 | 0.001483009 | 0.001337565 |
| 0.017692164 | 0.023548213 | 0.022046494 | 0.02693291  |
| 0.023043061 | 0.007013103 | 0.015731258 | 0.026797859 |
| 0.026743647 | 0.010067234 | 0.030812088 | 0.000662487 |
| 0.004223895 | 0.021365964 | 0.019027235 | 0.019279561 |
| 0.023510367 | 0.008764014 | 0.022803013 | 0.016600421 |
| 0.004865782 | 0.027493596 | 0.014347637 | 0.025810757 |

|             |             |             |             |
|-------------|-------------|-------------|-------------|
| 0.014612327 | 0.003644333 | 0.021569186 | 0.020913789 |
| 0.000178172 | 0.005954085 | 0.01615218  | 0.010603154 |
| 0.031934792 | 0.000208474 | 0.002310284 | 0.020894095 |
| 0.017191084 | 0.025249511 | 0.024864355 | 0.022393997 |
| 0.001923178 | 0.02815978  | 0.030069838 | 0.031843769 |
| 0.040021008 | 0.000129916 | 0.016272789 | 0.018585385 |
| 0.00972352  | 0.037731064 | 0.019185134 | 0.009854569 |
| 0.00521022  | 0.026357327 | 0.023804392 | 0.021725114 |
| 0.010521446 | 0.029396365 | 0.018795082 | 0.017294136 |
| 0.014714509 | 0.033285602 | 0.004905005 | 0.01405531  |
| 0.019669187 | 0.002830237 | 0.008924554 | 0.028939114 |
| 0.023095299 | 0.028555215 | 0.004036919 | 0.020661256 |
| 0.027815468 | 0.021456296 | 0.009915012 | 0.02829405  |
| 0.011909166 | 0.004759089 | 0.028417103 | 0.034273914 |
| 0.012108383 | 0.018790794 | 0.00838657  | 0.026541781 |
| 0.008228653 | 0.013672941 | 0.039165976 | 0.013082782 |
| 1.99E-06    | 0.015607487 | 0.005111496 | 0.009819028 |
| 0.007319049 | 0.023546391 | 0.025233471 | 0.026666917 |
| 0.009768629 | 0.022564254 | 0.046072437 | 0.003084338 |
| 0.021475481 | 0.026785912 | 0.014256801 | 0.026632884 |
| 0.030981919 | 0.000220441 | 0.000189125 | 0.029347257 |
| 0.011681685 | 0.006759426 | 0.025914037 | 3.89E-05    |
| 0.004019145 | 0.023884564 | 0.013677758 | 0.017837527 |
| 0.029921995 | 0.014882885 | 0.00963462  | 0.012078552 |
| 0.019071486 | 0.008789135 | 0.000241285 | 0.028992377 |
| 0.038525109 | 0.04222928  | 0.039128316 | 0.036466176 |
| 0.041524295 | 0.032919451 | 0.024622888 | 0.005006587 |
| 0.007161153 | 0.008396363 | 0.005365432 | 0.012516596 |
| 6.09E-05    | 0.018470716 | 0.036295931 | 0.010916757 |
| 0.027315427 | 0.040686094 | 0.002651703 | 0.033084022 |
| 0.000178442 | 0.00441488  | 0.015319298 | 0.038689053 |
| 0.039110508 | 0.001146528 | 2.14E-05    | 0.007759068 |
| 0.015039402 | 0.017068157 | 0.0107339   | 0.024457044 |
| 0.007403016 | 0.010155464 | 0.006750489 | 0.019948128 |
| 0.006161724 | 0.001850795 | 0.018461534 | 0.003759393 |
| 0.000805459 | 0.040396592 | 0.027484931 | 0.000586845 |
| 0.007645451 | 0.000147188 | 0.011878962 | 0.02610798  |
| 0.019302822 | 0.025651276 | 0.019421793 | 0.00714983  |
| 0.018987475 | 0.006898335 | 0.024918783 | 0.01514101  |
| 0.009116714 | 0.001416357 | 1.98E-05    | 0.021165111 |
| 0.009857982 | 0.008590651 | 0.010563849 | 0.000703036 |
| 0.001412442 | 0.005051566 | 0.014664027 | 0.006778928 |
| 0.010242254 | 0.016422926 | 0.01653752  | 0.026193658 |
| 0.010857136 | 0.022797233 | 0.012524549 | 0.017280646 |
| 0.017895651 | 0.001250789 | 0.024010777 | 0.002975404 |
| 0.027165484 | 0.012830592 | 0.026429804 | 0.022620393 |
| 0.024768454 | 0.019144285 | 0.009340627 | 0.002033971 |
| 0.03888039  | 0.005734174 | 0.007000717 | 0.007077403 |
| 0.018341843 | 0.014616838 | 0.014206813 | 0.010562783 |
| 0.025809895 | 0.020444894 | 0.005372933 | 0.020922876 |
| 0.000587412 | 1.60E-05    | 0.003415448 | 0.041829717 |
| 0.026026699 | 0.013559219 | 0.0140042   | 0.044713913 |
| 0.031338241 | 0.000185068 | 0.013905676 | 0.018083508 |
| 0.014518603 | 0.015605149 | 0.01583974  | 0.051099754 |

|             |             |             |             |
|-------------|-------------|-------------|-------------|
| 0.017953951 | 0.004420962 | 0.011134997 | 0.027721541 |
| 0.011504423 | 0.018094001 | 0.011175033 | 0.004393686 |
| 0.009306515 | 0.013781994 | 0.004488097 | 0.014014773 |
| 0.014765044 | 0.019705277 | 0.002006069 | 0.000419647 |
| 0.018481998 | 0.038792385 | 0.026286058 | 0.021547605 |
| 0.024854893 | 0.027361667 | 0.026376197 | 0.012891552 |
| 0.004316136 | 0.018137908 | 0.025482971 | 0.00599285  |
| 0.024432208 | 0.010861565 | 0.022186492 | 0.018312842 |
| 0.020430439 | 0.003880227 | 0.000785259 | 0.01550617  |
| 0.016784312 | 0.018925566 | 0.012008799 | 0.004714521 |
| 0.010044806 | 0.009345036 | 0.010045461 | 0.011764787 |
| 0.022467353 | 0.003540708 | 0.016042961 | 0.021917546 |
| 0.02379107  | 0.01757807  | 0.020149658 | 0.02469299  |
| 0.009383784 | 0.017330168 | 0.001197586 | 0.043985073 |
| 0.02022203  | 0.02106334  | 0.000183421 | 0.021662223 |
| 0.029833134 | 0.013269078 | 0.020453122 | 0.035142903 |
| 0.016008451 | 0.007495646 | 0.032104555 | 0.023032725 |
| 0.028921478 | 0.00432133  | 0.038034558 | 0.011253099 |
| 0.043062331 | 0.036599703 | 0.020674651 | 0.005516885 |
| 0.017104815 | 0.013372885 | 0.00935873  | 0.02981728  |
| 0.005463266 | 0.00109847  | 0.009387021 | 0.034925998 |
| 3.27E-05    | 0.008777982 | 0.037001295 | 0.006393537 |
| 0.035097248 | 0.021888522 | 0.018104039 | 0.024368669 |
| 0.007525681 | 0.025353451 | 0.008261301 | 0.004450717 |
| 0.020452384 | 0.019392539 | 0.01534466  | 0.002497249 |
| 0.019582511 | 0.006251485 | 0.004129542 | 0.000507473 |
| 0.000656527 | 0.017566043 | 0.02467009  | 0.034575806 |
| 0.01951367  | 0.026877597 | 0.004190187 | 0.006457073 |
| 0.022538837 | 0.018539652 | 0.017184433 | 0.013016452 |
| 0.001930548 | 0.039923403 | 0.018803627 | 0.00154163  |
| 0.022560555 | 0.032191735 | 0.032537106 | 8.56E-06    |
| 0.01512763  | 0.000333404 | 0.015881522 | 0.005805778 |
| 0.010857652 | 0.024447225 | 0.027696106 | 0.006571117 |
| 0.029307919 | 0.015155122 | 0.0036708   | 0.010952542 |
| 0.003707422 | 0.023780686 | 0.022216664 | 0.012228403 |
| 0.003669153 | 0.002803323 | 0.015117297 | 0.012994691 |
| 0.000501926 | 0.024907396 | 0.017127408 | 0.006001821 |
| 0.025027381 | 0.023767166 | 0.022798333 | 0.021708988 |
| 0.027669215 | 0.009157046 | 0.021683419 | 0.012648516 |
| 0.010988548 | 0.000609852 | 0.008236724 | 0.010243067 |
| 0.017839895 | 0.0033843   | 0.015124499 | 0.00717238  |
| 0.028160022 | 0.019825538 | 0.01697009  | 0.025406922 |
| 0.01034928  | 0.041732776 | 0.004811534 | 0.001312882 |
| 0.003766877 | 0.020758268 | 0.014525027 | 0.000561168 |
| 0.017227745 | 0.001024617 | 0.016930308 | 0.018724186 |
| 0.018662523 | 0.024447928 | 0.000435168 | 0.00177248  |
| 0.001442416 | 0.011546872 | 0.016005946 | 0.022413537 |
| 0.007607285 | 0.007352279 | 0.017015529 | 0.002669886 |
| 0.021663061 | 0.031732591 | 0.024314254 | 0.028983113 |
| 0.038432856 | 0.010034596 | 0.036996972 | 0.006254087 |
| 0.015279147 | 0.004020491 | 0.021434043 | 0.00762467  |
| 0.018799573 | 0.026866376 | 0.008623969 | 0.026575344 |
| 0.014043947 | 0.017782087 | 0.028624768 | 0.024443203 |
| 0.00714171  | 0.003283581 | 0.008350674 | 0.013738124 |

|             |             |             |             |
|-------------|-------------|-------------|-------------|
| 0.012288275 | 0.008124088 | 0.000134736 | 0.002760929 |
| 0.016133722 | 0.043674694 | 0.025678905 | 0.044034431 |
| 0.015677962 | 0.035576128 | 0.006630766 | 0.024733856 |
| 0.02195932  | 0.02651534  | 0.001335566 | 0.029038157 |
| 0.024082432 | 0.004856108 | 0.008489654 | 1           |
| 0.015268437 | 0.016567033 | 0.008833193 | 0.010157312 |
| 0.001517554 | 0.007588025 | 0.01715003  | 0.023200907 |
| 0.028090288 | 0.00226963  | 0.036937558 | 0.015819087 |
| 0.035677691 | 0.02562055  | 0.012509152 | 0.01297295  |
| 0.006743492 | 0.029930907 | 0.020468864 | 0.029952238 |
| 0.001407297 | 0.010797247 | 0.014972866 | 0.006480152 |
| 0.002435903 | 0.003530479 | 5.42E-05    | 0.020458022 |
| 0.024104875 | 0.019891248 | 0.026131499 | 0.017657393 |
| 0.019746917 | 0.035837544 | 0.008343865 | 0.01456968  |
| 0.000205028 | 0.013239569 | 0.024837863 | 0.011754971 |
| 0.000838909 | 0.033848889 | 0.000639672 | 0.038465863 |
| 0.025336818 | 0.007767689 | 0.041905377 | 0.002921237 |
| 0.021339519 | 0.030124059 | 0.010440397 | 0.011611843 |
| 0.036442668 | 0.012267184 | 0.007928147 | 0.030393277 |
| 0.010165961 | 0.008202536 | 0.019233048 | 0.00545684  |
| 0.019608915 | 0.027684693 | 0.024169682 | 0.036097905 |
| 0.007718535 | 0.01761174  | 0.027807541 | 0.029199144 |
| 0.026533224 | 0.018961946 | 0.008150684 | 0.010787604 |
| 0.015834483 | 1.98E-05    | 0.0294963   | 0.017040639 |
| 0.009517421 | 0.025035053 | 0.027159505 | 0.01878765  |
| 0.000208126 | 0.031787074 | 0.003397894 | 0.016590869 |
| 0.018537178 | 0.010061226 | 0.012313169 | 0.021631042 |
| 0.000624763 | 0.00035991  | 0.028055738 | 7.66E-05    |
| 0.005082955 | 0.009000788 | 0.020083368 | 0.017129517 |
| 0.008580866 | 0.023144825 | 0.010095625 | 2.53E-05    |
| 0.02469609  | 7.63E-05    | 0.02739472  | 0.002863773 |
| 0.004499821 | 0.004903772 | 0.019224015 | 0.0262446   |
| 0.024322975 | 0.004542073 | 0.004185246 | 0.024975661 |
| 0.001343079 | 0.014454282 | 0.019324125 | 0.014285297 |
| 0.010512072 | 0.010964652 | 0.014471151 | 0.005277358 |
| 0.013961206 | 0.019398118 |             |             |
| STIL        | 0.046181296 | 0.39376877  | 0.033065679 |
| 0.114890149 | 0.259746778 | 0.271135395 | 0.040556061 |
| 0.08867055  | 0.296333278 | 0.249968557 | 0.274923686 |
| 0.011667608 | 0.10438186  | 0.450503577 | 0.035848446 |
| 0.332633161 | 0.023331185 | 0.078127921 | 0.063798953 |
| 0.162424065 | 0.258524242 | 0.292923756 | 0.258531554 |
| 0.248977617 | 0.147973677 | 0.237106235 | 0.316935151 |
| 0.487294614 | 0.266051993 | 0.350138139 | 0.177033901 |
| 0.392310949 | 0.289289088 | 0.32849208  | 0.008437912 |
| 0.300810281 | 0.016029344 | 0.402606949 | 0.236452029 |
| 0.156331384 | 0.305122202 | 0.246245117 | 0.1945487   |
| 0.300378686 | 0.023618368 | 0.18580918  | 0.364608644 |
| 0.229747481 | 0.19682659  | 0.039340656 | 0.349443682 |
| 0.295191693 | 0.25064755  | 0.338502601 | 0.003309086 |
| 0.292599368 | 0.132283816 | 0.264318249 | 0.467031992 |
| 0.136774914 | 0.086558912 | 0.292517454 | 0.16775109  |
| 0.308761275 | 0.319257291 | 0.173971856 | 0.321257854 |
| 0.484452577 | 0.211474796 | 0.389717444 | 0.123953273 |

|             |             |             |             |
|-------------|-------------|-------------|-------------|
| 0.299331417 | 0.017896824 | 0.110364599 | 0.049098327 |
| 0.317049809 | 0.143043705 | 0.263044127 | 0.28482516  |
| 0.408188955 | 0.476401151 | 0.15970074  | 0.463041604 |
| 0.130529463 | 0.304855079 | 0.237165817 | 0.252874275 |
| 0.320722545 | 0.0588965   | 0.369536345 | 0.50153817  |
| 0.028551618 | 0.286463303 | 0.363287613 | 0.078940492 |
| 0.387870141 | 0.247485427 | 0.303447159 | 0.187364964 |
| 0.319563731 | 0.316847215 | 0.435558548 | 0.234172756 |
| 0.245289633 | 0.044903099 | 0.432046736 | 0.297237171 |
| 0.247540322 | 0.051075012 | 0.234034538 | 0.472426558 |
| 0.334402162 | 0.482441776 | 0.415368941 | 0.343646747 |
| 0.346485592 | 0.482870604 | 0.340441087 | 0.380316017 |
| 0.143218672 | 0.499887879 | 0.127481602 | 0.027375469 |
| 0.044262116 | 0.05466078  | 0.211067534 | 0.247192193 |
| 0.46180085  | 0.238250801 | 0.146888035 | 0.197823038 |
| 0.475748857 | 0.429919175 | 0.504691573 | 0.403431388 |
| 0.024063747 | 0.248661581 | 0.342087304 | 0.176121599 |
| 0.32813432  | 0.07044393  | 0.26314059  | 0.467727546 |
| 0.349058394 | 0.437433039 | 0.106524609 | 0.445369942 |
| 0.149275353 | 0.489873705 | 0.434731281 | 0.128520865 |
| 0.48195008  | 0.448378766 | 0.501588522 | 0.367356475 |
| 0.425453872 | 0.24917568  | 0.074260019 | 0.35716757  |
| 0.462550457 | 0.019624367 | 0.481212326 | 0.510058036 |
| 0.476857661 | 0.478635631 | 0.517737139 | 0.497503485 |
| 0.477377911 | 0.043910591 | 0.045382327 | 0.240649866 |
| 0.481792998 | 0.369659473 | 0.095782898 | 0.360623221 |
| 0.308895621 | 0.278673459 | 0.389344005 | 0.311077368 |
| 0.483321534 | 0.43218034  | 0.484853363 | 0.364036143 |
| 0.225611821 | 0.27152749  | 0.335182396 | 0.415149373 |
| 0.025742394 | 0.077932982 | 0.030008255 | 0.244898206 |
| 0.250350354 | 0.127036331 | 0.287567908 | 0.287478618 |
| 0.138875544 | 0.231262436 | 0.301550598 | 0.343654629 |
| 0.035648072 | 0.33552384  | 0.106891938 | 0.129824082 |
| 0.029513038 | 0.10376122  | 0.172939878 | 0.111001634 |
| 0.210353222 | 0.18795349  | 0.385477826 | 0.479317011 |
| 0.292435979 | 0.131562066 | 0.3626716   | 0.449977696 |
| 0.408359609 | 0.326911514 | 0.172224925 | 0.009274335 |
| 0.307414201 | 0.294319834 | 0.226116799 | 0.325675959 |
| 0.132085312 | 0.242018245 | 0.331886839 | 0.369428593 |
| 0.20434721  | 0.0935548   | 0.341384527 | 0.375433532 |
| 0.106852958 | 0.25612205  | 0.455304771 | 0.318251453 |
| 0.001128337 | 0.268763672 | 0.434832178 | 0.149376663 |
| 0.252177442 | 0.167581069 | 0.245869389 | 0.473835612 |
| 0.306104064 | 0.2291453   | 0.483034582 | 0.353926706 |
| 0.278218102 | 0.176472695 | 0.51654486  | 0.090994128 |
| 0.283416311 | 0.046908352 | 0.230749335 | 0.247076111 |
| 0.187589674 | 0.242304296 | 0.278115101 | 0.238673999 |
| 0.08079593  | 0.49725021  | 0.33834922  | 0.503979949 |
| 0.355934868 | 0.517408738 | 0.468045451 | 0.427912151 |
| 0.266096829 | 0.325974238 | 0.1839793   | 0.434730824 |
| 0.460952258 | 0.298007158 | 0.044719867 | 0.437867199 |
| 0.31750588  | 0.373707859 | 0.096971046 | 0.495688698 |
| 0.445559839 | 0.430795027 | 0.112063914 | 0.351328633 |
| 0.355559777 | 0.166893177 | 0.371994802 | 0.510408378 |



|             |             |             |             |
|-------------|-------------|-------------|-------------|
| 0.290467173 | 0.337097036 | 0.321886935 | 0.387167627 |
| 0.120821881 | 0.22095741  | 0.263068416 | 0.202868568 |
| 0.01406512  | 0.051249973 | 0.041635092 | 0.12818628  |
| 0.181153908 | 0.324232483 | 0.330443563 | 0.50777714  |
| 0.084143034 | 0.370428457 | 0.174341536 | 0.291410821 |
| 0.409243612 | 0.305710381 | 0.307958561 | 0.298973569 |
| 0.17795189  | 0.011925317 | 0.0951787   | 0.481107864 |
| 0.022021819 | 0.245837456 | 0.229222497 | 0.002378235 |
| 0.031760566 | 0.381716452 | 0.067639239 | 0.151178274 |
| 0.473976842 | 0.154034878 | 0.151656636 | 0.287646694 |
| 0.275660198 | 0.05811754  | 0.001915146 | 0.477639394 |
| 0.455302721 | 0.427223689 | 0.455200466 | 0.407482051 |
| 0.433060396 | 0.342252796 | 0.404281728 | 0.237934049 |
| 0.07359895  | 0.056137024 | 0.265822476 | 0.258689813 |
| 0.005141395 | 0.326996653 | 0.234252351 | 0.094051448 |
| 0.39698765  | 0.235564005 | 0.02294605  | 0.283034749 |
| 0.015886687 | 0.249059911 | 0.250418162 | 0.163542519 |
| 0.308008547 | 0.006819639 | 0.227719313 | 0.341525277 |
| 0.387646151 | 0.303407215 | 0.317180278 | 0.500995299 |
| 0.259166414 | 0.091517448 | 0.265661938 | 0.343626814 |
| 0.049309288 | 0.131126581 | 0.27222137  | 0.044568368 |
| 0.140800137 | 0.404930368 | 0.30445144  | 0.047826449 |
| 0.212136137 | 0.00238115  | 0.329475206 | 0.505303948 |
| 0.42517031  | 0.523632642 | 0.481390797 | 0.26701052  |
| 0.486262671 | 0.151510146 | 0.514552641 | 0.380471083 |
| 0.335727288 | 0.001021217 | 0.003805143 | 0.492275248 |
| 0.346262611 | 0.035032832 | 0.109492423 | 0.268591735 |
| 0.08627098  | 0.107272898 | 0.037834034 | 0.181655193 |
| 0.298075394 | 0.199891047 | 0.17089515  | 0.440834937 |
| 0.196040639 | 0.167966672 | 0.296866826 | 0.052421572 |
| 0.301202181 | 0.035711426 | 0.051034401 | 0.008202625 |
| 0.313563628 | 0.081413853 | 0.411126395 | 0.486335391 |
| 0.46997485  | 0.339848768 | 0.303410275 | 0.264742411 |
| 0.413339537 | 0.064697102 | 0.290119298 | 0.069211117 |
| 0.462642559 | 0.342659232 | 0.276707277 | 0.267763651 |
| 0.500712021 | 0.447828525 | 0.019921948 | 0.397393657 |
| 0.007952417 | 0.001486456 | 0.278323302 | 0.192110522 |
| 0.059718709 | 0.346262494 | 0.206641053 | 0.175938016 |
| 0.164512404 | 0.020526922 | 0.283612314 | 0.26862174  |
| 0.23590856  | 0.309528413 | 0.261489024 | 0.179798545 |
| 0.221657527 | 0.155822483 | 0.13764555  | 0.110423387 |
| 0.206166454 | 0.271740061 | 0.156664897 | 0.012038584 |
| 0.329228364 | 0.34607735  | 0.035804267 | 0.098629903 |
| 0.431695617 | 0.499171405 | 0.033896037 | 0.009256358 |
| 0.213836758 | 0.26866516  | 0.503861697 | 0.475169394 |
| 0.486202381 | 0.506377575 | 0.343230259 | 0.115353723 |
| 0.042569287 | 0.252795818 | 0.264764589 | 0.079071439 |
| 0.493744174 | 0.041745893 | 0.440170693 | 0.287781648 |
| 0.07343323  | 0.165402975 | 0.021918291 | 0.053405354 |
| 0.320754497 | 0.119040034 | 0.140466168 | 0.101126147 |
| 0.284536341 | 0.239219615 | 0.029081872 | 0.145338753 |
| 0.311707852 | 0.23256057  | 0.112644959 | 0.2002579   |
| 0.288541843 | 0.179641594 | 0.410929444 | 0.42512018  |
| 0.082607994 | 0.076665205 | 0.220944083 | 0.322817152 |

|             |             |             |             |
|-------------|-------------|-------------|-------------|
| 0.439960152 | 0.308385021 | 0.018197464 | 0.427866659 |
| 0.470864574 | 0.372572092 | 0.459262522 | 0.380252798 |
| 0.050558337 | 0.329645281 | 0.296357684 | 0.305900123 |
| 0.131984272 | 0.263462238 | 0.175742832 | 0.038028498 |
| 0.243201599 | 0.430495105 | 0.401823556 | 0.125375241 |
| 0.301455897 | 0.081242175 | 0.036147794 | 0.414752217 |
| 0.22214621  | 0.07058666  | 0.269008327 | 0.42279144  |
| 0.001213569 | 0.164066632 | 0.479075456 | 0.170747681 |
| 0.478032669 | 0.486889467 | 0.41114767  | 0.162430135 |
| 0.003512099 | 0.37066521  | 0.304503378 | 0.335530383 |
| 0.420718167 | 0.277910721 | 0.094461338 | 0.056568999 |
| 0.235566203 | 0.050666959 | 0.127849208 | 0.241949879 |
| 0.230419218 | 0.31107237  | 0.139744769 | 0.148650762 |
| 0.153910997 | 0.059081852 | 0.223907391 | 0.164270673 |
| 0.155827679 | 0.183526147 | 0.322821058 | 0.216261767 |
| 0.279146879 | 0.431397527 | 0.393937422 | 0.01423211  |
| 0.294219438 | 0.393042694 | 0.391675599 | 0.003896418 |
| 0.4006522   | 0.003768105 | 0.161581636 | 0.175701719 |
| 0.150255351 | 0.179698208 | 0.205043998 | 0.251381623 |
| 0.269462787 | 0.168282595 | 0.213178979 | 0.17118068  |
| 0.124948859 | 0.144922158 | 0.299304595 | 0.266234534 |
| 0.245224082 | 0.086688745 | 0.067860948 | 0.072721942 |
| 0.035264093 | 0.432316516 | 0.194340914 | 0.043506017 |
| 0.160837642 | 0.275322061 | 0.312589915 | 0.46543437  |
| 0.380239798 | 0.080321495 | 0.265326279 | 0.427406781 |
| 0.247629899 | 0.234312503 | 0.041065147 | 0.271332626 |
| 0.163462578 | 0.226792218 | 0.276234578 | 0.237487522 |
| 0.36404201  | 0.359097983 | 0.185430278 | 0.396624729 |
| 0.280537539 | 0.283012973 | 0.263134165 | 0.069996638 |
| 0.137046744 | 0.084828154 | 0.244872896 | 0.000719335 |
| 0.265961887 | 0.181931653 | 0.480673146 | 0.451807751 |
| 0.283937769 | 0.334084025 | 0.262812084 | 0.071987065 |
| 0.22426668  | 0.147575974 | 0.091792502 | 0.389744675 |
| 0.253873339 | 0.119880213 | 0.255122442 | 0.219256092 |
| 0.400258137 | 0.37549568  | 0.215346686 | 0.18234253  |
| 0.167039589 | 0.126509642 | 0.428846772 | 0.075070013 |
| 0.339214217 | 0.181364899 | 0.250114447 | 0.269809593 |
| 0.186344964 | 0.500706867 | 0.033764173 | 0.521124796 |
| 0.317160445 | 0.087217986 | 0.449231422 | 0.193731462 |
| 0.187506543 | 0.082637127 | 0.227153605 | 0.279516748 |
| 0.181658579 | 0.301512996 | 0.025943159 | 0.099479753 |
| 0.28086633  | 0.24263662  | 0.387647186 | 0.306766436 |
| 0.220966902 | 0.305326067 | 0.168576477 | 0.22277598  |
| 0.440146814 | 0.442628351 | 0.247583371 | 0.195564936 |
| 0.297794997 | 0.06955577  | 0.274919888 | 0.015268437 |
| 1           | 0.347426455 | 0.332482435 | 0.032244012 |
| 0.009687723 | 0.267107959 | 0.337084781 | 0.039184514 |
| 0.492005543 | 0.245226547 | 0.259744073 | 0.358401516 |
| 0.117542658 | 0.447044545 | 0.094024244 | 0.363784041 |
| 0.032861859 | 0.171347862 | 0.302152787 | 0.305098298 |
| 0.220896173 | 0.293447844 | 0.342489355 | 0.242445375 |
| 0.019946101 | 0.224015617 | 0.002551473 | 0.358937321 |
| 0.424813122 | 0.322620068 | 0.153496285 | 0.250856202 |
| 0.211334909 | 0.326795938 | 0.243638157 | 0.315774491 |

|             |             |             |             |
|-------------|-------------|-------------|-------------|
| 0.006398902 | 0.326853941 | 0.129911092 | 0.373882561 |
| 0.295510105 | 0.297149181 | 0.035421396 | 0.284824228 |
| 0.393176775 | 0.30563525  | 0.200857989 | 0.337649312 |
| 0.453790715 | 0.32795967  | 0.110714964 | 0.161780373 |
| 0.307851659 | 0.03711983  | 0.276982387 | 0.507868758 |
| 0.134929308 | 0.225463972 | 0.45724499  | 0.182119681 |
| 0.296910291 | 0.331376938 | 0.311202714 | 0.490488848 |
| 0.063929773 | 0.175588135 | 0.389413172 | 0.448534534 |
| 0.248606669 | 0.178892628 | 0.267781875 | 0.226733125 |
| 0.419977878 | 0.070251    | 0.249914606 | 0.296510411 |
| 0.259169652 | 0.224156732 | 0.231118614 | 0.170318405 |
| 0.02756417  | 0.116724953 | 0.264124258 | 0.090035914 |
| 0.238129979 | 0.303732118 | 0.22068823  | 0.347464294 |
| 0.106309836 | 0.019975076 | 0.412052432 | 0.038579971 |
| 0.219792469 | 0.313989909 | 0.163775968 | 0.294759285 |
| 0.138665082 | 0.266838596 | 0.261971129 | 0.000769957 |
| 0.392098179 | 0.037115316 | 0.228118903 | 0.223344351 |
| 0.292381948 | 0.035226431 | 0.407976864 | 0.513964359 |
| 0.209007784 | 0.248419005 | 0.328426541 | 0.429545814 |
| 0.177542431 | 0.30272914  | 0.32132988  | 0.324434943 |
| 0.232802815 | 0.319146467 | 0.331326739 | 0.326807698 |
| 0.310309348 | 0.175909101 |             |             |
| STX1A       | 0.034376227 | 0.402136043 | 0.026138495 |
| 0.086349129 | 0.246176852 | 0.28082875  | 0.025804722 |
| 0.065501592 | 0.296117319 | 0.29138962  | 0.255163672 |
| 0.005579027 | 0.133410032 | 0.428553498 | 0.023095754 |
| 0.316165012 | 0.012519005 | 0.053882133 | 0.061697821 |
| 0.155672943 | 0.228341365 | 0.310039926 | 0.251924335 |
| 0.233593747 | 0.126001966 | 0.224077603 | 0.343048974 |
| 0.490315232 | 0.333555722 | 0.363101962 | 0.212046791 |
| 0.355208143 | 0.271391636 | 0.362543944 | 0.004886067 |
| 0.302548789 | 0.017504002 | 0.370876736 | 0.193319963 |
| 0.168013085 | 0.274478448 | 0.273994258 | 0.16132629  |
| 0.301276659 | 0.014853181 | 0.253484306 | 0.367943177 |
| 0.224023194 | 0.193213683 | 0.03048096  | 0.358539416 |
| 0.297682476 | 0.236668048 | 0.356543221 | 0.001424811 |
| 0.324107512 | 0.191804941 | 0.309409717 | 0.465023222 |
| 0.113039657 | 0.064341829 | 0.334554548 | 0.16295165  |
| 0.309518368 | 0.31549819  | 0.159188408 | 0.321669684 |
| 0.469435388 | 0.22182041  | 0.41136547  | 0.108661215 |
| 0.276691756 | 0.012247209 | 0.087765667 | 0.040620601 |
| 0.323981491 | 0.118124577 | 0.257750098 | 0.299239776 |
| 0.409143478 | 0.456390164 | 0.138360299 | 0.454828527 |
| 0.12676187  | 0.302372923 | 0.234098415 | 0.224170201 |
| 0.305248409 | 0.043534294 | 0.347249634 | 0.478636982 |
| 0.021102811 | 0.300415747 | 0.342460192 | 0.064479393 |
| 0.395715217 | 0.293114846 | 0.320999688 | 0.201410012 |
| 0.320916749 | 0.287610512 | 0.425508749 | 0.197740699 |
| 0.255091177 | 0.033803938 | 0.423430277 | 0.296011945 |
| 0.224498343 | 0.038948902 | 0.194804403 | 0.482406454 |
| 0.320485736 | 0.477975765 | 0.414404934 | 0.311322935 |
| 0.324538266 | 0.474547406 | 0.321873494 | 0.378508957 |
| 0.212320752 | 0.495969411 | 0.105014669 | 0.016439029 |
| 0.033534964 | 0.040299821 | 0.208668102 | 0.224281366 |

|             |             |              |             |
|-------------|-------------|--------------|-------------|
| 0.467270296 | 0.224634613 | 0.113635704  | 0.159057343 |
| 0.464949737 | 0.427062734 | 0.500234055  | 0.377354503 |
| 0.014628588 | 0.282124646 | 0.322480557  | 0.176056813 |
| 0.301176387 | 0.054686944 | 0.258981373  | 0.448969212 |
| 0.318127463 | 0.42784672  | 0.09051672   | 0.42603209  |
| 0.12630742  | 0.468854425 | 0.442456984  | 0.095916301 |
| 0.465395229 | 0.435415965 | 0.483855736  | 0.374316278 |
| 0.414728219 | 0.227074186 | 0.068079747  | 0.335331722 |
| 0.44223416  | 0.018523367 | 0.489868804  | 0.511847154 |
| 0.469946887 | 0.478320682 | 0.503308805  | 0.500390476 |
| 0.473968536 | 0.031687976 | 0.05198517   | 0.203270594 |
| 0.465289209 | 0.342878323 | 0.079540279  | 0.356633554 |
| 0.292984914 | 0.271230921 | 0.406575626  | 0.288509367 |
| 0.45702463  | 0.434563156 | 0.494046415  | 0.340704934 |
| 0.219134035 | 0.243061332 | 0.355314181  | 0.405101658 |
| 0.016422466 | 0.059492244 | 0.0222200814 | 0.226257664 |
| 0.280150667 | 0.09840037  | 0.26427008   | 0.279138555 |
| 0.108775451 | 0.231203609 | 0.348956597  | 0.33903496  |
| 0.027483321 | 0.339501399 | 0.089449617  | 0.099013087 |
| 0.016083283 | 0.08546183  | 0.120775951  | 0.090744075 |
| 0.176191225 | 0.16495516  | 0.399414056  | 0.478521178 |
| 0.286671406 | 0.110500163 | 0.355069751  | 0.431117486 |
| 0.370006603 | 0.324056021 | 0.14760619   | 0.004471728 |
| 0.239413215 | 0.340403195 | 0.256233498  | 0.349191321 |
| 0.11526155  | 0.179328027 | 0.299407634  | 0.361178494 |
| 0.175447345 | 0.081271108 | 0.318807814  | 0.350896956 |
| 0.089829006 | 0.236650579 | 0.428308617  | 0.314281056 |
| 0.0001163   | 0.22456209  | 0.426517223  | 0.125726356 |
| 0.225708743 | 0.16253046  | 0.280390641  | 0.4568145   |
| 0.31106422  | 0.217740224 | 0.493492325  | 0.356360202 |
| 0.277364465 | 0.158874432 | 0.504484669  | 0.088819023 |
| 0.294326569 | 0.033613467 | 0.19735935   | 0.279048388 |
| 0.153292933 | 0.209711111 | 0.275380756  | 0.223906771 |
| 0.067383069 | 0.484003551 | 0.333366331  | 0.496575369 |
| 0.339614599 | 0.502849745 | 0.45978899   | 0.407121827 |
| 0.254150174 | 0.341038848 | 0.21513399   | 0.414940618 |
| 0.451247824 | 0.270974473 | 0.036039671  | 0.452610373 |
| 0.318146552 | 0.364572801 | 0.085262769  | 0.4704541   |
| 0.426013168 | 0.429258625 | 0.083808484  | 0.330495179 |
| 0.322471366 | 0.138627731 | 0.374136213  | 0.496403161 |
| 0.306018333 | 0.305117059 | 0.290634746  | 0.368747291 |
| 0.094980868 | 0.193813324 | 0.245733252  | 0.251908234 |
| 0.025387204 | 0.038286437 | 0.028972849  | 0.099171245 |
| 0.177742707 | 0.35657497  | 0.321957826  | 0.493741416 |
| 0.059134445 | 0.362415981 | 0.155500579  | 0.231197048 |
| 0.379474272 | 0.300088418 | 0.329346926  | 0.301738041 |
| 0.157744804 | 0.007223827 | 0.069438702  | 0.456446038 |
| 0.016214208 | 0.247992274 | 0.213801574  | 0.001499238 |
| 0.019270136 | 0.400770386 | 0.053851128  | 0.127144414 |
| 0.470063989 | 0.132197868 | 0.120850256  | 0.289414779 |
| 0.258255462 | 0.043036302 | 0.001117132  | 0.475694568 |
| 0.457607887 | 0.427030056 | 0.456540565  | 0.407977337 |
| 0.428893152 | 0.358606692 | 0.387614537  | 0.234110792 |
| 0.051647377 | 0.044182136 | 0.227832421  | 0.208818969 |

|             |             |             |             |
|-------------|-------------|-------------|-------------|
| 0.003669607 | 0.316852807 | 0.232189176 | 0.073021429 |
| 0.39889353  | 0.208680524 | 0.014200847 | 0.288758836 |
| 0.00865763  | 0.27425744  | 0.220892312 | 0.141203969 |
| 0.297049909 | 0.003679346 | 0.214464085 | 0.31099575  |
| 0.374934027 | 0.277375793 | 0.345510067 | 0.493960872 |
| 0.22694234  | 0.077551562 | 0.231967066 | 0.342584968 |
| 0.031939059 | 0.119719212 | 0.264837361 | 0.050827835 |
| 0.166164384 | 0.401653236 | 0.317560384 | 0.032945076 |
| 0.171833965 | 0.000757252 | 0.3036829   | 0.491967306 |
| 0.426852788 | 0.511608064 | 0.470806201 | 0.270909547 |
| 0.472732117 | 0.218425296 | 0.511717767 | 0.367127048 |
| 0.344678802 | 0.000384083 | 0.002245943 | 0.491145567 |
| 0.320923935 | 0.028940342 | 0.083652649 | 0.274658053 |
| 0.059427171 | 0.087994959 | 0.027687945 | 0.167658101 |
| 0.313469212 | 0.177885342 | 0.169262677 | 0.427660685 |
| 0.156808227 | 0.142909183 | 0.300765935 | 0.041303594 |
| 0.3124172   | 0.022129899 | 0.040212869 | 0.005711404 |
| 0.305524836 | 0.067371036 | 0.397690991 | 0.482075434 |
| 0.445245687 | 0.333269936 | 0.342467272 | 0.278330308 |
| 0.421002601 | 0.055540528 | 0.336444418 | 0.057741556 |
| 0.457401014 | 0.313746388 | 0.240464594 | 0.233324269 |
| 0.471330884 | 0.423139168 | 0.011574465 | 0.370023016 |
| 0.005216428 | 0.001316647 | 0.263865391 | 0.169622597 |
| 0.075294515 | 0.318528559 | 0.17296034  | 0.168830792 |
| 0.158723148 | 0.01256337  | 0.28810608  | 0.254598705 |
| 0.198223682 | 0.272870569 | 0.242211702 | 0.165485625 |
| 0.205952276 | 0.121829306 | 0.120403338 | 0.086012314 |
| 0.20886454  | 0.245624514 | 0.131017189 | 0.00633778  |
| 0.339234534 | 0.341016263 | 0.023708548 | 0.081151481 |
| 0.414776563 | 0.488976588 | 0.018231425 | 0.003834885 |
| 0.182791958 | 0.241401323 | 0.493574213 | 0.476884337 |
| 0.472094086 | 0.480263638 | 0.315379802 | 0.079856393 |
| 0.029830814 | 0.227571989 | 0.254584929 | 0.062505649 |
| 0.486775484 | 0.030697953 | 0.442199824 | 0.303266859 |
| 0.055479523 | 0.132630658 | 0.012815072 | 0.037627118 |
| 0.336797487 | 0.093951501 | 0.110947355 | 0.081043113 |
| 0.237251852 | 0.25273404  | 0.018332305 | 0.112708808 |
| 0.273033228 | 0.22433089  | 0.084965946 | 0.203981994 |
| 0.285499559 | 0.224418479 | 0.402663911 | 0.389923838 |
| 0.064647019 | 0.057703053 | 0.190701821 | 0.328133899 |
| 0.443079672 | 0.337118978 | 0.013677144 | 0.435643119 |
| 0.467320557 | 0.378599115 | 0.454627951 | 0.347760163 |
| 0.037364201 | 0.311613857 | 0.310783607 | 0.267341999 |
| 0.10427577  | 0.270174664 | 0.151948367 | 0.025827407 |
| 0.224013876 | 0.413122715 | 0.384469493 | 0.096518405 |
| 0.323783138 | 0.067706885 | 0.026475263 | 0.429859352 |
| 0.195422501 | 0.047413373 | 0.296463558 | 0.433471099 |
| 0.000657423 | 0.19151174  | 0.476431334 | 0.151431368 |
| 0.46755781  | 0.470248897 | 0.382031113 | 0.163162065 |
| 0.003084175 | 0.375660688 | 0.273096033 | 0.310708564 |
| 0.40544882  | 0.26624697  | 0.100033247 | 0.035920352 |
| 0.207282767 | 0.041106436 | 0.084357822 | 0.258051734 |
| 0.223188276 | 0.301604709 | 0.114454829 | 0.125833355 |
| 0.12739113  | 0.04921819  | 0.254608753 | 0.144343486 |

|             |             |             |             |
|-------------|-------------|-------------|-------------|
| 0.171575719 | 0.1530033   | 0.284067832 | 0.260434407 |
| 0.240251892 | 0.413140893 | 0.366303811 | 0.008812906 |
| 0.314976899 | 0.380107417 | 0.392396558 | 0.001077842 |
| 0.388660188 | 0.001354768 | 0.129525359 | 0.143319032 |
| 0.125966238 | 0.141941044 | 0.176475702 | 0.228118385 |
| 0.246576835 | 0.135847698 | 0.181792018 | 0.140280942 |
| 0.099853325 | 0.12753723  | 0.292871684 | 0.253392061 |
| 0.216105648 | 0.065727508 | 0.05647487  | 0.061136747 |
| 0.0232829   | 0.446029008 | 0.167420664 | 0.035840405 |
| 0.134707214 | 0.263813699 | 0.280133388 | 0.46604168  |
| 0.366711336 | 0.070384699 | 0.245790913 | 0.42313262  |
| 0.280828796 | 0.227034707 | 0.028741777 | 0.270682122 |
| 0.135885086 | 0.194159949 | 0.296804154 | 0.206354606 |
| 0.364970456 | 0.328116131 | 0.160611102 | 0.388254541 |
| 0.26481751  | 0.277131526 | 0.288266287 | 0.045938851 |
| 0.101751404 | 0.068528686 | 0.224051961 | 0.000386064 |
| 0.242593481 | 0.165752642 | 0.473175024 | 0.4419916   |
| 0.321485818 | 0.317253392 | 0.276623364 | 0.046020853 |
| 0.260238541 | 0.126921422 | 0.071207099 | 0.404119028 |
| 0.291529378 | 0.102975497 | 0.226899211 | 0.22671573  |
| 0.401803513 | 0.390595392 | 0.213022762 | 0.154439681 |
| 0.147936276 | 0.109397934 | 0.418198755 | 0.062712074 |
| 0.347233557 | 0.160552933 | 0.263366925 | 0.221285146 |
| 0.151061396 | 0.50347188  | 0.024419276 | 0.518528174 |
| 0.273531144 | 0.073565615 | 0.424867927 | 0.193624502 |
| 0.186888131 | 0.072036397 | 0.253569763 | 0.294497162 |
| 0.150721068 | 0.337631225 | 0.028396016 | 0.073326857 |
| 0.247405675 | 0.255250273 | 0.387239726 | 0.298042691 |
| 0.211283872 | 0.276383048 | 0.228831947 | 0.189064814 |
| 0.439330973 | 0.434039867 | 0.185017588 | 0.165932637 |
| 0.265044761 | 0.050093485 | 0.282921015 | 0.016567033 |
| 0.347426455 | 1           | 0.345087682 | 0.021087054 |
| 0.005076585 | 0.271299138 | 0.31787462  | 0.030554729 |
| 0.480167043 | 0.283939985 | 0.271618346 | 0.374082023 |
| 0.101686989 | 0.432706029 | 0.071049169 | 0.34496393  |
| 0.023317847 | 0.153965863 | 0.328389946 | 0.3141668   |
| 0.176787489 | 0.276614086 | 0.310581192 | 0.239372351 |
| 0.010919774 | 0.200386131 | 0.000253242 | 0.327514441 |
| 0.413302526 | 0.315363845 | 0.131928205 | 0.302761055 |
| 0.186293743 | 0.325797123 | 0.204062224 | 0.346977782 |
| 0.003104912 | 0.307018546 | 0.108998745 | 0.364653746 |
| 0.287057865 | 0.27967153  | 0.024329093 | 0.277361865 |
| 0.378864694 | 0.244609621 | 0.177465937 | 0.317114569 |
| 0.457178652 | 0.339651228 | 0.101048238 | 0.168130914 |
| 0.324040234 | 0.026814947 | 0.309921434 | 0.495610408 |
| 0.106150814 | 0.212895223 | 0.442545193 | 0.132488435 |
| 0.303790348 | 0.326897658 | 0.330827217 | 0.484834028 |
| 0.04095353  | 0.145928114 | 0.393162016 | 0.432245441 |
| 0.220034445 | 0.168108367 | 0.253558038 | 0.181508318 |
| 0.414434121 | 0.053038599 | 0.242510708 | 0.269003617 |
| 0.242064573 | 0.207272191 | 0.247523666 | 0.14562884  |
| 0.016830388 | 0.096489066 | 0.27238721  | 0.070451017 |
| 0.195446362 | 0.279715608 | 0.198946315 | 0.316960743 |
| 0.083729886 | 0.010502937 | 0.387229514 | 0.033155053 |

|             |             |             |             |
|-------------|-------------|-------------|-------------|
| 0.216347924 | 0.305788317 | 0.14318773  | 0.284605208 |
| 0.11691607  | 0.242413396 | 0.234102514 | 0.000157547 |
| 0.377994309 | 0.040514351 | 0.234873464 | 0.18361473  |
| 0.290968375 | 0.021584179 | 0.402279597 | 0.501381956 |
| 0.201734116 | 0.286954307 | 0.355939908 | 0.422553633 |
| 0.179407993 | 0.361556533 | 0.33537265  | 0.329357703 |
| 0.250048207 | 0.338662472 | 0.355345239 | 0.3492123   |
| 0.301487571 | 0.165818563 |             |             |
| STX4A       | 0.018506071 | 0.398582978 | 0.016699553 |
| 0.023159438 | 0.167887074 | 0.145390721 | 0.011345491 |
| 0.024169293 | 0.300713132 | 0.148771981 | 0.180157072 |
| 0.002100991 | 0.036244688 | 0.408810935 | 0.010262886 |
| 0.276003948 | 0.004063224 | 0.034558556 | 0.025482643 |
| 0.049498575 | 0.153886813 | 0.0951502   | 0.211081682 |
| 0.143026043 | 0.125211247 | 0.215450485 | 0.276052289 |
| 0.464685968 | 0.113002998 | 0.318783029 | 0.063739583 |
| 0.339103146 | 0.207963898 | 0.230812151 | 0.001609045 |
| 0.238646553 | 0.006079296 | 0.36245539  | 0.085263971 |
| 0.035767979 | 0.263160498 | 0.190172485 | 0.075167418 |
| 0.21919142  | 0.006583053 | 0.105148885 | 0.350572606 |
| 0.204341919 | 0.080068956 | 0.027688924 | 0.325364755 |
| 0.135456492 | 0.221182386 | 0.364954024 | 0.001191291 |
| 0.160132811 | 0.05323549  | 0.119481998 | 0.443273574 |
| 0.099782158 | 0.036126694 | 0.125994792 | 0.109820052 |
| 0.312768078 | 0.297456891 | 0.140684564 | 0.167759863 |
| 0.449306687 | 0.070893735 | 0.381008185 | 0.029042754 |
| 0.186596283 | 0.00786878  | 0.080827883 | 0.042371422 |
| 0.150789537 | 0.075412396 | 0.176869292 | 0.134991088 |
| 0.409383789 | 0.441835157 | 0.122645555 | 0.445543542 |
| 0.04626199  | 0.232333136 | 0.079073811 | 0.19589326  |
| 0.301805044 | 0.019895094 | 0.306494085 | 0.453375676 |
| 0.013915571 | 0.303046782 | 0.343048228 | 0.072392651 |
| 0.372743275 | 0.097547842 | 0.269305749 | 0.055044096 |
| 0.269410087 | 0.225293536 | 0.426992299 | 0.182378027 |
| 0.151299237 | 0.033432318 | 0.422540002 | 0.218832664 |
| 0.098921417 | 0.028768943 | 0.060316413 | 0.450300046 |
| 0.286382686 | 0.45083946  | 0.42099441  | 0.307786028 |
| 0.250559586 | 0.443107068 | 0.280298212 | 0.37024993  |
| 0.092880737 | 0.478206092 | 0.06922071  | 0.005441354 |
| 0.02132268  | 0.015581146 | 0.071864275 | 0.204803065 |
| 0.427793961 | 0.208239807 | 0.064306319 | 0.094335846 |
| 0.429578511 | 0.425515382 | 0.488397818 | 0.365147312 |
| 0.007197704 | 0.094283427 | 0.235089098 | 0.078191342 |
| 0.300163566 | 0.047125029 | 0.13426156  | 0.441517272 |
| 0.288704005 | 0.394524277 | 0.048179641 | 0.41607511  |
| 0.081324878 | 0.43369138  | 0.424436136 | 0.059657787 |
| 0.441636554 | 0.420250854 | 0.44295306  | 0.320070251 |
| 0.392298106 | 0.147511339 | 0.047018833 | 0.33110725  |
| 0.409009515 | 0.00353922  | 0.465039549 | 0.481625406 |
| 0.451196645 | 0.440868848 | 0.472336098 | 0.46628043  |
| 0.461979026 | 0.027028562 | 0.023111021 | 0.177810701 |
| 0.449188776 | 0.304964882 | 0.025984359 | 0.28622787  |
| 0.256893449 | 0.188133143 | 0.386520227 | 0.100147123 |
| 0.432879034 | 0.392242224 | 0.47295395  | 0.337179286 |

|             |             |             |             |
|-------------|-------------|-------------|-------------|
| 0.192418013 | 0.232196507 | 0.282873665 | 0.398866764 |
| 0.004772844 | 0.034056643 | 0.022652226 | 0.21618097  |
| 0.094733454 | 0.068513908 | 0.159804594 | 0.243181065 |
| 0.090869786 | 0.159506218 | 0.17234613  | 0.294190879 |
| 0.032403485 | 0.304251356 | 0.056399552 | 0.078709883 |
| 0.004709432 | 0.087317614 | 0.041025507 | 0.026560794 |
| 0.112747496 | 0.175150474 | 0.385152878 | 0.438900172 |
| 0.169158157 | 0.104735575 | 0.335703731 | 0.39329145  |
| 0.341626171 | 0.230090027 | 0.147414997 | 0.000688744 |
| 0.083494405 | 0.15688469  | 0.079609975 | 0.292089152 |
| 0.119778458 | 0.069967513 | 0.280559351 | 0.308318614 |
| 0.134769136 | 0.060710617 | 0.161410936 | 0.33694841  |
| 0.094111219 | 0.097934219 | 0.393895269 | 0.294499213 |
| 9.44E-05    | 0.156721056 | 0.393065922 | 0.037957316 |
| 0.235286265 | 0.046817467 | 0.077948145 | 0.422181852 |
| 0.112368741 | 0.095532025 | 0.460654817 | 0.304206935 |
| 0.100935428 | 0.173458376 | 0.476605498 | 0.045179907 |
| 0.217424223 | 0.006386965 | 0.167834491 | 0.210313524 |
| 0.126275614 | 0.194740835 | 0.197570563 | 0.087095083 |
| 0.066144341 | 0.473496567 | 0.3030499   | 0.469821165 |
| 0.151571173 | 0.473807867 | 0.427218832 | 0.376302905 |
| 0.229711306 | 0.242842268 | 0.061971287 | 0.377972202 |
| 0.410855872 | 0.096391811 | 0.039735931 | 0.443580502 |
| 0.215260573 | 0.333890067 | 0.019780683 | 0.43533875  |
| 0.399849549 | 0.428549614 | 0.034244502 | 0.289579659 |
| 0.286716923 | 0.096307136 | 0.336128731 | 0.47389878  |
| 0.120312063 | 0.22823579  | 0.134117176 | 0.316880461 |
| 0.080611445 | 0.068754907 | 0.235535456 | 0.074396354 |
| 0.005228066 | 0.030575605 | 0.023380847 | 0.048957146 |
| 0.051942203 | 0.353683289 | 0.288704964 | 0.472462697 |
| 0.037954295 | 0.334035024 | 0.156750989 | 0.090470561 |
| 0.370514295 | 0.198359488 | 0.242023981 | 0.26755997  |
| 0.147633637 | 0.001295783 | 0.02074222  | 0.440575644 |
| 0.018686462 | 0.07731473  | 0.161667031 | 0.000524341 |
| 0.00978659  | 0.408363628 | 0.057825886 | 0.125614294 |
| 0.433480599 | 0.128939539 | 0.115273172 | 0.147476079 |
| 0.219571554 | 0.029842961 | 0.000267836 | 0.454169121 |
| 0.447352946 | 0.420773062 | 0.452421583 | 0.407734448 |
| 0.416174588 | 0.341291636 | 0.348387771 | 0.183300258 |
| 0.017008765 | 0.02405449  | 0.067407217 | 0.126348807 |
| 0.002029164 | 0.268146194 | 0.156355766 | 0.067732807 |
| 0.370785125 | 0.205460812 | 0.005604074 | 0.244490812 |
| 0.002569895 | 0.079385205 | 0.096209539 | 0.076108113 |
| 0.26204076  | 0.001280234 | 0.065946453 | 0.107839133 |
| 0.362754705 | 0.270107211 | 0.154122878 | 0.466440352 |
| 0.163563091 | 0.085536955 | 0.126683283 | 0.300013101 |
| 0.01356328  | 0.050382787 | 0.167622776 | 0.014255686 |
| 0.059970745 | 0.397552691 | 0.158428181 | 0.009967798 |
| 0.139172309 | 0.000176084 | 0.284587777 | 0.471272377 |
| 0.41757488  | 0.479368545 | 0.439958095 | 0.124181961 |
| 0.443939096 | 0.070197566 | 0.488332739 | 0.353493379 |
| 0.210151459 | 9.34E-05    | 0.000949347 | 0.450321984 |
| 0.243474537 | 0.033548872 | 0.068751827 | 0.085880468 |
| 0.017594197 | 0.056114805 | 0.013500488 | 0.047710521 |



|             |             |             |             |
|-------------|-------------|-------------|-------------|
| 0.277534019 | 0.106452306 | 0.047993773 | 0.430418596 |
| 0.090085927 | 0.107595019 | 0.197526048 | 0.045097752 |
| 0.258441017 | 0.006776259 | 0.043998373 | 0.001067868 |
| 0.26812171  | 0.071629122 | 0.39740476  | 0.464379025 |
| 0.415948708 | 0.278201158 | 0.17941168  | 0.104740477 |
| 0.400539706 | 0.063734362 | 0.108122979 | 0.060174101 |
| 0.443863892 | 0.282824488 | 0.214094749 | 0.214603243 |
| 0.445910471 | 0.398943976 | 0.005808818 | 0.339835519 |
| 0.001234848 | 0.000287497 | 0.189840838 | 0.165874233 |
| 0.028484844 | 0.217748989 | 0.156041142 | 0.079927407 |
| 0.066746381 | 0.004513638 | 0.129996294 | 0.111669089 |
| 0.161393534 | 0.189476668 | 0.148936361 | 0.165897522 |
| 0.08980732  | 0.034298103 | 0.049214103 | 0.039841754 |
| 0.078960623 | 0.242020068 | 0.131869085 | 0.002526979 |
| 0.263904786 | 0.258473827 | 0.014118092 | 0.075969589 |
| 0.370562085 | 0.455180229 | 0.006923386 | 0.000771391 |
| 0.172490187 | 0.148320077 | 0.46327285  | 0.461818758 |
| 0.458529638 | 0.452942003 | 0.302624797 | 0.026296775 |
| 0.013371778 | 0.174870721 | 0.168138739 | 0.014507654 |
| 0.468050065 | 0.03539445  | 0.424167107 | 0.186690175 |
| 0.050142057 | 0.051787614 | 0.003487588 | 0.025915546 |
| 0.275964624 | 0.083263841 | 0.059927219 | 0.078956447 |
| 0.132275751 | 0.06739756  | 0.009550046 | 0.08543364  |
| 0.260548006 | 0.059436231 | 0.07106387  | 0.108191674 |
| 0.264013119 | 0.092311039 | 0.365719931 | 0.367990783 |
| 0.062668413 | 0.04518255  | 0.066023507 | 0.307593684 |
| 0.41605487  | 0.309097142 | 0.003964134 | 0.433787376 |
| 0.438422013 | 0.350522614 | 0.436714798 | 0.323554478 |
| 0.037354319 | 0.217536879 | 0.177111157 | 0.213909316 |
| 0.08950506  | 0.157487554 | 0.107646557 | 0.021556776 |
| 0.213459023 | 0.409157876 | 0.365229337 | 0.04934416  |
| 0.284179038 | 0.071019764 | 0.030189752 | 0.411793269 |
| 0.0526505   | 0.017691632 | 0.216986901 | 0.41631138  |
| 0.000413216 | 0.05071413  | 0.444042314 | 0.058061539 |
| 0.445393878 | 0.428285583 | 0.352826116 | 0.066995953 |
| 0.000876625 | 0.336297579 | 0.233185641 | 0.161535938 |
| 0.402065909 | 0.249207913 | 0.035961765 | 0.010667576 |
| 0.181430411 | 0.045348772 | 0.030196224 | 0.081916474 |
| 0.075849883 | 0.308172378 | 0.105429841 | 0.10787163  |
| 0.062878456 | 0.060089073 | 0.068065291 | 0.07347682  |
| 0.052826565 | 0.137612805 | 0.260125637 | 0.120242724 |
| 0.080880625 | 0.404301009 | 0.352588248 | 0.003515681 |
| 0.220524564 | 0.362332486 | 0.362622999 | 0.000573168 |
| 0.352495976 | 0.00039038  | 0.073896614 | 0.070961749 |
| 0.058222807 | 0.082730309 | 0.138826941 | 0.082402258 |
| 0.246588084 | 0.074740555 | 0.083932421 | 0.114511408 |
| 0.032503959 | 0.07790054  | 0.23842702  | 0.156923497 |
| 0.084653508 | 0.029713115 | 0.059895101 | 0.066751698 |
| 0.0068451   | 0.425910109 | 0.159409237 | 0.036973229 |
| 0.112999372 | 0.152379114 | 0.250717486 | 0.455520116 |
| 0.327997808 | 0.076584911 | 0.151777432 | 0.399112218 |
| 0.125260198 | 0.075203006 | 0.014431695 | 0.196027953 |
| 0.098392057 | 0.060226875 | 0.224599095 | 0.201338683 |
| 0.376003223 | 0.308954922 | 0.15284278  | 0.354793114 |

|             |             |             |             |
|-------------|-------------|-------------|-------------|
| 0.136742411 | 0.216429064 | 0.159546024 | 0.013027739 |
| 0.057885468 | 0.070122845 | 0.135782062 | 0.000486498 |
| 0.229161535 | 0.051063897 | 0.440931524 | 0.42255933  |
| 0.144630105 | 0.288012243 | 0.104653053 | 0.016687654 |
| 0.090178443 | 0.135267692 | 0.069286497 | 0.373018508 |
| 0.103784358 | 0.043107914 | 0.14994521  | 0.091538977 |
| 0.354748099 | 0.369501472 | 0.080976254 | 0.103330728 |
| 0.110556334 | 0.099273747 | 0.413073944 | 0.03654291  |
| 0.322544961 | 0.042482379 | 0.275727973 | 0.13419668  |
| 0.078765572 | 0.47163255  | 0.018686503 | 0.492132291 |
| 0.172616163 | 0.074823666 | 0.401963502 | 0.141503286 |
| 0.057248976 | 0.018663835 | 0.086459638 | 0.166361043 |
| 0.051332673 | 0.150524623 | 0.013756499 | 0.031961611 |
| 0.220255909 | 0.14052287  | 0.39770236  | 0.283851897 |
| 0.086883659 | 0.249814965 | 0.065585739 | 0.136571329 |
| 0.436987364 | 0.426951378 | 0.061240614 | 0.151968576 |
| 0.261978293 | 0.022550391 | 0.27332314  | 0.008833193 |
| 0.332482435 | 0.345087682 | 1           | 0.009380301 |
| 0.001708807 | 0.096027443 | 0.298697378 | 0.033734514 |
| 0.441367577 | 0.081894845 | 0.280746409 | 0.329194575 |
| 0.103844794 | 0.425007839 | 0.021529861 | 0.301481246 |
| 0.010612121 | 0.13852383  | 0.225184631 | 0.251435896 |
| 0.050102401 | 0.138678897 | 0.266430747 | 0.096363505 |
| 0.003787841 | 0.058948983 | 4.36E-05    | 0.315246501 |
| 0.410641794 | 0.202052305 | 0.130487882 | 0.129419388 |
| 0.157235199 | 0.302492042 | 0.0840308   | 0.262968351 |
| 0.000554058 | 0.247762863 | 0.083851879 | 0.339048239 |
| 0.088477859 | 0.259403947 | 0.005827414 | 0.194023871 |
| 0.379650791 | 0.097523484 | 0.175798052 | 0.101652615 |
| 0.436766974 | 0.322861527 | 0.100583957 | 0.044826225 |
| 0.337948531 | 0.028083444 | 0.175433868 | 0.474373144 |
| 0.055731823 | 0.085002869 | 0.394358729 | 0.058041571 |
| 0.174915678 | 0.314960036 | 0.320876207 | 0.47536876  |
| 0.012526213 | 0.129571596 | 0.357332099 | 0.418737918 |
| 0.194478218 | 0.059134277 | 0.097392439 | 0.090610768 |
| 0.400630471 | 0.015557283 | 0.075886409 | 0.245300338 |
| 0.092907112 | 0.18546405  | 0.255777597 | 0.065852937 |
| 0.005656914 | 0.036943453 | 0.102891275 | 0.06110498  |
| 0.162963449 | 0.188485768 | 0.065426897 | 0.286573915 |
| 0.022372512 | 0.002389429 | 0.354464278 | 0.012056931 |
| 0.170234665 | 0.254281021 | 0.111593278 | 0.168029725 |
| 0.110108157 | 0.224014041 | 0.199007148 | 0.000134503 |
| 0.346016615 | 0.00641062  | 0.119154075 | 0.056410061 |
| 0.103776251 | 0.010183073 | 0.374856211 | 0.469761051 |
| 0.185365578 | 0.098946545 | 0.118995593 | 0.416153656 |
| 0.046180492 | 0.169139935 | 0.167921517 | 0.311940441 |
| 0.093409837 | 0.233394872 | 0.229666641 | 0.172351413 |
| 0.277245593 | 0.092406184 |             |             |
| SUM03       | 0.189387225 | 0.083956594 | 0.133592948 |
| 0.064212444 | 0.059030675 | 0.027839858 | 0.18501649  |
| 0.154522699 | 0.092664398 | 0.006432733 | 0.068386989 |
| 0.202565463 | 0.006318806 | 0.112899967 | 0.210483511 |
| 0.041168596 | 0.224574589 | 0.246655997 | 0.028075558 |
| 0.04163104  | 0.067197322 | 0.015059521 | 0.046791734 |

|             |             |             |             |
|-------------|-------------|-------------|-------------|
| 0.058086519 | 0.283209526 | 0.067154515 | 0.022159758 |
| 0.085890347 | 0.003115819 | 0.043701411 | 0.002296826 |
| 0.182651427 | 0.053366294 | 0.012930663 | 0.131474981 |
| 0.046197229 | 0.00775658  | 0.183758729 | 0.062216401 |
| 0.007438728 | 0.223848373 | 0.01309889  | 0.094276951 |
| 0.017274786 | 0.141533462 | 0.002459315 | 0.039964463 |
| 0.063522887 | 0.058252936 | 0.189380978 | 0.050523749 |
| 0.019478577 | 0.132815552 | 0.038047883 | 0.017502159 |
| 0.010508474 | 0.000355145 | 0.003549821 | 0.117750031 |
| 0.272952281 | 0.252629025 | 0.004245593 | 0.094371998 |
| 0.043287457 | 0.072543989 | 0.203265583 | 0.011389477 |
| 0.114261552 | 0.009453382 | 0.040123649 | 0.041819565 |
| 0.040367682 | 0.156234119 | 0.321621036 | 0.190733341 |
| 0.017912332 | 0.205623444 | 0.068836987 | 0.015521728 |
| 0.072061061 | 0.173625279 | 0.189272083 | 0.120869192 |
| 0.01683326  | 0.034853681 | 0.028092279 | 0.167637339 |
| 0.092151714 | 0.133054878 | 0.079119208 | 0.14076565  |
| 0.175511562 | 0.024196832 | 0.065612959 | 0.249931554 |
| 0.086997133 | 0.011136506 | 0.016418852 | 0.013023746 |
| 0.053497808 | 0.042744324 | 0.151811992 | 0.181059048 |
| 0.053140163 | 0.224105728 | 0.141878149 | 0.031225977 |
| 0.050329216 | 0.198119709 | 0.033892582 | 0.05831969  |
| 0.049715498 | 0.092973648 | 0.067301405 | 0.119566759 |
| 0.029637684 | 0.106232443 | 0.070835697 | 0.121394194 |
| 0.001568726 | 0.112686316 | 0.170320361 | 0.242611956 |
| 0.144499332 | 0.204816248 | 0.032396321 | 0.232391103 |
| 0.07796346  | 0.136078204 | 0.144496933 | 0.118767745 |
| 0.086577377 | 0.120259853 | 0.106186469 | 0.097403993 |
| 0.221037387 | 0.00911085  | 0.02694761  | 0.069176855 |
| 0.09219552  | 0.291216442 | 0.022751087 | 0.153016961 |
| 0.166570479 | 0.074970692 | 0.109375836 | 0.189188181 |
| 0.128665643 | 0.148673057 | 0.066112913 | 0.197149745 |
| 0.143026675 | 0.142883114 | 0.125274606 | 0.04545803  |
| 0.151250965 | 0.057392891 | 0.025269322 | 0.116678686 |
| 0.158917885 | 0.004207534 | 0.069962799 | 0.078670009 |
| 0.103217585 | 0.057618087 | 0.12114689  | 0.095903767 |
| 0.105628516 | 0.28442359  | 0.000942644 | 0.129405495 |
| 0.12371799  | 0.127630822 | 0.137430604 | 0.019839335 |
| 0.05510448  | 0.044540738 | 0.066666157 | 0.010915972 |
| 0.182769443 | 0.084778838 | 0.076929916 | 0.088692873 |
| 0.051175254 | 0.24214843  | 0.017464687 | 0.140358277 |
| 0.189768875 | 0.158952346 | 0.23534409  | 0.172149626 |
| 0.008329787 | 0.243023365 | 0.037414432 | 0.055875154 |
| 0.266346181 | 0.053017368 | 0.008887136 | 0.057717329 |
| 0.264796243 | 0.026943503 | 0.169273393 | 0.156438628 |
| 0.198206305 | 0.35792474  | 0.08699399  | 0.119395594 |
| 0.125927657 | 0.279142021 | 0.043344745 | 0.095485465 |
| 0.033512892 | 0.206011557 | 0.060852662 | 0.149930048 |
| 0.199183153 | 0.027731296 | 0.274537964 | 0.054681359 |
| 0.020741176 | 0.00523475  | 0.004904811 | 0.023613512 |
| 0.313591068 | 0.061082205 | 0.050926332 | 0.070324089 |
| 0.087311243 | 0.146481744 | 0.021111395 | 0.216752631 |
| 0.22071176  | 0.043327332 | 0.099612571 | 0.029862952 |
| 0.0931204   | 0.072920292 | 0.073041609 | 0.050275638 |

|             |             |             |             |
|-------------|-------------|-------------|-------------|
| 0.119161248 | 0.014132807 | 0.007202325 | 0.084375192 |
| 0.010912541 | 0.032466037 | 0.084954839 | 0.072421222 |
| 0.021548356 | 0.231752973 | 0.120879719 | 0.002479748 |
| 0.035803614 | 0.051608778 | 0.172820087 | 0.015126245 |
| 0.163693392 | 0.196314928 | 0.046268609 | 0.037364791 |
| 0.186237476 | 0.123007115 | 0.126087156 | 0.101192634 |
| 0.010249558 | 0.123292309 | 0.072215509 | 0.117281139 |
| 0.104532828 | 0.016501316 | 0.003567923 | 0.069669099 |
| 0.077402907 | 0.010952639 | 0.236416816 | 0.049453081 |
| 0.015970169 | 0.049952569 | 0.054540569 | 0.116342303 |
| 0.185014299 | 0.10255859  | 0.161030142 | 0.105810964 |
| 0.131256266 | 0.154054338 | 0.099931218 | 0.141168158 |
| 0.006572749 | 0.033436539 | 0.021556005 | 0.11736438  |
| 0.229252097 | 0.035542418 | 0.213330161 | 0.004988121 |
| 0.000485451 | 0.231574244 | 0.243234156 | 0.168234252 |
| 0.017706277 | 0.026274448 | 0.062087675 | 0.111047331 |
| 0.271179021 | 0.147567986 | 0.207167797 | 0.0317026   |
| 0.118225486 | 0.034539286 | 0.027370696 | 0.055967478 |
| 0.236127848 | 0.071883308 | 0.118102225 | 0.171416532 |
| 0.211785221 | 0.014289555 | 0.084264438 | 0.013905761 |
| 0.168943274 | 0.050827438 | 0.286277005 | 0.339014271 |
| 0.108302572 | 0.278770582 | 0.177275182 | 0.008832527 |
| 0.132654913 | 0.280694864 | 0.027636504 | 0.093754661 |
| 0.116329845 | 0.119421215 | 0.113435611 | 0.135604558 |
| 0.095842193 | 0.074868849 | 0.07660023  | 0.050938575 |
| 0.153049287 | 0.131550947 | 0.012679896 | 0.075479725 |
| 0.014704997 | 0.120895817 | 0.073794859 | 0.321252114 |
| 0.061672327 | 0.147872949 | 0.206381651 | 0.054726631 |
| 0.088349013 | 0.003063045 | 0.045487754 | 0.126461825 |
| 0.115121974 | 0.156849402 | 0.007504202 | 0.010516568 |
| 0.126255475 | 0.172754295 | 0.009423386 | 0.119592307 |
| 0.092243203 | 0.15839484  | 0.054369106 | 0.09208639  |
| 0.185499558 | 0.005093311 | 0.035870668 | 0.000161578 |
| 0.019806474 | 0.150202347 | 0.019854126 | 0.093047327 |
| 0.144452776 | 0.123488829 | 0.142053991 | 0.131920139 |
| 0.100315128 | 0.100843451 | 0.113130313 | 0.017303442 |
| 0.112367369 | 0.000743703 | 0.10294257  | 0.0879349   |
| 0.009356784 | 0.009053641 | 0.090355099 | 0.076141887 |
| 0.032372478 | 0.213171913 | 0.266669917 | 0.012827916 |
| 0.149178375 | 0.113365403 | 0.228657313 | 0.02789912  |
| 0.045463876 | 0.103256669 | 0.034794892 | 0.118353054 |
| 0.115866933 | 0.190072321 | 0.022847287 | 0.290267795 |
| 0.043719093 | 0.180593929 | 0.274166654 | 0.020457043 |
| 0.096470226 | 0.237447827 | 0.161722245 | 0.107680787 |
| 0.153331063 | 0.064112533 | 0.005281065 | 0.022580092 |
| 0.098009968 | 0.169376146 | 0.008343432 | 0.178473291 |
| 0.093751304 | 0.05103132  | 0.185540524 | 0.18431326  |
| 0.132838704 | 0.132825078 | 0.239001201 | 0.082280075 |
| 0.070867683 | 0.016163107 | 0.030267309 | 0.216577879 |
| 0.019428352 | 0.026807401 | 0.22927001  | 0.052205401 |
| 0.073566646 | 0.152538469 | 0.011824144 | 0.015491782 |
| 0.123341936 | 0.055243269 | 0.044525908 | 0.201327225 |
| 0.049044862 | 0.035726717 | 0.121482798 | 0.162082053 |
| 0.031724796 | 0.158268607 | 0.272098186 | 0.196479305 |

|             |             |             |             |
|-------------|-------------|-------------|-------------|
| 0.019720754 | 0.025497434 | 0.265161332 | 0.283245753 |
| 0.093597431 | 0.085979116 | 0.18153493  | 0.111945571 |
| 0.236868483 | 0.058752616 | 0.10164889  | 0.09277053  |
| 0.14199118  | 0.147351202 | 0.224644661 | 0.121292642 |
| 0.201785081 | 0.090542349 | 0.044507687 | 0.096441236 |
| 0.111440967 | 0.206445625 | 0.116547741 | 0.018376764 |
| 0.30786419  | 0.084183881 | 0.207576862 | 0.29530337  |
| 0.028674182 | 0.299748259 | 0.166499644 | 0.15569113  |
| 0.056183351 | 0.012058495 | 0.227231473 | 0.22149692  |
| 0.136756793 | 0.00521159  | 0.266667679 | 0.05939451  |
| 0.112013563 | 0.007649128 | 0.047825841 | 0.18833119  |
| 0.282871063 | 0.205129158 | 0.026400007 | 0.094012904 |
| 0.058078007 | 0.018896564 | 0.089945595 | 0.074632345 |
| 0.117024806 | 0.036653785 | 0.11956376  | 0.160633436 |
| 0.302730955 | 0.032191294 | 0.017000496 | 0.057145717 |
| 0.247126429 | 0.034630356 | 0.155194451 | 0.321122929 |
| 0.249279891 | 0.189571665 | 0.090796328 | 0.181264167 |
| 0.032313457 | 0.165402795 | 0.186231263 | 0.087453508 |
| 0.014031995 | 0.149922506 | 0.014450616 | 0.069495817 |
| 0.009711618 | 0.006305955 | 0.108542943 | 0.097070238 |
| 0.153284504 | 0.094908108 | 0.161318458 | 0.064400978 |
| 0.000207497 | 0.037859254 | 0.069123679 | 0.021907451 |
| 0.086629785 | 0.148175647 | 0.072621105 | 0.176084098 |
| 0.241814038 | 0.21602094  | 0.124094487 | 0.017315782 |
| 0.004563453 | 0.055934745 | 0.30979589  | 0.166220264 |
| 0.12466731  | 0.196554359 | 0.011780494 | 0.116968081 |
| 0.014990731 | 0.280265012 | 0.169201838 | 0.008634122 |
| 0.005428602 | 0.118757573 | 0.076037163 | 0.175090315 |
| 0.030550362 | 0.106169436 | 0.128914933 | 0.022326287 |
| 0.053789656 | 0.197466727 | 0.151558464 | 0.114039127 |
| 0.129943928 | 0.132605922 | 0.148150412 | 0.035646369 |
| 0.082784505 | 0.133813351 | 0.080018941 | 0.214216608 |
| 0.106656518 | 0.150499037 | 0.051677901 | 0.041632468 |
| 0.042824831 | 0.164005583 | 0.297734238 | 0.285942605 |
| 0.193762373 | 0.088063317 | 0.296586065 | 0.229238469 |
| 0.232505991 | 0.036551864 | 0.223689395 | 0.09513587  |
| 0.162326207 | 0.199777626 | 0.061651352 | 0.074304688 |
| 0.00440397  | 0.02256819  | 0.143367833 | 0.043247237 |
| 0.198597742 | 0.03402836  | 0.029393024 | 0.068865811 |
| 0.052019731 | 0.212542931 | 0.293486251 | 0.145607734 |
| 0.040493595 | 0.037765028 | 0.00688103  | 0.151452947 |
| 0.144236334 | 0.280785917 | 0.055347439 | 0.070534849 |
| 0.123027023 | 0.038471091 | 0.070024493 | 0.118161088 |
| 0.009466428 | 0.191655385 | 0.007627887 | 0.143206664 |
| 0.004377632 | 0.193494679 | 0.329276164 | 0.052675894 |
| 0.003953384 | 0.139216783 | 0.071637922 | 0.020084726 |
| 0.056688669 | 0.047938097 | 0.036951846 | 0.129652493 |
| 0.152611343 | 0.168924458 | 0.15198005  | 0.136969108 |
| 0.02363777  | 0.031556771 | 0.035239264 | 0.068306651 |
| 0.110979212 | 0.095060404 | 0.279535677 | 0.093390968 |
| 0.038436405 | 0.28613653  | 0.195289615 | 0.099983832 |
| 0.044948858 | 0.119217103 | 0.004697583 | 0.02091496  |
| 0.084428865 | 0.011060684 | 0.00017817  | 0.011555247 |
| 0.161455815 | 0.026513311 | 0.05478574  | 0.107899243 |

|             |             |             |             |
|-------------|-------------|-------------|-------------|
| 0.036931436 | 0.16817977  | 0.00629055  | 0.091721239 |
| 0.105222623 | 0.147769968 | 0.047400036 | 0.258571833 |
| 0.151309164 | 0.212277222 | 0.048921664 | 0.010157312 |
| 0.032244012 | 0.021087054 | 0.009380301 | 1           |
| 0.208061329 | 0.004741274 | 0.035101577 | 0.209607177 |
| 0.095113046 | 0.003275495 | 0.047876438 | 0.053106747 |
| 0.267569988 | 0.151973079 | 0.142475599 | 0.080116123 |
| 0.095831505 | 0.19437657  | 0.023248133 | 0.028919683 |
| 0.040697247 | 0.022558422 | 0.106396767 | 0.018052715 |
| 0.218742276 | 0.046419725 | 0.021459603 | 0.218449917 |
| 0.130435972 | 0.020140633 | 0.309758526 | 0.006682696 |
| 0.198585959 | 0.139647791 | 0.049745773 | 0.019034512 |
| 0.131299573 | 0.03766848  | 0.251529961 | 0.105994274 |
| 0.002917268 | 0.04584586  | 0.152005407 | 0.037497619 |
| 0.174547733 | 0.026080706 | 0.272933003 | 0.005456936 |
| 0.098934815 | 0.09559583  | 0.16692177  | 0.048701757 |
| 0.040544305 | 0.307547462 | 0.013597303 | 0.129353831 |
| 0.176396471 | 0.021666328 | 0.077909384 | 0.097876525 |
| 0.021205803 | 0.136549405 | 0.025186718 | 0.129238294 |
| 0.154708637 | 0.237041508 | 0.080306545 | 0.106642728 |
| 0.226417862 | 0.028876358 | 0.014975484 | 0.066373772 |
| 0.103149759 | 0.11863485  | 0.020970899 | 0.127110089 |
| 0.010827837 | 0.170325515 | 0.037196001 | 0.082543034 |
| 0.186116054 | 0.13269524  | 0.026821757 | 0.283496889 |
| 0.136835501 | 0.045288743 | 0.033753877 | 0.206452356 |
| 0.103122816 | 0.103160206 | 0.185469653 | 0.001046413 |
| 0.064777444 | 0.063037606 | 0.203860775 | 0.038344751 |
| 0.269369944 | 0.086261361 | 0.04596498  | 0.066889075 |
| 0.099738279 | 0.010278781 | 0.051752456 | 0.041706633 |
| 0.014826758 | 0.1805097   | 0.135319203 | 0.109617927 |
| 0.137712858 | 0.014665331 | 0.006110257 | 0.123954018 |
| 0.008763088 | 0.005970747 | 0.012783161 | 0.042665401 |
| 0.011765287 | 0.010989879 | 0.015272627 | 0.010374577 |
| 0.099357199 | 0.106053939 |             |             |
| SURF1       | 0.179212614 | 0.036524705 | 0.146933731 |
| 0.021351145 | 0.025266808 | 0.010830197 | 0.165224441 |
| 0.097678162 | 0.043744748 | 0.001674941 | 0.030044084 |
| 0.153732996 | 0.000508774 | 0.048548029 | 0.174139776 |
| 0.014342069 | 0.163644597 | 0.205666104 | 0.006352961 |
| 0.009502902 | 0.028443524 | 0.003282599 | 0.018337629 |
| 0.023762623 | 0.226239079 | 0.03580618  | 0.005831385 |
| 0.035317233 | 1.72E-05    | 0.014554681 | 0.000196888 |
| 0.102594895 | 0.01955625  | 0.002816413 | 0.11577753  |
| 0.016332048 | 0.001251137 | 0.107425779 | 0.034774618 |
| 0.00121515  | 0.132628399 | 0.004364351 | 0.058205542 |
| 0.006500327 | 0.164415554 | 0.000167043 | 0.013085353 |
| 0.033215834 | 0.031009734 | 0.175695639 | 0.019931802 |
| 0.007143125 | 0.068766644 | 0.013880123 | 0.003711625 |
| 0.002345797 | 0.001234747 | 0.000294208 | 0.054395029 |
| 0.194869804 | 0.190326107 | 0.000389792 | 0.043548916 |
| 0.013309538 | 0.028659386 | 0.11726503  | 0.003453429 |
| 0.051202546 | 0.001485622 | 0.012867932 | 0.011541158 |
| 0.016742467 | 0.175775404 | 0.262368725 | 0.166434205 |
| 0.005529407 | 0.131264834 | 0.026014323 | 0.005181273 |

|             |             |             |             |
|-------------|-------------|-------------|-------------|
| 0.032239933 | 0.086253056 | 0.128566045 | 0.059354489 |
| 0.001990834 | 0.011360122 | 0.01220031  | 0.092187121 |
| 0.039485566 | 0.100548133 | 0.034747262 | 0.068141962 |
| 0.158835512 | 0.007496352 | 0.026222906 | 0.199210884 |
| 0.03767845  | 0.002425908 | 0.004578047 | 0.003412603 |
| 0.020245919 | 0.016110662 | 0.073513324 | 0.109241206 |
| 0.018889656 | 0.219510119 | 0.073037167 | 0.009587097 |
| 0.02262499  | 0.207209772 | 0.012721041 | 0.01936048  |
| 0.020459448 | 0.037824401 | 0.025076485 | 0.057178932 |
| 0.009340377 | 0.047631513 | 0.034946189 | 0.052655399 |
| 0.000409465 | 0.049334557 | 0.136683261 | 0.16999983  |
| 0.135854585 | 0.155958077 | 0.009613907 | 0.133971824 |
| 0.030135845 | 0.066279941 | 0.104623598 | 0.070888749 |
| 0.034066814 | 0.05880627  | 0.04594424  | 0.041583183 |
| 0.244129493 | 0.002114944 | 0.00992101  | 0.034148471 |
| 0.037667811 | 0.231437697 | 0.007541261 | 0.078144781 |
| 0.094149906 | 0.028908986 | 0.086341011 | 0.102060735 |
| 0.071453808 | 0.071894965 | 0.026718786 | 0.152645489 |
| 0.07224841  | 0.073503932 | 0.056610055 | 0.014885668 |
| 0.075742761 | 0.033435845 | 0.003333038 | 0.05539797  |
| 0.073618897 | 0.000919466 | 0.024568793 | 0.029565501 |
| 0.048011879 | 0.020060573 | 0.052053204 | 0.038515846 |
| 0.046156374 | 0.277386241 | 1.27E-05    | 0.064153564 |
| 0.060837046 | 0.069462913 | 0.064496388 | 0.005235351 |
| 0.018511088 | 0.019325122 | 0.023108223 | 0.001129906 |
| 0.088652937 | 0.036400829 | 0.02847183  | 0.036709387 |
| 0.025322051 | 0.149164456 | 0.004224189 | 0.074463588 |
| 0.121586011 | 0.139159054 | 0.247998034 | 0.089380825 |
| 0.002371036 | 0.169919856 | 0.015736329 | 0.019569805 |
| 0.182841602 | 0.023187536 | 0.001701073 | 0.020208583 |
| 0.271569604 | 0.007648539 | 0.142519744 | 0.123974967 |
| 0.170325809 | 0.294654602 | 0.02207147  | 0.056691965 |
| 0.061156432 | 0.212229646 | 0.012659473 | 0.040406052 |
| 0.011632304 | 0.170878211 | 0.022303891 | 0.070955559 |
| 0.102935066 | 0.009224398 | 0.171195455 | 0.033951217 |
| 0.004391995 | 0.000889894 | 0.00080647  | 0.00613851  |
| 0.252124427 | 0.022755154 | 0.018731624 | 0.026238199 |
| 0.055038054 | 0.097905297 | 0.00687255  | 0.120118855 |
| 0.17493853  | 0.017887185 | 0.042216234 | 0.009594155 |
| 0.068630148 | 0.042395592 | 0.028392255 | 0.009725459 |
| 0.060301502 | 0.001457384 | 0.001077252 | 0.036436255 |
| 0.001374106 | 0.010833908 | 0.031733899 | 0.026792614 |
| 0.002105219 | 0.163487696 | 0.050861397 | 8.44E-05    |
| 0.011866546 | 0.01799793  | 0.09720275  | 0.004688904 |
| 0.1137163   | 0.106921059 | 0.0154617   | 0.016991066 |
| 0.165652794 | 0.054115919 | 0.059891818 | 0.041381035 |
| 0.002893756 | 0.054034692 | 0.026328845 | 0.052219837 |
| 0.05110004  | 0.004069219 | 0.000238549 | 0.029406238 |
| 0.032843418 | 0.001319344 | 0.23066451  | 0.014996816 |
| 0.005233978 | 0.016751631 | 0.012348301 | 0.053128304 |
| 0.097042635 | 0.049407823 | 0.100354623 | 0.04592127  |
| 0.069193689 | 0.105896423 | 0.04375437  | 0.061083099 |
| 0.001461072 | 0.011050865 | 0.008553985 | 0.054234745 |
| 0.190643008 | 0.012968031 | 0.120792842 | 0.00064587  |

|             |             |             |             |
|-------------|-------------|-------------|-------------|
| 0.000706909 | 0.195159289 | 0.253984841 | 0.105125595 |
| 0.00642935  | 0.006724016 | 0.025657884 | 0.047947334 |
| 0.21727319  | 0.070729155 | 0.123858335 | 0.015560004 |
| 0.061618913 | 0.00991575  | 0.007697964 | 0.019303895 |
| 0.154625392 | 0.038643956 | 0.032369488 | 0.088625051 |
| 0.226455124 | 0.003915946 | 0.03529706  | 0.005926297 |
| 0.176447011 | 0.018205372 | 0.26909685  | 0.27373581  |
| 0.042395661 | 0.231733343 | 0.139032487 | 0.003018755 |
| 0.061495715 | 0.252164495 | 0.014068132 | 0.040098003 |
| 0.050710302 | 0.053273093 | 0.049376212 | 0.064904093 |
| 0.040460976 | 0.027283204 | 0.031436858 | 0.024755895 |
| 0.113670215 | 0.124466299 | 0.003650715 | 0.039845236 |
| 0.003972603 | 0.056484044 | 0.029387143 | 0.267705731 |
| 0.019800896 | 0.077050898 | 0.195464125 | 0.017658611 |
| 0.050354949 | 0.00020223  | 0.016664028 | 0.066731169 |
| 0.048804866 | 0.189568977 | 0.001401354 | 0.001999507 |
| 0.066185366 | 0.098069999 | 0.002291645 | 0.054566938 |
| 0.044592784 | 0.134099773 | 0.028984895 | 0.035237091 |
| 0.18398316  | 0.000776432 | 0.013700676 | 0.000111326 |
| 0.00199091  | 0.069838004 | 0.005970987 | 0.046839879 |
| 0.095008376 | 0.110072759 | 0.083073903 | 0.058704962 |
| 0.04751162  | 0.041593686 | 0.049988752 | 0.005318238 |
| 0.051961954 | 0.001001756 | 0.042604288 | 0.040952033 |
| 0.002234659 | 0.005861723 | 0.029513348 | 0.030109887 |
| 0.011641161 | 0.214987072 | 0.217048737 | 0.002703537 |
| 0.084176555 | 0.087606317 | 0.198898184 | 0.012870108 |
| 0.016196446 | 0.047841772 | 0.009983983 | 0.056269134 |
| 0.075473945 | 0.110124052 | 0.006911889 | 0.261721658 |
| 0.0141418   | 0.133767233 | 0.246374586 | 0.004977829 |
| 0.038458953 | 0.217981387 | 0.087891325 | 0.046490514 |
| 0.074376642 | 0.026074817 | 0.000874315 | 0.002195604 |
| 0.038106392 | 0.150569214 | 0.001124036 | 0.152137155 |
| 0.042295449 | 0.020299183 | 0.106815366 | 0.122034828 |
| 0.06067571  | 0.067355644 | 0.258400669 | 0.03691409  |
| 0.038120193 | 0.0050355   | 0.014467474 | 0.11807978  |
| 0.002671153 | 0.008752159 | 0.161036655 | 0.025526021 |
| 0.034712621 | 0.065292024 | 0.003376523 | 0.005031439 |
| 0.073042596 | 0.023678874 | 0.016951868 | 0.118770134 |
| 0.023930438 | 0.008392053 | 0.073522869 | 0.099885166 |
| 0.00353638  | 0.102955147 | 0.219428728 | 0.203270291 |
| 0.006146038 | 0.007621006 | 0.266337581 | 0.223518888 |
| 0.041809309 | 0.034236354 | 0.070628866 | 0.058672366 |
| 0.155198521 | 0.022612648 | 0.039578554 | 0.039335807 |
| 0.068357141 | 0.069016777 | 0.130898182 | 0.054160153 |
| 0.186515896 | 0.045665307 | 0.016973707 | 0.037788446 |
| 0.046187833 | 0.203444713 | 0.052491446 | 0.005151636 |
| 0.264712839 | 0.065830304 | 0.095998998 | 0.264173386 |
| 0.007646212 | 0.208578667 | 0.105177153 | 0.139652205 |
| 0.026774609 | 0.002509541 | 0.233376226 | 0.159008276 |
| 0.075001488 | 0.000888378 | 0.211512354 | 0.027692908 |
| 0.06073703  | 0.000977357 | 0.016311399 | 0.099589764 |
| 0.237447426 | 0.175805997 | 0.015391025 | 0.036068874 |
| 0.021571003 | 0.004640531 | 0.033253211 | 0.031379583 |
| 0.048536814 | 0.01123897  | 0.055653889 | 0.074497755 |



|             |             |             |             |
|-------------|-------------|-------------|-------------|
| 0.283875635 | 0.010657047 | 0.004442758 | 0.023944212 |
| 0.16175337  | 0.013899278 | 0.082552791 | 0.317568731 |
| 0.144497787 | 0.09616575  | 0.045093048 | 0.12379803  |
| 0.009159947 | 0.128268493 | 0.191796874 | 0.032388975 |
| 0.004458848 | 0.068257664 | 0.003990873 | 0.023386747 |
| 0.010567536 | 0.001350441 | 0.045048353 | 0.050293968 |
| 0.072569924 | 0.041029222 | 0.087354375 | 0.031544455 |
| 6.07E-05    | 0.012640065 | 0.030129119 | 0.008662195 |
| 0.037899993 | 0.07806039  | 0.01136312  | 0.116523269 |
| 0.149741449 | 0.209818703 | 0.060230342 | 0.00231695  |
| 0.000557958 | 0.020950579 | 0.212513668 | 0.105432445 |
| 0.076576053 | 0.166056087 | 0.002002492 | 0.077158618 |
| 0.002066342 | 0.185185347 | 0.090449545 | 0.002165933 |
| 0.00041744  | 0.049887144 | 0.035483844 | 0.201175057 |
| 0.008532193 | 0.046829121 | 0.057216592 | 0.01471326  |
| 0.01881631  | 0.126554222 | 0.082966055 | 0.067782967 |
| 0.081255528 | 0.069709294 | 0.075344669 | 0.017414637 |
| 0.040287399 | 0.093448638 | 0.047306708 | 0.136108594 |
| 0.070388168 | 0.096482894 | 0.019945465 | 0.022087074 |
| 0.019416307 | 0.136276465 | 0.27730388  | 0.269606946 |
| 0.064147665 | 0.033969829 | 0.20786168  | 0.236411305 |
| 0.137021397 | 0.015539527 | 0.132547653 | 0.042591473 |
| 0.076640178 | 0.180830284 | 0.024654935 | 0.031698126 |
| 0.000247176 | 0.003356361 | 0.125799053 | 0.020611202 |
| 0.117308542 | 0.008999603 | 0.009454848 | 0.040770763 |
| 0.018636955 | 0.123688556 | 0.199689475 | 0.072708598 |
| 0.018521461 | 0.013803503 | 0.001943391 | 0.072051855 |
| 0.121241997 | 0.230595355 | 0.023320142 | 0.068396318 |
| 0.057658504 | 0.015149383 | 0.026505398 | 0.059314779 |
| 0.001984632 | 0.102291508 | 0.000833135 | 0.115228711 |
| 0.000754788 | 0.164117042 | 0.267665955 | 0.018388918 |
| 0.000474025 | 0.09857974  | 0.034255823 | 0.009034888 |
| 0.021276712 | 0.017229241 | 0.014884058 | 0.064734083 |
| 0.089189599 | 0.131907839 | 0.076613147 | 0.117709176 |
| 0.00688941  | 0.013978942 | 0.012720251 | 0.034682949 |
| 0.061873211 | 0.0391364   | 0.280456169 | 0.036963811 |
| 0.015477876 | 0.234222722 | 0.099571959 | 0.044904778 |
| 0.017916914 | 0.033269136 | 0.000926563 | 0.006854746 |
| 0.039183635 | 0.002547261 | 0.000321    | 0.001422891 |
| 0.084054425 | 0.009007952 | 0.021452326 | 0.046558131 |
| 0.016058351 | 0.08386841  | 0.000446124 | 0.048551356 |
| 0.04988039  | 0.075166504 | 0.015097782 | 0.173618323 |
| 0.073219054 | 0.170792242 | 0.019273162 | 0.001517554 |
| 0.009687723 | 0.005076585 | 0.001708807 | 0.208061329 |
| 1           | 0.001009302 | 0.013368718 | 0.197746402 |
| 0.037657962 | 9.70E-05    | 0.018010692 | 0.019265595 |
| 0.188951418 | 0.079687017 | 0.07970854  | 0.032864742 |
| 0.032957933 | 0.120655137 | 0.006656214 | 0.008345692 |
| 0.016104141 | 0.007809456 | 0.052456649 | 0.005919101 |
| 0.229517119 | 0.013902233 | 0.018846059 | 0.133154488 |
| 0.069386097 | 0.00670056  | 0.225205774 | 0.001087987 |
| 0.114824619 | 0.067681937 | 0.007294959 | 0.004818156 |
| 0.068756058 | 0.012957358 | 0.159054158 | 0.049990148 |
| 2.72E-05    | 0.018041038 | 0.06420888  | 0.01264543  |

|             |             |             |             |
|-------------|-------------|-------------|-------------|
| 0.098296238 | 0.004452868 | 0.164736263 | 0.001014124 |
| 0.044565607 | 0.043059892 | 0.141686642 | 0.012261505 |
| 0.013470703 | 0.298532329 | 0.003659713 | 0.056489017 |
| 0.110366533 | 0.008231224 | 0.030305673 | 0.067963265 |
| 0.005593468 | 0.066044726 | 0.007298494 | 0.055976268 |
| 0.078183905 | 0.150181118 | 0.031012437 | 0.047386071 |
| 0.123674322 | 0.0116779   | 0.0042424   | 0.031397431 |
| 0.051111847 | 0.037818219 | 0.005666432 | 0.07254221  |
| 0.00352642  | 0.084313305 | 0.01465708  | 0.039239691 |
| 0.055594354 | 0.06638627  | 0.008949424 | 0.22795055  |
| 0.07175084  | 0.019923675 | 0.016709877 | 0.116398748 |
| 0.031842146 | 0.052511109 | 0.098108139 | 8.76E-05    |
| 0.03310665  | 0.026059293 | 0.114785861 | 0.013778687 |
| 0.219399479 | 0.039167623 | 0.024649547 | 0.033795341 |
| 0.042850239 | 0.003425125 | 0.018988806 | 0.01895652  |
| 0.001278195 | 0.172902046 | 0.067784566 | 0.044527969 |
| 0.069528172 | 0.001318368 | 0.000633847 | 0.05528539  |
| 0.001245195 | 0.000985218 | 0.002730565 | 0.017004997 |
| 0.003411643 | 0.00281791  | 0.003534393 | 0.002756268 |
| 0.046941198 | 0.052186543 |             |             |
| SUV39H1     | 0.006267581 | 0.173054007 | 0.003972696 |
| 0.031327359 | 0.271711377 | 0.088524286 | 0.005940039 |
| 0.01572112  | 0.134866847 | 0.065006293 | 0.167190564 |
| 0.00119742  | 0.151594583 | 0.235483044 | 0.00554426  |
| 0.290319164 | 0.004587751 | 0.021419731 | 0.019689673 |
| 0.045975497 | 0.245708533 | 0.13870276  | 0.085393005 |
| 0.218047326 | 0.044479445 | 0.103833032 | 0.239252447 |
| 0.24865268  | 0.131003302 | 0.246718358 | 0.059462131 |
| 0.185772992 | 0.304619351 | 0.225080194 | 0.000543568 |
| 0.156461401 | 0.026091785 | 0.171799805 | 0.117970432 |
| 0.166066889 | 0.128450842 | 0.077224222 | 0.083977116 |
| 0.126868765 | 0.002278212 | 0.051146698 | 0.284591064 |
| 0.1157294   | 0.066141305 | 0.005494246 | 0.211644259 |
| 0.098560959 | 0.110017992 | 0.153195138 | 0.000344643 |
| 0.246151934 | 0.196473067 | 0.211627457 | 0.212048256 |
| 0.064937197 | 0.030332532 | 0.131270946 | 0.053794217 |
| 0.208340638 | 0.241101227 | 0.108232175 | 0.106258125 |
| 0.236198746 | 0.19463744  | 0.272299171 | 0.040652547 |
| 0.110133393 | 0.001575728 | 0.045859535 | 0.010517685 |
| 0.134216817 | 0.075552742 | 0.187810733 | 0.225831067 |
| 0.172712822 | 0.216017586 | 0.085364575 | 0.195765398 |
| 0.117430039 | 0.317419862 | 0.145922419 | 0.186141518 |
| 0.202139764 | 0.010323638 | 0.239428642 | 0.247603214 |
| 0.003454623 | 0.135988659 | 0.213266608 | 0.02028347  |
| 0.182268735 | 0.141316416 | 0.130390116 | 0.178940537 |
| 0.326629224 | 0.28000992  | 0.187895896 | 0.123032332 |
| 0.178327038 | 0.008503954 | 0.166169779 | 0.343591813 |
| 0.126049375 | 0.010777258 | 0.140500721 | 0.312876882 |
| 0.224036422 | 0.247173674 | 0.211332406 | 0.203201207 |
| 0.28817727  | 0.244833808 | 0.20928547  | 0.184010089 |
| 0.048242464 | 0.237429814 | 0.045152051 | 0.004913642 |
| 0.005168482 | 0.013558203 | 0.10764634  | 0.133792805 |
| 0.270395955 | 0.12559214  | 0.038930965 | 0.130201099 |
| 0.327101153 | 0.167560571 | 0.238655838 | 0.225831569 |

|             |             |             |             |
|-------------|-------------|-------------|-------------|
| 0.003036305 | 0.172672268 | 0.280203574 | 0.038520785 |
| 0.204488711 | 0.022116676 | 0.275040914 | 0.195422383 |
| 0.168208495 | 0.302055339 | 0.019489557 | 0.184175002 |
| 0.044536729 | 0.252301824 | 0.204841884 | 0.050897597 |
| 0.22021091  | 0.185028343 | 0.283240235 | 0.347010324 |
| 0.185429596 | 0.098397134 | 0.020356061 | 0.192425571 |
| 0.25109682  | 0.026538735 | 0.282150076 | 0.300679786 |
| 0.218207807 | 0.317468153 | 0.298214014 | 0.275401449 |
| 0.214093869 | 0.010038271 | 0.031167545 | 0.210271079 |
| 0.214876497 | 0.197273886 | 0.035005619 | 0.240936478 |
| 0.276189842 | 0.096378878 | 0.247643545 | 0.118040403 |
| 0.24544099  | 0.248375801 | 0.262108373 | 0.193978197 |
| 0.095380704 | 0.109064209 | 0.297757749 | 0.157829229 |
| 0.004587316 | 0.01300293  | 0.00504901  | 0.142844062 |
| 0.058426837 | 0.069352222 | 0.083629605 | 0.219190047 |
| 0.074570483 | 0.068203927 | 0.200371933 | 0.332221669 |
| 0.005953861 | 0.18966805  | 0.034779386 | 0.037260481 |
| 0.006381097 | 0.029886549 | 0.046111544 | 0.03044409  |
| 0.136282223 | 0.051958947 | 0.248953125 | 0.273373591 |
| 0.155408075 | 0.044846919 | 0.204888905 | 0.245435141 |
| 0.232554591 | 0.284381297 | 0.076460925 | 0.003200225 |
| 0.132230005 | 0.121419503 | 0.216214927 | 0.240836742 |
| 0.036160479 | 0.073128729 | 0.240187827 | 0.32504467  |
| 0.062653669 | 0.018180944 | 0.156655345 | 0.156452568 |
| 0.030213139 | 0.126818452 | 0.281962818 | 0.168285813 |
| 0.001349392 | 0.125620891 | 0.263919444 | 0.103069118 |
| 0.127018273 | 0.144223226 | 0.16671046  | 0.284900058 |
| 0.158945979 | 0.157940188 | 0.276016557 | 0.31490663  |
| 0.075092472 | 0.047763631 | 0.283704584 | 0.07825642  |
| 0.220750847 | 0.037333237 | 0.176298711 | 0.087947212 |
| 0.091151639 | 0.159347871 | 0.283203911 | 0.153928208 |
| 0.020666388 | 0.233550535 | 0.175721469 | 0.26579103  |
| 0.152253449 | 0.279823658 | 0.296492482 | 0.237235506 |
| 0.157068772 | 0.198995295 | 0.2120741   | 0.264233989 |
| 0.285096332 | 0.11089271  | 0.008986645 | 0.277810128 |
| 0.148116846 | 0.313918022 | 0.082113758 | 0.278299836 |
| 0.20540262  | 0.171262778 | 0.034605266 | 0.291670037 |
| 0.199543147 | 0.062263657 | 0.230838275 | 0.272240391 |
| 0.08630083  | 0.241394234 | 0.181780808 | 0.301658074 |
| 0.049339661 | 0.138891468 | 0.119517405 | 0.198973716 |
| 0.025412072 | 0.008614021 | 0.00790162  | 0.069781656 |
| 0.183625013 | 0.208785077 | 0.255678801 | 0.257488441 |
| 0.025117061 | 0.179504922 | 0.08224725  | 0.11935093  |
| 0.186930466 | 0.187456484 | 0.275530211 | 0.253970174 |
| 0.085503612 | 0.004198752 | 0.027052749 | 0.215826462 |
| 0.002776727 | 0.180931139 | 0.082431133 | 0.000807498 |
| 0.00347004  | 0.176716674 | 0.015931792 | 0.047885265 |
| 0.304862103 | 0.047936375 | 0.060768278 | 0.078185302 |
| 0.199345132 | 0.015492406 | 0.001561027 | 0.259318311 |
| 0.223595432 | 0.211879133 | 0.217218701 | 0.172367634 |
| 0.246422895 | 0.208612732 | 0.29672307  | 0.083540151 |
| 0.014052006 | 0.008081437 | 0.204532659 | 0.151034795 |
| 0.000626243 | 0.227765186 | 0.169332961 | 0.036998449 |
| 0.289994439 | 0.137300649 | 0.002531938 | 0.253492458 |

|             |                     |             |             |
|-------------|---------------------|-------------|-------------|
| 0.001940161 | 0.221831619         | 0.053732849 | 0.071512696 |
| 0.26569354  | 0.000262654         | 0.076218314 | 0.157327268 |
| 0.151919285 | 0.126118785         | 0.188793561 | 0.24356474  |
| 0.155786319 | 0.022346949         | 0.179623319 | 0.25496087  |
| 0.008246931 | 0.048523176         | 0.079497451 | 0.018135849 |
| 0.041081332 | 0.181188624         | 0.128429764 | 0.007897344 |
| 0.113476486 | 0.000565407         | 0.139774544 | 0.245764546 |
| 0.173848663 | 0.299172585         | 0.242127931 | 0.241642297 |
| 0.236103422 | 0.186546118         | 0.263067577 | 0.175475381 |
| 0.123917019 | 7.94E-05 0.00084395 | 0.29912423  |             |
| 0.265384122 | 0.005522178         | 0.043913735 | 0.066355875 |
| 0.023527842 | 0.018071722         | 0.006132161 | 0.158728582 |
| 0.185282819 | 0.170689737         | 0.136689481 | 0.181492347 |
| 0.095229755 | 0.096791066         | 0.092334188 | 0.012578542 |
| 0.230306644 | 0.006368432         | 0.013106919 | 0.004474085 |
| 0.261122918 | 0.019116039         | 0.153264665 | 0.232208895 |
| 0.238751516 | 0.301936901         | 0.097835094 | 0.071855752 |
| 0.249316562 | 0.012628105         | 0.115243138 | 0.014699688 |
| 0.205025816 | 0.281468282         | 0.158294996 | 0.118512908 |
| 0.272912146 | 0.213298563         | 0.002547057 | 0.271205782 |
| 0.001241306 | 0.001989536         | 0.098816728 | 0.098187249 |
| 0.04155196  | 0.228615642         | 0.103529335 | 0.053066998 |
| 0.058524657 | 0.002198186         | 0.24668579  | 0.245222948 |
| 0.168898663 | 0.191870932         | 0.273362889 | 0.082622157 |
| 0.149525865 | 0.125584363         | 0.057404548 | 0.02850131  |
| 0.069718907 | 0.110758446         | 0.047734609 | 0.001224446 |
| 0.181711537 | 0.241604104         | 0.006634202 | 0.036209727 |
| 0.257263659 | 0.285013258         | 0.007501441 | 0.002979523 |
| 0.091322845 | 0.134641111         | 0.296441286 | 0.219984339 |
| 0.213175647 | 0.267455554         | 0.144589837 | 0.051270381 |
| 0.006339087 | 0.196362172         | 0.285096434 | 0.057379905 |
| 0.245250845 | 0.00737935          | 0.195725459 | 0.320008366 |
| 0.024654079 | 0.05401172          | 0.004460659 | 0.014846659 |
| 0.296610601 | 0.050538954         | 0.090324288 | 0.029301084 |
| 0.146492617 | 0.183541277         | 0.004481984 | 0.065268406 |
| 0.163782269 | 0.241215064         | 0.044545848 | 0.057416313 |
| 0.140347684 | 0.04623432          | 0.310998951 | 0.213595269 |
| 0.025113933 | 0.020183105         | 0.040430233 | 0.210713563 |
| 0.258717301 | 0.176364931         | 0.002970148 | 0.186104058 |
| 0.26118951  | 0.258126882         | 0.201988445 | 0.242069902 |
| 0.013518487 | 0.241356835         | 0.206230047 | 0.23550597  |
| 0.056912576 | 0.0907399           | 0.087719568 | 0.008423026 |
| 0.115455083 | 0.185163623         | 0.198980086 | 0.052445357 |
| 0.179693417 | 0.018223774         | 0.005773483 | 0.223250392 |
| 0.205467371 | 0.010576159         | 0.086572556 | 0.273177919 |
| 0.002028274 | 0.202454107         | 0.288493618 | 0.047378199 |
| 0.23669048  | 0.293037153         | 0.199692893 | 0.037741806 |
| 0.010569192 | 0.324998257         | 0.217549684 | 0.163700502 |
| 0.192441333 | 0.126508625         | 0.023690827 | 0.015818983 |
| 0.134031242 | 0.009945619         | 0.040360404 | 0.058686711 |
| 0.182580394 | 0.156993052         | 0.072479335 | 0.063131665 |
| 0.093046364 | 0.012834346         | 0.175320331 | 0.061581846 |
| 0.134580094 | 0.096315767         | 0.190229355 | 0.046083538 |
| 0.187880831 | 0.250282386         | 0.215354659 | 0.001271954 |

|             |             |             |             |
|-------------|-------------|-------------|-------------|
| 0.253527597 | 0.236180925 | 0.219513302 | 0.001002582 |
| 0.295750968 | 0.000101757 | 0.095654103 | 0.103938106 |
| 0.079233797 | 0.084758145 | 0.177095546 | 0.138570109 |
| 0.150386615 | 0.07000771  | 0.090586839 | 0.101236449 |
| 0.05145882  | 0.055523124 | 0.235970886 | 0.110563695 |
| 0.127251057 | 0.020018073 | 0.01507792  | 0.01470324  |
| 0.006722977 | 0.219747782 | 0.075315635 | 0.008775025 |
| 0.09305343  | 0.106559138 | 0.170569704 | 0.204868641 |
| 0.221020239 | 0.016762865 | 0.123343094 | 0.205644542 |
| 0.086756451 | 0.056185881 | 0.003752852 | 0.137808276 |
| 0.066721571 | 0.13239089  | 0.125626898 | 0.09195873  |
| 0.193989288 | 0.159542069 | 0.070528609 | 0.207375111 |
| 0.151080584 | 0.152390827 | 0.069807231 | 0.023758631 |
| 0.041784606 | 0.02777479  | 0.257121666 | 0.000818037 |
| 0.159977184 | 0.034395288 | 0.283983642 | 0.195113067 |
| 0.203433223 | 0.173062818 | 0.052339322 | 0.012069354 |
| 0.05335883  | 0.038604482 | 0.032996153 | 0.241461686 |
| 0.212954159 | 0.032579672 | 0.229833654 | 0.037471956 |
| 0.290674712 | 0.251614259 | 0.119663051 | 0.054504798 |
| 0.091032129 | 0.046098622 | 0.187261111 | 0.013515869 |
| 0.224170616 | 0.146994759 | 0.110142123 | 0.166679457 |
| 0.112678591 | 0.271483618 | 0.006334085 | 0.281046128 |
| 0.194748736 | 0.024755706 | 0.212882505 | 0.073775234 |
| 0.048949998 | 0.039593773 | 0.231059164 | 0.082245436 |
| 0.056512749 | 0.192230769 | 0.009658993 | 0.057384966 |
| 0.193697406 | 0.089369881 | 0.192748109 | 0.200018651 |
| 0.181251019 | 0.216651222 | 0.167041533 | 0.072809439 |
| 0.176944918 | 0.177644423 | 0.078839086 | 0.105516654 |
| 0.156314896 | 0.015736038 | 0.121218921 | 0.007588025 |
| 0.267107959 | 0.271299138 | 0.096027443 | 0.004741274 |
| 0.001009302 | 1           | 0.226442728 | 0.007571601 |
| 0.316390658 | 0.203582344 | 0.138077237 | 0.237822374 |
| 0.042283796 | 0.178774729 | 0.040572095 | 0.261085936 |
| 0.003946233 | 0.096420812 | 0.231618639 | 0.163789252 |
| 0.112222245 | 0.259177978 | 0.250180624 | 0.230778302 |
| 0.003168014 | 0.10304831  | 0.001302385 | 0.14461311  |
| 0.166473173 | 0.276152117 | 0.056031135 | 0.068366495 |
| 0.151137982 | 0.175394582 | 0.093927103 | 0.188505209 |
| 0.001437554 | 0.314157966 | 0.061631621 | 0.173257067 |
| 0.172739337 | 0.169643293 | 0.010356617 | 0.244532938 |
| 0.141126647 | 0.114001253 | 0.089592003 | 0.159304195 |
| 0.204344626 | 0.160624675 | 0.030764874 | 0.093095421 |
| 0.174572008 | 0.007700862 | 0.084211788 | 0.255834273 |
| 0.065479809 | 0.235819677 | 0.331341571 | 0.070126093 |
| 0.24518757  | 0.1466904   | 0.20803372  | 0.238859827 |
| 0.029915818 | 0.098899993 | 0.271359153 | 0.223051668 |
| 0.161008226 | 0.162020706 | 0.186257099 | 0.139805971 |
| 0.171609161 | 0.014319903 | 0.157181573 | 0.153287315 |
| 0.223423978 | 0.146526478 | 0.104393807 | 0.127060658 |
| 0.005858017 | 0.029638977 | 0.076435991 | 0.032452036 |
| 0.147927013 | 0.223799873 | 0.140093215 | 0.177185814 |
| 0.040699841 | 0.005885509 | 0.209974544 | 0.061972628 |
| 0.079379808 | 0.253481261 | 0.077992814 | 0.21099996  |
| 0.045979808 | 0.139807419 | 0.095681955 | 0.001255017 |

|             |             |             |             |
|-------------|-------------|-------------|-------------|
| 0.260622058 | 0.047367567 | 0.111324142 | 0.122170852 |
| 0.133882569 | 0.004084474 | 0.184393161 | 0.29957236  |
| 0.104840379 | 0.091551565 | 0.144790307 | 0.197459181 |
| 0.205942914 | 0.16317287  | 0.151568358 | 0.167007236 |
| 0.222460977 | 0.133537708 | 0.161649894 | 0.205824171 |
| 0.166427426 | 0.053403162 |             |             |
| SYCE2       | 0.051576641 | 0.403300459 | 0.039493939 |
| 0.119506534 | 0.238664718 | 0.253511172 | 0.047840771 |
| 0.095557273 | 0.312048458 | 0.249234242 | 0.25216768  |
| 0.013912465 | 0.077305301 | 0.44804872  | 0.03981774  |
| 0.304416496 | 0.026369701 | 0.084642313 | 0.070927019 |
| 0.172244065 | 0.229560738 | 0.242112642 | 0.248409681 |
| 0.226945944 | 0.16483169  | 0.245082243 | 0.292666592 |
| 0.490626553 | 0.210900248 | 0.330826169 | 0.191407417 |
| 0.404993023 | 0.254746209 | 0.287764817 | 0.011912446 |
| 0.276198317 | 0.016193255 | 0.426978571 | 0.223615095 |
| 0.139570775 | 0.313763139 | 0.251882074 | 0.182910102 |
| 0.312192739 | 0.028874792 | 0.163875863 | 0.353870155 |
| 0.243752932 | 0.196981819 | 0.045477146 | 0.349327321 |
| 0.293777007 | 0.251106674 | 0.349117609 | 0.003073766 |
| 0.242503678 | 0.096562878 | 0.211685386 | 0.477137525 |
| 0.141870318 | 0.086595058 | 0.281118109 | 0.164394198 |
| 0.287675418 | 0.312897994 | 0.178286618 | 0.31756332  |
| 0.485827473 | 0.171149888 | 0.385726148 | 0.122691676 |
| 0.280211574 | 0.025315617 | 0.122910213 | 0.061146179 |
| 0.286566072 | 0.138665882 | 0.230700538 | 0.257259055 |
| 0.425830892 | 0.488182339 | 0.169958623 | 0.484318481 |
| 0.106363192 | 0.275096397 | 0.219828648 | 0.25158221  |
| 0.319518551 | 0.069195414 | 0.359757446 | 0.512153004 |
| 0.0353061   | 0.285403924 | 0.359759891 | 0.090199473 |
| 0.391599598 | 0.220345118 | 0.295187256 | 0.144719881 |
| 0.305264788 | 0.289307935 | 0.449245276 | 0.232983047 |
| 0.216124642 | 0.053645571 | 0.451810307 | 0.260018979 |
| 0.217614212 | 0.06141205  | 0.22001827  | 0.459626845 |
| 0.326890579 | 0.478683571 | 0.416398659 | 0.342951938 |
| 0.316693704 | 0.486197927 | 0.344373158 | 0.380387738 |
| 0.136221444 | 0.507146913 | 0.13551553  | 0.028158451 |
| 0.053884448 | 0.05558995  | 0.194710394 | 0.252343821 |
| 0.451988406 | 0.240525573 | 0.153545465 | 0.18955597  |
| 0.461914307 | 0.446892058 | 0.513868948 | 0.400296016 |
| 0.029322877 | 0.219542554 | 0.323405196 | 0.16999463  |
| 0.312577158 | 0.078950891 | 0.223875746 | 0.483038625 |
| 0.356239206 | 0.421871711 | 0.120581641 | 0.466137159 |
| 0.148967294 | 0.493765201 | 0.44069336  | 0.1311683   |
| 0.498023875 | 0.464478683 | 0.501632059 | 0.339506861 |
| 0.435219652 | 0.248286807 | 0.057143061 | 0.363126168 |
| 0.457060764 | 0.014425795 | 0.472872666 | 0.505294393 |
| 0.490917313 | 0.466765114 | 0.516362857 | 0.494342764 |
| 0.485772461 | 0.053703243 | 0.04317053  | 0.224435505 |
| 0.498027727 | 0.378026771 | 0.092919135 | 0.332289218 |
| 0.273137198 | 0.266398422 | 0.376912966 | 0.268364622 |
| 0.486244782 | 0.437630514 | 0.482178056 | 0.361788062 |
| 0.239453884 | 0.284073738 | 0.301475879 | 0.434127978 |
| 0.031698739 | 0.085105833 | 0.037061653 | 0.248239767 |

|             |             |             |             |
|-------------|-------------|-------------|-------------|
| 0.251694074 | 0.127795762 | 0.283115539 | 0.266475873 |
| 0.138639966 | 0.230653909 | 0.25618399  | 0.320255634 |
| 0.046483959 | 0.308616238 | 0.119820281 | 0.142899682 |
| 0.034285552 | 0.118290254 | 0.164092142 | 0.10399205  |
| 0.189693109 | 0.214165765 | 0.367549669 | 0.483687263 |
| 0.270422649 | 0.146823166 | 0.351526732 | 0.453328588 |
| 0.40569784  | 0.298184428 | 0.176501934 | 0.010420179 |
| 0.290707987 | 0.271535905 | 0.18766503  | 0.296640725 |
| 0.152714679 | 0.221579072 | 0.311469519 | 0.342938945 |
| 0.208305552 | 0.09951808  | 0.310361008 | 0.387444149 |
| 0.120889753 | 0.22130634  | 0.445931197 | 0.311162407 |
| 0.00212186  | 0.266891551 | 0.42217382  | 0.136195176 |
| 0.254272439 | 0.118858481 | 0.196359266 | 0.473944792 |
| 0.258989978 | 0.190777892 | 0.474103602 | 0.330197677 |
| 0.233707247 | 0.199066753 | 0.513656957 | 0.07150461  |
| 0.26374791  | 0.048517434 | 0.224334239 | 0.252157591 |
| 0.191135183 | 0.242769287 | 0.238535812 | 0.223203038 |
| 0.091831001 | 0.499698246 | 0.343419278 | 0.497618367 |
| 0.332271417 | 0.520145738 | 0.450417565 | 0.418290866 |
| 0.262808408 | 0.302693575 | 0.133795432 | 0.432597193 |
| 0.461898815 | 0.301231867 | 0.055322533 | 0.421642692 |
| 0.317885486 | 0.355829056 | 0.104167151 | 0.494266637 |
| 0.459686092 | 0.450196048 | 0.102915323 | 0.337774165 |
| 0.354918174 | 0.167247075 | 0.374809558 | 0.507476318 |
| 0.296876726 | 0.30182572  | 0.299032207 | 0.380482065 |
| 0.131196729 | 0.186265357 | 0.277816521 | 0.157057783 |
| 0.009431747 | 0.058351906 | 0.050418485 | 0.119898208 |
| 0.149786319 | 0.311978759 | 0.3256593   | 0.511670521 |
| 0.086173858 | 0.371906403 | 0.184695222 | 0.265824397 |
| 0.427021031 | 0.267972093 | 0.270395691 | 0.274900364 |
| 0.191736618 | 0.014476596 | 0.08705824  | 0.498142861 |
| 0.029609892 | 0.199615356 | 0.218401316 | 0.001978793 |
| 0.037734622 | 0.38900316  | 0.083563069 | 0.170652737 |
| 0.45825472  | 0.178086694 | 0.165685946 | 0.30051594  |
| 0.26546724  | 0.06478491  | 0.001701433 | 0.484552424 |
| 0.465658728 | 0.438684027 | 0.467537872 | 0.423919836 |
| 0.440635466 | 0.333530838 | 0.397231203 | 0.235046065 |
| 0.085121799 | 0.069629636 | 0.231699125 | 0.246757056 |
| 0.003907574 | 0.320354045 | 0.216791859 | 0.103449436 |
| 0.374563297 | 0.238897373 | 0.025824615 | 0.25145048  |
| 0.019979176 | 0.203415832 | 0.233803002 | 0.160152644 |
| 0.293619607 | 0.009763909 | 0.216740365 | 0.315140566 |
| 0.400827894 | 0.310206388 | 0.28998348  | 0.510883527 |
| 0.240356528 | 0.107798896 | 0.255873614 | 0.320935181 |
| 0.057301099 | 0.152387471 | 0.258200548 | 0.04448251  |
| 0.121590948 | 0.41512177  | 0.287958963 | 0.063324249 |
| 0.210450393 | 0.003653804 | 0.340812111 | 0.506891536 |
| 0.44165624  | 0.520549597 | 0.481093478 | 0.223616187 |
| 0.492580631 | 0.112347951 | 0.514598865 | 0.384634591 |
| 0.319775472 | 0.001122903 | 0.002888031 | 0.489544369 |
| 0.323194097 | 0.045086387 | 0.116622627 | 0.250753675 |
| 0.085328319 | 0.113241352 | 0.041994971 | 0.162773836 |
| 0.286675028 | 0.177551219 | 0.139987065 | 0.456403415 |
| 0.196329249 | 0.162037834 | 0.280794899 | 0.062989474 |

|             |             |             |             |
|-------------|-------------|-------------|-------------|
| 0.275738636 | 0.039654397 | 0.062663975 | 0.006134414 |
| 0.294306462 | 0.099915378 | 0.435360083 | 0.488475713 |
| 0.475656022 | 0.329891362 | 0.2868956   | 0.216415842 |
| 0.406647511 | 0.074888697 | 0.270913314 | 0.077316349 |
| 0.473315491 | 0.328393234 | 0.27672272  | 0.280399741 |
| 0.499171634 | 0.460004757 | 0.023715914 | 0.394448414 |
| 0.00871228  | 0.000826951 | 0.279589883 | 0.194859674 |
| 0.057737849 | 0.310922043 | 0.217963248 | 0.181466096 |
| 0.154856778 | 0.023441999 | 0.243071314 | 0.237282285 |
| 0.233466694 | 0.290715257 | 0.228776101 | 0.192547298 |
| 0.211222442 | 0.153593523 | 0.134029855 | 0.109252365 |
| 0.19058356  | 0.294048351 | 0.174370437 | 0.015976075 |
| 0.317552687 | 0.31856865  | 0.040945564 | 0.108809408 |
| 0.426109018 | 0.491364206 | 0.038384877 | 0.009740424 |
| 0.225570275 | 0.251047011 | 0.490746189 | 0.481515938 |
| 0.497058101 | 0.507186273 | 0.35946832  | 0.106256951 |
| 0.046426343 | 0.241290246 | 0.239237637 | 0.078408405 |
| 0.489441393 | 0.051766357 | 0.446222873 | 0.248595029 |
| 0.083828811 | 0.175552994 | 0.023363076 | 0.060773966 |
| 0.279676406 | 0.120063625 | 0.134433383 | 0.114440476 |
| 0.260147881 | 0.213770444 | 0.036218618 | 0.146678947 |
| 0.319525629 | 0.214745519 | 0.121299209 | 0.201530533 |
| 0.306446894 | 0.189248728 | 0.39578596  | 0.427990504 |
| 0.089133758 | 0.088344509 | 0.231801835 | 0.316230813 |
| 0.43791477  | 0.291384989 | 0.016614182 | 0.440739605 |
| 0.465134192 | 0.352828982 | 0.467723871 | 0.372021799 |
| 0.060789306 | 0.291367115 | 0.263605207 | 0.287042964 |
| 0.133866823 | 0.247888179 | 0.171603468 | 0.045410117 |
| 0.253875347 | 0.442564715 | 0.421573612 | 0.11945516  |
| 0.278798603 | 0.090522595 | 0.046236954 | 0.406814461 |
| 0.195436461 | 0.073175389 | 0.257037073 | 0.406964178 |
| 0.001881282 | 0.125370598 | 0.479064084 | 0.153631854 |
| 0.487859117 | 0.486808942 | 0.418598343 | 0.163946616 |
| 0.004982381 | 0.359001306 | 0.281368319 | 0.319534335 |
| 0.427860199 | 0.280979083 | 0.089716708 | 0.05811628  |
| 0.240204208 | 0.061090401 | 0.121141575 | 0.222693512 |
| 0.202217137 | 0.30292059  | 0.14511914  | 0.154672404 |
| 0.15321249  | 0.073387289 | 0.185937679 | 0.167271999 |
| 0.144583937 | 0.188294156 | 0.31636546  | 0.212038201 |
| 0.229636881 | 0.426627128 | 0.40284462  | 0.017616828 |
| 0.25579623  | 0.390254132 | 0.392564505 | 0.004198615 |
| 0.379249643 | 0.004727534 | 0.146292436 | 0.164846486 |
| 0.145058668 | 0.164085303 | 0.191168481 | 0.239178916 |
| 0.27597589  | 0.175280798 | 0.205680669 | 0.165692724 |
| 0.118541746 | 0.154041946 | 0.285510772 | 0.276079507 |
| 0.217083222 | 0.090159731 | 0.083797334 | 0.089697631 |
| 0.034270375 | 0.428802103 | 0.205590773 | 0.054266485 |
| 0.154426517 | 0.279181797 | 0.32082582  | 0.47913906  |
| 0.377149953 | 0.096252128 | 0.244207498 | 0.429195251 |
| 0.232441549 | 0.221434112 | 0.047869334 | 0.275140219 |
| 0.158932481 | 0.182809056 | 0.268259966 | 0.242995164 |
| 0.363459648 | 0.368961546 | 0.194029895 | 0.404088067 |
| 0.27548664  | 0.275828929 | 0.267295036 | 0.065435963 |
| 0.145625395 | 0.097982015 | 0.216019238 | 0.001438361 |



|             |             |             |             |
|-------------|-------------|-------------|-------------|
| 0.253345332 | 0.194725262 | 0.470297347 | 0.468093837 |
| 0.236447398 | 0.337927204 | 0.241578426 | 0.077736624 |
| 0.233084071 | 0.173212209 | 0.10176521  | 0.387827378 |
| 0.198926878 | 0.121306799 | 0.24125598  | 0.216390314 |
| 0.393773821 | 0.376860245 | 0.194728388 | 0.174116333 |
| 0.171347484 | 0.139280938 | 0.4504193   | 0.085632453 |
| 0.324386485 | 0.162198838 | 0.251377179 | 0.247246677 |
| 0.178174341 | 0.504934537 | 0.040607953 | 0.51989171  |
| 0.287723853 | 0.100108243 | 0.455420256 | 0.185795854 |
| 0.196410131 | 0.076665702 | 0.181976563 | 0.271438124 |
| 0.172230785 | 0.252645769 | 0.020608592 | 0.079833997 |
| 0.269283653 | 0.235222442 | 0.396334621 | 0.304278002 |
| 0.201012071 | 0.299855544 | 0.126399979 | 0.2256889   |
| 0.457907712 | 0.461557588 | 0.231569739 | 0.208467492 |
| 0.290191838 | 0.069647443 | 0.271873938 | 0.01715003  |
| 0.337084781 | 0.31787462  | 0.298697378 | 0.035101577 |
| 0.013368718 | 0.226442728 | 1           | 0.050393914 |
| 0.48238397  | 0.194516414 | 0.265656341 | 0.350673225 |
| 0.129984509 | 0.469062634 | 0.088132407 | 0.34590586  |
| 0.044074204 | 0.180765476 | 0.273397245 | 0.281207149 |
| 0.193937945 | 0.258641494 | 0.336547954 | 0.200214275 |
| 0.02352695  | 0.20361799  | 0.005037018 | 0.376407308 |
| 0.451241515 | 0.297950053 | 0.167012807 | 0.234368533 |
| 0.209174863 | 0.333323016 | 0.196120062 | 0.292460247 |
| 0.007240694 | 0.294085765 | 0.12996258  | 0.371802619 |
| 0.27027694  | 0.291403493 | 0.039805727 | 0.257627647 |
| 0.417690722 | 0.263825681 | 0.208963425 | 0.337127263 |
| 0.466562113 | 0.337877191 | 0.131002616 | 0.151321021 |
| 0.308632283 | 0.044765093 | 0.262029549 | 0.509633644 |
| 0.125631399 | 0.194286981 | 0.439210242 | 0.178902978 |
| 0.249034219 | 0.341377438 | 0.301512573 | 0.495537877 |
| 0.058606659 | 0.178832384 | 0.377395113 | 0.458400188 |
| 0.245164431 | 0.154294011 | 0.216619401 | 0.198422975 |
| 0.435869798 | 0.067971943 | 0.234562979 | 0.30889051  |
| 0.221102795 | 0.214872211 | 0.24109596  | 0.150916089 |
| 0.023843728 | 0.115676937 | 0.231302119 | 0.098204473 |
| 0.226536628 | 0.286270347 | 0.208842876 | 0.356148288 |
| 0.09408644  | 0.02109769  | 0.423688974 | 0.032656779 |
| 0.215952273 | 0.296944576 | 0.15671913  | 0.271630812 |
| 0.15296654  | 0.26054778  | 0.272010132 | 0.000768318 |
| 0.379772918 | 0.04200236  | 0.203551301 | 0.196443159 |
| 0.238855742 | 0.040591138 | 0.416669003 | 0.504366157 |
| 0.211374787 | 0.220611946 | 0.279338627 | 0.42913353  |
| 0.150325029 | 0.265428111 | 0.271392151 | 0.332550687 |
| 0.190800303 | 0.312756075 | 0.304851404 | 0.295780982 |
| 0.306748407 | 0.170846718 |             |             |
| SYNGR2      | 0.187207712 | 0.145004279 | 0.177687376 |
| 0.061958826 | 0.034653528 | 0.044428577 | 0.25646884  |
| 0.189987329 | 0.162217598 | 0.042125217 | 0.043403479 |
| 0.164205775 | 0.00485985  | 0.123503435 | 0.247964372 |
| 0.03676997  | 0.174771646 | 0.200056021 | 0.064599031 |
| 0.120611932 | 0.037161429 | 0.020310945 | 0.07179587  |
| 0.045176798 | 0.285787322 | 0.109058281 | 0.032601417 |
| 0.124696625 | 0.008671599 | 0.04469919  | 0.016838783 |

|             |             |             |             |
|-------------|-------------|-------------|-------------|
| 0.193562129 | 0.030145757 | 0.020962487 | 0.170680037 |
| 0.049516558 | 0.01523377  | 0.245616705 | 0.056667921 |
| 0.007363654 | 0.209384837 | 0.049198233 | 0.062341301 |
| 0.053103955 | 0.181890753 | 0.014457196 | 0.053705548 |
| 0.109155601 | 0.098584671 | 0.225996209 | 0.068646585 |
| 0.057648585 | 0.109904418 | 0.086755073 | 0.012829399 |
| 0.012766699 | 0.000913713 | 0.007824313 | 0.165007371 |
| 0.144426846 | 0.142115336 | 0.020129392 | 0.144430795 |
| 0.05977183  | 0.07811447  | 0.142466515 | 0.047397225 |
| 0.140449741 | 0.010497302 | 0.059083176 | 0.051168229 |
| 0.069105124 | 0.300937432 | 0.217848732 | 0.27674555  |
| 0.039745273 | 0.101349674 | 0.040911032 | 0.022079472 |
| 0.141708876 | 0.216139778 | 0.159346732 | 0.198274424 |
| 0.025650716 | 0.028763642 | 0.035615179 | 0.112186624 |
| 0.111933511 | 0.282090714 | 0.065518524 | 0.173845931 |
| 0.298459924 | 0.056836703 | 0.08916745  | 0.26218569  |
| 0.121768936 | 0.028228112 | 0.040057597 | 0.009073622 |
| 0.04383093  | 0.034623908 | 0.22385408  | 0.111124943 |
| 0.043851064 | 0.241573776 | 0.22800555  | 0.022683567 |
| 0.03299786  | 0.201593925 | 0.039992861 | 0.075382721 |
| 0.054995048 | 0.117508094 | 0.110892539 | 0.125101687 |
| 0.029516362 | 0.133469125 | 0.070891177 | 0.145469202 |
| 0.011469444 | 0.159731351 | 0.130515052 | 0.154006054 |
| 0.228217362 | 0.16118222  | 0.06637145  | 0.175636475 |
| 0.092997519 | 0.110115499 | 0.132446204 | 0.074723168 |
| 0.091075393 | 0.200289155 | 0.16225725  | 0.106334559 |
| 0.215028449 | 0.021921096 | 0.029320492 | 0.103656705 |
| 0.081927329 | 0.242515224 | 0.016869735 | 0.216723304 |
| 0.14615924  | 0.076800086 | 0.180565892 | 0.253184163 |
| 0.178506594 | 0.158468804 | 0.110512332 | 0.117482939 |
| 0.191552925 | 0.203694356 | 0.133663656 | 0.037022738 |
| 0.183184731 | 0.063498386 | 0.060137718 | 0.141381589 |
| 0.144874228 | 0.001367913 | 0.095194423 | 0.103477887 |
| 0.158627783 | 0.070681724 | 0.13820125  | 0.117746228 |
| 0.158688979 | 0.256167285 | 0.008180194 | 0.070299114 |
| 0.181335894 | 0.11966261  | 0.132056411 | 0.029263773 |
| 0.041025892 | 0.062212823 | 0.08210477  | 0.016725516 |
| 0.186768047 | 0.103757026 | 0.108173641 | 0.107099726 |
| 0.116363196 | 0.215762114 | 0.023288083 | 0.217465521 |
| 0.182683677 | 0.16409971  | 0.220223489 | 0.157259382 |
| 0.038513631 | 0.121790679 | 0.067433114 | 0.058237163 |
| 0.128001281 | 0.097417077 | 0.016089226 | 0.04180507  |
| 0.324760457 | 0.035852685 | 0.169413776 | 0.18599495  |
| 0.154786686 | 0.321067024 | 0.070310271 | 0.082660074 |
| 0.063509638 | 0.383757119 | 0.055105796 | 0.121788722 |
| 0.055813328 | 0.203795453 | 0.071292132 | 0.146540599 |
| 0.154376543 | 0.025555865 | 0.206826194 | 0.023401785 |
| 0.031408702 | 0.025723845 | 0.008251727 | 0.031174556 |
| 0.369184267 | 0.076186645 | 0.049889302 | 0.048924082 |
| 0.099269826 | 0.230884422 | 0.03536386  | 0.222471821 |
| 0.267361253 | 0.032358481 | 0.093700774 | 0.053860545 |
| 0.095225891 | 0.071735608 | 0.079335036 | 0.050576527 |
| 0.133258867 | 0.008209556 | 0.008826366 | 0.103495759 |
| 0.019857838 | 0.032641964 | 0.105872094 | 0.054836968 |

|             |             |             |             |
|-------------|-------------|-------------|-------------|
| 0.037790536 | 0.347758931 | 0.143246597 | 0.004319392 |
| 0.045931623 | 0.023446944 | 0.088084995 | 0.054617186 |
| 0.117761047 | 0.131827428 | 0.028437776 | 0.03291764  |
| 0.186453187 | 0.16340824  | 0.127665461 | 0.122874524 |
| 0.025978105 | 0.150385896 | 0.078945299 | 0.108655865 |
| 0.090154188 | 0.033564907 | 0.004261661 | 0.078478465 |
| 0.095982946 | 0.03989636  | 0.274672377 | 0.070931931 |
| 0.048125787 | 0.047841951 | 0.054363722 | 0.127360557 |
| 0.206176642 | 0.186321242 | 0.103639414 | 0.07686763  |
| 0.102682893 | 0.104319379 | 0.108689035 | 0.159801419 |
| 0.043914395 | 0.034924689 | 0.028669203 | 0.090105892 |
| 0.16146531  | 0.036777528 | 0.217096363 | 0.008048654 |
| 0.001894918 | 0.247244476 | 0.217818426 | 0.081600016 |
| 0.012883868 | 0.044688988 | 0.062024362 | 0.142153796 |
| 0.164364844 | 0.144225028 | 0.211135551 | 0.034387933 |
| 0.161277804 | 0.041390893 | 0.025312575 | 0.043756893 |
| 0.195159207 | 0.045243364 | 0.065724698 | 0.2193597   |
| 0.265410732 | 0.013133049 | 0.10804217  | 0.004623565 |
| 0.233278894 | 0.10359867  | 0.339879416 | 0.326356389 |
| 0.104416169 | 0.311255644 | 0.168903207 | 0.053765484 |
| 0.078787362 | 0.205230904 | 0.007041085 | 0.135164959 |
| 0.174081185 | 0.177904579 | 0.176104565 | 0.213745232 |
| 0.138359369 | 0.094500543 | 0.079563323 | 0.071600421 |
| 0.191526964 | 0.241819935 | 0.015017721 | 0.060213458 |
| 0.019770622 | 0.086651474 | 0.06136791  | 0.199867635 |
| 0.06267185  | 0.133912666 | 0.181276735 | 0.043023139 |
| 0.084636727 | 0.005120047 | 0.099263515 | 0.118903417 |
| 0.082079763 | 0.182313136 | 0.016867361 | 0.022135797 |
| 0.173347983 | 0.16846629  | 0.020127674 | 0.161951873 |
| 0.053033413 | 0.260469808 | 0.043892649 | 0.065100182 |
| 0.212843469 | 0.026142145 | 0.081703336 | 0.00270758  |
| 0.031890805 | 0.204327134 | 0.040171174 | 0.169365939 |
| 0.09215849  | 0.09920993  | 0.157032197 | 0.16160687  |
| 0.170111797 | 0.12161291  | 0.132700738 | 0.013404694 |
| 0.145934516 | 0.002507453 | 0.136585661 | 0.126202554 |
| 0.032636447 | 0.00453873  | 0.032665671 | 0.094938237 |
| 0.031662114 | 0.293697569 | 0.166974853 | 0.030785144 |
| 0.108380961 | 0.186586628 | 0.217974522 | 0.021536846 |
| 0.049742494 | 0.046897285 | 0.025699388 | 0.185257091 |
| 0.097837415 | 0.113215024 | 0.058658959 | 0.286067249 |
| 0.038130548 | 0.158133822 | 0.298248615 | 0.005425607 |
| 0.070787409 | 0.304709212 | 0.253753339 | 0.14897988  |
| 0.161760706 | 0.050963696 | 0.024253469 | 0.036817673 |
| 0.118884084 | 0.236347743 | 0.023634719 | 0.212928421 |
| 0.146462747 | 0.04353096  | 0.11376176  | 0.15988065  |
| 0.140813001 | 0.156682834 | 0.220296152 | 0.08187682  |
| 0.044897203 | 0.004176586 | 0.057195601 | 0.165997834 |
| 0.058656784 | 0.033348298 | 0.170534659 | 0.141838363 |
| 0.113118533 | 0.129040734 | 0.015592786 | 0.016751784 |
| 0.080364515 | 0.051084496 | 0.025330405 | 0.218714281 |
| 0.051138362 | 0.037402633 | 0.095084945 | 0.161992841 |
| 0.0809133   | 0.203911379 | 0.274143066 | 0.240498318 |
| 0.037003587 | 0.028147915 | 0.198387553 | 0.203200224 |
| 0.090454269 | 0.100422237 | 0.200715551 | 0.039548948 |

|             |             |             |             |
|-------------|-------------|-------------|-------------|
| 0.190958266 | 0.065889372 | 0.107119987 | 0.140870196 |
| 0.193244569 | 0.161605478 | 0.230104782 | 0.091928082 |
| 0.189802462 | 0.06583598  | 0.029225824 | 0.066314035 |
| 0.137040065 | 0.254891433 | 0.161832495 | 0.017278834 |
| 0.231455592 | 0.10476866  | 0.109519803 | 0.230017977 |
| 0.024687506 | 0.161527384 | 0.082671434 | 0.181111742 |
| 0.049696367 | 0.014843928 | 0.254860263 | 0.135998246 |
| 0.127972194 | 0.007908934 | 0.176431977 | 0.106461841 |
| 0.144100202 | 0.059140991 | 0.053742973 | 0.178529323 |
| 0.208042316 | 0.250376011 | 0.072942973 | 0.097414955 |
| 0.082278145 | 0.040189145 | 0.043104184 | 0.137899332 |
| 0.127124633 | 0.042254203 | 0.167212095 | 0.124606002 |
| 0.26682302  | 0.025575759 | 0.030225653 | 0.048528652 |
| 0.171914771 | 0.050531219 | 0.123249801 | 0.245450429 |
| 0.225793471 | 0.238948509 | 0.134872015 | 0.093377926 |
| 0.043244039 | 0.225194323 | 0.256336328 | 0.112435204 |
| 0.013955706 | 0.145176424 | 0.047425959 | 0.085992428 |
| 0.003683005 | 0.005776508 | 0.132370423 | 0.074701543 |
| 0.191506653 | 0.109667793 | 0.16175961  | 0.125057625 |
| 0.000490402 | 0.0448649   | 0.044719257 | 0.03106142  |
| 0.125941625 | 0.134632533 | 0.12647339  | 0.125470218 |
| 0.158199004 | 0.240282147 | 0.106354635 | 0.042047632 |
| 0.011611757 | 0.072182655 | 0.183308988 | 0.184700735 |
| 0.089722717 | 0.313538993 | 0.013445005 | 0.095970857 |
| 0.03173023  | 0.159409847 | 0.118261555 | 0.04919193  |
| 0.007155705 | 0.131427087 | 0.103634035 | 0.183936604 |
| 0.028627318 | 0.126002822 | 0.135930548 | 0.019798835 |
| 0.04953455  | 0.108691645 | 0.07445143  | 0.057337737 |
| 0.081123733 | 0.095012986 | 0.071224742 | 0.038126417 |
| 0.099218417 | 0.124644017 | 0.057108611 | 0.099809381 |
| 0.070944455 | 0.144016322 | 0.046392698 | 0.081842803 |
| 0.029638608 | 0.145469711 | 0.345852313 | 0.375307899 |
| 0.09941256  | 0.118578067 | 0.225441221 | 0.254727955 |
| 0.117942861 | 0.074870476 | 0.165112205 | 0.158912011 |
| 0.134655918 | 0.302065818 | 0.074865375 | 0.106202593 |
| 0.02028554  | 0.045780728 | 0.235349015 | 0.063314145 |
| 0.113732819 | 0.021197339 | 0.053792664 | 0.10176353  |
| 0.089623478 | 0.207822597 | 0.212169471 | 0.15915897  |
| 0.045063325 | 0.071107834 | 0.035530086 | 0.079679963 |
| 0.130049388 | 0.268612479 | 0.029663928 | 0.043298075 |
| 0.083615719 | 0.079623694 | 0.084618841 | 0.177427247 |
| 0.01511749  | 0.16192222  | 0.034360199 | 0.157539983 |
| 0.029955998 | 0.306481004 | 0.218845469 | 0.075402743 |
| 0.006502176 | 0.121852271 | 0.043672271 | 0.062811928 |
| 0.064455621 | 0.075123999 | 0.051546754 | 0.137898175 |
| 0.138681801 | 0.180456125 | 0.228255098 | 0.201831843 |
| 0.038447214 | 0.021213823 | 0.080544605 | 0.04653482  |
| 0.075090875 | 0.130690811 | 0.230938127 | 0.124128348 |
| 0.039836225 | 0.28858752  | 0.204431304 | 0.104420815 |
| 0.090796923 | 0.06513887  | 0.006478711 | 0.060641342 |
| 0.11952048  | 0.017834072 | 0.001302225 | 0.008915738 |
| 0.090077452 | 0.079158169 | 0.105374029 | 0.111112708 |
| 0.033301728 | 0.120533672 | 0.008215655 | 0.124190374 |
| 0.184383806 | 0.225303109 | 0.04738816  | 0.193677043 |

|             |             |             |             |
|-------------|-------------|-------------|-------------|
| 0.124435475 | 0.139866191 | 0.068633191 | 0.023200907 |
| 0.039184514 | 0.030554729 | 0.033734514 | 0.209607177 |
| 0.197746402 | 0.007571601 | 0.050393914 | 1 0.103317  |
| 0.005717393 | 0.094141949 | 0.059055429 | 0.258801612 |
| 0.227277994 | 0.091862774 | 0.058014496 | 0.300993912 |
| 0.154119637 | 0.032170144 | 0.053040365 | 0.027801831 |
| 0.020888272 | 0.07535666  | 0.013004459 | 0.168519821 |
| 0.042063682 | 0.030203014 | 0.239819277 | 0.227902824 |
| 0.026095395 | 0.271961784 | 0.036046307 | 0.104926399 |
| 0.157280083 | 0.050766416 | 0.033283411 | 0.059596347 |
| 0.026658121 | 0.13748045  | 0.115432239 | 0.007646711 |
| 0.073119954 | 0.099200552 | 0.039338722 | 0.270234488 |
| 0.033669977 | 0.230730694 | 0.01821898  | 0.153542291 |
| 0.13903445  | 0.244446431 | 0.050520386 | 0.078373614 |
| 0.261455968 | 0.041086598 | 0.163577871 | 0.08703819  |
| 0.014516447 | 0.071819678 | 0.082173922 | 0.022046563 |
| 0.161998181 | 0.047573408 | 0.175599432 | 0.079716961 |
| 0.126262802 | 0.078623495 | 0.145895511 | 0.125717263 |
| 0.024439866 | 0.014086781 | 0.044655875 | 0.164979014 |
| 0.082116153 | 0.032175596 | 0.118413401 | 0.01123715  |
| 0.101225746 | 0.090898252 | 0.048351655 | 0.087011068 |
| 0.155778679 | 0.038166777 | 0.203989451 | 0.080931653 |
| 0.04239502  | 0.041048515 | 0.172832883 | 0.047618181 |
| 0.046212011 | 0.182264464 | 0.000355882 | 0.07580236  |
| 0.043773596 | 0.114929231 | 0.037960582 | 0.227635266 |
| 0.094444126 | 0.090115868 | 0.037161382 | 0.095380783 |
| 0.010312292 | 0.065941463 | 0.029767085 | 0.023363691 |
| 0.230966463 | 0.165758775 | 0.118830342 | 0.122862458 |
| 0.036858164 | 0.015638436 | 0.159369546 | 0.008096612 |
| 0.017485718 | 0.027616946 | 0.073658693 | 0.011640729 |
| 0.034399131 | 0.032180743 | 0.018083039 | 0.102727574 |
| 0.116702055 |             |             |             |

|             |             |             |             |
|-------------|-------------|-------------|-------------|
| TACC3       | 0.117356258 | 0.422912504 | 0.08625837  |
| 0.213243634 | 0.413061665 | 0.45154718  | 0.105522282 |
| 0.19815775  | 0.389760654 | 0.352921622 | 0.445718523 |
| 0.036126365 | 0.150533165 | 0.463422034 | 0.099462144 |
| 0.480233787 | 0.069094217 | 0.174775013 | 0.11872058  |
| 0.3120751   | 0.393782994 | 0.426043575 | 0.424790743 |
| 0.399243565 | 0.220757848 | 0.405005805 | 0.460736256 |
| 0.4925196   | 0.330143092 | 0.491930145 | 0.242990414 |
| 0.420037713 | 0.430897414 | 0.457800614 | 0.031681994 |
| 0.479338054 | 0.028936807 | 0.439146302 | 0.374543528 |
| 0.240950723 | 0.364772263 | 0.376276859 | 0.340259669 |
| 0.431828095 | 0.064075322 | 0.244251779 | 0.479402566 |
| 0.399163399 | 0.374533465 | 0.098707764 | 0.479845074 |
| 0.446944752 | 0.400513903 | 0.419054323 | 0.004734956 |
| 0.395030867 | 0.142875658 | 0.316921987 | 0.495782128 |
| 0.277071635 | 0.197952502 | 0.361894649 | 0.329375451 |
| 0.462041359 | 0.455462272 | 0.340496828 | 0.439827373 |
| 0.494429561 | 0.273168918 | 0.483405464 | 0.232442722 |
| 0.456473188 | 0.058611893 | 0.223731759 | 0.125265871 |
| 0.475636171 | 0.29209889  | 0.434112959 | 0.416615367 |
| 0.416369777 | 0.514337789 | 0.320193357 | 0.489743791 |
| 0.180696722 | 0.440766054 | 0.392649911 | 0.39211372  |

|             |             |             |             |
|-------------|-------------|-------------|-------------|
| 0.437738089 | 0.142852126 | 0.478026637 | 0.52067607  |
| 0.084804247 | 0.42513648  | 0.462561592 | 0.171715543 |
| 0.442789872 | 0.375329988 | 0.436677702 | 0.268928221 |
| 0.460276847 | 0.445578246 | 0.472174954 | 0.373571366 |
| 0.414244733 | 0.109863131 | 0.471377066 | 0.424058945 |
| 0.396518623 | 0.125907166 | 0.3454307   | 0.492226583 |
| 0.488181049 | 0.487289095 | 0.454962182 | 0.433363609 |
| 0.474446464 | 0.495834067 | 0.470234596 | 0.435813767 |
| 0.191136315 | 0.517741966 | 0.26407313  | 0.080640317 |
| 0.111065876 | 0.148120601 | 0.340829123 | 0.36403146  |
| 0.482547684 | 0.412997539 | 0.279413394 | 0.342327725 |
| 0.484951366 | 0.462454323 | 0.516165368 | 0.464642872 |
| 0.071119895 | 0.354641666 | 0.475149049 | 0.355377482 |
| 0.457239424 | 0.174340672 | 0.369368866 | 0.499893493 |
| 0.410974627 | 0.489195184 | 0.231044669 | 0.494444748 |
| 0.286875411 | 0.514575649 | 0.44987918  | 0.251976757 |
| 0.51293429  | 0.484722426 | 0.514622232 | 0.478855969 |
| 0.467412611 | 0.418030611 | 0.102370316 | 0.432284147 |
| 0.4889653   | 0.028513649 | 0.483481998 | 0.498554678 |
| 0.491236129 | 0.497061713 | 0.524414472 | 0.505396228 |
| 0.493956509 | 0.117898679 | 0.051256699 | 0.391340104 |
| 0.50101891  | 0.437881503 | 0.219737186 | 0.486692909 |
| 0.45710789  | 0.454428376 | 0.475208985 | 0.386177782 |
| 0.515455919 | 0.472163135 | 0.4826206   | 0.45608893  |
| 0.374885961 | 0.344293386 | 0.457043885 | 0.454860882 |
| 0.082519168 | 0.170073295 | 0.080965805 | 0.381597576 |
| 0.390402093 | 0.262011238 | 0.450335827 | 0.444679809 |
| 0.277004527 | 0.408632377 | 0.416046396 | 0.466133261 |
| 0.081242054 | 0.488214222 | 0.23848859  | 0.244685318 |
| 0.080972822 | 0.181063427 | 0.275814419 | 0.232514786 |
| 0.358187166 | 0.241068625 | 0.49041763  | 0.489217107 |
| 0.446234605 | 0.238183858 | 0.48229762  | 0.479112233 |
| 0.433809335 | 0.470855181 | 0.297391604 | 0.024392463 |
| 0.381142947 | 0.383309691 | 0.283812667 | 0.477297604 |
| 0.193177715 | 0.347423443 | 0.475229186 | 0.47187559  |
| 0.351010001 | 0.20622004  | 0.466947795 | 0.426260911 |
| 0.19830453  | 0.405368279 | 0.480465797 | 0.465991921 |
| 0.007292796 | 0.423102411 | 0.490481414 | 0.248419045 |
| 0.394173997 | 0.219117606 | 0.338144495 | 0.479103948 |
| 0.392248377 | 0.339353366 | 0.487961658 | 0.46971071  |
| 0.415348661 | 0.225310202 | 0.525912599 | 0.085823078 |
| 0.438054629 | 0.100875974 | 0.376398973 | 0.378711006 |
| 0.338685525 | 0.37660934  | 0.41920989  | 0.388314808 |
| 0.175252094 | 0.511193051 | 0.437244726 | 0.507022648 |
| 0.457658535 | 0.528729014 | 0.493555649 | 0.466047008 |
| 0.439511812 | 0.445798571 | 0.218223146 | 0.485873567 |
| 0.482718196 | 0.391129207 | 0.107964826 | 0.484419639 |
| 0.43766404  | 0.483290834 | 0.204706998 | 0.496156531 |
| 0.492266553 | 0.454249573 | 0.229161741 | 0.453223406 |
| 0.440537049 | 0.316074285 | 0.458330661 | 0.529008513 |
| 0.384113436 | 0.455505722 | 0.442826588 | 0.456722214 |
| 0.247832818 | 0.325968892 | 0.355777843 | 0.271205885 |
| 0.016731154 | 0.128343062 | 0.105201558 | 0.254066794 |
| 0.271659693 | 0.465110592 | 0.476129282 | 0.51352912  |

|             |             |             |             |
|-------------|-------------|-------------|-------------|
| 0.18573028  | 0.428846836 | 0.310330319 | 0.398672634 |
| 0.422328003 | 0.444999793 | 0.461432334 | 0.467738843 |
| 0.315975927 | 0.036935542 | 0.184009579 | 0.515806298 |
| 0.064112615 | 0.344864859 | 0.399008096 | 0.005621127 |
| 0.079835386 | 0.430594731 | 0.128605736 | 0.216880219 |
| 0.479187239 | 0.2204578   | 0.279041128 | 0.38706549  |
| 0.428652095 | 0.147861304 | 0.007417576 | 0.483277207 |
| 0.480804301 | 0.453661291 | 0.477915099 | 0.448149702 |
| 0.450373415 | 0.455138764 | 0.480247503 | 0.412462799 |
| 0.170530431 | 0.138973043 | 0.325915831 | 0.398099695 |
| 0.008980829 | 0.447555114 | 0.404568269 | 0.204412079 |
| 0.488156245 | 0.38845998  | 0.067719457 | 0.444795928 |
| 0.039697356 | 0.29054316  | 0.391135871 | 0.317680362 |
| 0.431879499 | 0.027776781 | 0.299115268 | 0.420510598 |
| 0.419253075 | 0.384937163 | 0.445799893 | 0.522839569 |
| 0.423775199 | 0.169135238 | 0.418390862 | 0.46691855  |
| 0.123117949 | 0.161333191 | 0.430404575 | 0.052991105 |
| 0.257535652 | 0.44751749  | 0.459249001 | 0.11530941  |
| 0.363538889 | 0.010621202 | 0.394904558 | 0.524456514 |
| 0.451544047 | 0.519251301 | 0.496422285 | 0.372057734 |
| 0.500131644 | 0.167708503 | 0.522463306 | 0.439492712 |
| 0.434128327 | 0.002149247 | 0.01191088  | 0.486625168 |
| 0.48532781  | 0.082264689 | 0.231358312 | 0.414737728 |
| 0.181469304 | 0.212931026 | 0.112476426 | 0.290884517 |
| 0.478278867 | 0.344668347 | 0.277147497 | 0.460132385 |
| 0.343785322 | 0.326634557 | 0.447922066 | 0.128185928 |
| 0.479834998 | 0.095128754 | 0.129933999 | 0.01609469  |
| 0.451797361 | 0.148076193 | 0.457124883 | 0.501056555 |
| 0.495433696 | 0.473094947 | 0.387877847 | 0.406757689 |
| 0.459286443 | 0.13132863  | 0.428020112 | 0.154280227 |
| 0.473364605 | 0.477594265 | 0.394307601 | 0.360052071 |
| 0.504259612 | 0.466150635 | 0.062436509 | 0.475707139 |
| 0.02461453  | 0.004527488 | 0.430793126 | 0.341229657 |
| 0.110876071 | 0.467349246 | 0.32555966  | 0.322734411 |
| 0.322138542 | 0.054322678 | 0.375080193 | 0.357351458 |
| 0.395946115 | 0.460183424 | 0.384173345 | 0.311674165 |
| 0.375009821 | 0.23315275  | 0.291127298 | 0.237719853 |
| 0.337914615 | 0.34884842  | 0.22507625  | 0.042716672 |
| 0.477677898 | 0.487083412 | 0.09760576  | 0.221759099 |
| 0.477788756 | 0.488283787 | 0.083162934 | 0.025398519 |
| 0.325870131 | 0.416808543 | 0.499325294 | 0.486912092 |
| 0.514995623 | 0.521503297 | 0.394304643 | 0.214243803 |
| 0.113743963 | 0.419857151 | 0.400287631 | 0.179357632 |
| 0.504551322 | 0.099811431 | 0.472466009 | 0.402367123 |
| 0.175460682 | 0.310102626 | 0.066441568 | 0.139594714 |
| 0.465170943 | 0.252368498 | 0.274902764 | 0.201186642 |
| 0.418760737 | 0.355060539 | 0.086982918 | 0.282778084 |
| 0.417317898 | 0.283435154 | 0.234290487 | 0.387011162 |
| 0.407453653 | 0.275206552 | 0.495634836 | 0.453154292 |
| 0.184674054 | 0.172215366 | 0.348609963 | 0.448663687 |
| 0.484895513 | 0.4456143   | 0.0450016   | 0.436211457 |
| 0.487318808 | 0.496765902 | 0.487388742 | 0.438918285 |
| 0.129255185 | 0.465441427 | 0.414324208 | 0.444214128 |
| 0.26726354  | 0.448564234 | 0.335166482 | 0.103555443 |

|             |             |             |             |
|-------------|-------------|-------------|-------------|
| 0.340513173 | 0.476499092 | 0.439832602 | 0.251422081 |
| 0.472040924 | 0.175487669 | 0.088076049 | 0.459597867 |
| 0.295365905 | 0.14281779  | 0.401147528 | 0.478870692 |
| 0.004769953 | 0.22534169  | 0.490795253 | 0.328619428 |
| 0.512910083 | 0.483086356 | 0.438904369 | 0.336088854 |
| 0.004897132 | 0.484426854 | 0.462833081 | 0.479999565 |
| 0.44534992  | 0.404857384 | 0.218330581 | 0.132361176 |
| 0.352287026 | 0.113918469 | 0.221341208 | 0.402932924 |
| 0.267742336 | 0.463870532 | 0.270891817 | 0.289869831 |
| 0.298189231 | 0.130149162 | 0.339686795 | 0.328482762 |
| 0.241943342 | 0.312617139 | 0.416273693 | 0.335043822 |
| 0.285907118 | 0.455548448 | 0.4581289   | 0.048256913 |
| 0.446228365 | 0.452231628 | 0.44624789  | 0.005255853 |
| 0.495254879 | 0.01605801  | 0.294155338 | 0.313972621 |
| 0.296210863 | 0.312519599 | 0.359332044 | 0.406543483 |
| 0.430752106 | 0.318921856 | 0.370981353 | 0.32322567  |
| 0.251887085 | 0.307337987 | 0.471971611 | 0.438018428 |
| 0.379315937 | 0.192996316 | 0.127901506 | 0.120109127 |
| 0.093198288 | 0.456878744 | 0.288241291 | 0.105063296 |
| 0.315810484 | 0.444485765 | 0.389249763 | 0.480629211 |
| 0.438568638 | 0.140113835 | 0.430952706 | 0.456934497 |
| 0.299306229 | 0.365924709 | 0.102497136 | 0.457638908 |
| 0.318698562 | 0.321257926 | 0.450659956 | 0.377282242 |
| 0.455514342 | 0.402329677 | 0.288268956 | 0.43667754  |
| 0.457412436 | 0.427422202 | 0.361258731 | 0.148302818 |
| 0.256589341 | 0.186345937 | 0.375903724 | 0.00456582  |
| 0.432823297 | 0.332063014 | 0.49039706  | 0.477900384 |
| 0.383953722 | 0.407848593 | 0.37025764  | 0.145458987 |
| 0.318998248 | 0.197659216 | 0.19970164  | 0.480641156 |
| 0.307782949 | 0.26623776  | 0.409085183 | 0.382109615 |
| 0.492069963 | 0.471150689 | 0.360633437 | 0.334748782 |
| 0.330402312 | 0.261449644 | 0.468534937 | 0.175803427 |
| 0.4826708   | 0.290485426 | 0.399780818 | 0.402954931 |
| 0.327588065 | 0.510074247 | 0.097389312 | 0.51974154  |
| 0.435492305 | 0.175426032 | 0.491946117 | 0.377265484 |
| 0.373500624 | 0.195449159 | 0.284834638 | 0.441639031 |
| 0.33053709  | 0.427623271 | 0.023300081 | 0.109376959 |
| 0.408909093 | 0.387131473 | 0.441595226 | 0.438309972 |
| 0.358293774 | 0.411771485 | 0.24611095  | 0.377038234 |
| 0.464720675 | 0.484218251 | 0.351341314 | 0.317626234 |
| 0.416539839 | 0.163959296 | 0.438380882 | 0.028090288 |
| 0.492005543 | 0.480167043 | 0.441367577 | 0.095113046 |
| 0.037657962 | 0.316390658 | 0.48238397  | 0.103317 1  |
| 0.298127605 | 0.413097284 | 0.486079533 | 0.236684604 |
| 0.486398532 | 0.205797984 | 0.476181695 | 0.08320551  |
| 0.335186662 | 0.456751028 | 0.451298205 | 0.327365416 |
| 0.407032212 | 0.454545181 | 0.341343168 | 0.062106858 |
| 0.364974677 | 0.004767626 | 0.40613663  | 0.457688847 |
| 0.438938573 | 0.251831144 | 0.353008008 | 0.363557487 |
| 0.41633077  | 0.345362868 | 0.47273312  | 0.024061137 |
| 0.460114491 | 0.279942803 | 0.439359426 | 0.317013012 |
| 0.441103518 | 0.102984717 | 0.417817362 | 0.44426033  |
| 0.381611336 | 0.311362246 | 0.400817642 | 0.476710171 |
| 0.41874007  | 0.2035804   | 0.316898609 | 0.437725847 |



|             |             |             |             |
|-------------|-------------|-------------|-------------|
| 0.100032867 | 0.429131289 | 0.524951697 | 0.265233904 |
| 0.323572182 | 0.490271698 | 0.30402191  | 0.413754889 |
| 0.40752972  | 0.460877492 | 0.513096934 | 0.13727142  |
| 0.328046797 | 0.4812984   | 0.455111396 | 0.373950784 |
| 0.277500461 | 0.351371677 | 0.339968514 | 0.444096575 |
| 0.150952085 | 0.3697039   | 0.422332003 | 0.322987263 |
| 0.393919433 | 0.381316558 | 0.293524232 | 0.068851861 |
| 0.253447559 | 0.437351216 | 0.205699057 | 0.392417392 |
| 0.462382554 | 0.355175451 | 0.400015185 | 0.209797008 |
| 0.048483097 | 0.454743569 | 0.035841049 | 0.394770791 |
| 0.472125725 | 0.327229032 | 0.453152278 | 0.230878877 |
| 0.436597935 | 0.403129546 | 0.002332119 | 0.468551389 |
| 0.085831073 | 0.397634925 | 0.335390471 | 0.380732561 |
| 0.089353601 | 0.448576557 | 0.514104131 | 0.388889594 |
| 0.403073395 | 0.417212322 | 0.453454786 | 0.239479787 |
| 0.405216763 | 0.429170132 | 0.458350425 | 0.324938358 |
| 0.43532568  | 0.471947017 | 0.453330939 | 0.443776019 |
| 0.353579634 |             |             |             |

TADA2L 0.006436224 0.182399017 0.004521558

|             |             |             |             |
|-------------|-------------|-------------|-------------|
| 0.009545453 | 0.233066547 | 0.113569149 | 0.002975272 |
| 0.011173065 | 0.127103474 | 0.070648639 | 0.175875839 |
| 0.000280196 | 0.066531687 | 0.233973534 | 0.002791761 |
| 0.244063627 | 0.001640344 | 0.014020555 | 0.005767097 |
| 0.011001155 | 0.187645209 | 0.127691249 | 0.10371108  |
| 0.170210612 | 0.04195887  | 0.092926112 | 0.243942053 |
| 0.258430173 | 0.095468998 | 0.281193634 | 0.023402729 |
| 0.165086159 | 0.267587671 | 0.258281806 | 0.000160118 |
| 0.168018975 | 0.004912475 | 0.15291455  | 0.081513977 |
| 0.059563064 | 0.120670358 | 0.096697016 | 0.069710391 |
| 0.113948353 | 0.001729357 | 0.035268402 | 0.246325242 |
| 0.1023503   | 0.057078811 | 0.00537897  | 0.214025523 |
| 0.090112431 | 0.124472591 | 0.168251816 | 0.000275326 |
| 0.286517103 | 0.115376175 | 0.220333618 | 0.2258322   |
| 0.0573781   | 0.022432922 | 0.064112504 | 0.051021451 |
| 0.191917645 | 0.201781365 | 0.090287202 | 0.094984876 |
| 0.239950646 | 0.111380246 | 0.281804856 | 0.014771599 |
| 0.094098138 | 0.000873615 | 0.035157213 | 0.008737519 |
| 0.127248286 | 0.062620224 | 0.206602118 | 0.196077718 |
| 0.178341812 | 0.211402381 | 0.064793104 | 0.198476297 |
| 0.023804056 | 0.276682374 | 0.11932415  | 0.142480791 |
| 0.162650454 | 0.005087911 | 0.230198657 | 0.238162751 |
| 0.002407477 | 0.149808027 | 0.180160266 | 0.01788062  |
| 0.201241176 | 0.117799769 | 0.151445864 | 0.168455549 |
| 0.291202747 | 0.211350879 | 0.183155715 | 0.105194339 |
| 0.183173416 | 0.006875484 | 0.174626586 | 0.31431001  |
| 0.132976704 | 0.009262126 | 0.06327562  | 0.31595841  |
| 0.205417366 | 0.262512219 | 0.207890417 | 0.158601587 |
| 0.24956302  | 0.250015156 | 0.194086478 | 0.190109234 |
| 0.032488924 | 0.24433191  | 0.040179414 | 0.002444244 |
| 0.005234993 | 0.010365126 | 0.060368076 | 0.116222756 |
| 0.284550965 | 0.130196692 | 0.034285597 | 0.087717095 |
| 0.29326333  | 0.180468129 | 0.24025368  | 0.208285942 |
| 0.002006783 | 0.126391287 | 0.233805478 | 0.046332659 |
| 0.175538036 | 0.016474974 | 0.242487378 | 0.194811042 |

|             |             |             |             |
|-------------|-------------|-------------|-------------|
| 0.164673654 | 0.274530016 | 0.019227813 | 0.182141852 |
| 0.033440471 | 0.24608401  | 0.223386883 | 0.037996579 |
| 0.217760456 | 0.192924786 | 0.274482187 | 0.348531327 |
| 0.199452038 | 0.10113658  | 0.004940967 | 0.166222034 |
| 0.250545558 | 0.007611034 | 0.291822566 | 0.297865538 |
| 0.221125511 | 0.314086287 | 0.281422818 | 0.287150582 |
| 0.228182308 | 0.007574491 | 0.005915791 | 0.153497956 |
| 0.213024105 | 0.186678707 | 0.021480773 | 0.234487119 |
| 0.24454365  | 0.10551084  | 0.257899446 | 0.04772652  |
| 0.233850028 | 0.256303645 | 0.276946279 | 0.179444263 |
| 0.07713315  | 0.106402089 | 0.295763875 | 0.168571084 |
| 0.002001819 | 0.012952613 | 0.0049762   | 0.116668366 |
| 0.066042769 | 0.050467046 | 0.088768364 | 0.183372096 |
| 0.056977944 | 0.073066558 | 0.253879256 | 0.31481454  |
| 0.005257488 | 0.214177547 | 0.028161416 | 0.026969266 |
| 0.002529348 | 0.026538588 | 0.014353507 | 0.020340401 |
| 0.113530529 | 0.049257276 | 0.273487367 | 0.271305529 |
| 0.132000695 | 0.038843143 | 0.215310781 | 0.243178267 |
| 0.205783956 | 0.277411671 | 0.062969568 | 0.000680025 |
| 0.037809258 | 0.116302422 | 0.174038216 | 0.263397182 |
| 0.033779681 | 0.031861048 | 0.198153942 | 0.316465109 |
| 0.064743231 | 0.015599509 | 0.129571907 | 0.159293228 |
| 0.026220715 | 0.138204707 | 0.263832901 | 0.161890733 |
| 0.000589183 | 0.100760582 | 0.261499682 | 0.021956379 |
| 0.100769585 | 0.047463038 | 0.147658699 | 0.257498026 |
| 0.104959919 | 0.12189162  | 0.294998257 | 0.303975313 |
| 0.04176023  | 0.0474717   | 0.278587884 | 0.021935109 |
| 0.191858893 | 0.012851375 | 0.137016821 | 0.104674408 |
| 0.067034574 | 0.122782521 | 0.26721491  | 0.135972501 |
| 0.022356286 | 0.235625661 | 0.185480321 | 0.271663252 |
| 0.12798     | 0.2697802   | 0.295007065 | 0.237100218 |
| 0.147031755 | 0.186668792 | 0.116436961 | 0.250387441 |
| 0.264000339 | 0.034600724 | 0.008077788 | 0.282776945 |
| 0.118989432 | 0.285826616 | 0.02226052  | 0.259434528 |
| 0.205055224 | 0.181000951 | 0.027725606 | 0.244201524 |
| 0.187332588 | 0.060672954 | 0.231060284 | 0.265293801 |
| 0.054423177 | 0.184880738 | 0.134698026 | 0.26203927  |
| 0.038420646 | 0.07985956  | 0.113586313 | 0.161043153 |
| 0.024981737 | 0.007716809 | 0.006329524 | 0.051833114 |
| 0.150071257 | 0.239299599 | 0.216195579 | 0.256547645 |
| 0.018034222 | 0.195255202 | 0.06436587  | 0.083396932 |
| 0.172275012 | 0.176866067 | 0.308471074 | 0.261964136 |
| 0.072187223 | 0.000862746 | 0.007665909 | 0.207807999 |
| 0.00238719  | 0.183675314 | 0.080660893 | 9.96E-05    |
| 0.001971183 | 0.195552979 | 0.013299949 | 0.042260489 |
| 0.300959452 | 0.043643354 | 0.046705834 | 0.064925971 |
| 0.19777501  | 0.011866613 | 0.000511736 | 0.245855202 |
| 0.220955631 | 0.202318641 | 0.215242085 | 0.17602265  |
| 0.22212625  | 0.215532367 | 0.258740112 | 0.10225325  |
| 0.008544819 | 0.007211299 | 0.096797079 | 0.103721478 |
| 0.00058176  | 0.227559708 | 0.15349419  | 0.02859972  |
| 0.298089379 | 0.106069609 | 0.001832977 | 0.247424996 |
| 0.000499263 | 0.207462121 | 0.038733352 | 0.056150745 |
| 0.22519661  | 5.31E-05    | 0.026388284 | 0.071405699 |

|             |                   |             |             |
|-------------|-------------------|-------------|-------------|
| 0.165904696 | 0.12164283        | 0.211828664 | 0.249246026 |
| 0.147335263 | 0.019418375       | 0.137598338 | 0.268800894 |
| 0.004977415 | 0.013777277       | 0.071935079 | 0.007976132 |
| 0.032761579 | 0.183925973       | 0.134120633 | 0.002253866 |
| 0.085698686 | 0.00050905        | 0.136802216 | 0.249783392 |
| 0.190523466 | 0.289492122       | 0.251479003 | 0.252298731 |
| 0.239329246 | 0.087898593       | 0.269486752 | 0.171898255 |
| 0.122015494 | 4.24E-05 6.93E-05 | 0.295568242 | 0.234987732 |
| 0.005761537 | 0.031768111       | 0.051861103 | 0.010398697 |
| 0.01576759  | 0.00520235        | 0.106792518 | 0.224627962 |
| 0.147435383 | 0.098843623       | 0.185302627 | 0.064626896 |
| 0.073965839 | 0.102956766       | 0.010377904 | 0.260944437 |
| 0.002828792 | 0.009925964       | 0.001337807 | 0.2380527   |
| 0.018033752 | 0.159551561       | 0.241426929 | 0.233166517 |
| 0.282035812 | 0.117086929       | 0.037120736 | 0.243108022 |
| 0.013286435 | 0.084235806       | 0.014452298 | 0.215093791 |
| 0.229311075 | 0.14105207        | 0.106715709 | 0.25312243  |
| 0.207808764 | 0.001438159       | 0.22478524  | 0.00056698  |
| 0.000365151 | 0.104790173       | 0.085280165 | 0.009203873 |
| 0.17643378  | 0.080974248       | 0.037961974 | 0.0461606   |
| 0.000733964 | 0.19755157        | 0.192249562 | 0.123595871 |
| 0.153253489 | 0.225805668       | 0.068070421 | 0.106185316 |
| 0.021557552 | 0.049398257       | 0.021991239 | 0.023207737 |
| 0.095364473 | 0.043266665       | 0.000317763 | 0.182660435 |
| 0.250160691 | 0.00498582        | 0.031636421 | 0.252089668 |
| 0.284353923 | 0.000861117       | 0.000469327 | 0.081214761 |
| 0.11156804  | 0.299490995       | 0.234700566 | 0.218074663 |
| 0.251460298 | 0.140527243       | 0.021794473 | 0.005414886 |
| 0.145059685 | 0.239578047       | 0.018857299 | 0.257256667 |
| 0.005862023 | 0.215123464       | 0.303782155 | 0.017786282 |
| 0.037626975 | 0.001464877       | 0.009970328 | 0.331676273 |
| 0.041886058 | 0.063992166       | 0.025949276 | 0.106250374 |
| 0.125492775 | 0.00269791        | 0.047138028 | 0.136654545 |
| 0.066941089 | 0.03229401        | 0.060703714 | 0.136184244 |
| 0.020393553 | 0.288909437       | 0.192083049 | 0.021614357 |
| 0.013054288 | 0.031738512       | 0.210025585 | 0.256758582 |
| 0.193678011 | 0.001910336       | 0.199172619 | 0.266459535 |
| 0.272842911 | 0.216098141       | 0.211557128 | 0.009915444 |
| 0.237997433 | 0.17810716        | 0.173970436 | 0.042264848 |
| 0.117684247 | 0.068888147       | 0.005934346 | 0.103604763 |
| 0.181082227 | 0.183738628       | 0.042440605 | 0.21855483  |
| 0.017362765 | 0.004381397       | 0.245386812 | 0.093436962 |
| 0.003752727 | 0.106213175       | 0.272479269 | 0.000616565 |
| 0.174932431 | 0.273167442       | 0.053501784 | 0.230971859 |
| 0.27388235  | 0.189196652       | 0.038499968 | 0.001222931 |
| 0.288594691 | 0.204468071       | 0.149226353 | 0.193708298 |
| 0.132114345 | 0.009768713       | 0.006843754 | 0.113566843 |
| 0.010080919 | 0.013484878       | 0.029428227 | 0.032984856 |
| 0.156413795 | 0.054955237       | 0.043601995 | 0.063128638 |
| 0.01046014  | 0.10276535        | 0.05998909  | 0.030508808 |
| 0.079082477 | 0.161733314       | 0.061003276 | 0.057290708 |
| 0.22487089  | 0.184690374       | 0.00089609  | 0.277787926 |
| 0.203862651 | 0.222924524       | 0.000514671 | 0.29005623  |
| 0.000157147 | 0.072699504       | 0.084306124 | 0.059321508 |

|             |             |             |             |
|-------------|-------------|-------------|-------------|
| 0.058668946 | 0.134528789 | 0.120493285 | 0.123149655 |
| 0.04862481  | 0.086889959 | 0.083498213 | 0.041450793 |
| 0.050606901 | 0.232330425 | 0.091747042 | 0.123378132 |
| 0.016606381 | 0.014410623 | 0.014458065 | 0.002505387 |
| 0.245095156 | 0.069599934 | 0.008771052 | 0.073855285 |
| 0.09395531  | 0.148776251 | 0.215957462 | 0.221509222 |
| 0.017118121 | 0.102652338 | 0.219521492 | 0.034117888 |
| 0.026636886 | 0.003250269 | 0.13841946  | 0.064082489 |
| 0.074258424 | 0.153517633 | 0.080651606 | 0.182869116 |
| 0.149811662 | 0.068249172 | 0.200724095 | 0.14658962  |
| 0.120231332 | 0.081906457 | 0.010033606 | 0.029938028 |
| 0.021281811 | 0.202955965 | 0.000586457 | 0.143639598 |
| 0.020797618 | 0.283389136 | 0.200284275 | 0.226358974 |
| 0.168811582 | 0.026570142 | 0.006448886 | 0.041671116 |
| 0.03542775  | 0.026513784 | 0.257174459 | 0.235177008 |
| 0.031134246 | 0.18104306  | 0.049238271 | 0.280731181 |
| 0.233041512 | 0.094374347 | 0.048154535 | 0.067418577 |
| 0.041559586 | 0.182992931 | 0.013732625 | 0.222773723 |
| 0.099652888 | 0.1217835   | 0.117533581 | 0.077654218 |
| 0.276565827 | 0.005450853 | 0.286034561 | 0.135943513 |
| 0.022495165 | 0.207570035 | 0.083929269 | 0.040884012 |
| 0.015984091 | 0.219395142 | 0.093967004 | 0.03349291  |
| 0.221709104 | 0.004119544 | 0.014684113 | 0.16218432  |
| 0.076053591 | 0.181855569 | 0.170825106 | 0.134522969 |
| 0.175210871 | 0.078749623 | 0.061689635 | 0.189215924 |
| 0.185040875 | 0.030445471 | 0.079624224 | 0.137026662 |
| 0.01316553  | 0.149457464 | 0.00226963  | 0.245226547 |
| 0.283939985 | 0.081894845 | 0.003275495 | 9.70E-05    |
| 0.203582344 | 0.194516414 | 0.005717393 | 0.298127605 |
| 1           | 0.130923516 | 0.268240168 | 0.034898707 |
| 0.183542943 | 0.026509069 | 0.260354618 | 0.000741044 |
| 0.078398879 | 0.230465321 | 0.15049486  | 0.070828987 |
| 0.207866939 | 0.215509559 | 0.225190816 | 0.001608068 |
| 0.049949607 | 0.000811838 | 0.136740438 | 0.167524449 |
| 0.211976956 | 0.047471658 | 0.073223084 | 0.124133777 |
| 0.16780365  | 0.030787408 | 0.218396192 | 0.000259525 |
| 0.28101835  | 0.055293121 | 0.191973552 | 0.070989587 |
| 0.130841294 | 0.003283094 | 0.190611396 | 0.147966372 |
| 0.038212839 | 0.076224    | 0.067386877 | 0.219702227 |
| 0.169204592 | 0.030282706 | 0.051324756 | 0.168070421 |
| 0.006165633 | 0.115717627 | 0.253518773 | 0.050712799 |
| 0.197488591 | 0.309494196 | 0.042786252 | 0.235977969 |
| 0.16005429  | 0.211001914 | 0.23788298  | 0.011968163 |
| 0.08390128  | 0.264951597 | 0.21669244  | 0.141629063 |
| 0.11225592  | 0.170524134 | 0.09248908  | 0.184256095 |
| 0.005155996 | 0.088092448 | 0.136858829 | 0.168173393 |
| 0.132470595 | 0.111579252 | 0.094373193 | 0.001630988 |
| 0.022742533 | 0.101981537 | 0.02536922  | 0.115398745 |
| 0.177340905 | 0.086689172 | 0.168804903 | 0.020491533 |
| 0.001457331 | 0.199876883 | 0.012991277 | 0.101122858 |
| 0.252261534 | 0.073288877 | 0.202515422 | 0.04329952  |
| 0.123529336 | 0.080687163 | 0.0008074   | 0.229575982 |
| 0.014594436 | 0.105477427 | 0.080259229 | 0.052830486 |
| 0.002489197 | 0.195326929 | 0.293012695 | 0.106731823 |

|             |             |             |             |
|-------------|-------------|-------------|-------------|
| 0.04473124  | 0.10001967  | 0.20242815  | 0.052874338 |
| 0.190857111 | 0.148470173 | 0.174421273 | 0.216157494 |
| 0.141438935 | 0.183235313 | 0.221267248 | 0.162456079 |
| 0.057212277 |             |             |             |
| TAGAP       | 0.058255306 | 0.417894156 | 0.04978603  |
| 0.065495354 | 0.178663405 | 0.220708533 | 0.063952843 |
| 0.10267945  | 0.361632725 | 0.302520466 | 0.184939314 |
| 0.014688674 | 0.069832574 | 0.386583844 | 0.060806902 |
| 0.237561355 | 0.028399831 | 0.08710595  | 0.101753091 |
| 0.212310843 | 0.167921059 | 0.189126789 | 0.239540331 |
| 0.197708434 | 0.178240728 | 0.250430816 | 0.284258506 |
| 0.447741962 | 0.167957763 | 0.263403964 | 0.159999621 |
| 0.36269146  | 0.188028575 | 0.245289498 | 0.016840837 |
| 0.254133078 | 0.040437024 | 0.415026597 | 0.156083249 |
| 0.084405064 | 0.300126882 | 0.266584832 | 0.126902827 |
| 0.284997187 | 0.031277747 | 0.187164198 | 0.310710849 |
| 0.27090857  | 0.226291563 | 0.068847575 | 0.305166393 |
| 0.297744595 | 0.222887334 | 0.343113716 | 0.001891556 |
| 0.182364344 | 0.078574887 | 0.172785192 | 0.454729273 |
| 0.123134404 | 0.083387527 | 0.26999734  | 0.242413009 |
| 0.302775324 | 0.300228267 | 0.189548547 | 0.300420183 |
| 0.427487629 | 0.132567678 | 0.343984713 | 0.092534223 |
| 0.262726054 | 0.053668219 | 0.121488346 | 0.111088438 |
| 0.273249937 | 0.121148457 | 0.193841493 | 0.212193329 |
| 0.411207055 | 0.478590822 | 0.180294459 | 0.476978045 |
| 0.139616698 | 0.223525198 | 0.182818001 | 0.217313946 |
| 0.321854075 | 0.119543523 | 0.260925153 | 0.459730366 |
| 0.076666054 | 0.294615098 | 0.322014852 | 0.119666792 |
| 0.377307306 | 0.263111362 | 0.268091336 | 0.098811435 |
| 0.242754822 | 0.214360194 | 0.480911775 | 0.17920285  |
| 0.216463765 | 0.075287094 | 0.464708855 | 0.199984961 |
| 0.143274341 | 0.069459823 | 0.152361063 | 0.398414445 |
| 0.251091583 | 0.420560574 | 0.401975415 | 0.313019516 |
| 0.231038921 | 0.427883654 | 0.255114816 | 0.388033296 |
| 0.182798233 | 0.478810772 | 0.11748617  | 0.03051782  |
| 0.072255859 | 0.068552998 | 0.245727427 | 0.251595795 |
| 0.393816276 | 0.224979793 | 0.12474251  | 0.142483771 |
| 0.39234005  | 0.455658084 | 0.491753066 | 0.342686442 |
| 0.034774995 | 0.235931185 | 0.225900105 | 0.200389549 |
| 0.269331743 | 0.111925224 | 0.157034151 | 0.469809105 |
| 0.294026961 | 0.34819336  | 0.133357665 | 0.472007519 |
| 0.2017539   | 0.433377668 | 0.402210245 | 0.098480088 |
| 0.463540978 | 0.447616704 | 0.428863251 | 0.25441525  |
| 0.415348468 | 0.18638539  | 0.124627085 | 0.348346325 |
| 0.401921246 | 0.007460638 | 0.428440451 | 0.445141348 |
| 0.455250917 | 0.375563637 | 0.461783613 | 0.443858411 |
| 0.462204152 | 0.074155771 | 0.064313792 | 0.18012374  |
| 0.460605831 | 0.299810228 | 0.119220614 | 0.259106622 |
| 0.234222484 | 0.237177623 | 0.366808008 | 0.155940907 |
| 0.449286486 | 0.382167954 | 0.442398483 | 0.326279624 |
| 0.291843426 | 0.273149633 | 0.256424889 | 0.434458729 |
| 0.035210064 | 0.079850499 | 0.05221309  | 0.266715048 |
| 0.238764866 | 0.110501065 | 0.235348832 | 0.273390717 |
| 0.122655207 | 0.26286829  | 0.224146651 | 0.241385291 |

|             |             |             |             |
|-------------|-------------|-------------|-------------|
| 0.074742379 | 0.255338225 | 0.124872967 | 0.139815661 |
| 0.028439235 | 0.14665403  | 0.096111521 | 0.083719629 |
| 0.149904781 | 0.259287973 | 0.318752688 | 0.436835151 |
| 0.280030188 | 0.141417341 | 0.29903756  | 0.399216956 |
| 0.344704125 | 0.21625875  | 0.195529449 | 0.003619088 |
| 0.16212836  | 0.304905085 | 0.150588328 | 0.271136584 |
| 0.199673454 | 0.166621005 | 0.248198433 | 0.256661213 |
| 0.170617834 | 0.161332186 | 0.244165645 | 0.375537798 |
| 0.150305607 | 0.154299301 | 0.350600313 | 0.291609762 |
| 0.003579709 | 0.189716051 | 0.343219165 | 0.12463664  |
| 0.25635084  | 0.078282487 | 0.1301055   | 0.394512545 |
| 0.216315016 | 0.179033111 | 0.434737615 | 0.27372143  |
| 0.214663665 | 0.258563253 | 0.468948758 | 0.06344694  |
| 0.277233267 | 0.020397353 | 0.170404222 | 0.300033257 |
| 0.161722496 | 0.218914019 | 0.195289101 | 0.154667208 |
| 0.097093395 | 0.468472644 | 0.323939532 | 0.438785955 |
| 0.241939471 | 0.470993798 | 0.367856433 | 0.346042763 |
| 0.234692412 | 0.294445831 | 0.102677898 | 0.328216884 |
| 0.384246344 | 0.242968317 | 0.080503312 | 0.386923216 |
| 0.305125283 | 0.276864832 | 0.086976459 | 0.413290137 |
| 0.435326965 | 0.452006055 | 0.091591964 | 0.275457958 |
| 0.267155537 | 0.134471836 | 0.353181713 | 0.475880013 |
| 0.306541873 | 0.233800045 | 0.198576457 | 0.30908247  |
| 0.11774527  | 0.15946222  | 0.302849224 | 0.151978719 |
| 0.005404391 | 0.084669129 | 0.05761338  | 0.093575875 |
| 0.099915277 | 0.298874884 | 0.269637059 | 0.455137507 |
| 0.08082824  | 0.350721787 | 0.226018179 | 0.150320263 |
| 0.375598319 | 0.259844869 | 0.229258829 | 0.239110247 |
| 0.20143372  | 0.009137472 | 0.056562124 | 0.474010031 |
| 0.055399328 | 0.133206559 | 0.255605252 | 0.001044179 |
| 0.04614491  | 0.395366682 | 0.114587416 | 0.190090956 |
| 0.406234989 | 0.193289951 | 0.146429392 | 0.29427865  |
| 0.216610299 | 0.075661723 | 0.001008691 | 0.457724323 |
| 0.485848925 | 0.4683246   | 0.487176538 | 0.468840299 |
| 0.439617893 | 0.354898411 | 0.327283199 | 0.21645121  |
| 0.080479142 | 0.093335365 | 0.134331555 | 0.170755081 |
| 0.007537965 | 0.26689629  | 0.225034269 | 0.100235165 |
| 0.324351028 | 0.235728398 | 0.02971057  | 0.247676446 |
| 0.011555954 | 0.117853561 | 0.249797475 | 0.175264047 |
| 0.268088398 | 0.014893272 | 0.116791288 | 0.204968219 |
| 0.373709145 | 0.285721237 | 0.236133744 | 0.472935916 |
| 0.173007398 | 0.138497234 | 0.170925579 | 0.270615809 |
| 0.060308912 | 0.125918523 | 0.28766926  | 0.025812948 |
| 0.141378263 | 0.453190279 | 0.272234503 | 0.053237323 |
| 0.158420021 | 0.003729311 | 0.297534869 | 0.467156251 |
| 0.435410139 | 0.450304661 | 0.420528992 | 0.143468439 |
| 0.434401154 | 0.117538403 | 0.469229703 | 0.353136684 |
| 0.276123031 | 0.00020199  | 0.005160695 | 0.411852517 |
| 0.224244459 | 0.075272144 | 0.109704911 | 0.185989917 |
| 0.062322425 | 0.13240169  | 0.062160235 | 0.106330172 |
| 0.246182417 | 0.138544133 | 0.123833261 | 0.444473774 |
| 0.155483574 | 0.162040342 | 0.293301523 | 0.091246569 |
| 0.241033272 | 0.036782328 | 0.100154988 | 0.003467065 |
| 0.262231239 | 0.125078945 | 0.45328403  | 0.457720156 |

|             |             |             |             |
|-------------|-------------|-------------|-------------|
| 0.417204592 | 0.248675625 | 0.26412088  | 0.215456186 |
| 0.414434875 | 0.100235271 | 0.245180755 | 0.104962419 |
| 0.433886372 | 0.224193732 | 0.211247608 | 0.229298129 |
| 0.424656158 | 0.397453867 | 0.032115912 | 0.306544924 |
| 0.006286175 | 0.00250339  | 0.219587766 | 0.210343206 |
| 0.164785514 | 0.240484697 | 0.187213853 | 0.265429373 |
| 0.213584796 | 0.020920216 | 0.18565818  | 0.161444766 |
| 0.18058186  | 0.223351485 | 0.158679745 | 0.243664348 |
| 0.182425451 | 0.100293765 | 0.128825941 | 0.127166899 |
| 0.274288682 | 0.283709027 | 0.177422271 | 0.026374158 |
| 0.270072997 | 0.234255435 | 0.045722722 | 0.117928656 |
| 0.33524867  | 0.407771463 | 0.043016751 | 0.003999383 |
| 0.207198383 | 0.233621014 | 0.419594084 | 0.451587249 |
| 0.474088902 | 0.45043915  | 0.348504547 | 0.089705012 |
| 0.053617951 | 0.207778191 | 0.182227417 | 0.065987777 |
| 0.446788119 | 0.076878354 | 0.439677218 | 0.195149048 |
| 0.102746558 | 0.132854265 | 0.018988751 | 0.07673684  |
| 0.230352491 | 0.123400799 | 0.105561874 | 0.111491886 |
| 0.18517096  | 0.147898716 | 0.050675672 | 0.12922113  |
| 0.263763723 | 0.115796779 | 0.116418857 | 0.246887633 |
| 0.308750341 | 0.320530119 | 0.308756254 | 0.38116204  |
| 0.101020256 | 0.118155814 | 0.161943826 | 0.326622136 |
| 0.376398067 | 0.307478433 | 0.011841935 | 0.432397149 |
| 0.428240837 | 0.272630182 | 0.44468181  | 0.323503547 |
| 0.084934059 | 0.196905412 | 0.266912123 | 0.220873482 |
| 0.148331239 | 0.222767823 | 0.187481216 | 0.06009187  |
| 0.285077222 | 0.463460325 | 0.372029867 | 0.092284068 |
| 0.279557979 | 0.128922593 | 0.07206528  | 0.410760825 |
| 0.112483782 | 0.058321658 | 0.279878189 | 0.391236195 |
| 0.000778905 | 0.096563328 | 0.455145172 | 0.134693127 |
| 0.482075848 | 0.40495555  | 0.361425891 | 0.217611532 |
| 0.002767494 | 0.29055096  | 0.197572593 | 0.207996262 |
| 0.379718547 | 0.268414662 | 0.171505835 | 0.04674923  |
| 0.216282513 | 0.077727565 | 0.089200645 | 0.209690394 |
| 0.149222696 | 0.270121181 | 0.145222421 | 0.19741911  |
| 0.132124045 | 0.124823046 | 0.146603388 | 0.142064097 |
| 0.187837071 | 0.164637092 | 0.255321328 | 0.287016205 |
| 0.10621057  | 0.403221996 | 0.331800555 | 0.02330695  |
| 0.235412482 | 0.377707051 | 0.385933263 | 0.001514706 |
| 0.277968596 | 0.005011579 | 0.119414641 | 0.110408887 |
| 0.120149751 | 0.15160025  | 0.163408799 | 0.165142759 |
| 0.256711483 | 0.153565192 | 0.136783455 | 0.13646221  |
| 0.087574705 | 0.165282091 | 0.2428185   | 0.259597237 |
| 0.132005931 | 0.082518296 | 0.118312785 | 0.129208723 |
| 0.027823766 | 0.420761134 | 0.20132775  | 0.074034187 |
| 0.153280402 | 0.275680765 | 0.277557148 | 0.461006651 |
| 0.344825122 | 0.132444376 | 0.251879991 | 0.370316972 |
| 0.236302783 | 0.194023418 | 0.064694451 | 0.252649542 |
| 0.144984182 | 0.111619302 | 0.283213536 | 0.209265117 |
| 0.355614013 | 0.343420688 | 0.191201538 | 0.389358473 |
| 0.205663368 | 0.306135424 | 0.244027514 | 0.043417764 |
| 0.108330703 | 0.12442186  | 0.153661958 | 0.000884473 |
| 0.214977814 | 0.149577152 | 0.381696719 | 0.440098685 |
| 0.207762519 | 0.320097453 | 0.210168952 | 0.059746345 |

|             |             |             |             |
|-------------|-------------|-------------|-------------|
| 0.220599193 | 0.1933212   | 0.105185817 | 0.353596998 |
| 0.140410906 | 0.117602042 | 0.171956477 | 0.205496008 |
| 0.324741953 | 0.36101833  | 0.206312287 | 0.198784471 |
| 0.19691603  | 0.152801113 | 0.474719828 | 0.106740485 |
| 0.278700064 | 0.093675647 | 0.295985439 | 0.163155895 |
| 0.141105891 | 0.466429814 | 0.056526281 | 0.46579508  |
| 0.211629329 | 0.133305302 | 0.433078394 | 0.227314102 |
| 0.203001338 | 0.069764674 | 0.127857078 | 0.294486392 |
| 0.183083711 | 0.217114275 | 0.021587308 | 0.046702994 |
| 0.208491822 | 0.323141311 | 0.381247657 | 0.308796943 |
| 0.163078032 | 0.268688738 | 0.135466061 | 0.223447269 |
| 0.458178897 | 0.473166766 | 0.128355005 | 0.200282874 |
| 0.262640042 | 0.064032463 | 0.244658486 | 0.036937558 |
| 0.259744073 | 0.271618346 | 0.280746409 | 0.047876438 |
| 0.018010692 | 0.138077237 | 0.265656341 | 0.094141949 |
| 0.413097284 | 0.130923516 | 1           | 0.296422629 |
| 0.170809287 | 0.464946097 | 0.078911515 | 0.251161259 |
| 0.094180142 | 0.189576101 | 0.26844702  | 0.312277294 |
| 0.102516873 | 0.177392106 | 0.242855149 | 0.127853965 |
| 0.023190896 | 0.149824381 | 0.003297131 | 0.357106656 |
| 0.459174953 | 0.231997764 | 0.193256711 | 0.306587804 |
| 0.174877963 | 0.357986878 | 0.183689414 | 0.279899945 |
| 0.005282562 | 0.201868019 | 0.135590981 | 0.324536049 |
| 0.12975428  | 0.295461068 | 0.030796248 | 0.240795078 |
| 0.441737512 | 0.176804098 | 0.239046854 | 0.197286717 |
| 0.447850372 | 0.371073839 | 0.158114444 | 0.155051745 |
| 0.336200078 | 0.066771874 | 0.26980047  | 0.480729962 |
| 0.10181389  | 0.117214659 | 0.341659408 | 0.114769083 |
| 0.212541964 | 0.34740009  | 0.304583989 | 0.493980035 |
| 0.045581946 | 0.1473314   | 0.333421389 | 0.423790564 |
| 0.212044238 | 0.124853171 | 0.140727535 | 0.139774637 |
| 0.410194482 | 0.049726415 | 0.195425224 | 0.251235979 |
| 0.129747115 | 0.202286993 | 0.298929383 | 0.121216166 |
| 0.023237071 | 0.145288307 | 0.198946681 | 0.113703633 |
| 0.180544539 | 0.217024773 | 0.161289759 | 0.314018343 |
| 0.058704282 | 0.009021238 | 0.386330024 | 0.011317883 |
| 0.203798658 | 0.212695948 | 0.161233914 | 0.220906267 |
| 0.14918214  | 0.256484482 | 0.2374639   | 0.000851088 |
| 0.336638076 | 0.032861341 | 0.243841814 | 0.114788432 |
| 0.210171396 | 0.049119341 | 0.398559262 | 0.436794949 |
| 0.222846548 | 0.255227827 | 0.214066613 | 0.424946755 |
| 0.091463    | 0.257827563 | 0.269535765 | 0.296791004 |
| 0.141682049 | 0.279127351 | 0.281726343 | 0.213526982 |
| 0.284391088 | 0.199238362 |             |             |
| TBC1D7      | 0.079669981 | 0.428098973 | 0.063403343 |
| 0.164896499 | 0.311401594 | 0.399937988 | 0.053018996 |
| 0.121711563 | 0.311560144 | 0.274782046 | 0.358262604 |
| 0.017356668 | 0.135444221 | 0.456444435 | 0.049648035 |
| 0.34846255  | 0.034106146 | 0.099580055 | 0.076632631 |
| 0.213843885 | 0.26847107  | 0.362145536 | 0.336291303 |
| 0.27616924  | 0.18078126  | 0.297820806 | 0.355928791 |
| 0.517094573 | 0.317668418 | 0.405843739 | 0.2272731   |
| 0.402678117 | 0.315664752 | 0.381945387 | 0.019029234 |
| 0.378649447 | 0.013372239 | 0.420818948 | 0.247636656 |



|             |             |             |             |
|-------------|-------------|-------------|-------------|
| 0.219399334 | 0.333774059 | 0.316213707 | 0.248126438 |
| 0.322262678 | 0.03855886  | 0.240508899 | 0.3448637   |
| 0.292072912 | 0.276544438 | 0.06335434  | 0.381007493 |
| 0.322491608 | 0.314197227 | 0.345197719 | 0.002111289 |
| 0.335533652 | 0.13350626  | 0.254792217 | 0.521821043 |
| 0.193567302 | 0.124965109 | 0.268526217 | 0.226744206 |
| 0.325313917 | 0.319650265 | 0.236042459 | 0.310207795 |
| 0.508967933 | 0.202108678 | 0.391354777 | 0.190768061 |
| 0.321507332 | 0.030105613 | 0.145274078 | 0.076563167 |
| 0.357417365 | 0.203390607 | 0.346383486 | 0.320499376 |
| 0.424941836 | 0.512790486 | 0.217115952 | 0.499643253 |
| 0.093248292 | 0.322490687 | 0.296808111 | 0.266217543 |
| 0.294935032 | 0.071342491 | 0.371918988 | 0.52277491  |
| 0.044795613 | 0.326865957 | 0.318683463 | 0.107163208 |
| 0.444747156 | 0.290054918 | 0.352946528 | 0.230281184 |
| 0.348314663 | 0.306337111 | 0.4651198   | 0.260352986 |
| 0.322211788 | 0.067191175 | 0.483224951 | 0.318812044 |
| 0.317928132 | 0.08526396  | 0.216845681 | 0.465292845 |
| 0.365090771 | 0.512276288 | 0.399614427 | 0.307834266 |
| 0.340469949 | 0.517410483 | 0.362734348 | 0.412751586 |
| 0.192815894 | 0.534811384 | 0.193622364 | 0.044892555 |
| 0.072166005 | 0.091067896 | 0.211051344 | 0.280174427 |
| 0.493819648 | 0.307562402 | 0.19023408  | 0.222457954 |
| 0.458289238 | 0.480235621 | 0.525882396 | 0.382835716 |
| 0.03916638  | 0.257892132 | 0.352167531 | 0.287652077 |
| 0.314072258 | 0.104389974 | 0.27925351  | 0.502929782 |
| 0.38295044  | 0.421269977 | 0.167936983 | 0.494468506 |
| 0.169663008 | 0.524555859 | 0.465720147 | 0.167321634 |
| 0.523579401 | 0.500455319 | 0.525564106 | 0.377928498 |
| 0.489725624 | 0.337732509 | 0.045212187 | 0.347149198 |
| 0.498605481 | 0.022472991 | 0.488148755 | 0.512924739 |
| 0.50658421  | 0.465563556 | 0.526209515 | 0.531570353 |
| 0.512794358 | 0.069958618 | 0.02403031  | 0.25642073  |
| 0.509098841 | 0.399141043 | 0.135590989 | 0.365138451 |
| 0.324121163 | 0.362610183 | 0.407398411 | 0.304135972 |
| 0.510473117 | 0.474182503 | 0.506706458 | 0.338624774 |
| 0.25471669  | 0.310053732 | 0.353397213 | 0.47194716  |
| 0.051015934 | 0.118501524 | 0.052592865 | 0.257417981 |
| 0.355570644 | 0.170050665 | 0.337219464 | 0.303996056 |
| 0.181734452 | 0.309662193 | 0.357428653 | 0.353004275 |
| 0.049346189 | 0.392603126 | 0.168921859 | 0.150700537 |
| 0.042917802 | 0.131590911 | 0.176917724 | 0.176741115 |
| 0.241873647 | 0.221958572 | 0.384092542 | 0.506060148 |
| 0.308176303 | 0.166003307 | 0.364524425 | 0.489557733 |
| 0.418429301 | 0.373461854 | 0.193452229 | 0.01671064  |
| 0.235238828 | 0.281586821 | 0.219379227 | 0.383952487 |
| 0.170681857 | 0.198050164 | 0.328540204 | 0.368991794 |
| 0.263126322 | 0.129889146 | 0.320454103 | 0.428202697 |
| 0.128757649 | 0.323058983 | 0.441951832 | 0.34376284  |
| 0.004145487 | 0.29609555  | 0.439008578 | 0.144690181 |
| 0.256170051 | 0.167207277 | 0.325241974 | 0.462182337 |
| 0.285986238 | 0.220950396 | 0.516775033 | 0.362055915 |
| 0.326294835 | 0.208646765 | 0.530882297 | 0.046402497 |
| 0.316458008 | 0.082443676 | 0.257278701 | 0.303946971 |

|             |             |             |             |
|-------------|-------------|-------------|-------------|
| 0.228102161 | 0.24735016  | 0.315443406 | 0.304677053 |
| 0.128868114 | 0.517793555 | 0.394364922 | 0.524768071 |
| 0.331847827 | 0.531870424 | 0.461418383 | 0.445346141 |
| 0.329227704 | 0.320159512 | 0.173867269 | 0.425086672 |
| 0.460703645 | 0.262550057 | 0.069189965 | 0.416357473 |
| 0.304413413 | 0.355355595 | 0.151038457 | 0.497790617 |
| 0.501260018 | 0.469785603 | 0.144083994 | 0.337063796 |
| 0.371977522 | 0.234615562 | 0.414191477 | 0.529744206 |
| 0.267493991 | 0.30502569  | 0.310937517 | 0.396027357 |
| 0.166947076 | 0.200949914 | 0.304336431 | 0.223880785 |
| 0.028281037 | 0.077311808 | 0.06459329  | 0.16625598  |
| 0.206859585 | 0.370370444 | 0.350106935 | 0.522602544 |
| 0.111767138 | 0.433337846 | 0.198398086 | 0.267073483 |
| 0.407570877 | 0.312427306 | 0.381321292 | 0.36417377  |
| 0.217251845 | 0.026115269 | 0.128324794 | 0.51314225  |
| 0.037420677 | 0.279069045 | 0.277497115 | 0.003951638 |
| 0.040702319 | 0.395339494 | 0.08575192  | 0.18492577  |
| 0.490609752 | 0.192174357 | 0.182682029 | 0.269814641 |
| 0.324593711 | 0.093469614 | 0.00664294  | 0.488916091 |
| 0.483397987 | 0.448521879 | 0.479249668 | 0.452506697 |
| 0.426027831 | 0.366872884 | 0.383000944 | 0.34518058  |
| 0.104374594 | 0.090029648 | 0.209986422 | 0.259584511 |
| 0.003778487 | 0.37192821  | 0.296341297 | 0.131697066 |
| 0.383536348 | 0.251982191 | 0.039873459 | 0.331421104 |
| 0.026400153 | 0.24972737  | 0.252372513 | 0.204229448 |
| 0.306859544 | 0.015592915 | 0.261558262 | 0.294792979 |
| 0.441208633 | 0.329402539 | 0.370605141 | 0.541918825 |
| 0.318960379 | 0.110176657 | 0.30397488  | 0.371694233 |
| 0.068567008 | 0.100138884 | 0.302556029 | 0.052962452 |
| 0.26059285  | 0.44838069  | 0.355874582 | 0.075783261 |
| 0.248330414 | 0.005833094 | 0.362372491 | 0.536131111 |
| 0.477549616 | 0.526432879 | 0.519433602 | 0.308306058 |
| 0.517119572 | 0.143401302 | 0.54147006  | 0.38911269  |
| 0.322991792 | 0.001241212 | 0.005967752 | 0.50470224  |
| 0.359054133 | 0.054450211 | 0.148950917 | 0.382772676 |
| 0.11259517  | 0.140492978 | 0.0691194   | 0.212831471 |
| 0.403170436 | 0.248355547 | 0.200858917 | 0.46370566  |
| 0.221145839 | 0.216782449 | 0.337453735 | 0.078236745 |
| 0.393852552 | 0.055839612 | 0.076647048 | 0.011183814 |
| 0.328356251 | 0.104511417 | 0.463114645 | 0.518222073 |
| 0.500721499 | 0.365020859 | 0.311728348 | 0.337618497 |
| 0.432694351 | 0.091319024 | 0.383128957 | 0.105254015 |
| 0.49440544  | 0.341288475 | 0.292246229 | 0.291124804 |
| 0.498818118 | 0.472775693 | 0.032097049 | 0.370263734 |
| 0.021905085 | 0.002660719 | 0.343889444 | 0.225560286 |
| 0.061326183 | 0.318690039 | 0.22103603  | 0.201529871 |
| 0.214095456 | 0.035640016 | 0.269281434 | 0.251087371 |
| 0.269736224 | 0.315262138 | 0.278274299 | 0.205888659 |
| 0.26243847  | 0.134507349 | 0.211687111 | 0.143193762 |
| 0.213826492 | 0.289258956 | 0.18292584  | 0.01941644  |
| 0.381395462 | 0.381602905 | 0.058760098 | 0.150649898 |
| 0.448851789 | 0.504163522 | 0.035739898 | 0.013905181 |
| 0.236399786 | 0.274765957 | 0.512084822 | 0.511726349 |
| 0.525638674 | 0.517427606 | 0.388235595 | 0.113813824 |

|             |             |             |             |
|-------------|-------------|-------------|-------------|
| 0.071103581 | 0.290797018 | 0.295580243 | 0.114645681 |
| 0.521632507 | 0.057948696 | 0.500302266 | 0.314436409 |
| 0.106343158 | 0.213114673 | 0.041220863 | 0.080242521 |
| 0.376529605 | 0.1644762   | 0.180332223 | 0.138518483 |
| 0.278080913 | 0.301728827 | 0.045963832 | 0.180563979 |
| 0.295609311 | 0.202189974 | 0.146777603 | 0.298184245 |
| 0.338087626 | 0.204908235 | 0.375488761 | 0.440036264 |
| 0.121552378 | 0.097964442 | 0.268160208 | 0.341975791 |
| 0.435978141 | 0.345764927 | 0.041333975 | 0.456880234 |
| 0.503469231 | 0.393650771 | 0.51099889  | 0.370394103 |
| 0.076700619 | 0.363478056 | 0.289941275 | 0.296769513 |
| 0.163547823 | 0.391268672 | 0.216590419 | 0.059027098 |
| 0.279602074 | 0.469178244 | 0.406913233 | 0.171117044 |
| 0.386699275 | 0.114081471 | 0.050439911 | 0.45395124  |
| 0.194725805 | 0.087601868 | 0.323776759 | 0.417145037 |
| 0.004484107 | 0.190115579 | 0.492180252 | 0.254515055 |
| 0.515298795 | 0.489315289 | 0.441817977 | 0.256528883 |
| 0.002579361 | 0.362171962 | 0.348955054 | 0.374383215 |
| 0.423535768 | 0.323980923 | 0.162512373 | 0.076905911 |
| 0.265211694 | 0.07772301  | 0.119044285 | 0.358203495 |
| 0.16997239  | 0.343174091 | 0.173991334 | 0.176376155 |
| 0.196344409 | 0.076802537 | 0.300028478 | 0.254527825 |
| 0.152126115 | 0.211556646 | 0.318074008 | 0.279820225 |
| 0.198078129 | 0.415178204 | 0.361966553 | 0.029080033 |
| 0.355121141 | 0.384676119 | 0.443686695 | 0.001375392 |
| 0.377945028 | 0.007943571 | 0.192095243 | 0.22576487  |
| 0.205273638 | 0.186217583 | 0.240384008 | 0.308071634 |
| 0.294586924 | 0.206422946 | 0.286632195 | 0.224349757 |
| 0.179012365 | 0.219962201 | 0.363981952 | 0.319403595 |
| 0.297149038 | 0.130960105 | 0.095540676 | 0.101044622 |
| 0.06329794  | 0.480517888 | 0.230699464 | 0.072697    |
| 0.209158013 | 0.321089526 | 0.343834001 | 0.500959393 |
| 0.428710921 | 0.109372949 | 0.289665322 | 0.453758907 |
| 0.219628873 | 0.299363211 | 0.060084616 | 0.367370578 |
| 0.224292017 | 0.225445546 | 0.373976438 | 0.266235703 |
| 0.337753775 | 0.395957567 | 0.224075068 | 0.446801577 |
| 0.363515428 | 0.282917361 | 0.297212266 | 0.0921211   |
| 0.168203466 | 0.114936988 | 0.268394336 | 0.002683706 |
| 0.310564    | 0.28045999  | 0.478591781 | 0.495825128 |
| 0.307808029 | 0.388229117 | 0.309059447 | 0.084432416 |
| 0.283935664 | 0.170645434 | 0.126937875 | 0.406177452 |
| 0.260366184 | 0.197589985 | 0.294444696 | 0.340659471 |
| 0.397705266 | 0.366077241 | 0.249044616 | 0.213643812 |
| 0.217473247 | 0.187754512 | 0.464821562 | 0.125070931 |
| 0.372245766 | 0.219881658 | 0.306503372 | 0.269839653 |
| 0.209808594 | 0.530219055 | 0.061388973 | 0.535985916 |
| 0.284748351 | 0.116025696 | 0.490386907 | 0.293175483 |
| 0.313827777 | 0.152277547 | 0.229701762 | 0.342684984 |
| 0.203176266 | 0.35976985  | 0.016330184 | 0.061581044 |
| 0.288827717 | 0.260870916 | 0.363877061 | 0.306702918 |
| 0.256244833 | 0.301490176 | 0.228765981 | 0.246302467 |
| 0.483242543 | 0.495865145 | 0.232527949 | 0.211003567 |
| 0.285003671 | 0.107030577 | 0.364181605 | 0.015819087 |
| 0.358401516 | 0.374082023 | 0.329194575 | 0.053106747 |

|             |             |             |             |
|-------------|-------------|-------------|-------------|
| 0.019265595 | 0.237822374 | 0.350673225 | 0.059055429 |
| 0.486079533 | 0.268240168 | 0.296422629 | 1           |
| 0.151868241 | 0.495662342 | 0.128488855 | 0.368988757 |
| 0.037904639 | 0.230358006 | 0.358984146 | 0.317993221 |
| 0.237466013 | 0.291693561 | 0.337723713 | 0.270264606 |
| 0.033457988 | 0.268162345 | 0.000733853 | 0.399435103 |
| 0.462197754 | 0.312292947 | 0.182259933 | 0.279019363 |
| 0.256080614 | 0.372771664 | 0.204992305 | 0.388812898 |
| 0.015055296 | 0.346325901 | 0.193297785 | 0.423864747 |
| 0.250039259 | 0.291845248 | 0.07472218  | 0.282801577 |
| 0.450885109 | 0.236180042 | 0.22156195  | 0.289888647 |
| 0.504078232 | 0.379418323 | 0.149110396 | 0.25663263  |
| 0.318400641 | 0.058982788 | 0.367607466 | 0.52817674  |
| 0.176650166 | 0.246752006 | 0.443439982 | 0.187696716 |
| 0.305973716 | 0.38866479  | 0.353553066 | 0.515796029 |
| 0.073860695 | 0.225270258 | 0.404563103 | 0.451648448 |
| 0.271148117 | 0.185010503 | 0.261343407 | 0.213039742 |
| 0.468319205 | 0.115259676 | 0.255144339 | 0.311193593 |
| 0.232183216 | 0.279741072 | 0.291594113 | 0.195851206 |
| 0.039875869 | 0.159471759 | 0.388141155 | 0.131668605 |
| 0.259173345 | 0.334462005 | 0.237777482 | 0.387590736 |
| 0.1642146   | 0.032617999 | 0.455814009 | 0.024310635 |
| 0.336595112 | 0.376266192 | 0.232667149 | 0.34273784  |
| 0.173642662 | 0.298699717 | 0.281299764 | 0.00072305  |
| 0.385560045 | 0.084883459 | 0.288892751 | 0.231246956 |
| 0.265560481 | 0.046713622 | 0.473607755 | 0.522920911 |
| 0.291707306 | 0.342695859 | 0.345065912 | 0.462169713 |
| 0.188675531 | 0.334635558 | 0.304472423 | 0.359466909 |
| 0.263594633 | 0.33896967  | 0.372351915 | 0.386462935 |
| 0.338183532 | 0.263629009 |             |             |
| TBCB        | 0.221794529 | 0.246947291 | 0.169898318 |
| 0.123587562 | 0.1256663   | 0.13373801  | 0.283149594 |
| 0.282122982 | 0.241952258 | 0.094715415 | 0.142456736 |
| 0.160615487 | 0.028534645 | 0.251393749 | 0.291812602 |
| 0.122969148 | 0.216873137 | 0.277692947 | 0.104027028 |
| 0.202775309 | 0.130999215 | 0.091453529 | 0.162088636 |
| 0.144958389 | 0.306292819 | 0.189129198 | 0.111072503 |
| 0.249537746 | 0.044084263 | 0.12706108  | 0.044515637 |
| 0.314713379 | 0.116871295 | 0.086836376 | 0.141821496 |
| 0.150661918 | 0.027710654 | 0.355629707 | 0.155578909 |
| 0.039769714 | 0.31877069  | 0.107639734 | 0.16712188  |
| 0.119781215 | 0.1742522   | 0.044676167 | 0.133672546 |
| 0.192289701 | 0.217266203 | 0.214715562 | 0.155570777 |
| 0.145152471 | 0.202495714 | 0.155877514 | 0.013758168 |
| 0.065169536 | 0.011550282 | 0.042850956 | 0.29594865  |
| 0.241141693 | 0.256836149 | 0.066803761 | 0.259686348 |
| 0.150586497 | 0.171737504 | 0.257716192 | 0.115547063 |
| 0.273035375 | 0.052726631 | 0.146199893 | 0.117917201 |
| 0.165544088 | 0.241798662 | 0.269598082 | 0.262151883 |
| 0.127079621 | 0.231387558 | 0.145485906 | 0.090415516 |
| 0.23248939  | 0.362287758 | 0.261550323 | 0.31594211  |
| 0.074858835 | 0.109216651 | 0.12494772  | 0.220424004 |
| 0.208059019 | 0.314702978 | 0.163014644 | 0.315756256 |
| 0.280142126 | 0.126290861 | 0.176710658 | 0.264978783 |

|             |             |             |             |
|-------------|-------------|-------------|-------------|
| 0.231925382 | 0.098363669 | 0.107321077 | 0.051849294 |
| 0.128599231 | 0.119727237 | 0.349962027 | 0.204971704 |
| 0.148810594 | 0.231263487 | 0.339906014 | 0.095425854 |
| 0.123308839 | 0.216174799 | 0.123800721 | 0.186274947 |
| 0.13978387  | 0.245631816 | 0.2108275   | 0.229454807 |
| 0.108194761 | 0.265157948 | 0.158808607 | 0.26878473  |
| 0.034037276 | 0.295867107 | 0.220251974 | 0.219594886 |
| 0.225647684 | 0.272098092 | 0.164088089 | 0.294589619 |
| 0.214375057 | 0.217942824 | 0.227264103 | 0.187762246 |
| 0.21676434  | 0.310546731 | 0.293737131 | 0.217024034 |
| 0.225095411 | 0.082395859 | 0.105217641 | 0.226242482 |
| 0.178568859 | 0.310793415 | 0.0783564   | 0.344459495 |
| 0.262682438 | 0.189221972 | 0.241361874 | 0.384936145 |
| 0.289002754 | 0.307849802 | 0.213731328 | 0.216868882 |
| 0.327287421 | 0.326760532 | 0.279516923 | 0.119142941 |
| 0.315147771 | 0.15191747  | 0.096409506 | 0.247524511 |
| 0.297430611 | 0.00749495  | 0.215240867 | 0.231348173 |
| 0.280168877 | 0.178828044 | 0.286110588 | 0.253996124 |
| 0.284328552 | 0.272356761 | 0.014867621 | 0.18146381  |
| 0.306649947 | 0.232232244 | 0.271731978 | 0.102843285 |
| 0.135579185 | 0.158817372 | 0.189764849 | 0.070714893 |
| 0.346031816 | 0.222687121 | 0.232174709 | 0.206372729 |
| 0.192230403 | 0.31832723  | 0.091177644 | 0.32542217  |
| 0.223634671 | 0.213560449 | 0.198009168 | 0.262852014 |
| 0.098868035 | 0.243221612 | 0.159914861 | 0.160909657 |
| 0.246734565 | 0.199782416 | 0.07329225  | 0.127172328 |
| 0.229956588 | 0.11679211  | 0.251015681 | 0.244294591 |
| 0.200767025 | 0.325366577 | 0.160754907 | 0.187360144 |
| 0.18497643  | 0.380333868 | 0.143149764 | 0.253319628 |
| 0.153204807 | 0.22838214  | 0.162246923 | 0.29340373  |
| 0.301841097 | 0.101293651 | 0.29090649  | 0.037139662 |
| 0.099467673 | 0.080579824 | 0.043792162 | 0.110488095 |
| 0.361053769 | 0.176118416 | 0.141142075 | 0.145352555 |
| 0.179241988 | 0.291657977 | 0.119705182 | 0.353112294 |
| 0.258008942 | 0.122730045 | 0.217087531 | 0.136396493 |
| 0.063536777 | 0.16689108  | 0.190277052 | 0.137765301 |
| 0.219066119 | 0.045312349 | 0.050450887 | 0.222204636 |
| 0.081683958 | 0.116995134 | 0.23665556  | 0.155490825 |
| 0.123445803 | 0.347885672 | 0.290586544 | 0.017290154 |
| 0.138235585 | 0.065311168 | 0.194667677 | 0.117156161 |
| 0.2225713   | 0.242368984 | 0.113793818 | 0.120133269 |
| 0.20261021  | 0.300981903 | 0.247131883 | 0.258952382 |
| 0.092932122 | 0.296479671 | 0.194416182 | 0.236113362 |
| 0.191570981 | 0.107012512 | 0.028655967 | 0.181658698 |
| 0.211454367 | 0.100807734 | 0.225523736 | 0.17092372  |
| 0.119034598 | 0.133368196 | 0.138891095 | 0.263109097 |
| 0.352358307 | 0.289092654 | 0.230512328 | 0.189056664 |
| 0.214308325 | 0.204597133 | 0.227616296 | 0.315069614 |
| 0.098859533 | 0.118752336 | 0.104622416 | 0.214771342 |
| 0.240074999 | 0.122540639 | 0.323604017 | 0.044187337 |
| 0.000836106 | 0.270573093 | 0.224316985 | 0.201942128 |
| 0.063962717 | 0.118988848 | 0.151962741 | 0.279478507 |
| 0.260621623 | 0.274570571 | 0.283145478 | 0.1140875   |
| 0.265601294 | 0.134892293 | 0.103390091 | 0.138697487 |

|             |             |             |             |
|-------------|-------------|-------------|-------------|
| 0.280605429 | 0.066258932 | 0.148232625 | 0.359713329 |
| 0.209360161 | 0.067539109 | 0.224640159 | 0.008705716 |
| 0.228545146 | 0.189834659 | 0.278999671 | 0.349900683 |
| 0.245102534 | 0.324526688 | 0.225965064 | 0.109309203 |
| 0.186426313 | 0.265726883 | 0.014187389 | 0.26099219  |
| 0.304692087 | 0.302717538 | 0.303078146 | 0.330751844 |
| 0.257247588 | 0.198988632 | 0.185882856 | 0.158360702 |
| 0.262481596 | 0.250555396 | 0.065279624 | 0.162987316 |
| 0.021412364 | 0.203340086 | 0.176899989 | 0.259334369 |
| 0.163676435 | 0.234960918 | 0.205931478 | 0.142321313 |
| 0.08468772  | 0.032602592 | 0.204191938 | 0.254701724 |
| 0.195106677 | 0.151043907 | 0.055479642 | 0.083738893 |
| 0.278810169 | 0.269812714 | 0.08275591  | 0.300647791 |
| 0.158859281 | 0.219962083 | 0.136232197 | 0.174177651 |
| 0.260645335 | 0.049445811 | 0.180084138 | 0.007270661 |
| 0.097203011 | 0.334194501 | 0.12844281  | 0.181733922 |
| 0.197599881 | 0.074992028 | 0.253543314 | 0.307513526 |
| 0.277302922 | 0.259983049 | 0.268426124 | 0.068598427 |
| 0.276934737 | 0.017336617 | 0.27506247  | 0.22360392  |
| 0.094221918 | 0.004584196 | 0.048138913 | 0.21748322  |
| 0.11229569  | 0.207451274 | 0.258229648 | 0.098573205 |
| 0.201771719 | 0.230687562 | 0.279087825 | 0.088127539 |
| 0.137793669 | 0.155357834 | 0.102522751 | 0.29847828  |
| 0.209406391 | 0.247383891 | 0.14368772  | 0.264945155 |
| 0.131933198 | 0.205277765 | 0.280037659 | 0.01354349  |
| 0.176241874 | 0.258376933 | 0.359779268 | 0.281134838 |
| 0.30720494  | 0.141078217 | 0.075225435 | 0.124207046 |
| 0.245954187 | 0.192959597 | 0.088904936 | 0.220897646 |
| 0.261741707 | 0.127331178 | 0.222886763 | 0.24772824  |
| 0.28420659  | 0.283606616 | 0.232121876 | 0.185515365 |
| 0.052831516 | 0.010060686 | 0.131179289 | 0.267330768 |
| 0.100603789 | 0.11486919  | 0.254367776 | 0.241867758 |
| 0.24209292  | 0.138881498 | 0.071405793 | 0.073529128 |
| 0.18937807  | 0.151861036 | 0.103345397 | 0.291637716 |
| 0.151965919 | 0.103638495 | 0.224361919 | 0.294093095 |
| 0.180678844 | 0.27301058  | 0.294038627 | 0.216604413 |
| 0.11233025  | 0.106082607 | 0.232913951 | 0.268411932 |
| 0.208262743 | 0.227408912 | 0.230905383 | 0.059592532 |
| 0.275085518 | 0.178215262 | 0.245475777 | 0.263682352 |
| 0.329936844 | 0.311763681 | 0.350658744 | 0.206526912 |
| 0.241451948 | 0.175971003 | 0.111548325 | 0.164673349 |
| 0.275488954 | 0.223406849 | 0.289363098 | 0.078749468 |
| 0.292768818 | 0.202008016 | 0.163778501 | 0.29077881  |
| 0.101629259 | 0.274651072 | 0.203546709 | 0.200719459 |
| 0.149487321 | 0.070635104 | 0.272028937 | 0.24873168  |
| 0.224635307 | 0.040790767 | 0.26825768  | 0.222668716 |
| 0.237873683 | 0.104726001 | 0.143459448 | 0.319967916 |
| 0.254597078 | 0.286700641 | 0.134555664 | 0.207314253 |
| 0.185037897 | 0.113275846 | 0.065319537 | 0.239792966 |
| 0.269616457 | 0.119996776 | 0.295277677 | 0.259553402 |
| 0.274825095 | 0.103503463 | 0.104256745 | 0.143596809 |
| 0.286905838 | 0.143472047 | 0.259705168 | 0.264393187 |
| 0.337088083 | 0.376208541 | 0.23441232  | 0.207914833 |
| 0.132150733 | 0.240986376 | 0.212816815 | 0.234857042 |

|              |             |             |             |
|--------------|-------------|-------------|-------------|
| 0.063111345  | 0.197067574 | 0.114039372 | 0.199179964 |
| 0.006652316  | 0.0360299   | 0.271778405 | 0.202122685 |
| 0.339680402  | 0.238025629 | 0.291144604 | 0.247311492 |
| 0.001411911  | 0.123908939 | 0.138233128 | 0.108844985 |
| 0.23059184   | 0.239410763 | 0.23769575  | 0.206393766 |
| 0.271154624  | 0.200616156 | 0.204771434 | 0.12051949  |
| 0.045630592  | 0.159394951 | 0.274065386 | 0.282171671 |
| 0.212477967  | 0.251431561 | 0.06813657  | 0.20837482  |
| 0.090102726  | 0.257931633 | 0.233873071 | 0.107398348 |
| 0.038067191  | 0.261121318 | 0.196052543 | 0.180518066 |
| 0.11185645   | 0.243462661 | 0.271206964 | 0.015512968 |
| 0.139898222  | 0.106323528 | 0.197941288 | 0.163670265 |
| 0.204772332  | 0.223711962 | 0.19363658  | 0.128152697 |
| 0.192023078  | 0.242204904 | 0.160330504 | 0.218689329 |
| 0.180393109  | 0.265222963 | 0.142935918 | 0.173292225 |
| 0.113928143  | 0.227768748 | 0.288882067 | 0.298126152 |
| 0.167572709  | 0.24182684  | 0.306044434 | 0.207128698 |
| 0.253250801  | 0.172948688 | 0.294298537 | 0.274848736 |
| 0.276977998  | 0.247968287 | 0.191742626 | 0.211104692 |
| 0.06183758   | 0.121419446 | 0.24021488  | 0.156401157 |
| 0.243201301  | 0.092875683 | 0.141605701 | 0.170689973 |
| 0.173713837  | 0.329977824 | 0.294240619 | 0.292657908 |
| 0.140925336  | 0.162490259 | 0.084428962 | 0.166149348 |
| 0.21145552   | 0.284027553 | 0.114311763 | 0.031981966 |
| 0.192888607  | 0.153895669 | 0.199522938 | 0.29536829  |
| 0.070995955  | 0.296163887 | 0.089191614 | 0.204800055 |
| 0.0711053297 | 0.2796795   | 0.271291199 | 0.171456097 |
| 0.039384599  | 0.243442162 | 0.142083749 | 0.139310076 |
| 0.162260365  | 0.16468673  | 0.152003567 | 0.26580913  |
| 0.26406809   | 0.238045098 | 0.349806506 | 0.239701355 |
| 0.113953237  | 0.087792628 | 0.150428112 | 0.143355621 |
| 0.192764117  | 0.264727589 | 0.246228365 | 0.259795807 |
| 0.127313492  | 0.282470682 | 0.356230398 | 0.227873488 |
| 0.197765074  | 0.176587431 | 0.039003735 | 0.146753761 |
| 0.243857539  | 0.081058849 | 0.003891889 | 0.032343012 |
| 0.199451087  | 0.169913461 | 0.189517685 | 0.218445309 |
| 0.119095801  | 0.24330695  | 0.044767545 | 0.229085353 |
| 0.292684505  | 0.346637165 | 0.129521596 | 0.286201757 |
| 0.230609937  | 0.235488663 | 0.147893721 | 0.035677691 |
| 0.117542658  | 0.101686989 | 0.103844794 | 0.267569988 |
| 0.188951418  | 0.042283796 | 0.129984509 | 0.258801612 |
| 0.236684604  | 0.034898707 | 0.170809287 | 0.151868241 |
| 1            | 0.347317636 | 0.216329073 | 0.156466461 |
| 0.251085063  | 0.258717362 | 0.113664405 | 0.142630801 |
| 0.102728656  | 0.089138323 | 0.179428937 | 0.066829059 |
| 0.200454557  | 0.137523139 | 0.019847368 | 0.352187444 |
| 0.327943831  | 0.096727811 | 0.325939032 | 0.0933571   |
| 0.214819618  | 0.278252626 | 0.154346203 | 0.111179595 |
| 0.079457592  | 0.104712464 | 0.269536831 | 0.225608253 |
| 0.037863693  | 0.163882298 | 0.168281081 | 0.127639259 |
| 0.370272574  | 0.111487176 | 0.324735155 | 0.06538917  |
| 0.273636563  | 0.24136294  | 0.234931296 | 0.15677496  |
| 0.151491024  | 0.252965221 | 0.114479123 | 0.309905013 |
| 0.210961275  | 0.069881235 | 0.187074287 | 0.18440769  |

|             |             |             |             |
|-------------|-------------|-------------|-------------|
| 0.093461962 | 0.274866992 | 0.122822113 | 0.318503737 |
| 0.177501357 | 0.236462476 | 0.191957181 | 0.266352248 |
| 0.249305025 | 0.093827819 | 0.069652216 | 0.14064923  |
| 0.270439786 | 0.149629752 | 0.110792139 | 0.213793241 |
| 0.056448684 | 0.221380399 | 0.156580945 | 0.15207116  |
| 0.143279032 | 0.295262578 | 0.131342371 | 0.28331637  |
| 0.199455155 | 0.13448095  | 0.130028161 | 0.303601166 |
| 0.136819613 | 0.074517343 | 0.326187201 | 0.003639374 |
| 0.165701908 | 0.132513312 | 0.24946543  | 0.130302743 |
| 0.264100032 | 0.200292761 | 0.16379563  | 0.025223337 |
| 0.212933833 | 0.03292456  | 0.18289841  | 0.110805169 |
| 0.091657298 | 0.24287095  | 0.292431792 | 0.262258173 |
| 0.229321763 | 0.118262857 | 0.069692607 | 0.286514163 |
| 0.042644047 | 0.071813722 | 0.100741323 | 0.146913851 |
| 0.0604237   | 0.097035214 | 0.108195111 | 0.078862076 |
| 0.200831954 | 0.248484226 |             |             |
| TCF19       | 0.222446334 | 0.521912757 | 0.207961349 |
| 0.249798244 | 0.317810535 | 0.501982146 | 0.175248305 |
| 0.270954375 | 0.483064907 | 0.388526955 | 0.429151704 |
| 0.077921846 | 0.068907137 | 0.512063256 | 0.157092212 |
| 0.403060352 | 0.101571875 | 0.239714394 | 0.127760154 |
| 0.350314692 | 0.290998842 | 0.347091009 | 0.528607237 |
| 0.300779983 | 0.362728241 | 0.502421154 | 0.3976215   |
| 0.527115815 | 0.272108132 | 0.481393804 | 0.265994625 |
| 0.481097859 | 0.325818881 | 0.386636182 | 0.088516303 |
| 0.483336778 | 0.012726847 | 0.485433969 | 0.315503187 |
| 0.142503393 | 0.462574451 | 0.465614777 | 0.329239936 |
| 0.467676213 | 0.146363811 | 0.275779815 | 0.433613972 |
| 0.470415001 | 0.388078929 | 0.228519638 | 0.507657666 |
| 0.430363248 | 0.494075159 | 0.508921295 | 0.008597893 |
| 0.278943891 | 0.063894145 | 0.192528602 | 0.528842963 |
| 0.344193242 | 0.231988646 | 0.292914231 | 0.396484902 |
| 0.437733417 | 0.424931224 | 0.372547615 | 0.434000298 |
| 0.525051007 | 0.15120779  | 0.475322631 | 0.252079036 |
| 0.481454108 | 0.147409713 | 0.312041186 | 0.258012398 |
| 0.419639247 | 0.302295031 | 0.383518141 | 0.294921818 |
| 0.523199925 | 0.508280611 | 0.379371561 | 0.521186638 |
| 0.089883894 | 0.330743748 | 0.290694998 | 0.380861518 |
| 0.443258519 | 0.21145636  | 0.479382938 | 0.513683223 |
| 0.174463031 | 0.485091548 | 0.475677106 | 0.307887857 |
| 0.53062815  | 0.278248924 | 0.486007299 | 0.156229065 |
| 0.380903038 | 0.347722052 | 0.503149873 | 0.416866174 |
| 0.342907354 | 0.237451966 | 0.514519999 | 0.302346448 |
| 0.34355887  | 0.245008098 | 0.238839802 | 0.488088943 |
| 0.480447356 | 0.52793428  | 0.508939162 | 0.448691601 |
| 0.381656858 | 0.524714191 | 0.492675698 | 0.506798513 |
| 0.200228225 | 0.527117348 | 0.349500042 | 0.116750482 |
| 0.24150251  | 0.180170385 | 0.255002144 | 0.416517166 |
| 0.513204126 | 0.467615346 | 0.357653544 | 0.29839691  |
| 0.470542881 | 0.521957412 | 0.524542887 | 0.494183385 |
| 0.141789343 | 0.23162858  | 0.392823797 | 0.439379812 |
| 0.451468629 | 0.262964348 | 0.239404651 | 0.515774126 |
| 0.485703186 | 0.47307556  | 0.366244452 | 0.516748414 |
| 0.334389098 | 0.510050783 | 0.533177781 | 0.294360624 |



|             |             |             |             |
|-------------|-------------|-------------|-------------|
| 0.518988467 | 0.520314474 | 0.505540088 | 0.406632242 |
| 0.518761586 | 0.482439714 | 0.093557058 | 0.479586562 |
| 0.496666166 | 0.014459059 | 0.508218068 | 0.508184261 |
| 0.528036213 | 0.491549903 | 0.500081918 | 0.51778874  |
| 0.53037733  | 0.221980623 | 0.029391529 | 0.334490597 |
| 0.523317383 | 0.493295282 | 0.213781768 | 0.432077356 |
| 0.373114489 | 0.523389918 | 0.485293358 | 0.3325036   |
| 0.496733006 | 0.514031697 | 0.520850798 | 0.493693054 |
| 0.443538087 | 0.451432709 | 0.367462033 | 0.515497209 |
| 0.136724573 | 0.28694792  | 0.19888817  | 0.415970769 |
| 0.467697148 | 0.27828336  | 0.515278075 | 0.385787608 |
| 0.309907351 | 0.500254851 | 0.32057432  | 0.388768937 |
| 0.20738946  | 0.495283974 | 0.33326441  | 0.351680027 |
| 0.115562639 | 0.309604699 | 0.285039412 | 0.260082189 |
| 0.309534182 | 0.377508131 | 0.488684168 | 0.509989664 |
| 0.386138888 | 0.369157985 | 0.508216767 | 0.499620228 |
| 0.458216625 | 0.385893425 | 0.374249641 | 0.031565083 |
| 0.296846597 | 0.319725315 | 0.15673997  | 0.42771219  |
| 0.34186481  | 0.316051057 | 0.428851307 | 0.413595253 |
| 0.467863184 | 0.328557281 | 0.383245111 | 0.489660283 |
| 0.341484122 | 0.342098842 | 0.486987998 | 0.485894843 |
| 0.025168179 | 0.44183225  | 0.50436155  | 0.162170821 |
| 0.443713118 | 0.12280074  | 0.242276329 | 0.49918251  |
| 0.282589046 | 0.22075537  | 0.513518049 | 0.411398783 |
| 0.413175731 | 0.38771858  | 0.507882986 | 0.043825782 |
| 0.364175921 | 0.078327579 | 0.355293752 | 0.447412362 |
| 0.388134366 | 0.38066871  | 0.312730723 | 0.300954381 |
| 0.323841638 | 0.523523131 | 0.501796335 | 0.521779055 |
| 0.381037584 | 0.509131638 | 0.495666701 | 0.501477923 |
| 0.472262003 | 0.376662603 | 0.107616604 | 0.502368615 |
| 0.499326232 | 0.342411203 | 0.244535034 | 0.484016093 |
| 0.415232431 | 0.42333007  | 0.146017306 | 0.503900758 |
| 0.504877671 | 0.521986035 | 0.231509635 | 0.405857018 |
| 0.47749052  | 0.390150704 | 0.486727904 | 0.504537035 |
| 0.379405638 | 0.362794269 | 0.341699803 | 0.429169275 |
| 0.336028294 | 0.211924449 | 0.446899549 | 0.149849076 |
| 0.009468073 | 0.24394943  | 0.212811796 | 0.230736943 |
| 0.148930188 | 0.469729416 | 0.443478111 | 0.521826987 |
| 0.240571258 | 0.50644743  | 0.384426919 | 0.326295655 |
| 0.508618022 | 0.366077506 | 0.37986611  | 0.415790162 |
| 0.394416965 | 0.050342938 | 0.196375849 | 0.511641385 |
| 0.178556347 | 0.222677949 | 0.455384909 | 0.006905283 |
| 0.160271511 | 0.514748121 | 0.264167162 | 0.349025442 |
| 0.482943399 | 0.363791008 | 0.382050219 | 0.412355876 |
| 0.419623085 | 0.233640196 | 0.007816273 | 0.509173032 |
| 0.507138278 | 0.497423895 | 0.509452503 | 0.505306209 |
| 0.485799781 | 0.479741492 | 0.454934461 | 0.524025583 |
| 0.241355822 | 0.266133455 | 0.191524682 | 0.344250202 |
| 0.015511606 | 0.450209835 | 0.350830629 | 0.292782234 |
| 0.45802505  | 0.413448022 | 0.133104861 | 0.370540601 |
| 0.088391042 | 0.173878418 | 0.433086861 | 0.309679035 |
| 0.383570287 | 0.078385345 | 0.302578556 | 0.32652196  |
| 0.522122705 | 0.484885951 | 0.354426575 | 0.52451923  |
| 0.405923774 | 0.326860905 | 0.353640347 | 0.445195696 |

|             |             |             |             |
|-------------|-------------|-------------|-------------|
| 0.190132991 | 0.148711809 | 0.475098395 | 0.057848072 |
| 0.289962209 | 0.501502084 | 0.41560968  | 0.208066923 |
| 0.390029706 | 0.034968074 | 0.500062675 | 0.521812591 |
| 0.527531106 | 0.508559529 | 0.525431201 | 0.254402534 |
| 0.526006145 | 0.080383089 | 0.524861141 | 0.5214355   |
| 0.429156443 | 0.004377395 | 0.015806746 | 0.507774541 |
| 0.414952968 | 0.217912204 | 0.305134623 | 0.46845552  |
| 0.203535608 | 0.351366776 | 0.183664711 | 0.177584816 |
| 0.502389676 | 0.27160583  | 0.171857408 | 0.522407768 |
| 0.335689157 | 0.330537401 | 0.500237847 | 0.253366738 |
| 0.441552498 | 0.147546691 | 0.249048887 | 0.013319711 |
| 0.404953423 | 0.298192883 | 0.506453644 | 0.526973131 |
| 0.50766965  | 0.420095125 | 0.387429808 | 0.415902049 |
| 0.482847289 | 0.290573491 | 0.393798057 | 0.306986702 |
| 0.533265675 | 0.420305308 | 0.4275464   | 0.452628578 |
| 0.501959797 | 0.516604871 | 0.12047036  | 0.464000046 |
| 0.049814238 | 0.002763069 | 0.516801492 | 0.394064368 |
| 0.076770749 | 0.376771789 | 0.392571691 | 0.338557443 |
| 0.309370758 | 0.117398698 | 0.235223534 | 0.218714631 |
| 0.378215769 | 0.404390234 | 0.267497146 | 0.394622218 |
| 0.289622336 | 0.142028019 | 0.289690961 | 0.267977651 |
| 0.306283881 | 0.464836289 | 0.365283229 | 0.092686188 |
| 0.476726031 | 0.429410738 | 0.174431614 | 0.327045896 |
| 0.500728578 | 0.513940577 | 0.115439577 | 0.031378616 |
| 0.419221056 | 0.364937771 | 0.503333275 | 0.532842702 |
| 0.522820299 | 0.503141389 | 0.476256436 | 0.174145705 |
| 0.190896282 | 0.373969753 | 0.288798553 | 0.133350698 |
| 0.524745125 | 0.229995395 | 0.528039135 | 0.27389994  |
| 0.268523393 | 0.336821364 | 0.095965088 | 0.21212986  |
| 0.382314635 | 0.317761463 | 0.245213838 | 0.342954691 |
| 0.357530318 | 0.235828002 | 0.157481938 | 0.324488321 |
| 0.463827322 | 0.15134181  | 0.306030856 | 0.456438515 |
| 0.496473673 | 0.312524603 | 0.456631609 | 0.483578229 |
| 0.300071271 | 0.270979116 | 0.458035494 | 0.45690658  |
| 0.508776889 | 0.44798161  | 0.078058971 | 0.528595311 |
| 0.507596174 | 0.480127095 | 0.529348832 | 0.441352791 |
| 0.238831969 | 0.391134692 | 0.304712407 | 0.371394916 |
| 0.318647745 | 0.509504185 | 0.339444848 | 0.193717312 |
| 0.419109999 | 0.497389653 | 0.512475368 | 0.261999801 |
| 0.479747392 | 0.329439919 | 0.215381367 | 0.509920101 |
| 0.160832446 | 0.218958493 | 0.470599007 | 0.477392134 |
| 0.004070714 | 0.111010615 | 0.489960502 | 0.347102198 |
| 0.50543432  | 0.500899533 | 0.499382206 | 0.403086387 |
| 0.00140203  | 0.422464173 | 0.432397739 | 0.437306813 |
| 0.527778837 | 0.490867308 | 0.260825437 | 0.154103225 |
| 0.395976108 | 0.257369648 | 0.213358773 | 0.458412926 |
| 0.156343658 | 0.513715768 | 0.322763457 | 0.350263804 |
| 0.263161252 | 0.27097569  | 0.227135031 | 0.373895785 |
| 0.139141411 | 0.362500897 | 0.436995768 | 0.408515843 |
| 0.178695323 | 0.478265232 | 0.497837815 | 0.112753759 |
| 0.355654113 | 0.472791206 | 0.493402485 | 0.006987657 |
| 0.460416631 | 0.03535821  | 0.256739241 | 0.278707994 |
| 0.27207584  | 0.279015257 | 0.307212586 | 0.324794435 |
| 0.464365732 | 0.336647366 | 0.367472066 | 0.341785343 |

|             |             |             |             |
|-------------|-------------|-------------|-------------|
| 0.233962183 | 0.36652078  | 0.428090584 | 0.471664958 |
| 0.31088513  | 0.264194906 | 0.269380326 | 0.268454697 |
| 0.131078256 | 0.522837482 | 0.396235473 | 0.241556616 |
| 0.330496906 | 0.455373728 | 0.439158034 | 0.529326128 |
| 0.474886377 | 0.302995004 | 0.39938023  | 0.533446773 |
| 0.264973613 | 0.409317599 | 0.211618265 | 0.49647694  |
| 0.364351541 | 0.220484206 | 0.497633667 | 0.485003439 |
| 0.495900917 | 0.476383334 | 0.39644819  | 0.49675983  |
| 0.422988345 | 0.401523056 | 0.425867491 | 0.149476548 |
| 0.324162235 | 0.302527764 | 0.264276613 | 0.013186    |
| 0.446421542 | 0.444605764 | 0.510958118 | 0.525148837 |
| 0.266353781 | 0.47083244  | 0.442769332 | 0.215945032 |
| 0.382911607 | 0.361258824 | 0.29712991  | 0.500037548 |
| 0.185486858 | 0.319707037 | 0.328294039 | 0.511050761 |
| 0.471136992 | 0.470995114 | 0.27080223  | 0.384423577 |
| 0.349763794 | 0.38913358  | 0.501245178 | 0.309864707 |
| 0.467400883 | 0.187382677 | 0.491218845 | 0.338752272 |
| 0.276963509 | 0.517483023 | 0.195507129 | 0.51960597  |
| 0.350015272 | 0.308953361 | 0.497129317 | 0.447066367 |
| 0.440071933 | 0.181320905 | 0.153901727 | 0.487989014 |
| 0.323194798 | 0.323553436 | 0.020204168 | 0.067695099 |
| 0.399570012 | 0.373489506 | 0.503418098 | 0.442141597 |
| 0.246219058 | 0.400820809 | 0.1417501   | 0.440173515 |
| 0.524822791 | 0.515695123 | 0.327681946 | 0.371629015 |
| 0.455435586 | 0.215179895 | 0.535609268 | 0.02562055  |
| 0.447044545 | 0.432706029 | 0.425007839 | 0.151973079 |
| 0.079687017 | 0.178774729 | 0.469062634 | 0.227277994 |
| 0.486398532 | 0.183542943 | 0.464946097 | 0.495662342 |
| 0.347317636 | 1           | 0.183760126 | 0.45616134  |
| 0.158717057 | 0.386994786 | 0.382387537 | 0.42275455  |
| 0.252177642 | 0.273852837 | 0.434253267 | 0.213840115 |
| 0.104850014 | 0.301059957 | 0.006183057 | 0.479488854 |
| 0.508930022 | 0.326426405 | 0.365214676 | 0.367912759 |
| 0.362653256 | 0.475886253 | 0.27054345  | 0.450177419 |
| 0.037630704 | 0.368252873 | 0.324336046 | 0.524300348 |
| 0.234158549 | 0.433948063 | 0.132828922 | 0.312339437 |
| 0.505307298 | 0.307136829 | 0.39154693  | 0.321818617 |
| 0.530923243 | 0.501986093 | 0.365645228 | 0.258112277 |
| 0.468651605 | 0.21099334  | 0.481192486 | 0.51483969  |
| 0.254189832 | 0.197023294 | 0.465205691 | 0.28637719  |
| 0.291669289 | 0.507680792 | 0.455378335 | 0.513415101 |
| 0.115476901 | 0.366122055 | 0.469642755 | 0.513483991 |
| 0.386313878 | 0.158916402 | 0.224618385 | 0.253461876 |
| 0.528581417 | 0.202875067 | 0.255044744 | 0.482337101 |
| 0.191432581 | 0.39950602  | 0.474622902 | 0.212957561 |
| 0.090471055 | 0.283517703 | 0.450790483 | 0.298209564 |
| 0.377355091 | 0.393203293 | 0.248774631 | 0.466064884 |
| 0.200709424 | 0.062905791 | 0.488677958 | 0.01340654  |
| 0.508903697 | 0.435844354 | 0.366445422 | 0.370789675 |
| 0.359778533 | 0.466136084 | 0.489976518 | 0.008580452 |
| 0.463307866 | 0.058205484 | 0.351647488 | 0.245831051 |
| 0.284782895 | 0.169222881 | 0.51921067  | 0.503817876 |
| 0.460775946 | 0.373914985 | 0.343993666 | 0.518549891 |
| 0.125571744 | 0.322336271 | 0.335056313 | 0.522414279 |

|             |             |             |             |
|-------------|-------------|-------------|-------------|
| 0.195856216 | 0.447077786 | 0.44024621  | 0.374567341 |
| 0.498028597 | 0.416184614 |             |             |
| TDG         | 0.10458093  | 0.121371192 | 0.055282561 |
| 0.076261076 | 0.196155652 | 0.057467598 | 0.103162683 |
| 0.118505231 | 0.121171961 | 0.013630676 | 0.155321993 |
| 0.073352165 | 0.043085261 | 0.194521398 | 0.119805974 |
| 0.131858116 | 0.133233545 | 0.196213532 | 0.030944836 |
| 0.055235578 | 0.206587408 | 0.049676536 | 0.066549072 |
| 0.177407358 | 0.195823742 | 0.089687891 | 0.074270152 |
| 0.153054353 | 0.014535465 | 0.117776529 | 0.006974641 |
| 0.241450345 | 0.183820667 | 0.053461529 | 0.043101596 |
| 0.100555022 | 0.02378603  | 0.216592729 | 0.141996693 |
| 0.053103589 | 0.255424313 | 0.023376731 | 0.169106205 |
| 0.037414732 | 0.059007117 | 0.005748539 | 0.112063096 |
| 0.095371588 | 0.101997287 | 0.075457121 | 0.111002867 |
| 0.046094159 | 0.175120674 | 0.062799826 | 0.00610089  |
| 0.059355957 | 0.011432634 | 0.028612905 | 0.174736078 |
| 0.293739528 | 0.263622689 | 0.016093215 | 0.112591739 |
| 0.100362043 | 0.164327289 | 0.287765662 | 0.028349356 |
| 0.184969485 | 0.051008246 | 0.105343624 | 0.06481421  |
| 0.073016334 | 0.057127343 | 0.27751547  | 0.093371913 |
| 0.053607012 | 0.298713658 | 0.17578471  | 0.076494624 |
| 0.102421808 | 0.237241605 | 0.231996561 | 0.160867488 |
| 0.060349684 | 0.13542354  | 0.101216078 | 0.29773935  |
| 0.166580907 | 0.085386693 | 0.17336901  | 0.21816984  |
| 0.081984349 | 0.046173075 | 0.127254065 | 0.142490213 |
| 0.138057388 | 0.040102442 | 0.036472299 | 0.067226321 |
| 0.173738239 | 0.138077905 | 0.193679551 | 0.246914527 |
| 0.147292802 | 0.09917207  | 0.164381178 | 0.136652233 |
| 0.130924914 | 0.110565054 | 0.093452612 | 0.143763136 |
| 0.119220845 | 0.166864585 | 0.116876491 | 0.200384891 |
| 0.106511648 | 0.181156772 | 0.146521738 | 0.18373986  |
| 0.00440296  | 0.177395775 | 0.177841264 | 0.147427547 |
| 0.06724761  | 0.198947934 | 0.074396291 | 0.311496394 |
| 0.162620803 | 0.201508794 | 0.14555696  | 0.233287225 |
| 0.199653913 | 0.146997714 | 0.166928358 | 0.174611937 |
| 0.107224272 | 0.042239124 | 0.097519475 | 0.08907541  |
| 0.176408523 | 0.21722923  | 0.113008468 | 0.194436058 |
| 0.235037693 | 0.176006826 | 0.083753428 | 0.226777064 |
| 0.141513964 | 0.242709046 | 0.112743316 | 0.22291203  |
| 0.20374814  | 0.182280283 | 0.23042709  | 0.153911404 |
| 0.204623323 | 0.095599965 | 0.024988668 | 0.17919385  |
| 0.266648974 | 0.020021779 | 0.148605771 | 0.165720945 |
| 0.156811602 | 0.143764876 | 0.226193486 | 0.183447897 |
| 0.15813256  | 0.15895773  | 0.003832006 | 0.279936176 |
| 0.175965628 | 0.207892454 | 0.171525406 | 0.066622246 |
| 0.160909386 | 0.075176655 | 0.143008471 | 0.032174536 |
| 0.278824469 | 0.166431988 | 0.148897967 | 0.15146498  |
| 0.070951851 | 0.258562522 | 0.073563237 | 0.161485342 |
| 0.113621118 | 0.100000272 | 0.092319608 | 0.245439895 |
| 0.015616945 | 0.318218157 | 0.062116524 | 0.141061707 |
| 0.322029082 | 0.071286202 | 0.043926997 | 0.179836192 |
| 0.095077401 | 0.069317799 | 0.162150663 | 0.124927975 |
| 0.12767624  | 0.228474173 | 0.101429387 | 0.13537141  |

|             |             |             |             |
|-------------|-------------|-------------|-------------|
| 0.256593462 | 0.177715314 | 0.106240613 | 0.18516476  |
| 0.085478583 | 0.158368428 | 0.124630193 | 0.252847996 |
| 0.318461893 | 0.105709335 | 0.279824736 | 0.048580976 |
| 0.053943178 | 0.019867805 | 0.036261921 | 0.076081823 |
| 0.19389589  | 0.090774189 | 0.128439088 | 0.202088224 |
| 0.09534729  | 0.100417468 | 0.065183817 | 0.257042425 |
| 0.138446787 | 0.118532362 | 0.206259557 | 0.064596472 |
| 0.024151023 | 0.12604955  | 0.158112868 | 0.130422421 |
| 0.161540821 | 0.058338152 | 0.037632404 | 0.173424774 |
| 0.040323871 | 0.111551864 | 0.170806088 | 0.204889445 |
| 0.042792642 | 0.149385103 | 0.216988471 | 0.012298885 |
| 0.107895707 | 0.107210547 | 0.317659185 | 0.027401041 |
| 0.207226178 | 0.308793827 | 0.164798709 | 0.122020142 |
| 0.109908118 | 0.188837848 | 0.200720888 | 0.184492402 |
| 0.038390481 | 0.216124835 | 0.164447005 | 0.211167811 |
| 0.17856562  | 0.054603367 | 0.03127652  | 0.150184741 |
| 0.16524029  | 0.028027207 | 0.100744992 | 0.11761928  |
| 0.041603057 | 0.146962357 | 0.13630872  | 0.213477006 |
| 0.253893363 | 0.129694947 | 0.209459238 | 0.251196386 |
| 0.223407124 | 0.18224507  | 0.191648728 | 0.238907544 |
| 0.014911123 | 0.104736536 | 0.076501157 | 0.267816447 |
| 0.215429714 | 0.1011599   | 0.248944628 | 0.035512426 |
| 0.001583413 | 0.123903744 | 0.118653646 | 0.274151368 |
| 0.096677015 | 0.06721413  | 0.156444502 | 0.189217253 |
| 0.233255298 | 0.221724309 | 0.222735782 | 0.084047456 |
| 0.164872457 | 0.098778872 | 0.104566642 | 0.156035399 |
| 0.263524784 | 0.063409304 | 0.129275104 | 0.230309695 |
| 0.068205854 | 0.069362931 | 0.117781663 | 0.010186532 |
| 0.075744393 | 0.083981854 | 0.139647734 | 0.240564789 |
| 0.22676652  | 0.195673787 | 0.162318182 | 0.018266596 |
| 0.264458248 | 0.197114188 | 0.036657234 | 0.167792213 |
| 0.178850122 | 0.179395692 | 0.170014345 | 0.170893737 |
| 0.170985268 | 0.145333311 | 0.182425149 | 0.072970439 |
| 0.113483991 | 0.07622745  | 0.060116955 | 0.163136759 |
| 0.006041488 | 0.248166738 | 0.175765993 | 0.259886483 |
| 0.155668335 | 0.217543756 | 0.092254024 | 0.157157149 |
| 0.034706473 | 0.026674425 | 0.055694665 | 0.201933224 |
| 0.265399734 | 0.048943308 | 0.01850238  | 0.036630235 |
| 0.154880126 | 0.203431076 | 0.044591423 | 0.190644387 |
| 0.187559426 | 0.080884067 | 0.148097853 | 0.215242394 |
| 0.125748165 | 0.010926354 | 0.057302699 | 0.001325145 |
| 0.030195129 | 0.199654749 | 0.055106022 | 0.05407355  |
| 0.211060068 | 0.032313107 | 0.177623873 | 0.209029297 |
| 0.132951883 | 0.196189824 | 0.191926879 | 0.089129881 |
| 0.18211891  | 0.011642682 | 0.180077093 | 0.133688739 |
| 0.0256656   | 0.003788048 | 0.047397759 | 0.164974751 |
| 0.106552673 | 0.073770817 | 0.247423359 | 0.026661425 |
| 0.145406972 | 0.072690046 | 0.150358138 | 0.115428524 |
| 0.104761657 | 0.256111233 | 0.113369727 | 0.154330251 |
| 0.189963345 | 0.280108385 | 0.043465372 | 0.148427913 |
| 0.12457883  | 0.110904339 | 0.146070235 | 0.027905131 |
| 0.228593295 | 0.120844889 | 0.175494383 | 0.171761986 |
| 0.240822405 | 0.183150389 | 0.015662441 | 0.041972741 |
| 0.186372059 | 0.070101314 | 0.026544068 | 0.089089399 |

|             |             |             |             |
|-------------|-------------|-------------|-------------|
| 0.140939145 | 0.142338898 | 0.280606723 | 0.215803984 |
| 0.230902815 | 0.199347693 | 0.116505555 | 0.179417974 |
| 0.037598641 | 0.019862879 | 0.051413588 | 0.266983107 |
| 0.032756896 | 0.087656348 | 0.268738929 | 0.074886736 |
| 0.121740295 | 0.058679213 | 0.068156131 | 0.08446823  |
| 0.23218372  | 0.137902018 | 0.167809735 | 0.215181926 |
| 0.144361464 | 0.10456111  | 0.197397613 | 0.184206085 |
| 0.054098141 | 0.165795172 | 0.187470901 | 0.074814534 |
| 0.053694105 | 0.085746466 | 0.15083499  | 0.228771031 |
| 0.190886346 | 0.174966861 | 0.108140458 | 0.079999088 |
| 0.249135108 | 0.12772302  | 0.204794667 | 0.147669639 |
| 0.196594676 | 0.243956267 | 0.257597794 | 0.179798042 |
| 0.126767687 | 0.206512117 | 0.166431519 | 0.18564339  |
| 0.187538629 | 0.080688986 | 0.169029679 | 0.097164244 |
| 0.226349229 | 0.123648024 | 0.134838649 | 0.212453272 |
| 0.107593231 | 0.297961369 | 0.292204508 | 0.100613557 |
| 0.133118675 | 0.060084413 | 0.124790465 | 0.25647837  |
| 0.203128344 | 0.039707394 | 0.247863878 | 0.085090059 |
| 0.158537977 | 0.011482371 | 0.134816259 | 0.274284429 |
| 0.192586518 | 0.139877019 | 0.028834902 | 0.184562016 |
| 0.126733439 | 0.048751253 | 0.052903262 | 0.111403281 |
| 0.213290637 | 0.100917395 | 0.171328259 | 0.289855491 |
| 0.170247996 | 0.107750091 | 0.067059666 | 0.151020552 |
| 0.259596931 | 0.067335779 | 0.228933181 | 0.173104195 |
| 0.292322127 | 0.235556012 | 0.1435296   | 0.245273649 |
| 0.079438297 | 0.09104199  | 0.06666541  | 0.158604685 |
| 0.071043464 | 0.083734137 | 0.026983993 | 0.15386835  |
| 0.018749353 | 0.048671944 | 0.209785097 | 0.146054397 |
| 0.231772294 | 0.19341754  | 0.236008088 | 0.083289716 |
| 0.002720467 | 0.121740542 | 0.165787143 | 0.067552559 |
| 0.13381038  | 0.200374133 | 0.075210724 | 0.155787451 |
| 0.331897508 | 0.091169139 | 0.138050546 | 0.031920162 |
| 0.024368415 | 0.098605559 | 0.339296587 | 0.178246626 |
| 0.23311549  | 0.089655633 | 0.057206756 | 0.169058393 |
| 0.057776874 | 0.33683781  | 0.273679699 | 0.013749172 |
| 0.029632562 | 0.211267566 | 0.135942879 | 0.071574885 |
| 0.110137182 | 0.192126023 | 0.219349379 | 0.008527656 |
| 0.145361566 | 0.072155958 | 0.271424527 | 0.226659802 |
| 0.234260896 | 0.220667719 | 0.310233497 | 0.111438618 |
| 0.13332468  | 0.192107598 | 0.152250363 | 0.30692913  |
| 0.184621012 | 0.188220669 | 0.141126817 | 0.077634206 |
| 0.120495598 | 0.146227469 | 0.143350075 | 0.124778084 |
| 0.132342819 | 0.153091369 | 0.277644284 | 0.100003949 |
| 0.323275921 | 0.073019286 | 0.320034331 | 0.139631397 |
| 0.278223412 | 0.090210103 | 0.122678279 | 0.127294249 |
| 0.012214088 | 0.037629127 | 0.064198639 | 0.09011461  |
| 0.248646605 | 0.098790042 | 0.061474193 | 0.08070694  |
| 0.096236919 | 0.260119498 | 0.274616483 | 0.227916835 |
| 0.10866185  | 0.081267222 | 0.014302805 | 0.167310859 |
| 0.146632457 | 0.188936995 | 0.193945508 | 0.021347037 |
| 0.20950169  | 0.043005162 | 0.151923129 | 0.163050869 |
| 0.050657893 | 0.278082543 | 0.013159521 | 0.085689661 |
| 0.008751135 | 0.110277879 | 0.25013199  | 0.11807048  |
| 0.032457378 | 0.16884561  | 0.205358992 | 0.026985113 |

|             |             |             |             |
|-------------|-------------|-------------|-------------|
| 0.148167662 | 0.112519322 | 0.108668248 | 0.153654445 |
| 0.219439385 | 0.147298423 | 0.193311945 | 0.090884173 |
| 0.066414808 | 0.111638319 | 0.053472947 | 0.163153507 |
| 0.225773538 | 0.175443322 | 0.144058997 | 0.176056682 |
| 0.109275726 | 0.17807309  | 0.272126913 | 0.1369878   |
| 0.063272783 | 0.180467997 | 0.04268762  | 0.039164635 |
| 0.116322645 | 0.051706569 | 0.000712895 | 0.036604789 |
| 0.29175024  | 0.051796345 | 0.093474777 | 0.197521934 |
| 0.137683509 | 0.306400526 | 0.035991468 | 0.116600701 |
| 0.135674615 | 0.180096091 | 0.077475358 | 0.310624664 |
| 0.22101857  | 0.184467192 | 0.078631996 | 0.012509152 |
| 0.094024244 | 0.071049169 | 0.021529861 | 0.142475599 |
| 0.07970854  | 0.040572095 | 0.088132407 | 0.091862774 |
| 0.205797984 | 0.026509069 | 0.078911515 | 0.128488855 |
| 0.216329073 | 0.183760126 | 1           | 0.19082453  |
| 0.042966603 | 0.253511269 | 0.083412698 | 0.068852898 |
| 0.101139491 | 0.103941103 | 0.231470766 | 0.097361882 |
| 0.11591786  | 0.106413083 | 0.011514316 | 0.240611915 |
| 0.151965123 | 0.085491044 | 0.259471629 | 0.013564577 |
| 0.335260524 | 0.213412181 | 0.094833799 | 0.057367946 |
| 0.07984594  | 0.136627986 | 0.302654563 | 0.162609141 |
| 0.016637725 | 0.092023909 | 0.136215555 | 0.12537123  |
| 0.178469068 | 0.059955652 | 0.289215437 | 0.022066671 |
| 0.149400526 | 0.143768617 | 0.104551684 | 0.117960954 |
| 0.077551163 | 0.142429346 | 0.029339232 | 0.211452593 |
| 0.268660751 | 0.113497509 | 0.19496054  | 0.15615471  |
| 0.091900582 | 0.179988378 | 0.065570417 | 0.199574001 |
| 0.202691024 | 0.308755734 | 0.182772834 | 0.171553754 |
| 0.356435787 | 0.121401448 | 0.072153078 | 0.165498804 |
| 0.136770467 | 0.099804661 | 0.071466548 | 0.191454334 |
| 0.064571779 | 0.284265187 | 0.05389555  | 0.210205275 |
| 0.127191964 | 0.14495685  | 0.057054004 | 0.232348822 |
| 0.23567484  | 0.131644496 | 0.1127298   | 0.288670403 |
| 0.148768776 | 0.078207356 | 0.274300234 | 0.01045196  |
| 0.08881977  | 0.169796086 | 0.27025328  | 0.119720954 |
| 0.206071974 | 0.141802142 | 0.062633533 | 0.011970261 |
| 0.20890458  | 0.050425586 | 0.114098531 | 0.11343616  |
| 0.048948209 | 0.087264876 | 0.192222765 | 0.213401064 |
| 0.190466873 | 0.03402612  | 0.024823035 | 0.179790712 |
| 0.053149335 | 0.027956211 | 0.045845312 | 0.080849142 |
| 0.072322306 | 0.029474883 | 0.046258718 | 0.047879022 |
| 0.163399125 | 0.139619241 |             |             |
| TFDP1       | 0.10037907  | 0.374523269 | 0.06881074  |
| 0.229098379 | 0.344229942 | 0.369188964 | 0.076856591 |
| 0.154510621 | 0.272010469 | 0.203461421 | 0.395432352 |
| 0.035952131 | 0.131772428 | 0.452579915 | 0.074020916 |
| 0.36761716  | 0.064042796 | 0.139245649 | 0.070001805 |
| 0.196494238 | 0.328842985 | 0.37194374  | 0.310914365 |
| 0.304780694 | 0.191005476 | 0.275344699 | 0.314417556 |
| 0.474076553 | 0.27262023  | 0.387571537 | 0.164619328 |
| 0.414600063 | 0.357222844 | 0.346026396 | 0.027633247 |
| 0.362706858 | 0.012385837 | 0.410908204 | 0.316852353 |
| 0.230019253 | 0.348122403 | 0.243115443 | 0.322572711 |
| 0.281191729 | 0.056749854 | 0.163514814 | 0.328793956 |

|             |             |             |             |
|-------------|-------------|-------------|-------------|
| 0.255870572 | 0.263057104 | 0.068462923 | 0.350085457 |
| 0.29189191  | 0.31789089  | 0.290778138 | 0.005325309 |
| 0.329833867 | 0.111905513 | 0.240313959 | 0.476903024 |
| 0.237272995 | 0.178129198 | 0.222512584 | 0.205980142 |
| 0.301888605 | 0.312666975 | 0.250221681 | 0.27649317  |
| 0.490577392 | 0.223139151 | 0.348565487 | 0.21644721  |
| 0.327419906 | 0.033399415 | 0.175446662 | 0.071160628 |
| 0.333035314 | 0.25801222  | 0.368919434 | 0.312766022 |
| 0.375556112 | 0.488514892 | 0.230265496 | 0.452713568 |
| 0.1083665   | 0.333680693 | 0.309335557 | 0.301684813 |
| 0.291005408 | 0.083230567 | 0.395378109 | 0.506885105 |
| 0.048652213 | 0.272218736 | 0.3187488   | 0.113922845 |
| 0.397674868 | 0.240261989 | 0.301620067 | 0.264874007 |
| 0.352350992 | 0.345579651 | 0.425519298 | 0.312716096 |
| 0.317040771 | 0.075858575 | 0.435951433 | 0.336241252 |
| 0.385896509 | 0.098996782 | 0.273870273 | 0.435707247 |
| 0.371273584 | 0.483412324 | 0.365220631 | 0.324094256 |
| 0.364073791 | 0.4903954   | 0.37212615  | 0.38360365  |
| 0.111104882 | 0.493125487 | 0.22455609  | 0.080505281 |
| 0.078651536 | 0.128258579 | 0.208246992 | 0.296133867 |
| 0.463423998 | 0.309160688 | 0.237461442 | 0.28914895  |
| 0.455453188 | 0.428402458 | 0.48212076  | 0.387785895 |
| 0.060901915 | 0.231137707 | 0.369246875 | 0.266855062 |
| 0.337308544 | 0.119962784 | 0.315346438 | 0.473159003 |
| 0.402308241 | 0.422149424 | 0.16968488  | 0.463802921 |
| 0.183415087 | 0.516490599 | 0.416828907 | 0.231083008 |
| 0.493887743 | 0.464446528 | 0.516622888 | 0.383168961 |
| 0.459661686 | 0.351390277 | 0.049581337 | 0.341870099 |
| 0.500206845 | 0.034775935 | 0.449201385 | 0.481507495 |
| 0.466391013 | 0.449104052 | 0.511434257 | 0.496667299 |
| 0.468293185 | 0.083581222 | 0.020764079 | 0.313745759 |
| 0.478425032 | 0.411753261 | 0.167064585 | 0.357663913 |
| 0.346206971 | 0.350530007 | 0.368139945 | 0.356328319 |
| 0.507397282 | 0.441194531 | 0.461877216 | 0.337492324 |
| 0.222727578 | 0.322273402 | 0.330454231 | 0.429717858 |
| 0.074720273 | 0.145453722 | 0.059110708 | 0.262462661 |
| 0.279394654 | 0.22681845  | 0.33751028  | 0.299788074 |
| 0.23683077  | 0.273084244 | 0.31677951  | 0.370649759 |
| 0.051293801 | 0.371295989 | 0.183883166 | 0.176571776 |
| 0.080326238 | 0.142883094 | 0.272345755 | 0.236207305 |
| 0.311798377 | 0.21510584  | 0.356288506 | 0.472376564 |
| 0.296872213 | 0.181237544 | 0.356251959 | 0.482408231 |
| 0.451759682 | 0.381748707 | 0.215199948 | 0.039361484 |
| 0.313141985 | 0.226725561 | 0.21775642  | 0.344198919 |
| 0.167067271 | 0.276634868 | 0.35284023  | 0.390485058 |
| 0.283241732 | 0.127779421 | 0.343357405 | 0.422726847 |
| 0.132646887 | 0.383205676 | 0.458265516 | 0.313861565 |
| 0.007051164 | 0.341877726 | 0.432525419 | 0.192120233 |
| 0.267674733 | 0.218365788 | 0.329011068 | 0.455106235 |
| 0.290225674 | 0.255435352 | 0.476282344 | 0.366704336 |
| 0.325256373 | 0.193596953 | 0.509735578 | 0.056834174 |
| 0.292678564 | 0.129724372 | 0.317498717 | 0.228072142 |
| 0.27182385  | 0.283278259 | 0.340272604 | 0.345317203 |
| 0.13593885  | 0.490648267 | 0.371414906 | 0.502288578 |



|             |             |             |             |
|-------------|-------------|-------------|-------------|
| 0.340777018 | 0.510549259 | 0.454544164 | 0.45347821  |
| 0.336126602 | 0.289580546 | 0.184470604 | 0.428811165 |
| 0.445804033 | 0.255084665 | 0.071505885 | 0.381907582 |
| 0.274754014 | 0.363082603 | 0.169380689 | 0.49901352  |
| 0.482634154 | 0.416304379 | 0.212135977 | 0.362615918 |
| 0.403522599 | 0.277058422 | 0.384809682 | 0.510813521 |
| 0.223355857 | 0.340504601 | 0.353503273 | 0.413972564 |
| 0.20116555  | 0.253448397 | 0.294601062 | 0.204745571 |
| 0.021185143 | 0.08895863  | 0.082298533 | 0.239487703 |
| 0.251731352 | 0.316874799 | 0.352743945 | 0.499458858 |
| 0.162858986 | 0.415689077 | 0.202131221 | 0.360306485 |
| 0.401412888 | 0.315856097 | 0.362328986 | 0.361400397 |
| 0.228663404 | 0.045612822 | 0.205069662 | 0.492618185 |
| 0.038371356 | 0.320301695 | 0.270197299 | 0.009248936 |
| 0.061870496 | 0.335316786 | 0.089950482 | 0.197447741 |
| 0.479442104 | 0.196643924 | 0.211694063 | 0.23166102  |
| 0.35137031  | 0.119932251 | 0.014308216 | 0.451412954 |
| 0.433666787 | 0.403764001 | 0.429107114 | 0.399686816 |
| 0.394094071 | 0.326711999 | 0.386349528 | 0.31447227  |
| 0.140345196 | 0.093780836 | 0.274521434 | 0.328864124 |
| 0.005931863 | 0.380267511 | 0.29738057  | 0.16629344  |
| 0.372289498 | 0.27164032  | 0.06419838  | 0.324083503 |
| 0.048194391 | 0.261083817 | 0.270083835 | 0.232653681 |
| 0.321075425 | 0.023939968 | 0.28860653  | 0.32977359  |
| 0.41282207  | 0.337604172 | 0.332733147 | 0.503819903 |
| 0.37435285  | 0.107152999 | 0.356461704 | 0.37776594  |
| 0.102445516 | 0.091960849 | 0.285124576 | 0.040400124 |
| 0.205408248 | 0.405569511 | 0.322921126 | 0.096583367 |
| 0.305549037 | 0.012035412 | 0.364438853 | 0.511361953 |
| 0.42262709  | 0.508660001 | 0.498442835 | 0.345472886 |
| 0.492786039 | 0.113041435 | 0.505892244 | 0.370011776 |
| 0.29275123  | 0.003171354 | 0.013463967 | 0.479139481 |
| 0.38456734  | 0.05130262  | 0.189555084 | 0.362773267 |
| 0.183835626 | 0.151615342 | 0.088625205 | 0.26686359  |
| 0.369793009 | 0.307936706 | 0.23642772  | 0.428383658 |
| 0.276782554 | 0.255524905 | 0.30132198  | 0.086055383 |
| 0.371955978 | 0.092143341 | 0.081151864 | 0.024267291 |
| 0.338959104 | 0.105015252 | 0.420229609 | 0.480539913 |
| 0.49588168  | 0.375004495 | 0.256166071 | 0.327613708 |
| 0.397163636 | 0.088683315 | 0.319105287 | 0.105693341 |
| 0.454523932 | 0.379193785 | 0.338835394 | 0.319248046 |
| 0.504266783 | 0.464994487 | 0.052903697 | 0.386544486 |
| 0.037074976 | 0.004612889 | 0.329726153 | 0.242393116 |
| 0.043941046 | 0.346910292 | 0.256491198 | 0.184786791 |
| 0.214074298 | 0.058730444 | 0.287696837 | 0.286334608 |
| 0.317668818 | 0.355366456 | 0.331586598 | 0.200373009 |
| 0.289080702 | 0.189348414 | 0.247622725 | 0.181707322 |
| 0.190777286 | 0.288546862 | 0.197928335 | 0.032202317 |
| 0.344220646 | 0.384880956 | 0.086312276 | 0.169921928 |
| 0.454815169 | 0.491490007 | 0.066880948 | 0.037869745 |
| 0.260476646 | 0.299241517 | 0.502273686 | 0.465288027 |
| 0.4932827   | 0.514197205 | 0.387391403 | 0.183374326 |
| 0.098907513 | 0.321703557 | 0.325600955 | 0.164012808 |
| 0.494537521 | 0.063364517 | 0.452518725 | 0.316840349 |

|             |             |             |             |
|-------------|-------------|-------------|-------------|
| 0.127753468 | 0.259421455 | 0.077720887 | 0.106577966 |
| 0.366511502 | 0.20434624  | 0.249115439 | 0.15026373  |
| 0.349081438 | 0.306995448 | 0.065545459 | 0.234021022 |
| 0.322454331 | 0.232500906 | 0.186477244 | 0.259767793 |
| 0.308329551 | 0.132439655 | 0.373929014 | 0.456178075 |
| 0.14391092  | 0.11355562  | 0.285983893 | 0.31807308  |
| 0.408351967 | 0.286882095 | 0.066141814 | 0.400203925 |
| 0.479766735 | 0.382681716 | 0.46998831  | 0.397873222 |
| 0.089365067 | 0.402419694 | 0.273710798 | 0.336956373 |
| 0.198028644 | 0.357702821 | 0.243190293 | 0.078735736 |
| 0.280587823 | 0.442726411 | 0.386862529 | 0.243319362 |
| 0.337980103 | 0.111734447 | 0.054106772 | 0.406728469 |
| 0.253794566 | 0.135901885 | 0.260792218 | 0.385562279 |
| 0.006332835 | 0.19958293  | 0.461705273 | 0.303842848 |
| 0.482881797 | 0.480155981 | 0.449766627 | 0.227963062 |
| 0.002910615 | 0.349531226 | 0.397427609 | 0.400856015 |
| 0.403409241 | 0.319079976 | 0.135676255 | 0.133012797 |
| 0.297626115 | 0.081821181 | 0.199170272 | 0.318568058 |
| 0.18328842  | 0.335461273 | 0.211753897 | 0.187665748 |
| 0.246885868 | 0.072453755 | 0.2986431   | 0.283399763 |
| 0.1428158   | 0.25537747  | 0.362116053 | 0.198093355 |
| 0.267691895 | 0.410393926 | 0.364023662 | 0.04381068  |
| 0.336765383 | 0.373287414 | 0.41321802  | 0.006415515 |
| 0.390940238 | 0.018745422 | 0.265339128 | 0.306331122 |
| 0.263250045 | 0.249264364 | 0.293252324 | 0.347369114 |
| 0.297095727 | 0.252008412 | 0.351583328 | 0.281817615 |
| 0.250049626 | 0.229483188 | 0.35822181  | 0.301936958 |
| 0.377349591 | 0.17351322  | 0.095140039 | 0.098107142 |
| 0.108840961 | 0.429750947 | 0.254266261 | 0.074001    |
| 0.25281905  | 0.299474929 | 0.373407384 | 0.449382113 |
| 0.428016363 | 0.101770052 | 0.299319265 | 0.424813917 |
| 0.17939394  | 0.290501421 | 0.074181658 | 0.331206801 |
| 0.269539152 | 0.316045275 | 0.312653603 | 0.274621232 |
| 0.307930085 | 0.405151919 | 0.246194137 | 0.424329845 |
| 0.372851395 | 0.263359361 | 0.238739038 | 0.166146277 |
| 0.224281112 | 0.126791987 | 0.323949262 | 0.006335449 |
| 0.343770492 | 0.281085196 | 0.465912951 | 0.457586856 |
| 0.290841874 | 0.387377114 | 0.269046866 | 0.133825515 |
| 0.208756813 | 0.167060206 | 0.156697901 | 0.363081746 |
| 0.260993986 | 0.230027204 | 0.342536437 | 0.293341233 |
| 0.381224692 | 0.326978305 | 0.259416774 | 0.237283466 |
| 0.228830342 | 0.189784804 | 0.422670825 | 0.128095325 |
| 0.340050582 | 0.289402948 | 0.249822804 | 0.3515735   |
| 0.273051207 | 0.486804769 | 0.075055447 | 0.502593409 |
| 0.337966485 | 0.120132052 | 0.481918436 | 0.267970055 |
| 0.277750064 | 0.199668334 | 0.238955441 | 0.287469071 |
| 0.237573725 | 0.334324632 | 0.014871203 | 0.097045919 |
| 0.340519276 | 0.220667122 | 0.328731331 | 0.299436569 |
| 0.287946086 | 0.33092739  | 0.193019267 | 0.261354664 |
| 0.428970862 | 0.44933384  | 0.334642197 | 0.238973164 |
| 0.310177908 | 0.157897747 | 0.329117403 | 0.01297295  |
| 0.363784041 | 0.34496393  | 0.301481246 | 0.080116123 |
| 0.032864742 | 0.261085936 | 0.34590586  | 0.058014496 |
| 0.476181695 | 0.260354618 | 0.251161259 | 0.368988757 |

|             |             |             |             |
|-------------|-------------|-------------|-------------|
| 0.156466461 | 0.45616134  | 0.19082453  | 1           |
| 0.040383283 | 0.24451716  | 0.322549521 | 0.286212122 |
| 0.345185111 | 0.330142542 | 0.375282654 | 0.317316132 |
| 0.061712427 | 0.326250233 | 0.003557688 | 0.401482858 |
| 0.416873911 | 0.321689887 | 0.19522414  | 0.20478876  |
| 0.300098896 | 0.342915687 | 0.264368716 | 0.330731941 |
| 0.032898621 | 0.38399199  | 0.226537416 | 0.409249939 |
| 0.273960632 | 0.283270684 | 0.112930267 | 0.293054507 |
| 0.409878007 | 0.314778978 | 0.233453179 | 0.301696664 |
| 0.451522547 | 0.328168032 | 0.137333743 | 0.255927877 |
| 0.272988292 | 0.069654254 | 0.295299493 | 0.500818954 |
| 0.249601015 | 0.301172554 | 0.454132943 | 0.275778745 |
| 0.315526495 | 0.356620657 | 0.30083974  | 0.476929155 |
| 0.138091032 | 0.274335406 | 0.388937011 | 0.428351149 |
| 0.310489193 | 0.226536002 | 0.315977555 | 0.295768635 |
| 0.425915594 | 0.169407468 | 0.270560567 | 0.327091773 |
| 0.284301538 | 0.306119266 | 0.230349881 | 0.259020144 |
| 0.079066985 | 0.185351878 | 0.379034936 | 0.155876095 |
| 0.317254237 | 0.359636784 | 0.280847074 | 0.403746032 |
| 0.247971514 | 0.072280844 | 0.45289098  | 0.038900884 |
| 0.31183483  | 0.398675679 | 0.263829426 | 0.351995403 |
| 0.191237463 | 0.301175853 | 0.279078278 | 0.003259608 |
| 0.389333158 | 0.076707133 | 0.276515542 | 0.32618484  |
| 0.287538405 | 0.07109876  | 0.439599265 | 0.511313569 |
| 0.283288143 | 0.273718906 | 0.330781588 | 0.432378703 |
| 0.219995391 | 0.27757676  | 0.293475765 | 0.321562774 |
| 0.280415949 | 0.289850829 | 0.328699811 | 0.366438009 |
| 0.329922491 | 0.259138846 |             |             |
| TFDP2       | 0.078938871 | 0.102960882 | 0.070358879 |
| 0.006349028 | 0.02942738  | 0.013762127 | 0.13199046  |
| 0.082190037 | 0.144124911 | 0.018017243 | 0.024720641 |
| 0.043430065 | 0.000879971 | 0.092796277 | 0.123704176 |
| 0.031695488 | 0.067182569 | 0.148645009 | 0.016895327 |
| 0.022415073 | 0.03387428  | 0.004598561 | 0.037087946 |
| 0.040650418 | 0.20790962  | 0.082700369 | 0.026384879 |
| 0.084340267 | 0.000872319 | 0.02737996  | 0.001578634 |
| 0.158169761 | 0.027100315 | 0.010778386 | 0.038450592 |
| 0.03064377  | 0.01411588  | 0.199183224 | 0.035933682 |
| 0.000972043 | 0.161683342 | 0.022776858 | 0.029359755 |
| 0.037216067 | 0.064327153 | 0.001159216 | 0.052244003 |
| 0.102588908 | 0.049659202 | 0.135865667 | 0.046736918 |
| 0.032813393 | 0.069831504 | 0.058418331 | 0.002474548 |
| 0.006016081 | 0.000246683 | 0.003755872 | 0.10903667  |
| 0.115328265 | 0.092691667 | 0.005696248 | 0.102443811 |
| 0.060212694 | 0.081446885 | 0.138718364 | 0.027148704 |
| 0.096427544 | 0.003883726 | 0.045789276 | 0.005332851 |
| 0.039946018 | 0.184292341 | 0.194524864 | 0.275808228 |
| 0.018336836 | 0.072842535 | 0.025782319 | 0.013124463 |
| 0.097774742 | 0.164274537 | 0.158819981 | 0.141578367 |
| 0.010568778 | 0.02765959  | 0.016807677 | 0.111330853 |
| 0.120369134 | 0.18087371  | 0.045202352 | 0.130088147 |
| 0.203902523 | 0.043464132 | 0.086072819 | 0.23230241  |
| 0.07698636  | 0.012942535 | 0.022124172 | 0.00299886  |
| 0.039504518 | 0.033443614 | 0.177057373 | 0.088617159 |

|             |             |             |             |
|-------------|-------------|-------------|-------------|
| 0.029523764 | 0.185268915 | 0.154875898 | 0.020632608 |
| 0.013013188 | 0.124899522 | 0.020056987 | 0.0573434   |
| 0.042265916 | 0.078109925 | 0.09047324  | 0.128301532 |
| 0.025766308 | 0.090582045 | 0.049271901 | 0.111352813 |
| 0.001215081 | 0.111004874 | 0.079270781 | 0.050776106 |
| 0.106988323 | 0.079750573 | 0.040683664 | 0.153979091 |
| 0.062047503 | 0.087827162 | 0.073558899 | 0.061411714 |
| 0.075108983 | 0.132234393 | 0.118072586 | 0.089147456 |
| 0.101745648 | 0.012196582 | 0.023299213 | 0.035177808 |
| 0.076280051 | 0.237691679 | 0.011784375 | 0.154724086 |
| 0.101951437 | 0.059769366 | 0.082414308 | 0.187417472 |
| 0.149001045 | 0.113900647 | 0.069840448 | 0.078117038 |
| 0.135825339 | 0.136063117 | 0.098176948 | 0.027572419 |
| 0.121046359 | 0.030181186 | 0.021079912 | 0.128467703 |
| 0.105989852 | 0.000218287 | 0.070901609 | 0.077210945 |
| 0.109900176 | 0.051058393 | 0.108756151 | 0.081812176 |
| 0.108558736 | 0.218078292 | 0.005412525 | 0.076033466 |
| 0.127746416 | 0.083966652 | 0.062702956 | 0.020988791 |
| 0.040207311 | 0.028891446 | 0.063523483 | 0.001697317 |
| 0.146172051 | 0.071404358 | 0.075864469 | 0.094326727 |
| 0.123889809 | 0.165863785 | 0.018858147 | 0.141061496 |
| 0.046893277 | 0.069270227 | 0.156939414 | 0.160427448 |
| 0.007900302 | 0.1075355   | 0.031601064 | 0.06621819  |
| 0.120308566 | 0.054297771 | 0.00708646  | 0.03544554  |
| 0.261267777 | 0.021737671 | 0.11124918  | 0.148715872 |
| 0.06143588  | 0.268169843 | 0.011442409 | 0.018582788 |
| 0.048777689 | 0.300378441 | 0.039011841 | 0.0910019   |
| 0.04303106  | 0.14637905  | 0.053228789 | 0.109046848 |
| 0.127531927 | 0.017945596 | 0.198976482 | 0.002510718 |
| 0.008709229 | 0.014163427 | 0.004228537 | 0.022351328 |
| 0.291194185 | 0.031844578 | 0.049362685 | 0.037018162 |
| 0.054548562 | 0.157000781 | 0.019877568 | 0.160675457 |
| 0.228805179 | 0.012551712 | 0.072143214 | 0.044378682 |
| 0.012482912 | 0.049566376 | 0.053829156 | 0.015382508 |
| 0.14203234  | 0.001279127 | 0.001362911 | 0.080561075 |
| 0.006490247 | 0.022571877 | 0.073336206 | 0.044229054 |
| 0.004277376 | 0.274760855 | 0.109788846 | 0.0016711   |
| 0.043762652 | 0.004077878 | 0.082577759 | 0.03259803  |
| 0.100208537 | 0.138788066 | 0.02399297  | 0.015162616 |
| 0.118036358 | 0.1172786   | 0.091769506 | 0.084714937 |
| 0.012576403 | 0.116490643 | 0.056878302 | 0.076139081 |
| 0.067059358 | 0.027979994 | 0.001284765 | 0.055794224 |
| 0.072310119 | 0.0099299   | 0.208253016 | 0.05626544  |
| 0.039475771 | 0.04288307  | 0.011947467 | 0.096144817 |
| 0.150081215 | 0.125059023 | 0.051105638 | 0.071316188 |
| 0.072340009 | 0.062362001 | 0.084240834 | 0.124613506 |
| 0.019796942 | 0.031118281 | 0.016534345 | 0.077598734 |
| 0.134312585 | 0.021933499 | 0.191513587 | 0.003247394 |
| 0.001178201 | 0.169397636 | 0.144697511 | 0.053885039 |
| 0.006263172 | 0.032266383 | 0.053867725 | 0.103159511 |
| 0.11082731  | 0.098219813 | 0.229809797 | 0.015357093 |
| 0.125563851 | 0.03288603  | 0.016784982 | 0.035711965 |
| 0.179362364 | 0.005332046 | 0.008056723 | 0.166176275 |
| 0.221835974 | 0.004874541 | 0.079601935 | 0.000455471 |

|             |             |             |             |
|-------------|-------------|-------------|-------------|
| 0.108281489 | 0.072779426 | 0.290017239 | 0.261344242 |
| 0.079977926 | 0.23475435  | 0.147533607 | 0.030574918 |
| 0.063100528 | 0.145494299 | 0.000703554 | 0.106530483 |
| 0.139581861 | 0.15094185  | 0.14093303  | 0.163643322 |
| 0.1267916   | 0.077643646 | 0.069914787 | 0.035010523 |
| 0.078872996 | 0.132971667 | 0.007386826 | 0.04570155  |
| 0.004427382 | 0.063691586 | 0.051596078 | 0.173275986 |
| 0.051545925 | 0.143532485 | 0.060395295 | 0.041382617 |
| 0.007753911 | 0.001574715 | 0.040394615 | 0.090220422 |
| 0.081859697 | 0.05786297  | 0.001192276 | 0.006637563 |
| 0.107467823 | 0.12330113  | 0.008973343 | 0.113547633 |
| 0.035441252 | 0.210113392 | 0.028805149 | 0.047287235 |
| 0.108063517 | 0.009213504 | 0.044239829 | 0.000187759 |
| 0.002609795 | 0.160308415 | 0.019991807 | 0.026319608 |
| 0.076185343 | 0.016631347 | 0.105502386 | 0.114385987 |
| 0.109190554 | 0.092160648 | 0.088008179 | 0.006318072 |
| 0.099573761 | 0.000734877 | 0.095228159 | 0.092132326 |
| 0.016393417 | 0.000574118 | 0.005094513 | 0.067564448 |
| 0.024705512 | 0.21009562  | 0.143873817 | 0.003480726 |
| 0.029885913 | 0.093847339 | 0.111305234 | 0.010423956 |
| 0.029208041 | 0.036025412 | 0.011747437 | 0.132461932 |
| 0.076459277 | 0.103306461 | 0.030441508 | 0.255661845 |
| 0.025929111 | 0.048390118 | 0.303003313 | 0.000794636 |
| 0.065677268 | 0.235351238 | 0.178050331 | 0.102301082 |
| 0.118366919 | 0.040776857 | 0.009362796 | 0.003528123 |
| 0.099456815 | 0.150621601 | 0.003897812 | 0.15194196  |
| 0.095554021 | 0.037393257 | 0.088143287 | 0.113895941 |
| 0.108488137 | 0.11129927  | 0.111472465 | 0.069652498 |
| 0.003676689 | 0.001026136 | 0.027018378 | 0.168021672 |
| 0.021282091 | 0.025724593 | 0.147184037 | 0.102257011 |
| 0.066687633 | 0.013957319 | 0.010146807 | 0.012180854 |
| 0.079227155 | 0.041132198 | 0.02037399  | 0.232306454 |
| 0.034534202 | 0.011031836 | 0.048873215 | 0.092345029 |
| 0.017447664 | 0.163740138 | 0.200772223 | 0.109858396 |
| 0.022081302 | 0.018917046 | 0.111468855 | 0.168594867 |
| 0.062095818 | 0.070375472 | 0.043182748 | 0.005853977 |
| 0.155710996 | 0.051298618 | 0.078497761 | 0.092943291 |
| 0.134739614 | 0.125009292 | 0.173126763 | 0.044176552 |
| 0.083242347 | 0.06437537  | 0.025811676 | 0.022595827 |
| 0.094966461 | 0.216967741 | 0.105760746 | 0.013014035 |
| 0.232694142 | 0.050300214 | 0.018824383 | 0.189209326 |
| 0.01816547  | 0.143770789 | 0.062423769 | 0.127624593 |
| 0.03141145  | 0.003877393 | 0.147673317 | 0.113921756 |
| 0.114063019 | 0.00211072  | 0.16659284  | 0.053167075 |
| 0.107868279 | 0.014186715 | 0.04473126  | 0.140704784 |
| 0.163895159 | 0.233258384 | 0.016230122 | 0.088173117 |
| 0.060597346 | 0.031272559 | 0.003276177 | 0.092437471 |
| 0.093249644 | 0.028001945 | 0.109042093 | 0.115985116 |
| 0.256274764 | 0.015324926 | 0.02487542  | 0.050173873 |
| 0.17541953  | 0.018308336 | 0.110747626 | 0.202145161 |
| 0.208351138 | 0.18670727  | 0.106494503 | 0.052796193 |
| 0.028934744 | 0.180282597 | 0.219648877 | 0.080953115 |
| 0.006433333 | 0.024901848 | 0.021517565 | 0.071669737 |
| 0.000701343 | 0.002446319 | 0.111187203 | 0.024515838 |

|             |             |             |             |
|-------------|-------------|-------------|-------------|
| 0.15043997  | 0.083516453 | 0.115259591 | 0.051642193 |
| 0.000814144 | 0.039846634 | 0.032509212 | 0.013730481 |
| 0.088289527 | 0.096333393 | 0.020173098 | 0.047495403 |
| 0.137098491 | 0.156465536 | 0.039934421 | 0.003437944 |
| 0.002983746 | 0.052736663 | 0.182013319 | 0.204738245 |
| 0.066514097 | 0.310248145 | 0.002531795 | 0.048848776 |
| 0.010453774 | 0.141468905 | 0.099390803 | 0.015253543 |
| 0.001384933 | 0.118809766 | 0.087859021 | 0.062758295 |
| 0.02066328  | 0.11482639  | 0.103661245 | 0.00468895  |
| 0.036351639 | 0.020389375 | 0.05414206  | 0.033715106 |
| 0.049140373 | 0.073974599 | 0.075909556 | 0.018178076 |
| 0.100312702 | 0.088622448 | 0.0256928   | 0.085784686 |
| 0.029749352 | 0.101242638 | 0.039414337 | 0.053385605 |
| 0.011435411 | 0.064485955 | 0.267656782 | 0.274086312 |
| 0.012125592 | 0.079747505 | 0.173185519 | 0.173470508 |
| 0.114299444 | 0.0495138   | 0.134223854 | 0.1071013   |
| 0.102799854 | 0.198881005 | 0.057149014 | 0.066360427 |
| 0.003543437 | 0.005614    | 0.0919559   | 0.040736971 |
| 0.080114674 | 0.006101861 | 0.030166828 | 0.074034815 |
| 0.078916333 | 0.156012064 | 0.160105963 | 0.120232445 |
| 0.023756726 | 0.075382006 | 0.012603841 | 0.021956895 |
| 0.074730789 | 0.254346576 | 0.024479271 | 0.005286604 |
| 0.065601832 | 0.011240929 | 0.058159215 | 0.118947607 |
| 0.007644128 | 0.123198269 | 0.003173939 | 0.054743516 |
| 0.005010628 | 0.218068282 | 0.195331102 | 0.056095439 |
| 0.002484549 | 0.050542954 | 0.037178174 | 0.013397905 |
| 0.051814409 | 0.066827013 | 0.031795667 | 0.094900586 |
| 0.138659159 | 0.141499409 | 0.182852582 | 0.10493905  |
| 0.028417184 | 0.008294927 | 0.060404823 | 0.031844668 |
| 0.058889964 | 0.094851968 | 0.157382994 | 0.089710702 |
| 0.031719808 | 0.24152837  | 0.154988897 | 0.065881144 |
| 0.022255923 | 0.011099189 | 0.003123774 | 0.028891047 |
| 0.059450749 | 0.007340688 | 0.000312552 | 0.003015134 |
| 0.076150635 | 0.057907335 | 0.086606228 | 0.110591914 |
| 0.021577865 | 0.12017616  | 0.001226015 | 0.093846596 |
| 0.122419236 | 0.156350042 | 0.010702832 | 0.193861518 |
| 0.109468866 | 0.062242697 | 0.036990821 | 0.006743492 |
| 0.032861859 | 0.023317847 | 0.010612121 | 0.095831505 |
| 0.032957933 | 0.003946233 | 0.044074204 | 0.300993912 |
| 0.08320551  | 0.000741044 | 0.094180142 | 0.037904639 |
| 0.251085063 | 0.158717057 | 0.042966603 | 0.040383283 |
| 1           | 0.150129039 | 0.023117469 | 0.044629445 |
| 0.008417859 | 0.014655793 | 0.060690933 | 0.006561847 |
| 0.067727316 | 0.01137575  | 0.016145718 | 0.172266026 |
| 0.163165864 | 0.022219045 | 0.237981484 | 0.012378182 |
| 0.095184984 | 0.131584234 | 0.012952047 | 0.019649184 |
| 0.006884221 | 0.021487534 | 0.116300436 | 0.070328102 |
| 0.001194519 | 0.082832067 | 0.014495355 | 0.040021829 |
| 0.185442032 | 0.008612676 | 0.226892101 | 0.004859783 |
| 0.101710792 | 0.106600866 | 0.173427214 | 0.01297599  |
| 0.073702612 | 0.226603071 | 0.014683693 | 0.124062982 |
| 0.05425676  | 0.008276088 | 0.055153421 | 0.044833152 |
| 0.015704933 | 0.115490305 | 0.040122468 | 0.135082166 |
| 0.033884865 | 0.110262586 | 0.061601333 | 0.117276648 |

|             |             |             |             |
|-------------|-------------|-------------|-------------|
| 0.112801519 | 0.016572954 | 0.006350802 | 0.030999407 |
| 0.103449988 | 0.008264726 | 0.014335393 | 0.09137102  |
| 0.006173435 | 0.08943502  | 0.074811045 | 0.033242176 |
| 0.012426302 | 0.073937306 | 0.008978879 | 0.1846692   |
| 0.077617702 | 0.033043488 | 0.023314035 | 0.134049048 |
| 0.007412918 | 0.005331781 | 0.140638941 | 0.000294499 |
| 0.037146028 | 0.029092918 | 0.089929602 | 0.025977491 |
| 0.159110561 | 0.092694039 | 0.066103562 | 0.005153259 |
| 0.081688122 | 0.001495579 | 0.04069136  | 0.012089856 |
| 0.004317075 | 0.099696323 | 0.10921088  | 0.088274802 |
| 0.096186916 | 0.00437099  | 0.002968666 | 0.11437506  |
| 0.001290458 | 0.007648477 | 0.015546671 | 0.050955604 |
| 0.005694672 | 0.019239362 | 0.016902745 | 0.007181167 |
| 0.074515324 | 0.060813379 |             |             |
| TFG         | 0.160573579 | 0.292133864 | 0.110481553 |
| 0.161308427 | 0.209021012 | 0.182265633 | 0.197245353 |
| 0.239344032 | 0.267458249 | 0.113550073 | 0.208614338 |
| 0.098933216 | 0.063349674 | 0.327656918 | 0.20512615  |
| 0.191157866 | 0.169381537 | 0.23267077  | 0.103616236 |
| 0.219680629 | 0.207680388 | 0.154445716 | 0.176407116 |
| 0.223731453 | 0.266609447 | 0.202383226 | 0.165948669 |
| 0.329767258 | 0.077561704 | 0.202134226 | 0.06982693  |
| 0.36988558  | 0.192778408 | 0.144020336 | 0.088661803 |
| 0.199617178 | 0.038016315 | 0.390079908 | 0.227988553 |
| 0.105313893 | 0.348967096 | 0.127133302 | 0.231224068 |
| 0.152273286 | 0.114546958 | 0.059535226 | 0.202658312 |
| 0.212010619 | 0.265191942 | 0.128449568 | 0.227019286 |
| 0.191112975 | 0.243106715 | 0.192113513 | 0.006092932 |
| 0.125020185 | 0.031887458 | 0.088519944 | 0.363588365 |
| 0.247490149 | 0.255048327 | 0.104579156 | 0.246145674 |
| 0.19088432  | 0.24334435  | 0.286406304 | 0.148701114 |
| 0.350016195 | 0.105380876 | 0.22131832  | 0.159188971 |
| 0.202824407 | 0.131917138 | 0.25993187  | 0.166069792 |
| 0.185052705 | 0.269768614 | 0.21278023  | 0.166227468 |
| 0.272647297 | 0.423886763 | 0.271915305 | 0.365115921 |
| 0.114622309 | 0.181742848 | 0.213135678 | 0.295865632 |
| 0.263853193 | 0.225187931 | 0.247028667 | 0.395689071 |
| 0.166385005 | 0.148146493 | 0.23337175  | 0.184166493 |
| 0.292280612 | 0.155831202 | 0.137956913 | 0.110431333 |
| 0.217055682 | 0.189104323 | 0.388973963 | 0.251760558 |
| 0.218212196 | 0.146657878 | 0.370737837 | 0.16849607  |
| 0.193941585 | 0.164310582 | 0.194602375 | 0.277297821 |
| 0.201728544 | 0.326651953 | 0.263748882 | 0.287115935 |
| 0.174630228 | 0.347599903 | 0.235712063 | 0.323083789 |
| 0.046689262 | 0.369076009 | 0.229667701 | 0.172456415 |
| 0.143512863 | 0.249755183 | 0.212786058 | 0.343521978 |
| 0.305034433 | 0.251846296 | 0.228369049 | 0.252126095 |
| 0.31758552  | 0.346346988 | 0.36268563  | 0.28601769  |
| 0.149866037 | 0.145242352 | 0.174292159 | 0.236890729 |
| 0.238602801 | 0.242523065 | 0.151836503 | 0.392847481 |
| 0.32809559  | 0.282016436 | 0.208813669 | 0.42619675  |
| 0.259895002 | 0.397719296 | 0.276100892 | 0.236459899 |
| 0.395453285 | 0.376512676 | 0.378435754 | 0.207611558 |
| 0.374539632 | 0.197266895 | 0.076735693 | 0.302193753 |

|             |             |              |             |
|-------------|-------------|--------------|-------------|
| 0.389322757 | 0.018113477 | 0.299396401  | 0.324281308 |
| 0.34532183  | 0.271161413 | 0.385934261  | 0.346942514 |
| 0.346161178 | 0.189788758 | 0.018569111  | 0.244204918 |
| 0.369060485 | 0.310176688 | 0.28098041   | 0.156907261 |
| 0.201802875 | 0.193877901 | 0.263685869  | 0.117627193 |
| 0.428267504 | 0.311223598 | 0.313244172  | 0.258971025 |
| 0.197031728 | 0.338704195 | 0.150993592  | 0.357909771 |
| 0.182670696 | 0.169678535 | 0.119723424  | 0.304954757 |
| 0.131382683 | 0.269362086 | 0.187370594  | 0.21429427  |
| 0.265802656 | 0.205598888 | 0.12878538   | 0.215163454 |
| 0.140156975 | 0.163562054 | 0.244998663  | 0.206297087 |
| 0.173628582 | 0.264409993 | 0.185858278  | 0.220108405 |
| 0.244912742 | 0.30931869  | 0.210417641  | 0.345861738 |
| 0.207379671 | 0.216173772 | 0.224850939  | 0.382842506 |
| 0.389690251 | 0.174048005 | 0.292752085  | 0.04818826  |
| 0.150995282 | 0.11822059  | 0.095465805  | 0.166697006 |
| 0.288781852 | 0.206889247 | 0.196619489  | 0.242417538 |
| 0.187697816 | 0.214403904 | 0.176357532  | 0.395191542 |
| 0.207409504 | 0.1942726   | 0.309296845  | 0.172395419 |
| 0.037069768 | 0.211354599 | 0.274414936  | 0.208474555 |
| 0.237901537 | 0.086454032 | 0.102558867  | 0.314307204 |
| 0.131846941 | 0.182849855 | 0.327501554  | 0.251909768 |
| 0.155165307 | 0.279340924 | 0.383670408  | 0.028109218 |
| 0.199959841 | 0.107753916 | 0.26606776   | 0.134806174 |
| 0.248750911 | 0.299189893 | 0.187254054  | 0.20776699  |
| 0.156288866 | 0.37125099  | 0.310692828  | 0.346746925 |
| 0.149557692 | 0.387599346 | 0.284579353  | 0.319217346 |
| 0.246851422 | 0.154101715 | 0.066750124  | 0.266516899 |
| 0.303616485 | 0.138430012 | 0.144067273  | 0.243868813 |
| 0.157607265 | 0.214092962 | 0.218377343  | 0.357917648 |
| 0.420582651 | 0.325959268 | 0.248827003  | 0.285963114 |
| 0.292934778 | 0.224854401 | 0.311495233  | 0.403790708 |
| 0.124870142 | 0.178797564 | 0.174383276  | 0.324042843 |
| 0.231439079 | 0.190954334 | 0.347099573  | 0.093345691 |
| 0.003644253 | 0.17753921  | 0.152403745  | 0.250435148 |
| 0.136762428 | 0.163786875 | 0.231960689  | 0.360970392 |
| 0.233593712 | 0.342677766 | 0.281356958  | 0.178801677 |
| 0.316609643 | 0.192157868 | 0.17117789   | 0.204456736 |
| 0.299874406 | 0.07814942  | 0.176593984  | 0.421058132 |
| 0.109326695 | 0.132836814 | 0.234075868  | 0.008732381 |
| 0.143969336 | 0.233429557 | 0.199259464  | 0.305660349 |
| 0.346984479 | 0.285880792 | 0.2111110936 | 0.130044043 |
| 0.26776771  | 0.217682442 | 0.022247811  | 0.342080997 |
| 0.367287701 | 0.359466668 | 0.360565931  | 0.366956099 |
| 0.328071997 | 0.264855617 | 0.276913944  | 0.179955666 |
| 0.231732012 | 0.178961691 | 0.131925225  | 0.225556775 |
| 0.012627437 | 0.297205258 | 0.242953193  | 0.229515191 |
| 0.244089639 | 0.263790992 | 0.139622301  | 0.20647491  |
| 0.064430168 | 0.07596043  | 0.212891389  | 0.281308422 |
| 0.285621965 | 0.088779945 | 0.096021175  | 0.138617149 |
| 0.319370605 | 0.301609515 | 0.146337428  | 0.380226009 |
| 0.220931049 | 0.16184809  | 0.21715818   | 0.262839371 |
| 0.210065429 | 0.056342781 | 0.199929596  | 0.011164779 |
| 0.113638482 | 0.377683164 | 0.181919981  | 0.15555764  |



|             |             |                      |             |
|-------------|-------------|----------------------|-------------|
| 0.237260002 | 0.041714271 | 0.298267846          | 0.386829159 |
| 0.322439401 | 0.355578049 | 0.352217 0.136755497 |             |
| 0.354818437 | 0.040645022 | 0.359653999          | 0.274322142 |
| 0.129529312 | 0.002779024 | 0.036773297          | 0.314180078 |
| 0.179360599 | 0.124958292 | 0.244416478          | 0.142124813 |
| 0.221212239 | 0.17871485  | 0.207799849          | 0.175934625 |
| 0.190411458 | 0.22958593  | 0.170925291          | 0.339752804 |
| 0.255284292 | 0.279227428 | 0.171047138          | 0.178259834 |
| 0.195026542 | 0.174091602 | 0.186015646          | 0.022106841 |
| 0.26105216  | 0.191316116 | 0.378951161          | 0.352212238 |
| 0.389205307 | 0.235480801 | 0.105272837          | 0.158053767 |
| 0.324751167 | 0.131169972 | 0.14311311           | 0.150850639 |
| 0.322520367 | 0.194347194 | 0.291418842          | 0.289531309 |
| 0.374742841 | 0.354706114 | 0.152954486          | 0.270081575 |
| 0.050461736 | 0.011680466 | 0.161907558          | 0.281834647 |
| 0.108567402 | 0.1755368   | 0.291692864          | 0.243376675 |
| 0.270460118 | 0.098416354 | 0.139400124          | 0.143231749 |
| 0.248226479 | 0.214823053 | 0.181365424          | 0.289879485 |
| 0.236677607 | 0.173818455 | 0.275028426          | 0.275294916 |
| 0.192328786 | 0.291847305 | 0.259669721          | 0.130661934 |
| 0.162814812 | 0.166909363 | 0.174884764          | 0.231897629 |
| 0.301271894 | 0.319647503 | 0.17625568           | 0.059507979 |
| 0.292364702 | 0.225897269 | 0.341968161          | 0.331308647 |
| 0.391164541 | 0.400922237 | 0.384739743          | 0.23613749  |
| 0.184679989 | 0.245865888 | 0.191503155          | 0.234351034 |
| 0.354311933 | 0.129707658 | 0.3503986            | 0.149246514 |
| 0.234295043 | 0.24737206  | 0.142896065          | 0.229895437 |
| 0.166060426 | 0.259151955 | 0.260878882          | 0.159473076 |
| 0.215101497 | 0.142561688 | 0.187720616          | 0.259511574 |
| 0.2777681   | 0.098753827 | 0.249858949          | 0.236870008 |
| 0.288465913 | 0.108796047 | 0.225529499          | 0.392843938 |
| 0.205521546 | 0.217462666 | 0.151561001          | 0.276619701 |
| 0.263547914 | 0.149470196 | 0.0582655            | 0.288305975 |
| 0.359465083 | 0.189393516 | 0.356607734          | 0.343218499 |
| 0.192945104 | 0.170808616 | 0.16397703           | 0.207176263 |
| 0.268928753 | 0.185692176 | 0.280535118          | 0.183362998 |
| 0.361982316 | 0.418045062 | 0.294694319          | 0.244789179 |
| 0.180272498 | 0.163327085 | 0.119579792          | 0.30574526  |
| 0.134836802 | 0.160834754 | 0.133430909          | 0.275845442 |
| 0.013178639 | 0.086773119 | 0.364762959          | 0.238292781 |
| 0.414180505 | 0.33464614  | 0.365117086          | 0.251959799 |
| 0.003553106 | 0.204075884 | 0.204164714          | 0.175412613 |
| 0.28457156  | 0.283894205 | 0.213241294          | 0.212084484 |
| 0.332222806 | 0.133995902 | 0.223722705          | 0.160828491 |
| 0.087171933 | 0.195035711 | 0.285841284          | 0.26007192  |
| 0.275319752 | 0.160236423 | 0.138767252          | 0.251814817 |
| 0.147634357 | 0.294761672 | 0.308068267          | 0.117764033 |
| 0.07664837  | 0.337318017 | 0.259305217          | 0.11563384  |
| 0.17750721  | 0.315714275 | 0.349947142          | 0.010526637 |
| 0.221869285 | 0.066868443 | 0.251784754          | 0.234943853 |
| 0.267424956 | 0.258371984 | 0.257870254          | 0.212664782 |
| 0.218120006 | 0.277223071 | 0.224723263          | 0.25717478  |
| 0.2434935   | 0.277958514 | 0.211995351          | 0.216366525 |
| 0.186736075 | 0.221607627 | 0.205622764          | 0.204228837 |

|             |             |             |             |
|-------------|-------------|-------------|-------------|
| 0.148037798 | 0.313044457 | 0.313514924 | 0.142000277 |
| 0.276826181 | 0.214309344 | 0.366945262 | 0.332207216 |
| 0.365724243 | 0.175805227 | 0.23420014  | 0.27760067  |
| 0.080140974 | 0.156861301 | 0.147014874 | 0.206832234 |
| 0.259227667 | 0.153619259 | 0.182848261 | 0.176112812 |
| 0.221081916 | 0.37975198  | 0.298409318 | 0.369518625 |
| 0.215032069 | 0.197113738 | 0.105749521 | 0.19296207  |
| 0.221423729 | 0.222329401 | 0.195845039 | 0.021975077 |
| 0.240970339 | 0.177676236 | 0.288129777 | 0.353112466 |
| 0.128262402 | 0.363169212 | 0.107131957 | 0.173001339 |
| 0.092372686 | 0.222626511 | 0.229192289 | 0.24338441  |
| 0.084839812 | 0.261618217 | 0.222712062 | 0.155614426 |
| 0.248819839 | 0.235295158 | 0.227336405 | 0.253380589 |
| 0.283959948 | 0.220039309 | 0.391255465 | 0.191963789 |
| 0.162558549 | 0.170963235 | 0.161970483 | 0.213447076 |
| 0.255023938 | 0.353065397 | 0.170189635 | 0.349072536 |
| 0.190185565 | 0.226690797 | 0.423642631 | 0.24067282  |
| 0.236555372 | 0.231891587 | 0.091908262 | 0.170811955 |
| 0.266246273 | 0.143346228 | 0.005593377 | 0.049321011 |
| 0.277973429 | 0.194376864 | 0.235082831 | 0.280435464 |
| 0.207478638 | 0.324466486 | 0.089297006 | 0.228386992 |
| 0.333673028 | 0.385934345 | 0.181412572 | 0.319575533 |
| 0.277126669 | 0.218885875 | 0.179278434 | 0.029930907 |
| 0.171347862 | 0.153965863 | 0.13852383  | 0.19437657  |
| 0.120655137 | 0.096420812 | 0.180765476 | 0.154119637 |
| 0.335186662 | 0.078398879 | 0.189576101 | 0.230358006 |
| 0.258717362 | 0.386994786 | 0.253511269 | 0.24451716  |
| 0.150129039 | 1           | 0.179376807 | 0.180579296 |
| 0.174044306 | 0.164044311 | 0.26955009  | 0.136930864 |
| 0.151043582 | 0.216322877 | 0.014006921 | 0.383963598 |
| 0.357827608 | 0.165603633 | 0.304234389 | 0.11267159  |
| 0.284109006 | 0.337308144 | 0.191307093 | 0.160252849 |
| 0.071441751 | 0.177431322 | 0.277194748 | 0.288213349 |
| 0.075509815 | 0.19673242  | 0.179914647 | 0.194588645 |
| 0.381880078 | 0.157359852 | 0.327450596 | 0.115109542 |
| 0.336650601 | 0.292408627 | 0.197750411 | 0.236884833 |
| 0.189641051 | 0.159621259 | 0.143552329 | 0.389632769 |
| 0.255825349 | 0.145611736 | 0.289716735 | 0.233473962 |
| 0.157791142 | 0.316895375 | 0.165772724 | 0.387922257 |
| 0.199532292 | 0.262783786 | 0.278205699 | 0.331178895 |
| 0.319619003 | 0.170612854 | 0.131901135 | 0.208548262 |
| 0.317990986 | 0.16023649  | 0.17958049  | 0.272625372 |
| 0.118450134 | 0.268651927 | 0.166376588 | 0.225998811 |
| 0.126960053 | 0.27995823  | 0.181083601 | 0.245381568 |
| 0.245607434 | 0.208026639 | 0.219213756 | 0.372932215 |
| 0.184150664 | 0.084935401 | 0.402271101 | 0.012281245 |
| 0.190561469 | 0.21081353  | 0.269980699 | 0.204490649 |
| 0.24968449  | 0.225414269 | 0.174253086 | 0.010732987 |
| 0.299920996 | 0.081540067 | 0.236097785 | 0.18787728  |
| 0.141209444 | 0.160388591 | 0.354644411 | 0.360172409 |
| 0.252864514 | 0.159101371 | 0.118062304 | 0.34539769  |
| 0.098554907 | 0.119923254 | 0.15145299  | 0.196786843 |
| 0.12715297  | 0.131224361 | 0.155620561 | 0.14240971  |
| 0.263793328 | 0.25807439  |             |             |

| TGFB1       | 0.026732637 | 0.364418577 | 0.018825549 |
|-------------|-------------|-------------|-------------|
| 0.061831228 | 0.256589658 | 0.203610949 | 0.02495418  |
| 0.055450776 | 0.289628603 | 0.197732116 | 0.207822637 |
| 0.005201624 | 0.174464794 | 0.381893711 | 0.025851104 |
| 0.307635966 | 0.014846713 | 0.046938525 | 0.060993396 |
| 0.151591382 | 0.215643773 | 0.253465743 | 0.170975876 |
| 0.232166393 | 0.117015617 | 0.20403831  | 0.303607323 |
| 0.440371952 | 0.224445253 | 0.341002081 | 0.133177922 |
| 0.324555347 | 0.279103405 | 0.278602587 | 0.005080757 |
| 0.24444801  | 0.041317827 | 0.336563152 | 0.162535868 |
| 0.188189042 | 0.257489291 | 0.173595864 | 0.132394205 |
| 0.194358301 | 0.011244173 | 0.151128112 | 0.357268401 |
| 0.219317279 | 0.19250438  | 0.022508884 | 0.338277369 |
| 0.231022517 | 0.215384503 | 0.293500763 | 0.000410891 |
| 0.274059497 | 0.189446784 | 0.270635991 | 0.420226316 |
| 0.117333764 | 0.063964896 | 0.238107338 | 0.154367309 |
| 0.307862716 | 0.33715301  | 0.195811624 | 0.212204271 |
| 0.414067951 | 0.221531248 | 0.390553252 | 0.090639396 |
| 0.198291248 | 0.01266313  | 0.094898266 | 0.043093693 |
| 0.26729883  | 0.111965909 | 0.233071739 | 0.284313674 |
| 0.342431757 | 0.424181555 | 0.157224016 | 0.400776974 |
| 0.169132331 | 0.30332368  | 0.245485459 | 0.251349397 |
| 0.312487893 | 0.046470533 | 0.31198448  | 0.432605724 |
| 0.022783761 | 0.240193994 | 0.307789386 | 0.062104189 |
| 0.363986986 | 0.304150047 | 0.209946192 | 0.210102147 |
| 0.355450855 | 0.254797108 | 0.399363167 | 0.182026161 |
| 0.255471343 | 0.029415998 | 0.373677864 | 0.300400926 |
| 0.178337007 | 0.031112861 | 0.179446879 | 0.450589153 |
| 0.289895465 | 0.424527836 | 0.365384784 | 0.299892745 |
| 0.267609722 | 0.426249032 | 0.288511399 | 0.363772203 |
| 0.141917676 | 0.446452545 | 0.084173301 | 0.018607733 |
| 0.02450196  | 0.049828507 | 0.232723301 | 0.246540085 |
| 0.435927187 | 0.223387667 | 0.080920845 | 0.144965616 |
| 0.451739187 | 0.373102636 | 0.446557704 | 0.338022957 |
| 0.013420547 | 0.299587641 | 0.259354262 | 0.153957067 |
| 0.283153962 | 0.059699175 | 0.243139285 | 0.398237781 |
| 0.287491263 | 0.409208511 | 0.06987843  | 0.392426589 |
| 0.116340889 | 0.433669083 | 0.379128594 | 0.076816242 |
| 0.419997837 | 0.385373919 | 0.45097145  | 0.378246735 |
| 0.379686889 | 0.154169406 | 0.066255356 | 0.320626691 |
| 0.421151043 | 0.022027123 | 0.4508949   | 0.46957641  |
| 0.411220642 | 0.430910041 | 0.477304661 | 0.464890516 |
| 0.415711048 | 0.031114366 | 0.049307125 | 0.225539691 |
| 0.406561852 | 0.311330657 | 0.100931752 | 0.263144105 |
| 0.302826174 | 0.184612843 | 0.406013315 | 0.169034554 |
| 0.433735246 | 0.408698063 | 0.447861492 | 0.303243239 |
| 0.186008153 | 0.227579286 | 0.311468828 | 0.354060683 |
| 0.019104562 | 0.041025493 | 0.020080213 | 0.253397087 |
| 0.183368309 | 0.098771112 | 0.165102177 | 0.287039713 |
| 0.115247415 | 0.172390713 | 0.288399112 | 0.350825918 |
| 0.026795909 | 0.268348806 | 0.079603723 | 0.069158056 |
| 0.017169646 | 0.088002499 | 0.077356805 | 0.081763326 |
| 0.156248479 | 0.15004184  | 0.361537405 | 0.452147575 |
| 0.250738921 | 0.101724351 | 0.312294348 | 0.410608484 |

|             |             |             |             |
|-------------|-------------|-------------|-------------|
| 0.35943084  | 0.278659268 | 0.159840843 | 0.004800599 |
| 0.151404513 | 0.263368688 | 0.252153562 | 0.311446318 |
| 0.115779227 | 0.125749951 | 0.268536038 | 0.368415924 |
| 0.113724154 | 0.071487712 | 0.232505716 | 0.326384852 |
| 0.085450411 | 0.19401717  | 0.386821135 | 0.250312495 |
| 0.000774591 | 0.152749488 | 0.386148633 | 0.155802165 |
| 0.215760382 | 0.156461272 | 0.231595967 | 0.417038415 |
| 0.242385237 | 0.229923771 | 0.465451817 | 0.387601141 |
| 0.188673149 | 0.145960069 | 0.47314567  | 0.069824047 |
| 0.282827002 | 0.037234212 | 0.213596391 | 0.190580185 |
| 0.139127137 | 0.227243342 | 0.278100415 | 0.209415929 |
| 0.058614725 | 0.432388064 | 0.32695809  | 0.448196883 |
| 0.231089861 | 0.467758731 | 0.418686526 | 0.371562372 |
| 0.25841746  | 0.259864522 | 0.219723962 | 0.359982681 |
| 0.417048941 | 0.180427602 | 0.035394783 | 0.416052636 |
| 0.223709872 | 0.351583546 | 0.12133857  | 0.427909773 |
| 0.40065543  | 0.368941459 | 0.080650222 | 0.352539722 |
| 0.290265221 | 0.105398792 | 0.383903255 | 0.471837852 |
| 0.202945811 | 0.229425153 | 0.220978459 | 0.388917803 |
| 0.091252257 | 0.202528001 | 0.255274556 | 0.276871318 |
| 0.023738921 | 0.031244686 | 0.022324683 | 0.099855415 |
| 0.202705441 | 0.324676846 | 0.327298413 | 0.439313733 |
| 0.051186227 | 0.348885503 | 0.175006973 | 0.158560403 |
| 0.323365596 | 0.25403341  | 0.311698576 | 0.319808501 |
| 0.173228228 | 0.009971738 | 0.056894105 | 0.415018124 |
| 0.015243785 | 0.225221299 | 0.171094803 | 0.001538987 |
| 0.015241979 | 0.34539614  | 0.053412968 | 0.124668911 |
| 0.464216121 | 0.125447189 | 0.107058135 | 0.180707147 |
| 0.273559755 | 0.040576279 | 0.002814255 | 0.446040131 |
| 0.438491165 | 0.416656436 | 0.429308929 | 0.387120404 |
| 0.417328163 | 0.375925098 | 0.381032229 | 0.170960457 |
| 0.044486312 | 0.035848155 | 0.194620753 | 0.162935152 |
| 0.002352707 | 0.33265086  | 0.232570751 | 0.077153204 |
| 0.388426333 | 0.217636695 | 0.012866108 | 0.319646529 |
| 0.005682625 | 0.215345124 | 0.159087756 | 0.142752994 |
| 0.346323633 | 0.004205989 | 0.123956659 | 0.208212499 |
| 0.320659685 | 0.248778447 | 0.277986102 | 0.44865741  |
| 0.185577507 | 0.068235827 | 0.191109889 | 0.35615937  |
| 0.029491774 | 0.070247727 | 0.197349146 | 0.025454727 |
| 0.139870683 | 0.390668761 | 0.251374736 | 0.025774531 |
| 0.150148935 | 0.000867101 | 0.265218526 | 0.446456621 |
| 0.370974713 | 0.467367345 | 0.422911261 | 0.234539877 |
| 0.418127437 | 0.223365283 | 0.462854881 | 0.320406673 |
| 0.208491122 | 8.94E-05    | 0.004019972 | 0.450744535 |
| 0.256779517 | 0.027842263 | 0.081311154 | 0.172232949 |
| 0.053980362 | 0.061665368 | 0.030780811 | 0.190861812 |
| 0.296453605 | 0.176148293 | 0.199884731 | 0.36742451  |
| 0.131636896 | 0.148942778 | 0.202852757 | 0.044046435 |
| 0.308854053 | 0.021661089 | 0.046049849 | 0.006350683 |
| 0.341683602 | 0.061688825 | 0.351735814 | 0.432283659 |
| 0.408899129 | 0.344394979 | 0.204407994 | 0.203811238 |
| 0.433132586 | 0.047352155 | 0.256570108 | 0.050704078 |
| 0.391216473 | 0.284325028 | 0.22879466  | 0.207793352 |
| 0.427848686 | 0.372226596 | 0.012276057 | 0.34465905  |

|             |             |             |             |
|-------------|-------------|-------------|-------------|
| 0.005042998 | 0.004876798 | 0.159146135 | 0.184963038 |
| 0.136019169 | 0.237341511 | 0.172073097 | 0.170644184 |
| 0.182343595 | 0.009219963 | 0.267329863 | 0.232479905 |
| 0.197841046 | 0.20557013  | 0.220690555 | 0.188230249 |
| 0.216781302 | 0.129754534 | 0.128649142 | 0.085546929 |
| 0.197442394 | 0.223182596 | 0.116887013 | 0.007693269 |
| 0.247992204 | 0.258099309 | 0.021626059 | 0.086741713 |
| 0.377742292 | 0.435558603 | 0.019911014 | 0.004398411 |
| 0.173760264 | 0.200913341 | 0.455123279 | 0.41936702  |
| 0.420982692 | 0.444697959 | 0.295982701 | 0.084364207 |
| 0.027264965 | 0.237674519 | 0.250145145 | 0.094768175 |
| 0.438136772 | 0.026217667 | 0.40454927  | 0.279189782 |
| 0.060197287 | 0.110984138 | 0.014316743 | 0.038149608 |
| 0.325366029 | 0.098990629 | 0.113538742 | 0.067343367 |
| 0.181000745 | 0.240775494 | 0.01946968  | 0.101453095 |
| 0.244809954 | 0.203397246 | 0.080428928 | 0.178555397 |
| 0.285402116 | 0.178139658 | 0.371086003 | 0.366208954 |
| 0.064837037 | 0.050418992 | 0.107319476 | 0.353554524 |
| 0.396103006 | 0.278087803 | 0.010295878 | 0.374346242 |
| 0.447001304 | 0.332935366 | 0.405058985 | 0.348010967 |
| 0.041123576 | 0.232363889 | 0.283822313 | 0.232482183 |
| 0.104164642 | 0.195279127 | 0.145440929 | 0.02480661  |
| 0.246351969 | 0.392261399 | 0.337174862 | 0.087342504 |
| 0.294513695 | 0.059282831 | 0.021967891 | 0.417877705 |
| 0.192402966 | 0.032273587 | 0.191686038 | 0.426154839 |
| 0.002604057 | 0.224139552 | 0.471507676 | 0.129547033 |
| 0.449156865 | 0.433661181 | 0.349347762 | 0.157395225 |
| 0.004375018 | 0.37219461  | 0.245923779 | 0.210458452 |
| 0.339456543 | 0.256063903 | 0.122663285 | 0.037510931 |
| 0.224244146 | 0.036395738 | 0.070791442 | 0.187710915 |
| 0.19957657  | 0.257995404 | 0.132388162 | 0.125713513 |
| 0.135779685 | 0.049726466 | 0.265418426 | 0.123444942 |
| 0.233274579 | 0.160821962 | 0.273478124 | 0.180527272 |
| 0.146290637 | 0.399904587 | 0.313851486 | 0.00869892  |
| 0.292277012 | 0.381806713 | 0.401034144 | 0.000397504 |
| 0.349668919 | 0.002047826 | 0.125820714 | 0.128502041 |
| 0.129189644 | 0.131798091 | 0.202211325 | 0.203387405 |
| 0.228688214 | 0.11962079  | 0.139970828 | 0.145506329 |
| 0.101604299 | 0.11834489  | 0.290179265 | 0.193944725 |
| 0.171464339 | 0.05665775  | 0.056974674 | 0.05856187  |
| 0.021633892 | 0.419011126 | 0.164498384 | 0.035099231 |
| 0.149774016 | 0.206236964 | 0.282218452 | 0.405872375 |
| 0.375150987 | 0.064393042 | 0.211886679 | 0.360628762 |
| 0.174641972 | 0.151476691 | 0.02120946  | 0.225048473 |
| 0.112956093 | 0.162463976 | 0.231059484 | 0.155610082 |
| 0.324994812 | 0.308504155 | 0.157349567 | 0.387496938 |
| 0.210929826 | 0.225753356 | 0.162391046 | 0.044971975 |
| 0.073622035 | 0.074335246 | 0.213939147 | 0.000138053 |
| 0.239319406 | 0.108284797 | 0.417268828 | 0.388596934 |
| 0.28575141  | 0.323367802 | 0.15204358  | 0.032336957 |
| 0.152891567 | 0.106588609 | 0.074162397 | 0.379714406 |
| 0.2486897   | 0.096327666 | 0.214799907 | 0.147715004 |
| 0.386334232 | 0.383269416 | 0.240583111 | 0.126492007 |
| 0.155518377 | 0.109424031 | 0.392569463 | 0.050609703 |

|             |             |             |             |
|-------------|-------------|-------------|-------------|
| 0.295495561 | 0.167618955 | 0.23407099  | 0.170830617 |
| 0.144196512 | 0.467830143 | 0.022674139 | 0.468767744 |
| 0.207044913 | 0.077819277 | 0.40312917  | 0.171244808 |
| 0.163674272 | 0.092055097 | 0.248889908 | 0.20943359  |
| 0.142428514 | 0.294508484 | 0.014625058 | 0.052783217 |
| 0.252129376 | 0.23146521  | 0.331654282 | 0.321222581 |
| 0.230564149 | 0.303116191 | 0.270620816 | 0.134734978 |
| 0.379612354 | 0.390653719 | 0.116798225 | 0.181638504 |
| 0.250351761 | 0.045832861 | 0.239765142 | 0.020468864 |
| 0.302152787 | 0.328389946 | 0.225184631 | 0.023248133 |
| 0.006656214 | 0.231618639 | 0.273397245 | 0.032170144 |
| 0.456751028 | 0.230465321 | 0.26844702  | 0.358984146 |
| 0.113664405 | 0.382387537 | 0.083412698 | 0.322549521 |
| 0.023117469 | 0.179376807 | 1           | 0.249150068 |
| 0.138312108 | 0.242612694 | 0.299748388 | 0.224749504 |
| 0.011926219 | 0.181525772 | 0.000327239 | 0.297970473 |
| 0.361436331 | 0.260270322 | 0.139846863 | 0.214206473 |
| 0.212170615 | 0.348096205 | 0.171299043 | 0.272743386 |
| 0.004678458 | 0.284732559 | 0.115346624 | 0.323302621 |
| 0.159820285 | 0.240974317 | 0.028500122 | 0.257167549 |
| 0.336534494 | 0.159627321 | 0.193164232 | 0.192543324 |
| 0.407457716 | 0.342766661 | 0.09588322  | 0.204177229 |
| 0.306284692 | 0.027821163 | 0.21001833  | 0.458041672 |
| 0.102532967 | 0.20806296  | 0.419543496 | 0.103958312 |
| 0.272039335 | 0.311747499 | 0.312770393 | 0.454121695 |
| 0.048780586 | 0.151116441 | 0.397416385 | 0.385804186 |
| 0.239895995 | 0.20190035  | 0.217747063 | 0.160959607 |
| 0.354575748 | 0.042185754 | 0.23189118  | 0.245005665 |
| 0.209167392 | 0.232953561 | 0.231461188 | 0.159736262 |
| 0.0175066   | 0.098907789 | 0.206200437 | 0.075116442 |
| 0.177734995 | 0.234859242 | 0.209396147 | 0.307410628 |
| 0.074796028 | 0.009826584 | 0.374115231 | 0.027855857 |
| 0.169897605 | 0.300716322 | 0.143729475 | 0.244670473 |
| 0.109903069 | 0.222183488 | 0.153081035 | 0.000283183 |
| 0.381072278 | 0.07437313  | 0.243367693 | 0.156929766 |
| 0.225909431 | 0.017787624 | 0.374972967 | 0.466610975 |
| 0.216280353 | 0.253945162 | 0.242942922 | 0.391353447 |
| 0.192182002 | 0.28872877  | 0.273142422 | 0.283026088 |
| 0.255152382 | 0.208993202 | 0.253155191 | 0.262408264 |
| 0.294960428 | 0.148021616 |             |             |
| TGIF1       | 0.031151877 | 0.39646657  | 0.022480561 |
| 0.04658122  | 0.193515752 | 0.171201776 | 0.035770655 |
| 0.066169981 | 0.336452229 | 0.232167143 | 0.170789316 |
| 0.007183531 | 0.096777836 | 0.397231751 | 0.036383872 |
| 0.280407232 | 0.017325821 | 0.056764728 | 0.074688595 |
| 0.14749407  | 0.178927892 | 0.188924181 | 0.187119454 |
| 0.191454659 | 0.139774528 | 0.223852474 | 0.286318695 |
| 0.44851621  | 0.171704269 | 0.296217019 | 0.110394067 |
| 0.350499583 | 0.225616342 | 0.231030555 | 0.005980388 |
| 0.230000951 | 0.042969234 | 0.381628448 | 0.13936275  |
| 0.089460529 | 0.281191959 | 0.185345135 | 0.10666283  |
| 0.212395565 | 0.014365408 | 0.150569349 | 0.363269247 |
| 0.235500642 | 0.173287392 | 0.032934882 | 0.317532016 |
| 0.240383954 | 0.214765043 | 0.329915367 | 0.001418083 |

|             |             |             |             |
|-------------|-------------|-------------|-------------|
| 0.195437608 | 0.110773794 | 0.203391584 | 0.435075896 |
| 0.115020154 | 0.061327662 | 0.252026832 | 0.175998068 |
| 0.336715034 | 0.34168602  | 0.190425931 | 0.243758594 |
| 0.428247216 | 0.16447818  | 0.375452345 | 0.070243964 |
| 0.215243815 | 0.022454318 | 0.103659729 | 0.064543216 |
| 0.24742665  | 0.096874146 | 0.1873455   | 0.213599939 |
| 0.384930218 | 0.458802784 | 0.160797347 | 0.441026283 |
| 0.168363758 | 0.257065792 | 0.175171618 | 0.239196766 |
| 0.347643673 | 0.070821066 | 0.28606241  | 0.453324428 |
| 0.037596007 | 0.276199647 | 0.34710381  | 0.089273865 |
| 0.365355183 | 0.258759121 | 0.222430141 | 0.120755857 |
| 0.296125981 | 0.234218765 | 0.453557866 | 0.185099135 |
| 0.203520701 | 0.042244459 | 0.418733296 | 0.23731283  |
| 0.132869796 | 0.035380471 | 0.154435435 | 0.438612274 |
| 0.27610714  | 0.427454511 | 0.411166951 | 0.335718278 |
| 0.245914685 | 0.428692806 | 0.265407036 | 0.387594163 |
| 0.143765515 | 0.46982314  | 0.078415962 | 0.02006071  |
| 0.034670743 | 0.048211255 | 0.234711967 | 0.249157923 |
| 0.414860259 | 0.226226201 | 0.085502865 | 0.125749381 |
| 0.440710908 | 0.414457905 | 0.481359844 | 0.361460573 |
| 0.017366647 | 0.248052104 | 0.227914031 | 0.145437697 |
| 0.306026728 | 0.074943165 | 0.172381451 | 0.439310501 |
| 0.286817673 | 0.395070047 | 0.076737578 | 0.433087723 |
| 0.147793203 | 0.435949893 | 0.392554929 | 0.071841081 |
| 0.441676106 | 0.41359778  | 0.444376292 | 0.314458128 |
| 0.391419682 | 0.13680856  | 0.12074506  | 0.355143022 |
| 0.415465454 | 0.009567771 | 0.454067929 | 0.471408306 |
| 0.436982141 | 0.415450238 | 0.48289231  | 0.458007403 |
| 0.444703654 | 0.041503757 | 0.070628623 | 0.21155932  |
| 0.438232534 | 0.298748875 | 0.09762403  | 0.258067672 |
| 0.279485229 | 0.181911998 | 0.400252954 | 0.151288482 |
| 0.451639036 | 0.388685446 | 0.45559425  | 0.340564017 |
| 0.226056744 | 0.248534486 | 0.277747298 | 0.38944137  |
| 0.018651161 | 0.046735299 | 0.028061221 | 0.273381608 |
| 0.167643027 | 0.091064801 | 0.178078901 | 0.290527649 |
| 0.112479143 | 0.190356165 | 0.224589385 | 0.300838568 |
| 0.042977803 | 0.25929983  | 0.076614635 | 0.088823872 |
| 0.01731722  | 0.110888545 | 0.081136987 | 0.064684268 |
| 0.138684849 | 0.196085785 | 0.356919502 | 0.44683677  |
| 0.250827222 | 0.114365277 | 0.31893799  | 0.405241571 |
| 0.36100285  | 0.22241726  | 0.185100395 | 0.002355814 |
| 0.158037992 | 0.280716156 | 0.180277775 | 0.281462501 |
| 0.147283611 | 0.151396056 | 0.275970234 | 0.310121695 |
| 0.121903897 | 0.098628851 | 0.235864205 | 0.348848573 |
| 0.113057583 | 0.145985021 | 0.382917815 | 0.275966626 |
| 0.000838353 | 0.15238127  | 0.374930232 | 0.126648836 |
| 0.26071084  | 0.103568089 | 0.141134126 | 0.416801626 |
| 0.227376524 | 0.198705519 | 0.454866178 | 0.329546507 |
| 0.19033046  | 0.196569931 | 0.484396764 | 0.082758118 |
| 0.264735449 | 0.017928812 | 0.193192322 | 0.214667715 |
| 0.141186331 | 0.236252814 | 0.220292856 | 0.145599705 |
| 0.068390635 | 0.463951062 | 0.3200117   | 0.452959826 |
| 0.2220682   | 0.480861552 | 0.406878774 | 0.366320436 |
| 0.245669134 | 0.270466008 | 0.140847189 | 0.350012196 |

|             |             |             |             |
|-------------|-------------|-------------|-------------|
| 0.407170199 | 0.199532356 | 0.050614459 | 0.430361704 |
| 0.252574775 | 0.331521704 | 0.075539861 | 0.429580574 |
| 0.41426272  | 0.412515316 | 0.076944345 | 0.324229064 |
| 0.277308295 | 0.099697011 | 0.363953343 | 0.489341533 |
| 0.245936078 | 0.229695214 | 0.192092563 | 0.347073879 |
| 0.094311827 | 0.176390498 | 0.278511031 | 0.186528053 |
| 0.006932293 | 0.0451214   | 0.029554571 | 0.081916505 |
| 0.119574324 | 0.329314577 | 0.305545724 | 0.459596264 |
| 0.056693811 | 0.34251864  | 0.210992733 | 0.143813775 |
| 0.36003671  | 0.247970136 | 0.245719512 | 0.278224807 |
| 0.185212727 | 0.005205115 | 0.045755518 | 0.449785413 |
| 0.026722909 | 0.150123323 | 0.194228519 | 0.000990019 |
| 0.023664254 | 0.384154501 | 0.075247251 | 0.149079051 |
| 0.446153814 | 0.147413875 | 0.124275236 | 0.224623042 |
| 0.239045369 | 0.044113479 | 0.00072028  | 0.463121138 |
| 0.474995218 | 0.4578988   | 0.473137129 | 0.433096473 |
| 0.451135358 | 0.375359218 | 0.367367934 | 0.167314924 |
| 0.048770794 | 0.045779197 | 0.153533702 | 0.153509034 |
| 0.005197435 | 0.287214583 | 0.200541405 | 0.084663519 |
| 0.375626663 | 0.246140378 | 0.015739945 | 0.283775484 |
| 0.005467022 | 0.138853153 | 0.201970934 | 0.142058811 |
| 0.31672346  | 0.005426321 | 0.096190943 | 0.199755582 |
| 0.342049969 | 0.271074273 | 0.220418774 | 0.461877611 |
| 0.160489392 | 0.096778271 | 0.151378941 | 0.31078847  |
| 0.035304521 | 0.098766936 | 0.230090998 | 0.020227712 |
| 0.114450784 | 0.430713132 | 0.238251042 | 0.026401322 |
| 0.146553959 | 0.001061398 | 0.277492775 | 0.466015354 |
| 0.399726474 | 0.472719994 | 0.423194238 | 0.155446116 |
| 0.428607342 | 0.156286224 | 0.475251973 | 0.344752333 |
| 0.232387387 | 8.96E-05    | 0.004220354 | 0.435430678 |
| 0.230929472 | 0.042433507 | 0.085838321 | 0.14309117  |
| 0.047849804 | 0.079527178 | 0.035849032 | 0.115503423 |
| 0.262082235 | 0.134180807 | 0.139801013 | 0.416339037 |
| 0.125193826 | 0.143618037 | 0.226088101 | 0.062202153 |
| 0.260369022 | 0.021684571 | 0.066913911 | 0.003166737 |
| 0.310525575 | 0.083379382 | 0.400643461 | 0.453819493 |
| 0.41772226  | 0.288962538 | 0.220173254 | 0.191486093 |
| 0.439094306 | 0.066765018 | 0.209800971 | 0.06799253  |
| 0.415879357 | 0.269093198 | 0.219565535 | 0.21434633  |
| 0.442398529 | 0.387954434 | 0.016636045 | 0.339997759 |
| 0.002938235 | 0.003030836 | 0.159800847 | 0.208897992 |
| 0.150811648 | 0.233425304 | 0.177771393 | 0.200544671 |
| 0.177110628 | 0.010477811 | 0.20767699  | 0.178099439 |
| 0.183719531 | 0.200783925 | 0.166717962 | 0.222243639 |
| 0.168455863 | 0.104027049 | 0.102343045 | 0.095862736 |
| 0.238198246 | 0.252107728 | 0.14059062  | 0.011976624 |
| 0.236442191 | 0.231240684 | 0.024836515 | 0.095591398 |
| 0.355243005 | 0.432006313 | 0.02759181  | 0.002862097 |
| 0.190148173 | 0.210648201 | 0.451264934 | 0.439874513 |
| 0.452774405 | 0.460470255 | 0.321550716 | 0.085367878 |
| 0.030709952 | 0.211124358 | 0.192961998 | 0.060265533 |
| 0.453069728 | 0.04413109  | 0.419371992 | 0.207003559 |
| 0.073026613 | 0.096733285 | 0.011950692 | 0.045339991 |
| 0.267866855 | 0.106980343 | 0.091834604 | 0.081065145 |



|             |             |             |             |
|-------------|-------------|-------------|-------------|
| 0.172993346 | 0.154084608 | 0.026388149 | 0.105067396 |
| 0.267064568 | 0.136112038 | 0.089438262 | 0.177842788 |
| 0.286894401 | 0.229039966 | 0.356130094 | 0.383023995 |
| 0.076416016 | 0.068329209 | 0.111928652 | 0.350362676 |
| 0.397591646 | 0.295476994 | 0.00718511  | 0.40991848  |
| 0.444841003 | 0.311490043 | 0.424610609 | 0.353828221 |
| 0.055306309 | 0.193789458 | 0.266155896 | 0.22728282  |
| 0.12056886  | 0.170277006 | 0.151546372 | 0.033134949 |
| 0.267137556 | 0.437086964 | 0.358660833 | 0.074019533 |
| 0.276009145 | 0.085575791 | 0.038114777 | 0.422479205 |
| 0.133836253 | 0.038405057 | 0.213401538 | 0.434962477 |
| 0.000337714 | 0.126509062 | 0.476192826 | 0.110838613 |
| 0.472323369 | 0.426575201 | 0.354673786 | 0.154628987 |
| 0.003544788 | 0.344484189 | 0.218006064 | 0.179311667 |
| 0.374041316 | 0.258660001 | 0.125275948 | 0.033610891 |
| 0.214933861 | 0.049941198 | 0.07808772  | 0.158345387 |
| 0.176689011 | 0.284450849 | 0.139555612 | 0.152537366 |
| 0.112401953 | 0.082913293 | 0.159281708 | 0.102026232 |
| 0.199097843 | 0.162273377 | 0.272980405 | 0.207189328 |
| 0.125371072 | 0.429690662 | 0.339959062 | 0.010285807 |
| 0.239777252 | 0.401057238 | 0.392088659 | 0.001155373 |
| 0.325521379 | 0.002284859 | 0.109509298 | 0.096950845 |
| 0.1018156   | 0.137478736 | 0.177693589 | 0.149309599 |
| 0.259218344 | 0.116422666 | 0.111247384 | 0.133098957 |
| 0.073590751 | 0.113817944 | 0.253308191 | 0.193421284 |
| 0.12627047  | 0.053961031 | 0.076544572 | 0.081295761 |
| 0.018997035 | 0.422716163 | 0.177886039 | 0.045343228 |
| 0.147463981 | 0.212030076 | 0.276697397 | 0.437146827 |
| 0.355190937 | 0.086637972 | 0.219459852 | 0.366923324 |
| 0.220636348 | 0.143967522 | 0.033116761 | 0.204724901 |
| 0.112595584 | 0.12767234  | 0.221911386 | 0.183547852 |
| 0.369737221 | 0.323750808 | 0.169627739 | 0.382932622 |
| 0.169355117 | 0.256953138 | 0.178127009 | 0.035876338 |
| 0.074692715 | 0.096372726 | 0.159811172 | 0.000119054 |
| 0.237852228 | 0.098354994 | 0.409878575 | 0.411157155 |
| 0.224194976 | 0.316088664 | 0.164279937 | 0.038187713 |
| 0.152754655 | 0.140765082 | 0.087075565 | 0.371956684 |
| 0.169379865 | 0.083818576 | 0.171495774 | 0.141913484 |
| 0.360254378 | 0.388396289 | 0.198145856 | 0.153162584 |
| 0.15855031  | 0.116954884 | 0.439313018 | 0.056829734 |
| 0.295632319 | 0.099910508 | 0.273731666 | 0.153477615 |
| 0.126020092 | 0.472107281 | 0.027936646 | 0.478935942 |
| 0.203977892 | 0.098166142 | 0.422912245 | 0.167935084 |
| 0.139698041 | 0.059029885 | 0.158913685 | 0.227488336 |
| 0.149916154 | 0.221819651 | 0.018780729 | 0.05393064  |
| 0.235477115 | 0.266378947 | 0.383382678 | 0.334524198 |
| 0.164810486 | 0.297298205 | 0.165952044 | 0.164295963 |
| 0.420414753 | 0.431367158 | 0.113421445 | 0.191238489 |
| 0.277838619 | 0.044442232 | 0.239440496 | 0.029952238 |
| 0.305098298 | 0.3141668   | 0.251435896 | 0.028919683 |
| 0.008345692 | 0.163789252 | 0.281207149 | 0.053040365 |
| 0.451298205 | 0.15049486  | 0.312277294 | 0.317993221 |
| 0.142630801 | 0.42275455  | 0.068852898 | 0.286212122 |
| 0.044629445 | 0.180579296 | 0.249150068 | 1           |

|             |             |             |             |
|-------------|-------------|-------------|-------------|
| 0.102599357 | 0.187813866 | 0.27241686  | 0.145331009 |
| 0.01286938  | 0.137299951 | 0.00142803  | 0.325933163 |
| 0.409800251 | 0.227750909 | 0.163207853 | 0.249538088 |
| 0.189180309 | 0.352519209 | 0.195244175 | 0.2526602   |
| 0.003001552 | 0.237356483 | 0.111924036 | 0.318663108 |
| 0.131098319 | 0.282433287 | 0.019613855 | 0.237555777 |
| 0.384364184 | 0.179817119 | 0.22321174  | 0.179331588 |
| 0.424698552 | 0.351999229 | 0.113074377 | 0.137488598 |
| 0.351832439 | 0.040455208 | 0.209442696 | 0.48328263  |
| 0.087076174 | 0.131862136 | 0.38889294  | 0.098222084 |
| 0.226111744 | 0.326466379 | 0.321648147 | 0.489996887 |
| 0.043165644 | 0.149344883 | 0.374092922 | 0.419294744 |
| 0.226523087 | 0.143126958 | 0.16337023  | 0.143367869 |
| 0.377954224 | 0.034434629 | 0.198313776 | 0.247532884 |
| 0.152021753 | 0.222576364 | 0.267809832 | 0.122839563 |
| 0.017388858 | 0.109339257 | 0.167948611 | 0.084432168 |
| 0.180035428 | 0.202762867 | 0.158348201 | 0.305777861 |
| 0.050898893 | 0.006154462 | 0.377758915 | 0.016294129 |
| 0.158503221 | 0.246828146 | 0.138603107 | 0.203259018 |
| 0.120471612 | 0.24855682  | 0.183444223 | 0.000291444 |
| 0.372942912 | 0.026207018 | 0.219586127 | 0.117227961 |
| 0.219929629 | 0.02643588  | 0.378526206 | 0.465906954 |
| 0.215161692 | 0.224353283 | 0.207204888 | 0.417326031 |
| 0.114619682 | 0.251274744 | 0.272628547 | 0.292422035 |
| 0.163983272 | 0.22386362  | 0.246318798 | 0.199565311 |
| 0.287763291 | 0.146834241 |             |             |
| TH1L        | 0.048698585 | 0.190187357 | 0.032420792 |
| 0.107540698 | 0.271251981 | 0.116156241 | 0.033312865 |
| 0.048943553 | 0.136786255 | 0.031024928 | 0.265280667 |
| 0.021897581 | 0.043688996 | 0.297401902 | 0.033251318 |
| 0.249410934 | 0.036593816 | 0.097051605 | 0.011810235 |
| 0.039410318 | 0.271258192 | 0.09327589  | 0.113428541 |
| 0.191854176 | 0.145009299 | 0.128456544 | 0.133986367 |
| 0.273535277 | 0.048358044 | 0.25075596  | 0.024355484 |
| 0.302428606 | 0.291948543 | 0.134310308 | 0.012949682 |
| 0.166725994 | 0.004142593 | 0.261342837 | 0.18545836  |
| 0.092991451 | 0.254287843 | 0.057976439 | 0.214355139 |
| 0.091038122 | 0.029634119 | 0.017267766 | 0.201780172 |
| 0.114672599 | 0.079320999 | 0.033299836 | 0.212636609 |
| 0.068018205 | 0.21150165  | 0.134397204 | 0.003244565 |
| 0.143412453 | 0.028345043 | 0.07338113  | 0.27011152  |
| 0.222862417 | 0.137127077 | 0.034153214 | 0.063220833 |
| 0.146216605 | 0.202927112 | 0.186288731 | 0.064493392 |
| 0.309122769 | 0.072337001 | 0.204851525 | 0.0822093   |
| 0.125054732 | 0.011856712 | 0.168716431 | 0.031321123 |
| 0.096725663 | 0.209703009 | 0.232342606 | 0.132085021 |
| 0.189170167 | 0.295580706 | 0.162518297 | 0.243465044 |
| 0.035437448 | 0.21807907  | 0.119958259 | 0.287147501 |
| 0.191062967 | 0.025187838 | 0.327338555 | 0.32578541  |
| 0.016958334 | 0.098411374 | 0.205977416 | 0.068447346 |
| 0.219243991 | 0.04589908  | 0.101288897 | 0.113687136 |
| 0.270585678 | 0.245374263 | 0.232035741 | 0.287735011 |
| 0.153440466 | 0.047116088 | 0.229415942 | 0.237891519 |
| 0.222578416 | 0.066013847 | 0.104372097 | 0.271481868 |

|             |             |             |             |
|-------------|-------------|-------------|-------------|
| 0.246407747 | 0.29496571  | 0.198320503 | 0.24258522  |
| 0.224996846 | 0.307443382 | 0.281933867 | 0.221945535 |
| 0.010147473 | 0.280768008 | 0.156932179 | 0.042970749 |
| 0.027337039 | 0.068263961 | 0.048292375 | 0.244284629 |
| 0.294883698 | 0.193601653 | 0.125324355 | 0.236182878 |
| 0.326782492 | 0.219544112 | 0.267936226 | 0.26575615  |
| 0.036701909 | 0.055558142 | 0.228242061 | 0.067329721 |
| 0.241888254 | 0.078566051 | 0.202532679 | 0.274777386 |
| 0.314266198 | 0.307064282 | 0.055700881 | 0.270874463 |
| 0.069244411 | 0.350425429 | 0.22481829  | 0.196157251 |
| 0.299259995 | 0.266195393 | 0.355794538 | 0.303152719 |
| 0.276706113 | 0.18497042  | 0.008436263 | 0.226179258 |
| 0.357765385 | 0.023562421 | 0.263864135 | 0.294536944 |
| 0.264580583 | 0.29839744  | 0.337289471 | 0.304285186 |
| 0.25763071  | 0.056761945 | 0.003504722 | 0.293463302 |
| 0.280377738 | 0.320391936 | 0.05848493  | 0.173660718 |
| 0.240740946 | 0.134695972 | 0.217851466 | 0.09961069  |
| 0.34402351  | 0.277937014 | 0.261871458 | 0.215914488 |
| 0.080505833 | 0.234374152 | 0.166178959 | 0.232560993 |
| 0.033255267 | 0.070402072 | 0.039973008 | 0.192570727 |
| 0.040820688 | 0.21009566  | 0.109221954 | 0.162377204 |
| 0.228982814 | 0.078370874 | 0.10043985  | 0.301575335 |
| 0.035286329 | 0.177345731 | 0.109175627 | 0.099798273 |
| 0.048484878 | 0.114138009 | 0.120636613 | 0.102227997 |
| 0.238745934 | 0.128172761 | 0.211059015 | 0.292372461 |
| 0.109659283 | 0.143966779 | 0.224386751 | 0.332933882 |
| 0.375465832 | 0.236182229 | 0.176025435 | 0.045832989 |
| 0.109073141 | 0.041242317 | 0.065718948 | 0.158755085 |
| 0.107814014 | 0.093302614 | 0.226496704 | 0.348591062 |
| 0.143568362 | 0.041918098 | 0.1254473   | 0.27721355  |
| 0.087086621 | 0.197766525 | 0.346085607 | 0.130735054 |
| 0.004987057 | 0.216223376 | 0.298250315 | 0.077609711 |
| 0.165798437 | 0.094959357 | 0.094619803 | 0.312135723 |
| 0.063546418 | 0.113784369 | 0.285370311 | 0.302330513 |
| 0.061403884 | 0.101611634 | 0.324094238 | 0.015077099 |
| 0.133618038 | 0.093021892 | 0.3316419   | 0.053814792 |
| 0.215322447 | 0.255300722 | 0.238242598 | 0.172277073 |
| 0.08558146  | 0.289543377 | 0.23732269  | 0.314581008 |
| 0.10079698  | 0.325492854 | 0.314132739 | 0.333493779 |
| 0.226506109 | 0.101419965 | 0.060197718 | 0.309691029 |
| 0.302545691 | 0.048586976 | 0.04591337  | 0.220300141 |
| 0.085544458 | 0.264200961 | 0.065853091 | 0.352537008 |
| 0.308940409 | 0.210970324 | 0.120585354 | 0.322073234 |
| 0.345199634 | 0.19269178  | 0.249276478 | 0.324760228 |
| 0.030484407 | 0.19777596  | 0.162677543 | 0.354772449 |
| 0.172997426 | 0.10979303  | 0.193102599 | 0.050989815 |
| 0.006212847 | 0.042923167 | 0.057792206 | 0.196434644 |
| 0.136033699 | 0.14030494  | 0.242706905 | 0.305971196 |
| 0.126849624 | 0.268962644 | 0.132849744 | 0.180716985 |
| 0.255002949 | 0.132713564 | 0.199144014 | 0.230506967 |
| 0.177893426 | 0.03717124  | 0.114837248 | 0.303261837 |
| 0.019141237 | 0.13309215  | 0.098900528 | 0.0117791   |
| 0.030275317 | 0.15722203  | 0.06732452  | 0.156633184 |
| 0.33078655  | 0.143759318 | 0.161609478 | 0.044543266 |

|             |             |             |             |
|-------------|-------------|-------------|-------------|
| 0.299792106 | 0.089814658 | 0.018920127 | 0.267507476 |
| 0.235351574 | 0.220935713 | 0.228217242 | 0.205029315 |
| 0.231896065 | 0.185887997 | 0.293420007 | 0.129411263 |
| 0.051693004 | 0.032024262 | 0.112232973 | 0.222424344 |
| 0.002134153 | 0.314411883 | 0.155144749 | 0.160911152 |
| 0.254767939 | 0.186348315 | 0.032349127 | 0.19217487  |
| 0.031297658 | 0.087547561 | 0.056402718 | 0.109058227 |
| 0.275440512 | 0.011806524 | 0.079146799 | 0.086867021 |
| 0.238594694 | 0.236256041 | 0.103160739 | 0.298751237 |
| 0.27817483  | 0.05998415  | 0.240611207 | 0.299905022 |
| 0.053796155 | 0.016129632 | 0.076468853 | 0.008905498 |
| 0.031380824 | 0.219437844 | 0.085603057 | 0.035409319 |
| 0.263243965 | 0.008716803 | 0.252381856 | 0.312700192 |
| 0.218527529 | 0.331244281 | 0.316017491 | 0.198375991 |
| 0.306657128 | 0.023668119 | 0.300120852 | 0.222727236 |
| 0.076344619 | 0.004292833 | 0.009942028 | 0.31010711  |
| 0.244796843 | 0.0294789   | 0.167087497 | 0.069883481 |
| 0.097349521 | 0.056560655 | 0.042498553 | 0.145603334 |
| 0.201373551 | 0.251411456 | 0.088706057 | 0.231012887 |
| 0.188536213 | 0.192174754 | 0.077713947 | 0.057974885 |
| 0.206299197 | 0.04846858  | 0.051465427 | 0.026544475 |
| 0.270923272 | 0.068972312 | 0.222983137 | 0.278910097 |
| 0.336754238 | 0.302181693 | 0.048570641 | 0.059226114 |
| 0.237593795 | 0.048635095 | 0.050672146 | 0.054927655 |
| 0.253405208 | 0.294601064 | 0.332581651 | 0.270334185 |
| 0.353140544 | 0.305615873 | 0.033745982 | 0.307259408 |
| 0.031150387 | 0.004531928 | 0.133440571 | 0.172095456 |
| 0.006466596 | 0.180948899 | 0.25358713  | 0.043127184 |
| 0.064545705 | 0.028475645 | 0.132648324 | 0.15051651  |
| 0.273518062 | 0.21052617  | 0.257142937 | 0.126534894 |
| 0.143320951 | 0.091848462 | 0.127354529 | 0.075780756 |
| 0.029318786 | 0.195692844 | 0.155681221 | 0.016345455 |
| 0.141278676 | 0.205483624 | 0.06392521  | 0.131347242 |
| 0.338637889 | 0.324039852 | 0.038485056 | 0.045201175 |
| 0.214865181 | 0.127796871 | 0.336773029 | 0.256082297 |
| 0.287606928 | 0.350895637 | 0.261669432 | 0.090045775 |
| 0.052996494 | 0.23646406  | 0.233849302 | 0.088418289 |
| 0.298756784 | 0.035274718 | 0.249851235 | 0.184793991 |
| 0.098996825 | 0.131471781 | 0.048862506 | 0.078778906 |
| 0.217576874 | 0.171710435 | 0.218071481 | 0.100182284 |
| 0.204821889 | 0.090217858 | 0.035776623 | 0.1979325   |
| 0.254965315 | 0.090446554 | 0.1532886   | 0.066910971 |
| 0.184738773 | 0.011985296 | 0.270734773 | 0.339476403 |
| 0.113618289 | 0.065039537 | 0.067197721 | 0.197845639 |
| 0.249043084 | 0.103468993 | 0.041641424 | 0.1995655   |
| 0.303744608 | 0.23818497  | 0.26659911  | 0.324269115 |
| 0.066570607 | 0.255447398 | 0.098276841 | 0.231650577 |
| 0.144083654 | 0.123690728 | 0.139800671 | 0.061566784 |
| 0.200592163 | 0.259618472 | 0.238346976 | 0.193420431 |
| 0.143747935 | 0.050267505 | 0.028761326 | 0.225659359 |
| 0.113078334 | 0.054724397 | 0.063336994 | 0.231881958 |
| 0.008151876 | 0.077927064 | 0.289720971 | 0.123146146 |
| 0.292018783 | 0.330553067 | 0.325477942 | 0.049449431 |
| 0.001507931 | 0.23573967  | 0.316014846 | 0.176773631 |

|             |             |             |             |
|-------------|-------------|-------------|-------------|
| 0.233851237 | 0.216571662 | 0.020807465 | 0.076651382 |
| 0.28687967  | 0.051603085 | 0.101826414 | 0.054263063 |
| 0.059957146 | 0.174364794 | 0.204693808 | 0.105154599 |
| 0.16546257  | 0.034442029 | 0.084445599 | 0.153982755 |
| 0.036689479 | 0.258863616 | 0.337811009 | 0.024054262 |
| 0.103771987 | 0.27063151  | 0.247018354 | 0.02363017  |
| 0.170235617 | 0.250062394 | 0.259874384 | 0.008963881 |
| 0.308573695 | 0.015014559 | 0.209335566 | 0.245621969 |
| 0.177877619 | 0.153841684 | 0.265141185 | 0.162623322 |
| 0.171389792 | 0.149090942 | 0.208762779 | 0.272044541 |
| 0.151251181 | 0.111969867 | 0.216551736 | 0.115529523 |
| 0.214037315 | 0.102310077 | 0.064750997 | 0.06162411  |
| 0.059836635 | 0.236083503 | 0.21713858  | 0.049728809 |
| 0.210838792 | 0.092334673 | 0.322523244 | 0.239074663 |
| 0.312630984 | 0.057436786 | 0.122447959 | 0.253219439 |
| 0.023868951 | 0.051899026 | 0.02240539  | 0.147487821 |
| 0.179292484 | 0.141885171 | 0.103787547 | 0.148758184 |
| 0.166283972 | 0.295459793 | 0.206791744 | 0.276309326 |
| 0.171658185 | 0.100363534 | 0.046626086 | 0.104947647 |
| 0.151480484 | 0.09267315  | 0.265559358 | 0.008163145 |
| 0.253005692 | 0.06099641  | 0.308582654 | 0.262484932 |
| 0.095576138 | 0.285284175 | 0.038678158 | 0.063371783 |
| 0.025668318 | 0.101130139 | 0.136544821 | 0.209953749 |
| 0.08974715  | 0.107901435 | 0.269771743 | 0.053499228 |
| 0.264171226 | 0.189611703 | 0.092855076 | 0.095100982 |
| 0.134002054 | 0.117522487 | 0.232628274 | 0.050566481 |
| 0.162359628 | 0.159594501 | 0.088677472 | 0.258662676 |
| 0.183695346 | 0.286998752 | 0.050554505 | 0.301388234 |
| 0.192480737 | 0.087786367 | 0.32079633  | 0.103623476 |
| 0.051080484 | 0.091879429 | 0.098959256 | 0.065108071 |
| 0.073491495 | 0.111501051 | 0.00164287  | 0.042827787 |
| 0.347020536 | 0.048700539 | 0.173864272 | 0.201526479 |
| 0.15210482  | 0.298053351 | 0.044365358 | 0.105588798 |
| 0.218623177 | 0.241149357 | 0.134040439 | 0.225650583 |
| 0.242589063 | 0.100971751 | 0.156281505 | 0.001407297 |
| 0.220896173 | 0.176787489 | 0.050102401 | 0.040697247 |
| 0.016104141 | 0.112222245 | 0.193937945 | 0.027801831 |
| 0.327365416 | 0.070828987 | 0.102516873 | 0.237466013 |
| 0.102728656 | 0.252177642 | 0.101139491 | 0.345185111 |
| 0.008417859 | 0.174044306 | 0.138312108 | 0.102599357 |
| 1           | 0.192673313 | 0.357058662 | 0.189788303 |
| 0.040951204 | 0.1189616   | 0.004760684 | 0.272623602 |
| 0.220152612 | 0.170238014 | 0.155136623 | 0.0237238   |
| 0.295748023 | 0.211063466 | 0.081784206 | 0.122891036 |
| 0.029441555 | 0.29083316  | 0.168604582 | 0.266861217 |
| 0.075907327 | 0.13222693  | 0.062449554 | 0.158497588 |
| 0.217778241 | 0.100230524 | 0.177760466 | 0.072295784 |
| 0.243946728 | 0.173189692 | 0.081735704 | 0.071494233 |
| 0.121773493 | 0.050054432 | 0.065084892 | 0.303217635 |
| 0.195362218 | 0.200345625 | 0.352919436 | 0.17755038  |
| 0.151622054 | 0.20476127  | 0.130828382 | 0.271329763 |
| 0.087509111 | 0.252340156 | 0.270092645 | 0.254605784 |
| 0.308823207 | 0.12165564  | 0.149135438 | 0.200224594 |
| 0.232977281 | 0.082106205 | 0.073390618 | 0.25057181  |

|             |             |             |             |
|-------------|-------------|-------------|-------------|
| 0.151576305 | 0.239625587 | 0.079878005 | 0.175604609 |
| 0.05423355  | 0.055689664 | 0.100904203 | 0.119949009 |
| 0.25340516  | 0.227454641 | 0.124662448 | 0.317197944 |
| 0.130559598 | 0.068476973 | 0.316345815 | 0.031968713 |
| 0.140135458 | 0.315500134 | 0.180011065 | 0.17942266  |
| 0.166347191 | 0.162731781 | 0.11976271  | 0.00424733  |
| 0.29083063  | 0.034761134 | 0.094063429 | 0.17380831  |
| 0.066554717 | 0.032607401 | 0.265092326 | 0.342199588 |
| 0.161598207 | 0.041178798 | 0.063856409 | 0.252065132 |
| 0.099000681 | 0.065646527 | 0.080124267 | 0.164532246 |
| 0.130749298 | 0.083270621 | 0.100718652 | 0.139450485 |
| 0.226305896 | 0.089877448 |             |             |
| THG1L       | 0.020785442 | 0.243569765 | 0.011570922 |
| 0.076328496 | 0.314327838 | 0.123413753 | 0.024250973 |
| 0.049952137 | 0.193111464 | 0.08904916  | 0.22010213  |
| 0.007819311 | 0.161667554 | 0.324800271 | 0.024017758 |
| 0.325891195 | 0.021875403 | 0.050494474 | 0.038927452 |
| 0.101335814 | 0.295035471 | 0.198614477 | 0.121866043 |
| 0.262229789 | 0.093914618 | 0.150952356 | 0.244486442 |
| 0.331261975 | 0.138324187 | 0.292589489 | 0.07142433  |
| 0.287864009 | 0.344417314 | 0.213858194 | 0.004854763 |
| 0.199541815 | 0.034887718 | 0.269462113 | 0.188017833 |
| 0.209919592 | 0.218444958 | 0.089367381 | 0.14151016  |
| 0.141042792 | 0.011098357 | 0.058860039 | 0.31803508  |
| 0.160170238 | 0.127096192 | 0.01573417  | 0.26643638  |
| 0.151256516 | 0.176223046 | 0.191447536 | 0.001026579 |
| 0.226617479 | 0.148855556 | 0.217568495 | 0.304902009 |
| 0.128458352 | 0.068564615 | 0.148350652 | 0.088200861 |
| 0.246181036 | 0.300112722 | 0.182418303 | 0.139206299 |
| 0.331392252 | 0.225644619 | 0.309367211 | 0.083895734 |
| 0.144484249 | 0.007517706 | 0.099640155 | 0.026563443 |
| 0.185483456 | 0.13616785  | 0.23561992  | 0.243720579 |
| 0.237667449 | 0.325130008 | 0.149685627 | 0.285542512 |
| 0.158754841 | 0.331419665 | 0.231870091 | 0.276794112 |
| 0.270383217 | 0.034243133 | 0.312453172 | 0.354676936 |
| 0.013029588 | 0.158535842 | 0.27070215  | 0.047661589 |
| 0.257631989 | 0.188832413 | 0.145494984 | 0.225924117 |
| 0.368344592 | 0.309421425 | 0.282716441 | 0.200611566 |
| 0.214092236 | 0.023138517 | 0.255293347 | 0.346633719 |
| 0.18261866  | 0.028288541 | 0.227852652 | 0.3723797   |
| 0.278034872 | 0.333999954 | 0.275496058 | 0.283954767 |
| 0.304530611 | 0.339561908 | 0.276360745 | 0.267855874 |
| 0.050830986 | 0.33231037  | 0.088441763 | 0.023818821 |
| 0.015285795 | 0.048782288 | 0.177263415 | 0.223507541 |
| 0.349368386 | 0.194066737 | 0.074999223 | 0.192141848 |
| 0.409146287 | 0.25108235  | 0.330101306 | 0.303727608 |
| 0.014100899 | 0.21939036  | 0.293548287 | 0.085640741 |
| 0.272634812 | 0.054199613 | 0.266642826 | 0.295603667 |
| 0.261758159 | 0.375645964 | 0.044899023 | 0.28911494  |
| 0.081927743 | 0.363660522 | 0.27227724  | 0.098414527 |
| 0.323996493 | 0.280875669 | 0.389303972 | 0.380200343 |
| 0.282519059 | 0.142104081 | 0.036586495 | 0.271987167 |
| 0.362910691 | 0.034702307 | 0.354028348 | 0.38033638  |
| 0.306846348 | 0.37707672  | 0.400839504 | 0.364880487 |

|             |             |             |             |
|-------------|-------------|-------------|-------------|
| 0.302197237 | 0.029022115 | 0.032484019 | 0.288206048 |
| 0.309901631 | 0.288670853 | 0.09020766  | 0.248326523 |
| 0.320125042 | 0.134672146 | 0.309245111 | 0.164480102 |
| 0.363603549 | 0.32805793  | 0.337779504 | 0.2636626   |
| 0.130279804 | 0.193263502 | 0.28259961  | 0.244672829 |
| 0.021115792 | 0.032962463 | 0.01579797  | 0.223300053 |
| 0.092236469 | 0.131276809 | 0.115251202 | 0.263513753 |
| 0.140784149 | 0.102351563 | 0.198195155 | 0.374768912 |
| 0.018157607 | 0.217698049 | 0.070997071 | 0.07032289  |
| 0.027467911 | 0.071200522 | 0.105156394 | 0.082527688 |
| 0.196889185 | 0.105095413 | 0.290521817 | 0.361868014 |
| 0.182928644 | 0.089721118 | 0.264507961 | 0.352435025 |
| 0.348337391 | 0.298386109 | 0.144523548 | 0.012328168 |
| 0.199082088 | 0.149142241 | 0.229918385 | 0.252469889 |
| 0.080603942 | 0.143536493 | 0.283096386 | 0.38471037  |
| 0.102522579 | 0.039065445 | 0.203767858 | 0.257013531 |
| 0.064449287 | 0.191403616 | 0.369381973 | 0.19549698  |
| 0.000961315 | 0.178342051 | 0.337589521 | 0.180459841 |
| 0.189239253 | 0.19542439  | 0.19944582  | 0.367051767 |
| 0.202226474 | 0.222767026 | 0.357946285 | 0.379197465 |
| 0.127800008 | 0.094328235 | 0.385855663 | 0.068511352 |
| 0.244363552 | 0.077043748 | 0.265682371 | 0.099996237 |
| 0.154480897 | 0.246043971 | 0.310960038 | 0.21834699  |
| 0.046044111 | 0.330817712 | 0.259788161 | 0.359082553 |
| 0.193847096 | 0.384524849 | 0.37004993  | 0.332226062 |
| 0.228199628 | 0.198139063 | 0.20967444  | 0.334688845 |
| 0.364218969 | 0.155651192 | 0.024562943 | 0.326729402 |
| 0.155182765 | 0.352893948 | 0.148149498 | 0.379313365 |
| 0.315629488 | 0.249804118 | 0.09224148  | 0.375739385 |
| 0.289910193 | 0.112204266 | 0.310025516 | 0.381138671 |
| 0.117315423 | 0.262874164 | 0.232258152 | 0.395754057 |
| 0.099606584 | 0.222601156 | 0.201475548 | 0.214889178 |
| 0.016889963 | 0.023909894 | 0.022955625 | 0.123573647 |
| 0.251330642 | 0.228641046 | 0.310471743 | 0.352307279 |
| 0.059156711 | 0.270708365 | 0.144651549 | 0.199568501 |
| 0.270053523 | 0.209220314 | 0.286221388 | 0.295828347 |
| 0.154530277 | 0.016121379 | 0.074989577 | 0.324860237 |
| 0.009795921 | 0.239604797 | 0.125022756 | 0.00291778  |
| 0.015278743 | 0.226195336 | 0.040459772 | 0.103451561 |
| 0.398806018 | 0.099452949 | 0.11054096  | 0.10926447  |
| 0.281745452 | 0.041533972 | 0.0056769   | 0.34471806  |
| 0.313691435 | 0.299299502 | 0.304594727 | 0.258369727 |
| 0.32696397  | 0.272553999 | 0.368401185 | 0.124038397 |
| 0.045585573 | 0.023150005 | 0.261654755 | 0.199939371 |
| 0.002044416 | 0.314571916 | 0.215350532 | 0.084107336 |
| 0.345894446 | 0.207079676 | 0.013418962 | 0.292657528 |
| 0.008662035 | 0.220118641 | 0.107867558 | 0.12134317  |
| 0.346707411 | 0.004128776 | 0.105671713 | 0.203944385 |
| 0.233803804 | 0.208280244 | 0.207617433 | 0.342619377 |
| 0.217390487 | 0.046531459 | 0.225037937 | 0.328987039 |
| 0.032017674 | 0.059766122 | 0.114473014 | 0.019077427 |
| 0.06867135  | 0.27263582  | 0.167949709 | 0.02617266  |
| 0.181260732 | 0.001571809 | 0.219607387 | 0.349032996 |
| 0.252464601 | 0.394798982 | 0.33871236  | 0.240515631 |

|             |             |             |             |
|-------------|-------------|-------------|-------------|
| 0.332382625 | 0.150308623 | 0.356767546 | 0.250483744 |
| 0.132933323 | 0.000676766 | 0.004496084 | 0.37700634  |
| 0.29159658  | 0.016221901 | 0.092684601 | 0.110626638 |
| 0.071840034 | 0.040191793 | 0.024483721 | 0.243064961 |
| 0.231167132 | 0.226590193 | 0.208738936 | 0.26561946  |
| 0.149500963 | 0.163961462 | 0.113711568 | 0.033714768 |
| 0.268640938 | 0.027013761 | 0.034782367 | 0.013193252 |
| 0.338143261 | 0.044486019 | 0.242644943 | 0.324503025 |
| 0.347601368 | 0.358361479 | 0.11258058  | 0.123355377 |
| 0.331094589 | 0.029539869 | 0.153972391 | 0.034741112 |
| 0.287103701 | 0.325327542 | 0.24805746  | 0.197049439 |
| 0.378578331 | 0.309658745 | 0.013220634 | 0.345530146 |
| 0.006512759 | 0.004467994 | 0.13077292  | 0.168384757 |
| 0.0627232   | 0.245790605 | 0.181192995 | 0.104073332 |
| 0.122663156 | 0.010471557 | 0.259788865 | 0.262767789 |
| 0.242662153 | 0.236648816 | 0.29733864  | 0.144622991 |
| 0.209249502 | 0.197720597 | 0.117825096 | 0.075538488 |
| 0.121890508 | 0.180725928 | 0.098034548 | 0.008352915 |
| 0.198289573 | 0.255983681 | 0.021192102 | 0.081007045 |
| 0.34339211  | 0.370528413 | 0.028507859 | 0.013547501 |
| 0.164164835 | 0.170010638 | 0.388312639 | 0.302853766 |
| 0.314824022 | 0.379383435 | 0.240938206 | 0.119297404 |
| 0.025575139 | 0.264459151 | 0.30706311  | 0.128960315 |
| 0.339764206 | 0.019803014 | 0.28456566  | 0.29815799  |
| 0.059766582 | 0.114393846 | 0.021449259 | 0.040501012 |
| 0.305626297 | 0.105552881 | 0.149754311 | 0.059450344 |
| 0.188785962 | 0.239770476 | 0.018401633 | 0.123661594 |
| 0.241901666 | 0.268412423 | 0.092203889 | 0.09920322  |
| 0.20941902  | 0.067247952 | 0.355773802 | 0.32459887  |
| 0.059513475 | 0.046161863 | 0.081785944 | 0.279081545 |
| 0.321463547 | 0.188827447 | 0.011483229 | 0.254210008 |
| 0.35632072  | 0.292184785 | 0.294703733 | 0.344492716 |
| 0.036656368 | 0.263279081 | 0.211143095 | 0.278270033 |
| 0.110029261 | 0.123204    | 0.142455363 | 0.026134443 |
| 0.200144282 | 0.289059173 | 0.27523116  | 0.099024849 |
| 0.209874442 | 0.040404642 | 0.015955017 | 0.298543681 |
| 0.273885323 | 0.035054202 | 0.100233874 | 0.338464484 |
| 0.005490216 | 0.224826067 | 0.382539419 | 0.110714591 |
| 0.344241821 | 0.38393233  | 0.300956748 | 0.086160709 |
| 0.010099076 | 0.352724472 | 0.276859898 | 0.186714646 |
| 0.265221947 | 0.202481633 | 0.056145194 | 0.053386071 |
| 0.227263472 | 0.025602198 | 0.100885484 | 0.108433553 |
| 0.207645637 | 0.205159604 | 0.142246393 | 0.111178873 |
| 0.146804879 | 0.030581891 | 0.229887163 | 0.105379676 |
| 0.183811282 | 0.177418297 | 0.28639414  | 0.071925426 |
| 0.202262525 | 0.340293295 | 0.283346447 | 0.008331838 |
| 0.26683217  | 0.321520405 | 0.311703339 | 0.003088642 |
| 0.34814535  | 0.003765191 | 0.149365211 | 0.15624635  |
| 0.137101443 | 0.137894457 | 0.25403968  | 0.21493018  |
| 0.205623378 | 0.117328516 | 0.144099826 | 0.175584948 |
| 0.122104406 | 0.098663308 | 0.277108784 | 0.146314033 |
| 0.19461343  | 0.054101053 | 0.039328419 | 0.037647831 |
| 0.028051005 | 0.297532101 | 0.146026497 | 0.02428909  |
| 0.164375227 | 0.13884045  | 0.274090823 | 0.286734616 |



|             |             |             |             |
|-------------|-------------|-------------|-------------|
| 0.324278789 | 0.038653065 | 0.167191797 | 0.278589242 |
| 0.099098418 | 0.098591209 | 0.015554931 | 0.179858803 |
| 0.120413496 | 0.212322381 | 0.152493353 | 0.13636561  |
| 0.243624592 | 0.260431401 | 0.138615465 | 0.307610796 |
| 0.18464227  | 0.18134287  | 0.084329615 | 0.070224911 |
| 0.078727207 | 0.063781836 | 0.294397441 | 0.00097718  |
| 0.232680581 | 0.077047655 | 0.357770931 | 0.285575927 |
| 0.217347296 | 0.272911531 | 0.085185813 | 0.03954149  |
| 0.074284388 | 0.076135587 | 0.075592637 | 0.296396611 |
| 0.222461828 | 0.080375391 | 0.282679559 | 0.076452987 |
| 0.348801149 | 0.298864162 | 0.198375748 | 0.093435248 |
| 0.147982652 | 0.088080338 | 0.280987987 | 0.03161861  |
| 0.242833777 | 0.229476392 | 0.140681737 | 0.215003036 |
| 0.165496944 | 0.360353643 | 0.020606859 | 0.369907803 |
| 0.221374083 | 0.0587077   | 0.327966169 | 0.117983383 |
| 0.101596389 | 0.097250115 | 0.248284578 | 0.114609675 |
| 0.126822698 | 0.216820556 | 0.007355044 | 0.080759301 |
| 0.284958389 | 0.12825337  | 0.244552547 | 0.276124055 |
| 0.237739659 | 0.312147401 | 0.184438593 | 0.111887932 |
| 0.257534219 | 0.271259793 | 0.15028214  | 0.186388033 |
| 0.237474376 | 0.048660919 | 0.167594024 | 0.010797247 |
| 0.293447844 | 0.276614086 | 0.138678897 | 0.022558422 |
| 0.007809456 | 0.259177978 | 0.258641494 | 0.020888272 |
| 0.407032212 | 0.207866939 | 0.177392106 | 0.291693561 |
| 0.089138323 | 0.273852837 | 0.103941103 | 0.330142542 |
| 0.014655793 | 0.164044311 | 0.242612694 | 0.187813866 |
| 0.192673313 | 1           | 0.334390966 | 0.253807932 |
| 0.016794101 | 0.186467988 | 0.004306354 | 0.241065529 |
| 0.251323953 | 0.271089744 | 0.115102523 | 0.093590688 |
| 0.239611177 | 0.261497292 | 0.167492364 | 0.201594028 |
| 0.008838288 | 0.334938139 | 0.119286326 | 0.254000841 |
| 0.17365013  | 0.207091217 | 0.03800029  | 0.265313935 |
| 0.228751273 | 0.176957182 | 0.164563497 | 0.190066844 |
| 0.288705946 | 0.229739183 | 0.063133708 | 0.166431418 |
| 0.210502311 | 0.023682319 | 0.10619837  | 0.359332193 |
| 0.115610773 | 0.259173881 | 0.406310489 | 0.136465659 |
| 0.241058165 | 0.225695089 | 0.228816    | 0.337360164 |
| 0.081447458 | 0.173448893 | 0.344938573 | 0.308380645 |
| 0.256873177 | 0.236053042 | 0.245096566 | 0.200125763 |
| 0.25185523  | 0.044580231 | 0.22487139  | 0.229673393 |
| 0.256555368 | 0.228472434 | 0.13488593  | 0.18630437  |
| 0.02484069  | 0.078503815 | 0.136540004 | 0.072885805 |
| 0.218570692 | 0.269039515 | 0.234527662 | 0.280101174 |
| 0.098135591 | 0.021715628 | 0.319450157 | 0.057728415 |
| 0.121833084 | 0.311640308 | 0.139227211 | 0.237823971 |
| 0.09620871  | 0.199990899 | 0.131923652 | 0.000209067 |
| 0.345499453 | 0.078480491 | 0.162768496 | 0.211698547 |
| 0.186460991 | 0.017598055 | 0.277726447 | 0.398392719 |
| 0.168561189 | 0.139421209 | 0.17390403  | 0.287338341 |
| 0.236387081 | 0.177230755 | 0.192436593 | 0.210135972 |
| 0.248580697 | 0.136217162 | 0.169092883 | 0.202823714 |
| 0.240586781 | 0.095061047 |             |             |
| TH0C4       | 0.116920405 | 0.347388942 | 0.07880213  |
| 0.259986955 | 0.35134747  | 0.319575826 | 0.110292262 |

|             |             |             |             |
|-------------|-------------|-------------|-------------|
| 0.1848209   | 0.265232269 | 0.183821266 | 0.371607274 |
| 0.054248223 | 0.112467555 | 0.426273546 | 0.104651023 |
| 0.358474883 | 0.095764484 | 0.180450968 | 0.07539715  |
| 0.224113963 | 0.347149211 | 0.315219874 | 0.278900049 |
| 0.322569579 | 0.206008301 | 0.274140533 | 0.289508068 |
| 0.437299854 | 0.204536725 | 0.349134011 | 0.150587469 |
| 0.417745091 | 0.354080379 | 0.299452517 | 0.041865396 |
| 0.331228294 | 0.01794089  | 0.413604881 | 0.355802049 |
| 0.233690644 | 0.350717341 | 0.215696698 | 0.345025673 |
| 0.270264611 | 0.075458412 | 0.121926059 | 0.319024196 |
| 0.262724206 | 0.277562964 | 0.079932338 | 0.329162922 |
| 0.286267599 | 0.300847884 | 0.261585338 | 0.005655787 |
| 0.284330019 | 0.088321319 | 0.207826834 | 0.442972575 |
| 0.263078098 | 0.216454371 | 0.205786391 | 0.21111384  |
| 0.28978901  | 0.313306775 | 0.274247294 | 0.267044504 |
| 0.458215912 | 0.208315697 | 0.31974791  | 0.227542581 |
| 0.318025687 | 0.049654444 | 0.21049003  | 0.088043834 |
| 0.318224615 | 0.289493222 | 0.344129879 | 0.30848188  |
| 0.348784953 | 0.470847523 | 0.26299241  | 0.428480113 |
| 0.124268145 | 0.326812119 | 0.322750901 | 0.330456944 |
| 0.297256535 | 0.116191978 | 0.373143624 | 0.487655727 |
| 0.066908932 | 0.248151907 | 0.314083197 | 0.131142928 |
| 0.363150359 | 0.225390112 | 0.266604589 | 0.235030246 |
| 0.347687242 | 0.351620994 | 0.409916379 | 0.326429337 |
| 0.303508142 | 0.093894    | 0.410814157 | 0.32437799  |
| 0.367906447 | 0.122038874 | 0.316179517 | 0.400238677 |
| 0.360584235 | 0.443780894 | 0.341526009 | 0.330870407 |
| 0.354015488 | 0.458683971 | 0.363078325 | 0.361571437 |
| 0.085020402 | 0.45947522  | 0.251818903 | 0.107481626 |
| 0.092798931 | 0.162358258 | 0.228782964 | 0.310947818 |
| 0.424544732 | 0.30752385  | 0.260413831 | 0.336500746 |
| 0.435907598 | 0.397916574 | 0.451196004 | 0.371524465 |
| 0.085806775 | 0.226898635 | 0.363022782 | 0.253610316 |
| 0.333824261 | 0.151327927 | 0.308251675 | 0.451626053 |
| 0.394078537 | 0.399559629 | 0.184815552 | 0.450211903 |
| 0.208303554 | 0.494389192 | 0.378346701 | 0.271336562 |
| 0.472708974 | 0.438798215 | 0.493736805 | 0.355911407 |
| 0.432350185 | 0.339728598 | 0.052437358 | 0.339775311 |
| 0.477109683 | 0.035052712 | 0.412407543 | 0.446876065 |
| 0.437467137 | 0.413734036 | 0.48838925  | 0.458432396 |
| 0.43313499  | 0.110538023 | 0.023904508 | 0.341719945 |
| 0.453996372 | 0.40270242  | 0.201510335 | 0.330877534 |
| 0.338842727 | 0.318784594 | 0.338599194 | 0.305821092 |
| 0.492578284 | 0.412576839 | 0.42150135  | 0.324896944 |
| 0.230089645 | 0.325397145 | 0.302443036 | 0.403674966 |
| 0.105996578 | 0.161514756 | 0.072647047 | 0.279918435 |
| 0.241037612 | 0.271265197 | 0.318081186 | 0.302079802 |
| 0.273080202 | 0.259511085 | 0.268580537 | 0.354616198 |
| 0.064265903 | 0.327565558 | 0.217251553 | 0.206368435 |
| 0.118841048 | 0.163083226 | 0.294247256 | 0.254680269 |
| 0.330693797 | 0.228316858 | 0.321509154 | 0.44644876  |
| 0.298186824 | 0.200937271 | 0.332384102 | 0.463685568 |
| 0.452036332 | 0.358309694 | 0.23719371  | 0.055999819 |
| 0.333416337 | 0.20746425  | 0.200186514 | 0.308896803 |

|             |             |             |             |
|-------------|-------------|-------------|-------------|
| 0.183717012 | 0.304320687 | 0.348586758 | 0.367113021 |
| 0.277597228 | 0.142493268 | 0.337926764 | 0.411028796 |
| 0.149377392 | 0.362299199 | 0.436657888 | 0.294497421 |
| 0.01252966  | 0.359471174 | 0.400902298 | 0.233009325 |
| 0.278430518 | 0.19176193  | 0.263592333 | 0.436199677 |
| 0.261203106 | 0.264345963 | 0.435231556 | 0.351090353 |
| 0.279511136 | 0.200282189 | 0.482533801 | 0.053603667 |
| 0.288726376 | 0.159903359 | 0.345035629 | 0.205847349 |
| 0.302916586 | 0.30992664  | 0.326627833 | 0.350280753 |
| 0.145287913 | 0.459126907 | 0.354148295 | 0.46476694  |
| 0.321734814 | 0.487818559 | 0.420744019 | 0.428673929 |
| 0.332254616 | 0.272934397 | 0.159721631 | 0.403965066 |
| 0.426147561 | 0.258992101 | 0.086682762 | 0.347517209 |
| 0.26947485  | 0.348557579 | 0.211405979 | 0.478553136 |
| 0.466676592 | 0.387889439 | 0.242303278 | 0.362860944 |
| 0.393574276 | 0.290476408 | 0.368011029 | 0.486028054 |
| 0.215629912 | 0.339006731 | 0.362498073 | 0.412159058 |
| 0.237049023 | 0.279276117 | 0.302220035 | 0.178913111 |
| 0.012332049 | 0.107985353 | 0.105281986 | 0.280396787 |
| 0.256709945 | 0.28144206  | 0.349041422 | 0.468838749 |
| 0.199475755 | 0.389914529 | 0.225816956 | 0.376477466 |
| 0.390776816 | 0.300921716 | 0.325136087 | 0.338331519 |
| 0.253664416 | 0.067914371 | 0.231937505 | 0.477670508 |
| 0.049965143 | 0.294010443 | 0.264193505 | 0.011635798 |
| 0.086460295 | 0.302781416 | 0.108500538 | 0.220125391 |
| 0.449487792 | 0.216043245 | 0.239970042 | 0.225364676 |
| 0.348799241 | 0.15120407  | 0.01789522  | 0.428990679 |
| 0.412804401 | 0.389317893 | 0.407375466 | 0.380574895 |
| 0.383471395 | 0.303980394 | 0.379721942 | 0.286177503 |
| 0.180773766 | 0.115454294 | 0.294013485 | 0.36161903  |
| 0.006950448 | 0.366967901 | 0.298986025 | 0.199524487 |
| 0.344295746 | 0.29154066  | 0.083512016 | 0.309684162 |
| 0.064435191 | 0.224516905 | 0.267046283 | 0.263752125 |
| 0.328320212 | 0.037151171 | 0.255024958 | 0.318112386 |
| 0.383845379 | 0.330653661 | 0.301165299 | 0.473742158 |
| 0.371412468 | 0.119803255 | 0.381784346 | 0.349560878 |
| 0.139630634 | 0.10001323  | 0.272768074 | 0.037431331 |
| 0.160248586 | 0.38768354  | 0.298366501 | 0.132579603 |
| 0.335592033 | 0.01938629  | 0.352683853 | 0.479231644 |
| 0.389901117 | 0.480443704 | 0.463061206 | 0.312927825 |
| 0.463361932 | 0.091419913 | 0.468781073 | 0.350596827 |
| 0.264829624 | 0.004917116 | 0.017004463 | 0.446089897 |
| 0.373025023 | 0.06092841  | 0.228337556 | 0.303369963 |
| 0.229982644 | 0.164285299 | 0.113079075 | 0.29330232  |
| 0.331163314 | 0.322884925 | 0.238600948 | 0.402335825 |
| 0.325714505 | 0.286974959 | 0.271322639 | 0.10530456  |
| 0.338688943 | 0.126163707 | 0.103723799 | 0.028362687 |
| 0.33837027  | 0.118493552 | 0.401962669 | 0.446553817 |
| 0.477175491 | 0.365905853 | 0.219324326 | 0.267396621 |
| 0.376632029 | 0.094854278 | 0.269260029 | 0.115230039 |
| 0.419628806 | 0.374069243 | 0.343970283 | 0.325109265 |
| 0.484732361 | 0.445029918 | 0.076993247 | 0.381898674 |
| 0.04374121  | 0.006057413 | 0.306799088 | 0.261244669 |
| 0.052365427 | 0.343078183 | 0.28628688  | 0.206547081 |

|             |             |             |             |
|-------------|-------------|-------------|-------------|
| 0.233531463 | 0.071296985 | 0.284438723 | 0.293463098 |
| 0.350801444 | 0.361859704 | 0.333818128 | 0.220104764 |
| 0.318912459 | 0.239795313 | 0.276448785 | 0.214225194 |
| 0.195725561 | 0.29603052  | 0.213020829 | 0.052918857 |
| 0.314990878 | 0.352391384 | 0.113129623 | 0.195782448 |
| 0.428532023 | 0.455656991 | 0.107329078 | 0.057245958 |
| 0.274157437 | 0.307481678 | 0.466641779 | 0.426693366 |
| 0.465169943 | 0.496714982 | 0.385989961 | 0.233494687 |
| 0.124946148 | 0.344852952 | 0.328186067 | 0.219011463 |
| 0.456695755 | 0.078705528 | 0.416878719 | 0.29851302  |
| 0.162304287 | 0.310481855 | 0.102902672 | 0.143386443 |
| 0.327194959 | 0.233104299 | 0.295713025 | 0.168787367 |
| 0.364619185 | 0.287880095 | 0.095398325 | 0.274323866 |
| 0.327287091 | 0.251144402 | 0.224679549 | 0.255354045 |
| 0.30173174  | 0.124723844 | 0.351926478 | 0.451946008 |
| 0.166152556 | 0.146314395 | 0.278404699 | 0.303198824 |
| 0.378640106 | 0.258192348 | 0.065534705 | 0.366235375 |
| 0.447419494 | 0.344708596 | 0.436097619 | 0.398579225 |
| 0.116228352 | 0.370204181 | 0.265948339 | 0.351051616 |
| 0.232736084 | 0.315575604 | 0.271400133 | 0.105963312 |
| 0.294060136 | 0.429570037 | 0.375871568 | 0.277614023 |
| 0.299190308 | 0.122637868 | 0.068633318 | 0.371064225 |
| 0.282960249 | 0.159260877 | 0.227743436 | 0.358721612 |
| 0.011388523 | 0.180640712 | 0.443516304 | 0.296546306 |
| 0.465333331 | 0.460079754 | 0.437545065 | 0.231389468 |
| 0.004893847 | 0.337487472 | 0.383753372 | 0.381346923 |
| 0.375101889 | 0.30605047  | 0.136914013 | 0.177652975 |
| 0.317089498 | 0.091787703 | 0.251502204 | 0.273132668 |
| 0.200858911 | 0.310149245 | 0.246884489 | 0.219161827 |
| 0.294307344 | 0.087038268 | 0.264604591 | 0.301774397 |
| 0.162555941 | 0.283624308 | 0.367757291 | 0.169725497 |
| 0.246833162 | 0.39787854  | 0.355200412 | 0.060776322 |
| 0.307934999 | 0.369317433 | 0.393448662 | 0.011478162 |
| 0.366781491 | 0.029596464 | 0.295789461 | 0.334998365 |
| 0.302665572 | 0.283324546 | 0.322979265 | 0.367164949 |
| 0.304835571 | 0.297219725 | 0.360099181 | 0.310568407 |
| 0.286023056 | 0.255604482 | 0.347667763 | 0.311717459 |
| 0.365495576 | 0.205448668 | 0.110529364 | 0.111253787 |
| 0.127765421 | 0.389647686 | 0.26773503  | 0.087047783 |
| 0.281722164 | 0.300361234 | 0.384139573 | 0.416001564 |
| 0.413362645 | 0.109093632 | 0.304772618 | 0.388368558 |
| 0.158136695 | 0.254122087 | 0.090248356 | 0.322543446 |
| 0.283593517 | 0.312928263 | 0.279283303 | 0.274202569 |
| 0.288286406 | 0.40387544  | 0.255984817 | 0.41148258  |
| 0.368823281 | 0.268132151 | 0.209791454 | 0.206343512 |
| 0.263179485 | 0.154415653 | 0.337876739 | 0.011240036 |
| 0.339173808 | 0.272473682 | 0.429201755 | 0.431180479 |
| 0.255498789 | 0.382435472 | 0.22915183  | 0.168475817 |
| 0.183452773 | 0.177523735 | 0.185395521 | 0.335118317 |
| 0.219496981 | 0.25453353  | 0.363362875 | 0.254981493 |
| 0.361287651 | 0.30993915  | 0.276241389 | 0.249792014 |
| 0.262491982 | 0.20858358  | 0.411032796 | 0.144829797 |
| 0.313433454 | 0.311481617 | 0.229290948 | 0.373115629 |
| 0.313798432 | 0.455090904 | 0.096441326 | 0.466332023 |

|             |             |             |             |
|-------------|-------------|-------------|-------------|
| 0.348097412 | 0.138872752 | 0.469160548 | 0.257150862 |
| 0.27554231  | 0.220942311 | 0.21775478  | 0.264780837 |
| 0.27208679  | 0.290910457 | 0.010751801 | 0.098557687 |
| 0.352700778 | 0.220994457 | 0.308973992 | 0.304264591 |
| 0.309143932 | 0.345777017 | 0.15698815  | 0.274004936 |
| 0.397701006 | 0.424950905 | 0.34889566  | 0.271476226 |
| 0.312786985 | 0.188164642 | 0.291172789 | 0.014972866 |
| 0.342489355 | 0.310581192 | 0.266430747 | 0.106396767 |
| 0.052456649 | 0.250180624 | 0.336547954 | 0.07535666  |
| 0.454545181 | 0.215509559 | 0.242855149 | 0.337723713 |
| 0.179428937 | 0.434253267 | 0.231470766 | 0.375282654 |
| 0.060690933 | 0.26955009  | 0.299748388 | 0.27241686  |
| 0.357058662 | 0.334390966 | 1           | 0.302161953 |
| 0.090546804 | 0.340947745 | 0.009040999 | 0.399277158 |
| 0.39919117  | 0.321247223 | 0.215200233 | 0.175774006 |
| 0.325976424 | 0.337167817 | 0.267426091 | 0.294548566 |
| 0.048065726 | 0.366649091 | 0.252820997 | 0.375673928 |
| 0.248059733 | 0.286603472 | 0.148012021 | 0.299100928 |
| 0.392503285 | 0.312593144 | 0.251233543 | 0.299789079 |
| 0.417270036 | 0.309650238 | 0.148671301 | 0.26241324  |
| 0.258611984 | 0.089826452 | 0.253916475 | 0.474466346 |
| 0.283659444 | 0.303831534 | 0.428369076 | 0.326370243 |
| 0.296430563 | 0.337819645 | 0.28039815  | 0.450823859 |
| 0.181930327 | 0.299672611 | 0.367737518 | 0.408597576 |
| 0.323563715 | 0.249696836 | 0.295399729 | 0.324416948 |
| 0.394850181 | 0.183414711 | 0.284157634 | 0.329043622 |
| 0.282014063 | 0.315436954 | 0.216901485 | 0.287056045 |
| 0.096621568 | 0.211506353 | 0.320980682 | 0.188225445 |
| 0.338822048 | 0.370719646 | 0.319531273 | 0.404569161 |
| 0.258591749 | 0.095948666 | 0.447049183 | 0.041786126 |
| 0.282602904 | 0.376947056 | 0.276571503 | 0.344841409 |
| 0.206090592 | 0.30616299  | 0.280147138 | 0.004981976 |
| 0.379772766 | 0.096363999 | 0.273469649 | 0.347208265 |
| 0.261121033 | 0.096160505 | 0.413997987 | 0.480421254 |
| 0.281343828 | 0.240127383 | 0.276124043 | 0.403912053 |
| 0.220123769 | 0.239148437 | 0.268586097 | 0.299624745 |
| 0.259567847 | 0.262357307 | 0.29213119  | 0.325400913 |
| 0.318148712 | 0.258530383 |             |             |
| TH0C6       | 0.016952318 | 0.191258897 | 0.010293397 |
| 0.07071397  | 0.319360482 | 0.11759039  | 0.015578785 |
| 0.035949943 | 0.141390942 | 0.055316436 | 0.230048233 |
| 0.006166358 | 0.199333011 | 0.269601315 | 0.01681529  |
| 0.288863858 | 0.017101616 | 0.040501766 | 0.023134199 |
| 0.066248422 | 0.286459628 | 0.199510915 | 0.103467667 |
| 0.244388424 | 0.07460088  | 0.114568566 | 0.212983757 |
| 0.272503611 | 0.14351317  | 0.281426286 | 0.050635671 |
| 0.228091585 | 0.34359712  | 0.210287037 | 0.00389615  |
| 0.183598723 | 0.021816686 | 0.203068    | 0.14540083  |
| 0.235914802 | 0.179989879 | 0.069229838 | 0.134369747 |
| 0.10074351  | 0.008257992 | 0.049590656 | 0.254170907 |
| 0.118977613 | 0.096766293 | 0.012051213 | 0.228617907 |
| 0.101241579 | 0.161484978 | 0.144604602 | 0.000751231 |
| 0.243351783 | 0.16587263  | 0.201350088 | 0.250725559 |
| 0.119917367 | 0.067184691 | 0.09976537  | 0.069108588 |

|             |             |             |             |
|-------------|-------------|-------------|-------------|
| 0.19247078  | 0.242348887 | 0.158596807 | 0.08468285  |
| 0.274815116 | 0.216848538 | 0.259712573 | 0.081425112 |
| 0.115106094 | 0.004044739 | 0.082516705 | 0.017263589 |
| 0.140197448 | 0.137679289 | 0.257014962 | 0.214850108 |
| 0.179405954 | 0.259396674 | 0.119786234 | 0.220129931 |
| 0.115601124 | 0.309458761 | 0.200628323 | 0.239624313 |
| 0.203687378 | 0.019101986 | 0.284575018 | 0.285367466 |
| 0.007564753 | 0.117695581 | 0.203597093 | 0.034242299 |
| 0.216904193 | 0.152847202 | 0.116401183 | 0.268102907 |
| 0.343084838 | 0.269670508 | 0.21613441  | 0.177843666 |
| 0.220244035 | 0.017012244 | 0.198268938 | 0.345522632 |
| 0.187944784 | 0.023286022 | 0.170431057 | 0.315729104 |
| 0.235535084 | 0.282783979 | 0.208797275 | 0.216797655 |
| 0.265619187 | 0.283591589 | 0.240591674 | 0.220506689 |
| 0.039451768 | 0.268368792 | 0.081124448 | 0.021795805 |
| 0.010646463 | 0.043080993 | 0.122778333 | 0.192387816 |
| 0.305980899 | 0.169981691 | 0.063219983 | 0.174552697 |
| 0.345924963 | 0.196545012 | 0.259571734 | 0.242459406 |
| 0.010571804 | 0.174577838 | 0.255597909 | 0.072746905 |
| 0.223934943 | 0.041845492 | 0.287456597 | 0.23194464  |
| 0.22778865  | 0.32132891  | 0.031634353 | 0.226569435 |
| 0.057433009 | 0.306649425 | 0.221487636 | 0.091460348 |
| 0.259927018 | 0.225390764 | 0.330421092 | 0.372376068 |
| 0.237785514 | 0.131698346 | 0.020261423 | 0.207233118 |
| 0.317373592 | 0.048191085 | 0.293822372 | 0.314284425 |
| 0.242866366 | 0.32188091  | 0.331336435 | 0.310994273 |
| 0.242243921 | 0.021928703 | 0.016653283 | 0.257026512 |
| 0.24389284  | 0.249397612 | 0.074432602 | 0.209311627 |
| 0.290211811 | 0.119970035 | 0.264343135 | 0.145087186 |
| 0.300768321 | 0.281818654 | 0.279956566 | 0.203055163 |
| 0.087805706 | 0.159553582 | 0.256451511 | 0.193882073 |
| 0.017982982 | 0.0272641   | 0.012413485 | 0.176794436 |
| 0.070563489 | 0.122866136 | 0.093493707 | 0.215917375 |
| 0.12922167  | 0.08097966  | 0.187464485 | 0.358024229 |
| 0.012395083 | 0.194833112 | 0.060145974 | 0.050092692 |
| 0.02183432  | 0.055527146 | 0.086135864 | 0.084076795 |
| 0.197411312 | 0.075810594 | 0.251588777 | 0.301354077 |
| 0.146744349 | 0.071263047 | 0.223461464 | 0.301840608 |
| 0.299165    | 0.289459923 | 0.116458143 | 0.014988141 |
| 0.134927178 | 0.100073688 | 0.21436779  | 0.229947588 |
| 0.060168576 | 0.097144346 | 0.229800655 | 0.377917693 |
| 0.086794545 | 0.028335633 | 0.147542244 | 0.213348308 |
| 0.0463695   | 0.192314952 | 0.316383183 | 0.14834105  |
| 0.00082958  | 0.146955369 | 0.293726464 | 0.145255527 |
| 0.139160343 | 0.210110702 | 0.23598696  | 0.299777606 |
| 0.166659468 | 0.187407684 | 0.308743434 | 0.36372715  |
| 0.115048569 | 0.066818678 | 0.318502045 | 0.052045563 |
| 0.208696244 | 0.094263005 | 0.246445541 | 0.073712311 |
| 0.127990045 | 0.205297211 | 0.321935064 | 0.203553099 |
| 0.038340172 | 0.26653166  | 0.225241789 | 0.302824851 |
| 0.139895341 | 0.313114944 | 0.320705888 | 0.291841391 |
| 0.201801693 | 0.157308214 | 0.225863209 | 0.282446358 |
| 0.301231215 | 0.095053193 | 0.018014862 | 0.267550579 |
| 0.109271265 | 0.308067269 | 0.13277483  | 0.314835714 |

|             |             |             |             |
|-------------|-------------|-------------|-------------|
| 0.260948093 | 0.191961767 | 0.082303784 | 0.332745404 |
| 0.258966852 | 0.107278829 | 0.267084549 | 0.314360885 |
| 0.0672838   | 0.218796135 | 0.175925091 | 0.355099254 |
| 0.083646541 | 0.179554781 | 0.160503382 | 0.217517272 |
| 0.032321683 | 0.018149663 | 0.017917396 | 0.126083063 |
| 0.263113757 | 0.191975555 | 0.266420624 | 0.286691103 |
| 0.053252295 | 0.240394624 | 0.106930972 | 0.156673227 |
| 0.205955627 | 0.183555966 | 0.296099018 | 0.286802146 |
| 0.125964706 | 0.017384065 | 0.074750651 | 0.256228027 |
| 0.006401444 | 0.257241889 | 0.098957672 | 0.003624428 |
| 0.009777861 | 0.173795171 | 0.028281661 | 0.080498343 |
| 0.350185383 | 0.076362894 | 0.083268914 | 0.061307016 |
| 0.274579699 | 0.036254384 | 0.011710549 | 0.273268327 |
| 0.24454474  | 0.229842339 | 0.234567335 | 0.199024784 |
| 0.25037362  | 0.229436737 | 0.308101321 | 0.11074792  |
| 0.033071461 | 0.014767802 | 0.211633117 | 0.171849806 |
| 0.001473772 | 0.301490932 | 0.202757251 | 0.071264905 |
| 0.303450407 | 0.160218171 | 0.011569692 | 0.275629665 |
| 0.007850704 | 0.226418172 | 0.07129662  | 0.10071798  |
| 0.311706668 | 0.003224911 | 0.091541439 | 0.151248887 |
| 0.191943264 | 0.170713622 | 0.173933041 | 0.279777227 |
| 0.216334999 | 0.031289818 | 0.21055159  | 0.323800735 |
| 0.022475048 | 0.031021377 | 0.081612148 | 0.013514854 |
| 0.072440144 | 0.21479352  | 0.127793459 | 0.017999287 |
| 0.156941356 | 0.001390218 | 0.18135546  | 0.287632674 |
| 0.200362488 | 0.325531234 | 0.28852275  | 0.270963401 |
| 0.273913091 | 0.148156462 | 0.294316103 | 0.197557326 |
| 0.091858097 | 0.000713227 | 0.004780907 | 0.319029048 |
| 0.256767463 | 0.01153581  | 0.078870254 | 0.102406845 |
| 0.063074308 | 0.028264547 | 0.019535475 | 0.234711151 |
| 0.222203669 | 0.244989131 | 0.211322194 | 0.204195429 |
| 0.125975424 | 0.146795303 | 0.08998625  | 0.024691047 |
| 0.266791269 | 0.022340988 | 0.023949804 | 0.01608606  |
| 0.307512273 | 0.031807979 | 0.18620796  | 0.264828829 |
| 0.289975077 | 0.335271149 | 0.077465471 | 0.115759673 |
| 0.274235919 | 0.022046464 | 0.133439287 | 0.025881022 |
| 0.230103786 | 0.279700405 | 0.225919031 | 0.166080944 |
| 0.311467264 | 0.252352044 | 0.009912385 | 0.284819015 |
| 0.009250749 | 0.006246245 | 0.107951614 | 0.136524386 |
| 0.037315813 | 0.203895386 | 0.150191312 | 0.063452521 |
| 0.092194217 | 0.009525991 | 0.218644665 | 0.222689536 |
| 0.207823763 | 0.200330119 | 0.307192931 | 0.107799195 |
| 0.172930765 | 0.146053153 | 0.105299654 | 0.057935026 |
| 0.078807809 | 0.136393998 | 0.076503669 | 0.005450107 |
| 0.165461754 | 0.238446938 | 0.019226204 | 0.067606864 |
| 0.304812856 | 0.314157742 | 0.018196183 | 0.014493931 |
| 0.134431899 | 0.140006782 | 0.33505499  | 0.246344755 |
| 0.252704624 | 0.311643875 | 0.195190553 | 0.095180531 |
| 0.020872993 | 0.231395878 | 0.307610525 | 0.12002652  |
| 0.284614197 | 0.012959386 | 0.236548281 | 0.306785007 |
| 0.046574312 | 0.086090247 | 0.022642624 | 0.033095433 |
| 0.310850503 | 0.094091454 | 0.150591336 | 0.045042815 |
| 0.164542117 | 0.239102132 | 0.012474337 | 0.107155573 |
| 0.19094864  | 0.221145378 | 0.075357355 | 0.075335778 |

|             |             |             |             |
|-------------|-------------|-------------|-------------|
| 0.171066226 | 0.037689292 | 0.30206087  | 0.268416305 |
| 0.049562083 | 0.031532464 | 0.058209726 | 0.238049427 |
| 0.263954303 | 0.149750294 | 0.017458487 | 0.197587498 |
| 0.305560221 | 0.263293282 | 0.241685354 | 0.292012043 |
| 0.02694727  | 0.265688728 | 0.173396635 | 0.230788236 |
| 0.088986305 | 0.123292763 | 0.120461567 | 0.020672905 |
| 0.162362364 | 0.227275421 | 0.211717694 | 0.103812414 |
| 0.192226717 | 0.028062802 | 0.010027422 | 0.254344162 |
| 0.233164366 | 0.027449135 | 0.079303451 | 0.281571234 |
| 0.008187633 | 0.254300534 | 0.312423199 | 0.110533344 |
| 0.277021302 | 0.319406643 | 0.253699836 | 0.066351458 |
| 0.006074123 | 0.299886103 | 0.265626287 | 0.16752847  |
| 0.208269935 | 0.177619824 | 0.045375567 | 0.045550678 |
| 0.201401435 | 0.019764211 | 0.073969208 | 0.095431958 |
| 0.142398577 | 0.165552061 | 0.122084592 | 0.080323806 |
| 0.134832203 | 0.018846206 | 0.245871147 | 0.104806372 |
| 0.135030268 | 0.157067531 | 0.249257336 | 0.048505129 |
| 0.174986718 | 0.270623014 | 0.21582317  | 0.007110162 |
| 0.270704606 | 0.254979192 | 0.267765645 | 0.001587482 |
| 0.314557833 | 0.003624482 | 0.152601059 | 0.168174219 |
| 0.131147534 | 0.117489895 | 0.240439895 | 0.187999139 |
| 0.153577088 | 0.099155609 | 0.142006423 | 0.168323217 |
| 0.118127886 | 0.086346694 | 0.25473015  | 0.113532241 |
| 0.195990068 | 0.044833503 | 0.029036987 | 0.027295137 |
| 0.031365112 | 0.252494245 | 0.12450914  | 0.018966674 |
| 0.150777125 | 0.104564514 | 0.237658197 | 0.225952271 |
| 0.291557808 | 0.028349486 | 0.135754726 | 0.231830268 |
| 0.064663891 | 0.080933418 | 0.010083036 | 0.154523056 |
| 0.115666492 | 0.211829363 | 0.132952185 | 0.100888339 |
| 0.182148663 | 0.215628382 | 0.120565856 | 0.257789137 |
| 0.177537719 | 0.130832768 | 0.055062554 | 0.06879189  |
| 0.066347082 | 0.047010115 | 0.303821458 | 0.000987289 |
| 0.209346542 | 0.061811344 | 0.304525464 | 0.22828342  |
| 0.199580553 | 0.239275484 | 0.062779763 | 0.02835216  |
| 0.050694069 | 0.05367458  | 0.062159403 | 0.247203241 |
| 0.227537048 | 0.07154885  | 0.273145959 | 0.062137725 |
| 0.300321284 | 0.236478597 | 0.16241165  | 0.074894068 |
| 0.120438654 | 0.070018129 | 0.214126277 | 0.025284832 |
| 0.197730411 | 0.235113943 | 0.104190302 | 0.197337186 |
| 0.152739898 | 0.296085426 | 0.017367169 | 0.304776831 |
| 0.184735306 | 0.044913618 | 0.270687902 | 0.107666091 |
| 0.082688084 | 0.108733294 | 0.246712346 | 0.080853803 |
| 0.089679102 | 0.200303708 | 0.005030817 | 0.06687176  |
| 0.264285709 | 0.08035873  | 0.179304899 | 0.221895822 |
| 0.207253306 | 0.268881223 | 0.209355554 | 0.082653821 |
| 0.200057528 | 0.212440263 | 0.116611734 | 0.151319531 |
| 0.193174102 | 0.044047918 | 0.148276207 | 0.006480152 |
| 0.242445375 | 0.239372351 | 0.096363505 | 0.018052715 |
| 0.005919101 | 0.230778302 | 0.200214275 | 0.013004459 |
| 0.341343168 | 0.225190816 | 0.127853965 | 0.270264606 |
| 0.066829059 | 0.213840115 | 0.097361882 | 0.317316132 |
| 0.006561847 | 0.136930864 | 0.224749504 | 0.145331009 |
| 0.189788303 | 0.253807932 | 0.302161953 | 1           |
| 0.014195028 | 0.168519317 | 0.000916005 | 0.193489845 |



|             |             |             |             |
|-------------|-------------|-------------|-------------|
| 0.189520712 | 0.234219143 | 0.091517543 | 0.062767263 |
| 0.22595802  | 0.215756357 | 0.128326612 | 0.180185351 |
| 0.010839696 | 0.324999897 | 0.112812336 | 0.225138365 |
| 0.139555204 | 0.147389462 | 0.039941535 | 0.229426334 |
| 0.176493693 | 0.130715227 | 0.130244613 | 0.128235908 |
| 0.233549841 | 0.186536201 | 0.047345307 | 0.161926537 |
| 0.15496056  | 0.017716608 | 0.085471615 | 0.290838794 |
| 0.12107285  | 0.263803509 | 0.360304238 | 0.104338208 |
| 0.241197233 | 0.187475454 | 0.180629146 | 0.26815891  |
| 0.075134688 | 0.157452298 | 0.304579484 | 0.239827653 |
| 0.237696003 | 0.212514207 | 0.236164375 | 0.167269991 |
| 0.20193386  | 0.047414764 | 0.178393108 | 0.190919729 |
| 0.232922062 | 0.211287741 | 0.097502577 | 0.174936209 |
| 0.025798032 | 0.060310675 | 0.135578068 | 0.06026377  |
| 0.188044044 | 0.236476219 | 0.187651877 | 0.24102468  |
| 0.115470371 | 0.025205034 | 0.267305515 | 0.05591148  |
| 0.11566776  | 0.311016489 | 0.132849547 | 0.225034384 |
| 0.081122428 | 0.153537414 | 0.093680327 | 3.84E-05    |
| 0.294053856 | 0.088822569 | 0.133955736 | 0.194310085 |
| 0.1585557   | 0.011845792 | 0.234773674 | 0.336902389 |
| 0.147586636 | 0.11749189  | 0.154967562 | 0.234497479 |
| 0.240068967 | 0.144749635 | 0.146653202 | 0.167901633 |
| 0.253866508 | 0.104267185 | 0.145198516 | 0.193919096 |
| 0.206131033 | 0.082802679 |             |             |
| THY1        | 0.201321633 | 0.050248669 | 0.156278256 |
| 0.092116594 | 0.045799039 | 0.01916463  | 0.171016633 |
| 0.12415703  | 0.052860874 | 0.002510614 | 0.057618715 |
| 0.243292396 | 0.002370494 | 0.076388701 | 0.178424566 |
| 0.028052578 | 0.237922725 | 0.241878976 | 0.012594286 |
| 0.029277695 | 0.053464659 | 0.008406853 | 0.027893394 |
| 0.039991872 | 0.262167403 | 0.047153982 | 0.010233613 |
| 0.054611132 | 0.001173956 | 0.028579762 | 0.001504224 |
| 0.1453091   | 0.039069985 | 0.006538966 | 0.172940792 |
| 0.028069392 | 0.00273525  | 0.138929152 | 0.062216927 |
| 0.007645658 | 0.178833128 | 0.006577229 | 0.101538234 |
| 0.01028886  | 0.1807953   | 0.000222177 | 0.022432771 |
| 0.041081156 | 0.039414548 | 0.181131158 | 0.03332732  |
| 0.010555462 | 0.100387626 | 0.020331508 | 0.011322836 |
| 0.005907092 | 0.000543277 | 0.001536682 | 0.077789819 |
| 0.265242154 | 0.244752641 | 0.001517926 | 0.048882955 |
| 0.020853431 | 0.042425964 | 0.149882786 | 0.005866907 |
| 0.079111718 | 0.00440363  | 0.021977467 | 0.042191656 |
| 0.026972271 | 0.13928713  | 0.312390668 | 0.147770102 |
| 0.010075116 | 0.187158956 | 0.047170446 | 0.009960351 |
| 0.044927713 | 0.118034783 | 0.155912214 | 0.080105798 |
| 0.007035387 | 0.021330035 | 0.020578418 | 0.135373193 |
| 0.054970452 | 0.093551627 | 0.064032585 | 0.100233725 |
| 0.134948557 | 0.011608442 | 0.041086588 | 0.206778059 |
| 0.055201953 | 0.00398308  | 0.0085051   | 0.008315429 |
| 0.036063295 | 0.030791606 | 0.094662096 | 0.166378783 |
| 0.03052025  | 0.225134616 | 0.094530495 | 0.019788646 |
| 0.046491752 | 0.227532715 | 0.025988967 | 0.034122643 |
| 0.03828723  | 0.061113827 | 0.037794743 | 0.082729068 |
| 0.019806354 | 0.073929963 | 0.060589752 | 0.073153735 |

|             |             |             |             |
|-------------|-------------|-------------|-------------|
| 0.000716949 | 0.071958403 | 0.183793703 | 0.239969208 |
| 0.13447629  | 0.18274117  | 0.014275649 | 0.177524014 |
| 0.050848494 | 0.092589531 | 0.141366945 | 0.112819441 |
| 0.05709103  | 0.07756706  | 0.066489623 | 0.065088688 |
| 0.253994632 | 0.00370923  | 0.020345644 | 0.043622027 |
| 0.060880678 | 0.241409926 | 0.016666054 | 0.106676223 |
| 0.140640425 | 0.049789999 | 0.096717854 | 0.132083569 |
| 0.081549957 | 0.108480667 | 0.041522454 | 0.21929893  |
| 0.10208416  | 0.100996598 | 0.089258105 | 0.030088762 |
| 0.106503068 | 0.05677406  | 0.007824709 | 0.076708801 |
| 0.113562164 | 0.006039435 | 0.040703703 | 0.04838637  |
| 0.069473279 | 0.036618205 | 0.08019327  | 0.060872019 |
| 0.067196669 | 0.275102654 | 2.75E-05    | 0.102618046 |
| 0.086417129 | 0.109245495 | 0.085530144 | 0.011544952 |
| 0.034232277 | 0.030705873 | 0.036078704 | 0.007543313 |
| 0.128289684 | 0.057046295 | 0.045109334 | 0.055860975 |
| 0.029387899 | 0.1944622   | 0.009001155 | 0.097899308 |
| 0.205156255 | 0.1677093   | 0.251496192 | 0.114298761 |
| 0.004394138 | 0.234090475 | 0.025639336 | 0.030329945 |
| 0.250731032 | 0.029310628 | 0.004013291 | 0.037898574 |
| 0.251425184 | 0.015839324 | 0.169760351 | 0.147214568 |
| 0.23199701  | 0.31775503  | 0.083389231 | 0.117838854 |
| 0.099850979 | 0.227630586 | 0.023048258 | 0.062300707 |
| 0.017965587 | 0.208405777 | 0.038816423 | 0.106313234 |
| 0.155484766 | 0.01992786  | 0.210993521 | 0.13152543  |
| 0.017085362 | 0.001836353 | 0.002166578 | 0.011776815 |
| 0.260281566 | 0.046720058 | 0.034086065 | 0.050755748 |
| 0.080661251 | 0.096738287 | 0.012941607 | 0.160990382 |
| 0.19203958  | 0.036919842 | 0.071597127 | 0.015888323 |
| 0.15406243  | 0.0712243   | 0.049458043 | 0.036246895 |
| 0.080278187 | 0.008896196 | 0.004295616 | 0.060036603 |
| 0.004396753 | 0.018648238 | 0.051201272 | 0.048107668 |
| 0.010183114 | 0.169330367 | 0.078283152 | 0.000560728 |
| 0.018081858 | 0.075049133 | 0.15539048  | 0.006496039 |
| 0.158090536 | 0.148082825 | 0.030101303 | 0.030889265 |
| 0.188709581 | 0.079847975 | 0.085154439 | 0.066638042 |
| 0.006349508 | 0.082338657 | 0.047527122 | 0.085823594 |
| 0.078244584 | 0.007300559 | 0.001666469 | 0.052195085 |
| 0.05440845  | 0.005987107 | 0.227768767 | 0.025852173 |
| 0.008251393 | 0.03126486  | 0.040977279 | 0.085762261 |
| 0.133736161 | 0.065966296 | 0.143199192 | 0.075229105 |
| 0.113734938 | 0.157739362 | 0.064040152 | 0.091001182 |
| 0.002713642 | 0.02162576  | 0.017802573 | 0.088293308 |
| 0.242594706 | 0.023068378 | 0.148073622 | 0.001897964 |
| 0.000358246 | 0.200740293 | 0.265531148 | 0.161555295 |
| 0.013851968 | 0.011993792 | 0.042355504 | 0.073137371 |
| 0.26929271  | 0.102508985 | 0.140657896 | 0.032580083 |
| 0.087316798 | 0.017369801 | 0.01569712  | 0.0338676   |
| 0.185187359 | 0.13699256  | 0.136961212 | 0.121698357 |
| 0.193514957 | 0.009429207 | 0.047084382 | 0.023154893 |
| 0.185715534 | 0.026489016 | 0.269365154 | 0.309930064 |
| 0.068570876 | 0.258408485 | 0.177177199 | 0.004497301 |
| 0.101495118 | 0.288756296 | 0.057839639 | 0.059379863 |
| 0.068561903 | 0.070162305 | 0.066236534 | 0.08166115  |

|             |             |             |             |
|-------------|-------------|-------------|-------------|
| 0.056848776 | 0.039905248 | 0.052865288 | 0.03741113  |
| 0.14615755  | 0.123753468 | 0.010247651 | 0.06768768  |
| 0.012618384 | 0.091737127 | 0.043213769 | 0.326944268 |
| 0.034995934 | 0.101334532 | 0.215580523 | 0.029396766 |
| 0.149276715 | 0.001776152 | 0.024384937 | 0.086648883 |
| 0.075377017 | 0.190365497 | 0.008870242 | 0.006652616 |
| 0.092086466 | 0.135734153 | 0.00499948  | 0.080295843 |
| 0.08234397  | 0.139862056 | 0.053766158 | 0.061565012 |
| 0.199787343 | 0.00264756  | 0.018939247 | 0.000559196 |
| 0.007345136 | 0.089857648 | 0.009618533 | 0.116840512 |
| 0.146066689 | 0.195679419 | 0.118273761 | 0.087406256 |
| 0.064997574 | 0.067067508 | 0.07851203  | 0.012895901 |
| 0.079765969 | 0.000734167 | 0.065620989 | 0.061909468 |
| 0.004656155 | 0.025196592 | 0.080684547 | 0.050526389 |
| 0.024545198 | 0.197740163 | 0.270838963 | 0.009271899 |
| 0.16367349  | 0.102251205 | 0.205928032 | 0.024851615 |
| 0.028741704 | 0.082247007 | 0.020048208 | 0.076511777 |
| 0.111910703 | 0.149951904 | 0.011281249 | 0.260612906 |
| 0.025569853 | 0.208157886 | 0.232444548 | 0.032156742 |
| 0.063306517 | 0.218412082 | 0.110338415 | 0.069325598 |
| 0.110988488 | 0.046783008 | 0.002168905 | 0.01032506  |
| 0.055580442 | 0.156414437 | 0.003541646 | 0.160876357 |
| 0.062468584 | 0.039471562 | 0.165211692 | 0.173238344 |
| 0.094579127 | 0.098836504 | 0.26254115  | 0.061961895 |
| 0.129618696 | 0.013566559 | 0.024717441 | 0.148975211 |
| 0.004395741 | 0.017522423 | 0.217873043 | 0.027200524 |
| 0.042361301 | 0.185341807 | 0.007495226 | 0.010738299 |
| 0.112491603 | 0.040533719 | 0.03379826  | 0.132296557 |
| 0.037896657 | 0.030422048 | 0.103844057 | 0.121531206 |
| 0.010812838 | 0.13037567  | 0.2598765   | 0.203947815 |
| 0.011688394 | 0.016391418 | 0.298607458 | 0.261523302 |
| 0.071864537 | 0.058071405 | 0.18496965  | 0.199432993 |
| 0.20371577  | 0.033947495 | 0.065789274 | 0.058466377 |
| 0.096354817 | 0.104565761 | 0.169943674 | 0.09545459  |
| 0.215433022 | 0.073290934 | 0.03109659  | 0.087164113 |
| 0.07146109  | 0.190921139 | 0.074583189 | 0.010990042 |
| 0.285387759 | 0.095400259 | 0.246197268 | 0.286152222 |
| 0.016169689 | 0.262426065 | 0.159189167 | 0.166078978 |
| 0.047135583 | 0.007178703 | 0.229953678 | 0.212553931 |
| 0.108758097 | 0.004400549 | 0.257070599 | 0.03362805  |
| 0.078162514 | 0.002217128 | 0.030943113 | 0.145166084 |
| 0.276458033 | 0.183197058 | 0.025752847 | 0.051957066 |
| 0.036517406 | 0.008171872 | 0.129064433 | 0.044371931 |
| 0.074145226 | 0.022595242 | 0.079835818 | 0.113850841 |
| 0.287316366 | 0.024318166 | 0.007781398 | 0.042044614 |
| 0.199288338 | 0.023860945 | 0.10494581  | 0.327466641 |
| 0.175813012 | 0.125047229 | 0.065841136 | 0.189170759 |
| 0.016068849 | 0.130553417 | 0.175601841 | 0.048411091 |
| 0.011794617 | 0.158856956 | 0.006447867 | 0.037245795 |
| 0.026052999 | 0.003418814 | 0.067253287 | 0.078335917 |
| 0.100486033 | 0.06742459  | 0.128553423 | 0.036664434 |
| 6.10E-05    | 0.023111117 | 0.058982456 | 0.018773782 |
| 0.056605953 | 0.10898375  | 0.027633086 | 0.191434311 |
| 0.211062312 | 0.213436647 | 0.116901237 | 0.010669416 |

|             |             |             |             |
|-------------|-------------|-------------|-------------|
| 0.003076498 | 0.033432427 | 0.270940041 | 0.120315515 |
| 0.107709195 | 0.14623059  | 0.006887076 | 0.113607598 |
| 0.006509057 | 0.2534157   | 0.142710794 | 0.00293135  |
| 0.004023014 | 0.073419157 | 0.055805855 | 0.208485511 |
| 0.015867997 | 0.068553037 | 0.081546458 | 0.039189806 |
| 0.037225509 | 0.257551049 | 0.128488044 | 0.117246967 |
| 0.120207485 | 0.100092634 | 0.11682505  | 0.03224404  |
| 0.056040427 | 0.121831988 | 0.082064102 | 0.203708876 |
| 0.11328924  | 0.117351955 | 0.033864415 | 0.030965277 |
| 0.03939399  | 0.183460565 | 0.271179826 | 0.2616276   |
| 0.214167451 | 0.050867075 | 0.262648163 | 0.234823979 |
| 0.186288671 | 0.022122377 | 0.186720134 | 0.060484317 |
| 0.114924967 | 0.178495998 | 0.036724872 | 0.051119782 |
| 0.00126193  | 0.013908144 | 0.128077373 | 0.031470969 |
| 0.162244459 | 0.026411072 | 0.014670829 | 0.05832941  |
| 0.028305341 | 0.172789351 | 0.256017581 | 0.102768163 |
| 0.032373995 | 0.019009073 | 0.003515714 | 0.169553122 |
| 0.165915223 | 0.245472293 | 0.044900488 | 0.16432385  |
| 0.091171467 | 0.036120226 | 0.047086045 | 0.083787889 |
| 0.004363673 | 0.143727466 | 0.004064268 | 0.158665179 |
| 0.002157045 | 0.174240944 | 0.31324248  | 0.030143317 |
| 0.001994708 | 0.129082836 | 0.06017955  | 0.013284308 |
| 0.037149865 | 0.026625172 | 0.022728006 | 0.08273792  |
| 0.108414488 | 0.156232089 | 0.097773845 | 0.130142183 |
| 0.013037598 | 0.028939494 | 0.016817592 | 0.064235104 |
| 0.095275394 | 0.059710262 | 0.284730107 | 0.058611012 |
| 0.029024548 | 0.248602448 | 0.139954186 | 0.057967534 |
| 0.028891988 | 0.100807218 | 0.002762596 | 0.01008435  |
| 0.058601694 | 0.00572216  | 0.000265584 | 0.007960353 |
| 0.137383442 | 0.010816571 | 0.031243986 | 0.064810051 |
| 0.027955364 | 0.123933207 | 0.002061917 | 0.062919003 |
| 0.067114169 | 0.097916378 | 0.047914653 | 0.220547288 |
| 0.107534793 | 0.222366443 | 0.030761244 | 0.002435903 |
| 0.019946101 | 0.010919774 | 0.003787841 | 0.218742276 |
| 0.229517119 | 0.003168014 | 0.02352695  | 0.168519821 |
| 0.062106858 | 0.001608068 | 0.023190896 | 0.033457988 |
| 0.200454557 | 0.104850014 | 0.11591786  | 0.061712427 |
| 0.067727316 | 0.151043582 | 0.011926219 | 0.01286938  |
| 0.040951204 | 0.016794101 | 0.090546804 | 0.014195028 |
| 1           | 0.040059145 | 0.037466108 | 0.175037141 |
| 0.089105436 | 0.013051477 | 0.257919751 | 0.001911434 |
| 0.172043517 | 0.088875186 | 0.026110291 | 0.009046127 |
| 0.207857259 | 0.028080817 | 0.204820824 | 0.078569323 |
| 0.002255498 | 0.025735481 | 0.185504557 | 0.021070957 |
| 0.121284186 | 0.017102882 | 0.197773336 | 0.004102074 |
| 0.063690153 | 0.05634068  | 0.148908468 | 0.029390273 |
| 0.01899771  | 0.295983845 | 0.006235823 | 0.083394301 |
| 0.16590394  | 0.018338956 | 0.055074303 | 0.105690368 |
| 0.011543547 | 0.087926743 | 0.012159841 | 0.078590183 |
| 0.139711267 | 0.209690857 | 0.050028907 | 0.068972152 |
| 0.181540034 | 0.020553178 | 0.010172144 | 0.056689911 |
| 0.07178987  | 0.142591324 | 0.011346772 | 0.10506319  |
| 0.008435455 | 0.123350583 | 0.017898082 | 0.064734439 |
| 0.197552883 | 0.080100694 | 0.016913921 | 0.262888417 |

|             |             |             |             |
|-------------|-------------|-------------|-------------|
| 0.111256792 | 0.037334891 | 0.028043178 | 0.166676284 |
| 0.109320822 | 0.181295157 | 0.138242826 | 0.001335505 |
| 0.049904055 | 0.050658416 | 0.156939446 | 0.024653691 |
| 0.268431134 | 0.056232665 | 0.035078506 | 0.095676026 |
| 0.06883225  | 0.012951184 | 0.027000174 | 0.039527762 |
| 0.006690727 | 0.185794001 | 0.095956125 | 0.072078984 |
| 0.093383901 | 0.005186126 | 0.002837723 | 0.079383769 |
| 0.006054075 | 0.002329895 | 0.005482231 | 0.026684776 |
| 0.007471177 | 0.005510514 | 0.006972358 | 0.006722919 |
| 0.072318562 | 0.066933379 |             |             |
| TIMM17B     | 0.049141276 | 0.24664484  | 0.0317969   |
| 0.057897313 | 0.281946119 | 0.123291397 | 0.039988909 |
| 0.054753696 | 0.189043612 | 0.044932055 | 0.239023001 |
| 0.015468404 | 0.039408117 | 0.323538108 | 0.041396795 |
| 0.259326816 | 0.032709309 | 0.100742767 | 0.015545327 |
| 0.04740597  | 0.266261716 | 0.090784904 | 0.123970404 |
| 0.222554802 | 0.158491275 | 0.154534321 | 0.17205402  |
| 0.316925514 | 0.038390877 | 0.263505975 | 0.02151414  |
| 0.329052142 | 0.285506874 | 0.153245101 | 0.010424521 |
| 0.196077441 | 0.009460885 | 0.30172217  | 0.180218779 |
| 0.076428354 | 0.281136322 | 0.0760867   | 0.189303814 |
| 0.109254891 | 0.026276823 | 0.017028924 | 0.241217685 |
| 0.153996463 | 0.114430513 | 0.039226989 | 0.249251045 |
| 0.092419561 | 0.220349542 | 0.166281207 | 0.000671626 |
| 0.148361185 | 0.026344307 | 0.084407606 | 0.317877742 |
| 0.222847926 | 0.147304706 | 0.034274241 | 0.096974344 |
| 0.188111087 | 0.256439383 | 0.233933454 | 0.074995804 |
| 0.340850806 | 0.063454938 | 0.247617462 | 0.045784263 |
| 0.136770706 | 0.017607377 | 0.18178245  | 0.048889244 |
| 0.113359732 | 0.217299452 | 0.238231154 | 0.15738816  |
| 0.227418479 | 0.351238326 | 0.19951105  | 0.294842044 |
| 0.042251156 | 0.243123997 | 0.138226962 | 0.312488052 |
| 0.238400022 | 0.037468646 | 0.313062932 | 0.364252194 |
| 0.027310585 | 0.125467168 | 0.234831818 | 0.085681227 |
| 0.263686461 | 0.073396343 | 0.116975297 | 0.10481855  |
| 0.306205067 | 0.247006678 | 0.296001183 | 0.268442378 |
| 0.194482755 | 0.055447252 | 0.279588983 | 0.25184934  |
| 0.180473095 | 0.069066183 | 0.103306801 | 0.314881662 |
| 0.253011958 | 0.32779925  | 0.240729365 | 0.276634273 |
| 0.220089952 | 0.342916386 | 0.282158576 | 0.280392542 |
| 0.012469805 | 0.329706655 | 0.151946466 | 0.041735664 |
| 0.030633506 | 0.081828062 | 0.073482815 | 0.28719028  |
| 0.332874133 | 0.21815538  | 0.11292582  | 0.22805108  |
| 0.368245769 | 0.268550577 | 0.32032592  | 0.286000733 |
| 0.037774499 | 0.082459489 | 0.222325178 | 0.088784504 |
| 0.262403853 | 0.102661006 | 0.206938256 | 0.321535008 |
| 0.313614422 | 0.332459394 | 0.064143832 | 0.326043369 |
| 0.096474309 | 0.386927566 | 0.259843899 | 0.176485318 |
| 0.343973663 | 0.308213026 | 0.389518825 | 0.315667268 |
| 0.318266031 | 0.166380539 | 0.013714899 | 0.262775332 |
| 0.392603156 | 0.015462494 | 0.313010402 | 0.34120159  |
| 0.307729772 | 0.320379818 | 0.387206627 | 0.352108118 |
| 0.30345128  | 0.067671605 | 0.005307878 | 0.297604977 |
| 0.319173359 | 0.324851564 | 0.078100484 | 0.175394561 |

|             |             |             |             |
|-------------|-------------|-------------|-------------|
| 0.259317694 | 0.146484623 | 0.274049297 | 0.052937305 |
| 0.392251757 | 0.317832734 | 0.311055899 | 0.23965005  |
| 0.117522966 | 0.258540816 | 0.192387287 | 0.275055555 |
| 0.026794123 | 0.063073193 | 0.04298262  | 0.241120688 |
| 0.048215427 | 0.219473371 | 0.108450242 | 0.211236172 |
| 0.234785869 | 0.107439604 | 0.118129454 | 0.311970081 |
| 0.044584571 | 0.186970085 | 0.125549177 | 0.101195194 |
| 0.044548336 | 0.136892796 | 0.057011689 | 0.081109219 |
| 0.227256375 | 0.158761103 | 0.239027292 | 0.344321584 |
| 0.137432007 | 0.144848336 | 0.244054588 | 0.368666522 |
| 0.397250037 | 0.23809837  | 0.209382329 | 0.019884064 |
| 0.0640381   | 0.059694033 | 0.078144978 | 0.190982773 |
| 0.138179547 | 0.075970789 | 0.234375772 | 0.35101946  |
| 0.128538267 | 0.063295416 | 0.124442566 | 0.315628237 |
| 0.106154443 | 0.16533326  | 0.351851846 | 0.153809173 |
| 0.003637779 | 0.188881934 | 0.310774906 | 0.080749207 |
| 0.200300248 | 0.053926211 | 0.066705159 | 0.342330899 |
| 0.05471144  | 0.134610869 | 0.336637413 | 0.336878602 |
| 0.047528766 | 0.133470388 | 0.372326328 | 0.015416612 |
| 0.18420302  | 0.050363562 | 0.329481455 | 0.077643087 |
| 0.212784552 | 0.28298005  | 0.258991093 | 0.168753145 |
| 0.0854759   | 0.334610616 | 0.279500565 | 0.351991778 |
| 0.10512525  | 0.374172813 | 0.33353414  | 0.343625494 |
| 0.248834991 | 0.129666625 | 0.050314444 | 0.310132525 |
| 0.332072009 | 0.04037617  | 0.057059274 | 0.264931402 |
| 0.107814862 | 0.284787816 | 0.062529494 | 0.377769493 |
| 0.358304146 | 0.25724032  | 0.117548522 | 0.34633091  |
| 0.327375971 | 0.172641587 | 0.302061881 | 0.381073592 |
| 0.040851669 | 0.19854934  | 0.158210784 | 0.390978134 |
| 0.174046252 | 0.121159267 | 0.244894448 | 0.066788688 |
| 0.004355632 | 0.051941812 | 0.056679769 | 0.192746481 |
| 0.131361014 | 0.176964806 | 0.277468267 | 0.344305481 |
| 0.122529093 | 0.31165373  | 0.176685354 | 0.136155161 |
| 0.276902404 | 0.159965893 | 0.223004453 | 0.26804366  |
| 0.214771667 | 0.025182382 | 0.078366204 | 0.351801812 |
| 0.026207519 | 0.120218068 | 0.127825372 | 0.012030584 |
| 0.030882205 | 0.200271439 | 0.081628621 | 0.178644694 |
| 0.378352887 | 0.162461498 | 0.157063766 | 0.054887777 |
| 0.311641127 | 0.099570987 | 0.010400901 | 0.325660941 |
| 0.304532349 | 0.291354047 | 0.2949585   | 0.272739945 |
| 0.294247123 | 0.250619607 | 0.318351767 | 0.137707917 |
| 0.054486736 | 0.040602237 | 0.097508365 | 0.198904676 |
| 0.001803794 | 0.339593933 | 0.205110187 | 0.167064888 |
| 0.284111683 | 0.218395411 | 0.030719508 | 0.240942488 |
| 0.014126758 | 0.076382497 | 0.067222783 | 0.141762107 |
| 0.329985069 | 0.01248677  | 0.043599332 | 0.063969282 |
| 0.265735062 | 0.259222039 | 0.115359442 | 0.346809886 |
| 0.248828517 | 0.073598123 | 0.225192212 | 0.327020681 |
| 0.056807288 | 0.014315871 | 0.100165555 | 0.004427234 |
| 0.028264254 | 0.287073801 | 0.108970596 | 0.02336273  |
| 0.241368773 | 0.005129027 | 0.262929055 | 0.356215545 |
| 0.262579041 | 0.370479892 | 0.347542861 | 0.177305841 |
| 0.33952696  | 0.025601811 | 0.347052491 | 0.25523624  |
| 0.083936721 | 0.001276164 | 0.00802239  | 0.34574543  |

|             |             |             |             |
|-------------|-------------|-------------|-------------|
| 0.227099245 | 0.038848103 | 0.172966327 | 0.047789219 |
| 0.074073672 | 0.063043299 | 0.052623267 | 0.148765539 |
| 0.22230416  | 0.253014591 | 0.104372159 | 0.274019734 |
| 0.191567194 | 0.219857956 | 0.098878675 | 0.074204301 |
| 0.232877413 | 0.042765442 | 0.071473494 | 0.014633117 |
| 0.310771516 | 0.081822008 | 0.272656327 | 0.322684551 |
| 0.365954834 | 0.316510728 | 0.058246024 | 0.051546636 |
| 0.307444219 | 0.057122441 | 0.047491145 | 0.065147593 |
| 0.289485398 | 0.274549386 | 0.313626302 | 0.261075692 |
| 0.378536496 | 0.328972543 | 0.036851772 | 0.319112153 |
| 0.015830488 | 0.005355703 | 0.127078103 | 0.207939536 |
| 0.017615126 | 0.17967047  | 0.256381744 | 0.072102462 |
| 0.101398233 | 0.016690696 | 0.14505173  | 0.152341732 |
| 0.27200203  | 0.202059177 | 0.24634105  | 0.179090511 |
| 0.175466643 | 0.070637029 | 0.146342991 | 0.092052199 |
| 0.034539439 | 0.223603524 | 0.163377354 | 0.01874296  |
| 0.158322684 | 0.205630604 | 0.06454756  | 0.14643926  |
| 0.350120915 | 0.349405781 | 0.029282234 | 0.023951515 |
| 0.223055665 | 0.146342766 | 0.370405521 | 0.300782759 |
| 0.333782622 | 0.38925878  | 0.293007541 | 0.081467687 |
| 0.055436188 | 0.267523987 | 0.252912707 | 0.079563554 |
| 0.341458445 | 0.041329571 | 0.300880507 | 0.204154084 |
| 0.119420135 | 0.128383131 | 0.034579949 | 0.092411974 |
| 0.23651214  | 0.181227136 | 0.219751784 | 0.09696985  |
| 0.182972104 | 0.076590921 | 0.04173911  | 0.195603974 |
| 0.261161371 | 0.065786543 | 0.162800403 | 0.099448262 |
| 0.234758721 | 0.018047079 | 0.287473549 | 0.370211425 |
| 0.120447206 | 0.080091101 | 0.053730155 | 0.263123819 |
| 0.285188316 | 0.13685449  | 0.021986142 | 0.245132779 |
| 0.357483304 | 0.247770364 | 0.309594902 | 0.356704645 |
| 0.081395098 | 0.227127786 | 0.131499807 | 0.23640496  |
| 0.166965622 | 0.132530486 | 0.170931999 | 0.069617806 |
| 0.257304175 | 0.321751218 | 0.272532455 | 0.179409099 |
| 0.181389536 | 0.062261239 | 0.035210321 | 0.286715656 |
| 0.099138615 | 0.03362479  | 0.081420048 | 0.286721751 |
| 0.006600697 | 0.085871666 | 0.355238781 | 0.115707629 |
| 0.358113567 | 0.359825123 | 0.345449738 | 0.077535947 |
| 0.001494061 | 0.267710708 | 0.281619087 | 0.157362995 |
| 0.257047525 | 0.256479846 | 0.030780019 | 0.072209249 |
| 0.312849896 | 0.056053617 | 0.074783478 | 0.046239646 |
| 0.050146946 | 0.193641077 | 0.232198158 | 0.139592676 |
| 0.186801721 | 0.051703692 | 0.072446524 | 0.159109169 |
| 0.050669268 | 0.269220845 | 0.337797657 | 0.036780921 |
| 0.053022546 | 0.321664584 | 0.263283812 | 0.024375345 |
| 0.203181891 | 0.303304517 | 0.323209383 | 0.003105946 |
| 0.301207566 | 0.009998608 | 0.208890442 | 0.221661643 |
| 0.194638078 | 0.162812162 | 0.289238965 | 0.157436075 |
| 0.20028191  | 0.15941458  | 0.1749805   | 0.268498167 |
| 0.142405685 | 0.138210452 | 0.243088458 | 0.135724142 |
| 0.164698086 | 0.096345045 | 0.082006186 | 0.077806756 |
| 0.036663632 | 0.290761038 | 0.234145465 | 0.058138749 |
| 0.238337582 | 0.119835932 | 0.344962598 | 0.28505623  |
| 0.358567913 | 0.071339042 | 0.149990834 | 0.273613667 |
| 0.023914904 | 0.045247972 | 0.024107418 | 0.175505034 |

|             |             |             |             |
|-------------|-------------|-------------|-------------|
| 0.180044609 | 0.096201971 | 0.134525206 | 0.14376579  |
| 0.210062859 | 0.325450438 | 0.223252394 | 0.334453884 |
| 0.174870371 | 0.138796546 | 0.054000625 | 0.072628468 |
| 0.129819724 | 0.112106756 | 0.262955908 | 0.004245241 |
| 0.260365385 | 0.04145495  | 0.327657797 | 0.304023301 |
| 0.114972847 | 0.331776402 | 0.030252819 | 0.050341932 |
| 0.023732945 | 0.113119428 | 0.146548094 | 0.249880649 |
| 0.088473433 | 0.117065761 | 0.266207006 | 0.060453467 |
| 0.298319748 | 0.244868281 | 0.130877698 | 0.111923687 |
| 0.177412623 | 0.135053762 | 0.2954728   | 0.058907378 |
| 0.180503637 | 0.139477946 | 0.121316841 | 0.221238951 |
| 0.192663181 | 0.339143642 | 0.058087224 | 0.347019091 |
| 0.188219372 | 0.108821542 | 0.367432464 | 0.142599621 |
| 0.060334483 | 0.077322787 | 0.101468509 | 0.086333369 |
| 0.087474012 | 0.125370542 | 0.001913017 | 0.033965526 |
| 0.342344017 | 0.079464534 | 0.210482134 | 0.25841857  |
| 0.178138012 | 0.3369887   | 0.046950111 | 0.117736363 |
| 0.265656347 | 0.294748067 | 0.070564767 | 0.257963422 |
| 0.255814529 | 0.098369101 | 0.174550991 | 0.003530479 |
| 0.224015617 | 0.200386131 | 0.058948983 | 0.046419725 |
| 0.013902233 | 0.10304831  | 0.20361799  | 0.042063682 |
| 0.364974677 | 0.049949607 | 0.149824381 | 0.268162345 |
| 0.137523139 | 0.301059957 | 0.106413083 | 0.326250233 |
| 0.01137575  | 0.216322877 | 0.181525772 | 0.137299951 |
| 0.1189616   | 0.186467988 | 0.340947745 | 0.168519317 |
| 0.040059145 | 1           | 0.002574959 | 0.298208211 |
| 0.267716709 | 0.18978816  | 0.190519219 | 0.036743839 |
| 0.319910556 | 0.281299665 | 0.063972686 | 0.150785312 |
| 0.018077374 | 0.272812603 | 0.191939664 | 0.285022631 |
| 0.042407892 | 0.165110952 | 0.044569668 | 0.196118353 |
| 0.265769842 | 0.065047659 | 0.225149657 | 0.049658065 |
| 0.293286601 | 0.23899782  | 0.104250181 | 0.076644753 |
| 0.167918269 | 0.05927705  | 0.081270683 | 0.355427948 |
| 0.195061403 | 0.178983532 | 0.36670922  | 0.145912595 |
| 0.171451396 | 0.251440407 | 0.167633796 | 0.333509008 |
| 0.078294843 | 0.246493996 | 0.315154328 | 0.296275645 |
| 0.330373794 | 0.140070169 | 0.126906664 | 0.182776458 |
| 0.267419484 | 0.049274887 | 0.082973906 | 0.26055547  |
| 0.135254684 | 0.27323594  | 0.116938918 | 0.185841273 |
| 0.036682042 | 0.071243351 | 0.098776408 | 0.136171182 |
| 0.238834031 | 0.233363794 | 0.141196313 | 0.337812248 |
| 0.076332468 | 0.035079535 | 0.356882087 | 0.042637169 |
| 0.149673841 | 0.303001687 | 0.202205458 | 0.188375252 |
| 0.169398943 | 0.187938144 | 0.125453316 | 0.002021055 |
| 0.336048134 | 0.040950559 | 0.135137823 | 0.144625884 |
| 0.056149924 | 0.031775416 | 0.311312303 | 0.378145303 |
| 0.201069698 | 0.04283419  | 0.053018887 | 0.304988617 |
| 0.064297093 | 0.085118744 | 0.100282788 | 0.191864695 |
| 0.137283196 | 0.097553581 | 0.117908708 | 0.141746399 |
| 0.260116256 | 0.112336465 |             |             |
| TIMM50      | 0.011099128 | 0.002374381 | 0.006065657 |
| 0.002494804 | 0.004688229 | 0.000641026 | 0.039366423 |
| 0.013339943 | 0.005577262 | 0.000346351 | 0.002159165 |
| 0.032568368 | 0.000472021 | 0.005238901 | 0.030728867 |



|             |             |             |             |
|-------------|-------------|-------------|-------------|
| 0.003339785 | 0.038243882 | 0.03942874  | 0.000264229 |
| 0.000938128 | 0.00855617  | 0.000444096 | 0.000485223 |
| 0.005977445 | 0.017221482 | 0.004636754 | 0.000489874 |
| 0.002506297 | 0.003133608 | 0.000292532 | 0.000284625 |
| 0.013410423 | 0.003979301 | 0.00067425  | 0.010137871 |
| 0.000739447 | 0.000788549 | 0.014221188 | 0.014422859 |
| 9.14E-05    | 0.011555217 | 0.000936959 | 0.007505802 |
| 0.002429243 | 0.018592124 | 0.009104638 | 0.003385481 |
| 0.005748988 | 0.003023066 | 0.012554808 | 0.001391544 |
| 0.002012266 | 0.003188482 | 0.000903609 | 0.000116521 |
| 0.000640336 | 0.001775429 | 0.000465233 | 0.003202725 |
| 0.016914722 | 0.021057469 | 0.000196453 | 0.002951696 |
| 0.002255363 | 0.005563909 | 0.011283834 | 0.00200833  |
| 0.004234889 | 0.000596396 | 0.001178742 | 0.000112136 |
| 0.002613273 | 0.028924383 | 0.031974986 | 0.020418776 |
| 0.000509635 | 0.012008069 | 0.001149864 | 0.001203262 |
| 0.003260286 | 0.007521808 | 0.018566398 | 0.005292874 |
| 0.00235759  | 0.00297541  | 0.002360231 | 0.015717462 |
| 0.009094139 | 0.031098981 | 0.004410079 | 0.007108618 |
| 0.020059546 | 0.00070826  | 0.006862273 | 0.020917683 |
| 0.001504467 | 6.88E-05    | 0.000318038 | 0.000398037 |
| 0.003496355 | 0.007682078 | 0.006646556 | 0.014597315 |
| 0.000893575 | 0.024820116 | 0.004856171 | 0.002161396 |
| 0.001857645 | 0.01730177  | 0.014876957 | 0.001885771 |
| 0.003324815 | 0.002597411 | 0.003436281 | 0.013923944 |
| 0.004140937 | 0.00367823  | 0.004827781 | 0.003372934 |
| 0.002820115 | 0.003675888 | 0.011379495 | 0.020363169 |
| 0.010943104 | 0.013484563 | 0.004085789 | 0.012431643 |
| 0.001791766 | 0.004587705 | 0.014624042 | 0.019933159 |
| 0.00475009  | 0.003540721 | 0.004189881 | 0.006763249 |
| 0.032833769 | 0.000598703 | 0.004302757 | 0.000662282 |
| 0.006744497 | 0.027605755 | 0.002090496 | 0.006619127 |
| 0.008321626 | 0.003783076 | 0.007062543 | 0.008244766 |
| 0.01308952  | 0.006319373 | 0.001510588 | 0.023611249 |
| 0.006272991 | 0.004961464 | 0.005543383 | 0.00157037  |
| 0.004158551 | 0.002770174 | 0.000257177 | 0.009014288 |
| 0.005627531 | 1.22E-05    | 0.00207221  | 0.003027674 |
| 0.004213244 | 0.002409753 | 0.005657425 | 0.002609504 |
| 0.003207362 | 0.032648834 | 0.000182761 | 0.017359079 |
| 0.005806107 | 0.007358465 | 0.007132283 | 0.001069423 |
| 0.003248566 | 0.000871023 | 0.001366721 | 0.0001238   |
| 0.00828804  | 0.002693518 | 0.001994897 | 0.006495626 |
| 0.009227974 | 0.011874997 | 0.000490939 | 0.004470798 |
| 0.013025902 | 0.010868377 | 0.01689251  | 0.011850737 |
| 0.001585365 | 0.02533719  | 0.002105312 | 0.00422955  |
| 0.024342176 | 0.001325179 | 0.000983544 | 0.003294191 |
| 0.026520165 | 1.13E-05    | 0.013902533 | 0.029917539 |
| 0.044593606 | 0.025051287 | 0.006106144 | 0.003204125 |
| 0.009051941 | 0.019612191 | 0.000668596 | 0.003739255 |
| 0.002750178 | 0.017013683 | 0.002116918 | 0.006090214 |
| 0.012219424 | 0.001553463 | 0.018788522 | 0.002231008 |
| 0.013747156 | 0.000171681 | 0.00032791  | 1.68E-05    |
| 0.019244131 | 0.014843059 | 0.007144603 | 0.002875628 |
| 0.005211284 | 0.009110684 | 0.002598959 | 0.008108717 |

|                      |                      |                      |             |
|----------------------|----------------------|----------------------|-------------|
| 0.019900043          | 0.001279383          | 0.006066674          | 0.001975529 |
| 0.004342081          | 0.011200997          | 0.002710091          | 0.006280004 |
| 0.013271228          | 4.39E-05 0.002078717 | 0.005444002          |             |
| 0.00041508           | 0.003102736          | 0.001734039          | 0.002396142 |
| 0.000132557          | 0.013673617          | 0.004760252          | 9.10E-05    |
| 0.002100285          | 0.000806416          | 0.01668385           | 0.000417735 |
| 0.020166117          | 0.019661968          | 0.001910893          | 0.003030791 |
| 0.009537359          | 0.004549701          | 0.003579119          | 0.003196363 |
| 0.001869329          | 0.005625451          | 0.002737753          | 0.004468486 |
| 0.00391212           | 0.001294153          | 0.000324904          | 0.004484317 |
| 0.00433973           | 0.001528979          | 0.018826165          | 0.001462355 |
| 0.003617475          | 0.003874917          | 0.002310977          | 0.00651319  |
| 0.007292632          | 0.003621114          | 0.011812752          | 0.00810906  |
| 0.007990222          | 0.008370208          | 0.003326081          | 0.005465728 |
| 0.001761698          | 0.005638278          | 0.006469421          | 0.007702457 |
| 0.024317491          | 0.00612734           | 0.010237246          | 0.000670935 |
| 0.003004149          | 0.01821609           | 0.029307276          | 0.016141171 |
| 0.00172947           | 0.000271189          | 0.004500816          | 0.004762912 |
| 0.029755831          | 0.003530481          | 0.01849424           | 0.009942385 |
| 0.009401513          | 0.001613998          | 6.92E-05 0.001547426 |             |
| 0.01586158           | 0.001265717          | 0.003018939          | 0.008720656 |
| 0.0237254            | 0.000144096          | 0.00301408           | 0.000156999 |
| 0.039499776          | 0.001050225          | 0.030667074          | 0.025004633 |
| 0.00345361           | 0.020466718          | 0.027108286          | 0.003094526 |
| 0.00505287           | 0.025295712          | 9.15E-05 0.004472929 |             |
| 0.004553251          | 0.00554235           | 0.00468822           | 0.004708159 |
| 0.00627393           | 0.001464789          | 0.005778562          | 0.000490113 |
| 0.019948293          | 0.013745822          | 0.007358585          | 0.01839007  |
| 4.82E-05 0.004033709 | 0.002818771          | 0.031447281          |             |
| 0.001931229          | 0.01520215           | 0.017605439          | 0.001507514 |
| 0.005609692          | 0.000617332          | 0.002773053          | 0.009792708 |
| 0.006599551          | 0.019094658          | 1.18E-05 0.002118927 |             |
| 0.003791882          | 0.008455583          | 2.37E-05 0.004220191 |             |
| 0.005315783          | 0.018608394          | 0.008618161          | 0.001987614 |
| 0.035977641          | 0.000686572          | 0.001692473          | 9.43E-05    |
| 0.001174864          | 0.004936592          | 0.000726159          | 0.009111117 |
| 0.018128374          | 0.018330452          | 0.007335224          | 0.004561688 |
| 0.002618121          | 0.00462658           | 0.003551397          | 0.000339393 |
| 0.004376945          | 0.001176498          | 0.003262462          | 0.004264034 |
| 0.000453659          | 0.000198715          | 0.000375042          | 0.003020917 |
| 0.004016808          | 0.012339218          | 0.030695956          | 0.00074234  |
| 0.013156855          | 0.009899107          | 0.013765657          | 0.004854253 |
| 5.26E-05 0.006386223 | 0.001580425          | 0.005219648          |             |
| 0.021395772          | 0.013949074          | 0.00042951           | 0.027194795 |
| 0.000384624          | 0.021356813          | 0.032002666          | 6.21E-05    |
| 0.004215756          | 0.020486593          | 0.006421645          | 0.003245956 |
| 0.006909009          | 0.003889509          | 0.000745478          | 0.000609569 |
| 0.003044797          | 0.009040673          | 0.000364639          | 0.010643223 |
| 0.003176206          | 0.00737362           | 0.0127337            | 0.013491058 |
| 0.007516495          | 0.006857952          | 0.038251297          | 0.008255447 |
| 0.000344694          | 6.74E-06 0.001406916 | 0.012931554          |             |
| 0.000508775          | 0.003828496          | 0.02372666           | 0.008038818 |
| 0.003787472          | 0.003772837          | 0.001582268          | 0.00486361  |
| 0.019285907          | 0.007681494          | 0.005436632          | 0.015049228 |

|             |             |             |             |
|-------------|-------------|-------------|-------------|
| 0.006498415 | 0.016960383 | 0.006342857 | 0.01269003  |
| 0.000375092 | 0.013650891 | 0.021133011 | 0.044045793 |
| 0.000420379 | 0.001251002 | 0.028452838 | 0.019199098 |
| 0.004167809 | 0.003414917 | 0.043361445 | 0.014583184 |
| 0.017239208 | 0.006020257 | 0.003538866 | 0.002499246 |
| 0.005154791 | 0.007432844 | 0.010557449 | 0.022086188 |
| 0.014907691 | 0.009711471 | 0.00463313  | 0.009829646 |
| 0.003195033 | 0.030889878 | 0.002411019 | 0.000854945 |
| 0.036117582 | 0.01400402  | 0.011249205 | 0.036491939 |
| 7.61E-05    | 0.020129004 | 0.018392132 | 0.015979593 |
| 0.008738994 | 0.000357757 | 0.037820501 | 0.024480092 |
| 0.015263901 | 0.003277902 | 0.035140759 | 0.001235611 |
| 0.004583069 | 9.09E-05    | 0.003342085 | 0.011077141 |
| 0.020526597 | 0.040408635 | 0.002415951 | 0.002851823 |
| 0.002356602 | 0.00017772  | 0.000142649 | 0.002235521 |
| 0.003478187 | 0.000912781 | 0.003217366 | 0.01080865  |
| 0.037775187 | 0.001726816 | 0.001480315 | 0.011872161 |
| 0.024683368 | 0.0003813   | 0.011313233 | 0.040755044 |
| 0.012583487 | 0.007723687 | 0.007006188 | 0.013572725 |
| 0.00056808  | 0.011477159 | 0.034162512 | 0.001328102 |
| 0.007260872 | 0.010861813 | 0.001185922 | 0.002120577 |
| 0.000247439 | 0.000494251 | 0.004899294 | 0.001887494 |
| 0.006215694 | 0.00537323  | 0.008257419 | 0.001365049 |
| 0.002365416 | 0.002933597 | 0.004611654 | 0.002257952 |
| 0.004193725 | 0.004484828 | 7.10E-05    | 0.025405862 |
| 0.015633963 | 0.014282803 | 0.027191172 | 0.000582611 |
| 0.00050808  | 0.002248051 | 0.027055665 | 0.023606525 |
| 0.017169471 | 0.026114654 | 0.000264419 | 0.005359347 |
| 0.001642363 | 0.021329704 | 0.012535824 | 0.00240357  |
| 0.0018391   | 0.006936212 | 0.008590781 | 0.016130951 |
| 0.0002132   | 0.006686416 | 0.00356203  | 0.039210005 |
| 0.002814286 | 0.025006584 | 0.013205382 | 0.010481001 |
| 0.010799808 | 0.016152316 | 0.01383972  | 0.003934237 |
| 0.010062304 | 0.019480292 | 0.005181356 | 0.015456531 |
| 0.008282059 | 0.008630422 | 0.002487904 | 0.004224897 |
| 0.002794436 | 0.01267628  | 0.020111818 | 0.018667242 |
| 0.004286192 | 0.001247241 | 0.016564209 | 0.013534157 |
| 0.014990109 | 0.003443962 | 0.014244571 | 0.003059622 |
| 0.005171367 | 0.01092584  | 0.004519376 | 0.002141548 |
| 4.65E-05    | 5.05E-05    | 0.013864532 | 0.00904752  |
| 0.002468547 | 0.000454257 | 0.001796338 | 0.003342542 |
| 0.01090022  | 0.013993281 | 0.007946462 | 0.002650095 |
| 0.005996026 | 0.000535782 | 0.005352685 | 0.024002097 |
| 0.028975961 | 0.006158472 | 0.012607881 | 0.005843761 |
| 0.000921861 | 0.002753143 | 0.007378687 | 0.000188405 |
| 0.007018443 | 0.000574815 | 0.00448087  | 0.001055342 |
| 0.018527243 | 0.031304851 | 0.026804168 | 0.000829581 |
| 0.005226125 | 0.00920273  | 0.001391854 | 0.002871592 |
| 0.002659684 | 0.00273493  | 0.000453418 | 0.002871592 |
| 0.011714675 | 0.00273493  | 0.0070683   | 0.014168308 |
| 0.004129324 | 0.007337339 | 0.00747942  | 0.000849706 |
| 0.003173155 | 0.000661595 | 0.012166137 | 0.01958047  |
| 0.017783516 | 0.021873173 | 0.003276552 | 0.00896895  |
| 0.001747295 | 0.008042774 | 0.001209003 | 0.000679314 |
|             | 5.69E-05    | 0.00032293  | 0.008648239 |

|             |             |             |             |
|-------------|-------------|-------------|-------------|
| 0.000567005 | 2.23E-05    | 0.000537794 | 0.011428395 |
| 0.002766181 | 0.003871319 | 0.00649116  | 0.004482013 |
| 0.012929407 | 0.001896924 | 0.010085312 | 0.003331162 |
| 0.005115245 | 0.008354994 | 0.027222619 | 0.00976517  |
| 0.014932525 | 0.000171563 | 5.42E-05    | 0.002551473 |
| 0.000253242 | 4.36E-05    | 0.021459603 | 0.018846059 |
| 0.001302385 | 0.005037018 | 0.030203014 | 0.004767626 |
| 0.000811838 | 0.003297131 | 0.000733853 | 0.019847368 |
| 0.006183057 | 0.011514316 | 0.003557688 | 0.016145718 |
| 0.014006921 | 0.000327239 | 0.00142803  | 0.004760684 |
| 0.004306354 | 0.009040999 | 0.000916005 | 0.037466108 |
| 0.002574959 | 1           | 0.011702339 | 0.006346908 |
| 0.003926114 | 0.021432533 | 0.00133263  | 0.013482283 |
| 0.005006835 | 0.002040108 | 0.000477032 | 0.00445453  |
| 0.003298158 | 0.012019475 | 0.002430884 | 0.000525241 |
| 0.007965294 | 0.005856781 | 0.004334776 | 0.006524633 |
| 0.003733957 | 0.017318082 | 0.002498773 | 0.002688965 |
| 0.002314481 | 0.00938052  | 0.000670232 | 0.002370255 |
| 0.031275688 | 0.001518407 | 0.005089719 | 0.013398269 |
| 0.003075868 | 0.004202991 | 0.027309259 | 0.000828894 |
| 0.003392289 | 0.000758904 | 0.004731264 | 0.023289719 |
| 0.017910742 | 0.002653914 | 0.006085103 | 0.012892124 |
| 0.005782216 | 0.001322337 | 0.013926922 | 0.003200292 |
| 0.002177727 | 0.003075025 | 0.009862231 | 0.003398001 |
| 0.006782185 | 0.001379233 | 0.008818356 | 0.002050417 |
| 0.006249379 | 0.000959254 | 0.024957697 | 0.017102689 |
| 0.005401435 | 0.00904645  | 0.010571997 | 0.002072286 |
| 0.004552048 | 0.009049358 | 0.000202243 | 0.000139833 |
| 0.002427039 | 0.007377932 | 0.002333388 | 0.016392324 |
| 0.006889771 | 0.007431292 | 0.001327773 | 0.005361468 |
| 1.56E-05    | 0.001159548 | 0.006927293 | 0.000145201 |
| 0.031807893 | 0.003683876 | 0.004294901 | 0.003800525 |
| 0.000555934 | 0.000334669 | 0.00363176  | 0.000375564 |
| 0.000738702 | 0.000340515 | 0.001686817 | 0.00033476  |
| 0.000305413 | 0.000133826 | 0.000165793 | 0.0033088   |
| 0.002105001 |             |             |             |
| TIPIN       | 0.272125914 | 0.41525699  | 0.238167834 |
| 0.300509216 | 0.291664118 | 0.412786679 | 0.23422919  |
| 0.313814512 | 0.391809103 | 0.260649094 | 0.393941105 |
| 0.135629095 | 0.05632261  | 0.433490415 | 0.217969114 |
| 0.340633161 | 0.169943415 | 0.30097272  | 0.112712246 |
| 0.312988658 | 0.281601259 | 0.290349292 | 0.428677188 |
| 0.278445817 | 0.368295782 | 0.42189237  | 0.299439861 |
| 0.425924395 | 0.191115257 | 0.390661971 | 0.178662928 |
| 0.433775512 | 0.294085826 | 0.292199027 | 0.133079403 |
| 0.397989105 | 0.011366245 | 0.442323415 | 0.323897319 |
| 0.125461092 | 0.432457518 | 0.328024291 | 0.35850896  |
| 0.347982852 | 0.201969734 | 0.172022667 | 0.342503306 |
| 0.38450476  | 0.352052754 | 0.252402088 | 0.408660656 |
| 0.333055585 | 0.44530577  | 0.38135495  | 0.011386455 |
| 0.219140903 | 0.041728507 | 0.140986019 | 0.447523932 |
| 0.382015605 | 0.300000726 | 0.197227186 | 0.352327823 |
| 0.344562134 | 0.355853776 | 0.371870304 | 0.321084789 |
| 0.439794771 | 0.12616565  | 0.366270449 | 0.26031588  |

|             |             |             |             |
|-------------|-------------|-------------|-------------|
| 0.408634883 | 0.178510376 | 0.355374959 | 0.261243179 |
| 0.335359746 | 0.345130272 | 0.345856819 | 0.239623545 |
| 0.412762129 | 0.480064306 | 0.381218297 | 0.456829753 |
| 0.081689084 | 0.276353684 | 0.264503303 | 0.374592056 |
| 0.376809744 | 0.241022771 | 0.420034818 | 0.460904776 |
| 0.202345009 | 0.35300298  | 0.392259296 | 0.317606699 |
| 0.432091012 | 0.206132552 | 0.355817655 | 0.14132475  |
| 0.322727607 | 0.304846219 | 0.443245953 | 0.418757934 |
| 0.298997713 | 0.267553551 | 0.470249995 | 0.254994539 |
| 0.33494297  | 0.286734718 | 0.235760435 | 0.388305047 |
| 0.403185304 | 0.433561396 | 0.402712098 | 0.396702804 |
| 0.31744628  | 0.436610623 | 0.426302102 | 0.423079652 |
| 0.111626603 | 0.450032018 | 0.382126458 | 0.189925358 |
| 0.264250463 | 0.245087882 | 0.221119047 | 0.404818566 |
| 0.419623884 | 0.421981192 | 0.387139809 | 0.324785277 |
| 0.394161799 | 0.448684329 | 0.444246913 | 0.420138025 |
| 0.205816849 | 0.176526591 | 0.325634323 | 0.396265367 |
| 0.394896092 | 0.301062018 | 0.210388265 | 0.481079875 |
| 0.445599521 | 0.397440528 | 0.367544834 | 0.492688045 |
| 0.328887419 | 0.451848685 | 0.422067381 | 0.353109209 |
| 0.473540851 | 0.470729418 | 0.430894754 | 0.337448373 |
| 0.447112001 | 0.435512848 | 0.078838263 | 0.412821423 |
| 0.434968277 | 0.017254487 | 0.404584668 | 0.410199711 |
| 0.435335409 | 0.396636151 | 0.422973262 | 0.423979932 |
| 0.437808458 | 0.267381385 | 0.019285538 | 0.333504804 |
| 0.459263502 | 0.44147484  | 0.250179077 | 0.336556166 |
| 0.322802952 | 0.437399421 | 0.387649067 | 0.280984046 |
| 0.461137197 | 0.422948868 | 0.415236842 | 0.414796218 |
| 0.354151666 | 0.427283778 | 0.279611074 | 0.461167179 |
| 0.202746214 | 0.327130615 | 0.231071447 | 0.386775063 |
| 0.338403485 | 0.3311585   | 0.429589334 | 0.321760533 |
| 0.356446225 | 0.408389197 | 0.237280103 | 0.332106627 |
| 0.22796495  | 0.387862747 | 0.361671282 | 0.364885277 |
| 0.190890756 | 0.332298667 | 0.328678256 | 0.31599233  |
| 0.325463055 | 0.357085258 | 0.383277581 | 0.418518725 |
| 0.318217478 | 0.380932096 | 0.416050792 | 0.434134316 |
| 0.424619095 | 0.319440149 | 0.382194748 | 0.065094265 |
| 0.274060416 | 0.217204593 | 0.119929189 | 0.326978235 |
| 0.340627867 | 0.32186082  | 0.363418845 | 0.359753842 |
| 0.433496664 | 0.322207845 | 0.318477135 | 0.439368473 |
| 0.341969665 | 0.326489312 | 0.418746793 | 0.373584901 |
| 0.046457059 | 0.416128713 | 0.420235707 | 0.174899259 |
| 0.394712659 | 0.12071839  | 0.195677362 | 0.416473322 |
| 0.219005868 | 0.204211795 | 0.415666368 | 0.353143772 |
| 0.334059606 | 0.354369816 | 0.431018489 | 0.032273658 |
| 0.292056286 | 0.109294978 | 0.366766033 | 0.310947063 |
| 0.403461812 | 0.375622951 | 0.274541429 | 0.284704088 |
| 0.333621344 | 0.448705052 | 0.43131742  | 0.432089418 |
| 0.298478265 | 0.438371212 | 0.409425424 | 0.435590128 |
| 0.425353242 | 0.279406315 | 0.085477272 | 0.421260946 |
| 0.413606619 | 0.260435101 | 0.264218722 | 0.376812783 |
| 0.309559878 | 0.349307515 | 0.160861221 | 0.430872676 |
| 0.468698578 | 0.430613621 | 0.291377323 | 0.365951317 |
| 0.437744979 | 0.408682227 | 0.408403151 | 0.443864792 |

|             |             |             |             |
|-------------|-------------|-------------|-------------|
| 0.265213675 | 0.309135192 | 0.298145102 | 0.383532813 |
| 0.373072449 | 0.210040841 | 0.40820067  | 0.112646347 |
| 0.006616221 | 0.27638128  | 0.262184078 | 0.285692319 |
| 0.144830241 | 0.347643664 | 0.375579403 | 0.432413373 |
| 0.309977406 | 0.439402433 | 0.36857198  | 0.321611098 |
| 0.433219921 | 0.302022031 | 0.30450069  | 0.347177488 |
| 0.392233638 | 0.089827135 | 0.261360405 | 0.48686201  |
| 0.19851474  | 0.195655003 | 0.396888412 | 0.013345633 |
| 0.21707367  | 0.39061448  | 0.283503373 | 0.361911253 |
| 0.40741966  | 0.365352705 | 0.390956374 | 0.296128509 |
| 0.39217103  | 0.294761292 | 0.019027194 | 0.414554926 |
| 0.412745686 | 0.407306202 | 0.412583493 | 0.422020521 |
| 0.396239409 | 0.386730839 | 0.385747875 | 0.434950397 |
| 0.298212977 | 0.28575341  | 0.177521619 | 0.343632206 |
| 0.019793217 | 0.405025281 | 0.313674527 | 0.344082905 |
| 0.373750976 | 0.38552453  | 0.198441759 | 0.310193299 |
| 0.138510722 | 0.134391591 | 0.379160419 | 0.316967571 |
| 0.346192378 | 0.12282838  | 0.260883505 | 0.264316234 |
| 0.441011    | 0.440639353 | 0.266936004 | 0.45610355  |
| 0.391132531 | 0.314458272 | 0.339078497 | 0.38730711  |
| 0.25911565  | 0.103706205 | 0.386632426 | 0.040478223 |
| 0.226673719 | 0.418965579 | 0.322037787 | 0.259618725 |
| 0.402560881 | 0.065679494 | 0.446676678 | 0.45808243  |
| 0.426188213 | 0.421490731 | 0.440949908 | 0.220870779 |
| 0.439370306 | 0.051000345 | 0.434431916 | 0.433139073 |
| 0.313053596 | 0.007962259 | 0.03207196  | 0.414293305 |
| 0.349280297 | 0.227378029 | 0.355862853 | 0.37793057  |
| 0.28348932  | 0.355672254 | 0.240063232 | 0.182854016 |
| 0.404939974 | 0.282025091 | 0.167815906 | 0.43076855  |
| 0.355101619 | 0.352029041 | 0.381885443 | 0.281502023 |
| 0.360344012 | 0.224594699 | 0.272587396 | 0.025581838 |
| 0.358767258 | 0.303016465 | 0.471978403 | 0.433302508 |
| 0.44077517  | 0.361823682 | 0.264299101 | 0.338384966 |
| 0.39638577  | 0.287346749 | 0.287438117 | 0.311779354 |
| 0.433641613 | 0.364795494 | 0.421457661 | 0.4362933   |
| 0.432229588 | 0.443494772 | 0.184289419 | 0.400813699 |
| 0.085172689 | 0.005161764 | 0.422163294 | 0.383804653 |
| 0.059664731 | 0.316642889 | 0.405722818 | 0.295011516 |
| 0.295532482 | 0.173370637 | 0.195181525 | 0.188816738 |
| 0.374999311 | 0.362502887 | 0.249761482 | 0.368915795 |
| 0.275719562 | 0.156158486 | 0.320610587 | 0.307223068 |
| 0.2472893   | 0.420917461 | 0.371517502 | 0.145795041 |
| 0.365507132 | 0.344451306 | 0.243131794 | 0.359456208 |
| 0.429549587 | 0.42510868  | 0.180799392 | 0.069439574 |
| 0.416831131 | 0.324820342 | 0.420114057 | 0.43016456  |
| 0.477512454 | 0.448039087 | 0.434411433 | 0.224598238 |
| 0.255071574 | 0.352700089 | 0.257942879 | 0.179652937 |
| 0.434186652 | 0.249191672 | 0.434476197 | 0.222747462 |
| 0.312886148 | 0.366171108 | 0.165551648 | 0.272874584 |
| 0.306029642 | 0.361240002 | 0.294100569 | 0.348951731 |
| 0.344618509 | 0.197057099 | 0.218373766 | 0.368125487 |
| 0.424358623 | 0.129109872 | 0.351045186 | 0.387269392 |
| 0.423667941 | 0.199232228 | 0.371332184 | 0.43660365  |
| 0.339559858 | 0.302345864 | 0.408546754 | 0.380267545 |

|             |             |             |             |
|-------------|-------------|-------------|-------------|
| 0.406322203 | 0.323241684 | 0.116130995 | 0.415646513 |
| 0.424539151 | 0.383343171 | 0.446925681 | 0.401306533 |
| 0.279470991 | 0.33679381  | 0.236908751 | 0.331452946 |
| 0.348141781 | 0.419047342 | 0.343415315 | 0.250802024 |
| 0.397030736 | 0.461858367 | 0.425253387 | 0.323170177 |
| 0.368972523 | 0.321301091 | 0.233250823 | 0.410282468 |
| 0.15667669  | 0.284653811 | 0.3384729   | 0.382170674 |
| 0.00756411  | 0.093018688 | 0.405148135 | 0.364648953 |
| 0.453479356 | 0.420269728 | 0.445576717 | 0.357996999 |
| 0.001226679 | 0.337561157 | 0.392371861 | 0.371296836 |
| 0.432882434 | 0.437376315 | 0.235792329 | 0.232914154 |
| 0.401472074 | 0.274597449 | 0.27583945  | 0.367953291 |
| 0.127199008 | 0.419743621 | 0.359080001 | 0.347367537 |
| 0.294191052 | 0.265992497 | 0.191686889 | 0.386178928 |
| 0.114810824 | 0.3889912   | 0.417459844 | 0.275759786 |
| 0.153515818 | 0.405763357 | 0.417446521 | 0.168536578 |
| 0.286334595 | 0.401167455 | 0.418552918 | 0.015398991 |
| 0.384678123 | 0.07404677  | 0.295077887 | 0.315214936 |
| 0.309579254 | 0.304883983 | 0.317086724 | 0.305365335 |
| 0.397416054 | 0.361683325 | 0.377689838 | 0.373914374 |
| 0.288936839 | 0.370160072 | 0.35827829  | 0.395757177 |
| 0.308073351 | 0.32794722  | 0.283581229 | 0.27626558  |
| 0.204457335 | 0.420635673 | 0.404719605 | 0.262969344 |
| 0.356771919 | 0.37096389  | 0.42352303  | 0.428644514 |
| 0.423088835 | 0.296784287 | 0.3541558   | 0.434971423 |
| 0.172013303 | 0.332752106 | 0.247968502 | 0.40511396  |
| 0.386378403 | 0.225202299 | 0.379750663 | 0.423164126 |
| 0.387339981 | 0.438038431 | 0.404286315 | 0.429830208 |
| 0.369808363 | 0.318480152 | 0.296482197 | 0.224715562 |
| 0.372192475 | 0.327742239 | 0.254887539 | 0.029373962 |
| 0.415992862 | 0.406864831 | 0.418808717 | 0.446848475 |
| 0.203382562 | 0.42905269  | 0.326737579 | 0.285890091 |
| 0.257700495 | 0.342374154 | 0.341672877 | 0.393003299 |
| 0.142093041 | 0.35673767  | 0.313730993 | 0.406917147 |
| 0.383068504 | 0.36721542  | 0.246186775 | 0.374496198 |
| 0.346629196 | 0.385883613 | 0.442529589 | 0.325568917 |
| 0.356731244 | 0.198713053 | 0.366073964 | 0.339703595 |
| 0.300462994 | 0.42018719  | 0.246376342 | 0.422570567 |
| 0.313812768 | 0.324992102 | 0.462312109 | 0.393714604 |
| 0.385785334 | 0.230399096 | 0.123703491 | 0.366699337 |
| 0.33218499  | 0.252247269 | 0.01214742  | 0.064929116 |
| 0.39244697  | 0.28752053  | 0.392618957 | 0.381750431 |
| 0.233378278 | 0.378863661 | 0.105705253 | 0.399174464 |
| 0.438026622 | 0.473963424 | 0.344003471 | 0.383315601 |
| 0.419684997 | 0.288801323 | 0.429485433 | 0.020458022 |
| 0.358937321 | 0.327514441 | 0.315246501 | 0.218449917 |
| 0.133154488 | 0.14461311  | 0.376407308 | 0.239819277 |
| 0.40613663  | 0.136740438 | 0.357106656 | 0.399435103 |
| 0.352187444 | 0.479488854 | 0.240611915 | 0.401482858 |
| 0.172266026 | 0.383963598 | 0.297970473 | 0.325933163 |
| 0.272623602 | 0.241065529 | 0.399277158 | 0.193489845 |
| 0.175037141 | 0.298208211 | 0.011702339 | 1           |
| 0.453365263 | 0.265461399 | 0.375335139 | 0.243275385 |
| 0.373000246 | 0.408875466 | 0.260984009 | 0.335661768 |

|             |             |             |             |
|-------------|-------------|-------------|-------------|
| 0.079055236 | 0.317605939 | 0.356547811 | 0.446969267 |
| 0.181891491 | 0.350803722 | 0.202637403 | 0.264111119 |
| 0.475674126 | 0.2806836   | 0.384414526 | 0.249241913 |
| 0.429685085 | 0.407523145 | 0.345781243 | 0.244033169 |
| 0.354072652 | 0.251633557 | 0.349251358 | 0.447622111 |
| 0.307526446 | 0.185999209 | 0.394407658 | 0.333173037 |
| 0.23918917  | 0.431159327 | 0.337951897 | 0.44262137  |
| 0.175233451 | 0.390725689 | 0.391519422 | 0.424271047 |
| 0.387996174 | 0.158344516 | 0.201095602 | 0.268569763 |
| 0.434088901 | 0.269313185 | 0.218577058 | 0.438363115 |
| 0.169081851 | 0.386494522 | 0.352740789 | 0.233299945 |
| 0.153517625 | 0.306999347 | 0.382171434 | 0.340753829 |
| 0.377765366 | 0.348078891 | 0.244446873 | 0.433557541 |
| 0.258141128 | 0.116443962 | 0.435616818 | 0.012123589 |
| 0.434673694 | 0.383215025 | 0.380835162 | 0.318485406 |
| 0.377619561 | 0.403543256 | 0.408272189 | 0.020404514 |
| 0.399418804 | 0.058384893 | 0.307055672 | 0.262899034 |
| 0.230294009 | 0.230654243 | 0.440569324 | 0.42286941  |
| 0.417782402 | 0.280486785 | 0.25616656  | 0.433392793 |
| 0.113586794 | 0.227031115 | 0.257926681 | 0.408163126 |
| 0.165888437 | 0.319919723 | 0.328935686 | 0.291585079 |
| 0.432605141 | 0.392062863 |             |             |
| TK1         | 0.200182204 | 0.505339591 | 0.198122784 |
| 0.223579371 | 0.286331556 | 0.461643495 | 0.161453606 |
| 0.240255026 | 0.472953163 | 0.39946327  | 0.385342432 |
| 0.068158322 | 0.057782961 | 0.480261937 | 0.14119272  |
| 0.377023663 | 0.086076827 | 0.216310306 | 0.118185246 |
| 0.343817594 | 0.261908705 | 0.311318843 | 0.497712093 |
| 0.274434898 | 0.345158258 | 0.488983705 | 0.37853861  |
| 0.503524126 | 0.252978164 | 0.44724556  | 0.278226015 |
| 0.455241755 | 0.295080405 | 0.363202851 | 0.083171848 |
| 0.446953005 | 0.012445831 | 0.466849043 | 0.287530052 |
| 0.128664902 | 0.433149143 | 0.465478437 | 0.291910445 |
| 0.467375637 | 0.135720331 | 0.275385135 | 0.415657245 |
| 0.461884841 | 0.36073299  | 0.220883444 | 0.48383697  |
| 0.416137076 | 0.452198648 | 0.500733286 | 0.00636733  |
| 0.253610624 | 0.05936392  | 0.180345502 | 0.50367324  |
| 0.307318343 | 0.198857098 | 0.293607048 | 0.37488702  |
| 0.42099424  | 0.401996444 | 0.339748612 | 0.435124475 |
| 0.496480485 | 0.13484462  | 0.454586401 | 0.227773932 |
| 0.461883632 | 0.145733828 | 0.286163493 | 0.257984776 |
| 0.401224361 | 0.26232802  | 0.340974471 | 0.275459844 |
| 0.51078319  | 0.494264996 | 0.353078658 | 0.50361347  |
| 0.08475835  | 0.306074763 | 0.264128346 | 0.349744157 |
| 0.424524448 | 0.204076242 | 0.442680182 | 0.487918267 |
| 0.16862598  | 0.479125366 | 0.457691087 | 0.295584626 |
| 0.503761328 | 0.264218602 | 0.475199151 | 0.133631153 |
| 0.352888751 | 0.323215127 | 0.484585454 | 0.379236244 |
| 0.308745165 | 0.231619036 | 0.507144026 | 0.2768995   |
| 0.301209525 | 0.232612133 | 0.21739667  | 0.462949517 |
| 0.455628194 | 0.498686298 | 0.492250628 | 0.425554305 |
| 0.357817818 | 0.496840216 | 0.461688837 | 0.478359682 |
| 0.203612511 | 0.502961468 | 0.318547475 | 0.095629208 |
| 0.229784106 | 0.151420509 | 0.241719645 | 0.383361961 |



|             |             |             |             |
|-------------|-------------|-------------|-------------|
| 0.483470987 | 0.428229592 | 0.32193402  | 0.268320059 |
| 0.442912486 | 0.503550156 | 0.503764314 | 0.465258509 |
| 0.127383107 | 0.221098132 | 0.370073815 | 0.397725854 |
| 0.421544034 | 0.243565895 | 0.215888412 | 0.506220378 |
| 0.450716892 | 0.444159414 | 0.343056652 | 0.507922625 |
| 0.313932085 | 0.478683218 | 0.512783915 | 0.261742282 |
| 0.495518881 | 0.497844742 | 0.474646883 | 0.373979594 |
| 0.489718547 | 0.448222676 | 0.092977528 | 0.457909679 |
| 0.460912026 | 0.011998329 | 0.482842732 | 0.482476266 |
| 0.507197391 | 0.464614526 | 0.47220061  | 0.488500549 |
| 0.507488424 | 0.20877872  | 0.032095576 | 0.302169488 |
| 0.502084951 | 0.460198877 | 0.183195803 | 0.412916266 |
| 0.345084097 | 0.487183975 | 0.458371476 | 0.302707407 |
| 0.465590575 | 0.485211236 | 0.494927292 | 0.468605441 |
| 0.44399183  | 0.419189482 | 0.348744395 | 0.495823438 |
| 0.118778925 | 0.26123443  | 0.191440633 | 0.38941487  |
| 0.456781863 | 0.243740336 | 0.484299652 | 0.364410346 |
| 0.274648714 | 0.472689172 | 0.297321158 | 0.355433861 |
| 0.205962713 | 0.467027465 | 0.30962776  | 0.336422506 |
| 0.098574214 | 0.291962059 | 0.248375957 | 0.222359387 |
| 0.270847384 | 0.368003301 | 0.46015514  | 0.484066485 |
| 0.368669642 | 0.351647028 | 0.478984951 | 0.465188048 |
| 0.42278379  | 0.356975999 | 0.345845519 | 0.026459015 |
| 0.275267069 | 0.320888854 | 0.144225979 | 0.403411508 |
| 0.329549243 | 0.289393491 | 0.403196601 | 0.377746564 |
| 0.437457356 | 0.314723846 | 0.360843423 | 0.458390476 |
| 0.332578903 | 0.301565762 | 0.453447667 | 0.471956333 |
| 0.023520667 | 0.413119666 | 0.473060681 | 0.145048762 |
| 0.423599104 | 0.104980505 | 0.212829021 | 0.474892783 |
| 0.260478117 | 0.199215804 | 0.484718369 | 0.378150087 |
| 0.377745478 | 0.378985824 | 0.480459119 | 0.041526194 |
| 0.345248857 | 0.061800673 | 0.319220651 | 0.449438778 |
| 0.358758314 | 0.347486539 | 0.28182586  | 0.267154039 |
| 0.306389012 | 0.498124868 | 0.466510897 | 0.492686181 |
| 0.36266492  | 0.4829544   | 0.465419739 | 0.466321204 |
| 0.439640235 | 0.364375595 | 0.096884488 | 0.473336548 |
| 0.474987013 | 0.336809745 | 0.240104235 | 0.462076561 |
| 0.413514997 | 0.394840194 | 0.12494246  | 0.475239248 |
| 0.475041248 | 0.507217988 | 0.194541216 | 0.373395075 |
| 0.439879116 | 0.352132416 | 0.456835261 | 0.475675933 |
| 0.390185904 | 0.34042389  | 0.318215093 | 0.395664193 |
| 0.310423245 | 0.192093604 | 0.419342089 | 0.136720004 |
| 0.008109267 | 0.228704492 | 0.199630438 | 0.195699772 |
| 0.129718334 | 0.451682603 | 0.416653486 | 0.494618841 |
| 0.210388984 | 0.470005007 | 0.364645389 | 0.297033527 |
| 0.487065107 | 0.340942315 | 0.349261459 | 0.380412538 |
| 0.365426028 | 0.043338008 | 0.166011574 | 0.50133556  |
| 0.177834591 | 0.196179281 | 0.426711164 | 0.00544886  |
| 0.150031385 | 0.502420704 | 0.259498783 | 0.330964988 |
| 0.449485233 | 0.348746967 | 0.363011971 | 0.422795053 |
| 0.377574886 | 0.21167209  | 0.005783547 | 0.488711002 |
| 0.487775888 | 0.479405535 | 0.490899467 | 0.487895097 |
| 0.46812395  | 0.455481504 | 0.429718068 | 0.49187823  |
| 0.216070922 | 0.255686596 | 0.177321078 | 0.314341357 |

|             |             |             |             |
|-------------|-------------|-------------|-------------|
| 0.01486196  | 0.410722967 | 0.31885492  | 0.267131858 |
| 0.428014042 | 0.387755441 | 0.115517873 | 0.340967508 |
| 0.079753445 | 0.15844922  | 0.409826892 | 0.277292197 |
| 0.351767062 | 0.071882229 | 0.287175973 | 0.305861005 |
| 0.496361568 | 0.453324591 | 0.333950423 | 0.499490008 |
| 0.363875349 | 0.328326319 | 0.324338077 | 0.405022034 |
| 0.170238998 | 0.151270213 | 0.457494476 | 0.06180634  |
| 0.255536791 | 0.478811172 | 0.387867132 | 0.198920049 |
| 0.357744921 | 0.03088978  | 0.471366825 | 0.493377628 |
| 0.508813686 | 0.481354959 | 0.494484526 | 0.225818743 |
| 0.49975448  | 0.077226037 | 0.498243532 | 0.500601673 |
| 0.424594325 | 0.003866841 | 0.012305121 | 0.480571016 |
| 0.38825183  | 0.217260113 | 0.277649828 | 0.432195975 |
| 0.175838232 | 0.337219543 | 0.160815976 | 0.155931571 |
| 0.467323319 | 0.235199328 | 0.147011448 | 0.502211576 |
| 0.307375097 | 0.295307689 | 0.483427273 | 0.243582199 |
| 0.404950439 | 0.129213841 | 0.242148322 | 0.010992786 |
| 0.372360246 | 0.291129078 | 0.502492173 | 0.502248762 |
| 0.476100825 | 0.387117391 | 0.384091754 | 0.375559042 |
| 0.457730562 | 0.286727458 | 0.36823191  | 0.298021733 |
| 0.511539289 | 0.391754677 | 0.387310359 | 0.422127093 |
| 0.471933932 | 0.487828838 | 0.106853898 | 0.436612563 |
| 0.042441649 | 0.001960568 | 0.496090249 | 0.362474142 |
| 0.07842824  | 0.356379494 | 0.363939255 | 0.329781054 |
| 0.28423975  | 0.101937725 | 0.219730091 | 0.200769834 |
| 0.346993145 | 0.374668959 | 0.238838063 | 0.375154656 |
| 0.264304522 | 0.127330938 | 0.251551142 | 0.234874026 |
| 0.294896593 | 0.447979498 | 0.34787952  | 0.085269526 |
| 0.460318952 | 0.398744128 | 0.155760146 | 0.299943037 |
| 0.466721663 | 0.483987977 | 0.105412545 | 0.024881793 |
| 0.388089419 | 0.335497788 | 0.470710541 | 0.509627171 |
| 0.503523194 | 0.474679511 | 0.446727968 | 0.148891504 |
| 0.168679745 | 0.345997262 | 0.260669831 | 0.111903383 |
| 0.495297902 | 0.2285246   | 0.502171164 | 0.252084554 |
| 0.248917448 | 0.310795948 | 0.076757667 | 0.192294245 |
| 0.351294547 | 0.283518738 | 0.211605073 | 0.332159323 |
| 0.326908095 | 0.20914403  | 0.143392753 | 0.292972568 |
| 0.434335842 | 0.142443068 | 0.278200864 | 0.425146832 |
| 0.472741369 | 0.328715497 | 0.430755255 | 0.45277427  |
| 0.278736986 | 0.26118492  | 0.436419784 | 0.427478769 |
| 0.486131336 | 0.439620085 | 0.063748107 | 0.51225629  |
| 0.475175372 | 0.449264154 | 0.504187186 | 0.406998265 |
| 0.227400532 | 0.356113411 | 0.290716555 | 0.346134876 |
| 0.290435695 | 0.470272015 | 0.306685794 | 0.178920706 |
| 0.390861086 | 0.473774957 | 0.493653795 | 0.225485692 |
| 0.453358293 | 0.322893557 | 0.216801567 | 0.482189716 |
| 0.146879047 | 0.194794784 | 0.465172398 | 0.452230396 |
| 0.003391804 | 0.09723007  | 0.46499969  | 0.297604037 |
| 0.480291476 | 0.473641233 | 0.468018185 | 0.371225421 |
| 0.001221436 | 0.400800296 | 0.394452168 | 0.407194555 |
| 0.503907782 | 0.453922497 | 0.237075445 | 0.130814514 |
| 0.361302087 | 0.249171647 | 0.188304559 | 0.428225569 |
| 0.155491083 | 0.486580998 | 0.291604817 | 0.334839945 |
| 0.231900357 | 0.273596395 | 0.201115162 | 0.333992043 |

|             |             |             |             |
|-------------|-------------|-------------|-------------|
| 0.133527895 | 0.326007214 | 0.402358481 | 0.408272085 |
| 0.163066891 | 0.451811279 | 0.478261852 | 0.101141848 |
| 0.326261731 | 0.45117499  | 0.461387583 | 0.006668917 |
| 0.427515824 | 0.028646158 | 0.220672684 | 0.241213471 |
| 0.236052086 | 0.247064229 | 0.272920785 | 0.293935984 |
| 0.44293878  | 0.306572579 | 0.324072318 | 0.303187036 |
| 0.199292461 | 0.332317662 | 0.397594535 | 0.458886037 |
| 0.270836387 | 0.236782646 | 0.261657815 | 0.264132619 |
| 0.105988075 | 0.495051727 | 0.365426537 | 0.234352272 |
| 0.29310843  | 0.435456416 | 0.403029662 | 0.510598904 |
| 0.437411346 | 0.299922343 | 0.370993252 | 0.508372386 |
| 0.261183376 | 0.37459408  | 0.197031793 | 0.473225246 |
| 0.319996798 | 0.190440309 | 0.475564027 | 0.470481936 |
| 0.481544826 | 0.447472577 | 0.363152254 | 0.46765865  |
| 0.387027065 | 0.39212564  | 0.429224396 | 0.123716478 |
| 0.297282017 | 0.289186712 | 0.235952998 | 0.011595658 |
| 0.408166727 | 0.409887111 | 0.482337622 | 0.504232924 |
| 0.245153652 | 0.434736499 | 0.432650557 | 0.195655439 |
| 0.391171396 | 0.35732836  | 0.27174407  | 0.477120533 |
| 0.168719613 | 0.280003596 | 0.295965542 | 0.479327397 |
| 0.444357387 | 0.455204212 | 0.248919618 | 0.35142271  |
| 0.323690444 | 0.371250431 | 0.483573515 | 0.293569511 |
| 0.451151835 | 0.162096776 | 0.485747478 | 0.307515584 |
| 0.244285978 | 0.493210885 | 0.179898643 | 0.493519198 |
| 0.325973755 | 0.295352289 | 0.466869607 | 0.410117025 |
| 0.405489896 | 0.14682823  | 0.140496504 | 0.471049612 |
| 0.296437034 | 0.298400533 | 0.020447727 | 0.058938619 |
| 0.36137583  | 0.367660047 | 0.493174986 | 0.416097736 |
| 0.22191769  | 0.369087052 | 0.125392961 | 0.414497242 |
| 0.508028845 | 0.507035598 | 0.294348825 | 0.343326032 |
| 0.422619008 | 0.183405818 | 0.504724022 | 0.024104875 |
| 0.424813122 | 0.413302526 | 0.410641794 | 0.130435972 |
| 0.069386097 | 0.166473173 | 0.451241515 | 0.227902824 |
| 0.457688847 | 0.167524449 | 0.459174953 | 0.462197754 |
| 0.327943831 | 0.508930022 | 0.151965123 | 0.416873911 |
| 0.163165864 | 0.357827608 | 0.361436331 | 0.409800251 |
| 0.220152612 | 0.251323953 | 0.39919117  | 0.189520712 |
| 0.089105436 | 0.267716709 | 0.006346908 | 0.453365263 |
| 1           | 0.309335996 | 0.342389337 | 0.367998616 |
| 0.324773268 | 0.449264251 | 0.242633435 | 0.429563464 |
| 0.030240527 | 0.33788313  | 0.285308378 | 0.490355398 |
| 0.222999854 | 0.423068721 | 0.10953932  | 0.292490666 |
| 0.501309685 | 0.280756398 | 0.364034352 | 0.31571203  |
| 0.508747176 | 0.480899866 | 0.358134339 | 0.224615577 |
| 0.459961403 | 0.20083914  | 0.46258024  | 0.488896218 |
| 0.216932657 | 0.174243972 | 0.433081533 | 0.256076124 |
| 0.267877845 | 0.477681195 | 0.445809003 | 0.489771765 |
| 0.092841374 | 0.326203043 | 0.437594734 | 0.490072986 |
| 0.345997624 | 0.140578356 | 0.19997766  | 0.225446558 |
| 0.508158609 | 0.174150482 | 0.233930217 | 0.449214402 |
| 0.173621529 | 0.359933223 | 0.474341982 | 0.183660451 |
| 0.07378765  | 0.249171059 | 0.402878849 | 0.275294555 |
| 0.341192007 | 0.367814002 | 0.22714456  | 0.431264772 |
| 0.164282159 | 0.05146181  | 0.456405434 | 0.011603894 |

|             |             |             |             |
|-------------|-------------|-------------|-------------|
| 0.473563344 | 0.39748445  | 0.324747811 | 0.34050123  |
| 0.33643528  | 0.441614546 | 0.47984865  | 0.007276558 |
| 0.434558981 | 0.052588917 | 0.323155691 | 0.215838389 |
| 0.26272477  | 0.155663762 | 0.490582564 | 0.472917576 |
| 0.426706566 | 0.350543319 | 0.320217896 | 0.492633054 |
| 0.111477478 | 0.309543613 | 0.318071091 | 0.503978876 |
| 0.175052401 | 0.442095046 | 0.420590962 | 0.350267891 |
| 0.468191309 | 0.375664953 |             |             |
| TMC8        | 0.020992901 | 0.302523277 | 0.012877846 |
| 0.067376457 | 0.276028372 | 0.150028851 | 0.026041392 |
| 0.052213374 | 0.246581398 | 0.154699173 | 0.198368759 |
| 0.006105074 | 0.144366807 | 0.358936639 | 0.024552426 |
| 0.330917224 | 0.016945558 | 0.049462366 | 0.056769268 |
| 0.128917477 | 0.253490725 | 0.209727457 | 0.140804584 |
| 0.236781073 | 0.100065396 | 0.183009889 | 0.281529852 |
| 0.386010314 | 0.168669708 | 0.302602139 | 0.109280779 |
| 0.313073058 | 0.30360708  | 0.234488328 | 0.004127276 |
| 0.214178778 | 0.046609445 | 0.312631058 | 0.190524662 |
| 0.188480818 | 0.232457114 | 0.130328571 | 0.13492185  |
| 0.186629103 | 0.010450505 | 0.09307536  | 0.366764017 |
| 0.197428844 | 0.156516108 | 0.016877954 | 0.302052068 |
| 0.215727012 | 0.181913229 | 0.251272069 | 0.000897654 |
| 0.246003125 | 0.16668015  | 0.256911955 | 0.354503342 |
| 0.112803716 | 0.061339066 | 0.23603704  | 0.110778393 |
| 0.290721003 | 0.333274548 | 0.17587392  | 0.205004847 |
| 0.374165572 | 0.237904778 | 0.359021638 | 0.081626011 |
| 0.181535453 | 0.009841257 | 0.092941266 | 0.033047009 |
| 0.23095964  | 0.110224057 | 0.209618231 | 0.276603874 |
| 0.299122851 | 0.372865293 | 0.150548627 | 0.346456903 |
| 0.189246682 | 0.325174889 | 0.235238051 | 0.262727088 |
| 0.309052657 | 0.044076673 | 0.313449812 | 0.399073096 |
| 0.016823212 | 0.211903619 | 0.318150384 | 0.053448509 |
| 0.296775108 | 0.246199642 | 0.185116695 | 0.196214165 |
| 0.36374661  | 0.305302481 | 0.34069364  | 0.19096066  |
| 0.20750708  | 0.025249529 | 0.309336835 | 0.320928833 |
| 0.170263191 | 0.027379015 | 0.236185993 | 0.419745202 |
| 0.29471951  | 0.375520911 | 0.3345617   | 0.314710004 |
| 0.305306168 | 0.380864562 | 0.289444576 | 0.308684895 |
| 0.088394658 | 0.387900468 | 0.079190987 | 0.017890668 |
| 0.018869517 | 0.042442695 | 0.221218913 | 0.223974464 |
| 0.384647314 | 0.198311107 | 0.079838835 | 0.163633502 |
| 0.44417256  | 0.306779512 | 0.3936005   | 0.335705693 |
| 0.012950082 | 0.275291314 | 0.300323373 | 0.103486352 |
| 0.293557536 | 0.053092194 | 0.258643312 | 0.347393078 |
| 0.269242011 | 0.401185889 | 0.055150717 | 0.337019504 |
| 0.103625468 | 0.396227055 | 0.325520883 | 0.08140364  |
| 0.371884301 | 0.327079618 | 0.420639615 | 0.374252729 |
| 0.317510699 | 0.141827562 | 0.060690043 | 0.308711836 |
| 0.381745962 | 0.025408147 | 0.406021124 | 0.434171936 |
| 0.363505458 | 0.416719641 | 0.446262671 | 0.410499512 |
| 0.357168212 | 0.028165444 | 0.060858896 | 0.261104098 |
| 0.363924569 | 0.299234392 | 0.088568488 | 0.274811353 |
| 0.312300728 | 0.150554644 | 0.351486089 | 0.178463216 |
| 0.396258603 | 0.364479949 | 0.394218273 | 0.297774329 |

|             |             |             |             |
|-------------|-------------|-------------|-------------|
| 0.17395614  | 0.202158043 | 0.31061907  | 0.292347999 |
| 0.017428694 | 0.034996521 | 0.015718475 | 0.234975228 |
| 0.13345304  | 0.107117403 | 0.149572216 | 0.285665711 |
| 0.121059315 | 0.131861663 | 0.236851186 | 0.362975084 |
| 0.020810368 | 0.244474188 | 0.068221421 | 0.075374725 |
| 0.021437604 | 0.074139654 | 0.096797229 | 0.070870744 |
| 0.163450299 | 0.125069997 | 0.327243615 | 0.409387002 |
| 0.230522444 | 0.09295165  | 0.291963548 | 0.374090736 |
| 0.353219403 | 0.28884048  | 0.146402959 | 0.006944462 |
| 0.229609987 | 0.23216613  | 0.25962974  | 0.279599685 |
| 0.091666573 | 0.164156486 | 0.302965513 | 0.366827221 |
| 0.107190567 | 0.052750689 | 0.25064983  | 0.280730781 |
| 0.07350204  | 0.180687624 | 0.389328936 | 0.242440297 |
| 0.000453403 | 0.17498694  | 0.363635094 | 0.185070303 |
| 0.219123558 | 0.152845154 | 0.193417034 | 0.410222993 |
| 0.243496227 | 0.236381092 | 0.402920204 | 0.367991292 |
| 0.148614946 | 0.116403301 | 0.430748074 | 0.10056262  |
| 0.269702164 | 0.048563247 | 0.234805988 | 0.143114586 |
| 0.148833356 | 0.240168738 | 0.279856581 | 0.213392235 |
| 0.047907498 | 0.383294885 | 0.278184402 | 0.402388656 |
| 0.258833058 | 0.430695064 | 0.398842233 | 0.346819157 |
| 0.233561159 | 0.247567069 | 0.215724215 | 0.361593601 |
| 0.402863696 | 0.21013124  | 0.027776735 | 0.383207209 |
| 0.226062071 | 0.37240728  | 0.13094724  | 0.412382863 |
| 0.349953683 | 0.309644676 | 0.080086242 | 0.365373769 |
| 0.288725422 | 0.100289866 | 0.337340253 | 0.425587386 |
| 0.199535936 | 0.272198865 | 0.262589218 | 0.391059302 |
| 0.093349731 | 0.230148729 | 0.219243191 | 0.236270576 |
| 0.013438748 | 0.024648171 | 0.021233078 | 0.105835261 |
| 0.216916061 | 0.279804673 | 0.333654558 | 0.403199546 |
| 0.051804516 | 0.291445953 | 0.159623917 | 0.207317983 |
| 0.313527621 | 0.235488411 | 0.279661575 | 0.30120717  |
| 0.15867983  | 0.011016008 | 0.061553346 | 0.372954258 |
| 0.011500018 | 0.224301236 | 0.138806184 | 0.00210859  |
| 0.016192941 | 0.29026836  | 0.045182254 | 0.108953558 |
| 0.424379298 | 0.10845366  | 0.114441156 | 0.181845767 |
| 0.258358605 | 0.03565973  | 0.002227764 | 0.405776764 |
| 0.376449943 | 0.361296578 | 0.370551258 | 0.317301122 |
| 0.388070743 | 0.311678185 | 0.388546071 | 0.136578012 |
| 0.046434852 | 0.02888355  | 0.273744217 | 0.195535884 |
| 0.002137595 | 0.303627117 | 0.210348791 | 0.076009411 |
| 0.366049442 | 0.222620549 | 0.011292801 | 0.2939213   |
| 0.006852795 | 0.230200646 | 0.148950953 | 0.13355276  |
| 0.340146475 | 0.003497398 | 0.125781377 | 0.265739575 |
| 0.269875814 | 0.225035011 | 0.249544737 | 0.393632024 |
| 0.191819697 | 0.058035523 | 0.211520858 | 0.320284843 |
| 0.031543421 | 0.102084874 | 0.167252637 | 0.022248072 |
| 0.077072725 | 0.322970246 | 0.223828138 | 0.027187918 |
| 0.169274043 | 0.000911866 | 0.24073608  | 0.394992388 |
| 0.306202677 | 0.439784788 | 0.375095212 | 0.233669163 |
| 0.375677862 | 0.18693787  | 0.409803959 | 0.290041568 |
| 0.199401373 | 0.000312251 | 0.003008862 | 0.421048143 |
| 0.290206516 | 0.019253979 | 0.084326658 | 0.134232221 |
| 0.060728181 | 0.051088385 | 0.023183539 | 0.217278599 |

|             |             |             |             |
|-------------|-------------|-------------|-------------|
| 0.246518578 | 0.17993955  | 0.192806066 | 0.322242989 |
| 0.148056738 | 0.14649446  | 0.164441451 | 0.036579757 |
| 0.270079092 | 0.022418692 | 0.039044292 | 0.006948963 |
| 0.326653213 | 0.051439015 | 0.292991675 | 0.375344544 |
| 0.376002317 | 0.349104743 | 0.176897548 | 0.145070298 |
| 0.376191263 | 0.035345893 | 0.200220458 | 0.039066124 |
| 0.341235199 | 0.330229698 | 0.233283599 | 0.202035924 |
| 0.41331526  | 0.346290207 | 0.011867602 | 0.367882114 |
| 0.003769772 | 0.003478011 | 0.148259368 | 0.171408537 |
| 0.103775506 | 0.259142646 | 0.176700511 | 0.147770504 |
| 0.145417298 | 0.008628275 | 0.287898003 | 0.278458395 |
| 0.2270498   | 0.234357799 | 0.251534311 | 0.163985506 |
| 0.221783633 | 0.19777871  | 0.11142752  | 0.079129298 |
| 0.162701722 | 0.209623836 | 0.104985765 | 0.00773268  |
| 0.23335899  | 0.26854326  | 0.019536242 | 0.076470536 |
| 0.361472539 | 0.409017096 | 0.027480381 | 0.007333313 |
| 0.164675754 | 0.206139035 | 0.422920817 | 0.359715988 |
| 0.365323405 | 0.417107344 | 0.261016847 | 0.106333137 |
| 0.023292448 | 0.252131127 | 0.277718862 | 0.10469935  |
| 0.385430587 | 0.023303866 | 0.330910004 | 0.280347951 |
| 0.057900363 | 0.119650945 | 0.014365681 | 0.035233148 |
| 0.30265138  | 0.093889698 | 0.121595323 | 0.063756637 |
| 0.209630793 | 0.235780491 | 0.018491431 | 0.110061931 |
| 0.2590052   | 0.287408015 | 0.086035155 | 0.12883627  |
| 0.243053301 | 0.128801904 | 0.383627614 | 0.347707794 |
| 0.057284684 | 0.048658752 | 0.104227774 | 0.308098949 |
| 0.371221732 | 0.240345225 | 0.007220717 | 0.317366753 |
| 0.395592169 | 0.318969411 | 0.341184099 | 0.349918862 |
| 0.037196267 | 0.247604518 | 0.270195535 | 0.280653047 |
| 0.104975301 | 0.142890885 | 0.137326068 | 0.023577608 |
| 0.212825635 | 0.335415481 | 0.323332492 | 0.087321716 |
| 0.23880766  | 0.047155731 | 0.019499727 | 0.344255668 |
| 0.261166494 | 0.034513877 | 0.142328815 | 0.384556456 |
| 0.003042645 | 0.209838159 | 0.430721163 | 0.104217546 |
| 0.394000295 | 0.418949398 | 0.324417156 | 0.110465411 |
| 0.012201653 | 0.384684567 | 0.261512948 | 0.218845762 |
| 0.313306611 | 0.217967071 | 0.070376499 | 0.04365494  |
| 0.214229415 | 0.028288221 | 0.097103954 | 0.12848035  |
| 0.266843041 | 0.241787073 | 0.130546776 | 0.121477211 |
| 0.143887515 | 0.040406186 | 0.223515433 | 0.106078953 |
| 0.232378966 | 0.161003071 | 0.281111119 | 0.119243491 |
| 0.218223789 | 0.382593684 | 0.326412417 | 0.007024437 |
| 0.262042481 | 0.360736807 | 0.341025872 | 0.002715192 |
| 0.357739716 | 0.002233877 | 0.132245739 | 0.137442543 |
| 0.12934949  | 0.142665344 | 0.220231019 | 0.214446478 |
| 0.239929491 | 0.125964972 | 0.138476929 | 0.150164849 |
| 0.101894185 | 0.099310892 | 0.284045378 | 0.178590799 |
| 0.180038629 | 0.050972838 | 0.043748945 | 0.043837178 |
| 0.019093049 | 0.344255886 | 0.146773752 | 0.026142431 |
| 0.146489782 | 0.190870886 | 0.271883753 | 0.347346532 |
| 0.330865087 | 0.04718706  | 0.19430069  | 0.318653562 |
| 0.172413302 | 0.126973434 | 0.017676397 | 0.20055813  |
| 0.106611585 | 0.189207598 | 0.18113379  | 0.157835188 |
| 0.30534946  | 0.278003512 | 0.136907029 | 0.335636106 |

|             |             |             |             |
|-------------|-------------|-------------|-------------|
| 0.201600405 | 0.224063729 | 0.13608502  | 0.052946455 |
| 0.08054417  | 0.066924004 | 0.245458563 | 0.000299599 |
| 0.231389192 | 0.090356557 | 0.395443311 | 0.33598655  |
| 0.254000021 | 0.281923264 | 0.119249533 | 0.038123603 |
| 0.117874976 | 0.092635962 | 0.071300084 | 0.336854599 |
| 0.235907177 | 0.078579485 | 0.247557082 | 0.10337219  |
| 0.376093388 | 0.357861613 | 0.222462253 | 0.110965516 |
| 0.148877978 | 0.094094178 | 0.338254434 | 0.037488326 |
| 0.285794391 | 0.194998946 | 0.189264514 | 0.201467681 |
| 0.161575767 | 0.414239998 | 0.018314928 | 0.424162383 |
| 0.246091234 | 0.062257386 | 0.357025512 | 0.124701794 |
| 0.120590542 | 0.076094366 | 0.253336973 | 0.165823437 |
| 0.138622932 | 0.24356061  | 0.014703412 | 0.084845692 |
| 0.264125346 | 0.193393005 | 0.311871031 | 0.30149214  |
| 0.237870587 | 0.308484303 | 0.191009233 | 0.130806987 |
| 0.316906558 | 0.324912584 | 0.152076306 | 0.183656483 |
| 0.246232336 | 0.042338948 | 0.192692079 | 0.019891248 |
| 0.322620068 | 0.315363845 | 0.202052305 | 0.020140633 |
| 0.00670056  | 0.276152117 | 0.297950053 | 0.026095395 |
| 0.438938573 | 0.211976956 | 0.231997764 | 0.312292947 |
| 0.096727811 | 0.326426405 | 0.085491044 | 0.321689887 |
| 0.022219045 | 0.165603633 | 0.260270322 | 0.227750909 |
| 0.170238014 | 0.271089744 | 0.321247223 | 0.234219143 |
| 0.013051477 | 0.18978816  | 0.003926114 | 0.265461399 |
| 0.309335996 | 1           | 0.121925444 | 0.15643117  |
| 0.214391563 | 0.292171304 | 0.184681412 | 0.230895862 |
| 0.004809046 | 0.318498707 | 0.103882788 | 0.275733515 |
| 0.209663211 | 0.254573087 | 0.027060302 | 0.273208151 |
| 0.275799247 | 0.211943006 | 0.172974714 | 0.252928315 |
| 0.342895569 | 0.274760905 | 0.075443714 | 0.164412322 |
| 0.274312717 | 0.023554201 | 0.151530028 | 0.409334576 |
| 0.104046921 | 0.236820423 | 0.419999342 | 0.133557238 |
| 0.26088346  | 0.255104899 | 0.282038076 | 0.395738136 |
| 0.062785102 | 0.154546795 | 0.366751821 | 0.359030609 |
| 0.235263793 | 0.225518977 | 0.238498225 | 0.196510366 |
| 0.299387787 | 0.037153726 | 0.258883381 | 0.243444689 |
| 0.267225834 | 0.214660218 | 0.185043319 | 0.172314457 |
| 0.016856129 | 0.084383034 | 0.150161658 | 0.069201611 |
| 0.200999157 | 0.258035465 | 0.236828243 | 0.284369221 |
| 0.071491201 | 0.013680767 | 0.340340222 | 0.060998651 |
| 0.130158513 | 0.294098707 | 0.125283021 | 0.233580672 |
| 0.096318441 | 0.217924686 | 0.16103452  | 5.70E-05    |
| 0.368120384 | 0.065993505 | 0.190954315 | 0.190780879 |
| 0.22008662  | 0.017864331 | 0.312323062 | 0.433731048 |
| 0.17607192  | 0.172957877 | 0.223397147 | 0.332900769 |
| 0.22720235  | 0.237173539 | 0.250163666 | 0.256267902 |
| 0.248282625 | 0.188708275 | 0.21245946  | 0.240240226 |
| 0.257356267 | 0.10773245  |             |             |
| TMEM126A    | 0.283916902 | 0.258467475 | 0.225682478 |
| 0.197466951 | 0.161837203 | 0.185538741 | 0.317671749 |
| 0.32210819  | 0.234962676 | 0.110769048 | 0.199102902 |
| 0.211039934 | 0.031046051 | 0.27061429  | 0.322002131 |
| 0.159430935 | 0.262419157 | 0.329542578 | 0.100211105 |
| 0.226161771 | 0.1672051   | 0.125891915 | 0.206029092 |

|             |             |             |             |
|-------------|-------------|-------------|-------------|
| 0.172432716 | 0.321697814 | 0.231717933 | 0.133798541 |
| 0.270960427 | 0.062199277 | 0.170121447 | 0.062005322 |
| 0.334911771 | 0.151464963 | 0.115165625 | 0.188280745 |
| 0.194396742 | 0.019287073 | 0.368461246 | 0.209057418 |
| 0.058205981 | 0.336414746 | 0.136437293 | 0.241185883 |
| 0.149812654 | 0.234352059 | 0.058587576 | 0.16075319  |
| 0.223318971 | 0.254338667 | 0.258993003 | 0.190278002 |
| 0.170618117 | 0.255674122 | 0.169907922 | 0.012513859 |
| 0.087358369 | 0.014014788 | 0.054127566 | 0.317980774 |
| 0.312547655 | 0.322297528 | 0.077972414 | 0.273069101 |
| 0.174458883 | 0.199180336 | 0.298160784 | 0.138144603 |
| 0.298900835 | 0.06254323  | 0.163346929 | 0.169042805 |
| 0.212098756 | 0.251022174 | 0.330512518 | 0.276449617 |
| 0.157397069 | 0.293967988 | 0.189067951 | 0.113377603 |
| 0.246111572 | 0.377560855 | 0.305990818 | 0.33234045  |
| 0.069854964 | 0.135191775 | 0.153765856 | 0.260147838 |
| 0.221908258 | 0.311579636 | 0.201883963 | 0.338365177 |
| 0.282255339 | 0.153544071 | 0.200806083 | 0.300993939 |
| 0.249886651 | 0.107242468 | 0.139979742 | 0.069700749 |
| 0.162594643 | 0.152959894 | 0.353634902 | 0.272795347 |
| 0.177185981 | 0.278598761 | 0.356452808 | 0.120773955 |
| 0.177438245 | 0.280696443 | 0.149371071 | 0.201156893 |
| 0.187686318 | 0.269401801 | 0.217196892 | 0.236264953 |
| 0.140201738 | 0.290577396 | 0.205864547 | 0.275591032 |
| 0.039332639 | 0.315276873 | 0.294813988 | 0.274900514 |
| 0.263220952 | 0.315289729 | 0.163128837 | 0.29842227  |
| 0.237018916 | 0.261270424 | 0.293526823 | 0.240649928 |
| 0.232956987 | 0.327782089 | 0.310335053 | 0.230735463 |
| 0.277327074 | 0.090896612 | 0.14098402  | 0.2699345   |
| 0.21833327  | 0.339346964 | 0.103252851 | 0.365085531 |
| 0.292856971 | 0.20645612  | 0.292090627 | 0.399326283 |
| 0.302314883 | 0.334251294 | 0.234360787 | 0.295299931 |
| 0.350150487 | 0.350160757 | 0.303297365 | 0.15189751  |
| 0.338330665 | 0.21649178  | 0.084977679 | 0.251406472 |
| 0.321516546 | 0.011781664 | 0.229689968 | 0.249058195 |
| 0.30165865  | 0.198099349 | 0.304558535 | 0.275272951 |
| 0.303702536 | 0.311560438 | 0.011974108 | 0.224085566 |
| 0.329361946 | 0.261741112 | 0.285445497 | 0.13497707  |
| 0.168281316 | 0.213073974 | 0.196901917 | 0.104120625 |
| 0.364448756 | 0.242560348 | 0.248799529 | 0.218514299 |
| 0.212684148 | 0.333452927 | 0.116130624 | 0.347076352 |
| 0.274176625 | 0.278411044 | 0.244060996 | 0.276883429 |
| 0.134011645 | 0.304588726 | 0.204255548 | 0.182922866 |
| 0.312787067 | 0.232974083 | 0.093969955 | 0.16164817  |
| 0.246228806 | 0.157964733 | 0.314365829 | 0.293276162 |
| 0.261538874 | 0.324664572 | 0.220875743 | 0.265901187 |
| 0.232627675 | 0.378853865 | 0.168490206 | 0.270756576 |
| 0.175722993 | 0.289039338 | 0.197298597 | 0.312982562 |
| 0.324666742 | 0.137892733 | 0.322520433 | 0.070139793 |
| 0.130956223 | 0.091437701 | 0.052546023 | 0.139955666 |
| 0.355058008 | 0.21818813  | 0.177840592 | 0.175753987 |
| 0.242348604 | 0.312292502 | 0.149182783 | 0.372673637 |
| 0.293906199 | 0.172773169 | 0.239221725 | 0.167509029 |
| 0.087043695 | 0.225440538 | 0.211365527 | 0.155680872 |



|             |             |             |             |
|-------------|-------------|-------------|-------------|
| 0.255976911 | 0.059946934 | 0.073048503 | 0.243868296 |
| 0.096659252 | 0.132918602 | 0.255247771 | 0.180966044 |
| 0.155211689 | 0.337361253 | 0.308603496 | 0.017622279 |
| 0.157843114 | 0.092884572 | 0.253398186 | 0.138099549 |
| 0.290621585 | 0.273902656 | 0.144126021 | 0.158986236 |
| 0.261841955 | 0.321062092 | 0.258098453 | 0.283028685 |
| 0.122058694 | 0.314690406 | 0.214924701 | 0.261004755 |
| 0.24557929  | 0.124774237 | 0.036374862 | 0.205993762 |
| 0.231576765 | 0.115994225 | 0.266994752 | 0.180040429 |
| 0.140572355 | 0.163698591 | 0.150608013 | 0.289527922 |
| 0.373111951 | 0.30527173  | 0.28767357  | 0.207409485 |
| 0.244574643 | 0.279177383 | 0.237434037 | 0.330692796 |
| 0.113522819 | 0.149401007 | 0.139422452 | 0.231449483 |
| 0.310242957 | 0.145006665 | 0.316491368 | 0.051710507 |
| 0.001567457 | 0.303903084 | 0.277664948 | 0.259979223 |
| 0.082642742 | 0.148230308 | 0.192013747 | 0.299958565 |
| 0.325490057 | 0.294619699 | 0.304937902 | 0.163674161 |
| 0.283734223 | 0.159005924 | 0.134484809 | 0.175463008 |
| 0.313515188 | 0.108061294 | 0.2278442   | 0.378622679 |
| 0.23178516  | 0.091097554 | 0.255511937 | 0.016096579 |
| 0.276356414 | 0.197672548 | 0.28035818  | 0.359288285 |
| 0.261684808 | 0.335767374 | 0.286955061 | 0.128533452 |
| 0.233524568 | 0.327137065 | 0.026541587 | 0.275409242 |
| 0.308943469 | 0.302462759 | 0.306913808 | 0.33354939  |
| 0.258574272 | 0.206780515 | 0.197959876 | 0.210095226 |
| 0.316549166 | 0.28773342  | 0.087484146 | 0.209720618 |
| 0.026218795 | 0.226997718 | 0.204178179 | 0.326838267 |
| 0.179186864 | 0.268760128 | 0.264195102 | 0.168999008 |
| 0.137230847 | 0.045920907 | 0.239742656 | 0.278561639 |
| 0.213694629 | 0.191360148 | 0.093373336 | 0.111489777 |
| 0.304931315 | 0.289583601 | 0.106416244 | 0.322653817 |
| 0.217661961 | 0.254499718 | 0.186953672 | 0.203071044 |
| 0.319159931 | 0.049799137 | 0.213227778 | 0.010955977 |
| 0.113852684 | 0.334380171 | 0.153312993 | 0.24073835  |
| 0.267183802 | 0.107175896 | 0.282346851 | 0.329524707 |
| 0.2964686   | 0.280776963 | 0.294894132 | 0.095993632 |
| 0.303125271 | 0.019091434 | 0.2965063   | 0.242174384 |
| 0.121427515 | 0.007758323 | 0.062756637 | 0.239505528 |
| 0.151568295 | 0.229716676 | 0.327035965 | 0.146667639 |
| 0.284568347 | 0.288536651 | 0.315533242 | 0.116896032 |
| 0.183421512 | 0.197241332 | 0.1193592   | 0.313181032 |
| 0.265513866 | 0.293767531 | 0.177787272 | 0.304095779 |
| 0.168353476 | 0.277002206 | 0.305479789 | 0.027411201 |
| 0.206061535 | 0.267188277 | 0.372372979 | 0.301594259 |
| 0.329625301 | 0.178663169 | 0.096179825 | 0.161799186 |
| 0.24924227  | 0.238952343 | 0.115099499 | 0.270242489 |
| 0.285122421 | 0.170270747 | 0.263959775 | 0.279031513 |
| 0.30732336  | 0.309205669 | 0.278768715 | 0.202743317 |
| 0.095616169 | 0.011382626 | 0.181130636 | 0.301544754 |
| 0.074493642 | 0.146536407 | 0.299493909 | 0.239019028 |
| 0.25637106  | 0.202132454 | 0.089975299 | 0.091677092 |
| 0.243733375 | 0.192779971 | 0.134569144 | 0.300029824 |
| 0.183067679 | 0.123333164 | 0.276181974 | 0.322831015 |
| 0.169539569 | 0.288075271 | 0.31468714  | 0.246158681 |

|             |             |             |             |
|-------------|-------------|-------------|-------------|
| 0.149462458 | 0.14263146  | 0.297469649 | 0.324453021 |
| 0.236500261 | 0.251807941 | 0.269562535 | 0.09649427  |
| 0.297735887 | 0.201837595 | 0.26664693  | 0.284934566 |
| 0.351675608 | 0.334052217 | 0.364429865 | 0.236477526 |
| 0.303514475 | 0.220475317 | 0.140006901 | 0.198943747 |
| 0.297232295 | 0.25544815  | 0.309075899 | 0.100232492 |
| 0.337146707 | 0.27151905  | 0.226296524 | 0.334989788 |
| 0.132707889 | 0.333034169 | 0.259357293 | 0.258443947 |
| 0.19901715  | 0.089813434 | 0.306794974 | 0.314984798 |
| 0.25143952  | 0.054451154 | 0.328269155 | 0.250337632 |
| 0.247881987 | 0.103934691 | 0.167217987 | 0.343441634 |
| 0.31965314  | 0.31994835  | 0.192032546 | 0.21757729  |
| 0.202040309 | 0.137755603 | 0.112277797 | 0.254367607 |
| 0.287413754 | 0.16111701  | 0.317783222 | 0.269458967 |
| 0.31457795  | 0.145340894 | 0.118144546 | 0.17885802  |
| 0.32784868  | 0.193958372 | 0.28834793  | 0.3112741   |
| 0.328590077 | 0.38365529  | 0.250693076 | 0.282689146 |
| 0.167380355 | 0.274766752 | 0.243704143 | 0.244670837 |
| 0.082444456 | 0.271038632 | 0.142486146 | 0.20415176  |
| 0.010546046 | 0.045043921 | 0.280738413 | 0.262614735 |
| 0.351876714 | 0.259322922 | 0.321143132 | 0.270676016 |
| 0.001028084 | 0.15286207  | 0.193328722 | 0.154459059 |
| 0.248257981 | 0.264772876 | 0.225378641 | 0.278978598 |
| 0.294365445 | 0.249601012 | 0.26512547  | 0.164385952 |
| 0.056777054 | 0.203846767 | 0.328768749 | 0.306631992 |
| 0.255310075 | 0.26554657  | 0.089512775 | 0.274546506 |
| 0.086651619 | 0.309343299 | 0.258422788 | 0.1237803   |
| 0.055092482 | 0.267065261 | 0.212477334 | 0.233824092 |
| 0.137264479 | 0.24854074  | 0.28010332  | 0.022743098 |
| 0.17164949  | 0.141691267 | 0.249684112 | 0.228155095 |
| 0.262761138 | 0.261242502 | 0.235617625 | 0.170046973 |
| 0.228843949 | 0.296690079 | 0.227164735 | 0.287774594 |
| 0.248023594 | 0.305295894 | 0.180736486 | 0.21424026  |
| 0.164160291 | 0.307120299 | 0.284753068 | 0.29853048  |
| 0.234252562 | 0.256747219 | 0.326997866 | 0.255355224 |
| 0.303927877 | 0.201677564 | 0.31601088  | 0.293975202 |
| 0.293405072 | 0.253795447 | 0.220285959 | 0.236153365 |
| 0.068281692 | 0.162819158 | 0.273883542 | 0.201140438 |
| 0.301819091 | 0.127935014 | 0.176540501 | 0.222697028 |
| 0.18855398  | 0.355427995 | 0.312624918 | 0.308540694 |
| 0.185316374 | 0.17868179  | 0.11048049  | 0.23852833  |
| 0.289995242 | 0.32303519  | 0.148558167 | 0.052954254 |
| 0.247692445 | 0.214313288 | 0.223186049 | 0.319955522 |
| 0.087734677 | 0.312386956 | 0.121743328 | 0.277331302 |
| 0.093699256 | 0.289389768 | 0.330463555 | 0.181913403 |
| 0.052364169 | 0.308924334 | 0.182694825 | 0.186965406 |
| 0.180010294 | 0.177097299 | 0.172270914 | 0.294759611 |
| 0.290476134 | 0.296987513 | 0.353600093 | 0.293408564 |
| 0.14691869  | 0.121952682 | 0.178401277 | 0.196933216 |
| 0.234751052 | 0.282255035 | 0.294576814 | 0.279577402 |
| 0.164123597 | 0.308916984 | 0.37455097  | 0.263187082 |
| 0.236741332 | 0.228342019 | 0.050643666 | 0.174546703 |
| 0.276746647 | 0.105222341 | 0.004479728 | 0.038972115 |
| 0.247647554 | 0.174836042 | 0.196382527 | 0.231480582 |

|             |             |             |             |
|-------------|-------------|-------------|-------------|
| 0.146047164 | 0.251903498 | 0.051024053 | 0.262478859 |
| 0.309900855 | 0.362154888 | 0.190291287 | 0.310224245 |
| 0.259294875 | 0.30925351  | 0.196159879 | 0.026131499 |
| 0.153496285 | 0.131928205 | 0.130487882 | 0.309758526 |
| 0.225205774 | 0.056031135 | 0.167012807 | 0.271961784 |
| 0.251831144 | 0.047471658 | 0.193256711 | 0.182259933 |
| 0.325939032 | 0.365214676 | 0.259471629 | 0.19522414  |
| 0.237981484 | 0.304234389 | 0.139846863 | 0.163207853 |
| 0.155136623 | 0.115102523 | 0.215200233 | 0.091517543 |
| 0.257919751 | 0.190519219 | 0.021432533 | 0.375335139 |
| 0.342389337 | 0.121925444 | 1           | 0.105225494 |
| 0.272391252 | 0.278223681 | 0.178829906 | 0.139793525 |
| 0.119844581 | 0.142745794 | 0.319739615 | 0.253836733 |
| 0.056527431 | 0.188719813 | 0.231326797 | 0.147094872 |
| 0.384153759 | 0.145192724 | 0.315110018 | 0.089940781 |
| 0.293488957 | 0.245548792 | 0.266283373 | 0.181765514 |
| 0.175405071 | 0.29176119  | 0.144931122 | 0.326164266 |
| 0.275689343 | 0.094618758 | 0.208911706 | 0.249178273 |
| 0.114700178 | 0.282301504 | 0.149014002 | 0.328639476 |
| 0.217899069 | 0.297827219 | 0.202499194 | 0.278433218 |
| 0.276857044 | 0.110152898 | 0.0926813   | 0.181864366 |
| 0.294379456 | 0.232884471 | 0.124788791 | 0.251282524 |
| 0.07660777  | 0.268770787 | 0.180514614 | 0.186110347 |
| 0.206171679 | 0.311301209 | 0.179356193 | 0.338206801 |
| 0.249629256 | 0.176258901 | 0.159778912 | 0.326081049 |
| 0.203199817 | 0.129736345 | 0.343544915 | 0.00633411  |
| 0.223688691 | 0.182991982 | 0.303574988 | 0.16215493  |
| 0.297493578 | 0.236261959 | 0.205494906 | 0.039627973 |
| 0.226913205 | 0.044338293 | 0.204740801 | 0.159275935 |
| 0.112175311 | 0.291082817 | 0.315001195 | 0.282884922 |
| 0.274210216 | 0.134164386 | 0.095298895 | 0.30358485  |
| 0.055971489 | 0.088705447 | 0.119642017 | 0.18575541  |
| 0.078505071 | 0.123825062 | 0.134860471 | 0.110319725 |
| 0.237436825 | 0.284358478 |             |             |
| TMEM147     | 0.013410729 | 0.374176447 | 0.013478303 |
| 0.011533514 | 0.118250225 | 0.115534423 | 0.008165998 |
| 0.017826659 | 0.306737079 | 0.19782614  | 0.116443682 |
| 0.000898094 | 0.039530649 | 0.319990391 | 0.007533238 |
| 0.1986335   | 0.002230241 | 0.022254731 | 0.030499993 |
| 0.048338543 | 0.096701856 | 0.071921716 | 0.180507585 |
| 0.10863159  | 0.097216209 | 0.186898258 | 0.274915659 |
| 0.399523076 | 0.112697984 | 0.25155956  | 0.079210282 |
| 0.252378703 | 0.140234812 | 0.20609725  | 0.00118698  |
| 0.188538943 | 0.011258494 | 0.294523458 | 0.049089918 |
| 0.026556979 | 0.199362562 | 0.224816054 | 0.041361046 |
| 0.209585115 | 0.004043029 | 0.163668335 | 0.303510336 |
| 0.203751162 | 0.073934583 | 0.023390672 | 0.274018318 |
| 0.131981305 | 0.167166508 | 0.369080978 | 0.000699652 |
| 0.129548902 | 0.063609744 | 0.110482436 | 0.383009775 |
| 0.064944838 | 0.022257091 | 0.150033081 | 0.117304275 |
| 0.294181427 | 0.256922824 | 0.116055071 | 0.164157469 |
| 0.354067222 | 0.057938257 | 0.354752353 | 0.021314762 |
| 0.140941595 | 0.008418585 | 0.056790891 | 0.046847145 |
| 0.133158932 | 0.048908769 | 0.129578434 | 0.114675642 |

|             |             |             |             |
|-------------|-------------|-------------|-------------|
| 0.374687621 | 0.371898053 | 0.09749831  | 0.395411202 |
| 0.045608349 | 0.183855876 | 0.062799896 | 0.138437704 |
| 0.259959391 | 0.018707131 | 0.206477547 | 0.361906369 |
| 0.015157502 | 0.324873439 | 0.276601856 | 0.061621637 |
| 0.329812846 | 0.116374975 | 0.261155796 | 0.038889317 |
| 0.211219354 | 0.150089623 | 0.387825755 | 0.112252847 |
| 0.131562569 | 0.026943816 | 0.376461936 | 0.16596555  |
| 0.057757958 | 0.02141435  | 0.037536515 | 0.383627126 |
| 0.208109791 | 0.368136163 | 0.377285816 | 0.23339355  |
| 0.179596711 | 0.356376537 | 0.196440389 | 0.326230558 |
| 0.186932621 | 0.411097414 | 0.046353295 | 0.003111043 |
| 0.01876315  | 0.011523929 | 0.075608824 | 0.160478027 |
| 0.350617677 | 0.168449662 | 0.040525982 | 0.056016067 |
| 0.334993538 | 0.385120073 | 0.427446217 | 0.281219241 |
| 0.004684525 | 0.101471997 | 0.166240624 | 0.070507131 |
| 0.217583824 | 0.040938681 | 0.092334846 | 0.368897573 |
| 0.205675629 | 0.299426762 | 0.040115375 | 0.356321144 |
| 0.07225822  | 0.337003272 | 0.374622745 | 0.033074939 |
| 0.364506127 | 0.354632714 | 0.344827279 | 0.23993183  |
| 0.327352109 | 0.099316681 | 0.047999702 | 0.270115787 |
| 0.312306256 | 0.002135085 | 0.405277151 | 0.405025363 |
| 0.384609656 | 0.351354556 | 0.381691757 | 0.391310276 |
| 0.402372891 | 0.022718824 | 0.031969632 | 0.114817037 |
| 0.373374856 | 0.216183698 | 0.022331709 | 0.229754088 |
| 0.19122185  | 0.143590419 | 0.352570445 | 0.059888797 |
| 0.341997083 | 0.328508414 | 0.415660833 | 0.273308977 |
| 0.200881555 | 0.17790097  | 0.252126245 | 0.34658041  |
| 0.003411455 | 0.022591986 | 0.018992908 | 0.18225946  |
| 0.104302229 | 0.042656208 | 0.124065052 | 0.215670197 |
| 0.056650882 | 0.151703481 | 0.166431925 | 0.216770673 |
| 0.030244385 | 0.244010607 | 0.043253966 | 0.055291477 |
| 0.002257329 | 0.071986907 | 0.019657977 | 0.01587771  |
| 0.070023023 | 0.152803199 | 0.333752027 | 0.374995555 |
| 0.15368369  | 0.075313867 | 0.268934305 | 0.311054051 |
| 0.241945971 | 0.166915817 | 0.113771591 | 0.000824593 |
| 0.04458677  | 0.188978268 | 0.073757899 | 0.266222129 |
| 0.107739476 | 0.038697738 | 0.201050109 | 0.218419844 |
| 0.092195136 | 0.058653576 | 0.118398604 | 0.269035938 |
| 0.079988068 | 0.060544961 | 0.286187749 | 0.268448749 |
| 0.000499153 | 0.096478357 | 0.300184134 | 0.027135124 |
| 0.186072489 | 0.027340268 | 0.059503151 | 0.326937321 |
| 0.100202613 | 0.073155275 | 0.397935374 | 0.236007064 |
| 0.088154444 | 0.164769019 | 0.39321527  | 0.040673589 |
| 0.211359694 | 0.002927435 | 0.104257838 | 0.273436327 |
| 0.079960501 | 0.140344587 | 0.146186601 | 0.058118654 |
| 0.051055886 | 0.39330753  | 0.257131254 | 0.37774318  |
| 0.114613897 | 0.387543263 | 0.328480513 | 0.275640662 |
| 0.172659191 | 0.240464745 | 0.052129844 | 0.275176822 |
| 0.324070604 | 0.089036144 | 0.035482738 | 0.398286524 |
| 0.207246145 | 0.256395017 | 0.017591844 | 0.327638551 |
| 0.32657445  | 0.3898722   | 0.020228188 | 0.211056458 |
| 0.191482482 | 0.061684407 | 0.294556758 | 0.390967607 |
| 0.135770535 | 0.156868663 | 0.083659861 | 0.233772164 |
| 0.053168875 | 0.045269327 | 0.206476613 | 0.078297975 |

|             |             |             |             |
|-------------|-------------|-------------|-------------|
| 0.005407654 | 0.02647877  | 0.016636355 | 0.027615521 |
| 0.034876475 | 0.359841441 | 0.224621488 | 0.386613626 |
| 0.022475549 | 0.275029058 | 0.139872973 | 0.044692833 |
| 0.290295808 | 0.168302437 | 0.204216344 | 0.216156982 |
| 0.118502029 | 0.00027007  | 0.0095593   | 0.362102452 |
| 0.018960016 | 0.053360293 | 0.147282387 | 7.07E-05    |
| 0.0061602   | 0.412755871 | 0.050566913 | 0.098920074 |
| 0.347745891 | 0.103844053 | 0.077610005 | 0.150287097 |
| 0.158582444 | 0.021576164 | 0.001740263 | 0.393610775 |
| 0.418415193 | 0.39590542  | 0.423836719 | 0.389963314 |
| 0.377609522 | 0.327704354 | 0.270301749 | 0.151246319 |
| 0.011623008 | 0.022075271 | 0.038687374 | 0.07314637  |
| 0.001657489 | 0.202380192 | 0.136329514 | 0.045152547 |
| 0.309347841 | 0.16144504  | 0.00348477  | 0.21335318  |
| 0.000860812 | 0.059434577 | 0.073845151 | 0.062071592 |
| 0.207590522 | 0.000918011 | 0.037237545 | 0.073980511 |
| 0.297395125 | 0.20019761  | 0.144172727 | 0.394317891 |
| 0.099762412 | 0.07512236  | 0.077185275 | 0.229081014 |
| 0.008528308 | 0.059473879 | 0.148574615 | 0.01426835  |
| 0.075811749 | 0.371554517 | 0.150353926 | 0.00662317  |
| 0.082217121 | 0.00060701  | 0.212692961 | 0.386881798 |
| 0.377753547 | 0.383461454 | 0.349362508 | 0.082326975 |
| 0.356362347 | 0.092455025 | 0.409237714 | 0.287337361 |
| 0.19320735  | 0.000618098 | 0.000367273 | 0.36431739  |
| 0.167151587 | 0.034060466 | 0.044513113 | 0.067022972 |
| 0.008618726 | 0.04184689  | 0.011442849 | 0.029520912 |
| 0.234736695 | 0.068708762 | 0.038331034 | 0.373387844 |
| 0.055932425 | 0.076651303 | 0.193088731 | 0.039523436 |
| 0.217772144 | 0.003805034 | 0.041477994 | 0.000252622 |
| 0.21051034  | 0.062748683 | 0.354638087 | 0.394137141 |
| 0.322359908 | 0.206853296 | 0.197368923 | 0.087918061 |
| 0.365266709 | 0.054813593 | 0.119054647 | 0.051031383 |
| 0.375667982 | 0.184582272 | 0.136933867 | 0.144923236 |
| 0.336096765 | 0.30864074  | 0.003755944 | 0.242404373 |
| 0.000417547 | 3.19E-05    | 0.142880605 | 0.135443968 |
| 0.060950387 | 0.152841835 | 0.10503617  | 0.087944571 |
| 0.065121989 | 0.002394867 | 0.098769028 | 0.079215688 |
| 0.10411807  | 0.130375433 | 0.095466635 | 0.155842209 |
| 0.068198282 | 0.021044346 | 0.03637395  | 0.030320129 |
| 0.101896976 | 0.187193056 | 0.097008871 | 0.001838654 |
| 0.226492746 | 0.194244696 | 0.009081708 | 0.057582637 |
| 0.269364343 | 0.354014332 | 0.0036539   | 0.000999719 |
| 0.125054672 | 0.116595592 | 0.36437519  | 0.402261674 |
| 0.383866427 | 0.352363045 | 0.240692103 | 0.014941528 |
| 0.009127125 | 0.124480734 | 0.122078172 | 0.009553862 |
| 0.38536804  | 0.030137682 | 0.374804147 | 0.151231025 |
| 0.03913139  | 0.032324323 | 0.001645131 | 0.019521389 |
| 0.224327961 | 0.057883379 | 0.03533678  | 0.05654207  |
| 0.077522722 | 0.056256055 | 0.007284671 | 0.052919513 |
| 0.184340058 | 0.038561092 | 0.047322452 | 0.108907998 |
| 0.235307615 | 0.17410029  | 0.285301901 | 0.272653607 |
| 0.045475689 | 0.0368021   | 0.042696262 | 0.285723811 |
| 0.347648729 | 0.336091838 | 0.002010106 | 0.40383294  |
| 0.36437069  | 0.272282516 | 0.371879833 | 0.238863648 |

|             |             |             |             |
|-------------|-------------|-------------|-------------|
| 0.031190454 | 0.138608018 | 0.170475291 | 0.144922537 |
| 0.065231809 | 0.130087074 | 0.085287995 | 0.016225375 |
| 0.184250773 | 0.354413315 | 0.297706775 | 0.027414746 |
| 0.274435801 | 0.066357578 | 0.026060376 | 0.382422549 |
| 0.030185995 | 0.009143891 | 0.241679117 | 0.375773854 |
| 0.001386644 | 0.043164439 | 0.38698027  | 0.039000022 |
| 0.384789772 | 0.334065974 | 0.262445516 | 0.068279747 |
| 0.001062473 | 0.278938131 | 0.144583302 | 0.105418972 |
| 0.329708963 | 0.197915042 | 0.049498908 | 0.005325288 |
| 0.129019308 | 0.037660575 | 0.014054152 | 0.073431608 |
| 0.053761454 | 0.247662107 | 0.074392424 | 0.092941027 |
| 0.04210862  | 0.063031087 | 0.056336256 | 0.051298119 |
| 0.064540412 | 0.091377947 | 0.171502586 | 0.17970807  |
| 0.041878486 | 0.331611022 | 0.266772197 | 0.00243244  |
| 0.196420213 | 0.303136447 | 0.315325097 | 0.000849584 |
| 0.250814463 | 0.000375255 | 0.043540128 | 0.038653781 |
| 0.037023967 | 0.052603908 | 0.093350571 | 0.055749168 |
| 0.196491912 | 0.050483236 | 0.049186852 | 0.070878275 |
| 0.01862663  | 0.065376388 | 0.195197871 | 0.134804354 |
| 0.047183658 | 0.018495992 | 0.055260722 | 0.062275343 |
| 0.003612975 | 0.38800139  | 0.116155463 | 0.032859044 |
| 0.079125059 | 0.139389127 | 0.179086736 | 0.406161449 |
| 0.260744995 | 0.071610606 | 0.124142016 | 0.324378539 |
| 0.165293813 | 0.067101629 | 0.011640089 | 0.173726098 |
| 0.067236202 | 0.031240068 | 0.236938903 | 0.143318675 |
| 0.34220575  | 0.233106508 | 0.112471009 | 0.29584527  |
| 0.101651678 | 0.210243463 | 0.172908553 | 0.005699737 |
| 0.032585023 | 0.058000719 | 0.086448969 | 0.002701895 |
| 0.157422367 | 0.037617707 | 0.340237354 | 0.356460473 |
| 0.134388172 | 0.227407756 | 0.096708568 | 0.008299843 |
| 0.114777014 | 0.111788956 | 0.049036915 | 0.343611984 |
| 0.08527698  | 0.031047026 | 0.09842841  | 0.080487842 |
| 0.292123955 | 0.347985481 | 0.071180325 | 0.082017186 |
| 0.09472832  | 0.081401948 | 0.377142292 | 0.031809854 |
| 0.284599259 | 0.023711134 | 0.313861199 | 0.072631494 |
| 0.049651845 | 0.411000897 | 0.015296298 | 0.414343916 |
| 0.108281456 | 0.065825186 | 0.322292053 | 0.134244131 |
| 0.055936773 | 0.013039285 | 0.068653399 | 0.17514653  |
| 0.03953879  | 0.130875673 | 0.01982563  | 0.015879309 |
| 0.139255118 | 0.166437028 | 0.364560414 | 0.245866735 |
| 0.06432825  | 0.18498974  | 0.077488274 | 0.109308887 |
| 0.397111129 | 0.381811029 | 0.028922605 | 0.111360986 |
| 0.189627426 | 0.013176355 | 0.230846573 | 0.017657393 |
| 0.250856202 | 0.302761055 | 0.129419388 | 0.006682696 |
| 0.001087987 | 0.068366495 | 0.234368533 | 0.036046307 |
| 0.353008008 | 0.073223084 | 0.306587804 | 0.279019363 |
| 0.0933571   | 0.367912759 | 0.013564577 | 0.20478876  |
| 0.012378182 | 0.11267159  | 0.214206473 | 0.249538088 |
| 0.0237238   | 0.093590688 | 0.175774006 | 0.062767263 |
| 0.001911434 | 0.036743839 | 0.00133263  | 0.243275385 |
| 0.367998616 | 0.15643117  | 0.105225494 | 1           |
| 0.106545449 | 0.27696845  | 0.054989339 | 0.262930794 |
| 0.000389496 | 0.163357481 | 0.062749198 | 0.262005407 |
| 0.057162842 | 0.228107059 | 0.003391781 | 0.162385459 |

|             |             |             |             |
|-------------|-------------|-------------|-------------|
| 0.338438148 | 0.054250702 | 0.145851911 | 0.072956358 |
| 0.389445397 | 0.318466144 | 0.090054115 | 0.042720812 |
| 0.354378754 | 0.023697752 | 0.193869277 | 0.400276214 |
| 0.031861864 | 0.052542558 | 0.289628153 | 0.028619931 |
| 0.142242285 | 0.278404855 | 0.331985301 | 0.419743234 |
| 0.005899657 | 0.08480818  | 0.293076451 | 0.355458804 |
| 0.135610336 | 0.042377655 | 0.060554676 | 0.0488279   |
| 0.342608355 | 0.008370098 | 0.065292816 | 0.176074068 |
| 0.055945071 | 0.138993994 | 0.307613479 | 0.04170265  |
| 0.0026111   | 0.031874158 | 0.078591069 | 0.046612066 |
| 0.102757559 | 0.129612069 | 0.044903797 | 0.213937104 |
| 0.011254094 | 0.000263869 | 0.28087931  | 0.004144418 |
| 0.138351499 | 0.173412724 | 0.083372543 | 0.132225857 |
| 0.07974144  | 0.184675153 | 0.151523635 | 0.000527506 |
| 0.268984534 | 0.006589071 | 0.112436742 | 0.028179061 |
| 0.087096154 | 0.006685193 | 0.315030283 | 0.370158073 |
| 0.16130876  | 0.119280544 | 0.104179002 | 0.351981969 |
| 0.032182773 | 0.184735729 | 0.151761382 | 0.282508686 |
| 0.072439271 | 0.23453446  | 0.223569503 | 0.13604065  |
| 0.218734373 | 0.082931275 |             |             |
| TMEM14C     | 0.164062187 | 0.275297929 | 0.100411107 |
| 0.242821313 | 0.289583396 | 0.223340373 | 0.181580055 |
| 0.241927215 | 0.22907369  | 0.106422131 | 0.286919523 |
| 0.108165104 | 0.097384991 | 0.344851106 | 0.191075169 |
| 0.246704507 | 0.184139708 | 0.245307426 | 0.082038367 |
| 0.21491845  | 0.295581502 | 0.220904241 | 0.190566397 |
| 0.284263145 | 0.238093442 | 0.20161215  | 0.190346838 |
| 0.33476062  | 0.110580271 | 0.2381028   | 0.076922913 |
| 0.375772326 | 0.272754966 | 0.18446871  | 0.081286613 |
| 0.24115404  | 0.029738565 | 0.367199785 | 0.31680179  |
| 0.180814194 | 0.346909645 | 0.126209137 | 0.334905285 |
| 0.15835173  | 0.114364969 | 0.063835127 | 0.217816666 |
| 0.201058787 | 0.277285497 | 0.106330421 | 0.241661856 |
| 0.19987326  | 0.257558785 | 0.180790372 | 0.005911226 |
| 0.183598035 | 0.051364518 | 0.126147578 | 0.357938427 |
| 0.294517678 | 0.312792395 | 0.113433141 | 0.217088317 |
| 0.203346412 | 0.249677151 | 0.29880104  | 0.155286077 |
| 0.364416581 | 0.154812493 | 0.232512191 | 0.207272529 |
| 0.226770424 | 0.088736293 | 0.255193714 | 0.115076143 |
| 0.218584164 | 0.346241524 | 0.287907749 | 0.222043907 |
| 0.257546622 | 0.410045766 | 0.278240485 | 0.343131114 |
| 0.128215462 | 0.23627272  | 0.27964797  | 0.328061226 |
| 0.255302637 | 0.175555659 | 0.295582852 | 0.40121835  |
| 0.117181446 | 0.149118577 | 0.237582746 | 0.154295647 |
| 0.291476556 | 0.172454515 | 0.151580517 | 0.189303852 |
| 0.258891387 | 0.251970529 | 0.355550904 | 0.292383015 |
| 0.269426711 | 0.122901166 | 0.340666897 | 0.233354545 |
| 0.301514652 | 0.155026539 | 0.269754874 | 0.298256153 |
| 0.241900388 | 0.343566954 | 0.257191678 | 0.293855787 |
| 0.228809901 | 0.363204704 | 0.271346764 | 0.315617804 |
| 0.045026686 | 0.36514111  | 0.267125652 | 0.209152777 |
| 0.117207663 | 0.280338851 | 0.217035025 | 0.346897848 |
| 0.329983366 | 0.265999475 | 0.260549739 | 0.336078436 |
| 0.350254965 | 0.321002772 | 0.353881031 | 0.299883057 |

|             |             |             |             |
|-------------|-------------|-------------|-------------|
| 0.149051411 | 0.170800281 | 0.230775903 | 0.25130458  |
| 0.26124657  | 0.215980087 | 0.231898379 | 0.376848228 |
| 0.353699419 | 0.31547649  | 0.193468996 | 0.398330568 |
| 0.236751422 | 0.418230982 | 0.27747019  | 0.304124968 |
| 0.390935604 | 0.362940066 | 0.405744143 | 0.25901398  |
| 0.37071936  | 0.246256069 | 0.060104466 | 0.294091911 |
| 0.41880238  | 0.036969238 | 0.312635927 | 0.340753315 |
| 0.34055665  | 0.301343006 | 0.401522184 | 0.362561286 |
| 0.339280217 | 0.16313832  | 0.016287761 | 0.313808749 |
| 0.361621891 | 0.342997976 | 0.299580264 | 0.194362285 |
| 0.255803074 | 0.226221107 | 0.272571279 | 0.173391458 |
| 0.43803712  | 0.326647739 | 0.32086711  | 0.261612668 |
| 0.174520902 | 0.332663245 | 0.188357959 | 0.334234781 |
| 0.188048192 | 0.181861449 | 0.100042448 | 0.290249498 |
| 0.141665711 | 0.3344574   | 0.211382575 | 0.237927219 |
| 0.320685117 | 0.204830465 | 0.169035767 | 0.263860234 |
| 0.095922219 | 0.200109094 | 0.251881083 | 0.202098617 |
| 0.203471016 | 0.223869865 | 0.261469571 | 0.315478529 |
| 0.330571507 | 0.248200225 | 0.228201999 | 0.356494842 |
| 0.227024753 | 0.204111735 | 0.243288184 | 0.402837127 |
| 0.426386122 | 0.237652343 | 0.278288249 | 0.085343331 |
| 0.214171268 | 0.123355475 | 0.135538446 | 0.19956822  |
| 0.22930837  | 0.261555814 | 0.239049695 | 0.302247953 |
| 0.210732235 | 0.17377428  | 0.223216754 | 0.386823363 |
| 0.167705273 | 0.294842324 | 0.348661864 | 0.183673443 |
| 0.03332262  | 0.267293132 | 0.30689482  | 0.268334439 |
| 0.232417726 | 0.152478213 | 0.169579495 | 0.337931279 |
| 0.168547311 | 0.239904057 | 0.342298964 | 0.299001406 |
| 0.192859553 | 0.21428297  | 0.394234715 | 0.035003209 |
| 0.221816723 | 0.187322008 | 0.330983699 | 0.12599603  |
| 0.290440764 | 0.317741747 | 0.2599602   | 0.293887248 |
| 0.148038228 | 0.370179126 | 0.317379403 | 0.365580655 |
| 0.189829722 | 0.397597781 | 0.319732233 | 0.355401302 |
| 0.272468275 | 0.172178255 | 0.110434544 | 0.300390269 |
| 0.327629798 | 0.152149368 | 0.111177731 | 0.255091853 |
| 0.164518022 | 0.248673587 | 0.255911024 | 0.386272769 |
| 0.417042629 | 0.30239591  | 0.326338144 | 0.328849642 |
| 0.339344053 | 0.277739573 | 0.318338861 | 0.411341629 |
| 0.122304229 | 0.231296297 | 0.246703332 | 0.371436469 |
| 0.257495336 | 0.26150824  | 0.317581859 | 0.1314075   |
| 0.00740457  | 0.151173968 | 0.142395051 | 0.351821054 |
| 0.223906294 | 0.175326781 | 0.25678229  | 0.369917918 |
| 0.272144273 | 0.351619709 | 0.242504375 | 0.271088795 |
| 0.313594181 | 0.225778508 | 0.225201398 | 0.254874178 |
| 0.28275695  | 0.116505019 | 0.291078446 | 0.40914658  |
| 0.074500652 | 0.216887466 | 0.230602786 | 0.022268575 |
| 0.135085768 | 0.219047985 | 0.149805277 | 0.270268314 |
| 0.376774638 | 0.247146097 | 0.221718594 | 0.126926419 |
| 0.314138369 | 0.222184286 | 0.043652417 | 0.340797126 |
| 0.344379899 | 0.332164419 | 0.335660458 | 0.328681976 |
| 0.315396999 | 0.259820354 | 0.3054093   | 0.201454541 |
| 0.239531776 | 0.145510582 | 0.205974948 | 0.299499747 |
| 0.011193031 | 0.339762126 | 0.278157384 | 0.247156622 |
| 0.269531451 | 0.263822676 | 0.149652557 | 0.247675278 |



|             |             |             |             |
|-------------|-------------|-------------|-------------|
| 0.083352053 | 0.126993608 | 0.218063954 | 0.304250943 |
| 0.31724639  | 0.079705131 | 0.140063571 | 0.190060444 |
| 0.31364954  | 0.307403536 | 0.185604419 | 0.380687934 |
| 0.304959677 | 0.12154207  | 0.303333485 | 0.308555848 |
| 0.21369016  | 0.05472737  | 0.202731969 | 0.015830072 |
| 0.128677972 | 0.345823363 | 0.206427895 | 0.15392907  |
| 0.301885131 | 0.044174673 | 0.305731821 | 0.392237705 |
| 0.305072449 | 0.377050778 | 0.370835247 | 0.219725783 |
| 0.366488595 | 0.055302368 | 0.368108959 | 0.277034275 |
| 0.144213029 | 0.005851208 | 0.047149912 | 0.33899734  |
| 0.23844416  | 0.083988929 | 0.273654158 | 0.185222351 |
| 0.306198712 | 0.168758352 | 0.199704972 | 0.275618455 |
| 0.227299434 | 0.326819055 | 0.245269901 | 0.32119732  |
| 0.319553707 | 0.32588006  | 0.176840383 | 0.143648302 |
| 0.242915536 | 0.206555611 | 0.144452614 | 0.045275985 |
| 0.296397711 | 0.145500182 | 0.342910847 | 0.353705109 |
| 0.405334197 | 0.280477121 | 0.115360323 | 0.197484784 |
| 0.322586834 | 0.100371528 | 0.167637887 | 0.127517353 |
| 0.320123218 | 0.25126618  | 0.338520254 | 0.307455709 |
| 0.398658324 | 0.364888031 | 0.149901987 | 0.3051716   |
| 0.075678178 | 0.017496667 | 0.187680591 | 0.269564792 |
| 0.072422851 | 0.226435817 | 0.30763388  | 0.20745863  |
| 0.271648166 | 0.111333568 | 0.197656553 | 0.209195065 |
| 0.310527361 | 0.26866616  | 0.267693437 | 0.244717159 |
| 0.299270494 | 0.233893692 | 0.340202596 | 0.290861142 |
| 0.171405484 | 0.273193675 | 0.237213125 | 0.112554961 |
| 0.189140431 | 0.219702378 | 0.182561178 | 0.234922083 |
| 0.342657524 | 0.348618086 | 0.181728093 | 0.104804241 |
| 0.291909195 | 0.256372496 | 0.371736672 | 0.328708984 |
| 0.382827642 | 0.417857079 | 0.371072475 | 0.302763185 |
| 0.198758574 | 0.302800014 | 0.263226199 | 0.320130831 |
| 0.365363192 | 0.098007449 | 0.342003747 | 0.208284695 |
| 0.220462544 | 0.306529813 | 0.195747617 | 0.222818034 |
| 0.220455786 | 0.286137022 | 0.355860473 | 0.156598636 |
| 0.29048294  | 0.209203526 | 0.167545541 | 0.307311171 |
| 0.290651727 | 0.16009668  | 0.267737911 | 0.232793585 |
| 0.272303566 | 0.083235318 | 0.258279017 | 0.41151151  |
| 0.203900747 | 0.187585994 | 0.178383435 | 0.274946392 |
| 0.278994451 | 0.157801363 | 0.09910371  | 0.274278385 |
| 0.374419724 | 0.220620558 | 0.351922665 | 0.373287149 |
| 0.164618829 | 0.24593374  | 0.189856986 | 0.261631037 |
| 0.278646084 | 0.224009191 | 0.299488049 | 0.167462815 |
| 0.333355022 | 0.390154258 | 0.293922151 | 0.338798097 |
| 0.202367713 | 0.12991712  | 0.087073973 | 0.304751087 |
| 0.216260889 | 0.19406566  | 0.136102144 | 0.285639104 |
| 0.021986884 | 0.142218759 | 0.369655154 | 0.318074547 |
| 0.40351554  | 0.361972361 | 0.383534201 | 0.24235863  |
| 0.004100561 | 0.231157502 | 0.279226686 | 0.238455355 |
| 0.284776859 | 0.292448813 | 0.179816042 | 0.276765661 |
| 0.358292805 | 0.106621481 | 0.296172705 | 0.189907138 |
| 0.12509229  | 0.210669579 | 0.297029661 | 0.239638381 |
| 0.341185213 | 0.104322542 | 0.206045982 | 0.308647166 |
| 0.157314906 | 0.323515985 | 0.351120584 | 0.106481331 |
| 0.132248951 | 0.340628232 | 0.270056925 | 0.116609062 |

|             |             |             |             |
|-------------|-------------|-------------|-------------|
| 0.226077538 | 0.318750276 | 0.353032168 | 0.01414447  |
| 0.26799506  | 0.076680763 | 0.343001894 | 0.347633434 |
| 0.358958386 | 0.315439967 | 0.331031801 | 0.299206068 |
| 0.231455133 | 0.315841706 | 0.318423611 | 0.332221218 |
| 0.349982798 | 0.283888372 | 0.255278756 | 0.227501902 |
| 0.295789685 | 0.261581369 | 0.154025997 | 0.148181814 |
| 0.211422376 | 0.312586795 | 0.309859853 | 0.110164198 |
| 0.326790618 | 0.222860456 | 0.392531386 | 0.32001282  |
| 0.388641888 | 0.129074774 | 0.261849801 | 0.289555885 |
| 0.084695365 | 0.180065495 | 0.125809766 | 0.230343278 |
| 0.306782885 | 0.263303842 | 0.189860019 | 0.188684709 |
| 0.215596531 | 0.383961155 | 0.298433212 | 0.371529004 |
| 0.274668786 | 0.197787019 | 0.110436965 | 0.297327726 |
| 0.265632237 | 0.19020704  | 0.289243514 | 0.027552356 |
| 0.286044985 | 0.205468256 | 0.318690093 | 0.34507361  |
| 0.171929185 | 0.377993472 | 0.12515791  | 0.202891744 |
| 0.096065691 | 0.178242095 | 0.230739385 | 0.251358439 |
| 0.133445027 | 0.313395564 | 0.304996562 | 0.173052289 |
| 0.277247219 | 0.236512078 | 0.26839009  | 0.256952819 |
| 0.287210864 | 0.209470548 | 0.355585387 | 0.169997552 |
| 0.187373361 | 0.284376894 | 0.15144313  | 0.303457268 |
| 0.331318537 | 0.357409331 | 0.153533751 | 0.360265612 |
| 0.252716565 | 0.182980518 | 0.425806737 | 0.246246525 |
| 0.244491729 | 0.329467827 | 0.144763608 | 0.176628899 |
| 0.295042212 | 0.193914292 | 0.005151887 | 0.079761936 |
| 0.337300904 | 0.175860048 | 0.22464274  | 0.278262997 |
| 0.282421398 | 0.352002338 | 0.124064206 | 0.230661873 |
| 0.311379524 | 0.35717092  | 0.265416793 | 0.318840827 |
| 0.290150061 | 0.276070872 | 0.194715877 | 0.019746917 |
| 0.211334909 | 0.186293743 | 0.157235199 | 0.198585959 |
| 0.114824619 | 0.151137982 | 0.209174863 | 0.104926399 |
| 0.363557487 | 0.124133777 | 0.174877963 | 0.256080614 |
| 0.214819618 | 0.362653256 | 0.335260524 | 0.300098896 |
| 0.095184984 | 0.284109006 | 0.212170615 | 0.189180309 |
| 0.295748023 | 0.239611177 | 0.325976424 | 0.22595802  |
| 0.172043517 | 0.319910556 | 0.013482283 | 0.373000246 |
| 0.324773268 | 0.214391563 | 0.272391252 | 0.106545449 |
| 1           | 0.322538894 | 0.243723861 | 0.185159345 |
| 0.105193303 | 0.248772547 | 0.31109071  | 0.308060934 |
| 0.11688521  | 0.202785582 | 0.240958494 | 0.233719301 |
| 0.341584302 | 0.21780682  | 0.301106292 | 0.154144061 |
| 0.327874872 | 0.270154572 | 0.158715264 | 0.288911005 |
| 0.174895403 | 0.133612716 | 0.156168846 | 0.390391798 |
| 0.352448822 | 0.237882981 | 0.337134715 | 0.31904334  |
| 0.214199775 | 0.302462186 | 0.176028879 | 0.374774609 |
| 0.287448305 | 0.311137896 | 0.305853557 | 0.326768507 |
| 0.361175516 | 0.243322557 | 0.210126265 | 0.300527386 |
| 0.308368144 | 0.232533241 | 0.225454685 | 0.289055659 |
| 0.192053651 | 0.30989062  | 0.148122466 | 0.315502685 |
| 0.18236165  | 0.279524885 | 0.239388963 | 0.240799358 |
| 0.303868594 | 0.273065044 | 0.292595399 | 0.390115853 |
| 0.308538766 | 0.143690768 | 0.410120897 | 0.03216825  |
| 0.213300696 | 0.274651948 | 0.31055549  | 0.257871785 |
| 0.240517758 | 0.240410101 | 0.183763729 | 0.013170944 |

|             |             |             |             |
|-------------|-------------|-------------|-------------|
| 0.328387015 | 0.114450602 | 0.259561433 | 0.305913147 |
| 0.182402723 | 0.150396943 | 0.354788165 | 0.3864985   |
| 0.258592786 | 0.173391155 | 0.159347173 | 0.339961604 |
| 0.164100398 | 0.143544011 | 0.180438037 | 0.198384284 |
| 0.194636783 | 0.144577737 | 0.178029825 | 0.195089955 |
| 0.275586977 | 0.266751718 |             |             |
| TMEM154     | 0.146661762 | 0.395484573 | 0.115349656 |
| 0.168237734 | 0.305146067 | 0.355602041 | 0.145943396 |
| 0.219319313 | 0.357260124 | 0.275907682 | 0.328866702 |
| 0.054132845 | 0.106472843 | 0.398467748 | 0.148367119 |
| 0.330943152 | 0.097540691 | 0.197235679 | 0.128005775 |
| 0.317404871 | 0.281194658 | 0.292718419 | 0.340513429 |
| 0.312033939 | 0.23573051  | 0.349483974 | 0.337730349 |
| 0.440001849 | 0.201929451 | 0.358373725 | 0.171917672 |
| 0.397451601 | 0.298570784 | 0.312272475 | 0.057306044 |
| 0.373183281 | 0.037842282 | 0.433376615 | 0.277830191 |
| 0.162870597 | 0.3525545   | 0.29657556  | 0.272307538 |
| 0.314583031 | 0.086509386 | 0.17548264  | 0.347634792 |
| 0.359466074 | 0.373198694 | 0.135456856 | 0.373023848 |
| 0.348143303 | 0.343182631 | 0.329123688 | 0.003294428 |
| 0.25241347  | 0.080284682 | 0.191902142 | 0.467152968 |
| 0.269009796 | 0.219738579 | 0.237538836 | 0.358401455 |
| 0.357635907 | 0.365479043 | 0.345642307 | 0.308175121 |
| 0.44133426  | 0.173258062 | 0.361772263 | 0.201396959 |
| 0.352831148 | 0.107303414 | 0.243691086 | 0.182902032 |
| 0.356658998 | 0.282732178 | 0.33786052  | 0.295057815 |
| 0.376594199 | 0.499252095 | 0.325329837 | 0.466964754 |
| 0.148706306 | 0.307019948 | 0.309377677 | 0.337339058 |
| 0.362952372 | 0.201532909 | 0.344816932 | 0.475825891 |
| 0.145825609 | 0.323513423 | 0.348460391 | 0.20608551  |
| 0.388978567 | 0.304725399 | 0.31178676  | 0.175923869 |
| 0.339493769 | 0.299836498 | 0.473055219 | 0.304261909 |
| 0.348285402 | 0.146499309 | 0.467413364 | 0.286775229 |
| 0.280993255 | 0.157797037 | 0.242978518 | 0.375069208 |
| 0.349609628 | 0.42868642  | 0.357316372 | 0.348757096 |
| 0.306107168 | 0.44381321  | 0.348210043 | 0.396270805 |
| 0.145314762 | 0.477045232 | 0.258485936 | 0.111266835 |
| 0.144630282 | 0.197576634 | 0.304630335 | 0.348321044 |
| 0.404152746 | 0.362522741 | 0.249665692 | 0.280576629 |
| 0.392199383 | 0.45091344  | 0.473565892 | 0.356128105 |
| 0.102653014 | 0.268288004 | 0.308749881 | 0.364951674 |
| 0.34816412  | 0.229158183 | 0.242501054 | 0.480144298 |
| 0.350170948 | 0.363887937 | 0.251535698 | 0.496872255 |
| 0.306321862 | 0.470699475 | 0.386012439 | 0.230400237 |
| 0.483193033 | 0.466729037 | 0.45705022  | 0.333687158 |
| 0.453350775 | 0.320769136 | 0.106583103 | 0.360425546 |
| 0.449415691 | 0.019079753 | 0.406772552 | 0.428940685 |
| 0.449167485 | 0.362925046 | 0.469265742 | 0.450493693 |
| 0.455175184 | 0.164688421 | 0.037277672 | 0.306785931 |
| 0.462638145 | 0.347475358 | 0.263369162 | 0.315662937 |
| 0.330906878 | 0.357710576 | 0.382370746 | 0.217156804 |
| 0.486500902 | 0.397608488 | 0.425421838 | 0.354287453 |
| 0.33799893  | 0.332472381 | 0.307812621 | 0.448575753 |
| 0.121448038 | 0.177503691 | 0.114604093 | 0.3604598   |

|             |             |             |             |
|-------------|-------------|-------------|-------------|
| 0.301363766 | 0.258067745 | 0.332468534 | 0.353276603 |
| 0.268082743 | 0.369244266 | 0.281558153 | 0.329273951 |
| 0.121036067 | 0.340543253 | 0.265067533 | 0.234817673 |
| 0.10266624  | 0.218624798 | 0.195880274 | 0.225835521 |
| 0.288648323 | 0.294531491 | 0.358515598 | 0.43934228  |
| 0.352710443 | 0.239564479 | 0.359521807 | 0.442351184 |
| 0.401137451 | 0.315504407 | 0.30642766  | 0.025392458 |
| 0.217439721 | 0.273259852 | 0.177230468 | 0.345397952 |
| 0.250593918 | 0.247938379 | 0.329325969 | 0.339525131 |
| 0.282980698 | 0.260096282 | 0.30888177  | 0.430061463 |
| 0.224388317 | 0.288885931 | 0.368254963 | 0.342690246 |
| 0.017702402 | 0.307251822 | 0.364836435 | 0.213766295 |
| 0.337697265 | 0.133017265 | 0.209959759 | 0.392159637 |
| 0.248067706 | 0.25736774  | 0.434840487 | 0.356562783 |
| 0.299124732 | 0.278993738 | 0.473977982 | 0.046490097 |
| 0.350165184 | 0.082343829 | 0.30761083  | 0.309318863 |
| 0.29800834  | 0.330547807 | 0.302661036 | 0.286485651 |
| 0.189479464 | 0.468453616 | 0.377990123 | 0.446436765 |
| 0.286766009 | 0.476856706 | 0.370402807 | 0.380564185 |
| 0.369157066 | 0.313090936 | 0.129742162 | 0.349984365 |
| 0.384925817 | 0.252510124 | 0.149001324 | 0.36110964  |
| 0.313959741 | 0.337815208 | 0.202270163 | 0.431224212 |
| 0.481240919 | 0.43386545  | 0.225957261 | 0.349255295 |
| 0.33901967  | 0.276889134 | 0.385494471 | 0.488330406 |
| 0.274417729 | 0.300566845 | 0.282999808 | 0.358872711 |
| 0.246400808 | 0.245137513 | 0.348735765 | 0.186896389 |
| 0.009704842 | 0.170792319 | 0.133895162 | 0.234870854 |
| 0.184753189 | 0.346549525 | 0.360851622 | 0.456227232 |
| 0.200311123 | 0.399829221 | 0.326311276 | 0.246184544 |
| 0.375895046 | 0.330334742 | 0.330706477 | 0.354362391 |
| 0.323976959 | 0.047902834 | 0.162101961 | 0.49406689  |
| 0.104565724 | 0.218352024 | 0.363849652 | 0.006307012 |
| 0.106826057 | 0.346718638 | 0.168149489 | 0.252260114 |
| 0.425072887 | 0.248688574 | 0.253431503 | 0.276322155 |
| 0.349258831 | 0.188719661 | 0.011397815 | 0.439857142 |
| 0.465620699 | 0.446034086 | 0.460617417 | 0.457946206 |
| 0.407068635 | 0.389025159 | 0.359785615 | 0.340247018 |
| 0.190902091 | 0.180441333 | 0.187874855 | 0.286579544 |
| 0.011001792 | 0.366273419 | 0.355051866 | 0.222458971 |
| 0.361859613 | 0.342928931 | 0.096113726 | 0.350890878 |
| 0.043957332 | 0.15575519  | 0.324854909 | 0.316079644 |
| 0.35700171  | 0.053624719 | 0.179332839 | 0.249120071 |
| 0.3989766   | 0.333682274 | 0.300534387 | 0.482072549 |
| 0.315376691 | 0.191993698 | 0.299923454 | 0.365564382 |
| 0.154548503 | 0.102401872 | 0.360162694 | 0.030242732 |
| 0.235854376 | 0.456483292 | 0.345458338 | 0.131400306 |
| 0.293757365 | 0.019728728 | 0.33678096  | 0.481101499 |
| 0.430108643 | 0.450146859 | 0.444288979 | 0.233720156 |
| 0.44887482  | 0.103655661 | 0.4684044   | 0.353519747 |
| 0.285134269 | 0.001717784 | 0.020484445 | 0.411411509 |
| 0.314331023 | 0.123460558 | 0.240921055 | 0.292865208 |
| 0.178364993 | 0.224312595 | 0.168224588 | 0.212184464 |
| 0.369666693 | 0.278765317 | 0.220245619 | 0.432452395 |
| 0.28946272  | 0.31797765  | 0.347301766 | 0.174767214 |

|             |             |             |             |
|-------------|-------------|-------------|-------------|
| 0.36333811  | 0.12055264  | 0.184109328 | 0.014361206 |
| 0.361719494 | 0.178900297 | 0.46249183  | 0.458247967 |
| 0.453906164 | 0.346688013 | 0.256361859 | 0.313245739 |
| 0.406646756 | 0.158943425 | 0.308794554 | 0.185894329 |
| 0.428250754 | 0.317845464 | 0.320412155 | 0.305803221 |
| 0.44293459  | 0.422174841 | 0.097843875 | 0.350140543 |
| 0.03364327  | 0.008848109 | 0.312474837 | 0.333851462 |
| 0.151978123 | 0.307354806 | 0.29706149  | 0.338386532 |
| 0.347837021 | 0.068652624 | 0.241381123 | 0.223333468 |
| 0.315870277 | 0.325820172 | 0.261078078 | 0.334014238 |
| 0.309798804 | 0.170304159 | 0.2976167   | 0.263799289 |
| 0.308237594 | 0.314880345 | 0.230273622 | 0.07688093  |
| 0.339426361 | 0.320128827 | 0.130880944 | 0.248551242 |
| 0.365966049 | 0.412683006 | 0.110185058 | 0.028425773 |
| 0.301522907 | 0.325781366 | 0.430270436 | 0.443465102 |
| 0.486137983 | 0.472487851 | 0.403031865 | 0.197459118 |
| 0.149232755 | 0.340057389 | 0.286454331 | 0.190361692 |
| 0.45440273  | 0.133238583 | 0.453059123 | 0.269783466 |
| 0.217023626 | 0.273213273 | 0.086970319 | 0.186144005 |
| 0.322370448 | 0.265775227 | 0.252300505 | 0.199244579 |
| 0.294069595 | 0.237391478 | 0.132045377 | 0.268796238 |
| 0.331877186 | 0.159092333 | 0.242461371 | 0.38537988  |
| 0.370649313 | 0.254141664 | 0.346219883 | 0.425884016 |
| 0.211772452 | 0.211691545 | 0.252356427 | 0.385209994 |
| 0.363229585 | 0.333540369 | 0.048515602 | 0.401396799 |
| 0.445732291 | 0.344787217 | 0.458345855 | 0.357154209 |
| 0.17591181  | 0.300802177 | 0.302018184 | 0.311758674 |
| 0.280329731 | 0.360502556 | 0.329582934 | 0.145374262 |
| 0.345345362 | 0.482910064 | 0.364811905 | 0.234209684 |
| 0.368699    | 0.207229404 | 0.122242424 | 0.405114867 |
| 0.17938127  | 0.140236151 | 0.311082966 | 0.376062434 |
| 0.007036407 | 0.14815548  | 0.450418945 | 0.296927412 |
| 0.495924576 | 0.414539289 | 0.407828224 | 0.368729196 |
| 0.003111272 | 0.343127636 | 0.322122924 | 0.311416386 |
| 0.36780443  | 0.360501608 | 0.296599236 | 0.147545489 |
| 0.32627293  | 0.143566142 | 0.192005129 | 0.321486558 |
| 0.163489324 | 0.35286877  | 0.281824165 | 0.309097892 |
| 0.280434797 | 0.177831625 | 0.242850934 | 0.305417977 |
| 0.21364489  | 0.293704595 | 0.334304205 | 0.284960214 |
| 0.133005412 | 0.395113015 | 0.34227335  | 0.078696864 |
| 0.331058931 | 0.373802895 | 0.417391323 | 0.003841244 |
| 0.340490695 | 0.028962214 | 0.258756453 | 0.253448081 |
| 0.277783953 | 0.275799659 | 0.30484479  | 0.297110558 |
| 0.346772417 | 0.296260557 | 0.285137921 | 0.289386209 |
| 0.23216169  | 0.323585411 | 0.35713794  | 0.35880279  |
| 0.258274987 | 0.206958374 | 0.171733306 | 0.167144212 |
| 0.108231565 | 0.419411419 | 0.286794941 | 0.144172316 |
| 0.3086957   | 0.362328337 | 0.348969572 | 0.444757442 |
| 0.401819537 | 0.175028451 | 0.358289881 | 0.372508323 |
| 0.194144254 | 0.278498127 | 0.133278583 | 0.373440535 |
| 0.297994452 | 0.205770295 | 0.370278924 | 0.293434092 |
| 0.354775052 | 0.399452346 | 0.286865313 | 0.427906641 |
| 0.340945965 | 0.344124349 | 0.253313531 | 0.142825014 |
| 0.227059363 | 0.226429103 | 0.267658545 | 0.008798876 |

|             |             |             |             |
|-------------|-------------|-------------|-------------|
| 0.349877131 | 0.273993143 | 0.380830493 | 0.449040042 |
| 0.257487726 | 0.385811459 | 0.255604677 | 0.1423475   |
| 0.231931825 | 0.216264877 | 0.222282136 | 0.371608047 |
| 0.178122519 | 0.282820472 | 0.301647249 | 0.319297622 |
| 0.364252208 | 0.368308133 | 0.314601088 | 0.320609724 |
| 0.339992449 | 0.275860676 | 0.470388719 | 0.213014433 |
| 0.336344196 | 0.203567147 | 0.337940976 | 0.279363288 |
| 0.274488721 | 0.460108486 | 0.142958602 | 0.456504732 |
| 0.291017485 | 0.219098745 | 0.4782578   | 0.379020161 |
| 0.361370807 | 0.216341963 | 0.170804951 | 0.355615719 |
| 0.311714868 | 0.295133742 | 0.013370822 | 0.060495549 |
| 0.326386546 | 0.348115694 | 0.34385033  | 0.376681648 |
| 0.278515234 | 0.349392175 | 0.185534684 | 0.322342146 |
| 0.443502265 | 0.480416979 | 0.224169227 | 0.309749685 |
| 0.343800331 | 0.183616866 | 0.348749556 | 0.035837544 |
| 0.326795938 | 0.325797123 | 0.302492042 | 0.139647791 |
| 0.067681937 | 0.175394582 | 0.333323016 | 0.157280083 |
| 0.41633077  | 0.16780365  | 0.357986878 | 0.372771664 |
| 0.278252626 | 0.475886253 | 0.213412181 | 0.342915687 |
| 0.131584234 | 0.337308144 | 0.348096205 | 0.352519209 |
| 0.211063466 | 0.261497292 | 0.337167817 | 0.215756357 |
| 0.088875186 | 0.281299665 | 0.005006835 | 0.408875466 |
| 0.449264251 | 0.292171304 | 0.278223681 | 0.27696845  |
| 0.322538894 | 1           | 0.257027387 | 0.349737277 |
| 0.036245666 | 0.299412543 | 0.29640432  | 0.36053564  |
| 0.155866106 | 0.341662701 | 0.128406806 | 0.311178227 |
| 0.45851461  | 0.232345623 | 0.321936702 | 0.22395639  |
| 0.445801594 | 0.380498516 | 0.231439769 | 0.307016217 |
| 0.354214229 | 0.143451713 | 0.331982429 | 0.483431241 |
| 0.247518601 | 0.206968896 | 0.355902369 | 0.235365637 |
| 0.283309649 | 0.376998358 | 0.347712972 | 0.486058383 |
| 0.140064852 | 0.296380658 | 0.377846744 | 0.411221644 |
| 0.33104748  | 0.210230306 | 0.213107388 | 0.245109371 |
| 0.416001491 | 0.148299453 | 0.266827171 | 0.342629879 |
| 0.186990984 | 0.352955166 | 0.337407456 | 0.244763748 |
| 0.08430052  | 0.286749929 | 0.339554267 | 0.241012234 |
| 0.30936201  | 0.331222297 | 0.273059032 | 0.379420488 |
| 0.178080345 | 0.049587656 | 0.439430515 | 0.015830455 |
| 0.339572031 | 0.340521877 | 0.323898073 | 0.330912668 |
| 0.238487517 | 0.35708255  | 0.305822822 | 0.004008034 |
| 0.371325571 | 0.090161541 | 0.366594973 | 0.225271907 |
| 0.248310681 | 0.118166801 | 0.435739369 | 0.44873901  |
| 0.369845047 | 0.334456261 | 0.259694336 | 0.432591639 |
| 0.150375023 | 0.277969168 | 0.298965934 | 0.353469386 |
| 0.215668378 | 0.298021721 | 0.332427329 | 0.294885094 |
| 0.372457127 | 0.358860708 |             |             |
| TMEM192     | 0.037300452 | 0.227621152 | 0.018502788 |
| 0.014538975 | 0.209124019 | 0.083279497 | 0.042297095 |
| 0.06064543  | 0.205625838 | 0.05426145  | 0.169423869 |
| 0.012370545 | 0.032276099 | 0.3135866   | 0.050567669 |
| 0.248876289 | 0.028913343 | 0.097920166 | 0.021275004 |
| 0.023782471 | 0.248101706 | 0.080912125 | 0.125490969 |
| 0.211623669 | 0.131366638 | 0.135812437 | 0.187393329 |
| 0.277162669 | 0.026257212 | 0.204584994 | 0.007674603 |

|             |             |             |             |
|-------------|-------------|-------------|-------------|
| 0.297062205 | 0.258633789 | 0.139510699 | 0.004369984 |
| 0.181442513 | 0.01369658  | 0.281791903 | 0.134046151 |
| 0.018719195 | 0.258828997 | 0.064404974 | 0.113991297 |
| 0.100905391 | 0.016882975 | 0.012264263 | 0.263887749 |
| 0.135459179 | 0.09269944  | 0.03830644  | 0.192006753 |
| 0.101022803 | 0.185524728 | 0.161612198 | 0.003401898 |
| 0.130239458 | 0.021253789 | 0.096169793 | 0.272682173 |
| 0.162331891 | 0.116506307 | 0.039083547 | 0.133547934 |
| 0.253516626 | 0.288119763 | 0.214074919 | 0.091609206 |
| 0.303631972 | 0.082497242 | 0.225603556 | 0.017342325 |
| 0.153955257 | 0.020355068 | 0.140731084 | 0.053970101 |
| 0.115211588 | 0.160634181 | 0.202602592 | 0.125648635 |
| 0.210607895 | 0.334557295 | 0.163694931 | 0.266535085 |
| 0.066000667 | 0.242233445 | 0.099839304 | 0.276613185 |
| 0.294498727 | 0.054531694 | 0.245147107 | 0.326781132 |
| 0.039497536 | 0.136716896 | 0.279854543 | 0.102144106 |
| 0.219731415 | 0.084586477 | 0.108149244 | 0.083494465 |
| 0.253939331 | 0.255102532 | 0.306579822 | 0.232089601 |
| 0.184523382 | 0.047744361 | 0.256765246 | 0.236829156 |
| 0.121510086 | 0.039473724 | 0.097818503 | 0.296503545 |
| 0.207897232 | 0.287196819 | 0.267049619 | 0.321610401 |
| 0.224298844 | 0.287908774 | 0.19746473  | 0.283993732 |
| 0.010107873 | 0.302417094 | 0.086042729 | 0.036354181 |
| 0.03057454  | 0.073036889 | 0.110467589 | 0.258775466 |
| 0.277039711 | 0.21017457  | 0.095959705 | 0.178114507 |
| 0.349707855 | 0.245591407 | 0.305020094 | 0.307819896 |
| 0.029074986 | 0.094674704 | 0.185407591 | 0.077012645 |
| 0.319752553 | 0.109362368 | 0.172055954 | 0.296948583 |
| 0.247742946 | 0.315434463 | 0.049306585 | 0.301293778 |
| 0.153337514 | 0.32992206  | 0.221509292 | 0.113432421 |
| 0.294337638 | 0.265354284 | 0.332475175 | 0.264856177 |
| 0.267388627 | 0.099546349 | 0.062967917 | 0.288565099 |
| 0.346647883 | 0.004923663 | 0.298449248 | 0.317539503 |
| 0.269671484 | 0.288617945 | 0.36283751  | 0.308654227 |
| 0.279047487 | 0.060399118 | 0.013267708 | 0.302036941 |
| 0.284660697 | 0.236490169 | 0.094179008 | 0.182854265 |
| 0.296187447 | 0.125279456 | 0.273478163 | 0.039829873 |
| 0.371036436 | 0.250466149 | 0.289497005 | 0.283048789 |
| 0.134545009 | 0.235741995 | 0.19698833  | 0.239142835 |
| 0.015424101 | 0.048095133 | 0.033219996 | 0.271388818 |
| 0.032424384 | 0.163341633 | 0.108688234 | 0.263271439 |
| 0.19055398  | 0.114982778 | 0.113681673 | 0.290105995 |
| 0.043733442 | 0.170424157 | 0.073969551 | 0.101467302 |
| 0.028477536 | 0.127923856 | 0.044151781 | 0.044690623 |
| 0.23185384  | 0.155162258 | 0.244837075 | 0.295545355 |
| 0.173829195 | 0.10414102  | 0.241032097 | 0.319457131 |
| 0.363702681 | 0.182543753 | 0.236372867 | 0.002763469 |
| 0.062384815 | 0.085600961 | 0.085443137 | 0.185870222 |
| 0.127876875 | 0.120198144 | 0.265794938 | 0.291653948 |
| 0.104010974 | 0.090281437 | 0.157333041 | 0.2847439   |
| 0.104394317 | 0.122366871 | 0.328425411 | 0.171488182 |
| 0.000736615 | 0.149362791 | 0.275844092 | 0.054960929 |
| 0.260256518 | 0.050854213 | 0.046249673 | 0.30009184  |
| 0.08579725  | 0.185683104 | 0.301459172 | 0.291308783 |

|             |             |             |             |
|-------------|-------------|-------------|-------------|
| 0.04513064  | 0.149424815 | 0.355160291 | 0.038913637 |
| 0.206027387 | 0.012322373 | 0.26746055  | 0.081343795 |
| 0.167398753 | 0.303257979 | 0.248505522 | 0.109776353 |
| 0.061395049 | 0.324510246 | 0.235349739 | 0.318171303 |
| 0.109549877 | 0.34576424  | 0.306236032 | 0.302787162 |
| 0.209559617 | 0.173022101 | 0.054496004 | 0.258438094 |
| 0.279032637 | 0.035661943 | 0.048243032 | 0.288695874 |
| 0.12967652  | 0.287616743 | 0.02755231  | 0.331078966 |
| 0.307631014 | 0.233356608 | 0.121305016 | 0.331368155 |
| 0.252622863 | 0.114104074 | 0.256739653 | 0.373613585 |
| 0.052043236 | 0.251104738 | 0.136004413 | 0.31819972  |
| 0.11320438  | 0.149353507 | 0.240781731 | 0.073219172 |
| 0.000921033 | 0.063049822 | 0.044658067 | 0.145426529 |
| 0.097100349 | 0.186178575 | 0.245265949 | 0.32217796  |
| 0.114896597 | 0.260934191 | 0.216579378 | 0.121916156 |
| 0.263125862 | 0.226018114 | 0.189144708 | 0.24724998  |
| 0.194589938 | 0.003370535 | 0.027064652 | 0.323896396 |
| 0.028596406 | 0.099536869 | 0.178317725 | 0.001459503 |
| 0.031652293 | 0.201579007 | 0.073351507 | 0.1498641   |
| 0.358397212 | 0.124879382 | 0.130285959 | 0.067748725 |
| 0.253619913 | 0.071642947 | 0.001110531 | 0.300912393 |
| 0.304231899 | 0.300712549 | 0.300570822 | 0.269907187 |
| 0.30916336  | 0.256095714 | 0.294156882 | 0.100766267 |
| 0.041987434 | 0.033223752 | 0.093868259 | 0.18571185  |
| 0.004976969 | 0.252152834 | 0.207606822 | 0.126286819 |
| 0.303758321 | 0.267926256 | 0.025438767 | 0.267097332 |
| 0.00338681  | 0.060376193 | 0.116974223 | 0.159427387 |
| 0.32961123  | 0.006968974 | 0.015840304 | 0.07069067  |
| 0.221829263 | 0.237722257 | 0.096881673 | 0.300112392 |
| 0.186867795 | 0.070633564 | 0.143350406 | 0.283106785 |
| 0.04771255  | 0.016669721 | 0.133953054 | 0.001437501 |
| 0.019139436 | 0.295090548 | 0.119357419 | 0.00718947  |
| 0.17997755  | 0.001722555 | 0.211473469 | 0.33247284  |
| 0.2266702   | 0.34059365  | 0.295034304 | 0.133047722 |
| 0.287030001 | 0.025454765 | 0.316403976 | 0.231517409 |
| 0.10025806  | 0.000271174 | 0.007419114 | 0.291780513 |
| 0.198363089 | 0.034707863 | 0.126788894 | 0.027589116 |
| 0.045487808 | 0.06446457  | 0.051233667 | 0.090446233 |
| 0.168193193 | 0.211102263 | 0.109201491 | 0.270608822 |
| 0.147535536 | 0.210078177 | 0.117614799 | 0.07561421  |
| 0.194412102 | 0.024029271 | 0.076292705 | 0.004005195 |
| 0.305902732 | 0.071575539 | 0.252524755 | 0.296773263 |
| 0.323617981 | 0.245028843 | 0.066106621 | 0.046022636 |
| 0.312791167 | 0.052129925 | 0.037082329 | 0.061668614 |
| 0.253021846 | 0.259308227 | 0.25274734  | 0.197888892 |
| 0.359382073 | 0.285087298 | 0.033335862 | 0.287343639 |
| 0.002040552 | 0.003256971 | 0.093273713 | 0.254165327 |
| 0.026660107 | 0.214049347 | 0.200042445 | 0.100346592 |
| 0.118197505 | 0.00788402  | 0.144456001 | 0.145379872 |
| 0.214810856 | 0.217118894 | 0.219630757 | 0.206808091 |
| 0.13256109  | 0.046329114 | 0.101327331 | 0.118427956 |
| 0.049787843 | 0.191791772 | 0.134975354 | 0.01748074  |
| 0.133149373 | 0.182525166 | 0.04582197  | 0.117300367 |
| 0.274440177 | 0.311001445 | 0.021631326 | 0.005882644 |



|             |             |             |             |
|-------------|-------------|-------------|-------------|
| 0.201678144 | 0.208474401 | 0.349666279 | 0.268530544 |
| 0.305669558 | 0.36144124  | 0.26954949  | 0.106095413 |
| 0.042196418 | 0.219898344 | 0.218027899 | 0.043180617 |
| 0.319779248 | 0.048674618 | 0.262944843 | 0.183058449 |
| 0.105718815 | 0.069460233 | 0.013527806 | 0.081705416 |
| 0.220144581 | 0.175547166 | 0.158404339 | 0.068346795 |
| 0.190341363 | 0.054850687 | 0.039432867 | 0.165671166 |
| 0.263896516 | 0.034036263 | 0.139247217 | 0.093193396 |
| 0.184792967 | 0.019607481 | 0.274033836 | 0.338685571 |
| 0.10134032  | 0.084713247 | 0.037871045 | 0.277972233 |
| 0.255846111 | 0.155255034 | 0.004892028 | 0.226478979 |
| 0.331359998 | 0.223490924 | 0.269472218 | 0.373044704 |
| 0.073353991 | 0.192258802 | 0.175131851 | 0.252993198 |
| 0.190413841 | 0.09168222  | 0.206470613 | 0.061996445 |
| 0.260139724 | 0.324881007 | 0.233651453 | 0.119433895 |
| 0.170415369 | 0.076095733 | 0.039211984 | 0.279005915 |
| 0.080986687 | 0.025013149 | 0.086803488 | 0.31306645  |
| 0.000310431 | 0.072795323 | 0.339292352 | 0.098348841 |
| 0.335089664 | 0.308012584 | 0.285446623 | 0.072097562 |
| 0.001283223 | 0.249172564 | 0.22544134  | 0.111317646 |
| 0.254644237 | 0.215903816 | 0.028746148 | 0.044917041 |
| 0.244140559 | 0.047549819 | 0.082359358 | 0.023033051 |
| 0.038955962 | 0.221533627 | 0.210055975 | 0.167125021 |
| 0.142863091 | 0.071043264 | 0.04724514  | 0.089952866 |
| 0.044004642 | 0.225378225 | 0.304090583 | 0.044383068 |
| 0.046912389 | 0.36376005  | 0.253883194 | 0.014265572 |
| 0.202469298 | 0.310961632 | 0.287273645 | 0.003308665 |
| 0.273704233 | 0.004928994 | 0.19908612  | 0.136834083 |
| 0.129180415 | 0.216915903 | 0.267486334 | 0.098457025 |
| 0.222628549 | 0.130384027 | 0.104583192 | 0.198412632 |
| 0.081528454 | 0.112953788 | 0.204432075 | 0.109188946 |
| 0.116138817 | 0.058723742 | 0.06996069  | 0.067267156 |
| 0.016452353 | 0.267289005 | 0.196427179 | 0.040837135 |
| 0.231441349 | 0.117723912 | 0.281262403 | 0.255823963 |
| 0.305143946 | 0.059917559 | 0.198150979 | 0.22871265  |
| 0.032065461 | 0.029081394 | 0.032131815 | 0.118746005 |
| 0.173727912 | 0.099959655 | 0.119199748 | 0.138203693 |
| 0.24210258  | 0.274473032 | 0.190462501 | 0.278074277 |
| 0.11479846  | 0.192179596 | 0.048294441 | 0.042086607 |
| 0.0873757   | 0.110590671 | 0.214854467 | 0.000520287 |
| 0.264122392 | 0.020965051 | 0.28821727  | 0.253529579 |
| 0.128151409 | 0.273178275 | 0.019972167 | 0.0408643   |
| 0.016958515 | 0.099404067 | 0.131522717 | 0.22519784  |
| 0.088223352 | 0.07635835  | 0.200075756 | 0.041590288 |
| 0.254434093 | 0.238389969 | 0.128172285 | 0.177506275 |
| 0.17417415  | 0.095714456 | 0.287703279 | 0.043478349 |
| 0.175789099 | 0.07945598  | 0.136745023 | 0.197824764 |
| 0.172936257 | 0.30113178  | 0.045534276 | 0.320945899 |
| 0.21791739  | 0.101240607 | 0.338098505 | 0.141108611 |
| 0.039132779 | 0.031906556 | 0.091306254 | 0.0948239   |
| 0.102601669 | 0.116397509 | 0.003023174 | 0.044899583 |
| 0.294336009 | 0.122754856 | 0.231027427 | 0.286866452 |
| 0.136424559 | 0.331700008 | 0.034481817 | 0.156924424 |
| 0.241394911 | 0.270647305 | 0.060715088 | 0.225665697 |

|             |             |             |             |
|-------------|-------------|-------------|-------------|
| 0.306793867 | 0.070753604 | 0.142833266 | 0.008343865 |
| 0.243638157 | 0.204062224 | 0.0840308   | 0.049745773 |
| 0.007294959 | 0.093927103 | 0.196120062 | 0.050766416 |
| 0.345362868 | 0.030787408 | 0.183689414 | 0.204992305 |
| 0.154346203 | 0.27054345  | 0.094833799 | 0.264368716 |
| 0.012952047 | 0.191307093 | 0.171299043 | 0.195244175 |
| 0.081784206 | 0.167492364 | 0.267426091 | 0.128326612 |
| 0.026110291 | 0.063972686 | 0.002040108 | 0.260984009 |
| 0.242633435 | 0.184681412 | 0.178829906 | 0.054989339 |
| 0.243723861 | 0.257027387 | 1           | 0.139750881 |
| 0.00406822  | 0.235595298 | 0.17039201  | 0.225538536 |
| 0.025917165 | 0.221644421 | 0.012163459 | 0.238186102 |
| 0.243761497 | 0.088952862 | 0.253395042 | 0.039531964 |
| 0.25007101  | 0.212944449 | 0.074289936 | 0.048890086 |
| 0.208100605 | 0.058110799 | 0.075001292 | 0.344107889 |
| 0.151749628 | 0.126865206 | 0.323482435 | 0.118824219 |
| 0.19801196  | 0.228630211 | 0.173214094 | 0.336809407 |
| 0.076551319 | 0.214709648 | 0.288351018 | 0.29618346  |
| 0.291878428 | 0.133811297 | 0.137056632 | 0.198172599 |
| 0.22202157  | 0.016068868 | 0.08931495  | 0.213225418 |
| 0.12289893  | 0.266655191 | 0.123925443 | 0.172573551 |
| 0.02137943  | 0.099951223 | 0.077009237 | 0.11510175  |
| 0.257123295 | 0.181580266 | 0.106907811 | 0.278239484 |
| 0.03253923  | 0.007169772 | 0.304184202 | 0.010441138 |
| 0.101631956 | 0.21605942  | 0.191738225 | 0.173425408 |
| 0.12081572  | 0.221597925 | 0.126233406 | 0.002085699 |
| 0.316737582 | 0.004544217 | 0.15559034  | 0.106147402 |
| 0.067723644 | 0.035869369 | 0.250106751 | 0.355465561 |
| 0.183044015 | 0.032763597 | 0.050991565 | 0.294486506 |
| 0.035053752 | 0.093208904 | 0.156538128 | 0.164333141 |
| 0.115204623 | 0.097465146 | 0.129344012 | 0.099887454 |
| 0.219475373 | 0.118710314 |             |             |
| TMEM5       | 0.030746588 | 0.421747564 | 0.025185572 |
| 0.067325535 | 0.208810804 | 0.244855194 | 0.021182578 |
| 0.054023615 | 0.313490296 | 0.249757704 | 0.210568406 |
| 0.004256736 | 0.115276763 | 0.421329196 | 0.019726729 |
| 0.285572284 | 0.010036022 | 0.042963278 | 0.049622639 |
| 0.136151261 | 0.167609469 | 0.246937452 | 0.21534115  |
| 0.18201659  | 0.133674833 | 0.229796372 | 0.293738618 |
| 0.500795937 | 0.270098438 | 0.366740451 | 0.186031348 |
| 0.34940513  | 0.233828065 | 0.292254678 | 0.004919553 |
| 0.253996389 | 0.014648008 | 0.373918192 | 0.138250481 |
| 0.140912248 | 0.27749088  | 0.23997807  | 0.123835794 |
| 0.236701388 | 0.012461059 | 0.233599211 | 0.350113083 |
| 0.230388144 | 0.170240485 | 0.028169285 | 0.366271916 |
| 0.233345301 | 0.245515162 | 0.367352424 | 0.000716254 |
| 0.25343575  | 0.147420739 | 0.230563924 | 0.485801538 |
| 0.114580283 | 0.052818406 | 0.253724626 | 0.148371932 |
| 0.300720629 | 0.305934813 | 0.169173988 | 0.245880119 |
| 0.470031524 | 0.161334619 | 0.415608429 | 0.096306159 |
| 0.214116315 | 0.012254331 | 0.090877373 | 0.045016983 |
| 0.26771328  | 0.098276002 | 0.213551178 | 0.238295452 |
| 0.418689229 | 0.468382286 | 0.142787475 | 0.469653779 |
| 0.088323325 | 0.253688163 | 0.193756413 | 0.218736262 |

|             |             |             |             |
|-------------|-------------|-------------|-------------|
| 0.295911814 | 0.037006173 | 0.329922564 | 0.478898372 |
| 0.020543932 | 0.295456243 | 0.318257269 | 0.068367732 |
| 0.420600107 | 0.252386934 | 0.266952338 | 0.157601625 |
| 0.312836503 | 0.220029965 | 0.442670282 | 0.185191298 |
| 0.218133532 | 0.032677751 | 0.445397006 | 0.247892978 |
| 0.175246372 | 0.034763827 | 0.13703574  | 0.475724717 |
| 0.30284966  | 0.484319553 | 0.410905891 | 0.292125612 |
| 0.251580337 | 0.481085653 | 0.31082111  | 0.391984903 |
| 0.210799274 | 0.508878482 | 0.089826381 | 0.013976242 |
| 0.031032214 | 0.036611463 | 0.16728295  | 0.234605005 |
| 0.476105948 | 0.234257466 | 0.088550612 | 0.120145026 |
| 0.450934294 | 0.449193358 | 0.508898601 | 0.359697697 |
| 0.012548713 | 0.227248247 | 0.249035666 | 0.166512647 |
| 0.279221918 | 0.052444644 | 0.193130567 | 0.459358534 |
| 0.316896979 | 0.412526236 | 0.081887061 | 0.44383942  |
| 0.102183584 | 0.472213539 | 0.454552774 | 0.074129088 |
| 0.47731068  | 0.452798826 | 0.484435102 | 0.360904768 |
| 0.436411391 | 0.185593106 | 0.046674938 | 0.330354816 |
| 0.446246757 | 0.012675479 | 0.492525166 | 0.508047889 |
| 0.477972232 | 0.46389297  | 0.500113945 | 0.509376231 |
| 0.486900845 | 0.030161234 | 0.034024271 | 0.184709614 |
| 0.470858622 | 0.339714691 | 0.070223453 | 0.280278329 |
| 0.263586832 | 0.221470688 | 0.420934804 | 0.195024139 |
| 0.46008134  | 0.447124746 | 0.502612202 | 0.326367117 |
| 0.189459973 | 0.2491776   | 0.295603257 | 0.426582101 |
| 0.015684447 | 0.050443623 | 0.02426472  | 0.232097281 |
| 0.250585111 | 0.080500512 | 0.207830886 | 0.247651556 |
| 0.099860513 | 0.200395825 | 0.28668559  | 0.321644265 |
| 0.031661309 | 0.310088313 | 0.079951515 | 0.077044445 |
| 0.012364937 | 0.093250211 | 0.081726876 | 0.077784638 |
| 0.133226553 | 0.176571614 | 0.397024559 | 0.486409077 |
| 0.228591654 | 0.114309107 | 0.343338687 | 0.438953226 |
| 0.360437211 | 0.26265433  | 0.150872213 | 0.003147271 |
| 0.147350444 | 0.270437825 | 0.188862299 | 0.315812034 |
| 0.129657345 | 0.115219763 | 0.262403784 | 0.348290677 |
| 0.139249369 | 0.073045235 | 0.229741225 | 0.36363189  |
| 0.09467035  | 0.185989382 | 0.407805909 | 0.281782639 |
| 0.000491256 | 0.166678237 | 0.420574595 | 0.090303954 |
| 0.212767002 | 0.117053829 | 0.226824822 | 0.442060877 |
| 0.228187872 | 0.162125039 | 0.506582806 | 0.354000634 |
| 0.223910893 | 0.173177792 | 0.506049204 | 0.050809602 |
| 0.240140348 | 0.027753092 | 0.184779189 | 0.245807054 |
| 0.132928163 | 0.202146067 | 0.225639155 | 0.178336196 |
| 0.073153796 | 0.487912424 | 0.354661918 | 0.497520311 |
| 0.240898767 | 0.50349786  | 0.449257332 | 0.402404721 |
| 0.257398491 | 0.262919387 | 0.155247806 | 0.395680622 |
| 0.444081588 | 0.197439004 | 0.041426614 | 0.445538301 |
| 0.240622959 | 0.340892042 | 0.07733764  | 0.458560034 |
| 0.441435358 | 0.447693043 | 0.065204757 | 0.315348954 |
| 0.312196651 | 0.113629201 | 0.393361577 | 0.500420729 |
| 0.235013686 | 0.215518336 | 0.204780569 | 0.361326275 |
| 0.091473874 | 0.139176445 | 0.262432114 | 0.203615912 |
| 0.024071561 | 0.034641983 | 0.025178824 | 0.077377091 |
| 0.136607874 | 0.363609111 | 0.310996322 | 0.49301988  |

|             |             |             |             |
|-------------|-------------|-------------|-------------|
| 0.046846876 | 0.38151072  | 0.162294465 | 0.153010848 |
| 0.369330249 | 0.229983208 | 0.29088592  | 0.298715797 |
| 0.166788029 | 0.006503596 | 0.051815226 | 0.463570092 |
| 0.0179455   | 0.188290867 | 0.177804744 | 0.001183011 |
| 0.015050843 | 0.416865432 | 0.059612806 | 0.135635991 |
| 0.470882547 | 0.142539374 | 0.115109263 | 0.21972807  |
| 0.259984704 | 0.038276318 | 0.0012344   | 0.480373779 |
| 0.476341965 | 0.443571526 | 0.473089994 | 0.433923327 |
| 0.430211142 | 0.377422474 | 0.374443495 | 0.214552769 |
| 0.042083328 | 0.040230189 | 0.145343408 | 0.149481378 |
| 0.001942729 | 0.326155456 | 0.194608831 | 0.074273755 |
| 0.391889911 | 0.201522903 | 0.012384661 | 0.272943956 |
| 0.006611354 | 0.196478108 | 0.164207185 | 0.116276241 |
| 0.293990376 | 0.00377951  | 0.153705079 | 0.20762544  |
| 0.389578146 | 0.277636391 | 0.281694798 | 0.507063413 |
| 0.182469281 | 0.082245434 | 0.175256457 | 0.345944772 |
| 0.025358033 | 0.084009564 | 0.213241304 | 0.046173588 |
| 0.184027611 | 0.426293649 | 0.25873278  | 0.028081283 |
| 0.146216408 | 0.000758489 | 0.305913666 | 0.498836799 |
| 0.449959815 | 0.504461418 | 0.477567427 | 0.20503594  |
| 0.477314636 | 0.172000632 | 0.518720065 | 0.36502363  |
| 0.256247576 | 0.000229698 | 0.001858151 | 0.488832525 |
| 0.254665855 | 0.035392512 | 0.075900765 | 0.229840075 |
| 0.044032451 | 0.072037379 | 0.026904854 | 0.12759047  |
| 0.330153726 | 0.140389851 | 0.133290135 | 0.434673505 |
| 0.117819261 | 0.122139748 | 0.242469078 | 0.04560787  |
| 0.30899379  | 0.018290816 | 0.045260458 | 0.003662212 |
| 0.303763024 | 0.074079277 | 0.419476272 | 0.493868007 |
| 0.448555465 | 0.324754876 | 0.267438357 | 0.22850379  |
| 0.436199539 | 0.061857101 | 0.285418954 | 0.060545309 |
| 0.466068868 | 0.278882879 | 0.231553303 | 0.229455922 |
| 0.458503219 | 0.421156397 | 0.010014255 | 0.348859509 |
| 0.005139669 | 0.001309521 | 0.210989301 | 0.173257951 |
| 0.071199567 | 0.228484309 | 0.169893028 | 0.143708802 |
| 0.139616814 | 0.01015778  | 0.209773834 | 0.180938893 |
| 0.177177431 | 0.199281418 | 0.17806427  | 0.17694925  |
| 0.16486368  | 0.079794649 | 0.106540049 | 0.071583241 |
| 0.177897326 | 0.246622551 | 0.134974801 | 0.005709386 |
| 0.276461678 | 0.268779937 | 0.020510547 | 0.088048905 |
| 0.405539999 | 0.479108943 | 0.0131815   | 0.0024858   |
| 0.184618676 | 0.182463295 | 0.487372887 | 0.490421728 |
| 0.483725154 | 0.475777221 | 0.32706148  | 0.056541832 |
| 0.026295811 | 0.198489089 | 0.195291194 | 0.05265961  |
| 0.492378932 | 0.030791255 | 0.467643707 | 0.235773807 |
| 0.055020218 | 0.105159179 | 0.010902891 | 0.032951966 |
| 0.308745311 | 0.091434645 | 0.087228097 | 0.082141663 |
| 0.166499712 | 0.204953132 | 0.016513728 | 0.090849868 |
| 0.255072156 | 0.151710008 | 0.074336057 | 0.187238225 |
| 0.306058923 | 0.205248123 | 0.379698338 | 0.385387898 |
| 0.066944767 | 0.04812859  | 0.145971395 | 0.339913278 |
| 0.434622682 | 0.309745858 | 0.01271861  | 0.451829367 |
| 0.475504931 | 0.363618153 | 0.473381612 | 0.333767534 |
| 0.039997324 | 0.231941785 | 0.239990937 | 0.206167169 |
| 0.090396857 | 0.24039456  | 0.125053099 | 0.022878722 |

|             |             |             |             |
|-------------|-------------|-------------|-------------|
| 0.238018542 | 0.428939341 | 0.379473454 | 0.076244908 |
| 0.315174018 | 0.069855166 | 0.025802171 | 0.452074514 |
| 0.132329531 | 0.034673222 | 0.254995424 | 0.436855585 |
| 0.000754626 | 0.151928446 | 0.483395514 | 0.129671562 |
| 0.48188958  | 0.462871583 | 0.381358887 | 0.155458175 |
| 0.002189356 | 0.360142965 | 0.246539309 | 0.232545383 |
| 0.400069339 | 0.276835168 | 0.107402093 | 0.027166674 |
| 0.209866561 | 0.046005069 | 0.055418227 | 0.225280773 |
| 0.154462586 | 0.289301568 | 0.115822745 | 0.108940916 |
| 0.102242685 | 0.055031032 | 0.212652591 | 0.124970053 |
| 0.137138813 | 0.151352902 | 0.268426545 | 0.240854032 |
| 0.140630476 | 0.402334279 | 0.342428549 | 0.008400453 |
| 0.260804463 | 0.37905262  | 0.415577031 | 0.000155547 |
| 0.365230016 | 0.00124613  | 0.098578127 | 0.109652224 |
| 0.102185561 | 0.104303425 | 0.156401781 | 0.180651752 |
| 0.234515772 | 0.106044989 | 0.142581455 | 0.131181149 |
| 0.08039366  | 0.114082842 | 0.275985125 | 0.206796174 |
| 0.162098221 | 0.055272156 | 0.06577652  | 0.070803877 |
| 0.020018811 | 0.469385497 | 0.173201076 | 0.042235059 |
| 0.125883679 | 0.215906822 | 0.280153515 | 0.48108725  |
| 0.378995107 | 0.081493891 | 0.193947968 | 0.426761732 |
| 0.216728701 | 0.178650355 | 0.024969416 | 0.242546245 |
| 0.111801509 | 0.134436351 | 0.262331611 | 0.187407999 |
| 0.356925487 | 0.333576435 | 0.167890244 | 0.405110692 |
| 0.216280617 | 0.216066234 | 0.234082146 | 0.033689518 |
| 0.076388738 | 0.07374956  | 0.167812769 | 0.000183741 |
| 0.23423749  | 0.141221023 | 0.461521133 | 0.455547952 |
| 0.250889763 | 0.333449645 | 0.227067799 | 0.032950808 |
| 0.22808175  | 0.133393521 | 0.072897155 | 0.415947733 |
| 0.216887662 | 0.092274714 | 0.178690403 | 0.206817278 |
| 0.394908607 | 0.391473448 | 0.173257165 | 0.124788908 |
| 0.128407556 | 0.116790578 | 0.437042325 | 0.057770497 |
| 0.326416222 | 0.122419167 | 0.279892936 | 0.154922363 |
| 0.113089224 | 0.515569785 | 0.023360505 | 0.519938192 |
| 0.188368013 | 0.082415897 | 0.435707012 | 0.179378016 |
| 0.18001603  | 0.066775372 | 0.18862376  | 0.251595536 |
| 0.119680378 | 0.277448069 | 0.018622037 | 0.040332349 |
| 0.234526659 | 0.214444    | 0.380463308 | 0.300359162 |
| 0.166340747 | 0.269451513 | 0.205980786 | 0.147795074 |
| 0.459104007 | 0.456973393 | 0.11940861  | 0.166439222 |
| 0.253306143 | 0.04191535  | 0.296672994 | 0.01456968  |
| 0.315774491 | 0.346977782 | 0.262968351 | 0.019034512 |
| 0.004818156 | 0.188505209 | 0.292460247 | 0.033283411 |
| 0.47273312  | 0.218396192 | 0.279899945 | 0.388812898 |
| 0.111179595 | 0.450177419 | 0.057367946 | 0.330731941 |
| 0.019649184 | 0.160252849 | 0.272743386 | 0.2526602   |
| 0.122891036 | 0.201594028 | 0.294548566 | 0.180185351 |
| 0.009046127 | 0.150785312 | 0.000477032 | 0.335661768 |
| 0.429563464 | 0.230895862 | 0.139793525 | 0.262930794 |
| 0.185159345 | 0.349737277 | 0.139750881 | 1           |
| 0.002821068 | 0.262206987 | 0.101771349 | 0.375238783 |
| 0.184608849 | 0.233768405 | 0.022690941 | 0.210222853 |
| 0.40271733  | 0.153019118 | 0.184385267 | 0.212318839 |
| 0.477282374 | 0.368059543 | 0.113325542 | 0.15343712  |

|             |             |             |             |
|-------------|-------------|-------------|-------------|
| 0.328164802 | 0.028990601 | 0.275727881 | 0.501259916 |
| 0.082897393 | 0.15758261  | 0.422623549 | 0.091723669 |
| 0.232685552 | 0.350954486 | 0.336119175 | 0.497746818 |
| 0.02933409  | 0.143616903 | 0.397604933 | 0.429118776 |
| 0.219377056 | 0.125611182 | 0.181425627 | 0.124950998 |
| 0.430776619 | 0.044072008 | 0.183241747 | 0.261890756 |
| 0.163576021 | 0.210325509 | 0.268017679 | 0.111168653 |
| 0.012757309 | 0.083858554 | 0.237533293 | 0.069768446 |
| 0.161952766 | 0.214669222 | 0.149106525 | 0.322178367 |
| 0.067777841 | 0.007286659 | 0.397508253 | 0.016088936 |
| 0.205324353 | 0.298326428 | 0.130402946 | 0.227556965 |
| 0.12341553  | 0.224950537 | 0.181689818 | 0.000280954 |
| 0.369837331 | 0.043911825 | 0.202542245 | 0.126035982 |
| 0.201847819 | 0.017378201 | 0.426306623 | 0.497484725 |
| 0.21782429  | 0.276025277 | 0.264990987 | 0.434571928 |
| 0.136621024 | 0.294640515 | 0.253027752 | 0.333843502 |
| 0.194599063 | 0.266148796 | 0.28765189  | 0.275970463 |
| 0.307767406 | 0.150815128 |             |             |
| TMEM50A     | 0.137569953 | 0.016060331 | 0.130995775 |
| 0.049783396 | 0.027784051 | 0.013058886 | 0.082013874 |
| 0.049976862 | 0.014806306 | 9.42E-05    | 0.04289814  |
| 0.126133795 | 0.000391945 | 0.02836413  | 0.088924977 |
| 0.012041894 | 0.129360843 | 0.121245298 | 0.000349116 |
| 0.003299087 | 0.029593993 | 0.004889237 | 0.009531145 |
| 0.020127477 | 0.133172267 | 0.018195898 | 0.002715776 |
| 0.020144004 | 0.000123011 | 0.014348704 | 0.000147879 |
| 0.060745623 | 0.021545567 | 0.002441206 | 0.146328511 |
| 0.011694423 | 5.89E-05    | 0.052146982 | 0.038614747 |
| 0.002487642 | 0.082307863 | 0.001395386 | 0.091013529 |
| 0.00253771  | 0.131127013 | 0.000619917 | 0.006552495 |
| 0.013721783 | 0.018517092 | 0.0940173   | 0.014242869 |
| 0.002525924 | 0.050146337 | 0.004879013 | 0.00020111  |
| 0.002873746 | 0.000769826 | 0.000276579 | 0.030202103 |
| 0.175579855 | 0.166127601 | 0.000101951 | 0.016183981 |
| 0.005239261 | 0.013753252 | 0.075309315 | 0.001177374 |
| 0.030945743 | 0.001102395 | 0.006753093 | 0.007389454 |
| 0.010299049 | 0.059773029 | 0.175935679 | 0.055087625 |
| 0.004075103 | 0.135803181 | 0.030077217 | 0.005073851 |
| 0.013463749 | 0.044237198 | 0.074682796 | 0.027287358 |
| 0.000495006 | 0.008539761 | 0.01428426  | 0.067999917 |
| 0.016934144 | 0.03110439  | 0.033618373 | 0.038911154 |
| 0.05178847  | 0.002169141 | 0.01203225  | 0.077717722 |
| 0.023059905 | 0.001054409 | 0.002036219 | 0.006929815 |
| 0.016731826 | 0.012354228 | 0.030891767 | 0.089721602 |
| 0.015993619 | 0.117371742 | 0.033209631 | 0.009365532 |
| 0.042055037 | 0.163339537 | 0.009842427 | 0.011660046 |
| 0.017666581 | 0.02426384  | 0.010188502 | 0.028202448 |
| 0.007520124 | 0.030618619 | 0.032000932 | 0.025126843 |
| 0.000856107 | 0.025852751 | 0.150118761 | 0.160082454 |
| 0.057533825 | 0.124428725 | 0.003589696 | 0.087626318 |
| 0.022134729 | 0.037799259 | 0.071225309 | 0.070315416 |
| 0.022386912 | 0.026483014 | 0.022149277 | 0.022031807 |
| 0.172678072 | 0.001171077 | 0.00862309  | 0.023189803 |
| 0.021412128 | 0.109690517 | 0.009715308 | 0.039560993 |

|             |             |             |             |
|-------------|-------------|-------------|-------------|
| 0.071750708 | 0.020259326 | 0.046254525 | 0.049393004 |
| 0.025467257 | 0.04746913  | 0.014716148 | 0.163890026 |
| 0.040929753 | 0.040212329 | 0.038306698 | 0.014454268 |
| 0.045811754 | 0.04284493  | 0.000128813 | 0.025546994 |
| 0.051301971 | 0.010591704 | 0.013636909 | 0.016881743 |
| 0.025095562 | 0.013491784 | 0.030384194 | 0.023426463 |
| 0.023114044 | 0.139522682 | 0.000421485 | 0.048799452 |
| 0.031853057 | 0.057563749 | 0.036088826 | 0.003512077 |
| 0.014191333 | 0.01345589  | 0.012099694 | 0.000642315 |
| 0.052010897 | 0.02392146  | 0.014979525 | 0.017197439 |
| 0.007275705 | 0.087439661 | 0.002725756 | 0.037321621 |
| 0.116535173 | 0.10437388  | 0.149416372 | 0.044252962 |
| 0.001432812 | 0.151264946 | 0.00843164  | 0.009674182 |
| 0.149600682 | 0.008669178 | 0.001345891 | 0.016391099 |
| 0.114885968 | 0.005834823 | 0.116735112 | 0.058977436 |
| 0.161204456 | 0.151948047 | 0.019306921 | 0.099679618 |
| 0.0562346   | 0.085805282 | 0.007082771 | 0.023942884 |
| 0.005706518 | 0.124355626 | 0.013840402 | 0.046266608 |
| 0.072124522 | 0.01033193  | 0.092248429 | 0.114911298 |
| 0.002898319 | 5.50E-05    | 0.000650301 | 0.003757342 |
| 0.114062298 | 0.01324061  | 0.011493256 | 0.02757372  |
| 0.040222156 | 0.032106347 | 0.003935186 | 0.068729524 |
| 0.083879676 | 0.030603626 | 0.029074287 | 0.003861562 |
| 0.077698847 | 0.036832693 | 0.021184626 | 0.007695048 |
| 0.024856697 | 0.001417424 | 0.002464798 | 0.023946116 |
| 0.000613558 | 0.0076751   | 0.019496434 | 0.024561536 |
| 0.001087768 | 0.055363154 | 0.029422921 | 0.000422484 |
| 0.005852532 | 0.019259287 | 0.092137766 | 0.000958305 |
| 0.086940077 | 0.061265757 | 0.016002183 | 0.021382765 |
| 0.106342562 | 0.028510607 | 0.037740183 | 0.026401038 |
| 0.001854836 | 0.031119512 | 0.019364405 | 0.039380292 |
| 0.041011327 | 0.001399099 | 0.000483246 | 0.022059921 |
| 0.022376945 | 0.000223829 | 0.117310345 | 0.007268156 |
| 0.001661471 | 0.011050997 | 0.00455315  | 0.036642287 |
| 0.056425445 | 0.021574288 | 0.094422485 | 0.034088569 |
| 0.062154221 | 0.122978002 | 0.026723469 | 0.03401799  |
| 0.000281439 | 0.007361785 | 0.007930796 | 0.043585808 |
| 0.151823306 | 0.010850973 | 0.056972755 | 0.000611632 |
| 7.63E-05    | 0.087233085 | 0.149529799 | 0.121224051 |
| 0.012264497 | 0.002848876 | 0.017261245 | 0.026001809 |
| 0.160447953 | 0.047557749 | 0.049224047 | 0.018870121 |
| 0.030027815 | 0.005321141 | 0.007842017 | 0.014041114 |
| 0.080958449 | 0.124219546 | 0.053512824 | 0.045902866 |
| 0.081478224 | 0.00626779  | 0.015433545 | 0.008616527 |
| 0.094521089 | 0.006571265 | 0.124450918 | 0.152886431 |
| 0.028022311 | 0.126763945 | 0.083055483 | 0.000617881 |
| 0.059351367 | 0.203636756 | 0.138154892 | 0.02066876  |
| 0.021856225 | 0.021824403 | 0.019992786 | 0.02602902  |
| 0.017378132 | 0.013812104 | 0.021403081 | 0.020155425 |
| 0.068165454 | 0.055471375 | 0.004222803 | 0.03280519  |
| 0.001176027 | 0.054269241 | 0.018940726 | 0.199913203 |
| 0.01216855  | 0.03483873  | 0.160560615 | 0.011617152 |
| 0.063028842 | 0.000799589 | 0.00612706  | 0.035489538 |
| 0.033442879 | 0.165675683 | 0.001964213 | 0.001255119 |

|             |             |                     |             |
|-------------|-------------|---------------------|-------------|
| 0.038015179 | 0.059561048 | 0.001863298         | 0.030881788 |
| 0.056165067 | 0.056914378 | 0.035941669         | 0.032683874 |
| 0.108756638 | 0.00026762  | 0.005143991         | 0.000196243 |
| 0.000616093 | 0.029909728 | 0.002471649         | 0.043233871 |
| 0.086278938 | 0.140846924 | 0.058001733         | 0.033398288 |
| 0.022887382 | 0.025185589 | 0.033619792         | 0.009016088 |
| 0.032792447 | 0.001358792 | 0.024161057         | 0.024143003 |
| 0.000784702 | 0.011593869 | 0.019758328         | 0.020009515 |
| 0.010808237 | 0.096621943 | 0.165395491         | 0.004621981 |
| 0.107158066 | 0.047113871 | 0.126577442         | 0.021455256 |
| 0.014052731 | 0.054599488 | 0.010056529         | 0.024021694 |
| 0.059183635 | 0.080253271 | 0.002778527         | 0.118778142 |
| 0.012034039 | 0.16389883  | 0.094831872         | 0.023710777 |
| 0.029922725 | 0.090004662 | 0.038213925         | 0.025607698 |
| 0.04671279  | 0.023478977 | 9.82E-05 0.00182044 |             |
| 0.019491275 | 0.074995142 | 0.000639049         | 0.078272465 |
| 0.022581243 | 0.016565902 | 0.091976968         | 0.09401966  |
| 0.037211263 | 0.039435274 | 0.16689331          | 0.025342225 |
| 0.072127143 | 0.007719944 | 0.011500454         | 0.056550747 |
| 0.000102829 | 0.006299689 | 0.119606775         | 0.007150171 |
| 0.017894741 | 0.037691024 | 0.003357764         | 0.00472521  |
| 0.058656799 | 0.016052216 | 0.019002036         | 0.04546184  |
| 0.021930924 | 0.003541818 | 0.079766609         | 0.053584854 |
| 0.000495244 | 0.052466217 | 0.12897418          | 0.121739553 |
| 0.003955759 | 0.006034374 | 0.217266851         | 0.149290353 |
| 0.034999351 | 0.02303973  | 0.035716187         | 0.095142754 |
| 0.098844984 | 0.009895289 | 0.025290404         | 0.020556231 |
| 0.0360209   | 0.042057492 | 0.07115383          | 0.038647013 |
| 0.152468375 | 0.040418417 | 0.01553313          | 0.050508847 |
| 0.026600653 | 0.071716261 | 0.02911492          | 0.005263109 |
| 0.139563839 | 0.070879283 | 0.150556817         | 0.160824393 |
| 0.006965053 | 0.146285968 | 0.115472764         | 0.088034011 |
| 0.021933706 | 0.003134484 | 0.12384981          | 0.119915168 |
| 0.041043645 | 0.001227115 | 0.127447733         | 0.013007713 |
| 0.032318616 | 0.000162151 | 0.011341358         | 0.06472652  |
| 0.162234952 | 0.076765814 | 0.012313313         | 0.017879558 |
| 0.01254931  | 0.001647308 | 0.047990577         | 0.013451153 |
| 0.028686386 | 0.008517341 | 0.031354502         | 0.046077055 |
| 0.14155668  | 0.013438671 | 0.00213705          | 0.016079033 |
| 0.086069796 | 0.015780375 | 0.041183405         | 0.181521374 |
| 0.072395323 | 0.044957913 | 0.023469111         | 0.165419974 |
| 0.00536888  | 0.049156299 | 0.06638744          | 0.016775128 |
| 0.006084304 | 0.05577864  | 0.001347301         | 0.011691282 |
| 0.018604218 | 0.002447721 | 0.024296782         | 0.062667722 |
| 0.037160315 | 0.028149328 | 0.06097919          | 0.014614071 |
| 0.000162142 | 0.008219076 | 0.03346225          | 0.010587428 |
| 0.018089087 | 0.050194985 | 0.003259021         | 0.13172117  |
| 0.124490737 | 0.110686304 | 0.043687363         | 0.002121828 |
| 0.000185237 | 0.010102978 | 0.144685597         | 0.044485253 |
| 0.061434661 | 0.044268656 | 0.003675487         | 0.092395981 |
| 0.000779835 | 0.142618993 | 0.072889941         | 0.000134442 |
| 0.000612573 | 0.024032945 | 0.019163493         | 0.198230947 |
| 0.006723176 | 0.025291158 | 0.0338247           | 0.004703381 |
| 0.015512867 | 0.128716381 | 0.077956198         | 0.09807958  |



|             |             |             |             |
|-------------|-------------|-------------|-------------|
| 0.085972555 | 0.044119835 | 0.062260845 | 0.022436036 |
| 0.01648327  | 0.059385719 | 0.067084123 | 0.13812372  |
| 0.116985984 | 0.057085004 | 0.014090342 | 0.012448839 |
| 0.030888735 | 0.164879831 | 0.130249494 | 0.124071987 |
| 0.1155016   | 0.018295321 | 0.138174999 | 0.144373988 |
| 0.10067774  | 0.00667898  | 0.09583563  | 0.020371482 |
| 0.056461108 | 0.086353818 | 0.013456051 | 0.02091519  |
| 0.000471958 | 0.000771849 | 0.05315738  | 0.015508154 |
| 0.087120918 | 0.013069703 | 0.004766792 | 0.022124265 |
| 0.007118774 | 0.085149943 | 0.14010515  | 0.047267593 |
| 0.018505643 | 0.004367095 | 0.000494459 | 0.12396386  |
| 0.106034388 | 0.11112582  | 0.028088631 | 0.079635475 |
| 0.044943666 | 0.014741693 | 0.018846372 | 0.033221888 |
| 0.001459259 | 0.072576437 | 0.000568431 | 0.091371173 |
| 0.000275546 | 0.069208855 | 0.162664315 | 0.010235091 |
| 0.000814515 | 0.102020496 | 0.03485747  | 0.006590928 |
| 0.014594865 | 0.00798298  | 0.010643892 | 0.028555758 |
| 0.045817094 | 0.088332096 | 0.031945874 | 0.074436192 |
| 0.00368868  | 0.027912859 | 0.003647123 | 0.036815285 |
| 0.051509436 | 0.021780937 | 0.180617928 | 0.02067366  |
| 0.011307536 | 0.121956567 | 0.059596314 | 0.026394696 |
| 0.013656695 | 0.055680653 | 0.00154814  | 0.00230939  |
| 0.025751705 | 0.002776771 | 0.000242167 | 0.000443127 |
| 0.077636735 | 0.002189665 | 0.007816049 | 0.022735551 |
| 0.017927934 | 0.055312757 | 0.00040268  | 0.018300249 |
| 0.022167744 | 0.035096052 | 0.015973891 | 0.103117034 |
| 0.042668459 | 0.177825546 | 0.012646761 | 0.000205028 |
| 0.006398902 | 0.003104912 | 0.000554058 | 0.131299573 |
| 0.068756058 | 0.001437554 | 0.007240694 | 0.059596347 |
| 0.024061137 | 0.000259525 | 0.005282562 | 0.015055296 |
| 0.079457592 | 0.037630704 | 0.07984594  | 0.032898621 |
| 0.006884221 | 0.071441751 | 0.004678458 | 0.003001552 |
| 0.029441555 | 0.008838288 | 0.048065726 | 0.010839696 |
| 0.207857259 | 0.018077374 | 0.00445453  | 0.079055236 |
| 0.030240527 | 0.004809046 | 0.119844581 | 0.000389496 |
| 0.105193303 | 0.036245666 | 0.00406822  | 0.002821068 |
| 1           | 0.013928574 | 0.117661198 | 0.039225198 |
| 0.000377136 | 0.006304817 | 0.121129372 | 0.007201904 |
| 0.043706141 | 0.002797106 | 0.07854966  | 0.000859935 |
| 0.023288348 | 0.019936018 | 0.070352626 | 0.01289063  |
| 0.004030929 | 0.151385119 | 0.001641587 | 0.030343407 |
| 0.119815505 | 0.013923915 | 0.024652732 | 0.062794803 |
| 0.004616177 | 0.03297632  | 0.003014458 | 0.026164436 |
| 0.074521846 | 0.114693496 | 0.020083694 | 0.022095405 |
| 0.096388489 | 0.011742453 | 0.00559258  | 0.030957906 |
| 0.027933699 | 0.092116339 | 0.00309433  | 0.046275164 |
| 0.004163476 | 0.064539721 | 0.003910449 | 0.038637085 |
| 0.033804074 | 0.030666002 | 0.012386303 | 0.146663942 |
| 0.050455307 | 0.020713247 | 0.016442292 | 0.082732641 |
| 0.08555913  | 0.064071543 | 0.061883811 | 5.65E-05    |
| 0.031941881 | 0.033068817 | 0.09234331  | 0.011218099 |
| 0.165329519 | 0.018607513 | 0.010728089 | 0.009907832 |
| 0.02971197  | 0.012732758 | 0.011428337 | 0.031010336 |
| 0.000497326 | 0.098182689 | 0.043939006 | 0.028452895 |

|             |             |             |             |
|-------------|-------------|-------------|-------------|
| 0.045328303 | 0.000585753 | 0.00054633  | 0.0297661   |
| 0.000771962 | 0.000369751 | 0.001307158 | 0.008622172 |
| 0.004750523 | 0.001047872 | 0.001772782 | 0.003432945 |
| 0.037429154 | 0.032983427 |             |             |
| TMEM97      | 0.044327468 | 0.317873948 | 0.027216059 |
| 0.140272994 | 0.307712217 | 0.247330543 | 0.03972651  |
| 0.086594972 | 0.235196847 | 0.158933816 | 0.289806301 |
| 0.014504097 | 0.169288085 | 0.405189277 | 0.037899814 |
| 0.331601821 | 0.032100902 | 0.079669013 | 0.054862691 |
| 0.146102714 | 0.30259261  | 0.318545198 | 0.197145961 |
| 0.282422337 | 0.129533894 | 0.192372033 | 0.27423202  |
| 0.420768796 | 0.243054176 | 0.346053642 | 0.130813119 |
| 0.354222815 | 0.32428652  | 0.301943742 | 0.009392813 |
| 0.267369245 | 0.020389568 | 0.341032031 | 0.264849375 |
| 0.245357835 | 0.279082135 | 0.166107279 | 0.230482979 |
| 0.217485035 | 0.023128578 | 0.121532855 | 0.331906982 |
| 0.183509296 | 0.191296142 | 0.028809047 | 0.321563971 |
| 0.238958503 | 0.237603866 | 0.255937642 | 0.002812493 |
| 0.323389481 | 0.163659742 | 0.278441172 | 0.400068897 |
| 0.153621631 | 0.106877422 | 0.221721939 | 0.135347201 |
| 0.259035756 | 0.30454164  | 0.187418833 | 0.228708933 |
| 0.426892445 | 0.267956338 | 0.350014745 | 0.137423144 |
| 0.243545623 | 0.013385735 | 0.116585206 | 0.03403497  |
| 0.278582429 | 0.171703227 | 0.287025573 | 0.312204543 |
| 0.319018932 | 0.411690815 | 0.158883942 | 0.377389503 |
| 0.146685844 | 0.317134514 | 0.288536671 | 0.27727449  |
| 0.285958605 | 0.049485874 | 0.374901044 | 0.442622383 |
| 0.021897584 | 0.201885965 | 0.311122344 | 0.06360859  |
| 0.335288933 | 0.237941926 | 0.219665489 | 0.282179501 |
| 0.355031362 | 0.320126291 | 0.357061649 | 0.243569292 |
| 0.266846802 | 0.034565015 | 0.347625326 | 0.327293091 |
| 0.297012322 | 0.046210218 | 0.275874069 | 0.430926664 |
| 0.317779078 | 0.426586923 | 0.336540211 | 0.313505751 |
| 0.329638727 | 0.42953273  | 0.335036836 | 0.33146754  |
| 0.090919273 | 0.426288094 | 0.129911342 | 0.038658158 |
| 0.034100159 | 0.072080941 | 0.204750574 | 0.251085595 |
| 0.425544713 | 0.230249339 | 0.142413834 | 0.230649294 |
| 0.454668428 | 0.344335766 | 0.42101836  | 0.361335098 |
| 0.026272631 | 0.255859057 | 0.328870521 | 0.161133622 |
| 0.307795228 | 0.065030692 | 0.325785299 | 0.390189136 |
| 0.335022646 | 0.421303483 | 0.090614577 | 0.376044727 |
| 0.125072103 | 0.451504087 | 0.361067241 | 0.145007053 |
| 0.416944643 | 0.376828428 | 0.468562251 | 0.397593481 |
| 0.373691101 | 0.230512136 | 0.047943247 | 0.313262184 |
| 0.440886248 | 0.040465471 | 0.423284147 | 0.455263996 |
| 0.399672191 | 0.443020145 | 0.47452997  | 0.44943594  |
| 0.397120969 | 0.039270111 | 0.031748461 | 0.272919562 |
| 0.405530745 | 0.358880141 | 0.117411969 | 0.303961964 |
| 0.307693239 | 0.234003417 | 0.35177598  | 0.301422556 |
| 0.442600072 | 0.400044152 | 0.420670699 | 0.312726536 |
| 0.162176801 | 0.249391236 | 0.304906947 | 0.338655197 |
| 0.034288777 | 0.071711019 | 0.023480935 | 0.234301342 |
| 0.188855594 | 0.150910641 | 0.230031843 | 0.258324205 |
| 0.15358863  | 0.177738879 | 0.294835627 | 0.378409079 |

|             |             |             |             |
|-------------|-------------|-------------|-------------|
| 0.026473825 | 0.278218507 | 0.105640723 | 0.106548889 |
| 0.041798951 | 0.093023079 | 0.186752145 | 0.14132012  |
| 0.244523513 | 0.146945638 | 0.345330769 | 0.433590098 |
| 0.255876262 | 0.120224159 | 0.322714267 | 0.424928335 |
| 0.4057628   | 0.33412508  | 0.165226401 | 0.019860297 |
| 0.299348146 | 0.217939596 | 0.269306868 | 0.286378741 |
| 0.109107459 | 0.227973035 | 0.304304211 | 0.407703185 |
| 0.170738827 | 0.070185478 | 0.307076775 | 0.33619084  |
| 0.085884866 | 0.301543754 | 0.435715732 | 0.241288018 |
| 0.001773979 | 0.247428102 | 0.407088071 | 0.201623045 |
| 0.21730441  | 0.2348474   | 0.30595053  | 0.43401924  |
| 0.288925388 | 0.265003083 | 0.435810246 | 0.385188154 |
| 0.234551801 | 0.132099698 | 0.463783211 | 0.086066065 |
| 0.262745952 | 0.097422977 | 0.272081455 | 0.163487991 |
| 0.18245343  | 0.254349484 | 0.312840431 | 0.304849472 |
| 0.069885495 | 0.425051664 | 0.3158978   | 0.450620861 |
| 0.314172519 | 0.462812174 | 0.43729173  | 0.40653866  |
| 0.265514124 | 0.26368457  | 0.241246282 | 0.406758432 |
| 0.425748118 | 0.231655555 | 0.03530068  | 0.378711154 |
| 0.237354684 | 0.373012165 | 0.157671085 | 0.457551521 |
| 0.400901548 | 0.340477688 | 0.139571705 | 0.377262352 |
| 0.357211639 | 0.166582929 | 0.353372548 | 0.458970712 |
| 0.195297587 | 0.313777084 | 0.331361933 | 0.414412992 |
| 0.119515462 | 0.261856795 | 0.238341023 | 0.246188372 |
| 0.025636323 | 0.041283503 | 0.037025083 | 0.173655184 |
| 0.281122002 | 0.271815838 | 0.333162677 | 0.44418988  |
| 0.09307079  | 0.345598598 | 0.156628148 | 0.311967818 |
| 0.346772746 | 0.279697613 | 0.31260757  | 0.312555344 |
| 0.176066238 | 0.023232253 | 0.128190064 | 0.414682457 |
| 0.014613397 | 0.319511651 | 0.184108203 | 0.004860754 |
| 0.028826285 | 0.295352963 | 0.054378719 | 0.135420882 |
| 0.45591937  | 0.134648358 | 0.138264452 | 0.189832951 |
| 0.306643468 | 0.060894155 | 0.006950865 | 0.414234626 |
| 0.381691484 | 0.357842963 | 0.375947127 | 0.330869535 |
| 0.372462513 | 0.306487543 | 0.392989779 | 0.192644788 |
| 0.078242287 | 0.045110786 | 0.317009529 | 0.273701794 |
| 0.003369412 | 0.352110509 | 0.246541389 | 0.100736294 |
| 0.376625921 | 0.223155191 | 0.026471111 | 0.27860781  |
| 0.019611328 | 0.297073688 | 0.19590309  | 0.172638988 |
| 0.335115587 | 0.007812347 | 0.223836627 | 0.320120076 |
| 0.326518986 | 0.272436782 | 0.30484778  | 0.43559219  |
| 0.275256777 | 0.066326413 | 0.298042699 | 0.365354975 |
| 0.053780585 | 0.087468748 | 0.20826957  | 0.030630873 |
| 0.127759763 | 0.339993927 | 0.268629008 | 0.04861258  |
| 0.212195864 | 0.003388731 | 0.294166074 | 0.443350103 |
| 0.344240233 | 0.472539548 | 0.434022652 | 0.337292432 |
| 0.426831702 | 0.162159012 | 0.449567801 | 0.320439377 |
| 0.241369683 | 0.001244103 | 0.006735857 | 0.452245094 |
| 0.328498011 | 0.024862929 | 0.111960448 | 0.241180474 |
| 0.114499347 | 0.081806932 | 0.041333079 | 0.279510347 |
| 0.285339773 | 0.257889497 | 0.24188141  | 0.356438958 |
| 0.206864481 | 0.18042202  | 0.216882854 | 0.044627134 |
| 0.293583124 | 0.045264048 | 0.042369277 | 0.016682327 |
| 0.332933429 | 0.064369147 | 0.329901302 | 0.415255643 |

|             |             |             |             |
|-------------|-------------|-------------|-------------|
| 0.431059726 | 0.371595434 | 0.210997785 | 0.233925965 |
| 0.373388675 | 0.047083911 | 0.262916881 | 0.050558587 |
| 0.385214085 | 0.350741143 | 0.295423238 | 0.257303635 |
| 0.459106449 | 0.398514728 | 0.022874863 | 0.38575815  |
| 0.013684962 | 0.003744496 | 0.220085026 | 0.184615089 |
| 0.052782154 | 0.317029125 | 0.211021629 | 0.144560023 |
| 0.164356975 | 0.023478432 | 0.31875708  | 0.317815753 |
| 0.245838036 | 0.29450484  | 0.320888473 | 0.159813643 |
| 0.264851114 | 0.210119537 | 0.170047411 | 0.116406343 |
| 0.161183049 | 0.234122665 | 0.136720035 | 0.013137105 |
| 0.269538315 | 0.32080707  | 0.039619834 | 0.098762973 |
| 0.419389863 | 0.455478878 | 0.039644302 | 0.01961157  |
| 0.204509149 | 0.251403194 | 0.467611814 | 0.399356237 |
| 0.412380352 | 0.460025554 | 0.308062621 | 0.148739604 |
| 0.046086672 | 0.263433711 | 0.312229681 | 0.139684911 |
| 0.433310816 | 0.028518704 | 0.375214771 | 0.322895783 |
| 0.069336685 | 0.178943127 | 0.036350575 | 0.05592679  |
| 0.317990167 | 0.120801602 | 0.186767444 | 0.083828846 |
| 0.292888081 | 0.309915231 | 0.030600061 | 0.151474827 |
| 0.290403116 | 0.297547417 | 0.111986993 | 0.170848964 |
| 0.260307488 | 0.105944082 | 0.390409308 | 0.396260753 |
| 0.077465149 | 0.064055403 | 0.180499982 | 0.303773199 |
| 0.388732292 | 0.226933271 | 0.026942649 | 0.3404967   |
| 0.432593715 | 0.350811179 | 0.390472105 | 0.377581822 |
| 0.044628636 | 0.340026761 | 0.274632914 | 0.296356897 |
| 0.126806534 | 0.233450455 | 0.17515901  | 0.036575054 |
| 0.229048575 | 0.365820953 | 0.344491159 | 0.158789125 |
| 0.252481494 | 0.05578664  | 0.023793893 | 0.363540147 |
| 0.302831051 | 0.073003324 | 0.183211789 | 0.377639704 |
| 0.004434097 | 0.247256727 | 0.434577202 | 0.194165787 |
| 0.419453682 | 0.451937303 | 0.382481415 | 0.145866456 |
| 0.006366791 | 0.361867841 | 0.317211062 | 0.325402526 |
| 0.35048823  | 0.259964834 | 0.084990394 | 0.079929382 |
| 0.253008475 | 0.040550913 | 0.148089751 | 0.211700076 |
| 0.231745089 | 0.264359782 | 0.153499417 | 0.126756552 |
| 0.195163555 | 0.040532745 | 0.300724443 | 0.180091208 |
| 0.177450773 | 0.201028002 | 0.32958139  | 0.137890458 |
| 0.302122053 | 0.388443238 | 0.342942019 | 0.016337162 |
| 0.297960071 | 0.355396509 | 0.36624208  | 0.005013326 |
| 0.396812594 | 0.006483905 | 0.203558588 | 0.231125822 |
| 0.194860551 | 0.195456735 | 0.237673006 | 0.297083862 |
| 0.235033261 | 0.177930648 | 0.246058299 | 0.190800873 |
| 0.176202905 | 0.144992203 | 0.289180532 | 0.223911413 |
| 0.306252006 | 0.095606816 | 0.055242136 | 0.055717375 |
| 0.05137282  | 0.375291667 | 0.188535117 | 0.036079183 |
| 0.172134016 | 0.230954578 | 0.320787973 | 0.380117687 |
| 0.37855352  | 0.059757022 | 0.238232024 | 0.367869678 |
| 0.165713794 | 0.197585765 | 0.032684015 | 0.235333513 |
| 0.168830239 | 0.295552871 | 0.221548813 | 0.183416281 |
| 0.292995626 | 0.330421615 | 0.180320466 | 0.368055869 |
| 0.291509719 | 0.223086814 | 0.17423069  | 0.106689014 |
| 0.139235904 | 0.076544308 | 0.307921147 | 0.001824835 |
| 0.271562611 | 0.164538358 | 0.438986612 | 0.379923701 |
| 0.296166757 | 0.325739014 | 0.181585273 | 0.074588098 |

|             |             |             |             |
|-------------|-------------|-------------|-------------|
| 0.149061265 | 0.112516633 | 0.093466492 | 0.344683678 |
| 0.294022112 | 0.136083663 | 0.296794654 | 0.173577956 |
| 0.383344302 | 0.329417097 | 0.243957117 | 0.157101997 |
| 0.164166189 | 0.112079997 | 0.35383746  | 0.06303042  |
| 0.280387603 | 0.282656324 | 0.180424104 | 0.29542124  |
| 0.224114225 | 0.439979857 | 0.032302751 | 0.457727736 |
| 0.308209377 | 0.075563449 | 0.405713537 | 0.170118628 |
| 0.178641541 | 0.135319327 | 0.29129317  | 0.205040303 |
| 0.17674972  | 0.310362758 | 0.016603326 | 0.113159866 |
| 0.311775452 | 0.184343398 | 0.304073508 | 0.289728215 |
| 0.285407342 | 0.321191108 | 0.215597515 | 0.178263321 |
| 0.350827363 | 0.362361446 | 0.261283265 | 0.202776065 |
| 0.277305781 | 0.085406313 | 0.235887033 | 0.013239569 |
| 0.326853941 | 0.307018546 | 0.247762863 | 0.03766848  |
| 0.012957358 | 0.314157966 | 0.294085765 | 0.026658121 |
| 0.460114491 | 0.28101835  | 0.201868019 | 0.346325901 |
| 0.104712464 | 0.368252873 | 0.136627986 | 0.38399199  |
| 0.021487534 | 0.177431322 | 0.284732559 | 0.237356483 |
| 0.29083316  | 0.334938139 | 0.366649091 | 0.324999897 |
| 0.028080817 | 0.272812603 | 0.003298158 | 0.317605939 |
| 0.33788313  | 0.318498707 | 0.142745794 | 0.163357481 |
| 0.248772547 | 0.299412543 | 0.235595298 | 0.262206987 |
| 0.013928574 | 1           | 0.139980002 | 0.339466621 |
| 0.280427849 | 0.231112386 | 0.058599808 | 0.284341824 |
| 0.315576228 | 0.289120616 | 0.187577304 | 0.295451662 |
| 0.380526599 | 0.280939763 | 0.089618097 | 0.214047086 |
| 0.241217495 | 0.03097428  | 0.205494748 | 0.442640281 |
| 0.174924628 | 0.318204879 | 0.455042785 | 0.210038909 |
| 0.310774532 | 0.290030189 | 0.253802458 | 0.417832981 |
| 0.10314736  | 0.195826166 | 0.38011415  | 0.381171242 |
| 0.277088294 | 0.254880307 | 0.32712609  | 0.269549451 |
| 0.346563559 | 0.089040368 | 0.279024297 | 0.285385791 |
| 0.32417243  | 0.241898946 | 0.168100477 | 0.234172861 |
| 0.039911299 | 0.118940697 | 0.259732483 | 0.086553019 |
| 0.238283757 | 0.306428457 | 0.278536766 | 0.338833226 |
| 0.161266846 | 0.037661883 | 0.387349759 | 0.063506612 |
| 0.187269532 | 0.348116062 | 0.168662268 | 0.304372343 |
| 0.131225888 | 0.220899934 | 0.193933686 | 0.00089104  |
| 0.379486788 | 0.076529879 | 0.225536617 | 0.293053934 |
| 0.273667312 | 0.033174704 | 0.361344587 | 0.474468752 |
| 0.201182206 | 0.214935235 | 0.299275579 | 0.368260609 |
| 0.264337374 | 0.262794793 | 0.278399264 | 0.269942692 |
| 0.306037728 | 0.229148249 | 0.268862208 | 0.324025939 |
| 0.290304328 | 0.162252105 |             |             |
| TMPO        | 0.19044096  | 0.227446025 | 0.115226287 |
| 0.166347392 | 0.169104101 | 0.138243413 | 0.207988866 |
| 0.260444764 | 0.206330237 | 0.05833846  | 0.179241403 |
| 0.140790402 | 0.056093001 | 0.283944648 | 0.231126247 |
| 0.147352663 | 0.221172382 | 0.245924096 | 0.079502638 |
| 0.149437757 | 0.173219472 | 0.120880999 | 0.130438883 |
| 0.174222674 | 0.279273685 | 0.152572992 | 0.103946379 |
| 0.26201538  | 0.051882298 | 0.170480194 | 0.03492267  |
| 0.333482182 | 0.162567477 | 0.092164236 | 0.107413854 |
| 0.147878374 | 0.024952507 | 0.333324577 | 0.191152674 |

|             |             |             |             |
|-------------|-------------|-------------|-------------|
| 0.07996306  | 0.340069495 | 0.072754484 | 0.224569552 |
| 0.08454467  | 0.135187622 | 0.034608967 | 0.150537554 |
| 0.151415761 | 0.20561691  | 0.127709084 | 0.17722763  |
| 0.118645623 | 0.246419613 | 0.137118209 | 0.012644993 |
| 0.088725072 | 0.019213613 | 0.054302013 | 0.302037933 |
| 0.29978027  | 0.296986499 | 0.053904958 | 0.194941947 |
| 0.140013514 | 0.197114424 | 0.298873432 | 0.082543584 |
| 0.29564494  | 0.078623823 | 0.166091081 | 0.148332365 |
| 0.136132268 | 0.123855285 | 0.299427085 | 0.144255467 |
| 0.11996128  | 0.287656124 | 0.187613879 | 0.10985454  |
| 0.206032581 | 0.365834782 | 0.259392374 | 0.291975099 |
| 0.077663796 | 0.130985117 | 0.163464195 | 0.292112601 |
| 0.213215869 | 0.194247274 | 0.221382285 | 0.334360353 |
| 0.158665423 | 0.09687435  | 0.180242011 | 0.197638614 |
| 0.242581803 | 0.098106281 | 0.082457424 | 0.099619977 |
| 0.182848012 | 0.134377843 | 0.321199004 | 0.267802262 |
| 0.178366101 | 0.139368161 | 0.305875737 | 0.1246045   |
| 0.185345452 | 0.15879861  | 0.15388103  | 0.216205279 |
| 0.162281377 | 0.272056137 | 0.201936261 | 0.245534974 |
| 0.117820122 | 0.290529437 | 0.200757725 | 0.280028353 |
| 0.025524126 | 0.301277949 | 0.221751552 | 0.251259951 |
| 0.144568458 | 0.308642916 | 0.14796855  | 0.35083824  |
| 0.251322462 | 0.254385147 | 0.226260008 | 0.227635801 |
| 0.2606954   | 0.281373603 | 0.288367874 | 0.243010604 |
| 0.184358126 | 0.087077859 | 0.11460444  | 0.216649167 |
| 0.210693086 | 0.236485368 | 0.115672815 | 0.329301691 |
| 0.314853223 | 0.232557993 | 0.187094754 | 0.36834506  |
| 0.218573751 | 0.349633456 | 0.214376695 | 0.244858633 |
| 0.332213619 | 0.317696902 | 0.326506165 | 0.177126707 |
| 0.331637364 | 0.154896055 | 0.053800451 | 0.252946924 |
| 0.358718773 | 0.018307587 | 0.237069059 | 0.257226705 |
| 0.276099147 | 0.214114139 | 0.322004956 | 0.286795217 |
| 0.281582849 | 0.190734473 | 0.007415758 | 0.239885316 |
| 0.300960658 | 0.282847849 | 0.301849907 | 0.098026533 |
| 0.164241349 | 0.143517884 | 0.214261061 | 0.088739832 |
| 0.385135169 | 0.257266879 | 0.249517054 | 0.216660346 |
| 0.117894294 | 0.345140873 | 0.093654236 | 0.29959775  |
| 0.227126006 | 0.184692925 | 0.134324289 | 0.286570081 |
| 0.0803654   | 0.28192792  | 0.137747585 | 0.155459578 |
| 0.292712865 | 0.15206907  | 0.085599495 | 0.190623859 |
| 0.151493295 | 0.117055871 | 0.221559558 | 0.173908867 |
| 0.216725065 | 0.295411605 | 0.20147873  | 0.263679363 |
| 0.240668412 | 0.293006115 | 0.167799974 | 0.280925934 |
| 0.137879151 | 0.219464895 | 0.18640243  | 0.347310442 |
| 0.375361899 | 0.121654934 | 0.313643829 | 0.067948197 |
| 0.109669651 | 0.061220098 | 0.061407351 | 0.111386371 |
| 0.293094662 | 0.176308496 | 0.152408309 | 0.219987066 |
| 0.154572443 | 0.18346314  | 0.120069099 | 0.375276919 |
| 0.202710706 | 0.180822926 | 0.269717986 | 0.111471442 |
| 0.051436    | 0.165024846 | 0.229844965 | 0.173178791 |
| 0.205714385 | 0.083185247 | 0.083648162 | 0.250849559 |
| 0.091540101 | 0.145735659 | 0.268354271 | 0.224336084 |
| 0.127354616 | 0.258287964 | 0.320650934 | 0.016717932 |
| 0.130839505 | 0.144248985 | 0.28462022  | 0.075825369 |

|             |             |             |             |
|-------------|-------------|-------------|-------------|
| 0.223486026 | 0.30578736  | 0.14841403  | 0.175342306 |
| 0.169145526 | 0.308151633 | 0.287048548 | 0.288540078 |
| 0.090715355 | 0.322581315 | 0.235821615 | 0.289047029 |
| 0.226070226 | 0.091590281 | 0.046432029 | 0.219003088 |
| 0.242297045 | 0.082659934 | 0.155115794 | 0.18583935  |
| 0.086477043 | 0.175250611 | 0.202909859 | 0.302551128 |
| 0.377964654 | 0.256196152 | 0.2995874   | 0.260858671 |
| 0.279868872 | 0.218978586 | 0.26700897  | 0.345617315 |
| 0.061930464 | 0.122285441 | 0.122435813 | 0.294014155 |
| 0.238293498 | 0.15440503  | 0.334330943 | 0.062798792 |
| 0.003126161 | 0.184554569 | 0.161672219 | 0.282195742 |
| 0.117344444 | 0.119683147 | 0.188746504 | 0.299053745 |
| 0.26823271  | 0.319493635 | 0.268790769 | 0.144667568 |
| 0.262673077 | 0.135843498 | 0.122463459 | 0.177644476 |
| 0.309149575 | 0.099509345 | 0.222364864 | 0.360318209 |
| 0.108617428 | 0.11228568  | 0.182337059 | 0.015396451 |
| 0.158200311 | 0.171907496 | 0.20609967  | 0.32349727  |
| 0.301446984 | 0.287624839 | 0.204067617 | 0.067286951 |
| 0.277240931 | 0.234454541 | 0.04090976  | 0.267808344 |
| 0.294063325 | 0.287530671 | 0.286807568 | 0.298869665 |
| 0.256029296 | 0.215358149 | 0.227281996 | 0.136082574 |
| 0.244235636 | 0.162209769 | 0.091355728 | 0.186286408 |
| 0.01321418  | 0.286907855 | 0.19416426  | 0.275126857 |
| 0.204540071 | 0.244311556 | 0.19303371  | 0.166186623 |
| 0.082544896 | 0.051647869 | 0.15830427  | 0.260300161 |
| 0.26556982  | 0.114982552 | 0.064024712 | 0.088989529 |
| 0.276617224 | 0.288711039 | 0.093040271 | 0.313915006 |
| 0.197904602 | 0.143938428 | 0.171306504 | 0.249305111 |
| 0.228474787 | 0.032121941 | 0.132496747 | 0.006659165 |
| 0.111328369 | 0.320937214 | 0.123854099 | 0.145186669 |
| 0.217816419 | 0.066920823 | 0.269989182 | 0.328582231 |
| 0.258682612 | 0.292183258 | 0.301355511 | 0.10931345  |
| 0.295633867 | 0.0223988   | 0.29401584  | 0.222147737 |
| 0.072367076 | 0.005759405 | 0.062461776 | 0.251903171 |
| 0.124739139 | 0.132765717 | 0.250619149 | 0.105117898 |
| 0.255582758 | 0.153594888 | 0.25222685  | 0.150047418 |
| 0.162982311 | 0.225342709 | 0.161030764 | 0.277051687 |
| 0.222346602 | 0.265734702 | 0.107627745 | 0.196446399 |
| 0.159479959 | 0.212402289 | 0.192564366 | 0.031708323 |
| 0.241430983 | 0.194064633 | 0.319420449 | 0.289457228 |
| 0.34712343  | 0.205626368 | 0.057983437 | 0.130843702 |
| 0.267194485 | 0.13175788  | 0.092962203 | 0.145026156 |
| 0.258221204 | 0.162265931 | 0.307237643 | 0.283775459 |
| 0.323266821 | 0.306360795 | 0.192963214 | 0.226020039 |
| 0.077146252 | 0.01734295  | 0.109196443 | 0.294942133 |
| 0.064868743 | 0.115961293 | 0.299621457 | 0.166856867 |
| 0.223947382 | 0.138238708 | 0.091075612 | 0.100971354 |
| 0.22509317  | 0.160224844 | 0.148357471 | 0.272272866 |
| 0.183627859 | 0.137400723 | 0.283697124 | 0.293301151 |
| 0.137582859 | 0.253245427 | 0.26854708  | 0.154290253 |
| 0.098651344 | 0.114855519 | 0.209140741 | 0.267520375 |
| 0.261817299 | 0.264098747 | 0.18529803  | 0.098050237 |
| 0.306574448 | 0.177169001 | 0.292068044 | 0.265433389 |
| 0.329277092 | 0.345847567 | 0.368090656 | 0.256106541 |

|             |             |             |             |
|-------------|-------------|-------------|-------------|
| 0.227427045 | 0.197833125 | 0.148203027 | 0.248407134 |
| 0.298995752 | 0.124125924 | 0.294130534 | 0.102738884 |
| 0.244170536 | 0.213497774 | 0.219869355 | 0.244469149 |
| 0.127236304 | 0.294479674 | 0.273655429 | 0.153655996 |
| 0.171971813 | 0.111279059 | 0.208945821 | 0.252505068 |
| 0.253276225 | 0.061231934 | 0.250008219 | 0.187295887 |
| 0.244452844 | 0.054087366 | 0.178299846 | 0.360425875 |
| 0.23012174  | 0.188285144 | 0.111356078 | 0.23915425  |
| 0.203381451 | 0.090062222 | 0.103344091 | 0.220903941 |
| 0.309541931 | 0.151508612 | 0.298727889 | 0.324999979 |
| 0.205155865 | 0.129174211 | 0.101389379 | 0.150231277 |
| 0.256568015 | 0.143293549 | 0.254668942 | 0.198096211 |
| 0.358311589 | 0.364868205 | 0.233870692 | 0.276273743 |
| 0.129043432 | 0.147596988 | 0.106970135 | 0.253293562 |
| 0.098428094 | 0.18741809  | 0.078908771 | 0.221855996 |
| 0.018661122 | 0.067324333 | 0.298528771 | 0.268320669 |
| 0.351020879 | 0.275859119 | 0.329911498 | 0.21488226  |
| 0.002074097 | 0.154986237 | 0.183543029 | 0.121973759 |
| 0.230944368 | 0.274901806 | 0.201086257 | 0.254068155 |
| 0.350977762 | 0.148046724 | 0.230298904 | 0.119998554 |
| 0.047007173 | 0.157837616 | 0.329455693 | 0.205989495 |
| 0.259498159 | 0.147807318 | 0.107876136 | 0.243729566 |
| 0.091060226 | 0.338717867 | 0.302381013 | 0.068877301 |
| 0.053773812 | 0.284263823 | 0.203918331 | 0.153043258 |
| 0.129648435 | 0.259111288 | 0.310186072 | 0.010574031 |
| 0.188180774 | 0.115811757 | 0.265883354 | 0.241430851 |
| 0.27166137  | 0.250121298 | 0.252326088 | 0.173903462 |
| 0.179140099 | 0.245182681 | 0.217334715 | 0.281833799 |
| 0.270365894 | 0.256265585 | 0.166020547 | 0.139588298 |
| 0.17745045  | 0.239125254 | 0.220638371 | 0.210320066 |
| 0.23332325  | 0.258233023 | 0.340974223 | 0.157336806 |
| 0.292708274 | 0.143086428 | 0.368746415 | 0.261656956 |
| 0.3482619   | 0.169323049 | 0.179745388 | 0.224416794 |
| 0.045016913 | 0.120555529 | 0.163062248 | 0.140186886 |
| 0.270609067 | 0.151181114 | 0.119553795 | 0.135971391 |
| 0.163564847 | 0.35760046  | 0.334989048 | 0.324737317 |
| 0.165722547 | 0.121608954 | 0.058276255 | 0.249808501 |
| 0.206617712 | 0.236063471 | 0.164213823 | 0.035229746 |
| 0.236806537 | 0.149973429 | 0.233395492 | 0.288332402 |
| 0.08671465  | 0.354703509 | 0.068323363 | 0.188268439 |
| 0.050215307 | 0.2009601   | 0.273360734 | 0.190551419 |
| 0.058272316 | 0.281540657 | 0.183574157 | 0.116038739 |
| 0.200152893 | 0.172622145 | 0.171947252 | 0.231708037 |
| 0.237159858 | 0.204378723 | 0.322212983 | 0.176638244 |
| 0.110505532 | 0.158719702 | 0.112349622 | 0.177324757 |
| 0.239078964 | 0.283468645 | 0.189156092 | 0.281812226 |
| 0.136162697 | 0.243448121 | 0.386497347 | 0.206259313 |
| 0.195573689 | 0.292780818 | 0.061853289 | 0.111130327 |
| 0.232757169 | 0.098953549 | 0.002566445 | 0.044202399 |
| 0.288775529 | 0.11850907  | 0.170781356 | 0.242698276 |
| 0.162676495 | 0.312561552 | 0.06887356  | 0.180582591 |
| 0.264768061 | 0.321189814 | 0.160651574 | 0.330194922 |
| 0.266113852 | 0.275641958 | 0.150962918 | 0.024837863 |
| 0.129911092 | 0.108998745 | 0.083851879 | 0.251529961 |



|                      |             |             |             |
|----------------------|-------------|-------------|-------------|
| 0.159054158          | 0.061631621 | 0.12996258  | 0.13748045  |
| 0.279942803          | 0.055293121 | 0.135590981 | 0.193297785 |
| 0.269536831          | 0.324336046 | 0.302654563 | 0.226537416 |
| 0.116300436          | 0.277194748 | 0.115346624 | 0.111924036 |
| 0.168604582          | 0.119286326 | 0.252820997 | 0.112812336 |
| 0.204820824          | 0.191939664 | 0.012019475 | 0.356547811 |
| 0.285308378          | 0.103882788 | 0.319739615 | 0.062749198 |
| 0.31109071           | 0.29640432  | 0.17039201  | 0.101771349 |
| 0.117661198          | 0.139980002 | 1           | 0.258156901 |
| 0.045927603          | 0.126102928 | 0.24081205  | 0.133220817 |
| 0.325713353          | 0.121134738 | 0.337931505 | 0.064473816 |
| 0.271198147          | 0.238332625 | 0.183200882 | 0.216970691 |
| 0.134844824          | 0.179442298 | 0.092766832 | 0.325589687 |
| 0.285215733          | 0.119508743 | 0.245325139 | 0.21937961  |
| 0.113044523          | 0.286990011 | 0.112017135 | 0.319818443 |
| 0.257542873          | 0.305590014 | 0.239235219 | 0.27087669  |
| 0.351937262          | 0.140161802 | 0.106343617 | 0.186992796 |
| 0.25878754           | 0.201613753 | 0.130459115 | 0.250921893 |
| 0.085370843          | 0.287030946 | 0.113063932 | 0.220507258 |
| 0.196074024          | 0.292170969 | 0.157213242 | 0.252266872 |
| 0.22639334           | 0.149061693 | 0.167508218 | 0.365098835 |
| 0.245433778          | 0.122015735 | 0.371318571 | 0.009485485 |
| 0.150862666          | 0.194319126 | 0.270258666 | 0.153087963 |
| 0.273063523          | 0.18303812  | 0.11350714  | 0.021102538 |
| 0.256553494          | 0.067700893 | 0.1853339   | 0.173956921 |
| 0.102091824          | 0.181869586 | 0.309973744 | 0.305789273 |
| 0.246283226          | 0.114878829 | 0.075788911 | 0.291524329 |
| 0.075455964          | 0.070680372 | 0.096016365 | 0.148165761 |
| 0.095579436          | 0.074037786 | 0.097754494 | 0.09223806  |
| 0.230588999          | 0.239855969 |             |             |
| TNFRSF25 0.160562491 | 0.42400894  | 0.140757048 |             |
| 0.247518239          | 0.291557094 | 0.457468573 | 0.105294173 |
| 0.189891022          | 0.334743855 | 0.270740163 | 0.406184145 |
| 0.054360554          | 0.074000747 | 0.445960442 | 0.097872086 |
| 0.348541333          | 0.073452053 | 0.167974817 | 0.0772214   |
| 0.244742701          | 0.265338602 | 0.347969654 | 0.421703745 |
| 0.257511084          | 0.25172107  | 0.367204791 | 0.32246342  |
| 0.493838821          | 0.276268059 | 0.429615452 | 0.212496056 |
| 0.425840794          | 0.302131103 | 0.348664414 | 0.056676871 |
| 0.414306294          | 0.006133516 | 0.451763867 | 0.279019543 |
| 0.157394587          | 0.373717743 | 0.346694709 | 0.314182919 |
| 0.342778206          | 0.099489537 | 0.229570107 | 0.342450054 |
| 0.330387621          | 0.299019643 | 0.138912791 | 0.416204509 |
| 0.320011281          | 0.408126158 | 0.377958569 | 0.005145552 |
| 0.275639655          | 0.06772386  | 0.18149993  | 0.522450286 |
| 0.28217265           | 0.191447709 | 0.217150007 | 0.274187976 |
| 0.333191154          | 0.329086949 | 0.285325612 | 0.317234595 |
| 0.507011072          | 0.142488166 | 0.38178747  | 0.236979631 |
| 0.381694791          | 0.070390369 | 0.226452537 | 0.137215332 |
| 0.349859638          | 0.26374331  | 0.360638605 | 0.262400389 |
| 0.427291814          | 0.525272514 | 0.276137052 | 0.511681981 |
| 0.064331713          | 0.287320955 | 0.259859356 | 0.308263403 |
| 0.327001892          | 0.113665537 | 0.420271206 | 0.522016975 |
| 0.089686364          | 0.355974733 | 0.361456695 | 0.189301974 |

|             |             |             |             |
|-------------|-------------|-------------|-------------|
| 0.435986544 | 0.222405843 | 0.385297082 | 0.176783517 |
| 0.328990484 | 0.299390629 | 0.477002092 | 0.349037378 |
| 0.302834642 | 0.141791416 | 0.515812423 | 0.2762528   |
| 0.352669933 | 0.16536165  | 0.202188771 | 0.404497658 |
| 0.405353652 | 0.494943929 | 0.382888656 | 0.338939341 |
| 0.330069631 | 0.505555884 | 0.418180249 | 0.404995318 |
| 0.146802488 | 0.526392836 | 0.284300161 | 0.094494111 |
| 0.14454692  | 0.14116445  | 0.182615369 | 0.321895973 |
| 0.455542314 | 0.369872365 | 0.281967276 | 0.257943043 |
| 0.407663026 | 0.504896068 | 0.516126317 | 0.389836765 |
| 0.093356084 | 0.187860592 | 0.341441142 | 0.355580623 |
| 0.361971456 | 0.16722888  | 0.233127221 | 0.529655735 |
| 0.405851188 | 0.394420889 | 0.25308462  | 0.523835882 |
| 0.220872636 | 0.51998396  | 0.452622946 | 0.250389379 |
| 0.532881804 | 0.52691433  | 0.501684726 | 0.368566254 |
| 0.507129263 | 0.423654249 | 0.051788802 | 0.358410407 |
| 0.489797434 | 0.019469864 | 0.44058485  | 0.466750556 |
| 0.506258182 | 0.410814981 | 0.494127077 | 0.496641964 |
| 0.513093166 | 0.134272512 | 0.015320893 | 0.2823622   |
| 0.520148179 | 0.407694819 | 0.160994793 | 0.364978521 |
| 0.321612203 | 0.440620162 | 0.389327263 | 0.326579705 |
| 0.511140948 | 0.437208648 | 0.468720712 | 0.377521107 |
| 0.29155431  | 0.352676084 | 0.314294649 | 0.509302086 |
| 0.098787255 | 0.214653255 | 0.120996624 | 0.30637562  |
| 0.383006063 | 0.230526004 | 0.410371049 | 0.299381899 |
| 0.25357988  | 0.370351228 | 0.294903638 | 0.344450832 |
| 0.112546368 | 0.428386603 | 0.245086825 | 0.235485364 |
| 0.089405281 | 0.203190499 | 0.256838017 | 0.255289073 |
| 0.277415353 | 0.294831697 | 0.404493167 | 0.467555529 |
| 0.299880503 | 0.266036882 | 0.41658026  | 0.474870832 |
| 0.421061257 | 0.354430351 | 0.271819817 | 0.040090093 |
| 0.249422604 | 0.236046945 | 0.144639848 | 0.36353617  |
| 0.232534228 | 0.250425355 | 0.349430505 | 0.375127357 |
| 0.374638883 | 0.202588094 | 0.318911611 | 0.464355186 |
| 0.217510395 | 0.347221309 | 0.415331648 | 0.368934647 |
| 0.016359255 | 0.368298593 | 0.423952226 | 0.132401497 |
| 0.319388441 | 0.143311937 | 0.272602311 | 0.430492558 |
| 0.241279429 | 0.190977795 | 0.474359135 | 0.361649798 |
| 0.367867117 | 0.271015371 | 0.504952149 | 0.031088592 |
| 0.286524064 | 0.089673432 | 0.307955963 | 0.315774324 |
| 0.308673311 | 0.295632802 | 0.290332016 | 0.284928743 |
| 0.227799303 | 0.518259005 | 0.399846905 | 0.505214764 |
| 0.317558103 | 0.509053134 | 0.420340204 | 0.436170423 |
| 0.389467847 | 0.290302119 | 0.113921226 | 0.419548677 |
| 0.421771168 | 0.247019663 | 0.143418958 | 0.385965019 |
| 0.299909103 | 0.355581747 | 0.118428402 | 0.481656157 |
| 0.514629002 | 0.487951157 | 0.203764162 | 0.341245421 |
| 0.406674064 | 0.334347144 | 0.388222318 | 0.51063056  |
| 0.25912779  | 0.304709457 | 0.302303126 | 0.361811043 |
| 0.254829396 | 0.184992464 | 0.323281512 | 0.144382759 |
| 0.016055974 | 0.148708589 | 0.136735729 | 0.211891352 |
| 0.156923162 | 0.374141051 | 0.363508886 | 0.507655533 |
| 0.187491722 | 0.435398123 | 0.258738073 | 0.303625863 |
| 0.421155165 | 0.300624728 | 0.349487656 | 0.361401785 |

|             |             |             |             |
|-------------|-------------|-------------|-------------|
| 0.286199022 | 0.051641028 | 0.2040047   | 0.530213087 |
| 0.090304741 | 0.233558796 | 0.337124458 | 0.010439082 |
| 0.097555116 | 0.383514204 | 0.155060184 | 0.24740462  |
| 0.444841571 | 0.252884264 | 0.275240074 | 0.280786262 |
| 0.366640462 | 0.166841657 | 0.013767381 | 0.458626776 |
| 0.464558755 | 0.430858896 | 0.463635215 | 0.459623622 |
| 0.391513251 | 0.374662278 | 0.370694501 | 0.434762294 |
| 0.169591087 | 0.159222242 | 0.178154558 | 0.292547096 |
| 0.010401488 | 0.389259652 | 0.288888919 | 0.216937994 |
| 0.380844076 | 0.302682159 | 0.097156718 | 0.313758739 |
| 0.075585398 | 0.182628481 | 0.317276337 | 0.233404244 |
| 0.316330573 | 0.048505338 | 0.30613268  | 0.278566311 |
| 0.47497511  | 0.376214669 | 0.311921261 | 0.532383607 |
| 0.374595291 | 0.195916859 | 0.320022551 | 0.393604967 |
| 0.129985087 | 0.08754255  | 0.352208236 | 0.056196996 |
| 0.269650144 | 0.450137929 | 0.333782255 | 0.14135296  |
| 0.327424395 | 0.024813962 | 0.395712424 | 0.53210073  |
| 0.490556044 | 0.493661807 | 0.51093594  | 0.265438227 |
| 0.514708734 | 0.074897443 | 0.520665882 | 0.404530084 |
| 0.334100188 | 0.004680828 | 0.01498503  | 0.45898659  |
| 0.365047931 | 0.120792277 | 0.231256358 | 0.448561745 |
| 0.184774491 | 0.240510404 | 0.125895725 | 0.177791736 |
| 0.438500539 | 0.256367106 | 0.164389582 | 0.481110008 |
| 0.272391425 | 0.266209217 | 0.382697163 | 0.150845925 |
| 0.390868447 | 0.117106448 | 0.140596936 | 0.021132831 |
| 0.341675093 | 0.180536653 | 0.502481117 | 0.511601689 |
| 0.499715961 | 0.367174038 | 0.302273251 | 0.385183535 |
| 0.390186498 | 0.181367816 | 0.340153456 | 0.196646061 |
| 0.498873878 | 0.362494539 | 0.362965196 | 0.360121815 |
| 0.487561012 | 0.480835895 | 0.078305215 | 0.379591056 |
| 0.057157494 | 0.003412521 | 0.425792799 | 0.288567728 |
| 0.039353937 | 0.318162575 | 0.304846169 | 0.215298013 |
| 0.229717697 | 0.093027182 | 0.214460108 | 0.198517903 |
| 0.313676255 | 0.337980293 | 0.254196058 | 0.264411024 |
| 0.245130377 | 0.116224338 | 0.250919961 | 0.19624689  |
| 0.205147636 | 0.334851025 | 0.255389761 | 0.052532094 |
| 0.393940308 | 0.380411977 | 0.124867644 | 0.235619648 |
| 0.426743575 | 0.474249897 | 0.073766175 | 0.03624796  |
| 0.316641054 | 0.283463545 | 0.477144992 | 0.504118113 |
| 0.540447561 | 0.509797112 | 0.423270401 | 0.141525073 |
| 0.141257303 | 0.312051255 | 0.261074504 | 0.120034049 |
| 0.510306747 | 0.125216912 | 0.503188311 | 0.254240546 |
| 0.175778746 | 0.27626868  | 0.088455944 | 0.141175453 |
| 0.35035042  | 0.245138264 | 0.219383226 | 0.236053414 |
| 0.312110257 | 0.229093528 | 0.094934734 | 0.258030024 |
| 0.358642423 | 0.142951098 | 0.223426179 | 0.340303052 |
| 0.3733454   | 0.186229124 | 0.381408947 | 0.454757566 |
| 0.213159621 | 0.163908025 | 0.372872378 | 0.356201643 |
| 0.409359619 | 0.344444859 | 0.093581022 | 0.451551795 |
| 0.474773331 | 0.416569073 | 0.52002251  | 0.355179758 |
| 0.143903964 | 0.372393213 | 0.242955972 | 0.305819257 |
| 0.229492943 | 0.454362114 | 0.255374963 | 0.121687679 |
| 0.304463007 | 0.490351578 | 0.400615439 | 0.241685405 |
| 0.399243931 | 0.200367977 | 0.113333095 | 0.420648524 |

|             |             |             |             |
|-------------|-------------|-------------|-------------|
| 0.154758909 | 0.172970549 | 0.359176632 | 0.378781999 |
| 0.004627451 | 0.120404641 | 0.447673571 | 0.326304717 |
| 0.506535068 | 0.454974228 | 0.458258429 | 0.296633775 |
| 0.000685748 | 0.349207394 | 0.395435122 | 0.39579327  |
| 0.425779645 | 0.391385518 | 0.183204289 | 0.132829183 |
| 0.319789794 | 0.160690262 | 0.176031605 | 0.415805555 |
| 0.131866983 | 0.406350514 | 0.245173197 | 0.232146114 |
| 0.217942301 | 0.141672961 | 0.23497902  | 0.322787615 |
| 0.100246983 | 0.290731243 | 0.363423963 | 0.288820261 |
| 0.178391765 | 0.390668011 | 0.384954355 | 0.077589055 |
| 0.317085345 | 0.363420893 | 0.416182895 | 0.004782848 |
| 0.403057693 | 0.02736908  | 0.23086943  | 0.269697986 |
| 0.242494488 | 0.225113062 | 0.262733194 | 0.298784881 |
| 0.342412128 | 0.260318167 | 0.349004238 | 0.296419748 |
| 0.226979874 | 0.273238033 | 0.361148426 | 0.355283064 |
| 0.319332554 | 0.217213348 | 0.161182612 | 0.163445891 |
| 0.128155817 | 0.454666496 | 0.300359145 | 0.149298391 |
| 0.267879098 | 0.33714022  | 0.356945751 | 0.501394466 |
| 0.412631139 | 0.184797212 | 0.313110549 | 0.449134446 |
| 0.187214653 | 0.346702567 | 0.127153849 | 0.399516408 |
| 0.302421425 | 0.230605791 | 0.39478424  | 0.363348588 |
| 0.369926728 | 0.431463826 | 0.303811    | 0.437801521 |
| 0.370453845 | 0.284715631 | 0.322296808 | 0.14937773  |
| 0.259425659 | 0.191137986 | 0.250541332 | 0.011479573 |
| 0.375756052 | 0.375033379 | 0.444325074 | 0.51066879  |
| 0.243341319 | 0.392820443 | 0.374792639 | 0.164442807 |
| 0.293723171 | 0.237050651 | 0.210616118 | 0.399062422 |
| 0.190424231 | 0.270430016 | 0.293340709 | 0.429546769 |
| 0.389959616 | 0.362521315 | 0.222844776 | 0.280572066 |
| 0.252602879 | 0.275997829 | 0.473244564 | 0.209568531 |
| 0.379537657 | 0.196967754 | 0.34996282  | 0.307000116 |
| 0.234231751 | 0.495349113 | 0.126033372 | 0.504235909 |
| 0.296014716 | 0.198628408 | 0.504600461 | 0.349949571 |
| 0.347740113 | 0.182037566 | 0.156957574 | 0.368931958 |
| 0.245535518 | 0.306348021 | 0.014286269 | 0.059067611 |
| 0.347067318 | 0.252920736 | 0.370387024 | 0.3358003   |
| 0.221778263 | 0.321118921 | 0.144329315 | 0.312663662 |
| 0.49963052  | 0.520942685 | 0.301592656 | 0.27551037  |
| 0.357816397 | 0.183231374 | 0.443240834 | 0.011754971 |
| 0.373882561 | 0.364653746 | 0.339048239 | 0.105994274 |
| 0.049990148 | 0.173257067 | 0.371802619 | 0.115432239 |
| 0.439359426 | 0.191973552 | 0.324536049 | 0.423864747 |
| 0.225608253 | 0.524300348 | 0.162609141 | 0.409249939 |
| 0.070328102 | 0.288213349 | 0.323302621 | 0.318663108 |
| 0.266861217 | 0.254000841 | 0.375673928 | 0.225138365 |
| 0.078569323 | 0.285022631 | 0.002430884 | 0.446969267 |
| 0.490355398 | 0.275733515 | 0.253836733 | 0.262005407 |
| 0.308060934 | 0.36053564  | 0.225538536 | 0.375238783 |
| 0.039225198 | 0.339466621 | 0.258156901 | 1           |
| 0.224567103 | 0.3128445   | 0.123949443 | 0.25301143  |
| 0.499290179 | 0.262114752 | 0.278400923 | 0.268959365 |
| 0.500132926 | 0.376037321 | 0.238107911 | 0.228895821 |
| 0.33817373  | 0.124866451 | 0.39016402  | 0.515658899 |
| 0.231926186 | 0.202465482 | 0.398467948 | 0.247318994 |

|             |             |             |             |
|-------------|-------------|-------------|-------------|
| 0.262738294 | 0.394275913 | 0.349836592 | 0.50341605  |
| 0.103943938 | 0.300294761 | 0.389026214 | 0.440384424 |
| 0.321849361 | 0.145690104 | 0.226476337 | 0.229949984 |
| 0.488455092 | 0.203928519 | 0.208048337 | 0.383145204 |
| 0.187277018 | 0.331650957 | 0.326231201 | 0.195151818 |
| 0.089733234 | 0.204412059 | 0.435628592 | 0.20905221  |
| 0.312690727 | 0.341523442 | 0.215623005 | 0.402986733 |
| 0.225966118 | 0.072526109 | 0.458414738 | 0.015485046 |
| 0.430953139 | 0.402815075 | 0.301960875 | 0.322551078 |
| 0.26598239  | 0.351253769 | 0.356782811 | 0.006684755 |
| 0.378054112 | 0.055961762 | 0.285178667 | 0.248432966 |
| 0.248137737 | 0.10669588  | 0.482445568 | 0.490233565 |
| 0.35791831  | 0.309600171 | 0.316496988 | 0.466861813 |
| 0.130117493 | 0.273876021 | 0.276263924 | 0.407060227 |
| 0.197825738 | 0.346062984 | 0.361436438 | 0.351649776 |
| 0.404910765 | 0.325487483 |             |             |
| TNFRSF9     | 0.008643391 | 0.210842068 | 0.007359203 |
| 0.02109864  | 0.175296386 | 0.108358242 | 0.004231083 |
| 0.011948333 | 0.138594561 | 0.079293867 | 0.170589058 |
| 0.000774651 | 0.019704312 | 0.275202252 | 0.002843415 |
| 0.2510568   | 0.001871059 | 0.018917332 | 0.004638402 |
| 0.014376868 | 0.156107096 | 0.087036526 | 0.120156792 |
| 0.118727083 | 0.06024164  | 0.124710551 | 0.191357955 |
| 0.300705503 | 0.071290157 | 0.264531166 | 0.061184513 |
| 0.216338369 | 0.210683112 | 0.206465963 | 0.000293414 |
| 0.15289236  | 0.001188603 | 0.208232142 | 0.092513042 |
| 0.041341648 | 0.148733874 | 0.1216668   | 0.077507674 |
| 0.176937636 | 0.003606333 | 0.037720788 | 0.257971951 |
| 0.115095839 | 0.04303705  | 0.007875419 | 0.234433514 |
| 0.086552372 | 0.137420253 | 0.21918333  | 0.000571287 |
| 0.180424426 | 0.053397817 | 0.136208115 | 0.2628419   |
| 0.066990921 | 0.021672173 | 0.064805085 | 0.036694767 |
| 0.174246369 | 0.185342223 | 0.075043503 | 0.126188306 |
| 0.293250885 | 0.056989083 | 0.276764736 | 0.018013591 |
| 0.115845939 | 0.000928541 | 0.04568589  | 0.010547687 |
| 0.106133667 | 0.054958568 | 0.140002255 | 0.138368805 |
| 0.243590349 | 0.247026785 | 0.069532524 | 0.253677804 |
| 0.013543036 | 0.214154411 | 0.077840689 | 0.140851609 |
| 0.169723061 | 0.005380313 | 0.27777628  | 0.293384394 |
| 0.001884022 | 0.182974402 | 0.226741498 | 0.024364488 |
| 0.220117048 | 0.056007526 | 0.20093243  | 0.075363132 |
| 0.239087067 | 0.220472789 | 0.21007967  | 0.139917015 |
| 0.098550403 | 0.011470068 | 0.219702615 | 0.223665965 |
| 0.113848448 | 0.015019443 | 0.063855796 | 0.324767832 |
| 0.251633906 | 0.301928532 | 0.244871718 | 0.191840968 |
| 0.263590073 | 0.297508839 | 0.256349026 | 0.192451908 |
| 0.026041014 | 0.286556681 | 0.052306795 | 0.002314065 |
| 0.007617095 | 0.006843227 | 0.034663511 | 0.114110673 |
| 0.299320963 | 0.123228283 | 0.048580525 | 0.090741373 |
| 0.312050425 | 0.225109849 | 0.289140842 | 0.250164451 |
| 0.003163152 | 0.067956201 | 0.278466292 | 0.034610433 |
| 0.19571748  | 0.016682795 | 0.163315422 | 0.248485912 |
| 0.208279821 | 0.296490599 | 0.024011458 | 0.221640024 |
| 0.029546778 | 0.288786155 | 0.277221558 | 0.053042519 |

|             |             |             |             |
|-------------|-------------|-------------|-------------|
| 0.271817293 | 0.24268708  | 0.31190832  | 0.30122278  |
| 0.228343232 | 0.139693764 | 0.003122285 | 0.193049554 |
| 0.266958089 | 0.005903776 | 0.306930856 | 0.331166941 |
| 0.282428564 | 0.355494579 | 0.310620818 | 0.306490406 |
| 0.27308897  | 0.010003338 | 0.006157178 | 0.148496502 |
| 0.278811418 | 0.240527162 | 0.011153192 | 0.274052833 |
| 0.198407491 | 0.124385888 | 0.228157372 | 0.078225826 |
| 0.262511597 | 0.276911618 | 0.30146999  | 0.214131657 |
| 0.0924973   | 0.129618587 | 0.252777755 | 0.216306837 |
| 0.001916697 | 0.020620351 | 0.007957602 | 0.109229004 |
| 0.075322697 | 0.050827664 | 0.119155501 | 0.147075448 |
| 0.061965868 | 0.072662773 | 0.152802393 | 0.266423538 |
| 0.008463144 | 0.244135223 | 0.033856279 | 0.046872279 |
| 0.003835118 | 0.034089761 | 0.027455758 | 0.018351179 |
| 0.093826178 | 0.070682771 | 0.268204213 | 0.295141489 |
| 0.105289865 | 0.061905072 | 0.23847566  | 0.262710968 |
| 0.233421018 | 0.253598063 | 0.066449256 | 0.001839488 |
| 0.069997346 | 0.09850748  | 0.093287139 | 0.213600898 |
| 0.043753956 | 0.047967986 | 0.234990388 | 0.280230058 |
| 0.102106416 | 0.015747757 | 0.140709156 | 0.186337761 |
| 0.037720256 | 0.104978146 | 0.311904848 | 0.197888382 |
| 0.001971902 | 0.156374655 | 0.298695674 | 0.017328997 |
| 0.122726855 | 0.034574169 | 0.086413475 | 0.319370584 |
| 0.069405449 | 0.069145658 | 0.295812542 | 0.240460046 |
| 0.035500966 | 0.062414461 | 0.30307841  | 0.020361266 |
| 0.135960684 | 0.010650941 | 0.142360064 | 0.109824524 |
| 0.093387213 | 0.124866657 | 0.174093304 | 0.101115178 |
| 0.034852327 | 0.280742035 | 0.183898671 | 0.310740836 |
| 0.167501703 | 0.306029238 | 0.324362635 | 0.26855351  |
| 0.149918032 | 0.166991696 | 0.057437506 | 0.327351263 |
| 0.315013533 | 0.05213203  | 0.012462409 | 0.288232203 |
| 0.155726306 | 0.286125168 | 0.012916105 | 0.317149992 |
| 0.23638063  | 0.235591426 | 0.023012655 | 0.227853435 |
| 0.239661839 | 0.077654495 | 0.21419088  | 0.284313413 |
| 0.079926625 | 0.204148219 | 0.160098526 | 0.25314578  |
| 0.056472968 | 0.056693442 | 0.114313783 | 0.061654043 |
| 0.013490031 | 0.009440853 | 0.011207671 | 0.042896915 |
| 0.076363123 | 0.224975813 | 0.225863365 | 0.3083118   |
| 0.022723926 | 0.198376441 | 0.065016392 | 0.128189111 |
| 0.2454667   | 0.127104075 | 0.209411906 | 0.200343931 |
| 0.076017385 | 0.001451068 | 0.012501344 | 0.258496534 |
| 0.003690357 | 0.101698881 | 0.07181309  | 0.000314884 |
| 0.003997897 | 0.22745386  | 0.020483634 | 0.058455825 |
| 0.288118821 | 0.063852427 | 0.08009242  | 0.106613293 |
| 0.169298673 | 0.014120429 | 0.000192006 | 0.282037012 |
| 0.235996501 | 0.214737536 | 0.236832529 | 0.193665452 |
| 0.240413482 | 0.179058863 | 0.275445477 | 0.121366611 |
| 0.011088847 | 0.009795125 | 0.10405464  | 0.129932555 |
| 0.000185236 | 0.203772391 | 0.09444924  | 0.038926987 |
| 0.263430972 | 0.1143572   | 0.002410963 | 0.158540503 |
| 0.002584506 | 0.164613294 | 0.043177742 | 0.040651156 |
| 0.176596922 | 0.000300824 | 0.078691889 | 0.099342615 |
| 0.216308192 | 0.157315638 | 0.159106654 | 0.291933579 |
| 0.154766483 | 0.032915229 | 0.152193871 | 0.218837583 |

|             |             |             |             |
|-------------|-------------|-------------|-------------|
| 0.007360028 | 0.02754409  | 0.076953632 | 0.031228441 |
| 0.015513118 | 0.190509887 | 0.105463112 | 0.005236321 |
| 0.122551585 | 0.000269872 | 0.189512345 | 0.288403333 |
| 0.236776999 | 0.333097429 | 0.294189739 | 0.172349053 |
| 0.296986001 | 0.039937304 | 0.308929767 | 0.223162897 |
| 0.176369195 | 0.000331474 | 0.000520374 | 0.33649549  |
| 0.27834629  | 0.008451894 | 0.043550567 | 0.062263586 |
| 0.013283749 | 0.024167633 | 0.004010947 | 0.069311233 |
| 0.20401453  | 0.097770828 | 0.040445657 | 0.240171765 |
| 0.078701543 | 0.06334283  | 0.110502313 | 0.013967955 |
| 0.196497284 | 0.004185473 | 0.01259257  | 0.001298429 |
| 0.186851537 | 0.02831201  | 0.202829776 | 0.280709647 |
| 0.274483166 | 0.259460729 | 0.147644959 | 0.031493427 |
| 0.220741276 | 0.021506163 | 0.060346932 | 0.021280092 |
| 0.278882995 | 0.292500237 | 0.170931253 | 0.156245594 |
| 0.307563111 | 0.270287219 | 0.00181361  | 0.281014609 |
| 0.001107899 | 0.000160505 | 0.169845126 | 0.079516467 |
| 0.002787474 | 0.201725843 | 0.108971071 | 0.029603715 |
| 0.026853716 | 0.001790398 | 0.146118783 | 0.14837837  |
| 0.146649755 | 0.172878827 | 0.170531673 | 0.065932361 |
| 0.079358219 | 0.027665473 | 0.03417371  | 0.017729762 |
| 0.016828711 | 0.138929515 | 0.068252688 | 0.000264004 |
| 0.221259887 | 0.262808079 | 0.006866171 | 0.037968227 |
| 0.297780749 | 0.335307255 | 0.002083154 | 0.001275187 |
| 0.10458494  | 0.094961511 | 0.320144579 | 0.280804922 |
| 0.266199308 | 0.295533057 | 0.168685987 | 0.018242263 |
| 0.00622244  | 0.139792676 | 0.17138585  | 0.010525108 |
| 0.289312402 | 0.010695733 | 0.238002843 | 0.197860561 |
| 0.022073306 | 0.051520326 | 0.001621941 | 0.011150586 |
| 0.239506257 | 0.044486505 | 0.054096245 | 0.049208228 |
| 0.128321641 | 0.070260858 | 0.003268556 | 0.058848823 |
| 0.186875146 | 0.074973039 | 0.043205184 | 0.04777377  |
| 0.149361746 | 0.017708788 | 0.319749596 | 0.234508006 |
| 0.029373741 | 0.018083848 | 0.06895555  | 0.167956518 |
| 0.301244051 | 0.187199378 | 0.002502493 | 0.24969631  |
| 0.272219259 | 0.300767633 | 0.257004187 | 0.216841749 |
| 0.013519528 | 0.242383237 | 0.121637186 | 0.194926345 |
| 0.043355906 | 0.111426586 | 0.055049523 | 0.008153865 |
| 0.099713877 | 0.204770078 | 0.251581347 | 0.042529836 |
| 0.174303538 | 0.023864979 | 0.008545742 | 0.226232144 |
| 0.084571954 | 0.007562628 | 0.118944152 | 0.250606907 |
| 0.000248579 | 0.066783165 | 0.275969752 | 0.040148668 |
| 0.251639654 | 0.323855436 | 0.239239856 | 0.026347937 |
| 0.00126008  | 0.291602926 | 0.233436557 | 0.204412239 |
| 0.258809225 | 0.141550997 | 0.00495028  | 0.008217103 |
| 0.119419619 | 0.016738731 | 0.020501329 | 0.031683077 |
| 0.054860366 | 0.191469142 | 0.057784115 | 0.045892123 |
| 0.050975786 | 0.014516265 | 0.050368708 | 0.05810097  |
| 0.01789166  | 0.090139601 | 0.191971086 | 0.050300994 |
| 0.104729699 | 0.239132251 | 0.267101262 | 0.001150638 |
| 0.165197118 | 0.215815303 | 0.207736601 | 0.000764964 |
| 0.31989962  | 0.000469406 | 0.058338159 | 0.07922202  |
| 0.048665662 | 0.051858173 | 0.107696004 | 0.100780298 |
| 0.154977706 | 0.055826873 | 0.094084873 | 0.088659018 |

|             |             |             |             |
|-------------|-------------|-------------|-------------|
| 0.033634462 | 0.043325125 | 0.196155077 | 0.113578852 |
| 0.112195931 | 0.020475319 | 0.019867363 | 0.021367128 |
| 0.003088243 | 0.243428161 | 0.086447539 | 0.013326127 |
| 0.065349946 | 0.097507654 | 0.170196988 | 0.269123203 |
| 0.208718321 | 0.026124582 | 0.08642917  | 0.279529559 |
| 0.043974484 | 0.032170844 | 0.004709026 | 0.148152892 |
| 0.061600066 | 0.060914607 | 0.13117764  | 0.143817822 |
| 0.217116015 | 0.185484667 | 0.081499126 | 0.211486292 |
| 0.139662715 | 0.116642948 | 0.13607105  | 0.010733129 |
| 0.052682621 | 0.02756521  | 0.151150827 | 0.000441311 |
| 0.151757143 | 0.030882788 | 0.339332256 | 0.258107459 |
| 0.127021246 | 0.171382891 | 0.045221428 | 0.013899317 |
| 0.064773649 | 0.06283719  | 0.03502621  | 0.255082113 |
| 0.144285311 | 0.02731906  | 0.163074242 | 0.057246818 |
| 0.287269678 | 0.23959501  | 0.052674    | 0.044305708 |
| 0.057031753 | 0.05363715  | 0.212111069 | 0.016484015 |
| 0.262634385 | 0.070976165 | 0.132832466 | 0.146628628 |
| 0.06969674  | 0.303058442 | 0.006501814 | 0.324235625 |
| 0.165774884 | 0.027365626 | 0.234211842 | 0.060642983 |
| 0.031311925 | 0.008367376 | 0.127011374 | 0.089078437 |
| 0.029657295 | 0.134165824 | 0.007555653 | 0.02249108  |
| 0.1736247   | 0.056300566 | 0.23927679  | 0.156741046 |
| 0.087247001 | 0.166467211 | 0.027707186 | 0.077008852 |
| 0.240567806 | 0.225001704 | 0.055294193 | 0.090926436 |
| 0.156874002 | 0.014162819 | 0.172443198 | 0.000838909 |
| 0.295510105 | 0.287057865 | 0.088477859 | 0.002917268 |
| 2.72E-05    | 0.172739337 | 0.27027694  | 0.007646711 |
| 0.317013012 | 0.070989587 | 0.12975428  | 0.250039259 |
| 0.037863693 | 0.234158549 | 0.016637725 | 0.273960632 |
| 0.001194519 | 0.075509815 | 0.159820285 | 0.131098319 |
| 0.075907327 | 0.17365013  | 0.248059733 | 0.139555204 |
| 0.002255498 | 0.042407892 | 0.000525241 | 0.181891491 |
| 0.222999854 | 0.209663211 | 0.056527431 | 0.057162842 |
| 0.11688521  | 0.155866106 | 0.025917165 | 0.184608849 |
| 0.000377136 | 0.280427849 | 0.045927603 | 0.224567103 |
| 1           | 0.154860784 | 0.00349575  | 0.142574773 |
| 0.188551644 | 0.054191024 | 0.077265511 | 0.135782497 |
| 0.260605478 | 0.16203149  | 0.043531042 | 0.022006718 |
| 0.172845612 | 0.008634677 | 0.106318549 | 0.285214127 |
| 0.044158629 | 0.13567449  | 0.332496679 | 0.064860599 |
| 0.150413639 | 0.16472205  | 0.20985181  | 0.260758707 |
| 0.009470005 | 0.092997325 | 0.243329367 | 0.26166615  |
| 0.132087696 | 0.061376584 | 0.122889114 | 0.090330051 |
| 0.242586258 | 0.008436995 | 0.061483835 | 0.182463517 |
| 0.151496749 | 0.111542241 | 0.117737258 | 0.05926517  |
| 0.001887626 | 0.015145178 | 0.07535074  | 0.029414867 |
| 0.12967477  | 0.18662406  | 0.069848462 | 0.190303164 |
| 0.016634443 | 0.003442335 | 0.225132605 | 0.01953488  |
| 0.108910743 | 0.247727384 | 0.061105993 | 0.151504792 |
| 0.062450321 | 0.135602507 | 0.142756779 | 0.000498059 |
| 0.235303701 | 0.007320161 | 0.05774821  | 0.080589668 |
| 0.043348769 | 0.004225943 | 0.221211817 | 0.320165702 |
| 0.095631321 | 0.028178191 | 0.092293455 | 0.225498769 |
| 0.046599686 | 0.131722312 | 0.106443057 | 0.221093757 |



|             |             |             |             |
|-------------|-------------|-------------|-------------|
| 0.115210306 | 0.195418079 | 0.165588936 | 0.211607737 |
| 0.173464961 | 0.042815557 |             |             |
| TNRC6A      | 0.047354952 | 0.382464806 | 0.03375151  |
| 0.069511136 | 0.19105801  | 0.177226564 | 0.064600879 |
| 0.099750571 | 0.335053189 | 0.229767395 | 0.178079236 |
| 0.016190271 | 0.072502098 | 0.402297066 | 0.06028225  |
| 0.269932188 | 0.033118055 | 0.091335227 | 0.095261384 |
| 0.179628095 | 0.197805438 | 0.179529217 | 0.194370238 |
| 0.21255447  | 0.165460947 | 0.231096244 | 0.258456164 |
| 0.43354919  | 0.139974543 | 0.267831141 | 0.116203202 |
| 0.380248598 | 0.21255817  | 0.220628152 | 0.012501233 |
| 0.225944911 | 0.046903116 | 0.414492472 | 0.183936371 |
| 0.08871225  | 0.302675413 | 0.194304488 | 0.136600171 |
| 0.252113379 | 0.026930477 | 0.118266528 | 0.347164316 |
| 0.241489811 | 0.195476637 | 0.049164927 | 0.301358258 |
| 0.274396169 | 0.216725722 | 0.313730319 | 0.002955398 |
| 0.181002559 | 0.077704348 | 0.178952071 | 0.426384545 |
| 0.133741632 | 0.087565728 | 0.25568248  | 0.191602485 |
| 0.309192225 | 0.331822772 | 0.19789288  | 0.275728412 |
| 0.428194532 | 0.159386688 | 0.346666369 | 0.085330118 |
| 0.247391228 | 0.040893259 | 0.130416516 | 0.082871113 |
| 0.249724169 | 0.123482753 | 0.184093895 | 0.216546584 |
| 0.384792263 | 0.46667336  | 0.182102616 | 0.447412476 |
| 0.171508935 | 0.236687743 | 0.186976494 | 0.255192966 |
| 0.350847586 | 0.112424656 | 0.291129732 | 0.464647894 |
| 0.059171348 | 0.257968793 | 0.357484357 | 0.111485361 |
| 0.346404518 | 0.232499907 | 0.220258644 | 0.109113389 |
| 0.279228863 | 0.24530682  | 0.454361589 | 0.209263824 |
| 0.199348045 | 0.05864149  | 0.42250945  | 0.21433499  |
| 0.149756409 | 0.05522723  | 0.199646107 | 0.412366054 |
| 0.277005438 | 0.414759827 | 0.401526663 | 0.357817223 |
| 0.249613013 | 0.423598878 | 0.276607263 | 0.374520166 |
| 0.111041864 | 0.46094744  | 0.105724196 | 0.033199893 |
| 0.054459637 | 0.067071482 | 0.249755086 | 0.261754055 |
| 0.391208766 | 0.228766923 | 0.123959943 | 0.165860311 |
| 0.42976821  | 0.412016031 | 0.475593832 | 0.372711725 |
| 0.032801502 | 0.232812134 | 0.241526531 | 0.153469883 |
| 0.312532324 | 0.09743638  | 0.180321204 | 0.449799965 |
| 0.305243428 | 0.382722883 | 0.10590087  | 0.44692525  |
| 0.188974106 | 0.440919029 | 0.378154442 | 0.106097008 |
| 0.450063019 | 0.418407191 | 0.444181539 | 0.287806897 |
| 0.38949742  | 0.166360202 | 0.127147982 | 0.36723297  |
| 0.413477803 | 0.01022634  | 0.429079987 | 0.455057386 |
| 0.438364889 | 0.399882193 | 0.479514648 | 0.439196569 |
| 0.437721509 | 0.062162551 | 0.075583894 | 0.227171746 |
| 0.448223841 | 0.31548369  | 0.120099755 | 0.254921597 |
| 0.259956311 | 0.204143857 | 0.362702423 | 0.170694026 |
| 0.45984973  | 0.377492923 | 0.433115018 | 0.349750065 |
| 0.248300901 | 0.271407855 | 0.24856312  | 0.394284366 |
| 0.032962006 | 0.069053426 | 0.039050636 | 0.28131349  |
| 0.172184339 | 0.118685899 | 0.214272023 | 0.273315675 |
| 0.133560767 | 0.211855696 | 0.201247839 | 0.28470632  |
| 0.060476293 | 0.236984543 | 0.10719787  | 0.135406169 |
| 0.035036207 | 0.13621002  | 0.121260028 | 0.081440959 |

|             |             |             |             |
|-------------|-------------|-------------|-------------|
| 0.169150362 | 0.231102033 | 0.325712297 | 0.436385116 |
| 0.268800412 | 0.137922152 | 0.310718978 | 0.407507022 |
| 0.380264874 | 0.217621087 | 0.204975366 | 0.00571086  |
| 0.226497567 | 0.269552862 | 0.167899396 | 0.241834922 |
| 0.173499049 | 0.214884259 | 0.285454512 | 0.293348287 |
| 0.151117425 | 0.127080175 | 0.268012982 | 0.363012031 |
| 0.137761407 | 0.158965364 | 0.389920975 | 0.268318273 |
| 0.0025207   | 0.198719766 | 0.362131043 | 0.158188654 |
| 0.283280563 | 0.095586305 | 0.124503881 | 0.421499727 |
| 0.230688627 | 0.206838163 | 0.425219234 | 0.30182772  |
| 0.188218276 | 0.223055195 | 0.475897468 | 0.089662741 |
| 0.261753429 | 0.027913916 | 0.212040343 | 0.220435365 |
| 0.165920205 | 0.259586472 | 0.204234294 | 0.166561064 |
| 0.083002165 | 0.46099087  | 0.312892846 | 0.440720373 |
| 0.260843937 | 0.47926445  | 0.391529303 | 0.36439267  |
| 0.242852172 | 0.283230918 | 0.118031461 | 0.357170531 |
| 0.404636753 | 0.252954701 | 0.066774801 | 0.397254788 |
| 0.292288417 | 0.323408971 | 0.097060086 | 0.437579844 |
| 0.423822721 | 0.412109266 | 0.102757467 | 0.323408125 |
| 0.294026919 | 0.12473596  | 0.348878886 | 0.482060913 |
| 0.278289909 | 0.265570049 | 0.232985267 | 0.34837933  |
| 0.11910139  | 0.198115822 | 0.292489596 | 0.150226632 |
| 0.003736767 | 0.068236289 | 0.049234489 | 0.109135261 |
| 0.121129967 | 0.287283507 | 0.303190266 | 0.459951012 |
| 0.086037499 | 0.335379366 | 0.230855148 | 0.193473708 |
| 0.388159175 | 0.259563539 | 0.211033777 | 0.254086096 |
| 0.206841948 | 0.010212618 | 0.065595134 | 0.466824762 |
| 0.039189894 | 0.14808163  | 0.219483572 | 0.001633981 |
| 0.045359091 | 0.361190394 | 0.100858784 | 0.180278797 |
| 0.424417561 | 0.17835222  | 0.157899862 | 0.268384389 |
| 0.237014792 | 0.066967128 | 0.001134975 | 0.456100881 |
| 0.462203891 | 0.44929182  | 0.463751347 | 0.426438226 |
| 0.446817854 | 0.338513814 | 0.365639789 | 0.169725786 |
| 0.082040381 | 0.072379461 | 0.189022532 | 0.204496568 |
| 0.007090469 | 0.279624171 | 0.212741578 | 0.10810283  |
| 0.347597602 | 0.266979811 | 0.027337644 | 0.247021823 |
| 0.012232638 | 0.132779678 | 0.244114919 | 0.176514684 |
| 0.304889623 | 0.011718694 | 0.115248421 | 0.247901016 |
| 0.347364391 | 0.288598513 | 0.217970866 | 0.457800504 |
| 0.177119962 | 0.121292644 | 0.189501715 | 0.286661335 |
| 0.063042202 | 0.141931468 | 0.255151964 | 0.019449178 |
| 0.093681852 | 0.421495958 | 0.251680012 | 0.049150067 |
| 0.171510371 | 0.003402906 | 0.2956611   | 0.461404046 |
| 0.393817694 | 0.467656051 | 0.416906119 | 0.157121936 |
| 0.429461784 | 0.111043111 | 0.462300455 | 0.348851213 |
| 0.254713883 | 0.000460144 | 0.005428735 | 0.423695087 |
| 0.237150185 | 0.055232651 | 0.109027729 | 0.152481563 |
| 0.073984098 | 0.109872826 | 0.052371875 | 0.131679211 |
| 0.235080725 | 0.153550248 | 0.139509219 | 0.424787182 |
| 0.173561848 | 0.162763838 | 0.243231895 | 0.082095148 |
| 0.227536359 | 0.038473599 | 0.089359607 | 0.004407313 |
| 0.291598635 | 0.108315961 | 0.412604158 | 0.442036724 |
| 0.42627503  | 0.281333137 | 0.222033164 | 0.179244412 |
| 0.409722799 | 0.079913512 | 0.200552848 | 0.081169656 |

|             |             |             |             |
|-------------|-------------|-------------|-------------|
| 0.413831537 | 0.280836315 | 0.241401851 | 0.242464865 |
| 0.45311519  | 0.404159242 | 0.031278485 | 0.353841817 |
| 0.005073488 | 0.002408187 | 0.189909786 | 0.223551945 |
| 0.137909216 | 0.266271106 | 0.208768173 | 0.236659893 |
| 0.191257797 | 0.019299656 | 0.212364862 | 0.198784926 |
| 0.207684029 | 0.243240025 | 0.186208375 | 0.238779174 |
| 0.195421708 | 0.149444985 | 0.123287347 | 0.128852669 |
| 0.241031523 | 0.284065791 | 0.170541036 | 0.025151565 |
| 0.239087491 | 0.23335336  | 0.042057761 | 0.114387473 |
| 0.356378993 | 0.424591689 | 0.055047275 | 0.007280561 |
| 0.216926844 | 0.249499374 | 0.438514547 | 0.427963608 |
| 0.455096203 | 0.468033715 | 0.342229884 | 0.121702267 |
| 0.047970225 | 0.216927785 | 0.201679432 | 0.080814223 |
| 0.441013492 | 0.063218492 | 0.403992348 | 0.204075759 |
| 0.096816586 | 0.1387703   | 0.021512013 | 0.072325204 |
| 0.227849722 | 0.124372592 | 0.122141617 | 0.103542829 |
| 0.219229836 | 0.15499086  | 0.047689216 | 0.135669179 |
| 0.300172075 | 0.15887866  | 0.117129409 | 0.19281751  |
| 0.290241767 | 0.221626681 | 0.347763944 | 0.402331695 |
| 0.094277185 | 0.107300311 | 0.150228365 | 0.327044384 |
| 0.385819984 | 0.255138307 | 0.009759291 | 0.39909401  |
| 0.429289244 | 0.29186536  | 0.417025921 | 0.366378821 |
| 0.076568642 | 0.207338615 | 0.268041209 | 0.249594282 |
| 0.146619879 | 0.176695767 | 0.186358898 | 0.053232682 |
| 0.281082644 | 0.443207802 | 0.378494798 | 0.100369503 |
| 0.235884206 | 0.101144715 | 0.056496563 | 0.387143431 |
| 0.15872678  | 0.06273167  | 0.212117351 | 0.400134774 |
| 0.001147484 | 0.106029305 | 0.46231373  | 0.125399168 |
| 0.470672048 | 0.427920179 | 0.371323432 | 0.168716342 |
| 0.00607607  | 0.327416352 | 0.223365279 | 0.213885062 |
| 0.380922273 | 0.261295588 | 0.11861979  | 0.056748636 |
| 0.233988924 | 0.064200994 | 0.122853942 | 0.157232115 |
| 0.19215213  | 0.280984608 | 0.162984246 | 0.182625279 |
| 0.147729393 | 0.107178797 | 0.142429781 | 0.128128825 |
| 0.198997308 | 0.186618464 | 0.293462129 | 0.192519509 |
| 0.154652873 | 0.430407874 | 0.364050218 | 0.018969806 |
| 0.219522997 | 0.396519391 | 0.374933748 | 0.00459047  |
| 0.316659321 | 0.005791009 | 0.139109475 | 0.126087746 |
| 0.130298492 | 0.177299653 | 0.186309645 | 0.177249891 |
| 0.280890353 | 0.163254062 | 0.141174935 | 0.149303285 |
| 0.096287556 | 0.145474733 | 0.242333844 | 0.233402136 |
| 0.14877187  | 0.077373653 | 0.097590954 | 0.102989013 |
| 0.028619577 | 0.392472924 | 0.201864507 | 0.058712979 |
| 0.159170273 | 0.251964068 | 0.299791448 | 0.430926593 |
| 0.349340457 | 0.103785248 | 0.246521117 | 0.359940994 |
| 0.221625694 | 0.165558245 | 0.053668013 | 0.211614346 |
| 0.139984063 | 0.145705599 | 0.217460393 | 0.206516099 |
| 0.361650299 | 0.343899799 | 0.189292309 | 0.379566694 |
| 0.198677274 | 0.292197965 | 0.192341346 | 0.055917922 |
| 0.115062634 | 0.121336648 | 0.179726581 | 0.001048569 |
| 0.240738811 | 0.124923302 | 0.399870248 | 0.415491272 |
| 0.204701154 | 0.319026474 | 0.167452698 | 0.06714202  |
| 0.157550264 | 0.173429582 | 0.111388555 | 0.346432153 |
| 0.148956643 | 0.105520763 | 0.192038497 | 0.151981678 |

|             |             |             |             |
|-------------|-------------|-------------|-------------|
| 0.347054856 | 0.367397921 | 0.208608479 | 0.188194638 |
| 0.185357429 | 0.135103244 | 0.447458528 | 0.079409404 |
| 0.274736725 | 0.117740157 | 0.251578532 | 0.197329898 |
| 0.165975441 | 0.456537935 | 0.044586136 | 0.466299323 |
| 0.251779993 | 0.117649091 | 0.430498595 | 0.176502331 |
| 0.156537134 | 0.068582194 | 0.144403059 | 0.238738352 |
| 0.187261431 | 0.200459357 | 0.018313828 | 0.076685118 |
| 0.24902337  | 0.279230763 | 0.381719164 | 0.328205091 |
| 0.181183857 | 0.30931526  | 0.117645999 | 0.215579429 |
| 0.417549116 | 0.433730162 | 0.164078785 | 0.222770047 |
| 0.291535062 | 0.064899198 | 0.223461007 | 0.033848889 |
| 0.297149181 | 0.27967153  | 0.259403947 | 0.04584586  |
| 0.018041038 | 0.169643293 | 0.291403493 | 0.073119954 |
| 0.441103518 | 0.130841294 | 0.295461068 | 0.291845248 |
| 0.163882298 | 0.433948063 | 0.092023909 | 0.283270684 |
| 0.082832067 | 0.19673242  | 0.240974317 | 0.282433287 |
| 0.13222693  | 0.207091217 | 0.286603472 | 0.147389462 |
| 0.025735481 | 0.165110952 | 0.007965294 | 0.350803722 |
| 0.423068721 | 0.254573087 | 0.188719813 | 0.228107059 |
| 0.202785582 | 0.341662701 | 0.221644421 | 0.233768405 |
| 0.006304817 | 0.231112386 | 0.126102928 | 0.3128445   |
| 0.154860784 | 1           | 0.031756004 | 0.257221301 |
| 0.39684301  | 0.23459177  | 0.243847185 | 0.227744977 |
| 0.41520655  | 0.333785565 | 0.132350513 | 0.139797892 |
| 0.327843767 | 0.056305609 | 0.203055454 | 0.477703954 |
| 0.11454031  | 0.144079756 | 0.381345696 | 0.14705246  |
| 0.223540139 | 0.321687933 | 0.28854615  | 0.479977354 |
| 0.06623973  | 0.170940048 | 0.350860339 | 0.428257301 |
| 0.240244968 | 0.155049886 | 0.170444696 | 0.181181761 |
| 0.378688967 | 0.048030855 | 0.223700759 | 0.271609153 |
| 0.17203826  | 0.22103151  | 0.249416425 | 0.145784579 |
| 0.026052436 | 0.138015259 | 0.165644283 | 0.104259757 |
| 0.200283863 | 0.226799693 | 0.189710801 | 0.324180524 |
| 0.064410759 | 0.013292304 | 0.391235735 | 0.024166714 |
| 0.15610997  | 0.237311237 | 0.147309236 | 0.221249372 |
| 0.142945867 | 0.256561364 | 0.22249238  | 0.001284682 |
| 0.365947107 | 0.029235987 | 0.217373641 | 0.148335013 |
| 0.224256172 | 0.04768138  | 0.372712389 | 0.455240854 |
| 0.211084988 | 0.195323146 | 0.205074485 | 0.407329177 |
| 0.116406318 | 0.224913213 | 0.266992288 | 0.287235199 |
| 0.154381476 | 0.242177741 | 0.246349262 | 0.202357154 |
| 0.28146361  | 0.162628372 |             |             |
| TOMM22      | 0.164333133 | 0.071078461 | 0.139175652 |
| 0.071499785 | 0.09948527  | 0.044825788 | 0.10205555  |
| 0.094854676 | 0.063644133 | 0.004539359 | 0.11483203  |
| 0.092093019 | 0.004093879 | 0.110216494 | 0.106735648 |
| 0.052349754 | 0.128529037 | 0.18387715  | 0.005172832 |
| 0.017550388 | 0.090156949 | 0.018911742 | 0.040564764 |
| 0.071982476 | 0.234687676 | 0.061318901 | 0.022577149 |
| 0.089750516 | 0.002568788 | 0.065375139 | 0.002599    |
| 0.173569033 | 0.07824445  | 0.018473741 | 0.098564459 |
| 0.04962635  | 0.001400513 | 0.157237405 | 0.090823351 |
| 0.018609336 | 0.198235441 | 0.012821089 | 0.160098683 |
| 0.017517532 | 0.126401234 | 0.001011967 | 0.039032031 |

|             |             |             |             |
|-------------|-------------|-------------|-------------|
| 0.05815232  | 0.061202862 | 0.116056041 | 0.064544368 |
| 0.016656051 | 0.140775    | 0.032406401 | 0.001528302 |
| 0.018808405 | 0.000802991 | 0.005300418 | 0.117538955 |
| 0.302049367 | 0.24251703  | 0.001989306 | 0.053518533 |
| 0.03121238  | 0.06338666  | 0.192737149 | 0.009574616 |
| 0.116467354 | 0.007179117 | 0.045700531 | 0.039221709 |
| 0.034765635 | 0.074982377 | 0.297522526 | 0.099208055 |
| 0.020423759 | 0.251021894 | 0.094574728 | 0.027225823 |
| 0.062815887 | 0.151692215 | 0.184827998 | 0.107108719 |
| 0.003488864 | 0.044522241 | 0.051412958 | 0.181786099 |
| 0.068583918 | 0.056433935 | 0.112168627 | 0.140497222 |
| 0.075877479 | 0.019241258 | 0.052941365 | 0.137542539 |
| 0.092478218 | 0.009139648 | 0.01714696  | 0.025180138 |
| 0.076383755 | 0.051516603 | 0.114167156 | 0.192954923 |
| 0.062811278 | 0.145322702 | 0.118177257 | 0.046421569 |
| 0.097999509 | 0.207037402 | 0.033545657 | 0.063950407 |
| 0.067103779 | 0.100459314 | 0.053472564 | 0.09550566  |
| 0.038698163 | 0.117727159 | 0.10756966  | 0.099712203 |
| 0.00051641  | 0.10712956  | 0.246393367 | 0.150280774 |
| 0.092134388 | 0.177758724 | 0.017051683 | 0.218273675 |
| 0.093672566 | 0.128473288 | 0.143009638 | 0.155793733 |
| 0.093848923 | 0.10163663  | 0.095646989 | 0.088778785 |
| 0.169299099 | 0.008940034 | 0.04299338  | 0.065152375 |
| 0.076147707 | 0.191044879 | 0.040486344 | 0.133905166 |
| 0.193868831 | 0.084185605 | 0.101222401 | 0.161689175 |
| 0.066010522 | 0.160558443 | 0.069500219 | 0.246700878 |
| 0.143121023 | 0.136044816 | 0.141681239 | 0.06794502  |
| 0.152345577 | 0.104937083 | 0.001244853 | 0.095006477 |
| 0.169057974 | 0.008724134 | 0.071305307 | 0.082430426 |
| 0.101438611 | 0.069154683 | 0.121750233 | 0.103462328 |
| 0.097884872 | 0.201371135 | 0.000214174 | 0.137519053 |
| 0.118167984 | 0.168985479 | 0.082892489 | 0.02385451  |
| 0.058005675 | 0.048525751 | 0.063605984 | 0.006634998 |
| 0.171987115 | 0.104356626 | 0.076802237 | 0.071771    |
| 0.032973503 | 0.215772783 | 0.021687702 | 0.125376218 |
| 0.130316858 | 0.14655902  | 0.178882448 | 0.13409661  |
| 0.010490449 | 0.270436341 | 0.036607329 | 0.045808867 |
| 0.270430513 | 0.038899671 | 0.012966923 | 0.075387506 |
| 0.151195054 | 0.03261674  | 0.207931487 | 0.11505057  |
| 0.15890861  | 0.253137573 | 0.03583476  | 0.132870727 |
| 0.135825432 | 0.182741884 | 0.04455446  | 0.104725573 |
| 0.028312747 | 0.209823489 | 0.06231009  | 0.163583327 |
| 0.204046111 | 0.049370526 | 0.194993181 | 0.104738236 |
| 0.011183224 | 0.004018402 | 0.006513627 | 0.027660942 |
| 0.216007644 | 0.031327344 | 0.050725288 | 0.101972774 |
| 0.096385648 | 0.067519497 | 0.020554312 | 0.196789884 |
| 0.146774321 | 0.077951557 | 0.111664168 | 0.025816843 |
| 0.063432357 | 0.098159023 | 0.086479991 | 0.020256279 |
| 0.077838964 | 0.00939355  | 0.012321655 | 0.095686054 |
| 0.005815931 | 0.029197436 | 0.090628182 | 0.096409923 |
| 0.007597128 | 0.13395244  | 0.118384781 | 5.09E-05    |
| 0.033662511 | 0.095263368 | 0.211851266 | 0.01171251  |
| 0.180108502 | 0.170217852 | 0.062286732 | 0.073275105 |
| 0.17582152  | 0.11042302  | 0.136967544 | 0.105777964 |

|             |             |             |             |
|-------------|-------------|-------------|-------------|
| 0.012530308 | 0.123257685 | 0.083622222 | 0.13219589  |
| 0.118850598 | 0.013624758 | 0.003522811 | 0.089587167 |
| 0.093438473 | 0.004230071 | 0.156106357 | 0.045311416 |
| 0.013064662 | 0.057155441 | 0.039646941 | 0.129755356 |
| 0.183088994 | 0.087657613 | 0.148943597 | 0.121194436 |
| 0.17156427  | 0.210801293 | 0.11199821  | 0.130427657 |
| 0.003775327 | 0.033261958 | 0.032861607 | 0.151356211 |
| 0.257097853 | 0.032535521 | 0.173456545 | 0.005678266 |
| 0.000704561 | 0.131037766 | 0.190893115 | 0.209524017 |
| 0.040025378 | 0.024868173 | 0.073077074 | 0.108482208 |
| 0.224351744 | 0.155462399 | 0.131344823 | 0.048222977 |
| 0.108294333 | 0.027726361 | 0.041950618 | 0.065734893 |
| 0.204188988 | 0.118876218 | 0.074022784 | 0.155394641 |
| 0.105876208 | 0.0257504   | 0.05367711  | 0.011376001 |
| 0.099140392 | 0.041657075 | 0.190868737 | 0.274423547 |
| 0.114437415 | 0.244217786 | 0.165618396 | 0.006410449 |
| 0.17166441  | 0.258581188 | 0.087156116 | 0.090602416 |
| 0.095944015 | 0.093764568 | 0.090414213 | 0.103307351 |
| 0.080142853 | 0.065818346 | 0.088770599 | 0.066286575 |
| 0.115814734 | 0.100388061 | 0.016185403 | 0.090392431 |
| 0.002317096 | 0.169154626 | 0.073959192 | 0.299048903 |
| 0.063158998 | 0.107336159 | 0.148977695 | 0.05466712  |
| 0.060324553 | 0.007343676 | 0.020416445 | 0.09873924  |
| 0.119288417 | 0.124973049 | 0.010063818 | 0.007656094 |
| 0.124960716 | 0.156197267 | 0.016293179 | 0.122295036 |
| 0.137637035 | 0.098585236 | 0.101997788 | 0.114997092 |
| 0.144206521 | 0.001336455 | 0.022218736 | 0.001408463 |
| 0.009039797 | 0.115351327 | 0.019015893 | 0.0590162   |
| 0.179967984 | 0.076986414 | 0.153792248 | 0.126419991 |
| 0.093635122 | 0.106520244 | 0.124582815 | 0.037596624 |
| 0.121246136 | 0.000392846 | 0.102988426 | 0.08498741  |
| 0.008485446 | 0.011172165 | 0.023082517 | 0.091108493 |
| 0.049372702 | 0.132513023 | 0.261687201 | 0.015291141 |
| 0.12693877  | 0.078331481 | 0.16785339  | 0.061419725 |
| 0.064004691 | 0.141977458 | 0.034251226 | 0.096121567 |
| 0.13632854  | 0.181940793 | 0.017101793 | 0.17377788  |
| 0.059850996 | 0.146385982 | 0.154722124 | 0.02503501  |
| 0.106951469 | 0.164330458 | 0.131117109 | 0.10350344  |
| 0.159784339 | 0.097957845 | 0.005021936 | 0.007977861 |
| 0.087014398 | 0.109652343 | 0.006801813 | 0.121921981 |
| 0.092317056 | 0.066163125 | 0.219859206 | 0.208829194 |
| 0.133673239 | 0.138084456 | 0.1612237   | 0.095743192 |
| 0.090975249 | 0.007704374 | 0.042916665 | 0.152825639 |
| 0.002057071 | 0.028976094 | 0.244567623 | 0.028316502 |
| 0.053155705 | 0.056911731 | 0.018001625 | 0.024685026 |
| 0.156971179 | 0.060490712 | 0.06831236  | 0.12924071  |
| 0.070898466 | 0.018063498 | 0.16486443  | 0.106670415 |
| 0.005679101 | 0.139190659 | 0.225860931 | 0.10768362  |
| 0.02539189  | 0.035894547 | 0.231234437 | 0.258752223 |
| 0.122715755 | 0.097027014 | 0.045023475 | 0.087764915 |
| 0.217152105 | 0.042900764 | 0.106666126 | 0.089863659 |
| 0.130129188 | 0.146211862 | 0.201645666 | 0.07193881  |
| 0.178775178 | 0.114939709 | 0.06563621  | 0.090161584 |
| 0.107705133 | 0.104060506 | 0.112261445 | 0.0303232   |

|             |             |             |             |
|-------------|-------------|-------------|-------------|
| 0.229247594 | 0.134558236 | 0.116717258 | 0.226521474 |
| 0.039591981 | 0.253926041 | 0.218265397 | 0.150012218 |
| 0.063168018 | 0.018457232 | 0.151868202 | 0.217946271 |
| 0.125554475 | 0.006810296 | 0.228816047 | 0.051469349 |
| 0.115258982 | 0.001504242 | 0.057846253 | 0.18318884  |
| 0.235321682 | 0.130183402 | 0.03198065  | 0.081571553 |
| 0.063525898 | 0.016276985 | 0.076769236 | 0.065867291 |
| 0.116767294 | 0.046369107 | 0.117273842 | 0.150394487 |
| 0.205515691 | 0.051947889 | 0.01519013  | 0.061577567 |
| 0.17559658  | 0.052896881 | 0.116540455 | 0.224056322 |
| 0.196251319 | 0.148901649 | 0.092978311 | 0.239817057 |
| 0.034043316 | 0.093028407 | 0.092489303 | 0.079668907 |
| 0.021834791 | 0.05877027  | 0.011622674 | 0.061962553 |
| 0.051520814 | 0.012564322 | 0.105952902 | 0.116471847 |
| 0.13923151  | 0.111597929 | 0.175628574 | 0.050516111 |
| 0.000140407 | 0.047450257 | 0.101953876 | 0.041290392 |
| 0.07782629  | 0.145776454 | 0.015088184 | 0.148028947 |
| 0.271635761 | 0.15166205  | 0.068723446 | 0.01155128  |
| 0.002736858 | 0.045716198 | 0.270096505 | 0.106172821 |
| 0.149368571 | 0.083462421 | 0.015506698 | 0.190084169 |
| 0.005252299 | 0.281931833 | 0.181603509 | 0.00541355  |
| 0.003544635 | 0.097278798 | 0.075557753 | 0.160043909 |
| 0.037581427 | 0.094847988 | 0.130328224 | 0.004943198 |
| 0.069901777 | 0.083023472 | 0.158826446 | 0.18909127  |
| 0.177257398 | 0.10073115  | 0.163769976 | 0.072195305 |
| 0.065825942 | 0.139922322 | 0.147682358 | 0.260969438 |
| 0.183290668 | 0.152830317 | 0.067748311 | 0.048071365 |
| 0.080587987 | 0.206340151 | 0.206960142 | 0.191238986 |
| 0.098295448 | 0.08512125  | 0.269893066 | 0.190314694 |
| 0.2122028   | 0.033753965 | 0.244801056 | 0.088363378 |
| 0.179754375 | 0.138599117 | 0.048764433 | 0.084158311 |
| 0.000914345 | 0.00984251  | 0.074440282 | 0.063890339 |
| 0.185860682 | 0.032450581 | 0.030993075 | 0.062987258 |
| 0.039506539 | 0.211127639 | 0.266558597 | 0.155640429 |
| 0.072500945 | 0.024717706 | 0.007149007 | 0.128249101 |
| 0.172029925 | 0.190755876 | 0.088353454 | 0.074427154 |
| 0.120358401 | 0.039587199 | 0.082434604 | 0.118636472 |
| 0.011834284 | 0.204946876 | 0.003404917 | 0.106335426 |
| 0.003796616 | 0.138860998 | 0.26005357  | 0.058849621 |
| 0.007469489 | 0.18198114  | 0.112808282 | 0.024794086 |
| 0.072283076 | 0.047035731 | 0.039013784 | 0.074958358 |
| 0.129183237 | 0.176052184 | 0.12151837  | 0.129953077 |
| 0.026588802 | 0.071182226 | 0.024256173 | 0.091377063 |
| 0.125149718 | 0.099003332 | 0.22258621  | 0.094624414 |
| 0.040768879 | 0.206407541 | 0.184384998 | 0.084138765 |
| 0.048937668 | 0.093007181 | 0.010348828 | 0.016665369 |
| 0.058598061 | 0.017219847 | 0.000492469 | 0.003611706 |
| 0.188573118 | 0.014142988 | 0.042800043 | 0.089099942 |
| 0.060670028 | 0.163294272 | 0.003736423 | 0.060455769 |
| 0.091040213 | 0.126092673 | 0.033752356 | 0.236724162 |
| 0.121169246 | 0.215392569 | 0.054125333 | 0.000639672 |
| 0.035421396 | 0.024329093 | 0.005827414 | 0.152005407 |
| 0.06420888  | 0.010356617 | 0.039805727 | 0.099200552 |
| 0.102984717 | 0.003283094 | 0.030796248 | 0.07472218  |

|             |             |             |             |
|-------------|-------------|-------------|-------------|
| 0.168281081 | 0.132828922 | 0.136215555 | 0.112930267 |
| 0.014495355 | 0.179914647 | 0.028500122 | 0.019613855 |
| 0.062449554 | 0.03800029  | 0.148012021 | 0.039941535 |
| 0.185504557 | 0.044569668 | 0.005856781 | 0.202637403 |
| 0.10953932  | 0.027060302 | 0.231326797 | 0.003391781 |
| 0.240958494 | 0.128406806 | 0.012163459 | 0.022690941 |
| 0.121129372 | 0.058599808 | 0.24081205  | 0.123949443 |
| 0.00349575  | 0.031756004 | 1           | 0.035609161 |
| 0.140491911 | 0.009768449 | 0.189979278 | 0.005953813 |
| 0.098501862 | 0.085882069 | 0.144227429 | 0.043772021 |
| 0.027787821 | 0.192492329 | 0.014129885 | 0.119237777 |
| 0.203971878 | 0.04966911  | 0.098932274 | 0.117919758 |
| 0.024735451 | 0.123332804 | 0.024260594 | 0.108604487 |
| 0.101963854 | 0.246129761 | 0.089168923 | 0.095119643 |
| 0.239682987 | 0.040194974 | 0.022804621 | 0.074551278 |
| 0.103008256 | 0.08342397  | 0.017326229 | 0.141123427 |
| 0.019614064 | 0.167898833 | 0.025876329 | 0.098261557 |
| 0.072733881 | 0.075929733 | 0.038788589 | 0.24052939  |
| 0.134039919 | 0.071136717 | 0.052309158 | 0.226325477 |
| 0.102077329 | 0.097335998 | 0.194203649 | 0.001195709 |
| 0.089050062 | 0.107883372 | 0.195455302 | 0.052255118 |
| 0.272839442 | 0.069134247 | 0.039574735 | 0.012413144 |
| 0.104947468 | 0.041303406 | 0.043471096 | 0.067383963 |
| 0.004639249 | 0.107111116 | 0.144518873 | 0.115025459 |
| 0.129738946 | 0.005924867 | 0.004943796 | 0.107553272 |
| 0.008682834 | 0.00699776  | 0.009732029 | 0.046009145 |
| 0.023020285 | 0.011335466 | 0.015796518 | 0.02152449  |
| 0.110818552 | 0.092308785 |             |             |
| TOMM6       | 0.028164531 | 0.286828073 | 0.015075349 |
| 0.057823995 | 0.272161029 | 0.137994878 | 0.042894324 |
| 0.075961085 | 0.256217608 | 0.145907553 | 0.182260045 |
| 0.010030291 | 0.182503101 | 0.340897389 | 0.045968048 |
| 0.308102992 | 0.03004311  | 0.068968369 | 0.084357552 |
| 0.149896841 | 0.260330524 | 0.204425003 | 0.131669661 |
| 0.267060357 | 0.109405992 | 0.174138591 | 0.272577916 |
| 0.352905755 | 0.140983326 | 0.268035296 | 0.075152739 |
| 0.306939621 | 0.298044533 | 0.216508812 | 0.006225588 |
| 0.205702147 | 0.096754946 | 0.307811319 | 0.194055115 |
| 0.166817348 | 0.242082318 | 0.113431986 | 0.1364827   |
| 0.160977772 | 0.013581707 | 0.078322095 | 0.347253025 |
| 0.19557791  | 0.186249412 | 0.022086314 | 0.271013783 |
| 0.222512444 | 0.17954128  | 0.220907309 | 0.001817327 |
| 0.232800844 | 0.15528499  | 0.247122162 | 0.332507651 |
| 0.125898345 | 0.085978392 | 0.221197204 | 0.152724319 |
| 0.300929315 | 0.348607891 | 0.213735391 | 0.190737831 |
| 0.346100592 | 0.264087373 | 0.327424915 | 0.077377993 |
| 0.18265239  | 0.018792335 | 0.11067903  | 0.047541799 |
| 0.233240764 | 0.130228616 | 0.214689077 | 0.275077784 |
| 0.269000118 | 0.370518648 | 0.173019972 | 0.32543599  |
| 0.281087664 | 0.320336736 | 0.253247065 | 0.283605357 |
| 0.329827461 | 0.076181101 | 0.278861617 | 0.377420644 |
| 0.033301988 | 0.189083343 | 0.306459856 | 0.069071171 |
| 0.277500292 | 0.286681436 | 0.153020726 | 0.205304915 |
| 0.351390262 | 0.289600426 | 0.346658407 | 0.190722333 |



|             |             |             |             |
|-------------|-------------|-------------|-------------|
| 0.243231943 | 0.031759717 | 0.296903714 | 0.311216103 |
| 0.165114687 | 0.030844394 | 0.250177892 | 0.387669629 |
| 0.25864131  | 0.344012059 | 0.318821271 | 0.324556926 |
| 0.275929972 | 0.349081816 | 0.249875734 | 0.315846279 |
| 0.080868939 | 0.365454924 | 0.080847038 | 0.031603013 |
| 0.026038417 | 0.072594987 | 0.297497198 | 0.253482916 |
| 0.351935507 | 0.211934097 | 0.089064814 | 0.180910362 |
| 0.422539052 | 0.290182821 | 0.370464026 | 0.322638554 |
| 0.020484965 | 0.311753934 | 0.254631754 | 0.124667236 |
| 0.298012153 | 0.079106133 | 0.258864292 | 0.332787873 |
| 0.255918898 | 0.376965017 | 0.064379769 | 0.335239443 |
| 0.150232943 | 0.376550966 | 0.288052489 | 0.08992561  |
| 0.350222553 | 0.308530579 | 0.395604209 | 0.341988241 |
| 0.305679838 | 0.119905708 | 0.110306942 | 0.313584968 |
| 0.374228755 | 0.024630778 | 0.37860006  | 0.401808531 |
| 0.332698708 | 0.371138612 | 0.42988045  | 0.383775647 |
| 0.33315523  | 0.040553965 | 0.078039827 | 0.2811253   |
| 0.337122075 | 0.27294502  | 0.147710495 | 0.236079975 |
| 0.319329795 | 0.143025088 | 0.346048099 | 0.15037905  |
| 0.396608726 | 0.334810671 | 0.365756208 | 0.293399628 |
| 0.181003425 | 0.213769108 | 0.282328239 | 0.276218065 |
| 0.028017485 | 0.040537221 | 0.020136615 | 0.274399652 |
| 0.110873654 | 0.128470686 | 0.142408179 | 0.311796517 |
| 0.142480504 | 0.14428258  | 0.229536327 | 0.348151804 |
| 0.028458675 | 0.209312516 | 0.079005103 | 0.081556348 |
| 0.031249762 | 0.093600012 | 0.10084755  | 0.081478649 |
| 0.190422721 | 0.138629507 | 0.302394135 | 0.384258767 |
| 0.257190615 | 0.094504939 | 0.270247634 | 0.364599996 |
| 0.357375763 | 0.252174823 | 0.18103186  | 0.006492613 |
| 0.204677528 | 0.234828109 | 0.268373812 | 0.259246431 |
| 0.110193268 | 0.183322248 | 0.286136633 | 0.344689387 |
| 0.097395847 | 0.078145194 | 0.247989555 | 0.285871303 |
| 0.085039606 | 0.180098111 | 0.361308437 | 0.22143062  |
| 0.001162762 | 0.154853982 | 0.330374524 | 0.244048265 |
| 0.236769053 | 0.162940127 | 0.172332027 | 0.372767608 |
| 0.259472972 | 0.292571886 | 0.379764019 | 0.364144295 |
| 0.157380126 | 0.132914234 | 0.415964462 | 0.122437295 |
| 0.288277311 | 0.050908716 | 0.246035234 | 0.136713197 |
| 0.151752735 | 0.272846889 | 0.28697582  | 0.21751899  |
| 0.049954012 | 0.365874997 | 0.277466358 | 0.374278895 |
| 0.227882475 | 0.412156444 | 0.364195415 | 0.327059978 |
| 0.234649732 | 0.252169524 | 0.218613045 | 0.314815564 |
| 0.364269994 | 0.197351771 | 0.03491518  | 0.360964341 |
| 0.215604919 | 0.349207788 | 0.171423575 | 0.381589376 |
| 0.344979691 | 0.286846798 | 0.112203597 | 0.371727164 |
| 0.265427283 | 0.099126235 | 0.333395473 | 0.42139126  |
| 0.184747171 | 0.259537456 | 0.241005374 | 0.384926976 |
| 0.098654764 | 0.274601629 | 0.246999768 | 0.260923769 |
| 0.009936556 | 0.038170532 | 0.02668874  | 0.133728832 |
| 0.232618839 | 0.257510615 | 0.319281257 | 0.377026365 |
| 0.071004842 | 0.28958023  | 0.200435342 | 0.18612343  |
| 0.291011639 | 0.26550997  | 0.263678412 | 0.29878214  |
| 0.185787011 | 0.011983658 | 0.065341907 | 0.362579239 |
| 0.017559876 | 0.224894176 | 0.167032093 | 0.002008979 |

|             |             |             |             |
|-------------|-------------|-------------|-------------|
| 0.024095134 | 0.266804503 | 0.056377611 | 0.124391033 |
| 0.416703857 | 0.117159055 | 0.114448259 | 0.162991795 |
| 0.265841164 | 0.048605708 | 0.002974053 | 0.383552158 |
| 0.376089846 | 0.368258943 | 0.368275627 | 0.321830718 |
| 0.387796109 | 0.323008494 | 0.368878215 | 0.121162648 |
| 0.061987295 | 0.038356993 | 0.253988589 | 0.200649118 |
| 0.004090071 | 0.299761885 | 0.244115286 | 0.09013676  |
| 0.356746207 | 0.253003698 | 0.018357271 | 0.317388927 |
| 0.006528325 | 0.191275926 | 0.175901636 | 0.18429869  |
| 0.371069101 | 0.006147211 | 0.086543442 | 0.230182476 |
| 0.249245095 | 0.22455683  | 0.230413264 | 0.36835708  |
| 0.182331886 | 0.062813209 | 0.200000522 | 0.319104245 |
| 0.045696528 | 0.093483324 | 0.183176819 | 0.012737301 |
| 0.087058551 | 0.336885263 | 0.231949693 | 0.028682289 |
| 0.162885273 | 0.001565933 | 0.223400373 | 0.377530307 |
| 0.281870343 | 0.409534709 | 0.347286222 | 0.219916121 |
| 0.343905941 | 0.192464107 | 0.382658753 | 0.267784439 |
| 0.173380642 | 0.000181023 | 0.006864026 | 0.379390957 |
| 0.249009342 | 0.024977631 | 0.096924801 | 0.109288568 |
| 0.072836883 | 0.058860619 | 0.041706107 | 0.229621488 |
| 0.222073342 | 0.20437726  | 0.245642108 | 0.30594329  |
| 0.160462457 | 0.179028018 | 0.164154304 | 0.0506622   |
| 0.259075991 | 0.030420506 | 0.056593903 | 0.006858438 |
| 0.344882105 | 0.059245743 | 0.285808322 | 0.352116853 |
| 0.361356767 | 0.325669103 | 0.15120061  | 0.155901729 |
| 0.386637889 | 0.038746712 | 0.187669138 | 0.04503769  |
| 0.308252187 | 0.292528446 | 0.231479861 | 0.192205101 |
| 0.392748392 | 0.321351191 | 0.021332287 | 0.338707537 |
| 0.003959319 | 0.007645163 | 0.1190604   | 0.211132491 |
| 0.194543359 | 0.25111912  | 0.183265169 | 0.202659754 |
| 0.207260619 | 0.011306998 | 0.287863241 | 0.2773042   |
| 0.224660517 | 0.226077123 | 0.24955193  | 0.20496885  |
| 0.250211162 | 0.217595865 | 0.141346346 | 0.122480759 |
| 0.229468011 | 0.205325192 | 0.110499714 | 0.015370964 |
| 0.195545583 | 0.231170382 | 0.028612444 | 0.092543423 |
| 0.325885337 | 0.371178337 | 0.043003174 | 0.008706657 |
| 0.176807924 | 0.242609631 | 0.399761416 | 0.330622566 |
| 0.348236272 | 0.401833725 | 0.269485842 | 0.152843581 |
| 0.034389315 | 0.260213235 | 0.279471673 | 0.14272038  |
| 0.364841146 | 0.030577657 | 0.315654541 | 0.270538573 |
| 0.078074865 | 0.120281895 | 0.021997232 | 0.054759283 |
| 0.283623056 | 0.118859027 | 0.149305817 | 0.061658976 |
| 0.211771359 | 0.234776718 | 0.032511598 | 0.125095795 |
| 0.254784555 | 0.24065302  | 0.102630723 | 0.153648423 |
| 0.240778624 | 0.145138822 | 0.344945223 | 0.344567106 |
| 0.068916856 | 0.065837672 | 0.085725293 | 0.331714537 |
| 0.334019053 | 0.222619357 | 0.007919257 | 0.289477345 |
| 0.385433013 | 0.276621014 | 0.319948171 | 0.366166018 |
| 0.051849306 | 0.215500235 | 0.299231788 | 0.272576489 |
| 0.137190314 | 0.134018599 | 0.179908642 | 0.035002698 |
| 0.251271706 | 0.346758772 | 0.29389646  | 0.104121314 |
| 0.228068396 | 0.05757391  | 0.025379277 | 0.341245818 |
| 0.252646738 | 0.040740025 | 0.132525274 | 0.382276153 |
| 0.003168555 | 0.224731274 | 0.425213752 | 0.124423509 |

|             |             |             |             |
|-------------|-------------|-------------|-------------|
| 0.392649054 | 0.384414312 | 0.307976375 | 0.14363488  |
| 0.014153001 | 0.351491245 | 0.234421253 | 0.184729442 |
| 0.287202233 | 0.22126564  | 0.117305304 | 0.058637377 |
| 0.232563652 | 0.032787446 | 0.118099809 | 0.12168998  |
| 0.230961233 | 0.227614822 | 0.161896712 | 0.154198491 |
| 0.179190112 | 0.055960454 | 0.230077583 | 0.114986802 |
| 0.311072255 | 0.181721942 | 0.281304982 | 0.120577416 |
| 0.173997038 | 0.391446472 | 0.294442127 | 0.011263431 |
| 0.266536368 | 0.365258405 | 0.347281355 | 0.002598667 |
| 0.318012765 | 0.004581964 | 0.166912454 | 0.147730429 |
| 0.15544908  | 0.188670406 | 0.252517534 | 0.209567753 |
| 0.238696617 | 0.147401362 | 0.135378267 | 0.162548672 |
| 0.119452323 | 0.125802065 | 0.272368354 | 0.174404066 |
| 0.172066722 | 0.061034946 | 0.055350054 | 0.053215923 |
| 0.027171408 | 0.330601443 | 0.161427205 | 0.031153313 |
| 0.180789453 | 0.199919766 | 0.281008106 | 0.318823631 |
| 0.339330046 | 0.052561746 | 0.229368105 | 0.280863317 |
| 0.167268737 | 0.121181457 | 0.027493572 | 0.179962141 |
| 0.125393663 | 0.197176425 | 0.171733778 | 0.139486642 |
| 0.29088776  | 0.277967004 | 0.152458224 | 0.334488804 |
| 0.192028524 | 0.240676557 | 0.109097555 | 0.065960565 |
| 0.083025027 | 0.086940633 | 0.248060117 | 0.000494533 |
| 0.239250702 | 0.080552558 | 0.351865037 | 0.308610029 |
| 0.263256812 | 0.291486452 | 0.098814883 | 0.04407393  |
| 0.090714764 | 0.093788829 | 0.088884944 | 0.312207356 |
| 0.219607055 | 0.097474732 | 0.243266414 | 0.09363365  |
| 0.34444198  | 0.340003684 | 0.27680272  | 0.149812686 |
| 0.185376151 | 0.099453338 | 0.339812342 | 0.046116258 |
| 0.247422121 | 0.196014389 | 0.181152757 | 0.199817236 |
| 0.193872801 | 0.387848274 | 0.026954817 | 0.394443167 |
| 0.243906609 | 0.079094982 | 0.359042481 | 0.145851124 |
| 0.131030848 | 0.104252727 | 0.243949283 | 0.166556806 |
| 0.17847153  | 0.239617275 | 0.013034793 | 0.095269861 |
| 0.268652224 | 0.23757839  | 0.28724352  | 0.329833642 |
| 0.265653086 | 0.335909022 | 0.223850834 | 0.149099781 |
| 0.294471334 | 0.314921566 | 0.139283515 | 0.210481147 |
| 0.261311407 | 0.057777194 | 0.171346885 | 0.038465863 |
| 0.284824228 | 0.277361865 | 0.194023871 | 0.037497619 |
| 0.01264543  | 0.244532938 | 0.257627647 | 0.039338722 |
| 0.417817362 | 0.190611396 | 0.240795078 | 0.282801577 |
| 0.127639259 | 0.312339437 | 0.12537123  | 0.293054507 |
| 0.040021829 | 0.194588645 | 0.257167549 | 0.237555777 |
| 0.158497588 | 0.265313935 | 0.299100928 | 0.229426334 |
| 0.021070957 | 0.196118353 | 0.004334776 | 0.264111119 |
| 0.292490666 | 0.273208151 | 0.147094872 | 0.162385459 |
| 0.233719301 | 0.311178227 | 0.238186102 | 0.210222853 |
| 0.007201904 | 0.284341824 | 0.133220817 | 0.25301143  |
| 0.142574773 | 0.257221301 | 0.035609161 | 1           |
| 0.271194006 | 0.213003975 | 0.213115903 | 0.188761463 |
| 0.316882221 | 0.277920371 | 0.078810152 | 0.207819338 |
| 0.272205741 | 0.034395897 | 0.14080654  | 0.397392142 |
| 0.130894874 | 0.232606166 | 0.385322111 | 0.140988246 |
| 0.277142819 | 0.25936712  | 0.261035171 | 0.392192479 |
| 0.095622633 | 0.171785261 | 0.358704043 | 0.34277714  |

|             |             |             |             |
|-------------|-------------|-------------|-------------|
| 0.261080716 | 0.269972907 | 0.23860263  | 0.218915566 |
| 0.27125     | 0.039729083 | 0.289552494 | 0.231967329 |
| 0.246324055 | 0.244071401 | 0.181456238 | 0.215140321 |
| 0.026143523 | 0.133711971 | 0.147814056 | 0.088537576 |
| 0.213450233 | 0.237490388 | 0.260750583 | 0.286627075 |
| 0.079444404 | 0.013886742 | 0.339866653 | 0.047402004 |
| 0.11887663  | 0.26430646  | 0.152273648 | 0.241301851 |
| 0.101569273 | 0.226574414 | 0.141884587 | 0.000331219 |
| 0.363509383 | 0.066500254 | 0.24325024  | 0.189524512 |
| 0.24439208  | 0.027995028 | 0.298053435 | 0.411847291 |
| 0.195637302 | 0.192645073 | 0.195512604 | 0.326555205 |
| 0.212150405 | 0.229879839 | 0.271980231 | 0.223023158 |
| 0.252718245 | 0.161928122 | 0.204841774 | 0.204049784 |
| 0.250752738 | 0.137839831 |             |             |
| TOP2A       | 0.253555017 | 0.502285143 | 0.248056917 |
| 0.23937668  | 0.276116693 | 0.466202473 | 0.198872138 |
| 0.284703335 | 0.472497649 | 0.35898647  | 0.38820009  |
| 0.095653251 | 0.055281644 | 0.478436563 | 0.180188793 |
| 0.351405571 | 0.115672167 | 0.254620824 | 0.124921329 |
| 0.340579373 | 0.252354741 | 0.302087352 | 0.508667392 |
| 0.264625122 | 0.389654622 | 0.48670737  | 0.349340126 |
| 0.494285744 | 0.231701201 | 0.432650199 | 0.236769956 |
| 0.463479216 | 0.281228732 | 0.334901771 | 0.11342113  |
| 0.441767694 | 0.011298506 | 0.476237016 | 0.281090962 |
| 0.114882893 | 0.457633728 | 0.438354796 | 0.304289654 |
| 0.425214138 | 0.175614489 | 0.253704967 | 0.384436562 |
| 0.452086785 | 0.370236337 | 0.272823205 | 0.465764961 |
| 0.388112738 | 0.479521515 | 0.481090775 | 0.009753085 |
| 0.233131093 | 0.048223582 | 0.15566694  | 0.507127379 |
| 0.345162851 | 0.237456744 | 0.248597578 | 0.401272969 |
| 0.398031557 | 0.386283255 | 0.365254351 | 0.390119896 |
| 0.49503938  | 0.122166339 | 0.427815231 | 0.241861666 |
| 0.448265132 | 0.184474101 | 0.32641297  | 0.300891917 |
| 0.375024886 | 0.292837821 | 0.345520101 | 0.249202711 |
| 0.501849598 | 0.491513954 | 0.376261707 | 0.504883965 |
| 0.075648418 | 0.28326425  | 0.253592184 | 0.356011991 |
| 0.413335734 | 0.234147501 | 0.433694943 | 0.487046514 |
| 0.210572505 | 0.450730187 | 0.437035788 | 0.343433008 |
| 0.506449501 | 0.242272222 | 0.444245882 | 0.128390239 |
| 0.333470508 | 0.299286446 | 0.491973694 | 0.39704305  |
| 0.308780098 | 0.27788967  | 0.508158979 | 0.256213794 |
| 0.304848713 | 0.277960784 | 0.203907955 | 0.44110671  |
| 0.432578285 | 0.493653427 | 0.476648234 | 0.418652689 |
| 0.327686525 | 0.492935776 | 0.449119565 | 0.485292572 |
| 0.180447998 | 0.501057944 | 0.35348611  | 0.131736046 |
| 0.282128615 | 0.192559947 | 0.229943722 | 0.407517119 |
| 0.473255374 | 0.448749299 | 0.356676631 | 0.273271401 |
| 0.426159923 | 0.512170157 | 0.498227905 | 0.45817468  |
| 0.16782446  | 0.195466818 | 0.336923725 | 0.437699513 |
| 0.414237357 | 0.288571533 | 0.198708617 | 0.50205723  |
| 0.464876791 | 0.42749024  | 0.388569806 | 0.500354142 |
| 0.338380076 | 0.481071644 | 0.502574204 | 0.290219893 |
| 0.498297074 | 0.507307573 | 0.470134384 | 0.354569248 |
| 0.503393126 | 0.452159131 | 0.092198694 | 0.45508734  |

|             |             |             |             |
|-------------|-------------|-------------|-------------|
| 0.467210654 | 0.011635094 | 0.46699745  | 0.46633023  |
| 0.502875709 | 0.442067656 | 0.464597494 | 0.481436925 |
| 0.506961456 | 0.255931751 | 0.024119511 | 0.302208948 |
| 0.501790854 | 0.462882121 | 0.214666166 | 0.376403125 |
| 0.328978981 | 0.491109343 | 0.447094026 | 0.284872671 |
| 0.472721174 | 0.476740796 | 0.483617175 | 0.461337764 |
| 0.427637296 | 0.451047162 | 0.315064553 | 0.509443012 |
| 0.156646662 | 0.310922963 | 0.240633688 | 0.403352826 |
| 0.435417944 | 0.272501449 | 0.481142348 | 0.347134523 |
| 0.305576791 | 0.485826003 | 0.273518865 | 0.339869097 |
| 0.253022789 | 0.44534305  | 0.345878131 | 0.363408316 |
| 0.127285141 | 0.342047237 | 0.267429992 | 0.256976981 |
| 0.283114185 | 0.408445671 | 0.441805761 | 0.47358816  |
| 0.348145236 | 0.388202195 | 0.466998694 | 0.470196927 |
| 0.431373135 | 0.332075588 | 0.380951436 | 0.033027162 |
| 0.25009972  | 0.277811928 | 0.124915898 | 0.377711534 |
| 0.377644059 | 0.287656874 | 0.379985798 | 0.365815888 |
| 0.459313959 | 0.359789383 | 0.3326061   | 0.48240919  |
| 0.373832511 | 0.30329915  | 0.443920905 | 0.443215128 |
| 0.034960767 | 0.406674906 | 0.460598053 | 0.141933711 |
| 0.425856371 | 0.102035596 | 0.202556635 | 0.457333547 |
| 0.238623775 | 0.190347545 | 0.476177876 | 0.366750909 |
| 0.379652365 | 0.420441645 | 0.475000455 | 0.033910906 |
| 0.323511771 | 0.070361785 | 0.328132564 | 0.420962312 |
| 0.375934589 | 0.3603444   | 0.270555023 | 0.261512621 |
| 0.356108875 | 0.498072498 | 0.478365989 | 0.486653659 |
| 0.324339595 | 0.476712609 | 0.449977548 | 0.46648217  |
| 0.445250396 | 0.328355563 | 0.084376559 | 0.456125466 |
| 0.456593485 | 0.29795072  | 0.289062949 | 0.4390564   |
| 0.369081165 | 0.371763155 | 0.132318887 | 0.467335189 |
| 0.488056911 | 0.509093258 | 0.228190646 | 0.36556204  |
| 0.444206078 | 0.383516008 | 0.454519252 | 0.475060393 |
| 0.338531934 | 0.313463736 | 0.289800718 | 0.38891661  |
| 0.343318683 | 0.182898953 | 0.445404157 | 0.121879607 |
| 0.007498404 | 0.281015864 | 0.246151643 | 0.218697852 |
| 0.12200504  | 0.425253394 | 0.397601205 | 0.489383228 |
| 0.251504159 | 0.486162476 | 0.389615664 | 0.281582838 |
| 0.485412115 | 0.324399974 | 0.33108479  | 0.370133674 |
| 0.396489189 | 0.053862225 | 0.189997492 | 0.491632409 |
| 0.223090851 | 0.184843222 | 0.443451662 | 0.0071116   |
| 0.188078863 | 0.487692686 | 0.305048967 | 0.375084814 |
| 0.443834928 | 0.390032921 | 0.386370644 | 0.374599795 |
| 0.387590686 | 0.258133654 | 0.008654636 | 0.476327005 |
| 0.485124045 | 0.477056271 | 0.488021851 | 0.496071146 |
| 0.454813495 | 0.44942852  | 0.410576582 | 0.505326877 |
| 0.25467336  | 0.301364851 | 0.153892295 | 0.307348156 |
| 0.018602828 | 0.415769032 | 0.320443115 | 0.30893368  |
| 0.412508681 | 0.395303517 | 0.158110495 | 0.330551739 |
| 0.102483567 | 0.137375561 | 0.414437925 | 0.297667484 |
| 0.348902633 | 0.101841142 | 0.265329307 | 0.272546673 |
| 0.510428026 | 0.474321487 | 0.302853191 | 0.497733616 |
| 0.369001007 | 0.36468622  | 0.310790035 | 0.405043144 |
| 0.209428407 | 0.129131451 | 0.449989432 | 0.051792496 |
| 0.28152407  | 0.489758399 | 0.369188064 | 0.229301852 |

|             |             |             |             |
|-------------|-------------|-------------|-------------|
| 0.367940886 | 0.046757609 | 0.485974092 | 0.494966235 |
| 0.512552103 | 0.469680699 | 0.49403563  | 0.211610691 |
| 0.496829753 | 0.062626045 | 0.492324242 | 0.495813581 |
| 0.38082949  | 0.005012    | 0.018877851 | 0.464262562 |
| 0.359380048 | 0.26699862  | 0.313738109 | 0.429021134 |
| 0.204113106 | 0.378835996 | 0.21029883  | 0.148538096 |
| 0.460940964 | 0.243452847 | 0.147985478 | 0.506044059 |
| 0.313631082 | 0.319484965 | 0.46692481  | 0.292856067 |
| 0.395139679 | 0.164236662 | 0.287111612 | 0.013225528 |
| 0.367647629 | 0.3377751   | 0.50217626  | 0.500282697 |
| 0.480579657 | 0.372003498 | 0.342423688 | 0.386171589 |
| 0.451465712 | 0.336183918 | 0.346501169 | 0.348774978 |
| 0.508414593 | 0.367849588 | 0.403384646 | 0.44206946  |
| 0.467893208 | 0.490383696 | 0.14440898  | 0.41923666  |
| 0.058894626 | 0.002843518 | 0.483045008 | 0.390377405 |
| 0.073635981 | 0.325830301 | 0.386495873 | 0.329997955 |
| 0.299799508 | 0.139229461 | 0.19343717  | 0.178381832 |
| 0.347185905 | 0.359313921 | 0.227137383 | 0.400743608 |
| 0.256141321 | 0.11951175  | 0.279968554 | 0.2724981   |
| 0.289254265 | 0.461840399 | 0.388910243 | 0.115594134 |
| 0.426450496 | 0.372474192 | 0.200142623 | 0.346866958 |
| 0.458893471 | 0.472008325 | 0.128147366 | 0.033620949 |
| 0.419138565 | 0.330070153 | 0.463136641 | 0.505948215 |
| 0.504080715 | 0.473260019 | 0.47144838  | 0.16514711  |
| 0.21608522  | 0.339064731 | 0.246942404 | 0.124779862 |
| 0.494215375 | 0.272545949 | 0.509090566 | 0.229230662 |
| 0.291899035 | 0.321448705 | 0.106416999 | 0.235099306 |
| 0.331829452 | 0.32622453  | 0.23040383  | 0.366640239 |
| 0.316767338 | 0.195926843 | 0.184149695 | 0.321175029 |
| 0.437453068 | 0.117113658 | 0.313788421 | 0.445821038 |
| 0.480614412 | 0.297252378 | 0.404256292 | 0.461309081 |
| 0.327468325 | 0.296609554 | 0.438006681 | 0.426051574 |
| 0.464678075 | 0.405875945 | 0.087457428 | 0.505563129 |
| 0.474359005 | 0.427244427 | 0.509393428 | 0.409733642 |
| 0.272958123 | 0.338034967 | 0.26217832  | 0.326099135 |
| 0.323443395 | 0.477596515 | 0.328690151 | 0.224581537 |
| 0.419500336 | 0.488051665 | 0.48286321  | 0.254468678 |
| 0.438660094 | 0.370209739 | 0.258249409 | 0.480200888 |
| 0.12880082  | 0.233543697 | 0.442336108 | 0.437354885 |
| 0.003949854 | 0.088249701 | 0.455359963 | 0.33432245  |
| 0.483550373 | 0.459995954 | 0.476463792 | 0.401657969 |
| 0.000915758 | 0.370033659 | 0.385679969 | 0.380806234 |
| 0.499361051 | 0.475726295 | 0.272439941 | 0.159226819 |
| 0.384487051 | 0.300870055 | 0.204937031 | 0.430869161 |
| 0.125926705 | 0.478621693 | 0.325738053 | 0.3550568   |
| 0.245830462 | 0.314565099 | 0.191308481 | 0.361866657 |
| 0.118066181 | 0.356669287 | 0.409565019 | 0.391270692 |
| 0.140827284 | 0.44606382  | 0.46007041  | 0.139396104 |
| 0.311083176 | 0.441913656 | 0.467181531 | 0.007429404 |
| 0.408041745 | 0.045192729 | 0.239361398 | 0.254378278 |
| 0.255120585 | 0.262360546 | 0.281051363 | 0.283481292 |
| 0.434196866 | 0.323506185 | 0.337178813 | 0.32781075  |
| 0.221502366 | 0.365842042 | 0.382205047 | 0.439642644 |
| 0.271587546 | 0.277053799 | 0.312561096 | 0.314446797 |

|             |             |             |             |
|-------------|-------------|-------------|-------------|
| 0.142811338 | 0.494147316 | 0.405612065 | 0.285545875 |
| 0.321804697 | 0.419223584 | 0.421087951 | 0.507257028 |
| 0.448405784 | 0.348928068 | 0.368900061 | 0.501320058 |
| 0.229513603 | 0.379709101 | 0.247556574 | 0.459854606 |
| 0.357914422 | 0.187364704 | 0.464562299 | 0.46997864  |
| 0.460371187 | 0.466345897 | 0.406152499 | 0.47435396  |
| 0.376921078 | 0.365890366 | 0.390841691 | 0.147294681 |
| 0.32227997  | 0.3320252   | 0.226426616 | 0.017247664 |
| 0.417447588 | 0.432185298 | 0.46599631  | 0.506445098 |
| 0.223624831 | 0.453631308 | 0.413022387 | 0.229112121 |
| 0.352529101 | 0.393144363 | 0.317046266 | 0.458546828 |
| 0.149306073 | 0.321501051 | 0.287797453 | 0.49566863  |
| 0.422372594 | 0.428383175 | 0.241486008 | 0.381876331 |
| 0.341499589 | 0.406290569 | 0.48997105  | 0.343223821 |
| 0.416004377 | 0.15772466  | 0.472301632 | 0.299015367 |
| 0.252892    | 0.483598043 | 0.230145486 | 0.482997865 |
| 0.303338092 | 0.345014639 | 0.479673227 | 0.441379409 |
| 0.427035391 | 0.176440606 | 0.122222616 | 0.455927371 |
| 0.310908736 | 0.277388926 | 0.017281238 | 0.054730845 |
| 0.369156871 | 0.348478889 | 0.471626139 | 0.413365074 |
| 0.211993247 | 0.373449991 | 0.118282683 | 0.426243564 |
| 0.511036181 | 0.506848584 | 0.29238359  | 0.367194944 |
| 0.433817992 | 0.226421401 | 0.508976216 | 0.025336818 |
| 0.393176775 | 0.378864694 | 0.379650791 | 0.174547733 |
| 0.098296238 | 0.141126647 | 0.417690722 | 0.270234488 |
| 0.44426033  | 0.147966372 | 0.441737512 | 0.450885109 |
| 0.370272574 | 0.505307298 | 0.178469068 | 0.409878007 |
| 0.185442032 | 0.381880078 | 0.336534494 | 0.384364184 |
| 0.217778241 | 0.228751273 | 0.392503285 | 0.176493693 |
| 0.121284186 | 0.265769842 | 0.006524633 | 0.475674126 |
| 0.501309685 | 0.275799247 | 0.384153759 | 0.338438148 |
| 0.341584302 | 0.45851461  | 0.243761497 | 0.40271733  |
| 0.043706141 | 0.315576228 | 0.325713353 | 0.499290179 |
| 0.188551644 | 0.39684301  | 0.140491911 | 0.271194006 |
| 1           | 0.26459571  | 0.396770531 | 0.266284238 |
| 0.508033261 | 0.484463895 | 0.39822446  | 0.235743937 |
| 0.435977245 | 0.24982491  | 0.446736547 | 0.487086642 |
| 0.242829485 | 0.161693709 | 0.416966842 | 0.264473014 |
| 0.247904698 | 0.495483428 | 0.411480586 | 0.489721032 |
| 0.112116257 | 0.355571503 | 0.42765867  | 0.48458028  |
| 0.36686932  | 0.133454155 | 0.185965701 | 0.222617507 |
| 0.512339965 | 0.209363967 | 0.216345783 | 0.455663181 |
| 0.153360153 | 0.37891172  | 0.459129279 | 0.190129911 |
| 0.100674993 | 0.288174939 | 0.415928798 | 0.318835478 |
| 0.349489049 | 0.34592673  | 0.21474409  | 0.448919362 |
| 0.189821149 | 0.065649453 | 0.467734917 | 0.008914016 |
| 0.495692335 | 0.3881331   | 0.361296946 | 0.326020038 |
| 0.38024287  | 0.439180402 | 0.464839542 | 0.012157821 |
| 0.424992948 | 0.050492697 | 0.326235576 | 0.211145158 |
| 0.244393872 | 0.19738271  | 0.50129047  | 0.465584267 |
| 0.451502866 | 0.342652133 | 0.292153269 | 0.498167721 |
| 0.100039492 | 0.276273518 | 0.290802028 | 0.485582315 |
| 0.160917543 | 0.399069467 | 0.391134643 | 0.319479497 |
| 0.472073389 | 0.414046332 |             |             |

| TOPBP1      | 0.028813146 | 0.253455851 | 0.016285813 |
|-------------|-------------|-------------|-------------|
| 0.022937928 | 0.207589879 | 0.097299854 | 0.029375199 |
| 0.046047557 | 0.203977208 | 0.061403905 | 0.192968542 |
| 0.008695248 | 0.023000099 | 0.362445259 | 0.027867724 |
| 0.284365668 | 0.016892367 | 0.076170835 | 0.015774071 |
| 0.023068404 | 0.23918752  | 0.082028461 | 0.145810574 |
| 0.179603187 | 0.124600992 | 0.157807175 | 0.190997703 |
| 0.326115183 | 0.033384002 | 0.240223596 | 0.01444582  |
| 0.328343136 | 0.258782777 | 0.1554034   | 0.002866143 |
| 0.188784361 | 0.005214148 | 0.311446995 | 0.143865417 |
| 0.022734622 | 0.26089265  | 0.085049859 | 0.119306702 |
| 0.142244035 | 0.014049512 | 0.016710283 | 0.294575811 |
| 0.142873998 | 0.071830185 | 0.028201503 | 0.229428407 |
| 0.106706073 | 0.196638009 | 0.205015834 | 0.006228909 |
| 0.136834607 | 0.01905638  | 0.095265537 | 0.309609769 |
| 0.145420356 | 0.080994814 | 0.04731359  | 0.086033918 |
| 0.24314472  | 0.274221702 | 0.159942274 | 0.111472124 |
| 0.35709754  | 0.073811817 | 0.261156254 | 0.019772456 |
| 0.168848522 | 0.011088575 | 0.119218446 | 0.03671061  |
| 0.111529568 | 0.126115162 | 0.18442306  | 0.124111245 |
| 0.262483686 | 0.354788598 | 0.139297727 | 0.310104817 |
| 0.042204321 | 0.243824211 | 0.087164161 | 0.251866746 |
| 0.281194617 | 0.03242733  | 0.308396897 | 0.373832676 |
| 0.019042489 | 0.170316672 | 0.320390411 | 0.080746984 |
| 0.244547124 | 0.063205805 | 0.149223078 | 0.073069583 |
| 0.264432055 | 0.287454626 | 0.311616533 | 0.252407676 |
| 0.139771766 | 0.039554641 | 0.286054581 | 0.237308075 |
| 0.13250442  | 0.035943885 | 0.103185389 | 0.34219024  |
| 0.258193141 | 0.338657067 | 0.301449774 | 0.335403401 |
| 0.270055822 | 0.337347099 | 0.260619565 | 0.282403996 |
| 0.012654046 | 0.343388911 | 0.085868492 | 0.019990603 |
| 0.025555727 | 0.038307273 | 0.073375516 | 0.221734902 |
| 0.317208732 | 0.1985662   | 0.101677965 | 0.167736154 |
| 0.386604088 | 0.279098596 | 0.349222217 | 0.348016871 |
| 0.020398922 | 0.074590416 | 0.244156266 | 0.059630993 |
| 0.337264871 | 0.068890222 | 0.174630608 | 0.333784631 |
| 0.283810471 | 0.352658889 | 0.046979456 | 0.31939049  |
| 0.104780975 | 0.370812632 | 0.275025938 | 0.114143117 |
| 0.33776294  | 0.30277906  | 0.37869291  | 0.298119874 |
| 0.292825614 | 0.1334412   | 0.039549447 | 0.295355072 |
| 0.366841413 | 0.005901153 | 0.338576895 | 0.368609504 |
| 0.322211372 | 0.355441512 | 0.399702383 | 0.348724346 |
| 0.322841658 | 0.042111638 | 0.011474217 | 0.282574996 |
| 0.33813091  | 0.287691573 | 0.049674567 | 0.234515016 |
| 0.27860491  | 0.146843245 | 0.274045838 | 0.066867883 |
| 0.387716063 | 0.292448982 | 0.334109307 | 0.311336866 |
| 0.136740859 | 0.231879704 | 0.219746349 | 0.272927037 |
| 0.00967674  | 0.047861877 | 0.026066679 | 0.219919116 |
| 0.043944336 | 0.132583771 | 0.142004188 | 0.233142392 |
| 0.160354862 | 0.109266192 | 0.114807576 | 0.310272842 |
| 0.032557698 | 0.219311967 | 0.065198322 | 0.110895689 |
| 0.020925977 | 0.099634805 | 0.060368221 | 0.036165636 |
| 0.198903807 | 0.148457307 | 0.280901213 | 0.335369178 |
| 0.148368749 | 0.109520405 | 0.279250807 | 0.344397749 |



|             |             |             |             |
|-------------|-------------|-------------|-------------|
| 0.376484462 | 0.217546257 | 0.181551185 | 0.003427866 |
| 0.098298233 | 0.085523083 | 0.080827434 | 0.198735687 |
| 0.10521412  | 0.134701028 | 0.317875469 | 0.318285621 |
| 0.135097526 | 0.058704519 | 0.176845166 | 0.291538283 |
| 0.092368354 | 0.124502197 | 0.389368784 | 0.212596079 |
| 0.000335111 | 0.195548013 | 0.327877732 | 0.048270098 |
| 0.256972748 | 0.043862021 | 0.051992093 | 0.363538395 |
| 0.086896431 | 0.138704469 | 0.332001682 | 0.286307879 |
| 0.048729144 | 0.134987884 | 0.386389764 | 0.060222901 |
| 0.179249893 | 0.014550121 | 0.258614635 | 0.093075136 |
| 0.172703489 | 0.27000501  | 0.224045101 | 0.114457422 |
| 0.063805874 | 0.365189928 | 0.239677847 | 0.366912274 |
| 0.157541491 | 0.384367103 | 0.360584925 | 0.3411358   |
| 0.209818305 | 0.183028731 | 0.047751667 | 0.33781047  |
| 0.33552579  | 0.053794466 | 0.038296512 | 0.321288783 |
| 0.159153706 | 0.334842619 | 0.022290072 | 0.388155365 |
| 0.328150862 | 0.275560715 | 0.083468835 | 0.32628374  |
| 0.305292677 | 0.121481385 | 0.260665996 | 0.392433305 |
| 0.067163338 | 0.282587727 | 0.173029813 | 0.331429193 |
| 0.113640098 | 0.119416714 | 0.209898737 | 0.054740675 |
| 0.001258787 | 0.042789716 | 0.037984152 | 0.112796448 |
| 0.08381662  | 0.211374022 | 0.276844297 | 0.377576343 |
| 0.087546657 | 0.269122505 | 0.164852401 | 0.169905069 |
| 0.322574518 | 0.197517932 | 0.189929404 | 0.249035328 |
| 0.162840428 | 0.003163656 | 0.029035064 | 0.358805948 |
| 0.01956676  | 0.099837673 | 0.145575308 | 0.001478992 |
| 0.025411384 | 0.237837859 | 0.059920831 | 0.13344538  |
| 0.370459066 | 0.122905117 | 0.149388288 | 0.09181581  |
| 0.243936097 | 0.05035639  | 0.00059073  | 0.337317252 |
| 0.313367921 | 0.301577976 | 0.31575797  | 0.273179766 |
| 0.322479724 | 0.235135131 | 0.327254015 | 0.120923462 |
| 0.036644075 | 0.027710453 | 0.115905301 | 0.213394207 |
| 0.002707284 | 0.256368411 | 0.159389999 | 0.1071707   |
| 0.3143522   | 0.244976826 | 0.016198781 | 0.222640417 |
| 0.005022703 | 0.080771814 | 0.111970767 | 0.114367017 |
| 0.285973872 | 0.003921617 | 0.034044022 | 0.107474153 |
| 0.262949733 | 0.253880425 | 0.109500148 | 0.34379849  |
| 0.208874419 | 0.070898847 | 0.170951496 | 0.279584106 |
| 0.035767053 | 0.030362733 | 0.133674753 | 0.003142346 |
| 0.016486926 | 0.285709132 | 0.125250037 | 0.009666116 |
| 0.203450299 | 0.001217355 | 0.250204248 | 0.369945999 |
| 0.266541389 | 0.392586084 | 0.344397569 | 0.148103647 |
| 0.342176428 | 0.021499294 | 0.362574825 | 0.271614298 |
| 0.137071271 | 0.000474608 | 0.002749116 | 0.351136238 |
| 0.257451101 | 0.025865749 | 0.11275454  | 0.040543533 |
| 0.03910364  | 0.057789088 | 0.026210105 | 0.08451265  |
| 0.191558316 | 0.173752825 | 0.074862098 | 0.315282506 |
| 0.147827244 | 0.155116021 | 0.132881285 | 0.054277925 |
| 0.201333971 | 0.017567759 | 0.051229687 | 0.002584329 |
| 0.270339267 | 0.067575375 | 0.277768249 | 0.334990606 |
| 0.361632201 | 0.274511847 | 0.091518105 | 0.045372376 |
| 0.299781055 | 0.048066584 | 0.042702654 | 0.05136878  |
| 0.31027636  | 0.335168545 | 0.274127912 | 0.232546126 |
| 0.410677779 | 0.34009738  | 0.019245934 | 0.347790126 |

|             |             |             |             |
|-------------|-------------|-------------|-------------|
| 0.001789335 | 0.00085801  | 0.138179104 | 0.197169122 |
| 0.010491724 | 0.245305085 | 0.202357345 | 0.070737283 |
| 0.070314064 | 0.007376148 | 0.144368018 | 0.157415972 |
| 0.228236008 | 0.239432295 | 0.218331227 | 0.157750525 |
| 0.117731396 | 0.051681357 | 0.07154656  | 0.077199016 |
| 0.036523045 | 0.216634607 | 0.138293335 | 0.009204495 |
| 0.173420043 | 0.239298283 | 0.032217214 | 0.094464798 |
| 0.334559581 | 0.374331902 | 0.017030946 | 0.005610435 |
| 0.200137492 | 0.190938935 | 0.394249619 | 0.316981449 |
| 0.343570816 | 0.399500602 | 0.272044459 | 0.075935246 |
| 0.02716826  | 0.211640863 | 0.213888288 | 0.027922611 |
| 0.36004401  | 0.041028849 | 0.287938072 | 0.180738517 |
| 0.078716479 | 0.076960014 | 0.009379553 | 0.052413193 |
| 0.229678484 | 0.131770321 | 0.126986998 | 0.081702373 |
| 0.214748742 | 0.057162833 | 0.024192319 | 0.145829742 |
| 0.304746719 | 0.048865112 | 0.123345032 | 0.075762097 |
| 0.195191947 | 0.019006644 | 0.332712218 | 0.362499302 |
| 0.08184407  | 0.06397668  | 0.063008476 | 0.249788362 |
| 0.311583218 | 0.170128741 | 0.004542151 | 0.272702558 |
| 0.352696222 | 0.283502875 | 0.306273828 | 0.367074532 |
| 0.053031094 | 0.242083631 | 0.152625133 | 0.286464519 |
| 0.1413867   | 0.104653845 | 0.147638907 | 0.042179873 |
| 0.20905509  | 0.322475006 | 0.292271716 | 0.10098981  |
| 0.177007778 | 0.061670031 | 0.033254409 | 0.281613665 |
| 0.090025812 | 0.026245353 | 0.102218291 | 0.315346741 |
| 0.000277971 | 0.057605907 | 0.352256515 | 0.078011686 |
| 0.34660358  | 0.366142412 | 0.325241325 | 0.051722423 |
| 0.001929969 | 0.289180978 | 0.276760689 | 0.166603464 |
| 0.314268625 | 0.217617683 | 0.014817149 | 0.033697121 |
| 0.220229847 | 0.043281243 | 0.075792477 | 0.027793071 |
| 0.049345349 | 0.259425869 | 0.162554363 | 0.125969482 |
| 0.114457689 | 0.052608348 | 0.042095767 | 0.086336981 |
| 0.031007172 | 0.200900361 | 0.319876303 | 0.044842927 |
| 0.090628629 | 0.369068487 | 0.324186667 | 0.008817486 |
| 0.180315589 | 0.31080658  | 0.280263828 | 0.005650691 |
| 0.337625164 | 0.002681167 | 0.156339192 | 0.134488245 |
| 0.104453136 | 0.168435053 | 0.222675242 | 0.106748225 |
| 0.248281335 | 0.120411827 | 0.119652345 | 0.178910321 |
| 0.066557185 | 0.089342079 | 0.218731004 | 0.1257754   |
| 0.133404621 | 0.048691182 | 0.055261528 | 0.055649895 |
| 0.01231937  | 0.284592816 | 0.18024329  | 0.033718125 |
| 0.173303449 | 0.131105125 | 0.282081874 | 0.302804935 |
| 0.298076007 | 0.055009351 | 0.160554598 | 0.285906324 |
| 0.046091407 | 0.039186873 | 0.023922111 | 0.139674353 |
| 0.144405934 | 0.102021342 | 0.127863407 | 0.184980371 |
| 0.275819567 | 0.287902088 | 0.171343856 | 0.282017284 |
| 0.138845902 | 0.182467555 | 0.074433923 | 0.034594188 |
| 0.101454843 | 0.084375505 | 0.205218031 | 0.000375526 |
| 0.262152281 | 0.02885643  | 0.357164989 | 0.30071181  |
| 0.119194678 | 0.261434386 | 0.030976627 | 0.044196311 |
| 0.025881023 | 0.112351215 | 0.108386213 | 0.253770001 |
| 0.093181833 | 0.058104624 | 0.211937158 | 0.052441506 |
| 0.294032156 | 0.260525997 | 0.093178167 | 0.134180614 |
| 0.130163644 | 0.091808076 | 0.300338411 | 0.035696643 |

|             |             |             |             |
|-------------|-------------|-------------|-------------|
| 0.22122878  | 0.081772117 | 0.147992603 | 0.229720345 |
| 0.152801191 | 0.340352358 | 0.029237197 | 0.37264002  |
| 0.254439303 | 0.07485976  | 0.345799072 | 0.105909517 |
| 0.037076135 | 0.020975442 | 0.089338624 | 0.098643962 |
| 0.075544046 | 0.109403693 | 0.005882499 | 0.08230157  |
| 0.296985413 | 0.095548346 | 0.277419738 | 0.259094941 |
| 0.118004419 | 0.303128523 | 0.024537094 | 0.160453066 |
| 0.282581811 | 0.295954104 | 0.087716526 | 0.200359407 |
| 0.297317016 | 0.051003649 | 0.174343344 | 0.007767689 |
| 0.30563525  | 0.244609621 | 0.097523484 | 0.026080706 |
| 0.004452868 | 0.114001253 | 0.263825681 | 0.033669977 |
| 0.381611336 | 0.038212839 | 0.176804098 | 0.236180042 |
| 0.111487176 | 0.307136829 | 0.059955652 | 0.314778978 |
| 0.008612676 | 0.157359852 | 0.159627321 | 0.179817119 |
| 0.100230524 | 0.176957182 | 0.312593144 | 0.130715227 |
| 0.017102882 | 0.065047659 | 0.003733957 | 0.2806836   |
| 0.280756398 | 0.211943006 | 0.145192724 | 0.054250702 |
| 0.21780682  | 0.232345623 | 0.088952862 | 0.153019118 |
| 0.002797106 | 0.289120616 | 0.121134738 | 0.262114752 |
| 0.054191024 | 0.23459177  | 0.009768449 | 0.213003975 |
| 0.26459571  | 1           | 0.196692479 | 0.071588505 |
| 0.291142454 | 0.208592186 | 0.07381494  | 0.033136395 |
| 0.215477505 | 0.039690222 | 0.085912327 | 0.373270897 |
| 0.119642506 | 0.134461055 | 0.375621898 | 0.135470189 |
| 0.181377214 | 0.230691633 | 0.192349797 | 0.354264041 |
| 0.051821905 | 0.195827552 | 0.297161859 | 0.338190537 |
| 0.25619915  | 0.103208764 | 0.142933939 | 0.189758436 |
| 0.27019303  | 0.016709994 | 0.086688001 | 0.254403825 |
| 0.15163771  | 0.217055681 | 0.130405951 | 0.133239    |
| 0.012433165 | 0.060163776 | 0.078540036 | 0.086799205 |
| 0.252229094 | 0.203920229 | 0.099208741 | 0.28630322  |
| 0.029130693 | 0.008348379 | 0.320088645 | 0.022946165 |
| 0.115506178 | 0.253243904 | 0.141571065 | 0.171184197 |
| 0.118948809 | 0.216424085 | 0.173983146 | 0.001706679 |
| 0.326236076 | 0.004246122 | 0.104875133 | 0.117358468 |
| 0.06989213  | 0.0265553   | 0.272979543 | 0.395155206 |
| 0.159242632 | 0.029768683 | 0.068234046 | 0.310512931 |
| 0.040746633 | 0.093785479 | 0.142749355 | 0.212271201 |
| 0.106209778 | 0.136148472 | 0.145086434 | 0.12974182  |
| 0.226411791 | 0.084625828 |             |             |
| TPD52       | 0.225099467 | 0.292529854 | 0.156390193 |
| 0.165077202 | 0.210205769 | 0.209516318 | 0.276664563 |
| 0.321735852 | 0.26948629  | 0.142472998 | 0.229870994 |
| 0.146755797 | 0.058004186 | 0.317568713 | 0.290972919 |
| 0.209571803 | 0.221268289 | 0.306474701 | 0.131715196 |
| 0.250597789 | 0.219764648 | 0.167001078 | 0.232125772 |
| 0.23349175  | 0.284747647 | 0.249613416 | 0.188053423 |
| 0.314481599 | 0.086932615 | 0.208876991 | 0.070922926 |
| 0.363212263 | 0.203566222 | 0.157953204 | 0.118312427 |
| 0.239503932 | 0.03821714  | 0.391625606 | 0.242389436 |
| 0.078363386 | 0.350936627 | 0.158038095 | 0.248344528 |
| 0.181625265 | 0.162243434 | 0.074305687 | 0.214782027 |
| 0.253524776 | 0.296660912 | 0.199285139 | 0.22455043  |
| 0.225632228 | 0.272497319 | 0.196824063 | 0.014228047 |

|             |             |             |             |
|-------------|-------------|-------------|-------------|
| 0.128344681 | 0.028148874 | 0.09021524  | 0.354458348 |
| 0.301251661 | 0.311740913 | 0.118653855 | 0.323069915 |
| 0.234718616 | 0.258338692 | 0.332948615 | 0.181861407 |
| 0.339931612 | 0.105848792 | 0.208928612 | 0.164325653 |
| 0.249028292 | 0.199590407 | 0.304189702 | 0.241307068 |
| 0.209035477 | 0.308817729 | 0.237312876 | 0.162596314 |
| 0.275109281 | 0.420549837 | 0.321381876 | 0.365028592 |
| 0.1266223   | 0.191890977 | 0.204147291 | 0.299736005 |
| 0.276742736 | 0.315131019 | 0.234889776 | 0.382311323 |
| 0.25259481  | 0.188867516 | 0.247430069 | 0.270392955 |
| 0.282406228 | 0.166641632 | 0.169567463 | 0.103578328 |
| 0.214694923 | 0.206350548 | 0.396032184 | 0.285839798 |
| 0.238559269 | 0.215286824 | 0.379853839 | 0.173686325 |
| 0.206974863 | 0.21270864  | 0.201368812 | 0.254783856 |
| 0.224520177 | 0.313334057 | 0.264116667 | 0.282563819 |
| 0.191488031 | 0.33168403  | 0.231974452 | 0.321855727 |
| 0.056320654 | 0.360326597 | 0.266564702 | 0.233462402 |
| 0.212636863 | 0.311981954 | 0.243175286 | 0.327300837 |
| 0.282406476 | 0.300473396 | 0.284979888 | 0.27206983  |
| 0.290478771 | 0.353530492 | 0.356987994 | 0.277533719 |
| 0.210815754 | 0.146837805 | 0.184611146 | 0.297152766 |
| 0.269672205 | 0.325227253 | 0.148712671 | 0.395824665 |
| 0.31180017  | 0.256796452 | 0.266735168 | 0.429155156 |
| 0.351773228 | 0.378128881 | 0.267670793 | 0.274780166 |
| 0.385283046 | 0.37548549  | 0.353656051 | 0.199189276 |
| 0.367668419 | 0.222796033 | 0.127854451 | 0.295627085 |
| 0.370140429 | 0.013944062 | 0.28389651  | 0.304215224 |
| 0.337952085 | 0.247176915 | 0.362829507 | 0.326441318 |
| 0.343783713 | 0.260809705 | 0.023864951 | 0.275772582 |
| 0.363301618 | 0.285532382 | 0.342492447 | 0.179970766 |
| 0.228419773 | 0.238996868 | 0.248929744 | 0.134194818 |
| 0.41564488  | 0.284510808 | 0.299642994 | 0.263351132 |
| 0.249370929 | 0.343761598 | 0.165082369 | 0.364046459 |
| 0.221763118 | 0.23108751  | 0.177967281 | 0.322633282 |
| 0.152602658 | 0.311700669 | 0.236430301 | 0.250568309 |
| 0.316525527 | 0.270800886 | 0.138249648 | 0.21458698  |
| 0.185682949 | 0.194934612 | 0.284941383 | 0.275175055 |
| 0.211005012 | 0.288778039 | 0.231368991 | 0.249920718 |
| 0.280786493 | 0.345495097 | 0.215232843 | 0.321380269 |
| 0.240812916 | 0.250779492 | 0.238544293 | 0.360953396 |
| 0.36861215  | 0.181513108 | 0.337579535 | 0.042880348 |
| 0.173178476 | 0.138752625 | 0.090916766 | 0.189133498 |
| 0.31716705  | 0.264870535 | 0.230655743 | 0.221734309 |
| 0.237916278 | 0.311962676 | 0.205919043 | 0.396086944 |
| 0.25991148  | 0.208784906 | 0.288155951 | 0.210882025 |
| 0.046585138 | 0.245706154 | 0.2544033   | 0.210404943 |
| 0.296827202 | 0.090908175 | 0.101814198 | 0.28971608  |
| 0.153594402 | 0.200179071 | 0.307707956 | 0.23255886  |
| 0.202809305 | 0.31785147  | 0.365766245 | 0.03576444  |
| 0.221601886 | 0.094372414 | 0.284799406 | 0.170080066 |
| 0.292221829 | 0.319473829 | 0.199800099 | 0.200223365 |
| 0.21286488  | 0.366866835 | 0.295894915 | 0.331325571 |
| 0.166876643 | 0.369641446 | 0.264319258 | 0.302674578 |
| 0.276685975 | 0.182016813 | 0.063987245 | 0.243875495 |

|             |             |             |             |
|-------------|-------------|-------------|-------------|
| 0.276684155 | 0.164565291 | 0.206305994 | 0.232813886 |
| 0.187926418 | 0.216955867 | 0.19293297  | 0.335840694 |
| 0.408764278 | 0.33154123  | 0.307365688 | 0.260099256 |
| 0.27011756  | 0.267646831 | 0.284139187 | 0.389926792 |
| 0.152348749 | 0.206178725 | 0.185227699 | 0.282195206 |
| 0.28037908  | 0.2055585   | 0.347170222 | 0.090407709 |
| 0.002370381 | 0.265484332 | 0.214234823 | 0.280340648 |
| 0.120785046 | 0.192643325 | 0.239330795 | 0.349201482 |
| 0.30289443  | 0.328960011 | 0.335887585 | 0.195238537 |
| 0.314016863 | 0.226745242 | 0.182931057 | 0.229449793 |
| 0.327918481 | 0.071185535 | 0.203738108 | 0.416480491 |
| 0.174089765 | 0.13212589  | 0.306432519 | 0.010765547 |
| 0.214703309 | 0.234035239 | 0.22753341  | 0.322919461 |
| 0.322035132 | 0.297309914 | 0.268200754 | 0.163551195 |
| 0.274788113 | 0.278428598 | 0.016941302 | 0.325258268 |
| 0.361361259 | 0.354774648 | 0.358244988 | 0.372051927 |
| 0.315304854 | 0.255879996 | 0.24786876  | 0.223323721 |
| 0.288715341 | 0.243192814 | 0.127401597 | 0.250357697 |
| 0.023614495 | 0.264015135 | 0.268639251 | 0.291235473 |
| 0.233688832 | 0.31624946  | 0.200156138 | 0.233195695 |
| 0.080782108 | 0.071501433 | 0.289505164 | 0.337878355 |
| 0.272931004 | 0.124262911 | 0.097207186 | 0.155548743 |
| 0.321256733 | 0.306209461 | 0.151014722 | 0.366177148 |
| 0.248295892 | 0.213123293 | 0.219211031 | 0.250020784 |
| 0.271965481 | 0.07473103  | 0.258514833 | 0.0118454   |
| 0.143851099 | 0.380614113 | 0.210824527 | 0.178688519 |
| 0.274677835 | 0.059175961 | 0.291880044 | 0.377101239 |
| 0.322889659 | 0.335910805 | 0.336314964 | 0.133595807 |
| 0.341384587 | 0.039491696 | 0.346109961 | 0.271443456 |
| 0.158130225 | 0.004363491 | 0.051718972 | 0.28812564  |
| 0.19555861  | 0.17096146  | 0.300330999 | 0.161689047 |
| 0.253693395 | 0.254559235 | 0.283977329 | 0.153552709 |
| 0.218673132 | 0.245107218 | 0.176107148 | 0.347023638 |
| 0.288807778 | 0.330459136 | 0.218567515 | 0.254535477 |
| 0.21723988  | 0.215310575 | 0.266310077 | 0.020860999 |
| 0.263391563 | 0.219499019 | 0.392256486 | 0.345158881 |
| 0.373474559 | 0.224454286 | 0.128246961 | 0.204879495 |
| 0.308016764 | 0.18561675  | 0.154572876 | 0.22116126  |
| 0.31763437  | 0.214390543 | 0.28324943  | 0.277701389 |
| 0.358073848 | 0.342849088 | 0.218200016 | 0.245402999 |
| 0.053665545 | 0.012742284 | 0.195280271 | 0.342069307 |
| 0.125924654 | 0.199770091 | 0.297015595 | 0.302858907 |
| 0.321303424 | 0.139019625 | 0.13755447  | 0.139858192 |
| 0.274977931 | 0.244803651 | 0.184185301 | 0.33012218  |
| 0.234726546 | 0.164647088 | 0.301189261 | 0.358851269 |
| 0.251190136 | 0.291487165 | 0.27700304  | 0.187974372 |
| 0.18502124  | 0.187244253 | 0.233222085 | 0.298787571 |
| 0.274555572 | 0.300197776 | 0.232481428 | 0.066600779 |
| 0.300191469 | 0.273303384 | 0.323058182 | 0.32411284  |
| 0.389069313 | 0.384734843 | 0.38519001  | 0.282585727 |
| 0.251158638 | 0.265086043 | 0.193423027 | 0.223375966 |
| 0.345592814 | 0.201642289 | 0.344771113 | 0.148530195 |
| 0.307281853 | 0.263899307 | 0.17641701  | 0.300721593 |
| 0.182342647 | 0.330807747 | 0.282770546 | 0.214604832 |

|             |             |             |             |
|-------------|-------------|-------------|-------------|
| 0.242362258 | 0.131918627 | 0.257015167 | 0.314113383 |
| 0.280925319 | 0.083022886 | 0.312847736 | 0.293355972 |
| 0.270574593 | 0.141653707 | 0.215033757 | 0.380296479 |
| 0.274495675 | 0.294431392 | 0.185319172 | 0.273599333 |
| 0.245931087 | 0.181899829 | 0.073970154 | 0.288281668 |
| 0.341613565 | 0.202255546 | 0.351766979 | 0.325719947 |
| 0.265724027 | 0.186090986 | 0.181438271 | 0.233402306 |
| 0.347349525 | 0.218388046 | 0.344458537 | 0.25456939  |
| 0.359188258 | 0.423733511 | 0.283033663 | 0.278502391 |
| 0.212172956 | 0.243306085 | 0.187103678 | 0.295569659 |
| 0.119814792 | 0.219845674 | 0.171481925 | 0.263060326 |
| 0.007735668 | 0.076033911 | 0.342191468 | 0.287081472 |
| 0.402834823 | 0.308351264 | 0.347726641 | 0.313139355 |
| 0.002371641 | 0.203260599 | 0.228284284 | 0.186617505 |
| 0.283627235 | 0.286420666 | 0.281832339 | 0.245784004 |
| 0.309077138 | 0.188864704 | 0.273497602 | 0.18716889  |
| 0.087463499 | 0.242075272 | 0.334739112 | 0.334046648 |
| 0.292619019 | 0.233672595 | 0.127971232 | 0.277853915 |
| 0.144745707 | 0.317030638 | 0.289036219 | 0.154693701 |
| 0.082227571 | 0.327051654 | 0.248029008 | 0.162053277 |
| 0.194285277 | 0.300372996 | 0.330032265 | 0.014794217 |
| 0.21580903  | 0.094154006 | 0.28778118  | 0.245765727 |
| 0.286641645 | 0.31648643  | 0.286518073 | 0.209754261 |
| 0.272301903 | 0.314991071 | 0.241541033 | 0.298416523 |
| 0.253306691 | 0.327664451 | 0.230910891 | 0.24478866  |
| 0.195235691 | 0.264689938 | 0.232671704 | 0.236508322 |
| 0.190042723 | 0.302683424 | 0.31547883  | 0.190540464 |
| 0.335390378 | 0.251344087 | 0.341327895 | 0.329138586 |
| 0.339526145 | 0.201888318 | 0.286663891 | 0.266943168 |
| 0.106190063 | 0.191622232 | 0.229647481 | 0.230647141 |
| 0.32255019  | 0.168578985 | 0.214587705 | 0.228953047 |
| 0.23202786  | 0.371998389 | 0.304117971 | 0.347774727 |
| 0.224036602 | 0.241680635 | 0.130516663 | 0.217694903 |
| 0.260562638 | 0.293738918 | 0.19690053  | 0.02515723  |
| 0.285421502 | 0.205429039 | 0.26832685  | 0.346885819 |
| 0.136278291 | 0.345311795 | 0.140304801 | 0.226573431 |
| 0.108876539 | 0.247478994 | 0.299690843 | 0.225719059 |
| 0.084460773 | 0.304582266 | 0.228335504 | 0.196237665 |
| 0.226149963 | 0.224533341 | 0.2374022   | 0.345107106 |
| 0.334631452 | 0.270824413 | 0.393189205 | 0.250111628 |
| 0.188643842 | 0.152371666 | 0.210254805 | 0.232415647 |
| 0.279956634 | 0.333584076 | 0.234230073 | 0.332867207 |
| 0.216360669 | 0.27134477  | 0.416041423 | 0.303235246 |
| 0.262397517 | 0.241057252 | 0.083354852 | 0.219052182 |
| 0.325986474 | 0.151483066 | 0.007181614 | 0.061296107 |
| 0.280808979 | 0.241528529 | 0.235198782 | 0.287788711 |
| 0.197627885 | 0.299644453 | 0.087846772 | 0.302020477 |
| 0.33812026  | 0.390667512 | 0.207681919 | 0.324541404 |
| 0.298621817 | 0.276223292 | 0.218251965 | 0.041905377 |
| 0.200857989 | 0.177465937 | 0.175798052 | 0.272933003 |
| 0.164736263 | 0.089592003 | 0.208963425 | 0.230730694 |
| 0.311362246 | 0.076224    | 0.239046854 | 0.22156195  |
| 0.324735155 | 0.39154693  | 0.289215437 | 0.233453179 |
| 0.226892101 | 0.327450596 | 0.193164232 | 0.22321174  |

|             |             |             |             |
|-------------|-------------|-------------|-------------|
| 0.177760466 | 0.164563497 | 0.251233543 | 0.130244613 |
| 0.197773336 | 0.225149657 | 0.017318082 | 0.384414526 |
| 0.364034352 | 0.172974714 | 0.315110018 | 0.145851911 |
| 0.301106292 | 0.321936702 | 0.253395042 | 0.184385267 |
| 0.07854966  | 0.187577304 | 0.337931505 | 0.278400923 |
| 0.077265511 | 0.243847185 | 0.189979278 | 0.213115903 |
| 0.396770531 | 0.196692479 | 1           | 0.120001028 |
| 0.328804556 | 0.282342679 | 0.22778699  | 0.235001514 |
| 0.223484179 | 0.23431063  | 0.178405678 | 0.379723743 |
| 0.29193585  | 0.132310932 | 0.259400818 | 0.25977913  |
| 0.171818747 | 0.315234523 | 0.194639615 | 0.382953708 |
| 0.235249901 | 0.31324117  | 0.254623538 | 0.325575965 |
| 0.311314726 | 0.162216969 | 0.136488417 | 0.229525761 |
| 0.315986855 | 0.184941465 | 0.186413792 | 0.272623635 |
| 0.113740018 | 0.313194704 | 0.211422995 | 0.237319601 |
| 0.170453393 | 0.364734764 | 0.212656955 | 0.311218928 |
| 0.292178132 | 0.22024213  | 0.20900623  | 0.353105337 |
| 0.198275851 | 0.08865018  | 0.382458193 | 0.010430495 |
| 0.23114724  | 0.219451564 | 0.329926041 | 0.217679877 |
| 0.258827767 | 0.284585363 | 0.225066846 | 0.021812358 |
| 0.276630487 | 0.049052773 | 0.273320448 | 0.190516314 |
| 0.170426443 | 0.233811566 | 0.343726401 | 0.339918859 |
| 0.304118519 | 0.186445949 | 0.132797195 | 0.343757948 |
| 0.084508225 | 0.132185031 | 0.180139777 | 0.215822981 |
| 0.119052701 | 0.15843981  | 0.18242962  | 0.145906901 |
| 0.265578461 | 0.323900531 |             |             |
| TPI1        | 0.012388324 | 0.289021373 | 0.010810239 |
| 0.02895519  | 0.204110619 | 0.112808252 | 0.008953328 |
| 0.018697516 | 0.21428039  | 0.108342003 | 0.17764494  |
| 0.00150272  | 0.020687807 | 0.34515947  | 0.006218929 |
| 0.295143054 | 0.003567136 | 0.031277175 | 0.010737543 |
| 0.032446442 | 0.183961074 | 0.077035509 | 0.142257705 |
| 0.153592049 | 0.09034035  | 0.180934346 | 0.233121497 |
| 0.382269067 | 0.063283134 | 0.28606705  | 0.077594788 |
| 0.296824385 | 0.232808076 | 0.20549612  | 0.001117447 |
| 0.178350695 | 0.003893093 | 0.301221811 | 0.117122799 |
| 0.050276176 | 0.204064536 | 0.15220012  | 0.088273745 |
| 0.23676252  | 0.005698809 | 0.041443336 | 0.335201444 |
| 0.180801071 | 0.064510307 | 0.013634266 | 0.293767406 |
| 0.122519068 | 0.164631939 | 0.285158607 | 0.00048321  |
| 0.160152166 | 0.04382523  | 0.122006116 | 0.342144891 |
| 0.088673476 | 0.030904818 | 0.088982396 | 0.058616827 |
| 0.236096418 | 0.257194436 | 0.111546673 | 0.16738517  |
| 0.36908963  | 0.056977219 | 0.344448529 | 0.025602018 |
| 0.150931727 | 0.004013058 | 0.071261553 | 0.023346284 |
| 0.131683122 | 0.071038269 | 0.148607768 | 0.161715816 |
| 0.327551947 | 0.338510182 | 0.10999129  | 0.348925706 |
| 0.026896644 | 0.25103054  | 0.096053159 | 0.19579572  |
| 0.248432074 | 0.01288652  | 0.314815646 | 0.387530661 |
| 0.006036333 | 0.238574813 | 0.305992611 | 0.042193112 |
| 0.279796366 | 0.072937118 | 0.229876636 | 0.060575821 |
| 0.290974335 | 0.265429687 | 0.302052372 | 0.17321996  |
| 0.117076153 | 0.021190594 | 0.302745799 | 0.244369943 |
| 0.10889303  | 0.024563336 | 0.085460301 | 0.396821074 |

|             |             |             |             |
|-------------|-------------|-------------|-------------|
| 0.302492663 | 0.370251018 | 0.328592793 | 0.271836017 |
| 0.296932788 | 0.374812674 | 0.3072934   | 0.259576093 |
| 0.03463431  | 0.374455456 | 0.070327527 | 0.003651556 |
| 0.013041306 | 0.011002488 | 0.055834347 | 0.163599607 |
| 0.361880618 | 0.161484695 | 0.0628498   | 0.121236837 |
| 0.39497693  | 0.30443156  | 0.385103694 | 0.319602166 |
| 0.005944418 | 0.088159319 | 0.315446457 | 0.04492617  |
| 0.251440714 | 0.031202026 | 0.169188907 | 0.337845876 |
| 0.260594676 | 0.363104808 | 0.036662782 | 0.311235495 |
| 0.050734287 | 0.370406339 | 0.346045396 | 0.069374782 |
| 0.363784493 | 0.323226519 | 0.395739278 | 0.324727285 |
| 0.29728762  | 0.158010558 | 0.008203729 | 0.272836136 |
| 0.335384083 | 0.00520245  | 0.383931815 | 0.416395438 |
| 0.371692302 | 0.420159013 | 0.405092422 | 0.383022392 |
| 0.355107466 | 0.019503591 | 0.015111159 | 0.192039889 |
| 0.370828559 | 0.300405673 | 0.01784977  | 0.300545605 |
| 0.236190917 | 0.143915464 | 0.291391252 | 0.078204347 |
| 0.34852238  | 0.349308002 | 0.378715901 | 0.282335201 |
| 0.156025034 | 0.176983176 | 0.279260408 | 0.291756253 |
| 0.003556262 | 0.027095889 | 0.013792995 | 0.164590427 |
| 0.082789672 | 0.07171259  | 0.142218778 | 0.204310854 |
| 0.085461159 | 0.100960224 | 0.145478905 | 0.300148812 |
| 0.017302807 | 0.260001462 | 0.053528277 | 0.074157382 |
| 0.00647557  | 0.056400548 | 0.035673685 | 0.020342383 |
| 0.110546467 | 0.114719412 | 0.310703883 | 0.383992349 |
| 0.144494075 | 0.090156232 | 0.285229964 | 0.336535611 |
| 0.302323556 | 0.268351077 | 0.100866918 | 0.00256148  |
| 0.096170706 | 0.126010056 | 0.092439919 | 0.242832521 |
| 0.073744717 | 0.061328084 | 0.29050496  | 0.309825998 |
| 0.121840838 | 0.028660299 | 0.166990437 | 0.249957548 |
| 0.063122616 | 0.101491492 | 0.376072926 | 0.257259088 |
| 0.000443196 | 0.192494019 | 0.354044357 | 0.033066322 |
| 0.182675242 | 0.03288577  | 0.061473195 | 0.407790524 |
| 0.072493466 | 0.085626259 | 0.36659902  | 0.283312925 |
| 0.045050281 | 0.102242151 | 0.392978903 | 0.028198471 |
| 0.186161498 | 0.013529124 | 0.180644443 | 0.150871773 |
| 0.128955992 | 0.176943711 | 0.189996767 | 0.112899097 |
| 0.048490724 | 0.365937253 | 0.239376296 | 0.385418508 |
| 0.186651746 | 0.40223324  | 0.384418772 | 0.324690705 |
| 0.1930944   | 0.213264654 | 0.046932624 | 0.388211822 |
| 0.400080961 | 0.08994721  | 0.023237221 | 0.357011968 |
| 0.218638695 | 0.340162396 | 0.024526226 | 0.40057787  |
| 0.31730908  | 0.320651776 | 0.028534927 | 0.287165589 |
| 0.285810928 | 0.093547669 | 0.283102345 | 0.374157788 |
| 0.114167237 | 0.24334548  | 0.186352006 | 0.321347886 |
| 0.083134764 | 0.073117964 | 0.170561436 | 0.058573531 |
| 0.005643984 | 0.01692012  | 0.018675558 | 0.053944661 |
| 0.075745805 | 0.268725912 | 0.291830145 | 0.395504102 |
| 0.032600205 | 0.251692859 | 0.108842753 | 0.135626179 |
| 0.330363229 | 0.155536649 | 0.218253964 | 0.232366227 |
| 0.117072256 | 0.002979319 | 0.016868115 | 0.354106043 |
| 0.008931505 | 0.090183208 | 0.100608591 | 0.00045459  |
| 0.00757701  | 0.300833684 | 0.038219955 | 0.092155581 |
| 0.357033932 | 0.100265229 | 0.117041887 | 0.151951376 |



|             |             |                     |             |
|-------------|-------------|---------------------|-------------|
| 0.201963453 | 0.023318284 | 0.000223227         | 0.381329862 |
| 0.332731076 | 0.311168588 | 0.334652942         | 0.280009235 |
| 0.343101715 | 0.240303166 | 0.354398677         | 0.14158326  |
| 0.018106099 | 0.018165264 | 0.112280412         | 0.164168385 |
| 0.000367437 | 0.247413204 | 0.125166451         | 0.058892362 |
| 0.314727875 | 0.170683979 | 0.003808217         | 0.193781356 |
| 0.003638418 | 0.122476804 | 0.060592792         | 0.062070481 |
| 0.233349232 | 0.000915626 | 0.078517 0.10688399 |             |
| 0.276422065 | 0.207632756 | 0.166869697         | 0.381685309 |
| 0.171031306 | 0.057376939 | 0.183913537         | 0.250500512 |
| 0.012885446 | 0.055525254 | 0.108880105         | 0.02855454  |
| 0.018725018 | 0.271388739 | 0.130669061         | 0.011021678 |
| 0.157769149 | 0.000190874 | 0.243108475         | 0.371076737 |
| 0.313276724 | 0.422267814 | 0.364496063         | 0.151649189 |
| 0.377994339 | 0.042303016 | 0.393152476         | 0.29235867  |
| 0.200662196 | 0.000372693 | 0.000178681         | 0.414773221 |
| 0.306403128 | 0.016420741 | 0.065642116         | 0.057292629 |
| 0.017303703 | 0.036364794 | 0.007513422         | 0.078887398 |
| 0.228047988 | 0.111433372 | 0.044063253         | 0.324821933 |
| 0.111604165 | 0.089922247 | 0.138676313         | 0.026327308 |
| 0.219273487 | 0.006598656 | 0.026317725         | 0.00137513  |
| 0.235731772 | 0.048553257 | 0.285601914         | 0.361641274 |
| 0.353992004 | 0.305041195 | 0.156010818         | 0.03817827  |
| 0.300004585 | 0.034086146 | 0.06381229          | 0.033869601 |
| 0.357397507 | 0.336594948 | 0.209032254         | 0.202368003 |
| 0.392569171 | 0.348038276 | 0.004056497         | 0.358184638 |
| 0.001285023 | 0.000159138 | 0.193167579         | 0.118132603 |
| 0.009259229 | 0.237811472 | 0.153880365         | 0.055461253 |
| 0.04301697  | 0.002664808 | 0.161068517         | 0.165200284 |
| 0.194841104 | 0.210246604 | 0.18359783          | 0.111331517 |
| 0.109405372 | 0.049332433 | 0.04558719          | 0.027786903 |
| 0.033760957 | 0.205151798 | 0.100566145         | 0.001882255 |
| 0.257525507 | 0.276443106 | 0.011227037         | 0.057905125 |
| 0.354640169 | 0.405247832 | 0.005587428         | 0.002006254 |
| 0.145351617 | 0.128226201 | 0.390403709         | 0.359764514 |
| 0.352522697 | 0.386331019 | 0.232513948         | 0.025984057 |
| 0.009662925 | 0.188987667 | 0.198744915         | 0.016464955 |
| 0.363584462 | 0.020956662 | 0.309261355         | 0.208511991 |
| 0.039604829 | 0.073482148 | 0.002760061         | 0.020730919 |
| 0.246129207 | 0.063561429 | 0.071443216         | 0.072315388 |
| 0.152151597 | 0.068560299 | 0.007288139         | 0.083323976 |
| 0.249706918 | 0.101435988 | 0.0666229           | 0.069248975 |
| 0.214099835 | 0.038499012 | 0.378671838         | 0.311480372 |
| 0.044558096 | 0.034860268 | 0.077106949         | 0.227797824 |
| 0.37584053  | 0.23377937  | 0.002284973         | 0.330349731 |
| 0.345526021 | 0.32546216  | 0.332356913         | 0.283917063 |
| 0.026332986 | 0.23868074  | 0.156837493         | 0.248745938 |
| 0.068507975 | 0.121135032 | 0.082472886         | 0.015544008 |
| 0.151235431 | 0.289628852 | 0.342809146         | 0.051811255 |
| 0.204170882 | 0.040036292 | 0.017823407         | 0.291196998 |
| 0.09496341  | 0.011210454 | 0.144494387         | 0.322828645 |
| 0.000673611 | 0.057851564 | 0.372354528         | 0.042778752 |
| 0.346499188 | 0.410355727 | 0.308195848         | 0.040086632 |
| 0.003695647 | 0.357905425 | 0.252603599         | 0.214787052 |

|             |             |             |             |
|-------------|-------------|-------------|-------------|
| 0.330208539 | 0.184279652 | 0.010314448 | 0.011993125 |
| 0.163629238 | 0.026716418 | 0.028057429 | 0.041937109 |
| 0.087976488 | 0.235723424 | 0.087288029 | 0.080509365 |
| 0.073731195 | 0.031185716 | 0.048038615 | 0.073840081 |
| 0.037928216 | 0.123237147 | 0.243670517 | 0.065554121 |
| 0.101544397 | 0.323977935 | 0.351519894 | 0.002479201 |
| 0.182468111 | 0.302434481 | 0.276727177 | 0.001440317 |
| 0.354674394 | 0.000120406 | 0.071753692 | 0.089982142 |
| 0.064137444 | 0.071486938 | 0.141550851 | 0.118906198 |
| 0.223054916 | 0.082933672 | 0.101665065 | 0.112770136 |
| 0.039884102 | 0.065444689 | 0.24033398  | 0.164300588 |
| 0.105458542 | 0.028054614 | 0.035810879 | 0.038062652 |
| 0.004231193 | 0.30845343  | 0.120857801 | 0.022821484 |
| 0.090952031 | 0.141871271 | 0.227135732 | 0.355081457 |
| 0.267330234 | 0.04384184  | 0.117738042 | 0.338942966 |
| 0.066823242 | 0.043420978 | 0.008105139 | 0.194414469 |
| 0.077314345 | 0.05645049  | 0.162994441 | 0.187899628 |
| 0.296336272 | 0.25071358  | 0.111552933 | 0.285879434 |
| 0.16468671  | 0.17895557  | 0.152621331 | 0.012776937 |
| 0.070555396 | 0.049319705 | 0.171319179 | 2.25E-05    |
| 0.186503659 | 0.03759619  | 0.402742846 | 0.34180621  |
| 0.125980324 | 0.227987105 | 0.0570332   | 0.018922357 |
| 0.07052603  | 0.099727238 | 0.054246875 | 0.321798616 |
| 0.113730137 | 0.036126691 | 0.19755217  | 0.064256932 |
| 0.354053141 | 0.325758738 | 0.074104917 | 0.064060983 |
| 0.093041949 | 0.082332546 | 0.308525736 | 0.025992233 |
| 0.30923263  | 0.074018378 | 0.185196696 | 0.169896352 |
| 0.093229133 | 0.393502439 | 0.011902386 | 0.410884986 |
| 0.200943925 | 0.046449278 | 0.313723034 | 0.08197827  |
| 0.042706808 | 0.01209463  | 0.112337589 | 0.117183004 |
| 0.044509879 | 0.130275497 | 0.007943433 | 0.026589962 |
| 0.213171331 | 0.092144685 | 0.32777054  | 0.225062537 |
| 0.109523206 | 0.22906609  | 0.030396602 | 0.112060343 |
| 0.323935259 | 0.310172159 | 0.060184157 | 0.139264855 |
| 0.205638858 | 0.018678387 | 0.198272081 | 0.002921237 |
| 0.337649312 | 0.317114569 | 0.101652615 | 0.005456936 |
| 0.001014124 | 0.159304195 | 0.337127263 | 0.01821898  |
| 0.400817642 | 0.067386877 | 0.197286717 | 0.289888647 |
| 0.06538917  | 0.321818617 | 0.022066671 | 0.301696664 |
| 0.004859783 | 0.115109542 | 0.192543324 | 0.179331588 |
| 0.072295784 | 0.190066844 | 0.299789079 | 0.128235908 |
| 0.004102074 | 0.049658065 | 0.002498773 | 0.249241913 |
| 0.31571203  | 0.252928315 | 0.089940781 | 0.072956358 |
| 0.154144061 | 0.22395639  | 0.039531964 | 0.212318839 |
| 0.000859935 | 0.295451662 | 0.064473816 | 0.268959365 |
| 0.135782497 | 0.227744977 | 0.005953813 | 0.188761463 |
| 0.266284238 | 0.071588505 | 0.120001028 | 1           |
| 0.340856129 | 0.229309157 | 0.071031925 | 0.028848295 |
| 0.247171954 | 0.016728301 | 0.121097049 | 0.376634784 |
| 0.054667324 | 0.133887164 | 0.390163256 | 0.08249793  |
| 0.163181003 | 0.222629957 | 0.273342106 | 0.354634128 |
| 0.012802228 | 0.121179488 | 0.305255393 | 0.350550958 |
| 0.171574454 | 0.075668542 | 0.113066939 | 0.107356173 |
| 0.314892027 | 0.010971872 | 0.080948411 | 0.238168638 |

|             |             |             |             |
|-------------|-------------|-------------|-------------|
| 0.148818155 | 0.145250546 | 0.176915197 | 0.072647263 |
| 0.002782535 | 0.023597719 | 0.071934508 | 0.048180806 |
| 0.164019809 | 0.23087787  | 0.094055962 | 0.250170484 |
| 0.018117163 | 0.004392869 | 0.302102199 | 0.022029246 |
| 0.125862356 | 0.267295589 | 0.080073828 | 0.177787988 |
| 0.088131977 | 0.187699529 | 0.195648273 | 0.000319359 |
| 0.306154833 | 0.013479782 | 0.078310586 | 0.083319958 |
| 0.057254659 | 0.007555518 | 0.289015572 | 0.399053902 |
| 0.131443679 | 0.042366934 | 0.08087516  | 0.298167523 |
| 0.056502937 | 0.137513485 | 0.123894969 | 0.280131926 |
| 0.108915154 | 0.227774956 | 0.186930096 | 0.202008654 |
| 0.222440128 | 0.057676815 |             |             |
| TPX2        | 0.157674613 | 0.497654455 | 0.146909498 |
| 0.216188369 | 0.322991275 | 0.510265261 | 0.112531112 |
| 0.202387222 | 0.445986592 | 0.406570823 | 0.424379201 |
| 0.042922065 | 0.083996905 | 0.487177959 | 0.10061211  |
| 0.410762928 | 0.061840401 | 0.172752663 | 0.110242998 |
| 0.319454535 | 0.286731899 | 0.374259678 | 0.502320756 |
| 0.298840862 | 0.287370762 | 0.464529449 | 0.420419861 |
| 0.513795513 | 0.320500912 | 0.496005821 | 0.302297944 |
| 0.434563197 | 0.333071866 | 0.423541399 | 0.051955248 |
| 0.483419362 | 0.011750078 | 0.455085508 | 0.294873792 |
| 0.166282253 | 0.406796281 | 0.475777091 | 0.302555039 |
| 0.467499956 | 0.092784774 | 0.316857031 | 0.438712135 |
| 0.440677157 | 0.364662277 | 0.157222382 | 0.508733894 |
| 0.428511254 | 0.45474179  | 0.499818283 | 0.00448032  |
| 0.314659924 | 0.087774957 | 0.226678164 | 0.522486024 |
| 0.286435952 | 0.179495472 | 0.32193827  | 0.35150116  |
| 0.434905691 | 0.414958654 | 0.32829059  | 0.438242397 |
| 0.500799398 | 0.167439627 | 0.486937474 | 0.235754561 |
| 0.460640958 | 0.089202595 | 0.242989451 | 0.183196245 |
| 0.434353232 | 0.260490908 | 0.385725783 | 0.320464769 |
| 0.496873166 | 0.524723103 | 0.324699025 | 0.526907312 |
| 0.089550463 | 0.345247605 | 0.299739458 | 0.347792471 |
| 0.4170329   | 0.146301031 | 0.469797343 | 0.516388645 |
| 0.112725532 | 0.484372277 | 0.454718897 | 0.227052215 |
| 0.512751926 | 0.304517391 | 0.498491002 | 0.176689536 |
| 0.390652334 | 0.349207535 | 0.493874534 | 0.369692186 |
| 0.349630728 | 0.163251793 | 0.526569025 | 0.321015849 |
| 0.342445927 | 0.176809162 | 0.229018093 | 0.492471837 |
| 0.477273522 | 0.513114368 | 0.490549984 | 0.41358544  |
| 0.392274503 | 0.505512108 | 0.480458075 | 0.477845639 |
| 0.237802644 | 0.530810409 | 0.293284736 | 0.075192723 |
| 0.166801787 | 0.132432389 | 0.247218794 | 0.368666601 |
| 0.509866808 | 0.428945223 | 0.293266616 | 0.268595868 |
| 0.464403454 | 0.516868732 | 0.528444823 | 0.468987819 |
| 0.087586255 | 0.255825736 | 0.405939259 | 0.404518687 |
| 0.427011231 | 0.192577315 | 0.257374548 | 0.531204278 |
| 0.445613893 | 0.469252187 | 0.294331378 | 0.526992771 |
| 0.274847687 | 0.502076847 | 0.520867487 | 0.240482304 |
| 0.530745043 | 0.525016577 | 0.486755716 | 0.423784825 |
| 0.495040919 | 0.46101957  | 0.07777228  | 0.444501701 |
| 0.470877557 | 0.015881168 | 0.504663595 | 0.502114698 |
| 0.512915993 | 0.49512215  | 0.490534257 | 0.507323989 |

|             |             |             |             |
|-------------|-------------|-------------|-------------|
| 0.518889644 | 0.150905047 | 0.030501998 | 0.310235978 |
| 0.5231989   | 0.464023119 | 0.173132125 | 0.449948933 |
| 0.37560899  | 0.508015305 | 0.484240096 | 0.345864874 |
| 0.496911466 | 0.504880961 | 0.512886312 | 0.464468738 |
| 0.408910423 | 0.391571056 | 0.396126717 | 0.512260311 |
| 0.089892864 | 0.216898427 | 0.132787537 | 0.372289257 |
| 0.490713429 | 0.22921354  | 0.487530853 | 0.380071778 |
| 0.256478855 | 0.466932305 | 0.360692817 | 0.396609293 |
| 0.136884454 | 0.508488761 | 0.27164097  | 0.274660432 |
| 0.073576826 | 0.232583127 | 0.239186184 | 0.223795286 |
| 0.283728921 | 0.298921608 | 0.495952971 | 0.497729953 |
| 0.384679389 | 0.298113131 | 0.498374064 | 0.473285074 |
| 0.422574411 | 0.407376808 | 0.310095479 | 0.022036148 |
| 0.282700053 | 0.348499669 | 0.18188772  | 0.452520413 |
| 0.263917121 | 0.274424745 | 0.419600102 | 0.419426036 |
| 0.414731483 | 0.254595726 | 0.386339493 | 0.445708279 |
| 0.262766681 | 0.344242522 | 0.471584178 | 0.481539094 |
| 0.013055562 | 0.408081129 | 0.49854095  | 0.149385603 |
| 0.395501264 | 0.134828088 | 0.279994612 | 0.48671131  |
| 0.299548498 | 0.222182896 | 0.508051447 | 0.417521357 |
| 0.41385422  | 0.310019803 | 0.502098873 | 0.045123609 |
| 0.373023944 | 0.068231314 | 0.323897223 | 0.455316731 |
| 0.33577384  | 0.337451263 | 0.32489957  | 0.304947607 |
| 0.251623166 | 0.51746193  | 0.474807275 | 0.50639193  |
| 0.395217097 | 0.507576306 | 0.492430693 | 0.480839447 |
| 0.447784037 | 0.392648061 | 0.130010354 | 0.493314858 |
| 0.491136448 | 0.338655148 | 0.170067853 | 0.487631752 |
| 0.418270497 | 0.427524202 | 0.134044515 | 0.483439069 |
| 0.502847111 | 0.505642908 | 0.187489839 | 0.394544698 |
| 0.448866579 | 0.339628381 | 0.473324068 | 0.506358597 |
| 0.387509265 | 0.363216829 | 0.347405482 | 0.417792151 |
| 0.270557244 | 0.206959015 | 0.392716934 | 0.179014426 |
| 0.014995159 | 0.169032477 | 0.143590627 | 0.195969451 |
| 0.161889408 | 0.486606477 | 0.439596663 | 0.505584841 |
| 0.179028216 | 0.476799827 | 0.322530071 | 0.313191862 |
| 0.468395999 | 0.369637248 | 0.408051386 | 0.422870775 |
| 0.334125352 | 0.036075506 | 0.163022607 | 0.529008129 |
| 0.11295461  | 0.243265563 | 0.415129754 | 0.004978688 |
| 0.099490326 | 0.503306134 | 0.187089315 | 0.273142425 |
| 0.473820718 | 0.288412744 | 0.311907183 | 0.408697066 |
| 0.400414956 | 0.169131049 | 0.005893623 | 0.492322533 |
| 0.485643252 | 0.468332461 | 0.486959739 | 0.481546014 |
| 0.465106878 | 0.472338404 | 0.447520465 | 0.502864195 |
| 0.175469803 | 0.19172108  | 0.199576024 | 0.318348116 |
| 0.010347302 | 0.436936738 | 0.34381809  | 0.224542557 |
| 0.460171682 | 0.367101388 | 0.083636455 | 0.377850886 |
| 0.056302808 | 0.205834563 | 0.388697333 | 0.268592716 |
| 0.371419019 | 0.043873454 | 0.317665711 | 0.335427955 |
| 0.482995504 | 0.433821939 | 0.39045576  | 0.53269952  |
| 0.387656466 | 0.247785908 | 0.346332769 | 0.442897483 |
| 0.128586752 | 0.140098246 | 0.450096897 | 0.067865495 |
| 0.297996099 | 0.464119    | 0.425898068 | 0.147879402 |
| 0.345748793 | 0.017659467 | 0.455561752 | 0.525182959 |
| 0.501257349 | 0.494487901 | 0.505144636 | 0.278942206 |

|             |             |             |             |
|-------------|-------------|-------------|-------------|
| 0.506171607 | 0.106562312 | 0.519887664 | 0.493006136 |
| 0.444108102 | 0.00252518  | 0.009784073 | 0.503669843 |
| 0.423744407 | 0.148512252 | 0.239921425 | 0.485180784 |
| 0.158029965 | 0.276255315 | 0.126458379 | 0.183322709 |
| 0.511472255 | 0.259758697 | 0.175516846 | 0.49184245  |
| 0.294517755 | 0.287918205 | 0.493482682 | 0.177539566 |
| 0.456499047 | 0.09933952  | 0.1738702   | 0.011579951 |
| 0.397425166 | 0.219361268 | 0.513738589 | 0.511724569 |
| 0.482846962 | 0.424517737 | 0.416635396 | 0.421878447 |
| 0.469817823 | 0.215631693 | 0.431482853 | 0.230942206 |
| 0.508459219 | 0.417370544 | 0.387398462 | 0.399246399 |
| 0.476287976 | 0.483539692 | 0.071984268 | 0.449427233 |
| 0.035235469 | 0.002229241 | 0.50199929  | 0.338224929 |
| 0.074452357 | 0.381637689 | 0.335036426 | 0.301532641 |
| 0.28120057  | 0.075046727 | 0.257501642 | 0.23310016  |
| 0.34705308  | 0.391803499 | 0.274369639 | 0.334587568 |
| 0.284261035 | 0.131441739 | 0.25651234  | 0.210920262 |
| 0.290572576 | 0.406428931 | 0.289676009 | 0.051450823 |
| 0.494363916 | 0.446294461 | 0.116340553 | 0.256697455 |
| 0.488924494 | 0.504194629 | 0.070957833 | 0.01936569  |
| 0.355701305 | 0.343864579 | 0.491738577 | 0.512763361 |
| 0.539019224 | 0.497849262 | 0.422021876 | 0.138355362 |
| 0.132236078 | 0.357833119 | 0.297418366 | 0.113216125 |
| 0.504220909 | 0.153950936 | 0.502904114 | 0.300962606 |
| 0.196447595 | 0.292814618 | 0.062921713 | 0.147831051 |
| 0.408081934 | 0.254541333 | 0.211831652 | 0.268724619 |
| 0.33953249  | 0.260290019 | 0.098751082 | 0.26698402  |
| 0.419434088 | 0.170348731 | 0.238347793 | 0.426009806 |
| 0.462858487 | 0.321204602 | 0.461586224 | 0.443929105 |
| 0.227570287 | 0.196756405 | 0.417545022 | 0.443197171 |
| 0.505940312 | 0.466324883 | 0.059717998 | 0.507070321 |
| 0.490890533 | 0.492419454 | 0.51726799  | 0.411752251 |
| 0.165401485 | 0.404445586 | 0.321778141 | 0.360088976 |
| 0.255372436 | 0.511431505 | 0.294688643 | 0.127727175 |
| 0.364170878 | 0.494221743 | 0.483480837 | 0.220152319 |
| 0.494883069 | 0.249292899 | 0.141933666 | 0.499072468 |
| 0.169583297 | 0.158526678 | 0.479324725 | 0.474325947 |
| 0.003273185 | 0.132928653 | 0.475104099 | 0.315270518 |
| 0.510969045 | 0.487825499 | 0.462883004 | 0.36510814  |
| 0.001367013 | 0.435104324 | 0.425113294 | 0.446207775 |
| 0.49947416  | 0.451504467 | 0.231004087 | 0.111120901 |
| 0.349783742 | 0.183592821 | 0.167042062 | 0.470796926 |
| 0.171068194 | 0.494096175 | 0.26302083  | 0.289190302 |
| 0.231227364 | 0.192029061 | 0.257228449 | 0.335446697 |
| 0.146318313 | 0.306872986 | 0.400883934 | 0.420925267 |
| 0.191143354 | 0.453413666 | 0.47257827  | 0.068662428 |
| 0.378115874 | 0.450377545 | 0.472193232 | 0.003492324 |
| 0.464345981 | 0.01788886  | 0.225319823 | 0.254438954 |
| 0.241392493 | 0.239823516 | 0.28251709  | 0.325072881 |
| 0.428362688 | 0.287118353 | 0.343870527 | 0.298491705 |
| 0.204875926 | 0.313864362 | 0.431886854 | 0.452266085 |
| 0.309126609 | 0.207039778 | 0.193605663 | 0.192906052 |
| 0.093469799 | 0.510527667 | 0.330391896 | 0.171288977 |
| 0.283940246 | 0.437652067 | 0.395461272 | 0.514203888 |

|             |             |             |             |
|-------------|-------------|-------------|-------------|
| 0.449481367 | 0.227118664 | 0.37875097  | 0.517987796 |
| 0.280795442 | 0.401469975 | 0.14037069  | 0.49211183  |
| 0.312250769 | 0.219564363 | 0.505330683 | 0.434990846 |
| 0.481129709 | 0.427461043 | 0.331195341 | 0.468505933 |
| 0.422486164 | 0.389257663 | 0.441692685 | 0.115240524 |
| 0.262958478 | 0.225524619 | 0.267304969 | 0.006826659 |
| 0.417029965 | 0.408849186 | 0.506284023 | 0.512055541 |
| 0.297922921 | 0.433914649 | 0.452637812 | 0.153848828 |
| 0.410977328 | 0.283168162 | 0.224677429 | 0.501813101 |
| 0.218985158 | 0.271906752 | 0.321641506 | 0.497888404 |
| 0.474950964 | 0.472758701 | 0.269543006 | 0.326473499 |
| 0.304526114 | 0.323063777 | 0.492290892 | 0.239355586 |
| 0.483067404 | 0.190633459 | 0.47782939  | 0.321302111 |
| 0.247387133 | 0.504391158 | 0.131619144 | 0.506525605 |
| 0.342152773 | 0.233181143 | 0.489584227 | 0.414322352 |
| 0.415726435 | 0.158760152 | 0.181873516 | 0.484891358 |
| 0.280647414 | 0.360156649 | 0.022213553 | 0.06291868  |
| 0.370534106 | 0.36420544  | 0.484979953 | 0.417931164 |
| 0.251053102 | 0.370238564 | 0.172854454 | 0.383053967 |
| 0.515147767 | 0.530775596 | 0.297736655 | 0.31372948  |
| 0.412630952 | 0.161742644 | 0.523849018 | 0.021339519 |
| 0.453790715 | 0.457178652 | 0.436766974 | 0.098934815 |
| 0.044565607 | 0.204344626 | 0.466562113 | 0.153542291 |
| 0.476710171 | 0.219702227 | 0.447850372 | 0.504078232 |
| 0.273636563 | 0.530923243 | 0.149400526 | 0.451522547 |
| 0.101710792 | 0.336650601 | 0.407457716 | 0.424698552 |
| 0.243946728 | 0.288705946 | 0.417270036 | 0.233549841 |
| 0.063690153 | 0.293286601 | 0.002688965 | 0.429685085 |
| 0.508747176 | 0.342895569 | 0.293488957 | 0.389445397 |
| 0.327874872 | 0.445801594 | 0.25007101  | 0.477282374 |
| 0.023288348 | 0.380526599 | 0.271198147 | 0.500132926 |
| 0.260605478 | 0.41520655  | 0.098501862 | 0.316882221 |
| 0.508033261 | 0.291142454 | 0.328804556 | 0.340856129 |
| 1           | 0.478981694 | 0.293505597 | 0.257045929 |
| 0.46119745  | 0.140334953 | 0.499621593 | 0.516687375 |
| 0.216619082 | 0.211016622 | 0.463881361 | 0.244592628 |
| 0.311181907 | 0.469908444 | 0.46975064  | 0.513873885 |
| 0.085976142 | 0.314067015 | 0.466294744 | 0.485187834 |
| 0.34749434  | 0.16223329  | 0.239841309 | 0.236545881 |
| 0.496914158 | 0.164358526 | 0.259696401 | 0.442945273 |
| 0.206946529 | 0.366994767 | 0.45950263  | 0.198657902 |
| 0.0619263   | 0.229348219 | 0.459811091 | 0.228520676 |
| 0.340104221 | 0.393887853 | 0.245886581 | 0.423485769 |
| 0.17744687  | 0.043769978 | 0.451236783 | 0.015031667 |
| 0.485727476 | 0.440666181 | 0.32048028  | 0.377934679 |
| 0.289551626 | 0.43202361  | 0.448271144 | 0.003543807 |
| 0.449490609 | 0.063887594 | 0.346067568 | 0.238819783 |
| 0.296019216 | 0.106967603 | 0.488776918 | 0.489609659 |
| 0.421351421 | 0.39566766  | 0.37815584  | 0.488648585 |
| 0.141964358 | 0.363968514 | 0.352672036 | 0.514556966 |
| 0.220673769 | 0.46578288  | 0.463461608 | 0.412462147 |
| 0.474918629 | 0.373541064 |             |             |
| TRAFD1      | 0.122660369 | 0.427232779 | 0.107743169 |
| 0.141676909 | 0.265321111 | 0.369297904 | 0.104423484 |

|             |             |             |             |
|-------------|-------------|-------------|-------------|
| 0.173142519 | 0.362834909 | 0.320504424 | 0.308225125 |
| 0.034931805 | 0.089645428 | 0.406791398 | 0.101930393 |
| 0.312581959 | 0.059581958 | 0.147823019 | 0.114543165 |
| 0.288676624 | 0.233528503 | 0.283105137 | 0.357045244 |
| 0.263159133 | 0.222168149 | 0.352564801 | 0.342193253 |
| 0.468314009 | 0.225875753 | 0.363883725 | 0.211478928 |
| 0.392186384 | 0.26364904  | 0.323314998 | 0.043501109 |
| 0.370794024 | 0.025438393 | 0.437547496 | 0.23072857  |
| 0.141909333 | 0.341608964 | 0.346899055 | 0.227547918 |
| 0.341612137 | 0.069305679 | 0.226764371 | 0.343946472 |
| 0.360453479 | 0.336147181 | 0.124102687 | 0.382733383 |
| 0.352142076 | 0.334910384 | 0.363383958 | 0.002530285 |
| 0.246681922 | 0.080466519 | 0.189241547 | 0.494570253 |
| 0.224957056 | 0.159379964 | 0.258312786 | 0.327678126 |
| 0.35384355  | 0.345281008 | 0.293038006 | 0.32743437  |
| 0.459862384 | 0.150606043 | 0.374453685 | 0.179402701 |
| 0.347395911 | 0.085962263 | 0.20002452  | 0.165868577 |
| 0.349368923 | 0.220743518 | 0.307253212 | 0.272727206 |
| 0.413546915 | 0.509403081 | 0.279836631 | 0.498203734 |
| 0.11137285  | 0.282549986 | 0.264326476 | 0.288361818 |
| 0.342827535 | 0.153151124 | 0.334895519 | 0.488143671 |
| 0.115995311 | 0.357912742 | 0.344661498 | 0.185847371 |
| 0.414071191 | 0.293639725 | 0.34848832  | 0.150032926 |
| 0.316282312 | 0.271553316 | 0.489559139 | 0.271545864 |
| 0.311976463 | 0.130116504 | 0.498970539 | 0.261134579 |
| 0.249041678 | 0.137968743 | 0.193256455 | 0.392177443 |
| 0.346801756 | 0.450904015 | 0.378958481 | 0.325070434 |
| 0.291833036 | 0.463377675 | 0.343646909 | 0.405460243 |
| 0.19433922  | 0.503017194 | 0.223924648 | 0.069865356 |
| 0.130561972 | 0.135158758 | 0.25624448  | 0.307124745 |
| 0.421978115 | 0.338526217 | 0.215934072 | 0.221006347 |
| 0.391678758 | 0.486707935 | 0.501772021 | 0.349473225 |
| 0.073742246 | 0.247927405 | 0.298472511 | 0.34292106  |
| 0.327497994 | 0.181287359 | 0.212295099 | 0.501900217 |
| 0.345715228 | 0.354715978 | 0.232864351 | 0.510912398 |
| 0.257727183 | 0.476133283 | 0.421903061 | 0.182966598 |
| 0.501721019 | 0.492145284 | 0.462150832 | 0.32226736  |
| 0.4703086   | 0.317887317 | 0.090756952 | 0.348355756 |
| 0.446593633 | 0.013232278 | 0.428175349 | 0.448110016 |
| 0.478469678 | 0.37841696  | 0.475562355 | 0.470120897 |
| 0.486376686 | 0.132304733 | 0.034249038 | 0.254307002 |
| 0.487517214 | 0.346247077 | 0.18834598  | 0.323191083 |
| 0.30295599  | 0.366062377 | 0.384367591 | 0.219792496 |
| 0.483439213 | 0.413800942 | 0.451944117 | 0.348738775 |
| 0.341186067 | 0.320804316 | 0.31043581  | 0.479235111 |
| 0.083527017 | 0.155742106 | 0.102878541 | 0.320669563 |
| 0.350970032 | 0.195708484 | 0.33814484  | 0.326320473 |
| 0.212348753 | 0.372422803 | 0.288615487 | 0.308340814 |
| 0.110966138 | 0.357938193 | 0.227366937 | 0.207965119 |
| 0.064431717 | 0.192088784 | 0.160412584 | 0.178043563 |
| 0.232230191 | 0.294337843 | 0.369167414 | 0.454781202 |
| 0.330936383 | 0.221438845 | 0.364616814 | 0.441070543 |
| 0.380596597 | 0.306045095 | 0.26343721  | 0.014777536 |
| 0.193713325 | 0.293425623 | 0.1633787   | 0.353903505 |

|             |             |             |             |
|-------------|-------------|-------------|-------------|
| 0.239903948 | 0.207150512 | 0.313947849 | 0.319302689 |
| 0.280773009 | 0.232500115 | 0.292630064 | 0.430114828 |
| 0.209145749 | 0.257442629 | 0.367905724 | 0.358234332 |
| 0.011897157 | 0.285622876 | 0.363842954 | 0.153465139 |
| 0.31643764  | 0.10830932  | 0.207313852 | 0.401677346 |
| 0.239737803 | 0.20949887  | 0.455371355 | 0.333395927 |
| 0.301678339 | 0.283512671 | 0.484697807 | 0.041605687 |
| 0.330122914 | 0.054718205 | 0.25726036  | 0.355199672 |
| 0.258890419 | 0.280868151 | 0.269630265 | 0.247039356 |
| 0.181886387 | 0.489038856 | 0.368828002 | 0.464529573 |
| 0.287819538 | 0.487786845 | 0.38006408  | 0.381840046 |
| 0.349072687 | 0.317486033 | 0.115881919 | 0.351019071 |
| 0.395424919 | 0.25485165  | 0.136685458 | 0.371120841 |
| 0.326021773 | 0.325853926 | 0.144857298 | 0.437253321 |
| 0.486605352 | 0.472237984 | 0.163223959 | 0.315456393 |
| 0.322110419 | 0.246438195 | 0.377489989 | 0.494433759 |
| 0.299192596 | 0.278271508 | 0.259379015 | 0.332006319 |
| 0.209288518 | 0.191586728 | 0.33348253  | 0.172674391 |
| 0.010809458 | 0.14367112  | 0.11108176  | 0.169421609 |
| 0.145012214 | 0.371337592 | 0.3442337   | 0.47442746  |
| 0.148682625 | 0.404460712 | 0.286188948 | 0.215249589 |
| 0.388806991 | 0.309755539 | 0.32336595  | 0.338484486 |
| 0.2834608   | 0.030114677 | 0.121142702 | 0.50609098  |
| 0.094510134 | 0.193620896 | 0.344382316 | 0.003755027 |
| 0.081067687 | 0.380228596 | 0.15216907  | 0.234333792 |
| 0.425110274 | 0.238873563 | 0.229445268 | 0.303388461 |
| 0.314852036 | 0.146573236 | 0.005858159 | 0.458737466 |
| 0.485287593 | 0.460456103 | 0.483046163 | 0.481560435 |
| 0.416141933 | 0.388311821 | 0.344642187 | 0.355917337 |
| 0.146796516 | 0.160329039 | 0.156962961 | 0.241908523 |
| 0.009044782 | 0.341682704 | 0.312671355 | 0.181213029 |
| 0.355380706 | 0.304786146 | 0.06897141  | 0.324715018 |
| 0.033630678 | 0.152069315 | 0.308678133 | 0.252503473 |
| 0.316459582 | 0.038560416 | 0.191186738 | 0.242062974 |
| 0.424353291 | 0.324192875 | 0.306307469 | 0.50521062  |
| 0.283630398 | 0.18900139  | 0.262950433 | 0.345630691 |
| 0.112271244 | 0.107996322 | 0.359388991 | 0.037163247 |
| 0.244026998 | 0.469039121 | 0.34545145  | 0.109029424 |
| 0.255835784 | 0.0129952   | 0.343317116 | 0.497859838 |
| 0.467879576 | 0.463199334 | 0.461295622 | 0.213491646 |
| 0.469377793 | 0.105026856 | 0.491491894 | 0.367679768 |
| 0.312998662 | 0.00109221  | 0.011440608 | 0.42862901  |
| 0.304037895 | 0.119155473 | 0.194232316 | 0.317593524 |
| 0.126877621 | 0.210602532 | 0.123558693 | 0.163095042 |
| 0.380359912 | 0.222406982 | 0.172121698 | 0.4601299   |
| 0.237278175 | 0.255269054 | 0.370568949 | 0.151623331 |
| 0.356103647 | 0.082945307 | 0.157018514 | 0.009110454 |
| 0.328039199 | 0.170100835 | 0.489310432 | 0.482873195 |
| 0.457045294 | 0.327526614 | 0.296142128 | 0.31822581  |
| 0.411433489 | 0.159582443 | 0.334335355 | 0.178556724 |
| 0.460858858 | 0.301351414 | 0.28759471  | 0.288201446 |
| 0.445567487 | 0.43393918  | 0.066459906 | 0.33494783  |
| 0.025005185 | 0.004639562 | 0.33297812  | 0.289777171 |
| 0.124783023 | 0.288885504 | 0.259740154 | 0.300059477 |



|             |             |             |             |
|-------------|-------------|-------------|-------------|
| 0.288425621 | 0.053661338 | 0.216766374 | 0.193495855 |
| 0.272086912 | 0.297426659 | 0.222095344 | 0.299161993 |
| 0.256040592 | 0.122526176 | 0.233547375 | 0.198780594 |
| 0.280183783 | 0.308443048 | 0.218317962 | 0.050715815 |
| 0.360511838 | 0.321347914 | 0.097443948 | 0.210841392 |
| 0.371102704 | 0.427974912 | 0.068736785 | 0.01460064  |
| 0.272034448 | 0.288888456 | 0.439341396 | 0.476113587 |
| 0.508772909 | 0.475693262 | 0.396908115 | 0.130857491 |
| 0.112812742 | 0.295924155 | 0.249705339 | 0.121567668 |
| 0.474091651 | 0.121288734 | 0.480367794 | 0.250290515 |
| 0.173319791 | 0.228294904 | 0.053665791 | 0.137371481 |
| 0.31665115  | 0.213599906 | 0.184841459 | 0.189777272 |
| 0.256417121 | 0.215278763 | 0.093601827 | 0.215979803 |
| 0.311666057 | 0.136924116 | 0.195713522 | 0.3694618   |
| 0.367657667 | 0.295913269 | 0.342723355 | 0.416342357 |
| 0.18185779  | 0.174222188 | 0.261185692 | 0.370580322 |
| 0.376246632 | 0.361798163 | 0.03885988  | 0.440312012 |
| 0.45484363  | 0.353563898 | 0.485369162 | 0.335693722 |
| 0.144353246 | 0.288223088 | 0.285127793 | 0.280508596 |
| 0.225370299 | 0.371822526 | 0.269594103 | 0.111576632 |
| 0.314761041 | 0.490181475 | 0.381383681 | 0.177500373 |
| 0.385703922 | 0.197916463 | 0.112395409 | 0.424112883 |
| 0.140719641 | 0.11184195  | 0.351853957 | 0.374622562 |
| 0.003997117 | 0.1263679   | 0.456272556 | 0.250601531 |
| 0.505676803 | 0.421845709 | 0.407969444 | 0.338761172 |
| 0.001893462 | 0.337339437 | 0.303192153 | 0.306753172 |
| 0.390375257 | 0.34849421  | 0.25644701  | 0.097572979 |
| 0.283382166 | 0.136738802 | 0.137067367 | 0.342572039 |
| 0.14587382  | 0.360993901 | 0.226720834 | 0.263206032 |
| 0.212235109 | 0.165872874 | 0.220386942 | 0.265935536 |
| 0.175132685 | 0.245728892 | 0.303323332 | 0.336301856 |
| 0.123827662 | 0.392666577 | 0.342735607 | 0.0578102   |
| 0.315499645 | 0.369007644 | 0.418240846 | 0.001995983 |
| 0.334924989 | 0.016146034 | 0.195145787 | 0.200115281 |
| 0.212555269 | 0.211929437 | 0.244552786 | 0.258108471 |
| 0.333505034 | 0.241079331 | 0.249012232 | 0.237647822 |
| 0.172452263 | 0.276293139 | 0.34290693  | 0.353808254 |
| 0.224473489 | 0.164876422 | 0.15824081  | 0.16414789  |
| 0.073215113 | 0.44472927  | 0.258181118 | 0.134495315 |
| 0.247376309 | 0.354141642 | 0.324280094 | 0.480956513 |
| 0.390275816 | 0.174317522 | 0.321858614 | 0.399744225 |
| 0.217204167 | 0.292392396 | 0.112292481 | 0.378560674 |
| 0.250504365 | 0.166613586 | 0.395387959 | 0.298016726 |
| 0.367030109 | 0.39262152  | 0.257950016 | 0.428814122 |
| 0.321139485 | 0.332745438 | 0.29994743  | 0.094170806 |
| 0.190632595 | 0.192991813 | 0.221503137 | 0.005155978 |
| 0.320400044 | 0.27636969  | 0.397477152 | 0.477342134 |
| 0.249926539 | 0.372006632 | 0.291701279 | 0.110549425 |
| 0.284328802 | 0.222128421 | 0.183328445 | 0.382571199 |
| 0.172751378 | 0.230856921 | 0.256900274 | 0.347766231 |
| 0.36135873  | 0.375046953 | 0.264051591 | 0.277242206 |
| 0.283012247 | 0.257138155 | 0.487867265 | 0.195157029 |
| 0.353452608 | 0.157199362 | 0.370210383 | 0.23812806  |
| 0.211848181 | 0.482659361 | 0.114434059 | 0.478764741 |

|             |             |             |             |
|-------------|-------------|-------------|-------------|
| 0.261519253 | 0.196041522 | 0.476529709 | 0.356885566 |
| 0.346441138 | 0.154141416 | 0.154954109 | 0.377896934 |
| 0.251591743 | 0.290951256 | 0.016282331 | 0.048607321 |
| 0.285879797 | 0.339305237 | 0.361430685 | 0.349925016 |
| 0.227244269 | 0.306279831 | 0.173632597 | 0.298601872 |
| 0.48193622  | 0.508109854 | 0.195960661 | 0.26260074  |
| 0.317410193 | 0.134595202 | 0.371709243 | 0.030124059 |
| 0.32795967  | 0.339651228 | 0.322861527 | 0.09559583  |
| 0.043059892 | 0.160624675 | 0.337877191 | 0.13903445  |
| 0.41874007  | 0.169204592 | 0.371073839 | 0.379418323 |
| 0.24136294  | 0.501986093 | 0.143768617 | 0.328168032 |
| 0.106600866 | 0.292408627 | 0.342766661 | 0.351999229 |
| 0.173189692 | 0.229739183 | 0.309650238 | 0.186536201 |
| 0.05634068  | 0.23899782  | 0.002314481 | 0.407523145 |
| 0.480899866 | 0.274760905 | 0.245548792 | 0.318466144 |
| 0.270154572 | 0.380498516 | 0.212944449 | 0.368059543 |
| 0.019936018 | 0.280939763 | 0.238332625 | 0.376037321 |
| 0.16203149  | 0.333785565 | 0.085882069 | 0.277920371 |
| 0.484463895 | 0.208592186 | 0.282342679 | 0.229309157 |
| 0.478981694 | 1           | 0.229583638 | 0.255658048 |
| 0.370033445 | 0.118951662 | 0.369919669 | 0.497679795 |
| 0.1844761   | 0.171449036 | 0.355062427 | 0.183386299 |
| 0.260242451 | 0.386861453 | 0.367682866 | 0.503438111 |
| 0.083659645 | 0.247969446 | 0.366165983 | 0.427052734 |
| 0.283291095 | 0.159189289 | 0.18651218  | 0.192795208 |
| 0.44932836  | 0.117709577 | 0.230634356 | 0.32669544  |
| 0.162445999 | 0.306189642 | 0.369045606 | 0.183149916 |
| 0.053879822 | 0.222954715 | 0.338588121 | 0.196907291 |
| 0.264313961 | 0.303750277 | 0.218538974 | 0.365072807 |
| 0.133156919 | 0.030793828 | 0.432026639 | 0.013099197 |
| 0.351379438 | 0.324207845 | 0.272331031 | 0.305352439 |
| 0.217771685 | 0.339175359 | 0.313236236 | 0.00245673  |
| 0.352932457 | 0.071021008 | 0.326341656 | 0.180269913 |
| 0.23653509  | 0.088344424 | 0.451798421 | 0.456171506 |
| 0.346317796 | 0.339599203 | 0.273023377 | 0.449672687 |
| 0.124390179 | 0.295275129 | 0.292450808 | 0.375484683 |
| 0.191013805 | 0.331509472 | 0.349658764 | 0.302007727 |
| 0.364905372 | 0.321313722 |             |             |
| TRAPPC1     | 0.227671958 | 0.258123301 | 0.249808412 |
| 0.16149939  | 0.091767123 | 0.160940581 | 0.189187699 |
| 0.191443967 | 0.218139306 | 0.107319885 | 0.135824103 |
| 0.132811456 | 0.01187547  | 0.229184545 | 0.170949465 |
| 0.103072419 | 0.129522123 | 0.194967507 | 0.058126797 |
| 0.176036147 | 0.083519171 | 0.080263913 | 0.182014754 |
| 0.088916984 | 0.315669704 | 0.205639855 | 0.09470223  |
| 0.256458939 | 0.050574638 | 0.133613522 | 0.079692193 |
| 0.289333221 | 0.084385979 | 0.0855193   | 0.176651129 |
| 0.14352957  | 0.004849277 | 0.343224374 | 0.116536198 |
| 0.037385463 | 0.28412594  | 0.14826615  | 0.145634554 |
| 0.140086351 | 0.207554156 | 0.063544013 | 0.113560705 |
| 0.19163915  | 0.167828944 | 0.248277819 | 0.160311786 |
| 0.125995025 | 0.202469174 | 0.176779102 | 0.00530838  |
| 0.055529    | 0.007567557 | 0.031538603 | 0.308438942 |
| 0.205661386 | 0.166306882 | 0.058252098 | 0.181193998 |

|             |             |             |             |
|-------------|-------------|-------------|-------------|
| 0.120201429 | 0.129940612 | 0.181598389 | 0.115815911 |
| 0.273574358 | 0.027183757 | 0.136852283 | 0.129425896 |
| 0.156591562 | 0.208773083 | 0.230087668 | 0.252675195 |
| 0.110831907 | 0.158895533 | 0.112914442 | 0.069651995 |
| 0.259827427 | 0.338525718 | 0.209211026 | 0.334417181 |
| 0.020474332 | 0.079056006 | 0.086288236 | 0.154907178 |
| 0.150235912 | 0.185707708 | 0.153595486 | 0.305626762 |
| 0.20293682  | 0.142466377 | 0.147525686 | 0.25105607  |
| 0.243474676 | 0.064996981 | 0.134179962 | 0.032818957 |
| 0.103963705 | 0.089147176 | 0.327261551 | 0.181640594 |
| 0.100498259 | 0.256879896 | 0.366457139 | 0.06882422  |
| 0.107094166 | 0.263485611 | 0.071503704 | 0.170499467 |
| 0.144766829 | 0.247057474 | 0.198491187 | 0.171938298 |
| 0.090019789 | 0.26986885  | 0.165759693 | 0.237579424 |
| 0.043122679 | 0.297024912 | 0.229456396 | 0.132666648 |
| 0.245193297 | 0.150186281 | 0.077170285 | 0.215821078 |
| 0.210780001 | 0.184581811 | 0.203472602 | 0.126772584 |
| 0.182388477 | 0.339552327 | 0.293779208 | 0.187100296 |
| 0.191894343 | 0.049757174 | 0.098056147 | 0.197300556 |
| 0.140905014 | 0.219910472 | 0.053986792 | 0.35285259  |
| 0.253190425 | 0.162957177 | 0.255455745 | 0.378814435 |
| 0.172343936 | 0.290752006 | 0.237881043 | 0.184298264 |
| 0.333150092 | 0.349281106 | 0.258994628 | 0.102445182 |
| 0.32074668  | 0.189604705 | 0.032441712 | 0.206874811 |
| 0.263172111 | 0.004330226 | 0.202023142 | 0.217641874 |
| 0.297011768 | 0.169307436 | 0.254239037 | 0.244977646 |
| 0.295723247 | 0.239209916 | 0.005466997 | 0.116382159 |
| 0.320281677 | 0.230605744 | 0.120801796 | 0.100621166 |
| 0.09765789  | 0.177840486 | 0.163916896 | 0.073574066 |
| 0.302157307 | 0.220688265 | 0.226550208 | 0.173292747 |
| 0.177497213 | 0.285369091 | 0.080177226 | 0.36124361  |
| 0.1770057   | 0.232911203 | 0.246654811 | 0.178160478 |
| 0.146889452 | 0.163889968 | 0.168444454 | 0.109175069 |
| 0.177519632 | 0.192798201 | 0.065098236 | 0.100997436 |
| 0.251812288 | 0.129690445 | 0.246009872 | 0.22743721  |
| 0.141827473 | 0.288278875 | 0.125186305 | 0.157740541 |
| 0.112135091 | 0.396919549 | 0.130898381 | 0.239728798 |
| 0.109435167 | 0.259368827 | 0.153411466 | 0.261824222 |
| 0.243409292 | 0.09539757  | 0.207480342 | 0.050729179 |
| 0.07454327  | 0.067174548 | 0.026325471 | 0.104413534 |
| 0.353553485 | 0.109670242 | 0.116017394 | 0.116873962 |
| 0.21556291  | 0.230153637 | 0.092699419 | 0.332001401 |
| 0.260536245 | 0.101768206 | 0.190366329 | 0.136473908 |
| 0.082629485 | 0.167114246 | 0.179257631 | 0.057495551 |
| 0.175845153 | 0.024632615 | 0.049025808 | 0.209923494 |
| 0.053324405 | 0.055268294 | 0.225003506 | 0.118718332 |
| 0.107123335 | 0.352649768 | 0.263204051 | 0.005178219 |
| 0.097647671 | 0.05043252  | 0.143362463 | 0.137787067 |
| 0.199083048 | 0.157368341 | 0.078391807 | 0.091264753 |
| 0.264224835 | 0.29249457  | 0.222929334 | 0.25131239  |
| 0.084381318 | 0.27366521  | 0.178859642 | 0.216909039 |
| 0.177780538 | 0.085282732 | 0.016364432 | 0.180228687 |
| 0.202732394 | 0.083583881 | 0.265601    | 0.152157243 |
| 0.109773786 | 0.108495703 | 0.069047914 | 0.24739128  |

|             |             |             |             |
|-------------|-------------|-------------|-------------|
| 0.335048444 | 0.322735212 | 0.128064467 | 0.134066891 |
| 0.200204741 | 0.205485198 | 0.19869976  | 0.276835514 |
| 0.097314101 | 0.087515619 | 0.087084969 | 0.167476009 |
| 0.233049823 | 0.059524436 | 0.261401539 | 0.025913025 |
| 0.001537155 | 0.232009367 | 0.238820281 | 0.119915135 |
| 0.035581889 | 0.121531325 | 0.131843467 | 0.268895853 |
| 0.182069823 | 0.255579286 | 0.20323072  | 0.095117414 |
| 0.265404249 | 0.090721684 | 0.091149045 | 0.113530804 |
| 0.217877773 | 0.07985617  | 0.124741719 | 0.347948532 |
| 0.235137998 | 0.047639019 | 0.171511653 | 0.009593076 |
| 0.196288611 | 0.201329502 | 0.285840687 | 0.333393598 |
| 0.205912471 | 0.340701015 | 0.231651902 | 0.117774129 |
| 0.147308452 | 0.224017993 | 0.014470308 | 0.248634125 |
| 0.281139829 | 0.26997356  | 0.282966193 | 0.320551787 |
| 0.21967091  | 0.166665419 | 0.152855665 | 0.201305219 |
| 0.202290021 | 0.258741575 | 0.041170477 | 0.117377072 |
| 0.015774619 | 0.169204729 | 0.11350556  | 0.227291615 |
| 0.131447438 | 0.167073478 | 0.175088374 | 0.099451695 |
| 0.141163491 | 0.028506394 | 0.154219468 | 0.138711928 |
| 0.125358706 | 0.161033268 | 0.090896163 | 0.070147389 |
| 0.311839814 | 0.254443617 | 0.077778431 | 0.303354272 |
| 0.138658066 | 0.264065911 | 0.118205345 | 0.138450406 |
| 0.196365447 | 0.037462393 | 0.157269022 | 0.017575206 |
| 0.090932606 | 0.300456876 | 0.10621011  | 0.236653802 |
| 0.178740544 | 0.095835969 | 0.266610105 | 0.295262123 |
| 0.311718198 | 0.242818747 | 0.267967253 | 0.055457779 |
| 0.284912857 | 0.009852394 | 0.270386921 | 0.230096322 |
| 0.103351877 | 0.008748224 | 0.021068547 | 0.211924328 |
| 0.10526555  | 0.258653864 | 0.216748077 | 0.139753312 |
| 0.155722393 | 0.251955824 | 0.190966118 | 0.053760821 |
| 0.151260575 | 0.093892567 | 0.046537069 | 0.307239054 |
| 0.156606872 | 0.158661918 | 0.146277185 | 0.252568889 |
| 0.119537022 | 0.171955317 | 0.248297838 | 0.012765633 |
| 0.125590503 | 0.287356935 | 0.382490539 | 0.282774657 |
| 0.28549029  | 0.12132061  | 0.086751302 | 0.111847505 |
| 0.202724555 | 0.264944633 | 0.093204493 | 0.267697701 |
| 0.285682251 | 0.11326326  | 0.183699318 | 0.246438911 |
| 0.256233455 | 0.283178136 | 0.170355072 | 0.159010433 |
| 0.090563895 | 0.002565715 | 0.179736709 | 0.185494164 |
| 0.02954913  | 0.09040132  | 0.213666563 | 0.146553596 |
| 0.133218885 | 0.163771814 | 0.048301109 | 0.045951716 |
| 0.150746549 | 0.117381642 | 0.068404505 | 0.20870681  |
| 0.09662012  | 0.049613479 | 0.149218884 | 0.154413101 |
| 0.092317898 | 0.27583899  | 0.309607359 | 0.155786625 |
| 0.129365965 | 0.103071795 | 0.204357351 | 0.240831309 |
| 0.200964201 | 0.21957521  | 0.13272098  | 0.049296506 |
| 0.232670495 | 0.108460405 | 0.220483761 | 0.277647046 |
| 0.334260874 | 0.282805522 | 0.321918743 | 0.087032263 |
| 0.204736758 | 0.131617105 | 0.075028185 | 0.081238672 |
| 0.265984909 | 0.24619789  | 0.29877694  | 0.058561002 |
| 0.230494826 | 0.189329638 | 0.118687096 | 0.206908077 |
| 0.088667832 | 0.199083561 | 0.124178968 | 0.26080924  |
| 0.110221915 | 0.052396954 | 0.194251259 | 0.18983202  |
| 0.187579728 | 0.029956534 | 0.209687969 | 0.190812384 |

|             |             |             |             |
|-------------|-------------|-------------|-------------|
| 0.229861441 | 0.097316008 | 0.124306147 | 0.280340354 |
| 0.24753864  | 0.230703075 | 0.197430981 | 0.154819117 |
| 0.182412176 | 0.1154421   | 0.088959597 | 0.261943607 |
| 0.241316229 | 0.12448279  | 0.310414261 | 0.188503051 |
| 0.244239858 | 0.095857206 | 0.067871555 | 0.104752547 |
| 0.187795183 | 0.168751297 | 0.153140511 | 0.220994255 |
| 0.25102399  | 0.343147967 | 0.239598435 | 0.150050883 |
| 0.133302576 | 0.258354606 | 0.244868711 | 0.214060654 |
| 0.037163002 | 0.182876807 | 0.137575395 | 0.163775243 |
| 0.008546523 | 0.020031376 | 0.233214908 | 0.147246675 |
| 0.310497498 | 0.222163078 | 0.279870686 | 0.188954702 |
| 0.000160768 | 0.108188473 | 0.130046712 | 0.116971604 |
| 0.234741795 | 0.217928181 | 0.129556588 | 0.138500022 |
| 0.208697239 | 0.259884677 | 0.122853944 | 0.150738354 |
| 0.032261398 | 0.159327606 | 0.194416573 | 0.195679014 |
| 0.126007063 | 0.248255771 | 0.051592788 | 0.192968911 |
| 0.036825226 | 0.193008625 | 0.187143161 | 0.123158809 |
| 0.029578542 | 0.207740911 | 0.188028154 | 0.183492339 |
| 0.08534469  | 0.198227914 | 0.233830895 | 0.009674087 |
| 0.124920744 | 0.079673921 | 0.111176028 | 0.120804279 |
| 0.133845912 | 0.115722236 | 0.116802391 | 0.102724066 |
| 0.166632036 | 0.1757144   | 0.148594829 | 0.169234901 |
| 0.127230926 | 0.201575788 | 0.123611078 | 0.176271966 |
| 0.093508605 | 0.210284475 | 0.305795071 | 0.34352852  |
| 0.129745889 | 0.235973145 | 0.270192739 | 0.269583766 |
| 0.162332858 | 0.147817134 | 0.240689098 | 0.297445244 |
| 0.229340568 | 0.307811153 | 0.128979101 | 0.231927997 |
| 0.050105838 | 0.127516065 | 0.216146945 | 0.17374795  |
| 0.176911348 | 0.05738539  | 0.152127838 | 0.205063561 |
| 0.15874431  | 0.309192243 | 0.255363572 | 0.268266091 |
| 0.131135137 | 0.119439613 | 0.120323946 | 0.10935904  |
| 0.208168057 | 0.248851501 | 0.074160471 | 0.049403343 |
| 0.157900499 | 0.216875162 | 0.19613794  | 0.321997259 |
| 0.051848786 | 0.252656072 | 0.127965181 | 0.189035575 |
| 0.11315585  | 0.33813226  | 0.228105224 | 0.163385656 |
| 0.030467647 | 0.197298418 | 0.102704112 | 0.194974467 |
| 0.144948418 | 0.146535705 | 0.084789894 | 0.169788327 |
| 0.171058488 | 0.259981523 | 0.334568867 | 0.266774261 |
| 0.120465167 | 0.058433986 | 0.166098513 | 0.109311339 |
| 0.111815781 | 0.257595937 | 0.23147417  | 0.250485457 |
| 0.092670595 | 0.262868322 | 0.321372995 | 0.186819073 |
| 0.193507827 | 0.106968775 | 0.026415137 | 0.149969907 |
| 0.143753872 | 0.06974303  | 0.002588594 | 0.013791362 |
| 0.149401189 | 0.115917392 | 0.187380556 | 0.154262844 |
| 0.072070655 | 0.162712432 | 0.026463246 | 0.180094376 |
| 0.323762299 | 0.361348596 | 0.114443744 | 0.205408061 |
| 0.174193332 | 0.173179738 | 0.182339962 | 0.010440397 |
| 0.110714964 | 0.101048238 | 0.100583957 | 0.16692177  |
| 0.141686642 | 0.030764874 | 0.131002616 | 0.244446431 |
| 0.2035804   | 0.030282706 | 0.158114444 | 0.149110396 |
| 0.234931296 | 0.365645228 | 0.104551684 | 0.137333743 |
| 0.173427214 | 0.197750411 | 0.09588322  | 0.113074377 |
| 0.081735704 | 0.063133708 | 0.148671301 | 0.047345307 |
| 0.148908468 | 0.104250181 | 0.00938052  | 0.345781243 |

|             |             |             |             |
|-------------|-------------|-------------|-------------|
| 0.358134339 | 0.075443714 | 0.266283373 | 0.090054115 |
| 0.158715264 | 0.231439769 | 0.074289936 | 0.113325542 |
| 0.070352626 | 0.089618097 | 0.183200882 | 0.238107911 |
| 0.043531042 | 0.132350513 | 0.144227429 | 0.078810152 |
| 0.39822446  | 0.07381494  | 0.22778699  | 0.071031925 |
| 0.293505597 | 0.229583638 | 1           | 0.096255229 |
| 0.141679589 | 0.239464204 | 0.136168667 | 0.286755577 |
| 0.13127422  | 0.04667728  | 0.162692557 | 0.134757099 |
| 0.062411338 | 0.259522123 | 0.122933814 | 0.292785071 |
| 0.075247554 | 0.180720881 | 0.159082866 | 0.249635949 |
| 0.170504954 | 0.043156956 | 0.045773501 | 0.08131823  |
| 0.308680892 | 0.157757268 | 0.063065419 | 0.196464879 |
| 0.038234894 | 0.157846659 | 0.172539238 | 0.076560794 |
| 0.096533996 | 0.152321274 | 0.133844898 | 0.231992473 |
| 0.141808668 | 0.116384567 | 0.079891609 | 0.266317524 |
| 0.104828957 | 0.08460728  | 0.289244919 | 0.00250689  |
| 0.208666995 | 0.127888527 | 0.176823264 | 0.099569272 |
| 0.273985495 | 0.166560107 | 0.18711257  | 0.024725408 |
| 0.171871172 | 0.033600253 | 0.114564668 | 0.078142339 |
| 0.058898517 | 0.193787937 | 0.299322204 | 0.235970494 |
| 0.197691586 | 0.09796247  | 0.067953269 | 0.275029547 |
| 0.026340944 | 0.065339249 | 0.070971868 | 0.16772975  |
| 0.040199097 | 0.112799723 | 0.104641137 | 0.085283915 |
| 0.187805224 | 0.186464352 |             |             |
| TRIM30      | 0.04238875  | 0.217540779 | 0.025749927 |
| 0.029187636 | 0.283065078 | 0.109936995 | 0.034054981 |
| 0.058072276 | 0.192490156 | 0.043115093 | 0.192018997 |
| 0.008184748 | 0.077030538 | 0.265607609 | 0.040731095 |
| 0.210760026 | 0.027190069 | 0.080571388 | 0.027550735 |
| 0.047162118 | 0.229015714 | 0.087296085 | 0.103903556 |
| 0.243493295 | 0.130169876 | 0.130278681 | 0.185736317 |
| 0.268622513 | 0.033349915 | 0.228390867 | 0.016230397 |
| 0.25352143  | 0.257392242 | 0.145989775 | 0.007987694 |
| 0.172447328 | 0.027706704 | 0.245310228 | 0.123399507 |
| 0.079837355 | 0.233869339 | 0.066862709 | 0.127449243 |
| 0.082945534 | 0.015811548 | 0.016151147 | 0.211529507 |
| 0.157307554 | 0.141875012 | 0.032580069 | 0.214795932 |
| 0.091142939 | 0.194849865 | 0.138029555 | 0.000502676 |
| 0.152436903 | 0.037023377 | 0.091246992 | 0.279204917 |
| 0.182690837 | 0.129332583 | 0.032101218 | 0.140772389 |
| 0.182849499 | 0.256307425 | 0.276593058 | 0.059748302 |
| 0.269747406 | 0.075559262 | 0.235528032 | 0.038005845 |
| 0.097971303 | 0.022299076 | 0.156816633 | 0.063327424 |
| 0.108191759 | 0.20691233  | 0.241394051 | 0.170716049 |
| 0.18226716  | 0.311128867 | 0.207363479 | 0.250320222 |
| 0.055850451 | 0.244712114 | 0.168535123 | 0.281915706 |
| 0.224809905 | 0.045478701 | 0.230015134 | 0.298257983 |
| 0.039827728 | 0.108206509 | 0.179893946 | 0.079594458 |
| 0.24167255  | 0.112429349 | 0.090167877 | 0.122715225 |
| 0.304406732 | 0.190979962 | 0.2732681   | 0.182948399 |
| 0.250352996 | 0.042262766 | 0.241329487 | 0.252754184 |
| 0.139606474 | 0.054105775 | 0.086121658 | 0.277020992 |
| 0.181673354 | 0.271279824 | 0.201706466 | 0.221758    |
| 0.175121078 | 0.280643038 | 0.206418748 | 0.270114635 |

|             |             |             |             |
|-------------|-------------|-------------|-------------|
| 0.017790396 | 0.284818503 | 0.12362314  | 0.035312689 |
| 0.031783628 | 0.100407513 | 0.104302449 | 0.290394816 |
| 0.286193536 | 0.228451866 | 0.086821758 | 0.18094388  |
| 0.309744704 | 0.231684746 | 0.272233787 | 0.228626723 |
| 0.029304745 | 0.113298453 | 0.168916971 | 0.114215278 |
| 0.203389333 | 0.122545569 | 0.195148745 | 0.263428251 |
| 0.245671334 | 0.273830986 | 0.068014506 | 0.290643649 |
| 0.112092751 | 0.322935795 | 0.212135987 | 0.117092015 |
| 0.288132363 | 0.258537571 | 0.328026499 | 0.282309022 |
| 0.283878293 | 0.117497979 | 0.015416453 | 0.227630466 |
| 0.339734914 | 0.012667064 | 0.276711286 | 0.292307225 |
| 0.251076535 | 0.260585831 | 0.335606724 | 0.311843943 |
| 0.257113803 | 0.070418796 | 0.00675047  | 0.253299285 |
| 0.256668967 | 0.248890229 | 0.118598774 | 0.133476423 |
| 0.235830866 | 0.113206353 | 0.273150465 | 0.029712383 |
| 0.342708955 | 0.288778146 | 0.275245723 | 0.197528157 |
| 0.115149617 | 0.229085609 | 0.18141701  | 0.232080825 |
| 0.029789917 | 0.047209758 | 0.036846737 | 0.258821885 |
| 0.043499773 | 0.192239854 | 0.083696305 | 0.22344734  |
| 0.193456228 | 0.113209894 | 0.134793401 | 0.289163502 |
| 0.041547733 | 0.140803094 | 0.121722662 | 0.071423811 |
| 0.031095082 | 0.131430805 | 0.029645224 | 0.063711476 |
| 0.203943128 | 0.140815412 | 0.213517785 | 0.310603884 |
| 0.143992557 | 0.105982323 | 0.195187603 | 0.335622234 |
| 0.324433376 | 0.203050952 | 0.199431967 | 0.008457466 |
| 0.031434556 | 0.064031535 | 0.097571958 | 0.187985211 |
| 0.140824302 | 0.044183888 | 0.17598695  | 0.304931107 |
| 0.087464971 | 0.076147123 | 0.096176321 | 0.282159891 |
| 0.089638815 | 0.13604435  | 0.274353093 | 0.127079617 |
| 0.00284635  | 0.117357193 | 0.248838617 | 0.080633179 |
| 0.162465461 | 0.048088204 | 0.068564376 | 0.265630699 |
| 0.057281021 | 0.151146889 | 0.30804174  | 0.331371192 |
| 0.040798801 | 0.131799044 | 0.325704985 | 0.013972618 |
| 0.218885566 | 0.052446919 | 0.26035467  | 0.079670884 |
| 0.150847989 | 0.264128558 | 0.262532596 | 0.174889015 |
| 0.070257092 | 0.277919555 | 0.284750178 | 0.289499607 |
| 0.075050686 | 0.320800848 | 0.266676787 | 0.272846013 |
| 0.221769051 | 0.127029646 | 0.054266249 | 0.227320013 |
| 0.268391315 | 0.032066826 | 0.049877656 | 0.233912516 |
| 0.08867709  | 0.24511878  | 0.114961464 | 0.292538889 |
| 0.323367538 | 0.21455863  | 0.105854557 | 0.318682957 |
| 0.240372644 | 0.129571326 | 0.313603336 | 0.34009026  |
| 0.033398885 | 0.145405929 | 0.10893237  | 0.357489983 |
| 0.12897498  | 0.111440104 | 0.268115297 | 0.097954965 |
| 0.008371976 | 0.05492039  | 0.043731636 | 0.166801418 |
| 0.15205031  | 0.169426372 | 0.247239922 | 0.285669434 |
| 0.09523313  | 0.298617731 | 0.19645885  | 0.072252224 |
| 0.208656495 | 0.163860074 | 0.235535014 | 0.269757579 |
| 0.226275237 | 0.017327256 | 0.035597991 | 0.297367606 |
| 0.028177292 | 0.119654837 | 0.139733418 | 0.001820427 |
| 0.019202718 | 0.177748989 | 0.073057796 | 0.155354198 |
| 0.348950323 | 0.142673332 | 0.104569068 | 0.040580393 |
| 0.301923684 | 0.091103162 | 0.014181412 | 0.282085806 |
| 0.293384245 | 0.28495743  | 0.279467924 | 0.266218121 |

|             |             |             |             |
|-------------|-------------|-------------|-------------|
| 0.275427093 | 0.270972013 | 0.27303065  | 0.116941606 |
| 0.050138802 | 0.045437647 | 0.068545601 | 0.141082832 |
| 0.000960792 | 0.331108177 | 0.263723929 | 0.130553374 |
| 0.267145045 | 0.206987234 | 0.0242268   | 0.276892375 |
| 0.004867941 | 0.070730492 | 0.053726889 | 0.176345996 |
| 0.348549039 | 0.010722195 | 0.018752528 | 0.040638404 |
| 0.215124647 | 0.203544521 | 0.125363107 | 0.298970018 |
| 0.186362485 | 0.056098121 | 0.171076206 | 0.315980651 |
| 0.045166757 | 0.011796211 | 0.087744283 | 0.002464974 |
| 0.046826357 | 0.291592937 | 0.120439746 | 0.016210417 |
| 0.154050152 | 0.002665407 | 0.198019102 | 0.303366747 |
| 0.225279974 | 0.30499086  | 0.28780989  | 0.165154932 |
| 0.271917489 | 0.038707952 | 0.294746455 | 0.194057076 |
| 0.05886652  | 0.000248597 | 0.006576782 | 0.288286088 |
| 0.167723778 | 0.039687117 | 0.132149023 | 0.033501618 |
| 0.045602093 | 0.044634304 | 0.06902508  | 0.154560494 |
| 0.206920877 | 0.253920625 | 0.139477151 | 0.226808261 |
| 0.140348992 | 0.221942833 | 0.085557177 | 0.072977962 |
| 0.247143123 | 0.028024656 | 0.07867956  | 0.00569268  |
| 0.314119135 | 0.075078198 | 0.240285512 | 0.272379472 |
| 0.309649332 | 0.295341536 | 0.047321719 | 0.045242923 |
| 0.314999049 | 0.043714346 | 0.05341408  | 0.055084202 |
| 0.230814171 | 0.191374687 | 0.239287502 | 0.185376381 |
| 0.299390157 | 0.260977138 | 0.029759098 | 0.240700533 |
| 0.008232848 | 0.0079449   | 0.084024719 | 0.224257898 |
| 0.051841194 | 0.130734106 | 0.19451811  | 0.101074726 |
| 0.146940563 | 0.009031121 | 0.138908828 | 0.14598458  |
| 0.211807806 | 0.16028703  | 0.226718029 | 0.21264916  |
| 0.194703843 | 0.061681896 | 0.172327984 | 0.108423914 |
| 0.052022047 | 0.170777119 | 0.12016027  | 0.016295103 |
| 0.124811174 | 0.163135544 | 0.050120855 | 0.141806204 |
| 0.271224325 | 0.277029852 | 0.016981857 | 0.008838113 |
| 0.190125326 | 0.148510014 | 0.312676512 | 0.253395845 |
| 0.280245936 | 0.318361276 | 0.26610818  | 0.07457033  |
| 0.047464197 | 0.240220569 | 0.261366834 | 0.093294675 |
| 0.288374306 | 0.033739862 | 0.273306089 | 0.218004953 |
| 0.11729074  | 0.093547449 | 0.024538302 | 0.09287767  |
| 0.231487162 | 0.1690115   | 0.198139961 | 0.063398116 |
| 0.122475304 | 0.10001758  | 0.042605153 | 0.148131196 |
| 0.196905672 | 0.050585502 | 0.13327532  | 0.135574083 |
| 0.236299566 | 0.024681629 | 0.232277421 | 0.294698859 |
| 0.098384804 | 0.072945518 | 0.02988186  | 0.300054216 |
| 0.231942766 | 0.129754669 | 0.010445427 | 0.207404323 |
| 0.328119571 | 0.193978845 | 0.265227282 | 0.314005133 |
| 0.078929657 | 0.165959658 | 0.149413484 | 0.182883199 |
| 0.159906814 | 0.122107754 | 0.197479648 | 0.062744608 |
| 0.285260756 | 0.297972308 | 0.213382683 | 0.136490353 |
| 0.18581741  | 0.060889582 | 0.027460317 | 0.287124588 |
| 0.084233135 | 0.016570458 | 0.070351991 | 0.277356965 |
| 0.013951316 | 0.117403619 | 0.337846821 | 0.114512797 |
| 0.332055684 | 0.293429162 | 0.272421901 | 0.117193066 |
| 0.003619254 | 0.239737406 | 0.195206581 | 0.108857442 |
| 0.199963717 | 0.233959357 | 0.070478447 | 0.048502461 |
| 0.279747183 | 0.045896738 | 0.041790794 | 0.041189859 |



|             |             |             |             |
|-------------|-------------|-------------|-------------|
| 0.030937855 | 0.148434969 | 0.213033954 | 0.14443426  |
| 0.196383071 | 0.056581603 | 0.087605622 | 0.155008047 |
| 0.07839497  | 0.226479536 | 0.248549212 | 0.04373591  |
| 0.025705372 | 0.287466661 | 0.186200007 | 0.019518637 |
| 0.23672384  | 0.270725134 | 0.335129077 | 2.44E-05    |
| 0.228751602 | 0.006297301 | 0.184443225 | 0.17250012  |
| 0.184126708 | 0.146489686 | 0.281367925 | 0.147941184 |
| 0.162754009 | 0.141989106 | 0.134913994 | 0.211314574 |
| 0.126477405 | 0.177196616 | 0.243474629 | 0.119485291 |
| 0.125083849 | 0.072852781 | 0.085369344 | 0.075207835 |
| 0.026173872 | 0.278321741 | 0.198687293 | 0.054056213 |
| 0.23281124  | 0.121693789 | 0.301117183 | 0.238797848 |
| 0.354600142 | 0.064716924 | 0.150977162 | 0.211796492 |
| 0.021547658 | 0.037592747 | 0.023248264 | 0.167092768 |
| 0.172318752 | 0.067924397 | 0.147864478 | 0.086908758 |
| 0.172839041 | 0.264182164 | 0.195827575 | 0.31797242  |
| 0.170980484 | 0.138328246 | 0.039780175 | 0.044226376 |
| 0.077775957 | 0.10817257  | 0.241812213 | 0.001764481 |
| 0.212351335 | 0.032060016 | 0.252769308 | 0.247303393 |
| 0.135329687 | 0.318056975 | 0.018367383 | 0.025770684 |
| 0.019821112 | 0.085353725 | 0.125614029 | 0.239127276 |
| 0.093148007 | 0.124481482 | 0.245608179 | 0.052587934 |
| 0.265225178 | 0.231373821 | 0.16614204  | 0.117705408 |
| 0.214694327 | 0.12489302  | 0.276769847 | 0.062918332 |
| 0.147271877 | 0.132435052 | 0.116861211 | 0.141569365 |
| 0.180197458 | 0.304217589 | 0.060425983 | 0.295703568 |
| 0.126165058 | 0.112104459 | 0.32522077  | 0.187234447 |
| 0.086509019 | 0.092791931 | 0.11293443  | 0.084744762 |
| 0.086309423 | 0.136534647 | 0.001257691 | 0.019243772 |
| 0.260629909 | 0.103548837 | 0.167009599 | 0.271104234 |
| 0.20351668  | 0.314520852 | 0.083072189 | 0.104073475 |
| 0.224891593 | 0.262868404 | 0.03136762  | 0.237808565 |
| 0.207779267 | 0.076858893 | 0.144589101 | 0.011611843 |
| 0.161780373 | 0.168130914 | 0.044826225 | 0.048701757 |
| 0.012261505 | 0.093095421 | 0.151321021 | 0.050520386 |
| 0.316898609 | 0.051324756 | 0.155051745 | 0.25663263  |
| 0.15677496  | 0.258112277 | 0.117960954 | 0.255927877 |
| 0.01297599  | 0.236884833 | 0.204177229 | 0.137488598 |
| 0.071494233 | 0.166431418 | 0.26241324  | 0.161926537 |
| 0.029390273 | 0.076644753 | 0.000670232 | 0.244033169 |
| 0.224615577 | 0.164412322 | 0.181765514 | 0.042720812 |
| 0.288911005 | 0.307016217 | 0.048890086 | 0.15343712  |
| 0.01289063  | 0.214047086 | 0.216970691 | 0.228895821 |
| 0.022006718 | 0.139797892 | 0.043772021 | 0.207819338 |
| 0.235743937 | 0.033136395 | 0.235001514 | 0.028848295 |
| 0.257045929 | 0.255658048 | 0.096255229 | 1           |
| 0.161632109 | 0.056301985 | 0.079654654 | 0.310920481 |
| 0.162787437 | 0.17392674  | 0.296194743 | 0.08870274  |
| 0.17688538  | 0.255857594 | 0.161535844 | 0.305706812 |
| 0.065717184 | 0.214074249 | 0.301162792 | 0.252304511 |
| 0.309016944 | 0.16519413  | 0.110017887 | 0.132971256 |
| 0.216807065 | 0.027358505 | 0.098478733 | 0.208301841 |
| 0.106493381 | 0.275041314 | 0.123446247 | 0.193247144 |
| 0.019798022 | 0.103640775 | 0.094336834 | 0.132088691 |

|             |             |             |             |
|-------------|-------------|-------------|-------------|
| 0.188619702 | 0.186376907 | 0.144087908 | 0.297945976 |
| 0.054413918 | 0.013856944 | 0.327999643 | 0.010187387 |
| 0.133113932 | 0.249328282 | 0.216124341 | 0.198858007 |
| 0.133372319 | 0.166839909 | 0.080096647 | 0.000270097 |
| 0.287983072 | 0.082169192 | 0.182785754 | 0.097434154 |
| 0.049523185 | 0.023379622 | 0.278999492 | 0.320366102 |
| 0.228596899 | 0.059570934 | 0.042641723 | 0.263941438 |
| 0.06351822  | 0.09662261  | 0.098190527 | 0.157983276 |
| 0.157344838 | 0.075479225 | 0.114803777 | 0.122971124 |
| 0.224226596 | 0.151260247 |             |             |
| TSC22D3     | 0.053205704 | 0.427192906 | 0.044123416 |
| 0.070661876 | 0.204374462 | 0.252218346 | 0.054229712 |
| 0.09757731  | 0.356939126 | 0.346471729 | 0.212659498 |
| 0.011527678 | 0.085182777 | 0.406302005 | 0.050407084 |
| 0.277525036 | 0.022956705 | 0.081754547 | 0.100489298 |
| 0.207283373 | 0.191756564 | 0.226927912 | 0.270902867 |
| 0.217489342 | 0.163065034 | 0.269266746 | 0.332014575 |
| 0.469445824 | 0.218225935 | 0.287630335 | 0.185468921 |
| 0.36587188  | 0.219030123 | 0.295370046 | 0.012155969 |
| 0.290915645 | 0.035627181 | 0.412777413 | 0.172243305 |
| 0.099080497 | 0.295438931 | 0.30330137  | 0.139300266 |
| 0.326380398 | 0.026411164 | 0.231215142 | 0.336230306 |
| 0.285255532 | 0.232124194 | 0.060573251 | 0.32257042  |
| 0.33105989  | 0.227907056 | 0.364064153 | 0.00210442  |
| 0.22536646  | 0.10437728  | 0.217020714 | 0.467509421 |
| 0.125539979 | 0.080329635 | 0.329606816 | 0.239463413 |
| 0.340478965 | 0.310623322 | 0.189000414 | 0.345364648 |
| 0.447638503 | 0.163380771 | 0.370726291 | 0.100348784 |
| 0.293779115 | 0.040829324 | 0.109954461 | 0.094275342 |
| 0.312398749 | 0.124909522 | 0.221138509 | 0.24757861  |
| 0.427020174 | 0.483455915 | 0.179753259 | 0.484905802 |
| 0.147809742 | 0.260634015 | 0.202800831 | 0.217423431 |
| 0.326522263 | 0.101280185 | 0.281393086 | 0.473664545 |
| 0.060560294 | 0.337458291 | 0.3387293   | 0.110401156 |
| 0.38963423  | 0.296490316 | 0.316144714 | 0.120477484 |
| 0.263018796 | 0.251384506 | 0.480229995 | 0.183419962 |
| 0.239198737 | 0.066014174 | 0.46662816  | 0.236505869 |
| 0.16730046  | 0.062233465 | 0.174625092 | 0.42795947  |
| 0.281393974 | 0.444080136 | 0.421475617 | 0.320857709 |
| 0.274005229 | 0.447660566 | 0.271780596 | 0.39512111  |
| 0.225641545 | 0.495678899 | 0.118956298 | 0.026274909 |
| 0.064790102 | 0.060867126 | 0.25771985  | 0.244164758 |
| 0.417827269 | 0.235291134 | 0.129452117 | 0.153409673 |
| 0.417678207 | 0.461667324 | 0.508746221 | 0.36049138  |
| 0.028757725 | 0.268573566 | 0.269022957 | 0.209217802 |
| 0.284500826 | 0.09955233  | 0.187931997 | 0.475950559 |
| 0.300967577 | 0.37297791  | 0.129878869 | 0.47018256  |
| 0.195433603 | 0.448682013 | 0.423809682 | 0.101470111 |
| 0.47360763  | 0.453742044 | 0.449076964 | 0.281731698 |
| 0.421815724 | 0.20912598  | 0.125718044 | 0.354272978 |
| 0.416443768 | 0.008701362 | 0.455535073 | 0.472897005 |
| 0.47099309  | 0.408365678 | 0.481348597 | 0.466745552 |
| 0.478185049 | 0.063577479 | 0.07258741  | 0.198495037 |
| 0.473450435 | 0.311362806 | 0.112515907 | 0.311116994 |

|             |             |             |             |
|-------------|-------------|-------------|-------------|
| 0.26797648  | 0.269037116 | 0.387128273 | 0.196138306 |
| 0.458741494 | 0.400865589 | 0.468501825 | 0.340445592 |
| 0.303685056 | 0.266846036 | 0.306973649 | 0.437185054 |
| 0.028732696 | 0.078629737 | 0.044590585 | 0.258459734 |
| 0.273911705 | 0.111230837 | 0.268848563 | 0.301868066 |
| 0.124480964 | 0.283779839 | 0.273209534 | 0.264639048 |
| 0.058673754 | 0.303089956 | 0.119839166 | 0.139870789 |
| 0.024169957 | 0.127699887 | 0.108648499 | 0.086982977 |
| 0.164568651 | 0.235718646 | 0.348496245 | 0.455603172 |
| 0.30916276  | 0.131832907 | 0.318732387 | 0.412479244 |
| 0.353256312 | 0.256476089 | 0.182700259 | 0.003119084 |
| 0.199401208 | 0.358116294 | 0.185027052 | 0.319234908 |
| 0.175491801 | 0.187042467 | 0.287329532 | 0.279177063 |
| 0.185767064 | 0.149518402 | 0.290330514 | 0.373708574 |
| 0.132943198 | 0.179365631 | 0.375474615 | 0.33534739  |
| 0.002032795 | 0.213645166 | 0.369937574 | 0.129359644 |
| 0.262381283 | 0.095050216 | 0.165251162 | 0.417340579 |
| 0.264805248 | 0.201230636 | 0.458041948 | 0.291705475 |
| 0.250770589 | 0.235282678 | 0.487253485 | 0.081739254 |
| 0.308797549 | 0.021767459 | 0.177049464 | 0.336040974 |
| 0.169796921 | 0.217961406 | 0.226334798 | 0.177095848 |
| 0.094060291 | 0.484715061 | 0.33085558  | 0.462097252 |
| 0.294686059 | 0.488425751 | 0.397238766 | 0.365206542 |
| 0.247221028 | 0.345779397 | 0.129787997 | 0.354209987 |
| 0.407278791 | 0.282882503 | 0.068225916 | 0.417293099 |
| 0.351137567 | 0.303809356 | 0.08689785  | 0.433635809 |
| 0.439295488 | 0.460722806 | 0.092514596 | 0.288704616 |
| 0.281137094 | 0.142486797 | 0.363292675 | 0.491108601 |
| 0.354728111 | 0.276261657 | 0.236903508 | 0.322961307 |
| 0.11741544  | 0.178210165 | 0.290641008 | 0.183056069 |
| 0.007214453 | 0.075173012 | 0.05129952  | 0.096948589 |
| 0.116630627 | 0.342026264 | 0.286111145 | 0.477213453 |
| 0.078219136 | 0.356917343 | 0.208968097 | 0.17988072  |
| 0.387291541 | 0.295374395 | 0.269873411 | 0.274834044 |
| 0.189637011 | 0.007571731 | 0.06023696  | 0.479756002 |
| 0.044712717 | 0.162652481 | 0.268151025 | 0.001145212 |
| 0.039399482 | 0.415061021 | 0.09503037  | 0.171477117 |
| 0.427898414 | 0.175659141 | 0.149763355 | 0.338825746 |
| 0.223869907 | 0.067643489 | 0.000600309 | 0.474395332 |
| 0.492480765 | 0.47129132  | 0.495010425 | 0.465922952 |
| 0.45007498  | 0.362670583 | 0.346554908 | 0.241193317 |
| 0.075114307 | 0.082149413 | 0.163246677 | 0.193374613 |
| 0.006155067 | 0.276639424 | 0.242031271 | 0.096224984 |
| 0.349051427 | 0.240644743 | 0.025138333 | 0.278563497 |
| 0.010447505 | 0.155025057 | 0.270891334 | 0.177083361 |
| 0.275352358 | 0.010602618 | 0.142058848 | 0.256858156 |
| 0.38196058  | 0.287672269 | 0.282829964 | 0.488366555 |
| 0.19658387  | 0.122159264 | 0.194312632 | 0.286924228 |
| 0.053148927 | 0.15471764  | 0.316860558 | 0.032474241 |
| 0.162014739 | 0.451389577 | 0.317368482 | 0.048060581 |
| 0.172387375 | 0.0024717   | 0.302903002 | 0.483909149 |
| 0.445582645 | 0.475149657 | 0.440374823 | 0.176337191 |
| 0.452452698 | 0.149597695 | 0.491511914 | 0.364336692 |
| 0.331314436 | 0.000209999 | 0.003940783 | 0.439418312 |

|             |             |             |             |
|-------------|-------------|-------------|-------------|
| 0.265884514 | 0.059887499 | 0.107913475 | 0.220365058 |
| 0.061535455 | 0.12908544  | 0.052565672 | 0.120307946 |
| 0.281922385 | 0.153370979 | 0.138308534 | 0.455409868 |
| 0.165063879 | 0.166120685 | 0.329820359 | 0.079155489 |
| 0.278930784 | 0.032218313 | 0.085930458 | 0.003048385 |
| 0.272260771 | 0.108116469 | 0.450938625 | 0.47571699  |
| 0.431130043 | 0.267121709 | 0.322659117 | 0.248654349 |
| 0.425345584 | 0.087738932 | 0.290773729 | 0.097386998 |
| 0.452026909 | 0.262227081 | 0.217187237 | 0.230450658 |
| 0.444811062 | 0.412034561 | 0.025610788 | 0.328023343 |
| 0.005244132 | 0.001863693 | 0.252106406 | 0.202563572 |
| 0.151063034 | 0.284815092 | 0.182111615 | 0.261514531 |
| 0.211020783 | 0.018385718 | 0.221677181 | 0.194138198 |
| 0.197256202 | 0.255484849 | 0.185816094 | 0.224502399 |
| 0.197521923 | 0.110832413 | 0.130424316 | 0.123113848 |
| 0.285608219 | 0.278248933 | 0.164843555 | 0.019163644 |
| 0.316438131 | 0.282831136 | 0.03952688  | 0.113261693 |
| 0.356827958 | 0.435651758 | 0.036276787 | 0.003430369 |
| 0.20117346  | 0.260846231 | 0.446327768 | 0.470799077 |
| 0.484790522 | 0.466121545 | 0.344515194 | 0.091194033 |
| 0.047400779 | 0.225559582 | 0.211014689 | 0.06326186  |
| 0.467505541 | 0.067390124 | 0.449776683 | 0.233087535 |
| 0.093251999 | 0.13844702  | 0.016548735 | 0.066789421 |
| 0.274457917 | 0.121905253 | 0.109445113 | 0.110740804 |
| 0.213320493 | 0.178601203 | 0.041202908 | 0.131705269 |
| 0.270875469 | 0.145770637 | 0.11401271  | 0.255994633 |
| 0.307187341 | 0.340885124 | 0.337846792 | 0.388581946 |
| 0.095149405 | 0.10589227  | 0.184696125 | 0.332626262 |
| 0.401767284 | 0.354719203 | 0.011572227 | 0.449681721 |
| 0.446573532 | 0.303337502 | 0.45715623  | 0.332957481 |
| 0.073632524 | 0.237938337 | 0.30573464  | 0.253681143 |
| 0.145209554 | 0.253003977 | 0.191536988 | 0.051008425 |
| 0.269454796 | 0.460483204 | 0.384543846 | 0.095285732 |
| 0.317889238 | 0.120129787 | 0.061954811 | 0.425642427 |
| 0.134473373 | 0.058275374 | 0.322478746 | 0.413967704 |
| 0.000438389 | 0.117491621 | 0.470228687 | 0.14551005  |
| 0.48814022  | 0.427926179 | 0.370409654 | 0.219361867 |
| 0.00347849  | 0.317531836 | 0.229435232 | 0.248867388 |
| 0.399599731 | 0.270453664 | 0.160994567 | 0.043277164 |
| 0.21042719  | 0.067872959 | 0.093070139 | 0.231552228 |
| 0.184930842 | 0.302941205 | 0.136131195 | 0.191101987 |
| 0.136025797 | 0.104407565 | 0.173216718 | 0.147880167 |
| 0.197961001 | 0.15921957  | 0.262147011 | 0.321191906 |
| 0.142858532 | 0.415999994 | 0.349533014 | 0.018310579 |
| 0.273839744 | 0.386619989 | 0.393356781 | 0.001453157 |
| 0.307709721 | 0.003513878 | 0.127139892 | 0.12077448  |
| 0.125390912 | 0.159560037 | 0.175450559 | 0.187739227 |
| 0.282549552 | 0.157490417 | 0.152961144 | 0.14409237  |
| 0.090272609 | 0.164093207 | 0.275652215 | 0.281186997 |
| 0.15650908  | 0.079355516 | 0.098359457 | 0.107614577 |
| 0.026154504 | 0.437250295 | 0.191237998 | 0.061473701 |
| 0.15718563  | 0.303139945 | 0.277443666 | 0.476273706 |
| 0.350675114 | 0.114531905 | 0.273019711 | 0.391226092 |
| 0.304217412 | 0.21912247  | 0.057429686 | 0.279074991 |

|             |             |             |             |
|-------------|-------------|-------------|-------------|
| 0.15176547  | 0.135428954 | 0.315222464 | 0.230751338 |
| 0.374661336 | 0.341472225 | 0.182063413 | 0.392069148 |
| 0.234755118 | 0.335730684 | 0.289769712 | 0.043270765 |
| 0.111889492 | 0.111160341 | 0.17671028  | 0.00024139  |
| 0.235611593 | 0.163677263 | 0.411620265 | 0.450135961 |
| 0.251623535 | 0.320950605 | 0.252398534 | 0.058166225 |
| 0.258149798 | 0.17772395  | 0.100015005 | 0.374971034 |
| 0.179981644 | 0.11776157  | 0.195264316 | 0.232160669 |
| 0.348297105 | 0.379917482 | 0.219198879 | 0.204387421 |
| 0.196396346 | 0.149208366 | 0.472599671 | 0.097684372 |
| 0.328095992 | 0.108696017 | 0.32514481  | 0.187686389 |
| 0.150378235 | 0.486466533 | 0.047717408 | 0.490664784 |
| 0.247869243 | 0.113987129 | 0.437365418 | 0.236182262 |
| 0.212548462 | 0.069248064 | 0.158884158 | 0.332830878 |
| 0.186169161 | 0.26019377  | 0.026608929 | 0.058238955 |
| 0.216517095 | 0.343375831 | 0.401452779 | 0.311986218 |
| 0.18065559  | 0.271097833 | 0.162174423 | 0.239197568 |
| 0.467842389 | 0.475100706 | 0.14996268  | 0.189816662 |
| 0.267711999 | 0.061742113 | 0.271468814 | 0.036442668 |
| 0.307851659 | 0.324040234 | 0.337948531 | 0.040544305 |
| 0.013470703 | 0.174572008 | 0.308632283 | 0.078373614 |
| 0.437725847 | 0.168070421 | 0.336200078 | 0.318400641 |
| 0.151491024 | 0.468651605 | 0.077551163 | 0.272988292 |
| 0.073702612 | 0.189641051 | 0.306284692 | 0.351832439 |
| 0.121773493 | 0.210502311 | 0.258611984 | 0.15496056  |
| 0.01899771  | 0.167918269 | 0.002370255 | 0.354072652 |
| 0.459961403 | 0.274312717 | 0.175405071 | 0.354378754 |
| 0.174895403 | 0.354214229 | 0.208100605 | 0.328164802 |
| 0.004030929 | 0.241217495 | 0.134844824 | 0.33817373  |
| 0.172845612 | 0.327843767 | 0.027787821 | 0.272205741 |
| 0.435977245 | 0.215477505 | 0.223484179 | 0.247171954 |
| 0.46119745  | 0.370033445 | 0.141679589 | 0.161632109 |
| 1           | 0.056845452 | 0.314295595 | 0.495710263 |
| 0.105887015 | 0.140608235 | 0.368709846 | 0.125262452 |
| 0.252202544 | 0.349026979 | 0.347910769 | 0.505634361 |
| 0.044948602 | 0.154298566 | 0.353853685 | 0.438541076 |
| 0.212043818 | 0.139009871 | 0.17381678  | 0.15814088  |
| 0.421205502 | 0.050661122 | 0.226182732 | 0.258122112 |
| 0.16281708  | 0.210925976 | 0.320180846 | 0.13139279  |
| 0.020604022 | 0.140399097 | 0.230803596 | 0.105959975 |
| 0.198069385 | 0.247433988 | 0.176186583 | 0.315145341 |
| 0.063597887 | 0.008434053 | 0.390707619 | 0.016073996 |
| 0.222258443 | 0.2389424   | 0.165337552 | 0.252805131 |
| 0.138631097 | 0.27783622  | 0.265358531 | 0.00053223  |
| 0.351142459 | 0.03195885  | 0.258363088 | 0.132795965 |
| 0.247185522 | 0.042188712 | 0.405532687 | 0.461384321 |
| 0.229977334 | 0.290267327 | 0.268244885 | 0.434234934 |
| 0.114723146 | 0.311154174 | 0.316781698 | 0.315644664 |
| 0.171052131 | 0.332720396 | 0.332252536 | 0.260398639 |
| 0.289541271 | 0.203639335 |             |             |
| TSP0        | 0.279005242 | 0.124023866 | 0.24261572  |
| 0.119294841 | 0.041640309 | 0.051003264 | 0.312719591 |
| 0.243776432 | 0.126464593 | 0.026749986 | 0.060436771 |
| 0.299667691 | 0.005045562 | 0.124463784 | 0.309689319 |

|             |             |             |             |
|-------------|-------------|-------------|-------------|
| 0.037230781 | 0.283807574 | 0.26456706  | 0.04589254  |
| 0.100265055 | 0.046821954 | 0.024914444 | 0.072737446 |
| 0.047628718 | 0.322076138 | 0.095548923 | 0.026671608 |
| 0.115145698 | 0.00894467  | 0.047364101 | 0.013118051 |
| 0.199590359 | 0.036549239 | 0.019866055 | 0.267858535 |
| 0.051607961 | 0.006455503 | 0.231199247 | 0.075438327 |
| 0.009896161 | 0.227770709 | 0.038237919 | 0.101610483 |
| 0.040310301 | 0.285216327 | 0.011654348 | 0.044432154 |
| 0.085358073 | 0.093185714 | 0.269781224 | 0.064064078 |
| 0.044502029 | 0.129132741 | 0.069270652 | 0.02337156  |
| 0.013725161 | 0.000273293 | 0.006739815 | 0.155885119 |
| 0.202656342 | 0.218392863 | 0.012912666 | 0.12290495  |
| 0.047089715 | 0.066743803 | 0.15110312  | 0.034499581 |
| 0.139555876 | 0.010502614 | 0.050338166 | 0.074787618 |
| 0.066427622 | 0.294285053 | 0.269235933 | 0.244923969 |
| 0.035711278 | 0.150040508 | 0.052584385 | 0.020748757 |
| 0.120653067 | 0.205449166 | 0.163740723 | 0.176623453 |
| 0.017193708 | 0.028314259 | 0.038704532 | 0.124940284 |
| 0.093389173 | 0.24817754  | 0.076829658 | 0.168963553 |
| 0.283394152 | 0.042892028 | 0.077212704 | 0.270474093 |
| 0.115118123 | 0.020107508 | 0.034326478 | 0.013001893 |
| 0.043681439 | 0.036569368 | 0.195519004 | 0.146269324 |
| 0.046313304 | 0.276761416 | 0.20729333  | 0.024073897 |
| 0.05374757  | 0.259638307 | 0.044911336 | 0.068746949 |
| 0.056430606 | 0.115624528 | 0.093021127 | 0.116556179 |
| 0.03031295  | 0.131486887 | 0.078232837 | 0.134527627 |
| 0.007123224 | 0.147704431 | 0.182853496 | 0.280230995 |
| 0.266261142 | 0.233659659 | 0.048206948 | 0.191003312 |
| 0.091598288 | 0.118398958 | 0.184381334 | 0.099980428 |
| 0.087695719 | 0.180463827 | 0.144927136 | 0.104043657 |
| 0.323407325 | 0.015515452 | 0.030263404 | 0.114284139 |
| 0.082535008 | 0.263735674 | 0.019994112 | 0.204247489 |
| 0.169336327 | 0.076058567 | 0.203092558 | 0.238216081 |
| 0.162544854 | 0.16279706  | 0.100671743 | 0.184251773 |
| 0.183695717 | 0.195294276 | 0.135688391 | 0.039725073 |
| 0.18372237  | 0.081401008 | 0.036750767 | 0.127734198 |
| 0.155029072 | 0.003372497 | 0.086257683 | 0.095195393 |
| 0.14572983  | 0.067951057 | 0.132016572 | 0.112765595 |
| 0.146235709 | 0.298237277 | 0.002369337 | 0.082972578 |
| 0.169804258 | 0.135121242 | 0.151684021 | 0.027540094 |
| 0.04187839  | 0.067317154 | 0.072863823 | 0.022322054 |
| 0.188620653 | 0.10022725  | 0.098320273 | 0.099594128 |
| 0.08180056  | 0.240187117 | 0.020467197 | 0.204566177 |
| 0.282615316 | 0.240761526 | 0.274596509 | 0.148127334 |
| 0.034337915 | 0.174295702 | 0.070671735 | 0.049704734 |
| 0.178909789 | 0.087083724 | 0.015017313 | 0.044993568 |
| 0.33888522  | 0.036219638 | 0.203369765 | 0.204672282 |
| 0.264990958 | 0.357428291 | 0.124155073 | 0.152876539 |
| 0.089139935 | 0.371848273 | 0.051105919 | 0.113251905 |
| 0.046370966 | 0.237719363 | 0.070318086 | 0.152146415 |
| 0.173432887 | 0.028204702 | 0.224815849 | 0.070294002 |
| 0.036818455 | 0.016036846 | 0.007042189 | 0.028143038 |
| 0.371072386 | 0.092815443 | 0.048664855 | 0.0563969   |
| 0.122681818 | 0.21312586  | 0.034184828 | 0.233418577 |

|             |             |             |             |
|-------------|-------------|-------------|-------------|
| 0.269830064 | 0.049578485 | 0.099345784 | 0.044515902 |
| 0.171672524 | 0.088552306 | 0.081261835 | 0.053694547 |
| 0.120331647 | 0.013193158 | 0.011638459 | 0.09929914  |
| 0.018366886 | 0.033194111 | 0.099884703 | 0.058202884 |
| 0.042631382 | 0.317801777 | 0.136460468 | 0.002825817 |
| 0.036871842 | 0.051244947 | 0.115506146 | 0.03817656  |
| 0.146505023 | 0.143635738 | 0.032743699 | 0.042855092 |
| 0.226602538 | 0.154319231 | 0.129566549 | 0.120606206 |
| 0.023747109 | 0.142713895 | 0.079625087 | 0.118749626 |
| 0.097168464 | 0.025254699 | 0.00431176  | 0.081371709 |
| 0.091862025 | 0.030743403 | 0.295547835 | 0.061010755 |
| 0.033457351 | 0.046610761 | 0.060455778 | 0.129553369 |
| 0.207132857 | 0.163515823 | 0.16839886  | 0.08182773  |
| 0.124635598 | 0.153424195 | 0.10285528  | 0.153017443 |
| 0.026720293 | 0.034774909 | 0.031916591 | 0.09688931  |
| 0.206527114 | 0.040389416 | 0.210183169 | 0.006816002 |
| 0.000735922 | 0.288042202 | 0.289477812 | 0.132885891 |
| 0.017540222 | 0.03646994  | 0.059232465 | 0.1355837   |
| 0.248639962 | 0.151730805 | 0.190531354 | 0.049990053 |
| 0.153616966 | 0.038061026 | 0.026326571 | 0.044853047 |
| 0.204571364 | 0.10422977  | 0.142633211 | 0.20981041  |
| 0.274010544 | 0.01754574  | 0.101751523 | 0.014963444 |
| 0.315436392 | 0.083556579 | 0.351040397 | 0.361877049 |
| 0.104313884 | 0.333373558 | 0.191684204 | 0.035122279 |
| 0.096895353 | 0.279452969 | 0.026042642 | 0.118940812 |
| 0.14799818  | 0.148451646 | 0.148402383 | 0.182277551 |
| 0.11455806  | 0.081149253 | 0.076727433 | 0.07791255  |
| 0.255109523 | 0.255932486 | 0.017398674 | 0.075814764 |
| 0.025619427 | 0.099864853 | 0.060723234 | 0.263326504 |
| 0.060128427 | 0.127206534 | 0.310199004 | 0.041218877 |
| 0.17888372  | 0.005713362 | 0.09258407  | 0.127020419 |
| 0.083083544 | 0.282894242 | 0.023390245 | 0.021751851 |
| 0.173839907 | 0.183451431 | 0.018382462 | 0.152972079 |
| 0.076199921 | 0.245392432 | 0.056857019 | 0.073578095 |
| 0.291082446 | 0.015409826 | 0.068529455 | 0.003064599 |
| 0.035169911 | 0.180171711 | 0.034977862 | 0.226090684 |
| 0.123769396 | 0.207790564 | 0.170279473 | 0.15700925  |
| 0.153889397 | 0.116787985 | 0.134455698 | 0.01772056  |
| 0.143499182 | 0.00112306  | 0.128720018 | 0.119521445 |
| 0.026140007 | 0.015654447 | 0.068805435 | 0.091082528 |
| 0.034762455 | 0.302306573 | 0.2232829   | 0.037986457 |
| 0.194472297 | 0.210387586 | 0.291103886 | 0.029679207 |
| 0.051349366 | 0.066864624 | 0.03167104  | 0.167513304 |
| 0.121423951 | 0.138054256 | 0.049720215 | 0.303858122 |
| 0.039536207 | 0.270414008 | 0.289268661 | 0.019273264 |
| 0.073660215 | 0.312751666 | 0.231734179 | 0.139943111 |
| 0.166619623 | 0.054921085 | 0.018719135 | 0.042485136 |
| 0.10426782  | 0.252159924 | 0.021380245 | 0.229600081 |
| 0.136547846 | 0.04735362  | 0.148124154 | 0.191359245 |
| 0.142646554 | 0.158526036 | 0.327554445 | 0.082995049 |
| 0.116571108 | 0.007213885 | 0.0604759   | 0.171137343 |
| 0.02491553  | 0.032750322 | 0.204079537 | 0.099132449 |
| 0.101946474 | 0.25044647  | 0.015026669 | 0.017414173 |
| 0.095105112 | 0.055642001 | 0.032102535 | 0.191822971 |

|             |             |             |             |
|-------------|-------------|-------------|-------------|
| 0.054236245 | 0.040587274 | 0.130235247 | 0.197070345 |
| 0.057260928 | 0.198115473 | 0.313931918 | 0.321002715 |
| 0.033231522 | 0.02970124  | 0.304635565 | 0.247661242 |
| 0.098490832 | 0.10023885  | 0.264299861 | 0.115542708 |
| 0.221945745 | 0.063901023 | 0.107547134 | 0.1296172   |
| 0.183945929 | 0.161044183 | 0.239728333 | 0.126710101 |
| 0.291863277 | 0.072415249 | 0.032622707 | 0.094942866 |
| 0.133180639 | 0.264447602 | 0.152724159 | 0.017323868 |
| 0.268092612 | 0.137971654 | 0.236360911 | 0.289103472 |
| 0.025852091 | 0.213279648 | 0.124365468 | 0.208082033 |
| 0.061705306 | 0.016916533 | 0.323746033 | 0.182514999 |
| 0.134912823 | 0.008139757 | 0.223922898 | 0.096935357 |
| 0.132442745 | 0.0297494   | 0.051687359 | 0.189364676 |
| 0.260557495 | 0.253888568 | 0.088143136 | 0.086970646 |
| 0.074989731 | 0.030653951 | 0.123593134 | 0.118486568 |
| 0.124015287 | 0.042498664 | 0.159858112 | 0.132401645 |
| 0.293121309 | 0.03211583  | 0.023120116 | 0.0504914   |
| 0.197938476 | 0.057317757 | 0.130749861 | 0.314748123 |
| 0.223277336 | 0.222237624 | 0.12317389  | 0.159606516 |
| 0.039525592 | 0.220250205 | 0.260018482 | 0.101564816 |
| 0.017042552 | 0.246159608 | 0.037776129 | 0.075300534 |
| 0.008686093 | 0.006422724 | 0.119085896 | 0.119239331 |
| 0.177089153 | 0.107942983 | 0.174035988 | 0.116597057 |
| 9.58E-05    | 0.040006285 | 0.057269394 | 0.036734329 |
| 0.117972756 | 0.145266845 | 0.105652347 | 0.217467375 |
| 0.190829164 | 0.276593586 | 0.158072589 | 0.046922432 |
| 0.008957137 | 0.067887531 | 0.223160442 | 0.168320479 |
| 0.112226681 | 0.264542418 | 0.015735398 | 0.134016569 |
| 0.01938405  | 0.206644792 | 0.141181106 | 0.034406652 |
| 0.009158092 | 0.120526528 | 0.096534303 | 0.30066101  |
| 0.028303095 | 0.112841444 | 0.130590507 | 0.035010451 |
| 0.053400674 | 0.233323609 | 0.110538973 | 0.095568125 |
| 0.116701399 | 0.117360966 | 0.088783952 | 0.048635728 |
| 0.088306598 | 0.147394204 | 0.09078288  | 0.142262024 |
| 0.122517354 | 0.160177396 | 0.046378792 | 0.07180238  |
| 0.048281943 | 0.225834468 | 0.362518365 | 0.386166069 |
| 0.224993549 | 0.109094752 | 0.270587616 | 0.289708313 |
| 0.150370777 | 0.063149365 | 0.191095208 | 0.141957761 |
| 0.144927365 | 0.302851417 | 0.072109907 | 0.104000903 |
| 0.013262147 | 0.050900912 | 0.293633169 | 0.060543584 |
| 0.158282832 | 0.035121817 | 0.046769935 | 0.101708396 |
| 0.07211636  | 0.225012286 | 0.260809784 | 0.156357962 |
| 0.052230815 | 0.051049274 | 0.028123177 | 0.164761571 |
| 0.185489076 | 0.280050912 | 0.038436793 | 0.109761388 |
| 0.097828162 | 0.102263989 | 0.084254464 | 0.167391113 |
| 0.013966612 | 0.175874843 | 0.033346027 | 0.250740029 |
| 0.023531422 | 0.300260146 | 0.274083451 | 0.066658114 |
| 0.006773562 | 0.17476152  | 0.054322595 | 0.066383131 |
| 0.061199054 | 0.059973648 | 0.047695244 | 0.147635018 |
| 0.135061282 | 0.192126497 | 0.198719687 | 0.231781477 |
| 0.032918027 | 0.033760024 | 0.060075677 | 0.063966717 |
| 0.097436759 | 0.119378569 | 0.302633116 | 0.115740824 |
| 0.042813797 | 0.306188957 | 0.207966173 | 0.106003003 |
| 0.094247712 | 0.114363056 | 0.006599821 | 0.049440894 |



|             |             |             |             |
|-------------|-------------|-------------|-------------|
| 0.12930663  | 0.017884065 | 0.000803651 | 0.011640481 |
| 0.1155405   | 0.051297326 | 0.084242675 | 0.098689163 |
| 0.037213217 | 0.128000602 | 0.007492635 | 0.121802098 |
| 0.163470796 | 0.205637876 | 0.076375828 | 0.212629104 |
| 0.133851036 | 0.241352785 | 0.068742316 | 0.012267184 |
| 0.03711983  | 0.026814947 | 0.028083444 | 0.307547462 |
| 0.298532329 | 0.007700862 | 0.044765093 | 0.261455968 |
| 0.100032867 | 0.006165633 | 0.066771874 | 0.058982788 |
| 0.252965221 | 0.21099334  | 0.142429346 | 0.069654254 |
| 0.226603071 | 0.159621259 | 0.027821163 | 0.040455208 |
| 0.050054432 | 0.023682319 | 0.089826452 | 0.017716608 |
| 0.295983845 | 0.05927705  | 0.031275688 | 0.251633557 |
| 0.20083914  | 0.023554201 | 0.29176119  | 0.023697752 |
| 0.133612716 | 0.143451713 | 0.058110799 | 0.028990601 |
| 0.151385119 | 0.03097428  | 0.179442298 | 0.124866451 |
| 0.008634677 | 0.056305609 | 0.192492329 | 0.034395897 |
| 0.24982491  | 0.039690222 | 0.23431063  | 0.016728301 |
| 0.140334953 | 0.118951662 | 0.239464204 | 0.056301985 |
| 0.056845452 | 1           | 0.035655771 | 0.153408042 |
| 0.140252155 | 0.019829219 | 0.075601396 | 0.122667657 |
| 0.021986979 | 0.15593928  | 0.036026769 | 0.1574457   |
| 0.138057742 | 0.167958968 | 0.076523585 | 0.132941824 |
| 0.15605271  | 0.027407982 | 0.0181761   | 0.0612951   |
| 0.155602282 | 0.171525833 | 0.029287896 | 0.129024285 |
| 0.013304116 | 0.118037228 | 0.063891101 | 0.065463551 |
| 0.195948943 | 0.174740926 | 0.049066177 | 0.24608561  |
| 0.101656854 | 0.046814277 | 0.045119729 | 0.194431079 |
| 0.109367389 | 0.124560007 | 0.18901587  | 0.000593668 |
| 0.087090421 | 0.053576622 | 0.148736604 | 0.040212994 |
| 0.281275646 | 0.087707186 | 0.082064023 | 0.095472782 |
| 0.094406589 | 0.012572387 | 0.060942    | 0.049218763 |
| 0.02303974  | 0.319850549 | 0.164989671 | 0.117917654 |
| 0.126219612 | 0.031616446 | 0.015387347 | 0.150609551 |
| 0.009572932 | 0.013844129 | 0.022990471 | 0.064706403 |
| 0.01309603  | 0.027253936 | 0.0279397   | 0.018784658 |
| 0.105914312 | 0.128923664 |             |             |
| TSR2        | 0.027329363 | 0.442538015 | 0.028782424 |
| 0.044483538 | 0.152922295 | 0.180132623 | 0.01473004  |
| 0.037970032 | 0.314281598 | 0.185875728 | 0.187721518 |
| 0.003491626 | 0.046644832 | 0.41027261  | 0.013234396 |
| 0.227977596 | 0.006078704 | 0.032508488 | 0.030444469 |
| 0.081323533 | 0.118152343 | 0.144411535 | 0.238602994 |
| 0.115752309 | 0.153757159 | 0.228692538 | 0.249642983 |
| 0.50118508  | 0.182854294 | 0.341661955 | 0.141035354 |
| 0.342122234 | 0.173295644 | 0.219436105 | 0.004856898 |
| 0.237145496 | 0.00372256  | 0.379810354 | 0.073317268 |
| 0.062358471 | 0.282362916 | 0.234016149 | 0.074237727 |
| 0.209382745 | 0.011582292 | 0.208187827 | 0.297499573 |
| 0.220181354 | 0.103516004 | 0.036907746 | 0.345628381 |
| 0.14713645  | 0.258302769 | 0.396911254 | 0.000824365 |
| 0.14189886  | 0.065212455 | 0.113981181 | 0.503799952 |
| 0.111064234 | 0.036307394 | 0.154462105 | 0.114038072 |
| 0.263494236 | 0.255708923 | 0.147345588 | 0.161906054 |
| 0.472195    | 0.070228611 | 0.381896447 | 0.067609299 |

|             |             |             |             |
|-------------|-------------|-------------|-------------|
| 0.161981306 | 0.011009018 | 0.089348137 | 0.053950258 |
| 0.158605188 | 0.079516567 | 0.180327201 | 0.119717196 |
| 0.448424504 | 0.472626608 | 0.128166152 | 0.493858222 |
| 0.030266592 | 0.188020909 | 0.094751479 | 0.179787689 |
| 0.256792229 | 0.023726264 | 0.30165563  | 0.472950663 |
| 0.016920122 | 0.311405728 | 0.290656895 | 0.081307637 |
| 0.434566111 | 0.132988192 | 0.282199108 | 0.072271447 |
| 0.24390614  | 0.16429596  | 0.453505954 | 0.174538584 |
| 0.146928741 | 0.041216425 | 0.484818954 | 0.178431615 |
| 0.104586313 | 0.040148259 | 0.061629242 | 0.43570523  |
| 0.273779286 | 0.484232838 | 0.405073653 | 0.258534449 |
| 0.198733303 | 0.479938358 | 0.289009898 | 0.391796318 |
| 0.17846946  | 0.516056998 | 0.086417796 | 0.009229113 |
| 0.029323001 | 0.022301227 | 0.079442693 | 0.215581901 |
| 0.45681079  | 0.227206443 | 0.066689687 | 0.079510088 |
| 0.396896873 | 0.491245763 | 0.515415883 | 0.339094333 |
| 0.010181778 | 0.106815553 | 0.199804808 | 0.121631368 |
| 0.247830385 | 0.052014115 | 0.104472673 | 0.48064922  |
| 0.316350898 | 0.363996947 | 0.063689957 | 0.46312267  |
| 0.067770048 | 0.460958821 | 0.475522981 | 0.059864462 |
| 0.485696004 | 0.481254892 | 0.459813582 | 0.29908329  |
| 0.45634034  | 0.17443593  | 0.025363814 | 0.308182385 |
| 0.427769816 | 0.005035803 | 0.470122314 | 0.480640235 |
| 0.493209981 | 0.426268505 | 0.467121163 | 0.495142531 |
| 0.5081207   | 0.034052466 | 0.014524391 | 0.141271193 |
| 0.485523094 | 0.327554102 | 0.037526228 | 0.246950987 |
| 0.205735014 | 0.205359676 | 0.391671496 | 0.124263261 |
| 0.444839408 | 0.430098819 | 0.494760913 | 0.311319784 |
| 0.17966105  | 0.259847245 | 0.240999094 | 0.468609193 |
| 0.010959093 | 0.042898617 | 0.034384731 | 0.205039827 |
| 0.202167641 | 0.066842701 | 0.16369431  | 0.196375989 |
| 0.087418355 | 0.175064048 | 0.166676965 | 0.258935785 |
| 0.044662733 | 0.302614713 | 0.070659033 | 0.075029301 |
| 0.007489576 | 0.106184846 | 0.05287395  | 0.050976678 |
| 0.095489289 | 0.208411933 | 0.373685199 | 0.464416304 |
| 0.140342884 | 0.124842828 | 0.333956531 | 0.421062781 |
| 0.331329383 | 0.211466777 | 0.145155599 | 0.00168035  |
| 0.078595139 | 0.163181246 | 0.083930721 | 0.276140458 |
| 0.15182096  | 0.065597967 | 0.219465218 | 0.289679289 |
| 0.152028679 | 0.063475263 | 0.132564964 | 0.378280502 |
| 0.109064786 | 0.109278705 | 0.375895365 | 0.266323866 |
| 0.000625114 | 0.146788734 | 0.395129399 | 0.035454555 |
| 0.197993816 | 0.051585918 | 0.128839787 | 0.408543066 |
| 0.124713492 | 0.073243382 | 0.48930065  | 0.29101323  |
| 0.164335237 | 0.207843947 | 0.483194605 | 0.021380158 |
| 0.185026758 | 0.012908589 | 0.151274744 | 0.23703304  |
| 0.120657799 | 0.171303437 | 0.166797537 | 0.09151571  |
| 0.092674786 | 0.492314468 | 0.349882182 | 0.487179364 |
| 0.13940526  | 0.481894619 | 0.415308336 | 0.386276046 |
| 0.23560607  | 0.192028795 | 0.065468336 | 0.370816243 |
| 0.409672803 | 0.115899876 | 0.054916532 | 0.415538168 |
| 0.171378576 | 0.283865927 | 0.031327122 | 0.433563072 |
| 0.445459395 | 0.486853769 | 0.038334543 | 0.256350458 |
| 0.296084976 | 0.113590929 | 0.36431932  | 0.479410692 |

|             |             |             |             |
|-------------|-------------|-------------|-------------|
| 0.151478416 | 0.158536586 | 0.108526964 | 0.303253287 |
| 0.090260527 | 0.060454521 | 0.259950774 | 0.091749636 |
| 0.012824241 | 0.036854981 | 0.029763949 | 0.044152805 |
| 0.055534006 | 0.35140226  | 0.260155217 | 0.487506925 |
| 0.036756463 | 0.384889941 | 0.151566013 | 0.08409584  |
| 0.373530267 | 0.152537724 | 0.238991905 | 0.252939408 |
| 0.158817729 | 0.003575722 | 0.032547432 | 0.469497667 |
| 0.026506249 | 0.094227195 | 0.155081736 | 0.000859117 |
| 0.012306252 | 0.440310063 | 0.07323278  | 0.150405284 |
| 0.428549072 | 0.160720055 | 0.116850681 | 0.1496375   |
| 0.227177167 | 0.036191132 | 0.000433055 | 0.46042584  |
| 0.471643449 | 0.433723194 | 0.473310195 | 0.4523044   |
| 0.399918326 | 0.350676209 | 0.320915926 | 0.239322974 |
| 0.028728354 | 0.033899205 | 0.061669395 | 0.096022213 |
| 0.002066146 | 0.290717073 | 0.142630346 | 0.074541569 |
| 0.347516438 | 0.176327609 | 0.010530426 | 0.216525442 |
| 0.006098019 | 0.097824577 | 0.110202316 | 0.067747805 |
| 0.234095257 | 0.003758033 | 0.102373395 | 0.116232698 |
| 0.427090001 | 0.286941523 | 0.1624477   | 0.510508704 |
| 0.158611491 | 0.100893532 | 0.114603518 | 0.305057898 |
| 0.017559162 | 0.05642074  | 0.144797855 | 0.041843203 |
| 0.142816465 | 0.43298144  | 0.159206971 | 0.021244171 |
| 0.130746224 | 0.000946835 | 0.319439162 | 0.498969969 |
| 0.488990668 | 0.478652617 | 0.476092794 | 0.108420998 |
| 0.481205669 | 0.077761656 | 0.514087356 | 0.371471413 |
| 0.17609332  | 0.000295433 | 0.00095298  | 0.459763785 |
| 0.211606657 | 0.053111396 | 0.072081158 | 0.179177985 |
| 0.026362707 | 0.061002272 | 0.020060468 | 0.052748439 |
| 0.32475245  | 0.094394303 | 0.058986658 | 0.460843757 |
| 0.078950576 | 0.100686991 | 0.192946808 | 0.054622598 |
| 0.271959686 | 0.012458515 | 0.051848934 | 0.001843921 |
| 0.248982147 | 0.093477931 | 0.459861381 | 0.502837901 |
| 0.438227754 | 0.268130355 | 0.193538913 | 0.163206759 |
| 0.401271728 | 0.086577044 | 0.187403414 | 0.078025218 |
| 0.489049359 | 0.23090887  | 0.213892694 | 0.231232807 |
| 0.435340165 | 0.423942604 | 0.007668478 | 0.304301125 |
| 0.004712322 | 0.000294213 | 0.214874023 | 0.161073862 |
| 0.028834121 | 0.158894806 | 0.159684578 | 0.082762931 |
| 0.077267276 | 0.00976562  | 0.096910482 | 0.081454025 |
| 0.145481092 | 0.156364176 | 0.115484613 | 0.168141009 |
| 0.079716552 | 0.030521956 | 0.061309421 | 0.043815121 |
| 0.103513235 | 0.251793284 | 0.153547562 | 0.004383816 |
| 0.258144976 | 0.236089949 | 0.01721854  | 0.091573116 |
| 0.381932281 | 0.459044556 | 0.007229021 | 0.001146936 |
| 0.184611184 | 0.111501637 | 0.460199719 | 0.507978695 |
| 0.50147105  | 0.456447832 | 0.336408757 | 0.026376984 |
| 0.020622136 | 0.153849664 | 0.136942401 | 0.021008543 |
| 0.493267083 | 0.04085859  | 0.489630675 | 0.154385919 |
| 0.05526534  | 0.063450536 | 0.007177104 | 0.028701999 |
| 0.255833249 | 0.087461567 | 0.054622427 | 0.09605137  |
| 0.099195327 | 0.101059861 | 0.011979552 | 0.081501549 |
| 0.239656017 | 0.060871107 | 0.070324769 | 0.129399907 |
| 0.302483341 | 0.153132302 | 0.331629242 | 0.37039828  |
| 0.074175367 | 0.044647188 | 0.114080013 | 0.305196638 |

|             |             |             |             |
|-------------|-------------|-------------|-------------|
| 0.414450442 | 0.29897504  | 0.012386424 | 0.480560861 |
| 0.456645207 | 0.337265337 | 0.496124138 | 0.295007711 |
| 0.044270811 | 0.189554719 | 0.129654536 | 0.158843696 |
| 0.081288376 | 0.204744196 | 0.095815936 | 0.025410006 |
| 0.229095433 | 0.437995045 | 0.37426731  | 0.049552378 |
| 0.301813028 | 0.087048014 | 0.034891137 | 0.445164643 |
| 0.051233685 | 0.026483839 | 0.23673846  | 0.400069644 |
| 4.09E-05    | 0.062224039 | 0.445988701 | 0.086398148 |
| 0.474157464 | 0.429528359 | 0.377045937 | 0.105679267 |
| 0.000416474 | 0.298360029 | 0.215795538 | 0.150828395 |
| 0.412011228 | 0.282639952 | 0.07069597  | 0.015321778 |
| 0.190506498 | 0.063290875 | 0.029928218 | 0.168622898 |
| 0.064671855 | 0.287079922 | 0.104541874 | 0.096705484 |
| 0.055314916 | 0.068408565 | 0.103477559 | 0.089955387 |
| 0.053448725 | 0.139713819 | 0.242718664 | 0.197548995 |
| 0.070088941 | 0.368699905 | 0.324022162 | 0.007673913 |
| 0.206546385 | 0.341744219 | 0.394333751 | 0.000109771 |
| 0.324954414 | 0.000952738 | 0.060276727 | 0.066837314 |
| 0.056878701 | 0.059019432 | 0.117432602 | 0.09614217  |
| 0.216343179 | 0.069805409 | 0.091072609 | 0.11546362  |
| 0.043958379 | 0.090089342 | 0.233216754 | 0.160006706 |
| 0.092263901 | 0.038314375 | 0.083878739 | 0.094805127 |
| 0.014598016 | 0.473821    | 0.18038336  | 0.05757628  |
| 0.107736487 | 0.141525169 | 0.26046167  | 0.507017105 |
| 0.353826323 | 0.109060318 | 0.126922179 | 0.44049014  |
| 0.153937616 | 0.135364736 | 0.022795917 | 0.232021955 |
| 0.103179467 | 0.067734701 | 0.258496869 | 0.197849609 |
| 0.344777991 | 0.334529863 | 0.176719394 | 0.390105487 |
| 0.144282776 | 0.169094842 | 0.186635602 | 0.018308936 |
| 0.057452643 | 0.078083072 | 0.108882719 | 8.55E-05    |
| 0.210681983 | 0.1122621   | 0.438340203 | 0.478384699 |
| 0.13292094  | 0.321636156 | 0.194026607 | 0.023519394 |
| 0.190913776 | 0.162251867 | 0.075286474 | 0.395449805 |
| 0.107783852 | 0.062394222 | 0.132246118 | 0.175986338 |
| 0.352601218 | 0.353505792 | 0.083459138 | 0.090653615 |
| 0.105853757 | 0.123550911 | 0.447363193 | 0.051781747 |
| 0.30259882  | 0.053908053 | 0.30197401  | 0.102092463 |
| 0.063220654 | 0.5025584   | 0.026317513 | 0.506876655 |
| 0.117368864 | 0.095213858 | 0.432911578 | 0.167741132 |
| 0.122496827 | 0.035954921 | 0.082127098 | 0.184984308 |
| 0.06824588  | 0.154090721 | 0.012182298 | 0.018077806 |
| 0.201394284 | 0.128487331 | 0.381183962 | 0.259970477 |
| 0.075542329 | 0.225316651 | 0.098451842 | 0.123266477 |
| 0.498255262 | 0.489108802 | 0.071644639 | 0.149543634 |
| 0.237142212 | 0.028472941 | 0.323467771 | 0.007928147 |
| 0.276982387 | 0.309921434 | 0.175433868 | 0.013597303 |
| 0.003659713 | 0.084211788 | 0.262029549 | 0.041086598 |
| 0.429131289 | 0.115717627 | 0.26980047  | 0.367607466 |
| 0.114479123 | 0.481192486 | 0.029339232 | 0.295299493 |
| 0.014683693 | 0.143552329 | 0.21001833  | 0.209442696 |
| 0.065084892 | 0.10619837  | 0.253916475 | 0.085471615 |
| 0.006235823 | 0.081270683 | 0.001518407 | 0.349251358 |
| 0.46258024  | 0.151530028 | 0.144931122 | 0.193869277 |
| 0.156168846 | 0.331982429 | 0.075001292 | 0.275727881 |

|             |             |             |             |
|-------------|-------------|-------------|-------------|
| 0.001641587 | 0.205494748 | 0.092766832 | 0.39016402  |
| 0.106318549 | 0.203055454 | 0.014129885 | 0.14080654  |
| 0.446736547 | 0.085912327 | 0.178405678 | 0.121097049 |
| 0.499621593 | 0.369919669 | 0.136168667 | 0.079654654 |
| 0.314295595 | 0.035655771 | 1           | 0.493153664 |
| 0.050895188 | 0.069993097 | 0.371769857 | 0.050636153 |
| 0.136092657 | 0.363336265 | 0.311645665 | 0.49368148  |
| 0.013297015 | 0.131198809 | 0.355097747 | 0.424869958 |
| 0.192443641 | 0.049381568 | 0.08711888  | 0.060548829 |
| 0.465969873 | 0.032438003 | 0.087564106 | 0.251022873 |
| 0.072933218 | 0.184689781 | 0.282392107 | 0.051331596 |
| 0.008424002 | 0.052214613 | 0.166959069 | 0.069312354 |
| 0.136171709 | 0.166400708 | 0.066734942 | 0.311590895 |
| 0.04060892  | 0.004483535 | 0.384462812 | 0.005068598 |
| 0.227375806 | 0.258285373 | 0.119931509 | 0.153205492 |
| 0.137410181 | 0.210082588 | 0.184809635 | 1.71E-06    |
| 0.326257486 | 0.01732453  | 0.11356661  | 0.062800875 |
| 0.115813451 | 0.013859162 | 0.440661009 | 0.467368233 |
| 0.210352025 | 0.17427462  | 0.165072089 | 0.440205316 |
| 0.0555849   | 0.175848356 | 0.141734503 | 0.341270583 |
| 0.089247307 | 0.226702816 | 0.216152374 | 0.169290364 |
| 0.293767126 | 0.108445688 |             |             |
| TTK         | 0.169475643 | 0.508290591 | 0.138529732 |
| 0.232661825 | 0.388645467 | 0.511767088 | 0.144181998 |
| 0.247586731 | 0.471733203 | 0.405296183 | 0.468110364 |
| 0.054604211 | 0.113715399 | 0.525744885 | 0.13556836  |
| 0.476364959 | 0.088406553 | 0.216676433 | 0.135186775 |
| 0.35448682  | 0.366234536 | 0.420051818 | 0.511622777 |
| 0.377571249 | 0.299511809 | 0.483445069 | 0.468340808 |
| 0.532929502 | 0.326675835 | 0.524851028 | 0.265578392 |
| 0.472099364 | 0.405169262 | 0.458268786 | 0.053905564 |
| 0.523048341 | 0.022507316 | 0.460489347 | 0.366333452 |
| 0.193367472 | 0.442177811 | 0.45003074  | 0.355245484 |
| 0.480326207 | 0.098982519 | 0.284333877 | 0.495671897 |
| 0.465646953 | 0.415341892 | 0.159069627 | 0.53119835  |
| 0.477725092 | 0.478195236 | 0.497701574 | 0.006484784 |
| 0.360561288 | 0.106443426 | 0.272651782 | 0.516228095 |
| 0.328284545 | 0.22987634  | 0.356321604 | 0.40172655  |
| 0.495477628 | 0.481051238 | 0.387056478 | 0.473384817 |
| 0.526168175 | 0.223716778 | 0.5183928   | 0.255067327 |
| 0.512071924 | 0.098706118 | 0.279162402 | 0.192288562 |
| 0.488384819 | 0.31896347  | 0.443928512 | 0.379426634 |
| 0.500882481 | 0.52783299  | 0.372568608 | 0.510872928 |
| 0.149038155 | 0.415329306 | 0.363724234 | 0.416878206 |
| 0.481455973 | 0.188995712 | 0.512345846 | 0.519584122 |
| 0.132476704 | 0.491951689 | 0.510099134 | 0.245853186 |
| 0.522577125 | 0.359399781 | 0.495787405 | 0.222785127 |
| 0.451882997 | 0.424783499 | 0.493689031 | 0.422059517 |
| 0.414398933 | 0.169951245 | 0.505662074 | 0.388365188 |
| 0.394085299 | 0.181703946 | 0.305260155 | 0.531395564 |
| 0.520427228 | 0.536381982 | 0.521698348 | 0.478373255 |
| 0.45934015  | 0.528123559 | 0.511838186 | 0.511467224 |
| 0.212537372 | 0.523870128 | 0.317831813 | 0.103546694 |
| 0.171365952 | 0.177831027 | 0.330001817 | 0.421146575 |

|             |             |             |             |
|-------------|-------------|-------------|-------------|
| 0.537387486 | 0.474178923 | 0.333221185 | 0.340974513 |
| 0.517499931 | 0.493679892 | 0.522066612 | 0.518150838 |
| 0.104275768 | 0.31845727  | 0.461503524 | 0.431126408 |
| 0.495546059 | 0.230568491 | 0.321277306 | 0.522265596 |
| 0.477265652 | 0.520797274 | 0.305464783 | 0.521099459 |
| 0.343019704 | 0.515896987 | 0.526816763 | 0.285641669 |
| 0.523347523 | 0.508522489 | 0.523427902 | 0.476584824 |
| 0.499657663 | 0.473398068 | 0.117977913 | 0.492571576 |
| 0.511341028 | 0.022038175 | 0.537065581 | 0.536544327 |
| 0.516803233 | 0.533094242 | 0.523871147 | 0.535561389 |
| 0.519266188 | 0.170306159 | 0.045106902 | 0.391660139 |
| 0.513338385 | 0.4945062   | 0.240025321 | 0.496472317 |
| 0.45223338  | 0.526451829 | 0.52333946  | 0.383713362 |
| 0.512394065 | 0.529208223 | 0.537699458 | 0.514764808 |
| 0.442589264 | 0.422563064 | 0.446933576 | 0.488779819 |
| 0.11006364  | 0.229673264 | 0.132083176 | 0.434289855 |
| 0.456105739 | 0.287616784 | 0.516214206 | 0.455992332 |
| 0.313496022 | 0.490704174 | 0.39907067  | 0.460169814 |
| 0.136745875 | 0.531842492 | 0.295964368 | 0.308613899 |
| 0.099742256 | 0.252100382 | 0.294861408 | 0.260850212 |
| 0.362213392 | 0.306007847 | 0.53157465  | 0.529064098 |
| 0.456952003 | 0.311246573 | 0.537104823 | 0.511038583 |
| 0.476663726 | 0.45715164  | 0.362743981 | 0.026800779 |
| 0.354887321 | 0.387962721 | 0.232168828 | 0.491408534 |
| 0.273423603 | 0.359941218 | 0.488243735 | 0.477076591 |
| 0.428528191 | 0.285742238 | 0.460380515 | 0.466037515 |
| 0.277604946 | 0.40070134  | 0.52109053  | 0.514910488 |
| 0.013613533 | 0.456604572 | 0.536326006 | 0.220815635 |
| 0.455993799 | 0.180772771 | 0.30732994  | 0.526426737 |
| 0.366683948 | 0.305220199 | 0.537017168 | 0.477425902 |
| 0.458106566 | 0.316739165 | 0.526791772 | 0.07039137  |
| 0.439481937 | 0.087606973 | 0.392954706 | 0.447000759 |
| 0.385363701 | 0.409921877 | 0.395357452 | 0.362926847 |
| 0.248666756 | 0.522436006 | 0.504266467 | 0.536298701 |
| 0.449504135 | 0.523751693 | 0.534210239 | 0.520828104 |
| 0.492849796 | 0.449529408 | 0.17111449  | 0.528631117 |
| 0.527495716 | 0.389928387 | 0.170998588 | 0.527894422 |
| 0.462133476 | 0.489217619 | 0.180864309 | 0.522574525 |
| 0.503230527 | 0.490360001 | 0.250908645 | 0.464654427 |
| 0.48912022  | 0.371359265 | 0.510234603 | 0.520714253 |
| 0.413848864 | 0.442418838 | 0.41397214  | 0.476593196 |
| 0.30203879  | 0.290116408 | 0.430271932 | 0.225416913 |
| 0.013175035 | 0.18906922  | 0.154419454 | 0.25914451  |
| 0.217159196 | 0.510086641 | 0.496431379 | 0.529348549 |
| 0.225187543 | 0.503520162 | 0.376280547 | 0.381929412 |
| 0.495777247 | 0.447372451 | 0.455323684 | 0.48002937  |
| 0.378801679 | 0.042252057 | 0.199099116 | 0.529364351 |
| 0.112932525 | 0.299853308 | 0.471068043 | 0.006054667 |
| 0.118066301 | 0.509683694 | 0.193846959 | 0.291220443 |
| 0.52182449  | 0.297606587 | 0.342941176 | 0.429011253 |
| 0.457432705 | 0.196447471 | 0.007758802 | 0.52288423  |
| 0.508922276 | 0.500303245 | 0.507786177 | 0.484968316 |
| 0.507923331 | 0.512073985 | 0.504371053 | 0.495783123 |
| 0.211766482 | 0.201600657 | 0.268493641 | 0.394134248 |

|             |             |             |             |
|-------------|-------------|-------------|-------------|
| 0.01405211  | 0.483051215 | 0.414010654 | 0.258237483 |
| 0.515159408 | 0.436444885 | 0.099605483 | 0.447210219 |
| 0.056888851 | 0.240585433 | 0.456087476 | 0.343803875 |
| 0.444292816 | 0.047874246 | 0.312807875 | 0.396920318 |
| 0.487427042 | 0.463647566 | 0.428540429 | 0.525634632 |
| 0.442649202 | 0.248363559 | 0.406461464 | 0.495516988 |
| 0.160676718 | 0.162030665 | 0.498399455 | 0.055200204 |
| 0.296463804 | 0.491257343 | 0.474925594 | 0.154011842 |
| 0.398908108 | 0.018860806 | 0.474337939 | 0.526042807 |
| 0.49833633  | 0.531884956 | 0.529663004 | 0.330187939 |
| 0.523738231 | 0.132142451 | 0.533531253 | 0.515778006 |
| 0.468313699 | 0.002670212 | 0.01583424  | 0.53503201  |
| 0.48063645  | 0.141210015 | 0.280488917 | 0.469286419 |
| 0.202725192 | 0.292210309 | 0.15488556  | 0.242034278 |
| 0.529017336 | 0.330688693 | 0.241330567 | 0.499854538 |
| 0.360898069 | 0.356502854 | 0.520420917 | 0.192250974 |
| 0.498554401 | 0.122834207 | 0.191911473 | 0.015796965 |
| 0.466395323 | 0.220069903 | 0.494704224 | 0.525829662 |
| 0.510848996 | 0.478286942 | 0.421207372 | 0.457238898 |
| 0.51410848  | 0.206538682 | 0.445046394 | 0.231264939 |
| 0.518432018 | 0.480445597 | 0.43831473  | 0.427883049 |
| 0.519308599 | 0.509716689 | 0.091427835 | 0.503634177 |
| 0.034579845 | 0.004295367 | 0.498848586 | 0.400209133 |
| 0.109543207 | 0.456271639 | 0.379857744 | 0.365239554 |
| 0.352488492 | 0.081507939 | 0.32429659  | 0.301278287 |
| 0.412132768 | 0.466851184 | 0.345723308 | 0.38188005  |
| 0.355355429 | 0.193838011 | 0.312339001 | 0.277159357 |
| 0.363405273 | 0.428404011 | 0.302125805 | 0.066237004 |
| 0.512865152 | 0.492002651 | 0.136458579 | 0.285083877 |
| 0.525057248 | 0.538198432 | 0.103312055 | 0.027766556 |
| 0.394135864 | 0.427343557 | 0.533291351 | 0.526058655 |
| 0.530873064 | 0.515361352 | 0.450780571 | 0.211019396 |
| 0.155506682 | 0.427943866 | 0.366832784 | 0.164412666 |
| 0.532107188 | 0.159350502 | 0.51431536  | 0.360686663 |
| 0.230382556 | 0.33685071  | 0.082704836 | 0.18306317  |
| 0.45904477  | 0.305193684 | 0.277447683 | 0.271780423 |
| 0.418505296 | 0.307981152 | 0.123243657 | 0.323421416 |
| 0.472099347 | 0.217319848 | 0.283707791 | 0.457101976 |
| 0.482916705 | 0.325631169 | 0.513658783 | 0.487403118 |
| 0.250294302 | 0.230071624 | 0.414372262 | 0.495948021 |
| 0.536174569 | 0.489275397 | 0.060480698 | 0.511974914 |
| 0.527812334 | 0.527377638 | 0.513496747 | 0.477568301 |
| 0.185460183 | 0.458160862 | 0.393645513 | 0.437802909 |
| 0.316260935 | 0.514072085 | 0.369156431 | 0.149225612 |
| 0.410287318 | 0.49831057  | 0.507219352 | 0.27357255  |
| 0.520654342 | 0.257754282 | 0.144500157 | 0.52799686  |
| 0.232329607 | 0.184716892 | 0.473853208 | 0.522414726 |
| 0.004007705 | 0.174135908 | 0.518169708 | 0.366694476 |
| 0.516658906 | 0.526857199 | 0.494889326 | 0.401988246 |
| 0.002578269 | 0.488558893 | 0.479538651 | 0.485386988 |
| 0.521619394 | 0.481226211 | 0.270022867 | 0.150161795 |
| 0.401101918 | 0.179429177 | 0.232468136 | 0.465548804 |
| 0.220844912 | 0.531437519 | 0.318449084 | 0.347062642 |
| 0.299788406 | 0.201466949 | 0.300919654 | 0.370305853 |

|             |             |             |             |
|-------------|-------------|-------------|-------------|
| 0.206622995 | 0.360188087 | 0.459671011 | 0.406894995 |
| 0.240698663 | 0.508473029 | 0.512072998 | 0.07627221  |
| 0.436686831 | 0.502630687 | 0.508211545 | 0.005835363 |
| 0.514020915 | 0.024327872 | 0.298498975 | 0.313428968 |
| 0.303928159 | 0.324847019 | 0.36037572  | 0.384806737 |
| 0.48177492  | 0.349940815 | 0.389215347 | 0.355432869 |
| 0.258026617 | 0.359319205 | 0.485195377 | 0.487148118 |
| 0.365093516 | 0.237807809 | 0.195328709 | 0.189248197 |
| 0.116050371 | 0.530569744 | 0.361218932 | 0.166501516 |
| 0.351390442 | 0.485109081 | 0.443156608 | 0.51306549  |
| 0.493804639 | 0.217478678 | 0.456453121 | 0.530239295 |
| 0.309065046 | 0.421097642 | 0.1556452   | 0.509558245 |
| 0.367891053 | 0.287452589 | 0.515602513 | 0.453722428 |
| 0.516878173 | 0.458714301 | 0.361837805 | 0.500143953 |
| 0.466615767 | 0.45512862  | 0.41878065  | 0.156850545 |
| 0.300496075 | 0.252852894 | 0.339734166 | 0.007303024 |
| 0.478117114 | 0.398726311 | 0.539148193 | 0.503303525 |
| 0.352704996 | 0.472116223 | 0.434531193 | 0.183099197 |
| 0.370745486 | 0.279932173 | 0.258693565 | 0.529569477 |
| 0.260904867 | 0.311668954 | 0.390677172 | 0.470422874 |
| 0.519067489 | 0.511226202 | 0.345694146 | 0.395500514 |
| 0.368791061 | 0.337785441 | 0.48898799  | 0.246801179 |
| 0.513239654 | 0.245518725 | 0.483725759 | 0.395932403 |
| 0.323944885 | 0.530576498 | 0.144982204 | 0.536156011 |
| 0.422813658 | 0.248519138 | 0.498801709 | 0.450424329 |
| 0.431145333 | 0.201872086 | 0.228341089 | 0.505098021 |
| 0.358395659 | 0.406373076 | 0.02532834  | 0.092975872 |
| 0.435380462 | 0.423445512 | 0.510060061 | 0.480402925 |
| 0.32123922  | 0.441153761 | 0.209345605 | 0.440346527 |
| 0.49525672  | 0.514244835 | 0.357766539 | 0.367708893 |
| 0.473865568 | 0.199371417 | 0.52118376  | 0.030393277 |
| 0.507868758 | 0.495610408 | 0.474373144 | 0.129353831 |
| 0.056489017 | 0.255834273 | 0.509633644 | 0.163577871 |
| 0.524951697 | 0.253518773 | 0.480729962 | 0.52817674  |
| 0.309905013 | 0.51483969  | 0.211452593 | 0.500818954 |
| 0.124062982 | 0.389632769 | 0.458041672 | 0.48328263  |
| 0.303217635 | 0.359332193 | 0.474466346 | 0.290838794 |
| 0.083394301 | 0.355427948 | 0.005089719 | 0.447622111 |
| 0.488896218 | 0.409334576 | 0.326164266 | 0.400276214 |
| 0.390391798 | 0.483431241 | 0.344107889 | 0.501259916 |
| 0.030343407 | 0.442640281 | 0.325589687 | 0.515658899 |
| 0.285214127 | 0.477703954 | 0.119237777 | 0.397392142 |
| 0.487086642 | 0.373270897 | 0.379723743 | 0.376634784 |
| 0.516687375 | 0.497679795 | 0.286755577 | 0.310920481 |
| 0.495710263 | 0.153408042 | 0.493153664 | 1           |
| 0.279761443 | 0.269177645 | 0.515437732 | 0.311019958 |
| 0.382415913 | 0.490266423 | 0.498466183 | 0.517655757 |
| 0.135857837 | 0.370522801 | 0.515042665 | 0.517656697 |
| 0.410104069 | 0.229907055 | 0.304472471 | 0.318024192 |
| 0.49860419  | 0.183005778 | 0.332488525 | 0.48123472  |
| 0.266414942 | 0.432917158 | 0.462802305 | 0.271944203 |
| 0.085843304 | 0.296218739 | 0.481079119 | 0.264403575 |
| 0.414705493 | 0.456229342 | 0.319414126 | 0.462683268 |
| 0.215927289 | 0.054444992 | 0.487839752 | 0.022147748 |



|             |             |             |             |
|-------------|-------------|-------------|-------------|
| 0.479696048 | 0.486230543 | 0.377503277 | 0.442862802 |
| 0.303483416 | 0.490586525 | 0.471498624 | 0.004671884 |
| 0.506422104 | 0.070451692 | 0.416479671 | 0.306511695 |
| 0.370730261 | 0.129718812 | 0.503929401 | 0.530870803 |
| 0.46063432  | 0.425981705 | 0.413544576 | 0.51454918  |
| 0.184992351 | 0.397255105 | 0.423187794 | 0.525804101 |
| 0.274618792 | 0.475749588 | 0.497212935 | 0.441207683 |
| 0.508753409 | 0.419759352 |             |             |
| TUBA1B      | 0.123350715 | 0.177296871 | 0.066705339 |
| 0.161104468 | 0.209229601 | 0.092934927 | 0.139626572 |
| 0.166600348 | 0.15205457  | 0.030413195 | 0.199668056 |
| 0.115363551 | 0.053544042 | 0.25712354  | 0.158438963 |
| 0.168993976 | 0.175942065 | 0.18624444  | 0.041268776 |
| 0.095854049 | 0.21748358  | 0.104108936 | 0.097925686 |
| 0.175414875 | 0.230606085 | 0.124292573 | 0.094917331 |
| 0.222902589 | 0.039416898 | 0.168833388 | 0.020931696 |
| 0.306881609 | 0.206401917 | 0.077233226 | 0.069546822 |
| 0.13784949  | 0.017408829 | 0.278935668 | 0.185265701 |
| 0.087761902 | 0.306649437 | 0.041106142 | 0.21842122  |
| 0.05950214  | 0.093510811 | 0.018179802 | 0.14581441  |
| 0.117124111 | 0.137495789 | 0.084891229 | 0.161618271 |
| 0.075030809 | 0.220941414 | 0.102781142 | 0.00649386  |
| 0.078432356 | 0.019377565 | 0.049515815 | 0.246889794 |
| 0.317963113 | 0.252489428 | 0.0354742   | 0.108919288 |
| 0.124737648 | 0.188888363 | 0.280240844 | 0.050352562 |
| 0.262953959 | 0.07998278  | 0.146230598 | 0.116444125 |
| 0.103192269 | 0.059234073 | 0.288186195 | 0.08947058  |
| 0.084994119 | 0.296594191 | 0.198292879 | 0.09385302  |
| 0.158605264 | 0.305625324 | 0.238856617 | 0.228978174 |
| 0.071765682 | 0.151741061 | 0.138410237 | 0.316230206 |
| 0.192525346 | 0.110021931 | 0.237898192 | 0.294027078 |
| 0.077645533 | 0.07274699  | 0.168177141 | 0.14856965  |
| 0.197206654 | 0.066118824 | 0.064130482 | 0.108868561 |
| 0.201246416 | 0.166212532 | 0.251767966 | 0.297654436 |
| 0.150948562 | 0.11121345  | 0.233172057 | 0.152750622 |
| 0.178494435 | 0.125312433 | 0.150822218 | 0.199891904 |
| 0.168959572 | 0.238980305 | 0.166055033 | 0.238362694 |
| 0.134784266 | 0.257163844 | 0.206387498 | 0.233103271 |
| 0.011630755 | 0.249929942 | 0.20394474  | 0.209654375 |
| 0.072371345 | 0.232110142 | 0.102964657 | 0.329833332 |
| 0.230379928 | 0.221776808 | 0.162262018 | 0.241309213 |
| 0.260253721 | 0.213748476 | 0.236715379 | 0.225772164 |
| 0.128274275 | 0.068183668 | 0.129667636 | 0.129853271 |
| 0.21624187  | 0.193247026 | 0.123707513 | 0.269850378 |
| 0.301232395 | 0.235492298 | 0.103608421 | 0.295167813 |
| 0.132571784 | 0.320417357 | 0.175290317 | 0.247820927 |
| 0.279946712 | 0.256676924 | 0.304303572 | 0.197926373 |
| 0.274861223 | 0.138238936 | 0.033469128 | 0.222718142 |
| 0.338230558 | 0.027840382 | 0.207633382 | 0.231345246 |
| 0.228290458 | 0.205417616 | 0.295584488 | 0.253613507 |
| 0.227604043 | 0.147977215 | 0.005634619 | 0.2890606   |
| 0.250539507 | 0.277357905 | 0.213892928 | 0.097929552 |
| 0.185801476 | 0.111727898 | 0.187229132 | 0.081068344 |
| 0.347559118 | 0.227598738 | 0.212248226 | 0.191264744 |

|             |             |             |             |
|-------------|-------------|-------------|-------------|
| 0.087431191 | 0.300589205 | 0.098106622 | 0.231885144 |
| 0.154911854 | 0.122436663 | 0.100143263 | 0.255194994 |
| 0.044183018 | 0.311175847 | 0.086193646 | 0.151962406 |
| 0.330865708 | 0.090213578 | 0.063665877 | 0.213967094 |
| 0.101604249 | 0.11173136  | 0.173380171 | 0.139317046 |
| 0.184874441 | 0.237983578 | 0.184447351 | 0.241732367 |
| 0.2540155   | 0.211171935 | 0.151010016 | 0.247566351 |
| 0.095077889 | 0.196246027 | 0.172359033 | 0.314694934 |
| 0.380295046 | 0.138939917 | 0.287655326 | 0.089468426 |
| 0.108755513 | 0.038578154 | 0.058709469 | 0.105712353 |
| 0.213545956 | 0.159934669 | 0.162859928 | 0.250630264 |
| 0.131452831 | 0.099469085 | 0.097152297 | 0.318718994 |
| 0.155813215 | 0.170043841 | 0.270512674 | 0.094466237 |
| 0.034037245 | 0.165304363 | 0.222237665 | 0.172945419 |
| 0.187630361 | 0.097822146 | 0.079230282 | 0.240937139 |
| 0.071381725 | 0.134146842 | 0.235758837 | 0.24195434  |
| 0.085279696 | 0.172954852 | 0.285805424 | 0.017632435 |
| 0.117512418 | 0.147092514 | 0.345090487 | 0.042890355 |
| 0.245010071 | 0.312646469 | 0.179946614 | 0.159481158 |
| 0.133383473 | 0.262355629 | 0.243878375 | 0.260170226 |
| 0.072427598 | 0.286931582 | 0.229673739 | 0.281567805 |
| 0.222466231 | 0.069418123 | 0.053213885 | 0.216353381 |
| 0.229671555 | 0.052850331 | 0.112267341 | 0.165340141 |
| 0.058582771 | 0.184201499 | 0.152660463 | 0.290045782 |
| 0.322920859 | 0.19449183  | 0.261574569 | 0.283754799 |
| 0.291761858 | 0.215519488 | 0.233762707 | 0.306818329 |
| 0.036724909 | 0.130328242 | 0.115410415 | 0.312680479 |
| 0.242248223 | 0.155563142 | 0.268643697 | 0.056870876 |
| 0.003363031 | 0.11524029  | 0.125861304 | 0.267228938 |
| 0.130738138 | 0.09984619  | 0.19457708  | 0.260849791 |
| 0.229542159 | 0.278133997 | 0.219805708 | 0.152051569 |
| 0.226734852 | 0.109465692 | 0.130960847 | 0.185017836 |
| 0.271990033 | 0.104841833 | 0.248754562 | 0.303309086 |
| 0.068139424 | 0.114974331 | 0.126501764 | 0.027138266 |
| 0.109277087 | 0.129057139 | 0.150346505 | 0.268899422 |
| 0.28746848  | 0.228120705 | 0.194037895 | 0.038849483 |
| 0.292408717 | 0.195626919 | 0.052286978 | 0.231296692 |
| 0.234064847 | 0.228802294 | 0.225585925 | 0.225117763 |
| 0.216758679 | 0.181233413 | 0.227685671 | 0.108873045 |
| 0.166806537 | 0.083003747 | 0.10706955  | 0.182954875 |
| 0.010121829 | 0.291355636 | 0.173336672 | 0.276405655 |
| 0.194983631 | 0.227385591 | 0.140407443 | 0.170422851 |
| 0.073642354 | 0.053665196 | 0.106121027 | 0.183633111 |
| 0.279147448 | 0.07308026  | 0.060412266 | 0.080473101 |
| 0.224254504 | 0.26112268  | 0.06724643  | 0.26482475  |
| 0.228991794 | 0.101221298 | 0.175353643 | 0.258707656 |
| 0.166500601 | 0.017640343 | 0.082641807 | 0.004512447 |
| 0.055969516 | 0.248655189 | 0.080462137 | 0.094993906 |
| 0.256760838 | 0.05041437  | 0.242385704 | 0.284171844 |
| 0.198246461 | 0.268421025 | 0.26878848  | 0.111302896 |
| 0.259133647 | 0.019777851 | 0.254371589 | 0.192769561 |
| 0.04697452  | 0.006957569 | 0.065954753 | 0.233417172 |
| 0.142333059 | 0.08182924  | 0.264119012 | 0.073027069 |
| 0.251676486 | 0.094878447 | 0.158783992 | 0.166096343 |

|             |             |             |             |
|-------------|-------------|-------------|-------------|
| 0.14884592  | 0.251386775 | 0.153678836 | 0.218549499 |
| 0.202948185 | 0.276246927 | 0.063444096 | 0.149486072 |
| 0.155965424 | 0.179391306 | 0.139917169 | 0.05122763  |
| 0.251931183 | 0.135387249 | 0.239748432 | 0.243689551 |
| 0.312628778 | 0.221677258 | 0.034737242 | 0.091101053 |
| 0.230718946 | 0.091966357 | 0.058841043 | 0.107215522 |
| 0.212424914 | 0.188896029 | 0.333019773 | 0.278203225 |
| 0.305575939 | 0.272118648 | 0.137619886 | 0.235176265 |
| 0.077583174 | 0.021580481 | 0.086540028 | 0.260185344 |
| 0.031857501 | 0.113491341 | 0.307097698 | 0.09341562  |
| 0.149108159 | 0.105439094 | 0.089215135 | 0.100329447 |
| 0.259137812 | 0.160131146 | 0.179593629 | 0.213995504 |
| 0.158446911 | 0.143679611 | 0.22487112  | 0.204197277 |
| 0.07201894  | 0.218198251 | 0.229762093 | 0.101131553 |
| 0.086928162 | 0.120029726 | 0.151238056 | 0.237810244 |
| 0.262993284 | 0.248139073 | 0.15589445  | 0.125775558 |
| 0.279696643 | 0.128502196 | 0.27457706  | 0.217832537 |
| 0.272685314 | 0.318974298 | 0.310036189 | 0.236246234 |
| 0.161468923 | 0.227203823 | 0.174140332 | 0.241251049 |
| 0.260600081 | 0.087666524 | 0.236604083 | 0.110265088 |
| 0.215321642 | 0.177904049 | 0.201904304 | 0.190239798 |
| 0.138364279 | 0.294151741 | 0.279694277 | 0.13017181  |
| 0.160941868 | 0.0973838   | 0.131670408 | 0.272053167 |
| 0.246024123 | 0.071756157 | 0.250935965 | 0.102687662 |
| 0.199814799 | 0.023241464 | 0.180565698 | 0.343956922 |
| 0.210408336 | 0.136455976 | 0.076641127 | 0.207329891 |
| 0.184707976 | 0.073382844 | 0.105905565 | 0.170293241 |
| 0.277229179 | 0.150942458 | 0.244318987 | 0.327019397 |
| 0.165440418 | 0.14808471  | 0.076137248 | 0.174396062 |
| 0.247429605 | 0.0974917   | 0.211392701 | 0.163790244 |
| 0.302831353 | 0.295744508 | 0.201681429 | 0.256181284 |
| 0.111510618 | 0.099458004 | 0.074469468 | 0.209750897 |
| 0.117710799 | 0.158170257 | 0.046627041 | 0.196929037 |
| 0.018952863 | 0.073111945 | 0.26360997  | 0.214828152 |
| 0.295651585 | 0.26090701  | 0.309741899 | 0.119173342 |
| 0.001851826 | 0.157606145 | 0.219931571 | 0.100968814 |
| 0.194238278 | 0.24644953  | 0.094493319 | 0.242343871 |
| 0.36181798  | 0.108630025 | 0.229867898 | 0.076000024 |
| 0.051581916 | 0.14193232  | 0.336672102 | 0.174626501 |
| 0.221074398 | 0.091191408 | 0.100423074 | 0.18465944  |
| 0.072520687 | 0.357181404 | 0.329979125 | 0.031575029 |
| 0.066087627 | 0.259336678 | 0.19139208  | 0.106026033 |
| 0.12566989  | 0.237816267 | 0.267458433 | 0.016919319 |
| 0.201117656 | 0.09687894  | 0.260769493 | 0.243782139 |
| 0.245777599 | 0.212382951 | 0.302306893 | 0.153986412 |
| 0.162779292 | 0.193184407 | 0.191120058 | 0.33210034  |
| 0.259473724 | 0.177796661 | 0.166399976 | 0.099616124 |
| 0.178415535 | 0.189429703 | 0.153316271 | 0.141479123 |
| 0.209937678 | 0.211764354 | 0.315770481 | 0.113686916 |
| 0.316291653 | 0.088314342 | 0.36716148  | 0.207593482 |
| 0.325652983 | 0.112239488 | 0.130253835 | 0.194411338 |
| 0.026333901 | 0.076038316 | 0.089159424 | 0.119579447 |
| 0.250809514 | 0.175376816 | 0.085847264 | 0.122030993 |
| 0.137241653 | 0.32675339  | 0.307593993 | 0.285702777 |

|             |             |             |             |
|-------------|-------------|-------------|-------------|
| 0.127600807 | 0.093638256 | 0.032193741 | 0.271487849 |
| 0.174370056 | 0.191431304 | 0.202932572 | 0.033320521 |
| 0.2518015   | 0.09475608  | 0.22228396  | 0.236736613 |
| 0.071261297 | 0.326372463 | 0.040962617 | 0.157234887 |
| 0.026402135 | 0.145352547 | 0.254884541 | 0.161339552 |
| 0.057232535 | 0.210000824 | 0.217617862 | 0.065215933 |
| 0.193384199 | 0.151223406 | 0.139551612 | 0.147791233 |
| 0.20572014  | 0.169727666 | 0.249557196 | 0.096588525 |
| 0.101688365 | 0.178847346 | 0.079124822 | 0.195843043 |
| 0.212536275 | 0.241811438 | 0.138634948 | 0.246426155 |
| 0.133329842 | 0.185593279 | 0.339070774 | 0.147051774 |
| 0.109143582 | 0.26470635  | 0.065589109 | 0.061233352 |
| 0.172512332 | 0.078944796 | 0.001487059 | 0.055384055 |
| 0.339038414 | 0.066244962 | 0.139039667 | 0.219369653 |
| 0.15206567  | 0.325602443 | 0.055444171 | 0.124071915 |
| 0.201792431 | 0.247672438 | 0.164028704 | 0.320944649 |
| 0.25794419  | 0.230824504 | 0.124785134 | 0.010165961 |
| 0.134929308 | 0.106150814 | 0.055731823 | 0.176396471 |
| 0.110366533 | 0.065479809 | 0.125631399 | 0.08703819  |
| 0.265233904 | 0.050712799 | 0.10181389  | 0.176650166 |
| 0.210961275 | 0.254189832 | 0.268660751 | 0.249601015 |
| 0.05425676  | 0.255825349 | 0.102532967 | 0.087076174 |
| 0.195362218 | 0.115610773 | 0.283659444 | 0.12107285  |
| 0.16590394  | 0.195061403 | 0.013398269 | 0.307526446 |
| 0.216932657 | 0.104046921 | 0.275689343 | 0.031861864 |
| 0.352448822 | 0.247518601 | 0.151749628 | 0.082897393 |
| 0.119815505 | 0.174924628 | 0.285215733 | 0.231926186 |
| 0.044158629 | 0.11454031  | 0.203971878 | 0.130894874 |
| 0.242829485 | 0.119642506 | 0.29193585  | 0.054667324 |
| 0.216619082 | 0.1844761   | 0.13127422  | 0.162787437 |
| 0.105887015 | 0.140252155 | 0.050895188 | 0.279761443 |
| 1           | 0.131646379 | 0.257264558 | 0.213585116 |
| 0.101424515 | 0.225674003 | 0.093666259 | 0.263428266 |
| 0.267935164 | 0.322335127 | 0.229150368 | 0.227685794 |
| 0.373665013 | 0.145201281 | 0.113397788 | 0.194417304 |
| 0.20599274  | 0.193699358 | 0.107493267 | 0.240419981 |
| 0.098574535 | 0.296456548 | 0.076819893 | 0.214815471 |
| 0.199451161 | 0.183538118 | 0.113734163 | 0.2295825   |
| 0.254492275 | 0.161808448 | 0.159715162 | 0.341291829 |
| 0.256424667 | 0.146830554 | 0.331232563 | 0.023977389 |
| 0.127593307 | 0.221616046 | 0.270103369 | 0.131830702 |
| 0.245080493 | 0.163313904 | 0.094394317 | 0.023190198 |
| 0.258859467 | 0.060772302 | 0.127982848 | 0.198888005 |
| 0.085344529 | 0.121977803 | 0.260165091 | 0.285057915 |
| 0.209178694 | 0.064075306 | 0.059469932 | 0.24614646  |
| 0.087160632 | 0.048670679 | 0.072605069 | 0.1222779   |
| 0.096129759 | 0.04931976  | 0.066267227 | 0.074226285 |
| 0.215171827 | 0.142906223 |             |             |
| TUBB2C      | 0.018057799 | 0.170881679 | 0.010339404 |
| 0.078014787 | 0.331325359 | 0.101541512 | 0.0199542   |
| 0.041058499 | 0.13312119  | 0.048149184 | 0.217924774 |
| 0.00790062  | 0.193741384 | 0.252125986 | 0.020898588 |
| 0.282129246 | 0.022523415 | 0.047300211 | 0.026631391 |
| 0.073553109 | 0.298538024 | 0.178568896 | 0.089065801 |

|             |             |             |             |
|-------------|-------------|-------------|-------------|
| 0.256860897 | 0.074167058 | 0.110093875 | 0.195018    |
| 0.247639149 | 0.111730632 | 0.251379452 | 0.046790376 |
| 0.222403216 | 0.341240909 | 0.183143769 | 0.005010352 |
| 0.164075117 | 0.029818194 | 0.196789741 | 0.161385859 |
| 0.251414561 | 0.17375605  | 0.058590672 | 0.138928927 |
| 0.094968545 | 0.009631113 | 0.036416462 | 0.243143029 |
| 0.117741304 | 0.101289276 | 0.012169895 | 0.211844486 |
| 0.099176571 | 0.148381897 | 0.126748197 | 0.000804867 |
| 0.217587358 | 0.14445124  | 0.183571002 | 0.227903523 |
| 0.125319685 | 0.075592086 | 0.09410685  | 0.065672284 |
| 0.177365671 | 0.238177862 | 0.166789037 | 0.079970494 |
| 0.252126372 | 0.221469205 | 0.239723265 | 0.081679942 |
| 0.1069745   | 0.005205027 | 0.091560103 | 0.018647518 |
| 0.13200205  | 0.147887136 | 0.239058837 | 0.214274314 |
| 0.161367992 | 0.2432967   | 0.130922192 | 0.202210199 |
| 0.128898795 | 0.30634095  | 0.218945749 | 0.252376277 |
| 0.200818759 | 0.023654943 | 0.271366651 | 0.268839019 |
| 0.008899336 | 0.102993897 | 0.194334756 | 0.034879315 |
| 0.194538564 | 0.145449362 | 0.0998738   | 0.260853799 |
| 0.342987525 | 0.27498777  | 0.199936881 | 0.178199776 |
| 0.209510096 | 0.018251901 | 0.179571407 | 0.339498559 |
| 0.180177382 | 0.025663718 | 0.201563679 | 0.290693731 |
| 0.222681803 | 0.256311358 | 0.189763449 | 0.216151272 |
| 0.259686501 | 0.260617299 | 0.233543773 | 0.201421374 |
| 0.031288043 | 0.245028833 | 0.085929977 | 0.026267685 |
| 0.011330526 | 0.050716912 | 0.13182973  | 0.196330862 |
| 0.278415435 | 0.163767196 | 0.066669542 | 0.194375106 |
| 0.330573216 | 0.176029143 | 0.237336924 | 0.230440653 |
| 0.013116952 | 0.175216377 | 0.254354468 | 0.067721623 |
| 0.215001056 | 0.047430144 | 0.287762975 | 0.213704341 |
| 0.218821907 | 0.30453296  | 0.033616979 | 0.212306834 |
| 0.059563638 | 0.289261724 | 0.197014766 | 0.101150044 |
| 0.242909298 | 0.205994116 | 0.312910098 | 0.350222472 |
| 0.21801446  | 0.12518518  | 0.018859712 | 0.201049044 |
| 0.298561114 | 0.051668871 | 0.267468667 | 0.290484655 |
| 0.222209391 | 0.298615516 | 0.314117478 | 0.284867691 |
| 0.218282447 | 0.02560694  | 0.017431888 | 0.272612612 |
| 0.225619092 | 0.242307112 | 0.085768813 | 0.191542726 |
| 0.279009475 | 0.105999145 | 0.239867455 | 0.131211676 |
| 0.286279813 | 0.264019065 | 0.253584791 | 0.191674416 |
| 0.085923367 | 0.155074213 | 0.235597767 | 0.175358793 |
| 0.023080228 | 0.028036126 | 0.013178712 | 0.179533288 |
| 0.060979418 | 0.138828642 | 0.08601898  | 0.212113765 |
| 0.141187533 | 0.072944031 | 0.162059121 | 0.347641117 |
| 0.013233624 | 0.169255384 | 0.067107218 | 0.054351973 |
| 0.028989485 | 0.057982996 | 0.092305221 | 0.087503813 |
| 0.203612213 | 0.074019898 | 0.224703848 | 0.282641173 |
| 0.141733049 | 0.072837036 | 0.201454674 | 0.288218413 |
| 0.294998183 | 0.276839438 | 0.118862932 | 0.018592318 |
| 0.150461164 | 0.090905485 | 0.212473136 | 0.205678037 |
| 0.060801975 | 0.105928023 | 0.226789766 | 0.361722678 |
| 0.081656745 | 0.028183258 | 0.145220855 | 0.201270522 |
| 0.046658252 | 0.184660237 | 0.301450242 | 0.137524605 |
| 0.001318948 | 0.14890797  | 0.271424512 | 0.177333484 |

|             |             |             |             |
|-------------|-------------|-------------|-------------|
| 0.137019972 | 0.200282273 | 0.207421215 | 0.285937551 |
| 0.157815184 | 0.195587261 | 0.27963124  | 0.348193407 |
| 0.094223172 | 0.063703606 | 0.297020671 | 0.055386147 |
| 0.20392434  | 0.115967247 | 0.259156514 | 0.063403958 |
| 0.135893812 | 0.216697284 | 0.310582785 | 0.221906034 |
| 0.037627359 | 0.243858953 | 0.2123971   | 0.276591256 |
| 0.139921339 | 0.294259009 | 0.296041496 | 0.271262277 |
| 0.194216836 | 0.146199229 | 0.210688644 | 0.267406709 |
| 0.286573955 | 0.099691723 | 0.018801243 | 0.24095428  |
| 0.105432048 | 0.298939397 | 0.175008078 | 0.29852592  |
| 0.247265926 | 0.17226209  | 0.090423065 | 0.334554764 |
| 0.251506702 | 0.106971676 | 0.255710943 | 0.293887495 |
| 0.065017839 | 0.216189781 | 0.18549739  | 0.357617249 |
| 0.091455783 | 0.19626455  | 0.158734446 | 0.201603673 |
| 0.026461593 | 0.019433346 | 0.02027511  | 0.140660776 |
| 0.283728848 | 0.167227562 | 0.265942169 | 0.265893542 |
| 0.059561343 | 0.222522522 | 0.110747926 | 0.167618156 |
| 0.196163493 | 0.17196324  | 0.268448222 | 0.269765623 |
| 0.132567775 | 0.023271513 | 0.080454432 | 0.241993253 |
| 0.007071321 | 0.248406819 | 0.09247085  | 0.004058563 |
| 0.011994058 | 0.152817114 | 0.030306506 | 0.083047911 |
| 0.327610959 | 0.078472833 | 0.08786334  | 0.059147514 |
| 0.270103312 | 0.041311212 | 0.014831729 | 0.255735786 |
| 0.226219106 | 0.214964802 | 0.216527876 | 0.182250067 |
| 0.238660615 | 0.208863582 | 0.30221526  | 0.096819224 |
| 0.040487662 | 0.016593824 | 0.234814879 | 0.187205368 |
| 0.001071442 | 0.294234718 | 0.203829378 | 0.078273948 |
| 0.279543764 | 0.165256064 | 0.013403122 | 0.259880435 |
| 0.00929974  | 0.213594709 | 0.068634275 | 0.109402439 |
| 0.314098449 | 0.004258764 | 0.086795098 | 0.155434516 |
| 0.173270619 | 0.161504793 | 0.16535673  | 0.258135789 |
| 0.213231703 | 0.030904898 | 0.224770153 | 0.301780016 |
| 0.028132933 | 0.035223559 | 0.074583109 | 0.011744294 |
| 0.057749653 | 0.198577388 | 0.12336419  | 0.022972182 |
| 0.16441948  | 0.001933787 | 0.171338448 | 0.264551342 |
| 0.179174283 | 0.303790595 | 0.264943624 | 0.258833757 |
| 0.252316764 | 0.127623889 | 0.268819057 | 0.180559401 |
| 0.081159906 | 0.000820253 | 0.005532942 | 0.297690014 |
| 0.249717752 | 0.011604759 | 0.088088932 | 0.088005691 |
| 0.072359842 | 0.027532889 | 0.022689699 | 0.270095039 |
| 0.195757995 | 0.25577707  | 0.221248967 | 0.186419239 |
| 0.139286257 | 0.156694514 | 0.077972782 | 0.026667846 |
| 0.244435567 | 0.027550518 | 0.026724829 | 0.016407867 |
| 0.299087162 | 0.032866744 | 0.170641924 | 0.239515951 |
| 0.275117646 | 0.332608697 | 0.066825635 | 0.093609591 |
| 0.255621855 | 0.020604897 | 0.119964445 | 0.025060211 |
| 0.207807182 | 0.278032834 | 0.227578173 | 0.164927704 |
| 0.295925052 | 0.238029449 | 0.012549992 | 0.282638079 |
| 0.009908157 | 0.007209199 | 0.097315785 | 0.138276428 |
| 0.040656611 | 0.199194365 | 0.158585432 | 0.068593721 |
| 0.097002107 | 0.010548505 | 0.222913708 | 0.239234641 |
| 0.223470739 | 0.201191906 | 0.315926748 | 0.110633431 |
| 0.193820495 | 0.188883085 | 0.117589273 | 0.065479892 |
| 0.076839726 | 0.13486541  | 0.076750282 | 0.007482115 |

|             |             |             |             |
|-------------|-------------|-------------|-------------|
| 0.150318254 | 0.220749798 | 0.022310544 | 0.07226322  |
| 0.28734729  | 0.289754957 | 0.025167733 | 0.018996178 |
| 0.136777604 | 0.14260189  | 0.309745789 | 0.221541872 |
| 0.231409221 | 0.294907653 | 0.18847423  | 0.114484496 |
| 0.023585706 | 0.244208386 | 0.319057445 | 0.155462649 |
| 0.258002437 | 0.013900227 | 0.212368826 | 0.296554977 |
| 0.053595272 | 0.100147617 | 0.027591631 | 0.039336299 |
| 0.279604845 | 0.099631234 | 0.170568232 | 0.045821257 |
| 0.169022148 | 0.247934699 | 0.016231488 | 0.116040876 |
| 0.191473638 | 0.252365401 | 0.084956393 | 0.071244348 |
| 0.166094179 | 0.03368161  | 0.286833833 | 0.25967148  |
| 0.051700015 | 0.036074028 | 0.056619731 | 0.225454358 |
| 0.242532433 | 0.12947781  | 0.016111774 | 0.176373513 |
| 0.282942571 | 0.237272406 | 0.218239275 | 0.288484509 |
| 0.031089535 | 0.249855965 | 0.166954071 | 0.240070721 |
| 0.096461322 | 0.106311535 | 0.127395017 | 0.024392961 |
| 0.163032719 | 0.212360195 | 0.202495806 | 0.111896503 |
| 0.165880488 | 0.027205166 | 0.010899829 | 0.22731715  |
| 0.268950982 | 0.03036541  | 0.065269094 | 0.257485801 |
| 0.012509536 | 0.250376736 | 0.296468477 | 0.107023081 |
| 0.260077147 | 0.304812984 | 0.242667655 | 0.065993805 |
| 0.010714792 | 0.290914567 | 0.255003179 | 0.164053635 |
| 0.190732977 | 0.166147394 | 0.04318065  | 0.056692324 |
| 0.208580683 | 0.019818102 | 0.087859641 | 0.080504101 |
| 0.155357195 | 0.149633351 | 0.132630603 | 0.086162563 |
| 0.15720011  | 0.019513967 | 0.241377093 | 0.109518079 |
| 0.151896633 | 0.165473929 | 0.247124823 | 0.040074576 |
| 0.177336594 | 0.25839139  | 0.208062144 | 0.008569148 |
| 0.247259076 | 0.245163847 | 0.252765276 | 0.002797606 |
| 0.293493464 | 0.004889512 | 0.164792958 | 0.181843877 |
| 0.146216999 | 0.126384417 | 0.257822953 | 0.203745538 |
| 0.152747582 | 0.111430249 | 0.144165826 | 0.176401943 |
| 0.133199855 | 0.093395098 | 0.248623002 | 0.113409988 |
| 0.198500936 | 0.049580582 | 0.030361299 | 0.027629509 |
| 0.033803466 | 0.224978881 | 0.125188315 | 0.019625822 |
| 0.158937997 | 0.105738778 | 0.241728645 | 0.203477141 |
| 0.279936366 | 0.027468902 | 0.132594957 | 0.208030812 |
| 0.05836782  | 0.072585134 | 0.011170217 | 0.148304493 |
| 0.117115396 | 0.214701108 | 0.117349442 | 0.095252819 |
| 0.166626335 | 0.208131149 | 0.119732401 | 0.245874406 |
| 0.181432533 | 0.12805172  | 0.048132054 | 0.080564871 |
| 0.073139562 | 0.05109713  | 0.31771484  | 0.001529644 |
| 0.202436648 | 0.060665772 | 0.280088713 | 0.208977216 |
| 0.183372502 | 0.231774166 | 0.050739203 | 0.033234987 |
| 0.043824881 | 0.052782513 | 0.067893127 | 0.226495308 |
| 0.206996102 | 0.076532401 | 0.293337454 | 0.053305174 |
| 0.285020888 | 0.222623932 | 0.173215322 | 0.074037789 |
| 0.132262886 | 0.072230743 | 0.200878321 | 0.026022072 |
| 0.179390748 | 0.267374843 | 0.090580076 | 0.206808465 |
| 0.172461299 | 0.273298563 | 0.019812032 | 0.279837509 |
| 0.189285325 | 0.046226551 | 0.255856599 | 0.098526151 |
| 0.085632912 | 0.123738649 | 0.242274158 | 0.07003602  |
| 0.097746277 | 0.180767569 | 0.004494467 | 0.075926482 |
| 0.266410463 | 0.078277101 | 0.163799825 | 0.219122817 |

|             |             |             |             |
|-------------|-------------|-------------|-------------|
| 0.231504023 | 0.275998664 | 0.183573575 | 0.083153738 |
| 0.179292816 | 0.19394057  | 0.124676264 | 0.164478178 |
| 0.18652021  | 0.049375352 | 0.127272165 | 0.008202536 |
| 0.225463972 | 0.212895223 | 0.085002869 | 0.021666328 |
| 0.008231224 | 0.235819677 | 0.194286981 | 0.014516447 |
| 0.323572182 | 0.197488591 | 0.117214659 | 0.246752006 |
| 0.069881235 | 0.197023294 | 0.113497509 | 0.301172554 |
| 0.008276088 | 0.145611736 | 0.20806296  | 0.131862136 |
| 0.200345625 | 0.259173881 | 0.303831534 | 0.263803509 |
| 0.018338956 | 0.178983532 | 0.003075868 | 0.185999209 |
| 0.174243972 | 0.236820423 | 0.094618758 | 0.052542558 |
| 0.237882981 | 0.206968896 | 0.126865206 | 0.15758261  |
| 0.013923915 | 0.318204879 | 0.119508743 | 0.202465482 |
| 0.13567449  | 0.144079756 | 0.04966911  | 0.232606166 |
| 0.161693709 | 0.134461055 | 0.132310932 | 0.133887164 |
| 0.211016622 | 0.171449036 | 0.04667728  | 0.17392674  |
| 0.140608235 | 0.019829219 | 0.069993097 | 0.269177645 |
| 0.131646379 | 1           | 0.342923755 | 0.121781622 |
| 0.226647251 | 0.173426791 | 0.163504711 | 0.247370459 |
| 0.093711548 | 0.165604025 | 0.28686207  | 0.224756554 |
| 0.243653293 | 0.241009258 | 0.236349072 | 0.180910137 |
| 0.181915482 | 0.04889365  | 0.197075601 | 0.190572344 |
| 0.247923598 | 0.208550424 | 0.087085914 | 0.193281465 |
| 0.027716697 | 0.066102609 | 0.116679658 | 0.066560454 |
| 0.19535564  | 0.240908587 | 0.218302153 | 0.237267234 |
| 0.120376628 | 0.029739151 | 0.260701382 | 0.066968175 |
| 0.101277444 | 0.296965811 | 0.13329175  | 0.223281628 |
| 0.082095609 | 0.147391914 | 0.089604846 | 0.000136449 |
| 0.282492851 | 0.116168124 | 0.127726676 | 0.210203303 |
| 0.142225862 | 0.014278348 | 0.215696441 | 0.314234947 |
| 0.142300054 | 0.102934342 | 0.136054865 | 0.21287642  |
| 0.265669164 | 0.127051093 | 0.134111469 | 0.15303005  |
| 0.253188065 | 0.091845234 | 0.127541789 | 0.177438357 |
| 0.192856802 | 0.07928692  |             |             |
| TUBE1       | 0.098387928 | 0.3946083   | 0.069595772 |
| 0.217188423 | 0.403682327 | 0.420823859 | 0.083196868 |
| 0.164698768 | 0.320496084 | 0.290554056 | 0.433692689 |
| 0.031332612 | 0.156845474 | 0.455066944 | 0.078511191 |
| 0.454912738 | 0.06001246  | 0.148720651 | 0.095430308 |
| 0.259260561 | 0.387039821 | 0.428320497 | 0.368656133 |
| 0.376524292 | 0.18270334  | 0.344290448 | 0.414483197 |
| 0.488158471 | 0.327254449 | 0.459938235 | 0.219186659 |
| 0.414210509 | 0.42255979  | 0.435262674 | 0.025355772 |
| 0.437976646 | 0.021855517 | 0.420880331 | 0.36712291  |
| 0.26012581  | 0.338989921 | 0.31829212  | 0.339794934 |
| 0.375267138 | 0.054038593 | 0.212605609 | 0.430529683 |
| 0.333072281 | 0.327655808 | 0.074938111 | 0.43159965  |
| 0.390693591 | 0.35752361  | 0.356592079 | 0.003781818 |
| 0.398707891 | 0.15241088  | 0.318015708 | 0.484551581 |
| 0.25074825  | 0.180949962 | 0.319230758 | 0.264076331 |
| 0.401252699 | 0.404497031 | 0.295105761 | 0.379703976 |
| 0.493697174 | 0.278399693 | 0.431703264 | 0.225303528 |
| 0.409670823 | 0.039127479 | 0.191879703 | 0.088563259 |
| 0.429930501 | 0.272474603 | 0.416490624 | 0.401674636 |



|             |             |             |             |
|-------------|-------------|-------------|-------------|
| 0.395421253 | 0.49812494  | 0.274117572 | 0.469547931 |
| 0.163475667 | 0.420541222 | 0.377651541 | 0.356799971 |
| 0.378047923 | 0.10498416  | 0.4515167   | 0.514757994 |
| 0.058215761 | 0.359800309 | 0.408820629 | 0.132730994 |
| 0.40447975  | 0.333705639 | 0.384169439 | 0.292570825 |
| 0.434061236 | 0.428342074 | 0.446301207 | 0.346843824 |
| 0.384487882 | 0.084939302 | 0.447518521 | 0.414187423 |
| 0.404220926 | 0.104716438 | 0.335410722 | 0.455563492 |
| 0.452796185 | 0.487914735 | 0.39134323  | 0.381436414 |
| 0.453297949 | 0.495448979 | 0.437811853 | 0.39473414  |
| 0.156568486 | 0.506713802 | 0.238461513 | 0.072098973 |
| 0.084059854 | 0.128552014 | 0.292171862 | 0.316832305 |
| 0.469971355 | 0.359770742 | 0.251723427 | 0.327760353 |
| 0.471612084 | 0.440805029 | 0.502253441 | 0.415455392 |
| 0.058259987 | 0.326194196 | 0.457752882 | 0.30475164  |
| 0.413284023 | 0.136751786 | 0.377472511 | 0.482836539 |
| 0.383898049 | 0.449040168 | 0.190113563 | 0.472341523 |
| 0.232112454 | 0.515608539 | 0.429476854 | 0.238281579 |
| 0.501430114 | 0.46924036  | 0.518961305 | 0.460164671 |
| 0.456605446 | 0.391569452 | 0.077519759 | 0.374507654 |
| 0.493310024 | 0.035922707 | 0.469266692 | 0.500689529 |
| 0.480542768 | 0.461826991 | 0.525090918 | 0.506542021 |
| 0.480879575 | 0.091057503 | 0.040165562 | 0.369197519 |
| 0.48940383  | 0.398686185 | 0.187605977 | 0.45297609  |
| 0.429280405 | 0.41352728  | 0.419109806 | 0.3966723   |
| 0.509889922 | 0.447076183 | 0.478869144 | 0.399346294 |
| 0.30539776  | 0.309464559 | 0.429159872 | 0.435170915 |
| 0.069554322 | 0.146460115 | 0.061843284 | 0.325097351 |
| 0.346063061 | 0.24139752  | 0.399434349 | 0.393553858 |
| 0.253994479 | 0.341917201 | 0.398199857 | 0.445343611 |
| 0.05844218  | 0.450919513 | 0.205329833 | 0.205290708 |
| 0.074687365 | 0.144910596 | 0.272359861 | 0.227854017 |
| 0.344431086 | 0.214633453 | 0.44225049  | 0.487176411 |
| 0.395383107 | 0.203781744 | 0.435096744 | 0.479267979 |
| 0.441527751 | 0.460173721 | 0.251608585 | 0.029407207 |
| 0.378277117 | 0.331124    | 0.286661155 | 0.437293203 |
| 0.163532833 | 0.326998348 | 0.439280847 | 0.453207991 |
| 0.314944101 | 0.157608637 | 0.435829226 | 0.414241093 |
| 0.157847927 | 0.409748158 | 0.457543266 | 0.406601568 |
| 0.005851551 | 0.394922899 | 0.44770928  | 0.238472149 |
| 0.338245429 | 0.24355094  | 0.360743098 | 0.468953269 |
| 0.370208381 | 0.324362229 | 0.488540616 | 0.440271872 |
| 0.376014878 | 0.197176573 | 0.523019851 | 0.080837313 |
| 0.39072615  | 0.109466452 | 0.357557541 | 0.311500272 |
| 0.309842943 | 0.335181233 | 0.408829069 | 0.387636433 |
| 0.145790891 | 0.502045878 | 0.381947595 | 0.50920345  |
| 0.436464505 | 0.524335648 | 0.460714708 | 0.445327591 |
| 0.397348724 | 0.3952225   | 0.23545942  | 0.447850522 |
| 0.458876576 | 0.342879324 | 0.081106912 | 0.430201628 |
| 0.380901633 | 0.449980237 | 0.19071613  | 0.503960138 |
| 0.481682343 | 0.43263361  | 0.216048572 | 0.421037177 |
| 0.408544232 | 0.291968861 | 0.404696019 | 0.523065213 |
| 0.323127183 | 0.431584966 | 0.433896763 | 0.423085346 |
| 0.219303928 | 0.317192933 | 0.297076719 | 0.270463445 |

|             |             |             |             |
|-------------|-------------|-------------|-------------|
| 0.021037405 | 0.097426441 | 0.084858996 | 0.246726832 |
| 0.288660496 | 0.409807417 | 0.437226548 | 0.509640543 |
| 0.165947803 | 0.407499636 | 0.252173102 | 0.406917336 |
| 0.409774066 | 0.407058633 | 0.44085423  | 0.436923217 |
| 0.26724709  | 0.038732625 | 0.191792316 | 0.501119833 |
| 0.043809684 | 0.359964128 | 0.337386013 | 0.007040177 |
| 0.06418619  | 0.365402173 | 0.097932502 | 0.18757402  |
| 0.487119406 | 0.188121051 | 0.243042707 | 0.326647804 |
| 0.39839956  | 0.12480671  | 0.009430403 | 0.475433327 |
| 0.459613237 | 0.431181676 | 0.455457035 | 0.420777722 |
| 0.4243888   | 0.394791594 | 0.436779823 | 0.364223867 |
| 0.145910083 | 0.106774165 | 0.342498385 | 0.381007868 |
| 0.007424884 | 0.413131752 | 0.366873822 | 0.177744195 |
| 0.442956656 | 0.335229599 | 0.057626783 | 0.408013281 |
| 0.039260644 | 0.312833937 | 0.338642026 | 0.275411819 |
| 0.393902569 | 0.021692022 | 0.314230958 | 0.414480962 |
| 0.409050746 | 0.336784664 | 0.421875706 | 0.514245138 |
| 0.409427213 | 0.131016305 | 0.410484201 | 0.435092725 |
| 0.105743947 | 0.132242516 | 0.368440137 | 0.049048853 |
| 0.2232737   | 0.422793186 | 0.412429912 | 0.099059965 |
| 0.341815861 | 0.009076079 | 0.35567301  | 0.518421188 |
| 0.433945541 | 0.522146792 | 0.497805432 | 0.391193102 |
| 0.497452948 | 0.166223186 | 0.518459598 | 0.384678428 |
| 0.389061263 | 0.00212856  | 0.011766908 | 0.490969361 |
| 0.467061527 | 0.058673575 | 0.204874199 | 0.399313621 |
| 0.179682035 | 0.177193832 | 0.089616526 | 0.305292644 |
| 0.437593263 | 0.339145187 | 0.276331161 | 0.441768292 |
| 0.319306466 | 0.2928787   | 0.38782903  | 0.098006329 |
| 0.444434161 | 0.087047678 | 0.096245337 | 0.02119137  |
| 0.413508726 | 0.114663396 | 0.43015573  | 0.492210034 |
| 0.493397768 | 0.447735041 | 0.343582942 | 0.37804276  |
| 0.419717592 | 0.101839825 | 0.397585018 | 0.121870388 |
| 0.464388495 | 0.45736071  | 0.366524606 | 0.32406315  |
| 0.50856032  | 0.464578695 | 0.050752985 | 0.436487383 |
| 0.026733444 | 0.004643839 | 0.389880713 | 0.28846159  |
| 0.080212374 | 0.442277038 | 0.291322828 | 0.256449086 |
| 0.273482614 | 0.049866118 | 0.372884677 | 0.358879707 |
| 0.370811092 | 0.433003905 | 0.38810369  | 0.251346923 |
| 0.354528204 | 0.235562219 | 0.268445808 | 0.201328914 |
| 0.267244126 | 0.298393839 | 0.18893194  | 0.032280352 |
| 0.435983929 | 0.465105703 | 0.083374111 | 0.185862612 |
| 0.447907392 | 0.497683749 | 0.07141355  | 0.028708908 |
| 0.282393992 | 0.373479923 | 0.5072595   | 0.477650754 |
| 0.501467229 | 0.520615101 | 0.38034245  | 0.200506241 |
| 0.09678862  | 0.390930481 | 0.392464882 | 0.175271225 |
| 0.501253781 | 0.073406078 | 0.459558409 | 0.396930474 |
| 0.14242523  | 0.28976868  | 0.064082972 | 0.11392739  |
| 0.44570812  | 0.220297956 | 0.264966975 | 0.168693521 |
| 0.408830621 | 0.358178967 | 0.067492732 | 0.25693035  |
| 0.373431606 | 0.299782076 | 0.204368771 | 0.321834937 |
| 0.349768073 | 0.207500842 | 0.458148146 | 0.452966546 |
| 0.155921463 | 0.135922933 | 0.320694995 | 0.391036719 |
| 0.43453201  | 0.385475963 | 0.047873104 | 0.419636449 |
| 0.487298877 | 0.464640413 | 0.475788667 | 0.39840872  |

|             |             |             |             |
|-------------|-------------|-------------|-------------|
| 0.100081705 | 0.46330018  | 0.376557095 | 0.417145769 |
| 0.227186193 | 0.408766475 | 0.28988558  | 0.082252693 |
| 0.286063412 | 0.454327361 | 0.40059497  | 0.244266087 |
| 0.421817709 | 0.134103207 | 0.063876765 | 0.422299014 |
| 0.311082937 | 0.13239726  | 0.340604189 | 0.421707578 |
| 0.005379547 | 0.241487175 | 0.484350431 | 0.310579628 |
| 0.498254697 | 0.489598218 | 0.44185706  | 0.276177697 |
| 0.004370363 | 0.446578444 | 0.450614056 | 0.467885262 |
| 0.412562256 | 0.355993513 | 0.168112534 | 0.128346692 |
| 0.317191486 | 0.089098121 | 0.214885035 | 0.368902594 |
| 0.26371046  | 0.413801268 | 0.236790744 | 0.237031832 |
| 0.278375867 | 0.091954072 | 0.350151998 | 0.302501239 |
| 0.214571671 | 0.281020368 | 0.384047497 | 0.270609524 |
| 0.313322532 | 0.42932449  | 0.409317172 | 0.0396649   |
| 0.418084174 | 0.395337886 | 0.42039237  | 0.006031667 |
| 0.467109091 | 0.0142582   | 0.284852141 | 0.316791487 |
| 0.284338783 | 0.287390509 | 0.337966234 | 0.398020059 |
| 0.374763616 | 0.288845843 | 0.366014798 | 0.303639707 |
| 0.25182454  | 0.261381614 | 0.436511362 | 0.383846673 |
| 0.394836667 | 0.176138884 | 0.09666579  | 0.094268037 |
| 0.090127866 | 0.442087115 | 0.250216544 | 0.081119583 |
| 0.283741619 | 0.383954727 | 0.358391757 | 0.465725389 |
| 0.42054496  | 0.107419478 | 0.381447283 | 0.428751955 |
| 0.253771381 | 0.339713255 | 0.077757707 | 0.406951084 |
| 0.287839551 | 0.33963344  | 0.392733595 | 0.33136211  |
| 0.392613051 | 0.396691675 | 0.249507829 | 0.430165396 |
| 0.431610083 | 0.363592178 | 0.313349168 | 0.152670352 |
| 0.239260102 | 0.147191101 | 0.377330104 | 0.004586265 |
| 0.398460811 | 0.302911351 | 0.472496199 | 0.466056036 |
| 0.372136286 | 0.37898773  | 0.328340325 | 0.133770044 |
| 0.274588409 | 0.165518162 | 0.169129333 | 0.423603056 |
| 0.321625096 | 0.240251114 | 0.396884987 | 0.335780042 |
| 0.448439769 | 0.413244715 | 0.332171308 | 0.281697031 |
| 0.280006149 | 0.220285133 | 0.442290307 | 0.142494983 |
| 0.436395901 | 0.310365141 | 0.331046552 | 0.400651679 |
| 0.310527676 | 0.504162369 | 0.07675655  | 0.517724816 |
| 0.419741645 | 0.138074824 | 0.482057276 | 0.31948406  |
| 0.320843116 | 0.192413764 | 0.300666362 | 0.374233863 |
| 0.289805614 | 0.415213658 | 0.021351328 | 0.113228517 |
| 0.385650294 | 0.31598104  | 0.378757882 | 0.379489742 |
| 0.350840585 | 0.371309294 | 0.243565214 | 0.319554576 |
| 0.444143779 | 0.461258661 | 0.359549487 | 0.275892177 |
| 0.369800988 | 0.15106789  | 0.389161803 | 0.019233048 |
| 0.45724499  | 0.442545193 | 0.394358729 | 0.077909384 |
| 0.030305673 | 0.331341571 | 0.439210242 | 0.071819678 |
| 0.490271698 | 0.309494196 | 0.341659408 | 0.443439982 |
| 0.187074287 | 0.465205691 | 0.19496054  | 0.454132943 |
| 0.055153421 | 0.289716735 | 0.419543496 | 0.38889294  |
| 0.352919436 | 0.406310489 | 0.428369076 | 0.360304238 |
| 0.055074303 | 0.36670922  | 0.004202991 | 0.394407658 |
| 0.433081533 | 0.419999342 | 0.208911706 | 0.289628153 |
| 0.337134715 | 0.355902369 | 0.323482435 | 0.422623549 |
| 0.024652732 | 0.455042785 | 0.245325139 | 0.398467948 |
| 0.332496679 | 0.381345696 | 0.098932274 | 0.385322111 |

|             |             |             |             |
|-------------|-------------|-------------|-------------|
| 0.416966842 | 0.375621898 | 0.259400818 | 0.390163256 |
| 0.463881361 | 0.355062427 | 0.162692557 | 0.296194743 |
| 0.368709846 | 0.075601396 | 0.371769857 | 0.515437732 |
| 0.257264558 | 0.342923755 | 1           | 0.298336554 |
| 0.398360233 | 0.357772565 | 0.400829903 | 0.496563856 |
| 0.134915741 | 0.298568088 | 0.434223772 | 0.444931319 |
| 0.341098964 | 0.278442019 | 0.366134653 | 0.339782549 |
| 0.431552757 | 0.152626277 | 0.34585629  | 0.380107427 |
| 0.343092701 | 0.355142492 | 0.310271934 | 0.289774368 |
| 0.069145842 | 0.209987752 | 0.415476025 | 0.172231664 |
| 0.36477281  | 0.438833429 | 0.346076526 | 0.389712148 |
| 0.221010087 | 0.056164577 | 0.449046244 | 0.045687405 |
| 0.352602811 | 0.456564732 | 0.29216991  | 0.427076668 |
| 0.198254085 | 0.378436003 | 0.349185315 | 0.00229758  |
| 0.424223115 | 0.087435467 | 0.351527176 | 0.354982803 |
| 0.363534727 | 0.072208233 | 0.439486172 | 0.519358058 |
| 0.334906295 | 0.346566672 | 0.408856703 | 0.442687096 |
| 0.260815095 | 0.37304016  | 0.392761098 | 0.402918214 |
| 0.337752965 | 0.383660399 | 0.423214754 | 0.445845634 |
| 0.397030489 | 0.300597986 |             |             |
| TUBG1       | 0.086110492 | 0.197909462 | 0.058509074 |
| 0.150453161 | 0.208355463 | 0.084175238 | 0.103042128 |
| 0.116496704 | 0.167241106 | 0.031799141 | 0.199648387 |
| 0.079450932 | 0.027615549 | 0.294008012 | 0.098950474 |
| 0.204794134 | 0.114455926 | 0.17542209  | 0.029308453 |
| 0.079247249 | 0.227519849 | 0.078351023 | 0.107033059 |
| 0.171670432 | 0.229595435 | 0.149970172 | 0.105284611 |
| 0.258390349 | 0.032545764 | 0.18274165  | 0.026029379 |
| 0.350886571 | 0.216951346 | 0.085055341 | 0.045245312 |
| 0.137542298 | 0.009096716 | 0.325970301 | 0.1818242   |
| 0.066974741 | 0.313250827 | 0.051707308 | 0.19620165  |
| 0.088667342 | 0.071077782 | 0.015611387 | 0.181841004 |
| 0.135753547 | 0.094195969 | 0.073350359 | 0.186238282 |
| 0.071747806 | 0.212348057 | 0.13097325  | 0.007523457 |
| 0.075406305 | 0.014331021 | 0.04389952  | 0.271980346 |
| 0.282635703 | 0.193097619 | 0.040465702 | 0.086376148 |
| 0.141887523 | 0.205053214 | 0.23633385  | 0.061645437 |
| 0.301681192 | 0.063247214 | 0.172519328 | 0.091486611 |
| 0.124853067 | 0.044066855 | 0.271455761 | 0.082246826 |
| 0.077598601 | 0.237811984 | 0.169158    | 0.091468332 |
| 0.198891014 | 0.33048615  | 0.230210532 | 0.267630149 |
| 0.052657132 | 0.167122511 | 0.106222247 | 0.319045818 |
| 0.217907887 | 0.081113102 | 0.278959536 | 0.340256486 |
| 0.051966436 | 0.094377529 | 0.216033607 | 0.138770261 |
| 0.209894191 | 0.047138744 | 0.085000981 | 0.070874232 |
| 0.216452559 | 0.206983325 | 0.271757296 | 0.317561316 |
| 0.12049072  | 0.107920962 | 0.259996875 | 0.163617661 |
| 0.149460796 | 0.12193894  | 0.149122415 | 0.233831262 |
| 0.213301885 | 0.271629014 | 0.202301204 | 0.27998485  |
| 0.176941162 | 0.293484503 | 0.25373734  | 0.234818984 |
| 0.009509044 | 0.283086774 | 0.19693675  | 0.113143134 |
| 0.062284198 | 0.12132894  | 0.077354389 | 0.300861237 |
| 0.254765165 | 0.209367308 | 0.167367737 | 0.252201294 |
| 0.299180173 | 0.239766575 | 0.275680632 | 0.269309543 |

|             |             |             |             |
|-------------|-------------|-------------|-------------|
| 0.08747197  | 0.054580378 | 0.176620707 | 0.075753738 |
| 0.245700482 | 0.159330525 | 0.127599402 | 0.306088354 |
| 0.328688568 | 0.273217729 | 0.088421318 | 0.318837956 |
| 0.112580214 | 0.352432369 | 0.209829131 | 0.247204018 |
| 0.319046647 | 0.287507743 | 0.342100969 | 0.21563171  |
| 0.288133325 | 0.162569405 | 0.022502458 | 0.256164982 |
| 0.349860509 | 0.018336742 | 0.238080022 | 0.27072516  |
| 0.270819555 | 0.251769177 | 0.332670714 | 0.279570834 |
| 0.260168783 | 0.132572037 | 0.006637668 | 0.300302572 |
| 0.29790639  | 0.318030181 | 0.11580538  | 0.133901214 |
| 0.198965268 | 0.119648764 | 0.194502127 | 0.091967403 |
| 0.36862208  | 0.254416839 | 0.241435596 | 0.230236976 |
| 0.106075007 | 0.297086268 | 0.117304517 | 0.258673037 |
| 0.096162382 | 0.10977049  | 0.090166548 | 0.244001734 |
| 0.042390551 | 0.271539726 | 0.107991542 | 0.160242847 |
| 0.29558026  | 0.087361634 | 0.056744817 | 0.231221828 |
| 0.096158993 | 0.135061187 | 0.162825955 | 0.170516103 |
| 0.134193148 | 0.212061458 | 0.186269928 | 0.144649058 |
| 0.229034111 | 0.220205427 | 0.173314212 | 0.279562705 |
| 0.103359139 | 0.214808642 | 0.200863843 | 0.333420845 |
| 0.399147084 | 0.161474184 | 0.255402396 | 0.067678155 |
| 0.152333359 | 0.039220921 | 0.049254774 | 0.116018095 |
| 0.198292604 | 0.165305884 | 0.211266991 | 0.264384537 |
| 0.158597016 | 0.080280785 | 0.106370251 | 0.321364052 |
| 0.159077008 | 0.12963762  | 0.319231899 | 0.125200213 |
| 0.019543808 | 0.221300845 | 0.259487013 | 0.128067148 |
| 0.211810228 | 0.071429421 | 0.057574375 | 0.296827801 |
| 0.065914264 | 0.09943599  | 0.254844426 | 0.241551116 |
| 0.065878423 | 0.174191929 | 0.318789429 | 0.020287627 |
| 0.119748738 | 0.1037914   | 0.343566743 | 0.051641918 |
| 0.268762034 | 0.310435535 | 0.169754734 | 0.127468579 |
| 0.133686627 | 0.29722906  | 0.240053676 | 0.294383571 |
| 0.085782762 | 0.326407933 | 0.269144785 | 0.309294688 |
| 0.225222865 | 0.086655951 | 0.040751793 | 0.275263632 |
| 0.279984346 | 0.070254199 | 0.105122234 | 0.194534003 |
| 0.084764989 | 0.221018033 | 0.101800891 | 0.341632075 |
| 0.338708878 | 0.228911789 | 0.159367428 | 0.30103313  |
| 0.331107416 | 0.211330753 | 0.239191921 | 0.330500813 |
| 0.04614679  | 0.170170857 | 0.130977893 | 0.329457299 |
| 0.251496257 | 0.125700284 | 0.252785698 | 0.038086977 |
| 0.001523569 | 0.096812357 | 0.123425858 | 0.213940174 |
| 0.094899281 | 0.115352822 | 0.224402332 | 0.303898383 |
| 0.197882492 | 0.269162148 | 0.206508403 | 0.173402741 |
| 0.28538022  | 0.113229792 | 0.128798422 | 0.180977492 |
| 0.251621171 | 0.066904449 | 0.164744274 | 0.341328175 |
| 0.062142343 | 0.087385518 | 0.117896565 | 0.013705627 |
| 0.087598153 | 0.154586897 | 0.150775991 | 0.261876667 |
| 0.30032415  | 0.237129743 | 0.238668584 | 0.050948814 |
| 0.271400136 | 0.160911292 | 0.019292356 | 0.268761712 |
| 0.254525544 | 0.247503033 | 0.249526357 | 0.237083411 |
| 0.249201964 | 0.177862187 | 0.271887396 | 0.115738145 |
| 0.130780292 | 0.070877911 | 0.121574817 | 0.226409914 |
| 0.006128974 | 0.27959181  | 0.145938573 | 0.256614892 |
| 0.214114143 | 0.240357257 | 0.083683968 | 0.157231923 |

|             |             |             |             |
|-------------|-------------|-------------|-------------|
| 0.067968929 | 0.052064244 | 0.09315898  | 0.143224915 |
| 0.265867228 | 0.044583816 | 0.075087256 | 0.098278482 |
| 0.250756579 | 0.27484947  | 0.065323377 | 0.299524981 |
| 0.235702623 | 0.117162057 | 0.207601327 | 0.243848337 |
| 0.124552046 | 0.028787548 | 0.083964702 | 0.007348486 |
| 0.027904681 | 0.251868774 | 0.071228867 | 0.098157706 |
| 0.293741885 | 0.032348578 | 0.275712026 | 0.314673113 |
| 0.226645199 | 0.313840191 | 0.300189995 | 0.106605192 |
| 0.301446498 | 0.014621618 | 0.288525309 | 0.229694468 |
| 0.06491238  | 0.006779237 | 0.025683825 | 0.275717817 |
| 0.190331625 | 0.073605587 | 0.253579526 | 0.066527246 |
| 0.182898317 | 0.091416867 | 0.084877426 | 0.127191204 |
| 0.152352638 | 0.210484395 | 0.091855497 | 0.255986585 |
| 0.223994481 | 0.233461715 | 0.074296873 | 0.133075671 |
| 0.151891922 | 0.122066272 | 0.126159957 | 0.027902328 |
| 0.244172486 | 0.141057343 | 0.265568555 | 0.274948028 |
| 0.346211392 | 0.243855861 | 0.039147293 | 0.061068431 |
| 0.235839461 | 0.091353651 | 0.049374164 | 0.101094456 |
| 0.253053651 | 0.25125607  | 0.347643194 | 0.316001599 |
| 0.354739456 | 0.317845927 | 0.086622212 | 0.293855676 |
| 0.040596022 | 0.006536245 | 0.11896481  | 0.233077156 |
| 0.015306656 | 0.151998397 | 0.328618615 | 0.071169929 |
| 0.08970193  | 0.070999827 | 0.089386281 | 0.104142128 |
| 0.293260666 | 0.195926    | 0.186059228 | 0.19525915  |
| 0.136179539 | 0.144361719 | 0.137893187 | 0.126721745 |
| 0.053494345 | 0.255834185 | 0.243932514 | 0.068438889 |
| 0.112820802 | 0.148130602 | 0.123544066 | 0.209728559 |
| 0.301250976 | 0.292285486 | 0.13045488  | 0.086417685 |
| 0.287580679 | 0.134087482 | 0.30569867  | 0.250241961 |
| 0.305232936 | 0.359717083 | 0.319070555 | 0.172485265 |
| 0.098284544 | 0.238376536 | 0.176457498 | 0.148871848 |
| 0.287633985 | 0.093029522 | 0.250683313 | 0.115804946 |
| 0.194679469 | 0.16427048  | 0.109588524 | 0.159168967 |
| 0.142205058 | 0.246321094 | 0.240284963 | 0.159052701 |
| 0.188928362 | 0.07601218  | 0.091606533 | 0.264936537 |
| 0.296233671 | 0.085262384 | 0.245406664 | 0.076832133 |
| 0.207907546 | 0.020917578 | 0.22676125  | 0.373465417 |
| 0.189398506 | 0.138274641 | 0.094347986 | 0.197647127 |
| 0.225285319 | 0.088211973 | 0.050175854 | 0.202598795 |
| 0.290363753 | 0.181861748 | 0.270085857 | 0.341266533 |
| 0.152646644 | 0.173334616 | 0.080435679 | 0.219429743 |
| 0.220885605 | 0.093767644 | 0.180727529 | 0.141991909 |
| 0.270696642 | 0.306539829 | 0.254719491 | 0.213158992 |
| 0.113131845 | 0.098053754 | 0.080909255 | 0.212107195 |
| 0.12223401  | 0.131360419 | 0.055822607 | 0.213214076 |
| 0.01011836  | 0.047866129 | 0.288249301 | 0.12616895  |
| 0.31501756  | 0.311682529 | 0.343384178 | 0.071123726 |
| 0.00308473  | 0.194398197 | 0.253312568 | 0.134042878 |
| 0.239479449 | 0.23294008  | 0.041498633 | 0.16499539  |
| 0.338654429 | 0.105351867 | 0.201388384 | 0.057943146 |
| 0.066024174 | 0.169163396 | 0.294384701 | 0.170031287 |
| 0.192735832 | 0.090546981 | 0.067320102 | 0.161702796 |
| 0.052478062 | 0.330858875 | 0.354360403 | 0.026975641 |
| 0.09146876  | 0.286610072 | 0.257151219 | 0.062417232 |

|             |             |             |             |
|-------------|-------------|-------------|-------------|
| 0.116900338 | 0.264272117 | 0.26091424  | 0.033252949 |
| 0.243251069 | 0.052672283 | 0.217157899 | 0.22328476  |
| 0.189894803 | 0.185190669 | 0.274216002 | 0.133070614 |
| 0.198004809 | 0.197796137 | 0.178471312 | 0.300704807 |
| 0.168757751 | 0.151189808 | 0.178570274 | 0.124268948 |
| 0.145086024 | 0.138704594 | 0.140320169 | 0.13397238  |
| 0.111589275 | 0.220590982 | 0.295137906 | 0.103539621 |
| 0.260348945 | 0.099233243 | 0.368887027 | 0.243727918 |
| 0.311315231 | 0.111930018 | 0.128678882 | 0.233101328 |
| 0.030209271 | 0.06328758  | 0.064630612 | 0.134780586 |
| 0.20977915  | 0.141696159 | 0.088833055 | 0.172248913 |
| 0.169888687 | 0.342772598 | 0.276928316 | 0.291108038 |
| 0.140140896 | 0.1109956   | 0.040012644 | 0.177271228 |
| 0.205274762 | 0.181629582 | 0.202871398 | 0.021787399 |
| 0.252814399 | 0.087955728 | 0.269030362 | 0.27474802  |
| 0.057156155 | 0.307544757 | 0.043739706 | 0.144572249 |
| 0.030092878 | 0.175279987 | 0.233874594 | 0.185148044 |
| 0.04872497  | 0.127970094 | 0.23277182  | 0.053964994 |
| 0.226063923 | 0.178578728 | 0.097002736 | 0.130397571 |
| 0.184627876 | 0.172431979 | 0.274080153 | 0.085163524 |
| 0.133809867 | 0.139317855 | 0.092045712 | 0.235787583 |
| 0.204293746 | 0.27456979  | 0.109469454 | 0.285122704 |
| 0.173835417 | 0.163789727 | 0.352148771 | 0.111565167 |
| 0.076673925 | 0.126308174 | 0.055848061 | 0.060550591 |
| 0.129337717 | 0.064189705 | 0.002031245 | 0.057995456 |
| 0.341665366 | 0.056251678 | 0.18102957  | 0.223145423 |
| 0.125208882 | 0.325338392 | 0.028761632 | 0.142066905 |
| 0.233959585 | 0.271749305 | 0.189225015 | 0.31690288  |
| 0.27365522  | 0.140259898 | 0.135555531 | 0.00545684  |
| 0.182119681 | 0.132488435 | 0.058041571 | 0.097876525 |
| 0.067963265 | 0.070126093 | 0.178902978 | 0.082173922 |
| 0.30402191  | 0.042786252 | 0.114769083 | 0.187696716 |
| 0.18440769  | 0.28637719  | 0.15615471  | 0.275778745 |
| 0.044833152 | 0.233473962 | 0.103958312 | 0.098222084 |
| 0.17755038  | 0.136465659 | 0.326370243 | 0.104338208 |
| 0.105690368 | 0.145912595 | 0.027309259 | 0.333173037 |
| 0.256076124 | 0.133557238 | 0.249178273 | 0.028619931 |
| 0.31904334  | 0.235365637 | 0.118824219 | 0.091723669 |
| 0.062794803 | 0.210038909 | 0.21937961  | 0.247318994 |
| 0.064860599 | 0.14705246  | 0.117919758 | 0.140988246 |
| 0.264473014 | 0.135470189 | 0.25977913  | 0.08249793  |
| 0.244592628 | 0.183386299 | 0.134757099 | 0.08870274  |
| 0.125262452 | 0.122667657 | 0.050636153 | 0.311019958 |
| 0.213585116 | 0.121781622 | 0.298336554 | 1           |
| 0.103177613 | 0.22302403  | 0.114683906 | 0.287368834 |
| 0.166663316 | 0.303171571 | 0.239551877 | 0.269300225 |
| 0.336394399 | 0.106876246 | 0.099447314 | 0.18543909  |
| 0.240651877 | 0.123230861 | 0.093707028 | 0.277063458 |
| 0.09965629  | 0.25413083  | 0.088190075 | 0.160217045 |
| 0.101151767 | 0.107818545 | 0.077549858 | 0.203831592 |
| 0.274237322 | 0.194851119 | 0.137054386 | 0.349246922 |
| 0.15304255  | 0.10577198  | 0.34720033  | 0.023119471 |
| 0.123631783 | 0.236784978 | 0.209297945 | 0.139415202 |
| 0.241854251 | 0.183488288 | 0.139052405 | 0.018217469 |

|             |             |             |             |
|-------------|-------------|-------------|-------------|
| 0.279902376 | 0.034959091 | 0.089166756 | 0.17301946  |
| 0.073317695 | 0.092727348 | 0.271160546 | 0.319922561 |
| 0.184197464 | 0.044356225 | 0.057051544 | 0.261334601 |
| 0.075087084 | 0.043117745 | 0.06514376  | 0.153153292 |
| 0.072277118 | 0.070343603 | 0.078450833 | 0.08434977  |
| 0.222871417 | 0.104470437 |             |             |
| TULP4       | 0.019164494 | 0.275460317 | 0.010367923 |
| 0.049534533 | 0.282389077 | 0.137549998 | 0.02150361  |
| 0.048156172 | 0.221407405 | 0.119642605 | 0.204156428 |
| 0.005215387 | 0.20791666  | 0.336546438 | 0.023233729 |
| 0.314245641 | 0.015827121 | 0.041611467 | 0.0488067   |
| 0.098145765 | 0.260409225 | 0.224718841 | 0.13895277  |
| 0.245638514 | 0.089627147 | 0.155774453 | 0.28341973  |
| 0.352359042 | 0.184079401 | 0.303669337 | 0.069205547 |
| 0.278218119 | 0.319286887 | 0.241835778 | 0.003033174 |
| 0.220749444 | 0.045816188 | 0.270378202 | 0.15342857  |
| 0.177036037 | 0.218144311 | 0.105742754 | 0.116288992 |
| 0.145511689 | 0.00798325  | 0.090604186 | 0.33706407  |
| 0.167080666 | 0.138444447 | 0.015955998 | 0.274635323 |
| 0.17318236  | 0.181666981 | 0.218672944 | 0.001343555 |
| 0.255981805 | 0.197583942 | 0.264675864 | 0.326293694 |
| 0.110784651 | 0.058766165 | 0.185696458 | 0.108749756 |
| 0.285572886 | 0.318225087 | 0.1788978   | 0.15269155  |
| 0.343750729 | 0.256423261 | 0.334241713 | 0.070522111 |
| 0.152278373 | 0.007465345 | 0.084446375 | 0.028646675 |
| 0.206675199 | 0.117495954 | 0.244024395 | 0.249304754 |
| 0.258187996 | 0.344617782 | 0.135733915 | 0.305402781 |
| 0.197049498 | 0.330480498 | 0.215701219 | 0.250322695 |
| 0.286909094 | 0.035687597 | 0.291246966 | 0.35889099  |
| 0.015017978 | 0.187391996 | 0.283354564 | 0.049770595 |
| 0.280233477 | 0.248079493 | 0.164101696 | 0.237215891 |
| 0.357131145 | 0.285297087 | 0.313584137 | 0.178881623 |
| 0.236301618 | 0.021510833 | 0.278371657 | 0.341193464 |
| 0.166903351 | 0.022591269 | 0.190426379 | 0.39674676  |
| 0.263168805 | 0.352198333 | 0.304382892 | 0.285295466 |
| 0.2867831   | 0.348640841 | 0.25186497  | 0.300836431 |
| 0.084631969 | 0.355875671 | 0.071195174 | 0.019728277 |
| 0.015594083 | 0.046080849 | 0.208276588 | 0.220403265 |
| 0.366639588 | 0.200314799 | 0.065559044 | 0.15197278  |
| 0.416581308 | 0.277320455 | 0.356116009 | 0.309688647 |
| 0.011001604 | 0.263429659 | 0.263942774 | 0.104652582 |
| 0.283659498 | 0.052460411 | 0.252626101 | 0.312344965 |
| 0.247457736 | 0.377410961 | 0.043959916 | 0.305598798 |
| 0.095002865 | 0.366675742 | 0.292899096 | 0.073895617 |
| 0.332743245 | 0.295297816 | 0.389650439 | 0.38157823  |
| 0.298046471 | 0.125390029 | 0.071133322 | 0.279248571 |
| 0.369779369 | 0.030025887 | 0.384355112 | 0.401554132 |
| 0.321962538 | 0.384611186 | 0.413895739 | 0.387418394 |
| 0.327290443 | 0.025519758 | 0.046749087 | 0.25729525  |
| 0.321052922 | 0.266632696 | 0.096226216 | 0.253480148 |
| 0.326411157 | 0.143980589 | 0.350209922 | 0.158748663 |
| 0.374087814 | 0.335144391 | 0.369716547 | 0.276410679 |
| 0.144572791 | 0.191555241 | 0.309395492 | 0.262762601 |
| 0.015405902 | 0.029381526 | 0.014101299 | 0.229674727 |



|             |             |             |             |
|-------------|-------------|-------------|-------------|
| 0.106336263 | 0.106261458 | 0.122351609 | 0.287917594 |
| 0.119298473 | 0.119976637 | 0.245318114 | 0.369640658 |
| 0.017774937 | 0.236521796 | 0.059090212 | 0.062045505 |
| 0.017425276 | 0.069579988 | 0.08286969  | 0.070386188 |
| 0.179579445 | 0.109018185 | 0.323219842 | 0.376282511 |
| 0.205002124 | 0.078569038 | 0.279304192 | 0.354870135 |
| 0.335409466 | 0.28238036  | 0.146672351 | 0.004878064 |
| 0.165349389 | 0.198481299 | 0.265862577 | 0.285564259 |
| 0.082930998 | 0.136258626 | 0.277719009 | 0.374634566 |
| 0.09520725  | 0.047367316 | 0.210784236 | 0.265601104 |
| 0.064774616 | 0.18295426  | 0.362547645 | 0.214880453 |
| 0.000216461 | 0.147512683 | 0.342406465 | 0.170281771 |
| 0.200723132 | 0.191020401 | 0.22103027  | 0.363084388 |
| 0.247890473 | 0.24533662  | 0.38912709  | 0.382509831 |
| 0.165093951 | 0.1049609   | 0.404524519 | 0.102628848 |
| 0.273431579 | 0.046154283 | 0.228316988 | 0.125212473 |
| 0.129375034 | 0.233525855 | 0.316829971 | 0.193496139 |
| 0.042640222 | 0.354695906 | 0.271349545 | 0.377557181 |
| 0.202187198 | 0.396202614 | 0.37934611  | 0.331776543 |
| 0.224440299 | 0.230499082 | 0.252778835 | 0.32012574  |
| 0.358261159 | 0.156196915 | 0.024070581 | 0.367590364 |
| 0.167700958 | 0.356888286 | 0.11859263  | 0.373943535 |
| 0.324374965 | 0.273073555 | 0.0852244   | 0.357201175 |
| 0.265333199 | 0.095821372 | 0.323528818 | 0.404840436 |
| 0.139405146 | 0.257635656 | 0.206391445 | 0.373082347 |
| 0.079928841 | 0.220818597 | 0.210377008 | 0.277434407 |
| 0.019305172 | 0.024547228 | 0.018390758 | 0.102715787 |
| 0.228612232 | 0.273413712 | 0.306283936 | 0.368852297 |
| 0.048961893 | 0.287375207 | 0.152638266 | 0.162267633 |
| 0.269055765 | 0.238629394 | 0.309515797 | 0.319038461 |
| 0.148930486 | 0.00786196  | 0.056644758 | 0.335506155 |
| 0.009944479 | 0.245968974 | 0.146162216 | 0.001829916 |
| 0.012645791 | 0.26285023  | 0.038013493 | 0.097303494 |
| 0.419503553 | 0.092455669 | 0.093461101 | 0.122590636 |
| 0.269891195 | 0.034441197 | 0.002698265 | 0.364596472 |
| 0.348196563 | 0.33285682  | 0.339793671 | 0.292615137 |
| 0.351555192 | 0.314748076 | 0.356824207 | 0.130303683 |
| 0.037177618 | 0.022029921 | 0.22214843  | 0.163574505 |
| 0.003148365 | 0.304730373 | 0.23134334  | 0.069960759 |
| 0.371242501 | 0.209498408 | 0.011170624 | 0.3273703   |
| 0.004418783 | 0.226253983 | 0.131359363 | 0.127739686 |
| 0.350627396 | 0.002792118 | 0.087726268 | 0.205366137 |
| 0.245388147 | 0.209544171 | 0.225744411 | 0.358647997 |
| 0.191955105 | 0.047164156 | 0.17810601  | 0.342499875 |
| 0.025302926 | 0.064489886 | 0.142657106 | 0.014403512 |
| 0.101006288 | 0.307998245 | 0.201400944 | 0.016533725 |
| 0.14816289  | 0.000574388 | 0.214818783 | 0.369367403 |
| 0.274832174 | 0.404332124 | 0.350016528 | 0.237358103 |
| 0.339950963 | 0.217549565 | 0.380122721 | 0.259805864 |
| 0.151958309 | 0.00018579  | 0.004496782 | 0.384381343 |
| 0.263078673 | 0.01693145  | 0.076005219 | 0.118200055 |
| 0.051779693 | 0.04095703  | 0.024257783 | 0.200371865 |
| 0.249554389 | 0.204845074 | 0.226801423 | 0.28865092  |
| 0.119676153 | 0.152648607 | 0.141985214 | 0.033482835 |

|             |             |             |             |
|-------------|-------------|-------------|-------------|
| 0.289064321 | 0.01885689  | 0.034615342 | 0.006938121 |
| 0.341764471 | 0.043135324 | 0.262559001 | 0.348049678 |
| 0.348268313 | 0.335488487 | 0.142270362 | 0.167788288 |
| 0.369183752 | 0.03120366  | 0.188057977 | 0.035426433 |
| 0.304527284 | 0.295560124 | 0.22083973  | 0.176987579 |
| 0.379114798 | 0.3091122   | 0.010772323 | 0.325235249 |
| 0.003477661 | 0.005586922 | 0.124779538 | 0.175738213 |
| 0.102813537 | 0.238734412 | 0.155913727 | 0.125115592 |
| 0.145841933 | 0.007589903 | 0.262681369 | 0.248240834 |
| 0.201901631 | 0.218432737 | 0.266346565 | 0.156821914 |
| 0.193224517 | 0.15074013  | 0.109170788 | 0.080059437 |
| 0.164004011 | 0.175166979 | 0.091278006 | 0.006353334 |
| 0.205405906 | 0.258878441 | 0.016960876 | 0.072892231 |
| 0.334083648 | 0.378789216 | 0.020681933 | 0.005910295 |
| 0.15288447  | 0.187030833 | 0.406529255 | 0.328779739 |
| 0.333995457 | 0.384648846 | 0.242459585 | 0.103839222 |
| 0.0219718   | 0.237398272 | 0.288683654 | 0.097124652 |
| 0.365660117 | 0.01934378  | 0.312258647 | 0.303387289 |
| 0.052963395 | 0.086852468 | 0.015002107 | 0.034182086 |
| 0.332884322 | 0.097438069 | 0.118376708 | 0.051051329 |
| 0.174608515 | 0.236987482 | 0.015580978 | 0.103049354 |
| 0.228972162 | 0.213508737 | 0.077882432 | 0.118673773 |
| 0.21753688  | 0.102499187 | 0.355932591 | 0.32163081  |
| 0.053891103 | 0.041639838 | 0.073238083 | 0.315411476 |
| 0.334833313 | 0.229220969 | 0.008838537 | 0.282946942 |
| 0.383115106 | 0.306326861 | 0.314977953 | 0.341819033 |
| 0.032876371 | 0.249505021 | 0.250157703 | 0.256436304 |
| 0.104807546 | 0.13356702  | 0.144086641 | 0.022074751 |
| 0.209127129 | 0.314256309 | 0.273170081 | 0.081605377 |
| 0.248880953 | 0.043602738 | 0.015367184 | 0.343330217 |
| 0.216390031 | 0.028603154 | 0.12545897  | 0.380751302 |
| 0.001989306 | 0.250771947 | 0.404765592 | 0.114301312 |
| 0.366270287 | 0.378556423 | 0.294813091 | 0.106538676 |
| 0.007622749 | 0.355055088 | 0.25075475  | 0.170729603 |
| 0.279984253 | 0.213623124 | 0.085014767 | 0.037909448 |
| 0.20613783  | 0.024994316 | 0.079956335 | 0.122580652 |
| 0.190877562 | 0.22701743  | 0.129103888 | 0.112494222 |
| 0.12602743  | 0.034553597 | 0.245580846 | 0.092367192 |
| 0.214629279 | 0.156727901 | 0.265308521 | 0.105560674 |
| 0.182527389 | 0.362043163 | 0.275069815 | 0.006313034 |
| 0.301053964 | 0.33545971  | 0.334741858 | 0.001167532 |
| 0.341954642 | 0.002283412 | 0.132736705 | 0.124123926 |
| 0.118931305 | 0.136957439 | 0.229756264 | 0.184487667 |
| 0.209480993 | 0.100273508 | 0.120597665 | 0.149707547 |
| 0.096596458 | 0.093285855 | 0.277537016 | 0.139326357 |
| 0.17139059  | 0.043507661 | 0.038703371 | 0.038059286 |
| 0.021862926 | 0.335294895 | 0.13897488  | 0.022768612 |
| 0.15610475  | 0.152344939 | 0.25425229  | 0.310239169 |
| 0.330422483 | 0.040566081 | 0.180272065 | 0.288372676 |
| 0.146907832 | 0.118004109 | 0.015946844 | 0.178442405 |
| 0.115064212 | 0.195970277 | 0.178997246 | 0.129465822 |
| 0.275529646 | 0.25602604  | 0.134266414 | 0.315264828 |
| 0.168943147 | 0.205262097 | 0.098072247 | 0.050136891 |
| 0.058986794 | 0.060083257 | 0.257648323 | 0.000137148 |

|             |             |             |             |
|-------------|-------------|-------------|-------------|
| 0.232289516 | 0.069738595 | 0.364107749 | 0.297670459 |
| 0.268024582 | 0.275813127 | 0.100428563 | 0.028732151 |
| 0.084554391 | 0.074511076 | 0.067315779 | 0.317099249 |
| 0.255493496 | 0.074568471 | 0.238925547 | 0.089519743 |
| 0.35038956  | 0.323904698 | 0.215975187 | 0.107364763 |
| 0.144274346 | 0.081136666 | 0.304305988 | 0.030639265 |
| 0.255912085 | 0.181629527 | 0.173048855 | 0.177019139 |
| 0.143982136 | 0.381407195 | 0.017925293 | 0.392508848 |
| 0.205395183 | 0.058188388 | 0.337842541 | 0.140180069 |
| 0.105937691 | 0.086499535 | 0.260759935 | 0.142847553 |
| 0.127624676 | 0.252456833 | 0.014235444 | 0.084243708 |
| 0.259641015 | 0.169449695 | 0.269220904 | 0.293502017 |
| 0.21987157  | 0.301734317 | 0.259175092 | 0.116091303 |
| 0.282584735 | 0.294969922 | 0.117726592 | 0.167627418 |
| 0.2410063   | 0.041370626 | 0.185482648 | 0.019608915 |
| 0.296910291 | 0.303790348 | 0.174915678 | 0.021205803 |
| 0.005593468 | 0.24518757  | 0.249034219 | 0.022046563 |
| 0.413754889 | 0.235977969 | 0.212541964 | 0.305973716 |
| 0.093461962 | 0.291669289 | 0.091900582 | 0.315526495 |
| 0.015704933 | 0.157791142 | 0.272039335 | 0.226111744 |
| 0.151622054 | 0.241058165 | 0.296430563 | 0.241197233 |
| 0.011543547 | 0.171451396 | 0.000828894 | 0.23918917  |
| 0.267877845 | 0.26088346  | 0.114700178 | 0.142242285 |
| 0.214199775 | 0.283309649 | 0.19801196  | 0.232685552 |
| 0.004616177 | 0.310774532 | 0.113044523 | 0.262738294 |
| 0.150413639 | 0.223540139 | 0.024735451 | 0.277142819 |
| 0.247904698 | 0.181377214 | 0.171818747 | 0.163181003 |
| 0.311181907 | 0.260242451 | 0.062411338 | 0.17688538  |
| 0.252202544 | 0.021986979 | 0.136092657 | 0.382415913 |
| 0.101424515 | 0.226647251 | 0.398360233 | 0.103177613 |
| 1           | 0.2457755   | 0.25873885  | 0.370358126 |
| 0.065815245 | 0.152539988 | 0.361308295 | 0.324010512 |
| 0.240943125 | 0.223296781 | 0.243594771 | 0.177572843 |
| 0.265823144 | 0.03477977  | 0.230675788 | 0.214239904 |
| 0.236233657 | 0.230406012 | 0.16320801  | 0.173663647 |
| 0.020070634 | 0.088687057 | 0.158621866 | 0.065193191 |
| 0.194689821 | 0.234965753 | 0.198330925 | 0.267459323 |
| 0.077486921 | 0.010716506 | 0.316833851 | 0.045459492 |
| 0.128037828 | 0.291157562 | 0.139261169 | 0.230118827 |
| 0.086445183 | 0.205653054 | 0.127995075 | 0.00017497  |
| 0.352309527 | 0.052648102 | 0.198501785 | 0.170160103 |
| 0.235045017 | 0.015277795 | 0.292342132 | 0.411083784 |
| 0.179736013 | 0.186333585 | 0.214375788 | 0.315968811 |
| 0.21366549  | 0.226825141 | 0.245098432 | 0.22447925  |
| 0.26334708  | 0.151624703 | 0.19352388  | 0.209162508 |
| 0.245624022 | 0.108708403 |             |             |
| TXN1        | 0.172001312 | 0.407871977 | 0.144206775 |
| 0.185413725 | 0.270942974 | 0.39208715  | 0.137298064 |
| 0.230142173 | 0.359594299 | 0.275439764 | 0.345092041 |
| 0.058486559 | 0.080876133 | 0.413099722 | 0.133272053 |
| 0.312972047 | 0.089987689 | 0.193050599 | 0.116766707 |
| 0.271638451 | 0.244159999 | 0.288412605 | 0.394374732 |
| 0.260059044 | 0.263873588 | 0.363835623 | 0.316766517 |
| 0.454430189 | 0.216567081 | 0.374708207 | 0.178142049 |

|             |             |             |             |
|-------------|-------------|-------------|-------------|
| 0.406150023 | 0.271537099 | 0.304948823 | 0.063279881 |
| 0.381909314 | 0.016286493 | 0.444829255 | 0.249428748 |
| 0.128377434 | 0.363857572 | 0.328026196 | 0.264754811 |
| 0.325059778 | 0.102737718 | 0.203106864 | 0.329859052 |
| 0.351131634 | 0.326649737 | 0.160642927 | 0.383137602 |
| 0.330155145 | 0.385502231 | 0.361752839 | 0.008288034 |
| 0.235747452 | 0.060544909 | 0.162239082 | 0.490934125 |
| 0.278615789 | 0.205066501 | 0.219342169 | 0.332031263 |
| 0.338371375 | 0.336427671 | 0.317494568 | 0.307222499 |
| 0.463029738 | 0.140386647 | 0.363977339 | 0.20100214  |
| 0.352586478 | 0.107560032 | 0.245554783 | 0.187881378 |
| 0.32878977  | 0.265077703 | 0.328418235 | 0.245787702 |
| 0.402536812 | 0.511470234 | 0.306360108 | 0.491814922 |
| 0.086473196 | 0.272425232 | 0.254931626 | 0.30973462  |
| 0.341454302 | 0.170856055 | 0.364864259 | 0.489930079 |
| 0.138192302 | 0.347248209 | 0.348722808 | 0.226189869 |
| 0.406583719 | 0.244982323 | 0.346029981 | 0.149414365 |
| 0.311122637 | 0.273957162 | 0.479647749 | 0.320046168 |
| 0.30687577  | 0.163107958 | 0.5007497   | 0.253777649 |
| 0.285576753 | 0.175101361 | 0.200027033 | 0.372003569 |
| 0.35597734  | 0.448592897 | 0.374639301 | 0.339629451 |
| 0.294255293 | 0.460899912 | 0.366872934 | 0.399421012 |
| 0.159599742 | 0.495769757 | 0.271775156 | 0.107257651 |
| 0.176369164 | 0.175241237 | 0.226350607 | 0.338496864 |
| 0.409167477 | 0.380781646 | 0.278999198 | 0.246264737 |
| 0.374584938 | 0.484871834 | 0.489196145 | 0.37179917  |
| 0.109482377 | 0.201256022 | 0.297556508 | 0.376028069 |
| 0.346568087 | 0.217700201 | 0.205449877 | 0.505572396 |
| 0.36935391  | 0.362885349 | 0.282570635 | 0.517306287 |
| 0.275897993 | 0.481194295 | 0.41062407  | 0.232246632 |
| 0.502996811 | 0.498000215 | 0.461766345 | 0.325496852 |
| 0.480099554 | 0.357227276 | 0.077333169 | 0.363080277 |
| 0.455754769 | 0.012777618 | 0.408731695 | 0.43011792  |
| 0.471327507 | 0.370469476 | 0.464841006 | 0.458521335 |
| 0.481972483 | 0.170271681 | 0.02207175  | 0.276055041 |
| 0.487159087 | 0.371466507 | 0.217333114 | 0.320518189 |
| 0.303241754 | 0.392675921 | 0.380808482 | 0.250471454 |
| 0.490367574 | 0.403985303 | 0.435919683 | 0.369165834 |
| 0.322145506 | 0.350953248 | 0.287907044 | 0.486087011 |
| 0.120695264 | 0.215072331 | 0.139163903 | 0.337632587 |
| 0.340105852 | 0.239139506 | 0.379708995 | 0.312282194 |
| 0.258476965 | 0.389860455 | 0.268201567 | 0.316824789 |
| 0.141165061 | 0.368336678 | 0.26195939  | 0.250212904 |
| 0.096330555 | 0.234451648 | 0.222752728 | 0.225266314 |
| 0.267382538 | 0.321639966 | 0.375624824 | 0.438235724 |
| 0.30987072  | 0.263587345 | 0.381207789 | 0.449084819 |
| 0.396108317 | 0.305842168 | 0.300393733 | 0.023384487 |
| 0.215785437 | 0.24288937  | 0.139931929 | 0.339232992 |
| 0.264862437 | 0.239458669 | 0.325050656 | 0.33245915  |
| 0.336794637 | 0.257463986 | 0.294446742 | 0.453483632 |
| 0.241726842 | 0.287376972 | 0.372223023 | 0.355895229 |
| 0.018265775 | 0.322970877 | 0.38191109  | 0.147725027 |
| 0.332354684 | 0.11355902  | 0.211478287 | 0.389066099 |
| 0.235465882 | 0.199033636 | 0.438713848 | 0.336675685 |

|             |             |             |             |
|-------------|-------------|-------------|-------------|
| 0.33138086  | 0.304211166 | 0.475447969 | 0.036412751 |
| 0.30025874  | 0.080224397 | 0.289114102 | 0.324792748 |
| 0.295464337 | 0.311704541 | 0.268080131 | 0.262756214 |
| 0.231687988 | 0.48673742  | 0.396318169 | 0.45953676  |
| 0.280754611 | 0.479793133 | 0.376475868 | 0.391572497 |
| 0.370951142 | 0.291126848 | 0.097524029 | 0.372129093 |
| 0.381885102 | 0.251756801 | 0.169017706 | 0.366357282 |
| 0.298595009 | 0.330440369 | 0.157512994 | 0.435753912 |
| 0.496796359 | 0.465880353 | 0.211171899 | 0.327975376 |
| 0.362801307 | 0.30223449  | 0.385204695 | 0.487988674 |
| 0.26240469  | 0.278805224 | 0.263681654 | 0.343861666 |
| 0.253999865 | 0.185237071 | 0.355680277 | 0.141899512 |
| 0.009845815 | 0.187811545 | 0.153779324 | 0.20937779  |
| 0.141366633 | 0.356655102 | 0.34482197  | 0.472372207 |
| 0.199906673 | 0.413523417 | 0.306925532 | 0.243526905 |
| 0.396484556 | 0.299851009 | 0.314445714 | 0.341850263 |
| 0.319785187 | 0.040146123 | 0.160558015 | 0.511340968 |
| 0.122552575 | 0.19741952  | 0.362632714 | 0.005412636 |
| 0.114115456 | 0.374698383 | 0.185066348 | 0.264397108 |
| 0.415166459 | 0.267331175 | 0.271860399 | 0.280126885 |
| 0.34831169  | 0.188327217 | 0.008496751 | 0.435772102 |
| 0.463067455 | 0.437014318 | 0.462863411 | 0.466493501 |
| 0.390321515 | 0.379287001 | 0.350210348 | 0.391307478 |
| 0.196507192 | 0.196832205 | 0.150934932 | 0.270830082 |
| 0.010695694 | 0.366225309 | 0.30963619  | 0.227880261 |
| 0.361337649 | 0.326481257 | 0.107552876 | 0.31416421  |
| 0.056471091 | 0.143939399 | 0.3280754   | 0.276932413 |
| 0.320953499 | 0.058458289 | 0.207343529 | 0.241883755 |
| 0.439499737 | 0.363883662 | 0.286958133 | 0.499209625 |
| 0.326014343 | 0.216390757 | 0.279294424 | 0.36398651  |
| 0.151434319 | 0.104835349 | 0.356712231 | 0.035820326 |
| 0.276971043 | 0.459632692 | 0.338182364 | 0.145378791 |
| 0.295217075 | 0.024638951 | 0.365638357 | 0.498062497 |
| 0.46358067  | 0.453870037 | 0.464590828 | 0.217589155 |
| 0.46967844  | 0.075272226 | 0.482287596 | 0.377790522 |
| 0.300360233 | 0.002593485 | 0.015903211 | 0.414326844 |
| 0.313846273 | 0.148600286 | 0.238364749 | 0.347761254 |
| 0.166988712 | 0.247552567 | 0.165617254 | 0.161875214 |
| 0.39261675  | 0.246254175 | 0.171300598 | 0.462404266 |
| 0.265060482 | 0.286416269 | 0.36653342  | 0.186025304 |
| 0.363203593 | 0.116996835 | 0.185832295 | 0.011322537 |
| 0.334798887 | 0.208817701 | 0.497136051 | 0.476369987 |
| 0.468629712 | 0.337317799 | 0.275898725 | 0.340202375 |
| 0.386261602 | 0.194429432 | 0.319206958 | 0.214973868 |
| 0.458172793 | 0.316966528 | 0.335879881 | 0.334256545 |
| 0.449635624 | 0.444428516 | 0.097636582 | 0.350358171 |
| 0.038578294 | 0.003814318 | 0.362420163 | 0.32513545  |
| 0.07987937  | 0.285404052 | 0.299068359 | 0.279688243 |
| 0.278378735 | 0.088673402 | 0.195167431 | 0.184198373 |
| 0.297627439 | 0.313060201 | 0.229005015 | 0.316438748 |
| 0.249634469 | 0.12304635  | 0.265699696 | 0.242396407 |
| 0.263879736 | 0.335564848 | 0.260830765 | 0.072479606 |
| 0.351045093 | 0.329947556 | 0.138162328 | 0.260463704 |
| 0.37914706  | 0.423360662 | 0.089497919 | 0.025738525 |

|             |             |             |             |
|-------------|-------------|-------------|-------------|
| 0.322541156 | 0.302543604 | 0.435881047 | 0.46751423  |
| 0.511373462 | 0.476282496 | 0.42189442  | 0.161399551 |
| 0.156700508 | 0.301000978 | 0.248490503 | 0.135212189 |
| 0.472164967 | 0.154348213 | 0.476015471 | 0.23253418  |
| 0.212680195 | 0.25759874  | 0.086645606 | 0.17558789  |
| 0.312679088 | 0.264626765 | 0.218720491 | 0.232777351 |
| 0.276545563 | 0.215051733 | 0.128834409 | 0.259197718 |
| 0.346629946 | 0.12180565  | 0.242093861 | 0.381402218 |
| 0.380395694 | 0.232791078 | 0.345834276 | 0.427678395 |
| 0.226437135 | 0.202381014 | 0.30925129  | 0.370917853 |
| 0.377935514 | 0.333753857 | 0.063577321 | 0.42635816  |
| 0.447266799 | 0.362970266 | 0.48617776  | 0.35014766  |
| 0.179708856 | 0.306707409 | 0.250787507 | 0.289356979 |
| 0.264889199 | 0.397341575 | 0.296852073 | 0.149814444 |
| 0.338487074 | 0.491783111 | 0.37620374  | 0.223876609 |
| 0.377047865 | 0.233328525 | 0.140830634 | 0.405006268 |
| 0.135410467 | 0.160730124 | 0.33785211  | 0.371329524 |
| 0.004349999 | 0.110334743 | 0.434106316 | 0.307154952 |
| 0.495955946 | 0.414024588 | 0.420480729 | 0.353182405 |
| 0.001738319 | 0.326147101 | 0.3338832   | 0.325578596 |
| 0.394124718 | 0.382663157 | 0.258936614 | 0.132070039 |
| 0.318806124 | 0.176668135 | 0.171386502 | 0.357531152 |
| 0.117467258 | 0.378878656 | 0.266843039 | 0.276633566 |
| 0.236356239 | 0.189150043 | 0.208998648 | 0.312209142 |
| 0.131178652 | 0.294053455 | 0.337260779 | 0.305440769 |
| 0.132564227 | 0.382482945 | 0.358481914 | 0.086839649 |
| 0.30324585  | 0.361408635 | 0.409775592 | 0.003486462 |
| 0.352643376 | 0.030622363 | 0.229795227 | 0.238311725 |
| 0.241498626 | 0.241395773 | 0.266926153 | 0.270508782 |
| 0.348290302 | 0.272685808 | 0.298522868 | 0.281088581 |
| 0.208783442 | 0.316428252 | 0.345172049 | 0.348947714 |
| 0.258879647 | 0.21044206  | 0.194732044 | 0.188933443 |
| 0.116820177 | 0.430183274 | 0.306196624 | 0.169009849 |
| 0.284609058 | 0.352335929 | 0.346314521 | 0.470906019 |
| 0.396118525 | 0.206493851 | 0.325863267 | 0.398244002 |
| 0.197828071 | 0.313256001 | 0.159407845 | 0.377253378 |
| 0.309592757 | 0.188786513 | 0.386300698 | 0.331787704 |
| 0.362782197 | 0.410521593 | 0.310008677 | 0.42297774  |
| 0.341243332 | 0.308358994 | 0.288677505 | 0.130782362 |
| 0.237890185 | 0.229115136 | 0.227426145 | 0.008939569 |
| 0.353043909 | 0.331245244 | 0.390978536 | 0.475406539 |
| 0.227927678 | 0.382480781 | 0.305509095 | 0.156240713 |
| 0.261084693 | 0.246513521 | 0.232494498 | 0.382537273 |
| 0.159295241 | 0.278513282 | 0.27350028  | 0.381460785 |
| 0.362410796 | 0.357038426 | 0.241958787 | 0.318884921 |
| 0.298154257 | 0.289356935 | 0.479142556 | 0.234672579 |
| 0.345398489 | 0.168630547 | 0.356161199 | 0.263315986 |
| 0.239528162 | 0.465429387 | 0.154197283 | 0.466730661 |
| 0.266989949 | 0.232685019 | 0.486870376 | 0.378662823 |
| 0.374555969 | 0.188674358 | 0.136445479 | 0.370184298 |
| 0.268125576 | 0.272412948 | 0.013782238 | 0.055538884 |
| 0.31969486  | 0.298466278 | 0.360422766 | 0.3544798   |
| 0.218499733 | 0.325243637 | 0.147454939 | 0.334681206 |
| 0.476330662 | 0.507856062 | 0.241437578 | 0.29731146  |

|             |             |             |             |
|-------------|-------------|-------------|-------------|
| 0.352039745 | 0.185613998 | 0.399155177 | 0.027684693 |
| 0.331376938 | 0.326897658 | 0.314960036 | 0.136549405 |
| 0.066044726 | 0.1466904   | 0.341377438 | 0.161998181 |
| 0.40752972  | 0.16005429  | 0.34740009  | 0.38866479  |
| 0.274866992 | 0.507680792 | 0.179988378 | 0.356620657 |
| 0.115490305 | 0.316895375 | 0.311747499 | 0.326466379 |
| 0.20476127  | 0.225695089 | 0.337819645 | 0.187475454 |
| 0.087926743 | 0.251440407 | 0.003392289 | 0.431159327 |
| 0.477681195 | 0.255104899 | 0.282301504 | 0.278404855 |
| 0.302462186 | 0.376998358 | 0.228630211 | 0.350954486 |
| 0.03297632  | 0.290030189 | 0.286990011 | 0.394275913 |
| 0.16472205  | 0.321687933 | 0.123332804 | 0.25936712  |
| 0.495483428 | 0.230691633 | 0.315234523 | 0.222629957 |
| 0.469908444 | 0.386861453 | 0.259522123 | 0.255857594 |
| 0.349026979 | 0.15593928  | 0.363336265 | 0.490266423 |
| 0.225674003 | 0.173426791 | 0.357772565 | 0.22302403  |
| 0.2457755   | 1           | 0.342192695 | 0.491366908 |
| 0.113487233 | 0.300961263 | 0.373324981 | 0.422359996 |
| 0.323013806 | 0.15044794  | 0.192196029 | 0.21166661  |
| 0.451769797 | 0.160304614 | 0.222291687 | 0.36416117  |
| 0.157674813 | 0.335361474 | 0.347348995 | 0.199105053 |
| 0.079662285 | 0.265215131 | 0.372706773 | 0.237498586 |
| 0.303590232 | 0.306838846 | 0.213132949 | 0.38587503  |
| 0.182269921 | 0.049395488 | 0.443936822 | 0.011806059 |
| 0.388352843 | 0.344991967 | 0.31561576  | 0.30954373  |
| 0.265874819 | 0.356020303 | 0.336520923 | 0.005568606 |
| 0.358339461 | 0.059519965 | 0.311175628 | 0.201335383 |
| 0.230558303 | 0.126333467 | 0.453781714 | 0.451348363 |
| 0.373906523 | 0.326572197 | 0.263490443 | 0.444279315 |
| 0.114783505 | 0.259279315 | 0.268102399 | 0.379065259 |
| 0.176593952 | 0.315479183 | 0.339539769 | 0.29200972  |
| 0.380958359 | 0.360034589 |             |             |
| TXNIP       | 0.038026493 | 0.424715165 | 0.031844457 |
| 0.07359268  | 0.214774694 | 0.254951323 | 0.032953337 |
| 0.071207702 | 0.336969212 | 0.331386109 | 0.216794753 |
| 0.006349227 | 0.101355544 | 0.412216923 | 0.029788935 |
| 0.280528911 | 0.014298151 | 0.058898001 | 0.073098457 |
| 0.182774308 | 0.193161629 | 0.243979684 | 0.246107609 |
| 0.215263106 | 0.140955573 | 0.241107731 | 0.331064505 |
| 0.489368422 | 0.256504762 | 0.326478018 | 0.228246465 |
| 0.356940441 | 0.228314346 | 0.316418473 | 0.007351646 |
| 0.278259302 | 0.026493834 | 0.392524666 | 0.168511508 |
| 0.134867797 | 0.27932708  | 0.297064469 | 0.137167844 |
| 0.314010456 | 0.017405774 | 0.251286058 | 0.356089129 |
| 0.25561767  | 0.207858027 | 0.039318942 | 0.35132394  |
| 0.305978787 | 0.227087479 | 0.374778051 | 0.001016554 |
| 0.255507256 | 0.139346982 | 0.246543502 | 0.474250653 |
| 0.110258653 | 0.063310237 | 0.334872658 | 0.190914126 |
| 0.311806142 | 0.314710064 | 0.169110162 | 0.331506597 |
| 0.457529925 | 0.17396367  | 0.404880207 | 0.102981935 |
| 0.267854445 | 0.021802546 | 0.095629644 | 0.061162873 |
| 0.31404945  | 0.11106872  | 0.222065636 | 0.268887645 |
| 0.428432507 | 0.471236395 | 0.151677416 | 0.478639279 |
| 0.126348003 | 0.267548294 | 0.21542808  | 0.21895696  |

|             |             |             |             |
|-------------|-------------|-------------|-------------|
| 0.316387399 | 0.062266108 | 0.307703804 | 0.478604346 |
| 0.033904468 | 0.315697327 | 0.336829875 | 0.078876064 |
| 0.401100451 | 0.296196288 | 0.314334923 | 0.142860265 |
| 0.294137708 | 0.25032836  | 0.457437505 | 0.180573272 |
| 0.236122145 | 0.043591486 | 0.45098258  | 0.251493639 |
| 0.177164263 | 0.046570251 | 0.171037167 | 0.460823539 |
| 0.29551033  | 0.463268823 | 0.422449811 | 0.309516737 |
| 0.281680597 | 0.465258059 | 0.297321283 | 0.387356175 |
| 0.23930132  | 0.502545695 | 0.105966829 | 0.017023364 |
| 0.043324803 | 0.044163445 | 0.225266318 | 0.232860398 |
| 0.447896074 | 0.224603744 | 0.109373518 | 0.145338724 |
| 0.440927098 | 0.451154935 | 0.511625695 | 0.362177131 |
| 0.017868008 | 0.273897038 | 0.282631595 | 0.182608824 |
| 0.281479693 | 0.069101159 | 0.206806909 | 0.464370051 |
| 0.305678882 | 0.398780129 | 0.104069069 | 0.451294184 |
| 0.144353504 | 0.458534782 | 0.44342077  | 0.089074791 |
| 0.475352562 | 0.44984203  | 0.468654476 | 0.323527548 |
| 0.422125702 | 0.208679453 | 0.077537925 | 0.345148606 |
| 0.425457836 | 0.01080871  | 0.478605501 | 0.497327111 |
| 0.477892678 | 0.445787034 | 0.494545859 | 0.489018336 |
| 0.481777803 | 0.042033619 | 0.060067562 | 0.183774829 |
| 0.47433902  | 0.326632792 | 0.086737337 | 0.31934461  |
| 0.262038618 | 0.251798783 | 0.403745636 | 0.211672536 |
| 0.454715271 | 0.428302632 | 0.487817423 | 0.335540359 |
| 0.256248371 | 0.24909084  | 0.31955165  | 0.426487417 |
| 0.020401913 | 0.061499212 | 0.029340525 | 0.241877772 |
| 0.28658606  | 0.095308967 | 0.249901694 | 0.277045138 |
| 0.105256288 | 0.244391425 | 0.299385614 | 0.29594412  |
| 0.039875458 | 0.303911816 | 0.100766438 | 0.107740739 |
| 0.01682339  | 0.101922963 | 0.096990888 | 0.080156993 |
| 0.152376528 | 0.196031506 | 0.374596035 | 0.477093654 |
| 0.288710935 | 0.119479926 | 0.333195434 | 0.422552258 |
| 0.353175384 | 0.276257677 | 0.158306499 | 0.003286046 |
| 0.19168013  | 0.350959201 | 0.207153266 | 0.325019422 |
| 0.14243431  | 0.154801312 | 0.272162605 | 0.313837625 |
| 0.166979902 | 0.102642817 | 0.283513702 | 0.358778203 |
| 0.107427682 | 0.189394573 | 0.394464231 | 0.31513433  |
| 0.000938691 | 0.204558276 | 0.397521464 | 0.116923599 |
| 0.232760901 | 0.107313165 | 0.200711248 | 0.439943399 |
| 0.263122738 | 0.19137568  | 0.482594955 | 0.323776521 |
| 0.240180932 | 0.19304157  | 0.498971391 | 0.07181389  |
| 0.295252241 | 0.026287038 | 0.178316652 | 0.316560159 |
| 0.149245762 | 0.2071618   | 0.232615601 | 0.191425062 |
| 0.074834623 | 0.484524466 | 0.336317491 | 0.479824342 |
| 0.295755592 | 0.500004415 | 0.426562037 | 0.381215645 |
| 0.247432633 | 0.332635065 | 0.152292165 | 0.383091132 |
| 0.436765024 | 0.271539507 | 0.048492203 | 0.438437129 |
| 0.328755009 | 0.329489413 | 0.0891499   | 0.450441218 |
| 0.434592868 | 0.454664884 | 0.075206523 | 0.305799231 |
| 0.295392207 | 0.129839863 | 0.379059536 | 0.493889485 |
| 0.33287642  | 0.266521019 | 0.245427501 | 0.345744068 |
| 0.098545812 | 0.168994873 | 0.269211711 | 0.207012534 |
| 0.01421103  | 0.048766046 | 0.035058915 | 0.087408209 |
| 0.137034503 | 0.351361351 | 0.306358941 | 0.486631184 |



|             |             |             |             |
|-------------|-------------|-------------|-------------|
| 0.059059069 | 0.359865912 | 0.179738816 | 0.181340707 |
| 0.381656195 | 0.276977803 | 0.287700132 | 0.272625893 |
| 0.172880535 | 0.007277115 | 0.054713399 | 0.469636721 |
| 0.025663744 | 0.185841497 | 0.22338617  | 0.000971222 |
| 0.023481985 | 0.422092571 | 0.07133385  | 0.145447675 |
| 0.447588214 | 0.152907687 | 0.125079928 | 0.313499329 |
| 0.23714126  | 0.049664105 | 0.000821326 | 0.484633755 |
| 0.486053976 | 0.459157355 | 0.485628991 | 0.446153739 |
| 0.448758047 | 0.369462688 | 0.37147662  | 0.229154945 |
| 0.056722111 | 0.057820998 | 0.176650553 | 0.184465956 |
| 0.003317827 | 0.297862331 | 0.226618459 | 0.077596527 |
| 0.373232701 | 0.216244527 | 0.015937407 | 0.269659204 |
| 0.00814225  | 0.194055588 | 0.218445733 | 0.146706861 |
| 0.284521032 | 0.00578381  | 0.166905019 | 0.254931712 |
| 0.379380236 | 0.274863411 | 0.311950784 | 0.499198748 |
| 0.194452661 | 0.096985722 | 0.203801049 | 0.309865917 |
| 0.036065187 | 0.134051175 | 0.273077033 | 0.049762439 |
| 0.162329139 | 0.432252502 | 0.304799334 | 0.039236379 |
| 0.158043318 | 0.001200908 | 0.300168391 | 0.488533926 |
| 0.446639092 | 0.495411094 | 0.456826036 | 0.203047566 |
| 0.466503735 | 0.179517842 | 0.505939867 | 0.366618    |
| 0.327547818 | 0.00020262  | 0.002049503 | 0.471424084 |
| 0.276965166 | 0.042256331 | 0.086872902 | 0.233882353 |
| 0.052813356 | 0.096400062 | 0.034589398 | 0.136414316 |
| 0.293361772 | 0.151222147 | 0.139134664 | 0.44273057  |
| 0.149345558 | 0.142322625 | 0.300490271 | 0.054131212 |
| 0.285024744 | 0.02331371  | 0.056227218 | 0.003455148 |
| 0.287741364 | 0.085043626 | 0.428969686 | 0.484013206 |
| 0.437789655 | 0.301883621 | 0.328663941 | 0.234069383 |
| 0.431120683 | 0.06823828  | 0.310391055 | 0.069602414 |
| 0.460380319 | 0.272478537 | 0.220726945 | 0.227347827 |
| 0.45324214  | 0.416426967 | 0.014754466 | 0.346803003 |
| 0.004704292 | 0.001161531 | 0.249264632 | 0.179929166 |
| 0.115201792 | 0.28069302  | 0.173939611 | 0.207376077 |
| 0.175151061 | 0.012512594 | 0.241437258 | 0.21002069  |
| 0.185282563 | 0.244803101 | 0.196196109 | 0.194266684 |
| 0.19592189  | 0.106677564 | 0.118256611 | 0.091630086 |
| 0.24084388  | 0.261671747 | 0.142938024 | 0.009874396 |
| 0.323317127 | 0.292102784 | 0.027101654 | 0.090197571 |
| 0.383162108 | 0.460810035 | 0.021834008 | 0.002756354 |
| 0.187189191 | 0.23058577  | 0.466359614 | 0.48094763  |
| 0.481093577 | 0.47174759  | 0.327830623 | 0.073447669 |
| 0.03319561  | 0.215969108 | 0.219111113 | 0.060513377 |
| 0.476576379 | 0.041907832 | 0.453241765 | 0.256167178 |
| 0.066722029 | 0.130368444 | 0.012012213 | 0.045911762 |
| 0.288378452 | 0.09669943  | 0.100774125 | 0.088942463 |
| 0.202415499 | 0.207071893 | 0.025106877 | 0.110478003 |
| 0.264040862 | 0.177557085 | 0.08920348  | 0.223362433 |
| 0.306600608 | 0.299080393 | 0.369049655 | 0.383020876 |
| 0.071625611 | 0.072856126 | 0.175695107 | 0.33411977  |
| 0.428562128 | 0.344065365 | 0.01043328  | 0.453382297 |
| 0.45702624  | 0.336076836 | 0.461642983 | 0.331582193 |
| 0.049209236 | 0.250657116 | 0.297659338 | 0.241698675 |
| 0.112016505 | 0.252509574 | 0.158144208 | 0.032858398 |

|             |             |             |             |
|-------------|-------------|-------------|-------------|
| 0.245519076 | 0.437094031 | 0.390577998 | 0.085640217 |
| 0.313371986 | 0.084626957 | 0.037557079 | 0.434677007 |
| 0.153999409 | 0.04372026  | 0.308729765 | 0.427939224 |
| 0.00078832  | 0.142821939 | 0.481811303 | 0.132910646 |
| 0.483586213 | 0.453256134 | 0.373226297 | 0.184815048 |
| 0.003369199 | 0.352254471 | 0.230696832 | 0.264357561 |
| 0.401044233 | 0.26438187  | 0.125005455 | 0.033876858 |
| 0.205847509 | 0.050857824 | 0.074064103 | 0.238306558 |
| 0.19825878  | 0.287595024 | 0.119324176 | 0.146986845 |
| 0.123814248 | 0.071685475 | 0.20210309  | 0.139945295 |
| 0.185950365 | 0.149709722 | 0.263817467 | 0.299818822 |
| 0.158469495 | 0.410718314 | 0.356512468 | 0.011273638 |
| 0.28235327  | 0.387426866 | 0.399142372 | 0.000714513 |
| 0.340757063 | 0.001709775 | 0.113161121 | 0.119899113 |
| 0.115928665 | 0.13195254  | 0.161999326 | 0.201650846 |
| 0.250336436 | 0.136647154 | 0.154457523 | 0.12943273  |
| 0.087110935 | 0.139934151 | 0.275906492 | 0.267386898 |
| 0.166097482 | 0.066344762 | 0.075032278 | 0.0814643   |
| 0.02049113  | 0.449287769 | 0.17372787  | 0.046849535 |
| 0.132190458 | 0.276318793 | 0.274602323 | 0.481064108 |
| 0.358671046 | 0.090635393 | 0.240938293 | 0.41131683  |
| 0.281179128 | 0.203288696 | 0.035844084 | 0.276040795 |
| 0.12923034  | 0.139646799 | 0.306281418 | 0.20375713  |
| 0.372224155 | 0.331653188 | 0.165312338 | 0.396141324 |
| 0.243091721 | 0.295101916 | 0.293911997 | 0.037747117 |
| 0.096924346 | 0.084820161 | 0.18579631  | 0.000130284 |
| 0.223769763 | 0.158671207 | 0.441794838 | 0.453421353 |
| 0.269497323 | 0.318506174 | 0.255001787 | 0.044166452 |
| 0.279206164 | 0.149667794 | 0.077848523 | 0.403390945 |
| 0.214205752 | 0.102991274 | 0.199803955 | 0.222044267 |
| 0.381160377 | 0.398949883 | 0.208721854 | 0.159959681 |
| 0.164569761 | 0.124131322 | 0.453957037 | 0.075426145 |
| 0.330651771 | 0.125420498 | 0.292339807 | 0.184314998 |
| 0.137336295 | 0.506459812 | 0.031690521 | 0.509514869 |
| 0.235409394 | 0.091213881 | 0.429686626 | 0.204736963 |
| 0.203164806 | 0.064891856 | 0.192250809 | 0.307196445 |
| 0.154262562 | 0.286422735 | 0.024085912 | 0.049781526 |
| 0.222427815 | 0.294030375 | 0.401480714 | 0.306729643 |
| 0.188552222 | 0.269897689 | 0.188908462 | 0.195803091 |
| 0.462663529 | 0.461110989 | 0.143492529 | 0.175109562 |
| 0.25566686  | 0.04834541  | 0.272397044 | 0.024169682 |
| 0.311202714 | 0.330827217 | 0.320876207 | 0.025186718 |
| 0.007298494 | 0.20803372  | 0.301512573 | 0.047573408 |
| 0.460877492 | 0.211001914 | 0.304583989 | 0.353553066 |
| 0.122822113 | 0.455378335 | 0.065570417 | 0.30083974  |
| 0.040122468 | 0.165772724 | 0.312770393 | 0.321648147 |
| 0.130828382 | 0.228816    | 0.28039815  | 0.180629146 |
| 0.012159841 | 0.167633796 | 0.000758904 | 0.337951897 |
| 0.445809003 | 0.282038076 | 0.149014002 | 0.331985301 |
| 0.176028879 | 0.347712972 | 0.173214094 | 0.336119175 |
| 0.003014458 | 0.253802458 | 0.112017135 | 0.349836592 |
| 0.20985181  | 0.28854615  | 0.024260594 | 0.261035171 |
| 0.411480586 | 0.192349797 | 0.194639615 | 0.273342106 |
| 0.46975064  | 0.367682866 | 0.122933814 | 0.161535844 |

|             |             |             |             |
|-------------|-------------|-------------|-------------|
| 0.347910769 | 0.036026769 | 0.311645665 | 0.498466183 |
| 0.093666259 | 0.163504711 | 0.400829903 | 0.114683906 |
| 0.25873885  | 0.342192695 | 1           | 0.500215528 |
| 0.035200532 | 0.139432145 | 0.376315252 | 0.437087123 |
| 0.209311706 | 0.143340131 | 0.189483117 | 0.149493698 |
| 0.425123808 | 0.045294294 | 0.223795957 | 0.260483045 |
| 0.181643758 | 0.199030294 | 0.288350345 | 0.125559679 |
| 0.014265722 | 0.106055217 | 0.233233646 | 0.080915428 |
| 0.177971206 | 0.253998526 | 0.180826649 | 0.31416939  |
| 0.064000665 | 0.007661355 | 0.390351389 | 0.018744126 |
| 0.211208153 | 0.26419044  | 0.140973025 | 0.2593088   |
| 0.124870264 | 0.244474018 | 0.236054968 | 0.000125282 |
| 0.362796252 | 0.04368573  | 0.236227416 | 0.139295942 |
| 0.238390473 | 0.025930162 | 0.409672622 | 0.480358032 |
| 0.210922238 | 0.29432833  | 0.284233223 | 0.428510359 |
| 0.138007819 | 0.333145424 | 0.30457778  | 0.331491818 |
| 0.196011674 | 0.333126403 | 0.336256458 | 0.294573563 |
| 0.296497681 | 0.173745087 |             |             |
| UBE2C       | 0.166062037 | 0.511143767 | 0.13806663  |
| 0.206320001 | 0.368842299 | 0.497395818 | 0.145303598 |
| 0.244164613 | 0.483144488 | 0.421413989 | 0.442205459 |
| 0.051674093 | 0.111858782 | 0.514732578 | 0.138267051 |
| 0.458012622 | 0.08424355  | 0.211959889 | 0.146131235 |
| 0.358696436 | 0.344901551 | 0.400712523 | 0.507462211 |
| 0.365227062 | 0.298858041 | 0.484426249 | 0.467469685 |
| 0.526726881 | 0.315512915 | 0.506725746 | 0.260110481 |
| 0.463257574 | 0.383391481 | 0.446648257 | 0.052607739 |
| 0.514215233 | 0.026527166 | 0.458345624 | 0.34092795  |
| 0.175219098 | 0.435426881 | 0.455044854 | 0.328646309 |
| 0.478328463 | 0.09565035  | 0.291596589 | 0.489424891 |
| 0.471754194 | 0.417910375 | 0.164141882 | 0.521874397 |
| 0.478922655 | 0.467304754 | 0.500766838 | 0.006211007 |
| 0.344522315 | 0.103548064 | 0.265077164 | 0.512606437 |
| 0.314995336 | 0.220693921 | 0.361771603 | 0.418739237 |
| 0.497993784 | 0.478856945 | 0.385425325 | 0.471550911 |
| 0.5168658   | 0.217513259 | 0.512997331 | 0.236504048 |
| 0.50441923  | 0.106651927 | 0.273994595 | 0.205492787 |
| 0.480895025 | 0.304297411 | 0.425930898 | 0.366481717 |
| 0.500769147 | 0.524332691 | 0.37108261  | 0.509480019 |
| 0.154120405 | 0.401398884 | 0.349334538 | 0.404410527 |
| 0.482533933 | 0.200751002 | 0.4883036   | 0.510452301 |
| 0.143112161 | 0.496479173 | 0.503382187 | 0.25279391  |
| 0.519222443 | 0.367917158 | 0.491363835 | 0.206980507 |
| 0.437356959 | 0.406729748 | 0.497292594 | 0.402484772 |
| 0.408400358 | 0.173768207 | 0.506861441 | 0.371651059 |
| 0.363463206 | 0.17937923  | 0.290049362 | 0.521965282 |
| 0.499387191 | 0.5263838   | 0.521395829 | 0.472278881 |
| 0.437852162 | 0.518317198 | 0.489977939 | 0.51194812  |
| 0.229220507 | 0.520189578 | 0.303809328 | 0.098653061 |
| 0.175460354 | 0.174908728 | 0.339236198 | 0.416878882 |
| 0.526231944 | 0.467886561 | 0.318262759 | 0.320842017 |
| 0.505875264 | 0.494410238 | 0.519363124 | 0.507469909 |
| 0.101877541 | 0.321333189 | 0.438375209 | 0.435686054 |
| 0.484765691 | 0.236184109 | 0.302392361 | 0.518788391 |

|             |             |             |             |
|-------------|-------------|-------------|-------------|
| 0.461475171 | 0.507351487 | 0.307148431 | 0.520340952 |
| 0.352455446 | 0.505145844 | 0.520971869 | 0.26699588  |
| 0.516742578 | 0.504090842 | 0.51120128  | 0.456994379 |
| 0.494835435 | 0.449090932 | 0.131916712 | 0.491098513 |
| 0.50013546  | 0.018474185 | 0.53037691  | 0.528114369 |
| 0.511802487 | 0.518629614 | 0.515806937 | 0.527571645 |
| 0.515889886 | 0.173103364 | 0.049697329 | 0.374410754 |
| 0.50709714  | 0.47683956  | 0.242951031 | 0.479264941 |
| 0.438245715 | 0.514695209 | 0.522013089 | 0.355894858 |
| 0.504171005 | 0.519712067 | 0.532667433 | 0.50733414  |
| 0.455510448 | 0.416722488 | 0.4369976   | 0.487553858 |
| 0.105980089 | 0.222764748 | 0.134064518 | 0.436597131 |
| 0.45232727  | 0.27416837  | 0.501364747 | 0.454632319 |
| 0.301016082 | 0.498797976 | 0.390939351 | 0.442413012 |
| 0.143311502 | 0.516432166 | 0.291441549 | 0.304647073 |
| 0.09212563  | 0.255494854 | 0.269130861 | 0.243310595 |
| 0.342910191 | 0.312728559 | 0.523507268 | 0.521223022 |
| 0.456039679 | 0.305818922 | 0.522853391 | 0.500618353 |
| 0.463270353 | 0.434556337 | 0.363335712 | 0.020960344 |
| 0.330038211 | 0.398573984 | 0.225716928 | 0.485857988 |
| 0.281247822 | 0.343179706 | 0.472544812 | 0.455765891 |
| 0.4120024   | 0.301810385 | 0.444829608 | 0.461819404 |
| 0.281907473 | 0.372129688 | 0.50328101  | 0.513518524 |
| 0.01302314  | 0.430549786 | 0.520990933 | 0.213639888 |
| 0.455818348 | 0.165929403 | 0.287299299 | 0.513339001 |
| 0.359227371 | 0.298742981 | 0.530149742 | 0.462011916 |
| 0.442984004 | 0.327398098 | 0.519445578 | 0.072263459 |
| 0.441276191 | 0.074123111 | 0.372358323 | 0.46105792  |
| 0.371128884 | 0.401483243 | 0.379123062 | 0.342367516 |
| 0.246201482 | 0.517704099 | 0.498378583 | 0.5264536   |
| 0.433604084 | 0.516156514 | 0.519162757 | 0.505222171 |
| 0.482335208 | 0.450540744 | 0.162737412 | 0.509363751 |
| 0.514553898 | 0.382330769 | 0.176781745 | 0.523402924 |
| 0.464727477 | 0.474185547 | 0.175014901 | 0.508590182 |
| 0.497046191 | 0.491722466 | 0.237865272 | 0.449559715 |
| 0.467394696 | 0.351107023 | 0.505569927 | 0.515224136 |
| 0.423423267 | 0.426370694 | 0.390681298 | 0.461028239 |
| 0.291016566 | 0.279800588 | 0.4335615   | 0.222637697 |
| 0.011908671 | 0.193974331 | 0.153232686 | 0.242220065 |
| 0.200497334 | 0.510548039 | 0.484789732 | 0.521449426 |
| 0.216455853 | 0.496578282 | 0.384858229 | 0.349362687 |
| 0.488179518 | 0.442220201 | 0.440948542 | 0.468165885 |
| 0.379283082 | 0.036038234 | 0.179003253 | 0.524196741 |
| 0.120418713 | 0.278188017 | 0.47589697  | 0.005165273 |
| 0.117424711 | 0.513999706 | 0.19944103  | 0.291886758 |
| 0.512245476 | 0.298595831 | 0.332940774 | 0.435719278 |
| 0.439550554 | 0.19357009  | 0.006204442 | 0.519760788 |
| 0.512352035 | 0.505527161 | 0.511913492 | 0.492033939 |
| 0.508903459 | 0.51519139  | 0.490468043 | 0.485436921 |
| 0.204838904 | 0.20508321  | 0.246970583 | 0.371829993 |
| 0.013699882 | 0.467122117 | 0.412138153 | 0.251363325 |
| 0.504274448 | 0.434874094 | 0.0962806   | 0.441810191 |
| 0.050183148 | 0.222810767 | 0.459007406 | 0.342310618 |
| 0.435954221 | 0.047370808 | 0.287136399 | 0.378277535 |

|             |             |             |             |
|-------------|-------------|-------------|-------------|
| 0.482012735 | 0.456119335 | 0.41656755  | 0.518801163 |
| 0.416448139 | 0.255218067 | 0.379241676 | 0.48013831  |
| 0.156487677 | 0.165083443 | 0.506175087 | 0.050301288 |
| 0.301891095 | 0.496873779 | 0.475070885 | 0.14677186  |
| 0.377200943 | 0.017381337 | 0.463135259 | 0.518521675 |
| 0.497994051 | 0.521232974 | 0.519060125 | 0.307186062 |
| 0.513861488 | 0.134268062 | 0.527064589 | 0.507649056 |
| 0.46276386  | 0.001998703 | 0.015444512 | 0.523210869 |
| 0.454023221 | 0.148637069 | 0.271610018 | 0.444660576 |
| 0.185493292 | 0.293059975 | 0.156681628 | 0.223476814 |
| 0.515736116 | 0.312764637 | 0.231939568 | 0.499358122 |
| 0.342553534 | 0.349852934 | 0.520516798 | 0.198467326 |
| 0.486167209 | 0.114926866 | 0.201067704 | 0.012424064 |
| 0.45477527  | 0.225384545 | 0.496603363 | 0.520757936 |
| 0.500819869 | 0.459105927 | 0.421439426 | 0.449198618 |
| 0.514948514 | 0.21253522  | 0.440819034 | 0.236479047 |
| 0.513022638 | 0.456702614 | 0.418527872 | 0.413183583 |
| 0.50746079  | 0.49943772  | 0.090624724 | 0.487521327 |
| 0.02997277  | 0.004295745 | 0.480581327 | 0.400811975 |
| 0.12906517  | 0.439022904 | 0.367434657 | 0.384904162 |
| 0.361558784 | 0.076646533 | 0.310536074 | 0.284494081 |
| 0.3923751   | 0.446018332 | 0.324871105 | 0.392919684 |
| 0.343638934 | 0.181724044 | 0.302042655 | 0.276664549 |
| 0.378688132 | 0.426772829 | 0.299940495 | 0.066910551 |
| 0.503545733 | 0.470596199 | 0.132723575 | 0.282788116 |
| 0.506124762 | 0.524280985 | 0.101082071 | 0.022492792 |
| 0.385960817 | 0.422951063 | 0.521499538 | 0.522111447 |
| 0.525876488 | 0.505649679 | 0.447381449 | 0.200715975 |
| 0.151166542 | 0.412931428 | 0.351008366 | 0.154284563 |
| 0.524884896 | 0.166184312 | 0.512335534 | 0.346783614 |
| 0.231406897 | 0.316817575 | 0.074981492 | 0.182393809 |
| 0.443851074 | 0.29868836  | 0.260347585 | 0.266841559 |
| 0.395026624 | 0.291991463 | 0.124703788 | 0.31040823  |
| 0.458876931 | 0.200944307 | 0.27657625  | 0.46679491  |
| 0.484034682 | 0.355507808 | 0.496539781 | 0.477191306 |
| 0.247755656 | 0.234844142 | 0.393991164 | 0.496967932 |
| 0.525949119 | 0.493575378 | 0.053044251 | 0.512776276 |
| 0.521120982 | 0.510228328 | 0.509389356 | 0.465714246 |
| 0.189546925 | 0.431239895 | 0.393984484 | 0.421031656 |
| 0.314940806 | 0.499956999 | 0.369355126 | 0.149826729 |
| 0.413446661 | 0.499426642 | 0.499904576 | 0.254509418 |
| 0.517681439 | 0.26604101  | 0.15182021  | 0.527774322 |
| 0.213308322 | 0.174542361 | 0.480197644 | 0.519597607 |
| 0.003212883 | 0.165233957 | 0.514018708 | 0.350265438 |
| 0.513819744 | 0.513127154 | 0.482622984 | 0.41512352  |
| 0.002726436 | 0.476546116 | 0.451204497 | 0.456237152 |
| 0.515030416 | 0.474794271 | 0.290632846 | 0.138799539 |
| 0.389314242 | 0.183085796 | 0.21803731  | 0.451190405 |
| 0.214928222 | 0.524863053 | 0.312562675 | 0.354477697 |
| 0.28898319  | 0.215923548 | 0.288099067 | 0.353806132 |
| 0.214292755 | 0.347852488 | 0.441719545 | 0.426514385 |
| 0.217927368 | 0.50469643  | 0.499965111 | 0.074443128 |
| 0.427751947 | 0.499265644 | 0.506139538 | 0.004988919 |
| 0.492424285 | 0.022571593 | 0.28324212  | 0.288817389 |

|             |             |             |             |
|-------------|-------------|-------------|-------------|
| 0.288346037 | 0.315254833 | 0.346046541 | 0.35918348  |
| 0.478665711 | 0.337981841 | 0.359732185 | 0.337233901 |
| 0.237469761 | 0.358076024 | 0.471727848 | 0.480908003 |
| 0.334741094 | 0.225980281 | 0.202038185 | 0.196343903 |
| 0.105439045 | 0.528810997 | 0.355777008 | 0.170094039 |
| 0.343195013 | 0.485834175 | 0.43106555  | 0.511283905 |
| 0.484121769 | 0.225281467 | 0.452934593 | 0.519060077 |
| 0.3195566   | 0.406147331 | 0.158561136 | 0.499343754 |
| 0.35611685  | 0.263241199 | 0.51811586  | 0.443055312 |
| 0.518183587 | 0.450737358 | 0.356008898 | 0.49529452  |
| 0.444964817 | 0.462955934 | 0.418290915 | 0.140418021 |
| 0.282413818 | 0.2577746   | 0.318657431 | 0.006181709 |
| 0.464555795 | 0.380344099 | 0.524206373 | 0.498551025 |
| 0.344975541 | 0.465124211 | 0.423123668 | 0.171665537 |
| 0.369486021 | 0.284299037 | 0.255160181 | 0.523505759 |
| 0.247649695 | 0.301159958 | 0.368476373 | 0.464609227 |
| 0.504543281 | 0.510547858 | 0.342854553 | 0.397965166 |
| 0.371988199 | 0.336339876 | 0.492102942 | 0.247431876 |
| 0.504042276 | 0.222733834 | 0.495258764 | 0.36889015  |
| 0.307509279 | 0.525072619 | 0.146408558 | 0.528494062 |
| 0.403662903 | 0.253800797 | 0.49189101  | 0.457063264 |
| 0.430735937 | 0.191665594 | 0.216147582 | 0.509924431 |
| 0.351882611 | 0.394862322 | 0.02586146  | 0.087168988 |
| 0.41577828  | 0.443908711 | 0.511063616 | 0.481072562 |
| 0.307177035 | 0.431039004 | 0.209465945 | 0.438026648 |
| 0.496292282 | 0.514763543 | 0.326061587 | 0.362258449 |
| 0.464592029 | 0.189406437 | 0.513834525 | 0.036097905 |
| 0.490488848 | 0.484834028 | 0.47536876  | 0.129238294 |
| 0.055976268 | 0.238859827 | 0.495537877 | 0.175599432 |
| 0.513096934 | 0.23788298  | 0.493980035 | 0.515796029 |
| 0.318503737 | 0.513415101 | 0.199574001 | 0.476929155 |
| 0.135082166 | 0.387922257 | 0.454121695 | 0.489996887 |
| 0.271329763 | 0.337360164 | 0.450823859 | 0.26815891  |
| 0.078590183 | 0.333509008 | 0.004731264 | 0.44262137  |
| 0.489771765 | 0.395738136 | 0.328639476 | 0.419743234 |
| 0.374774609 | 0.486058383 | 0.336809407 | 0.497746818 |
| 0.026164436 | 0.417832981 | 0.319818443 | 0.50341605  |
| 0.260758707 | 0.479977354 | 0.108604487 | 0.392192479 |
| 0.489721032 | 0.354264041 | 0.382953708 | 0.354634128 |
| 0.513873885 | 0.503438111 | 0.292785071 | 0.305706812 |
| 0.505634361 | 0.1574457   | 0.49368148  | 0.517655757 |
| 0.263428266 | 0.247370459 | 0.496563856 | 0.287368834 |
| 0.370358126 | 0.491366908 | 0.500215528 | 1           |
| 0.126032473 | 0.355847103 | 0.506116613 | 0.512573147 |
| 0.397074657 | 0.219840694 | 0.284888081 | 0.298457015 |
| 0.494582509 | 0.166580787 | 0.325856527 | 0.467062058 |
| 0.247583398 | 0.423072639 | 0.478623669 | 0.258782405 |
| 0.078296564 | 0.299901539 | 0.464458577 | 0.262943383 |
| 0.39687483  | 0.434519654 | 0.303657554 | 0.451228801 |
| 0.19298964  | 0.045053513 | 0.479713642 | 0.019989739 |
| 0.469542633 | 0.461129999 | 0.370170589 | 0.427418315 |
| 0.297786063 | 0.483953056 | 0.464372506 | 0.004374556 |
| 0.495134454 | 0.065517861 | 0.420562985 | 0.276877232 |
| 0.356862041 | 0.128381549 | 0.498861031 | 0.520159583 |

|             |             |             |             |
|-------------|-------------|-------------|-------------|
| 0.459630536 | 0.433987238 | 0.397447037 | 0.512975423 |
| 0.173029278 | 0.397123152 | 0.421518108 | 0.519295183 |
| 0.260725824 | 0.471119355 | 0.492574282 | 0.42116425  |
| 0.499904636 | 0.421375264 |             |             |
| UBE2E3      | 0.098397624 | 0.070106804 | 0.046320396 |
| 0.056128779 | 0.151175416 | 0.032186072 | 0.117519649 |
| 0.106536937 | 0.074506674 | 0.006292376 | 0.114587742 |
| 0.082029067 | 0.024148799 | 0.131233062 | 0.136106367 |
| 0.096634059 | 0.13143439  | 0.207323685 | 0.018559173 |
| 0.032916839 | 0.182146445 | 0.028445014 | 0.03902495  |
| 0.140362476 | 0.159463794 | 0.058387233 | 0.043002078 |
| 0.090435386 | 0.005418601 | 0.069704025 | 0.002083877 |
| 0.182750788 | 0.144561511 | 0.029073916 | 0.035739669 |
| 0.066346609 | 0.018986695 | 0.154638873 | 0.133282427 |
| 0.027471005 | 0.195202152 | 0.010145398 | 0.153838859 |
| 0.021108421 | 0.063822699 | 0.001170009 | 0.074177898 |
| 0.05951628  | 0.072598085 | 0.070131459 | 0.06609807  |
| 0.029224099 | 0.120786491 | 0.03206229  | 0.007973816 |
| 0.036708406 | 0.004898252 | 0.01775981  | 0.104798581 |
| 0.262208825 | 0.268087735 | 0.007436366 | 0.075301007 |
| 0.064896888 | 0.115744988 | 0.224789302 | 0.016373636 |
| 0.120553621 | 0.034187626 | 0.059548021 | 0.036099731 |
| 0.053273567 | 0.056592208 | 0.255183518 | 0.074465084 |
| 0.033189252 | 0.2686413   | 0.126817085 | 0.050579434 |
| 0.058114861 | 0.158070307 | 0.188568215 | 0.097396368 |
| 0.047498518 | 0.096978496 | 0.071782315 | 0.250036472 |
| 0.120511019 | 0.084712101 | 0.12456872  | 0.145808014 |
| 0.076456966 | 0.023531146 | 0.090339577 | 0.125036087 |
| 0.078842554 | 0.021698915 | 0.018087505 | 0.049470842 |
| 0.121386596 | 0.115530553 | 0.124385259 | 0.218075809 |
| 0.100544906 | 0.095546251 | 0.099985087 | 0.098574152 |
| 0.105046231 | 0.098225438 | 0.080425769 | 0.087078931 |
| 0.081533834 | 0.102255732 | 0.071471751 | 0.159222387 |
| 0.077100824 | 0.114318629 | 0.101932883 | 0.118587318 |
| 0.000703953 | 0.107994441 | 0.147769933 | 0.146441806 |
| 0.05866131  | 0.195147213 | 0.051372956 | 0.24534084  |
| 0.098878123 | 0.142687943 | 0.130225573 | 0.221600949 |
| 0.138494145 | 0.086151574 | 0.10140511  | 0.123017176 |
| 0.120990037 | 0.026507223 | 0.069416566 | 0.059365736 |
| 0.140002311 | 0.196121095 | 0.089590702 | 0.126426349 |
| 0.17220635  | 0.121222109 | 0.064112483 | 0.149819889 |
| 0.120023694 | 0.165041414 | 0.062511899 | 0.221014325 |
| 0.131416822 | 0.113737564 | 0.155016223 | 0.102958745 |
| 0.129551565 | 0.065568607 | 0.02127218  | 0.1285727   |
| 0.186665782 | 0.013908975 | 0.088545846 | 0.102213202 |
| 0.09514024  | 0.089781196 | 0.151521295 | 0.112345349 |
| 0.094075212 | 0.148970348 | 0.002911372 | 0.252106092 |
| 0.111247256 | 0.149636078 | 0.14358912  | 0.041508412 |
| 0.121578129 | 0.048319141 | 0.086428537 | 0.019695875 |
| 0.196436062 | 0.101097304 | 0.087312532 | 0.104628717 |
| 0.045656483 | 0.195855304 | 0.044524657 | 0.098475756 |
| 0.089681836 | 0.092485095 | 0.083622309 | 0.187965829 |
| 0.006187395 | 0.307260971 | 0.040460439 | 0.101044074 |
| 0.307948615 | 0.043989128 | 0.023462944 | 0.129514798 |

|             |             |             |             |
|-------------|-------------|-------------|-------------|
| 0.085489588 | 0.040159215 | 0.13325888  | 0.116700159 |
| 0.134790438 | 0.197114459 | 0.088262622 | 0.100019593 |
| 0.233116816 | 0.136008773 | 0.062215306 | 0.114667891 |
| 0.058560854 | 0.131020121 | 0.079009904 | 0.171100401 |
| 0.250572675 | 0.070516312 | 0.240650847 | 0.044945434 |
| 0.045987295 | 0.010725903 | 0.024038506 | 0.043540017 |
| 0.152455801 | 0.080039112 | 0.099299841 | 0.144780556 |
| 0.070036196 | 0.082338903 | 0.050310508 | 0.180487579 |
| 0.113539646 | 0.092335283 | 0.146854736 | 0.038801956 |
| 0.021289679 | 0.105060714 | 0.103222666 | 0.107995095 |
| 0.129961144 | 0.040956395 | 0.018051633 | 0.116704825 |
| 0.023088136 | 0.096875225 | 0.101714172 | 0.140991195 |
| 0.021374749 | 0.106880771 | 0.141060271 | 0.012547362 |
| 0.070660705 | 0.082530599 | 0.284105723 | 0.012314398 |
| 0.186183294 | 0.265959981 | 0.123917222 | 0.095221431 |
| 0.086031029 | 0.120731617 | 0.128693887 | 0.116995526 |
| 0.027270542 | 0.141793342 | 0.107811278 | 0.147873131 |
| 0.1278126   | 0.03409129  | 0.018578637 | 0.100799151 |
| 0.10773576  | 0.015423687 | 0.08933628  | 0.070139811 |
| 0.026445276 | 0.103592451 | 0.087533276 | 0.147448776 |
| 0.170850652 | 0.074989393 | 0.2120486   | 0.192080474 |
| 0.169384748 | 0.149959965 | 0.120639998 | 0.159368989 |
| 0.007609594 | 0.08678853  | 0.065049134 | 0.198659698 |
| 0.195676848 | 0.098444833 | 0.178349335 | 0.018719363 |
| 0.000307799 | 0.114756926 | 0.118124039 | 0.27637232  |
| 0.07914681  | 0.034944371 | 0.110918744 | 0.121379574 |
| 0.244914035 | 0.144379468 | 0.177573461 | 0.083375416 |
| 0.113723417 | 0.070533081 | 0.062495741 | 0.106211485 |
| 0.211842939 | 0.04997904  | 0.115451159 | 0.155015927 |
| 0.062847066 | 0.052142124 | 0.080860416 | 0.013407623 |
| 0.091890108 | 0.044051795 | 0.121591352 | 0.201777948 |
| 0.151412624 | 0.155446444 | 0.143731641 | 0.010833328 |
| 0.19748075  | 0.188519386 | 0.025135246 | 0.10537641  |
| 0.109344341 | 0.112628668 | 0.103764996 | 0.10384134  |
| 0.110558542 | 0.086642472 | 0.12764771  | 0.041442628 |
| 0.103746387 | 0.062094683 | 0.049309179 | 0.154901966 |
| 0.005170511 | 0.173390089 | 0.127194171 | 0.247764642 |
| 0.099999913 | 0.177265709 | 0.10339984  | 0.106996408 |
| 0.03328497  | 0.016623162 | 0.044328419 | 0.172740727 |
| 0.201482869 | 0.050399011 | 0.010363182 | 0.024852165 |
| 0.096202357 | 0.152853546 | 0.024045517 | 0.117802165 |
| 0.154690538 | 0.064533811 | 0.123453629 | 0.147857391 |
| 0.13582624  | 0.006806571 | 0.039523754 | 0.000195767 |
| 0.011138163 | 0.125510278 | 0.034186863 | 0.039915475 |
| 0.193458352 | 0.034164908 | 0.124706203 | 0.134301218 |
| 0.075469736 | 0.128010245 | 0.122091142 | 0.06531353  |
| 0.115604312 | 0.005047775 | 0.11106144  | 0.085773403 |
| 0.014596509 | 0.005435724 | 0.054632465 | 0.102892977 |
| 0.075516839 | 0.059274269 | 0.238931761 | 0.011168324 |
| 0.127213823 | 0.062345662 | 0.141730701 | 0.100628151 |
| 0.058927048 | 0.225276167 | 0.086790865 | 0.096068064 |
| 0.179148019 | 0.248217866 | 0.024039637 | 0.134320786 |
| 0.075344959 | 0.10003386  | 0.130787164 | 0.022527143 |
| 0.166184214 | 0.097773268 | 0.109592111 | 0.105274189 |



|             |             |             |             |
|-------------|-------------|-------------|-------------|
| 0.165216699 | 0.126362484 | 0.007503252 | 0.020866275 |
| 0.117730229 | 0.055983067 | 0.010081369 | 0.071315992 |
| 0.083853188 | 0.1116894   | 0.234076525 | 0.172232793 |
| 0.163133138 | 0.134649771 | 0.138541697 | 0.135167668 |
| 0.028250281 | 0.021467352 | 0.030406423 | 0.215306987 |
| 0.016951843 | 0.068819382 | 0.23321731  | 0.055194402 |
| 0.093401321 | 0.053641853 | 0.051239748 | 0.068767719 |
| 0.201487733 | 0.109073348 | 0.141045517 | 0.163985479 |
| 0.116621386 | 0.090860138 | 0.164473442 | 0.173588538 |
| 0.028112779 | 0.126043788 | 0.158892655 | 0.087738484 |
| 0.030247674 | 0.055992123 | 0.159666718 | 0.19685021  |
| 0.130555994 | 0.112670091 | 0.120597238 | 0.096794846 |
| 0.202997664 | 0.104225488 | 0.135354848 | 0.086457003 |
| 0.124920675 | 0.169755894 | 0.185394475 | 0.170017667 |
| 0.126921793 | 0.167070395 | 0.130653825 | 0.148763878 |
| 0.118358478 | 0.077382776 | 0.099761704 | 0.065684867 |
| 0.212849135 | 0.110332485 | 0.125666728 | 0.21074366  |
| 0.067212724 | 0.27196319  | 0.284500606 | 0.085091855 |
| 0.122694178 | 0.031839519 | 0.134027787 | 0.245343006 |
| 0.161623379 | 0.027042126 | 0.238684562 | 0.052536978 |
| 0.101708833 | 0.004200803 | 0.089283633 | 0.206859726 |
| 0.173275997 | 0.132514624 | 0.019751602 | 0.119026358 |
| 0.077107315 | 0.024751363 | 0.042912429 | 0.061859912 |
| 0.13777822  | 0.062088977 | 0.103578718 | 0.225983304 |
| 0.161278322 | 0.080412356 | 0.044937069 | 0.128179087 |
| 0.242344548 | 0.037584687 | 0.194639062 | 0.177597728 |
| 0.21985733  | 0.158430763 | 0.094154512 | 0.240421092 |
| 0.042218726 | 0.06912259  | 0.065065731 | 0.092715508 |
| 0.057482107 | 0.07881685  | 0.012618547 | 0.095749822 |
| 0.012702529 | 0.032962794 | 0.135118956 | 0.119430671 |
| 0.151173972 | 0.128560623 | 0.16882963  | 0.056133892 |
| 0.002381053 | 0.07927173  | 0.129854862 | 0.047265814 |
| 0.084365788 | 0.141475081 | 0.037687229 | 0.151680499 |
| 0.272750847 | 0.078328457 | 0.136877862 | 0.012839636 |
| 0.018484692 | 0.06495913  | 0.312443797 | 0.151958671 |
| 0.216484375 | 0.074190706 | 0.029541581 | 0.131522045 |
| 0.035574671 | 0.300756666 | 0.227717585 | 0.005634292 |
| 0.024491145 | 0.148987272 | 0.095815117 | 0.077207448 |
| 0.06875645  | 0.134379745 | 0.141390426 | 0.020065797 |
| 0.100790278 | 0.082555142 | 0.269324536 | 0.213193507 |
| 0.216259466 | 0.219410333 | 0.277030785 | 0.085656457 |
| 0.101845061 | 0.172714761 | 0.12475201  | 0.279120601 |
| 0.17020281  | 0.143955167 | 0.09352684  | 0.051335379 |
| 0.102011288 | 0.135700902 | 0.117419519 | 0.099773255 |
| 0.113455832 | 0.087633537 | 0.230327139 | 0.081910062 |
| 0.290598235 | 0.048902599 | 0.253128173 | 0.080872173 |
| 0.192483787 | 0.067444354 | 0.093032738 | 0.075316977 |
| 0.006123099 | 0.017805589 | 0.063242735 | 0.052903724 |
| 0.213168784 | 0.080557687 | 0.030222353 | 0.059764526 |
| 0.059960534 | 0.193663725 | 0.225676046 | 0.150704839 |
| 0.073804732 | 0.056655146 | 0.006424654 | 0.157498821 |
| 0.142579941 | 0.167802143 | 0.166072951 | 0.023637578 |
| 0.167865073 | 0.022033678 | 0.096831231 | 0.100113997 |
| 0.03130876  | 0.200407651 | 0.005211925 | 0.094229004 |

|             |             |             |             |
|-------------|-------------|-------------|-------------|
| 0.002708028 | 0.085081197 | 0.234995726 | 0.066417528 |
| 0.020675663 | 0.138876997 | 0.169339442 | 0.014003208 |
| 0.093827222 | 0.06747702  | 0.084102341 | 0.128535147 |
| 0.178542308 | 0.110277661 | 0.123425659 | 0.068032181 |
| 0.037996949 | 0.099410806 | 0.026987435 | 0.15512261  |
| 0.213955178 | 0.105491238 | 0.135498593 | 0.108294146 |
| 0.098730529 | 0.14458463  | 0.189342104 | 0.088638327 |
| 0.030803758 | 0.127432152 | 0.02935504  | 0.021196853 |
| 0.097272446 | 0.029904468 | 0.000291148 | 0.04182835  |
| 0.252961132 | 0.032469829 | 0.056547596 | 0.141003245 |
| 0.110033959 | 0.24902121  | 0.015743878 | 0.092783135 |
| 0.078168404 | 0.110061652 | 0.065572355 | 0.269356068 |
| 0.175900596 | 0.191398411 | 0.043213522 | 0.007718535 |
| 0.063929773 | 0.04095353  | 0.012526213 | 0.154708637 |
| 0.078183905 | 0.029915818 | 0.058606659 | 0.079716961 |
| 0.13727142  | 0.011968163 | 0.045581946 | 0.073860695 |
| 0.177501357 | 0.115476901 | 0.202691024 | 0.138091032 |
| 0.033884865 | 0.199532292 | 0.048780586 | 0.043165644 |
| 0.087509111 | 0.081447458 | 0.181930327 | 0.075134688 |
| 0.139711267 | 0.078294843 | 0.023289719 | 0.175233451 |
| 0.092841374 | 0.062785102 | 0.217899069 | 0.005899657 |
| 0.287448305 | 0.140064852 | 0.076551319 | 0.02933409  |
| 0.074521846 | 0.10314736  | 0.257542873 | 0.103943938 |
| 0.009470005 | 0.06623973  | 0.101963854 | 0.095622633 |
| 0.112116257 | 0.051821905 | 0.235249901 | 0.012802228 |
| 0.085976142 | 0.083659645 | 0.075247554 | 0.065717184 |
| 0.044948602 | 0.138057742 | 0.013297015 | 0.135857837 |
| 0.267935164 | 0.093711548 | 0.134915741 | 0.166663316 |
| 0.065815245 | 0.113487233 | 0.035200532 | 0.126032473 |
| 1           | 0.271100841 | 0.121335253 | 0.11034941  |
| 0.298226084 | 0.109718248 | 0.061874664 | 0.171328837 |
| 0.080439232 | 0.07731119  | 0.046809388 | 0.143425837 |
| 0.057932358 | 0.225799133 | 0.027072839 | 0.202179222 |
| 0.121227818 | 0.123369866 | 0.034658431 | 0.20737387  |
| 0.21058879  | 0.100371905 | 0.096644582 | 0.213637076 |
| 0.114380908 | 0.077403039 | 0.192333696 | 0.015320867 |
| 0.051915005 | 0.119097866 | 0.220575192 | 0.082653834 |
| 0.170705951 | 0.101666859 | 0.045057329 | 0.021013381 |
| 0.150155787 | 0.023148042 | 0.078981687 | 0.11003649  |
| 0.029143511 | 0.099450068 | 0.120698904 | 0.141625981 |
| 0.128909116 | 0.013527713 | 0.011589524 | 0.115532366 |
| 0.035709914 | 0.014127637 | 0.031091688 | 0.045182201 |
| 0.051704866 | 0.015127021 | 0.024599159 | 0.027438788 |
| 0.109569308 | 0.095455759 |             |             |
| UBE2L3      | 0.20633245  | 0.258080371 | 0.129318794 |
| 0.241521697 | 0.218897173 | 0.191135609 | 0.213970869 |
| 0.281018057 | 0.217573451 | 0.084319683 | 0.249393679 |
| 0.150122455 | 0.058353376 | 0.334752403 | 0.218504307 |
| 0.192738042 | 0.221692935 | 0.273304535 | 0.079861205 |
| 0.168090906 | 0.23009631  | 0.168396151 | 0.182804604 |
| 0.21324062  | 0.279178643 | 0.182539176 | 0.14317899  |
| 0.311140315 | 0.080363325 | 0.206558425 | 0.057421197 |
| 0.377424004 | 0.209714486 | 0.135923895 | 0.106574048 |
| 0.199936116 | 0.016063351 | 0.373130796 | 0.263494133 |

|             |             |             |             |
|-------------|-------------|-------------|-------------|
| 0.104764793 | 0.360617609 | 0.10808557  | 0.295645728 |
| 0.133516345 | 0.154598967 | 0.051160396 | 0.182506734 |
| 0.173814919 | 0.223986185 | 0.136506319 | 0.210744728 |
| 0.161856028 | 0.267779258 | 0.170236505 | 0.01768701  |
| 0.1280675   | 0.026045056 | 0.079497931 | 0.345004419 |
| 0.2998138   | 0.314383414 | 0.082758224 | 0.196274436 |
| 0.164844938 | 0.214477357 | 0.27096838  | 0.129298375 |
| 0.350779819 | 0.103866463 | 0.199156734 | 0.190523892 |
| 0.194755959 | 0.114334913 | 0.285583052 | 0.132263135 |
| 0.164588931 | 0.32077206  | 0.234531991 | 0.14786822  |
| 0.250092937 | 0.403202313 | 0.260011496 | 0.337034319 |
| 0.081122456 | 0.174703637 | 0.198722124 | 0.301254776 |
| 0.231525057 | 0.185513247 | 0.275241297 | 0.388629614 |
| 0.138878576 | 0.129628186 | 0.21983667  | 0.181480944 |
| 0.274806735 | 0.112286822 | 0.12975226  | 0.127096798 |
| 0.206883101 | 0.197487029 | 0.34689141  | 0.30205197  |
| 0.202693165 | 0.150039854 | 0.343343384 | 0.168696801 |
| 0.255162992 | 0.181643614 | 0.20916003  | 0.260821752 |
| 0.205946376 | 0.324131382 | 0.240751079 | 0.277252789 |
| 0.182432417 | 0.34323914  | 0.251098327 | 0.299240252 |
| 0.034253921 | 0.348785226 | 0.270576107 | 0.24503116  |
| 0.157730128 | 0.285912235 | 0.158388056 | 0.339657941 |
| 0.296540759 | 0.259921446 | 0.290939193 | 0.28774012  |
| 0.306824371 | 0.320124082 | 0.336944837 | 0.290365464 |
| 0.191744114 | 0.105627503 | 0.181472752 | 0.22846179  |
| 0.243876316 | 0.233467963 | 0.159637513 | 0.375354229 |
| 0.359606315 | 0.278340757 | 0.216805153 | 0.401207421 |
| 0.228693543 | 0.400272854 | 0.261461325 | 0.30732163  |
| 0.381314947 | 0.362086256 | 0.379138918 | 0.213446921 |
| 0.367122623 | 0.229028973 | 0.049667774 | 0.282450007 |
| 0.399471126 | 0.022878958 | 0.281284994 | 0.307998594 |
| 0.327790058 | 0.268183977 | 0.37036311  | 0.333164446 |
| 0.329029214 | 0.196087522 | 0.009347794 | 0.268162821 |
| 0.355075327 | 0.333656103 | 0.275190224 | 0.157588704 |
| 0.201814212 | 0.203654386 | 0.237767546 | 0.159781174 |
| 0.424648531 | 0.298600068 | 0.294747549 | 0.255777049 |
| 0.151159835 | 0.35925728  | 0.138307576 | 0.339158992 |
| 0.220676645 | 0.224656436 | 0.13388446  | 0.277166954 |
| 0.120119317 | 0.319127795 | 0.205997838 | 0.186574585 |
| 0.314073578 | 0.187439292 | 0.119767517 | 0.223357654 |
| 0.133826759 | 0.168336268 | 0.250333618 | 0.224387128 |
| 0.236754404 | 0.268746584 | 0.300043985 | 0.299572503 |
| 0.293051827 | 0.291895421 | 0.204030269 | 0.324356779 |
| 0.177508415 | 0.233050768 | 0.227330758 | 0.387002906 |
| 0.413767185 | 0.181961207 | 0.293569479 | 0.085574017 |
| 0.195261987 | 0.087463972 | 0.083663498 | 0.153279801 |
| 0.269775009 | 0.253035669 | 0.203635556 | 0.257940952 |
| 0.224728454 | 0.181755021 | 0.181864954 | 0.400029569 |
| 0.197410433 | 0.244932335 | 0.327704911 | 0.15784032  |
| 0.045020224 | 0.250806402 | 0.280062228 | 0.191171085 |
| 0.223511021 | 0.115001802 | 0.121799465 | 0.306718289 |
| 0.132383216 | 0.173185575 | 0.30915754  | 0.247985874 |
| 0.17316089  | 0.25142849  | 0.367703275 | 0.024790635 |
| 0.162658916 | 0.169580019 | 0.303804687 | 0.106085117 |

|             |             |             |             |
|-------------|-------------|-------------|-------------|
| 0.278155142 | 0.309502584 | 0.19259585  | 0.227300291 |
| 0.17841202  | 0.35744868  | 0.304758257 | 0.34144593  |
| 0.150231713 | 0.372109106 | 0.28832671  | 0.338076262 |
| 0.244506211 | 0.132192534 | 0.063571075 | 0.279917493 |
| 0.294219188 | 0.132850749 | 0.139953965 | 0.224033291 |
| 0.131665411 | 0.214304789 | 0.19910744  | 0.362385075 |
| 0.412511594 | 0.29856089  | 0.325468171 | 0.289075029 |
| 0.333403786 | 0.282399186 | 0.287364159 | 0.386589749 |
| 0.096296647 | 0.185373771 | 0.190990983 | 0.32602939  |
| 0.26625003  | 0.190500285 | 0.324038551 | 0.075617529 |
| 0.00385275  | 0.189005196 | 0.183434449 | 0.318619323 |
| 0.146663426 | 0.144353228 | 0.21914322  | 0.353880228 |
| 0.299440369 | 0.341664165 | 0.246412374 | 0.238430678 |
| 0.316995831 | 0.178520937 | 0.166405676 | 0.202543381 |
| 0.291615084 | 0.107881738 | 0.276101469 | 0.406134104 |
| 0.102426587 | 0.154573999 | 0.215431315 | 0.018149744 |
| 0.176252445 | 0.204933283 | 0.190689465 | 0.313807446 |
| 0.338885811 | 0.28779368  | 0.236321268 | 0.107951491 |
| 0.292296711 | 0.245825215 | 0.035212169 | 0.310658616 |
| 0.321688195 | 0.309641184 | 0.316825372 | 0.318154043 |
| 0.286424509 | 0.226163892 | 0.268295796 | 0.189335018 |
| 0.274956403 | 0.174865347 | 0.145879129 | 0.263929235 |
| 0.013996024 | 0.307591921 | 0.21793965  | 0.266725994 |
| 0.238042042 | 0.25051772  | 0.197212351 | 0.189006501 |
| 0.112529688 | 0.084763088 | 0.2050387   | 0.272588516 |
| 0.271158259 | 0.109382541 | 0.120370254 | 0.152064031 |
| 0.32079801  | 0.319034161 | 0.135721643 | 0.362783804 |
| 0.272560143 | 0.147566982 | 0.244208873 | 0.271541849 |
| 0.249883243 | 0.053709238 | 0.173738174 | 0.01307936  |
| 0.115988267 | 0.334763021 | 0.166496285 | 0.183152589 |
| 0.283892212 | 0.06858007  | 0.314458354 | 0.377665682 |
| 0.300006836 | 0.348131054 | 0.353619928 | 0.158340117 |
| 0.351156589 | 0.028600051 | 0.344881789 | 0.265529397 |
| 0.120671927 | 0.008562006 | 0.051860001 | 0.305308851 |
| 0.195925148 | 0.11576547  | 0.28230247  | 0.165129387 |
| 0.302633657 | 0.187798402 | 0.230337701 | 0.186590641 |
| 0.190430185 | 0.266150883 | 0.175421142 | 0.322489314 |
| 0.285745215 | 0.29413653  | 0.153708247 | 0.171434686 |
| 0.193404269 | 0.233024925 | 0.166553502 | 0.037757351 |
| 0.254451471 | 0.188294694 | 0.352878719 | 0.336648441 |
| 0.39590784  | 0.239715592 | 0.094500063 | 0.168971484 |
| 0.285329816 | 0.12996037  | 0.130685146 | 0.151203274 |
| 0.310787523 | 0.212605035 | 0.342840168 | 0.32540419  |
| 0.38135025  | 0.36181662  | 0.18966032  | 0.276412671 |
| 0.084077978 | 0.011563045 | 0.175459018 | 0.276735358 |
| 0.041609518 | 0.178866164 | 0.318835886 | 0.172301723 |
| 0.217231946 | 0.160375723 | 0.129743714 | 0.145491049 |
| 0.273540608 | 0.231744056 | 0.201988981 | 0.245564051 |
| 0.218916958 | 0.180533956 | 0.298658519 | 0.294982097 |
| 0.144282718 | 0.282295641 | 0.280925829 | 0.146422544 |
| 0.15263068  | 0.178940255 | 0.2211006   | 0.254390737 |
| 0.316561535 | 0.322620411 | 0.20104046  | 0.114378616 |
| 0.320211868 | 0.22352616  | 0.343665441 | 0.313314688 |
| 0.376589242 | 0.397869961 | 0.389380055 | 0.284244271 |

|             |             |             |             |
|-------------|-------------|-------------|-------------|
| 0.23431008  | 0.242370081 | 0.194202139 | 0.247908727 |
| 0.347292866 | 0.128773688 | 0.329212848 | 0.141754482 |
| 0.241351507 | 0.278982252 | 0.224453441 | 0.247044841 |
| 0.166914838 | 0.297973551 | 0.311857935 | 0.179316583 |
| 0.248969643 | 0.14771166  | 0.205394363 | 0.302813617 |
| 0.295968547 | 0.098494585 | 0.284167453 | 0.204028359 |
| 0.257777746 | 0.064926446 | 0.225060893 | 0.402764887 |
| 0.229202767 | 0.205078009 | 0.187099101 | 0.244127865 |
| 0.250344807 | 0.12527514  | 0.116678852 | 0.262805545 |
| 0.346897638 | 0.194886087 | 0.342743881 | 0.353917112 |
| 0.192707052 | 0.199847912 | 0.133337422 | 0.216434595 |
| 0.280382769 | 0.193989509 | 0.274674966 | 0.204451545 |
| 0.335165695 | 0.387211526 | 0.28231321  | 0.322274209 |
| 0.162799067 | 0.153295687 | 0.114629487 | 0.276647198 |
| 0.14482613  | 0.238569492 | 0.115122397 | 0.2503572   |
| 0.015504111 | 0.082167673 | 0.332448101 | 0.303815423 |
| 0.383163692 | 0.331278526 | 0.378049465 | 0.212697159 |
| 0.00264105  | 0.189947118 | 0.242512433 | 0.199035672 |
| 0.282673402 | 0.288602457 | 0.154232341 | 0.282729527 |
| 0.352742473 | 0.14289488  | 0.292535659 | 0.161356548 |
| 0.0751511   | 0.19314892  | 0.306288537 | 0.225404083 |
| 0.289590983 | 0.128947731 | 0.134130587 | 0.28872677  |
| 0.091893449 | 0.337934134 | 0.340319804 | 0.090490057 |
| 0.107455267 | 0.317625035 | 0.257981728 | 0.151123744 |
| 0.166197423 | 0.286028748 | 0.325207075 | 0.019990269 |
| 0.239326192 | 0.109489163 | 0.30510134  | 0.303162664 |
| 0.30522801  | 0.287851911 | 0.278266449 | 0.233681675 |
| 0.210331837 | 0.294204943 | 0.29380142  | 0.310636367 |
| 0.30938038  | 0.274291239 | 0.206037929 | 0.191614632 |
| 0.251705842 | 0.274747856 | 0.196986442 | 0.192482861 |
| 0.246435168 | 0.289255587 | 0.34071875  | 0.143563325 |
| 0.303022001 | 0.188751817 | 0.389871379 | 0.308717277 |
| 0.365722996 | 0.162593062 | 0.221710062 | 0.276735885 |
| 0.070460528 | 0.170883187 | 0.174905436 | 0.191183802 |
| 0.312091524 | 0.211793572 | 0.158689161 | 0.188984414 |
| 0.196539023 | 0.388922275 | 0.331026619 | 0.347849549 |
| 0.228371877 | 0.158969935 | 0.096036446 | 0.288560997 |
| 0.279759428 | 0.213408726 | 0.215066922 | 0.03598056  |
| 0.259418413 | 0.214065233 | 0.291259782 | 0.337030337 |
| 0.11752484  | 0.365226529 | 0.111625333 | 0.245358965 |
| 0.080257295 | 0.21725591  | 0.258833322 | 0.223549506 |
| 0.087474842 | 0.300755046 | 0.244023265 | 0.160509038 |
| 0.239721884 | 0.200790884 | 0.188670367 | 0.259332376 |
| 0.253592766 | 0.214775284 | 0.34880531  | 0.193307071 |
| 0.152957835 | 0.206335934 | 0.133469816 | 0.259075624 |
| 0.28717334  | 0.328827323 | 0.189357067 | 0.334290171 |
| 0.205638726 | 0.217084038 | 0.419441671 | 0.220430761 |
| 0.220035279 | 0.282423855 | 0.088031598 | 0.151165424 |
| 0.263622978 | 0.135967627 | 0.004213754 | 0.067474456 |
| 0.316773816 | 0.137196707 | 0.210087674 | 0.24977631  |
| 0.196282078 | 0.323008423 | 0.072612253 | 0.233074849 |
| 0.307448836 | 0.356853118 | 0.266764879 | 0.324068839 |
| 0.292114525 | 0.297216513 | 0.180430333 | 0.01761174  |
| 0.175588135 | 0.145928114 | 0.129571596 | 0.237041508 |

|             |             |             |             |
|-------------|-------------|-------------|-------------|
| 0.150181118 | 0.098899993 | 0.178832384 | 0.126262802 |
| 0.328046797 | 0.08390128  | 0.1473314   | 0.225270258 |
| 0.236462476 | 0.366122055 | 0.308755734 | 0.274335406 |
| 0.110262586 | 0.262783786 | 0.151116441 | 0.149344883 |
| 0.252340156 | 0.173448893 | 0.299672611 | 0.157452298 |
| 0.209690857 | 0.246493996 | 0.017910742 | 0.390725689 |
| 0.326203043 | 0.154546795 | 0.297827219 | 0.08480818  |
| 0.311137896 | 0.296380658 | 0.214709648 | 0.143616903 |
| 0.114693496 | 0.195826166 | 0.305590014 | 0.300294761 |
| 0.092997325 | 0.170940048 | 0.246129761 | 0.171785261 |
| 0.355571503 | 0.195827552 | 0.31324117  | 0.121179488 |
| 0.314067015 | 0.247969446 | 0.180720881 | 0.214074249 |
| 0.154298566 | 0.167958968 | 0.131198809 | 0.370522801 |
| 0.322335127 | 0.165604025 | 0.298568088 | 0.303171571 |
| 0.152539988 | 0.300961263 | 0.139432145 | 0.355847103 |
| 0.271100841 | 1           | 0.266948465 | 0.317111396 |
| 0.352078277 | 0.163643155 | 0.156229938 | 0.249550276 |
| 0.305796867 | 0.243611819 | 0.165570921 | 0.290028804 |
| 0.132876056 | 0.279857929 | 0.128321744 | 0.250555095 |
| 0.202559534 | 0.281786457 | 0.2060586   | 0.255565512 |
| 0.285948835 | 0.213467618 | 0.209968632 | 0.392787993 |
| 0.291219982 | 0.152373962 | 0.402488123 | 0.01661883  |
| 0.200138094 | 0.23259709  | 0.295734065 | 0.204818528 |
| 0.27852199  | 0.219475869 | 0.176150796 | 0.025512658 |
| 0.288905813 | 0.062858024 | 0.197889015 | 0.246481554 |
| 0.143488804 | 0.197840198 | 0.342580774 | 0.357688197 |
| 0.238107954 | 0.133492327 | 0.120532919 | 0.325244396 |
| 0.104995312 | 0.100480139 | 0.133287462 | 0.184095756 |
| 0.126007691 | 0.119543955 | 0.143319841 | 0.143657344 |
| 0.255903577 | 0.25432182  |             |             |
| UBE2M       | 0.092082763 | 0.405207489 | 0.065139994 |
| 0.162923402 | 0.358724367 | 0.378964444 | 0.081621685 |
| 0.157590581 | 0.313437866 | 0.285454512 | 0.369999498 |
| 0.02693551  | 0.161499262 | 0.441571989 | 0.081859579 |
| 0.39550158  | 0.055519021 | 0.137710763 | 0.106039514 |
| 0.25844853  | 0.33501825  | 0.373408003 | 0.33801271  |
| 0.346579682 | 0.183424867 | 0.318962654 | 0.393235417 |
| 0.483761501 | 0.288579978 | 0.408402579 | 0.189631545 |
| 0.404578311 | 0.367817152 | 0.390138235 | 0.023397912 |
| 0.404813717 | 0.031442475 | 0.420005074 | 0.302111041 |
| 0.222085558 | 0.337559111 | 0.298468218 | 0.281583399 |
| 0.333268235 | 0.046958002 | 0.203774638 | 0.390837401 |
| 0.320144499 | 0.328105558 | 0.074419332 | 0.391864124 |
| 0.367293039 | 0.32468012  | 0.329020973 | 0.002808449 |
| 0.352256943 | 0.142561285 | 0.285333942 | 0.486942706 |
| 0.225467702 | 0.168936719 | 0.301945032 | 0.279769854 |
| 0.379627561 | 0.379227301 | 0.289777199 | 0.339661804 |
| 0.483006621 | 0.254555917 | 0.396807277 | 0.192343414 |
| 0.362516921 | 0.044849911 | 0.178888827 | 0.096635371 |
| 0.39763896  | 0.250941775 | 0.379132339 | 0.367168427 |
| 0.394637372 | 0.502570334 | 0.264297711 | 0.472092219 |
| 0.167829115 | 0.378258999 | 0.347269675 | 0.325041761 |
| 0.353610496 | 0.115372566 | 0.383748958 | 0.506351644 |
| 0.068168703 | 0.334185465 | 0.36205686  | 0.132368155 |

|             |             |             |             |
|-------------|-------------|-------------|-------------|
| 0.409488171 | 0.347074549 | 0.3444387   | 0.25624278  |
| 0.391584057 | 0.367408572 | 0.461994636 | 0.296372834 |
| 0.375584604 | 0.082126622 | 0.455490014 | 0.366716911 |
| 0.336928454 | 0.096193274 | 0.28882948  | 0.44760432  |
| 0.388086125 | 0.478115603 | 0.391931483 | 0.344539935 |
| 0.38207442  | 0.487224042 | 0.374281111 | 0.409633884 |
| 0.168021309 | 0.507225144 | 0.211226371 | 0.068218032 |
| 0.083373198 | 0.1323165   | 0.301799588 | 0.301596429 |
| 0.462538372 | 0.340816554 | 0.216100598 | 0.28287976  |
| 0.461347082 | 0.447562003 | 0.502234066 | 0.382172785 |
| 0.054873725 | 0.324295398 | 0.383122945 | 0.313398804 |
| 0.367253893 | 0.142703033 | 0.326697352 | 0.482727747 |
| 0.368209367 | 0.420275422 | 0.181628956 | 0.481361167 |
| 0.234842678 | 0.506982993 | 0.423638138 | 0.199989496 |
| 0.498813151 | 0.469497128 | 0.508708857 | 0.404191712 |
| 0.459850951 | 0.330065747 | 0.087250106 | 0.359514405 |
| 0.488124976 | 0.025553239 | 0.466375467 | 0.493112543 |
| 0.475846053 | 0.44300504  | 0.519351642 | 0.50383935  |
| 0.48012809  | 0.091868757 | 0.045501189 | 0.324980597 |
| 0.482471046 | 0.379818774 | 0.202677104 | 0.387887526 |
| 0.383508753 | 0.370808137 | 0.400005318 | 0.305949278 |
| 0.508714794 | 0.44415245  | 0.477933907 | 0.356877462 |
| 0.296421377 | 0.310927661 | 0.385303275 | 0.438940754 |
| 0.068029402 | 0.130309628 | 0.060034964 | 0.315808344 |
| 0.315689153 | 0.219201317 | 0.348762115 | 0.372444355 |
| 0.228569858 | 0.339832077 | 0.36836114  | 0.393462594 |
| 0.059790177 | 0.393748502 | 0.193918156 | 0.181714267 |
| 0.063567539 | 0.14380559  | 0.209234116 | 0.199354602 |
| 0.303751804 | 0.22606183  | 0.400430134 | 0.485341321 |
| 0.372113083 | 0.182346196 | 0.384138864 | 0.475749346 |
| 0.429686717 | 0.39365137  | 0.24214014  | 0.018673275 |
| 0.28753241  | 0.321132501 | 0.261874877 | 0.405074215 |
| 0.178760456 | 0.26543754  | 0.375913484 | 0.395011674 |
| 0.266795817 | 0.169281564 | 0.381120603 | 0.418136005 |
| 0.149885041 | 0.346611786 | 0.434282025 | 0.366276766 |
| 0.005211682 | 0.325362104 | 0.419336001 | 0.21942135  |
| 0.310379978 | 0.195497123 | 0.309124002 | 0.450179869 |
| 0.330167215 | 0.304459365 | 0.489196741 | 0.400287711 |
| 0.340623926 | 0.212210149 | 0.518808694 | 0.073098715 |
| 0.379134641 | 0.088958052 | 0.310536799 | 0.304935922 |
| 0.269725011 | 0.309014968 | 0.368769713 | 0.339783445 |
| 0.133269957 | 0.497994871 | 0.378962064 | 0.499234031 |
| 0.360969876 | 0.519769685 | 0.443166159 | 0.431475804 |
| 0.362477377 | 0.36884715  | 0.207393237 | 0.401981724 |
| 0.444790985 | 0.289352729 | 0.081611421 | 0.406807454 |
| 0.346440843 | 0.394560783 | 0.188254043 | 0.483868131 |
| 0.485115363 | 0.437013685 | 0.19486309  | 0.377406846 |
| 0.358374911 | 0.250301231 | 0.403126948 | 0.524504142 |
| 0.298037264 | 0.36768545  | 0.361622589 | 0.404814072 |
| 0.19467044  | 0.28498074  | 0.315984473 | 0.264384157 |
| 0.017672384 | 0.099189492 | 0.078899174 | 0.219467018 |
| 0.251896878 | 0.381958815 | 0.391972777 | 0.500966323 |
| 0.150280982 | 0.411996585 | 0.252989766 | 0.30886577  |
| 0.395946462 | 0.374226275 | 0.402292611 | 0.401389267 |

|             |             |             |             |
|-------------|-------------|-------------|-------------|
| 0.260979349 | 0.029825268 | 0.151557778 | 0.499921183 |
| 0.047203178 | 0.309479787 | 0.322882425 | 0.005380097 |
| 0.058508792 | 0.366606574 | 0.096399563 | 0.194151993 |
| 0.48572645  | 0.193681313 | 0.20962908  | 0.294297334 |
| 0.358145382 | 0.119169726 | 0.007122433 | 0.476169626 |
| 0.476056552 | 0.449892862 | 0.470995646 | 0.441801719 |
| 0.433500035 | 0.381264276 | 0.388521729 | 0.331466348 |
| 0.133573761 | 0.105796305 | 0.266243109 | 0.317240318 |
| 0.006365643 | 0.374776336 | 0.359110129 | 0.161963083 |
| 0.40163289  | 0.313204234 | 0.053625768 | 0.388595743 |
| 0.027728091 | 0.25369455  | 0.311370839 | 0.273559314 |
| 0.36889963  | 0.021175608 | 0.229768624 | 0.334758483 |
| 0.40475335  | 0.325871783 | 0.378702229 | 0.512359041 |
| 0.346519218 | 0.123802713 | 0.342699944 | 0.395507705 |
| 0.096728542 | 0.119823447 | 0.351049789 | 0.038460207 |
| 0.236222691 | 0.444487254 | 0.391607281 | 0.084477301 |
| 0.28750743  | 0.007469008 | 0.341616491 | 0.514383057 |
| 0.437776664 | 0.510841105 | 0.488035852 | 0.329554221 |
| 0.486633992 | 0.166433579 | 0.514473898 | 0.371819081 |
| 0.336500955 | 0.001264494 | 0.011242156 | 0.47789679  |
| 0.3867634   | 0.061373922 | 0.184857846 | 0.334516154 |
| 0.1493792   | 0.162263194 | 0.096151408 | 0.264429821 |
| 0.398950429 | 0.305283799 | 0.263046451 | 0.441719925 |
| 0.277183585 | 0.279903579 | 0.353080729 | 0.098741075 |
| 0.412288435 | 0.074276666 | 0.101656474 | 0.013105522 |
| 0.382481952 | 0.110951833 | 0.440253485 | 0.491224604 |
| 0.485960884 | 0.394512217 | 0.306798564 | 0.347704291 |
| 0.436422701 | 0.098004673 | 0.369867697 | 0.117204062 |
| 0.457218582 | 0.379674324 | 0.317037444 | 0.283926159 |
| 0.492552446 | 0.451556553 | 0.049740204 | 0.380649513 |
| 0.019655958 | 0.005575224 | 0.331591204 | 0.280150968 |
| 0.114195849 | 0.375880917 | 0.257298029 | 0.27325241  |
| 0.289443628 | 0.041329786 | 0.328920649 | 0.306420488 |
| 0.319928503 | 0.368991288 | 0.33367138  | 0.25647201  |
| 0.326870903 | 0.197199553 | 0.256948543 | 0.201074647 |
| 0.28329312  | 0.289367834 | 0.184369029 | 0.032813707 |
| 0.386302447 | 0.398582043 | 0.07691149  | 0.1783747   |
| 0.426167032 | 0.479681838 | 0.06464464  | 0.019893351 |
| 0.255774605 | 0.345919823 | 0.496241482 | 0.475624491 |
| 0.501051744 | 0.511077156 | 0.385387089 | 0.180827119 |
| 0.091913847 | 0.349761183 | 0.350579512 | 0.166991541 |
| 0.497010959 | 0.072624889 | 0.466296259 | 0.356406814 |
| 0.14024454  | 0.246432126 | 0.055466119 | 0.113168738 |
| 0.401050934 | 0.20713932  | 0.237084366 | 0.148694936 |
| 0.337848146 | 0.321033956 | 0.069140762 | 0.229259516 |
| 0.324929789 | 0.24487652  | 0.185704793 | 0.334420219 |
| 0.333265733 | 0.230068417 | 0.397749696 | 0.443152392 |
| 0.144849257 | 0.132907248 | 0.259858747 | 0.377043234 |
| 0.41557341  | 0.36332397  | 0.036750084 | 0.422395159 |
| 0.488857212 | 0.403280264 | 0.476913841 | 0.392016713 |
| 0.100176182 | 0.383762287 | 0.357279803 | 0.356808303 |
| 0.218648757 | 0.374064932 | 0.287138685 | 0.08059761  |
| 0.301547976 | 0.468219231 | 0.390758555 | 0.2104889   |
| 0.397293317 | 0.131934245 | 0.063404836 | 0.436227142 |



|             |             |             |             |
|-------------|-------------|-------------|-------------|
| 0.253865885 | 0.108531943 | 0.321996514 | 0.418542833 |
| 0.004770313 | 0.222563336 | 0.490605034 | 0.284421672 |
| 0.508185176 | 0.47346875  | 0.427725315 | 0.298993295 |
| 0.005054063 | 0.398301763 | 0.374452882 | 0.38007867  |
| 0.401141051 | 0.33229449  | 0.206250133 | 0.108213176 |
| 0.288876045 | 0.08490207  | 0.176789643 | 0.334352227 |
| 0.228278138 | 0.366998723 | 0.223100984 | 0.234870202 |
| 0.260047314 | 0.098085056 | 0.321128191 | 0.274186152 |
| 0.231928131 | 0.254502117 | 0.333751143 | 0.27612935  |
| 0.221172009 | 0.430201737 | 0.35720115  | 0.037770933 |
| 0.394963392 | 0.399599351 | 0.436014194 | 0.003009284 |
| 0.401574164 | 0.012682465 | 0.254436297 | 0.26593039  |
| 0.260329016 | 0.262482306 | 0.308823266 | 0.341603258 |
| 0.341505799 | 0.261720799 | 0.304749081 | 0.267574029 |
| 0.216990877 | 0.259885813 | 0.39483445  | 0.351247728 |
| 0.321146121 | 0.154367401 | 0.100188399 | 0.103044175 |
| 0.07745839  | 0.451240983 | 0.23753049  | 0.079905986 |
| 0.268937659 | 0.358025067 | 0.352787652 | 0.465946808 |
| 0.424087152 | 0.106282825 | 0.357714813 | 0.414479725 |
| 0.2463901   | 0.289034049 | 0.076552131 | 0.373378678 |
| 0.264497862 | 0.278673239 | 0.372928797 | 0.282538521 |
| 0.360800417 | 0.391065671 | 0.231016792 | 0.437642954 |
| 0.377717761 | 0.349443843 | 0.27775226  | 0.122920919 |
| 0.195845133 | 0.14650098  | 0.328474308 | 0.003201998 |
| 0.354337368 | 0.262051444 | 0.451863743 | 0.462134016 |
| 0.34626622  | 0.386572638 | 0.28782459  | 0.107099888 |
| 0.247975011 | 0.167104269 | 0.157091765 | 0.390878715 |
| 0.277920709 | 0.230678022 | 0.344361109 | 0.3136323   |
| 0.402093062 | 0.38597055  | 0.325605602 | 0.272557895 |
| 0.281015583 | 0.20515195  | 0.457495289 | 0.137215265 |
| 0.389026824 | 0.25867446  | 0.317739744 | 0.325150664 |
| 0.274982454 | 0.504383286 | 0.077309608 | 0.510910578 |
| 0.348895432 | 0.138050611 | 0.484669465 | 0.326397951 |
| 0.318129668 | 0.18669407  | 0.262030462 | 0.363106429 |
| 0.269414446 | 0.379955345 | 0.015301945 | 0.085899618 |
| 0.336404566 | 0.327729622 | 0.355192903 | 0.364135494 |
| 0.320016619 | 0.340670181 | 0.255825535 | 0.291939213 |
| 0.448437805 | 0.470149387 | 0.265225779 | 0.257909568 |
| 0.331369162 | 0.136682744 | 0.353952844 | 0.027807541 |
| 0.389413172 | 0.393162016 | 0.357332099 | 0.080306545 |
| 0.031012437 | 0.271359153 | 0.377395113 | 0.078623495 |
| 0.4812984   | 0.264951597 | 0.333421389 | 0.404563103 |
| 0.191957181 | 0.469642755 | 0.182772834 | 0.388937011 |
| 0.061601333 | 0.278205699 | 0.397416385 | 0.374092922 |
| 0.270092645 | 0.344938573 | 0.367737518 | 0.304579484 |
| 0.050028907 | 0.315154328 | 0.002653914 | 0.391519422 |
| 0.437594734 | 0.366751821 | 0.202499194 | 0.293076451 |
| 0.305853557 | 0.377846744 | 0.288351018 | 0.397604933 |
| 0.020083694 | 0.38011415  | 0.239235219 | 0.389026214 |
| 0.243329367 | 0.350860339 | 0.089168923 | 0.358704043 |
| 0.42765867  | 0.297161859 | 0.254623538 | 0.305255393 |
| 0.466294744 | 0.366165983 | 0.159082866 | 0.301162792 |
| 0.353853685 | 0.076523585 | 0.355097747 | 0.515042665 |
| 0.229150368 | 0.28686207  | 0.434223772 | 0.239551877 |

|             |             |             |             |
|-------------|-------------|-------------|-------------|
| 0.361308295 | 0.373324981 | 0.376315252 | 0.506116613 |
| 0.121335253 | 0.266948465 | 1           | 0.439609951 |
| 0.312356981 | 0.256487918 | 0.304350459 | 0.282886588 |
| 0.428036256 | 0.121736683 | 0.325205793 | 0.33492637  |
| 0.278651921 | 0.334290334 | 0.305993615 | 0.263356324 |
| 0.057045138 | 0.218858429 | 0.377071232 | 0.165381836 |
| 0.315456104 | 0.378713714 | 0.308452337 | 0.383611961 |
| 0.180301688 | 0.038864193 | 0.449042279 | 0.033558292 |
| 0.321515312 | 0.392334209 | 0.278200016 | 0.382089004 |
| 0.179728208 | 0.346590964 | 0.304496574 | 0.00151636  |
| 0.395689411 | 0.083173553 | 0.358191853 | 0.280286751 |
| 0.319981544 | 0.066098082 | 0.444088883 | 0.509844332 |
| 0.32237634  | 0.356510099 | 0.345585846 | 0.44706279  |
| 0.22453511  | 0.3545988   | 0.363601575 | 0.361599323 |
| 0.300457983 | 0.341519766 | 0.3885456   | 0.38303278  |
| 0.359973969 | 0.301466128 |             |             |
| UBE2T       | 0.14415253  | 0.44057674  | 0.117484073 |
| 0.196578869 | 0.326966243 | 0.425975424 | 0.126555203 |
| 0.219798221 | 0.413437301 | 0.361330059 | 0.392336446 |
| 0.045947205 | 0.091132582 | 0.459597584 | 0.113636677 |
| 0.409090508 | 0.074123963 | 0.188162918 | 0.126879029 |
| 0.299669456 | 0.308773238 | 0.344182072 | 0.442810709 |
| 0.317743371 | 0.258394174 | 0.420231602 | 0.40621593  |
| 0.483645175 | 0.272275051 | 0.444925759 | 0.236227402 |
| 0.422227454 | 0.341643344 | 0.389286114 | 0.045036306 |
| 0.44239571  | 0.020183685 | 0.459355654 | 0.315136493 |
| 0.15622679  | 0.379974528 | 0.399484752 | 0.293126881 |
| 0.437893476 | 0.085482118 | 0.244337071 | 0.436387709 |
| 0.409816047 | 0.347563226 | 0.13714134  | 0.455267902 |
| 0.428979277 | 0.408184062 | 0.441453741 | 0.007952029 |
| 0.302556395 | 0.088071985 | 0.232263776 | 0.501041357 |
| 0.276313181 | 0.188252363 | 0.326048728 | 0.337376277 |
| 0.432002483 | 0.417787222 | 0.324148647 | 0.430827694 |
| 0.488172115 | 0.191587723 | 0.453185277 | 0.211236933 |
| 0.438778273 | 0.087383898 | 0.238829608 | 0.169704636 |
| 0.411948668 | 0.261481496 | 0.365197951 | 0.320424453 |
| 0.442344326 | 0.522723069 | 0.319510532 | 0.511157804 |
| 0.127565231 | 0.357163829 | 0.302265116 | 0.353842549 |
| 0.421375067 | 0.166995303 | 0.441709541 | 0.516972935 |
| 0.114686192 | 0.441419016 | 0.453391491 | 0.216409046 |
| 0.447869931 | 0.302939207 | 0.438224408 | 0.17835875  |
| 0.386399813 | 0.370231661 | 0.48956605  | 0.362901021 |
| 0.339433087 | 0.147781504 | 0.502431331 | 0.330637651 |
| 0.324628573 | 0.156196298 | 0.268932951 | 0.461368422 |
| 0.45133635  | 0.474782033 | 0.460269113 | 0.420483396 |
| 0.404698094 | 0.484565246 | 0.444349929 | 0.439290653 |
| 0.193021397 | 0.518297036 | 0.268477817 | 0.082985161 |
| 0.153435015 | 0.142538372 | 0.283265044 | 0.355385784 |
| 0.459853322 | 0.408105913 | 0.294495293 | 0.287888631 |
| 0.446328799 | 0.490555349 | 0.520347201 | 0.457492194 |
| 0.089070189 | 0.270015427 | 0.407102527 | 0.351791451 |
| 0.431393835 | 0.196996286 | 0.26975916  | 0.518899245 |
| 0.411457642 | 0.44782186  | 0.268713594 | 0.516896389 |
| 0.298362881 | 0.500153324 | 0.458378736 | 0.241985549 |

|             |             |             |             |
|-------------|-------------|-------------|-------------|
| 0.519048885 | 0.503174925 | 0.48917973  | 0.406024903 |
| 0.475082537 | 0.405676388 | 0.102508253 | 0.431604703 |
| 0.466539241 | 0.016689837 | 0.466905927 | 0.47344632  |
| 0.498612976 | 0.464234085 | 0.499720785 | 0.484605631 |
| 0.503417795 | 0.148390799 | 0.042074444 | 0.335677215 |
| 0.512513501 | 0.427404799 | 0.196342061 | 0.437569179 |
| 0.385491854 | 0.449660899 | 0.448366082 | 0.338605066 |
| 0.505071218 | 0.456607963 | 0.468570822 | 0.456678491 |
| 0.396759026 | 0.365807955 | 0.388020223 | 0.48429897  |
| 0.091755862 | 0.199221494 | 0.115146973 | 0.371520314 |
| 0.397278552 | 0.240808378 | 0.459612164 | 0.394615162 |
| 0.26362089  | 0.425154394 | 0.338556608 | 0.395745732 |
| 0.121012119 | 0.458605311 | 0.250982664 | 0.278796224 |
| 0.084472234 | 0.217234219 | 0.263300668 | 0.20740662  |
| 0.303567529 | 0.291720753 | 0.462170017 | 0.468573871 |
| 0.395455436 | 0.268776508 | 0.468440591 | 0.46121685  |
| 0.41030296  | 0.392860503 | 0.308609929 | 0.020139349 |
| 0.33391588  | 0.345298843 | 0.200385389 | 0.421831945 |
| 0.236592534 | 0.325014134 | 0.434166359 | 0.404228474 |
| 0.376880601 | 0.243874131 | 0.405153155 | 0.440087241 |
| 0.243265787 | 0.329673237 | 0.454274081 | 0.460070865 |
| 0.010935808 | 0.402636218 | 0.461032422 | 0.185680444 |
| 0.403049231 | 0.145425755 | 0.25105104  | 0.458640362 |
| 0.328657978 | 0.25505094  | 0.463692431 | 0.401219425 |
| 0.388741533 | 0.279737    | 0.506881695 | 0.068442132 |
| 0.37676677  | 0.073843587 | 0.332219486 | 0.399817612 |
| 0.330816678 | 0.354577846 | 0.3295779   | 0.30518768  |
| 0.216672851 | 0.512456456 | 0.432244012 | 0.489421806 |
| 0.407406635 | 0.512073295 | 0.461221052 | 0.446419364 |
| 0.414466591 | 0.401527705 | 0.139450515 | 0.462843623 |
| 0.457703228 | 0.378599558 | 0.148369215 | 0.460630972 |
| 0.421448844 | 0.429486409 | 0.156146718 | 0.473650919 |
| 0.496084391 | 0.480983894 | 0.206738139 | 0.397982056 |
| 0.42177423  | 0.314712637 | 0.437616587 | 0.512606689 |
| 0.38211878  | 0.389503112 | 0.364048262 | 0.407548867 |
| 0.259816676 | 0.242235935 | 0.371824347 | 0.183959658 |
| 0.009540279 | 0.165307694 | 0.135592048 | 0.211907287 |
| 0.175780123 | 0.445066268 | 0.428615907 | 0.506130371 |
| 0.189852013 | 0.428824807 | 0.325216948 | 0.336726313 |
| 0.440728207 | 0.387001579 | 0.380865049 | 0.408599157 |
| 0.32465136  | 0.032281902 | 0.160539406 | 0.527277095 |
| 0.100967715 | 0.248533885 | 0.406449184 | 0.004131649 |
| 0.104499983 | 0.448889273 | 0.171040552 | 0.252004443 |
| 0.446245818 | 0.259661739 | 0.305406663 | 0.40121975  |
| 0.386448942 | 0.164070627 | 0.004794128 | 0.471111034 |
| 0.482596744 | 0.455795516 | 0.484557149 | 0.468413947 |
| 0.444758745 | 0.435630455 | 0.437820281 | 0.423632645 |
| 0.188673243 | 0.180801703 | 0.237333819 | 0.34497509  |
| 0.011822104 | 0.407008105 | 0.346105811 | 0.219817935 |
| 0.445796898 | 0.381143171 | 0.082645163 | 0.376539072 |
| 0.04865415  | 0.20776055  | 0.399844199 | 0.292467897 |
| 0.375918914 | 0.040082404 | 0.267787739 | 0.365015327 |
| 0.439636386 | 0.401022733 | 0.372767418 | 0.520461005 |
| 0.374723541 | 0.221375643 | 0.347558654 | 0.41540694  |

|             |             |             |             |
|-------------|-------------|-------------|-------------|
| 0.139988418 | 0.175446524 | 0.428535002 | 0.048429431 |
| 0.242023142 | 0.458740998 | 0.419091636 | 0.13775404  |
| 0.342967066 | 0.015886718 | 0.411681979 | 0.51963468  |
| 0.472689092 | 0.495062436 | 0.484251938 | 0.275083506 |
| 0.494973052 | 0.110066313 | 0.511418285 | 0.449127532 |
| 0.423004643 | 0.002363843 | 0.010851925 | 0.464010697 |
| 0.422963182 | 0.123555904 | 0.238430303 | 0.397486137 |
| 0.164266517 | 0.253588031 | 0.127563272 | 0.197549737 |
| 0.447254218 | 0.272127183 | 0.196884336 | 0.48344022  |
| 0.311872947 | 0.296470718 | 0.456812374 | 0.167040969 |
| 0.419842956 | 0.101283977 | 0.167967016 | 0.010924631 |
| 0.39370538  | 0.196764502 | 0.493888017 | 0.498768902 |
| 0.484850453 | 0.410991411 | 0.381148624 | 0.37618457  |
| 0.439689903 | 0.179229176 | 0.386547221 | 0.200075066 |
| 0.482790663 | 0.422746975 | 0.375997603 | 0.370666728 |
| 0.485423894 | 0.466876968 | 0.076668648 | 0.440263058 |
| 0.025798116 | 0.002498715 | 0.438625097 | 0.344444408 |
| 0.091275992 | 0.398927666 | 0.326912047 | 0.318315855 |
| 0.288327169 | 0.069756104 | 0.274605259 | 0.263951856 |
| 0.357256522 | 0.410537111 | 0.292187113 | 0.329573647 |
| 0.298051432 | 0.175460289 | 0.25459113  | 0.234829567 |
| 0.317668503 | 0.37595408  | 0.263511807 | 0.056543987 |
| 0.446859683 | 0.431009403 | 0.114357128 | 0.243308815 |
| 0.45162684  | 0.466790853 | 0.088204646 | 0.021356887 |
| 0.342355255 | 0.378031493 | 0.469929251 | 0.490644254 |
| 0.525929327 | 0.505686833 | 0.408726152 | 0.179146762 |
| 0.129578232 | 0.361788866 | 0.31240399  | 0.129973634 |
| 0.495675349 | 0.143651763 | 0.47888594  | 0.304584518 |
| 0.199087447 | 0.289069488 | 0.065816174 | 0.155370143 |
| 0.388215104 | 0.256285239 | 0.227848453 | 0.241115851 |
| 0.361767084 | 0.263549586 | 0.106351596 | 0.273817964 |
| 0.418950125 | 0.190710025 | 0.247033171 | 0.386628568 |
| 0.415462119 | 0.296748169 | 0.451076219 | 0.443307384 |
| 0.212252384 | 0.203027566 | 0.371410666 | 0.425360028 |
| 0.467578084 | 0.428827572 | 0.04603108  | 0.451276819 |
| 0.466738329 | 0.457539614 | 0.49507111  | 0.413426676 |
| 0.161484315 | 0.391564714 | 0.341750389 | 0.387476485 |
| 0.271020272 | 0.428227797 | 0.313891929 | 0.128536843 |
| 0.349955337 | 0.491717992 | 0.449220558 | 0.222959356 |
| 0.442011707 | 0.226876923 | 0.131005392 | 0.451413432 |
| 0.19773127  | 0.158494572 | 0.410910086 | 0.450976401 |
| 0.003117064 | 0.13942115  | 0.465466419 | 0.29722307  |
| 0.510046552 | 0.457868153 | 0.433242142 | 0.334831201 |
| 0.003010033 | 0.427191687 | 0.410858334 | 0.424065129 |
| 0.460486621 | 0.410029281 | 0.214941355 | 0.123581444 |
| 0.338564079 | 0.156581157 | 0.19967979  | 0.384906747 |
| 0.189535601 | 0.465812194 | 0.268603618 | 0.299932355 |
| 0.25108502  | 0.180670198 | 0.241212897 | 0.310023577 |
| 0.175507469 | 0.306145067 | 0.393616653 | 0.3584505   |
| 0.221454884 | 0.443223891 | 0.456362091 | 0.062802932 |
| 0.365594773 | 0.43307289  | 0.433246041 | 0.005710671 |
| 0.445816698 | 0.01965372  | 0.246447704 | 0.259305821 |
| 0.248658146 | 0.275962032 | 0.302274575 | 0.328344894 |
| 0.431419791 | 0.301681025 | 0.32915572  | 0.296915635 |

|             |             |             |             |
|-------------|-------------|-------------|-------------|
| 0.208181085 | 0.307100136 | 0.41928424  | 0.42489564  |
| 0.306104469 | 0.196311252 | 0.170441396 | 0.165493567 |
| 0.091337489 | 0.455078756 | 0.308190988 | 0.143608256 |
| 0.29210787  | 0.432504749 | 0.379376927 | 0.493966778 |
| 0.41901086  | 0.189114964 | 0.393145863 | 0.459895219 |
| 0.293508286 | 0.378007278 | 0.139686061 | 0.439098469 |
| 0.311310836 | 0.237678741 | 0.442938728 | 0.405450952 |
| 0.458197555 | 0.407073896 | 0.30792546  | 0.42700207  |
| 0.404059044 | 0.405484041 | 0.379514464 | 0.125627177 |
| 0.261761153 | 0.218502702 | 0.282874097 | 0.005738097 |
| 0.404216765 | 0.348905511 | 0.467562081 | 0.491002519 |
| 0.298741796 | 0.400434522 | 0.375934272 | 0.160751515 |
| 0.332961474 | 0.250125353 | 0.223256165 | 0.460806582 |
| 0.219707259 | 0.254061878 | 0.333924682 | 0.398627284 |
| 0.451325596 | 0.446975997 | 0.285654883 | 0.341423972 |
| 0.313218214 | 0.291085108 | 0.487928448 | 0.213028425 |
| 0.450910454 | 0.201277604 | 0.426416142 | 0.338667071 |
| 0.276966356 | 0.495236172 | 0.123157481 | 0.50403767  |
| 0.373038868 | 0.213083148 | 0.490061391 | 0.372845786 |
| 0.366081346 | 0.155533344 | 0.190019707 | 0.44381617  |
| 0.306194839 | 0.337365186 | 0.024800139 | 0.089963064 |
| 0.367893621 | 0.370648603 | 0.454114174 | 0.413394494 |
| 0.265959041 | 0.376606644 | 0.164712486 | 0.397285175 |
| 0.490108465 | 0.510196645 | 0.31970436  | 0.316732073 |
| 0.410607241 | 0.162590357 | 0.446192263 | 0.029199144 |
| 0.448534534 | 0.432245441 | 0.418737918 | 0.106642728 |
| 0.047386071 | 0.223051668 | 0.458400188 | 0.145895511 |
| 0.455111396 | 0.21669244  | 0.423790564 | 0.451648448 |
| 0.266352248 | 0.513483991 | 0.171553754 | 0.428351149 |
| 0.117276648 | 0.331178895 | 0.385804186 | 0.419294744 |
| 0.254605784 | 0.308380645 | 0.408597576 | 0.239827653 |
| 0.068972152 | 0.296275645 | 0.006085103 | 0.424271047 |
| 0.490072986 | 0.359030609 | 0.278433218 | 0.355458804 |
| 0.326768507 | 0.411221644 | 0.29618346  | 0.429118776 |
| 0.022095405 | 0.381171242 | 0.27087669  | 0.440384424 |
| 0.26166615  | 0.428257301 | 0.095119643 | 0.34277714  |
| 0.48458028  | 0.338190537 | 0.325575965 | 0.350550958 |
| 0.485187834 | 0.427052734 | 0.249635949 | 0.252304511 |
| 0.438541076 | 0.132941824 | 0.424869958 | 0.517656697 |
| 0.227685794 | 0.224756554 | 0.444931319 | 0.269300225 |
| 0.324010512 | 0.422359996 | 0.437087123 | 0.512573147 |
| 0.11034941  | 0.317111396 | 0.439609951 | 1           |
| 0.346967109 | 0.189592779 | 0.257443792 | 0.270385646 |
| 0.462532166 | 0.145702819 | 0.29295916  | 0.421335761 |
| 0.230914012 | 0.36105458  | 0.408646126 | 0.223780252 |
| 0.065748693 | 0.251355613 | 0.394080334 | 0.223930274 |
| 0.360977499 | 0.390649272 | 0.26900407  | 0.398240687 |
| 0.170735409 | 0.04282381  | 0.446907742 | 0.021605664 |
| 0.403442822 | 0.410305066 | 0.312145915 | 0.381436148 |
| 0.25994891  | 0.43214299  | 0.427413083 | 0.003889716 |
| 0.432781385 | 0.055977178 | 0.340783484 | 0.256834932 |
| 0.322857199 | 0.113508651 | 0.450271675 | 0.485035416 |
| 0.387820663 | 0.355807881 | 0.360411005 | 0.455217678 |
| 0.153984827 | 0.341316166 | 0.364767081 | 0.464285584 |

|             |             |             |             |
|-------------|-------------|-------------|-------------|
| 0.226419283 | 0.428648169 | 0.433218893 | 0.37622421  |
| 0.431606659 | 0.350241943 |             |             |
| UBL4        | 0.190449264 | 0.29214652  | 0.11522489  |
| 0.243783664 | 0.308841922 | 0.262147029 | 0.202086351 |
| 0.28771858  | 0.243641189 | 0.130423263 | 0.323449297 |
| 0.117252472 | 0.108295931 | 0.363577771 | 0.214350749 |
| 0.276474118 | 0.198530171 | 0.273844403 | 0.10575823  |
| 0.226974099 | 0.315884351 | 0.252445274 | 0.238069731 |
| 0.306376514 | 0.245334435 | 0.236158449 | 0.223620595 |
| 0.351460564 | 0.132278882 | 0.270189256 | 0.084997611 |
| 0.386341998 | 0.298633213 | 0.214028936 | 0.084670814 |
| 0.28344637  | 0.030931529 | 0.38229407  | 0.330554726 |
| 0.167339823 | 0.358136005 | 0.15469047  | 0.349537991 |
| 0.187822031 | 0.127426289 | 0.081312706 | 0.246273792 |
| 0.233380585 | 0.3057514   | 0.128011184 | 0.257935505 |
| 0.236279024 | 0.29601041  | 0.196231682 | 0.011180352 |
| 0.207112007 | 0.055397918 | 0.141847545 | 0.378096256 |
| 0.327051643 | 0.336994455 | 0.135381983 | 0.262890123 |
| 0.243206687 | 0.280404183 | 0.335765407 | 0.187171072 |
| 0.382615284 | 0.173054223 | 0.241999086 | 0.219131995 |
| 0.264029833 | 0.103821077 | 0.282079089 | 0.137793562 |
| 0.248840525 | 0.372711355 | 0.325357926 | 0.235884621 |
| 0.276197723 | 0.431349649 | 0.309451947 | 0.364649067 |
| 0.139501753 | 0.263137305 | 0.291690779 | 0.341847022 |
| 0.273956187 | 0.201823393 | 0.302280871 | 0.418345814 |
| 0.139955495 | 0.184685951 | 0.257774997 | 0.187214497 |
| 0.307540423 | 0.195631668 | 0.185052262 | 0.201085405 |
| 0.28638171  | 0.279553688 | 0.378016706 | 0.330186178 |
| 0.302589891 | 0.141351517 | 0.365140253 | 0.25720339  |
| 0.328332662 | 0.170608571 | 0.283536574 | 0.309872238 |
| 0.275233061 | 0.36142301  | 0.275889538 | 0.301311944 |
| 0.260798403 | 0.378309661 | 0.28743787  | 0.334097779 |
| 0.059002465 | 0.386360099 | 0.289738717 | 0.227969148 |
| 0.145020098 | 0.306894797 | 0.244358093 | 0.347452874 |
| 0.340955599 | 0.317690721 | 0.303391698 | 0.350993446 |
| 0.355388697 | 0.345089228 | 0.375177537 | 0.316400858 |
| 0.164783747 | 0.18602457  | 0.257107039 | 0.297457215 |
| 0.29891086  | 0.2480984   | 0.245342609 | 0.398608218 |
| 0.362055059 | 0.321277502 | 0.230239073 | 0.42075778  |
| 0.282324074 | 0.431377876 | 0.294383922 | 0.323393839 |
| 0.408463095 | 0.383840914 | 0.416931612 | 0.277360885 |
| 0.390406657 | 0.278464302 | 0.077457946 | 0.30774028  |
| 0.432248614 | 0.031647967 | 0.328664002 | 0.355462434 |
| 0.359049074 | 0.311830203 | 0.415102419 | 0.378613363 |
| 0.362290743 | 0.186571208 | 0.018510182 | 0.344392815 |
| 0.381204893 | 0.346218964 | 0.338180507 | 0.228621085 |
| 0.291315501 | 0.269277784 | 0.285167548 | 0.209879692 |
| 0.45501286  | 0.337025592 | 0.339545379 | 0.279266801 |
| 0.206852734 | 0.348103308 | 0.216920342 | 0.356793473 |
| 0.201266345 | 0.213560966 | 0.118084176 | 0.308788001 |
| 0.170749346 | 0.357259426 | 0.259436377 | 0.27398789  |
| 0.350571816 | 0.251908224 | 0.197414216 | 0.292672891 |
| 0.105620747 | 0.238914686 | 0.272004507 | 0.233907037 |
| 0.210794045 | 0.231185198 | 0.30566539  | 0.331719219 |

|             |             |             |             |
|-------------|-------------|-------------|-------------|
| 0.366131625 | 0.265092674 | 0.251526428 | 0.368069257 |
| 0.26269269  | 0.22359619  | 0.269882173 | 0.41704925  |
| 0.431968258 | 0.265320454 | 0.303582582 | 0.071689466 |
| 0.243896057 | 0.147263232 | 0.14837105  | 0.235054969 |
| 0.240537092 | 0.301688396 | 0.278353468 | 0.304160891 |
| 0.252363032 | 0.211249514 | 0.258962296 | 0.407288364 |
| 0.187798901 | 0.324274865 | 0.359169597 | 0.222762281 |
| 0.032004643 | 0.299429427 | 0.316578791 | 0.268711802 |
| 0.275492047 | 0.169912809 | 0.19091086  | 0.34455121  |
| 0.205598456 | 0.263770808 | 0.3579406   | 0.302160532 |
| 0.240881423 | 0.234793739 | 0.411316461 | 0.043001021 |
| 0.251870177 | 0.18140091  | 0.35799965  | 0.156601994 |
| 0.318433824 | 0.341668775 | 0.286892284 | 0.312396136 |
| 0.176246936 | 0.392180712 | 0.330757864 | 0.38222433  |
| 0.219365553 | 0.413405766 | 0.330462665 | 0.366646848 |
| 0.311032417 | 0.205612716 | 0.117288323 | 0.308610056 |
| 0.333449937 | 0.185062184 | 0.129884279 | 0.269860814 |
| 0.194491296 | 0.274913401 | 0.261802676 | 0.396209447 |
| 0.434748013 | 0.324349992 | 0.36235011  | 0.326220322 |
| 0.342316837 | 0.310411064 | 0.326788276 | 0.42972891  |
| 0.146089683 | 0.264330116 | 0.268413217 | 0.365402111 |
| 0.279888881 | 0.276829    | 0.332745522 | 0.143414416 |
| 0.007476285 | 0.183552373 | 0.163498411 | 0.369128192 |
| 0.22496448  | 0.213017023 | 0.28807057  | 0.389724603 |
| 0.302902222 | 0.367022008 | 0.277963269 | 0.294255833 |
| 0.33091984  | 0.266695217 | 0.255767889 | 0.293008179 |
| 0.306509566 | 0.098891372 | 0.293142107 | 0.429481422 |
| 0.09115594  | 0.235270535 | 0.283197384 | 0.018598978 |
| 0.152800967 | 0.237739138 | 0.154740293 | 0.275985322 |
| 0.388580157 | 0.253315789 | 0.251619959 | 0.154663179 |
| 0.344088862 | 0.243510147 | 0.034735454 | 0.353971264 |
| 0.363856951 | 0.350089747 | 0.356988484 | 0.350723031 |
| 0.328779273 | 0.271269767 | 0.307174046 | 0.242143146 |
| 0.268145539 | 0.170796286 | 0.212368791 | 0.327168738 |
| 0.013812811 | 0.338110316 | 0.313602903 | 0.273094574 |
| 0.281862925 | 0.307572832 | 0.169247131 | 0.284095402 |
| 0.084168912 | 0.139099143 | 0.267722955 | 0.343890597 |
| 0.321973712 | 0.085649903 | 0.153421797 | 0.217624939 |
| 0.334371912 | 0.321303667 | 0.213121875 | 0.399170666 |
| 0.34044024  | 0.139631696 | 0.317264575 | 0.315575578 |
| 0.234852375 | 0.070979808 | 0.243606591 | 0.017107242 |
| 0.167541458 | 0.368510403 | 0.248100265 | 0.16139666  |
| 0.327808927 | 0.045942685 | 0.316586099 | 0.413319831 |
| 0.326698969 | 0.391495006 | 0.387409763 | 0.238193727 |
| 0.382329105 | 0.062249391 | 0.387093212 | 0.289534138 |
| 0.175726055 | 0.005508269 | 0.049641785 | 0.349453195 |
| 0.270294442 | 0.095839401 | 0.296879915 | 0.218767212 |
| 0.311256325 | 0.199710963 | 0.229428502 | 0.268256807 |
| 0.267052593 | 0.350764994 | 0.263769694 | 0.346030511 |
| 0.338682345 | 0.360090658 | 0.217887646 | 0.168803693 |
| 0.281484938 | 0.213023632 | 0.168847293 | 0.039221658 |
| 0.317401299 | 0.154732568 | 0.368289134 | 0.373598202 |
| 0.421793818 | 0.300699143 | 0.143090561 | 0.244305432 |
| 0.334966843 | 0.120502327 | 0.201421585 | 0.153636771 |

|             |             |             |             |
|-------------|-------------|-------------|-------------|
| 0.339935926 | 0.285033615 | 0.33860288  | 0.310318599 |
| 0.413339896 | 0.381479872 | 0.165931247 | 0.306688049 |
| 0.070546882 | 0.015369792 | 0.222977338 | 0.319135103 |
| 0.080843409 | 0.257005866 | 0.309042537 | 0.241162456 |
| 0.303469146 | 0.128437467 | 0.210397364 | 0.223205762 |
| 0.336355851 | 0.306312372 | 0.287983672 | 0.269791594 |
| 0.30917993  | 0.235774638 | 0.363726336 | 0.336513952 |
| 0.213409237 | 0.280850781 | 0.244426673 | 0.123095967 |
| 0.221485521 | 0.255619522 | 0.200848442 | 0.268362619 |
| 0.347762803 | 0.362346794 | 0.187694711 | 0.095361138 |
| 0.300351332 | 0.303739008 | 0.3877264   | 0.349154479 |
| 0.405290275 | 0.431930053 | 0.389951    | 0.328944836 |
| 0.221728916 | 0.32465439  | 0.284479848 | 0.306367765 |
| 0.386008169 | 0.119014344 | 0.362818458 | 0.227454216 |
| 0.247605576 | 0.314266728 | 0.201667098 | 0.246186828 |
| 0.254130196 | 0.325189636 | 0.368640947 | 0.179974046 |
| 0.31990091  | 0.228071178 | 0.188084396 | 0.334969423 |
| 0.299963984 | 0.156520324 | 0.298707319 | 0.277172514 |
| 0.279495801 | 0.104495706 | 0.266395628 | 0.420597634 |
| 0.232393452 | 0.212903835 | 0.210339166 | 0.287226263 |
| 0.289884728 | 0.19122114  | 0.102193963 | 0.294627082 |
| 0.390744475 | 0.256279926 | 0.37288983  | 0.38132813  |
| 0.187633173 | 0.278621464 | 0.217066376 | 0.2936903   |
| 0.318810849 | 0.263286639 | 0.344500469 | 0.189233614 |
| 0.343199274 | 0.412888399 | 0.305406082 | 0.35654709  |
| 0.24197363  | 0.16093812  | 0.104840798 | 0.322490295 |
| 0.213780569 | 0.218436706 | 0.168218176 | 0.299407274 |
| 0.015980868 | 0.147155428 | 0.381640539 | 0.363309486 |
| 0.421291726 | 0.369931961 | 0.3925468   | 0.285239647 |
| 0.004073505 | 0.254129654 | 0.314636379 | 0.26738472  |
| 0.305734952 | 0.302885868 | 0.218773165 | 0.282081408 |
| 0.35018921  | 0.128514731 | 0.315813287 | 0.224676989 |
| 0.125812895 | 0.256742969 | 0.329715253 | 0.273500177 |
| 0.357586013 | 0.128615089 | 0.219080761 | 0.336609337 |
| 0.162646621 | 0.340873068 | 0.349749028 | 0.136546834 |
| 0.150282481 | 0.356427913 | 0.279830245 | 0.126453379 |
| 0.258923815 | 0.325144548 | 0.36572062  | 0.01357518  |
| 0.281616055 | 0.081593055 | 0.370593612 | 0.361456486 |
| 0.371427931 | 0.353693813 | 0.358292276 | 0.313947373 |
| 0.273692365 | 0.341407496 | 0.346027417 | 0.359651553 |
| 0.357053003 | 0.324467951 | 0.290992156 | 0.25612166  |
| 0.321374528 | 0.27968617  | 0.161608984 | 0.156876613 |
| 0.227061297 | 0.33191526  | 0.315397884 | 0.128230527 |
| 0.363190301 | 0.260906676 | 0.392426687 | 0.341056419 |
| 0.396957611 | 0.137194832 | 0.305926511 | 0.304911616 |
| 0.11013278  | 0.222569287 | 0.157668049 | 0.261240985 |
| 0.356513802 | 0.283918409 | 0.229549479 | 0.225226889 |
| 0.230409233 | 0.393121412 | 0.306314895 | 0.380113706 |
| 0.305582115 | 0.233323542 | 0.136021195 | 0.298366613 |
| 0.28658976  | 0.21897371  | 0.303075457 | 0.023853559 |
| 0.330013877 | 0.240333516 | 0.330550635 | 0.36249285  |
| 0.1968882   | 0.384467783 | 0.154409234 | 0.223184922 |
| 0.115613767 | 0.189324619 | 0.263825633 | 0.263490644 |
| 0.149643145 | 0.341171391 | 0.32540039  | 0.210353457 |



|             |             |             |             |
|-------------|-------------|-------------|-------------|
| 0.28131607  | 0.24365952  | 0.285809011 | 0.314704256 |
| 0.320566214 | 0.237786877 | 0.377080655 | 0.198135306 |
| 0.222136168 | 0.280393472 | 0.188085234 | 0.326164376 |
| 0.354753215 | 0.373595886 | 0.175608621 | 0.378469355 |
| 0.281715113 | 0.198501528 | 0.443072283 | 0.294241198 |
| 0.284083833 | 0.339602288 | 0.153150593 | 0.217569377 |
| 0.328429749 | 0.220885354 | 0.006957369 | 0.091403311 |
| 0.348574911 | 0.210780175 | 0.240209294 | 0.294654247 |
| 0.288953239 | 0.348415532 | 0.139699694 | 0.281108832 |
| 0.334482911 | 0.381156966 | 0.297831902 | 0.319558196 |
| 0.311358126 | 0.300006575 | 0.237274941 | 0.026533224 |
| 0.248606669 | 0.220034445 | 0.194478218 | 0.226417862 |
| 0.123674322 | 0.161008226 | 0.245164431 | 0.125717263 |
| 0.373950784 | 0.141629063 | 0.212044238 | 0.271148117 |
| 0.249305025 | 0.386313878 | 0.356435787 | 0.310489193 |
| 0.112801519 | 0.319619003 | 0.239895995 | 0.226523087 |
| 0.308823207 | 0.256873177 | 0.323563715 | 0.237696003 |
| 0.181540034 | 0.330373794 | 0.012892124 | 0.387996174 |
| 0.345997624 | 0.235263793 | 0.276857044 | 0.135610336 |
| 0.361175516 | 0.33104748  | 0.291878428 | 0.219377056 |
| 0.096388489 | 0.277088294 | 0.351937262 | 0.321849361 |
| 0.132087696 | 0.240244968 | 0.239682987 | 0.261080716 |
| 0.36686932  | 0.25619915  | 0.311314726 | 0.171574454 |
| 0.34749434  | 0.283291095 | 0.170504954 | 0.309016944 |
| 0.212043818 | 0.15605271  | 0.192443641 | 0.410104069 |
| 0.373665013 | 0.243653293 | 0.341098964 | 0.336394399 |
| 0.240943125 | 0.323013806 | 0.209311706 | 0.397074657 |
| 0.298226084 | 0.352078277 | 0.312356981 | 0.346967109 |
| 1           | 0.247961002 | 0.232747185 | 0.32228902  |
| 0.327713496 | 0.240524038 | 0.248760283 | 0.300850508 |
| 0.202002598 | 0.351348419 | 0.182059642 | 0.33275809  |
| 0.192779174 | 0.333571929 | 0.283774714 | 0.269385075 |
| 0.346838924 | 0.295277378 | 0.295739768 | 0.398207874 |
| 0.320725038 | 0.133250121 | 0.421916545 | 0.02920688  |
| 0.25352066  | 0.306799565 | 0.354766309 | 0.292480268 |
| 0.242320864 | 0.285910774 | 0.219854004 | 0.01542663  |
| 0.329438207 | 0.093416405 | 0.295539129 | 0.314137862 |
| 0.217716556 | 0.173337279 | 0.369414641 | 0.401749908 |
| 0.303407882 | 0.210944498 | 0.187469368 | 0.359209553 |
| 0.165438589 | 0.169263299 | 0.213926462 | 0.229921619 |
| 0.206428442 | 0.174700859 | 0.215617361 | 0.218829133 |
| 0.288221729 | 0.319764375 |             |             |
| UBL7        | 0.018290823 | 0.141222381 | 0.008702258 |
| 0.038607359 | 0.307141528 | 0.066060024 | 0.027564865 |
| 0.043572561 | 0.134203173 | 0.035655496 | 0.158009593 |
| 0.008990817 | 0.177710111 | 0.203907096 | 0.032206297 |
| 0.24937883  | 0.029389828 | 0.061781207 | 0.04089353  |
| 0.076712547 | 0.298603706 | 0.111453663 | 0.063234574 |
| 0.287164672 | 0.069874501 | 0.094320189 | 0.184730515 |
| 0.191287458 | 0.054660667 | 0.180111223 | 0.021280132 |
| 0.194395227 | 0.310243908 | 0.141421103 | 0.004797483 |
| 0.137682726 | 0.092064351 | 0.174918282 | 0.149258307 |
| 0.155614202 | 0.158450631 | 0.039850366 | 0.115928465 |
| 0.07316361  | 0.008143878 | 0.017796273 | 0.228277291 |

|             |             |             |             |
|-------------|-------------|-------------|-------------|
| 0.114203554 | 0.103100671 | 0.01400995  | 0.164978843 |
| 0.085473653 | 0.114539473 | 0.093548235 | 0.000747051 |
| 0.171887776 | 0.10564243  | 0.136828544 | 0.177854481 |
| 0.1211395   | 0.09422209  | 0.075312303 | 0.091341068 |
| 0.186029002 | 0.257063942 | 0.200883698 | 0.063593834 |
| 0.194842357 | 0.195912007 | 0.197352533 | 0.045428905 |
| 0.095521598 | 0.010251453 | 0.10261755  | 0.028997367 |
| 0.110338813 | 0.157797045 | 0.20638307  | 0.204967389 |
| 0.121717667 | 0.213076484 | 0.152455248 | 0.162222769 |
| 0.2105288   | 0.298497128 | 0.182339193 | 0.267734799 |
| 0.221442561 | 0.040136342 | 0.199914251 | 0.22037523  |
| 0.019021286 | 0.080705316 | 0.179654018 | 0.043353533 |
| 0.150207716 | 0.145844514 | 0.066645073 | 0.182866264 |
| 0.317501728 | 0.260592824 | 0.185728965 | 0.154115356 |
| 0.222932561 | 0.021625177 | 0.144616395 | 0.313540747 |
| 0.129399711 | 0.02521818  | 0.182518662 | 0.239149556 |
| 0.171164454 | 0.193096043 | 0.163486784 | 0.221954984 |
| 0.219090269 | 0.200243084 | 0.169592974 | 0.185618184 |
| 0.019548777 | 0.196725657 | 0.073831355 | 0.030913122 |
| 0.012801082 | 0.063106318 | 0.169584587 | 0.210082937 |
| 0.214898137 | 0.152085003 | 0.059498796 | 0.202026914 |
| 0.292411571 | 0.138011706 | 0.193772808 | 0.198096399 |
| 0.015848968 | 0.177008555 | 0.200782251 | 0.057154587 |
| 0.206598772 | 0.072554384 | 0.263478965 | 0.174794727 |
| 0.170667711 | 0.260779834 | 0.031865365 | 0.184664875 |
| 0.092714857 | 0.236137254 | 0.141406523 | 0.094432281 |
| 0.195098988 | 0.160618905 | 0.254631257 | 0.282378601 |
| 0.172440385 | 0.079221223 | 0.044836727 | 0.19496634  |
| 0.251865622 | 0.034261867 | 0.218702625 | 0.237513148 |
| 0.171834168 | 0.230026729 | 0.272744461 | 0.228129464 |
| 0.169593876 | 0.035814001 | 0.033575997 | 0.291237011 |
| 0.176689952 | 0.184424172 | 0.116699766 | 0.145414473 |
| 0.274792507 | 0.077362927 | 0.216265425 | 0.064296726 |
| 0.254857632 | 0.206585422 | 0.201964831 | 0.171105063 |
| 0.096694117 | 0.141339948 | 0.204230311 | 0.135322437 |
| 0.02465121  | 0.024010737 | 0.0141248   | 0.213180758 |
| 0.029692398 | 0.157994152 | 0.061678547 | 0.244417326 |
| 0.155435311 | 0.070065201 | 0.132021989 | 0.304114982 |
| 0.017136289 | 0.115843038 | 0.070128579 | 0.055711825 |
| 0.031107878 | 0.068138589 | 0.059629634 | 0.062506141 |
| 0.211273656 | 0.07379313  | 0.177505578 | 0.234120121 |
| 0.157803595 | 0.063627996 | 0.157516441 | 0.242294406 |
| 0.269264835 | 0.214454347 | 0.144403004 | 0.010312445 |
| 0.105353131 | 0.079658035 | 0.178972408 | 0.172678311 |
| 0.068069784 | 0.094715481 | 0.203620338 | 0.297005514 |
| 0.055090954 | 0.043070426 | 0.126196972 | 0.174305349 |
| 0.050658346 | 0.128258666 | 0.242597257 | 0.114140352 |
| 0.001449614 | 0.114030833 | 0.208236546 | 0.218585023 |
| 0.150192029 | 0.140624238 | 0.109129152 | 0.232418012 |
| 0.125641657 | 0.214725863 | 0.226335653 | 0.315479127 |
| 0.058623098 | 0.066191517 | 0.253439881 | 0.069552424 |
| 0.232619201 | 0.071015072 | 0.255115064 | 0.052875751 |
| 0.130975975 | 0.244271178 | 0.299383538 | 0.17928692  |
| 0.030145554 | 0.199489143 | 0.181442959 | 0.217673872 |

|             |             |             |             |
|-------------|-------------|-------------|-------------|
| 0.094876699 | 0.249598203 | 0.231313386 | 0.21435342  |
| 0.174424512 | 0.147131284 | 0.166800929 | 0.195778732 |
| 0.229877341 | 0.071256203 | 0.021912066 | 0.206551663 |
| 0.101213837 | 0.260853254 | 0.179380752 | 0.240750455 |
| 0.210367576 | 0.132834274 | 0.089327962 | 0.326189457 |
| 0.19058302  | 0.083293457 | 0.227944057 | 0.260557329 |
| 0.051092522 | 0.206084823 | 0.152786784 | 0.329560031 |
| 0.087786525 | 0.202355308 | 0.168056919 | 0.176670186 |
| 0.010065027 | 0.026852184 | 0.022432958 | 0.156548371 |
| 0.223946059 | 0.136207593 | 0.244447939 | 0.21283376  |
| 0.071368321 | 0.184642598 | 0.147178517 | 0.107262342 |
| 0.157557599 | 0.185510512 | 0.222282912 | 0.244322639 |
| 0.15068739  | 0.017075292 | 0.055594126 | 0.205579845 |
| 0.010659918 | 0.16605865  | 0.103451318 | 0.003022637 |
| 0.013812239 | 0.120213337 | 0.036162119 | 0.086222077 |
| 0.288436577 | 0.074856031 | 0.079495831 | 0.042873376 |
| 0.239784853 | 0.051092878 | 0.009381146 | 0.220387026 |
| 0.208282208 | 0.207899641 | 0.19748285  | 0.167565155 |
| 0.231215499 | 0.205022268 | 0.267381294 | 0.063035084 |
| 0.039731794 | 0.019675996 | 0.181344714 | 0.177235681 |
| 0.001570081 | 0.250879789 | 0.23924657  | 0.085374294 |
| 0.243839524 | 0.191313885 | 0.013788656 | 0.274877385 |
| 0.004910669 | 0.121800169 | 0.063862231 | 0.150409963 |
| 0.340815819 | 0.004980097 | 0.032950675 | 0.104307149 |
| 0.12601902  | 0.137961268 | 0.12328849  | 0.205237327 |
| 0.167440227 | 0.030670613 | 0.189188118 | 0.259502134 |
| 0.031759897 | 0.029339065 | 0.077160732 | 0.003818325 |
| 0.034657365 | 0.189100844 | 0.108847372 | 0.016635715 |
| 0.143412822 | 0.001711382 | 0.129662718 | 0.21552757  |
| 0.134338499 | 0.248495893 | 0.202509659 | 0.19915304  |
| 0.192289597 | 0.112506946 | 0.214495123 | 0.142655494 |
| 0.060683741 | 0.000224691 | 0.008930676 | 0.232029525 |
| 0.190148475 | 0.013493946 | 0.095721491 | 0.036380516 |
| 0.061492648 | 0.027599877 | 0.031827327 | 0.222128079 |
| 0.139529349 | 0.261571319 | 0.216644901 | 0.149969594 |
| 0.14406299  | 0.190075009 | 0.065058921 | 0.036260999 |
| 0.200239422 | 0.026133357 | 0.041194091 | 0.009833326 |
| 0.30019261  | 0.033697295 | 0.140683842 | 0.189873145 |
| 0.225942294 | 0.279247542 | 0.041728269 | 0.061065567 |
| 0.249271442 | 0.018626937 | 0.074253155 | 0.025324077 |
| 0.153508427 | 0.224697261 | 0.192887131 | 0.130586454 |
| 0.247063346 | 0.185942754 | 0.017424802 | 0.24032953  |
| 0.004787591 | 0.016420871 | 0.058097745 | 0.167098359 |
| 0.111388027 | 0.181569085 | 0.151596389 | 0.092205455 |
| 0.122603722 | 0.007882565 | 0.213754127 | 0.225551855 |
| 0.213394551 | 0.183667646 | 0.297473427 | 0.146407101 |
| 0.21804069  | 0.197237153 | 0.121949152 | 0.081784039 |
| 0.096012393 | 0.119840064 | 0.06915616  | 0.012003642 |
| 0.109453962 | 0.162291798 | 0.027176393 | 0.079047927 |
| 0.217417299 | 0.223008217 | 0.036201951 | 0.015157845 |
| 0.128569773 | 0.164546721 | 0.252410328 | 0.169007175 |
| 0.186474454 | 0.250978933 | 0.168793062 | 0.132991415 |
| 0.024431472 | 0.254634573 | 0.314344129 | 0.171011425 |
| 0.205880518 | 0.017719007 | 0.168020389 | 0.272055148 |

|             |             |             |             |
|-------------|-------------|-------------|-------------|
| 0.072467547 | 0.080155773 | 0.02561909  | 0.057794854 |
| 0.229448642 | 0.115508758 | 0.190594128 | 0.036504243 |
| 0.155785897 | 0.171732831 | 0.024754083 | 0.12537196  |
| 0.171313747 | 0.183166745 | 0.097810132 | 0.077923652 |
| 0.149150582 | 0.036764701 | 0.232502939 | 0.229627294 |
| 0.055612515 | 0.051961672 | 0.026321085 | 0.23404953  |
| 0.191262368 | 0.111840825 | 0.007235469 | 0.134651864 |
| 0.242057705 | 0.171285044 | 0.168545387 | 0.283626616 |
| 0.043311308 | 0.181671263 | 0.192921223 | 0.233360457 |
| 0.12755373  | 0.070309175 | 0.169100783 | 0.034552685 |
| 0.187793827 | 0.19831902  | 0.161946245 | 0.110607012 |
| 0.136339319 | 0.030449644 | 0.014270397 | 0.198428662 |
| 0.216089558 | 0.02368221  | 0.048614996 | 0.238973997 |
| 0.009847508 | 0.199787452 | 0.272751748 | 0.078472318 |
| 0.234423726 | 0.245650133 | 0.196069831 | 0.066965075 |
| 0.016190037 | 0.25445503  | 0.190619933 | 0.109703945 |
| 0.145592314 | 0.145036211 | 0.059568151 | 0.056821514 |
| 0.209308834 | 0.018935631 | 0.087427639 | 0.044112753 |
| 0.133823931 | 0.12154098  | 0.160678519 | 0.121581439 |
| 0.191016749 | 0.029362088 | 0.174637806 | 0.095172745 |
| 0.215281707 | 0.171168082 | 0.222754967 | 0.028501431 |
| 0.100062879 | 0.252405053 | 0.169046388 | 0.008720265 |
| 0.231923321 | 0.24105029  | 0.23206687  | 0.002678418 |
| 0.222228523 | 0.006143202 | 0.188645627 | 0.164388734 |
| 0.161672741 | 0.164347898 | 0.292878803 | 0.149302306 |
| 0.149209429 | 0.125263722 | 0.107286812 | 0.171827665 |
| 0.107293375 | 0.106495431 | 0.21697243  | 0.101819439 |
| 0.129474142 | 0.045529688 | 0.035129998 | 0.030053191 |
| 0.02626722  | 0.183717761 | 0.120826552 | 0.020110705 |
| 0.190192583 | 0.104245747 | 0.225976021 | 0.156091009 |
| 0.252618782 | 0.026171467 | 0.153313265 | 0.146393028 |
| 0.046628406 | 0.041957513 | 0.012086814 | 0.115802276 |
| 0.118447586 | 0.154383722 | 0.094190741 | 0.069824375 |
| 0.149436293 | 0.180543487 | 0.114363412 | 0.220600547 |
| 0.141586991 | 0.153356584 | 0.028225241 | 0.068286401 |
| 0.064021586 | 0.066126627 | 0.309315458 | 0.001136489 |
| 0.187205195 | 0.029864787 | 0.209807489 | 0.159377952 |
| 0.159291074 | 0.212626627 | 0.023680107 | 0.026752837 |
| 0.020655687 | 0.045586188 | 0.07807891  | 0.183055418 |
| 0.135984572 | 0.071373415 | 0.272495191 | 0.026442124 |
| 0.235566632 | 0.205893669 | 0.186102368 | 0.093528924 |
| 0.175463755 | 0.068585248 | 0.183199096 | 0.026421757 |
| 0.138438316 | 0.19275199  | 0.078016244 | 0.184207485 |
| 0.198258417 | 0.222794709 | 0.025982091 | 0.2242412   |
| 0.181988827 | 0.055130029 | 0.225610805 | 0.104811265 |
| 0.060960304 | 0.112133442 | 0.177815313 | 0.060665787 |
| 0.103508953 | 0.141452234 | 0.002917321 | 0.072461296 |
| 0.246155902 | 0.102288093 | 0.137766191 | 0.242219181 |
| 0.247614842 | 0.29480218  | 0.157150978 | 0.086357245 |
| 0.138063865 | 0.159728203 | 0.076559993 | 0.186597101 |
| 0.181579442 | 0.049193412 | 0.084870465 | 0.018961946 |
| 0.178892628 | 0.168108367 | 0.059134277 | 0.028876358 |
| 0.0116779   | 0.162020706 | 0.154294011 | 0.024439866 |
| 0.277500461 | 0.11225592  | 0.124853171 | 0.185010503 |

|             |             |             |             |
|-------------|-------------|-------------|-------------|
| 0.093827819 | 0.158916402 | 0.121401448 | 0.226536002 |
| 0.016572954 | 0.170612854 | 0.20190035  | 0.143126958 |
| 0.12165564  | 0.236053042 | 0.249696836 | 0.212514207 |
| 0.020553178 | 0.140070169 | 0.005782216 | 0.158344516 |
| 0.140578356 | 0.225518977 | 0.110152898 | 0.042377655 |
| 0.243322557 | 0.210230306 | 0.133811297 | 0.125611182 |
| 0.011742453 | 0.254880307 | 0.140161802 | 0.145690104 |
| 0.061376584 | 0.155049886 | 0.040194974 | 0.269972907 |
| 0.133454155 | 0.103208764 | 0.162216969 | 0.075668542 |
| 0.16223329  | 0.159189289 | 0.043156956 | 0.16519413  |
| 0.139009871 | 0.027407982 | 0.049381568 | 0.229907055 |
| 0.145201281 | 0.241009258 | 0.278442019 | 0.106876246 |
| 0.223296781 | 0.15044794  | 0.143340131 | 0.219840694 |
| 0.109718248 | 0.163643155 | 0.256487918 | 0.189592779 |
| 0.247961002 | 1           | 0.167635426 | 0.193244658 |
| 0.132063024 | 0.029465148 | 0.185432015 | 0.158407011 |
| 0.183971869 | 0.221837133 | 0.080979095 | 0.22788591  |
| 0.026612642 | 0.082109011 | 0.065024709 | 0.081257234 |
| 0.194224071 | 0.212033254 | 0.202875524 | 0.20657289  |
| 0.075456169 | 0.01802319  | 0.228898491 | 0.053171455 |
| 0.067219868 | 0.222646657 | 0.146503725 | 0.201665034 |
| 0.072274079 | 0.146302877 | 0.069600355 | 0.000355473 |
| 0.263695271 | 0.089507799 | 0.160472405 | 0.151020197 |
| 0.117675945 | 0.016361886 | 0.171562502 | 0.260827364 |
| 0.142083915 | 0.078499412 | 0.079130795 | 0.181589042 |
| 0.192070229 | 0.10014204  | 0.124060304 | 0.111376849 |
| 0.204554647 | 0.066052953 | 0.103891507 | 0.123014411 |
| 0.165080194 | 0.086861581 |             |             |
| UBR7        | 0.015996415 | 0.199786122 | 0.009128907 |
| 0.04766073  | 0.289452014 | 0.112374553 | 0.013607145 |
| 0.03119383  | 0.152350199 | 0.052241109 | 0.220272251 |
| 0.004974848 | 0.154822274 | 0.28778715  | 0.014618431 |
| 0.29665598  | 0.013434075 | 0.042012212 | 0.025186266 |
| 0.048544207 | 0.278938677 | 0.161239627 | 0.113329267 |
| 0.232300315 | 0.074764223 | 0.120060741 | 0.219703884 |
| 0.281247811 | 0.118062331 | 0.273743916 | 0.036886093 |
| 0.238543514 | 0.332676706 | 0.210091216 | 0.002302472 |
| 0.18895693  | 0.018701539 | 0.214893048 | 0.137202057 |
| 0.137189597 | 0.185050816 | 0.071551577 | 0.121487273 |
| 0.109203459 | 0.006320776 | 0.043862848 | 0.27200463  |
| 0.118640817 | 0.07710523  | 0.012774801 | 0.225496568 |
| 0.091970459 | 0.163178909 | 0.157891128 | 0.001820002 |
| 0.233007236 | 0.12545836  | 0.167397038 | 0.257209267 |
| 0.112981687 | 0.062670249 | 0.091499988 | 0.073508839 |
| 0.214139733 | 0.25417178  | 0.150519455 | 0.090190588 |
| 0.288082894 | 0.189152926 | 0.264797174 | 0.052169195 |
| 0.128022839 | 0.004098961 | 0.07924608  | 0.017997065 |
| 0.131435863 | 0.124321583 | 0.242050014 | 0.195316269 |
| 0.192840311 | 0.272078967 | 0.114435793 | 0.231744361 |
| 0.110631853 | 0.305889156 | 0.144756281 | 0.232611457 |
| 0.224351924 | 0.017668402 | 0.286665249 | 0.296661764 |
| 0.008161732 | 0.131269414 | 0.230369967 | 0.037801767 |
| 0.219955182 | 0.122320137 | 0.126491727 | 0.197776801 |
| 0.327327532 | 0.285259752 | 0.231231084 | 0.183533224 |

|             |             |             |             |
|-------------|-------------|-------------|-------------|
| 0.205997164 | 0.017313578 | 0.209536477 | 0.335792355 |
| 0.17154419  | 0.020588364 | 0.145554522 | 0.327636273 |
| 0.236643149 | 0.293040769 | 0.232175707 | 0.240608135 |
| 0.278724062 | 0.289347721 | 0.235933113 | 0.229920156 |
| 0.036372343 | 0.281149386 | 0.071358079 | 0.017049202 |
| 0.011292399 | 0.031812109 | 0.106701171 | 0.188551305 |
| 0.307447604 | 0.171418406 | 0.065320117 | 0.164624697 |
| 0.357601747 | 0.207636429 | 0.275679703 | 0.266840518 |
| 0.009026495 | 0.140190945 | 0.256544641 | 0.059936143 |
| 0.251344961 | 0.041824098 | 0.27001103  | 0.24517346  |
| 0.226965572 | 0.333751503 | 0.031623492 | 0.236510125 |
| 0.065499743 | 0.311438682 | 0.229946818 | 0.08592836  |
| 0.267446993 | 0.232830475 | 0.334274545 | 0.363786323 |
| 0.240736211 | 0.123951674 | 0.030207656 | 0.226881208 |
| 0.322200562 | 0.029310424 | 0.307784063 | 0.327935825 |
| 0.252933035 | 0.334187272 | 0.343996619 | 0.317201137 |
| 0.255340831 | 0.021283063 | 0.017443077 | 0.26103333  |
| 0.256133055 | 0.245613248 | 0.059715964 | 0.225092538 |
| 0.302532591 | 0.123822049 | 0.27249092  | 0.137418783 |
| 0.312505033 | 0.278267151 | 0.293686223 | 0.227950466 |
| 0.09568765  | 0.163931906 | 0.262459894 | 0.202065737 |
| 0.011590421 | 0.027575423 | 0.012026932 | 0.184312931 |
| 0.056030671 | 0.113329671 | 0.102174242 | 0.228743393 |
| 0.125334508 | 0.086413113 | 0.183630523 | 0.358382046 |
| 0.01299306  | 0.206779676 | 0.052277113 | 0.055924893 |
| 0.01597926  | 0.056251048 | 0.082043208 | 0.059349798 |
| 0.195805567 | 0.080976837 | 0.270052332 | 0.302599119 |
| 0.155140063 | 0.070133965 | 0.234870837 | 0.304206322 |
| 0.307544978 | 0.278537086 | 0.123551958 | 0.007468459 |
| 0.137878361 | 0.092651261 | 0.173993142 | 0.236149677 |
| 0.061601577 | 0.103120744 | 0.25791718  | 0.368818554 |
| 0.09072486  | 0.031715853 | 0.156869805 | 0.219883891 |
| 0.048825956 | 0.166719515 | 0.33066945  | 0.168994847 |
| 0.000207873 | 0.150096451 | 0.302783324 | 0.115953117 |
| 0.160031876 | 0.19042514  | 0.17596201  | 0.309790286 |
| 0.15829564  | 0.173978222 | 0.314453959 | 0.348409107 |
| 0.099249551 | 0.073608448 | 0.331480768 | 0.066403332 |
| 0.210356356 | 0.053960002 | 0.237356559 | 0.079516842 |
| 0.12793395  | 0.21383657  | 0.311255532 | 0.170977891 |
| 0.037496302 | 0.284654198 | 0.221918325 | 0.315187013 |
| 0.135794488 | 0.324549644 | 0.334281291 | 0.298266927 |
| 0.198991198 | 0.175505894 | 0.18152705  | 0.292464758 |
| 0.304955355 | 0.092381433 | 0.017896305 | 0.289544553 |
| 0.124378942 | 0.325118114 | 0.086024329 | 0.325296524 |
| 0.264851837 | 0.203436223 | 0.069483577 | 0.333069869 |
| 0.259265994 | 0.099866546 | 0.261792897 | 0.329055765 |
| 0.06600936  | 0.248080524 | 0.175655414 | 0.343350158 |
| 0.077628935 | 0.156093821 | 0.163584922 | 0.169318059 |
| 0.019635877 | 0.019724625 | 0.017895309 | 0.11593055  |
| 0.188359313 | 0.205828103 | 0.268855332 | 0.302871659 |
| 0.054229418 | 0.238628126 | 0.114461298 | 0.140768193 |
| 0.223185256 | 0.201904811 | 0.280564473 | 0.28310616  |
| 0.124353468 | 0.007848118 | 0.055757063 | 0.268899734 |
| 0.00688031  | 0.193264384 | 0.111504921 | 0.002512009 |

|             |             |             |             |
|-------------|-------------|-------------|-------------|
| 0.008952695 | 0.189091653 | 0.028958377 | 0.080616719 |
| 0.358248312 | 0.075601666 | 0.08662005  | 0.062885933 |
| 0.261577576 | 0.033126462 | 0.004149847 | 0.284748513 |
| 0.256587476 | 0.242680711 | 0.249695057 | 0.209509608 |
| 0.265391827 | 0.234181865 | 0.312400326 | 0.108965618 |
| 0.025871315 | 0.014157205 | 0.179897089 | 0.180998566 |
| 0.00137494  | 0.282080739 | 0.196735866 | 0.068583231 |
| 0.316949563 | 0.175368121 | 0.009074854 | 0.275669055 |
| 0.005263626 | 0.17681845  | 0.073579855 | 0.099553886 |
| 0.30798953  | 0.0020677   | 0.07598371  | 0.143490798 |
| 0.198932111 | 0.180138787 | 0.161766828 | 0.286972183 |
| 0.211980107 | 0.034022296 | 0.191967413 | 0.315094295 |
| 0.018284392 | 0.033043771 | 0.093835511 | 0.009463728 |
| 0.059658786 | 0.226351322 | 0.129851037 | 0.012282158 |
| 0.155460335 | 0.000794994 | 0.186048385 | 0.301547539 |
| 0.208542566 | 0.338329013 | 0.295911718 | 0.251466551 |
| 0.281050649 | 0.121452064 | 0.307337351 | 0.207219414 |
| 0.107479966 | 0.000439616 | 0.004302289 | 0.325123969 |
| 0.261104984 | 0.011552586 | 0.075552167 | 0.080067461 |
| 0.045804941 | 0.030836877 | 0.016856132 | 0.163895836 |
| 0.213051573 | 0.227750477 | 0.163413419 | 0.222470512 |
| 0.120086106 | 0.144120522 | 0.100984923 | 0.025644425 |
| 0.256194325 | 0.015950021 | 0.024721343 | 0.009070841 |
| 0.302386061 | 0.033107674 | 0.196733216 | 0.276318511 |
| 0.298866141 | 0.320069347 | 0.079988984 | 0.103366473 |
| 0.282429227 | 0.02334073  | 0.108021802 | 0.027258186 |
| 0.242196684 | 0.298321165 | 0.226443255 | 0.167751523 |
| 0.329379114 | 0.26255912  | 0.008504475 | 0.297969459 |
| 0.004586048 | 0.003904838 | 0.110628554 | 0.144897773 |
| 0.032071548 | 0.226167482 | 0.147606892 | 0.05808885  |
| 0.074928354 | 0.007495264 | 0.21230958  | 0.21707496  |
| 0.201883524 | 0.210590064 | 0.296980885 | 0.113162713 |
| 0.155203214 | 0.119490996 | 0.086208869 | 0.052718909 |
| 0.074117786 | 0.143595501 | 0.079407961 | 0.004267536 |
| 0.171723559 | 0.244166756 | 0.017808958 | 0.065480853 |
| 0.303773428 | 0.326426977 | 0.016208959 | 0.009192487 |
| 0.139027198 | 0.158252566 | 0.349495675 | 0.258027991 |
| 0.264984128 | 0.323878897 | 0.202216147 | 0.083591135 |
| 0.016568489 | 0.220688894 | 0.293110784 | 0.076179    |
| 0.298603148 | 0.014901508 | 0.242459771 | 0.29134908  |
| 0.045405265 | 0.066779181 | 0.015143499 | 0.03111703  |
| 0.306832535 | 0.094025882 | 0.134493585 | 0.045130236 |
| 0.17547283  | 0.176311691 | 0.011494003 | 0.104744258 |
| 0.20726059  | 0.168540264 | 0.075762464 | 0.073634192 |
| 0.167697063 | 0.035056964 | 0.314729217 | 0.278801209 |
| 0.048960639 | 0.03333251  | 0.050867573 | 0.243125405 |
| 0.273161057 | 0.162393318 | 0.010711121 | 0.2112254   |
| 0.314190932 | 0.27600463  | 0.249627378 | 0.305291951 |
| 0.026902845 | 0.271212211 | 0.183803975 | 0.249922956 |
| 0.093933664 | 0.115951005 | 0.124663423 | 0.020331079 |
| 0.163584484 | 0.240549911 | 0.221077242 | 0.093783352 |
| 0.193345334 | 0.031209542 | 0.011478154 | 0.261426436 |
| 0.182811649 | 0.025054257 | 0.086894251 | 0.296668889 |
| 0.002056761 | 0.185917245 | 0.319537814 | 0.086039521 |

|             |             |             |             |
|-------------|-------------|-------------|-------------|
| 0.284780484 | 0.325161386 | 0.257355439 | 0.052320981 |
| 0.005615267 | 0.305092748 | 0.265863981 | 0.167849579 |
| 0.22881275  | 0.176797574 | 0.036196011 | 0.033974424 |
| 0.191314847 | 0.020583669 | 0.06955944  | 0.07300328  |
| 0.127150104 | 0.188324448 | 0.119891916 | 0.08564666  |
| 0.12258752  | 0.021778561 | 0.179389234 | 0.090031137 |
| 0.105401821 | 0.154095296 | 0.255140548 | 0.044157367 |
| 0.174334129 | 0.294256577 | 0.234969036 | 0.004842111 |
| 0.261503394 | 0.265796798 | 0.267522071 | 0.002341    |
| 0.326022508 | 0.002571661 | 0.151222034 | 0.150809337 |
| 0.114556631 | 0.128155876 | 0.231269758 | 0.144237828 |
| 0.171111758 | 0.093887072 | 0.127155983 | 0.158059616 |
| 0.081146098 | 0.079738891 | 0.245232819 | 0.109807447 |
| 0.167499409 | 0.038292447 | 0.02891688  | 0.027686322 |
| 0.022209764 | 0.259575981 | 0.124809104 | 0.017795023 |
| 0.148343858 | 0.110549451 | 0.234292863 | 0.237459757 |
| 0.285153557 | 0.029133527 | 0.147955346 | 0.239539049 |
| 0.069266806 | 0.068462894 | 0.00975806  | 0.142128986 |
| 0.1160636   | 0.180097768 | 0.133797498 | 0.113279827 |
| 0.205842728 | 0.219424939 | 0.120926459 | 0.254567152 |
| 0.162280774 | 0.147484706 | 0.059028074 | 0.050682973 |
| 0.065025531 | 0.047994311 | 0.282357357 | 0.00030444  |
| 0.221548072 | 0.046683848 | 0.317868016 | 0.234597075 |
| 0.186185336 | 0.234074151 | 0.05592007  | 0.0252759   |
| 0.041353832 | 0.058047341 | 0.063230769 | 0.250475118 |
| 0.183949495 | 0.05666986  | 0.253341381 | 0.050106902 |
| 0.296145828 | 0.244274421 | 0.125098839 | 0.087328923 |
| 0.117084624 | 0.066231754 | 0.225432955 | 0.023362421 |
| 0.209737941 | 0.164233604 | 0.114636713 | 0.203990454 |
| 0.148161896 | 0.302803105 | 0.016199204 | 0.318473545 |
| 0.207759904 | 0.044605833 | 0.278047343 | 0.106058697 |
| 0.060451214 | 0.071731332 | 0.191328459 | 0.085784975 |
| 0.076310202 | 0.185144534 | 0.007422245 | 0.079331737 |
| 0.264830055 | 0.086338554 | 0.200568736 | 0.232303555 |
| 0.184351228 | 0.270097151 | 0.156800206 | 0.096026117 |
| 0.211900031 | 0.222566801 | 0.110852434 | 0.149414213 |
| 0.215108045 | 0.037934623 | 0.153217229 | 0.008150684 |
| 0.267781875 | 0.253558038 | 0.097392439 | 0.014975484 |
| 0.0042424   | 0.186257099 | 0.216619401 | 0.014086781 |
| 0.351371677 | 0.170524134 | 0.140727535 | 0.261343407 |
| 0.069652216 | 0.224618385 | 0.072153078 | 0.315977555 |
| 0.006350802 | 0.131901135 | 0.217747063 | 0.16337023  |
| 0.149135438 | 0.245096566 | 0.295399729 | 0.236164375 |
| 0.010172144 | 0.126906664 | 0.001322337 | 0.201095602 |
| 0.19997766  | 0.238498225 | 0.0926813   | 0.060554676 |
| 0.210126265 | 0.213107388 | 0.137056632 | 0.181425627 |
| 0.00559258  | 0.32712609  | 0.106343617 | 0.226476337 |
| 0.122889114 | 0.170444696 | 0.022804621 | 0.23860263  |
| 0.185965701 | 0.142933939 | 0.136488417 | 0.113066939 |
| 0.239841309 | 0.18651218  | 0.045773501 | 0.110017887 |
| 0.17381678  | 0.0181761   | 0.08711888  | 0.304472471 |
| 0.113397788 | 0.236349072 | 0.366134653 | 0.099447314 |
| 0.243594771 | 0.192196029 | 0.189483117 | 0.284888081 |
| 0.061874664 | 0.156229938 | 0.304350459 | 0.257443792 |



|             |             |             |             |
|-------------|-------------|-------------|-------------|
| 0.232747185 | 0.167635426 | 1           | 0.179500541 |
| 0.209185697 | 0.033011451 | 0.147371578 | 0.19462354  |
| 0.202459    | 0.207127042 | 0.104563262 | 0.167436906 |
| 0.019755016 | 0.051910538 | 0.107391612 | 0.057607199 |
| 0.201333194 | 0.22720722  | 0.13947813  | 0.238870647 |
| 0.081174574 | 0.01508541  | 0.268152543 | 0.050984361 |
| 0.11013063  | 0.294953064 | 0.129369761 | 0.218681537 |
| 0.078519939 | 0.16483082  | 0.106343412 | 0.000296571 |
| 0.297942308 | 0.036721051 | 0.131126059 | 0.151486592 |
| 0.141822781 | 0.010922271 | 0.23380897  | 0.351483087 |
| 0.14497559  | 0.097184517 | 0.134485002 | 0.248375524 |
| 0.181710887 | 0.134327079 | 0.148075822 | 0.174241179 |
| 0.210409251 | 0.113818958 | 0.155709939 | 0.183953533 |
| 0.207266484 | 0.082060685 |             |             |
| UCK2        | 0.044523177 | 0.199987111 | 0.024342365 |
| 0.096042051 | 0.266680763 | 0.088667678 | 0.06441028  |
| 0.089038495 | 0.172347296 | 0.046325188 | 0.207233796 |
| 0.035689917 | 0.085932185 | 0.296714216 | 0.069500755 |
| 0.262824754 | 0.070963807 | 0.114373208 | 0.040838885 |
| 0.086632292 | 0.290294761 | 0.128160791 | 0.104847783 |
| 0.235822135 | 0.142253957 | 0.136966744 | 0.158956073 |
| 0.265799216 | 0.060276974 | 0.21382195  | 0.02947963  |
| 0.307434538 | 0.292759082 | 0.129653031 | 0.017233046 |
| 0.165972413 | 0.029435364 | 0.278211594 | 0.190734092 |
| 0.109991595 | 0.25973832  | 0.054810855 | 0.169692697 |
| 0.096006091 | 0.031476927 | 0.024442477 | 0.239414633 |
| 0.134594493 | 0.114233241 | 0.036577236 | 0.202117532 |
| 0.101247407 | 0.185822789 | 0.136479666 | 0.00430017  |
| 0.130970774 | 0.049555313 | 0.105511033 | 0.26114477  |
| 0.20524366  | 0.146374201 | 0.072498181 | 0.098616526 |
| 0.194991746 | 0.259852748 | 0.22754412  | 0.083037392 |
| 0.294635491 | 0.1479448   | 0.213042814 | 0.078717495 |
| 0.138109707 | 0.021177769 | 0.177443342 | 0.04832147  |
| 0.118687105 | 0.206372494 | 0.212652689 | 0.144752514 |
| 0.189530779 | 0.312931451 | 0.192108629 | 0.248037216 |
| 0.138571785 | 0.247876168 | 0.161074458 | 0.318607902 |
| 0.255239713 | 0.06645692  | 0.280302032 | 0.324280945 |
| 0.032045235 | 0.107460056 | 0.242855388 | 0.087440213 |
| 0.21005133  | 0.102451565 | 0.094417501 | 0.144063404 |
| 0.285438174 | 0.27216065  | 0.265485924 | 0.264250789 |
| 0.177864221 | 0.052564852 | 0.23276518  | 0.253914639 |
| 0.160810221 | 0.057774018 | 0.207607791 | 0.279816885 |
| 0.2275999   | 0.277363395 | 0.223475204 | 0.296196248 |
| 0.233118969 | 0.288734868 | 0.239504397 | 0.245344794 |
| 0.018196189 | 0.282297969 | 0.127818962 | 0.076145372 |
| 0.029983889 | 0.104072505 | 0.142129752 | 0.274687217 |
| 0.277336102 | 0.201796158 | 0.114172836 | 0.243175397 |
| 0.346846549 | 0.219759292 | 0.277978364 | 0.282546351 |
| 0.043450006 | 0.122071613 | 0.216846505 | 0.0830408   |
| 0.279112967 | 0.110041838 | 0.203595695 | 0.278225106 |
| 0.276512566 | 0.315702793 | 0.056996135 | 0.283906777 |
| 0.115466239 | 0.338108769 | 0.209458235 | 0.169969921 |
| 0.293553433 | 0.256259078 | 0.34426771  | 0.283547806 |
| 0.262559844 | 0.131822893 | 0.053161062 | 0.26481668  |

|             |             |             |             |
|-------------|-------------|-------------|-------------|
| 0.349063898 | 0.028174571 | 0.272976721 | 0.301119955 |
| 0.258255834 | 0.287541616 | 0.35332663  | 0.297991346 |
| 0.254740716 | 0.069400554 | 0.018523941 | 0.33266733  |
| 0.27508812  | 0.278987734 | 0.137547319 | 0.171977852 |
| 0.277283932 | 0.118777648 | 0.240286006 | 0.117898401 |
| 0.359718078 | 0.262080914 | 0.264614401 | 0.243868043 |
| 0.112961617 | 0.236424417 | 0.180566125 | 0.224575527 |
| 0.053144781 | 0.058766761 | 0.038459399 | 0.252967342 |
| 0.048790631 | 0.218957279 | 0.100452854 | 0.225641169 |
| 0.236442956 | 0.091422807 | 0.099937079 | 0.303129285 |
| 0.042880213 | 0.1579672   | 0.106292205 | 0.110849331 |
| 0.078451437 | 0.130721524 | 0.155140252 | 0.12408384  |
| 0.24999101  | 0.144191205 | 0.214222129 | 0.294367968 |
| 0.148530749 | 0.130371063 | 0.218786048 | 0.327201937 |
| 0.382253122 | 0.212325872 | 0.21975445  | 0.031010274 |
| 0.184661545 | 0.076284358 | 0.119797865 | 0.166873359 |
| 0.125360413 | 0.188834517 | 0.253700264 | 0.32295296  |
| 0.114247977 | 0.065857818 | 0.149321181 | 0.277128592 |
| 0.101065128 | 0.161816329 | 0.333154528 | 0.14744055  |
| 0.006086774 | 0.187200633 | 0.27911953  | 0.195920963 |
| 0.21633404  | 0.148139885 | 0.104712683 | 0.310495543 |
| 0.129678319 | 0.188620652 | 0.2838753   | 0.308636852 |
| 0.092738368 | 0.123130882 | 0.336865432 | 0.054736589 |
| 0.18296361  | 0.088177757 | 0.329887215 | 0.061540086 |
| 0.211142468 | 0.308138871 | 0.254954033 | 0.169507169 |
| 0.071076435 | 0.296217993 | 0.235487988 | 0.305659931 |
| 0.127502376 | 0.336016351 | 0.302489715 | 0.308849336 |
| 0.225851172 | 0.134059717 | 0.111757418 | 0.278694975 |
| 0.295239046 | 0.098487414 | 0.050984325 | 0.243644612 |
| 0.110021038 | 0.28243281  | 0.131578925 | 0.341905435 |
| 0.308279705 | 0.210840903 | 0.158760214 | 0.351959021 |
| 0.295381721 | 0.150805376 | 0.260128067 | 0.347148961 |
| 0.067206173 | 0.232814574 | 0.172701827 | 0.363038156 |
| 0.15910112  | 0.212576217 | 0.227556664 | 0.10602317  |
| 0.004276446 | 0.055776457 | 0.056797594 | 0.19723598  |
| 0.17413814  | 0.151180693 | 0.262588195 | 0.305445466 |
| 0.134730267 | 0.258073689 | 0.190781237 | 0.195383088 |
| 0.255880318 | 0.175726299 | 0.190983635 | 0.239038527 |
| 0.207271398 | 0.034621134 | 0.134422967 | 0.312586288 |
| 0.026148114 | 0.156105329 | 0.13291942  | 0.010109513 |
| 0.045776995 | 0.166708662 | 0.078433992 | 0.164882299 |
| 0.344198082 | 0.143610632 | 0.156824111 | 0.066309483 |
| 0.284726837 | 0.094791589 | 0.012985355 | 0.285995109 |
| 0.268046165 | 0.262314088 | 0.260534295 | 0.232695675 |
| 0.277206056 | 0.219651522 | 0.309328096 | 0.102733913 |
| 0.084714149 | 0.03742934  | 0.198573218 | 0.229533497 |
| 0.005162904 | 0.29152434  | 0.199772286 | 0.161711433 |
| 0.272300451 | 0.244190226 | 0.0438136   | 0.235713801 |
| 0.024044518 | 0.104999597 | 0.116354407 | 0.153224164 |
| 0.331409744 | 0.017245018 | 0.07304202  | 0.147237249 |
| 0.215452584 | 0.233457748 | 0.105716785 | 0.292824812 |
| 0.232183965 | 0.068035422 | 0.212309751 | 0.288849631 |
| 0.077089631 | 0.03715123  | 0.099633791 | 0.006686769 |
| 0.042066799 | 0.253767321 | 0.108134971 | 0.044101188 |

|             |             |             |             |
|-------------|-------------|-------------|-------------|
| 0.236543063 | 0.009461716 | 0.225905115 | 0.312859365 |
| 0.210046227 | 0.332368057 | 0.294820523 | 0.163242236 |
| 0.287848992 | 0.054396312 | 0.298489305 | 0.220518481 |
| 0.081332641 | 0.001958182 | 0.021034572 | 0.297819563 |
| 0.224338625 | 0.03304874  | 0.168673692 | 0.070279846 |
| 0.136423138 | 0.060686248 | 0.05891601  | 0.192083728 |
| 0.170580032 | 0.254465655 | 0.174387424 | 0.238952391 |
| 0.194994123 | 0.229347888 | 0.087902298 | 0.073999373 |
| 0.1960627   | 0.07139558  | 0.073598339 | 0.023843238 |
| 0.3052861   | 0.074189096 | 0.229391755 | 0.27587132  |
| 0.328612404 | 0.287235565 | 0.057195616 | 0.09296803  |
| 0.278678493 | 0.048191214 | 0.07735301  | 0.058235178 |
| 0.240124602 | 0.285678108 | 0.29968768  | 0.236634976 |
| 0.354998896 | 0.289209774 | 0.047103963 | 0.311661039 |
| 0.018353926 | 0.010411723 | 0.102426786 | 0.223265347 |
| 0.04546638  | 0.205472478 | 0.248504779 | 0.09714722  |
| 0.126696543 | 0.03282299  | 0.160082021 | 0.173510428 |
| 0.274444193 | 0.222608756 | 0.260790489 | 0.181760094 |
| 0.173602968 | 0.195835043 | 0.142050614 | 0.126770709 |
| 0.092353147 | 0.202525598 | 0.14968994  | 0.033534654 |
| 0.133690697 | 0.184883829 | 0.062984329 | 0.1377306   |
| 0.301043813 | 0.307720845 | 0.086617558 | 0.04730271  |
| 0.218492436 | 0.173262065 | 0.333536877 | 0.249013931 |
| 0.286560368 | 0.356528193 | 0.267800477 | 0.195459583 |
| 0.061040102 | 0.264782352 | 0.253416627 | 0.166691059 |
| 0.29515314  | 0.044672964 | 0.244536239 | 0.196505519 |
| 0.121927713 | 0.131370294 | 0.065796539 | 0.09786721  |
| 0.210683556 | 0.18858048  | 0.223017304 | 0.085732419 |
| 0.207142545 | 0.135370535 | 0.051830545 | 0.203017981 |
| 0.266900399 | 0.150082577 | 0.168081038 | 0.082347723 |
| 0.192753189 | 0.034349895 | 0.273486342 | 0.345671262 |
| 0.115024247 | 0.089327936 | 0.070750491 | 0.24199392  |
| 0.246875889 | 0.120130206 | 0.027801287 | 0.200938526 |
| 0.31177615  | 0.216866891 | 0.255810237 | 0.361692285 |
| 0.083502242 | 0.215428737 | 0.143235221 | 0.265869661 |
| 0.187029096 | 0.095724493 | 0.191058557 | 0.073315547 |
| 0.246545625 | 0.289982436 | 0.23821516  | 0.170185982 |
| 0.146149713 | 0.062240625 | 0.037148095 | 0.241743558 |
| 0.199696617 | 0.078763807 | 0.065568804 | 0.266891014 |
| 0.006469522 | 0.121667712 | 0.321723092 | 0.133387919 |
| 0.314869158 | 0.323139849 | 0.304854831 | 0.082703053 |
| 0.006192044 | 0.254217323 | 0.263546414 | 0.142161532 |
| 0.231177428 | 0.212716718 | 0.058649854 | 0.122551832 |
| 0.291124718 | 0.04994283  | 0.185761301 | 0.068956024 |
| 0.131635592 | 0.183564222 | 0.236721104 | 0.155625704 |
| 0.192158712 | 0.054927803 | 0.131238974 | 0.128611686 |
| 0.120193691 | 0.264537514 | 0.332142448 | 0.03825792  |
| 0.148106688 | 0.319580095 | 0.252840392 | 0.028423869 |
| 0.18565716  | 0.292811173 | 0.278164794 | 0.015966871 |
| 0.281628109 | 0.022890414 | 0.22768211  | 0.207130639 |
| 0.180045912 | 0.202553934 | 0.30541704  | 0.164188061 |
| 0.203605762 | 0.163617965 | 0.152364248 | 0.254035065 |
| 0.161588954 | 0.127523288 | 0.21795418  | 0.121569644 |
| 0.174882989 | 0.092427797 | 0.073076603 | 0.067705622 |

|             |             |             |             |
|-------------|-------------|-------------|-------------|
| 0.07143615  | 0.239210772 | 0.215117336 | 0.047686537 |
| 0.24574842  | 0.113095725 | 0.321462243 | 0.235619256 |
| 0.315651375 | 0.059432129 | 0.166106396 | 0.22602218  |
| 0.053822817 | 0.073636751 | 0.036211519 | 0.135544526 |
| 0.180228664 | 0.208322063 | 0.10567255  | 0.13834701  |
| 0.197000141 | 0.290386279 | 0.203659441 | 0.285556888 |
| 0.149170008 | 0.150955847 | 0.044423598 | 0.144885699 |
| 0.129227815 | 0.115979891 | 0.270581368 | 0.006085083 |
| 0.261499784 | 0.065091299 | 0.288688383 | 0.249581955 |
| 0.118397482 | 0.287806233 | 0.049856602 | 0.085481492 |
| 0.034328248 | 0.101839018 | 0.148876872 | 0.213562536 |
| 0.110086167 | 0.108764735 | 0.265853603 | 0.052974493 |
| 0.262710534 | 0.219207293 | 0.161506995 | 0.13301281  |
| 0.18384837  | 0.115794609 | 0.260208154 | 0.049743241 |
| 0.163558407 | 0.190979954 | 0.10306563  | 0.24551258  |
| 0.212888479 | 0.289777249 | 0.05507043  | 0.302438283 |
| 0.219196068 | 0.101988394 | 0.329808244 | 0.120865725 |
| 0.07929008  | 0.136192412 | 0.12842936  | 0.072696285 |
| 0.150100351 | 0.118146998 | 0.004600511 | 0.099259573 |
| 0.337306352 | 0.09107693  | 0.194485034 | 0.260700463 |
| 0.181979207 | 0.345624281 | 0.084903056 | 0.131982298 |
| 0.21758897  | 0.24736726  | 0.178632504 | 0.259621109 |
| 0.273575276 | 0.103678223 | 0.133108852 | 0.010787604 |
| 0.226733125 | 0.181508318 | 0.090610768 | 0.066373772 |
| 0.031397431 | 0.139805971 | 0.198422975 | 0.044655875 |
| 0.339968514 | 0.09248908  | 0.139774637 | 0.213039742 |
| 0.14064923  | 0.253461876 | 0.165498804 | 0.295768635 |
| 0.030999407 | 0.208548262 | 0.160959607 | 0.143367869 |
| 0.200224594 | 0.200125763 | 0.324416948 | 0.167269991 |
| 0.056689911 | 0.182776458 | 0.013926922 | 0.268569763 |
| 0.225446558 | 0.196510366 | 0.181864366 | 0.0488279   |
| 0.300527386 | 0.245109371 | 0.198172599 | 0.124950998 |
| 0.030957906 | 0.269549451 | 0.186992796 | 0.229949984 |
| 0.090330051 | 0.181181761 | 0.074551278 | 0.218915566 |
| 0.222617507 | 0.189758436 | 0.229525761 | 0.107356173 |
| 0.236545881 | 0.192795208 | 0.08131823  | 0.132971256 |
| 0.15814088  | 0.0612951   | 0.060548829 | 0.318024192 |
| 0.194417304 | 0.180910137 | 0.339782549 | 0.18543909  |
| 0.177572843 | 0.21166661  | 0.149493698 | 0.298457015 |
| 0.171328837 | 0.249550276 | 0.282886588 | 0.270385646 |
| 0.32228902  | 0.193244658 | 0.179500541 | 1           |
| 0.215089802 | 0.082147399 | 0.158605986 | 0.238514985 |
| 0.177563632 | 0.266698465 | 0.097549544 | 0.204737921 |
| 0.077010907 | 0.116885652 | 0.099757154 | 0.135419065 |
| 0.271105381 | 0.226250084 | 0.192361161 | 0.305450341 |
| 0.13975937  | 0.056801324 | 0.319093439 | 0.051610919 |
| 0.108177603 | 0.261900047 | 0.195634992 | 0.186478536 |
| 0.147955554 | 0.193458501 | 0.121361462 | 0.00633993  |
| 0.315181343 | 0.04533501  | 0.132076386 | 0.210542556 |
| 0.13294768  | 0.050889155 | 0.251281484 | 0.344648993 |
| 0.178501518 | 0.077611265 | 0.096193602 | 0.264180292 |
| 0.146903457 | 0.084163459 | 0.126695959 | 0.156862192 |
| 0.148289271 | 0.083746666 | 0.10809744  | 0.115840534 |
| 0.225040562 | 0.105240769 |             |             |

| UHRF1       | 0.17456656  | 0.477055666 | 0.172343068 |
|-------------|-------------|-------------|-------------|
| 0.23338839  | 0.286255207 | 0.488664552 | 0.1190872   |
| 0.201989578 | 0.421399891 | 0.368349457 | 0.403646093 |
| 0.052957992 | 0.0609053   | 0.465349872 | 0.103622185 |
| 0.373437319 | 0.066161483 | 0.177471815 | 0.09392044  |
| 0.29583162  | 0.256044448 | 0.336788466 | 0.492185395 |
| 0.259605499 | 0.302834541 | 0.451767789 | 0.36756796  |
| 0.490077027 | 0.286769774 | 0.462573801 | 0.284743958 |
| 0.424706986 | 0.297227364 | 0.376702553 | 0.064650136 |
| 0.448266189 | 0.00691437  | 0.453424022 | 0.275491538 |
| 0.140294352 | 0.401822185 | 0.451999194 | 0.294763138 |
| 0.43899261  | 0.112094913 | 0.291589286 | 0.395184584 |
| 0.413098339 | 0.32778343  | 0.178411481 | 0.477782881 |
| 0.381940962 | 0.446453347 | 0.478929515 | 0.005267905 |
| 0.271192155 | 0.064717913 | 0.185460892 | 0.511808684 |
| 0.287273107 | 0.176813296 | 0.274419483 | 0.32258134  |
| 0.390542913 | 0.372440278 | 0.304926336 | 0.402841975 |
| 0.485010613 | 0.134274948 | 0.444086546 | 0.231516668 |
| 0.438261221 | 0.099459857 | 0.247842065 | 0.19264003  |
| 0.390076066 | 0.248358219 | 0.350725263 | 0.272842139 |
| 0.483812318 | 0.513127511 | 0.310024773 | 0.519879986 |
| 0.065257033 | 0.300218762 | 0.258571602 | 0.323874783 |
| 0.382730683 | 0.142340966 | 0.449113842 | 0.504619029 |
| 0.117531006 | 0.454042603 | 0.425776859 | 0.239162185 |
| 0.492013988 | 0.246956369 | 0.474200386 | 0.147322135 |
| 0.347364477 | 0.313967875 | 0.481453416 | 0.365127235 |
| 0.303077196 | 0.183543205 | 0.525611007 | 0.278184906 |
| 0.323516385 | 0.196846525 | 0.201409809 | 0.454760926 |
| 0.451153368 | 0.491249292 | 0.463396598 | 0.388440629 |
| 0.354872376 | 0.485727133 | 0.462032465 | 0.451718543 |
| 0.202193403 | 0.516516381 | 0.30029044  | 0.079820564 |
| 0.185919    | 0.127155918 | 0.202571979 | 0.350907604 |
| 0.480710925 | 0.406724673 | 0.299153696 | 0.251180872 |
| 0.429789822 | 0.514030903 | 0.513306918 | 0.444365115 |
| 0.100183252 | 0.204678986 | 0.370216859 | 0.382248604 |
| 0.399217426 | 0.192172126 | 0.220748014 | 0.527324853 |
| 0.438472228 | 0.436198463 | 0.302316272 | 0.521809816 |
| 0.254835628 | 0.488841815 | 0.502310171 | 0.245430152 |
| 0.52260331  | 0.522992792 | 0.469233029 | 0.383349138 |
| 0.489029085 | 0.459466541 | 0.064306223 | 0.420767116 |
| 0.448822712 | 0.013695654 | 0.470719923 | 0.47008861  |
| 0.503434324 | 0.462237081 | 0.468027793 | 0.478693666 |
| 0.508202782 | 0.16213426  | 0.022307916 | 0.28374521  |
| 0.51682958  | 0.452092352 | 0.152420793 | 0.413303974 |
| 0.335465555 | 0.490950621 | 0.443446255 | 0.330928152 |
| 0.481639972 | 0.476631932 | 0.482736181 | 0.439859905 |
| 0.380372456 | 0.38844624  | 0.347387481 | 0.514636865 |
| 0.096491782 | 0.237864416 | 0.154575618 | 0.346118057 |
| 0.468017379 | 0.221327809 | 0.475292688 | 0.334374925 |
| 0.250687488 | 0.440634441 | 0.309783192 | 0.35663461  |
| 0.156996266 | 0.480160486 | 0.273540197 | 0.284969226 |
| 0.08037917  | 0.243479461 | 0.245064853 | 0.22376896  |
| 0.261363691 | 0.316441092 | 0.458375304 | 0.467739258 |
| 0.338267553 | 0.314856111 | 0.471067972 | 0.450230184 |

|             |             |             |             |
|-------------|-------------|-------------|-------------|
| 0.403865946 | 0.368120962 | 0.301526966 | 0.027911691 |
| 0.265100762 | 0.296109263 | 0.143786216 | 0.404345286 |
| 0.2754144   | 0.261286304 | 0.387152636 | 0.384454671 |
| 0.42715276  | 0.252238345 | 0.348972169 | 0.443361077 |
| 0.275983565 | 0.320307464 | 0.446247488 | 0.448531989 |
| 0.017455326 | 0.401817697 | 0.471991969 | 0.124647106 |
| 0.375254417 | 0.115482301 | 0.24660656  | 0.460322074 |
| 0.255603118 | 0.184748123 | 0.476068078 | 0.376887382 |
| 0.386926876 | 0.319685264 | 0.481021107 | 0.034565674 |
| 0.320760564 | 0.065591972 | 0.305698676 | 0.419002164 |
| 0.331842249 | 0.314894332 | 0.283611492 | 0.272585266 |
| 0.27531723  | 0.504804455 | 0.450354011 | 0.482827245 |
| 0.357466426 | 0.488126345 | 0.462789033 | 0.460825432 |
| 0.42519937  | 0.342244887 | 0.102265429 | 0.471307661 |
| 0.463170363 | 0.304590087 | 0.190696941 | 0.448308398 |
| 0.377265699 | 0.387814938 | 0.11011871  | 0.461811135 |
| 0.49320328  | 0.502679486 | 0.17920702  | 0.359916338 |
| 0.437230404 | 0.344901207 | 0.438852998 | 0.485218386 |
| 0.34986551  | 0.327516816 | 0.315613666 | 0.384822596 |
| 0.27869827  | 0.176200791 | 0.376148534 | 0.138638974 |
| 0.012580181 | 0.180891586 | 0.163162764 | 0.184768852 |
| 0.133927468 | 0.443290495 | 0.402438328 | 0.490092537 |
| 0.18347314  | 0.457024555 | 0.306068397 | 0.300112602 |
| 0.457878697 | 0.323319415 | 0.360950837 | 0.379132211 |
| 0.322436322 | 0.041151508 | 0.168504461 | 0.520765131 |
| 0.130610392 | 0.209912706 | 0.387309387 | 0.006095986 |
| 0.114095723 | 0.477958472 | 0.204951644 | 0.284559924 |
| 0.439621504 | 0.302414485 | 0.322259045 | 0.379860513 |
| 0.373467546 | 0.177553896 | 0.006622586 | 0.463878435 |
| 0.464434048 | 0.440260874 | 0.467115941 | 0.468236232 |
| 0.431974767 | 0.431512843 | 0.4135174   | 0.49754479  |
| 0.180540801 | 0.203821094 | 0.173112777 | 0.299384222 |
| 0.01115576  | 0.408098424 | 0.299664575 | 0.232946375 |
| 0.419765297 | 0.343426252 | 0.096008679 | 0.329462934 |
| 0.075713571 | 0.175166357 | 0.367201928 | 0.241282408 |
| 0.332350677 | 0.054219516 | 0.324143996 | 0.302050828 |
| 0.479684099 | 0.428803518 | 0.340267831 | 0.518582498 |
| 0.371017572 | 0.268377133 | 0.322818828 | 0.40787176  |
| 0.136089859 | 0.123674641 | 0.42017819  | 0.072057608 |
| 0.273302866 | 0.447899203 | 0.375540599 | 0.168604374 |
| 0.341617159 | 0.024930015 | 0.453505865 | 0.511004084 |
| 0.496990339 | 0.468919707 | 0.486019514 | 0.245109262 |
| 0.4964695   | 0.07770485  | 0.502227377 | 0.478523854 |
| 0.413251268 | 0.00398623  | 0.010133034 | 0.473771206 |
| 0.391857101 | 0.170061151 | 0.244712291 | 0.478478539 |
| 0.16298724  | 0.29178789  | 0.12917799  | 0.156483384 |
| 0.479714629 | 0.232414866 | 0.143045269 | 0.486507528 |
| 0.280835216 | 0.267709532 | 0.461983717 | 0.19095874  |
| 0.413399688 | 0.109919013 | 0.18304119  | 0.01225922  |
| 0.358698406 | 0.239006474 | 0.514863662 | 0.498486398 |
| 0.471373531 | 0.387416923 | 0.381090025 | 0.392684116 |
| 0.432105469 | 0.242167854 | 0.38081345  | 0.251434667 |
| 0.495520428 | 0.389199422 | 0.377731129 | 0.402588047 |
| 0.45831366  | 0.470138778 | 0.08075041  | 0.422525953 |

|             |             |             |             |
|-------------|-------------|-------------|-------------|
| 0.044656506 | 0.001682265 | 0.502091883 | 0.319394766 |
| 0.050988457 | 0.345762447 | 0.333057585 | 0.265200836 |
| 0.244674399 | 0.091341724 | 0.21708734  | 0.196819566 |
| 0.327597157 | 0.36095391  | 0.240945315 | 0.316258895 |
| 0.247687815 | 0.110920827 | 0.236538415 | 0.197863881 |
| 0.246891961 | 0.405635101 | 0.307157123 | 0.05883058  |
| 0.460514376 | 0.409399772 | 0.129063927 | 0.262250061 |
| 0.466580432 | 0.478686656 | 0.075470695 | 0.023729824 |
| 0.355270235 | 0.306465851 | 0.462792442 | 0.497183887 |
| 0.531174984 | 0.482508766 | 0.414867809 | 0.126030343 |
| 0.142434218 | 0.326959252 | 0.257745218 | 0.098805692 |
| 0.487258278 | 0.174523852 | 0.491961511 | 0.255829162 |
| 0.200885653 | 0.289056039 | 0.069349148 | 0.151852504 |
| 0.362703442 | 0.252236455 | 0.197832899 | 0.293340552 |
| 0.316781435 | 0.21954086  | 0.106267769 | 0.264156041 |
| 0.40580178  | 0.142989058 | 0.240122272 | 0.392142142 |
| 0.441717787 | 0.275150062 | 0.424895249 | 0.429055917 |
| 0.240704567 | 0.201823723 | 0.439089936 | 0.401385939 |
| 0.475489618 | 0.421958502 | 0.071879569 | 0.489424916 |
| 0.461323377 | 0.459153925 | 0.509634642 | 0.384504102 |
| 0.176738065 | 0.374907145 | 0.27004372  | 0.327763677 |
| 0.246313256 | 0.491384005 | 0.268655893 | 0.139315124 |
| 0.346748027 | 0.483779898 | 0.466506925 | 0.217016035 |
| 0.451854097 | 0.264575077 | 0.162704233 | 0.465258102 |
| 0.144627607 | 0.176620587 | 0.453224951 | 0.433399921 |
| 0.00314153  | 0.103195195 | 0.440693902 | 0.301679883 |
| 0.492357349 | 0.461303522 | 0.451106192 | 0.33389189  |
| 0.000793888 | 0.391359385 | 0.404220146 | 0.423016627 |
| 0.48460472  | 0.435751623 | 0.201980501 | 0.114152733 |
| 0.336928959 | 0.208766628 | 0.164666927 | 0.451431424 |
| 0.144555548 | 0.470958949 | 0.255798371 | 0.274003746 |
| 0.209691041 | 0.204175107 | 0.216903945 | 0.325974152 |
| 0.108988988 | 0.300603904 | 0.385871259 | 0.383716186 |
| 0.173630094 | 0.422493432 | 0.453666757 | 0.081573717 |
| 0.327841539 | 0.419378075 | 0.441241773 | 0.004820374 |
| 0.433580898 | 0.022359081 | 0.208007024 | 0.241990943 |
| 0.223391473 | 0.219409611 | 0.255499114 | 0.294223818 |
| 0.403184428 | 0.273475702 | 0.334602479 | 0.289528333 |
| 0.195491723 | 0.296593861 | 0.390126737 | 0.425307024 |
| 0.289665288 | 0.21636987  | 0.211118615 | 0.2136574   |
| 0.10253097  | 0.481691028 | 0.333474539 | 0.193270338 |
| 0.266873299 | 0.399809343 | 0.381351698 | 0.504977252 |
| 0.423194669 | 0.250338005 | 0.340805799 | 0.502939138 |
| 0.242173248 | 0.378152946 | 0.155934566 | 0.461434414 |
| 0.302528215 | 0.199356684 | 0.465824011 | 0.4421439   |
| 0.449722398 | 0.420738171 | 0.334036512 | 0.445090651 |
| 0.390003071 | 0.345034693 | 0.424700909 | 0.1176704   |
| 0.274390573 | 0.233205477 | 0.235403288 | 0.009880071 |
| 0.396165244 | 0.419157574 | 0.480342225 | 0.50776746  |
| 0.24935772  | 0.414504199 | 0.451766037 | 0.171205441 |
| 0.392566788 | 0.305618607 | 0.232397862 | 0.464888689 |
| 0.182789985 | 0.26461808  | 0.291216589 | 0.49577676  |
| 0.436675636 | 0.430385216 | 0.226748999 | 0.308718077 |
| 0.278575738 | 0.328645721 | 0.480310648 | 0.251396899 |

|             |             |             |             |
|-------------|-------------|-------------|-------------|
| 0.446014955 | 0.168596834 | 0.449652659 | 0.303269449 |
| 0.225539749 | 0.480580616 | 0.144399894 | 0.485758734 |
| 0.311812168 | 0.243848373 | 0.478772048 | 0.385487269 |
| 0.388989045 | 0.145080252 | 0.14773349  | 0.447226362 |
| 0.257824647 | 0.311804006 | 0.019004269 | 0.05497134  |
| 0.351839807 | 0.314596104 | 0.460213702 | 0.38144604  |
| 0.214091061 | 0.342254423 | 0.132270965 | 0.367715212 |
| 0.510923259 | 0.525927932 | 0.297121961 | 0.30287551  |
| 0.395097994 | 0.167095869 | 0.511074945 | 0.015834483 |
| 0.419977878 | 0.414434121 | 0.400630471 | 0.103149759 |
| 0.051111847 | 0.171609161 | 0.435869798 | 0.164979014 |
| 0.444096575 | 0.184256095 | 0.410194482 | 0.468319205 |
| 0.270439786 | 0.528581417 | 0.136770467 | 0.425915594 |
| 0.103449988 | 0.317990986 | 0.354575748 | 0.377954224 |
| 0.232977281 | 0.25185523  | 0.394850181 | 0.20193386  |
| 0.07178987  | 0.267419484 | 0.003200292 | 0.434088901 |
| 0.508158609 | 0.299387787 | 0.294379456 | 0.342608355 |
| 0.308368144 | 0.416001491 | 0.22202157  | 0.430776619 |
| 0.027933699 | 0.346563559 | 0.25878754  | 0.488455092 |
| 0.242586258 | 0.378688967 | 0.103008256 | 0.27125     |
| 0.512339965 | 0.27019303  | 0.315986855 | 0.314892027 |
| 0.496914158 | 0.44932836  | 0.308680892 | 0.216807065 |
| 0.421205502 | 0.155602282 | 0.465969873 | 0.49860419  |
| 0.20599274  | 0.181915482 | 0.431552757 | 0.240651877 |
| 0.265823144 | 0.451769797 | 0.425123808 | 0.494582509 |
| 0.080439232 | 0.305796867 | 0.428036256 | 0.462532166 |
| 0.327713496 | 0.132063024 | 0.209185697 | 0.215089802 |
| 1           | 0.178500889 | 0.217748016 | 0.430451755 |
| 0.177718663 | 0.340869901 | 0.429112656 | 0.173553853 |
| 0.066874239 | 0.210294731 | 0.434311015 | 0.232120304 |
| 0.321683826 | 0.361470191 | 0.213157644 | 0.410471505 |
| 0.177021845 | 0.052416204 | 0.433138093 | 0.011788353 |
| 0.480827412 | 0.412134823 | 0.304035281 | 0.335694721 |
| 0.30478299  | 0.405284401 | 0.444768977 | 0.005645139 |
| 0.416860327 | 0.051990678 | 0.299657981 | 0.221170519 |
| 0.256212654 | 0.120471508 | 0.473664813 | 0.46167932  |
| 0.399305967 | 0.345320239 | 0.337737613 | 0.469194471 |
| 0.116003348 | 0.310830163 | 0.304306824 | 0.489736308 |
| 0.182768621 | 0.432601118 | 0.418626054 | 0.372293747 |
| 0.453300816 | 0.349836084 |             |             |
| UHRF2       | 0.166429784 | 0.124609854 | 0.162528317 |
| 0.079484838 | 0.097332619 | 0.082267549 | 0.079123984 |
| 0.0733332   | 0.089999307 | 0.011561119 | 0.162851051 |
| 0.085374313 | 0.002711772 | 0.171399121 | 0.080505731 |
| 0.07938649  | 0.089102948 | 0.155502498 | 0.003000527 |
| 0.01358842  | 0.095372629 | 0.035635475 | 0.079935268 |
| 0.065576344 | 0.26638887  | 0.090951477 | 0.037225508 |
| 0.156139915 | 0.008535223 | 0.115132845 | 0.004731506 |
| 0.227215505 | 0.094535019 | 0.039744541 | 0.079233788 |
| 0.083273438 | 7.71E-06    | 0.210408158 | 0.096769877 |
| 0.011696548 | 0.248108449 | 0.030754606 | 0.189667296 |
| 0.034837177 | 0.13046312  | 0.004007924 | 0.06274453  |
| 0.068256351 | 0.05409348  | 0.133336214 | 0.105739104 |
| 0.022978886 | 0.194810186 | 0.071851276 | 0.001253681 |



|             |             |             |             |
|-------------|-------------|-------------|-------------|
| 0.032567434 | 0.001282855 | 0.009959869 | 0.188953861 |
| 0.304490351 | 0.211429807 | 0.004001182 | 0.054113517 |
| 0.051178204 | 0.079253593 | 0.164540714 | 0.019638958 |
| 0.19309823  | 0.008097608 | 0.076417681 | 0.038724487 |
| 0.064014536 | 0.052204309 | 0.267427473 | 0.082448453 |
| 0.03317493  | 0.224456967 | 0.119774999 | 0.030210139 |
| 0.119149636 | 0.215918619 | 0.155083461 | 0.172978664 |
| 0.00212278  | 0.054837289 | 0.042495303 | 0.178397726 |
| 0.088030567 | 0.037341859 | 0.172070579 | 0.207510904 |
| 0.053703788 | 0.043243313 | 0.088220532 | 0.140216487 |
| 0.15245258  | 0.010144263 | 0.044170686 | 0.02841173  |
| 0.089060062 | 0.068299418 | 0.168435583 | 0.243555599 |
| 0.065094521 | 0.154736102 | 0.191029659 | 0.057730999 |
| 0.130091299 | 0.200788204 | 0.028328024 | 0.110570416 |
| 0.109944588 | 0.173012591 | 0.096817537 | 0.12392385  |
| 0.060146311 | 0.189035121 | 0.157339985 | 0.143814045 |
| 0.001455474 | 0.176411625 | 0.245213255 | 0.130137469 |
| 0.085381923 | 0.126882008 | 0.013087354 | 0.218112887 |
| 0.157418016 | 0.139534059 | 0.148207102 | 0.145236135 |
| 0.14103517  | 0.173881641 | 0.161772281 | 0.136370769 |
| 0.139396607 | 0.009343846 | 0.064791414 | 0.071812942 |
| 0.112536002 | 0.142818104 | 0.047009668 | 0.210384921 |
| 0.256981226 | 0.132569142 | 0.094221148 | 0.224747043 |
| 0.058482393 | 0.230017819 | 0.134073721 | 0.256543872 |
| 0.213261326 | 0.213290109 | 0.203341219 | 0.103668296 |
| 0.223078685 | 0.155636416 | 0.001323678 | 0.128326036 |
| 0.233243565 | 0.010757498 | 0.123388999 | 0.13875591  |
| 0.17051838  | 0.122167273 | 0.179009347 | 0.166463661 |
| 0.168158934 | 0.155388465 | 0.0007672   | 0.138987437 |
| 0.191448204 | 0.225796842 | 0.052365569 | 0.050054049 |
| 0.079736173 | 0.089444027 | 0.100322537 | 0.014217101 |
| 0.232042905 | 0.152455076 | 0.134820737 | 0.110703185 |
| 0.043632929 | 0.251409763 | 0.039804769 | 0.203347708 |
| 0.078684381 | 0.165671445 | 0.180538412 | 0.133815212 |
| 0.023469826 | 0.228518479 | 0.061511334 | 0.055081099 |
| 0.255305444 | 0.054224886 | 0.024219052 | 0.10040502  |
| 0.149747922 | 0.076179773 | 0.176345284 | 0.122843951 |
| 0.120559137 | 0.245106211 | 0.045405198 | 0.152303282 |
| 0.138357248 | 0.213851389 | 0.085324081 | 0.155082045 |
| 0.036038833 | 0.246553614 | 0.110088289 | 0.21347393  |
| 0.253339999 | 0.074215656 | 0.199302606 | 0.10235065  |
| 0.016173944 | 0.008695674 | 0.007641489 | 0.050876882 |
| 0.220805834 | 0.03955636  | 0.077768212 | 0.143798404 |
| 0.147559457 | 0.067478387 | 0.032930839 | 0.255672641 |
| 0.167579362 | 0.105066768 | 0.169255329 | 0.050592485 |
| 0.037401852 | 0.130998816 | 0.146742873 | 0.013857581 |
| 0.101772681 | 0.013307059 | 0.022670526 | 0.151994806 |
| 0.009381947 | 0.028766667 | 0.150335693 | 0.123434342 |
| 0.013527525 | 0.161932876 | 0.17979479  | 0.000272892 |
| 0.039594391 | 0.034868536 | 0.222041071 | 0.02485364  |
| 0.200028101 | 0.163889756 | 0.076028036 | 0.066797501 |
| 0.20702098  | 0.183869425 | 0.16814235  | 0.179183341 |
| 0.024360893 | 0.182616512 | 0.143608221 | 0.199457838 |
| 0.153087003 | 0.023957527 | 0.00544347  | 0.149085212 |

|             |             |             |             |
|-------------|-------------|-------------|-------------|
| 0.144262911 | 0.005148468 | 0.16298299  | 0.086355632 |
| 0.024106655 | 0.085358216 | 0.013035364 | 0.198581813 |
| 0.241559401 | 0.155055993 | 0.141153664 | 0.140498151 |
| 0.236572291 | 0.250224529 | 0.139372466 | 0.190856739 |
| 0.008461745 | 0.052482393 | 0.043969839 | 0.172943664 |
| 0.250688155 | 0.031693386 | 0.174517152 | 0.006886967 |
| 0.000932236 | 0.117238034 | 0.179949803 | 0.183122535 |
| 0.032961166 | 0.053171024 | 0.097120155 | 0.17517766  |
| 0.210461745 | 0.210137495 | 0.121125821 | 0.07149597  |
| 0.165646308 | 0.040144869 | 0.064859216 | 0.088709144 |
| 0.180889121 | 0.091519319 | 0.096152272 | 0.221852457 |
| 0.094624226 | 0.032553116 | 0.069880445 | 0.025121011 |
| 0.095484996 | 0.084947287 | 0.186804209 | 0.282953702 |
| 0.166046546 | 0.253228123 | 0.188392894 | 0.01417581  |
| 0.190485859 | 0.225272585 | 0.080159021 | 0.142885002 |
| 0.142314126 | 0.133197438 | 0.137678147 | 0.152514924 |
| 0.113892057 | 0.096239707 | 0.120221531 | 0.112711622 |
| 0.083584871 | 0.078635397 | 0.019500151 | 0.09897393  |
| 0.005083584 | 0.19581767  | 0.069344541 | 0.288312928 |
| 0.098519027 | 0.113029297 | 0.139345859 | 0.067459166 |
| 0.074024193 | 0.012929396 | 0.031522518 | 0.07400281  |
| 0.124832738 | 0.092522028 | 0.023989627 | 0.013826023 |
| 0.205394319 | 0.214339181 | 0.024838833 | 0.190423945 |
| 0.176856424 | 0.128173472 | 0.109455647 | 0.155822097 |
| 0.11572057  | 0.001187024 | 0.039306581 | 0.002641347 |
| 0.01231286  | 0.159735184 | 0.027019479 | 0.04420337  |
| 0.213404206 | 0.060643212 | 0.229351926 | 0.200364305 |
| 0.162540586 | 0.168442168 | 0.200386154 | 0.052346765 |
| 0.196020982 | 0.000881633 | 0.172966288 | 0.145608615 |
| 0.023374987 | 0.010975653 | 0.027364821 | 0.149384955 |
| 0.078282222 | 0.138592035 | 0.251361012 | 0.035938703 |
| 0.126589695 | 0.105533254 | 0.12227073  | 0.047008671 |
| 0.1089991   | 0.131823076 | 0.027448173 | 0.161876597 |
| 0.127604432 | 0.162847901 | 0.038052201 | 0.163155777 |
| 0.085328036 | 0.143348475 | 0.127532639 | 0.045273705 |
| 0.123436948 | 0.169199337 | 0.196721073 | 0.174914633 |
| 0.222133194 | 0.119727536 | 0.014910899 | 0.01618196  |
| 0.122336066 | 0.155748852 | 0.012085022 | 0.152734574 |
| 0.166730611 | 0.102901886 | 0.262165516 | 0.271081294 |
| 0.200394138 | 0.206207621 | 0.128057095 | 0.13513862  |
| 0.125444175 | 0.006340472 | 0.085385678 | 0.146166726 |
| 0.000650657 | 0.048789003 | 0.262395861 | 0.022789318 |
| 0.043357676 | 0.060259311 | 0.023087093 | 0.025544332 |
| 0.160573843 | 0.079367281 | 0.0749195   | 0.11775627  |
| 0.056721566 | 0.010704141 | 0.132113611 | 0.083777631 |
| 0.004779866 | 0.180231965 | 0.274029093 | 0.072980478 |
| 0.053498037 | 0.064497887 | 0.20928858  | 0.235439486 |
| 0.188066573 | 0.165333488 | 0.03249728  | 0.077476564 |
| 0.237465646 | 0.04606994  | 0.170506685 | 0.160809933 |
| 0.20642378  | 0.212716733 | 0.243917424 | 0.053781945 |
| 0.160647405 | 0.119597008 | 0.065726818 | 0.050149766 |
| 0.18029887  | 0.109376448 | 0.182237028 | 0.038835105 |
| 0.182267228 | 0.12471635  | 0.105727424 | 0.168131621 |
| 0.066747547 | 0.241073347 | 0.180273721 | 0.183423762 |

|             |             |             |                   |
|-------------|-------------|-------------|-------------------|
| 0.084045512 | 0.016536804 | 0.103227554 | 0.212884748       |
| 0.161439391 | 0.006445126 | 0.204847787 | 0.050986294       |
| 0.138699788 | 0.002466886 | 0.095630618 | 0.246998272       |
| 0.249920036 | 0.111225078 | 0.058731676 | 0.099853579       |
| 0.112415171 | 0.036757364 | 0.139546467 | 0.125188414       |
| 0.174595831 | 0.093990052 | 0.19247942  | 0.179460341       |
| 0.170896117 | 0.09041547  | 0.020386709 | 0.076052096       |
| 0.153822374 | 0.091311336 | 0.096998657 | 0.183737378       |
| 0.191703549 | 0.205224428 | 0.139464085 | 0.244038715       |
| 0.063668582 | 0.108698077 | 0.098840998 | 0.128162555       |
| 0.020024323 | 0.075192663 | 0.031670074 | 0.098678772       |
| 0.009682099 | 0.011698305 | 0.146662426 | 0.133889841       |
| 0.191896009 | 0.166904705 | 0.247460301 | 0.043346482       |
| 0.000823533 | 0.071461064 | 0.15399301  | 0.069263393       |
| 0.139626473 | 0.187234593 | 0.010284879 | 0.135997828       |
| 0.276482391 | 0.183477867 | 0.070100643 | 0.018570193       |
| 0.003510482 | 0.090600827 | 0.24492463  | 0.095662289       |
| 0.108510379 | 0.082291726 | 0.017101071 | 0.171107014       |
| 0.002597006 | 0.278354857 | 0.232058321 | 0.012498083       |
| 0.00765991  | 0.137426737 | 0.122679541 | 0.140375175       |
| 0.051436822 | 0.129289084 | 0.164891819 | 0.006289022       |
| 0.11902859  | 0.060512738 | 0.150582943 | 0.188291411       |
| 0.147686202 | 0.094090199 | 0.146074571 | 0.066897669       |
| 0.085246517 | 0.117637546 | 0.161971686 | 0.271313996       |
| 0.164943167 | 0.112169012 | 0.082705149 | 0.059171183       |
| 0.103622495 | 0.2120009   | 0.195219081 | 0.203758909       |
| 0.101581602 | 0.142602355 | 0.300907982 | 0.197105199       |
| 0.196534361 | 0.040090361 | 0.26758564  | 0.156676642       |
| 0.214986945 | 0.173928458 | 0.057544235 | 0.156790873       |
| 0.002147099 | 0.01516637  | 0.069250803 | 0.082578306       |
| 0.188015384 | 0.04275099  | 0.053761822 | 0.111666055       |
| 0.074777076 | 0.275238138 | 0.297922535 | 0.197713871       |
| 0.077812104 | 0.032984253 | 0.020518219 | 0.135557911       |
| 0.190599144 | 0.169679907 | 0.088777069 | 0.050169447       |
| 0.16442145  | 0.046739185 | 0.148385963 | 0.193453801       |
| 0.018931587 | 0.237685423 | 0.010430817 | 0.120052369       |
| 0.009534049 | 0.182373816 | 0.245986563 | 0.093710213       |
| 0.013974235 | 0.154047021 | 0.10760465  | 0.048470357       |
| 0.105038743 | 0.073930841 | 0.032452193 | 0.078780528       |
| 0.099057927 | 0.181914728 | 0.168035465 | 0.119575561       |
| 0.055036783 | 0.060386079 | 0.050105907 | 0.117207156       |
| 0.104512742 | 0.15618858  | 0.18367723  | 0.158585418       |
| 0.058501752 | 0.198051372 | 0.24530649  | 0.093938285       |
| 0.040171032 | 0.069133307 | 0.01345763  | 0.030118706       |
| 0.054483555 | 0.03009171  | 0.000151089 | 0.003824407       |
| 0.226681961 | 0.017513914 | 0.083069347 | 0.101421511       |
| 0.049156794 | 0.170618464 | 0.003780469 | 0.06980144        |
| 0.160657049 | 0.195395682 | 0.051369684 | 0.212367492       |
| 0.16246549  | 0.214534532 | 0.109441753 | 1.98E-05 0.070251 |
| 0.053038599 | 0.015557283 | 0.11863485  | 0.037818219       |
| 0.014319903 | 0.067971943 | 0.082116153 | 0.150952085       |
| 0.005155996 | 0.049726415 | 0.115259676 | 0.149629752       |
| 0.202875067 | 0.099804661 | 0.169407468 | 0.008264726       |
| 0.16023649  | 0.042185754 | 0.034434629 | 0.082106205       |

|             |             |             |             |
|-------------|-------------|-------------|-------------|
| 0.044580231 | 0.183414711 | 0.047414764 | 0.142591324 |
| 0.049274887 | 0.002177727 | 0.269313185 | 0.174150482 |
| 0.037153726 | 0.232884471 | 0.008370098 | 0.232533241 |
| 0.148299453 | 0.016068868 | 0.044072008 | 0.092116339 |
| 0.089040368 | 0.201613753 | 0.203928519 | 0.008436995 |
| 0.048030855 | 0.08342397  | 0.039729083 | 0.209363967 |
| 0.016709994 | 0.184941465 | 0.010971872 | 0.164358526 |
| 0.117709577 | 0.157757268 | 0.027358505 | 0.050661122 |
| 0.171525833 | 0.032438003 | 0.183005778 | 0.193699358 |
| 0.04889365  | 0.152626277 | 0.123230861 | 0.03477977  |
| 0.160304614 | 0.045294294 | 0.166580787 | 0.07731119  |
| 0.243611819 | 0.121736683 | 0.145702819 | 0.240524038 |
| 0.029465148 | 0.033011451 | 0.082147399 | 0.178500889 |
| 1           | 0.01425227  | 0.175470839 | 0.02529686  |
| 0.176695296 | 0.045122481 | 0.081525251 | 0.090636468 |
| 0.054974755 | 0.068549365 | 0.210053999 | 0.14834911  |
| 0.087292016 | 0.041207293 | 0.263863063 | 0.115919983 |
| 0.104340992 | 0.234421761 | 0.001229526 | 0.14098764  |
| 0.154395363 | 0.195412724 | 0.059390454 | 0.310685342 |
| 0.088542288 | 0.068327918 | 0.019156355 | 0.145365175 |
| 0.01147812  | 0.044698341 | 0.078633495 | 0.007246912 |
| 0.099785658 | 0.210654667 | 0.17868406  | 0.143212632 |
| 0.007459536 | 0.012566298 | 0.175056326 | 0.007271843 |
| 0.014703182 | 0.018698398 | 0.085967085 | 0.026294917 |
| 0.028183367 | 0.032550039 | 0.040777642 | 0.161904407 |
| 0.090520048 |             |             |             |
| UQCR        | 0.018111835 | 0.228998816 | 0.009707885 |
| 0.023754719 | 0.288578876 | 0.088273582 | 0.022099728 |
| 0.038872787 | 0.209874155 | 0.070230966 | 0.168498333 |
| 0.003807752 | 0.106606065 | 0.295668026 | 0.022750049 |
| 0.285808389 | 0.013096784 | 0.056943771 | 0.041121115 |
| 0.054723317 | 0.265644742 | 0.0842292   | 0.107239628 |
| 0.263263499 | 0.089204784 | 0.14315224  | 0.254375981 |
| 0.292752707 | 0.051896716 | 0.235149545 | 0.026699334 |
| 0.261273837 | 0.297426852 | 0.178112771 | 0.00224092  |
| 0.176385632 | 0.056599017 | 0.256171047 | 0.132108291 |
| 0.083193964 | 0.203175473 | 0.082199025 | 0.09611506  |
| 0.133765992 | 0.00650916  | 0.025246964 | 0.314513724 |
| 0.170028007 | 0.106399385 | 0.016602889 | 0.232135409 |
| 0.127687803 | 0.154563015 | 0.177980097 | 0.001354831 |
| 0.181370879 | 0.073396417 | 0.141402753 | 0.273429685 |
| 0.116124337 | 0.070422411 | 0.09421881  | 0.1078597   |
| 0.257941705 | 0.317124167 | 0.199047933 | 0.107964963 |
| 0.288840124 | 0.133219917 | 0.294427401 | 0.031310453 |
| 0.125218297 | 0.011191957 | 0.102109253 | 0.038706038 |
| 0.131100205 | 0.129219481 | 0.203430042 | 0.207770718 |
| 0.216587906 | 0.308498267 | 0.161719032 | 0.264968216 |
| 0.124434106 | 0.324679403 | 0.157030847 | 0.267051831 |
| 0.286134018 | 0.036671566 | 0.250721243 | 0.319309134 |
| 0.020275468 | 0.157029648 | 0.260481604 | 0.057256801 |
| 0.226429584 | 0.134985882 | 0.125503558 | 0.115746896 |
| 0.348456326 | 0.28420222  | 0.280281136 | 0.169639678 |
| 0.213924192 | 0.024822084 | 0.235677459 | 0.318348142 |
| 0.117180888 | 0.02611599  | 0.124270832 | 0.33917486  |

|             |             |             |             |
|-------------|-------------|-------------|-------------|
| 0.223152024 | 0.288261914 | 0.263004525 | 0.284486756 |
| 0.264420128 | 0.292833999 | 0.224225573 | 0.265373554 |
| 0.032928994 | 0.301778786 | 0.073654087 | 0.013439851 |
| 0.018153578 | 0.043813516 | 0.133547669 | 0.228574425 |
| 0.297822092 | 0.197996954 | 0.068403542 | 0.171047733 |
| 0.373297163 | 0.230134921 | 0.304220282 | 0.280554199 |
| 0.012827413 | 0.156460241 | 0.247525605 | 0.066988465 |
| 0.261045064 | 0.073504976 | 0.23724399  | 0.268729452 |
| 0.222969783 | 0.329968903 | 0.042712164 | 0.275804642 |
| 0.104025932 | 0.322847176 | 0.234224431 | 0.081392068 |
| 0.291394608 | 0.249453435 | 0.345846758 | 0.325161861 |
| 0.253512075 | 0.103735631 | 0.035026216 | 0.267143237 |
| 0.324662273 | 0.011641548 | 0.323385362 | 0.345882046 |
| 0.273088622 | 0.32749178  | 0.372482677 | 0.327970148 |
| 0.272243679 | 0.037762327 | 0.035552743 | 0.278095926 |
| 0.277038931 | 0.241454658 | 0.074974298 | 0.209755634 |
| 0.291939335 | 0.111680539 | 0.297863018 | 0.058643637 |
| 0.340421693 | 0.295322743 | 0.310394556 | 0.251801642 |
| 0.150836272 | 0.184379065 | 0.263944287 | 0.219407246 |
| 0.013202721 | 0.027599566 | 0.016317932 | 0.242434783 |
| 0.043883264 | 0.130038995 | 0.103289719 | 0.286615753 |
| 0.136348846 | 0.108594152 | 0.161597681 | 0.344541957 |
| 0.022051519 | 0.174856886 | 0.070019877 | 0.072529366 |
| 0.014699736 | 0.079367699 | 0.042156094 | 0.031617276 |
| 0.185819869 | 0.110913245 | 0.264279404 | 0.334205313 |
| 0.184451767 | 0.07702307  | 0.229063928 | 0.323893434 |
| 0.317963325 | 0.242913204 | 0.154942229 | 0.002705278 |
| 0.091955904 | 0.117839097 | 0.151883075 | 0.232685184 |
| 0.089871245 | 0.071926109 | 0.264813847 | 0.324218202 |
| 0.08200593  | 0.052802548 | 0.161175593 | 0.240830747 |
| 0.066294976 | 0.116655044 | 0.323915177 | 0.19117932  |
| 0.000345099 | 0.140293788 | 0.28515291  | 0.114879716 |
| 0.200053912 | 0.064772501 | 0.075326899 | 0.321700099 |
| 0.115953356 | 0.187896889 | 0.322129669 | 0.339438538 |
| 0.057313867 | 0.105132451 | 0.353596271 | 0.074623152 |
| 0.271501338 | 0.036156446 | 0.235575556 | 0.105775757 |
| 0.134517825 | 0.262530686 | 0.282343104 | 0.164494657 |
| 0.041376755 | 0.300297181 | 0.246594708 | 0.312980956 |
| 0.134912444 | 0.352032565 | 0.315213528 | 0.28176888  |
| 0.200965543 | 0.2182799   | 0.095760895 | 0.277550699 |
| 0.317424427 | 0.086335089 | 0.027238527 | 0.308011192 |
| 0.166239013 | 0.335168595 | 0.10742371  | 0.326347457 |
| 0.294353612 | 0.227769159 | 0.066404813 | 0.351502622 |
| 0.23740799  | 0.088484989 | 0.298982391 | 0.358154841 |
| 0.071231357 | 0.240434158 | 0.16816757  | 0.365329916 |
| 0.090181537 | 0.139856299 | 0.21854436  | 0.118954678 |
| 0.005155014 | 0.031836745 | 0.023755401 | 0.112518392 |
| 0.152881316 | 0.220491009 | 0.298639904 | 0.321596778 |
| 0.059597908 | 0.248507431 | 0.174797625 | 0.104898094 |
| 0.246853946 | 0.214078899 | 0.247318786 | 0.2874212   |
| 0.172565046 | 0.005302059 | 0.024995397 | 0.303019827 |
| 0.0141981   | 0.132049329 | 0.133350487 | 0.000740486 |
| 0.012004672 | 0.216182606 | 0.045326977 | 0.104462004 |
| 0.366122016 | 0.099098046 | 0.099470478 | 0.084329515 |

|             |             |             |             |
|-------------|-------------|-------------|-------------|
| 0.253466906 | 0.043158408 | 0.001429586 | 0.322104081 |
| 0.311932212 | 0.306374158 | 0.305642502 | 0.25991744  |
| 0.332572586 | 0.26989839  | 0.335412827 | 0.099019594 |
| 0.032170302 | 0.025568444 | 0.118523435 | 0.180312595 |
| 0.001049856 | 0.279685875 | 0.238647997 | 0.080625405 |
| 0.319872349 | 0.231196179 | 0.008817715 | 0.295747264 |
| 0.002416751 | 0.104509299 | 0.071312942 | 0.147781999 |
| 0.352472197 | 0.002658234 | 0.030093432 | 0.101367475 |
| 0.201627203 | 0.186834654 | 0.158075764 | 0.308288179 |
| 0.171969327 | 0.046464272 | 0.183606569 | 0.290322401 |
| 0.026099137 | 0.057254402 | 0.11183946  | 0.004268823 |
| 0.034961905 | 0.277866206 | 0.15822847  | 0.012299726 |
| 0.147617949 | 0.000586426 | 0.184309379 | 0.314609751 |
| 0.225988895 | 0.352070527 | 0.292572133 | 0.182735749 |
| 0.286679324 | 0.083478124 | 0.319638719 | 0.214482749 |
| 0.108455796 | 6.69E-05    | 0.002075473 | 0.330340946 |
| 0.23518594  | 0.018785227 | 0.089103721 | 0.03894065  |
| 0.028854229 | 0.03392889  | 0.026827531 | 0.147003624 |
| 0.192699615 | 0.211858938 | 0.129515621 | 0.250011732 |
| 0.137234702 | 0.168583854 | 0.108642029 | 0.041723873 |
| 0.244390167 | 0.011707847 | 0.048042464 | 0.002071101 |
| 0.315760982 | 0.049491503 | 0.230271889 | 0.288038825 |
| 0.3131254   | 0.319418769 | 0.082606323 | 0.052062008 |
| 0.329729056 | 0.027432442 | 0.078415595 | 0.033064936 |
| 0.250644792 | 0.274887615 | 0.213713989 | 0.165289907 |
| 0.338738062 | 0.274958858 | 0.012586684 | 0.309224789 |
| 0.001322052 | 0.00264104  | 0.098298113 | 0.192072933 |
| 0.080813482 | 0.213335959 | 0.163296103 | 0.11056549  |
| 0.110692006 | 0.004227181 | 0.206318288 | 0.224363486 |
| 0.217987924 | 0.213690065 | 0.265898914 | 0.179214778 |
| 0.190846511 | 0.115703559 | 0.097148282 | 0.07733018  |
| 0.090145583 | 0.17037341  | 0.089701069 | 0.006935261 |
| 0.166464841 | 0.22256377  | 0.021256534 | 0.083370051 |
| 0.28654013  | 0.318209348 | 0.016903642 | 0.003816459 |
| 0.157042266 | 0.199141623 | 0.34818211  | 0.270424478 |
| 0.284533931 | 0.342131165 | 0.23117936  | 0.070873205 |
| 0.019514457 | 0.243938402 | 0.303694035 | 0.072729762 |
| 0.304146724 | 0.02441841  | 0.256219319 | 0.274016345 |
| 0.073437653 | 0.075314259 | 0.009799653 | 0.050254672 |
| 0.266442208 | 0.109117356 | 0.142087585 | 0.050652013 |
| 0.159691862 | 0.122919891 | 0.021890202 | 0.115406373 |
| 0.229356249 | 0.122643829 | 0.09840656  | 0.1011992   |
| 0.209696585 | 0.051644963 | 0.313834971 | 0.293426344 |
| 0.056806058 | 0.055620922 | 0.03523045  | 0.297784135 |
| 0.286334124 | 0.183342345 | 0.002784225 | 0.233672362 |
| 0.33248869  | 0.243214772 | 0.260110559 | 0.334705632 |
| 0.045843575 | 0.203092989 | 0.224009547 | 0.266446538 |
| 0.127236352 | 0.097133517 | 0.171307934 | 0.032108401 |
| 0.22063275  | 0.284069    | 0.252376896 | 0.082193905 |
| 0.193361517 | 0.04400694  | 0.019556717 | 0.284759661 |
| 0.125611787 | 0.014934471 | 0.090776237 | 0.330054995 |
| 0.002410454 | 0.126735838 | 0.370059277 | 0.067395509 |
| 0.330923946 | 0.337271775 | 0.261726017 | 0.075418883 |
| 0.018342409 | 0.330253298 | 0.215231566 | 0.140690044 |

|             |             |              |             |
|-------------|-------------|--------------|-------------|
| 0.2397897   | 0.189993188 | 0.043857603  | 0.024916786 |
| 0.210090508 | 0.025445376 | 0.047161934  | 0.04065469  |
| 0.091441575 | 0.18758837  | 0.149545643  | 0.13291664  |
| 0.157210213 | 0.043723901 | 0.102431872  | 0.093244289 |
| 0.144857123 | 0.168907524 | 0.246912108  | 0.052354802 |
| 0.078583406 | 0.338795118 | 0.252845134  | 0.005489062 |
| 0.25509475  | 0.309549614 | 0.303618936  | 0.000954057 |
| 0.289853589 | 0.001950334 | 0.14653824   | 0.128724867 |
| 0.124795985 | 0.145569701 | 0.25734652   | 0.143852644 |
| 0.216780736 | 0.123463747 | 0.104219604  | 0.152230503 |
| 0.071637473 | 0.11687746  | 0.266234669  | 0.139290914 |
| 0.116671718 | 0.036702845 | 0.045725843  | 0.041247841 |
| 0.010969977 | 0.273623191 | 0.138312309  | 0.024581729 |
| 0.170387792 | 0.151337471 | 0.25595951   | 0.257866183 |
| 0.302981524 | 0.03890096  | 0.168012047  | 0.229218137 |
| 0.078022776 | 0.046468555 | 0.014077284  | 0.161406371 |
| 0.120545794 | 0.086300137 | 0.145757231  | 0.111597531 |
| 0.240662572 | 0.231183316 | 0.131044925  | 0.284329947 |
| 0.168646866 | 0.213499943 | 0.061353453  | 0.027867936 |
| 0.063814531 | 0.074518978 | 0.262175041  | 8.55E-05    |
| 0.20776758  | 0.031605972 | 0.300903667  | 0.250138865 |
| 0.178279906 | 0.255560103 | 0.031319211  | 0.019049912 |
| 0.031270303 | 0.073520584 | 0.080690154  | 0.273192677 |
| 0.128504395 | 0.062658536 | 0.261628548  | 0.04256424  |
| 0.315797324 | 0.297239146 | 0.162046978  | 0.109718461 |
| 0.17899394  | 0.083423963 | 0.281544477  | 0.031575892 |
| 0.215083453 | 0.120521943 | 0.142224887  | 0.173383123 |
| 0.170605018 | 0.329494611 | 0.024417802  | 0.335102908 |
| 0.19956177  | 0.064440412 | 0.302562747  | 0.124056004 |
| 0.055700288 | 0.048807568 | 0.152792058  | 0.103208434 |
| 0.077737416 | 0.149764155 | 0.004834337  | 0.051290255 |
| 0.246556312 | 0.140279915 | 0.235808202  | 0.295936151 |
| 0.204069908 | 0.313393344 | 0.1011111024 | 0.126421989 |
| 0.234639281 | 0.253369363 | 0.055082615  | 0.197662854 |
| 0.222224085 | 0.036033884 | 0.138220461  | 0.0294963   |
| 0.249914606 | 0.242510708 | 0.075886409  | 0.020970899 |
| 0.005666432 | 0.157181573 | 0.234562979  | 0.032175596 |
| 0.3697039   | 0.088092448 | 0.195425224  | 0.255144339 |
| 0.110792139 | 0.255044744 | 0.071466548  | 0.270560567 |
| 0.014335393 | 0.17958049  | 0.23189118   | 0.198313776 |
| 0.073390618 | 0.22487139  | 0.284157634  | 0.178393108 |
| 0.011346772 | 0.082973906 | 0.003075025  | 0.218577058 |
| 0.233930217 | 0.258883381 | 0.124788791  | 0.065292816 |
| 0.225454685 | 0.266827171 | 0.08931495   | 0.183241747 |
| 0.00309433  | 0.279024297 | 0.130459115  | 0.208048337 |
| 0.061483835 | 0.223700759 | 0.017326229  | 0.289552494 |
| 0.216345783 | 0.086688001 | 0.186413792  | 0.080948411 |
| 0.259696401 | 0.230634356 | 0.063065419  | 0.098478733 |
| 0.226182732 | 0.029287896 | 0.087564106  | 0.332488525 |
| 0.107493267 | 0.197075601 | 0.34585629   | 0.093707028 |
| 0.230675788 | 0.222291687 | 0.223795957  | 0.325856527 |
| 0.046809388 | 0.165570921 | 0.325205793  | 0.29295916  |
| 0.248760283 | 0.185432015 | 0.147371578  | 0.158605986 |
| 0.217748016 | 0.01425227  | 1            | 0.211708068 |

|             |             |             |             |
|-------------|-------------|-------------|-------------|
| 0.171424637 | 0.221542847 | 0.145436594 | 0.173134994 |
| 0.008822751 | 0.07153214  | 0.070816811 | 0.079786766 |
| 0.202760877 | 0.222889233 | 0.158594392 | 0.254692629 |
| 0.034631446 | 0.005845032 | 0.300889597 | 0.030057397 |
| 0.096448295 | 0.245854521 | 0.13805912  | 0.222119604 |
| 0.084779966 | 0.195833392 | 0.119268918 | 0.000117277 |
| 0.315485529 | 0.037669727 | 0.156986649 | 0.101533339 |
| 0.098112203 | 0.013961379 | 0.246361416 | 0.355063842 |
| 0.169661464 | 0.073147424 | 0.076709303 | 0.262513239 |
| 0.108184126 | 0.136198005 | 0.151539533 | 0.189218098 |
| 0.176505965 | 0.12477999  | 0.156866602 | 0.149842595 |
| 0.204350057 | 0.096525201 |             |             |
| USP1        | 0.153374407 | 0.372074419 | 0.116367491 |
| 0.228216992 | 0.262226237 | 0.304559654 | 0.1379956   |
| 0.213341394 | 0.290123039 | 0.186229288 | 0.31794968  |
| 0.071528275 | 0.062557087 | 0.425078134 | 0.12556122  |
| 0.291406579 | 0.105410352 | 0.196489223 | 0.087589412 |
| 0.219403516 | 0.253773294 | 0.245389165 | 0.295670469 |
| 0.24431897  | 0.255768961 | 0.290054581 | 0.247589532 |
| 0.441370118 | 0.16044463  | 0.309010227 | 0.139761881 |
| 0.430541936 | 0.262429885 | 0.243794443 | 0.061611313 |
| 0.304137235 | 0.011539306 | 0.45018918  | 0.278237116 |
| 0.132923045 | 0.376200645 | 0.230065378 | 0.285716968 |
| 0.268012134 | 0.104674022 | 0.12006356  | 0.279614687 |
| 0.271498699 | 0.259667479 | 0.120721716 | 0.310753326 |
| 0.26841784  | 0.31411423  | 0.280633356 | 0.009439017 |
| 0.202361011 | 0.046932497 | 0.137080023 | 0.466553742 |
| 0.26652197  | 0.209895206 | 0.175097923 | 0.225459758 |
| 0.265274316 | 0.282548564 | 0.266245912 | 0.250451204 |
| 0.464777805 | 0.13231003  | 0.296581964 | 0.191283654 |
| 0.299092109 | 0.083568721 | 0.23156977  | 0.132333563 |
| 0.262146198 | 0.25987356  | 0.280759017 | 0.220046206 |
| 0.379587704 | 0.498005424 | 0.268867369 | 0.467487149 |
| 0.07895096  | 0.249766332 | 0.235805045 | 0.291003872 |
| 0.283118129 | 0.143087966 | 0.339954529 | 0.497432073 |
| 0.100004076 | 0.256761349 | 0.3006376   | 0.176738971 |
| 0.377782674 | 0.175338568 | 0.265682848 | 0.142416577 |
| 0.278727125 | 0.272339265 | 0.445472822 | 0.313550429 |
| 0.243491022 | 0.136141321 | 0.462213051 | 0.234314773 |
| 0.284782036 | 0.159710848 | 0.224482857 | 0.372300387 |
| 0.320524624 | 0.442708798 | 0.348020928 | 0.3185217   |
| 0.28159081  | 0.460073618 | 0.33691927  | 0.375095962 |
| 0.083605814 | 0.476899658 | 0.260001973 | 0.115650742 |
| 0.140445375 | 0.162724546 | 0.182556328 | 0.310601438 |
| 0.405101424 | 0.308501091 | 0.279116879 | 0.268060557 |
| 0.395624574 | 0.4450957   | 0.470349908 | 0.364052703 |
| 0.114098308 | 0.161571973 | 0.289693125 | 0.26400302  |
| 0.307021188 | 0.180823093 | 0.204146594 | 0.489005529 |
| 0.400010763 | 0.361528986 | 0.229278581 | 0.494993697 |
| 0.220739557 | 0.493895019 | 0.391761958 | 0.257906928 |
| 0.496403527 | 0.47683234  | 0.477773417 | 0.288520703 |
| 0.459732634 | 0.325785884 | 0.05215432  | 0.341170956 |
| 0.466464492 | 0.018721473 | 0.398610715 | 0.43159971  |
| 0.459814959 | 0.381249404 | 0.474465286 | 0.450921214 |



|             |             |             |             |
|-------------|-------------|-------------|-------------|
| 0.457881376 | 0.148657036 | 0.018429583 | 0.279900352 |
| 0.481221473 | 0.395191524 | 0.183942052 | 0.281980276 |
| 0.270196341 | 0.31946574  | 0.320384045 | 0.253457373 |
| 0.49751562  | 0.403062769 | 0.420013956 | 0.324429584 |
| 0.247369674 | 0.359613217 | 0.242456002 | 0.453620446 |
| 0.123820415 | 0.199538406 | 0.111795976 | 0.275105578 |
| 0.244216074 | 0.248778747 | 0.325075215 | 0.259379793 |
| 0.260314751 | 0.280920451 | 0.206554822 | 0.287636413 |
| 0.106373864 | 0.301901074 | 0.236559573 | 0.238860094 |
| 0.125679794 | 0.210064019 | 0.267829774 | 0.222976918 |
| 0.270165466 | 0.301608157 | 0.298681666 | 0.436997085 |
| 0.251514663 | 0.23464802  | 0.317443865 | 0.458618602 |
| 0.43477509  | 0.281123253 | 0.251350194 | 0.044932247 |
| 0.264639108 | 0.178004013 | 0.127174357 | 0.264783622 |
| 0.244855625 | 0.267506486 | 0.303621859 | 0.302940588 |
| 0.302798829 | 0.18134737  | 0.275384806 | 0.44680909  |
| 0.192609086 | 0.275812026 | 0.408049841 | 0.285913139 |
| 0.018901371 | 0.328072431 | 0.374621251 | 0.165637594 |
| 0.283196594 | 0.113726977 | 0.18195749  | 0.414028983 |
| 0.201630596 | 0.184804276 | 0.423266352 | 0.290493102 |
| 0.252719058 | 0.26878396  | 0.474808953 | 0.038101595 |
| 0.240755199 | 0.111053195 | 0.294894135 | 0.218984619 |
| 0.294348224 | 0.288145026 | 0.241977558 | 0.26223633  |
| 0.191774788 | 0.475610272 | 0.358972544 | 0.459284668 |
| 0.267115406 | 0.482869856 | 0.387546062 | 0.410581541 |
| 0.314306395 | 0.234566209 | 0.089970033 | 0.380067491 |
| 0.400904086 | 0.227408434 | 0.129673815 | 0.328266332 |
| 0.250471208 | 0.296433286 | 0.157243514 | 0.461926164 |
| 0.491181718 | 0.431132503 | 0.216761654 | 0.311882795 |
| 0.375390371 | 0.289726794 | 0.354442728 | 0.483686456 |
| 0.208541351 | 0.269129045 | 0.274559117 | 0.362311427 |
| 0.251896767 | 0.189297396 | 0.32879517  | 0.110640008 |
| 0.007044405 | 0.149311627 | 0.143793524 | 0.22888546  |
| 0.150288459 | 0.266322233 | 0.30729868  | 0.474271125 |
| 0.207512518 | 0.401034657 | 0.243281451 | 0.290008376 |
| 0.413186201 | 0.24904395  | 0.257175695 | 0.287702129 |
| 0.268703591 | 0.059183151 | 0.192789978 | 0.507478119 |
| 0.089698655 | 0.19086333  | 0.273611877 | 0.008242241 |
| 0.117733197 | 0.32192812  | 0.156186398 | 0.270985291 |
| 0.419810365 | 0.27158146  | 0.264214518 | 0.226429375 |
| 0.309110831 | 0.175825929 | 0.011397941 | 0.428063683 |
| 0.430830846 | 0.406903243 | 0.430285883 | 0.420008707 |
| 0.381674404 | 0.295056496 | 0.337083137 | 0.299253454 |
| 0.206446404 | 0.162503955 | 0.185183993 | 0.295080655 |
| 0.008891447 | 0.33329426  | 0.253362222 | 0.220384698 |
| 0.307824669 | 0.285584266 | 0.10826137  | 0.253790159 |
| 0.079123796 | 0.141402654 | 0.273148482 | 0.243942111 |
| 0.279016968 | 0.056863311 | 0.218998338 | 0.251242544 |
| 0.422713514 | 0.355152182 | 0.235546636 | 0.487132117 |
| 0.316885422 | 0.166978752 | 0.296872635 | 0.308854718 |
| 0.164638372 | 0.096278132 | 0.274530449 | 0.029267649 |
| 0.153129094 | 0.418381973 | 0.267101715 | 0.162530711 |
| 0.307384216 | 0.030147929 | 0.375471898 | 0.490191514 |
| 0.427953677 | 0.464630726 | 0.465054351 | 0.213026603 |

|             |             |             |             |
|-------------|-------------|-------------|-------------|
| 0.47115903  | 0.052354418 | 0.472216005 | 0.36187198  |
| 0.248595015 | 0.004478152 | 0.01697463  | 0.424141224 |
| 0.304594069 | 0.102214364 | 0.239062677 | 0.288039757 |
| 0.205696029 | 0.203918636 | 0.13806607  | 0.184898004 |
| 0.307116757 | 0.243594548 | 0.159269031 | 0.442155831 |
| 0.28223888  | 0.260144825 | 0.276435909 | 0.148792239 |
| 0.291539002 | 0.135201871 | 0.145247838 | 0.017371736 |
| 0.285710518 | 0.172228523 | 0.460007355 | 0.458291761 |
| 0.480389423 | 0.306572143 | 0.209720823 | 0.246443949 |
| 0.364776316 | 0.141030055 | 0.241263239 | 0.161395449 |
| 0.443912085 | 0.313540372 | 0.328243114 | 0.340815    |
| 0.474572244 | 0.459727101 | 0.099969017 | 0.345659046 |
| 0.044333041 | 0.003564437 | 0.310603219 | 0.267328815 |
| 0.044131531 | 0.271913732 | 0.286853049 | 0.208322631 |
| 0.212032456 | 0.095813316 | 0.189305171 | 0.192751278 |
| 0.304038924 | 0.306451956 | 0.235784714 | 0.241983231 |
| 0.242826592 | 0.16418648  | 0.241701324 | 0.216189454 |
| 0.182170829 | 0.329281846 | 0.262627226 | 0.073804228 |
| 0.287814626 | 0.297692356 | 0.138914764 | 0.225169008 |
| 0.403607018 | 0.438432932 | 0.112349254 | 0.046744802 |
| 0.297011416 | 0.269316212 | 0.445475825 | 0.44573681  |
| 0.494510675 | 0.491245578 | 0.420980271 | 0.185404553 |
| 0.147281452 | 0.287310006 | 0.240287619 | 0.156930143 |
| 0.461919788 | 0.123978558 | 0.441707733 | 0.208550255 |
| 0.193168748 | 0.280227698 | 0.106053441 | 0.166075671 |
| 0.260865862 | 0.242028749 | 0.239152908 | 0.209027746 |
| 0.29495509  | 0.1983068   | 0.124340188 | 0.264164867 |
| 0.329059953 | 0.146561767 | 0.24145491  | 0.268730584 |
| 0.319394994 | 0.137546131 | 0.309275712 | 0.452925344 |
| 0.199565257 | 0.179126811 | 0.298092693 | 0.290962815 |
| 0.364897679 | 0.244017786 | 0.065785285 | 0.39490659  |
| 0.44071525  | 0.309222191 | 0.462025142 | 0.373061434 |
| 0.154690376 | 0.293898419 | 0.206322478 | 0.286634776 |
| 0.238148211 | 0.303061466 | 0.254844322 | 0.13954156  |
| 0.314216469 | 0.465506435 | 0.387889122 | 0.242721603 |
| 0.279126696 | 0.170482818 | 0.11241384  | 0.371271875 |
| 0.167807884 | 0.183211542 | 0.234379799 | 0.336596491 |
| 0.007127627 | 0.099850701 | 0.428421573 | 0.268425173 |
| 0.479683484 | 0.436101972 | 0.444576049 | 0.24273243  |
| 0.002793659 | 0.284391705 | 0.326281984 | 0.320973891 |
| 0.394174658 | 0.320478716 | 0.144659468 | 0.164235371 |
| 0.308022934 | 0.138574077 | 0.214887809 | 0.26393771  |
| 0.121698375 | 0.310786195 | 0.247882818 | 0.230138142 |
| 0.243884158 | 0.133516548 | 0.180230085 | 0.287298434 |
| 0.11066524  | 0.280135245 | 0.343726657 | 0.185234238 |
| 0.164769819 | 0.388984396 | 0.351018759 | 0.084127163 |
| 0.241587238 | 0.35255793  | 0.390435021 | 0.011004562 |
| 0.317514821 | 0.038051551 | 0.240085299 | 0.2662081   |
| 0.250392837 | 0.241983884 | 0.263581406 | 0.273772209 |
| 0.300969015 | 0.27981045  | 0.310682457 | 0.280752551 |
| 0.230519877 | 0.264291183 | 0.297385339 | 0.299347727 |
| 0.275261271 | 0.210792802 | 0.162989272 | 0.170491214 |
| 0.12857771  | 0.39672291  | 0.298136588 | 0.130354415 |
| 0.261401479 | 0.289254059 | 0.380982391 | 0.444481316 |

|             |             |             |             |
|-------------|-------------|-------------|-------------|
| 0.401178274 | 0.163438895 | 0.270964642 | 0.394931827 |
| 0.145986398 | 0.25699271  | 0.133777966 | 0.306429302 |
| 0.280866037 | 0.211025645 | 0.277197187 | 0.293750343 |
| 0.290349324 | 0.423898782 | 0.285639983 | 0.41593047  |
| 0.314734491 | 0.248289753 | 0.218513714 | 0.169352106 |
| 0.266827062 | 0.190678147 | 0.236572482 | 0.014020455 |
| 0.314544857 | 0.296479373 | 0.406677416 | 0.460859058 |
| 0.18692498  | 0.383896587 | 0.227872283 | 0.187341456 |
| 0.187043765 | 0.241907063 | 0.215585436 | 0.32052161  |
| 0.14135897  | 0.249980257 | 0.280456694 | 0.275615057 |
| 0.324802804 | 0.292877806 | 0.209810909 | 0.258399418 |
| 0.251943876 | 0.240935404 | 0.44828606  | 0.186072913 |
| 0.285405553 | 0.198004342 | 0.247858549 | 0.294474862 |
| 0.257091899 | 0.452901276 | 0.131345903 | 0.46250514  |
| 0.275628008 | 0.179697551 | 0.484160346 | 0.264096524 |
| 0.278601515 | 0.178692283 | 0.129331659 | 0.264835239 |
| 0.24307503  | 0.216217304 | 0.010445865 | 0.07216624  |
| 0.30862679  | 0.211347109 | 0.319329762 | 0.287400091 |
| 0.217179432 | 0.31244394  | 0.098860172 | 0.288667512 |
| 0.44022138  | 0.47177223  | 0.29899016  | 0.274212818 |
| 0.306028513 | 0.190227243 | 0.30261844  | 0.017040639 |
| 0.296510411 | 0.269003617 | 0.245300338 | 0.127110089 |
| 0.07254221  | 0.153287315 | 0.30889051  | 0.118413401 |
| 0.422332003 | 0.136858829 | 0.251235979 | 0.311193593 |
| 0.213793241 | 0.482337101 | 0.191454334 | 0.327091773 |
| 0.09137102  | 0.272625372 | 0.245005665 | 0.247532884 |
| 0.25057181  | 0.229673393 | 0.329043622 | 0.190919729 |
| 0.10506319  | 0.26055547  | 0.009862231 | 0.438363115 |
| 0.449214402 | 0.243444689 | 0.251282524 | 0.176074068 |
| 0.289055659 | 0.342629879 | 0.213225418 | 0.261890756 |
| 0.046275164 | 0.285385791 | 0.250921893 | 0.383145204 |
| 0.182463517 | 0.271609153 | 0.141123427 | 0.231967329 |
| 0.455663181 | 0.254403825 | 0.272623635 | 0.238168638 |
| 0.442945273 | 0.32669544  | 0.196464879 | 0.208301841 |
| 0.258122112 | 0.129024285 | 0.251022873 | 0.48123472  |
| 0.240419981 | 0.190572344 | 0.380107427 | 0.277063458 |
| 0.214239904 | 0.36416117  | 0.260483045 | 0.467062058 |
| 0.143425837 | 0.290028804 | 0.33492637  | 0.421335761 |
| 0.300850508 | 0.158407011 | 0.19462354  | 0.238514985 |
| 0.430451755 | 0.175470839 | 0.211708068 | 1           |
| 0.177955058 | 0.288542623 | 0.238502407 | 0.208335537 |
| 0.089229686 | 0.215671856 | 0.28676609  | 0.212405077 |
| 0.301717947 | 0.294555567 | 0.229298007 | 0.408552377 |
| 0.203837965 | 0.082244369 | 0.455018688 | 0.019658962 |
| 0.295939261 | 0.316808016 | 0.268667977 | 0.273801671 |
| 0.243591589 | 0.298813906 | 0.295775825 | 0.008234422 |
| 0.346558551 | 0.059404443 | 0.233170014 | 0.245571532 |
| 0.205782795 | 0.127481057 | 0.433844898 | 0.460506186 |
| 0.28953862  | 0.208980856 | 0.22484973  | 0.421139407 |
| 0.123103839 | 0.193076691 | 0.215548443 | 0.301656601 |
| 0.164271908 | 0.251378673 | 0.262990583 | 0.255938939 |
| 0.310241409 | 0.26664875  |             |             |
| USP5        | 0.011008819 | 0.17458466  | 0.00629412  |
| 0.045417698 | 0.290962056 | 0.089695239 | 0.012193095 |

|             |             |             |             |
|-------------|-------------|-------------|-------------|
| 0.025520629 | 0.13668199  | 0.052155249 | 0.187193218 |
| 0.00389225  | 0.14348187  | 0.25220657  | 0.012100509 |
| 0.294265314 | 0.011043615 | 0.036071042 | 0.024620837 |
| 0.051978849 | 0.277959767 | 0.140802398 | 0.088606441 |
| 0.230866291 | 0.05954122  | 0.109435147 | 0.214212138 |
| 0.248833487 | 0.10353205  | 0.239982435 | 0.043252202 |
| 0.213047177 | 0.319938462 | 0.194418891 | 0.00177358  |
| 0.163496664 | 0.028157849 | 0.192278345 | 0.142053186 |
| 0.162453284 | 0.154725361 | 0.065570032 | 0.111013422 |
| 0.114809883 | 0.004962765 | 0.036146786 | 0.274724564 |
| 0.115658658 | 0.073797627 | 0.008748436 | 0.208830364 |
| 0.095045215 | 0.128027914 | 0.141447068 | 0.00103014  |
| 0.219532174 | 0.140847369 | 0.181324886 | 0.219561527 |
| 0.092773907 | 0.051597297 | 0.110313662 | 0.058113434 |
| 0.199060124 | 0.247496246 | 0.131377616 | 0.090645091 |
| 0.251028137 | 0.203242838 | 0.252097262 | 0.049938041 |
| 0.117528222 | 0.003127472 | 0.06800519  | 0.014249084 |
| 0.122914323 | 0.106089352 | 0.203870298 | 0.210350097 |
| 0.171088151 | 0.234418028 | 0.10620128  | 0.202513668 |
| 0.128972717 | 0.31181955  | 0.152720138 | 0.221410904 |
| 0.211490246 | 0.016626664 | 0.260139762 | 0.263895962 |
| 0.006009639 | 0.120935345 | 0.220893642 | 0.029140555 |
| 0.184306533 | 0.127379464 | 0.114668146 | 0.189227183 |
| 0.328522336 | 0.29851235  | 0.198805608 | 0.160685933 |
| 0.181664817 | 0.013725241 | 0.175435155 | 0.334869962 |
| 0.147305546 | 0.017061585 | 0.172279313 | 0.302684331 |
| 0.227292509 | 0.253135302 | 0.207630972 | 0.228507629 |
| 0.280175592 | 0.254551269 | 0.224223214 | 0.196065285 |
| 0.032870323 | 0.243584977 | 0.060984743 | 0.012248583 |
| 0.008014719 | 0.025478939 | 0.11372826  | 0.163045294 |
| 0.271405777 | 0.142314222 | 0.054038409 | 0.164499275 |
| 0.339123549 | 0.174009156 | 0.242731319 | 0.240975254 |
| 0.006865419 | 0.158669949 | 0.274280369 | 0.045090296 |
| 0.230319122 | 0.033756456 | 0.28090392  | 0.21040196  |
| 0.195236115 | 0.310793812 | 0.025120466 | 0.201639374 |
| 0.055726902 | 0.274555359 | 0.200812708 | 0.076677514 |
| 0.234302359 | 0.196812264 | 0.300493648 | 0.344461888 |
| 0.200060933 | 0.108850429 | 0.025736961 | 0.206126155 |
| 0.277252351 | 0.032487595 | 0.276012124 | 0.299835763 |
| 0.223931595 | 0.311712844 | 0.312861299 | 0.280178334 |
| 0.218627584 | 0.016985898 | 0.026417668 | 0.253736352 |
| 0.225550983 | 0.221182026 | 0.052656325 | 0.219552782 |
| 0.282688568 | 0.104871159 | 0.242628791 | 0.123268104 |
| 0.271892586 | 0.251546183 | 0.259892292 | 0.202848521 |
| 0.094908612 | 0.13326655  | 0.265136091 | 0.168218707 |
| 0.009600915 | 0.020033319 | 0.008417979 | 0.162602976 |
| 0.051986457 | 0.101831248 | 0.087979554 | 0.220735405 |
| 0.10915024  | 0.072224214 | 0.16805641  | 0.341814876 |
| 0.009465439 | 0.18184528  | 0.047200765 | 0.050695869 |
| 0.014666773 | 0.043595845 | 0.071849573 | 0.047949349 |
| 0.173362424 | 0.06514991  | 0.237552831 | 0.276939522 |
| 0.148647811 | 0.05904952  | 0.207309401 | 0.265495973 |
| 0.273294849 | 0.274399432 | 0.10131968  | 0.007256334 |
| 0.163811095 | 0.100530906 | 0.199196939 | 0.218210618 |

|             |             |             |             |
|-------------|-------------|-------------|-------------|
| 0.048054567 | 0.104830243 | 0.253292664 | 0.340472864 |
| 0.074232076 | 0.024595821 | 0.158906527 | 0.180462605 |
| 0.039724235 | 0.142410197 | 0.303390612 | 0.159135443 |
| 0.000205269 | 0.14483855  | 0.271119015 | 0.136035278 |
| 0.147605459 | 0.151185594 | 0.158141026 | 0.294490204 |
| 0.155394    | 0.170715957 | 0.275066194 | 0.321302045 |
| 0.077144556 | 0.057525383 | 0.293589217 | 0.083983303 |
| 0.210585789 | 0.054905666 | 0.222660853 | 0.073064934 |
| 0.11955234  | 0.197055286 | 0.29219972  | 0.169554515 |
| 0.028130192 | 0.245452716 | 0.18792845  | 0.275251135 |
| 0.148617788 | 0.290893485 | 0.301270033 | 0.258529897 |
| 0.173382428 | 0.17830434  | 0.195916818 | 0.273311889 |
| 0.288552341 | 0.102204228 | 0.013765427 | 0.264441387 |
| 0.13580436  | 0.318214874 | 0.09768057  | 0.29656439  |
| 0.227066211 | 0.174478973 | 0.055823456 | 0.316061094 |
| 0.230324441 | 0.08146236  | 0.235740652 | 0.288460903 |
| 0.076013105 | 0.252788153 | 0.192569188 | 0.328444646 |
| 0.070286727 | 0.168571513 | 0.13745846  | 0.175368278 |
| 0.015692744 | 0.013898569 | 0.013795801 | 0.102359764 |
| 0.200574876 | 0.18565516  | 0.267490466 | 0.268912853 |
| 0.043444914 | 0.197298013 | 0.099409115 | 0.151387015 |
| 0.20265863  | 0.185034941 | 0.255210786 | 0.262436364 |
| 0.1087107   | 0.008226251 | 0.049325977 | 0.234950031 |
| 0.004809944 | 0.191315615 | 0.089014674 | 0.002659018 |
| 0.007614669 | 0.165724678 | 0.023124513 | 0.065588149 |
| 0.317674939 | 0.062651485 | 0.079517429 | 0.068668306 |
| 0.225306097 | 0.026062026 | 0.002999753 | 0.262728715 |
| 0.226668742 | 0.216709331 | 0.220587331 | 0.179076995 |
| 0.248406709 | 0.20410253  | 0.301983264 | 0.086792635 |
| 0.024019225 | 0.01158617  | 0.22610443  | 0.182884417 |
| 0.000953874 | 0.248947216 | 0.180926051 | 0.057283843 |
| 0.283362992 | 0.161308025 | 0.006231238 | 0.251618749 |
| 0.004639658 | 0.196168544 | 0.067039772 | 0.090709191 |
| 0.289300398 | 0.001513212 | 0.076871091 | 0.176486058 |
| 0.16431475  | 0.150013683 | 0.159108467 | 0.251612744 |
| 0.184722735 | 0.028171058 | 0.201047394 | 0.271090593 |
| 0.016590141 | 0.048498311 | 0.0843499   | 0.010425697 |
| 0.037689123 | 0.190817133 | 0.12453838  | 0.01267643  |
| 0.147994891 | 0.000417634 | 0.159513747 | 0.259424648 |
| 0.176601797 | 0.307574791 | 0.254937296 | 0.241310171 |
| 0.246948465 | 0.13319128  | 0.269467085 | 0.182982873 |
| 0.106321158 | 0.000317677 | 0.002546599 | 0.300480088 |
| 0.261687887 | 0.00813682  | 0.06705894  | 0.068261293 |
| 0.042869091 | 0.024432119 | 0.011552704 | 0.187312181 |
| 0.181570079 | 0.207657026 | 0.160037605 | 0.191202877 |
| 0.122796391 | 0.126392237 | 0.087543083 | 0.019682414 |
| 0.224999185 | 0.013611932 | 0.020048251 | 0.007353466 |
| 0.273719861 | 0.026188323 | 0.164535776 | 0.23828503  |
| 0.259985544 | 0.309007447 | 0.076997745 | 0.07631138  |
| 0.251398026 | 0.017051628 | 0.1023422   | 0.019955507 |
| 0.210196524 | 0.299530872 | 0.197713269 | 0.146148731 |
| 0.296223364 | 0.232611458 | 0.006354036 | 0.292397214 |
| 0.002960813 | 0.003843884 | 0.098754468 | 0.120717172 |
| 0.03800749  | 0.230843424 | 0.1346435   | 0.057685987 |

|             |             |             |             |
|-------------|-------------|-------------|-------------|
| 0.069545076 | 0.005272591 | 0.232291435 | 0.24413499  |
| 0.202702699 | 0.207323716 | 0.296447962 | 0.098158651 |
| 0.165140408 | 0.160469131 | 0.07466642  | 0.042844382 |
| 0.066418611 | 0.13011427  | 0.064449341 | 0.003535267 |
| 0.165844974 | 0.237546644 | 0.01331503  | 0.051655535 |
| 0.276223057 | 0.293503877 | 0.017002363 | 0.008421965 |
| 0.115189568 | 0.150393838 | 0.309637662 | 0.223229484 |
| 0.226407629 | 0.289320889 | 0.167921583 | 0.080994985 |
| 0.011997349 | 0.220056061 | 0.301316098 | 0.083702933 |
| 0.256265472 | 0.011536131 | 0.202198116 | 0.29700423  |
| 0.038819761 | 0.06953224  | 0.011244237 | 0.025808019 |
| 0.279261166 | 0.074543938 | 0.126048514 | 0.038691572 |
| 0.177467167 | 0.182912296 | 0.009193099 | 0.094266896 |
| 0.191720408 | 0.240296945 | 0.06738134  | 0.061182461 |
| 0.151314351 | 0.036737411 | 0.306033562 | 0.246581795 |
| 0.038046415 | 0.029503293 | 0.048214132 | 0.215591402 |
| 0.254649944 | 0.149907771 | 0.005975435 | 0.184043733 |
| 0.274996826 | 0.252789012 | 0.21025274  | 0.275645321 |
| 0.021916167 | 0.252105293 | 0.187674507 | 0.258506004 |
| 0.080196563 | 0.092210626 | 0.110214417 | 0.015838904 |
| 0.138222172 | 0.203263109 | 0.207706062 | 0.079173626 |
| 0.165878164 | 0.023046285 | 0.009132257 | 0.222445514 |
| 0.226644607 | 0.020705745 | 0.07436503  | 0.267385132 |
| 0.003250314 | 0.195209887 | 0.293113452 | 0.065625334 |
| 0.250756843 | 0.302286185 | 0.226690399 | 0.045538291 |
| 0.012534086 | 0.311001957 | 0.244554226 | 0.166717774 |
| 0.20052884  | 0.147751887 | 0.027354162 | 0.031710512 |
| 0.168041876 | 0.014751875 | 0.071325762 | 0.057594995 |
| 0.183950366 | 0.165348979 | 0.103261233 | 0.07827526  |
| 0.122712937 | 0.017257323 | 0.172987949 | 0.077202887 |
| 0.134354901 | 0.131727311 | 0.22961363  | 0.038383239 |
| 0.201566484 | 0.266687497 | 0.226477817 | 0.003439715 |
| 0.237416314 | 0.247118958 | 0.231400992 | 0.003412005 |
| 0.303429096 | 0.001679358 | 0.134863782 | 0.139817785 |
| 0.109193431 | 0.116025134 | 0.219127267 | 0.148222466 |
| 0.167506698 | 0.093172965 | 0.112725397 | 0.138676869 |
| 0.075316378 | 0.069225195 | 0.237031547 | 0.111739777 |
| 0.152386556 | 0.030696792 | 0.021704306 | 0.020608932 |
| 0.014378448 | 0.219234567 | 0.101129401 | 0.013185182 |
| 0.126952359 | 0.10926415  | 0.207575195 | 0.206510214 |
| 0.243817418 | 0.021888064 | 0.13163435  | 0.20769518  |
| 0.078903202 | 0.061899909 | 0.006777646 | 0.136204174 |
| 0.091337412 | 0.17398258  | 0.114251481 | 0.102380394 |
| 0.191655275 | 0.186623531 | 0.094415066 | 0.222680604 |
| 0.157819482 | 0.149697552 | 0.056411536 | 0.045148585 |
| 0.060720143 | 0.039679814 | 0.285855674 | 0.000149447 |
| 0.189665705 | 0.04116516  | 0.287907029 | 0.204148335 |
| 0.179217384 | 0.199182112 | 0.047996985 | 0.022589574 |
| 0.041820943 | 0.048121155 | 0.050924716 | 0.226340079 |
| 0.187884778 | 0.045940139 | 0.257847969 | 0.041014032 |
| 0.285595682 | 0.239115211 | 0.132722052 | 0.068456391 |
| 0.109920808 | 0.056874273 | 0.197196504 | 0.018003683 |
| 0.202512975 | 0.179698259 | 0.100362375 | 0.204059265 |
| 0.144487952 | 0.271092436 | 0.011554973 | 0.284105398 |

|             |             |             |             |
|-------------|-------------|-------------|-------------|
| 0.219478509 | 0.034251215 | 0.236536431 | 0.081289386 |
| 0.053629216 | 0.060683918 | 0.21150782  | 0.076268243 |
| 0.072275431 | 0.166855882 | 0.007907171 | 0.084695412 |
| 0.240005432 | 0.083005154 | 0.188143002 | 0.212761683 |
| 0.193926855 | 0.252211816 | 0.142070208 | 0.085624384 |
| 0.180461385 | 0.187467184 | 0.109971174 | 0.137261439 |
| 0.1825881   | 0.028533921 | 0.123099196 | 0.009517421 |
| 0.259169652 | 0.242064573 | 0.092907112 | 0.010827837 |
| 0.00352642  | 0.223423978 | 0.221102795 | 0.01123715  |
| 0.322987263 | 0.168173393 | 0.129747115 | 0.232183216 |
| 0.056448684 | 0.191432581 | 0.064571779 | 0.284301538 |
| 0.006173435 | 0.118450134 | 0.209167392 | 0.152021753 |
| 0.151576305 | 0.256555368 | 0.282014063 | 0.232922062 |
| 0.008435455 | 0.135254684 | 0.003398001 | 0.169081851 |
| 0.173621529 | 0.267225834 | 0.07660777  | 0.055945071 |
| 0.192053651 | 0.186990984 | 0.12289893  | 0.163576021 |
| 0.004163476 | 0.32417243  | 0.085370843 | 0.187277018 |
| 0.151496749 | 0.17203826  | 0.019614064 | 0.246324055 |
| 0.153360153 | 0.15163771  | 0.113740018 | 0.148818155 |
| 0.206946529 | 0.162445999 | 0.038234894 | 0.106493381 |
| 0.16281708  | 0.013304116 | 0.072933218 | 0.266414942 |
| 0.098574535 | 0.247923598 | 0.343092701 | 0.09965629  |
| 0.236233657 | 0.157674813 | 0.181643758 | 0.247583398 |
| 0.057932358 | 0.132876056 | 0.278651921 | 0.230914012 |
| 0.202002598 | 0.183971869 | 0.202459    | 0.177563632 |
| 0.177718663 | 0.02529686  | 0.171424637 | 0.177955058 |
| 1           | 0.175738268 | 0.09405603  | 0.16157837  |
| 0.013406999 | 0.042937807 | 0.083508544 | 0.047939633 |
| 0.182433509 | 0.231175045 | 0.161795013 | 0.205351025 |
| 0.063444739 | 0.014386756 | 0.234271727 | 0.086209759 |
| 0.085156111 | 0.268605334 | 0.101588397 | 0.20745088  |
| 0.06284752  | 0.148195939 | 0.102435799 | 4.55E-05    |
| 0.278926986 | 0.049168241 | 0.114517874 | 0.158875864 |
| 0.136384475 | 0.008562553 | 0.197391159 | 0.311928824 |
| 0.117501624 | 0.079882733 | 0.135730938 | 0.209844126 |
| 0.223256326 | 0.128553223 | 0.138890404 | 0.162231953 |
| 0.212792617 | 0.113390194 | 0.138964109 | 0.182037854 |
| 0.177830826 | 0.061204819 |             |             |
| USP6NL      | 0.140975237 | 0.315828285 | 0.085823901 |
| 0.167400968 | 0.267086698 | 0.236036629 | 0.147912249 |
| 0.21689486  | 0.262626395 | 0.130376862 | 0.272964064 |
| 0.077157429 | 0.108458298 | 0.374513195 | 0.16379639  |
| 0.249447346 | 0.13736105  | 0.203421813 | 0.092851608 |
| 0.20437573  | 0.273143775 | 0.238415333 | 0.214152692 |
| 0.274022217 | 0.231959181 | 0.208803619 | 0.215689618 |
| 0.372637746 | 0.131892191 | 0.259899009 | 0.077072625 |
| 0.384727089 | 0.264422731 | 0.205779704 | 0.055803774 |
| 0.261176185 | 0.030580099 | 0.386506162 | 0.266032579 |
| 0.14130103  | 0.357465147 | 0.145052984 | 0.276521349 |
| 0.16925845  | 0.086686243 | 0.08288392  | 0.243473317 |
| 0.207820011 | 0.274118883 | 0.099411609 | 0.261360456 |
| 0.217450083 | 0.273234249 | 0.213262416 | 0.005749541 |
| 0.196772105 | 0.060867767 | 0.143059901 | 0.396947363 |
| 0.255933344 | 0.260251374 | 0.132530366 | 0.248442317 |

|             |             |             |             |
|-------------|-------------|-------------|-------------|
| 0.232849919 | 0.275258727 | 0.2878231   | 0.174939351 |
| 0.396875821 | 0.162324674 | 0.261869233 | 0.175053536 |
| 0.240082435 | 0.079059107 | 0.226360939 | 0.113282638 |
| 0.237449092 | 0.300335133 | 0.291783887 | 0.221094642 |
| 0.293007303 | 0.448086732 | 0.255099574 | 0.381565524 |
| 0.14200284  | 0.241761335 | 0.260191735 | 0.315231791 |
| 0.282963423 | 0.164412786 | 0.299729519 | 0.430000813 |
| 0.113902047 | 0.173074974 | 0.262974704 | 0.151581184 |
| 0.32764661  | 0.201626723 | 0.171550568 | 0.185429491 |
| 0.264069161 | 0.244901831 | 0.402177654 | 0.277866267 |
| 0.285154638 | 0.108385895 | 0.382379564 | 0.234957819 |
| 0.273740234 | 0.124957574 | 0.232433898 | 0.333375167 |
| 0.241414905 | 0.379382808 | 0.297502069 | 0.311115576 |
| 0.231318437 | 0.394100174 | 0.269704356 | 0.358374906 |
| 0.059512064 | 0.407956788 | 0.222129958 | 0.1664397   |
| 0.107404779 | 0.24208331  | 0.236160037 | 0.348322799 |
| 0.362101383 | 0.275213442 | 0.227631252 | 0.281629317 |
| 0.376628576 | 0.364306638 | 0.397872829 | 0.325863155 |
| 0.11509368  | 0.189284718 | 0.223679798 | 0.270552617 |
| 0.282446151 | 0.198272    | 0.220066884 | 0.41363125  |
| 0.355551703 | 0.340259907 | 0.177862501 | 0.434115052 |
| 0.248362525 | 0.443437678 | 0.312844239 | 0.240260103 |
| 0.421320136 | 0.397518239 | 0.430186781 | 0.274843701 |
| 0.403199061 | 0.227822372 | 0.084302207 | 0.31919545  |
| 0.444757089 | 0.027856344 | 0.353650958 | 0.378772492 |
| 0.376149795 | 0.329226235 | 0.434696539 | 0.400972175 |
| 0.381921663 | 0.139577959 | 0.022362829 | 0.290437501 |
| 0.394661245 | 0.341078265 | 0.286021946 | 0.209147187 |
| 0.266313396 | 0.241580456 | 0.313530247 | 0.17805802  |
| 0.468747353 | 0.351109585 | 0.363608761 | 0.291315274 |
| 0.19039068  | 0.341555017 | 0.206187326 | 0.370462257 |
| 0.139417115 | 0.157404361 | 0.086680551 | 0.308057443 |
| 0.155600843 | 0.27715817  | 0.223073866 | 0.256745562 |
| 0.274099186 | 0.232708095 | 0.192406257 | 0.276950257 |
| 0.091878383 | 0.219171476 | 0.211051706 | 0.180335743 |
| 0.141221017 | 0.216666862 | 0.223342324 | 0.256899583 |
| 0.307065657 | 0.258145751 | 0.263575563 | 0.387975144 |
| 0.247549708 | 0.188902162 | 0.271265338 | 0.426606977 |
| 0.432155099 | 0.234905745 | 0.282993486 | 0.04480239  |
| 0.193549433 | 0.150921064 | 0.144477531 | 0.222376737 |
| 0.232554297 | 0.245265164 | 0.243252952 | 0.3114107   |
| 0.203250905 | 0.186111018 | 0.235794996 | 0.411264109 |
| 0.167840843 | 0.276372704 | 0.367658235 | 0.202897785 |
| 0.019435204 | 0.241105231 | 0.332523295 | 0.230188011 |
| 0.246005624 | 0.159685651 | 0.176540279 | 0.358018821 |
| 0.191587888 | 0.248000162 | 0.384210334 | 0.316516133 |
| 0.226661337 | 0.23514529  | 0.432815286 | 0.041169249 |
| 0.241728508 | 0.119014602 | 0.299740692 | 0.15057733  |
| 0.254388882 | 0.314708699 | 0.263931621 | 0.258786463 |
| 0.135477105 | 0.412480537 | 0.342682416 | 0.402872098 |
| 0.19439978  | 0.43211369  | 0.347833511 | 0.376965566 |
| 0.273740241 | 0.197638367 | 0.121005353 | 0.313975711 |
| 0.347528797 | 0.156133116 | 0.102741907 | 0.297115015 |
| 0.181168812 | 0.266195298 | 0.200651553 | 0.407077496 |



|             |             |             |             |
|-------------|-------------|-------------|-------------|
| 0.444116909 | 0.342702853 | 0.288445234 | 0.337289575 |
| 0.335142544 | 0.243595808 | 0.343229941 | 0.452901327 |
| 0.140078052 | 0.237183003 | 0.229236314 | 0.372893919 |
| 0.212881855 | 0.248440406 | 0.336928758 | 0.15048359  |
| 0.007716654 | 0.142480725 | 0.116974019 | 0.289383218 |
| 0.199351824 | 0.202836187 | 0.266850653 | 0.406373488 |
| 0.228773172 | 0.37973552  | 0.256707659 | 0.233955822 |
| 0.334005659 | 0.251978158 | 0.240991406 | 0.266694358 |
| 0.278542753 | 0.064610528 | 0.214523224 | 0.440737254 |
| 0.069386916 | 0.211416833 | 0.259562542 | 0.01256252  |
| 0.107790182 | 0.259521736 | 0.141236712 | 0.258820656 |
| 0.412843578 | 0.236359405 | 0.195073875 | 0.142372967 |
| 0.314973405 | 0.183328235 | 0.023681282 | 0.376136439 |
| 0.391451976 | 0.376867481 | 0.383249517 | 0.375646784 |
| 0.352697827 | 0.301497187 | 0.319500802 | 0.212956855 |
| 0.190027505 | 0.129181323 | 0.180676117 | 0.262860233 |
| 0.013118285 | 0.343746435 | 0.28716682  | 0.207780393 |
| 0.303609881 | 0.267768996 | 0.119948485 | 0.269320887 |
| 0.051448255 | 0.127351385 | 0.241924748 | 0.293385255 |
| 0.33157912  | 0.056950701 | 0.123744676 | 0.187491823 |
| 0.342755774 | 0.322501098 | 0.196789545 | 0.416955588 |
| 0.279237378 | 0.12331003  | 0.257745676 | 0.330271217 |
| 0.167626098 | 0.056811055 | 0.230539051 | 0.014753848 |
| 0.158627696 | 0.393977972 | 0.228660671 | 0.106660148 |
| 0.259591899 | 0.027095616 | 0.314864995 | 0.432689934 |
| 0.343981053 | 0.410452325 | 0.402561092 | 0.211919507 |
| 0.396256833 | 0.071565862 | 0.409598722 | 0.303785546 |
| 0.163998785 | 0.002993336 | 0.040784553 | 0.366712521 |
| 0.234340631 | 0.083564199 | 0.226958093 | 0.191341849 |
| 0.230760369 | 0.16443509  | 0.17835672  | 0.225744946 |
| 0.242312261 | 0.296159948 | 0.241121549 | 0.361502776 |
| 0.268805749 | 0.302492146 | 0.205911222 | 0.132626617 |
| 0.258637483 | 0.148169174 | 0.134325618 | 0.030047266 |
| 0.314855073 | 0.140910673 | 0.381593598 | 0.395645566 |
| 0.429779592 | 0.283530127 | 0.136676365 | 0.237384721 |
| 0.365851654 | 0.103594318 | 0.189111072 | 0.12529593  |
| 0.356007377 | 0.244117767 | 0.322836792 | 0.294603542 |
| 0.424686444 | 0.38664918  | 0.11741012  | 0.311596226 |
| 0.04544084  | 0.014805095 | 0.191131968 | 0.282852688 |
| 0.094505743 | 0.23323716  | 0.281868568 | 0.224888935 |
| 0.285315176 | 0.084301942 | 0.199021906 | 0.197038519 |
| 0.273131488 | 0.265143591 | 0.250818813 | 0.262154039 |
| 0.268616863 | 0.186092423 | 0.298171919 | 0.275417646 |
| 0.212858841 | 0.276505202 | 0.227197585 | 0.08557207  |
| 0.202047645 | 0.227661961 | 0.143008041 | 0.210200384 |
| 0.355466937 | 0.379302523 | 0.133472956 | 0.059476801 |
| 0.285837942 | 0.267417081 | 0.407253478 | 0.3698525   |
| 0.422670924 | 0.446243476 | 0.388848238 | 0.260167237 |
| 0.163921437 | 0.281017508 | 0.250397418 | 0.240430838 |
| 0.40742797  | 0.091385595 | 0.384480036 | 0.213174112 |
| 0.19050355  | 0.239025103 | 0.13928039  | 0.186001974 |
| 0.238011946 | 0.260296759 | 0.291486819 | 0.137817149 |
| 0.269112437 | 0.199854794 | 0.134745201 | 0.264340596 |
| 0.294360062 | 0.135255958 | 0.22696099  | 0.255757069 |

|             |             |             |             |
|-------------|-------------|-------------|-------------|
| 0.288196219 | 0.109900142 | 0.27814292  | 0.425891685 |
| 0.181683906 | 0.16738373  | 0.166989522 | 0.310897223 |
| 0.308638747 | 0.186397488 | 0.070925944 | 0.315130901 |
| 0.413532691 | 0.244471199 | 0.391419237 | 0.389163533 |
| 0.142274994 | 0.242568002 | 0.213202507 | 0.251229328 |
| 0.258607449 | 0.237776213 | 0.295446199 | 0.138679198 |
| 0.349367492 | 0.432501795 | 0.311737506 | 0.274960689 |
| 0.230086538 | 0.134969266 | 0.08007184  | 0.352728238 |
| 0.182399663 | 0.158071512 | 0.163642364 | 0.329985202 |
| 0.009687568 | 0.143744775 | 0.406782068 | 0.306023402 |
| 0.442917399 | 0.382814931 | 0.394889815 | 0.259007166 |
| 0.002829301 | 0.248912783 | 0.265153145 | 0.224964421 |
| 0.317485811 | 0.310686674 | 0.218078334 | 0.199582165 |
| 0.339686648 | 0.100818282 | 0.238531805 | 0.208086416 |
| 0.120012199 | 0.231700796 | 0.273089136 | 0.235006016 |
| 0.286776316 | 0.110248708 | 0.207617734 | 0.265829414 |
| 0.164223921 | 0.300552966 | 0.345527198 | 0.136670223 |
| 0.125073526 | 0.377154679 | 0.2853157   | 0.087910583 |
| 0.248115797 | 0.346987694 | 0.38671755  | 0.007433037 |
| 0.284910202 | 0.051036261 | 0.301646443 | 0.281402217 |
| 0.299616297 | 0.296767544 | 0.30244461  | 0.258240874 |
| 0.236737601 | 0.271763403 | 0.271364932 | 0.287561273 |
| 0.277044462 | 0.263714716 | 0.256356899 | 0.225073191 |
| 0.262199411 | 0.209786154 | 0.149062894 | 0.146372036 |
| 0.165489776 | 0.3587909   | 0.300326464 | 0.101951171 |
| 0.303670074 | 0.229894197 | 0.383617202 | 0.360709544 |
| 0.408911094 | 0.131689463 | 0.280953526 | 0.318746818 |
| 0.106946888 | 0.192579103 | 0.11669036  | 0.230623128 |
| 0.289023061 | 0.242844096 | 0.214317589 | 0.189494215 |
| 0.250388475 | 0.392062119 | 0.293054381 | 0.396192438 |
| 0.254790275 | 0.220311038 | 0.12544777  | 0.214054528 |
| 0.211338857 | 0.17528938  | 0.262813407 | 0.013367809 |
| 0.286074541 | 0.189172749 | 0.346415106 | 0.376415077 |
| 0.195025996 | 0.391171603 | 0.14476009  | 0.155481225 |
| 0.106884536 | 0.17944526  | 0.20174081  | 0.283094742 |
| 0.1460372   | 0.275852929 | 0.271159793 | 0.188736662 |
| 0.297440726 | 0.266830497 | 0.266151511 | 0.273312437 |
| 0.274049856 | 0.191278319 | 0.394933324 | 0.154850422 |
| 0.205347063 | 0.226278663 | 0.178952467 | 0.267943182 |
| 0.287844794 | 0.395934088 | 0.129450105 | 0.400370743 |
| 0.24418067  | 0.18045969  | 0.455644315 | 0.27156035  |
| 0.239317134 | 0.271604879 | 0.147541435 | 0.206417375 |
| 0.282518602 | 0.214848309 | 0.006820733 | 0.073094307 |
| 0.324481851 | 0.209797531 | 0.258841296 | 0.305727882 |
| 0.256237101 | 0.353508335 | 0.15066607  | 0.237214402 |
| 0.353398887 | 0.399464516 | 0.225479467 | 0.299419782 |
| 0.309745281 | 0.224045946 | 0.213935761 | 0.025035053 |
| 0.224156732 | 0.207272191 | 0.18546405  | 0.170325515 |
| 0.084313305 | 0.146526478 | 0.214872211 | 0.101225746 |
| 0.393919433 | 0.132470595 | 0.202286993 | 0.279741072 |
| 0.221380399 | 0.39950602  | 0.284265187 | 0.306119266 |
| 0.08943502  | 0.268651927 | 0.232953561 | 0.222576364 |
| 0.239625587 | 0.228472434 | 0.315436954 | 0.211287741 |
| 0.123350583 | 0.27323594  | 0.006782185 | 0.386494522 |

|             |             |             |             |
|-------------|-------------|-------------|-------------|
| 0.359933223 | 0.214660218 | 0.268770787 | 0.138993994 |
| 0.30989062  | 0.352955166 | 0.266655191 | 0.210325509 |
| 0.064539721 | 0.241898946 | 0.287030946 | 0.331650957 |
| 0.111542241 | 0.22103151  | 0.167898833 | 0.244071401 |
| 0.37891172  | 0.217055681 | 0.313194704 | 0.145250546 |
| 0.366994767 | 0.306189642 | 0.157846659 | 0.275041314 |
| 0.210925976 | 0.118037228 | 0.184689781 | 0.432917158 |
| 0.296456548 | 0.208550424 | 0.355142492 | 0.25413083  |
| 0.230406012 | 0.335361474 | 0.199030294 | 0.423072639 |
| 0.225799133 | 0.279857929 | 0.334290334 | 0.36105458  |
| 0.351348419 | 0.221837133 | 0.207127042 | 0.266698465 |
| 0.340869901 | 0.176695296 | 0.221542847 | 0.288542623 |
| 0.175738268 | 1           | 0.172506323 | 0.278480896 |
| 0.144263968 | 0.280926522 | 0.257672707 | 0.210986551 |
| 0.284839407 | 0.255807622 | 0.254247493 | 0.391743767 |
| 0.241608679 | 0.08452437  | 0.425967588 | 0.019661936 |
| 0.220856907 | 0.267846022 | 0.301005617 | 0.257520044 |
| 0.223444429 | 0.25435411  | 0.188349305 | 0.009010892 |
| 0.349175755 | 0.072623929 | 0.286461653 | 0.255716151 |
| 0.211132845 | 0.123781563 | 0.384587431 | 0.42166435  |
| 0.267643477 | 0.207729946 | 0.177441636 | 0.381467685 |
| 0.145602007 | 0.170838477 | 0.212704182 | 0.220815983 |
| 0.193129785 | 0.163294509 | 0.205481402 | 0.199777512 |
| 0.293787893 | 0.284929771 |             |             |
| USPL1       | 0.056981437 | 0.424816432 | 0.056710537 |
| 0.061520271 | 0.143129712 | 0.221121784 | 0.049906756 |
| 0.084785446 | 0.354031613 | 0.314886475 | 0.165937535 |
| 0.01174128  | 0.048731683 | 0.367642851 | 0.044960919 |
| 0.198608684 | 0.019506734 | 0.06960806  | 0.079843261 |
| 0.185246121 | 0.124907661 | 0.162919869 | 0.240249396 |
| 0.148647446 | 0.181781688 | 0.243739998 | 0.250746516 |
| 0.44771481  | 0.16638321  | 0.254936887 | 0.198451747 |
| 0.342827613 | 0.148185766 | 0.222563199 | 0.017346165 |
| 0.229738422 | 0.019599572 | 0.404284813 | 0.119702413 |
| 0.069343096 | 0.285945105 | 0.295769162 | 0.105955592 |
| 0.280068748 | 0.03089741  | 0.229188181 | 0.27575836  |
| 0.257834984 | 0.192981774 | 0.071434723 | 0.301216392 |
| 0.260368529 | 0.220895687 | 0.364330771 | 0.001484179 |
| 0.152912186 | 0.0616993   | 0.136148726 | 0.461544594 |
| 0.110582351 | 0.064377473 | 0.24601919  | 0.209739152 |
| 0.25962317  | 0.257912411 | 0.163184827 | 0.278951796 |
| 0.419770697 | 0.092509393 | 0.332244412 | 0.087108454 |
| 0.23262797  | 0.050194712 | 0.110328327 | 0.108852491 |
| 0.237869735 | 0.097901045 | 0.164233521 | 0.170821358 |
| 0.427504018 | 0.465510297 | 0.155940148 | 0.485936774 |
| 0.076756564 | 0.177866448 | 0.144169732 | 0.182330203 |
| 0.279731265 | 0.090857188 | 0.24401341  | 0.446383215 |
| 0.066013372 | 0.296654761 | 0.289724938 | 0.116558262 |
| 0.385008169 | 0.213794644 | 0.277230141 | 0.073455615 |
| 0.209293634 | 0.168255369 | 0.471111252 | 0.160363781 |
| 0.175068998 | 0.075107534 | 0.480177312 | 0.157649624 |
| 0.122162367 | 0.070666481 | 0.107216831 | 0.37687374  |
| 0.233703842 | 0.415705936 | 0.388440622 | 0.271602652 |
| 0.191331334 | 0.422861566 | 0.245422925 | 0.372538749 |

|             |             |             |             |
|-------------|-------------|-------------|-------------|
| 0.225845676 | 0.477265998 | 0.110458502 | 0.022037207 |
| 0.075504825 | 0.050691965 | 0.173021514 | 0.225731664 |
| 0.383577435 | 0.210707574 | 0.111492777 | 0.108521729 |
| 0.355051407 | 0.473849374 | 0.488052756 | 0.315396256 |
| 0.030452535 | 0.178363083 | 0.193602293 | 0.189667785 |
| 0.232379327 | 0.094478309 | 0.118089498 | 0.469959434 |
| 0.284826364 | 0.317220595 | 0.133213373 | 0.470276897 |
| 0.156989139 | 0.417309763 | 0.415795742 | 0.082857918 |
| 0.462065034 | 0.45739782  | 0.409080392 | 0.226691759 |
| 0.419557744 | 0.183356037 | 0.077653767 | 0.320338162 |
| 0.379088218 | 0.004701776 | 0.412269073 | 0.426444016 |
| 0.459546182 | 0.357003913 | 0.43371915  | 0.432863139 |
| 0.467090897 | 0.068277497 | 0.042425421 | 0.137024383 |
| 0.462318088 | 0.290166673 | 0.083682693 | 0.232895758 |
| 0.186192435 | 0.228203413 | 0.345521267 | 0.139580856 |
| 0.422965137 | 0.377409554 | 0.435348285 | 0.300177783 |
| 0.266650396 | 0.263236381 | 0.22141678  | 0.453037524 |
| 0.0300735   | 0.079165374 | 0.056165003 | 0.231181976 |
| 0.27055477  | 0.08680919  | 0.225882651 | 0.218301912 |
| 0.099407627 | 0.250122823 | 0.198571078 | 0.207769864 |
| 0.081290412 | 0.243764309 | 0.116400624 | 0.125812886 |
| 0.020619927 | 0.14318699  | 0.077738938 | 0.071526422 |
| 0.113776751 | 0.268243117 | 0.305025604 | 0.422961904 |
| 0.226649305 | 0.143204089 | 0.283434686 | 0.380452072 |
| 0.310748517 | 0.187161427 | 0.170566609 | 0.002711609 |
| 0.123237987 | 0.27140819  | 0.110467563 | 0.245939667 |
| 0.204902606 | 0.120672795 | 0.206870909 | 0.22640655  |
| 0.168996719 | 0.144237393 | 0.198667234 | 0.368580835 |
| 0.149073158 | 0.129448832 | 0.323020426 | 0.273447079 |
| 0.003655912 | 0.168330333 | 0.327309376 | 0.077136419 |
| 0.223247815 | 0.052952658 | 0.115301674 | 0.372064251 |
| 0.169946422 | 0.120421832 | 0.423049269 | 0.239678159 |
| 0.193921504 | 0.26834508  | 0.445765422 | 0.039251821 |
| 0.225970098 | 0.015816711 | 0.140708951 | 0.317282755 |
| 0.139529333 | 0.181282601 | 0.152055203 | 0.126898013 |
| 0.1039597   | 0.458617059 | 0.315479517 | 0.426071737 |
| 0.205940225 | 0.449685784 | 0.345636564 | 0.327657908 |
| 0.218361769 | 0.25085333  | 0.07084014  | 0.314043341 |
| 0.36655673  | 0.208405413 | 0.086462233 | 0.364177259 |
| 0.271926091 | 0.242340538 | 0.063256397 | 0.390403305 |
| 0.426733028 | 0.471907795 | 0.066438074 | 0.233575289 |
| 0.251906162 | 0.124701717 | 0.33625134  | 0.448900408 |
| 0.287641901 | 0.182826725 | 0.158880359 | 0.272545571 |
| 0.106906177 | 0.104402352 | 0.285636961 | 0.112349875 |
| 0.006254176 | 0.078769122 | 0.056522298 | 0.068524805 |
| 0.069479669 | 0.295596631 | 0.240637438 | 0.443032243 |
| 0.06445006  | 0.34374063  | 0.197429376 | 0.118315742 |
| 0.366728925 | 0.204541897 | 0.200222924 | 0.204969942 |
| 0.183726214 | 0.007497655 | 0.044691389 | 0.464086499 |
| 0.058882019 | 0.103168895 | 0.221994507 | 0.000744622 |
| 0.039610643 | 0.409827822 | 0.118105175 | 0.188072805 |
| 0.374119427 | 0.199460667 | 0.135104318 | 0.282324313 |
| 0.192543853 | 0.066501972 | 0.000588946 | 0.441561545 |
| 0.473347229 | 0.450340851 | 0.477085345 | 0.469454352 |

|             |             |             |             |
|-------------|-------------|-------------|-------------|
| 0.410317357 | 0.332778516 | 0.294209119 | 0.224049419 |
| 0.067982306 | 0.092252713 | 0.092239896 | 0.133950482 |
| 0.004995583 | 0.246465044 | 0.179442998 | 0.090544924 |
| 0.293302671 | 0.200533414 | 0.026159136 | 0.200463214 |
| 0.012067887 | 0.096879625 | 0.207760395 | 0.133021864 |
| 0.222236597 | 0.014554838 | 0.119374014 | 0.165238604 |
| 0.388212511 | 0.275474391 | 0.21323851  | 0.470676933 |
| 0.149383305 | 0.146005725 | 0.142070524 | 0.244345793 |
| 0.048360982 | 0.111192539 | 0.256339789 | 0.035630774 |
| 0.148194899 | 0.442782657 | 0.239674688 | 0.054413651 |
| 0.135639349 | 0.003748523 | 0.296545882 | 0.455987698 |
| 0.456832549 | 0.428168813 | 0.414625145 | 0.116051557 |
| 0.431333297 | 0.090996869 | 0.460720397 | 0.346889926 |
| 0.264335249 | 9.20E-05    | 0.002780763 | 0.397692008 |
| 0.193445062 | 0.086941211 | 0.094299313 | 0.195891684 |
| 0.047894704 | 0.12580314  | 0.052082295 | 0.075446685 |
| 0.245715324 | 0.104320328 | 0.083199312 | 0.44838837  |
| 0.123391136 | 0.127316229 | 0.278644704 | 0.089350645 |
| 0.218547699 | 0.029734685 | 0.093316592 | 0.002144834 |
| 0.222386537 | 0.134480525 | 0.46769958  | 0.454861731 |
| 0.401705094 | 0.223023233 | 0.269492205 | 0.193917716 |
| 0.385012585 | 0.112905567 | 0.24252722  | 0.108303281 |
| 0.443806927 | 0.195326174 | 0.19154447  | 0.222576923 |
| 0.398197699 | 0.390101198 | 0.025777414 | 0.276707696 |
| 0.006701654 | 0.000705109 | 0.225872273 | 0.181196806 |
| 0.108832656 | 0.19289697  | 0.169898731 | 0.211547388 |
| 0.162170482 | 0.020215939 | 0.138320327 | 0.117301117 |
| 0.148330325 | 0.182049775 | 0.119374984 | 0.217882451 |
| 0.138762032 | 0.062774337 | 0.103639489 | 0.095603199 |
| 0.217042103 | 0.278805909 | 0.179805891 | 0.020746567 |
| 0.261424162 | 0.209002433 | 0.040325468 | 0.109501207 |
| 0.319512747 | 0.391371378 | 0.028487296 | 0.002254417 |
| 0.194772382 | 0.181307903 | 0.395177261 | 0.458236921 |
| 0.473413081 | 0.425277301 | 0.340003148 | 0.056019264 |
| 0.046638913 | 0.167261235 | 0.140558598 | 0.042976912 |
| 0.43638642  | 0.077763463 | 0.447049985 | 0.154994901 |
| 0.088801673 | 0.114746355 | 0.014389184 | 0.062620649 |
| 0.199056377 | 0.103482722 | 0.078212779 | 0.114273473 |
| 0.144720423 | 0.121539988 | 0.041843127 | 0.105881928 |
| 0.239221587 | 0.085136817 | 0.097951691 | 0.229505233 |
| 0.307728889 | 0.326526494 | 0.280101157 | 0.354944595 |
| 0.094096138 | 0.100809924 | 0.167505368 | 0.295109301 |
| 0.364735849 | 0.294984271 | 0.012249372 | 0.448233238 |
| 0.407505543 | 0.259325058 | 0.452131583 | 0.28075175  |
| 0.077888167 | 0.169110291 | 0.206789497 | 0.174254042 |
| 0.118269263 | 0.224099521 | 0.145946518 | 0.053109241 |
| 0.259646497 | 0.449690594 | 0.365904061 | 0.073387089 |
| 0.266133286 | 0.129173883 | 0.073507962 | 0.399478989 |
| 0.076419352 | 0.051170674 | 0.293148528 | 0.360218833 |
| 0.00046548  | 0.067906401 | 0.425017675 | 0.115659264 |
| 0.464348183 | 0.383761881 | 0.348618155 | 0.197114974 |
| 0.001466572 | 0.260136775 | 0.172017712 | 0.189524742 |
| 0.377671369 | 0.259131735 | 0.145649861 | 0.033322726 |
| 0.192381702 | 0.087086518 | 0.060979848 | 0.214351258 |

|             |             |             |             |
|-------------|-------------|-------------|-------------|
| 0.107591607 | 0.257068062 | 0.122187046 | 0.161012193 |
| 0.098800083 | 0.125649705 | 0.119238914 | 0.129743671 |
| 0.122768641 | 0.143660677 | 0.225482128 | 0.313348934 |
| 0.079635301 | 0.363507779 | 0.31260478  | 0.022192619 |
| 0.197064224 | 0.342258741 | 0.367540859 | 0.000715366 |
| 0.254420916 | 0.003643968 | 0.086665523 | 0.087563519 |
| 0.09258487  | 0.106954125 | 0.123089551 | 0.136135852 |
| 0.226463776 | 0.124534139 | 0.120561681 | 0.112919515 |
| 0.067900764 | 0.14574734  | 0.212876926 | 0.241837498 |
| 0.109154614 | 0.072827173 | 0.126858153 | 0.142740572 |
| 0.022884882 | 0.419057204 | 0.192027495 | 0.083140241 |
| 0.121109716 | 0.245548284 | 0.253943904 | 0.473188831 |
| 0.321315504 | 0.150118043 | 0.199216412 | 0.376377111 |
| 0.220109082 | 0.182827072 | 0.061634152 | 0.245826735 |
| 0.123472631 | 0.080421324 | 0.283443976 | 0.20239131  |
| 0.336987239 | 0.330264881 | 0.182758359 | 0.374165427 |
| 0.185402836 | 0.252924143 | 0.271340552 | 0.03065411  |
| 0.09544159  | 0.116627592 | 0.114646654 | 0.000744828 |
| 0.189963509 | 0.158430294 | 0.367355603 | 0.44957899  |
| 0.167802197 | 0.301696278 | 0.225787117 | 0.050858029 |
| 0.263701489 | 0.209271646 | 0.095688366 | 0.346407999 |
| 0.112167244 | 0.103674832 | 0.137320997 | 0.224685536 |
| 0.301919216 | 0.339429251 | 0.150881505 | 0.162135653 |
| 0.159344158 | 0.14931057  | 0.469740151 | 0.107580029 |
| 0.263232351 | 0.069465981 | 0.299225935 | 0.127799245 |
| 0.103287173 | 0.458024011 | 0.053875084 | 0.453242365 |
| 0.161973448 | 0.132538324 | 0.414549433 | 0.208427038 |
| 0.201625046 | 0.05372739  | 0.09532097  | 0.284266897 |
| 0.136982117 | 0.18556688  | 0.019336466 | 0.028122817 |
| 0.178514876 | 0.270409349 | 0.374509561 | 0.270028424 |
| 0.11995097  | 0.226326194 | 0.106326872 | 0.193786108 |
| 0.477354925 | 0.483531061 | 0.103877391 | 0.174640847 |
| 0.231802213 | 0.052376728 | 0.257687657 | 0.027159505 |
| 0.231118614 | 0.247523666 | 0.255777597 | 0.037196001 |
| 0.01465708  | 0.104393807 | 0.24109596  | 0.090898252 |
| 0.381316558 | 0.111579252 | 0.298929383 | 0.291594113 |
| 0.156580945 | 0.474622902 | 0.05389555  | 0.230349881 |
| 0.074811045 | 0.166376588 | 0.231461188 | 0.267809832 |
| 0.079878005 | 0.13488593  | 0.216901485 | 0.097502577 |
| 0.017898082 | 0.116938918 | 0.001379233 | 0.352740789 |
| 0.474341982 | 0.185043319 | 0.180514614 | 0.307613479 |
| 0.148122466 | 0.337407456 | 0.123925443 | 0.268017679 |
| 0.003910449 | 0.168100477 | 0.113063932 | 0.326231201 |
| 0.117737258 | 0.249416425 | 0.025876329 | 0.181456238 |
| 0.459129279 | 0.130405951 | 0.211422995 | 0.176915197 |
| 0.45950263  | 0.369045606 | 0.172539238 | 0.123446247 |
| 0.320180846 | 0.063891101 | 0.282392107 | 0.462802305 |
| 0.076819893 | 0.087085914 | 0.310271934 | 0.088190075 |
| 0.16320801  | 0.347348995 | 0.288350345 | 0.478623669 |
| 0.027072839 | 0.128321744 | 0.305993615 | 0.408646126 |
| 0.182059642 | 0.080979095 | 0.104563262 | 0.097549544 |
| 0.429112656 | 0.045122481 | 0.145436594 | 0.238502407 |
| 0.09405603  | 0.172506323 | 1           | 0.083708184 |
| 0.015579107 | 0.111822067 | 0.189262176 | 0.099978653 |

|             |             |             |             |
|-------------|-------------|-------------|-------------|
| 0.144421144 | 0.181501447 | 0.117149715 | 0.296588063 |
| 0.047929682 | 0.006835362 | 0.368650884 | 0.006267437 |
| 0.210726535 | 0.19529144  | 0.135539691 | 0.183883853 |
| 0.150895426 | 0.222092722 | 0.226821105 | 0.000492399 |
| 0.299945203 | 0.028978315 | 0.193316957 | 0.084634188 |
| 0.159257264 | 0.041833882 | 0.401641858 | 0.411440676 |
| 0.210619641 | 0.24020368  | 0.190987316 | 0.41506024  |
| 0.066151178 | 0.234352181 | 0.214191425 | 0.302580629 |
| 0.106726467 | 0.278708855 | 0.264004824 | 0.197004663 |
| 0.270621753 | 0.177470815 |             |             |
| UXT         | 0.048031254 | 0.167197626 | 0.023992415 |
| 0.083084075 | 0.282367074 | 0.08048733  | 0.069737884 |
| 0.099613252 | 0.153878791 | 0.035859511 | 0.191648914 |
| 0.035091133 | 0.132191128 | 0.248364929 | 0.082076585 |
| 0.224696553 | 0.08172871  | 0.117320015 | 0.05011054  |
| 0.09013226  | 0.282554692 | 0.122769171 | 0.085073964 |
| 0.251746297 | 0.132073244 | 0.114214927 | 0.147904587 |
| 0.220398069 | 0.052595698 | 0.187970441 | 0.02212619  |
| 0.25967094  | 0.281584967 | 0.115119784 | 0.019062708 |
| 0.148525163 | 0.055089069 | 0.233537713 | 0.170541117 |
| 0.138816799 | 0.234501595 | 0.042423014 | 0.160419288 |
| 0.070101151 | 0.029256873 | 0.019687557 | 0.200533284 |
| 0.123855138 | 0.132004756 | 0.035733525 | 0.1741518   |
| 0.090326269 | 0.171596662 | 0.103955744 | 0.002999868 |
| 0.129731784 | 0.05857372  | 0.101512437 | 0.222998803 |
| 0.209467583 | 0.16804025  | 0.060704719 | 0.10989777  |
| 0.167842313 | 0.242265341 | 0.25807184  | 0.059690653 |
| 0.241875948 | 0.161972223 | 0.185742862 | 0.079941218 |
| 0.106587017 | 0.024892321 | 0.182730942 | 0.053332044 |
| 0.104708031 | 0.23364058  | 0.222753006 | 0.149819456 |
| 0.146380529 | 0.273217516 | 0.203289765 | 0.203888939 |
| 0.158661864 | 0.240722346 | 0.184211153 | 0.315443099 |
| 0.225666405 | 0.07558296  | 0.233562476 | 0.271605362 |
| 0.039787109 | 0.08202433  | 0.188847154 | 0.085590912 |
| 0.182468858 | 0.118726077 | 0.069402609 | 0.171332471 |
| 0.281616106 | 0.232357045 | 0.230571064 | 0.229463721 |
| 0.205344119 | 0.049984174 | 0.19385895  | 0.250260341 |
| 0.154819005 | 0.057188249 | 0.195879871 | 0.237418855 |
| 0.180809127 | 0.230278364 | 0.176925338 | 0.249689756 |
| 0.191433939 | 0.241138017 | 0.198050632 | 0.223678576 |
| 0.017844117 | 0.236599697 | 0.127160401 | 0.092014543 |
| 0.031779078 | 0.140120744 | 0.159747493 | 0.285239561 |
| 0.23838497  | 0.202080166 | 0.105372582 | 0.238408591 |
| 0.298782049 | 0.18141119  | 0.228322856 | 0.230265869 |
| 0.047399114 | 0.134980868 | 0.177207408 | 0.096243202 |
| 0.232452604 | 0.12950287  | 0.207441563 | 0.229949826 |
| 0.241443538 | 0.267370522 | 0.058610023 | 0.248131194 |
| 0.12121924  | 0.293520865 | 0.166856034 | 0.161686337 |
| 0.247721958 | 0.214397312 | 0.298664415 | 0.260625128 |
| 0.232156564 | 0.109325785 | 0.046822282 | 0.225857113 |
| 0.314322487 | 0.03293753  | 0.23003721  | 0.252206205 |
| 0.209347629 | 0.235483652 | 0.306486216 | 0.258486137 |
| 0.209413431 | 0.077866819 | 0.016646709 | 0.32013511  |
| 0.223025141 | 0.239308736 | 0.189585191 | 0.130700136 |

|             |             |             |             |
|-------------|-------------|-------------|-------------|
| 0.252562168 | 0.098284204 | 0.219140708 | 0.082562965 |
| 0.320197235 | 0.232967349 | 0.223087488 | 0.197230888 |
| 0.097448185 | 0.22036094  | 0.158729132 | 0.186649659 |
| 0.069105086 | 0.055493935 | 0.03870374  | 0.254589638 |
| 0.039852831 | 0.239369101 | 0.078822427 | 0.215733522 |
| 0.245724051 | 0.084876479 | 0.09934744  | 0.285144569 |
| 0.042533148 | 0.122307846 | 0.114772711 | 0.09346602  |
| 0.084129942 | 0.135350258 | 0.120759996 | 0.135807109 |
| 0.257532557 | 0.130334369 | 0.179480414 | 0.258437658 |
| 0.137056157 | 0.11427492  | 0.177569    | 0.297846256 |
| 0.345235469 | 0.190251768 | 0.221807079 | 0.02970817  |
| 0.124638424 | 0.064440314 | 0.131390444 | 0.149767819 |
| 0.126599604 | 0.143643378 | 0.202217247 | 0.299552922 |
| 0.089876699 | 0.071268729 | 0.119329038 | 0.252319698 |
| 0.092080038 | 0.157908594 | 0.277497575 | 0.113902935 |
| 0.007304654 | 0.144826611 | 0.231349856 | 0.231794859 |
| 0.182606975 | 0.13839619  | 0.109567002 | 0.25305925  |
| 0.118871414 | 0.200804346 | 0.24897094  | 0.302528443 |
| 0.081881317 | 0.113394043 | 0.290245121 | 0.048417765 |
| 0.186447396 | 0.115163499 | 0.319416725 | 0.050527099 |
| 0.1880363   | 0.305367681 | 0.260858608 | 0.186759922 |
| 0.065698291 | 0.244945477 | 0.226632985 | 0.254777726 |
| 0.095992375 | 0.287072704 | 0.249609801 | 0.26352658  |
| 0.210218579 | 0.114077812 | 0.118318819 | 0.220623673 |
| 0.245499556 | 0.074452758 | 0.050542334 | 0.200860632 |
| 0.083951401 | 0.244699686 | 0.204917049 | 0.282211543 |
| 0.278452904 | 0.169167146 | 0.177020587 | 0.332800236 |
| 0.251555937 | 0.141076876 | 0.251178738 | 0.304997646 |
| 0.048418943 | 0.183964789 | 0.140981597 | 0.348226395 |
| 0.151918847 | 0.211503422 | 0.230759565 | 0.127177931 |
| 0.006721688 | 0.061103819 | 0.055506915 | 0.220701815 |
| 0.20713869  | 0.127267864 | 0.238527261 | 0.253474916 |
| 0.139673927 | 0.243967596 | 0.196410878 | 0.144220742 |
| 0.201521192 | 0.162829233 | 0.189699076 | 0.236884446 |
| 0.220172413 | 0.04134125  | 0.12795517  | 0.26619314  |
| 0.027754497 | 0.166394915 | 0.126197878 | 0.008811998 |
| 0.042432453 | 0.133142226 | 0.076015244 | 0.159625516 |
| 0.312635029 | 0.135860295 | 0.129442418 | 0.045118979 |
| 0.288987535 | 0.105590521 | 0.022753859 | 0.24134377  |
| 0.236463017 | 0.233932623 | 0.226223124 | 0.206843028 |
| 0.241479386 | 0.208877898 | 0.269053151 | 0.087103525 |
| 0.092566934 | 0.040377116 | 0.166346478 | 0.19816687  |
| 0.00375852  | 0.292515889 | 0.229425859 | 0.16214561  |
| 0.241265185 | 0.230549834 | 0.049207895 | 0.24336737  |
| 0.019313589 | 0.09911727  | 0.095406152 | 0.182433365 |
| 0.341253552 | 0.020392995 | 0.047711021 | 0.108772427 |
| 0.177620616 | 0.200825149 | 0.100847079 | 0.248633354 |
| 0.211484017 | 0.056049345 | 0.195508171 | 0.282662209 |
| 0.081197009 | 0.02873376  | 0.083355091 | 0.004058452 |
| 0.052172026 | 0.233220731 | 0.10423646  | 0.041489802 |
| 0.202417634 | 0.009969063 | 0.186785685 | 0.265297879 |
| 0.172451779 | 0.27709432  | 0.249183261 | 0.164894717 |
| 0.236951077 | 0.061641408 | 0.249963836 | 0.174012826 |
| 0.055182709 | 0.001341018 | 0.026314231 | 0.250167886 |



|             |             |             |             |
|-------------|-------------|-------------|-------------|
| 0.179404905 | 0.033571358 | 0.16833831  | 0.056845772 |
| 0.135126656 | 0.050864076 | 0.077961571 | 0.224269993 |
| 0.155443883 | 0.28529941  | 0.222846421 | 0.19306928  |
| 0.182561088 | 0.249925972 | 0.069460696 | 0.077683437 |
| 0.194701101 | 0.074634405 | 0.08038439  | 0.020804542 |
| 0.301578992 | 0.070472137 | 0.194164441 | 0.229268848 |
| 0.285261205 | 0.273311459 | 0.041258138 | 0.084366103 |
| 0.260096062 | 0.041439975 | 0.076727838 | 0.052908175 |
| 0.191385296 | 0.225550448 | 0.272863125 | 0.200769629 |
| 0.295552268 | 0.239950066 | 0.053522916 | 0.257189004 |
| 0.019916224 | 0.01906256  | 0.074013683 | 0.231831635 |
| 0.074043008 | 0.159225834 | 0.228276497 | 0.106929846 |
| 0.155699952 | 0.031656827 | 0.152305494 | 0.169600041 |
| 0.252436292 | 0.188537049 | 0.260829021 | 0.192761721 |
| 0.195393967 | 0.200925747 | 0.176262779 | 0.151625527 |
| 0.099637709 | 0.16978568  | 0.131105637 | 0.038178338 |
| 0.104616857 | 0.153968781 | 0.068226876 | 0.145771255 |
| 0.255242212 | 0.252073086 | 0.083813195 | 0.046058256 |
| 0.203251921 | 0.166867588 | 0.285521593 | 0.204553664 |
| 0.239738563 | 0.30331616  | 0.245474057 | 0.212202893 |
| 0.068519345 | 0.258137538 | 0.267132926 | 0.231509394 |
| 0.248734643 | 0.040732989 | 0.212367771 | 0.200030822 |
| 0.134087838 | 0.124386931 | 0.080012128 | 0.113358787 |
| 0.198895838 | 0.201630137 | 0.250249902 | 0.069724523 |
| 0.172487729 | 0.159792212 | 0.061164144 | 0.197398249 |
| 0.222129853 | 0.138363705 | 0.16918977  | 0.091411959 |
| 0.184592326 | 0.031999409 | 0.224306634 | 0.30038846  |
| 0.113658671 | 0.088791209 | 0.048228437 | 0.243055425 |
| 0.200779769 | 0.097652664 | 0.029509089 | 0.160611688 |
| 0.280080371 | 0.174683254 | 0.215202556 | 0.332992796 |
| 0.089693033 | 0.180524488 | 0.137792543 | 0.225669745 |
| 0.196489413 | 0.088028464 | 0.212591113 | 0.080418787 |
| 0.259160722 | 0.259050799 | 0.191603791 | 0.180115481 |
| 0.134161584 | 0.057448702 | 0.033089665 | 0.220440451 |
| 0.190167989 | 0.066666659 | 0.050109968 | 0.236611048 |
| 0.014144705 | 0.153665047 | 0.28984863  | 0.148239882 |
| 0.281811554 | 0.271465779 | 0.262013465 | 0.103001443 |
| 0.008636093 | 0.22107758  | 0.220974783 | 0.112623364 |
| 0.18051169  | 0.202130014 | 0.089870391 | 0.131111145 |
| 0.29329094  | 0.046612828 | 0.161851225 | 0.062216406 |
| 0.098132571 | 0.142742441 | 0.251757703 | 0.157624804 |
| 0.224411054 | 0.054278311 | 0.157548492 | 0.140529638 |
| 0.156428562 | 0.265318216 | 0.290836676 | 0.033160073 |
| 0.098684708 | 0.278605717 | 0.191954238 | 0.0327198   |
| 0.193106247 | 0.257559097 | 0.269559354 | 0.00725984  |
| 0.230511175 | 0.027493266 | 0.247301143 | 0.215375843 |
| 0.208726563 | 0.207141012 | 0.328443959 | 0.169323878 |
| 0.170474735 | 0.168102353 | 0.147438124 | 0.255745469 |
| 0.184196464 | 0.151931293 | 0.212245107 | 0.106503729 |
| 0.16670964  | 0.094003714 | 0.076267753 | 0.066639603 |
| 0.082224402 | 0.211926134 | 0.208810961 | 0.048299282 |
| 0.268363918 | 0.10503474  | 0.308445206 | 0.190745355 |
| 0.309894245 | 0.054871041 | 0.155643145 | 0.178685974 |
| 0.042794795 | 0.064973276 | 0.03739371  | 0.125245116 |

|             |             |             |             |
|-------------|-------------|-------------|-------------|
| 0.191434263 | 0.19118152  | 0.098126483 | 0.096285448 |
| 0.154310782 | 0.257167663 | 0.200904498 | 0.266209013 |
| 0.148311207 | 0.13265287  | 0.030511184 | 0.152212839 |
| 0.109914831 | 0.119153984 | 0.278778218 | 0.006210922 |
| 0.236166708 | 0.057354372 | 0.231783431 | 0.204569096 |
| 0.121911065 | 0.282394023 | 0.033485105 | 0.070256468 |
| 0.025137612 | 0.083063648 | 0.152137567 | 0.186134625 |
| 0.108073536 | 0.129457419 | 0.26902782  | 0.045454127 |
| 0.231040131 | 0.190456686 | 0.19069966  | 0.132917676 |
| 0.209192207 | 0.112283414 | 0.228533447 | 0.05255015  |
| 0.127734653 | 0.215265106 | 0.08378956  | 0.205461969 |
| 0.226105768 | 0.249046936 | 0.064075081 | 0.252794631 |
| 0.173262166 | 0.106319628 | 0.295738322 | 0.135507418 |
| 0.093745918 | 0.195339748 | 0.134533512 | 0.061953469 |
| 0.152580884 | 0.11618899  | 0.002909531 | 0.080186862 |
| 0.312143976 | 0.089479858 | 0.147887559 | 0.251786845 |
| 0.208479356 | 0.339936006 | 0.117820981 | 0.115673976 |
| 0.17628741  | 0.210719561 | 0.125357501 | 0.263496179 |
| 0.235982243 | 0.115088991 | 0.109312718 | 0.01878765  |
| 0.170318405 | 0.14562884  | 0.065852937 | 0.082543034 |
| 0.039239691 | 0.127060658 | 0.150916089 | 0.048351655 |
| 0.293524232 | 0.094373193 | 0.121216166 | 0.195851206 |
| 0.15207116  | 0.212957561 | 0.210205275 | 0.259020144 |
| 0.033242176 | 0.225998811 | 0.159736262 | 0.122839563 |
| 0.175604609 | 0.18630437  | 0.287056045 | 0.174936209 |
| 0.064734439 | 0.185841273 | 0.008818356 | 0.233299945 |
| 0.183660451 | 0.172314457 | 0.186110347 | 0.04170265  |
| 0.315502685 | 0.244763748 | 0.172573551 | 0.111168653 |
| 0.038637085 | 0.234172861 | 0.220507258 | 0.195151818 |
| 0.05926517  | 0.145784579 | 0.098261557 | 0.215140321 |
| 0.190129911 | 0.133239    | 0.237319601 | 0.072647263 |
| 0.198657902 | 0.183149916 | 0.076560794 | 0.193247144 |
| 0.13139279  | 0.065463551 | 0.051331596 | 0.271944203 |
| 0.214815471 | 0.193281465 | 0.289774368 | 0.160217045 |
| 0.173663647 | 0.199105053 | 0.125559679 | 0.258782405 |
| 0.202179222 | 0.250555095 | 0.263356324 | 0.223780252 |
| 0.33275809  | 0.22788591  | 0.167436906 | 0.204737921 |
| 0.173553853 | 0.081525251 | 0.173134994 | 0.208335537 |
| 0.16157837  | 0.278480896 | 0.083708184 | 1           |
| 0.081016083 | 0.14878413  | 0.097020197 | 0.146631785 |
| 0.244729626 | 0.199385556 | 0.206791615 | 0.285327829 |
| 0.154207663 | 0.054391059 | 0.295554581 | 0.045899721 |
| 0.097732304 | 0.239011973 | 0.217383477 | 0.185174567 |
| 0.138590846 | 0.166977848 | 0.085097722 | 0.00399503  |
| 0.28093595  | 0.084824375 | 0.150927559 | 0.193027173 |
| 0.119445646 | 0.050138151 | 0.223745288 | 0.294174169 |
| 0.186453706 | 0.083820248 | 0.079802034 | 0.225839357 |
| 0.161871693 | 0.07812299  | 0.109778245 | 0.125043351 |
| 0.165920366 | 0.060741351 | 0.090900509 | 0.102095393 |
| 0.199314363 | 0.119925061 |             |             |
| VDAC1       | 0.169063259 | 0.049359624 | 0.125303674 |
| 0.036610866 | 0.055898877 | 0.028503953 | 0.110979212 |
| 0.084675114 | 0.043639874 | 0.002967534 | 0.083031768 |
| 0.138263212 | 0.00131821  | 0.079915954 | 0.133031517 |

|             |             |             |             |
|-------------|-------------|-------------|-------------|
| 0.036673653 | 0.155407299 | 0.185285471 | 0.001307354 |
| 0.004024467 | 0.0700696   | 0.016084332 | 0.031231879 |
| 0.04734547  | 0.202101185 | 0.037601409 | 0.01370609  |
| 0.057811865 | 0.001935344 | 0.040741286 | 0.000242487 |
| 0.131589353 | 0.056261298 | 0.012264091 | 0.084519728 |
| 0.039436199 | 0.00024333  | 0.112840457 | 0.074220734 |
| 0.001764791 | 0.164103808 | 0.006731704 | 0.138584198 |
| 0.009371402 | 0.151649115 | 0.000623691 | 0.026360669 |
| 0.02980621  | 0.037988791 | 0.143296059 | 0.036444071 |
| 0.010510732 | 0.107189911 | 0.0202405   | 0.000768125 |
| 0.012199954 | 0.000351683 | 0.003912223 | 0.076798294 |
| 0.259280129 | 0.24864697  | 0.001086141 | 0.04789561  |
| 0.025986296 | 0.045773023 | 0.138616794 | 0.006677371 |
| 0.08329791  | 0.005425025 | 0.024909876 | 0.007792526 |
| 0.033770922 | 0.068668887 | 0.241296694 | 0.078935401 |
| 0.014633294 | 0.204276928 | 0.072831931 | 0.013478081 |
| 0.0405166   | 0.110643302 | 0.11887302  | 0.070712546 |
| 0.002739928 | 0.028306    | 0.024820192 | 0.13361814  |
| 0.054306808 | 0.054439904 | 0.075992918 | 0.096167985 |
| 0.081933132 | 0.012219806 | 0.043934463 | 0.143705136 |
| 0.059276105 | 0.005094803 | 0.010305622 | 0.016792186 |
| 0.042652423 | 0.038565559 | 0.086649947 | 0.175404827 |
| 0.043101296 | 0.152018296 | 0.084645598 | 0.029609015 |
| 0.076325238 | 0.163468606 | 0.02186737  | 0.041135101 |
| 0.046274263 | 0.068038377 | 0.03985947  | 0.079398076 |
| 0.026689048 | 0.077738102 | 0.062449376 | 0.074631481 |
| 2.18E-05    | 0.072373722 | 0.16849539  | 0.203813087 |
| 0.07496302  | 0.176676653 | 0.012901003 | 0.163010516 |
| 0.061336361 | 0.085885717 | 0.117040042 | 0.119825746 |
| 0.065995902 | 0.071650852 | 0.06603452  | 0.069965244 |
| 0.179028937 | 0.005085412 | 0.024759514 | 0.047736636 |
| 0.070538663 | 0.165925107 | 0.026591733 | 0.099369197 |
| 0.13665126  | 0.060548945 | 0.06393847  | 0.115120503 |
| 0.070341802 | 0.109938206 | 0.04366867  | 0.217852872 |
| 0.09414101  | 0.093737866 | 0.091869206 | 0.043504962 |
| 0.10304688  | 0.062340558 | 0.001584471 | 0.072943802 |
| 0.123813548 | 0.002587496 | 0.047404452 | 0.054018867 |
| 0.066716279 | 0.043681837 | 0.083610813 | 0.06716266  |
| 0.067458888 | 0.167591398 | 0.000108464 | 0.11351766  |
| 0.080093641 | 0.105694323 | 0.072386415 | 0.016474278 |
| 0.049902156 | 0.038909852 | 0.043637206 | 0.002894959 |
| 0.127926227 | 0.057181454 | 0.049905567 | 0.057979467 |
| 0.022065653 | 0.172434669 | 0.014036254 | 0.087971111 |
| 0.090715321 | 0.134952626 | 0.176053579 | 0.104798496 |
| 0.004636264 | 0.223579154 | 0.023781504 | 0.035314577 |
| 0.246241801 | 0.02863959  | 0.007841646 | 0.049894931 |
| 0.15314871  | 0.023543322 | 0.128958656 | 0.096256223 |
| 0.165168262 | 0.23315868  | 0.039283499 | 0.133909636 |
| 0.125724531 | 0.154006224 | 0.030499033 | 0.062754104 |
| 0.022899042 | 0.168089707 | 0.048048275 | 0.106015184 |
| 0.16119681  | 0.02924996  | 0.1975537   | 0.023899404 |
| 0.009313505 | 0.002956807 | 0.003684827 | 0.017475725 |
| 0.177253833 | 0.038978578 | 0.039422142 | 0.070911087 |
| 0.072712036 | 0.07542679  | 0.017087805 | 0.149322539 |

|             |             |             |             |
|-------------|-------------|-------------|-------------|
| 0.14582862  | 0.064180899 | 0.079574722 | 0.016890565 |
| 0.022770822 | 0.068369891 | 0.058680603 | 0.015791204 |
| 0.075390615 | 0.005486239 | 0.00747459  | 0.063414345 |
| 0.005064104 | 0.027956872 | 0.059812938 | 0.063875398 |
| 0.005094119 | 0.116832386 | 0.083563072 | 0.000180526 |
| 0.021398021 | 0.008762538 | 0.174109065 | 0.006537232 |
| 0.149704094 | 0.136172338 | 0.047713118 | 0.036013239 |
| 0.13964868  | 0.082773168 | 0.08281587  | 0.075180251 |
| 0.008416465 | 0.083497353 | 0.058855337 | 0.09774132  |
| 0.087116092 | 0.009709652 | 0.003109838 | 0.056721841 |
| 0.056781919 | 0.001036807 | 0.146880296 | 0.033084772 |
| 0.00846418  | 0.037980546 | 0.004489579 | 0.092314634 |
| 0.123522369 | 0.059083445 | 0.182992227 | 0.086547209 |
| 0.120093058 | 0.168594974 | 0.064396677 | 0.095926952 |
| 0.002378772 | 0.030289587 | 0.021995056 | 0.095217305 |
| 0.191092858 | 0.032153383 | 0.120601785 | 0.003570872 |
| 9.04E-06    | 0.137641624 | 0.178582143 | 0.192325602 |
| 0.022583809 | 0.016063998 | 0.044312693 | 0.073471328 |
| 0.251093304 | 0.10726191  | 0.108868299 | 0.042815258 |
| 0.075699937 | 0.026859576 | 0.025835624 | 0.044278073 |
| 0.14155535  | 0.021796746 | 0.077224164 | 0.109876137 |
| 0.102358055 | 0.017577376 | 0.053782463 | 0.008316266 |
| 0.133612776 | 0.027117508 | 0.172405596 | 0.231159437 |
| 0.081998077 | 0.172752645 | 0.132406097 | 0.004178396 |
| 0.120771385 | 0.241986929 | 0.017044249 | 0.060082214 |
| 0.065278673 | 0.064942067 | 0.061783022 | 0.073189026 |
| 0.053945214 | 0.047292964 | 0.056422799 | 0.041209694 |
| 0.08365701  | 0.068903658 | 0.012739973 | 0.067398273 |
| 0.022237109 | 0.104572052 | 0.050218937 | 0.277805052 |
| 0.04584966  | 0.086529422 | 0.186455043 | 0.041676142 |
| 0.036992866 | 0.003865622 | 0.025319592 | 0.075504957 |
| 0.086149774 | 0.115418105 | 0.002066412 | 0.005698729 |
| 0.087174893 | 0.132338029 | 0.007369911 | 0.078843673 |
| 0.106862048 | 0.09577449  | 0.058956283 | 0.083543307 |
| 0.147015786 | 7.06E-05    | 0.021049548 | 8.29E-05    |
| 0.083473581 | 0.011070616 | 0.027385672 | 0.002053935 |
| 0.0714499   | 0.114731602 | 0.091360063 | 0.147432255 |
| 0.072512182 | 0.083822914 | 0.023730115 | 0.060561534 |
| 0.000353761 | 0.070363314 | 0.065602953 | 0.080585333 |
| 0.004196726 | 0.042529656 | 0.055761093 | 0.006555196 |
| 0.124102879 | 0.226675639 | 0.055761093 | 0.031651372 |
| 0.107808844 | 0.168410849 | 0.008882036 | 0.136808417 |
| 0.110880945 | 0.027111054 | 0.032220078 | 0.038075318 |
| 0.158200283 | 0.014621786 | 0.069224225 | 0.102257536 |
| 0.168127124 | 0.014621786 | 0.174448662 | 0.03423146  |
| 0.128029929 | 0.139541902 | 0.091734489 | 0.080046202 |
| 0.053992964 | 0.091988587 | 0.073273843 | 0.108084012 |
| 0.123931773 | 0.003270891 | 0.009016593 | 0.060777525 |
| 0.047148501 | 0.003003722 | 0.142319524 | 0.061556568 |
| 0.092904008 | 0.170765899 | 0.15610603  | 0.098411013 |
| 0.010725918 | 0.200468654 | 0.063171639 | 0.029523697 |
| 0.025124198 | 0.024298499 | 0.134239651 | 0.000549744 |
| 0.050574857 | 0.192291186 | 0.019978436 | 0.044733082 |
| 0.04715427  | 0.012154384 | 0.014566666 | 0.108716844 |
|             | 0.048646391 | 0.099250597 | 0.038916577 |

|             |             |             |             |
|-------------|-------------|-------------|-------------|
| 0.007159761 | 0.118014062 | 0.106174119 | 0.002486642 |
| 0.101011294 | 0.203469568 | 0.127438437 | 0.014746714 |
| 0.022258264 | 0.249977963 | 0.209779695 | 0.080622284 |
| 0.066537555 | 0.047258684 | 0.053343139 | 0.170549483 |
| 0.035502235 | 0.076220009 | 0.06005243  | 0.093541412 |
| 0.107044175 | 0.146559582 | 0.079521323 | 0.205369185 |
| 0.080261657 | 0.039021963 | 0.054014103 | 0.07857449  |
| 0.110581962 | 0.076709973 | 0.017663071 | 0.190387049 |
| 0.080948069 | 0.124760845 | 0.208463944 | 0.027195511 |
| 0.249203437 | 0.173867747 | 0.113877054 | 0.057652159 |
| 0.006796288 | 0.141040862 | 0.199848287 | 0.095789442 |
| 0.002631406 | 0.196318163 | 0.030166757 | 0.063075165 |
| 0.000865149 | 0.038194559 | 0.14507671  | 0.245448477 |
| 0.123255873 | 0.018513289 | 0.056127253 | 0.040356798 |
| 0.011350122 | 0.037236171 | 0.042835581 | 0.082013615 |
| 0.031828587 | 0.079970709 | 0.120525667 | 0.18121677  |
| 0.038892271 | 0.011537752 | 0.046098437 | 0.170271071 |
| 0.032717913 | 0.097911284 | 0.224364325 | 0.151525164 |
| 0.116029227 | 0.056049354 | 0.232969009 | 0.0224679   |
| 0.097634539 | 0.101573842 | 0.056079498 | 0.012880021 |
| 0.078141743 | 0.00854165  | 0.045160227 | 0.001939675 |
| 0.006577007 | 0.069221064 | 0.113549371 | 0.096465049 |
| 0.069907881 | 0.127021169 | 0.031121545 | 0.000544702 |
| 0.027506429 | 0.078397095 | 0.022497988 | 0.055173843 |
| 0.109917597 | 0.008339257 | 0.172235041 | 0.212858694 |
| 0.146190433 | 0.088891114 | 0.004861503 | 0.000714232 |
| 0.04031439  | 0.246495347 | 0.093640021 | 0.097926495 |
| 0.08062543  | 0.007565435 | 0.112580754 | 0.002216214 |
| 0.241653608 | 0.158382941 | 0.003583126 | 0.003451676 |
| 0.077673525 | 0.053152979 | 0.16809988  | 0.024925147 |
| 0.070693511 | 0.083411754 | 0.004072555 | 0.048797842 |
| 0.103575173 | 0.159515761 | 0.147126794 | 0.130364337 |
| 0.110880195 | 0.128883145 | 0.036406021 | 0.047800586 |
| 0.095909424 | 0.096001711 | 0.231401584 | 0.148655844 |
| 0.086986086 | 0.037446274 | 0.024723552 | 0.060868728 |
| 0.201036317 | 0.167625162 | 0.168174813 | 0.115019954 |
| 0.057836052 | 0.237569987 | 0.159829113 | 0.197037961 |
| 0.018074473 | 0.175743327 | 0.058534323 | 0.122680929 |
| 0.119028287 | 0.047831482 | 0.056086369 | 0.00025182  |
| 0.002658018 | 0.083723138 | 0.029109575 | 0.168907106 |
| 0.034528877 | 0.017059515 | 0.052011149 | 0.030985427 |
| 0.167163701 | 0.239101483 | 0.102449017 | 0.032062637 |
| 0.019080168 | 0.003855967 | 0.156823322 | 0.14268084  |
| 0.165347789 | 0.061067203 | 0.01890105  | 0.110448172 |
| 0.016737415 | 0.055728374 | 0.078659027 | 0.008327842 |
| 0.145521931 | 0.002656052 | 0.127981025 | 0.001494046 |
| 0.108479318 | 0.245435689 | 0.032886657 | 0.005262655 |
| 0.129005029 | 0.064734941 | 0.013869701 | 0.041589761 |
| 0.028261668 | 0.026320949 | 0.08196847  | 0.08498901  |
| 0.12206799  | 0.082350145 | 0.100421404 | 0.01628867  |
| 0.038877685 | 0.01756316  | 0.079535597 | 0.096556924 |
| 0.061504355 | 0.205572457 | 0.062837578 | 0.037729016 |
| 0.188593204 | 0.138423113 | 0.065104523 | 0.01825821  |
| 0.065128345 | 0.005970964 | 0.011473446 | 0.059271026 |

|             |             |             |             |
|-------------|-------------|-------------|-------------|
| 0.01187193  | 2.24E-05    | 0.001753799 | 0.162515031 |
| 0.011136765 | 0.030899282 | 0.063326481 | 0.03361505  |
| 0.125125439 | 0.001891044 | 0.048962018 | 0.061710104 |
| 0.088373182 | 0.034914172 | 0.174053418 | 0.119223684 |
| 0.243045848 | 0.036268367 | 0.000208126 | 0.02756417  |
| 0.016830388 | 0.005656914 | 0.186116054 | 0.055594354 |
| 0.005858017 | 0.023843728 | 0.087011068 | 0.068851861 |
| 0.001630988 | 0.023237071 | 0.039875869 | 0.143279032 |
| 0.090471055 | 0.127191964 | 0.079066985 | 0.012426302 |
| 0.126960053 | 0.0175066   | 0.017388858 | 0.05423355  |
| 0.02484069  | 0.096621568 | 0.025798032 | 0.197552883 |
| 0.036682042 | 0.002050417 | 0.153517625 | 0.07378765  |
| 0.016856129 | 0.206171679 | 0.0026111   | 0.18236165  |
| 0.08430052  | 0.02137943  | 0.012757309 | 0.033804074 |
| 0.039911299 | 0.196074024 | 0.089733234 | 0.001887626 |
| 0.026052436 | 0.072733881 | 0.026143523 | 0.100674993 |
| 0.012433165 | 0.170453393 | 0.002782535 | 0.0619263   |
| 0.053879822 | 0.096533996 | 0.019798022 | 0.020604022 |
| 0.195948943 | 0.008424002 | 0.085843304 | 0.199451161 |
| 0.027716697 | 0.069145842 | 0.101151767 | 0.020070634 |
| 0.079662285 | 0.014265722 | 0.078296564 | 0.121227818 |
| 0.202559534 | 0.057045138 | 0.065748693 | 0.192779174 |
| 0.026612642 | 0.019755016 | 0.077010907 | 0.066874239 |
| 0.090636468 | 0.008822751 | 0.089229686 | 0.013406999 |
| 0.144263968 | 0.015579107 | 0.081016083 | 1           |
| 0.068124977 | 0.03122097  | 0.204113351 | 0.119885633 |
| 0.04443828  | 0.029253571 | 0.159678091 | 0.097065296 |
| 0.038260825 | 0.126104546 | 0.000361549 | 0.05860045  |
| 0.069324976 | 0.181832507 | 0.030777605 | 0.226387796 |
| 0.057361718 | 0.027500663 | 0.027754588 | 0.080100835 |
| 0.00151501  | 0.035546843 | 0.059953424 | 0.003489872 |
| 0.137841737 | 0.095255485 | 0.081570701 | 0.091806598 |
| 0.002513808 | 0.003642043 | 0.086385912 | 0.001694706 |
| 0.004380603 | 0.010386557 | 0.026618105 | 0.013614767 |
| 0.006673906 | 0.010149535 | 0.010985468 | 0.087297758 |
| 0.073299699 |             |             |             |

|             |             |             |             |
|-------------|-------------|-------------|-------------|
| VGLL4       | 0.101545132 | 0.200959677 | 0.058812516 |
| 0.040699893 | 0.15174436  | 0.067717123 | 0.106845556 |
| 0.132733156 | 0.212038551 | 0.030533424 | 0.131114358 |
| 0.05210793  | 0.033668097 | 0.255671765 | 0.123321064 |
| 0.131953409 | 0.09794504  | 0.186037793 | 0.056587569 |
| 0.064693072 | 0.153610229 | 0.044920463 | 0.106828274 |
| 0.154070178 | 0.23948145  | 0.133877854 | 0.103374227 |
| 0.221980636 | 0.018082953 | 0.134825134 | 0.010444019 |
| 0.294741002 | 0.147811704 | 0.064329873 | 0.033976393 |
| 0.122462844 | 0.028380497 | 0.301482539 | 0.09933207  |
| 0.025074085 | 0.306840576 | 0.04759225  | 0.106990781 |
| 0.063040819 | 0.050043907 | 0.012856249 | 0.148266724 |
| 0.146980666 | 0.114184867 | 0.100800782 | 0.144640059 |
| 0.068699149 | 0.208891028 | 0.118966602 | 0.012357645 |
| 0.053476104 | 0.00944052  | 0.028405511 | 0.25665351  |
| 0.251922842 | 0.201205593 | 0.027782386 | 0.181982038 |
| 0.151981078 | 0.207380853 | 0.308005252 | 0.047948218 |
| 0.249733874 | 0.0437755   | 0.150441247 | 0.047678315 |

|             |             |             |             |
|-------------|-------------|-------------|-------------|
| 0.094583027 | 0.085273187 | 0.269172897 | 0.161079716 |
| 0.065293583 | 0.22751956  | 0.155951186 | 0.067109446 |
| 0.176304    | 0.335003375 | 0.25060668  | 0.255011622 |
| 0.061980072 | 0.130972161 | 0.078730285 | 0.279551505 |
| 0.229758275 | 0.118906336 | 0.174614375 | 0.291526089 |
| 0.127359579 | 0.090417219 | 0.178360806 | 0.206339081 |
| 0.202150042 | 0.05326001  | 0.064103829 | 0.040423051 |
| 0.169219791 | 0.127674313 | 0.306865406 | 0.225600261 |
| 0.147266565 | 0.123331571 | 0.266696584 | 0.119511037 |
| 0.087253308 | 0.109409516 | 0.070725187 | 0.19298866  |
| 0.131284026 | 0.228523242 | 0.19062872  | 0.24936417  |
| 0.108653049 | 0.240806665 | 0.153481762 | 0.267594815 |
| 0.012113782 | 0.262699955 | 0.148241676 | 0.104807512 |
| 0.09575655  | 0.168944791 | 0.094358157 | 0.341412275 |
| 0.208369699 | 0.250700696 | 0.141667286 | 0.169138609 |
| 0.235715294 | 0.2432653   | 0.255888046 | 0.228489418 |
| 0.094209947 | 0.047271027 | 0.095038254 | 0.11326373  |
| 0.210921075 | 0.262370825 | 0.080280402 | 0.287311587 |
| 0.258589828 | 0.204513044 | 0.107037844 | 0.332555906 |
| 0.197896685 | 0.298940231 | 0.175310808 | 0.15957853  |
| 0.283475408 | 0.268081098 | 0.280802508 | 0.151387062 |
| 0.282720505 | 0.092823355 | 0.05286462  | 0.248185471 |
| 0.314486753 | 0.006004196 | 0.211725555 | 0.22695262  |
| 0.233499876 | 0.182762774 | 0.29184061  | 0.247850425 |
| 0.243994153 | 0.185584812 | 0.007202946 | 0.239895652 |
| 0.257184074 | 0.223429081 | 0.177696059 | 0.084768399 |
| 0.164146394 | 0.095800548 | 0.202033213 | 0.031297865 |
| 0.352489964 | 0.216586821 | 0.21988167  | 0.214501044 |
| 0.125110108 | 0.313782689 | 0.088841197 | 0.252811678 |
| 0.092216771 | 0.099902053 | 0.112043774 | 0.308114026 |
| 0.026876269 | 0.245065212 | 0.088065909 | 0.175846627 |
| 0.26660269  | 0.116782974 | 0.05149997  | 0.176862969 |
| 0.142283276 | 0.093672116 | 0.154451056 | 0.148726898 |
| 0.083407104 | 0.283446301 | 0.079182391 | 0.08440725  |
| 0.204717718 | 0.2753532   | 0.15171598  | 0.247238849 |
| 0.109585679 | 0.171598145 | 0.164934219 | 0.308063279 |
| 0.338769095 | 0.097698306 | 0.327013425 | 0.01243375  |
| 0.047905382 | 0.035116617 | 0.03237633  | 0.101409106 |
| 0.278443152 | 0.087734585 | 0.148588882 | 0.187665729 |
| 0.112294487 | 0.162536917 | 0.073424993 | 0.335850609 |
| 0.191622399 | 0.084091357 | 0.236536894 | 0.106363527 |
| 0.014709103 | 0.117884954 | 0.19204818  | 0.095513992 |
| 0.221136085 | 0.033694768 | 0.028381183 | 0.214400603 |
| 0.051236722 | 0.099074678 | 0.234551517 | 0.202446899 |
| 0.057710248 | 0.260230998 | 0.290541394 | 0.017388424 |
| 0.134556277 | 0.046536689 | 0.251715639 | 0.059880999 |
| 0.185920746 | 0.322814752 | 0.139682255 | 0.088692402 |
| 0.133328747 | 0.273638675 | 0.257284593 | 0.246209931 |
| 0.045866102 | 0.288404121 | 0.201372062 | 0.243976196 |
| 0.195537644 | 0.082696721 | 0.02208429  | 0.1775492   |
| 0.204241614 | 0.043123484 | 0.138164244 | 0.174573124 |
| 0.067769745 | 0.166989826 | 0.108114856 | 0.256776373 |
| 0.333113889 | 0.219363259 | 0.157789215 | 0.24809841  |
| 0.223026723 | 0.154219473 | 0.244989192 | 0.319756397 |

|             |             |             |             |
|-------------|-------------|-------------|-------------|
| 0.029202267 | 0.109519531 | 0.064005312 | 0.262959824 |
| 0.192548653 | 0.07837145  | 0.339660129 | 0.032398749 |
| 0.000693781 | 0.165316875 | 0.12475377  | 0.178748313 |
| 0.053627607 | 0.111256703 | 0.173642047 | 0.264104258 |
| 0.195125655 | 0.280040571 | 0.308164701 | 0.058813602 |
| 0.231802621 | 0.121015588 | 0.107267346 | 0.169193536 |
| 0.309658152 | 0.02183149  | 0.064100645 | 0.321947189 |
| 0.110271562 | 0.047365003 | 0.175265078 | 0.0029953   |
| 0.075321137 | 0.155232129 | 0.191515779 | 0.289029092 |
| 0.274515628 | 0.247270379 | 0.174030366 | 0.035920168 |
| 0.248538976 | 0.178369236 | 0.007556767 | 0.239857877 |
| 0.28007278  | 0.281688229 | 0.274176896 | 0.283514143 |
| 0.252889068 | 0.211193256 | 0.208394561 | 0.099706796 |
| 0.110074809 | 0.101222839 | 0.039406919 | 0.13476765  |
| 0.006921005 | 0.245102308 | 0.188379789 | 0.23660082  |
| 0.196706504 | 0.271779836 | 0.075828904 | 0.17546155  |
| 0.019425502 | 0.01964515  | 0.083614612 | 0.216578661 |
| 0.272236694 | 0.041056094 | 0.015602032 | 0.039127628 |
| 0.225548747 | 0.249930431 | 0.051065796 | 0.26966502  |
| 0.15159699  | 0.129014598 | 0.107097919 | 0.220979087 |
| 0.111395537 | 0.023931005 | 0.092140691 | 0.001458085 |
| 0.050025946 | 0.313695049 | 0.078251748 | 0.047374103 |
| 0.173267188 | 0.019153189 | 0.217052805 | 0.289125183 |
| 0.217167313 | 0.255657165 | 0.251128271 | 0.061105278 |
| 0.24548075  | 0.013086388 | 0.254507879 | 0.187367207 |
| 0.043420984 | 0.001095844 | 0.026719541 | 0.212005674 |
| 0.104541172 | 0.11937088  | 0.215544203 | 0.03114332  |
| 0.086539109 | 0.090681739 | 0.15527532  | 0.062415968 |
| 0.130478301 | 0.183413821 | 0.084880488 | 0.248810319 |
| 0.154115043 | 0.257141649 | 0.075920005 | 0.197654565 |
| 0.140592344 | 0.072872269 | 0.207621706 | 0.005962632 |
| 0.23522056  | 0.177813241 | 0.284240301 | 0.25000814  |
| 0.302975828 | 0.177908646 | 0.029639501 | 0.054505347 |
| 0.261096073 | 0.108270304 | 0.037745777 | 0.124591447 |
| 0.214365823 | 0.140443823 | 0.258330685 | 0.225499015 |
| 0.286103358 | 0.260072524 | 0.102178039 | 0.198107605 |
| 0.014100594 | 0.008819973 | 0.069661407 | 0.333113475 |
| 0.065886055 | 0.092087669 | 0.256706511 | 0.119186486 |
| 0.144300225 | 0.044662194 | 0.055877082 | 0.06525815  |
| 0.198210549 | 0.13798115  | 0.121199526 | 0.31078178  |
| 0.115226794 | 0.069974968 | 0.155238792 | 0.196760055 |
| 0.099142976 | 0.219913282 | 0.224121786 | 0.070193693 |
| 0.075433914 | 0.095443217 | 0.126566694 | 0.240693166 |
| 0.21081839  | 0.222408273 | 0.086302091 | 0.024859414 |
| 0.279730338 | 0.155001811 | 0.259042608 | 0.225770935 |
| 0.286438158 | 0.307344731 | 0.335588229 | 0.139375106 |
| 0.108638927 | 0.180833265 | 0.135867253 | 0.108032717 |
| 0.261579623 | 0.122812977 | 0.252780361 | 0.084859069 |
| 0.246831069 | 0.091995101 | 0.075347237 | 0.209176233 |
| 0.113695164 | 0.287259153 | 0.195755338 | 0.117711706 |
| 0.11196763  | 0.047110942 | 0.129263229 | 0.218653025 |
| 0.237856086 | 0.02375625  | 0.23803958  | 0.124710474 |
| 0.218519097 | 0.031660566 | 0.159415579 | 0.319529895 |
| 0.199354889 | 0.171211884 | 0.034370789 | 0.250694693 |



|             |             |             |             |
|-------------|-------------|-------------|-------------|
| 0.174432062 | 0.085919886 | 0.023153291 | 0.190420376 |
| 0.279828499 | 0.125186793 | 0.251999564 | 0.320831022 |
| 0.203378392 | 0.094415962 | 0.082694022 | 0.14951814  |
| 0.281694971 | 0.081433283 | 0.256485383 | 0.180382558 |
| 0.37321085  | 0.34625525  | 0.201333774 | 0.159332211 |
| 0.116325058 | 0.148733393 | 0.103243835 | 0.235503014 |
| 0.040327769 | 0.066728693 | 0.054025028 | 0.217026138 |
| 0.004089697 | 0.031021939 | 0.281543278 | 0.120663703 |
| 0.324261271 | 0.235983956 | 0.27596482  | 0.119649682 |
| 0.002264696 | 0.142835851 | 0.145082723 | 0.063773921 |
| 0.202867439 | 0.242572427 | 0.134685667 | 0.094643798 |
| 0.310634339 | 0.123591316 | 0.099362255 | 0.039766657 |
| 0.020399511 | 0.145520477 | 0.3233619   | 0.230312732 |
| 0.182661301 | 0.169407832 | 0.041773949 | 0.139401243 |
| 0.061708351 | 0.30631241  | 0.264502116 | 0.033401271 |
| 0.021735358 | 0.284172158 | 0.179326835 | 0.056924221 |
| 0.118806356 | 0.24975545  | 0.287422892 | 0.0039429   |
| 0.158479628 | 0.042260379 | 0.199407452 | 0.139002415 |
| 0.162383545 | 0.200236475 | 0.255080525 | 0.081280641 |
| 0.182490332 | 0.173911856 | 0.10801679  | 0.237039327 |
| 0.108424687 | 0.211626408 | 0.155426181 | 0.098686946 |
| 0.078023828 | 0.109254399 | 0.203703068 | 0.187699084 |
| 0.076946634 | 0.229002754 | 0.300087227 | 0.127487852 |
| 0.294393329 | 0.103682284 | 0.325631633 | 0.223186023 |
| 0.315796386 | 0.14373988  | 0.145243218 | 0.179124356 |
| 0.02794515  | 0.050467718 | 0.085836261 | 0.111414573 |
| 0.23999784  | 0.059887532 | 0.099695096 | 0.110553338 |
| 0.158441806 | 0.306378098 | 0.296872204 | 0.28518146  |
| 0.102293591 | 0.125382471 | 0.02831467  | 0.085166097 |
| 0.116841731 | 0.237393503 | 0.132862195 | 0.007401156 |
| 0.216466094 | 0.046806611 | 0.192948185 | 0.238635616 |
| 0.053393009 | 0.315303057 | 0.022615555 | 0.067131681 |
| 0.016982858 | 0.170609206 | 0.258465317 | 0.170127206 |
| 0.026901836 | 0.139875962 | 0.158147386 | 0.041476374 |
| 0.176271317 | 0.163433157 | 0.102949098 | 0.203565316 |
| 0.249741471 | 0.172810445 | 0.30515695  | 0.110198404 |
| 0.095759074 | 0.056834885 | 0.108875678 | 0.119556733 |
| 0.174583071 | 0.248872983 | 0.152694222 | 0.247646129 |
| 0.101412927 | 0.233122436 | 0.348105948 | 0.186976669 |
| 0.080121628 | 0.111575142 | 0.030209244 | 0.069383366 |
| 0.117604767 | 0.05289131  | 0.00200368  | 0.026991332 |
| 0.250912579 | 0.092646198 | 0.159424879 | 0.256276924 |
| 0.09906745  | 0.315033485 | 0.035408163 | 0.164788372 |
| 0.227182676 | 0.283954431 | 0.056229997 | 0.322643559 |
| 0.263105312 | 0.13413559  | 0.118198829 | 0.031787074 |
| 0.116724953 | 0.096489066 | 0.036943453 | 0.13269524  |
| 0.06638627  | 0.029638977 | 0.115676937 | 0.155778679 |
| 0.253447559 | 0.022742533 | 0.145288307 | 0.159471759 |
| 0.295262578 | 0.283517703 | 0.14495685  | 0.185351878 |
| 0.073937306 | 0.27995823  | 0.098907789 | 0.109339257 |
| 0.055689664 | 0.078503815 | 0.211506353 | 0.060310675 |
| 0.080100694 | 0.071243351 | 0.006249379 | 0.306999347 |
| 0.249171059 | 0.084383034 | 0.311301209 | 0.031874158 |
| 0.279524885 | 0.286749929 | 0.099951223 | 0.083858554 |

|             |             |             |             |
|-------------|-------------|-------------|-------------|
| 0.030666002 | 0.118940697 | 0.292170969 | 0.204412059 |
| 0.015145178 | 0.138015259 | 0.075929733 | 0.133711971 |
| 0.288174939 | 0.060163776 | 0.364734764 | 0.023597719 |
| 0.229348219 | 0.222954715 | 0.152321274 | 0.103640775 |
| 0.140399097 | 0.174740926 | 0.052214613 | 0.296218739 |
| 0.183538118 | 0.066102609 | 0.209987752 | 0.107818545 |
| 0.088687057 | 0.265215131 | 0.106055217 | 0.299901539 |
| 0.123369866 | 0.281786457 | 0.218858429 | 0.251355613 |
| 0.333571929 | 0.082109011 | 0.051910538 | 0.116885652 |
| 0.210294731 | 0.054974755 | 0.07153214  | 0.215671856 |
| 0.042937807 | 0.280926522 | 0.111822067 | 0.14878413  |
| 0.068124977 | 1           | 0.059915816 | 0.242206289 |
| 0.220768521 | 0.115167436 | 0.0798712   | 0.320364385 |
| 0.074718396 | 0.028419128 | 0.332541455 | 0.003762189 |
| 0.111872068 | 0.150387426 | 0.262305375 | 0.119756735 |
| 0.217312499 | 0.187918866 | 0.093864186 | 0.006742441 |
| 0.234930977 | 0.020937601 | 0.134806294 | 0.06279524  |
| 0.055817676 | 0.088260751 | 0.259030446 | 0.270017973 |
| 0.238916697 | 0.054710243 | 0.030154115 | 0.260429313 |
| 0.031168384 | 0.039344431 | 0.06117855  | 0.125238777 |
| 0.051595396 | 0.050966505 | 0.069890358 | 0.048122668 |
| 0.194200502 | 0.174006022 |             |             |
| VKORC1      | 0.047559332 | 0.380565449 | 0.041612601 |
| 0.07051715  | 0.216100917 | 0.223015061 | 0.018667872 |
| 0.04532785  | 0.255451402 | 0.076687645 | 0.283841379 |
| 0.00958574  | 0.05789401  | 0.427444229 | 0.019857673 |
| 0.251790669 | 0.016104869 | 0.055982457 | 0.020444154 |
| 0.057529046 | 0.17539871  | 0.156239264 | 0.234898805 |
| 0.152558895 | 0.181751715 | 0.205687399 | 0.212991185 |
| 0.469913558 | 0.135846341 | 0.382971571 | 0.056310244 |
| 0.367017337 | 0.240012012 | 0.218891522 | 0.008854855 |
| 0.265862981 | 0.00224568  | 0.366976561 | 0.101744817 |
| 0.075649624 | 0.327276018 | 0.147556355 | 0.138023978 |
| 0.14381839  | 0.017936367 | 0.087217829 | 0.260443838 |
| 0.179614693 | 0.09787653  | 0.045487894 | 0.336082932 |
| 0.096200417 | 0.324738018 | 0.29036643  | 0.00119509  |
| 0.176858766 | 0.046804201 | 0.087104202 | 0.487419174 |
| 0.185679177 | 0.082687868 | 0.064529801 | 0.11678792  |
| 0.223283886 | 0.249357737 | 0.197428265 | 0.096026363 |
| 0.480108424 | 0.069247752 | 0.332540767 | 0.079318396 |
| 0.160456545 | 0.011691437 | 0.133615424 | 0.049562875 |
| 0.133988596 | 0.153214601 | 0.271587854 | 0.12922418  |
| 0.365244047 | 0.470701057 | 0.157208283 | 0.43992332  |
| 0.023933129 | 0.210407868 | 0.101575951 | 0.235187883 |
| 0.240627844 | 0.020180892 | 0.367427342 | 0.472845446 |
| 0.019264554 | 0.210454891 | 0.261780028 | 0.089365128 |
| 0.425902761 | 0.085053874 | 0.210332767 | 0.105307276 |
| 0.279321061 | 0.190195662 | 0.412958631 | 0.246862138 |
| 0.195702027 | 0.049255449 | 0.442645678 | 0.219680227 |
| 0.184470915 | 0.057640702 | 0.062037718 | 0.414321432 |
| 0.284232521 | 0.48688863  | 0.341525753 | 0.262842569 |
| 0.211190881 | 0.483308753 | 0.324399853 | 0.387369578 |
| 0.055893001 | 0.488687535 | 0.134803597 | 0.026714684 |
| 0.035752353 | 0.045212135 | 0.056649969 | 0.274558853 |

|             |             |             |             |
|-------------|-------------|-------------|-------------|
| 0.470732429 | 0.26863638  | 0.101625408 | 0.127895299 |
| 0.410682907 | 0.441121474 | 0.46696798  | 0.344712376 |
| 0.020213958 | 0.071078547 | 0.208328245 | 0.131390226 |
| 0.270090238 | 0.072996043 | 0.149635817 | 0.460379662 |
| 0.380740588 | 0.386161082 | 0.074575719 | 0.451620328 |
| 0.075406764 | 0.495420981 | 0.424082483 | 0.112576861 |
| 0.47635466  | 0.466551842 | 0.487946307 | 0.354759866 |
| 0.475794234 | 0.219377792 | 0.013797686 | 0.299070096 |
| 0.491434388 | 0.011891677 | 0.43935848  | 0.457501965 |
| 0.452465676 | 0.419342996 | 0.474412813 | 0.495590801 |
| 0.470362158 | 0.048484273 | 0.003758882 | 0.199199679 |
| 0.456419744 | 0.381092278 | 0.052550538 | 0.221991362 |
| 0.242292984 | 0.225714766 | 0.374151355 | 0.121243758 |
| 0.480233613 | 0.433081919 | 0.461189207 | 0.297769183 |
| 0.130858196 | 0.309998589 | 0.220486209 | 0.441295041 |
| 0.022275516 | 0.068617162 | 0.04587295  | 0.228542696 |
| 0.114159121 | 0.126305282 | 0.161915406 | 0.192780377 |
| 0.154035396 | 0.161810201 | 0.165242656 | 0.313721195 |
| 0.047340842 | 0.298783547 | 0.098282939 | 0.084837219 |
| 0.019269801 | 0.134056461 | 0.073977105 | 0.092816967 |
| 0.165233532 | 0.203544669 | 0.356634471 | 0.449588206 |
| 0.131505917 | 0.152278036 | 0.333075665 | 0.465027259 |
| 0.406215946 | 0.2496402   | 0.187492689 | 0.011991864 |
| 0.06709797  | 0.074354439 | 0.067764317 | 0.261248445 |
| 0.163672741 | 0.064291078 | 0.227625092 | 0.373370435 |
| 0.180307606 | 0.066978586 | 0.119446034 | 0.421683756 |
| 0.114046517 | 0.171790355 | 0.413174158 | 0.213356569 |
| 0.00243011  | 0.175242927 | 0.417965495 | 0.042855167 |
| 0.194974691 | 0.090546315 | 0.152411678 | 0.404565801 |
| 0.092046828 | 0.08433863  | 0.485509137 | 0.353851323 |
| 0.138031892 | 0.190982301 | 0.48454919  | 0.011587638 |
| 0.17362056  | 0.037041992 | 0.23244603  | 0.139441679 |
| 0.16411016  | 0.220219201 | 0.229886037 | 0.129406268 |
| 0.115985048 | 0.478815651 | 0.381666463 | 0.495430495 |
| 0.104919436 | 0.477841688 | 0.434806611 | 0.440579744 |
| 0.283181731 | 0.146222239 | 0.067069968 | 0.387108453 |
| 0.40370005  | 0.062456893 | 0.060420088 | 0.366585426 |
| 0.117645044 | 0.297838635 | 0.042419962 | 0.456579735 |
| 0.472967206 | 0.418162499 | 0.073503452 | 0.311326571 |
| 0.371892057 | 0.178363312 | 0.376971805 | 0.489653869 |
| 0.062205314 | 0.168852276 | 0.116429936 | 0.366054532 |
| 0.130150284 | 0.065429337 | 0.281178456 | 0.07898021  |
| 0.018968439 | 0.049135772 | 0.045593113 | 0.103080396 |
| 0.079127    | 0.282215804 | 0.27547568  | 0.475526439 |
| 0.075765737 | 0.438288418 | 0.161105251 | 0.096173526 |
| 0.35557308  | 0.16052238  | 0.2794754   | 0.29587571  |
| 0.195007934 | 0.014015703 | 0.0698422   | 0.46434236  |
| 0.027269141 | 0.113229597 | 0.162555461 | 0.004473499 |
| 0.016215908 | 0.339265089 | 0.079217549 | 0.181154094 |
| 0.46842494  | 0.180609051 | 0.13717721  | 0.070321156 |
| 0.320705596 | 0.0666349   | 0.008892052 | 0.422309634 |
| 0.420289409 | 0.383939935 | 0.414245778 | 0.400957842 |
| 0.352306731 | 0.334545966 | 0.330414337 | 0.255146202 |
| 0.036370519 | 0.036955987 | 0.060563295 | 0.132537777 |

|             |             |             |             |
|-------------|-------------|-------------|-------------|
| 0.002075253 | 0.377879772 | 0.17973084  | 0.120021022 |
| 0.356342738 | 0.192689221 | 0.021974503 | 0.246725332 |
| 0.014355858 | 0.089981402 | 0.08179138  | 0.094908555 |
| 0.285767272 | 0.007670397 | 0.098938243 | 0.084902518 |
| 0.428961454 | 0.326337612 | 0.142034913 | 0.494206227 |
| 0.24472849  | 0.090648345 | 0.159134652 | 0.392880879 |
| 0.027253348 | 0.018251405 | 0.128497561 | 0.016474664 |
| 0.145930805 | 0.407464414 | 0.132765035 | 0.023691774 |
| 0.184627459 | 0.003935329 | 0.351610876 | 0.503390411 |
| 0.437002863 | 0.475053733 | 0.498641804 | 0.171862725 |
| 0.478980269 | 0.04566922  | 0.49953971  | 0.351996205 |
| 0.122970522 | 0.000966033 | 0.005962578 | 0.45562771  |
| 0.23135029  | 0.052777502 | 0.115142216 | 0.16076123  |
| 0.050754175 | 0.0697845   | 0.03754043  | 0.073147436 |
| 0.353697645 | 0.174786619 | 0.078906567 | 0.416444694 |
| 0.110455411 | 0.156507066 | 0.157642879 | 0.066354659 |
| 0.314250852 | 0.026850765 | 0.057708199 | 0.010233282 |
| 0.30146216  | 0.096921211 | 0.421011995 | 0.480796627 |
| 0.471756949 | 0.319876049 | 0.102436413 | 0.16073564  |
| 0.388695254 | 0.087812495 | 0.126335662 | 0.086209735 |
| 0.452462775 | 0.261799526 | 0.303876129 | 0.286878303 |
| 0.459983973 | 0.436867636 | 0.016909888 | 0.323643125 |
| 0.020734731 | 0.002171554 | 0.205051504 | 0.196371866 |
| 0.012888423 | 0.163295286 | 0.211375386 | 0.057402385 |
| 0.076397868 | 0.021120567 | 0.104147783 | 0.094650255 |
| 0.192321807 | 0.179031506 | 0.176160949 | 0.173562367 |
| 0.103822982 | 0.03439046  | 0.103662054 | 0.061008032 |
| 0.060206235 | 0.253395048 | 0.18205122  | 0.00786319  |
| 0.224460976 | 0.249497845 | 0.03920955  | 0.132947317 |
| 0.431602012 | 0.470030128 | 0.012573714 | 0.010860173 |
| 0.233623223 | 0.12350272  | 0.485997928 | 0.470806125 |
| 0.487594801 | 0.476131633 | 0.372712102 | 0.04236807  |
| 0.037596973 | 0.195210059 | 0.184775514 | 0.042031992 |
| 0.496025117 | 0.041550529 | 0.477388242 | 0.183313526 |
| 0.079159656 | 0.078040081 | 0.027065732 | 0.051092052 |
| 0.295269991 | 0.145554077 | 0.114025254 | 0.106812683 |
| 0.133502984 | 0.103782162 | 0.020706259 | 0.129501675 |
| 0.264596271 | 0.051910054 | 0.107082306 | 0.131644105 |
| 0.299391688 | 0.045594529 | 0.328468503 | 0.417407048 |
| 0.108817112 | 0.052771813 | 0.089999223 | 0.311128036 |
| 0.382019136 | 0.212921178 | 0.041239713 | 0.403720864 |
| 0.477747848 | 0.348131061 | 0.483065369 | 0.347856564 |
| 0.058762695 | 0.253339118 | 0.116439853 | 0.179738964 |
| 0.115877758 | 0.241552676 | 0.128395629 | 0.043388045 |
| 0.264133372 | 0.432517852 | 0.343032411 | 0.113206585 |
| 0.285838803 | 0.084827862 | 0.033822694 | 0.428505262 |
| 0.057282308 | 0.039463527 | 0.162465914 | 0.373274423 |
| 0.001643082 | 0.074517982 | 0.430758673 | 0.131506643 |
| 0.464557162 | 0.436646444 | 0.423190929 | 0.090770288 |
| 0.000204905 | 0.283485882 | 0.29171987  | 0.17608565  |
| 0.382886181 | 0.329857598 | 0.065614363 | 0.035179693 |
| 0.267620239 | 0.074562668 | 0.044269954 | 0.146578643 |
| 0.041285149 | 0.276621859 | 0.161261018 | 0.104489352 |
| 0.095078984 | 0.057391387 | 0.121748499 | 0.144964839 |

|             |             |             |             |
|-------------|-------------|-------------|-------------|
| 0.035504216 | 0.214043723 | 0.314396807 | 0.082128068 |
| 0.0679723   | 0.367866963 | 0.303626871 | 0.01525694  |
| 0.235544575 | 0.332782815 | 0.419548936 | 0.000387203 |
| 0.362031967 | 0.006147404 | 0.12247548  | 0.139453125 |
| 0.109393496 | 0.095170205 | 0.184127479 | 0.115101413 |
| 0.203016816 | 0.098264347 | 0.158566004 | 0.1976636   |
| 0.08338585  | 0.121363196 | 0.254803607 | 0.142588847 |
| 0.14925033  | 0.069661427 | 0.093273526 | 0.098757682 |
| 0.045465568 | 0.456668821 | 0.242530889 | 0.068914818 |
| 0.173838068 | 0.127426537 | 0.336374858 | 0.448713744 |
| 0.425874538 | 0.107034742 | 0.140771914 | 0.427094522 |
| 0.056207574 | 0.109198564 | 0.023737683 | 0.222334291 |
| 0.171173308 | 0.099193853 | 0.226922236 | 0.187843313 |
| 0.281257507 | 0.384388618 | 0.244034509 | 0.416585438 |
| 0.177873784 | 0.132928466 | 0.10387637  | 0.048724307 |
| 0.089781151 | 0.093633671 | 0.171272451 | 0.002040968 |
| 0.27747475  | 0.102843064 | 0.445147081 | 0.45207671  |
| 0.127014587 | 0.387520506 | 0.111505431 | 0.033647522 |
| 0.077738407 | 0.152487707 | 0.114749473 | 0.355636763 |
| 0.100188266 | 0.100008983 | 0.188526361 | 0.133592654 |
| 0.347756191 | 0.297012509 | 0.082225738 | 0.11289928  |
| 0.129118499 | 0.142323049 | 0.403346854 | 0.064859764 |
| 0.251449392 | 0.083594158 | 0.210354429 | 0.152370187 |
| 0.105287556 | 0.473537751 | 0.045718617 | 0.485294577 |
| 0.136087416 | 0.113083941 | 0.467844882 | 0.201029141 |
| 0.105784545 | 0.081429794 | 0.083681234 | 0.13722937  |
| 0.066736278 | 0.162090791 | 0.004774637 | 0.021895932 |
| 0.29122087  | 0.084717352 | 0.296965831 | 0.266086732 |
| 0.105251931 | 0.279222964 | 0.094602903 | 0.1242177   |
| 0.435344057 | 0.453466874 | 0.085639681 | 0.193873363 |
| 0.277370468 | 0.063764034 | 0.328394441 | 0.003397894 |
| 0.264124258 | 0.27238721  | 0.102891275 | 0.026821757 |
| 0.008949424 | 0.076435991 | 0.231302119 | 0.038166777 |
| 0.437351216 | 0.101981537 | 0.198946681 | 0.388141155 |
| 0.131342371 | 0.450790483 | 0.057054004 | 0.379034936 |
| 0.008978879 | 0.181083601 | 0.206200437 | 0.167948611 |
| 0.100904203 | 0.136540004 | 0.320980682 | 0.135578068 |
| 0.016913921 | 0.098776408 | 0.000959254 | 0.382171434 |
| 0.402878849 | 0.150161658 | 0.179356193 | 0.078591069 |
| 0.239388963 | 0.339554267 | 0.077009237 | 0.237533293 |
| 0.012386303 | 0.259732483 | 0.157213242 | 0.435628592 |
| 0.07535074  | 0.165644283 | 0.038788589 | 0.147814056 |
| 0.415928798 | 0.078540036 | 0.212656955 | 0.071934508 |
| 0.459811091 | 0.338588121 | 0.133844898 | 0.094336834 |
| 0.230803596 | 0.049066177 | 0.166959069 | 0.481079119 |
| 0.113734163 | 0.116679658 | 0.415476025 | 0.077549858 |
| 0.158621866 | 0.372706773 | 0.233233646 | 0.464458577 |
| 0.034658431 | 0.2060586   | 0.377071232 | 0.394080334 |
| 0.283774714 | 0.065024709 | 0.107391612 | 0.099757154 |
| 0.434311015 | 0.068549365 | 0.070816811 | 0.28676609  |
| 0.083508544 | 0.257672707 | 0.189262176 | 0.097020197 |
| 0.03122097  | 0.059915816 | 1           | 0.102380278 |
| 0.190252154 | 0.195231877 | 0.070642351 | 0.378940217 |
| 0.098622731 | 0.022200996 | 0.427386057 | 0.007266205 |

|             |             |             |             |
|-------------|-------------|-------------|-------------|
| 0.269526499 | 0.345004252 | 0.19294951  | 0.182805229 |
| 0.183449566 | 0.205281821 | 0.15692544  | 0.001073154 |
| 0.352706703 | 0.022931391 | 0.130855077 | 0.089506016 |
| 0.091946875 | 0.019096621 | 0.457553506 | 0.489039156 |
| 0.250622321 | 0.121328431 | 0.121348121 | 0.438391178 |
| 0.064568452 | 0.120789333 | 0.109793029 | 0.288834559 |
| 0.112666    | 0.151889796 | 0.182056746 | 0.183298988 |
| 0.328980461 | 0.144546222 |             |             |
| VPS29       | 0.236986342 | 0.196063365 | 0.179331313 |
| 0.177417669 | 0.109581209 | 0.101873706 | 0.280717506 |
| 0.265855426 | 0.189205953 | 0.050011031 | 0.128479493 |
| 0.212661218 | 0.01968193  | 0.222129352 | 0.286846898 |
| 0.09728141  | 0.273133139 | 0.284393238 | 0.064068802 |
| 0.149951862 | 0.116351162 | 0.069585803 | 0.110169081 |
| 0.117241314 | 0.327821955 | 0.143920498 | 0.068397776 |
| 0.209803593 | 0.027970832 | 0.112808735 | 0.030681387 |
| 0.301495006 | 0.097221747 | 0.057215791 | 0.189717868 |
| 0.105907615 | 0.015120927 | 0.322132286 | 0.156989073 |
| 0.042969627 | 0.314372134 | 0.064366534 | 0.188137405 |
| 0.075418166 | 0.211396813 | 0.024395658 | 0.105131601 |
| 0.138333161 | 0.169999756 | 0.195111641 | 0.133896281 |
| 0.091948019 | 0.197895052 | 0.115689524 | 0.011038656 |
| 0.04641119  | 0.006662979 | 0.026846371 | 0.253744539 |
| 0.273333905 | 0.279970402 | 0.03615975  | 0.173480394 |
| 0.099803996 | 0.142266104 | 0.244759513 | 0.06913773  |
| 0.240357831 | 0.037146162 | 0.115814178 | 0.137067414 |
| 0.12024785  | 0.206630929 | 0.317986033 | 0.202603306 |
| 0.086996124 | 0.238132242 | 0.12012355  | 0.066742384 |
| 0.184103176 | 0.317458212 | 0.240347626 | 0.263557709 |
| 0.046525914 | 0.079559627 | 0.105812918 | 0.232765986 |
| 0.17114081  | 0.247345484 | 0.161584005 | 0.28194751  |
| 0.224463812 | 0.077352119 | 0.145349484 | 0.242970841 |
| 0.195529929 | 0.057160656 | 0.066464243 | 0.045516694 |
| 0.116374738 | 0.09359916  | 0.287981465 | 0.228851017 |
| 0.110720565 | 0.214034191 | 0.285721461 | 0.072238437 |
| 0.123355263 | 0.231248895 | 0.109388635 | 0.152812456 |
| 0.123216071 | 0.211796449 | 0.16282078  | 0.203247078 |
| 0.08032175  | 0.23361974  | 0.157483122 | 0.222840025 |
| 0.016085594 | 0.248641041 | 0.235446511 | 0.269418462 |
| 0.204506409 | 0.285389182 | 0.1053527   | 0.298051964 |
| 0.186283375 | 0.194363098 | 0.227667173 | 0.191100528 |
| 0.189668176 | 0.256494228 | 0.241684086 | 0.190319086 |
| 0.258082124 | 0.050244444 | 0.08148249  | 0.171385849 |
| 0.158331129 | 0.274487805 | 0.065356242 | 0.299066909 |
| 0.26932273  | 0.167115127 | 0.214849613 | 0.338253062 |
| 0.211615148 | 0.283259645 | 0.175612257 | 0.249443932 |
| 0.289830568 | 0.286696916 | 0.254271883 | 0.108163573 |
| 0.283363632 | 0.139088394 | 0.047166542 | 0.214205112 |
| 0.277427546 | 0.010812228 | 0.174305564 | 0.192201192 |
| 0.237051268 | 0.152512902 | 0.250402199 | 0.217115245 |
| 0.236425242 | 0.262024945 | 0.005185791 | 0.172591869 |
| 0.265801259 | 0.234622602 | 0.234588494 | 0.069702335 |
| 0.104996578 | 0.116684606 | 0.151534537 | 0.056655443 |
| 0.314903411 | 0.195979639 | 0.188576332 | 0.173459846 |

|             |             |             |             |
|-------------|-------------|-------------|-------------|
| 0.119490868 | 0.317208108 | 0.05943727  | 0.281100874 |
| 0.278988571 | 0.220809155 | 0.200655937 | 0.239535378 |
| 0.065820511 | 0.25634698  | 0.115302315 | 0.107622943 |
| 0.257530409 | 0.128204824 | 0.04694623  | 0.117166504 |
| 0.241403903 | 0.080537239 | 0.250742991 | 0.216950077 |
| 0.271870102 | 0.348586981 | 0.176062906 | 0.227401983 |
| 0.173350778 | 0.357784868 | 0.113534933 | 0.21775196  |
| 0.102989595 | 0.260160994 | 0.138466869 | 0.270888362 |
| 0.301084661 | 0.079140796 | 0.294182932 | 0.090640489 |
| 0.083331138 | 0.042022814 | 0.028826945 | 0.071453513 |
| 0.355950058 | 0.152058559 | 0.108745543 | 0.141241655 |
| 0.156520136 | 0.212345869 | 0.083914494 | 0.332019207 |
| 0.259459726 | 0.117838302 | 0.200148228 | 0.086077475 |
| 0.108725532 | 0.151697314 | 0.168786439 | 0.122789833 |
| 0.183389885 | 0.039955549 | 0.040075772 | 0.197741062 |
| 0.051337817 | 0.087524703 | 0.198407115 | 0.143725322 |
| 0.083709753 | 0.30737292  | 0.251599322 | 0.00852044  |
| 0.08990023  | 0.101802411 | 0.219214134 | 0.065091038 |
| 0.214899067 | 0.244452604 | 0.088979335 | 0.112448723 |
| 0.208608189 | 0.255956932 | 0.222081395 | 0.224150156 |
| 0.063686551 | 0.257640638 | 0.170002997 | 0.220881516 |
| 0.179021629 | 0.062523828 | 0.019741129 | 0.166835037 |
| 0.187367315 | 0.064623946 | 0.230717934 | 0.131596299 |
| 0.070755836 | 0.115082784 | 0.13730203  | 0.241703055 |
| 0.323030372 | 0.23521188  | 0.243977725 | 0.181630957 |
| 0.223646471 | 0.211175508 | 0.200686545 | 0.272522747 |
| 0.05334773  | 0.086313989 | 0.085131281 | 0.210260909 |
| 0.255450141 | 0.102744821 | 0.296447094 | 0.0276691   |
| 0.000766133 | 0.240064164 | 0.233636806 | 0.22336671  |
| 0.060872602 | 0.082026639 | 0.135512677 | 0.239659364 |
| 0.280963364 | 0.252975031 | 0.255716551 | 0.112930616 |
| 0.23575928  | 0.090226567 | 0.073871753 | 0.110129998 |
| 0.284436891 | 0.129266775 | 0.202192573 | 0.319468346 |
| 0.176859353 | 0.057636134 | 0.15489687  | 0.015332742 |
| 0.240551437 | 0.141372162 | 0.295950221 | 0.37595017  |
| 0.214869907 | 0.343336601 | 0.229199341 | 0.062016817 |
| 0.193550633 | 0.283979103 | 0.040382155 | 0.217366642 |
| 0.245319704 | 0.24293391  | 0.241287201 | 0.267159262 |
| 0.207331747 | 0.15845009  | 0.168006721 | 0.118616635 |
| 0.279584953 | 0.224919528 | 0.058802554 | 0.151404031 |
| 0.019393964 | 0.204668122 | 0.132474073 | 0.298700581 |
| 0.136622362 | 0.206590028 | 0.247701522 | 0.100976043 |
| 0.135689875 | 0.024619737 | 0.139730587 | 0.208313525 |
| 0.181529161 | 0.193193503 | 0.054396008 | 0.060293983 |
| 0.248616386 | 0.257310108 | 0.056348446 | 0.259862589 |
| 0.149428893 | 0.21041868  | 0.133186981 | 0.163313858 |
| 0.288247838 | 0.027084352 | 0.11444079  | 0.006290311 |
| 0.063361138 | 0.2743907   | 0.081548692 | 0.220813962 |
| 0.196956808 | 0.122333902 | 0.248905653 | 0.267170222 |
| 0.229860206 | 0.224902164 | 0.238937247 | 0.058412669 |
| 0.245197476 | 0.008703168 | 0.232448629 | 0.192902911 |
| 0.057090206 | 0.009122874 | 0.06325536  | 0.188502746 |
| 0.088129676 | 0.211971773 | 0.267552726 | 0.078374697 |
| 0.260461141 | 0.1985625   | 0.278063346 | 0.091071508 |

|             |             |             |             |
|-------------|-------------|-------------|-------------|
| 0.111787572 | 0.148208408 | 0.085328503 | 0.246468629 |
| 0.205162048 | 0.22297609  | 0.08870836  | 0.262877034 |
| 0.0973192   | 0.271593357 | 0.256509805 | 0.032275919 |
| 0.162997553 | 0.266253861 | 0.305301641 | 0.237625108 |
| 0.282432016 | 0.136085094 | 0.042645929 | 0.083362108 |
| 0.200568241 | 0.193788802 | 0.056921595 | 0.194665202 |
| 0.220742585 | 0.11415388  | 0.249054099 | 0.271006711 |
| 0.257738159 | 0.259410411 | 0.264802173 | 0.172435915 |
| 0.108646602 | 0.011711655 | 0.09941727  | 0.249572698 |
| 0.046761513 | 0.08328107  | 0.291925379 | 0.153480853 |
| 0.177154337 | 0.188234764 | 0.052574622 | 0.058287532 |
| 0.182702464 | 0.12153027  | 0.090017548 | 0.256681072 |
| 0.131131217 | 0.101960179 | 0.223845307 | 0.259799391 |
| 0.101941259 | 0.260165142 | 0.319234674 | 0.24268116  |
| 0.075881332 | 0.076353164 | 0.272631407 | 0.278900323 |
| 0.197711422 | 0.198871952 | 0.260848476 | 0.119546067 |
| 0.291271394 | 0.128184294 | 0.214147502 | 0.219039939 |
| 0.285206404 | 0.282060423 | 0.333880807 | 0.208338401 |
| 0.271146149 | 0.151124077 | 0.09107681  | 0.189175054 |
| 0.235209031 | 0.191978258 | 0.245520765 | 0.057698598 |
| 0.278374989 | 0.220327381 | 0.235849921 | 0.295204094 |
| 0.072211302 | 0.271452988 | 0.220404277 | 0.199964884 |
| 0.134074693 | 0.056396917 | 0.283108725 | 0.250959799 |
| 0.218292669 | 0.035228725 | 0.266330944 | 0.150558684 |
| 0.212629504 | 0.04774555  | 0.123437207 | 0.307390121 |
| 0.267508652 | 0.251505944 | 0.117134229 | 0.170749723 |
| 0.153462553 | 0.065652154 | 0.110507081 | 0.1890955   |
| 0.233143415 | 0.101609469 | 0.253457229 | 0.245338419 |
| 0.269057305 | 0.084319051 | 0.064120063 | 0.11344548  |
| 0.254316728 | 0.108220456 | 0.210082861 | 0.271556317 |
| 0.318868533 | 0.324482834 | 0.203749089 | 0.242370079 |
| 0.08623495  | 0.191500605 | 0.179000147 | 0.189360465 |
| 0.059933353 | 0.225991909 | 0.066274758 | 0.157219902 |
| 0.016990385 | 0.02811268  | 0.22912881  | 0.194744748 |
| 0.292769099 | 0.213445807 | 0.283834822 | 0.174926425 |
| 0.000940372 | 0.103593803 | 0.128711426 | 0.090203355 |
| 0.193354166 | 0.225114477 | 0.150203697 | 0.272335365 |
| 0.302686074 | 0.213589114 | 0.226023165 | 0.089435563 |
| 0.032389791 | 0.123259505 | 0.305016033 | 0.21926887  |
| 0.208401495 | 0.213881465 | 0.053833755 | 0.211669528 |
| 0.056044246 | 0.297601721 | 0.24715389  | 0.056379286 |
| 0.031031178 | 0.221025967 | 0.17251086  | 0.223680486 |
| 0.076822069 | 0.208733663 | 0.236361661 | 0.02615121  |
| 0.126673083 | 0.166563414 | 0.199996277 | 0.185740584 |
| 0.213733828 | 0.199096008 | 0.176382802 | 0.122440272 |
| 0.150098114 | 0.231756754 | 0.170446325 | 0.231736876 |
| 0.218489932 | 0.230734997 | 0.110990191 | 0.12956931  |
| 0.116001624 | 0.267681055 | 0.301476775 | 0.305881968 |
| 0.229191695 | 0.197738594 | 0.336673857 | 0.229665026 |
| 0.232338663 | 0.117674749 | 0.310362902 | 0.22600635  |
| 0.263347018 | 0.246085536 | 0.136791775 | 0.183202731 |
| 0.029975941 | 0.091400191 | 0.219513282 | 0.117406134 |
| 0.227281066 | 0.089528096 | 0.092043671 | 0.137149743 |
| 0.130960152 | 0.327478855 | 0.321129112 | 0.266198492 |



|             |             |             |             |
|-------------|-------------|-------------|-------------|
| 0.119289555 | 0.098805045 | 0.050630273 | 0.23222156  |
| 0.23551461  | 0.284132468 | 0.104154344 | 0.072650351 |
| 0.179565602 | 0.141896015 | 0.173771538 | 0.257412598 |
| 0.045430066 | 0.287815963 | 0.057079802 | 0.242697886 |
| 0.043873375 | 0.271295492 | 0.2979028   | 0.138557143 |
| 0.027084745 | 0.248015973 | 0.129334686 | 0.098607899 |
| 0.140272214 | 0.128175916 | 0.116325468 | 0.201723808 |
| 0.212598819 | 0.229954519 | 0.291940164 | 0.226262959 |
| 0.077899108 | 0.097804739 | 0.096446948 | 0.138908774 |
| 0.184345601 | 0.222657424 | 0.255089545 | 0.218141025 |
| 0.101291692 | 0.296526855 | 0.32725667  | 0.163767998 |
| 0.158141105 | 0.202832536 | 0.029025904 | 0.08796741  |
| 0.207140507 | 0.055607024 | 0.001875904 | 0.024995451 |
| 0.218973841 | 0.095426507 | 0.144687528 | 0.183930271 |
| 0.103489688 | 0.241084371 | 0.027544414 | 0.169600158 |
| 0.239090339 | 0.293356208 | 0.137205005 | 0.307067399 |
| 0.217214691 | 0.275821174 | 0.117321134 | 0.016590869 |
| 0.090035914 | 0.070451017 | 0.06110498  | 0.283496889 |
| 0.22795055  | 0.032452036 | 0.098204473 | 0.203989451 |
| 0.205699057 | 0.02536922  | 0.113703633 | 0.131668605 |
| 0.28331637  | 0.298209564 | 0.232348822 | 0.155876095 |
| 0.1846692   | 0.245381568 | 0.075116442 | 0.084432168 |
| 0.119949009 | 0.072885805 | 0.188225445 | 0.06026377  |
| 0.262888417 | 0.136171182 | 0.024957697 | 0.340753829 |
| 0.275294555 | 0.069201611 | 0.338206801 | 0.046612066 |
| 0.240799358 | 0.241012234 | 0.11510175  | 0.069768446 |
| 0.146663942 | 0.086553019 | 0.252266872 | 0.20905221  |
| 0.029414867 | 0.104259757 | 0.24052939  | 0.088537576 |
| 0.318835478 | 0.086799205 | 0.311218928 | 0.048180806 |
| 0.228520676 | 0.196907291 | 0.231992473 | 0.132088691 |
| 0.105959975 | 0.24608561  | 0.069312354 | 0.264403575 |
| 0.2295825   | 0.066560454 | 0.172231664 | 0.203831592 |
| 0.065193191 | 0.237498586 | 0.080915428 | 0.262943383 |
| 0.20737387  | 0.255565512 | 0.165381836 | 0.223930274 |
| 0.269385075 | 0.081257234 | 0.057607199 | 0.135419065 |
| 0.232120304 | 0.210053999 | 0.079786766 | 0.212405077 |
| 0.047939633 | 0.210986551 | 0.099978653 | 0.146631785 |
| 0.204113351 | 0.242206289 | 0.102380278 | 1           |
| 0.177740941 | 0.11232193  | 0.117534119 | 0.309614188 |
| 0.182922027 | 0.14478722  | 0.309032484 | 0.003956838 |
| 0.132136803 | 0.129318064 | 0.22413615  | 0.101514575 |
| 0.307083141 | 0.1486539   | 0.115349735 | 0.041267643 |
| 0.192669585 | 0.043115998 | 0.127362896 | 0.120660202 |
| 0.060550281 | 0.259598878 | 0.262366098 | 0.229638859 |
| 0.200107657 | 0.071622008 | 0.04556157  | 0.243606705 |
| 0.038557768 | 0.041706969 | 0.060784493 | 0.119844122 |
| 0.048124376 | 0.058199831 | 0.066643925 | 0.057812908 |
| 0.187646454 | 0.192165325 |             |             |
| VPS36       | 0.115410592 | 0.284793535 | 0.066223157 |
| 0.171153384 | 0.231483232 | 0.176792253 | 0.134240258 |
| 0.195621937 | 0.239542603 | 0.100495161 | 0.235767939 |
| 0.075717384 | 0.077700748 | 0.377827613 | 0.136129698 |
| 0.243649378 | 0.129274488 | 0.190075792 | 0.079277896 |
| 0.152057498 | 0.254150029 | 0.187756386 | 0.172408345 |

|             |             |             |             |
|-------------|-------------|-------------|-------------|
| 0.234985227 | 0.222589306 | 0.186616331 | 0.173344199 |
| 0.354135387 | 0.098699961 | 0.245750465 | 0.063182921 |
| 0.39425223  | 0.242532366 | 0.164146842 | 0.045691664 |
| 0.20540515  | 0.022799759 | 0.384957139 | 0.264748564 |
| 0.113864275 | 0.347483282 | 0.111912565 | 0.250689367 |
| 0.152493299 | 0.080874635 | 0.057102187 | 0.248702148 |
| 0.178102022 | 0.199915658 | 0.078001864 | 0.246181724 |
| 0.186154643 | 0.257974996 | 0.202023076 | 0.012769534 |
| 0.16144926  | 0.044403968 | 0.120013902 | 0.368501464 |
| 0.247275115 | 0.21686237  | 0.118041841 | 0.173211314 |
| 0.212139221 | 0.270236502 | 0.256596039 | 0.161590862 |
| 0.388720746 | 0.148546408 | 0.251986803 | 0.146727742 |
| 0.209076157 | 0.061990907 | 0.227879297 | 0.086873454 |
| 0.191466926 | 0.245565568 | 0.228904079 | 0.181913274 |
| 0.281213234 | 0.425802538 | 0.229403869 | 0.362027348 |
| 0.124249326 | 0.212960608 | 0.21122658  | 0.320439733 |
| 0.283494216 | 0.136975216 | 0.315883798 | 0.426217929 |
| 0.08372426  | 0.152404064 | 0.279752826 | 0.142234575 |
| 0.294550587 | 0.141544732 | 0.142909764 | 0.149197645 |
| 0.263137092 | 0.239876419 | 0.371258067 | 0.300802898 |
| 0.208384765 | 0.089354283 | 0.353595752 | 0.207088068 |
| 0.240458019 | 0.10543354  | 0.24472027  | 0.325866504 |
| 0.252742332 | 0.365072399 | 0.292516126 | 0.328471561 |
| 0.22565153  | 0.380094807 | 0.282418325 | 0.324848624 |
| 0.040904157 | 0.386361463 | 0.189890773 | 0.13796663  |
| 0.091410967 | 0.182424244 | 0.189833455 | 0.325013726 |
| 0.34158161  | 0.261319928 | 0.222044398 | 0.266657645 |
| 0.376255682 | 0.334897746 | 0.380226487 | 0.342906191 |
| 0.101998984 | 0.145527937 | 0.217613793 | 0.179215602 |
| 0.2977091   | 0.157088501 | 0.196762833 | 0.395543951 |
| 0.360052157 | 0.342967306 | 0.148942071 | 0.408057028 |
| 0.203452683 | 0.431434978 | 0.296007536 | 0.228381865 |
| 0.404998451 | 0.374179272 | 0.423422911 | 0.273523451 |
| 0.37302594  | 0.20146404  | 0.067782023 | 0.323457416 |
| 0.428835623 | 0.022381624 | 0.338877328 | 0.369647875 |
| 0.361834723 | 0.334164587 | 0.426695989 | 0.379424539 |
| 0.361844439 | 0.116382735 | 0.019706816 | 0.297873206 |
| 0.385595992 | 0.348717621 | 0.216517061 | 0.194169094 |
| 0.248822009 | 0.194699928 | 0.284960725 | 0.193658324 |
| 0.454893984 | 0.334202518 | 0.344580087 | 0.304445816 |
| 0.156307328 | 0.332450154 | 0.176311412 | 0.343480615 |
| 0.116312949 | 0.142092097 | 0.073704742 | 0.29161366  |
| 0.119195059 | 0.243100406 | 0.203742067 | 0.217103625 |
| 0.251171862 | 0.174490805 | 0.149192791 | 0.285915135 |
| 0.085328363 | 0.19045824  | 0.171821372 | 0.176923989 |
| 0.139960499 | 0.202188269 | 0.26738998  | 0.205454186 |
| 0.275168368 | 0.24399846  | 0.256471223 | 0.370394899 |
| 0.209214205 | 0.191207612 | 0.271834791 | 0.413937738 |
| 0.439531282 | 0.209972393 | 0.269945832 | 0.04412025  |
| 0.252493834 | 0.122694676 | 0.125043597 | 0.178728397 |
| 0.208598034 | 0.276848248 | 0.254865907 | 0.313358296 |
| 0.188537583 | 0.135464051 | 0.22788077  | 0.389589385 |
| 0.160524279 | 0.238713788 | 0.385303474 | 0.181814483 |
| 0.015484744 | 0.243315211 | 0.330721956 | 0.205862337 |

|             |             |             |             |
|-------------|-------------|-------------|-------------|
| 0.254952513 | 0.147963911 | 0.139460471 | 0.365564911 |
| 0.181501378 | 0.214022389 | 0.356812892 | 0.300721915 |
| 0.181777632 | 0.215235941 | 0.420058806 | 0.049605011 |
| 0.191558895 | 0.117873217 | 0.316676204 | 0.11486606  |
| 0.236196247 | 0.326270375 | 0.219702747 | 0.229610298 |
| 0.126250451 | 0.397516393 | 0.31309261  | 0.389012539 |
| 0.194749553 | 0.422647242 | 0.349175049 | 0.374649068 |
| 0.260802861 | 0.17269747  | 0.098204521 | 0.332869265 |
| 0.349515138 | 0.173008098 | 0.092768802 | 0.287994221 |
| 0.166250934 | 0.282722666 | 0.170789011 | 0.413592466 |
| 0.420290337 | 0.319872163 | 0.249032826 | 0.345757434 |
| 0.352101515 | 0.213879636 | 0.317130695 | 0.433762415 |
| 0.125887019 | 0.235741419 | 0.23357461  | 0.373015967 |
| 0.201757111 | 0.23012157  | 0.310716136 | 0.108458505 |
| 0.004175209 | 0.116349716 | 0.106027383 | 0.254018099 |
| 0.172140173 | 0.1867847   | 0.269691068 | 0.400692384 |
| 0.206797685 | 0.345491522 | 0.240330795 | 0.26791343  |
| 0.349296347 | 0.216789206 | 0.188510379 | 0.239869444 |
| 0.264361232 | 0.052764847 | 0.194738909 | 0.428862392 |
| 0.055529189 | 0.183373005 | 0.205777523 | 0.009847539 |
| 0.104733209 | 0.240997765 | 0.135835008 | 0.249105571 |
| 0.394278308 | 0.229128796 | 0.210230881 | 0.134947351 |
| 0.306125269 | 0.150047965 | 0.014713524 | 0.361112843 |
| 0.359742302 | 0.346831153 | 0.355395331 | 0.336125653 |
| 0.340490303 | 0.263748829 | 0.330448442 | 0.16584015  |
| 0.181516108 | 0.107537233 | 0.204220372 | 0.274077003 |
| 0.010931035 | 0.324470255 | 0.220497599 | 0.206257969 |
| 0.300060046 | 0.275365981 | 0.101766138 | 0.219497766 |
| 0.055543952 | 0.11952924  | 0.215709755 | 0.238438615 |
| 0.317764366 | 0.046368834 | 0.126114371 | 0.203582039 |
| 0.324729988 | 0.316688252 | 0.166228464 | 0.397128274 |
| 0.254758889 | 0.119545528 | 0.247780024 | 0.307184148 |
| 0.157639579 | 0.073262316 | 0.184753486 | 0.013974842 |
| 0.096504868 | 0.353377922 | 0.189913535 | 0.108658792 |
| 0.251910914 | 0.025414589 | 0.314008896 | 0.415232935 |
| 0.317892527 | 0.407834522 | 0.387485507 | 0.187029156 |
| 0.385729986 | 0.051429745 | 0.391217022 | 0.296449246 |
| 0.152235773 | 0.003978931 | 0.028179095 | 0.361269007 |
| 0.228978417 | 0.071645099 | 0.201263277 | 0.154994204 |
| 0.213500699 | 0.138799494 | 0.132122227 | 0.200267708 |
| 0.212975938 | 0.251944803 | 0.191326017 | 0.349511719 |
| 0.257101105 | 0.248525655 | 0.166748124 | 0.121071203 |
| 0.211208044 | 0.133389961 | 0.118122089 | 0.025211602 |
| 0.301273569 | 0.137621254 | 0.355076765 | 0.374115398 |
| 0.424762415 | 0.289066164 | 0.11792246  | 0.172280187 |
| 0.331606127 | 0.09317225  | 0.146045273 | 0.103066708 |
| 0.342219588 | 0.278246589 | 0.342394433 | 0.310070715 |
| 0.433193233 | 0.388852149 | 0.101761592 | 0.3352085   |
| 0.03442922  | 0.007397442 | 0.171356202 | 0.271498388 |
| 0.052985341 | 0.227595615 | 0.29626711  | 0.172604342 |
| 0.19918764  | 0.081580306 | 0.179760035 | 0.195051185 |
| 0.273137188 | 0.25735269  | 0.233202377 | 0.236456796 |
| 0.225741646 | 0.210507494 | 0.228559906 | 0.22682064  |
| 0.164324059 | 0.279499277 | 0.229445956 | 0.075860559 |

|             |             |             |             |
|-------------|-------------|-------------|-------------|
| 0.172691624 | 0.206831231 | 0.123873093 | 0.192674594 |
| 0.357123285 | 0.378406248 | 0.137103294 | 0.061825217 |
| 0.292703255 | 0.246748811 | 0.400865616 | 0.348263495 |
| 0.40206945  | 0.442644514 | 0.376078538 | 0.256362018 |
| 0.134225941 | 0.24410666  | 0.222094362 | 0.195569052 |
| 0.388461349 | 0.082377423 | 0.348112322 | 0.180656773 |
| 0.164890273 | 0.225244552 | 0.11652812  | 0.155813356 |
| 0.200035079 | 0.226930697 | 0.25570735  | 0.137953935 |
| 0.270640401 | 0.171352724 | 0.117667193 | 0.239094869 |
| 0.323877717 | 0.144239645 | 0.208350749 | 0.177202809 |
| 0.261703863 | 0.076946871 | 0.293058562 | 0.424736798 |
| 0.163871101 | 0.146419502 | 0.16803624  | 0.280519307 |
| 0.304649002 | 0.147651015 | 0.053309922 | 0.294659252 |
| 0.388500031 | 0.246905132 | 0.364453385 | 0.397973768 |
| 0.126776943 | 0.226158369 | 0.179356577 | 0.250379267 |
| 0.223399637 | 0.175623954 | 0.243974107 | 0.11891398  |
| 0.317218392 | 0.401026944 | 0.317653515 | 0.239868012 |
| 0.177139491 | 0.111497811 | 0.069781543 | 0.313028876 |
| 0.193446871 | 0.159559106 | 0.124237166 | 0.309748502 |
| 0.006993409 | 0.110460132 | 0.386657306 | 0.236041156 |
| 0.414424042 | 0.386247593 | 0.392169068 | 0.172601006 |
| 0.004613647 | 0.255372339 | 0.268528242 | 0.217967787 |
| 0.32088194  | 0.283130198 | 0.119210896 | 0.187546427 |
| 0.331447377 | 0.095443488 | 0.258015872 | 0.150020122 |
| 0.122249054 | 0.232101996 | 0.267714629 | 0.194411823 |
| 0.250026313 | 0.100239184 | 0.153690835 | 0.217242883 |
| 0.124650916 | 0.304709491 | 0.363221638 | 0.096014512 |
| 0.164114684 | 0.375189917 | 0.309991418 | 0.070123886 |
| 0.191331407 | 0.335418391 | 0.348358839 | 0.017768832 |
| 0.301408384 | 0.046749366 | 0.267117969 | 0.257513603 |
| 0.247978068 | 0.272030224 | 0.269444407 | 0.234932073 |
| 0.241894098 | 0.247406992 | 0.248808658 | 0.263452097 |
| 0.235150614 | 0.209450024 | 0.227580957 | 0.192405789 |
| 0.246842062 | 0.179953597 | 0.134567576 | 0.131146835 |
| 0.134222493 | 0.322198022 | 0.291241946 | 0.090799537 |
| 0.254026808 | 0.197261164 | 0.382841061 | 0.340344659 |
| 0.380319839 | 0.11604329  | 0.236856021 | 0.310180913 |
| 0.099008864 | 0.163728655 | 0.104150243 | 0.183589698 |
| 0.24449317  | 0.237083438 | 0.160225885 | 0.192087812 |
| 0.24699034  | 0.381920349 | 0.279722718 | 0.364236994 |
| 0.224228696 | 0.18931929  | 0.107271673 | 0.200207367 |
| 0.214233612 | 0.168086236 | 0.236977704 | 0.012246144 |
| 0.282962473 | 0.16587545  | 0.348825373 | 0.357632519 |
| 0.155158824 | 0.360118705 | 0.118651481 | 0.168805469 |
| 0.085847314 | 0.180051344 | 0.201279609 | 0.268575212 |
| 0.124917632 | 0.208044479 | 0.250607657 | 0.137794467 |
| 0.295235654 | 0.254497625 | 0.205215032 | 0.230396554 |
| 0.21919232  | 0.169689374 | 0.36919467  | 0.121959901 |
| 0.191522176 | 0.20947238  | 0.15216959  | 0.273544866 |
| 0.267647684 | 0.375986979 | 0.103161301 | 0.388331683 |
| 0.250719429 | 0.162642099 | 0.433773115 | 0.185063875 |
| 0.175960381 | 0.192840142 | 0.12803364  | 0.160412596 |
| 0.241769442 | 0.166643359 | 0.006929468 | 0.097385081 |
| 0.337619927 | 0.159907844 | 0.258755583 | 0.289595696 |

|             |             |             |             |
|-------------|-------------|-------------|-------------|
| 0.214912466 | 0.354679543 | 0.093310052 | 0.22021847  |
| 0.328936542 | 0.368513685 | 0.27409057  | 0.302716627 |
| 0.320546505 | 0.188552459 | 0.194004132 | 0.018537178 |
| 0.238129979 | 0.195446362 | 0.162963449 | 0.136835501 |
| 0.07175084  | 0.147927013 | 0.226536628 | 0.080931653 |
| 0.392417392 | 0.115398745 | 0.180544539 | 0.259173345 |
| 0.199455155 | 0.377355091 | 0.23567484  | 0.317254237 |
| 0.077617702 | 0.245607434 | 0.177734995 | 0.180035428 |
| 0.25340516  | 0.218570692 | 0.338822048 | 0.188044044 |
| 0.111256792 | 0.238834031 | 0.017102689 | 0.377765366 |
| 0.341192007 | 0.200999157 | 0.249629256 | 0.102757559 |
| 0.303868594 | 0.30936201  | 0.257123295 | 0.161952766 |
| 0.050455307 | 0.238283757 | 0.22639334  | 0.312690727 |
| 0.12967477  | 0.200283863 | 0.134039919 | 0.213450233 |
| 0.349489049 | 0.252229094 | 0.292178132 | 0.164019809 |
| 0.340104221 | 0.264313961 | 0.141808668 | 0.188619702 |
| 0.198069385 | 0.101656854 | 0.136171709 | 0.414705493 |
| 0.254492275 | 0.19535564  | 0.36477281  | 0.274237322 |
| 0.194689821 | 0.303590232 | 0.177971206 | 0.39687483  |
| 0.21058879  | 0.285948835 | 0.315456104 | 0.360977499 |
| 0.346838924 | 0.194224071 | 0.201333194 | 0.271105381 |
| 0.321683826 | 0.14834911  | 0.202760877 | 0.301717947 |
| 0.182433509 | 0.284839407 | 0.144421144 | 0.244729626 |
| 0.119885633 | 0.220768521 | 0.190252154 | 0.177740941 |
| 1           | 0.23467144  | 0.230701749 | 0.387974977 |
| 0.206279928 | 0.084792882 | 0.412250047 | 0.029166204 |
| 0.166857772 | 0.268488921 | 0.233547393 | 0.226938988 |
| 0.21914866  | 0.234982562 | 0.179956169 | 0.012211275 |
| 0.339979581 | 0.047480264 | 0.20261538  | 0.256063827 |
| 0.189568282 | 0.117911992 | 0.349940599 | 0.415099657 |
| 0.230740008 | 0.142579285 | 0.151491375 | 0.353341107 |
| 0.136414694 | 0.132147035 | 0.180213231 | 0.215147819 |
| 0.159392846 | 0.142172858 | 0.169926697 | 0.169789967 |
| 0.275263167 | 0.205594297 |             |             |
| VPS45       | 0.048328685 | 0.33511631  | 0.03286941  |
| 0.141937445 | 0.278579804 | 0.197248871 | 0.051377685 |
| 0.088191952 | 0.261274497 | 0.137201701 | 0.240497502 |
| 0.020098859 | 0.101403893 | 0.400637138 | 0.048494898 |
| 0.316300598 | 0.042392637 | 0.090211178 | 0.048079933 |
| 0.168119705 | 0.255724104 | 0.221810234 | 0.164895863 |
| 0.247013763 | 0.159328656 | 0.212408371 | 0.232088614 |
| 0.426114282 | 0.151152988 | 0.324058155 | 0.117668235 |
| 0.384398559 | 0.298662148 | 0.225246929 | 0.016606079 |
| 0.224454826 | 0.022646342 | 0.378812725 | 0.245598346 |
| 0.206911161 | 0.304691924 | 0.142178316 | 0.208534058 |
| 0.188845969 | 0.030245422 | 0.085767637 | 0.326459523 |
| 0.211526529 | 0.187607597 | 0.034814762 | 0.325936456 |
| 0.204577211 | 0.237188259 | 0.256967971 | 0.001088581 |
| 0.222647374 | 0.095211612 | 0.186993652 | 0.41450215  |
| 0.176722509 | 0.111415025 | 0.167407323 | 0.134706198 |
| 0.258179379 | 0.311667048 | 0.218771203 | 0.196923847 |
| 0.430730858 | 0.17682119  | 0.341697741 | 0.131858718 |
| 0.211417051 | 0.021686953 | 0.150133581 | 0.051956509 |
| 0.243232658 | 0.164505468 | 0.228351549 | 0.257977938 |

|             |             |             |             |
|-------------|-------------|-------------|-------------|
| 0.331591327 | 0.436895906 | 0.195614838 | 0.400517554 |
| 0.125203614 | 0.280429809 | 0.2555848   | 0.309054488 |
| 0.304475821 | 0.064834926 | 0.359527578 | 0.461580833 |
| 0.031463024 | 0.198549977 | 0.31280193  | 0.082185111 |
| 0.345371055 | 0.195098473 | 0.181953769 | 0.18516259  |
| 0.347721846 | 0.280981593 | 0.387015034 | 0.252818532 |
| 0.220874949 | 0.047609661 | 0.373097238 | 0.280973267 |
| 0.229933967 | 0.056987435 | 0.245571278 | 0.416875043 |
| 0.31906934  | 0.424250292 | 0.341913583 | 0.330340769 |
| 0.280620424 | 0.4384722   | 0.336975965 | 0.342207898 |
| 0.065669979 | 0.437757335 | 0.13524516  | 0.045293544 |
| 0.038550911 | 0.080493143 | 0.191446512 | 0.284744878 |
| 0.422876389 | 0.238619394 | 0.131575975 | 0.223003576 |
| 0.453517863 | 0.363309873 | 0.434335024 | 0.358119215 |
| 0.034424091 | 0.210351514 | 0.282229941 | 0.145321706 |
| 0.302186606 | 0.08328672  | 0.24716302  | 0.414895683 |
| 0.347956696 | 0.413813649 | 0.094137421 | 0.408861085 |
| 0.126728139 | 0.464950621 | 0.363581047 | 0.146074927 |
| 0.44171038  | 0.399874922 | 0.47791081  | 0.363020585 |
| 0.391655767 | 0.201062714 | 0.04110582  | 0.334720426 |
| 0.448217268 | 0.028186715 | 0.417885038 | 0.450194988 |
| 0.414599006 | 0.424081225 | 0.48250846  | 0.448145805 |
| 0.406951428 | 0.053084805 | 0.027035597 | 0.282294099 |
| 0.423786444 | 0.373186496 | 0.118822294 | 0.250738689 |
| 0.295806052 | 0.190915006 | 0.351282087 | 0.193667064 |
| 0.461371372 | 0.405265693 | 0.415316973 | 0.314055211 |
| 0.168144666 | 0.272740284 | 0.253816849 | 0.361826334 |
| 0.046365708 | 0.071845278 | 0.035181725 | 0.266771922 |
| 0.157091756 | 0.158217076 | 0.186080622 | 0.255644516 |
| 0.176743206 | 0.158195414 | 0.209156668 | 0.348145952 |
| 0.041334674 | 0.250106813 | 0.120282526 | 0.109809555 |
| 0.054440488 | 0.121897207 | 0.150002844 | 0.136464629 |
| 0.2050396   | 0.181469896 | 0.320749185 | 0.44342708  |
| 0.228250498 | 0.149007935 | 0.311181208 | 0.436307095 |
| 0.421596268 | 0.278710537 | 0.194629354 | 0.027364496 |
| 0.228430954 | 0.17499864  | 0.182247445 | 0.251339726 |
| 0.142866308 | 0.187965422 | 0.290621061 | 0.382269768 |
| 0.148664735 | 0.076628062 | 0.243162145 | 0.358588347 |
| 0.11148395  | 0.233391795 | 0.423045813 | 0.228912978 |
| 0.004839801 | 0.221875039 | 0.396498323 | 0.185939283 |
| 0.233141464 | 0.154875427 | 0.191522792 | 0.439974424 |
| 0.197293013 | 0.213411906 | 0.432269888 | 0.37489582  |
| 0.171228514 | 0.160425991 | 0.4725993   | 0.046233976 |
| 0.226576235 | 0.090580077 | 0.289790587 | 0.141953319 |
| 0.201577944 | 0.276360297 | 0.259722428 | 0.247388696 |
| 0.084282593 | 0.433381721 | 0.330086394 | 0.448806529 |
| 0.235821141 | 0.477463925 | 0.423985525 | 0.405120937 |
| 0.278720505 | 0.209776424 | 0.151684235 | 0.396797768 |
| 0.434251306 | 0.193595539 | 0.052498093 | 0.364006017 |
| 0.201854148 | 0.348271663 | 0.154748692 | 0.465720978 |
| 0.425844938 | 0.360175854 | 0.128825454 | 0.379869087 |
| 0.359681669 | 0.155661907 | 0.36854054  | 0.470438703 |
| 0.167347281 | 0.250350511 | 0.272340124 | 0.424150421 |
| 0.150486484 | 0.226055203 | 0.272079305 | 0.169532074 |

|             |             |             |             |
|-------------|-------------|-------------|-------------|
| 0.011840509 | 0.047803623 | 0.045259793 | 0.165358646 |
| 0.21575549  | 0.25455631  | 0.332344411 | 0.44634439  |
| 0.097098317 | 0.354197795 | 0.190678786 | 0.249387725 |
| 0.360650898 | 0.222562014 | 0.2601455   | 0.289386372 |
| 0.209713637 | 0.036592451 | 0.123398779 | 0.441391248 |
| 0.023524556 | 0.2213038   | 0.163766002 | 0.006109717 |
| 0.036751701 | 0.298272823 | 0.079694139 | 0.172499909 |
| 0.450564881 | 0.17043035  | 0.164195    | 0.164880923 |
| 0.307572795 | 0.073365428 | 0.009762814 | 0.431636819 |
| 0.405964414 | 0.385586454 | 0.39750095  | 0.359717278 |
| 0.39377097  | 0.317092287 | 0.401635611 | 0.175446271 |
| 0.086532442 | 0.054416832 | 0.247787834 | 0.239946695 |
| 0.003369829 | 0.357538322 | 0.212965093 | 0.129575206 |
| 0.359669689 | 0.242619701 | 0.031644546 | 0.267314058 |
| 0.024923597 | 0.186599183 | 0.163445906 | 0.163942053 |
| 0.345103303 | 0.013625039 | 0.166405777 | 0.22942638  |
| 0.338689494 | 0.288218633 | 0.234460243 | 0.451338076 |
| 0.23911188  | 0.088251814 | 0.26646036  | 0.348888357 |
| 0.06452883  | 0.070612872 | 0.179577281 | 0.030873627 |
| 0.096451983 | 0.365858263 | 0.208983713 | 0.064179286 |
| 0.227129323 | 0.006173722 | 0.3105557   | 0.451419959 |
| 0.360684586 | 0.475508528 | 0.436353901 | 0.234319314 |
| 0.438151637 | 0.102003149 | 0.453084825 | 0.335068172 |
| 0.187809263 | 0.001989956 | 0.007541584 | 0.448756357 |
| 0.287106596 | 0.038445268 | 0.135742889 | 0.178928361 |
| 0.121129549 | 0.085326844 | 0.050160727 | 0.236946438 |
| 0.272911261 | 0.215821395 | 0.183389313 | 0.368508393 |
| 0.206693356 | 0.185097837 | 0.176367462 | 0.063493818 |
| 0.273271223 | 0.058874467 | 0.064124862 | 0.018394046 |
| 0.340530167 | 0.085474446 | 0.359057441 | 0.425890424 |
| 0.44486128  | 0.361077239 | 0.15624673  | 0.167040553 |
| 0.387972603 | 0.06138191  | 0.188818667 | 0.066142367 |
| 0.392828694 | 0.330646144 | 0.304013793 | 0.278508118 |
| 0.463697962 | 0.408575918 | 0.031307194 | 0.390008986 |
| 0.018706506 | 0.00445802  | 0.185724954 | 0.207493511 |
| 0.058827313 | 0.256551421 | 0.246947182 | 0.149887809 |
| 0.164400063 | 0.025673393 | 0.248264443 | 0.245037841 |
| 0.269587318 | 0.243780437 | 0.249521343 | 0.194363204 |
| 0.244502335 | 0.190070315 | 0.167933682 | 0.114662735 |
| 0.147134928 | 0.266208278 | 0.165327765 | 0.021887689 |
| 0.227568073 | 0.252762194 | 0.048917168 | 0.125865174 |
| 0.413195378 | 0.445351694 | 0.055103304 | 0.026799582 |
| 0.229533479 | 0.207196073 | 0.455485591 | 0.404645275 |
| 0.430181327 | 0.475669685 | 0.336340493 | 0.14226678  |
| 0.055155349 | 0.275309784 | 0.251782936 | 0.152466874 |
| 0.432787764 | 0.040817846 | 0.388914938 | 0.24546817  |
| 0.094593378 | 0.190901658 | 0.04270399  | 0.070019369 |
| 0.275915112 | 0.142719295 | 0.182108481 | 0.105180984 |
| 0.240346947 | 0.223084657 | 0.041819154 | 0.15980011  |
| 0.299022272 | 0.238256004 | 0.13010435  | 0.160174054 |
| 0.286110764 | 0.098170396 | 0.373282474 | 0.418565752 |
| 0.099311711 | 0.078559425 | 0.15252386  | 0.310087354 |
| 0.383659861 | 0.210079211 | 0.025668266 | 0.349126594 |
| 0.432313093 | 0.317781027 | 0.404606928 | 0.385602191 |

|             |             |             |             |
|-------------|-------------|-------------|-------------|
| 0.06687594  | 0.252090245 | 0.223484228 | 0.26951539  |
| 0.141297494 | 0.192249641 | 0.167674517 | 0.047584798 |
| 0.265409952 | 0.395704712 | 0.362688249 | 0.152824122 |
| 0.23511244  | 0.07166561  | 0.034790831 | 0.366136394 |
| 0.250083042 | 0.069781329 | 0.152255751 | 0.375059473 |
| 0.008189825 | 0.166774215 | 0.451829694 | 0.160776386 |
| 0.446081704 | 0.459550107 | 0.398947559 | 0.141371974 |
| 0.005296101 | 0.351409806 | 0.297290716 | 0.255964534 |
| 0.348030889 | 0.270977236 | 0.086239744 | 0.092077071 |
| 0.287904367 | 0.053519648 | 0.144633617 | 0.173524687 |
| 0.209680939 | 0.250727558 | 0.186612747 | 0.144976372 |
| 0.191508136 | 0.058962872 | 0.215559879 | 0.172728773 |
| 0.163692391 | 0.228143423 | 0.343291256 | 0.115237452 |
| 0.183989649 | 0.395623248 | 0.349298528 | 0.023371541 |
| 0.232331067 | 0.381492864 | 0.38350549  | 0.00536262  |
| 0.367750838 | 0.010076233 | 0.179429229 | 0.204439993 |
| 0.186913007 | 0.175519297 | 0.246817038 | 0.261094106 |
| 0.246214121 | 0.176877555 | 0.208979335 | 0.212359061 |
| 0.16973619  | 0.146009686 | 0.282705201 | 0.211930993 |
| 0.22936959  | 0.105700842 | 0.078827044 | 0.078858594 |
| 0.053057205 | 0.377384998 | 0.216592095 | 0.052623677 |
| 0.190230894 | 0.204386879 | 0.346593831 | 0.393639513 |
| 0.391241197 | 0.080217814 | 0.212784944 | 0.367868562 |
| 0.114159871 | 0.146600684 | 0.036316976 | 0.224929044 |
| 0.150080075 | 0.212730538 | 0.1852764   | 0.192821107 |
| 0.295505827 | 0.361768628 | 0.204519644 | 0.396272662 |
| 0.244416716 | 0.199637601 | 0.140509701 | 0.109206941 |
| 0.140285557 | 0.105555674 | 0.253013928 | 0.004383823 |
| 0.269558854 | 0.143940649 | 0.42584233  | 0.401070554 |
| 0.20651688  | 0.351858237 | 0.144674303 | 0.078787807 |
| 0.126993774 | 0.138746523 | 0.117030338 | 0.345950066 |
| 0.186570584 | 0.135949604 | 0.263800929 | 0.144618131 |
| 0.379757788 | 0.337204168 | 0.220144835 | 0.142849882 |
| 0.173378945 | 0.141308081 | 0.387529494 | 0.071409852 |
| 0.266284568 | 0.231738519 | 0.186536465 | 0.247425483 |
| 0.204540854 | 0.450152022 | 0.041612262 | 0.456745022 |
| 0.250499604 | 0.102820198 | 0.432374207 | 0.15595991  |
| 0.16809014  | 0.127397461 | 0.201076372 | 0.175926461 |
| 0.178264901 | 0.231202662 | 0.008286672 | 0.069169509 |
| 0.319936792 | 0.170302353 | 0.31020257  | 0.308863544 |
| 0.24854076  | 0.344361861 | 0.142714439 | 0.159595076 |
| 0.368297945 | 0.388312354 | 0.20410666  | 0.242160688 |
| 0.285063255 | 0.089272645 | 0.227712134 | 0.010061226 |
| 0.303732118 | 0.279715608 | 0.188485768 | 0.045288743 |
| 0.019923675 | 0.223799873 | 0.286270347 | 0.04239502  |
| 0.462382554 | 0.177340905 | 0.217024773 | 0.334462005 |
| 0.13448095  | 0.393203293 | 0.131644496 | 0.359636784 |
| 0.033043488 | 0.208026639 | 0.234859242 | 0.202762867 |
| 0.227454641 | 0.269039515 | 0.370719646 | 0.236476219 |
| 0.037334891 | 0.233363794 | 0.005401435 | 0.348078891 |
| 0.367814002 | 0.258035465 | 0.176258901 | 0.129612069 |
| 0.273065044 | 0.331222297 | 0.181580266 | 0.214669222 |
| 0.020713247 | 0.306428457 | 0.149061693 | 0.341523442 |
| 0.18662406  | 0.226799693 | 0.071136717 | 0.237490388 |



|             |             |             |             |
|-------------|-------------|-------------|-------------|
| 0.34592673  | 0.203920229 | 0.22024213  | 0.23087787  |
| 0.393887853 | 0.303750277 | 0.116384567 | 0.186376907 |
| 0.247433988 | 0.046814277 | 0.166400708 | 0.456229342 |
| 0.161808448 | 0.240908587 | 0.438833429 | 0.194851119 |
| 0.234965753 | 0.306838846 | 0.253998526 | 0.434519654 |
| 0.100371905 | 0.213467618 | 0.378713714 | 0.390649272 |
| 0.295277378 | 0.212033254 | 0.22720722  | 0.226250084 |
| 0.361470191 | 0.087292016 | 0.222889233 | 0.294555567 |
| 0.231175045 | 0.255807622 | 0.181501447 | 0.199385556 |
| 0.04443828  | 0.115167436 | 0.195231877 | 0.11232193  |
| 0.23467144  | 1           | 0.255859031 | 0.364040536 |
| 0.137325646 | 0.044025947 | 0.412974478 | 0.041204526 |
| 0.174561543 | 0.329320943 | 0.168408122 | 0.250021109 |
| 0.159395737 | 0.233898201 | 0.178075495 | 0.001343295 |
| 0.390459496 | 0.091736892 | 0.200995187 | 0.237253827 |
| 0.188256369 | 0.04023034  | 0.382541687 | 0.472682985 |
| 0.218091331 | 0.178214823 | 0.197705012 | 0.382122295 |
| 0.192447663 | 0.194519244 | 0.211985463 | 0.270187691 |
| 0.218096078 | 0.183383603 | 0.208755054 | 0.243218213 |
| 0.305725222 | 0.15020578  |             |             |
| WARS        | 0.029263748 | 0.209971546 | 0.01775732  |
| 0.06167813  | 0.317653361 | 0.089779001 | 0.036573897 |
| 0.053045702 | 0.188638391 | 0.047998883 | 0.192960128 |
| 0.013377751 | 0.092853505 | 0.27971871  | 0.037827795 |
| 0.28422348  | 0.035882466 | 0.08454667  | 0.036564797 |
| 0.099202715 | 0.302488161 | 0.101179625 | 0.0930822   |
| 0.28762404  | 0.117960467 | 0.145473175 | 0.195686095 |
| 0.276177737 | 0.049896747 | 0.226536691 | 0.034696599 |
| 0.284861542 | 0.314868438 | 0.150136729 | 0.009390863 |
| 0.164712996 | 0.049228861 | 0.268278626 | 0.179743692 |
| 0.143887865 | 0.231379646 | 0.063741185 | 0.148096278 |
| 0.110201461 | 0.014881437 | 0.021047268 | 0.26828264  |
| 0.163910028 | 0.119475971 | 0.024605679 | 0.228119071 |
| 0.101630428 | 0.1629861   | 0.144683309 | 0.000592324 |
| 0.153318972 | 0.062103307 | 0.104432164 | 0.265129203 |
| 0.168206266 | 0.113503577 | 0.074613672 | 0.104846698 |
| 0.211276461 | 0.293007586 | 0.241346729 | 0.085955986 |
| 0.282228962 | 0.130791879 | 0.248478874 | 0.059595339 |
| 0.126699197 | 0.01729492  | 0.151661567 | 0.048007681 |
| 0.125346325 | 0.186038165 | 0.212517723 | 0.20261137  |
| 0.193862657 | 0.306491776 | 0.205538793 | 0.252154874 |
| 0.133733922 | 0.297484357 | 0.183907252 | 0.324047712 |
| 0.269430624 | 0.048654117 | 0.267773562 | 0.320146072 |
| 0.026563062 | 0.116454064 | 0.235440275 | 0.067745528 |
| 0.21915615  | 0.119248609 | 0.09979408  | 0.129019109 |
| 0.345272309 | 0.280020586 | 0.267347305 | 0.21119201  |
| 0.211656469 | 0.039333494 | 0.228383489 | 0.299764301 |
| 0.143985364 | 0.047692377 | 0.173856082 | 0.303616629 |
| 0.233264301 | 0.274365542 | 0.226307736 | 0.282553396 |
| 0.246421632 | 0.290263369 | 0.244490236 | 0.247755442 |
| 0.019237893 | 0.286067295 | 0.115792291 | 0.034737253 |
| 0.022183775 | 0.067810453 | 0.144029542 | 0.269634486 |
| 0.289840314 | 0.194925067 | 0.087436884 | 0.238051294 |
| 0.363353272 | 0.217543208 | 0.282736517 | 0.262950892 |

|             |             |             |             |
|-------------|-------------|-------------|-------------|
| 0.02533688  | 0.143566908 | 0.240232844 | 0.069729122 |
| 0.248352026 | 0.098049557 | 0.237250161 | 0.267532937 |
| 0.252047393 | 0.325935432 | 0.051723481 | 0.278480363 |
| 0.105960291 | 0.333230411 | 0.215819243 | 0.134214499 |
| 0.294255258 | 0.251037766 | 0.349223406 | 0.310341471 |
| 0.257205964 | 0.125038094 | 0.030203624 | 0.260509039 |
| 0.335700629 | 0.027432621 | 0.288286185 | 0.317557537 |
| 0.262142709 | 0.300901653 | 0.362743465 | 0.310324104 |
| 0.253219808 | 0.057263685 | 0.024046267 | 0.319326067 |
| 0.271482733 | 0.271475243 | 0.10339552  | 0.178795536 |
| 0.284479017 | 0.109654255 | 0.262100842 | 0.070883987 |
| 0.347415213 | 0.286885697 | 0.275970177 | 0.228019877 |
| 0.134310425 | 0.207666342 | 0.213825778 | 0.217911278 |
| 0.034429567 | 0.040194187 | 0.027110039 | 0.25989329  |
| 0.043928286 | 0.19434479  | 0.090925527 | 0.257374217 |
| 0.196356709 | 0.093757142 | 0.121695569 | 0.323913614 |
| 0.032747964 | 0.153995716 | 0.108610513 | 0.08893575  |
| 0.042027259 | 0.106632739 | 0.071288593 | 0.073778544 |
| 0.219198511 | 0.12606589  | 0.219535689 | 0.320652058 |
| 0.168640135 | 0.111038906 | 0.211147527 | 0.328426087 |
| 0.352117015 | 0.240042579 | 0.185794097 | 0.017205104 |
| 0.114258671 | 0.077981998 | 0.127262636 | 0.190916331 |
| 0.111882879 | 0.100988924 | 0.242333248 | 0.334126595 |
| 0.092186928 | 0.057091774 | 0.139325768 | 0.255295576 |
| 0.08478286  | 0.136766006 | 0.31804056  | 0.15311794  |
| 0.003229492 | 0.167051888 | 0.278104599 | 0.18584873  |
| 0.194471392 | 0.098276151 | 0.088824313 | 0.320744829 |
| 0.100705026 | 0.177661386 | 0.299786684 | 0.347762391 |
| 0.060719001 | 0.108941521 | 0.341715426 | 0.039183852 |
| 0.236082011 | 0.073076024 | 0.306234884 | 0.075057959 |
| 0.186597083 | 0.288907877 | 0.281410499 | 0.185602245 |
| 0.05605205  | 0.286541057 | 0.245651571 | 0.302775139 |
| 0.109355746 | 0.344055341 | 0.30035636  | 0.290389813 |
| 0.229371127 | 0.155630185 | 0.105421848 | 0.275116211 |
| 0.31656683  | 0.081426961 | 0.040499841 | 0.257111556 |
| 0.127599382 | 0.296100406 | 0.162502979 | 0.33528575  |
| 0.304726584 | 0.212689691 | 0.094009548 | 0.372686    |
| 0.268642278 | 0.124411369 | 0.292507962 | 0.347143323 |
| 0.063530698 | 0.220760342 | 0.172516428 | 0.396312992 |
| 0.138680924 | 0.168061102 | 0.228445937 | 0.117309651 |
| 0.006826498 | 0.039916839 | 0.039847696 | 0.169958546 |
| 0.174860886 | 0.168348683 | 0.295842762 | 0.301704581 |
| 0.093022562 | 0.254330604 | 0.188425892 | 0.125641023 |
| 0.240528394 | 0.179972208 | 0.226734139 | 0.259313207 |
| 0.203380258 | 0.026640188 | 0.067227374 | 0.304691643 |
| 0.020118257 | 0.131827679 | 0.123990943 | 0.003486708 |
| 0.021440551 | 0.176803664 | 0.065140898 | 0.140231117 |
| 0.354599454 | 0.129665788 | 0.130861318 | 0.061593913 |
| 0.282597458 | 0.076028301 | 0.009982896 | 0.30565723  |
| 0.287999256 | 0.283450902 | 0.276294109 | 0.243565673 |
| 0.304597342 | 0.247914768 | 0.334814287 | 0.09925496  |
| 0.054605315 | 0.034370551 | 0.163021738 | 0.210331998 |
| 0.001829731 | 0.310053257 | 0.237213292 | 0.128071485 |
| 0.282252528 | 0.234916917 | 0.019075878 | 0.268995999 |

|             |             |             |             |
|-------------|-------------|-------------|-------------|
| 0.010487247 | 0.097270018 | 0.071778503 | 0.158123009 |
| 0.366006896 | 0.008719727 | 0.050756102 | 0.105157666 |
| 0.2019453   | 0.203633491 | 0.12961585  | 0.300001025 |
| 0.205574713 | 0.057771021 | 0.232697965 | 0.295825775 |
| 0.04519392  | 0.031697407 | 0.09681778  | 0.006717934 |
| 0.03246783  | 0.261645269 | 0.114719408 | 0.032381828 |
| 0.201769923 | 0.003653922 | 0.203956154 | 0.305385142 |
| 0.212769585 | 0.338180879 | 0.290384679 | 0.180949465 |
| 0.285814324 | 0.066195711 | 0.302161211 | 0.215160207 |
| 0.082635957 | 0.000611083 | 0.007656467 | 0.315402722 |
| 0.232524224 | 0.026543401 | 0.139241583 | 0.051396375 |
| 0.078306388 | 0.045272214 | 0.040644938 | 0.196457955 |
| 0.181749974 | 0.253480475 | 0.154409421 | 0.229551307 |
| 0.186228173 | 0.216072795 | 0.087550419 | 0.05892294  |
| 0.223128708 | 0.037281659 | 0.065001775 | 0.012712234 |
| 0.329723428 | 0.062433895 | 0.223709551 | 0.274823916 |
| 0.318943615 | 0.327082021 | 0.054900449 | 0.059902136 |
| 0.307739773 | 0.036054562 | 0.075808115 | 0.044991542 |
| 0.237556078 | 0.274757502 | 0.258672159 | 0.204528094 |
| 0.338621767 | 0.27662011  | 0.02510954  | 0.313107188 |
| 0.008598669 | 0.008260256 | 0.098386005 | 0.202337527 |
| 0.074524273 | 0.201898108 | 0.221075446 | 0.101738166 |
| 0.121384695 | 0.012582504 | 0.196076728 | 0.204408258 |
| 0.271662239 | 0.216057163 | 0.283193013 | 0.18879406  |
| 0.228246367 | 0.179722768 | 0.136212558 | 0.088049186 |
| 0.086584166 | 0.190968367 | 0.118674212 | 0.017476024 |
| 0.14889672  | 0.190390601 | 0.042116454 | 0.117675764 |
| 0.29894185  | 0.305987533 | 0.045872561 | 0.020235077 |
| 0.188050637 | 0.167583447 | 0.328359072 | 0.251262809 |
| 0.278937285 | 0.34721525  | 0.247968569 | 0.120575263 |
| 0.035379481 | 0.299087932 | 0.301474387 | 0.161690758 |
| 0.287489187 | 0.032388524 | 0.24727382  | 0.249906176 |
| 0.105920056 | 0.11849766  | 0.031530406 | 0.080597785 |
| 0.232958727 | 0.148635915 | 0.212323846 | 0.070078009 |
| 0.178095457 | 0.142773646 | 0.036276539 | 0.167901659 |
| 0.238532396 | 0.166570774 | 0.137949858 | 0.096571575 |
| 0.215981842 | 0.040515891 | 0.286591356 | 0.319627143 |
| 0.087451568 | 0.078441596 | 0.045467709 | 0.270059602 |
| 0.263565865 | 0.138972877 | 0.010435581 | 0.206918463 |
| 0.31664429  | 0.216183423 | 0.254083894 | 0.344082654 |
| 0.069451521 | 0.203088538 | 0.179947531 | 0.262648031 |
| 0.156943838 | 0.097374771 | 0.183912212 | 0.053720189 |
| 0.244757121 | 0.282635258 | 0.245946619 | 0.135700826 |
| 0.163866582 | 0.050804095 | 0.027360521 | 0.256483956 |
| 0.191791232 | 0.034166221 | 0.070193409 | 0.286788546 |
| 0.011111112 | 0.131011363 | 0.351922789 | 0.083695302 |
| 0.325560036 | 0.336612458 | 0.286842418 | 0.073273055 |
| 0.010200276 | 0.296873852 | 0.238392087 | 0.145198893 |
| 0.217579989 | 0.200991645 | 0.053318359 | 0.068354239 |
| 0.276689071 | 0.036257769 | 0.096430564 | 0.057340564 |
| 0.123344801 | 0.16475657  | 0.205393548 | 0.155096634 |
| 0.20869679  | 0.048826888 | 0.140632513 | 0.129582765 |
| 0.1629033   | 0.226126476 | 0.292250937 | 0.035191547 |
| 0.087909399 | 0.317640618 | 0.245492664 | 0.013882074 |

|             |             |             |             |
|-------------|-------------|-------------|-------------|
| 0.221042268 | 0.309301681 | 0.299108619 | 0.004169534 |
| 0.274114691 | 0.008200146 | 0.190511432 | 0.188843083 |
| 0.18038587  | 0.166752304 | 0.308653709 | 0.168941834 |
| 0.196682661 | 0.162056416 | 0.13889557  | 0.216901051 |
| 0.120316626 | 0.136242185 | 0.249954341 | 0.146411099 |
| 0.137817915 | 0.068373487 | 0.062690507 | 0.056579792 |
| 0.031984122 | 0.250059516 | 0.178523942 | 0.039034108 |
| 0.21746213  | 0.130540994 | 0.305829135 | 0.239782332 |
| 0.322983837 | 0.050667937 | 0.165442416 | 0.222632668 |
| 0.04369996  | 0.051061451 | 0.017590824 | 0.164723738 |
| 0.143535274 | 0.129552896 | 0.123137984 | 0.116613496 |
| 0.200569215 | 0.266649186 | 0.16641558  | 0.304209504 |
| 0.17393767  | 0.173336895 | 0.046418354 | 0.076645131 |
| 0.101963297 | 0.101488026 | 0.302644556 | 0.002775517 |
| 0.22917006  | 0.048790898 | 0.287702718 | 0.250122996 |
| 0.13428476  | 0.28423259  | 0.035610962 | 0.040550031 |
| 0.033099316 | 0.08703723  | 0.114739131 | 0.241750676 |
| 0.101056266 | 0.092028001 | 0.29922841  | 0.040188732 |
| 0.29689013  | 0.260536806 | 0.171205069 | 0.106843455 |
| 0.206687575 | 0.11312427  | 0.268966838 | 0.044879437 |
| 0.181348813 | 0.174563391 | 0.11208571  | 0.215946076 |
| 0.213324835 | 0.310018796 | 0.041476495 | 0.310376894 |
| 0.199461549 | 0.08793096  | 0.316687706 | 0.124192858 |
| 0.076579993 | 0.104154829 | 0.137174788 | 0.078990777 |
| 0.109381143 | 0.132438726 | 0.002699728 | 0.051469001 |
| 0.298778674 | 0.107549246 | 0.199002707 | 0.286438396 |
| 0.240203844 | 0.346926739 | 0.096391828 | 0.114089404 |
| 0.218417781 | 0.246259764 | 0.094087641 | 0.249914421 |
| 0.231276554 | 0.063255589 | 0.128324728 | 0.012313169 |
| 0.22068823  | 0.198946315 | 0.065426897 | 0.033753877 |
| 0.016709877 | 0.140093215 | 0.208842876 | 0.041048515 |
| 0.355175451 | 0.086689172 | 0.161289759 | 0.237777482 |
| 0.130028161 | 0.248774631 | 0.1127298   | 0.280847074 |
| 0.023314035 | 0.219213756 | 0.209396147 | 0.158348201 |
| 0.124662448 | 0.234527662 | 0.319531273 | 0.187651877 |
| 0.028043178 | 0.141196313 | 0.00904645  | 0.244446873 |
| 0.22714456  | 0.236828243 | 0.159778912 | 0.044903797 |
| 0.292595399 | 0.273059032 | 0.106907811 | 0.149106525 |
| 0.016442292 | 0.278536766 | 0.167508218 | 0.215623005 |
| 0.069848462 | 0.189710801 | 0.052309158 | 0.260750583 |
| 0.21474409  | 0.099208741 | 0.20900623  | 0.094055962 |
| 0.245886581 | 0.218538974 | 0.079891609 | 0.144087908 |
| 0.176186583 | 0.045119729 | 0.066734942 | 0.319414126 |
| 0.159715162 | 0.218302153 | 0.346076526 | 0.137054386 |
| 0.198330925 | 0.213132949 | 0.180826649 | 0.303657554 |
| 0.096644582 | 0.209968632 | 0.308452337 | 0.26900407  |
| 0.295739768 | 0.202875524 | 0.13947813  | 0.192361161 |
| 0.213157644 | 0.041207293 | 0.158594392 | 0.229298007 |
| 0.161795013 | 0.254247493 | 0.117149715 | 0.206791615 |
| 0.029253571 | 0.0798712   | 0.070642351 | 0.117534119 |
| 0.230701749 | 0.255859031 | 1           | 0.288941491 |
| 0.080318513 | 0.02687872  | 0.319652188 | 0.034352518 |
| 0.103932004 | 0.270509996 | 0.171762487 | 0.213264335 |
| 0.121249163 | 0.188958339 | 0.112105807 | 0.000780605 |

|             |             |             |             |
|-------------|-------------|-------------|-------------|
| 0.326510591 | 0.094878789 | 0.15484767  | 0.150708913 |
| 0.098440089 | 0.023482739 | 0.254111582 | 0.343847617 |
| 0.184778709 | 0.074085323 | 0.076126439 | 0.255914004 |
| 0.144118424 | 0.097584725 | 0.115690861 | 0.166115336 |
| 0.166359221 | 0.093564526 | 0.122194718 | 0.139436401 |
| 0.226046274 | 0.103134539 |             |             |
| WDHD1       | 0.229243485 | 0.356811304 | 0.174009095 |
| 0.305877972 | 0.334030886 | 0.387805287 | 0.204573216 |
| 0.305139171 | 0.336722365 | 0.220002024 | 0.405632045 |
| 0.113205389 | 0.085439044 | 0.402835809 | 0.197802944 |
| 0.347700694 | 0.171619026 | 0.283489813 | 0.112367373 |
| 0.289247891 | 0.320719498 | 0.308380296 | 0.369987347 |
| 0.316258628 | 0.29887702  | 0.360215792 | 0.299678622 |
| 0.417636136 | 0.192606268 | 0.382367901 | 0.159689511 |
| 0.417719503 | 0.328869885 | 0.295964686 | 0.104696172 |
| 0.381347871 | 0.017440039 | 0.435752722 | 0.354786949 |
| 0.174456149 | 0.385293277 | 0.275287222 | 0.380815281 |
| 0.306274892 | 0.158616409 | 0.147245881 | 0.333086671 |
| 0.343517599 | 0.35584837  | 0.180797124 | 0.380993645 |
| 0.322230963 | 0.408577488 | 0.321534879 | 0.011177709 |
| 0.247502696 | 0.056811492 | 0.163172748 | 0.450266057 |
| 0.370657093 | 0.312370427 | 0.192886141 | 0.32182564  |
| 0.326188814 | 0.351060716 | 0.373055084 | 0.290068241 |
| 0.44122172  | 0.159850352 | 0.350689981 | 0.274767985 |
| 0.368697287 | 0.128623113 | 0.326003949 | 0.193635058 |
| 0.332594288 | 0.369583057 | 0.371494136 | 0.27189374  |
| 0.353231249 | 0.486162686 | 0.365020515 | 0.445957324 |
| 0.10410341  | 0.303134708 | 0.309672038 | 0.38401805  |
| 0.354539949 | 0.209978448 | 0.409991404 | 0.474996449 |
| 0.158737367 | 0.303931627 | 0.360391376 | 0.248341044 |
| 0.38367866  | 0.225540376 | 0.309754384 | 0.186244293 |
| 0.345745192 | 0.324297594 | 0.436099882 | 0.40183417  |
| 0.329192854 | 0.194999102 | 0.449357403 | 0.289280326 |
| 0.369616134 | 0.23094052  | 0.275806773 | 0.369655167 |
| 0.38759646  | 0.420771421 | 0.356352253 | 0.371864326 |
| 0.331524755 | 0.438042837 | 0.407360109 | 0.381683447 |
| 0.101982442 | 0.455384481 | 0.360348004 | 0.191197464 |
| 0.201429334 | 0.263331211 | 0.243224138 | 0.389007746 |
| 0.39265485  | 0.405757216 | 0.367900491 | 0.356608563 |
| 0.380999607 | 0.429615196 | 0.446108705 | 0.392170423 |
| 0.174219691 | 0.201588278 | 0.338110521 | 0.371486544 |
| 0.378225973 | 0.270935876 | 0.253175046 | 0.472112905 |
| 0.412150214 | 0.383798462 | 0.316979648 | 0.486047096 |
| 0.308612449 | 0.475169659 | 0.36938606  | 0.352472656 |
| 0.477304839 | 0.462170722 | 0.456183994 | 0.352625194 |
| 0.45211395  | 0.407793216 | 0.06971628  | 0.377185058 |
| 0.455854591 | 0.024799224 | 0.375763809 | 0.403012838 |
| 0.434305776 | 0.378197174 | 0.451540326 | 0.429434378 |
| 0.437134536 | 0.221992274 | 0.018257258 | 0.359634214 |
| 0.456587412 | 0.413747452 | 0.283998279 | 0.327554462 |
| 0.340068085 | 0.393872473 | 0.367137447 | 0.284819521 |
| 0.485442675 | 0.396117085 | 0.395746342 | 0.380770998 |
| 0.304175996 | 0.382379673 | 0.287685214 | 0.441209655 |
| 0.201055151 | 0.276182662 | 0.168638668 | 0.369841101 |

|             |             |             |             |
|-------------|-------------|-------------|-------------|
| 0.299249991 | 0.351389893 | 0.387651775 | 0.326812778 |
| 0.362998582 | 0.359130085 | 0.255421663 | 0.353271789 |
| 0.156564631 | 0.35989105  | 0.334653166 | 0.308128367 |
| 0.193543462 | 0.273529727 | 0.336712591 | 0.336658806 |
| 0.36044128  | 0.310925758 | 0.362934697 | 0.415098499 |
| 0.323074203 | 0.31541429  | 0.388473738 | 0.446433247 |
| 0.426058133 | 0.340499097 | 0.351847956 | 0.071420436 |
| 0.286315032 | 0.208454551 | 0.150698157 | 0.324610292 |
| 0.267950055 | 0.322301102 | 0.359712464 | 0.376030476 |
| 0.376994719 | 0.261703796 | 0.322329589 | 0.445924552 |
| 0.26731492  | 0.363166481 | 0.402348203 | 0.337857904 |
| 0.037538442 | 0.399180117 | 0.39605766  | 0.216669861 |
| 0.356571053 | 0.153468635 | 0.227779178 | 0.388978574 |
| 0.240604169 | 0.241081064 | 0.405420838 | 0.368514887 |
| 0.323785099 | 0.279485761 | 0.455419552 | 0.036859292 |
| 0.302835863 | 0.159004797 | 0.386446984 | 0.265015948 |
| 0.38314566  | 0.379163678 | 0.309177622 | 0.334075849 |
| 0.263596815 | 0.454305599 | 0.404216688 | 0.435654222 |
| 0.299269281 | 0.460854449 | 0.389901687 | 0.410134119 |
| 0.406173647 | 0.275779182 | 0.110030977 | 0.397505599 |
| 0.388775283 | 0.262343849 | 0.18882762  | 0.351560414 |
| 0.284710477 | 0.354750201 | 0.225929976 | 0.436799973 |
| 0.482606084 | 0.410550216 | 0.321011198 | 0.378932813 |
| 0.418853561 | 0.389977897 | 0.39252678  | 0.467520183 |
| 0.231052503 | 0.317825381 | 0.319615564 | 0.392352626 |
| 0.341597523 | 0.24814963  | 0.372775991 | 0.142151447 |
| 0.008996878 | 0.223139067 | 0.20800608  | 0.328170753 |
| 0.197352378 | 0.321807293 | 0.372915421 | 0.447079572 |
| 0.301453832 | 0.406070155 | 0.334306862 | 0.340881659 |
| 0.386039243 | 0.314380372 | 0.323375418 | 0.360394092 |
| 0.367755593 | 0.098135503 | 0.280394668 | 0.490514708 |
| 0.133022075 | 0.241611605 | 0.365361016 | 0.01366471  |
| 0.171403881 | 0.335132836 | 0.212073247 | 0.300279822 |
| 0.40488314  | 0.297070528 | 0.338991039 | 0.2528581   |
| 0.407704336 | 0.267339539 | 0.026334636 | 0.405649575 |
| 0.417414898 | 0.395438262 | 0.414085606 | 0.412910875 |
| 0.362869361 | 0.363098197 | 0.380367994 | 0.381960313 |
| 0.289639408 | 0.231780225 | 0.214746676 | 0.363292298 |
| 0.014996586 | 0.410398295 | 0.339076951 | 0.313151187 |
| 0.369698509 | 0.367890021 | 0.172554334 | 0.328718048 |
| 0.110597536 | 0.162807031 | 0.33928712  | 0.338420832 |
| 0.363231265 | 0.097228003 | 0.24532983  | 0.274621701 |
| 0.408312485 | 0.389509745 | 0.287214116 | 0.466688093 |
| 0.405950914 | 0.224865429 | 0.369240094 | 0.393427726 |
| 0.240700542 | 0.100608484 | 0.338920041 | 0.035457157 |
| 0.227531446 | 0.415377954 | 0.324739446 | 0.221311982 |
| 0.392983222 | 0.051314613 | 0.392765092 | 0.471040407 |
| 0.410763614 | 0.437318529 | 0.444003523 | 0.261380216 |
| 0.447594192 | 0.064872041 | 0.448234896 | 0.37960891  |
| 0.279827885 | 0.006837242 | 0.032300407 | 0.396421662 |
| 0.35864515  | 0.153268707 | 0.332891996 | 0.351110163 |
| 0.295722281 | 0.279496513 | 0.225491075 | 0.239301408 |
| 0.387760098 | 0.331934884 | 0.218995258 | 0.419268748 |
| 0.368453294 | 0.366375591 | 0.336238515 | 0.218156435 |

|             |             |             |             |
|-------------|-------------|-------------|-------------|
| 0.36776906  | 0.213635661 | 0.213486245 | 0.032629119 |
| 0.372972118 | 0.227206833 | 0.44950077  | 0.439323457 |
| 0.463370691 | 0.379121677 | 0.236309202 | 0.322331635 |
| 0.372071927 | 0.197704735 | 0.29039509  | 0.230246631 |
| 0.418150334 | 0.36787804  | 0.414098586 | 0.392823549 |
| 0.449024955 | 0.435790214 | 0.160517411 | 0.388075771 |
| 0.081444653 | 0.007443957 | 0.3677846   | 0.367813562 |
| 0.066478608 | 0.321121875 | 0.38033091  | 0.279436755 |
| 0.306398588 | 0.147056676 | 0.226271273 | 0.230197975 |
| 0.38755531  | 0.371820577 | 0.293477589 | 0.332338396 |
| 0.315481362 | 0.200591287 | 0.357272345 | 0.316539088 |
| 0.246188317 | 0.357960739 | 0.300502973 | 0.12180318  |
| 0.340081003 | 0.34802544  | 0.21505481  | 0.322905816 |
| 0.409163089 | 0.409110125 | 0.16744022  | 0.077064403 |
| 0.379009538 | 0.33815957  | 0.42196095  | 0.422810759 |
| 0.476474987 | 0.471279097 | 0.421712925 | 0.263769511 |
| 0.233239164 | 0.368710492 | 0.299538343 | 0.23552623  |
| 0.441468453 | 0.172643327 | 0.431269417 | 0.256796749 |
| 0.27883472  | 0.369697755 | 0.173517419 | 0.253322664 |
| 0.322009461 | 0.348417687 | 0.336644724 | 0.273299184 |
| 0.359222795 | 0.246764445 | 0.192534655 | 0.361203784 |
| 0.395438403 | 0.162795529 | 0.331994117 | 0.361478024 |
| 0.381562338 | 0.167326733 | 0.365830253 | 0.441622634 |
| 0.287981211 | 0.254578842 | 0.34418622  | 0.370181187 |
| 0.375299675 | 0.294141854 | 0.111242904 | 0.371319702 |
| 0.425247955 | 0.368306467 | 0.44604605  | 0.395743108 |
| 0.228160327 | 0.352001924 | 0.253318069 | 0.345672047 |
| 0.337295512 | 0.390806573 | 0.354283039 | 0.21138779  |
| 0.368119599 | 0.461066035 | 0.378487159 | 0.347528537 |
| 0.350032257 | 0.239883005 | 0.156577606 | 0.376538889 |
| 0.199660032 | 0.244835647 | 0.283997768 | 0.362517266 |
| 0.012652615 | 0.130317366 | 0.412613178 | 0.383556184 |
| 0.468247231 | 0.409632779 | 0.430024443 | 0.342631404 |
| 0.002402972 | 0.33989511  | 0.398654496 | 0.372578571 |
| 0.379110768 | 0.400668517 | 0.231683638 | 0.250601416 |
| 0.394843719 | 0.19592946  | 0.288580372 | 0.343291179 |
| 0.138831483 | 0.375589579 | 0.35126969  | 0.317564798 |
| 0.335229925 | 0.18800009  | 0.23157929  | 0.396709359 |
| 0.142453599 | 0.381720426 | 0.405414787 | 0.231666189 |
| 0.173154183 | 0.37997469  | 0.37858427  | 0.138764855 |
| 0.309073396 | 0.374582916 | 0.394343017 | 0.012044199 |
| 0.380752827 | 0.069019136 | 0.334533286 | 0.358469767 |
| 0.349417157 | 0.32901616  | 0.35233922  | 0.352490976 |
| 0.367507733 | 0.368884119 | 0.402858614 | 0.385409207 |
| 0.335200974 | 0.371242008 | 0.37213644  | 0.366421195 |
| 0.349393875 | 0.313456206 | 0.212863611 | 0.197871141 |
| 0.208921404 | 0.3851745   | 0.362154498 | 0.191866426 |
| 0.367590583 | 0.355073572 | 0.407581574 | 0.421697528 |
| 0.409966048 | 0.208630848 | 0.355830146 | 0.386157635 |
| 0.159833527 | 0.322410294 | 0.194555263 | 0.384051707 |
| 0.389245931 | 0.265140045 | 0.350410053 | 0.352281559 |
| 0.343780971 | 0.423231924 | 0.363454062 | 0.411401536 |
| 0.391394816 | 0.302306787 | 0.247267299 | 0.255325137 |
| 0.347264366 | 0.2724353   | 0.300835403 | 0.025617244 |

|             |             |             |             |
|-------------|-------------|-------------|-------------|
| 0.40349319  | 0.369226229 | 0.390593209 | 0.44105914  |
| 0.227594014 | 0.405412862 | 0.271840499 | 0.252976289 |
| 0.218835431 | 0.252018128 | 0.305891051 | 0.369786982 |
| 0.168784289 | 0.364068191 | 0.353016523 | 0.346918625 |
| 0.37668249  | 0.344894137 | 0.281797178 | 0.354822616 |
| 0.348687981 | 0.332197661 | 0.43806695  | 0.2736598   |
| 0.333722257 | 0.257929118 | 0.307694338 | 0.359815325 |
| 0.339484119 | 0.431469456 | 0.206013046 | 0.435596707 |
| 0.325956636 | 0.263401335 | 0.479421829 | 0.370831202 |
| 0.382149132 | 0.284223328 | 0.157117723 | 0.329475147 |
| 0.342288259 | 0.274345161 | 0.011080499 | 0.077054199 |
| 0.39918547  | 0.270103809 | 0.339921896 | 0.368205992 |
| 0.280886863 | 0.383874204 | 0.136424029 | 0.364325534 |
| 0.420584    | 0.460176602 | 0.350417921 | 0.368726979 |
| 0.393329171 | 0.289781604 | 0.375755721 | 0.021631042 |
| 0.347464294 | 0.316960743 | 0.286573915 | 0.206452356 |
| 0.116398748 | 0.177185814 | 0.356148288 | 0.172832883 |
| 0.400015185 | 0.168804903 | 0.314018343 | 0.387590736 |
| 0.303601166 | 0.466064884 | 0.288670403 | 0.403746032 |
| 0.134049048 | 0.372932215 | 0.307410628 | 0.305777861 |
| 0.317197944 | 0.280101174 | 0.404569161 | 0.24102468  |
| 0.166676284 | 0.337812248 | 0.010571997 | 0.433557541 |
| 0.431264772 | 0.284369221 | 0.326081049 | 0.213937104 |
| 0.390115853 | 0.379420488 | 0.278239484 | 0.322178367 |
| 0.082732641 | 0.338833226 | 0.365098835 | 0.402986733 |
| 0.190303164 | 0.324180524 | 0.226325477 | 0.286627075 |
| 0.448919362 | 0.28630322  | 0.353105337 | 0.250170484 |
| 0.423485769 | 0.365072807 | 0.266317524 | 0.297945976 |
| 0.315145341 | 0.194431079 | 0.311590895 | 0.462683268 |
| 0.341291829 | 0.237267234 | 0.389712148 | 0.349246922 |
| 0.267459323 | 0.38587503  | 0.31416939  | 0.451228801 |
| 0.213637076 | 0.392787993 | 0.383611961 | 0.398240687 |
| 0.398207874 | 0.20657289  | 0.238870647 | 0.305450341 |
| 0.410471505 | 0.263863063 | 0.254692629 | 0.408552377 |
| 0.205351025 | 0.391743767 | 0.296588063 | 0.285327829 |
| 0.159678091 | 0.320364385 | 0.378940217 | 0.309614188 |
| 0.387974977 | 0.364040536 | 0.288941491 | 1           |
| 0.30183096  | 0.125674833 | 0.448198249 | 0.019898719 |
| 0.387657496 | 0.393987271 | 0.38352833  | 0.348815571 |
| 0.320189474 | 0.378012137 | 0.343513302 | 0.013866571 |
| 0.386686259 | 0.089039065 | 0.321938521 | 0.307640272 |
| 0.247056024 | 0.190338778 | 0.427005082 | 0.438134273 |
| 0.392300486 | 0.28358094  | 0.25968902  | 0.410904431 |
| 0.152994603 | 0.231573907 | 0.262517426 | 0.364111343 |
| 0.207836998 | 0.285694668 | 0.31467419  | 0.303248669 |
| 0.40058458  | 0.380420243 |             |             |
| WDR1        | 0.118226582 | 0.131199403 | 0.084280253 |
| 0.095283779 | 0.185708008 | 0.101888692 | 0.061335704 |
| 0.077998306 | 0.094150787 | 0.013439645 | 0.234255192 |
| 0.052798771 | 0.016906319 | 0.212314666 | 0.066997278 |
| 0.133646367 | 0.077543092 | 0.143665347 | 0.005908003 |
| 0.02149856  | 0.179691968 | 0.065395658 | 0.089282436 |
| 0.127787124 | 0.199478831 | 0.091589408 | 0.064757568 |
| 0.182040133 | 0.016788227 | 0.168830181 | 0.007143869 |



|             |             |             |             |
|-------------|-------------|-------------|-------------|
| 0.24521871  | 0.184073798 | 0.069134992 | 0.038793661 |
| 0.117583333 | 0.00111495  | 0.206622288 | 0.138769147 |
| 0.039390163 | 0.253270268 | 0.032101387 | 0.230056427 |
| 0.041181879 | 0.073632053 | 0.006343665 | 0.097101032 |
| 0.075670295 | 0.07036956  | 0.07397904  | 0.136044273 |
| 0.033812458 | 0.218836054 | 0.076727858 | 0.00263109  |
| 0.075115247 | 0.00600911  | 0.027196916 | 0.205155677 |
| 0.316913693 | 0.231417346 | 0.007230506 | 0.063777996 |
| 0.07625391  | 0.119055711 | 0.206993195 | 0.026396006 |
| 0.222158951 | 0.026267399 | 0.111214447 | 0.052725368 |
| 0.074262158 | 0.028742635 | 0.242532836 | 0.051656627 |
| 0.051959564 | 0.28624671  | 0.201506516 | 0.065266183 |
| 0.121392856 | 0.234304286 | 0.172283979 | 0.176142109 |
| 0.008903952 | 0.112218408 | 0.084283362 | 0.240382626 |
| 0.117331344 | 0.033177187 | 0.23370727  | 0.236196847 |
| 0.036183714 | 0.050672717 | 0.111793245 | 0.101580359 |
| 0.170415416 | 0.022730116 | 0.053248966 | 0.079020103 |
| 0.159791824 | 0.123190223 | 0.175710626 | 0.276105566 |
| 0.121232482 | 0.087463207 | 0.182348216 | 0.126941608 |
| 0.204392432 | 0.12457312  | 0.057343893 | 0.157410975 |
| 0.146424755 | 0.208249669 | 0.117115708 | 0.157598843 |
| 0.108785409 | 0.220387698 | 0.196382761 | 0.171352487 |
| 0.003011434 | 0.199069383 | 0.226349163 | 0.116394061 |
| 0.054610207 | 0.14272898  | 0.026853796 | 0.256236957 |
| 0.201918434 | 0.183235141 | 0.153471576 | 0.204093861 |
| 0.198652162 | 0.16867906  | 0.180641771 | 0.172646622 |
| 0.095579355 | 0.023517473 | 0.108401963 | 0.085881643 |
| 0.15512891  | 0.129000602 | 0.110029096 | 0.212209417 |
| 0.283805567 | 0.187383649 | 0.080510827 | 0.225978485 |
| 0.068289179 | 0.270600391 | 0.148354992 | 0.259885975 |
| 0.228247079 | 0.213910716 | 0.256267668 | 0.180856347 |
| 0.238538298 | 0.16581894  | 0.002571862 | 0.152428788 |
| 0.291353305 | 0.017047445 | 0.163520042 | 0.181390694 |
| 0.182958954 | 0.171713336 | 0.227746833 | 0.209392056 |
| 0.18397181  | 0.11020222  | 0.000205172 | 0.218445642 |
| 0.200626987 | 0.262801725 | 0.079637821 | 0.079102438 |
| 0.140563641 | 0.101937297 | 0.139173772 | 0.033622217 |
| 0.275039768 | 0.194194722 | 0.168909003 | 0.138772497 |
| 0.047266556 | 0.256195347 | 0.073184502 | 0.191197066 |
| 0.066509135 | 0.128383164 | 0.097235147 | 0.167271166 |
| 0.025771529 | 0.277714835 | 0.075939544 | 0.092809404 |
| 0.291452654 | 0.062973318 | 0.051187303 | 0.181516443 |
| 0.075213634 | 0.104029075 | 0.156153755 | 0.103028668 |
| 0.100720748 | 0.185452864 | 0.070088225 | 0.159804793 |
| 0.221279237 | 0.153951613 | 0.124113798 | 0.195909317 |
| 0.057989328 | 0.183778204 | 0.143555509 | 0.267377196 |
| 0.314800154 | 0.13206046  | 0.205853175 | 0.080846453 |
| 0.028703815 | 0.014810049 | 0.025219947 | 0.084295992 |
| 0.158363341 | 0.054616213 | 0.120183857 | 0.23573462  |
| 0.138888507 | 0.055441945 | 0.057025722 | 0.267401564 |
| 0.114355314 | 0.172273031 | 0.228654784 | 0.066495403 |
| 0.019552837 | 0.154558821 | 0.194870436 | 0.035275322 |
| 0.115737393 | 0.044512805 | 0.05193698  | 0.191305246 |
| 0.022197883 | 0.065915219 | 0.194114562 | 0.206386676 |

|             |             |             |             |
|-------------|-------------|-------------|-------------|
| 0.029329646 | 0.117458337 | 0.223914689 | 0.002014696 |
| 0.071077159 | 0.088945998 | 0.302285194 | 0.028299293 |
| 0.206092782 | 0.221419594 | 0.153777263 | 0.129621353 |
| 0.139121324 | 0.206918385 | 0.208561708 | 0.218464658 |
| 0.040593547 | 0.224830709 | 0.198047576 | 0.252956782 |
| 0.189567058 | 0.041831427 | 0.018547591 | 0.193059158 |
| 0.186716065 | 0.011956361 | 0.088327653 | 0.120706706 |
| 0.033772864 | 0.143020879 | 0.040343284 | 0.242129271 |
| 0.265557864 | 0.151353077 | 0.18094647  | 0.219906772 |
| 0.286508277 | 0.251698893 | 0.184592905 | 0.235500691 |
| 0.011194334 | 0.091237469 | 0.079520614 | 0.256753622 |
| 0.223301007 | 0.064182496 | 0.194384476 | 0.022751851 |
| 0.004257555 | 0.085676262 | 0.115931599 | 0.25761408  |
| 0.090355502 | 0.074553568 | 0.145084985 | 0.208762523 |
| 0.205379352 | 0.24602593  | 0.13062572  | 0.106743134 |
| 0.176235756 | 0.072227343 | 0.121590356 | 0.150616166 |
| 0.196751367 | 0.077688066 | 0.123118832 | 0.236129912 |
| 0.046531304 | 0.08233001  | 0.085217138 | 0.020071468 |
| 0.060392402 | 0.094712583 | 0.111575638 | 0.219570461 |
| 0.231729866 | 0.19045335  | 0.160928352 | 0.016960074 |
| 0.280057907 | 0.18251829  | 0.064788042 | 0.170199056 |
| 0.163615458 | 0.153060475 | 0.156363639 | 0.1573757   |
| 0.142952643 | 0.128335425 | 0.174925836 | 0.11726973  |
| 0.079909765 | 0.054952534 | 0.04364011  | 0.14968721  |
| 0.0030392   | 0.275802366 | 0.120850884 | 0.249710156 |
| 0.154157485 | 0.143401175 | 0.097953429 | 0.122795859 |
| 0.047437454 | 0.036714035 | 0.03745926  | 0.111979387 |
| 0.201419169 | 0.046607022 | 0.032626702 | 0.024703524 |
| 0.201089622 | 0.222192098 | 0.049564774 | 0.216189206 |
| 0.251612664 | 0.072906754 | 0.16659919  | 0.238924363 |
| 0.093190329 | 0.00277022  | 0.046492141 | 0.003434776 |
| 0.026050657 | 0.175991611 | 0.046298484 | 0.034929283 |
| 0.235603424 | 0.028064563 | 0.222110635 | 0.231125864 |
| 0.1627312   | 0.214934036 | 0.236874292 | 0.120181726 |
| 0.221484399 | 0.00447066  | 0.205899103 | 0.155675866 |
| 0.030803181 | 0.009666402 | 0.025837619 | 0.194803069 |
| 0.127415687 | 0.065240455 | 0.230563389 | 0.041437335 |
| 0.12657292  | 0.072379963 | 0.108397455 | 0.104190325 |
| 0.147998774 | 0.235352086 | 0.069397052 | 0.166764731 |
| 0.16011414  | 0.21380264  | 0.045364989 | 0.105511529 |
| 0.143966028 | 0.106180727 | 0.086321081 | 0.042863348 |
| 0.19772595  | 0.104608608 | 0.185277876 | 0.19737459  |
| 0.264395356 | 0.196621546 | 0.020237507 | 0.032595459 |
| 0.162791619 | 0.07956668  | 0.02052958  | 0.090374487 |
| 0.17694024  | 0.158600632 | 0.319162699 | 0.26375848  |
| 0.246168067 | 0.228831347 | 0.089593274 | 0.185881001 |
| 0.081081107 | 0.008175114 | 0.0892802   | 0.177192583 |
| 0.002240928 | 0.081607465 | 0.26156462  | 0.031042131 |
| 0.063144523 | 0.047849598 | 0.055978218 | 0.066317899 |
| 0.211624798 | 0.121804051 | 0.158823131 | 0.12713059  |
| 0.102830416 | 0.029862179 | 0.178482822 | 0.105563881 |
| 0.011726543 | 0.164861559 | 0.202477874 | 0.045512987 |
| 0.071848952 | 0.108404484 | 0.152379486 | 0.21186745  |
| 0.241506801 | 0.211517004 | 0.033918372 | 0.079497637 |

|             |             |             |             |
|-------------|-------------|-------------|-------------|
| 0.242321187 | 0.078876904 | 0.227936627 | 0.177697522 |
| 0.219331941 | 0.253866339 | 0.25320494  | 0.085899738 |
| 0.126379601 | 0.174729674 | 0.139664088 | 0.084157677 |
| 0.214760817 | 0.059043799 | 0.19722643  | 0.091098967 |
| 0.155760842 | 0.130693268 | 0.098121116 | 0.144886839 |
| 0.125863058 | 0.250907361 | 0.256965605 | 0.124078767 |
| 0.124021928 | 0.045337024 | 0.078238307 | 0.226846101 |
| 0.189074579 | 0.019329814 | 0.198377405 | 0.065983451 |
| 0.151425348 | 0.003525042 | 0.14506851  | 0.278476617 |
| 0.188360529 | 0.085880093 | 0.050988544 | 0.143987652 |
| 0.145938718 | 0.050194908 | 0.111956806 | 0.131882088 |
| 0.221809066 | 0.136287181 | 0.205921775 | 0.248326229 |
| 0.11959725  | 0.155569944 | 0.042614984 | 0.125119531 |
| 0.17088059  | 0.111736723 | 0.135919562 | 0.130314847 |
| 0.211805388 | 0.215891623 | 0.156446484 | 0.284234916 |
| 0.091469205 | 0.070562707 | 0.048863225 | 0.161516359 |
| 0.050842091 | 0.057463088 | 0.035172603 | 0.14046756  |
| 0.016060113 | 0.042090064 | 0.192404477 | 0.1771393   |
| 0.220519224 | 0.21572789  | 0.268626231 | 0.05587421  |
| 0.000168671 | 0.11728383  | 0.223105031 | 0.102965472 |
| 0.155132934 | 0.210185277 | 0.01922268  | 0.130844185 |
| 0.315897454 | 0.099493375 | 0.080661909 | 0.031944151 |
| 0.009861881 | 0.10774612  | 0.264926299 | 0.099712523 |
| 0.165433945 | 0.04843306  | 0.041892957 | 0.205629917 |
| 0.010156318 | 0.314525651 | 0.282993285 | 0.014091172 |
| 0.023312626 | 0.178860302 | 0.144578411 | 0.084585803 |
| 0.102963298 | 0.16371043  | 0.210728704 | 0.004252964 |
| 0.182370651 | 0.04163664  | 0.22539698  | 0.268348604 |
| 0.207572502 | 0.139832426 | 0.235381584 | 0.117114423 |
| 0.105617227 | 0.141355938 | 0.21711513  | 0.322066698 |
| 0.214555371 | 0.138560038 | 0.134653386 | 0.069939657 |
| 0.174173715 | 0.183256948 | 0.1207562   | 0.112027763 |
| 0.116882869 | 0.171511757 | 0.277548506 | 0.106045187 |
| 0.250900166 | 0.056607705 | 0.312552525 | 0.164640806 |
| 0.280109207 | 0.091820831 | 0.086180098 | 0.174797682 |
| 0.004769156 | 0.025006455 | 0.048630079 | 0.102278805 |
| 0.230958607 | 0.087338736 | 0.069492967 | 0.101567713 |
| 0.091015293 | 0.281160818 | 0.282917438 | 0.230773304 |
| 0.124876166 | 0.048885572 | 0.02224471  | 0.146901366 |
| 0.169948785 | 0.133560498 | 0.1778212   | 0.026358087 |
| 0.2132845   | 0.045856908 | 0.1931034   | 0.196510659 |
| 0.045609668 | 0.279145296 | 0.014464448 | 0.0934087   |
| 0.010186487 | 0.114355889 | 0.212414709 | 0.128797169 |
| 0.039947728 | 0.174404956 | 0.190855155 | 0.048884993 |
| 0.155802481 | 0.101951283 | 0.062722983 | 0.097999739 |
| 0.130021476 | 0.145282499 | 0.176143148 | 0.086764165 |
| 0.078263475 | 0.12522667  | 0.052258238 | 0.173040523 |
| 0.16792378  | 0.191278841 | 0.126184505 | 0.196942016 |
| 0.094810454 | 0.142986935 | 0.274941102 | 0.117079491 |
| 0.053244426 | 0.110028375 | 0.042182033 | 0.038067496 |
| 0.069972941 | 0.061837101 | 0.000246541 | 0.014577445 |
| 0.303029992 | 0.02586932  | 0.093750002 | 0.143683202 |
| 0.103432762 | 0.237651065 | 0.016701572 | 0.081513434 |
| 0.158794693 | 0.192588656 | 0.065993264 | 0.236757775 |

|             |             |             |             |
|-------------|-------------|-------------|-------------|
| 0.197048175 | 0.205701741 | 0.122038684 | 0.000624763 |
| 0.106309836 | 0.083729886 | 0.022372512 | 0.103122816 |
| 0.031842146 | 0.040699841 | 0.09408644  | 0.047618181 |
| 0.209797008 | 0.020491533 | 0.058704282 | 0.1642146   |
| 0.136819613 | 0.200709424 | 0.148768776 | 0.247971514 |
| 0.007412918 | 0.184150664 | 0.074796028 | 0.050898893 |
| 0.130559598 | 0.098135591 | 0.258591749 | 0.115470371 |
| 0.109320822 | 0.076332468 | 0.002072286 | 0.258141128 |
| 0.164282159 | 0.071491201 | 0.203199817 | 0.011254094 |
| 0.308538766 | 0.178080345 | 0.03253923  | 0.067777841 |
| 0.08555913  | 0.161266846 | 0.245433778 | 0.225966118 |
| 0.016634443 | 0.064410759 | 0.102077329 | 0.079444404 |
| 0.189821149 | 0.029130693 | 0.198275851 | 0.018117163 |
| 0.17744687  | 0.133156919 | 0.104828957 | 0.054413918 |
| 0.063597887 | 0.109367389 | 0.04060892  | 0.215927289 |
| 0.256424667 | 0.120376628 | 0.221010087 | 0.15304255  |
| 0.077486921 | 0.182269921 | 0.064000665 | 0.19298964  |
| 0.114380908 | 0.291219982 | 0.180301688 | 0.170735409 |
| 0.320725038 | 0.075456169 | 0.081174574 | 0.13975937  |
| 0.177021845 | 0.115919983 | 0.034631446 | 0.203837965 |
| 0.063444739 | 0.241608679 | 0.047929682 | 0.154207663 |
| 0.097065296 | 0.074718396 | 0.098622731 | 0.182922027 |
| 0.206279928 | 0.137325646 | 0.080318513 | 0.30183096  |
| 1           | 0.093599622 | 0.274613516 | 0.006547406 |
| 0.145251247 | 0.232942481 | 0.239089819 | 0.110572773 |
| 0.241673362 | 0.11243603  | 0.069807548 | 0.010341198 |
| 0.195829318 | 0.031105736 | 0.074570787 | 0.131915415 |
| 0.020305477 | 0.06785694  | 0.22602371  | 0.233478219 |
| 0.170677042 | 0.018056752 | 0.022471866 | 0.192603307 |
| 0.027980274 | 0.028445085 | 0.035437118 | 0.098165951 |
| 0.070273918 | 0.03658555  | 0.051818042 | 0.07193314  |
| 0.186028574 | 0.114883394 |             |             |
| WDR45L      | 0.133988588 | 0.029479953 | 0.129356989 |
| 0.082027316 | 0.05121418  | 0.025390181 | 0.069444186 |
| 0.051660894 | 0.021730792 | 0.000965659 | 0.079583046 |
| 0.11761428  | 0.00058394  | 0.055409488 | 0.069846232 |
| 0.028878155 | 0.107352876 | 0.128482856 | 0.000545444 |
| 0.003109942 | 0.055323195 | 0.010876904 | 0.0185779   |
| 0.031746236 | 0.155377324 | 0.029026239 | 0.006865495 |
| 0.041862967 | 0.001160784 | 0.034432925 | 0.000580006 |
| 0.102284493 | 0.044776168 | 0.007826261 | 0.104061431 |
| 0.024711367 | 0.000135286 | 0.083290524 | 0.072433267 |
| 0.004119834 | 0.113812103 | 0.004314528 | 0.146901161 |
| 0.007676626 | 0.147096702 | 9.26E-05    | 0.01610909  |
| 0.021616433 | 0.025060979 | 0.086637747 | 0.030904283 |
| 0.005991688 | 0.078202394 | 0.012169664 | 0.000706166 |
| 0.009274678 | 0.0002221   | 0.002034012 | 0.054547898 |
| 0.21069826  | 0.170656388 | 0.000450184 | 0.015472648 |
| 0.010600278 | 0.025403841 | 0.084391347 | 0.003657846 |
| 0.062513769 | 0.00297256  | 0.016862356 | 0.015000342 |
| 0.021445738 | 0.039376609 | 0.192882099 | 0.04181939  |
| 0.008817266 | 0.153930345 | 0.049786064 | 0.011221696 |
| 0.027965863 | 0.071065285 | 0.08969586  | 0.04876474  |
| 0.000658831 | 0.019536197 | 0.020821871 | 0.10178591  |

|             |             |             |             |
|-------------|-------------|-------------|-------------|
| 0.027893542 | 0.024974828 | 0.074504627 | 0.072796135 |
| 0.035060469 | 0.00614243  | 0.026429704 | 0.07815081  |
| 0.040397196 | 0.001774546 | 0.006988392 | 0.013454929 |
| 0.034864839 | 0.031708389 | 0.047448952 | 0.147815498 |
| 0.023397243 | 0.109804958 | 0.054601255 | 0.021671015 |
| 0.077417027 | 0.173512972 | 0.019536214 | 0.027476435 |
| 0.043778554 | 0.049807815 | 0.02150165  | 0.04968175  |
| 0.02143101  | 0.061410952 | 0.071893849 | 0.040691592 |
| 0.000528027 | 0.048546265 | 0.18230231  | 0.127094546 |
| 0.055560988 | 0.101806935 | 0.004477239 | 0.107237109 |
| 0.046342273 | 0.054299228 | 0.102472919 | 0.107263314 |
| 0.047441922 | 0.045699398 | 0.042510698 | 0.045840557 |
| 0.146216756 | 0.002166515 | 0.026745405 | 0.02594301  |
| 0.041800433 | 0.092777538 | 0.02347485  | 0.067902747 |
| 0.122787886 | 0.044542157 | 0.052215795 | 0.076301108 |
| 0.026605742 | 0.085504622 | 0.032541784 | 0.216425883 |
| 0.072166846 | 0.068575332 | 0.073169523 | 0.035857578 |
| 0.074603169 | 0.086236936 | 0.00010471  | 0.044755501 |
| 0.088853538 | 0.004228854 | 0.029675396 | 0.037096919 |
| 0.049713985 | 0.034475015 | 0.058282758 | 0.047488997 |
| 0.044544734 | 0.120083776 | 0.000742316 | 0.081695799 |
| 0.060453507 | 0.10739116  | 0.03233226  | 0.012324929 |
| 0.029777531 | 0.029018377 | 0.023869653 | 0.003145177 |
| 0.085568004 | 0.047756584 | 0.032044733 | 0.033156995 |
| 0.011329455 | 0.118310322 | 0.00887456  | 0.062176704 |
| 0.08927869  | 0.121516829 | 0.141072934 | 0.055791861 |
| 0.004493878 | 0.175433255 | 0.018802895 | 0.016386191 |
| 0.185703505 | 0.013307414 | 0.004424127 | 0.037945013 |
| 0.099453516 | 0.017278266 | 0.1272414   | 0.077879534 |
| 0.154717751 | 0.149641066 | 0.037683074 | 0.119383485 |
| 0.082388547 | 0.099463612 | 0.017882329 | 0.046633806 |
| 0.010721504 | 0.15792551  | 0.031889784 | 0.078719745 |
| 0.119271718 | 0.028801088 | 0.105232252 | 0.118287048 |
| 0.010283203 | 0.000692292 | 0.002123402 | 0.010314735 |
| 0.112818154 | 0.025261181 | 0.027856055 | 0.058761602 |
| 0.073881417 | 0.029075802 | 0.011632889 | 0.101142083 |
| 0.089615149 | 0.058694737 | 0.063545492 | 0.009799917 |
| 0.040088015 | 0.079671685 | 0.046706067 | 0.010051936 |
| 0.039793908 | 0.002854459 | 0.007641603 | 0.052884662 |
| 0.002076472 | 0.012699776 | 0.039202126 | 0.046063279 |
| 0.002188146 | 0.061961776 | 0.055273942 | 0.000248382 |
| 0.01034933  | 0.02803175  | 0.14425514  | 0.002746067 |
| 0.136065751 | 0.086621732 | 0.031275425 | 0.038464802 |
| 0.132433686 | 0.05312418  | 0.057476436 | 0.053277937 |
| 0.006854586 | 0.058610593 | 0.044254593 | 0.076418111 |
| 0.065743606 | 0.004181543 | 0.001684709 | 0.05467733  |
| 0.049147188 | 0.000688937 | 0.106292092 | 0.017647041 |
| 0.004938711 | 0.027087577 | 0.004728944 | 0.074615952 |
| 0.089492024 | 0.039551015 | 0.102404228 | 0.062253331 |
| 0.117266657 | 0.164297592 | 0.044997272 | 0.059819262 |
| 0.001096749 | 0.020147328 | 0.02344578  | 0.078606563 |
| 0.193693471 | 0.01903152  | 0.070683187 | 0.001495135 |
| 0.000117822 | 0.074549705 | 0.154629804 | 0.143535258 |
| 0.019943795 | 0.00787179  | 0.035161701 | 0.052232961 |

|             |             |             |             |
|-------------|-------------|-------------|-------------|
| 0.171151265 | 0.073600394 | 0.053393583 | 0.050090736 |
| 0.060079609 | 0.010961125 | 0.017972426 | 0.029096651 |
| 0.097110168 | 0.069239707 | 0.074482068 | 0.077316957 |
| 0.062776296 | 0.015278388 | 0.01959671  | 0.019057496 |
| 0.092277309 | 0.014490434 | 0.120119467 | 0.170480741 |
| 0.052984078 | 0.147996491 | 0.125834295 | 0.002423988 |
| 0.08996341  | 0.179072258 | 0.05272184  | 0.040839587 |
| 0.03643215  | 0.03510999  | 0.034077903 | 0.039562874 |
| 0.031301822 | 0.022820764 | 0.044451394 | 0.036674335 |
| 0.074965831 | 0.053643918 | 0.013287243 | 0.063651879 |
| 0.001667626 | 0.086250047 | 0.026509925 | 0.219711946 |
| 0.026588378 | 0.049057866 | 0.140834124 | 0.020355442 |
| 0.112344306 | 0.004412793 | 0.010339154 | 0.039192071 |
| 0.052237281 | 0.124660376 | 0.007976536 | 0.005497499 |
| 0.067873419 | 0.092374148 | 0.005695127 | 0.057907187 |
| 0.099052536 | 0.063248019 | 0.07414657  | 0.056988304 |
| 0.114261559 | 0.00016109  | 0.009038111 | 0.001015482 |
| 0.001023433 | 0.043209586 | 0.005824937 | 0.052328474 |
| 0.151401589 | 0.12288029  | 0.099901197 | 0.061267657 |
| 0.042401473 | 0.053142594 | 0.064398597 | 0.023850168 |
| 0.06441143  | 0.000924361 | 0.048194234 | 0.046452064 |
| 0.003841822 | 0.016445355 | 0.009858577 | 0.045264055 |
| 0.031873156 | 0.083784214 | 0.192527516 | 0.011903944 |
| 0.132949987 | 0.060298321 | 0.094674609 | 0.034619988 |
| 0.030559419 | 0.080099466 | 0.013932348 | 0.043994814 |
| 0.096270922 | 0.097154886 | 0.006135935 | 0.104918902 |
| 0.023713666 | 0.149353707 | 0.080774192 | 0.023031249 |
| 0.049185806 | 0.099614055 | 0.059839219 | 0.049230069 |
| 0.082222187 | 0.049577066 | 0.001559368 | 0.003272514 |
| 0.032315432 | 0.082609703 | 0.001991311 | 0.083514757 |
| 0.046101659 | 0.04487616  | 0.14986678  | 0.153473038 |
| 0.073189639 | 0.076519224 | 0.137286973 | 0.056164526 |
| 0.089980411 | 0.002764965 | 0.031232824 | 0.066719839 |
| 4.30E-05    | 0.017753427 | 0.170226916 | 0.007432956 |
| 0.01835403  | 0.060092981 | 0.009153945 | 0.012409092 |
| 0.103759822 | 0.03618179  | 0.040444371 | 0.048408926 |
| 0.031768304 | 0.006851667 | 0.085350044 | 0.050622171 |
| 0.000457826 | 0.084142415 | 0.164570096 | 0.086583656 |
| 0.012514136 | 0.019750795 | 0.198921257 | 0.151373591 |
| 0.074233442 | 0.051522222 | 0.033073489 | 0.094477213 |
| 0.126226758 | 0.017334036 | 0.05277243  | 0.041320414 |
| 0.063805517 | 0.07757248  | 0.102000608 | 0.045098316 |
| 0.143844408 | 0.064888277 | 0.031318055 | 0.046669997 |
| 0.051679276 | 0.070061309 | 0.049939063 | 0.013252795 |
| 0.132999287 | 0.105372516 | 0.119991738 | 0.139762346 |
| 0.018214461 | 0.155309662 | 0.14114017  | 0.125819737 |
| 0.050086909 | 0.00661292  | 0.097380791 | 0.158559577 |
| 0.075041715 | 0.004165932 | 0.153011569 | 0.014989043 |
| 0.049092955 | 0.000160315 | 0.029404761 | 0.106590385 |
| 0.1728966   | 0.075924372 | 0.035947184 | 0.027508588 |
| 0.030310147 | 0.004766874 | 0.067442422 | 0.027356507 |
| 0.052686496 | 0.02493867  | 0.0561198   | 0.077080162 |
| 0.124149872 | 0.037391182 | 0.004649048 | 0.036007989 |
| 0.096405348 | 0.027985929 | 0.049834444 | 0.156799915 |

|             |             |             |             |
|-------------|-------------|-------------|-------------|
| 0.084941425 | 0.066420372 | 0.048050097 | 0.194767854 |
| 0.011958583 | 0.04834064  | 0.064990014 | 0.029713187 |
| 0.014465483 | 0.069850581 | 0.003725668 | 0.023112699 |
| 0.021279941 | 0.004830213 | 0.043706269 | 0.07197583  |
| 0.061494597 | 0.058135498 | 0.106276104 | 0.015301945 |
| 0.000416295 | 0.020849405 | 0.078381144 | 0.030216003 |
| 0.038769607 | 0.075234578 | 0.002109527 | 0.142653651 |
| 0.163329046 | 0.114827412 | 0.067386282 | 0.003454395 |
| 0.000859901 | 0.023116529 | 0.161648822 | 0.048933333 |
| 0.078466421 | 0.037299462 | 0.006238247 | 0.11338989  |
| 0.000954741 | 0.17900581  | 0.124720168 | 0.000825618 |
| 0.004020809 | 0.043530845 | 0.04448562  | 0.152500553 |
| 0.013610043 | 0.043775668 | 0.052345829 | 0.010074053 |
| 0.041942129 | 0.107040291 | 0.104483042 | 0.146293292 |
| 0.109545908 | 0.058793858 | 0.088643356 | 0.041806638 |
| 0.03225106  | 0.084038208 | 0.11273743  | 0.18816361  |
| 0.135721606 | 0.06232225  | 0.029898926 | 0.023828852 |
| 0.065727422 | 0.174387726 | 0.118307639 | 0.117233046 |
| 0.092660537 | 0.033837781 | 0.173756601 | 0.135444331 |
| 0.118091274 | 0.011596354 | 0.140926114 | 0.040276761 |
| 0.084394395 | 0.086436534 | 0.020730143 | 0.045962804 |
| 7.18E-06    | 0.002148603 | 0.048382354 | 0.029290797 |
| 0.107590577 | 0.027129957 | 0.00935455  | 0.048033604 |
| 0.01580359  | 0.125859545 | 0.165481544 | 0.072676918 |
| 0.035668975 | 0.008195283 | 0.002900529 | 0.137884681 |
| 0.164414817 | 0.105850322 | 0.052960198 | 0.069695879 |
| 0.072655527 | 0.028169989 | 0.044927579 | 0.061396652 |
| 0.004116704 | 0.102995764 | 0.001943396 | 0.120262307 |
| 0.001463352 | 0.091209884 | 0.172889244 | 0.021926022 |
| 0.003624964 | 0.106135505 | 0.062467948 | 0.012974063 |
| 0.033391936 | 0.017428877 | 0.015054998 | 0.032674653 |
| 0.051200907 | 0.105570179 | 0.050130201 | 0.076826491 |
| 0.011664268 | 0.046202808 | 0.007261149 | 0.078175827 |
| 0.070637014 | 0.043062594 | 0.149745163 | 0.043211502 |
| 0.029382893 | 0.116093774 | 0.092514465 | 0.029665072 |
| 0.015925254 | 0.051370723 | 0.004776139 | 0.005303359 |
| 0.030151082 | 0.007356859 | 0.000209161 | 0.001197495 |
| 0.129828058 | 0.003074602 | 0.018251197 | 0.033397679 |
| 0.027102483 | 0.083680527 | 0.000697609 | 0.027442974 |
| 0.040678724 | 0.056612624 | 0.039621088 | 0.12980084  |
| 0.067507353 | 0.179574857 | 0.026700738 | 0.00035991  |
| 0.019975076 | 0.010502937 | 0.002389429 | 0.103160206 |
| 0.052511109 | 0.005885509 | 0.02109769  | 0.046212011 |
| 0.048483097 | 0.001457331 | 0.009021238 | 0.032617999 |
| 0.074517343 | 0.062905791 | 0.078207356 | 0.072280844 |
| 0.005331781 | 0.084935401 | 0.009826584 | 0.006154462 |
| 0.068476973 | 0.021715628 | 0.095948666 | 0.025205034 |
| 0.181295157 | 0.035079535 | 0.004552048 | 0.116443962 |
| 0.05146181  | 0.013680767 | 0.129736345 | 0.000263869 |
| 0.143690768 | 0.049587656 | 0.007169772 | 0.007286659 |
| 0.064071543 | 0.037661883 | 0.122015735 | 0.072526109 |
| 0.003442335 | 0.013292304 | 0.097335998 | 0.013886742 |
| 0.065649453 | 0.008348379 | 0.08865018  | 0.004392869 |
| 0.043769978 | 0.030793828 | 0.08460728  | 0.013856944 |

|             |             |             |             |
|-------------|-------------|-------------|-------------|
| 0.008434053 | 0.124560007 | 0.004483535 | 0.054444992 |
| 0.146830554 | 0.029739151 | 0.056164577 | 0.10577198  |
| 0.010716506 | 0.049395488 | 0.007661355 | 0.045053513 |
| 0.077403039 | 0.152373962 | 0.038864193 | 0.04282381  |
| 0.133250121 | 0.01802319  | 0.01508541  | 0.056801324 |
| 0.052416204 | 0.104340992 | 0.005845032 | 0.082244369 |
| 0.014386756 | 0.08452437  | 0.006835362 | 0.054391059 |
| 0.038260825 | 0.028419128 | 0.022200996 | 0.14478722  |
| 0.084792882 | 0.044025947 | 0.02687872  | 0.125674833 |
| 0.093599622 | 1           | 0.094857653 | 0.001251558 |
| 0.051811025 | 0.069002005 | 0.103141156 | 0.022684897 |
| 0.200185576 | 0.031457829 | 0.025039961 | 0.019591022 |
| 0.055141674 | 0.006182371 | 0.01482075  | 0.060816731 |
| 0.001375004 | 0.088972342 | 0.071162896 | 0.056782624 |
| 0.053328353 | 0.000911346 | 0.002387395 | 0.051036281 |
| 0.002110425 | 0.001813724 | 0.003572347 | 0.020964529 |
| 0.010906133 | 0.004368412 | 0.005047681 | 0.011852302 |
| 0.061076313 | 0.033881178 |             |             |
| WDR76       | 0.214044319 | 0.425515049 | 0.166144695 |
| 0.284441053 | 0.372371666 | 0.447083399 | 0.193151217 |
| 0.299679883 | 0.402861858 | 0.287473231 | 0.442373426 |
| 0.090339547 | 0.101377542 | 0.46146045  | 0.183956933 |
| 0.406624848 | 0.14338775  | 0.271232064 | 0.13014274  |
| 0.337416089 | 0.350560247 | 0.355805276 | 0.433102545 |
| 0.356471522 | 0.312497162 | 0.424058981 | 0.371056956 |
| 0.451451669 | 0.238176992 | 0.446487646 | 0.201896186 |
| 0.437198722 | 0.369101112 | 0.360622431 | 0.086714924 |
| 0.446095264 | 0.021738962 | 0.448754004 | 0.371163623 |
| 0.193154625 | 0.422764831 | 0.344512827 | 0.381784196 |
| 0.379098992 | 0.137665073 | 0.191201746 | 0.403859155 |
| 0.409113522 | 0.401305245 | 0.179141335 | 0.451456805 |
| 0.390808945 | 0.450663963 | 0.394603192 | 0.009272303 |
| 0.294164063 | 0.074138732 | 0.202993126 | 0.475212565 |
| 0.370378135 | 0.294224188 | 0.252825126 | 0.370618935 |
| 0.397267268 | 0.414375812 | 0.402330796 | 0.360575178 |
| 0.461462589 | 0.189155657 | 0.425084779 | 0.274429371 |
| 0.428625771 | 0.127260738 | 0.325701531 | 0.207961192 |
| 0.398948671 | 0.369227424 | 0.412791586 | 0.324817166 |
| 0.415640655 | 0.506269111 | 0.39277457  | 0.473969662 |
| 0.12479615  | 0.356673661 | 0.351047869 | 0.415692651 |
| 0.416712311 | 0.218888443 | 0.461363434 | 0.494460351 |
| 0.160008966 | 0.379222549 | 0.425473776 | 0.25991802  |
| 0.450850531 | 0.285021165 | 0.382660787 | 0.206634349 |
| 0.401648904 | 0.372033405 | 0.462028135 | 0.422208858 |
| 0.377890241 | 0.194537494 | 0.473701336 | 0.336919537 |
| 0.388403536 | 0.222076998 | 0.303090473 | 0.441246623 |
| 0.446805165 | 0.460395628 | 0.427920857 | 0.426156019 |
| 0.387118441 | 0.459751527 | 0.461926961 | 0.445752209 |
| 0.140266041 | 0.48350671  | 0.361079291 | 0.161766257 |
| 0.201018101 | 0.244570395 | 0.290348784 | 0.423106077 |
| 0.459883646 | 0.45274833  | 0.369182159 | 0.367237635 |
| 0.445471932 | 0.456174366 | 0.476796114 | 0.451519577 |
| 0.153517542 | 0.253505875 | 0.39438811  | 0.415733082 |
| 0.432748476 | 0.274068001 | 0.28786927  | 0.49341818  |



|             |             |             |             |
|-------------|-------------|-------------|-------------|
| 0.452501447 | 0.447324869 | 0.332678254 | 0.504526877 |
| 0.338194181 | 0.490877367 | 0.439174411 | 0.339478395 |
| 0.498729688 | 0.482475703 | 0.474593443 | 0.410330576 |
| 0.467964821 | 0.446519809 | 0.085976456 | 0.435222743 |
| 0.466632568 | 0.02478176  | 0.44805596  | 0.452074722 |
| 0.461047234 | 0.447035951 | 0.474771673 | 0.460181331 |
| 0.464448616 | 0.215777952 | 0.027440924 | 0.38731701  |
| 0.4801504   | 0.461192468 | 0.288198769 | 0.393996751 |
| 0.390908718 | 0.454187501 | 0.438667314 | 0.318787427 |
| 0.499522699 | 0.462964384 | 0.450887566 | 0.442744934 |
| 0.370513757 | 0.414974238 | 0.351996311 | 0.461837903 |
| 0.174782295 | 0.268723328 | 0.161146986 | 0.414775172 |
| 0.363717494 | 0.345165045 | 0.448199179 | 0.3886019   |
| 0.360019354 | 0.425380068 | 0.313093821 | 0.406195878 |
| 0.157113015 | 0.429486556 | 0.340999813 | 0.323691147 |
| 0.16174585  | 0.279815893 | 0.324764787 | 0.316159624 |
| 0.375035836 | 0.307128762 | 0.435129908 | 0.457633836 |
| 0.383055236 | 0.327563983 | 0.452675056 | 0.466201883 |
| 0.45046056  | 0.394275366 | 0.372591749 | 0.051662832 |
| 0.318840284 | 0.273576456 | 0.1853444   | 0.394979866 |
| 0.285921519 | 0.34267205  | 0.417982757 | 0.426677954 |
| 0.407500273 | 0.285662558 | 0.379342836 | 0.450198994 |
| 0.283507609 | 0.385360914 | 0.460010733 | 0.412829668 |
| 0.027602337 | 0.433436348 | 0.461031367 | 0.234404271 |
| 0.406552915 | 0.164012856 | 0.261600766 | 0.453516868 |
| 0.290282608 | 0.274517608 | 0.456193531 | 0.424182337 |
| 0.374416028 | 0.302835437 | 0.479185561 | 0.04858241  |
| 0.367689007 | 0.138958184 | 0.404611372 | 0.337495325 |
| 0.39962873  | 0.410640946 | 0.352519208 | 0.364733812 |
| 0.268659353 | 0.478990314 | 0.462828532 | 0.460546952 |
| 0.361529522 | 0.484756619 | 0.455131298 | 0.465111109 |
| 0.455091014 | 0.345169701 | 0.133198725 | 0.458780684 |
| 0.454787809 | 0.318225938 | 0.191970747 | 0.425600625 |
| 0.356994385 | 0.41712903  | 0.235831848 | 0.46031533  |
| 0.495978815 | 0.439328556 | 0.30486123  | 0.427336717 |
| 0.460585984 | 0.396828803 | 0.456328308 | 0.490373565 |
| 0.301785187 | 0.370299285 | 0.36503497  | 0.44282117  |
| 0.343048153 | 0.273089349 | 0.416212563 | 0.176532822 |
| 0.010980451 | 0.221873505 | 0.196490376 | 0.316208365 |
| 0.215886114 | 0.3981644   | 0.436127636 | 0.471994493 |
| 0.283289649 | 0.460597326 | 0.370868417 | 0.362325101 |
| 0.437413807 | 0.370601209 | 0.382967736 | 0.419257834 |
| 0.395104771 | 0.078101472 | 0.250947763 | 0.509305345 |
| 0.133574371 | 0.269844086 | 0.419256307 | 0.010218692 |
| 0.156458379 | 0.409271882 | 0.216631802 | 0.312232134 |
| 0.45644476  | 0.313826236 | 0.354700837 | 0.320990114 |
| 0.44510792  | 0.252970993 | 0.017783503 | 0.444968363 |
| 0.44805244  | 0.429568945 | 0.445553442 | 0.440557104 |
| 0.431940396 | 0.432855682 | 0.441347274 | 0.438622923 |
| 0.275749971 | 0.235425674 | 0.239902056 | 0.390039117 |
| 0.013228175 | 0.457731778 | 0.387079531 | 0.305989352 |
| 0.434774119 | 0.412271334 | 0.147458366 | 0.385788024 |
| 0.089134213 | 0.193645731 | 0.389132246 | 0.363899818 |
| 0.412046533 | 0.080041828 | 0.271086894 | 0.325232564 |

|             |             |             |             |
|-------------|-------------|-------------|-------------|
| 0.431898005 | 0.432484899 | 0.34869084  | 0.492099163 |
| 0.433426438 | 0.24425385  | 0.399599776 | 0.446933497 |
| 0.219870832 | 0.127324255 | 0.407506435 | 0.04175576  |
| 0.264079732 | 0.439881501 | 0.394321961 | 0.207275712 |
| 0.408903632 | 0.037582208 | 0.437938892 | 0.493745608 |
| 0.437423496 | 0.461704227 | 0.464080412 | 0.294919354 |
| 0.468953527 | 0.086988875 | 0.476028174 | 0.441791031 |
| 0.347697687 | 0.004803049 | 0.025221006 | 0.457356549 |
| 0.412957863 | 0.156526113 | 0.328974924 | 0.401703845 |
| 0.265413259 | 0.292136716 | 0.210749254 | 0.256048359 |
| 0.453478376 | 0.347407791 | 0.239673379 | 0.444622182 |
| 0.38252326  | 0.382756385 | 0.409379712 | 0.220026503 |
| 0.432473125 | 0.183220736 | 0.219551113 | 0.023193979 |
| 0.423775114 | 0.237064032 | 0.470999299 | 0.465280579 |
| 0.477163746 | 0.433236563 | 0.301892949 | 0.373241044 |
| 0.440942246 | 0.207973334 | 0.357203415 | 0.239363502 |
| 0.444228255 | 0.420258589 | 0.439419577 | 0.421272901 |
| 0.465208748 | 0.455788837 | 0.138700062 | 0.446241426 |
| 0.060048571 | 0.006412166 | 0.425639076 | 0.399517913 |
| 0.088615941 | 0.376983073 | 0.397154733 | 0.332428761 |
| 0.344698731 | 0.119795125 | 0.269003812 | 0.266385756 |
| 0.414767717 | 0.418791346 | 0.324660746 | 0.373054874 |
| 0.35323392  | 0.211489034 | 0.36263391  | 0.320936419 |
| 0.301718156 | 0.400689885 | 0.313600806 | 0.104759807 |
| 0.411920959 | 0.410222378 | 0.191339041 | 0.326717604 |
| 0.466783918 | 0.461199166 | 0.149430679 | 0.055379071 |
| 0.4031018   | 0.386384391 | 0.461054218 | 0.451295949 |
| 0.499293303 | 0.488430493 | 0.429175234 | 0.255552256 |
| 0.210143176 | 0.409527936 | 0.340222137 | 0.226974585 |
| 0.46536449  | 0.176500177 | 0.455529222 | 0.304488343 |
| 0.277842185 | 0.376319171 | 0.140990283 | 0.240606065 |
| 0.381048328 | 0.348095885 | 0.331379257 | 0.284466084 |
| 0.390217219 | 0.285703532 | 0.176876501 | 0.361689666 |
| 0.439664895 | 0.191963083 | 0.330404027 | 0.422682248 |
| 0.441395548 | 0.227660001 | 0.4314657   | 0.449647588 |
| 0.284569632 | 0.260443852 | 0.38005392  | 0.434989726 |
| 0.446408673 | 0.369747173 | 0.087927575 | 0.424939027 |
| 0.461264949 | 0.435730649 | 0.469597272 | 0.442659759 |
| 0.225718152 | 0.399218154 | 0.312345898 | 0.392912994 |
| 0.346627607 | 0.45121927  | 0.381037497 | 0.197794615 |
| 0.405218703 | 0.479684427 | 0.441937119 | 0.33059817  |
| 0.422487773 | 0.257875838 | 0.160185197 | 0.446851338 |
| 0.221911215 | 0.226139134 | 0.355742013 | 0.434122338 |
| 0.009783982 | 0.152433452 | 0.44886274  | 0.391399841 |
| 0.491419068 | 0.460173343 | 0.455403004 | 0.391300471 |
| 0.003277209 | 0.407585098 | 0.438684476 | 0.427081319 |
| 0.444079423 | 0.448905368 | 0.266369105 | 0.217523566 |
| 0.416203777 | 0.198039167 | 0.273091053 | 0.39582799  |
| 0.171190002 | 0.441522519 | 0.356905896 | 0.34790983  |
| 0.344794474 | 0.205487265 | 0.269859569 | 0.408335459 |
| 0.177559077 | 0.391348553 | 0.439078321 | 0.297824971 |
| 0.196871831 | 0.441917507 | 0.440056347 | 0.117707618 |
| 0.367510633 | 0.437409953 | 0.456877083 | 0.009190081 |
| 0.440173911 | 0.050127151 | 0.334355896 | 0.355192776 |

|             |             |             |             |
|-------------|-------------|-------------|-------------|
| 0.35190083  | 0.340878625 | 0.37390038  | 0.383337947 |
| 0.425654768 | 0.382875277 | 0.412605619 | 0.389331303 |
| 0.318679039 | 0.394036873 | 0.430810806 | 0.429304796 |
| 0.364910424 | 0.293992753 | 0.218931297 | 0.205189737 |
| 0.174980485 | 0.450381862 | 0.377581118 | 0.191687158 |
| 0.380348731 | 0.424406108 | 0.441015233 | 0.451031666 |
| 0.461056134 | 0.222711905 | 0.407163486 | 0.450927867 |
| 0.212479848 | 0.364746772 | 0.188538139 | 0.450743355 |
| 0.398269611 | 0.278137382 | 0.424517362 | 0.398917502 |
| 0.417137097 | 0.433866344 | 0.378943457 | 0.454811483 |
| 0.442202713 | 0.370145512 | 0.311165444 | 0.220599206 |
| 0.341316928 | 0.281305095 | 0.32890915  | 0.017269379 |
| 0.445189991 | 0.39767605  | 0.457254794 | 0.463693539 |
| 0.278391321 | 0.451021779 | 0.328457885 | 0.231169161 |
| 0.276295299 | 0.274849942 | 0.302318737 | 0.442991435 |
| 0.203713158 | 0.364185955 | 0.386775305 | 0.406009666 |
| 0.444008387 | 0.419625298 | 0.322526275 | 0.385751316 |
| 0.382367881 | 0.351853394 | 0.462869085 | 0.27656734  |
| 0.40683293  | 0.267886392 | 0.380223548 | 0.383172674 |
| 0.353049143 | 0.460387115 | 0.192580529 | 0.464185464 |
| 0.36963145  | 0.271510138 | 0.490776675 | 0.421809497 |
| 0.431177896 | 0.268784074 | 0.187387411 | 0.403071277 |
| 0.365091957 | 0.328720647 | 0.015423329 | 0.085052034 |
| 0.427280628 | 0.338224539 | 0.41180632  | 0.429512921 |
| 0.315108721 | 0.423957498 | 0.168163989 | 0.409919276 |
| 0.449294912 | 0.48457014  | 0.356657537 | 0.389907678 |
| 0.43627601  | 0.263813704 | 0.440875753 | 0.028055738 |
| 0.412052432 | 0.387229514 | 0.354464278 | 0.185469653 |
| 0.098108139 | 0.209974544 | 0.423688974 | 0.182264464 |
| 0.454743569 | 0.199876883 | 0.386330024 | 0.455814009 |
| 0.326187201 | 0.488677958 | 0.274300234 | 0.45289098  |
| 0.140638941 | 0.402271101 | 0.374115231 | 0.377758915 |
| 0.316345815 | 0.319450157 | 0.447049183 | 0.267305515 |
| 0.138242826 | 0.356882087 | 0.009049358 | 0.435616818 |
| 0.456405434 | 0.340340222 | 0.343544915 | 0.28087931  |
| 0.410120897 | 0.439430515 | 0.304184202 | 0.397508253 |
| 0.061883811 | 0.387349759 | 0.371318571 | 0.458414738 |
| 0.225132605 | 0.391235735 | 0.194203649 | 0.339866653 |
| 0.467734917 | 0.320088645 | 0.382458193 | 0.302102199 |
| 0.451236783 | 0.432026639 | 0.289244919 | 0.327999643 |
| 0.390707619 | 0.18901587  | 0.384462812 | 0.487839752 |
| 0.331232563 | 0.260701382 | 0.449046244 | 0.34720033  |
| 0.316833851 | 0.443936822 | 0.390351389 | 0.479713642 |
| 0.192333696 | 0.402488123 | 0.449042279 | 0.446907742 |
| 0.421916545 | 0.228898491 | 0.268152543 | 0.319093439 |
| 0.433138093 | 0.234421761 | 0.300889597 | 0.455018688 |
| 0.234271727 | 0.425967588 | 0.368650884 | 0.295554581 |
| 0.126104546 | 0.332541455 | 0.427386057 | 0.309032484 |
| 0.412250047 | 0.412974478 | 0.319652188 | 0.448198249 |
| 0.274613516 | 0.094857653 | 1           | 0.020933979 |
| 0.436097337 | 0.442552544 | 0.399964756 | 0.399049586 |
| 0.32748822  | 0.43380982  | 0.40207085  | 0.008498587 |
| 0.445782632 | 0.095049065 | 0.373349608 | 0.314936417 |
| 0.290071829 | 0.173143945 | 0.451038536 | 0.461213785 |

|             |             |             |                      |
|-------------|-------------|-------------|----------------------|
| 0.439598287 | 0.34866611  | 0.317281083 | 0.445351853          |
| 0.173210137 | 0.293979341 | 0.322283398 | 0.436167765          |
| 0.240852554 | 0.358433151 | 0.38803246  | 0.362266019          |
| 0.455613524 | 0.418082793 |             |                      |
| WFIKKN2     | 0.000743766 | 0.013588777 | 5.31E-06 0.002573313 |
| 0.057726756 | 0.007791878 | 0.001517878 | 0.002571802          |
| 0.009837287 | 0.004655544 | 0.026130501 | 0.000389001          |
| 0.010375466 | 0.025103369 | 0.00127772  | 0.047413028          |
| 0.001459628 | 0.005322892 | 0.000194604 | 0.00121514           |
| 0.061127628 | 0.014049617 | 0.005600001 | 0.041829499          |
| 0.003502563 | 0.007989883 | 0.028839471 | 0.020577003          |
| 0.006422357 | 0.026430087 | 0.000676209 | 0.023173355          |
| 0.060657583 | 0.026368119 | 0.000103949 | 0.023099428          |
| 0.001344438 | 0.01613125  | 0.039269032 | 0.00729675           |
| 0.012247078 | 0.004955798 | 0.023826396 | 0.014802519          |
| 0.00046043  | 0.001018494 | 0.040580438 | 0.010316311          |
| 0.010707792 | 0.000300033 | 0.022483237 | 0.016707695          |
| 0.009902273 | 0.010539663 | 2.34E-05    | 0.043177603          |
| 0.019189389 | 0.041097909 | 0.015941236 | 0.011608256          |
| 0.010299192 | 0.010731607 | 0.003534855 | 0.022261119          |
| 0.03355493  | 0.013249401 | 0.010495057 | 0.023635389          |
| 0.039965319 | 0.029293561 | 0.000167148 | 0.012343056          |
| 0.000118255 | 0.007293064 | 0.000518731 | 0.01349197           |
| 0.015872566 | 0.028116077 | 0.040655791 | 0.0125258            |
| 0.018464157 | 0.012401632 | 0.014813859 | 0.010050426          |
| 0.058286004 | 0.023230102 | 0.031611428 | 0.023703926          |
| 0.001670216 | 0.03448871  | 0.024367681 | 0.000192509          |
| 0.010563284 | 0.026946683 | 0.001835761 | 0.012873593          |
| 0.015100117 | 0.010570065 | 0.039476524 | 0.056865973          |
| 0.071255334 | 0.014134826 | 0.022674413 | 0.02575109           |
| 0.000877232 | 0.011056716 | 0.066909702 | 0.025596468          |
| 0.001469462 | 0.043517753 | 0.034315961 | 0.030835322          |
| 0.022117284 | 0.019714575 | 0.030559444 | 0.049384514          |
| 0.023258617 | 0.030137013 | 0.016329777 | 0.000644082          |
| 0.018868426 | 0.006230701 | 0.00127992  | 0.000262615          |
| 0.003497544 | 0.014412376 | 0.01550801  | 0.026450091          |
| 0.012760291 | 0.006456478 | 0.03311456  | 0.043971408          |
| 0.010797464 | 0.019473046 | 0.027386761 | 0.000657906          |
| 0.024857717 | 0.05265708  | 0.003297951 | 0.032768424          |
| 0.00267642  | 0.079002636 | 0.015881044 | 0.017734787          |
| 0.038190618 | 0.001901036 | 0.014457109 | 0.005902914          |
| 0.025767302 | 0.015085158 | 0.014098263 | 0.018908637          |
| 0.013358752 | 0.030582323 | 0.05503373  | 0.014128229          |
| 0.010769339 | 0.000226053 | 0.021773154 | 0.02826239           |
| 0.000209299 | 0.027881978 | 0.031055647 | 0.017901348          |
| 0.036307346 | 0.032746563 | 0.026232043 | 0.016653878          |
| 0.001050445 | 0.000220827 | 0.048066518 | 0.017663184          |
| 0.025125919 | 0.006570355 | 0.02993923  | 0.045311642          |
| 0.009944533 | 0.024906151 | 0.004556709 | 0.025664393          |
| 0.024225045 | 0.023844511 | 0.019870977 | 0.009408162          |
| 0.010507221 | 0.043619762 | 0.010324013 | 0.000575529          |
| 0.001444661 | 0.000122419 | 0.015802993 | 0.003184235          |
| 0.019580443 | 0.007523045 | 0.031403577 | 0.019159218          |
| 0.006044311 | 0.026283894 | 0.059198981 | 4.67E-05             |

|             |             |             |             |
|-------------|-------------|-------------|-------------|
| 0.019682075 | 0.005169405 | 0.005396775 | 0.002536169 |
| 0.002779636 | 0.005340916 | 0.005849516 | 0.029296711 |
| 0.003721899 | 0.025451609 | 0.026294338 | 0.019218945 |
| 0.004013283 | 0.021051758 | 0.024879095 | 0.033650932 |
| 0.051091878 | 0.009739451 | 0.000197652 | 0.027661059 |
| 0.013893884 | 0.04536568  | 0.030034975 | 0.002383799 |
| 0.018699494 | 0.044401936 | 0.052382709 | 0.005424229 |
| 0.001587127 | 0.028765305 | 0.013788145 | 0.00246175  |
| 0.023240211 | 0.036594006 | 0.017873487 | 0.000486162 |
| 0.02124251  | 0.027065961 | 0.017704987 | 0.018530283 |
| 0.002579912 | 0.017858273 | 0.034408118 | 0.019589342 |
| 0.039372274 | 0.024936461 | 0.043735765 | 0.001612966 |
| 0.002702038 | 0.027234599 | 0.002651525 | 0.030097434 |
| 0.001382721 | 0.040396271 | 0.005876685 | 0.017335031 |
| 0.028168138 | 0.056456057 | 0.037563439 | 0.001331582 |
| 0.020091175 | 0.015334921 | 0.025104861 | 0.034218972 |
| 0.028332529 | 0.034551254 | 0.026385979 | 0.016881245 |
| 0.029143427 | 0.03066281  | 0.033188432 | 0.032302941 |
| 0.003462657 | 0.000499264 | 0.02846972  | 0.021964083 |
| 0.053255059 | 0.003211855 | 0.032764213 | 0.018793125 |
| 0.011445874 | 0.009866574 | 0.045821654 | 0.026877354 |
| 0.007591632 | 0.022790504 | 0.026900404 | 0.007878358 |
| 0.053621775 | 0.060144388 | 0.049271525 | 0.008917374 |
| 0.040200716 | 0.011437859 | 0.028535773 | 0.000183436 |
| 0.000693769 | 0.000923629 | 0.025845171 | 0.047967931 |
| 0.018448434 | 0.0387858   | 0.024525071 | 0.005863064 |
| 0.015997361 | 0.008366257 | 0.038323545 | 0.019810378 |
| 0.028490331 | 0.034926368 | 0.042395277 | 0.01079696  |
| 0.00020395  | 0.007443205 | 0.019640856 | 0.000269402 |
| 0.039919796 | 0.006620774 | 0.000170086 | 0.00099668  |
| 0.012334525 | 0.001216803 | 0.004671464 | 0.034877147 |
| 0.003951897 | 0.008625667 | 0.010362437 | 0.02880121  |
| 0.002622809 | 1.63E-05    | 0.02644097  | 0.0179893   |
| 0.017971035 | 0.017737276 | 0.012285079 | 0.024844497 |
| 0.018446778 | 0.038231566 | 0.005296843 | 0.002885142 |
| 0.000734755 | 0.056881752 | 0.039623559 | 2.24E-06    |
| 0.028979548 | 0.027210211 | 0.006779732 | 0.032459139 |
| 0.018084889 | 0.000386551 | 0.035452711 | 0.000192787 |
| 0.043394502 | 0.00658475  | 0.013514539 | 0.042008025 |
| 0.000285239 | 0.001059198 | 0.035205937 | 0.011001338 |
| 0.01412284  | 0.024094451 | 0.020815366 | 0.031475057 |
| 0.001488969 | 0.042571679 | 0.032760022 | 0.002619865 |
| 0.000673038 | 0.008178364 | 4.02E-05    | 0.00022466  |
| 0.020470256 | 0.000527278 | 0.025526026 | 0.013227    |
| 0.01288619  | 0.021298465 | 0.01152224  | 0.000327608 |
| 0.021965786 | 0.056974362 | 0.021180895 | 0.032768392 |
| 0.023543229 | 0.01596788  | 0.014352083 | 0.013806084 |
| 0.033014243 | 0.042559036 | 0.000319913 | 3.38E-06    |
| 0.002918327 | 0.006242463 | 0.001915028 | 7.63E-06    |
| 0.050312408 | 0.016775609 | 0.047172452 | 0.009204525 |
| 0.014292068 | 0.027405966 | 0.018853817 | 0.00085297  |
| 0.001112602 | 0.026012244 | 0.001575449 | 0.032505822 |
| 5.75E-05    | 0.035760005 | 0.001317506 | 0.006988116 |
| 0.018522621 | 0.023876754 | 0.046826536 | 0.00126188  |
|             |             |             | 0.00994532  |

|                      |                      |             |             |
|----------------------|----------------------|-------------|-------------|
| 0.002549934          | 0.023591825          | 0.000470811 | 0.006392456 |
| 0.000815269          | 0.016029522          | 0.054183619 | 0.026181704 |
| 0.014174346          | 0.031499686          | 0.021450212 | 0.000777804 |
| 0.045121881          | 6.05E-05 5.46E-05    | 0.008313205 | 0.01128408  |
| 0.000627391          | 0.041818327          | 0.015655427 | 0.006600291 |
| 0.00803418           | 0.000179617          | 0.058174816 | 0.071282948 |
| 0.036710625          | 0.030567349          | 0.072424998 | 0.008364388 |
| 0.033517532          | 0.015277032          | 0.012156755 | 0.005482502 |
| 0.001112398          | 0.01362041           | 0.004793374 | 0.000244765 |
| 0.021046111          | 0.041051696          | 0.001522242 | 0.00427444  |
| 0.032340887          | 0.030563189          | 0.00122479  | 0.001027828 |
| 0.009664688          | 0.026632531          | 0.033402746 | 0.017104566 |
| 0.017012693          | 0.0286882            | 0.012512646 | 0.013706122 |
| 0.001424215          | 0.036110712          | 0.071038464 | 0.01219718  |
| 0.022246892          | 0.000463348          | 0.013796438 | 0.061412294 |
| 0.003903239          | 0.012470887          | 0.000995702 | 0.002708495 |
| 0.042727957          | 0.006994186          | 0.027684051 | 0.002884718 |
| 0.036528973          | 0.024222967          | 0.000921968 | 0.013141906 |
| 0.023060385          | 0.039798271          | 0.009941142 | 0.004978823 |
| 0.012816807          | 0.001286944          | 0.042605976 | 0.025313141 |
| 0.002732535          | 0.002977777          | 0.003603946 | 0.022624905 |
| 0.027613858          | 0.014492774          | 0.000129376 | 0.013315917 |
| 0.026669392          | 0.032410999          | 0.014663867 | 0.03597447  |
| 0.001641403          | 0.047855009          | 0.033506973 | 0.055821706 |
| 0.010548191          | 0.006645447          | 0.014663267 | 0.00131114  |
| 0.011535976          | 0.014994282          | 0.022720837 | 0.015344611 |
| 0.015670946          | 0.000714599          | 0.000405503 | 0.017896435 |
| 0.052586347          | 0.001284634          | 0.004776111 | 0.027085426 |
| 8.46E-05 0.043597652 | 0.029744083          | 0.006706524 |             |
| 0.021691114          | 0.032903397          | 0.020809353 | 0.004439124 |
| 0.000207846          | 0.047974042          | 0.040569741 | 0.026582634 |
| 0.016857664          | 0.015064859          | 0.00044872  | 0.007952726 |
| 0.020608413          | 0.000376185          | 0.014500861 | 0.000905658 |
| 0.006576677          | 0.016540583          | 0.013818572 | 0.008189894 |
| 0.028240165          | 0.00067145           | 0.017629788 | 0.011002419 |
| 0.010800949          | 0.017492687          | 0.031309778 | 0.002162485 |
| 0.031390916          | 0.029497808          | 0.028156825 | 0.000139149 |
| 0.033451064          | 0.026150019          | 0.021433787 | 0.000143577 |
| 0.044564504          | 1.89E-05 0.032713412 | 0.037280676 |             |
| 0.027091585          | 0.022215695          | 0.042894937 | 0.02837611  |
| 0.026283663          | 0.014076752          | 0.01812218  | 0.023828054 |
| 0.014796771          | 0.007272012          | 0.034508647 | 0.011109037 |
| 0.032539358          | 0.003534542          | 0.000845089 | 0.000566537 |
| 0.00054289           | 0.016770395          | 0.009083675 | 0.000296942 |
| 0.017797251          | 0.015098483          | 0.023353055 | 0.015089138 |
| 0.023659169          | 0.000480683          | 0.017082134 | 0.016283156 |
| 0.002457297          | 0.000947575          | 0.00028998  | 0.013149614 |
| 0.010246011          | 0.033188556          | 0.008456279 | 0.009515798 |
| 0.021488347          | 0.01690264           | 0.007890208 | 0.019848854 |
| 0.023099484          | 0.02175474           | 0.005443453 | 0.009616223 |
| 0.008914756          | 0.00273111           | 0.068188174 | 0.000119091 |
| 0.022138941          | 0.001512192          | 0.031353833 | 0.015301967 |
| 0.033548025          | 0.019659418          | 0.001282358 | 0.003134789 |
| 0.001924033          | 0.002518508          | 0.004972455 | 0.021188769 |

|             |             |             |             |
|-------------|-------------|-------------|-------------|
| 0.040492788 | 0.00488756  | 0.051052388 | 0.00228625  |
| 0.036324989 | 0.028362746 | 0.025433098 | 0.006325654 |
| 0.013497413 | 0.004051643 | 0.015195112 | 0.001040272 |
| 0.023638749 | 0.043508111 | 0.006253405 | 0.044081772 |
| 0.032140108 | 0.023897416 | 0.000684561 | 0.026441881 |
| 0.055756887 | 0.001779586 | 0.019668382 | 0.005926603 |
| 0.003002368 | 0.006789523 | 0.053129982 | 0.00723541  |
| 0.007394341 | 0.025180928 | 9.26E-05    | 0.007910456 |
| 0.040739149 | 0.00881131  | 0.018027187 | 0.02367811  |
| 0.041692611 | 0.034583325 | 0.008713777 | 0.008970481 |
| 0.011778141 | 0.01187029  | 0.014870726 | 0.017698659 |
| 0.018481636 | 0.005014036 | 0.008598524 | 7.66E-05    |
| 0.038579971 | 0.033155053 | 0.012056931 | 0.001046413 |
| 8.76E-05    | 0.061972628 | 0.032656779 | 0.000355882 |
| 0.035841049 | 0.012991277 | 0.011317883 | 0.024310635 |
| 0.003639374 | 0.01340654  | 0.01045196  | 0.038900884 |
| 0.000294499 | 0.012281245 | 0.027855857 | 0.016294129 |
| 0.031968713 | 0.057728415 | 0.041786126 | 0.05591148  |
| 0.001335505 | 0.042637169 | 0.000202243 | 0.012123589 |
| 0.011603894 | 0.060998651 | 0.00633411  | 0.004144418 |
| 0.03216825  | 0.015830455 | 0.010441138 | 0.016088936 |
| 5.65E-05    | 0.063506612 | 0.009485485 | 0.015485046 |
| 0.01953488  | 0.024166714 | 0.001195709 | 0.047402004 |
| 0.008914016 | 0.022946165 | 0.010430495 | 0.022029246 |
| 0.015031667 | 0.013099197 | 0.00250689  | 0.010187387 |
| 0.016073996 | 0.000593668 | 0.005068598 | 0.022147748 |
| 0.023977389 | 0.066968175 | 0.045687405 | 0.023119471 |
| 0.045459492 | 0.011806059 | 0.018744126 | 0.019989739 |
| 0.015320867 | 0.01661883  | 0.033558292 | 0.021605664 |
| 0.02920688  | 0.053171455 | 0.050984361 | 0.051610919 |
| 0.011788353 | 0.001229526 | 0.030057397 | 0.019658962 |
| 0.086209759 | 0.019661936 | 0.006267437 | 0.045899721 |
| 0.000361549 | 0.003762189 | 0.007266205 | 0.003956838 |
| 0.029166204 | 0.041204526 | 0.034352518 | 0.019898719 |
| 0.006547406 | 0.001251558 | 0.020933979 | 1           |
| 0.005553784 | 0.037521723 | 0.010141003 | 0.031189455 |
| 0.004426678 | 0.014487813 | 0.012514096 | 9.09E-06    |
| 0.034639784 | 0.000516244 | 0.013831959 | 0.038726792 |
| 0.005619381 | 0.00063962  | 0.014610694 | 0.032175179 |
| 0.00830259  | 0.002076215 | 0.013622891 | 0.017543845 |
| 0.010294407 | 0.018563062 | 0.023049502 | 0.014992275 |
| 0.051348366 | 0.013216577 | 0.014304013 | 0.02958961  |
| 0.016942596 | 0.003925475 |             |             |
| XDH         | 0.108233004 | 0.405665896 | 0.104800861 |
| 0.159209836 | 0.152887468 | 0.282673305 | 0.05803183  |
| 0.107732349 | 0.283824548 | 0.143227487 | 0.232371691 |
| 0.034732758 | 0.038797672 | 0.410853725 | 0.054595102 |
| 0.196134414 | 0.043288148 | 0.092412146 | 0.038748553 |
| 0.133954657 | 0.129298138 | 0.194830845 | 0.244551826 |
| 0.127732889 | 0.254074542 | 0.231788595 | 0.164741642 |
| 0.467592657 | 0.160393389 | 0.313705757 | 0.128631257 |
| 0.394488807 | 0.162865725 | 0.186938799 | 0.044677096 |
| 0.228089065 | 0.002002479 | 0.422508732 | 0.139208584 |
| 0.090274428 | 0.358423806 | 0.200778953 | 0.177217831 |

|             |             |             |             |
|-------------|-------------|-------------|-------------|
| 0.177472959 | 0.068326104 | 0.143140813 | 0.22071072  |
| 0.201653776 | 0.166723987 | 0.091976013 | 0.317083418 |
| 0.160905971 | 0.320472794 | 0.308573046 | 0.002635637 |
| 0.145137712 | 0.033135216 | 0.086773237 | 0.508266969 |
| 0.19632998  | 0.11001412  | 0.101566021 | 0.153643562 |
| 0.190935893 | 0.21587554  | 0.191689898 | 0.156292186 |
| 0.478338347 | 0.064942322 | 0.294129212 | 0.153059198 |
| 0.198102896 | 0.044413913 | 0.167557208 | 0.091192726 |
| 0.182220176 | 0.150850876 | 0.20233926  | 0.131709899 |
| 0.404523076 | 0.497124258 | 0.174742486 | 0.489510356 |
| 0.023087474 | 0.145775372 | 0.136745528 | 0.214806546 |
| 0.227838574 | 0.058556363 | 0.324680961 | 0.487664571 |
| 0.054022842 | 0.212760434 | 0.250846327 | 0.133920249 |
| 0.429807614 | 0.11246622  | 0.211963529 | 0.095258909 |
| 0.213881668 | 0.142399577 | 0.449347775 | 0.241328045 |
| 0.164794963 | 0.091617064 | 0.505331941 | 0.140827043 |
| 0.201066538 | 0.110045455 | 0.091077859 | 0.364941028 |
| 0.260408991 | 0.469959918 | 0.339755004 | 0.253808687 |
| 0.160974194 | 0.480567067 | 0.311360463 | 0.381576125 |
| 0.088054457 | 0.499611106 | 0.175937952 | 0.058678222 |
| 0.0943849   | 0.084847358 | 0.083626475 | 0.275072675 |
| 0.4315019   | 0.256396285 | 0.161235576 | 0.131381445 |
| 0.360556419 | 0.495041593 | 0.483306385 | 0.32776075  |
| 0.059424701 | 0.088687922 | 0.170065266 | 0.221326142 |
| 0.237119681 | 0.09703298  | 0.114774693 | 0.50649979  |
| 0.392159672 | 0.334787696 | 0.158166911 | 0.505247615 |
| 0.112704514 | 0.490575097 | 0.435284644 | 0.142518636 |
| 0.509426384 | 0.515421992 | 0.46682986  | 0.260680894 |
| 0.501165384 | 0.252046929 | 0.019334697 | 0.302516611 |
| 0.462372104 | 0.010955228 | 0.404232593 | 0.425852988 |
| 0.480781798 | 0.370464509 | 0.45115077  | 0.468032254 |
| 0.490921818 | 0.083217543 | 0.004389587 | 0.159987644 |
| 0.49326254  | 0.384243453 | 0.086813709 | 0.183705749 |
| 0.177283851 | 0.251862133 | 0.32754949  | 0.170903578 |
| 0.476462275 | 0.416313801 | 0.437606934 | 0.289535311 |
| 0.150936616 | 0.345311973 | 0.158712953 | 0.505271705 |
| 0.067398216 | 0.136884738 | 0.091661199 | 0.224970151 |
| 0.236057518 | 0.127436268 | 0.223711968 | 0.155183493 |
| 0.152407505 | 0.208377403 | 0.157660752 | 0.230458774 |
| 0.102594831 | 0.252895295 | 0.150640474 | 0.12732015  |
| 0.053432538 | 0.192625712 | 0.134887422 | 0.163644452 |
| 0.143497658 | 0.298793981 | 0.30121261  | 0.435358127 |
| 0.148314135 | 0.210414496 | 0.306051462 | 0.448839034 |
| 0.385488821 | 0.186259379 | 0.202442746 | 0.032059533 |
| 0.108314132 | 0.11299552  | 0.066664972 | 0.19935189  |
| 0.243461685 | 0.112751972 | 0.192208813 | 0.283330086 |
| 0.219879154 | 0.116386839 | 0.150780688 | 0.454678831 |
| 0.171837662 | 0.195661705 | 0.372909935 | 0.201972778 |
| 0.015448073 | 0.193781361 | 0.374803688 | 0.058615666 |
| 0.200365356 | 0.074316591 | 0.160478957 | 0.38767753  |
| 0.113185544 | 0.087438275 | 0.447432813 | 0.27120447  |
| 0.204914667 | 0.274817717 | 0.466144917 | 0.009561752 |
| 0.14313968  | 0.059137595 | 0.201579012 | 0.175336768 |
| 0.176061845 | 0.203606702 | 0.148410273 | 0.153799752 |



|             |             |             |             |
|-------------|-------------|-------------|-------------|
| 0.174884774 | 0.486114455 | 0.372470912 | 0.473202347 |
| 0.151760218 | 0.46947163  | 0.382293397 | 0.407935388 |
| 0.266754026 | 0.139108699 | 0.053199366 | 0.362563197 |
| 0.383847238 | 0.11468785  | 0.115063568 | 0.321295938 |
| 0.143867571 | 0.237073437 | 0.065925104 | 0.441613799 |
| 0.497140021 | 0.473053809 | 0.112342537 | 0.255977534 |
| 0.355004334 | 0.201159384 | 0.353433909 | 0.471835531 |
| 0.123833596 | 0.141884312 | 0.144469399 | 0.31496879  |
| 0.163782016 | 0.082784254 | 0.307261315 | 0.071349865 |
| 0.014698136 | 0.091189272 | 0.087390918 | 0.115541447 |
| 0.078886164 | 0.243342071 | 0.238886052 | 0.471075113 |
| 0.106158637 | 0.429799748 | 0.179842566 | 0.146801594 |
| 0.387107406 | 0.147304795 | 0.190917342 | 0.222659756 |
| 0.216599038 | 0.040775386 | 0.122638583 | 0.500906898 |
| 0.06409491  | 0.121323382 | 0.182565592 | 0.007189938 |
| 0.056786261 | 0.351225669 | 0.144214443 | 0.252590047 |
| 0.408277794 | 0.262104419 | 0.17730367  | 0.13684996  |
| 0.268061927 | 0.104280992 | 0.015230318 | 0.421289572 |
| 0.433589017 | 0.398315896 | 0.431568773 | 0.441341836 |
| 0.349266621 | 0.303755019 | 0.294338236 | 0.267208509 |
| 0.097958725 | 0.100645551 | 0.076270638 | 0.14275988  |
| 0.005666767 | 0.327940675 | 0.152849301 | 0.151887697 |
| 0.291425674 | 0.189493472 | 0.065395817 | 0.17619516  |
| 0.0567966   | 0.091427956 | 0.158494368 | 0.12105256  |
| 0.228641902 | 0.03720129  | 0.183314535 | 0.127114714 |
| 0.473247527 | 0.348579682 | 0.16478591  | 0.507382424 |
| 0.206812036 | 0.154572176 | 0.166653315 | 0.309820593 |
| 0.075031244 | 0.036213994 | 0.182724051 | 0.037814552 |
| 0.191433907 | 0.429298315 | 0.172515341 | 0.092576235 |
| 0.185495003 | 0.020914427 | 0.38605635  | 0.502444233 |
| 0.482906719 | 0.450967985 | 0.488073675 | 0.140301713 |
| 0.489005635 | 0.034877277 | 0.489103048 | 0.370569894 |
| 0.167335084 | 0.003664024 | 0.009627488 | 0.423720352 |
| 0.187165745 | 0.11334021  | 0.137706097 | 0.285204241 |
| 0.10596907  | 0.14167729  | 0.080958002 | 0.089604645 |
| 0.304374543 | 0.136096054 | 0.082184786 | 0.455453444 |
| 0.139075409 | 0.143532528 | 0.205436051 | 0.111518763 |
| 0.238983073 | 0.074547676 | 0.098531232 | 0.016227282 |
| 0.240014134 | 0.167786098 | 0.492836965 | 0.48587823  |
| 0.470619017 | 0.258992861 | 0.156967459 | 0.22465059  |
| 0.357933405 | 0.153024915 | 0.192875983 | 0.138674055 |
| 0.47837044  | 0.216612321 | 0.2881886   | 0.320176223 |
| 0.443915837 | 0.453642489 | 0.048684999 | 0.295312589 |
| 0.056003678 | 0.002224958 | 0.244459161 | 0.196477881 |
| 0.01706431  | 0.150283496 | 0.236145157 | 0.107760468 |
| 0.121650058 | 0.067678443 | 0.099594083 | 0.090423537 |
| 0.178868903 | 0.166521379 | 0.125549412 | 0.19569117  |
| 0.123935047 | 0.048553993 | 0.147577704 | 0.10506163  |
| 0.099937757 | 0.306227559 | 0.253431565 | 0.032584251 |
| 0.212103818 | 0.197253542 | 0.080595681 | 0.167265529 |
| 0.398424177 | 0.436982992 | 0.0368337   | 0.024766672 |
| 0.263142396 | 0.13655061  | 0.438142596 | 0.482795136 |
| 0.517448631 | 0.469517182 | 0.411258204 | 0.065876329 |
| 0.091578811 | 0.167862011 | 0.130124759 | 0.065026284 |

|             |             |             |             |
|-------------|-------------|-------------|-------------|
| 0.481315217 | 0.08286199  | 0.494354947 | 0.127220847 |
| 0.1095391   | 0.153492019 | 0.060402262 | 0.083026983 |
| 0.200342657 | 0.153390948 | 0.117862482 | 0.163900865 |
| 0.151367853 | 0.121891787 | 0.057111342 | 0.140356549 |
| 0.270355273 | 0.062852536 | 0.127675616 | 0.19791226  |
| 0.323853512 | 0.097627593 | 0.278028955 | 0.421203176 |
| 0.148915814 | 0.090961894 | 0.215993142 | 0.274940947 |
| 0.360699154 | 0.188619958 | 0.083323478 | 0.431507491 |
| 0.444637193 | 0.287324481 | 0.50676658  | 0.312771698 |
| 0.097426664 | 0.195655891 | 0.114169533 | 0.146062075 |
| 0.123029124 | 0.280720069 | 0.13314124  | 0.074903028 |
| 0.282906748 | 0.466236891 | 0.368719436 | 0.139436013 |
| 0.239888566 | 0.132975552 | 0.073097926 | 0.399731373 |
| 0.068132849 | 0.100847701 | 0.201437003 | 0.325410142 |
| 0.004394622 | 0.060837105 | 0.407765668 | 0.198019072 |
| 0.476210526 | 0.415019228 | 0.43586597  | 0.17546344  |
| 5.47E-06    | 0.231914021 | 0.238946119 | 0.209959573 |
| 0.395294872 | 0.33120432  | 0.113219155 | 0.076422472 |
| 0.268835472 | 0.133624455 | 0.083723668 | 0.266252899 |
| 0.054362534 | 0.261178748 | 0.17032857  | 0.121223253 |
| 0.113949879 | 0.104670773 | 0.131594213 | 0.197321473 |
| 0.042947221 | 0.217905951 | 0.295784324 | 0.166781299 |
| 0.077465383 | 0.345390373 | 0.309659497 | 0.056726884 |
| 0.167604295 | 0.31907775  | 0.397382327 | 0.001766836 |
| 0.29582328  | 0.02007443  | 0.120360728 | 0.149458035 |
| 0.133179017 | 0.109137071 | 0.14382569  | 0.158980411 |
| 0.203400351 | 0.137132471 | 0.20221107  | 0.182645595 |
| 0.133305122 | 0.159615401 | 0.209582668 | 0.189862825 |
| 0.175550274 | 0.136120163 | 0.164817474 | 0.18308843  |
| 0.0895533   | 0.438497639 | 0.28116621  | 0.130301935 |
| 0.155622776 | 0.175183731 | 0.337170598 | 0.48102176  |
| 0.394853561 | 0.188709565 | 0.157634835 | 0.431542667 |
| 0.085932217 | 0.201135844 | 0.078595175 | 0.227624419 |
| 0.173134478 | 0.113480183 | 0.227905943 | 0.219348122 |
| 0.274677634 | 0.416164302 | 0.27610386  | 0.420007215 |
| 0.204525955 | 0.136463191 | 0.178898628 | 0.086568003 |
| 0.145676025 | 0.136309196 | 0.124703981 | 0.010837948 |
| 0.24284659  | 0.241238457 | 0.407951951 | 0.494935021 |
| 0.121765675 | 0.381339425 | 0.218750962 | 0.093214165 |
| 0.174444012 | 0.242664941 | 0.14725563  | 0.329401686 |
| 0.095294777 | 0.168334451 | 0.150219768 | 0.276027567 |
| 0.305182699 | 0.274825602 | 0.110876034 | 0.148103888 |
| 0.134630343 | 0.191501937 | 0.448288931 | 0.138086188 |
| 0.22166323  | 0.103523631 | 0.224200401 | 0.151384351 |
| 0.117258753 | 0.464489758 | 0.084578569 | 0.467431843 |
| 0.137106578 | 0.169502486 | 0.480125047 | 0.208667457 |
| 0.217669366 | 0.117933993 | 0.075997829 | 0.200948307 |
| 0.124547002 | 0.164720786 | 0.006354957 | 0.022838911 |
| 0.250690722 | 0.124944745 | 0.30730487  | 0.243021631 |
| 0.110946514 | 0.249466537 | 0.079864128 | 0.161073574 |
| 0.485791551 | 0.508287618 | 0.151074179 | 0.211057647 |
| 0.264106886 | 0.11249682  | 0.320391476 | 0.005082955 |
| 0.219792469 | 0.216347924 | 0.170234665 | 0.064777444 |
| 0.03310665  | 0.079379808 | 0.215952273 | 0.07580236  |

|             |             |             |             |
|-------------|-------------|-------------|-------------|
| 0.394770791 | 0.101122858 | 0.203798658 | 0.336595112 |
| 0.165701908 | 0.508903697 | 0.08881977  | 0.31183483  |
| 0.037146028 | 0.190561469 | 0.169897605 | 0.158503221 |
| 0.140135458 | 0.121833084 | 0.282602904 | 0.11566776  |
| 0.049904055 | 0.149673841 | 0.000139833 | 0.434673694 |
| 0.473563344 | 0.130158513 | 0.223688691 | 0.138351499 |
| 0.213300696 | 0.339572031 | 0.101631956 | 0.205324353 |
| 0.031941881 | 0.187269532 | 0.150862666 | 0.430953139 |
| 0.108910743 | 0.15610997  | 0.089050062 | 0.11887663  |
| 0.495692335 | 0.115506178 | 0.23114724  | 0.125862356 |
| 0.485727476 | 0.351379438 | 0.208666995 | 0.133113932 |
| 0.222258443 | 0.087090421 | 0.227375806 | 0.479696048 |
| 0.127593307 | 0.101277444 | 0.352602811 | 0.123631783 |
| 0.128037828 | 0.388352843 | 0.211208153 | 0.469542633 |
| 0.051915005 | 0.200138094 | 0.321515312 | 0.403442822 |
| 0.25352066  | 0.067219868 | 0.11013063  | 0.108177603 |
| 0.480827412 | 0.14098764  | 0.096448295 | 0.295939261 |
| 0.085156111 | 0.220856907 | 0.210726535 | 0.097732304 |
| 0.05860045  | 0.111872068 | 0.269526499 | 0.132136803 |
| 0.166857772 | 0.174561543 | 0.103932004 | 0.387657496 |
| 0.145251247 | 0.051811025 | 0.436097337 | 0.005553784 |
| 1           | 0.274187465 | 0.174503645 | 0.167889263 |
| 0.243301862 | 0.201122129 | 0.186105711 | 0.004624656 |
| 0.314863393 | 0.039824362 | 0.151890215 | 0.124427915 |
| 0.116476434 | 0.063140139 | 0.476966013 | 0.450079529 |
| 0.249452242 | 0.178046449 | 0.16383913  | 0.444252628 |
| 0.062872234 | 0.141362688 | 0.131570949 | 0.293954875 |
| 0.100409455 | 0.179976352 | 0.190243925 | 0.191038314 |
| 0.320122971 | 0.193440197 |             |             |
| XPNPEP1     | 0.080168543 | 0.363580589 | 0.056434866 |
| 0.21212463  | 0.324135941 | 0.335762953 | 0.058845973 |
| 0.120709738 | 0.259755835 | 0.174633024 | 0.357568434 |
| 0.027522608 | 0.137961006 | 0.436278874 | 0.057029118 |
| 0.329832828 | 0.051404947 | 0.111163868 | 0.055482732 |
| 0.18158294  | 0.301448302 | 0.3515699   | 0.259602008 |
| 0.283535737 | 0.177236737 | 0.234794211 | 0.281807072 |
| 0.466142071 | 0.258654861 | 0.368611654 | 0.157569785 |
| 0.397513424 | 0.329965827 | 0.320524122 | 0.023479572 |
| 0.320553084 | 0.011470528 | 0.390520871 | 0.28580811  |
| 0.252485516 | 0.331475029 | 0.209371471 | 0.294060275 |
| 0.240413361 | 0.044981488 | 0.146061804 | 0.303828439 |
| 0.220830327 | 0.237907153 | 0.052441419 | 0.347184234 |
| 0.250976971 | 0.290385889 | 0.279613355 | 0.002297102 |
| 0.316549374 | 0.120584554 | 0.231954545 | 0.465469026 |
| 0.20289333  | 0.152826627 | 0.193500732 | 0.173930237 |
| 0.258846375 | 0.28903514  | 0.21900434  | 0.234649503 |
| 0.47688202  | 0.210867613 | 0.350261709 | 0.199685885 |
| 0.278624031 | 0.024720534 | 0.151474238 | 0.055387191 |
| 0.302617388 | 0.229771388 | 0.338000054 | 0.302889592 |
| 0.359918662 | 0.469746171 | 0.199284959 | 0.434931031 |
| 0.098506921 | 0.306397312 | 0.302969475 | 0.28766711  |
| 0.278225321 | 0.064199483 | 0.395452781 | 0.491611041 |
| 0.036292217 | 0.228533276 | 0.30048734  | 0.087541462 |
| 0.393600734 | 0.22769673  | 0.259157611 | 0.268743741 |

|             |             |             |             |
|-------------|-------------|-------------|-------------|
| 0.331773122 | 0.307595782 | 0.406600198 | 0.27276722  |
| 0.29654832  | 0.059113615 | 0.416357317 | 0.314720924 |
| 0.356893121 | 0.082380746 | 0.248686603 | 0.434631816 |
| 0.326792957 | 0.474324464 | 0.350212154 | 0.309593891 |
| 0.322982725 | 0.482580157 | 0.361392835 | 0.371477403 |
| 0.098378076 | 0.479597464 | 0.197289273 | 0.066164977 |
| 0.058783416 | 0.109667905 | 0.186708634 | 0.290305477 |
| 0.46488588  | 0.262425857 | 0.193636948 | 0.259998247 |
| 0.454576191 | 0.410183217 | 0.466415899 | 0.371231159 |
| 0.047634481 | 0.223068245 | 0.332349446 | 0.233833951 |
| 0.299768184 | 0.096608001 | 0.302962307 | 0.453092606 |
| 0.391249215 | 0.422549339 | 0.139597499 | 0.443809575 |
| 0.14716847  | 0.506479148 | 0.408046346 | 0.1996496   |
| 0.479791017 | 0.448141751 | 0.510226189 | 0.381014674 |
| 0.447152173 | 0.311498161 | 0.034678282 | 0.327947815 |
| 0.491917052 | 0.039227725 | 0.443606051 | 0.475451804 |
| 0.452535197 | 0.447402395 | 0.502393259 | 0.491660566 |
| 0.452233842 | 0.065707857 | 0.017606778 | 0.274990358 |
| 0.46093131  | 0.407500743 | 0.143238694 | 0.312594469 |
| 0.308879668 | 0.302704425 | 0.367766594 | 0.30775547  |
| 0.492027179 | 0.441246438 | 0.453601464 | 0.319340062 |
| 0.186952096 | 0.304904547 | 0.299869569 | 0.411723773 |
| 0.063497986 | 0.116786433 | 0.045768887 | 0.251400613 |
| 0.249724984 | 0.198121658 | 0.27901436  | 0.262965655 |
| 0.202705489 | 0.230262372 | 0.297669995 | 0.352664963 |
| 0.043393498 | 0.324798312 | 0.161316458 | 0.139666626 |
| 0.067195321 | 0.130279194 | 0.21862824  | 0.217148472 |
| 0.273500718 | 0.195049041 | 0.349219551 | 0.468361641 |
| 0.262221171 | 0.161127615 | 0.338020591 | 0.474125341 |
| 0.440596842 | 0.353180114 | 0.194639527 | 0.041414734 |
| 0.25909251  | 0.200208191 | 0.211876452 | 0.31065968  |
| 0.153397352 | 0.219701489 | 0.300860588 | 0.40292857  |
| 0.234067847 | 0.100591756 | 0.296301135 | 0.404467386 |
| 0.114650374 | 0.354223371 | 0.4485941   | 0.265156334 |
| 0.006557301 | 0.292781882 | 0.429901123 | 0.179057784 |
| 0.220372965 | 0.218115295 | 0.326002543 | 0.449734786 |
| 0.250683376 | 0.234527536 | 0.473780924 | 0.381464555 |
| 0.274167431 | 0.173801343 | 0.498902601 | 0.042719216 |
| 0.265343712 | 0.128868614 | 0.283840829 | 0.194613736 |
| 0.23322588  | 0.261151748 | 0.317614616 | 0.328280484 |
| 0.110005828 | 0.473008681 | 0.36715408  | 0.493190502 |
| 0.295582381 | 0.499696482 | 0.451404442 | 0.446054129 |
| 0.295929177 | 0.250978021 | 0.188286406 | 0.423462432 |
| 0.444774764 | 0.210816865 | 0.056078718 | 0.375571372 |
| 0.234037353 | 0.343056777 | 0.166461365 | 0.490196687 |
| 0.468808468 | 0.39894566  | 0.180456241 | 0.366796848 |
| 0.397597077 | 0.239364183 | 0.386318303 | 0.497989972 |
| 0.189163044 | 0.295076145 | 0.319277068 | 0.42189527  |
| 0.170968825 | 0.23273603  | 0.281891369 | 0.207818695 |
| 0.028654096 | 0.067082577 | 0.064357594 | 0.215568917 |
| 0.25779658  | 0.2757792   | 0.323855335 | 0.483764034 |
| 0.132957675 | 0.408667467 | 0.175705216 | 0.313809815 |
| 0.380514664 | 0.275646303 | 0.339543427 | 0.324034316 |
| 0.210209286 | 0.048936312 | 0.186640774 | 0.472920984 |

|             |             |             |             |
|-------------|-------------|-------------|-------------|
| 0.027954419 | 0.307551658 | 0.224002399 | 0.009688847 |
| 0.046188377 | 0.322987965 | 0.080316475 | 0.183599042 |
| 0.478319894 | 0.183868395 | 0.173155821 | 0.192308095 |
| 0.332988283 | 0.100689437 | 0.018467948 | 0.443650881 |
| 0.421278689 | 0.391282198 | 0.414088188 | 0.384026892 |
| 0.383912708 | 0.326826145 | 0.386672271 | 0.273553103 |
| 0.112897732 | 0.074189297 | 0.254941629 | 0.285161569 |
| 0.004190467 | 0.389156624 | 0.270476176 | 0.138538742 |
| 0.37025018  | 0.225694315 | 0.050327039 | 0.294006868 |
| 0.041419323 | 0.25558426  | 0.214680562 | 0.19880803  |
| 0.326866842 | 0.019354177 | 0.269184266 | 0.281703024 |
| 0.396800933 | 0.321730243 | 0.310440399 | 0.492495239 |
| 0.332553445 | 0.090325254 | 0.328810865 | 0.385932189 |
| 0.081677727 | 0.068612487 | 0.238251846 | 0.039972908 |
| 0.185358982 | 0.390201798 | 0.281929638 | 0.082384458 |
| 0.263643884 | 0.009838386 | 0.351482627 | 0.496389226 |
| 0.408417262 | 0.499921191 | 0.489551286 | 0.334017879 |
| 0.48160243  | 0.117146805 | 0.49527126  | 0.358495058 |
| 0.247650361 | 0.002782767 | 0.011877339 | 0.477756567 |
| 0.341755318 | 0.043106883 | 0.159982946 | 0.327740301 |
| 0.162712549 | 0.121733452 | 0.071766973 | 0.270833202 |
| 0.331419019 | 0.284956706 | 0.227297491 | 0.405685124 |
| 0.241693452 | 0.22375644  | 0.252415098 | 0.066814418 |
| 0.338899909 | 0.079392689 | 0.063210613 | 0.027620646 |
| 0.331112506 | 0.093294016 | 0.398479064 | 0.467891451 |
| 0.482712416 | 0.366719932 | 0.218969571 | 0.286869621 |
| 0.394464803 | 0.072511614 | 0.291983073 | 0.084083191 |
| 0.439945619 | 0.33086991  | 0.331439952 | 0.307448507 |
| 0.48959674  | 0.449080619 | 0.041017242 | 0.382271711 |
| 0.038460213 | 0.005098315 | 0.283335136 | 0.205311545 |
| 0.041130233 | 0.304027191 | 0.247654704 | 0.157175826 |
| 0.191628582 | 0.045948176 | 0.276045787 | 0.269042555 |
| 0.27933627  | 0.306890348 | 0.310477354 | 0.183035526 |
| 0.274583171 | 0.174160648 | 0.227965372 | 0.147210458 |
| 0.159584015 | 0.2742792   | 0.182733028 | 0.024591755 |
| 0.306088823 | 0.34034756  | 0.070222816 | 0.141666488 |
| 0.453669696 | 0.484350041 | 0.052908478 | 0.03611291  |
| 0.24595381  | 0.25077809  | 0.493775835 | 0.452531745 |
| 0.475314593 | 0.500552009 | 0.36908445  | 0.153545972 |
| 0.081163907 | 0.29230873  | 0.304642165 | 0.163562292 |
| 0.481200446 | 0.046663486 | 0.441864942 | 0.304074353 |
| 0.103524338 | 0.233188087 | 0.068337297 | 0.086740225 |
| 0.336894758 | 0.169779159 | 0.226663149 | 0.122277084 |
| 0.301312033 | 0.30035635  | 0.05069622  | 0.198458706 |
| 0.304659589 | 0.233761395 | 0.152972619 | 0.227225064 |
| 0.304580509 | 0.112147194 | 0.372889367 | 0.44162725  |
| 0.11762539  | 0.090444083 | 0.239116763 | 0.315449538 |
| 0.403717808 | 0.249661388 | 0.062381673 | 0.386071585 |
| 0.472369692 | 0.352163144 | 0.457122564 | 0.386908697 |
| 0.070662058 | 0.363324645 | 0.24837384  | 0.292217402 |
| 0.161980093 | 0.321918414 | 0.205890194 | 0.061630169 |
| 0.269604077 | 0.423100863 | 0.37461376  | 0.216799535 |
| 0.300236359 | 0.086624593 | 0.039879125 | 0.401506311 |
| 0.250145683 | 0.107282655 | 0.223173813 | 0.381283569 |

|             |             |             |             |
|-------------|-------------|-------------|-------------|
| 0.008661418 | 0.210275031 | 0.456892387 | 0.268453564 |
| 0.470243184 | 0.475931368 | 0.438104935 | 0.198390724 |
| 0.002731767 | 0.333987896 | 0.35090173  | 0.359260993 |
| 0.383705904 | 0.31079701  | 0.118251303 | 0.116243623 |
| 0.295546655 | 0.064278238 | 0.163774212 | 0.292583574 |
| 0.176987157 | 0.279938996 | 0.182629095 | 0.155662876 |
| 0.224004277 | 0.055270044 | 0.307203028 | 0.255725698 |
| 0.139988135 | 0.237284938 | 0.353677799 | 0.168075084 |
| 0.233156175 | 0.396182699 | 0.349747211 | 0.035953021 |
| 0.312597776 | 0.367459543 | 0.411245991 | 0.004470596 |
| 0.390615061 | 0.014970363 | 0.233645539 | 0.28131137  |
| 0.241905963 | 0.208992708 | 0.26232978  | 0.32635091  |
| 0.246595426 | 0.216734182 | 0.316774634 | 0.247330771 |
| 0.234325922 | 0.197533805 | 0.320804146 | 0.265032156 |
| 0.346728637 | 0.151609946 | 0.085654456 | 0.087688689 |
| 0.095329174 | 0.423716662 | 0.24130302  | 0.060969342 |
| 0.218077299 | 0.256720441 | 0.366434716 | 0.434699721 |
| 0.426451528 | 0.092224699 | 0.258916535 | 0.416224975 |
| 0.1430403   | 0.243173631 | 0.053528735 | 0.297084133 |
| 0.226164139 | 0.288387161 | 0.275350563 | 0.225224821 |
| 0.294977556 | 0.391900655 | 0.233505842 | 0.422086281 |
| 0.338927183 | 0.223821771 | 0.20370945  | 0.149536556 |
| 0.189099318 | 0.101935625 | 0.306479421 | 0.006395374 |
| 0.295496919 | 0.244877201 | 0.461120667 | 0.444265367 |
| 0.273620906 | 0.383363742 | 0.230446925 | 0.106642325 |
| 0.184831515 | 0.151147931 | 0.126469171 | 0.362424447 |
| 0.25568802  | 0.20506282  | 0.31497027  | 0.256047338 |
| 0.384922868 | 0.326901248 | 0.243748035 | 0.18993349  |
| 0.198952745 | 0.161124675 | 0.404652952 | 0.105814045 |
| 0.297724878 | 0.288429282 | 0.209582212 | 0.310158206 |
| 0.242396841 | 0.480240746 | 0.060119291 | 0.492137305 |
| 0.292132707 | 0.108139008 | 0.467083    | 0.233597517 |
| 0.249979489 | 0.194357977 | 0.242771382 | 0.245061674 |
| 0.203567956 | 0.320452899 | 0.010960496 | 0.077300897 |
| 0.328849721 | 0.189358618 | 0.313414207 | 0.293282876 |
| 0.281463387 | 0.327293836 | 0.200924921 | 0.208201054 |
| 0.411548006 | 0.43080646  | 0.280494812 | 0.230707255 |
| 0.293575187 | 0.134337381 | 0.284219081 | 0.009000788 |
| 0.313989909 | 0.305788317 | 0.254281021 | 0.063037606 |
| 0.026059293 | 0.253481261 | 0.296944576 | 0.043773596 |
| 0.472125725 | 0.252261534 | 0.212695948 | 0.376266192 |
| 0.132513312 | 0.435844354 | 0.169796086 | 0.398675679 |
| 0.029092918 | 0.21081353  | 0.300716322 | 0.246828146 |
| 0.315500134 | 0.311640308 | 0.376947056 | 0.311016489 |
| 0.050658416 | 0.303001687 | 0.002427039 | 0.383215025 |
| 0.39748445  | 0.294098707 | 0.182991982 | 0.173412724 |
| 0.274651948 | 0.340521877 | 0.21605942  | 0.298326428 |
| 0.033068817 | 0.348116062 | 0.194319126 | 0.402815075 |
| 0.247727384 | 0.237311237 | 0.107883372 | 0.26430646  |
| 0.3881331   | 0.253243904 | 0.219451564 | 0.267295589 |
| 0.440666181 | 0.324207845 | 0.127888527 | 0.249328282 |
| 0.2389424   | 0.053576622 | 0.258285373 | 0.486230543 |
| 0.221616046 | 0.296965811 | 0.456564732 | 0.236784978 |
| 0.291157562 | 0.344991967 | 0.26419044  | 0.461129999 |

|             |             |             |             |
|-------------|-------------|-------------|-------------|
| 0.119097866 | 0.23259709  | 0.392334209 | 0.410305066 |
| 0.306799565 | 0.222646657 | 0.294953064 | 0.261900047 |
| 0.412134823 | 0.154395363 | 0.245854521 | 0.316808016 |
| 0.268605334 | 0.267846022 | 0.19529144  | 0.239011973 |
| 0.069324976 | 0.150387426 | 0.345004252 | 0.129318064 |
| 0.268488921 | 0.329320943 | 0.270509996 | 0.393987271 |
| 0.232942481 | 0.069002005 | 0.442552544 | 0.037521723 |
| 0.274187465 | 1           | 0.228131503 | 0.320110454 |
| 0.181579396 | 0.252404951 | 0.229199932 | 0.002052484 |
| 0.388884063 | 0.097531587 | 0.252237297 | 0.303168647 |
| 0.246526563 | 0.052971642 | 0.432648258 | 0.503728194 |
| 0.245038115 | 0.25001389  | 0.296525814 | 0.419104572 |
| 0.224822728 | 0.257599465 | 0.257848963 | 0.293037093 |
| 0.27955854  | 0.248723388 | 0.289498003 | 0.346045641 |
| 0.329461734 | 0.223359189 |             |             |
| YKT6        | 0.164101213 | 0.271018989 | 0.101996127 |
| 0.156917068 | 0.184509339 | 0.171286868 | 0.16335989  |
| 0.220174024 | 0.231873159 | 0.076834692 | 0.204130971 |
| 0.107081422 | 0.066100683 | 0.328215014 | 0.1843602   |
| 0.177623825 | 0.168909562 | 0.206891436 | 0.075536577 |
| 0.150170521 | 0.1872111   | 0.157885039 | 0.156680998 |
| 0.186852269 | 0.267289308 | 0.172227415 | 0.1300401   |
| 0.315058505 | 0.076624731 | 0.21195499  | 0.045312727 |
| 0.358638476 | 0.186778487 | 0.123444212 | 0.080300137 |
| 0.179254228 | 0.019719751 | 0.359913441 | 0.196126273 |
| 0.086891117 | 0.356736401 | 0.093253379 | 0.229798138 |
| 0.104365141 | 0.110259798 | 0.050776805 | 0.183322491 |
| 0.164771958 | 0.211511846 | 0.112662359 | 0.21391491  |
| 0.137919051 | 0.271042557 | 0.172146524 | 0.007987581 |
| 0.11626708  | 0.028139198 | 0.074888707 | 0.352701695 |
| 0.284209266 | 0.263541381 | 0.069895579 | 0.202750153 |
| 0.170174674 | 0.224996973 | 0.292713922 | 0.10373266  |
| 0.34671915  | 0.094312193 | 0.203856704 | 0.150752025 |
| 0.163731852 | 0.094178063 | 0.267921602 | 0.124047894 |
| 0.148353468 | 0.272668593 | 0.214098826 | 0.13091068  |
| 0.247558342 | 0.40985197  | 0.246324239 | 0.337502424 |
| 0.083885413 | 0.15488737  | 0.177043645 | 0.296743996 |
| 0.238882102 | 0.158477294 | 0.25792923  | 0.380191544 |
| 0.126898814 | 0.122790152 | 0.213182633 | 0.179308731 |
| 0.288788397 | 0.119227836 | 0.107620076 | 0.120050393 |
| 0.2100362   | 0.154753659 | 0.363031582 | 0.277841903 |
| 0.201356078 | 0.121262491 | 0.350455786 | 0.14891898  |
| 0.207042298 | 0.136898368 | 0.155411293 | 0.265402099 |
| 0.194305891 | 0.325515454 | 0.243482985 | 0.269528658 |
| 0.142604691 | 0.34123949  | 0.230917743 | 0.31972158  |
| 0.034467963 | 0.354689286 | 0.208432774 | 0.20608351  |
| 0.120286696 | 0.261575911 | 0.155507626 | 0.352605851 |
| 0.304000509 | 0.266195689 | 0.211225675 | 0.22174125  |
| 0.307716188 | 0.328520475 | 0.341212007 | 0.280731537 |
| 0.143262051 | 0.106125308 | 0.13727306  | 0.229511449 |
| 0.240895436 | 0.200594909 | 0.13536324  | 0.375384817 |
| 0.340606408 | 0.278003802 | 0.17156084  | 0.406317861 |
| 0.208981369 | 0.396717435 | 0.262741229 | 0.225793081 |
| 0.377725051 | 0.363164262 | 0.373806286 | 0.216318793 |

|             |             |             |             |
|-------------|-------------|-------------|-------------|
| 0.374685327 | 0.173587445 | 0.058256762 | 0.281149799 |
| 0.403848585 | 0.020467769 | 0.2887613   | 0.310517858 |
| 0.325198136 | 0.262598517 | 0.37228861  | 0.341107594 |
| 0.333089364 | 0.154413697 | 0.009267745 | 0.2481461   |
| 0.348266227 | 0.311691867 | 0.265914168 | 0.125585512 |
| 0.193817618 | 0.173736911 | 0.257935839 | 0.115181567 |
| 0.427961301 | 0.299717608 | 0.302687728 | 0.249829993 |
| 0.130456124 | 0.353546691 | 0.121289058 | 0.342843678 |
| 0.17110523  | 0.166376104 | 0.11299841  | 0.294479704 |
| 0.103192054 | 0.255287715 | 0.158580654 | 0.177947765 |
| 0.273432857 | 0.171484594 | 0.11337293  | 0.223258443 |
| 0.128042755 | 0.152665793 | 0.200115006 | 0.16040704  |
| 0.168468864 | 0.266629647 | 0.196804784 | 0.255221612 |
| 0.245342705 | 0.285062072 | 0.210347834 | 0.327895744 |
| 0.160370657 | 0.212877698 | 0.225745186 | 0.386735351 |
| 0.404132606 | 0.148188001 | 0.305619325 | 0.057122003 |
| 0.122323898 | 0.081745345 | 0.077411944 | 0.142347595 |
| 0.273605121 | 0.1828414   | 0.178820178 | 0.25899718  |
| 0.166216304 | 0.173187684 | 0.144071334 | 0.403727265 |
| 0.193032317 | 0.204991675 | 0.312828605 | 0.137780171 |
| 0.034437563 | 0.176630037 | 0.276647683 | 0.16539113  |
| 0.222126701 | 0.108762614 | 0.111176045 | 0.295991561 |
| 0.113931657 | 0.162269934 | 0.323437534 | 0.261723103 |
| 0.157592315 | 0.256639133 | 0.37302849  | 0.020031487 |
| 0.152615918 | 0.112913426 | 0.289839189 | 0.095524507 |
| 0.223052336 | 0.304747981 | 0.173690249 | 0.184852092 |
| 0.159430832 | 0.361540543 | 0.316820124 | 0.344500488 |
| 0.114578439 | 0.372033427 | 0.285480002 | 0.332722726 |
| 0.251316589 | 0.114795764 | 0.063868867 | 0.260349706 |
| 0.285618511 | 0.094228766 | 0.135501704 | 0.232687273 |
| 0.106603705 | 0.20877718  | 0.165941972 | 0.350663747 |
| 0.415702864 | 0.301553332 | 0.27992303  | 0.289246948 |
| 0.3088791   | 0.218142066 | 0.301011543 | 0.39713454  |
| 0.079130887 | 0.146639651 | 0.141223644 | 0.323740446 |
| 0.218632463 | 0.166132049 | 0.337873283 | 0.082298931 |
| 0.004858638 | 0.155804788 | 0.133573791 | 0.26223669  |
| 0.129123933 | 0.154579108 | 0.217385607 | 0.349914545 |
| 0.235834777 | 0.357687169 | 0.261118759 | 0.161219425 |
| 0.296174396 | 0.163077877 | 0.153876824 | 0.20886532  |
| 0.294111624 | 0.080571615 | 0.214089268 | 0.402167667 |
| 0.087910623 | 0.133458709 | 0.201584253 | 0.014781017 |
| 0.126708086 | 0.212743599 | 0.180083789 | 0.301495633 |
| 0.352797786 | 0.269987129 | 0.196816722 | 0.084102021 |
| 0.29762246  | 0.200220451 | 0.035741162 | 0.315492261 |
| 0.339232461 | 0.327650484 | 0.331508077 | 0.339285814 |
| 0.294388343 | 0.255210633 | 0.261019907 | 0.160049326 |
| 0.196748674 | 0.135420596 | 0.105188835 | 0.191182413 |
| 0.014398809 | 0.315304731 | 0.208678761 | 0.246996031 |
| 0.246075434 | 0.250292528 | 0.156044922 | 0.195342245 |
| 0.067568209 | 0.06892484  | 0.177431276 | 0.243657566 |
| 0.289276745 | 0.08378292  | 0.083231499 | 0.109425456 |
| 0.317957043 | 0.313029198 | 0.117006586 | 0.364739721 |
| 0.214153215 | 0.139639303 | 0.18104187  | 0.289443273 |
| 0.185569964 | 0.032601712 | 0.157563058 | 0.008576571 |



|             |             |             |             |
|-------------|-------------|-------------|-------------|
| 0.131050059 | 0.360144511 | 0.146940119 | 0.114695478 |
| 0.221249746 | 0.046321733 | 0.300089032 | 0.382403869 |
| 0.304975923 | 0.344391938 | 0.353372385 | 0.13361669  |
| 0.345382583 | 0.033071843 | 0.350099987 | 0.262456415 |
| 0.096558277 | 0.004150132 | 0.057567776 | 0.302246094 |
| 0.150556025 | 0.115403842 | 0.227062511 | 0.135508346 |
| 0.230047273 | 0.153777283 | 0.207444441 | 0.154606987 |
| 0.199679678 | 0.230917784 | 0.171171584 | 0.321286978 |
| 0.21300023  | 0.257531659 | 0.136587959 | 0.170310979 |
| 0.191574727 | 0.176749334 | 0.162921617 | 0.036054854 |
| 0.270905802 | 0.174140219 | 0.356690925 | 0.342839528 |
| 0.38855848  | 0.234819222 | 0.079407594 | 0.171292066 |
| 0.310837063 | 0.128292121 | 0.119251892 | 0.140033219 |
| 0.308263451 | 0.191367561 | 0.319425902 | 0.295908419 |
| 0.370429981 | 0.347161285 | 0.149109648 | 0.257859532 |
| 0.068652011 | 0.015868053 | 0.132089222 | 0.290561489 |
| 0.063067363 | 0.142025254 | 0.293626899 | 0.165765786 |
| 0.225983014 | 0.11465789  | 0.111863358 | 0.115327202 |
| 0.229185965 | 0.18026631  | 0.166224569 | 0.265808789 |
| 0.18860911  | 0.12887322  | 0.268978069 | 0.260978851 |
| 0.147479237 | 0.266288314 | 0.259419632 | 0.112197557 |
| 0.12598408  | 0.142402912 | 0.171741517 | 0.242891939 |
| 0.305593454 | 0.317255057 | 0.144321952 | 0.078024074 |
| 0.302878007 | 0.188326037 | 0.345552833 | 0.318429675 |
| 0.379418149 | 0.393176244 | 0.386074133 | 0.227572835 |
| 0.191156231 | 0.21157071  | 0.164173478 | 0.212973251 |
| 0.353980794 | 0.106592266 | 0.34473828  | 0.126062626 |
| 0.207509848 | 0.20003809  | 0.17914499  | 0.199881455 |
| 0.161241821 | 0.273716078 | 0.254080024 | 0.146015544 |
| 0.189038115 | 0.12609015  | 0.15888828  | 0.23647705  |
| 0.270865623 | 0.070564965 | 0.22278196  | 0.198582923 |
| 0.265708541 | 0.066001599 | 0.216954109 | 0.395134974 |
| 0.211933287 | 0.162582068 | 0.125596092 | 0.270462564 |
| 0.247940336 | 0.118012753 | 0.09821025  | 0.267551687 |
| 0.360780186 | 0.19278536  | 0.34934041  | 0.351931527 |
| 0.170847977 | 0.15861209  | 0.124468221 | 0.166775939 |
| 0.235325261 | 0.173583516 | 0.244570394 | 0.159629161 |
| 0.357938621 | 0.403586728 | 0.266779647 | 0.260106171 |
| 0.162936526 | 0.14183346  | 0.091496235 | 0.302678209 |
| 0.107877153 | 0.169520396 | 0.104277719 | 0.267349447 |
| 0.011299837 | 0.082883082 | 0.344119956 | 0.277157433 |
| 0.395607051 | 0.321157002 | 0.366553797 | 0.213947768 |
| 0.001367535 | 0.188012504 | 0.212227018 | 0.146450748 |
| 0.273742861 | 0.299743065 | 0.196821843 | 0.216039017 |
| 0.350677151 | 0.134620358 | 0.211842647 | 0.150523055 |
| 0.059293067 | 0.1936393   | 0.305848353 | 0.195734921 |
| 0.238369187 | 0.131683112 | 0.132584112 | 0.235035515 |
| 0.095495697 | 0.325722929 | 0.324709149 | 0.088966863 |
| 0.070053165 | 0.324449803 | 0.237234119 | 0.119797699 |
| 0.15798241  | 0.294564229 | 0.348157689 | 0.008231284 |
| 0.228394556 | 0.082212822 | 0.258187106 | 0.237038705 |
| 0.257206226 | 0.243257387 | 0.252865934 | 0.181607698 |
| 0.195409167 | 0.227649659 | 0.222306935 | 0.276877799 |
| 0.25531219  | 0.234554386 | 0.18913439  | 0.153977798 |

|             |             |             |             |
|-------------|-------------|-------------|-------------|
| 0.195907043 | 0.217532651 | 0.19310773  | 0.189322799 |
| 0.205449205 | 0.310103286 | 0.334545557 | 0.138878232 |
| 0.284082415 | 0.157258598 | 0.37965811  | 0.311624588 |
| 0.381681232 | 0.161854999 | 0.200471038 | 0.27226196  |
| 0.058176181 | 0.143626725 | 0.134314931 | 0.159749154 |
| 0.26284963  | 0.170097002 | 0.146703841 | 0.155004855 |
| 0.20000041  | 0.383010615 | 0.32942259  | 0.361752703 |
| 0.179921987 | 0.139490531 | 0.077231421 | 0.222806815 |
| 0.193046359 | 0.208766014 | 0.178302976 | 0.0240753   |
| 0.263180417 | 0.156859074 | 0.284538452 | 0.334839557 |
| 0.112534243 | 0.378696784 | 0.09250631  | 0.164064446 |
| 0.065706596 | 0.197927223 | 0.243497049 | 0.229393542 |
| 0.079935487 | 0.262837868 | 0.191746663 | 0.140243782 |
| 0.237376339 | 0.208339525 | 0.182328669 | 0.231533344 |
| 0.223992723 | 0.197965722 | 0.35774265  | 0.159414111 |
| 0.141298471 | 0.162443002 | 0.139671845 | 0.191841588 |
| 0.229572858 | 0.33485931  | 0.154346305 | 0.336489777 |
| 0.157030986 | 0.221573915 | 0.425710482 | 0.221877969 |
| 0.195721805 | 0.271240509 | 0.080098812 | 0.135215371 |
| 0.229567583 | 0.129901975 | 0.00409696  | 0.047367902 |
| 0.306710761 | 0.135963969 | 0.207951599 | 0.266117391 |
| 0.172872349 | 0.325835936 | 0.089184467 | 0.184311672 |
| 0.312219124 | 0.366223828 | 0.172875512 | 0.312144517 |
| 0.290714629 | 0.243832616 | 0.186676731 | 0.020083368 |
| 0.163775968 | 0.14318773  | 0.111593278 | 0.203860775 |
| 0.114785861 | 0.077992814 | 0.15671913  | 0.114929231 |
| 0.327229032 | 0.073288877 | 0.161233914 | 0.232667149 |
| 0.24946543  | 0.366445422 | 0.27025328  | 0.263829426 |
| 0.089929602 | 0.269980699 | 0.143729475 | 0.138603107 |
| 0.180011065 | 0.139227211 | 0.276571503 | 0.132849547 |
| 0.156939446 | 0.202205458 | 0.007377932 | 0.380835162 |
| 0.324747811 | 0.125283021 | 0.303574988 | 0.083372543 |
| 0.31055549  | 0.323898073 | 0.191738225 | 0.130402946 |
| 0.09234331  | 0.168662268 | 0.270258666 | 0.301960875 |
| 0.061105993 | 0.147309236 | 0.195455302 | 0.152273648 |
| 0.361296946 | 0.141571065 | 0.329926041 | 0.080073828 |
| 0.32048028  | 0.272331031 | 0.176823264 | 0.216124341 |
| 0.165337552 | 0.148736604 | 0.119931509 | 0.377503277 |
| 0.270103369 | 0.13329175  | 0.29216991  | 0.209297945 |
| 0.139261169 | 0.31561576  | 0.140973025 | 0.370170589 |
| 0.220575192 | 0.295734065 | 0.278200016 | 0.312145915 |
| 0.354766309 | 0.146503725 | 0.129369761 | 0.195634992 |
| 0.304035281 | 0.195412724 | 0.13805912  | 0.268667977 |
| 0.101588397 | 0.301005617 | 0.135539691 | 0.217383477 |
| 0.181832507 | 0.262305375 | 0.19294951  | 0.22413615  |
| 0.233547393 | 0.168408122 | 0.171762487 | 0.38352833  |
| 0.239089819 | 0.103141156 | 0.399964756 | 0.010141003 |
| 0.174503645 | 0.228131503 | 1           | 0.172937844 |
| 0.261507564 | 0.202415688 | 0.129500943 | 0.016773084 |
| 0.29559659  | 0.057733919 | 0.206015759 | 0.18602546  |
| 0.128309392 | 0.146725063 | 0.352934001 | 0.35940006  |
| 0.261476507 | 0.138862887 | 0.104157036 | 0.340722494 |
| 0.08660905  | 0.095804634 | 0.124818554 | 0.180922417 |
| 0.116419428 | 0.096873545 | 0.126291666 | 0.11993808  |

|             |             |             |             |
|-------------|-------------|-------------|-------------|
| 0.266088144 | 0.246907101 |             |             |
| YWHAE       | 0.037406786 | 0.319165952 | 0.022479843 |
| 0.089570964 | 0.287773169 | 0.17107309  | 0.037741379 |
| 0.079777262 | 0.259319544 | 0.12150483  | 0.235203638 |
| 0.011660986 | 0.148152052 | 0.392354804 | 0.038534143 |
| 0.304830302 | 0.031126852 | 0.068672825 | 0.058256801 |
| 0.121496276 | 0.250452167 | 0.21252218  | 0.164438013 |
| 0.237199566 | 0.137817382 | 0.192116929 | 0.2556548   |
| 0.409974542 | 0.152557759 | 0.324829705 | 0.088158142 |
| 0.349232409 | 0.304917287 | 0.214504694 | 0.009318704 |
| 0.225080388 | 0.031798426 | 0.345139753 | 0.185200762 |
| 0.185542508 | 0.281269505 | 0.12156342  | 0.154888948 |
| 0.160674177 | 0.018589616 | 0.08664237  | 0.325648492 |
| 0.203578898 | 0.168417609 | 0.028001612 | 0.309811874 |
| 0.186592715 | 0.234658459 | 0.248657856 | 0.002001233 |
| 0.224869417 | 0.116944002 | 0.195606261 | 0.398678798 |
| 0.158587261 | 0.088459564 | 0.162292649 | 0.129532701 |
| 0.2679183   | 0.318778475 | 0.222008861 | 0.166181276 |
| 0.407544556 | 0.198354076 | 0.352329354 | 0.110578419 |
| 0.168042725 | 0.016321572 | 0.130532015 | 0.04775379  |
| 0.212991579 | 0.150867374 | 0.246009652 | 0.237136465 |
| 0.309162194 | 0.420027152 | 0.1828645   | 0.377092065 |
| 0.133701218 | 0.299072144 | 0.235413876 | 0.291497475 |
| 0.301503327 | 0.053782738 | 0.336568384 | 0.435022558 |
| 0.026823024 | 0.199093754 | 0.298468741 | 0.075125729 |
| 0.335781353 | 0.208825414 | 0.17533134  | 0.1992701   |
| 0.359615606 | 0.271619525 | 0.373122476 | 0.225157855 |
| 0.22017117  | 0.037034531 | 0.351641811 | 0.304575214 |
| 0.196021491 | 0.043029476 | 0.203372935 | 0.417430191 |
| 0.291015381 | 0.410218449 | 0.332696274 | 0.310786773 |
| 0.280180338 | 0.414467419 | 0.305029313 | 0.341313144 |
| 0.08156263  | 0.421893507 | 0.111586369 | 0.034997345 |
| 0.032082038 | 0.072053024 | 0.190967063 | 0.276840245 |
| 0.411694741 | 0.248731195 | 0.106512362 | 0.178468478 |
| 0.438563385 | 0.344942099 | 0.416527919 | 0.351602663 |
| 0.023472781 | 0.213687149 | 0.270728564 | 0.135740345 |
| 0.293099229 | 0.080738055 | 0.230117746 | 0.38658293  |
| 0.322075902 | 0.399114993 | 0.079620222 | 0.387870721 |
| 0.115853594 | 0.440501216 | 0.34555322  | 0.108039283 |
| 0.413167322 | 0.373848106 | 0.457022341 | 0.374559758 |
| 0.376631746 | 0.168174646 | 0.042452812 | 0.323705684 |
| 0.435664579 | 0.023047276 | 0.416589552 | 0.441017594 |
| 0.388577163 | 0.415273613 | 0.469228881 | 0.441619956 |
| 0.392003316 | 0.047082265 | 0.024944571 | 0.273361909 |
| 0.395287431 | 0.339295418 | 0.122035285 | 0.247795842 |
| 0.306025933 | 0.164074719 | 0.363993081 | 0.170743795 |
| 0.445554798 | 0.39713507  | 0.413311233 | 0.310407327 |
| 0.160064003 | 0.259426301 | 0.271500911 | 0.338035626 |
| 0.035977522 | 0.054447194 | 0.028786397 | 0.267743487 |
| 0.137603611 | 0.143443572 | 0.158443854 | 0.269057223 |
| 0.160728218 | 0.141009042 | 0.219746307 | 0.367598972 |
| 0.034037518 | 0.243501017 | 0.09481847  | 0.090040597 |
| 0.035711587 | 0.110372929 | 0.118892839 | 0.105259817 |
| 0.192584084 | 0.16243642  | 0.334044136 | 0.432636008 |

|             |             |             |             |
|-------------|-------------|-------------|-------------|
| 0.210820606 | 0.121899267 | 0.305838059 | 0.429712531 |
| 0.399255312 | 0.282818099 | 0.187230757 | 0.011942022 |
| 0.178649586 | 0.168400078 | 0.200941196 | 0.270219016 |
| 0.129908087 | 0.148991966 | 0.283442911 | 0.386663519 |
| 0.133401749 | 0.066516919 | 0.210036973 | 0.344834855 |
| 0.096411107 | 0.20688679  | 0.408096551 | 0.227864074 |
| 0.002295139 | 0.184811941 | 0.380265702 | 0.162051975 |
| 0.221510871 | 0.157179071 | 0.20114532  | 0.409695723 |
| 0.216565701 | 0.209497719 | 0.432346958 | 0.38503068  |
| 0.167733061 | 0.152240789 | 0.46238839  | 0.056661176 |
| 0.247295628 | 0.079840665 | 0.265969338 | 0.132947548 |
| 0.170907052 | 0.273074059 | 0.280776114 | 0.228681641 |
| 0.073642337 | 0.415871632 | 0.333218735 | 0.43112726  |
| 0.204048261 | 0.459075809 | 0.41147314  | 0.385249529 |
| 0.265071115 | 0.200545565 | 0.161599638 | 0.370780442 |
| 0.407106249 | 0.184596795 | 0.042403288 | 0.369473971 |
| 0.17119788  | 0.357107246 | 0.173581355 | 0.435044973 |
| 0.409376596 | 0.33687021  | 0.112905731 | 0.378940754 |
| 0.329781489 | 0.137510457 | 0.377354972 | 0.461543329 |
| 0.139222511 | 0.235086106 | 0.217212475 | 0.415286519 |
| 0.122699693 | 0.198574307 | 0.274092269 | 0.194829974 |
| 0.014446888 | 0.041084928 | 0.035750071 | 0.134766532 |
| 0.210775373 | 0.270044332 | 0.324241838 | 0.431398052 |
| 0.075043947 | 0.353347243 | 0.189123664 | 0.186792222 |
| 0.333814928 | 0.217621656 | 0.285763887 | 0.312875068 |
| 0.203748728 | 0.018231705 | 0.080764872 | 0.416658619 |
| 0.020060927 | 0.223077215 | 0.161824515 | 0.002231446 |
| 0.023994262 | 0.295757676 | 0.066536665 | 0.150844385 |
| 0.454130467 | 0.14798891  | 0.135655265 | 0.135143544 |
| 0.314812789 | 0.058672226 | 0.006421258 | 0.413431005 |
| 0.400077773 | 0.379909215 | 0.391639369 | 0.351515975 |
| 0.386696335 | 0.329738782 | 0.389121343 | 0.166878321 |
| 0.069065958 | 0.043391314 | 0.205257011 | 0.189979533 |
| 0.002495278 | 0.359005696 | 0.229248046 | 0.108917584 |
| 0.379304363 | 0.240227311 | 0.02328106  | 0.298247602 |
| 0.01178274  | 0.188860631 | 0.14253492  | 0.155105757 |
| 0.358255319 | 0.008368059 | 0.114072089 | 0.197461602 |
| 0.316958326 | 0.26515609  | 0.23340742  | 0.432377841 |
| 0.225629987 | 0.072013457 | 0.208288253 | 0.361464522 |
| 0.04727222  | 0.074027278 | 0.152774919 | 0.019377814 |
| 0.122689307 | 0.365825553 | 0.210350617 | 0.039637827 |
| 0.189534986 | 0.002991378 | 0.281693599 | 0.436644215 |
| 0.342672621 | 0.45668553  | 0.416997215 | 0.22495985  |
| 0.409853083 | 0.126871675 | 0.438148151 | 0.305384007 |
| 0.158274452 | 0.000649601 | 0.005734981 | 0.433581555 |
| 0.276080544 | 0.032443987 | 0.11307538  | 0.15083182  |
| 0.079899446 | 0.062531663 | 0.044636798 | 0.207306385 |
| 0.27835719  | 0.211590511 | 0.198548795 | 0.351757959 |
| 0.154233367 | 0.181291074 | 0.156455019 | 0.056117732 |
| 0.295170231 | 0.037368868 | 0.057363987 | 0.009457268 |
| 0.350330007 | 0.075416356 | 0.33927733  | 0.408296187 |
| 0.425883482 | 0.366947752 | 0.142005182 | 0.161798135 |
| 0.394584346 | 0.050536705 | 0.199054847 | 0.056724023 |
| 0.368784136 | 0.310636431 | 0.281968284 | 0.243479801 |

|             |             |             |             |
|-------------|-------------|-------------|-------------|
| 0.440067987 | 0.384070185 | 0.02212361  | 0.361556724 |
| 0.009824692 | 0.003664207 | 0.157574538 | 0.215054613 |
| 0.0727846   | 0.220224155 | 0.213896892 | 0.139049121 |
| 0.156081603 | 0.017780506 | 0.224692873 | 0.230426905 |
| 0.243656472 | 0.230546665 | 0.247576091 | 0.195313854 |
| 0.213026427 | 0.164068979 | 0.150119181 | 0.108501279 |
| 0.159646649 | 0.233356138 | 0.139971891 | 0.014533938 |
| 0.217947466 | 0.257215814 | 0.034562969 | 0.115010129 |
| 0.387528371 | 0.426550211 | 0.034193245 | 0.012470279 |
| 0.213409962 | 0.200029027 | 0.450375181 | 0.389119131 |
| 0.4079025   | 0.450307936 | 0.322911841 | 0.124467042 |
| 0.041410706 | 0.256006955 | 0.271655424 | 0.127302425 |
| 0.421298637 | 0.033798072 | 0.378435154 | 0.256631195 |
| 0.08452014  | 0.133467828 | 0.029902477 | 0.056674552 |
| 0.302091064 | 0.1361244   | 0.146916784 | 0.082401868 |
| 0.193414911 | 0.242527035 | 0.032332747 | 0.137960276 |
| 0.279711998 | 0.194086062 | 0.115559087 | 0.148847194 |
| 0.276721248 | 0.098183429 | 0.368572975 | 0.387848735 |
| 0.085290311 | 0.06324252  | 0.110090676 | 0.333985884 |
| 0.367044313 | 0.217848758 | 0.017192992 | 0.334442849 |
| 0.432650314 | 0.316303053 | 0.385456728 | 0.381750706 |
| 0.057652323 | 0.24775596  | 0.218468694 | 0.260616874 |
| 0.136644646 | 0.166361614 | 0.165997373 | 0.040491039 |
| 0.26613274  | 0.382632171 | 0.333022245 | 0.116884575 |
| 0.250565929 | 0.066330143 | 0.027444062 | 0.376165707 |
| 0.205868749 | 0.047202091 | 0.131225184 | 0.386276799 |
| 0.005292628 | 0.187468976 | 0.449036759 | 0.147679075 |
| 0.433763552 | 0.4349442   | 0.368645728 | 0.136480026 |
| 0.006922798 | 0.353355527 | 0.278342188 | 0.20619742  |
| 0.333074585 | 0.262552291 | 0.098192794 | 0.063131524 |
| 0.26711748  | 0.045157126 | 0.102385423 | 0.149612705 |
| 0.149603097 | 0.246323138 | 0.172621479 | 0.137170809 |
| 0.163881063 | 0.053528293 | 0.221695156 | 0.142455585 |
| 0.167937518 | 0.209263811 | 0.313165331 | 0.114285448 |
| 0.158422444 | 0.393509755 | 0.318221566 | 0.015154722 |
| 0.26623219  | 0.36441941  | 0.389303923 | 0.001879652 |
| 0.359325404 | 0.006343955 | 0.155933569 | 0.163284629 |
| 0.153397836 | 0.154563828 | 0.246365573 | 0.226531035 |
| 0.236771847 | 0.141237197 | 0.169398292 | 0.191174545 |
| 0.1355914   | 0.133942322 | 0.299751625 | 0.168771544 |
| 0.200004709 | 0.075391965 | 0.069528297 | 0.06772189  |
| 0.039614092 | 0.381437812 | 0.198548791 | 0.043284822 |
| 0.186260726 | 0.183513411 | 0.326309699 | 0.374028851 |
| 0.392878222 | 0.068388833 | 0.193144826 | 0.344860578 |
| 0.123262153 | 0.14406519  | 0.030704962 | 0.216041496 |
| 0.151316528 | 0.183280174 | 0.199596286 | 0.164168989 |
| 0.287268992 | 0.330705183 | 0.190832025 | 0.380619999 |
| 0.218541147 | 0.193021781 | 0.115839203 | 0.075135395 |
| 0.095935637 | 0.093125684 | 0.243975216 | 0.001500357 |
| 0.260263122 | 0.115808679 | 0.405417483 | 0.371141083 |
| 0.21814305  | 0.342186455 | 0.114221059 | 0.050674267 |
| 0.105544781 | 0.116471431 | 0.105384263 | 0.35194715  |
| 0.196962319 | 0.113604095 | 0.260539202 | 0.121161096 |
| 0.375943194 | 0.334849028 | 0.20835577  | 0.133754548 |

|             |             |             |             |
|-------------|-------------|-------------|-------------|
| 0.175040068 | 0.125371223 | 0.374354601 | 0.057550052 |
| 0.261356699 | 0.20232023  | 0.190059132 | 0.190047643 |
| 0.174215287 | 0.440741565 | 0.035407149 | 0.445846738 |
| 0.203878769 | 0.093228322 | 0.414355436 | 0.162282315 |
| 0.162463283 | 0.119505287 | 0.205008189 | 0.160152698 |
| 0.152821056 | 0.229874741 | 0.009998542 | 0.064707648 |
| 0.296316793 | 0.164728976 | 0.295298767 | 0.312910933 |
| 0.224140407 | 0.337658229 | 0.185318969 | 0.140694719 |
| 0.348486769 | 0.370513204 | 0.150721512 | 0.223440524 |
| 0.276826953 | 0.06835724  | 0.22066912  | 0.017129517 |
| 0.294759285 | 0.284605208 | 0.168029725 | 0.038344751 |
| 0.013778687 | 0.21099996  | 0.271630812 | 0.037960582 |
| 0.453152278 | 0.202515422 | 0.220906267 | 0.34273784  |
| 0.130302743 | 0.370789675 | 0.119720954 | 0.351995403 |
| 0.025977491 | 0.204490649 | 0.244670473 | 0.203259018 |
| 0.17942266  | 0.237823971 | 0.344841409 | 0.225034384 |
| 0.024653691 | 0.188375252 | 0.002333388 | 0.318485406 |
| 0.34050123  | 0.233580672 | 0.16215493  | 0.132225857 |
| 0.257871785 | 0.330912668 | 0.173425408 | 0.227556965 |
| 0.011218099 | 0.304372343 | 0.153087963 | 0.322551078 |
| 0.151504792 | 0.221249372 | 0.052255118 | 0.241301851 |
| 0.326020038 | 0.171184197 | 0.217679877 | 0.177787988 |
| 0.377934679 | 0.305352439 | 0.099569272 | 0.198858007 |
| 0.252805131 | 0.040212994 | 0.153205492 | 0.442862802 |
| 0.131830702 | 0.223281628 | 0.427076668 | 0.139415202 |
| 0.230118827 | 0.30954373  | 0.2593088   | 0.427418315 |
| 0.082653834 | 0.204818528 | 0.382089004 | 0.381436148 |
| 0.292480268 | 0.201665034 | 0.218681537 | 0.186478536 |
| 0.335694721 | 0.059390454 | 0.222119604 | 0.273801671 |
| 0.20745088  | 0.257520044 | 0.183883853 | 0.185174567 |
| 0.030777605 | 0.119756735 | 0.182805229 | 0.101514575 |
| 0.226938988 | 0.250021109 | 0.213264335 | 0.348815571 |
| 0.110572773 | 0.022684897 | 0.399049586 | 0.031189455 |
| 0.167889263 | 0.320110454 | 0.172937844 | 1           |
| 0.136341352 | 0.23004416  | 0.153750922 | 0.000468528 |
| 0.373228624 | 0.079283057 | 0.196427085 | 0.185460219 |
| 0.191154411 | 0.029284292 | 0.363828683 | 0.461496265 |
| 0.223499841 | 0.194366886 | 0.188961703 | 0.367976296 |
| 0.191370933 | 0.196039737 | 0.205402586 | 0.261343984 |
| 0.224675542 | 0.155478613 | 0.195729327 | 0.216624463 |
| 0.288834611 | 0.145187038 |             |             |
| YWHAH       | 0.317379549 | 0.242328344 | 0.29066946  |
| 0.292284798 | 0.137487553 | 0.195938965 | 0.263993784 |
| 0.279626581 | 0.198155073 | 0.089940298 | 0.206150643 |
| 0.235776272 | 0.018578453 | 0.259648859 | 0.249391182 |
| 0.137710178 | 0.242002033 | 0.294171614 | 0.058219384 |
| 0.176940489 | 0.13684212  | 0.117019206 | 0.204480733 |
| 0.128306907 | 0.340100485 | 0.214034383 | 0.105071825 |
| 0.263521762 | 0.062312992 | 0.166548664 | 0.068620405 |
| 0.324489897 | 0.129457188 | 0.102671367 | 0.237967033 |
| 0.17394665  | 0.00425355  | 0.352069318 | 0.191250579 |
| 0.057142551 | 0.325870065 | 0.132318849 | 0.253707877 |
| 0.136586988 | 0.291540138 | 0.058098495 | 0.13023138  |
| 0.187349882 | 0.193285125 | 0.272638467 | 0.178907115 |

|             |             |             |             |
|-------------|-------------|-------------|-------------|
| 0.131243442 | 0.257592484 | 0.160258172 | 0.013401944 |
| 0.07630462  | 0.009430057 | 0.040451144 | 0.31323384  |
| 0.312238363 | 0.288265546 | 0.057202039 | 0.191952812 |
| 0.132471397 | 0.152016894 | 0.237407854 | 0.116810472 |
| 0.295919831 | 0.041459136 | 0.143439933 | 0.197284857 |
| 0.186185492 | 0.210450703 | 0.314301949 | 0.231906875 |
| 0.130335209 | 0.266250873 | 0.16828248  | 0.088706322 |
| 0.243066025 | 0.353744447 | 0.257818735 | 0.323335103 |
| 0.027965546 | 0.10599764  | 0.122327356 | 0.217644722 |
| 0.170523747 | 0.205696388 | 0.203467588 | 0.327762931 |
| 0.210198184 | 0.137073412 | 0.169540465 | 0.272264034 |
| 0.246704702 | 0.06820567  | 0.1372292   | 0.058729101 |
| 0.135583509 | 0.126168229 | 0.318186817 | 0.270053463 |
| 0.134178513 | 0.283164165 | 0.35080325  | 0.097753701 |
| 0.187283857 | 0.31926399  | 0.114096471 | 0.184418552 |
| 0.180840183 | 0.267064273 | 0.196188879 | 0.196025837 |
| 0.122896835 | 0.288910591 | 0.210765687 | 0.245204786 |
| 0.032587324 | 0.303340349 | 0.325565509 | 0.263002799 |
| 0.273697141 | 0.255438792 | 0.089975845 | 0.261500531 |
| 0.230663685 | 0.231965731 | 0.305279322 | 0.211145943 |
| 0.208780944 | 0.32369338  | 0.294243713 | 0.213595667 |
| 0.286738208 | 0.055987227 | 0.129935851 | 0.232795571 |
| 0.182863414 | 0.272085975 | 0.084073122 | 0.356630217 |
| 0.305536331 | 0.189588363 | 0.294375735 | 0.381277123 |
| 0.204260958 | 0.325769727 | 0.23662034  | 0.31145192  |
| 0.344833211 | 0.352240986 | 0.29250109  | 0.137429668 |
| 0.337423524 | 0.251657118 | 0.03152838  | 0.2200425   |
| 0.3073232   | 0.012430869 | 0.212675244 | 0.232254451 |
| 0.297909096 | 0.189950237 | 0.279541366 | 0.262327061 |
| 0.297153623 | 0.289505215 | 0.003847408 | 0.181730472 |
| 0.326233592 | 0.2741058   | 0.185351199 | 0.12330326  |
| 0.134729581 | 0.211038388 | 0.171229828 | 0.114886769 |
| 0.338938191 | 0.23585039  | 0.234480316 | 0.191599571 |
| 0.162720619 | 0.328417232 | 0.095680128 | 0.351905034 |
| 0.280664425 | 0.325040657 | 0.278964019 | 0.21454759  |
| 0.142614527 | 0.272938883 | 0.204165789 | 0.131124059 |
| 0.2845091   | 0.19771023  | 0.07911101  | 0.139580317 |
| 0.250436561 | 0.1549734   | 0.31039565  | 0.280420844 |
| 0.267951159 | 0.314593496 | 0.245962664 | 0.292912686 |
| 0.19486703  | 0.375165717 | 0.152066547 | 0.253534873 |
| 0.128187532 | 0.31295054  | 0.184185867 | 0.299465685 |
| 0.30399798  | 0.128895909 | 0.267008292 | 0.129717746 |
| 0.11997313  | 0.064376437 | 0.035371971 | 0.119879185 |
| 0.344114012 | 0.178483022 | 0.152301537 | 0.160972256 |
| 0.275803263 | 0.236117036 | 0.122168535 | 0.363976058 |
| 0.279251461 | 0.173536252 | 0.230336179 | 0.146251076 |
| 0.122230343 | 0.235645247 | 0.20701771  | 0.095568797 |
| 0.204490293 | 0.052279867 | 0.074874885 | 0.232483009 |
| 0.071918074 | 0.084657354 | 0.239730064 | 0.155235438 |
| 0.142218359 | 0.31991348  | 0.286065664 | 0.007228444 |
| 0.111180737 | 0.114889655 | 0.227997728 | 0.118732985 |
| 0.279853224 | 0.220096902 | 0.115731748 | 0.142854512 |
| 0.3061825   | 0.306497539 | 0.244615299 | 0.274297123 |
| 0.106107995 | 0.294409078 | 0.206665509 | 0.257957886 |

|             |             |             |             |
|-------------|-------------|-------------|-------------|
| 0.224641671 | 0.09324559  | 0.025182959 | 0.209600377 |
| 0.222353164 | 0.095343668 | 0.274031252 | 0.159236106 |
| 0.110308587 | 0.140215503 | 0.105605989 | 0.281844686 |
| 0.360350965 | 0.30246053  | 0.24809911  | 0.17399493  |
| 0.257171067 | 0.310588285 | 0.214147621 | 0.301367959 |
| 0.088066212 | 0.120723737 | 0.124338051 | 0.208653572 |
| 0.320431667 | 0.097403994 | 0.276768047 | 0.03333662  |
| 0.002383356 | 0.27706798  | 0.305326485 | 0.23109705  |
| 0.065071782 | 0.128509533 | 0.163449588 | 0.287939728 |
| 0.30572034  | 0.285193157 | 0.229774866 | 0.166885262 |
| 0.279714731 | 0.116648086 | 0.117368886 | 0.146929495 |
| 0.266307333 | 0.161361506 | 0.268921172 | 0.363056641 |
| 0.226458544 | 0.079797422 | 0.200700844 | 0.024767541 |
| 0.272132596 | 0.185246621 | 0.27963459  | 0.36270533  |
| 0.236663575 | 0.352465751 | 0.293416236 | 0.107456424 |
| 0.213812393 | 0.318986001 | 0.048140262 | 0.252229957 |
| 0.273590689 | 0.260947218 | 0.272760494 | 0.300570353 |
| 0.219895864 | 0.16895977  | 0.17796632  | 0.228045827 |
| 0.298873821 | 0.277768326 | 0.070307361 | 0.187552334 |
| 0.022844397 | 0.212893169 | 0.147567223 | 0.323447329 |
| 0.153946756 | 0.208559915 | 0.288455913 | 0.126977588 |
| 0.239673045 | 0.042649367 | 0.183179809 | 0.194952919 |
| 0.165443395 | 0.223543426 | 0.129689974 | 0.095517401 |
| 0.320315331 | 0.287912534 | 0.093018641 | 0.313915803 |
| 0.220401517 | 0.25509359  | 0.180985186 | 0.181873828 |
| 0.297369073 | 0.035666106 | 0.167636591 | 0.019156609 |
| 0.107414519 | 0.295448838 | 0.121412012 | 0.304124995 |
| 0.268697598 | 0.160717961 | 0.298882727 | 0.316498522 |
| 0.298321612 | 0.265882984 | 0.294221166 | 0.089253447 |
| 0.303827547 | 0.010899347 | 0.284327079 | 0.238589944 |
| 0.109711109 | 0.019706233 | 0.053413565 | 0.231149214 |
| 0.144627228 | 0.243988354 | 0.316042037 | 0.179019453 |
| 0.297779443 | 0.288287039 | 0.273750672 | 0.095454522 |
| 0.17969409  | 0.163958703 | 0.079974649 | 0.303128113 |
| 0.236346001 | 0.235782009 | 0.154639776 | 0.27910724  |
| 0.150442068 | 0.304745326 | 0.259440502 | 0.042592537 |
| 0.16798927  | 0.275155124 | 0.365405118 | 0.292043735 |
| 0.321301158 | 0.162248204 | 0.087031229 | 0.146025932 |
| 0.21074117  | 0.263463656 | 0.103519857 | 0.281377765 |
| 0.287732988 | 0.15815455  | 0.261039384 | 0.301234237 |
| 0.292923031 | 0.309978271 | 0.264152633 | 0.189329469 |
| 0.179379871 | 0.0070554   | 0.205627343 | 0.237132141 |
| 0.021399067 | 0.121938334 | 0.289388819 | 0.144471216 |
| 0.162760771 | 0.274324477 | 0.06732896  | 0.069740765 |
| 0.221063314 | 0.166315617 | 0.111894518 | 0.225760835 |
| 0.1378823   | 0.085225689 | 0.237774715 | 0.236588505 |
| 0.098638381 | 0.282832714 | 0.340407219 | 0.223038078 |
| 0.141798639 | 0.134114386 | 0.312906564 | 0.313964668 |
| 0.238609495 | 0.246378802 | 0.219171163 | 0.137613582 |
| 0.287144163 | 0.145611939 | 0.251389178 | 0.279698975 |
| 0.34332231  | 0.315774425 | 0.353464305 | 0.170056484 |
| 0.312814932 | 0.183394351 | 0.110641059 | 0.152837718 |
| 0.285591943 | 0.250867973 | 0.301716695 | 0.079652174 |
| 0.294714286 | 0.278536439 | 0.25813987  | 0.291005584 |



|             |             |             |             |
|-------------|-------------|-------------|-------------|
| 0.115914868 | 0.298381751 | 0.22555856  | 0.298396383 |
| 0.173982713 | 0.076683717 | 0.269612851 | 0.290329416 |
| 0.231226759 | 0.044556277 | 0.300613266 | 0.200167314 |
| 0.229127185 | 0.067939957 | 0.150507507 | 0.326800107 |
| 0.322080267 | 0.267766945 | 0.243829944 | 0.171496135 |
| 0.191967224 | 0.115316865 | 0.199001123 | 0.247822289 |
| 0.265044363 | 0.154090007 | 0.316401216 | 0.235045592 |
| 0.287522269 | 0.142657122 | 0.079482703 | 0.147014486 |
| 0.260715638 | 0.203145441 | 0.20878814  | 0.294434337 |
| 0.276541952 | 0.349380794 | 0.244533154 | 0.281524275 |
| 0.147059477 | 0.260163304 | 0.240373916 | 0.219551283 |
| 0.065461687 | 0.307782278 | 0.131068407 | 0.174011109 |
| 0.015827435 | 0.03173624  | 0.246921725 | 0.251624955 |
| 0.320876887 | 0.249427143 | 0.322105416 | 0.202801365 |
| 0.000181678 | 0.129872294 | 0.19396654  | 0.162263052 |
| 0.244910844 | 0.246811871 | 0.135872657 | 0.274085903 |
| 0.273044481 | 0.280519837 | 0.22940604  | 0.175435315 |
| 0.0400719   | 0.185128971 | 0.281006969 | 0.225352851 |
| 0.200664291 | 0.222539318 | 0.074840977 | 0.28188512  |
| 0.039989885 | 0.286679159 | 0.24735581  | 0.103843268 |
| 0.053091494 | 0.228270677 | 0.204198556 | 0.27111221  |
| 0.109132222 | 0.212487393 | 0.251155888 | 0.024142982 |
| 0.163235369 | 0.165506169 | 0.204609136 | 0.225292337 |
| 0.226067053 | 0.191584328 | 0.185866367 | 0.15805849  |
| 0.19080684  | 0.252681974 | 0.249177798 | 0.274300588 |
| 0.245534138 | 0.257070056 | 0.155791964 | 0.189795937 |
| 0.169787602 | 0.334361863 | 0.293547317 | 0.317585781 |
| 0.284512158 | 0.240841355 | 0.327351007 | 0.28472143  |
| 0.247923214 | 0.162364365 | 0.301870021 | 0.289330091 |
| 0.271618903 | 0.277341756 | 0.165285693 | 0.24484348  |
| 0.049317374 | 0.160647346 | 0.26827136  | 0.19122716  |
| 0.275350482 | 0.114311271 | 0.158015334 | 0.233061342 |
| 0.159902931 | 0.352126702 | 0.314574703 | 0.288069311 |
| 0.178219478 | 0.124473071 | 0.112384118 | 0.251385909 |
| 0.318171286 | 0.285823769 | 0.122692549 | 0.093323244 |
| 0.221444693 | 0.270192358 | 0.220556285 | 0.322897588 |
| 0.066340175 | 0.293504672 | 0.135654182 | 0.312257606 |
| 0.099876306 | 0.315143359 | 0.313418556 | 0.168157422 |
| 0.043778723 | 0.296136403 | 0.159583621 | 0.206969153 |
| 0.162149387 | 0.146972329 | 0.112192356 | 0.224369254 |
| 0.212634492 | 0.296661757 | 0.322108283 | 0.302792218 |
| 0.133832545 | 0.112514734 | 0.154118096 | 0.183383492 |
| 0.188957439 | 0.266210459 | 0.297095541 | 0.265338054 |
| 0.135167235 | 0.290377173 | 0.354830673 | 0.215323304 |
| 0.21950035  | 0.207132602 | 0.038993042 | 0.149187334 |
| 0.207240991 | 0.089490522 | 0.002912917 | 0.027112196 |
| 0.226941006 | 0.110149313 | 0.178414028 | 0.178907084 |
| 0.109319225 | 0.207477869 | 0.033396136 | 0.218366962 |
| 0.306846083 | 0.351383229 | 0.210119115 | 0.265603791 |
| 0.226281178 | 0.312644514 | 0.201996438 | 0.008580866 |
| 0.138665082 | 0.11691607  | 0.110108157 | 0.269369944 |
| 0.219399479 | 0.045979808 | 0.15296654  | 0.227635266 |
| 0.230878877 | 0.04329952  | 0.14918214  | 0.173642662 |
| 0.264100032 | 0.359778533 | 0.206071974 | 0.191237463 |

|             |             |             |             |
|-------------|-------------|-------------|-------------|
| 0.159110561 | 0.24968449  | 0.109903069 | 0.120471612 |
| 0.166347191 | 0.09620871  | 0.206090592 | 0.081122428 |
| 0.268431134 | 0.169398943 | 0.016392324 | 0.377619561 |
| 0.33643528  | 0.096318441 | 0.297493578 | 0.07974144  |
| 0.240517758 | 0.238487517 | 0.12081572  | 0.12341553  |
| 0.165329519 | 0.131225888 | 0.273063523 | 0.26598239  |
| 0.062450321 | 0.142945867 | 0.272839442 | 0.101569273 |
| 0.38024287  | 0.118948809 | 0.258827767 | 0.088131977 |
| 0.289551626 | 0.217771685 | 0.273985495 | 0.133372319 |
| 0.138631097 | 0.281275646 | 0.137410181 | 0.303483416 |
| 0.245080493 | 0.082095609 | 0.198254085 | 0.241854251 |
| 0.086445183 | 0.265874819 | 0.124870264 | 0.297786063 |
| 0.170705951 | 0.27852199  | 0.179728208 | 0.25994891  |
| 0.242320864 | 0.072274079 | 0.078519939 | 0.147955554 |
| 0.30478299  | 0.310685342 | 0.084779966 | 0.243591589 |
| 0.06284752  | 0.223444429 | 0.150895426 | 0.138590846 |
| 0.226387796 | 0.217312499 | 0.183449566 | 0.307083141 |
| 0.21914866  | 0.159395737 | 0.121249163 | 0.320189474 |
| 0.241673362 | 0.200185576 | 0.32748822  | 0.004426678 |
| 0.243301862 | 0.181579396 | 0.261507564 | 0.136341352 |
| 1           | 0.19762173  | 0.200661971 | 0.056600698 |
| 0.200113824 | 0.042826959 | 0.140357407 | 0.152851371 |
| 0.082425084 | 0.283112579 | 0.312961099 | 0.266247666 |
| 0.237834454 | 0.106213743 | 0.086420903 | 0.2847251   |
| 0.043804097 | 0.070621239 | 0.085913388 | 0.178082963 |
| 0.061191497 | 0.114405848 | 0.117414759 | 0.107533198 |
| 0.221963777 | 0.236580979 |             |             |
| ZBP1        | 0.090142479 | 0.381202972 | 0.06386967  |
| 0.111377198 | 0.204776464 | 0.210279933 | 0.098661723 |
| 0.154818523 | 0.31910135  | 0.182820928 | 0.217346978 |
| 0.037380563 | 0.065019537 | 0.419364725 | 0.095310996 |
| 0.244889685 | 0.066687263 | 0.137405995 | 0.087832185 |
| 0.185193218 | 0.209512364 | 0.191959593 | 0.225764755 |
| 0.215821844 | 0.22123235  | 0.229422468 | 0.229521181 |
| 0.436177108 | 0.132429137 | 0.274318972 | 0.103633591 |
| 0.413763969 | 0.216123626 | 0.207777955 | 0.030512585 |
| 0.242231346 | 0.024070032 | 0.440799235 | 0.209466183 |
| 0.093151864 | 0.354589233 | 0.188253486 | 0.182438492 |
| 0.223941324 | 0.055615633 | 0.105723793 | 0.295056324 |
| 0.228289352 | 0.215764646 | 0.080967153 | 0.294217852 |
| 0.248971228 | 0.262912285 | 0.291386791 | 0.005976909 |
| 0.172423641 | 0.05386261  | 0.140137342 | 0.450992557 |
| 0.185835414 | 0.139397381 | 0.180741289 | 0.215214756 |
| 0.265247153 | 0.299075884 | 0.230324722 | 0.238733889 |
| 0.448050929 | 0.130097759 | 0.315105854 | 0.124656613 |
| 0.248317243 | 0.062355562 | 0.178025133 | 0.106194351 |
| 0.238706941 | 0.17806519  | 0.217115143 | 0.196188187 |
| 0.380215485 | 0.495789509 | 0.209069489 | 0.461587322 |
| 0.119208301 | 0.222007588 | 0.194884161 | 0.275793509 |
| 0.321131282 | 0.133005999 | 0.309368881 | 0.4861248   |
| 0.086528927 | 0.22645079  | 0.32598201  | 0.146350585 |
| 0.366459281 | 0.189311359 | 0.213301911 | 0.115638996 |
| 0.260275117 | 0.230729464 | 0.465058851 | 0.249620448 |
| 0.213929306 | 0.089792955 | 0.451829023 | 0.205112942 |

|             |             |             |             |
|-------------|-------------|-------------|-------------|
| 0.19155241  | 0.092449324 | 0.189204645 | 0.387938175 |
| 0.273947741 | 0.430977767 | 0.377653869 | 0.344044055 |
| 0.239618281 | 0.443320602 | 0.290099121 | 0.388792301 |
| 0.083437137 | 0.473081416 | 0.158564529 | 0.070398119 |
| 0.090505885 | 0.116242731 | 0.211514553 | 0.30275041  |
| 0.397876331 | 0.264382108 | 0.179998525 | 0.199381159 |
| 0.409987703 | 0.43601208  | 0.476649031 | 0.374515649 |
| 0.065669518 | 0.178120785 | 0.231840111 | 0.19925888  |
| 0.303556669 | 0.14061635  | 0.172591243 | 0.478005029 |
| 0.356230629 | 0.368820793 | 0.150562011 | 0.484566802 |
| 0.214030699 | 0.472299911 | 0.382487551 | 0.157152946 |
| 0.477493687 | 0.454937398 | 0.463599024 | 0.277026305 |
| 0.433979039 | 0.209010037 | 0.088644235 | 0.361564479 |
| 0.449883139 | 0.012490521 | 0.415215501 | 0.440838192 |
| 0.450120179 | 0.382955841 | 0.479123689 | 0.446468447 |
| 0.454096773 | 0.100996313 | 0.035129816 | 0.236587817 |
| 0.466845757 | 0.351487788 | 0.161383814 | 0.240109164 |
| 0.242259666 | 0.234195334 | 0.346536582 | 0.182531321 |
| 0.492104209 | 0.387065567 | 0.42619372  | 0.347984672 |
| 0.228001585 | 0.332501402 | 0.2191589   | 0.431122137 |
| 0.069879297 | 0.116061326 | 0.068068241 | 0.294912248 |
| 0.181531663 | 0.170061752 | 0.244622175 | 0.250345338 |
| 0.178512996 | 0.235010682 | 0.185643512 | 0.274122092 |
| 0.090606286 | 0.234803975 | 0.1527275   | 0.171026435 |
| 0.069858666 | 0.189135941 | 0.172379121 | 0.133137811 |
| 0.210167931 | 0.283037735 | 0.308979092 | 0.437551285 |
| 0.250243951 | 0.180091083 | 0.316227081 | 0.44248798  |
| 0.417325459 | 0.220536405 | 0.245615388 | 0.015066939 |
| 0.209939437 | 0.196209542 | 0.129779937 | 0.228467677 |
| 0.225427492 | 0.224559897 | 0.259644228 | 0.297225501 |
| 0.198999759 | 0.158184253 | 0.249342418 | 0.420427775 |
| 0.173957651 | 0.198030539 | 0.39985784  | 0.2439262   |
| 0.008210732 | 0.232895077 | 0.365930217 | 0.150455017 |
| 0.276611926 | 0.10495079  | 0.133908884 | 0.410986128 |
| 0.201486416 | 0.189981444 | 0.427350316 | 0.300479262 |
| 0.222237759 | 0.266725743 | 0.482900277 | 0.049667547 |
| 0.232879844 | 0.053477547 | 0.243188381 | 0.199119978 |
| 0.204021841 | 0.282367058 | 0.209161873 | 0.185648356 |
| 0.122812326 | 0.474802723 | 0.348000452 | 0.451828356 |
| 0.223919648 | 0.486730739 | 0.388207853 | 0.392939903 |
| 0.261961103 | 0.234168028 | 0.093862455 | 0.360106941 |
| 0.396501247 | 0.218177198 | 0.097071383 | 0.361373465 |
| 0.235549485 | 0.295552472 | 0.116866232 | 0.45022208  |
| 0.468146282 | 0.424987791 | 0.158361379 | 0.32405054  |
| 0.332572764 | 0.182722615 | 0.357455391 | 0.493785311 |
| 0.204119249 | 0.24224031  | 0.220716924 | 0.356700954 |
| 0.160214967 | 0.184371759 | 0.332946112 | 0.120391276 |
| 0.004052584 | 0.109709432 | 0.085755255 | 0.15773     |
| 0.125160015 | 0.253476326 | 0.281470985 | 0.469176173 |
| 0.137613033 | 0.379143578 | 0.249072318 | 0.207946526 |
| 0.401539689 | 0.244470801 | 0.214223888 | 0.247119281 |
| 0.245355581 | 0.023331346 | 0.107514103 | 0.496341033 |
| 0.061913421 | 0.156412183 | 0.246378943 | 0.00310649  |
| 0.075357138 | 0.34039347  | 0.139044445 | 0.238980167 |

|             |             |             |             |
|-------------|-------------|-------------|-------------|
| 0.42867627  | 0.231986114 | 0.190953901 | 0.211708153 |
| 0.272869256 | 0.112196297 | 0.004090554 | 0.440511396 |
| 0.456261983 | 0.437854718 | 0.455212642 | 0.436261522 |
| 0.41778641  | 0.326661159 | 0.350980332 | 0.210779524 |
| 0.130916522 | 0.111703785 | 0.162849912 | 0.222250668 |
| 0.0124023   | 0.311203479 | 0.222722111 | 0.154040041 |
| 0.335938644 | 0.270534011 | 0.060481159 | 0.234128104 |
| 0.028622108 | 0.117444188 | 0.246344571 | 0.21036857  |
| 0.302055064 | 0.029093547 | 0.123351728 | 0.209197703 |
| 0.389384088 | 0.33180827  | 0.203217068 | 0.476301586 |
| 0.219009921 | 0.146103238 | 0.210833853 | 0.305167721 |
| 0.104583051 | 0.10258814  | 0.24345175  | 0.021100348 |
| 0.121196909 | 0.437747304 | 0.234715288 | 0.082642941 |
| 0.209412312 | 0.011528105 | 0.337693059 | 0.48351162  |
| 0.414536889 | 0.467846016 | 0.442707806 | 0.162513458 |
| 0.452037117 | 0.070491508 | 0.4691483   | 0.360854368 |
| 0.219679383 | 0.001748392 | 0.011423413 | 0.417383287 |
| 0.241543383 | 0.084799479 | 0.156003039 | 0.185259542 |
| 0.121467133 | 0.149631531 | 0.096780827 | 0.138922411 |
| 0.248214348 | 0.186944042 | 0.148187652 | 0.439272892 |
| 0.209393411 | 0.205228217 | 0.241690809 | 0.115499246 |
| 0.23080209  | 0.075059235 | 0.117635394 | 0.010089692 |
| 0.295957062 | 0.147509919 | 0.449071058 | 0.456760545 |
| 0.460313681 | 0.281141759 | 0.186908629 | 0.205839875 |
| 0.396318639 | 0.11060737  | 0.194570482 | 0.1132579   |
| 0.427709582 | 0.264665594 | 0.287193593 | 0.289757231 |
| 0.46703042  | 0.433098458 | 0.061649662 | 0.341962879 |
| 0.015389737 | 0.003297517 | 0.216063198 | 0.25717558  |
| 0.083060981 | 0.243038421 | 0.251994054 | 0.216443481 |
| 0.205881239 | 0.04509905  | 0.179189909 | 0.174924993 |
| 0.225738794 | 0.254826099 | 0.192005793 | 0.256146187 |
| 0.198879621 | 0.140839152 | 0.173143981 | 0.177535087 |
| 0.224854932 | 0.30605458  | 0.222634723 | 0.048542495 |
| 0.227685875 | 0.234344871 | 0.080323713 | 0.161271358 |
| 0.375283875 | 0.429526935 | 0.078960288 | 0.019156048 |
| 0.26884086  | 0.24776567  | 0.445284889 | 0.437477746 |
| 0.483280159 | 0.487127979 | 0.39720844  | 0.156850237 |
| 0.092669185 | 0.229769267 | 0.19934428  | 0.11058284  |
| 0.457846787 | 0.087250294 | 0.431274687 | 0.186115195 |
| 0.136751668 | 0.180504727 | 0.052147538 | 0.116716128 |
| 0.219122422 | 0.173542529 | 0.16742265  | 0.136898641 |
| 0.230931098 | 0.156613702 | 0.082328412 | 0.185389441 |
| 0.318627236 | 0.122892919 | 0.164871767 | 0.223019359 |
| 0.304862324 | 0.16308443  | 0.324507881 | 0.436562468 |
| 0.136504364 | 0.140294296 | 0.18270847  | 0.321532887 |
| 0.36970037  | 0.226785964 | 0.02647096  | 0.395950232 |
| 0.441694941 | 0.280136906 | 0.445899883 | 0.385218464 |
| 0.10862219  | 0.218556544 | 0.218775889 | 0.241991969 |
| 0.190878808 | 0.21476739  | 0.220663787 | 0.091131098 |
| 0.32223739  | 0.473164876 | 0.378253052 | 0.153424446 |
| 0.233304575 | 0.133580155 | 0.078738795 | 0.389574205 |
| 0.141677964 | 0.102351821 | 0.202463258 | 0.375682298 |
| 0.002621496 | 0.094902215 | 0.452471983 | 0.185492541 |
| 0.487949006 | 0.429812965 | 0.410402996 | 0.200857336 |

|             |             |             |             |
|-------------|-------------|-------------|-------------|
| 0.002723766 | 0.286800628 | 0.23900305  | 0.224037418 |
| 0.387574008 | 0.301169601 | 0.144832149 | 0.09744901  |
| 0.283194448 | 0.096373721 | 0.155977772 | 0.194203067 |
| 0.125814913 | 0.273635767 | 0.207922018 | 0.20417216  |
| 0.180631287 | 0.125941626 | 0.142842114 | 0.183193258 |
| 0.139855993 | 0.239122003 | 0.325819498 | 0.176787026 |
| 0.132001534 | 0.418894989 | 0.351292262 | 0.044266399 |
| 0.217418072 | 0.381898235 | 0.393322674 | 0.005190778 |
| 0.312128113 | 0.017702593 | 0.179790527 | 0.170407904 |
| 0.173561323 | 0.208268846 | 0.210720256 | 0.20258774  |
| 0.266422389 | 0.203231794 | 0.193978153 | 0.192622831 |
| 0.146182133 | 0.194706166 | 0.239625424 | 0.237552643 |
| 0.184215213 | 0.127962192 | 0.140772552 | 0.1469262   |
| 0.067294837 | 0.402117465 | 0.261089281 | 0.092105425 |
| 0.201906185 | 0.243362455 | 0.347757024 | 0.439487745 |
| 0.388500722 | 0.139997941 | 0.256720827 | 0.376089688 |
| 0.158943916 | 0.198138542 | 0.091830649 | 0.231091193 |
| 0.19938398  | 0.163388571 | 0.225405664 | 0.21742024  |
| 0.323485976 | 0.394294676 | 0.250930921 | 0.407033581 |
| 0.224064751 | 0.250467732 | 0.175225936 | 0.096982179 |
| 0.161832692 | 0.156965367 | 0.190278904 | 0.004377263 |
| 0.260047452 | 0.173954191 | 0.397474297 | 0.440180418 |
| 0.179731523 | 0.365194992 | 0.180213674 | 0.107836036 |
| 0.148966504 | 0.210366109 | 0.15697811  | 0.335564712 |
| 0.129794981 | 0.163753235 | 0.211512845 | 0.18698464  |
| 0.33516653  | 0.323480889 | 0.199963939 | 0.228621161 |
| 0.211795153 | 0.170210102 | 0.460223867 | 0.125508554 |
| 0.241760612 | 0.135595511 | 0.229773234 | 0.216283667 |
| 0.198575703 | 0.456715524 | 0.082054005 | 0.465268415 |
| 0.235956885 | 0.1625184   | 0.474857971 | 0.216783524 |
| 0.196865379 | 0.112318487 | 0.121232938 | 0.23947669  |
| 0.221372581 | 0.192121905 | 0.011343304 | 0.064464062 |
| 0.278230061 | 0.232341518 | 0.345585522 | 0.316571634 |
| 0.181726704 | 0.323938938 | 0.104749643 | 0.242261521 |
| 0.433058787 | 0.463894381 | 0.195496393 | 0.26044253  |
| 0.314971316 | 0.114894131 | 0.241627684 | 0.023144825 |
| 0.266838596 | 0.242413396 | 0.224014041 | 0.086261361 |
| 0.039167623 | 0.139807419 | 0.26054778  | 0.094444126 |
| 0.436597935 | 0.123529336 | 0.256484482 | 0.298699717 |
| 0.200292761 | 0.466136084 | 0.141802142 | 0.301175853 |
| 0.092694039 | 0.225414269 | 0.222183488 | 0.24855682  |
| 0.162731781 | 0.199990899 | 0.30616299  | 0.153537414 |
| 0.056232665 | 0.187938144 | 0.006889771 | 0.403543256 |
| 0.441614546 | 0.217924686 | 0.236261959 | 0.184675153 |
| 0.240410101 | 0.35708255  | 0.221597925 | 0.224950537 |
| 0.018607513 | 0.220899934 | 0.18303812  | 0.351253769 |
| 0.135602507 | 0.256561364 | 0.069134247 | 0.226574414 |
| 0.439180402 | 0.216424085 | 0.284585363 | 0.187699529 |
| 0.43202361  | 0.339175359 | 0.166560107 | 0.166839909 |
| 0.27783622  | 0.087707186 | 0.210082588 | 0.490586525 |
| 0.163313904 | 0.147391914 | 0.378436003 | 0.183488288 |
| 0.205653054 | 0.356020303 | 0.244474018 | 0.483953056 |
| 0.101666859 | 0.219475869 | 0.346590964 | 0.43214299  |
| 0.285910774 | 0.146302877 | 0.16483082  | 0.193458501 |

|             |             |             |             |
|-------------|-------------|-------------|-------------|
| 0.405284401 | 0.088542288 | 0.195833392 | 0.298813906 |
| 0.148195939 | 0.25435411  | 0.222092722 | 0.166977848 |
| 0.057361718 | 0.187918866 | 0.205281821 | 0.1486539   |
| 0.234982562 | 0.233898201 | 0.188958339 | 0.378012137 |
| 0.11243603  | 0.031457829 | 0.43380982  | 0.014487813 |
| 0.201122129 | 0.252404951 | 0.202415688 | 0.23004416  |
| 0.19762173  | 1           | 0.228880506 | 0.003604538 |
| 0.361704578 | 0.034330562 | 0.224013762 | 0.174662654 |
| 0.213852032 | 0.083050345 | 0.410662089 | 0.461841104 |
| 0.242845783 | 0.195598884 | 0.188049822 | 0.423692376 |
| 0.10220548  | 0.187245506 | 0.22480645  | 0.278834204 |
| 0.143541985 | 0.216253046 | 0.231985401 | 0.196136017 |
| 0.300958361 | 0.215587169 |             |             |
| ZBTB32      | 0.071262459 | 0.393266167 | 0.065709078 |
| 0.107311928 | 0.139309616 | 0.180468798 | 0.066439228 |
| 0.097659497 | 0.306155667 | 0.172517188 | 0.171074607 |
| 0.028621851 | 0.023289733 | 0.407618624 | 0.053060983 |
| 0.21853335  | 0.034401902 | 0.093189976 | 0.049504438 |
| 0.137003468 | 0.132456689 | 0.135107719 | 0.205479963 |
| 0.126432112 | 0.228355733 | 0.244696969 | 0.174343755 |
| 0.444617903 | 0.111638186 | 0.260363158 | 0.121166836 |
| 0.408987065 | 0.159903681 | 0.160895136 | 0.026271299 |
| 0.190665998 | 0.005402697 | 0.452183387 | 0.147327666 |
| 0.056318903 | 0.33499072  | 0.191138858 | 0.133802105 |
| 0.224943924 | 0.052036975 | 0.104747773 | 0.269946166 |
| 0.220633474 | 0.135939218 | 0.075840516 | 0.29488604  |
| 0.190847729 | 0.249576848 | 0.32964537  | 0.004601532 |
| 0.11745535  | 0.028433173 | 0.090132422 | 0.459148603 |
| 0.155469907 | 0.07969169  | 0.152092854 | 0.132961021 |
| 0.22834637  | 0.245877046 | 0.164149021 | 0.216516358 |
| 0.457182318 | 0.070932712 | 0.300195884 | 0.08925741  |
| 0.210202449 | 0.049211982 | 0.15274959  | 0.098544606 |
| 0.175739864 | 0.10724995  | 0.142350069 | 0.127812347 |
| 0.426650033 | 0.48080315  | 0.169818308 | 0.488752118 |
| 0.045333297 | 0.160522153 | 0.114099416 | 0.216344851 |
| 0.276111257 | 0.081724542 | 0.304285284 | 0.48633501  |
| 0.055420887 | 0.247139343 | 0.31571787  | 0.141039866 |
| 0.367343966 | 0.107781143 | 0.214302969 | 0.060476173 |
| 0.211759741 | 0.178424482 | 0.45350788  | 0.231573534 |
| 0.122730165 | 0.092069296 | 0.479124859 | 0.14359526  |
| 0.138114135 | 0.084793266 | 0.123998747 | 0.369319519 |
| 0.27186064  | 0.434001017 | 0.38178921  | 0.312183116 |
| 0.193893771 | 0.449011251 | 0.299709818 | 0.357824357 |
| 0.075377718 | 0.478454728 | 0.127506467 | 0.035694661 |
| 0.082319577 | 0.052528297 | 0.107653136 | 0.24420845  |
| 0.385957927 | 0.224377753 | 0.143588614 | 0.130018523 |
| 0.376615377 | 0.464856411 | 0.486393589 | 0.356454698 |
| 0.048744394 | 0.100082917 | 0.196114142 | 0.137137105 |
| 0.271156137 | 0.091884496 | 0.108130038 | 0.49608098  |
| 0.350409179 | 0.342975428 | 0.126838867 | 0.484477465 |
| 0.128459603 | 0.458648378 | 0.411778093 | 0.119073461 |
| 0.489143406 | 0.47652864  | 0.446237025 | 0.240454889 |
| 0.432046652 | 0.19521072  | 0.046737675 | 0.337723534 |
| 0.414897661 | 0.005784821 | 0.400421746 | 0.429936247 |

|             |             |                      |             |
|-------------|-------------|----------------------|-------------|
| 0.4746952   | 0.377957913 | 0.451995276          | 0.43194245  |
| 0.46908434  | 0.076929587 | 0.022876237          | 0.176974175 |
| 0.492314511 | 0.354723297 | 0.067650244          | 0.21193649  |
| 0.188468254 | 0.206144597 | 0.308719885          | 0.166605108 |
| 0.457463209 | 0.378738137 | 0.421551543          | 0.329618665 |
| 0.19846209  | 0.309960712 | 0.174558672          | 0.463132535 |
| 0.04077636  | 0.105058094 | 0.074351612          | 0.230336961 |
| 0.179606898 | 0.104851103 | 0.224378934          | 0.182752227 |
| 0.133048967 | 0.188276838 | 0.129166638          | 0.226646748 |
| 0.102445014 | 0.238601358 | 0.116221562          | 0.155030405 |
| 0.042674823 | 0.173078406 | 0.139493522          | 0.086407883 |
| 0.125795781 | 0.304354094 | 0.294910675          | 0.420615704 |
| 0.164849679 | 0.193935078 | 0.30464933           | 0.409825638 |
| 0.372904553 | 0.174530215 | 0.193908113          | 0.012790346 |
| 0.187867032 | 0.151447437 | 0.073494643          | 0.19067531  |
| 0.223079923 | 0.168965927 | 0.241030905          | 0.25383982  |
| 0.192804059 | 0.112132443 | 0.191404281          | 0.402539587 |
| 0.176240395 | 0.135580604 | 0.381468075          | 0.24298404  |
| 0.006396796 | 0.208426815 | 0.359575707          | 0.07299833  |
| 0.249962457 | 0.052811748 | 0.093511 0.409867355 |             |
| 0.133076207 | 0.097116071 | 0.405786044          | 0.242661254 |
| 0.162513427 | 0.276831915 | 0.456734235          | 0.032426185 |
| 0.150932409 | 0.029390607 | 0.19223586           | 0.18335883  |
| 0.178109599 | 0.218404148 | 0.133278019          | 0.122065498 |
| 0.138373844 | 0.476057249 | 0.315231081          | 0.447416332 |
| 0.19499288  | 0.469536705 | 0.375441484          | 0.376908746 |
| 0.233915519 | 0.177638737 | 0.049571325          | 0.372062633 |
| 0.394177127 | 0.185868984 | 0.107857299          | 0.342980013 |
| 0.209232707 | 0.264197417 | 0.049187082          | 0.44273458  |
| 0.450912661 | 0.466059727 | 0.082266796          | 0.261504814 |
| 0.326979153 | 0.147837279 | 0.315894077          | 0.459181295 |
| 0.199972969 | 0.18294301  | 0.176312766          | 0.302071923 |
| 0.151879745 | 0.099616646 | 0.284884115          | 0.059762981 |
| 0.002617784 | 0.082089747 | 0.077637838          | 0.08710912  |
| 0.062460691 | 0.245741811 | 0.254115554          | 0.470364459 |
| 0.089374413 | 0.349280361 | 0.196727779          | 0.174540868 |
| 0.4269376   | 0.156845432 | 0.157549548          | 0.200980795 |
| 0.202017295 | 0.01641204  | 0.076793891          | 0.496976567 |
| 0.066734733 | 0.094810718 | 0.169707363          | 0.002874046 |
| 0.064147416 | 0.362032887 | 0.14714945           | 0.233494026 |
| 0.380099798 | 0.244305122 | 0.201760581          | 0.218782275 |
| 0.218087064 | 0.07674729  | 0.001378094          | 0.433486323 |
| 0.435115457 | 0.411497731 | 0.442291663          | 0.427003461 |
| 0.389328474 | 0.279007847 | 0.318273449          | 0.198839536 |
| 0.091319268 | 0.092153583 | 0.111483823          | 0.167392526 |
| 0.00585134  | 0.263670106 | 0.129255027          | 0.133961028 |
| 0.29041166  | 0.222380992 | 0.041631833          | 0.165425907 |
| 0.037772454 | 0.085324761 | 0.188920734          | 0.114847372 |
| 0.22346938  | 0.022592548 | 0.148265487          | 0.180972974 |
| 0.419455705 | 0.328436536 | 0.15023516           | 0.479396766 |
| 0.170308755 | 0.17525722  | 0.160717835          | 0.252775867 |
| 0.070213914 | 0.100358855 | 0.198455467          | 0.031606568 |
| 0.08045679  | 0.407135439 | 0.172551498          | 0.084930083 |
| 0.18902156  | 0.011197342 | 0.353277388          | 0.475234533 |

|             |             |             |             |
|-------------|-------------|-------------|-------------|
| 0.446673824 | 0.456190716 | 0.443916251 | 0.109577647 |
| 0.465546096 | 0.035935692 | 0.46791427  | 0.375388142 |
| 0.214555439 | 0.002793854 | 0.003811241 | 0.413510849 |
| 0.210349697 | 0.098542322 | 0.127239047 | 0.18042751  |
| 0.080058944 | 0.133940544 | 0.052000739 | 0.07618261  |
| 0.235576769 | 0.104964374 | 0.064549454 | 0.465121613 |
| 0.149307667 | 0.123894915 | 0.206376588 | 0.107879653 |
| 0.194660751 | 0.050910326 | 0.105353529 | 0.004403441 |
| 0.225424569 | 0.16554899  | 0.474020584 | 0.46042799  |
| 0.446877732 | 0.242926307 | 0.183649891 | 0.149221674 |
| 0.345723721 | 0.136717454 | 0.151115911 | 0.12151677  |
| 0.461446598 | 0.25443678  | 0.260535647 | 0.299302918 |
| 0.45369709  | 0.443878533 | 0.039331404 | 0.331698335 |
| 0.013120889 | 0.000367144 | 0.2272604   | 0.193688222 |
| 0.026938984 | 0.188493641 | 0.230709021 | 0.133933078 |
| 0.105179603 | 0.039099853 | 0.115089289 | 0.11076676  |
| 0.19139787  | 0.188086294 | 0.120446092 | 0.204364698 |
| 0.118864299 | 0.077229327 | 0.09449483  | 0.093773577 |
| 0.122000128 | 0.326934361 | 0.241070138 | 0.030836957 |
| 0.20989312  | 0.198800842 | 0.057482349 | 0.138390893 |
| 0.369711412 | 0.42761701  | 0.05099368  | 0.013092836 |
| 0.248693525 | 0.16121744  | 0.421133913 | 0.455216532 |
| 0.492867629 | 0.468072328 | 0.378737521 | 0.075216728 |
| 0.060426218 | 0.172241743 | 0.125154815 | 0.046269378 |
| 0.450850008 | 0.100352028 | 0.431178355 | 0.119563289 |
| 0.107850334 | 0.142485121 | 0.029164319 | 0.071988577 |
| 0.177314137 | 0.12822526  | 0.094664522 | 0.168306053 |
| 0.171513148 | 0.095521736 | 0.053088824 | 0.131635856 |
| 0.306764715 | 0.090624241 | 0.128334087 | 0.155431196 |
| 0.293328251 | 0.129302151 | 0.305669857 | 0.413230166 |
| 0.124296388 | 0.105249015 | 0.216030707 | 0.258945152 |
| 0.373807235 | 0.208124432 | 0.02163936  | 0.428565175 |
| 0.408095032 | 0.278128464 | 0.458653406 | 0.322921514 |
| 0.097333966 | 0.175856811 | 0.13798402  | 0.188944473 |
| 0.126368304 | 0.182281579 | 0.127410838 | 0.066074661 |
| 0.25853599  | 0.449887577 | 0.402945978 | 0.097049593 |
| 0.205002808 | 0.13384609  | 0.091856449 | 0.355917507 |
| 0.089047687 | 0.091916494 | 0.193210245 | 0.332223941 |
| 0.001178866 | 0.04387495  | 0.409980598 | 0.11554322  |
| 0.459333369 | 0.420779617 | 0.405209759 | 0.12851633  |
| 0.001357222 | 0.26065329  | 0.224449718 | 0.204551274 |
| 0.412607649 | 0.276834126 | 0.068931094 | 0.056646779 |
| 0.231370825 | 0.114859401 | 0.103363929 | 0.161318082 |
| 0.098288291 | 0.27508961  | 0.155460059 | 0.140798257 |
| 0.102116679 | 0.130727105 | 0.083792218 | 0.131307537 |
| 0.061436737 | 0.194483563 | 0.291475326 | 0.153004719 |
| 0.11637069  | 0.374980107 | 0.370496723 | 0.033390607 |
| 0.139429665 | 0.343348863 | 0.347116905 | 0.007601236 |
| 0.299168407 | 0.010252736 | 0.100091173 | 0.111859384 |
| 0.100704176 | 0.11721566  | 0.138979896 | 0.137377041 |
| 0.254863742 | 0.138152335 | 0.147427441 | 0.151219699 |
| 0.083559493 | 0.125180093 | 0.199275064 | 0.202472287 |
| 0.131509282 | 0.092037453 | 0.146625684 | 0.164316125 |
| 0.04006967  | 0.384164796 | 0.238009393 | 0.102812769 |



|             |             |             |             |
|-------------|-------------|-------------|-------------|
| 0.135269094 | 0.193000538 | 0.306155841 | 0.467432157 |
| 0.332980265 | 0.166710654 | 0.164011218 | 0.401582772 |
| 0.138223189 | 0.154244587 | 0.074867727 | 0.197941225 |
| 0.130768848 | 0.10472443  | 0.183323719 | 0.260365816 |
| 0.325436742 | 0.380851042 | 0.224871127 | 0.37428207  |
| 0.172541254 | 0.184386396 | 0.198868544 | 0.057068714 |
| 0.140986443 | 0.140624729 | 0.116544418 | 0.004183459 |
| 0.22504827  | 0.170964465 | 0.402838355 | 0.468261679 |
| 0.113051343 | 0.319881619 | 0.196087666 | 0.09601135  |
| 0.167105264 | 0.262678207 | 0.134477799 | 0.320037817 |
| 0.084498551 | 0.103224067 | 0.143957874 | 0.183697069 |
| 0.309718186 | 0.303962646 | 0.105394187 | 0.146262541 |
| 0.129741343 | 0.165081827 | 0.454007558 | 0.100082345 |
| 0.248531142 | 0.080519132 | 0.235897134 | 0.163694205 |
| 0.117365239 | 0.446916383 | 0.059910794 | 0.460254406 |
| 0.179137439 | 0.147764246 | 0.444395727 | 0.144385982 |
| 0.143482066 | 0.050712481 | 0.071174494 | 0.197397205 |
| 0.127657555 | 0.12900437  | 0.010230615 | 0.047609241 |
| 0.234650533 | 0.154240652 | 0.368561109 | 0.259075551 |
| 0.101926344 | 0.254706286 | 0.046463168 | 0.189781093 |
| 0.468598967 | 0.477597487 | 0.173138062 | 0.2141372   |
| 0.275551751 | 0.071886897 | 0.259554382 | 0.010095625 |
| 0.261971129 | 0.234102514 | 0.199007148 | 0.04596498  |
| 0.024649547 | 0.095681955 | 0.272010132 | 0.090115868 |
| 0.403129546 | 0.080687163 | 0.2374639   | 0.281299764 |
| 0.16379563  | 0.489976518 | 0.062633533 | 0.279078278 |
| 0.066103562 | 0.174253086 | 0.153081035 | 0.183444223 |
| 0.11976271  | 0.131923652 | 0.280147138 | 0.093680327 |
| 0.035078506 | 0.125453316 | 0.007431292 | 0.408272189 |
| 0.47984865  | 0.16103452  | 0.205494906 | 0.151523635 |
| 0.183763729 | 0.305822822 | 0.126233406 | 0.181689818 |
| 0.010728089 | 0.193933686 | 0.11350714  | 0.356782811 |
| 0.142756779 | 0.22249238  | 0.039574735 | 0.141884587 |
| 0.464839542 | 0.173983146 | 0.225066846 | 0.195648273 |
| 0.448271144 | 0.313236236 | 0.18711257  | 0.080096647 |
| 0.265358531 | 0.082064023 | 0.184809635 | 0.471498624 |
| 0.094394317 | 0.089604846 | 0.349185315 | 0.139052405 |
| 0.127995075 | 0.336520923 | 0.236054968 | 0.464372506 |
| 0.045057329 | 0.176150796 | 0.304496574 | 0.427413083 |
| 0.219854004 | 0.069600355 | 0.106343412 | 0.121361462 |
| 0.444768977 | 0.068327918 | 0.119268918 | 0.295775825 |
| 0.102435799 | 0.188349305 | 0.226821105 | 0.085097722 |
| 0.027500663 | 0.093864186 | 0.15692544  | 0.115349735 |
| 0.179956169 | 0.178075495 | 0.112105807 | 0.343513302 |
| 0.069807548 | 0.025039961 | 0.40207085  | 0.012514096 |
| 0.186105711 | 0.229199932 | 0.129500943 | 0.153750922 |
| 0.200661971 | 0.228880506 | 1           | 0.003944386 |
| 0.317972169 | 0.016299064 | 0.124703507 | 0.116372124 |
| 0.132421827 | 0.063250891 | 0.406835334 | 0.437673509 |
| 0.20039588  | 0.12979373  | 0.153676058 | 0.413306007 |
| 0.058532952 | 0.137749191 | 0.152430747 | 0.297607729 |
| 0.081463583 | 0.212236935 | 0.188710752 | 0.162723626 |
| 0.279569349 | 0.134521749 |             |             |
| ZBTB41      | 0.070225827 | 0.002999741 | 0.061426455 |

|             |             |             |                      |
|-------------|-------------|-------------|----------------------|
| 0.006665427 | 0.001035853 | 0.000979908 | 0.051876299          |
| 0.020070386 | 0.002619736 | 0.000440157 | 0.003874789          |
| 0.134250494 | 0.001078427 | 0.004778998 | 0.053570855          |
| 0.000837164 | 0.062592123 | 0.057900889 | 3.73E-05             |
| 0.000251135 | 0.002571793 | 0.000164093 | 0.002476026          |
| 0.00106864  | 0.056128188 | 0.002892018 | 0.000440561          |
| 0.002555029 | 0.00061136  | 0.00076935  | 0.000762525          |
| 0.014840518 | 0.00125948  | 0.000484294 | 0.048247627          |
| 0.001513695 | 0.000101141 | 0.012801777 | 0.005711295          |
| 0.000322455 | 0.021423714 | 9.35E-05    | 0.013448886 7.40E-05 |
| 0.118162807 | 0.000637468 | 0.000377731 | 0.001265403          |
| 0.00158126  | 0.087490738 | 0.001002646 | 0.00019274           |
| 0.010751368 | 0.000814152 | 0.000606284 | 0.000853697          |
| 0.009480478 | 0.002226564 | 0.004714428 | 0.043656209          |
| 0.046940133 | 0.000722248 | 0.00309908  | 0.00058652           |
| 0.001444485 | 0.009438427 | 8.22E-06    | 0.005685085          |
| 0.00054659  | 0.000173322 | 0.000187583 | 0.002481278          |
| 0.042097889 | 0.052509    | 0.024992671 | 0.000134572          |
| 0.019318122 | 0.001981101 | 0.000708892 | 0.002824576          |
| 0.008456962 | 0.011645573 | 0.005443977 | 0.000193178          |
| 7.50E-05    | 0.000169474 | 0.008717701 | 0.002745426          |
| 0.01581103  | 0.004092851 | 0.006706863 | 0.032195329          |
| 0.000169228 | 0.002513845 | 0.0545116   | 0.002938533          |
| 0.001299785 | 3.79E-05    | 0.00034512  | 0.000574199          |
| 0.001445122 | 0.006760859 | 0.027434581 | 0.000655965          |
| 0.084909983 | 0.008379438 | 3.30E-05    | 0.003511503          |
| 0.061669186 | 0.001066821 | 0.000866967 | 0.00189491           |
| 0.003308911 | 0.001977074 | 0.006436166 | 0.000497887          |
| 0.004338702 | 0.003281413 | 0.004278909 | 0.000617302          |
| 0.004114468 | 0.025555336 | 0.070598291 | 0.038721939          |
| 0.029344594 | 0.000116598 | 0.013323756 | 0.00207803           |
| 0.005431985 | 0.028994896 | 0.009114902 | 0.002260153          |
| 0.006301004 | 0.003788195 | 0.00452134  | 0.10249731           |
| 0.001722933 | 0.00036855  | 0.003123908 | 0.004953993          |
| 0.03598316  | 5.23E-05    | 0.009454453 | 0.013632989          |
| 0.002192448 | 0.014175518 | 0.010871005 | 0.008915466          |
| 0.006857771 | 0.002108284 | 0.043664558 | 0.006931999          |
| 0.008322006 | 0.004458227 | 0.000538344 | 0.007828677          |
| 0.005071846 | 7.83E-05    | 0.005390813 | 0.007546999 1.76E-05 |
| 0.001376435 | 0.001778764 | 0.004345999 | 0.001107449          |
| 0.003855563 | 0.002592425 | 0.004326002 | 0.059054071          |
| 0.00015699  | 0.007184698 | 0.006226356 | 0.008130514          |
| 0.006331511 | 6.77E-05    | 0.001437536 | 0.002885734          |
| 0.001081537 | 0.000318101 | 0.008958218 | 0.001943531          |
| 0.001726521 | 0.003633689 | 0.001317912 | 0.024686883          |
| 0.000545365 | 0.009154909 | 0.025714461 | 0.058032678          |
| 0.103556987 | 0.00737904  | 4.91E-05    | 0.029005019          |
| 0.001793916 | 0.000781233 | 0.038406954 | 0.001828703          |
| 0.001010549 | 0.000998508 | 0.09767245  | 0.000566127          |
| 0.018472896 | 0.031565533 | 0.063835108 | 0.067767505          |
| 0.01322079  | 0.017073165 | 0.008563033 | 0.044465332          |
| 0.000586931 | 0.002182037 | 0.000523033 | 0.042755177          |
| 0.00212246  | 0.005597373 | 0.013307452 | 0.000279821          |
| 0.031222505 | 0.005277413 | 0.001266293 | 0.000976772          |

|             |             |             |             |
|-------------|-------------|-------------|-------------|
| 0.002026198 | 0.000101896 | 0.046721808 | 0.008596882 |
| 0.001829224 | 0.001801733 | 0.015591814 | 0.017305772 |
| 0.000577147 | 0.016272829 | 0.042789388 | 0.002616988 |
| 0.004023051 | 0.000442443 | 0.014511707 | 0.007680336 |
| 0.002205949 | 0.000781201 | 0.00863533  | 0.000175025 |
| 0.000452558 | 0.002833309 | 0.000144769 | 0.000642715 |
| 0.001916203 | 0.00125622  | 0.000184444 | 0.028972849 |
| 0.003955382 | 4.86E-05    | 1.76E-05    | 0.000449352 |
| 0.000210977 | 0.023390878 | 0.01139176  | 0.000729479 |
| 0.000792415 | 0.052959999 | 0.005582769 | 0.003905124 |
| 0.003732379 | 3.50E-05    | 0.004255098 | 0.002065859 |
| 0.005983264 | 0.00520928  | 0.000328974 | 0.001543819 |
| 0.002735215 | 0.002087615 | 1.53E-06    | 0.070288898 |
| 0.000696565 | 1.44E-05    | 0.000797517 | 5.98E-05    |
| 0.009446876 | 0.004996447 | 0.027533564 | 0.003284837 |
| 0.009866999 | 0.024405352 | 0.002015802 | 0.005089305 |
| 0.000238099 | 0.001273815 | 0.000814551 | 0.003439171 |
| 0.040355759 | 0.001524783 | 0.010788082 | 0.002877599 |
| 0.000450362 | 0.055334144 | 0.09965331  | 0.020001712 |
| 0.00010874  | 4.93E-05    | 0.001241067 | 0.004018005 |
| 0.072662355 | 0.006476728 | 0.012231789 | 0.004452121 |
| 0.007612267 | 0.000601092 | 0.000181394 | 0.000804078 |
| 0.016160339 | 0.002301875 | 0.016030274 | 0.00937002  |
| 0.076132144 | 0.000105275 | 0.003605839 | 0.001503404 |
| 0.112222288 | 0.001058831 | 0.072286411 | 0.060023279 |
| 0.002924836 | 0.043773936 | 0.034499313 | 2.47E-05    |
| 0.005460527 | 0.064384119 | 0.000484182 | 0.002708316 |
| 0.003247956 | 0.003402209 | 0.003295885 | 0.005216378 |
| 0.002222732 | 0.001394181 | 0.001756838 | 0.002985037 |
| 0.022549602 | 0.020586599 | 0.000345491 | 0.005727149 |
| 0.001993639 | 0.003860357 | 0.001256118 | 0.073236744 |
| 0.000997636 | 0.007466596 | 0.101476328 | 0.000594789 |
| 0.040095297 | 0.001920173 | 0.003397161 | 0.004939604 |
| 0.002773375 | 0.075301375 | 0.000107855 | 0.000144505 |
| 0.009219361 | 0.018729847 | 0.000652582 | 0.004426528 |
| 0.007323135 | 0.038749739 | 0.002452735 | 0.002480139 |
| 0.058445178 | 8.60E-05    | 0.001420015 | 3.23E-05    |
| 0.005354674 | 7.19E-06    | 0.010789613 | 2.04E-05    |
| 0.079227201 | 0.013406826 | 0.005625115 | 0.00456604  |
| 0.003255318 | 0.004715775 | 9.25E-05    | 0.005040963 |
| 0.007544573 | 0.003435221 | 0.005085995 | 5.20E-05    |
| 0.001265461 | 0.003254134 | 0.00182864  | 0.000792008 |
| 0.06658955  | 0.049842168 | 0.00033595  | 0.03427047  |
| 0.0395774   | 0.043645914 | 0.000580463 | 0.000848946 |
| 0.004695679 | 0.000375563 | 0.006107086 | 0.010723655 |
| 0.014104508 | 0.000493947 | 0.069864046 | 0.000327575 |
| 0.054995216 | 0.048782983 | 0.002897827 | 0.002441139 |
| 0.053506952 | 0.010075916 | 0.004242549 | 0.007329539 |
| 0.00115467  | 0.000611846 | 0.000480001 | 0.001998993 |
| 0.065919844 | 0.000285119 | 0.056806415 | 0.004262523 |
| 0.002163954 | 0.018691845 | 0.02482678  | 0.006448494 |
| 0.007464702 | 0.114478367 | 0.003141175 | 0.006936167 |
| 0.000368856 | 0.002066707 | 0.013343132 | 0.000407387 |
| 0.000828094 | 0.027999145 | 0.001031995 | 0.002144478 |

|             |             |             |             |
|-------------|-------------|-------------|-------------|
| 0.056687175 | 0.00050502  | 0.000236525 | 0.008079043 |
| 0.002207881 | 0.00116375  | 0.010090107 | 0.000931757 |
| 0.000423288 | 0.007406913 | 0.014796925 | 6.08E-06    |
| 0.016387417 | 0.067296587 | 0.081092761 | 0.000133421 |
| 0.00020828  | 0.108257187 | 0.043849426 | 0.00389484  |
| 0.002918343 | 0.025740979 | 0.02752035  | 0.027188543 |
| 0.001610082 | 0.003199888 | 0.003356169 | 0.007358408 |
| 0.006890033 | 0.016751936 | 0.010693914 | 0.071569023 |
| 0.003540208 | 0.000541357 | 0.003215345 | 0.004355909 |
| 0.08225963  | 0.004696311 | 0.000717368 | 0.049058786 |
| 0.008391468 | 0.03713925  | 0.055733658 | 4.24E-05    |
| 0.043735477 | 0.014787644 | 0.044069014 | 0.004499027 |
| 0.000458926 | 0.061660791 | 0.035383396 | 0.01056403  |
| 0.000774991 | 0.045486182 | 0.00127615  | 0.003653598 |
| 0.000715802 | 0.000804345 | 0.013022472 | 0.074328821 |
| 0.037347056 | 0.004980802 | 0.001608278 | 0.001293883 |
| 0.000207685 | 0.007698253 | 0.002498866 | 0.003540592 |
| 0.000698129 | 0.005532994 | 0.007566959 | 0.066239751 |
| 0.001152938 | 0.000409037 | 0.002215954 | 0.02911084  |
| 0.001126769 | 0.007750065 | 0.097703246 | 0.013915178 |
| 0.010167906 | 0.003859207 | 0.031647305 | 0.000255141 |
| 0.030602529 | 0.085434736 | 0.001922883 | 0.000122631 |
| 0.056530409 | 0.000105224 | 0.001084409 | 4.64E-05    |
| 0.002081384 | 0.00241602  | 0.009562693 | 0.005685052 |
| 0.002851337 | 0.010830737 | 0.001753569 | 0.002124751 |
| 0.000187746 | 0.004616016 | 0.000657241 | 0.004109881 |
| 0.00928391  | 0.000407219 | 0.042181123 | 0.020364052 |
| 0.084292438 | 0.027018812 | 0.000165713 | 0.000125775 |
| 0.002679147 | 0.037338461 | 0.012165722 | 0.006587739 |
| 0.033837046 | 0.000332816 | 0.009296072 | 0.001122323 |
| 0.034818792 | 0.015659504 | 0.000303363 | 0.000119773 |
| 0.004271468 | 0.003946728 | 0.089053569 | 0.000184057 |
| 0.003399292 | 0.003466062 | 0.008935723 | 0.001569893 |
| 0.076293937 | 0.014712571 | 0.011737709 | 0.009321372 |
| 0.012070804 | 0.007277831 | 0.000839934 | 0.003729433 |
| 0.010248551 | 0.007755783 | 0.026478232 | 0.012574649 |
| 0.007089441 | 0.000670627 | 0.000888116 | 0.002932772 |
| 0.042678897 | 0.064175097 | 0.07289263  | 0.031384971 |
| 0.002274228 | 0.044842021 | 0.067648723 | 0.020060812 |
| 0.00055328  | 0.015973783 | 0.003778888 | 0.006038143 |
| 0.047271471 | 0.002357803 | 0.003249944 | 0.000148864 |
| 0.000137131 | 0.052605387 | 0.000631858 | 0.021427114 |
| 0.002001099 | 0.000209119 | 0.010483728 | 0.00139675  |
| 0.019128474 | 0.043571145 | 0.005709719 | 0.000678137 |
| 0.000553769 | 0.000353146 | 0.030769817 | 0.038909542 |
| 0.045290962 | 0.001601253 | 0.016040608 | 0.008939201 |
| 0.002524801 | 0.002208443 | 0.006167934 | 0.001079311 |
| 0.010013682 | 0.0001628   | 0.082207329 | 0.000663295 |
| 0.0432039   | 0.069351798 | 0.000597339 | 0.001747347 |
| 0.013422284 | 0.001982752 | 0.001091666 | 0.000755408 |
| 0.000487013 | 0.000517376 | 0.010357597 | 0.005725323 |
| 0.019255214 | 0.006275763 | 0.023736778 | 6.63E-05    |
| 0.000969598 | 0.000654645 | 0.006812408 | 0.00672313  |
| 0.002347728 | 0.079410349 | 0.002598646 | 0.002391143 |

|                      |                      |                      |             |
|----------------------|----------------------|----------------------|-------------|
| 0.04905128           | 0.010874875          | 0.003577787          | 0.000651132 |
| 0.004472598          | 0.001917469          | 0.000300045          | 0.004831255 |
| 0.000466439          | 7.84E-06 5.51E-05    | 0.013367848          | 0.000131668 |
| 0.001606637          | 0.002631117          | 0.000468552          | 0.007314025 |
| 0.001822014          | 0.005587739          | 0.004974249          | 0.007573172 |
| 0.009271698          | 0.021578087          | 0.012525492          | 0.060180594 |
| 0.002199276          | 2.53E-05 0.000769957 | 0.000157547          |             |
| 0.000134503          | 0.066889075          | 0.033795341          | 0.001255017 |
| 0.000768318          | 0.037161382          | 0.002332119          | 0.0008074   |
| 0.000851088          | 0.00072305           | 0.025223337          | 0.008580452 |
| 0.011970261          | 0.003259608          | 0.005153259          | 0.010732987 |
| 0.000283183          | 0.000291444          | 0.00424733           | 0.000209067 |
| 0.004981976          | 3.84E-05 0.095676026 | 0.002021055          |             |
| 0.001327773          | 0.020404514          | 0.007276558          | 5.70E-05    |
| 0.039627973          | 0.000527506          | 0.013170944          | 0.004008034 |
| 0.002085699          | 0.000280954          | 0.009907832          | 0.00089104  |
| 0.021102538          | 0.006684755          | 0.000498059          | 0.001284682 |
| 0.012413144          | 0.000331219          | 0.012157821          | 0.001706679 |
| 0.021812358          | 0.000319359          | 0.003543807          | 0.00245673  |
| 0.024725408          | 0.000270097          | 0.00053223           | 0.095472782 |
| 1.71E-06 0.004671884 | 0.023190198          | 0.000136449          |             |
| 0.00229758           | 0.018217469          | 0.00017497           | 0.005568606 |
| 0.000125282          | 0.004374556          | 0.021013381          | 0.025512658 |
| 0.00151636           | 0.003889716          | 0.01542663           | 0.000355473 |
| 0.000296571          | 0.00633993           | 0.005645139          | 0.019156355 |
| 0.000117277          | 0.008234422          | 4.55E-05 0.009010892 |             |
| 0.000492399          | 0.00399503           | 0.027754588          | 0.006742441 |
| 0.001073154          | 0.041267643          | 0.012211275          | 0.001343295 |
| 0.000780605          | 0.013866571          | 0.010341198          | 0.019591022 |
| 0.008498587          | 9.09E-06 0.004624656 | 0.002052484          |             |
| 0.016773084          | 0.000468528          | 0.056600698          | 0.003604538 |
| 0.003944386          | 1 0.00336391         | 0.000338161          |             |
| 0.000964513          | 0.00383369           | 5.46E-05 0.087677143 |             |
| 0.006327303          | 0.003643586          | 0.005636179          | 9.80E-05    |
| 0.000273884          | 0.006294768          | 0.000191442          | 0.001329821 |
| 3.36E-05 0.000921005 | 0.000753507          | 0.000383384          |             |
| 0.000181852          | 0.000474608          | 0.005529406          | 0.004464489 |
| ZC3H6 0.107937491    | 0.393806179          | 0.076621425          |             |
| 0.185624078          | 0.357252569          | 0.359445574          | 0.108346967 |
| 0.178244235          | 0.319193059          | 0.27088147           | 0.368253219 |
| 0.041026049          | 0.12965104           | 0.433964253          | 0.107488371 |
| 0.399439028          | 0.076550786          | 0.168422448          | 0.101826062 |
| 0.28062851           | 0.351072146          | 0.352794582          | 0.329735771 |
| 0.35516233           | 0.198355055          | 0.329356597          | 0.370732404 |
| 0.466401166          | 0.249211907          | 0.392179207          | 0.178277278 |
| 0.414376429          | 0.368468672          | 0.364740116          | 0.033863763 |
| 0.39378329           | 0.031710007          | 0.429617402          | 0.338011444 |
| 0.211285569          | 0.349061038          | 0.282436882          | 0.309764722 |
| 0.332614628          | 0.062603791          | 0.174181137          | 0.390392737 |
| 0.32700416           | 0.337581509          | 0.089564143          | 0.385726293 |
| 0.364132167          | 0.325661679          | 0.321166739          | 0.002987754 |
| 0.321017051          | 0.116226689          | 0.26088682           | 0.471371691 |
| 0.249376178          | 0.198481026          | 0.278904558          | 0.289945575 |
| 0.38005058           | 0.385232047          | 0.307250872          | 0.339894666 |

|             |             |             |             |
|-------------|-------------|-------------|-------------|
| 0.472198801 | 0.235290487 | 0.381415079 | 0.202715667 |
| 0.384746661 | 0.058336325 | 0.205649675 | 0.113007709 |
| 0.39481667  | 0.273947984 | 0.369980198 | 0.355280917 |
| 0.383461198 | 0.500203885 | 0.285408497 | 0.464112483 |
| 0.18231692  | 0.370742626 | 0.345111875 | 0.349264005 |
| 0.369388618 | 0.1424011   | 0.38756494  | 0.500989869 |
| 0.085011555 | 0.323770539 | 0.378573163 | 0.15206107  |
| 0.391202781 | 0.320023137 | 0.328827367 | 0.235107375 |
| 0.385738435 | 0.377843868 | 0.459688008 | 0.322355836 |
| 0.361991895 | 0.10214866  | 0.448672997 | 0.356439967 |
| 0.338031655 | 0.115881604 | 0.30753141  | 0.42682086  |
| 0.396988112 | 0.461077073 | 0.381319673 | 0.3669188   |
| 0.383874892 | 0.472855645 | 0.379823111 | 0.398295397 |
| 0.130222831 | 0.492229631 | 0.232655994 | 0.088848234 |
| 0.095288312 | 0.154902282 | 0.31155847  | 0.319824241 |
| 0.442978261 | 0.339533542 | 0.237488871 | 0.316624359 |
| 0.452858579 | 0.437319367 | 0.49044885  | 0.380329244 |
| 0.073025497 | 0.309788435 | 0.384007746 | 0.30476251  |
| 0.384760046 | 0.166093447 | 0.321271163 | 0.480789268 |
| 0.369943765 | 0.410089617 | 0.192609617 | 0.479631299 |
| 0.263494579 | 0.499769433 | 0.405748349 | 0.233275679 |
| 0.491909537 | 0.462393515 | 0.497268385 | 0.391698856 |
| 0.448711674 | 0.335565207 | 0.105956492 | 0.361438797 |
| 0.479224099 | 0.030342666 | 0.445641406 | 0.474776537 |
| 0.464957313 | 0.423852328 | 0.509914968 | 0.482904103 |
| 0.465747348 | 0.111773325 | 0.046661886 | 0.350271622 |
| 0.47652824  | 0.377611706 | 0.218870864 | 0.381244048 |
| 0.389150834 | 0.367434472 | 0.386463747 | 0.294501974 |
| 0.506503522 | 0.423146478 | 0.455356598 | 0.367558086 |
| 0.310388938 | 0.317511421 | 0.368541174 | 0.432331596 |
| 0.084240479 | 0.145958756 | 0.073044117 | 0.333083705 |
| 0.292149614 | 0.249241521 | 0.34725912  | 0.380002429 |
| 0.259016019 | 0.330966307 | 0.329735274 | 0.384743223 |
| 0.073581199 | 0.381717677 | 0.216307313 | 0.211175195 |
| 0.088009476 | 0.162881593 | 0.233766102 | 0.220870153 |
| 0.324997728 | 0.241039303 | 0.384983285 | 0.469535642 |
| 0.379088398 | 0.20547121  | 0.385599654 | 0.464088142 |
| 0.436887604 | 0.382272793 | 0.268841148 | 0.028771096 |
| 0.310582979 | 0.3048247   | 0.239538827 | 0.380390995 |
| 0.192199074 | 0.30962773  | 0.388596341 | 0.39244946  |
| 0.279376334 | 0.18937137  | 0.384017925 | 0.4175483   |
| 0.174137683 | 0.346419349 | 0.427621397 | 0.363178656 |
| 0.008901113 | 0.348626402 | 0.404912003 | 0.251731994 |
| 0.337558426 | 0.192279595 | 0.269534715 | 0.445789708 |
| 0.311538125 | 0.313680825 | 0.466448912 | 0.395232889 |
| 0.327846083 | 0.223070192 | 0.508292912 | 0.074003676 |
| 0.373415973 | 0.091168407 | 0.338694828 | 0.28697595  |
| 0.301545617 | 0.332295512 | 0.363027144 | 0.331946591 |
| 0.146250441 | 0.489893623 | 0.363093744 | 0.485320261 |
| 0.364273744 | 0.509913224 | 0.428673794 | 0.422817777 |
| 0.371712282 | 0.356668112 | 0.193836199 | 0.392555503 |
| 0.434070708 | 0.292273764 | 0.098008991 | 0.387599485 |
| 0.348498329 | 0.392255478 | 0.186053847 | 0.480994279 |
| 0.478916287 | 0.42669127  | 0.224181635 | 0.386282243 |

|             |             |             |             |
|-------------|-------------|-------------|-------------|
| 0.361755282 | 0.270664724 | 0.386346861 | 0.515627159 |
| 0.297695786 | 0.382583674 | 0.369654848 | 0.399500261 |
| 0.2229853   | 0.310738135 | 0.316588673 | 0.235664073 |
| 0.012092314 | 0.117075442 | 0.096517289 | 0.24751765  |
| 0.246734147 | 0.362219134 | 0.396746052 | 0.488597136 |
| 0.180219429 | 0.400142614 | 0.275774476 | 0.339321604 |
| 0.397309602 | 0.376163675 | 0.377519755 | 0.389264517 |
| 0.277715858 | 0.04287292  | 0.183780445 | 0.498930355 |
| 0.058418244 | 0.292288406 | 0.336261801 | 0.008091765 |
| 0.08035257  | 0.347996067 | 0.115275287 | 0.211896134 |
| 0.468883516 | 0.207204373 | 0.239168526 | 0.295692045 |
| 0.362464388 | 0.144040718 | 0.010026639 | 0.466118395 |
| 0.464551736 | 0.442059912 | 0.459142296 | 0.4337218   |
| 0.42716844  | 0.376514919 | 0.395049623 | 0.32211885  |
| 0.157772063 | 0.122267265 | 0.288205801 | 0.344798102 |
| 0.010054817 | 0.374452657 | 0.356979481 | 0.190375598 |
| 0.394102838 | 0.336756895 | 0.069661362 | 0.380222426 |
| 0.038896035 | 0.229427915 | 0.336866351 | 0.293201571 |
| 0.376897562 | 0.030600233 | 0.232884846 | 0.340965439 |
| 0.396021271 | 0.330126779 | 0.347941492 | 0.498424895 |
| 0.356598771 | 0.144448001 | 0.360072759 | 0.389866802 |
| 0.124201496 | 0.114925801 | 0.362128371 | 0.0354923   |
| 0.193651491 | 0.436048958 | 0.366045153 | 0.103011901 |
| 0.319840131 | 0.012015763 | 0.345925965 | 0.503535505 |
| 0.423115253 | 0.497928117 | 0.473570064 | 0.310536151 |
| 0.47637819  | 0.138899293 | 0.497916317 | 0.371692595 |
| 0.331457863 | 0.00193977  | 0.016735439 | 0.459633609 |
| 0.389195582 | 0.072471894 | 0.21668167  | 0.317095976 |
| 0.186803373 | 0.187691956 | 0.112680052 | 0.271933541 |
| 0.380323433 | 0.314610533 | 0.25880364  | 0.434649603 |
| 0.313253394 | 0.303631328 | 0.354836444 | 0.119262336 |
| 0.387471606 | 0.100962203 | 0.121833747 | 0.020201085 |
| 0.386916326 | 0.125849796 | 0.435501302 | 0.477567292 |
| 0.477855893 | 0.388609816 | 0.286451158 | 0.33343815  |
| 0.422617865 | 0.112426777 | 0.326588791 | 0.13449519  |
| 0.444565747 | 0.390607294 | 0.334795105 | 0.300776841 |
| 0.489268987 | 0.445909503 | 0.068230368 | 0.390858137 |
| 0.026716197 | 0.007587245 | 0.329745534 | 0.299470058 |
| 0.115293904 | 0.390095147 | 0.287223646 | 0.289616747 |
| 0.307276465 | 0.053087926 | 0.324820978 | 0.304618779 |
| 0.346632863 | 0.385581645 | 0.334641276 | 0.274646925 |
| 0.341621661 | 0.221191496 | 0.273076615 | 0.226881703 |
| 0.283475247 | 0.300233003 | 0.20107336  | 0.048323957 |
| 0.373806716 | 0.384627587 | 0.098257629 | 0.197947642 |
| 0.416996949 | 0.465227551 | 0.095681173 | 0.031524138 |
| 0.275825791 | 0.354586448 | 0.480120852 | 0.459202735 |
| 0.493057026 | 0.50903489  | 0.386780408 | 0.215354822 |
| 0.112885437 | 0.373114182 | 0.345805966 | 0.190996237 |
| 0.482420657 | 0.089075734 | 0.450546937 | 0.338196312 |
| 0.166078315 | 0.280492206 | 0.073142738 | 0.139508564 |
| 0.37795651  | 0.233613024 | 0.266323853 | 0.168484152 |
| 0.368859512 | 0.286648374 | 0.088938774 | 0.263643531 |
| 0.345895964 | 0.242371915 | 0.215980345 | 0.323484852 |
| 0.335482713 | 0.214146806 | 0.397864729 | 0.451993779 |

|             |             |             |             |
|-------------|-------------|-------------|-------------|
| 0.169867126 | 0.162273542 | 0.267774802 | 0.374190988 |
| 0.400082846 | 0.348215881 | 0.04369878  | 0.406481904 |
| 0.472925761 | 0.392412005 | 0.462874063 | 0.396159339 |
| 0.122253566 | 0.378657547 | 0.351307074 | 0.375909431 |
| 0.248416452 | 0.356359037 | 0.305304123 | 0.102118067 |
| 0.30952875  | 0.468086522 | 0.387016516 | 0.241623152 |
| 0.377062662 | 0.149813869 | 0.079473366 | 0.415554355 |
| 0.265690057 | 0.134424458 | 0.30778571  | 0.400800638 |
| 0.005837231 | 0.200426945 | 0.478498096 | 0.291034729 |
| 0.500583468 | 0.464250655 | 0.430974641 | 0.2925919   |
| 0.003901805 | 0.392609884 | 0.383482718 | 0.380034826 |
| 0.392394322 | 0.338068135 | 0.201231397 | 0.142305497 |
| 0.312721846 | 0.09868334  | 0.22286275  | 0.318101699 |
| 0.24267698  | 0.372661823 | 0.253535902 | 0.266349466 |
| 0.283174329 | 0.115430157 | 0.290740494 | 0.284668473 |
| 0.232006036 | 0.280319872 | 0.358473594 | 0.251866496 |
| 0.227259241 | 0.428185113 | 0.368453588 | 0.050935936 |
| 0.370931073 | 0.401092247 | 0.419425085 | 0.006553565 |
| 0.397229654 | 0.019722552 | 0.282228882 | 0.289080243 |
| 0.285282318 | 0.296763459 | 0.330217429 | 0.346988708 |
| 0.355457328 | 0.292567335 | 0.315551081 | 0.295652572 |
| 0.243848249 | 0.268490484 | 0.386974284 | 0.361484165 |
| 0.323876082 | 0.183100441 | 0.112461346 | 0.115477587 |
| 0.094658682 | 0.428833232 | 0.251921197 | 0.093546176 |
| 0.294873839 | 0.360510123 | 0.360910839 | 0.451923024 |
| 0.41544948  | 0.11939236  | 0.372836657 | 0.401164596 |
| 0.221215829 | 0.288832814 | 0.090996196 | 0.368944783 |
| 0.280666499 | 0.288982454 | 0.353663465 | 0.301382719 |
| 0.364997038 | 0.401264744 | 0.250019638 | 0.430806962 |
| 0.369722627 | 0.358579466 | 0.263336591 | 0.156501489 |
| 0.230219163 | 0.170499886 | 0.336528748 | 0.006011793 |
| 0.371076311 | 0.25694139  | 0.436935893 | 0.45464855  |
| 0.317081537 | 0.383748694 | 0.275761525 | 0.137037857 |
| 0.229698874 | 0.180161559 | 0.183089066 | 0.378377649 |
| 0.249262901 | 0.245646351 | 0.353340792 | 0.294453188 |
| 0.396702896 | 0.381361237 | 0.336488354 | 0.293087979 |
| 0.300653186 | 0.225879491 | 0.452845014 | 0.153572257 |
| 0.376130547 | 0.264482528 | 0.313158743 | 0.356211554 |
| 0.302153422 | 0.485699689 | 0.093493184 | 0.493752461 |
| 0.37556386  | 0.157554345 | 0.483498285 | 0.321695984 |
| 0.300909277 | 0.195425082 | 0.241873174 | 0.346258949 |
| 0.307248092 | 0.34974896  | 0.017342111 | 0.095805204 |
| 0.35861746  | 0.329147998 | 0.349425777 | 0.371517004 |
| 0.327005913 | 0.361445074 | 0.210263971 | 0.311541992 |
| 0.436557714 | 0.462822051 | 0.297112832 | 0.284451705 |
| 0.352221332 | 0.162460327 | 0.341572069 | 0.02469609  |
| 0.392098179 | 0.377994309 | 0.346016615 | 0.099738279 |
| 0.042850239 | 0.260622058 | 0.379772918 | 0.095380783 |
| 0.468551389 | 0.229575982 | 0.336638076 | 0.385560045 |
| 0.212933833 | 0.463307866 | 0.20890458  | 0.389333158 |
| 0.081688122 | 0.299920996 | 0.381072278 | 0.372942912 |
| 0.29083063  | 0.345499453 | 0.379772766 | 0.294053856 |
| 0.06883225  | 0.336048134 | 0.005361468 | 0.399418804 |
| 0.434558981 | 0.368120384 | 0.226913205 | 0.268984534 |



|             |             |             |             |
|-------------|-------------|-------------|-------------|
| 0.328387015 | 0.371325571 | 0.316737582 | 0.369837331 |
| 0.02971197  | 0.379486788 | 0.256553494 | 0.378054112 |
| 0.235303701 | 0.365947107 | 0.104947468 | 0.363509383 |
| 0.424992948 | 0.326236076 | 0.276630487 | 0.306154833 |
| 0.449490609 | 0.352932457 | 0.171871172 | 0.287983072 |
| 0.351142459 | 0.094406589 | 0.326257486 | 0.506422104 |
| 0.258859467 | 0.282492851 | 0.424223115 | 0.279902376 |
| 0.352309527 | 0.358339461 | 0.362796252 | 0.495134454 |
| 0.150155787 | 0.288905813 | 0.395689411 | 0.432781385 |
| 0.329438207 | 0.263695271 | 0.297942308 | 0.315181343 |
| 0.416860327 | 0.145365175 | 0.315485529 | 0.346558551 |
| 0.278926986 | 0.349175755 | 0.299945203 | 0.28093595  |
| 0.080100835 | 0.234930977 | 0.352706703 | 0.192669585 |
| 0.339979581 | 0.390459496 | 0.326510591 | 0.386686259 |
| 0.195829318 | 0.055141674 | 0.445782632 | 0.034639784 |
| 0.314863393 | 0.388884063 | 0.29559659  | 0.373228624 |
| 0.200113824 | 0.361704578 | 0.317972169 | 0.00336391  |
| 1           | 0.082814174 | 0.357567515 | 0.306849082 |
| 0.321031736 | 0.088548756 | 0.43292517  | 0.495615119 |
| 0.329227713 | 0.316465196 | 0.328323386 | 0.440641483 |
| 0.211914686 | 0.319005056 | 0.358949151 | 0.357916729 |
| 0.282213348 | 0.328443638 | 0.36417756  | 0.35833536  |
| 0.369762381 | 0.302503568 |             |             |
| ZC3HAV1     | 0.011273393 | 0.04992959  | 0.011917926 |
| 0.019764615 | 0.151759933 | 0.034037135 | 0.007973155 |
| 0.012488288 | 0.045347648 | 0.009800556 | 0.068352119 |
| 0.00221209  | 0.01337214  | 0.058066163 | 0.007796225 |
| 0.068856009 | 0.00943791  | 0.020979575 | 0.000339084 |
| 0.012323357 | 0.091636042 | 0.025160904 | 0.0161063   |
| 0.10763739  | 0.032099268 | 0.038942431 | 0.048882221 |
| 0.067540605 | 0.006767701 | 0.069783456 | 0.012276717 |
| 0.06364463  | 0.097814205 | 0.044172703 | 0.011545776 |
| 0.037662301 | 0.001294462 | 0.060212677 | 0.061361558 |
| 0.105326712 | 0.052051087 | 0.019837697 | 0.062566131 |
| 0.025992063 | 0.006135144 | 0.002570605 | 0.057253612 |
| 0.060215075 | 0.059244405 | 0.006068927 | 0.074375406 |
| 0.023113325 | 0.042467105 | 0.029224766 | 0.001770685 |
| 0.052588833 | 0.01569323  | 0.028485914 | 0.068291058 |
| 0.060221597 | 0.043212002 | 0.006833656 | 0.026377292 |
| 0.035460818 | 0.068018293 | 0.094986523 | 0.013756157 |
| 0.060658324 | 0.022223171 | 0.06981557  | 0.00289175  |
| 0.020553558 | 0.005058026 | 0.053716519 | 0.01530711  |
| 0.036486993 | 0.084350553 | 0.075638916 | 0.099096846 |
| 0.040293317 | 0.070696833 | 0.08003835  | 0.059026299 |
| 0.007162923 | 0.086414035 | 0.119964549 | 0.103286616 |
| 0.052555347 | 0.00928837  | 0.068610053 | 0.073756902 |
| 0.006478105 | 0.021447246 | 0.037021242 | 0.011924996 |
| 0.062586473 | 0.037688589 | 0.019671601 | 0.060821451 |
| 0.131129191 | 0.062380558 | 0.05622426  | 0.044945788 |
| 0.086549798 | 0.010516428 | 0.051494657 | 0.1008662   |
| 0.056980198 | 0.027860461 | 0.042364677 | 0.072314562 |
| 0.059598873 | 0.064665234 | 0.038198888 | 0.049442572 |
| 0.055050416 | 0.072031301 | 0.077817333 | 0.05343361  |
| 0.001236586 | 0.065011621 | 0.066033044 | 0.010155551 |

|             |             |             |             |
|-------------|-------------|-------------|-------------|
| 0.006374707 | 0.035368926 | 0.031924244 | 0.087629119 |
| 0.080256634 | 0.054041279 | 0.023016446 | 0.089864792 |
| 0.086312152 | 0.048725186 | 0.060824673 | 0.047119588 |
| 0.008845482 | 0.046139436 | 0.069401401 | 0.027289461 |
| 0.038409813 | 0.030882328 | 0.096444303 | 0.05736951  |
| 0.067231265 | 0.07290236  | 0.024798567 | 0.066408609 |
| 0.018555066 | 0.084376927 | 0.051664274 | 0.050792967 |
| 0.074596824 | 0.060886912 | 0.091377946 | 0.095870134 |
| 0.069764481 | 0.050716513 | 0.000113081 | 0.050936831 |
| 0.084145988 | 0.002689116 | 0.066851746 | 0.072837806 |
| 0.060548798 | 0.069802099 | 0.085953468 | 0.078816494 |
| 0.055855476 | 0.020677759 | 6.08E-05    | 0.082537936 |
| 0.060564418 | 0.082971425 | 0.034475242 | 0.032990372 |
| 0.063616356 | 0.022204037 | 0.065602699 | 0.001886769 |
| 0.080418665 | 0.09151723  | 0.063956621 | 0.037056317 |
| 0.030020073 | 0.05065947  | 0.053909635 | 0.051957998 |
| 0.021183763 | 0.012144159 | 0.010939276 | 0.066113489 |
| 0.018094843 | 0.079761071 | 0.015484013 | 0.060195273 |
| 0.063789404 | 0.019276198 | 0.040437947 | 0.090611564 |
| 0.009000444 | 0.029976082 | 0.070046562 | 0.01725843  |
| 0.01632071  | 0.030139522 | 0.004133544 | 0.034501951 |
| 0.058384298 | 0.028439607 | 0.044982608 | 0.090986834 |
| 0.040420086 | 0.036479357 | 0.040314044 | 0.092059056 |
| 0.083779993 | 0.085463328 | 0.040487791 | 0.008488271 |
| 0.006968273 | 0.014529482 | 0.036407152 | 0.05050283  |
| 0.033603752 | 0.007437695 | 0.043418213 | 0.10544704  |
| 0.019468182 | 0.010714489 | 0.020699947 | 0.0623465   |
| 0.020373131 | 0.051229159 | 0.067346504 | 0.027715145 |
| 0.007648509 | 0.040031446 | 0.063425672 | 0.029825204 |
| 0.029282292 | 0.002727893 | 0.028216596 | 0.077315277 |
| 0.010979573 | 0.045043423 | 0.077602097 | 0.116634267 |
| 0.002430372 | 0.022548399 | 0.078753411 | 7.33E-05    |
| 0.071446432 | 0.012801481 | 0.095638763 | 0.018920843 |
| 0.051660382 | 0.070860439 | 0.091104959 | 0.108385195 |
| 0.02019648  | 0.057589744 | 0.081273175 | 0.067216499 |
| 0.022155171 | 0.080990112 | 0.067742638 | 0.064671614 |
| 0.06607666  | 0.027506148 | 0.019920199 | 0.06404659  |
| 0.084115274 | 0.003529809 | 0.013033111 | 0.048748826 |
| 0.022027478 | 0.06982582  | 0.036004201 | 0.078391903 |
| 0.08335687  | 0.04698817  | 0.02709203  | 0.102423881 |
| 0.071751071 | 0.047619588 | 0.10387452  | 0.077623066 |
| 0.008328922 | 0.036092662 | 0.043252402 | 0.135215956 |
| 0.054600524 | 0.041547633 | 0.067400697 | 0.036808694 |
| 0.006632738 | 0.008619016 | 0.012909138 | 0.074213426 |
| 0.110713837 | 0.036383227 | 0.087278942 | 0.064836929 |
| 0.022996062 | 0.076703018 | 0.043197688 | 0.025638624 |
| 0.046276161 | 0.034576151 | 0.084248504 | 0.077468054 |
| 0.065883504 | 0.024380516 | 0.009294389 | 0.070131976 |
| 0.005226677 | 0.052000899 | 0.02305635  | 0.0001575   |
| 0.00373448  | 0.036683496 | 0.020004805 | 0.041966186 |
| 0.087991195 | 0.044779969 | 0.03129281  | 0.008950654 |
| 0.104802136 | 0.035961701 | 0.012364382 | 0.075015918 |
| 0.068196903 | 0.066083062 | 0.061405262 | 0.058014714 |
| 0.068421116 | 0.066997846 | 0.09060215  | 0.031197619 |

|                      |                      |             |             |
|----------------------|----------------------|-------------|-------------|
| 0.018460247          | 0.015217605          | 0.036158653 | 0.052841627 |
| 1.45E-05 0.128795739 | 0.089434484          | 0.042813546 |             |
| 0.062943618          | 0.046577118          | 0.006156101 | 0.077015061 |
| 0.002900882          | 0.033903448          | 0.006236094 | 0.051442659 |
| 0.114273233          | 0.008091871          | 0.00172718  | 0.010847147 |
| 0.047741118          | 0.040895213          | 0.054745873 | 0.076604143 |
| 0.064672591          | 0.013286208          | 0.108531181 | 0.091521353 |
| 0.013689109          | 0.000243349          | 0.014087124 | 0.001103407 |
| 0.001737521          | 0.061871551          | 0.028956599 | 0.01200775  |
| 0.055248308          | 0.003597815          | 0.051757488 | 0.06716262  |
| 0.052657744          | 0.075888209          | 0.071028632 | 0.075318984 |
| 0.069016863          | 0.008923568          | 0.068502341 | 0.045141195 |
| 0.010786365          | 7.66E-05 0.000174088 | 0.083653336 |             |
| 0.057879397          | 0.009929059          | 0.04820649  | 0.010873131 |
| 0.020580774          | 0.008247257          | 0.018389145 | 0.137554494 |
| 0.062891436          | 0.108508475          | 0.055600676 | 0.043635633 |
| 0.060747382          | 0.070774946          | 0.014427892 | 0.015561695 |
| 0.078840957          | 0.016969078          | 0.018019301 | 0.001000201 |
| 0.098447273          | 0.019039786          | 0.051423123 | 0.060769651 |
| 0.077614407          | 0.122524268          | 0.008932751 | 0.003581401 |
| 0.079194399          | 0.00832062           | 0.016396646 | 0.011512105 |
| 0.05250505           | 0.058050918          | 0.070122034 | 0.054766147 |
| 0.06966461           | 0.063194148          | 0.007503677 | 0.073958924 |
| 0.006256369          | 0.000973351          | 0.023284364 | 0.045072117 |
| 0.002588143          | 0.035882506          | 0.068106919 | 0.026544053 |
| 0.044645859          | 0.001267395          | 0.060402144 | 0.069569933 |
| 0.089544055          | 0.044696581          | 0.094673079 | 0.049426044 |
| 0.124952582          | 0.016710156          | 0.096492827 | 0.022450848 |
| 0.003355927          | 0.046253091          | 0.029606651 | 0.005081632 |
| 0.038300524          | 0.044506503          | 0.017876221 | 0.044969537 |
| 0.080245224          | 0.067282195          | 0.003254155 | 0.005832623 |
| 0.048459509          | 0.030992274          | 0.071927165 | 0.057515206 |
| 0.061152392          | 0.077484653          | 0.06154937  | 0.021703052 |
| 0.014925305          | 0.110845 0.117350145 | 0.095447891 |             |
| 0.061158366          | 0.005270909          | 0.064062526 | 0.095251934 |
| 0.034897842          | 0.06817636           | 0.013289643 | 0.029814784 |
| 0.066139642          | 0.041196539          | 0.101821591 | 0.021152487 |
| 0.035306905          | 0.060274414          | 0.012246544 | 0.044984815 |
| 0.045274097          | 0.035804901          | 0.03991676  | 0.036251455 |
| 0.079662122          | 0.003715058          | 0.068019657 | 0.072647354 |
| 0.025716939          | 0.019556003          | 0.008172009 | 0.076575989 |
| 0.0590662            | 0.028119693          | 0.001592016 | 0.04561057  |
| 0.078318608          | 0.046670313          | 0.060843671 | 0.075320867 |
| 0.022955446          | 0.050585884          | 0.043133842 | 0.059002177 |
| 0.035983149          | 0.038173049          | 0.047550939 | 0.01693535  |
| 0.071409156          | 0.061487488          | 0.060012385 | 0.059839052 |
| 0.044254034          | 0.009558291          | 0.004955253 | 0.064289876 |
| 0.059634694          | 0.002737817          | 0.013012646 | 0.061827407 |
| 0.042453266          | 0.066461472          | 0.093554996 | 0.030816445 |
| 0.081695274          | 0.08864648           | 0.073215184 | 0.033126265 |
| 0.000304803          | 0.084004364          | 0.058504739 | 0.046780404 |
| 0.038191951          | 0.055481268          | 0.00752034  | 0.024891374 |
| 0.100746177          | 0.010291231          | 0.010736978 | 0.005957602 |
| 0.003140743          | 0.023847609          | 0.063228557 | 0.037184207 |

|             |             |             |             |
|-------------|-------------|-------------|-------------|
| 0.102271805 | 0.008749301 | 0.053561513 | 0.089577781 |
| 0.021680826 | 0.066680847 | 0.066092522 | 0.007854549 |
| 0.004704564 | 0.059899611 | 0.04553172  | 0.010436781 |
| 0.07238934  | 0.072005681 | 0.094012118 | 5.64E-05    |
| 0.058938027 | 0.002962213 | 0.060102401 | 0.094148054 |
| 0.097202077 | 0.032610532 | 0.103621961 | 0.110182223 |
| 0.036134599 | 0.054745615 | 0.064420589 | 0.077045595 |
| 0.085992513 | 0.069991601 | 0.092414795 | 0.049100338 |
| 0.051979034 | 0.035809096 | 0.023405127 | 0.019375347 |
| 0.008134905 | 0.063640829 | 0.050727064 | 0.019536739 |
| 0.06477624  | 0.04102572  | 0.093801019 | 0.054596086 |
| 0.104290294 | 0.016958273 | 0.034314839 | 0.051212702 |
| 0.000645027 | 0.001536482 | 0.002825454 | 0.085489636 |
| 0.039848742 | 0.019384365 | 0.041691167 | 0.017125229 |
| 0.033463839 | 0.070256383 | 0.047372562 | 0.096017405 |
| 0.095505392 | 0.031039109 | 0.010216694 | 0.024321766 |
| 0.031340807 | 0.027068819 | 0.118681224 | 0.006036513 |
| 0.047623709 | 0.013527533 | 0.063649373 | 0.063227104 |
| 0.037123387 | 0.094246105 | 0.00220555  | 0.007140759 |
| 0.011637417 | 0.019993693 | 0.031999393 | 0.069219236 |
| 0.030990587 | 0.055089607 | 0.129670542 | 0.013567498 |
| 0.088410817 | 0.067346399 | 0.074211172 | 0.015673682 |
| 0.077393558 | 0.051995805 | 0.064593315 | 0.023848743 |
| 0.036518112 | 0.120924639 | 0.022844793 | 0.050440315 |
| 0.075163746 | 0.0812443   | 0.020439203 | 0.070356426 |
| 0.035829855 | 0.028418212 | 0.077296528 | 0.043330432 |
| 0.051568521 | 0.060981868 | 0.056412852 | 0.01615547  |
| 0.027038004 | 0.046531366 | 0.000223916 | 0.000256252 |
| 0.078279616 | 0.021774241 | 0.033023709 | 0.069666736 |
| 0.132772116 | 0.096733966 | 0.018562768 | 0.018091592 |
| 0.048806863 | 0.05847646  | 0.007928739 | 0.078170091 |
| 0.037127486 | 0.025994912 | 0.030032391 | 7.63E-05    |
| 0.037115316 | 0.040514351 | 0.00641062  | 0.010278781 |
| 0.003425125 | 0.047367567 | 0.04200236  | 0.010312292 |
| 0.085831073 | 0.014594436 | 0.032861341 | 0.084883459 |
| 0.03292456  | 0.058205484 | 0.050425586 | 0.076707133 |
| 0.001495579 | 0.081540067 | 0.07437313  | 0.026207018 |
| 0.034761134 | 0.078480491 | 0.096363999 | 0.088822569 |
| 0.012951184 | 0.040950559 | 1.56E-05    | 0.058384893 |
| 0.052588917 | 0.065993505 | 0.044338293 | 0.006589071 |
| 0.114450602 | 0.090161541 | 0.004544217 | 0.043911825 |
| 0.012732758 | 0.076529879 | 0.067700893 | 0.055961762 |
| 0.007320161 | 0.029235987 | 0.041303406 | 0.066500254 |
| 0.050492697 | 0.004246122 | 0.049052773 | 0.013479782 |
| 0.063887594 | 0.071021008 | 0.033600253 | 0.082169192 |
| 0.03195885  | 0.012572387 | 0.01732453  | 0.070451692 |
| 0.060772302 | 0.116168124 | 0.087435467 | 0.034959091 |
| 0.052648102 | 0.059519965 | 0.04368573  | 0.065517861 |
| 0.023148042 | 0.062858024 | 0.083173553 | 0.055977178 |
| 0.093416405 | 0.089507799 | 0.036721051 | 0.04533501  |
| 0.051990678 | 0.01147812  | 0.037669727 | 0.059404443 |
| 0.049168241 | 0.072623929 | 0.028978315 | 0.084824375 |
| 0.00151501  | 0.020937601 | 0.022931391 | 0.043115998 |
| 0.047480264 | 0.091736892 | 0.094878789 | 0.089039065 |

|             |             |             |             |
|-------------|-------------|-------------|-------------|
| 0.031105736 | 0.006182371 | 0.095049065 | 0.000516244 |
| 0.039824362 | 0.097531587 | 0.057733919 | 0.079283057 |
| 0.042826959 | 0.034330562 | 0.016299064 | 0.000338161 |
| 0.082814174 | 1           | 0.04989513  | 0.046941064 |
| 0.003314019 | 0.004269363 | 0.076371358 | 0.077161098 |
| 0.063965926 | 0.009651948 | 0.01029926  | 0.055041597 |
| 0.013254829 | 0.025155632 | 0.018261248 | 0.044769915 |
| 0.079779583 | 0.01793181  | 0.02498196  | 0.056979098 |
| 0.064881888 | 0.03631905  |             |             |
| ZDHC21      | 0.036846132 | 0.315989061 | 0.024794211 |
| 0.044243547 | 0.240705962 | 0.123813004 | 0.045382992 |
| 0.074326969 | 0.28041408  | 0.096279819 | 0.186257905 |
| 0.013707053 | 0.119367201 | 0.340034389 | 0.055888297 |
| 0.254068225 | 0.035263497 | 0.076490951 | 0.065544315 |
| 0.121235493 | 0.219052796 | 0.146676116 | 0.147564026 |
| 0.233279486 | 0.153227798 | 0.18233623  | 0.240224873 |
| 0.363427915 | 0.094606831 | 0.266620095 | 0.046174067 |
| 0.321276182 | 0.254970172 | 0.1810366   | 0.010830074 |
| 0.216917448 | 0.057327026 | 0.330274049 | 0.119832899 |
| 0.098152391 | 0.284868861 | 0.102891345 | 0.108873095 |
| 0.12602346  | 0.01776471  | 0.060282668 | 0.289912513 |
| 0.201602325 | 0.164207876 | 0.041259812 | 0.269791727 |
| 0.141154754 | 0.218253722 | 0.217764673 | 0.00098213  |
| 0.154073119 | 0.080901785 | 0.133821659 | 0.368820833 |
| 0.163259174 | 0.102174567 | 0.110733464 | 0.182570222 |
| 0.276140018 | 0.324747384 | 0.268623787 | 0.108819245 |
| 0.359120434 | 0.139007156 | 0.300772707 | 0.066162368 |
| 0.152127539 | 0.026699644 | 0.147537039 | 0.079414068 |
| 0.159335133 | 0.164299337 | 0.232335101 | 0.168715    |
| 0.275180031 | 0.409686909 | 0.205414745 | 0.350965197 |
| 0.157965115 | 0.261101892 | 0.169038021 | 0.28975284  |
| 0.313654914 | 0.07634509  | 0.260728459 | 0.388901748 |
| 0.047580102 | 0.174586095 | 0.268162167 | 0.102544001 |
| 0.31491319  | 0.196614324 | 0.140280049 | 0.131641887 |
| 0.308879768 | 0.22091585  | 0.390241233 | 0.200012088 |
| 0.245394241 | 0.051907309 | 0.343016632 | 0.253363341 |
| 0.119767501 | 0.049341299 | 0.12975072  | 0.361349362 |
| 0.230750106 | 0.355859916 | 0.307969457 | 0.301546755 |
| 0.208689601 | 0.363809882 | 0.232917737 | 0.356946022 |
| 0.056750667 | 0.388454271 | 0.104563622 | 0.042717545 |
| 0.032578617 | 0.09065472  | 0.19997291  | 0.306594894 |
| 0.361321083 | 0.244722197 | 0.081150833 | 0.160780554 |
| 0.392667152 | 0.331761591 | 0.384396837 | 0.304074828 |
| 0.026496076 | 0.188182505 | 0.190219668 | 0.139131991 |
| 0.275319704 | 0.122389305 | 0.174684419 | 0.367105861 |
| 0.278231319 | 0.349985225 | 0.065017652 | 0.385303393 |
| 0.143596545 | 0.397258819 | 0.298024396 | 0.098372921 |
| 0.377225594 | 0.348745219 | 0.39982155  | 0.304283241 |
| 0.355679039 | 0.124300399 | 0.082275653 | 0.313142872 |
| 0.403979725 | 0.01417011  | 0.370923476 | 0.387125419 |
| 0.347073321 | 0.335122165 | 0.428152667 | 0.396933028 |
| 0.357049096 | 0.066596854 | 0.032920282 | 0.255876505 |
| 0.353232669 | 0.279102154 | 0.150869342 | 0.186233503 |
| 0.2840369   | 0.14858684  | 0.357785198 | 0.083009951 |

|             |             |             |             |
|-------------|-------------|-------------|-------------|
| 0.426692867 | 0.342697737 | 0.369559263 | 0.277338471 |
| 0.176424648 | 0.261667272 | 0.228964533 | 0.321923383 |
| 0.03700521  | 0.045109222 | 0.038301489 | 0.310818102 |
| 0.084890505 | 0.153258683 | 0.10975213  | 0.284781959 |
| 0.171813893 | 0.152003546 | 0.15060524  | 0.303591235 |
| 0.052425327 | 0.195831853 | 0.103398363 | 0.08737193  |
| 0.032814127 | 0.144683765 | 0.066300707 | 0.085548131 |
| 0.187081678 | 0.188744865 | 0.285708121 | 0.387384238 |
| 0.193383629 | 0.121379477 | 0.261469875 | 0.387548679 |
| 0.372109464 | 0.210949458 | 0.234177761 | 0.007021    |
| 0.086018991 | 0.135467041 | 0.137871156 | 0.239495077 |
| 0.169164463 | 0.103958027 | 0.228333336 | 0.319382441 |
| 0.105747678 | 0.10381801  | 0.138427548 | 0.342092257 |
| 0.118196166 | 0.131361773 | 0.335607852 | 0.191566237 |
| 0.003051229 | 0.135404945 | 0.318719529 | 0.14982614  |
| 0.234305869 | 0.102969228 | 0.11524032  | 0.34562609  |
| 0.140842026 | 0.184245502 | 0.395839541 | 0.353827951 |
| 0.121994557 | 0.184945257 | 0.424657887 | 0.043184269 |
| 0.264485108 | 0.035464048 | 0.246386469 | 0.127399811 |
| 0.161423133 | 0.280700405 | 0.262005433 | 0.139839887 |
| 0.074555701 | 0.385738191 | 0.318811097 | 0.383694964 |
| 0.114272972 | 0.417143737 | 0.343779668 | 0.336310417 |
| 0.257899678 | 0.184817178 | 0.118635812 | 0.284158644 |
| 0.341295392 | 0.092638715 | 0.061011947 | 0.335420165 |
| 0.141188272 | 0.289441259 | 0.118224755 | 0.372571354 |
| 0.391219745 | 0.315323807 | 0.105492294 | 0.346408838 |
| 0.265787859 | 0.119986013 | 0.35601131  | 0.442180984 |
| 0.098411969 | 0.195236141 | 0.125426422 | 0.369812413 |
| 0.120358049 | 0.166277586 | 0.305706115 | 0.162043565 |
| 0.007784342 | 0.060198414 | 0.042416146 | 0.12319644  |
| 0.136698033 | 0.243355179 | 0.285025661 | 0.379249451 |
| 0.085868691 | 0.342696317 | 0.245267671 | 0.096322807 |
| 0.285436789 | 0.212014866 | 0.251196572 | 0.288716828 |
| 0.233145746 | 0.013767025 | 0.059489281 | 0.391585937 |
| 0.034674149 | 0.13575959  | 0.188639967 | 0.002434097 |
| 0.026505208 | 0.272092959 | 0.088333974 | 0.174600077 |
| 0.424658198 | 0.159598476 | 0.122038225 | 0.087939881 |
| 0.285751495 | 0.077858827 | 0.005686285 | 0.384049311 |
| 0.405867383 | 0.396622306 | 0.393543081 | 0.373752213 |
| 0.380465491 | 0.355675395 | 0.330394232 | 0.143829815 |
| 0.057377264 | 0.042900478 | 0.111454661 | 0.143925557 |
| 0.004702288 | 0.323421956 | 0.261148151 | 0.123394728 |
| 0.335490591 | 0.256077073 | 0.026789902 | 0.313912216 |
| 0.007310178 | 0.092987097 | 0.126799198 | 0.163127534 |
| 0.370545557 | 0.011175393 | 0.050994725 | 0.104912835 |
| 0.285785443 | 0.257325951 | 0.138839309 | 0.390900654 |
| 0.179853869 | 0.084890535 | 0.151404692 | 0.337390017 |
| 0.047441282 | 0.034098646 | 0.141616292 | 0.007518399 |
| 0.101439329 | 0.393160518 | 0.150749878 | 0.026236886 |
| 0.160790732 | 0.003193726 | 0.246787312 | 0.402005168 |
| 0.315576679 | 0.398780106 | 0.36639922  | 0.140047919 |
| 0.357430291 | 0.105527244 | 0.395882413 | 0.276469975 |
| 0.101396867 | 0.000182066 | 0.013262568 | 0.363889771 |
| 0.193403011 | 0.049706629 | 0.122966406 | 0.084400956 |

|             |             |             |             |
|-------------|-------------|-------------|-------------|
| 0.066703319 | 0.062533687 | 0.061156896 | 0.135658967 |
| 0.239540863 | 0.203149153 | 0.170425527 | 0.326223621 |
| 0.13398112  | 0.214556187 | 0.134569441 | 0.084501731 |
| 0.262884638 | 0.035411701 | 0.092036914 | 0.007264571 |
| 0.347386139 | 0.088046652 | 0.333874446 | 0.375511394 |
| 0.380021547 | 0.293483934 | 0.088302144 | 0.136986535 |
| 0.410815432 | 0.064026114 | 0.12850381  | 0.073236039 |
| 0.323644625 | 0.22853289  | 0.243210202 | 0.210272564 |
| 0.386296009 | 0.331348857 | 0.029401485 | 0.295324859 |
| 0.007634623 | 0.012580499 | 0.114178485 | 0.255017141 |
| 0.158456481 | 0.18003526  | 0.204089541 | 0.159842835 |
| 0.193128405 | 0.015749264 | 0.154154792 | 0.136874481 |
| 0.207211013 | 0.187640681 | 0.202713364 | 0.258827733 |
| 0.164909428 | 0.10435935  | 0.134861817 | 0.118011902 |
| 0.1700976   | 0.224707157 | 0.145433199 | 0.021620011 |
| 0.173011807 | 0.189510443 | 0.040933462 | 0.134659513 |
| 0.319388785 | 0.359513471 | 0.039262884 | 0.009338631 |
| 0.208077015 | 0.173732017 | 0.396060683 | 0.350924585 |
| 0.38187947  | 0.410496543 | 0.31873844  | 0.110312584 |
| 0.044981654 | 0.24583587  | 0.231859179 | 0.114497816 |
| 0.385346837 | 0.047255273 | 0.362673501 | 0.216827699 |
| 0.112077577 | 0.088033806 | 0.029682929 | 0.081299898 |
| 0.259321296 | 0.162857082 | 0.147178274 | 0.076064063 |
| 0.138846912 | 0.136986528 | 0.039754613 | 0.145463881 |
| 0.241427158 | 0.096744248 | 0.124850444 | 0.149291175 |
| 0.275471739 | 0.102443046 | 0.291114407 | 0.365880837 |
| 0.104437509 | 0.08623065  | 0.058203115 | 0.356736663 |
| 0.313508601 | 0.205511759 | 0.01310942  | 0.30463767  |
| 0.408498778 | 0.248878018 | 0.357262158 | 0.364270229 |
| 0.081810736 | 0.180542816 | 0.193722665 | 0.21197326  |
| 0.17027727  | 0.138076338 | 0.204739291 | 0.058695612 |
| 0.320751559 | 0.401894135 | 0.283372379 | 0.105142527 |
| 0.240835722 | 0.086480762 | 0.039790833 | 0.378317108 |
| 0.116710961 | 0.038402385 | 0.121422572 | 0.376474747 |
| 0.003305942 | 0.134377175 | 0.429140437 | 0.123887453 |
| 0.429414703 | 0.365187325 | 0.32978907  | 0.152267191 |
| 0.003089712 | 0.290817968 | 0.211606208 | 0.117263881 |
| 0.284707253 | 0.267960699 | 0.166982095 | 0.056621351 |
| 0.274024232 | 0.055614364 | 0.082359427 | 0.109703332 |
| 0.10181598  | 0.22016831  | 0.206532403 | 0.182114217 |
| 0.149683808 | 0.085890324 | 0.158463938 | 0.11827361  |
| 0.18708206  | 0.217097956 | 0.285346074 | 0.096483171 |
| 0.065765157 | 0.385952623 | 0.25971651  | 0.018661121 |
| 0.256825651 | 0.365303852 | 0.392952022 | 0.00075392  |
| 0.277853836 | 0.008121404 | 0.155696358 | 0.125967208 |
| 0.136337355 | 0.151985444 | 0.253461989 | 0.13145217  |
| 0.218020016 | 0.128766502 | 0.1067227   | 0.188708196 |
| 0.103367913 | 0.149002042 | 0.251570322 | 0.14837935  |
| 0.113420585 | 0.06404822  | 0.095028938 | 0.091969846 |
| 0.037262231 | 0.367109692 | 0.213123105 | 0.057398047 |
| 0.22285592  | 0.144361896 | 0.312128055 | 0.339755374 |
| 0.383356997 | 0.086474931 | 0.193540421 | 0.288713351 |
| 0.082552205 | 0.090763872 | 0.032964656 | 0.183974988 |
| 0.158801405 | 0.11836494  | 0.187153391 | 0.132975465 |

|             |             |             |             |
|-------------|-------------|-------------|-------------|
| 0.270503274 | 0.319913974 | 0.206589732 | 0.378061715 |
| 0.146198243 | 0.207750736 | 0.068763808 | 0.059649383 |
| 0.074369078 | 0.124930518 | 0.209746072 | 0.001364367 |
| 0.251976492 | 0.066991169 | 0.332313701 | 0.335928467 |
| 0.161157593 | 0.346956954 | 0.0713884   | 0.037866305 |
| 0.060780952 | 0.119984994 | 0.123414176 | 0.305560487 |
| 0.12081254  | 0.104669353 | 0.207337291 | 0.085277908 |
| 0.313800138 | 0.314578148 | 0.198856228 | 0.147474492 |
| 0.215895129 | 0.131984961 | 0.37829665  | 0.059941541 |
| 0.210896546 | 0.115887451 | 0.190764325 | 0.148680421 |
| 0.149565986 | 0.397042246 | 0.051884806 | 0.393816724 |
| 0.158064245 | 0.127252354 | 0.405016029 | 0.208372629 |
| 0.121656632 | 0.11526411  | 0.129445777 | 0.125043631 |
| 0.141773378 | 0.162159079 | 0.005677527 | 0.03908406  |
| 0.272253827 | 0.169248839 | 0.266490918 | 0.33779261  |
| 0.168379938 | 0.341190042 | 0.169770638 | 0.135014461 |
| 0.325763646 | 0.362793963 | 0.077433231 | 0.240674387 |
| 0.271976139 | 0.065285092 | 0.194011592 | 0.02739472  |
| 0.228118903 | 0.234873464 | 0.119154075 | 0.051752456 |
| 0.018988806 | 0.111324142 | 0.203551301 | 0.065941463 |
| 0.397634925 | 0.105477427 | 0.243841814 | 0.288892751 |
| 0.18289841  | 0.351647488 | 0.114098531 | 0.276515542 |
| 0.04069136  | 0.236097785 | 0.243367693 | 0.219586127 |
| 0.094063429 | 0.162768496 | 0.273469649 | 0.133955736 |
| 0.027000174 | 0.135137823 | 0.001159548 | 0.307055672 |
| 0.323155691 | 0.190954315 | 0.204740801 | 0.112436742 |
| 0.259561433 | 0.366594973 | 0.15559034  | 0.202542245 |
| 0.011428337 | 0.225536617 | 0.1853339   | 0.285178667 |
| 0.05774821  | 0.217373641 | 0.043471096 | 0.24325024  |
| 0.326235576 | 0.104875133 | 0.273320448 | 0.078310586 |
| 0.346067568 | 0.326341656 | 0.114564668 | 0.182785754 |
| 0.258363088 | 0.060942    | 0.11356661  | 0.416479671 |
| 0.127982848 | 0.127726676 | 0.351527176 | 0.089166756 |
| 0.198501785 | 0.311175628 | 0.236227416 | 0.420562985 |
| 0.078981687 | 0.197889015 | 0.358191853 | 0.340783484 |
| 0.295539129 | 0.160472405 | 0.131126059 | 0.132076386 |
| 0.299657981 | 0.044698341 | 0.156986649 | 0.233170014 |
| 0.114517874 | 0.286461653 | 0.193316957 | 0.150927559 |
| 0.035546843 | 0.134806294 | 0.130855077 | 0.127362896 |
| 0.20261538  | 0.200995187 | 0.15484767  | 0.321938521 |
| 0.074570787 | 0.01482075  | 0.373349608 | 0.013831959 |
| 0.151890215 | 0.252237297 | 0.206015759 | 0.196427085 |
| 0.140357407 | 0.224013762 | 0.124703507 | 0.000964513 |
| 0.357567515 | 0.04989513  | 1           | 0.112378656 |
| 0.145633198 | 0.031645814 | 0.346787349 | 0.410249684 |
| 0.249156048 | 0.16111023  | 0.11415536  | 0.365402695 |
| 0.107681625 | 0.144045527 | 0.16649969  | 0.214947664 |
| 0.150576647 | 0.118913401 | 0.160006713 | 0.132894365 |
| 0.278847113 | 0.154927977 |             |             |
| ZFP101      | 0.044414699 | 0.191570168 | 0.027214343 |
| 0.097248799 | 0.286812553 | 0.105541107 | 0.035343517 |
| 0.053300982 | 0.144397387 | 0.033184438 | 0.242837846 |
| 0.023647683 | 0.062487773 | 0.292183328 | 0.035867246 |
| 0.265665842 | 0.043410886 | 0.096629894 | 0.01803749  |



|             |             |             |             |
|-------------|-------------|-------------|-------------|
| 0.057782667 | 0.29510296  | 0.107104684 | 0.104857891 |
| 0.225199128 | 0.137372299 | 0.12846546  | 0.148336471 |
| 0.268420914 | 0.053633368 | 0.240653799 | 0.026715015 |
| 0.297775368 | 0.308583438 | 0.139174762 | 0.013252383 |
| 0.16850331  | 0.0091704   | 0.260389201 | 0.193548709 |
| 0.110297608 | 0.251949364 | 0.056212886 | 0.201248034 |
| 0.092621347 | 0.025815335 | 0.018743423 | 0.219785596 |
| 0.120318072 | 0.089018824 | 0.0308085   | 0.211589697 |
| 0.076124257 | 0.196418669 | 0.132272961 | 0.002226213 |
| 0.14905267  | 0.041058369 | 0.084217175 | 0.262336799 |
| 0.214507014 | 0.141021654 | 0.045123248 | 0.072974253 |
| 0.164368279 | 0.2298223   | 0.204476404 | 0.069200793 |
| 0.298313098 | 0.097343756 | 0.210340837 | 0.073327705 |
| 0.126894578 | 0.012783605 | 0.167148095 | 0.033682457 |
| 0.102680232 | 0.213916909 | 0.231017679 | 0.151262566 |
| 0.185444321 | 0.296050816 | 0.174693565 | 0.240423096 |
| 0.062487819 | 0.245847912 | 0.138143623 | 0.302792898 |
| 0.213437041 | 0.029738544 | 0.311802544 | 0.320750771 |
| 0.019098038 | 0.10007619  | 0.217248691 | 0.069396348 |
| 0.214462527 | 0.062850741 | 0.097913231 | 0.125328335 |
| 0.290182057 | 0.261525002 | 0.238452638 | 0.274160975 |
| 0.172998452 | 0.045730628 | 0.223553183 | 0.26004129  |
| 0.200672918 | 0.060414773 | 0.134970677 | 0.278765279 |
| 0.243522732 | 0.284868747 | 0.204134685 | 0.259236231 |
| 0.235545764 | 0.298315798 | 0.268382652 | 0.229447435 |
| 0.011489045 | 0.277447197 | 0.144478731 | 0.050151987 |
| 0.024863881 | 0.073695797 | 0.073268113 | 0.253099571 |
| 0.289337757 | 0.192600715 | 0.115771669 | 0.243773198 |
| 0.339179714 | 0.213817051 | 0.268052043 | 0.267349442 |
| 0.035695427 | 0.075877794 | 0.231017963 | 0.067495636 |
| 0.251464148 | 0.084586605 | 0.218509205 | 0.26921771  |
| 0.294927121 | 0.315593336 | 0.052140642 | 0.268629798 |
| 0.081488585 | 0.344420685 | 0.216555972 | 0.183770839 |
| 0.292456444 | 0.256481904 | 0.350842376 | 0.307919657 |
| 0.265359328 | 0.1607357   | 0.014942827 | 0.233170818 |
| 0.3520022   | 0.036465681 | 0.268382497 | 0.299459048 |
| 0.25952756  | 0.29662733  | 0.342896708 | 0.302166302 |
| 0.251686443 | 0.056909638 | 0.007507341 | 0.315214653 |
| 0.273027246 | 0.303132857 | 0.07524098  | 0.175287485 |
| 0.260524863 | 0.128899544 | 0.226510161 | 0.101932961 |
| 0.346188193 | 0.272786874 | 0.261746149 | 0.221790306 |
| 0.091692328 | 0.229872105 | 0.179263882 | 0.222431956 |
| 0.037429223 | 0.061237057 | 0.035603769 | 0.21143797  |
| 0.040032157 | 0.216466498 | 0.103102894 | 0.190587337 |
| 0.229798848 | 0.082661095 | 0.105474539 | 0.311550983 |
| 0.034110784 | 0.170287101 | 0.107681048 | 0.097101592 |
| 0.054712068 | 0.113416376 | 0.117280391 | 0.105912734 |
| 0.247857851 | 0.125657348 | 0.211419414 | 0.295680951 |
| 0.124767264 | 0.133628209 | 0.223248392 | 0.32910684  |
| 0.375644124 | 0.23763098  | 0.184315426 | 0.040239675 |
| 0.125763596 | 0.048936764 | 0.084510776 | 0.164471212 |
| 0.106960404 | 0.113320522 | 0.235207443 | 0.347769398 |
| 0.126402514 | 0.046013992 | 0.132805062 | 0.270217149 |
| 0.087316749 | 0.180597017 | 0.341049534 | 0.133141243 |

|             |             |             |             |
|-------------|-------------|-------------|-------------|
| 0.004841062 | 0.20186962  | 0.290607295 | 0.119349377 |
| 0.17849574  | 0.119072343 | 0.101704379 | 0.313448583 |
| 0.080493065 | 0.138641462 | 0.285528468 | 0.31996662  |
| 0.068208817 | 0.101157817 | 0.326827866 | 0.023389198 |
| 0.159029376 | 0.090590974 | 0.339823681 | 0.05588826  |
| 0.213012663 | 0.271706921 | 0.261441234 | 0.174028391 |
| 0.074898349 | 0.286715346 | 0.235950732 | 0.309785865 |
| 0.103729507 | 0.32819373  | 0.308716078 | 0.321340021 |
| 0.227897866 | 0.114724268 | 0.08558873  | 0.297295912 |
| 0.302373741 | 0.058929577 | 0.043860863 | 0.230403516 |
| 0.094575406 | 0.274770344 | 0.088679004 | 0.347964329 |
| 0.304370307 | 0.205703998 | 0.123866499 | 0.345228987 |
| 0.322816611 | 0.173571142 | 0.2536747   | 0.330833362 |
| 0.039799536 | 0.211405414 | 0.169756738 | 0.369983177 |
| 0.165378836 | 0.129743889 | 0.199888873 | 0.074859379 |
| 0.006894142 | 0.042600383 | 0.052613355 | 0.202545471 |
| 0.152828845 | 0.144567362 | 0.25697085  | 0.301602664 |
| 0.124553343 | 0.262763341 | 0.147076178 | 0.169547608 |
| 0.248616971 | 0.149743746 | 0.207580563 | 0.24079935  |
| 0.183256471 | 0.038275932 | 0.119090083 | 0.300397907 |
| 0.01897201  | 0.133442666 | 0.10830863  | 0.011149469 |
| 0.029433996 | 0.157221134 | 0.065496781 | 0.152303374 |
| 0.339313344 | 0.136749564 | 0.154157525 | 0.046957279 |
| 0.298727382 | 0.08929516  | 0.018164906 | 0.273725361 |
| 0.245016935 | 0.233327021 | 0.236566612 | 0.210422643 |
| 0.248430114 | 0.200628317 | 0.3024412   | 0.115906751 |
| 0.055744887 | 0.032337316 | 0.14351348  | 0.222357466 |
| 0.003710654 | 0.31161523  | 0.17904919  | 0.157170331 |
| 0.262713346 | 0.202064432 | 0.030010997 | 0.217519111 |
| 0.024746118 | 0.093449013 | 0.064476935 | 0.126624251 |
| 0.306976785 | 0.01167518  | 0.073799095 | 0.101438387 |
| 0.223024306 | 0.231302406 | 0.106359743 | 0.293104695 |
| 0.259053895 | 0.058444645 | 0.23787854  | 0.30340558  |
| 0.054376247 | 0.019016519 | 0.082388365 | 0.007160091 |
| 0.030673916 | 0.227076907 | 0.091134553 | 0.035425299 |
| 0.250845987 | 0.007883255 | 0.236460568 | 0.308212815 |
| 0.209937587 | 0.332120189 | 0.305209602 | 0.197741583 |
| 0.296500055 | 0.036428257 | 0.29728924  | 0.221609485 |
| 0.077710869 | 0.002738598 | 0.013396519 | 0.306873845 |
| 0.243642753 | 0.027414139 | 0.164275594 | 0.067907517 |
| 0.110591548 | 0.055825144 | 0.044302706 | 0.163842606 |
| 0.189972498 | 0.263243375 | 0.120340077 | 0.227330629 |
| 0.194072361 | 0.206949328 | 0.081223893 | 0.059012153 |
| 0.208960079 | 0.052847517 | 0.054354185 | 0.034871408 |
| 0.293907505 | 0.064932305 | 0.217680698 | 0.273408476 |
| 0.328506156 | 0.307364828 | 0.049353349 | 0.068438212 |
| 0.254297783 | 0.044257249 | 0.060544429 | 0.05269125  |
| 0.24375921  | 0.293206751 | 0.315582738 | 0.250396955 |
| 0.350225207 | 0.294320777 | 0.033549271 | 0.308315164 |
| 0.023506087 | 0.006899789 | 0.118509368 | 0.183812067 |
| 0.014811231 | 0.192309027 | 0.247158451 | 0.05472212  |
| 0.080731527 | 0.025988396 | 0.155624627 | 0.168265118 |
| 0.278037746 | 0.219090466 | 0.276455618 | 0.141103945 |
| 0.168306162 | 0.127507421 | 0.13314418  | 0.083495202 |

|             |             |             |             |
|-------------|-------------|-------------|-------------|
| 0.04448039  | 0.191257226 | 0.144822425 | 0.017871271 |
| 0.13895388  | 0.201744164 | 0.06023507  | 0.129146778 |
| 0.327351119 | 0.31891056  | 0.046192926 | 0.044740018 |
| 0.208950767 | 0.140486494 | 0.334352925 | 0.249351597 |
| 0.281482172 | 0.349783369 | 0.254961607 | 0.114747351 |
| 0.050696308 | 0.26198229  | 0.257193248 | 0.120274378 |
| 0.293767564 | 0.034146127 | 0.243647112 | 0.205090896 |
| 0.103038914 | 0.127287013 | 0.05323562  | 0.082239699 |
| 0.224523053 | 0.172430048 | 0.228784412 | 0.089234799 |
| 0.204737388 | 0.111338127 | 0.036378749 | 0.1984002   |
| 0.254641694 | 0.118895532 | 0.153790052 | 0.074256851 |
| 0.18599918  | 0.017563705 | 0.276072261 | 0.337515931 |
| 0.109569219 | 0.069375514 | 0.060512776 | 0.216762019 |
| 0.251815088 | 0.110589565 | 0.033528936 | 0.196216617 |
| 0.306709673 | 0.231975132 | 0.257884563 | 0.339636241 |
| 0.067187447 | 0.243266914 | 0.120487828 | 0.244145788 |
| 0.152030815 | 0.112100978 | 0.154852748 | 0.061270832 |
| 0.213235408 | 0.26440758  | 0.236310998 | 0.186894768 |
| 0.14695496  | 0.050468259 | 0.028080535 | 0.231248149 |
| 0.15064534  | 0.058011969 | 0.063075649 | 0.246816948 |
| 0.008479314 | 0.097706963 | 0.304050066 | 0.115349092 |
| 0.298373499 | 0.329368088 | 0.314043105 | 0.053856082 |
| 0.002782183 | 0.250358893 | 0.297484963 | 0.16482261  |
| 0.226661252 | 0.215193099 | 0.029095874 | 0.088408579 |
| 0.291170489 | 0.046216492 | 0.11891089  | 0.060705489 |
| 0.080905166 | 0.173478995 | 0.213794945 | 0.118515029 |
| 0.18099288  | 0.036604493 | 0.11111266  | 0.146691092 |
| 0.065088726 | 0.260599139 | 0.334712279 | 0.025082628 |
| 0.11460039  | 0.28710026  | 0.247108155 | 0.021766698 |
| 0.185747638 | 0.266060369 | 0.266477053 | 0.008968797 |
| 0.299684403 | 0.015196322 | 0.217261094 | 0.237297056 |
| 0.187937965 | 0.169101764 | 0.292008188 | 0.161300707 |
| 0.17719923  | 0.156849035 | 0.188405765 | 0.267340769 |
| 0.149593695 | 0.116167207 | 0.220204185 | 0.119981002 |
| 0.191843461 | 0.0951245   | 0.062422221 | 0.058565541 |
| 0.061828189 | 0.235754167 | 0.20884552  | 0.04575054  |
| 0.225384486 | 0.098634802 | 0.322590936 | 0.233315353 |
| 0.317049132 | 0.053220789 | 0.140235378 | 0.239850878 |
| 0.029501268 | 0.057502143 | 0.021344726 | 0.145707915 |
| 0.174691781 | 0.163908369 | 0.10406729  | 0.138535228 |
| 0.17498866  | 0.287890134 | 0.199097263 | 0.283071812 |
| 0.166359497 | 0.118137657 | 0.044429798 | 0.116082669 |
| 0.139722597 | 0.094864472 | 0.288511379 | 0.006696593 |
| 0.253740061 | 0.059997193 | 0.300906307 | 0.253427502 |
| 0.109710529 | 0.285245267 | 0.040460027 | 0.061895549 |
| 0.027810446 | 0.094003065 | 0.134267919 | 0.212602973 |
| 0.097001071 | 0.107154053 | 0.281122413 | 0.046755054 |
| 0.272078346 | 0.205111913 | 0.114910606 | 0.102055005 |
| 0.151399618 | 0.113397027 | 0.236153168 | 0.048161282 |
| 0.165226088 | 0.16364824  | 0.091448922 | 0.257324232 |
| 0.204116785 | 0.287184775 | 0.048366227 | 0.300649628 |
| 0.203186502 | 0.087696524 | 0.319475572 | 0.10882473  |
| 0.057370411 | 0.108750165 | 0.113588486 | 0.067206288 |
| 0.089457098 | 0.118063191 | 0.002202301 | 0.058674335 |

|             |             |             |             |
|-------------|-------------|-------------|-------------|
| 0.344400398 | 0.060602726 | 0.177569445 | 0.225923758 |
| 0.181674838 | 0.31761444  | 0.062851978 | 0.108509169 |
| 0.212685643 | 0.237269794 | 0.141322802 | 0.235691517 |
| 0.247184391 | 0.095182988 | 0.14460182  | 0.002863773 |
| 0.223344351 | 0.18361473  | 0.056410061 | 0.041706633 |
| 0.01895652  | 0.122170852 | 0.196443159 | 0.029767085 |
| 0.335390471 | 0.080259229 | 0.114788432 | 0.231246956 |
| 0.110805169 | 0.245831051 | 0.11343616  | 0.32618484  |
| 0.012089856 | 0.18787728  | 0.156929766 | 0.117227961 |
| 0.17380831  | 0.211698547 | 0.347208265 | 0.194310085 |
| 0.039527762 | 0.144625884 | 0.006927293 | 0.262899034 |
| 0.215838389 | 0.190780879 | 0.159275935 | 0.028179061 |
| 0.305913147 | 0.225271907 | 0.106147402 | 0.126035982 |
| 0.031010336 | 0.293053934 | 0.173956921 | 0.248432966 |
| 0.080589668 | 0.148335013 | 0.067383963 | 0.189524512 |
| 0.211145158 | 0.117358468 | 0.190516314 | 0.083319958 |
| 0.238819783 | 0.180269913 | 0.078142339 | 0.097434154 |
| 0.132795965 | 0.049218763 | 0.062800875 | 0.306511695 |
| 0.198888005 | 0.210203303 | 0.354982803 | 0.17301946  |
| 0.170160103 | 0.201335383 | 0.139295942 | 0.276877232 |
| 0.11003649  | 0.246481554 | 0.280286751 | 0.256834932 |
| 0.314137862 | 0.151020197 | 0.151486592 | 0.210542556 |
| 0.221170519 | 0.078633495 | 0.101533339 | 0.245571532 |
| 0.158875864 | 0.255716151 | 0.084634188 | 0.193027173 |
| 0.059953424 | 0.06279524  | 0.089506016 | 0.120660202 |
| 0.256063827 | 0.237253827 | 0.150708913 | 0.307640272 |
| 0.131915415 | 0.060816731 | 0.314936417 | 0.038726792 |
| 0.124427915 | 0.303168647 | 0.18602546  | 0.185460219 |
| 0.152851371 | 0.174662654 | 0.116372124 | 0.00383369  |
| 0.306849082 | 0.046941064 | 0.112378656 | 1           |
| 0.089544761 | 0.031271536 | 0.256966128 | 0.342188002 |
| 0.168129125 | 0.049827427 | 0.075577485 | 0.251645593 |
| 0.116123872 | 0.073662192 | 0.092503063 | 0.159771983 |
| 0.143892987 | 0.084325513 | 0.105896895 | 0.137357549 |
| 0.227414512 | 0.095234212 |             |             |
| ZFP110      | 0.017436564 | 0.265057089 | 0.010019747 |
| 0.008023531 | 0.218151102 | 0.106325721 | 0.01425583  |
| 0.031210525 | 0.210183464 | 0.084659167 | 0.174974239 |
| 0.002455147 | 0.028701296 | 0.332623259 | 0.015542016 |
| 0.279264364 | 0.00757348  | 0.041373154 | 0.009310332 |
| 0.012380403 | 0.220788249 | 0.106434264 | 0.143036706 |
| 0.200311415 | 0.090935411 | 0.139346547 | 0.257582383 |
| 0.330798517 | 0.055675447 | 0.269693104 | 0.009230699 |
| 0.268744752 | 0.269365077 | 0.211708714 | 0.001068479 |
| 0.202127848 | 0.005879413 | 0.261713051 | 0.106780976 |
| 0.017345829 | 0.219572816 | 0.104251155 | 0.085865699 |
| 0.138304308 | 0.005731239 | 0.023680382 | 0.310528093 |
| 0.144409802 | 0.081827128 | 0.017512469 | 0.239933372 |
| 0.127150241 | 0.17896671  | 0.217954839 | 0.000995516 |
| 0.201053143 | 0.054479265 | 0.159932518 | 0.307102275 |
| 0.102864387 | 0.052535262 | 0.067565108 | 0.102622075 |
| 0.284015558 | 0.296608298 | 0.154203312 | 0.123134913 |
| 0.331106057 | 0.097551679 | 0.301282247 | 0.009196623 |
| 0.150346531 | 0.006229759 | 0.077214742 | 0.028686663 |

|             |             |             |             |
|-------------|-------------|-------------|-------------|
| 0.133931405 | 0.099578727 | 0.210467227 | 0.165065472 |
| 0.254723157 | 0.332685202 | 0.115746166 | 0.296664081 |
| 0.030130786 | 0.289685002 | 0.105766969 | 0.215593121 |
| 0.275338683 | 0.022805579 | 0.269913704 | 0.343398014 |
| 0.014043329 | 0.193433779 | 0.292844742 | 0.057627704 |
| 0.254887485 | 0.116892528 | 0.164163662 | 0.108733107 |
| 0.292012713 | 0.251199048 | 0.306414953 | 0.178332792 |
| 0.194492023 | 0.022888953 | 0.272492442 | 0.281582963 |
| 0.121063633 | 0.021046193 | 0.074634727 | 0.37169819  |
| 0.244443519 | 0.333456547 | 0.305424645 | 0.282094615 |
| 0.265688573 | 0.325207607 | 0.224654881 | 0.297283284 |
| 0.013106089 | 0.339766968 | 0.060085834 | 0.009850276 |
| 0.015705595 | 0.028795462 | 0.096620983 | 0.195123434 |
| 0.329933021 | 0.191802031 | 0.064731053 | 0.122096262 |
| 0.378123822 | 0.273321696 | 0.345006297 | 0.312364031 |
| 0.008921143 | 0.124936365 | 0.227015032 | 0.066626914 |
| 0.292242666 | 0.050642643 | 0.198865506 | 0.306233221 |
| 0.238013342 | 0.345031505 | 0.034190769 | 0.295155948 |
| 0.096477347 | 0.343088688 | 0.280458706 | 0.065340193 |
| 0.312500895 | 0.284702153 | 0.357735827 | 0.33006847  |
| 0.281361815 | 0.109412531 | 0.020257069 | 0.266610589 |
| 0.345250233 | 0.004025883 | 0.361555364 | 0.378655905 |
| 0.310816433 | 0.358404174 | 0.387442777 | 0.361053438 |
| 0.320471537 | 0.025351732 | 0.01027205  | 0.232636207 |
| 0.31218928  | 0.241708299 | 0.047944099 | 0.248666686 |
| 0.29815867  | 0.142573477 | 0.3154553   | 0.031631364 |
| 0.357473582 | 0.298969781 | 0.35004848  | 0.288219844 |
| 0.140828785 | 0.193614848 | 0.280945637 | 0.256095711 |
| 0.005254188 | 0.027494006 | 0.014963678 | 0.208832917 |
| 0.054038482 | 0.091364651 | 0.127547604 | 0.265436838 |
| 0.109055952 | 0.118791079 | 0.185523292 | 0.327507004 |
| 0.019909578 | 0.230126838 | 0.047583374 | 0.064612437 |
| 0.008330532 | 0.070963032 | 0.025173461 | 0.025631039 |
| 0.17049022  | 0.114602846 | 0.30947113  | 0.346244112 |
| 0.174962813 | 0.073990303 | 0.291836823 | 0.326680977 |
| 0.316718993 | 0.235493136 | 0.145825352 | 0.00054758  |
| 0.052395658 | 0.129477017 | 0.134881745 | 0.248827113 |
| 0.081078284 | 0.07680666  | 0.269623307 | 0.323384108 |
| 0.101728532 | 0.051343739 | 0.17295056  | 0.260865759 |
| 0.068417934 | 0.125197565 | 0.351027115 | 0.20864553  |
| 6.71E-05    | 0.138319579 | 0.315431928 | 0.035382844 |
| 0.21501015  | 0.025025073 | 0.078764981 | 0.336804285 |
| 0.109544731 | 0.160697584 | 0.360098626 | 0.326564877 |
| 0.040750015 | 0.11340584  | 0.384427247 | 0.029023999 |
| 0.23399536  | 0.005194996 | 0.203279205 | 0.12393507  |
| 0.117926615 | 0.219534431 | 0.268690266 | 0.11318704  |
| 0.044359009 | 0.349439941 | 0.243196892 | 0.360210171 |
| 0.13652275  | 0.373701135 | 0.350914651 | 0.315141912 |
| 0.200641261 | 0.226365464 | 0.082547796 | 0.300632341 |
| 0.322553875 | 0.024818253 | 0.024380269 | 0.358922358 |
| 0.162675125 | 0.328214588 | 0.012492937 | 0.351625907 |
| 0.304512202 | 0.268326652 | 0.059811356 | 0.3182058   |
| 0.246304944 | 0.089201891 | 0.277972412 | 0.386498184 |
| 0.072045058 | 0.2442159   | 0.142043525 | 0.318138974 |

|             |             |             |             |
|-------------|-------------|-------------|-------------|
| 0.071929481 | 0.108938132 | 0.197381959 | 0.116026057 |
| 0.002176292 | 0.028189638 | 0.018820742 | 0.080641394 |
| 0.106289317 | 0.26415753  | 0.2667522   | 0.357960575 |
| 0.049514332 | 0.268811241 | 0.146553694 | 0.101347881 |
| 0.271094926 | 0.237077008 | 0.259035216 | 0.288784865 |
| 0.135113581 | 0.000688262 | 0.009346465 | 0.32450325  |
| 0.011643005 | 0.132861283 | 0.154356428 | 0.000150367 |
| 0.010111427 | 0.259821489 | 0.038523974 | 0.094938388 |
| 0.384357802 | 0.088159939 | 0.094274879 | 0.088299063 |
| 0.237577186 | 0.030865408 | 0.00017191  | 0.336436996 |
| 0.330019719 | 0.314783348 | 0.327095182 | 0.282143103 |
| 0.332770612 | 0.286518454 | 0.31711965  | 0.118955079 |
| 0.02097162  | 0.019610405 | 0.092099569 | 0.142428022 |
| 0.008765102 | 0.257100404 | 0.195365688 | 0.065980241 |
| 0.352735857 | 0.208336912 | 0.007513221 | 0.289856953 |
| 0.000748844 | 0.110316614 | 0.098343427 | 0.109154754 |
| 0.302473098 | 0.001381205 | 0.012779897 | 0.079970609 |
| 0.240542148 | 0.210461211 | 0.150930938 | 0.337010179 |
| 0.167635941 | 0.049323401 | 0.138386955 | 0.305495076 |
| 0.017954257 | 0.011993591 | 0.133097547 | 0.001683739 |
| 0.013830182 | 0.295303361 | 0.148397741 | 0.003826458 |
| 0.134137725 | 0.000165152 | 0.206425569 | 0.356540033 |
| 0.264184289 | 0.382834753 | 0.32920604  | 0.175871238 |
| 0.322981187 | 0.052726338 | 0.360748034 | 0.256998374 |
| 0.14590067  | 4.61E-05    | 0.000769309 | 0.348303165 |
| 0.241149741 | 0.017903817 | 0.068235095 | 0.042666817 |
| 0.021491726 | 0.0411238   | 0.018524769 | 0.086861722 |
| 0.22087975  | 0.166085444 | 0.102925742 | 0.293398127 |
| 0.104138048 | 0.13038755  | 0.156385937 | 0.036302209 |
| 0.247152928 | 0.007643713 | 0.035420906 | 0.001205966 |
| 0.29727167  | 0.045443629 | 0.259021413 | 0.33324461  |
| 0.327342262 | 0.282110321 | 0.116228537 | 0.045437262 |
| 0.334761575 | 0.033959224 | 0.066166294 | 0.03779568  |
| 0.295956582 | 0.272749214 | 0.206654695 | 0.168999975 |
| 0.365998657 | 0.299562013 | 0.008330368 | 0.291328008 |
| 0.000382222 | 0.000537051 | 0.121312248 | 0.176734491 |
| 0.013345353 | 0.219740532 | 0.142098159 | 0.07945063  |
| 0.085792106 | 0.001518992 | 0.178902594 | 0.167354225 |
| 0.173370283 | 0.213424502 | 0.220133026 | 0.147913076 |
| 0.120063353 | 0.019342236 | 0.065658858 | 0.059974449 |
| 0.02910696  | 0.166977805 | 0.092370706 | 0.00367061  |
| 0.181617643 | 0.247843457 | 0.015789608 | 0.066740165 |
| 0.309306157 | 0.361783458 | 0.00408438  | 0.000693272 |
| 0.149224029 | 0.179368161 | 0.388803655 | 0.316648821 |
| 0.326051233 | 0.367368612 | 0.233851708 | 0.050060063 |
| 0.015985815 | 0.194209201 | 0.231651933 | 0.023879343 |
| 0.356481511 | 0.023219536 | 0.294966294 | 0.242617515 |
| 0.050994559 | 0.051034729 | 0.003876073 | 0.03241372  |
| 0.296954621 | 0.095013698 | 0.094922653 | 0.050470784 |
| 0.157616151 | 0.079099725 | 0.012149988 | 0.097565447 |
| 0.235594228 | 0.044191035 | 0.07601378  | 0.091084513 |
| 0.190154916 | 0.030102449 | 0.330116416 | 0.306486719 |
| 0.054591193 | 0.041423253 | 0.041819838 | 0.292769757 |
| 0.322769862 | 0.223693302 | 0.00138869  | 0.274934487 |

|             |             |             |             |
|-------------|-------------|-------------|-------------|
| 0.35985157  | 0.289571084 | 0.300524766 | 0.33320359  |
| 0.031887801 | 0.222375567 | 0.208123611 | 0.2299962   |
| 0.104059687 | 0.116019613 | 0.135016662 | 0.022630649 |
| 0.196701909 | 0.307902391 | 0.26035155  | 0.067507106 |
| 0.236315003 | 0.049744976 | 0.017963976 | 0.323625379 |
| 0.078326597 | 0.011262704 | 0.127363004 | 0.359148733 |
| 6.61E-05    | 0.106573502 | 0.369311254 | 0.071633262 |
| 0.345607911 | 0.344801968 | 0.279470259 | 0.060420734 |
| 0.000760433 | 0.30668917  | 0.23504664  | 0.138131847 |
| 0.285765453 | 0.206111326 | 0.013520251 | 0.016162963 |
| 0.182003787 | 0.027034903 | 0.036099736 | 0.019890512 |
| 0.021266093 | 0.242910959 | 0.119220484 | 0.10542666  |
| 0.091953256 | 0.039040467 | 0.066489368 | 0.072968088 |
| 0.036655655 | 0.147398998 | 0.255521062 | 0.071071234 |
| 0.04783861  | 0.359059971 | 0.273769761 | 0.003842293 |
| 0.25945287  | 0.306100902 | 0.294241695 | 0.000257813 |
| 0.321252557 | 0.000624231 | 0.118286472 | 0.098054181 |
| 0.084200191 | 0.128629136 | 0.198774217 | 0.103225673 |
| 0.206415729 | 0.089783204 | 0.094312243 | 0.131751309 |
| 0.051545825 | 0.080947473 | 0.240380193 | 0.123338075 |
| 0.111208425 | 0.030520061 | 0.038579814 | 0.03919302  |
| 0.005217715 | 0.31467118  | 0.135266336 | 0.022370117 |
| 0.142310912 | 0.1255149   | 0.232085633 | 0.300634404 |
| 0.298973733 | 0.040336736 | 0.166773629 | 0.277453894 |
| 0.028859326 | 0.025348217 | 0.013681999 | 0.148485817 |
| 0.114807746 | 0.080998497 | 0.163573883 | 0.135742572 |
| 0.276431372 | 0.241448066 | 0.131658735 | 0.28108606  |
| 0.133693687 | 0.199086649 | 0.082438669 | 0.017481865 |
| 0.05547568  | 0.058689173 | 0.20423859  | 0.000120028 |
| 0.223004239 | 0.023686969 | 0.342183881 | 0.283830555 |
| 0.198080652 | 0.243523366 | 0.028030346 | 0.017822722 |
| 0.032647924 | 0.076792501 | 0.068337267 | 0.287963422 |
| 0.149218204 | 0.04939585  | 0.189023546 | 0.053886618 |
| 0.317045945 | 0.293448676 | 0.12032004  | 0.116627485 |
| 0.120122617 | 0.072549143 | 0.291935945 | 0.028578869 |
| 0.243969204 | 0.073409933 | 0.175545759 | 0.159438453 |
| 0.119993092 | 0.352754994 | 0.017172541 | 0.376086586 |
| 0.191852641 | 0.057945563 | 0.320262742 | 0.124295643 |
| 0.040251989 | 0.018039021 | 0.137981861 | 0.122562373 |
| 0.065883571 | 0.164596508 | 0.003933161 | 0.018514261 |
| 0.234366801 | 0.127609595 | 0.272579814 | 0.267325865 |
| 0.133639239 | 0.27243218  | 0.048960342 | 0.126306814 |
| 0.277109887 | 0.286285088 | 0.045434512 | 0.152040623 |
| 0.250091479 | 0.029234541 | 0.179051224 | 0.004499821 |
| 0.292381948 | 0.290968375 | 0.103776251 | 0.014826758 |
| 0.001278195 | 0.133882569 | 0.238855742 | 0.023363691 |
| 0.380732561 | 0.052830486 | 0.210171396 | 0.265560481 |
| 0.091657298 | 0.284782895 | 0.048948209 | 0.287538405 |
| 0.004317075 | 0.141209444 | 0.225909431 | 0.219929629 |
| 0.066554717 | 0.186460991 | 0.261121033 | 0.1585557   |
| 0.006690727 | 0.056149924 | 0.000145201 | 0.230294009 |
| 0.26272477  | 0.22008662  | 0.112175311 | 0.087096154 |
| 0.182402723 | 0.248310681 | 0.067723644 | 0.201847819 |
| 0.000497326 | 0.273667312 | 0.102091824 | 0.248137737 |

|             |             |             |             |
|-------------|-------------|-------------|-------------|
| 0.043348769 | 0.224256172 | 0.004639249 | 0.24439208  |
| 0.244393872 | 0.06989213  | 0.170426443 | 0.057254659 |
| 0.296019216 | 0.23653509  | 0.058898517 | 0.049523185 |
| 0.247185522 | 0.02303974  | 0.115813451 | 0.370730261 |
| 0.085344529 | 0.142225862 | 0.363534727 | 0.073317695 |
| 0.235045017 | 0.230558303 | 0.238390473 | 0.356862041 |
| 0.029143511 | 0.143488804 | 0.319981544 | 0.322857199 |
| 0.217716556 | 0.117675945 | 0.141822781 | 0.13294768  |
| 0.256212654 | 0.007246912 | 0.098112203 | 0.205782795 |
| 0.136384475 | 0.211132845 | 0.159257264 | 0.119445646 |
| 0.003489872 | 0.055817676 | 0.091946875 | 0.060550281 |
| 0.189568282 | 0.188256369 | 0.098440089 | 0.247056024 |
| 0.020305477 | 0.001375004 | 0.290071829 | 0.005619381 |
| 0.116476434 | 0.246526563 | 0.128309392 | 0.191154411 |
| 0.082425084 | 0.213852032 | 0.132421827 | 5.46E-05    |
| 0.321031736 | 0.003314019 | 0.145633198 | 0.089544761 |
| 1           | 0.011987767 | 0.266303993 | 0.384029047 |
| 0.164601916 | 0.031103828 | 0.086823653 | 0.304417655 |
| 0.022261449 | 0.159121469 | 0.188541096 | 0.213142933 |
| 0.151378312 | 0.154888115 | 0.188321345 | 0.155564275 |
| 0.220842054 | 0.092733127 |             |             |
| ZFP113      | 0.180470754 | 0.091441217 | 0.152566746 |
| 0.066576858 | 0.040608201 | 0.024447475 | 0.176626931 |
| 0.132525188 | 0.097071082 | 0.007965572 | 0.055662966 |
| 0.199903854 | 0.00220411  | 0.113704596 | 0.175413459 |
| 0.037157057 | 0.187519043 | 0.230147543 | 0.019047857 |
| 0.036495293 | 0.048964112 | 0.010570024 | 0.050097085 |
| 0.039753297 | 0.308541521 | 0.077078029 | 0.018609694 |
| 0.090893899 | 0.002798588 | 0.039392034 | 0.00341728  |
| 0.190162222 | 0.039348344 | 0.011493512 | 0.131833351 |
| 0.038093066 | 0.002678301 | 0.204061876 | 0.05413541  |
| 0.004202525 | 0.220749907 | 0.016994996 | 0.076297505 |
| 0.023322774 | 0.158023969 | 0.002784507 | 0.038623442 |
| 0.065888335 | 0.041035928 | 0.213006229 | 0.050213809 |
| 0.018155709 | 0.120691129 | 0.048091602 | 0.021301315 |
| 0.007685354 | 0.000127036 | 0.002790369 | 0.122941035 |
| 0.23307582  | 0.188145675 | 0.004435988 | 0.070890965 |
| 0.039756666 | 0.060785646 | 0.15121611  | 0.014672131 |
| 0.119309939 | 0.005615214 | 0.038679765 | 0.034827805 |
| 0.043156664 | 0.161318973 | 0.299763791 | 0.20482187  |
| 0.015850739 | 0.145113697 | 0.045464975 | 0.011100174 |
| 0.089697909 | 0.175753833 | 0.162095582 | 0.137979516 |
| 0.009772096 | 0.026509158 | 0.018047723 | 0.135868818 |
| 0.085830848 | 0.118318484 | 0.07672879  | 0.146891383 |
| 0.15871095  | 0.029974042 | 0.071915152 | 0.265745475 |
| 0.087421908 | 0.006580519 | 0.020814057 | 0.006638921 |
| 0.041312169 | 0.037221102 | 0.15722348  | 0.170416266 |
| 0.031265123 | 0.260782151 | 0.160650563 | 0.02291226  |
| 0.036747582 | 0.217250057 | 0.025732078 | 0.056767922 |
| 0.052477355 | 0.095732253 | 0.074033721 | 0.116796095 |
| 0.028826774 | 0.109232659 | 0.073566804 | 0.110735617 |
| 0.001369294 | 0.118181547 | 0.159105257 | 0.179927896 |
| 0.161701563 | 0.136105354 | 0.020643146 | 0.191037145 |
| 0.07506536  | 0.111742741 | 0.14322227  | 0.095401097 |



|             |             |             |             |
|-------------|-------------|-------------|-------------|
| 0.079912541 | 0.137034548 | 0.115268039 | 0.098973399 |
| 0.214421295 | 0.005747717 | 0.027038421 | 0.047385032 |
| 0.085670103 | 0.252547711 | 0.015475516 | 0.168890578 |
| 0.165416895 | 0.069689199 | 0.111219581 | 0.198099743 |
| 0.106146312 | 0.1450285   | 0.075796232 | 0.18058     |
| 0.152624959 | 0.157485747 | 0.120674241 | 0.037159846 |
| 0.151925092 | 0.061662518 | 0.018244873 | 0.115502839 |
| 0.142956461 | 0.002518785 | 0.069301913 | 0.078704758 |
| 0.115761558 | 0.058486316 | 0.116210755 | 0.092323184 |
| 0.115235092 | 0.282156446 | 0.00096514  | 0.100865078 |
| 0.139761678 | 0.128309881 | 0.078483629 | 0.021988162 |
| 0.043692064 | 0.043517316 | 0.057561213 | 0.012357362 |
| 0.1723281   | 0.081396932 | 0.077501769 | 0.092984218 |
| 0.056705892 | 0.233179335 | 0.015848061 | 0.160196778 |
| 0.154165511 | 0.166839819 | 0.268250971 | 0.141886001 |
| 0.009585939 | 0.188422819 | 0.042619183 | 0.044716179 |
| 0.216659563 | 0.047205061 | 0.006788812 | 0.045307516 |
| 0.316605903 | 0.028836087 | 0.155725792 | 0.184973225 |
| 0.175281138 | 0.35678475  | 0.086645002 | 0.08336229  |
| 0.08873657  | 0.325648764 | 0.041648721 | 0.093247087 |
| 0.027657604 | 0.235000814 | 0.062202975 | 0.137390098 |
| 0.178556966 | 0.023896804 | 0.237282836 | 0.050888908 |
| 0.02457675  | 0.005279717 | 0.003161515 | 0.020359916 |
| 0.330316813 | 0.060386567 | 0.05136626  | 0.056714852 |
| 0.104381834 | 0.131148459 | 0.019891943 | 0.210364985 |
| 0.254756171 | 0.030944328 | 0.096823745 | 0.034517412 |
| 0.087132716 | 0.081324856 | 0.071887764 | 0.032131118 |
| 0.119474482 | 0.008438544 | 0.004662206 | 0.0884518   |
| 0.008890528 | 0.020185011 | 0.080152139 | 0.054749463 |
| 0.018018251 | 0.266473503 | 0.117803401 | 0.002594419 |
| 0.026529961 | 0.032839086 | 0.138798183 | 0.017675062 |
| 0.157489053 | 0.160732526 | 0.030811422 | 0.025116265 |
| 0.215333974 | 0.12936195  | 0.109499421 | 0.102111248 |
| 0.011627668 | 0.122618377 | 0.070897152 | 0.110853616 |
| 0.09100337  | 0.015679332 | 0.002134011 | 0.074960802 |
| 0.079184688 | 0.014033924 | 0.272811029 | 0.04915634  |
| 0.018756502 | 0.045398928 | 0.030608404 | 0.118705727 |
| 0.17967986  | 0.122239995 | 0.112372102 | 0.084734129 |
| 0.128089925 | 0.144474685 | 0.085546637 | 0.133360733 |
| 0.008752471 | 0.03175303  | 0.019887478 | 0.095715806 |
| 0.228215662 | 0.023352524 | 0.188047412 | 0.002587093 |
| 0.000732479 | 0.229894816 | 0.267140094 | 0.115068811 |
| 0.009684819 | 0.02636508  | 0.055406295 | 0.115538068 |
| 0.232965485 | 0.131481277 | 0.182198323 | 0.033285204 |
| 0.137134738 | 0.027120819 | 0.020246902 | 0.041547217 |
| 0.201339462 | 0.059634364 | 0.091470794 | 0.180679429 |
| 0.246763491 | 0.008973462 | 0.072692013 | 0.010229438 |
| 0.188605999 | 0.059001039 | 0.332811151 | 0.353703657 |
| 0.092886106 | 0.308913791 | 0.207842982 | 0.012935204 |
| 0.101005149 | 0.251754844 | 0.016596719 | 0.096191417 |
| 0.115557193 | 0.117175856 | 0.115436413 | 0.139058498 |
| 0.094448233 | 0.063193567 | 0.072110035 | 0.053519821 |
| 0.141458324 | 0.141317419 | 0.011280585 | 0.069390994 |
| 0.015373275 | 0.095207434 | 0.04667875  | 0.303894832 |

|             |             |             |             |
|-------------|-------------|-------------|-------------|
| 0.053949694 | 0.132101584 | 0.181112013 | 0.037504928 |
| 0.106454787 | 0.002540955 | 0.042619693 | 0.087678628 |
| 0.083368936 | 0.145735044 | 0.010847901 | 0.011220633 |
| 0.141529587 | 0.173421917 | 0.008039927 | 0.124256712 |
| 0.076869471 | 0.215149482 | 0.047219448 | 0.069686942 |
| 0.176120121 | 0.007364303 | 0.034979551 | 0.000947794 |
| 0.010714664 | 0.143717557 | 0.015786723 | 0.11002242  |
| 0.139994142 | 0.124132236 | 0.15621497  | 0.133248042 |
| 0.11487817  | 0.10099605  | 0.114217087 | 0.011964552 |
| 0.120284051 | 0.000190593 | 0.10509163  | 0.09992084  |
| 0.012618823 | 0.011327643 | 0.052339597 | 0.076310302 |
| 0.033073439 | 0.255111722 | 0.247811281 | 0.013802035 |
| 0.121637306 | 0.129592082 | 0.174044164 | 0.01629002  |
| 0.040269605 | 0.063892951 | 0.01714648  | 0.135131997 |
| 0.102442165 | 0.13670086  | 0.025756113 | 0.304712088 |
| 0.032806707 | 0.162347223 | 0.279273282 | 0.016271868 |
| 0.072085704 | 0.285944773 | 0.182466523 | 0.112729468 |
| 0.150241    | 0.052791755 | 0.006763024 | 0.016742654 |
| 0.084938494 | 0.21848114  | 0.006726162 | 0.207873229 |
| 0.107679347 | 0.051713599 | 0.166481178 | 0.196700834 |
| 0.132827468 | 0.140749943 | 0.217176373 | 0.081462677 |
| 0.062357912 | 0.005339328 | 0.040421003 | 0.176989912 |
| 0.007388783 | 0.026570954 | 0.223693567 | 0.040940654 |
| 0.046013582 | 0.151270956 | 0.008970934 | 0.011784425 |
| 0.109243459 | 0.050835413 | 0.030866858 | 0.17388648  |
| 0.033552655 | 0.0268002   | 0.078558248 | 0.119113727 |
| 0.022619031 | 0.179101395 | 0.311535506 | 0.184144197 |
| 0.021842315 | 0.02447075  | 0.247425353 | 0.258586536 |
| 0.091110514 | 0.087387814 | 0.17694212  | 0.094991126 |
| 0.232856798 | 0.045982537 | 0.09575579  | 0.100952554 |
| 0.151425977 | 0.145987292 | 0.219616096 | 0.085568346 |
| 0.174301624 | 0.073122206 | 0.03015457  | 0.054976978 |
| 0.111583532 | 0.259106292 | 0.118823983 | 0.013026223 |
| 0.28765818  | 0.081018244 | 0.154145272 | 0.259687904 |
| 0.022293468 | 0.247090393 | 0.116098901 | 0.201782451 |
| 0.050398471 | 0.007215268 | 0.211146429 | 0.193754391 |
| 0.142265882 | 0.004268668 | 0.24971513  | 0.043618005 |
| 0.106356613 | 0.007574416 | 0.047818804 | 0.18316481  |
| 0.280657257 | 0.213215999 | 0.038338086 | 0.074112721 |
| 0.06112794  | 0.020151202 | 0.072831663 | 0.08709496  |
| 0.10613308  | 0.036759184 | 0.126783967 | 0.137447268 |
| 0.309190045 | 0.028697102 | 0.013196697 | 0.052513913 |
| 0.207237244 | 0.030736985 | 0.110799815 | 0.313754621 |
| 0.209429393 | 0.187715227 | 0.103804766 | 0.1375018   |
| 0.028321386 | 0.194059236 | 0.24218903  | 0.078911228 |
| 0.010483876 | 0.155981136 | 0.01752932  | 0.062088179 |
| 0.004588448 | 0.002952378 | 0.100177668 | 0.06418834  |
| 0.147755845 | 0.095847496 | 0.162992554 | 0.042677418 |
| 6.35E-05    | 0.035182744 | 0.063422448 | 0.023789527 |
| 0.099516827 | 0.130873108 | 0.036113733 | 0.1426244   |
| 0.20363815  | 0.262879781 | 0.10857354  | 0.015353549 |
| 0.004331196 | 0.060078781 | 0.256287404 | 0.150108899 |
| 0.086335287 | 0.229742871 | 0.006254302 | 0.092122231 |
| 0.007839715 | 0.237663873 | 0.155152748 | 0.008922034 |

|             |             |             |             |
|-------------|-------------|-------------|-------------|
| 0.00673095  | 0.11038964  | 0.089174945 | 0.158212924 |
| 0.020735315 | 0.099634743 | 0.108636609 | 0.044167685 |
| 0.051467745 | 0.160811587 | 0.102262234 | 0.083308641 |
| 0.086726197 | 0.097451574 | 0.102858892 | 0.027218592 |
| 0.083748116 | 0.11415588  | 0.065592749 | 0.170169881 |
| 0.07403063  | 0.115646083 | 0.042187821 | 0.04361982  |
| 0.031715486 | 0.147769173 | 0.326315083 | 0.337249685 |
| 0.142643104 | 0.083689217 | 0.279642972 | 0.261088718 |
| 0.168982955 | 0.034700449 | 0.196924018 | 0.108265404 |
| 0.134049533 | 0.251664153 | 0.048525565 | 0.084006562 |
| 0.004964727 | 0.021511578 | 0.149472725 | 0.041891736 |
| 0.153370374 | 0.022723538 | 0.027403546 | 0.094962768 |
| 0.0577578   | 0.212718906 | 0.27015173  | 0.13265614  |
| 0.033931655 | 0.035037074 | 0.010270444 | 0.11377536  |
| 0.155382307 | 0.282505786 | 0.037265941 | 0.067894225 |
| 0.104455023 | 0.040894509 | 0.072978915 | 0.133457482 |
| 0.006646958 | 0.162253169 | 0.01052468  | 0.157373212 |
| 0.006233412 | 0.262594665 | 0.315084272 | 0.051292906 |
| 0.002924072 | 0.099232943 | 0.054269879 | 0.020795734 |
| 0.052769174 | 0.04648078  | 0.022761068 | 0.10596752  |
| 0.115788844 | 0.177877323 | 0.158786011 | 0.139636912 |
| 0.025882999 | 0.019420777 | 0.041004487 | 0.061375103 |
| 0.08225234  | 0.095406719 | 0.261634553 | 0.09546217  |
| 0.036395829 | 0.287950947 | 0.186308444 | 0.070684381 |
| 0.033152519 | 0.060990703 | 0.003138239 | 0.020584448 |
| 0.066744053 | 0.008038104 | 0.000390249 | 0.010449214 |
| 0.132606507 | 0.021612025 | 0.06580855  | 0.089018813 |
| 0.023183822 | 0.136067512 | 0.002423523 | 0.093205309 |
| 0.122808475 | 0.161378519 | 0.052563716 | 0.228593516 |
| 0.140682865 | 0.167074165 | 0.051821893 | 0.004903772 |
| 0.035226431 | 0.021584179 | 0.010183073 | 0.1805097   |
| 0.172902046 | 0.004084474 | 0.040591138 | 0.230966463 |
| 0.089353601 | 0.002489197 | 0.049119341 | 0.046713622 |
| 0.24287095  | 0.169222881 | 0.087264876 | 0.07109876  |
| 0.099696323 | 0.160388591 | 0.017787624 | 0.02643588  |
| 0.032607401 | 0.017598055 | 0.096160505 | 0.011845792 |
| 0.185794001 | 0.031775416 | 0.031807893 | 0.230654243 |
| 0.155663762 | 0.017864331 | 0.291082817 | 0.006685193 |
| 0.150396943 | 0.118166801 | 0.035869369 | 0.017378201 |
| 0.098182689 | 0.033174704 | 0.181869586 | 0.10669588  |
| 0.004225943 | 0.04768138  | 0.107111116 | 0.027995028 |
| 0.19738271  | 0.0265553   | 0.233811566 | 0.007555518 |
| 0.106967603 | 0.088344424 | 0.193787937 | 0.023379622 |
| 0.042188712 | 0.319850549 | 0.013859162 | 0.129718812 |
| 0.121977803 | 0.014278348 | 0.072208233 | 0.092727348 |
| 0.015277795 | 0.126333467 | 0.025930162 | 0.128381549 |
| 0.099450068 | 0.197840198 | 0.066098082 | 0.113508651 |
| 0.173337279 | 0.016361886 | 0.010922271 | 0.050889155 |
| 0.120471508 | 0.099785658 | 0.013961379 | 0.127481057 |
| 0.008562553 | 0.123781563 | 0.041833882 | 0.050138151 |
| 0.137841737 | 0.088260751 | 0.019096621 | 0.259598878 |
| 0.117911992 | 0.04023034  | 0.023482739 | 0.190338778 |
| 0.06785694  | 0.088972342 | 0.173143945 | 0.00063962  |
| 0.063140139 | 0.052971642 | 0.146725063 | 0.029284292 |

|             |             |             |             |
|-------------|-------------|-------------|-------------|
| 0.283112579 | 0.083050345 | 0.063250891 | 0.087677143 |
| 0.088548756 | 0.004269363 | 0.031645814 | 0.031271536 |
| 0.011987767 | 1           | 0.133950949 | 0.104255632 |
| 0.11302584  | 0.009587479 | 0.005924975 | 0.124189734 |
| 0.00508321  | 0.005094697 | 0.010975577 | 0.049687895 |
| 0.007063858 | 0.014193354 | 0.01486603  | 0.009575969 |
| 0.093540443 | 0.075008283 |             |             |
| ZFP187      | 0.190218931 | 0.458443598 | 0.170370268 |
| 0.253103853 | 0.326780525 | 0.492855322 | 0.141113267 |
| 0.231871676 | 0.412595984 | 0.32846633  | 0.428884488 |
| 0.064927936 | 0.083270592 | 0.460485576 | 0.132254331 |
| 0.385304213 | 0.092318272 | 0.207356871 | 0.103885552 |
| 0.319057662 | 0.293361932 | 0.36129049  | 0.468262178 |
| 0.30087692  | 0.303622053 | 0.437175878 | 0.373218497 |
| 0.477071919 | 0.277786135 | 0.46657773  | 0.244534468 |
| 0.424632376 | 0.32929424  | 0.380182611 | 0.073963491 |
| 0.460307684 | 0.011650527 | 0.453229923 | 0.308828629 |
| 0.17250164  | 0.409413934 | 0.402691905 | 0.335859119 |
| 0.399111291 | 0.11878929  | 0.250898106 | 0.394870742 |
| 0.410341165 | 0.373229593 | 0.176273533 | 0.472696949 |
| 0.380479105 | 0.453922626 | 0.436613446 | 0.004601559 |
| 0.291012595 | 0.073048944 | 0.196954591 | 0.509416303 |
| 0.322792955 | 0.226198676 | 0.255441456 | 0.352356191 |
| 0.391692229 | 0.389240278 | 0.351394752 | 0.368863934 |
| 0.48394058  | 0.156795532 | 0.437620057 | 0.26111738  |
| 0.432470094 | 0.105943104 | 0.276524955 | 0.194454502 |
| 0.402845947 | 0.303876904 | 0.392839602 | 0.302001177 |
| 0.448774626 | 0.520143071 | 0.343863786 | 0.506868564 |
| 0.085902288 | 0.323925484 | 0.304819919 | 0.361613204 |
| 0.391683605 | 0.165390029 | 0.452834118 | 0.507011832 |
| 0.132222194 | 0.413569989 | 0.414897179 | 0.241287796 |
| 0.482769445 | 0.274710606 | 0.428300361 | 0.181880352 |
| 0.373961948 | 0.331281711 | 0.482477052 | 0.383843604 |
| 0.351635861 | 0.183073977 | 0.512533916 | 0.305489955 |
| 0.360576514 | 0.205199774 | 0.232928142 | 0.4499422   |
| 0.446657848 | 0.480558705 | 0.442652679 | 0.395576143 |
| 0.359635339 | 0.484526036 | 0.45978866  | 0.454626514 |
| 0.176108223 | 0.512976299 | 0.328051468 | 0.112689113 |
| 0.184143336 | 0.178058592 | 0.238088103 | 0.385601783 |
| 0.479191231 | 0.42860329  | 0.315935641 | 0.295171546 |
| 0.437386324 | 0.49874765  | 0.505760406 | 0.439857329 |
| 0.117601143 | 0.230704494 | 0.373447085 | 0.421601209 |
| 0.407664821 | 0.223125494 | 0.252605206 | 0.520804051 |
| 0.443066651 | 0.441592211 | 0.310744    | 0.523885559 |
| 0.284108433 | 0.50085335  | 0.475655269 | 0.279920876 |
| 0.521823379 | 0.515784597 | 0.481708506 | 0.401030625 |
| 0.494128988 | 0.456433751 | 0.070878907 | 0.421514146 |
| 0.469312915 | 0.019219506 | 0.463031689 | 0.462641296 |
| 0.492760286 | 0.454156286 | 0.479954069 | 0.477710981 |
| 0.498617357 | 0.179004641 | 0.022217799 | 0.321242838 |
| 0.506963202 | 0.454815886 | 0.209662972 | 0.397317584 |
| 0.359814569 | 0.483025293 | 0.450462318 | 0.313658938 |
| 0.499225911 | 0.475208793 | 0.471459828 | 0.431540889 |
| 0.36817264  | 0.39772767  | 0.35107865  | 0.50165091  |

|             |             |             |             |
|-------------|-------------|-------------|-------------|
| 0.126637003 | 0.244505393 | 0.153799011 | 0.375544174 |
| 0.428861548 | 0.270580896 | 0.450669812 | 0.356682434 |
| 0.293945778 | 0.440470126 | 0.322744531 | 0.378860581 |
| 0.151440926 | 0.460830497 | 0.304428058 | 0.284568229 |
| 0.107849727 | 0.256244873 | 0.259772111 | 0.276020178 |
| 0.307149295 | 0.311567204 | 0.450002804 | 0.465941421 |
| 0.357999499 | 0.315533603 | 0.461336961 | 0.45969482  |
| 0.422422076 | 0.382598968 | 0.330993251 | 0.038972854 |
| 0.261645054 | 0.283273887 | 0.162063233 | 0.408610045 |
| 0.278203627 | 0.274728808 | 0.38836143  | 0.408146738 |
| 0.407892825 | 0.267420049 | 0.352403113 | 0.456066463 |
| 0.273659255 | 0.358648747 | 0.44795247  | 0.423483353 |
| 0.022315498 | 0.402113274 | 0.469144517 | 0.163961139 |
| 0.379306032 | 0.140233661 | 0.269623099 | 0.454402956 |
| 0.263792615 | 0.222672721 | 0.474433169 | 0.40590328  |
| 0.387680676 | 0.306965273 | 0.490189742 | 0.035111845 |
| 0.345597696 | 0.093294027 | 0.345388488 | 0.380790214 |
| 0.355087957 | 0.349263747 | 0.320496303 | 0.3143178   |
| 0.26807417  | 0.502473239 | 0.463564327 | 0.481762709 |
| 0.347081306 | 0.495338404 | 0.460660617 | 0.464737812 |
| 0.444394401 | 0.33780878  | 0.120524765 | 0.460386796 |
| 0.458493258 | 0.286294745 | 0.188189018 | 0.438425287 |
| 0.355023679 | 0.395807974 | 0.156413783 | 0.459411031 |
| 0.50634608  | 0.482048371 | 0.230336081 | 0.387710384 |
| 0.44493921  | 0.36764089  | 0.454085146 | 0.498661429 |
| 0.312961819 | 0.336115837 | 0.328063173 | 0.411834317 |
| 0.301009415 | 0.214687828 | 0.394573344 | 0.164392522 |
| 0.01394037  | 0.192538429 | 0.170077957 | 0.239240526 |
| 0.171640595 | 0.426436621 | 0.416036898 | 0.489174494 |
| 0.219831485 | 0.467584373 | 0.330476991 | 0.31206745  |
| 0.438659059 | 0.343423953 | 0.384552872 | 0.404813892 |
| 0.352731535 | 0.059619674 | 0.208618363 | 0.522849031 |
| 0.126001729 | 0.241565872 | 0.402189102 | 0.009565242 |
| 0.123499717 | 0.446081768 | 0.20372109  | 0.292920145 |
| 0.452517838 | 0.302355617 | 0.322116786 | 0.33369457  |
| 0.409809327 | 0.208693436 | 0.013625909 | 0.456457927 |
| 0.468236967 | 0.438615429 | 0.466819339 | 0.468043754 |
| 0.429622112 | 0.442995296 | 0.422523534 | 0.482091383 |
| 0.208211365 | 0.209906504 | 0.191188745 | 0.324174623 |
| 0.011835861 | 0.43892421  | 0.34556073  | 0.260067192 |
| 0.42788453  | 0.364098081 | 0.115660792 | 0.362899997 |
| 0.078156106 | 0.184259298 | 0.367139473 | 0.290219227 |
| 0.37038695  | 0.064566016 | 0.295436532 | 0.297828838 |
| 0.459571641 | 0.428867097 | 0.348348249 | 0.518449376 |
| 0.399011613 | 0.249183898 | 0.352223963 | 0.436265792 |
| 0.162747963 | 0.108120455 | 0.415311135 | 0.056079375 |
| 0.296647027 | 0.456939532 | 0.3852039   | 0.17435158  |
| 0.3638906   | 0.029319969 | 0.445264694 | 0.514510324 |
| 0.481116311 | 0.473662678 | 0.486887323 | 0.273025516 |
| 0.493902409 | 0.086019202 | 0.502295242 | 0.460842182 |
| 0.369838666 | 0.004087169 | 0.017314561 | 0.468180732 |
| 0.392589878 | 0.161712913 | 0.276306521 | 0.456942991 |
| 0.204394329 | 0.287808188 | 0.164436474 | 0.199692795 |
| 0.483912374 | 0.285243523 | 0.188213378 | 0.472229863 |

|             |             |             |             |
|-------------|-------------|-------------|-------------|
| 0.315954901 | 0.319100738 | 0.436760489 | 0.198820833 |
| 0.435249795 | 0.139189655 | 0.193507434 | 0.018749879 |
| 0.392649679 | 0.23004114  | 0.503334306 | 0.495743524 |
| 0.482038235 | 0.408951604 | 0.335860029 | 0.403708869 |
| 0.443070231 | 0.224094482 | 0.378637562 | 0.244208897 |
| 0.480814654 | 0.392226889 | 0.40060415  | 0.405060434 |
| 0.466410332 | 0.461815822 | 0.101290977 | 0.426480884 |
| 0.057099094 | 0.004443471 | 0.460346123 | 0.350987298 |
| 0.068817844 | 0.351176459 | 0.355418958 | 0.291396363 |
| 0.297968355 | 0.100719636 | 0.2393691   | 0.220453392 |
| 0.357890513 | 0.375324124 | 0.275437912 | 0.339967796 |
| 0.293998464 | 0.139457129 | 0.299402002 | 0.244616851 |
| 0.266180151 | 0.396770227 | 0.303578659 | 0.07365819  |
| 0.439342285 | 0.40736979  | 0.152578596 | 0.288475953 |
| 0.468379529 | 0.47093395  | 0.098074252 | 0.036518709 |
| 0.369271401 | 0.330876571 | 0.463698425 | 0.48792339  |
| 0.527409883 | 0.493190491 | 0.42037237  | 0.168490802 |
| 0.171202541 | 0.362713091 | 0.293490256 | 0.151367029 |
| 0.489440711 | 0.165309952 | 0.491857282 | 0.282184009 |
| 0.227471517 | 0.321620911 | 0.099310724 | 0.184521758 |
| 0.380386162 | 0.291627557 | 0.252829913 | 0.279084193 |
| 0.339125069 | 0.251570898 | 0.128949128 | 0.300661551 |
| 0.40736986  | 0.158334841 | 0.269243184 | 0.419945694 |
| 0.447197313 | 0.251210048 | 0.42353462  | 0.441378198 |
| 0.257888947 | 0.217626085 | 0.394661846 | 0.422655049 |
| 0.461308636 | 0.399850056 | 0.086094236 | 0.460204317 |
| 0.466876192 | 0.450399193 | 0.504964176 | 0.405942061 |
| 0.191633972 | 0.386370306 | 0.288031842 | 0.344162265 |
| 0.282839544 | 0.496181074 | 0.314539697 | 0.158441834 |
| 0.374732379 | 0.492661813 | 0.448387568 | 0.266754735 |
| 0.451800479 | 0.255500966 | 0.152082262 | 0.467044637 |
| 0.170430811 | 0.188697062 | 0.411614183 | 0.437814064 |
| 0.006228964 | 0.131476927 | 0.44680252  | 0.353936246 |
| 0.504222532 | 0.459340312 | 0.4529797   | 0.376013376 |
| 0.001247476 | 0.39674601  | 0.417268283 | 0.418449687 |
| 0.459827179 | 0.449515984 | 0.249790107 | 0.153729259 |
| 0.373126307 | 0.199190105 | 0.198292928 | 0.446439015 |
| 0.154334214 | 0.453450761 | 0.296867931 | 0.300498734 |
| 0.263371456 | 0.196667545 | 0.255120622 | 0.368223198 |
| 0.138029299 | 0.336516352 | 0.405687864 | 0.348701614 |
| 0.170084209 | 0.427755259 | 0.435272839 | 0.097068667 |
| 0.357566958 | 0.42807597  | 0.457480017 | 0.004913229 |
| 0.434520535 | 0.032681824 | 0.260047872 | 0.290402736 |
| 0.281766157 | 0.26311093  | 0.304247913 | 0.333162472 |
| 0.402007888 | 0.311739505 | 0.368748795 | 0.333753783 |
| 0.251638419 | 0.339108651 | 0.410640718 | 0.423346571 |
| 0.324737851 | 0.251027624 | 0.211158503 | 0.206503331 |
| 0.136078349 | 0.476800239 | 0.352347315 | 0.191528809 |
| 0.317316294 | 0.404697886 | 0.406467699 | 0.490132711 |
| 0.44688933  | 0.235699833 | 0.369463857 | 0.480644191 |
| 0.217737617 | 0.3731236   | 0.16012242  | 0.465109631 |
| 0.343053301 | 0.232497099 | 0.458135851 | 0.407131978 |
| 0.430139837 | 0.427052337 | 0.354345457 | 0.456284162 |
| 0.413637346 | 0.348754711 | 0.361001333 | 0.159541274 |

|             |             |             |             |
|-------------|-------------|-------------|-------------|
| 0.291395973 | 0.248186358 | 0.276045413 | 0.013378241 |
| 0.41884985  | 0.407399719 | 0.469829861 | 0.498172295 |
| 0.268823472 | 0.438573218 | 0.393893575 | 0.184165119 |
| 0.334372415 | 0.281345525 | 0.255802411 | 0.458153094 |
| 0.196726707 | 0.317717704 | 0.328742589 | 0.472009803 |
| 0.440924836 | 0.426394698 | 0.273625495 | 0.336150454 |
| 0.322566253 | 0.338544374 | 0.480618514 | 0.262189165 |
| 0.424403905 | 0.211656674 | 0.418554177 | 0.328633493 |
| 0.27112583  | 0.483277176 | 0.163375622 | 0.485619626 |
| 0.325473727 | 0.254875752 | 0.495634762 | 0.4212647   |
| 0.420852395 | 0.209772802 | 0.168504248 | 0.431831563 |
| 0.300322468 | 0.334095494 | 0.015590354 | 0.059795202 |
| 0.384436049 | 0.32531376  | 0.430670861 | 0.40282949  |
| 0.259580474 | 0.375862351 | 0.164012699 | 0.370416426 |
| 0.492287441 | 0.518726392 | 0.302599131 | 0.334655086 |
| 0.407341098 | 0.209156414 | 0.488236602 | 0.019224015 |
| 0.407976864 | 0.402279597 | 0.374856211 | 0.135319203 |
| 0.067784566 | 0.184393161 | 0.416669003 | 0.165758775 |
| 0.448576557 | 0.195326929 | 0.398559262 | 0.473607755 |
| 0.292431792 | 0.51921067  | 0.192222765 | 0.439599265 |
| 0.10921088  | 0.354644411 | 0.374972967 | 0.378526206 |
| 0.265092326 | 0.277726447 | 0.413997987 | 0.234773674 |
| 0.095956125 | 0.311312303 | 0.003683876 | 0.440569324 |
| 0.490582564 | 0.312323062 | 0.315001195 | 0.315030283 |
| 0.354788165 | 0.435739369 | 0.250106751 | 0.426306623 |
| 0.043939006 | 0.361344587 | 0.309973744 | 0.482445568 |
| 0.221211817 | 0.372712389 | 0.144518873 | 0.298053435 |
| 0.50129047  | 0.272979543 | 0.343726401 | 0.289015572 |
| 0.488776918 | 0.451798421 | 0.299322204 | 0.278999492 |
| 0.405532687 | 0.164989671 | 0.440661009 | 0.503929401 |
| 0.260165091 | 0.215696441 | 0.439486172 | 0.271160546 |
| 0.292342132 | 0.453781714 | 0.409672622 | 0.498861031 |
| 0.120698904 | 0.342580774 | 0.444088883 | 0.450271675 |
| 0.369414641 | 0.171562502 | 0.23380897  | 0.251281484 |
| 0.473664813 | 0.210654667 | 0.246361416 | 0.433844898 |
| 0.197391159 | 0.384587431 | 0.401641858 | 0.223745288 |
| 0.095255485 | 0.259030446 | 0.457553506 | 0.262366098 |
| 0.349940599 | 0.382541687 | 0.254111582 | 0.427005082 |
| 0.22602371  | 0.071162896 | 0.451038536 | 0.014610694 |
| 0.476966013 | 0.432648258 | 0.352934001 | 0.363828683 |
| 0.312961099 | 0.410662089 | 0.406835334 | 0.006327303 |
| 0.43292517  | 0.076371358 | 0.346787349 | 0.256966128 |
| 0.266303993 | 0.133950949 | 1           | 0.468748119 |
| 0.425686468 | 0.365637621 | 0.331504573 | 0.46357395  |
| 0.142686477 | 0.309915657 | 0.312661871 | 0.464344117 |
| 0.215183813 | 0.389718324 | 0.405027335 | 0.37560749  |
| 0.462318013 | 0.391171002 |             |             |
| ZFP318      | 0.14099032  | 0.46474743  | 0.107705057 |
| 0.2372282   | 0.416549525 | 0.506473555 | 0.116965482 |
| 0.218412923 | 0.421076476 | 0.370601221 | 0.484808028 |
| 0.044182623 | 0.140521447 | 0.503668801 | 0.111042032 |
| 0.494311506 | 0.077150838 | 0.192249906 | 0.123714674 |
| 0.321604069 | 0.394746149 | 0.454172335 | 0.477466111 |
| 0.396125266 | 0.254673299 | 0.442039633 | 0.471374277 |

|             |             |             |             |
|-------------|-------------|-------------|-------------|
| 0.505154979 | 0.35238016  | 0.529690867 | 0.254027985 |
| 0.441234139 | 0.436917835 | 0.477319171 | 0.03938963  |
| 0.519624709 | 0.022366486 | 0.448768538 | 0.382275819 |
| 0.227341066 | 0.405087429 | 0.410356644 | 0.368161209 |
| 0.453545992 | 0.078870493 | 0.269737472 | 0.492244493 |
| 0.422703297 | 0.393565545 | 0.120831782 | 0.516267657 |
| 0.459061945 | 0.451658888 | 0.457959744 | 0.005571321 |
| 0.401279492 | 0.13076353  | 0.307520571 | 0.5102822   |
| 0.309278114 | 0.218422211 | 0.356724746 | 0.355167729 |
| 0.478757099 | 0.470709175 | 0.363239714 | 0.451893765 |
| 0.505903358 | 0.261386141 | 0.508324601 | 0.25137227  |
| 0.491972113 | 0.068429886 | 0.249185383 | 0.142964067 |
| 0.489561348 | 0.315314945 | 0.461512959 | 0.407514382 |
| 0.457975668 | 0.525767137 | 0.343160204 | 0.502849722 |
| 0.159634442 | 0.44024618  | 0.387717368 | 0.410123235 |
| 0.457085919 | 0.151399536 | 0.516300557 | 0.528633152 |
| 0.096426348 | 0.455391173 | 0.488138911 | 0.197726619 |
| 0.489454243 | 0.366881576 | 0.473637461 | 0.266788955 |
| 0.468996333 | 0.45011228  | 0.482357437 | 0.410803767 |
| 0.426741595 | 0.130718764 | 0.490832562 | 0.42201544  |
| 0.425350768 | 0.148516304 | 0.333727535 | 0.522410098 |
| 0.517468834 | 0.513138503 | 0.489454939 | 0.457325389 |
| 0.481838823 | 0.505131108 | 0.507040502 | 0.476180624 |
| 0.201378936 | 0.528762728 | 0.295888583 | 0.093236019 |
| 0.132406598 | 0.162492909 | 0.326693604 | 0.394150322 |
| 0.522853846 | 0.449409171 | 0.312249988 | 0.35083439  |
| 0.512070712 | 0.481265988 | 0.524852209 | 0.49938012  |
| 0.08390761  | 0.336272392 | 0.483900564 | 0.399500274 |
| 0.485518611 | 0.192471984 | 0.362684658 | 0.515895047 |
| 0.454442207 | 0.519347493 | 0.263935632 | 0.510165545 |
| 0.303252861 | 0.523086541 | 0.49469061  | 0.277570323 |
| 0.525169392 | 0.502614638 | 0.517613451 | 0.498957574 |
| 0.48427955  | 0.463877204 | 0.102271319 | 0.46376631  |
| 0.496686052 | 0.026942981 | 0.518344799 | 0.519398437 |
| 0.502242914 | 0.529236083 | 0.524795659 | 0.514918029 |
| 0.506891077 | 0.134871859 | 0.043798537 | 0.401521214 |
| 0.513571102 | 0.478537929 | 0.227984631 | 0.505411126 |
| 0.468306532 | 0.507566446 | 0.506803874 | 0.418687613 |
| 0.522795379 | 0.510555383 | 0.513968454 | 0.488217381 |
| 0.393810129 | 0.384961938 | 0.464077531 | 0.475835955 |
| 0.093462803 | 0.200951574 | 0.099266241 | 0.405275363 |
| 0.430691177 | 0.280233194 | 0.492280426 | 0.450409632 |
| 0.301892271 | 0.449382672 | 0.425446216 | 0.482006266 |
| 0.09855619  | 0.529691702 | 0.264490978 | 0.270036793 |
| 0.090281901 | 0.208391338 | 0.303276419 | 0.262224198 |
| 0.374655125 | 0.257807031 | 0.524952798 | 0.506171573 |
| 0.451568676 | 0.272353481 | 0.519992543 | 0.489935221 |
| 0.461774791 | 0.485728775 | 0.327097924 | 0.028151901 |
| 0.383290266 | 0.381126036 | 0.266564716 | 0.499292799 |
| 0.222977991 | 0.361959775 | 0.492858738 | 0.495809013 |
| 0.398489763 | 0.233084604 | 0.47563419  | 0.443163354 |
| 0.226552804 | 0.43113746  | 0.514867357 | 0.493564415 |
| 0.009333514 | 0.452114478 | 0.528955198 | 0.234093127 |
| 0.421206192 | 0.221500733 | 0.3544738   | 0.511906628 |



|             |             |             |             |
|-------------|-------------|-------------|-------------|
| 0.39119481  | 0.329703103 | 0.517281597 | 0.489258224 |
| 0.449883077 | 0.258563266 | 0.528742065 | 0.077699816 |
| 0.439739171 | 0.100571755 | 0.39708575  | 0.404883283 |
| 0.369189401 | 0.396318835 | 0.425097233 | 0.395828018 |
| 0.208260084 | 0.522515667 | 0.47700178  | 0.514858085 |
| 0.466412827 | 0.531248733 | 0.528812223 | 0.507857666 |
| 0.477744706 | 0.448927382 | 0.206311789 | 0.522612983 |
| 0.514840061 | 0.384320747 | 0.129058882 | 0.513660093 |
| 0.445880898 | 0.499742828 | 0.191183193 | 0.505622249 |
| 0.505227351 | 0.47016344  | 0.24873284  | 0.470944639 |
| 0.481078182 | 0.354386429 | 0.490326271 | 0.533349486 |
| 0.38972615  | 0.46202468  | 0.445791403 | 0.478901796 |
| 0.275293456 | 0.315974119 | 0.388845215 | 0.257545555 |
| 0.017629868 | 0.149007381 | 0.12459451  | 0.26772363  |
| 0.257681134 | 0.494434033 | 0.496580708 | 0.520377681 |
| 0.207987685 | 0.474383269 | 0.332976946 | 0.413280734 |
| 0.461780589 | 0.454032895 | 0.478228614 | 0.489867322 |
| 0.344631308 | 0.040695925 | 0.207012774 | 0.527686566 |
| 0.078213066 | 0.343537001 | 0.432205867 | 0.006909683 |
| 0.093574482 | 0.469448014 | 0.150039705 | 0.247577314 |
| 0.512436911 | 0.252234064 | 0.308788571 | 0.400346086 |
| 0.458038705 | 0.168839624 | 0.0086693   | 0.494797836 |
| 0.484721236 | 0.459940434 | 0.482833088 | 0.459415386 |
| 0.477336215 | 0.486169526 | 0.500646116 | 0.465367392 |
| 0.187243726 | 0.15846891  | 0.30868508  | 0.409342106 |
| 0.010463516 | 0.480060268 | 0.416044567 | 0.23045777  |
| 0.51319885  | 0.410104297 | 0.082410401 | 0.455817675 |
| 0.049814938 | 0.284249018 | 0.424108838 | 0.327828629 |
| 0.445655746 | 0.034691659 | 0.333842919 | 0.423975257 |
| 0.447357499 | 0.429856779 | 0.450611316 | 0.532731557 |
| 0.456654333 | 0.196076141 | 0.428581429 | 0.499661083 |
| 0.138510281 | 0.152768134 | 0.464491733 | 0.055193748 |
| 0.290946041 | 0.456709654 | 0.476499469 | 0.130703373 |
| 0.392903759 | 0.013998532 | 0.441137179 | 0.535515416 |
| 0.4683322   | 0.519993274 | 0.507551329 | 0.377883855 |
| 0.510440831 | 0.153989811 | 0.530731799 | 0.481015142 |
| 0.457287085 | 0.00246647  | 0.014662058 | 0.522590395 |
| 0.500812577 | 0.100944162 | 0.256588485 | 0.468610925 |
| 0.200651363 | 0.247301834 | 0.128944907 | 0.279121678 |
| 0.521130554 | 0.354272456 | 0.269326655 | 0.474192307 |
| 0.356776752 | 0.346847801 | 0.484313818 | 0.149538855 |
| 0.507793146 | 0.109241064 | 0.148022596 | 0.017938348 |
| 0.469058296 | 0.173715304 | 0.476040452 | 0.511854855 |
| 0.50375996  | 0.49245417  | 0.409483665 | 0.454955903 |
| 0.48957592  | 0.160101542 | 0.452349871 | 0.184336742 |
| 0.487393563 | 0.497353552 | 0.431148528 | 0.401780419 |
| 0.508248123 | 0.481569988 | 0.073465236 | 0.501482813 |
| 0.031987789 | 0.004524091 | 0.477576019 | 0.367411962 |
| 0.097583214 | 0.474804054 | 0.355786871 | 0.32774908  |
| 0.331522829 | 0.069281956 | 0.361457897 | 0.339532468 |
| 0.413001065 | 0.475120051 | 0.384080737 | 0.335740503 |
| 0.370310772 | 0.215557048 | 0.309040366 | 0.254283504 |
| 0.334119404 | 0.387002193 | 0.259834588 | 0.049457658 |
| 0.509080252 | 0.510019629 | 0.115114832 | 0.250645416 |

|             |             |             |             |
|-------------|-------------|-------------|-------------|
| 0.517504036 | 0.524612131 | 0.089342632 | 0.028881429 |
| 0.361379621 | 0.426400263 | 0.520560042 | 0.49946641  |
| 0.530172558 | 0.526276878 | 0.412600268 | 0.215289507 |
| 0.132604827 | 0.431700201 | 0.398259294 | 0.174165745 |
| 0.514881747 | 0.118788348 | 0.487902911 | 0.397032454 |
| 0.194937746 | 0.3277319   | 0.077444739 | 0.15475049  |
| 0.483465061 | 0.280293762 | 0.285428413 | 0.231619115 |
| 0.435188779 | 0.348546268 | 0.098545399 | 0.307429241 |
| 0.449985429 | 0.259275308 | 0.257668676 | 0.419731187 |
| 0.445440575 | 0.279977514 | 0.516698619 | 0.461747008 |
| 0.213985626 | 0.189567315 | 0.394608992 | 0.474498521 |
| 0.519496786 | 0.468092956 | 0.058115904 | 0.470918608 |
| 0.506444503 | 0.532454887 | 0.503402391 | 0.465963455 |
| 0.147602218 | 0.491312979 | 0.405805269 | 0.450985915 |
| 0.288453593 | 0.5000778   | 0.351806587 | 0.119743    |
| 0.371025591 | 0.489205638 | 0.475801906 | 0.274875538 |
| 0.507236027 | 0.203615537 | 0.105492078 | 0.499019682 |
| 0.274931545 | 0.168763862 | 0.438404298 | 0.506019247 |
| 0.004320318 | 0.211626652 | 0.495397625 | 0.366626603 |
| 0.519221424 | 0.51274754  | 0.468808084 | 0.364960514 |
| 0.003354219 | 0.496254549 | 0.495922723 | 0.506520596 |
| 0.489428312 | 0.449682587 | 0.23508068  | 0.145360353 |
| 0.382288032 | 0.139369491 | 0.234614003 | 0.450554318 |
| 0.248824066 | 0.507458328 | 0.294536943 | 0.307240393 |
| 0.304364475 | 0.149594258 | 0.342956403 | 0.359723703 |
| 0.215446618 | 0.342031864 | 0.449683649 | 0.363336638 |
| 0.284289736 | 0.486049053 | 0.490536711 | 0.059521624 |
| 0.456099918 | 0.47878392  | 0.483079116 | 0.005841666 |
| 0.525268167 | 0.020016861 | 0.309064193 | 0.332572754 |
| 0.310216775 | 0.323860062 | 0.368978121 | 0.408659444 |
| 0.456136267 | 0.335844719 | 0.402136597 | 0.350698121 |
| 0.267858487 | 0.33130173  | 0.489814806 | 0.460589932 |
| 0.401817005 | 0.219197731 | 0.151138241 | 0.143946146 |
| 0.110539706 | 0.500462317 | 0.326292349 | 0.127363854 |
| 0.338791809 | 0.462152869 | 0.424095981 | 0.493620315 |
| 0.475392682 | 0.168320547 | 0.446666988 | 0.503627893 |
| 0.300790448 | 0.401756083 | 0.121515461 | 0.487550863 |
| 0.352636176 | 0.329347404 | 0.488315403 | 0.418757483 |
| 0.485849108 | 0.425106422 | 0.327056227 | 0.471101492 |
| 0.477118009 | 0.433417981 | 0.392066044 | 0.162191375 |
| 0.284660532 | 0.209329611 | 0.374255934 | 0.005835045 |
| 0.470852674 | 0.377700096 | 0.529423187 | 0.492711506 |
| 0.38265476  | 0.446513247 | 0.412834516 | 0.166855044 |
| 0.343208258 | 0.229850459 | 0.226034148 | 0.511103202 |
| 0.303675688 | 0.295232861 | 0.413905992 | 0.438612149 |
| 0.515150863 | 0.492755329 | 0.354289511 | 0.363063473 |
| 0.344209336 | 0.294153212 | 0.477470154 | 0.203242756 |
| 0.508516695 | 0.285145976 | 0.434466284 | 0.419273421 |
| 0.333049066 | 0.513300362 | 0.115335572 | 0.523826538 |
| 0.442606197 | 0.201979899 | 0.502646985 | 0.415950881 |
| 0.405379726 | 0.210866521 | 0.271226137 | 0.472142963 |
| 0.340253636 | 0.438191887 | 0.023489071 | 0.106420802 |
| 0.438103641 | 0.39221103  | 0.474514198 | 0.459681664 |
| 0.348743144 | 0.431517884 | 0.239955886 | 0.403957119 |

|             |             |             |             |
|-------------|-------------|-------------|-------------|
| 0.481382381 | 0.501668584 | 0.379034556 | 0.341253401 |
| 0.451761658 | 0.187388202 | 0.493635902 | 0.0262446   |
| 0.513964359 | 0.501381956 | 0.469761051 | 0.109617927 |
| 0.044527969 | 0.29957236  | 0.504366157 | 0.118830342 |
| 0.514104131 | 0.293012695 | 0.436794949 | 0.522920911 |
| 0.262258173 | 0.503817876 | 0.213401064 | 0.511313569 |
| 0.088274802 | 0.360172409 | 0.466610975 | 0.465906954 |
| 0.342199588 | 0.398392719 | 0.480421254 | 0.336902389 |
| 0.072078984 | 0.378145303 | 0.004294901 | 0.42286941  |
| 0.472917576 | 0.433731048 | 0.282884922 | 0.370158073 |
| 0.3864985   | 0.44873901  | 0.355465561 | 0.497484725 |
| 0.028452895 | 0.474468752 | 0.305789273 | 0.490233565 |
| 0.320165702 | 0.455240854 | 0.115025459 | 0.411847291 |
| 0.465584267 | 0.395155206 | 0.339918859 | 0.399053902 |
| 0.489609659 | 0.456171506 | 0.235970494 | 0.320366102 |
| 0.461384321 | 0.117917654 | 0.467368233 | 0.530870803 |
| 0.285057915 | 0.314234947 | 0.519358058 | 0.319922561 |
| 0.411083784 | 0.451348363 | 0.480358032 | 0.520159583 |
| 0.141625981 | 0.357688197 | 0.509844332 | 0.485035416 |
| 0.401749908 | 0.260827364 | 0.351483087 | 0.344648993 |
| 0.46167932  | 0.17868406  | 0.355063842 | 0.460506186 |
| 0.311928824 | 0.42166435  | 0.411440676 | 0.294174169 |
| 0.081570701 | 0.270017973 | 0.489039156 | 0.229638859 |
| 0.415099657 | 0.472682985 | 0.343847617 | 0.438134273 |
| 0.233478219 | 0.056782624 | 0.461213785 | 0.032175179 |
| 0.450079529 | 0.503728194 | 0.35940006  | 0.461496265 |
| 0.266247666 | 0.461841104 | 0.437673509 | 0.003643586 |
| 0.495615119 | 0.077161098 | 0.410249684 | 0.342188002 |
| 0.384029047 | 0.104255632 | 0.468748119 | 1           |
| 0.426454167 | 0.421008916 | 0.434711275 | 0.478817565 |
| 0.225642059 | 0.411436491 | 0.433916819 | 0.495946958 |
| 0.316717289 | 0.458149816 | 0.495443454 | 0.471154586 |
| 0.485531187 | 0.388685874 |             |             |
| ZFP382      | 0.138971329 | 0.364344435 | 0.104134901 |
| 0.144216734 | 0.209614816 | 0.250959233 | 0.128520406 |
| 0.194243088 | 0.303102312 | 0.1544335   | 0.243953086 |
| 0.059646514 | 0.071846472 | 0.387152543 | 0.134307658 |
| 0.215823976 | 0.100712744 | 0.169011875 | 0.087804162 |
| 0.208279695 | 0.196081422 | 0.204343967 | 0.239452387 |
| 0.212742172 | 0.257388551 | 0.234339553 | 0.205197792 |
| 0.410797403 | 0.128078574 | 0.261231973 | 0.097461275 |
| 0.393007623 | 0.203993432 | 0.19516098  | 0.059424426 |
| 0.249731542 | 0.019962919 | 0.420411187 | 0.198425318 |
| 0.10669178  | 0.367839139 | 0.181049382 | 0.2129863   |
| 0.188199861 | 0.084416799 | 0.106543895 | 0.23265348  |
| 0.230713027 | 0.253584536 | 0.116700387 | 0.279803015 |
| 0.212319549 | 0.286510089 | 0.256226399 | 0.005669729 |
| 0.161150721 | 0.04303406  | 0.111020154 | 0.447784363 |
| 0.223681576 | 0.195078212 | 0.128531631 | 0.256834727 |
| 0.224227152 | 0.256595813 | 0.261218055 | 0.182196324 |
| 0.423297556 | 0.10920839  | 0.274868245 | 0.15288508  |
| 0.234234995 | 0.09102275  | 0.211518229 | 0.141374097 |
| 0.222694857 | 0.233584089 | 0.245911224 | 0.1798881   |
| 0.345396804 | 0.4859765   | 0.239060204 | 0.441283174 |

|             |             |             |             |
|-------------|-------------|-------------|-------------|
| 0.086516828 | 0.196439117 | 0.209073235 | 0.269271461 |
| 0.275296863 | 0.152414321 | 0.287004053 | 0.456644148 |
| 0.121374075 | 0.199479942 | 0.26161832  | 0.164533726 |
| 0.371230236 | 0.17865792  | 0.195671991 | 0.124905865 |
| 0.233604264 | 0.193841731 | 0.449727946 | 0.246866369 |
| 0.240408137 | 0.122290163 | 0.450485053 | 0.185833468 |
| 0.214336894 | 0.135205068 | 0.160677927 | 0.342034775 |
| 0.234394047 | 0.408808783 | 0.32350486  | 0.29277553  |
| 0.198070699 | 0.421730453 | 0.269907204 | 0.38049324  |
| 0.078889002 | 0.451960118 | 0.210118043 | 0.118199288 |
| 0.127795736 | 0.184684013 | 0.189430513 | 0.331854537 |
| 0.379643352 | 0.274363608 | 0.209454852 | 0.207878841 |
| 0.361568466 | 0.431478264 | 0.442645099 | 0.324859735 |
| 0.101943665 | 0.153314788 | 0.195305013 | 0.275887338 |
| 0.258292629 | 0.189211019 | 0.15816753  | 0.463500004 |
| 0.360851208 | 0.326203982 | 0.20229617  | 0.485881052 |
| 0.22507286  | 0.458378187 | 0.358642257 | 0.193838335 |
| 0.464548136 | 0.454099948 | 0.438660929 | 0.24684541  |
| 0.449416821 | 0.232833731 | 0.066338293 | 0.324604123 |
| 0.445049764 | 0.015711866 | 0.373350781 | 0.39516544  |
| 0.421766893 | 0.333432256 | 0.44376759  | 0.424806634 |
| 0.431783037 | 0.142759691 | 0.015624658 | 0.220232315 |
| 0.440879398 | 0.345669564 | 0.217002609 | 0.198607461 |
| 0.220011724 | 0.246710498 | 0.321508841 | 0.154074031 |
| 0.478558262 | 0.375342966 | 0.394177136 | 0.296350418 |
| 0.209811658 | 0.354302568 | 0.186713675 | 0.437188769 |
| 0.122835957 | 0.158950501 | 0.102986686 | 0.294019939 |
| 0.191398843 | 0.213493363 | 0.234435456 | 0.227093781 |
| 0.220436829 | 0.248580105 | 0.1751887   | 0.239980497 |
| 0.117785523 | 0.224081656 | 0.208297383 | 0.179857039 |
| 0.10324019  | 0.232233557 | 0.167731356 | 0.198668281 |
| 0.22498162  | 0.310151442 | 0.272467767 | 0.410509242 |
| 0.220861327 | 0.204538623 | 0.276836818 | 0.436040408 |
| 0.405481012 | 0.205814968 | 0.265559749 | 0.029520983 |
| 0.143083932 | 0.149425284 | 0.104722152 | 0.215906845 |
| 0.273115053 | 0.181407591 | 0.217530096 | 0.276440403 |
| 0.216923443 | 0.196574984 | 0.194547451 | 0.441532282 |
| 0.192497631 | 0.216684766 | 0.354127666 | 0.216994052 |
| 0.021093245 | 0.217286665 | 0.334769455 | 0.151768897 |
| 0.238624998 | 0.099062834 | 0.144510186 | 0.363469012 |
| 0.158293962 | 0.170511032 | 0.40800323  | 0.283940147 |
| 0.217084307 | 0.290771357 | 0.4506983   | 0.026738315 |
| 0.21667112  | 0.079195458 | 0.240088528 | 0.184319124 |
| 0.222596707 | 0.270730088 | 0.204360542 | 0.206132258 |
| 0.158388092 | 0.448465621 | 0.361225878 | 0.425175596 |
| 0.176791082 | 0.451575359 | 0.347281529 | 0.373554128 |
| 0.269651094 | 0.184463819 | 0.07784866  | 0.316953978 |
| 0.355246326 | 0.15458662  | 0.12547654  | 0.306068871 |
| 0.181716646 | 0.244423233 | 0.159093725 | 0.411542916 |
| 0.476954553 | 0.407948991 | 0.202802848 | 0.292842277 |
| 0.323063348 | 0.226017721 | 0.355997739 | 0.46803329  |
| 0.152726556 | 0.191465244 | 0.179976262 | 0.338417698 |
| 0.196440364 | 0.162587655 | 0.354606409 | 0.110838778 |
| 0.008253913 | 0.149670218 | 0.119922979 | 0.198716235 |

|             |             |             |             |
|-------------|-------------|-------------|-------------|
| 0.128932409 | 0.219551937 | 0.25300656  | 0.433383039 |
| 0.179371674 | 0.403763944 | 0.254656692 | 0.173851885 |
| 0.359733068 | 0.215340954 | 0.216377446 | 0.238099172 |
| 0.27207124  | 0.049417694 | 0.144926359 | 0.47976697  |
| 0.089777543 | 0.151045036 | 0.262317405 | 0.005726963 |
| 0.097801887 | 0.306954431 | 0.168186236 | 0.278830569 |
| 0.404949415 | 0.270281603 | 0.191926124 | 0.157073907 |
| 0.284955743 | 0.168493385 | 0.015838239 | 0.402712492 |
| 0.43249847  | 0.412693722 | 0.427042444 | 0.433093482 |
| 0.369854476 | 0.316260815 | 0.304751438 | 0.240214599 |
| 0.168991756 | 0.149093897 | 0.117836252 | 0.20500229  |
| 0.00983423  | 0.32784829  | 0.246562445 | 0.187323126 |
| 0.2925679   | 0.24955803  | 0.102135335 | 0.231633997 |
| 0.046044903 | 0.096535803 | 0.226966692 | 0.240631243 |
| 0.286696385 | 0.056553216 | 0.126095319 | 0.15205875  |
| 0.394439573 | 0.333339858 | 0.185973703 | 0.458480126 |
| 0.237420543 | 0.156909376 | 0.208131485 | 0.306987744 |
| 0.139642158 | 0.054440803 | 0.235042261 | 0.017317555 |
| 0.182255773 | 0.439286607 | 0.21846491  | 0.113204518 |
| 0.218280608 | 0.024782634 | 0.33929064  | 0.464039125 |
| 0.407987645 | 0.421188767 | 0.430334597 | 0.159724264 |
| 0.429349703 | 0.053022496 | 0.441625722 | 0.330446006 |
| 0.171970444 | 0.002013812 | 0.024147926 | 0.380933912 |
| 0.206248978 | 0.115133474 | 0.196841563 | 0.209735964 |
| 0.160093837 | 0.172994872 | 0.159803414 | 0.149051502 |
| 0.251151938 | 0.212079672 | 0.159302312 | 0.413008518 |
| 0.210209531 | 0.24274527  | 0.228058697 | 0.146145446 |
| 0.24596058  | 0.117763218 | 0.146869722 | 0.016345905 |
| 0.277290165 | 0.175838741 | 0.449872074 | 0.433597981 |
| 0.446233175 | 0.260064156 | 0.152185202 | 0.22932473  |
| 0.37744457  | 0.135444133 | 0.198808532 | 0.148980186 |
| 0.405205038 | 0.212426645 | 0.292761624 | 0.298771252 |
| 0.426597461 | 0.410640287 | 0.097725812 | 0.294054107 |
| 0.040153556 | 0.00715626  | 0.212020866 | 0.265021436 |
| 0.083009663 | 0.193474394 | 0.262309211 | 0.218656373 |
| 0.245248543 | 0.074345903 | 0.146179748 | 0.140062981 |
| 0.22479214  | 0.22098999  | 0.17987293  | 0.269848662 |
| 0.211214804 | 0.113834634 | 0.240153597 | 0.223072536 |
| 0.205556204 | 0.302087039 | 0.250017974 | 0.075407049 |
| 0.211582294 | 0.208407847 | 0.127128942 | 0.205473148 |
| 0.353891114 | 0.389454684 | 0.094636627 | 0.03338581  |
| 0.286888767 | 0.222944493 | 0.410152719 | 0.417912115 |
| 0.46924189  | 0.454954259 | 0.4142088   | 0.163396018 |
| 0.141613539 | 0.234664235 | 0.191601523 | 0.155236525 |
| 0.435412827 | 0.108861517 | 0.437028683 | 0.16899427  |
| 0.179522169 | 0.203391742 | 0.098149732 | 0.163234425 |
| 0.210587035 | 0.223711277 | 0.204656595 | 0.154363479 |
| 0.205195627 | 0.160311462 | 0.122851368 | 0.213377272 |
| 0.284710377 | 0.090702995 | 0.198448443 | 0.269435373 |
| 0.320733368 | 0.136080825 | 0.266252956 | 0.423249067 |
| 0.179123128 | 0.164208859 | 0.181365784 | 0.31193276  |
| 0.324189891 | 0.201065698 | 0.058771918 | 0.370262188 |
| 0.426843727 | 0.243484787 | 0.441745937 | 0.354405661 |
| 0.147645976 | 0.206331568 | 0.179744042 | 0.206249663 |

|             |             |             |             |
|-------------|-------------|-------------|-------------|
| 0.221264442 | 0.25456954  | 0.245027924 | 0.132183315 |
| 0.351303018 | 0.472408407 | 0.339844069 | 0.203734857 |
| 0.241806848 | 0.162329278 | 0.098126559 | 0.38102605  |
| 0.114943549 | 0.130793986 | 0.193547389 | 0.331748931 |
| 0.006431298 | 0.094643171 | 0.41780538  | 0.252512216 |
| 0.47317093  | 0.389367824 | 0.406645902 | 0.26593278  |
| 0.001580289 | 0.235078014 | 0.229399747 | 0.210372185 |
| 0.349727587 | 0.319896321 | 0.23012237  | 0.138733079 |
| 0.310279943 | 0.127074509 | 0.153931333 | 0.2329755   |
| 0.082522612 | 0.240380295 | 0.236291909 | 0.220409076 |
| 0.213927298 | 0.139385619 | 0.165573761 | 0.244684879 |
| 0.119142358 | 0.262714628 | 0.310772829 | 0.17342419  |
| 0.086450454 | 0.372978795 | 0.292741505 | 0.082296813 |
| 0.215388663 | 0.344538044 | 0.403062325 | 0.003600906 |
| 0.266211148 | 0.037011031 | 0.20915111  | 0.204773558 |
| 0.218051134 | 0.212303951 | 0.226561276 | 0.207295679 |
| 0.228425645 | 0.223306504 | 0.225373157 | 0.229796258 |
| 0.199498783 | 0.252493854 | 0.23814216  | 0.231524572 |
| 0.195524327 | 0.183170529 | 0.183970159 | 0.189859355 |
| 0.120969979 | 0.396461534 | 0.300702199 | 0.128058547 |
| 0.242735146 | 0.236420301 | 0.363591885 | 0.416042972 |
| 0.40637732  | 0.17774056  | 0.242215643 | 0.353609142 |
| 0.105343628 | 0.201822364 | 0.123561973 | 0.245351072 |
| 0.247984071 | 0.151811117 | 0.24501462  | 0.202293539 |
| 0.268374267 | 0.408256494 | 0.29395831  | 0.416059353 |
| 0.238510109 | 0.208188343 | 0.15326099  | 0.137954369 |
| 0.183618609 | 0.183265568 | 0.185644404 | 0.011163708 |
| 0.257629325 | 0.208885873 | 0.356347717 | 0.428695478 |
| 0.159302347 | 0.39115021  | 0.165161832 | 0.129181325 |
| 0.137293643 | 0.226361652 | 0.189160037 | 0.304273642 |
| 0.110397655 | 0.236556326 | 0.212598414 | 0.223471145 |
| 0.292035813 | 0.277095134 | 0.208568455 | 0.247689039 |
| 0.245174372 | 0.21031477  | 0.446436419 | 0.177030689 |
| 0.209053377 | 0.149926245 | 0.213234799 | 0.200355023 |
| 0.210300364 | 0.428544545 | 0.132412799 | 0.427510145 |
| 0.18927747  | 0.202120736 | 0.474667707 | 0.27868831  |
| 0.267092315 | 0.196074246 | 0.104181214 | 0.22111413  |
| 0.22917874  | 0.186914174 | 0.009718148 | 0.043968451 |
| 0.272829567 | 0.208746205 | 0.2864713   | 0.294872176 |
| 0.18938181  | 0.310472204 | 0.116664279 | 0.231060499 |
| 0.418935224 | 0.46382726  | 0.172465432 | 0.274922113 |
| 0.29151536  | 0.173408198 | 0.245083867 | 0.024322975 |
| 0.209007784 | 0.201734116 | 0.185365578 | 0.137712858 |
| 0.069528172 | 0.104840379 | 0.211374787 | 0.122862458 |
| 0.388889594 | 0.106731823 | 0.222846548 | 0.291707306 |
| 0.229321763 | 0.460775946 | 0.190466873 | 0.283288143 |
| 0.096186916 | 0.252864514 | 0.216280353 | 0.215161692 |
| 0.161598207 | 0.168561189 | 0.281343828 | 0.147586636 |
| 0.093383901 | 0.201069698 | 0.003800525 | 0.417782402 |
| 0.426706566 | 0.17607192  | 0.274210216 | 0.16130876  |
| 0.258592786 | 0.369845047 | 0.183044015 | 0.21782429  |
| 0.045328303 | 0.201182206 | 0.246283226 | 0.35791831  |
| 0.095631321 | 0.211084988 | 0.129738946 | 0.195637302 |
| 0.451502866 | 0.159242632 | 0.304118519 | 0.131443679 |

|             |             |             |             |
|-------------|-------------|-------------|-------------|
| 0.421351421 | 0.346317796 | 0.197691586 | 0.228596899 |
| 0.229977334 | 0.126219612 | 0.210352025 | 0.46063432  |
| 0.209178694 | 0.142300054 | 0.334906295 | 0.184197464 |
| 0.179736013 | 0.373906523 | 0.210922238 | 0.459630536 |
| 0.128909116 | 0.238107954 | 0.32237634  | 0.387820663 |
| 0.303407882 | 0.142083915 | 0.14497559  | 0.178501518 |
| 0.399305967 | 0.143212632 | 0.169661464 | 0.28953862  |
| 0.117501624 | 0.267643477 | 0.210619641 | 0.186453706 |
| 0.091806598 | 0.238916697 | 0.250622321 | 0.200107657 |
| 0.230740008 | 0.218091331 | 0.184778709 | 0.392300486 |
| 0.170677042 | 0.053328353 | 0.439598287 | 0.00830259  |
| 0.249452242 | 0.245038115 | 0.261476507 | 0.223499841 |
| 0.237834454 | 0.242845783 | 0.20039588  | 0.005636179 |
| 0.329227713 | 0.063965926 | 0.249156048 | 0.168129125 |
| 0.164601916 | 0.11302584  | 0.425686468 | 0.426454167 |
| 1           | 0.220008885 | 0.164627374 | 0.415682158 |
| 0.092647648 | 0.162577995 | 0.183074978 | 0.249401812 |
| 0.139364792 | 0.178198222 | 0.210252465 | 0.186046607 |
| 0.304334314 | 0.280615453 |             |             |
| ZFP414      | 0.020922676 | 0.354116494 | 0.017932116 |
| 0.00847407  | 0.197570802 | 0.15282209  | 0.012090215 |
| 0.028176696 | 0.285690684 | 0.119748287 | 0.182258222 |
| 0.001475408 | 0.032590816 | 0.350839154 | 0.013101389 |
| 0.236493483 | 0.005134738 | 0.035184123 | 0.010105195 |
| 0.021652723 | 0.152958695 | 0.098917773 | 0.185765051 |
| 0.16853066  | 0.116469201 | 0.190201562 | 0.273923596 |
| 0.412258662 | 0.060526728 | 0.313603179 | 0.020861742 |
| 0.286529306 | 0.215579364 | 0.229293119 | 0.00185822  |
| 0.22472458  | 0.005327896 | 0.306367536 | 0.074913558 |
| 0.023470626 | 0.238390162 | 0.161245885 | 0.072525755 |
| 0.15876509  | 0.006005337 | 0.044778678 | 0.295866816 |
| 0.204511845 | 0.102077396 | 0.02679274  | 0.303863964 |
| 0.116523774 | 0.215790008 | 0.292877205 | 0.000240423 |
| 0.179141388 | 0.042875975 | 0.121903052 | 0.408573714 |
| 0.105480116 | 0.044861342 | 0.058936021 | 0.144303651 |
| 0.275929949 | 0.27702644  | 0.180124413 | 0.122644057 |
| 0.381588515 | 0.061886711 | 0.360588152 | 0.014037027 |
| 0.141357814 | 0.010359633 | 0.086071493 | 0.050707401 |
| 0.159125491 | 0.095260624 | 0.213292648 | 0.157907045 |
| 0.330274006 | 0.402548626 | 0.137493957 | 0.384860142 |
| 0.019090635 | 0.232960841 | 0.111442184 | 0.201067316 |
| 0.267101576 | 0.022858242 | 0.259155339 | 0.392682806 |
| 0.019909262 | 0.241269901 | 0.255323    | 0.066569466 |
| 0.362788653 | 0.132358569 | 0.206662622 | 0.081832312 |
| 0.286873962 | 0.183609744 | 0.387405776 | 0.148840762 |
| 0.211710442 | 0.029683094 | 0.372864166 | 0.237885729 |
| 0.104819481 | 0.029632377 | 0.051754284 | 0.402826633 |
| 0.233869068 | 0.401853714 | 0.343913212 | 0.245927677 |
| 0.207632577 | 0.392509248 | 0.236724968 | 0.350447533 |
| 0.047183455 | 0.425569804 | 0.075729481 | 0.007679259 |
| 0.023064108 | 0.029200723 | 0.085360502 | 0.229168921 |
| 0.402482389 | 0.226204229 | 0.057732944 | 0.096239306 |
| 0.378438406 | 0.373061028 | 0.421042498 | 0.296242863 |
| 0.008323302 | 0.116156997 | 0.193160003 | 0.108472268 |

|             |             |             |             |
|-------------|-------------|-------------|-------------|
| 0.236170411 | 0.062929517 | 0.148542449 | 0.377801444 |
| 0.257907757 | 0.341918522 | 0.055676874 | 0.379579673 |
| 0.084142948 | 0.391472492 | 0.364278831 | 0.056283064 |
| 0.393157278 | 0.373831449 | 0.404570976 | 0.314764215 |
| 0.375737041 | 0.132957073 | 0.010725556 | 0.286381743 |
| 0.386857385 | 0.001837556 | 0.42059868  | 0.420652244 |
| 0.382288663 | 0.375868098 | 0.423096457 | 0.431004954 |
| 0.404027269 | 0.033240393 | 0.005192642 | 0.167058093 |
| 0.377425852 | 0.270841952 | 0.046408004 | 0.221122023 |
| 0.246758894 | 0.156022934 | 0.387887295 | 0.023812422 |
| 0.397496705 | 0.378715509 | 0.424881772 | 0.274436056 |
| 0.163418499 | 0.220109564 | 0.258886224 | 0.352473718 |
| 0.006859181 | 0.032497086 | 0.023987901 | 0.232355539 |
| 0.091763235 | 0.080071839 | 0.126022244 | 0.241841293 |
| 0.095370435 | 0.153890879 | 0.200933321 | 0.288912941 |
| 0.031600687 | 0.246590029 | 0.068355979 | 0.0607455   |
| 0.005586261 | 0.092460169 | 0.013781828 | 0.028917793 |
| 0.117624876 | 0.156335473 | 0.347052374 | 0.410200991 |
| 0.172744574 | 0.093102491 | 0.279423508 | 0.382553412 |
| 0.308499876 | 0.223117266 | 0.150894224 | 0.000357608 |
| 0.025779761 | 0.134352376 | 0.090968501 | 0.293514985 |
| 0.126220968 | 0.035146753 | 0.214850613 | 0.306714131 |
| 0.105533759 | 0.064842443 | 0.120551339 | 0.318417865 |
| 0.084720314 | 0.108749809 | 0.328163024 | 0.235258235 |
| 0.000149382 | 0.11873683  | 0.343818464 | 0.020564117 |
| 0.182563699 | 0.021127453 | 0.076365784 | 0.349591453 |
| 0.078033445 | 0.106709431 | 0.440017706 | 0.329405265 |
| 0.037352291 | 0.160866971 | 0.433056005 | 0.009141019 |
| 0.238350768 | 0.00552373  | 0.16137646  | 0.190525153 |
| 0.107288677 | 0.191098756 | 0.222988857 | 0.10909483  |
| 0.062771062 | 0.405906585 | 0.326451999 | 0.411131413 |
| 0.106631042 | 0.424487308 | 0.373601995 | 0.333889717 |
| 0.227362188 | 0.205860228 | 0.049493925 | 0.30422936  |
| 0.357604925 | 0.030095523 | 0.039418416 | 0.380748981 |
| 0.153506412 | 0.292191359 | 0.019473352 | 0.368417415 |
| 0.380703808 | 0.363726081 | 0.040969667 | 0.281678626 |
| 0.248100812 | 0.095091943 | 0.364271503 | 0.434755338 |
| 0.077612371 | 0.16998645  | 0.103688513 | 0.317996608 |
| 0.076901593 | 0.069911911 | 0.25851211  | 0.100119335 |
| 0.005659924 | 0.034977566 | 0.023014886 | 0.060962231 |
| 0.078798154 | 0.322168403 | 0.263577092 | 0.404688825 |
| 0.039094257 | 0.342716698 | 0.167405569 | 0.060074452 |
| 0.287988432 | 0.19113944  | 0.280932888 | 0.278878612 |
| 0.164513045 | 0.001024744 | 0.007229458 | 0.386891073 |
| 0.019632145 | 0.095136064 | 0.164517343 | 0.000136788 |
| 0.007725602 | 0.351154787 | 0.05667588  | 0.123372326 |
| 0.417477957 | 0.125377429 | 0.089123319 | 0.094092347 |
| 0.247727638 | 0.038215774 | 0.000382899 | 0.401082349 |
| 0.420705496 | 0.395846561 | 0.413636081 | 0.385964222 |
| 0.373855823 | 0.362747772 | 0.319230837 | 0.179150208 |
| 0.019231943 | 0.027358279 | 0.047891024 | 0.103830233 |
| 0.000340291 | 0.301119638 | 0.20233558  | 0.068659168 |
| 0.357174612 | 0.187289268 | 0.006995071 | 0.281712629 |
| 0.000710789 | 0.079450226 | 0.066427    | 0.096712143 |



|             |             |             |             |
|-------------|-------------|-------------|-------------|
| 0.288589743 | 0.002131189 | 0.015289399 | 0.04868178  |
| 0.316016305 | 0.230144176 | 0.175821476 | 0.422971896 |
| 0.156944463 | 0.06874636  | 0.121481602 | 0.322887356 |
| 0.014002908 | 0.011658644 | 0.133026093 | 0.005499541 |
| 0.084266366 | 0.393030646 | 0.158250544 | 0.005249185 |
| 0.113234517 | 0.000205325 | 0.241822478 | 0.419345604 |
| 0.371227052 | 0.414388513 | 0.395078233 | 0.138707535 |
| 0.385080589 | 0.04584729  | 0.431559062 | 0.288459768 |
| 0.134075476 | 1.69E-05    | 0.000589699 | 0.399753522 |
| 0.197776723 | 0.035956811 | 0.068133516 | 0.053239232 |
| 0.013807519 | 0.043727932 | 0.024774216 | 0.064910068 |
| 0.291066673 | 0.13521024  | 0.071584655 | 0.355453606 |
| 0.081610724 | 0.128029032 | 0.16049224  | 0.047080004 |
| 0.297565844 | 0.007188369 | 0.049237294 | 0.000573784 |
| 0.295454202 | 0.067354428 | 0.354574688 | 0.411562185 |
| 0.378888358 | 0.285034362 | 0.126456646 | 0.041837433 |
| 0.407401826 | 0.053272707 | 0.080505186 | 0.05465191  |
| 0.371552286 | 0.214216201 | 0.194152522 | 0.180615702 |
| 0.373773634 | 0.336320564 | 0.007396707 | 0.278740301 |
| 0.000856153 | 0.000579842 | 0.143234917 | 0.179590107 |
| 0.021002539 | 0.164805473 | 0.142604962 | 0.09199059  |
| 0.097015246 | 0.001556156 | 0.127970286 | 0.112675457 |
| 0.147400861 | 0.154735639 | 0.155642375 | 0.185256333 |
| 0.111938588 | 0.012138043 | 0.078257648 | 0.051552379 |
| 0.040201612 | 0.198319685 | 0.11249537  | 0.003605589 |
| 0.218453501 | 0.214828917 | 0.016866806 | 0.088705473 |
| 0.322294309 | 0.384621703 | 0.002376557 | 0.000344972 |
| 0.164723821 | 0.136777458 | 0.411500965 | 0.402997556 |
| 0.401250254 | 0.39514896  | 0.289232354 | 0.025659002 |
| 0.017182061 | 0.177116308 | 0.188112623 | 0.02019331  |
| 0.413406703 | 0.028428457 | 0.403783191 | 0.21414754  |
| 0.057318441 | 0.051062757 | 0.003154723 | 0.034345255 |
| 0.288687174 | 0.093865563 | 0.074698861 | 0.063025824 |
| 0.098371251 | 0.077704937 | 0.013446749 | 0.080183753 |
| 0.203617249 | 0.028679334 | 0.068725562 | 0.138712093 |
| 0.271212074 | 0.045926659 | 0.309856746 | 0.321084949 |
| 0.062203552 | 0.044170707 | 0.043340749 | 0.336143981 |
| 0.346209017 | 0.27217999  | 0.002207122 | 0.368579664 |
| 0.414269343 | 0.291239439 | 0.395467341 | 0.296460558 |
| 0.042460853 | 0.186150318 | 0.178759628 | 0.174191549 |
| 0.094862451 | 0.173121466 | 0.126028195 | 0.025197478 |
| 0.239226228 | 0.379677008 | 0.297548025 | 0.055857005 |
| 0.293555074 | 0.066746157 | 0.023273084 | 0.413944418 |
| 0.047152931 | 0.007213796 | 0.180509383 | 0.395580228 |
| 0.000180039 | 0.083804952 | 0.427331526 | 0.075246494 |
| 0.419840754 | 0.377766489 | 0.308365323 | 0.101078975 |
| 0.000504544 | 0.305767006 | 0.193491331 | 0.129987254 |
| 0.316786798 | 0.243343894 | 0.035986195 | 0.011178949 |
| 0.193216129 | 0.041440754 | 0.016744828 | 0.033682628 |
| 0.020590001 | 0.232202522 | 0.1162011   | 0.110727875 |
| 0.080674245 | 0.056521822 | 0.069654526 | 0.09346385  |
| 0.029345913 | 0.139305563 | 0.221883849 | 0.12050691  |
| 0.020487681 | 0.350594086 | 0.258193856 | 0.005047811 |
| 0.269463811 | 0.332498845 | 0.390599738 | 0.000316148 |

|             |             |             |             |
|-------------|-------------|-------------|-------------|
| 0.294327657 | 0.000482822 | 0.082107102 | 0.077856829 |
| 0.073534621 | 0.078815053 | 0.155018576 | 0.098700754 |
| 0.194548519 | 0.073733214 | 0.085743159 | 0.118558944 |
| 0.044253769 | 0.108297021 | 0.252926332 | 0.140938296 |
| 0.084718471 | 0.033869567 | 0.066564953 | 0.067703901 |
| 0.004665782 | 0.416360827 | 0.155915103 | 0.039860486 |
| 0.129719377 | 0.148251302 | 0.244391637 | 0.391486762 |
| 0.350990184 | 0.073485348 | 0.151422332 | 0.336382901 |
| 0.031690471 | 0.025028209 | 0.01449708  | 0.204796776 |
| 0.108939592 | 0.043541739 | 0.245294159 | 0.133650386 |
| 0.295318823 | 0.283322543 | 0.155601426 | 0.358033667 |
| 0.152274665 | 0.184263025 | 0.109861742 | 0.010926577 |
| 0.045686318 | 0.074202193 | 0.149490263 | 6.34E-05    |
| 0.205525718 | 0.031837628 | 0.368115148 | 0.366567596 |
| 0.159732816 | 0.306808193 | 0.034546205 | 0.011811013 |
| 0.055800915 | 0.106947091 | 0.070697112 | 0.367539853 |
| 0.112260342 | 0.060272666 | 0.161128173 | 0.089935445 |
| 0.330604356 | 0.335178984 | 0.107472427 | 0.103436028 |
| 0.139409564 | 0.104349855 | 0.382171084 | 0.043562484 |
| 0.258624367 | 0.056708117 | 0.243402204 | 0.102801254 |
| 0.084830497 | 0.437535458 | 0.026196085 | 0.431973855 |
| 0.122196393 | 0.083835613 | 0.379982787 | 0.192741431 |
| 0.082371194 | 0.021980005 | 0.104311891 | 0.153872636 |
| 0.057256531 | 0.181646458 | 0.003513721 | 0.006455901 |
| 0.201705134 | 0.144580408 | 0.30101169  | 0.28766612  |
| 0.11364797  | 0.251117819 | 0.057136714 | 0.113765201 |
| 0.376304129 | 0.387307044 | 0.024091721 | 0.155692163 |
| 0.222053536 | 0.027797276 | 0.245248589 | 0.004542073 |
| 0.248419005 | 0.286954307 | 0.098946545 | 0.014665331 |
| 0.001318368 | 0.091551565 | 0.220611946 | 0.036858164 |
| 0.403073395 | 0.04473124  | 0.255227827 | 0.342695859 |
| 0.118262857 | 0.373914985 | 0.03402612  | 0.273718906 |
| 0.00437099  | 0.159101371 | 0.253945162 | 0.224353283 |
| 0.041178798 | 0.139421209 | 0.240127383 | 0.11749189  |
| 0.005186126 | 0.04283419  | 0.000555934 | 0.280486785 |
| 0.350543319 | 0.172957877 | 0.134164386 | 0.119280544 |
| 0.173391155 | 0.334456261 | 0.032763597 | 0.276025277 |
| 0.000585753 | 0.214935235 | 0.114878829 | 0.309600171 |
| 0.028178191 | 0.195323146 | 0.005924867 | 0.192645073 |
| 0.342652133 | 0.029768683 | 0.186445949 | 0.042366934 |
| 0.39566766  | 0.339599203 | 0.09796247  | 0.059570934 |
| 0.290267327 | 0.031616446 | 0.17427462  | 0.425981705 |
| 0.064075306 | 0.102934342 | 0.346566672 | 0.044356225 |
| 0.186333585 | 0.326572197 | 0.29432833  | 0.433987238 |
| 0.013527713 | 0.133492327 | 0.356510099 | 0.355807881 |
| 0.210944498 | 0.078499412 | 0.097184517 | 0.077611265 |
| 0.345320239 | 0.007459536 | 0.073147424 | 0.208980856 |
| 0.079882733 | 0.207729946 | 0.24020368  | 0.083820248 |
| 0.002513808 | 0.054710243 | 0.121328431 | 0.071622008 |
| 0.142579285 | 0.178214823 | 0.074085323 | 0.28358094  |
| 0.018056752 | 0.000911346 | 0.34866611  | 0.002076215 |
| 0.178046449 | 0.25001389  | 0.138862887 | 0.194366886 |
| 0.106213743 | 0.195598884 | 0.12979373  | 9.80E-05    |
| 0.316465196 | 0.009651948 | 0.16111023  | 0.049827427 |

|             |             |             |             |
|-------------|-------------|-------------|-------------|
| 0.031103828 | 0.009587479 | 0.365637621 | 0.421008916 |
| 0.220008885 | 1           | 0.068213247 | 0.374822283 |
| 0.022324081 | 0.172124482 | 0.146638882 | 0.263831928 |
| 0.123393562 | 0.168611882 | 0.212337051 | 0.166927856 |
| 0.266690832 | 0.129267136 |             |             |
| ZFP595      | 0.013842758 | 0.32756743  | 0.011182435 |
| 0.019313896 | 0.21035726  | 0.159578588 | 0.006674386 |
| 0.018574096 | 0.227643326 | 0.112085123 | 0.20893704  |
| 0.000894886 | 0.049006537 | 0.375616794 | 0.0057864   |
| 0.289514312 | 0.002431893 | 0.024734235 | 0.012258331 |
| 0.027852873 | 0.177459874 | 0.12702258  | 0.182371269 |
| 0.156702008 | 0.089499003 | 0.171939493 | 0.278354344 |
| 0.416077002 | 0.118048897 | 0.348888456 | 0.048970502 |
| 0.282105176 | 0.247884678 | 0.277425555 | 0.000649324 |
| 0.233650987 | 0.003462778 | 0.285177757 | 0.091259292 |
| 0.051882033 | 0.218023316 | 0.16287432  | 0.084284957 |
| 0.187460223 | 0.004042557 | 0.073397489 | 0.328620981 |
| 0.164284499 | 0.074512607 | 0.014775138 | 0.310403545 |
| 0.120508683 | 0.205368321 | 0.299687794 | 0.000615153 |
| 0.233932812 | 0.077033637 | 0.171220544 | 0.384628878 |
| 0.090403581 | 0.032490681 | 0.083104728 | 0.08016734  |
| 0.264517911 | 0.267135926 | 0.123754672 | 0.136351026 |
| 0.398833033 | 0.076510235 | 0.368570689 | 0.025005143 |
| 0.155838881 | 0.002977609 | 0.062761592 | 0.021816719 |
| 0.145748412 | 0.077844572 | 0.213185398 | 0.170481714 |
| 0.332063883 | 0.369617913 | 0.09988107  | 0.364168928 |
| 0.030270655 | 0.266404339 | 0.099861264 | 0.182229984 |
| 0.244509079 | 0.010104034 | 0.319419594 | 0.392287307 |
| 0.006106141 | 0.252729735 | 0.292154965 | 0.042848051 |
| 0.33278117  | 0.104365057 | 0.244680472 | 0.104790164 |
| 0.300892462 | 0.232937194 | 0.33318456  | 0.168344629 |
| 0.173125299 | 0.018756341 | 0.333364796 | 0.2733995   |
| 0.130626222 | 0.020209084 | 0.05953998  | 0.436223173 |
| 0.282401486 | 0.416947015 | 0.343179382 | 0.253724367 |
| 0.27189344  | 0.400504135 | 0.283883063 | 0.3137608   |
| 0.056643162 | 0.411209656 | 0.063644288 | 0.003968725 |
| 0.012722256 | 0.013585558 | 0.059591939 | 0.177556283 |
| 0.41408672  | 0.187197516 | 0.056335589 | 0.096731159 |
| 0.409875793 | 0.342674243 | 0.413131946 | 0.325859358 |
| 0.004548713 | 0.10603876  | 0.263278849 | 0.070654049 |
| 0.266245558 | 0.03073851  | 0.190578316 | 0.359200913 |
| 0.266188536 | 0.377415181 | 0.036366588 | 0.333672118 |
| 0.055585731 | 0.39519868  | 0.377126937 | 0.056587964 |
| 0.376745131 | 0.349608206 | 0.412723644 | 0.377769222 |
| 0.340964023 | 0.151886407 | 0.015222448 | 0.264176401 |
| 0.379259788 | 0.013190493 | 0.432523898 | 0.447929485 |
| 0.386046475 | 0.435633361 | 0.427912025 | 0.434579878 |
| 0.394530563 | 0.016467363 | 0.011050186 | 0.177995776 |
| 0.378413293 | 0.28914852  | 0.022584021 | 0.293058738 |
| 0.262460089 | 0.178573044 | 0.355736062 | 0.083019547 |
| 0.379133446 | 0.37276569  | 0.432399494 | 0.288922796 |
| 0.13822569  | 0.191689757 | 0.317185038 | 0.32173588  |
| 0.002711566 | 0.026234337 | 0.01280114  | 0.172384712 |
| 0.09357349  | 0.065415872 | 0.14641155  | 0.223143701 |

|             |             |             |             |
|-------------|-------------|-------------|-------------|
| 0.081894499 | 0.126176833 | 0.223865398 | 0.332393513 |
| 0.015446346 | 0.312701568 | 0.046968169 | 0.056022455 |
| 0.003716973 | 0.058162874 | 0.028130143 | 0.024538613 |
| 0.122478085 | 0.113703386 | 0.374242944 | 0.407951613 |
| 0.150879379 | 0.079239121 | 0.321153542 | 0.365686708 |
| 0.312233324 | 0.279876572 | 0.110469278 | 0.000946249 |
| 0.061149731 | 0.139681897 | 0.120720607 | 0.301579698 |
| 0.07698105  | 0.050866569 | 0.269805518 | 0.354226632 |
| 0.119153534 | 0.035223642 | 0.153922429 | 0.282173536 |
| 0.061597458 | 0.127917192 | 0.384055493 | 0.254208241 |
| 0.000457489 | 0.147876267 | 0.380527048 | 0.030810705 |
| 0.180518508 | 0.054194741 | 0.108442221 | 0.392820342 |
| 0.096031967 | 0.105261256 | 0.434139687 | 0.33398918  |
| 0.07670317  | 0.11053356  | 0.42694599  | 0.035924756 |
| 0.212095789 | 0.009558604 | 0.171461902 | 0.166694136 |
| 0.108607918 | 0.17163081  | 0.244677446 | 0.114891222 |
| 0.048897606 | 0.405267277 | 0.279421966 | 0.430929024 |
| 0.170973181 | 0.419058476 | 0.416655565 | 0.353486994 |
| 0.21013031  | 0.226225159 | 0.080849205 | 0.368989367 |
| 0.383861218 | 0.06328199  | 0.022030324 | 0.408585461 |
| 0.178870659 | 0.351118211 | 0.020132366 | 0.402193229 |
| 0.346396146 | 0.342164175 | 0.033931185 | 0.29060011  |
| 0.282343926 | 0.094352419 | 0.316393377 | 0.417830329 |
| 0.089375828 | 0.224193086 | 0.145577817 | 0.324793378 |
| 0.067357601 | 0.072411459 | 0.186362426 | 0.105830214 |
| 0.015950041 | 0.017991583 | 0.01449505  | 0.053689593 |
| 0.08964     | 0.333946168 | 0.287502976 | 0.421177564 |
| 0.030246478 | 0.310729472 | 0.110772718 | 0.102323462 |
| 0.308105989 | 0.196285647 | 0.299383113 | 0.298552632 |
| 0.116541698 | 0.001434955 | 0.016859772 | 0.366723864 |
| 0.007883311 | 0.125454834 | 0.131748313 | 0.000406763 |
| 0.005234991 | 0.336998477 | 0.032888449 | 0.088592386 |
| 0.416078198 | 0.091629987 | 0.089825093 | 0.109088673 |
| 0.235365143 | 0.022093148 | 0.000321144 | 0.393485003 |
| 0.366983596 | 0.337645765 | 0.366111872 | 0.31869508  |
| 0.346192451 | 0.303302388 | 0.333595362 | 0.171227269 |
| 0.013766662 | 0.015747242 | 0.082293746 | 0.125466124 |
| 0.001125981 | 0.283935138 | 0.16120703  | 0.052647787 |
| 0.366848042 | 0.164897027 | 0.003862604 | 0.258534934 |
| 0.001597057 | 0.147225585 | 0.070730522 | 0.069197406 |
| 0.261520665 | 0.000574774 | 0.058565935 | 0.092910231 |
| 0.308088571 | 0.224445198 | 0.189523623 | 0.409395242 |
| 0.178647085 | 0.050933029 | 0.145051348 | 0.32590701  |
| 0.009579049 | 0.028339404 | 0.128455574 | 0.011662412 |
| 0.045344989 | 0.318927826 | 0.159217324 | 0.005347957 |
| 0.130005238 | 9.07E-05    | 0.250904258 | 0.414338968 |
| 0.345822001 | 0.438167104 | 0.40471571  | 0.195878877 |
| 0.396562123 | 0.074827491 | 0.436090932 | 0.303539428 |
| 0.186419588 | 5.08E-05    | 0.000478644 | 0.432047273 |
| 0.269813527 | 0.016707569 | 0.056273319 | 0.076602057 |
| 0.013864559 | 0.036978792 | 0.009261269 | 0.074089748 |
| 0.294670182 | 0.13140308  | 0.068712007 | 0.348839669 |
| 0.084512375 | 0.095739802 | 0.178359162 | 0.026023317 |
| 0.289815094 | 0.004926485 | 0.023750944 | 0.001487422 |

|             |             |             |             |
|-------------|-------------|-------------|-------------|
| 0.26974585  | 0.044080943 | 0.308708359 | 0.402072045 |
| 0.370547827 | 0.310002113 | 0.171874213 | 0.080059472 |
| 0.352789035 | 0.036876963 | 0.092360423 | 0.036759569 |
| 0.382084505 | 0.295118739 | 0.206895068 | 0.188380558 |
| 0.40052662  | 0.352639044 | 0.003291113 | 0.320538866 |
| 0.001195749 | 0.000416248 | 0.175749689 | 0.131735498 |
| 0.013114203 | 0.215348659 | 0.133927688 | 0.055378134 |
| 0.057449031 | 0.002368411 | 0.162028305 | 0.149009488 |
| 0.159075088 | 0.190917533 | 0.191512619 | 0.118414886 |
| 0.103164789 | 0.029196118 | 0.05365989  | 0.032436293 |
| 0.042772666 | 0.184401269 | 0.094564029 | 0.001094447 |
| 0.252483647 | 0.299437688 | 0.009880327 | 0.057774798 |
| 0.371384767 | 0.433614371 | 0.002822766 | 0.000754546 |
| 0.142173296 | 0.135133565 | 0.440534238 | 0.402936227 |
| 0.385143914 | 0.401065543 | 0.246262718 | 0.021670172 |
| 0.009906615 | 0.175811005 | 0.210695674 | 0.013731795 |
| 0.419717662 | 0.016983609 | 0.367370501 | 0.247101688 |
| 0.034608479 | 0.051224914 | 0.002685625 | 0.01783782  |
| 0.332820742 | 0.068387166 | 0.065788172 | 0.056733113 |
| 0.136247542 | 0.084388043 | 0.005416304 | 0.07277853  |
| 0.22802475  | 0.061795971 | 0.056647119 | 0.091130281 |
| 0.225749626 | 0.043104974 | 0.377623395 | 0.3225411   |
| 0.045021033 | 0.027244836 | 0.059620909 | 0.284002733 |
| 0.386577512 | 0.274090199 | 0.00412403  | 0.361253163 |
| 0.407968386 | 0.373531739 | 0.374379321 | 0.298401095 |
| 0.022267274 | 0.264370757 | 0.178083536 | 0.21191854  |
| 0.066875728 | 0.168436039 | 0.089359863 | 0.013114723 |
| 0.169791047 | 0.325588133 | 0.312223688 | 0.052393521 |
| 0.282737736 | 0.042485867 | 0.013596276 | 0.372067305 |
| 0.066076849 | 0.009631197 | 0.178889199 | 0.380235126 |
| 2.78E-05    | 0.097660062 | 0.399630269 | 0.064899939 |
| 0.378516143 | 0.40439317  | 0.319570301 | 0.0559276   |
| 0.000854998 | 0.347361434 | 0.25660228  | 0.189276486 |
| 0.344064721 | 0.225142335 | 0.020253253 | 0.009194206 |
| 0.166580182 | 0.027205045 | 0.019776411 | 0.062079845 |
| 0.052200813 | 0.271834127 | 0.08685689  | 0.07455046  |
| 0.065127751 | 0.02876806  | 0.078123487 | 0.076492543 |
| 0.038323128 | 0.121953274 | 0.241501112 | 0.093602357 |
| 0.085914681 | 0.346100974 | 0.306251367 | 0.002234104 |
| 0.259662798 | 0.307787947 | 0.328297233 | 0.000220816 |
| 0.370080864 | 7.78E-05    | 0.078816792 | 0.086436817 |
| 0.065445379 | 0.073584279 | 0.144840179 | 0.105926686 |
| 0.201631407 | 0.067905785 | 0.099663871 | 0.113550281 |
| 0.040354562 | 0.068214812 | 0.25742339  | 0.135914539 |
| 0.117006739 | 0.025917884 | 0.035128486 | 0.038105974 |
| 0.005237005 | 0.383975159 | 0.129082821 | 0.02260908  |
| 0.102455827 | 0.137547492 | 0.229464789 | 0.382004792 |
| 0.314623788 | 0.046033478 | 0.133187437 | 0.363658148 |
| 0.078227823 | 0.071538246 | 0.00802131  | 0.194713917 |
| 0.092230249 | 0.065048553 | 0.212859791 | 0.157971916 |
| 0.310855122 | 0.262565448 | 0.125803124 | 0.315215518 |
| 0.161151456 | 0.170831113 | 0.139222405 | 0.011099657 |
| 0.051000862 | 0.044028809 | 0.173087948 | 0.000504645 |
| 0.213662265 | 0.03590322  | 0.424486804 | 0.358813269 |

|             |             |             |             |
|-------------|-------------|-------------|-------------|
| 0.192380507 | 0.261882878 | 0.066911541 | 0.012523214 |
| 0.06175366  | 0.086849981 | 0.051530729 | 0.349545557 |
| 0.170614112 | 0.042630864 | 0.177856533 | 0.087052968 |
| 0.361107547 | 0.330641954 | 0.087607665 | 0.077682917 |
| 0.090952923 | 0.077702558 | 0.324024804 | 0.026669773 |
| 0.303725527 | 0.069060163 | 0.216285351 | 0.142382289 |
| 0.083830347 | 0.424089222 | 0.011709493 | 0.447724639 |
| 0.174063514 | 0.048229501 | 0.34520799  | 0.124039784 |
| 0.049741795 | 0.01798862  | 0.142014032 | 0.139710842 |
| 0.045049511 | 0.19211585  | 0.019126198 | 0.03024869  |
| 0.218399049 | 0.104644917 | 0.318396952 | 0.241741341 |
| 0.111762735 | 0.231772178 | 0.074731149 | 0.108449268 |
| 0.353656143 | 0.344262526 | 0.045438771 | 0.124861965 |
| 0.220595948 | 0.020261146 | 0.252470325 | 0.004185246 |
| 0.328426541 | 0.355939908 | 0.118995593 | 0.006110257 |
| 0.000633847 | 0.144790307 | 0.279338627 | 0.015638436 |
| 0.417212322 | 0.10001967  | 0.214066613 | 0.345065912 |
| 0.069692607 | 0.343993666 | 0.024823035 | 0.330781588 |
| 0.002968666 | 0.118062304 | 0.242942922 | 0.207204888 |
| 0.063856409 | 0.17390403  | 0.276124043 | 0.154967562 |
| 0.002837723 | 0.053018887 | 0.000334669 | 0.25616656  |
| 0.320217896 | 0.223397147 | 0.095298895 | 0.104179002 |
| 0.159347173 | 0.259694336 | 0.050991565 | 0.264990987 |
| 0.00054633  | 0.299275579 | 0.075788911 | 0.316496988 |
| 0.092293455 | 0.205074485 | 0.004943796 | 0.195512604 |
| 0.292153269 | 0.068234046 | 0.132797195 | 0.08087516  |
| 0.37815584  | 0.273023377 | 0.067953269 | 0.042641723 |
| 0.268244885 | 0.015387347 | 0.165072089 | 0.413544576 |
| 0.059469932 | 0.136054865 | 0.408856703 | 0.057051544 |
| 0.214375788 | 0.263490443 | 0.284233223 | 0.397447037 |
| 0.011589524 | 0.120532919 | 0.345585846 | 0.360411005 |
| 0.187469368 | 0.079130795 | 0.134485002 | 0.096193602 |
| 0.337737613 | 0.012566298 | 0.076709303 | 0.22484973  |
| 0.135730938 | 0.177441636 | 0.190987316 | 0.079802034 |
| 0.003642043 | 0.030154115 | 0.121348121 | 0.04556157  |
| 0.151491375 | 0.197705012 | 0.076126439 | 0.25968902  |
| 0.022471866 | 0.002387395 | 0.317281083 | 0.013622891 |
| 0.16383913  | 0.296525814 | 0.104157036 | 0.188961703 |
| 0.086420903 | 0.188049822 | 0.153676058 | 0.000273884 |
| 0.328323386 | 0.01029926  | 0.11415536  | 0.075577485 |
| 0.086823653 | 0.005924975 | 0.331504573 | 0.434711275 |
| 0.164627374 | 0.068213247 | 1           | 0.350613009 |
| 0.055169601 | 0.187517289 | 0.164875967 | 0.289109162 |
| 0.151263679 | 0.217407769 | 0.224725887 | 0.224105164 |
| 0.252681571 | 0.08167846  |             |             |
| ZFP623      | 0.165187763 | 0.460652124 | 0.141596984 |
| 0.204622258 | 0.320909041 | 0.467073653 | 0.134020209 |
| 0.220354554 | 0.423604148 | 0.355544858 | 0.409758055 |
| 0.055213781 | 0.089463445 | 0.462414376 | 0.128377638 |
| 0.399759872 | 0.081260545 | 0.195601073 | 0.116711977 |
| 0.313308622 | 0.3004161   | 0.366036095 | 0.465946574 |
| 0.310718146 | 0.282850373 | 0.433809051 | 0.395940809 |
| 0.482429727 | 0.285863728 | 0.458903094 | 0.227273751 |
| 0.419897029 | 0.335355469 | 0.393370903 | 0.056079784 |

|             |             |             |             |
|-------------|-------------|-------------|-------------|
| 0.466636811 | 0.016655882 | 0.455593514 | 0.305194979 |
| 0.152413087 | 0.400191033 | 0.402345551 | 0.311329395 |
| 0.411358274 | 0.099430201 | 0.260505451 | 0.4184894   |
| 0.408909967 | 0.367540623 | 0.16312013  | 0.467721507 |
| 0.40423883  | 0.434712913 | 0.444123974 | 0.00515469  |
| 0.300865697 | 0.082323334 | 0.22091566  | 0.50834058  |
| 0.296862337 | 0.20879698  | 0.288338743 | 0.367260536 |
| 0.425880151 | 0.410787683 | 0.342323078 | 0.397201127 |
| 0.488211489 | 0.177478062 | 0.445765401 | 0.221401675 |
| 0.454933528 | 0.098070715 | 0.254507315 | 0.186048691 |
| 0.419364115 | 0.281230103 | 0.386509458 | 0.309264635 |
| 0.449431826 | 0.525876199 | 0.329623265 | 0.510647819 |
| 0.115982559 | 0.340127974 | 0.298535101 | 0.358150103 |
| 0.415880364 | 0.171445591 | 0.4439317   | 0.51088077  |
| 0.129634207 | 0.430953218 | 0.439753088 | 0.234957139 |
| 0.47287708  | 0.300389002 | 0.436333251 | 0.182379016 |
| 0.378060148 | 0.35029665  | 0.495509555 | 0.373189787 |
| 0.35749138  | 0.168928426 | 0.513924234 | 0.317775649 |
| 0.33924588  | 0.175826518 | 0.242852519 | 0.460077578 |
| 0.44748715  | 0.476853794 | 0.459807646 | 0.413983556 |
| 0.37672483  | 0.484514275 | 0.444080133 | 0.459292751 |
| 0.188328076 | 0.519356454 | 0.288235059 | 0.098973145 |
| 0.166026603 | 0.162601746 | 0.271136092 | 0.375618927 |
| 0.475305767 | 0.418255056 | 0.294817147 | 0.286051134 |
| 0.447088415 | 0.500909103 | 0.516788013 | 0.450818724 |
| 0.100902616 | 0.258033369 | 0.379423211 | 0.403238951 |
| 0.429765338 | 0.212836444 | 0.260688325 | 0.52481162  |
| 0.424454462 | 0.450529095 | 0.283951078 | 0.524370175 |
| 0.304800618 | 0.499893142 | 0.471257722 | 0.253699894 |
| 0.520251755 | 0.512243681 | 0.482976135 | 0.404240154 |
| 0.487229855 | 0.420379827 | 0.108993535 | 0.433413798 |
| 0.470205412 | 0.017277736 | 0.470622081 | 0.468766629 |
| 0.495863642 | 0.459580588 | 0.491519314 | 0.483175029 |
| 0.504198652 | 0.161154477 | 0.034084606 | 0.32768013  |
| 0.509798247 | 0.435629159 | 0.209300203 | 0.416181067 |
| 0.381592243 | 0.476749745 | 0.460880658 | 0.32337982  |
| 0.50501695  | 0.465113173 | 0.475401934 | 0.447173056 |
| 0.388400091 | 0.383267133 | 0.372984355 | 0.497637666 |
| 0.101477638 | 0.216995694 | 0.133434817 | 0.382743268 |
| 0.409623007 | 0.251382071 | 0.448496127 | 0.38514741  |
| 0.278624444 | 0.44527799  | 0.337359028 | 0.386351473 |
| 0.138488931 | 0.467476859 | 0.270485191 | 0.2766597   |
| 0.090401549 | 0.239967153 | 0.250019452 | 0.241354974 |
| 0.306837065 | 0.304518927 | 0.462909207 | 0.463458002 |
| 0.386521866 | 0.290020449 | 0.468805455 | 0.457137964 |
| 0.419090775 | 0.383261173 | 0.330858933 | 0.024664705 |
| 0.281259421 | 0.324504671 | 0.181359577 | 0.424019512 |
| 0.26213158  | 0.302688752 | 0.410671028 | 0.4076351   |
| 0.386062776 | 0.274346613 | 0.379646337 | 0.450847182 |
| 0.2637374   | 0.344218342 | 0.449785291 | 0.445205528 |
| 0.01489     | 0.389731541 | 0.468492774 | 0.177012835 |
| 0.402039551 | 0.150559852 | 0.261729285 | 0.457427975 |
| 0.298488066 | 0.249948725 | 0.475381396 | 0.408325743 |
| 0.402239947 | 0.300915648 | 0.501478472 | 0.054187178 |

|             |             |             |             |
|-------------|-------------|-------------|-------------|
| 0.369990067 | 0.067490304 | 0.33706965  | 0.395509736 |
| 0.341469004 | 0.352635803 | 0.331555143 | 0.300002879 |
| 0.238416298 | 0.513378372 | 0.448552877 | 0.489298601 |
| 0.371502597 | 0.504416564 | 0.465127149 | 0.459436667 |
| 0.438206508 | 0.373996881 | 0.136850673 | 0.457115136 |
| 0.457536655 | 0.310481451 | 0.171147822 | 0.458576706 |
| 0.387589094 | 0.411072286 | 0.138631678 | 0.464806678 |
| 0.501432224 | 0.48562976  | 0.222016236 | 0.393797048 |
| 0.428447452 | 0.333370749 | 0.447884428 | 0.511058193 |
| 0.348223664 | 0.366858389 | 0.338731658 | 0.407912672 |
| 0.27260974  | 0.23795073  | 0.387176774 | 0.18312562  |
| 0.011576345 | 0.181773467 | 0.148870042 | 0.223592838 |
| 0.170592252 | 0.445168233 | 0.423400103 | 0.497353006 |
| 0.205062934 | 0.454002988 | 0.337094897 | 0.315020273 |
| 0.438277796 | 0.378637135 | 0.388562755 | 0.41215669  |
| 0.339640516 | 0.039145749 | 0.184209459 | 0.52619678  |
| 0.11516331  | 0.243564915 | 0.422421398 | 0.007159999 |
| 0.11499195  | 0.455673515 | 0.188352997 | 0.273468957 |
| 0.457097506 | 0.278581952 | 0.306530327 | 0.364238428 |
| 0.396785703 | 0.185752891 | 0.008064209 | 0.464543715 |
| 0.481947678 | 0.454292265 | 0.481890404 | 0.477625097 |
| 0.44343472  | 0.45516442  | 0.428822273 | 0.453038962 |
| 0.186746751 | 0.188657706 | 0.207306708 | 0.326699981 |
| 0.014422806 | 0.42195813  | 0.355583307 | 0.238322583 |
| 0.441821495 | 0.378152182 | 0.098824391 | 0.381775867 |
| 0.056058079 | 0.19022301  | 0.40773088  | 0.294109428 |
| 0.37938047  | 0.049910068 | 0.276153261 | 0.32249444  |
| 0.449701772 | 0.421007244 | 0.354396172 | 0.520023563 |
| 0.38376583  | 0.24013547  | 0.337302897 | 0.433253855 |
| 0.147763814 | 0.122453315 | 0.447969263 | 0.046630081 |
| 0.28014998  | 0.467145973 | 0.404159832 | 0.139069879 |
| 0.348189477 | 0.020187658 | 0.428794602 | 0.521108652 |
| 0.479816153 | 0.483793734 | 0.486500401 | 0.272257622 |
| 0.493705092 | 0.104564029 | 0.510362355 | 0.461167434 |
| 0.399802079 | 0.002452609 | 0.017328005 | 0.467091795 |
| 0.397602727 | 0.14506067  | 0.254692084 | 0.42207368  |
| 0.18211148  | 0.281704542 | 0.147884136 | 0.192270631 |
| 0.469395923 | 0.279069762 | 0.19686536  | 0.481008631 |
| 0.305879409 | 0.313996488 | 0.461914071 | 0.187361526 |
| 0.431235892 | 0.116860687 | 0.184271299 | 0.015321256 |
| 0.399744576 | 0.211826791 | 0.502402267 | 0.501935335 |
| 0.4814507   | 0.403597389 | 0.361295973 | 0.424031362 |
| 0.453893182 | 0.209582714 | 0.381115207 | 0.229869342 |
| 0.483310844 | 0.402091158 | 0.384631412 | 0.384188837 |
| 0.475642826 | 0.460543857 | 0.089914878 | 0.430927153 |
| 0.037141697 | 0.004355859 | 0.441620902 | 0.354838853 |
| 0.091411234 | 0.379043704 | 0.337710257 | 0.317429509 |
| 0.311984338 | 0.082832055 | 0.259693469 | 0.234482248 |
| 0.348750124 | 0.387537029 | 0.281631729 | 0.344417542 |
| 0.293070897 | 0.145449583 | 0.275035928 | 0.244828324 |
| 0.303082162 | 0.389169657 | 0.284823395 | 0.064989665 |
| 0.445883492 | 0.414011212 | 0.132292928 | 0.264063604 |
| 0.459245643 | 0.471520312 | 0.094138705 | 0.026096865 |
| 0.353569303 | 0.357535403 | 0.467470835 | 0.492988729 |



|             |             |             |             |
|-------------|-------------|-------------|-------------|
| 0.530956217 | 0.500836821 | 0.414233064 | 0.17343331  |
| 0.149661008 | 0.363627432 | 0.299711416 | 0.134597438 |
| 0.497606776 | 0.15716117  | 0.49163317  | 0.294623391 |
| 0.211830587 | 0.289698973 | 0.078452618 | 0.168672522 |
| 0.390936961 | 0.277057497 | 0.236158172 | 0.253723952 |
| 0.351155026 | 0.245328528 | 0.115911208 | 0.286355903 |
| 0.409473275 | 0.162849699 | 0.253880532 | 0.413077481 |
| 0.433796012 | 0.282507141 | 0.434368975 | 0.444507272 |
| 0.238419254 | 0.212097105 | 0.368116673 | 0.434077462 |
| 0.466872415 | 0.425470082 | 0.063186408 | 0.461127294 |
| 0.467853697 | 0.45688492  | 0.504042368 | 0.412804411 |
| 0.176623988 | 0.389293485 | 0.324114071 | 0.362325114 |
| 0.282375329 | 0.466693292 | 0.320801578 | 0.142903312 |
| 0.370016295 | 0.501279321 | 0.445737965 | 0.24320432  |
| 0.460902023 | 0.247885039 | 0.14456179  | 0.472195254 |
| 0.177139944 | 0.174306724 | 0.427419161 | 0.454673799 |
| 0.003075632 | 0.138071424 | 0.456335255 | 0.331743831 |
| 0.511309864 | 0.457301804 | 0.441490886 | 0.368206493 |
| 0.001401809 | 0.409596063 | 0.411594139 | 0.408724806 |
| 0.463195157 | 0.436690596 | 0.254335657 | 0.136284491 |
| 0.356379433 | 0.180042954 | 0.201268212 | 0.425320592 |
| 0.177237018 | 0.471997922 | 0.285801655 | 0.309671694 |
| 0.252303265 | 0.195665424 | 0.253207327 | 0.32852986  |
| 0.161189196 | 0.320251794 | 0.402974616 | 0.367704995 |
| 0.188465281 | 0.444448436 | 0.443455623 | 0.078175499 |
| 0.370220538 | 0.439970211 | 0.452774137 | 0.005117733 |
| 0.439169373 | 0.025104878 | 0.25721319  | 0.268218305 |
| 0.262446412 | 0.277087503 | 0.3041696   | 0.314211212 |
| 0.416987027 | 0.29897413  | 0.33450028  | 0.314079791 |
| 0.22375185  | 0.316899573 | 0.410579962 | 0.418978693 |
| 0.307994429 | 0.220870013 | 0.191618138 | 0.188549052 |
| 0.110541846 | 0.476564647 | 0.333561006 | 0.167051599 |
| 0.311130682 | 0.415502505 | 0.391691258 | 0.494840944 |
| 0.436981481 | 0.217075101 | 0.393643931 | 0.473249259 |
| 0.253767254 | 0.370499279 | 0.150148001 | 0.444110964 |
| 0.32802193  | 0.238770296 | 0.459176393 | 0.405881871 |
| 0.454139535 | 0.416887545 | 0.334602345 | 0.447153349 |
| 0.391901651 | 0.385778203 | 0.367652257 | 0.140580634 |
| 0.266382671 | 0.236299144 | 0.277635697 | 0.007842288 |
| 0.423562217 | 0.355981723 | 0.471416698 | 0.495593014 |
| 0.291379962 | 0.423818031 | 0.393388387 | 0.168128417 |
| 0.324521738 | 0.266420701 | 0.239061088 | 0.459863694 |
| 0.211587327 | 0.282335119 | 0.320617592 | 0.43840557  |
| 0.442128298 | 0.441217804 | 0.28920795  | 0.352979347 |
| 0.321122782 | 0.312366358 | 0.488363472 | 0.234152748 |
| 0.438655921 | 0.19643325  | 0.434822809 | 0.331802625 |
| 0.268346614 | 0.489743973 | 0.142160992 | 0.495963492 |
| 0.350889586 | 0.238158132 | 0.496100644 | 0.415115126 |
| 0.38343396  | 0.181566532 | 0.180617027 | 0.445182358 |
| 0.308808069 | 0.346441689 | 0.021591858 | 0.074235283 |
| 0.379501949 | 0.365448026 | 0.448534037 | 0.417257171 |
| 0.260911377 | 0.379958864 | 0.1753484   | 0.382191494 |
| 0.495628992 | 0.519811828 | 0.301362961 | 0.324121269 |
| 0.418459593 | 0.186483912 | 0.476122647 | 0.024975661 |

|             |             |             |             |
|-------------|-------------|-------------|-------------|
| 0.429545814 | 0.422553633 | 0.416153656 | 0.123954018 |
| 0.05528539  | 0.197459181 | 0.42913353  | 0.159369546 |
| 0.453454786 | 0.20242815  | 0.424946755 | 0.462169713 |
| 0.286514163 | 0.518549891 | 0.179790712 | 0.432378703 |
| 0.11437506  | 0.34539769  | 0.391353447 | 0.417326031 |
| 0.252065132 | 0.287338341 | 0.403912053 | 0.234497479 |
| 0.079383769 | 0.304988617 | 0.00363176  | 0.433392793 |
| 0.492633054 | 0.332900769 | 0.30358485  | 0.351981969 |
| 0.339961604 | 0.432591639 | 0.294486506 | 0.434571928 |
| 0.0297661   | 0.368260609 | 0.291524329 | 0.466861813 |
| 0.225498769 | 0.407329177 | 0.107553272 | 0.326555205 |
| 0.498167721 | 0.310512931 | 0.343757948 | 0.298167523 |
| 0.488648585 | 0.449672687 | 0.275029547 | 0.263941438 |
| 0.434234934 | 0.150609551 | 0.440205316 | 0.51454918  |
| 0.24614646  | 0.21287642  | 0.442687096 | 0.261334601 |
| 0.315968811 | 0.444279315 | 0.428510359 | 0.512975423 |
| 0.115532366 | 0.325244396 | 0.44706279  | 0.455217678 |
| 0.359209553 | 0.181589042 | 0.248375524 | 0.264180292 |
| 0.469194471 | 0.175056326 | 0.262513239 | 0.421139407 |
| 0.209844126 | 0.381467685 | 0.41506024  | 0.225839357 |
| 0.086385912 | 0.260429313 | 0.438391178 | 0.243606705 |
| 0.353341107 | 0.382122295 | 0.255914004 | 0.410904431 |
| 0.192603307 | 0.051036281 | 0.445351853 | 0.017543845 |
| 0.444252628 | 0.419104572 | 0.340722494 | 0.367976296 |
| 0.2847251   | 0.423692376 | 0.413306007 | 0.006294768 |
| 0.440641483 | 0.055041597 | 0.365402695 | 0.251645593 |
| 0.304417655 | 0.124189734 | 0.46357395  | 0.478817565 |
| 0.415682158 | 0.374822283 | 0.350613009 | 1           |
| 0.1437645   | 0.334916948 | 0.358089075 | 0.462315883 |
| 0.222697263 | 0.406110412 | 0.425373556 | 0.372825309 |
| 0.457625319 | 0.380365048 |             |             |
| ZFP758      | 0.007932977 | 0.118069885 | 0.004498807 |
| 0.010703903 | 0.286891344 | 0.072524089 | 0.007656093 |
| 0.014530066 | 0.096963093 | 0.036723997 | 0.154540556 |
| 0.001515749 | 0.044973423 | 0.170288383 | 0.008334872 |
| 0.230165346 | 0.006172191 | 0.026849886 | 0.003413225 |
| 0.006533772 | 0.243721718 | 0.096508036 | 0.057501856 |
| 0.214106882 | 0.039284249 | 0.074740719 | 0.18154934  |
| 0.174908381 | 0.037411784 | 0.190847862 | 0.005339313 |
| 0.141492036 | 0.284779181 | 0.168422684 | 0.000880807 |
| 0.125017343 | 0.005427849 | 0.126720064 | 0.112078824 |
| 0.03072623  | 0.10335616  | 0.044440947 | 0.093705099 |
| 0.07457708  | 0.003103207 | 0.009670785 | 0.206160966 |
| 0.089256784 | 0.071510095 | 0.005590489 | 0.156859414 |
| 0.069839518 | 0.090934413 | 0.091306588 | 1.78E-06    |
| 0.21127566  | 0.073853392 | 0.16133621  | 0.153383834 |
| 0.071330317 | 0.044345984 | 0.040366032 | 0.048336391 |
| 0.145231137 | 0.19438309  | 0.116901924 | 0.059409302 |
| 0.16947894  | 0.123653123 | 0.196102427 | 0.014105788 |
| 0.078630291 | 0.002596806 | 0.052689198 | 0.0103715   |
| 0.106635817 | 0.097133456 | 0.186928751 | 0.212667873 |
| 0.108074223 | 0.161113209 | 0.088929726 | 0.13270557  |
| 0.028468979 | 0.275232364 | 0.161702152 | 0.184758424 |
| 0.152380345 | 0.011173711 | 0.18689543  | 0.180371621 |

|             |             |             |             |
|-------------|-------------|-------------|-------------|
| 0.004910156 | 0.077821863 | 0.142039193 | 0.018311071 |
| 0.133537952 | 0.101833105 | 0.07352623  | 0.17374796  |
| 0.294279936 | 0.236611543 | 0.13524258  | 0.109851906 |
| 0.180268892 | 0.008712215 | 0.114758479 | 0.31055836  |
| 0.13223512  | 0.012575592 | 0.109687747 | 0.22190601  |
| 0.160838131 | 0.17571566  | 0.135009503 | 0.154079237 |
| 0.213033248 | 0.178603712 | 0.161274946 | 0.139221671 |
| 0.004654317 | 0.16771262  | 0.049504007 | 0.007553982 |
| 0.005281442 | 0.024007352 | 0.077884838 | 0.132078288 |
| 0.203061681 | 0.109323381 | 0.036510225 | 0.145145687 |
| 0.255030801 | 0.113655231 | 0.163199041 | 0.162223772 |
| 0.005076118 | 0.130580403 | 0.220322693 | 0.039629613 |
| 0.155036531 | 0.027853496 | 0.273828118 | 0.137425096 |
| 0.136432186 | 0.23333507  | 0.018740214 | 0.137183796 |
| 0.040241809 | 0.195440684 | 0.135010929 | 0.05863438  |
| 0.160394356 | 0.131039686 | 0.218684975 | 0.293490577 |
| 0.140417927 | 0.079755522 | 0.002233995 | 0.145124832 |
| 0.203242061 | 0.005640624 | 0.197802626 | 0.214072188 |
| 0.149251484 | 0.226368618 | 0.226113121 | 0.204995305 |
| 0.145509351 | 0.013451853 | 0.002956135 | 0.208179909 |
| 0.148486247 | 0.157192085 | 0.04108936  | 0.156467924 |
| 0.230850031 | 0.072872781 | 0.192680453 | 0.014856804 |
| 0.19241519  | 0.19069794  | 0.184586869 | 0.131786099 |
| 0.064244871 | 0.090645796 | 0.222078775 | 0.110026787 |
| 0.005271741 | 0.013114625 | 0.00570362  | 0.129528924 |
| 0.030965596 | 0.087502203 | 0.053864002 | 0.175262353 |
| 0.087349914 | 0.051777936 | 0.157902651 | 0.290665971 |
| 0.006075573 | 0.125045434 | 0.041358139 | 0.030836772 |
| 0.009067965 | 0.030920139 | 0.017996659 | 0.029107029 |
| 0.147506222 | 0.040426143 | 0.1737475   | 0.204234298 |
| 0.125490764 | 0.039887005 | 0.139255144 | 0.197923048 |
| 0.19825665  | 0.236258292 | 0.074704475 | 0.001189181 |
| 0.046512171 | 0.0727346   | 0.159246125 | 0.183154403 |
| 0.033948205 | 0.040841329 | 0.172800788 | 0.286574464 |
| 0.044617148 | 0.01780974  | 0.118241882 | 0.124155533 |
| 0.025034296 | 0.130000439 | 0.214895599 | 0.104596568 |
| 8.39E-06    | 0.098248576 | 0.197848828 | 0.044256108 |
| 0.093885897 | 0.025186605 | 0.097846074 | 0.206842694 |
| 0.070254471 | 0.160206671 | 0.20494198  | 0.278902255 |
| 0.012481411 | 0.036177584 | 0.209529024 | 0.008362801 |
| 0.188708684 | 0.010698421 | 0.179730822 | 0.051919405 |
| 0.088115199 | 0.153548546 | 0.27043359  | 0.175344749 |
| 0.018194989 | 0.163545992 | 0.146365807 | 0.19113908  |
| 0.103708246 | 0.20474627  | 0.217233653 | 0.18413449  |
| 0.134247397 | 0.134525145 | 0.111926883 | 0.18890104  |
| 0.210413448 | 0.010972405 | 0.009346342 | 0.18845357  |
| 0.092716275 | 0.24241951  | 0.019642217 | 0.206507553 |
| 0.161919912 | 0.111996255 | 0.046077718 | 0.259999404 |
| 0.164070345 | 0.060441248 | 0.195058101 | 0.205704226 |
| 0.035147632 | 0.185159415 | 0.150280307 | 0.272270458 |
| 0.052132192 | 0.129769143 | 0.104169709 | 0.138609495 |
| 0.003240081 | 0.00952587  | 0.009646815 | 0.093897642 |
| 0.211806189 | 0.137554567 | 0.21117929  | 0.183166184 |
| 0.033219314 | 0.146983937 | 0.075639078 | 0.103371427 |

|             |             |             |             |
|-------------|-------------|-------------|-------------|
| 0.127925503 | 0.147677473 | 0.237903833 | 0.222912387 |
| 0.087814688 | 0.001559914 | 0.010536868 | 0.158001602 |
| 0.003104739 | 0.16095011  | 0.062955629 | 0.000368364 |
| 0.004365767 | 0.109987636 | 0.015681428 | 0.045616061 |
| 0.245307015 | 0.043140981 | 0.050275327 | 0.041446822 |
| 0.188849284 | 0.021486795 | 0.001222825 | 0.187325752 |
| 0.161731728 | 0.155363402 | 0.153677777 | 0.124483851 |
| 0.178104308 | 0.162072414 | 0.232364502 | 0.062067549 |
| 0.014170172 | 0.008272219 | 0.138320878 | 0.140607622 |
| 3.82E-05    | 0.212522191 | 0.171207037 | 0.042385852 |
| 0.219080286 | 0.116340719 | 0.004041892 | 0.2258823   |
| 0.000837939 | 0.15059238  | 0.031720577 | 0.077757439 |
| 0.251740546 | 0.001106958 | 0.007670964 | 0.070444835 |
| 0.107104885 | 0.097162138 | 0.14818255  | 0.175897572 |
| 0.144465014 | 0.016373135 | 0.176621628 | 0.225379872 |
| 0.012081734 | 0.004910784 | 0.056214606 | 0.001495622 |
| 0.006161707 | 0.136308457 | 0.103643341 | 0.00384966  |
| 0.107838428 | 5.64E-05    | 0.106084609 | 0.179155726 |
| 0.117667819 | 0.216672817 | 0.177835687 | 0.239126152 |
| 0.167817812 | 0.059564398 | 0.187979413 | 0.11707157  |
| 0.065410398 | 1.29E-05    | 0.000387989 | 0.220622883 |
| 0.198364733 | 0.00550519  | 0.051571915 | 0.026284994 |
| 0.021449221 | 0.014844809 | 0.010700983 | 0.189811868 |
| 0.146755612 | 0.203550325 | 0.126856573 | 0.120664791 |
| 0.096952087 | 0.111651083 | 0.054484254 | 0.013556201 |
| 0.197515665 | 0.00773961  | 0.014957611 | 0.000945663 |
| 0.233171617 | 0.016816174 | 0.107106524 | 0.164545336 |
| 0.183285844 | 0.265784079 | 0.049373078 | 0.017393632 |
| 0.19512553  | 0.010127659 | 0.047207724 | 0.012712389 |
| 0.137288356 | 0.217704644 | 0.145752498 | 0.09806219  |
| 0.203998622 | 0.157193562 | 0.005104201 | 0.211844084 |
| 0.0005157   | 0.001022841 | 0.061887664 | 0.091760906 |
| 0.006897096 | 0.172853659 | 0.099772512 | 0.046424256 |
| 0.06413954  | 0.000885652 | 0.216550241 | 0.227734577 |
| 0.164532736 | 0.158556781 | 0.278211231 | 0.075599009 |
| 0.164732522 | 0.036599671 | 0.078784269 | 0.034944729 |
| 0.010066419 | 0.084380849 | 0.040575841 | 0.002367742 |
| 0.123267866 | 0.178777364 | 0.01037197  | 0.04015825  |
| 0.199131441 | 0.204597444 | 0.004001093 | 0.001429635 |
| 0.079355285 | 0.116383568 | 0.222269826 | 0.151172858 |
| 0.15135576  | 0.201833281 | 0.118029513 | 0.04847016  |
| 0.009677548 | 0.186411868 | 0.289986006 | 0.055124    |
| 0.176076323 | 0.006834208 | 0.142186681 | 0.293392129 |
| 0.03020851  | 0.059154228 | 0.004373221 | 0.021754196 |
| 0.243141833 | 0.058999938 | 0.120012025 | 0.023551055 |
| 0.13623092  | 0.119749457 | 0.007727156 | 0.072699342 |
| 0.125167862 | 0.106184623 | 0.049655546 | 0.050993615 |
| 0.116947871 | 0.01097498  | 0.225922361 | 0.171226609 |
| 0.027089686 | 0.021317605 | 0.021983341 | 0.172951394 |
| 0.176252346 | 0.109065919 | 0.000807277 | 0.120701646 |
| 0.20371495  | 0.184443952 | 0.143626433 | 0.202187138 |
| 0.016578844 | 0.199446093 | 0.162130058 | 0.19465185  |
| 0.061005866 | 0.073732304 | 0.094784144 | 0.012050146 |
| 0.108492293 | 0.139722033 | 0.135810982 | 0.067928984 |

|             |             |             |             |
|-------------|-------------|-------------|-------------|
| 0.130190642 | 0.014396515 | 0.005353793 | 0.167370878 |
| 0.162276221 | 0.005679676 | 0.05011875  | 0.202817447 |
| 0.001321343 | 0.188053264 | 0.221340694 | 0.054700492 |
| 0.180445893 | 0.217817294 | 0.158299655 | 0.037653562 |
| 0.004123008 | 0.251410149 | 0.18213553  | 0.124500274 |
| 0.126923976 | 0.106268035 | 0.00735892  | 0.018810818 |
| 0.134697012 | 0.009220637 | 0.031953923 | 0.0097515   |
| 0.031113772 | 0.105332517 | 0.082027428 | 0.059709153 |
| 0.121068021 | 0.010977793 | 0.102618588 | 0.06800917  |
| 0.04310459  | 0.099801595 | 0.16298221  | 0.025191002 |
| 0.050123298 | 0.187704678 | 0.143493158 | 0.002542401 |
| 0.223374039 | 0.183073175 | 0.183922317 | 0.000262293 |
| 0.223641178 | 0.000649927 | 0.120398004 | 0.127971813 |
| 0.107230047 | 0.091865462 | 0.193574987 | 0.145457765 |
| 0.113037971 | 0.077469216 | 0.095935405 | 0.113739714 |
| 0.071409613 | 0.062262584 | 0.204003017 | 0.085686938 |
| 0.142862953 | 0.024927882 | 0.015364838 | 0.013741585 |
| 0.004466862 | 0.16162315  | 0.072428007 | 0.009466188 |
| 0.107029735 | 0.080851555 | 0.158726609 | 0.137426237 |
| 0.191794904 | 0.014305309 | 0.103401813 | 0.139101606 |
| 0.00855042  | 0.006399082 | 0.003708016 | 0.111729508 |
| 0.07231943  | 0.094458585 | 0.090927505 | 0.058422732 |
| 0.123821102 | 0.128290645 | 0.06702417  | 0.169103967 |
| 0.139710059 | 0.108923    | 0.03442256  | 0.021875068 |
| 0.042167802 | 0.029014922 | 0.274716897 | 1.47E-05    |
| 0.139148878 | 0.015121006 | 0.200451826 | 0.136020243 |
| 0.167447615 | 0.156497963 | 0.010203084 | 0.010786247 |
| 0.016418785 | 0.028346118 | 0.036397918 | 0.171773289 |
| 0.16842178  | 0.043168709 | 0.238624571 | 0.026121879 |
| 0.22114818  | 0.181369618 | 0.123969424 | 0.047834638 |
| 0.098447345 | 0.043161724 | 0.135903985 | 0.013608956 |
| 0.146261957 | 0.17308467  | 0.068787596 | 0.157604672 |
| 0.124554759 | 0.197071733 | 0.009636621 | 0.198066772 |
| 0.159988533 | 0.025163946 | 0.168166729 | 0.069649354 |
| 0.035591106 | 0.031252091 | 0.214834771 | 0.05586939  |
| 0.046328728 | 0.16413491  | 0.000444901 | 0.007419733 |
| 0.185699493 | 0.067105077 | 0.120627725 | 0.164630208 |
| 0.202944045 | 0.201846327 | 0.059467936 | 0.055115974 |
| 0.117321418 | 0.125937556 | 0.035229722 | 0.106581502 |
| 0.123370513 | 0.023814602 | 0.083471384 | 0.001343079 |
| 0.177542431 | 0.179407993 | 0.046180492 | 0.008763088 |
| 0.001245195 | 0.205942914 | 0.150325029 | 0.008096612 |
| 0.239479787 | 0.052874338 | 0.091463    | 0.188675531 |
| 0.042644047 | 0.125571744 | 0.053149335 | 0.219995391 |
| 0.001290458 | 0.098554907 | 0.192182002 | 0.114619682 |
| 0.099000681 | 0.236387081 | 0.220123769 | 0.240068967 |
| 0.006054075 | 0.064297093 | 0.000375564 | 0.113586794 |
| 0.111477478 | 0.22720235  | 0.055971489 | 0.032182773 |
| 0.164100398 | 0.150375023 | 0.035053752 | 0.136621024 |
| 0.000771962 | 0.264337374 | 0.075455964 | 0.130117493 |
| 0.046599686 | 0.116406318 | 0.008682834 | 0.212150405 |
| 0.100039492 | 0.040746633 | 0.084508225 | 0.056502937 |
| 0.141964358 | 0.124390179 | 0.026340944 | 0.06351822  |
| 0.114723146 | 0.009572932 | 0.0555849   | 0.184992351 |

|             |             |             |             |
|-------------|-------------|-------------|-------------|
| 0.087160632 | 0.265669164 | 0.260815095 | 0.075087084 |
| 0.21366549  | 0.114783505 | 0.138007819 | 0.173029278 |
| 0.035709914 | 0.104995312 | 0.22453511  | 0.153984827 |
| 0.165438589 | 0.192070229 | 0.181710887 | 0.146903457 |
| 0.116003348 | 0.007271843 | 0.108184126 | 0.123103839 |
| 0.223256326 | 0.145602007 | 0.066151178 | 0.161871693 |
| 0.001694706 | 0.031168384 | 0.064568452 | 0.038557768 |
| 0.136414694 | 0.192447663 | 0.144118424 | 0.152994603 |
| 0.027980274 | 0.002110425 | 0.173210137 | 0.010294407 |
| 0.062872234 | 0.224822728 | 0.08660905  | 0.191370933 |
| 0.043804097 | 0.10220548  | 0.058532952 | 0.000191442 |
| 0.211914686 | 0.013254829 | 0.107681625 | 0.116123872 |
| 0.022261449 | 0.00508321  | 0.142686477 | 0.225642059 |
| 0.092647648 | 0.022324081 | 0.055169601 | 0.1437645   |
| 1           | 0.113870647 | 0.107131467 | 0.11141488  |
| 0.238707828 | 0.073666078 | 0.104784999 | 0.163424042 |
| 0.131320549 | 0.052730169 |             |             |
| ZFP85-RS1   | 0.010074277 | 0.329812276 | 0.008591496 |
| 0.023889537 | 0.208323328 | 0.139678031 | 0.006887789 |
| 0.02040534  | 0.250528629 | 0.161437529 | 0.170879321 |
| 0.000854262 | 0.131893967 | 0.33205307  | 0.006678667 |
| 0.281853145 | 0.003003582 | 0.020461052 | 0.035437745 |
| 0.066670141 | 0.170108525 | 0.162823762 | 0.160141198 |
| 0.176213441 | 0.076953483 | 0.169230591 | 0.327084284 |
| 0.401104369 | 0.207013811 | 0.323999646 | 0.106948948 |
| 0.253938544 | 0.241305304 | 0.283758737 | 0.000860243 |
| 0.224941207 | 0.020663236 | 0.266851606 | 0.079339163 |
| 0.100483848 | 0.191171346 | 0.177341615 | 0.066137889 |
| 0.193368086 | 0.003156171 | 0.159771795 | 0.349295178 |
| 0.184091061 | 0.090267354 | 0.01262496  | 0.307713801 |
| 0.145188618 | 0.171962042 | 0.306309751 | 0.00027715  |
| 0.234472495 | 0.191996688 | 0.219886462 | 0.365896309 |
| 0.073091695 | 0.026994647 | 0.20864654  | 0.099429094 |
| 0.303278699 | 0.297707665 | 0.131105767 | 0.155238468 |
| 0.361417637 | 0.153162239 | 0.391283245 | 0.040093608 |
| 0.147858621 | 0.003526703 | 0.054676015 | 0.024759577 |
| 0.166229301 | 0.067701274 | 0.196996266 | 0.196827681 |
| 0.321318086 | 0.349814882 | 0.103257988 | 0.349489458 |
| 0.095328368 | 0.287422153 | 0.123919346 | 0.179017686 |
| 0.266239134 | 0.015454922 | 0.267241884 | 0.366172874 |
| 0.007395742 | 0.267364809 | 0.279860845 | 0.039170456 |
| 0.321925186 | 0.206592891 | 0.239379787 | 0.130387181 |
| 0.313840448 | 0.226950019 | 0.33728119  | 0.131821051 |
| 0.198370248 | 0.016099432 | 0.318879759 | 0.284423671 |
| 0.102093179 | 0.016611325 | 0.087317983 | 0.43308835  |
| 0.257860649 | 0.381349472 | 0.349192431 | 0.245532843 |
| 0.258170571 | 0.372958374 | 0.243221725 | 0.313699304 |
| 0.163999044 | 0.396161318 | 0.052157635 | 0.004227256 |
| 0.010489895 | 0.014244227 | 0.125752164 | 0.1718022   |
| 0.393584817 | 0.177510415 | 0.042423999 | 0.088059974 |
| 0.399996438 | 0.327017719 | 0.400984464 | 0.296587252 |
| 0.00333534  | 0.198576291 | 0.24523507  | 0.07451507  |
| 0.242521121 | 0.031657582 | 0.187619328 | 0.334551263 |
| 0.223940809 | 0.367186693 | 0.032495314 | 0.318895799 |

|             |             |             |             |
|-------------|-------------|-------------|-------------|
| 0.062281431 | 0.360254363 | 0.35694613  | 0.042112371 |
| 0.352700406 | 0.324605036 | 0.383522    | 0.357452704 |
| 0.31444051  | 0.120971955 | 0.039733492 | 0.268822388 |
| 0.346689966 | 0.009930692 | 0.426318971 | 0.435867317 |
| 0.365040601 | 0.411094165 | 0.412867671 | 0.418376876 |
| 0.37310566  | 0.015159228 | 0.042819053 | 0.166934276 |
| 0.351341964 | 0.248671594 | 0.036745889 | 0.281291692 |
| 0.271201952 | 0.15447416  | 0.380565314 | 0.121772469 |
| 0.353137428 | 0.361600209 | 0.420788093 | 0.269124909 |
| 0.164385271 | 0.167281035 | 0.340339538 | 0.298994979 |
| 0.004346577 | 0.01898026  | 0.010546094 | 0.188142059 |
| 0.129176499 | 0.056428913 | 0.121917796 | 0.255575887 |
| 0.06920625  | 0.13432741  | 0.243923225 | 0.321430599 |
| 0.014434176 | 0.276201007 | 0.043820423 | 0.045815769 |
| 0.003646758 | 0.052442041 | 0.034917931 | 0.030650102 |
| 0.106864976 | 0.105019366 | 0.366032975 | 0.399626546 |
| 0.18279422  | 0.066601818 | 0.290102058 | 0.339154834 |
| 0.277836238 | 0.265582934 | 0.105767553 | 0.000489867 |
| 0.087674923 | 0.21429782  | 0.188768661 | 0.3284006   |
| 0.074015994 | 0.06102885  | 0.24384776  | 0.322312659 |
| 0.089807914 | 0.03859003  | 0.155854407 | 0.254494201 |
| 0.055311987 | 0.105883419 | 0.33751371  | 0.254785792 |
| 0.000892518 | 0.119942547 | 0.348899285 | 0.064111056 |
| 0.173010667 | 0.096893719 | 0.167326106 | 0.366742564 |
| 0.178921417 | 0.125822259 | 0.425978254 | 0.337905265 |
| 0.124556925 | 0.106108305 | 0.412325703 | 0.065063602 |
| 0.26507965  | 0.012117206 | 0.148687507 | 0.207180566 |
| 0.09402189  | 0.163240172 | 0.249002237 | 0.109317962 |
| 0.03851034  | 0.378332761 | 0.269344226 | 0.398769372 |
| 0.153928895 | 0.404935239 | 0.383095881 | 0.315180205 |
| 0.203973448 | 0.264444692 | 0.167483495 | 0.323474363 |
| 0.370370883 | 0.120575096 | 0.019905336 | 0.418068539 |
| 0.203139261 | 0.330577327 | 0.046218975 | 0.364408141 |
| 0.322467684 | 0.330557083 | 0.029372548 | 0.289389624 |
| 0.230736086 | 0.071349202 | 0.32604486  | 0.403660104 |
| 0.154626533 | 0.213871731 | 0.135457051 | 0.313866195 |
| 0.055274217 | 0.099989978 | 0.189909047 | 0.20693578  |
| 0.025187561 | 0.015778271 | 0.011477238 | 0.045496828 |
| 0.107028901 | 0.356995857 | 0.282903961 | 0.389541712 |
| 0.02352762  | 0.283992089 | 0.121692322 | 0.08147657  |
| 0.275865934 | 0.212333916 | 0.310278462 | 0.293025968 |
| 0.11646593  | 0.001674708 | 0.020122348 | 0.342108115 |
| 0.007737998 | 0.138903558 | 0.133159927 | 0.000352442 |
| 0.004352152 | 0.348677337 | 0.030673545 | 0.078847577 |
| 0.407082128 | 0.082073906 | 0.072891719 | 0.132627036 |
| 0.211703356 | 0.019180044 | 0.000275811 | 0.396766165 |
| 0.386066576 | 0.362230509 | 0.382245104 | 0.331615696 |
| 0.371027722 | 0.338986279 | 0.330908991 | 0.149554599 |
| 0.014791419 | 0.01450757  | 0.109741355 | 0.106608586 |
| 0.001246933 | 0.263741043 | 0.186557816 | 0.043496165 |
| 0.368231179 | 0.165011523 | 0.003243495 | 0.291905574 |
| 0.001295634 | 0.171428487 | 0.087236813 | 0.072879073 |
| 0.277694511 | 0.000562096 | 0.078238344 | 0.137751525 |
| 0.271508732 | 0.194128548 | 0.20661845  | 0.390446619 |

|             |             |             |             |
|-------------|-------------|-------------|-------------|
| 0.143752989 | 0.046060664 | 0.128971397 | 0.304774301 |
| 0.00847173  | 0.058136005 | 0.134567074 | 0.022784061 |
| 0.095014792 | 0.328884349 | 0.173155873 | 0.008251279 |
| 0.104506882 | 0.000788401 | 0.209788759 | 0.386056248 |
| 0.331428577 | 0.417020095 | 0.366947161 | 0.175112777 |
| 0.362574269 | 0.223217242 | 0.415177494 | 0.277977924 |
| 0.187171501 | 0.000354392 | 0.000733326 | 0.410615916 |
| 0.241089024 | 0.015866703 | 0.04640877  | 0.108418148 |
| 0.017142683 | 0.031683764 | 0.008834396 | 0.08837808  |
| 0.27685176  | 0.123105635 | 0.105220369 | 0.324293647 |
| 0.075208353 | 0.096883003 | 0.168766519 | 0.024097791 |
| 0.291444035 | 0.005342079 | 0.024833777 | 0.001902771 |
| 0.282748875 | 0.039027812 | 0.293973173 | 0.384134806 |
| 0.339103773 | 0.298961694 | 0.180049243 | 0.131958683 |
| 0.381340744 | 0.031355817 | 0.193450778 | 0.032554503 |
| 0.352095145 | 0.254337735 | 0.168151019 | 0.152309565 |
| 0.363974717 | 0.31370428  | 0.002670125 | 0.294701132 |
| 0.00099758  | 0.001042673 | 0.147807672 | 0.131328647 |
| 0.077858572 | 0.208688759 | 0.11454558  | 0.084657125 |
| 0.08149837  | 0.002579047 | 0.18500937  | 0.152319783 |
| 0.142522825 | 0.17533856  | 0.185152007 | 0.132812584 |
| 0.112427933 | 0.057833655 | 0.052035567 | 0.031798231 |
| 0.120562847 | 0.169628547 | 0.077918189 | 0.001328829 |
| 0.256305353 | 0.26247959  | 0.007513855 | 0.051702086 |
| 0.323570364 | 0.394293113 | 0.004479951 | 0.000186512 |
| 0.121187578 | 0.138362431 | 0.407337562 | 0.38095006  |
| 0.360013075 | 0.372361325 | 0.226458596 | 0.03033977  |
| 0.008080981 | 0.176735947 | 0.215844662 | 0.028723512 |
| 0.388908131 | 0.01518985  | 0.351839456 | 0.27211777  |
| 0.032037715 | 0.043899639 | 0.002933315 | 0.016515029 |
| 0.332602354 | 0.059044131 | 0.058697074 | 0.045286976 |
| 0.113033233 | 0.151038816 | 0.004992076 | 0.062227785 |
| 0.194265329 | 0.126254833 | 0.047049282 | 0.105153095 |
| 0.228940455 | 0.148732158 | 0.351476824 | 0.286950119 |
| 0.03770694  | 0.027286934 | 0.058730561 | 0.306990287 |
| 0.375504212 | 0.31625827  | 0.003396304 | 0.352123443 |
| 0.389369259 | 0.332015848 | 0.352189139 | 0.278490868 |
| 0.020916038 | 0.218363732 | 0.226141154 | 0.196400739 |
| 0.064201702 | 0.148036971 | 0.097047604 | 0.011229302 |
| 0.17448189  | 0.318815357 | 0.292693915 | 0.040193649 |
| 0.298332868 | 0.039797079 | 0.012460208 | 0.381134182 |
| 0.100898446 | 0.011669785 | 0.195339643 | 0.402510575 |
| 0.000108818 | 0.149984305 | 0.411601629 | 0.058047509 |
| 0.376688    | 0.377648432 | 0.277640362 | 0.07472898  |
| 0.002777091 | 0.358295437 | 0.207648281 | 0.151249934 |
| 0.30925357  | 0.201039299 | 0.055298523 | 0.009973548 |
| 0.151258996 | 0.022084078 | 0.025733357 | 0.113788458 |
| 0.126801907 | 0.241521823 | 0.079400272 | 0.083233974 |
| 0.065538463 | 0.031148581 | 0.164858773 | 0.066188118 |
| 0.133922862 | 0.104157873 | 0.206357058 | 0.147386791 |
| 0.107587561 | 0.345929867 | 0.277572007 | 0.001896306 |
| 0.289328893 | 0.321341628 | 0.334525724 | 0.000517382 |
| 0.328111164 | 0.000309789 | 0.068134078 | 0.068345368 |
| 0.059346841 | 0.068601866 | 0.141411255 | 0.099774875 |



|             |             |             |             |
|-------------|-------------|-------------|-------------|
| 0.194883133 | 0.062730158 | 0.076129806 | 0.093891418 |
| 0.036949669 | 0.069330137 | 0.257817351 | 0.144897654 |
| 0.08844527  | 0.020686765 | 0.033202139 | 0.035249231 |
| 0.005970678 | 0.382525645 | 0.10970384  | 0.019784236 |
| 0.096167503 | 0.140315853 | 0.204615377 | 0.368308622 |
| 0.297644431 | 0.041716651 | 0.14480453  | 0.328108145 |
| 0.172483875 | 0.091513259 | 0.007446128 | 0.193339557 |
| 0.076103172 | 0.086013664 | 0.229710049 | 0.131697191 |
| 0.314619292 | 0.232198651 | 0.105392741 | 0.311938676 |
| 0.144121243 | 0.208810131 | 0.141312749 | 0.013153532 |
| 0.037758283 | 0.043225325 | 0.169394368 | 0.002122024 |
| 0.18779713  | 0.055094789 | 0.384849006 | 0.333469613 |
| 0.216170811 | 0.245606934 | 0.114659283 | 0.011078223 |
| 0.125587327 | 0.075795704 | 0.042586731 | 0.364372271 |
| 0.198170098 | 0.03781687  | 0.164808725 | 0.087198481 |
| 0.35615619  | 0.367953748 | 0.120181502 | 0.074996017 |
| 0.103777483 | 0.071796973 | 0.329849697 | 0.024260719 |
| 0.315626924 | 0.076467489 | 0.241302947 | 0.11629523  |
| 0.076778787 | 0.421304329 | 0.010324752 | 0.427275958 |
| 0.15337215  | 0.046496566 | 0.322324208 | 0.132153252 |
| 0.080166384 | 0.03212953  | 0.177621688 | 0.157164178 |
| 0.060373561 | 0.212612561 | 0.016004033 | 0.031425726 |
| 0.186693771 | 0.15048428  | 0.324029891 | 0.265884236 |
| 0.12395193  | 0.226575776 | 0.208135663 | 0.096820214 |
| 0.340010725 | 0.331043059 | 0.057718174 | 0.118488419 |
| 0.198090292 | 0.014868804 | 0.22491249  | 0.014454282 |
| 0.30272914  | 0.361556533 | 0.169139935 | 0.005970747 |
| 0.000985218 | 0.16317287  | 0.265428111 | 0.017485718 |
| 0.405216763 | 0.190857111 | 0.257827563 | 0.334635558 |
| 0.071813722 | 0.322336271 | 0.027956211 | 0.27757676  |
| 0.007648477 | 0.119923254 | 0.28872877  | 0.251274744 |
| 0.065646527 | 0.177230755 | 0.239148437 | 0.144749635 |
| 0.002329895 | 0.085118744 | 0.000738702 | 0.227031115 |
| 0.309543613 | 0.237173539 | 0.088705447 | 0.184735729 |
| 0.143544011 | 0.277969168 | 0.093208904 | 0.294640515 |
| 0.000369751 | 0.262794793 | 0.070680372 | 0.273876021 |
| 0.131722312 | 0.224913213 | 0.00699776  | 0.229879839 |
| 0.276273518 | 0.093785479 | 0.132185031 | 0.137513485 |
| 0.363968514 | 0.295275129 | 0.065339249 | 0.09662261  |
| 0.311154174 | 0.013844129 | 0.175848356 | 0.397255105 |
| 0.048670679 | 0.127051093 | 0.37304016  | 0.043117745 |
| 0.226825141 | 0.259279315 | 0.333145424 | 0.397123152 |
| 0.014127637 | 0.100480139 | 0.3545988   | 0.341316166 |
| 0.169263299 | 0.10014204  | 0.134327079 | 0.084163459 |
| 0.310830163 | 0.014703182 | 0.136198005 | 0.193076691 |
| 0.128553223 | 0.170838477 | 0.234352181 | 0.07812299  |
| 0.004380603 | 0.039344431 | 0.120789333 | 0.041706969 |
| 0.132147035 | 0.194519244 | 0.097584725 | 0.231573907 |
| 0.028445085 | 0.001813724 | 0.293979341 | 0.018563062 |
| 0.141362688 | 0.257599465 | 0.095804634 | 0.196039737 |
| 0.070621239 | 0.187245506 | 0.137749191 | 0.001329821 |
| 0.319005056 | 0.025155632 | 0.144045527 | 0.073662192 |
| 0.159121469 | 0.005094697 | 0.309915657 | 0.411436491 |
| 0.162577995 | 0.172124482 | 0.187517289 | 0.334916948 |

|             |             |             |             |
|-------------|-------------|-------------|-------------|
| 0.113870647 | 1           | 0.190541369 | 0.270501523 |
| 0.160458241 | 0.221043106 | 0.245643723 | 0.214379795 |
| 0.239591796 | 0.084086252 |             |             |
| ZFYVE16     | 0.014598317 | 0.326792059 | 0.010275591 |
| 0.026188105 | 0.223215575 | 0.121947005 | 0.014920391 |
| 0.033063091 | 0.269212732 | 0.128019928 | 0.17701644  |
| 0.002809636 | 0.111744696 | 0.36163302  | 0.015862737 |
| 0.306240554 | 0.008029195 | 0.036802361 | 0.043151633 |
| 0.075003476 | 0.213789132 | 0.149098113 | 0.160956109 |
| 0.210885556 | 0.096103604 | 0.178428279 | 0.306115545 |
| 0.392345523 | 0.14388929  | 0.298869528 | 0.059473927 |
| 0.296120224 | 0.269883948 | 0.245260041 | 0.00165368  |
| 0.228590771 | 0.032731872 | 0.303158381 | 0.104346466 |
| 0.079986215 | 0.230634257 | 0.136268527 | 0.080511056 |
| 0.17732251  | 0.005237507 | 0.09598485  | 0.36784752  |
| 0.187908072 | 0.097939045 | 0.018722892 | 0.290588843 |
| 0.146807993 | 0.184338706 | 0.275765303 | 0.001439171 |
| 0.205464542 | 0.128852316 | 0.188951186 | 0.363181122 |
| 0.095878214 | 0.044194055 | 0.173842791 | 0.124507414 |
| 0.335130656 | 0.337944244 | 0.165324833 | 0.151656113 |
| 0.375786148 | 0.161773184 | 0.362112336 | 0.038913752 |
| 0.174868654 | 0.006949204 | 0.076747673 | 0.03534117  |
| 0.167979185 | 0.090496256 | 0.208645035 | 0.188759524 |
| 0.312285132 | 0.382705879 | 0.128761508 | 0.355508727 |
| 0.146910865 | 0.304036609 | 0.125651701 | 0.226969921 |
| 0.322790368 | 0.029668021 | 0.280906227 | 0.390019899 |
| 0.014630419 | 0.241495653 | 0.327583093 | 0.058343945 |
| 0.30866585  | 0.189625913 | 0.202843006 | 0.122142193 |
| 0.323250061 | 0.268540315 | 0.368330089 | 0.169663255 |
| 0.209346911 | 0.024332843 | 0.327757454 | 0.296384543 |
| 0.109065909 | 0.021452491 | 0.11539605  | 0.428204606 |
| 0.268241832 | 0.382086877 | 0.365286829 | 0.311608693 |
| 0.279073063 | 0.374660194 | 0.245905629 | 0.33667856  |
| 0.091431812 | 0.40097506  | 0.06082659  | 0.009864348 |
| 0.015023199 | 0.025115662 | 0.16067903  | 0.212300066 |
| 0.384369565 | 0.198980279 | 0.056957767 | 0.120555055 |
| 0.430795961 | 0.328254127 | 0.410006238 | 0.336825896 |
| 0.006807803 | 0.193131825 | 0.248022915 | 0.077171698 |
| 0.305494825 | 0.051161672 | 0.199552308 | 0.357293928 |
| 0.246813169 | 0.389525381 | 0.037968722 | 0.344495192 |
| 0.09894705  | 0.382552953 | 0.335584818 | 0.059280148 |
| 0.365739567 | 0.333007748 | 0.401680434 | 0.351537793 |
| 0.322747868 | 0.118207865 | 0.091852856 | 0.311781279 |
| 0.376711649 | 0.0116843   | 0.423662145 | 0.438013574 |
| 0.365359035 | 0.405782161 | 0.441570084 | 0.415309517 |
| 0.375002615 | 0.024516891 | 0.051406309 | 0.225645418 |
| 0.363282233 | 0.262628213 | 0.058744109 | 0.274829391 |
| 0.316959371 | 0.154455842 | 0.379446747 | 0.11887248  |
| 0.396053026 | 0.347821799 | 0.412200525 | 0.312167305 |
| 0.182313967 | 0.199132145 | 0.319233359 | 0.304214016 |
| 0.007550586 | 0.025095372 | 0.014960835 | 0.238562955 |
| 0.090762276 | 0.082577417 | 0.129019852 | 0.303700681 |
| 0.100564851 | 0.139027459 | 0.204907698 | 0.338449732 |
| 0.021688518 | 0.259440411 | 0.052297059 | 0.066442635 |

|             |             |             |             |
|-------------|-------------|-------------|-------------|
| 0.008156923 | 0.073219658 | 0.052708282 | 0.03780223  |
| 0.147483713 | 0.129873791 | 0.355068337 | 0.400489057 |
| 0.209423945 | 0.080721914 | 0.304206251 | 0.360230926 |
| 0.331717112 | 0.253532403 | 0.151324009 | 0.001292609 |
| 0.117238772 | 0.189862951 | 0.173634638 | 0.300496073 |
| 0.093494858 | 0.105635836 | 0.290270651 | 0.338306244 |
| 0.100217689 | 0.057425054 | 0.177854514 | 0.284453782 |
| 0.075064805 | 0.113879521 | 0.368685246 | 0.257645578 |
| 0.000177423 | 0.140735963 | 0.355393022 | 0.100275885 |
| 0.232409176 | 0.106717097 | 0.128300604 | 0.385444056 |
| 0.191268496 | 0.163746343 | 0.41895286  | 0.352531261 |
| 0.134045366 | 0.130321    | 0.437879717 | 0.09445893  |
| 0.281699507 | 0.013999344 | 0.193886555 | 0.16788217  |
| 0.121342984 | 0.221765497 | 0.272400392 | 0.113141302 |
| 0.044832959 | 0.401665818 | 0.275285876 | 0.410012459 |
| 0.158180218 | 0.42859381  | 0.395799332 | 0.338652769 |
| 0.224089857 | 0.267309565 | 0.155021739 | 0.330393761 |
| 0.375150237 | 0.129917543 | 0.027581851 | 0.419627934 |
| 0.206497978 | 0.356257445 | 0.053426094 | 0.391810596 |
| 0.344441751 | 0.327071007 | 0.049172313 | 0.334303861 |
| 0.254419939 | 0.084321067 | 0.328097032 | 0.438945598 |
| 0.142834689 | 0.263096776 | 0.151771721 | 0.344296272 |
| 0.071691295 | 0.142331621 | 0.222283549 | 0.180656756 |
| 0.009546662 | 0.026338408 | 0.017596985 | 0.068379504 |
| 0.112545273 | 0.321877347 | 0.304532033 | 0.406013232 |
| 0.040929722 | 0.296115453 | 0.166949177 | 0.104549169 |
| 0.302614193 | 0.250966781 | 0.284393248 | 0.302609062 |
| 0.146078051 | 0.002487853 | 0.029184986 | 0.372248288 |
| 0.012481145 | 0.137629432 | 0.167594547 | 0.000686879 |
| 0.009397112 | 0.325925061 | 0.043152575 | 0.101862088 |
| 0.430009128 | 0.09829322  | 0.095687171 | 0.124504293 |
| 0.237949137 | 0.029553109 | 0.000462216 | 0.407304615 |
| 0.401477681 | 0.385825672 | 0.397706211 | 0.346254079 |
| 0.399932982 | 0.347547866 | 0.358948544 | 0.137513502 |
| 0.023050439 | 0.019479734 | 0.134630405 | 0.143509857 |
| 0.00419956  | 0.275656141 | 0.213296126 | 0.0631364   |
| 0.385446921 | 0.222367004 | 0.006490455 | 0.317251493 |
| 0.002137619 | 0.136666719 | 0.123311786 | 0.104830145 |
| 0.327779945 | 0.001461118 | 0.064016985 | 0.151773845 |
| 0.274765389 | 0.225078386 | 0.174321458 | 0.394094452 |
| 0.165129976 | 0.059425506 | 0.143530595 | 0.320432764 |
| 0.015776383 | 0.058720176 | 0.158410506 | 0.011048235 |
| 0.073549185 | 0.35399865  | 0.169039721 | 0.010118564 |
| 0.133459544 | 1.30E-05    | 0.227382133 | 0.40602437  |
| 0.3202189   | 0.433812099 | 0.373511426 | 0.166135821 |
| 0.36955805  | 0.163054854 | 0.420322818 | 0.29434128  |
| 0.173409181 | 1.43E-05    | 0.002546951 | 0.404649917 |
| 0.249870916 | 0.020881442 | 0.066749921 | 0.086858829 |
| 0.027608944 | 0.043221387 | 0.015680271 | 0.097429907 |
| 0.249735646 | 0.15337555  | 0.125948677 | 0.340981806 |
| 0.102301124 | 0.133687069 | 0.173487711 | 0.037419326 |
| 0.273198529 | 0.009757501 | 0.038924904 | 0.002672014 |
| 0.321901654 | 0.04965399  | 0.30768571  | 0.390215229 |
| 0.364677081 | 0.302390148 | 0.142247019 | 0.137688957 |

|             |             |             |             |
|-------------|-------------|-------------|-------------|
| 0.403057707 | 0.039206368 | 0.144672923 | 0.041990848 |
| 0.348655569 | 0.286833741 | 0.202623614 | 0.176825944 |
| 0.402457422 | 0.331631361 | 0.006456872 | 0.327972172 |
| 0.001245351 | 0.002495722 | 0.136667843 | 0.179958952 |
| 0.094301689 | 0.244802641 | 0.14684805  | 0.108689934 |
| 0.106454198 | 0.004436937 | 0.193479682 | 0.169404483 |
| 0.176684874 | 0.210328548 | 0.211348808 | 0.173117048 |
| 0.132786267 | 0.081898562 | 0.064950344 | 0.053859407 |
| 0.14795392  | 0.195538533 | 0.098581094 | 0.003897901 |
| 0.227748958 | 0.25414642  | 0.013279624 | 0.068453296 |
| 0.333542104 | 0.402651039 | 0.012622198 | 0.001630559 |
| 0.1530855   | 0.181755829 | 0.428031862 | 0.374949462 |
| 0.376661605 | 0.409924004 | 0.257428259 | 0.059808388 |
| 0.013323408 | 0.2131768   | 0.236534728 | 0.041648532 |
| 0.40315553  | 0.024309774 | 0.349762959 | 0.262495716 |
| 0.049978108 | 0.052635409 | 0.006005264 | 0.029295614 |
| 0.315243307 | 0.087646457 | 0.084228266 | 0.05441848  |
| 0.150703915 | 0.131132862 | 0.010530249 | 0.090463278 |
| 0.239646016 | 0.119631238 | 0.07080752  | 0.108579793 |
| 0.23179201  | 0.118548939 | 0.364577096 | 0.334893829 |
| 0.053439697 | 0.044380176 | 0.057929644 | 0.333091229 |
| 0.369458598 | 0.284576673 | 0.00404342  | 0.338472042 |
| 0.406119998 | 0.319462301 | 0.352923636 | 0.341111303 |
| 0.033306372 | 0.225656424 | 0.244445333 | 0.246753158 |
| 0.101454279 | 0.131931013 | 0.136534231 | 0.020347754 |
| 0.216397403 | 0.357002361 | 0.303788078 | 0.057732659 |
| 0.27325633  | 0.053930638 | 0.019894654 | 0.381107158 |
| 0.11751063  | 0.019727579 | 0.166421598 | 0.419149389 |
| 0.000113718 | 0.134438894 | 0.43358146  | 0.069267793 |
| 0.401981677 | 0.392634832 | 0.30477602  | 0.080743907 |
| 0.003375335 | 0.358723275 | 0.229289362 | 0.148804919 |
| 0.322813879 | 0.219965552 | 0.066317381 | 0.018921791 |
| 0.187611347 | 0.028828496 | 0.050762909 | 0.095041308 |
| 0.138096642 | 0.265491073 | 0.116717488 | 0.121786704 |
| 0.089762277 | 0.046655307 | 0.139605437 | 0.072719445 |
| 0.152085041 | 0.14047771  | 0.257350314 | 0.111673698 |
| 0.121998499 | 0.399875477 | 0.306212349 | 0.00352921  |
| 0.281653641 | 0.364111326 | 0.346961174 | 0.000755593 |
| 0.338927773 | 0.000764763 | 0.103229295 | 0.086669529 |
| 0.078149423 | 0.114734861 | 0.18995772  | 0.103691489 |
| 0.232466277 | 0.08505101  | 0.083995328 | 0.12374213  |
| 0.04781329  | 0.083570986 | 0.261052685 | 0.147760745 |
| 0.096994273 | 0.028715996 | 0.043323258 | 0.045032918 |
| 0.010074633 | 0.372819111 | 0.138385105 | 0.024657838 |
| 0.136694015 | 0.152779544 | 0.241631919 | 0.361245197 |
| 0.323548591 | 0.049428301 | 0.184594626 | 0.319143794 |
| 0.150759151 | 0.091924348 | 0.013085684 | 0.178002192 |
| 0.101914778 | 0.111246525 | 0.201662064 | 0.1502497   |
| 0.335316848 | 0.267538804 | 0.132808819 | 0.327820401 |
| 0.141682752 | 0.244019869 | 0.10683726  | 0.023433742 |
| 0.051413393 | 0.063590791 | 0.198474182 | 0.000789976 |
| 0.231118408 | 0.049209082 | 0.387597084 | 0.335288452 |
| 0.200298116 | 0.271390143 | 0.094208964 | 0.019070978 |
| 0.080190392 | 0.08994607  | 0.064138575 | 0.343423913 |

|             |             |             |             |
|-------------|-------------|-------------|-------------|
| 0.165692946 | 0.045934561 | 0.189302354 | 0.07265112  |
| 0.352807458 | 0.362919713 | 0.143050517 | 0.112896921 |
| 0.136658601 | 0.082760448 | 0.352191296 | 0.029462934 |
| 0.289830853 | 0.083461757 | 0.225801691 | 0.153213123 |
| 0.109861116 | 0.417292833 | 0.016263148 | 0.432528448 |
| 0.200672798 | 0.062773563 | 0.358421788 | 0.144141082 |
| 0.072643228 | 0.039353477 | 0.156514343 | 0.146748359 |
| 0.089608776 | 0.187827285 | 0.017810803 | 0.059144475 |
| 0.234131758 | 0.169208173 | 0.332119154 | 0.311426875 |
| 0.141328951 | 0.286921156 | 0.162161596 | 0.12919631  |
| 0.335872376 | 0.341487296 | 0.078624452 | 0.158597459 |
| 0.256810302 | 0.024129201 | 0.207601255 | 0.019324125 |
| 0.32132988  | 0.33537265  | 0.167921517 | 0.012783161 |
| 0.002730565 | 0.151568358 | 0.271392151 | 0.027616946 |
| 0.429170132 | 0.148470173 | 0.269535765 | 0.304472423 |
| 0.100741323 | 0.335056313 | 0.045845312 | 0.293475765 |
| 0.015546671 | 0.15145299  | 0.273142422 | 0.272628547 |
| 0.080124267 | 0.192436593 | 0.268586097 | 0.146653202 |
| 0.005482231 | 0.100282788 | 0.000340515 | 0.257926681 |
| 0.318071091 | 0.250163666 | 0.119642017 | 0.151761382 |
| 0.180438037 | 0.298965934 | 0.156538128 | 0.253027752 |
| 0.001307158 | 0.278399264 | 0.096016365 | 0.276263924 |
| 0.106443057 | 0.266992288 | 0.009732029 | 0.271980231 |
| 0.290802028 | 0.142749355 | 0.180139777 | 0.123894969 |
| 0.352672036 | 0.292450808 | 0.070971868 | 0.098190527 |
| 0.316781698 | 0.022990471 | 0.141734503 | 0.423187794 |
| 0.072605069 | 0.134111469 | 0.392761098 | 0.06514376  |
| 0.245098432 | 0.268102399 | 0.30457778  | 0.421518108 |
| 0.031091688 | 0.133287462 | 0.363601575 | 0.364767081 |
| 0.213926462 | 0.124060304 | 0.148075822 | 0.126695959 |
| 0.304306824 | 0.018698398 | 0.151539533 | 0.215548443 |
| 0.138890404 | 0.212704182 | 0.214191425 | 0.109778245 |
| 0.010386557 | 0.06117855  | 0.109793029 | 0.060784493 |
| 0.180213231 | 0.211985463 | 0.115690861 | 0.262517426 |
| 0.035437118 | 0.003572347 | 0.322283398 | 0.023049502 |
| 0.131570949 | 0.257848963 | 0.124818554 | 0.205402586 |
| 0.085913388 | 0.22480645  | 0.152430747 | 3.36E-05    |
| 0.358949151 | 0.018261248 | 0.16649969  | 0.092503063 |
| 0.188541096 | 0.010975577 | 0.312661871 | 0.433916819 |
| 0.183074978 | 0.146638882 | 0.164875967 | 0.358089075 |
| 0.107131467 | 0.190541369 | 1           | 0.253925167 |
| 0.153431604 | 0.188376482 | 0.220808833 | 0.177049519 |
| 0.256249877 | 0.09843007  |             |             |
| ZKSCAN3     | 0.074680774 | 0.448254239 | 0.068165987 |
| 0.129447551 | 0.219937019 | 0.324384413 | 0.053944845 |
| 0.107139295 | 0.336477237 | 0.297816197 | 0.272618644 |
| 0.016869222 | 0.060365281 | 0.448258132 | 0.045275136 |
| 0.286297884 | 0.026415298 | 0.090545277 | 0.066550506 |
| 0.192620638 | 0.193507258 | 0.252843997 | 0.317929097 |
| 0.198732042 | 0.195951913 | 0.295153979 | 0.300805748 |
| 0.516048982 | 0.239873957 | 0.332821727 | 0.23958057  |
| 0.406157646 | 0.228033424 | 0.304897333 | 0.020152967 |
| 0.313930693 | 0.008256606 | 0.447223316 | 0.195157577 |
| 0.125975314 | 0.332258642 | 0.332641234 | 0.18462874  |

|             |             |             |             |
|-------------|-------------|-------------|-------------|
| 0.339481754 | 0.04087535  | 0.235865826 | 0.311506202 |
| 0.287496684 | 0.224309425 | 0.0733793   | 0.354836544 |
| 0.300799471 | 0.276530042 | 0.381180181 | 0.00250241  |
| 0.230339155 | 0.076706768 | 0.179734363 | 0.524137937 |
| 0.159271269 | 0.092211482 | 0.260507966 | 0.202259721 |
| 0.297192607 | 0.277685934 | 0.190223759 | 0.321003153 |
| 0.504602752 | 0.126865783 | 0.374360563 | 0.149577624 |
| 0.303031766 | 0.037866279 | 0.130689629 | 0.090324633 |
| 0.300129615 | 0.146839543 | 0.247106802 | 0.233858948 |
| 0.464409045 | 0.519410447 | 0.188701405 | 0.530177388 |
| 0.064809835 | 0.245518473 | 0.202619069 | 0.221796175 |
| 0.289725294 | 0.074140964 | 0.337048497 | 0.52350536  |
| 0.049953828 | 0.339805988 | 0.328113251 | 0.117074921 |
| 0.436695542 | 0.21659623  | 0.350806162 | 0.123855037 |
| 0.270132318 | 0.247917118 | 0.486698048 | 0.225723395 |
| 0.224028072 | 0.078698209 | 0.514766329 | 0.230134733 |
| 0.220560596 | 0.087378523 | 0.1627952   | 0.441814704 |
| 0.324719871 | 0.500848403 | 0.417506291 | 0.307658677 |
| 0.28432358  | 0.507042232 | 0.330658535 | 0.403500351 |
| 0.18938901  | 0.539305034 | 0.164536328 | 0.031781566 |
| 0.081363885 | 0.062142063 | 0.166038383 | 0.255131067 |
| 0.464295609 | 0.261750159 | 0.169063906 | 0.169647819 |
| 0.427815826 | 0.510748289 | 0.54207562  | 0.380056983 |
| 0.03782547  | 0.189228606 | 0.297746494 | 0.229348819 |
| 0.281505713 | 0.096657098 | 0.187056613 | 0.525315549 |
| 0.366279936 | 0.388681675 | 0.161074237 | 0.511850926 |
| 0.157960678 | 0.506072857 | 0.478339901 | 0.136804119 |
| 0.531481554 | 0.516833641 | 0.500057344 | 0.301343543 |
| 0.484133128 | 0.293765252 | 0.049131642 | 0.34974188  |
| 0.463541404 | 0.011963744 | 0.474668097 | 0.499019217 |
| 0.524107274 | 0.442353149 | 0.507302494 | 0.509084834 |
| 0.526952818 | 0.072062291 | 0.025699726 | 0.20117763  |
| 0.529667669 | 0.378369167 | 0.091366058 | 0.327984501 |
| 0.255668196 | 0.323343001 | 0.38031053  | 0.24554446  |
| 0.494299267 | 0.449433361 | 0.498862608 | 0.345991552 |
| 0.268175038 | 0.306163713 | 0.292857921 | 0.499084213 |
| 0.03927463  | 0.112216784 | 0.060618312 | 0.237904103 |
| 0.340371678 | 0.128636782 | 0.321072777 | 0.257705362 |
| 0.144449315 | 0.286960365 | 0.264280728 | 0.273289802 |
| 0.066356092 | 0.349323459 | 0.148886876 | 0.160262691 |
| 0.033866715 | 0.141746455 | 0.147419793 | 0.121537846 |
| 0.175956076 | 0.259556601 | 0.359806384 | 0.49054071  |
| 0.263846769 | 0.166146486 | 0.346963235 | 0.460431293 |
| 0.388025247 | 0.28940597  | 0.180145127 | 0.010293135 |
| 0.215585967 | 0.267786797 | 0.144810502 | 0.317516795 |
| 0.191454834 | 0.183037531 | 0.294104843 | 0.306632218 |
| 0.252617527 | 0.132683921 | 0.276635675 | 0.42319251  |
| 0.144837869 | 0.22371245  | 0.417434304 | 0.337478758 |
| 0.004235849 | 0.26855096  | 0.412655385 | 0.09891578  |
| 0.25122946  | 0.091498063 | 0.20045991  | 0.453267176 |
| 0.227026705 | 0.151548272 | 0.490602056 | 0.298760642 |
| 0.271741287 | 0.246957028 | 0.516089051 | 0.042260305 |
| 0.258207909 | 0.041090201 | 0.201824709 | 0.318762903 |
| 0.201288871 | 0.214094976 | 0.221149054 | 0.204741523 |

|             |             |             |             |
|-------------|-------------|-------------|-------------|
| 0.132338644 | 0.524275755 | 0.367278908 | 0.5099979   |
| 0.304373374 | 0.52113426  | 0.433506085 | 0.415732113 |
| 0.277291027 | 0.290992716 | 0.102581686 | 0.410178271 |
| 0.44449013  | 0.268041931 | 0.081731665 | 0.407420323 |
| 0.310279791 | 0.305765596 | 0.086721337 | 0.483449196 |
| 0.492223533 | 0.506985289 | 0.101421454 | 0.290093622 |
| 0.344755531 | 0.198040926 | 0.382306045 | 0.513594374 |
| 0.296476981 | 0.261532316 | 0.25146914  | 0.343724332 |
| 0.152017868 | 0.141287427 | 0.296689764 | 0.134456308 |
| 0.011059279 | 0.081779503 | 0.068600164 | 0.110876554 |
| 0.114340258 | 0.340526695 | 0.298613021 | 0.522363866 |
| 0.092430215 | 0.406105441 | 0.186795774 | 0.221293732 |
| 0.431044822 | 0.255409217 | 0.282480463 | 0.285246927 |
| 0.1963899   | 0.017032811 | 0.090533741 | 0.525557656 |
| 0.049605219 | 0.174689791 | 0.25424325  | 0.002239482 |
| 0.04607384  | 0.424313899 | 0.10641782  | 0.198084119 |
| 0.446154179 | 0.210172778 | 0.184816816 | 0.306536584 |
| 0.252331873 | 0.081943572 | 0.002132329 | 0.490760081 |
| 0.491804762 | 0.45825705  | 0.494209313 | 0.472986527 |
| 0.430532275 | 0.343917557 | 0.356870513 | 0.313390439 |
| 0.093113153 | 0.097256263 | 0.158549666 | 0.213571069 |
| 0.004476192 | 0.315606408 | 0.218733083 | 0.118543649 |
| 0.348645519 | 0.229552665 | 0.035146046 | 0.252605284 |
| 0.026286908 | 0.168923172 | 0.245688909 | 0.159262136 |
| 0.257571658 | 0.016288782 | 0.224876478 | 0.266370736 |
| 0.454777788 | 0.328223183 | 0.290962713 | 0.541411707 |
| 0.246938614 | 0.135405836 | 0.235421708 | 0.310588627 |
| 0.062836777 | 0.127532001 | 0.291090183 | 0.057392875 |
| 0.18101989  | 0.454264646 | 0.29965032  | 0.076895952 |
| 0.214911468 | 0.006010547 | 0.367954648 | 0.53080798  |
| 0.50209084  | 0.51157301  | 0.503334913 | 0.199751201 |
| 0.516154936 | 0.090104637 | 0.534862175 | 0.40303559  |
| 0.330261092 | 0.001227099 | 0.003169158 | 0.483502589 |
| 0.303700334 | 0.070830537 | 0.131548652 | 0.323575841 |
| 0.083052857 | 0.149126488 | 0.055741961 | 0.125958707 |
| 0.336602082 | 0.162973818 | 0.115641685 | 0.494739843 |
| 0.185240066 | 0.166299539 | 0.333821429 | 0.086106537 |
| 0.30448863  | 0.046546842 | 0.084851962 | 0.005222396 |
| 0.264200027 | 0.12820103  | 0.497480155 | 0.520521399 |
| 0.484403971 | 0.292290803 | 0.317735838 | 0.264515136 |
| 0.409398199 | 0.108812348 | 0.30791913  | 0.116907743 |
| 0.512577538 | 0.293729436 | 0.261823249 | 0.28805538  |
| 0.486087218 | 0.47390185  | 0.029702946 | 0.351741638 |
| 0.014662334 | 0.000769752 | 0.332972732 | 0.198203573 |
| 0.047766505 | 0.275749155 | 0.212813058 | 0.186660866 |
| 0.164775637 | 0.032478292 | 0.192125452 | 0.179578467 |
| 0.224643707 | 0.269560287 | 0.190008103 | 0.199969368 |
| 0.189430409 | 0.09712715  | 0.145829117 | 0.11459958  |
| 0.189968314 | 0.309286212 | 0.20162508  | 0.020190527 |
| 0.347992214 | 0.320055703 | 0.052661321 | 0.135157153 |
| 0.417793806 | 0.485649647 | 0.03449725  | 0.008358608 |
| 0.232489602 | 0.231483422 | 0.483044131 | 0.521514728 |
| 0.536991716 | 0.506176208 | 0.386339835 | 0.081015183 |
| 0.060928477 | 0.232244231 | 0.208125684 | 0.063654552 |

|             |             |             |             |
|-------------|-------------|-------------|-------------|
| 0.512331235 | 0.074734689 | 0.499891541 | 0.220198897 |
| 0.100804441 | 0.180796921 | 0.026976522 | 0.071553326 |
| 0.284929653 | 0.137453572 | 0.123383814 | 0.150196846 |
| 0.231351868 | 0.190520996 | 0.043848693 | 0.152315406 |
| 0.297102572 | 0.142656615 | 0.13222809  | 0.252218941 |
| 0.332678802 | 0.229441302 | 0.354345153 | 0.429117471 |
| 0.116767152 | 0.103405619 | 0.269547769 | 0.312844838 |
| 0.42938507  | 0.330867276 | 0.027226291 | 0.486229646 |
| 0.476657272 | 0.341611416 | 0.515640932 | 0.340156381 |
| 0.080698405 | 0.281807869 | 0.234285576 | 0.253376308 |
| 0.142422483 | 0.324389528 | 0.173717952 | 0.059011842 |
| 0.266926267 | 0.478710966 | 0.42397143  | 0.122623135 |
| 0.330325883 | 0.130627336 | 0.068134598 | 0.435024028 |
| 0.128343783 | 0.081668235 | 0.327925721 | 0.396081138 |
| 0.001805522 | 0.099192265 | 0.473475137 | 0.179662965 |
| 0.510951596 | 0.471332444 | 0.4319119   | 0.209668742 |
| 0.001593659 | 0.3125497   | 0.283072753 | 0.316835172 |
| 0.442631308 | 0.306254423 | 0.123070691 | 0.056025312 |
| 0.236149385 | 0.089755681 | 0.098313116 | 0.290556344 |
| 0.140625311 | 0.327181929 | 0.146120105 | 0.167802786 |
| 0.139003425 | 0.097274321 | 0.175746234 | 0.194907972 |
| 0.106044883 | 0.181037455 | 0.293576862 | 0.288642879 |
| 0.161262371 | 0.405009029 | 0.377072934 | 0.02727341  |
| 0.260081849 | 0.375066062 | 0.410671895 | 0.002103263 |
| 0.342077031 | 0.006030997 | 0.133763812 | 0.155313488 |
| 0.141984407 | 0.145374662 | 0.175757786 | 0.224656283 |
| 0.28409542  | 0.173041282 | 0.214121135 | 0.175211951 |
| 0.116704948 | 0.178639792 | 0.295990759 | 0.300711149 |
| 0.205478555 | 0.107612838 | 0.11327504  | 0.126289783 |
| 0.041983143 | 0.466111544 | 0.224971807 | 0.081553069 |
| 0.162493425 | 0.298453458 | 0.315190749 | 0.524512196 |
| 0.384100106 | 0.137329569 | 0.243902234 | 0.45645016  |
| 0.234843504 | 0.275591782 | 0.066246138 | 0.32784368  |
| 0.178217422 | 0.147639208 | 0.335152966 | 0.278416593 |
| 0.358029396 | 0.391059182 | 0.21536165  | 0.424080551 |
| 0.287442999 | 0.269700191 | 0.323859318 | 0.060551608 |
| 0.153321741 | 0.11682436  | 0.181591884 | 0.002283227 |
| 0.260045857 | 0.248415999 | 0.460502995 | 0.513756588 |
| 0.218948969 | 0.356365516 | 0.309319161 | 0.08093018  |
| 0.307133539 | 0.21127405  | 0.118256476 | 0.391055659 |
| 0.169927732 | 0.146631452 | 0.217649545 | 0.309561678 |
| 0.368984487 | 0.360442619 | 0.177267435 | 0.190025522 |
| 0.180258186 | 0.182222452 | 0.486998474 | 0.123328415 |
| 0.343110629 | 0.130828414 | 0.318881297 | 0.214993081 |
| 0.154632815 | 0.521260905 | 0.059127837 | 0.528541401 |
| 0.244803221 | 0.124102121 | 0.478823834 | 0.240942325 |
| 0.251953824 | 0.082261589 | 0.141056857 | 0.32709292  |
| 0.171589894 | 0.255079612 | 0.021758035 | 0.049972443 |
| 0.241602002 | 0.245383288 | 0.397551184 | 0.28399148  |
| 0.169955679 | 0.268407288 | 0.121629646 | 0.243523882 |
| 0.516436807 | 0.520689738 | 0.19851459  | 0.198181979 |
| 0.275576697 | 0.080424548 | 0.332679786 | 0.014285297 |
| 0.324434943 | 0.329357703 | 0.311940441 | 0.042665401 |
| 0.017004997 | 0.167007236 | 0.332550687 | 0.073658693 |



|             |             |             |             |
|-------------|-------------|-------------|-------------|
| 0.458350425 | 0.174421273 | 0.296791004 | 0.359466909 |
| 0.146913851 | 0.522414279 | 0.080849142 | 0.321562774 |
| 0.050955604 | 0.196786843 | 0.283026088 | 0.292422035 |
| 0.164532246 | 0.210135972 | 0.299624745 | 0.167901633 |
| 0.026684776 | 0.191864695 | 0.001686817 | 0.408163126 |
| 0.503978876 | 0.256267902 | 0.18575541  | 0.282508686 |
| 0.198384284 | 0.353469386 | 0.164333141 | 0.333843502 |
| 0.008622172 | 0.269942692 | 0.148165761 | 0.407060227 |
| 0.221093757 | 0.287235199 | 0.046009145 | 0.223023158 |
| 0.485582315 | 0.212271201 | 0.215822981 | 0.280131926 |
| 0.514556966 | 0.375484683 | 0.16772975  | 0.157983276 |
| 0.315644664 | 0.064706403 | 0.341270583 | 0.525804101 |
| 0.1222779   | 0.15303005  | 0.402918214 | 0.153153292 |
| 0.22447925  | 0.379065259 | 0.331491818 | 0.519295183 |
| 0.045182201 | 0.184095756 | 0.361599323 | 0.464285584 |
| 0.229921619 | 0.111376849 | 0.174241179 | 0.156862192 |
| 0.489736308 | 0.085967085 | 0.189218098 | 0.301656601 |
| 0.162231953 | 0.220815983 | 0.302580629 | 0.125043351 |
| 0.026618105 | 0.125238777 | 0.288834559 | 0.119844122 |
| 0.215147819 | 0.270187691 | 0.166115336 | 0.364111343 |
| 0.098165951 | 0.020964529 | 0.436167765 | 0.014992275 |
| 0.293954875 | 0.293037093 | 0.180922417 | 0.261343984 |
| 0.178082963 | 0.278834204 | 0.297607729 | 0.000921005 |
| 0.357916729 | 0.044769915 | 0.214947664 | 0.159771983 |
| 0.213142933 | 0.049687895 | 0.464344117 | 0.495946958 |
| 0.249401812 | 0.263831928 | 0.289109162 | 0.462315883 |
| 0.11141488  | 0.270501523 | 0.253925167 | 1           |
| 0.162430653 | 0.345433638 | 0.326706529 | 0.30136221  |
| 0.318789236 | 0.211888984 |             |             |
| ZMAT1       | 0.01130567  | 0.187454971 | 0.006810032 |
| 0.039038498 | 0.307553131 | 0.109528015 | 0.010456839 |
| 0.025384146 | 0.146532553 | 0.059637226 | 0.196161197 |
| 0.002833627 | 0.233654032 | 0.246827947 | 0.011745901 |
| 0.280040408 | 0.0097134   | 0.029729172 | 0.028421866 |
| 0.059509277 | 0.264023776 | 0.183206132 | 0.094112819 |
| 0.246852909 | 0.058157557 | 0.107470467 | 0.243092093 |
| 0.259518197 | 0.143080368 | 0.26763912  | 0.046309355 |
| 0.197262167 | 0.325917101 | 0.229874382 | 0.00184506  |
| 0.180981292 | 0.034914582 | 0.181694052 | 0.119804009 |
| 0.207379416 | 0.15257243  | 0.071863071 | 0.102694572 |
| 0.10157371  | 0.004200646 | 0.05300091  | 0.265933377 |
| 0.120828872 | 0.092653158 | 0.008962983 | 0.221281614 |
| 0.100104841 | 0.137870828 | 0.144428913 | 0.000308423 |
| 0.264086931 | 0.207890279 | 0.22274742  | 0.234446642 |
| 0.090358964 | 0.050801413 | 0.111917603 | 0.075385776 |
| 0.208191518 | 0.254677272 | 0.149636394 | 0.081838973 |
| 0.249849801 | 0.230851119 | 0.270062415 | 0.056540481 |
| 0.108583818 | 0.003243287 | 0.063561199 | 0.015936462 |
| 0.137268858 | 0.111467728 | 0.242694149 | 0.235047008 |
| 0.169431371 | 0.241022441 | 0.108238845 | 0.205943949 |
| 0.141540107 | 0.324331978 | 0.186459983 | 0.2150639   |
| 0.206987988 | 0.016335078 | 0.246231578 | 0.259309549 |
| 0.006849062 | 0.122585957 | 0.197034833 | 0.028036146 |
| 0.206872348 | 0.181526018 | 0.115123942 | 0.250596775 |

|             |             |             |             |
|-------------|-------------|-------------|-------------|
| 0.347769204 | 0.260406871 | 0.208877849 | 0.139426824 |
| 0.236966925 | 0.012596463 | 0.18369781  | 0.357927584 |
| 0.152927738 | 0.016205908 | 0.14613395  | 0.314905534 |
| 0.212143985 | 0.262095664 | 0.20524244  | 0.203476568 |
| 0.255358613 | 0.259913571 | 0.209159873 | 0.214496356 |
| 0.050641181 | 0.253564715 | 0.06005493  | 0.012582555 |
| 0.007972597 | 0.031200878 | 0.134734875 | 0.17361451  |
| 0.291655936 | 0.153962221 | 0.046523205 | 0.145965216 |
| 0.335579261 | 0.183893588 | 0.247785507 | 0.225183593 |
| 0.005926467 | 0.20290863  | 0.243749661 | 0.06376639  |
| 0.209370085 | 0.035730505 | 0.293182204 | 0.211225364 |
| 0.189029132 | 0.307522124 | 0.02645344  | 0.208260885 |
| 0.057287928 | 0.277016904 | 0.208674954 | 0.064333086 |
| 0.236782571 | 0.20352627  | 0.302215558 | 0.366978661 |
| 0.215201538 | 0.105353735 | 0.02633582  | 0.197929726 |
| 0.287480617 | 0.039034329 | 0.290548724 | 0.306082605 |
| 0.225302257 | 0.308578099 | 0.315720557 | 0.298360011 |
| 0.227045863 | 0.016624109 | 0.024001825 | 0.231088046 |
| 0.222426351 | 0.211267464 | 0.066070539 | 0.205009342 |
| 0.28995606  | 0.10920968  | 0.275179683 | 0.110811311 |
| 0.275578583 | 0.267469816 | 0.274999045 | 0.190245666 |
| 0.09369623  | 0.13411728  | 0.282640506 | 0.175857813 |
| 0.010593473 | 0.018335466 | 0.008458608 | 0.171976871 |
| 0.064025467 | 0.096571338 | 0.080809365 | 0.233039609 |
| 0.10167617  | 0.081668242 | 0.215531979 | 0.351800133 |
| 0.009441179 | 0.185996382 | 0.049000541 | 0.039236228 |
| 0.011867736 | 0.044504581 | 0.05145193  | 0.054295933 |
| 0.169601358 | 0.064352114 | 0.253391795 | 0.289761476 |
| 0.159671915 | 0.054286894 | 0.207555233 | 0.275844772 |
| 0.26240192  | 0.282589273 | 0.102348205 | 0.005952648 |
| 0.104029001 | 0.116017966 | 0.2386926   | 0.249877914 |
| 0.051407563 | 0.073384581 | 0.218306938 | 0.356025018 |
| 0.066510434 | 0.027633216 | 0.138698241 | 0.187912337 |
| 0.038416677 | 0.15393928  | 0.285455557 | 0.150644276 |
| 5.69E-05    | 0.11564101  | 0.270969864 | 0.137777064 |
| 0.132023836 | 0.187213154 | 0.21550715  | 0.279350482 |
| 0.169287712 | 0.186437368 | 0.302294894 | 0.358499629 |
| 0.094417496 | 0.060020404 | 0.302153042 | 0.06559657  |
| 0.240967382 | 0.056197303 | 0.206520445 | 0.083361886 |
| 0.10291866  | 0.185745349 | 0.328613537 | 0.179896986 |
| 0.028059309 | 0.248741056 | 0.210587045 | 0.282174055 |
| 0.129568737 | 0.29365947  | 0.300407457 | 0.257437596 |
| 0.183686676 | 0.180423829 | 0.250642759 | 0.252480274 |
| 0.281644298 | 0.086812652 | 0.013883244 | 0.275368939 |
| 0.119475842 | 0.305556405 | 0.121369805 | 0.284776137 |
| 0.237198493 | 0.179589861 | 0.057837176 | 0.316166126 |
| 0.214364872 | 0.078657705 | 0.264492274 | 0.299121475 |
| 0.069419092 | 0.214718875 | 0.158350331 | 0.333988399 |
| 0.061924088 | 0.167231627 | 0.150038548 | 0.256148263 |
| 0.033252599 | 0.01409908  | 0.011921313 | 0.099289406 |
| 0.238969143 | 0.208249527 | 0.263180099 | 0.267073198 |
| 0.037760288 | 0.220978157 | 0.10316816  | 0.112966171 |
| 0.183297352 | 0.200206257 | 0.312010569 | 0.293386542 |
| 0.112403376 | 0.009018513 | 0.043228475 | 0.233708892 |

|             |             |             |             |
|-------------|-------------|-------------|-------------|
| 0.004950779 | 0.225979692 | 0.099784002 | 0.00175442  |
| 0.005702831 | 0.175996342 | 0.022285986 | 0.064196336 |
| 0.340246618 | 0.061290799 | 0.063662154 | 0.059038282 |
| 0.245012369 | 0.026526705 | 0.00612334  | 0.267769762 |
| 0.244155132 | 0.231886635 | 0.233926177 | 0.196554034 |
| 0.252726862 | 0.243345881 | 0.292970658 | 0.096876362 |
| 0.021751302 | 0.011774959 | 0.185954054 | 0.145289975 |
| 0.000861712 | 0.276208389 | 0.219079345 | 0.05227862  |
| 0.302626323 | 0.151490615 | 0.006235791 | 0.299836713 |
| 0.003103064 | 0.216635966 | 0.062712415 | 0.097836561 |
| 0.313369501 | 0.001607746 | 0.065447042 | 0.136824705 |
| 0.169117558 | 0.145475501 | 0.184010246 | 0.261015302 |
| 0.176877854 | 0.026082066 | 0.181116786 | 0.30857564  |
| 0.014277548 | 0.031552725 | 0.084874183 | 0.00977887  |
| 0.070125087 | 0.211884316 | 0.136592527 | 0.010374911 |
| 0.121674069 | 0.000232072 | 0.15379527  | 0.26711513  |
| 0.187267332 | 0.305411662 | 0.262620767 | 0.265484112 |
| 0.247545907 | 0.201761853 | 0.279079549 | 0.178985109 |
| 0.093931606 | 5.70E-05    | 0.003212954 | 0.304216164 |
| 0.234534887 | 0.009098624 | 0.059442554 | 0.079772064 |
| 0.0370603   | 0.022543236 | 0.013918696 | 0.204815785 |
| 0.213029834 | 0.222917619 | 0.205301808 | 0.189891643 |
| 0.102898053 | 0.131778941 | 0.092416621 | 0.019878125 |
| 0.268997452 | 0.012413307 | 0.020418486 | 0.007605196 |
| 0.301388775 | 0.02545573  | 0.170843469 | 0.248149403 |
| 0.259685192 | 0.320129141 | 0.077323612 | 0.10401418  |
| 0.282474823 | 0.017354519 | 0.137569485 | 0.020756164 |
| 0.21186454  | 0.253269596 | 0.182651778 | 0.13175534  |
| 0.282397781 | 0.2242634   | 0.005754141 | 0.260611148 |
| 0.003766382 | 0.006525592 | 0.090450975 | 0.125872643 |
| 0.06382296  | 0.199569617 | 0.120427463 | 0.067588305 |
| 0.093484748 | 0.004582904 | 0.235932236 | 0.229533677 |
| 0.17798943  | 0.18354391  | 0.29530176  | 0.107031145 |
| 0.175414928 | 0.130268596 | 0.088949685 | 0.046361505 |
| 0.084909748 | 0.118923421 | 0.058957648 | 0.003143292 |
| 0.16603761  | 0.229382907 | 0.012373581 | 0.053089109 |
| 0.271501894 | 0.290749862 | 0.011455494 | 0.005697655 |
| 0.109172281 | 0.143201002 | 0.315426517 | 0.233099888 |
| 0.231851647 | 0.284231542 | 0.17081014  | 0.071532329 |
| 0.012508147 | 0.217727499 | 0.313588327 | 0.09702845  |
| 0.266222911 | 0.009949397 | 0.22338441  | 0.335130703 |
| 0.03708963  | 0.060545222 | 0.011721758 | 0.025071625 |
| 0.323562654 | 0.07441433  | 0.122702821 | 0.032730757 |
| 0.14382862  | 0.226811616 | 0.008430372 | 0.082390792 |
| 0.165166562 | 0.205705955 | 0.058482548 | 0.078556238 |
| 0.16508453  | 0.048215285 | 0.292187991 | 0.23690485  |
| 0.037045007 | 0.026292959 | 0.03966247  | 0.250439852 |
| 0.253529963 | 0.166852879 | 0.007623409 | 0.190971589 |
| 0.295005742 | 0.25419772  | 0.222678479 | 0.268041883 |
| 0.021071017 | 0.241846068 | 0.206917285 | 0.218762168 |
| 0.076120825 | 0.112471661 | 0.115821555 | 0.01468139  |
| 0.152640413 | 0.214015403 | 0.193588555 | 0.07581581  |
| 0.202937879 | 0.023788695 | 0.007765268 | 0.257643634 |
| 0.203341153 | 0.015494829 | 0.083316972 | 0.290783164 |

|             |                     |             |             |
|-------------|---------------------|-------------|-------------|
| 0.005126118 | 0.269633226         | 0.309962728 | 0.081102898 |
| 0.26488105  | 0.295020748         | 0.221036701 | 0.06374326  |
| 0.007723352 | 0.308210586         | 0.224680841 | 0.147261246 |
| 0.191081537 | 0.159780313         | 0.04984382  | 0.02777464  |
| 0.170942496 | 0.014711174         | 0.049482789 | 0.079271468 |
| 0.145602841 | 0.15816748          | 0.101134583 | 0.07722657  |
| 0.122176888 | 0.017336582         | 0.246712154 | 0.084370583 |
| 0.166285381 | 0.125272468         | 0.209991766 | 0.052576032 |
| 0.143097139 | 0.264710419         | 0.195372972 | 0.003698519 |
| 0.295734919 | 0.249496 0.26308287 | 0.000392115 |             |
| 0.288977598 | 0.001550301         | 0.130274311 | 0.132632644 |
| 0.112448289 | 0.105242147         | 0.219594806 | 0.152566313 |
| 0.146963922 | 0.083927346         | 0.108594341 | 0.132712593 |
| 0.082549208 | 0.078255241         | 0.253625002 | 0.108177171 |
| 0.147064044 | 0.029850445         | 0.023276978 | 0.021972719 |
| 0.015962757 | 0.249827021         | 0.100681182 | 0.014220634 |
| 0.131240932 | 0.10842309          | 0.204698785 | 0.213348367 |
| 0.269969902 | 0.023569945         | 0.138335459 | 0.209944589 |
| 0.074817821 | 0.070111981         | 0.006530636 | 0.148118804 |
| 0.093974992 | 0.162515649         | 0.141366653 | 0.083012093 |
| 0.185557382 | 0.185329837         | 0.096807279 | 0.242792803 |
| 0.1632138   | 0.146455761         | 0.053790055 | 0.040019529 |
| 0.046450618 | 0.03847949          | 0.286827793 | 2.81E-05    |
| 0.186481016 | 0.043183306         | 0.282322643 | 0.207837204 |
| 0.220746457 | 0.217119564         | 0.050625586 | 0.015731334 |
| 0.046340816 | 0.043758545         | 0.04725671  | 0.246713141 |
| 0.23354706  | 0.053017875         | 0.248718517 | 0.050277327 |
| 0.29202172  | 0.249719835         | 0.1637987   | 0.069280319 |
| 0.118501304 | 0.058877997         | 0.205716514 | 0.020046626 |
| 0.199317121 | 0.189665278         | 0.111468782 | 0.164225759 |
| 0.134494085 | 0.286127775         | 0.012475913 | 0.29098993  |
| 0.174684305 | 0.036953674         | 0.24486802  | 0.109037656 |
| 0.072285165 | 0.084242304         | 0.255255439 | 0.085261854 |
| 0.075577677 | 0.213504275         | 0.006512068 | 0.057735768 |
| 0.224266855 | 0.096384852         | 0.17764224  | 0.225216378 |
| 0.213056502 | 0.250126568         | 0.253255839 | 0.075330726 |
| 0.18790503  | 0.198429166         | 0.076462498 | 0.130108674 |
| 0.171451834 | 0.027788859         | 0.1362552   | 0.010512072 |
| 0.232802815 | 0.250048207         | 0.093409837 | 0.011765287 |
| 0.003411643 | 0.222460977         | 0.190800303 | 0.011640729 |
| 0.324938358 | 0.216157494         | 0.141682049 | 0.263594633 |
| 0.0604237   | 0.195856216         | 0.072322306 | 0.280415949 |
| 0.005694672 | 0.12715297          | 0.255152382 | 0.163983272 |
| 0.130749298 | 0.248580697         | 0.259567847 | 0.253866508 |
| 0.007471177 | 0.137283196         | 0.00033476  | 0.165888437 |
| 0.175052401 | 0.248282625         | 0.078505071 | 0.072439271 |
| 0.194636783 | 0.215668378         | 0.115204623 | 0.194599063 |
| 0.004750523 | 0.306037728         | 0.095579436 | 0.197825738 |
| 0.115210306 | 0.154381476         | 0.023020285 | 0.252718245 |
| 0.160917543 | 0.106209778         | 0.119052701 | 0.108915154 |
| 0.220673769 | 0.191013805         | 0.040199097 | 0.157344838 |
| 0.171052131 | 0.01309603          | 0.089247307 | 0.274618792 |
| 0.096129759 | 0.253188065         | 0.337752965 | 0.072277118 |
| 0.26334708  | 0.176593952         | 0.196011674 | 0.260725824 |

|             |             |             |             |
|-------------|-------------|-------------|-------------|
| 0.051704866 | 0.126007691 | 0.300457983 | 0.226419283 |
| 0.206428442 | 0.204554647 | 0.210409251 | 0.148289271 |
| 0.182768621 | 0.026294917 | 0.176505965 | 0.164271908 |
| 0.212792617 | 0.193129785 | 0.106726467 | 0.165920366 |
| 0.013614767 | 0.051595396 | 0.112666    | 0.048124376 |
| 0.159392846 | 0.218096078 | 0.166359221 | 0.207836998 |
| 0.070273918 | 0.010906133 | 0.240852554 | 0.051348366 |
| 0.100409455 | 0.27955854  | 0.116419428 | 0.224675542 |
| 0.061191497 | 0.143541985 | 0.081463583 | 0.000753507 |
| 0.282213348 | 0.079779583 | 0.150576647 | 0.143892987 |
| 0.151378312 | 0.007063858 | 0.215183813 | 0.316717289 |
| 0.139364792 | 0.123393562 | 0.151263679 | 0.222697263 |
| 0.238707828 | 0.160458241 | 0.153431604 | 0.162430653 |
| 1           | 0.107254374 | 0.155076629 | 0.197902622 |
| 0.191222927 | 0.079056425 |             |             |
| ZMYM5       | 0.02280222  | 0.416128914 | 0.020526504 |
| 0.050336803 | 0.154939072 | 0.172824879 | 0.016250032 |
| 0.039301611 | 0.30671589  | 0.244851985 | 0.170342476 |
| 0.00319556  | 0.044697615 | 0.404293187 | 0.012764597 |
| 0.255662001 | 0.005737582 | 0.031649377 | 0.03703731  |
| 0.098775493 | 0.129764084 | 0.154921615 | 0.20942765  |
| 0.122417862 | 0.129062861 | 0.228067205 | 0.261811596 |
| 0.483723662 | 0.204824252 | 0.319039319 | 0.205717961 |
| 0.338294654 | 0.181351031 | 0.22021722  | 0.003624569 |
| 0.216952118 | 0.00643632  | 0.374510161 | 0.100558085 |
| 0.072928173 | 0.25793409  | 0.232010363 | 0.083142432 |
| 0.254164269 | 0.010559473 | 0.218333164 | 0.337995313 |
| 0.223971723 | 0.109575124 | 0.026589788 | 0.339604602 |
| 0.19678336  | 0.217183202 | 0.403438334 | 0.001092406 |
| 0.161998325 | 0.089235586 | 0.15666997  | 0.462292263 |
| 0.094607298 | 0.03186328  | 0.245025894 | 0.099137781 |
| 0.282588422 | 0.272579133 | 0.128570191 | 0.240909453 |
| 0.453088534 | 0.094574832 | 0.393216781 | 0.063111353 |
| 0.175747371 | 0.010146286 | 0.078440508 | 0.044235008 |
| 0.191038536 | 0.066917957 | 0.15458506  | 0.154566355 |
| 0.447268911 | 0.443922701 | 0.119864913 | 0.474614941 |
| 0.050533798 | 0.208363718 | 0.11235827  | 0.179762619 |
| 0.277216643 | 0.028062199 | 0.304795456 | 0.463320734 |
| 0.015133805 | 0.331235385 | 0.329170956 | 0.068569948 |
| 0.388339148 | 0.157145243 | 0.298076308 | 0.076870881 |
| 0.254720628 | 0.196729454 | 0.426846191 | 0.170092708 |
| 0.127037733 | 0.033957085 | 0.442674754 | 0.191770414 |
| 0.111971728 | 0.031985957 | 0.095380019 | 0.447734162 |
| 0.293179425 | 0.459980573 | 0.419499442 | 0.282803978 |
| 0.236684359 | 0.457398682 | 0.29731669  | 0.358164582 |
| 0.188821783 | 0.490813495 | 0.073365915 | 0.00737722  |
| 0.02657717  | 0.018436377 | 0.106142036 | 0.191927594 |
| 0.432561621 | 0.199971042 | 0.070318778 | 0.084492845 |
| 0.411784109 | 0.449060827 | 0.503648118 | 0.352196554 |
| 0.009292774 | 0.143450552 | 0.238823782 | 0.103928956 |
| 0.262830607 | 0.042477347 | 0.118813617 | 0.453637305 |
| 0.29463686  | 0.37596316  | 0.062833976 | 0.426540268 |
| 0.074997361 | 0.438256175 | 0.457459591 | 0.056725514 |
| 0.461611869 | 0.441859377 | 0.447275206 | 0.301906482 |

|             |             |             |             |
|-------------|-------------|-------------|-------------|
| 0.404059302 | 0.161877225 | 0.037854399 | 0.315499134 |
| 0.396001047 | 0.006584918 | 0.466899083 | 0.486101482 |
| 0.479387618 | 0.445072763 | 0.465158242 | 0.471172757 |
| 0.480205886 | 0.02713416  | 0.035819508 | 0.152165328 |
| 0.472600041 | 0.317471022 | 0.035394086 | 0.285807148 |
| 0.216766348 | 0.185676311 | 0.36965029  | 0.168412116 |
| 0.421979113 | 0.410846227 | 0.480430692 | 0.326382169 |
| 0.200425832 | 0.22963837  | 0.268173931 | 0.42241553  |
| 0.008902382 | 0.040236884 | 0.024415199 | 0.194671754 |
| 0.220156561 | 0.060942281 | 0.183629284 | 0.212181523 |
| 0.079573532 | 0.156310929 | 0.192166899 | 0.267340556 |
| 0.03416145  | 0.302911412 | 0.060017899 | 0.078890688 |
| 0.007818852 | 0.085377125 | 0.067203393 | 0.044774815 |
| 0.09245288  | 0.181658158 | 0.371588202 | 0.455451865 |
| 0.164890544 | 0.111321672 | 0.334359865 | 0.394426671 |
| 0.321504073 | 0.223603277 | 0.128330318 | 0.001712454 |
| 0.14217206  | 0.235705664 | 0.119331172 | 0.274284751 |
| 0.122137432 | 0.1004462   | 0.257426637 | 0.286322052 |
| 0.142565807 | 0.054934035 | 0.188122028 | 0.334706736 |
| 0.096084848 | 0.116228001 | 0.386299697 | 0.297129992 |
| 6.10E-05    | 0.161814179 | 0.390709562 | 0.05290062  |
| 0.211605778 | 0.058073398 | 0.132076373 | 0.430387762 |
| 0.169522597 | 0.095021924 | 0.460891099 | 0.281273528 |
| 0.167532479 | 0.177023673 | 0.471736806 | 0.048986859 |
| 0.195087366 | 0.013311215 | 0.151710131 | 0.239412455 |
| 0.120870181 | 0.172177205 | 0.164543151 | 0.108075318 |
| 0.072549758 | 0.473182629 | 0.30788345  | 0.469724785 |
| 0.216199427 | 0.475875462 | 0.417626985 | 0.367206513 |
| 0.218581178 | 0.225559995 | 0.087005795 | 0.390209246 |
| 0.424292089 | 0.193693608 | 0.042130623 | 0.43029341  |
| 0.230178991 | 0.31333345  | 0.035941785 | 0.437386789 |
| 0.406869912 | 0.460437495 | 0.038582555 | 0.264723303 |
| 0.288199616 | 0.098409002 | 0.338241626 | 0.460579719 |
| 0.248907577 | 0.194017268 | 0.161328039 | 0.304360578 |
| 0.08346036  | 0.083826901 | 0.229563789 | 0.107826398 |
| 0.011406445 | 0.028264699 | 0.024084663 | 0.044471104 |
| 0.067591093 | 0.354128415 | 0.27928478  | 0.480128948 |
| 0.032155906 | 0.333343292 | 0.142080039 | 0.126062586 |
| 0.385259177 | 0.163001859 | 0.224355534 | 0.242932166 |
| 0.140880775 | 0.003355594 | 0.033341523 | 0.449998776 |
| 0.01965382  | 0.110076994 | 0.142241668 | 0.000570713 |
| 0.013447433 | 0.43403038  | 0.061063856 | 0.127661153 |
| 0.410125846 | 0.138512304 | 0.12022368  | 0.240688378 |
| 0.205842828 | 0.028103114 | 0.00016113  | 0.462487821 |
| 0.452030126 | 0.420055881 | 0.457699832 | 0.415115423 |
| 0.414134012 | 0.324135668 | 0.342891441 | 0.199059783 |
| 0.031641611 | 0.033690815 | 0.109174675 | 0.113960484 |
| 0.002083238 | 0.262380922 | 0.131853325 | 0.064653524 |
| 0.347339174 | 0.183581219 | 0.008313138 | 0.207721128 |
| 0.006110661 | 0.139168957 | 0.138827072 | 0.073920544 |
| 0.230548319 | 0.002583614 | 0.143390829 | 0.189970716 |
| 0.383033677 | 0.26366149  | 0.202738005 | 0.485129634 |
| 0.151455333 | 0.092314543 | 0.126518639 | 0.276008959 |
| 0.018747663 | 0.11016239  | 0.174109712 | 0.057267076 |

|             |             |             |             |
|-------------|-------------|-------------|-------------|
| 0.095814937 | 0.393117274 | 0.193418695 | 0.024240514 |
| 0.13455728  | 0.00047198  | 0.297452883 | 0.472068532 |
| 0.44935704  | 0.481374133 | 0.447921808 | 0.125637563 |
| 0.462998869 | 0.105677619 | 0.49465225  | 0.36716047  |
| 0.259654864 | 0.000297023 | 0.000139594 | 0.462019588 |
| 0.244845482 | 0.036982943 | 0.065536375 | 0.183314958 |
| 0.028786189 | 0.061988753 | 0.015381596 | 0.068056406 |
| 0.284442657 | 0.086869336 | 0.065068934 | 0.444855129 |
| 0.087720061 | 0.090087404 | 0.212482645 | 0.043726593 |
| 0.246438332 | 0.011898128 | 0.042957808 | 0.001588559 |
| 0.240008577 | 0.078104948 | 0.418714964 | 0.474174293 |
| 0.417439165 | 0.273445326 | 0.272762635 | 0.155291668 |
| 0.382071921 | 0.066139037 | 0.211744034 | 0.0606822   |
| 0.469931455 | 0.269689482 | 0.204021939 | 0.219997564 |
| 0.43744009  | 0.412225673 | 0.006651768 | 0.332553258 |
| 0.002714957 | 0.000598366 | 0.217114325 | 0.146051233 |
| 0.037484976 | 0.193064043 | 0.154257114 | 0.103926758 |
| 0.080619771 | 0.007838957 | 0.139959025 | 0.123211687 |
| 0.155949032 | 0.177284885 | 0.125038416 | 0.153581791 |
| 0.101297368 | 0.054869594 | 0.058496801 | 0.045133436 |
| 0.12622825  | 0.24846463  | 0.13497216  | 0.003934157 |
| 0.276766034 | 0.255333103 | 0.014159414 | 0.074247664 |
| 0.376128583 | 0.458769226 | 0.009553531 | 0.001182281 |
| 0.169506424 | 0.134747638 | 0.449599023 | 0.481331619 |
| 0.469741819 | 0.448304944 | 0.301950543 | 0.034118471 |
| 0.017419782 | 0.162122473 | 0.146384817 | 0.023009666 |
| 0.46560377  | 0.035519578 | 0.437145262 | 0.164215444 |
| 0.047867058 | 0.078291392 | 0.005637648 | 0.023443183 |
| 0.248993803 | 0.073064584 | 0.051275552 | 0.088976257 |
| 0.128512717 | 0.119342291 | 0.011325245 | 0.077407681 |
| 0.254635875 | 0.112005246 | 0.066440039 | 0.127428499 |
| 0.277247657 | 0.1936341   | 0.364059362 | 0.357656079 |
| 0.060075884 | 0.042824124 | 0.142618444 | 0.28659204  |
| 0.429977719 | 0.314316347 | 0.007156474 | 0.464068491 |
| 0.428378936 | 0.345706977 | 0.453481025 | 0.29598244  |
| 0.036801627 | 0.1985841   | 0.17026251  | 0.191037669 |
| 0.075026161 | 0.171222979 | 0.08851075  | 0.020148474 |
| 0.200634683 | 0.402286427 | 0.391479658 | 0.047301056 |
| 0.276338326 | 0.071886543 | 0.030876749 | 0.40384419  |
| 0.085088508 | 0.02894906  | 0.231172597 | 0.395735594 |
| 1.34E-05    | 0.070686529 | 0.441018445 | 0.07682947  |
| 0.447389183 | 0.439151374 | 0.358110012 | 0.097530449 |
| 0.001562942 | 0.33287266  | 0.22130071  | 0.191100393 |
| 0.413044503 | 0.244696021 | 0.054657866 | 0.016440589 |
| 0.172915897 | 0.047750652 | 0.041367595 | 0.161863722 |
| 0.11920266  | 0.291655417 | 0.093312387 | 0.095936954 |
| 0.061039118 | 0.059792368 | 0.109125359 | 0.081722471 |
| 0.079321545 | 0.126966609 | 0.241652162 | 0.213754349 |
| 0.130276922 | 0.376362536 | 0.362679778 | 0.00566444  |
| 0.193321842 | 0.347085982 | 0.3542785   | 0.000616058 |
| 0.339696379 | 0.000320906 | 0.058981469 | 0.068435822 |
| 0.059970547 | 0.069451905 | 0.116591269 | 0.118527143 |
| 0.236932621 | 0.077073755 | 0.098785361 | 0.104378342 |
| 0.045189451 | 0.075913322 | 0.234027578 | 0.172107576 |

|             |             |             |             |
|-------------|-------------|-------------|-------------|
| 0.105713205 | 0.037208899 | 0.063728216 | 0.072051129 |
| 0.010990264 | 0.428259086 | 0.153601809 | 0.041341655 |
| 0.09486621  | 0.173913809 | 0.243657771 | 0.484307873 |
| 0.317717098 | 0.083868927 | 0.13683986  | 0.423158221 |
| 0.225466617 | 0.148939989 | 0.021305311 | 0.221785488 |
| 0.086557592 | 0.0845024   | 0.233684494 | 0.211431544 |
| 0.370224004 | 0.307526969 | 0.146512574 | 0.357644282 |
| 0.154372214 | 0.19767512  | 0.255220104 | 0.019570508 |
| 0.062680439 | 0.067756943 | 0.115696207 | 0.000617946 |
| 0.200705855 | 0.115182632 | 0.444684162 | 0.451452382 |
| 0.163853675 | 0.281272382 | 0.219905022 | 0.028347929 |
| 0.243533296 | 0.148590826 | 0.064808132 | 0.389379573 |
| 0.139273768 | 0.055872002 | 0.141495564 | 0.163793266 |
| 0.365138222 | 0.375440999 | 0.100508225 | 0.090442644 |
| 0.099705504 | 0.107080626 | 0.424291481 | 0.044077546 |
| 0.334409835 | 0.066850841 | 0.293710983 | 0.117598661 |
| 0.073812473 | 0.487291687 | 0.018186058 | 0.500153184 |
| 0.151682687 | 0.074724893 | 0.397589532 | 0.128340879 |
| 0.116402762 | 0.028310109 | 0.11034687  | 0.2092743   |
| 0.081078946 | 0.172976813 | 0.023168429 | 0.034841649 |
| 0.196696845 | 0.163982655 | 0.411634011 | 0.259597001 |
| 0.095504394 | 0.225290852 | 0.091761172 | 0.128712753 |
| 0.46640217  | 0.446452152 | 0.103795276 | 0.14386919  |
| 0.233297801 | 0.02574052  | 0.282549666 | 0.010964652 |
| 0.319146467 | 0.338662472 | 0.233394872 | 0.010989879 |
| 0.00281791  | 0.133537708 | 0.312756075 | 0.034399131 |
| 0.43532568  | 0.141438935 | 0.279127351 | 0.33896967  |
| 0.097035214 | 0.447077786 | 0.029474883 | 0.289850829 |
| 0.019239362 | 0.131224361 | 0.208993202 | 0.22386362  |
| 0.083270621 | 0.136217162 | 0.262357307 | 0.104267185 |
| 0.005510514 | 0.097553581 | 0.000305413 | 0.319919723 |
| 0.442095046 | 0.188708275 | 0.123825062 | 0.23453446  |
| 0.144577737 | 0.298021721 | 0.097465146 | 0.266148796 |
| 0.001047872 | 0.229148249 | 0.074037786 | 0.346062984 |
| 0.195418079 | 0.242177741 | 0.011335466 | 0.161928122 |
| 0.399069467 | 0.136148472 | 0.15843981  | 0.227774956 |
| 0.46578288  | 0.331509472 | 0.112799723 | 0.075479225 |
| 0.332720396 | 0.027253936 | 0.226702816 | 0.475749588 |
| 0.04931976  | 0.091845234 | 0.383660399 | 0.070343603 |
| 0.151624703 | 0.315479183 | 0.333126403 | 0.471119355 |
| 0.015127021 | 0.119543955 | 0.341519766 | 0.428648169 |
| 0.174700859 | 0.066052953 | 0.113818958 | 0.083746666 |
| 0.432601118 | 0.028183367 | 0.12477999  | 0.251378673 |
| 0.113390194 | 0.163294509 | 0.278708855 | 0.060741351 |
| 0.006673906 | 0.050966505 | 0.151889796 | 0.058199831 |
| 0.142172858 | 0.183383603 | 0.093564526 | 0.285694668 |
| 0.03658555  | 0.004368412 | 0.358433151 | 0.013216577 |
| 0.179976352 | 0.248723388 | 0.096873545 | 0.155478613 |
| 0.114405848 | 0.216253046 | 0.212236935 | 0.000383384 |
| 0.328443638 | 0.01793181  | 0.118913401 | 0.084325513 |
| 0.154888115 | 0.014193354 | 0.389718324 | 0.458149816 |
| 0.178198222 | 0.168611882 | 0.217407769 | 0.406110412 |
| 0.073666078 | 0.221043106 | 0.188376482 | 0.345433638 |
| 0.107254374 | 1           | 0.232343599 | 0.204544769 |



|             |             |             |             |
|-------------|-------------|-------------|-------------|
| 0.271166013 | 0.095481118 |             |             |
| ZRANB1      | 0.024120071 | 0.407842624 | 0.018470441 |
| 0.050452968 | 0.201825704 | 0.18633661  | 0.017496074 |
| 0.046291228 | 0.307191781 | 0.205162867 | 0.204274774 |
| 0.00344444  | 0.096084076 | 0.425276216 | 0.016078103 |
| 0.292227671 | 0.008298141 | 0.03543137  | 0.047288759 |
| 0.103280471 | 0.170834341 | 0.200145311 | 0.213964145 |
| 0.16709911  | 0.128853572 | 0.222739702 | 0.295593931 |
| 0.490199311 | 0.221216953 | 0.354669012 | 0.136242667 |
| 0.347919691 | 0.235749408 | 0.252075635 | 0.003330958 |
| 0.247034446 | 0.012888289 | 0.369818283 | 0.114304147 |
| 0.097644864 | 0.274549063 | 0.195925794 | 0.097030064 |
| 0.218003636 | 0.009795843 | 0.188290596 | 0.35746536  |
| 0.219806018 | 0.12797868  | 0.025386282 | 0.352322354 |
| 0.196196392 | 0.239879199 | 0.366203552 | 0.001427992 |
| 0.206549114 | 0.124156009 | 0.196294985 | 0.470484613 |
| 0.11076371  | 0.041783424 | 0.22478621  | 0.118619291 |
| 0.311254301 | 0.311168185 | 0.162391983 | 0.214500039 |
| 0.464342954 | 0.142187842 | 0.411161109 | 0.067386    |
| 0.177375842 | 0.009582419 | 0.08747678  | 0.042772278 |
| 0.211641495 | 0.089041779 | 0.204862805 | 0.187419243 |
| 0.414507706 | 0.460744875 | 0.13723459  | 0.460957767 |
| 0.081722157 | 0.259739493 | 0.150238665 | 0.214712002 |
| 0.304607422 | 0.031087806 | 0.33066681  | 0.474536289 |
| 0.016335002 | 0.300692781 | 0.333094869 | 0.068469278 |
| 0.402602692 | 0.201988286 | 0.269814976 | 0.126207488 |
| 0.307143856 | 0.229357652 | 0.435571954 | 0.187310853 |
| 0.179927531 | 0.031241994 | 0.433715506 | 0.249773005 |
| 0.138490265 | 0.030875841 | 0.1163415   | 0.477505132 |
| 0.302143114 | 0.47603828  | 0.419039197 | 0.302204059 |
| 0.265906219 | 0.469428261 | 0.304836827 | 0.385687237 |
| 0.168647711 | 0.500740434 | 0.080307793 | 0.011096173 |
| 0.025096628 | 0.028218783 | 0.141434487 | 0.225549241 |
| 0.46094836  | 0.231108895 | 0.075160336 | 0.10505577  |
| 0.449473629 | 0.437711552 | 0.504097038 | 0.371097515 |
| 0.010007653 | 0.185827737 | 0.253124146 | 0.124242421 |
| 0.290710445 | 0.050779217 | 0.156553728 | 0.451425061 |
| 0.311811837 | 0.41452345  | 0.064286674 | 0.433304539 |
| 0.087824069 | 0.46258251  | 0.444552629 | 0.06490725  |
| 0.465372543 | 0.440181095 | 0.47580991  | 0.356840663 |
| 0.420575702 | 0.165040091 | 0.046408065 | 0.334275984 |
| 0.437575207 | 0.00956346  | 0.489657258 | 0.507106715 |
| 0.469706277 | 0.466862609 | 0.497303849 | 0.499018813 |
| 0.479664786 | 0.028833615 | 0.03467609  | 0.189832705 |
| 0.464915453 | 0.331537289 | 0.056317358 | 0.293546412 |
| 0.270386013 | 0.193578748 | 0.409618183 | 0.182908252 |
| 0.455530218 | 0.432698915 | 0.497029653 | 0.340340143 |
| 0.191125819 | 0.246980865 | 0.300370558 | 0.413055369 |
| 0.011607602 | 0.04087467  | 0.022731219 | 0.230464056 |
| 0.190153065 | 0.078169188 | 0.177876471 | 0.253920919 |
| 0.098440216 | 0.164104457 | 0.232577831 | 0.325457958 |
| 0.030414073 | 0.311329755 | 0.065464644 | 0.075922801 |
| 0.009837067 | 0.089839726 | 0.074838097 | 0.057047664 |
| 0.124811943 | 0.172750758 | 0.402146843 | 0.475638328 |

|             |             |             |             |
|-------------|-------------|-------------|-------------|
| 0.189188524 | 0.10957727  | 0.349140245 | 0.430605911 |
| 0.359768817 | 0.259732995 | 0.149724155 | 0.001963508 |
| 0.139048866 | 0.232698703 | 0.163205605 | 0.311323527 |
| 0.122972632 | 0.108329355 | 0.278293781 | 0.343469147 |
| 0.140762952 | 0.058672162 | 0.201462918 | 0.356524458 |
| 0.092367114 | 0.147180323 | 0.413988162 | 0.291506493 |
| 0.000114514 | 0.163734187 | 0.41697017  | 0.076344257 |
| 0.22146432  | 0.103205738 | 0.178159508 | 0.440686207 |
| 0.207896822 | 0.138657361 | 0.494697359 | 0.345965434 |
| 0.190866517 | 0.170379583 | 0.502845961 | 0.057412935 |
| 0.237212282 | 0.020110596 | 0.183829451 | 0.215281638 |
| 0.131599765 | 0.205416306 | 0.224134339 | 0.141374365 |
| 0.070119618 | 0.485669579 | 0.33999054  | 0.492243178 |
| 0.209159852 | 0.49968727  | 0.447958476 | 0.398266092 |
| 0.250745389 | 0.241308555 | 0.130697481 | 0.398588822 |
| 0.4383393   | 0.179461257 | 0.038313604 | 0.452821912 |
| 0.20752753  | 0.350718655 | 0.059115156 | 0.456139311 |
| 0.42909849  | 0.437935911 | 0.054560236 | 0.318672734 |
| 0.309095546 | 0.10871949  | 0.376753229 | 0.496531859 |
| 0.205307165 | 0.21948784  | 0.17331456  | 0.354445677 |
| 0.087342053 | 0.11696337  | 0.255479067 | 0.165342085 |
| 0.018352483 | 0.030375628 | 0.023748533 | 0.061963155 |
| 0.108736799 | 0.365580729 | 0.309953679 | 0.491947484 |
| 0.039350859 | 0.367034536 | 0.161441661 | 0.13336047  |
| 0.374509053 | 0.201753088 | 0.281214609 | 0.294292096 |
| 0.160950249 | 0.003813683 | 0.039424256 | 0.457686134 |
| 0.01739685  | 0.153338321 | 0.166307616 | 0.000562846 |
| 0.012682939 | 0.414391407 | 0.056951832 | 0.130203477 |
| 0.465564813 | 0.136057041 | 0.116202813 | 0.192065612 |
| 0.253956702 | 0.03328464  | 0.000573865 | 0.471997258 |
| 0.467621343 | 0.436274143 | 0.467435881 | 0.421830151 |
| 0.430917194 | 0.366733093 | 0.374777353 | 0.200938199 |
| 0.034611898 | 0.031837899 | 0.127459991 | 0.130704653 |
| 0.002382362 | 0.311414431 | 0.180311681 | 0.071885454 |
| 0.397051897 | 0.208452887 | 0.009872451 | 0.270728637 |
| 0.004884686 | 0.165673258 | 0.146572673 | 0.095898115 |
| 0.290809644 | 0.002585474 | 0.124934929 | 0.182547343 |
| 0.378770024 | 0.27598992  | 0.227611588 | 0.495104112 |
| 0.180443503 | 0.079888882 | 0.145096106 | 0.336947701 |
| 0.020908609 | 0.078303377 | 0.177818088 | 0.030864555 |
| 0.131563853 | 0.416573613 | 0.214932606 | 0.021380998 |
| 0.144561358 | 0.000449266 | 0.298467949 | 0.493141154 |
| 0.435772671 | 0.503057903 | 0.468250642 | 0.166586096 |
| 0.468045292 | 0.14706223  | 0.511485459 | 0.361476721 |
| 0.226557468 | 0.000135928 | 0.001562501 | 0.480955227 |
| 0.263413149 | 0.032420002 | 0.072885004 | 0.177774694 |
| 0.035058888 | 0.058769034 | 0.020804806 | 0.099514748 |
| 0.311628596 | 0.126385529 | 0.109296961 | 0.434782873 |
| 0.095909439 | 0.118802495 | 0.205399135 | 0.04430252  |
| 0.2983358   | 0.013731265 | 0.043483339 | 0.003068008 |
| 0.299510024 | 0.071798559 | 0.409135218 | 0.483783254 |
| 0.443433331 | 0.320255938 | 0.233864155 | 0.189763874 |
| 0.426729828 | 0.058550966 | 0.23502513  | 0.058168731 |
| 0.458646153 | 0.290674171 | 0.231226088 | 0.22612447  |

|             |             |             |             |
|-------------|-------------|-------------|-------------|
| 0.461481852 | 0.418023462 | 0.007916997 | 0.351308833 |
| 0.003046479 | 0.000685617 | 0.198753199 | 0.174780852 |
| 0.058285783 | 0.213792972 | 0.165785689 | 0.118691852 |
| 0.109016619 | 0.008217735 | 0.176398494 | 0.15423648  |
| 0.17588802  | 0.19989925  | 0.171187623 | 0.173504241 |
| 0.129641371 | 0.070107821 | 0.079874118 | 0.059906965 |
| 0.158933051 | 0.242159508 | 0.131749102 | 0.004443706 |
| 0.27305835  | 0.274570766 | 0.016021394 | 0.084094685 |
| 0.399116796 | 0.478566305 | 0.010684732 | 0.001647379 |
| 0.184515088 | 0.159844974 | 0.486844553 | 0.480687579 |
| 0.475574398 | 0.472306786 | 0.321550846 | 0.050111565 |
| 0.020285931 | 0.194772676 | 0.195057787 | 0.038673299 |
| 0.487016035 | 0.031135405 | 0.4507718   | 0.217162475 |
| 0.053273183 | 0.080410436 | 0.008139936 | 0.028408249 |
| 0.306656188 | 0.090043725 | 0.071327403 | 0.079477141 |
| 0.142308328 | 0.165544693 | 0.013187945 | 0.089941658 |
| 0.264864333 | 0.124701858 | 0.074263865 | 0.145556303 |
| 0.289498837 | 0.172177503 | 0.38605299  | 0.381082001 |
| 0.064689469 | 0.044387332 | 0.12134015  | 0.335820925 |
| 0.435557218 | 0.312946462 | 0.008646527 | 0.444150353 |
| 0.466877112 | 0.366159953 | 0.460171318 | 0.340318701 |
| 0.038267649 | 0.231921853 | 0.204520232 | 0.215704836 |
| 0.091242793 | 0.180803416 | 0.115592095 | 0.022200198 |
| 0.231089158 | 0.421799021 | 0.378041085 | 0.060070965 |
| 0.307878124 | 0.069612204 | 0.025769365 | 0.43949235  |
| 0.112073249 | 0.029899779 | 0.212636674 | 0.435932372 |
| 0.000109184 | 0.120442348 | 0.475726523 | 0.101435068 |
| 0.47090394  | 0.458336138 | 0.373585248 | 0.116682464 |
| 0.002100546 | 0.361160765 | 0.249006827 | 0.191748035 |
| 0.406408893 | 0.266442603 | 0.078692945 | 0.021335896 |
| 0.202377062 | 0.044116855 | 0.048559263 | 0.177022657 |
| 0.122546947 | 0.299055117 | 0.11309627  | 0.108439319 |
| 0.081068454 | 0.054591209 | 0.165907686 | 0.095040492 |
| 0.112785416 | 0.149708306 | 0.269790994 | 0.196290048 |
| 0.135394861 | 0.411240609 | 0.352676679 | 0.006123699 |
| 0.25332382  | 0.374410029 | 0.39871122  | 0.000278049 |
| 0.370717173 | 0.000838433 | 0.081051812 | 0.087006693 |
| 0.078428456 | 0.090494988 | 0.156405444 | 0.140246156 |
| 0.240096686 | 0.086380571 | 0.113452307 | 0.126546464 |
| 0.061754487 | 0.093207651 | 0.270194978 | 0.170732283 |
| 0.130912187 | 0.042500162 | 0.061696094 | 0.066469575 |
| 0.015423487 | 0.455373333 | 0.167991526 | 0.038437012 |
| 0.123230915 | 0.177079508 | 0.274899684 | 0.471350791 |
| 0.367924809 | 0.075660836 | 0.163078379 | 0.419423117 |
| 0.195808196 | 0.148757466 | 0.02166191  | 0.225133366 |
| 0.108645169 | 0.114534171 | 0.250340686 | 0.192624629 |
| 0.364290979 | 0.324858037 | 0.163062814 | 0.389244521 |
| 0.170749606 | 0.210487688 | 0.195979035 | 0.026494496 |
| 0.062685346 | 0.071600296 | 0.158533487 | 0.000447081 |
| 0.236376642 | 0.110419158 | 0.461015883 | 0.442031607 |
| 0.211265842 | 0.317273339 | 0.184368776 | 0.02839902  |
| 0.177446126 | 0.130839484 | 0.072309158 | 0.40903656  |
| 0.184224289 | 0.069075636 | 0.176491376 | 0.154679647 |
| 0.390332821 | 0.388265197 | 0.137549718 | 0.108028205 |

|             |             |             |             |
|-------------|-------------|-------------|-------------|
| 0.123875193 | 0.109248489 | 0.427996802 | 0.044378274 |
| 0.333522566 | 0.094594237 | 0.277200334 | 0.137562099 |
| 0.09531847  | 0.504800476 | 0.020492485 | 0.517137924 |
| 0.163839357 | 0.07822827  | 0.426170617 | 0.158598993 |
| 0.133401948 | 0.048176284 | 0.156507479 | 0.202344626 |
| 0.098214142 | 0.22042345  | 0.01995642  | 0.042357283 |
| 0.232536972 | 0.17927317  | 0.387385492 | 0.301377058 |
| 0.132216956 | 0.268177155 | 0.160986522 | 0.134651532 |
| 0.448859832 | 0.44455752  | 0.108771625 | 0.163686729 |
| 0.262249522 | 0.032622497 | 0.287304698 | 0.014471151 |
| 0.331326739 | 0.355345239 | 0.229666641 | 0.015272627 |
| 0.003534393 | 0.161649894 | 0.304851404 | 0.032180743 |
| 0.471947017 | 0.183235313 | 0.281726343 | 0.372351915 |
| 0.108195111 | 0.44024621  | 0.046258718 | 0.328699811 |
| 0.016902745 | 0.155620561 | 0.253155191 | 0.246318798 |
| 0.100718652 | 0.169092883 | 0.29213119  | 0.145198516 |
| 0.006972358 | 0.117908708 | 0.000133826 | 0.328935686 |
| 0.420590962 | 0.21245946  | 0.134860471 | 0.223569503 |
| 0.178029825 | 0.332427329 | 0.129344012 | 0.28765189  |
| 0.001772782 | 0.268862208 | 0.097754494 | 0.361436438 |
| 0.165588936 | 0.246349262 | 0.015796518 | 0.204841774 |
| 0.391134643 | 0.145086434 | 0.18242962  | 0.186930096 |
| 0.463461608 | 0.349658764 | 0.104641137 | 0.114803777 |
| 0.332252536 | 0.0279397   | 0.216152374 | 0.497212935 |
| 0.066267227 | 0.127541789 | 0.423214754 | 0.078450833 |
| 0.19352388  | 0.339539769 | 0.336256458 | 0.492574282 |
| 0.024599159 | 0.143319841 | 0.3885456   | 0.433218893 |
| 0.215617361 | 0.103891507 | 0.155709939 | 0.10809744  |
| 0.418626054 | 0.032550039 | 0.156866602 | 0.262990583 |
| 0.138964109 | 0.205481402 | 0.264004824 | 0.090900509 |
| 0.010149535 | 0.069890358 | 0.182056746 | 0.066643925 |
| 0.169926697 | 0.208755054 | 0.122194718 | 0.31467419  |
| 0.051818042 | 0.005047681 | 0.38803246  | 0.014304013 |
| 0.190243925 | 0.289498003 | 0.126291666 | 0.195729327 |
| 0.117414759 | 0.231985401 | 0.188710752 | 0.000181852 |
| 0.36417756  | 0.02498196  | 0.160006713 | 0.105896895 |
| 0.188321345 | 0.01486603  | 0.405027335 | 0.495443454 |
| 0.210252465 | 0.212337051 | 0.224725887 | 0.425373556 |
| 0.104784999 | 0.245643723 | 0.220808833 | 0.326706529 |
| 0.155076629 | 0.232343599 | 1           | 0.219544856 |
| 0.297506969 | 0.119535383 |             |             |
| ZRANB3      | 0.01819959  | 0.346606446 | 0.015069656 |
| 0.071715376 | 0.256918623 | 0.184350065 | 0.011393493 |
| 0.032232195 | 0.239149458 | 0.135990151 | 0.245241767 |
| 0.002928213 | 0.111235479 | 0.390390798 | 0.010103557 |
| 0.315299244 | 0.0069907   | 0.030212699 | 0.026070157 |
| 0.085714802 | 0.206569885 | 0.221248489 | 0.181530907 |
| 0.186104211 | 0.106502735 | 0.194786751 | 0.27786374  |
| 0.452441172 | 0.232282253 | 0.384718804 | 0.150420725 |
| 0.318018999 | 0.283373004 | 0.27719194  | 0.002941036 |
| 0.24587208  | 0.0075992   | 0.317750198 | 0.126597245 |
| 0.176532082 | 0.242341323 | 0.164631907 | 0.114527438 |
| 0.19422186  | 0.007911289 | 0.138111035 | 0.335154322 |
| 0.189993801 | 0.112919542 | 0.016963299 | 0.353850189 |

|             |             |             |             |
|-------------|-------------|-------------|-------------|
| 0.153334462 | 0.226209826 | 0.30100674  | 0.000259454 |
| 0.235528115 | 0.155389597 | 0.210213808 | 0.423653855 |
| 0.112817934 | 0.041610578 | 0.169678755 | 0.084355826 |
| 0.257299895 | 0.283825894 | 0.150445858 | 0.157679494 |
| 0.431894413 | 0.153524732 | 0.391754134 | 0.083284981 |
| 0.16238208  | 0.004378248 | 0.080590696 | 0.025574323 |
| 0.189548473 | 0.099694208 | 0.235682361 | 0.207003801 |
| 0.348793601 | 0.399878698 | 0.127051448 | 0.393487879 |
| 0.062690891 | 0.286916168 | 0.170784379 | 0.221752545 |
| 0.255970552 | 0.01686806  | 0.359789963 | 0.434615666 |
| 0.007549427 | 0.237670357 | 0.289217904 | 0.04584713  |
| 0.36840481  | 0.170319253 | 0.238309024 | 0.176076998 |
| 0.346865097 | 0.255051969 | 0.354417124 | 0.191301228 |
| 0.193009953 | 0.022512398 | 0.361593183 | 0.297931258 |
| 0.168150331 | 0.028338582 | 0.12733678  | 0.456550367 |
| 0.317895593 | 0.447259961 | 0.347282068 | 0.265903728 |
| 0.2866907   | 0.446057711 | 0.333175394 | 0.329495137 |
| 0.108002309 | 0.444642878 | 0.087561938 | 0.009571122 |
| 0.014888454 | 0.023568132 | 0.106145498 | 0.209063374 |
| 0.45659698  | 0.207635722 | 0.065892417 | 0.126608645 |
| 0.444197873 | 0.366386825 | 0.438370733 | 0.335944629 |
| 0.007409836 | 0.171099979 | 0.295426205 | 0.100673245 |
| 0.264908725 | 0.03724565  | 0.211123529 | 0.390012373 |
| 0.307407958 | 0.414558904 | 0.048169874 | 0.368508358 |
| 0.055385835 | 0.441260236 | 0.404020013 | 0.075135668 |
| 0.421547454 | 0.387630907 | 0.462443478 | 0.409735247 |
| 0.380753198 | 0.188864258 | 0.01722683  | 0.288680387 |
| 0.421141145 | 0.020996821 | 0.450478523 | 0.474991455 |
| 0.420351016 | 0.464451874 | 0.465655869 | 0.47237625  |
| 0.418840148 | 0.021116401 | 0.017846602 | 0.203639823 |
| 0.413255698 | 0.342280621 | 0.044211486 | 0.292840122 |
| 0.278903509 | 0.189099168 | 0.376409957 | 0.187031292 |
| 0.414379432 | 0.424756376 | 0.452113357 | 0.28872437  |
| 0.144941453 | 0.214671372 | 0.314513876 | 0.353534262 |
| 0.010566093 | 0.032498057 | 0.016305693 | 0.195882823 |
| 0.169759711 | 0.085480636 | 0.146416504 | 0.227326687 |
| 0.102101175 | 0.130859146 | 0.230251084 | 0.360850693 |
| 0.018464734 | 0.310055904 | 0.066042447 | 0.062510323 |
| 0.010469388 | 0.068305065 | 0.072931873 | 0.066954009 |
| 0.137825073 | 0.12685397  | 0.373916485 | 0.449665101 |
| 0.161704835 | 0.100064681 | 0.325274536 | 0.410016243 |
| 0.350454766 | 0.317215201 | 0.122857105 | 0.006457725 |
| 0.13937627  | 0.167962112 | 0.179162157 | 0.312247833 |
| 0.090709237 | 0.089370159 | 0.270535765 | 0.394242416 |
| 0.132614358 | 0.036443924 | 0.17666687  | 0.313187612 |
| 0.06856305  | 0.173246006 | 0.410752653 | 0.248107868 |
| 0.000122823 | 0.175981046 | 0.415308371 | 0.080260623 |
| 0.179117805 | 0.133276807 | 0.239970921 | 0.432362535 |
| 0.175355766 | 0.131649198 | 0.466128259 | 0.377311959 |
| 0.149205075 | 0.117165854 | 0.461038613 | 0.038328815 |
| 0.224287027 | 0.040133232 | 0.206732173 | 0.162514882 |
| 0.135738076 | 0.191689275 | 0.263856339 | 0.171998145 |
| 0.059378413 | 0.42741814  | 0.316375429 | 0.462179257 |
| 0.198740335 | 0.459309291 | 0.44453668  | 0.391876325 |

|             |             |             |             |
|-------------|-------------|-------------|-------------|
| 0.249607122 | 0.20879047  | 0.166832113 | 0.407567117 |
| 0.435274722 | 0.138732015 | 0.02676857  | 0.404071263 |
| 0.174764547 | 0.358128051 | 0.07297586  | 0.44476816  |
| 0.389571402 | 0.366961888 | 0.050496394 | 0.33166372  |
| 0.325765182 | 0.117126215 | 0.362238527 | 0.447643567 |
| 0.141999475 | 0.223926795 | 0.187368379 | 0.380659849 |
| 0.088638205 | 0.120509528 | 0.211765092 | 0.180301356 |
| 0.041551217 | 0.019523578 | 0.018975105 | 0.070426502 |
| 0.154140333 | 0.320455926 | 0.319040448 | 0.446947058 |
| 0.037027402 | 0.343636334 | 0.122830643 | 0.151794568 |
| 0.330962555 | 0.185904957 | 0.32215838  | 0.310583595 |
| 0.141318259 | 0.008695317 | 0.052119129 | 0.401969947 |
| 0.00922787  | 0.193064269 | 0.127322271 | 0.0016729   |
| 0.008340943 | 0.337641221 | 0.040195249 | 0.106937682 |
| 0.451115024 | 0.113436636 | 0.106366395 | 0.134618005 |
| 0.272110439 | 0.029987929 | 0.002560929 | 0.429094519 |
| 0.39317892  | 0.361775333 | 0.387109297 | 0.341706973 |
| 0.369343923 | 0.323269022 | 0.375903745 | 0.194731458 |
| 0.02857873  | 0.02073462  | 0.161487577 | 0.147264418 |
| 0.000855174 | 0.336991968 | 0.180147449 | 0.067296981 |
| 0.378188559 | 0.175670831 | 0.007562741 | 0.26997946  |
| 0.007122694 | 0.224501434 | 0.098883171 | 0.076497476 |
| 0.293455686 | 0.002011787 | 0.173232297 | 0.186059571 |
| 0.338319819 | 0.2460568   | 0.229751032 | 0.452141782 |
| 0.210966865 | 0.056868863 | 0.190141416 | 0.356792415 |
| 0.016657063 | 0.051745482 | 0.126643349 | 0.044522228 |
| 0.107091515 | 0.339781238 | 0.178180139 | 0.021235603 |
| 0.160246497 | 0.000573036 | 0.2822662   | 0.445211045 |
| 0.376577944 | 0.475395824 | 0.444483353 | 0.215204792 |
| 0.438143949 | 0.148380221 | 0.468340215 | 0.324997028 |
| 0.175655449 | 0.000376012 | 0.001295328 | 0.475853029 |
| 0.297515509 | 0.020162188 | 0.072320797 | 0.190411401 |
| 0.040555917 | 0.04118645  | 0.013893558 | 0.144084109 |
| 0.325818911 | 0.158188154 | 0.121600393 | 0.361435187 |
| 0.10674544  | 0.117132684 | 0.156923938 | 0.030056134 |
| 0.316848701 | 0.01420446  | 0.028367196 | 0.006305956 |
| 0.304415056 | 0.051692694 | 0.335318085 | 0.434053154 |
| 0.414249773 | 0.363288958 | 0.17568878  | 0.158777179 |
| 0.379048141 | 0.041548528 | 0.213851618 | 0.042221176 |
| 0.410478404 | 0.31830153  | 0.242764674 | 0.223492356 |
| 0.43426447  | 0.38938331  | 0.005603735 | 0.358355581 |
| 0.006294377 | 0.001101171 | 0.198774508 | 0.141919342 |
| 0.029431382 | 0.221558112 | 0.165097509 | 0.07634018  |
| 0.084019463 | 0.007628823 | 0.195255273 | 0.177702871 |
| 0.196110578 | 0.205689143 | 0.220904312 | 0.131614837 |
| 0.139984318 | 0.085125882 | 0.081935669 | 0.04336436  |
| 0.089394314 | 0.213656695 | 0.111223738 | 0.002770565 |
| 0.276635934 | 0.300012119 | 0.013706773 | 0.072940928 |
| 0.416092494 | 0.464675245 | 0.009074897 | 0.004347512 |
| 0.163955173 | 0.131787046 | 0.465633167 | 0.429252199 |
| 0.417615911 | 0.439739025 | 0.27962427  | 0.04622652  |
| 0.016262658 | 0.214221592 | 0.240248897 | 0.05321398  |
| 0.442715214 | 0.018887752 | 0.400159008 | 0.269355166 |
| 0.043106193 | 0.088531016 | 0.009763952 | 0.0234835   |

|             |             |             |             |
|-------------|-------------|-------------|-------------|
| 0.341547905 | 0.081012017 | 0.088930362 | 0.070231248 |
| 0.14704266  | 0.201679021 | 0.008628929 | 0.090930105 |
| 0.243425892 | 0.183629245 | 0.068509036 | 0.108230302 |
| 0.265342436 | 0.089495762 | 0.392273224 | 0.357055331 |
| 0.054979175 | 0.032734785 | 0.112285016 | 0.296822814 |
| 0.412212255 | 0.261282661 | 0.013068042 | 0.37690698  |
| 0.435556274 | 0.379032678 | 0.410928237 | 0.32057462  |
| 0.028094672 | 0.281871362 | 0.174565404 | 0.225954666 |
| 0.076403225 | 0.189847798 | 0.100922415 | 0.016832162 |
| 0.193320017 | 0.350859862 | 0.345590772 | 0.069068656 |
| 0.287654372 | 0.045195031 | 0.015444462 | 0.388830367 |
| 0.153724297 | 0.025853432 | 0.169707842 | 0.388911737 |
| 0.002358112 | 0.164620727 | 0.435554595 | 0.099280935 |
| 0.415836567 | 0.450589941 | 0.36070941  | 0.087321112 |
| 0.002312587 | 0.373950711 | 0.288514027 | 0.213090175 |
| 0.353827992 | 0.246776313 | 0.049079359 | 0.024367746 |
| 0.204541974 | 0.031937017 | 0.047586423 | 0.162695436 |
| 0.147334535 | 0.260874158 | 0.104882032 | 0.084646715 |
| 0.087236673 | 0.030480324 | 0.211384562 | 0.102932208 |
| 0.098206829 | 0.146747812 | 0.273268318 | 0.120258803 |
| 0.167024527 | 0.359392429 | 0.326917717 | 0.004929496 |
| 0.270806326 | 0.33839316  | 0.368781932 | 0.000494413 |
| 0.393691743 | 0.000913392 | 0.092303915 | 0.114502053 |
| 0.087607529 | 0.077637591 | 0.171848628 | 0.168595576 |
| 0.20909472  | 0.085310563 | 0.13029434  | 0.141240735 |
| 0.076869282 | 0.085829372 | 0.288411255 | 0.164619057 |
| 0.165534497 | 0.041248398 | 0.043268334 | 0.045732869 |
| 0.016879247 | 0.408180272 | 0.151703652 | 0.029140015 |
| 0.11960831  | 0.142872445 | 0.271950696 | 0.410542364 |
| 0.356964984 | 0.054268266 | 0.13869574  | 0.396137147 |
| 0.123017731 | 0.129383973 | 0.011655881 | 0.232856475 |
| 0.103873684 | 0.139633921 | 0.223855328 | 0.17094946  |
| 0.3017463   | 0.300389034 | 0.145334465 | 0.364805125 |
| 0.193559813 | 0.168368781 | 0.150181396 | 0.034779526 |
| 0.06633235  | 0.053797741 | 0.209183458 | 0.000180548 |
| 0.231951953 | 0.107096416 | 0.455147236 | 0.398498103 |
| 0.207541701 | 0.303677014 | 0.14843097  | 0.02541458  |
| 0.148152766 | 0.099899217 | 0.061328924 | 0.379391098 |
| 0.219579062 | 0.066202183 | 0.219272175 | 0.13442408  |
| 0.396547518 | 0.353613925 | 0.131754    | 0.075935129 |
| 0.111031896 | 0.09873263  | 0.353547652 | 0.033743868 |
| 0.316565184 | 0.144487127 | 0.209892098 | 0.166245232 |
| 0.100546535 | 0.465109134 | 0.015771908 | 0.475139601 |
| 0.176856967 | 0.058267396 | 0.383629937 | 0.135945699 |
| 0.118245745 | 0.060263271 | 0.201643038 | 0.14798841  |
| 0.079514258 | 0.232231964 | 0.01187046  | 0.039915253 |
| 0.252577752 | 0.115740519 | 0.320200054 | 0.262574575 |
| 0.153478456 | 0.262849839 | 0.173083336 | 0.105809239 |
| 0.378161002 | 0.374014253 | 0.116598836 | 0.152075725 |
| 0.229582373 | 0.031131032 | 0.268162559 | 0.005277358 |
| 0.326807698 | 0.3492123   | 0.172351413 | 0.010374577 |
| 0.002756268 | 0.205824171 | 0.295780982 | 0.018083039 |
| 0.453330939 | 0.221267248 | 0.213526982 | 0.386462935 |
| 0.078862076 | 0.374567341 | 0.047879022 | 0.366438009 |

|             |             |             |             |
|-------------|-------------|-------------|-------------|
| 0.007181167 | 0.14240971  | 0.262408264 | 0.199565311 |
| 0.139450485 | 0.202823714 | 0.325400913 | 0.193919096 |
| 0.006722919 | 0.141746399 | 0.000165793 | 0.291585079 |
| 0.350267891 | 0.240240226 | 0.110319725 | 0.13604065  |
| 0.195089955 | 0.294885094 | 0.099887454 | 0.275970463 |
| 0.003432945 | 0.324025939 | 0.09223806  | 0.351649776 |
| 0.211607737 | 0.202357154 | 0.02152449  | 0.204049784 |
| 0.319479497 | 0.12974182  | 0.145906901 | 0.202008654 |
| 0.412462147 | 0.302007727 | 0.085283915 | 0.122971124 |
| 0.260398639 | 0.018784658 | 0.169290364 | 0.441207683 |
| 0.074226285 | 0.177438357 | 0.445845634 | 0.08434977  |
| 0.209162508 | 0.29200972  | 0.294573563 | 0.42116425  |
| 0.027438788 | 0.143657344 | 0.38303278  | 0.37622421  |
| 0.218829133 | 0.123014411 | 0.183953533 | 0.115840534 |
| 0.372293747 | 0.040777642 | 0.149842595 | 0.255938939 |
| 0.182037854 | 0.199777512 | 0.197004663 | 0.102095393 |
| 0.010985468 | 0.048122668 | 0.183298988 | 0.057812908 |
| 0.169789967 | 0.243218213 | 0.139436401 | 0.303248669 |
| 0.07193314  | 0.011852302 | 0.362266019 | 0.02958961  |
| 0.191038314 | 0.346045641 | 0.11993808  | 0.216624463 |
| 0.107533198 | 0.196136017 | 0.162723626 | 0.000474608 |
| 0.35833536  | 0.056979098 | 0.132894365 | 0.137357549 |
| 0.155564275 | 0.009575969 | 0.37560749  | 0.471154586 |
| 0.186046607 | 0.166927856 | 0.224105164 | 0.372825309 |
| 0.163424042 | 0.214379795 | 0.177049519 | 0.30136221  |
| 0.197902622 | 0.204544769 | 0.219544856 | 1           |
| 0.28828037  | 0.091461552 |             |             |
| ZRSR1       | 0.123576641 | 0.410033335 | 0.101952566 |
| 0.190141505 | 0.26723667  | 0.345219552 | 0.101748448 |
| 0.164217014 | 0.314969778 | 0.224813479 | 0.325066488 |
| 0.047586343 | 0.078746364 | 0.432146583 | 0.099021143 |
| 0.305680078 | 0.07446604  | 0.153578326 | 0.078239946 |
| 0.240279503 | 0.251496468 | 0.289175197 | 0.312393803 |
| 0.256284808 | 0.235212406 | 0.301462269 | 0.282234512 |
| 0.476067001 | 0.206251475 | 0.340925826 | 0.164259735 |
| 0.422700056 | 0.273602605 | 0.291768745 | 0.048418283 |
| 0.337745433 | 0.013404201 | 0.446737395 | 0.2607571   |
| 0.150309365 | 0.368368452 | 0.26135462  | 0.270291442 |
| 0.278712309 | 0.078736688 | 0.163116016 | 0.299627216 |
| 0.285588533 | 0.281840853 | 0.108865934 | 0.339128244 |
| 0.281868043 | 0.31288249  | 0.306732041 | 0.002482021 |
| 0.23784715  | 0.068110684 | 0.171524983 | 0.498267814 |
| 0.236351291 | 0.178355531 | 0.191157834 | 0.256041356 |
| 0.296086307 | 0.299722602 | 0.265277231 | 0.269051575 |
| 0.484434806 | 0.143900269 | 0.325958875 | 0.187968883 |
| 0.324957281 | 0.06568574  | 0.19764992  | 0.121609306 |
| 0.312659498 | 0.237450488 | 0.305196965 | 0.250500978 |
| 0.40143915  | 0.517037171 | 0.252364596 | 0.490085745 |
| 0.093963308 | 0.265345228 | 0.25633721  | 0.28288869  |
| 0.296279371 | 0.12096337  | 0.339878822 | 0.509670738 |
| 0.087032679 | 0.27991128  | 0.307683515 | 0.155928074 |
| 0.416064934 | 0.2228738   | 0.291621404 | 0.164054163 |
| 0.295639903 | 0.273090732 | 0.475124649 | 0.285818363 |
| 0.282098302 | 0.116348792 | 0.488913929 | 0.255181689 |



|             |             |             |             |
|-------------|-------------|-------------|-------------|
| 0.285023447 | 0.134157366 | 0.205008687 | 0.404667415 |
| 0.333747547 | 0.471627713 | 0.373337729 | 0.316548873 |
| 0.287487471 | 0.485051773 | 0.33391746  | 0.401130429 |
| 0.111818026 | 0.507996337 | 0.233369879 | 0.088955623 |
| 0.109584441 | 0.139651244 | 0.206041567 | 0.308667823 |
| 0.444031043 | 0.301729649 | 0.225263497 | 0.245787809 |
| 0.419727833 | 0.474938404 | 0.501177318 | 0.36672947  |
| 0.080336152 | 0.20056917  | 0.292356896 | 0.289783848 |
| 0.309555152 | 0.157158059 | 0.220594328 | 0.509045577 |
| 0.387566767 | 0.383967064 | 0.20361141  | 0.510036318 |
| 0.215531489 | 0.507303394 | 0.423942482 | 0.215384991 |
| 0.514380644 | 0.498897559 | 0.493241902 | 0.310713031 |
| 0.481915757 | 0.32128753  | 0.063106304 | 0.351069113 |
| 0.482351657 | 0.020156838 | 0.43453599  | 0.461239606 |
| 0.483191171 | 0.403469767 | 0.496989072 | 0.4841234   |
| 0.487314406 | 0.117871702 | 0.02077382  | 0.263607377 |
| 0.497552648 | 0.388199428 | 0.169575559 | 0.299909846 |
| 0.293832228 | 0.337513226 | 0.361700278 | 0.243415817 |
| 0.509382193 | 0.425869487 | 0.454508974 | 0.328322569 |
| 0.26071824  | 0.342624596 | 0.274524055 | 0.4767507   |
| 0.090439401 | 0.160200861 | 0.092576554 | 0.281222473 |
| 0.281516916 | 0.213431202 | 0.308620282 | 0.28318902  |
| 0.228253293 | 0.298738412 | 0.251687455 | 0.297599631 |
| 0.090272398 | 0.331150708 | 0.215048329 | 0.196792996 |
| 0.086750142 | 0.188216674 | 0.200783758 | 0.21652982  |
| 0.251935435 | 0.283835526 | 0.325747303 | 0.463273954 |
| 0.286372068 | 0.213664875 | 0.332623787 | 0.467271222 |
| 0.428057671 | 0.301518201 | 0.242667115 | 0.035536664 |
| 0.214859273 | 0.217930616 | 0.146272095 | 0.306745928 |
| 0.231050054 | 0.227053895 | 0.301060801 | 0.321075102 |
| 0.275805    | 0.181429653 | 0.277949887 | 0.448333954 |
| 0.180857405 | 0.286853536 | 0.408179844 | 0.302862606 |
| 0.015516024 | 0.298315428 | 0.395392426 | 0.157644858 |
| 0.280195873 | 0.141353472 | 0.215073485 | 0.430032173 |
| 0.214933389 | 0.203790506 | 0.465345026 | 0.31768751  |
| 0.278506916 | 0.261667127 | 0.50313427  | 0.03394316  |
| 0.274689402 | 0.074670073 | 0.275806558 | 0.253051704 |
| 0.268451159 | 0.268075066 | 0.267582597 | 0.256404305 |
| 0.167332514 | 0.502139845 | 0.373697935 | 0.489310705 |
| 0.269937921 | 0.505871847 | 0.413018439 | 0.422256029 |
| 0.330277731 | 0.258850176 | 0.11706658  | 0.383682286 |
| 0.420142826 | 0.215785909 | 0.114575958 | 0.362936677 |
| 0.263380657 | 0.304066724 | 0.131209168 | 0.475561596 |
| 0.501906463 | 0.45887499  | 0.189836025 | 0.31773918  |
| 0.362627167 | 0.263463746 | 0.380931168 | 0.51104131  |
| 0.226458563 | 0.275582161 | 0.268899458 | 0.369323911 |
| 0.21439532  | 0.202204981 | 0.328562749 | 0.149637325 |
| 0.012355489 | 0.123991484 | 0.109487193 | 0.201482528 |
| 0.162285274 | 0.303980955 | 0.317072137 | 0.490513365 |
| 0.166940627 | 0.420912222 | 0.239210104 | 0.258788451 |
| 0.404984684 | 0.279140973 | 0.299339202 | 0.308937991 |
| 0.250960981 | 0.050398824 | 0.174334406 | 0.517937811 |
| 0.072607758 | 0.205859703 | 0.29464696  | 0.008780184 |
| 0.085312976 | 0.356024902 | 0.137085238 | 0.246366166 |

|             |             |             |             |
|-------------|-------------|-------------|-------------|
| 0.450771931 | 0.245542396 | 0.225666283 | 0.235655359 |
| 0.310436265 | 0.1503272   | 0.014865498 | 0.460631716 |
| 0.46743981  | 0.440344147 | 0.462977063 | 0.455138052 |
| 0.406744998 | 0.34105448  | 0.350357798 | 0.318987298 |
| 0.147710909 | 0.132146323 | 0.180389543 | 0.263077061 |
| 0.010745432 | 0.346259596 | 0.276768693 | 0.187588961 |
| 0.33408367  | 0.273861459 | 0.080125906 | 0.289630982 |
| 0.051632129 | 0.15637573  | 0.274484793 | 0.226822956 |
| 0.293414273 | 0.041709768 | 0.223820433 | 0.235966724 |
| 0.436363329 | 0.350117016 | 0.268305694 | 0.514467645 |
| 0.3071699   | 0.157331959 | 0.283520915 | 0.334233948 |
| 0.120554014 | 0.072786464 | 0.301759963 | 0.035381807 |
| 0.194700469 | 0.450743302 | 0.284627562 | 0.114838625 |
| 0.277121569 | 0.018891913 | 0.373822175 | 0.5158084   |
| 0.458530903 | 0.486993899 | 0.488094716 | 0.229553129 |
| 0.49160578  | 0.080960988 | 0.504587707 | 0.38269596  |
| 0.268193223 | 0.002536126 | 0.017975116 | 0.450404567 |
| 0.305034766 | 0.092610209 | 0.203394014 | 0.310197253 |
| 0.16991329  | 0.196615291 | 0.115698684 | 0.184785276 |
| 0.341944539 | 0.240017345 | 0.171496647 | 0.456278111 |
| 0.250010487 | 0.252410395 | 0.308452694 | 0.129416642 |
| 0.322513878 | 0.108698141 | 0.126186993 | 0.024482142 |
| 0.308468059 | 0.148421932 | 0.476074563 | 0.491978426 |
| 0.486535541 | 0.314263289 | 0.235246756 | 0.299764801 |
| 0.406749055 | 0.135210456 | 0.272725737 | 0.155379932 |
| 0.468249213 | 0.305720587 | 0.304506432 | 0.317423134 |
| 0.481301092 | 0.45934252  | 0.073011052 | 0.344975991 |
| 0.043976054 | 0.005233617 | 0.311413596 | 0.257516011 |
| 0.065092725 | 0.285529518 | 0.261065718 | 0.22318703  |
| 0.240246218 | 0.06812922  | 0.213402107 | 0.195266541 |
| 0.280064176 | 0.295441487 | 0.238031442 | 0.24214011  |
| 0.248314715 | 0.133190015 | 0.236646089 | 0.187212962 |
| 0.206637662 | 0.320144824 | 0.237711447 | 0.0527053   |
| 0.318864221 | 0.30477507  | 0.10891843  | 0.199636526 |
| 0.413068213 | 0.458885294 | 0.081118313 | 0.034285279 |
| 0.271625031 | 0.260674091 | 0.468008837 | 0.478490541 |
| 0.517959958 | 0.505861919 | 0.413133106 | 0.150276816 |
| 0.121424662 | 0.29343911  | 0.246061643 | 0.138642786 |
| 0.490970904 | 0.100640115 | 0.480220724 | 0.238054551 |
| 0.159332679 | 0.245251235 | 0.078598151 | 0.133932404 |
| 0.29628979  | 0.21564292  | 0.21187731  | 0.179275984 |
| 0.27715895  | 0.205328115 | 0.090036591 | 0.230179408 |
| 0.304835494 | 0.145442701 | 0.197254732 | 0.291426564 |
| 0.333119487 | 0.169625546 | 0.323680704 | 0.454660806 |
| 0.178639826 | 0.154239335 | 0.261614272 | 0.318846079 |
| 0.387944554 | 0.28701897  | 0.061930521 | 0.42622299  |
| 0.469807778 | 0.330478468 | 0.49252348  | 0.369375399 |
| 0.128136466 | 0.303996643 | 0.241177151 | 0.277793484 |
| 0.213753194 | 0.340031826 | 0.243637016 | 0.108298698 |
| 0.31576349  | 0.487806514 | 0.390016325 | 0.215773729 |
| 0.325740737 | 0.161726367 | 0.092182814 | 0.416989261 |
| 0.164994148 | 0.136559501 | 0.277201894 | 0.373655711 |
| 0.005369134 | 0.125435018 | 0.460062063 | 0.266363575 |
| 0.506850863 | 0.451326564 | 0.445582979 | 0.261460334 |

|             |             |             |             |
|-------------|-------------|-------------|-------------|
| 0.001186304 | 0.303538267 | 0.320708568 | 0.315296334 |
| 0.401309325 | 0.327428181 | 0.178532553 | 0.13173148  |
| 0.298512542 | 0.120238659 | 0.171999922 | 0.316164928 |
| 0.144767727 | 0.324321738 | 0.224729082 | 0.225388242 |
| 0.217557929 | 0.121640312 | 0.219069253 | 0.269176817 |
| 0.130845479 | 0.251277106 | 0.334826967 | 0.227873791 |
| 0.149565271 | 0.40487028  | 0.347618193 | 0.064916667 |
| 0.282335471 | 0.378932712 | 0.421497551 | 0.004917767 |
| 0.325747649 | 0.024931739 | 0.219874545 | 0.239916064 |
| 0.229913058 | 0.220503086 | 0.251052788 | 0.266776891 |
| 0.291258611 | 0.239339283 | 0.279620654 | 0.258848553 |
| 0.211380386 | 0.241955024 | 0.310435476 | 0.305241924 |
| 0.261430206 | 0.189178005 | 0.144828788 | 0.155556142 |
| 0.104439789 | 0.441114149 | 0.279252381 | 0.115703416 |
| 0.247340232 | 0.293745988 | 0.364451716 | 0.475473679 |
| 0.417185371 | 0.156939748 | 0.293144675 | 0.419550016 |
| 0.150349043 | 0.26061347  | 0.100186108 | 0.326022891 |
| 0.252783323 | 0.204491114 | 0.319667965 | 0.279981782 |
| 0.314147967 | 0.426264694 | 0.268547572 | 0.442090301 |
| 0.307069464 | 0.26697453  | 0.238033862 | 0.140916261 |
| 0.21637467  | 0.168930842 | 0.239328716 | 0.010181166 |
| 0.318515694 | 0.264142762 | 0.429272882 | 0.484566439 |
| 0.221520721 | 0.395308894 | 0.259928573 | 0.137137512 |
| 0.214137357 | 0.220120396 | 0.18049869  | 0.351002893 |
| 0.170550928 | 0.231415283 | 0.266465538 | 0.298314099 |
| 0.342991093 | 0.323079961 | 0.23621492  | 0.24929133  |
| 0.245810611 | 0.231006588 | 0.46992248  | 0.17117961  |
| 0.308822743 | 0.18858142  | 0.282093661 | 0.273114037 |
| 0.226949087 | 0.486894578 | 0.107695912 | 0.491294656 |
| 0.270128663 | 0.168044573 | 0.498898547 | 0.29738582  |
| 0.286689777 | 0.174516825 | 0.156235129 | 0.295883973 |
| 0.243296381 | 0.270353665 | 0.01270772  | 0.056385994 |
| 0.299216965 | 0.247971217 | 0.338920216 | 0.302452001 |
| 0.228697272 | 0.311061021 | 0.14338401  | 0.262523808 |
| 0.469758177 | 0.498701129 | 0.245099766 | 0.249599538 |
| 0.302987273 | 0.160066572 | 0.3289463   | 0.013961206 |
| 0.310309348 | 0.301487571 | 0.277245593 | 0.099357199 |
| 0.046941198 | 0.166427426 | 0.306748407 | 0.102727574 |
| 0.443776019 | 0.162456079 | 0.284391088 | 0.338183532 |
| 0.200831954 | 0.498028597 | 0.163399125 | 0.329922491 |
| 0.074515324 | 0.263793328 | 0.294960428 | 0.287763291 |
| 0.226305896 | 0.240586781 | 0.318148712 | 0.206131033 |
| 0.072318562 | 0.260116256 | 0.0033088   | 0.432605141 |
| 0.468191309 | 0.257356267 | 0.237436825 | 0.218734373 |
| 0.275586977 | 0.372457127 | 0.219475373 | 0.307767406 |
| 0.037429154 | 0.290304328 | 0.230588999 | 0.404910765 |
| 0.173464961 | 0.28146361  | 0.110818552 | 0.250752738 |
| 0.472073389 | 0.226411791 | 0.265578461 | 0.222440128 |
| 0.474918629 | 0.364905372 | 0.187805224 | 0.224226596 |
| 0.289541271 | 0.105914312 | 0.293767126 | 0.508753409 |
| 0.215171827 | 0.192856802 | 0.397030489 | 0.222871417 |
| 0.245624022 | 0.380958359 | 0.296497681 | 0.499904636 |
| 0.109569308 | 0.255903577 | 0.359973969 | 0.431606659 |
| 0.288221729 | 0.165080194 | 0.207266484 | 0.225040562 |

|             |             |             |             |
|-------------|-------------|-------------|-------------|
| 0.453300816 | 0.161904407 | 0.204350057 | 0.310241409 |
| 0.177830826 | 0.293787893 | 0.270621753 | 0.199314363 |
| 0.087297758 | 0.194200502 | 0.328980461 | 0.187646454 |
| 0.275263167 | 0.305725222 | 0.226046274 | 0.40058458  |
| 0.186028574 | 0.061076313 | 0.455613524 | 0.016942596 |
| 0.320122971 | 0.329461734 | 0.266088144 | 0.288834611 |
| 0.221963777 | 0.300958361 | 0.279569349 | 0.005529406 |
| 0.369762381 | 0.064881888 | 0.278847113 | 0.227414512 |
| 0.220842054 | 0.093540443 | 0.462318013 | 0.485531187 |
| 0.304334314 | 0.266690832 | 0.252681571 | 0.457625319 |
| 0.131320549 | 0.239591796 | 0.256249877 | 0.318789236 |
| 0.191222927 | 0.271166013 | 0.297506969 | 0.28828037  |
| 1           | 0.280499906 |             |             |
| ZWILCH      | 0.093050235 | 0.320839432 | 0.066402074 |
| 0.076556355 | 0.170756408 | 0.133077383 | 0.084954984 |
| 0.133161556 | 0.275763867 | 0.073281951 | 0.18655013  |
| 0.042312237 | 0.051581101 | 0.353756083 | 0.09568776  |
| 0.179055807 | 0.074986945 | 0.119396685 | 0.062602327 |
| 0.110864411 | 0.151081847 | 0.114008851 | 0.174300204 |
| 0.152074395 | 0.254620783 | 0.193047433 | 0.152979787 |
| 0.359929462 | 0.065318259 | 0.232707443 | 0.040607503 |
| 0.361884311 | 0.174736574 | 0.117506746 | 0.038432188 |
| 0.187031596 | 0.01502708  | 0.382502205 | 0.108648047 |
| 0.054128365 | 0.354451618 | 0.09820482  | 0.12162455  |
| 0.106767378 | 0.053963487 | 0.05203326  | 0.204221692 |
| 0.190625288 | 0.149999296 | 0.091911596 | 0.239997519 |
| 0.110634108 | 0.28172085  | 0.215604103 | 0.005469678 |
| 0.087189481 | 0.024245191 | 0.058754866 | 0.402472047 |
| 0.235356213 | 0.142550236 | 0.06175548  | 0.179188026 |
| 0.19723289  | 0.241224804 | 0.281959936 | 0.088040282 |
| 0.378226981 | 0.064869039 | 0.23997652  | 0.089813157 |
| 0.130561736 | 0.060141634 | 0.223980243 | 0.132416188 |
| 0.115917795 | 0.196258151 | 0.197025741 | 0.09504114  |
| 0.295630691 | 0.449785483 | 0.232793345 | 0.389909672 |
| 0.055919135 | 0.158586744 | 0.120137487 | 0.267573865 |
| 0.257807907 | 0.100384631 | 0.255763185 | 0.411098275 |
| 0.084671528 | 0.15691994  | 0.229622604 | 0.173770719 |
| 0.336244801 | 0.102221889 | 0.12814555  | 0.076764028 |
| 0.214889792 | 0.146022958 | 0.414834553 | 0.239905871 |
| 0.17140681  | 0.105494548 | 0.405774144 | 0.14994904  |
| 0.123137369 | 0.103266605 | 0.090730412 | 0.300359216 |
| 0.199995239 | 0.364386795 | 0.285735416 | 0.271546124 |
| 0.145732857 | 0.375904483 | 0.232868084 | 0.360035965 |
| 0.04061365  | 0.404646506 | 0.160009021 | 0.093199544 |
| 0.080213969 | 0.141453942 | 0.116356619 | 0.340139721 |
| 0.337653345 | 0.280843678 | 0.128265666 | 0.145710141 |
| 0.324204179 | 0.385642892 | 0.392226351 | 0.298128921 |
| 0.069627642 | 0.08465684  | 0.136399956 | 0.17502385  |
| 0.240923833 | 0.180854238 | 0.094306452 | 0.416997832 |
| 0.336664262 | 0.29237877  | 0.120554965 | 0.449955877 |
| 0.144975531 | 0.419329023 | 0.308537187 | 0.139640775 |
| 0.416780137 | 0.40815311  | 0.397632169 | 0.224334018 |
| 0.415254008 | 0.150189393 | 0.043697402 | 0.301296134 |
| 0.41995315  | 0.009038627 | 0.332386346 | 0.34931593  |

|             |             |             |             |
|-------------|-------------|-------------|-------------|
| 0.369808812 | 0.28949966  | 0.401705758 | 0.382150667 |
| 0.384905    | 0.129774886 | 0.008239595 | 0.213667638 |
| 0.388867322 | 0.311786999 | 0.164182332 | 0.137570322 |
| 0.194344418 | 0.15725365  | 0.29778327  | 0.078991771 |
| 0.450527641 | 0.334636097 | 0.350669562 | 0.273208254 |
| 0.152375311 | 0.354260563 | 0.137090629 | 0.392248521 |
| 0.087321839 | 0.098342847 | 0.099930737 | 0.301503209 |
| 0.091913431 | 0.188232032 | 0.126261581 | 0.192194516 |
| 0.215466823 | 0.160073666 | 0.094070301 | 0.225889512 |
| 0.122142006 | 0.172882925 | 0.149707147 | 0.129210977 |
| 0.071120667 | 0.247622205 | 0.103526628 | 0.130852662 |
| 0.17500898  | 0.299952087 | 0.244550719 | 0.365949407 |
| 0.127321134 | 0.194525481 | 0.247881783 | 0.411276541 |
| 0.389167639 | 0.150007085 | 0.284642812 | 0.017451385 |
| 0.073170943 | 0.074170771 | 0.057900101 | 0.166830488 |
| 0.279172259 | 0.103174613 | 0.181728724 | 0.256242835 |
| 0.154583806 | 0.133993732 | 0.102363398 | 0.425725873 |
| 0.189025948 | 0.125598599 | 0.321267769 | 0.163481007 |
| 0.014387057 | 0.146149114 | 0.297327031 | 0.090168024 |
| 0.225444011 | 0.06787191  | 0.080570388 | 0.314528079 |
| 0.088982849 | 0.105254196 | 0.367794891 | 0.268759677 |
| 0.124857764 | 0.286174077 | 0.409544857 | 0.014018009 |
| 0.159765932 | 0.052764613 | 0.240331506 | 0.108805486 |
| 0.188218846 | 0.279936141 | 0.166975911 | 0.116541926 |
| 0.15297376  | 0.403476255 | 0.350053944 | 0.379524507 |
| 0.084640942 | 0.407484213 | 0.307949677 | 0.34387645  |
| 0.253308802 | 0.111863537 | 0.044498863 | 0.273841954 |
| 0.308273717 | 0.076910109 | 0.12707439  | 0.271076573 |
| 0.095695983 | 0.219774048 | 0.106004376 | 0.366493368 |
| 0.447276609 | 0.356755746 | 0.146451251 | 0.282111813 |
| 0.296845552 | 0.175815486 | 0.33398955  | 0.433181907 |
| 0.069992687 | 0.128569489 | 0.091250753 | 0.318506474 |
| 0.17959262  | 0.097099835 | 0.361134161 | 0.065153128 |
| 0.004641372 | 0.118301336 | 0.098467544 | 0.135534698 |
| 0.076908896 | 0.191565793 | 0.22446509  | 0.387865341 |
| 0.136397437 | 0.386804663 | 0.266600652 | 0.089621571 |
| 0.31893378  | 0.137850944 | 0.16923492  | 0.219633117 |
| 0.283711523 | 0.0297675   | 0.090971793 | 0.437774499 |
| 0.085670755 | 0.086326279 | 0.192648079 | 0.00375045  |
| 0.062507051 | 0.265279313 | 0.170191481 | 0.282561502 |
| 0.379041782 | 0.263739536 | 0.174668164 | 0.072844121 |
| 0.287235955 | 0.137905979 | 0.012052638 | 0.355181076 |
| 0.394789302 | 0.379024508 | 0.388140359 | 0.398690983 |
| 0.33386149  | 0.297738644 | 0.272442082 | 0.179345179 |
| 0.108160124 | 0.091293755 | 0.059972501 | 0.126813957 |
| 0.007501394 | 0.316488225 | 0.191236783 | 0.197671915 |
| 0.272608918 | 0.247331717 | 0.074707147 | 0.209954387 |
| 0.026641872 | 0.049402745 | 0.126435227 | 0.157667266 |
| 0.286993801 | 0.039664066 | 0.053908247 | 0.074250757 |
| 0.355838902 | 0.317985585 | 0.095758054 | 0.409917163 |
| 0.185344895 | 0.144154267 | 0.124666273 | 0.297683984 |
| 0.092613919 | 0.027757383 | 0.123359641 | 0.007437264 |
| 0.127036262 | 0.416417692 | 0.1198871   | 0.062654893 |
| 0.181548716 | 0.017622916 | 0.308471676 | 0.422540735 |

|             |             |             |             |
|-------------|-------------|-------------|-------------|
| 0.360214232 | 0.375842404 | 0.387043836 | 0.087643471 |
| 0.379726828 | 0.030272197 | 0.394267301 | 0.289532941 |
| 0.080518727 | 0.001303421 | 0.022510488 | 0.333340465 |
| 0.151474032 | 0.118577307 | 0.178522772 | 0.104503304 |
| 0.101402978 | 0.100200818 | 0.121536319 | 0.085381544 |
| 0.225841135 | 0.167376068 | 0.107249644 | 0.369323317 |
| 0.132945685 | 0.218448852 | 0.121545629 | 0.15598753  |
| 0.213398544 | 0.078167246 | 0.153978854 | 0.011195188 |
| 0.274786317 | 0.174327746 | 0.410817947 | 0.388334197 |
| 0.412750995 | 0.23852614  | 0.07175013  | 0.134951275 |
| 0.353093961 | 0.130581842 | 0.104430796 | 0.138910911 |
| 0.353033516 | 0.185156184 | 0.286061902 | 0.276478955 |
| 0.387276837 | 0.370423999 | 0.070158892 | 0.259514837 |
| 0.02635503  | 0.006764517 | 0.130960416 | 0.287082054 |
| 0.059882747 | 0.118457833 | 0.255134683 | 0.130183908 |
| 0.160607602 | 0.051990554 | 0.07675254  | 0.075393791 |
| 0.198395711 | 0.15458958  | 0.130303293 | 0.2808994   |
| 0.119724624 | 0.067429409 | 0.160562037 | 0.157492991 |
| 0.131963691 | 0.271509436 | 0.241904462 | 0.053417758 |
| 0.138822693 | 0.14831462  | 0.088591874 | 0.218423717 |
| 0.314117937 | 0.344462769 | 0.061221255 | 0.023164022 |
| 0.287876516 | 0.135830065 | 0.373414631 | 0.367944704 |
| 0.424076336 | 0.414376759 | 0.403441725 | 0.114407935 |
| 0.099857728 | 0.194196336 | 0.145851784 | 0.104973399 |
| 0.394335468 | 0.099902998 | 0.397510278 | 0.114304709 |
| 0.176220955 | 0.110666594 | 0.074111481 | 0.133548094 |
| 0.175614782 | 0.230999122 | 0.150605346 | 0.135658537 |
| 0.112331621 | 0.091781584 | 0.084663803 | 0.181340902 |
| 0.264220509 | 0.043595303 | 0.180552257 | 0.163683601 |
| 0.294447402 | 0.07079519  | 0.23295951  | 0.394890936 |
| 0.180446442 | 0.124767696 | 0.087775505 | 0.304891951 |
| 0.27895026  | 0.149812719 | 0.041248416 | 0.321493945 |
| 0.396103869 | 0.21189037  | 0.397766746 | 0.346571186 |
| 0.148161304 | 0.142024193 | 0.098113333 | 0.157387904 |
| 0.204700881 | 0.149264599 | 0.198584227 | 0.118405498 |
| 0.36560117  | 0.446072954 | 0.293785567 | 0.135213824 |
| 0.195390419 | 0.151240084 | 0.085454849 | 0.353715766 |
| 0.06072493  | 0.08127765  | 0.107390366 | 0.306438689 |
| 0.004415819 | 0.057124582 | 0.382888888 | 0.170320119 |
| 0.438138017 | 0.343766269 | 0.371754214 | 0.169116047 |
| 0.000968079 | 0.205338705 | 0.196008692 | 0.103029529 |
| 0.308714339 | 0.31126272  | 0.17530598  | 0.092388586 |
| 0.314854398 | 0.127817615 | 0.096419903 | 0.124045112 |
| 0.03862519  | 0.214009882 | 0.257224264 | 0.185891798 |
| 0.136312038 | 0.141583119 | 0.095583141 | 0.153335535 |
| 0.070715386 | 0.277479622 | 0.29519347  | 0.090206179 |
| 0.042350905 | 0.348614794 | 0.250939357 | 0.057622447 |
| 0.163464884 | 0.315572096 | 0.386444186 | 0.001711412 |
| 0.236430098 | 0.03012725  | 0.150220494 | 0.130256697 |
| 0.138377567 | 0.138199367 | 0.215189764 | 0.113747821 |
| 0.20441823  | 0.139519841 | 0.129594568 | 0.22231933  |
| 0.128929673 | 0.185426936 | 0.199842364 | 0.131996503 |
| 0.112675668 | 0.114644799 | 0.191521339 | 0.191524587 |
| 0.093063728 | 0.363118023 | 0.306905519 | 0.131501354 |

|             |             |             |             |
|-------------|-------------|-------------|-------------|
| 0.242908271 | 0.124242245 | 0.357498095 | 0.364285931 |
| 0.396712531 | 0.170929171 | 0.154359735 | 0.30669819  |
| 0.054251844 | 0.110768864 | 0.083554465 | 0.174575706 |
| 0.212294798 | 0.091458128 | 0.169858666 | 0.16070932  |
| 0.233751713 | 0.38388993  | 0.306252077 | 0.39030737  |
| 0.135023789 | 0.139677477 | 0.069820578 | 0.091247318 |
| 0.109377076 | 0.192288693 | 0.136352119 | 0.007335976 |
| 0.250531793 | 0.113156676 | 0.309967827 | 0.3769024   |
| 0.088361945 | 0.386275656 | 0.079339909 | 0.077712971 |
| 0.06182044  | 0.206323251 | 0.20400077  | 0.270965611 |
| 0.060010781 | 0.156512551 | 0.164238386 | 0.116966441 |
| 0.259306163 | 0.242296962 | 0.123400525 | 0.167503551 |
| 0.206073674 | 0.192786349 | 0.409346587 | 0.110590157 |
| 0.16473489  | 0.086441995 | 0.180030107 | 0.12411542  |
| 0.135189212 | 0.381662015 | 0.114220708 | 0.379337844 |
| 0.109196459 | 0.214396432 | 0.450830694 | 0.223226925 |
| 0.156855888 | 0.146007348 | 0.056684128 | 0.117897548 |
| 0.144302258 | 0.102017415 | 0.004223546 | 0.025786499 |
| 0.26720185  | 0.117265338 | 0.244660411 | 0.287164852 |
| 0.108918562 | 0.307311948 | 0.076237972 | 0.154203534 |
| 0.369029126 | 0.421756838 | 0.092326884 | 0.280309339 |
| 0.287212637 | 0.120451886 | 0.218429029 | 0.019398118 |
| 0.175909101 | 0.165818563 | 0.092406184 | 0.106053939 |
| 0.052186543 | 0.053403162 | 0.170846718 | 0.116702055 |
| 0.353579634 | 0.057212277 | 0.199238362 | 0.263629009 |
| 0.248484226 | 0.416184614 | 0.139619241 | 0.259138846 |
| 0.060813379 | 0.25807439  | 0.148021616 | 0.146834241 |
| 0.089877448 | 0.095061047 | 0.258530383 | 0.082802679 |
| 0.066933379 | 0.112336465 | 0.002105001 | 0.392062863 |
| 0.375664953 | 0.10773245  | 0.284358478 | 0.082931275 |
| 0.266751718 | 0.358860708 | 0.118710314 | 0.150815128 |
| 0.032983427 | 0.162252105 | 0.239855969 | 0.325487483 |
| 0.042815557 | 0.162628372 | 0.092308785 | 0.137839831 |
| 0.414046332 | 0.084625828 | 0.323900531 | 0.057676815 |
| 0.373541064 | 0.321313722 | 0.186464352 | 0.151260247 |
| 0.203639335 | 0.128923664 | 0.108445688 | 0.419759352 |
| 0.142906223 | 0.07928692  | 0.300597986 | 0.104470437 |
| 0.108708403 | 0.360034589 | 0.173745087 | 0.421375264 |
| 0.095455759 | 0.25432182  | 0.301466128 | 0.350241943 |
| 0.319764375 | 0.086861581 | 0.082060685 | 0.105240769 |
| 0.349836084 | 0.090520048 | 0.096525201 | 0.26664875  |
| 0.061204819 | 0.284929771 | 0.177470815 | 0.119925061 |
| 0.073299699 | 0.174006022 | 0.144546222 | 0.192165325 |
| 0.205594297 | 0.15020578  | 0.103134539 | 0.380420243 |
| 0.114883394 | 0.033881178 | 0.418082793 | 0.003925475 |
| 0.193440197 | 0.223359189 | 0.246907101 | 0.145187038 |
| 0.236580979 | 0.215587169 | 0.134521749 | 0.004464489 |
| 0.302503568 | 0.03631905  | 0.154927977 | 0.095234212 |
| 0.092733127 | 0.075008283 | 0.391171002 | 0.388685874 |
| 0.280615453 | 0.129267136 | 0.08167846  | 0.380365048 |
| 0.052730169 | 0.084086252 | 0.09843007  | 0.211888984 |
| 0.079056425 | 0.095481118 | 0.119535383 | 0.091461552 |
| 0.280499906 | 1           |             |             |
